# Supplementary material for: RLP/K enrichment sequencing; a novel method to identify receptor‐like protein (RLP) and receptor‐like kinase (RLK) genes
Source: PubMed Central journal article supplement (PMC7383770; doi:10.1111/nph.16608), 2020-05-22
Supplement: NPH-227-1264-s001.pdf [file NPH-227-1264-s001.pdf]

## ***New Phytologist* Supporting Information**

Article title: RLP/K enrichment sequencing; a novel method to identify receptor-like protein (*RLP*) and receptor-like kinase (*RLK*) genes

Authors: Xiao Lin, Miles Armstrong, Katie Baker, Doret Wouters, Richard G.F. Visser, Pieter J. Wolters, Ingo Hein and Vivianne G.A.A. Vleeshouwers

Article acceptance date: 27 March 2020

The following Supporting Information is available for this article:

**Notes S1** Fasta file of the 977 RLP RLK genes from DM genome used for generating the RLP/KSeq enrichment library

**Notes S2** Fasta file of the 977 RLP RLK genes from M6 genome used for generating the RLP/KSeq enrichment library

**Notes S3** 18 additional known RLP and RLK genes from Solanaceae species

**Notes S4** The 2x bait library used in this study

**Notes S5** Java script for calling the informative SNPs

**Notes S1** Fasta file of the 977 RLP RLK genes from DM genome used for generating the RLP/KSeq enrichment library

>PGSC0003DMG400009417 C-LecRK

AATTAACTACTCTGTCTGAACAACACTTTCTTCTTCAAAGAAATTCAACTAACCATTGGAGACTCCAAATG  
TGA ACTCTTGACCTTTCTCTCTCTAAAAAAACCCTATCCACCCACCCCATATCCACAATGCCCAACCCAC  
ACTCAAATCATTCTAGGTTTTGCTATACAGTGAGAACAAGTGATGATACTGATGGCTGTAAACCTCTG  
TTCCCTTTGTTTCTACTTACTTGTCTTCTGCTTCCACTTCTGTAAGTAAAGAAAAGATT  
ATAGTACCTTTTATTTAGAGAAAAGGGTGTCTGAATATGTTATCAGAATTCATGTTAGTGTGTGAATTTG  
GAGAAAGTTTTGATTTTTATTTTTTTGAATTTTTTTTCAGGTCCTAATAAGACACTTGATTCACAAATAGTT  
TCATCTTCTGGGAATCAAAGTCATGATGATGGTAATGTTTTGGAATTAATTAGATTATTGTTCTGTCTATT  
TCCTTGGA ACTGATAGATTGGCTTGTGTTGATTAGATTAGGGCTCTTTTTAGAATCAGTAATGGAGTTGC  
ATCTATAATCATCTTTTCAACATAATGTTCAACTACTATATGTTACTTTGTGTATAATATGTTGGGATTTCT  
TACTGGTGCTTCTTATGTAAATTGTAATGTGTGCATATCTATGTGTCATTTGCTAATTTAACTAGCATAG  
TGA ACTTTTGAGTTTGGAGAAAATAAAGGCTGGCGAATCCAATCTTGTTTATCAAGTTGCTATAGGTTTA  
AGGTCTACA ACTTGGGGTATTTTGTGCCAACTATTATTCATAAATCAAGATTTTGAGA ACTACGTCACTT  
CCCAGCATCATTAAAGCTCAGGCCATAAAAGACTGTCTCGCAACCAGTTATCCCTCGAAAAAATAAAAAATA  
GAAGATGAACTTGCAACTATTTATTAATCAGCTTCTACTTCTAAAGAAAATTAATTGACCAGCCTCTCGA  
TTCCGGTTTACAAAGTTATGGATTCCCATTCTCCAAGACAGTTGTTCTTGGAATATTCTTAGAACAATAT  
TCTATTTGACTGATCGATTATCCTTCTAAGAAATCCTGGTGGTCATAGTCACCTGATTGAATTTAATTTATT  
CGGTGACAAAGGAGCAGAAGTAGATTCTGCTCATTTCATGCATAAAGGCATGCTTAGGTTGCTCTTAA  
AGTGAAACTTTGGTTCTATTTGAGGGAGATAATATATATGCTTTTATGGTGGATTAATGATGGCCTTGAT  
GAATAATGTTGTCCAGTTCCTTTCTATTGAGGAACTCCTCCCTGGAGTTTCTTTTGTGTTTGATGATATGC  
ATTTACCATTTTTTTTTCTAAAAAACTGCACTAGATGTCTGGGAGGACTCATGAGGTGATGCATAGAGC  
TCACCTGGTAGTTGTCTAAGAGGAGGAGGTGGCCAGATGAAGCATGTGACACTTACAATTTACCAGTT  
AGAGGTTTTGCTATTACATTAGGCAATGGAATGACGAGAATAACAGCGTGTTTTATGTTGATCAGCATGT  
AGAGCAGCAGTAATTGCGCTAGTATTCTAGCTTGATAGTACTACATCTTTCATTTGAGATAGCACATCATT  
TTCTTTTGAAATGGGCATAGACTGAAAGCAATAGGGAAAATAATGATGATCCA ACTTTATCCTACTTTTG  
CCCCCTGCTATTCTTGAATATTGATGGTTTTTACAGGATATTTGCAGTCATGTGGAATGTGATTCTACAT  
ACTCTATATGCCTCTTTAGTAAGACCTGTGCTTTCAAGTCTCAAGTTATCCCTGCAACTTATGGTGTTAGA

CATACTGGTACACGTGTAGAAATGTCATGCCAAGAACCATCTAGCTGTTCAATTAAGTTTCCACAATTAC  
GAAGAACCTTTCTTTTCCATTTCGCTCTGTAGGAAGAAGAACAAAGTTCTAGTTTTTATTGAACTCGCATG  
GGTTTTAAAAAAGACGTATATTTGTTGGTACATCAGTGAATAAGGCTGTGGATCATCTCAGAGAAAAC  
GACTAATTGAGTGAACACAATTAGGAGTCTTGGATGGAACAATTATGGAGAATGTTTCATCTGTCTAAAG  
GGGATAAGATGGGAGAAACCAGGGAGCATTAAAGGAGTCCTGAGCAGTTGGAATAGAGATGGCAATG  
CTTCTGACAAGGAGAAGAGATGGAACTTGTTCCAGCATGTATTTGGTGGACAATCTGGAAAGAGAGA  
AACAAACCGGAGTTTTGAAAATTGGCAGAATAGCTTACAGAAGATCAAGATGGACTGCTTAGCTCTTTTCT  
ATTTTTGGTGTAACAAGATATATTAAGTACTAGGACAGAAGACATCTTTGATGTGCTAGATTGTTTATAGGC  
AGCAGTTTAGACAATGACTATTTTTATTCTGTAAGTTGTAACACTTTTGAAGGGGAACTACACTTTTTGTTGT  
AGTATACCTGTGGATATATAGACTAAAGTTACCAATTTTTTTTTTAAAAAACAATTAGGAGTCCAAGCTG  
AACGAAAAGAGAAGAAAACACTGGAGCTTAATTTTTTTTTTAAAGATTCAGTGTTCTTCTCTTTTCGTT  
CAGCTTGGACAAGCTTAGTTTAATGCAAGTTTGGCTTTGTTTGTGCAAACTTGGTACTTTCATTTATCCAT  
CATACTTGAATCTAGCACACCTTCCCTCTCAACAAAGGAAAAGTGAAAACACTGAGAACACACTGTGATG  
CAAACCTCCACTAATCTGAGTGATATCACACAATCCATAACACGGAGGCCAAGAAACGACTACTCCTATC  
AGTTTCATAAGACACAGGGGTAGAGGGCAATGACCTGGTGTCAACATCGTTCTTGGGTCTTCTTATTTT  
GTAAGCTTAGTTTGAGATGGCAGTGGAGGCCAATTGTGGTGAACCGTGAATCTTCAATCTTCAAATCTT  
GGAGACCTTATCTGAAATGAATTCTAATTTTGAAGCTGATCCCTCAATTGTAACCTTTGTAAAAA  
AGTAAATAAATCCATTAATGAAGATAAAGATACTTTTAGGGTGAAAAGTCATCTTCAGTTGTGGTATTAG  
AAATAACTAGTTCAGAATACCCGAGCTTTATTGTCCATTATGAGGTATTTATTAGATATAAACAAGTTCAT  
GATACCTGAGTTTTACCTACCTAGATATAAACAACACTATTCCTACCTAGCACTTCCAGTCCCCGCAATCTT  
ACTAGTATTATTTACAACACTGAAGTCGATGATCAAACCTTAAGGAAACAACAGAAAGAAAAAACATTA  
CTACAAATATAGAAAGATGGTGAAAAGAATCAACAAATGTGTACAAGAGTTGGAGATCATGTGGCTAA  
ATGGATGGGGTTAGTGCAGGGATGGCAAGTTTGGAGCCACTTTTATAACATTAGGAACACATATAAACTG  
ATAGAATAACATTAGGGGTATAGATGAACTGATAGTATAATGGAGGGTAAAATTAACCTTTTCAATAG  
TACAGGAAGTGAGGGACAAATATGACCCTTTTCTAATTTCTTTCTTCTTCTTAGATAAATGAAGAAGTT  
AGATCAAGTATTATTAACACTAGTGCAACTGAACTTATTTGGACCTCTCAACGCGTGGTTTTCTTAGT  
GTATGTTTTTTATTTTAACTGGTCAAGTTATTATGTCTCATCTCTTGGCACTGTTGTTTATTGTTTCGCAA  
GCAGGAAGATGTGATCCTGGTTGGTTTAGCAGCCAAATGGGAAAAGTGTTCAAATATAATGCGACC  
TCTTTGCAATGGAATGAATCAGAGACTTACTGCAATGGTTTTGGAGGAAACCTGGCTGCCATAGCATCTT

CAGAAGAACTGAAC TTTGTCCAAAAGCTCTGTGGCAATGATAGTAACGGATGCTGGGTTGGCGGAAGG  
AGCATCAATACCACAGCTGGGTTGGGTTGGAAATGGTCTGATAATGCTTCTAGCTGGAATGAGAGTATT  
GCTCCTAAGACAAC TTTGGACTCAAGTTGCAAAAATTTCTCATGCTATGGCTTTAAGTCGGTGGATTTGT  
GTACATCGATAACCAATGGCGCTATTATAGCTGAGAGATGCAATGTAAC TCATGCTTCTATATGCACACT  
TGATGCTGGTAAGTGATTGCAGACCAATTTATTTCTAATTGTTTCTTTCACCCAGTGTAATTTTGCAAAGT  
AGGAGCAAAACCCTTTCCCTGATATAGTGTGGTTATACTATGTGATTAAAAGCTTCATAGTCCCCTTTTGT  
TTTTCCATGAGAAGTGCATTTTAGCTAACCATTATACAGGCCTACATTGTTATCTGGATAAATCTATTAC  
ATTCCTAATTGGTTTTTAAATAATCTTCTAAATTTTACATTAGGGAGCAAGTGTCGCCATATGCGTTGCC  
ACAGGGAGTATCTCATTATTCTTGCAGTTGTGAGTGGGTTGATCCTTTGCACTACTTTGGCTATTGTGATA  
TGGCTTCTTGTATTTTCGGCGAAGTAAAAGACGCAAAGATCATCGCGTGCATCATTAGCATTAGTACCCC  
CGTCTTGGAAAATTTTCAATCGTGATGAAGTAAAGTCCATGACAAAGAATTTCAAGTGAAGCAAATCGTCT  
CCTTGGGGACGCCAAAACAGGTGGTACCTATAGTGGGCTTTTACCTGATGGTTCAAGGGTGGCTGTGAA  
AAGATTGAAGAGGTGCGGTATTCAGAGGAAGAAAGAGTTCTACTCTGAGATTGGAAGGGTTGCAAGAC  
TTCATCATTCAAATCTGGTATCTATCAAAGGATGTTGCTATCATCATGGTGACCGCTATATTCTGTACGAG  
TTTATTATCAATGGACCCCTGGATAGGTGGCTACCCATATTCTAGAGGAGGTAGGAGTTTGGACTGG  
AGCATGAGAATGAAGGTCGCCACCACCCTTGCTCAAGGGATTGCGTAAGTAGTGTTCCAACATTATCTTC  
ATGTGCATTGTAGATTAGGAATAAATATTTTAACTTATCCTTGAGGTGGATTGATTTTAGTCAGAAATGT  
GAGTTTATTCTTTAAATTTTATCATACTTCCCTTCTTTGTCATGAGTATGAACTCATATATAACATGTTTGGG  
TTGATGCCAATGAAGATGTTATCGTGGAAGTCAAACAAGGGTGAAAATAGATGATAAGAATGCATTAT  
CTATATTGTTAAGAAAAAAGGTGTGTTATCTGTCTTGCAATATTCCTTTTCGTATTTTCTTTTTCTCCCT  
AGATTTTTCATTGAGAAGAAAGTCAAATACTGCACATCTTGACCAAGATACTTCTTGTTAACATATAATGC  
AATTAATAAATGAAAACCTTTTTAGTTTACAACATTCGTTCCAGTACTAAGGAGAATTCACCTCCTAGGGA  
TCTACCTATCTGCTTTTCCCACTCCAGCTAGATCTTACCATTGCCAAACGTGTCTTTGCAGCACTGGCCTTC  
TGGCTTCTCGTGTTTCTTTT CAGGTTTGGGGTGGATCTTTCCTTTCTCAATTATCACATACTCGGTTAGGTC  
GCCC GTGTGTGTCTTTCAATCTAAGTGTGTTGAGCAGGAACTCTTTCATGAATCTCACTAAAATATTGT  
AGGAAAGCTATGATTGATTTTCTATTCGGGGATT CATTATTA ACTATTATGACTCTATTTATTGGTGACAG  
AATTGTTGGACTTTTATCTAGGGAATATTTCTTGACATGGAAATTATGGCAAATAAATTTTTCAGGGGT  
TGTGGGACTACTCACCACCTAACCCCAACAACAAATATACATGGAAGAAATATTGAAGTGTACAAAA  
GAAGCCAATATATTATTCCAATTATTCACGATGATAGAGTGAAATAATTAGCATAAGATAGACCAAACCT



TAGGCTTATCTACATCACCAGATTTAATATATGCAATGTATTATGTATGGTCCCTGGTAGTTTAACTTTTC  
ATGGACTTCTTTGTTAAGAGGTATTATTTTCCATAATTTATTTCAGTGTAAGTTGAAAAATATAGGCCACTT  
GAGTAAGCTGGGTTCAATTCATAATGTACATACTTTTAAAGATTTCAATAGTTTGCAAGTAGGTCTTTGTA  
ATTTTTATATGCTTCAAGGAATTCAGACAGAAGTGGGTGAGAAAAGATGGAATACTTAAGGAAATGGAT  
ACCAGCGACATCTTAGTAAGAAAATAAAAACTGCATATTACTGTCCTGTTGTCTTCATGAGTTTTTGTCT  
GAGTGTCTTGCCTTGTCTAGGGCGGATGTCTATGGAAAGTGAAGTCATAGAAAATAGGATGTCTATGG  
AGGTCACTGTTATAAGCGAAGCAACCTAGATGCCTAATATATCAATGGATAGATACTTTAAGACCAGTCA  
TGCCTATGTCATATTTGTTAAAAAAGGGAAAATAAACAGAGACAATTCAGGGTCTATTACTAGTTTATTA  
CCTTTGTAATTTATGGAATTGAAGGATCTAGCAAGTATGTTAATCAACTGCATAAGGTGAAAATGACTGG  
TCTGGTTGTATTTTAAACCATGAAAGGTGGTGATAGTTGTTAAACTCTGTTTTGTGTCACTGTGTCAGCT  
AGTGCACAAGAGGATGTGCGAGTGGCCAAAGCATGACATTGTTTGTGCTATCTCTATGATGGCAGTT  
TCTTTGCTTATATTGTTAGTGCTTACTTTCATCAAATGTGACAGGTTTCTTCATGACAAAATGAAGCCACA  
AGTTGTGCATAGGGATATCCGTGCAAGCAATGTTCTTCTTGACGAAGACTTTGGCGCCCATCTAATGGG  
AGTTGGTCTGTCTAAGTTTGTACCATGGGAAATTATGCATGAGAGGAGAGTCATGGCAGGTGGTACTCA  
TGGGTATCTTGCTCCGAGTTTGTATAGAAAATGAGCTTACTACAAAGAGTGACGTCTACAGCTTTGGA  
GTCCTCTTGCTTGAATAATTAGTGGACGAAGACCAGCACAGGCAGTTGATTCTGTTGGATGGCAAAGT  
ATATTTGAATGGGCCACGCCTCTGGTGCAGGCTCATCGATATGTTGAACTCTTGGATCCTCTCATATCATC  
TTCTTCTCTTCTCAGATTCCTGAAGTTGGAGTCATCCAAAAGTTGTTGATCTTGTTTATTCTTGTACACA  
ACATGTACCATCAATGCGTCCGAGGATGTCACATGTCGTCATCAGCTACAACAATTAGCTCAGCCCCCT  
ATTGTAAGTAAGTGGATAAGAATTATAGTTCAGCATTTCTTTTACTGAAACCAGCCTGCAATCTTTTAT  
CCTAGTTGCAAGGGCTAATTGTATTAGGCATTATTTTGAACCTTGACATGCAAGGCCTTGAGGCTTGAAC  
CAGTCCATGATGGTTGAGATGTAATACAACAATACTGTATCACCAAAGCCAGTATGCTTTCATCTGC  
TGCTGCTTTCATTGTTTACTTGTAGCACCTGTATTTCTAAAATTTGTTTCTGTTTCTGTGTTAAAATATC  
ACTATGCATAACAACCAATTCAATAAATGTCCATGAAATCTTG

>PGSC0003DMG400000179 G-LecRK

CAAATATTCTCTGAGCTTTTCAATGTTTCTTAAAAACCAAAATCTTTTTTCTTTAGCTAAGCAAATTC  
TCACCATGATTCCACAGAAAGCAATTTTCAATTTACTTTTCATCACAATTTCTATGGCATTGAGGTCAGTT  
CAGAAACAGCAAATCAAGAATGCAAATGTAAACATGACCCATGTAGCTGAACTCACTAAAGAGTCTT  
TTTCAGCTGAAAGAAAGTTGGGATCTTTAGAAGGGAGCATAAAGTTTGAATCTTTGAACAAATCTAGAG

TTTTACTAAGTGGGAACCTCACTGTTTTGAGTGAAAACAAGACATTTGAAGTGGGGTTTTTCAAGACTAA  
TGATGAGAGTAAATGGTATTTAGGGATTTGGTTTGCTTCAATTCCTACCCCTACTTATGTTTGGGTTGCTA  
ATCGTGAAAAACCCATCAAGAATCCATTTTTAGCTACTTTGGAGATTAGTGAGGATGGGAGATTAGTTTT  
GAAGGAAGATTCAAGAACCATTGTATGGGAAACAACCAATTTGGAGAAAGCTAGTGATGTGAAGCTTTT  
GGACCAAGGGAATTTGGTTCTTGTCTTAATGAAGGTGTTTTGGTATGGGAAAGTTTTGATTTTCCTACA  
GATACATGGCTTCCTGGGATGAACTTGACTGCAACAAAATGGCTGACATCTTGGAGAAGTACTAATGAT  
CCATCACCTGGAAGTACTCTTTAAGGCTCCAACCACATAGTTATGGTGAGATAGTTCTTTTTTATAATGG  
TACTTATCCATATTGGTCCACTGGGAAATGGAGTGAAAATGCATTTGTTGATGTACCAGAAATGACTGTT  
CCTTACATTTACAAGTTCAATTTTGAATCACCTTTTACCCCTATGGCATCATTGGATACTCAGCGGTGAC  
ATTAGAGAATGGAATGCCTCCTCCTTTAACTAGATTCATGGTTGATTTCACTGGACAGGTTAAACAGTTC  
ACTTGGATCCAACAGGCGCAAAGTTGGAACATGTTTTGGTCACAGCCAGAGAATATGTGTAGTACTTAC  
GGTCTTTGTGGGAATTTGGGGTTCTGTAATAGTAAGTCATTGAATCCATGTAAGTGTTTACCAGGGTTCA  
CCCCTTTGGATGGTGATTCATGGGATGCAGGGGATTTTTCGGGTGGCTGTACCTCGAGAGTAATGAAG  
TTTGTGGTGAGAATGATAGGTTTGAAGAGGTTGGAATGGTTAAATATGATGGAGCAAGGGTAGTTTCA  
GTTTCTGGAAGTAGAAATGAATGTGAGAGAGAGTGTTTAGGTAATTGTTCTTGTATTGTTTTGTATCACA  
ATGAGAAGACTAATTTGTGCAAGAGTTTATATGGGTCATTGCTCAATCTTAGGAATCTTACTTCCGATGG  
CACTGTTGAGGATAAGCTATATGTTAGAGTTCAAGGAGGAGGGAATACTCGAAAGAATCAGATTCAAG  
TCAGATTACTTGTGATCGAAATGATCTGTGGATTTGTGGTAATTCTGTTAGTTGGAATTGGGACTTTCTT  
GGTAGTTAGGAGGAGAAGAGTAAGGAGGAAGAAAAAGATGAGGAAGATGTATTTCTATAATGAAT  
TTGAAGGTATTTTCATACAAAGAGCTTAATGCTGCAACAAAGGGATTCTCGGAGAAGCTTGGTCATGGT  
GGTTTTGGAAGTGTGTTCTAGGGGAGCTATCGGATTCTTCACTCGTAGCTGTGAAGAGACTTGAAAGA  
CCTGGTGGTGGTGAAAAGGAATTTGAGCTGAGGTATGCACAATAGGGAACATTCAGCATGTTAATTTA  
GTGAGATTGAGAGGATTTTGCCTGAAAATTCTCATAGGCTTCTGGTTTATGAGTACATGTCAAAGGGTC  
CTCTTAGCGCATATTTAAGGCGAGATGGTCAGAATCTAAGTTGGGATGTTAGATTCCGAATTGCTGTAG  
GGACAGCAAGAGGTATTGCTTATTTACATGAAGAGTGTGCAATTGTATAATACATTGCGACATTAAACC  
AGAGAATATTCTGCTACATGAAGATTTTTAGCAAAGGTTTCTGATTTTGGACTTGCAAAGCTCCTTGGT  
AGGGACTTTAGTAGAGTGTTGGCAACCATGAGGGGTACCTGGGGCTATGTTGCACCCGAGTGGATCTCT  
GGATTAGCGATCACAACGAAAGCTGATGTATATAGCTATGGCATGACATTATTGGAAGTGTAGGTGGT  
CGACGCAATGTAGAGTCACCACCTTCAGCTAAAGGCGAAGAGGGTGGAACAGAGGAGAAGTGTTTTT

CCCACCGTGGGCAGCACGTCAAATAGTCGAAGGAAACATTGCTGCAGTTATGGATGAAAGACTACATG  
GAACGTACAACCTCACGGAGGCAGAACGTGTGGGATTGATAGCTATTTGGTGCATTCAGGACGATGAA  
TCAACGAGGCCTTCCATGGGAATGGTGGTGAAAATGTTGGAAGGAGTAGTCGAGGTGACAACGCCTCA  
ACCTCCGAAGCTGCTCCAAGCATTAGTATCTGGTGAATCATTCCATGGGGTAGGAATTGATTCAAGTAAC  
GGGACATCACGAGACGGAGGTTTCAGCTCGGGTTATAATCCTCAACGTTCAAGATATTCAAAGACTCT  
CAAGCTTCAAGTTAGGTCTGCTTCTCAACTAGTATGCAAGTTGATTTTTCCAGCTTCACTGAATGTAGAG  
TTCTTTTTTATTGTCTTCAAATCCCACTGAGAATTAGTAGCAAATGCTCATCATGGTATTTTGTA  
GTATCATGAATATAGAAAATCTTGTTACTTTGCTTAAAAATTGTCACTTTTTTTTTTTTGTAAATCCAA  
AGAACAAAAGCAAAACAAAACATACATTTCACTTTTGAAGGAATGTATGTTTGGATCAGAGGGTCGGGG  
CAGAGCTAGTAAATTACACTATTGATATATGGTTAAAATATTTTTTACGTATATATAGTAGACATTGAACC  
CTTTAACTTCTTCGTGTGTTTACTTCTTCATATTTTGAACCTTTAATGAAAATCCTGACTTGCATAGGGTT  
ATAGGAGAGGGCTTCTAACCTTAGAATGAGACGGTAGTTGAAAATATCAAAGTTATAATAACGGAAT  
TATTTAATGGATATATTTTTATTGGTAGATATTTTGTATAGTGAACCTAAAATGAGATATAAGATATAGGT  
GTATAATATAAAGCATTAAAACATGTGTTTGGATTATACCAACCAAACATTATGCAAATTTTATACTGA  
GATTATTTTTGTTACTATGGTAAACCAAATGACTATAATAAGAATATACCCTTAACCTAATTTAATGGGA  
GAGTTAATTTATTTTTATAAATGAGTGTAACGTTTGTACCTGCCAATTATAACCACACTTTACTTTCT  
AAGTTAATTTACATAACTGTCTTGACTACAACAATAACAATAACCACTTGCAATAGTTTCTCTTTTGT  
AGCTAAATAATATAACAGAAATTGAAACAAGAAAGACCATATACTCACACAACAAGCAAACAGAAAAA  
GGAGAAATGTTTTCTAACTTGCAACTTTAGTAACAAAATTTTCCCAAATTAATTTTTTCAAAGAGTG  
TAAAGATTGAGGGGGTTAAAGAAAATGGTCAAAGGAGAGCAGAGGTAGACAACCTCTGCACTCTCACCA  
AAGAAGTTTGTACCTTGAAATGGAGACACCTGGCAGTTCAGGTGGGGAGGTGCCGATATATGGGGG  
CTCCTCGTCTATGGAGCCGACTGAGTTACACTCGGCTCCATCTACCATGCTGGCAGATTATCCGCCAGTA  
CAAGGCTTTCAAGATTTGAAGAACTTGGTTAGCATGGAATCTGGGAAGTTATGGACTATTGCAGGTCCC  
ATAGCCTTTAATATTCTGTGTAATTATGGGATTAATTCTTTCACAAGTATATTTGTTGGACATATTGGTGA  
TGTAGAACTCTCTGCCGTTGCCATATCTTATCGGTGATAGCAAATTTCTCATTCCGATTCTTGGTTAGGT  
TCTTTTTTTGTTCTTACTAATTCTCAAAGTTCTGTTCTTCTTATATTATGTTATATGGGCATTGAGTATTCA  
TATAGCCGACCCCACTTGCTTGAAATAGCGGGATAGTTGTTGTTATTGTTGTGGTTGTTTGTAAATGT  
AATACAACGAAGATATGTTGGATTTTGTCACTCTTGTGAGACTTATGACTATAGATCACAATAGTTT  
ATTATGAAACAGAACTAGGATTTTGATTGTCAAATGATATAAAGTCTCAAAAAGGTTAGAATAAGCATT

TTTTAGGTTATTGGTTATGTTAGTTTTCTAATTCTTCATCTTTTTTTTGGATGGATTATCAGTTAGGCATGGG  
TAGTGCACTTGAGACACTTTGTGGACAAGCATTGGTGCAGGCCAAATAGAATTGTTAGGAGTTTACTT  
GCAGAGGTCATGGATAATACTTGTTGCTTCTTGCTTCTGCATAATGCCACTCTACATCTTTTCCACGCCGA  
TACTGAAGTTATTAGGCCAAAGAGATGACATAGCAGAGTTAGCTGGAAAATTTTCGATACAAATCATA  
CTCAAATGTTCTCCCTTGCTATCAACTTCCCGACCCAAAAGTTCTTGCAAGCACAAAGCAATGTCGCGATC  
CTGGCATGGGTTGGGTTTCATGGCTTTAGCCATGCATATCGGGGTGCTCTTTCTTTTTATCAAAGTTTTCCG  
ATGGGGCGTACTGGTGTGCTGCAGCCTATGATGTTTCTGCTTGGGCTATTGCTCTGGCTCAAGTGGTT  
TATATTGTTGGCTGGTGCAAAGATAGTTGGAAGGGGTTGTCTTGGTTGGCCTTAAAGGAACTTTGGCCC  
TTCGTAAAGCTTTCTGTTGCATCAGCAGTGATGATTTGCTTGGAGATCTGGTATTTTATGACTATAATTGT  
TCTAACTGGTCATCTTGAGGACCCCGTCATCGCTGTTGGATCTCTTTCTATCTGGTACAATCTTGCAAATA  
TGCACTTAAAATTTATAATGTGTTTATAATTGTTCTGTTTTTCAAGCTTAGATTCTTTCTTCTTATTGTTTC  
AGTATGAACCTTAATGGATGGGAAGGCATGTTGTTTATTGGAATTAATGCAGCAATAAGGTATACTACT  
ACTCTACTAGTTATAGTAGGACATTGTCAGTGCACAAAAGTTAACTCTAACGAATAGTGTAAGTACTGCTAA  
CGGTTATTTTCAATTTGTTGATATTTCAAGTGTTCGCGTTTCCAACGAGCTTGGATCAGGCCATCCTAGGGCT  
GCAAAGTATTCCGTCTTCGTACAGTAGCTGAATCTCTCATGATTGGGATATTCTGCATGGTACTAATCAT  
ATTAACCAAGGACCATTTTGCATTGCTTTTACAAGCAGTGAGAAAATGCAAAAAGCTGTTTCTAAGTTG  
GCATATCTTCTTGGTGTTACAATGCTGCTTAATAGCGTTCAGCCAGTTATATCAGGTACCAAATATGTGT  
GTTTCTTACTCAAACAATTCTCCACACACACATCAGTTGATGTGCCAATCAAATAGTAACTATTTGGTACA  
AATCTATGTTGCTTGGACTCTTCAAAAATGTCAATGGGTGTGTGTCGGATTCTCGATTAGTAGAGTATT  
GTTGAAGAACCCGCACAATCAAAGTGAAGAGTCCGCGCAACTTTAGGTACAACTCAAAGAATAAATT  
AGAATGTTTCTAATATTGAAGGTGTTGCTGTTGGAGGAGGATGGCAAGCACTAGTGGCATAACATTAATT  
TGGCTTGCTACTATGTCATTGGCCTCCCACTTGGGTTCTTGGGCTATAAAACAAGTTTGGGAGTTCA  
GGTAACAACATAAATCTTCTTGTATTAATTTAGCTCCGGTTTGACCATAGATTAGTAGTTTAAAAACAAA  
GGTATACTAAATTGTTCTTTTACTTGATCTCAACTAGACATCTTTGCCCTCCAATTCTGAGTCTGCACAAGT  
AGATACGTAACTTATATAAAGTTGAACAAGTAGACACATGTGTCCTATATGACATAATGAAAATCAGTT  
TGGGTGTGTCTCACGTGAATTGACACGTAGGACACATTTATCTACTTGTTCAACTTTATACAAGTTTAAGT  
GTCTACTTGTGCATACCGAAAGTTGTAGGGCATATATGTCAACTGAAGTCAAGTTAAAGAACGTTTATGT  
ATAATTTTGAACATTGTTTGTTCATGAAATTTGGTCAGTTTTCTAAAAATATTCAATTGAGCTAGTTTTTG  
GATGAAATTTACGCCTACTCACAAAACAAGTAAATGCATATCCAAACATAACTTCATATTCCAAAAAC

TATTGTTCAACACAACCTTCAAAAACCTCACTTTTTCAAGTTTCAACTAAATCTATGGTCAAAAACCTCAAACCTCA  
AACGTTAGCTTAGTTTTAAGTTTAAATTTTAGCTGGAACTTTGATATAACGATAAAGTTATTTTGAATAA  
ACTATTGATATTTGTATCCGGATAAATTGTCTACATTACACTAATTGTCTCTTCATTTTTTTTTCTCTTTCT  
GTAGGGAATATGGATGGGCATGATTTTTGGAACCTTTTTGCAAACAATAATTCTTTGTGTTATCGTATATA  
AAACCAATTGGAACGAAGAGG

>PGSC0003DMG400000915\_ G-LecRK

ATGGAGTTCATCTTATTCTTTCTCATTTTATCTTTGTCCAGTATTCCTGTCTTTGGTTTTTATCAAAGAAT  
TTGTCTATCCCAACTTTACTGCTTCCAATTTCCAATTTGTCGATAGCACCGGAAGTTTCTGGTTTCTCGCA  
ATGGAACATTCAAAGCTTCTATCTTCAATCCCGGTCTGAACAAGTTAATTTCTATTTGTGTGTTATCCAT  
GCTGAATCCAATACCATTATCTGGTCTGCAAATGGTGATGCACCTATTTCAACTTCAGGAATTATGAGGT  
TGACCAAGAAGGGTATTGGTATTACTGAAAAAGATGGCAGTTTTAAGTGGTCAACTCCACCATTAAAGT  
TAGCAGTATACGCGATGCAGCTAACTGAGACTGGAAATCTCCTTCTCCTTGATCAGTTTAATGGGACACT  
TTGGCAAAGCTTTGATCATCCGACAGATACAATTGTAATTGGACAGAAGTTGCGTGTTGGCATGATGCTT  
TCAAGTGCAATAGCAGGCGATGACTTGCAAAGGGTCATTACAGGCTTTCTTTGTCTGCTCCGATGCTA  
TGTTACAGTGGCAAGGTCTGACATACTGGAAATTGTCCATGGAAACCAAAGCTTATACTAATTCAAATTA  
TGCAGTGGAAATACATGTCTGTCAATCAAACAGGTCTTTATCTTTTTGGTCAAGGTGGTTCTGTAGTTGTG  
ATAATGGTGAACCTGTTACAATCCACTTTTAGAATTGCCAAATTGGATGGTTCAGGTCAGTTGATCGTTA  
TTAGTTTTGTTGGCTCTGACATCAAACGAGATTTTGTCTGGGCCAGTGGATGGGTGTAGAGTACCTTATGT  
TTGCGGAGGGCTTGGTGTATGCACCTCTGATGTATTATCAGATAATCCTAAATGTTCTCTGCTGCTAACT  
TCAATCTTGGATCACATGATTCAAGCAGCTGTGTGCCTAGTGATAGTTCCTATTCTTTGCCAGTTTCTTGT  
AATTCCACCAACCACAGTAATCTGTGCAATTCTTCTCCATGTCGTACATAGGACTTGGCTTTGGTATGGA  
CTACTTCACTACTGATTTTACCAAGCCCTTCAGGGATGGGGTAAATTTGTCCCTTTGTCAAATTTCTGCT  
CAGTAGACTGTTTATGCTTGGGGATATTTTATGCAAACCTCGTCTGGTTCTTGTACAAACTTGAAGATGA  
AATAGGGTCAATTATGTTAAGGACTAGTAGAAATGATGATCTGTTGGGATTTGTTAAGACCCTGGTTGG  
AGTTTCAACAACCTTAGGAAACAATGATAATTTTATGATCAGGAAGCTGCAGACTTTCTTTAGTTGCAACA  
GTGATCTTACCTTTACAGGAATCTTCTACTCATGGCGCTGGGTTTCATTATGTGGAGAAGATCTAGAC  
CCCAAAGAATGGGAAAGATAGAGTCGAAAAAAGCCAACCCAGTTCTCCTTCTCAGAGGATCTGGATG  
CCTTCTCCATCCAGGATTACCTGTACGGTTTGAGTACAAACAGCTTAAGGCTGCAACTGATAATTTCAA  
GACTCAGATCGGCACAGGAGGCTTTGGTGTGTATATAAGGGTGTGCTCCCTGACAACACTCTGGTTGC

AGTAAAGAAGATAATAAATTTAGGCATTCAAGGGCAGAGAGACTTTTGTACTGAGATTGCAATCATTGG  
CAATATTCACCACATAAACTTGGTCAAGTTGAAAGGTTTCTGTGCTCAAGAGAGACAACGCCTATTGGTT  
TATGAATATATGAACCGTGGATCGCTTGATCGCACTCTTTTTGGTCATGTACCTGTATTGGAATGGCAAG  
AACGGGTTGAAATAGCTATTGGTTCTGCCCGCGGACTTGCATACTTGACAGTGGCTGTGAACAAAAGA  
TTGTTCACTGTGATGTGAAGCCAGAGAACATTCTCTTGACGATAATTTTCAGGTGAAAATATCTGATTTT  
GGCCTCTCCAAGCTGCTGAATCGTGAAGAATCCAGTCTATTCACAACAATGAGGGGGACTCGTGGCTAC  
CTTGCTCCTGAATGGCTCACAAGTTCTGCAATCTCAGACAAAACGGATGTGTATAGCTTTGGAATGGTAC  
TCCTTGAAATTGTAAGTGGAAGAAAAAACTGCTCTTTAAGAACACAAAGTCACAGCCTTGATGATAGTG  
CTACTGGAGATCACTCATCATCTTCATCTGCACAGGGACTTGTTTATTTCCCTTTATTTGCATTAGAGATG  
CATGAGCAAGGAAGGTACCTTGAACCTTGCTGACCCAAAACCTTGAAGGGCGGGTCAGTGGTGGAGATAT  
TGAGAAGTTTGTGCGGATAGCATTGTGCTGTGTCCATGAGGAGCCATGTCTCAGGCCAACTATGGTTAG  
TGTTGTTAGCATGTTAGAGGGAGAGATACCACCGACTGCGCCAAGAATGGAATCTCTAACTTTTTACG  
CTTCTATGGGCGACGGTTTTTCAGAGGCATCAAACATGGAAGAACTGGAGGCCAGATAGATGCCATGTT  
ATATCCGCAGGCAAATACTTCTCATAACAACCTCTCGGAGCGTCTCTAATGCTTACTTCTCTTATATTTTCGTC  
CCAACAGATCTCTGGTCCAAGATAA

>PGSC0003DMG400001059 G-LecRK

AAAAATTCATACTAGAACAATAGTTCTTTAATGGCATGCCTAAAAATCCTACTATTTTTCTCTTCATGAA  
CATTTCTTTTGCCCAAAAAACACAATTTTTCAAGGCCAACACCTTAGAGTTGGAGAAAATTGGAATCA  
GCAAACAAGGAATTCAGGCTTGAGTTTTTTAGCCTTGATGCCAATAAAACACAATATATTGGCATATTCT  
ACAATTTACCCTCTAACATGACCTTATTCCCCGGTGATGATCGACCCGTTTGGGTTGCAAATCGCGATATT  
CCGATACAATATGCATCAGGTAACACTCTCACATTGGATGATGATGGAAAGTTGAAAATTTTTTATGGAG  
GGGACAGTTTTGTTATGTTAAGTTCTTATAATGTAACAACAAGAAATGCAAGTGCTACACTATTTGACAA  
TGGCAATTTTGTGTTGGTGGAAATTGAATACTAATGGTTCAGAGAATAAAACATTGTGGCAAAGTTTTGAT  
TATCCTACTGATACACTATTACCTGGGATGAAACTTGGGAGAAATGTTAAAACAGGACAGATATGGTCA  
CTGACTTCTTGATAAGCAAAGATGTACCTGCCTCGGGGTCATTTACGATTGGTATAGACACGAATGAC  
ATTGACCAATTGATAATATGGTGGATGGGAAGTGTGTTTTGGACGAGTGGACGCTGGGGAAATGAGAC  
GTTTGGCAATGTATCGCGAGTATCACACTATGAGTATGTTAACTTGAGTTTTGTTTCGACAGAGGATGAG  
AAATATGTGACTTATTCGGTCAGTGAGACTCGAACTTTGTCTAGATATGTAATGGATACATTTGGTTTTAT  
TAAGGAAAGAGGAGCAGCAGGACCTTTTGGGGTGTGTTTTTACAAGCCTAGTGCTGGTTGTGTGACACA

AGAATCGATTGGGTGCTCGATCAGAAACGATTCATGGTTCAAGAGGAGGCCAAATAGTGTCTCTGGTAA  
TAGATTTAGGTTTGCAAACAACAACATGAGTTTATTTGATTGCAAGAAACAGTGTGAGAAAACTGTTCT  
TGTGCTGCTTTTGCCTCTATCACAGCTACTGGTACTGGTTGTGATATTTGGAGTAACGTATCGATTTTGAA  
TTCACCTTGAATCAGATGTTTTCACTCTTGATGATGAAAGAGGTATATTCATATTTACCTCATTGTCTTTTT  
ATGTTGTTGTCGTGTGACCAGGAGGTGCGCGGGCTCCAGCCTCTTGCAGATATGCAGGGTAAGGCTGCGT  
ATAATAGACTCTTGTAGTCCAAGGAAGTGCATTGTTTCTATGTCTAGCAAGTAAAGTTAGTAAAGCGGAC  
TCTAACGATGAATTGTGCAATGTGTATTCATAGATTTGGTGCCAATAAGAAATCGGAACAGCACAGATG  
TACCAAGCACAGTCTCACTTCTCCAGATTTAGCACCAGAACCATCTCCTAATTCAACGTCAGGATCGTCT  
AAAGGAACTTGTATGTATTGTGTCTAAATCTTGCTCTTCAACTATTGTATATGATTGAAGGTGAAAACCTT  
TTTTGATTGTTTCTCCATATTATCCATTTAAGAAAGAACTATAACATTTTAGGCACGTATTCTTTTGTAGT  
ATCATCATTACACAATCTAGTCCTTGTTTCGAGTATATCCAGAGAAAGGTCATTTAGATCATCTGTGTTGA  
TGTTGTTACTGCTCCTTTCTGAATGTTCTGCACTGTTTTCTTTTTACTTGTCATGTTCTCTTCACTGTCGT  
TTTTCCATTTCCATAACTACTTTTATTTGTTGCTCTTGAGCCGAGGGTCCTTTAGAAACAGTCTCTTACCT  
CCATGTGGTAGGGGTAAGGTCTGCGCACACTCTACCCTCTCCAGACTCCACTTGTGGAATTTCACTCGTT  
ATGTTGTTTTGTTGTTGATGCAGCAACAAAATGGTGGATATGGCTTATAGCTATAATCGGTTTGACACTA  
TTCGTAGGACTTAGCTCCCTATGCTACTTTCTACACGGAAAAGGTGAGCACTCGAAGAATTTAGCTAGAA  
GCTTGCACCAGTAAAACACTCAACTATGTTGCTCGGACTCTGCTAAAATGCTGCCACAGTACCCCTGTCGGA  
TCCTCAAAAAAAAAAACTCACTACTTTTGAAGGATCTGACACACACCAAACAGCATTTTTTAAAAGTCCG  
AGCAATATAGAAATGCTCTATACTATGGGTTCTGATCCACAACCTCCTCTTCACTATCAGGGAAAGCA  
AAAGCAACAGCTTTGCTATTGCTTAATCAAACAGCAAATATATCTAAAAAGAGAAAAATAGACAAGAAA  
ATGAGCCATGAAGTGCAGTTATACAGCCTCGAGAGCCTAGCAATCGCCACAGACAATTTTTACCAGGA  
AATAAGCTTGGGGAAGGTGGATTCGGACCAGTTTACAAGGTAAACATGAAACCTTTTATATGAATATGA  
TTCACGTAAGCATAAATACTTAAACGAGTCATTATTTTTAGGGAGAAATGGCTGATGGGCAAGAAGTA  
GCTATAAAAAGACTTTTCTAGTTCAGGACAAGGCCTATTGGAGTTCAAGAATGAAATTCTATTGATTG  
CAAACTTCAACATACTAACCTTGTTAGGCTTCTAGGATACTGTACTCTACGCGAAGAACGGATTATAGT  
TTATGAATACATGCACAACAAAAGCCTAGACTTCTCCTCTTTGGTAAATATCATGTTTTTTCATCTTCAACA  
ATTAGAACAACCTTTGTCAAGAAATTTCATTTTTACAATGATATGAACAGATAGTAACAAAAAGGAGCTA  
CTAAATTGGGACACACGATTCAGAATCATCGAAGGGATTGCTCAGGGTATACTGTATCTGCATAAATATT  
CAAGGTTGAAAGTGATTCATAGAGATTTAAAAGCAAGCAACATCTTACTTGACGCGGAAATGAATCCAA

AGATATCAGACTTTGGCATGGCGAGGATATTTGGAACACAAGAATCTGAAGCAAACACTAAAAGAATTG  
TTGGAACACAGTAAGTTAATAAGCAATGTTTTATACATAACAAGTTTTATACAATATTACTTGAAGTTCTGA  
ATACATTTTTCGGATACTACTTCAGTGGCTATATGTCTCCAGAGTATGCCTTGAGAGGCATTGTTTCAACG  
AAAACGGATGTATTCAGCTTTGGAGTTTTACTGTTAGAAATTGTTAGTGGCAAGAAAAACAACAGCTGC  
TATGATTCCGAACATCCACTAAACCTCATAGGACTGGTAAGTTTCTAGACTATATTATGAACATATCTCGC  
GAAATGGAGAAACATATAACTATTAGTACTATGTTTTAGGCATGGGAATTGTGGAGAGATGAGAGAG  
CTTTGGAGCTAATAGATGCAACACTAATTGAATCATGCTCGCGCGATGAAGTAATGAGATGCATTGATG  
AGGACTTCTTTGTGTGCAAGATTATGCAAAAGATAGGCCTTCAATGTCAAATGTTGTTTCAATGCTTATG  
AATGATACGAAACAACCACCACCACCAGAACGACCAGGATTTTTTCATCGAGAGAGGGGATCAACGT  
GCAGAGATCTCCGAAGAAGTAGTCAGATACTCGATAAACGGGCTATCAATATCAGAGTTGAGAGCAAG  
ATAAGATACAAGATGGTCAATTGGGAAGTAACTTATTTAACATTCTTTTGATGAAGTGAAAAAGTCACC  
AACTTCAAGTACATACTTATAGGACTAATTCGAGTCCTCTTTCTTGATACTATTACATTATGATGCATTT  
TGTGAGTAGAATATTTGAGACGGATCCAGAATTTAAGTCAAAGATGGTAAACGAGATAAGGCAAGGCG  
AAGTTATGGCAATGGAGACTTCACCATTACCTTCCCCCTCCCGCCTGATAGCAACGTCACCAGTTACATTT  
AAAATGTTAGAGAATACACTTGACACTCATCGATTATATAAGTCGAAAGAGAATATCAGAGGAGTTTCT  
GAACTATCAATATTCGTATATTAGAAAAAGAGGTAAGTGAATGTACATATATTTTCTCATTCTGAGCTTT  
ACATGTTCCACAAATGGGCTGTGAATTAGTTTACTCAATTAATACTACAAAAATAAAGAACAATTTTGGT  
TTTACCTAAACTCACTACAATTCTGATGATTTAGCTTCATCAATATTGTTATCTTTATCGCTAACAAAAAC  
TAAACGATCACCATCTCTGATCAACTCTATTCGTCGATTCAGCTCCATCTTTGCTTACAACCTTTGGCCTG  
AGAGATACCATATCTACTAGAACCAATTTGAAGTAGCTCTTTAAACTCTGTGGGAGTAAAATGAGTTTT  
CCCCGTTGTCTCCTTTCTCAGGGCAACACACTGTCACTCGGGGAGCATAAGTCTTGGTTGTCATGACAC  
TTACATTACTGTCGTTTGCAGATAAAAGCACGTCGTGCTCATTGGTCTGCTTTGCTGACATTATCCCGAAT  
AATGAGTTGTGGAAGTTATTAGACCTACGTCTAGGACGTGAACGCCCTAATGATCCGTCTAGTCCTAGA  
AATGAGACTCCATGGGATGCAGGGGTGATTGTTGGTTCACTTTTGAACCTCCAAGAAATCTAACCCCTC  
GTTCTCGGGGATAGGATCAACGGATCGAGTTCTCATCATTACCCTGGATTCAAAGAGTTCTTTGATGTC  
TTCATGTCCTTGTGCTCAGCAAGGTCCCGGGGGTCCAATTATGTTTCGTCTGGTTGATCAACGTTAGCC  
CCTCGATCCAAGAGATACTTTACTATTTCTATGTTACCTTCAAAACAGCAACATGGAGAGCTGATGAAC  
CATTGATCTTGGGAAGCGTGACATCCCCGCCATAACGGACAATCTCCTTGAGCAAACCTCAAGTTGTTTTG  
TTCAACAGCAACGCAGGCGAAATGTCCACATCACCAGCTGATAGTTTAGCACCGTTGTTAACGAGTAA



CTGGATAACTGACTCGTGCTTCCCCATGATAGCCTCCCACAATGGCACATTGCCTTCTGAATCTGTGTATA  
CACAAGAAACAAAATCAAATTCTTATATCTGGCTGTGTCTGGTGGACATGATAGGAAAAGGAGACA  
ACTGATAGAGTGTGAAACTCGCAAAAAAACGATAGTTGAGGTGTGTTTTGACTATAAACTCTCTAATCTTTG  
GACAAAAACAACTTTTGGCAACAACAGAATTTGAAAAAAGAAATGGAGCATACTCTACTATTGGGAT  
CAGCCCCGAAATCGAGCAGAAGAACCACACAGTTCTCAATGCCTTTAGACGCAGCGATA

>PGSC0003DMG400002017 G-LecRK

ATGAATGCGATTTGCGTAGCAACAGATACTATATCAATGAACCAACAAGTTGTAGATGGTGAAACATTA  
GTTTCAGCAGGAGGTATCTTTGAGCTTGGGTTCTTCAGTCCTAATGGATCCCAAGGGCGATATGTCGGG  
ATATGGTACAAGGGATTACCAAGTTGAAAAAGTTGCATGGGTTGCAAACCGCGAAAGAGCATTAAATTGG  
ATCATATGGAGTTCTTATGATTAATGCAAGTGATGGAAATTTAGTCCTTGTGGATGATAAAAAATATGTCT  
GTCTGGTCTACAGAAATTAATCTGGTATCGAACAATAACACAATTGCTGTACTGACTGATCAGGGGAATC  
TTGTTCTCCGCGATAAGAACGAGTTGAATGAATCTGTACTGTTATGGGAGAGCTTCAATCATCCATCCGA  
TACTCTCTTGCCTCGTATGAAGATTGGGCTGAATACTAGAACAGGGGAGCAAATAGTCGTCACGTCGTG  
GAAAGATGAGAAAAATCCATCACTGGGAAGTTTTAGCACTGCTGTGGTGGATCCTCATGAACTTTTACA  
AGTACTTATTTTGAATGGCTCATCGAAGCATTTTCAGATCGGGGCAGTGGAACCGGAGAAGTTTCATAGG  
AGTGCCTAGCATGACTAAAGACTTCCATAATGGCTTTCACTACTTATGGATAATAATGGGGAGGAACTT  
TATTTTACTTATGCTATACTCAATTACTCTGCTCCAACATTGATATACATTGATTCTACGGAGCGATAATT  
CAAATGGATTGGGATGCAGAAGAGAATAAATGGTTAAAGGTGCAGGTAGTACCTAATGGTCAATGTGA  
CTTGATAACACATGTGGTCTTTTTGGAAGTTGCAAGGATAATGATTCACCAATATGCAAATGTTTGACG  
GGCTATGAACCAAAGTCTATCGGTGAATGGAACGAGGGGAATTGAACTAGTGGTTGTGTCCGGAGAGC  
ACAATTCCAGTGTGAGGAGACGATCACTAGTACGAATTCTGATGATGAGAGAAAGAGAGGGGAAAAGA  
ATTCTGATCACTTGTTTGGCATATGCTTATGTGGATGGAATAGGCTGCATGATTTGGGGAAAAGAACTTA  
TTGACCTCCAAGAGTTTGCCCGTGGTGGAGAGCAACTATACATTGCCTCGCACATTCCCAACTTGGTAG  
ATACAGATACTAATTCTATGTTGCTCGGACACTCCAAAATGTTGTTGCACCCGTATAGGATCCTCCA  
AAAAACACACTATTATTGGAGGATCCTACATGCACACAACAATACTTTTGAAGAGACTGAGCAACATAG  
CACCAATTTTCTCTATAAACATCCCATTTTATTACTACTCGAACGAACTTCACTTCATTTTGGATTTGTTTT  
AGTAGTTTGCCTATGTTATTTGTCTCTAATCATTTGTTGGATTCACATTCTCCTTTTATGACTGTAGTGTT  
GGGCCAGCTTTAGTGCCTGAACTATTCTCAGAGACAGAGCTAGGATTTGAGTTTATGGATTTTGGAT  
TCTAGAAAAACAAATACTGGGTCTTGAATAAATTATTTATACTTATTAAATGGATTCTTAAACACAAAA

AATATATGGTCTAGCCCAAAGCTACTGGATTCTACAGACTCTGTAGACAGGCTTGTAGCTCCGCCTTTTC  
CATCGAGTACTTGCTACCTCTACCAATAGGGATACTGAGTAATTCTGCTCACTAAGGCATAAGTAGATG  
TGAAAAAACACCTAGTATGGTTTTGCTTCCATCGGAATCTGAACTTGAGACCTCATGTTTTAGTTTTTTTC  
TTATCGAGTTGCCTTTTGTGCATGCAGATAAGAGGAGGATGCTAACGGGAGCCCATATTGCAATTATTGTC  
TCAGCGACATTGGCCTGATTCTTATTGTTTGCCTATATATGTATTGAAGATCAGGAAAAAAGGTAAAA  
AAAAAAAAAAAAACAGTCAATTTTTACAGTTGTTAGAGGCACAACTTTTCGCTATCTTTTGGAAAGACTTT  
AATTTTTACTAGATTTTATCAGGCATTGGGAGTTTAGTCCCTTTTCGCATAGCTTCAAACACTCTTCAGC  
AACAAATTTGCTTCATAACAGTTTTACTCAAGGTAGAAGTACAGAATTACCAGTTTTCAGCTTCAAGTGC  
ATAGAAGCTGCTACTAAGAACTTTTGTATCGAAATAAACTTGGAGAGGGGGGATTTGGACCTGTATAC  
AAGGTATATATATATATATCACTCGTGTGTGCTTTAATCATCGAAAAAGTAGAGCAAATTTACATGGTT  
TATACTCATTTGCTTATTAGTTGAAGTCATGTGTGATTATATATAGGGGGTATTAGCAAATGGACAAGA  
GGTTGCTATTAACGACTTTTCGAGGAGCTCAGGACAAGGCATTGAAGAGTTCAAGAATGAGGTTACACT  
GATTTCTGGACTTCAACACAGAACTTAGTCAAACCTGATGGGATTTTTCGTTTACGGGGAGGAAAAGTT  
GCTGATCTATGAATACATGTCCAACAGAAGCTTAGACGTTTTCATATTCGGTGAGCTAATTAACAAGAGT  
ACTTAAACAGTACTTTTTCTTGATGAATTATGATTAATTACTCTTTGTGCTTGGCAGGAGGATCAAGATCT  
AATGATAAGGCGGCATTGAGTTGGAATCAACGATATAGTATCGTTGAAGGGATAGCTAGAGGTCTTCTT  
TATCTGCATCGTGATTCACGACTAAAAATCATTACAGAGATCTTAAGACAAGCAATATTCTGTTAGACG  
AAGATATGAATCCCAAATCTCAGATTTTGGAAATGGCTAGGATTTTTCGGAGGGAATCAAACCTATAGCAA  
ATACCAACAGGATTGCCGGTACCTAGTAAGTATTAATTGTTTCATATATAGCAGTGAAATTCATCATAACT  
AAATTGTATATTTGTGTATCAATGCAGTGGTTACATGTCCCCTGAATATGCAATACAAGGATTTTTTTCCG  
AGAAGTCGGATGTCTTCAGTTTTGGTGTGCATATTGTTAGAGATTATCAGCAGTAAAAGAAACAACAGCT  
ATTGCTACTCTGAAGACTCTCTCAACCTCCCGGACCAGGTGAAAAAAGAGAAAAACTGAAAGAATTTCTC  
ATTTTCTCATATACAGTCAAACCTCTTATAATAACGTAATTTCTTGTCTAGCTGCTATAGCAAAAATGTA  
GTATAAAGAACATATAAATATAACATAATATGGAAGTTTCGAGAAAAACTAGGCCGAGGATGATTGTTAT  
CGAGAGGTCTGAATGGACTTGAATATTCTTCTATCCTATACTACTACTATTTTCACATGACAAAATAATA  
TCAATGGATTTTATAGGCATGGCAACTGTGGAATGAAGGCAAGATACTCGAGTTTCCGGATCCAAAGGT  
GTTTGGTTCACTTGAACACCAACACAAGTTGTTAGATGCATCATTGTGGGATTGCTTTGTGTGCAAGAA  
CATGCAAGTTACAGGCCAAATACAGCTACAATTGTTTCCATGCTCTGCAGTGACACACTTCTTCTCCGCC  
TAAGCGGCCGGCATATAGCAGCAGAGGCTCTGATGATCCAAGCATTTACCTTGCTCCAGAAATCCATT

TCTATTTCAAATGTTGAAGGACGTTAA

>PGSC0003DMG400003313 G-LecRK

TTCAAATTACATATTTCAAACCTTCTGTATGAATTAGGATTCATACTATAACATGAATATAAAATTTTCA  
ATTCTTGTTTTACCTTTACTTGTTGTTTCATCTTATTGTTCAACAATCTTTAGTTTATCATCTGAAGGTTAC  
TTTCTGCTCCACAAGATTTAATTCGTCTCGAAATGGAAAATTCCTGCTGGTTTCTACTCTGTTGGTGAT  
AATGCATATATCTTTGCTATATGGTTTACTAAGTCATTGGCTGATGGAACCAACACAATTGTTTGGATGG  
CTAATCGAAATCAACCGATAAACGGACAAAATCACATCTGTCGCTGTTTAAATCAGGCAACCTTGTACT  
GATTGACGCGAATCAGATCAATGTTTGGGAATCTGGTACACAATCATCAACTTCTCTGTTGAGTTAAGA  
TTGTTGGATAATGGAAATCTTGTTCTTGTAACCTTATGAAGGTCAAAGATTATGGCAAAGCTTTGATTCAC  
CAACTGATACACTTCTTCTGAACAACCACTTACGAAAACCTCAAAGCTTGTTTCGCGTAGAAGCTTGACT  
AATTTCTCCTCTGGATTCTATCAGTTACATTTAATGAAGATAATGTCCTGCATCTTGTCTTTGATGGAATA  
GAGATGACAAGTGTGTTTTGGCCAAGCCCGTGGTTAATCGTTTGGGATGCAGGTTAGTAGAGACAGATT  
CAGAATTTAAATTTGATTCGTTAAATCCTTAGTTTGTGTCCTCAACTCACATATATTTTTGCATGAAAAA  
TACTAGTTTTAGTTGAACTCATTATATGTTTCATTTGAGTGTATTGGTTAGTAAAGATGGATTGAGGATTT  
AAATTTAGTTGGTTCAATCTTTAGTACAACCTCATTTTTTTTCGGTTTAACTGAACTCACTGCTGATCATGTC  
TGCAGGTCGATCCACTTACAATGACAGCAAAACAGCAGTTCTTGATCGTTTTGGGAATTTTACATCGAGT  
GATCGATTTGGATTCCAATCTGCTGATTATGGTGTGGAATTGCAAAGAAGATTCAGCCTTGACGTAGAT  
GGTAACCTTCGATTGTACAGCCTAGATAAGCTGAGCAACATTTGGAAAGTTTCTTGGCAGTTATTTCCAG  
CAGCCTGCAGGATTCATGGAGTTTGTGGATTGAACAGTTTGTGTTCTATGATCCTGTCTCTGGCAGAAA  
ATGTTCTTGTGTACCAGGATACAGGATGAAAAATCCTAAAGATTGGTCCTATGGTTGTGAACCAGAATTC  
AGTATCTCTTGCAACGATACAAGCTCGTTGGACTTCATTCCACTTCGCCATGTTGAGTTTTACGGGTATGA  
TATTGCATATTTTCGCAATAAACTTTGCAAGAATGTAAAGATTTGTGCTTGAAACACTGTGATTGTAAA  
GGTTTTGAATACAAGTATGTTGAGGGTAATGGCACCTATGGTTGTTACCCGAAAACACTTCTGTTCAATG  
GCTATGTTCAAGCTAGTTGGCCTGATTTTGTTCCTTAAAGTGCCTAAAGCACAACTGCCAGGCAGGA  
GCAGTATGAAGGAAACCTTCAATGTGACGATAAAAAGGTGATGTTGGATAGAGCTTATAGAAGGAAAG  
AACATGGTGGATGGATGAAGCCATTCATTTGGTTAGTTGTTGTAGCTGGAGTCTTTGAGATTCTCTGTGT  
TCTCACTTACTTTATTTAAAACGAGAAAAAGCTCGAATGAAACCACACAAGGCTACCTTCATCTTTTCGACA  
AGATTCAAGAAATTCACCTATGCTGAGCTTAAAAAGGCCACTTCCAATTTAGTGAAGAGATAGGTCGA  
GGAGGCGGTGGTATTGTGTACAAAGGGAAAGTTGTCTGATGACAGAGTTGCAGCTATAAAGTCTCTCTAT

GGAGCCAGCTATCAAGGAGAAGCAGAATTTTTAGCTGAAGTGAGCACTATAGGCAACGTTAATCACATG  
AATTTGATCGAAATTTGGGGATATTGTGCTGAGGGAAAGCACAGGCTTTTAGTTTATGAGTACATGGAG  
TGTGGTTCTTTGTCAGATAATTTGAATGCCAACAACTCTTGATTGGGAAAAAAGGTTTGAAATCGCGTTGG  
GAACGGCTAAAGGACTTGCATACTTGCATGAAGAATGCTTAGAATGGGTTTTGCATTGTGATGTAAAGC  
CTCAGAACATACTTTTAGATTCCAATTACAAGCCAAAAGTTGCTGACTTTGGGCTTTCAAAGATATTTAAC  
AGAGGTGGCTTGGATCATTCAAACTTTTCCACGATAAGGGGGACGAGAGGATACATGGCTCCAGAATG  
GGTATTCAAGATGCCTATTACATCCAAAGTCGATGTCTATAGTTATGGCATTGTTTTATTAGAGATGATCA  
CAGGTAAGAGTCCAGAAGTTTGTGCTGATGGTGACTCGGGGGATGATGATTCTATGGGACTAGGATTG  
TTGGTCACTTGGATTAGAGAAAAAATGCGCGAAAACAGTGAAAGAAAATCATGGATTCAACAAATTGTG  
GATCCTGCATTGAATGGTAAATTCGATTTGGAAAAAATGGAGATCTTATTAGAGTTAGCTTTGCAATGTT  
CGGAAGAAGATAGAGATGCAAGACCTACCATGTGTGAGGTGGTGGATAAAAATGCTTCATCCAGAAAAT  
TTCGAGTTAAAATTAGACATGTTAATGTAGTTTCTCAAGATGTAAAATCTTGCCAAAGCTGATATAGTAC  
AAGCTTATATGTAATGTCTCTTGAGTAGCTAGTACTTTTTGAATTCCAAAATGTAAATCCTTATAGAATGAC  
ATAGTTTCTTAACAATATTGTGCATTATAGCTACTGTTATGGTCTTGTGCATCAGTGCTAGATGGAAAGT  
GTGCAAGAGTACAT

>PGSC0003DMG400003982 G-LecRK

GAAAAGATAAAATCTATGGCTGCTTTGCTATGGTTATTAATCTTATCTGCATTTTCATGCAGTGACACTAGC  
ACAACAAAGACAGTTTAATATAACTCTTGGCTCTTCTCTAACACCTACTGCCAATTCATCATGGTTTTAC  
CGTCCAGGCGCTTTGCCTTTGGGTTTTATGAACAAACCAATGGCTATGCTGTTGGAATCTTAATTGTCGG  
TATGCCTAAGAAGACAGCAGTGTGGACAGCAAATAGGAACAGTCCTGTTGTTCCGAGCAACGCTGTCTT  
GCTCTTAATAATGATGGAAGGCTCATTGTACAAGTAGGAGGACAAGAAATCACTGTCGTAAATCTCTCT  
GGTCAAGTCATTGCTTCAGCTTCCATGCTGGATACTGGCAACTTTGTGCTCTATAATTCTGATCACAGTAT  
CATATGGCAAAGTTTTGACAATCCAACAAACACCCTTTTACCAGGTCAGCATATATCAGCTGGACAAGAG  
CTGTTCTCGAGTGCTTCAGTAGCAGATGATTCATACGGTATTTTCCGTCTCAAATGCAAGATGATGGGA  
ACCTCGTTCAGTACCCTGTCAATACACCAGATACTGCCCATATGCTTACTACTCAACACGCACTTCTAGA  
GTAGGGAATACTGTTACACTGAATCTTGATGATGACGGCCTCCTCTACTTGCACAATTCCACTAAGAGGC  
TAAGAAATCTAACCAGAGGAGGCTACCCTAGAGAAAGGACCATCATCTATATGATGAAAATTGATGCTG  
ATGGTATTTTTCGAGTCTATTCACATTCTCTGAACCAACAGAACAGCTCCGTGATATGGTCATCAACAAAT  
GATGGCTGTAATCCAATAGGCCTTTGTGGGCTTAATGGGTTTTGCACCAATATAGATGATCAAGCTAAAT

GTTTGTGTCTCCGGGATTTGATTTTGTAAATGCCAGGAAATTGGAGCGCAGGCTGTGAAAGGAATTTCA  
CCGCAGAAACCTGTCGGTTAAAGGAGAGCACTTCCAAATACTATGCTATGAGAACAGTTGAAAACACAG  
GATGGGAAGATAGTACTTATGTTGTTTTGGCCGGAACGACCAAGGAAGATTGAGACCAAGCCTGTCTAC  
AGGATTGTAAGTGTGAGGCTGCTCTGTTCAAAGACAGAGAGTGTAGAAAGCAAAGGCTGCCTCTGAGG  
TATGGAAGGAGAGAACTGGATAATTCTAATCTAGTATTGGTCAAGGTGGGCACTAATTTCATAACCAAC  
AAAGGGGTGCCTAATCAGACGATTGAAGAAACAAAAGGCCAAAAGCTAAGGATAGACATCCTAATTGC  
CAGCATTACATTGGCTGTCTTTGCTTTGTTGGTGTAGGCATCTCTGGATTTCTCATTACAGAATTCATG  
TCTGGACTTACAGAAAAATCCAGGATAGTAGAAGTGTTCAGTTATGTGAGGATGTTGCTCCACGAGCAT  
TTTCTATGCAGAACTAGAGCAGGCAACCAAGTGGCTTCAAAGAAGCGTTAGGGAGGGGGGGATTTGGA  
ACAGTATTTAAAGGGATATTGGCAGAAGGTCAGAAAGTGATAGCTGTTAAGAGACTAGACAAAGAATT  
GGTAGAAGGGGAAACAGAGTTCCAAACTGAAATAAAAATCATTGGAAGGACACATCACCGAAATCTAG  
TCCGTCTCCTTGGTTATTGCCTGGAGGGATCAAGAAGGCTTCTGGTGTATGAGTACATGACCAATGGGT  
CACTTGCGGACATACTTTTTACACCAGAAAAACAGCCCATGTGGGAGGAAAGGTGTGGCTTTGCTAGAG  
ATATTGCAAGGGGCCTCCTATATTTGCATGACGAGTGTGACACACAAATCATCCATTGTGATATAAAGCC  
TCAGAACATACTCATGGATGATCAGTACTGTGCAAAAATATCTGACTTTGGAATGGCCAAGCTCTTAAAG  
AAAGACCAAAAACAAGAACTTACACAGGGATAAGAGGGACCAGAGGCTATGTTGCACCAGAATGGCACC  
GAAATCTGCCAGTCACTGTGAAAGCAGACGTTTACAGTTTTGGTGTTCCTATTGGACTTGATTTGCAG  
GCGGAAGTTTGTGATATGAGCCTTGATGAAAATGAGGCAATTCTTGAATTCTGGGTTTACAATTGCTTT  
GATGCAGGAGAGCTAGATAAACTAGTCAGGGACGAGGAGGTTGATAGAAGACAATTCGAGAGAATGG  
TGAAATAAGCATTGGTGCATTCAAGAGGAACCATCACTTCGCCCTTCAATGAAGAAAGTTCTACTGATGC  
TGGAAGGAACAGTAGAAATTCAGTGCCTCCTAGTCCTTCTTCTTTTCTAAGTGCCATATAGTTTTAACT  
TCTTCACTTTTTGTTTCAAGTATCCCAACTTTCCCATAGAGAGCAGAGTACTTTATTATAATTGTATCAATT  
TTCTACATCATTCTCCACCTCTTCTAGCCATCAGTTATCTTCTGCTGTGGTGTATCTCAAGGCTTATGTTTC  
CATTTTGAGATTTGTCCATATCAACACTTCTTCAAATTTACTTGTAGTATTTGAATTGTAATACTAATT  
T

>PGSC0003DMG400003999 G-LecRK

ATGGCTGCTTTGCTATGGTTATTAATATTATCTGCATTTTCATGCAGTAGCACTAGCACAAACAAAGGCAGT  
TCAATATAACTCTTGGCTCTTCTCTAACACCTACTACCAATTCATCATGGTTTTCGCCGTCCAGGCGCTTTG  
CCTTTGGGTTTTATGAACAAAACAATGGCTATGCTGTTGGAATCGTAATTGTCGGTATGCCTAAGAAGAC

AGCAGTGTGGACAGCAAATAGGAACAGTCCTGTTGTTCCGAGCAACGCTGTCTTGCTCTTAACTAGTGA  
TGGAAGGCTCATTGTACAAGTAGGAGGCCAAGAAATCACTGTCGTAATCTCTCTGGTCAAGTCATTGC  
TTCAGCTTCCATGCTGGATACTGGCAACTTTGTGCTCTATAATTCTGATCACAGTATAATATGGCAAAGTT  
TTGACAATCCAACAAACACACTTTTACCTGGTCAGCATATATCAGCTGGACAAGAGCTGTTCTCGAGTGC  
CTCGGAAGCAGATGATTCTTTCCGGATTTTCCGTCTCAAATGCAAGATGATGGGTACCTTGTTCAAGTAT  
CCTGTCAATACACCAGATACTGCCCCATATGCTTACTACGCATCCTACATCCGTGGAGTAAGGAATAATT  
TTTCACTGAATCTTGATGATGACGGCCTCCTCTACTTGCTCAATTCCAACAATAGTCTAAAAAATCTAACC  
AGAGGAGGCTACCGTAGAGAAAGGACCATCATCTATATGATGAAAATTGATGCTGATGGTATTTTTTCGA  
GTTTATTCACATTCTCTGAACCAACAGAACAGCTCCGTGATATGGCCATCAACAGATGATAGGTGTGATC  
CAAAGGCCTTTGTGGGCTCAATGGTTTTTGCACCAATATAGATGTTCAAGCTAAATGTATGTGTCTTCC  
GGGATTTGACTTTGTAATGCCAGGAAATTGGAGCGCAGGCTGTGAAAGGAATTTCCCCACAGAAACCTG  
TCAGTTAAAGGAGAACACTTCCAATACTATGACATGAGAACAGTTGAAAACACAGTATGGGAAGATAG  
TACTTATGTTGTTTTGGCCGGAACGACCAAGGAAGATTGTGAACAAGCCTGTCTACAGGATTGTAAGTGT  
GAGGCTGCTCTGTTCAAAGACAGAGAATGTAGAAAGCAAAGCTGCCTCTGAGGTATGGAAGGAGAGA  
CTTGGGTAATTCTAATCTAGTATTGGTCAAGGTGGGCACTAGTTTCATATCCAAAGAAGGGGTGCCTAAT  
CAGACGATTGAAGAAACAAAAGGCAAAAAGCTAAGGATAGACATCCTAATTGCCGCCATTACATTGGCT  
GTTTTTGCTTTGTTGGTGTAGGCATCTCCGGATTCTCATTACAGAAATCATGTCTGGACTTACAGAAA  
AATCCAGGAGAGTAGAAGTGTTCAAGTTATGTGAGGATGTTGCTCCACGAGCATTTTCCTATGCAGAACT  
AGAGCAGGCAACCAGTGGTTTTCAAAGAAGCGTTAGGGAGGGGAGCATTGGAACAGTATTTGCAGGA  
ATTTTGGCAGAAGACCAGAAAGTGATAGCTGTTAAGAGACTAGACAAAGAATTAGTAGAAGGGGAAAC  
AGAGTTCCAAACTGAAATAAAAATCATTGGAAAGACACATCACCGAAATCTAGTCCGCCTCCTTGGTTAT  
TGCCTGGACGGATCAAGAAGGCTTTTGGTGTATGAGTACATGACCAATGGGTCACTTGCGGACGCACTT  
TTACACCAGAAAAACAGCCAACGTGGGAGGAAAGGTGTGGCTTCGCTCGAGATATTGCAAGGGGCCT  
CCTATATTTGCATGACGAGTGTGAAACACAAATCATCCATTGTGATATTAAGCCTCAGAACATACTCATG  
AATGATCAGTTCTGTGCAAAAATATGTGACTTTGGAATGGCCAAGCTCTTAAAGAAAGACCAAACAAGA  
ACCTACACAGGGATAAGAGGGACCAGAGGCTATGTTGCACCAGAATGGCACCGAAATCTGCCAGTGAC  
AGTGAAAGCAGACGTTTACAGTTTTGGTGTCTGCTCCTATTGGAATTGATCTGTAGGCGGAAGTGTGTAGA  
TTGGAGCCTTGATGAAAATGAGGCAATTCTTGAATACTGGGTCTACAATTGCTTTGATGCAGGAGAGCT  
AGATAAACTAGTAGGGGACGAGGAGGTTGATAGAAGACAATTCGAGAGAATGGTGAAAATAAGCATCT







ACTGGACAGGAATTTTACCTGTCCTCATGGAAGAATGAATATGATCCGGCTCCAGGGAAATATACGTAT  
CATTGTGATCCTACTGGATATCCTCAGAATGTCATGAGGAAAGGTAAAGTTAAGGTGTTGAGTGGCGGA  
CCATGGAATGGACTCCGCTGGAGTGGTGTACCAGGATTGACAAAAATACTATTTATACATTTAAGCTG  
GATTTTGATGAAAAGAAAGCAATTTACAGTTACGCGCTCGTGGATAAATCTGTTTTATCGAAATTAACCT  
TGAACAGTCATGGTATGCTTAAGCGTTGGACGTGGGATGAGAAGATAAAGGAATGGCATGTTTACCTG  
GCTTCACCAGCAGATGCCTGTGAAAATTATGGAGCATGTGGTGCCTATGGTAGTTGCAACATCATATTTT  
CTCCTGTTTGTGTTGCTTAGACAAGTTTGTGCCTAAAGATCAGAAAAATTGGTCAGTGACAAAGTGGTC  
CGGTGGATGTGTTAGAAGGACACCCCTTAATTGCCAGAATGGAGATGGATTTCTCAAGTACTCTGATAT  
AAAGCTACCTGATACACAGTATTCACGGTTTGTGCGAGAATGACACTCCGAGAATGCGAGAAAGTTTG  
CCTAAAGAATTGTTCTTGTATGGCTTACTCAAATCTTGATATACGCAATGGTGGGAGTGGCTGTTTGCTT  
TGGTATGGCGACTTAATTGACATTCGAGAATTACCTGGAGGACAGGACATTTACATTAGGATAGCTAAC  
TCAGAGTTAGGTAATAATTTATGCAACAAATTCATTAATTTGATAAATATGAAGCATTAGCTGAATGAA  
GTAAACTTCACAATTATTAGCTTTAGTTGTGTTTTGCTTATCTATTTGTTAAAAAGTTCACATAGCATATAT  
TTAGTTTATTTTACCCTCCATTTTTTTTTAGGCTCGAAGAAGAAAATGAAAGCACTTGTGCTGAGTTTATCA  
CTGTTGAGCGGAGTGTCTGTCATTGGCCTGATCATATGGCTGTATATTTTGATAAAGACGAGGAAGAAG  
AAGAGGAAGATGATTCTGAAAGATGATCTAGAACTTCCACTGTTTTCCCTATCAACAGTAACTAAAGCGA  
CCTCTAATTTCTCAGACAAGAACATGCTCGGAGAAGGTGGATTTGGATCTGTTTACAAGGTAGCATAACT  
TGTAGGTTTATTATATGTAATAATTGACAGTAAACAGATAAGTAACACTTTGAATTATCACTGTCAAG  
ACATCCTTAGCTTCAATATGAGTCAGCTGTATGTTATGATATTGTAGGGAATCCTGGAGGGAGGACAAG  
AAGTAGCTATGAAGAGGCTCTCAAAATCTCCTCGCAAGGAGTCAACGAGTTCAAGAATGAAGTTAATT  
GTATTGCCAAACTTCAGCATCGAAACCTTGTGAAGCTTATAGTTGCTGCGTTGAAGGAGAAGAGAAAA  
TTCTGGTCTACGAATACATGCCAATAGAAGTCTTGATTTTCATCATATTTGGTATGCTTACTCTTGCTTAAC  
ACATAAAACCTCAAGTACTGCTCATAGTATAGCATTGAGCTTGCAGCTTTCACCATGATTTTGGAAAAGG  
TTGTTAATTTCAAATGGAAGTAGATTCTGTTAACATACTAAAAGCAGTTAGAGCATCAGTTACTATACTA  
ATTGTTGGAAGATCTGTTAACAGATGAAGACAAGAGCTCGACTCGACTGGCCTAAGCGCTTCAACAT  
CATCAATGGAATTGCTAGAGGACTTTTGTATCTCCATCAAGATTCTCGGCTAAGAATTATCCATAGAGAC  
CTCAAAGCTAGTAACATTTTGTAGACGCTGACATGAACCCCAAGATCTCGGATTTTGGCATAGCTAGAA  
GTGTGATAGGGAATGAGACGGGTGCTAATACACATCATGTGGTTGGGACACAGTAAGTGATTTCACT  
ACGACCTTTTAGCATTTATCTCATGTACTACTCATATAGTATCATCTGTGTAACACTATTTTCTGTTTGATA

TGTGATGCAGTGGCTACATGTCCCCAGAGTATCTAATACATGGTGTGTTTTCTCGATAAAATCAGATGTATT  
TAGCTTTGGCGTGTTGGTTCTAGAGATAATCAGTGGTCTGAAGAAACAGAGGATTTTTCCATGAAAGTCA  
CAGTATCAACCTTCTCGGACATGTAAGTTTTGTATGTTAAAAAGTACTTACATATTCAGATTTTCAGACCAC  
TCGTAAGGTAATTACAAGTGATAGTGTAAGTAACTGATAGTGTAAGTAAAGTCTTACTAAGTGTGGTGT  
ATATAACTTAAATCTATTAACACGCTTCACTTGCTTGTACTGATCTGTTATTAGCAGGTTTGGAACTTT  
ATAAAGAAGGTAGACCATTGGAGCTGATTGATGTGCATATTACAGATTCATGTTATTTTACTGAATTACT  
ACGGATAATTCATGTCGCTCTATTATGTGTACAACATAGTCCAGAAGACAGGCCAGACATGTCTGAAGT  
GGTTGTGATGTTGGCTAATGATGCCATTTTGCCTGAAGCTAAGGAACCTGGTTTTTACACAGAAAGCAA  
ATTCCTGATTCTGAATATTCTACAAGCATGTATTCGAAAAACGAAATCACTATTACACAGTTAGATCCCC  
GGTAAATTAATTTTCATATTCTTGTAGATCTTTAAATGTCTAGAAGCTTGAATAACAGAGGAGAACATTT  
TATGAGTTGTATCATATTAGGAAAGAATTTACCTAACTCTTGAATTAAGGACAGCCTGGAGCACTA  
AGCTCTCGACATTCATGGATTCAGGTCAGAATTGGACCACACGGGTCTATTGTACGACAGTTTTACAGGC  
ACTTGAGTATTAGTTACAAATTGCCATTGTTGCGTATGTTACATGGTTTTGTTATACTTACAGATACGTAT  
CCACTCTGGGTGTGTGTAAGAATCTAATATGAATACTACAGTTTTTTTTGAAATTTTAACTACTCTCCA

>PGSC0003DMG400004930 G-LecRK

ATTAAGGCTTAGGCATCAAACACATAGATGGAATCTAAATACTTCATACTTTTCTTACTATCTTTCTAC  
TCTTTTATACCGAAGATTAGTTCTACTACGACAAATGTAATCAATACTAATCAGTTCATAACAGATGGTGA  
CACTATTGTTTCATCTGGTGGAAACCTTTGAGCTGGGATTTTTTCAGCCCCAATGGTTCACAACGCGATATA  
TTGGGATATGGTACAAGCAAATCTTCTTATGTCCAACAATTGTATGGGTTGCAAACAGAGAGAAAC  
CACTACCAATACATCTTCAGTCGTTTTGAAGGTCAACAAGCCGGAATACTTGCTCTACTTAATGACAA  
GAATGAAACTATATGGTCCACGAACACCTCACGATCAGTCCAAAATCCAGTTGCAGTGCTGTTGGATTCT  
GGTAATCTTGTCTAAAAGATGCAAATGATGACAATCCAGAAAATTTCTATGGCAGAGTTTCAATTTTC  
CAACTGATACTCACTTGCCTGATATGAAACTCGGAAAGAATTTAAGACTGGTATTGAAGTTTACCTTTTA  
GCATGGAAGAACGATAATGATCCAACCTCCAGGGGAATACAGTCTCCACATTGATCCTACTGGATATCCA  
CAAGGCCTCATTAGACATGGGGCAAGGGTATCAGCTCGAGCAGGACCATGGAATGGTTTACGGTGGAG  
TGGAGCACCTGCACCACTACAAACACAAACCAGCATATATACTTTTCAATTTGTTTTCAATGAAGAGGAG  
GTTTACTATAGTTTTTCTCTCATTAACTCACTGTTAACAAGGTTAGTCTGACTAACAATGGTTATATA  
CAACGTTTGACGTGGGTGGATAGGACAAAGAGTTGGCATCTTACCTCAATATTCCTCTGGATACTTGTG  
ATACATATAGCTTATGTGGTGCATATGGGAGCTGTGTCATAGATAGTTCTCCTGTTTGTGGATGTTTGA

CAAGTTTGAACCTAAATATCCACAAAATTGGCAAACGGGAGACTGGTCACAAGGGTGTGTTAGGAAGA  
CACCTATTGATTGCAACAAGGAACATGGATTTCTAAAATATTCTGGAATCAAGTTGCCAGAACTAACAA  
CTCTCAGTACAATAAGACCATGACACTCGAAGGATGTAGGCAAGTATGCTCAACGAACTGTTCTTGAC  
AGCTTATTCGAGCCTAGATATAAGCAATGGAGATAAAGGTTGCTTGTGTTTGGTCTGGGGAGTTGATTGA  
TATCAGAGAGCTCTCTGGAAGAGGACAAGACATTTACATACGAATGGATTCTTCAGACATAGGTAAGAA  
CTTATGTTAACGAAATTTCTAATGATGTGTTTTGAACTTTTAAATTTTTAACATATGTAGACCATATTAT  
ATATGCAAAGTAGTGGCCTATATCAATTCGAAGAAGCTAATTTAGAAAATGGTTGTAGTATCTCAGGC  
AAGTTCAAACAGAAAGAAGACAGGGACAGTACTCGCGGTGAGTTTCTCGTTGTTGGTGGCAGTGATTCT  
GCTAGGCCTGATTCTGTTTCATGTACATACGTAAAAAGAAGAACTAAACTCAAAGAAGATTTTGAGCT  
GCCACAGTTTCAATTGTCGTTAATAACAAGAGCCACAAATAACTTTTCGGTCAACAACCAGATTGGAGAA  
GGTGGATATGGACCTGTTTATAAGGTATAAACTCAATTTTTTTTTGGAATAGTGACCAGGATAGAGATGA  
CTTTCATTCTGCAATACTCGCATCTTTGTAAAATATATTTCTTCTGATATACTTTTTCCATTTCAAGGGAG  
TACTGGAAGAGGGACAAGAAATTGCTGTGAAGAGACTGTCAAGGACTTCCATGCAAGGAATTGATGAA  
TTCAAGAATGAAGTTACCTATATTGCCAAGCTTCAGCATAGAAATCTTGTGAGACTTCTGGGTTGCTGCA  
TTCAAGGGGAAGAAAAAATGTTGATCTATGAATACATGCCTAATAAAAGCCTGGACTCATACATATTTG  
GTTAGGATTTCTAACCTACTATAAAAGCAAAAATGAGTAATGAACCATGTTTTCAAATTAAGCTGCTAA  
AAAAAAGAAGTTTTTTATTTTTTTTTGTAGATCAAACAAAGAAAAAGTTACTTGATTGGTCAAGGCGTT  
TCGACATCATTAAATGGAATTGCTCGTGGCTTATTGTATCTCCATCAAGATTCTAGACTACGTATTATCCAT  
AGAGACCTTAAAGCAAGCAATGTTTTGTTAGATACAGAAATGAATCCAAAGATATCAGACTTTGGGATG  
GCTCGAAGTGTTGCAGGAAATGATATGGGAGCAAAAACATGCCATGTAGTTGGGACACAGTAAGAATC  
GATCATACAGAAGTACTCTCATATGAAATCCCCCTTCTAAATTTCTCATGGTGTAGTTCTTTTTTTGGAAC  
AGCGGTTACATGTCCCCTGAATATGCAGTAGATGGAATCTTCTCAGTAAAATCAGATGTGTTTAGCTTTG  
GCGTATTGGTGTTAGAGATTGTGAGTTGCAAGAAAAATAGAGGATTTGTCCATGAAGATCACAACCTTA  
ACCTTCTCGGTCACGTAAGCACTCTATACATTCTTGTCTATATTACATATAGAATTTGTCATGATCTAAATT  
ACTCAAACAGGCATGGAAGCTTTACAAGGAAGATAGGTCCTTGGAACTAATTGATGAGAAGCTAGCTGA  
ATCTTGTGATATTTCTCAAGTTTTGAGGTCAATTCAAGTGGGACTATTATGTGTGCAACAATGTCCTGAAG  
ATAGACCAAACATGTCTTCTGTGGTTCAAATGCTAGGTAATGAGAGTTTACTGGCAAAGCTAAAGAAC  
CAGGATTTTTCATGGAAAGAACGCTACATGATTCAGATAATTCAGGAATGCAGACAGGAAGTTCGAAAA  
ATGAAATAACAATGACAATGTTAGATCCTCGGTAGAGTACTGTGAATGAGGCAACTACTGTTGATAAGC

ATGAGTAACAAATTATTTTAGAGGGCGTGATAACGACATTGAAGCGCCTGAGAAGCGCTCAAGCATCAC  
CTCAGGGATTAAGCGTGCCTTTGAGTATTTAGAAAAATGGTTCATAATTGCCATGCTATTATAAGTATCT  
ATTCAACTTGAATTTTCATTTGTATCTTATCTTAGAAAAGAAATGTAAATTCTAGTAAGCAAAAATGTCCAA  
ATTATATAGCCTATGATAATACATAAAAATCGAATCAAACCGACAGATGCACGAGCTCTCCAATATCTGCA  
TGGAAGAGTCCAATATGTCGTTGAAATTAAGGTCACAACTTTGGATTCCATATTTGAGTAAAGAGA  
AGAAGATAGGGAAAAAGGCCATAAGCCCACATTGACCGTGACGGCCTTTCATATCCATCTCCGCCCAT  
AATAAGGGAAAGTAACTAATCGGGTATGAATAGATAAGAAAGTGAGATTTGAATCCAACCCGGCC

>PGSC0003DMG400005044 G-LecRK

ATGTCACCAGAGTATGCAATGGGAGGACTATTTTCTGAGAAATCTGATGTCTACAGCTTTGGCGTATTGC  
TACTAGAGATTGTCAGTGGAAAGAGAAACAGCGGATTTTATGACCACGAAAGGCATCTCAACCTTCTCA  
GTTATGTAAGTGCAAATCAGCAGGATCTCTTGCCACAAGTTATTCACACAACTTAGAGTATTCATTTT  
AAAATGATTTTCAGGCGTGGAAGCTACGGACTGAAAGCAACGGATTAGACTTAATGGATAAATCAGTTTT  
GGACTCAGATTCCTCTGCAACAGTGCTGAGATGCTTACATATTGGCCTGCTTTGTGTCCAGGATCATGCT  
GCTGATAGGCCATCAATGCCGTCTATCGTTCTTATGCTAAGTAGTGAGATGGATCTTCTCAACCAAAGC  
AACCTACATTTATATTTCAAAGATGGTTGAATTCTAATACCCAATCGCAAATCAGCAAACTCAGTCTGTT  
AATGATATTACTGTCTCTGTTGCAGAAGGACGATAA

>PGSC0003DMG400005689 G-LecRK

AAAAAACCTGGTCAACAAAAGAAATCAAAGCCAACAGCATGCTTGTCTCTGTTTTGGTCATTCTATTTT  
GACTGTAAACATTCATGTGTGGATTAGAGAGCTTCTCTCATATGGCTACCTACAGAATTCTGATTGCTTTT  
ATCCTCGTGTTATCCTGTCACTTTTTGCGTGCAGATTTCAACTCAATATTGAAGGGAGAAAGTTTAGCTGA  
TTACCAACAGCTGGTCTCAGCAAATGGCTTCTTCAAATGCAATTTTTTCAGTCCAGGCAAGTCAAGGAAC  
CGCTACTTGGGTATATTTTCCACTCGGCCTAGTCTTGATTTGTACTIONGATGTTAATGGAGGAGGAGATG  
AAAAGGCTTTGTGGATAGCTAACAGAGACGATCCGATAACCGATAACATCTGGAAGTCTTATGATAGCTC  
CTGATGGCAGATTAATAATTTCTATAAAGAAGGTAATGTTACTTTGTTTCAGTGCTACACCAACAACAGC  
CACTAACTTAACTGCTATACTACTCGATAATGGGAATTTTGTGCTGAGGGAATGAATACCAATAGCTCT  
GTAAATCGAACGCTATGGCAAAGCTTTGATTATCCAACCTGATACTACTGCCTGGAATGAAGCTTGGG  
ATTAACCTGCGAACGGGGCATAAATGGTCATTGACTTCATGGGTAAATGATCAAGCACCTGCTTCAGGG  
TCTTTTACCTTTGGTCTTGACCCTAATGGTACAAATCAGCTGATGATCTTGTGAATGGGCAAGGTCTATTG  
GAAGAGTGGCCCGTGGCCTACTGGCCATCTCGCTCTTAAATATGTCTCAAATGAGGATGAGAAATACTTT

ATGTATACTGTTGAATTTGAATATCAAAGATACTCTGTGAGTCCATTTGGAATAATTCAGGATACTTTTAA  
AGGAAATGCAGTGTGGTAATTGTAGTAATGAGACTCCCCATGCTGGCTGCGTAAAGCAGGTATTGCC  
CCAGTGCAGGGCAGCTAAAAAGTACTGGTTTGAGCTTAGACAAGTTTACATGTTTGGAGACAGCGTTAA  
ATTTGATGAGAACTATACCTTGAGCCTCTCAGATTGCAAGGCCAAGTGTGTGAATGATTGCTCGTGTGT  
GCCTATGCCTCAGTCGATAGTGACACCGGAATTGGCTGTCAAATTTGGGGGAATGACACGAGTTTTGTG  
ACAGCACAAAACAGTCTAGCCAGAGATGTTTTCTTCTTACAAGAAAAGGTAATTCTTGAGTACAAAGTT  
ATTCAATAGAGTGAAAGATCAAAGACATGTTAATAATGTTGCATCTCATATTATGATTACTTTATCCAGC  
TCAAGATAAATTGTTTTGTGAGGGCATCACACTAATGTCACCAATCTGCATTACTCTCATTGTCATGTCAT  
TCCAAAATTACTAGTACTAGAACAAAGAAATTTCTCCGATCGCAATGCTGCAGGATTTGAGTTAATAAG  
AGTGTCATCTTCATTTCAAAAATACACTCGAGCAAATGAACAACCATACCTTACAGAATCTTGTTTTGGA  
GGCTATTAATTATTATTTTTGGTATTTCTAGAGTACCGACAATTATGATAGCATCATAGTGTATTCCCA  
AGGTAAATATGTGGAATTTTGGTCATAAACACTGACTTACAATTTTGACAGATAGGAAGCGGAAATGGT  
GGATATGGTTGACAATAGCAGTGTCCCTAATGGTATTTGCGTTTATTTGCTCCTTATTCTGTCTGATACGA  
AGAAAATCAGAGCAAGAGGTGAGCAAACATCAGCTCTAGCATTAGTCTAAGGTGACACTTATTTGTC  
TTTGAAATCTTCAATTTTGCATTTGTCACCTAGGCAAAGTCAGACAAATGGAGAAAATTTTATACGAGCT  
TGAAGATCCTAAGACCATTTCTGGCCAGTACAATACTAACAAGACTGCTAGACTAAGGAAGAAGTTCAG  
GCATGATAGACACATATTCAGCCTAGAGACTATGAATATGGCCACAAACAATTTCTCGTCTTCTAATAAG  
TTGGGACAGGGCGGTTATGGACCTGTTTATAAGGTAAGTTTAGAAGCTTTTTGTCTTAAGCTGATTTT  
TAGATTTGCAAGTAGCAAAAATTTAGGGGATGTTGCTCGACGGACAAGAGATAGCCATCAAGAGACTT  
TCAAGAAGTTCAGGGCAAGGATTGGTTGAGTTTCAAACGAAATTGTGCTGATTGCTAAACTCCAGCAC  
ACTAATCTTGTTAGGCTTTTAGGATGTTGCATTGAAGGGGAAGAGAAGATATTAGTTTATGAATACATG  
ATGAACAAAAGCTTAGACTTCTCCTATTTGGTATGGATTTCCAATTTTCATGCCTAAATTGCTTAATTAATC  
ATATTTGATAACTAATAACCCCTTCCATTTTGATTGAATAGATCCTAGCAGAAAAGATTCATAAAATGGA  
ATACGCGTTTGAACATTATTGAAGGAGTTGCTCAGGGACTACTTTATCTCCATAAGTATTCGAGGTTGAG  
GGTGATTCATAGAGATCTAAAAGCCAGCAATGTCTTGCTTGATGACAATATGAACCCCAAATCTCAGAT  
TTTGGTTTGGCCAGGATATTTGGAATGCAAGAATTTGAAGCAAACACGGAGCGAATTGTTGGTACCTAG  
TAAGTCCTTAATAGATATAATTATCTAACAATGGTGATTCACTGTGTCCTTTTTATTATGTGCTAAGTTGCT  
ACCTTTTCAGTGGTTATATGTCTCCAGAATATGCCATGAATGGCATTGTGTCCATGAAGACAGATGTATT  
CAGTTTTGGAGTTCTAGTACTCGAGATTGAGTGGCAAAGAAACAACAGCTGCTATCATTTAGAACGCC

CACTAACCTCATCGGATATGTAAGTTCCTCTCGTAAAATATCAATATAGCATGATCAAGAGGCGGATGG  
AGTGTATTCAATGAGTTCAACTAAACCCAATACTTTAGAAACGAAACATAAATATACAACATCAACAT  
ACCCATTGGAATCCCACAAGCCACAAGTTGGGTCTGGGAGGGCGGTGTGCACACAGACTTACCTACCTA  
GTAAAGGCTAGGCTGTTTTCAATAGACCCTCGACTCAAGACACGAAACATTGATATACATGTGAAAATCA  
CTTGAATTATAAAATTCTGAAGTATAATGAGTCTAGTTCTAAAACTTTAAAGTTCAACCTGTCAACTTTA  
CATTGTTTTGGATCCACCCTGGCATGATCACTTAGTTGAACAAGGAAATTTCAAACCTGATATGCTCAATT  
TGTCTCAGGCATGGGAATTGTGGAAAGCAGGCAGCGTCTTGAAGAACTAACAGATCCTGTATTGACAA  
ATGAATCAACACCAACGAATGAAGTGATGAGATGCATTCATGTAGGATTACTCTGTGTTCAAGTCAATCC  
TATGGACAGGCCATCCATGTCAAATGTGGTTCTGATGCTCACAAATGATAGCCTACAACCTATCCGTCCCC  
AAGCAACCAGCATTTTTTATTGAGACAGCTATGACTGAGACTGAAACTCGCGAAGAAGTTGGACATTGT  
TCCACAAATGGGCTATCAATTTAGATATGGTAGCGAGATGACTTTTCATCATTGCACCCCTCAAAATTGT  
AAAAAATGGTAATATGCAATCTCCCTTGTGATACAAAATAAAAACCACTGCTTGTCTCCTTCATCCAGATT  
TACTTTTTCTAGCGTCGATATTAAGTATGAGTTGTTGACAAAATAAAGTGAGTAAGCTTGTTAGAGCCT  
TTCAAGATTATACTGTGTCTAAACAATTTTTATACATTTGTTTTGAATGCAAATGAGGATTCAGAGTATCA  
ATTGTAACCTGAAATCAGAACTCATAAATGTAGTAATTGTTACTAGTTTTGCAAAGATGATTAGTATCTGT  
ACATTAGAAAATCAAATGGATGTTTCCCACGTTCTTTGTTGCTTG

>PGSC0003DMG400007073 G-LecRK

CCAATCTAAGAAGCAAATGTATCATCTAACAAACAAGCTAAAACAACAACTAAACATGTCTTCTTCTCT  
GGCCTACTACACTTCTTGCCTCTCTCTTTCTTTCTCCCAAATATTTTCTTGCATTGCTCAAGTTCCAGCAGA  
AAACACCTTTAAATTCGTCATGATGGCGAATTAGGAGATTATGTTGTAGAATACAGAGCAAATTTATCGC  
GTTATTAGTATTTTCAATAACCCATTTAGCTCTGTTTCTACAACACAACCTCCTAATGCATGGACATTAGC  
ATTGCGAATGGGCACTGTCCGTTCTGAATCACTCATGCGTTGGGTGTGGGAAGCAAATAGGGGAAACCC  
CGTTAAAGAAAATGCGACATTCACGTTTGAACTAACGGAAATCTCGTATTGGCGGATGCTGACGGTCCG  
AATCGCTTGGCAGACCAACACGGCCAATAAGGGGGTCACCGGGTTCAAATTGTTACCTAACGGTAACAT  
GGTGCTACATGACTCCAAGGGTAAATTCGTCTGGCAGAGTTTCAACTATCCCACTGACACATTACTAGTG  
GGCCAACTCTCCGATTGTCCGGCCCGAATAAGCTTGTGAGCCGGCCTCGGTGAAAAAGAATGCAAAC  
GGGCCTTATAGCTTGGTGGTGCAGCCGAGATTGTTGCTGTCTACAAGGGAAACAAGGTAGACGTGGA  
ATTAGCTTGGTTGATTATGGGAATAACACGTTGGAATCGATAAAATTGAATAGTGGGAATCAAAGATT  
GAAATTGGATTATAGATTTGCAAATCAACACAGAGAAGTTCACATGTGATGGCATTACTAAATACAAC

ACAACATTGACATATCTTAGACTTGAAATTGATGGAAATCTAAAGGCCTACACTTTTGTAGAGATGAAG  
AAGCAGATGAATTCCGTTGGAAAGTAACTTACAGTAGGATTTGAAACGTCTAAATCTGTATACACATTAT  
CCTTTACGAGCAAATTCACGGGTTATATTATTATTGTTGTTGTTATATTGTTGTAAACGTAGCTCTATAA  
GATAATGATTAGTGTGTCCAGTACAATAAGTGGGTCCACAGCTAGTAGTCCAATAAATGAGTACTTCCTA  
TTAATGTTAATTATATTTTTCTTTTTCCCTTTTTGAAAAAATATTATGTTTTGGTTGAATTAAGA

>PGSC0003DMG400007455 G-LecRK

ATTTTTAGAGGAATGAGGTGGAAAAAGGAAAAAAGAAATTGGGTCCTTTGTGATTTCTTGCATTGG  
CAGTAACCAACGTCCAAAGGCCAAATCTCATCGATTGTGACATTGTAACAAAATATACATAATTCATCAA  
TCTTCATAAACCTATCATCATAATCATAATCAATACAACATTATTGTAACAAAACAAATATTCCTTCTTGT  
ATATACACACAATATTAATAAATTATAAAGTTTTTACATTCTTGATTGTGTACGTGGGAAATTGGGCAG  
CAAATTTGCAATTTTTATCCTGTATCTAATGCTTTGTGGATGTTCTCACAATTTGATTCACCTTTTTGGAG  
TGGGGTTTCCTTAGAAAGGGTAAATTCTACATAATCTGAATTTCTGTATCTTTTTCTTGATTTGGGTATCT  
GGATATTCGAATTATTCTGTTTGGTGTGTGGGGTTTCTGAAACTGCATTTGATGATCTGGGGTACTTT  
TATTTTGGTCATAGTTGCTGGTGATATCATTATTTGGCTGCTTTGTTTAGAAAGATTGAATCTTTTTACTC  
TGATAAGGTTCTGCAGTGTGTGGAGGGATTGTTCTTATGAATTATAGCTAAAAAGGAGATATTGTTCTGC  
TTTAGACCTGTCACTAAATTCTGTGTCCTGTGGCAACATTTTGATTTCCGCTAAAATCTGATATGTTAAG  
GTTGAGGTTGAGGTTCTTGTGTGTGAAAATCCTAGCTGTTAACTTGGGAGTGGTGTGTGTGTATACT  
ATGAGTGAATTGTTGGTGAGTTTGGATAAATTTGGAATAAGAGGAAGTAATTTACTGCATATTAGGG  
ATCTTAGTTTTATGTCAGCAAGTCTGCATTGTATAAGAAATGTTGTAAATGTAGCTAGCTTTGGTGGTGG  
TGAGATGTTAAACTTTAATCATCCACCTCCAAGTTATAGAATTTGTAGTTCCATTATCTGTGACTTCTCTC  
CTGGCTCGTTACTCTCTTTGACAAATGTAAATATAGTCTGTCCTAGCCTCACTACCAATCTTATAGACTTA  
TAATGGATTCTTCACCATCTCATGAAGAATCTGCTCCTCCAAGTATGTTGGCACCTCCAACGTTTAGTCCT  
CCGCCTACACCTTCTAGTCCATCTGATAGCTCACCACCACCTCCATCTTCTAGTCCACCTCCTAGTTCACCA  
CCACCTGCATCTTCTAGTCCACCTCCTAGTTCACCTCCACGTGAATCAACTAGTCCACCACCTAGATCACC  
ACCACCTCAATCTTCTAGTCCACCACCAGCCTCACCTCCACCTGAACCAACTCCTCCTTCTCCTGTCAGTTC  
ACCTCCACAACTTCATCACCTCCCCCTGCATTGTCACCTCCGCCACACGTACAGAATCCAGAACCTCCTC  
CAGCACCACAATCACATGGAAATTCATCCCCACCACAATCTCCTGAACCTAAAAAAGGTTTCATCATCATCT  
TCACCACCTTCACCACCTTCATCCAAGTACCTGGGGATGGAGGTGGAGGTGGAAATTCACCACCATCCC  
CAACATCTAAGTCATCAGATAATTCGCCTCCTTCACCAGCCTCAGGCCCTCCTAAAGATTCGCCACCTTCA

CCAGCTGCATTATCTCCAAGTAACTCACCATCTTCTGATTCACCCTCAAACATCAACACCAACATCTGT  
AATACAATGGTCACCACCACCTCCATCCTCTAATGGTGCACAATCTTCTTAATCCTCCTTCATCACAAGT  
TCCTAGTAACCATAGTTCCGGAAACCGTTCAACAGGAAGTCCAAAGCCTGCTGGTGGCAACAGCAATGG  
TACTGCAGAGACAGTTTCCATTGGCGTTGTAATTGTTCTTTTTTGGTTGGTATCATCGGAGCAGTTGCAT  
GGTGCATACGGAAGCGAAAGAAGAAGAATTCTGTCCATTGTAGTGGTTATGTCAAGCCAATCTCTGTGT  
GCTCCTCTCCAAAATCAGGTAAATTTTCAGAACTATAAAATCATTCTTTTGTATTGTTATTTCAGTGCTCA  
AGATGCTTGCAAGAAAAATCAATGTAATATTTGTAGTTGAGACCTTTCAAGTGAAATCTGAGAAGATGT  
GAAAGTTGTGTACAGAGTCTGCTTTATTGAAGGTCAATGAATCAACACCTGAGAGAAATGGAACGAGCT  
CTAATTTCTCAATTCTCCAGCAGACCCTGGCGGATTCAACAATGCAAAGACATGGTTTACTTATCAAGA  
ACTTGTTGAGGCCACTAATGATTTTTTCAGCGAATAATGAATTAGGGAAGGGTGGATTTGGTTCTGTATAC  
AAAGGCTATCTAGCAGATGGAAGATATGTCGCGTAAAGCAGCTAAATATTGGTGGGAGCCAGGGCGA  
ACGGGAATTTAGAGCTGAAGTTGAAATCATTAGCCGGATACACCATCGTCATTTGGTTTCACTTGTAGGT  
TATTGCATTTAGAGAAACAAAAGGCTCCTCGTTTATGACTATGTCTCCAATAATACCCTTTACTTCCATCTT  
CATGGTAAGCATAACATTTGTAGATTTAATTATTTCAATTTGTTATGTTTGGTCACTAAGTGAGCTGTTGAT  
ACTTGCAAGTTACAGCACAAGGGAGGCCTGTCATGAATTGGCCAACACGTGTTAAAATTGCTGTTGGCG  
CAGCTCGTGAATAGCTTATCTGCATGAAGATTGTAATACTGTTCTTCTCCTCAATTCTTATGAGTTATCC  
ATGTTTTATTCACATGATATCTTTCATTGGTTGAACAAACGTCCCCCTTATAGTTAAAAGAGAATGTACAG  
TTAAAACTTTACCACAACCTTGAATTAGTTTTAATGATCCCTAAAGCTGTGGCGGGATCATGGATGGCA  
ATCTAAGCTCCACACCTTCTCCTACTCTTCTAAAAGCGTACATTAACGAAAGGAAAATAAAAAAGAGA  
GAGTAAACCAAACATGTAGTAATAATTTTCAGCTCATAGAAGTAGAAGACCTTCCAGTTGGCATTTCCTT  
TTTGTAAATGTAATGATATTACTTATGCAGTTTAGAATTGAGTTCTAAGGTCCTTTTTCATGCCATAAATTAC  
CTCGTTATATAACTTTTTGGCATGAGTGTAATTATCATATCTGCATTAAGATTGTAATTAGTGTCTGTTC  
CTAATCCTTTTATGTTATCCATGTTTATTTTTATTTTCAGTTCGTTTGTATGGCTGAAAAAATGTCTCCTCT  
TTCTGCCCCAAAAGTTAGAGAGAAAGCAGGAGGTCAAAAATGTTACCATATGACGAATCGGATTGTGA  
TATGAGATTGTGTGTTCTATCATATCACTTACATTCTTTTTATTGATCCCTACTCCACTAGCTGAACAGCT  
GTGGTAAATTAATGATGCAATCTGAGCTACTTCCAGAACCAACTTTGTCCTATTATCCCTACAAGAGGA  
CTTGAAGTAAAAGAGAAAATGGAACGTATAAATAGTTTAAAGCTCGATGGAAGTAGAAAGATCTTAGTA  
TTGGATTTCCCTTTGGTAATGTTATAATAACTCCGCAATTTAGAATTGTGTCCTCTGTTTTTATGCATC  
TCGCAAATTATCTCGATTATATGACCTTTTGGCAGTATAAATAATGAATTCTAATCACTTCTCTAATTAGTA



ACTTAAAAGATGCTTTTGTAGCTGAATGTACCAAATGAGGCTCAAATCAAATAAGACTGAACAAAGC  
ATGATTGGTTCCATTGAGAGAACAGAAAAATTGTATGACTCAGTTCTTTATACATTCTTGTATTGCACCA  
TGTAGTTACATTCCCGAGAAAGAAATATTTTAATCCATGAGCAGGCATAGTCGCCTTGAACATGAGTATA  
TCTTCCACACTGAAGTGAGCGCATCAGGCGCTGCATTTGTAGTGCATTATATGCTTTTCGATTGCCAATAT  
TCACTCTACGACAAGCATTGAATAAATCTTCACTGATCGAGCCAGGTTGAAAAGTGAGAGAAACATGT  
TCAACTGCTCTTGTGAAGCATATAGTGAAAAAGCAAGTGACAACTGGTTTCTCCATATAACTAAGCTGA  
ATGTGTTAATCATCACTGACTTATTATGTTATACTGTTGAATAAGTAATGAAAAGTTAAGAAAAGTAGAC  
CAGGCGACGCGATTGTGATTTTCTATGTTCAATTCCTTCATTTTTGTTACTTGAGCTGCCTTTAATTATATA  
GTTAAAGTATGATACTCCTTTTTATTTGGTTCTTAATTAATTCTTTTGGTGTGGATGACAGGTTATCCTCG  
TATTATTCACAGGGACATTAAGTCATCAAACATTCTTTTAGATGATAACTTTGAGGCCCATGTATGTCTAA  
GTCTTCGAACTCCTATATCCACATTCTTTGTCTCGCGAGTTGTCTTTACAATTAATTTACTTTCTACAGGT  
TGCTGATTTTGGACTAGCTAAATTAGCTCAGGATGCAGAAAGTCATATCACAACACGTGTCGTGGGAAC  
ATTTGGGTATGTTTCAGTGTCAACTTTTATATTAAGTGGACAGCATAAGATAAATATTTTATTCCATCTTTT  
TCAATTTACATATTTATTCTAATTCCTTAGATCTGACTCAGATACATGGCTCCTGAATATGCATCAACTG  
GCAAGCTGACTGAAAAATCTGATGTATATTCTTTGGCGTGGTACTTCTGGAGCTAATTACTGGAAGGA  
AGTCAGTGGATACATCTCAGCCTTCAGGGCAAGAGAATCTAGTTGAGTGGGTATGTTGTAGCCAATCTA  
TTATTTGTCTTTCTCGAAATCCATATTTTCATCAGGTCTCCTTTATTACCTCTTTGTTAGAAATTTTGACATT  
AATATCCAACCTAAGGCAATGAAAGTGCATATCAGCATGCAGAGAGAACTTAATTTTTAGTCCTTTTAGC  
TAGGATAACCTACAAAATTTCAATTTGAGTCAGGATTTGGTTGTTCTCCGTCTTTTCCATACTGCACAAG  
AACTGGTAGCTGATATGTGAAGAAACCGCCATTTTGTACTGTACAGTAGTAGGCCTCTAGTTGGTCTG  
CTAGTGAAGTTCCTCTTCTTTATTTTTCCCTTTTTTACCATGAAATGATGCCTTATCCTGGGAAGAATGTGG  
TTGCAATGCTGTAAGCCTGAAACATTGTGTCTGCATTTTTTTTTAAATTTTACAACAATCAAACAGCTTGA  
TCAAGTTATCCGCTTTAATTTCAATGATCCTTTAATGTTAGAAAAGTGA AAAACCATTAACAGTAGCAGCC  
GAAAACCTGTATCTTTTATCATGCTGAATGTGTGAATTCATTTACTATAGTTATTTTATTTTCGAACTCTT  
TCGTTTTCTTGTGTCAGTGCCTAGTAGCAGTAGCCAGTTTACAAAGCTTTTAAATGCCTTGTATTCTGGTA  
CTAGTTTCCACTACTAAATTTGAACCAGGCTTAAAAATAACTACTCCATTATATTGACTGTAACCTGATTT  
TTTTGTTGTCCAGGCACGACCTTTGCTTAGTCGAGCACTTCAAAGGAGGAATTTGATCTGTTGGCAGAT  
CCGTGCCTTGAAAAAACTACGTTGGCATGGAGATGTTCCGAATGATTGAGGCTGCTGCATCTTGCCTG  
CGTCACTCATCTGCAAAGAGACCAGCAATGGGACAGGTAACCTCTTGTCTGTTATATTGAAAACCTATGC

AAAAGACACCTTCAAGACTCTTCTTGTGAAGGGCATTTACAACATTCTGAATTCTGATCATGGTTATGCTT  
CGTAGATCATGAGAGCTTTCGATGGTATGGCTATACAAGATCTGTCAAACGGGATGAAAGTTGGTGAAA  
GTGCAATACATAGCGCTGCACTACAATCTGCAGAAATAAGTTGGTTTLAGGAAAATGGCATTTCGGTAAGC  
AAGATTTTAGTTTCGGATTTTTTCAGCGAAAGTAATCAGAATAATAGAGAGTCAAATGAACATCCTTAGAG  
GATTTTATAGAACAAAAGGGCTTATTGAAGCTATGTATGCATCTGTTGATACATCAAAGGTACCTTATTA  
GCTTAGAGATGCCTTGGTTTLAGCTTTCATATGTATAAGTCCCTTTTGGCTTTGAGTAATTTTC

>PGSC0003DMG400008493 G-LecRK

TAAAAAGGTGTATATAGCTAGCGTCCGGCATGCTTTTATTTCAACTCTAATGGCTTTTGATTTTCAATCAC  
AACAAAGAAATCATGTACGTATAGATTATTATCTAAATTTTCATGTTTTTCCCATTTGGCTAAGTAGATTTTA  
TAGTAGTTGATTTTTTTTTCTATTTCCTTTTCATTAATTTGCAGAAATATTAGGTGCTACAAAGTTAAAT  
TTTGAATATTTGAGCAATGGGTTGGAATTGCTTTGGAGTTTTGCAATCATACAAAAACAATAGAGAGACT  
CAAATCCAAGGTAAGTACACTCATAACTCTTATTTCTGTTTTCTCAATTACATGCTTAAAACAATCGTTCT  
TATAAAATTTAGAACCCAGAAAATTTAAAGATTTGACGCTTCTGCTCTACTTTTTGTAGTCCATCCAAATT  
TGAGAAGTACTTCACATAATTTTCATTTTCTTTTTGTGTTTTTCATTGTGTAGAGTTCACGACCAACAATGT  
GAGGGTTTTTCTATAACTCATTGAGATCAGCAACAGGTCACTCCATCCATCTAACAAAATAGGAGGT  
GGTGGTTTTGGAGTTGTGTATAAGGTAATCATCTCGTTTATGGTGTGCATGCCTTTAATGGTCCTTGTGG  
ATGCTAGTTATTAAGTAGTGAGTTTTAACTTATATACGTTCAAAGTTTAAAAGAATCTTTTACAGTCAAG  
TCACTTAAAAGATAAATAATAATTTATCCATTGAAATGGGATTAGCTAGTAAGTAGATGCATTTAAG  
GGTGTAGCCTAATGATTAATAAAGTGGGATGAGACCAATGAGATTTTTAGGTTCAAATCTCAACGGAGG  
CCAAAAAGGGTGTAGCCTAGATAGACACCTTCCAATGTAACTAAGCTTTGGTGGGTAGAGTACCGATG  
GAATAGTCGAGTTACATGTAATCTCATACGAACACCACCATCATAAAAAAGAAAGTAAAATAAGATAG  
ATTACCTGCTACATTAATAATATATATATGTTAAATCTTTTATGTATTTCCACTCTCTGTACTTGTGCAACT  
TGTTCTTTAAATGTAGGGAGTTTTGAGAGATGGAACCTGTGTTGCCATTAAATGTCTCTCTGCTGAATCA  
AAACAAGGGACTAAAGAATTCTTAACAGAGATTAATATGATTTCAAATACCCAACATCCAAATCTTGTTT  
AGCTGATTGGTTGTTGTGTTGAGAGTGGCAATAGAATGTTGATATATGAATACTTGAAGAATAACAGCC  
TTGCCAGTGCTTTACTAGGTAATGTTCTCACAGATCAGTTTTAAAAAAAACCTATTTTTGAACCAAATGAA  
CATGACATAGTTGAAGTTAGGAATGTTAAATGAGCGGATTGGACTGAATCTGGACGAGTTAAAATTGTT  
ATTTAGGTTCTAATGGTAAACGCGTTGCCCTGAATTGGCCTCAGAGAGTTGCTATATGTTTLAGGTACAG  
CATCTGGTTTAGCATTCTTCATGAAGAAGCCTCACCACCGATTGTTTCATCGAGATATTAAGGCTAGTAAT

ATCCTTATAGATGAAAACCTTCATCCTAAAATTGGAGATTTTGGTCTGGCTAAGCTTTTTCTGAAAATGT  
CACTCATCTAAGTACGCGAGTAGCAGGAACAATGTGAGTAGTTACATTGAATTTAGTTTCATAACATTC  
GATATTCCTCTCCTGTCTCGTCTCAGTATGGTATTCTGATGTGCAGAGGTTATCTTGCTCCGGAGTATGCC  
TTGTTTGGACAACCTCACAAAAAGGCTGATGTTTATAGTTTTGGAGTTCTTGACTTGAAATCATAAGTG  
GAAGAAGCAGTAGTAAATCAGCATTGGAGTGGAGCTCTTGGTTCTGGTGGAATGGGTAGGATTATACT  
TTCAGCTTTATGATCTTCAAGATTCATCAGTAATCAGCATTGAAAGTTTACGCGTTGCAGGTATGGAA  
GCTAAGAGAAGAAGGACAGCTTCTGGAAATCATTGATCCAGAGCTAACAGAGTATCCAGAACTGAATT  
ACTGCGGTTTCATCAAAGTTGCTCTCTTTTGCACACAAGCAGCACCTACCCAAAGACCTAATATGAAACAA  
GTGATTGAGATGTTGTCTAAGGAAGTCAACCTCAACGAGAAGTCGTTAACTGAACCAGGAGTTTATAGA  
CCACATAGCTCGAAACGATCAAGTTATGGTAGTCTGCAGAAATCATCCTCCGCGGGGAAGAATGGGGT  
GCAATCTGTAATCCTTTTGTAAATCAACAAAGTTTGGAGAGCTTTCAGAGTGTACCCAAATGCTTCCTA  
GATAATGTTAACTGGTGTCTTATTCTTCATACTTGATAATGTCGTTATTCTAACGTGGGCTATCGAGGA  
GTAAATGTATTGTCTCTCATTAGACCTAGCTTTTTTCATACATTTTCTCATGTAATGTAAAGTTGGCAGTA  
GCTGATAAGGGAGAAAGAGAGACAATCACACAGAATGAGCTACTATGTAACTCCAAATTCAGATATGA  
AGATGAAGTTTACAGCAGAGACTATGAACACAGTAAAGGATAGAACTAGGAGAACTTTTCTCTATGC  
ACATATTAGCTCCTAAAACCTAGAAATGAAGGTAAAACTTCTGATAGGAGTTATTCTCAAACCTCATAAA  
CATATAAAGGACGACTGCTTTACAAGATCAACACAGTAGCATTTCATTGTGCAGCAGAGAATAAACCTT  
CAAGGTGCAGCAGTAGTAGCTTGAGGCTTGCAGAGGAAGCAACAGAAGTTTCTATTCTGTCTGTTGCA  
TCTTTTCTGGTCCGAAGATGGTTTTGCAGAAGGCTTCATATGGTCAGGGGGTGTGTTTGGAGTTTCA  
CAAGTATTTGACGCATTCTAGAGAGTTCAGTTGGCCTGCCAGGTTTGGTCCCTGGATGACATTGATGAA  
TGGCTGCTTCTCCTTATCCTTCTTTCTTTCTTTCTATGGTCGGGACCTCCTTGGGATAAGCTCTCCAATT  
GTCCTCCAATAAGCATTATTAGCTTCTAGTATGGAACCTCTCTTGGTTGGCCAAGAATAACTGGAAAAAG  
AAAAAGATGACACATGAACTGCAACACATTGATTGACTAAGGAGGAACTTGCCGTACTGTGGAACCTATG  
TTAGAGATTTGACAAACCATAAAACCAAGACATAGTTCTGTGCAGATTAGCTAATAAACTCACCAAA  
GCACAAATACTCAGCATAGATTGACTAAAGGTTATCAGCACATTTTATGATCTTGTGGAAACCTTCCACT  
TTCAATTTTTTAAATTTACACCTTACTTAGTGTTAACTCTAAATCATATGAAATGTAAACAGATAAATGT  
AGAACTGGTTTTCTCTGTGTGCCTGCCTTGGTTGAGTCGAAAGTACCAATACAATGACTTTTAAAAAAC  
AAAAGTAACTTAAAAAGAGAGTAAAAAGTACCATGATTAATAAATTGGATAGTACTTTTACCAAGTTAA  
CTAGGTTAATCTCCCTCTCTCAACACTCATATCCTATACCGAAGATTTGAAAGCAACGATTAGGAAGAGA

AGGTAAGTAGATGCACGACACATCAGACCAGTGATAATTTTCCTTCCAGCTAAAGCAACTGTTTGGAAAA  
CAAACACCCAGCACAAAGCAAATTTATGCCAAACTAGTTAACAAACCATGACTTTAAGCAAAAATGCCTCG  
GAAAGATTTCTAATTTATATAGCTATAGGTCTCACCTTCTCCTTCTCCCGGTTAGCAGCTATGTTGTTCTCA  
CATCTAAGTTTCCATTTCTATAGTACTCTGCTTTGTATTCTCTGCTTCTTTAATTATTTCCCTAACAATTT  
CTTTCTCCCTTTTCTCCTTCTCCTCCAGCCGTATGGCGTTCAAT

>PGSC0003DMG400008508 G-LecRK

TTTAAATTTATTTTTAGCAATCACTCATTCTACCAGCAAATTGTGCAGCCATAGAAATGAAGAATAGCAGT  
TCAATTCTGATACTTGTGCATTTTTTATGCTTTAGCCTCATCTAATCTTTCCCTAGGAGGGGACACCATT  
TCTGTGAATGAATCTGTTTCTTCAGGCCAAACAATTATCTCTTCAGGTGGGAACTTTGAGCTTGGTTTCTT  
CAGACCAGGCGACTCTCGCTCCTACTACATAGGCATATGGTACAAGAACTATAACCCTCAAGCAGTAGTA  
TGGGTAGCAAATAGGGATAAACCCTTGATAGTGCTGATGCTAACTTGATAATTAGTCAAGGTAACCTG  
GTGCTTCTCGATAGACTTCAAACTCAATTTGGTCTGCACTTACTGAGAACATCAATCCAAATATTTTCAGT  
TGCTGCAGTTCTTCGTGATGATGGGAATTTTTATTTGAGTGATGTGTCAAAGGCATCAATGCCCTTACTA  
CTTTGGCAAAGTTTTGATCACCCAACACACACTTTTTTGCCTGGTGCTAAGATTGGATATGATAAACGGA  
CACAAAGAAAACAGGTTTTGGTTTCATGGAAGAATTCGAGTGATCCGGCACCAGGAATGTATTCTCTAG  
AAATGGACCCAAAAAATGCTCAATATGTTATAAAATGGAATAGGACTACAGAGTATTGGGCAAGTGGTT  
CATGGGATGGCCAAAGATTCGGCTTAGTGCCTGAGATGAGCTTAACTACATATATAATTACAGCTATAT  
CGACAATGAGAATGAGTCATATTTTACATACTCCCTTTACAATAGTACAATCACATCAAGATTGATAATG  
GATGTCTCGGGACAAATTAAGCAACTGTCATGGTTGGATGGTAGCATTGATTGGAATTTATTCTGGACTC  
AACCAAGAGAATCTTGTGAGGTTTATGCTATATGTGGGGCATTGGAGTTTGTGATGAAGCTAATGCAA  
CCTGCAATTGTTTGAAGTGGTTTCAAGCAAAGATCAGATGCAGAATGGAATTCAAATGATTATTCCAGTG  
GCTGTGTAACAGACGAAAAGGTGCAGTGTGATGCAATTACTGAAGACAAAGATAGTTTATGGATAACTT  
CAATTGTGAGAGTACCTGCTTCTCATAACTAATATCACAGTTGGGACAGCCTCACAGTGTAGATCTGC  
ATGTTTCAACGATTGCTCTTGCCTGCTTATACTTATGATGGTTCCGGTACCTGTTCCATCTGGACAGGGG  
ATCTGTTCAATCTGGAACAACCTCAGCACAACCTGAGTCAAAAAGGACAATATTTGTCAAACGCGGCTCACC  
TGAAGGTTAGAATAGCATATTAACATAGCTTGATTCTTTATTTTCATATAAGTACTATGTTATGGATAGAAT  
TCCTTATTAACCATTAGCACTTAACAACAATGATTCTCCTTTCAGCTCAAACCTAAAGCTAAGAAGTCGATG  
AAGCTAAAAGCAATCCTTTCGTCAATATCAGTTTTGATGTTTCTACTCATAGGCAGCATTAGCTACATTTA  
CTATAAAAGAAGAATTGCAAAAAGAGCAGGTAGTTGCTGAATGAATCTTACTCTGAAAGATATTTTCTCT

TATAGCATTTTGAACCTACTTTCAAAGGTCATTCTCAATCAGATAGAAGTAAAGGTATTCAAGGGGCACA  
TAAATCTCACTGGCACAAAGCTGAAGGAGAAGCAAAGTATTAATGAATGAAAACAGTGATGAAGCGA  
TTGATGTTCCATATTTTCACTTGGAGACTATTTTGAAGCTACAGACAACCTTCTCAAATGCGAATAAGCTC  
GGACAAGGAGGATTCGGTCCTGTTTACAAGGTTCAAACCTCATTCTACATCTATATGGACTGGCATGGC  
CATATTGACCTATAGTAATGAGATGAATTTTTTTGCAGGGTATCTTTCCGGGCGAAAAAGAAATTGCAG  
TAAAAACGTTATCCAGTCAATCAGGACAAGGCATAGATGAATTTAAGAATGAAGTGAAGTACTCTAATTGCAA  
AGCTTCAACATCGAAATCTGGTGAGGCTATTGGGTTATTGCATCAATGCAACGGAACAAATATTACTTTA  
TGAATATATGCCGAATAAAAGTTTAGATACATTCATATTTGGTGAGTTAGCCTTGTTAAGTTCTTTATTCT  
CAAAGTCATACATTTCTTATAATGATCTAATTTTTATTGACGTACCAAACCTTTGTCATGGTAACGATGCAAG  
ATGGAACACTTTGTCAATTATTGGATTGGAAGAAACGTTATGACATCATACTGGGCATTGCACGGGGTC  
TATCTTATCTTCACCATGATTCACGACTAAGGATCATTATAGAGATTTAAAAACCAGTAACATTTTATTA  
GATGAGGAGATGAACCCGAAAATTTAGATTTTGGCTTGGCAAGGATTGTTGAAGGAAAAGTAACAGA  
AGCAAATACAAAGAAAGTAGTGGGGACCTAGTAAGTATTATATCTCTCCTGTCATTAATTTCTTACAAA  
AGGAGCTTTGGATAAGATCTTATACTCAAATGTTTTGTTACCTGATGAAATCTAGCGGCTATATGTCTCC  
TGAATATGCACTAGATGGATTGTTTTCCATCAAATCAGACGTATTCAGTTTTGGAGTAGTCGTAAGTGGAG  
ATAATCAGTGGAAGAAGGAATACAGGATTTTATCAGTCAGAAGAAGCCTTAAACTTGTTGGGCTATGTA  
AGTGAAGAACTTCCCATGACTTAATTATTATATCTTCTTCTTAGCTTTGTTTCTCTGATAGAAAAATTATC  
ACAGGCATGGAAATTGTGGACAGAAAAAACTGAGATACAATTAATAGAGAAGTCACTACTTGAATCATG  
CAACAAAAGTGAAGCATTGAAGTGCATAAATATTGCACTCCTGTGTGTACAAGAAGATCCAAATCATCG  
TCCTAATATGTCAGATGTCATTTTAATGCTGGGAGGGGAAGGTACTAACCTTCCAACACCTAATAGACCA  
GCTTTTGTAAATAAGGACACATGCTTCTAGTACATCTTCTTCTCCTCCGATAAGAAATACATCGTATCCAA  
CAATCAGGTGACGATTACAGTTGAAGAAGGACGTTAGCAGGAATAGTGAAGGCATTTAATTCGTATGG  
AAAGGGCTAGGGGTGGCACTAGCTAGGACTTAAAGATGAGCCATATTATACTTTTTTATCCTTGTTAACC  
TCTACTTTGGTCCTAAAAGAGTCCAGGGATAATTGTGTGTCGGTACTTGGCCAAATGTCGTCTTCTCTATA  
ATAGTTAGGACAAAAGGTGGAAATGTTGGGAAAACCTTCAAGTGTGTTGTAAGTCAAACATATACAATTTT  
GCTTTAGAATGTAGTAGGTCTTAGCAATCAAGTACAAGAGTAATTTGATTATTCCTGATGCCTTCAAATG  
TACAAGCAATGTAATTTTTCTTCTTATTCAATATCTTATTGGC

>PGSC0003DMG400008523 G-LecRK

CACACCCAAAAAATCAACTTGTTTGACTACTTTCATGGACTCTGAAGAGAAAAGTATACCTCCGTCAACA

CTTATTTTCTCTTATTGTTTCGTTTCATCATCTTCTTTACCATGGAAATGAAGAACAATCATTGTTTCTAGT  
ACTTTTTTTGTGCTTTAGTCTCGGTACCAATCTTTCTATCGGAGAAGACACCATTTCTATGAATGAATCTG  
TTTCTTCAGGGCAAACAATTATCTCTTCAAGTGGGACCTTTGAGCTTGTTTTCTTACACCAGGTAACCT  
TTTAAATATTATCTAGGCATATGGTACAAGAATATTTTCATCGCAAACCTGTAGTTTGGGTAGCAAATAGGG  
AGACACCAGTTAGTGATGCTGCTCACTTGACAATTATTCAAGGCAACCTAGTGCTTCTCGATAAAATTTCA  
AAGCTTAGTTTGGTCAACAAATATTTCAAGGAGTGACCTCCAAAAAATTTAGTCATAGCAGTTCTTTGT  
GACGATGGAAATTTGATTTTGAGTGATTTGTCATCAAACCTCATCAATACCGTTACTACTTTGGCAAAGTTT  
TGACTACCCAACACATGCATTTTTACCTGGTGGTAAGGTTGGATATGACAAACGCACACAAAGAAAACA  
GGTTCTGATTTTCATGGAAGGATTTGAACGATCCGTACCTGGATTGTTTTCCATGGAATTAGACCCACGG  
CGTGCCCAACTTGTTATAAAATGGAATAGGACAACACAGTATTGGGCAAGTAGTTCATGGAATGGCCGG  
ACGTTACAGCTCAGTACCTGGGATGAGGTAAACTACATATTCAATTACAGCTATATCGACAATGAGAATG  
AGTCATATTTTACATATTCCCTTTATAATAGTGAAATCCCATCAAATTTATCATGGATGTCTCAGGACAA  
ATTAAGCAACTCTTATGGTTCGACTAGTTTGGATGATTGGTATCCATTCTGGGCTCAACCAACGGAACAAT  
GTGATGTTTACGCCAATTGTGGGGCATTGTTGGAGTTTGAACAATGTTAATTCATCCTGCAATTGCTTGAG  
CGTTTTCAAAGCAAGATCTGATGCAGAATGGAATTCAAATAATTATTCCAGTGGCTGTGTAAGAGTAAG  
AGACCAAGAGGTGCAGTGTAACGGAATTACTGAAGACAAGGATAGCTTTTGGATGAATTCAATAGTGTC  
ATTACCTGCTTCTCAAGATACTAATATCACAGTTGCGGAAGCCTCACAGTGATAGTCTGCATGTTTCAAC  
AATTGCTCTTGCACTGCTTATACCTATGATGTTTCTGGTGCATGTTCAATTTTGGACCGGGGATCTGTTCAA  
TCTACAACAACCTCAGCAAACCTGAAACAGAAAAACTATCTTTGTCAAAGTGGCTCACCTGAAGGTTA  
GAATAACATAAAATAACTTAGCTTAATAAGTATCGAGGTCCACTTTTGCATTATGTTTTTTCGAGAAAGAT  
GTTAAACATATCTGACTTGTTTTTGGCTCTCTACTTTCAGATCAAACCTAAGGCTAAGAAATCGATGAAGCT  
GGTAGTTCTACTTTCATCCACAACAGCTTTTATCGTTCTATTCATAGGAAGCTTTAGTTACATTTACTATAG  
AAGAAGAAGAAGAAGAATGACAAAAGGAACAGGTATTTACTGAATGAATCTCACTCTGGAAAATATTTTC  
GTTTCGTACCTTTTTTAACTTAATTTGCTTTCTCAATCTTATTGAGGTAATGAGGTCATTCTGTTTTTCTTAT  
TCCTTTTCCCTAAATGATACTCAAGGGACACAAATATCTCACTTGGACAAGATTGGAGGAGGAGAAATC  
ATTGATGTTCCATACTTTTGTGTTGGAGACCATTTTGGTAGCTACAGATAACTTCTCGAATGCAAATAAGCT  
CGGACAAGGAGGATTTGGTCTGTTTACAAGGTTAAAATATAATTATTGCACCTCTGTGTACTGGTATGG  
CTTAATTGACCAATAGTAATGAGATGAACAACCTTTTAAACAGGGTATCTTTCCAGGCGGAAAAGAAATTGC  
AGTGAAAAGGTTATCTAGTCATTCAGGACAAGGCATAGATGAATTTAAGAATGAAGTGACTTTAATTGC

AAAACCTCAACACAGAAATCTGGTCAGGCTTTTGGGCTATTGCATCAACGGAAAGGAACAAATTTTACT  
GTATGAATATATGCCAAATAAAAGTTTGTAGATACATTCATATTTGGTAAGTTTGCCAAGGTATGTTCTTTAT  
TCTCAAGCACCTATACTATTGACAAGATTTAATCTTTGTCATGATATTTATGCAAGATGGAGAAGCTTTGCA  
AATTATTGGATTGGAAGAAGCGCTATGACATCATATTGGGTATTGGACGAGGTCTTGCTTATCTCCACCA  
TGATTCACGACTAAGGATCATTATAGAGATTTAAAAACCAGCAACATTTTACTAGATGAGGATATGAAT  
CCCAAGATTGCAGACTTTGGCTTGGCGAGGATTGTTGAAGGAAGAAGAACAGAAGCAAAGACAGAGAA  
AATAGTTGGGACCTAGTAAGTATAACATCCTTCCTATTGATCATTTTTCCCTTTTGCTTTTGTAAAATACAT  
CTAACACGTTTTTCGACATGGTGTAAATCAAGTGGCTATATGTCTCCTGAATATGCATCAGATGGTCTGTTTT  
CCCTCAAGTCAGATGTATTAGTTTTCGGAGTAGTCATACTTGAGATGATCAGTGGACGAAAGAACACAG  
GATTTTACCAATCAGAAGAAGCATTAACTTGTTAGGTTATGTAAGTGCAGAAACTCAGACCTACATCAT  
TTTTGTCTTTTTGCAAGTTTTGATATCTAACTGGAAGTTATCACAGGCATGGAGAATGTGGATAGAAGA  
AAGGGCAATGCAATTAACAGAGAAGTCATTACTAGAATCATGCAATAGAAGTGAAGTGAAGTGAATGTA  
TCAATGTTGCACTCTTGTCGTGCAAGAAGATTCAAATGATCGTCCTAAAATGTCAGATGTCATTGTAAT  
GTTGGTAGGAGAAGGTACGAGTCTCAGAGACCTAATAGACCAGCTTTTGTAAATAAGAACACACGCGTC  
TAGCAGACCATCTTCTCCCTCAAAGTCTCTAACAATCAAGTGACAATTACAGAAGAAGGAGGACGGTA  
GTAATGGTGTGAGATCATCTTAATTTTCATTTATATATGATACAATTGTAATGTTTTCTGCAGACTTCTAA  
AGCACGAGCAGAAAAATAATCTATATTTTGTAGTATCTTGATTGTAATTTGTAGCCATGACATTGTTATC  
CTTACACATATATTACATGCACTTTTC

>PGSC0003DMG400008524 G-LecRK

GTGAAGTTTCTCCACTTGCCATAATCTTGTCTCCAACCCCATTAAGAGAAAAAAAAAATTAACAACAGA  
GCAAGAAAAGTTGGAGCTCAAGAAGGTGAATGATACTCAAAGAAGTGAATAAAGGAAGAAAAATTGT  
TTGGATTTTCTAAAATCCAATTTAATTTAAGGTAAATTAGTTTTAGGTACTTTTAACTTTATTTTGGAGTA  
AATAAATGTGTATGTTATTCATTTGTTTTTGTGGCTTTTATGGTTCTTGAGTGATTGATTTTTGGATTTT  
CATCTTGGTTGTTGAATGTTATTTGCTTTTTGTGTGTGTGTGTGTGGATTCATGGTTCTTGAGTTTAA  
TCTGATTCAATAATGAATTCTTGAAAGTTAGTATAGTTTTTCATATTGAATTTACATGTGGAACTACTTTT  
GATGTTGACTTTTATGTTATAAGCATTCTAGGTGGAAAAGTTATTTAAAAATTGTTATATATAACTTAAAT  
CCTTTTGGTTTTTGTCAATTCAGGCATTTATGTTTGTATTGGGTATATGTGTTATCAATTACTACAATTAC  
CTAAAAAGAAAAGTTGTGTCTTACTACTCTCAACATCATCTCGTTGTCTAGCAAGATATGTCTAGTTCTCC  
CTCTACTTACCTATCCATTAGGAAAGTGGAACCTTTCTTGACCTTCGAAAAGGTATAAAATGGTTTTATAAA

TATGGTATGGTATATGGACTAATTTTTAGGTGCTACTTGCTTGCTTCAAGCACAATACTTTGATTTCTTTT  
TAAAGTTTTAGACAGAGGTGGAGCCAAGATTTAAAATTTATGAGTTTTAGATTCTTTTTATGTTACTGGG  
TTCTAAATTGATAAAATGTATAAATTCAAAAGATTTTTAAAGACAAATACAAGATTTAAACTAAAACACT  
GGATTCAGACTGAACCTGTAGCTGATATTCTAGCTCCGCCCTAGACTTTTTTATTAGCATCCTCAAATAC  
TAAAGTGGTCTTATTGCCCTTCTTTTGTACACTTTTTAGCTAGTTTTCTCAAATGCATGAAAAGGAAG  
AGATGCTCTATTTTCATCTTTTAAGTTCAATTCTTGAGGCTATATCTTGAATTCATTTATTTTTTTAAATAA  
ATAAAATTGAGGGCCTAAGAAAGAGATTACAATGTGGGGAATCGAATACTCACACAGGCAGACAATCA  
ACTGAGTTACGAGATTCTCCTTTATCTTGATTTACATGATTTGCTATATTTTGTGTGATTCAAGTTGTCT  
ATCTATTTTAGCTTTAGGTTATCAGTTCTGTTCTATTTTCAGGCTAATTGCAAATGATTTGAGGCTTTGAA  
GGTTTACGAGGATGTTGGACTTAAACAAAATAGAACCTGAAGAAGGAAAGCTAGACTTGGATCTTCGTC  
GCGTAACTATGATCTTGATGACAAATCTCATCTTAGATATGGTGATTGGGTCATTTCAAGAGCCATTC  
ATCTAAAAAAGTTAGAATCTCTCGACCTGAATCTCCGAGAGGTGAAAATTCAGATAGACAACCTCAGGA  
TGCAGATTATCCCTCACTTAGCTATGAACTCGAAAGTGAGATTCTATCCAGGTTTCCTAGGTGGGAGTAT  
TGAAACTTAGCCTCGTAAACAAGAGATGTTCAATGCTTCTAAAGAGTGGTGAGATATTTGAGATTTCGT  
AAAGAGAATGGATTTAAGAACCTTCGGTATATATGTTAGCAAGTGGGGAGACTAATTGGTGGACGTTT  
GATAGAGAGTTTAATTCCCGGAGGAAAATCCCTGATTTACCATCAGATGTGTGCTTCACATTTGGCGATA  
AGGAATCGCTATGTGCAGGCACACATTTACTGTTTCGGGTAGGGAAATCGATGGTCTTGTTATATGGA  
GGTTCGAATTAGCAACGAATTGTTGGTACAAAGGTCCTTCTATGGTTAATCCAAGATGTTTATTTGCATC  
AGCTACTTGTGGCACCTCTGCTTTTGTGCTGGTGGTGGTATTATGGCGAACAGTGAGGTCTATGAC  
ACAGCTGAGAAATACAACCCCGATAGCAGATCGTGGGACCCACTACCGAGGATGAAGAGGAAGAGGA  
AGCTTTGTTGAGGATGTTACATGGACAAGAAATTCTACGTGATCGGGGGGAGGAATGAGAACGGAGAG  
CTTACCTGTGGAGAATTCTTCGATGAGGGTAAGAACAAGTGGGAGCTGATTCCGGACATGTTGAAGGAT  
GATCCAGTCCTAACATGCCACTCACCACCCCTCATTGCTGTCGTGAACAATGAGCTGTACTCACTCGAGG  
CATCTTCAAACCAGCTGAAGCTTTACCTGAAAAAACCAACACTTGGAAAATGTTAGGACAAGTGCCAG  
TTAGAGCTGATTCAAACAGAGGATGGGGCATTGCTTCAAGTCATTGGGAAATGAACTTCTTGTAATCG  
GAGCTGCTTCATCGTCAGCCTCTTATTCGGGTAATTCCATGGCTATATATACTTGCTGTCCAGATCCTGAT  
GCAATTGAGTTGCAGTGGCAACCTCTTGACAGTGGTCGAAATCGACTTAGTAGCTTTATCTTAAACTGTT  
CTGTTATGGTAGCTTGAATAATGTCATTTATCTAGCAAACAACCTTGTGTATTATGATCAAATATATAAGT  
GGCATATGGCCACTGGTTTATGATATTTCTTGCATATATTTACTAATGTTTGCTCTGCTATGTTTGATGTA



ATTTGCATTTATTGTTGCATTATTATGATTTATATTGAGGTGTTGTTCTAA

>PGSC0003DMG400010240 G-LecRK

AAAACAATGTCTTCTTTGCTTGAATAACACTTTGTTCCCTTATTCATAGTAACATTAGCCAATGTTCCCTCCT  
TCCAAAACCTTCAAGTACATAAATGAAGGCTCATTGGCGAATACTCCGTTGAATATTTTGCAGATTATC  
GTGTGTTGGACATTGTCAACTTCCCTTTCACCCTTGTTCCTTAATTCTACTCCAAACACCTTCATACTTG  
GGCTACGAATGGGTCATCGTAGATCTGAGTCCATTATGCGATGGGTCTGGGAGGCTAATCGTGGTAAGC  
CTGTCCGCGAAAACGCCACTTAACGTTTGGTACTAATGGGAATTTGGTACTAACTGATGTCGATGGCAC  
GGTAGCTTGGCATAACCAATACTGCCAACAAAGGTGTAACAGGGCTAAAACTTTTGCCTAATGGCAACTT  
GGTTTTACATGACAAAAATGATAGATTTGTTTGGCAAAGTTTTGATCACCCAACGGATACACTTTTGGTG  
GGCCAAAGTTTAAGGGCTAAAGGCCCATCTAAGCTTGTTAGTAGAAAGTCCAGTAAAGAACCTGTTGAT  
GGCCTTATAGTTTTGTCCTAGAAGGGAGACATTGGGCCATGTATTATATAAGTGTAATTCACAAAAG  
CCTTTACCATATTTCAAATCAGATGATTTTGGTAATGGGAAAGGCTCTTAGCCAATTTTGATTTCTATTG  
TGAGCCAGAATATGGTGAAAATTATGCTTTTGGAGCTAGGATTTAGGATTAACATGACCAATTCTCCTAGC  
TCTGGTACTTCTATATTTACTAGGCCCAAATACAATAGTACATACACTATGTTTAGAGTTGATATGGATGG  
TAATTTAAGAATGTACTTATGAACCAAATGTTGATTGGGGAGCATGGGAAGTCACATATCGACTTCTC  
GATAGGGACAACGATGGAAAAAGTGAATGCAAGCTACCGAGGAGGTGTGGATCATTAGGCGTTTGCG  
AGGATAGCCAGTGTGTGGCGTGTCCGAGCCCTCGAGGCTTGATTGGGTGGAGTAAGGGATGTGCACCA  
CCAAAGTTGCCAGTATGTAGGGGAGGATCAAATGTGGACTATTATAAGGTGGAAGGAGTTGAACATTTT  
ACTAGTGATTATAATGAAGGAGTTGGGCCTATGAAAATAAGTGAATGCAAAAATAGGTGCAACAAAGA  
TTGCAAATGTGTGGGCATTTTCTACAAACAAGAGTCATCAAAGTGCTTGGTTGTACCTGAGCTAGGGGC  
TTTGGTTAAAGTGGAATAATCCTCCCATGTTGGCTACATCAAGATCTCAAAGTAGATGAAGTTATTACTG  
ATTTATATTTATATCAAGCAAGCATGTTATATTTTTTAAATTTTCAGTAATAATAATGTAACTTTTGTCAAAA  
TATAATAAATAATAAATGCAC

>PGSC0003DMG400011251 G-LecRK

ATGTTAATTTCTCCAAAAGGAAATTTAATTTGGGATTTTTTAGTCCAAATGTTTCTAATAATCAAAGGTT  
TGTTGGTATATGGTATGTTGATGGTCCAAAAAATTCATTTGTTTGGGTTGCAAACAGAGATAAGCCAATT  
TTTGATAAAAATGGTGTTTTTACTATTGAGAAAAATGGGAATTTAGTGGTGAAAAATGGTCGTGGCGAT  
TTAATGTGGACGAGTAATGTTGCTGCTATGAATAATAATTGTACAGCACATCTTTCTGATTATGGAATC  
TTATGATGTTTAATGGCAATAACAGGGAGTTGTGGCAGAGTTTTCCACCATCCTACAGATACATTTTTACC

AGAAATGAGATTTTATTTGGATGAAGTTTTGAGGTCATGGACTAGTGAAAGTGATCCTTCACCTGGACG  
GTACGTAATCTTGTATCGTGTGATCATCTTATCTGAAATCTTTTATTTACTTAATTTTGTGGTGTACATGCC  
CCCTCACGTGTGGATGAATTTTTATATAATGTGTGGTGGTGAGACTCTCTGATAGCATGTTGCGTTTGT  
GACATCTCATTTAAAAGCTTAATTGAGAATGTGCTTTTTTATTTTACGTAATTTTGTGGTGAACCCCTCACG  
TGTTTGACTCGTGGAAAGTTGAAAGACAGAAGGGTTGTTGGTCAGTCACGGACTATTTGATTTTATTATG  
ACGATTCAATGTTAATGACCTCATTCAATATTTTTTTTTTTTATCCTTCACTATCGTGGGCTGGATGGATA  
GCTAGTAGTTGTGAGTAACAGTCCCCTTTTTATAGATTAAAGGTGATGATTTTTTGTATTGGGTGGCAG  
TGAGACTCAAACCTAAGAACTCAGCTTGCCCTGATATGGTAATGCATTTGTGCCATCTCATCCAAAAGA  
TTAAGTTGAAAATATGTTTTCTTCACTTAATTTTATTTTATGTCATGCCCCCTCACATGTTTCTTGAATCTTT  
GATATTGGGTGGTAGTGAGACTTGAAACCTAAGAACTCTACTTGCACTGATATGGTAATGCATTTGTGAC  
ATCTTATCGAAAAGATTAAGTTGAAAACATGTGTTTCATAACTTAGTTTTGTTTTTAAACACGACCTCTCAT  
GTGCTTCTGAATCCTTGATATTGGATGGCAGTGAGATTGGAACCTAAGAACTATGTCTGTTCCGATACA  
ATGTTGCATTTGTGACATCCCAAAGTCAAAGAGCATATTTTTATTTACTTAATTACGTTTCCAACAGGTAC  
TCATTAGGAGTAAATACTCGCGGATCACCACAAATTGTGATCTTTGATGGAGAGAAGAGACGTTGGCGG  
AGTGGATATTGGGATGGACGCATATTCACAGGCGTTACAGATATGAAGCCCGAGTATCTACATGGTTTC  
AAGCTTTACAATGAAGGAGATAAGCTATACTTCACTTACACTGTATCAGATCCTTCTGATTTGGTGAGGT  
TCCATATTAGTCCAACCGGATACGAGCTGGAACAAAGGTGGGATAAAGATAACGAAAACCTGGAGTATA  
ATACAGTCTCATCCATCAGGTGATTGTGACTTGTATAACTTATGTGGGAATTTGCGGAAATGTGATATCA  
CATATTTGAAAAAATGCATTTGTTAGTTGGATTTGTACCGAAAGATTTGGGGCAGTGGAATGCGAGGA  
ACTGGTCAGAAGGGTGTGTTAGGAGGAAAGAAGTGGAAATGCAGAGGAAATAACAGTGTCTTGAAGAG  
TGGTAGTGGAAAGAAGGACGGATTCTTTGAGATTGAGAAAATCAAGTTGCCGGATTTTGTGATACTGC  
ATATTTACAAAATATCGATGAGTGTGCAAGCATGTGCCTTGAAAATTGTTTATGACTGCTTATGCTTTTG  
TTAGCGGAATCAATTGCATGATGTGGAGTGGAGATTTAGTCGATATGCAGCAGTTTCAGGAAGGCGGA  
AACACTCTCTATGTTGCTTGTGATTCTGAATTTGGTAAAAATGTGTAATTTTTTCTGTTGTTATTCA  
TATAATCATTTTAGATGTTCTTATTATAAACTTTCTTGAAACAGCTGGAAGCAACAAGACAGTCAAATTTG  
TGGTAATATCCGTTATGGTAGCCGGGGCTTTTCTTGTATGTATGGTAGTTTTTCTACTATGCAAGTACAAA  
GCCAAAACGCGAGGTAAGATTGCAGAAAAGCTGGTGTGTTTACGACAGTCATTTATTGTTATGCAATATA  
CCTATATCTTCTTCAATGTCCATTTTCAAGTGTCCAATAAGATCAACCAAATGGAGACAAGCGTTCCAAC  
AGGAGCGGAGAGTTTTCTATGAACACATCAGGAGCAGGAGACTTGAGTATTGAAGGGCATCAAGGAAG

TGGTTCAGAACTTATATTCTTCAGTTTCAGCGGTGTAGCAGCAGCTACCGATAACTTTTCTAACGAAAAC  
AAGCTGGGACAAGGTGGATTTGGCCCTGTCTACAAGGTTGGTTCCATTCAATTGACAAGCGTGTCTTAC  
TTTTCTAGAGAAGTATGACATTATTGTGTTAAACTAACGTGCGATGTTTGTATATTTAGGGAAAACACTACTAT  
GTGGCGTAGAAATTGCAGTGAAGAGACTTTCAAGAAAGTCAGGACAAGGTGTGGAGGAATTCAAGAAT  
GAGATCAAGCTAATCGCCAAATTACAACATAGAAATCTTGTTAGACTTATGGGATGCTGCATTGAAGGA  
GAAGAAAAGATGCTTTTTTACGAGTACATGGCCAACAGAAGTTTAGATTCAATTTCTATTTGGTTAGTACT  
CTAGATATGCTACAAATTATTCATCGATAGAGAGATCGATCACTTACAATTATTTTGGTTGATAAATTTT  
TGACAGATCCTGTTAAGCAAGCTCAATTAGACTGGAGGAAACGCTTCAACATTATTGAAGGGATTGCAC  
GAGGGCTATTGTATCTCCATAGAGATTCGCGACTCAGAATAATCCATAGGGATTTAAAGGCTAGTAACA  
TTTTGCTAGATGAAGAGATGAACCCGAAAATTTAGACTTTGGTATGGCTAGGATATTTGGTGGAAATG  
AAAATGAAGCAAACACAAATAGAGTAGTTGGGACATAGTGAGTATCATTTGATTTTTATACCTTTAAGAG  
TGAGTACCTTTAACTTGCTCAAAGAACTAACTCCATCAACGCGTTTCTTTTTTTGTTTTTACTTAAATCAGC  
GGATATATGGCTCCTGAATATGCAATGGAAGGTTTGTCTCCGAAAATCTGATGTTTATAGCTTTGGTG  
TACTATTACTGGAGATCATCTGTGGACGGAGGAACACAAGCTATCGTTCAAATGAACACTCTGGCATTAT  
TGGTTATGTATGTCCAATAACTACTTCTCGATATCTGTTGTGAAGTTAAATCTTTTAAACAACAATTCTACGT  
TTTTCTTTTTAGGCATGGCAGAAGTGGGATGAAGGTACACCAATGGACTTAGTAGACCGTTCTATTTGG  
GACGAGTGTCAATATGATGAAGCATTGAGATGTATACAGTTAGCACTAATTTGTGTACAAGACATGGCA  
GTTACAGACCGAGCATATCATCCATCGTGTTAATGTTGGAGACGGACAATATACGATTGCCCTTGCCTA  
GGCAACCTACATATACCTCAATGAGAAAACATGAAGATGCAGAAACATGGAATGAGAAGCAGGATTTTT  
CTGCAAACAATGTCACAATTAGTGTATAGTTGGTAGATGA

>PGSC0003DMG400013383 G-LecRK

AGACTCCATAGCTGTAAAGCTTGCAAACGATGTCGCTCCATCCTTCTTCTTCATCCTCACTTCTCTTCTTCC  
TTCTCTTCTTCTTCTTGAACCCCTTTTTCTTCTTCTCACAAAAAATCCTCTCTTCATTCAATTCAAATCCCCT  
CCTTGAATCCAACCCAAAACCAAATCCTACTTTCACCCAACTCCACTTTCGCTGCTGGGTTTCTTCAATCT  
TCCAAAATTCCTTCAATTTCTCCATTTGGTACTACAAAATCCCTGTCAAACCATTGTTTGGTCAGCTAAC  
CCAAATCCCCACTTAATTCCTCAGCTACCCTTTTCATTTCTTCTCCGGTGAACACTCAAGCTAACCCCATCT  
ACATCTTCTCAGCTCCAAATTTATGGCCTTCAATTATTCGAAACACCTCCTCTGTTCTTTTCTACAAGAA  
GATGGAAGCTTGGTTTATGGAACTGGAACAGTTTTTTGAACCCAACTGATACTTATCTTCCGACCCAGA  
ACATCACCGGAACAAATTTAACTTCCGCTAATGGAAAATTCCAGTTTGGATCGAATTCGAATACCCT

TTTCTTCAATGGAAACGATAGTTATTTCACTTTTTCCCAAATGCCCTCAGAGGTTGGAGGAAACAGGG  
GAAGTTACTCAAGTTAATGGAAAATTTGTTTCGTCGGATTTCCGGGGAGAAAGGGAAACTGAGAAGGAT  
GAAATTGGATGAAGATGGGAATATGAGAATCTATAGTTTTGATCTTAGTTCAAGTTTAGCTAAAAATTG  
GACAATTGTTTGGCAAGCAGTTAATCAATTATGTACAATACATGGTACTTGTGGTACAACTCTATATGC  
TTGTATGATACTTCTACAACCTCAAACCTTCTTGTGTTTGTCCACCTGGTTTTAGGAAAGACACTAGTAAATC  
TTGTGTGAGGAAAATTCCATTGATGACGAAGGATTCGAAGGCTAGTAAGTATTTACCTCTTGATTTTGT  
AGTTTTACTGGTGTGGGTAACCAAACAGACCTTAAAGCTTTGAGCTTTTCGAGTTGTGAAAAAATTGTT  
CAGATAAGAATGATTGTTTAGGTTTTTTGTTAAGTATGATGGGACTGGATATTGTGTCCTTGTTTTGA  
GAAATTGTTGTATGGATATTGGTCACCAGGTAAGTACTGAGTTTGTATGTATTTGAGAGTTGATAGTAGAGA  
GAACGATATATCGAATTTATAGGCATGACTAGTTTGTATGGAGACTTCATGTCCAGTGAGAATTAGCCTT  
CCATTTCCACCAGAAGAGTCTAAGACAACCACTAGAAATATTGTGATCATTTCGACGATTTTGCAGCTG  
AGTTGATTAGTGGAGTGTCTTCTTTTGGGCATTTCTCAAGAAGTATATTAAGTATAGGGATATGGCTAG  
GACTTTTGGTCTTGAAGTCATGCCTGCGATTGGACCAAAAAGGTTTAGCTTTTCTGAGATCAAGAATGCA  
ACTAATGATTTCACTGATAAAATTGGGAGGGGTGGATTTGGAGATGTTTACAAAGGGAAAGTTGAGTGT  
GGACGTGTTGTTGCTGTGAAGTGCTTGAAGAATGTCAAAGGTGGTGTGCTGAGTTCTGGGCTGAGGT  
CACGATCATAGCACGTATGCACCATTTGAATTTGGTGTAGGTTGTGGGGTTTTGTGCTGAGAAGGGTAG  
AAGGATACTTGTGTATGAGTATGTACCTAATGGTTCATTGGGTGAATTCCTCTTCCAAAAGTCTCTGATCC  
AGTCACCAGATGGACAGAAACCTATACTCGATTGGAATATAAGGTACAGGATTGCGCTTGGTGTGGCAC  
GAGCAATTGCCTATCTACACGAAGAGTGTGGGAATGGGTATTGCATTGTGATATCAAGCCTGAAAATA  
TTCTCTTAGGCGATGATTTCTGCCAAAGGTGTCTGATTTTGGGCTAGCTAAGCTAAAGAAGAAAGAGG  
AGATGATGACCATGTCAAGATTTGAGGCACGCCAGGATATGTAGCACCGAATGGACCAAGGCTGAT  
CCAATTACTCCAAAAGCCGATGTGTACAGCTTCGGATTGGTGTGTTGGAGATAGTTTCAGGTACAAGG  
AACTTTGAGCATCATAACTCAAAGGTGGAAAGTGATCAATGGTTTTTCCCTGCTTGGGCATTTGATAAGG  
TGTTTAAGGATATGAATGTTGATGATATTTTGGACCCTCAAATCAAACAATCGTATGATTCAAGGGCACA  
CTTTGACTTAGTGAACAGGATGGTGAAGACAGCAATGTGGTGCATCCAAGATCGGCCAGATGCACGAC  
CATCAATGGGGAAAGTGGCTAAGATGTTGGAAGGGACGGTGGAGATCATCGAGCCAAAGAAGCCTACC  
ATTTTCTTCTTATCAGAGGAATAATATATGGCTCAATCCTCTTCATAATTTCCCTCAAATGCTGCCTCAACA  
AGTTGCAGTAAGCATGTATTCCATGTTGTTTTGTATTGTAATAAAAGAAAGTAGATAGGAATTTGGATCA  
TGTTGTGTTTTGTCTGTTTTCTTTTTCTTTTTCTTTTTCCAGTTTTGTAATCTCTCTTGTGTTGTAGTTGTAAA

GTACATTTTGATCAATGAAGAAGCAAATGGTTGTTACATAGAAG

>PGSC0003DMG400013882 G-LecRK

TTCATTTTGGTCCAGAGTTTAAAGTTTGAGGAACCTAACAGAGAAGATTACCTTGTTAGAAAGCATCAG  
TTATGTGTCAGAAGAAAGAGTTGTTGATAGTAATTGTTTCATTTCTTGTCCTTTGTAGTTCCATAGAT  
ACCATTTCTTTAACCAATCTCTCAAAGATGGTGATTTGTTGATCTCTCAGGGAAATCTTTTGCTTTGGG  
TTTCTTTGGGAATTCCCCTGATAAACGTTACGTCGGAATTTGGTACAACAATGTTCTGAACTAACTGTTG  
TTTGGGTTGCCAACAGAGACAATCTGTCAATGGCACATCTGGGATTCTCACCATCGATTCAACTGGAAA  
TCTTGTTGTACATCTCGATGCGGAAACAAAACCTGTAGCCTGGAGAACAATGTTTCTTCAGCTACAAAA  
CGAGCAGACTCGTATACTGCTAAGCTGGAGGATTCAGGGAAATTTATATTGTTTCAAGACTCCAAAATG  
GATGTTACTGAGTGGCAGAGCTTTGATTATCCTACCAATACTTTGCTTCCTTCAATGAAATATGGAATAG  
ACAAGAGGACGGGTTTGAACCGGTTTCTAACATCCTGGAAATCGTTGAACGATCCAGGCACTGGAGAGT  
ATCGTTACACAATGGAGCTCAATGGGACACCTCAAGTTTTCTTGACAAAGAACTCTAGCAGGATTTGGCG  
GACAGGATCCTGGACGGGTCATGGTTGGAGTGGTGTACCAGAAATGAGCCCACGATTCATCTTCAGCCT  
TAGTTATGTGGACAATGATACCGAGGTTTCTTGACATATGGCATAACATGACAGTTCAATAATCTCAAGA  
ATGGTCTGAATGAATCCGGGATCGTGAACCGGTTAACCTGGCAAGAGAGTGAGCAAAGTGGGTGCA  
ATTTTGGTCTGCCCCCTAAAGACCCTTGAGACAATTATGAACATTGTGGAGCATTAGCAATTGCAATCTGT  
TCAATTTGGCTGAATTTGAATGCAGTTGTCTTCCAGGGTACGAGCCAAAGCTAAGCCGACAATGGTTCTT  
GAGAGATGGCTCTCATGGATGTTTGAGGAAGAAAATGAAGAGGTGTGCAACAATGGTGAGGGATTTG  
TCACATTAAGTCATGTAAAGGTCCCCGACACAGGTGCAACTAGGATGAACAAGAGCATGGGATTGAAG  
GAATGTGAAGAGTTGTGTCTGAAGAATTGCTCCTGCACAGCCTATGCAAGTGCTAATATTAGTGCTGGA  
GGAAGTGGATGCATCACTTGGTATGGTGAGTTGATAGACATAAAGCAATTTACAGATGGGGCCCAAGA  
TTTATATATCAGAGTCTCTGCATCTGATTTAGGTAAGGAGTTAACTTAATATATTATGTGAGGATTTAGGT  
AATTCATATTATGTGGAGAAGAATGTGCAAGTTGATCATTTTTGGTTAGTAGTAGTACACAGTATCTTA  
CCCTGGTGTACTGGAAGTTCTCATTTTTTGTGTTGTTGAGCGCAATTCTCGAAGAATTCAAGAGGCCATA  
ATAGGAAAAGAATGATAGGGATTCTAGCAGGGTCTGCTGCAGCAATAATTCTTGCCTCTCTTTGGCAT  
GTTGTTTGGTGATCAATATAAGGAGAAATGGTAAGGATATTATTCTACATCATACTTTAGTCGAATTTTT  
CAGTATCTGTACAGCAGCTATAATGGTGAAGCAACTATAGCAACCTAGACCTTCTACTACCTTTCTATATC  
GTGCAGCAAAAACAATAACACTTACTGCAAATTTCAATTTGATCCTAATCGGTGTTTGCTGATGTCACAGAT  
AATGAGAGAAGTGAAAGTATAGCATCCTATGACGGCATGGATGAAAGTAAACATACAGAAATCTCTATC

TTTGATTTAACCACAATAACTAATGCCACTGATAAGTTCTCTGATGCTAACAACTTGGTGAAGGAGGAT  
TTGGTAGCGTATACAAGGTAACAACCTCCCAAACATGATTGAATTCCTAACAAATCAACATTATCTTTATAG  
GAGGCTGCAAATAGATTTAATAATACTTGTTAAACCAAGATTTTCTCCCTAAAAATAAGAAGAAGAAGCT  
ATGTTTACCAAATAATAATCTGGAATCAATATCAGGGTCACCTGACAGATGGACAAGTAATAGCTGTCAA  
AAGACTTTCAGTAACTTCAGGACAAGGGACCGAGGAGTTCAAGAATGAAGTCACACTAATTGCAAGACT  
TCAGCACAGAAATTTGGTGAGGCTTTTAGGATGTTGCGTTCAACGAGGAGAGAAGATGTTGGTTTATGA  
ATATATGCCAAACAAATCCTTGGACAGTTTTATTTTTGGTAAGGAACATCTCCAGAACCGGAATTTCTCC  
ATTGACCTCCAGTCTCTACATGCTTTTACATGTTTACTGATGATTAATGATTACTGCTTTAACGTGTGTGT  
GTGTGTCCCTAAAAGATTTCTTATGCACAAATTTTTAACTGTGATCCAGATAAAACAAAAGGGTCTTTG  
TTGGATTGGGGAAAACGTTTTGAAATCATAACATGGGATTGCACGAGGAATGTTATACCTTCACCAAGAC  
TCTAGACTAAGAATTATTCATAGGGATCTAAAAGCAAGCAATGTTTTACTCGATGCCTCCATGCAACCAA  
AAATATCAGACTTTGGAATGGCCAGAATATTTGGAGGTGACCAAATGGAAGCAAACACAAATCGAGTTG  
TTGGAACATAGTAAGTATGTCAAGTTGTGTATAAACATAAATGAGTTATGTTAGATATGTGCATGTGATC  
TTAAAATGATAAATCTTGACATTGCTTATCTATTGCAGTGGTTATATGTCACCTGAATATGCAATGGTAG  
GGCACTTTTCAGCAAAGTCTGATGTTTTAGTTTTCGGGTTTTGTGTTTGGAAATTATCACTGGCAGAAA  
GAACAACAGTCATAAGGATCAGGAGAAATCTCGACATTTAGTTGGATATGTAAGTACAAACATATATAT  
GCTGTAAAATCGAGAAATTGCATTTATTATCTTACAGTTGCCTTAGACATAAGCTGTGTCATGGATGGT  
AGTACTGCAAATAATAATTTGGAAACAATTCCTTTTCAGGTTGTTAAAAGTGCTGAATAGATCGAGATTT  
TGATTTTCAGAATTTCAATTTTTGGTGTATAGTCGCTTCTCTTATAGAGAAGAAATTGTCTGAAATTTTG  
ATTGTGATGCATTGTGGTGTCTTATTTTCAGTTTTGGGATCTTTGGAAGGATGAAAAGGCTTTAGATGTT  
GTTGATCCATTGTTAGGTGGCTCATATGAAGCTTGTGAAGTTTTGAGATGCATCCACATTGGCCTTTTGT  
GTGTACAACCGTTTACAGATGACAGACCGACTATGTCAGAAGTGGTCTTCATGCTGTGCAATGAAACAA  
ATCTTCCTTTCCCTAAACAACCTAGCCTTATATTCAGATCAGAGAATCATAGTTCAGTTACACACTCTTCAT  
CAGCAAGCATAGCAACATCATCTGTCAACGATATGTCTATTTCAACAGTTCATGGTCGCTAGAGCTTATG  
CTAACTATTCAAGAACTATTTTGAAGAAATACAGAATTCCTTTTTCTGTACTTTGCTTTCATAGTATTAGA  
GAGATTTATTGGTGGGTTATACACAACATTTAACATGCTAGTCCATTCTTGATTCAAACACTAGTGGGGTTG  
GGCTTTAATAGCACTGGAACCAAACTGACTTCTGATTCCCATGGCCCATGTTACAGACTTAAAGGTAG  
GTGGGTGGCAAAGGATTGGTAGGAAAGAAGCATAAACACAGAGGGTTTCTATTTTCATCTGTGAATTAA  
ATGGTGCTCTTTGTCAGCTGTTTTTGATAATTGCCCACTTCATGTTTTCTTTAACAGTCTTCTCTGTGTTC

ATCAATGCTCTAAAAGCAACAAAGGCTAATCCTGCTAGCCACACACAACCTTTTCAATTTTTTTTATTGATTT  
GCAGGATAGTAATTTGGTTGTGGAGTTTTGTCAATAAATGAGATATTTAACTATTATTAGTTGGTTATGT  
TTTTCTCAAAAAGTTATGGATAAGAAAATACAAACATGTAAGTTATCTTATGTAAGATTTTAACTTTTGT  
TTCATAATTAGATCATGAGATAGACATGTATCAAATACAACAATAATATTATGATCATGAGTAAGAGCAC  
TGTTGTCTCAATCTTTCTGTGATGAGTATCTGTAAAAGTAATATCAACTAGTCTGTTGAAAATCTTTTAGC  
ATTAATGCATTGAATCATTGAAGACTTATATCATACTTTGGGAAGTAATGAGCACTAGATACATTTGAT  
ACTCAGATAACAGAAATACATATACACGTCAGACAACCTAACGAACATAAGGTGCGGTAATTGTCACCTC  
GTTGATCGAAGATGATGCTGTTTCTGTAGTAATCAAGTCTGAGTTACGGGTAATGAAGGGCTTCTTCGG  
GGAGGGAACCGTTGCTTCAATACTTAGCATGGACAGAATTGTTGACATGGTTGGTCTGTCTGCTGCGTT  
GAGTTGCAAACACAATAGTCCTACTAGAATGCAGCGTAATGCTTCTCACTGGGACAAGAATCAACTATT  
GATGGATCTACCAGCTCAAAGGCCTTACCATCATTCCACAACCTCCAGGCCTGAAGCAGCAGTTCA

>PGSC0003DMG400013885 G-LecRK

GGGATGTGTACCAAAATACCATCTTCATTCCTTCCCTCTTCTATCAAACAAGAGAACAAGTACACCAACA  
AATGTCTCAAACACCAACACTGCAGCAAAAACAAAATACTCTTTTCTTAAATTCATAATGAGAAACACCA  
AAGATTACTACTTTACCAATTCTTGTTCTTGATTTTGATTTCCCAATTTCTTCATCCAATTCTTGCTATACC  
CACTGATACAATCACCCCAACACAGCCTTTAACCAAAGATCAAACCTTAGTATCTTCCGATCAACACTTTG  
AATTAGGCTTTTTCTCTCCCGCGGTGCAAATTCAGACAAATGGTATATCGGTATTTGGTACAAAGAGAT  
TCAAGACAGGACTATTGTCTGGGTTGCAAACAGAGCTAAACCCCTTTCAGCTTCATCAACATCAGTCCTA  
AAAATCACAGAAATTGGTACCCTTCTCTCGTCGATGGCCAACTGGAAATCCCGTCTGGTCTTCCGATC  
AAACTCCGGCGACCAACGTAGTAGCCCAACTCCTTGACTCCGGGAACCTTGTCAATTCGACCGGAAAACG  
ATGACAGAGAACAGAGCTACCTGTGGCAGAGCTTTGATTATCCAACAAACACTTTATTACCTGGGATGA  
AACTTGGGTGGGATTCAAATCCGGGATGAATAGAAACATAACATCATGGAAATCAGCAATCGATCCAG  
CTCCCGGAGATTACACCTTCAAGATCAACACCAGTGGGTTCCCGGAAGTTTACTTAACAAATAAACAACA  
AATTATCTACAGGAGCGGCGCTTGGAAATGGAATTAGATTCAAGTGGGGTACCGGAAATGAAGGCAAGTG  
AGATTATCTCATTGAAATTCAGTTCAAATCAGATGAAATTAATTACATGTTCAAATTACACAACAAAAC  
TTATACTCAAGATTGTCTGTGAGTCATACTGGTTTTCTTGAAAGATTCACTTGGATCCCAACAAGCAACAT  
ATGGAATCGATTTTGGTATGCTCCAAAAGATCAATGTGACGGATACACAGAGTGTGGGGTATCTGGAAT  
TTGTGACACAAATATTTACCAATCTGCAAATGTATGGTGGGATTCAAGCCTAAAATCAAGTGGCCTGG  
GAATTGCGAGATGGGTCTAATGGTTGTGTTTCGTTTTATAAATTGGATTGCAAACCTGATAAATTTAACA

TATTGAGGAACATGAAGTTGCCAGATACGACGAATTCGTTTGTGGATACAAATATGAATTTGGATGAAT  
GTGAAGCTATGTGTATGAAGAATTGTTCTTGACGGCCTATACAAATTCGAATATTAGCGGAAGTGGGT  
CGGTTGTGTGATTTGGAGCACCGAACTTGTTGACATGCGGCAGTATGCGGCGGCGGAAGGTGGCCAA  
GTTCTCTACGTTAGGGTGGCTACTTCTGATGCAGGTATCATCCTATTTTTCTACTTCTTTTTTCGCTTAGTA  
CAATGATAACGAATTAACGATTAATAATCGATAAAAAATAGTTGTATTTAAATCGTATTA AAAAGAATCT  
GTACAATTAATTTAAGTAATTTGGGGTTGGAATTTGATTGTTAGATAATCCACTTCTGTGTTAGGATCAA  
ATTTTGGGGATGATTTGAGTCGACTCGGCTGCACGAGTGGAGTTTGTGGAATTTTTATTTACTTGTTA  
GGTTGGATGATATTTCAACACAGAGAAGTAGAGTAAAATAGAAAGGGTGATGAAATTTTTGGAAAATAT  
TTTTGTGGAAGTTTGGAGAGTATTTCCATGATTGGAATATGCAATTTAATACTTTTTATCTCAATTTATG  
TGCTACACTTTTTAGTTTGTCTACAAAGGAATGATGCATTTTTTTTTGGTAAGTAAACATTTTATTTGTCAA  
GTAAACGTTACAAAACAACATTTTTATATTTAGTACTAACAATTTATTATCTTTAATTAGATGATTTATAGT  
CACACAAACATCTATGACTTGTTTAGACCACACATTTCAAAAATCACTCTTTCTTAAATTTTATATCAAATC  
AAATTACGTCACATAAATTGAGACAAATAAAGTAGTATAATGTTTTGCACATTTTTGTCGGAGAATTCAA  
GTTTGATGCAAAGTTAATTTATTTAATTCATTCGGCGAACTTGCTGTTCTTATGTTCTCTGAATTATTCCAC  
TATATAAACTGTATATATTGTTTTGTGTTTGAATTTATTTCCATAAATTCAAAAGTCGAGGACAAGTTGAA  
AAATCTGTATGTCTCAAATTTGTTACTCATTTTTGCATGTCATCCGATCCAAATATCCTTGAATTATATTAT  
TCTTTTGTCAATTTAATAAGAAGCATATTACACATTATAATAATTTAATTTACTCTTTTCTGATTGAGTTCC  
AAAGTTGGCAAACCTTAGCCCTTGATCAAAGATAAACCATGTGCATGCAGTTAGTTTTGCCTCTAATAGAT  
GAAATTATAAAAATATATTTTACTTTTTTGAATTCCTTTTTCTATTTTATTTTTTTGGGTATTGCTATTTTTT  
TAAAATCCCCCCCCAAACGTCATGCAGAAATTAATTAGAGTATTTATTTGAAAATAAATACTCTATTC  
CCTTTAAACAACACGTATAGTTGTCTTTAATATCCTTGGTCCCCTTTTTAAATTCCTTTACGTTACCTAC  
TTTCGATCTAATATTTTATATAATCAACTAGATTTCAAATAAAAATAAAAATTCATAATTGCTAGTTGAA  
AAAACAAGAAGTTAGTATAATAATTATTGAGTGCATTTAATCCCGAAAAGGACTTATAAACAACCTACTT  
TTCAAAGTTATTCTGCTAATGAGTTTGCCAATATATTCTTTGTGGTATGCACGTTTTCAATATAATTTTTCT  
TTTTCTATGCTTTGTGATTTTACTTTGAAAATCGAAAAGTATAAAAAACCTAACCATATCTACCAATC  
CCCATCAACAATTTGCCTTCAATAGGGACTTAATTTTATTTATTTACTATATTTGGACTTTCTTTTTCTCATT  
TGATTTGATAGGGATGATTAGTATTTGGAAAATATGTTACACAGTCAAGTATCTCAAGGCTCTAAAAGTA  
ATCAGCCACCTAATTCCACCTTCTTCCAATCACCTATTCATAAATTTGAACAAACATTATAGATTTATTGT  
CACAAATTCAGCTCGTAATTAACGTTTCAGATTGAAATATTAATAATAAAAAGGTAACAAAGTAATCAAAATG



TGCATTTGCTTTTTCTTTGTACTTTCTCTTTAAATCTGCATGCTTAAGAGGAACTTTAATTATGGTGG  
GAAATAAAGTTTCAAATAAAGCTTATTTAGCTCTAAATTATTTCAATTAATTGGTCCCACAATAAATGG  
GTCCCACAAAGAGATACTCCTTTGCAAATCAAACGGTGACGAAGCAATTTCTGGTCCGGTGTAAATGGG  
CCCTTACATGGCCGTCGATCTTGACTTTTATTGGGCCATCCCGGCCAGTTGTTTTCCCTTTTTCTCCTTT  
TAGAGAAAAAAGCATATGTTTCCTAATGTAATACAAGAAAATGATTGGACACCAATTCCTTTGACACGT  
TTGGGAAAAGGTCATATACACGTTTGAAAAGTAAGGTTTGGTGGGGTAAATTAATTCAAATATTACAAA  
GGGATTAAGAAGTATATATTAAGCTAACTATTTTTTTTTACCAAGAATATGTCAAGGATGATATTAATAG  
TTTTTTTTGGACACAACCTTTGTGAAGTAGGTGAATTAGATCATGTTTAGTGACACCATTGGACTGTAGTCT  
TTTCAATTCAACTTTTCTATTGTCACCGAAAATGATTTTGAACAACACTATAGGTTTTTCATACATAAATA  
GACATTCAAATTTGGCCTAAGTAAACACCTTAACTTTAGTATACATACCTAGACACCTCAAATTATTTCT  
CCGTGTCAATTGAACTCTCCAACCTACAAAATGATAATCTAGACACCTTCAAATTAATGTGTCAAGTCAG  
CATGGGTGTCCATGAGACATAGTGGGACGAGTTGGAGGCGTCTAGATATGCTCTTTTGAAGTTGGAGTG  
CTTCCTTTGTCAGCTGAGGTCAAGTTGAGTGTTTCTTTATGTATTATGCTAGTAAAAAATGATGATCTTC  
TTTTTGCAGCACTAACTCTTGAATAAAAATTAAGCATGATTAATTAACCTGAAAAACTTTTAATTTCAAGT  
CAAATTGGAGGTGTGGGATCTGGAAATAGCTCTGGCAAGACAAAAATAGTTGCAATAGCTGCTGGGGT  
TACAGTTGGTATAGCTCTTGCTATTTGGACTAACCTTTGCTTCTTATCAAAGAGAAGAAAACATCAA  
GGTTCAATCCGAACTAAATCCGTAAACAGAGGTATTATATGAATCTATCATGATAAATAAGATTGTCTAA  
TATAAATGCTTCATTTTCTAATGAATGTTTCTTATGATCCTAAACCAGGCACTAGCGAACGAAGTCAAG  
AACTTCTGATGAATGCAACTATTATCCAAGTAAAAGAGAATTTTCTGGTGAACTTCCACGGAAGAGTT  
TGAATTGCCATTATTTGATTTCAAGCACCTAGCTACGGCTACAGAAAATTTTTCTGATGCGACTAAGTTGG  
GCCAAGGTGGATTTGGTTGTGTTTACAAGGTAAAATCTCAGTTATATGTAAACCATAGTGGTATAATAAA  
GAAGAAAAAATGATCGACGAACTCAATAATATAATCTTTTGATCAGGCAATGCTGGTTGGTCAAGAAGT  
AGCAGTCAAAGGCTCTCGAAGAATCCGGACAAGGAGTAGAGGAATTTAAAAATGAGCTAAGATTAA  
TTGCCAGGCTTCAACACAGAAATCTAGTCCGGCTTCTGGCTGTTGTGTTGAAATGGAAGAGAAGATGC  
TGATCTATGAATACCTGGAGAATAAAAGTTTAGATTCAATTTTATTCAGTAAGCTTTTTTCGTTGTATCGT  
CAAGAGAGTAGTGTTCACATCATTTACTTACATGCTTATATAATTTGTGAGTCACATTTGAATATGCTCC  
TCAGATAAACAGAAAAGCTCGCTGCTCGATTGGCAAAGCGGTTCAATATTATTTGTGGCATTGCTCGG  
GGGCTTCTATACCTTACCAAGATTCAAGATTTAGGATTATCCACAGAGACCTTAAAGCAAGCAATATTC  
TGCTTGATAAGGATTTGACCCCCAAAATATCAGATTTTGGCATGGCAAGAATATTTGGCGGAGATGAGA

CTGAAGGAAATACAAAAAGAGTAGTTGGAACCTAGTAAGCACTCAACATAATTTCTTCACATAATTCATA  
GAACCTTTAAAGCTGTTACTAAATCTGTTTTTTGTTTTGATGTAGTGGTTACATGTCTCCGGAATATGCA  
ATGGATGGCCTCTTCTCTGTTAAGTCCGATGTTTTAGCTTTGGGGTTTTGGTGTAGAAATAGTAACCG  
GGAAGAAGAACAGGGGATTCTATTATCAAAACAACCAACTCAACCTTCTTGACATGTAAGTCCACAGA  
TCATATGTTAGCTTCATTATTGGTAATACATTCATTATTTGATTCATTTCTGATAAACAAAGTAATCGATTA  
TGCAGGCGTGGAGACAATGGAAAGAAGGGAGCGGCTCAGAGCTACTAGATCCATCTTTTGGAGAATCA  
TTTTCTCCGTCTGAAGTAATGAGATGCATACAGGTTGGACTGTTGTGTGTCCAGGAACAAGCGGAAGAC  
AGACCAAACATGGCCACTGTGGTTTTGATGTTAGGCAGTGAAAACGCGTCACTACCTCAGCCTAAAAAC  
CCAGGATTTTGCCTTGAAGAAGACCCGTTGATTCTGATTCATATTCGACTAATTATGAAGAACTTGCA  
CTGTCAATCAAGTTACAGTTACCATGATAGATCCCCGGTAGTTGATGGTGACGCCCTCAGAAAGTGTATA  
TTACTACAAGAGGTTCACAATTTTCTTTGTATACTTTCTCAGTTTTTGCTTTTTGGGTAAGTTTTGTGTAA  
GATAAAGAGTATAATTAGGTCTTTTTTCTCATTACATACAATTGTGGGTTCAAAAATCTTTTTTTCATCA  
TCAATGTAATAGTCCAATCATTCTTTTCCATATCCTTAATTGAAATCCATTGTAAATTAATCTGTGC

>PGSC0003DMG400013886 G-LecRK

GCCTCATCAGAACCTTCTTCTTTCTTTTTGTTTTCTATACCCTTTACCATTCTCCTTTGTAAAATTCCCAATTT  
TCTCCATTCTTGAATTGTGGCATCATCATTTCCATTTCCAAATCTTGAATGGCCACTGGCTTTAGATTTCC  
CCCCTTTTGGTTCTTATTTCTTTTCATTCTTTCTTGTCTCCTCATTCTGTTTAGGTGGTGACAGAGTTACG  
CGAGGAGAGATTTATAAAGATGGTGATAACATCACTTCTAAAGGAGGGGATTTTGTGTTGGGGTTCTTT  
AGTCCTGCAAATACCAGTAAAAGGTATCTTGGTATATGGTATGTTGACGTACCAGTAAAGACATATATTT  
GGGTTGCCAACAGGAACAATCCTGTTTCATGATAAAAATGGTACCTTTTCAATTAATGAAAATGGGAATTT  
GGTGGTTAAAGATGGACATGGGGATTTACTATGGTCGTCTAATGTTTCTGTTAAAACCACAAATTCTACG  
GCTTGTCTGAGAGACGAGGGCAATCTTGTATCCTTAATAATGACAGGAATGCTACGAGGTAAATTCT  
GAATTGTGGGAGAGCTTCTCGGATCCTACAGATACATTTTTGCCTGGAATGGAAGTTCTCATAGAAAGA  
CAAGGCCAAGAGCAAAAAGTTTTCCGTTCTTGGACAAATGAGAGTGACCTTCACCTGGGAGGTAATCA  
ATGGGAGTTGATCCTCGTGGAACACCTCAGATTGTTATTTGGGATGGACCGAATAGACGATGGAGGAG  
TGGACATTTTGTGAGCGGAATTCATTGGTGTCCAGATGTGATTAGAATACTTTTTTCTCTGGCTTCA  
GAATTCAAAACGAAGGAGACAATAAATTGTTACTCACTTACAGTGCCTCAAATACATCTTCTTTTGTGAG  
GTTTCAGATTACTGTGACTGGAAATGAGCTGCAACAGAGGTGGAACGAAGACCAGGGTGAATGGAACA  
CGTTGCAATCTAGGCCTGTAGGTGGTTGTGACTTGTATAACTTCTGTGGGAATTTTGCAGAATGTGACAA

AGATGTATGCCAATGTTTAAAAGTTTTGTACCACGTGTTCCAGGAGCAGTGGCATGCTGGGAACCGAAC  
CGAAGGATGTGTTAGGAAGACAGAATTGGAATGCAGGAGAAATAGCAGTGTTCAGGAATGATAGTT  
CAAAAGATGATGGATTCTCGACTATTCGGAGAGTTAAATTACCTGACCATGCTAATGTTTCAGAAATAAC  
CATAGACGAGTGCAAAATCAGGTGCCTGAATGATTGTTCTGCAATGCTTATGCTTATGTCAGAGGAATC  
AATTGTATGATGTGGCGTAATGATTTAGTTGATATAGAGCATTTTCAGGAAGGTGGGAACACTCTTTATG  
TTCGTCTTCATCCTTCAGATATCGGTAAGCACAATACTTTCTGCTGAATTCATAAATCTCTACCAGTTTTC  
TTCTCATTGTCGAATTATACAAATCTAAAACCAAAGTAGTTTGTCTTTTAGTACAAAGATCAATTTCTTGT  
TTGTCTTTACTCTTTATTTGTAGCAAGCTCAAACAACAAGCAATATATCTTTTTCTCCTTGTTGAAGA  
ATGATTAGCCTTTCTAATTTCTTGATTTCTCCTTTGAATATCTTTTGAAACAGGTAAAAAAGAAGACGA  
TCATAATTGTTGTAATATCAATTCTAGCAGCTCTGGCTTTGGTTGTTATGGTGGCCATTTGGCTAGTATGC  
AAGTACAGGGCCAGAAAACGAGGTAAATTTTGATGCAGTAACATTTCTGACTTGTTAGTTGCATTTATTA  
TATGTTCCATATTGTACTTATACCTTTGACTTGCAATTTTCAGAATCCAAGAGGACCAGTGAAATCCCAA  
AAACCATTTAGTTAGGAGTGGAGAGTTCTCCACGGAATATTCTGGACCAGGCGACATCAGTGCTGAAGG  
GCATCAAGGAAATGGTTCAGAATTAGCATTTTTCAGCTTCAGCATGGTGGCCACAGCTACTGACGACTTC  
TCTCTTGCAAACAAGCTTGGGCAAGGGGGATTTGGCCCCGTTTATAAGGTAAATTTCAATCTTGATAGA  
TTATTCTGTTCTTTAGGAAGTATATGGCCATGTTTTGGACTAAAGTTGATGTTTTTCAAATCTTTAGGGA  
AAGCTACCTTGTTGGTCAAGAAGTTGCTGTAAAAAGGCTTTCACAAAAGTCTGGACAAGGCGATGAGGA  
GTTCAAGAATGAGATCACTCTAATAGCAAAATTGCAACACAGAAATCTTGTTAGACTTTTTGGGTTGCTGT  
GTTGAAGGAGAAGAAAAATGCTGATTTACGAGTACATGCCAACAAAAGCTTAGATACATTTCTATTT  
GGTAAGTTCAGGAAATTCTATCAAATAATTTCTGCTGCTCCACAGATGTACTATAGCAACACATCTCAT  
TGAGATAGACACTAACAACTGTATTGGCTGTAAACTTTGACAGATACTGTTAGGAAATCCCAGTTAGAC  
TGGAGAAAACGCTTCAACATTATCGAAGGAATTGCCCGAGGATTACTGTATCTCCATAGAGATTCAAGG  
CTTAGAATAATCCATAGGGATCTAAAGGCTAGTAACATTCTGTTGGATGAAGAGATGACCCCAAAAATTT  
CAGACTTTGGCATGGCCAGAATATTTGGAGGAAACCAAATGAAGCAAATACAAATAGGGTCGTAGGA  
ACATAGTAAGTATCATTTGATTTTAAATCTTTAAGAGACTAATTTCAAATTTCTTGTTCTGGAGCTAA  
ATCCATTTCAATTTGTACCTTGTTGCTAAACAACAGTGGATATATGGCTCCTGAGTATGCTATGGAGGGC  
CTGTTCTCTGGCAAGTCTGATGTCTACAGCTTCGGCATAATATTGCTTGAAATTATATGTGGACGTAGAA  
ATACAAGCTTTCCGACAGATGAGCATTGAGGCATCATTGGATATGTAAGTCTGACTAATTTCTCCACCTA  
TTTCAATCATTTTAGTCAAGAACAAGCTGTCTAAATAATGGGGCTAATTTCTTGTTGATGAGCTATGAC

GGAGTGGTCATCTTTCTCATATTTTTCTGGTGGAAAATATTCAGGCATGGGAGAAGTGGGAAGAAGGT  
AGACCAATGGACCTGGTGGATCGTTCAATTTGGGATGGTTGTCAACACAATGAAGCATTGAGATGTATA  
CACTTGGCATTGCTTTGTGTTCAAGATTTGGCGGCTCACAGACCAAACATGTCTTCTGTGGTTTTGATGCT  
GGAAACAGACAATGTAAGGTTGCCCTTGCCTAGGCAACCTACCTATACTTCAATGAGAAGATCTGTGGA  
TGAAGATATATGGCATGGGAATCAGGATGTAACATCTTCCAACAATGTCACAGTTAGTGTACTAATAGG  
TAGATGATTGGTTAATGCTTGTTCCTTCTAACATACTGCTTCATTTAAGAGAATGGGATCAAGTAGTGT  
AACTATGCCAAGTTATACTTGGAACTATGTTCATAATTTTTTTGTTAGCTAGGTACACTTTAGCACATCATG  
TGTATTGTAATTAGAAGGTGGTTCAGCTCTCAAAGCTGAAAGAGAGATATGTCACAACCTTGTTC AATTA  
GTATGGCTGAAGTTTTTTTTCTTACTGTTTGTAGATGGAGATGCTCCACCAATCGAGCAAACCCCACTTGT  
CATATCTAGTTTTTTTTTTTTATGACAAAGGAAACCCGCAGCCGCTACCCTTTGGGTGCGCACAGGTAAA  
ACCCCTGCTCCTATGCAATAGCTCGCAAACCACATAAATCAAGCATTTC AATCGGTCCGTATATATCACTG  
TATAATCAAGGAACAGAATTACATGCTTGTTATCTCCTATCACTTCAAGAAACCATTTTGCAGTTCTTCTA  
AAGCTTGAGAACTAGTATTTTGTCCATTGAAGCACAAGCAATAGTTATTACCAGTTCTGCATAA CTGA  
ACTATCTGTAGGGAGATCAGCTTGTGTTCCCTTTGAGACAGAAGGGGAAATGGAATTATTTACTATGTA  
ATTAATCAGTGTCAATTTAGTGGTGGTTGACTTGTTCATGTA ACTCAAATATGGAAG

>PGSC0003DMG400013887 G-LecRK

AAAAATTTCACAAGTTACACGCTTTATATTTTGGTTAAGCACGCACGCCACGTAGTTAATGTGGTGC GTA  
AAAGTCACACCTTTGAAAGGTTTGGTATGTAAGAGATTCCCATGGCTGGGGAGTGTGTAGAAGTGAT  
TTGGCTAAGAGTTCACAGATTA ACTAGGTATTAGGCCTATTTTCTACAGTAACTGTTTTTCCC GTAAACA  
TTTTGCAGAGATGGTTGGTGTGTCATTGAGTCAATACCCGTAGGAAAAGGACAATCCATTAAATTCACAT  
CAGAAATTGTCAACATGATACAAAATCCTGCCCTTATATTCTCAGAGCTAAACATATCAGCCCAAGTAATT  
TTTCAGTATTGCAGGTATCAAATGCACAAGAAGTACTCAGAAACATAGTAAGCTGTAGACGTAGAAGCA  
AAATGGCCACTTAACAAATCATTTGAGACATGGGTCCAGCAATTAATTGACACCCAATTGAAAAGTAAAC  
GGATGAGAACATAAAAAAGATAAGTATCCAAGAACCTTATTTGACTAAAGGAAAAGAAAGGTCATCCTT  
GAGGTTCTCAGCTCTTACACTTCAAATGATAAGACTGTACCTTTTGG AAGTAAAGAAGTTAGAATGAGCA  
TATCTATGCTTTTTCATCTTTTACTCTATTGTTTTTATGTAGTTTTTTCCAGTGCCAATACTTCAGACACCAT  
TAGCAGTAGTGAGCCTGTGAGAGACTCAGAACTGTATTTTCTAGAGGCAAAAGATTTAAACTGGGTTT  
TTTTAGCCCCAGGAATTCTGCAAACGTTATGTAGGGATTATGTTTAACCTACCATCACCAACACCAACT  
GTAGTATGGGTAGCTAACAGAGATGAGCCTTTACACGATTCTAGTGG AATACTCACAATATCAGAAGAT

AGCAATCTTGTCATGTTGAATGGACAGAAGGAGATAATTTGGTCATCCAGTATTTCAAACCTCTATGAAGA  
ATTCCACAGCACAACTCTTGACACTGGAACTTAGTCTTGAAAGACAGCTCAAATGGGAGAGTTCTAT  
GGGAAAGCTTTCAATATCCTACGGATTCTCTTTACAGCTCATGAAAATGGGCACTGATAAGCGTACTAA  
CACAACAACCTCCTGAACTCATGGGGGAGTCCTGATGATCCATCCGTTGGGAGCTTTTCAGCTGGAATT  
CAACATCGATACATTCCTCAGTTTCTTATTTGGAAAAACAGTTCTCCTTACTGGCGGGGCGGTCCATGGA  
ATAAACAGATATACATAGGATTACCAGAAATGAATTCTTTCTATCTCTATGGTATTGACCTAGTAATTGAT  
AATGCTGGCACAGCATAACCAAATTTAGACCCAAATCAGTCTAGGATACTCTATTATTCCTTGAATTC  
AACAGGGTCTTACCAGGAGAAGGTTTGGGATCAAAGTAAGAAGGATTGGGTGGTAACATGGGCAAATC  
CCCGAACAGAGTGTGATTTTTATGCCAAGTGTGGGACATATGGAAGCTGTAATCCAATGAATTCTCCAAT  
ATGCAGTTGTATACAAGGTTTCAAACCAAAAAATGATGGAGAATGGAAGAAGGGAGATTGGTCTGGTG  
GATGCATCAGAAGTACTGCACTAGACTGTGAAAGGAACAAAACCTGATATTGAGAAGGACAAGCAGGAC  
GGGTTTCTGAAGCTGCAGACAATGGGAGTGCCAGATTTTGTAAATTCGGTACCTTCTGCAAAAAAAGAC  
TGTGAGAGTGACTGTTTGAGTAACTGTTCCCTGCACTGCATATTCATACTACAGAGGCATAGGTTGTATGC  
ATTGGAATAGAAGCTTAGTTGATATTCAAGAATACTCCAGGGATGGGGCGGCTAGTTTGTTCAATCGCCT  
TGCCTACTCTGAACTTGTAACATACTTCTTTACAACCTTGAGCTTTCAATTGTTTAGCTTGTTTTTTTTTT  
TTGGAECTACAAGGAGTTGAAATTTAAAGTCTTCTTGCTTTGAAGAATATAACCAAGACTCCCAATAAA  
ATCTATAAAACCATCGAATTAGGCTCAAATTCTCAATTAATGTATTGCTTAGCTCTTTTCTATTTTTGGTGT  
AAACAAAGATATATTAAGTACAGACAGAAGACATCTTTAATGTGCTAGATTGTTTATAGGCAGCAGTTTAG  
ATTAAGACTGTTTTATTCTGTAAGTTGACTCCCTCTGTCCAATTTATGTGACTTACTTTTCTTTTTGGTCA  
GTCCCAAAAAGAATGACACATTTCTATATTAAGTAATAATTTAACTATAAAAATGTTTATTTTACCCTTAAT  
GAAATGATTTACAGCCACACAAATTTCTATCATTCAATTTGGACCACAAGTTTTAAAAGTCTTCTTTCTTT  
CTTAACTTCGTGCCGAGTCAAAGTACCTCACATAAATTGGGACGGAGGGAGTAATACTTTTGAAGGGG  
AACTGCACATTTTTGTAGTGCACCTGTGTATATATAGACTAAAGTTACCAGTTTCAAAAAAATAAAAAAT  
CAATTAGTTCTATCACTTCCATGGAAAGAAAGATATGCTCAAGAACAGTCTATGGCTCATACATGTTTGC  
AGCTGCAATGACAAGAAAGACATTCCTGTAGCAGCTATTGCAACCACAGTCTCAATAGGCTCAATAAC  
AGTTATCTTGTGTGGATATCTTTTCTGGAAATTGTTGGCTAAGCACAGAGGTAATTAATCAAATAAGATT  
TTTGAGAAGACAACTAGAACTTCTCTGTCTGCAAATGGTTTGATTCTGAATGTCCACTCTGAACCAGA  
AAGGAAGAGGAAAAATGAAGCACTCTTAAGAGAAGCATCTCCAAAATTTACCAAGAAGGCATGAGTA  
AAGATGACATCAATCAAGTCAAATTTGAAGACATCACCTTGTACAGATTTGACATGTTAGCGAATGCCAC

TGACAGTTTTACCCAGCTAGCAAGCTGGGGCAAGGAGGCTTTGGTCCAGTCTACAAAGTAATGTTTCTT  
GATGCATCTCTGCAGTGTTCTGACAAATGAACACAATATAAAATAAATTAGATCAATTATCTGCAGGGAC  
AATTGCCAGATGGACAAGAAATTGCAGTAAAAAGGCTTTCACAGTCTTCTGGTCAGGGGCTACAGGAGT  
TTATGAATGAGGTCGTTGTGATTTCTAGACTACAACATCGTAATCTTGTTAGACTCCTTGGCTGTTGCACA  
GAGAGAGGGGAAAAGATGCTGATTTATGATTTTCATGCCAAATAGAAGCTTAGATGCATATCTTTTTGGT  
CAGTGCAGAATTTTCTTTCATTGGTTTTGCCTGTCCTTCAACTTAAGTACTTCCAGAATCAAAGAAAGCT  
GTATTTCTTAAGGAAACAAATCCATCATACTTTCTCGGTGATACCTTTTCAGTTTCACACCAGGAAAA  
GTTTCTTGATTGGAGTAAACGAGCCATCATTATTGAAGGAACTGGTCGAGGCCTCCTTACCTTCACAGA  
GACTCAAGACTACGAATTATTCATAGAGATCTGAAGGCAAGCAACATCCTGTTGGATGAATACCTAAAC  
CCAAAAATTTCCGATTTTGGCATGGCGAGGATTTTTGGAGGCAATCAAGATCAGGCCAGCACTATAAGA  
GTTGTTGGCACATAGTATGTTTGCCTGCTTCCATTTTTTTCATGGATGAACTGCCATCATTAGTCATT  
GAGTTTCTGTGTAATATCTTATGCAGTGGTTACATGGCCCCTGAATATGCAATGTACGGAAGATTCTCAG  
AAAAATCAGATGTCTACAGCTTCGGTGTGTTGATCTTGAAATTGTCAGTGGAAGGAAGAACTCTAGTT  
TTTATGATGATGAAGATGAACTGACTCTACTTGCATATGTAAGTTCATTCTTGCAACTATATATAAAGCTT  
TAATGTTCTGCTAGCTCATCAAACCAAAAAAATAGAGGAGAAAAATTATGAACTTCTGAAAATAACATT  
TTTGCTGTTTGACAATGTCTTTGTTTCATTAGGCATGGAAGTTGTGGAATGAAAACAATATCATAAAATTG  
ATAGACCCCAAAATATTTGATTCAAGCTTTGAAAAACAGATGGTGAGATGTGGACATATTGGATTATTAT  
GTGTTCAAGAATATGCAGAAGATAGGCCAAATGTCTCCACAGTTCTGTCAATGCTCACTAGTGATATTGC  
TGAACTACCTACTCTAAACAACCTGCATTTACCGGAGGACATGCTTACCACAGCAAGTATCTTCTAAA  
AGCCAAGGGTCCGTGAATGCTGATACCATTACTATATTGGAACCACGATAGGATACAGAGTTTTCAACA  
GGCAGGCAAAGATCATTACTTTCTTAAAATGGTAACAGTAGCATAGTATTTCTTGAATGTGCATAGGGT  
AAAACACGCTCCTTTGCAATAACTTGCAAAACACACAAAAGAGGTAAAAGTGCACTAGCTATGTGATGA  
ATTAATTACAGAGTGAGCATGGAGAACATGAAACAGTTGATCAATTTTTAACTTTGCATTATGAAAATCC  
TTAGAAAGAAAGTAGACAAAAGGAAAAAAGAATCGCAAATCCCAATTAACAAGTTCAAATAATGGC  
AATCAAAGACTTGAAAAATCATACCTACTGTACTGATACACGAAACGGCGTCGGCGAAAAAATAGCCACT  
CGTTTTACCACTGTTTTTCTTAGAAAATTACAGAGAAGTGAATTGGTGAATTAATCAATGTTGAGGAAAA  
GTTAACTCTGCACTATTTTAGGTCATTCACACAAGTTATTTGGGTGTTGGTTAAAGACTATAATTGTTTCA  
TTTTGTTTTAATTTTGCATAAATAATGTGAACTTACCTAAATCTCACTAGTTTAGGAGTTAATTACTTA  
TATATATTTTAGTTTGAATATTACGTGTGTTACCCCAATTTTGGTGCCTAAGAAACATCCAGATACAT

GTATTTCTGAATACATGGGCCAAAACACTAGGTGTAAGTTGTTCTAGATACATTGTATCCAAGTAGATTCAC  
ATGTATTTCTGATACATAAAAAAATTGGTTCGCCTCCTTCGCCTCTCTCCCATATCGCTCACCCTCTCCAA  
TGTATTAGGGATATATAATAAATCTCGCTCACCTCTCTCCCTATTTTAGTCTATCCAGAA

>PGSC0003DMG400015476 G-LecRK

TCCAAGTATTGTTTTGGGGGGTTGGGGCTGGGGAAAACACTGCTAGACTAAGATGAAAATTTTACAATGTT  
AACATTTCTCTCTCTGTTCCATTTGACAATCATTATCCATTCTTGTTCATTGAGGTAAAAACTTTTATT  
TATTTATTTATTTATTCCCATATTATATAATGCAAGTAACATTGTTTCATGGAAATATCGTAGGGACATTGA  
AGAATCGTTGAGAAGAGCAGTTAACGGGAGATAGATAGATATTGAGGGAATTTTTATCATTGTTAAAA  
ATATGGATTCATCTCCTGGAACCTGCTTCCTCCAATGATACTGATTCTAAAGAAACCCCTTCTTCAAATGGA  
ACTCCGCCTTCATCTTCAGATTCAAAAAATGATTCTCCTTCGTCTTCGTCTTCGTCTTCATCTCCAC  
CACCAAAAAATGAATCTCCACCTTCATCACCACCACCACAATCTCCTCCTCCATCTCCTAATGCATCACCAC  
CTCAAAAAATGATTCTCCTCCGCCTTCTTCACCACCACCATCCTCTTCTGAATCTAATTCATCACCATCAA  
AAGATAATAATAATAATAATCAATCCCCAAATCCTTCTTCTAATACACCTTCACAATCACCACCACCATCAT  
CCACGTATAATACTCCATCAACCCCAAATAGTCCTAAAAATCCTCCATCATTCTATTATTTTCTCCACCAC  
CGCCTGCTTCTTCACGTGAATCGCCTGCACCTCCTCATGCACATTTGTCTCCTCCTCCACGCTCAGGATCT  
AATCAACCATCACCTGCAAACGATGATTCTCAAGTACTGTTGGTATAGTAGCTGGAATTGCTGTCGGAG  
GCATCGTCATAATTGCATTAATCATTCTATGTGTATGGTGTAGTAAAAGGAAGAAGAAACAGAGATACT  
ATATGGCTCCTGGACCTAAAGGTATGTTACTAATTAATAAAGTGTTGTTTAAAGCATAGTATTACTTT  
TTAATTTTCGATTAATATGTTTTTGATTAGGTGGTGATCCATACTACAATAACAACAATCAATGGAATAG  
ACGTCAGTCGATGGATCATGTAATGAAGGTACCACAAAGTGAAATGGGGACTCAGAGTGGTTGGGCTG  
GAGCTACTCCACATCAGCAGGGAGCTAGTTCAAGCGGCGAATTTGGCTCAGGTTATTCAGGCCAAGCAG  
TGCCATTGCCTTCTCAATCACCTAACATGGGACTTGGTGGTTTCTCCAGAGCCAATTCAGTTATGAGGA  
GCTAGCTAAGGCCACAGATGGATTTTCTCAGGCCAATCTGTTAGGACAAGGTGGTTTCGGATACGTGCA  
TAAAGGTGTTTTGAATGATGGAAGAGTGGTTGCCATCAAGAGTTTGAAAGCAGGAAGTGGACAAGGAG  
AACGAGAATTTCAAGCTGAGGTTGAGATCATTAGCAGAGTTCATCATCGTCATCTTGTGTCCCTCGTTGG  
ATATTGCATTGCTAATGGACAACGCATGTTGGTCTATGAATATGTTGACAACAAAACCTTGGAGTTTCAC  
CTTCATGGTACATTCTTCTTCTATTCAATACTCACTACTTCTTCTACGATCATGTTAATTTTATTGTGAAATAA  
GAGAATCCTTTTCTAGTTGATTCCCAAATTTGATTCAATATATTTCTTAATTCTAGTTTTGATAAGGGTG  
AAATCAAATTCATTATTGCAGGAAAAGGTCAACCTGTCATGGATTGGGAGACCAGACTTAAAATTGCTTT

GGGATCAGCTAAAGGACTTGCTTATCTCCATGAAGATTGTATGAACATTCTAATCTACACTTTCACCTCTC  
TCTGTCTCTCTTTATCTCTCTCTCTCATTTCTTGATATATACATGCAGGCCAATATAGAATTATCCACCGCG  
ACATCAAGGCTGCAAATATTCTACTAGACCTCAATTATGAAGCCTTGGTAATTAATGATCAGCCACATT  
TGATATGTCAATGAAGATATGAAGAGCAAGTTTTATGTTAAAACCTCGCGTTTTTGTTTAAGAAAGGTTT  
ATTAACCATCACAAATGCCTTTTAGATTTAAAGGAAAATTTGGTTTATTAGGTGGCAGATTTTGGATTGG  
CTAAGCTTACTTCGGATAACAACACTCATGTATCAACTCGTGTTATGGGAACATTCGGGTGAGTCAAGCA  
TAGCTACTTAGTCGTATAAACTTGTATTCAACAATCAGAACCAATTATGTATTTAACATACTTCAGATG  
TCTCTAAGCTAGAAAGTTACTTGCAGGTAAGTCTGCTGAATATGCATCAAGTGGCAAACCTAACAGAGA  
AGTCAGATGTGTTTTCATATGGAGTAATGCTGTTGGAGCTCATAACCGCAAAAAACCTGTTGATCCTAG  
CAATATGATGGAGGACAGTTTAGTAGATTGGGTTTGTCTAGATCCTCAGTTCACATTTGATTGCGCCAA  
GATGTGCTTAGACTTTTAACTTTTGTGGAGGATTGATCTAATATATGAATGTATACAGGCTAGGCCCT  
TCTTACAAGAGCACTGGAAGAGGAAAATATGATGGATTGGTAGACCCACGTCTTGAAGGGAACTTTG  
ATACAGATGAGCTACATCGCATGATAGGTTGTGCTGCTTCTAGCATTGCGCACTCTGCTAAAAGACGTCC  
CAAAATGAGTCAGGTATGATTACCCTCTCTAGAAGATAACAAATACTGCATATTTACATTATGATTTAACA  
TGTTGTAGCATATTTTGGTGGTTTGTCTATATGGACTCGAGAAATTCATATCTTTACATGATATCAGAGTA  
AGGTTTCTCCGTTTGGACAAAATGACTTGTTCCTTATATAAATATTATGTATTATGAACAGATTGTA  
CGTGCATTGGAAGGCAATTCATCGTTGGAGGACTTGAACGATAATCCAAAACCAAGCAAGGTTCTAGC  
TTTGCCGCGTCAAATGGGGCACCCACTCAGAGCTATGATACTGGTATGTATAATGCTGACATGATGAAG  
TTCAGGAAAATGATTATGCCAACCAAGAATTCAGCAGCAGTCCAAGTGAGTAATGAATCAACCCTTCTT  
CCTCCTCCTCAAGCAACGATTCAACACGCGGGCAAGAGTAAAAAAGAATGTACCTAAAGCTTGAGATA  
TTTTTCAAACATATTCTTGGCTGGAACCTTATAACAGAGATTTGGGATTACAAAATTAATGTTTATGAT  
GAACATTCACTACTCATATCTTGATTTGAATAACAAAGATTATAGGATCAGAATACAATTATACTTTTTT  
GTTTCAATATGTACATACAATTTATCCTACAAAAATGTTGAAGATCTTTATGTTTAAAC

>PGSC0003DMG400017034 G-LecRK

GCTAACCAAAAACCACTACACTTCAATGTAATCCTTCTGTCTCTTAATTAATAGTACCGTTTATGTA  
TTGATGAATGTAAAAACATTTAAAAAGACTCACTTGATAGGTAAGTCACTATTTAAGGAGTGGGGGGG  
ACACTACTAATGTTGTAACATTATAATCATGCCAACTTTTTATTTTCTTTCATCTTGTCTATACATTCCTAA  
CAACAACAAAGTCCTGGAGCAAAGCCTATTGATTCACCGTTTGGTAACTACTTTGTCGGCTATGTGC  
ACTCTGTAACCAGAATAGAGCTCTGGACTTAAAACCAACCCACTTTTTGAAGTTTGAAGGCGGCGCCTAA



ACTAGTGAGTAACATTCCACACATGAAAATTTATGAGCTTTTTATCTCATTGCTGGTTGGCTCATGGAT  
ACTGCACCTCTGATATTCACATTGGTTATCAGGTAAGTCTTGCTATACCAACATCATATTGCAAAGGATTC  
ATAGGCAGGGCTTTTCTAATGGAACTGATCACAACCAAATTGGACCAAATTTTAGAGGTGGAATCAGT  
GTTGAAGCCAATAATGATAAATACACATGTTCACTTGATGTTTTCTGGGAGATGTCAAGGTTTGGAGTT  
CTGGTCATTTGTCACAATTCTACACAATAGACAAATGTACACTTGAGCTAACTCAGTATGGAGACTTATT  
GTTGAAAGGGGGTCTAGATGACAGAATTGGATGGAAAGCTGGAACCTCAGGACAAGGTGTCAAGGTA  
ATTAATTGTCAATCTTTAGATATAAGTTGTATATGCAAACAAAAGGGAAATAACATTTCTTAGTATATGTT  
TTTTGAGGTAAACTATAAAAAGAACAAATTATTATGTGCAACAATGCTAATATATGACTTCTTCTGCAG  
AGACTGAACTTACTTGGGACAGGTAATTTGGTGTAGTTGATGCTATGAACTTGATTAATGGCAAAGTT  
TCAATTTTCCAATAATATTATGCTTTGGGGTCAGAGACTAAGCTCAAGAACTCGGTAAACGTCTTTCCCT  
AGCAACTCTAGTTTGCATATTCTTTGAGATTCAGTATGACAAGATTGCATTGTACTTATACTCTGGGAA  
ATCGAAGTACTCGTATTGGGAATATACACCTTTGGAATTAGATGGCCTGAATATCACATATGTTGAGTTA  
ACTTCTAACGCGCTGGAGATATCAACAACGAAAATCGTAGAATTGGAAGGATAACATCAGACAAGCCA  
GAGCCCTTGAGATTTTTAGCATTGGGAAATAGCACAGGGAATTTGGGATTCTACTATTACTCATCTGACA  
AAGGAAAGTTTGAAGCTTCATATCAAGCACTAAACACTAGCTGTGATCTCCGTTGGCATGTAAACCTTA  
CGGTATATGTACATTTTCAGAGAAGTGTTCTTGCATAAGACTAATAAAAAGAGGAGATGGATTGCTTTCT  
GATTGCACTGAAAATGTAAGAATTTGTGGAAGAAATGATTCCCAAATGCTAGAATTACAAGGCGTTACG  
AGTGTATTAAGAAGCAATCCTTATAAGATCAATGTGACCAAAGAAATATGTGCAAATTTGTGCTTGGATA  
ACTGTACATGTGTTGCAGCATTACATTTTTCTTATGAGAATGATCCCGCGAAACCTGGAGAATGCTATGT  
GTATGGACTAGCTAGAGGAGTTAAACAAATCGAAAGAGATGGAAGATTGAGTTATATGGTGAAGGTAC  
CAAAGGGAAGTCAAGGTCATGATAAGCACTCTCATTGGAAGAAATGGATTCCAATTGTTGTAGGAG  
TGGTTGATGGAGTTGTATTACTTGTTTTAGGAGGAGTTGGATACTATGTAATCCGAAAGAGAAGAA  
AGTCGTGCGTAGATACTGGTCACAGCAATTGATATTGTATAGATAAAAATTTGATTTCAAGATAACATTT  
TCTACATCGAGATAGCAATTAACCGATTCTCATGAAAATCAAGGATGAAGCTCGAGTGACAGATACTA  
AACTTGTAGCCAAAACTTAAATTTTTGAACTTGGCTTGGCTTGATGAATTGCCTGAGATTGAGTAGAAT  
TCGAAGAAATAGAAGTGCAAAGGTATGCAAGCAATCTTTTCAGGGTTAAAATGTTGTTACTTCACAAG  
AGATTTTTCGATTCTAAACTGACATGTTGAATTTGTTGATGTCTAAGGTTAATTAGAGAGAAACACTCTA  
CGATATTCTATACTTCAAAAATTGACTTACAAAATGCGCGGCCAAATGTCC

>PGSC0003DMG400017106 G-LecRK

CGAAGTATTA AAAATCACAACAAACACATTATACTTACATCCCTATATAATCTCCTTTAACAATGGCTCCT  
AATTATGTGATGATAGTTGCTCTGATAACATTTATTTGCTTTTCACTATCTTTTGGTGATGATGCTATGTTA  
CCAACGTCACACAACAATCTCATAGACAAACCTAAGTACTGCAATAAAAGTTGTGGAAATGTCAACATCC  
CTTTCCCATTTGGTATGACCCCAGATTGCGCTCTACGCAATCAGTTCCTTGTCACCTTGAATTACTCCTTTC  
ATCCTCCCCAGCCTTTTTTAGGAAACAGCAGTATTGAAATCACAAGCATATCTCTCTCTGGGCAACTTAAG  
GTCTTACATTT CATATCCAGAGATTGTTATCGTGATGGGATAAGCACGAATAGAACCAAGCCATATATAG  
TATTACCATCGTTATTA ACTGTGGACAACACTGCGAATAGCTTCATCGCCGTTGGCTGTGACACGTATGC  
AATTGTCCAGGGTTATTATACCAAGTTTGGAACTGAAATCGAGTATCTCCGCTACATAACAGGATGCATG  
TCCATGTGCTATAGTATTGATGAAGCTGATGATGATACATGTTCTGGGGTCGGTTGTTGCAAGACATCCA  
TCCCTAAGGGAACATCGAATGTCAATATAACACTAAGCAGCTATAATAATTATAATGATACTAATATGAC  
AAATGACCCTAGCTGCAGCTATGCTTTTGTGGTCGATCAAGCTAATTTTAACTTTTCTAAGAGTTACCTCA  
GCAGTTTACAGAACACGAAGAAGCTTCCTCTTGTGCTAGATTGGGCAGTTGGTGAAGACAAATGTGAAA  
TAGCTAAGAGAACTCGACTGCATATGCATGTAAGAGTAACAACAGCTATTGCCATGATGATTCAAATG  
GTTATCGATGTTCTGCATGCAAGGATATGATGGGAATCCATACCTGAGTTGTCAAGGTATGTATATGTT  
TGAGAGTTTCTAATATGATTTTAATTATATCAAATCTATCATTTTGGAAATGAATGTTTACGTTATCATA  
GTTTGTACTCTACGAGTCTGCAGATATCGACGAATGTATAGATCGGAAACCAGATTATAGATGTGCCAA  
GGATGCCATTTGCCAGAATACAGAAGGGAGTTATACATGCATATGCCCTCCAGATTT CAGTGGTAATGG  
TACAGTATGCAATCGTGACAATCCTCAGAGAATAACTCAAAATATTTATTTTGTATAGGTACCTCTCTTA  
ACTTCTTTCAAATCGATAACAATTTTATTTTACGAACTATATACATCGACCTAAAATGTCTAATAAAGTTT  
AAATATTTTATACAGGTGCTACAGCAGGGGTTGCTTTT GCGATTATTATTGTTTTTGGCTGGTCATACAC  
TGCATTCCAAAGGAGAAAGATGTCAAAGATGAAGAAGAAGTTTTTCCAGGAAAATGGTGGATTAGTTCT  
ACAACAGCGACTTACAAGGGAAGAGGGATCAAGTCATAATAACAATAAAGATTTT CACAGCGGAAG  
AGCTAGAAAAGGCAACTAATGGCTTTGACAAAGATAGAGTTGTTGGTCACGGAGTTTTTGGAACTGTGT  
ACAAAGGATATCTGAAAGATAATTGCATCGTTGCCATAAAAAATCTAAGGTAATTGATCGCAATCAGATC  
GAACAATTCATAAATGAAGTCCTTGTCTTTCCCAAATCAACCATAGAAATGTGGTTAAGCTCTTAGGTT  
GTTGCCTCGAGACGGAAGTTCCACTATTGGTGTATGAATTTATCAGCAATGGAACACTTTCTGAACACTT  
ACATGATAAATTTAAGGCGTCAACTCTTCTTTGGATATTCGTCTGAAAGTTGCTGCAGAACTGCTGGA  
GTACTTTCTACTTGCCTCTGCAGCTTACCCTCCTATCATCCATAGAGATATAAAATCAGTCAACATTCTT  
TTAGACAAAAACTACACAGCCAAAGTGTCTGATTTTGGAGCATCCAGGTTGGTTCTGCTGATCAAACAG

AGTTATCTACATTGGTTCAAGGAACTCTAGGATATCTAGATCCTGAATACTTGCAAACAAATCAACTTAA  
TGAAAAAAGTGATGTATACAGTTTCGGAGTAGTGCTTATAGAGCTCCTAACCGGTAGAAAGGCTTTATG  
TTTTGAAAGACCAGAAGAAGAGAGATGTCTAGCTCAATATTTTCATATCTTCAGTGGAAAAGGGTCATTT  
GTTTCGATATTCTAGACAGCAACATAGTCTGTGATGAGGTAAATGCAGGGCAATTGAAAAATGTTGCTGT  
GCTTGCCCAAAGGTGCTTAATTCTTAAAGGGGATGATCGACCTACTATGAAGGAAGTTGCAGCAGAATT  
GGAAGCTGGATCAAAATTGAAGCACTCGTGGGCTCAAAGTATCAGCAGTCCGAGGAGATTAAGTCCTT  
ACTGCCTGGATTTGGATATGAATATTGTGAACACAGTATCCATATTGATAGTGTAAACGAGCCATGTAAC  
TTACCATTTCTGGAGGAAGGTGATCAATCATGCATGTTAATTTTGCTCAGAAGCACGAGCTCAAACCG  
CCACGGCTTCAACATGAATTTCTTTTTCTCTTGGGCATGTTAGAAATATGAACTAAGTTTGATAAGTTGC  
ATCTCTTTTATTTGTCCAGACATAATAAATTTGAGTAACAAATTAATGTCAAGTGTAGTTATTTATTATGTA  
TCCGAGTAAAAATCAACACATTTTGAGAGAATCTATGTATTATTTTATGC

>PGSC0003DMG400017277 G-LecRK

ATGATTGCAGAGCAGAGAGTGTATCTTCCTATCCTTCTCTTCATTTGTCTCCACTCCTTTTCATCCCGGTTT  
GCTTTCTCGCAACTTTTCTGGAATAAATGTTAGTGTGTTTGAATTCTACTACTGGACTTTCCAATTCTTGG  
ATCAATTTGCCATATGTTAGAGTTTACAATACCTCCGAGCCTTCTGAAATGACGCCTATTATTCGGAGCA  
GAAAGGATAGCCCTCAGTTTCTCTTGCCTTCTATTGCCCCCTTCTAACTAACGGTACCACAGAATGCCTT  
CTTGGTATCCTTTTGTATCACAACAGATTCAACGGGGTTTCAAGTGTCCCCAGTTAGTTTGGTCTGCTAA  
CAGGAACCATCCAGTGAAAGTCAATGCAACGTTGCAACTAGGCCAAAATGGCAACTTGGTCTTGACAGA  
CTCTGATGGCACTCTTGTGTTGTTCCACTAATACTACTGGAAAATCTGTTTCTGGCTTAAACATGACAGAAA  
TGGGAAATCTTGTGCTCTTTGATAAGAGAAAACAAGCAATTTGGCAGTCTTTTGATCATCCAACAGATTG  
TTTGCTTCCGGGGCAGAAGTTGGTTTCTGGTAGGAAGCTGATAGCAAGCATTTTCAGGATCCAATCAGTC  
CTTTCTTTTACTGTTCTTAATGGACGCCTGGTGTCTTCATAGATACCAACCCACCTCAGTATTATATCGC  
TTCAAGTGGGGATTATAGTCCTCTTACGATTTTGACGGTCGAACCTTACTGCTCTACAAGACCCTGATA  
CATCCCAATTCATAAAGCTTGGGCCTGATGGACATTTAAGGTTATACCAGTCGGATGCATTTGATTGGAA  
ACAGTTAGATGAGGTCATGAATTCATATCTGGGGAAGTGTGGGTACCCAATGGCGTGTGGAAGATATA  
GCATTTGTACAAATGATGGGCAATGTAATTGTCCGGTAGAAGGAACTTCTTCAGGCCAATAAATAGGA  
ACCCGGATCTCGGGTGTTCACAGCTAACATCTATTTCTTGCAACTCTTCACATTATCATAGTCTTATAGAG  
CTCAGCGACACCACATATTTTGCATTTGAGATCAACTTTTATGCAAGTTCAAACATGTGGTTTGGAGGGAA  
CAAAGATGGAAAATTGCAAAGCGGCCTGTTTGGAGTAACTGTTCTGCAAAGCTGCTGTTTGGTCTAAAA

CTCTAAGGAAAACTGCTTATTACTGAATGAAGTATTATCTCTTAAGGACAACCTGGTCTGGTAGTGACAA  
GACAAAAGTTTTCTCAAGGTGCAGAATTCGCAAAGTCTCAGTATCAGCCGCAATCGTTTCTCAAAGA  
AAGCAATCAAGACCTCTGAAAGTGATTGTAGCATCTGCTCTTGCTGCTTTAGTGGGAATAATTTAAGTA  
TTAGTGCATGGTTTGTCTTTTCAAAAAGAGGACACTGTCTGTCAAGGCTGGGGATTTTCTGGATTTAGC  
ACCAATCTTACCGGAATCCTAACTCGATTCTTTACAATGAGTTGAAAATAATTACACAAGATTTTCAGCA  
GAAAGCTCGGGGAAGGAGGATTTGGCTCAGTATATGAAGGAACACTGAGTAATGGCAACAAAATAGCT  
GTGAAGCGTCTGAATGGTTTAGGTCAAGTAAAGGATTCATTCTTAACAGAGGTAAAGATAGTTGGTAGC  
ATTCACCATGTCAATTTGGTAAAACCTATTGGCTTTTGTGCTGAAAAAGATCACTGGGTTCTGATCTATGA  
GTACATGGTAAATGGATCATTGGATAGGTGGATTTCTCATGAAAAGCAAGAAAATGGGCTTACATGGCT  
TACGAGGCAAAGGATAATATCAGATATTGCAAAGGATTAGCGTATCTTCATGATGAATGCAATCATAA  
GATAATTCATTTGGACATCAAACCACACAACATCCTCTTAGATCAAAAATTTCAATGCTAAGATATCTGATT  
TTGGGTTGTCGAAACTAATTGAGAAAGACAAAAGCAAAGTTGTTACTAGAATGAGAGGAACACCAGGG  
TATTTAGCTCCTGAATGGTTGAGGTCTGTAATAACCGAGAAAGTAGATGTATATGCCTTTGGAATTGTGC  
TCTTGGAAGTTCTTTGTGGGCGAAAGAATTTGGATTGGTCGCAGGCTGACAAAGATAATGTCCATTTGCT  
TAGTGTCTTTAAGAGAAAAGCAGAACAAGATCAGCTCATTGATATGGTTGACAAAACAACGAGGATAT  
GCAGATCCACAGGGAAGCTGTGATGAAAATGATGAGCCTCGCAGCATGGTGTGTGCAAGGTGATTTCA  
ACAAGAGGCCTTCATGTCATTGGTGGTTAAGGTACTGGAAGGTTTGGTGTCTGTTGAAACCAACTGG  
ATTTCAATTTACAAACCTAACTGAGGCTGGGGCAGGCAACCAACAGATGGAAGTCCCTATCAGTTCAA  
TACTGCCTTCAGTTTTATCTGGACCAAGGTAAACAATATGCTTGAGAATTATGACAATATTTCCAATTCTA  
GTGTAACCTTCATAAATGTAATATTCAGTAACTTTGCATTAGTT

>PGSC0003DMG400017278 G-LecRK

AATTTATTCAAACCTAAATAACTTATTTTGCTAAAAGTTACTGCAGTAACTAAAAGCAAACCTCAACAAAGC  
ATTTTCAGCAGACAATTCGAGTCAAGGTTTATTTTCTTACTGTTCTCAATGGAAGCTGGGCCACATACAT  
AGATTCTGATCCACCTCAGTATTACTACACTTCAGAAAATCCCAATAGTCCTTATTGGAGTTTTGATGGTC  
ATACCTTACTGCTTTACAATATCCTCCTACATCGATAGCTCAATACATACAGCTTGGGCATGATGGACAT  
TTACGCGTATACCAATTGGACAACCTTGAACAGAATTTGGTTTCTGGTCAGAAGCTGACAGCAAGCGTTT  
CAGCAGACAATTCGAGTCAAGGTTTATTTTCTTACTGTTCTCAATGGAAGCTGGGCCACATACATAGA  
TTCTGATCCACCTCAGTATTACTACACTTCAGAAAATCCCAATAGTCCTTATTGGAGTTTTGATGGTCATA  
CCCTTACTGCTTTACAATATCCTCCTACATCGATAGCTCAATACATACAGCTTGGGCATGATGGACATTTA

CGCGTATACCAATTGGACAACCTTGAAAAAATATGCTCGGCCTTAATTGGAAAGAGGTAGGTGACATT  
TTGACACTCTCTGACTGTAGGTACCCAATGGTGTGTGGGAGATACAGCATTGTGTAGATGGAGGACAA  
TGTACTTGTCCAGTTGAAGTTAACTTCTTCAAGCCATTTTCTGAGAGGATGCCTAATCTCGGATGCACTGA  
GCTGACGCCCATTTCTTGTGACTCTTTGCAGTATCATAGTCTTGTAGAGCTAAAGAATACTGACTATTTTT  
CATTTCCGGTTCAATGATGAACTAACTCGAGCGTATTTTGGCTTAAAGGGAAAAAGATTGAAGATTGCC  
AAAGGGCATGTCTGAGTAACTGTTCTTGCAAAGCTGCTGTTTATGATCCGTATCTGAATGTGAGTCTACT  
ACGAGGGAAGTGTGTTACTGAATGAAGTCTTCTCTCATAGACAGTGCAGTAGGAAGCGGCACGAC  
AGTTTTTCTTAAGGTGCAGAATTCCTCAAATGCACCAGTCATTTCCCCTAGACAGAAATTGCCTTTCAAAG  
TTATCATAGGATGTACTTTGATTGGGATAATTTGATTCTTTCAGTTTGTCTGCTCTTTCCAAAAAGAGA  
TCGGAGAAACGCAAAGCTGGTGATTTTCTGGATCTAGAACCAATCTTACCGGGAATCCTAATTCGATTCT  
CTTACAATGAGCTGAAAATAATTACACAAGATTTACGCATAAAGCTCGGGAAAGGAGGATTTGGCTCTG  
TATATGAAGGAACACTGAGAAATGGCACCAAATAGCTGTGAAGCATCTGGATGGAGTAGGTCAAGTA  
AAGGAATCATTCTTAACAGAAGTAAAGACAGTCGGTGGCATTACCATATCAATCTGGTAAAACTCCTTG  
GATATTGTGCCGAAAAAGCCACAGGCTTCTAATCTATGAGTACATGGTGAATGGATCGTTGGATAGGT  
GGATCACGCAAGAAAATGGGCTTACATGGAACACAAGGCAGAGGATAATATCAGATATTGCGAAAGGA  
TTAGCTTATCTACATGAGGATTGCAGCCATAAGATAATTCATTTGGACATTAACCACAAAACATCCTTAT  
AGATCAAAATTTCAATGCTAAGATATCTGATTTTGGTCTGTCTGAAGCTAATTGAGAAAGACAAAAGCAA  
AGTTGTGACTAGAATGAGAGGAACGCCGGGTATATAGCCCCTGAATGGTTGAGCTCAATAATCACTGA  
AAAAGTTGATGTGTATGCTTTTGAATTGTGCTCTTGAAACTCTCTGTGGACGAAAGAATTTGGACTGG  
TCCCAAATGATGAAGAAGATGTCCATTTGCTAACTGTTTTTACGAGAAAAGCAGAACAAGAGCAGCTC  
ACAGATATGGTTGACAGAAACGAGGATATGCAGCTCCACAGAGAAGCAGTGACAGAAATGATGAGCCT  
TGCTGCGTGGTGTCTACAGGGCGATTTCTCCAAGAGGCCTTCCATGTCATTGGTGGTTAAGGCACTCGA  
AGGTTTGGTACTGTTGAAACCAACTTAGATTATAATTTAGAAATGTACCTAAGGTTGGGGCAGGCAA  
CCAACCGAGGGAAGCCGCTATCAGCTCAAATGCCATCAGTTTTATCGGGACCGAGGTAAACAGTATG  
TCTAATTCTAGCACAAATCTTACGGTGTATTAGATTACAATTCATGAATGTAATATTCAGTAACTTTGCA  
TTAGATTTTTTGGATTTTTCATGTAATTATCATGTAGAAGCTCCTCAATTCATATGTGACAGGAGATATAATA  
TTGCATTAGCTTTTCTCATTTTTTGTAAGGGAAAGTATCAAGACTCGAGAACAGCATGAATCGGATATCG  
AGGGCCAGATGCTCTGCC

>PGSC0003DMG400017282 G-LecRK

GAAAAAACTACTTGAATAAAAGGATGAATTTTAAGATTGATACTGATCAATCAAACAGAGCCTTCTTTCT  
GAAAAAATAGTACAATGGTGCTTAATTATAGTGCCATTCTTTTCATGGCCAGTCTCCTCTTCATTTCTTC  
ACAGCATCTAATTAGTTGTCAACCTCCTGAAACATTTATCACCAATTCCTCCATTTCTGGATCAATAGCC  
GCGCCCGCTCCTATGTAGTGAATTCCACAGATGGAGCCACACTGACACCCATCCTATCGAGAGAAAGGA  
ACGAGACTCTGTTTGTCTGTGGTTTCTTATGTGATTACAATGGTACTGCTTGC GTTTTTTGGCGTCCTTTTAT  
CCCCAAAGATCAGTAACAACAATTCTTATCTATATTACGCGAGATTAGTTTGGTCAGCAAATCGGAATAA  
TCCAGTTAGAGCTAATGCAACCTTGCAACTTAGGCAAGATGGAGGTTTATTCTTGATGGACTCAGATGG  
CACTTTGATTTGGAGTACAACCACAAGCACAAGAGGAAAGGTTGTTACGGGATTCAAATTGACAGTACT  
GGGAAATATTGTTCTCTTTGACAAAAGTAACGACATCATTGGCAGTCTTTTGATCATCCTACAGACACTT  
TGGTTCCTGGACAAATGACAAATGCTGGACAAATGCTGAGATCCAGTGTATCAGCAACAAATTGGAGTG  
AAGGTTTGTTTACATTTGAAGTTCAACTATTTGGCTTTTTAGCATACTAAGTCAAATCCACGTCAACTC  
TATGTCTCAAGACTTGGTGGGATAATGGTTCCTGTTTCTGGACTAATCTTTGATTCGAAAATAATTAT  
TTTCAACGGGACATTAATCTTAAATTTTGCATTTTCAAATACTAGATTCATGAGGTTTGGGAATGATGGG  
CATTTAAGGGTGTATCACTGGAGAGGATCTTGGTTAGAGGAGGCTGATCTATTGACAGACTACATTGGT  
GAGTGTGGGTATCCAACCGTGTGTGGGAATTACTCTGTTTGTGCAAATGGGCAGTGCACCTTGCCTCAA  
ACCGCGTTGATCAGACTAACTTTCTCCAGCAAATAAATTACAGGCAGCCAAACCAGGGGTGTGCCTT  
ATAACACCTATCTCTTGTGAACATTCCCAATATCATATTTTGATGGAGCTTAAGTACATAGCTTATATTCCC  
CTCTATTTGCAATATGGTACCAACAAAACAGATTTGGAGAATTGCAAAACGTCTTGCTTAAGCAATTGTT  
CTTGCAAAGCAGCTCAATTTCAATTTAGTGGTCCTAATAACACAATGGGTCACTGCGCATTGTTGAATGA  
TGTGTTTTCGCTCACATACGATTATGGAGCACCCAATAAGACCACTCTTTTCATCAAGGTGCAGAGCTCTT  
TTAACTTACAAGCCTCTCCATCACTTGTCTCTTCCAGAGAAGAAATCAAAGCGTGTCTCAGCAATTGTAGG  
ATCCACCATCGGAGCTTCATTTGGTTTGCTTCTCATGGTTTTAACTTGCTTTGCCTATATTTTCAGAAGGA  
GAAAAGGGCTCGAGGAAGATGAGGAGGAGTTCCTTGATCAAATACCAGGAATGCCTACTAGATTTTCCT  
ACGAGGAACTAACTGTGATGACAGAAAATTTAGTGAGAACTTGGGGAAGGGGGATTTGGTTCTGTA  
TTTGAAGGAACAATGAGTGATGGCACCAAATAGCGGTGAAGCGTCTGCAAGGTTTTGATAATGTGAA  
GAAATCATTCTTAGCTGAGGTAGCAACAATCGGTAGCATTGAGCATGTCAATTTGGTAAAACCTGTTGGA  
TTTTGTGCTGAGAAATCACACAGACTTCTGGTTTATGAATATATGGCCAATGGCTCTTTAGATAGGTGGA  
TTTTTACGGAAAGCAGGAACGATCTCTCACATGGGATATCAGGAAAAGATCATATCAGACGTCGCCA  
AGGGCCTAGCTTACCTACATGAAGACTGTAACAACAAAATTATTCATTTGGATATTAACCTCAGAACAT

TCTTCTTGATCATAATCTCAATGCAAAAGTATCAGATTTTGGGTTATCAAAGCTTGTGGGGAAAGATGAA  
AGTAAGATAGTTACAACAATGAGAGGAACACCAGGCTATTTAGCACCTGAATGGTTACATGAGGTCATT  
ACTGAGAAAGTGGATGTTTATAGCTTTGGGGTTGTGATTTTGGAAATCATCTGCGGCCGGAAGAATTTG  
GATCGTCATCAAGATGAGGATGATATGCATTTGCTTAGTTTGTTCATGAGAAAAGCAGAGGAGAGACAA  
CTCTTGAAATGGTGGACAAGAACAGTGAAGACATGCAGCTACATAGAAAAGAGGCTGTGGAAATGAT  
GAAGATTGCAGCCTGGTGTTTACAAAGTGATTATACTAAGAGGCCTCCATGTCGTTGGTAGTTAAGGT  
GTTTCAGGGTTAGTGGCTGCTGAAACCGACTTGCAATACAGCTTCACATTTCCAACAATGACGAGAAGA  
GTTGCCGGAACATAATCAAGAAAGGGAATCTGTGGTTGGTATCAGTTTGCCACTTCCATCACAGTTGTCAG  
GACCTAGGTAAATTCTTAGTAGTATTTATCATCAAGACTGAATAGCTAATACGAAAAGCCATTTTGTGTTT  
TTCATAATCCTTATTATATCAATACTATTTAGAAAAGTAGAACAACACTGTCTACTA  
GAAAAATGTTAGTTTTCGTGCAGTCGAATTAAGTATTGATAAATGGATTGCCTCCTCCGTATT  
GATGAATTAATTTGATTGCGC

>PGSC0003DMG400017284 G-LecRK

AAAAAAGGCACAACAGAAAGAACTCATATATTTAGAAAAATATGTTTGTAGAAAAGAGACTGTATTTT  
CCTATCCTTCTCTTCATTTACCTTCTTTTTGTTTCGTCTCGATTTACTATATCACAATCTTTACAGGACAACA  
AGATCAGTCTTTCAAATTCTACAGCAGGGCTTGCCGGGCCTCTGTTGTTTCGTCTCGATTTGCTATATCGCA  
ACCTTTACAGGACTACAACATCACTCTTTGCAATTCTACTGCAGGGCTTGCCGGGCTTTCCTTTTCTGGA  
TCAACAGGCCCTCTCTTCTTGTAAATTCCACCGAGGACTTCTTTGGTTTCGTGACACCATACTTCAGCGA  
AAAAATGCTGGCTCACGATTCCTCTGTGGCTTCTACTGCAATTACAATGCCACAGAATGCCTTCTTGGTAT  
CCTTTTGTACCACAACGAGAACAATATGATAGATAAACCCAGTTAGTTTGGTCTGCTAACAGGAACCAT  
CCAGTGAAATTCATGCAACCTTGCAACTAGGCCATGATGGCAACTTGGTCTTGACAGACTCCGATGGC  
ACTCTTGTGTTGGTCCACTGATACAATTGGGAAATCTGTTTCTGGCTTAACTTGACAGAAATGGGAAATC  
TTGTTCTCTTTGATAAGAGAAAGCGCACAAATTTGGCAGTCTTTTGATCATCCTACAGACTCTTTGCTTCCA  
GGGCAGAATTTGGTTTCCGGGCAGAAGCTCATAGCAAGCGTTTCAGCAACCAATCGGAGTCAAGGTTTG  
TTTTCTTACTGTTCTCAATGGAAGCTGGGCTGCTTACACAGATACTGTTCCGCCTCAATACTACTACATT  
TCATCCTATGCTGATAGTTCTTATTACAGTTTTGATGGTCAAACCTTTACTGCTTACACAATCCTACTAAC  
TCGACAGCTCAATTCATGAAGATTGGGCCTGATGGACATTTAAAGGTATACCAATGGTCTGTAGTTGATT  
GGAAAGAAGTATCTGACATTTTGTGCCAAATGTAGAAAAGTGGGTACCCAATGGTATGTGGAAGTT  
ATAGCATTTGTACAAATAACGGGCAATGTACTTGTCCGCAACAGGAAAAGTCTTTCAGACCATTTTCTGA

GAGGAAACCAGATCTTGGATGTTACAGCTGACTTCCATTTACTGCAACTCTTTGCAGTATCATAGTTTCA  
TAGAGCTCAAGAATACTACATATTTTTTCATTTAACATTGATCAGGAACTAAATTCGAGCAAATTGTGGCTT  
GGGCAGAAAAAGTTGGAAGATTGCAAAGGGCCTGTCTGAGTAACTGTTCTTGCAAAGCTGCTGTTTTT  
GAATATAATTGGAATGGGGCTCGAAGAGGGAACTGTTTGTTACTGAATGAAGTTTTCTCTCACAGAC  
AGCGAAGAAGGAAGAGGCAAGACAGTATTTATTAAGGTGCAAATACCTCAGAGGCGCAGACTCGGTC  
TCTAATCATTCTGGAGGAAAGAAATCAAGACCTTCAAAGTGATAATAGGATCTACTCTTGACGCTTTC  
TTCGGGATAATTTAAGCATAGCTACTTGCTTTGTTATTTTCAGAAAGAGGGCACATGAGTCCAGAAAGG  
CTGCGGATATTTTGGATTTAGCACCAATCTTACCGGGAATTCTAACTCGATTCTTACAATGAACTGAAA  
ATAACTACAGATGATTTAGTAGAAAGCTCGGGGAAGGAGGATTTGGCTGTGTTTATGAAGGAACACT  
GAGAAATGGAATAAAATAGCTGTGAAGAATCTGGATGGTGTAGGTCAAGTAAAGGAATCATTCTTAAC  
AGAAGTAAAGGCAGTCGGTGGCATTACCATATCAATCTTGTAATACTCATTGGATTTTGTGCCGAAAA  
AAGCCACAGGCTTCTAATCTATGAGTACATGGTGAATGGATCGCTGGATAGGTGGATTACGCATGAAAA  
TCAAGAAAATGGGCTTACATGGAACACAAGGCAGAGGATAATATCAGACATCGCCAAAGGGTTAGCAT  
ATCTACATGAGGATTGCAGCCATAAGATAATTCATTTGGACATCAAACCACAAAACATCCTTCTAGATCA  
ATATCTCAATGCTAAGATATCAGATTTTGGGTTGTGCGAAGCTAATTGAGAAAGACAAAAGCAAAGTTGT  
GACTAGAATGAGAGGAACACGGGGTTATTTAGCTCCTGAATGGTTGAGCTCGGTAATCACTGAGAAAG  
TTGATGTATATGCTTTTGAATTGTCCTCTTGGAATTCTCTGTGGGCGAAAAAATTTGGATTGGTCCCA  
AGCTGATGAAGAAGATGTACATTTGCTAAGTGTCTTTAGGCGAAAAGCGGAACAAGAGAAGCTCATCG  
ATATGGTTGACAAAATGAGGATATGCAGCTCCACAGGGAAGCAGTGACAGAAATGATGAGCCTTGCT  
GCATGGTGTCTACAGGGCGATTTTTCCAAGAGGCCTTCCATGTCATTGGTGGTTAAGGCATTGGAAGGT  
TTGGTACTGTTGAAACCAACTGAATTATGATTTACACATGTACCTGAGGTTGGGGCAGGCAACCAA  
GAGAGGGAAGTCATTATCAGTTCAAATTTCTTCAATTTTATCGGGACCAAGGTAAACAATATGCTTAA  
GATTTTGTCTTTGAAGGAACCAACATATGGTTGCGTAATGTCAAATATCGCAACATTTTCAATTCTAGCAT  
AACTTTTTTACCGTGTATGAGATTATAATTCATGAAATGTAATGTTGAGTAACTTCTATATTAATTTTTGA  
GCTTCATGTTACTATCATGTAGAGGCTTCTCAATCCATGTGCGAAAATAAGTATAATATTGTACGTGGTG  
GTGCAGCTACTGAATTCAAACCAGATGAACTGTTCTTGATCTTAA

>PGSC0003DMG400017286 G-LecRK

AATCAGGCAGATGTTATCTTCCATTGGTTAGTTGAGAAATGTGATTTGGAAAACATTTCTTCTGACTTG  
ACGCGTAAATGATTCGAAAATTGGGTATCACTGAACTCCACACATCTCAAAGTATTCTTAGCCACAAC



ATTATGAACTACTGGAAGATGCTAACCTACATGTAAAATACAGTTTGGATATTCTGTATGCTCATTTCCTT  
CTTCAACTATACACCACAAGATTCCATCTATTTTATTGGTTTTGATTAGGAAACAATGTTTGCAGAACAGA  
GACTGTGTTTTCTATCCTTCTCTTCATTTATCTCCTCTTATGTTTCATCTCAATTTGTTATATCACAATCTTCT  
CGGGAATTCAGCATCAGTCCTTCGAATTCTACTGCAGGGCTTGCCGGGCTTGCCGGGCTTGCCGGGCTT  
TCCTCTTTATGGATCAACAGGCCGTCTTAGGGTTAATTCCACGGCTGACGGCTTCTTTACTTTGACAAC  
ACCCATACTTCAGCGGGGAAATGCTGGCCCACGATTCTCTGTGGCTTCTACTGCATTTACAATGCTACA  
GAATGCCTTCTTGGTATCCTTTGTACCACAACAATATGACGAGCCGAATGGTGTGATAGATAAACCC  
AGTTAATTTGGTCTGCTAACAGGAACCATCCAGTGAAAGTCAATGCAACCTTGGAACTAGGACAAGATG  
GCAACTTGGTCTTGACAGACTCTGATGGCACTCTGTTTGGTCCACTCATACAATGGCAAATTTGTTTCA  
GGCGTAAACTTAACAGATATGGGAAATCTTGTGCTCTTTGATAAGAGAAAGCGCGCAATTTGGCAGTCT  
TTTGATCATCCTACAGACTCTTTGCTTCCAGGGCAGAATTTGGTTTCTGGGCAGAAGCTCATAGCAAGCG  
TTTCAGCAACCAATCGGAGTCAAGGTTTGCTTGCTTACTGTTCTCAATGGAAGCTGGGCCGCTTACAC  
GGATACTGATCCGCCTCAATATTACTACATCTTACTATCTTGAGAGCCCTTATTACAGTTTTGATGGTC  
GGACCTTTAATGCTTTACAATCTCTTGATAAATCAGCAGCTCAATTCATGAAGATAGGGCCTGATGGACA  
TTTAAAGGTATACCGATGGTTTATAGCTGATTGGAACGAAGTATCTGACATTTTCTCGCAATATGTAGAA  
AACTGTGGGTACCCAATGGTATGTGGAAGTTACAGCATTGTACAAATAACGGGCAATGTACTTGTCCG  
CTACAGGAGAACTTCTTCAGGTCAATTTCTGAGAGGAAACCAGATCTTGGATGTTACAGCTAACTTCCA  
TTTACTGCAACTCTTCGCAGTATCATAGTTTCGTAGAGCTCAAGAATACTACATATTTTTTCAATTAACATTG  
ATCAGGAACTAAATTCGAGCAGATTATGGCTTGGGCAGGCAAAGTTGGAAGATTGCAAAGGGCCTGC  
CTGAGTAACTGTTCTTGCAAAGCTGCTGTTTTTGAATATGGTTGGAATGGGACTCACAGAGGGAAGTGT  
TGTTACTGAATGAAGTTTTCTCTCTCAAAGACAGCGAAGAAGGAAGAGGCAATACAGTATTTCTTAAGG  
TGCAGAATTCCTCAAAGCCGCAGACTCAGTCTTAATCATTCTGGAGGAAAGAAATCAAGACCTTCCAA  
AGTGATAATAGGATCTACTCTTGCAGCTTTCTTTGGGATAATTTAAGCATAGCTACTTGCTTTGTTATTTT  
CAGAAACAGGACCCGTGAGTCCAGAAAGGCTGCGGATATTTTGGATCTAGCACCATCTTACCGGGAAT  
CCTAACTCGATTCTTTACAATGAGCTGAAAATAATTACAGATGATTTTCAGTATAAAGCTCGGGGAAGGA  
GGATTTGGCTGTGTTTATGAAGGAACACTGAGAAATGGCACCAAATAGCTGTGAAGAATCTGGATGG  
TGTAGGTCAAGTACAGGAATCATTCTTAACAGAAGTAAAGGCAGTCGGTGGCATTACCATATCAATCT  
GGTAAACTCATTGGATTTTGTGCCGAAAAAAGCCACAGGCTTCTAATCTATGAGTACATGGTGAATGG  
ATCGCTGGATAGGTGGATTACGCATGAAAATCAAGAAAATGGGCTTACATGGAACACAAGGCAGAGGA

TAATATCAGATATCGCCAAAGCGTTAGCATATCTACATGAGGATTGTAGCCATAAGATAATTCATTTGGA  
CATCAAACCACAAAACATCCTTCTAGATCAATATCTCAATGCTAAGATATCAGATTTTGGGTTGTGAAG  
CTAATTGAGAAAGACAAAAGCAAAGTTGTGACTAGAATGAGAGGAACACGGGGTTATTTAGCTCCTGA  
ATGGTTGAGCTCGGTAATCACTGAGAAAGTTGATGTTTATGCTTTTGGAAATTGTCCTTCTGGAAATTCTCT  
GTGGGCGAAAGAATTTGGATTGGTCTCAACCTGATGAAGAAGATGTCCATTTGCTGAGTGTATTTAGGA  
GAAAAGCGGAACAAGAGCAGCTCATTGATATGGTTGACAAAATGAGGATATGCAGCTCCACAGGGAA  
GCAGTGACAGAAATGATGAGCCTCGCTGCATGGTGTCTACAGGGCGATTTTTCCAAGAGGCCTTCCATG  
TCATTGGTGGTTAAGGCGTTGGAAGGTTTGGTACTGTTGAAACCAACTTGAATTATGATTTACACATG  
TACCTGAGGTTGGAGCAGGCAACCAAGAGAGGGGAAGTCATTAGCAGTTCAAATTTCTTCAATCTTAT  
CGGGACCAAGGTAACAATATGCTTAAGATTTTGTTCATTGAAGGAACCAACATATGGTTGCGTAATATC  
AAATATTGCAACATTTCCGATTCTAGCATAACTTTTTATAATTCATGAAATGTAATGTTTCAGTAACTTCTAT  
ATTGAATTTTTGAGCTTCATGTTACTATCATGTAGAGGCTTCTCAATTCATGTGCGAAA

>PGSC0003DMG400017315 G-LecRK

CAACAATGTTTGCAGAAAAGAGACTGTATTTTCTATCCTTCTCTTCATTTACCTTCTCTTTTGTTCGTCTC  
GATTTACTATATCACAATCTTTACAGGACAACAAGATCAGTCTTTCAAATTCTACAGCAGGGCTTGCCGG  
GCTTTCCTCTTTCTGGATAAACAGGCCATCTCTTATTGTTAATTCACCACCGATGGCTTCTTTGGTTCAAC  
AACACCCATACTTCAGCGGGGAAATGCTGGCCCACGATTCATCTGTGGATTCTACTGCAGGTACAATACC  
ACAGAATGCCTTCTTGGTATCCTTTTGTACCACAACAATACAACGAGGAGAACGGTATGATAGATAAAC  
CCCAGTTAGTTTGGTCTGCTAACAGGAACCATCCAGTGAAAGTCAATGCAACCTTGCAACTAGGCCATG  
ATGGCAACTTGGTCTTGACGGACTCTGATGGCACTCTTGTGGTCCACTAATACTACTGGAAAATCTGT  
TTCTGGCTTAACTTAACAGAAATGGGAAATCTTGTGCTCTTTGATAAGAGAAAGCGCGCAATTTGGCA  
GTCTTTTGATCATCCTACGGATTCTTTGCTTCCAGGGCAGAATTTGGTTTCCGGACGGAAGCTCATAGCA  
AGCGTTTCAGCAACCAATCATAGTCAAGGTTTGTGCTTCTTAGTGTCTCAATGGAAGCTGGGCTGCTT  
ACACGGATACTGTTCCGCCTCAATACTACTACACTTCATCCTATGCTGATAGTTCTTATTACAGTTTTGATG  
GCCAAAGCTTTACTGCTTTACACTATCCTACTAAATCAAAGCTCAATTCATGAAGATTGGGCCTGATGG  
ACATTTAAAGGTATACAAATGGTCTGTAGTTGATTGGAACGAAGTATCTGACATTTTGTGCCATATGTG  
GATAACTGTGGGTACCCAATGGTATGTGGAAGTTATAGCATTGTACAAATAACGGGCAATGTACTTGT  
CCGCCACACGAGAACTTCTTACAGCATTCTGAGAGGAAACCAGATCTTGGATGTTACAGCTGACTT  
CCATTTACTGCAACTCCTCGCATTATCATAGTTTTGTAGAGCTCAAGAATACTACATATTTTGTATTTACAGC

TCAATCTTGAAC TAAGTTCGAAGATATTTTGGCTTGAGGGGAAAAAGTTGGAAGATTGCAAAAGGGCTT  
GTCTGAGAAACTGTTCTTGCAAAGCTGCTGTTTTGTATATGATTGGGAAGGGGCTCAAAGAGGGAACT  
GTTTGTACTGAATGAAGTTTTCTCTCTCACAGACAGCGAAGAAGGAAGAGGGCGAGACAGTATTTCTTA  
AGGTGCAGAATACCTCAAGGGCGCAGACTCAGTCTCTAATTATTCCTGGAGGAAAGAAATCAAGACCTT  
TGAAAGTGATAATAGGATCTACTCTTGCAGCTTTCTTTGGGATAATTTAAGCATAGCTACTTGCTTTGTT  
ATTTTCAGAAAAAGGACACATGAGTCCAGAAAGGCTGCGGATATTTTGGATCTAGCACCAATCTTACCG  
GGAATCCTAACTCGATTCTTACAATGAGCTGAAAATAATTACAGATGATTTAGTAGAAAGCTCGGG  
GAAGGAGGATTTGGCTGTGTTTATGAAGGAAGACTGAGAAATGGCACTAAAGTAGCTGTGAAGCATCT  
GGATGGTGTAGGTCAAGTTAAGGAATCATTCTTAACAGAAGTAAAGGCAGTCGGTGGCATTACCCATAT  
CAATCTGGTAAAACCTATTGGATTTTGTGCCGAAAAAGCCACAGACTTCTAATCTACGAGTTCATGGTG  
AATGGATCGCTGGATAGGTGGATTACGCATGAAAATCAAGAAAATGGGCTTACATGGAACACAAGGCA  
GAGGATAATATCAGATATCGCCAAAGGGTTAGCGTATCTACATGAGGATTGTAGCCATAAGATAATTCA  
TTTGGACATCAAACCGCAAACATCCTTCTAGATCAGTATTTCAATGCTAAGATATCAGATTTTGGGTTGT  
CGAAGCTAATTGAGAAAGACAAAAGCAAAGTTGTGACAAGAATGAGAGGAACACGGGGTTATTTAGCC  
CCTGAATGGTTAAGCTCAGTAATTAAGTACTGAGAAAGTTGATGTGTATGCTTTTGAATTGTGCTCTTGGAAA  
TTCTCTGTGGGCGAAAGAATTTGGATTGGTCCCAAGCTGATGAAGAAGATGTCCATTTGCTAAGTGTCTT  
TAGGCGAAAAGCGGAACAAGAGCAGCTCATAGATATGGTTGACAAAAACAATGAAGATATGCAGCTCC  
ACAGGAAAGCAGTGACAGAAATGATGAGCCTTGCTGCATGGTGTCTACAGGGCGATTTTTCCAAGAGG  
CCTTCCATGTCATTGGTGGTTAAGGCATTGGAAGTTTTGGTGACTGTTGAAACAACTTGAATTATGATT  
TCACACATGTACCAGAGGTTGGGGCAGGCAACCAACAGAGGGGAAGTCATTATCAGTTCAAATTTCTT  
TAATTTTATCGGGACCAAGGTAAACAATATGCTTAAGATTTTGGATTTGAAAGAACCAATATGGTTGCT  
TAATGTCAAATATTGCAACATTTTCAATTCTAGCATAACTTTTTTATGGTGTATGAGATTA

>PGSC0003DMG400017318 G-LecRK

ATAAAATTATGACTTATATTTTCTTCTCCTCGTGA AAAATTTCTTCAGGCCATCTTCTGAGAGGAAACCAGAT  
CTTGGATGTTACAGCTGACTTCCATTTACTGCCCTCTTTGCAGTACCATAGTTTCATAGAGCTCAAGGA  
TACCGCATATTTTTCATTTAGTATAATCATGAACCAAGTTGATCATATTTTGGCTTGAGGAGAAAAAGT  
TGGAAGATTGCAAAGGGCCTGTCTGAGAACTGTTTCATGCAAAGCTGCTGTTTTTGAATATAATTTGTA  
TGGGAATCGAAGAGGGAGCTGTTTGTACTGAATGAAGTCTTCTCTCATAGACAACAACGGACAAGG  
AAGAGGCAAGACAGTATTTCTTACGGTGCAGAATCAGTCTTCAATCATTCTGGAAGAAAGAAATCAAG

ACCTTTCCAAGTGATTATAGGATCTACTCTTGCAGCTTTCTTCGGGATAATTTTAAGCATAGCTACTTGCT  
TTGTTATCTTCAAAAAGAGGATACATGAGTCCAGAAAGGCTGCGGGTTTTCTTGATCTGGAACCAATCTT  
ACCAGGAATTCTAACTCGATTCTCTTACAATGAGCTGAAAGTAATTACAAAAGATTTTCAGTAGTAAGCTC  
GGGAAGGAGGATTTGGATCTGTTTATGAAGGAACACTGAGAAATGGCACCAAATAGCTGTGAAGCA  
TCTGGATGGTCTAGGTCAAGTAAAGGAATCATTCTTAACAGAAGTTAAGGCAGTCGGTGGCATTACCA  
TATCAATCTGGTAAAACCTATTGGATTTTGTGCAGAAAAAGCCACAGTTTCTTATCTATGAGTACATG  
GTAAATGGATCATTGGATAGGTGGATTACGCATGAGAATCAAGAGAATGGGCTTACATGGAACACGAG  
GCAGAGGATAATATCAGATATCGCCAAAGGCTTAGCGTATCTACATGAGGATTGCAGCCATAAGATAAT  
TCCTTTGGACATCAAACCACAAAACATCCCTCTAGATCAATATCTCAATGCTAAGATATCAGATTTTGGGT  
TGTCGAAGCTAATTGAGAAAGACAAAAGCAAAGTTGTGACTAGAATGAGAGGAACACGGGGTTATTTA  
GCCCCTGAATGGTTGAGCTCAGTAATCATTGAGAAAGTTGATGTTTATGCTTTTGAATTGTCCTCTGG  
AAATTCTCTGTGTGCGAAAGAATTTGGATTGGACCAAGCTGATGAAGAAGATGTCCATTTGCTAAGTG  
TATTTAGGAGAAAAGCTGAACAAGAGCAGCTCATGGATATGGTTGACAAAAACAACGAAGATATGCAG  
CTCCACAGGGAAGCAGTGACAGAAATGATGAGCCTAGCTGCATGGTGTCTACAGGGTGATTTTTCCAAG  
AGGCCTTCATGTCATTGGTGGTTAAGTCATTGGAAGGTTTGGTGACTGTTGAAACCAACTGGATTATG  
ATTTACACACGTACCTGAGGTCTGGGCAGGAAACCAACAGAGGGAAGCCATTATCAGTTCAAAAATTC  
CTTCAATTTTATCGGGACGAAGGTAAACAATATGCTTAAGGTTTTGTCTTTTTAGGAACCAATTTGTGGTT  
GCATAATGTCAAATATTGCAACATTTCCAATTCTAGCATAACTTAAGGTTTATGAGATTATAATTCATGAA  
CTGTAATGTTACAGTAACTTCTATATTAATTTTTGAGCTTCA

>PGSC0003DMG400017327 G-LecRK

AGAGACGCGTTCCTCAAAAAGAAAGGCATTATTAGAACACAGGAGGAGTTGCTAGCAAAGCAGATTTCAA  
ACATTTTCTTTTGTAGCTTTAGTAAGAAATGATTGCAGAGCAGAGATTGTATTTTCATCATGTCCTGGTC  
ATCATTTATTTTCAGTTTTTTTTCATTACAGGTTTGCTTCATCCAGATTTTCATGGTACCTAAATGGCAGTTAT  
TTGAATTCTACTGCTGGACTTTCCACTTCATGGACCAATAGGCCATTTTGGTTTGATGCACAATCCACATA  
TGGATTATCTCTTTGACACCTATCCTTCTGAGTGGAAATAAATGGAAATAAATACCACTTCTGTGGCTTCT  
ACTGCAATAGCCAAAGTGTTGAATGCCTTCTCGGGATCTTCTTTGCATTCCCGGACAGCTCCTCTACTGAC  
AACAAATTCATGGATCCCCAGTTGGTTTGGTCTGCTAATCGAGACCGTCCAGTGAATGCCAATGCAACCT  
TGCAACTAGGAAAAGATGGCAACTTGGTCTTGGAAAGACTCTGATGGCACTTTTGTGGTCCACTAATAC  
TACTGGAAAATCTGTTTCTGGCTTAAACATGACAGAAACGGGGAATCTCGTGCTCTTTGACAAAGCCAAT

CGCACAGTTTGGCAGTCGTTTCGATCATCCTACAGATTCTTTGCTCCCGGGGCAGAGCTTGGTTTCTGGGA  
GGAAGCTCATAGCAAGCGTCTCAGCAACCAATTGGAGTCAAAGTTTGCTTTCTTTAACTATTATCAATGG  
AAGCTGGGCCACTTACATCGAATCTGATCCACCTCAGTTTTACTATGCTTCAAGTAATCCGGATACTAGTA  
CTTATTTTCTGTTTTGATGGTCAAACACTTACTGTTTCAGCAAGGCCCTCCTAAATCACCAGCTCAATTCATG  
AAGCTTGGGCCTGATGGACATTTATGGGTATACCAATGGGACGAGAATGCATTAAATTGGAAAGTCATA  
TCTGATGTTTTGTTAATGTACATGCAGAGAACTGTGGGTACCCAACGGTGTGTGGAAGATATGGCATT  
GTACAAGTAATAGGAAATGTAGATGTCCGCCAGAGCGAAATTTCTTCAGGCCATTAGATGAGAGGAATA  
TAGATGATGGATGTTTACAGCTGACTTCCATTTACTGCAACTCTTCGCAGTATCATAGTTATGTGGAGCTC  
AAGAATACCACATATTTTGCATTTGAGTTCAGTGATGACCGAATTTGGGTATATTACCGTTTGAGGGGA  
AAAAGTTGGAAGATTGCAAAGGGGCTTGTCTGAGAACTGTTCTGCAAAGCTGTTGTCTTCAGATATG  
ATTCGGATGGGGCTACAACCTGGGAGCTGTTTATTACTGAATGAGGTCTTTTCTCTCGTAGACACCGACGA  
CGGAATGGACAAGAGAGTATTTCTTAAGGTGCAGAATTCCTCAAACACTCAGAATCAGTCTAAAACCATT  
TCTGGAGGAAAAAATCAAGACCTCACATAGTGATAATAGGATCTACTCTTGCAGCTTTCTTTGGGATAA  
TGTTAAGTATCACAGCTTTCTTTGTTATCTTTAAAAAGAGGACAAAAGATTCCAGAAAGGATGGGGGTTT  
TCTGGATCTCGAACCAATCTTTCCGGGAATGCTAACTCGGTTCTCTTACAATGAGCTAAGAATAATAACT  
GAAGATTTTCTGAGAAAGCTCGGGGAAGGAGGATTTGGCTCAGTATATGAAGGAACACTGAGTAATGG  
CACCAAATAGCTGTAAAGCGTCTGGATGGTCTAGGTCATGTGATGGAATCATTCTTAACAGAAGTAAA  
GATAGTCGGTGGCATTATCACATTAATCTGGTAAAACCTCATTGGATTTTGTGCTGAAAAGACCCAAAGA  
CTTCTGATCTATGAACACATGGTAAATGGATCACTAGATAGGTGGATTTATCATAAAAATGAAGAAAAT  
GGGCTTAGATGGCATAACAAGGCAAAGGATTATAACAGATATTGCCAAAGGATTAGCTTATCTTCATGAC  
GAATGCAGCCAGAAGATAATTCATTTGGACATCAAACCACAAAATATCCTTCTAGATAAAAATTTCAATG  
CTAAGATATCTGATTTTGGGCTATCGAACTGATCGATAAAGACGAAAGCAAAGTTGTAACCTAGGATGA  
GAGGAACACCAGGGTATTTGGCTCCTGAATGGTTGAGGTCAGTTATCACTGAGAAAGTAGACGTGTATG  
CCTTTGGAATTGTGCTCTTGGAGCTGTTGTGTGGTCGAAAGAATTTGGATCGGTCCCAAGCTGATGAGG  
ATGTCCATTTGCTAAGTGTTCGAAAGAAAATCGGAACAACAGCAGCTTATGGATATTGTTGACAAAAA  
CAATGAGGATATGCAGATCCACAAAGAAGCAGTGACAGAAATGATGAGCATTGCTGCGTGGTGTCTAC  
AGGGAGATTTACCAAGAGGCCTTCCATGTCTTTGGTGGTCAAGGCATTGGAAGGTTTGGTGTCTGTTG  
AAACAACTTGGATTATGATTTACAAGCCTACCCGAGGTTGAGGATGACAACCAACAGAGGGAAGAC  
ACTATCAGTTTAATATTGCCTTCAATTTTATCTGGTCCAAGGTGAACAACCTAGCCTAAGAGGTTGTAAGTT

TTTTTTCCTTCCCAAGTCTATGTCTTTCTTTGTGAAAATGTATTTCCATGCTTCATCACCAGATCCATCT  
TTCTCTGTACATAAATTTGGCTAACAGGTAAACTATGTCATAATGTAAAAGGTAAACTTAATTAGCTTTG  
ATAGATAACCAATTAACGTCTCGTGGCAGAGATGGATAGCATTTTCTTTCTAATTTGCATCTTTGTGGTCA  
ATACATCTTCATATGCAGCACATTTTATATTTCTAAGAGTAAGGGGTCTACTTATTCTGTGTTATGTACAG  
AGAAAAGTGCAG

>PGSC0003DMG400017330 G-LecRK

AAACAACCCAACATCTTAAATTTAAGTTCAATCATTTTTTCATCTCAATGATGAACTAAAGGCCCTTGCCT  
TCTTTGGAAAACCAAAAAATTGGTCTTTATGGCATTAAAGCCAGTTTTTACCTTCTTCTTCTTCACTTTCT  
TGTTCTTTTCATTTGATAACTAGCCAACCTTATGATTATCCATCTGCAAATCTTTCTACAACCTGGATCAAC  
AGTGTTTCTGCAGACCATTCAAGTGAATTTCACTGATGGCTCAACAATAAGAGCCATACTACTCAGAGGAA  
CTTTTGGTCCAAAATATGCTTGTGGTTTCTACTGTAATGGAAATTGTGATACTTACCTCTTTGCCATATTCA  
TTGTGCAAACCAACAGTGCTTCCCGAATTACTCTTCCCGCGATTGGGTTCCACAAGTTGTTTGGTCTGCT  
AACAGGAATAAACCTGTTAGGATCAATTCTACTTTGGAACTTACAGCACAAAGGAGATTTGGTGCTTAGA  
GATGCTGATGGTACTTTAGCTTGGTCAACTAACTACTGGGAAGTCTATTGCTGGCTTAAACTTGACCG  
ATGAGGGGAATCTTGTTCTGTTTGATTGCGAAGAATGCAACTGTTTGGCAATCGTTTCATCACCCAACTGA  
TGCTTTGGTTCCAGGGCAGAGGTTAGTACCAGGGATGAAGCTAACAGCAAGTGTTTCAACAACAAATTG  
GACTGAGAGAGGTTTGTTTTCTCTCTTTTTACCGATGATGGTTTTGTTGCTTTGGTAGAGTCAAATCCTC  
CCCAAACATACTTTGACGTGACTATTGGAAGATTGAATGCAAGTAGAGGCTCAAATTATGTTGTGTATTT  
GAATGGTAGTCTAGCTTTACTCTCAAACCTCTAGTAATCCAGCAATTCACAGACACTGGTTTTCATTTAGTC  
TAGCGACCTCAGCTCAATATATGAGACTGGAGTCTGATGGACACTTGAAAGTGTATGAGTGGCAAAGTG  
GGTGGACTGAGATGGATGATCTCCTCACAGGTTTTAACGGCGAGTGTTATTACCCCATGGCCTGTGGAA  
GATATGGCATTGCTCAAGGGGGCAGTGCAGTTGTCCCAAATCGAGCTCTAATTCAACGACCTATTTAG  
ACAGATAGATGATAGGCAGGGTAATCTGGGTTGCTCTGAGGTCACAAGGCTGACATGTAATGCTTCAAG  
TAACCACAGATTTTTGGATCTTCAAGATGTGGACTATTTACGTTTACGACAGATATCAGAAACACTAGT  
ATGAATACCTGTAAAGATGCATGTTTGAGGAACTGTTCTGTAAAGCTGCTTTGTTTGCAGTGGTTTAA  
ACTCATCCACGGGAGACTGCTACCTACCATCCGAGATCTTTTCACTAGCGAATAATGAGAAGGACAAGA  
CAAGGTATGATTCCCATGCATTTATAAAAGTACAGGTTGAACCTGAAATAGCTGCTGCTAAAGAGAAAA  
GGCGTGTTAATGGTGTATACTGGGCTCTGTTATAGGAGTTTCCATCTTAGGGATCATAGTTGGAATTGC  
AGTTTTCATATTCTGGAAGAAGAAGAGAAAAGGCCAATGAAGATGAGGAGGATTATCTAGATCACGTACC

AGGAATGCCGACTAGATTTTCATACGATGATCTAAAGGCTGCAACGGAGAACTTCACCAAGAAGCTTGG  
TCAAGGAGGATTTGGGTCAGTTTTTGAAGGGTGCTTAGCAGATGGCACAAAGATTGCAGTGAAATGTCT  
TGATGGAATAGGACAAGTCAAAGCGTCATTCTTAGCTGAGGTTGAAACTATTGGCAGCATAACATCATGT  
AAACTTGGTGCAATTGATTGGCTTCTGCGCTGAGAAATCTCATAGGCTTTTAGTATACGAGTGCATGAGC  
AACGGATCACTAGAAAAATGGATCTACCATGGGAAACAGGAGCAAACCTCTAGATTGGAAGTGCAGGAG  
GAAGATTATTCAAGACATAGCCAAAGGATTAGCCTACCTCACGAAGAATGCAGGCAAAAGATTCTGCA  
TTTGGATATTAAGCCCCAACATACTATTGGATGAGAAGTACAACGCTAAACTTGCTGACTTTGGGCTT  
TCAAAGCTAATTGATCGGAATCAGAGCCAAGTTATGACTCAGATGAGAGGCACTCCTGGTTATTTGGCT  
CCTGAATGGCTTAGTGGAGTCATAACAGAGAAGGTAGATGTCTACAGCTTTGGCATTGTGCTCTTGAA  
ATTTTGAGTGGAAGAAGACATTTTGAAGCATCGGAGTCTGAAGACCAACAGGTAATGGTGAAGTTATTC  
AGGAGAAAGGCAGAGGAAGGGAAGTTGGTGGATCTTATTGATAAGCACAGTGAAGATATGCAGTTTTA  
CAAAGAAGAAGTAGTAAAGGCGATGCAGATTGCTGCCTGGTGTTTACAAAGCGATTTACGAAGAGGC  
CATCAATGTCGATGGTGGTCAAGGCCATGGAGGGTGTATAGATGTTGACAAGGATCTAGACTACAGCT  
TTAGACCACAACTGTTTCCGCAATACCATATATCAGTTTTGCAGATTCAACTCCTTTATTGCCTTCGATCC  
TATCAGGTCCAAGGTGAGGAGGAAGTTCCTTGAATTTTTGTTAATTTCTTTTTTTTATGCTATTGCAGCT  
TGCTCGCTGCTGTGTAATACTTCTCCAATGTTCAAAAGTTATGATTGTTTTCTTCAATTTATT

>PGSC0003DMG400017331 G-LecRK

TTTTAACTCATCTTCCTCTAGTGTTCTTAATGGCTTTATGCAAGATTATTCCTTTTGCCTTCATCCTTCTTTG  
TTGTTCTTGTTATCTGATATCGGGCCAACGTTTTGATTACCCCACTGCAAATCTTTCTACAAGTTGGATCA  
ACAGTGTTTCTGCACCCCAATCAGTGGATTTCACTGATGGCTCAAGAGTAAGGGCTATACTACTCAGAGG  
AACTTTTGGTCCAAAATATGCTTGTGTTTCTACTGTAATGGCAATTGTGATACTTACCTCTTTGCCATTTT  
CATTGTGCAAATAATAGCGCGTCCCAAATACTTCTCCCGCGATTGGATTCCCAAGTTGTTTGGTCTG  
CTAACCGGAACAATCCGGTTAAGATCAATTCAACTTTGCAGCTTACAGCACAAGGAGACTTGGTGCTCA  
GAAATGCTGATGGTACTTTGGCTTGGTCAACTAACACTGCTGGCAAATCTGTTGCTGGTTTAAGCTTGAC  
CGATGAAGGGAATCTTGTTCTGTTTGAAGTGAAGTGAAGTGAAGTGAAGTGAAGTGAAGTGAAGTGAAGT  
GATGCTTTAGTTCCAGGGCAGAAGTTAGTATCCGGGATGAACTAACAGCAAGTGTTCACAACAACAAC  
TGGACCAAAGGAGGTTTGTTCCTCTCTGCTATCGATAATGGTTTGGTTGCTTTCATAGAGTCAAATCC  
TCCCCAACATACTTTGACGCGACTATTGGTGGATTGGATCCTAGTGGAGGATCCAATTATGTTAAGTAT  
TTGGATGGAAGCTTAACTTTCTTCAAAATTCGAGTGGTACAACCGAGTTGGTTCTGGTTTCTATTACTCC

AGCATCCTCTGCTCAGTATATGAAACTCGAGTCCAACGGACACTTGAAAGTGTACGAGTGGAAAAATCG  
ATGGGGAGAGGTGGATGATCTCTTGACAGGCTTTCGTGGTGTGTGCAATTACCCACAGTCTGTGGAAG  
ATATGGCATTTCACAATGGGACAATGTAGTTGTCCATAAGCTCTAATTCAACTACCTATTTAGACCG  
ATAAACGTTAGGCTGCCTAATCTTGTTGCTCTGAGGCCAAAAAGCTAACTTGTAACAACCTAAAGAAAC  
ACAGACTTTTGGAAAGTTGAAGATGTGGACTATTTGCGATTTACTGCAGATATTAGTAACACAGATGTGAA  
TACTTGTAACGCGCATGTTTGAATAAATGTTCTGTAAAGCTGCATTCTTTCGTAGTGGTTTAAATTCTT  
CCAGGGCCATAGGGGAATGCTACTTACCAACTGAGATCTTTTACTAATGAATAATGAGAAGGACAAGA  
CAAGGTATGACTCTGTCGCGTTTATAAAAGTACAGGTTTAAAGCTAAACCAGCTGCTGCAATAGGGAAAA  
AATCGTGTTTTATGTACAAAAATGAATCTATGGGAGGACATGGATGGAAACTTAGCAAATTATGCACGG  
GATCTTGAATAAGTTCATGCTAGACATGAACTATATGAAGGTATTATTACATAAATAAATGGTTGGATAA  
GCCAAATTAGTGTTAAGAGTTCTCTGTATTCTTCATTTCTTCTTCTCTGTATTACACTTTCATTTCTGTT  
TGTTATCTGTAATTTCAATTCAATAGACAATAATAAAGACA

>PGSC0003DMG400017946 G-LecRK

AGCTATGCAAAAATTTCCACGCGACATATCAACATAGTAGCAAATAGATTATGAAGCTTCATATTCTGAAC  
ATCTCCATGAATCCATCTGCAAGTGAAATCAAATCCATCTGCTATCTCATTTTAAATGGAGGCCATAAACA  
TACTTTACTTCTTGTCCATATGGATTCTGTCTCGTGTGAGTGCTCAACATACCATACCTGCAAATCAA  
CCTCTAACAGATGGAAGCACCATTATTTATCAGATGGCAAGTTTAAAGTTGGAATTTTTTTCCCTGGGA  
CATCCGGGAAACGCTACTTAGGAATATTGTTAATAAAGTTACTGTACAGACAGTGGTATGGGTTGCTA  
ATAGAGACAATCCACTCAATGACACATCCAGTGCCTAAATCTTACCAGACAAGGAATTTACTTCTTCT  
AAATGGTTCTGGCAGAATCATTGGTCTCCAATCCACTAGACATGGGAAAAATCCAGTAGCACAACCTC  
CTTGATTCAGGCAATCTTGTGTTGCGAGATGCAGCCGAGGATAAGCCTCAGAACTACCTGTGGCAAAGT  
TTTGACAATCCAGGTGACCCAGCTTACCTGGAATGAAGGTTGGGATTAATCTGAAAACCTGGTTTTATC  
GTTCCCTTTCGTCATGGAAGAGCACAATGATCCTTCCAGGGGTCAGTTTACCTGGACATTCGATACTGG  
TGGATTCGTACAAACATTCATTATGAATGGTTCCATTGAACTCTACAGAGCTAGACAATGGAATGGTCGA  
GTCTTTCCTAATGCACCATCTAGTGACACTTCGTGGAATGGTTATAACTATACATACTTATCTGATCCTAA  
TGAAATATCATTATCATGTATGAACTTACAGACAGCTCTATCATTGCAAGGGTAGTGATGCAACTAAATGGA  
TTTCTACAGCTTTCAGAATGGAATAATCAGACCCAAAATTGGGACGATGTTGTTAGTGCACCAGCTGATA  
ACTGTGACATTTATGGCCAGTGTTCATTATGGTTTGTGCAACAGCGGCAATTCCTCAATCTGCAGATG  
TTTGGATAAATTTGAACCCAAAGATCCAACAGAATGGGCAAGGGGAAATTTGGTCAGGTGGCTGTGTTA



GAAAGACAGCAATATTGAATTGCCAAAAGGAAGTTAAATTCTTCAAGTATCAAGGCATCAAGTTGCCAG  
ACACTCGTTTTCTGGTACAGTGGAGGAGTACTCTTAATGCATGCGAGGAATTGTGCTTGAGAACT  
GCTCGTGTATGGCTTACGCAAATCCAGACATAACAGGGACAAATGAAGACTGCTTACTTTGGTTTGATG  
AGCTGATGGATATCAGAGAGTTTGGTGCTACTGGGCAAGATATCTATGTAAAGTTGGACTCTTCTGAGT  
TAGGTATAAATCTGTTTCTTACTTTTTCATGTAAGGCTGTTAAGTATGCTACATTAGATTTTGTGAGCAA  
GTTGAGGTTTCTCTACATTATTTGAAAAACAAAACAATATCTTTTTCTTCTTATGAATTTATTTCTGTCA  
TCAGGTAAGTCCAGTACAGGGAAAGTAAAGAACTGAGAATCAGCTTGCCACTGGCAGCATTAGGTCTG  
TTCCTAGTACTATGCTTAATCATGTACATAAGGCCAAAAGAAGAAGAATCAGCAATATTTTAGAAAAGGTA  
AACCTCAGAGTTTTGCTGCTTTTGAATTTGTGGTGCCTTTTTCTGGAGTTACATTTGGTAAATATCATA  
ATTTTTCTCTTACGTCCAATAAGTCCTTATTTAACAGGAAGAAGACCAAGAATCTCTGAAATGTTGTG  
CACTAAAGAAAGGAAAGATAAAGAGCTAGATTTACCGTTGTTTGATTTGAAACTATATCTCATACTACC  
AATAACTTTTCATTGAACAACAAGCTTGGAGAGGGAGTTTTGGACCTGTTTACAAGGTAACGATTTTAA  
CTTCAGCTCTTCTGTTTCATCCAAAAGAACTGCCTAAAATGGAATTTCCGAACCTTTAAAAGGAAACACA  
TGTTTCAGTAAGAAAATTGATATGTCATTCTCCTATTTTCATCTAAACAGCAATGTCAAAATCTCGTTTATT  
GTTTGTGAGTAAATATTCTGGATAAGCTGATTCAACTAATTTCTGGATATCTAGGGTATGCTGGAAGA  
TGGGCAAGAAATTGCAGTAAAGAGACTTTCAAGATACTCAGCACAGGGAACTGATGAGTTCAAGAATG  
AGGTTATCTTCATTGCTAAACTCCAGCATCGGAATCTTGTGAAGCTTCTTGTTGCTGTATCCAAGCAGA  
GAAAAGATGTTGGTTTATGAGTACATGCCAAATAATAGCTTGGATTGGTTCCTTTTTGGTTGGTTCTCAC  
TTCTCTCAACTCTTAATACATTTGGTTATCTGTAGTAATAGTTCAATCAGCTGCAGATGGATTTGGCCATC  
ATCAGATGGAGTTGGTTATCACTTTTCTGAACTCTTGATTTTTGCAGATACAGATAGGAGGTCAGTCTT  
GATTGGCCTAAGTGCTCCATATTATTAATGGAATTGCTCGCGGACTTCTCTATCTTCATCAAGACTCAAG  
ATTGCGGATAATCCACAGAGATCTTAAACCTAGCAACGTTTTGCTAGACATTGACATGAACCCGAAGATA  
TCTGACTTTGGCATGGCAAGAAGTTTTGGAGGAAATGAGACTGCAGCCATGACAAAAACAGTGGTTGG  
GACATAGTAAGAATCTTTAAACCGATTAAGTATTTGCAGTCTACTAAAAGCTACTTACTTTGTTTATTTG  
ACATTATCCTACAGTGGGTACATGTCCCCGGAGTATGCAGAAAAAGGAGAATTTTCAGTGAAATCAGAT  
GTATATAGCTTTGGAGTTCTAGTACTGGAGATTTTAAAGCAGGAAGAGAAATAGAGGGTCTTGCATCCA  
GACCATGACCATAATCTTCTAGGACATGTAGGTGATCTTCTTTTCTATCTTATATGTTAAGTAAAATAAT  
AGCATCTAACTGCATGATAGTAAATGTTTCAAGGTGTGGATCCTTTTCAAAGAAGGCAGGGTTATGGAAGT  
AATTGATACACAATAAGGCAGTCATGCAATCAGTCTGAAGTTCAAAGATCAGTTCATGTAGGTCTATTA

TGTGTGCAGCAGTGTCCAGAAGATAGGCCGAATATGGCATCAGTTGTGCTCATGTTGGGTAGTGATGTC  
GCACTACCCTTGCTAAAGAGCCAGGCTTTTTCAATGGCAGGAACCGATTCACTGAAGCTGACAGTTCAT  
CTAGCAAGCATGGCGAACTTCAGTGAATGAATTAAGCATCACACAGTTGGATGCCAGATAGGAGATAA  
AATTCAGGTCATGGATGTTTTCTGTATGCTATATTAACCTAATTGTTGCAGTCATATAGAACAAGAACTA  
CTGGTTGTTCAACTAAATAGTTTTACTCAAGAATCTGTGGCATGGTATTAAGCATGACAACCTTGACTC  
AGTATGCTGTATATAAAGATAGGAGCAGCAGAGTTGTGAGAAGAGCTAAAAGCATTCTCTACATACAAA  
AGCACCTAGTACATTTGCTTATGAAAGAAGAACAACCTATTCTGTAAAAGACTTTCAGCCTCCCTTG  
AAGTAAGAACAATTTTTCTTTGTTGGCTTGTATGAGTCCACGACTAGTCAGGAGACCAGGTCCCTTGAC  
TGTAGTAATAACAGGAAGTAATGTAAATGCTCAAAGTAAAGAACATAGATGTTTACCTGGAACTTCCTT  
GCTCAAGAGAGGAAAAGCTACGACCTGTCACACGAGATTTCTCAAACTCCAATAACTTCAAGTAACTTG  
TGAGTACTGACTCTAGTAATCACAAGGATTAAGATATTTATCCTACAAACCTTTAAACACCTCTATTACAA  
AACACAAAGCAATAACCCTATTGTCCACTTTATCAACTACCTCTAAGTAGAATAGACTTCAACAAACACCA  
CTCAGCTAACTCAAGCCAAAACTTAACTAGCACTAATATGGAATGGCATGATCTATCTTCCCGTATAAC  
ATAGGAATAGATTCTTAATAAAAGACCATAAGACACTAGACTCAAATAACAACCTTCAGACTCTGCAAGAC  
TAAATTGGGTCCCTCATTACGTGTCAGAGTAGTTCTTTCTTTAAAACGGGTTTTGCTTTTGAATAATCCTA  
ATTGCAAAGCTAGGTTGTTTCTTGCAACAAACAACCTTAGCAGCATGTCATTGGTCGAGGACTGTTGTC  
CTTTCTGTGCCTCTACTGCAGTGTCCACCAACCACTGCAGTTTCTACAGCTTTAGAACTGCACTTCATTGA  
CTTGTCCTTTACGACAAAAACATAGAGGACTAGGTCCCTTTACTAGATCCTATTTCTTTATAGCTTGTTAA  
ATCATCAAATCCCAAATACAACATTTCCCTCCTTTTTGATGATGATAAATTATTGCCCATGTCTACATAT  
CTTTTGCTTGACATTCCCCCTATCAACATGCGTCCCTTGTCGGAAAGACCTGATCCCTTGATCTGAACAT  
GCTTACATGTCATCAGTGTATCTTCTCCTTTTGACATTATAGAAAAGTAAGAACAGTAAATCAAGCAA  
ATCACATGCATTCTGGGTAAATTCATGGCCACTAGACAATACTAATATGAACAAACAGGCAGAAAGAAA  
GGAACGAGAAACAAACATTCTTGGTTTTCCAACCTCCGCCTTCTCACTTTTCCATTGGTCAAACCAAATG  
AGTAGCAAACCTTTGGTTGATAAGCGGCCAACTCCGCCTTCTCCACCGTAGAAAAAATCTATAATTCCAAC  
TATCTTATACACCTTATCAATGAACTCTTAAGGATCCTCATCAACCTTGGAACATGGAACCTTTGAAGGAT  
TCAACCTAGTTAAGTCCCTTATCCTTGTCACTGCCGTACCCTCATTGGATTGATGGGAGCAACAACCTTCT  
CCAATTTATCGGGTGGTCATAACTTGAGTCAACACTTGAAAAACGGCTCAAATTCAGCATGAGTCACTT  
GCTTGGCCAAAGGATCAACCAGAACTTGAGGAACCTCGGGCTCCATATTTTTACATGTATTCTTTTAC  
AAAACTCTTCGAGGGGCCATATCCTGAAAAGCACCGAAC

>PGSC0003DMG400017949 G-LecRK

TATATATCAGCTATTTTCATCAATAATCCCAAAGGAGAATCGTGCAATTCCTTTAGTAAAACAAGGATGA  
TGAAAGCAGACATGTTTCATTTGTTATTATTATCTTACATGTTTTGTGTTTTGATTCTTACTAGAGCTGCA  
GATAATATACGTAGAGATGAACCTTTAAGAGATGGAGAAACGATTGTTTCGTCAGGTGGAAATTTTGAG  
TTGGGATTTTTCTCCCAACTCCAACATCGAGTAAACGATACCTGGGAATATGGTTCAACAAAGTATCTG  
TACAGACAGTGGTATGGGTTGCTAATAGAGACACTCCACTGAATGATAAAAATGGTATGCTCAATTTTAC  
AACACAAGGAAATCTTACTCTTGTAATGGTTCTGGCAGTGTGTTTGGTCTTCCAATACCACAAGAGGA  
GGCGTGCAAAATCCAATAGCACAGCTTCTAGATTCAGGCAATCTTGTTGTTAGAGAAGATGCAAGTGAG  
AATTCGAATTATGTATGGCAGAGTTTTGACTATCCTGGTGACACAGCTTTGCCTGGAGTTAAGATTGGGA  
TCGATCTTAAGACTGGTTTTCGTCGTTTCCTCTGGTCATGGAAGAGCAGAAATGACCCTTCTAATGGTCA  
ATATAGTTTCATATTTGATCCTAATGGATTCCCACAGCCATTTCTCATGAACGGTTCATCCAACGCTTCA  
GGGGCGGAGCATGGAATGGTCAAAGCTTTGCTAATTCACCATCTCTACTACCAAGTCCTTCATATAAATA  
CATATTTGCATCCGATCCAGACCAAGTATACTTTACTTATGAGCTCATTGACACTTCTGCTATTGCAAGGG  
TAGTGATGCAACTACATGGGTTTCTAGAGCTTTGACATGGAATAATCTAACTCAGAATTGGGATAACTT  
TGGTAGCGCACCAGCAGACAACACTGTGACATTTATTCCCAATGTAACGCATATGGTTTGTGCAACAGTGG  
CAATTCTCCAATCTGCAGTTGTTTGGATAAATTTGAACCCAAAGATCCAACAGAATGGGTAAGGGGAAA  
TTGGTCAGGTGGCTGTGTTAGAAAGACACCAGTATTGAATTGCCAAAAGGAAGTTAAATCTTAAAGTA  
TTCAGGGATCAAGTTGCCAGACACTCGATTTTCCTGGTACGGTCGAGGAGTAACTCTTAATTCATGTGAG  
GAATTGTGCTTGAGAACTGTTTCATGTGTGGCCTATGCAAACTAGACACAACAGGGACAAATGAAGAC  
TGCTTGCTTTGGTTTGTGAGCTGATGGACATCAGAGAGTTTGGTTCAAGTGGGCAAGATATCTATATAA  
AGTTGGACTCCTCTGAGACAGAGATAAGTACAGGTTGGTATGCTTCTTTACATTAGTCTTGAGTTTTCTA  
GACCAAATTGAACTGTCTATTAATAAATTTGAAAAGACTAAGATGAATTTATATGAATCATCAGGAAACTC  
CAGTAAAGAGATATTAAGAAATTGAGAATCAGCTTGCCATTGGCAGCATTAAAGTCTTCTCTCAGTGCTA  
TGCTTGATCTTGTACATTAGGCATACGAAGAACAAGAAGAAGAAAGAGGAGGAGAATCAGAATCAACA  
ACGTTTTAGTGAAGGTAAACCGGATGTTTTGCTACTTTGAAATTTGAAATAAGTGGCTTGAATTGATGGT  
AAATCCTAGAAATTCCTCTTAACATCCAATTAAGTCCTTATTTTACAGGAAGCTCTGAAATGTTGTACAT  
TAATAAGAGCAAAAATGATGATCTAGATTTACCATTGTTTGTATTTGCCACTATCTTGGAGGCTACCAAT  
AACCTTTCTTTGAGCAACAAGCTTGGAGAGGGTGGTTTTGGACCTGTTTACAAGGTAACAATGTTAACTA  
CAGCTCTTTCTTTTTCTCTAAACAACTGCTTATCTTCAATATATTATATATGCTGGAACATTGACAACTT

TCGGAACCTTTAAAAGGAAACAAGTTCCCGATTAGAAAATATGTCTCCGATTCTCCAGAAATGTCATTAA  
AAGTTAATTCCACTTCAAACAAGCTATCTAAAAAGTTTACTCAGAATTTTTCAATCGAAAACTAGAGA  
AGCTAATTGCCTGAGGATATGTAGGGTGCCTGAAAGATGGACAAGAAATAGCAGTAAAGAGACTTTC  
AAGATACTCAGCACAGGGAACGGATGAGTTCAAGAATGAGGTTATCTTCATTGCTAAACTCCAACATCG  
GAATCTTGTGAAGCTTCTTGTTGTTGTATACAAGCAGAAGAAAAATGTTGGTTTATGAGTACATGCCT  
AACAAAGCTTGGATTGGTTCCTTTTTGGTTGGTTCCTCACTTCTCTCAACTCTTAATACATTTGGTTATCTG  
TAGTAATAGTTCAATCAGCTGCAGATGGATTTGGTTATCACTTCTCTGAACTTTTGATTTTTGCACATAAA  
GATAGGAGGTCCTGCTTATTGGCCCAAGTGCTTCCATATTATAAATGGAATTGCTCGAGGACTTCTCT  
ATCTTCATCAAGACTCAAGATTGCGAATAATCCACAGAGATCTTAAACCTAGCAATGTTTTGCTAGACAT  
TGATATGAACCCGAAGATATCTGACTTTGGCATGGCAAGAAGTTTCGGAGGAAATGAGACTGGAGCCA  
TGACAACAAGAGTGGTTGGAACATAGTAAAGATCTTAAACCAAAGAGCTACTTACACTCTACTAAAAA  
GCTAACTTTCTTTATTTGTGATTTAAAAAAGAAGAGATACTTACTTTCTTTGTTTGACGTTATCCTACAG  
CGGCTACATGTCTCCGGAGTATGCAGAAGAAGGGAAATTCTCAGTAAAATCAGATGTTTTTAGCTTTGG  
AGTTGTAATTCTGGAGATTTAAGCGGGACGAGAAATAGAGGGTTCATTCATCCAGACCATCACCATAA  
TCTTCTAGGACATGTAGGAACTCATCTTATACTTACAGCGTAAAAATCATGTTAGTTAAAATTATAGCATC  
TAACTGCATGATGTGAAATGTATGTTTCAGGTGTGGATCCACTTCAAAGAAGGCAGGGTTATGGAAGTAA  
TAAATACACATCTAAAGGAGTTATGCAACAACCTATGTGAAGTGCAAAGATCAGTCCATGTAGGTCTATT  
GTGTGTGCAGCAGTGTCCAGAAGATAGGCCTAGCATGTCATCAGTTGTGCTGATGTTGTCTAGCGATGT  
TCCATTGCCCTCACCTAAAGAGCCTGGTTTTTTTACTAGCAGAAGCCGATTCGGTGAAGTTAATAGTTCAT  
CTAGCAAGCTTGGCGAACATTCTGGAAATCAATTAAGCATCACACTATTGGATGCTAGATAGGATATATA  
TATATATATTTTCATTGTTTGCTTGTAGAGGCTAGTGTACGGACTTAGAGTCTCACTAATGTTCCGTGCG  
GTACTIONGACAACCTTACACAGGAATCTAATTACAGTGGCGGGACATGACACTAGGCTTTATTTACTTTATT  
CTTTACTTCACAGAGCTCAACACAGCTTCCAGTTGTACAACCAAACAACCTTAAAGTGAATTTGTCAAATGT  
ACAAGTGCTTTCTCAGTCTAATAATTCTTCATAATCTATATTGTCCTCACTCCTCAGATTGTGAAATGAGTT  
GAGACAATTTGTCATAATTGTACAAAGGGCATTGGACAGCTCTTTTTCAAACAAGTACAGTTGATAGTA  
TTTTAATTAACAACCTTACGGTGTATCAACAGGTTGGTCAATC

>PGSC0003DMG400018452 G-LecRK

CTTCAACCATGTTAACAGTTAGAACTTGCCTTCTTTAATTTCTCCCCATTGATATCATGGCTCTCTATTTCT  
TTACTTGTGTTGTTTATCTTTGGATCCGCTAGAGCTCAATCAAATCCACCTAGTACAATAAGATTAGGATC

TTCTCTTCATCCCACTGGACAATCTGTAGCATGGTACTCAGCTTCAGGCCATTTGCCTTCGGCTTTTATCC  
ACAAGGAAGTGGTTACAAGGTGGGAATTTGGTTAGTGGGAGGCTCCAATAACACTATTGTGTGGACCG  
TGTCTCGTGATGATCCAGAAATATCTGCTGATTCTACCTTAGCTTTTCATTGATGGAATTGTAGTTCTGAAA  
ACAAATAACAGTGAGGATAAGACTGTTGCTAGTTCGTCAGAATCTGCTTCTTATGCCAACTTGCTTGATA  
ACGGTAACTTTGTTCTTTACAATCAAGATCATGAACTATCTATGAGAGCTTCAGTTTTCTACTGATACA  
ATTTTAGGTGGCCAGAAATTAACAAGTGGGGGTAAATTGGTTTCTAGTTTCTCCTCCACAAATCACTCCT  
CAGGGAGATTTGCCTCTGGATGCAGGATGATGGGAACCTTGTTGCATACCCAGAACTTGTTTCGGC  
CAGTAGATGCCTATTGGTCTTCACAAATGTACTGTGATGGTTGCAGAAATCTCCTGCTTCTTAACAGCACT  
GGCATCTTATTTCTGATCAATGACACTGATTCTTCAGTACTTCGACAATTATACACTCCACTTGTACAGAA  
TAACAGAGCTATTTATCGGGCCACTCTAGATTATGATGGGAATTTTCGACTCTATTCTCACGAATTCAACT  
CCAATGGGAATTCTAAAATGGTAATGGAGTGGGAGGCAATTGATGATATTTGTCTTGTGAAGGGTTTCT  
GTGGCCTTAATGGCTATTGTGTTGGAAGTAATCACAATGCATCATCTTGTATGTGTCTACCAGGGTCATA  
CTTGAGAGAGAATGATCCAAGCTTTGGTGATTGTCAAAGGAACTTCACCAGAGGAAAGTGCATTAATGG  
GAAAGAAGATGTAAGTGTCTACAAGATTACTACCACAACCAATTTGACCTGGGAGGATCCTCCTTACTTT  
GTTACATCACTTCTAGGAAAAGAAGATTGTGGTAAATCTTGTTTGGAGGACTGTGATTGTGATGCTGCTC  
TTTTCGATGAACTGGCCAGTGTATGAAACACAAGCTTCCTCTGAGGTATGTTAAAGGTGCTCCTGAAG  
GATCTCGCACTGCTTACTTCAAAGTCAGCAATCTAGCAGTGCAAAATCCAACAACGGATTCAGTGAAGCC  
ACCATGGGTGGTGTATCTTGGTTTTATCGATAAGTTTCGTTATGTATTCAGGTAAGTCTTGCATTTTCAG  
GCTTTTATGTCTTCAAATTCGGGATAATAAAGTACAGGAAGCTACTTCAGACAGGAACCCACAGGCTTAAC  
AAAAGATTTCATACTCAAACCTTGCTCTTACAAGGAGCTAAAACAGGCAACGGATGGTTTCAAAGAGGA  
ATTAGGAAAGGGTGCTTTTGGAGCAGTTTATAAAGGGAGCTTTGACAAAGGTAAAAACCTTGTGGCAGT  
GAAGAGGCTAGAGAAGGTAGTGGAAGAAGGTGAAAGGGAGTTCAGAGCAGAAATGAAGGTCATTGGT  
AGAACTCGACACAGAACTTGATTGTTTTGCTAGGATATTGTGCTGAAGGATCAAAAAGAGCTCTTGTTT  
ATGAATATATGAGCAATGGTTGCCTAGCAAATCTGTTGTTCCGAGGAGCTACTCGGCCGGATTGGAATC  
TAAGAGTAAATATTGCACTAGATGTGGCCAGGGGAATCCTCTACCTCCATGAAGAATGTGAAGCTCCAA  
TTATCCACTGTGATATAAAGCCACAAAACATCTTACTCGACGAGTTGTTGACAGCTAAAATCTCAGATTTT  
GGTCTGGCCAAGCTGCTAATGCCTGATCAAACAAGAACATTCCTGCTGTAAGAGGGACTAGAGGGTA  
TTTAGCACCAGAGTGGCAAACAATGCCCCATCTCTGTCAAGGTTGATGTCTTCAGCTATGGTATTGTA  
TTGCTAGAAATCATTTGCTGCAGAAGAAACATTGAAGTCTGTGTGACTAAAATAGAAGAAATCCAGCTTT

CTATATGGGCATATAGTTGCCTTGTTGAAGGTGAAGTAGACAAGCTTGTTGGAAGTGAAGAAGTAGACA  
AGAAAACCTTGGAAGGAATGATCTCTGTGGCGATTTGGTGCATTCAGGACGAACCAGCTCTTCGTCCTC  
CATGAAAAAAGTATTACACATGTTGCAGGGAATTATTGATATTCCAATTCCTCCATGTCCAAGTCCCAGT  
AGTTAATTCAGTAGTTGTAAGTGGTTTGGTTTATTATATTGTTGTTTTCTTCAATAACATCTTTAATGGA  
AATTTTAGTGAGGATATATAGTTAGTTCAACATACATGAGTTCAGATTATGTTTTATTTAATGAGATCAT  
TTGCAGGCCCTATGGGTGTAATCTTGAAAGATATTACTCAAAAATGAGAATGTTTTGAAGTGTGAGAGT  
ATCAAAATACTCAACTATTACACTAGGAGATTATCAAAATTATGCTTTCATCATATGTTGGGAGTTGCG  
AAAATTTAGACATATATACAAGTATATGTGGGAATATTTAAGGTGTTGAGAGCCACTAGATTTGGAGCTT  
CTAATTAAGGTGGATAACACTTCAATATAGTAACATGATTGCTGATATTATGCAGGGAAAGGGTATTCCT  
TGATAGTATTGTGGTTAAAGGCTTAAAGCAAGGAAGACTCTTTATCAAACCAATGGTATTATATATTGCT  
GTAGAAAAGGAAATTAATAGTGGATGCAATGGCTAACTGGAGCTTAAAGGGGCATACATCTATCAGTT  
CAATGATCTACTACAAGAAGCTAAAGCTGCATACAACAAATTGAACAAAATTCAGGTGCTTAGTCAAAG  
GTGCAGAGTATGCAACAAGATTCTTGTAAGAACTTCATGCATCAAGACATGATAAACCACCTTCATATTTT  
GTATGTTCTTATAAAATCAGATAGAAAAAGTAGTCGAAAGATGATTTTATTAATTCAGTAGTCA

>PGSC0003DMG400018457 G-LecRK

GGAATACTACTGCCATTTAAAATTGGAAATGTCCAAGTTAGTATACAAAAGAATACTTAGCAAAGAGTAT  
ATCTATATTCTCATCCTTGTGTCATGGCTAACTTAACATTTACTTTTCATGTTGTTGATGCTTCCATTTGTGT  
TGCAGCTATTCAAGTTGGAGCTCAGCAACAGCCCTCCAACATAACCTTAGGTTCTTTTCTTTATCCGAACC  
GAAATCCAAGTTATTGGCCATCTTCTCAGGCCTTTTCTCATTTGGTTTCTACCAAAAAGGGGATGGATTT  
CAAGTTGGCATATGGCTACCTGATAAACTGTTGTTTGGACTGCAAATAGAGATGATCCTCCACTTCATT  
TGGATGCATATATCGAGTTCACAAAGGGAGGCAAACCTTATACTATGGACAAAACAGAACAAAAAATCA  
TTGCAGAATCTCCACAGCCAGTAACTTCAGCATCCATGCTTGATTCTGGTAACTTTGTTATCTATAACAAA  
ACAATTGTTGTTTGGGAAAGTTTTGATTATCCAACAGACACCATCCTGGCCGGTCAGCGTCTAACATTGG  
GCCAGAGCCTTGTCTCTAGTGTACTGAAGTTGATCATTCAAGTGGAAAGATTTTATCTTAGTATGCAGGC  
TGATGGGAACCTTGTTGCCTACCCAACCAATTATCTTAATGGACCTGAGGCTTCTATTGGGGTTTTATGC  
TACAAAGCAGAGGTGAATTTGGTGAGGTTAGCTCAGTTTTTCATAGGTCTTACTCCAACAGGCCAACTCTT  
TCGGAATGCTTCTAATGGTTTTCGTTTTCCAAGTCAATACCATAGGGAATACCTCTAATCAATCATCAACCA  
ACAAAGCAGCAGCAATTTATCGCGCAACTCTTGATCCTGATGGGATTTTTAGGCTTTATACACATAACTTT  
GACAACTCAAGCTTGGAAATCAATTGGTCAGCGCTGGAAAACCAATGCAAAGCCAGGGGATTCTGTGG

TTTAAACAGTTATTGTAAGTACTGCAAAAAATGGCAGCAGCATAGGCGATTGTTCTTGTTTTCTGGATTTTCAT  
ATGTCAACCGTGCAATGAAATCCAAGGCTGCTATCGGGGATTGTTTATGAAGAGTTTTGTGGAAGCA  
GCAGAGACTCAACATTGGCCTACAATGTCACGGCGATTCAACACTTGAAAGTTGGAGGATATCCATTTTC  
TCAGGTTTCAATGGTTGAGCAGGACTGTAGAAATCTTGCTTGGATGATTGTACTTGTGGGCTGCTCTA  
TACATGAATGGAGTTTGCAGCAAATTAAGCTTCCATTAATTGATTGACAATTGAACAAAATGATGAGT  
CCATCAAGAGCTTCGTCAAGCAGAGCTATAACATCTCCCAAATGGCAGGTCCTACTCCCTATCCTGG  
AAAAACAGGGAATAGAAATGAAAGTCGGAAAGAGATAATATTGATTCTATCCCTGGTTCTTGTTCTGT  
AGCATTCTGTTCACTGTTTTTGCAATTTTCAGTTATATTTTCTACAGAAGCAGAGCGGACGAATACCAA  
AGCTATTGGAAAATCCATATTTGGGGCCAAATGAGGAGTTCACTCTTCGATCATTTTCTTACAGTGAGCT  
TGAGAAAGCCACTGAACATTTCAAGGAAGAGATAAGACATGGTTCAATTCGGGAACGTCTATAAAGGAAT  
TCTATCAGAAGGTAACAGAACAGTTTCTGTAAAACGACTGGAGAAAATCGGGGATGAAGGAGAAAGGG  
AATTTAAAGCAGAAATGACTGCGATTGGGCAAGCTCGTCACAAAACCTTGGTTCAATTTGCTTGGTTTTTG  
CTTGGAGGGATCAGAAAAAATTCTTGTGTATGAGTACATGAGCAACGGGTCCTCGCAGATATCATATT  
CAATTCAGAAACAAGACCTTCTTGGGAGCAAAGGATGAGACTTGCCTGGACATATCAAGGGGAATACT  
TTATCTGCATGAAAAGTGTGAGACTTGCATAATCACTGCAACATAAAGCCACACAATATCCTAGTAGAT  
GATTCGTGGACGGCTAAAATCTCTGAATTTGGGCTTGCAAAGTTTCTGGTGCCTGATCAAGTAGGAAAC  
CAACTTCAGCTTAAAGGAACAAGAGGATATTCAGCACCAGAGTTGCAGAATAGTGCATTGATCTCCGAT  
AAGGTAGATGTTTATAGCTACGGAGTAATGCTCTTGGAGATCATATGCTGTAGAAGTAATATGGATGTC  
AACGTCTCAACCGAGGATGAAATCTTCTCCTAATTGGGTACACAAATGCTTTGTCGAGAATGATATCA  
GAAAGCTAGTGGGAGATAAGGAAGTAGATCATGCGAAGTCCTTGGAGAGGATGGTGAAGGTTGGATT  
GTTATGCATTCACGATAATCCTGATCTGCGCCCTTCTATGAGGAATGTAGTTCTCATGTTAGAAGGTACT  
ATGGATATAACCATTTTTGGCATGGTATTAAGTCTTTTACACTTCGTTTGGCTGGTTGCTACATCTCATTCA  
AAATGTATCATATTATATTGTATTGTGTTGTGTAAGTGCATTGTATTGTACTGTTTTCTTTTTATGAATACA  
AC

>PGSC0003DMG400019062 G-LecRK

ATGGTTCTGTGTGGTATTATTTATATAATTTATCTGAAAAGATCGGCAAGAAGTAAAGGTAACAATGTAG  
AAATTTTCACTGCTTTTTCTCAACTACTCCAACCTTTGGATATCGTAATCACTTCAATTGTTTTGATTATAG  
AAGCCAGAGATATTGTTTTGGGAATGCCTATGGAGTACTTGCCTCATAGAGATAGTTTTGATGAAGATT  
AATCACTGAAGATGATAAGAAACGGATTGATGTCCCGTTTTTTCAGCTTGAATAGCATACTAGTTGCTACT

GAAAACCTTCTCAAATGCAAGTAAGCTCGGGAGAGGTGGATTTGGACCTGTTTATAAGGTTTTGCAACTTT  
ATTTTTCTTTCTTCTTCTGTTCTAAGTTGTTTTACCATTAGATTTTTTTCTTTCTTTTCATTATATAACAG  
TCCGGAGATATATTTATGCAGGGTAAGTTTCTCGGAGGTACAGATATGGCAGTTAAAAGGTTGTCAAGT  
AATTCTGGACAAGGTGTTGAAGAATTTAAACTGAAGTAATGTTGATTGCCAACTGCAGCACAGAAAT  
TTAGTTAGGCTTCTAGGCTATTGTGTTGAGAGAAATGAAAAGATTTTGTATATGAATATATGCCCAACA  
AAAGCTTGGATACGTTTCTATTCGGTTAGTATACTTCCCTCCCTACCATGAAACTCGTTGTAGTAATAGTT  
TTATGATTGATTCTCTCTGAAGTTATCTTACAACTTGAATTAGATCATGCATTCTGTGCTGATTACTGGA  
CTGGAGGATTCGTTTTGAAATTATATTGGGTATTGCTCGAGGGTACTTTATCTTCACCAAGACTCAAGG  
CTAAGGATCATTATAGAGATCTAAAGACGAGCAACATATTGTTAGATGAAGAAATGAATGCCAAAATA  
TCAGATTTTGGCTTGGCAAGGATTGTTGAAGGCCAAAATACAGAAGCCAATACTAACAAAGTCGTTGGA  
ACATAGTAAGTCTCTTAGTTCTGCTTCACCTTTGATTTGGTGGGAAGAAGATAGATATATACACACCTAA  
TGTATTGTTTACACAACTAGATGCTAAAATAACCTATTCTGGAACACTAAAAACAGTGGCTATATGTC  
TCCGGAATATGCATTGGAGGGACTCTTTTCAATCAAGTCTGATGTATTTGCCTTCGGAGTAGTCCTACTC  
GAGATCGTAAGTGGGAGGAGAAACATGGAATTTTTCGAAGATGTAAACCTCATTGGTCATGTAAGTACC  
AAAATTTCCCTCATTAAATATACATCTCATTCTACTTAAAGCTTTCATTGACTCAAATTAGCATTTCACAGG  
TATGGAGACTGTGGATGAAAGACAGTGCATTAGACATGATGGATCAAACCATAGTTGAGTCGTGCGAT  
GAAAGTGAAGTGCTAAAGTGCGTTAATGTGGCACTCCTATGTGTTCAAGAAGATCCAGCTGAGCGTCCT  
GTAATGTCAAATGTTGTTTTATGCTTGGAGGTGAAAGCATAACACTACCAAGACCAAATCAACCAGCTT  
TTATAGCACGAAGAAATAGTGCTGGTGCAAGTACATCTTCTTCGTCTTCTAAGCTATACAACACTTCCAAC  
AATGGGTTGACAATAACTCAACGAGTAGGCCGATGA

>PGSC0003DMG400019237 G-LecRK

GCCAAGTGAATTCAAGAAGTGGACAACCTTTGTCAAATTCAAAATTGTCCAAAATCTTGCAAGCCCCAC  
TTTGTCTTCCAAGTAATTCAGTCACAAAAATGAAGTCTTGGTCATATTGACATGTTATCACATCACCAACA  
CCCTTTTAATATTTTTAAAATTTTTTTGCCTTATTTTGTGTAACCAAGAAATGAAAAGGGCTAGTAGCT  
ATGGAGAAATTTCTACCCTTTTTGCTTCTTTGCCTTTTAATTTTCTTCGAAAAGTTAATGGACAAGGAGA  
TATGATAACTACCACTAAGTTTATCAAAGATGGTGAACTATTGTTTCTTCTGATGGAACATTTGAGTTG  
GGTTTTTTCAGTCCTGGAAATACTTCTACAAATCGTTATGTTGGAATTTGGTACAAGAAAATTTCTGTTAT  
TACTCCTGTTTGGGTTGCTAATAGGTTGGTTCCACTTACTAATAAATCCGGGGTTTTGAAAGTTATTCAAT  
CGGGCGGTGTTGCTCTTCAAATGTTACAAATTCACAATTTGGTCGACAAATTCATCGAGATTCGTGCA



AAACCCTGTTGCCAGTTGCTGGACACGGGGAATTTTGTGTTGAGGGATGCTAATGATCCGAACCCAGA  
GAATTCCTTTGGCAGAGTTTTGATTACCCTACTGATACGCTGATTGCGAATATGAAACTTGAAGAGAT  
TTGATTACTGGGTTTGAAAGGTATCTTAGTTCATGGAAAAGCAGTGATGATCCTGCTCCAGGGGATTATA  
CTTATCATTGTGATCCAACGGGTTATCCACAGGACGTTATGCGAAAAGGGGCTGATGTGATTTATAGAG  
CAGGGCCATGGAATGGTTTAAGGTGGAGTGGTGCACCTAATATGGTGAACAATTCAATCACTTCGTTTG  
GTTTGGTAATGAACAATAAGGAAATTTATTATAAATATGAACTCGTGAACAAATCTGTAGTTTCAGCTCT  
AGTAGTAAAGCCTAATGGGAACACTATGCGTTTGATTTGGATCGCGAAGACTCAGGGTTGGGTTAACTA  
CCATTCTGCTGATGCAGATGACTGTGACACTTACAAATTATGTGGTGCATATGGGACTTGTAACATTTTG  
AGTGATCCTGTGTGTCATTGTTTAGATAAATTCGAGCCAAAGCATCAGGATGATTGGAATAGGGCAGAT  
TGGACTAGTGGTTGTGTCCGGAAAACCCATTGAATTGACTGGAGATGGATTTATTATGTATTCTGGTG  
TTAAACTGCCTGATACACGAACTTCTTGGTTCAATGAGACCATGAGTTTAGATGAATGCAGGGCGGTTTG  
CTTGAGAAATTGTTCTGTATGGGTTATACTAATCTGGATATACGCAATGGAGGAAGCGGGTGCTTGAT  
ATGGATTGAGGAGCTGATTGACATCAGACAGCTATCTCAATCAGGACAGGATATCTACATTAGGATGTC  
TGCTTCAGAAATAGGTAATATGCAATTTACTGAGGTTTTCTTTATTACACAATGCTTGTTATTAAGAATGA  
TGTATTGGATAGTTCAATTCTGTAAGGCTGATTAACGAACGAAGAGTAGTGCATTTACAGGGAAATTAG  
GTGTAACATCCTCAAGCAATGGATCCTTTTGTGAGAATAAGACTTATATGACCATCTTGTTCTACAATA  
AAATAATTTGCACAGGATTTAAAAAGTTTATCGGAAATTCTAATCAAACAACACTACCTGAAGAACTTTT  
GGATGGAAAATGTTGCAGGTTCTGCTGGATCAAGTTCAAAGGGAGATAAATCTGTTATACTTGCAGTAG  
CTTTGCCACTATTGTTTGCCTGATTCTTCTAGGTTTAGGTGTTGGCCTGATTCTTTATAAACGGAGAAGG  
AGAGAGGATCCAGTGGTTATGACAAGGGGTAAGTGAACATAACAAGTTTTTATCTGTTGAAAAGCCGG  
AAGTAATTAATGGTTATTAGTTCTGTATTCCATTAGTATCTCTTTTCAAGCTCATCGTTTGAACAAAGTCTG  
CTTGGTTGTTCAAATTGCAGGGAGATTTAGTGGTCACAACAACAAGAACGATAACACTAATCAAAGTCA  
CCATGAAGATTTTGAGCTACCACTTCTGATTTGCTTACATTAATCAATGCTACTGACAACCTTTCAATTGC  
GAACAAGATTGGAGAGGGTGGCTTTGGACTAGTTTACAAGGTAGAAACATTTGATCCTTGAGAGCACAT  
TGAAACCTTAAATCGATTTAACTTTTTGGTTGAAATGAAAGTAAGTTCTACTTTTACAGGGTGTGTTAGA  
AGGGGGGCAAGAAGTAGCAGTGAAGCGGCTATCAGAAACATCAAAGCAAGGAATTCACGAGTTCAAG  
AATGAAGTTAACTGCATTGCTAACTTCAGCATCGAAATCTTGTAAGCTTCTGGGATGCTGCGTTCAAG  
GAGAAGAGAAGATGTTGGTCTACGAATACTTGCAAACAAGAGCCTTGATATATATATATTTGGTTAGT  
CTTTCACATCCAGTGTACATCCATTTCTTCAAGTGAACCTTCTGATGTGATTTCACTGAGCTTAGTTTCATG

TTTAGGAGAAATTATAATAAGTTGAAAACATTTGGCAGATGAAGAAAGGAGCGCATTACTTGACTGGCC  
AAAGCGCTTCAACATTATCAATGGAATTGCTCGTGGACTGATGTACCTCCATCAAGATTCAAGACTTAGA  
ATCATCCACAGAGACTTGAAAGCGAGCAATGTCTTACTTGATACTGAAATGAACCCGAAGATATCAGATT  
TTGGGATGGCTAGAAGTTTTGGAGGAGATGAGACTGGAGCCAATACACGCCGTGTTGTTGGAACATAG  
TAAGATTTAATCTTTAATTTTACATGTAGTTGTTACATTCACATGTGCATTTCTGCATTATATTGTTACTT  
GTCCGCGTAGCTTGGGATTTTCAAAGCAAAAAGAAGATATTTAACTTGCCTTGTCTACCCCGCTCTG  
TCCTGCATAAGAGCTCCTCTACCCTGCCCTATATAAGATTAAACCCACCCTATCCCATTGCCATCTCTAATT  
ATATAGTCCTTTGTTATCGTTGTTGCAGTGGTTACATGTCCCCGGAATATGCAGTCGATGGGATATTCTC  
AGTGAAATCAGATGTCTTTAGCTTTGGAGTATTAGTACTAGAGATTGTGAGCGGAAAGAAGAACAGAC  
GATTCGTTTCATCCAGACCACCACCTCAACCTTCTGGACATGTAAATACTATGTCCCAACTCCTATGTGTA  
AAAGGACTTTACTCAAAGTATCTGTTAATGAGTTCAAGAGTAGTATATAAACTATTGACATTGTCAATGT  
ATATAACTTAAATCGTTTGTTAACGGATGAGTCATTATATGCAGACATATATGCTACATAAAGAAGGAAG  
ATCATTGGAGCTAGTTGATCCAAAACCTGGTGGACTCATGTAATATATCAGAAGTACTAAGATCAATCCAT  
GTAGGTTTATTATGTGTTCAACAAAATCCAGAGGACAGGCCAAGTATGTCAACTGTGATTATGATGCTG  
AGCAATGAAGGCATTTTGCCATCAGCTAAACATCCTGGCTTCTTTACTGAAAGGAAAATTGGTGATGTTG  
ATCAATTTTCTGGAGTACACAAACACCTAGTTCTATAAATGAAGTTACCATCACATTGTTGGATGCTCGA  
TAGGAAGAATGTCGAGTGATTTCTGAGATGATCACTCAACTAATAGTTACTATATCAGAAAGTCACTTTC  
TTTGTTAAAAGATCATTGGAATGTGATTTTCTGAGATAATTACTACTACTTAAGTAACCATCTGAGAACTC  
AACCAGAATTGTATTAATCTTCTCCTCTTTTCTATTTTATTTATTTAGTTAGAAATTTTTGTATTTCAACA  
ACATACACAGTGTGATCCCACTTGATTCTTTTGTAGTAACATATTTGTCTACATTGTACGTTAG

>PGSC0003DMG400019238 G-LecRK

ATGAATGCAATACAAAGGAATGATTTTTACTTGTTATTGTTATTGTACTTGTATTCGATCAACCATACTTTT  
GGTGCTACAGATAGTACTATAACAGCTACTCAGTTTCTGAAAGATGGCGATAAAAATTGCTTCACATAGTG  
GAAGCTTTGAAATGGGGTTCTTCAGTCCAGGTGATTCAGAGAATCGCTATGTGGGTATATGGTACAAGA  
ACATATCTGTTAGGACTGTGGTGTGGGTAGCTAACAGAGAAGCTCCTTTGACCGGTGAATCAGGTATCT  
TGAAAGTCATTGAACAAGGAATTCTTGTCTTCTCAATGGTACTAACAATGTTGTGTGGTCAACTAATAC  
CTCTAGATCTGTGCAGAATCCTGTTGCACAGTTGCTGGATTCGGGGAATCTTGTTTTAAAACAAGCTGAT  
GATGATAACTCGGGAATTTCTCTGGCAGAGTTTTGATCACCCAAGTGATACACTATTACCAAGCATGA  
AGCTCGGTTGGAACCTTTGTAACCTGGCCGAGAGGTGTACTTGTTCATCATGGAAGAACGAGGAGGATCCA

GCTCCCGGTGATTATACATATCATTGTGATCCTTCTGGATATCCACAGAACATCCTGAAGAAGGGTTCAG  
ATGTTGTGTATCGGTCTGGACCGTGAATGGTCTTCATTTTAGTGGTGCATTAAGCTCAAGAGACAGTCC  
TTTGTATACATTTGGGATATTCTCAAGTAAGACGGAGGTGTATTTGGATTTTATCTCACATCTTCGGTTA  
TCACAAGGTTGACACTAAGTCAGAATGGTGCATTACAGCGTTGGACTTGGGGTGACCGTGACAGGATT  
GGATCCCTTACCTCTCAATACCCACAGACAACCTGCGATGTTTACAACTGTGTGGCGCATATGGTAGCTG  
CAACAGTCAAAATTCTCCTGTATGTGGATGCTTAGACAAATTTGTGCCAAAACATAATGAAGATTGGCAA  
AAGGCAGACTGGTCAACTGGCTGTGTTAGGAGGACTGAACTAACTGCCTCCAGGGAGATGTATTTTTG  
AAGTATTCGCATATTAATTGCCAGACACACGGAATTCCTGGTCCAATGTGACTATGACACTAGAAGAAT  
GCAAGACTATATGCTCTAGAAATTGCTCATGTATGGCTTACTCAAATATTGACATACGCAATGGAGGAA  
GTGGATGCTTATTGTGGTTCAAGGATCTGCTTGACATTCGACAGCTATCTAAAGAGGGACAAGATATCT  
ATATAAGAATAGCTGCCTCTGAATTAGGTATGTTTGTTACTGAAACAGTTAACAATGATTTGTCATTTGTA  
ACTTGAAAATAAAAACCTAAATTTATGGTTGCTGATACTTGGGGTTAAGCAGAGGTAACTTAAATTTCA  
ACTGTGCTTATGCTTATAAGTATCTAGTACTAGAACGAAATTTCAAAGTCTTGCGTGCTGTATATATAT  
ACTAGTTTCTGAGCACATGCTTCGCACGTGTGTTTCATGTGAATTTTTATAGATACGTTAGAATGACTAAA  
ATTCATGAAAATTTATATATGTAAATTGTAATGAACAATAAAATGCAACAATTACAAAATAAGTATAAA  
GACTTACGACAATAAAACATTCATAGAAAATAAATTAAGAAGTCTAATAGAGAAAAAAAAAAAAAAGAC  
AAAAAGAAACAGATTTAAGAAAAAATACAAGGTAGACATTATTCTTATAAGACTGATACATATATAGAT  
GGAAAAATAAGTACAAAATTAGTACATAACTCTCCGAGTTCTTATCGATTCTTCCATATCCTATCAAAAT  
TCAAGAGTCTTCTTCATCTACTTTAACTATAGAATAAAAATAATAATAGCCTAATAATCTTGGTAGGGATT  
TCATGAGATAAAGAAGTTGAATTTATATAGATAGAATAGAAGGAATATCAAAAGATATCTTAAAGTGCT  
AGTTTAAATATTTAGAGGTTATGAATATGAAAAGATGAGAGTTATGAATATTAAGAGTATAAAAGTTGA  
ATAAGTAATTAGAAAATAATAGTAAATAAATGAAGAATATGAAAAAGAAAATTAAGTTAGCAAACCAT  
GTAGAAAGAACAATAAAGTTCTTATCATGTAATTAAGCATCAATGAATTTAAATTTGTGAAGCTAGAG  
TCATTCTTTAATAATAATCAAGAGGACATTATCAATGTGTGCGTCTCCATTTTGCAGATTTGCACCCTTCA  
AATTATTAATTTTCGTTAGTTATCATAAAGGATAATACTTTATCCACATAAATTATATTAAGGAAAAAGT  
TATGAGAAGAGGAAAAGTATAGCAATTTAGGTATAGACTTTTTTTAATTTTTCTTTTATATATATAGATT  
ATAGATGATAAATATTAATAAATTAGATATTTAATTAGGAATTAATCTTAGGAAGTCTAAAAGTCATTAA  
TATTTAATTAATTTTTTTTTTAAAAAAATTATAATTATTATATACATATAGATTATAGATGATAAATATTA  
ATAAATTAGATATTTAATTAGGAATTAATCTTAGGAAGTCTAAAAGTCATTTAACATTTAATTAAACTTA

TACAATCAAATATTTAAATATTTTATAACAATTTAATTAATAGAAGGGTAAAACCGTAATTCAACTTTCA  
ACTTTTTTTGTTTCATGCTTATAGTAATATATGATATATATATATATATATATGTATAGCTAGGAACTAAAAC  
TTAGTAGAATAAAAAGGCTACTACTTAGATTGAGGTGTTGAATTTTAAAGCTAAATCTATAAGCATAATG  
AGTTATTGCATCTGTCAGCTAAAAATCTAAGACGAAATAAAAAGAGGAATTTAGTTGGAAAACTCATTG  
AGAACTAAAAATATGATTTGCAGAATACCTCTACTAAATGTCAACAAATTAATAATGACGTACCGTACTT  
CAAAGTCCAGCAGAATGTTGTAECTCAATATCAGTTATCAACTCCCCAAGTGATCAACAGGTAGAGACA  
GTCAAATTTATTGATTACTTTGTTGGAATGGACCTTGCAGATAGTCTGGAGAAATCAGATGGTGAAAAA  
GGAAGAGCACTATGCTGGATTCTCCATTATCCGTTGGTTTAGTTCTAGTAATCCTTAGCATATTGCTGAT  
ATGCCACAGAAGAAGGAAGAAGGCTTTAAAGCTTACAACGAAAGGTAAGCTGGATAGGTCACTTTTTTG  
CCTGATCGTTGAGCAAAATAGAGGAAGTGAATTTCAATTAGAAGTGAAGACGGTCTTTGCTGCTTTAAC  
ACAATTCAATCAATTTCTTTTAGCTGCAGAAAAATCGAGATACAGCGGAAGTATCAAGCAGGATTACAA  
CAGTGGTAGTTGCACTGAAGAATTTGAGATACCACTGTTTGACTTATCTACCATAACTAAGGCTACCGAT  
AACTTTTCAGTAAACAGAAAGATTGGAGAGGGGGGCTTTGGTCCTGTTTATAAGGTAAAAACACTTGTT  
TCATGGGCAATTTTGTACAAGAAAAATACCAGCTTATCACACAAAGTCTAGATGACTGACAGAAGCTTCC  
TGGTCCTCCAGAGCAAAGCCTTCATCTTTAGTAGGCAAAATGTAATGAATTAAGTATATGCTGGAGCGTT  
TTTTGACCTAACTATACTTAACTGATTCTCATAATTTCTCCAGTCTTTTTTCGTGGGAAGCAGCTTACTT  
TGTACCTTATACTTTCAATTTAGATATTATTTATTGTTTTTGGAGAAAAAGATATAAAATATATCGGAAAC  
AATCTCTCTACCTTCAAAGGTAGTGGTAAGGTTGTGTACACACCAGTTACCACCCTCCCAGACCCAC  
TTGCGGGATTACACCAAGTATATTGTTGTTGTACGTTATGTAAAATATTTAACTTGCAGATTTTGATGTTT  
AGGGAATACTTGAAAAAGGACGAGAAATAGCTGTCAAGCGGCTGTCTAAAACATCCACGCAAGGAGAA  
GATGAGTTCAAGAACGAAGTGGTATATATTGCCAACTTCAGCATAGAAATCTTGTGAAGATTCTTGGA  
TGTTGCATTGAAGGAGAAGAAAAAATGCTGATATATGAATACTTGTCAAACGGAAGTCTTGATTCATTTA  
TATTTGGTAACAAATCCCATACCAATATTGTGTATTCTGAATTATCTTCTCCCAGTTTCGAATCTCCCATC  
AAATAAGAAAAAATAACATGTAAGGAGTGAATAAACCTCAGCTTTATTAGAGCCTAATAATAATG  
TACACAGTAGCCACATTGATCTTTACGTTCAATACGTGAATGGACGGATTTAGTTTGATGTTTTAGAACT  
ACTTTCTATCTATAGCTTAGTGAACCAACAAAATTTGGCAGGTGGCAGACAAAGCAGGATATTAGACTG  
GTCTGAGCGATTTACATCATCAATGGGATTGCTCGGGGACTTGTGTATCTGCATCAAGATTCTCAACTG  
CGGATAATTCATAGAGACCTGAAAGCTAATAACATCTTGCTAGACAATGATATGAATGCAAAGATATCA  
GACTTTGGTATAGCAAGATGCCATGAAGAGGATGGTAATGAAGCCATGACAAACCGAGTTATTGGAAC

ATAGTAAGAATCTATTACTGGGTAGTAGGAAATGCTTGAGATAGTTATGTTTTCCAGCATTAGTAACTAT  
ATTTTGTGTACATTTTCTGCAGCGGATACCTCTCACCAGAATATGCGCTATATGGGCAATACTCTGTAAAA  
TCAGATGTGTATAGCTTTGGTATCTTAGTACTGGAAATTGTGAGTGGAAAAAGCAACAGACGATTTCGCT  
CCTTCAAACCTTAACCGTAGTCTAATCGGGCATGTAAGATTTTTATGTATTTTTCTTATTTATACATTGGTG  
TTAGCAACTAACAAGTATCTTGCAAGGCTAGTGATGCTTATAAGCTTGTAATACTACAGGCATGGGAA  
CTCAACAAGGAAGGTAGGTCAATAGAACTACTTGATGAACGCGTAGGTGATTCTTGTTCTACACCTCAA  
GAAGTGGTACGATCAATTGGTGTGGTCTATTATGTGTCCAAGAACGTCCAGATGATCGTCCAAGTATGT  
CTTCCGTAGTTCTAATGTTAAACAATGAAGGTACGCTGCCTCAGGCTAAACTACTAGCTTTTTACATGGA  
AGGAGATGCATCAGATACTGAATTACTTTCTACCCAATCACATATTACAACGGATGACACCCCGTTAGAA  
ATTAGATGA

>PGSC0003DMG400019241 G-LecRK

TTGATTTTTCACATTTTCCCAAATATTCCAAAAGGACTAAACAATTTCCATGAAACGCTTTAGCTTTTTCTA  
TTTCTGTTCTCTAATATAGTGTCAATTTCTATTCATATTTTCCACTGCTTTAGACACTATATCGAACGATAG  
CCCCATCAAAGATGGACATACCATAGTTTCAGCTGGTGGAAACTTTGAGCTTGGATTTTTTCAGCCCTGGA  
AATTCCAAGAATCGGTATATCGGTATATGGTACAACAATTTACCTAAAGGCAGAGAAGTAGTGTGGGTT  
GCCAATAGAGTGAACCCACTGAATGAACTTCTGGCATATTAACAGTCAGTAGCAAAGGGATTGTACTA  
CTCAATGGAAACCAAGATGTGATTTGGTCATCAAATTCATCGAAAAGTTTGATAAAACCAAGTGGCTCAAC  
TTTTGGACGCTGGAAATCTTGCTTAAAAGATGACAGTTTGGTAAATCAAAAAGACTATGCTTGGCAGA  
GTTTTGATTATCCAGACAGTACTTTGTTACCTGGCATGAAATTAGGCCTTAACTTGGTCACGGGCAAGTA  
TTGGACTATGTCGTCGTGGAAGAGCAGTGATGATCCTTCTCCAGGAGAATATTTGGATCGCCTCGACAC  
CAGTGGTTATCCTCAATCCTTGTGTGGGAAGGTCCTGCAATAAAGTTTAGCTCAGGAATATGGAATGG  
ACATTTATTTGTTGGAGGGCCAAATTTGAAACCAAATCCTTATTATACATTTGAGTTTGTGAACAATGACA  
AGGAGATCTACTATAAATATGAGCTTATCAATACTTCTATTCCTACCAGGTTGGTCTTGAATCCAGCAGG  
CCTGCTTCAACGACTCTTATGGATCGAACGGAACCAGAACTGGTTCCTTTACTCCACTGGACAGATGGAT  
AATTGTGACCGTTATGCCTTGTGTGGTCAATTTGCGCAGTGCAACATCAATGACTCACCTCCATGTGATT  
GTTTGAGAGGATTTAGCCTAAAAATCAACAAGGATGGGATGCAGCAGATTGGTCTAGTGGGTGTGTA  
CGAAGAACTCCGTTGACATGTGGGACAAGTGACAGGTTTCTGAAGTATTCTAGTGTGAAATTGCCAGAT  
ACACGCCATTCTTGGTTTGACAAAAGCATTGGCCTCGAGGAATGCCAAAGGCTGTGTCTGAAAACTGT  
TCGTGTACAGCATATCCAATCTTGATGTTAAAAATGGCGGGAGTGGATGCTTACTTTGGTTTAATGAAC

TCGTTGATATCAGAGAATATGCTGAACTTGATCAAGATCTCTATGTAAGGATGGCTGCATCAGAATTAG  
GCAAGTCTCCTTATGCTAAGATGAATCATACCACAGGGAATCTTAGTAACTCAATTGATTGATTGACTAT  
TTGAACTCCACCTTGTTAACGAGGGTTGGGTTCCCAACCTCGTAATCCCCTTTCCCATTTCCCATTTAGCC  
TTCACCTACCCCAACCCCATTTCAAAAATAAGAATCATACCGGAAGGTTTTCAAGTAATAATGAATTT  
TCACAGGTTGAGGCTATATGGGAAACACAAGAACATCAGTCATTGCAATTATATTAACAGTTTCAGCAAT  
CATCCTTGTTGGTTTTCTATTTTGGTTTGCTATGCAGAGAAAGAAAGGGGAAAGAGGTTAGAAAATTTGT  
CCGTCGCGTTGAAAGTATAGTTATTTTATTACCTCAATCTCTTTACAAAATAAAGTTCAATTTTACAGGA  
GTAGGAGAAGGAGAAGGAAAGGAAGATATGGAATCACCTTTGTTTGATGTGATGACTGTTTCTGCTGC  
AACTAATAATTTCTCATCTGCTAATATCATTGGAGAGGGTGGTTTTGGATCTGTTTATCGGGTAACTAGA  
ATTATATTCTCTGTGTATCTTAGTCAAATATATGAATGATTCTCTTGACTTAGACTTCGCGTGGATTAT  
GTGACAGGGAAAACATCAACAGGACCAGAAATAGCAGTAAAGAAGCTCTCTAACATTCCGGACAAG  
GTTTTGAAGAGTTGAAGAATGAAGTTGTTCTGATTTCCAACTTCAGCATAGAAATCTAGTTAGGCTTCT  
AGGCTGTTGTCTTGAAGGGGAAGAAAGGATGCTAATTTATGAATATATGCCAAACAATAGCTTGGACTT  
CTTCATCTTTGGTTGATTCTCTTGACGCATTTTATCAAAAAGATTCATCTTATCATATCAGCATTGTTCTGC  
TAATGCAAATGAACTGATGTTTCTGCAGATGAATGCAGGAAGAAACAACCTCCCTGGGAAAATCGTTT  
TCGTATTGCAATGGGAATATCAAGGGGCATTCTTTATCTTACCAGGACTCCAGATTAAGGATCATACAC  
AGAGATCTAAAGACCAGCAACATTTTACTGGACAGTGAATTGAATCCCAAATTTCTGACTTTGGACTGG  
CTAGGATTATTGGTGGTGACCAAACGAAGCAAGAACAAGCGAGTAATAGGGACATAGTAAGTTCAA  
TTAGATAACTCATTGATGCTTTTCTCTGTTAGAGTTCCACATTGGTTGGGGAATTGACTGATT  
TATATGGACTTGGGCAATTCTCCCTCATAAACTAGATTTGAGTTGAGTTAGACTCAAGTGTATATCCTTC  
CATGGTATCAGAGCCAGGTAATCCCGATTGGGGCTCCTGGTCCATGTTGGTGGTTTGGTTATATGAAA  
TTGGACAATCTTTCCCTTATGAGCTAGCTTTTGGGGTTGAGTTAGGCATGTGTCAAATCTTTACAACCTC  
CATAAAATCATTTAACCCATATTAACATTATATATGTCTTTGTGCAGTGGCTATATGTCTCCAGAATACG  
CAGTTGATGGGAAATTTTCAAGTGAATCAGATGTCTTCAAGTCTTGGTGTCTTCTACTAGAAATAGTCAG  
CGGAAGAAAGAACAACAACATTTTATCATCCAGATCACCATCATAGTCTTATAGGACATGTAAGCAAGTT  
ACAAATCCAGACATTTGCTTTTGTCAATTTTACTACTACATTTGTATTTCTACATGTCATTGAAAATATACT  
TGATTTTGTATAGGCTTGGTTATTATGGAACGAAGGAAAGGCTTTGGAACATAATCGATGATTGTTTAAA  
AGAATCGTTTGTGGAATCCCAAGTACTAAGATGTGTTTATGTGGCACTGTTATGTGTTCAACGACTAACA  
GATGAACGACCAACAATGTCATCAGTGGTTTTTATGTTGAGCCATGAAGAAGTGGCATTACCTCAACCA

AAGGAGCCTGGTTTCTTCATAGAGAGAAGTATAGCTGAAACAGATCATTCAAATGAGAAAAGATGCATC  
AGTGACAATGTTTTGACATTAACAATTCTTCAACCAAGATAGCAATGGCGGAACCAGAAAATTCAAGAAC  
CTTCTATTGTATAAAGGTGATTCAACAATAATGTATATACAATACAGAAAATCTGTTCATCCCTATATGT  
ACAGTAAAATATTTTGACGAAGGGGCTTCAGTTGAAACCCCTCTAGACCATGCAGCTCCGCCCTGATTG  
TTATTGGACGAGCATTACTAACATGCTTACATAGAACAATTGCGTATATCTTTCTGATATTTGATTAAGA  
CTCACGAGCCATCGGGACCATTGTGTCAAGTTGTGCAAATTGTCAGAACATGATGGAAATGGACATGAA  
AGTTGTTACACAGTATAATGACTTATAGTAGATCTGAATGGCTAAATGATAGCCACTGACTTTGTTGAGC  
AATTATTTTTCTCATGACTACAAATCAATATCATGTCCTGGGGGAGTGTTTCTTTGCAATCACATTCATC  
ATATCTTTTTCCACATCTCTATCACCAAACCTCGAGTTTTGTGCAACTTTTTCTGGTTTTTCTACCCAGTGTT  
CAGTACCAGCTTTGGGGGCTTTTTTTGAAAAATGCTAACAGGGTAGAGCAAGGTGGGTGCATATCTTA  
GCAGGTCAAGGCTTGCCTCACCTTAACCCGCCCTATTGACATCCCTACCTACTTCAAGGTAAGCCAGCTTC  
AACAGACGCCATAAATCCCAGAATGCCTACCTCCTAGTTCCTGGAACATGTAAATCTTTGCATTTGA  
TTCTCATTTGAACAGCATAACAGATTTATATTCAGAGGTAGTTACAATAAGTAGAACAAGGAAATGTTCTC  
GAAAACACTCACAAAATAAATAATTCAAAAAAATGAAGTCATAGCCAACAGAAAAAAGGCCGTTCAAT  
CAAGCCAAAAACAATCCCTTGATGGTTTATACTCCTAAGGCATAAAGCAGTGCAATGGAAGCTCCTAC  
AGTGATTGTCCAGAGATATATGGTTTGAGACAAAGAATTAGCACCCTGCATTGGTCATTAGAACCACT  
GAAGCATCCAGGTCTACTCACCTTAGGTTCTACTCCCCCTGTGGAAAAGCTACTCTTTGGTTTGCCATTGC  
TGAAGAGTACACACCAGAAATAGGGGCCACCACCACCGGAGCCACTCACAGCAGCACCAACCTCAGTGT  
GATTCTTGCTATAGAGAATATCCAACTCTTGGTATTTCTTATAAGAATATCATTGAATGCTTCAGAAGGT  
TCGGCATACTTGGATTGACATGCGAGAAATCTTCCAGTTATTTGAGCAAGCGATGACGCCTGCACACCAC  
AGTTAGGGGCAAATTCTTGGGCGAATTCAGATTCAGCAGGTTTCTTTCCATCTGGCCCTCCAACCTTTA  
CAATCACCTCCATATGCTTTTATATATTGCAGAGCCAAGCATGCCAAGCCAGGGTTACTGTATAAGGAGG  
ATAATTTATTCGCAGTTCTATTACTATTAAGGGCAGATACCAGCTCATCAGCAGGATTATCAGTTACCTTG  
GCTGCAGTTTATCAAGCCAATATATGTGTTAGAGGTTGATCATAAAGGCAATAATAGTGAATCAAGATC  
GAGAAGCTATCTGCTTGAAGGAATACACATTGGGAATGACAAGCGTAAATTACATCTAAACCCAAGAGG  
CTTGAGCACATGTCAGTATGCTTTGCGTAATTGGAAGTACACGCAATTATCTAAGACTGACTAAAGGAA  
GAAGAGCCAGAGAAGGAGAGTAAACATCATTTGCGCTGTGACTATAATTCTAGCACACTCATGGAAAGA  
TTATCAACAACCACCCTATTATCAAGAGATCTCTAACAAGAAAGATACAAAATTAGGGCTCCAACATAGT  
ATTTGAAGGCATAAACTAAAGCATCTTGAGCACTGTCTTCCATTAGTGGGCTAGAGTCCCACATTGGTT

GGGAAAAGACTGGTGGCTTGTTTATATTAACCTTAGACAACCCTCCCCTAAAAGCTAACTTTTGAGGTTGA  
GTTAGGTCCAGATATCATATCTTTACCTGGGCGGCAAAGGGTGTGGAAATGGGTTAGAGTCCTCATTGG  
TCTCCTTATATGGACTTAGACAACCCTTTCTCATGAGATGCCTTTTGTGGCAAGGGGTGTTGGAATGGG  
TTAGAGTCCACATTGGTCTCCTTAGATGGACTTAGGCAATCCTCCCCTCATGAGATGGCTTTTGTGGTTG  
AATTAGGTCAGGTGTCATATCTTTACGGGTATCTTCTCATGTTACCACAAATTACAAAGACCGAAAAACC  
AATTTGAGCAGCTCCCCTAACTATTCACACTATTCACAAAATCAGAATTTGCAGATTGACTAAATAGTTT  
CTAGTCAGTGCTATAAATGCAACATGCCAACAAAATCAGAATTTGCAGATTAATAAAGAGTTTCTTGTC  
AATGCCATAAATGCAG

>PGSC0003DMG400019275 G-LecRK

CTTTTTGATGTAAAAATCATGAAGGCATTACTTAGGGAAAGTTTCTACTTATTCTTGTTCTGTGTTTGTA  
TTCAATCCATCAAAGCTTTGGTGCTACAGATAACAATAACTACAACCTCATTTTCTAAAAGATGGTGATGAT  
GATATACTTCACCTGGTGGAATATTTGAAATGGGGTTCTTCAGTCCAGATAATTCGGAAAATCGCTATG  
TCGGTATGTGGTACAAGAACGTATCTGATAGGACTGTGGTGTGGGTTGCCAATAGAGAAGCTCCTTTGA  
GGAGTGGATCAGGTATCTTGAAAATAATTAAGTCTCGACTTGTCTTGTTGATGGAACTAACAATGTTGT  
GTGGTCAACTAATACCTCTAGATTGGTTCAGAATCCTGTGCGCAGTTGCTAGATTCTGGAAATCTTGTT  
GTTAAAGAGGCTGGTGATGATAGCTCGGGGAATTTGATATGGCAGAGTTTTGATCACCCAACGGATACG  
CTATTAGCAGGCATGAAGCTTGGGAGGAATTTGTAACCGGAAGAGAGGTGTACTTGTATCATGGAA  
GAATGAGGAGGATCCAGCTCCCGGTGATTATACATTCCATTGTGATCCTACTGGTTACCCACAGACTATC  
GTGAAGAAGGGCTCAGATGTTGTGTATAGCTCTGGACCGTGGAAATGGTCGATATTTAGTGGAACACAA  
AACTCGAGACTAGGTACTTTCTATACATATGGAGTATATTCAAGTAAGACAGAGGTGTATTTTTTGTATA  
AGCTCACATCTTCAGTTCTTGAGGTTGACAGTAAGTCATAATGGAATTCTACAGATTTGGACTTTGGA  
TGACAGAGAACAGGGTTGGGTGCCTTTGATCTTAGTACCAGCAGATAAATGTGAGGTTTATAATTCATG  
TGCGCATATGGTAGCTGCAACAGTCAAGATTCTCCAGTATGTAGATGCTTAGATAAATTTGTGCCAAC  
AATAGTGATGCTTGGAAGAGGGAAAGATTGGTCAGGTGGCTGTGTTTCGGAAAATAAATAAATTGCCTT  
CATAGAGATGTATTTTTGAAGTATTCGCATATTAATTTGCCAGACACACGGAATTCCTGGTCCAATGTGA  
CTATGACACTAGAAGAATGCAAGGATATCTGCTCAAAAAATTGCTCTTGATGGCTTACTCAAATCCTGA  
CATACGAGGAAGTGGATGCTTATTGTGGTTCGGGGATCTGCTTGACATTCGGAAGGGAAACCAATGGACT  
GCAAGAGATCTACATAAGAATGGCTTCTTCTGAATCAGGTAGGCTTGTTGCTACTTAAAGATTTTTGATA  
GATTACCTAAAGATAGTAAAGGAATTTGGGGTTGCAAGCACTTTGAATAAAGCAGACTGTATTTTTGTG



CCTATGCTTGTAACATCTAGTAGTGCAACTGCCAGCTCCTACCATATATAACCAGGAACTAACAAATTA  
TAGTAGAACGGAAAGCGACTCCTTTAGAGTGAAGTTGGTCTGAACTAATAAGCTGAATCTACAAGCATA  
TGA CTGGTTAGACCCTGTTCAATTTTTAGAACTAATTGGTAAGCACTTAGTTTTCTATAGAACAAGCACT  
TGATATGCAGTACTCCAAAGGCTTGCAGAACCCTTAATAACTCAGAATAAGAAATCATCTCTCCCATCCG  
CTTGCAGAACCTTTAATAACTCAGAATAAGAAATCATCTCTCGAATGGATTGGAGAAAGATTGAAATTCA  
TTATTTGTCTCAGTTTAAATGGTACTTGCAGATGATCAGGAGGAATCGGATGGAAAGAAAGGAAGAGT  
ACTTTTCTGGATTCTGCCATTATCAGTTGGTCTGATTCTGGTATTCCTTAGTCTGCTAATCTACCATAGAA  
GAAGGAAGAAGGCTTTAGAGCTAAAAACAAAGGTAAGCTGGATCCCCTTTATTTTTCTTGACGTCTAA  
GCAAATAGAGGAATAGACATTTAAATATTAGTGAAAAGAACTTCATAGTTGTCTGATATTCACAACTTA  
AACAACTTCACTTCATTTTCTATTTCTTAGAAGCAAATTACATCATTTGGTTTTGGCAGGAAGGACAGG  
ATGTGGGGGCAATTGCGCTGAAGAATTTGAAATACCACTGTTTGACTTATCTACCATAGCAAACGCTACC  
AATAACTTTTCAATTGACAGACAGATTGGAGAGGGAGGCTATGGACCTGTTTACAAGGTATACACACAC  
TTAAACCCTTGTCTTCAGAGTAAAGCTTAATCTTCAGACACAATTTAGGAGTTGTATGATCAAAGGTGT  
AATGACAAAAACCTTTGCTTTGTGAAACTAAAAGGAGACAGATACAATAGCTAAGGGAAGAAAGGTGG  
GGATATGGGGGATGTCCTTCTCAGAATGTGTCCTAGAACCACTATCTTAGCTTTTCCAATAAGTGTTGTC  
GACAATTAGCTCAAGTTAGTCAGTCTAGAGTCTTTAGAGGGGATATCCTTCTGGTGCGTGA ACTTGTACA  
TTTTCTAAACATTCTCCGGATGTATTTTTATGAGTTAAATTATCTTTCTTCTGCATCTCAAGCCTTTATAGT  
GAGCCGACATTTTGATCAACTTAGATATTTAAAATATTAACATGCAGATATTGTGATGTTTAGGGCATA  
TTGAAGGAGGGGAAGTAGCTGTCAAGCGGTTATCTAGA ACTTCCACACAAGGAGAAAATGAGTTCAA  
AATGAAGTTGTATATATTGCCAACTTCAGCACAGAAATCTGGTGAAGATTCTTGGCTGCTGCATTGAAG  
GGGAAGAAAAAATGTTGATCTATGAGTATTTGCCGAATGGGAGTCTTGATTCA TTTATATTTGGTACAAC  
TTCTCAATCCAATATTAAGAATTTGAATAATAATTGTACTCTCGTATTATTTTTCCATCGACAAAGAACTG  
ATTTTGCTTTAGGCTTTAATAGTACCTTCCACTATACCTACTTAGAATGTTAATAACCCAACATTATTTGGC  
AGATGACGCACAAAGCAAGGTATTAGACTGGCCTAAGCGATTTACATTATCAATGGTATAGCTCGGGG  
ACTTATGTATCTGCATCAAGATTCTCAATTGAGAATAATCCACAGAGACCTGAAAGCTAACAAATATTTTG  
TTAGACAAAGACATGAATCCAAAGATATCAGATTTCCGGGATAGCAAAAATATGTGAAGAGAATGACATT  
GGAGCCAAGACAAACCGAGTTGTTGGAACATAGTAAGAACCTTCAACTGGGTAGTTAGGAATTTGAACC  
TAAGACGAGTTTTGAGATATTAAGCATGTTTTCCAGCACTAGTAATTCTACATTTTGTTTACATTTTATGC  
AGTGGGTACCTCTACCGGAATATGCATTGCACGGAAGATACTCAGTAAAATCAGATGTATTTAGCTTTG

GTATCTTAATATTGGAAATTGTGAGTGGGAAAAGCAACAGAAGATTCTCTCATCCAGATCACAACTTAA  
TCTACTTGGACATGTAAGATTTGATTAGTTTTATTTACTTATCCTTTGGTGTATGTTATCTCCTAGTAAC  
AGAGATCTGCAAATCTAGTCAAATGCTAATAAATCTTGAATCTACAGGCATGGAACTCTATAAAGAAG  
GTAGGTCAACAGAACTACTTGATGAATACCTAGGTGATTCTTGTTCAACAACCGAAGTGGAACGATCAA  
TCTGTGTTGGTCTATTATGTGTCCAACAAAGTCCAGAAGACCGTCCAATATGTCTTCTGCAGTTATGAT  
GTTAAGCAATGAAGGTGAATTGCCACAGGCTAAACGGCCAGGATTTTACATAGAAAGAGATGCACCAG  
ATGGTGAATTATATGCACAGAATACAGTGAGTGAGACCCCATCACAATATTAGCTGCCCGATAAGAAA  
ATATTTGTCCACTCGCTTCCACAACAAGCTTGCAGTTTTAATAACCTTTTCTTAATTCTTTGTAGAAATGT  
GGTGA AAAATTTTGTGTATGGCTTTCCTTATTGGTGTATTA ACTATGTCAA ACTGACTCAAACATATGTAA  
AGTGCTGATTGCTGTTGCTTCTCAATACAAGGAAGAGGTTAGCCAACAAATCAAGTTCAAGAACATTA  
GCCTCAAACCCAAACACAAGCTCCATAGAAAAAGATGGTGTACATCAGTCCATAAACTGTTCTTAACC  
TGCGGATATGATCTACGGATTTAATCTATCGCAAACTGTTTTAGTTTTAGTACTTTACTAATGGATTTT  
GTCACA ACTTTCAATAAATCAAATTCAGGTTTTAACTTTGATGAGACATTTCTCAATCAA ACTAGTATC  
ATTTTAGTCATTACTTGTACTTAATTTCTTTCTACTGTCATTACTATAATAACAACAACATGATCTGGAAA  
GGGTAGAATGTATGCATACCTTACCCTTACCTCGAGATAAAGAGGTTGCTTCTGATAGACCCTTGTCTCA  
AGGATAAACAAAATAACGACTGAAGGAGCCATGGACTGTCATAGTATAATCTATAGCAAATCACAAT  
TACTCCATGTCCAATCATTTAGAAGGGGAACGAGGAAGCAATAAGTTTCGGTACTTAACCCCTGTTCTCC  
AATGTGCACAGATTATATAACGTTAATTGGAACAATAGCATTTCGTAATTGATGAAAGAAAAATATTC  
GTACCACGAGTTAGCCGCCGGTAGCGTTGGCCGATTCCGGAGCACTGAATTTTGATTGGATTGCTGAT  
TACCGAGCACTGAAAAAGGAAATGAAGGTACA ACTTCAATTATACA ACTTTACACCAATTTATGAATCAA  
AGATGAACTTCTCATAGATACAGATGAATGCATATCGGCAGTAGAATTAGATGAAAATGAGAGAGGAT  
TTGACAAAGCATATCATCCTAAAATACACTATAATTATACAATCTTAACACAACACATGAATAATTAATG  
ATAGAAAAATTAATAATTTCAATTTTTTGTGATATTCTCAAGCAAAGGGATCACAGTGCACATTTCAAGT  
AATTAAGTTTTAAATATGCGTAGTTTTAAATATCACAACTTGCTTGGACATAAAATTATTACGATTTCTAA  
CAAGATATTAATAATTATCTAATTTTTTTCATGCTCAAAGTCAAGAACTATTGACCTCCTATAATTTCT  
TAATTCCACATCAGCCGCCGTTTAGTCTTAGTTATCCAGTCAAATCTATGAAGACCCCATTAATTTCGAAC  
TGCAGCAACATTTTCTCATGTTTGATACTGCTCAGAACATATATGCCTTTTACTAAATTATTCGTAAAATA  
TACTATTCAAAAGTCCACCAAAGCAGCCATTA ACTTTTTTAAAAGCAGCAGGACTTGAAGCAGCCTCAA  
CTCTCATTAAAAAGCTAAGACTTTTCATAGTCATAGACCTTTCACTCCTTTCAAATAACTCTTTCATATG

TTAGAAAGCTCAAGTGATGGCTTTTTTAACACTAGTTTGTTTCAGTTTCTTCTTGTAAGATTCACCGTCTGC  
AAACAAGTCAAAGTGTCATCACTATGCTACATTTGACATTGAAAAAATTGGATCTCAAAGCATGAAGG  
CATTACTAAGGGAAAGTTTTTACTTATCTTTGCTCCTGTGTTTGTGTTTCATCCACCGAAGCTTTGGCGCT  
ACAGATAACAATAACTACAACCTATTTTCTGAAAGATGGTGATGATAATGTTGCTTCAACTGGTGGAATAT  
TCGAAATGGGGTTCTTCAGTCCAGGTAATTCGAAAAATCGCTATGTGGGTATGTGGTATAAGAACATAT  
CTGTTAGGACAGTGGTGTGGGTGGCCAACAGAGAAGCTCCTTTGACTGGTGGATCAGGTATCTTGAAAA  
TAATCAAGCCAGGAATTCTGTCCCTGTCAATGGTACTAACCATGTTGTGTGGTCAACTAATACCACTAG  
ATCTGTGCAGAATCCTGTAGCGCAGTTGCTAGATTCTGGAAATCTTATTGTCAAAGAAGCTGGTGATGAT  
AGCCCGGGGAATTTGATATGGCAGAGCTTTGATCACCCAACGGATACGCTATTAGCAGGCATGAAGCTT  
GGTAGGAACCTTTGTAAGTGGCAGAGAGGTGACTTGTGCATCATGGAAGAATGAGGAGGATCCAGCTCC  
TGGTGATTCTACATATCACTGCGATCCTTCTGGTTACCCGCAGAATATCCTGAAGAAGGGGTCCGGATGTA  
GTATACCGCTCTGGACCATGGAATGGTCGCTCTTTCAGTGGGAACCGAAACTCAAGAGAAGGTCCTTCC  
TATACATTTGGAGTATATTCAAGTAAGACAGAGGTGTATTTTGGATATAACCTCACAACCTCAATTATCGT  
GAGGTTGACATTAAGTCACAATGGAGTCCTACAGGTTTGGACTTGGGGTGATGGAGACCAAGGTTGGA  
TCCCTTTCCTCTTAATACCCGCTGATAATTGTGATATGTATAAGTTGTGTGGCGCATATGGCAGCTGCAAC  
AGTCAAGATTCTCCAGAATGTGGATGCTTAGACAAATTTGTGCCCAACAATAGTGATGCTTGGAAAGAGG  
AAAGACTGGTCAGGTGGCTGTGTTCCGGAGAACTGAACTAAATTGCCTCCAAGAAGATGTATTTTTGAAG  
TATTCGCATATCAAATTGCCAGACACACGGAATTCCTGGTCCAATGTGACTATGACACTAGAAGAGTGCA  
GGAATACCTGCTCTAAAAATTGTTCTTGTATGGCTTACTCCAATTCTGACATACTCAATGAAGGAAGTGG  
ATGCTTACTGTGGTTCAAGGATCTGCTTGACATTCGGCAGGGACCCAACGGAGGGCAAGATATCTACAT  
TAGAATGGCTTCTTCTGAATCAGGTTGGCTTGTGCAACTTAATATTTTTTGTAGATTGCCTGAGGATA  
GTAAAGGAGTTTAAGGTTGCAGGCACCTTAATAAAGCAGACTGTAGTTTAGTGCCTATGCTTACTATGAT  
ACTATCTACTGCCAATTCCTACCATATTTAGCCCGTAACTACCAAATAATAGCAGTACAGAAAGCTACTAT  
TTTTTAGTGAAGTTGGGATGAATTTATAAGCCAAATCTGCAAGCATGATGACTATAGAACAAGCATTGTA  
TATGACTTGCATTACACAAGGAATTGAAGAACCTTGACAACCTCAACCAACTAAAAAGGATGTG  
CTGACTCCAAAGGCTTGCAGAGCCTTTTATAACTCAAATAAAAAATCATCTCCAATGGATAGGATAATT  
GCAATTTATTATTTATGTTTGTGAAATTGATACTTGCAGATAGTCTGGAGCAATCAGATGGAAAGAAAAG  
GAAAGTACTTTTCTGGATTCTACCATTATCAGTTTGTGTTGATTCTGGTATTCCTTACTCTGCTGGTCTACCA  
TAGAAGAAGGAAGAAGGCTTTAGAGCTCAAAAACAAAGGTAAGCTGAATACCCCTTAATTTTTTCTTGA

CATCTAAAGTCTAAGCAAATAGAGGAAAAGACATTTAAATTATACTGAAAAGAACTTTCACCTTCATTCCG  
CTTTCTCTTATAGGCAAATATGTCATTTGGTTTTGGCAGGAAGGTCAGGATGCAGTGGAAATTACAAG  
ATGAATTACAACCGTGGCAATTGCACTGAAGAATTTGAAATACCACTGTTCGACTTATCTACCATAGCAA  
AGGCTACCAATAACTTTTTCAATTGACAGACAGATTGGAGAGGGGGGCTTTGGACCTGTTTACAAGGTAT  
AAACACTTAAGACCTGGGTCTTCAGAGTAAAGCTTCATCTTTAAATACAATATAGGAGTTGTATGATCAA  
AGGTATAAGCCTTTGCTTTGTGAAACCAAAGGAGACCTATACAATAGCTAAGGGAAGAAAGGTTGGG  
ATATGGGGGATGTCCTTCTCAGAATGTATCCAAGAACCACTAGTCTAGCTTTTCAATAAGTGTGTCCCA  
AGTTAGTCAATATAGAGCCTTTAGCATTTTCAAGAAAGTGCTGCAAGAGTAACCCATCACCTTTGGGTG  
GAACTGCAGATTAAGTGTTGAGGATATAGTTTGTTTAAGAAGAGAGTCATTTGTTCTTTGTAGTCATTT  
ATTTGTTTCATCTTTCCATGGTGACAAGTGGCAACTTGTCCCGCATCAAAGGGCGAATATTTCTTATAGA  
CTTTAGTTTTAATTTAAAGAAGATTATCATAGGGCTAAACTGAAAATATAATGAACTTATAATAGAGAT  
TTGGCACATTTGACCTAAATTTGTTAACGGAGATTTTGATCAACTTAGGTATTGAAAATATTAACATGCA  
GAGATTGTGATGTTTAGGGCATACTTGAAGGACAGGAAATAGCCGTCAAGCGGTTGTCTAAAACCTCTA  
CACAAGGAGAAAAAGAGTTCAAAAATGAAGTTTTATATATTGCTAAACTTCAGCAAAGGAATCTGGTGA  
AGATTCTTGGCTGTTGCATTGAAGGGGAAGAAAAAATGTTGATTTATGAGTACTTGCCAAATGGGAGTC  
TTGATTCATTTATATTTGGTACAACCTTCTCAATCCAATATTATGCATTTGAATAATAGTTGCATTTCAGTGA  
CTTGATGCCTATAGGCATACACTGATTTTCTCCAACCTCAAATCCCCATAAAGCAGGAAAAAAAATGT  
AAGGAGAGAACTAAGACCCCAGTTGTTAAGAGCCTAATAATTACATACTTGGTAGTTCAAACCTTCTCGT  
ATTATGTTCCATCAGCAAGGAACTGATTTTGTGTTTTGGTTTTAATACTACATTCCAACCTATTTAGT  
GTGTTAATGACCCAACATTATTTGGCAGATGACATACAAAGCAAGGTATTAGACTGGCCTAAACGATTTT  
ACATTATCAATGGCATAGCTCGGGGACTTATGTATCTGCATCAAGATTCTCAATTGAGGATAATCCACAG  
AGATCTGAAAGCTAACAATATCTTATTAGACAAGGACATGAATCCAAGATATCAGACTTTGGCATTGCA  
AAAATATGTGATGGGAATGACATTGGGGACAAGACAAACCAAGTTGTTGGAACACAGTAAGAACCTTA  
TACTTGATAGCTAGAAATTTGAACCTAAGAAGAGTTTTGAGATATTAGGTACGTTTTCCAGCATTAGTAA  
TTCTATTTTTTTGTTTACATTTCTATGCAGTGGGTACCTCTCACCGGAATATGCATTGCACGGAAGATACTC  
AGTAAAATCAGATGTATTTAGCTTTGGTATCTTAATATTGGAAATTGTGAGTGGGAAAAGCAACAGAAG  
ATTCTCTCATCCAGACCACAACCTTAATCTACTTGGACTTGTAAGATTTGATGAGTTTCATTTTACTTATCC  
TTTGGTCTTATGTTATCTTCTAGTTACAGATATCTGCAAATCTAGTCAGCATTAAATAAATTGTGTAATCTAC  
AGGCATGGAACTCTATAAAGAAGGCAGGTCAACAGAACTACTTGATGAATACCTAGGGAATTCTTGTT

CAACACCCGAAGTGGAACGATCAATCTGTGTTGGTCTATTATGTGTCCAACAATGTCCAGAAGATCGTCC  
AAGTATGTCTTTTGTGGTTATGATGTTAAACAATAAAGGTGATTGCCACAGGCTAAACGGCCAGGTTTT  
TACATTGAAACAGATGCACCGGATGGTGAACCTCTCGTCTAGCCATACTGAGACCCCCATCACAATATTGG  
TAGCCCGATAAGAAAATATTGTTTCACTTGCTTTCAACAAGCTTGCAGTTGTAAAAAATCTTTTCTTTTATT  
CTTTGTAGAAATGTTGTAAAAAATATTTGGTATATCAGCTATTTCGAAC

>PGSC0003DMG400019276 G-LecRK

AAAAAATGAAGTCTTGGTAATCTCTGAGACAATCTTACTGAAAAGAATACCACAAGAGATGGAATATGT  
TAAATTCCTTTTAAACAATTTTGAAGAAGAATGCAATGCAACAAAAGGTAAATATAACTATCATGGATATA  
ACAATATTTCAATTTATTCTACTTCTCTTGTATTTTGTGTTTCTTCAAATGTTAGTGGTCAAGGAGATACC  
ATAACTACAACCTCAATTCATTAACATGGTGATACTATTGTTTCGTCTCATGGAACGTTTCGAGTTAGGATT  
CTTCAGTCCTGGAGATACTTCTACAAATCACTATGTTGGAATATGGTACAAGAAAACCTCTGCTACTACTC  
CTGTTTGGGTTGCCAATAGACTAGCTCCTGTTGCTAATAAGTATGGGGTGTGAAAGTTATTCAGCCAGG  
TCTGATTGACTTCTGAATGATACTAATGCAACTGTTTGGTCCACAACTCATCGAAATCTGTACAGAATC  
CTGTTGCTCAGTTGTTGGACACAGGGAAATTTTGTGGTGAGGGATGCTAATGATCCGAATCCAGAGAATT  
TCCTCTGGCAAAGTTTTGATTATCCTAGTGATACGTTGTTGGAAGGTATGAAACTTGGGACGGACTTGGT  
GACTGGATTAGAAAGGTATCTTACTTCTTGGAGAAGTAGTGATGATCCTGCTCCGGGGGATTATACTTAT  
CATTGTGATCCTACGGGTTATCCACAAAACCTTATGCGAAAAGGGGCTAATGTGACGTTTAGAGCAGGG  
CCGTGGAATGGTATCAGGTGGAGTGGTGCACCAAATCTGGTAAACAACCTCTATCATTTCTTTTGGCATGG  
TTATGAATAGTAGGGAAATTTACTACAAGTATGAGATGGTGAACAAATCCGTTATTTCAACATTTGTTTT  
AGAGCCTTATGGGAAAGCTATGCGTATCATTGGATTGGAAAGGTTTCAGGGATGGGTAAATTACCACTC  
TGCAGTTGTGGATGACTGTGACACCTACAAATTATGTGGTGCATATGGGACTTGCAACATTTTGAAGTAT  
CCTTTTTGTCAATGTTTAGATAATTCGAGCCAAAACATCCTGATAATTGGGAAAGGTCTGACTGGTCTAG  
TGGTTGTGTCCGGAAGATCCCACTGAATTGCACAGGAGATGGATTTATTAAGTATTCTGGTGTAAACTG  
CCTGATACGCGAAATTCTTGGTTCAATGAGACAATGACACTAGATGAATGCAGGGTAGTTTGTGTTGAGA  
AATTGTTTCGTGTACGGGTTATACTAATCTGGATATACGCAAGGAGGAAGGGGGTCTTGCTATGGATT  
GGGAGCTGGTTGACATCAGACAGCTACCTGCATCAGGACAGGATATCTACATTAGGATGTCTGCTTCAG  
ACATAGGTAATTAATAATTAATATGCGATTTATAAATCATAACCATGTCAATTGTAATCAATGCCAGAA  
ATTCAACTCATATGAGGGACAAAGGTAATCCAAGTCCACATTATGGGAATAAGACTTCAAGGACCGTCC  
TGTTTTCTCGACATAAATAACAACAATATAAAAAGAGAAAAAATTTCTAGCATTACTAGAAACAACATAT

TGATAATATTTTCGATGGGAAATGTTGCAGGTTCTGCTGGATCAAAGGAAAGATAGCTTTCATACTTGCA  
ATAGCTTGGCCACTATTGGTTGCATTGATTCTGCTTGGTTTAGGTGTAGGCCTGATTCTTTGTAAACGAAA  
AAGGAGAAAGGATCCGGTGGTTACAACAACAGGTAAGTGGAAGTACCAATTCTGTCTATCGTAAAACCA  
GAAGCAACTAGTGGTCATTAGTTCTGTATAACCTAGTATTTCAATTCAGCTCCTTATTTGAGCAAGGTC  
TACTTGTATGTTCAAATTGCAGGGAGATTAGGTGGTCACAGCAACAAGAATGATAACAGTAATCAAATT  
CACGAGGAAAATTTTGAGCTTCCACTTTTTGACTTATTAACGTTAACCAATGCTACCAACAACTTTTCAATT  
GCAAACAAGATTGGAGAGGGTGGCTTTGGACAAGTTTACAAGGTACAAACATTCTCAGACCCCAAGTA  
ATGATACTCGAGACTTAATTTCTTTGCTTTTCTTGAAAGGAATATTAACTCTTGGAGTCAGTACATACAGC  
AGTGTGGCTAGTATGATGAGCGGAATGAGTGTTAAGTTGAGAGCCTTGTTCAGACCGATAATGTTTT  
ATAAAATAAAGGTTTCATATTCAAAGAAAAGGAACATCAGCTGGAAAAGATTACCAACCATGAGATAAG  
CTGTGGAATGAAATGTGCAAGTAGATGCTGCCTGAACAAGAACTTGATTGCACTAGTAAGGAAAAAAT  
GACGATTCACTCCATCAAATTTCTAACGGGACTGCTACTTTTACAGGGTGTATTAGAAGGTGGACAAGA  
AGTAGCAGTGAAGCGGCTTTCAGAAACATCAGAGCAAGGACTTCACGAGTTCAAGAATGAAGTTAAGT  
GCATCGCAAACTTCAGCATCGGAATCTTGTAAGCTTCTAGGATGCTGCATTCAAGGAGAAGAGAAGA  
TGCTGGTGTATGAGTACTTGCCAAACAAAAGCCTGGAATTATATATATTTGGTTAGTCTTTCACATCTACT  
GAACGGCCATTTCTTTCAATGCAATCAATTGTGATTTACGAAGGTTGGTTTCATTGTTATAGAAACCTTT  
AGTAATAAGTTGAAAACATTTGACAGATGAAGAAAGGAGTGCATTACTTGATTGGCCTAAGCGCTTCAA  
TATTATCAATGGAATTGCTCGAGGACTGATGTATCTTCATCAAGATTCTAGGCTCAGAATCATCCACAGA  
GACTTGAAAGCTAGCAATGTCTTACTTGATATTGAAATGAATCCAAAAATATCCGATTTTGGGATGGCTA  
GAAGTTTCAGAGGAGATGAGACAGGAGACAATACAAGCCGTGTTGTTGGAACATAGTAAGATTTAATA  
TTTGATTATATATGTAGTCATGAACACATGGTGCATTATATAATCCTGTAGTTTCTTTATTGCAGTGGTTA  
CATGTCCCCGGAATATGCAGTCGAGGGGATATTCTCAGTGAAATCAGATGTCTTTAGCTTTGGGGTATTA  
GTACTAGAGATTGTGAGTGGAAAGAAGAACCGACGATTTGTTTCATCCAGACCACCTTCAACCTTCTTG  
GACATGTAAGTACAGTAACTCCTAACGGTAAAAGACTCAGAAAAAGTGTGGTTAATGCATTTAAGTTT  
TATGTGCCGACAGTAAATTACATGTAATCTCTATTATAAGAGCTTGTTAACTAACATACTATCACAAGTT  
AAACTACAATGCTAGAGTATAAAGTCTTTGACTGTTAGTGTGTATAAGTTAAATCCTTTGTTGATGGAG  
GGATCGTTTTATGCAGGCATGGATGCTTCATAATGAAGAACGGACGTTGGAAGTACTAGTAGATCCATATCT  
CGTAAATTCATACTATATATCAGAAGTACTAAGATCAGTCCATGTGGGATTGTTATGTGTTCAACAGAAT  
CCAGAGGACAGGCCAAGCATGTCAACTGTGATTATGATGCTGAGCAATGAAGGCATTTTACCACTGCCT

AAACATCCCGGTTTCTTCACTGAAAGGAAAGTTGAAGGTCATGATCAATTATCTTGGAGTACACAAACAC  
CAAGTTCTATAAACGAAGTTACCATCACGCTGTTGAATGCTCGATAGAAGCATATCATGGCCATAGTCAG  
TGGCAAAGCCAGGATTTTCACTAAGGGTTTCAAATATGAAAGAAGTAAACACACAAAGTCAAGACGAT  
TCAACAACACTATTATATATACATAAACAATTAATTGTAGACCTTTATATATATAGTGTAAATTTTTGGCGAA  
AGGGTTCGGATGAACCCCTTGCATCAACTGGCTCCATCCTTGTGCGATTGTGAGTGTCAATTCATTTCTCAG  
AATTGTATTAATAATCCTCCCTTTTTTCTTTAAGAAATTAGAAAGCAAATCTGCAGGAATTGTATTGAAA  
TATGTCTAAATTTAAGGCTTTGAATTCAATTTAG

>PGSC0003DMG400019278 G-LecRK

ATGAAAGGGAAACATTTTTATCTTCTTGCTCCATTTTTCTTCCATCTTGCTAATTTCCACAGCATTAGAC  
ACAATCACAACAGAAAAACCAATTAGAGATGGTGACACAATTGTTTCAGCTGGAGGGGTTTACGAGCTT  
GGATTTTTCAGCCCTGGAAATTCGAAGAATCGCTACGTTGGCATATGGTTCAAGAAGATAGCAACTAGA  
ACTGTTGTCTGGGTTGCCAACAGAAACATTCCACTGAATGACAATTCAGGAGTGTTATTACTCAATCCCA  
ATGGAATTCTTGACTTGTGACAATCCAATGCCTCAATTTGGTCATCAAACCTCATCAAGATTGTTAATG  
AATCCAAAAGCACGGCTCCTGGATTCCGGTAACCTTGTGTCGGTGATGGAAATAATAGTGAACGAGAA  
GTTAATTCGTGTGGCAGAGTTTTGATTATCCAGGAGATACTTTATTACCTGGGATGAAGCTTGGACGTA  
ATCTGGTCACGGGCATGGATTGGTACATAGAGTCATGGAAGAGCACTGATGATCCTGCTGCGGGTGAA  
TATATAGAACGTCTTGATTCTCATGGATACCCTCAATTTTTCGTGTGGAAAAATTCGTCTATAGTATATAG  
CACAGGGCCATGGAATGGTATCGCATTTAGTAGTAGTCCTAAAAATCAACCAGCTATATATTATGCTTTC  
GAGTTTGTATTAAACAGAAGGAGATTTACTTTAAATACGAGCTTAATGAGTCCCTGCCACCAGGGTG  
GTGATCAATCAGGCTGGAATGGTAGAACACCTAACATGGATCGAGCGTAATCACAGATGGATAGTCTAC  
GTATCAGCACAATCTGATAATTGTGATCGTTTTGCTTTATGTGGTCCTTATGCAAGTTGCAACATCAATAA  
CTCTCCTCCATGTGACTGCTTGCAGGTTTTCGAGCCTAGGTATTGTTAAAAATATGCCTTCACACGACTCC  
TCTGTCTGTTCCAATACCATGTTAATTCATTAATTATGTCTTCACAGGTATCCTGAACAATGGTATGCAGT  
GGACTGGTCTAATGGTTGTATAAGGAAAACCTTCTTTGTCTTGTAACCAAGATGGTTTTCTTAAATTTAGG  
AATATCAAGATGCCGATTCTAGACACTCCTGGTATAATGTAAGCATTAGTCTTGAAGAATGCAAGAAA  
ATGTGCTTGGCTGATTGCAATTGTACAGCCTACTCAAATCTTGATATAAGAAATGGCGGAAGTGGATGC  
TTACTATGGTTCGGTGAACCTCATTGATATTAGAGAGTACAACAAAATGAGCAATACCTGTTTGTGAGA  
GTTGCTGCTCAGAATTAGGTAATGACCCTACTCTATACCATTTTTGTGTTCTTTTGCACAATATAAGCAT  
GACACCTTAGAGTTAAGGAACTTTACTATCTGATGTCACTGATAGTAACATATGATAGTCGCGGAAGCA

ATTCATATGTCAATTGAAGACTGCTTATGGACTTTTTATTAACAGATTCAGTCAGGAATCGGAGGGGAA  
AGAGGTCAGCCCTGATTGCGGTCATTTAGCACTAGTAGCAACTTCTATCCTCATCTTTCTAGCTTGGTTT  
ACCTTCCAAAGAAAGAACAACAAAAACAGATAAACATACTGGAGGTATTAGAAAATTGTTAACTGTGAAT  
GCTTATTTACCTCCATCTAGCTAACATTGTTGACTTTATCAAATGATTGAGGAAAAGTTCAATTATATCA  
TGTCTGTGATTGGAAAATATATGTTGACAGGTTGAGAAGTTGGAAACAAGGACCTCGAGTTGCCATTGT  
TTGATTTAGTTACTGTTACTACTGCCACTGAAAATTTCTCTTCTGCGAATGTGATTGGTGAGGGTGGCTTT  
GGACAGGTTTACAAGGTAAATCAACTTTGATCTTCAACTAAAAGCTACAAGCATATTTGACCCTAGAGAG  
AAAATCGCAGGGTATTCTACCAGATGGACTAGAGATAGCAGTAAAGAAGCTATCAACGTATTCTGGACA  
AGGCGTTCAAGAGTTAAAAAATGAAATTGCTCTCATTTCCAAGCTGCAACATAGGAACCTTGTCAAGCTT  
TTGGGTTGCTGCCTTGAAGGAGAAGAAAAGATGCTAATCTATGAGTTTATGCCCAACTCTAGCTTGGACT  
GTTTCATTTTTGGTCTGCTTTTCGTGATTCATTAATAAATACTACTTGTATAAGTCTCAATATCTCTG  
TTATCACTCAAGAATTGGTTTTACATTGTGCAGATCCAAGCAGAAAAGCTTCACTTGCATGGAAGAATCG  
CTTTGAAATTTCTGTGGGAATATCTCGAGGTCTTCTTTACCTTCACCAGGACTCAAGATTTAGAATTATTC  
ATAGAGACCTCAAGACCAGCAACATTTTACTAGATGGAGACATGAATGCCAAAATTGCTGATTTTGGCCT  
TGCCAAAATTTTTGGCGGAGAACAAGTGGAAGGAAATACTAAGAGAGTGATAGGGACATAGTAAGTTC  
TACAAATCTTTATGATAGACATTCAATCAGTACTTGAACCTAAATTTGATGAGTTGATGCAGTGGATATAT  
GTCACCTGAGTATGCTGTTGATGGGAAATATTCAGTAAAATCCGATGTATTTAGTATCGGCGTTATCATT  
CTAGAGCTAGTCAGTGGCAGAAGGAACAGGAAATTTATCATTGGAACATTATCACAATCTTTTGGGA  
CATGTAAGCACATACAACACTAACTTCGTTCCCTTAACTCACTTTTTCTATAGTGAATGCATTTGTATAA  
ATGTGTTCTGTTTGTAAATTTAGGCATGGTTACTTTGGACTGAAGACAAAGCGTTGGAACCTGATGGACGA  
ATGTTTGAAAGAATCATTTTCAGAATCTCAAGTGTGAGATGCATCCAGGTTGGCTTGTGTGCGCCCAA  
AAACACCCTGAGCATAGGCCTACAATGGCATCAGTAGTTTTCTGGTTGGGAAATGAAGGCCTGGTTCTT  
CCTCAACCAAAGCAGCCTGGATTTTTTATAGAAAGGAATTCAATGGATTCAACAGAATCAGCTCAATTTA  
TCAGTTAGCTCGTTGTAATCGGATAAGGGCATTGTGAATTCAAGTTCAATCAACACATATAATATCTAAT  
TAATGAGAAGAAAATCTGAAAGTGTGTACACACATTTTCAAGCAGCAGCTTTGTAGCACAAATTAATCCGGAT  
TCACAGGGGAAAGTTGACTTTTTGGGAGAACTAAAGTCTCCTCATCAAAGTGACTCCATTCAAGAA  
GTTGAAGATTCTTCTGTTTTTCTCTCAGTTGAATATTAGATGGTGACTTTACAACTTTTTAAATAAATG  
CATTAAATTAATAGAAAATAAAAAAGACATCAGTTCCTTTTTCTTAGTTCTGCCATTACTAGTCCAAGA  
TGTACATCGTCATTAACACTAAATCATTTTAGGAAGACTTTAGGCAATTTACTCCAATACATTTATGTG



TTTACACCAAGAAAATAGATGCATGCCATATGTTTGTATGAATAGTTCTATAGCGTGCAATTGCAAACAC  
CAGGTTAATGGTGGAAATGGAAAGTCAAAGGCATACAACTTTTGACAAGTTCAAACCTTGACATCTAATT  
CTTGGCAGCAGTTGTGATTGGCCTTTCATTCAAAAAAGTTCTTTTTTTCATTTTATAGTTGTGATTGGCCTT  
TCATTCAAAAAAGTTCTTTTTTTCATTTTATTTATATAAAAACATTTTTGGACATGGTTGTTAATTCTAACT  
GAGAAAAAAAAGTTATCAGTATCTTTTCTGTGTCAAGGCTTTTTTGAACCTGTCAATCAAAAACATGAG  
TCAGAGTCTATCAAAGGGCTACTGTTTTTATTCTTTGCTCACATTTTTTCTTCATCTTACTAATTTCCGC  
GGCATTAGACACGATCACACAGATGAATCCATTAGAGATGGTGACACAATTGTTTCAGCTGGTGGGAT  
TTATGAGCTTGGATTTTTCAGTCCTGGAAATCCGAAGAATCGTTATGTTGGCATATGGTACAAGAAGATA  
TCACCTAGAACTGTTGTCTGGGTTGCAAACAGAGATATTCCACTTAATGACACATCAGGAGTGTTAACAC  
TCAAACCAATGGGATTCTTGTACTTGTGATAATTCCAATACCTCAATTTGGTCATCAAACCTCATCAAGA  
TCATTAAGGATCCAAAAGCACGGATTCTGGATTCCGGGAACCTTGTGTCAATGATGGAAATGAAAGA  
GACCTGAAAATTAATTCGCGTGGCAGAGTTTTGATTATCCAGGAAATACTTTTATACCTGGCATGAAAC  
TTGGACGTAATTTGGTCACGGGCATGGATTGGTACATGTCATCATGGAAGAGCATTGATGACCCTTCTCC  
TGGTGAATATATAAACCGTCTTGAATCTCATGGATACCCGCAATTGTTTGTGTGGAAAAATTCAACTATA  
GTGTCTAGCTCAGGGATATGGAAAGGTAATGCATTTACTGTTAGTGCAAATAGTAAACCAAATACACAT  
TACACTCCGAGTTTATTATTAATCAGCAGCAAATTTACTACCAATTCAAGCTTAAGAACGAGTCACTGCC  
CAGCAGGATGGTGCTTAACCCGGAAGGGCTGATAGAACACATAACATGGATTGAGAGCAGTCAAAGCT  
GGTTTCTGTACTCAACAGTACAGATTGATAGCTGTGGTCGATTTGCTTTATGCGGTCCTTATGCAAGTTG  
CAGCATCAATAACTCCCCTCCATGTGACTGCTTGCAAGTTTTCAATCCTAGGTATTGTTAAAATGAGTGA  
TCATCAAACCTTAAACTATTAGAGATAACACACTTGATTACTTAGTTATGATTTTACACTCCCCTTCATGTG  
TGTGCTTGATTCTATTTCTTGGGCCAAGCACATAGATATTATATTGATTACTTAATTATGACTTCACAGGG  
TTCCTCAACAGTCTGCAGCAGATTGGGCTACTGGTTGTGTTAGGAGAACTTCTTTGGATTGTAAACAAGA  
CGTTTTTCTTAAATTTACGGGCATCAAGATGCCTGATTCTAGAACTCCTGGTTTAAATGAGAGCATTAAAC  
CTTGAAGAATGTGAGAAATTATGCTTAGCTGATTGCAACTGTACAGCCTACTCAAATCTTGATGTTAGAA  
ATGGCGGAAGTGGATGCTTACTATGGTTCGGAGATCTCATTGATATTCGAGAGTTGAGCCAAAATGAAC  
AAAATCTGTTTGTGAGAGTTGCTGCTTCAGAAATAGGTAATGACCCTACTCTGCACCATTTTCATTTTGT  
GTTCAATATAAATACACAGATCTTTGAAACTGACGAATCCCTGGTCAACAAATTAAGTATAACCAAGTTT  
GCAGGCTTCATAACAAAATAAGACGTATATGTAAATTGAAGACTGCTTATGAACTAATTATTGAACATAT  
TCAGACAGGAAGCGGAGGAGAAAGATGTCAGTCCTGATTGGTGTCAATTCAGCAGTGGTAGCAACATTT

ATCCTCAGCTTTTTAGCTTGGTTTTCTTCCAAAGAAAGAAAAGAAGAATAGGTAAATATAGTTGAGTCA  
CTCTTGTCTACCAACTTTATAAGAAAATTGTCAAGTCTAAATGCTGTGCTGGCTAGGTGAATTTTCTATCT  
AGCTGACATTGTTTGCCTTACCAAATTCTCATTGATATCATGTTTGTGGTGGGCGAATGTATATTGACAG  
GTCCAGCTGTTGAAAATGAGGACATGGAGCTTCCATTGTTTGATTTAGTTACTGTTACTAGTGCCACTGG  
GAACTTTTCTGCTAAGAATGTGATCGGGAAGGGTGGATTTGGACCGTTTACAAGGTAAATCAACTTTG  
ATCCTCAACGTCTAACTTGAAATGGCATCTTTGACCTTGACATAAATTTCAAGGTATCCTACCAAATGGA  
CAAGAGATAGCAGTAAAGAGGCTATCAAAGCATTCTGGACAAGGCTTTCAAGAGTTAAAAAATGAATTC  
GTTCTCATTTCGAAGCTGCAACACAGGAACCTTGTTAAGCTTTTGGGTTGCTGCCTTGAAAGAGAAGAAA  
GGATGCTAATCTATGAGTTTATGCCCAATGCTAGCTTGGACTATTTCAATTTTTGGTCTGCTTTTCATGATC  
CATTAAATAAATAGTACTTGATATAAGTCCTCAATATCTCTGCATCACTCAATGATTAGTTCTACATTGTGC  
AGATCCAAGCAGAAAACTTCACTTTTCATGGAAGAACCGCTTTGAAATTGCTATAGGAATATCTCGAGG  
TCTTCTTTACCTTCACCAGGACTCAAGATTAAGAATTATTCACAGAGATCTCAAGACCAGCAACATTCTAT  
TAGATACTGACATGAATGCCAAAATTTCTGACTTCGGCCTTGCCAAAATATTTGGTGGAGATCAAGTGG  
AGGAGAACTAAGAGTATAGTAGGGACATTGTAAGTTTCTACACATCTTTAAATCGTATAATCTTTATTA  
TATTAGATCAGTACATGAGCATAAACTTATTGAATTGATGTAGTGGATATATGTCCCCGGAGTATATTGT  
TGATGGGAAGTATTCAGTAAAATCAGATGTATACAGCATCGGCGTAATCATTCTTGAAATAGTTAGTGG  
CAGAAGGAACAGGAAATTTTCATCATTGGAACATCTTACAATCTTTTGGGACATGTAAGCATATACATT  
ACACAACCTTCATTCCCTTAATTCGCTCTTAGCTTTCTATTGCGAATACATTTGTATAAATGTGTTCTGTTG  
TAATATAGGCATGGTTACTTTGGACTGAAGGCAACGCGTTGGAACCTGATGGATGAATGTTTGAAGAAT  
CATTTTCAGAATCTCAAGTGTGAGATGCATCCAGGTCGGTTTGTATGCGTCCAAAAACTCCCAGAGGA  
TAGACCTATAATGGCATCAGTGGTTTCTGGTTGGGAAATGAAGGTCTGGTTCTTCTCAACCAAAGCAT  
CCAGGTTTTTTCACAGAGAGGAATCCAATGGAATCTACTGATGAAGAATGTCTAAGTAACAACGCGACG  
TTAACAGTTCTTGAACCAAGATAGACAAATAATCACTATTGGATGTTTTGAAATGTATTTACTTTGTCTTA  
TTTGTCAAACAGTACTAGTGTATATATGATAGAATACTAAAAGAGATAGTTTAATGCCAGTGTTTATA  
TCAAGGCAGGGTAAATAATTGATATACACTTCTGTCTTTGATAATTGAGCAATCAATGGACTAATTATT  
GGCAAATTTGTAAGCACAAGTAGTTAGAGGTATCTATATCATGCATTAATTTTTTTGGGGACAATGAAT  
ATATTCATCAAACATAGTTGCTATACATGATACATAAGCCCTATTCTATATGAAGTATCTTTTTTTGTTTCC  
CACTCGGTGTCTGGATCCACATTGGAGCTCTGGCTAAATTTGGATTGCGTATAGCAGGA

>PGSC0003DMG400021804 G-LecRK

TGAATGTCTGCGACTTCCCTGTTGATGACCCATTTTGGCCGTCTCCATTACCAAACACTAGTCTTTGATT  
GTGTTGCAAAGAGCTCCAAAAATGGAAGAAATTCGCTAATAAATAAGCTGCATTTTATTTTTCCAACCAT  
GAAGCTGCTACAAACAACACTATTCATTTCTTGTTTCGTTTTCTACTTATTTTCCATTTTCCAAATTTATTAGGT  
GATACCATAACAACAACACTCAATTTCTCAAAGATGGTGAACCCAGTATCACTTCATCCGGTGGAAAGTTTTC  
AGATGGGGTTTTTCAGTCCAGGTAATTCCAAAAATCGTTATATAGGTATATGGTATAGCAACATATCTGT  
AACAACCGTTGTTTGGGTTGCCAATAGAGAAGCTCCTCTAGGAACTAATTCAGGTACCCTAAAAGTTATC  
AAACCAGGACTACTTGTTATAGTGAATGATAGTAACCACATCATATGGTCTACCAATACCTCGAGATCTG  
TGCAAACCCTGTTGCAAAGTTGCTTGATTCTGAAATCTTGTTGTTATTGATGCTGGTCATGGTGTGG  
TGATGATATTAATAATTGGGGATTTTCTCTGGCAGAGTTTTGATTACCCAACCTGATACCCTTTTGCCCGGG  
ATGAAAATTGGGTGGAATTTTGTAACTGGGAAGGAACTGTATTTGTCGTCGTGGAAGAACGAGGAGGA  
TCCAGCTCCGGGTGATTATACGTACCATTGTGATCCTTCTGGTACTTGCAGAACATTTTGAAGAAAGGT  
TCAAAGGAGGTATACAGATCTGGGCCATGGAATGGCTTAAGGTTTAGCGGAGCAACAAGTTCAAGACA  
AAGTCCATTTTATACATTTGGTGTGATTTCAACTAAAACCTGAGGTGTATTTAGTTATCACCTTCTAGCTTC  
GGTTATTACAAGGTTTTGTTTGAATCCAAATGGTGCCTTACAACGATGGACTTGGGGCGATAGGAATAA  
AGTTGGGCACCTTACCTTTTATTACCAACAGATAATTGTGATACTTATAAGTTGTGTGGAGGATATGGT  
AGTTGTAGTAGTTTGAATTCTCCGGTATGTGGATGTTTAGAAAAGTTTCGAGCCTAACATGTTGAAGATT  
GGGGGAAGGCAGATTGGTCAAGTGGTTGTGTTAGGAGGATTGAACTGAATTGCATCAAGGGAGATGG  
ATTTTTGAAGTATTCGAACTTAAATTACCAGACACGCGGAATTCATGGTTAATGTGACTATGAACCTT  
GAAGAATGCCGAAAGTTTGCTTGAGAAATTGCTCTTGATGGCATACTCAAATCTTGACATACGCAATG  
GAGGAACCGGTTGCTTACTGTGGTCTGAAGATCTGCTTGATATTCGACAGCTAGCCAACGAAGGACAAG  
ATATCTACATTAGAATGGCTGCCTCTGAATTAGGTAAGTTTATTGCTGAAAATATAAAATAAATAGTTTT  
GAGATTGATTTTCGTAAAGACGGTAAATTTATGAGTTGCAGGAGCCTGGGATTAATAAATAAATAAAGTGAATT  
TTCTTGTAGACACTGCCAATGACTACTATGAAATCCATAAATGAAAGTAGTTAATGGTAGGAGTACCGTT  
ATCCTTTTTGTAGTGATGAATCTTTATTTGTTTCTAAGAAAAGGAATTTGTCCATTTTTGGGGGTCTCAA  
AGGTGCGTGGAACGCATATGAACTCTGAAATGGGAAAAGGATAAACTCCACTTCTTCTGAATGGGT  
AGTCAATCCTATGTGTCGATAGGAGCAGTTGACAATTGAATCCGATTTTGACCATTATTTTACATCAAAC  
ATGTTGACTATAACGACAAAGTAAAACCTCACAGATTTAACAGAACAAAATACTATGAAATTAGTACAGC  
TACGTCTCTAGATTAAGAAAAAATGAGTTAGAGTTGAGCTATGCTGAACTGGTGACCACTGACCATG  
ATGTCTAGACAAATAAAAGAGCTTTAATGTAGTCATGTCTAATAAGCTGACGGAGAAAGTCGAACTGAT

TACCTATATTTGGGTTACATACTTGCAGCTAGTCAGGTGAAATCAAATGGACACAAACGAAAATTA CTCT  
CCTGGATTATCCCGTTATCGGCTGGAGTGATTTTGGTAATCCTAAGCCTAGTGATCTGGATTAGAAGAAG  
GAAGATAGCTTCAGAGAAAAAGAAAGGTAACCTCGACAAGTCATTATGTTTCGGAATATAATTAGTAGAT  
GAATTCAAATTCAAAGGAAAATCTTTCTTGTCTAGTATTTGCCAACTGAATTTGGTATATCGGTCTTTTG  
ACAGGATGCTGGGGGAACAATGGCAATTACAAGATGGATTACCTCAACGGAAACCTCAGTGAAGAATA  
TGAGTTACCACTGTTTCGACTTATCTACAATAGCTAAATCTACGAACAACCTTTTCAGGGATGAGCAAATT  
GGAGAAGGTGGATATGGACCTGTTTACAAGGTAATCACTTATAGCATTTCACCTGTTTACATGAAATAA  
GCAATTCACAGCCACATAATTGAGCATAGAGAGATTCGGGAAGACTGACAGTAAGGAATGATTTATCG  
ACTTTATAGTTTTGGAAGAGTTTTATAAACATTAGCTAACTTGATTGAATTTATAATAGTTGCTCAATTC  
TTCATAATTTGAGCTTCTACCTTTTGGTGGAAAGTATAATTTGATTTTCATGTTTCAGTGTTGAAAAACTTA  
ACATGTAGATATATGATGTTTAGGGCGTGCTTGAACACGGACAGGAAATAGCTGTGAAGCGGTTGTCTA  
GGACTTCCACACAAGGACAAGAGGAGTTCATGAATGAAGTGATGTATATTGTGAACTTCAGCATAGAA  
ATCTGGTGAAGATTCTCGGATGTTGCATCGAAGGAGAAGAAAAAATGTTGATCTATGAGTACATGCCAA  
ATGGAAGTCTTGATTCAATTTATATTTGGTAAGGATTTCTCAAAAAAAAAAGAAAAAATTGTGCTTAATAG  
TTACATACATCTCAGTTGATAGATGCCCTGTAGGAGTACCCAAATAATCCTCTTAGCCCAAAGTTATGTTT  
TATTGTTACTTTTCCGATTTATTTTCGATGTTTAAATCCCACTCTCAGTTTTATCTGATTTGTGTGAATTAATG  
TTCCAATGAACTTTTAAACAGATGACACACGAAGCACGGTATTAGACTGGTCTAAGCGCTTTACAT  
AATCAATGGGATAGCTCGGGGACTTATGTATCTGCATCAAGATTCTCAGTTGAGGATCATTACAGGGA  
CCTGAAAGCTAACAAACATTTTACTAGACAATGACATGAATCCAAAGATATCAGACTTCGGTATAGCAAGA  
AGTTGTGAAGACGACAAGTTTGGAGCCAAGACACACCGAGTAGTTGGAACATAGTAAGAATCTCAAGA  
TGATATTTTACTGAATCATTCAAACCTGGAATAGCAGAAGAGCCTTGACATTATCATAGTATGTTAAAAT  
CAAAAAATAAAATCAAAAAATTATCATAGTATGTTTACCCAGTATTAGTAACGCTAATTTCTGTTTACGTT  
TTATGCAGTGGCTACCTCTCACCGGAATATGCTGTACATGGTGTCTACTCGGTGAAGTCAGATGTATTTA  
GCTTTGGTGTCTTAGTTCTTGAAATTGTGAGTGGGAAAGGGAACAGAAAATTCTCTCATCCAGACCATAA  
CCTTAACCTCCTCGGACATGTAAGGGTTGTGTTTTTCATTGTCCATCAGTAAATTATCTCGTAAACCTGGT  
CATGCTAACACGATAGTAAAATCTACAGGCATGGACACTCTATAAAGAAGGTAGATCAATGGAATTACT  
CGGGGATTTCCCATGATGTTTATTCTACACCTGAAGTTATACGATCAATCCATGTTGGTCTATTGTGTG  
TTCATCATCGTCCAGAAGATCGTCCAAGTATGTCTTCAGTGGTTATGATGTTAAACAATGAAGGTGACT  
GCCACCTGCTAAACAGCCAGCTTTCTTCGTAGAAACAATAACACCAGATAATGAATTCTCTTCTAGTCAAT

ATGCACATAGTACAGTGAATCAGATCACCATCACAACATTAGAAGCCAGATAGTAAATTCTTCATTGCAA  
ATAGCAATCTATTATACCCTTCATTCTTTCTTTGTAACAACGTAGCAATCTTATCGTAATAGTGTACC  
CATCATATCAAATCTTGGATATGCCTCTGCACGCGATCCTTCTCTGCCAGCCATAAACAGCTAATCATAG  
CAATGCAGGGGGTTAAATAGGGAAAAGATGTAAAATCACAAAACAACCTTCAGGATCGGTATATATTC  
TCTCTTTGTATGTGTTATTTTGCTTTTGTTTCATATATAGTTTAGTATTGATTTATATGTATGTGTTTATCTA  
TTAATTAAGAAGATGGAAGAATGTGTAGATCCAACACTAAAAGGATCATTTTGTAAGATATATAGACAT  
GTTATTCAAAG

>PGSC0003DMG400021993 G-LecRK

AAAAGTATGAAAATTTTATGATGATGAATTGATGGAGGACAAAAAAGTTTATTCCCTTAGCCCTTTACTT  
GTGATTTTATTGATCACACTCATCGTTATCGCACGTATAACGTTGAAATATTCGGAGACATTTTTCCTCAT  
TTTCGGAGCTGATGTTGCGTTGATAGTTGGTGTTTTTGCTGGTGTTTTGATCCGAAGGAAGTTCAACAAC  
AGGAGGTTATTGCTAGAAAATCAGTTAGACTCAGATGGACGCGAGCTGAGGATCGAGTATAGTTTCCTA  
AGGAAAGTAGCTGGTGTCCAACAAGATTTAAGCTGAAAGAGCTCGAAGAAGCAACCGATAACTTTGG  
ATCGTTGGTAGGACGTGGATCATCAGCTTGTGTTTTCAAAGGTGTGCTTAGTGATGGTACATCAGTAGCT  
GTTAAAAGGATAGATGGAGAGGAGCGTGGCGATAAGGAATTCAAATCAGAAGTTGCAGCTATTGCTAG  
TGTTCAACATGTTAATCTTGTACGTTTACTTGGATATTGTAGTGTTCCCTCCTCAGGACCTCGATTTTTGGT  
TTATGAGTATATTGTTAATGGATCACTTGATAATTGGATTTTTCGAAAAAGGGGAATTCGAGGGTGTTTG  
TCGTTGGATTTGAGGTGTAGAGTTGGTCTAGATGTGGCTAAGGCACTTTCTTATTTGCATCATGATTGTA  
GATCGTGTATTTTACATCTCGATGTCAAGCCTGAGAATATACTTTTAGACGAGAATCATCGTGCTATTCTA  
GCTGATTTCCGGTTGTCTAAGTTGATGGGGAAAGATGAGAGTAGAGTTGTTACAACGATTAGAGGTACT  
CGGGGGTATTTAGCCCCGAGTGGCTCCTGGAGAACGGGATTTCTGAGAAAAGTGATGTTTATAGCTAC  
GGAATGGTGCTATTGGAGATGATTGGAGGGAGGAGAAATATTACTTTAGCTGAAAATGGGAAGAGTAC  
CAATCAAAGAGTAAGTTCAGCTATTTTCCTAAGATTGTGAGTGAGAAATTGGAGCAGGGGAAGATCAT  
GGAAGTCCTGGACGAGAGGCTCGTCCATGAGGCAGCTACAGGAGGTGTAGCTGTAGAAATGCAAGTG  
AAAAGATTGGCGTGTGTGGCGTTGTCTTGCATCCAAGAACGGCCTAGTCTTAGGCCAACAATGGCACGA  
GTCGTTGAAATGTTGGAAGGTCGTGGGCCAGTAGAAGCGCCTAGACAAACGACAATGTTGATCCTTGAT  
CTATTAGACGAGGGTGTGGATCATCATCCTGGGATACCTAGGGTTGCTGCAGCCATGGCAAGATCTAGT  
GATACTAATTCGCTTCGCTCTTATACAATGTCTATTCTCTCAGGGAGGTAGTACCTACATAATGCATAAGG  
GATTCGTCTGCTTTCTGTCAAATTTTTCAATATCAATAGGTTGATTGTTTCTCGAGTGTTGTATCCTGAAT

CCGAAAGAGTGTACTTGAATTCTCCCCCTAACAAAAAAGTGTATGAATTTGCTTTTGTTCACGCCAA  
ATATA

>PGSC0003DMG400022391 G-LecRK

AAAGATAACATTCAAAGCATAACGAAAAGAGAAAGAAGTGTGAGCAAATAGTATTGCAGGCTGCAGCT  
ATAGGTATTCTCCATTTTAGTTTATACAGAACTAATTCACATGCAAATTGGCAGAAGAAAACTTCATAA  
GCAATGAAATTAAGCACAAGAGAGATACTTCTGTTTCTTTCTATATCAACTGCTTCAGGTATCATTAGCAC  
CAATAAATTCCTGCGAGATTCAGAACTTTAGTCTCCAATGACAAAAGATTCATATTCGGGTTCTTTAGTC  
CTGAAAATTCGACGAATCGTTATGTTGGTGTATGTTAATGTCCAACCACCAACTGTTGTATGGGTTGC  
CAACAGAGAGAAACCTTTACAGGATTCTAGTGGAAAGAGTGACAATATCTGATGATGGAAATCTTGTAAT  
CTTGAATTCACAGAATAGGAGTATATGGTCATCAAATATTTACCAGCTGTGAGAAATTCACAGCGCAG  
ATCTTGGATACTGGAACTTAGTTTTGAACGATAGCTTCAATGGGAGGGTTCTCTGGGAAAGTTTTCGG  
GATCCTTCAGATTGCTTCTTGACAGCCATGAAAATTGGCGTTGATGTAAGTACTAACACGACAAATCTGC  
TGAAATCATGGATAAGTCCTTCAGATCCATCTGTTGGGAGTTTCTCAGTTGGTATTCAACCTGAAACAGT  
TCCCCAGATTTCCATATGGAAGAATGGGAAACCTCATTGGCGTAGTGGTCCATGGAATAAACAGGTTTT  
CATTGGGGTACCAGACATGACTTCATTCTATCTCAATGGATTTGATCTAGTTAATGACAACAAGGGCACC  
GTGTACCTTACCTATTTATATGCAAATCAGATTGAGCTGACGTTTTTACCTTGAACCTAACAGGGTTTTT  
GCAGCAGAAATATATGGATCCTAGTAAGAATGATTGGGAAGTAACATGGGAATTTCTGCAACTGAGTG  
TGATTTTTATGGAAAATGTGGACCTTTTGGAAAGCTGTGATCCTACAAGCTCACCAATCTGTTCTTGTTAG  
AGGGATTTAGGCCGACAAGTGAAGAGGAATGGGGAAAAGGAACTGGACTCGTGGATGCAACAGAAA  
GTCCATGTTAGAGAGCGAAAGAAACAGTTCTAACCTTGAGCAAGGGAAGCAAGATTGGTTTCTGAAGCT  
GCAGTCAATGAAAGTGCCGGATTCTGCTATTTGGGTACCTTTTGCAGATGAAGATTGTGTTAACGGTTGC  
TTGAGGAATACTTCATGCATAGCTTATTCATACTACACAGGCATAGGATGCATGCATTGGGAAGGAAGC  
TTACTTGATGTTTCAGAAATTCTCCATCGGTGGGGCAGATTTATTCTCCGCCTTTCATACTCTGAGCGTGG  
TAAGACCTGCATTTTCAGAACTATAATATAAGCTATAAACTCTGCTTGCCAATGACATATGTATAATGGA  
CACTTATTTTGTAAATGCAGATCAAAGAGAGAATATAAAGTAGTCATTGCCATCATAGTCCCAGTAGGCT  
CAATAATTCTTGCCATTTTCGGATACATTTCTGCAAATATGTAGCTAAGCGCAGAGGTAACAAGCTTAT  
CTGAAACATTAGAAAATCCATAGTAGCTTTAATCATACGAATCACTTTATCTCTAATGTCCTCTTGAATCA  
GGATGGAAGAGAATGAGTAAGATCTTATCAAGTGAATCATCGCCAACTATTACAAGGAAGACAAGATT  
ACAGAGGACATCAATCAAGCTAAATTGGAAGAACTGCTTGTATACAACCTTTGATATCTTAGCAAACGCAA

CTGAGAATTTTCATCTGTCCAGCAAGCTTGGACAGGGAGGTTTTGGTCCAGTTTACAAAGTAAGGATTTG  
TTTGATTGAGTGTCTTACAATTGTTTTAAGAAAACATAACCAAGTATATGATATAATTGCAGGGGAAAT  
TGCCAGATGGACAAGAGATTGCTGTGAAAAGGCTTTCACAGTCTTCTGGTCAGGGGCTGCAGGAGTTCA  
TGAATGAGGTTGTGGTGATTTCAAACCTCAACATCGTAATCTTGTTAGACTTTTTGGGTGCTGCATAGA  
AAGAGGGGAAAAGATTCTGGTTTATGAATACATGCCAAAAGAAGCTTGGATGCCTATCTCTTTGGTTC  
GTTATGATTAGTTTTCTTTATTTTCCATAGTCTAACTAAAACAACTTTTTCTTTAATTTAACTTGTCAAAT  
TCGCGATGTATTTTCAGGGTCACAACAACAAGAGGAAGAGTTCCTGGATTGGAGTAAACGTGTGATCAT  
TATTGAGGGAATTGGTCGAGGCCTTCTTTACCTTCACAGGGATTCAAGACTAAGGATTATTCATAGGGAT  
TTAAAGGCCAGCAACATTTTGTGGATGAATACCTGAACCCCAAATTTTCAGATTTTGGGATGGCAAGG  
ATTTTTGCAGGCAACCAAGATCAGGCCAACACAAGCAGAGTAGTTGGAACCTAGTAAGTTCTTGTATCTT  
TCCCTTTTATCTTTTCATGAATGAAAAGAACACAAAAAGTAAACATTCAAATTATAACATGATGCAGTG  
GTTACATGGCACCTGAATATGCAATGGAAGGAAGATTCTCAGAAAAATCAGATGTTTATAGCTTTGGAG  
TATTGTTATTGGAAATTATAAGTGGAAGGAGGAACACTAGCTTTCACCAAGATGATGGTGCATTAAGCC  
TGCTAGCATTGGTAAGTTCTTATGAAAATTAAGCTCCAATTCATATGAAATGTCAACTTTTCATAGTTCAA  
GTTTCCAATGTTTTGTCAACGTGCTTGCTCTTCAGGCGTGGAATGTTGGATTGGAAACAAGATTGTGGA  
ATTGGTTGATCCCAAGATAACTGACCTGCACCTTGAAAAGAAATGGTGAGATGTGTACAAGTTGGATT  
ATTATGTGTACAAGAATATGCAGAAGACAGACCAAATGTCTCCACAATTTGTCTATGCTCACCAAGATG  
TTTATAGCTTTGGAGTATTGTTATTGGAAATTATAAGTGGAAGGAGGAACACTAGCTTTCACCAAGATGA  
TGGTGCATTAAGCCTGCTAGCATTGGTAAGTTCTTATGAAAATTAAGCTCCAATTCATATGAAATGTCAA  
CTTTTCATAGTTCAAGTTTCCAATGTTTTGTCAACGTGCTTGCTCTTCAGGCGTGGAATGTTGGATTGGA  
AACAAAGATTGTGGAATTGGTTGATCCCAAGATAACTGACCTGCACCTTGAAAAGAAATGGTGAGATGT  
GTACAAGTTGGATTATTATGTGTACAAGAATATGCAGAAGACAGACCAAATGTCTCCACAGTTTTGTCTA  
TGCTCACCAGGGAAATTGATGATTTACCAAGTCCTAAACAACCTGCATTTACAACAAGACCGAGCTTTTC  
CAAAAATGCACTTCTAAATCTCAAGGCTCCATTAACAATGTTACCGTACTATTATGGAAGGACGATAA  
GGCATATACGATTTTTATTTAGGCATGATAGTATTCTTTCTCTGTAATTACTGTTTCTGGTTCTTATT  
ATAATGGTTCCACTCAATATTACCTCAGTACATTAAGAATCCAAGAGAAAAGTGTTAACCTGCAAGTCA  
CTTATGCTTGATAACAGAACCCATATCCAAGCAAGAAGAAGCAAAGCTAGACTTCAAACCTCAGAGTTGT  
CAACAAGTAGCCTAAACAGGTGTTTGCAGAAATTTAGAGAATCCTATCCACGGATTGAGATCATTTAGA  
GTTAGCTTTGTATTACAGCTGACTCTGAAGATGAACAACCTTTCTAGACAAAGGCATTCTTACAGCGTGG

TTGGAGGGTCACCAAATCAACAGGGAAGCCTGTAGGAAAGGGGAACATGCATCCAATTCACATCAGAA  
ATTGCTGAAATGATGTGAAATCTTGCACTTTTGTCTTGGAACTCAAGTCATGTCAGCCCAAGAATA  
TTTGCAGTATCACAGGTAACAAAGGACAAGAAACCTTCTGAGATAGCATGTAAATTTTTCAAATTCAGA  
CAAAGATTACTCCTTTCCTTAGAATTGTTAATAAACCTATTATTCTGCTGATGCCTTTACTAAAT

>PGSC0003DMG400022426 G-LecRK

GAAATATCGTAACTAATAGAGTAGCATTACATATAATCTTAGTCCAGGTAGGGGTGAATAGGATGGAA  
TGCACTTATGGAACCTGTTTTTTGAAAGTCATTTTCCTGATTTCCGAGAACTTGTTATCCTAGTCAAT  
TGAAAACAAAAGAGCTGGAATCATATTGAATAATTGGTCCCAGTTTGAGGAAAATCCTTACGGTAGTCT  
ATCTAAGCACACAGATTATTCTGAAGACTTGTAATTCAAATCTGAATACCAATATTCCATAGCCATTGT  
TTTTATGAGCTAGCAACATGAAGTCTACTAGTGTCTTCTTGTGTTGATTCTTGCTGTATTTGAGTCACTTCA  
AATGTGATTCTAGGGACATCATAACTTCAAGGAACATATTAACAAAACAAAAGGAAAACCTTTGTGTCAG  
CTGGACAGATATTCGAGCTGGGACTCTTCAACACACGATCTAAAGACGGAAAACCTTAGAAATTATGTTG  
GCATATGGTACCGGGTGAGTCCCAAACTATTGTGTGGGTTGCCAATAGGGACAGACCAATCCCGTAT  
CAGATGAAATTTGGCTATTGGCATTGATGTGGATGGTAATCTCAAAGTGTGGACTCAAAGAAGA  
CTTACTTTTCAACAGGACTCGTTAGTGCATCTTCTTCTAAGCGTACAGCAAATCTCTATGACTCAGGAAAT  
TTGGTTTTAATTGATGAATTGTCAGGCAAGAGATTGTGGCAAAGTTTTGACAACCCCACTGACACCTTCC  
TTCCTGGTATGAACATGGACAGTGCATTGAAGTTGACTGCTTGGAGGGTTACCCAAGAGGATCCCAGCA  
CTGGAGATTACACGTTTCGGCAAATACAGCAACCAATTTGAGTACAACATACTATCCCAAAAAGGG  
GCCTTCACTGGAAAGCCTCTGTTTCTGCTAAGCCCTTGTAGTTCCAGGGAACCTGCCCTCTTGTGGGATCA  
ATGTTAACCAATTTCAAGTTTCAATACAGAACAACAATATACCCCGAAATTGAACAAGTCACCGACTGATG  
ATGTTTCATCTGTGCCAGACTTTAATTACACAAGGCTACTACTGAATTCCTCAGGGGAAATACAATTATAT  
GGCTGGAGTAACGAGAGTACAGGGTGGTTACAAATATGGTCAGAACCACAAGATCCATGCGATGTGAA  
TGAAAGTTGTGGGAAATTTGGAATTTGCAACAGTGGGTTTATGTCTCGGTGCAAGTGTGTTGCCAGGATT  
TGACCCTGATTCTCCAGATGAATGGACGGTGGGACTTGTACTGATGGTTGTTCAAGAAAGTCAGTTCGT  
GGTTGCAACAAGAAGTCAGAATTTGACACATTCTTAACTTTTCAACTATCAATGGGAAAACCTTTGTTTGC  
ATACCTAACAAAGGTGTGGATCACACCGACAAATCCTTTTGTAGTTGTATCCTCATTATTTACCTACGCA  
AGTTTCAATTTGTTTGGTTTCAGAGCATGTAGGACAAAGAGGATGGAGTGGAGAGAAGGCAACATCCTT  
GAATCTCAAAGTCCTGATTATTTCTGTCAGTGTAGCTGCTGCTGGAACATAACCATAACCATTTGCTATG  
TAATCTACCATAGAAAAAAGGTGGCAAGAAGGAAAGGTAACAAATAGCACAAGCTTTTATATAAATGAT







TGAAAATCTTAAATTTTAATTCATCTACTTCATAATTAATAAGGGTAACATGATAAACTTACTATGTCAAT  
AATTATTTTCTTTAATAGGTGTGTCAATTCAAAAGTGGACAAGTAATTAGGGACAGAGGAAGTAAACAA  
ATAGGCCTTTTTTTTTCTTTCCAACCAATAAGGTTTCATCTTCCTCACACCCCACCACCCCACCACCTTCTCC  
ACCATAACCCCACCCTTACGCCTCGAACCCCCACCCGCACCTCTCTTTCCCCTATTTTGAACCCTGCCGCC  
ACCCACACTTGCCTCACCCCTTCTTCTTCTTCTCGAGGTCCCGTCCCTGCCACGTTCTTTCTTCTTTTTCA  
AAACTCCACACATTCCTTCATTTCAAATTATTCTTGCTTATTCTTAGAAATGATGAATAGGAAAAAAA  
TGAAAAACCAACAACCTTATTATTGCTTCAAGATCTTACTTTTGAAGGGTTGTTGATTGTGATGAACTT  
GAAGTTTTTTAATAAAAAATAATATAATTTCTTCATCTTAAATTATTTTTTTAATTTGTACTCCTATTATTT  
ATTTATTTTGATAATGTGCTTTAAAATTGAATGTTTTCTAGTCTTGGATCCATAAAGTTTGATTTTATTTT  
TATAATCTTAGATTAATTCTCAATTTTTTTTCTATTTTTTACCTTTCTAAAATTGTATAAATAAAAAGAAACA  
AAAAAGAATTAAAAAAACTCAAATTTAAATAAATTTCAAGGTGGCGCTGATGTGACAATGATGTGGCA  
TTGATTTGGCAATGAAATGGAGCATGTGTAATACACTTGCCATTGTGAGACTGATATTGTAATATTAGAT  
TTGAAAAAAATCACTTCAAAAATGTTAAGGGGTATTTAAACGTCCATGTAGTTAAGTGCTAAAGTAAG  
TTGTGCTGCCAAGTTAAGGGGTTTTTTTTATGTGTTTTCTCTAAAATATACCCTAACTTAACTATATCC  
TTAAAATATTATTCTTATCAAGAAAACATTTTTCAAGTATTTAAAAGTGAATAATTTTCATCCTTCTACTTG  
AATTTATGAGAAATCTAACAAATCCCACAAAAATCAAGTTATTCCTTCATAATTATTATTCTTAGATACGC  
CAAAAATACTATCGTGAACTTTTATGGTAATTAAGTTTAGCATTATGCAAAATCTTTAAATTTGACAGTTT  
TTTTCATTTATTTTTCATGTAATTTCATATTTAAAATATTATTAGTTGGTATAAGTTTCTTCTCAATTGAATA  
TACTAGAAGTGACGTTTGTGCGAAACTTCCCCTTCTAATAATGTAGAATGAACTCAAATGCGAGACATG  
ATCAATATTTTGATTACTTCAATATCAGATTGACCCAAATATTTATTGATCTAAATACAATTTGACTTTGAA  
AAAGGTAAAGGTAATTAAGCTTCAAGCTTATTTCTGTTATTAATGAGAAAAAGAGCTGATCATGTATCCT  
CACACCTTCCAACATTTTTTGTTCAGTAAGCAATGGTGTCTAAGATTCTTAATATTTATTTTCGAAACTT  
CTTATAGCAGGTAATGAAATTATGCAAGAAAACTTTTGTTGATAGTCACATGAATTGCTCATGTTTTGTA  
GGATCCCTTAGTTTTTGGACTATATCTAACATAAGGATGAAAATTGTTAACTTTCAAATATTTAGAGGATG  
TTTTTTGCCAAAAAGATATTTAAGGATGTAGTTTAAGTTTGGGGTATAGCATAAGGATGTTTTTGAC  
CAAAAACCTTTGATATTGTTCCCGGTAGTATTTTTCCCAATTGAGTTGTGCTATCATGGGCCGAGCCTCT  
TTACCTGAAAATTATGCGGTGAATAGAGGTTAAATGTTAATTATTATGAATATATATTTAATTTGTATA  
TTATTCACCTAACTAAAAAGAAAATTTGCAAATCCTCGCCACAGGCGTTTACTGATCATGTACTCATTCA  
CTACTCAAGGCCGTTTTTATCTCATATACATGGTGGTATACGTTATCTTGACTCATACATGATGGGATACA

CTATCTAAGATAATTAATCCTGGGATAACTTGTTTCGTTTAATTGGATCAATTCTTGTCTTGTGATATACAG  
CGGCTATCTTGCACCAGAATATGCATTGGAAGGACTTTTTCAATCAAGTCTGATGTTTTGCTTTGGAG  
TGGTTGACTGGAAATCATTAGTGGAACAAAACTTGGATGTTCTTGAAGACACAAACCTCTTGGGTC  
ATGTAAGTACCTCTCTATTTAGAACATGTAATCTTAAGACATAAACGAAATGTGAAGATTGACATATAAA  
GTAGGCCTTCTGTCCCAATTTATATGAATATTGGGCATCGTTGATAACTCGAAATTAATATAATTACAG  
GCTTGGAACTATGGATGGAAAACAAGGCATTGGACATAATGGACCAAAGTCTAGTGGATACATTCAAT  
GAAATTGAAGTAGTAAAGTGCATAAACATAGCACTTTTATGTGTGCAAGAAGATCCAGGTGATAGGCCA  
ATTATGTCAAATGTGATAATTATGCTTGGAAAGTGATAGCATGCCTCTTCCAAGACCCAATCAACCAGCTT  
ATGTCACAAGGAAAAATTACACAATAGGAGCAAGCACATCATCCTCCTCTTATAATTATAATAATTAC  
TATAATTATGATTCATTCCTACTGGCTCCAAAAATGAGTTGACCATCACTGATATGCAAGGCCGATAAATAT  
TATATAGTAGTAGTAAGTTTTGCACGATATGGACATGTTAAATACATATTCTAAGGTTAGTGTGAATGAC  
AATATTTATGTAGTAGGCGGATCTACGTAGAGGAGAGGAATGCAAGGGCACCCGATCGAACACTCGA  
GAAGAACTTCATGTATAAATATCTCGAGTATATATGTGTATGTACTCCATTAATAATCTATGTGTGTTAGCA  
TATATATATTGAATGTAAATATAGTAATTTGTATATTATGATAAATATAGGGCTAATAGGTTAGGATTAG  
CAGTACTATTCTTGTATGGAGCACACAATTGAAGCAGACATGTTGATGCTCAGCTTTGTGCTTATAGT  
AATTCTTGGATAATACTAATATTTGTACTGGTAATAAAATCCTTGTTAATCCTCTAAATGTTGCATTAGTT  
TC

>PGSC0003DMG400022787 G-LecRK

CACACTTCGACTAATTCATAGAATACGTATCACCTCTCACCAGCAACAAAATCTTGATTTGTGGAAAAA  
AAAAAACCAAAGTGATGATCACTAGTCTACAATATTTGCTTGTCTTCATTTTTCTTACTTAGGACTTTGCT  
TATCAATATGTAACATTAATAGCACTCAATATCTAAAAGATCCAGCAACTTTATGGTGTCTGATAACATG  
TTCAAGTTGGGATTTTTTCAGTCCTGGAAATACTACGAATCGTTACGTTGCTATTTGGTACAACCTTCTCAGA  
AACAACTGTTGTTTGGGTAGCAAATAGAGATAAAGTACCATTGAAAGATTCATTTGGTGTGTTTCAAGATT  
TCTGAGGATGGAAATCTTGTGTGATGAATGGAATGAAAGATGTTATTTGGACGTCGAACATTCATCTA  
CTTCACACGTTGTTACGAGTTCTGTTGCTCAGTTACGAGGAGGGAACCTTGTTTTACTTGACAACCTCGAA  
AAATAGGAACATAATATGGCAAAGTTACCAACATCCTAGTGATACATTTTTGCCTAAAATGAAAATACCT  
ATTAACCTGTTACAACAGGGGAGAAAACAGGGCTAAGATCTTGGAAAAGTCCTTTGGATCCAAGTTTT  
GGTGATTTTTCGACTAGCATTACCGCGATTCTTCTCAGCTTTTGATTTGGAAAGGGAAGAATCTATACT  
GGCGAAGTGGTCAATGGAATGGTCAGGTTTTTATTGGAATAAAGGGTATGCATAGAGTGCACACTGGT

GGATACAATGTTGTTGATGATGAAGAGGGCACTGTCTATCTTACGGGTTTTGTTGAACGAAAAAACCT  
ACAAGGTTTGTCTTGGACTCGAGTGGGAACCTGGTACAATCATACTGGGATGGGATTGAGAGGATTGG  
AAGTTCCGTGGTCAGCTATCGAAAATGATTGTGATGTTTATGGAACCTGTGGTCCATTTGGGAGCTGCA  
ATTCATTGTATTGCGCAATTTGTTCTGTGTTAAGAGGGTTCGAGCCAAAGAATATCGATGAATGGGAAAA  
GGAGAATTGGACTAGTGGTTGTGTGAGGAGGAAAAGTTTGCAATGTGATCAAGAAAACAACAAAACAA  
GTACAAGAGATGGATTTTTGAAGATGGGATACATGAAAGTGCCTGATTTGCTGAATGGTTACCTCCTA  
AGCTTGAAGATGAATGCAGAAGCCAATGCTTGAGTAATTGTTCTTGCTTAGCTTATGCTTTGACACAGG  
AATAGGCTACATGTCGTGGAGCGGATACTTGATTGACATTCAACAGTTTCAAGCCTCTGGCAGCAGACTT  
CACATCCGTGTGGCACATTCTGAACTCGGTATTGATTCATTGTTTCTTGATTTGCCACTGTTCCATTAATGT  
TTCCAGTAGTCTTACATGATTTGGTTTCGTCTGCAGATCATCACGGAGAGATTAGACTAATCGCAACTCT  
AGTGATTGTATCGTCTTTTGTGTTTGCCTGGTGTGTATCTTATATGGTTTTGGATGTCAAGGCAAAGA  
GGTAAAATATGGTTTCACTTTAAAAGGAACAATCATTTAGATGGAAAGAAGATCTGTTTGGGAGAAATT  
ATTAGTAATGTTGGTTTGGATGAGTTGCCAATTTCAAGTTTGAAGTGCTTGCAATGTCAACAAATCAGT  
TTCATGACAACAATAAGCTTGGACAAGGTGGTTTTGGTCCGGTATACAAGGTAAACCTGTTTTTTCTTC  
GCGTGAACCAATATGTTCCAACCTCCGGTCTTGTAATGCAACTGTCACGTAGTATCGTTTACCTGTTTAT  
TGTTTCGTAGGGAGTATTAGCAGACGGGGTGGAATAGCTGTCAAGAGGCTTTCGACTGTCTCAGGACA  
AGGGATGGAAGAGTTCATGAATGAAGTGTGTTGATATCTAGAGTCCAACATAGAAACCTGTTAGATT  
ATTGGGATGTTGCATAGAAAAAGAAGAGAAGATGTTGATCTATGAGTATTTGCCAAATAAAAGCTTGGA  
TGTTTTTCTCTTTGGTTAGTCCTAAAAGAACTCTTACTCTGCGATATATAGTCAGACCTTTTTATAACAGT  
CATTCTCTATAATAACATTCCACTATAACAACCAAGTTTCTTTGGAACCGATTTTAATGTTATGTTTTTA  
TAATAGCATTCACTATAGCAAGCCAAAAAATCATCCAGACAAACGACATTGTTATAGAGAGGTCTGACT  
GTATGTTCAATTATAGCTTTCCTCTTTTATCTCATGCAAAAGCTTAAGTTGTTATAGAAAGAAATTGTCTTC  
GATGAATGTTTAGATCAAACGCATAAAGGGATGTTGGATTTGAGCAAACGATTGCACATTATCGAAGGG  
ATAGGGCGAGGACTACTATATCTACATAGAGATTCAAGAATAAAGATAATCCATAGAGATCTAAAGCCA  
AGTAATATCTTGTTAGATAATGATTTCAATCCAAAGATTCAGACTTTGGCATGGCTAGGATTTTTAAATG  
CAATCAAGATCAAGCAGAGACAAGGAAAGTTGCAGGAACATAGTAAGTATATATATAGCCATTCAATAT  
GCTAAGTTTTCTTCTGTCTAAAAGTTCCACATTAAGCTAATTCGTTGATTTATCGTTGAATTTGCAATGC  
CTTAGTGGCTATATGGCTCCAGAGTACGCGATCAAAGGGATGTTTTCTGAGAAATCGGATGTTTTTAGCT  
TTGGAGTAGTGTGTTGGAAATAATGAGTGGGCAAAGGTTGCAAGTTTTTGAATGAGGAGATCTCAT

TAAGCCTTCTTGATATGTAAGTTCCTTTAAAACCTCTCTTGTACTTAATTGTGAGAAGCAAAAATATATTG  
ATAAAGAAGTTCATTAGAATCTAACTTTAGAACTTGATATTGAGTGTTATAGCCTTGTAATAAGGACA  
TTTTGATAGATCGAATTGAATGTTATTAACGCTCAAACTTTAGTACAACCTTTTCTGATCCCATTGATGG  
GAAGACCCATATTATACCAACATCTCTTTAGGTTCTTCGATCATCTAGAGGTGTATATTTCCATTCTGCTT  
GGATCCAGTATCATTAAAGCTTCAAATCCTGAGTGCCTCATTGTTAATTATTTAATAAATCTAAATACCA  
CTAAAACAATTTATTTATTTTTTCAGGCATGGGAACTATGAAAAGAGAATGATTTATCAAATTTTATTGATC  
AAGTGATATGGGATCCCAACTTTGAAATTGTGTTGACAAAATGCATACAAATAGGTTTGTGTGTGTTCA  
AGAATTTGCTAGAGATAGGCCAACAGTTTCAAATGTTCTTTCCATGTTTTCAAGTGAAGTTATAAGTCTTC  
CAACACCATTGAAGCCTGCTTTTGCTAATTTTTATGATGATAATGGAGTTGGTTCTGTAAATTATGTCACT  
TTGACAAACCTTGATGCTAGATAATTAATATGAAATATTGTGAAT

>PGSC0003DMG400024258 G-LecRK

ATGGTGTTCATCGACTCAATTCAGGAGGTTTACATATACTGAACTTAAGAAAGCAACAAAAACTTCAAG  
GTTGAGCTAGGAAGAGGAGGTTTCAGGAGTTGTTTATAAAGGAGTTTTAGCAGACGGAAGAGCGGTAGC  
AGTCAAGAACTTTCAAATGAGTTTCAAGAAGAATTTTGGGCAGAGATGACTACCATAGGAAGAATCAA  
CCATATGCATTTGGTGAGGATGTGGGGATTTTGTCTGAAGGTAGACGTCAGCTTTTGGTCTATGAATAC  
GTCGAGAACTCATCACTAGACAGGCATCTTTCCAGGGCTGATATTCTTGAATGGAACAAAGGTTTGCA  
GTGGCACTAGGGACAGCCAAAGGTCTGGCATATCTTCATCATGAATGTCTTGAATGGGTGATTCAATTGT  
GATGTTAAGCCTGAAAATATACTTCTCGATAGTGAATTCGAGCCCAAGATTGCAGATTTTGGACTTGCAA  
AGCTGTCCCAAAGAGGCGGCCCTGGTTCAGATTTCTCCAAGATTCGCGGTACTAAAGGCTATATGGCTC  
CTGAATGGGCTTTGAACCAACCTATAACAGCAAAAGTTGATGTTTATGCCTTTGGGATTGTAATACTAGA  
AATGATCAAAGGAAGTAGGCTGTCAAGTTGGGTGGTGGATGATAGTGAATGTGATCATGAACAAGATT  
CACAGCTCGGAAAATTTGTCAGGATGGTGAAGAGAAAGATTCAAAGTGGAGAAGATTCTTGGGTGGAG  
AAACTTGTGATCCACGACTAGAAGGCAAATTTGGCAAGAACCAGGCAGTGACACTGATTGAAATAGGC  
CTTTCTTGTGTAGAGCAAGACAGAAACAAAAGGCCTACAATGGCCTCAGTAGTCCAAACATTGCTGGAT  
TGTGAAGATGAAACAACACAAATAACATAG

>PGSC0003DMG400024259 G-LecRK

ATGAAAAGTTTGAACTTTACTATCTTTTTCCATTTTATGTTTTTCAATTTCTTGTCTTCTTTCCCTTTGAT  
AACATCATCAAGAATTTGCTTAAAGGTGATTCTTTTTAGTTAAAGATGATTCACATTTCACTTCTCC  
ACAAAAACATTCATTGTGGTTTTTATCCTATAGAAAGTACTAGTAATGCTTATTATTTTGAATTTGGT

ATACAAATTCAAGAGATAAAACTGTTGTTTGAATGCTAAACAAGATAGGCCTGTTAATCTCAAAGGGT  
CAAAGTTGACATTAAGAAAGAATGGAGCTTTAGTTTTAACAGATGTTGATGATACAATTGTTTGGCAAAC  
AAACACAACATCATTGATGTTGAAAAGGCTGAGGTTCTTGAAACAGGAAACTTAGTATTGAAGAATCC  
TAAAGGTGATGTTTTGTGGCAGAGTTTTGATTTGCCTACTGATACTTTATTGCCTGATCAAAGATTTACCA  
AGAATCATAGATTAGTTCCTCCTTTGAGGAAAGGGAGTTATCACCTGGATACTTTAGTTTGTACTTTGAT  
AATGATAATGTATTGAGAATGATTTATAATGGTCCTTTAGTTTCGAGTATATACTGGCCTAATCGCGAAA  
GGAGTGCGCCCCAGAATGGTAGAACTAGTCAGGTGGATACTGTAGTTGCACATTTTATGTTGGAATGGGT  
AGATTTTTCTCAAGTGATATGTTGCAATCAATGTTTCTGATATGGGGCTTGGGATATTGAGAAGATTGA  
CTATAGATACTGATGGTAATTTGAGGATGTATAGTTTGGATAACTTGACAGGGTTGTGGAAGATGTCGT  
GGCAAGCTATTGCACAACCTTGTGCTGTGCATGGAATGTGTGGAAGATTTTCGATATGTACTTATGTATC  
GAAGCCTAAATGTACATGTCCTCCTGGATATGAGATTGTTAATGGAAGTGATTGGAGTAGAGGTTGTAG  
GCCAATGTTTAGATCAAGTTTGGAGTCTAAACAACATGTAAAGTTTGTGGAGATTCCTAATGCTGATTAT  
TGGGGTTTTGATCTCAATGCCACTACTCCTTTGTCATTTGAATCTTGTAGGGCATTGTGCTTGGACGATCC  
ACGTTGTCGTGCATTTGTTTATAGGTTAACTGGTGTGGGATCATGCTATACTAAAGGCATCCTTTTTAATG  
GATACAGGTCTCCTAGTTTCCCTGGAAGTGTATTCTTGAAACTCCCTATGAATCTAAGTGCATCAGAATC  
AGGTCATTTGATGCTTGAAGGACTGATGCAAATGTGGATTGAGTCCTGAAAACCTCTTTTTGGTTCT  
CTTTCTATGTATGTATTGGATTTAAGAAGGTGAAGTGGATTTATCTTTACGTGTTTTGTTTCACCCTTGG  
TGAATAGAGATTCTGTTCTTCGTGTTAGGCTGGTGGGCGTTGTTTAGTAAACATGGGATTCTGCTTCC  
ATTGAGTATGGATATAAAATGGTGTCACTGACTCAATTCAGGAGGTTTACGTATACTGAACTTAAGAAA  
GCAACAAAAAACTTCAAGGTTGAGCTAGGAAGAGGAGGTTTCAGGAGCTGTTTATAAAGGAGTTTTAGC  
AGACGGAAGAGCTGTAGCAGTCAAGAACTTGCAAATGAGTTACAAGAAGAATTTTGGGCAGAGATGA  
CTACCATAGGAAGAATCAACCATATGCATTTGGTGAGGATGTGGGGATTTTGTCTGAAGGTAGACGTC  
AGCTTTTGGTCTATGAATACGTGAGAACTCATCACTAGACAGGCATCTTTCCAGGGCTGATATTCTTGA  
ATGGAACAAAGGTTTGCAGTGGCACTAGGGACAGCCAAAGGCTGGCATATCTTCATCATGAATGTCT  
TGAATGGGTGATTCATTGTGATGTTAAGCCTGAAAATATACTTCTCGATAGTGAATTCGAGCCCAAGATT  
GCAGATTTTGGACTTGCAAAGCTGTCCCAAAGAGGCGGCCCTGGTTCAGATTTCTCCAAGATTCGCGGT  
ACTAAAGGCTACATGGCTCCTGAATGGGCTTTGAACCAACCTATAACAGCAAAGTTGATGTTTATGCCT  
TTGGGATTGTAATACTAGAAATGATCAAAGGAAGTAGGCTGTCAAGTTGGGTGGTGGATGATAGTGAA  
TGTGATCATGAACAAGATTCACAGCTCGGAAAATTTGTCAGGATGGTGAAGAGAAAGATTCAAAGTGG

AGAAGATTCTTGGGTGGAGAACTTGTCGATCAACGACTAGAAGGCAAATTTAGCAAGAACCAGGCAG  
TGACACTGATTGAAATAGGCATTTCTTGTGTTGAGCAGGACAGAAACAAAAGGCCTACAATGGCCTCAG  
TAGTCCAAACATTGCTGGATTGTGAAGATGAAACAACACAAATAACATAG

>PGSC0003DMG400024260 G-LecRK

ATGAAAAGTTTGAAACTTTACTATCTTTTTCCCTTTTTAGTTTTCTCATTCTTGTTTTGTCTTTCCCTTTGAT  
AACATCATCAAGAATTTTGCTTAAAGGTGATTCTTTTTCAGTTAAAGATGATTCACATTTCACTACTTCTCC  
ACAAAAACATTCACCTGTGGTTTTATCCTATAGAAAGTACTAGTAATGCTTATTATTTTGGAAATTTGGT  
ATACAAATTCAAGAGATAAACTGTTGTTTGAATGCTAAACAAGATAGGCCTGTTAATCTCAAAGGGT  
CAAAGTTGACATTAAGAAAGAATGGAGCTTTAGTTTTAACAGATGTTGATGATACAATTGTTTGGCAAAC  
AAACACAACATCATTTGATGTTGAAAAGGCTGAGGTTCTTGAAACAGGAACTTAGTATTGAAGAATCC  
TAAAGGTGATGTTTTGTGGCAGAGTTTTGATTTGCCTACTGATACTTTGTTGCCTTATCAAAGATTTACCA  
AGAATCATAGATTAGTTCCTCTTTGAGGAAAGGGAGTTTATCACCTGGATACTTTAGTTTGTACTTTGAT  
AGTGATAATGTATTGAGAATGATTTATGATGGTCCTTTAGTTTCGAGTATATACTGGCCTAGTCGCGATA  
GGGATGTGTATGGGAATGGTAGAACTAGTCAGAATAGTAGTAGATTTGCTTATTTTGTGGAATGGGTA  
GATTTTTCTCAAGTGATATGTTGCAATTCAATGTTTCTGATATGGGGTTTGGGATATTGAGAAGATTGAC  
TATAGATACTGATGGGAATTTGAGGATGTATAGTTTGGATAACTCGACAGGGTTATGGAAGATGTCGTG  
GCAAGCTATTGCACAACCTTGATTGTGCATGGAATATGTGGAAGATTTTCGATATGTACTTATGTATCG  
AAGCCTAAATGTACATGTCCTCCTGGATATGAGATAGTTGATGGAAGTGATTGGAGTAGAGGTTGTAGG  
CCAATGTTTAGATCAAGAAGTTTGGAGTCTAGACATGTCAAGTTTGTGGAAGTTCCTAATGTTGATTATT  
GGGGTTTTGATCTCAATGCCACTACTCCTTTGTCATTTGAATCTTGTAGGGAATTGTGCTTGGGTGATCCA  
CGTTGTCGTGCATTTGTCTATAGGCGTACTGGGGAGGGATCATGCTATACTAAAGGCATCCTTTTCAATG  
GATACAGGTCTCCTGGTTTCCCTGGAAGTGTGTTTTGAACTCCCTATGAATCTAAGTGCATCAGAATC  
AGGTCATTTGATGCTTGAAGGTAAGTACTGATGTAAAATGTGGATTGAGTCCCCAAAACGTTCTTTTTGGTTCT  
CCTTCTATGTATGTATTCGATTTTAAGAAGGTGAAGTGGATTTATCTTTACCTGTTTTGTTCCACCCTTGGT  
GGAATAGAGATTCTGTTCTTCGTGTTAGGCTGGTGGCGTTGTTTAGTAAACATGGGATTCCTGCTTCCA  
TTGAGGATGGATATAAAATGGTGTGCATCGACTCAATTCAGGAGGTTTACGTATACTGAACTTAAGAAAG  
CAACGAAAACTTCAAGGTTGAGCTAGGAAGAGGAGGTTTCAAGGAGCTGTTTATAAAGGAGTTTTAGCA  
GACGGAAGAGCGGTAGCAGTCAAGAACTTTCAATGAGTTTCAAGAAGAATTTTGGGCAGAGATGAC  
TACCATAGGAAGAATCAACCATATGCATTTGGTGAGGATGTGGGGATTTTGTCTGAAGGTAGACGTCA



GCTTTTGGTCTATGAATATGTGCGAGAACTCATCACTTGACAGGCATCTTCCAGGGCTGATATTCTTGGAT  
GGAAACAAAGGTTTGCAGTGGCACTAGGGACAGCCAAAGGTCTGGCATATCTTCATCATGAATGTCTTG  
AATGGGTGATTCATTGTGATGTTAAGCCTGAAAATATACTTCTCGATAGTGAATTCGAGCCCAAGATTGC  
AGATTTTGGACTTGCAAAGCTCTCCCAAAGAGGTGGCCCTGGTTCAGATTTACAAAGATTCGCGGTACT  
AAAGGCTACATGGCTCCTGAATGGGCTTGAACCAACCTATAACAGCAAAGTTGATGTTTATGCCGTTG  
GGATTGTAATACTAGAAATGATCAAAGGAAGTAGGCTGTCAAGTTGGGTGGTGGATGATAGTGAATGT  
GATGACGAACAAGATTCACAGCTCGGAAAATTTGTCAGGATGGTGAAGAGGAAGATCCAAAGTGGAGA  
AGATTCTTGGGTGGAGAACTTGTGCGATCCACGACTAGAAGGTAAATTTAAGCAAGAACCAGGCAGTG  
ACACTGATTGA

>PGSC0003DMG400024426 G-LecRK

CATTGTTTGGGAGAACGGCAGGGTTTAAACGACGTGTTTTGACATAAAGTGTGATCATCAAGACTTTAT  
AAAAATGTCTTCATCATCTAAGGATGATCAATCATCCAATACACCATCATCGGATTCTTCATCATCTTCTC  
GAATTCTCCACCGTCTGGCTCATCCTCAAATTCTTCGCCATCCCAAGACAATTCATCTTCATCCAATGATTC  
AAAATCCCAATCTCCTCCTCAAAGTAATTCATCATCTTCTCCGCCATCAGGGGATAATAATAACTCGTCTC  
CTTCCGGTGGTAACAACAACAATAATGACAATAACAACGACAACAAGGACAACAACAACAATAATGGTA  
ACAACAACAACAACAATGATGGTAACAACAACAACAATGGTAACAATGATAACGACAACAATAACAATA  
AGAATGACAATAACAACAATAATGGTGGGAACAATAACAACAACAACAACAATGGTGGTAACAATAAC  
AATAACAACAACAACAATGGTGGTAACAACAATAATGGTAACAATCTTCACCACCAGGAAAATCGTCA  
AATTCAAATGGAGGTTTCATCACCTCCTCCACCCACCACCACCACCTCCTCCACCACCTCCTCTTCTCCT  
TTTTCTCCCAACTCCGGGTTTCTTCTCCTCCAAAGCATAAGCCACCACCAAGCAAGTCCTTAGATAATAA  
TAATAACAACAAGCCTAATGATAACGGGACAGCCATCATTGTAGGAGTTGCTGCTGCAGGAGGTCTATT  
ACTTCTTGTCATGTTAGTTTTCTTATATCATGTTGTAAACGCAAAGGAGAAGGCCACGCGACCAAATG  
GGCTACTACAGGGACAATTCTCATGGAGGCAATAGTATGTTCTTCTTCTTAACTTATACTGTATGTTT  
TATGTTGAGCATACTGTTTTCAAATAGAATTAGCTTCAAATGCAGTAGCTATGAAGAGAACTGGTAAATG  
TGCAGAGTACTGAATATGTTTAGGTTTAAATAGTGTTAGTATTGAGAATGTATATATGGTGCAGGTA  
ACTACTATAACAGTGGACCATATGGGAATTGGCACAACAACAACAATATTCAATCAACGGATCATATGG  
TGAAAATGCCTAATCCTCAAGCACCGAGTACTAACGTAAGTTCAGAAGTGGCAATAGCACCTCC  
ACCACCACCACCAATGATGAGTAGCAGTGAATTAAGCTCAGCTGCTTCTCTGGTCCGCAACAACCTCCA  
TTGCCACCCCCACACCCATCAATGGCTCTTGGTTTTAACCAAAGTAGTTTTACATACGATGACTTATCTAC

CGCAACTGGAGGATTTGTTAAGTCTAATCTATTGGGACAAGGTGGTTTTGGCTTTGTACATAAAGGGGT  
CTTGCCTAATGGTAAGGATATAGCTGTCAAAAGTCTAAAAGCTAATAGTGGACAAGGTGAACGAGAATT  
TCAAGCTGAAGTTGAAATTATTAGTCGTGTACATCATCGACATCTTGTCTCTTTAGTCGGTTATTGCATTG  
CTGGATCTCAAAGGTTGTTGGTATATGAGTTTGTTCCTAATGGCACTCTTGAGTATCACCTTCATGGTATT  
AACTTAATTCCTTTTTTTTATATCTAAATACTCATTCTACATATGTCGTATTTAACTCATCGATCCCTTATT  
TAATTAGGAACTGGTCGCCCTGTTATGGACTTCCCTACTAGGCTTAAAATTGCATTAGGATCTGCCAAAG  
GCTTCGCGTACCTTCATGAAGATTGTAAGTTCATATATACTATTCTCATTTAAGCACTTGTCTATATATTCT  
CATAAAAAATTAACCTTCTATTTTCATATATAAATTACAGGCCACCCTCGTATTATTCACAGAGACATTA  
GCTGCTAATATTTTACTGGACCATAACTGTGAAGCTAAGGTATTTGGTAAAAATAGTTGAAACATTGATT  
CCTCATTAGATTCTAACAAATTTTATTACTCCCTTTGTAAGGTTGCTGATTTTGGATTAGCTAACT  
TTCCAACGACACTAATACACATGTTTCTACGCGTATCATGGGCACTTTTGGGTGAGTTTAGTTTGATAATT  
CTTCAAATATCCAATGGATTTGCATTAATCGAAAGAGTATATTTATTTGTGTAGGTAAGTACTTAGCACCAGAAT  
ACGCTTCAAGTGGCAAGCTAACTGAAAAGTCTGACGTCTATTCTTATGGTGTTATGCTGTTGGAACCTTAT  
AACTGGGCGTCGCCTATAGACATCAGCAGTGATGATGATACTTTAGTGGAATGGGTATAACCATGATGA  
TTACTTTACATCTTCAAATTAATTCAGTAGGACATCGATCAGATTATATGTATATATATGTGCAGGCTAG  
GCCAATTCTGATTCGTGCAACAGAGGGTGGAACTACGATGAATTAATAGATCCACGTTTGGAAAGGAAA  
TTTTGATGCCCAAGAGATGCTATGTATGGTAGCTTGTGCTGCTGCATCCATCAGACATTCAGCAAGAAGA  
CGTCCCAAATGAGTCAGGTTAATTTCTTCTTAATATTCGTCAAAGCTTTTCTAATTCACAATTTTAAAA  
AGTATAGTGGTCCAGCGATTGACATATATATATGTTGTAGATTGTACGTGCTTTAGAAGGTGATGTGTCT  
CTGGATGATTTAAATGAGGGAATGAAGAAGTCCCCGAGTACTGCAATGTTTGGTTCTAGTGAAAGTTCT  
GAATACGATGGAGGTTTCATATGACCTTAAGAAATTCAGAAATCTGGAATGTCGAGTCAAGAATTCACA  
AGCAGTGAACATGGTACCGGTGAATTTGTCCATTCCGGTGGTGAATCTCAAGAACATGGGCAGAAAAG  
GCACACCCCTTAAGGAAAATGGATCATACTTCAACTTCTGATGGATCTATAAGTAATAATTACACACATT  
TGTTGGGCTTACAAGGATGCTTTAGGCATTAAAACTAGTTTTATGGGGGAAATATAATTATGTATTTAA  
ACAACAATTGTGAAGCTTTATTAGAGATTTGAATGCGGGTTGTAAAGAGTATCACATCCTCCTAACCATT  
CTGTGGTTGGCTTTGGTTGTCAGTTGAATCATTTAGTTTTGTTGACTTTGGAAGTTGGGATATATACTAA  
TTCTGAATTGTTTTCAATATATTTTCGTCAATGTATCTGCTAATTAATAATCTTTTCTTTGTTTA

>PGSC0003DMG400024998 G-LecRK

GAAGAATTAGCATCAAAAATTTGAATCCATGAAATTTCTAGCTTTTTTATTCATTTACTTCAATTTTCTTTC

AATTG TACTAGCATTAGACACCATAACTATTGATCAACCTATTAAGATGGTGACACAATTGTTTCATCA  
GGTGGTGT TTTATGAACTTGGATTTTTTCAGGCCTGGAAATTCGACGAATCGATATGTTGGTATATGGTACA  
AGAAAATATCAACTGGAAGTGTGTTTGGGTTGCTAATAGAAATAATCCGTTGAGTGATAGTTCAGGTG  
TGTTGATGATCAATCCTGATGGAATCTTAGTACTTGTTAATAGTACTAATGTGACGATTTGGTCAACGAA  
TTCATCAACAATCTTGAAGAATCCAATAGCAAGATTGTTAGATTCAGGTAATACTTGTTATGTTTCGTTTC  
TGGAGAGTGAACTACATGAACTTTGACCAACATTTAACATGTATTTTTTACCATACTAGAAGAATTGCA  
AGTACTTTTCGTATACTTTTTAAAAATCTGTAAATTTTAATTTTGAATATTGAGTTAATGTAATCTAATCT  
GATTTTCGTAATCTTTTCATCAAGGAAGGAAATGAAAATAGAATTGAGATTTTCACCTGGGAGAGTTTTGA  
TTATCCAGGGGATACTCTGTTGCCTGGAATGAAGCTGTGTCCAGAAATACTTGTCATGTTTAGTTTCTCG  
AGAGTTAAACTGAATGAACTTTGATCAACATTTTAACATGTTTATTTTTAACATACTGATATGAGAAGAA  
CTGCAATTTGTAGTACTTTTCGTATAATTTTTACTACTGTTGTTTCTTTACTTTGGTTATCCTTTATATTTGT  
ACTGTA ACTACTTTTCTTTCTTCAATATTTTCATCTTGAAGTTCAATTATTGCTTTTCTTTCAAAGACGAGG  
GTTTATCAGAAACAACTCTGTGTATGTTGTTGTCGTAGTAGTACTTTTAGTATAGTTTTTTAACTAT  
CTTAATTTTAATTTGAAAATACTGAGTTAATCTAATGTAATCTGATATCAGGTAATCTTGTCATCAGGGAA  
GAAAATGAAAACAGGCCTGAGTTTTTCACCTGGCAGAGTTTCGATTATCCAGGGGATACTCTGTTGCCTG  
GAATGAAGCTCGGGCGGAATTTGGTAACAGGCCTGGATTGGTACTCGTCGTCGTGGAAGAGTCCTGAT  
GATCCTGCTATAGGTGAATTTGTTGAAAGGATGGATGTT CAGGGGTATCCACAGTTATTTGTATGGAAA  
GGTTCATCAATTACATTTAGTTCAGGTCCTGGAATGGTTTAGCATTTAGTAGCAGTCCTAGTTTGCAACC  
GAATACGATTTTTACGTTCCGTTTTG TACTGAATCAGGAGGAAGTTTATTACAAATATGATCTTAAGAAT  
GGATCACTGCTCACCAGGGTGGTACTAACCCTGGAGGATTGATAAATCACTATACTGGATCGATCGT  
ACGCAGAGTTGGTTCCTTTATTTGACAGCACAGTTTGATAACTGTGATCGTTTTCGCGTTGTGTGGTCCTTA  
TGCAAGATGTGTCATTAACA ACTCGCCCCGTGTGACTGTCTGAGGGGTTTTCGAGCCAAAGTATCCACA  
GGAATGGGATGCAGCTGACTGGTCTAGTGGATGTGTTAGGAGGACTCCGTTGGCGTGT CAGCAAGATG  
GATTTAGGAAGTTTACGGGGATTAAAGTGCCTGATACGCAGAAATCATGGTTTAACGAGAGCATTGGAC  
TTGAGGAATGCGGAAAGTTGTGCTTGGCTGATTGTA ACTGTACAGCCTACTCAAATATGGATGTTTCGAG  
ATGGTGGAAAGTGGATGCTTACTCTGGTTCGGAGACCTCATCGATATCAGAGAACTTAGTCCAAATCAGC  
AGGACCTGTTTGTGAGAGTGGCTGCTTCAGAAGTAGGTAATAACTACTTACTGTTTTTCGTTTCTCTAACT  
TGATCTTGTG AACGTGGCGAAAAACATGTATGTAAAATTT CAGCAAGTATGTATCTAGATAGTCAAAA  
GTCTCGATAGTTAGCTCGTGGAGTCTTCAGTCAATAGAAAAAACATCTATGAATGTGTGTTGGTGCATTG

TTCTCTCACTCAAAGACGGAACGTTGCCTGTTTCTTATGGCCTACAATTTTTGTTGGGAACTCATGAAT  
GTGAATCATATTGTTATGACAATGTTGGAATTTCTGATTGATTATGTACGAACTTATCGACAGACAAGA  
AACGAAAGAAAAAGAAGTCAAGGCTGATTGCAATCGTATCAGCAGTAGCCGCGACTTGTATCCTCAGCC  
TTCTAGCTTGGTGTGCATTATTCCACAGAAGAAAAAGAGTAAAGGTAAACA ACTATTGTTTCATCGTTAT  
CAAAAGATCGTGTTGCTAACGTTCTATTTGTATCAGGCTAATGTATACATTTATACCAATTGATTGCTCAT  
TTTACAGGTAGGGAAGTTGGAGCAGACGATATGGAGTTACCATTGTTTCGATTTAGTAACTGTTGCTAAC  
GCCACTAAGAACTTCTCTTGCTAATATTATTGGAGAGGGTGGCTTTGGACCTGTTTATAAGGTACAAT  
AACTATCCCATCGTTCGAATTTTAGCTAAAAAAGGCATCTTTAACACTTTGTTTTGAAAAAAATTCAGG  
GGAAACTACGAAATGGACCTGAGATAGCGGTGAAGAGGCTTTTCGGAATACTCAGGACAAGGTCTTCAA  
GAGTTGAAAAATGAACTGATACTGATATCCAACTACAACACAGGAATCTTGTCAAGCTTTTAGGTTGTT  
GCCTTGAAGGAGTAGAGAGGATGCTGATATATGAGTATATGCCAAACAATAGCTTGGACTATTTCATTTT  
TGGTCCGGTTCTCTCGACTAGTCACCTTTATACTATGTTGCTCGTATCCTCCAAAAAATGATGTTGCACCA  
GTGTCGGATCCTCAAAGATGCACTACTTCTGGAGGATCCAACATGGGCGCGGAGGCATTTTTGGAGGA  
CTTGAGCAACCTACTAATAAATGAATGGATGAGGATCACTGACATTTTACATATTGCAGATCCAAGCAG  
AAAAGAATCACTTTCTTGGAGAAATCGCTATGAAATCGCGATGGGAATATCTCGAGGCCTTCTCTATCTT  
CATCAGGACTCAAGATTAAGAATTATACACAGGGACCTGAAGGCCAGCAACATTTTGTGGATACTGAC  
TTGAATCCAAGGATTTCTGACTTTGGTCTAGCTAAGATATTTGGTGCAGACCAAATGGAAGGAAAAACA  
AAGCGAGTAATCGGAACATAGTAAGTCTTATAAACACCTCTATGATAGATGTTTTTGTGTTACAATC  
AACAAAGTTGATCAACTTAAATTTGATGCATTGTGTAGCGGATACATGTCTCCGGAGTATGCTGTGATGG  
GAAATATTCAGTGAAATCTGATGTCTTCAGCCTTGGCGTGCTTTTACTTGAAATTGTCAGTGGCAGAAAG  
AACAGGAAGTTTCATCATTTGAGTCATCATCATAATCTTTTGGGACATGTAAGTACATATAGCACTAAATT  
TTTACCCTTTAGCCTCTTTTTTTACTAAACACTCGACCCCGTCTGAGCTTACTCACATCACCAGTCCCAAGC  
TCCATAAAGGAAGAGGGTTGCAGCCAGTATAAACTAGTCAGTTCATGTCGAATCCTCACAATACAGT  
CGGAACTGAGGCATTGTAGTAGTTGTTATAGCCTGTTTTCCATTAAAAAACTTGACCTGCCTGAGTTTA  
CTCATATTACCGGTCCCAAACCCCATAAAGGAAGAGGATCGCAGTAGGCTAGAAGCCATTATAAACT  
AGTCAATTCATGACGAATCCTCATAATACAGTTGGGGCCGAGGTGTTGTAGTAGTAGTTGTTATAGCCTT  
ACATTTCCATTCCCAAGCCCCTACAGAAGTAAGAGGGTCACAATAGGCTAGCAGCCAAGCATAAAATA  
GTCAATTCATGACGAATCCTCATAATGCAGACGGGACTGAGGCGTTGTACTAGTCCACATAGCCTTTCTT  
TTACTAATGCAAGTGATAATTCATGATGACTGAGGCATTGTAGTAGTCACCGTTGTAGCTTCTTTTTACT

AAATGCATTTGTATAACTGTGTTATCATAAAAAATATTTTCAGGCATGGTACTATTGAATGAAGGCAAAG  
CATTGGAACATAATGGATGAATGTTTAAAAGACTCATATGTTGAATCACAAGTGGTGGAGATGCATTCAAGT  
AAGTTTATTGTGTGTACAAAACTCCCTGAAGACAGGCCTACAATGGCTTCAGTAGTTTTCTGGTTAAGC  
AATGATGGTGTGGAATTGCCTCAACCAAAGCAGCCTGGTTTCTTTATAGAGAGGGATTCAACTAATCAAT  
CAAATGAATCAACTGATGAAAGATGTGTTACTGACAATGAACTTTCACTAACAATTCTTGAGGCAAGATA  
GACAAAATATGAACTTGCAGTCGTGTGACCAGGAGGTCAAGGGTTCAAGTCATGACAATAGCCTCTTGC  
GG

>PGSC0003DMG400025558 G-LecRK

AAAAAAAACCTCAAATCTATGGCTGTTTTGCTATGGTTATTAATCTTATCTGCATTTTCATGCAGTAACACTA  
GCACAACAAAGGCAGTTTAATAACTCTTGGCTCTTCTAACACCTACTACCAATTCATCATGGTTTTTC  
ACCATCCAGGCGCTTTGCCTTTGGGTTTTATGAACAAACCAATGGCTATGCTGTTGGAATCTACATCGTC  
GGTATGCCTAACAAGACAGCAGTGTGGACAGCAAATAGGAACAGTCCTGTTGTCCCGAGTAACACTGTC  
TTGCTCTTAACTAATGATGGAAGGCTCATTGTACAAGTAGGAAGCCAGGAAAACCTGTGCATCAATTCCT  
CTCGAGCCATTGCTTCAGCTTCCCTGATGGACACGGGAAAACCTTGTGCTCTATGATTCTGATCGCAATGT  
CATTTGGCAAAGTTTTGACAATCCAACAACACACTTTTACCTGGTCAGCATATATCAGCTGGACAAGAG  
CTGTTCTCGAGTGCCTCGGAAGCAGATGACTCATTAGGGATTTTCCGTCTTCCGTCTCATAATGCAAGTT  
GATGGGTACCTTGTTCAAGTATCCTGTCAATACACCAGATACTGCCCATATGCTTACTACGCATCCTACAT  
CCGTGGAGTAAGGAATAATTTTTCACTGAATCTTGATGATGACGGCCTCCTCTACTTGCTCAATTCCAACA  
ATAGTCTAAAAATCTAACAGAGGAGGCTGCCGTAGAGAAAGGACCATCATCTATATGATGAAAATTG  
ATGCTGATGGTATTTTTCGAGTTTATTACATTCTCTGAACCAACAAAACAGCTCACCGATTTGGTCATCA  
ACAGATGATAGGTGTGATCCAAAAGGCCTTTGTGGGCTTAATGGATTTTGCACCAATATAGATGCTCAA  
GCTAAATGTATGTGTCTTCCCTGGATTTAATTTTGTAAATGCCAGGAAATTGGAGCGCTGGCTGTGAAAGG  
AATTTACCACAGAAACCTGTCAGTTAAAGGAGAACAACCTTCAAATACTATGACATGAGAACAGTTGAA  
AACACAGCATGGGAAGATAGTTCTTATGTTATTTTTGCCGTAACGACCAAGGGAGATTGTGAACAAGCC  
TGTCTACAGGATTGTAACCTGTGAGGCTGCTTCGTTCAAAGACAAAGTGTGTAGAAAGCAAAGGCTGCCT  
CTGAGGTATGGAAGAAAAGACCTGGGTAATCTAATCTTGCATTGGTCAAGGTGGGCATTAATGTGTTA  
GACAACAAAGAGTTGCCTGATCAGAAGATTGAAGAAACAAAAGGCCAAAAGCTAAGGATAGACATCCT  
AATTGCCAGCATTACATTGACTGTTTTTGTCTTGTGGTTGATGTTATTTAGTTTTGATGATTTGACAAAC  
AAAGGGATCCTATAATGGTACCTGATACCTTGTGACAATTTGTTGAAAATGCCAGCTGGAAAAAGTATA

GAAAGTTGGTGAGGTTGGTGCACGGCTTCCAAGCATGCCAGAATCCTCAGCCAATAGCATGGCTTCCTT  
GTGTGTGTCTATTAGATAAAAGGCTTTAATCAATAGACACATTTTTAGTTTTTGCATTCTGAAATTCTCA  
ACCACACAAGCAAAAATCACTCCTATCAAGAAGTATTATCCTCAAGAGCAACAGGGACCTGATAGAGCT  
GCTTGCTGCTTAGTTGTCTTGAGATTATATCTTCCGTGCTTATATTGTAATCTATTCTAATCTATAAAGG  
AATTAGATCGTTGCTTTGTTTCATCTAAAAGTCTAAGCCAGTTAAGTGTAAGTGGCTTAGTGGGCAGTGTT  
GTATCTACTTAGTCAAATTCTAAGTCATCTAGAGTTAGGTGGTTTAGTGGGCAGTGTTGTATCTGCTTAG  
TTGAAGTCTAAGTTATCTAGAGTTAGGTAGCTTAGTGGGTAGTGTGTATCTGCTTAGTTGTTTTCTTTGT  
AGTAGAGTTACTACATAGAGGGGGAAGGGATTTAGAGGTAAATTCCTAGGTTGCAACTGCCTGTAATCT  
AAACTGTTGCTCCGTTTGAGTGAAATGGAGTTGGATTGAAAGCCTGTGAGGACAGGTCGTGGTTTTTAC  
CGCCCTTGAACAAGGGGATTTCCACGTAAACTACTTGTGTTGTTTTCTTTATTGTTTACGCCTCATTTATTG  
TTCATACTGAGTCAAGGGACCTGGTCCGTTGACTGATAGTGGACGCATACATCTTATCATTGGTGTTAGG  
CATCTCTGGATTTCTCATTACAGAATTCATGTCTGGAGTCTGGACTTACAGAAAAATCCAGGAGAGTAG  
AAGTGTTCAAGTTGAGCGAGGATGTTGCTCCACGAGCATTTTCTATGCAGAACTAGAGCAGGCAACCAG  
TGGTTTCAAGGCGTTAGGGAGGGGGGCATTTGGAACAGTATTTAAAGGGATTTTGGCAGAAGGCCAGA  
AAGTGATAGCTGTAAAGAGACTAGACAAAGAATTGGTAGAAGGGGAAACAGAGTTCCAAACTGAAATA  
AAAATCATTGGAAGGAAACATCACCGAAATCTAGTCCGCCTCATTGGTTATTGCCTGGACGGATCAAGA  
AGGCTTCTGGTGTATGAGTATATGACAAATGGGTCACTTGCGGGCATACTTTTTACACCAGAAAAACAG  
CCCATGTGGGAGGAAAGGTGTGGCTTTGCTCGAGATATTGCAAGGGGCCTCCTATATTTGCATGACGAG  
TGTGAAACACAAATCATCCATTGTGATATTAAGCCTCAGAACATACTCATGGATGATCAGTTCTGTGCAA  
AAATATCTGACTTTGGAATGGCCAAGCTCTTAAAGAAAGACCAACAAGAACCTACACAGGGATAAGAG  
GGACCAGAGGCTATATTTTGTGCTAAGTACTAGCAACCGTCGTTGTAGTATTTGAATTGTAATACTAA  
TTTAGGAGAGTTACAATTTTCTCCATAGTGTAAAGCGAATCTGCAACAACCACAAC

>PGSC0003DMG400026154 G-LecRK

GTCTCACTGAAATGAAATAGAGGGCAAGAGCTACCTATTTGAATTTATGTTCTTCATTCAAATCATCAAC  
AATTCCATAAAACAATGCAATTAAGTAATTTTCTGTTGTTGTTGTTGTCTGCAGCATTGATGATTTTACAT  
CGATGTGATGCAAGGAGGAGCACCATTGATGGAAGCAGTAAATTAGTTGACAATGGCGAAACCCTCGT  
ATCTGCTGGAGAAAATTTGAAATGGGATTCTTTTCTGATGATGCCGGTTAAACAATATGTAGGCATA  
TGGTATTACAAATTAAGTCTAGAACTGTTGTATGGGTTGCTAATTGGAATAATTCGATTCAGGGTAAAA  
GAATAATGAATGAGGATAATTCGGTTGTCGTTGAAGATGGTAATCTCAAAGTTATAAGTAATGGGTATA

CTTATTTCTCCACACAATTAGGTAGTGGTTCTAACAGGAAAGTAGAGTTGTTGGATACAGGGAATTTAGT  
TTTAGTTGATGAAGGAGCTGAAATGTGGCAGAGTTTTTCGCAATCCAACCGATACATTCTACCAGGTATG  
AAAATGGATAGCAGTTTGAATTTGACTGATTCAAATATGAGAACTACATATTCCGATTAGATCAAGCAA  
GTGACAAGGAATATGTTATAGTACTTCCAAAGCAGGGCAAATTTCTCTGGAAAGGGTCTGCGGAATCAG  
GAAAGTTAAGTTTCAGTGAGATGCCTGGTTATGTTGCCTACTTGTATCCAACCTCCACTAATAATTCATTG  
GAATCGATAGGAACATTTAACAAGTATAGGCTCTTAATGAACTCCTCGGGGGAAATACAATTCTACGGT  
TGGGATAAGGAGATCAGTGGATGGTCTTTGAGGTGGTCAGCGCAAATGATAAGTGTGATTGGTATAA  
GTATTGTGGGAAATTTAGCATTGTAAACAGCAAACGTGAGCCAGTATGCAAATGTTTGCCCGGGTATAA  
GCTCAATCCTCCAGATAATTCAAAGCAGGAGAATTTTCAGGTGGTTGTTCAAGTATGTCAGTTAGCTCT  
TGCAATGAAGACAATGTAGAAGTGCTCGACACGTTCTTGGATTTGAGGTGCGATGAAATTCAAGAGTCCA  
GACAGGATATTCAGTAATAATAGTACCCGTGAGGACTGCAGGAGAATTTGTCTAGGCAACTGTAAGTGC  
CAGGCCTATACTTACCATGATTCTGTATGCCGGATTTGGGTCAGTCTCATGTATCTCCAGGAGAACT  
ATGCTGGTGGCTTCAACATCTCTGTTCTGTGTCAGCATTTCGATATTGGTAATTTCTTTTTCGATTTAACT  
ACGTACACAGACAGTTTAAGCTAATGTGTGACCACAAATAGTACAGTAATTTGATTTTTGTGCATTGCAG  
AAGCAACAAGGAGAAATTGCAAGCCGTGTGGCATAAACCTAATACCCTATCCATTAAGCAGTGAACCAA  
ATTGTGGTGACCCTTTGTATTATAGTTTCTCATGTGATGATTTAGTTGGTCAGGTAAGCTTCCTCACATCG  
AATGGCAAGTATACTGTCGTTAACTTTGATAAAGATAACAAAACATTTGTTATAGAAGCAGCTCATAAAG  
AATCTGTTGGTACTTGTGATGACAAAGGACCGGTGACAGGAATTTCTTGGTTCAACCAGTCATCACCTTT  
TAAGGTGATAAACTGGTGTTACAATCCCACAGAGAATCTTAATTCAGGACCTTTTAGTCGAGGGAAAGA  
TTTAATATTGATTAGTTGGAAACCACCATTGGAGCCATTTTGCAAGACTTCAGAAGATTGCAATGATTGG  
CCAAATTCTAGTTGCAATATGACAAAACAAGGAGAAAGAAGATGTATATGCCAAACTGATTACAAATGG  
AATGGCTTGATTTAAATTGTTCTCGAGTTTAGGTATATGGATCAATGTTACTTACTACAAATGATTTTC  
TTGCCAATAGTTCAATGATACCTTTTCTATGTTCTCCATTTGACCTTTTATATGACCAACACAAATTTTAT  
TTCTTAAATTTGCTTCAGAACTTGGAACACAAGGATCATTATTGCGAAGCTGGCATCCTCACGGAATCA  
GAGAACCCTTGTTATTTCCATCTCTGTAGTTCTTGGAGTTATAACTTTGTGCAGCATTAGTTATATAATTTA  
TCAGAACACTAGAGTGACAAGAAGTAGA

>PGSC0003DMG400026155 G-LecRK

ATCTGATTGAACGAAAAACCAAGTCTTACCATGACTATCAACATGATCTTAATTGATGCTGTGCATCTTC  
TGTTATCAAATTTGGTGCAACCATGCAACTGCAACATTATTCGATTCGTCTACTTTTTGTGATCCTAACAT

GTTTATCTATCAATATTCATCAGTCTCTTGGAGTTGAAATGATCTCAGTAAATCACTCTGTTTCTGGAAAC  
CAAAGTATAGTCTCTTCGGGCGAAAACCTTTGAATTAGGATTCTTTTTCTGGTAGTTCGAAAAATTACTA  
TCTTGGTATATGGTATAAGAATGTAATGCCACAAACAATAGTATGGGTAGCAAACAGGGAGAAGCCACT  
TTCTGCTACTGATATGAATTCTGTTGAGTTGAAAGTTTTGGATGGTAATTTAGTGCTTATTACTGAATCCA  
AAAACCTGTTTTGGTCCACAAATATCAGCAACACAATTAGTTCAAATACACTAATGGCAATTCTTTCTGAT  
GATGGTAATTTGATTTTGAGTGATGGATCAAATCAACTACACCCTTTGGCAAAGCTTCGATAACCCGA  
CTAATACATGGTTGCCGAATGCTAAGGTGAAGTATGACAAGCGTACAAATACAACAAAGATTCTTACTTC  
TTGGAAGAACTCAGAGGATCCATCTCCGGGGATTTTTCCGTGGAAATGGATCAGAGTAATAAGCAGTT  
CTTGATAAAGTGGAACAGGACTGAGATGTAICTCAGCTACTGGATCTTGGAAATGGGCGTATTTTCAACAT  
GATGCCTGAGATGAGTTTGAATTCTGATAGATACAGTTTTTCATATGTTGATAATGAAAATGAGAGCTAT  
TTTACCTATTCCCTCCGTAACCTTTCCAAAATCAGATTAACACTAGATGTCTCTGGGCAAATCAGGCATCT  
GATTTGGGCCGAAAATTTAAAGGAATGGCAAATTTTTACATCTCAACCAAGACAACCCTGTGAGGTGTA  
TGCTAGTTGTGGTGCCTTTAGCATTGCAATAAGGAGTCCGCGACCTTCTGTAATTGCTTGACTGGTTTC  
ACACCTAGATCTGATACAGAATGGGACTTGAATGATCATTCTGGTGGCTGTGTTAGGAAGGAAAGCTTG  
CAGTGTGGTGATGGTAAAATGAAGGGCGTTTTTCGGAGAATCCCAAAGTGACATTGCCCGGTTATTCT  
CTAACTGTGCCGGCTGCTAGTTCTGAGGAATGCCAGTCGACTTGCTTGAGTAACTGTTCTTCATGTAATG  
CATATGCTTATGATAATAATGTGTGTTCAATTTGGAATGAAGTTGTGAATCTGAAGCAACTCTCACCAGG  
AGATGGTAGTGGAAGTGTGATTTATACCAGACTTGCTGTCTCTGATGAAGCACGCGGTGAAGGTAAGTT  
TAAAGTTAGGAGTTGATTTGATAGTGTGGCCATTTCTATGTATGCAATGCTCATCTCCAAATAGCTACC  
GATAGAGCTTTCTATGGATGTCTGTTTTTCTTGTCTGATGTTTCAGTTCTTTACCTCATGTCTTTCAACAG  
TACGAGTCTATATATTCTCTAAATCTTAGTGCTCATAAGAATTAAGTACTAGGCAATTATAAGTTTACGCAAAC  
ACCTTCTATGTTTTAAACAAACATCAGATCGCCACTGACCAAATTTAAGTTTACGCAACATCCTCTACGTT  
ATAAACACACATAAGATAGTCACTGACCAAATGTATGGTTTTCATGATTTGATTAGTTACAACACTAGCCAA  
AATGAGTTGAAGACCTTTCCGAGTAAACATTACCAGTTCCGCTGAGTTCCACATCAGCTCTTTAAGGAT  
GGGATGGTCTTTTCATATGGTTTTGGACAGTTCTTACCTCATAAACTAGCTTTTATAGTTGAGTTAGCCTC  
AAGGTCCATTTCTTATCAAGTTATTAGAATCAGACCCATCCCAAATAGTCTATTTCTTGTCAACAATTTCT  
TATGTTTCTTCTTTCTGTCATCAGATGCAAATTCAGGGAAATTGTCCCTGAAGGTTAAAGTCATCATATCT  
GGCGTGGTAGCCGTTGCAGTTCTACTTCTATGTAGCTTTAGCTACATTTATCATAGGAGAATAATGTCAA  
AGAAAACAGGTACTTGTGTTGCTATTACAATCTCTGGAGTAGTTGTTTTACCACTTCCAGAAAAATTTCTC



CTTCCATTTTTTTTTCCGAATCAGATCAAGAGAGATATCTCAAAGGCTGCTCTTTTTTTTATTTTTTTATT  
TTTTATCTTAGCAAGCCAACAAAGCACAGGAGGCAATCCAGTTCCACATTGGTTAAACAGAGAAAGAGA  
AGCACAAAACCTGATTAACGAAAATGATAAGCAAAGCATTGCCGTTCCATTCTTTAGTTTTGAAAACATA  
CTAGCAGCCACAGATCATTCTCAGATGTAAATAAACTTGGACAAGGAGGTTTTGGTCCTGTTTATAAGG  
TTAGCATTAAATAATTCATTTTAAACATGAGTTCAACTTTATGTAGTCATTTTCATAGCATCCTAGTTTACACAT  
TGAAAATCTTTCAGGGTATATTTTCAGATGGACAAGAAATTGCTGTGAAAAGGCTATCAACCCAATCTAG  
ACAGGGCATTGAAGAATTCAGGAACGAAGTCATACTGATCTCGAAACTTCAACATAGAAATCTAGTCAG  
ACTTTTAGGCTACTGTATCACAGGGTATGAACAGATTCTACTTTACGAGTATATGTCAAACAAAAGTCTA  
GACACCTTCATATTCGGTTAGTATATATATCTGAACTTATCTTATTTCTTAATCTCTCTATTTACTTGATCAA  
TATTGTTAAATTTTCTCGTTGTTTACCAAATAAGATCCAACACTTAGCAAGTCATTGAAATGGAGAAAG  
CGATTTGAGATCATATTAGGAATTTCTCGAGGGCTTCTCTATCTTCATGAAGACTCAAGGCTCAGAATCA  
TTCATAGGGATCTGAAAACAAGTAACATTCTTTTGGATCAACAAATGAACCCAAAATATCAGACTTTGG  
CTTGGCAAGGATAGTTGAAGAACAACAACAGAAGCAAGTACCAAAAAAGTGGTTGGAACCTAGTAAG  
TAATACAAACATGACAATGTTATGAACTTTGCTTAATTCATCTCACATCTGACTCATGATAATTCCATCAT  
TAATTTAGCGGATATATGTCTCCTGAATATGCATTGGAAGGAGTATTCTCAATTAAGTCAGACGTATTCA  
GCTTAGGAGTAGTTATACTGGAGATAGTAACCGGAAGGAGAAATACAGGATTTTATCAATCTAAAGAAG  
CATCTAACCTTTTGGTCCATGTGAGTGCCTAGAGTACATGTTAATTTTTTCCAATATGTATGTTGGACTTC  
ATATTCATTATTCTAAATCATGATATCACAGGCATGGAATTAAGTGGAAAGAAAAAAGAGCACTACATTTG  
CTGGATCATTATTGCTCGAATCATGCAACCCGAAAGAAGCAATGACGTGCATAAACGTTGGGCTCTTAT  
GTGTGCAAGAAGATCCAGGTGATCGTCCTTCATGTCAAATGTTGTAATGATGCTTCGTAGTGATAGTAC  
GTCTCTTCCAAAGCCTAATCAACCTGCTTTTGTGTCAAGGAGAAATGTGTCTAATTCAACTTCTGTTTCAT  
CTGGTACACCACCTAGCTTCACCAAATGAGTTGACAATCACAGTTGAAGAAGGCCGATGATGTGATG  
AATTCATTAGTTTTTCAAATGAATTTAAACGCGAAGTTTATTTATTTTTTACCTTAGATTAACAAAACAAA  
TTACAGGAATACATCATCTTTTTCTTTTTCTCAATTTTTTGTGTTTAGGCAGTAGAAGACTTAGGACCAG  
TACTGCTGATATTTATAGTGAAAACCTGAAAGGTATATATGCTTAATATTGTGTACAACATAGAATATATT  
GTGTTGATAAAAAAAGTTCATTTTCTGTTTCATTTTGGTCTCTTCTACCTTCTTAACTTGTCTTAAAAGGC  
CATTGAGTAAGAATGGAAGAACAACAAAAG

>PGSC0003DMG400026156 G-LecRK

TTTAAACAGGAGCAAATTACAAGGAGGTGTACTAGGAAAAATAATGGAGTTGGATTGTGTTGTAGCTAT

TTTAATTGTATTTTGTGTTCTTTCGTTACGCTTGTGGCGAGTGAAGAAAGTATCAAGATGGGCAAATCA  
ATCACTGGTAATCAGAAAATGATTCAGGTGGTGGAAGTTTTGCCTTAGGCTTCTTCACTCCGCGTAATT  
CTACATTTACCTATCTTGGCATATGGTACAACACGATCCCCGAACAAACAGTCATTTGGATTGCTAATAG  
AGAATCTCGAATTCCTCAGAATTCTACTGTTGTTTTCACTATTGGTGATGATGGGAATTTAGTGATTTTTG  
ACGTAAGATCAACTTATTTGGTCATCAAATGTTTCATCCATAACTTCAAATTCTACTGTAGGAGCACTA  
CTAGATAATGGAAATCTAGTGCTCATAACATGGTGAGTCTGATATATTGTGGCAGAGCTTTGATCATCCTA  
CCGATACGTTTATGCCTGATATGAACTTGGTTATAATAGAAAACAGGACAACGGACTCTGATCAATTC  
GTGGACAAGTAATGAAGATCCTCGGCCTGGAAATTTCTCGTTTGGGATAAATCCTGAAGGGCGGACGC  
GCTTTTATATATTGAAGCAGAACAGTATTTATTTTAGGTTTGATGATAGTACTGAATACAGTGGAGGGAA  
TATCGGAGGAATTGCTTGGTATATTTCTGTTGTTTCGGGAAATGATGGAGTTTTTGTACGTATGGTTAT  
ACCAAAGGGTTGGTAACATTAAGGATTGTTTTGCATCCTAATGGTTACATTCAGTTGCTGGTATGGCGTC  
AAAATGCTAATAAGTGGATAGTTAACTTCAGGCACCAGAATCTCTTTGTGAACGTTACGCGGAGTGTG  
GTCCATTTGGCAGCTGTGATGTTGGATCAAGTGGATTATGCAGATGCTTAACTGGATTTGAACCAAGATT  
TTCGACAGATTGGGAGAACGGGAAATGGAATGATGGTTGTGTTAGAAAAGTAGCATTGAGTTGTGATG  
GCGGAGACATATTCTTGAAACATGAAGAGGGTATGAAGTTTCCGGATCATTCTATCTCCTTAGGACATAT  
GAGCATTAAAGACTGTGAAACGCGGTGCATTAGGAACTGTTCTTGTTTCAGCTTATGCTTATTCGAATAGC  
ACTTGTTTAATTTGGTTTGGAGATTTACTGGACCTTTCCACAACCTTTCTGGTGGCAGAGTTCTCAATGT  
TCGAGTTCGTGGCTCCGAGCCAGGTATTTTCACTTCTATCCTTACTAATTCTACTAACAACGATTCTCTAC  
ACGTCTTTGGTCAAGAAAATAAATTTATTTGCTTTTTGTCTTCTGGATGCAGTACTCATGGTGGATCTA  
GGAATTTGGCTCATAGACACAAAGTTTTCGTTGCGAGTATTGTTTCTGCAATATCTATCATCTTGGTTCTT  
ATAAGTATTTTTTTCTTTATCTTCGAAAGAAAGCACTTGAGAAGACAAGGTATGTTTAGTGTACGTCTTAA  
TTGTAAATACAAATACTGAATTCGAATTCGTATGGGTTACTGATTTGCTTACTGATTGCTGTTTGAA  
ATTAGGCTGGAAGAATGGAATAAGCTTTTATTAGGTCCGTGTCTGGTTTATATTCGGTTGAAAAAAG  
CGATATGAAGTTGCTGCAGTACAACCTTCAGAAAATAAGAGAGGCTACTAACAACCTTTCATGGAGAACA  
CAAATTTGGAGAAGGTGGATTTGGTCCTGTGTTTAAAGTGCTAAAATAAATTCATTGTTGATATTTTAC  
TGCTGCTACTTTGAGAGAGACGTCAACGTCTCATTTTCGTTTCATGACTATGGTGGATGTGGATTTACAT  
ATTCTGTTTCAGGGATTTTAACTGAATTCGGAGACGTAGCCATCAAAGGCTAAGCAAGAGGTCATCA  
CAAGGACTGGAGGAGTTTATGAATGAACTGAAGCTAATCGCGAACTGCAGCATAAGAATCTTGTGAGC  
CTCTTAGGATGCTGTGTTGAAGGGGAGGAGAAAATACTAATCTATGAGTATATGTCCAATTGCAGCTTG

GACAAATTTCTGTTTGGTTCGTCTTCTACTCCGTTTTAAGACTTCACATAACTTAAATTTTTACTCCTCTCA  
ATTCCCTTTGGTTAATGAGATGTTCAAATGTCTTTTTAGACCCTTCGTTGAAGGTTACACTCGATTGGGT  
ACACGTTTGGGGATAATAGAAGGAATTGCTCAAGGAATGCTTTACCTGCATAAGTACTCGAGATTA  
GTCATCCACAGGGACTTAAAAGCAAGCAACATTCTTCTAGATCAAGAGATGATCCCAAAAATATCAGACT  
TTGGAATGGCAAGGATTTTCGGGACTGATCAAACACAGGCCAATACAAATCGAGTCGTTGGTACATAGT  
AAGTAATAACCCCTTATGATTTGTGGTTTCCAAGCTTTTTATGTCATTTGTGCATATCTAATGGATACATATT  
TATACAAATATGGCATAGTGGCTATATGTCTCCAGAATACGTAGTATATGGCCAATTTTCAGAGAAATCA  
GATGTTTTCAGCTTCGGAGTATTGCTGTTAGAAATCCTGAGTGGTGAACGTAACCTCAGACTTTTTAATGA  
CTGAAATTTCCGCGTCCCTCTTAGGATGGGTAAGAACAACCTCAAGACTTTAATTAATTCTGCTTTCTTTAC  
TTTGTTCATGTTTTTATTTATGGTGCAACTCATTGAACTTTTTTAAGGCATGGAATAAGTGGAAAGA  
AGGAAAAATCTTGGAGTTGATTGATCCGTCCATAAGAGAACTTGCGACAATAACAAAGCAACAAGATG  
TATTATAGTTGCCCTTCTTTGTGTTCAAGAAATCCCTGTTGATCGACCAACAATGTCTGATGTATCTTTCAT  
GTTAAGCAACGAAACAACCTCCTATCCCTGAACCAAAGAACCTGCTTTTCGTAGCAGCTGGCAATCTCAG  
CAGTTAAGTGATGTATCCATAAATGAGATGACGATTACCTTGCCAGCACCGCGATGAAATGATTTAAGTT  
CTCCTACTTCTGTGGTAAATTTTTCTTGTAGCATAGAGCTGTCATAATTTTTTTTTGTAGAACTTGCATA  
AGTGTAGCTCTGGAAGAAATATAGACTAAATTTCTCTGTTAATTGATGTTTTCATGTTTTGTTTTTTCT  
GTTCTACAGTGTATCAAGTTTGTGAAAATGTTGTTTTGAACATTCACTTGGCTT

>PGSC0003DMG400026183 G-LecRK

AAAACAATGGAGTTGGATAGTTTCTTACCTCTTTTACTGTTAATTTTCTCATGTTCTTGCTTACCCGTTCTT  
CCTTGCCAAAATTGTGTCAAAGTTGGCAAATCAATCACTGGGAATCAGAAATTGGTTTCAGCTGATAGA  
AGTTTTGCCTTAGGATTTTTCACTCCATCAAATTCACGTACACCTATCTTGGCTTATGGTACAACATAATC  
CCTCAACAAACAGTCGTTTGGGTTGCCAACAGAGAATCTCCAATCCCACAGAATGCTTCACCAGTTTTCA  
CTATCGGCGATGATGGAAATTTAGTGATTTTCGATGAAAAAGGCAAACCTCATCTGGTCATCAAATGTCTC  
ATCAACAGCACCGGAATCATTATTAACCTCAAATTCTACTATCGGAATATTGTTAGATAACGGGAACCTT  
GTTCTTCGACACTACGGTGAGTCCACTTATTTGTGGCAGAGCTTCCAGTATCCTACAGATACGCTATTAC  
GCCATATGAGATTTGGTTTCAATAAAAATTAGTGGCTTACGAAATGTGATCACTTCATGGACAAGTAATGA  
CGATGCTCGCCCTGGAAATTTCTTTTTGGAATAGACCCTACTGAAGGGGTTATGCGTTTTGTCATTTGG  
AACCGAAACGGTATTTATTATAGATTTGACGATAGTTGCAGAGCGTATATACTAGCAACAGTGTGGTGT  
TCACTGTTGTTACTGAAAATGATAATGTATATCTTAATTTAGCTTACTACAGAATCTTTCTGAGATTAAGA

ATCGTTCTGAATCCGAGCGGGCACCTTCAGGTGATGGTGTGGAATCGGAATGGAAGTAACAGATGGAA  
TGTTGAATTTGAAGCACCACAATCTAAGTGTGACCTTTACGCACAGTGTGGTCCGTTTGGTATCTGTGGG  
ATCAGATCAAGTGGATTATGCAGTTGTTTAGACGGATTTGAACCTAAATTTTCGACAGATTGGGCAAATG  
AGAAATGGATTGGAGGTTGTGTGAGAAAAATAGCGTTGGGGTGTGATGGTGGAGATGGATTTTTTAAG  
CACGAGAATATGAAATTGCCAGATCATGCTGTCTCTTTAGGAAATATGAGCACCGAAGAGTGTGAACT  
CAGTGCATTAAGAACTGCTCCTGTTCAGCTTATGCTTGTACGAAAAACGCCTGTTTTATATGGCATGGAG  
ATTTACTGGATCTTGGGCATGACACTACTAACGGCAGAGCTCTCTATGTTTCGAGTTCACGTGTTAGAGCT  
AGGTATGTTTACTTGTATCATTGCTGGTTCTGTTAACAACAAGTGAAAGACTAGTATAATTTTCGTGTTGT  
GGATGCAGTTACTGATAATCTATCTGGGAATTCAGCTCGAAGATACAAAATTCTCACTGTGAAAATTGTT  
TCTGCAATTTTTGCAATCTTGCTTCTTGTTAGTACCTCTGCTTTTATCTTCAAAGAAAGCGCTTGAAAAG  
ACGAGGTGAATCTAGCATTCTAGACTGTAATGATTTTCAGATTTTCATATTGTTTACAGTGCTTTGCCTTAC  
TGATTGTTGTTTGAAGTAGATAAGATGGACGGAGATTCTGCTTTAGTTAGCTCCATGCCTAGTGGATCT  
TTAGTTGGGAAAGATGATATGAAGTTGGTACAGTACAGCCTGCAGAATATAAGAGACGCAACAAACAA  
CTTCCATGAAAGTAACAACTTGGAGAAGGTGGTTTTGGCCCCGTGTTAAGGTGCAAATTCATATTT  
TGATGTTTCGTATTTAATTTTCATGAATATAGAGAATTGTGGCTTTAAACATTCTGTTTCAGGGATCTTTGGC  
TGAATTTGGAGACGTAGCCATCAAAGGTTAAGCAGGAGGTCATCACAAGGACTGGAGGAGTTCATGA  
ATGAGTTGAAGCTAATAGCGAATTTGCAGCACAAAAATCTAGTCAGCCTCTTAGGATGTTGCATTGAAG  
GGGAGGAGAAGATATTGATCTATGAGTATATGCCCAATTGCAGCCTGGACAAATTTATTTCTGGTTATAC  
TCATTAGTATTATTTTACGAGAATCATAACTTTGTTTTCTCATTCTGTTGGCTAATTGGATATTCATTTT  
TTTTTTTTAGACCCTTCGTTGAAGGTTACACTCGATTGGGATACACGTTTTGGGATAATAGAAGGAATTG  
CTCAAGGAATACTTTACCTGCATAAGTACTCGAGATTAAGTCCATCCACAGGGACTTGAAGGTAAGCA  
ACATTCTGCTAGATCAAGAGATGATCCCAAAAATATCAGATTTTGGAAATGGCAAGGATTTTCGGGACTG  
ATCAAACACAGGCCAGTACAAAACGAGTGGTTGGTACATAGTAAGTATAGTAGCCGCTTCTGTAACCAG  
TTTTTATGTTACTACCCCTTGTGTATAGCTACTTAAGACTGATTTACGCCAATATGGCATAGTGGCTATAT  
GTCTCCAGAATACGTAGTATATGGCCAATTCTCGGAGAAATCAGATGTATTCAGCTTTGGAGTATTGCTG  
TTGGAAATCTTGACTGGTGAACGAACTCAGACTTCTTCATGACTGAAGTTTGTGTGTCTCTATTAGGAT  
GGGTAAGTACATTCGCGCATTGAAAATAAGTCCAAGTTTGTGTCAATTTCTTTAACATTTACATCAT  
TTGGCATGTTAGGCATGGAAAATGTGGAAAGAAGGAAGAATGTTGGAGCTAATAGATCCATCAATAAG  
GGCGACCTGCGACAGTAACAAAACAACACGGTCTGTTCTGGTTGCTCTTCTTTCGTTCAAGAAATTCCT

ACTGATCGACCAACAATGTCTGATATAGTTGTCATGTTAAGCAACGAAACAACCTCCCATCCCTGAGCCAA  
AAGAACCGGCTTTTCGCAGCAGCTGGCGACATCAAAAGTTAAACGATGTTTCCATAAATGAGTTGACAT  
TTACTTTGCCAGTACCTAGATGAGAGGATTTAGCTTTCCATATTTCTTATGGAATTAATCTTATTTTGAAA  
AGAACCATCTCAAAAATGTTTAGCACTGTAAATAAAAAATCAAAAACCAATTAATAACTCCCTCTGTCCC  
AGTTTATATC

>PGSC0003DMG400026184 G-LecRK

ATGGCGAAGAAAACAGGTTTGTGTTGCTATTACAGCCGTTGCAATTCTACTTCTTTTTTTGCTCTATGAA  
TCAGATAAAGAGAGATATCTCAAAGGCTGCTCTTGTTTTCTGATCTTAGCAAGCCAACAAAGCACAGG  
AGGCAATCCAGTGCCACATTGTTCAACAGAGAAAAAGACGCACAAAACCTGATTAACGAAAATGATAA  
GCAAAACATCGCCGTTCCATTCTTTGTTTGGAAAACATATTAGCAGCCACAGATGATTTCTCAGATGTA  
AATAAGCTTGGACAAGGAGTTTTGGTCCTGTTTATAAGGTTAGCACTATTTTTCACTTCAATAGTTCCG  
CTTTATGTAGTCATTTTATAGCATCCTAGTTTACACATTGAAAATCTTTCAGGGTATATTTTCAGATGGAC  
AAGAAATTGCTGTGAAAAGGCTGTCAACCCAATCTAGACAGGGCATTGACGAATTCAGGAACGAAGTC  
ATACTGATCTCGAACTTCAACATAGAAATCTAGTCAGACTTTTAGGCTACTGTATCACAGGGTATGAAC  
AGATTCTACTTTACAAGTATATGTCAAACAAAAGTCTAGACTCCTTCATATTCGGTTAGTATATATATCTG  
AACATATCTTATTTCTAATCTCTCTATTTACTTGATCAATGTTGTTAAATTTTCTCATTGTTTACCAAACA  
AGATCCAACACTTAGCAAGTCATTGAAATGGAAAAAGCGATTTGAGATCATATTAGGAATTTCTCGAGG  
GCTTCTCTATCTTCATGAAGACTCAAGGCTCAGAATCATTATAGAGATCTGAAAACAAGTAACATTCTTT  
TGGATCAACAAATGAACCCAAAAATATCAGACTTTGGCTTGGCAAGGATAGTTGAAGAGCAAACGACA  
GAAACTAGTAATTA

>PGSC0003DMG400026185 G-LecRK

ATGATTTCAAGTAAATCACTCTGTTTCTGGAAATCAAAGTATCGTCTCTTCAGGCGAAAGCTTTGAATTAG  
GATTCTTTAAACCTGGTAGTTTCGAAAAATTACTATCTTGGTATATGGTATAAGAATGTAATTACACAAAC  
AATAGTATGGGTAGCAAACAGGGAGAAGCCACTTTCTGCTACTGATATGAATTTCTGTTGAGTTGAAAGT  
TTTGGATGGTAATTTAGTGCTTATTACTGAATCCAAAACCTGTTTTGGTCAACAAATATCAGCAACACAA  
TTAGTTCAAATACACTAGTGGCAATTCTTTCTGATGATGGTAATTTGATGTTGAGTGATGGATCAAATTC  
AACTACACCACTTTGGCAAAGCTTTGATAACCCGACTGATACATGGTTACCGAATGCTAAGGTGAAGTAT  
GACAAGCGTACAAATACAACGAAGATACTTACTTCTTGGAAAGAACTCAGAGGATCCTTCTCCGGGGATT  
TTTTCCGTGGAGATGGATCAGAGTAATAAGCAGTTCTTGATAAAGTGGAACAGGACTGAGCTGTACTCA

GCTTCTGGATCTTGAATGGGCGTATTCTCAGCTTGATGCCTGAGATGAGTTTGAATTCTGATAGATACA  
GCTTTACATATGTTGATAATGAAAATGAGAGCTATTTTATGTATTCCCTTCGTAACCTTTCCAAAATTAGA  
TTAACTAGATGTCTCTGGGCAAATCAGGCATCTGATTTGGGCCGAAAATTTAATGGAATGGCAAATTT  
TTACATCTCAACCAAGACAACCGTGCGAGGTGTATGCTAGTTGTGGTGCCTTTAGCATTGCAATAAGGA  
GTCCACGACCTTCTGTAATTGCTTGACTGGTTTCACACCTAAATCCAATACAGAATGGGACTTGAATGAT  
CATTCCGGTGGCTGTGTAAGGAAGGAAAGCTTGCAGTGTGGTGTATGGTAAAAGGGCAGGTTTTTGT  
GAATCCCAACGTGACATTGCCGAATATTCCATATCTGTTCCGGCTGCTAGTGCCGAGGAATGCCATTCT  
ACTTGCTGAGTAACTGTTCCCTCATGTAATGCATATGCTTATGATAATAATGTGTGTTCAATTTGGAATGA  
AGTTGTGAATCTGAAGCAACTCTACCAGGAGATGGTAGTGAAGTGTGATTTATACCAGACTTGCTGT  
CTCTGACGAAGCATAACGGTGAAGGTAAGTTTAAAGTTAGGAGTTGTACTTGATAGTGTGTTGTCATTTCTA  
TGTATGCAATGCTCATCTCAAATAGTTACTGACAGCTTCTATGGATGTTTGTGTTTTTCTGTCTAATGTT  
TCTTCAGTTCTTTACCTCATGGACTTCAACATTACGAGTTCTCTAAATCTTAGTGTTTACAAGAATTAATA  
GGCAATTATAACTTCACATAAACAGACCTTACGTTTTAAACAAACATCAGATAGTCACTGACTAAATATA  
AGTTTACGCAACACCCTCTATGTTATAAACACACATAAGATAGTCACTGACCGAATGCATGGTTTTTCATG  
TTTTATTAGTTACAAGTACCAATATGAGTTGAAGACCTTTAGCCAGTAACTATTACCAGTTTGTGAG  
TTCCACATCGGCTCTTTAAGGATGGGATGGTCTTTCACATGGTTTCGGACAGTCCTTGACTCATAAACT  
AGATTTTATAGTCGAGTTAGCCTCAAGGGTCCATGTCTTATCACATTATTAGAATCAGACCCATCCCGATT  
CTTTGTTTACCCGATATTCTGCCCCATAATATTGTTACGCTCCAGTTGGCAGGCCTAGGCATGAGCGAT  
GTTGAGTTCCACATAGTCTCTTAAGGGATGAGATGTTTTTTTTATATGGTCTCGGACAATCATCATATCA  
TGAAGCTAGCTTTTAGGGACAAAAGTTTATTTCTTGTCACAGTTTTCTTATGCTTCTTCTTTCTGTCATCA  
GATGTAATAATCAGGGAAATTTCCCTGAAGCTTAAAGTTATCATATCTGGCGTGGTAGCCGTTGCAATTC  
TACTTCTATGTAGCTTTAGCTACATTTATTGTAGTAGAATGATGGCGAAGAAAACAGGTTTGTGTTGCTA  
TTACAGCCGTTGCAATTCTACTTCTTTTTTTGCTCTATGAATCAGATAAAGAGAGATATCTCAAAGGCT  
GCTCTTGTGTTTTCTGATCTTAGCAAGCCAACAAAGCACAGGAGGCAATCCCGTGCCACATTGGTTCAACAG  
AGAAAAGAAGCACAAAACCTGATGAACGAAAATGATAAGCAAACTTCGCCGTTCCATTCTTTGTTTC  
GAAAACATATTAGCAGCCACAGATGATTTCTCAGATGTAAATAAGCTTGGGCATGGAGGTTTTGGTACT  
GTTTATAAGGTTAGCACTATTTATCACTTCAATAGTTCCGCTTTATGTAGTCATTTTCATAGCATCCTAGTT  
TACACATCGAAAATCTTTTAGGGTATATTTTCAGATGGACAGAAATTGCTGTGAAAAGGACTAATCAACC  
CAATCTAGACAGGGCATTGAAGAATTCAGGAACGAAGTCATACTGATCTCAAACCTTACTAACATAGAA

ATACTAGTCAGACTTTTAGGCTACTGTATCACACGGGTATGAACAGATTCTAACTTTACGAGTATATGTC  
AAACAAAAGTACTAGACACCTTCATATTCGGTTAGTATATATATCTGAATTTCTTAATCACTCTATTTACTT  
GATCAATGTTGCTAAATTTTCTCCATGGTCACCAAAAACAAGATCCAACACTTAGCAAGTCATTGAAATGG  
AAAAAGCGATTAGAGATCATATTAGGAATTTCTCGAGGGCTTCTCTATCTTCATGAAGACTCAAGGCTCA  
GAATCATTATAGAGATCTGAAAACAAGTAACATTCTTTGGATCAAGAAATGAACCCAAAAATCTCAGA  
CTTTGGCTTGGCAAGGATAGTTGAAGAACAACAACAGAAGCAAATACCAATAAAGTGGTTGGAACCTA  
GTAAGTAATACAAACATGTTAATGTTATGAACTTTGCTTAATTGCATCGCACATCTGACTCGTGATTATC  
CATCATTATTTGGTTGATTTAGCGGATATATGTCTCCTGAATATGCATTGGAAGGAGTATTCTCGATTAA  
GTCAGACGTATTCAGCTTAGGAGTAGTTATACTGGAGATAGTAACTGGAAGGAGAAACACAGGATTTTA  
TCAATCTAAAGAAGCATCTAATCTTTTGGTCCATGTGAGTGCCTAGAGTACATGTTAATTTTTTCCAATAT  
ATATGTACGTTGAACTTCATATTCATTATTCTAAATCATGATATCACAGGCATGGAATTACTGGAAAGAA  
AAAAGAGCACTACATTTGCTGGATCATTATTGCTCGAATCATGCAACCCGAAAGAAGCAATGACGTGC  
ATAAACGTTGGGCTCTTATGTGTGCAAGAAGATCCAGGTGATCGTCCTACAATGTCAAATGTTGTGATG  
ATGCTTCATAGTGAAAGTACGTCTCTTCCAAAGCCTAATCAACCGGCTTTTGTGTCAAGGAGAAATGTTT  
CTAATTCATCTTCAGTTTCATCTGGTAAACCACCTAGCTTCACCAAATTGAGTTGACAATCACAGTGGAA  
GAAGGCCGATAATGTGATGAATTCATTAGTTTTTACGCCAATTTTCTCCGCATGAAATTATTTTTTACCTT  
AAGAGAAGATAAAATACATCAAATCAACTTGATAGCAAACCTTTTTATCAGTTTAACTACATTGGTG

>PGSC0003DMG400026810 G-LecRK

CAAATTGGAAGAGACATTTTTCAAAGTGTCTGAAACCTTTTTAGACCACTCCCTTTACTCCAGAAAAA  
AATTGCTTTGTTGATTTTCCGTCAGTCCCTTCTTGTCTTCCAGGGAAAGATAAAGAGTTGAAAATCTAC  
AATGTGAGGCACTTAAATTTGCCTCTTACTTTACTGGTGAGTCATATCTTGTTAATTTAAGCTCACCA  
CTCAAACCTTCCCAAGATACTAACTTTCTGTTTCACTCTAGCTTTTTCACTGAGATATGTTGATTTAAAG  
CTTTTTCACTTGTGGGGTTCTCATTTTCTCAAATCTTGAAATACCCATTTAAGGATTTCAACTTTTGGAGT  
TATGTTAGACCGAGTACTTTTGTCTACATTATCCTTAAAATTGGGACGTAATTGTAAAGATCCATTCTCT  
CTTGATGTGCACTTAGATTTGTTCTTATCTTTCCTTAAAAATATTTTTTCTTACCTAAATTGCTCTTT  
TTTTGCTTAGAAAAATTGAGATATATATGTGTGTATGTGGACTCATGGTTTCTTGTCAACGCGTATTTTGT  
CAAAGGCATGTTTGTTCGAAGTCTATGCGTCTATATTGACTTTTAAATAGTTAATTTTTGGGGTATTAAA  
CTACTCCCTTATTAGTTTTCAACTTTGGATGCTTGCAAACATTTTTTAGTGTCATTTAAAGTATAGAAA  
AGTGGTTGAATATGCATAAGGACCTAAATAGGGTCCATTTGTAGTTTTGAACCAGGATTTCAAACAAA

AGCTGTTTTCTTAAGCCATTTTAAATTAATTTTCTTTGTGTAAGTTATTTTATGGTCCATCTGTAGGTCAT  
ATTTTTTTTAGTTCAATCATAAGGTGTGGATCTTTGTTTTCTCACATGGCAAGTTTCTTATAGGGAAGCA  
TTTGCTGTTTCAAGAAAGTGTCTGCAGGCAATATTCTTCCAATTGATGTGGTTTCATTCTCAAAAAAATA  
TTCTTCCAATTGATGTGGTTTGGATGTCGTTTCTGAGGTTCAATGCTTCCCTTCTCTTTCAATCATTTTCCC  
ACCTTTTGTGGATCTTGGTGTAACCTTGAATCAATTGGTAGTTTGAGAGTTTTACCTTATAGTTGATAGT  
GATATTTCAATTCCTTTACAAAAGAACAGTTTCTTGTTTATTGTAATCAGTGGAAATGACTGAACATATTT  
TTTGTTGATATGCAGAAGCTGGAACCAGCTTTCTGTCTTTTCATCTGCTTCCGCAAGTAGTGACAGATATG  
GATAGAGGAGACAGAATAATTGCCTGTTATTCTAATTTGCTGCTTTCTGTCTCTATCGGGTTCTTGCTTTT  
TTCAGTTGTCAGTTCACAAATTCCTTTGGGTTCCAACTAACAGTAGAAGAGAACAATTATTGGTTCTCAT  
CCAATAAGGACTATGCAATTGGATTCTTGAACCTTCTCCGACCAGTATAGCTTTGGTGTCCGTTTCAATGCA  
ATTTATATACCTAGCAGTGAGCAAGCAGCCATTTGGACTGCAGGGTGGAAATGTTAAAGTTAGTAGCAAA  
GCATATTTGAGCTTTCCCTAACTGGGGAAATGATATTGTTTGATCCAGCAAAGGGAAAAATTGTTTGGC  
AAAGCAAACTGGCAACACATCTGTTGAATCAGCTGTTCTTCTTGATGATGGCAACTTTGTCTGTAA  
TAGGAATAAGAGTGCTGTTTGGCAGAGTTTTGAAAGTCCATCTGACACAATGCTGTCTGGCCAGAGTTT  
ATCTGTTGGCCAGTCTCTTCGAGCTTCTAGCAGGGGTTCTTTAACAAGTTATTACAGTCTTCATATGAATG  
TTTCTGGTGAGATGCAGCTTAGGTGGGAGACTAGTATCATTTACTGGACTGTTGGGGGTCTAAATCTG  
CTGTACGAGCCATTCTTGGCTCTGACGGAATCCTCCAACCTTACTGATCAGCAATCGCAAGCTGTTTGGTC  
AGTCTATGGTGAGGACCACAATGATTCTGATGTGAAGTTTCGGTTCCTCAGACTAGATTCTGATGGTAAT  
CTTCGGATATACTCATGGGAAAATAATGCAACATCATGGAGAACAGTTTGGCAAGCTATAATTAATCAGT  
GTGATGTCTTCGCAACCTGTGCTACCAATGGTATTTGCACCTTGAATGCATCTGACTCTTATGTTTGTGG  
TGTCCATTTAGATCTACAAGAGACTCAAACCTCTGAATGTCTAATTCCATACAAACCAAGTTGTGAATCCG  
GTTTATCCATGATCCTTCATGAGCATATGATTTGTACGGAATATAACCACCAACAACACAGTTGTGCA  
AACCAATTTGCAGCAGTGTAGAACTCTGTGTCAGAAAGATCCATCCTGCCATGCTGCATCCTTTATCAAC  
AATGGCACTCCACAATGCCACATGATGAACTCCCGGTATGTTGGTGGTCAATCAGATCCTTCTTTGGGTT  
CCGTTACTTTTGTCAAACTTGTTCAGACCCAATTGCTGTTTTACCTCCGCCTGTACCTGCTCCGAGAAAG  
GTATCACAGAAAATTTGTGTTGCTTGTCTGTTAGAAGTTGCTGCTGCGTCAATCGTTGTGTTTGTGATGCT  
TCAATTCAGCATTGGAGTTTACCTTTTTAGGAGAAGGAAACATATGATGCAGAAATCTGCTTTACCCCAT  
ATAGTGCCTAATGCTACTGGCTGCATCGTGTCTTCTTACTCTGAAATCAAAGACCTGACTGATAATTTTAA  
GCAACAAATTGGGCAGAATGTGTTCAAAGGTCTACTCCAGATAATAGGCTTGTGTCAGTTAAAGATCTC



AATGCCTCTATTGATGAAAGGAGGTTCCGGGCTGCAGTTCTAAAAATAGGAAGCATATACCACAAAAAT  
CTTTTGAGGCTGGATGGTTATTGCTGTGAGTCCGGCCGTAGGTTATTGGTTTATGAGCTTGCCAAATATG  
GTTCTGTTGACAAATGTTTAGAAGAACCTAGAATGTGCAAGAGATTGACGTGGAGAAAAAGAATGGAT  
ATATGTTTGTGAGTGGCAAGGGCCATATCTTACTTGCATACAGGATGTAGGGAGTTTATTAGTCATGGAA  
ATCTTAAATGTGAAAATGTTGTCTTAGATGATGAATTAGAGGCCAAAGTTAGTGAATTTGGACTGAGGA  
CTATTCAAGCTGAGGCTTCCAGTAGCGGGGGGTTAGCAGAGACAGATGTAAGAGATTTTGGCAAAGTG  
ATGGTGGTATTAATCACTGGATGCCAAATGCGGATGAAGCTTGTATTGGTCTATGAAAAATGGGTG  
AAAGCTGAAAAGGAAATGGCCATGGATCAGCGAATTGTGGTTGGCACCGATTGAGAAGAGTTAGAACG  
AGCATTAAAGAATTGCATTTTGGTGCTTACAAGGTGATGAACGTATGAGGCCATCAATGGGAGAGGTAAT  
CAAGGTACTGGAGGGAECTCTGACTGTCGATCCTCCACCACCTCCTTTTGTCTATAATCAACAGTGGCCA  
CCTGATGATGAATCACCATCTGAATCATATTCAGCACTGTAGAAGTTCTAATTCGTATATTTCAATCCCAT  
TAAGTCATCTGTTTCTGTACAGAACTTACCAGGCACCTTCGACTTGGCATGATGTAGAATGCCTAGTTTTT  
CCAGTATGGCATGCTTAATCTGAAATCAAGACGAGCATCCCACTCTGCCTCTTCTGAAACTGTAACCTG  
GTATGTAACCCTCCAAGTACAGTTTTGTGTTAGAAAATCCTGATTCAGAAATTCAGTTTTCTTTTTAAGT  
TTTTATTCTGTTTCATGTTAATTATCACTGCTTATCACATGTGTTTACATTTGATATTTTCTTGGAGGTGACT  
AAACTTCCTTAACTCTGCCCAAATGTCTCCTTGGCTTGTGCTATCAGTTGGCACTGGCTTTTTTACTAGG  
CAGTGGTCCAAGAGATCGTGGATGAGGTTTGAACCTGGACATCTCTATTCTTAGGATTACTCTGACCATT  
AAGTCGATCCTAACTTAAAATGGAAATGGAAGTTTGTGTCTTTTTTCTTACAGAGGTGGTTTCCATGCT  
ATTTGCACCTCGACCATTTACCAGGTAATGGTATCTCCACCAACCTAGGTATCAGGTAACCTCTATCTCC  
AAAGCTTAGACAAATGAAAAGAAATCACCTAGCATTTTGAATTTGTTGATAGGTCACACTTGTGTTTTA  
TATATGTTCTGTTTTGATTTTGGCTTGTGACCTTTGTTGCCTGGTAAGTAGGGTCATTTTCGGTGAACA  
TCCATGATCAGTATTTAGCAATGAACACAATTCATTATTTTTATTAGTGAAAGAGTTG

>PGSC0003DMG400027233 G-LecRK

CACAACCAAAAAGTTATGTTATGACTTTTGTGAGTTTGTCTTAAATCTAAATTTACAAACTCGAAAAAGTT  
ATTGTAAGTAGCAGAGTGGCCTTGCTAGTACAATCCACTTATATGCTAGGTAGCAGAGTAGATTGCTACC  
GCGATCAACTGAAATTCAGCTCTCTATTGCTCCAAAGAAAACATTTTACATGTGTAGTCTTGTGTCAG  
GATCCACATAGAGATATCTTGGTTATCGTGACCAATTGAGATTCAAACACTTTGTTGCTCCAGTGAACAA  
AAAAACATTTTCATAGAGTAATCTTGTGTCAGAATCTACTGAGATATCTTGGTTATCGTGACCAATTGAT  
ATTCAAACTTTTTTGTCTCCTGTTCCATTTATATAGTAAGTCTTGTACCAAGATCAGCTGAGATTTAGCT

TTTTGTTGCTCCGATTCATTTTCTTGTTTCTATTAACAAAAAATATTTTGATAGAGTAATCTTGTTGTCAG  
GATCCACTGAGATATCTTGGTTATTGTGACCAATTGATATTCAACACTTTGTTGTTGCTCCAATTCCATTC  
ATATAGTAAGCCTTGCTACCAAGATCAATTGAGATTCAGCTTTTTGTTGCTCCGATTCGTTTTCTGTTCTCC  
TTTTCAAGTAAGTAAAGTAGGTTGACTCGCTACTTTACCTTCTGTGTATAATGAGACGGAACAGAGTAA  
AAAATGCAACTTATAAGTATGGTATGCAAAAAGATTCTTGATTCAAGAACTGATTTTTTTTTCAAGTTT  
TCATTGTTGTTAAGAGCATGGGATCATCTTTTTGTTATTATTGTTACCCTTTGTTATCTTGTTTTCTTGT  
ACACTCTGGACCTCTTCTCTTCAACCATTAACTCCAAATTTCACTGCTTCAAATTTCAAGTTCATTGATAC  
TTCTGGATCATTCTTGTATCACCAAATGGAACCTTTAAAGCAGCAATAACAAACACAAAATCTCAAGAA  
AGATCCTATTACTTTGTCATTGTTCACTCGGAATCACATGTAGTTGTTTGGTCAGCAAATCGCGATATGCC  
TGTATCTGATTCAGGTGAGTTGCACCTTCTGTGATGGCCTTGCTCTTTTTGATGATTCAGGTCACACCG  
TTTGGTCTGCGAAGCGTAGTAGTACTAGTAGTTCTGTTACTTCAATGCAGCTTCTTGAATCAGGAACTT  
GGTGTGGTTGATGCTTTTAATAACTGTGTGGGAAAGTTTTGATTCCCCGACAGATAACAATCGTTGTA  
GGCCAACGATTGCCTGTTGGGAAATCGTTGGTTAGTTCAGTGAACGAAGATGAAATTGCTAAAGGCGAT  
TATAAACTTGTGGTTGTAGAGAATGATGCAATGTTACAATGGAATGGAATGACTTATTGGAAGTTAAGT  
ATGGAACCTAAGGCTTTTACTGATGCATATACTCTGGTGGAGTATATGATGATCAGTAGCAACGGGTTG  
TTCCTTGTAGGGGCGAATGGGACGGAGAGAGTGATTCAGGTTATTTGGATGAGGTGAAAGATCCTGA  
CTTAGGATTGCGAAATTGGAAGAGAATGGACATTTGGTGTCAAACGATTCAGTAACGGAAATTGGAT  
GTCTGAATTTGATAGTCCTATTGATAGTTGTCGTGTTGCTTCACTTGCAAGAAGCTTGGAGTTTGTGAT  
GAGGGGAGCTGTTCTTGCCACCGGATTTCTGTGTTAGTTCTGAGGTGAATGGTAGTTGTGCTCCAGTT  
GATAGAAATCTGGTAATGCCAGTTTCTGTAATGCATCTTGAATATGAATGTAAGTGAATTGGGAAATC  
GTGTTTCGTACTTGAGGCTAGAGAATGGTATGGACTATTTGCTAATGATTTTATCGAACCTGTGAAGCG  
TGGTGTTAATGTATCTGCTTGTCAAGATCTTGTCTAAGAATTGTTCTTGTGCTGAGTGTTTTTCATGATCA  
GTCGTCGGGGTCATGTTATATGATTGAAAATTTCTTGGTTGATTTTGGGGGCTCGGATTCTGGTAAC  
GGAAGAGGTAGATTGGGATACGTTAAGGTCATTTCTGAACCGTCATCATTTGATCCAAATGACAACCTCA  
AGTGACAAGAGGTCAAGATTACCCGTTGTTGCTTTGGTTTTACTTCTTCTTCTGGGCTTTTCTGATCAT  
TGTGATGATGGCTGGGATTATGTGGTTGATGAGAAGAAAAAGATTGATGCAGATTTCAAGGGAAAGAGT  
TTGGACGGACGGATTCTTCTTGTGTTGCTGAGCTTGATAACATTTCCATACTGGGGTTGCCTGTGAAATTT  
GATCATGAGGAGATTCGGGTAGCTACGGAGTGTGTTAGAAATCAAATTGGTACTGGTGGATTTGGAACA  
GTATATAAAGGTACACTTTCTGATGGAGCTGTTGTTGCTGTCAAGAAGATGAATGCTCTCGGGGCTCAC

GGAAATAGGGAGTTTTGCACTGAGATCGCGATTATTGGGAGAGTTCACCATGTTAATTTGGTCAGTTTG  
AAAGGATTTTGTGCACATAGGGGAGAAAGGTTTCTGGTGTATGAATATATGAATCGAGGCTCATTGGAT  
CGAACCTTTTTGGACTTGGACCTGCCTTAGATTGGCATAACCAGATATGAAATCGCGCTTGGAACAGCAC  
GTGGGCTTGCTTACCTGCATGGTGGTTGTGAGCAGAAGATCATACATTGTGATGTGAAGCCAGAGAACA  
TACTCCTCCATGACAACCTGCAAGTAAAAATATCAGATTTTCGGGCTTCCAAGCTTCTTAATTCTGAGCAG  
TCTAGTTGGTTTACCACGATGAGAGGAACTCGAGGCTACTTAGCTCCTGAATGGCTGACTAGCTCAGCC  
ATAACGGAGAAATCAGATGTCTACAGCTACGGAATGGTGCTACTAGAAATAGTACGAGGGAAGAAGAA  
CTCCTCGTTCCAACCACCAAATGACACTACTTCTCAAAGCGAAAGTAGTGAAAGGAACAGGCTTTCTCCA  
TCGTCTCTTGCCTCAGCAAATCAGCCAATCTACTTCCCATTATTCGCGTTGGAAATGCATGAACAGAAAA  
AGTACCTGGAGCTAGTGGATCCTCGTGTCTGGGGAGTGTCAAAGTGAGGAAGTCGAGAAGCTAGTA  
CGTGTGGCTTTGTGTTGTTTGCATGAAGAGCCAACCTCTGAGACCAACAATGGCCAATGTTGTTGGCATGT  
TAGAAGGTGTGTTGCCTTTGGCTACGCCACAGGTTCAATCACTCAATTTTCTACGATTTTATGGTCGTAGA  
TTCACTGAAGCATCAACTATCGATGGGGATCAAGAGGTTAATGTGTTTGAGTTACATCAACAAAGCAGG  
AACCGTAGCAGTACTACTAGTAGCTTACAATTCCTTCTTATATGTCTTCACAGCAAGTCTCAGGTCC  
AAGATAGCACTAGTAAATCAAACGTTGCTCAAACACTACAAAATGTTGTTACATTCGTGTCTGGTCCTC  
CAAAAGTGCATAGCTTTGGGAAGATCCAACCTACTTTTGACATTATTTTTGGAGAGTCTAAACAACACGG  
AGTAAATCTGCTTTTTTAGTTCAATATGTTATGCTACTGTTTGAAAACTTTAGTTGTAATATGATGTTTGTA  
CCTCTTCTGTGAGGCAGTAGAAAGAGTATAAATATAAGTTGTAATTTATTCAATTC

>PGSC0003DMG400028461 G-LecRK

AAATACAACATCAGCTTCAAATCATCTTTACCCTATCCAGACAAGTAGTTAAGCAGATGGGAATAGATAC  
ATTTGATGATCGTCAAGTCATTGATATAAATTAGAGATTTACAGATGAACTATTCGTATGTATAAGAA  
TTCTTTCCCTTGAAATATGTTTTTGGTCAATGAACATTTTAGTTTTTTGTCTAAACAGAATCATGGCTT  
TACCCTCTGTCAAACATTTGTTGAAGCTTTTGATCATTGTGCTCCTTGAGAACCTTACTTTGGCTCAATTC  
CTGATTATCACACAGTGAAAATACCCACAACGTGGATAAACAATAATGTATCGTCTATCAATGTTACAAA  
GCCCTGACATGGCCTTTTACTCATTCAATCAATCATCTGGACCTTTCATGCGAATTCTGATGCTCAAAG  
AGATAGGAAAGGACATGGGATATGCTTGTGGTTTTGCTTCAAATGGAGAGGATGATTCCTTTGTGTTTTC  
CATTGGAATTATACGTCTTCGTCAGGACTTTCTAGGAGCTCAGCGCTGGACTGACCTTGAGCTGGTCTGG  
TTTGCAAACAGAAACCATCCAATTCATGAAAATGGAACGCTGCAATTGTTGCAAGATGGAGATTTAGTG  
TTAAAAGATGTGGATGGAACCTTGTATGGTCTACAGGCACCGCAATAAGTTTGTTCGGGCATTAAG

ATGATGGATACTGGGAACCTTGTGCTTCATGACATGTATAATCAGACTGTCTGGCAGTCTTTTGATCATC  
CAACAGATGCATTGCTCCAGGCCAGAAATTAAGGTCTGGTCAAAGACTTGCGGCTAGAGTTTCTTCGTC  
CAATTGGAGTGAAGGTAACACTATATCTCTGTAACCAATCAAGGCTTGTTTGCAATTTACATATCAGAC  
AAGCCGCAGATGTATTTAAGTTTTTGGTCAGTGGAGAAAGGGATAGCTTTGATGAAAGTTATGTCAA  
GCAGTTAATGGTACTCTTGCCTTGTACATATCTTCAACCGAGCCGAATGAGCCAAATGCTGTCTTCTCAA  
GACCTTCAAGGATGAAATATTTGAGATATGATTATGATGGACATCTTCGAGCCTACACCGAGGGTAGTG  
ATCAGACAAACGATCTTTTGGCAGATTTTCATTGGGCTTTGCGATTACCCACAGCTTGTGGCAGTTTGA  
GCTTTGCTCAAATGGAATTTGTTCTTGTCCAGGTCCATTAATAAAAAGTAATGATCGACAAAACAACGGA  
TGTGTGGAAGTTAGTCCGGTGAATGTGATGGACAACGCTCCACAGAATGGACCGTGCTTCGGATGTC  
TATTACTTTAACTATGTCGACACTGATGCAGCAGCTCTGAGAGGAACAGATGAGGAAAGTTGCCAAGAG  
TTGTGCTTGAAGAACTGTTCTTGTAAAGTAGTTCTATTCCGGTATTTCACTAACTTTTCAAGTGGTGACTG  
CTATTTACCCTCTCCTGTTCTGTCACTTATAATTGATGGAAAGGGAAGAAGTGTCTATGAATCATCTGCAT  
TCATCAAATTACCAAATGATGCAGAAAAAGGTAAGTCTACAGCTACAAGAAGAACTGGCATTATAGCTG  
GATTAAGTGGTGAACAGTTCTTCTGATAGCATTAACTGTTGGCATCTTGATTGCTTTCAACAGAAAACA  
CACATTACAAGAAAATAATGATGATTACTCAGGGGAGATATCTGGTCTTGTAAGATTTTCTTATGAACAG  
CTGAAGATGGCAACTTGAATTTCCAGAAAAAGCTTGGTCAGGGAGGTTTTGGCTCAGTTTATGAAGGA  
GTTATTCGAGATGGTCAGAAAGTAGCAGTGAAGGTTCTTGATGGTTTTGGCCAAGGAAAGAGGGAATT  
CTTGGCAGAGGTCCAGACCATAGGAAGCATCCATCATGTTAATCTTGTTAGACTAATTGGAGTTTGTGCT  
GAGAAAGAGCACACAATATTAGTTTATGATTTTCGTGAGTAATGGATCATTGGATAAATGGATTTTTGGC  
ACATCCTCTACTCAATTTACCCTTGATTGGAAAATAAGAAGAAAAATCATCCATGATATAGCAAAAAGGAT  
TGGCTTATCTTCATGAAGAATGTATGCAAAGAATAGTCCACTTAGATGTTAAGCCGCAGAACATTCTGCT  
GGACGAGAATCTTTGTGCAAAAGTATCTGATTTTGGCTTGGCCAAGTTGGTGGATAAAGATCAGAGCCA  
CATAGTGACCAGAATTAGGGGAACCCCTGGATACTTGGCTCCTGAATGGTGTAGTGCATTCATTACAGA  
AAAAGCAGATGTCTACAGCTTTGGAATTGTTGCAATGGAGATCCTCTGTGGACGCAAGAACGTGGACTA  
TTCACACTCACTGGAACATCCACATTTGCTTAGTTTATTTATGGAGAAAGCCGAAAACAATCAGCTTATC  
GATATGATGGGAAACTACAGCGATGATCCACAATGCAATACATCAGAAGTCATCCGTATGATGAAGCTT  
GCTGTCTGGTGCTTACAGAATGATTTTACTCTGAGGCCTTCCATGTCAATGGTGGTTAAAGTAATCGAGG  
GGACAATGGACATTGAATCTCAGTTAGACTATAGTATTCCAAATTCACAAACAATTGCAGCAATCAAAAG  
AGTGGCAGACACCACGACTAACTTGTTTCCTTCAATTCTTTCAGGACCTAGGTAAGCATTCTAAGCATG

ATGAAGAGTCAATAGAGAAAAGAAAATCCCCCTCCTTTATCTTATTTCTTGTCTGATCCCATGATCATCA  
TTGTTGTATAGCTATTTATTGGTTTCATTTGTGTTGTTTTCTGTGACTCAGTAAGATACTTCAATTAATTA  
AGAACCATGGCGTGATTTCCA

>PGSC0003DMG400028617 G-LecRK

GTCACAGTAAAAGTTCTACAAACAATATCATCGAAACTTGGGAACAGATACTGGAATGTCAACCGAGCC  
TCTTGTACGCAGGAGAGGGATTTAACATGACGGATCCTAATTATGATGAAGTTTTAGCAATGTAAAAT  
GTAATTGTTCAATTAATAATGGCTCAGTTTGCCATGTTGTAACAATGTAAGCTCTGCTTTGATTTTTAAAA  
CTTCACATTTTACTCTTAATCAGAAAGTTTTACAGTTAAACAGATGCCATCTTCTGCATCATGTAATGAGA  
ATTTCTTACACTTTTTTTGTTGATACAGCCAATTGAAGCGTCTTAATATGACAGGAATTCTGCCTCCAGAA  
TTTGCAAATCTTACTCATCTGCAAGAATTGTGAGTATCAGTTATAGATTTTTCTCCCCTTCCGATTACAGA  
AACTTTTATTCAATTGTTTTTATAAAATCGTAACAGTAGTAGCAAGTTAACTATTTGTTGCTTTTATACCT  
TCGAGGTGGCCTAGTGGTCTGGGCTTGGGAATTCATGTCGGAGGTCTCAAGTTCAAACCCCTTGTC  
AACGTAAACAAGGGGTTTGCCTTCTGGGTGAGCTCGTCACACCAGGCTTGCCTAGTGCGGGTTACCTC  
TCCTGTGTGCATAAGAGTGGGGGTTTTACCTGTGGCTTAATCAATTTTTGCATTTCCAGAGATCTGACTC  
GTAATTACTTAAGTGGATCGATTCCCTCAAGCTATGGCCAGCTTCGCGTCACTAATTTGTAAGTTCTTTTC  
TGTTTAATCTTTTCAATGAAGAATTTTTGACATTTTGTCAAACCTCAGGTCACTCTTGGGTAACCGTATCA  
GTGGGCCGATTCCGAAGGAGTTAGGTGACATTTTCACTGGAAGAAGTGAAGTTGAAGATATTGCAT  
ACTTCCTTTAATTTTCTACATATGTCACATTCATGAATTCATATTTTTCAGAGTTTTGGAAAATAATCTACT  
TGAAGGACCTCTTCCCGAACCTTGGTAGCTTGAACCGCCTCAGAAGAATGTAAGACATAGATTCAAC  
GTCTAATATCTACTTATTGTTACATCTATTCCAAATTAATTTGGCACTTTTCAATTCCCAGTTGTCAAAC  
TAACTTGCATTTCTTTACCGTTTTTATTTGGAAAGAACTGTCAAGTTCATGAGGTTAATGAAGTATATCCTAC  
CCATGATAGAACGATTTTACTCACTAATGTATTGGTACCTAAAATAGTGGTGTCAACGAACCACTCAACA  
AGAGCAAAATACGCTCAAATTTATTTGTGCAAAAGAAGAAGAAGTTCAGAAAATTCGTAAGGAATAATC  
TGAGGAAATAGATTTATTTATAGCCATAGAAGTACTGTTTCTGACAGTTTGCAACCTTCCAGAATACCTTA  
AGAGAAGTACTATTTTCGAAAGTTTCTTAAGATTGTTGTTTATTTGTAATAATAGGATACTTAGAACAA  
TACTTTGCAGAACTTCGTAAGAAACATCACTTCATATTCCTTCATTTCTCATTTATTATTATTATTATA  
CCCAACTTTTAAATATGAAGAAAGAGTTAATCGAGTCTAATTTAGCTCCAAAAGTTGGTCAAATTGTAT  
CAAACATAAGCAAAAAGTGTGATCAAATTGGGATGAACAGTGTGATTTTTAGTTATCATGGTTAATTG  
ATGGATCATTTTGCAGGTTGCTTTCTGCCAATAATCTCAATGGAACCTATACCTGAGAACTTCAGCAACCTT

AAGAACATGAGAGATTTGTAAGCAAGAAAATGTTATAAGAACATTTGACTTTTGTGCTTCAATCTCTTAA  
CTCTTCGTCTGTTTGCAGTAGGATCGATGGGACTAGCATATCTGGAACCATAACCAGATTTTATTGGCAA  
TTGGACCGAAATGGATAGATTGTAAGTATGCATCTTGTAGTTGTAAATGTTGATGGAATATTCTTCTCCC  
GGAAGGATTCTAAACTTTAAAAAAGCAAAAATTGGTATCATAATTGTATTTAATAGCAAATATCATG  
AAACTTTTTGCAGAGACATTCAAGGAACGTCAATGGAGGGACCTATTCCTCCTACAATATCCCAGTTGAA  
AAACATGACACAGTTGTAAGTACACACGTCTCTCGTACTACCTGCTATAGCGGAAGTTCTCATGTGCATT  
GTTGTTTTTCAGGACAATATCTGATTTGAGAGGAAAACAAATGCAATTCCCAAATCTTCAAGGCTTGAGGA  
ATATGACAAGGCTGTGAGTAGTTGGAAATTTAGCTATTACATCTCTTCATTTTAATTTTCGTATTCTCATGG  
TTCTTTAGTTTACTCAGGACTTTGAGAAATTGCTCAATTTTTGGTCCGATTCCGAGATATGTAGGTGACA  
TGCCTTTGAAACTTTTGTAAAGTTTGTATCTCCTCTTCGATTTTTTTTTTTTTGTCTATAATACAAACCTGGA  
ATTACCCTATATTGTATAAAAGGAAAATCTTCTACATACCAATGCATTCGTCGTATTTGCATGATGGAGCA  
AAGATTTTCACTAATTGTTTGGATAACCACAGTGGTTTGCTTGCTGTCTAGTTTGATGCTAAACCTGCCTG  
CTTCTGATAACAGTTATTTAATTACTTGCAGGGACCTGAGTAACAATATGTTGAATGATACAATCCCAGA  
TACATTTGAGCAGTTGAATTTTATAACATGTAGGTACCTTGCAAGTGAAACTTTTACAAGTTGAAGCAT  
AAATCTTGTACATGTTTGTATTTATTTCTTTCTCTCGAAGTTTTTCATTCGGTTATAACAAGCAAAAGTTTAA  
TCTGCAATGTAGGTTGCTTGGTAACAACACATTAAGCGGAGCAATTCCCAGCTGGATGTTTAGTAAAAG  
AGAGAACATGTTGGTATTTGCTCAATTTATTCCGTTTTCTCATCTTAGTAGTAAACTTTGGTTATTATTAT  
AGTTAGCCACACTTCAAAGTTAACAGTTTTTTTCCCATAGCTTTTTGTTTACTGCAAGGACACATTTACAA  
GAATTTGATGGCGTCGACAACACTACAATTTTTTGCAGTGATTTATCATAACAATTTACCCATACAACATA  
CTCCAGGATGCCAGTCTCTACCATGTGAGCATTCAATTTATTATTGCTTTTTTTTATTAGTGAGAATTTCCGT  
CCTTTAACTACATAACTTACTAACATTCTTTCTTTAATAGAACTTAGCCGCCAGCTATTCAGATACAATG  
AACACGTTCAAAAACATGTAAGTCCTCCTAAATGTTGTCTTATGCATCAGGTGCTAGTTTGTGTTGATGCCT  
TCTATCTATTGTCGGCTTTATCTATTCGAAATTGTAGGGATGCCTGGTGTCCATGAAACCCCTCATTGT  
CCCACAGAAGCGAAATGTAAGAGTTACATCCTATTAACCTTATTTTTTTTATACCTGAAAATTAATAAATG  
AAGTAGCAGTTTGTCAAAGGACCTCAGGGGTTATGTCTGGATCGTTTACCCTGAATCGACTCTTGGAGT  
GGCAGACTGTAGAGTTTGAAGTACAAAAGCATAGCCTTGGAGTTGAGAGATAATTTACAAACCTTCTCT  
CATGTTATGGTCTTTATGTCAATTGCAGATACTTCGCTATTCATAAACTGTGGAGGAGGTAGAACTACAT  
TTGAGGGAAATGATTATGAGGAGGACAAGATCAGTTCCGGTCCATCATATTTTTCTTCGTCCTCCGATAA  
ATGGGCATTCAGCACTTCAGGAGTGTACGTGGGTGAGTAAATGCTAGCTATATTGCAACAAATACATT

TTCCTAGATGTGTCCGGTCCTGACTTTTACAACACAGCACGCCTTGCCCCAAATTCTCTCAAATATTATG  
GGCTTTGTCTACGAGGAGGTAGCTACAGAGTGCGCCTTCACTTTGCTGAAATAATGTTTTCTAATGACTC  
AACATATAGCAGCCTTGGAAGGCGGATATTTGATGTAGCAATACAAGTAAGTTTGAGGCCTAACTTCTTT  
TGTAATAATAAATATGTAATCTAAAATGTTGATTTATTCAGTTCAGATATGATTTGGTCACTTGATGTAG  
ATATACTGAGTTCTGATATGATTGGCAACTTTCTGATTTAATATTGAATGTTGGAGATAATTTTGATTTCT  
TACACAGGGGAGAGTAGTTTTGAAGGATTTCAACATCATGGAAAAAGCTAATGGTGTGGAAAAGGTC  
ATACCGAGGACTATGATAATTAATGTTAGTAGCACTCTGGAGATTCACTTGTATTGGACCGGGAAGG  
GGACTAACGCCATTCCAGAAAGAGGTGTATATGGACCTCTGATTTAGCTATCACAGTGACACCAAGTC  
CGTTTATCTCTCTCTGCCTATAGACTTTACACTTTTTCTCCCTCCCACAATCTTATCCCATTTTCTTCTTGCA  
GACTTTAACACAGGCAACGGGTTACCTGTGCGAGCAGTTATTGGCATTGTACTTGCTTCAATTGTGGTGG  
TTCTGATAGTGTTATTTGCTCTGTGGAAGAAGGGCATTTTTGGAGGGAAAAATAATGAAGAAGAATTAG  
GTAAACATACCTCAGAATTAATTAATCACTCTCTATATTTGATATGGTGATACTTTTGTGTGATAATCAG  
AATTATTTACGAGATTTCTAGCTGCGACATACAAATAATTATCTGCCTGTAATTGACCAGCATTGAGATG  
ATTGTTCTGTTGGTGGATCGACATCATGACATATCATAGATAGTTAGCACACAATAAATGCTCATGACT  
GCTTAACTATATATCTTCGTCATACAGATGTTTTAGAAGATCTATATATACTGACGTTTGCAATATTCTTC  
TCGTTTACAGAACTCAGAGCCCTTGATTTACAAACAGGTCATTTTAGACTTAGACAAATTAAGCTGCTA  
CAAATAACTTTGATCCTGCCAACAAAATTGGTGAAGGAGGGTTTGGACCAGTTTACAAGGTATCAAATC  
TCTATCTCTCTACCCATACTGATTTTGCGCAAGGATAGCTTGTGGTTCTGTGGTGATATTTCTACTGT  
GCGTAACGTTTATAGGAAAATAGCTGATATAATCCATATCCTACGTTCTTCCCTCCGTGTGTGATATGATC  
GTTGTGAATTAATCTTGCTATCTGTAGGGTGTACTCTCGGATGGTGCAGTGATAGCTGTTAAGCAGCTGT  
CTTCCAAGTCGAAGCAAGGAAATCGTGAATTTGTCAATGAGATAGGCATGATTTAGCTCTACAACACCC  
AAACCTTGTCAAGCTTACGTTGTTGTATAGAAGGGAACCAGTTATTAGTGATATACGAATACATGGA  
AAATAACTGTCTTGCTCGAGCTCTCTTTGGTAATGCTTTGCAATAACATTTTGAAAATTATTAATCATGTA  
ATGATAATTTTATGCTTATTAGTCTCGTATTCTCCTTTCTTAGGCCGTGACGACCAGAGGTTGAACCTAG  
ACTGGGCAACCAGAAAAAGGATATGCTCAGGAATAGCAAAAAGGGTTAGCTTACCTTCATGAAGAATCA  
AGGTTGAAAATCGTACACCGAGATATCAAGTGTACCAATGTGCTTCTTGATAAGGATCTTAACGCTAAG  
ATTTCCGATTTTGGATTAGCTAAATTAGATGAAGAAGAGAACAACACTCATATTAGCACCCGAATTGCTGGAA  
CAGTGTGAGCCTTCTTATCATAACTATCTCTGACTATCATTTGAATTTGTTGTCATGGTCAGTTTGAAG  
TATCTTACATTTCTTTTCCGTTTTTGAAGAGGTTATATGGCTCCCGAGTATGCAACGAGAGGCTACTTGA

CAGATAAAGCTGATGTTTATAGCTTCGGAGTCGTTGCATTGGAGATTGTCAGTGGGAAAAGCAACACAA  
ACTACAGGCCAAAAGAGGAATTTGTTTACCTTCTTGATTGGGTAAACTATCTTTCTACTAATATCTGCAAC  
ATTATATCTTTAGTTTAAAGACCACAAGATGCAAATGTCTTTGTTACTTTCTTAAACTCTGTACGGAGGTAT  
CTTTGCATATTTAGTTTTTCTTTTCTCTAGCTAATTTGATGTTTGCTATGTATGTGAATGTTTGTTTTAGGCT  
TACGTCCTACAAGAACAGGGAAATCTGTTAGAAGTAGTGGATTACATCTCGGTTCCAATTACTCCAAAA  
AAGAGGCAATGCAGATGATAAATATTTCTCTTTTGTGCACAAATCTCTCTCCTACTCTCCGACCATCCATG  
TCTTCTGTGGTGAGTATGCTCGAAGGGAAACTCCCCGTGCAAGCACAATAATCAAGCTGACTACATCA  
ACCAACGAAATGAGATTTAAATCGTTTGAAAAAGTTTACATGACAGCCAAACAACATACTCTCAGGAGT  
CTCAAGGACAAGCACCTTGAATGATTCGTCAGGGTCAGGGTCTCTGCCTGCTAAAGATGAAAAGTTTA  
GTTCTCCAGTAGACTTCTTCCAGATCTTTATGATATAAACATAGATTGATTTTGATTTTGATTTTACACA  
GGATCAAATATTTATTTTCTTGTGTATACTACTTTGTAA

>PGSC0003DMG400029520 G-LecRK

CCCCACCCACCCCTCCTTTGAATTTTCTGAAAATCCACATAAACACGGTTCCTTAATGTAACAAAGAA  
CCTTAAAATTTGTAAGGACAAGTTATAATTTTCTATTGTTTTATACTTTGTACAAAGTCCTCTTGAGTTTTG  
TAATGGACTAATTATTTTTGTGTACCCGCTATGACCAAACCCAGAAAAATTCTTGAGAACTTTTTGAAACC  
CTTTTTCTCAAGTCCAACAAAGGTAAGCAAAAATTCTGTGAGGGTACCCTTAATCTTGATTTTTTTTTT  
GTTGTTCTAATGGTGATTTTGGGTTTTTTTTCTTGTGTGAATTGACTAATCAAAAAAAGGGAAGAATGAC  
GACTTAGAGAAAATTGCAGCACAAGAACAGAAGCAATTCTTTTTGGAGTTCCTGTTTCTGCTACCAAAG  
ATTTTACCCAGATAACAAGCTTGGTGAAGGTGGATTTGGGCCTGTATTCAAGGTAAAAAATAAAAAACA  
AACTGAAAATCAACAAAATTGAGTCTTTCTTGTGATTTGGGTGTTAACAAAAACTCAAGCTTTCTTGAAA  
AGATTGAGTCGTTTTGTGATTTGGGTGTTAACTGAACTCAAACCTTCTTGAAAAAATTGAGTCTTTTTGT  
GATTCTGAAGAAAATGAATCTTTTTGTGATTTGGGTATGAACAGAACTCAAGCTTTCTTGCAAAAATT  
GAGTCTTTTTGTGATTTGGGTATGAACTGAACTAAGGCTTTCTTGAAAAAATTGAGTCTTTTTTTGATTT  
AGGTATTGAACAGAACTCAAGATTTCTTGAAAAATTGTGTCTTCGTTCTTTATAGGGGAAATTGAGTGA  
TGGGAGGCAAATAGCTGTGAAGAAGCTTTCACATAGTTCAAGGCAAGGGATGAAGGAATTCAAGAATG  
AAGCTAAGTTGTTGGCTCGTGTACAACACAGAAATGTGGTGAATTTGTTAGGGTACTGTATACATGGGG  
TAGAGAAGTTGCTTGTCTATGAGTATGTTGCTAATGAGAGCCTTGACAAAATCCTCTTTAGTAAGTTTTAT  
TACTACTAGTTTTTATCTTCTTAGCTCTACTAGATTTTGTATGTGCTTTTAAAATGAAATGAAATGACATTC  
ATTGAGAGGCGTAGCCAGGATTTTATGTTTCTAGGTCATAATTGTGTTTGTACTGAGTTCTG



GATAGATTAGTCGTA CTTATTAGATGAATTTTTAATGCAATAACAAGGTTTGAGCCAAAGTTACCAGGA  
TCTGCAGAACTAGTAGACACCTGTGGCTCCGCCCTTGCTTCACTATCCAAAGATTA AAAACAAATTGAAC  
TGCAGATGGATGCTCTTGT CAGTCTTTTTAGGAGTGAGATACTGGAAATAGCCTTGGGATAAGCATTTC  
ATTTTGCTATTGGGTCCAGAAATTTGTTCTTTCAGTTACGTTGTCAGTAATCTAGTTCAATGATCTCTGTGT  
CAGTCCGTGAAACTACTAGAGACCGTCATATTGTTCTGTATCCGTGTGTTTTACTTGCTTAACAAACTCTA  
AGCTCAAATGTTCCCTTGA ACTCCAGTGATGGACCATAATGTTAAAATTAATTTTTCTCTTGACATCCAGCA  
GCTAACTTGTGGCTGTTCTTCTGTCTGCTTTCTTTTTTTGATAACTTTGGTGTTGGGCCAGCATGTG  
TGCACCTCGACTATTTCA TGAATACTTTTATCCTCCTATCAATACATGTATCATGTAAATCTGTTACCAA  
GGGTCAGACAGATGAAAAGAACTACATAGCTTGTTTTTTGCCTTTGCTAGGATTCGTACCCACCCAT  
TGTGTTCAATCCAGCTTCA TCAACCTTAGGCGGCCG CAGTATGTTATTGAAACTTCTTCTGTCTGGAACAG  
CCTCCATTCCCACTAAGGTACATCATACTCCCTAGACACCACGCGTGGGATTACACTGGGTATGTT  
GTAGTAGTATTTGTAGATATTGAAACTCCTTGTACTTCTCAAGAATTCTGTAACCCTGAAACATCATT CGA  
CGACATTTGAGGACCTTAACTTCTCGTGTA AAACTTATCAGTAGAAGCAATTTGTGATTCCAAGCCGA  
ATATAATATAATTCTTCAAGCAAGAAATTTTTCTCATAGTGGTCTTAGTAAAACCAGACTCTTACTTTAT  
GAATCTTTTTAACCTTTCCGAGTTTTGAGCAAGAAGAAAGATGTTTAGTAGTTTTAGAAGCTAGTACTGA  
CTCTTATATTCTTGTATTAGAATCTGCTAACAGAGATGCACTCAGCTGGAAGCAACGGCATGACATAATT  
GTTGGCATTGCTAGAGGGTTGCTATATCTTCATGAAGGTTACATACTTGCATTATCCACCGTGACATAA  
AAGCTAGCAACATCCTACTTGATGACAAATGGGTGCCCAAGATTGCTGATTTTGG AATGGCTAGACTCTA  
CCCTGAAGATAAAAACATATTAATACCCGTGTAGCTGGTACCAAGTATGATTCTATCGAACCTTATAAA  
CTGTGTTTAGTAATGACTATGTAGAAATTTCA TTGAATAATATATTGCACAAGTACACTCACTTGATATTG  
CTAACAACTCTCTTTGATAATTTAACTTGG AAGCCAGTGGCTATATGGCGCCAGAGTACGTTATGTATGG  
ACATCTATCTGTTAAGGCTGATGTATTCA GTTTCGGAGTTGTAGTTCTGGAGCTCATAAGTGGCCAGAAG  
AATTCAACCTTTAACAGAGATCCTGATTCTCGAAGCCTTCTTGAATGGGTAAGAACTTGATTTCTCTGCGC  
TTTTCAGTCTTGATATTCTTGA AATTTCTGAATTACAAAATAAGCACCGGTCAATGCCTTCGTTCCCTGTT  
GAGTATAATAGGAGAGTCCTCGGAATCAATTCGAGCTTCTATAATCATGTAACAGAAAAACAATATA  
GCCATATGGTAGAATTTTTTAACTACTTGAAAAGTAAGATCGAACTACTTTTTGTCTATGTTATAGTGCAA  
ACATAATCAAATCGGTAGGTGGAGGGAGAAGGACTTTACATTTAAGGTATAGGGATACTCTTGATGGTG  
TGAGGCCTTTTGGAGAAAAC TTTTGTGGCTGTGACCCTAAGTGGATAGTAGCACACCATGTAAAGGTAT  
TTTCTAGGCCGACTTAGCCTATAAGCAGATAGTAGAGCCAATTATTTGACGGGTTGAGTATGGAGATGA

AGGCATTGAGTGAGTTTGCTGCTAGTCGTGGTAAATGCACAAGAAAAACACTATCAGTCTTGGTGATTG  
ACCACACGGTACTAGGTCCGGGGAGTGTGTCGTTCTCGGGTGAATCGTGATTCGAGAGAATATTTGTGG  
AGATGCCAACAAAGTCTCATATTGGTAGTCGAAGTAGAAAAATAGCTATATATAAGGTGTTGGGATGGT  
CTTACGGTGTGTGGGGTAAAAACGTGCATGCTTGGCCCGAAACAACAGTATTAACCATGTTTAAAGTG  
TCTTTGAGCGGGGTTAGCCTAACTTTGTACCAGATGGTGATCATGATTAATGTTGTTATGGTTGTAGGC  
GTACAGGCTTTACAAGAAGGGTCCGAGCTGGGAGATTATGGACCCTGCACTGGCACAATCGGCTATCCC  
CGATGAGATAGCAATGTACATACAAATTGGCTTATTATGCATTCAAGCGGATCCACCACTACGTCCAACC  
ATGCAACAGGTCGTGGTGATGCTATCAAAGAATCCTGGATCTCTTGATAGAGAACCAACTAGACCTGGA  
TATCCCGTTCAAGAATTAGATCTCACAGACCAGGTGGTGGTACGTCTCATACAGCTGGAACCTCGGGT  
GCATCCAATCCTTCTACATTCAGCTCCTCGTCTATTAGCAACACTGTTAGTGCAACTGCAAGTTCATCCAC  
ACCTACAAGACGGAGATCGGACCCTCATGGAAAACGTCTGTGAGAGATTAGGCGCGTTGTTGTTGGG  
AGATTTTTTCTTATTCTTTTTGTGTATACATTCAATTTTTGTAGCATGTAAATTGTTACAAATAGAGATCA  
ATGAGTATGATGAATCTTAGTGACAGTTAACATGTAAAAGAAGTGTATGCAGTTACTCTCAGGATATAA  
AACTACGTGGCACAATATATAAATGTGTCCTTTAATTTGGCCTCGTTTTATAATTATACCCTCTAACTTTAG  
GTGTGCACAAGTAAACAACCTTAACTTTTATAAAATTGAAGAAGTAGACATGAGTTTTACGTGGCATGATA  
TACATTGGACACCATGTAGGATGAATATTGTCACGTCAGACATGTGTGACTATTTGTTTAAATTTATGCAA  
ATTTAAGTGTTTACTTGTGCACACACAAAGTTGGAGAACATAAATGTAAGTTGAGGTCAAATTAGAAGG  
CATATTTATA

>PGSC0003DMG400030209 G-LecRK

TTTTGATATTTTCTTTCAATTCAAATTAATAAACCAAAACGCCCAATTCTTGGCCAAAAATGAAAATTCAA  
CTCAGAAGGAGGCCAAAGTAGAAAAGTAAAGTCAAAGTCGACACTTCTTCTTCCCACCTTCCCCTGTTTT  
CTCCACCTCCACAACAATGGCACACAACCTATAAATCCACACCAAATACCTCATTCTTCTTACCCATTTCC  
TCCAAAAATGAGACTACTATTCATACTTTTACCATTCTTATCATCACCATAGAAGCTGCAGATATTCTTCC  
TAATTCTACCCTTTCAGCTTCCAACCCAAACTCAAATGGTCATCTCAAACAACACCTTCTCTTTTCCTT  
CCTACAGCTCGACCCACAAACCAGAGTTCCTATTTTGTGCTATTTCTTACAACAATATACCCATATGGA  
AAGCCGGCGCCGATACCGTTAACGGTGGAGCAGTTGATATCTCTGGTGAACACTACGGTTCCTCTCTAACG  
GTGACCTTACGCTCATAAGTGGGTCTTCTGGTCTGTTGTTTGGAGTTCAGGAACTGTAAATCGTGGTGT  
TTCTTACGCTTCTTGTGATGATAATGGAAATTTTCGTCTCAAAAACGGTACGGTATCGAACATTTGGTCTA  
CTTTTGATAACCCAACTGATACTATTGTTCTGGACAGAATTTCACTAATAATCATGTTTTGAGATCTGGG

TTGTATTCTTTTAGCCTTATGAATAATGGGAACTTGTCACTTTTGTGGAATGGTTCTATAGTGTATTATAA  
TTCTGGGTTGAATTCTTCTGTAAATGTTAACTTGTCTTCGCCTAGTTTGGGAATGCAGCCTATTGGGATTC  
TTCACTTTCTGATCCTAGTCTTTTGAACCCTGTGAATGTTGTTTATAGTAGTGATTATGCTGATGAAGGG  
AACATTTTAAGGTTTTTCAAGCTGGATAATGATGGAAATCTTAGGATTTATAGTTCTACACAGGGTAGTG  
GGACTCAAATGTGAGATGGGCTGCTTAACTGATCAGTGTGAGGTTTTTGGTTATTGTGGGAATTCG  
GGGTTTGTAGTTATAATGAACTGATCCAACCTGTGGATGTCCTTCGCAGAATTTTGGCTTACTGATCC  
GAATGATAGTCGAAAAGGGTGTAGGAGGATAGTTGAACTTAGTAATTGTCCTTCCAATGCAACTATGTT  
GCAATTGGATAATGCTAAGTTCTTGACTTATCCTCCGGAATTATCTGAGCAGATTTTTTCTGCTGGTATTT  
CAGCATGTAGGTTTAACTGTCTTGTTAATGGTGCTTGTGTTGCTTCGACTTCTTAGCAGATGGCACGGG  
GATGTGTTATATTAACAGCCAAATTTGTTAGTGGCTATCAGGCGCCGACCCTTCTAGCACTTCATTTT  
TTAAGATATGTGGGCCTGCAATGCCTAATCCTACTGCAGTTTCAGACACTGTTGAGGAGAAGAATGGAG  
GGAGGGTTCCTGGCTGGGTTGTGCGAGTTGTGGTTGTGGCTAGTGTGGTTGGTTGATCCTGTTGGAGG  
GTGGTTTGTGGTGTGGTGCTTTAGGAACAGTTCTAAATTTGCATCACTGTCATCTCAATATGCACTTCTT  
GAATATGCCTCTGGTGCCCTGTGCAGTTCACATTCAATCAGCTTCAGCGGGCAACCAAGGGGTTAAG  
GAGAAGCTTGGTGCAGGAGGATTTGGGGCTGTTTATCGGGCAGTTCTGGCTAATAGGGCTGTTGCTGC  
AGTAAAGCAGCTGGAAGGAATTGAGCAAGGAGAGAAGCAGTTCAGAATGGAGGTTGCTACTATTAGTA  
GCACACACCATTTGAATTTGGTGAGATTAATTGGGTTTTGTTCTGAAGGGCGCCACAGGCTACTGGTCTA  
TGAGTTCATGAAAAATGGTTCTCTTGATAAGTTCCTCTTTTCAGAAGATCATTATCGGGAAGGCTTTTGA  
ACTGGGAGCAACGGTATAATATTGCTTTGGGGACGGCAAGAGGTATCACATACCTTACGAGGAATGCC  
GAGATTGTATAGTTCATTGTGACATAAAGCCTGAGAACATACTATTGGATGAGAACTACGTTGCCAAAG  
TATCAGATTTTGGCCTCGCCAAGCTCATTAAACCCGAAGGACCACAGACATAGAACCTTGACAAGTCATGT  
GAGGGGTAAGGATACTTGGCTCCCGAGTGGCTGGCCAATCTTCTATAACTTCCAATCTGATGT  
GTACAGTTATGGTATGGTATTACTGGAAATAGTGAGTGGTAAAAGGAACTTCGAAGTCTCTGAGGAGAC  
TAACCAGAAGAAGTGCTCTTTGTGGGCATATGAAGAATTTGAAAGGGGTAATATGGAGGCCATTATGG  
ACAAAAGCTTTCCAATCAGGAGATGGATATGGAACAAGTTATGCGAGCAATTCAGGTGAGCTTCTGGT  
GCATTCAAGAGCAACCATCTCAAAGGCCAACGATGGGCAAGGTGGTTCAGATGTTAGAAGGCGTTTTTGG  
AGATTGATCGGCCACCAGCACCTAAGGCTACTGAAGGGTCTTTGCTGGAACCAGCTTAAACACCAGTA  
GCACAAGCGGTCTCTCCACCTTTGCAGCCTCGGCCCCAGCTCCCTTTCATCATCATCATTCCAACGGCA  
GGATTCCAGTCTTCAGCTTCTGCAAAGAATGTCGATAGGCAATCATCATCACTTCTACACTCCGAAATTA

AGTGAGTCTAAACCATACACTTTAGATTCCCTACAAGAACTGATGGGAGGTTTAGTATCTCAAAGATCAT  
TGTTTGACTTGTGTCTTACAATTCATATTGTATAATAGATAGGGTTTGCATATATATTGATATGTTTCATAT  
TAGAAAATACCACTCACTTATTTTCCATATCCTATTATTCACCAGAATTCGACGACTCTGTCCTGTCCTGTT  
TGTGGTGCTTGTCCCATTCTTTTGATAATGAAGCTAGGGGTGTGCATCAGTCTGGTTCGATTTTATGTAT  
TATTAGTTCGATTTATCGATTTTCGGGTTGGGGATGATTTGGTCAGGGGGTTGATGTGAACTAGAAACA  
TGGCTATAAAATAAT

>PGSC0003DMG400030225 G-LecRK

ATGTCTAGTAAAGCTGGTCATAATGCACCTGTATTTGAGAAGTACCAGCAGAAAGCAAAGAACTTTATG  
TGTTTCATGTCTTGCAAAGGGTGACAGAAATACCCAGAAAACCTCCTGGAGGTCTCATCTATAGGCAAAGA  
TGGAACAATATGTATTTTGTACTAGTGCTGCATTCCTTGGCACTACTTATTCTGACTATTTGGCCTCTGCT  
GGTAAATACCTCAAGTGTTCTTCTGGTTCTGTTTCTCCGAATGAGCTTCTCTCATTCTCTAAGTCTCATGTA  
GAAATTTAACTTTGATAGAGTGCTACAAGCCTGTATTATGACGATTCATCATAAATTAAGCATGGAAC  
TAGCAATGTGTTCTTGGTGAACATAATCATCATGTTTGATGTTGTTCTAGGTGGACTACATTCTTGGTGACA  
ACCCGAGAGCAACAAGTTACATGGTGGGATATGGAAACAATAACCCAAGACAGGTACACCACAGAGCC  
TCCTCCATTGTCTCGTTTAAGGTTAATCCTAGTTTTGTTATCTTTCGGGCAGGCTATCCTACCTGTTATAGT  
AGAAAGGCGAGTGATCCTAATCTCCTTACTGGTGCTCTTATTGGTGGACCTGATGCCTATGACAACCTTA  
CTGATCAAAGAGATAACTATGAGCAAACCTGAGCCTGCCACTTACAACAATGCTCCGTTGATCGGTGTGTT  
GACAAGACTTCATGCTGGTCACAACGGTTACAATCATCTCCTCCCAGGTACATTTTAGTGAATTAACATCT  
TTATATGAGTATTTTGAGGATTCATCATAAAATGACTAGTTTTAGCTAGCCATCCACCTACTACAACCTTGC  
TTGGGATTGAGACGTAGTAGTTGTTGTAGTACTAAATTATTCGTATAACTCATTTAGTCTCAAGTTCTAAC  
CTGTAATGGAGAAAATCCACTCAATGACACATCCAGTGCGCTAAATTTTACCAGACAAGGAATTCTTACT  
CTTCTAAATGGTTTTGGCAGAGTAATTTGGTCTCCGATTCCACTAGACATGGGCAAATCAAGTAGCAC  
AACTCCTTGATTCAAGCAATCTTGTTGTTGAGATGCAGCCAAGGATAAGCCTCAGAACTACCTGTGGCA  
AAGTTTTGACAATCCAGGTGACACAACCTTACCTGGAATGAAGGTTGGGATTAATCTGAAAACCTAGTTTT  
CATCGTCCCTTTTCATCATGGAAGAGCACAATGATCCTTCCATAGGTGAGTTTACCTGGACATTCGATA  
CTGGTGGATTCTGCAAACATTCATTATGAATGGTTTCATTGAACTCTACAGAGTTAGACCATGGAATGT  
CCGAGTCTTTCCTAATGCACCATCTCATGACATATCTTGGAAATGGTTATAACTATACTACTTATCTAATCC  
TAATGAAATATTATTAATGTATGAACTGACATGTAGCTCTATCATTGCAAGGGTAGTGATGCAACTAAAT  
AGATAA

>PGSC0003DMG400030553 G-LecRK

AAAAAATGTCTCCTCTCTTTGTTTTCTCTTTGTACTCTCTTTTTCTCTCTAAAAAATTTAGCAAAAGCTAA  
CAATTCACAAGCCAAAATAGTTCAATTATTGGTAACACAATTGGTGGAAACAAATGGATTTCATTGCC  
TCAACAATAGTTTCTTCAAGTGGTAATTTTGAATGGGATTCTTCAAACCAGGTAACAATCCAATTATTA  
CATAGGTATATGGTATAAAAAAATAAGTAAACAACTATAATTTGGGTTGCAAATAGAGAAACACCAAT  
TTCCATATATGAAATGGATTTTGCACAATTCAAGATTGATAATGGTAATTTAGTACTCATAAATGGTACTA  
AACACATAATTTGGTCCACAAATATCAATTTACAACAAATTTCAACAATTCACAAGTTGTAGCAACACTA  
TTTGATGATGGCAATCTAGTATTAAGTAATCAGGATATTACCAATTCGACGAATTATCTATGGACAAGTT  
TTGATCATCCCTCTCATACGTTTCATGCCTGGTTCAAATTCGGTTACAACAAACATACAAGATTTAAACAG  
GTACTTACTTCATGGAAAAACGTGAACGATCCATCACCAGGACCCTTTACACATGAAGTTTACATGGAAA  
ATAAGTATATTGGACAAGGTGTTAATATGTGGAACCATAGTGTTGTTTATTGGAATAGTGGACCATGGA  
CAGGTAACAATTTTACAGGGGTACCATATCAACCAAATCCTATGTTTAATTATACATATGTTAATAATGAT  
GATGAGGTTTATTATATGTATAATTTCTTTAACCTTCATTAATATCAAATTTTATTATGGATGTTAATGGA  
CAAACAAAACAAGTATTATGGATGGATAGTACTAATGATTGGAATGTGTTTTACTGATCCAAAACAA  
GTTTGTGATGTTTATTCTTATTGTGGAGTTTTGGTATTTGTAATGAGGTAAACTCTACTTCAACATGTGA  
TTGTTTGAATGGTTTTAAGCCTAAGTTTGAGAAAGATTGGAAATTGAGTAGTTTTTCAAGTGGATGTATG  
AGGAAAACAAGTTTGAATTGTGGTGATTTTGGTGAAAAGGATAGGTTTTGGATGTATAAGAATATGAGA  
TTACCTACAAATAATGAGAGTTTGGGAGTTGGAAATGAAGTTGAGTGTGAAAGTGGTTGTTTGGAGGAT  
TGTGATTGTGTTGGTTATGCTTATGGTAGTGAAATATTGGGTGTTTGGTATGGAAAAGGGAGATGTTG  
AATTTGCAACAACCTTCTCAAGATAATGTTAATGGAAGCACAATTTATGTTAGGCTTGCAGCTTCTGAGTT  
TTCAAGTAACCAAGGTAATGACTTGCAATTTCTCCTATTTTTTTGAATTTAGATGCATGATGTACTTTATT  
TTGTTTTTTTTGGTTCTCGTTAGGTGTCTGATATCTGTTTTGGGATCTGACTAAGATGTATTCGCACCACTT  
TAGGGATGGGGTGGGGGAAGGGGAAGCTTTTCCTACCGAAAACGACTTCAATCTCAAACCTTGAACCTA  
GAGACTAGAGACATCTAGTTGAGGATAGATGAATACTTAACAGTTACCACTCCACCACAACCTTTAGTAA  
TACATATCTACAGTTACCATTCCACCACAACCTTTATACATATATATACTTCAAATTTGTTACCTTTGTAG  
GTAGAGTGGATTTACCTAGTTTATAAAGTTTTCTTTGAGTCCAAATTTGAATTTTACTTAATTACTTCTCCTC  
TTTTTTTTCTCTATTATCAAGAAAATGAAAACCAAAAACACATATTTTCTTTGTTTAAACGATCCAGTATCTG  
AAATTTACTGGCTTGATTAATTTAGATTTACATCGGGGTAAGCCTAATTAAGGTGTTAATCTCTTTCTAT  
TAATTCATTATTGAATTCGAGACGTCTGGTTAAAAATGGAGGCCATCCCCTCACAATTAGTGACACATTA

AAACATAACATTTTTTTCTTTCTCTTTTTGTTATTTGTCTATTTATGAACTTGTCAATTAATCTTTTCATTTT  
ACTTGGTAATAATGTGTTCTTTGCTCTTTCATTAACAGATCAAAAGCAAACCTCAACAAAGCTGAAAATT  
GCAATTCCTATTGGTGTAATTGCTGCACTTCTTATTCTATCATGCTTTACCTACATATACTATAGAAAAAG  
AAGAACTCAAAAGTCAAAGGTAACAACAAATGTCTCTTTTTTTAATGACATTTTTCTCCTTTTTATTAAT  
AAAAATATACAAAATTTAGTATTATCAAGACTCTAAACTCATACATTTTTTTAATTTTTAAATATAGAGAG  
TACTACAAAATTTACAGACAGAATACAAAAGGAGAAGGACTAGAATTGATAGATATTCAAGATGATGA  
TATTGAGTTCCATTCTTTAGTTTTGAAAGTATATTAGTAGCAACAGATGACTTCTCTGAACAAAATAAGC  
TTGGTCAAGGGGGATTTGGTCCTGTTTACAAGGTATTTATGCAAATATCATTTTGTAATTTATTTTTATAT  
GTGGCGCACAGTTTGAAATTCGATTTGTATAGGGATAGAGGTACAAACAGGTTTGACAGAACCCAATAA  
TTTTGGTTCAGACCTTATTTTTGTTTAAAAGATCGATGAATTAGTATAAATATTTTATCCAGATCCCAAT  
AAGCTCTCTTTTCAAAAATCTGAAATCTATACACTCAAAATCTAGTTTGCGGCATGTACTACTTTTCTTAT  
TAGTTGTCATGTCTTTTTACTGCCACATTTCCCTTTTTCAAACACTTTGAAATGCTTTTCTTGAGTCTGAG  
CGTCTATCAGAAACAATTTCTCTATTTCCATGAGGTAGGAGTAAGGTCTATGTACCATCTACCCTCTCTAT  
ACTCCACTTATGAAATTACACTACTGAATATGTTAGTAGTATTATATTGTTTTTGTGTGGTGGCCGAACC  
TGTGACGTGCACCTAACCAACATAATCACTTTTTAAATAAATATATTGTATCACAGTATTTATTTTTAAAA  
ATAAATAATTTTTTTGTAGGGAATTTTTCTGGAGGAAGAGAAATTGCATTA AAAAGGTTATCAAGTCAT  
TCTGGACAAGGCATAAATGAATTCAAGAATGAAGTAATGTTGATTGCAAGGCTTCAACATAGAAATCTT  
GTTAGACTTTTGGGTTATTGCATTCAATCAAGTGAAAAGATTTTACTCTATGAGTATATGGCAAACAAAA  
GTTTAGACACCTTCATATTTGGTTAGTATTTTTATTTTTAACTAATATCTTTATACTGTCGATGTATATAA  
GTTAAATTTATTTGATTGTTTTTCTTGCATAAGATCGAAAACGAAGCGTATTATTGGATTGGAGAAAAAG  
ATTTGAGATTATAGAGGGAATTGCTAAAGGACTTCTTTATCTACATCATGATTCAAGATTAAGGATCATT  
CATAGAGATCTCAAAACAAGTAACATATTATTAGATGAAGAATTGAATCCAAAATATCAGATTTTGGAT  
TAGCAAGAGTTGTTGAAGGGAAAATTACACAAGCAAATACAAATAAAGTGGTTGGAACCTAGTAAGTA  
CTCATAACTCCCTATTGTGATGTGACCTTCTCCAGAATCTGCTAATGTAGGATGTTTTGTGCATCCGAGT  
TCAGACTGTCCTTTTTAAAATAATTTGCCAATTGTGTTGATTTTCTTGTTTCATTAATATGTTTTTGTGATAC  
TATTAATGCAGTGGTTATATGGCTCCGGAGTATGCAATAGACGGATTATTCTCAATTAATCAGATGTAT  
TTAGTTTTGGAATAGTTATACTCGAGATCATCAGTGGAAGAAGAAATACTGGATTTTTTAATCAAGAAGA  
AGCGTCAAATCTCTTAGGCCTTGTGAGTGAATAATTAATTAATTTCTTGCTTTTTTTTTGCAACACTGTCAC  
GGAGTTTCAAACCTCATAGGTTAAACTCCAGTACATTGCCATGGAATTTACCTATGAAATTTGAATCGA

TCTCCATGACATTTATTTTTCAATTACATGACTGAAAAGTGACTAGTCCGCGCTATTTATTACAAAACCTTTA  
TGTTAACATAAATATGTGAACTATAATTTAGGCATGGAGATTGTGGACAGAAGATAAGTCAATGGACTT  
AGTGGATCAATCACTACATAAATCATGCAACAAAGAGGAAGCAATTAATTGATAAATATTGGGCTTTTA  
TGTGTACAAGAAGATCCAAAAGATAGGCCCAATACATCAAATATAATAATGATGCTTGGTAGTGAAAAT  
TCCAATATTATTTCACTTCCAAGACCAAATCAACCAGCTTTTATGACAAGAAAATGTGGTAATAATGACAC  
ATCTTCTTCTTCTAATGCTAAGTCTGATGGTGTCTCCAACAATCAGCTTACAGTCACCATTGAAATGGGTC  
GATAACGCACTACTAGAAATCAGTCAATTTTTATCATGAACATGTTTCATTGAAAAATCTATCGAAAATAT  
TTCTGATAGAACGTCTGTTGAAAATTGACTGATTTAAGACTGAGATGCCAACAATTTTGACATAGCAATA  
TTGTAGTTTTATCTTACTTATTCAATGTATATATTCAACTTAAGTATGTACTTTAGAAACATCTTTAGTAA  
TTAAATTATGTATTTTT

>PGSC0003DMG400031860 G-LecRK

CTTTGATAGTACAAACAATTTCTGGTTAGACCAAGAAATATAGTGAGCCATTGTGTATATGAAATCATTT  
GTTACTTCCTATTGTCTAAACCAAGGCCTTCTGATTTTCATACAAGATGAGAATATCTCTTAATCTTCTTGCA  
TTCTCCTCCTAGTCCTTCATCATCAGTCAAATGGCCAAAATAATCCAATATTAGCATAGGTTCTACTTTC  
ACTGCTGGAGAAAATGTTTCTTTGTTATCCTTGTCTGGGGACTTTGCCTTCGGATTTTATCCTGTTTCAGA  
TACTCTTTTCCTAGTAGGAATTTGGTTCAACAAAATCCAGGAAACAACACTTGTCTGGTCAGCAAATCGC  
GACAATCCAGCTGAAATCAGATCAACTATTAGTCTAACAAATGGTGGTCAGCTTGTGCTCAACTATGCTA  
ATGGCACAGTTCAACAGATTTACAATGAGTCTGCAAGGTTGGGAACCATGCAAGATGATGGAAATCTTG  
TGTTGAGAGACTCAAGTTCAAATAAAGTTTGGGAAAGCTTTAAATCTCCCACTGATACACTTTTGCCAGG  
ACAGACTTTATCATCAGCAGGAAAGCTCTATTCTAATTCTATTTTCAGATGGGAATTTCCAAGTACTCTAAA  
GGGAATTTTCATGCTAGAAATGCAACTTGATGGAAAATTGGTACTATCTGCTTATCATTTTTGGGGATACAG  
GATATTGGCTGAGTAGTTTAGATGATGAAGGAAACCGTGAAGTGAATTTAGTTTTCGACCAGAGGAATG  
CATCTTTGTACCTTGTGAAAGATAACAATAACACAATTTTTCTTTCCATTGAATGTGCCAACCCAGTT  
GAAGACTACTACCACCGTGCAACTATAGACAGTTTTGGCAACTTCCAGCAGTATGCTTATCATAAGACTA  
ATGGTAGCAATTGGATTAGAGTTTTGAAGATCCCTTCAGAGCCATGTATGGTTAATGCTGTTTGTGGGGC  
TTATGGATTCTGCAGCTCAAATGATAATGAACTGTAAATTGTGACTGTCTTCCGGGGTATGTCTTCTTG  
GATCCAAGTAATCCTACCAAAGGTTGTCATCCAGAGACAATGATCAACTTCTGTGCAGGTCATCTATCTA  
GCGGAAATTTACAATAGAGGCTATTCAGAATAGTGACATGCCTTACAATGAGGTTGGGGATTATGAAA  
TTTATCGTGATGTTGACGAGGAGGAATGCAAGAAAGTTATCATGGAAGATTGTTATGCCATGGCTGCTT

CTCTAATCAATAGGGAATGTCACAAGAGGCGTACTCCTATACTCAACGCCCGTAGAATTTCTATGACCAC  
AGGTAGTGTTCCTTCATCAAGGTGCCTATTAAGTCAGTTAAAGATGACATATCAACAAAAAAGAAATCC  
AACACCAGAGCCCATCTCACTGCTGGCCTTATAACTACCAGTTCACTTACTTTCTATTTGGAGCCTTGGC  
TTTTACTATCATCCTGCTCCTTGGAGACTTTTAAAACGAGAGTGGAATCCAAATTCATCAAGAATAGGT  
ATCAATTTCCGCGAGTTCACATACAAAGAACTGCATGAAATTACAAATGGCTTCAGCAAGCAACTTGGAA  
AAGGAGCTTCTGCAAAGTTTACTATGGTAATCTAAAGTTAAAGGATGTTCAAGTAGAGATTGCAGTGA  
AGCTGATGAAAGACGTTGCAGAGCCAAGTGAGAACGTATTCATGACAGAGCTAAAAATCATAGGCAGA  
ACTCATCACAAGAATTTGGTAAAATATTAGGATTTTGCATTGAGGATAATCATTTCATTTTGGTTTACGA  
GTTGATGAAGAACGGAGCTTTATCAGATTTTTTGTTC AAGGAAGAAATACTGCCTACTTGGAGTCACAG  
AACTGAAATGGCATCAGGAATTGCAAGAGGACTGCTTTACTTACATGAAGAATGTGATTCTCCAATCATC  
CACTGTGACATAAAGCCTCAAAATGTACTTCTTGACAGCAAATACAATGCCAAGATTTT CAGATTTTGGGC  
TATCGAAACTCTTGAAGAAGGATCAAACAAGAACAGATACTTGTGCAAGAGGGACAGTGGGATATTTA  
GCACCAGAATGGCTAAAGAATGCTCCAATAACACCCAAAGTTGACATTTTTAGTTTTGGTGTAAATGTTAC  
TAGAGATCACATGTGGTAGAAGGCATATTGAGCTTAGCAGGGTAGAGGAAGAGAGCGAAGACGATGA  
AGGTGATGATTTATTGCATGTAAATTGGGTTTCAGGCTGTGTGAGAAGTGGTAGAATTGACAACTTGC  
AAGGAGTGATCCTGAAATATTGAATGATATTAAGACTTGAACGATTCGTCAAGGCGGGATTGTGGTG  
TGTCCATCCTGATCCAATGTTAGACCTTCAATGAAAATAGTGATGCAAATGCTTGAAGGCATAACTGAG  
GTTGGAGTTCTCCAATGTTTTATCACTAAATGATTGTTTAAATCATCAACAGGGAGGAGCATTGGAACA  
CGACGAAAAACTGAAAGGAAAAGGCCTCCTTGGCATTGCAAATGGTAGTAAAAATCCTGGAGTACTT  
GTGATATTGTAAAATTAGTCTCTGTCTCAGAATTTGATTGTTAAGTTTTTTCTTTTTTGTGTTGAAGTCCTGA  
ATTTAAATTACTTTTTGCTAGTTTATAATCTGTGCTTCAGTTTCTCCCTTGTC A

>PGSC0003DMG400031861 G-LecRK

GAAAAGAATTCCACACATTCCAGTGACCTCATAATCATAGCCTTCTGCATTATATTATGCAAGTCTTTGAA  
TCATGGCCTTTTGAATAAAGATTTTAATTCTCCATTTGTATCTAAGTTATAATATCTCAAAAAGAATAAA  
GTATTTTCCATAAGATTCCAACAATGGTTTCTTGGAAAATCCTGTTATGGTTTGTCTCAATTTATCTTGCAT  
TTATTAGCTCTTTCTGTCAAGAACTACAAATATTGTCCCTCTTGGTTCCAATATCACAGCTGGAAGTAA  
TCTTCACACTGGCTTTTATCCTCTGGAGATTTTGTCTTTGGTTTCTACCATCTTAACAGTACTGGACTATTC  
CTTGTTGGAATATGGTTTGATAAAATCCCCGATAAACTCTCGTTTGGTCAGCCAATCGTGATGATCCAG  
TTCATGCTGGATCAAAGGTTAATCTAACGTTGAGTGGACGCCTCGTGTTGAAAGATACTAATGGGAGAG



AGTTTGT TTTGTACAATGGCACAGGCACTAGTCATGATACTATGCAAGATGATGGAAATTTGTCCTGAA  
AAATTCATCCTCAGGTGTCTTGTGGGAAAGCTTTGATTTCCCAACAGATACAATTTGCCTGGTCAATATC  
TTGATATGGGGCAGGCGCTGTTTTCCAGTGCCAATGGGACAGTAGATTACTCGACGGGGAAGTATAGA  
CTACTGATGCAGACTGATGGGAATGTGGTCTTGTCTGCATATAGAACTGCTGATATTGGCTACTGGAATT  
CTATAACTGAAAACAATAAGAATGTAAGACTGGTCTTCGACAACACCAGTGATACTTTGCTCATTACAAA  
TGGAAGCTCTATCATATCCAACATGACATTGACAGAGAAGTTGCCTGATTCAGTTTCGAGATTATTACCAC  
AGAGCTATGATCACTGATAAAGGAGATTTCCAACAGCTCTCCACAGAAAAGTAAATGGGAGCGGTTGG  
AATGTTGCACTGCAAGTTATCGTGAAGCCTTGTATTGTGAATAACATTTGTGGTGTATATGGCTTTTGCC  
AATCACCAGACAATAAGGAAGCCAATTGTAGTTGCTTGCCAGGCTATTCTCCAAGGGATCAGTACACTCC  
ATCTAAAGGATGTTATCCGAATGAGATGAAAGATTTTTGTGATCCGAATTCTCCCTTTCGGATGTCTATG  
TTGAAAGGATCTCTAATGCTGATTTCCCTAATAGGATGTATGCTGAACTAGAAAGGGTATTTGATACTAC  
AGAGGAGCTTTCAGGCAGGAAGTGTGAATGATTGTCTTTGTGAGGCAGCTGTGTTAATGATTCAAC  
ATGTTTCAAGAAGAGGATGCCTATACAGAATGCCAGAAGTATTAATCCTGATACAAATAACATGGTTGC  
ATTTCTTAAAATTAGCAACTCTTCGATAACTCAAACAAAAAGCACTCTATTTCAAAGGGTGT TTTGGTAG  
CAGGTGTGACAGTATGTTCACTACTCGCTCCGCTTTTTGCAGCAATTGCTATATATTATCACCTTTTGTG  
AAGAAACATAGAGATGCCAAAACCCCTCCAAAAGAAAGGCAATTGAGATGAATTTAAGGGCATT TTTG  
TTCCAGCAGCTGCACGAAGCCACCAACGGTTTTCAAGAATAAATTAGGCCAAGGAGCTTCTGGTGTCTGTT  
TATAGCGGAATTCTCAAGTTAGAGGATGAAGAAGTTGAAGTTGCTGTGAAGAAATTAGGAAATGGAAT  
TGAACAAGGTGATGATAAAGAATTTTTGGCAGAAGTAAGGGTGATAGGCCTAACACATCACAAAAATCT  
GGTTCATTTGATAGGCTTCTGCAATGAAAAAGCAACAGGCTTGTGTTTATGAATTAATGAAAAATGG  
GGCCGTGTCAAATATTGTCTTTTCGCGATGGACAAAACCAAGCTGGAAGCTAAGAAGTGACATAGTACT  
TGACATTGCCAGAGGCCTGTTATACTTGCATGAAGAGTGTGAGAACCAGATCATTATTGCGACATTAA  
GCCACAGAATATCCTTCTTGACAAGA ACTACTCTGCAAAAATTGCTGATTTTGGTCTTGCAAAGCTTCTTA  
TGAAAGACCAGACGCGAACAAACACGAATTTTAGAGGAACCATGGGTTATATGGCACCAGAATGGCTA  
AAAAATGTGCCCGTGACAACCAAGTTGACATCTACAGTTTTGGTGT TTTGCTGCTTGAGATTATTTCTG  
CCAAAGGCACATGGACTTGAACCCAATCGGCCAAGAAAATGAAGAACCCGAGTTGATCTTAGTCGATTG  
GGTCTTCATTGTGTGAGAAACGAGAAGCTGAGAGCTGTTGCTAGTCTTGATGAAGAAATTATGTTACA  
TTTTACAATTTTGAGAGAATGACTATGGTTGGCCTATGGTGCTTGTGTCCTGAGCCGAATCTTCGACCA  
TCTGCAGCAAAGCTTGTTCAGATGTTGGAAGGAACTATAGAACTAGGTGTTCTCCTATGGTTGATACAA

CTATATGAGCCATTTTCTGTATTATCTTGTAATTTTTCCAACAATTAAGTGCATTCTGTTTTATTAATCATT  
AGACCTGGTTAAATTCATTGTTTTTCTCATAGTTCTCTGGTGCAAAAGTTAGTGTTT

>PGSC0003DMG400032782 G-LecRK

TCTCTCTCTCTCTCTCTCTCTCTCTTATCTCATATCAGCAAAAAGCCACACAAAACCTGCGTTTGCACCA  
AACAAATGCAATTTTGTACCTCTTCTGTTCACTCTTCTTGCATACGTGCTGTCTTCTGTGTAGACTG  
TCTTCTCTCTGGTTGTTTCATTCAAATGAAATTTTTAGAGCTTTGACTTGAATGAATTCTTATTGCTTCTT  
CTGCTCTTGTGGGTCCTTGTCACTTTCACGTTTTTTGATTCTTGGACCATAATTCATACCCCATGTGAAT  
GTGATAGACAATGTCATTTATGAGTTCCTGCCTTCTTCTTATCATAATTCTCATTCAACTTTTCCCCTTTT  
GAATCTGAGGTTTTGGTGGATATTTCCAGATTGTTCTTGTCCAAATTGGGTAATGGAGTCTTGGATTTT  
CCTTTATTTAGTAATGATCTTCTTCTTCTGCCTGAGACTTGTATAGCTAGTGTTTCAAGATAAAGGCAGAC  
TGAATCTGGGGTTTCAAGGCTCTCAAATGACTTGGATAGACAACGATGGATTAATTCTTGTTCCTAATAG  
CTCAAATTTGCATTTGGATTTAACCTACTAATGATGTTACCTTGTTCCTTCTTGTGTCATCCATGTAAG  
TAGCTCTACCATCGTTTGGTCAGCTAACAGAGATTCCCCTGTTTCAAATAATGATAATTTGTTTTTGATG  
ATACTGGAAATGCCAATTTGCAAAGTGGGAAATCAACAATTTGGTCTACGAATACGGCTGATAAAGGAG  
TTTTCCGCATGGAATTGAAGGATTCGGGGAATCTAATTTTGGTTGGGAAAGATGGTAGCGTTATTTGGG  
AAAGCTTCACACATCCTGTTGATACTCTTCTGTCAGGCCAGAATTTCACTCAAGGAATGAAGCTTGTAAAG  
CACTCCTAACACAATAATTTGAGTTATCACTTGAATTTAAGTCTGGGGATATGGTTCTTTCTGCAAGTT  
TTCAGCCTCCACAGCCTTATTGGGCTATGGGGAAAGATGATAGAAGGACTATCAATCAAGTTGGAGGAG  
GTGCACTTCAGCAATTCTTGTATGGAAATGCTTGGAAAATTTATGGTGAGAAGAGAGTGTGCTCTGGC  
AGTTCATTTTCCCTGATGATAAATATCCAAATGCGACTCGGTTGGCTGTTCTTGGAGAAGATGGTTCCAT  
TACTTTTAGCATTCTTCAAGATGAATCGAAGCTTACTCGGGGACAAGAATCCACAAGATGAATGCAG  
CAGACCAGACTCTTGTGATCCATATTTCAATTTGTTATAGTGGCAACAAGTGTGAGTGCATCAGCCCTTC  
CATCTTGCAAACCTGAGACTGCTTCGTTTTGCAATAAAGATGTGGAGCTTGTAGATGCTGGGGATAGTCT  
TGGTATTTTGCACCTTGGTTTTGTTTCTCCATCTGCTAAAAGTATTTAAATGGTTGCAAAGCTTCTTGCCT  
TGGCAATTGCTCATGTGCTGCTATGTTCTTGTATAGCACTTCAGGGAATTGTTTTATGTTTGTCAATAG  
GAAGTTTACAAGGTTTCGGTTAATGGAGCTGGTTTTCAAGTCATACATTAAAGTATCAGCTAGCCAGGGGA  
ATGGGGATAGCGGTGGTGGAGGTGGAGGTGGGAAGGGACGATTACCTATTGTCTTTGGTATCGTCATT  
TCTTCGGCTATTGTCACTTCTTGGCCTAATTTATGGAGGTATTAGATATCAGAGGAGAAAGAACAACAAGA  
TGCCTGATTCTGCAAAGGGGAGTTCAGAAGAAGACAATTTCTTGGAGGGCCTATCAGGGATGCCGATTC

GTTTTAGTTACAAAGAACTTCAGAATGCAACTAATAACTTCTCAATAAACTTGGGCAAGGAGGGTTTG  
GTTTCAGTTTACCAAGGGGTCTCCAGATGGGACTAGACTTGCTGTGAAGAAATTGGAAGGCATTGGCC  
AGGGAAAGAAAGAATTCGAGCAGAAGTTAGTATTATAGGCAGCATCCATCATCTTCATTTGGTGAGAC  
TGAGAGGTTTTTGTGCTGAAGGAACACACAGGCTTCTGGCTTATGAGTACATGGGAAATGGATCTTTAG  
AGAAATGGCTTTTCAAGAAGAACAAGGAATTCTTGCTAGACTGGGATACACGATTTAATATTGCACTTG  
GCACAGCAAAGGCCTAGCTTACCTCCACGAGGACTGTGATGTAAAAATTGTGCATTGCGATATCAAAC  
CTGAAAATGTACTTCTTGATGATCATTTCTCGCCAAGGTCTCAGATTTTGGCCTCGCTAAGCTGATGACC  
AGAGAGCAGAGCCATGTTTTACAACCATGAGGGGTACAAGAGGATATCTCGCACCAGAATGGATCAC  
AAATTATGCCATATCAGAGAAAAGTGACGTTTTTAGTTATGGAATGGTTTTGCTTGAGATAATTGGAGGT  
AGGAAGAATTATGATCCTTCAAAAGTTCAGAGAAATCCCATTTTCCCTCATAACGCTTTAGGATGATGG  
AAGAGGGGAAATTGGAAGACCTTATCGATAGGAACTTGAAAGTTGAAGAAGAGGATGAAAGGGTCTCC  
ATAGCAATTAAGTTGCTCTGTGGTGTATACAGGATGACATGTCTCTCAGGCCATCCATGGCTAAGGTTG  
TGCAAATGCTGGAAGGGATCTCCATGTCCCTCACCGCCAAGTCTTCAAATGGGGTCACGACTTTT  
TTCAAGTTATTTGAAATCACTAAGTGGCGAGGGTACTTCATCCGGCACCTCTGCACCATCAGACTGCAAC  
AGCGATGCTTATCTTTCGGCTGTTTCGGCTCTCAGGTCCAAGATAGCATTGCAAGAAGCATAAACATAGT  
CGTTCATGTAAGGGCTGTTGTAGATGATTGACAAACATGTGCAATGGTTTCATACCTTTTAGTTTTCTGT  
ATATTAATAATTATCTAGGAAATTTTTTGGCCATATTAGCCATGACAAAGGTTGGAGTTGATTGAGAATGT  
TTTTTTGTATATATCAATGCTATAAATGAGTTGAAAATAAACAAAGAAAATGCATTTGGTAACACTC  
ATCCTGGATTTCAAGTACAGCATGTGTG

>PGSC0003DMG400034859 G-LecRK

ATGTACCTGGGATTATGGTACAAAGATGTAGGTCCCGGTACCGTTGTATGGGTTGGCAATAGAAGAAAT  
CCAGTTAATTGTGGTGCATTGCTAGGACTAGACACAGAAGGAGACATTTTCTCCAAGATATACTGAGA  
ACAACAGTATGGATTCATAAGCCCAACAGTACAGTTCCTTACTAGTACTGAAGCTCCTTGATTCAGGTA  
ATCTTGTGTTTAGAGATTCTAGCAATCTGACGGCTGGAGAGTACCTGTGGCAAAGCTTTGACCACCCAGT  
TGACACATTGTTACCAAGAATGAAGCTTGGCTGGGACAAGAAAAGTGGCATCGACCGATCCATAAGGTC  
CTGGAGGACAGAAGGTGATCCAGCTCCAGGTGATTATTTGTTTCAGGTTAGACTCAGGTGACTCAGGTCA  
GTTACCCCAACTAGTTCTTGAGAAAAACCAGCGAATACATTCAAGATGGGGTCTTGGGATGGACAGAA  
ATTCAGTGGCGGTTATGCCCTCATGGATAACCATGCATTCAGACCAATTTTCATTCCGATACAGATGCG  
TTTTTTTTTTCACATTCGAAGCCAAGAACGATTGGAGTTTGAATTTTCACTGAATCCAGACGGAAAAATA

CAGTTCTTGAGGTGGAATAATGCCTACCAATTACTGGGAGGAAGTGAATACACTGAATAAGGACACATG  
TGACCAGTATAGAACTTGTGGGCCTTATGGAGTTTGTAGTGATGGAGATCTCCCCTGCGGGTGCCTGA  
TGGTTTCACAGCTGCATCACCAGATGAATGCGGCATGATGAATTTTACGGAGGGATGTAGGAGAAACAC  
CTCACTTAACTACACCAATAAAGACGTCTTTGTGGAGAATACTGGACTGAAGTTCCTGATAATGCTACT  
TACTGGGGAATGTTGTACCACCAGGAGTGTGAACAGAAGTGCTTAAATGAAAGATCGTGTATGGCTTAT  
ACTAACATCAATATCAACGGAAATGGAAGCAAATGTGTCGTTTGGTTGGGAAATTTACTTGATATAAGA  
CATTACAGATAGCTGGGAACAACATTTTTATACGGATGGCACCTGAAAACTAGGTAAAAATGATTGC  
TTGCTTTAACTGATTTAATTCCTAGATTATATTATTAATATGGTGCAAAACAATGTGTGCAAGAATGACAT  
TTGAAAGGTGAAGTAGTTAATTGTTGTGTAGGTTTGATTATTTACACAGAAACATCAATTAATAGAATTC  
CCATATTAGTGCTTGATTAAGTGGTTCATCGCAAATTGATGTTTGAAGCATTAGATTGAATGTTGTCACAT  
AATTGCTACACAATCGAGCATAAGATGAAACAACCCTGCATGCATCTAGTTATTCTTATTACAAAATCTTT  
AACATAATGAGCAAATACCTCTAGAATTCCTATAAAGTTTATGTCAAATCTGAAGCCTAATTTTATGAGTA  
AGAAACAACCTAACACTTTTAACTTTCTTATGGACAGATGCACCTGTTTCCGACAGCAGATGCAAAAATAA  
ATGGACAGTTTTTGTCTTTAATCTCAGAGCTGGCACTACTTATTATTTGCTTATAGCTGTTGTGTTCT  
ATGTCAAAAATGAGGACAGAGGTGCTAGGTAAAAAGAATCACCTTGCCTGCTATTATATTATTTTCAT  
AGTTCTTCATTCCAGACTAAGCTTAGTTTCACTAGAACACTATTATTTAGCAAACACAAGACCTAAGTAAG  
AAAGCTAGCGTAATACTCATATTAAGGTATGATTCACATCCATTATTTTCTAATTAATTTGCTTTCTCATAG  
CAGATGAACAAGAAATCAATCAGCCGACAAATTCTCAAGGAGCTTTGCTGCAAGGCACTAATGTCATTG  
CATATGATTCCAGTGATCTAGTTGCAGCCACTAACAAATTTTCGCTGGCTAATAAGATAGGGCATGGTGG  
CTTTGGCAATGTTTATAAGGTTATTATTTCTTTTCGACAAGCATGAAAATGCATATTTACAGTAACTCAGA  
CAACAAAATTAATACCTAAATGATACATCTGTAGGGTGTACTAGAGAATGGAGTAGAAATAGCAGTGAA  
GAAGCAGGAAGTGACTTCATGTCAAGGATTTACTGAGTTCGAGAATGAAGTCAAGTTAATAGCAAAGCT  
ACAGCATCGTAACCTAACCAAATTGTTGGGATACTGCATTAATGGAACAGAAAAATTCCTAGTCTATGAG  
TTCATGGCGAATAATAGCCTAGACAAGGTCATATTTGGTATGACATCTTAAATAACATTCTTCTTTTTTAC  
TATTGTCTGTGTTGTTTTGATATTGGAAAAGCCACAAAAGACAGAAATTTAGGAGTATCCGAGTGAAATT  
GAGTAACTGTTTTCTGTACATGTCTAGATCCTGCAAGAAGGGGTACAGTAACATGGCCAATGCGCTTTAA  
CATTATCAAAGGAATCGCAAAAGGATTAGTTTACATGCATCATGACTCAAGGTTGACAATAATCCACCGG  
GACTTAAAAGCTAGCAATGTCTTGCTAGACAGAGAGATGACACCCAAGATATCTGACTTAGGGCTGTCA  
AGGGTATTCGAAGATGATGTTGAAGAAAAGACTCAGCATTTAATTGGAACACGGTTAGTATATTATCAT

TAAGACTACATGTTTATGTATATTTTAGAGTTTTTACAGATGGTTTTATGTTGTGGTTGTAGTGGTAATTA  
TATGCCTCCTGAGTACATGAAAAATGGACATTATTCAACAAAACAGACGTTTTTAGTTTTGGAATCCTGG  
CATTGGAGATGTGAGTGGCCAAAAGAATTATGATTATCGGCACCCAGTCTATGATATTGGTCTAGTAGA  
CTATGTAAGTACATCATCGATCCCCTGGTTATCGTCATTA CTTCACTTAAATTGGTTACATAGAAGTTTCA  
CCTTGTGCTAAAACAATTTACATGATTGATGATCGATCTATTGTTGGTCAGGCTTGGAGAATTTGGAGTA  
AGGGGAATGCCATAGAACTACTGGATCCAATGATTGAAAAACCAGGTGATGAGAATGAAGTTTTAGGA  
TGCATCCTTGTTGGGCTCTTGTGTTGTCAACGCCGTGCCAAGACAGAACTTCAATGATTCAGGTGGTTT  
CCTTACTGGAGGAGAATGAAATGTCAAGGTTAAATTTTGTGCCTCAGGAACCTTAA

>PGSC0003DMG400035841 G-LecRK

GGAATTCTTACTCTTCTAAATGGTTCTGGCAGAGTAATTTGGTCCTCCGATTCCACTAGACATGGGCAA  
ATCCAGTAGCACAACCTCTGGATTCAGGCATTCTTGTGTTTCGAGATGCAGCCGAGGATAAGACTCAGA  
ACTACATGTGGCAAAGTTTTGACAATCCAGGTGACACAACCTTACCTGGAACGAAGGTTGGGATTAATC  
TAAAACTAGTTTTCATCGTTCCATTTTCGTCATGGAAGAGCACAAATGATCCTTCCAGAGGTGAGTTTAC  
CTGGACATTCGATACTGGTGGATTCTGCAAACATTCATTATGAATAGTTCCATTGAACCCTACAGAGCT  
GGACCATGGAATGTCCGAGTCTTTCCTAATGCACCATCTCGTGACACATCTTGAATGGTTATAACTATA  
CATACTGA

>PGSC0003DMG400042814 G-LecRK

ATGGAGATCAAAAACAATTATTTTCTCCTCTTTTCTTTGATGTACCTATGCTTCTCTCTCAAACCCATCTC  
TCCATTGAAGCTGCTGACACCATTTCTGCAAATCAATCCCTTCTGGAGACCAAACAATTATCTCTTCAGG  
TGAAAATTTAACTTGGTTTCTTCCAACCAGGTAATTCTTCCAACACTACTACATAGGCATGTGGTACGATA  
AAGTGGTTGAACAACTGCTGTTTGGGTTGCAAACAGGGAAAAACCAGTTCTTGATAAGAGCACTGCAG  
AGTTAAAGATCTTAGATGGTAATTTAGTACTGGTGGATGAATCTCAAACCTCAATTTGGTCCACAAATAT  
CAGTTCAGCAACTCGAGTTCTGTTGTAGCAGTCCTCCGAGATGATGGTAATTTGATCTTGACAGATGGG  
TCTAATTCACACCACCACTTTGGCAAAGTTTTAATAACCCACCAATACTTGGTTGCCTGGTTCTAAACT  
TTCTTACAACAAAGCCACCAGAACAAAGCAACTTCTTACTTCATGGAAGAGTGCAGACGATCCTACACCT  
GGGCTGTATTCACTTGAACCTCGACCCAAATGAGAAGCAGTATATTATAAGGTTCAATAGAAGTGAGCAA  
TATTGGAATACTGGACCATGGAATAATCGAATTTTCAGAGATGTGCCTGAGATGAGGACTAACTATATT  
ACAATTTTAGCTATGAGGACAATCAGAATGAAAGCTATTTTACATATTCCCTTTATGATGATTCTATCATA  
TCAAGATTCATTATGGATGGCTCTGGACAGATTAAGCAACTCACATGGTTGAATACTTCGAATCAGTGGA

ATCTGTTCTGGTCTCAGCCAAGACAACAATGTGAAGTTTATGCATTTTGCGGGCCATTTGCTACCTGTCA  
GGAAACCAATCCCTTCTGTAATTGTTGGATGGTTTCAAGCATAGTTCAGAGACTGATTGGAATCAAAAT  
GATTTTTCTGGAGGATGTGAGAGGCCAAACGAAGTCGCAATGTGGCAATGGTAAGGGGGAGAAAGATG  
ACTTTTGGATGCATCCCCAGATGAAAGTACCTGAAAATGCTCAAAATATTTCTGCTGGAAGTGCTGAAGA  
ATGCAGATCTACCTGTTGAATAATTGCACTTGCACTGCTTATACTTATGAAAGTTCATGCTCAATTTGGA  
ATGGTGAACCTTGAATATGCAGCAACTCCCACAAAATGATGGCAGGGGTGAGTTGATCTATGTCAGGG  
TAGCTGCATCTGACATCCCAAAATCAAAGAGTAAAAGGGGAATCCAATTGGTGTTTCTGTGGGGTCTG  
CTGCTGCCGTACTGATCCTTCTGGGCATTCTTTTTGTTGTATTCCGGAGAAGGCGTAGGCATATTGGAAG  
TGGGAAAATAGTGGAGGGTTCATTGGTTGCATTTGATTACAAAGACTTGCAACATGCGACTAAAAATTT  
CTCAGAGAAGTTGGGTGGTGGAGGCTTTGGTTCTGTTTTCAAAGGGAAACTATCTGATTCATCTGTTATT  
GCTGTAAAAGGCTCGATAGCATCAGCCAGGGAGAGAAGCAATTTGATCAGAAGTCAGCACAATCGG  
GACAATCCAACATGTTAATCTTGTACGCCTTCGTGGATTTTGCTCTGAAGGTAACAAGAACTGCTGGTT  
TATGATTACATGGAAAATGGATCCTTGGATTCACATATTTTTACCGAAAAGCAGTCAGATGTTATGGATT  
GGAAAACGAGGTACCAGGTGGCACTAGGGACAGCTAGAGGCTTGACTTATCTCCATGAGAAGTGCAGG  
GACTGCATCATACTTGTGACATAAAGCCTGAAAACATCCTTCTTGTATGCACAATTATGCCCAAAGTAG  
CAGATTTTGGCCTGGCAAAGCTTGTGGGCGCGATTTTAGCAGAGTGCTTACTACTATGAGAGGAACAA  
GAGGTTATCTTGCACCAGAATGGATATCAGGGGTGGCCATTACAGCCAAAGCCGATGTTTATAGCTACG  
GCATGATGCTTTTGGAAATTGTATCAGGGAAGCGAACTCGGAATACTCTCACGATGGGAAAGTGAAT  
TCTTTCCTAGTTGGGCTGCACGTGTAGTAGTTGATGAAGGCGATATCCTTAGCCTATTGGACAATAGGCT  
GGACAGAGCTGCTGATGCTGAGGAGGTGTCAAAAATATGTAAAGTTGCATATTGGTGCATCCAAGATG  
ATGAATCCAAAGACCCTCAATGGGCCAGGTTGTTTCAAGATTCTTGAAGGAGTTTTGGATGTGAATTTGCC  
TCCTCTCCCACGCTCTCTTCAAGTTTATGCAGACAATGAGGAGCACATCGTTTTCTTACCGAGTCATCCT  
CGAGCCAGACTAGTTCACAAGCTCAGAGCAAGACTTCAAGTACAACATCTCAATCTAAAAGCATCACAG  
AGTCTACGAATTCAGGTCTTGA

>PGSC0003DMG400042886 G-LecRK

ATGGACTTTGTTAACTCAATAACTCCTTTGAAACTAACTCAGTTTTTCATTATTTCCATCTTTTTCTCAATTT  
TTTTCAAATTAAGTTGAATCTGAGACACCCAACCGTTTTTCAAAGTTTTAAAGCAAACCCAGATCCC  
CAAATTTGAATTTTCAAGCCTCTTCTTACTGATTCTACTGGAATTACTCACTGAGTTTTCTTCGAGTTGAA  
GAAAATCAACTCACTCTTGCTATTATCCATGTAAATCTTTCGAGTCGATATGGGTTGCTAATTTGACCCG

TTTAGCTAAATGGGCTGACCCGACTGAGCTCTACTTCAATGGCAGCCTTGTTCTGTCTGATTCACGTTTCAG  
GGGTATTTTGGTCAACTCACACTGATGGAGACCGTGTATGGCTTTCAAATACATCAAATTTGCAAGTTCA  
GAAGGTTGATAATGGAGTGACGTCACCTTCTGTTTTATGGCAAAGTTTTGATTTTCCCTCAAATACCCTTG  
TGGAAAATCAAATTTCACTAGTGCCATGACTTTAGTTTCGTCAAATGGGCTTTATTCCATGAGATTGGG  
CTTTGATTTTTTCGGGTTGTATTTTAAAGGTGAATCGGGTTCGGATTTCGGGTCAGATCTACTGGAGGCAC  
AAGGCATTAGAAGCTAAAGCTGATGTGATGGAAGATCAAGGACATATTTATGTTGTATTAAGTCAAAT  
GGATTTTTGGGAATGTACCAAATGAGTCAGTTCCAGTTGACATTGAATCATTTAACAGCTTTCAACAAC  
CCGTATCCGGCGTCCGTCCGGTACGGGTCGAACCGGATGGTAACTTAAAAGGGTATTTTTGGGACGGG  
TCGAGTTGGGTATTGGACTATCAAGCGATAAAGGAGACATGTGAATTGCCTAGCCCCTGTGGGGCGTAC  
GGGCTCTGTCATCCAGGCAAGAGTTGCTCTTGCCTGGATAACAGCACGGACTACAGTATTGGCGGGTGT  
GCCCCGCCGAATAGTCAGGAGTCCCGCGATTTTTGCGGGGCCTCCTATGATCTTGATCACAAGAAGTAC  
AAGGGGTATCAAGAAATGGTGTGAATTGCCTAACACTGAGTTAATGGACTATCAACATATGTTTTCTT  
TTCAAGAATGTCAAAGTGCATGTGAAGGAAATTGTACATGTTGGGGTGTGGTGTACACTAACACATCTG  
GATTTTGCTACATACTAAATTACCCCATACAAAGTTTAGTAGGGGTGAGGGATGAATCCAAGATGGGGT  
TTTTCAAATGAGGGAGGGTGTAGGAAAAGATAAGATGGGGGTGGGGTTTGGGGTGAGGGTAGGGTT  
ATTATGTGGGGCCATATTGGTATTAGGTGGGGTCATAGGTTTAGGGTATTATAGATATATAAAAAGAAA  
AAGAGAAAGAGGAGTTAGTGGTTATGTTGATGATGATGGAGTAGTGGTTGGACCATATAAAGATTTGG  
GAAATGCAAGTTTTAGGTCAATTGAACTAATTGAAAGATGA

>PGSC0003DMG400044943 G-LecRK

ATGGCTCCATGCTTTCTTTGTTACTATCTGTCATCTTTTTATTTCCATCGCCCTGTATGTATGTTACGCTG  
CTGCTACTGACTCCTTGTTCATATCAAATCCTCACCAACTTGAACCCTTAGTTTCATCCAACCATAATT  
TCGTAATTGGATTTTTTGGTTATTATTCATCGACTCTACCTCTATGCAAGACGTACCTGGGATTGGGGTAC  
AGGAGTGTAGATTCCAGGGCTATAGTATGGGTAGGTAATGAATTGAATCCACTTGGATGTTTTACAGCG  
CTAGACTAACCAAAGAAGGATTTTATGTCAAAGATATAGTGCTGGGAACAACGGTATGGATTCATAAG  
CCCAACAGAACAGTTCCGTCACCAGTTCTGAAGCTCCTTGATTCAGGTAATCTTGTGTTTGGAGATTCTA  
GCAATCTGACGGCTGGAGAGTATCTGTGGCAAAGCTTTGACCACCCTTTCACACATTGTTACCAGAAAT  
GAAGCTTGGCTGGGACAAGAAAAGTGGCATCGACCGATCCATGAGGTCCTGGAGGACAGAAGGTGATC  
CAGCTCCAGGTGATTATTTGTTAAGGTTAGACTTAGGTGACTCAGGTCAGTTACCCCAACTAGTTCTTGA  
GAAAAACCAGCGAATACAATCAAGATGGGGTCCTTGGGATGGACAGAAATTCAGTGGCGGTTATGCC

TCATGGATAACCATGCATTGACACCAATATTTTCATTCCGATACAGATGCGATTTTTTTTACATTTCGAAGCC  
AAGGAGGATTCAAGTTTGATACTTTCACTGAATCCAGATGGGAAACTACAATTCTTGAGATGGAATAAT  
AATGCTACCAATTTCTGGGATGAAGTGAAGACACTCAATATGGCCATATGTGACCAGTATAGCACATGT  
GGGCCTTATGGAGTTTGTACCGATGGAGATTTCCCCTGTGAATGTCCTGATGGATTCACAGCTGCATCAC  
CAGAAGAATGGGACAAGATGAATTTACGGAAGGATGTAGGAGAAACACCTCACTTAACTATAACAGAT  
AAAAACGTGTTTGTCAAGAACACTGAACTAAAGTTGCCTGATAAAGCTACTTACTGGGGAATGTTGTAC  
CCTCAGGACTGTGAACAGAAGTGCTTAAACAAAAGATCGTGTATGGCTTATACTAACATCAATATCAACG  
GAAATGGAAGCAAATGTGTCGTTTGGTTGGGCGATTTACTTGATATGAGACGTTACGGATAGCTGGGA  
ACGACATTTTTATAAGGATGGCAAATGGAAAACCAGGTAAAAATGATTGCTTACTTGTGATATGATTGCT  
TGCTTATGACACGACAATAATTCAATGCCTAAATTATTTTTAGTATAGTGCAAAGTTATGTGTGCATGAA  
TGACATTTGAATGGTGAAGTAGTTAATTGTTGGTGCATAAACATCAATAAATAAAATTTCCATATTAGTG  
CTTGATTAAGTGATTCTGCAGATTTGTCTTTTTTTTAAAACAAAAAGTATCTATAACTTGATTCTTACATG  
AACCACTCATCCCTCATCTCTATCAGAGGGAAACAGTTCTATAACTTTTTCAAATGCATATGTATCTCCGT  
TATATAGAAACGTTAGATGTGTTTCAAGCATTTTACTGAATGTAGTCACATAACTGCTACACAATCTAGC  
AAAAATTGACACTAACCTGCATGCATCTAGTTGCTCTCATAGCAAATCTTTAACTTTGTATCAACAGAAT  
ATTATGAGCAAGAAAACAATAACACCTTTTACTTTCTTATGAACAGATGCACCTGTTTCCCATGGGAAA  
AGAAAATTGAATGAGGGATCGATAGCAGTGATTTCTGTATTAGTTCTGGAAGTACTTATCTCGATTTTAT  
ATATTGTGTATACACATCGAGCAAAGAGTACAGAGGTGCTAGGTAAAATGAATCACCTCTCGCTGCTTAT  
ATATTATTTTCGTAGTTATTTTTTTTCAGCCCAACCTTAGTTTCACTCAAACACCATTTCATGAGCAAACCTC  
CTTTAACTCTTGAGACAACAAGAATGAACAGAGACATTGTTCAAAGCATCTTGTTCTGCCAATACCCTT  
TAGTTTGTAAATGAAAAACAAAATTTACTTAGAGCACACATGACCCTGTAACCTAGCTCGCGGTTTCGCTTC  
CATTATTGTCTGATATATTTGTTTTTAAAAAGAATATTTTCATCTGAGCAGATGAACCAGAAATCAATCA  
GCCAGAAAATTCTGTAGGAGCTTTGCTGCAGGGAACAGATGTCATTGCATATGATTCCAGTGATCTAGC  
CGCAGCCACTGACAATTTCTCGCTGTCTAATAAGATAGGGCATGGTGGCTTTGGCAATGTTTATAAGGTT  
AGTATTTCTTTTCAACAAGCATGAGCATGCATATTTACAGTAACTCAGACAACACAATTAATACCCAAATG  
ATACATAAATCTGTAGGGTGTACTAGAGAATGGAGTAGAAAATAGCAGTGAAGAAGCAAGACGTGGCTT  
TGCGTCAAGGAGTTGAGGAGTTTCGAGAATGAAGTCAAATTAATTGCAAACCTACAACATCGTAATCTAA  
CCAAGTTGTTGGGATACTGCATTCATGGAATAGAAAAATTCGTAGTCTATGAGTTCATGGCGAATAAAA  
GCCTAGACAAGGTCATATTTGGTAGGTCATCTTAAATAACAACCTTTGTTTTACTATTATATGTGTTAATAT



GATATTGGACAAGCCATAAGAGACAGAAATTTTAGGCCTATCGGAGTGAAATTAATAGGGTAACTGTTT  
TCTCTACATGTCCAGATGCTGCAAGAAGGGCAACAGTAACATGGCCAACGCGCTTAAACATTATCAAAG  
GAATCGCAAGAGGACTAGTTTACATGCATCATGACTCGAGGTTGACAGTAATCCACCGGGACCTAAAAG  
CTAGCAATGTCTTGCTAGACAGCGAGATGACACCCAAGATATCTGACTTTGGGTTGGCAAGGGAATTTG  
AAGACGATGTTGAAGTCAAGACTCACCGTGTAGCTGGAACATAGTAAGTAGACTAGCACTCATTATCAT  
TAACACTACATGTTTATGCATATTTTACAGATAGTCTTATGTTGTGGCTGTAGTGGCTATATGTCTCCTGA  
ATACATGCAAGCTGGACATTATTCAACAAAATCAGATGTGTTTCAGTTTTGGAATTTTGACATTGGAGATT  
GTGAGTGGCCAAAGGAATTCGATTTATCGGCACCCAACCTATGATATTGGTCTAGTAGGCTATGTAAGT  
ATATCGATCATCCCCTGATTAATATGGTCACTACTTGTACACCTAAGTTTCACCTTGTGCTAAAACAATT  
TACATGCATGATTGATCTTTTGTGGTCAGGCTTGAAAATTTGGAATGAAGGGAATGCCATAGAACTA  
CTGGATCCACTGATAGATAAACCAGATGATTTGGATGAAGTTTTAGGATGCATCCATGTTGGGATCTTGT  
GTTGTCAACGGCGATCCCAAGACAGACCTTCAATGGTTCAGGTGGTTTCCTTACTGGAGGAGAATGAAA  
TGTTAAAGTTTAATTGTGTGCCCGGGAACCTTACTTCTATAAGGAGACGAGTCAGAGTAGCAGGAGTC  
GCGAAAGTATGAATGGGCTAAGTATTACTGAATTCACCGGAAGATCATGA

>PGSC0003DMG400045997 G-LecRK

ATGACTTCTTTAGTTATGCTTCTTGTGGTCTCTTATTGTTTCCCCTTTCAGCCATTGCTCAATCTTACCAA  
ATGTTAGTTTGGGTTTCATCACTCACTACAAGTGATGTTACTAGCTTTTGGTCATCCCCATCTGATGAATTC  
GCTTTGGGCTTCCAAAAAATTGGAATGAATCAAGGTACTIONACTAGCCATATGGTTCAACAAAATCACAG  
ACAAAACCATAGTTTGGTCAGCCAATAGGAATAATCTTGCCTTAGATGGATCCAAAGTTCAGCTCTCCGC  
GGATGGAAGACTAGTCCTCACTGATCCAAATGGTCAAGAGATGTGGGCTCGTGGCATGGCGAATGCTC  
AATTGGCCTATGGAGCCATGCTTGATAATGGAACTTTGTGCTAGCAACTAGTAGTTCAGACACTCTATG  
GCAGAGTTTTAATGAGCCCACCGATACGATTTTGCCTGGTCAAGTACTTAACCAAGATAACAGTCTTGTT  
TCAAGTTTCTCTGACACGAATGTATCGAGTGGGAGGTTTGTGTTTCACTTCAAACCTGATGGAAATCTAG  
TGCTTTACACAGTCAATTATCCAGCTGAGGCAACAAATGCTGCATATTGGTCACCTATGTCAGTTGGCAG  
TGGTTATCAGGTGATCTTCAATCAATCAGGCTTTATTTTTCTTCAAGCAAAGAATGGAACCTTTGATAAATT  
CGATATCTTCTAATGTGGAATAATTCAAGAAGCCAATCAATGTATCATCGAGCGATTCTTGAATATGATGG  
AGTTTTTAGGCACTATGTCCATCCGAAATCTTCTGGTAGGGAACCGATGGCATGGTCTAGTTTGTATAAC  
ATTCCTGATAACATCTGTTTGTCTATCAGGCAAAGTACAGGAGGGGGTGCCTGTGGTTTCAACAGCCTAT  
GCTCAATAGGAACTGATCAGAGGCCGAGATGTGATTGTCCACTCGGATATATCTTGGATGATCCGAATG

ACAAATTAGGCAGCTGCAGACAAAATTTCTCTGAGCAAACTGTAACCATGAATCGCGAGAAGTTGAGT  
CTTTCACATTCCACGAAATGTTGGATACTAACTGGCCTGACTCTGATTATGAGTCTCACCGCGATGTTTCA  
GAGGATTGGTGCAGACAGAATTGCTTGAATGATTGTTTTGTGATGTTGCCATTTACAGTGACGACAAC  
GTCTGTTGGAAGAAAAGGTATCCTCTTTCAAATGGGAGAGTAGGTCCAACGATCGGAGGGAAGGCTTT  
GATAAAAATAAGGAAAGACAACCTCCACAGTGGGAACACCAAATGTTGAAATAAGAAAAAGAAAAATC  
AGTCTACTCTGATCATTCTGGTTCTGTGTTGTTGGCCAGTTCAGTTTTCATGAATTTGTTCTTAATTCTTTT  
GGCCCTATTGTACATTTTTAAGTTTATAGGAAAAAACGAAAGAGGACTGCACCGTATTCAGCTGTTCCA  
GGAGTGAACCTAAGAAGTTTTAGCTACAAAGAGCTAGAACAAGCTACAAATGGATTCAAGGAAGAATT  
AGGAACTGGAGCTTTCTCAACAGTTTACAAAGCGTTCTTGATGATGAAAATGGGAAAGTCGTTGCTGT  
CAAAAACTCCGAAACATGGTAACAGAAGGAGAAGGAGAAGAAGTATTTGAAGCTGAAGTGAATTCAA  
TCAGCAGGACTAATCACAAGAACTTGGTCCAACCTCTTGATTCTGCAACGAAGGCCAACACCGCCTTTT  
GGTATATGAACACATGAAAACCGGCTCAATAGCACACTTGCTATTCAAAGATTCTAGGCTTAGTTGGTCC  
AAAAGGGTACAAGTTGCCATCGACACTGCCAAAGGACTTTGTTATTTGCATGAAGAGTGCAGTACCCAA  
ATTATACATTGTGACATCAAACCCCAAATGTGCTTTTGGATGAAAATTTGACAGCAAAAATAGCAGATT  
TTGGTATGGCCAAGCTACTGAAAAACATCAGACTCAAACAACCACTAGGATACGTGGAACCAAAGGGT  
ACGTAGCCCCAGACTGGTTCAGAAGCATGCCTGTAAGTGTGAAGGTTGATGTGTACAGCTTCGGAGTCT  
TGCTCTTGGAGTTGATTTGCTGCAGAAAAACTATGAGCAGGATGTGGCAAACGAGAACGAAATGATA  
CTACTGGAGTGGGCTTATGATTGCTATAAAAGAAATAAGTTGCATTTACTTGTAGGCGATGATGAAGAG  
GCATTAGAAGATATCAAGAGATTCGAGAAGTTTTTGTGGTTGCAATTTGGTGCATTCAAGAAAATCTAG  
CATCAAGGCCTAACATGAAGAAAGTCATGTTAATGCTTGAAGGTTCTGTTGAAGTATCAATTCCTCCTGA  
CCCTTTTTCGTTTGTGCGATTCTATTTAG

>PGSC0003DMG400046324 G-LecRK

ATGGTTGTTAATTATAGTGCCACTCTTTTCATGCTCAGTCTCCTCATTCTTTCTTCACAGCATCTGATTAGT  
TGTC AACCTTCTGAACTTTTATACCAATTCCTCCATTTCTGGATCAATAACCGCGCCCGCTCCTATGTA  
GTGAATTCACAGATGGAGCCACACTGACACCCATCCTATCGAGAGAAGGGAATGAGGCTCTGTTTGTCT  
TGTGGTTTCTTATGTGATTACAATGGCACTGCTTGCCTTTTTGGCGTCCTTATATTACCAAATACCTATGA  
TTCTTATCTATACTACCCGAGATTAGTATGGTCAGCAAATCGGAACAATCCAGTTAGAACCAATGCAACC  
TTGCAACTTAGGCAAGATGGAGGCTTGTGTTGATGGACTCAGATGGCACTTTGATTTGGAATACAAGC  
ACAAGCGGAAAGGTTTCTGTGGGATTCAACTTGACAGTAATGGGAAATCTTGTCTCTTTGACAAAAGT

AACGACATCATTTGGCAGTCTTTTGATCATCCTACAGACACTTTGGTTCCGGGACAAATAATGGTCCCTG  
GACAAAAGCTGATATCCAGAATATCAGCAACAGACTGGAATGAAGGTATGCTCACACTTGATTTAAAT  
ATTCTGGCCTTTCTGCTTACATTGAGTCAAATCCACGCCAACTCTATGTCTTGAGACTTGGTGTGGAAAA  
CCTTTCCAGTTTCCTGGACTAGGCTTTTCTTTGAAAGGTTATGGTTCCAGAGGGATGTTAACCATAGGTTT  
CGAATTTTCAAATGCTCGATTCATGAGATTAGGGGTTGATGGGCATTTAAGGGTGTATCACTGGAGAGG  
ATCTTGGTCAGAGGAGGCTGATCTATTTACATACTACATTGGTGAGTGCGGGTATCCAACCATGTGTGG  
AAATACTCTGTATGTGGAAATGGGCAATGTACTTGTCTCAAACCGCGGTTGGATTTGGTCAGACTAAC  
TTTCTCCAGCAAATCAATTACAGGCAGCCAAACCAGGGTGTGTCTTGTACACCTATCTCTTGTGAAC  
ATTCCCAATATCATATTCTTATGGAGCTTGAGGACATAGCTTATATTCCCCTTTATTTTCAGTACGGTACCA  
ACAAAACAGATTTGGAAAATTGCAAAGGTCTGCTTAAGTAACTGTTCTTGCAAAGCAGCTCAATTTCA  
ATTTAGTGGTCCTGGTAACACAATAGGTGACTGCGCATTGTTGAATGATGTGTTTTCGCTCACAGACAAT  
TATGGAGCACCCAATAAGACCACTCTTTTCATCAAGATGCAGAACTCTTCTTACCTACAAGCCTCTCCACC  
ACTTATCTCTTCAGAGAAGAAATCAAAGCGTGTCCCAACAATAGTAGGATCCACCATCGGAGCTTCATTT  
GGTTTGCTTCTCATGGTTTTAACTTGCTTTGCCTATATTTTCAGAAGGAGAAAAGGACTCGAGGAAGACG  
AGGAGGAGTTCCTTGATCAAATACCAGGAATGCCTACTAGATTTTCTACGAGGAACTCACTGTGATGA  
CAGAAAATTTAGCGAGACACTTGGGGAAGGGGGATTTGGTTCTGTATTTGAAGGAACAATGAGTGAT  
GGCACCAAAATAGCGGTGAAGCGTATGCAAGGATTCGGTAATGTGAAGAAATCATTCTTAGCTGAGGT  
AGCAACAATCGGTAGCATTGAGCATGTCAATTTGGTAAACTTGTGGATTTTGTGCTGAGAAATCACAC  
AGACTTCTGGTTTATGAATTCATGGCCAATGTCTCTTTAGATAGGTGGATTTTTACGGAACAGGGGAAA  
AATCCCTCACATGGGGTGTGAGGAAAAAATCATATCAGACGTCGCCAAGGGCCTAGCTTACCTACATG  
AAGATTGTAACAACAAAATTATTCATTTGGATATTAAACCTCAGAACATTCTTCTTGATCATAATCTCAAT  
GCAAAGTATCAGATTTTGGGTTATCAAAGCTTGTGGGGAAAGATGAAAGTAATATAGTTACAGCAATG  
AGAGGAACACCAGGCTATTTAGCACCTGAATGGTTGCATGAGGTCATTACTGAGAAAGTGGATGTTTAT  
AGCTTTGGGGTTGTGATCTTGAAATCATCTGCGGCCGGAAGAATTTGGATCGTTATCAAGATGAGGAT  
GATATGCATTTGCTTAGTTTGTTCATGAGAAAGGCAGTGGAGAGACAACCTCTTGAAATGGTGGACAAG  
AAGAGTGAAGACATGCAGCTACATAGAAAAGAGGCTGTGGAAATGATGAAGATTGCAGCCTGGTGTTT  
ACAAAGTGATTATACTAAGAGGCCTTCCATGTCGTTGGTAGTTAAGGTGTTGCAGGGTTTAGTCGCTGCT  
GAAACCGATTTGGATTACAGCTTCACATTTCCAACAATGACGAGAAAAGTTGCCGGAGCTATTCAAGAA  
AGGGAAGCTGTGGTTGGTATCAGTTTACCATTTCCATCACAGTTGTCAGGACCTAGGTAA

>PGSC0003DMG401004946 G-LecRK

ATGGGATTTTTTCCCCGACTAGTTTCACGAATAATTGGTATGTCGGAATATGGTACAGGCACAATGTAC  
CTGATAAGTCTGTGGTATGGGTTGCCAATCGAGCAAATCCATTCAACAACAAATCAGGTGTTAGGTTGA  
AAATCATCGATACAGGACAACCTTGCTCTTCTCACTGCTGACAATAAGAGCATATGGTCTACTAATTCGTC  
AAGGAGTTTGGCTGTGAAGAATACAGTTGCACAGTTGTTGAACTCGGGGAATCTTGTCGTAAGAGATGT  
AAATGATGCTAGGCCTGAGAACTTCTGTGGCAGAGTTTTGATTATCCTACTGATACACTGTTACCAGGC  
ATGAAAATGGGTAAGAACTTTGTGACTGGACAAGAATTTTACCTGTCCTCATGGAAGAAGGAATCTGAT  
CCAGCTCCAGGAGAATATACATACCGTTGTGATCCTACTGGATATCCTCAGAATGTCGTGAGGAAAGGT  
AAAGTTAAGGTGTTCAATACCGGACCATGGAATGGAGTCTTCTGGAGTGGTGTACCAGGAAGTATACAA  
AATACTATTTCCACATCTAAGCTGGATTTTGATGAAAAGAAAGCATTTTACAGCTTCACGCTTCTGGCTTC  
TGTTATGACCAAATTAACCATAAAAAGTAGCGGAGTGCTTCAAATTTCAACGTGGGTTGAGAATAGACA  
GGAATGGCAAGATTATGTTTCTTCATCGGGCGATACTTGTAACTATGGAACATGTGGTGCATATGG  
TAGTTGCAACAACGTGCACACTCCTGTGTGTAGCTGCTTAGACACGTTTGTGCCTAAAGATCCAAGAAAT  
TGGGCAATGAAAAATTGGTCCAGCGGGTGTGTTAGAAGGAAACCCCTTAATTGCCAGAATGGAGATGG  
GTTTCTCAAGTACTCTAGTATAAAGCTACCAGATACACAGTATTCATGGTTTGATGTGAGTATGACACTC  
CACAAGTGCAAGCAAGCTTGCTTGAGGAATTGCTCGTGTATGGCTTACTCAAATCTTGATATACGCAATG  
ATGGGAATGGCTGTTTGCTTTGGTATGGCGACTTAATTGACATTCGAGAATTACCTGGAGGACAGGACA  
TTTACATAAGGGTTGCTACCTCAGAGTTAGGTAACATTTGTGAATTTGATCAAAGTTGGAGTATTAGCTG  
ATTGATTTAAACTTCCCAATTCTCAGATTTAGTTGATTTTACTTAGATATCTGTTAAAAGTTCACACAGTA  
TATGTTCACTCTTCCATGTCTATTTAGTTTATTTACCCCTCCATGTTTTGTTGAGGCTCGAAGAAAACAAA  
ACTACTCGTGTTAAGTCTGTTACTGTTGATTGGAGTACTGTGACTGGCCTGACCATAGGGCTGTATATT  
TGGAAGAAGAAGAAGAGGAAGATGAATTTGAAAGATGACCTAGACCTCCCACTGTTTACCTTATCAACT  
CTAACTAAAGCATCCTCTAATTTCTCAGTCGAGAACAAGATTGGAGAAGGTGGATTTGGATCTGTTTACA  
AGGTAACATCTTAAGTTTATGAATCATTCTTTCAGTAAACAATATCTACTATTATTGACAGTAAACAGATG  
ACACTTACTGAATCACTAAACCAGTTATATGTTGATATTATAGGGAATCCTGGAAGGTGGACACGAAGT  
AGCTATAAAGAGGCTATCCAAGTCTTCTCGCAAGGAGTTAACGAGTTCAAGAATGAAGTTATTTGCATT  
GCCAACTTCAGCATCGAAATCTTGTAAGCTTATAGGTTGCTGCATTGCAGGAGGAGAAAAAATGTTG  
GTCTATGAATACATGTGCAACAGAAGTCTAGATTTCTTCATATTTGGTCTGGTACTCTCTCTTAACTCGA  
AGAACCTCTATTAATAACAAATAGTAAAGTTGATAGTTTAAATCACATTATCAGTGTTCTAACGGAGGACAT

GTAAACAGATGAAAAGAGGAGCTTGTTACTCGACTGGCCTAAGCGCTTCGACATCATCAATGGAATTGC  
TAGAGGACTTCTGTATCTCCATCAAGATTCTCGGCTAAGAATTATCCACAGAGACCTCAAAGCTAGTAAC  
ATTTTGCTAGATGCTGACATGAACCCCAAGATCTCAGATTTTGGCATAGCTAGAAGCGTTGTAGGGAAT  
GAGACTGGTGCTAATACACACCATGTGGTTGGGACACAGTAAGAAATTTAATACTACTCATTTTTTAGCA  
TTTATATTATGTATATAATATCCTTTACTTAACACTATTTTTGTTAATGTGTAATGCAGTGGCTACATGTC  
CCCAGAGTATGTAGTCCATGGTGTCTCAGTGAAATCAGATGTATTTAGCTTTGGTGTGTTAGTACTA  
GAGATAATCAGTGGTCCGAGAAACAGAGGATTTGCCCGTGAAAGTCACAGTATCAACCTACTCGGACAT  
GTAAGTCTTGTGGTAATTAAGACGAGTTTAAATTTGTGCTACTAACAGAGTAAAATAATCCTTAAACA  
ACGAGGTCACCTTATAAGGTAGTTAATTGATAACACCTCATAAAAATGATAGTTAAACTGCATTGAACTTA  
AATCCATCAGGCACATCAACCGCTACATGTTTCTTGATTATGTAAGTATTGTTATTTATAGGTATGGAA  
ACTTTACAAAGAAGGTAGACCATTGGAGCTAATTGATGGGGATCTAATGGATTTCGAGTTATATTTCTGA  
ATTGCTACGCCTTATCCATGTCGCTCTGTTATGTGTACAACAATGTCCAGAAGACAGGCCAGACATGGCT  
ACAGTAATCTTGATGTTGACTAATGATGCTATTTTGCCTCAAGCTAAGGAACCTGGTTTCTTCACAGAAA  
GCAAAGTCACTTCTGGATGTTCTACAAGCATGAGTTCAACAAACGAAATTACCGTCACACAGTTAGAACC  
CCGTAATACATTACATGTTTATTGATCGTTCAATGTCAACAAGCTTGAATTACAGTGTGGTAAAG  
CCATAATGGCCTATGTTATATGGTATCTGTTATTAGCAAGTCTTCAATATGGGTGTGTATCAGTATTTAGT  
GTGGATACCTTTAGTTTTTATTAATTCTAATGTATTTTAAAGTATTGAAACAAGTACCTATTACAGCATGT  
GTACATCAAATAAATTAAGATCCATATAAAATAAATCAACACAATGAGAGTTCACTACTTCACAGTAA  
CAGAAGAAGCTATTGTTGTTGGTGTGTTAGAAAGCTCCAGTCCCATAGTACTCCATTATTTACAGAGTATCA  
GTTATGTTGTTCCATTCTCCGAGTTTACACGATCAAACATCAGGCAGTCACTGCACCAACAATTAGAAT  
GATAGCAGAATGGTTTGATTAAAGTAATGAAATTGCCAAGACTAGAGTGATTGGAAGGATTGCAATTCT  
AATTTCTTACTTTCTTTCTAGGAAATGTACAAAAGATATTATCACTGCAACTGACTTTATAAATGGAAACA  
ACTAAAATTGAAAGACATAAAACGCATTCACTCAATGCGATTTATGAGTAAAATTCTGTTTCTTCTTTTT  
CTTGTTGAAATTACTAGATTAACCCTTCTGTTAATTTTATTTGTACGCTATTTTAAAAATATATTTATTTAT  
TTCATTTATTACTTTTATAATATCAAGAAAAGATAAATATTTTATCTTTTTAAAAAATGTCATGTCGTTGA  
AACTTGAAAGACCCTTCTTAGATACCTAAATAAAAAGAGCTGAGAATGAAAGGCATAAAACACATTCA  
CTGGATTGATTTATGAGTAAGATTCCGTTTCTTCTTTTTTATTACTGAAATTACCATATTACCCCTTCTGTT  
TAATTTTATTTGTCCACTATTTTTAAAATATATTTATTTCTTTCAATTTATTACTTTTATAATATCAAGAAAAG  
ATAAATATTTTATCTTTAAAAAAAATGTCATGTCGTTGAAAACCTGAAAACCTGTTCTCAGATGCCTAAAT

AGAAAGAACTGAGAATGAAAGACATAAAACGCATTCAGCGAATGCGATTTATGAGTAAAATTTTGTGTC  
TTCTTATTTATTGTTGAAATTACTATATTACCTCTCCGATTAATTTTATTTGTCCACTATTTTTAAAATATA  
TTTATTTATTTCAATTTACTTTTATAATATCAAGAAAAGATAAATATTTTATCTTTTTAAAAAAATGTCAT  
GTCATTGAACACTTGAAAACCCCTTCTCAGATACCTAAATAAAAAGAGTTGAGAATGAAATGTATAAAAT  
GCATTCAGCGAATGCGATTTATGAGTACAAATCTATTTTTATTTTTATTGTTGGAATTACTATATTATCT  
CTCCATATTTCAATTTACTTTTATAATATCAAGAAAATATAAATATTTTTCTTTTAAAAGAAAAGAAA  
TGTTATGTCGTTGAAAACCTTCTCCAGATACCTAAATAGAAAGAGCTGAGAATGAAAGGT  
ATAAAATGAATTCAGTGAATGCGATTTATGAGTAAAATTCTCTTTCTTTTTTATTGTTGAACTTACTAT  
ATTACCCTCCGTTTAATTTTATTTGTAAACAATTTTTAAAATATATTTATTTATTTCAATTTACTTTTATA  
ATATCAAGAAAAGATAAAAATATTTTATCTTTAAAAAAAGACACGTTGTTGAAAACCTTGAAAACCCCTC  
TCAGATACCTAAATAGAAAGAGTTGAGAATGAAAGACATAAAACGCATTCAGCGAATGCAATTTATGAA  
TAAAATTATGTGTCTTCTTATTTATTGTTGAAATTACTGTGTTACCCCTCCGTTTAATTTTATTTGTCCACT  
ATTTTTAAAATATATTTATTTACTTTTATTTAGGTAGATGAGAAGGGTTTATTACCTAGTGCAAAAGA  
TATTATCACGGCAACTGACTTTCTAGCAGATGGAAAGACCATTACTTCATCTGATGGAAGCTGTGAGATG  
GCTAGTTTCACGAATAATTGGTATGTTGATGAAAAGAGAGCATTTTACAGCTTCACGCTTTTATTCCCTAAC  
TGTTAGATTAACAGATCCTTGGTTATGACTTATGACTATCACATTAACCAACTTGATAAATAGGAGTTTTT  
GTCCACTTGAAACCACAAGTGTGAGACCCGGTCTCAATTTGAGACCCGTGCCGACCCCGACAGCCGACG  
CGAGATCCGACCCTGACCTTGACCCTAACATCTGACCCAAAACCCGACCTCAACCCTAACACTCTGTTGA  
CACCAAATTTTGACCCTCCTTTTTCTAATTTATTCGTTGAACTTCTAAATTGGTAACAAGTCGAATACTT  
TATAATCACTATTATTTCCATTTATCACTATTTCTATCGTAATGATCTATATTACTTTAACTTTTATGATA  
TTTATGTTTATCATCTTTTTATTATCATTTTCACTATTTCAAATTATTATTTTTTATCAATGTTACTATTAGT  
ACTTTATTGTCGTCTTCTTTAAAATAGATTGTCGTTATTTTATTTAAGTTTCTTACTTACTTAACTATTTTA  
CGTAATATATATTATATTAGTTATTAATAAAAAGCTCAAATGATTTAATTTAAAGAAGGAAAAATGCCAT  
GAAAGCCTATCCATTTTCAGCCCTTTTTACAATCTTAAAATATGCAACAATTTGGCTATCCAAAATGCAGC  
CCAATAGGCCCATACGTTTCAGCCAAGTTCACTAAAAAACCCAAATTCGCAGCCCTAATCCAAGACTCAC  
CAGCAGCAGCGCTAAGCATCCCTTTCTCCTCTCTCCCTCTTCTAAGCAAAGTTCCAATATAGTGCAGCCA  
TTGACAGTTTTATCCTTACGTTTTGAGCTTAATTTTGTCTTGTGAGGCAGCCAACGAATGCTTTCTTGT  
TTCATGCTTCAAACGCAGCAGCTGCTTTTCAAATTTCAAACAAAATCTCACTATTTCCGACGATTATAT  
GCAGCAATATCACTGCCATATTTGACCAATTTCAAACGGATACTTTCCCGCTCAAGCATGCCTTAACCCTA

ATCTTCACCTATAAATACATCCTTATATATTTACAAAGAAAAAAAAAAGGTTTTTCAGTCACCTTCTCCCCT  
CTAACTTTACTAGTCTTTACAACCTTAACAAAAAGGTTTTAATCTCTCTTTGCTCCTGTTGGACGACAACAA  
AGGCATTTCAAAGTTGTTCAATTACGAGAGTATAGATTCAAGGCCGATAACAATCCCAGTTCACTGCCCA  
CAATCGGTAATCTCGACCGCTTTACTTTGTTATATTTACTCTTTTATCCAGCTCGCCAGCGTGTGGTAT  
TAGTTTCTATATGAAAAATGACAAATGATTAAGGCTGGGCACCGAACCGGAATGGGACCATCGAACCG  
GTTTGATCGGGTTGTTGATCGGTACCGGGATGAACCGGACAGGAACTACCGGGATGGAGGCTCAGTTC  
CATCCCGTCCCCTATATACCGGGATAGAACCGGGATGGACCGAAATGGATCGGAACGGGATGGGATA  
A

>PGSC0003DMG401005047 G-LecRK

TTAACACCAAAAAACACATTTTTTTCATCTATGTTCTTGCTTCTACTTTCTTCTAATTTACAAATCCTCGCAAT  
AGCAGCAACAACAACAGATAATACGATAACGATTACAAATCCCCTTACGATATCGAAAACCTTAGTCTCT  
CAACAAAAAAATTCGAATTAGGATTTTTCACTCCTGGTGGTCCGAATTCAGACAAATGGTACGTCCGA  
ATATGGTACAAAGAAATCAAAGAAACGACGATAGTTTGGGTTGCGAACAGAGAAAACCCCGTCACCAA  
TTCATCGTCTCCCCCTGTGTTAAAAATAACACAAGATGGACGTCTTGTTATTGATAATAGAGATGGAAAT  
TATACGTTGTCATTAATTCGCGAATAATAACTACATTTATCGCTAAGTTATTGGATTCAGGTAATTT  
CGTCGTTCTAACAGAGAAAGACGAAATTATGGTGTGGCAGAGTTTTGATTATCCAACGGATACTCTGTTA  
CCCGGGATGAAACTTGGGTGGGACTCGAAAACGGGGTTAATCGGAATATAACGTCATGGAAATCGCC  
ATTTGATCCTTCTCCGGTAATTATACGTTTAACTTGATGTTAATGGTTTGCCTGAAGCTTATTTGACAA  
ACAGAGATACAATTTTCTATAGAAGTGGACCTTGGAAATGGTGTGGATTTAGTGGTGTACCAGAAATGA  
AGCCAACAGATATTATAGTTTTCGAGTTTCAGATGAATAAGGATGAAGTTTACTACACTTTTGAGGTATG  
TTCGTCTCTTACGTATGAGTCTGATTCTTTTTTAGTAATGACAGGTAGCGTTATGTTGAGTCTCATGCTA  
GTGGTGGGATCGAGGCAATCTTCACTTCATGAACAAGTGTCTATTTCTTATCATGGTATCAGAGTTAGAC  
TTGTCTGTTCAATTCTTCGTTTATATGATGTTAGTGGGGTTAGGGGACTCTTTTGTCTTCTTATACGGTCTT  
GAGTAATCTTACCTTATGAGGTAGTTTTTGGGGTTGAGTTATGTCTAACGTCTATTTTTTACATGACAGA  
TTTATCTATGCTCTGATACCATGTTAATTTGTAAAAACGTGTTTTTACTTACTTAATTATGTTTTTGTAG  
GTGCTTGACAAGAAAATATGTTTCGAGATTGTTAGTGAAGCATAACGGTTTTTTAGAGAGGTATACTTGG  
ATTCCGACTAGTAACATTTGGAACAAATTCTGGTACGCCCCGAAGGACCAATGTGATTTATACGAAGAG  
TGTGGTGTTCGGGAATTTGTAACGCGAATTTATCGCCGGTATGCAAATGTCTAGTAGGGTACAAGCCT  
AAAAATCAAGTGGCATGGGATTTAAGAGATGGATCAGATGGATGTATTAGATATCATGATTTGGATTGT

GAAACTGATGTTTTAACATATTGAAGAACATGAAATTGCCACAAAGTTCAAGTTCATTTGTTGATACTA  
AGATGAATTTGGAAGAATGTGAAAAAATGTGTAGGTACAACGTTCATGCACGGCGTACACCACCGCAA  
ACGTTACGGGTTTCGGGTTTCGGGTTGTGTCATTTGGACAAAGGAATTAGTCGATATGCGCCAATATTCGG  
CAGCAGAAGGTGGACAATTTCTCTACGTTAGAGCTGCTTCTTCTGACGCAGGTACATTTTTCATTTCAATC  
TGATGTTTCGATATCTGTTTGAATTGTTATAGAAAATACGTTTTTTGTGGTAAAATAGTACTCCATTTCAA  
ATAATGAAAAGGTAATTTAATTTGCTTCTATAAACTTGAATCTGAAACCTGTGGTTATTATGAAAAGAG  
TGCTTAATATCCTAGCGCTATTCTTAATTTAGTAGGAGAGAGTTGAGTCGAACTCAATTTAATGGAGTGG  
TTGAATGTTGGTAGAGATATATATGAAATTTAATGTATTTGTTGGGTTGAATAATAATAATAAATTG  
GTCTCATTTTCATGAAGTTTGAACACTACATATTTTTAAATGATAAAAAAATGGTCGTCTAGGCAATTTTTAC  
CCCTTTATTTTAGAAATTTGAAGTAATATCATGGATTGGACACGTGGAGATTCGCCACGTCACACTAGGT  
TGTTAGCACGCCCTTGTTGAGATTTTACAAACTCTGAAACGATTGTGTAGATGATGAAGTTCAATATTTT  
ATTTTAGGATATTCTGGAACAATTTTGTAGGTGATAAAGTTCGATATTTCTTTTTTAGGAGATTCTAGAAC  
GATTGTATAGATAATGGAGTTCGGTATTTTCAATTTTAGGAGATTCTAAAATGATTGTGTAGATGATAGAG  
TTCGATATTTTCGTAATGAAAAAAAATGCTTGTTTAAAATATCTTGTTAGTATATATTTAATGAGAGTAAT  
TAATAGAAAAGTAGTTGGTGCTATACTTTGAAAAACAAGAGGTTAGTACATATTATCATTACAATAAGC  
AAATTATAATTAATTAAGTCCATTGACTCTTGACAAAGACTTGAAAACAGCCAACACTATATATTCGAATAT  
ATATTATCTTGCATTATATTTTATTTGATATTGAGAGAGACAAAACATATTCTTTGTGGTAGGCACGTTTT  
AATTTTCACTTAATTTTCTTTTTCTTTTTTGAATTATTATGCATTGAAAAATTAAGAAAAAAATGTAAA  
CCAAAACATATGAAAAATACCCTCAAAGTCCTAAATTAGTTAATTATATGGTTTATCTACTATTAGGTGT  
TTGAATTTTTTTTTCTTTTTGATAAGATTGGGATGGTTAATTAGTTAGAAAATAATGCACCTACATCTCA  
AGCTTCTAGAATTAATTATTTCCATTCAAAGAAAATTCTACTAATAATACAAAGTTTTTATTCTCCCTTT  
GGTAAGTTAACTAAAACACTGAGTTTCCTTTTTCTTGTTATCTTATTCTTTCCTATGTATAAGCATGAGATCA  
TATTTCAACTAGAATTTAAGTTAAGTTATATATACAAATAATATGGAAAAAAATGCTAATAGTAACAGA  
CATATGAATTAAGGATAAATAAAAACACTCGATAATACACTAATAAAAAAGGTGAGTATAAAAGGTAC  
ATTTCTAACTTTATTAATTAGTTTGATGTGCACTTACAGCCTTACATGTTACGTAACCTTAGTAGTTTTTA  
TCCAGATTCTATAAATATATATATTAATAAATTCACTAAATATTTAGAGGGTCAGTAACCGATTTACATGA  
ATTCAGTAGCTTTTATCCAACCATCGTTTTCTTCGGGTGAAGCTATAATAAGTCTGTAGGCAGGTTTCG  
ATAGAACTTAGTAGCTTTGACCTATAGTCTATATTTTTGCTTAAAAATCCACTAATCATGTATAAATTATTT  
ATCAATAACTCAGCAAGCTATTTTTCTAGAATTTATAATTCATAAACTTAAAATTTTAGCTCAGATTCTTA



TTATAAATATTCATAAACTTCAAATCTTGGATCCGATTGTTATAAGTTAATGCTTACCTAAAAAAGAAG  
GTGAGAAACGGGTTTAAAATTTAAACTTGGTCATAAAATGAACAAAGCGTGTGTAACCTTTTTAAATTT  
GTATTTTGTATTGCTAACGCAAATTGTTGCGTGACATAATGAAAAATACATTAATTTTTTGCTGCTTTATT  
GTTATATTTTCATGAGGATATCATATCTTTTTTAATTATTATTTATTTTTTAAAATTTTGACAATAAATGGA  
AAAACAAAATTAGTGGACAATTGGTCCTAAAAAGTTAGGTGTAAGTTCACACAAAAGATTCTTTTTGAA  
ATGGATGAGAAGAAATCATTTTTTTGAACCCACTTTATATTCCAAAAATAGTCACTTGGCCGATTATTTTG  
ACTTTGATTAATTTCAAATTTACATATAGTATGAGTTCTACTTTTAATTTTATTTTAACTTTGATTAATTTCA  
AATTTACATATAGTATGAGTTTTACTTTTAATTTTTTCATAACGTTTACTTTTCATATTATAAACATAAAAAAT  
AAATACTTTTTGACAAGGACAGTCTTTGGGTCATTTGAATGGTGTACAAGTTACATTA AAAATTATAATATT  
TAAAAATAACTAATGTATAATATTATTTAGTATATATGTATTTGACTTTACATTGGATAAATTAGTATCAA  
CACTTATTTTCAATTTTAACTTAGATTTTCTAAAGGACCTTGAAGAAGAGTCTCAAGAAAGGGCATTTT  
GGTCATTTTTCGTATTTTATCTAGAGATTATTATCTGCATTAAGGTTGTATAAAAATAATATCACAATTA  
CGGTGTAACGACTAACCCCAAATCAAACTTTCAATCACACGGAATAATATAATCTCACATTTTCATCTCGG  
GATTGTTATCTATTATTTCAAATATCAAACGACTATAGGAATTAAGTTATGTAATGTGCACTAATGTT  
TTTGGATTCATGACAAAGGAACTTGACCTTCCGTTCAATTTGTATTTTTCGAGCAATTCACACCTAGTTCA  
AGTTACTCAATCGCGATAAAAAATAATTTGTGACTTTACTGTTAAAAAAAATAACAACCTTTGATGGAA  
GACTCATTTTTATGTGTTAATTTTCAAGCAAAAAGTGGAAATGTTGGATCTGAAGATGGTTCTGGCAAAAC  
AAAAAGAATTGCTATGGCTACTGGAATTACAGCTGGTGTGTTCTTGTCTAATTGGAGTTGTAAGCATT  
TGCATTTTATCAAAGAGAAAAAATTATTGGAAGGTCCAATAAGAAACAAAGCAGAACAAAGAGGTAT  
GTTATTATAAGCCTATAATTTGATTTTCAAGTATGGTATTCGATATTTACTTAAGGCATAATACATAAAGAA  
TGCACATCTATAGACACCACGACTCCTTACTGTGTCTTATGGACACCTGACGTTGTTGTGACACATAAAT  
TTTGGAGATGTCTAGATGATCATTTTGTAAAGTTGGAATGTACGTTCACTAGACATGATGGTGACGAGTTG  
AGGTGTCTAACTATACATTACTCAAATTAGAGGGTTCAGTTGTCAGTTGAGGTCAAGTTAAGGTGTCTA  
TCTATATATTATACAGTAACCATCTCATAATTCATATTTCTTACACTATTTTTGAACCAGGCTCTATTGAAA  
GAAGTCAAGATCTTCTAGTGAACACAGGCATTATTCCAAGTAAAAGAGAAATTTCTAGTGAAACAGTCG  
CGGACGAGTTTGAATTGCCATTATTTGATCTCAGTACCTTAGCTATGGCTACTGAAGATTTTTCTGATGCA  
AACAAAGCTAGGCCAGGGCGGTTTTGGTTGTGTTTACAAGGTAAAGCTCATCTTGACGTTAAAAAAGCAA  
AAACTTATGTTGCTCGGATTGGTCAAAAATGTCATCATATCCATGTCAGATCCTCCAAAAATACATTACTT  
TGGAAGATGTAACACGGGTGTAGTGACATTTTTCGAGGATCATAGCAATACATCAAAGTAGTACTTTTT

TTCATTTACAAGTTAAAGCTGATCATATATCAGTAAAAAGAATATATGCTGCTCAGACAGGACAAAAATG  
TCGTTGCATGCACTCGTGTGATCCTCCAAAAATGCATCACTTTGGAGGATTGATCTAACAAGGGTGCA  
ATGACATTTTTTGTAGTATCTGAGCAATAATGAAAACTAGTCCTTTTTTTTTGCATTTACAATGTAAA  
CAACTAGATGTGAAAAAACCTATGTTGTTCCGATTCTACAAAAATGTCATTGCACCCCTGATCTGACAC  
GGGTGTTACAACATTTTTCAAGGATATGAGCAACATATGAAAACTAGTTTTTGCCTTTACAAGGTAGAC  
GTGAAAAAACCTATGTTGTTCTGATCCTACAAAAATATCATTACACCCTTGTCGGATCTCCAAGAAAAT  
GCTTCATTTTTGGAGGATCTGACATGAGTGCAGTGACATTTTTCAAGATTGAGCAACATTGGGAAAGA  
CGGACTCTGTTTTATTGAAAATGTGAAGACATTCAACAAAAGAACATCTCTTTTTTTTTATTATCAGG  
GAATAATAGATGAAGGTCAAGAAATAGCAGTGAAAAGGCTGTCAAAGAATTCAGGCCAAGGAGTAGA  
GGAATTCAAGAATGAGCTAAGATTAATTGCTAGACTTCAACACAGAAACCTCGTTCGCCTTCTGGATGT  
TGC GTT GAGATGGAAGAGAAAATGTTGATATACGAATACATGGAAAATAAAAGCTTGGATTCAATCTTA  
TTCAGTAAGTCGTTCTTATGATCAGTAACTATGTTTATGTGTGCTATTGGACTTCAAATTAACAAATATA  
CGCGTCTCAGATAAGCAGAAAAGCTCGCTGCTAGATTGGCAAAGACGATTCAACATTATCTGTGGGATT  
GCTCGGGGGCTTCTGTATCTTCATCAAGATTCAAGATTTCCGATTATCCACCGAGACCTCAAAGCAAGCA  
ACATTCTCCTTGACAAGGAAATGATCCCGAAAATATCAGATTTTGGCATGGCACGGATTTTTGGAGGCG  
ATGAGACCGAAGGAAATACAAAGAGAGTTGTTGGAACCTAGTAAGTAGAATCACATTATCCTTATAAA  
TCATTCATAAAAAACACTTCGAAAAGTGTGGTAAATCGACGTTTTTCTCTTAATGTAGCGGTTACAT  
GTCTCCTGAATACGCGATGGATGGTCTATTCTCTGTTAAATCAGACGTTTTTCAGCTTCGGAGTTTTAGTGT  
TGAAAATAGTAACAGGGAAGAAGAACAGAGGATTTTATTTTCAGAACAATGAAAGAAACCTTCTTGCC  
ATGTAAGTACACCAAATTATCACAACCTAGTCATCATTCTAACTAAGTCGGAACAGAATTTTGAGTTTA  
TGC GTT CTGAATTCTAAAAAATATAGCTAATTAGTAGGTTCTCGATAAATTATTTATGCATGTTAAGTAG  
ATTCATAACATAACTACAAGGTTTTACTAAAGTTGCTACTGAGTTCTGTCGAACCTGTAACCTTCTCTCT  
AGTTCCGCCCTAAATGTATAATCCGCTCTGCAGGCGTGGAAACTATGGAGAGAAGGAGGAGCCTCAG  
AACTACTCGATTCATCAGTTGGTGAATCATTTTCTCCGTGTGAAGTAATCAGATGCATACAGGTCGGGTT  
ATTGTGTGTTGAGGAACAAGCAGAAGATAGACCGAACATGGCAACCGTTGTATTGATGTTAGGAAGTG  
AAACCGCAACAATGCCTCAGCCTAAACACCCTGGTTTTTGCCTCGGAAGGAGACCTGTTGATGAACCTC  
GGAAACTATTTACGAAGAACTTTCACTGTGAATCAAGTTACGATTACCATGCTTGATCCCCGGTAGAGT  
TAAACGTTGAGACAGATCATAGGCTTGCCCGCTTCTACGTGACAGAATAGAAATAAAGGCAAATTCCACT  
GATGGGAGTGTGAACATAGAGATTTACGACGAATGAATGCAATACATGGATGATGGATCCCTGCTGG

CAAAAATGTATAGATAGTACATTAGTGTTTTTCTCCACCCGACCATATCAGGAGGATCAATAGTGTTTTA  
ACTTACCCTCCTATAGTACATTAGTACTACGAGTGGTTAGCAATTTTCTCTTTGTACACTTACCTTGATTTT  
TTTTACAAAATAATGTTTTTTTTTTGGGTAGTTAATTATAGAA

>PGSC0003DMG401009323 G-LecRK

GCTGCCAAAAATGAAATCTTTAGCCAATTCCATCTTCATCTTAATATTGACCTTATTCTGCAGCCATACAG  
GTATCATTACCCTTCCATCTGTGGCTGCAATAACCTCAATGAAGCCTGGTGATGAACTCAATCACACTCA  
GGTTCTTGATTCTGAAGATGGAACATTCAAGTTAGGATTTTTTTCTATCTCACAAACAAATAACTCTTATC  
TTGGTATATGGTATGCAGGTGATCCACAAGATAAGAAGCTATGGATAGCCAATCCAAATACGCCTTTATT  
GAACAATTCAGGATTGCTCACTATAGATACTACAGGAACATTGAAAATCACTAGTGGAGGGAAAACAGT  
TGTGAATATTACCCCTCCTTTATTGACAGGAAGTTTAATAGCTAGGCTTCAAGATTCTGGAAATCTTGTGC  
TTCAGGATGAACTGAGAACAGGACTTTATGGCAAAGCTTCGATCATCCTACCGATACGCTTTTTCCAGG  
TATGAAGCTTGGTTATAACCTTACAACAAAGCAGAATTGGACTTTAACTTCTTGGTTGAGTAGTTATATTC  
CGGCTTCGGGGGCTTTTACTTTAAGTTTGTAGTCCATTCAAGATGCATTTCAAGCTGGTTATACGTCAAG  
GGGCGAGGTTTATTGGACTAGTGGCGCTTGGAGGAATCAAAGTTTTCCATTCTTAACTGCATTGCATGAT  
TCTTCTAACAGATATCAGTATAATCTCAACTTGGTGTCTGAAAAGATGGTGTGTTCTTCCAATTTGATGC  
GCCAGATGGAAGTTTCCCAAGTCTTGTGTTGACTTTTAATGGGGCTATTCTTGGTGGTGGTGAAGACAG  
TCGTATATACGCCCTTTATAATGAGTTTTGTTATGGTTATGAAAGTCACGATGGTTGTGTCTCTAATCAGT  
TGCCTGAGTGCCGAAAGGATGGGGATAAATTTGAGCTAAAGAGTGCATACTTCACTACTGGTAGTGCTA  
CTTCTAATTATGATGATAATGCAAACATTAGTCTTGGTGATTGTATGAAGAATTGCTGGGAGCACTGCAG  
TTGTGTTGGCTTCATCACCAGCAGCAATGGAATAGGCTGCATAATTTGGAATGGAAATGGGGAGTTTCG  
AGTTGATGAGAGTGGTAGTGCAGTGCACAATATGTTCTGGTTTCATCAAAGGTAAATCCTTATATTAG  
GAATACACCTTGTTTATGAACTAATCTATTTTGAATAGATCAAGAGTCACCTGTATAACACTCAGCAACCT  
ATGTGTGCAGGAAAACAAAAGAATTGGATATGGATAGTAATTGTTGTAGCTATTGTTGTCCCTATGCTG  
ATATCTGGTTTCATCTGCTACATTATAGTGAGAAGGCGCAAACACTACAAGGTAAATCTCTGAAAAGTGAA  
AAATGATTAAGTAAAGCTTTTTTATTAATTATGTTAAGCATGTGTAATATCTACAAACTTTTTCTTGCAC  
AGCTGAGAAAAGAAGGGAGGAAGAGTATATACGTGAGTTGACAGCATCCGATAGCTTCAACGACACCA  
ATATGAAAGAAAAGGATGGAAGGGAAGTCCAAGATTTGAAGATATTTAGCTTTGGATTTGTATTGGCAG  
CCACAAACAATTTCTCAAGTAAAACAAGCTTGGAGAGGGTGGTTTTGGACCTGTTTATAAGGTATAATT  
ACATCATATGCCTTCGGAAAACCTCAGTGCCATCATTGCATTAACCTGAATTACCTGTAAAATTTTATGACA

GGGAAAATTTCCAGATGGGAGAGAGGTGGCAGTCAAGAGACTTTCACGAACATCAGGTCAAGGGCTTG  
TAGAGTTCAAGAATGAGCTTATACTCATTGCAAAAGTTCAGCACACAAATCTAGTTCGAGTTCTAGGATG  
CTGTATTCACGAAGATGAGAAAATATTGATATATGAGTATATGCCTAACAAAGAGCTTGGACTTCTTCCTA  
TTCGGTTCGTTACCATTTCAAAACAAAGAATTAATAGCTCAAATAAGTTCTGAAAATTTTGACCTGAAAT  
GCTTTCTGTCTTTGACAGATCCTGAAAGAAAGAAGCTACTGGATTGGCAGAAACGTTATGAAATTATCG  
AAGGAATTGCTCAAGGATTGCTCTATCTTCACAAATACTCAAGAATGAGAGTGATACATAGAGATCTTAA  
AGCCAGTAATGTGCTATTGGATGAGAACATGAATCCTAAGATAGCTGATTTTGGTATGGCAAGAATTTTC  
AAACAGAACGAGACGGAGGCAGTGACTGCCAGGGTGTGGGAACATAGTGAGTAGAACTTATTTTCATG  
ATATAAGTTTAATTCATTTAGACATTTTCATATTGACTAAACGGGTAATGTTTCCTGTCCTCTATACAGTG  
GTTACATGGCTCCCGAGTTCGCAATGGAAGGAGCATTCTCAATCAAGTCTGATGTCTTCAGTTTTGGAAT  
CTTAATGCTGGAAATTGTGAGTGGTAGGAGAATACTAGCTTACAACAATTCGATCGTCCACTCAATTTT  
ATAGGTTATGTAAGTTTTCTTGACACCCCTTTTTCTTTTAAGTACTATAATACATAAAGTTTGAGAATAC  
TGATCATTTTGGTTTAGGCATGGGAACTATGGAAAGAAAAGTGTGCACTGGAATTGAAGGATCCAGCTC  
TTGGAGATTTATGTGACACTAACTGCTGTTACGAGTTATTCATGTGCGACTATTATGTGTACAAGAAGG  
AGCAACTGATAGGCCAACAAATGTCTGATGTTATCTCACTGCTAGGTAATGAAAGTATGCCACTGCCTACG  
CCAAAACAACCAGCATTTTTTCACAGGAAGAAATGAAGCAGAATCAAATTCATCGGGTATCAAAGCAGAA  
CAATGTTTCGGTTAATGATTGTTCCATCACTGTCATTGAAGCAAGATAGCTTAGAGACATTATCTTGCTGTA  
CTCTGTTGTGCAACACTCAGTAGCTATACATGAAAAGCATGTTTCCTTATGGTATAGATTAGTCAATTTGT  
ACTGTTAGTACTTGTATAGCTGTCTTTAGCTGTGTTTGTAAACAATACATAAATTTCTTTCCTACAAAGACC  
AGAATTATCAATAACTTTTTTTTTTTTTTGCATTTTCTCACTTAAATGTAGTAACATTTATTAGTATAACAAC  
CTTAAGATTGTAAGATTCTCTTTATTTATTAGCTCCTGTATATTTTTAAAATTAGGAGACTCATCAATGATG  
ATATTTTTTTGTGGTCCACATAAATGGATAACTTATCTGAGGATCATAATTCATAAGGATGACTGTAACT  
AATCTAGTCCAAACAACCTACTCGACGAGTTAAGGACATTCTTAATCTTGATTCAACAATGCATCAATGA  
AGTTCACAGTGATTTCAACAAGTAGATATGATATCTTTTTGAATTATATTAGCAAGCAGCAAAATGAAA  
TAGAGAAATATGAGGAAGAAAAAAGAAATTAGAAAAGTCAAAGAAATAACAGAAACAAAATGCAAATT  
GATTCACATTTCAACAAGAAAATTAAGATTGTCTCTTCAACAATTTTCTTACAAGTAAGGTAATATT  
TCTACTTAGAAAAATCTTCAAATTTCTGGCTGGAAAATGTTTAATATAATTGTCTATTCTCTAATGCATTA  
TTGGCTTTGAACAGTAAACAACCTAAAAAGGAATAATCTATTATTATCTGCAGCAACATTTCTTTCTTTCT  
GGCTGCCAAAATGAAATCTTTAGCAAATTACATTTGCTTCCTCATCTTGACATTATTCTGCAGCCAAACAT

GTATCATTAGCCTTCCATCTGTAGCTGCAATAACCTCAATGAAGCCTGGTGATGTACTAAATCACTCACA  
GGTACTTGATTCAGAAGGTGGAAGATTCAAGTTGGGATTTTTCTCTATCCCACAAACAAATAAACTTAT  
CTTGGAATATGGTATGCAGGTGATCCAGTAGAGAAAAAATTATGGATAGCCAATCCAAACACACCTATA  
TTGAACAGCTCAGGATTGCTCACATTAGATTCTGCAGGAACATTGAAAATCACCAGTGGAGGGAAGACA  
GTTGTGAATATTACCACTCCTTTATTGACAGGAAGTTAATAGCTAGGCTTCAAGATTCTGGAAATTTGG  
TGGTTCAGGATGAGACTCGGAACCGGACTTTATGGCAAAGCTTTGATCATCCTACCAGTTGTCTTTTGGC  
TGGTATGAAGCTTGGTTATAACCTTACCACAAGGCAGAATTGGACTCTAACTTCTGGTTGGTTAGTAGT  
ACAATTCCGGCCTCAGGGGCTTTTACTTTAAGTTTGGAGGCAATTCAAGATGCATTTCAAGTTGGTTGTTA  
GACGAAGGGGTGAGGTTTACTGGACTAGTGGGGCTTGAACAATCAAGTTTTCCATTCTTACCTTCATT  
CCGTGATTCTGCTACTACTTATCAGTACAATCTCAACTTGGTATCCGGTACTGATGGGATGTTCTTCCAAT  
TTGAGGCTACAAAGGGAAGTTTCCCAAGTCTTGAGTTGTTTTAGATGGAGCTATTGCTGCTGGAGACG  
GTAGTATATACACCCGTTATAATAAGTTCTGTTATGGTTATGGAGGTGATGATGGTTGTGTCTCTAGTCA  
GTTGCCTGAGTGTGAAAGAACAGTGATAAGTTTGGAGCAAAGAGAGGAGACTTTATAGATTTATCTGG  
TACTACTACTAGCAATTATGACAATGCAAGCATTAGTCTTGGTGATTGTATGCAGAAGTGCTGGGAGCA  
CTGCAGTTGTGTTGGATTCACCAGTCTAACAGCAATGGGACAGGCTGCCGAATTTGGAATGGAAAGAG  
GGATTTTCGAGTCGATGAGAGTGGTAATGCAGTTCAAAGATATGTTCTGATTTACCCAAAATCATCTAAA  
GGTTAGTCTTTAATTATGTCATAAATACACCTTCTTATGAACTAATTTTTTGGTCGAACAAACACATTTTAT  
TGCAAACACCCAAAAACAGAATACAGTATATCCTAAGTAAAAAGATACAACCTGACCACAGCTAACCAA  
TTTAGAAACATCCCCTACTCTCCTCCCTTCTATACAGTTTTCTATTTGTAAAGTTCTTGTGGTGTTTTTT  
AAAAATGGGGCAGCACAAAAAGATTGAAAATGTCTCTCAATATTTTATTAATCATAATAGGGCTTTAAAT  
AGCCAACTTGATAACATAATCTGCAGAAAATCTGCATAACAAGAATTTAAAAAGACTAAATAATCTCAAC  
AACTAAAACAACCTAACAAATATTTAAAATTCAAATTCATCCTAAAACCTAGGTAGCTTATTATTTAAAAA  
ATGACTGCAGTAACTAAAAGCAAACCTCAACAGTTCCTTCTATCCATTCTCCGTCTTTACAGTTTTTCAATTT  
CAATATATAGACTGTATTAGTGAAGAATCAACTGTATAATTTTCATCGTGTTACGTGTGCAGGAAAAACT  
TGGATATGGATAGTATTATCTATAGTTATACAATGCTAATATGTGGTTTTGATTTGCTTGATCAAAACAA  
GAATACAAAAACTACAACGTAAGTCTCTGAAAAGTGATTTACTAACTAGTATGTTGTTTATCAGTTATTTT  
AAGCATGTATGTAAATCTACATACTTCTCTTGCATAGGTGAGAAAAGAAAGAAGGAGGAGCATATACGT  
GAGATGAACGCAGCAGACAGCTTCAACAACACAAATCTGAAAGAAGAAGATGAAAGGGGAGTACAAG  
ATTTGAAGCCTTAAGATCAATGAAGCTCTTGATACCACTGTTGGTGTTTTTTAAAAGTGGGGCAGCACAA

AAAGATTGAAAATGTCTCTCAATATTTTATTAATCATAATAGGGCTTTAAATAGCCAACCTTGATAACATAA  
TCTGCAGAAAATCTGCATAACAAGAATTTAAAAAGACTAAATAATCTCAACAACCTAAAACAACCTAACAA  
ATATTTAAAATTCAAATTCATCCTAAAACCTAGGTAGCTTATTATTTAAAAAATGACTGCAGTAACTAAAA  
GCAAACCTCAACAGTTCTTCTATCCATTCTCCGTCTTTACAGTTTTTCAATTTTCAATATATAGACTGTATTA  
GTGAAGAATCAACTGTATAATTTTCATCGTGTTACGTGTGCAGGAAAAACTTGGATATGGATAGTATTAT  
CTATAGTTATCACAATGCTAATATGTGGTTTGATTTGCTTGATCAAAACAAGAATACAAAACTACAACG  
TAAGTCTCTGAAAAGTGATTTACTAACTAGTATGTTGTTTATCAGTTATTTTAAGCATGTATGTAAATCTA  
CATACTTCTCTTGATAGGTGAGAAAAGAAAGAAGGAGGAGCATATACGTGAGATGAACGCAGCAGAC  
AGCTTCAACAACACAAATCTGAAAGAAGAAGATGAAAGGGGAGTACAAGATTTGAAGATATTTAGCTTT  
GGATTGATATTGGCAGCCACAAACAACCTTCTCGAGTGATAACAAGCTCGGAGAGGGTGGTTTTGGACCT  
GTTTATAAGGTACATTTTCAGTATGGTATATCATATATGTACCCCAAAAACCTTCTGTAGTACTCTCATTAT  
ATGAAATAATAATCTGTAAAAATGTATGACAGGGACAATTTCTGATGGGAGAGAGGTGGCAATCAAG  
AGACTTTCAGAACATCAGGTCAAGGGCTTGCGGAGTTCAAGAATGAGCTTATACTAATTGCCAAAGTT  
CAGCACAGAAATCTAGTTCGTGTTCTAGGATGTTGTATTACGGAGATGAGAAAATGTTGATATATGAG  
TACATGCCTAACAAAGAGCTTGGACATCTTCTTTTCGGTTTGTAACCATTTCAAATAAGATCTAATCTTT  
CAAATAACTGTCGAAATGTTTGATGAAATGTTTTAGTCATTGACAGATCCTGAAACAAGAAGCTACTG  
GATTGGCAGAAGCGCTTTGAGATTATAGAAGGAATTGCTCAAGGATTACTCTATCTTCACAAATACTCAA  
GAATGAGAGTGATACATAGAGATCTAAAGGCTAGTAATGTGCTCTTGGATGAAAACATGAATCCTAAGA  
TAGCTGATTTTGGTCTGGCAAGAATTTTAAACAGAATGAGACGGAGGCAGTGAAGGGTAGTTG  
GAACATAGTGAGTTGAGCTTATTTCTTGATATTGACCTAGAGAACATGTATACATATTCATACTGACATA  
GGTGGAAAATGTTTTCTATACACAGTGGTTACATGGCTCCCGAGTTCCGCATGGAAGGAGCTTTCTCAAT  
CAAGTCTGATGTCTTCAGCTTTGGAGTCTTAATGCTGGAAATTTTGAGTGGTAGGAGAAATGCTAGCTTA  
CAACAATTCAATCGTCCGCTCAACTTAATAGGTTATGTAAGTGTTCCTTGACATCCTTTTTATATTTGAAGT  
ACTAAATGTACAAAGTTTGAGATAATTGATCATTCTGGTTTAGGCATGGGAACCTATGGAAAGAAGGGTG  
TGGACTAGAACTGAAGGATCCAGCTCTTGAAGATCTTTATGACACTGAACAATTTTTACGAGTAATTCAT  
GTCGGACTACTATGTGTACAAGAAGGAGCAACAGATAGGCCAACAATGTCTGATGTTATCTCAATGCTT  
GGTAATGGAAGTATGTCATTGCCAATTGCAAACAACCTGCATTTTTACAGGAAGAGATGAAGCTGAA  
TCATATTCGTCATCAAACAAAACAGAACAATGTTCAATTAATGATTGTTCCATTACTGTCATTGAAGCAAG  
ATAAGATTAGAGATGTTATTTTGTGTAATAAAGATTGCAGTAGATCACCAATGTTTTAATGACCTCTAA

AGTAACTGAAGGCTCTTTTTGTTAAGGTTAAAAGCTAATTTTTCTGCTTCATACATATTAGAAGCTCG  
G

>PGSC0003DMG401013876 G-LecRK

GAAAACTTGAGACTTTAAGAAAGGGGACGAGAGGAGTACACATTTTTGTCCATAATTTCCAAAGCAGC  
TGACGACAACCCTTTAACCTTTGTCACGTAATCCTACTCAAGCAAATCTTCGTTGGGCTGTCTAATTC  
TTGTGCCTCTTCGTAGTTTAACTTAGGCCCAACATCTTAGCCAGCCTCAGATAATTGGTCCATAAGCATT  
ATCTGGGCTATCCATGTTCAACATTATTAGTACTTATTTTTAGTGGAATGATTGCACTACTGCAGTTT  
GATGTCATTTTCATCAATTGGATATTTTCCTTGCGTAGAATTTCAAATATTTTGACTAAGGTGTTTGATTA  
GTTGCGTAACTTTGGTTTGGTAGAATTCTCAAAGACTAATTTATTTTTCTGTTTCTCTGAGATGATAAC  
ATTGATATACTTATGGATACTTGAATGTTTGTGTTGTTAATTCGTCTATTCCCTCGACGTGTCAAACTTT  
TTAAAAACAGGTATTTGGGAATGAAGATATTGTTGGTTGATTTAGTTCTCTTGCTTTCTTGTTTTCATTTA  
GTTAGGTGCAATAATACGCGTTCAGACAACCTTATTGCCTGGACAAACCCTTTCTTTTCTGCAGCAGATA  
CTTAGTGTCCAAACAAGGGAAGTTTGAACCTCGGTTTCTTCTGTCCAGGTAATTGTGAAAAGCTTTTTATT  
GGTATATGGTATACAAACATAAAGCCCAAGACCGTGGTTTGGATAGCAACTAGGGACAACCCCATCCGC  
CCTCCGTTCAATAGTTCTCATCTAGAGCTGTCTGATGGAAATCTAGGAATCTTTAATGAACGTAAACAAA  
GAGTTTGGGACTCTAATTTATCCACAGCAGATGTCAATAGGGCAGTACTTCTTGATTCTGGAAATTTTAT  
TTTGACAAATGGCATTGAAATACAGTGGCAGAGCTTTGATTATCCTACAGATACATGGCTGCCTGGTGC  
GAGGATTGGATTTGATAAGTCCAAGAACACACTCCAGAACTTACTTCTTGTATGGATGCAAATGATAC  
GGCTTCAGGACACTTCTCTTTGGAATTAGACCCTAATCAAATGGTGAGTTAGTCATGCTACGTAACCTC  
GTGGTAATGTGGATCTGGGTGCCTTTGAATCTCGTGGTATCCAACCTTCAGTTATAATCCAACCTGAACATA  
GTGCATTTATTACATACAATGTCTTTGGTGAATCTGTCAATTTCTCGAATTGCCTAGATCATAGCAGGTTT  
ATGAGGGAACTCTTCTGGTCTAATGAGCATCAGAATTGGATGGTTGTGCGGTCTGTACCTGTTGATATGT  
GTGACGCAACGAATATATGTGGTGCCTTTGGAATTTGTGATATAAATACCAGTCCAATCTGTGGATGTTT  
ACAAGGTTATGAACCCAAGTTTCCATTAGGTTGGGATACTAATGATTATTCTGGTGGGTGTGTGAGAAT  
AACTCCGCTGCAGTGTGGCAGCAATAACGATGGTTTTGTTTCGTATGCAAATGTTGAACTTCTGCATCA  
TCTGAATCAGTGAAGTGGGGAATGATCAGATCTGTGAATATATATGTTTCATCCAATTGCTCATGCAATG  
CTTATACTTACAGCTATAGTGGAGTGTGCTTATTATGGAATGATGATCTTATCAATCTGAGAAGATTATCT  
GATAATTCACGTCAAGCAGTGTTAAGCATAAAAATGTTTGAGCTTTCAAACAAAGGTTAGGTGCTTCTAA  
ACTGCTTCTTGTCTAATTGTGCTTACTTGAACTGACATTATGTTCAATTTCTCCTCTCCCCATCTATCTTA

TTGCTCAGGCAATAAAAAGTCATCGTTTGTAGTGCTAGTAGCATCCATCACTTCAGCAATTTTTGTCTGTG  
GTACATGCTGTTACTTTCTATGGAGACGAAAGCTCAAGAAAAAAGGTACTTCTTTATATTTCCAATAGCT  
ATGCCAGCGCTTTATGAATGTTAATGTGGCCTACATTGGTTGAGGCCATGAGGGTATAGGATCTTGTCTC  
CTTATATTGTCTTGGCTATCCTCACCTCATGAACTAGCTTTCAATCGAGATTGACATTTTCTTAACAATGAA  
CATATGTGGGATGCCAATAAACGAACCTAGTCCTTCTTGATTCAATTATTAAGTGTGCAGTCTTCGTGTGA  
TATTCTAGTTCTTACTAGTAGTAGCAGGTTATCTGACTTAACTGTGTTCTCGCTGTCACACTCACTACAATC  
ATGGATTAGATTATAAGTTAAAATTACCAATGTACAGCTTCATCTATAGACTTCATGTTTCTATTGCCTTTT  
CAGGGATTTTGAGAAAGATGAAGTTCAGGGAAATGTTACTTTCTGACTCAGCAACTAACATGTCAAAC  
CTGGAACCTCCATTGGAAAGGGACAAGAAAAGAATGGTGACATTGAACTGAAGTTCTTTGAACTACATG  
ACTTGAAAGCCGCGACAGACAATTTTCCCCCTGATAATAAGCTTGGAGAAGGAGGTTTTGGTCCTGTTTT  
TAAGGTATTGTTACTACAACCTGAATACCTGCAACACAAATATGCGTTCACACCTAAAGAAAATGGAAAG  
AAATCCCTCCGGAAATAGCCAGATAGTATGTATCCTGATTTTAGTTAATATCTTTGCTAGCTGTACTTATG  
TCTTGGAGGTGTGATAAATGTTTTTTGCAATTTCTAGGGTCAATTGCCAGATGGGCAGCAAATAGCTGT  
GAAAAGGCTATCAACTCAATCAAGGCAAGGCATAAGTGAATTCAAAACCTGAGGCCCTTCTCATTGCAAA  
ACTCCAACACAGAAACCTTGTTAGGTTCCCTGGCTGTTGTGTAGAAGATGAGGAGAAAATGTTGGTATA  
TGAATATATGCCAAATAAAAGTCTAGACTATTTTCATATTCGGTATATATGATAATTTACTACCATCTGTTTT  
TGTGTTAACCTTTTCTCCTGTCAAATGTGTGCTTACTGGATAAATTTGATATGTACAACCTTAGACGAGAG  
CAGGAGGTCATTGCTTGATTGGAAAAAGCGGCATGAGATCATTATTGGTATAGCTAGAGGGATACTCTA  
TCTGCATCAGGACTCAAGATTAAGAGTAATCCACCGTGATCTGAAAGCCAGCAACATTCTTTTAGATGAA  
GACATGAACCCCAAGATATCAGATTTTGGTACAGCAAGAATATTTAGCGGAAACCAAGATGAAGCAAAT  
ACTCTTCGAATAGTTGGCACATAGTAAGCAAGCAAATACTGAAAGTTCTTTTCCCATACTACTTTGCCTAC  
TCATTATAGCTCCTTTTCTATGCAGTGGCTATATGTCACCTGAATATGCTCTAGCTGGTCTCTTCTCAGTAA  
AATCTGATGTCTTTAGCTTTGGTGTCAATTATTGGAGATCATTAGTGAAAAAAGAACAGAATCTCTTA  
TAATAGTGATTCCCCTCAAATTTGATACGACAGGTAAGTTGTAAAATGCAAATGTTTGAATCTTTCTTTG  
ATTAAGAATCAAATTTATCCATTTCAATGAACTACTGATTCAGGCCTGGGAGCTTTGGAATGATGGCAAG  
GCCTTCGAGCTGATAGATCCAACGATAGTTGATTCTTGCCCCAGTGAGGAAGCACTACGCTGTATTCAAG  
TGGGACTATTGTGTTTGAAGTGAATGCAGGGGACAGACCAACCATGTCATCAGTTCTATTTCATGCTAA  
GTAATGAAGCAACGATTCCCTCCCCAAAGCAGCCATTGATTACCCTAACTCTGACTCGAGTACAACAGA  
AACAAACACCATCTTCGATCAATGAGGTGACTATTACTGCACTTGATGGTCGTTAGTCAGCTGATGACTGA



TGATTCAGCCAATCCGTTCAAGTGTGGGAGGGTTATTGACCCATCCATTTACTAGCTCAACGAATTGGGT  
TGATATGTTGTCAAATTGATTCGGGAGAGATTGTCAAATAATTTTCAGAGGACATTTTTTTATTTGATA  
TGTTATATAAATAGTTACAATAAAGAAAACAATAATTTTAGGTATTAATAAATTCATAAAAGAACAATAA  
AATAATTAACCTTACTAAGAATTGAACGAATTGAGTTACAACCTCACATTGTAGTCCTGTTTCAGTCAAAT  
TTAATCCACTCAAATTCGACTCAACCCGTCTATTTGAGACCTTTGATCT

>PGSC0003DMG401019239 G-LecRK

ATGAGCGGTAATGGCTGGGGAAGGGGGCAAGTACATCCTTTTGTTCAGTTCGTGGGAATTGCTTCCA  
TCACTAACCAGTTCAGCTCGGCTAGTGGGCTTTTGTGTTGGAACCTCGAATCCGGACCTGTTGACAAGA  
CCAGATCCATCAACAAACCTAGGTCCAATATTTGCGTCTACGAGCTAGCCATCAACAGACGGACATCCTT  
TTACCGCAGTCTTCCCCTATTGGGCATAGACTTTTCTACGTTAGGCTCCTGTAAGGGCGGGTATGAGAAG  
GGTCCCCCTCTCCCTTGCAAAGCTTAGTTATCCGTGAATGAGAACTCGTTTTGCTTGTGGCTGGCTTAT  
GATGGTTTCCTGTCCCAATTCAACATATTCCTTTTTTTGCTCCTGCTTGGTAGCAGGCTTGTGTGCGAGCT  
TGGTCCGGTTTTGATTCTAAAGCCCACGGAGAAGGGTGTGGAGCCTCGTTTTCCATGCTGCTCCTAGTT  
CGTGGGAATTGCTTCCATCAAATAGCCGTACCATTAAGTAAATTAATAAATAAGCTACATTGGGGTAA  
AATGCTTTCTAACAATGCGACTTCATATCCAAAAGATTCAAACCCAAGACTTTTAATTAAGAATGAAG  
GAGTCACATCACCACAACCTGTGTCAGTGATTTGATGTTGTTGTTGTAAGCAAATAAGATAGAACATGGCC  
CCAACATCCATGTGTGGCTGTGATTAAATTCAACTATTCATTATAAACAATAATCTCAAAACCAAAGAAT  
ACGATGAGTATTAATCAAACCAGCCAAGCTAAGGTGTGTTCAAATAGGACTTGGGTCAAGTGTCATCAA  
TATGCTGCATGAACTGGTCATAAGAGTCGGAAGGCAGACTTGCTAAGCACTTCGACATAGAGGAAAGA  
CAACACAACGTCTATTGGATCACAAGCATGAAGGAATTGCTAAGGGAGAGTTTTCACTTATTCTTGCTC  
ATGTATTTGTATTTTGTCAACGCAGCATTGGCGCTACAGATACCATAAGTACAACCCACTTTCTGAAAG  
ATGGTGATGCCAATATTACTTCACCTGATGGAACCTTTGAAATGGGGTTTTTCAGTTCAGGTAGTTCCAA  
AAATCGCTACGTGGGTATGTGGTACAAAAGCTTATCTGTTAGGACAGTGGTGTGGGTTGCCAACAGAGA  
AGCTCCCTTGACCAGTGGATCAGGTATCCTTAAGGTTATTGAGCCAGGACGTCTCGTCCTTCTCAATGAC  
ACTAACAAGTTGTATGGTCAACTAATACCTCTACATCTGTGCAGAATCCCATTGCACAGTTGCTGGATT  
CTGGGAATCTTGTGCGTGAACAAGCTGGTGTGATAATTTCTTTGGCAGAGTTTTGATCACCCAAGTGA  
TACACTATTACCAGGCATGAAGCTTGGTTGGAACTTTTTAAGTACAGAGAGGTGTACTTGTGATCGTGG  
AAGACCCAAGAGGATCCAGCTCCAGGTGATTATACATATCACTGTGATCCTTCTGGATATCCACAGAACA  
TCCTGAAGAAGGGGTCAAATGTTGTCTATCGATCAGGGCCGTGGAATGGTCTTCATTTTAGTGGAACAA

GAAACCCAAGAGGCAGTCATTTATACAAATATGAGATATTCTCAAGTAAGACACAGGTTTATTTTGGATA  
TAAGCTCATATCTTCAGTTATCACAAGGTTGATACTTAATCAGAATGGTGCCCTAAAACCTTTGGACTTGG  
GGTGATCATGTATCTGATTGGATCCCTCAACTCTCAATACCCGCAGATAACTGTGATGCTTACAACTGT  
GTGGCGCATACGGGACTTGCAACAGTCAAGATTTTACTGTATGTAGATGCTTAGACAGATTTGTGCCCA  
ACAATAGTGAAGCTTGGAAGAAGAGAACTGGTCAGGTGGCTGTGTTCGGAAAACAGAACTAAATTGC  
CTTCAAGGACATAGATTTTTGAAGTATTCACATATCAAATTGCCAGACACACGGAATTCCTGGTCCGATG  
TGACTATGACACTTGAAGAATGCAAGAATACCTGCTCTAAAAATTGCTCTTGTATGGCTTATGCAAATCC  
TGACATACGCAATGGAGGAAGTGGATGCTTGTGTGGTTCGAGGATCTGCTTGACATTAAGGTGGTTTC  
CGATGAAGGTCAAGATATCTACATAAGAATGGCTGCTTCTGAACCAGGTAGGTTTTGTTGTCACTTAAAG  
ATTTTTGATGGATTACCTGAAAATAGTAAAAGAATGTATGGTTGCAGTCACTTCTTTGGAACCAATTGAT  
AGGTATTTAGTTTTCTGTAGAACAAGAAGTTGAGATGCATGCGGCTTGAATCAAAGAAAAAATCTTCTCA  
AAATTAAGAGATTTATAGTAACATTCAAAAATTAATAATGACTTGCATTATATTGAATTCTAGAACCCTT  
ACAACCTCAATATCAACAAATTCAAAATGATGTGCAGTACTCCAAAGGCTTACAGAATCTTTTTTAATTCAA  
TATAAAATTATCTCCCTCGTGGATTGGACAGAAAGTGAAATTGATTATTTTTGCGGAATGGATACTTGCA  
GATAGTCTGGAGAAATCAGATGGAAAGAAAAGAAAAGTACTTTTTCTGGATTCTGCCATTATCAGTTGGT  
CTGATTCTGGTAATTCTTAGCATGTTGATCTTCCATAGAAGAAGGAAGAAGGCTTTACAGCTCAAAGG  
AAAGGTAAAATAGGATAAATCTCATTTTTTATTGACATCTTAGCAAAATCAAGGAACATAATTCAAAGAA  
AAGTGAAGAACTTTAATATTTGGTCTGGATCACAGCTTAAACAAAATTCACTTCGTTTGCAGGCAGGTAG  
GTCCGGACGCAATGGCAACTACAAGATGGATCATAGTGGTAATTGTGAGGAAGAATTTGAGATACCAA  
TGTTTGACTTATCTACCATAATGAAGGCTACCAATAACTTTTCAATAGACAGAAAGATTGGAGAGGGGG  
GCTTTGGACCGTTTACAAGGTATAACTGGTGCACAGGCAAAAACCTTCTGATCCTATAGAGTAAAGTTT  
CATCTTTAGATTCAGTATAGAAGTTGTATGATGAAATGCATAATGAAATAAAGCTTTGGCTTGTGAAACC  
GAAGGAGACATACACAATAGCTAAGGAAGAACAAGGATACGGTGGAACACAACTGATTGTCTCTTTCT  
AATTGGAACACAATTGACTCTGTGTACTTCTACATCAAGTAAGGTAATGAAAATATTAACATGCAGAAA  
TTGTGATGTTTAGGGCATACTTGAAGGACGGGAAATAGCTGTCAAACGGCTGTCCAGAACTTCCAAACA  
AGGAGAAGGTGAGTTCAAGAATGAAGTTTTATATGTTGCAAGACTTCAGCACAGGAATCTGGTGAAGA  
TTCTTGGTTGCTGCAGTGACGGGGAAGAAAAGATGTTGATCTATGAGTACTTGCCGAATGGGAGTCTTG  
ATTCATTTATATTTGGTACTATTCTCCATCCAATATTGTGCAAATTAATAAATAATTGTGTTTCAGTGATG  
ATGCCTATAGTAATACTTCATTAATCTTTTTTATTTTGAAGTAAAAGTAACTAGTAGTACTTTGGTAATTTT

GTTCCAATTATGAAAGCCCCATAAAGCAGGAAAAATATTGATAGACCAAACCTGTTGTGGGAGTATTTA  
ATACTACTTTCTCCTATAACCAATTAGTCAGTTAATGACCCAACAAAAAAATTGGCAGATGACACACAA  
AGCAAGGCATTAGACTGGCCTAAGCGATTTACATTATCAATGGTATAGCTCGGGGACTTATGTATCTGC  
ATCAAGATTCTCAATTGAGAATAATTCACAGAGACCTGAAAGCTAACAAACATTCTGCTAGACAAGGACAT  
GAATCCAAAGATATTAGACTTCGGCTTGGCAAAAATATGTGAAGAGGATGACATTGGAGCCATGACAAA  
CCGAGTAGTTGGAACATAGTAAGAACCTTCCACTGGATAGTATTATTTTGATAAGATTTACTGGATAATA  
ATTTGAACCAAAGAAGAATCTTCAGTTAGTAAAGGCATGTTTTCCAGCATTACTAATTATAATGTTGCGC  
ACATTTTAATGCAGTGGGTACCTCTCACCGGAATATGCATTGCACGGAAAATACTCAGTAAAATCAGATG  
TATTTAGCTTTGGTATTTTAGTATTGGAAATTGTCAGTGGGAAAAGCAACAGAAAATTCTCTCATCCAGA  
TCATAACCTTAATCTACTCGGGCATGTAAGATTTTACTTGTTTTATTTCTTATTTTTTTGATAACCGAGGTG  
TTGGAGCCAACATACTTGAGCCAAGCGTCTATCAAAAATAGTCTCTCTACCAACGAGGTAGTGGTAAGG  
CCTACATACACACTACCCTCCCCAACTCCACTTGTGGGATTATACTAGTTATGTTGTTGTTGTCGTGGTG  
CCGAGGCCAGCTTGCGCACACCTCAACTTATTCATGGGATACCTGCAAACCTCCACCACCAATAGGTAC  
CGGGTAACTCTGTCCAACAAGGTTAGGACTGATGGGAAGAAATTGCCTAGTGTTTTTTGTCTCTGCTGGA  
ATTTGAAACTGATCATCGACCACTAGGTACACCCTGGGTGCAGTTGTTTAATTTTATTTATTCCTTGGT  
GTATGTTATATACTAGTAACAAATATCTTGTAACGACCCCTGCTAATAAGCTTGCAATATCTACAGGC  
ATGGAACTTTATATACAAGGTAGGTCAATAGAACTACTTGATGAATGCCTAGGTGATTCTTGTTCAACA  
TCTGAAGTGGTACGATCAATTAGTGTTGGTTTATTATGTGTCCAACAATGTCTGAAGATCGTCTAAGTA  
TGCTTCCGCAGTTCTGATGTTAACAATGAAGGTGTGTTGCCGTTGGCTAAACAACCAGGTTTTTACAT  
AGAAGGAAATGCACCGGGTGGTGATTTCACTCCTAGCCAATCTGCACAGATTACAGTGAGTGACACCCC  
CATCACAATACTAGCTGCTCGATAGAAGATATTGGTTCACTTGTGTTGCAACAAGCTTGCAAGTTGCAATGA  
TCTTTTCTTAATTCTCTATAGTAATGTGGTGAAAAAATGTGTGCATGATTGTGCTTTTTTAGGTGTATCA  
ACTATGTCAAACATATGTAGGAAGCTTGCTGACTGGCTGTTACTTTGATTTGCGCAGTATATCTGAT

>PGSC0003DMG401019242 G-LecRK

ATGTTACTAACTTCTGCAGCACTAGACACAATCACTACAGATAAATCCATTAGAGATGGTGACACAATTG  
TTTCAGCTGGAGGGGTTTATGAGCTTGGATTTTTCAGCCCTGGAAATTCGAAGAATCATTACGTTGGCAT  
ATGGTACAAGAAGATATCACCTACAACCTGTTGTGTGGGTTGCAAACAGAGATATTCCACTTAATGACACT  
TCAGGAATGTTAACTTAATCCCAATGAAATTCTTGTAAGTTGTTGATAAATCCAATGTATCAATTTGGTC  
ATCAAACCTCATCAAGATCGTTAAGAATCCAAAAGCATGGCTCCTGGATTCCGCGAACCTTGTGTTAGT

GATGGAAATGATAGAGAACAGGGAATTAATTTGGCGTGGCAGAGTTTTGATTATCCAGGAAATACTTTA  
TTACCTGGAATGAAGGTAGGAATAGATTTGATTACGGGCATGGATAGGTATGTAACGTCATGGAAGAG  
CACGGATGATCCTACTCCTGGTGAATATGTAGATCGTGTTGATTCACATGGATACCCTCAATTGTTCTTGA  
TGAGAAATTCATCTGTAGTGTTTTGCTCAGGGCCATGGACTGGTGCTGCGTTTTCTAGTAGTCCTAGTAA  
TAAACCAACTTTGTATTATACGTTGAGTTTGTGTCAATCAGAAGGAAATTTACTTTAAATACGAGCTTA  
AGAATGACTCTATGCCACCAGGGTGGTGCTCAACCGGATGGGGTGATAGAACACTTAATATGGATTGA  
GCATACTCAGAGCTGGTTTCTACTTGACAGCACAACCTGGATAATTGTGATCGTTTTGATTTATGCGGA  
CCTTATTCAAGTTGCAACATCAATAACTCCCCTCCATGTGACTGTTTGAAAGGTTTTGAGCCTAGGTTTGT  
ATTTGTTAAACTTTGTGATCATCTCGCGTTAAGCTATTAGAGAGAGTGCACTTTTGAATTTGATTACTAA  
GTTATGTTTTCACACACCCTCATGTGTGTGCTTGATTCTTTTTCATGGACCAAACACGTGTAATTATTTTT  
TTGCCTTACAGGTATCCTCAAGATTCTGCAGCAGACTGGTCTAGTGGCTGCATAAGGAGAACTTCTTTA  
AATTGTACCCATGATGGTTTTCTTAAATTTACGGGTATCAAGGTGCCGGATTCTAGAACTCCTGGTATG  
ATGAGAGAATGAACCTTGAAGATTGCGAGAAAATGTGCTTGGCTGATTGCAATTGTACAGCCTACTCAG  
ATCTTGATGTTAGAAATGGCGGAAGTGGATGCTTACTATGGTTTGGAGAACTCATAGATATACGAGAGT  
TCAGCCAAAAGAGCAAAATCTGTATGTGAGAGTAGCTGCTTCAGAATTAGGTAATGACCCTACTCTGC  
ATAAATGCACTAACTCTTTAGAATTGAAGGAACTCTGCTACCTAATTTACTTACATGATGGACATTAAAGT  
TGATTAGGTGCTTTAGTAGTTGGTAATATGGCGATTTCAATTGTGAAGGATTTCAATTTTCGGTGGTACTGG  
AACGGAAGTAGCTTGCTGCAAAGAGCATTGAATAATTTATATCTTACTCTACGACTATATGGATACTA  
GGACATAACCGGTTAGTAGGATTGCTAAGGGATGAGACACTTCATTCCCTTAAAAGGCTTAAAAACATG  
CTAGACCTCATGACAGATCAAGGCTGTTGACAGCGGGTGATAATCATATGCATTCTGTCCTTAGTAGTGC  
CGCTTGTAATCAGTGACACTGTACTTTAATATGTGTCATCTTCAAAGAAGATCTCCAATTTAACAATGCA  
GCTTGTAATCAATTAACATTGACTACTTTTTAGTAATCTTGTTGATTGAATGCCCTGGTCTACAAGTTA  
CAAAGTCTGCAGGGCTTCATAACAAAATAAGAAGTAATACAATCAATGCAATTAACTACTGATATGGCTA  
ACTCATATGTAAATTGAATACTGATTATGAACTAATATAGAACATGTTTCAGACAGGACGCGGAGGAGAA  
AGAGGTCAGTCCTGATTGGTGTCAATTCAGCAGTGGTAGCAACGCTTATCCTCAGCTTTTTAGCTTGTT  
TTACTTCAAAGAAGGAAAAGAAGAAGTAATAGGTAATATGCCTGAGGTAATCTTGTCTATCTGGCTGA  
CATTGTTGCGCTTGACCAAATTCTCATTGATAGCATGTTTGTGGCAGGCGAATGTATATTGACAGGTTCA  
AAAGTTGAAAATGAGGACATGGAGCTTCCATTGTTTGAATTTAGTTACTGTTACTAGCGCCACTGGAACT  
TCTCTTCTGCTAATGTGATTGGGGAAGGCGGATTTGGACCGGTTTACAAGGTAAATCAACTTTGATCTTC

AACTTCTAGCTGGAAGTGGCATCTTTAACCCCTTGATAGAAAATTGCAGGGTATCCTACCAAATGGACAA  
GCAATAGCAGTAAAGAGGGCTATCGGAGTATTCTGGACAAGGCATTCAAGAGTTAAAAAATGAAATCGTT  
CTCATTTCOAAGTTGCAACATAGGAATCTTGTCAAGCTATTGGGTTGCTGCCTTGAAGGAGAAGAACGG  
ATGCTAATCTATGAGTTCATGCCAACGCTAGCTTGGACTATTTCATTTTTGGTCTGCTTTTTCGTGATTTA  
TTGCCTATACTAGTACTTGACAAGCCCTCAATATCTCTGATCACTCAATGATTAGTTCTACATTGTGCAGA  
TCCAAGCAGAAAAGCTTCACTTGGATGGAAGAATCGTTTTGAAATTGCTATGGGAATATCTCGTGGTCTT  
CTTTACCTTCACCAGGATTCAAGATTAAGAATTATTCACCGAGATCTCAAGACCAGCAACATTTTATTAGA  
TAGTGACATGAATGCCAAAATTTCTGACTTCGGCCTTGCCAAAATTTTTGGTGGAGATCAAGTGGAAAGG  
AGAAACTAAGAGTATAGTAGGGACATTGTAAGATTCTACACATCTTTAAATCGTATAATCTTTATTATATT  
AGATCAGTACATGAGCATAAACTTATTGAATTGATGTAGTGGATATATGTCCCCGGAGTATATTGTTGAT  
GGGAAGTATTCAGTAAAATCAGATGTATACAGCATCGGCCTAATCATTCTTGAATAGTTAGTGGCAGA  
AAGAACAGGAAATTTGCTCATTGGATCATCATACAATCTTTTGGGACATGTAAGCACAAAACCTTCACT  
CCCTTAATCACTCTTAGCTTCTATTGTGAATACATTTGTATAAATGTGTTGTTCTGTTTGTAAATTTAGGC  
ATGGTTACTCTGGAGTGAAGGCAACGCGTTGGAAGTATAGACGAAAGTATCAAAGAATCCTTTTCAGA  
ATCTCAAGTGTTGAGATGCATCCAGGTTGGTTTGTATGCGTCCAAAACCTCCCCGAGGATAGGCCTACA  
ATGGCATCAGTAGTTTTCTGGTTAGGCAATGAAGGTCTAGTTCTTCTCAACCAAAGCAACCTGGTTTTTT  
CATAGAGAGGAATTCAATAGAATCAACAGAGTCATCAACTGATGAAGTATATGTAAGTAGCAGCGTGTC  
GATAACAGTTCTAGAGCCAAGATAA

>PGSC0003DMG401028902 G-LecRK

TTTTGGCCATTTTGTGTCAATCCTCTAAATAGAAATCCCCAGTCAGCAAAGATGCAATCTTGGAGTTTGG  
CACCACAGGAAATCTTGTGATGGATGGAGACACCACAGTGTGGGCATCAAACACCTCGGAAGCAG  
GCGTTGAGTTGGCTGTCATGTCTGAAAATGGCAACTTCATTCTCTACAGCACCAATCTAAGTACCATTGC  
ATGGCAAAGCTTTTCACATCCATCTGATACTCTTGCCTGGTCAATCCTTAACAGTGTCACTAGAATTAA  
CATCATCAAATTACCTTCTCATGGTGGTACTACACTTTAAAAATGTTGCAGCAGCCTACTTCACTAAGT  
CTTGCATTGACCTATAATGTCCCCAACTACTACGATTCATCGCCTGAATTTTACAGCAATTTTTCTTATTGG  
TCAGGACCTGAAATATCAAATGTGACTGGAGATGTTACTGCAGTATTGGATAAAGCAGGAAGCTTTGGT  
ATAGTTTATGGCTCATCTTCAGATGGAGCAGTTTATGTATATAAAAATGATGGAGATTATGGAGGACTAT  
CATCGGCTGTAAATCAAACGAATTCCAATGTTCCATCTATTCTTCGTCGATTAACCCTTGAGGTTAATGGA  
AATTTACGTTTGTATCGATGGGATAATGATGTGAATGGATCAAGGCAATGGGTTCCAGAGTGGGCAGCT

GTGTCTAATCCATGTGATATTTCTGGAGTTTGTGGCAATGGGATATGTAATTTAGACAGAAGCAAACA  
AATGCTTCTTGACATGTTTGCCAGGGACTTCTACGGAGGGAGATGATGTTTCATGTTCTGGGAAATCCTT  
CAGTGACAGGGAAATGTGGACCTCAGCATGAAAATATGATGTCCCAGTTCAAGATTTCTACGGTTCAGA  
AAACGAATTATTATTTCTCAGAATCATCTGTTATAGGAAATTATAGCGATAAAGGGTCACTGTCCAAATG  
TGGTGATGCTTGCTTATCAAACCTGTGGTTGTGTTGCATCTGTTTATGGACTTAGTGAGGAAAAGGCTTAT  
TGTTGGTTACTCAGGAGCTTGAATTTGGTGGATTTGAGGATCCTGTTTCGACCTTATTTGTGAAGGTTG  
AGGCCAATGCCTCGGTATCTGAAAACCTGGGAATTCATCAGATGAGTCGAAGAGTAGGCACGATAAG  
GTTTTGGTACTTCTATAGTCTGAGTATGACTGTTCTCATTTTGCTTCTCTGTTGTTTATTGTATATCAAT  
ATCCATAGGAGAAGATCTATGAGAAGGGCACTTGAGGGATCTTTGCTGTTGTCTGGAGCTCCAATTAGC  
TTCAGCTACCGCGACCTGCAATGTTGGACTAACAAATTTTTCCGAGTTACTTGGAACAGGTAAAGATATAG  
AATTTTTATTACTTCTATGATACTAACCTCTCAACTATAGAAATAACAAGCACAGAAAACCTGTTCTCTTCA  
GATAAGGTAAGAATATGATCAGTAACATTGCTGCTTTGACAGGTGGATTTGGAAGTGTGTATAAAGGAA  
GTTTAAAGGATGCAACATTGATTGCAGTAAAGAACTTGATAAAGTTTCACCTCATGGGGAGAAGGAAT  
TTATAACAGAGGTCAAACCATTGGCTCTATGCATCATCTGAACTTGGTTCGTCTATGCGGTTACTGTTCT  
GAGGGAACCCAACGGTAAGTTTTAACTTTTTTTCATTGTAATTTGTGATGTATAGATTGGGAAGTACGTA  
GAATTGTAGCATTACAGTCAAGCACTAGCACAACCTTCACTAAAATTTCACTCTTTGGCAGGCTACTAGT  
GTATGAGTACATGAAAAATAGCTCATTAGACAAGTGGATATTTCACTCATTAGTACAAGAAATAGACTA  
CTGGATTGGGCGTCACGTTTTTCGCATAGCAGTTGGCACTGCACAAGGGATAGCCTATTTTCATGAGCAAT  
GTAGGAACAGAATTATACATTGTGATATCAAGCCAGAAAACATACTTCTGGATGAGAATTTCTGCCCTAA  
AGTATCTGATTTTGGACTAGCTAAGTTAATGGGAAGAGAGCACTCTCATGTTGTCACAATGATCCGAGG  
AACGAGAGGTTATTTAGCTCCCGAGTGGGTCAGCAATCGACCTATCACTGTAAAAGCTGATGTTTACAG  
CTATGGCATGCTTCTTCTAGAGATCATTGGTGGTCGGAGAAATCTTGATATGACTTGTGATGCAGATGAC  
TTCTTTTATCCTGGATGGGCTTACAAGGTACACACGCAATCCTCTAATTGTATTCATAGTGTCCCTCCTT  
CTGGTACATGTTCTTCACTATCTTCTCCTTTTTTTCAGGAGATGACTAGTGGAACACCCGTAAAAGTT  
GTAGATAGGCGACTTAGAGGAGCAGTAGAGGAAAAAGAGGTAACGAGAGCACTGATGGTCGCCTTCT  
GGTGTATTCAGGATGAAGTGTCAAACAGGCCTTCCATGGGAGAAGTGGTGAAGATGTTGGAAGGATCA  
GTTGACATGAATATGCCACCAATGCCACAGACAGTTTTGGAGTTAATAGAGGAAGGCTTAGATCAAGTA  
TACAAGGCAATGAAGAGGGAACCTCAATCAGTACAGTTCTTCTCCATTGCTACTCATCCATCATCTAATG  
CTACATGCAGTCACTCCAGTATGTCACCTAGATAGTTGAAGGTGAAATCGAACACAGTTTTTCTAGGAT

TAAGTAATCGTATCATCATTGATTATTCATTCCCCGTCTCCCAAAGAAGTCCCGGAAAAAGAATAAGAA  
GGGAACACAACCACTTTTGTATCATGTGTTGCTACAACACCATACACGTTGCAAGAACTCACTGTCTTGTT  
TTATTGTTTAATTTCACTCAATTCCTCTGGTCTCTAAGATATCTCCACCATTTCTCTGTATAATTCGTCACT  
ATCTCTTTTTCGGTTTCTTTTATA

>PGSC0003DMG401029444 G-LecRK

GGTAATAGGAAGAGTATTAGAAAACCAAAAAGATGACCACTAGCAGCAGAAATGTGCATCATTTTGT  
CATCTAATTCTTGTTATTCTTCATTGTTTAAACAGGATTTTGCACAGAAGTAGATAGCATTACCAGCAC  
TCTATCTCTGAGGGATCCTGGGATTTTATCATCTCCAGGAGGCGTCTTGAAGTTGGGATTTTTCAGTCCTC  
TAAACAGCTCTAACAGGTATGTTGGTATTTGGTACAATTTTTCTGAAACGATTGTCATTTGGGTGGCTAA  
TAGGGACAAACCTTTAAGAGATTCTTCTGGGGTTGTCAAATATCTGGTGATGGAAATATCTTAGTTATG  
AACGGGGAGGAGGAGATTCTTTGGTCATCAAATGTTTCAACCTCTCAGGTAAACTCAATTGCCCTTCTCC  
AAGATTCTGGGAATTTTGTCTTGTAGATCATCTGAACAATGGGAGCACAATATGGCAGAGTTTTGAACA  
TCCTTCTGATTCAATTGTCCCTAAAATGAGATTAAGTGAAAACACAAGGACAGGGGAGAGGGGTAGAAGT  
AAAATCTTGAGAAGCCCTTGGGATCCTAATTTCCGAAACTTTTTCTTAGGAATGAATTCTGGATTCAATC  
CTCAGGTGTATATCTGGAAAGGTAGTCATCCCTATTGGCGAAGTGGTCAATGGAATGGCCAGATCTTTA  
TCGGAGTGCAGGGTATGTATTCTGTGTCGTCTGATGGATTCAATGTAGTGAACGATCGCGAAGGTA  
TATACCTTACTGGCCCTGGTGATTTTGATTTCTAACGAAATTTGTCTTGGATTGGAAAGGGAATTTGGTT  
CAATCATATTGGGATGTGAATGAGACAAACTGGAAGATAATATGGTCAGCTCCCAATAACGATTGTGAA  
GTTTATGGAACATGTGGTCCATTTGGGAGCTGCAATTTGGAGTCGCCGATCTGTTCTTGTCTGAAAGGTT  
TTGAGCCAAAGCACAGGGAAGAATGGGAAAAGGGGAATTGGACTAGTGGTTGTGTTAGGAGGAAAGC  
TTTGCAATGTGAAGTAAGGAATAACTCAGGGGATTCAAGTAAAGAAGACGGATTTCTAAAGATAGGGT  
CAATAAAATTGCCTGATTTTGCAGAAAGGTCATCGACTAGAGAAGACCAATGTAAAAGCCAATGCTTGG  
GATATTGTTCTGCATAGCGTATGCATATGACTCAGGTAAGTGGCTGTATGTCATGGAGTAACAACTTGAT  
TGATATTCAGCAGTTCCAAAGCTCGGGGAAAGATCTCTATATTCGCGTGGCACATTCAGAGCTTGGTATG  
TATAGTGGTGTGAATAGAAGACTCATTATCCACCAGAATAGCTTAATCAGTCATTTGAGATATCATGG  
ACTTATTGAATTCCATATATATACATTAAGTAGCTTACTTCTGTAGAGAAGTGAATTTTGTTCACCTTTGT  
GATTGCTCTACATTACAGATCATCATAAAGACATAAAGAAAATTGTAATTCAGTAATCCTTGGTTTTCTT  
ACACTCTGTGTTTGTCTGTTTCTTTGCTGTACATGGATGGCCAGACTTAGAGGTAAAACAAGCTATAAAG  
TTTTAGTATTATACATTTAGAAGCACTTTGTTTGTCTATAGTAGTAAATTTGTATCCCTGCTGATATTAGGA

GTAAAAGGAAGAAGATAAATTTACTTGGTGACAGAAGTGCAGTTCATATGGAAGAGTTACAGTCTTC  
AGCCTCGATACGCTTGCAAATGCAACATCCCAATTCATGAGGATAAGAAGCTTGGTCAGGGCGGTTTT  
GGTCCAGTTTACATGGTACAATTTTCTTCTCTCTCGATCACTTTTCAAATTCAGTTGCTGAAATTGCTGAT  
TACTTGTAGGGAAAATTGGAAGACGGGAAAAGAAATAGCAGTCAAGAGGCTTTCAAAAGCCTCGGGACA  
AGGGCTGGAGGAGTTCATGAATGAAGTGTGGTGATCTCGAAAGTCCAACATAGAAACCTTGTTAGACT  
TTTGGGATGTTGCGTTGATAAAGAGGAGAAGATGTTGATTTATGAATATATGCCCAAGAAAAGCTTGGAA  
TGTGTTTTCTTTGGTTAGTCCTTGCTTTTAATAAGCATTGTACTTCTCATAGCAGTTCCTTTGTTACTCCAC  
ATCTATGTTGTTCCGACTCTTCAATAATGTCGATGGATGCTTGTAGATCCTCCAAAAGTACTGCACCTTT  
GGAGGATCCGACACGAGAACATCAACAATTTTGGGGAGTCTGAGCAACATTGCTCCACATTTCTTCTGA  
AGCAAAGTTAATCCCTTCTCCATTCATATTTGACAAACATCTAGATGAAGGCCACCGAGGCATTTTGGAT  
TGGAGAAAACGTTCCACTATAATCGAAGGGGTTGGTTCGAGGACTCCTTTATCTTCACAGAGATTCAAGA  
TTGAAGATAATTCATAGAGATCTGAAGCCAAGTAACATTTTGTCTCGATAATGACTTCAATCCAAAGATTT  
CAGATTTTGGCATGGCTAGGATTTTCGGATCTGACCAAGATCAAGCAGACACAAGGAGAGTAGTTGGTA  
CTTAGTAAGTGGACATTGATCTATATCTACCATAGCTTTACACAGTTTTTCTCCTGTAAAAAACCATATCAT  
ACATACTTACTAATAATCATTTTTTACACGAATGTGCTGACATTTTACAGTGGATAACATGGCCCCTGAA  
TATGCAATGAAAGGAAGATTCTCTGAGAAATCGGACGTTTTTACGCTTTGGAGTTCTAGTGTTAGAGATC  
ATCAGTGGCCGAAAAAGTACAAGTTCTTGAATGAGACATCCTCTTTTAGCCTTTTCGGATATGTAAGAT  
TCCCTTTATATGCTACTATTCAAATACTAAAAATGCTCATACTGCAAAAACACTATACAGTCAAAACATTTCT  
ACATCGACCTCGTTTGTCCAGATATCTTTTGGTTGCTATAGTGAAATGCTATTATAGAGAACATCCAAAGT  
AAATTTACCATTATAGTAACGTGTTGTTATAGTTCGATTGTGTGTACCTTATATTTTTACATTATGATGGT  
AGAATTACTTTTGTGCTCACTGTGTTTTATGCATCAATAAGTTTGTATGATCAATTTTTCACTGTTTTCAGGC  
ATGGATGTTATGGAAAGAACAAGATTTATCAACTTTTATCGATCCATTCATATTGAACACGAGCTCGGAA  
ATGGAGATCAGAAAATGCATACAGATTGGTTTACTATGTGTTCAAGAATTTGCTGAAGACAGACCAAGT  
ATTTTATCTGTTCTTGCTATGCTTACCAGTGAAACTACAAGTCTTCTGCACCATCACAACCTGCTTTTACT  
GAAAGACATGATTGTATCTTCAAATGTGCAATGTAATAATTGTACTTTGAACAATATCAGTATCACAA  
ACATAACTGGTAGATGACATGAGTATATGAAATTATTATTTTTAAGATATGCAAAATTATCCATTTGTCTC  
AATTTGTATGATATCTTTGTCATTCATTTTTCGATTACATGTAAATATTCGTGTTGAATCAAATATCATAA  
TCCACAAGTGAATATGTGTTTCCAATCACAGAATATATTATGGGATGTATTTGGAATAAAATGAAAAG  
GCATTTAGGTTTAAATGTCAATTTGTGCAACAATACATTTTTTATTACACTATGTGCATTATTACCACTTATA



GTTGACAAGCATGTTGACGTTGAGATGCTAGCTTATTGTCAAGGTCCCCACTCAATTCTCACACTAACGT  
GGCTTTTGGATTTTCACTCATTCTTACTTTTTCGAAATAGTTTAAATATATCAATCATTATATTTCTGGTCTA  
AGGTTGAATTAAGCTTAGATGTCATATCTTTACATCAATACTCATTATTTTATTTTCTTCTTCTTTTTCA  
ATGAGCATTTAATAATTTAAGGAAAAGAAATGTGTTATTTCAACAAGTTAAAAGTTGTCAATTCACAATG  
TTATTTCAAGAACATACTACACAATGATAGTGATGGGAGAAAAGACTTATATTGTCAGCGTATAGAAGT  
TAAACTCTACATTTTACATTATTCGTTTTTAAGTGTCAATTTTTGCATTGGCCTAAAAGTCTCGGATAGAG  
AATGATATGTGGTTTGTGATATTTCTATAGGGTCAACAAATTAATAATCCTATTTGGCTGCTTGTGATATT  
AGACTTTGACAACATATTGTGCTTTTTGTTTCATATAGTGTGGTAATAAGAAAAGTCTTAGAAAACCAAAAA  
GATGAGCAACAGCAGCAGCAGAAGAAGAAATTTGCAATATTTGTTTCATATAATTCTTGTTATTCTTCGT  
TTTATCGATACAGGATTATGCAGTGAAGTGGATAACATTACCAGCATTCAATCTCTGAGAGATCCTGGAA  
TTTTATCGTCTCCAGGAGGCGTATTCAAGTTAGGATTTTTAGTCTCAAACAGTACTAATAGGTATGTT  
GGTATTTGGTACAATTTTTCTGTAACAAGTGTCAATTTGGGTGGCTAATAGGGACAAACCTTTAAGAGATT  
CTTCTGGTGTGTAAGATATCTCGTGATGGAAATGTCGTTATAACGAATGGAGAGGAGGAGATTCTTT  
GGTCATCAAATGTTTCAACTTCTCAGGTAAACTCAATTGGCCTTCTCCAAGATTCTGGGAACTTTGTTCTC  
GTTGATCATCGGGACAATATGAGCACTATATGGCAGAGTTTTGAACATCCTTCTGATTCAACTATTCCTA  
GAATGAGAATAAGTGAAAATACAAGGACAGGGGAGATGGTAGAAGCAAGATCTTGGAGAAGTCCTTC  
GGATCCTAATATCGGAGACTTTTTCTTTAAGAATGAACTCTGGAGTCATTCTCAAGTGTATATATGGAAA  
GGAAACCGTCCCTATTGGCGAACTGGTCAATGGAATGGACAGATCTTTATAGGAGTGCAGAATATGTAT  
GCTGTGGTATCTGATGGATTTAATGTAGTGAATGATCGCGAAGGTACTGTATATTTTACTGGACCTATTC  
GTGATAATTTTTTAAGGATATTAGTCTTGGATTGGAGAGGGAACTTGTTCAATCATATTGGAATGTGAC  
TGAGACAAACTGGAAGATAATATGGTCAGCTCCAGTAACAATTGTGAAGTTTATGGAACGTGTGGTCC  
ATTTGGGAGCTGCAATCATTGGAGTCGCCGGTCTGTTCTTGTCTGAAAGTTTTCGAGCCAAAGCATAG  
GGAAGAATGGGAAAAGGGGAATTGGACTAGTGGTTGTGTTAGGAGGAGTGCTTTGCAATGTGAAGTTA  
AGAATAACACCGCGAATTCAAGTAAAGAAGACGGATTTCTAAAGATGGAGTTGATGAAATTGCCTGATT  
TTGCTGAAAGGTCATCTACTTCAGAAGACTTATGTAGAAGCCAATGCTTGGGGAATTGTTCTGCATAGG  
GTATGCATTTGATTGAGGTATCGGCTGTATGTCGTGGAGTGAATGATTGACATTGAGCAGTTCCAAAGC  
TCGGGGAAAGATCTCTATATTCACGTGGCAAATTCAGAGCTTGGTATGTATTCTGGTACTGAATAAAAAA  
CTCATTGTCAGTCATTTGAGATAGGCGTAATACATAAATGTGCCCTTTTACTTGGCCTCAACTCACATCTA  
TGCTCTCATGAACACTCAAAGTTAGATGGCATGGATGTCAGCAAAGGCCAAATCAAAGACACATTTAT

GTATTATGCCTTTGAGATATGTTTCGACTTAATTGAATTCCATGTATTCTGTAAAGAACTGATATTTGTTCA  
CCTTTAGTGTTTTCTGCAGATCATGGTAAAGACATAAAGAAAATCGTAATTCCAGTAATTGTTGGTTCTCT  
TACACTCTGTGTTTGTCTGTTCCCTTTGCTATAACAATGGTGATCAGACGTAGAGGTAAACATGCTAATAAG  
TTTTGTATTACACATTAAGAAGCACTTTGTTTCGCTATAGTTAACTTGTATTCTGCTGATATTAGGAGTG  
AAAAGAGAGGAGGTAGCTTTACTTGGTAACAAAAGTCCAGTTAATATGGAAGAATTACCAGTCTTCAGC  
CTCGATACGATTGCAAATGCAACATCCCAATTCAATGAGGATAATAAGCTTGGTCAGGGCGGTTTTGGT  
CCAGTTTACAAGGTACGAGTTTCATCTCTCTCGATCACTCCCATAATTCAAGTTACTGATATTGGTGATT  
CCTTGTAGGGGAAATTGGAAGATGGGAAAGAAATAGCTGTCAAGAGGCTCTCAAAGCCTCGAAACAA  
GGGCTGGAGGAGTTCATGAATGAAGTGTTGGTGATCTCGAAAGTCCAACATAGAAACCTTGTTAGACTC  
TGTGGATGCTGTGTCGATAAAGAGGAGAAGATGCTGATTTATGAATATATGCCAAAGAAAAGCTTAGAT  
GTGTTTCTCTTTGGTTAGTCCTTGTTACTTCTCATCTGCATTACTCCACATCTATGTTGCTCGGACTCTCA  
ATAATGTTGATGGATGCTTGCTAGATCCCCAAAAGTACTGCATTTTTGGAGGATCCAACATGAGTACAT  
CAGCATTCTGAGCAACATTACTCCACATTTCTTCTGATCCTTTTGTTAAATTCTCCATTCATATTTGACAA  
ACATCTAGATGAAGCACATCGAGACATTTTGGATTGGACAAAACGTTCCATTATAATCGAAGGAGTTGG  
TCGAGGACTCCTTTATCTACACAGAGATTCAAGATTGAAGATAATTCATAGAGATCTAAAGCCAAGTAAC  
ATCTTGCTCGATAATAACTTCAATCCAAAGATTTAGATTTTGGCATGGCTAGGATTTTCGGATCTGATCA  
AGATCAAGCAGACACAATGAGAGTAGTTGGTACTTAGTAAGTGATCATTTATCTATATACAATACCATAA  
CTTTGCATAATTTAACTACTCGAATCGTACTGACATATTTACAGTGGATACATGGCACCCGAATATGCAAT  
GGAAGGAAGATTCTCAGAGAAATCCGATGTTTTAGCTTTGGAGTTCTAGTCTTAGAGATCATAAGTGG  
TCGAAAAAGTACAAATTCTTGGACTGAGACATCCTCTTTGAGCCTTTTGGGATATGTAAGACTCCTCTTAT  
AGTTGCTATAGCGAAATGTTTGTATAAAGAACGTATAATATAACATAACATGAAGAATCAGTTCCAAAA  
AAGAACTTGGCTGTTATATAATGAAATGTTATTATAGAGGACGACTATTATAAAGAGGTCTGACCGACT  
ATATCATGTACCTTATATTTAGGCATGGAAGTTATGGAAAGAACAAGATTTATCAACTTTTATCGATCC  
GTTTATATTGAATCCGAGCTCGGAAATAGAGATCAGAAAATGCATACAGATTGTTTACTATGTGTACAA  
GAATTTGCTGAAGACAGGCCAAGTATTTTCATCTGTTCTTGTATGCTTACTAGTGAAACAACAAGTCTTCC  
AGCACCATCACAACTGCTTTTACTGAAAGAAGACACTTCAGAATGTGCAATGAAAATAGAGAAACTAA  
GTTTACTTTGAACAAAATGAGTATCACAACCTTACTGGTAGATAACATGAGCATATGAAATTACTTTTTA  
AAGATTTGCACAATTGTTATAGTATGATCCATTCGTCTCAATTTGTATGATACCTTTTGTTCAAAATGTTT  
GACAATATTGGGTCCGTGTAAAGCACAGAATATTTGTTATTAGTTACAAA

>PGSC0003DMG402003983 G-LecRK

AAAAAAGAGAAGAAAAGCTAAAATCTATGGCTGCTTTGCTATGGTTATTAATATTATCTGCATTTTCATGC  
AGTAGCACTAGCACAAACAAAGGCAGTTCAATATAACTCTTGGCTCTTCTCTAACACCTACTACCAATTCAT  
CATGGTTTTTCGCTGTCCAGGCGCTTTGCCTTTGGGTTTTATGAACAAAACAATGGCTATGCTGTTGGAAT  
CTTAATTGTCGGTATGCCTAAGAAGACAGCAGTGTGGACAGCAAATAGGAACAGTCCTGTTGTTCCGAG  
CAACGCTGTCTTGCTCTTAATAATGATGGAAGGCTCATTGTACAAGTAGGAGGACAAGAAATCACTGT  
CGTAAATCTCTCTGGTCAAGTCATTGCTTCAGCTTCCATGCTGGATACTGGCAACTTTGTGCTCTATAATT  
CTGATCACAGTATCATATGGCAAAGTTTTGACAATCCAACAAACACCCTTTTACCTGGTCAGCATATATCA  
GCTGGACAAGAGCTGTTCTCGAGTGCCTCGGAAGCAGATGATTCTTTCGGGATTTTCCGTCTCAAAATGC  
AAGATGATGGGAACCTCGTTCAGTACCCTGTCAATACACCTCATTAGGGATTTTCCGTCTCAAAATGCAA  
GATGATGGGAACCTCGTTCAGTACCCTGTCAATACACCAGATAGTGCCTCATATTCTTACTACTCAACAG  
GCACTTATGGAGCAGGGAATAATGTTACTGAATCTTGATGATGACGGCCTCCTCTACTTACTCAATTC  
CACTAAAAGTCTAAGAAATCTAACTCAAGGAGGCAACCGTAGAGAAAGGACCATTATCTATATGCTGAA  
AATTGATGCTGATGGTATACTTAGAATTTATTCAAATTCTCTGAACCAACAGAACAGCTCCGTGATATGG  
TCATCAACAAATGATAGGTGTAATCCAAAAGGCCTTTGTGGGCTTAATGGTTTTTGCACCAACATAGATG  
ACCAAGCTAAATGTTTGTGTCTTCCGGGATTTGATTTTGTAAATGCCAGGAAATTGGAGCGCAGGCTGTG  
AAAGGAATTTACCGCAGAAACCTGTTCGGTTAAAGGAGAGCACTTCAAATACTATGCTATGAGAACAG  
TTGAAAACACAGGATGGGAAGATAGTACTTATGTTGTTTTGGCCGGAACGACCAAGGAAGATTGTGAA  
CAAGCCTGTCTACAGGATTGTAAGTGTGAGGCTGCTCTGTTCAAAGACAGAGAGTGTAGAAAGCAAAG  
GCTGCCTCTGAGGTATGGAAGGAGAGACTTGGGTAATTCTAATTTAGTATTGGTCAAGGTGGGCACTAA  
TTTCATACCCAACGAAGGGGTGCTTTATCAGATGATTGAAGAAACAAAAGGCAAAAAGCTAAGGATAG  
ACATCCTAATTGCCGGCATTACATTGGCTGTTTTTGTCTTGTGGTGTAGGCATCTCTGGATTCCCTCATT  
ACAGAAATCATGTCTGGACTTACAGAAAAATCCAGGAGAGTAGAAGTGTTCAGTTATGTGAGGATGTTG  
CTCCACGAGCATTTCCTATGCAGAACTAGAGCAGGCAACAAGTGGTTTCAAAGAAGCGTTAGGGAGG  
GGAGCATTTTGAACAGTATTTAAAGGAATTTTGGCAGAAGACCAGAAAGTGATAGCTGTTAAAGACTA  
GACAAAGAATTAGTAGAAGGGGAAACAGAGTTCCAACTGAAATAAAAATCATTGGAAGGACACATCA  
CCGAAATCTCGTCCACCTCCTTGGTTATTGCCTGGAGGGATCAAGAAGGCTCCTGGTGTATGAGTACATG  
ACCAATGGGTCACCTGCGGACATACTTTTCAACAGAAAAACAGCCCACGTGGGAGGAAAGGTGTGG  
CATCACTCGAGATATTGCAAGGGGCCTCCTATATTTGCATGACGAGTGTGACACACAAATCATCCATTGT

GATATAAAGCCTCAGAACATACTCATGGATGATCAATACTGTGCAAAAATATCTGACTTTGGAATGGCCA  
AGCTTTTAAAGAAAGACCAAACAAGAACCTACACAGGGATAAGAGGGACCAGAGGCTATGTTGCACCA  
GAATGGCACCGGAAACTGCCAGTGACAGTGAAAGCAGACGTTTACAGTTTTGGTGTCCCTATTGGAA  
TTGATCTGTAGGCGGAAGTGTGTTGATATGAGCCTTGATGAAAATGAGTCAATTCTTGAATACTGGGTCT  
ACGATTGCTTTGCTGCAGGAGAGCTAGATAAACTTGTCTGGGGACGAGGAGGTTGATAGAAGACAATTC  
GAGAGAATGGTGAAAATAAGCATCTGGTGCATTCAAGACGAACCATCACTTCGCCCTTCAATGAAGAAA  
GTTCTACTGATGCTGGAAGGGACAGTAGAAATTCAGTGCCTCCTAGTCCTACTTCTTTTTTAAGTGCCAT  
ATAGTTTTGAACTTCTTCACTTTATGGTTTTTGTACTTCAAATTTCAAGTATTCCAATTTCCCATAGAGAG  
CTGACCACTTTATCATCCATACTTGAGCTAAATAAAATATAGTTCTATCAAATTTCTACATCATTC

>PGSC0003DMG402004946 G-LecRK

ATTTTAAGGCCTTCAGAACTAGCTAGATTTACTGAAAAGGTCAGGTTACCTCCAGATATCTAAACCTG  
CATAGATTAGGTAGCATGTAATAAAGCAGTTCTTAATGGAAAGTTTTGTGCTTATATTGCAGATATTGTT  
ATGTGGTTTTGTATGCTCAATTTCTAGTGCGAAAGATATCATCACTGCAACTGACTTTCTAACAGATGGA  
AAGACCATTACTTCATCTGATGGAAGTTTTGAGATGGGATTTTTTTCCCGGCTAGTTTCACGAATAATTG  
GTATGTTGGAATATGGTATAAGCACGATGTACCTGATAAGTCTGTGGTATGGGTTGCCAATAGAGAAAA  
TCCATTCAACAACACATCAGGTGTTATGTTGAAAATCATCGATACAGGACAACCTTGCTCTTCTACTCCTG  
CTAATACAATCATGTGGTCTACTAATTCATCGAGGCCTTTGGCTGTGAAGAATACAGTTGCACAGTTGTT  
GAACTCGGGGAATCTTGTGATAAGAGATGCAAATGATACCAAGCCTGAGAAGTTCTGTGGCAGAGTTT  
TGATTATCCTACTGATACACTCTTACCAGGCATGAAGATGGGTAAGAACTTTGTAAGTGGACAAGAATTT  
TACCTGTCCTCATGGAAAAACGAATATGATCCAGCTCCAGGGGAATATACGTATCATTGTGATCCGACTG  
GATATCCTCAGGATGTCATGAGGAAAGGTAAGTTAAGGTGTACAGTACTGGACCATGGAATGGACTC  
CGCTGGAGTGGTGTACCAGGACTGACAAAAATACTATTTATACATTTAACTGGATCTTGATGAAAAG  
AGAGCATTTTACAGCTTCGCGCTTTTAGGTTCTGTTATGACCAAATTAACCATGAACAATAACGGCGTGC  
TTCAGCGTTCAATGTGGGCTGAGAATAGACAGGAATGGCATGTTTACATTTCTTACCGGAAGATACTTG  
TGACAATTATGGAACATGTGGTTCATATGGTAGTTGCAACAACATACTCACTCCTGTGTGTAATTGCTTA  
GACAAGTTTGTGCCTAAAGATCCAAGAAATTGGGCAATGACAAATTGGTCCGGCGGGTGTATTAGAAG  
GAAACCGCTTAATTGCCAGAATGGAGATGGATTTCTCAAGTACTCTGGTATAAAGCTACCAGATACACA  
GTATTCATGGTTTGATAGGAGTATGACTCCACGAGTGCAAGCACGCTTGCTTGAGGAATTGCTCGTG  
TTTGGCTTACTCAAATCTTGATATACGCAATGGTGGGAGTGGCTGTTTGGTGTGGCGACTTAATT

GACATTCGAGAATTACCTGGAGGACAGGACATTTACATAAGGGTTGCTACCTCAGAGTTAGGTAACATT  
TGTGAATTTGATCAAAGTTGGAGTATTAGCTGAATGATTTAAACTTCCCAATTCTCAGATTTAGTTGTATT  
CTACTTAGATATCTGTTAAAAGTTCACACAGTATATGTTCACTCTTCCTTGTCTATTTAGTTTATTTACCCC  
CTCCATGTTTTGTTTCAGGCTCGAAGAAAACAAAACACTACTCGTGTTGAGTCTGTTACTGTTGATTGGAGTG  
ACTGTGACTGGCCTGACCATTGGGCTGTATATTTGGAAAAAGAAGAAGAAGAGGAAGATGAATTTGAA  
AGATGACCTAGACCTCCCACTGTTTACCTTATCAACTCTAACTAAAGCATCCTCTAATTTCTCAGTCGAGA  
ACAAGATTGGAGAAGGTGGATTTGGATCTGTTTATAAGGTAACATCTTAAGTTTATGAATCATTCTTTCA  
GTAAATAATATCTACTATTATTGACAGTAAACAGATGACACTTACTGAATCACTAAGCCAGATATATGTT  
GATATTATAGGGAATCCTGGAAGGTGGACACGAAGTAGCTATAAAGAGGCTATCCAAGTCTTCCTCGCA  
AGGAGTTAACGAGTTCAAGAATGAAGTTATTTGCATTGCCAACTTCAGCATCGAAATCTTGTGAAGCTT  
ATAGGTTGCTGCATTGCAGGAGGAGAAAAATGTTGGTCTATGAATATATGTGCAACAGAAGTCTAGAT  
CTCTTCATATTTGGTCTGGTACTCTCTCTTAACTCGAATAACCTCTATTAGTACAAATAGTAAAGTTGATA  
GTTTAATCACATTATCAGTGTCTAACAGAGGACCTGTTAACAGATGAAAAGAGGAGCTTGTTACTCAAC  
TGGCCTAAGCGCTTCGGCATCATCAATGGAATTGCTAGAGGACTTCTGTATCTCCATCAAGATTCTCGGC  
TAAGAATTATCCACAGAGACCTCAAAGCTAGTAACATTTTGTAGATGCTGACATGAACCCCAAGATCTC  
AGATTTTGGCATAGCTAGAAGCGTTGTAGGGAATGAGACTGGTGCTAATACACACCATGTGGTTGGGAC  
ACAGTAAGAAATTAATACTACTCACTTGTAGCATTTATATTATGTATAATAACCTTTATTTTACTACT  
TTCTGTTTAATATGTGATGCAGTGGTTACATGTCCCCGGAGTATGTAGTCCATGGTGTTCCTCAGTAAA  
ATCAGATGTATTTAGCTTTGGCGTATTAGTGCTAGAGATAATCAGTGGTGAAGAAACAGAGGATTTGC  
CCGTGAAAGTCACAGTATCAACCTACTCGGACATGTAAGTCTTGTGTTGTAATTAAGACGAGTTTAAATT  
TTGTGCACTATATGGTAGCTACAGATATTTCTCTATAATAATTAATTGATAACACCTCGTACAAATGATAG  
TTAAACTGCATTGAACTTAAATCCTTCAGGCACATCAACTGGTGCATGTTTCTTGATTATGTAAGTATTG  
GTTATTGATAGGTATGGAACTTTATAAAGAAGGTAGACCATTAGAGCTAATTGATGGCCATCTAATGG  
ATTCGCGTTATATTTCTGAATTGCTACGCTTAATCCATGTGCTCTGTTATGTGTACAACAATGTCCAGAA  
GACAGGCCAGATATGCCTACAGTGATCTTGATGTTGACTAATGATGCTATTTTGCCTCAAGCTAAGGAAC  
CTGGTTTCTTCACAGAAAGCAAAGTCACGTCTGAATGTTCTATAAGCATGTGTTCAACAAACGAAATTAC  
CGTCACACAGTTAGAACCCCGTAAATTACATTACATGTTCAATTCAGATCGTTCAATGTCAACAAGCTTG  
AATTACAGTATTTTGTGCTGTAAAGCCATAATTGCCTATGGTATCTGTTATTAGTAATTATGGGTGTGTTG  
TAGTTTTTATTAATTCTAATGTATTTTGAAGAATTCGTACAAAGTACCTATTCAACATGAGTACATCAAAA

TAAACGAAAGAT

>PGSC0003DMG402005047 G-LecRK

CAATGGTTATCACATGAAAAGAACCATAGCAATTGTGACAATCTGCATTGGTGCAATACTCATCGCGCTC  
TCGTTTGCTTGTTGTTTGGTAATAAGGAAAAGGAGAAGAGGTAAAGGGTACCCCTTAATTTCTTCGTGTG  
TTTACTACTTTTATTGAATCCCCTTAGTGAAATCTTGGCTCCGCGACTTACAATAGTGAGTTACTTCATGTA  
CAGATAAGGAGGACCAATTCACCAGTTTGAACACTTTGACAAGGAATTTAGCATCCTATGAGAACTCTTC  
AAGAGGTAATGAGATGGATGGAAGTGAACACGTCGATGTGTTAATCTTCGATCTAAGCACTATCATTTCC  
TTCCACTGATGATTTCTCTGATGCTAACAACTCGGAGAAGGAGGCTTTGGTAGCGTTTACAAGGTACCT  
CCCGATATTTTACCAATTTCTTACTCATTGTTGAGCCAATTTTACTTGACAACAAGCTTACATTTTGATTT  
CAGGGCCAGCTAAACAATGGGCAAGAGATAGCGGTCAAAGACTTTGAAAAATTCAGGGCAAGGAGT  
GGAGGAATTCAAGAATGAAGTAACGTTAATCGCGAGAGTACAACACAGGAATCTTGTGAGGCTTTTAG  
GATGTTGCATACAAAGAGGAGAGAAAATGTTGATCTATGAATACTTGCCAAACAAGGCTTGGACAGTT  
TCATCTTTGGTATATACATTTGCATATTGTGTTAAAATTTTAAAAAATAGGCATGTTACTGATGGATTGCT  
TATGTATGAATTTGAATCGGTATTGCAGATAAACTAAAGGGTTCGCAGTTAGATTGGAGAAAACGATT  
TGAAATCATCGTTGGAATAGCACGAGGATTATCATACCTTCACCACGACTCACGAGTAAGAATCATACAC  
AGGGATCTAAAAGCCAGCAATGTTTTACTAGATGCCTCAATGCACCCGAAAATATCAGATTTCCGGA  
GCTAGGATATTTGGTGGTGACCAATTGAAGCTAACACGAATCGAGTCGTTGGAACATAGTAAGCATCA  
CTTTTATGTATGAACATATGTGTATTTTTCTCAAAGGCACTTAACTTGTATAAAGTTGAACAAGTAGACA  
CACTCGTCCTACATGATGATTCGCATAAGATACTCGAAGTATTGTTGATTATGCCATGTAAGACGCAT  
ATTATGTCATGTAGAACATGTGTGTCTACTTGTTTACACCTCATAGATGTCAGTTGAGGCTAAGTTAAAT  
GACACGACGTTTATGTATTATGTCATATTTAAATTGTGGATGTTGACATAGCTATTGGTTTCAATTCAGTGG  
TTATATGTCACCAGAATATGCAATGGAAGGGCATTTCAGTGAATCTGATGTTTTTCAAGTTTTGGTGTTC  
TGTTGTTGGAGATCATTACTGGCAGGAAGAACAACACTACACATTATCAGGATCATTATTAAATTTAGTTGG  
AAATGTAAGACATCTTTCATCAAGAACTCACCTTTAGTTAAGAAGATGTATCTTGTGTTTTGCTCTAGCCCT  
TATACCATTGCTCTAGGGAAGGATATGTGGAATGTTTCATCTCTTCTTTTTTTTCTTATACGGTGGAGTCA  
GGGCTAGCTTCTGCATACTTTGACTATTACAATGTACCTGCTACCCTCCACCAACATAGGGATGGAACA  
ATGGCGGGAGCTACATGCATTGGAAGGGTATTCAAATTGAATCCCCTTCTTTAGGAAGCTATGATAGAA  
ACTATTGGGTGTGTCTGAACAAAGTCCCACATGAAAAGTAAAAAAAATACTTTAAGATGTCCGGATAA  
TCTTAATGTTATGAAGTCTTCTGGAAAAAACTATGCGGGTTTGGTCCAAGGGAACAATATCATGCCATG

TTCAGAGTATCTTATTGGATTATTTTAGCCTAACAACTGATATCAGAGCCAGTGGTTTGGCAGGACAATT  
ATTGAGATGGTAGAGTGATGGAGTGGGGTCCGACTTGGTGCCTTTGACCATCTATGGGCCGATTTACTA  
TCTTTACCTGTAGCCTTAGAGATGCTTACACAAAAAGAAGCTAGTGGCCGTTCTGTGACCATAAATACTCT  
ATTGATATGGTGGCACGCAGTGAATCTCCAGATAAGCCTATAAAGTGATAGGTCATGTGGAACCTCAAT  
TTAAGGAGAAGACTGTTGAGTGTACGTAAACAAAGTCTCACATGAAAAATAAAAAAATATAACTTAT  
AAGGTATTGGATACTCTTAATATTGTGAGGCCTTTTGAGAAAACCGTTGGGGTTTTGTCCGCAAACCTGAC  
AATATCACATCATGTTAAAAGTATCTTTGAGTTATTTAGCCCAATAGAAACACATTCTTTGTCAAACAT  
ATATGAAATTTTGGACCCCTTAACCCCATACACGACATTTTTGTATTTTCCTTGAATCCCCTAATTGAAAA  
TTTTGATTCCGCCACTGACCAGAAATGTTAACTTTGCTCTCCCTTTTTTCAGGTATGGGATTCATGGAATG  
ATGACAAAGCTATAGATGTTGTTGATCCCTCATTAGGGGATTGGTATGAAAGTAGTGAAGTTTTGAGAT  
GCATCCAAATTGGACTATTATGTGTACAATCATATGCAAATGAAAGACCAATGATGTCTCAAGTTGTCTT  
CATGCTTTGCAATGAAACAAAATTGTCTAATCCTGGACAACCTGGTTTTGTGTTTCAGATCAAGAAATTCTT  
CTTCACTTCTTATTCATCATCAGCTAGTATTGGAAATTCTGTAAATGACATTTCTATTACTGCACAACATG  
CTCGCTAAGTGTGTGTCAGATCCTTCAAAGTAGTACCATATATTTTTGTGGATCTGACATGGGTTTCATCA  
ACATTTTTGAAGAGCACTGAGCCATATGGTCATTAGGTAATTTATACTTGATCTATTTATTGATTTAGTTT  
AAGATTTTTTACATTTATCAATGATGTATTTTAACTGTTATAACAGGTAACGTATCTTTT

>PGSC0003DMG402007101 G-LecRK

CAAGAAGCAAATGTATCATAACAAACAAGCTAAAACAACAACTAAACATGTCTCCTTCATGGCTTACTA  
CACTTCTTGCCTCTCTATTTCTTTTCTCCCAAATATTTTCTTGCCTTGCCCAAGTTCCACTTGAAAACACCTT  
CAAATTCGTCAATGAAGGCGAATTAGGACCTTATGTTGTAGAATACAGAGTAGACTATCGCGTTATTAGT  
ATTTTCAATAACCCATTTTCACTTTGTTTCTACAACACAACCTCCTAATGCATGGACATTAGCATTGCGAAT  
GGGCACTGTCCGTTCTGAATCACTCATGCGTTGGGTGTGGGAAGCAAATAGGGGAAACCCCGTTAAAG  
AAAACGCGACATTCACGTTTGGAACTAACGGAAATCTCGTATTGGCGGATGCTGACGGTCAATTGCTT  
GGCAGACCAACACGGCCAATAAGGGGGTGACAGGGTTCAAGTTGTTACCTAATGGTAACATGGTGCTA  
CATGACTCTAAGGGTAAATTCGTCTGGCAGAGTTTCAACTATCCCACTGACACATTACTAGTGGGCCAAA  
CTCTCCGATTGTCCGGTCCGAATAAGCTCGTGAGCCGGCCTCGGTGAAAAAGAACGTAAACGGGCCTT  
ATAGCTTGGTGGTGCAGCCAAAATTGTTGCTATCTACAATAGGACTAAGTTAGGCGTGGAATTAGCTT  
GGTTCGATTTTGGAAACAGTACGTTGGAATCAGTAAAATTGAATAGTGGAAATCAAAGATTGAAATTGG  
ATTATAGATTGGCAAATCAACAAAGAGAAGTTCACATGTGATGGCATTACTAAATATAACACAACATT

AACATATCTTAGACTTGAAATTGATGGAAATTTAAAGGCTTACACTTTTGTTAGAGATGAAGAAGCAGAT  
GAATCCGTTGGAAGGTAACCTACCAAATGCTTTGAGAACTTTTTAAAATAAAAAATAAAATAATATAT  
ATTAACAAACGTAACCTTTATAAGATAAGGATTTCAATTTCCAGTAAAAATAAGTGGAGAAAATGAGTGGGT  
CCACAGCTATTATTTTCTTTTTTTTTTTGGTTGAAGGGTGTATTTTATTATTATGATTTCTAGTTTTTTGTT  
TTCTGTTAAAGGATGTATTTAATTATGTTTTCTACTAGCTATGACAAATGTGAA

>PGSC0003DMG402009323 G-LecRK

ATGAAGCTTGGTTATAACCTCACCAAAGCAGAATTGGACTTTAACTTCTTGGTTGAGTTTTAGTGTTC  
TGCTCAGGGGCTTTTACTTTAAGTTTGGAGGTTTTGAAAATGCATTTAGTTGGTTATTCGTGGAAGG  
GGTAAGGTTTATTGGACTAGTGGGGCTTGGACAATCAAGGCTTTCCATTCTTACCTTTATTCCATGATTC  
TGCTACTATTTATCAGTATAATCTCAATTTGGTATCCGATAAAGATGGGATGTTCTCCAATTTGATGCAA  
CAGAGGGAAGCTTTCCAAGTCTTGCATTGAATTCAGACGGGGATATTCTTGGTGGATACCGGTTACAT  
ACACCCTTTTTAAAGACTTCTGTTATGGTTATGAAAGCGAGGATGGTTGTTTCTAATCAGTTGCCTGAG  
TGTCGAAAGGATGGGGATAAATTTGAGCAAAAGAGTGGAGACTTTATACATACATCTAGTATTACTACT  
GAGTTTTATGACAATGCAAGCATTAGTATTGTTGATTGTATGCATAAGTGCTGGGAGCACTGCAGTTGTG  
TTGGCTTACCACCGCCAGCAGCAATGGGACAGGCTGCCGTATTTGGAATGGAAATGGGGATTTTCGAG  
TCTATGAGAGTGGTAATGCAGTGCAAAGATATGTTCTAGTTTCACCAAATCATCTAAAGGAAAGTCTTT  
ATATCAGGAATACTCATTTTTATGTAATCAATTGTCAACTGTATAACTCTCAGCATGCTATGGGTGCAGGA  
AAAATTTGGATATGGATAGTAATTAGTGTAGCTGTTTTATCGCGTTGCTAGTATCTGGTTTCATCTGCTA  
CATTATAATGAGAAGACGCAAACACTACAAGGTAAATCACCAAATGTGGTTTTAGAAGCTAGTAGTTGT  
TTAGTCAATTATTTAAGCATGAATGTATATCTACATACTTTCTTACATAGATGAGAAAAGAAAGGAGG  
AAGCATATATACGCGAGTTGACAGCAGTAGACAGCTTCAACACCGCAAATCTAAAAGAAGAAGATGGA  
AGGGAAGTACAAGATTTGAAGATATTTAGCTTTGGATTCATATTGGAAGCCACAAACAATTTCTCAAGT  
GAAAAGATGCTCGGAGAGGGTGGTTTTGGGCCTGTTTATAAGGTATATTTGCACTATGTTATATGTAGCT  
CAGACATTTGCTTACTGCTCTCACTACATAACGAATCAACTATAAAAATGGATGGCAGGGAAAATTTCCA  
GATGGGCGAGAGGTGGCAGTCAAGAGACTTTCAAGAACCTCGGGACAAGGGCTTGTGGAGTTCAAGA  
ATGAACTCATACTAATTGCCAAAGTTCAGCATACAAATCTAGTTTGAGTTCTAGGATGTTGTATTACGG  
AGATGAGAAAATGTTGATATATGAGTACATGCCTAACAAAGAGCTTGAACCTTCTCCTCTTTGGTCTGTTG  
CTATTTCAAAAAAAAAAAAAAGACTAATTTTTAGGTAATTTTTAAAATTTTGATGTGAAATGCTTTCTCT  
TTAACAGATCCTGCAAGAAAGGAGCTACTGGATTGGCAGAAACGATTTGCAATTATCGAAGGAATTGCT



CAAGGATTGCTCTATCTTCACAAATACTCAAGAATGAGAGTGATACATAGAGATCTAAAAGCCAGTAAT  
ATGCTTTTGGATGAAAACATGAAATTTTGGTCTGGCAAGAATTTTCAAACAGAACGAGACGGAGGGAGT  
GACTGGCAGGGTTGTTGGAACATAGTGAGTTGAGCCTAGTCATTTCTTCGATATAAATCTATGGAACAT  
GTGTACTTATTCATACTTACTGAGTAAAAAATGTTTTCTATCCTCTGCACAGTGGTTACATGGCTCCCGAG  
TTCGCCATGGAAGGTACTTTCTCAATCAAGTCTGATGTCTTCAGCTTTGGAGTCTTAATACTGGAAATTGT  
GAGTGGTAGGAGAAATACTAGCTTACAACAAATTGATCGTCCACTTAACCTAATAGGTTATGTAAGTTTT  
CTTTAAACCCTTCTTTCTTTAATGTACTAAAGTTCACAAAGTTCACAATACTGATCATTTTTGGTTCAGGCA  
TGGGAACATGGAAGAAGGGTGTGGACTAGAACTGAAGGATCCAGCTCTTGAAGATCTTTGTGACAC  
TGAACAATTTTTACGAGTTATTCATGTCTGGACTATTATGTGTACAAGAAGGTGCAGCAGATAGGCCAAC  
AATGTCTGATGTTATCTCAATGCTTGGTAATGGAAGTATGTCACTGCCAATTGCAAAACAACCTGCATTTT  
TCACAGGAAGAGATGAAGCTGAATCATATTCGTCATCAAACAAAACAGAACAATGTTCAATTAATGATT  
GTTCCACTACTGTCATTGAAGCAAGATGA

>PGSC0003DMG402013876 G-LecRK

TTAGTCCTCTATCAGATTTCCCCAAAGTTTCATTGCCATCACCTAGGAACTTTCTTTATTCTCCTCTTTCG  
TTTTACGTAGTATGAAGATAATATTGGTTCTCTTGCTTTCTTACTTTCAATTTAGTTAGCTGCAACAGTACT  
CGTTCAGATACCTTGTTGCCTGGCCAGTCCTTTTCCTTTCTGCAGAAGATACTTTAGTATCCAAACAAGG  
GAAGTTTGAACCTCGTTTTCTTCTGTCCAGGTAATTGTGAAAAGCTTTTTATTGGTATATGGTATACAAACA  
TAAAGCCCAAACTGTGGTTTGGATAGCAAATAGGGACAACCCTATTCGCCCTCCGTTCAATAATTCTCA  
TCTAGAGCTGTCTGATGGAAATCTACAACCTTGGATGCACGTAACAAAGAGTTTGGAGTTCTAGCTTA  
TCCACACCTTCAGCATATGCCAATAAAGCAGTACTTCTTGACTCTGGAAATCTTGTTTTGACAAATGGCAT  
TGACAGACAGTGGCAGAGCTTTAATTATCCTACAGATACGTGGCTGCCTGGTGCATGATTGGATTTAA  
TAAGTCCAAGAACACACTCCAGAACTTACTTCTTGGAGGGATCTGAATGATCCAGCTTCAGGAAGCTA  
CTCTTTGCAATTAGGCCAGAATCAAATGGTGAGTTAGTTGTTCAACATAATTTCCAGGAAGAATGGAG  
GTCTGGGCCTTGAATGAAGGAGGGTTTGCTATTCTAGCACAACAAAATTATTATAAGGATTTATTCGAC  
TTCAGTTATGATCCAACCTGAATATAGTAAATATATTACTTACAATGTCTTTGATGAATCTGACATTTCTCG  
AATTGTCTTAGAATTTAATGGGTTCGATGAAGCAATGGTCTGGTCTAAAGATCATCAGAGTTGGCAGTTA  
GTGTGGTCTCGATCTACTGATAATTGTGACCGAATAAATTTCTGTGGTGCTTTTGCAATTTGTGACATGA  
ATGCCGGTCCACCCTGTGAATGCTTAAAAGGTTATGAAAAGAAGTTTAAATTAGATTGGGATAGTAGAA  
ACTATTCAGGTGGGTGTGTGAGAAAAAATCCGCTGCAGTGTGGCAGCAATAACAAAAATTTTGTCCATA

TGCCAAATGTAAAACCTCCTGTGTCATCTGAATCAATGAAAGTAGGAAATGATCAGATCTGTGAATATAT  
ATGTTTCATCCAATTGCTCATGCAATGCTTATGCTTACAGCAATAGTGGAGAGTGCTTATTATGGTATAGC  
GATTTGATTGATCTGTCAAGATTACCTAATAATTCAAGTCAAGTAGAGTTCAACATTAAGCTTTTTGAGC  
GCTCGAACAAAGGTTAGGTGCTTCCAAGCTGCATCTTATTTCTAATGTGCTCCTTTTCAACCAAAAATATG  
TTATTTTCCTCCTTTCTTGATCTTCCTTAATGTTTAGGAAAGAAGAACTACTACTGGTAGCACTAGTAGT  
GTCCATCACTTCTGCAAGTTTTGTCTGTGGTACATGCTGTTACTTTCTATGGAGAATAAAACTCAAGGAA  
AAAGGTACATTCTAATTCTTGCTAGTAGCAGTTGAGTAACTTCAGTTTCACTTCTATTTGGCATGACTGAA  
AGAGGTCAATCAAATGTAACCTTTGATTTAATTAGTCATGGAAAGGAAATTATATTCTCTGAATCATGC  
TTAGATAAAAGTTAAAATTGCCCATGTCCAGCTTCTTCTAAACTCATCAATAAACTTCTGTTTATATTGAT  
TTACATCAGGGATTTTGGGAAGGAAAAAGTTCAGGGAAATGTTACTTTCTAAATCAGCAACTAACTTATC  
AAAACCTGGAACCTCCAGTAAAATGGGACAAGAAAAGAACTTTCCATCGAGCTGAAGTTCTTTGAATT  
ACGTGAGTTGAAAGCTGTGACAGACAATTTTTCACCTGACAATAAGCTTGGAGAAGGAGGTTTTGGGCC  
TGTTTTTAAGGTATTGTTACTACATAAGAAAATATATTGACAACCTGAATAACTGCAACACTAAATTCTAC  
TCAGGCCCAAAGAAAATGGGAAAAAGTCCCTCTTGAGGTGAACAGGTAGCGTAATGGTTTTAACTAAAA  
TCTTTTCCATACTTGTGTTTTAATGGTGTGATTAATTGCATTGCAATTTCTAGGGTCAATTGCCAGATGGG  
CAGAAAATAGCTGTGAAAAGGCTATCAACTCAATCACAGCAAGGAATTAATGAATTCAAACCTGAGGTC  
CTTCTCATTGCTAAACTTCAACACAGAAATCTTGTTAGGTTTCTTGGCTGCTGTGAAGAAGACGAGGAGA  
AAATGTTGATCTACGAATATATGCCAAACAAAAGTCTAGACTATTTTCATATTTGGTATGATAACTTCTTAT  
CTGATGTTATGTTAACTCTTTCCTCCTAAGTAGTGCTTACTGGATAAATTTGATATGAACAACCTAGACGA  
GAGCAGGAAGTCGTTGCTTGATTGGAGAAGGCGGTATGAAATCATTATTGGAATTGCTAGAGGGATAC  
TCTATCTTCATCAGGACTCAAGATTAAGAATAATACACCGTGATCTGAAAGCCAGCAACATTCTTTTAGA  
TGAAGATATGAACCCCAAGATATCAGATTTTGGTACTGCTAGAATATTTAGTGGAACCAGAATGAAGC  
TAAGACTCTTCGAGTTGTTGGAACATAGTAAGCACGAAAATACCAAAGGGATTTCTCTGTGCGATCCTT  
ACCATTTATCAATACTTTGCGCACTCATTATTGCCCTTTCCTTTGCAGTGCCTATATGTCACCTGAATATG  
CTCGAGCTGGTCTCTTCTCAGTAAAATCTGATGTCTTTAGCTTTGGTGTTATATTATTGGAGGTCATAAGT  
GGCAAAGGAACATGGTCTCTTATAATAGTGATTCCCTCCTAATTTGATACGACGGGTGAGTTTTAAGA  
TACAAACATTTGAAACTAACTTTTGATTTAATAATCAAACCTATTTGCTAAATGAACTGCTGCTTCAGGCC  
TGGGAGTTGTGGAATGATGGTAAGGCCTTTGAGCTGGTAGATCCATCAATAGTTGATTCTTGCCAGT  
GAGGAAGCATTACGCTGCATTCTAGTAGGACTATTGTGTTTGCAACTCAACGCAGCAGACAGACCAACC

ATGTCAACAATTCTGTCCATGCTAAGTATTGAAGCAACGGTTCCTCCCCGAAGAAGCCCTTCATTACCC  
GTAACCTCAGACTTGATTACTACAGAAACAGCATCATCTTCGATCAACGAGGTGACAATTACCGCACCTTA  
TGTTTCGTTAGTTGTCTGACGTGTATATGTATTTCTGTTATCTGAGTATCAAATGTATCTAGTGCTCATTACT  
TCCCAAAGTATGATATAAGTCTTCAATGATTCAATGCATTTAATGCTAAAAGATTTTCAACAGACTAGTTG  
ATATTACTTTTACAGATACTCATCACAGAAAGATTGAGACAACAGTGCTCTTACTCATGATCATAATATTA  
TTGTTGTATTTGATACATGTCTATCTCATGATCTAATTATGAAACAAAAGTTAAAATCTTACATAAGATAA  
CTTACATGTTTGTATTTTCTTATCCATAACTTTTTGAGGAAAAACATAACCAACTAATAATAGTTAAATATC  
TCATTTATTGACAAAACCTCCACAACCAAATTACTATCCTGCAAATCAATAAAAAAATTGAAAAGTTGTGT  
GTGGCTAGCAGGATTAGCCTTTGTTGCTTTTAGAGCATTGATGAACACAGAGAAGACTGTTAAAGAAAA  
CATGAAGTGGGGCAATTATCAAAAACAGCTGACAAAGAGCACCATTTAATTCACAGATGAAATAGAAAC  
CCTCTGTGTTTATGCTTCTTTCTACCAATCCTTTGCCACCCACCTACCTTTAAGTCTGTAACATGGGCCAT  
GGGAATCAGAAGTCAGTTTTGGTTCCAGTGCTATTAAAGCCCAACCCCACTAGTTTGAATCAAGAATG  
GACTAGCATGTTAAATGTTGTGTATAACCCACCAATAAATCTCTCTAATACTATGAAAGCAAAGTACAGA  
AAAAGGAATTCTGTATTTCTTTCAAATAGTTCTTGAATAGTTAGCATAAGCTCTAGCGACCATGAACTG  
TTGAAATAGACATATCGTTGACAGATGATGTTGCTATGCTTGCTGATGAAGAGTGTGTAACCTGAACTATG  
ATTCTCTGATCTGAATATAAGGCTAGGTTGTTTAGGGAAAGGAAGATTTGTTTCATTGCACAGCATGAAG  
ACCACTTCTGACATAGTCGGTCTGTCATCTGTAAACGGTTGTACACACAAAAGGCCAATGTGGATGCATC  
TCAAACTTCACAAGCTTCATATGAGCCACCTAACAAATGGATCAACAACATCTAAAGCCTTTTCATCCTTC  
CAAAGATCCCAAACCTGAAATAGAAACACCACAATGCATCACAATCAAAATTTTCAGACAATTTCTTCTCT  
ATAAGAGAAGCGACTATAACACCAAAAATTGAAATTCTGAAATACAAAATCTCGATCTATTCAGCACTTT  
TAACAACCTGAAAGGGAATTGTTTCAAATTATTATTTGCAGTACTACCATCC

>PGSC0003DMG402014514 G-LecRK

TTCATGCATTTCTCACTTCACTCCATAACTCCTATGCATCCACACTCACCGTTCCTCGCCGTCGTTCGGAA  
GCCAAAATGGTATCACTTCAAGAGCCATTCTAAACCGCCGCAACAGTCATTAATTTTACACATTCACC  
ACTGCCGCTTCGCCGTCATCACCGAACGCGTCGTTAAAGCCAATAATTAACCTATTGATGATAAAATC  
GCTTTACATCCACCGCCACGGCGGCGGATATATACTCATCCGTTACCGAAGCTTCTCCGAACTTACGTT  
ACCACCGCTCCGGTAACGGCGTTAATGTTTCTGTGAATGGTTCTTCTGCACCAGTTTCTAGAGATGAA  
ACTTCGTCGATTAAGTTCAATCGCCGTTGTCAAGTGCATCAATCGGATCTGTAATTGGAATTTCTGTAG  
GCGTTACCGGAGCTTTCTTCAATTGTTGCAATTATACTCTTCGTGTGTTGCAGGAATAAGCTTAAATGTGG

AAAATTACGTGATCGTGAATCTCCACTGCCAAAAGGTAAAGCTTTTTTCAGTTTGATACAGTAGTTGAATC  
AGTAATATATACAGTAACAATAAGCTGCTTTTTTCAGGGGAAATGTGTTTCACTTAACCAGAAAATATT  
TTTCTTTGCTCATGAAGCTTTCAATGTTCTGTTTATCTTCAGTAATTGATTACCTTGCTAGCTTGATATTTG  
CAAAGAAATGACGTTTCAGGGTTAAGTACTTCACTTCGCCTGAATTTTATTTTCGCCAAAGATGATTTTCGAT  
ACAACAACGTACCCAGTATAATATCCCACAAGTGGGGTTTAGGGAATGCGATGTATATGCAGCCTTACC  
TTGCTTGTGAAGATAGAGAGACTTTTTTCCACTAGATACTCGGTTTCGAGTAATCATTTCAAATATCAAGTAT  
TTAAGCAAATACAGTAAAAAATTAGGTGCCCGGGTGACCCAGTGGTTTGTACTTGGAACCTCCATGTTCC  
GAGGTCTCAAGTTTGAATCCCTTGCAAGCAAAGCAAGGGCTTTGTCACACCAGGGTTGCTTAATGCA  
AGTTACCTCTCCTGTGTGGTTTGCAGCTATTGCATAGGAGTAAGAGTTTTACCCTGTGAGCGCTCAAAG  
GGTAGCTTCTGTGAATTTCCCTTGCCTTAAGAAAAAAAAAATTAAGAAGAGAACAAGTAGCTACATCAA  
TAACACAATAATTGAAGCAAAGGAAATAATAGGTACTGCTAAAGTCGAAGAAAAAAAAATTAGTAAGAGG  
GTAATAATATAACAATACTAATAAGGGAATTAGACAACGCTCACTACTACTAACCTTCTAACTTAATCAT  
TGATCTTCATATCTTTCTATCTAAGATCATGTCTGCGATAAGCTGTAGGTGAGCCATGCCTTCTCAAATCA  
CCTCTCCCAAAGACTTCTTCGGCCTGCCACCTCTACGGCTCTACCTATGCTTATACCCACTACAACCAAC  
CTCTCACACCCAGTGAGGTACGCAAGATTTTTTGTAAAGGCATGTCGGTATTTAAAAATAAATAATTGATA  
TAGCAACATTATATTAATATCTTGACAGGAGCAGACCCCTTCATTTGCTGTAATTTTTTGCCTTGCATCTT  
CTTGATGCCTTCTAATGAAATCTCCTTACTTCATAAAAAAAAAAATTATAAAAATTATTTAAAGCATACTA  
ATAAAAATAAATCAAGTAACTACTACAGCTTATTATTGTGTCCTATTCTATTTTGGACAAGTAATCAAAT  
TTCTATAATAGGATATAAATTGTATTTTAGTTCAATTGGTTTATCTTATCCTGATTTTGAATAGGAATTGAA  
GGTTGGAGGTTCAAATCCCTATAACACTTACTTTTTATCTAAAAGGCCCAAAATATAACTCAAATTTGG  
GCTTGTGAGGGTGAAGTTCGACTCGGCCACACTTTAGAGAATGACTACACCATCTGCACGCAGTAAACCAATA  
AGCCAAGGAAGCTGTTCAAGTAGTGTCATTAATATTTTTTCTACTTATATTTGAGTTTTTCAGATTTTAGA  
TATAATTATATAACTAAAAATTTTCATCGAAGCAGTGTCGGTTGACACTCCTTGACATAGGGTGGGTC  
CGCCCTTGCTCGCACCTCATCGCTGCGGCGTACATTTTCTTTTACATACCCGAATCATCTCAGCCTCGCT  
CCCTCACTACCATGGAGGCCACTCCTGCCTTTTTCTTGAATAACTTTGTTCTTGATCCTATTTCTCCTATAT  
GCCACACATCCATCCCAACATCCTCATTTTCAGCTACTCTCATTTTTTGGACGTGCGAGTTCTTGATTGGTC  
AACACTCTGCCCCTTACTACATAACTAGTCTACCACCACTCCATAACACTTACCTTTTAAGGATTGGTGGC  
ACATTCTTATCATAACAAGACAAAAGGTGCTAGCTTCCATTTCTCCACCCCGCTTACGAGGATGTGTAAC  
TTCATAGTCAATCTCCCCATTTCTTGAATTATTGACCCTAGATACTTGAAACTTTCTTTCTTGGGGGTGAC

TGGTGTATTAATCCTTACTTCTACATCTCCATGTGGATATGTCATGAACTTAAACTCTAAGTATTCAGTCT  
TGGTCCTACTCAATCCGAACCCCTTAGACTCCTGGGTCTGTCTCCAAACCTTAAATATATTGTTGACTCTGT  
TTTATGCCTCGTTAATCAAACTATGTCCTCTGCAAATAGTATACACCATGGCACCTCTCCTTGGATATGC  
CACGTCAGTTGATCCATCACCAAAGCAAAAAGAAATAGATTAAGAGTTTATCCTGATGCAACCTCATCAT  
GATTGGGAAGAGACCTGAGTTTCCTCCTATTGTCCTGACTCGTGTCTTGGTACTATCATAACATGTCCTTAC  
TTCCCTAATATAAGCCTCAGGTACACCTTTAGCCTCCAAACATCACCAAAGAACCCTCTAATGACGTTGT  
TGTAAGCTTTTTCTACGTCAATGAACATCATATGTAAGTCCTCTTCTCTCCCTAAACTGCTCGATTAATCG  
CCTAACGAGATGTATGGCTTCTGTAGTTGAAAGCCCTACGATAAGTCCAAATTGGTTCTCGCTGATAGAT  
ACACCCCTCCTCAACCTCATCTCCACCACTCTCTCCCAAACCTTTCATAGTGTGGGTCAACTAACAACCTTGAT  
ATCCCTATAACTGGTACAATCCTGAATATCACCCCTTGTCTTGTACAACAAGATCAAAGATGATTTAATTA  
CTATTTAAATTTATCATTATTTTGTATGATTTAGTAGGAGTGGTGACTTTATCTCTAAATTCAACTATT  
GAAAATTAGTGATCCAAATTGCTATTTTTCTCGTACAATTAATAGTAACTTCTTTAAAAATTTACTAGT  
AATGAAATTAGTGACTTATGTTTCTAAATTCATTGTGACAGACAATTATCATTCTTAAATTTTATACTTCT  
TATGTTCAATTTATATGATTGTGTTGAATGTGTATGGACTACGGAGTTTAAAGAAGAAAAAGGGACTTT  
TTGAGACATAATCGAGTATATGTCACATAACAAAAGTATCTATAGGATCTTATGCTTTTAAACATGCCAT  
GCCATTCTGGAAATGTGACAGTTTGGACATTAATCTCTTAAATGTGAAACTTTCTCCGTCTGACCAGATAT  
AATGCTTAAATCTTGTTTTAAAGAGGCTCCTTGTTCAGAGCTTGTTCATTGATTGCAATTTGCATTTAGA  
ATGGGGTCCAAATTGTTGATATTATGAAATTTAGCAGTTTAACTATCAACATAAGTTCAAAAAAGCTGT  
TTACTAACCAGTATGAGTTCAACTTGGTATATTCATTTGCTAATTGTTTCGGTTCGATTCATCAGATGACTT  
GTACCATGTTCTGCGTCAAAGTTTTAGACAGCAGAATGTAGCAAATGGTTCTCCTGTTTCCCAAAGCAA  
GTGACACCATTCCGCCCACTTCACTTCTTTGACAACAATGCTCATTCCAATTCCCTAATTCAGAAGCTGG  
CAGTCATTTTACCAAAGACCACATAGTGGATTTAGCTGTTTCGGGTGGCAATTTACATATGAAGAG  
CTGTGGTTAGCAACTAGTGGATTCTCTACATCCAACCTTCTAGGTGAAGGTGGATTTGGGTATGTACACA  
AAGGAGTCCCTCCTACTGGAAGAGAAATTGCAGTTAAACAGTTGAAGGTTGGTAGCCATCAAGGGGAG  
CGTGAATTTCAAGCAGAAGTAGAGACTATTAGCCGAGTGCATCATAAACATCTTGTGTCTTTGGTTGGAT  
ACTGCATGAATGGAACAAAGAGATTGCTTGTACGAATTTGTTTCCAACAGGACCTTAGAGTATCATTT  
ACATGGTATGTTCTTTCTTTTTCTTAAATCTGGTTGTTGGTTCGAATCCTGTATCAATAAGATTTTGTGA  
CCAGCTTAAGGCATTTTTTGAATTATGCTAATATTTGTACAGCAGAGAGTTGATAATTAAGGTAAAATA  
AATCTACCTTAACGGGGGCTTCTTAAATGCAGCTTAGTTTCACTGTATTGATTTTAAAAGCATGTAAAAT

ACACCTCACGAGTTATGAGTTCCATGTTAAATGGACAATCTTTAAGGGGGTACTTAACCAAGCCTTTTAA  
GTAAGATTCCTCGTGGTATATGCCTATACCACAAAAAGGTGGCCTAGAATTCATCAAACCATGGTTTTT  
AACATGAGAAGGTAAAAGAAGAGCTTGCAAATACATGCTACTTCTGTAACCCAAGCCCTTTAATCTTGCA  
TGGTAAAGCACTGCTATTTCTATGCTTTTGGAAAGACCAGCATTTAATATCTTCTGACTTCTGCTGTCCCA  
GGCACTTCATTTGCAATTTTCCACATACTTTTCTATACCCTTATGGTGTATTATTTAACACACTTCATGTG  
AGGTACATTTGATGGAGGATCTTTCATAAGTACCACATTTTAGATGTGTGATTTGTTTCATCATCTGTTTT  
AAGTTTTGTATAAAGAATGTTCCCTATCCACCCTGATGCATGTTTTCTTTTGAACTTTTGTTTTACAGAAAT  
GCTCTTGATCAGTTTATACTTCTGATCACTTCTAAATATCCGATTGAATAGAGTTTCCATAAGTTCCTC  
TGATATAAAGGTCTTTCTACCAAGATGCTATTTAGAACAGATTGTATGATATGCAGGGGAGGCACAATC  
CACGATGAAATGGGCATCTAGAATGAAAATTGCTATAGGGTCAGCCAAAGGATTGGCTTATCTGCATGA  
AGACTGTGAGTGCCTTCATCTCTGTCTTGGCTTCTATGTTTGTCTTAATTTGCATGTTTCGTCCATTAGT  
TGACTAGAGGTGTCCAAAGGGTAAATTGAATATTAAGTGGCCTGGATGCTTTTTAACAAATGTTGAACA  
TGTTTCCACAGGGAACCTTGTAGTGTGTTTGTAGATTGTGACAAGTTGGGTAACATAATGGTTTTTCAT  
CACATATCTATCTTCACTTTTTCTCCTGAAAAGGATGTAAATCTAATTTTCTCCCTCCAATAGATACCATT  
GATCCTCACTTCTATAATACCATTTCTGAATCTCCTCGAGATTTGAGAGCTGAATACCTCGGTTCTAGGGT  
CTGCTAATGGATAGCAGAAGGCCATAATAATCCTAAATTGTGAAAGATATAACATGAATATGCATCAG  
GCAAACGTACTTTCCCATATAATTTTATATGCCATGTTCTTTCTGTCAAATATGAAATCAAATAGTTTT  
AGTATATTTTCTTCCACTACTACCAATTTAATATAGATGTCAACGTATCTTTGCGCTCTGTAGGACAATTTA  
ATTGTGGTTGCTTGAATTAGCTTGAATAGAATAAATATCACTTCTTTTGTAGTGTAGCAACAACAGGTAATC  
GTTCTCTGAAGATACTAACTTGTGGCTGCAGGTAACCCCACTATCATTTCATCGTGATATCAAGGCAGCTA  
ATATTCTTCTTGATTCTAACTTTGAAGCTAAGGTAACCTTTGTGTTTCGCTTTTTGGTATTGCCACTATATTT  
TCTGTTCTTTTTTTGAGAACTGTTTTTTATTTTTTTGAGAACTATTTTCTGTTCTATCTTACTATCAAAG  
AAAGGTCGGGCTGTTTTCTATTATCGACAACCTGGCTTCTGAGTACACCTAGAATCCACTGTTGATGTAAA  
TAGTTTTTTGTTCTTAACAATAAAATCCATATGATGAGATTAATTTGAACCAAATGAGCATCTACTCAGG  
TGCAAATGTTAACTGCATTATTGATTCTGCTTTTTGTTTCTTTAATTTTCATGTGACAACCTAAGAACATATT  
TCCTCGCAAGTTATTTAACATGAATGGGAACCTTTGATTTGTATCCAGGTTGCGGACTTTGGACTTGCCAA  
GTTCTTATCTGATTCAAACCATCATGTCAGTCATATCTCCACTAGAGTGGTGGGAACCTTTGGGTGAGTTT  
TATTGATCCTGTCTCTGCTACCATGAATTAGATATCAGAAGGAAAAAATTGACTAGATCAAGCAAATTT  
ACTATATACAGGTCACCATACTGAGTGGACCAGTCTCTTCTACTTTTATCAAGTAAAAAGTGGTGCTTCCC

TCGTTCTAGCGTTAATAATATTCATTTTTTTGGGCTAACCTCATACGTAGCATAGGCTATGCCCTTCCCAT  
GTTAACTTTGTTTCATCCAACCTGCAAACCTGATATCTATATCAGATACCTATAGAAAATCGAGCTAGAATG  
GGACTCTCAAATCTGGGGATTTTAAAGACATTGATGACTTGCATGACCTCGATTTTAGGTCAACCTGCTC  
ATAATGCAGTGATTCTCTCAGAGTTATAACCGAAGTTTTCTGCTAGTCGGAGGATGAGAAGAGCGCA  
TGGGATGTTACTGCTGTTTTCCCGTGTCTGATAGTGTGGGTTTCTTAGTCCTTGATTTTCCCTTACCAACA  
CTGATTGGGGAAAGAGGGGGTTTGGGGGGTTAAGGAGAGGGGCTTGGATTTTGGAACTGTAGAACT  
TAAGCTACTTCATGATTAGTAATGATTTCTGGATTACACAGCTTCAGGTAGATGGACCACGTAAAACTA  
ACAGGGTAAAACCTACATTTCTGATCACAATTTCTTCATGTATTTGATAAAGCTGACGTCTTGACGGTAT  
CTGGCCCCAGAGTATGCACAGAGTGGAAAGACCTCAGATAAGTCCGACATCTTTTCTTTTGGAGTCATGC  
TCCTGGAGTTAATTACAGGGCGTCCACCTATAATCTCAACTGAATCCTCCGCATGCAGCAGTTTGATCAT  
ATGGGTATGTTAACTGTTCCACTTTCTTGACCGCTATTCAGCATTCTTAAGTGCCTAAAACCTAATGTTCAA  
CTAGATGCATGAGTAAAACGTTTGTGTGCAACCTTTATAACTGGTTAAATAGCATAATGCTTAAATTTACT  
TTCTGTCCAACCTACACTAATCAAATCCTCAATATGGAATAACATTCATCTTACTATAATCTTATCCTTAATT  
AGCTATGTATGCACTGTATTTAATCTGAGGCAGAACATGCAAGCACAGCTTATGCAATTCTCTGAGGTGG  
CCTTTCTATTTATAAGAGATCTTGATCCTCCGGAAGGTTTATCATTGTGGTTTTAGAAGTACTGGGTGGT  
TTTTATCCTTTATTGCTTTTCTTTTTTGCAGGTGATAAATGGTTGAGAAATTTATCACGGCAGTAATCAATA  
TCACGGAAACAACCTTTCTACCTCCACGAGGTAGTGGTAAAGTCTGCGTATACTCTACCCTCCTCAGACC  
CCACTTGTGGGACCTCACTGGGTATGTTGTTGTTGTTGTTGTTGTTGTTAATCAATCACTTAAAAAAGAACCA  
TGAAAAAGCATTGGCTTAAAATCAGAATTTGGCAGACCACCGTCTTGTACAAAAGAAATGTGCAAATC  
AAAAGGATCTGGTGTCTTGTAAAAGTTCATCTCTGTCAAGCCAAAGGCATAAAAAATTCACGTCCATCTTA  
CAAATTTTTAAAAGAAATTTGTCATCCTTGTACCAAATGATTTGGCTTTTGGACACCCGTTTTGATGATGG  
AACATATCTCAAGTTTTCTGTTGCATCTTTTACAACCTATTAGTTTGTCCAAAGTTTCAGTCTTAAAGCATGG  
AGTTCACCATGAATTTGATATCATACTCTATCAAATTTTCCAAAATAAGGCTCCCTTTTTAGGAAATCTT  
GGAGATACGGGTTCTGGAATCATTGTGTTGATCTCAAAGATTACTGTTGTTTCTACTTAAGTCCCAC  
AATTGATCAGAATTAATTACATAAGTTAATTCGAAATTGAGATCAGAAAGACGGATTTAGAGTTAGCA  
GCTTCTTGCATGCTGCCTACTCACAGACAGAATTAGTTATGTCACTTTAGTTAATCAGAATTAACCTTTACA  
CCTCTTCCGGGGCATTTTTTTTCATAACCTCGTCATCAAATACAATTTTTGTATTAGGAATCATTACCGTA  
GTTTCTGGTTTTTCATATTCTTGGTTTTTGGATTAAGTACTTTTTGAGTGTGTTTTATTAAGTGGATGTACACA  
AATTTCTTGATCAACATATTGGTTTCTTGTAGCAAATAACAAAATTTTTGGGAACTAGAAGCATCTCTA

GGCCGATGCTTAAATGCATTTTCAAAGATATGGATATCATTGTTGTCAACCCTCTTCTTATAGTATACCAC  
TTGTACATAGCATAAGAAGACTCTTTCTGATACACAGGCAAGGCCTTTGCTTAGAAGTGCATTGGATGAT  
GGAAAATTGGACGCCCTAGTAGATCCATGTTTGGGACAAAATTATAACAGTGAAGAGATGGCTAACATG  
ATTGCTTGTGCTGCTGCTTGTGTGCGTCATTCATCACGGAGAAGACCGCGGATGAGTCAAGTAATAACA  
TCTTCTCTTAATCTTTTTCTGTTAGTGTGCGGATTTCTTTAAAGGGGTTTATAAACCAAAACCTTCCTAC  
TTATTGTTTCAGGTAGTTCGTGCTTTAGAAGGCGATGCCTTTATCCTGGACCTTGATGAGGAAAATAGGCC  
AGGACAGAGTACCATTTGTGACTTTGATTCTGATGGAAGCAACTATTTTGAGAAGTTCAAGAAAATCCA  
GCGGAGCACTCTGAAATCAAAGAAGAATGGTAATACCACCGTGCACCGGGGGCTGTCATGGAAGTAC  
ACCAACTGAAAATGGAGTTAGATGAACGAAGCTCTTCTCCCCTTTTTATCTTTCTTTTCACTGATGTAGAT  
GATAATTCGAGGGTGAATATATGATTGCAACCATCAAAGTTGTCTCACTTAGTGAGAGGATTGATAGT  
TTGTAGTTACTTGAAAGTGCAAAAAGAGAAGAAACAGGAATTGGCATGAGATATTCAGTATATCACCAA  
GTAAAATCTGTGTATAAAGATGCATGTTTCAGATGTACATATAGATTTCTTCCCCTCTCTTTTTCTTATTC  
CTTTTTGC

>PGSC0003DMG402019242 G-LecRK

ATGAAAGGCCTATTTTCATTATGCATTTGCTGCCAATTTCTCTTCATTTTACTAACTTCTGCAGCATTAGAC  
ACAATCACTACAGATAAATCCATTAGAGATGGTGACACAATTGTTTCAGCTGGAGGGATTTATGAGCTT  
GGATTTTTAGCCCTGGAAATTCGAAGAATCGTTACGTTGGCATATGGTACAAGAAAATATCAACTGGA  
ACTGTTGTTTGGGTTGCCAACAGAAACATTCCACTGAATGACAATTCAGGAGTGTTAACTCAATCCCA  
ATGGAATTCTTGACTTGTGATAAATCGAATGTCTCAATTTGGTCATCAAATCATCAAGATCGTTAAAG  
AATCCAAAAGCACAGCTCCTGGATTCCGCAAACCTTGTTGTCAGTGATGGAATGATAGAGGCCTGGAA  
AATAATTCGCGTGGCAGAGTTTTGATTATCCAGGAAATACTTTGTTACCTGGCATGAGGATTGGAAAA  
GATTTGGTCACGGGAATGGATTGGCATGTAACGTCATGGAAGAGCATGGATGATCCAACTCCTGGTGA  
ATATGTAGATGGTCTTGATTCTCATGGATATCCACAATTGTTTGTGTGGAAAAATTCATCTGTAGTATTTA  
GCTCAGGGCCATGGAATGGTATTGCATTCAGTGGTAGTCCTAATAATAAACCAATACATATTACAGTTT  
CGAGTTTGTTATTAATCAACAGGAAATTTACTACACATATACAATTAGGAATGACTCCATTCCCACCAGG  
GTGGTGCTCAATCCGTCTGGTGTGCTAGAACACCTAATATGGATAGAGCGCAGTCAGAGCTGGTTTCTC  
TACTTGACAGCACAAATTTGATAATTGTGATCGTTTTAGTTTATGTGGACCTTATTCAAGTTGCAACATCAA  
TAACTCCCCTCCATGTGACTGTTTGAAGGTTTTGAGCCTAGGTTTGTATTTGTTACACTATCTGATCATC  
TCACGTAAAGCTGTCAGAGAAAGCACACATTGGACTTTTGATTACTTACTTATGTTTTACACGCCCTCA



TGTGTGTGCTTGATTCTTTTTTTGTTACCTAATTATGTCTTCACAGGTATCCTCAAGATTCTGCAACAGAAT  
GGTCTAGTGGTTGCGTTAGGAGAACTTCTTTGGATTGTACCCATGATGGTTTTCTTAAATTTACGGGTAT  
CAAGATGCCTGATTCTAGAACTCCTGGTATAATGAGAGCATGAACCTTGAAAATTGCGAGAAAATGTG  
CTTGGCTGATTGCAATTGTACAGCCTACTCAGATCTTGATGTTAGAAATGGCGGAAGTGGATGCTTACTG  
TGGTTTGGAGAACTCATTGATATACGAGAGTTCAGCCAAAATGAACAAAACCTGTTTGTGAGAGTAGCT  
GCTTCAGAATTAGGTAATGTCCCACTCTGCACCATTCTCTCGTCTTAACAATATAAATACACAACCTCTTA  
GAATTGAAGGAACTCTACTATCTTATTTACTTGATAGACATTAATAATTGTTTATCAGCCATTAATGGCTG  
CACATCTACAATAGTTTCCCCTTAAGGAGGGAGCTGATAATCTAGTACGAACGTATCCATCTAGTAGTGC  
TGTACTTGCATTTGCCTCTCAGATCATCCACTAGTCCCCTTTGTTGCAGACTTTATTTTGTATAGAGTTTGA  
CACTAGCAGCTATATTCAGAATGAATAACCATATAGGAGAGCAAAGATTGTTGCGTAACAGTTTCCTCCA  
AGGGATTTTAGGAAAGCTGCCTCTCAGCTTCTGATGTGCTAGACCTTATGGAAGATCAAGGATGTTAAC  
AGCGGGGGATGGTCGTACACACTCTATCCTTTAATAGTTACTGATTAGCAAGTCTGCGGGGTTTCATAGA  
AAAATAAGAAGTAATACAATCAATGCAATTCATTACTGATATGGCCAACTCATATGTAAATTGAACATAT  
TCAGACAGGAAGGGGAGGAGAAAGAGGTCAATCCTGATTGGTGTCAATTCAGCAGCAGTAGCAACATT  
TATCCTCAGCCTTTTAGCTTGGTTTTACTTCCGAAGAAGGAAAAGAAGAAGAGGTATATATACTTGAG  
ATACTCTTGTCTTTCTGGCTGACATTGTTGGCCTTTACCAATTCTCATTGATATCATGTTTGAGGCGGGC  
GAATGTATATTGACAGGTTTAGAAGTTGAAAATGAGGAAATGGAGCTTCCATTGTTTGATTTAGTAACT  
GTTACTAGTGCCACTGAGAACTTCTCTTCTGCTAATGTGATTGGAGAGGGAGGTTTTGGACCCGTTTACA  
AGGTAAATCAACTTTGATCCTCAATGTCTAGCAAGAAGTGGCATCTTTGACTCTTGATAGAAAATTGCAG  
GGTATCCTACCAAATGGACAAGAGATTGCAGTAAAGAGGCTATCAAAGCATTCTGGACAAGGCTTTCAA  
GAGTTAAAAAATGAAATCGTTCTCATTTCGAAGCTGCAACATAGAAACCTTGTCAAGCTATTGGGTTGCT  
GCCTGAAGGAGAAGAAAGGATGCTAATCTATGAGTTCATGCCCAACGCTAGCTTGGACTATTTCATTTT  
TGGTCTGATTTTCATGATTCATTAATAACTACTTGTATATGTCCTCAATATCTCTGCATCACTCAACGA  
TTAGTTCCACATTGTGCAGATACAAACAGAAAAGCTTCACTAGCATGGAAGAATCGCTTTGAAATTGCTA  
TGGGAATATCTCGAGGTCTTCTTTACCTTCACCAGGATTCAAGATTACGAATTATTCACAGAGATCTCAA  
GACCAGCAACATTTTATTAGATAGTGACATGAATGCAAAGATTTCTGACTTCGGCCTTGCCAAAATTTTT  
GGTGGAGATCAAGTGAAGGAAAACTAAGAGAGTAATAGGGACATAGTAAGTTTCTACACATCTTCA  
AATCATAGAATCTTTATTACATTCAATCAGTACATGAGCATAAATATATTGAGTTGATGCAGTGGATATA  
TGTCCCCGGAATATGCTGTTGATGGGAAATATTCAGTAAAATCAGATGTATTCAGCATTGGCGTAATCAT

TCTTGAAATAGTCAGTGGCAGAAAGAACAGGAAATTCGTCATTTGGAGCATCATCACAATCTTTTGGG  
ACATGTAAGCACAAAACCTTCATTCCCTTAATTCCTCTCAACTTCCTATTGTAATAACATTTGTATAAATGT  
GTTGTTCTGTTTGAATCTAGGCATGGTACTTTGGAGTGAAGGCAACGCGATGGGACTGATAGATGAA  
TGTTTGAAAGAATCATTTTCAGAATCTCAAGTGTTGAGATGCATCCAAGTTGGTTTGTATGCGTCCAAA  
AACTCCCCGAGGATAGGCCTACCATGGCATCAGTAGTTTTCTGGTTAGGCAATGAAGGCCTGGTTCTCC  
TCAACCAAAGAAACCTGGTTTTTTTTATTGAGAGGAATTCAACGGAATCAGCAGAGTCATCTGATGAAGG  
ATATCTAAGTAACAACGTATCGATAACAGTCCTAGAGCCAAGATAGACATAAATCCAACAATTGTAAC  
TTTGAAATGTATCCACTTTGTCCTGTTTTGTCAACAGTATTAGTGTATATATGGACTATATCATGAGGTG  
CATTGAGGAAGATAGTCTAGTATTTCTGTTTTTCATTGACATGTGTATTCTTCGATACTATAATAAACGTA  
ACGAATTGGCCTATTCTGAATAACTTGTA AAAATCATGTCTCCGCTGCTGACCATCAAAAT

>PGSC0003DMG402026153 G-LecRK

CAGAGATATTGTTTTGGGAATGCCTATGGAGTACTTGCCTCATAGAGATAGTTTTGATGAAGATTTAATC  
ACTGAAGATGATAAGAAACGGATTGATGTCCCGTTTTTCAGCTTGAATAGCATACTAGTTGCTACTGAAA  
ACTTCTCAAATGCAAGTAAGCTCGGGAGAGGTGGATTTGGACCTGTTTATAAGGTTTTGCAACTTTATTT  
TTCTTTCTTCTTCTGTTCTAAGTTGTTTTACCATTCAAGTTTTTTTTCTTTGTTTTTATTATATAACAGTCCG  
GAGATATATTTATGCAGGGTAAGTTTCTCGGAGGTACAGATATGGCAGTTAAAAGTTGTCAAGTAATT  
CTGGACAAGGTGTTGAAGAATTTAAACTGAAGTAATGTTGATTGCCAAACTGCAGCACAGAAATTTAG  
TTAGGCTTCTAGGCTATTGTGTTGAGAGAAATGAAAAGATTTTGTTATATGAATATATGCCCAACAAAAG  
CTTGATACGTTTCTATTTCGTTAGTATACTCCCTCCCTACCATGAAACTCGTTGTAGTAATAGTTTTATG  
ATTGATTCTCTCTGAAGTTATCTTACAAACCTTGAAATTAGATCATGCATTCTGTGATTACTGGACTGGA  
GGATTCGTTTTGAAATTATATTGGGTATTGCTCGAGGGCTACTTTATCTTACCAAGACTCGAGGCTAAG  
GATCATTCATAGAGATCTAAAGACGAGCAACATATTGTTAGATGAAGAAATGAATGCCAAAATATCAGA  
TTTTGGCTTGGCAAGGATTGTTGAAGGCAAAAATACAGAAGCCAATACTAACAAAGTCGTTGGAACATA  
GTAAGTCTCTTAGTTCTGCTTACCTTTGATTTGGTGGGAAGAAGATAGATATATACACACCTAATGTATT  
GGTTTACACAACTAGATGCTAAAATAACCTATTCTGGAACACTAAAACAGTGGCTATATGTCTCCGGA  
ATATGCATTGGAGGGACTCTTTCAATCAAGTCTGATGTATTTGCCTTCGGAGTAGTCTACTCGAGATC  
GTAAGTGGGAGGAGAAACATGGAATTTTTCGAAGATGTAAACCTCATTGGTCATGTAAGTACCAAAAT  
TCCCTCATTAAATATACATCTCATTCTACTTAAAGCTTTTATTGACTCAAAATTAGCATTTACAGGTATGGA  
GACTGTGGATGAAAGACAGTGCATTAGACATGATGGATCAAACCATAGTTGAGTCGTGCGATGAAAGT

GAAGTGCTAAAGTGCCTAATGTGGCACTCCTATGTGTTCAAGAAGATCCAGCTGAGCGTCCTGTAATG  
TCAAATGTTGTTTTATGCTTGGAGGTGAAAGCATAACACTACCAAGACCAAATCAACCAGCTTTTATAG  
CACGAAGAAATAGTGCTGGTGCAAGTACATCTTCTTCGTCTTCTAAGCTATAACAACACTTCCAACAATGG  
GTTGACAATAACTCAACGAGTAGGCCGATGAAATCAATATACATATAAGTTAAATGCATAACGCACACA  
AGCCAATAATGTGCCGGTATATCTTTACTTCAATTTAGTTTGAATTTCTGTTAAATTATTTTGGCAGCA  
AAATAACCGATTGTGTTGTAGTCTCGGA

>PGSC0003DMG402029906 G-LecRK

CAAAGAAGTACAAAACACTCATGAAGTAGAAATAATTGGGGACTAAGACTATTTCCCACCGTGATCAAA  
GTAACAGTCTTATTTTCAAATTATCACTTCCACTTAATTATGAAATGTTTTATCTTTTATGGATAGTGGT  
GTATAAAAGATAAAACTCACATTTATATACCATAGTTTTTGTATGTGAAAATGACATACTTCATAAAATA  
TCTTCTTGTTCTTGTTCTTGTTCTTCTCATCTTTCCCCTGCATATTTTAGCACAAACTATAACCATTAGGCAGA  
TCTCTCATAGCAAACGATGAAACAACACCATGGCTTTCTCAATCTGGAGATTTTGCATTTGGATTCAAGA  
AAATTCAAAGTCAAATCAGTCTTGCTTTGCATATACTATGCCAAGATTAAGATGCCACCATAGTTTG  
GTATGCAAATGGTGGTAACCTCGTGCCAGGAGGCTCTATCGCGGAGTTAAATCCTCAAAGGGACTAAT  
TCTCCGCGATCCTAAAGGGAAAATGATCATTGGAGCACTGGTCCGATTGGTTCTAATGTTGCTTATGCT  
GTCATGAATGATACTGGAACTTTGTTCTTGTTGGAGTTGATTCTTCAGTTTTATGGGAAAGTTTTCGATA  
TCCGACTGATACCCTTATGCCTACTCAAATACTAGAGATTAACAACAAGCTTGTTGCTCGAAAATCGGAG  
TCTTTCTTTGTTCTGGTAGATTTTATCTTCGTATGTTGAGTGATGGAAATTTGGTTCTTGTTACTCAATCC  
AAGCCAACGAATTCGATTATGATGCTGAGTATTACAACAGTCATACTTCTGATTCAGGAGATGAAGCCA  
ATTCTGGTTATCGATTGGTATTCGATGAGTTTGGTTCAGTTTACATTTTAAAAAGGAACAATCAAAGACTT  
GTGTTGACACCTCCCAATGTTCTTCAATTTAGAAAATTATCACAGGCTAAGTCTTGATTTTGTGGTGT  
TTAACTCATTATTATCATCCTAAGAGTACGGGGGATCAGAAGTGGAGTACTCTTTGGTCTTTGCCTGAT  
AACATATGTCTAGCAATTCTTGAAGATGTTGGAAGTGGAGTTTGTGGATTCAATAATGTATGCAATCTAG  
GTGAAAATCAAAGACCATATTGTGAGTGTCCAAAAGGGTATTCGTTGATCGATCCAAATAATAAGTATG  
GAAGCTGCAAACCAAATTTGTTCCAAGTTGTGATGAATTTGGACAGGGAAATCCTGAAGAATTATATG  
ATTTTGTGTTGGTGACAGATGTTGATTGGCCGTTATCAGATTTAGAGAGGATTTATCCTTCTGCTGAAGA  
AGAATGCAAGAAGGCTTGTTTAGAAGATTGTTTCTGTGCTGTTACTATTTATAGAAGCAATAGTTGTTGG  
AAGAAGAACTTCCATTGTCAAATGGGAGAGTAGATACCTCTTTGAATGTAAAAGCTTTCTTAAATAA  
GGAAAATTTGAACATAAGAGCTTCTTAAATTAGATATAATGTATGTCTGCTATAGGTTTCATGGTTGAATT

CGTCGATCCAACCTTGCAATTTTACACAATTCAATAGTTTGGATTTGTAATAATTAATGGACCATATTGTAT  
AACAAACTTTGATTAGCAAATAGTGAAATATTTACATACATTTCAAGAAACATATTGCACTGAGATACAGA  
TACAGGTTATTGATGTACTCTTTAGGTCCAAGCAAATGAATAATGGAAAAAAAAAATGGTTGATCTAAAT  
AGAATCGACAAACGAAAAAGGGTCAGGAGGAATTGATACTTCAACAGAACCTTCAAGCATTAAACATGAC  
TTTCTTCATGTTAGGCCTTGATGCTAGATTTTCTTGAATGCACCAAATTGCAACCAACAAAACTTCTCGA  
ATCTCTTGATATCTTCTAATGCCTCTTCATCATCGCCTACAAGTAAATGCAACTTATTTCTTTTATAGCAAT  
CATAAGCCCACTCCAGTAGTATCATTTCGTTCTCGTTTGCCACATCCTGCTCATAGTTTTTCTGCAGCAA  
TCAACTCCAAGAGCAAGACTCCGAAGCTGTACACATCAACCTTACAGTTACAGGCATGCTTCTGAACCA  
GTCTGGGGCTACGTACCCTTTGGTTCCACGTATCCTAGTGGTTGTTGAGTCTGATGTTTTTTCAGTAGCT  
TGGCCATACCAAATCTGCTATTTTTGCTGTCAAATTTTCATCCAAAAGCACATTTTGGGGTTTGATGTCA  
CAATGTATAATTTGGGTACTGCACTCTTCATGCAAATAACAAAGTCCTTTGGCAGTGTGATGGCAACTT  
GTACCCTTTTGGACCAACTAAGCCTAGAATCTTTGAATAGCAAGTGTGCTATTGAGCCGGTTTTTCATGTG  
TTCATATACCAAAGGCGGTGTTGGCCTTCGTTGCAGAATCCAAGGAGTTGGACCAAGTTCTTGTGATTA  
GTCCTGCTGATTGAATCACTTCAGCTTCAAATACTTCTTCTCCTTCTCCTTCTGTTACCATGTTTCGGAGT  
TTTTTGACAGCAACGACTTTCCATTTTCATCATCAAGAACCGCTTTGTAACTGTTGAGAAAGCTCCAGT  
TCCTAATCTTCTTGAATCCATTTGTAGCTTGTCTAGCTCTTTGTAGCTAAAACCTTCTTAAGTTCACCTC  
GGAACAGCTGAATACGGTGCAGTCCTCTTTCGTTTTTTTCTATAAACTTAAAAATGTACAATAGGGCCA  
AAAGAATTAAGAACAATTCATGAAAACGAACTGGCCAACAACACAGAACCCAGAAATGATCAGAGTA  
GACTGATTTTTCTTTTTCTTATTTCAACATTTGGTGTCCCACTGTGGAGTTGTCTTTCCTATTTTTATCA  
AAGCCTTCCCTCCGATCGTTGGACCTACTCTCCATTTGAAAGAGGATACCTTTTCTTCCAACAGACGTTG  
TCGTCAGTGTAAATGGCAACATCACAAAAACAATCATTCAAGCAATTCTGTCTGCACCAATCCTCTGAAA  
CATCGCGGTGAGACTCATAATCAGAGTCAGGCCAGTTAGTATCCAACATTTCTGTTGAATGTGAAAGACT  
CAACTTCTCGCGATTTCATGGTTACAGTTTTGCTCAGAGAAATTTTGTCTGCAGCTGCCTAATTTGTCATTC  
GGATCATCCAAGATATATCCGAGTGGACAATCACATCTCGGCCTCTGATCAGTTCCTATTGAGCATAGGC  
TGTTGAAACCACAGGCACCCCTCCTGTACTTTGCCTGATAGACAAACAGATGTTATCAGGAATGTTATA  
CAAAGTAGACCATGCCATCGGTTCCCTACCAGAAGATTTTCGGATGGACATAGTGCCTAAAAACTCCATCA  
TATTCAAGAATCGCTCGATGATACATTGATTGGCTTCTTGAATTTTCCACATTAGAAGATATCGAATTTAT  
CAAAGTTCCATTCTTTGCTTGAAGAAAAATAAAGCCTGATTGATTGAAGATCACCTGATAACCACTGCCA  
ACTGACATAGGTGACCAATATGCAGCATTGTTGCCTCAGCTGGATAATTGACTGTGTAAAGCACTAGAT

TTCCATCAGTTTGAAGTATGAACTCAAACCTCCCACTCGATACATTCGTGTCAGAGAACTTGAAACAAG  
ACTGTTATCTTGGTTAAGTACTTGACCAGGCAAAATCGTATCGGTGGGCTCATTAAACTCTGCCATAGA  
GTGTCTGAACTACTAGTTGCTAGCACAAAGTTTCCATTATCAAGCATGGCTCCATAGGCCAATTGAGCAT  
TCGCCATGCCACGAGCCCACATCTCTTGACCATTTGGATCAGTGAGGACTAGTCTTCCATCCGCGGAGAG  
CTGAACTTTGGATCCATCTAAGGCAAGATTATTCCTATTGGCTGACCAAATATGGTTTTGTCTGTGATTT  
TGTTGAACCATATGGCTAGTAAGTACCTTGATTCATTTCCAATTTTTTGGAAAGCCCAAAGCGAATTCATCA  
GATGGGGATGACCAAAGCTAGTAACATCACTTGTAGTGAGTGATGAACCCAACTAACATTTTGGTAA  
GATTGAGCAATGGCTGAAAGGGGAAACAATAAGAGACCAACAAGAAGCATAACTAAAGAAGTCATGTA  
AGAAAGAGGCCAAAGTTATAAATGGATATTATGTACACC

>PGSC0003DMG403026153 G-LecRK

GTTTACTTTTTCATACCATAAAAAATGTTACTGACTCAAGTAGTTGCTGGAAAAGTTTAAGTTATGCAAAT  
GAGTAATTTTCTTGTGTTGTTTGCAGTGTTGGTGATTATATGTGGATGTGATGCAAGGAGCACGATC  
GATGGAGGGAGTGAGTTAATAGACAACGGGGAAACTGGTATCTGCTGGAAAAAATTCGAAATGG  
GATTCTTTTGTGATGATGCCGGTTAAACTGGTATGTAGGCATATGGTATAACAAGAAAGGTCCTCGAA  
CTGTTGTATGGGTTGCTAATTGGAATGATTTCGATTCAGAATTCACAAAAAATAAGGAGAATGTTTCCAT  
GGTCGTTGAAGATGGTAAGCTCAAAGTTTTGAATATTAGTGGACACATTTATTTCTCCTCAGAAGTAGAT  
GGTAACTCTGGCGTTAAAGCAGAGTTGTTGGATACAGGGAATTTGGTTTTATTTGATGAATCAGGAACT  
AAAATGTGGCAGAGTTTTCGGAATCCAACCGATACATTTCTACCAGGCATGAAAATGGATAGTAATTTG  
AAGTTGATTGATTCAAAAATGGCAACTACAAATTCCAATTAGATCAAACAACAACAAAAAATATGTCA  
TAGTTGATGAGAATGGAATGCATAAAATTCCTGCAAGGGTCTGTAGGAGGGTTTGCGAAATCAACT  
GCTTATGAATTCCTCAGATTCAATGATATGCCCTCTTTTGTAACTTCTTTTTATCCAATAATTCAGTTGAA  
GCGAGAAGAACATTATTCAATAATTCAGTGGAAAGCGACAAGAACATTATTCAATAATAATCGTAGTTTTA  
CTCCGATTGATTTTTCAAGGTTAGCCAATCATAGTAGCAAAGATTCTATTTTCGAAGGTAAGTACTAGACTCCTG  
ATGAACTCCTCTGGAGAAATACAATTCTACTTATGGGATAACCAGAGTGGATGGTCCTTGTATGGTCTG  
CCCCAAAAGATGAATGCGACGAGTTTAGAAAATGTGGGACATTTGAGATTTGTAACAGCAATGGAAGTT  
CAGTGTGCAGCTGTTTGCCTGGGTTTTCAGAGTGATCCTCCAGAAGATAATGGAGACGGGGAATATTCAG  
GTGGATGTTGAGAATATCAGATAACTCATGCAAAGAAGATACATTTGTGCATCTGAGCTCAATGAAAT  
TTGGAAATTCAAATTGGACAGATAAAAAGATTAATACCAGTGAGAACTGCATGAGTCATTGTTTAAGCA  
GCTGCTCATGCAAAGCATATACATATTATAACAATTCTGGATGCTGGTTTTGGGGTTCGAATCTCAATAA

TCTCCAGGAGAACTACCCTGGTGGCTTCAACCTCTCTGTCCGCGTGCCCCCTACAGAGGCGTATGTATGT  
GAAGGGGAGGGGGTTACATGCACCCATCCTCCCCTCCTAACCCTATATAATACTACTATTTTTCTAAT  
TATCTTTTTAAATTTGTATTGGTGAACCCAAGGTTAAAAAGAATACTCTAGTATATTGATAAGTAAGTACA  
AATAGGGGGTGCATAACTTATAGATTTGTGGTTCAAATTTTTCTATCCACATTAACATTTTTAATTTTTAAT  
TAATATAACAAAATGTACCACTTTTCATAGATCTTTTTAATAATTTATAAATAAAAAGAGGTTCAAATACC  
CATATTTTTAGGTTGCATTAGCTATGTCT

>PGSC0003DMG400000578 L-LecRK

CAATCATTAAAGGCATTAATAATTTACATTCCATCTGAATTACTATATTTTTGTTTACTGAAACTGAAATAGGA  
CAAAAAATTGCATTATGCAAGTGAGGACTTTAAGTTCTCTTGTTTGAAGAAAGTAAATGAAGTTAT  
CTGTAGACCACATCCTTATGTACAACCTTGACAATTGATAATTTGCTACTCAGAAAATTCAAATTCAAAA  
AAATTTATCACTAGCCAAGAATTAGCTCATCATGGATTACTTCTTCTGGTTTTCTTCTCGTTTGCCATACT  
AGTTAATAGTAATTTAGGTTTCGTTTCGCGGACGGACCTTCAATTAACGTGACGAAGCATATCTTTTTCGA  
GATTTCAAGTTCTAGTAATCCCAGATTGAAGCAAGATCTTACACTTCTCGGTAGTGTATCGTCTCGGATG  
AAAAAAAATCCGTTCAAATTCCTGATCCTGAGCGAGAAGGTGATGATCTAAAGCATCTAGCAGGACGAG  
CTATATATTCTTCACCTATCCGTTTCTTTGATCCTCGGACTCAAACACCGGCTTCTTTGAAACGACTTTCT  
CGTTTCAATTTGAAGTGAAGTCCAATTCAGCAATGAGACGTCAGATCAGGGGAAATCTGTTGGTGGTA  
GTGGCCTTACTTTTATAATCGTTCCGGATGAATTGACTGTTGGCCGTGCTGGTCCGTGGCTTGGGATGCT  
GAACGATTTGTGCGATGAGGATTATAAACAGTAGCTATTGAGTTTGATACTCGGCAGAACCCTGAATT  
TGGTGACCCGAATGATAATCACTTGGGCATTAATTTGGGTAGCATAGTATCAACTGCAGCGATTAATGCT  
TCGGATGCCGGAGTTCAATTGAATGACGGATCAATTCACAGAGTTTGGATATCTTATGATGGGCGAAAG  
GGTTTTATTGAAATTCGTCTTGACCTGATGGCAGAGGATATCCTTCTAAACCAGTTTACTCTGGTTTACT  
TGATCTTTCACCTTACTTGAATGAGTATATGTTTGTGGATTTTCAGCTGCTACTGGTAACCATACACAAA  
TCCACAACATCTTGTGATGGAATTTACCTCAATTAGTCAAGCTTCCCTTCGAATTCCTTCGACAGAGACG  
TGCCAGAACAAAATCATGCTTCAAATAGCACACAATCTGAAATTGATCATCGGAAAACGCCTAATAGTT  
TCTTTATTTTCTTGCTGTTGTCATTCTTCTGGTAATCGTTCTTATTAACCTCTATTTTCAAGTACTACAAGCG  
AGATGACAATTCGACGAAGCATTCACTCTGCCGAGAAAAAGCAGAGACCGCGGCCACCAAACAAGG  
CACGTCGCTTACAATAGCTGAGATCTCCATCGCAACAAGGAATTTCAAGGAGTTACAAATATTAGGCA  
GTGATGAGAAGAGCATTACGTATAAGGCCACGATCCTGAACGGGTGCAACGTTGTTGTAACGATTTT  
TAACTCAATTTTTCAACACACACGGGTTTAAAAGCGTCAATTTACAAGGAAATCAAGGCTATCACCAG

AATTCGTCACCCGAATTTGGTCCCGATTAGAGGATGGTGCTATGACAACCAAGAAACAATAGTTGTGTA  
CGATTTTCATCCCCAATGGAAGCCTCGATAAATGGCTGTTGCGCGTTGGAGTTTTGCCTTGGACGAGACGT  
TTAAGGTCGTTAAAGATTTAGCAGATTCTCTTGTCTACCTTCATTCAAAGCAACTCGCTCACAAAACGT  
TAAAAGTAGCAGCGTGTTTCTTGACGTGAGCTTCAGAGCAGTAGTGGGTGATTTGGGGTTTGTGCTTAC  
TTCAGCCGGGTCAACCCGGTTTGAGGCCATGGTGAGTCAGACAGCTGATGTGTTCGAATTCGGAGTAGT  
CGTGCTAGAGATCATTGCGGGTTCGGAGCAGAAAGTCCAACCCGGGAGAACGGGATTTGTTGGATCTTG  
CATGGGCAATGCATGAGGTACAACAGAAGGAAACTCTAGTGGATCGTAGAATGGGCGCGGTAGTGAAC  
CTGGAGCAGGCGATTTCGGGCTTTGGATATCGGGTTGCTCTGCACGTTGAACGAGAACAAAGGAAGGCC  
TACGATGGAAGAAGTTGTGGAGTTCCTAAATATGGAGAAACCGATACCGGAGTTGCCATCGGGTCGAC  
CCGTTTGTGTTGCCGTACAGCAGCACCACAGGCTTATGCAGTGGGTATACTTGTACAGCATTCAAATG  
AAGTTACGTGTTGCTTACTAATTGGTTCTTCGGCGTTCCACGTAAGCACCAATTATTCTTATCTATTATA  
CTACAAAATAATGACAGGGAAGCACATGTATATGCTATGTGACGTTATTTTCATGACATAGACAACACTATT  
GTCTGGTCTATGGTCGGAGTTTAATATCACAAGAACTCCTAAAAAGATTTGAAATTATTGTAATTATGT  
ACTGCAATTCAAATGTTCAATATATAAAAATTGTATGTAATCTGTTTATTCTCCA

>PGSC0003DMG400000789 L-LecRK

ATGCGTTTTTGTGTTGCAAAATCTCACAAGGGTCACTCTGTTCTTCATCTTCACCATAAATTCACCTTCCCTT  
TCAGCTCCTTTCTTGCCTATAAACAATGTAACCTTTATGGCGATGCTTCATTCACCGCAAAATCAATCAC  
CCTCACCCAAGAACGCAACTGTTTCATCATCATCAACACCTCCCATTTCTGGCATTGGAAGAGCTTTCT  
ACACATACCCAGTTCGTTTTCTTGATTCTTTAACCAATAAACTGCTTCTTTCTGTGTACTTTCTCTTTTAC  
TATACTTCCAACCCCTTCTTGCCCTTTTGGTGATGGCATGGGGTTTTTGGTCACTTCTGATGTTGATTCTTT  
GAGCATCTCTGATGGGTATATGGGTCTTCCGAATCCCGACTCGGAAGATTCCTTCTTGGCTGTGGAATTC  
AATGCCAATGATAACCGTATTGGTGTTGATACTAAAGAAATTAGGTCTTTGGCTTCTACTAATGTTGATTC  
AGCTGGGATTGATTTGAAAAGTGGGAAAGAAATGGCGGGTCGGATTGAGTATAAAGATTCAGAGAAAA  
TGATCAGAGTTTGGATTGGGTATGAACTGCAATTAGGCCTCCTAATCCTGTTCTTTCTACCAGAATTGAT  
GTTTCCAATCAGTTGAAGGAGTTTATGAGGATTGGTTTCACTGCTAAAGGGTCTGCAGTTTATAGCATT  
GTCGTTGGCGATTTAGAACGTTTGGATTGATTCGTCTCCAATATCATCGTCTTGGGATCAATCCGATGA  
AGGAAACTGTTTGTGTTTCCCTGAAGAGGAAATTGGTGGGCATATTTCTGATTCTCATCATAGTAGT  
AGTAGTAGTGGTAGTAAAAGTTTACTGAAATTGACTTATGGAGGGTTAGCTGCAATTGTCACACTTGTG  
GTTGTGCTTTGTCTGTTGTGTTTGTCTTTCGTTGAGAAGGAAAAACGCGATAGAGTAGGGGAGACCA

ATGAACGGCAAATGTGTAGATTACAAGGAAATAGAGTGCCTCAAAGATTGTCATTATCTGAAATAAAAT  
CAGCTACAGAGTGTTTTAATCATGAAAGGATAATCGGAGAAGGAGCATCTGCTGTTGTGTATGAAGGG  
GAAATTCCTTCTAGGGGATCTGTGGCTGTTAAGAGATTTGTCCAAGGGAGTAGATTGGGTCCTTCACAT  
ATTCCTTTAATACTGAATTTGCTTCTATGGTTGGCTGTTAAGACACAAGAATTTGATTCAGCTTCAAGG  
GTGGTGTGTGAGAGGAATGAATTGGTGCTAGTGTATGAATTCATGCCTAATGGTAGCCTTGACAAAAT  
CCTCCACGAGCGATCGCATTGACTAAGTTTCTGACATGGGAGAGAAGATTGAACATAGTTATTGGTGT  
GTCATCTGCTCTTATGTATCTTCATGAAGAGTGTGAGAATCATATAATCCACAGAGATGTGAAGAGTTGC  
AATATAATGCTTGATGCTGAGTTCAATGCCAAGCTTGGAGATTTCCGGTTTAGCAGAGGTGTTTGATAATT  
CTAAGACAAGGGATGCTACTGTACCAGCTGGAACAATGGGATATTTGACCTGAGTATGTCTATACTG  
GTATTCCAAGTGTAAAACAGATGTGTATAGCTTTGGTGTGTGGTACTGGAAGTGGCATCAGGTAGAA  
AGCCTATCGACGAAGGTGGTGGTTTGATTACTGATTGGGTGTGGGACTTGTGGGAGAAAGGGAGGATA  
ACTGAGGCTGCTGATCCTAACTAATGGGGCGGTTTCAGAAGAATGAAATGGATAGAATGCTCATTGTG  
GGACTTTCTGTGTGCATCCCGATCATGAGAAGAGACCGCGAATGAGAGATGTTTTCCGTATGCTTAAA  
GATGAAGCTCCACTTCTCATTTTACCTCCAATGAAGCCCACTGTGAGAATTCAATCTGTTTTACCAGAGAG  
CTGTGAAGAAATCATGAATTGGGCTGCAAGAATGGAGGATACACCATGGTCCACTCCCAGAAGTCAATTT  
TAGCAAGAAGTACTAG

>PGSC0003DMG400001773 L-LecRK

ATGGAGATTTACTCATTACTAGTTGTATTGCTCTGTTTCTTGGCTGCTTTAGCTGCTGCCACTGAGTTTGA  
TTCTGGGACTTTAACTCTTAGTAGTTTGAAGCTTTTAGGTGATGCCCATTTGGGGAATAATACTATAAAG  
TTGACTCGTGACCTTGCTGTTCCAAATTCGGTGCCGAAAAGTTTTGTATTCTAAACCAGTAAAGTTCC  
GGCAGCCGGGTCTTGATTTTCCGGCAAGTTTCTCTACGTTTTTCTCGTTTTCTGTTAGTAATTTGAATCCTT  
CATCGATTGGAGGTGGATTGGCTTTTGTATCACACCGGATGATGAGTCGGTTGGTGATTCCGGTGGGT  
ATTTGGGGATTTTGGATGCAGAAGGAGGGCAAATGGGAATTTTGGAGTTGAATTTGATACACTTATGG  
ATGTTGAATTTAAAGATATTAATGGAAATCATGTGGGGTTAGATTTAAATTCAATGATTTCAACTCAGGT  
TGGTGATCTTGATTCTATTGGTGTGATCTTAAAAGTGGTGAATTTGGTTAATTCTTGGATTGATTATTTTG  
GTTCTACAAAAAATTGAATCTTTATGTTTCATATTCTAATCTTAAAGCCAAAAGAACCATTTTTATCTGTTA  
CAATTGATATTTCTGAATATGTAAATGATTTTCATGTTTGTGGGGTTTTCTGGTTCAACACAAGGGAGTAC  
AGAGATTCATAGTATTGAATATTGGAGTTTCACTTCATCATTGATACAAATCCTAAATCTCCCCCTGAAG  
CGGTGGCGGAGCAGCCTCCGCCCCCGCCAACTGCTAGTTTGTATGAACCCACGGCGGATGTAAGTACAT





ACATACATTTGTTAACTATGGCTGTTTTGCATCTGTATCATACTTTGTTTTGATAATCCCCTTTGTCACCT  
CATTGTCTTTCAATTTTGATAGTTTTAATCCCAATGATCAGAATATAACATATGAGGCAGATGCTTATCCA  
AACGGTGTAAATTCAGCTCACCAAAAACGAGCAGGGTAGTGGTTAAACGATAGCATAGGCCGAGCTAC  
ATATTCTAAAACACTCTATCTTTGGGACAAGGCTTCTGGGAATATCACCGATTTCACTACTCACTTCTCCTT  
TGGAATCAATTCAGTGGGAAAAACTTATATGCTGATGGTCTTGCCTTCTCCTCGCTCCTGCAGGTTCAA  
GAATTCCTGATAAGAAGTCAGCCGCAGGAGGCGGCCTTGCCTTGAATTGATAGTCGACAAAATACAT  
CGAAAAATCATCCTTTTGTGCTGTTGAGTTTGACACCTTTAAGAACTATTATGATCCACCAGGTGATCAT  
GTAGGTGTCAACATCAACTCCATGGTATCTGTTGTTAATGTGACTTGGTTTAGTAGCATTCCAAATGGTA  
AGAGAACTGATGCCTGGATTACTTATAATTCAACCTCAAAAAATCTTAGTGTTGTCTTCACCGGTTTCCAA  
CCACAAGGGAATACCACAGTCACTTTCTGCAGACTCTATCTTACAATATTGATCTGAGGGACTACTTGC  
CAGAATGGGTCACTTTTGGCTTCTCAGGTGCAACAGGATCCCTCTTGCATTACAAACCATTTATTCTTGG  
AATTTTACTTCTTCTTTAAAATATAATGACAACATAACAGATCCATTTGTGCCCTACCAAGCCCTGTGCC  
ACATCCAGATGTATCCCTACCAACCCAGATCCAGATCCAGATCCAGATCCCTTCAAGCAAAAAACTGTCA  
GGACTAGTAATTGGATTGATTTCTGGCGGTTGTGTTTCGGTAGCACTATCTGTTTTGATATTGTTTGCATT  
TTGGAGAAAGAGGAAGGTCAGAGAATATGAAGATGAAGATGAAGATGATATTATTGACAGTTCCATGA  
CTAATGAATTTGAAAGAAGCACAGGACCAAGAAGTTCTTGTACAGTGAGTTGGTTAGATGTACAAATT  
ACTTTTCGCGGGAAGAGATGCTTGGGCAGGGTGGGTTTCGGAGGTGTTTATAAAGGATATCTCAGTGAA  
TCCAACCTATATTGCTGTTAAGAGGGTTTCAAGGGAGTCAAAGCAAGGAATAAAAGAGTATGCATCA  
GAAGTCAGGATCATCAGCCGTTAAGACATAAACATTTGGTGCAACTCATTGGTTGGTGCCATCAAAAA  
AGAGAACTTCTACTTGTCTATGAGTTTATGCCTAATGGAAGCTTAGATTACGATCTCTTCAAGGGAAGAA  
GCCATTTGACATGGTCAATAAGATTCAAGATTGCTCAAGGCTTGGCCTCAGCGTTGCTTTATTTACACGA  
TGAATGGGAACAATGTGTGGTGCATAGGGACATAAAGTCGAGCAACATTATGTTGGATTCCAATTTCAA  
CGCTAAACTTGGGGATTTTGGTTGGCTAGGCTAGTTGACCATGATAAGGGATCCCAAACAACAGTTTT  
GGCAGGCACGATGGGTTACATGGCTCCTGAATGTCTCACCCTGGCAAAGCTAGCAAGGAAACAGACG  
TCTATAGCTTTGGTGTGTCGCATTAGAAATAGCTTGTGGAAGGAAACCTATTGATCCTAAAGCTGAGGA  
GCATCAAGTAAATATTGTCGATTGGGTTTGGAGACTTTACGGGATGGGAAATATTCGTGAAGCAGTTGA  
TCCTAGACTCTCATCAGAGATCAATGAAGAGGAGGTGGAGCACTTGCTAATTGTTGGTTTATGGTGTGC  
TCATCCAGATAACAATTGCAGGCCTTCTATTAGGCAAGCAACTCAGGTTCTTAATTTTGAAGCTCCGTTGC  
CCCACTCCCTCAAACATGCCTGTACCGACATATTGCAGTCTGCCACAATATGGACCAACTACTTCATTT

GCATCACCATACGACTCTAATGGTCCTGGGATATCTGAAATACACTCTTCAGGGACTAGAGACTACACTG  
GTTCTTCAAATAACACAGCAGCTTCTGCAGCATCTTCGCCTTCCGCATCACTTTTGTACACACGTTGATAT  
TGTCTTATAAATGAACAGGTCTTTTATTTCCCTGCATTCAATCTTTCAATTGCAGTGTCCAACCTTTTGGTCT  
ATGTATTCTTTATTATTTCTACTTTTA

>PGSC0003DMG400004397 L-LecRK

ATGGCTATTTTTGCATCTTTATCTGCTCTCACATACCTTGTTTTGATAATCCCCTTTGTCACATCACTGTCCT  
TCAATTTTGATAGTTTAAATCCCAATGATCAGAATGTAACATATGAGGCAGATGCTTATCCAGCAAATGG  
TGTAATTCAGCTCACAAAAACCAGCGGATAGTGGTGCAAACCTATAGCATAGGCCGAGCCACATATTC  
AAAAACTCCATCTTTGGGACAAGGCCTCTGGGAATGTCACAGATTTCACTACACACTTCTCCTTTAGC  
ATAAATTCACAGGGCATGAACATATATGCTGATGGAATTGCCTTTTTCTCGCCCCTGCAGATTCAAGAA  
TTACTGATAACTCAACCGCAGGAGGCGGCCTTGGCCTTGCAAATTATTATAGTCGACAAAATACATCAAG  
AAATCAATCTTTTGTGCTGTGAGTTTGACACCTTAAAGAACATTGATGATCCACCAGGTGATCATGTA  
GGCATCGACATCAACTACATGGTATCTATTGTTAATGTGACCTGGTTTAGTAATATCCGAATGGTACGA  
GAACTGATGCCTGGATTACTTATAATCAACCTCAAAAAATCTTAGTGTGCTTCACTGGTTTTCAACCA  
CAAGAGAATACCACAGTCACTGTCCTGCAGACCCTATCTTACAATCTTGATCTGAGGGAATATTTGCCAG  
AATGGGTCACCTTTGGCTTCTCAGGTGCAACAGGAACCTACTTTGCAATACAAACCATATATTCTTGGA  
TTTCACTTCTTCTTTAAACTATAATGAAAACATAACAGATCCAGATGTACCCCAACCAAGCCCTGTGCCAG  
AAGATACTCCAAGCAAAAATAAGTCAGGACTAGTGATTGGATTGATTTCTGGTGGTTGTGTTTCAGTAG  
CAGTATCTGTTTTTATATTGTTTGCATTTTGGAGAAAGAGGAAGGTCAGAGAAGATGAAGATGAAGATA  
TAATTGATGGTTCCATGACTAATGAATTTGAAAGAAACACAGGACCAAAGAAGTTTTTGTATGGTGAGT  
TGGCTAGATGTACAAATAACTTTTCGCGGGAAGAGATGCTTGGGCAGGGTGGGTTTGGAGGTGTTTATA  
AAGGATATCTCAGGGAATATGACTCCTATATTGCTGTTAAGAGGATTTCAAGGGAGTCAAAGCAAGGAA  
TAAAAGAGTATGCATCAGAAGTCAGGATTATCAGCCGGTTAAGACATAAACATTTGGTGCAACTCGTTG  
GTTTCGTGCCATCAAAAAAGAGAACTTCTACTTGTCTATGAGTTTATGCCTAATGGAAGCTTAGACCACCA  
TCTTTTCAAGGGAAAAAGCCATTTGACATGGCCAATAAGATTCAAGATTGCTCAAGGCTTGGCCTCAGC  
GTTGTTTTATCTACGCGAAGAATGGGAACAATGTGTGGTGCATAGGGACATAAAGTCGAGCAATATTAT  
GTTGGATTCCAATTTCAATGCTAAACTTGGGGATTTTGGTTTAGCTAGGCTAGTTGACCATGATAAGGGA  
TCCCAAACAACAGTTTTGGCAGGCACAATGGGTTACATGGCTCCTGAATGTGTCAACCACTGGCAAAGCT  
AACAAAGGAAACCGACGTCTATAGCTTTGGTATTGTCGTGTTAGAAATAGGTTGTGGAAGGAAAATGGG

CTTGGAGACTTTACGGGATGGGAAATCTTAGTGAAGCAGTTGATCCTAGACTCTCATCAGAGTTCAATG  
AAGAGGAGGTGGAGCACTTGCTAATTGTTGGCTTATGGTGTGCTCATCCAGATAACAATTGCAGGCCTT  
CCATTAGGCAAGCAATTCAGGTGCTTAATTTTGAAGCTCCATTGCCACACTCCCTCCAAACATGCCTGTG  
CCGACATATTGCAGTTATGGATCAACTACTTCATTTGCATCACCATACGACTCCAATGGTCCTGGGATATC  
TGGAATACAGTCTTCAGGGACTAGAGACTACACTGGTTCTTCAAATAACACAGCAGCTTCTGCAGCATCT  
TCGCCTTCCGCATCACTTCTGTACACACGTTGA

>PGSC0003DMG400004401 L-LecRK

GTTGTTTTGCCTCTCTCAAATACTTCTTCTTATCCCTTTAGTCACTTCACTCTCCTTCAATTTTGATACTTT  
TACACCCAATGATCACAATGTAACCTATGAGAGAGATGCTTCTCCACAAAATGGTGCAATTCTACTCACC  
ACAAACCTCCTCAATCGCAATATCAATGCTAGTATAGGTGCGAGCTATTATTCAAACCACTCCATCTATGG  
GACAAGGCCTCTCGAAATCTCACTGATTTCACTACACATTTCTCCTTTAGCATTAAATCACAGGGAAGAGC  
TGAATATGGTGATGGTTTTGCCTTCTTCCCTTGCCCCTGCAGGTTCAACAATTCCTTATAATACAACAAGAG  
GTGGAAGCCTTGGCCTTACAAGTAATAATGAGCGACTAAATTCATCCAGTAATCATTTTGTGCTGTGGA  
GTTTGACACCTATCAGAACCTGTATGACCCAAAGGGTGATCATGTAGGTGTGCATATCAACTCTATGCAA  
TCTGTTGTTAATGTGACTTGGTTTGTAGTATCCAAATGGTACGAAAATGATGCCTGGATTACTTATA  
ATTCTAACTCAAAAAATCTTACTGTTGTCTTCACTGGTTTTCAACTCCAGTCTCCAAGGGAATAATATCAC  
AGTCACTGTCTGCAGAACCTATCTTACAATCTTGATCTGAGGGAATATTTACCAGAATGGGTCACTTTT  
GGCTTCACTGGTGGAGGAGGAAATAGCTTTGCATTTCAAAGAATCTATTCTTGGAAATTTACTTCTTCTTT  
AGATAATATGACAGATACAGGGGTAACCTTATCAAACACCAAGCCAAAGGATGCACCAATAAAAAGTAA  
GTTAGGACTTGTGGTTGGATTGATTTCTGGTGGTTGTGTTTTGGTTGCAGTATGTGCTTTGGTGTGTTT  
GCATTTTGGAGAAAGAGTAAGGTCAGAGAAGATGATCATGTCTTTGATGGTTCCATGACTAATGAATTT  
CAAAAAAGTGCAGGACCAAGAAGTTCTGGTACAGTGAGTTGGCTAGATGTACAAATAACTTTTCACAG  
GAAGAGATGCTTGGGTGGGGGGGATTCGGAGGTGTTTATAAAGGATATCTCAGTGAATCCAACCTTTAT  
ATTGCTGTTAAGAGGGTTTCAAGGGAATCACAGCAAGGAATAAAAGAGTATGTATCAGAAGTCAGGAT  
CGTCAGCAGGTTAAGACATAAACATTTGGTGAACCTCATTGGTTGGTGCCATCAAAAAAGAGAATCTTCT  
ACTTGTCTATGAGTTTATGCCTAATGGGAGCTTAGACCACCATCTTTTCAAGGGAAAAAGCCATTTGACA  
TGGCCAATAAGATTCAAGATTGCTCAAGGCTTGGCCTCGGCGTTGCTATATCTACATGAAGAATGGGAA  
CAATGTGTGGTGCATAGGGATATAAAGTCTAGCAATATTATGTTGGATTGTAATTTCAATGCCAAGCTTG  
GGGATTTTGGGTTAGCTAGGCTAGTTGACCATGATAAGGGATCCCAAACAACAGTTTTGGCAGGCACAA

TGGGTTACATGGCTCCTGAATGTGTCACCACTGGCAAAGCTAACAAAGGAAACAGACGTCTATAGCTTTG  
GTATTGTCGTGTTAGAAATAGGTTGTGGAAGGAAACCTATTGATCCTAAAGCAGAGGAGCATCAAGTAA  
ACATTGTCGATTGGGTTTGGGAGACTTTATGGGATGAGAAATATTCTTGAAGCAGTTGATCCGAAACTATC  
ATCAGAGTTCAATGAAGAGGAGATGGAGCATTGCTAATTGTTGGCTTATGGTGTGCTCATCCAGATAG  
TAATTGCAGGCCTTCTATTAGGCAAGCAGTTCAAGTGCTTAATTTTGAAGCTCCATTACCCACACTCCCTC  
GGAACATGCCTGTGCCACATATTGCAGCTTCTCACACCATTTACCAACTATTTCACTTTCATCAACACAT  
GAAACCAACGGTACAGAGATCGCCCTTGCCCAATCCAGCATTAGTAAACGAAAACAACATTGATGCT  
TCATTA AAAAGAACATTTTCTTCAGCATCTTCATCTTCAACATCAGTTTTGTATCCAAGTTAATATTGCCCT  
GTTAAGATCCTGCATTTTGTCTTCCATTAGCAGTGTCCATCTTTTCTTTCTTACTTTTTGTTGTTTCTTCT  
AATGAAAGAGGATTGAATGGATTACATTTTCTGTAATTTTAACTGTTCTATCAAAC

>PGSC0003DMG400008822 L-LecRK

ATGTTCTTCAATTTTTTCACTAGTAGCTCTCTTTTTAGTTGATTTTACCAGCTTCTTGTGAAGTTGATG  
CATTCAATTTCAATGGATTCCAATCAGCTAATCTTAGCTTGGATGGCATAGCACAGTTCACATCTACTGAT  
CTTTTGTGTTAAACAAATTCAGGAACACAAAATCAGGGCCATGCTTTCTATCCAAATCCAATTCATTTCAA  
GAACTCACCTAATGGTTCTGTATTTTCTTCTCCACTACTTTCGTGTTTCGCGATAAGGTCTGATTATGGAA  
ATTTGAGTGGTCATGGACTGGTTTTCGTTATCGCGCCACATAAAGGACTTCAGGGGTCTTTGGCAAATCA  
CTATCTTGGTCTTTTTAACTCTAATAATAATGGGAATGGATTAAACCATGTCATTGGAGTTGAGCTCGATA  
CAATCTATAGCGAGGATTTTGGTGATATCAATGACAATCATGTTGGAATTGATATAAATGGATTGAGGTC  
TGTAGCAATTCACACAGCAGGTTATTTTGTGATACTGGTTTTTTTCACTTACTTTAATTAGTGGCA  
AAGAAATGCAAGTTTGGATTGATTACGATGGGAGGACTAAGCAAATGAATGTAACAGTAGCTCAGTTAC  
ATATGGAAAAACCAGTTAGACCACTTTTGGCTTTGAAACATGATCTTTCGTGATTCTTGATCAGACTATG  
TATGTTGGTTTTTTCATCCTCAACAGGTTTCAAGTCCCAACACATCATTATATCTTGGGATGGAGCTTCAAGAC  
AAATGGGAAAGCTCAAGA ACTCTCGCAACTTCTGAGCTTCTCGTCTTGGGAGTAAAGGGACATCAAG  
ATTTGTAACGATTGGTTTGCCTATAATCTCGTTGGTTTTCAGTTGTTGCAGCTGTGTTAGCGGTGGTTTATT  
ATGTAAGAAGGAAGAAGTATGAAGAAATTCATGAAGATTGGGAACGCGAGTATAGACTACAAAGGTTT  
AAGTATAAAGAATTGTACATTGCTACTAAGGGATTAGAGAAAAGGAGGTATTGGGAGCTGGAGGATT  
TGGTAAAGTTTATAAAGGAGTGATGCCTATCACTAACTTGAGATAGCTGTAAAGAAGATATCTCATGA  
ATCAAGACAAGGTATGAAGGAATTTATTTTCGGAGATTGTAAGCATTGGTCGTATGCAACACAGGAATGT  
AGTACA ACTATTGGGTTATTGCAGGCGAAAAGGGGAGTTGATTTTGTATATGAATACATGTCTAATGG

AAGTCTAGACAAGTATTTATACGATCAACCAAGATACACCCTCGATTGGAACCAAGATTCAGAGTCATT  
AGAGGTGTAGCCTCTGGACTTTTTTCTACACGAAGAATGTGATCACGTAGTGATTCATAGAGATGTTA  
AGGCCAGTAACGTCTTGTTAGATGGTGAACATAATGGCAAGTTAGGAGATTTTGGACTCGCGAGGCTAT  
ATGGTCATGGGACCGATCCTCAGTCTACTCGTGTTGTTGGTACTCTTGGTTACCTTGCACCAGAGCATA  
TAGAACTGGCAGGGCAACACCTAGTAGTGATGTATTTTCATTTGGGGCATTCTGCTTGAAGTTGCATGT  
GGTAGGAGGCCGATACAGCCAAGACAAGACGGTGATGATCTGATTTTGGTTCGATTGGGTGTTCTCGTGC  
TGGAATAGGGGTAATACTTGATGCTGCTGATCCAAACATAGGCATTGATTTTGTCCAGGACAAGTG  
GAGTTGGTCTTAAAGTTAGGCTTGTCTGTTCTCATTAGATCCTTCGTGTAGGCCAACCATGCGACAAA  
TCTTGTGTTCTTGGATGGTGTGTTGGCCTTACCAGAGTTATCAGAACTCGGTGTTTCATCAGCTAACCTA  
ACATTTGAACATCGCGGAGGTTTTGATGATTTTGTCAAGTCGTATCCAACCTTCTTTGGGCTATGCATATTC  
CGGCTCTCCATCTGTAACAGACTCCTTCTCTCTGGTGGCCGATGA

>PGSC0003DMG400008897 L-LecRK

ACTAGATTTGACTATATTGTGTGATTATTTTTCATATATACATATTGAAGTTTGGCTGGCCTCAAGAAAAT  
GACATTACAGAGTATACATTGTAGACTTGAACATTGGGAGATAAATAGTCATATTTGTGATTGTAGAAA  
GTTAACCCCGCGAACATTATTATCAGTTCTATCCCTATAAGAGTTTTGAGCAGACATGGAGAAATTGTTTT  
TAGCCATGATTTTTAGTTTTCTGTTTTACTTTTTCATGCTCCATTAGGCTATGCAGCTGCAGAAGATCTCG  
ATTTACCTACAACGGGTTCCACTCAACAACTTGAGTCGTGATGGAATAGCAGAGTTCACATCAGATG  
GCTTGTTAAGGCTAACTAATGCTTCACAATTGCAGGAGGGTCATGCTTTTTATCCTAGACCTATCAATTC  
ATGAATTTAGCATCTAATGGTTCAGATTTCTTTCTCAACCACATTTGTCTTTGCCATAGTGCCTGAGTAC  
TCGATTTTAGCTGGTCATGGTATGTCTTTGTGATTGCACCAGCTAGAAGGCTTCCAGAAGCACTTCCAA  
GCTCTTATCTTGGCTTGTAAATGATTCTAGCAATGGAAATGCCACCAGCCATGTTGTTGCGGTGGAGTT  
TGACACGCTACAGAACCGTGAATTTGATGATATTGACAGCAACCATGTAGGCATTGACATCAATGGCCT  
AAAATCTGTAATAGCCAAGCCGGCGGTTATTATACCAGTAATGAGAAATCCTTCAATAACTTAACTCTT  
GCTAGTGGCCAGCCAATGCAAGTTTGGGTGGAATATGATTCTGTGGATAAGCATATGAATGTCACAATG  
GCTCCACTGCACGTTGCAAACAGACCGTCCTCTCCTGTCCTTAGTCTACGATCTTTCATCTGTCATGGA  
TGAAAACGTGTCTATAGGCTTCTCAGCATCCACCGGTGCAGTTGTTTCAACACATTATATCCTTGGATGG  
AGCTTTAAAATGAATGGAGTGGCTCAAGGGCTTGATCTCTCTCAACTTCTAAGCTTCTCGAGTAGTAC  
CTAAGAAAGAATCCAAGCTTTTATTGCTTGGTTTGGCCGTGATTTCTTCAGTTTCATTTGTGATTGTAGTC  
CTGGTAATAATTTATTACATAGGAAAGAAGATGAAGTTTGCTGAATTGCAAGAAGAGTGGGAGCTTGAT

TATGGACCACACAGGTTCAAGTACAAGGATTTGTACTGCCACAAAGGGCTTTAGCAGCAAGGATTTG  
TTGGGATCCGGGGGATTTGGCAGAGTCTACAGAGGGGTATTGCCCATATCCAACATTCAGATAGCAGTC  
AAGAGGGTCTCTCATGAATCAAGACAAGGGATGAGGGAATTTGTTTCAGAAATTGTTAGTATTGGCCGG  
CTACGCCACAGGAATTTAGTACCACTTTTGGGTTATTGCAGGCGTAAAGGAGAGTTACTTCTGGTTTACG  
AATGCATGCCTAACGGAAGCCTAGACAAGTATTTGTTTGACAAACCAAGCTGCACTCTTGATTGGAACCA  
AAGATTTGAGTCATCAAAGGCGTAGCATCAGGACTAGTCTATCTTCATGAAGAGTGGGAACAAGTAGT  
GATTCATAGAGATATAAAAGCGAGTAACGTGTTGTTAGATGTTGAATTAATGGAAGATTAGGAGATTT  
TGGGCTAGCAAGATTGTATGATCATGGGACAGATCCTCAAACCTACGCATATCGTTGGAACCTCTCGGATA  
CCTTGCCCCAGAGCATACAAGAACAGGCAAAGCCACAACCTAGCACTGATGTGTATTCAATTTGGGGCATT  
TTTACTTGAGGTGGCTTGTGGGAGAAGGCCAATAGATCAAAGGGTATCGGACGAGGACCTCGTTTTGGT  
TGACTATGTATTCTTGTGGACTAGAGGTGATATTGTTGAAGCCATTGATCCAACTTGGGCAATAAC  
TATGTAAAAGAAGAGGTTGAGTTGGTACTAAAACCTGGACTATTGTGCTCTCAGACAGAACCAGCAGCT  
AGGCCAAATATGAGGCAAGTGTGATGTACTTGGAAAATGCCCTGCCTTTGCCAGAGTTATCACTGATG  
CAAACCTCAAATATTAGCTTAACTTTTGCAGGCTTTGATCATTTTGCAATGTCATGGTCTTCTTCTGTTACT  
GATTCCCTTCTCTCCGGTGGTTCGATGACTCGGGCGAAATTTTAATATTTTCTAGTAAAAATAAAACTTGT  
TATATAAGCTATATTTCTTCCACCTAAGGTTGTATACTTGGTTCATTTAGGCATCTTGGAG

>PGSC0003DMG400010466 L-LecRK

CGTGTTCCTTTGGATTCTCTGCTTCATTCACACCCCTCTTCTCACCCCCATAATCCTCACTCTTCTCCCC  
TGTTCCAGCTTTCTTCAAAAAATTTCACTATTTTCTAAGCTAAAAAAAAGCTAAAAATCAAATCTTTGT  
GCAATTTGATCTTCATTGTGCAATGGGGTTTTGCTAAAATCTAGCAATGAAGTCAATTCTTGAAGAATTT  
CCAGCAACATTCCTGTAAAAGTCATCCTGTTGTAGTGTGTTCTCTCTTGTCTACTTTCTTGCATTTTCACT  
GTTTCTAAGCTCAAAAAATAGCTAAAAATCAAATCTTTGTGCAATTTGATTTTCAATTGTGTAATGGGGTTT  
TGCTAAATCAATTCTTGAAGAAATTTCTTCTGTAAAAGGCATCATGTTGTAGTGTGTTCTCTCCTTAATC  
CTCACTCTACTGTGTCAGTTTTTCTACTTTTTTGCATTTTCACTGTTTCTAAGCCCCAAAAAATAGCCTACCC  
TTTTGTATCTTACCAAATCTTGTGATTTGGTGTGAAAAATCTTACTTTTATACAATTTGATCTTCATTC  
TCTGATGGGTTTTGCTAGAATCTAGCAATGACATCAAATCTTGAAAAAATTCAGGGACTTTCTTGTAT  
GGTTCATCTTATTGTTCTGTTTCTGTAGTATTAGTTCAACATTTGGTAAAACCTGATTTGATTTTGAAT  
TAACACTGAGTAGTTAAAGCTTCTTGGTGTGACACTTGTAGTAACAACACTGTAAGGTTGACAGGTG  
ATCTTGCTGTACCAAATTCGGTGCCGGAAGTTCTGTATTCAAACAGTAAGATTCCGGCAACCGG

GGTTTGATTTTCCGGCGAGTTTCTCGACATTCTTACATTTTCAGTTACTAATTTGAACCCATCGTCAATTG  
GTGGTGGTCTTGCTTTGTGCTTACGCCGGGTGATGAGTTAGTAGGTGATGCTGGAGGGTATATGGGAA  
TCTTGATGCTAAAGGGACACAAATTGGTACAATTGCTGTGGAATTTGACACCCTTATGGATGTTGAATT  
CAAAGATATTAATGGAAATCATGTTGGTTTGGATCTAAATTCATGATTTCAACTGAAATTGGTAATTTG  
GATTCCATTGATATTGATCTCAAGAGTGGTGATTTGATTAATTGTTGGATTGAATATTCTGGTTCTAATGG  
AGAGATGGATATATTTGTGTCATATACTAATCTCAAGCCAAAAGAATCATTTTTATCAGTTAACATCAATC  
TTGCTGAGTATGTAAATGATTTTCATGTTTGTGGGGTTTTCTGGTTCAACTCAAGGGAGTACTGAGATTCA  
TAATATTGTGTGGTGGAGTTTCAGTTCATCATTTGATGCAACTCCAACTCGGGGGAGGTGGTGGCTCC  
ACCACCACCGCCAACGACTAGTTTGATGAACCCAACGGCAGATTCTGTCGCGTTGCCACCACCTTCTATG  
GCTCCATCAGAGTCTAATAGTAGTACACCAGGTGTATTACAAGAAAAGAGAAGTAGGAAATGTCATAGC  
AATTTTTGTAAACAAGGTCCTGGAGCTGTTGTTGGTGTGGTACTGCTGGTGCATTTTTTCTTGCAATTTGC  
TACATTGGTACTTATTTGGTTATACTCCAAAAGGTTCAAGAGAGTTAAAAATTCTGAGATTGTGGCATCT  
GATATCATCAAATGCCTAAGGAGTTCAGCTATAAAGAGCTTAAATTGGCCACGAAAGGTTTCATTCCAA  
CGAGAATTATAGGCCGTGGTGCATTTGGGACTGTTTACAAGGGCATTTTATCGGATACTGGTGGCATTG  
TGGCAGTCAAGAGATGTAGTCATAATGGACAAGGGAAAGCAGAGTTCTTATCTGAATTATCTATAATTG  
GAACCCTTAGGCATAGAAATCTTGTTAGGCTTCAAGGATGGTGCCATGAGAAAGGTGAAATTTTGTTGG  
TTTACGATCTTATGTCTAATGGGAGTCTTGATAAGGTGTTATTTGAATCAAGAATGGTTCTTTCATGGTCA  
CATAGGCGAAAAATTTTGATAGGTGTTGCTTCTCCTTGGCATATTTGCATCAAGAATGCGAAAACCAGG  
TGATTCATAGGGACATTAAGAGTAGTAACATCATGTTGGATGAAGGGTTCAATGCAAGATTAGGAGATT  
TTGGATTAGCAAGGCAAGTTGAGCATGACAAGTCCCCGATGCAACGGTAGCAGCTGGGACAATGGGC  
TACTTGGCTCCAGAGTACTTGTTAACCGGAAGGGCAACCGAAAAAACTGATGTTTTAGCTATGGAGCA  
GTGGTTCTTGAAGTGGCTTGTGGAAGGAGGCCAATTGAGAGGGAAACAATAAAGTTGAGAAAGTTAG  
AGTGAATAGCAACTTGGTTGAATGGGTATGGGGGGTGCATAGAGAAGGGAATTTACTAAATGCAGCTG  
ATTCAGACTTTGTGGTGAAGTTTGTGATGAACAAGAAATGAGAAGGGTTCTAATGATTGGGCTAGCTTGTT  
CACATCCCGACCCTACGGCTAGACCAACAATGAGAGGTGTAGTTCAAATGCTGGAAGGTGAATCTGAAA  
TCCCAATTGTCCCAAGAATACTAGACCTTCTATGAGTTTTAGCACATCACATCTTCTAATGAGTTTGAAGAT  
AGTGTCTGACTTAAATGGTTTGTATCACACTTCCCCTTCATCATCCGAAAGTAGCTTCACTGGTGGTCCG  
CAATGGCAATGGCATGGAGTTGGTCTAAATGCAAGACTAAAAAAGACTTGACTTTTCGAGTTAATGCAC  
CCATAAGAGCCCAACAATCCCACATATGGGGCCACCATCAAGGCGGAACAGACACAATAACTACTCTGA



TTGGGCGTGGACAAGGAAAAAGTGGCATCTTTTTGTTTTGTTTCATAAATTCATTAATTTTATTCATAATA  
TATATGTACCAATAAGCTTTAAGATTTAGTAATGTAATTTTCTCCTTTTCCTTTCATATACTATAGTCCATT  
GAGTGCAAGATTAGAGATATTTAGTGGGGAAAATAAA

>PGSC0003DMG400011071 L-LecRK

AAAAAAAAAAAAAATTCTCACTATCCATCACCAAATCTTGAAAAAAATTCTTGTGTATCGTCTTTTTATAA  
GGCAAATCAACTTCGATTCTTGAATAATCCACATCACTTCTGCTTCTATATATCTTACTTTAAAATGTTCAA  
TTTTCTCACATTCCTCTGCTTTACCATTTCTTCTCAATTCTTGCTTCATCTCAACTTGATGAATTCATTTTCA  
CAAAATTCATCAACCAACAACAACATAACCTTAAGTGGAGTAGCAAAAATAAGCCAAAATGGGTTTA  
TTCAATTAACCAATGACACAAGTAGACTAATAGGCCATGCTTTTTACTCTTCACCTTTCCATTTCAAGCCTA  
CTAATGCCTCTACCTTCTTTCTCAACGTGTTTCGCTTTGGCCATAGTCCCCGAGTATCCAAAACCTCGGG  
GGCCATGGCCTAGCGTTCACAATTTCTCCGTCAAAGACTTTAGTACCGCTCTTCCGAGCCAGTACTTAG  
GTCTGCTCAATGCTAGTGATATTGGTAACTTCTCTAACCATATTTTTGCTGTTGAATTCGACACGGTACGT  
GATTTTGAGTTTGGTGATATTGATGATAACCATGTTGGTGTTAATATTAACAGCTTAGAATCAAATAAAT  
CAGCTGCAGCTGGCTATTTTATTAACGATCAAATGTGAAACAAGATTTGAATCTTAAAAGTGGGAAAG  
TCATTCTGTTTGGGTAGAATATGATTCTGTTACAAAATTAGTTAATGTAACCTTTCCACCAAATCTTTAA  
AACCAAAAATTCCTCTTTTATCTTATAATTTTGATGTCTCTCCAATTTTTAAAGAAAATATGTATGTTGGCT  
TCTCTGCTTCTACTGGTTTGTGCTGCTAGTTCACATTACATTTTGGGTTGGAGTTTTAAGTTAAATGGAGAA  
GCAAATCACTTGACTTGGATTCTCTACCATCACTTCTGGACCTAAGAAGAAGCATACAAGACTAATTA  
TTGTCATCTCGATTATAGTGTGTTGTTGCGGTTAATTTCAATCTTGATTGCTTTTTATACAATACGGAGAT  
TCAAGAATGCTGATGTGATTGAGCAGTGGGAGCTTGAGATTGGTCCTCATAGATATTCGTATCATGAAC  
TCAAGAAAGGTAAGACTAGAGGTTTTAAGGAGAGTGAACACTCGGGCGAGGTGGATTTGGGAAAGTTTAC  
AAAGGTGTTTTGACAAATTCAAAAGCAGAAATTGCTGTGAAACGAATTTCTCATGAATCTAAACAAGGG  
TTGAGGGAATTTGTGTCTGAGATTGCGAGCATTGGAAGACTCCGTCATAGGAATTTGGTTCAATTGTTA  
GGATGGTGTAGACGTCGTGGTGATTTGTTGCTTGTGTTATGAGTTTATGCCTAATGGAAGTTTGGATAACT  
TCTTGTGTTGATGAGCCAAAATGGTGTTGAAATGGGAACAAAGGTTCAAGATTATCAAAGGGGTTGCTT  
CTGGTTTACTTTACTTACATGAAGGCTATGAACAAGTCGTGCTACATCGAGACATTAAGGCTAGTAATGT  
GTTACTAGATGGTGAATTAATGGTAAGTTAGGGGATTTGGACTTGCTAGATTGTATGAGCATGGGTC  
TAATCCGTCCACGACTAAAGTTGTAGGTACATTAGGGTACCTTGCACCAGAATTACCAAGAACAGGACG  
AGCCACAACAAAGACTGATGTGTTTGCCTTTGGTGCTTTGTTACTCGAGGTGGTTTGTGGACGTAGGCC

AATTGAACACAAAGCAGGACCCGAGGAGTTTGTTCCTCGTGGACTTGGTGTGGGATAAATGGAGAGAAG  
GTAAAATACTTGACATTGTGGACTATAGATTGAAAGGCGAATACAATGAGAGTGAGGTTTTGATGGTGT  
TAAAATTGGGACTAATGTGCTCAAATAACAAGCCATTGGCGCGACCAAGTATTAGGCAAGTTGTAAGAT  
ACTTTGAAGGTGAAATTGGGATGCCTGAGGCTCCAACAACACAAGGTTCTGATGATCTTGAAGGATTTG  
GATTCGATGAAAGTGAACGTTGGAATCCTTAGCATCGACTGGTATTATGATCAAGTCAAGTTCATTTAC  
ATGTTTGTCTAATGGAGATGAAAATAGTACTAATTATGTTTCCTTTTCTACTTCACCACTTCCACTTCTATA  
TAGTGGTGAATGTACCTAGATACTAATATGAACTAGCATTGCAAACCTTTTCTATATTTTCTGATGAACAC  
TAATGTACATTGTTTTTCTTTTCTTTGTGTTACCTCTTTGTAGTAGTTTTTTTCCACAGAAAACCTTAGGA  
AGCTTCCCGGTATTTTCAGTGAGAACCTGTTTTCCACCATGTGTTTTCCAGTGTGCTGGTTCGATGGGAA  
ATGGGTGGAAAATCATGTTTTATAATACAAATTTTTCATTGATTCGCGATGGAA

>PGSC0003DMG400018184 L-LecRK

TAGGAATCAAATAATTAGTCAAAGGATGATCAGAAGTCTAGTCATCTTCATCATTTTTAGAGAAACAGCA  
CTCATCTAATTCCTTCAAAGTACCATGTAATTAACACATAATTTCCCGTTTCTTCACAAAATTCTCTT  
CTTCTTCTTCATGCAAACCCCAACAATATGCCACCATTATCACTGTTCTTCATTCTCATCAACCTTACAGTC  
TTCCCATCCATTTCCGCCGTCGAATTTCTTCAACTCCTTTACTGCTAACACCACCCTGCCCTCAACCTC  
ATCGAGGATGCCCCGCTTGAGCCACCAGTTATCCGCCTCACAAATGACTCCAACCAATTTTCCCTGGCC  
GAGCTTTTTACCCATCTCAAATTCCTGTAAAATCCGCTTCAAATTCACCTTCAATTTGTCCTCTTTCTCTAC  
CCAGTTCATCTTCTGTACTCCCTGATGATTCTCTAGTCCCGGATTCGGAATTGCTTTTGTCTCTCTGC  
TTCAACTTCCCACCTAATGCCCTCTCCAGTCAATACTTTGGACTTTTCTTAACGCCACCGTTCACACGGT  
GGCCCCACTTCTCGCCGTCGAGTTTGATACGGGTCGTAACCCGGAATTCAATGACCCAGATAGAAATCAT  
ATCGGGATTGATCTTAACAGCATTGAATCTATTGTTACCCAAACGGCTGGGTATTATAGTTCTTCTGGTA  
ATGATAGTGATTCTTTTGTGCCTTTAAATTTGCGGTCTGGGCAAAATATACATGCTTGGATTGAGTTAAC  
GGACCTGAATTCGAGATTAATGTTACTATTGCTCCGGCGGGTATGTCACGGCCTGTTAGAATTTGTTGA  
GTTATAGAAACCCATAATTGCGAATTACACGTCTGCCAGATGTATATGGGGTTCTCTGCTTCCAAGAC  
TCAATGGGTTGAGGCGCAAAGACTTCTAGCTTGGAGTTTCAGTGATTCTGGAGTTGCAAGGGATATTA  
TACTACGAATTTGCCGTTTTTTCAGCTGGAAAATTCGGGTCTTCGCTATCTCCCGGTGCTATTGCTGGG  
ATTGTTATTGGTTCTGTGGTTGCTGTGTTGGGTTGTTTATTTATATTTTATTGGTTTTGGTGGCGTAAGAA  
GGAAGAAGATGATGTTATCGAAGATTGGGAACCTGAGTACTGGCCTCATAGATTTTTCATATGAAGAACT  
TAGCCAAGCTACAAAAGGGTTTTCTAAAGATGAGCTACTTGGGGCTGGTGGTTTCGGTAAAGTATACAA

GGGAACATTTGCTAATAGCACAGAAGTGGCAGTGAAATGTGTGAACCATGACTCAAGACAAGGAATTA  
GGGAATTCATGGCTGAGATATCTACTATTGGAAGGCTTCAACATAAGAATTTAGTACAAATGAGAGGGT  
GGTGTAGGAAGGGGAATGAACTTATGATTGTGTATGATTACATGCCTAATGGGAGTTTGAATAAATGGA  
TATTCGATAAGCCGGAGAAGGTTATGAATTGGGTAGACCGGAGGAGGGTTCTAGCTGATGTTGCAGAG  
GGGTTGAATTATTTGCATCATGGTTGGGAACAAGTAGTTGTACATAGGGATATTAAATCTAGCAATGTTT  
TGTTAGATAGTGAAATGAGAGGGAGATTGGGTGATTTTGGGCTAGCTAAGTTGTATACTCATGGTGGTG  
TCCCTAATACTACTAGGGTAGTAGGTACATTAGGGTACTTGGCACCTGAAGTGGTGACAAGGGCTAACC  
CAACTGCTGCTAGTGATGTTTATAGTTTTGGGGTGGTGGTTTTGGAGGTGGCATGTGGGCGAAGGCCG  
ATTGACTTTGGGATTGTGTTGGAGGAAGAGGAAGTGTGATTGATTGGGTTAGACAAAAGTACAGGGA  
AGGGCGATTATGTGAGGCAGCAGCAGATAAAAGGATTAAGGGGCAGTGTCAGAGGAAGAAATGGAA  
GCTATGTTGAACTAGGACTTACATGTTGTCACCCTGATCCTCTCCGTCGACCTACTATGGGAGAGGTTG  
TTGCTGTATTGCTTGGTGAGAATGTGGATGCAACGCCAAATGAGTTGATCGTTGAATTAGCACCTAGTG  
AAAGGAACACGGGAGATAGAAGCGACTGGTCAACTGAGGAATCAGAACCACTTTCGGCTGTGTAGATA  
TTGTACTTTTGTTCCTTTATTGTTGAATCTTTTTCATCCCTTGAATTTATTGTTAAAGGTTTGTCTTTGT  
ATTGTTCTTACATGCTTTTGAACCTCTAACTTAGCATTAGTTGCAAATAGTTATGGATATGCAATTA  
ACTCA  
AGATATCAAACTGCTATGTCTTTGCGCTACCTTAAAGGGTCAACATCCATGGCAATTAGCAAACGTCTA  
TACGCATTAAGATTCGCCTCGGTGGAATAACG

>PGSC0003DMG400018677 L-LecRK

ATTTTACACTACTCCAACATGCTTCAAATAGCTTCTTTTATTGACCCTTCCTCTTATTAAGCCCTTACAT  
CTCTATACTTCTTTTCACTACACAATATGGAATTTTTGACACCAAAAATCTTCATATTTTTCTTTGTTTTCA  
ACTCATATCACAAGCCAAAATCATAACATTTGACCAACAATATGGTGACCCTTTTATGATCATAATATGTC  
CCCTTCTTGAAATCAAACATCCTGCACAAATAAGCAATCAAGCACTTCAAATCACCCCTGACACAGCTTCC  
TCTGCTTACCAAATGTTCAATAATTCAGGCAGAATCCTATTAACCGCCTTTCAAACCTATGGGTAGACA  
ATGATATTTCAAGGACAGCGTCATTCAACACATCATTCTAGTAAACATATATAGACCGGATAACCAAAC  
ACCAGCTGAAGGTCTAGCTTTCTTGATATGTCCAAATTTGATTTGCCACTAAATAGCCAGGGCCAGTAT  
TTGGGCCTAACGAATGCTACAACAGATGGTGAATTATCCAACAAAATAATCGCGATTGAGCTAGATACA  
TTCAAACAAGATTTGATATTGATGATAACCATATTGGGATTGATATAAACAGTGTTAAATCCGTTAAGT  
CGGAACCTTTAACACCACATGGAATTGAACTAGCTCCAATAGGTGCTAGATTTTACAATATATGGATACA  
CTATGATGGATTCAAGAAAGTACTTGATGTGTACATTATTGAACAAATGACGAAAAATGGGACAACACC

AACAAGGCCAAAAGTACCAATACTAACACACAATGTTGATTTGAGAGAATTTGTAAAGCAAGAATCATA  
TTTTGGATTTTCAGCTTCAACAGGACATTTCAATCAGTTGAATTGTGTGTTGAGATGGAATTTAACAGTTG  
AGTATTTTCAAGAAAAGAATGATCAAGAAAAGGTTACTAATAATAAGTCTAAGTGTGGTGTATCAGTATT  
GGTTGTTTTATTGATTTTGTGAGGGTATTTTGGGTATTTTTTTATAAGAAAAAAGGGATGATAGGTCA  
CAATCTAATATATTAGGGGCATTAAAGAGTTTACCTGGAATGCCTAGGGATTTTGAGTTTAAAGAATTGA  
AAAAAGCTACTAATAATTTTGATGAAAAGAATAAACTTGGTGAAGGTGGATTTGGAGTTGTGTACAAAG  
GGTATTTAGTTGGTGAAAATTTGGAAATTGCTGTGAAGTGGTTTTCTAGGGAAAGTATCAAGGGTCAAG  
ATGATTTCTTGGCTGAGTTGACAATTATCAACCGTTTAAAGGCATAAACATCTTGTCAAATTACTTGGTAAG  
TATTTTGAECTCTTACTTTTTATGCTTTTTTTGAGTATTTGTTCTTTGTTCAAGCTCAGATAAAGGAGGA  
ATGTTATGATCTTAAGATTTTGATATATATGCTTATTGAGTTTAAAGCGTAATTGGTTGATAGATTCGTCAT  
GTCATTGGAATTTTATTCATGTTCTATGTATAGGTAGCAAAATCTACTAAGATTCTACTGAAAAAAGAGA  
CAGGTTTTACACATAATCATTCTTCGTTTTGAGGACACTTTTTATTTATTGAGTCGTGTTTCTTATCCTTCC  
TCGACATAGTAACCGCTTTCATATTTTTATAACTTTCAAGTACAAGTGCATGTTTCATCCATCTTCATAGTC  
ATTTCTTTGTTCCTTTAGTCGTTTTGATAGGACTTTTTTTATTGAGTCGTATTTCTTCTCCTTCTTCAACATA  
GTGATTTGTTTCATGTTTTTTTTCAAATTCATAACTTTGACCACAAGTGCATGTTTCATCCATCTTCGTTT  
TGAACGAAAGCTTAAATTAATTTTATTAATTATGGTACCAAGAATATTTTCTGTGTTCTAAGGAGTTCC  
ATTTTGACTCATGTTAGGCCCATCTCCATCTTGAAAATGGTCCCAATAATTATATCCAACACTACTACAAGAT  
AAGTGAAAAAGTTAAAATCTTTGATGCAACTTGCAAGTGTCAAAAATGGTGTGCTCATGTACCTTTTAC  
AATAGTTTGAAAGTGATAAACATATACTTTTTGTCTCAAAATATTTATTTATATATTTTTATACGCCTTTT  
AAGAAAACATTAATTAGTAAAGATATTTAATTATTTCCCCCTTATTTATATTTTAAAACATAATCTCTATTT  
ATATGTCATATTTGAGGTATCTGTAAATTTCAAAAATAATTAATACTAACTAAATATAAAATGAGGTAGG  
GGTGATTAATTTTAACTGAATTTTTAAAATATAATCCAAAGTTTCTTGAGGACCTACTAACTAATAATT  
TTAGTGCCCTCTTGATGAAAAATCCAAAGTAATAAATATTAATTTCTTAGCTGGAAGACAGAAGAGCACT  
GATTCCATTTCTTTGTCTTTTTGGTTTTCTATACCACCAATTTCAAACATAGGGTCCCACACTCTTTTGTTT  
TTTGTTAGCTTCGGTATAAATATCGAGTAATTCTAATCATTAAATTAATTATATGAAAAAATTGTCTAG  
TATTTTTGTTTCGATTAAATTTGAATCATTGTTTGAACAAACTTTTTTTGTAGGGAAGCTTCTGTCTTTG  
AAAATCACTTTCATTCAAATGTCACCTATTATGATAAGTTTGGTACTTTCTAATATTAATATAAATAATTG  
GACAATTGCTTCAAATGCACTCAACTCCAATTAAGACTAAGATTGTAACCCTACAACATGTCATCATAAT  
TGAGAGAGGTCCATATATTTCCAAAATTAGGTCCTACAAAAAAGTTGATTGGAACACATACAACCCAACTT

TTTTGCCTTGTAAGATTTGATATCCTCAAATAGTATTGATAAGATATATTTATAGATTATTATTATTGT  
AGTAACAATTTAGCTTATATATGCATTAACAATTTAACTGCATCTGTGTGAGCTCGCTCAAATTGTCTGT  
CCTTAATCCGAATAAAGAAGGAGGGTTGTTGAGGATCACTCAGAAACACCATTCTCTATCCCATAAGAG  
TAGGAGTAAGGCTGCATCAATTCATAGATCATTATTATTGTAGTCATAATTTGGCCTATATGTATATCTAC  
TAATAACAATTTCAACTCTGTCATCAGTGTGATCTCGCTCACATTGTCCGGTCTCAAGATTGAATAAAGAA  
GGAGAGTTGTGAGGGTCAACCGAAAACGGTCTCTCTGCCTTATAAAGATAGGAATAAGGATATTTACA  
TCTTACCTTTGTGACAGCTACCCCACTTGTAGGATTTCACTGAATTTGTTGTTATTGTTGTTGCACTAACAA  
TTTCAAGTGATCTAAAGTAATTTTTGAACCTCCTTACCTTCTAATGAGAACGTAACCTAAATGTTGCATG  
TAGTTATCATTAGGTGACCTGCAGGTAATGGTATAAAAGTTCTTTTACGCTTTCAGTGTATATATATGGT  
AATCACATGCATATTATTGTGACAGGATGGAGCCATAAGCATGGTAAGCTACTACTTGTATATGAATACA  
TGCCAAATGGTAGCCTGGACAAACATCTTCTCATCAGGGCAAGAAAAAGAGCCACTCAGCTGGAGTG  
TGAGGTACAACATTGTATCAGGAGTCGCGTCAGCTCTGCACTATCTTCACAACGAATACGAGCAGAAGG  
TAGTCCATCGCGATCTCAAGGCAAACAACATCATGCTCGACTCAAACCTTCAATGCACGTTTAGGTGATTT  
TGGATTAGCACGAGCAATTGACAACGAAAAGACCTCATATGCTGATGAAGCTGAAGGTGACTTGGCAC  
GATGGGATACATCGCGCCAGAATGCTTCCACACAGGAAAAGCAACTCAACATTCTGATGTCTATGCATTC  
GGAGCTGTGTTGTTGGAGCTAATATGTTGCCAAAGGCCTGGAACCTAAAGTTAATGGCTTTCAACTCTTC  
TTGATTGGGTTTGGTTCTTGCATCGCGATGGGAGAATCCTTGAAGCTGTTGACAAGAGGCTCGAGGATC  
AATACGTGGTTGAAGAAGCAGAGAGATTGTTACTACTTGCTCTGGCTTGCTCCCATCCAATTGCCAATGA  
AAGGCCTAAACACAAACTATAGTTCAAGTTATATCAGGATCAGTACCAGCACCACAAGTACCACCATT  
AAACCATCATTGTATGGCCTTCTATGGTTCCAATTGACATAGATTCATCGAGCATCGTCGATACAATATC  
CATCACAACCTCCTCAGTACAGTTCAGAGAACAACAGTATTGAATATCAAAGCAAGTAGAGATAGCAATA  
GCTTGATTTAAGGCCACTAAGATATTTTTTTTGCTTATTGTGTAATGACAAGAATAGCAGCTCATGTATAT  
ATTTCTCAGCCTTTTATGTTAAATCCATCCTATACATTGTTCTTCTGCGGTTTACTGTTTGATTTGTTGT  
ATTAATAATGACATGTATTGCATAATTTCTAAAAGAAGTTGTTTCG

>PGSC0003DMG400020326 L-LecRK

CAACAATAGAACAAATTAGCATATTTTCTCTCAATCAAGAAAATATTACCAATGTTGTTAAATTTTGT  
ACTAGTGTCTCTCTTTGTACCAACTTCTTGTGAAGTTGATGGATTCATTTACAATGGATTCAAATCAA  
GTAATATTAGCTTAGATGGCATTGCTAATATTACATCCAATGGTCTTTTGTGTTAACCGATTCCAAAACA  
CAAGATCAAGGCCATGCTTTCTATCCAATCCAATTCATTTCAAGAATTCACCTAATGGTAATGCATTTTC

ATTCTCTACAACCTTTGTGTTTCGCGATAACGTCTGATTATCCACCATTGGATGGTCATGGACTAGTTTTTG  
TTATCGCGCCACAGAGAGGAATTCAGAAGGCTTTGGCAAACCACTATCTTGGCCTTTTTAACTCAAGTAA  
TAATGGGGATAAATCAAACCATGTTGTTGGAGTTGAGTTTGATAACAATATATAGCGCGGATTTTGGTGA  
TATGAATGACAATCATGTTGGAATTGATATAAATGGATTGAGGTCTGTAGCAAATCACACAGCAGGTTA  
TTTTGATGATACTGGTTTGTCAACAACCTTACTCTGATTAGTGGCAAGGCAATGCAAGTTTGGGTGGAT  
TATGATGGCAGAACTAAGCTAATCAATGTGACAGTAGCTCCTTTACATATGGAAAAACCAGTTAGTCCAC  
TTTTGGCTTTGAAATATGATCTTTCGCCGATTCTTAATCAGATTATGTATGTTGGTTTTTCATCATCAACTG  
GTTCAAGTCCCAACACATCATTATATCTTGGGATGGAGCTTTAAGGCAAATGGGAAAGCTCAAGAACTTTC  
TCAACTTCCTAGTCTTCCTCGTGTTGGGCGCAAAGGGACTTCAAGATTTGTAACGATTGGTTTACCGGTG  
ATCTCTTTGGTTTCAATTGTTGTAGCAACCTTAGTGGTGGTTTACTATGTAAGAAGGAAGAAGTATGAAG  
AAGTTCTTGAAGATTGGGAACGTGAGTATAGACCGCAAAGGTTCAAGTTATAAAGATTTGTACTGCTA  
CTAAAGGATTCAGAGAAAAGGAGCTGTTGGGAGCTGGAGGATTTGGTAAAGTTTATAAAGGAGTGATG  
CCTGTAACCAAACCTTGAGATAGCTGTAAAGAAGATATCTCATGAATCAAGACAAGGGATGAAGGAATTT  
GTTTCGGAGATTGTAAGTATAGGCCGTATACAACATAGGAATGTAGTACCACTTTTGGGCTATTGTAGG  
CGAAAAGGGGAATTACTTTTTGGTTTATGAATTCATGTCTAATGGAAGTCTAGACAAGTATTTATACGACC  
AACCAAGACTCACCTCGATTGGAACCAAAGATTCAGAGTCATTCGAGGTGTAGCATCAGGACTATTTTT  
CCTACATGAAGAATGTGACCATGTAGTGATTCATAGGGATATTAAGGCTAGTAATGTCTTGTTGGATGG  
TGAACTAAATGGCAGGCTAGGAGACTTTGGACTCGCGAGGCTATATGGTCATGGGACCGATCCTCAATC  
AACTCGTGTCGTTGGTACTCTTGGTTATCTTGCACCAGAGCATACTAGAACTGGCAGGGCAACACCTAGT  
AGTGATGTATTTTCTTTGGGGCTTTTCTGCTTGAAGTTCCTGTGGTAGGAGGCCGATAGAACCAAGAC  
AAGCCGGTGATGATCTGATTTTAGTCGATTGGGTGTTTTCTGTGCTGGAATAGAGGTAATATTCTTGAGG  
CTGTTGATCCAAACTTAGGCAATGATTTTGTCCAGGGCAAGTGGAGTTGGTTTTAAGTCTAGGCTTGTT  
CTGCTCTCATTAGAGCCCTCATTTAGGCCAACCATGCGACAAAACGTGTTGTTCTTAGATGGTGTGTTG  
GCCTTGCCAGAGTTATCAGCCCTCGGTGTTTCATCTGCTGGTCTAACATTTGACCATCGCGGAGGTTTTG  
ATGATTTTATCAAGTCGTATCCAGCTTCTTCTGTTAATGCACATTCCTTCCGCTTCTGCTAGCAGAATCAC  
TCCTTTCTGATCCCCGATGATTCATGGTGAGTTGGACATAACTTCTTTGGTGGAAATATTGATATACTGATC  
CTGGTAAATATAACATGATTTTAGTGATTATGTACTTCTGATAAATTATTGTAATTCATACACCTGAAACA  
TATTGTGACATGTCTTAAGATATCAGCCATGGTATCCTGATCTTATTGTTTACTTCCAATGCTAAATAAAT  
ACTAATCAGAGATTCAGCAATGGC

>PGSC0003DMG400020327 L-LecRK

AAAAAATGGATTA AAAAGATCATTTTTTTGT CATATCAAGAAATGTATAAACAGTTGAACAAATTAGCTT  
TATATGGTCACAAATCACAATATTATCTCTCAATCAAGAAAATATTGGCAATGTTGTTCAATCTTGTCATA  
CTAGTAGCTCTCTTCTTAGTTGGTATTGCACCAGCTTCTTGTGAAGTTGATGCATTCATTTACAATGGATT  
CCAATCAAGGAATCTTAGCTTGGATGGCATAGCAGAGTTTACGCCGATGGCCTTTTGCTGTTAACAGAT  
TCTGAAACACAAGATCAGGGCCATGCTTTCTATCCAAATCCAATTCATTTCAAGAATCAACTAATGGTAC  
TGCAGTTTCATTCTCCACAACATTTGTGTTGCCATAAGGTCTGATTATGGAATTTTGAGTGGTCATGGAC  
TGGTTTTTGTATCGCGCCACAGAGAAGAATTCAAGGAGCTTTGGCATACCACTATCTTGGCCTTTTTAAC  
TCAACTAATAATGGGGATAGATCAAACCATGTTGTTGGAGTTGAGCTCGATAACAATCTACAGCGAAGAA  
TTTGGTGATATCAATGCCAATCATGTTGGAATTGATATAAATGGATTAAGGTCTGTAGCAGTTGAAACAG  
CAGGTTATTTTGATAATACTGGCTTGTTTCATAATTTGACTTTGATAAGTGGTCAGCCAATGCAAGTTTGG  
GTGGATTATGATGGCAGCACTACGCAAATTAATGTAACAGTAGCTCCATTACATGTGGAAAAACCAGTT  
AATCCACTTTTGTCTTTGAAAACACTGATCTTTGCGCGATTCTTGATCAGACCATGTATGTTGGTTTTTCATCA  
TCAATTGGTTCAGTCCCAACACATCATTATATCTTGGGATGGAGCTTCAAGATAAATGGGAAAGCTCAAG  
AACTCTCTCAACTTCCTAATCTTCCTCGTCTTGGACGCAAAGGGACATCAAGATTTGTAAAGATTGTTTTG  
CCATTAATCTCTTTGGTTTTACTTGTGTAGCAACCTCAATGGTGGTTTATTATGTAAGAAGGAAGAAGTA  
TGAAGAACTTCTTGAAGATTGGGAACGCGAGTACAGACCACAAAGGTTTCATGTACAAAGATTTGTACAC  
TGCCACTAAAGGATTCAGAGAAAAGGAGCTGTTGGGAGCTGGAGGATTCGGAAAAGTTTACAAAGGAG  
TGATGCCTATACCAATCTTGAGATAGCTGTAAAGAAGATATCTCATGAGTCAAGACAAGGGATGAAGG  
AATTTGTTTCGGAGATTGTGATCATAGGTCGTCTACAACACCGGAATGTAGTACCACTTTTGGGTTATTG  
CAGGCGGAAAGGAGAGTTGCTTTTGGTTTATGAATACATGTCTGGTGGAAAGTCTAGACAAGTATTTGTA  
CAACAAACCAAGATTCACCCTTGATTGGAACCAAGATTCAGAGTTATTAGAGGTGTAGCATCAGGACT  
ATTTTTCTACACGAAGAATGTGACCATGTAGTGGTTCATAGGGACATTAAGGCCAGTAATGTCTTGTTG  
GATGGTGAACATAATGGTAGGCTAGGAGACTTTGGACTTGCAGAGCTATATAGTCATGGTACCGATCCT  
CAGTCTACTCGTGTCTGTTGGTACTCTTGGTTACCTTGCAACCAGAGCATACTAGAAGTGGCAGGGCAACGC  
CTAGTAGTGATGTATTTTCTTTGGGGCTTTTCTGCTTGAAGTTGCCTGTGGTAGGAGGCCAATAGAGCC  
AAGACAAGACGATGATGATCTGATTTTAGTCGATTGGGTGTTCTCATGTTGGAATAGGGGTAATATTCTT  
GAGGCTGTTGATCCAAACATAGGGATTGATTTTATTCCAGGGAAAGTGGAGTTGGTCTTAAAGCTAGGC  
TTGTTCTGCTCTCATTAGAGCCCTCGTATAGGCCAACCATGCGACAAATTTTGTGTTCTTAGATGGTGT

TGTGGCCTTACCAGAGTTATCATCACTCGGTATTTTCATCAGCTGGCCTAACGTTTGACCATCACGGAGGT  
TTTGATGATTTTGTACGTCCTATTCATCTTCGATGAATGCACATCCCGCTCTCCATCTGTAACAGACTCC  
TTTCTCTCTGGTGGCCGATGATTCTTACATTAAATATGTTAGTAACTTTAACTTGTAAAGTTGTAATCATGG  
TTAGCACCTCATCTTAGTTTTAATTGAATCTCTATACTGCTGCACCTCAAATAAGATGGAAATGCA

>PGSC0003DMG400020328 L-LecRK

AAAAAAATTAGCCATGTTTTCAAGATTGTGTCCTTGATTGTGTCTGCTCTTTTTGTTGTTACAAATTCTG  
AAGACTTTGGATTCATTTACAATGGGTTCAATAGAGCAAATTTGAGTCTTGATGGCATAGCACAATTTAC  
ATCAAATGGCTTATTAGAGTTAACAATACTTCTAGGCTACAAAAGGGGCATGCTTTTTATCCTACACCA  
ATTAATTTCAAGAACTTACAAAATGTTCAAATTTCTTTTTCTACCCTTTTGTCTTTGCTATTGTGCCTT  
CTGTTTTACCTGGTCATGGTATGGCTTTTGTAAATTGCACCTGTTGGTGGCCTAGTAGATGCACTTCCAAGC  
CCATTTTTAGGCCTGTTCAATGATAACACTACTGGGAGAGTCAGTAACCATGTTTTCGCGGTCGAGTTTG  
ATACTTTACAGAACAGAGAATTCAATGATATTGATGGTAACCATGTTGGAATTGATATCAATGGATTGAA  
ATCCGTTGAATCAAAGACAGCAGGTTATTATTATGGTGTAAATTCATAACATGACTCTTGCTAGTGGT  
CAGCCAATGCAGGGTTGGGTGGACTATGATGGTGTGGCTAAGCAAATTAATGTAACCTCTGGCTCCAATG  
AATGTAGCAAACCAAATGTACCCTTTTGTCAATTGTTGTATGATCTTTCACCAATCTTGAATGAAACCAT  
GCATATCGGTTTCTCTGGATCGACTGGCTCGGTTGTTCAACACAATATGTTCTAGGATGGAGCTTTGAA  
ATGAATGGAATAGCTCAAGGTCTTGATCTTGCTAGACTTCCTAAGCTTCCTCGAGTTGGACCGAAGAAAC  
AATCTAAACTTTTTGTTGGTTGCTTTGCCAATGATATCAGCAGTTGTTGTAGTAATAGCCTTTTCTGTGTTG  
ATTTACTATGTCGGAAGGAAGAGGAAGTTTGCGGAATTGCTTGAAGATTGGGAGCTTGAATATGGACCT  
CATCGGTTCAAATACAAAGATCTTTATATCGCGACAAAGGGATTTGCTAACAAAAAGTTGTTAGGTTGTG  
GCGGTTTTGGCAGAGTTTACAAAGGAGTATTACCAACTTCTTCAATTGAGGTAGCAGTTAAGAAGGTGT  
CTCATGACTCAAACAAGGATTGAGGGAATTTGTAGCAGAAATTGTTAGTATTGGTCGTCTACGCCACA  
GGAATTTAGTGCAACTTTTGGGATATTGCAGGCGTAAAGGAGAGTTGCTTTTGGTTTACGAATACATGC  
CTAATGGAAGTCTTGATAAGTTCCTATATGACAAACCAATATGTGCCCTCAGTTGGAACCAAAGATTTCCG  
AGTCATCAAAGGCGTAGCATCAGCACTAGTCTATCTACATGAAGAATGGGAACAAGTTGTAATACACAG  
AGATGTGAAGGCTAGTAATGTGTTGTTAGACAGTGAATTGAACGCGAAATTAGGAGATTTTGGACTAGC  
AAGATTGTATGATCACGGGACCGATCCACTCACTACACATGTAGTTGGAAGTGTAGGTTACCTTGCCCCT  
GAGCAGACAAGAACAGGCAAAGCCACAACCATTAGTGATGTATATGCTTTTGGTGCATTTTTGCTTGAA  
GTGGCTTGTGGGAGAAGGCCAATAGATCCACGAGTATCGGATGAGGACATCGTGTGGTTGATTACGT



ATTTTCTTGTTGGAGTAGAGGTGATATTCTTCAATCCATTGATCAAAAATTTGGGGAATGAATATGTTAAA  
GAGGAAGTTGAATTGGTACTAAAACCTCGGACTTGTTGCTCTCAGACAGAACCAACAAGGAGGCGAAG  
TATGAGGCAAGTTTTAATTTACTTGAAGATATCGTGCCTCCGCCATTGCCAGAGTTGTCATTGTTACAA  
AGTTCTGCCATTATTTTTCAATTCAGGTTTTGATCATCACTTGTCTATGTCTTCATCATTTTTCTCCAGAGA  
AAGTACTTTCATATCCCTCCACCGATTGGAACCTCTTCCATTCACTGGTCCATGATTAGAACTCTTTCTGT  
ATTGCCTTGATGAATTGTGATTCCAATCCCAACAGCAACAACAACCTGTACTTCAATTCAAACAAGTTCGT  
GTTAACTATGTGAATCTTACTGTCTATATCGTTTCAATTAAGCATGTAATGTTTGTACGATACAAATAA  
TGGACTAATGTACACTTAGAATGATCCGGTTTCTTTGATCTATAATGTTGTCGACATGTATTGCTA

>PGSC0003DMG400023671 L-LecRK

AAAAACATAGTTTTTTGTTATATGTTGATATGTATATTCTAGGCAAGATTAGTTATTTAACTAACTTTGTT  
CATCTTTTGATCATATTCATATTTTTGGTTCTTAGAGTGGATTGTATGAGTTTCAGCTACCAAAAATTCACC  
AAGCAAAACGAAAAAGATTTCACTACTAACGATTTCGTACATAGCCGTTGATGCTATCCAAGTAACTC  
GCGATGTTTCGTGGTGCTTCCATCAGTAATTTGTCTGGAAGGATATGGTATTCACATCCTATGAATCTATG  
GAACAGAAGGAAAAACAGAACAGCCTCGTTTAATTCAACGTTTGTGATCAATATCAAACCTGAGAGTGA  
TCCATGGGGTGAAGGATTGGCTTTCATATTGACTAAAGAAAGTGGTTCTCACTCAATCCCGGATAACAGT  
TATGGACAATGGCTTGGGATTGTGAATGAAAGTACTAATGGATCTTCTCAACAACATATTTGCAGTTG  
AATTCGATACAAGGAAAAGTTACCTTGATGATCTTGATGATAATCATGTTGGCATTGACATAAACAGCAT  
CAATTCTGTCAAGCAAGTCTCGTTGATTGATCGTGGTGTTAACCTTTCCTAGCTGTTGATGTTATAGCAA  
GTGTCCGGTATGATGGAGAATCCAAGATGTTGAAGTTTATACATTCATGAGCAATCAAACCGGAGACA  
ATGAGAGAAATCCCATCATTTCCATGCCTATTGATCTTCTAGTTATCTCCCCGAGGATGTTTTCGTAGGA  
TTTTCAGCCTCAACTGGGATATATAATCAGCTGAACTGCATAAAGGCATGGAATTTTACAAGCACAGATA  
TTGGGAACAGTAATGGAGTTAGCCTGTTATGGTTGTGGATCTTGATACCAGTAATGTCAGTTCTTGTTAT  
GTTCTTAGGTGGGGTTTTTCGTATATTTTCAGCTGGTGGAGAAAAAAGAAGAGGAGGCAAGTGTTAGACC  
AATCTGAGAATATAGAGATTCAGATTCAGAATTCAGCTACTGCACCTCAGAGATTCCATCTGAAGGACTT  
GAAACGAGCAACGGGGAACCTTTCATCCGAAGAACATTCTTGAAGAGGAGGATGTGGAGTAGTCTCA  
AAGGGATGTTAGATCAAAAAGAGGTGGCTGTGAAGAGATTCTTTAATGATTCAAGTCAAGGGGCAAAA  
GATCTCATAGCAGAAGTCACAACTATAGGCAATCTGCACCATAAAAACCTTGTCAAATTGATAGGATGGT  
GCTATGAGAGCAATGAACTCCTTGTAGTCTATGAGTTCATGCCAAATGGGAGCTTAGACAAGTTGATATT  
TTGCGAAGAAAACGGAAAAGGTTTGAAGTCTGAATTGGGAAATAAGGTATGGTATCATCTGTGGGACTG

CTCAAGCACTTGATTATCTGCACAATGGATGTCAAAAAGAGTACTTCACAGAGACATAAAAGCCAGCA  
ACATCATGCTTGACTCAGAACTCAATGCTCAGCTAGGGGATTCGGATTAGCTAGGACAGTTCAAGTGA  
ATGGAAAGACTCACCATTCAACAAAAGAGATTGCTGGTACTATAGGCTATATGGCACCAGAGAGTTTCC  
ATATAGGCCGAGCCACAGTTGAAACAGACGCTTTGCATTTGGAGTGCTAGTTCTTGAAGTTGCTTGTGG  
TCGAAAACCTGGAAATCGATATGAGGAGAATAATTATACTAATAAAGTCATTGAATATGTATGGGACTT  
GTACAAGATTGGAAGGATCATTGATGCCATAGATGTCAGATTGGATAGAGACTTCAATGAAGAACAAGC  
CGAATGTGTGTTAATATTAGGATTGGCTTGTGCCATCCAAATCCTTACGAAAGGCCAAGCATGAAAAC  
GCTTTACAGATTCTTACAGGGGAATCAGTTCTACCAAACATCCCAACTGAGAAACCTGCATTTGTATGGC  
CAGCCAGAGCTCCATCGTCCAACGAAGCTGCTAGTGGCTCTCTCCTGGATGGCCAACCTTACACAGATTAC  
AGTACTCAGTGGCAGATGACTGCAGAGTATGAGGAACCTCAGCAAGGTTAGGTAACCTTTAGGAGGC  
AAAAGATACCTGTAAATTCACATATGTAAAGGCATGAATGTCTCTTTATTTTTTTCTTTCTATGTATGTGG  
TGGGGAGTGGGAGATATCTTCTCCGAGTGTTGTTTTCTGCATTATAAATAATTTTGTATTTAGTCAAT  
GTCATAATCAACTTTCCAAGTAAAACTGAAAACAAAAGCAGCAAGCATTGTAACAAAGGCAGCTAGCT  
ACATGAGTTACTCCTACAGAACATAAATGTTGTACCAAACCACAAAGAAGTTGTGAAAATGAAAATTC  
ACGATCCATCATCATCTTCATGTTCTATCTCGAAGAACTCTTTCGTA CTCCATCAATAACAGTTTCTCTGG  
ATTGTTTCATGTCTGCTATGTCCATCGTT

>PGSC0003DMG400026646 L-LecRK

GCACAAAAAACTTAACAATTTGTA CTCCAACAACCTCCATGGACAATCCCTATAGCCTAGTTATTCTTGC  
ATTGATCTTTTTCCCTATTCTTGTGAGAGCTCAATCTTTGATTTTGCTTACAATGGATTCAATAACTCAA  
TATCATTAGAGATGGAGTTGCAATAATCAATCCAAGTGGTGCACCTAAGCTCACTAATAGATCACAAAAT  
GTTATAGGTCATGCGTTCCACCCCAATCCTGTACCAATTTTCAACTCCAGTACTAAAAATGTTACTTCATTT  
AGTACATACTTTGTCTTCGCCATTGTCCCTCTTGAGAAAACCTCTGGTGGCTTTGGCTTTGCTTTCACCTTA  
TCTCCATCCCCGGGTTTTCCAGGTGCTCAGGGTGATCACTTTCTTGGAGTCCTCAACAACACGAACAATA  
GAAAGGATACTAACCACATCTTTATGGTTGAATTCGACACTGTGGATGGTCATGATGAAGGTGTGGATA  
CAGATGGAAATCACATTGGGATTAACATCAATAGCATGATATCTATCGCGTCACAACCAGCCAATTA  
TGTTAATGGTACTTCTAGAACAGAGGAGGTACATCTACAAAACGGAGAATCAATTCAGGCTTGGATCGA  
TTATGATGGAATGAGCAAAGTGGTAAATGTA ACTATATCTCCAGAACAGTTCCAAAGCCAATTCGACCT  
CTGATCAGTGAGGTCGTAGATTTATCTCCTGTGTTGAACCAA ACTATGTATGCTGGTTTCTCAGCAGCCA  
CGGGAGATAAAGCGAGCTCTCATTACATCTTGGGTTGGAGTTTTCGGTTGAATGGAGCTGCTGATCCTTT

AGATCTTGATAACCTACCTGTTGCCCCACCTGAAGTGGTAAGACCCTCCAAGAATCCCATCTCAAAGG  
GCCTTGATAGGAACATTCTGCTCCGTCGTTATCCTGCTCCTTGGGGCATTATATCTATAGAAGGATGA  
GGCAGCATGAAGTTCTAGAGGACTGGGAGCTGGATTGCCTCACAGGTTCCGATTTAGAGATCTTTACA  
AGGCAACTAAGGGATTCAAGGAAAGTGAACATAATTGGAGTTGGAGGATTTGGTGCTGTTTACAAGGGT  
GTTTTGCCTACTAATGGAGCCGAGGTTGCAGTAAAGAAGATATCGAGCAATTCTCTTCAAGGAATGAGA  
GAATTTGCAGCGGAGATCGAAAGCTTAGGCAGGTTAAGGCACAAACACTTGATCAACCTACAAGGCTG  
GTGCAAGAACAAGAATGATCTTCTCCTAGTGTATGACTTTGTCCCAAATGGAAGTCTTGATTCACTATT  
ACAGGCAGAAAAGGGACATTGTTCTAACATGGGAACAGAGATTTAACATCATCAAAGGGATTGCTGCA  
GGGCTTCTTTACTTGCATGAAGAATGGGAACAAGTGGTAATACATCGCGATGTGAAGAGCAGTAACGTC  
CTAATTGATGGTGAAATGAATGGTCGATTAGGGGATTTTGGGCTAGCAAGATTATACGACCATGGCAAG  
AATTCACACACAACAAATGTTGTTGGCACAATAGGGTACATTGCACCAGAATTGACACGGACAGGGAAAG  
GCCTCAACGAGCACGGATGTGTATGCATATGGTGTACTACTTCTTGAAGTAGCTAGTGGAAGACCTCCT  
ATTGTCTATGAACCAGGGAAAGGAGCTTTAGTACTAGCTGATTGGGTGATAGAATGTTTACAACCTAGGT  
AATGTTCTTGATGCAGTTGATCAAAGGTTGAATTCAGTCTATGTAGATAAAGAGGTTCAAATGATTTTGA  
GACTTGGGCTTGTGTTTGCACACCCAAGACCAGAAGCTAGGCCAACAAATGAGACAAATAATGAAGTATC  
TCACTGGAGATGAATCACTTCCAGTTTTTGGAGCAGCAGTTGAGCTGTGTTGGATCTGATAGGGTTGATG  
AAATCACAGCCAAGTTCTTGGAAAGTGTGTTTCTACTGATACAATCAATATATCACGTCGTTGCTATCCGTC  
GGACAGATATCATCTAGTTCACTCCATTCTGGTAGATGAAAACCTGTATAAAGGACATACACTCTTCTTT  
TGTTTTGTTAAACCACTTTGTTGGGATTGATTAAGTAGCTTCTATTTACCCAAATCCTGTTTTTCTCCTCAT  
AATTCTGCAATTTAGATAGGTCATTTATTTCTAGGCTCATTGAGCATTACAAGTTAACATAATCTCACTTC  
TATGTCTGCAACATCACTTATCACATCCTATATTTTTGTTTATGTACAAAC

>PGSC0003DMG400026647 L-LecRK

TAATTGTCTCTTTAAATTGAATATAAATATTGCACAAAAAACTTAACAATTTGTACTTCCAACGACTCAAT  
GGACAATTCCTATAGCCTAGTTATTCTTGCATTGATCTTTTCCCCTATTCTTGTGAGAGCTCAATCTTTTGA  
TTTTGCTTACAATGGATTCAATAACTCAAATATCATTAGAGATGGAATTGCAATTATCAATCCAAATGGT  
GCACTTAAGCTCACTAATAGATCACAAAATGTTATAGGTCATGCTTTCCACCCCAATCCTGTACCAATTTT  
CAACTCCAGTACTAAAAATGTTACTTCATTTAGTACATACTTCGTCTTCGCCATTGTCTCTCTAGAGAAAA  
CCTCTGGTGGCTTTGGATTTGCTTTCACCTTATCTCCATCCCCGGGTTTTCCGGGTGCTAAGGGAGCTCAT  
TTTCTTGGAGTCGTCAACAGTAGTAACGATGGCAATGATACTAACCACATCTTTATGGTTGAATTTGACA

CTGTGGATGGTCATGACGAAGGTGTGGACACAGGTGGAAATCAAATTGGGATTAACAGAAATGGCATG  
AGGCATATCACGTCAGAATCAGCTGATTACTATAATAATGCTACTTCTGAAACAAAACCAGTAGATCTAC  
AAAACAGAGAATCAATTCAGGCTTGGATCGATTATGATGGAATGAGCAAAGTGGTAAATGTA ACTATAT  
CTCCATAAAAGTTCCAAAGCCAATTATACCTCTGATCAGTCGGGATGTAGATTTATCTCCTGTGTTGAAA  
GAGACTACGTATGCTGGTTTCTCAGCAGCCACGGGAGATAAAGCGAGCTCTCATTACATCTTGGGTTGG  
AGTTTTCGGTTGAATGGAGCTGCTGATCCTTTAGATCTTGAAAAGCTACCAAGTTGCCCCACCTGAAGTGG  
TAACATCCTCCAAGAATCCCATCTCAAAGGGCCTTGATCGGAACATTTTGCTCCGTGGTTATCTGCTC  
CTTGGAGCATTTTATATCTATAGAAGGATGAGGCAGCATGAAGTTCTAGAGGACTGGGAGCTGGATTGT  
CCTCACAGGTTCCGATTTAGAGATCTTTACAAGGCAACTAAGGGATTCAAGGAAAGTGA ACTAATTGGA  
GTTGGAGGATTTGGTGCTGTTTACAAGGGTGTTTTGCCTACTAATGGAGCCGAGGTTGCAGTGAAGAAG  
ATATCGAGCAATTCTCTCCAAGGAATAAGAGAATTTGCAGCGGAGATCGAAAGCTTAGGCAGGTTAAG  
GCACAAACACTTGATCAACCTACAAGGCTGGTGCAAGAACAAGAATGATCTTCTCCTAGTGTATGACTTT  
GTCCCAAATGGAAGTCTTGATTCATTACTTTACAGGCAGAAAAGGGACATTGTTCTAACATGGGAACAG  
AGATTTAACATCATCAAAGGGATTGCTGCAGGGCTTCTTTACTTGCATGAAGAATGGGAACAAGTGGTA  
ATACATCGCGATGTGAAGAGCAGTAACGTCCTAATTGATGGTGAAATGAATGGTCGATTAGGGGATTTT  
GGGCTAGCAAGATTATACGACCATGGCAAGAATTCACACACAACAATGTTGTTGGCACAATAGGGTAC  
ATTGCACCAGAATTGACACGGACAGGGAAGGCCTCAACGAGCACGGATGTGTATGCATATGGTGTACT  
ACTTCTTGAAGTAGCTAGTGGAAAGACCTCCTATTGTCTATGAACCAGGGAAAGGAGCTTTAGTACTAGCT  
GATTGGGTGATAGAATGTTTACA ACTAGGTAATATTCTTGATGCAGTTGATCAAAGGTTGAATTCAGTCT  
ATGTAGATAAAGAGGTTCAAATGATTTTGAGACTTGGGCTTGTTTGTTTACACCCAAGACCAGAAGCTA  
GGCCAACAATGAGACAAGTAATGAAGTACCTCAATGGAGATGAATCACTTCCAGTTTTTGAGCAGCAGT  
TGAGCTGTATTGGATCTGGTAGGGTTGATGAAATCACAGCCAAGTCTTGGAAGTATTTTCTACTGATAC  
AATCAATATATCACATCGTTCGCTATCCGTCGGACAGACATCATCTAGTTCACTCCATTCTGGTAGATGAA  
AACTCAGTAAAAAGGACATACACTCTTCTTTTGTGTTTAAACCACTTTGTTGGGATTAATTAAGTAGCT  
TAGAATAATATATACTAGGAAAAAGGTAAGTCTCAAGTCAACATTTTCACTTAGCTGGAGTGCAAAAA  
CCATGTAATTTAGAGAAGAAAAGTTATAAAATTAGTCTAGAAAGTAAATTTGTAATTATAAAAAAAAAA  
AAAATCTATGTAGAATATTCGTTATAAAATCTATTTGTAATAAAAATGGTGACATGATTCAGA

>PGSC0003DMG400027140 L-LecRK

CTTTAAACCCCACTCTTTCACTTTCCCAACTCTTTCTTCATTCTTTGTAATCACACAGACAAATCACATGTG

GCAAATCAAAGTAGAACTCTACAAAAGAATGTCTAGATTAGCTATAAATCATCACCCACACAATTCT  
TCAACTCTACAAACAAATTTCAATCTAACTATGCCATGGCCAAACAAATTACACCAACCCTTTTCTTGATTC  
TCTTTATTTTGCTGTCAAGAACAGTTTTTCTGATGAATTTGTGTATAATGGCTTTAATGGGGTTGAAGCT  
AGTAATCTTACTGTAAATGGGATTGCTCAGATTTTAAAGAGTGGCGCTTTAAAGCTTACAAATGAAACAT  
CTAGAGTTGTTGGTCATGCTTTTTACAAAATCCAATTAATCAAGAATCCCAATCTGGTAAAGTTTCT  
TCCTTTTCTACTGCTTTTGCTTTTGGGATTGTTCTGAATATGCTAAGTTAGGTGGGCATGGCTTTGCTTTT  
ACAATTTCAAGGACTAAAGAGATGAAAGGGGCTCTCCTAGTCAGATTTAGGTCTTTAAGTTCAAGTA  
ATATTGGGAATTTTCAAATCATGTATTTGCTGTTGAATTTGATACTGTTCAAGATTTTGAATTTGGTGAT  
ATTAGTGATAATCATGTTGGTATTGATGTGAATGATTTGAAGTCTAATGCTTCAGTAAATGCTAGTACTT  
CTCTGAAGGAAGTTTTAGTAAACAAAAGCTTTTTCTCAGAGTGGAAAGACAATTCAGGCTTGGATTGAC  
TATGATTCAAGTAGAAATGTGTTGAATGTTACACTTTCCTTTCTCAACAAAACCAGCCTTTTCAATTTTG  
TCTTTCCCTTTGGACCTTTCTCTAGTTTTTGAGGAATTCATGTATGTTGGATTTTCTGCTTCAACTGGTTTG  
CTAGCTAGCTCACATTATATATTTGGTTGGAGTTTCAAGATGAATGGGAAAGCTCAATCTTTGGATCTTG  
ATTCATTGCCTGCTCTCCCTAAGCCTAAGAAGGATCAAACAGTCTTGATTGTAGCTACCACGATATCGGC  
TGTTGTGTTTCTTGATTCCGACTCGTTTTAGCCTTGATGTCAATTTGGAAAATCAAGAACATAGATGTGA  
TTGAACCTTGGGAACCTGAAATAGGTCCACATAGGTTTTCTTACAAAGAGCTAAAGAAGGCTACTAGGG  
GTTTTAGAGATAAAGAGTTGCTCGGGTTTGGTGGATTTGGTCGAGTTTATAAAGGAACACTGCCTAAGA  
CGAATACCGTTGTTGCTGTGAAGCGAATACATCATGAAGCAAACAGGGTCTTCAAGAATTTGTGTCTG  
AAATCGCGACTATTGGTCGCCTTAGACATAGAAATTTGGTTCAGCTCTTAGGATGGTGTGCGCGAAGAG  
GTGATTTGTTACTTGTATGACTTTATGCCTAATGGAAGCTTAGACAAATACATTTATGATGAACCAAGA  
TTACTTTAACTTGGGATCAGAGGTTCAAGGTTATTAAGGTGTGGCTTCTGGTCTGTTGATTTACATG  
AAGAATGGGAACAACTGTGATCCATAGAGATATTAAGCAGGGAATGTGTTGTTAGATTCCGATATGA  
ATGGACGACTTGGAGATTTCCGACTTGCTAAGTTATACGAGCATGGAGCAAATCCTAGTACAACAAGAG  
TAGTCGGTACGTTGGGTTACTTAGCTCCAGAATTAACCAAGATCGGAAAGCCTACACCAAGTTCAGATG  
TTTTGCCTTTGGTGCATTGCTGCTAGAAGTTGCTTGTGGGAGGAGGCCAGTTGAGGCAAAGGCATTGC  
CTGAGGAGTTAATCCTAGTGGATTGGGTATGGGATAAGTGAAGGAAGGTGCCATTCTTGAAGTGGTT  
GACTCGAGATTAAATGGCGAGTATGATGAGATGGAGGCCATAATGGTGCTTAAATTAGGACTCATGTGT  
TCAAATAATACACCATCTAAGAGACCTAGCACGAGACTAGTGGTGAGATACTTGGAGGGGGAGGTGAC  
ACTCCCAGAGACGCTGGCAGCTCCCGATGAATATGATGGAAAGAAGGGTGGTACTAGCGGTATGGAGT

TAGAGGACTTAATAGATTCTATCCGTCTTCGTCTTATTTTGAGAAAGTAAGTACATGGTCATCAGCTTAT  
GACGGTGAAGGCGATATTGATATTGAAGCTAATTCAGTAACGCCATTAACGGATTCTGGCAGAGAGGA  
CAACAGATAGCCATGCAAAATGGAGGGACCATTCTACTTGCCCTCCCAAACCTCCCTCCATATTTAGTACT  
TTTTATGGTTTGATTTTTGAACTTAAATGTAAATTATGGCTTTTGAAAAGAAAATGATATTAGTATCAACC  
ATTTCTATGGTTTTGAGAATATTGGTGTTAGTAAAATGTGAATATATTTTTGCAATCAAGTCAATTTTGAA  
TCTTGATGAAGCTTG

>PGSC0003DMG400029735 L-LecRK

GAATGATATTTCCCATTTTCTCTGCTTCCATAATTCTTTATCCATGTGAATTAGCTCTGCTTCTTTCTTAG  
AATGAACCAATATTATCCAAAAATCTTCTTTCTTACCTGTTATTAACCCTATTTTCTTGTAATCAATCAGTT  
GCAGAAACTGATTTTGCCTCAATGGCTTTACACAATCAGATGTGTCATTTTTTGGGAATGTTACAATCGA  
ATCTAGAGTTCTTACTCTTTCAAATGACTCAACTTTTTCAATTGGTAGAGCTCTGTACCCTTCAAAGATTGT  
CACAAAAGAAGCCAATTCATCTAAAGTTCTTCCCTTTTCAACATCTTTCATTTTTGCAATGGCTCCTTACAG  
AGACAGGCTGCCAGGACATGGTATAGTTTTCTGTTTGTGCCACACACAGGTATTGATGGTACTACTTCT  
GCACAGAATTTAGGTTTCTTGAATTTCACAAATAATGGGAATCCTGATAATCATGTTTTTGGGGTTGAGT  
TTGATGTTTTCAAGAATCAAGAATTCAATGACATAAATGAGAATCATGTTGGAATTGATGTTAATTCTCTT  
GCATCAGAGTTTGCTCATGAAGCAGGATATTGGCCTGATGAGAAAATAAGTATAATAGTGATGGTAGC  
CTAAATGAGGAGTCTTTAGAGACTTTAAAGTTGAATAATGGAAGAAATTATCAAGTTTGGATTGATTATG  
CTGATTTCAACATTAGTGTA ACTATGGCACCAGTTGGTGTGAAAAGGCCTAAGCAGCCTTTGTTGGATTT  
TCACCTAAATCTTTCCAGGTTTTTGAGGAAGAGATGTATGTGGGGTTTACAGCAGCCACTGGAGA ACTT  
GCTCAAAGTCACAAGATTTTAGCTTGGAGTTTTAGTAACTCGAATTTTTCGATAGGTGATGGTTTGATCA  
CACAAGGGCTGCCTTCGTTTGAGCTTCTGAGGATCCAGTTTATCGATCGAAGGGATTCAATGCAGGTAT  
GACAGTGTCACTCTTGTCTTGTGGTTCATTGCTGTAGCTTCATGGCTTTTGATTAAGAGAAATAGG  
AGAATGAAAAAGGAAAGAGAGGATATGGAAGATTGGGAATTGGAATATTGGCCACATAGGATTACTTA  
TCAAGAAATTGATGCTGCAACAAAGGGTTTTGCTGATGAAAATGTGATTGGAATTGGAGGTAATGGGA  
AGGTTTATAAAGGGGTTTTGGCTGGGGGTTTCAGAGGTTGCAGTAAAGCGAATTTCTCACCAAACAGTG  
AAGGGGCAAGGCAATTCTTGGCTGAGATTTTCGAGTCTTGGTAGGCTAAAGCAAAGAAATTTGGTGT CAT  
TAAGAGGGTGGTGAAGAAAGATAGAGGCAGCCTGATTGTGGTTTATGATTATATGGAAAATGGGAGC  
TTGGATAAAAGGCTGTTTGAATCTAATGAGAGAAGCATGCTGAGTTTTGAAGACAGAATTAGGATTTTG  
AAAGACGTGGCATCAGGGGTTCTATACTTGCATGAGGGATGGGAGTCAAAGTGTTGCATAGGGACAT

TAAGGCTAGCAATGTTTTACTTGACAGGGACATGAATGCAAGGCTAGGTGATTTTGGTCTAGCTAGAAT  
GCATGATCATAGTCAAGTGGCTAGCACGACTCGAGTTGTTGGCACGGTGGGATACTTGGCGCCAGAGTT  
TGCCAAGACTGGCCGTGCCTCCACACAACTGATGTGTTTGGATATGGAGTGCTAATTATGGAGGTGAT  
GTGTGGAAGGAGGCCTATAGAGGAGGAAGGCAAGCCACCTTTAGTGGATTGGCTGTGGGAACTAATG  
AGACGAGGCGAATTGATTAACGCCTTTGATAGTCGATTAAGGATTAATCAAGATTTCAATGAAGAGGAA  
GCTTTAAGGGTGTGCAACTAGGCATGATATGCGCGAGCCTAGACGCCAAAGCTAGGCCAAGCATGAG  
ACAAGTAGTGAAATTCTTTGACAGGAATAGTGATATTGATGAATATGAACTGAGGATATGGATGCTTA  
CCTTCTAGAGAGTTTGAGATCTAATACCATGTTGTCCAATTTTCTTGAGTTTAAGCCATGGTTCACATC  
CAACATTTGAAGAAATTAGAGAAGGTTTGTCTTCTCCATGTCAATTTCTTGGACAAATTCTCTGGTGGAT  
GGTAGATGAGTTAACATTTGGTTGGTTTATGTCCATCACTCTGATTTAACTTATGTTACCTTCCAAGGCC  
TAGCTTTGATTGAATTTGCATTTGGCAATGCTGCTTCATGTACAAATTTATATGATGGAGTAGGAAAAAG  
GATTTGGTTATGACTTGTGAGATATACATGTATTCATTTCTTTTTTTGTACCTTGATGCTAGTTACAGTG  
GAAGAGTTTGTCTCTTTTTTTTTTTTAACTATAGAATTTGTTCTTTATCTTTTTTCAATTTACACGAGATAA  
G

>PGSC0003DMG400030144 L-LecRK

GTATATATAAAATTTATTTTTTAGCAAAGCACTAACAGAGTGTTTGGTGGTTTATTGTATATATATGCAGT  
TGCATGTCTAACAATGTGATTAACATATTGTCCAACATGTTTGTCTCTTTATCTTCTCTCAAATA  
CTTGCTTCTTATCATAATTATCCCTTTAGTCACTTCACTCTCCTTCAATTTTGATACTTTTACACCCAATGAT  
CACAATGTAACCTATGAGAGAGATGCTTCTCCAGAAAATGGTGCAATTCTACTCACAAAAACCTCTCA  
ATCGCGATATTAATGCTAGTATAGGCCGAGCTATATATTCAAACCACTGCATCTATGGGACAAGGCCTC  
TCGAAATCTCACTGATTTCACTACACATTTCTCCTTTAGCATTAAATTCACAGGGAATAACTAAATATGGTG  
ATGGTTTTGCCTTCTTCTTCCCCTGCAGGTTCAACAATTCCTTATAATACAACAAGAGGTGGAAGTCTT  
GGCCTTACAAGTAATAATGAGCGACTAAATTCATCGAGCAATCATTTTGTGCTGTGGAGTTTGACACCT  
ATCAGAACCCCTATGACCCAAAGGGTGATCATGTAGGTGTGATATTAATCTATGCAATCTGTTGTTAA  
TGTGACTTGGTTTAGTAGCATTCAAATGGTACGAAAATGATGCCTGGATTAGTTATAATTCTAACTCA  
AAAAATCTTACTGTTGTCTTCACTGGTTTTCAACTCCAAGGGAATAATATCACAGTCACTGTCCTGCAGAA  
CCTATCTTACAATCTTGATCTGAGGGAATATTTGCCAGAATGGGTCACTTTTGGCTTCACTGGTGGAGCG  
GGAAGGAGATTTGCATTTCAAAGAATCTATTCTTGGAAATTTACTTCTTCTTTAGATAATATGACAGATAC  
AGGGGTAACCTTATCAAACACCTTGCCAAAGGATGCACCAACAAAACTAAGTTAGGACTTGTGGTTGG

ATTGATTTCTGGTGGTTGTGTTTTGGTTGCAGTATGTGCTTTGGTGTTATTTGCATTTTGGAGAAAGAGT  
AAGGTCAGAGAAGATGATTATGTCTTTGATGGTTCATGACTAATGAATTTCAAAAAAGTGCAGGACCA  
AAGAAGTTCTTGACAGTGAGTTGGCTAGATGTACAAATAACTTTTACAGGAAGAGATGCTTGGGCGG  
GGTGGATTCCGGAGGTGTTATAAAGGATATCTCAGTGAATCCAACCTTATATTGCTGTTAAGAGGGTTT  
CAAGGGAATCACAGCAAGGAATAAAAGAGTATGTATCAGAAGTCAGGATCGTCAGCCGGTTAAGACAT  
AAACATTTGGTGCAACTCATTGGTTGGTGCCATCAAAAAAGAGAACTTCTACTTGTCTATGAGTTTATGC  
CTAATGGAAGCTTAGATCACCATATTTTTAGTGGAAAAAGCCATTTGGCATGGCCACTAAGATTCAAGAT  
TGCTCAAGGCTTGGCCTCGGCGTTGCTATATCTACACGAAGAATGGGAACAATGTGTGGTGCATAGGGA  
TATAAAGTCTAGCAATATTATGTTGGATTCTAATTTCAATGCCAAGCTTGGGGATTTTGGGTTAGCTAGG  
CTAGTTGACCATGATAAGGGATCCCAAACAACAGTTTTGGCAGGCACAATGGGTTACATGGCTCCTGAA  
TGTGTCACCACTGGCAAAGCTAACAAGGAAACAGACGTCTATAGCTTTGGTATTGTCGTGTTAGAAATA  
GGTTGTGGAAGGAAACCTATTGATCCTAAAGCAGAGGAGCATCGAGTAAACATTGTCGATTGGGTTTG  
GAGACTTTATGGGATGAGAAGTATTCTTGAAGCAGTTGATCCGAACTATCATCAGAGTTCAATGAAGA  
GGAGATGGAGCATTTGCTAGTTGTTGGCTTATGGTGTGCTCATCCAGATAATAATTGCAGGCCTTCTATT  
AGGCAAGCAGTTCAGGTGCTTAATTTTTGAAGCTCCATTACCCACGCTCCCTCGGAGCATGCCTGTGCCCA  
CATATTGCAGCTTCTCACGCCATTTATCAACTATTTAGTTTTATCAACACATGAAACCAGCGGTACAGAG  
ATCGCCCTTGCCCAAATCCAGCATTAGTAAACGGAAACACCACTGATGCTTCAATAAAGAGAACATCTT  
CTTCAGCATCTTCATCTTCAACATCAGTTTTGTATCCAAGTTAATATTGCCCTGTTATAACCCTGCATTTTG  
TCTTCCATTAGCAGTGTCCATCTTTTCTTTCTTACTTTTTGTTGTTTCTTCTAATGAAGAGGATTCTTTG  
GAT

>PGSC0003DMG400047213 L-LecRK

ATGTTGCTATTTTTAGTAATTTTTGTTATCCCTTCTTTATATTCATTGAACTTCAATCTCACCAATATCAATC  
CTTCTTATGTTAATCTCTCTATCAATGTCACTGGAGACGCCTACGTAACGAAACAGGGCATAACAAGTTAC  
GCCTAATGAACGTAACATTACATTAAGTAGGAAAACAGGACGCGCCATGTACATTGAGACACTGCAGTT  
ATGGGACAAAGCTACAGGGGAAATGACAGATTTTACTACACATTTCTTTTTGTTATTGATTCAAATGGT  
AACGATCGTTTTGCTGATGGACTAGCCTTTTTCTTAGCTCCTGTTGGTTCGAGTATTCCAGTTGGTTCGTT  
TGGCAGTGGCCTTGGTCTTGTGATGCTGAGACAGAAAACATGTCATCACATGAGTCATTTGTTGCTGTA  
GAGTTGATACACATGTGAATAACTGGGACCCCTCAGACATACATGTAGGCATCAATATAAATTCTATGG  
AATCTGTTGCTACAACAATATGGAAAAATGACATTAACCTTGGGAAGAAAAATGATGCTTGGATTAGTT



ACAATGCTAATTCCAAGGTTCTTGAAGTTGTTTTACAGGATTTGAGAAAAATATAATCGAGACAAACT  
AAGCTACCCGGTTGATCTGAGGGATTATTTGCCTGAGAATGTTAGTTTTGGCTTCTCAGCATCAACTGGA  
CAATTGTTTCAGAAAAACAATGTCAAGTCTTGGGATTTCAATTCAAGTTTGAGTTTTGATGCTATCAAAGT  
TCCACAACAGCCTAGTGCAAGTCCTCCTATACAAGCTCAAGATCCAAGAAATCATCCTATTCAAGGTCAA  
AATCCAAATGATCCTCCCATTACTCATGTTCAAGAACCCAAGGGTCCTCCTCAAGAAGTACTCAGCACCT  
CGGAAAAGGAAGCAAGGGACTACTAGTCGGATCAAGCATAGGTTTACCTATTCTGATTCTTGGTTTGA  
TAACTGCCAGTTGCTTTTTGTGGAAGAAAAAGAAGAAAGGAGATAAAAAATTAGACCATGTCTTCATTG  
ATCTAGATATGGATGATGAATTTGAAAAGGGTACCGGTCCTAAGAAGTTCTCGTATGGTGAATTAGCTC  
GTGCAACAAACAACTTTGCTGAGGGACAGAAGCTTGGAGAAGGGGGATTTGGTGATGTTTATAAAGGT  
TTATTGAAGGAATGTAACCTCATATGTTGCTGTTAAGAGAGTGTCAAAGGGTCTAAACAAGGGATAATG  
GAGTATGCATCAGAAGTGAAGATCATCAGTCGATTAAGGCATAGAAATTTGGTTCAACTTATCGGTTGG  
TGCCACGAGAAAGAGAAGCTTCATCTTGTATGAATTGATGCCCAATGAAAGCCTAGATAAACATCTTT  
TCAAAGATAAGTCATTGTTGGTCTGGGAAATAAGGTGGAAAATTGCTCAAGCAATTGCCTCAGCTTTGCT  
GTATCTACACGAAGAGTGGGAACAATGCGTAGTCCATAGGGACATAAAAGCAAGTAATGTCATGTTGG  
ATTCAAACCTCACCGCTAAATTAGGTGATTTTGGGTTGGCTAGGCTTATTGACCATGACAAAGGATCTCA  
AACAAATGTTAGCAGGGACCGTGGGGTATATGGCACCGGAATGTATCATGAATGGAAAAGCTAGCA  
AGGAGTCAGATGTATACAGCTTTGGAATAGTAGCATTGGAAATAGCAAGTGGAAAGAAGATCAATAAAT  
ATCAAAGCACCGAAGATGAAGTGAGATTGGTTGAATGGGTGTGGAGCCTCTATGGAACGGGAGAGCT  
AGTCGAAGCAACTGATCCAAGATTGAATAAAATGTTAATGAGAAAGAAATGGAACGTTAATGGTCAT  
CGGTCTATGGTGTGCTCATCCAGACAACAACTCAGGCCATCAATAAGGCAAGCAATCCATGTTCTAAAT  
TCTGAAGCCCAATTACCAAATCTTCCATCAAGAATGCCAGTTGCAACATATTCACCCCTCCATTGAATAT  
GTTTTCGTCTCCATTTTCAAATACCTATGAAGTTAATAAGCAGGAGCAGACTATGACTTACACTATTTCT  
CAAGTGTCTATACTTCGTCAGCTGCTTCATCGACAAAATCACTTTTGTA

>PGSC0003DMG401009415 L-LecRK

CTCCATTTTTCACTCATTGATCAATTATTTTATTTGCATTTACAAAAAGTAAGACAAAGCCAACGTGCTTC  
AAAGTTTCTGCTCATTGATTCTTCTTCTTCCCCTGTTTTCTTGCCCATCACCAAATCTACTTCTCTGTAGC  
CACCACCATCTCTGAAGGGACTCACTGCTGATGAAAAATGGGATTGTTAACACCAAAAACACTCACCATT  
TTCATCATTCTTCTTCTTTACTACACCTCAAACCTCAAGCTCAAAAAATGGAACATTACAACCTAGAATAT  
GCATCTTTTGATCAAACCTTTCTTTGACATCTTTGAAGTTGAAAGTCCTGCAACAATCAGTAACTTTGCTCTC

CAAGTAACCCCTGATTCTGCTTCTTCAGATTTCAATCTCTACAATAACTCAGGAAGAATCCTCTTTAAGCG  
ACCATTTAAGCTCTGGGATGGTGATGTTTTAGACAATAAAACAAGGGTTGCATCTTTCAACTCTTCTTTTC  
TTGTCAACATTTACAGACCAAAGAATGAAACAGCTGCTGAAGGGTTAACATTCTTGATTTACCAGATTT  
GGAGAAGCCCGATAATAGCCAGGGCCAGTATTTAGGGTTAACAAATGCTACTACAGATGGGAAATCTA  
GTAACAAAGTTGTTGCTGTTGAGCTTGATACTTCTAAACAAAGCTTTGACCCTGATGGTAACCATATAGG  
TATTGATGTTCATAGTGTTAGATCTGTAAAGGTTGAATCTTTAACACCCCTTGGTATAGAACTTGCTCCTA  
TGGGTGCAAGATTCTATAATGTTTGGGTACAATATGATGGAATCAAGAAAGTTCTTGATGTTTATATTGT  
TGAACAAGCACAGAAAAATGGGTCTACCCACCTATACCAAAAACCCCATTTTAAACATATAATCTTGAT  
TTGAAAGAACATGTAAATCAAGAATCATATTTTGGGTTTTCTGCATCAACTGGGACTAACTACCAACTCA  
ACTGTGTATTGAGATGGAECTTAACAGTTGAGTACTTCCCAGAAAAGAAAAGTCCTTGGTTGAAGATTG  
TTTTAGGTGTTGGGATTCTGTAGTGGTGCTTTTGATTCTTGCCGCGCGTATTTAGGGTATTGTTATCAT  
AAGAAAAGGATTGATAGGTCACAGTCTAACATATTGGGTGCACTCAAGAGCTTGCCTGGAACACCACAA  
GAGTTTCAGTTTAAGGCTTTGAAGAAAGCTACAACAATTTTGATGAAAAGAATAAGCTTGGGCAAGGA  
GGATATGGAGTTGTTTACAGAGGATTTTTAGCTGGTGAGGAGAACAAAGATATTGCTGTCAAATGGTTT  
TCTAGGGAAAGCATCAAAGGGCAAGATGATTTCTTGGCTGAGCTTACTATTATCAATCGTCTTCGACATA  
AACATCTGTCAAATTGCTTGGTAAGTGTCTTAGTTTTCTTCAAACATAGATTTTGTGCATTTGTTTGAG  
TAGAGTATTAGAGTTATATTATTGTGACTGTTTTGTTTATGATCTTCAATAACTGTTAGGGAAATGGTACT  
GGTAACTGGTAAAGTTGCTGCAATGTGATCGAAAGTTCATAGATTCGGGGTGTGGATATAGTCTCTTAG  
GCTGCGTAAAGTACACCCTTGTGGTCTAATCCTTCTCAGTATAGCTACAAATTTGAGTCTCAATAAGGC  
CTTATCTCCAATATTTCAATTGAAAAGTAAACTATACAAATAGGGTAAAGATTAGTTTTTATTTTTGGGTA  
TGTACATAAAATGTGTGAATACCTTCAAGGCAAAGGAAGTTGTAAGTGTAGAGTAAATTTTGTCAA  
TTAGTTGCATTTTCTTGAATTTCCCTTATAGAATTTTCCCCACCCCTCCTGCCATAATTAAGCAATGAGA  
CAAGGATAATGGCGAGAGGATCCAAATTTAGCAATCAGAAACAGAAATTGCCTCTATGTTTTTTGATTC  
TCAATGAAAGAGAGAATTCATTACCAGGATTCATTGATGTGACTTGAAAGAATGGAACCAAAAACCTTG  
TAAAAGTTACTGACATAATTTAAAGCCAAAGATTGGTGGGACATCAAATTTAATACTCCAATTTGTTTGT  
CATTTTGTCTTTCTTTTTTTGGGTATAAAAAAGAAGGGAAAAGTTCAAATATGCCATCGAACTTTTAGA  
AAAGGCTCATTTATGCCATCCGTTAAAAGTTTGACTCATTTATGTCATTTCTGTTAAAGAAAATGCTCATC  
CATGCCATTTTTTTAACTCCGTTTTGCAAACCATTTTTTACACACCAAACATGGTTTAACTTTTTCTA  
TTGGTGTTTTTGGATCAAATGTACATTTTTTCTTGTTTTTCTTTAAAAAACACCAAGAACACATGAAGAA

CATAAACAACTCCAAAATTTCAACGTCTTCAATTCTTCATGAATCACCTCAAATTTCAAGAGTAGTTTCG  
CTCCGAGCTAGATACCAAACTCAATTTCTTTTGAGCTCGAATTCAACCTAACTCAACAAGACCCCAATTG  
AAATTTCTTCAAAGTTTCAAACTTGAACATTCTTTAAATGGTAGATTCTCCAAACTTCAAATCATTGGA  
AATTTTGAACATAAACTCAAAAAACACTAGTCAACAAAGATCTAATGTTAAAAACAAGAATCAAAGCAA  
ATTTTGAAATTTTGGGACTGATTTTCGTTTTTTGGAATATATATTTTTAAATATGGGTGAATTTTTTGA  
CTACAAATGATTTTAAAATTTTTATTTTTTAAAAAAATAATTAATGGTGTAGCCGAAATTTGAGATGAT  
TTCGTGAAGAATTGAAGACGTTGAAAATTTTGGAGTTGTTTATGTTCTTCATGTGTTCTTAGGCGTTTTT  
AAAGTAAAAACAAAGCAAAAATAGTACATTTGATCCAAAACAACCAATAGAAAAGTGTTAAACCATGT  
TGGTGTGTA AAAAATGGTTTTGCAAACCGGCGTTAAAAAAAATGGCATGGATGAGCTTTTCTTTAAC  
AGCAATGGCATAAATGAGCCAACTTTAACGGATGGCATAAATGAGCCTTTTCTAAAAGTTTCGATGGC  
ATATTTGAGCCTTTTCCAAAAAGAATGGCTTTTACTATTTTATTTCAACTCCTTCTTTTAACTTTACAAC  
TAATATGTTTGAGACTATAAGATTGAAAATCTTTTGATATACATATGTTTAAATTAAGACCATAAAAATC  
TAAAATCTTCTTTATTATCATAAACTCTGCAAGTCAAAAACAAGACAAACATATTGAAACGGAAGGAGTT  
TATGTAATATTATTATGTTGTTTCGGACTCTCCAAAATGTTGTTGCACATGTATTGAATTCTTAAAAACA  
ATACTACTTTTGAAGGATCCGATCGGTATCCATCACATATTTAGAGAGAGCGAAGCAACACTAATACAAT  
AGACTCATTAAACCGCGTGAGCACATGCCCTTGCTTTTTATGCTTTTCTTTTCTAGTAACTAGTAATTGAT  
CTTATTCAACTAATTTATGTAATTTAACAAGGGACTAGTCTTTCTATTCTTACATTTAGTATGCTAGGAAT  
TTTGACATGGGACTAGTTTTTCTAGTCTGACATTTAGCGTGCTAGGAATGTACTAGGTTGGACCATCTTCT  
GACAAGCAAATTTCCCCTTCTGAAGAATCAAAGTCTTCTTGAACATTTAATAACTTGGTACTTCTTTTTGTC  
TTCAATCTCCTTTTCTTTCTTAGAATTCTCAAGTCATCCAAGGGTTTGTCAAAGTTTCTTTTACCCTGACT  
AACTAGATTTGCGTAGCATAGGGCCCAACAAAGTGAGAAACGCTATATATCAAGACCATTTTTTAATGCT  
TGAAGTCGAGATCTCTAGTTAAGGAATCACACTCCCCGTTAGGCGATAGTAAATGTTTTAATAGTTGATT  
CATACCATTTGGTAAGTAAGAGTTTAAAGCCAAAAATATCAAGGAAGTAAGAAAACTAATGGAATGCCT  
TAAAGTTTTGACCAAGAACCAACTTGTTACTATGGTCCCTCCAATTTAGAAAAACAATGCACTATCTTGAA  
GCCCTTCATTTGACTTGCTTAAAAGAAGATGATCATCCTTTGCTGACCATGGAATAAGCAGCCATTCGTC  
AAAGTTCAAACAATTTTTATGTCAAATTTTGGGAAGTTTCTTCTTGTCTAACATCCCTTTCAATCAT  
TGTCACGATTAAGACAAGTTTTGGATGTTAGTTGAATGATGGTAAATTAATCCAATGAAAAGGACAT  
TAATTCTGATTTTAGTATACATTCATCTTCAAACACCTAATTTTTGTGTACCTACTCTTGTATCTGACCC  
TACAAAGAGATAAGGTTTGTAAAATACAAAAAAAAGTTTACCATTTGGGTATTCTGCAACTTCTGTGTCT

AGCTGTTTTACTGATAAAAAACAAACATATGCATCTTACAAAATTACATGTTATGGTGACAGGATGGTG  
TCACAAGAATGGAAAGTTACTGCTTGTATATGAATACATGCCTAATGGCAGTCTAGATATGCACCTCTTT  
GCGGGACCAGATAAAGAGTCGTTGAGCTGGAACGTCCGCTACAAGATTGTTCAAGGTGTTGCCTCAGCA  
TTGCACTATCTGCACAATGAGTATGAGCAGAGGGTGGTCCATCGCGACCTGAAGGCGAGTAACATCATG  
CTTGACTCAAAGTTCAATGCGCGCCTTGGGGACTTTGGCCTTGCACGGGCACTTGACAACGAAAGGACC  
TCGTATGCTGAGGCAGAAGGAGTGCTTGGCACAATGGGATACATTGCACCAGAGTGTTCACACAGG  
GAAAGCCACACAGCAATCTGATGTATACGCGTTTTGGGGCAGTGTTGTTGGAAGTTGTATGTGGCCAGAG  
ACCTGGAACCAAGATTAATGGCTTTCAATTCTTTGTTGATTGGGTTTGGTACTTGCACCGCGATGGCCGT  
ATCTTGGAAGCTGTTGATCCAAGGCTTGGAGGTGACTATGTTGCTGATGAAGCAAAGAACTTCTACTG  
CTTGGTTTGGCTTGTGCACATCCTATAGCTATTGACAGGCCTAAAACACAGGCAATAGTTCAGATTATAT  
CAGGGTCAGCACCAGCACCAGAAGTCCACCATTCAAGCCAGCATTGTGTGGCCATCAATGATGCCAA  
TTGACATAGACTCAAGTGTTATGGACACAACATCCATTACTACTTCTCACTTCAATTCAGGATGGAGTCTT  
GACTATCAAAGCAGGGAGACCCCAACATATGCAGACCACTCTTTGGTGTAGTTACTTTGATGGTAAACA  
ACTATTACCAAAGGAAAAATGATTTTTTTGGCCTTCTATTTTTTAAAAAATTCCTGTAATTATGTTTTCT  
TGGGAGGAGGTTAAAAATTCCTCAGTTTTTTATTTTTTGTGGATGTTTTTTCCCTTATCAATTTGTTAT  
TGGGGCATGATGAAAAGATCAGAGCAACCCGTGTACATTCATATAACTCAGTAGTGTTACATTATGTCAT  
ATTTACTGTTTTCTGTCTTTGTCAACCAAATTATGTAAGACACTCATGTTGAGCCAAATTGGAGGA  
GACAGAAAATGAATAGTGGCGAAGTATCTTTGTTGCCTCAATTGTACTACTACATACTAAAGAATT  
CCAAGATCTCAATTGTAATGAAAGATAAGAAGTATCAATTCTTATAAAGCAATAGATAACAGAAGA  
ACACAATACAAAGATGGATCATAGATGCTTTGTTGATATGCATAAATGCTCTGCCATTTTATAGGCTATT  
GTAGTATTAGATCGTTGACAATATATAGTAGATGAAATCCCACTAAGATTTATCTACTGTCAAGATCATT  
CTGTAAATCAATATAACGGAGAACCTGAGATGCTTGCCAAAGTTTTACAAGTTAGTGCGCATAAGATCA  
AGAGTTTCCCCGCCTTTAACTTTGTTGATAAACGGAGCTTCTATAATCATTGAAAGTGAAAGGAACAT  
AGATACGGGGGTGTTGAGCATCCACCAGCTCAGGTGGTGGTCCACTGCTGTGTCCCTTGGTCCCAAGA  
GGAATGAAGCAATAGACACCCGTACTTTTGCTTCTTGCATATCACTCTATGCTTGACAGTGTGTAATCTT  
CCATTGCTCCATACCTTCACATAGGCCATAGCAAAAAGCAAGTATCATTGTCTAGTTCTTTTTTCGGAATC  
TTAGAAGGGTTAAGGGAGTAGGAATTATCTAACTTCTGCTAAACAATCCCCGCCAGAGGCTAGCATAA  
GATTGTTGGAACACGTCAAATCTGAAAATGAACTAGGTAGAGTAGCAGCATAGTTACCGTGCCCATGT  
CTCCAAGATTCACCAGGAGGGTGTTTGGCCAAGGATCAACTGCTACAAATTCACCAGACTTCTTCATGAC

CTCAAGACCGCCAACACTTTTCATCATCCTGTAGAATAGTAAGGAATCCTGAGTCTGTGTGTGTCTGAACC  
CCAGAGGAACCTACAGCTTCTGGGGTGAAGTGGTACTTGTTAATCCTAAACTGACAAGGCCAATCCTCA  
AAGGAAACATTTGGCAGTCCCAACCCTTCACTCATCTTTCGCAGAATGTCCATCATTAGTCCATTAGTTGC  
TGCAGCATACGTCTTGATTGTCTCTCTGTTACAGTAGGAATCAAACCTGCTTTTAAGCATTCTAGTAAAGC  
AGTCTTTT

>PGSC0003DMG402009415 L-LecRK

TGCAACTTCTGTGTCTAGCTGTTTTTACTGATAAAAAACAAACATATGCATCTTACAAAATTACATGTTAT  
GGTGACAGGATGGTGTACACAAGAATGGAAAGTTACTGCTTGTATATGAATACATGCCTAATGGCAGTCT  
AGATATGCACCTCTTTGCGGGACCAGATAAAGAGCCGTTGAGCTGGAACCTCCGCTACAAGATTGTGCA  
AGGTGTTGCCTCAGCATTGCACTATCTGCACAATGAGTATGAGCAGAGGGTGGTCCATCGCGACCTGAA  
GGCGAGTAACATCATGCTTGACTCAAAGTTCAATGCGCGCCTTGGGGACTTTGGCCTTGCACGGGCACT  
TGACAACGAAAGGACCTCGTATGCTGAGGCAGAAGGAGTGCTTGGCACAATGGGATACATTGCACCAG  
AGTGTTCACACAGGGAAAGCCACACAGCAATCTGATGTATACGCGTTTGGGGCAGTGTTGTTGGAAG  
TTGTATGTGGCAAGAGACCTGGAACCAAGATTAATGGCTTTCAATTCTTTGTTGATTGGGTTTGGTACTT  
GCACCGCGATGGCCGTATCTTGGAAGCTGTTGATCCAAGGCTTGGAGGTGACTATGTTGCTGATGAAGC  
AAAGAACTTCTACTGCTTGGTTTGGCTTGTGCACATCCTATAGCTATTGACAGGCCTAAAACACAGGCA  
ATAGTTCAGATTATATCAGGGTCAGCACCAGCACCAGAAGTTCACCATTCAAGCCAGCATTGTGTGGC  
CATCAATGATGCCAATTGACATAGACTCAAGTGTTATGGACACAACATCCACTACTTCTCACTTCAAT  
TCAGGATGGAGTCTTGACTATCAAAGCAGGGAGACCCCAACATATGCAGACCACTCTTTGGTGTAGTTA  
CTTTGATGGTAAACAACACTATTACCAAAGGAAAAATGATTTTTTTGGCCTTCTATTT

>PGSC0003DMG400000295 LRR-RLKs

TTTTTACCAAATGTTTCATAGAACTTAGAAAAATCACCAAAAAAATGTCCAAAATTATTTTTTCACTTTT  
CATTTTTCTGCTTTTCATCATTCTCATGGAAAATCCCAAGAATCTCCAAATCAAGAAAAGGCCATTTTACT  
CCAACTAAAACAACACTGGTTTACTTCACCAAATGTCACAAAATGGATTTTCATCATCAAATCATTGTTCTT  
GGGATGGAATAATTTGTACCCAAAATTTAGTTTCTGGTATTCAAATCCCTTTTGGAAATATCTCAAACCA  
ATCCCAAATTTCAATTTGTGATCTTAAAAATCTCACCTTTCTTGATTTGAACCATAATTTTCATCCCTGGAAAC  
TTCCCTGATATCTACAATTGTTCAAATCTTGAATCTTAGACCTTTCTTATAACTACATGGCTGGTAATCTC  
CCTGATGAGATTAACCGTCTTTTCGAGTAATCTAAAATACCTAAACTTAACTTCCAACAACCTCAATGGTGA  
TATCCCTAAAGGAATTGGTGGATTGAGTCAGCTCAAAGTACTTGACCTGAGGGGGAATTTGTTTAATGG

ATCTTTTCCTGAAGAGATTGGTGAATTGTTGAATCTTGAAGCACTTATGTTGAGCTCGAATGGTTTTGCTC  
CACAGGCTATACCATCACGATTCACCAAGTTGAAAAATTTGAAAATTTTTGGATGACAGAAGCACATTT  
GATTGGAAATATCCCGGAATATATTGGTAACATGACAAGTCTTGAATTTTTGGATTTGTGCAACAATGGA  
TTGAGTGGTAGTATCCCTGATGGTTTGTTCAGCTCAAGAACTTGAGTATTGTGTATTTATTTACTAACAA  
ATTGTCAGGGGAAATACCACAGTCAGTTTCATCAATGAATTTAGATGTTGTTGATTTGTGTAACAACAGT  
TTGACAGGAAAAATACCAGAAGATTTTCGGAAGTTGACGAACTGAGTGGATTGGCTTTGTTTTCAAT  
CAATTATCAGGGGAAATACCTTTGAGTATAGGCAAATTATCATCATTGGTATCTGTTAAGTTGTTTGGGA  
ACAAGTTATCAGGTGAAATTCCACCTGATTTTGGTCGATTTTCGAAACTTTTTGACTTCCAAGTTTCAGAA  
AATCAACTTGTTGGAAAGCTACCTGAGGGTATTTGCAATAACAAGGCATTAGCTAGGATGGTTGCTTTTG  
GCAACAATCTAACAGGTGAACTGCCAAGTTCACCTGGAAGTTGTGACAGTCTGAGGTATCTTCGAGTCG  
AAAATAACCGACTTTCTGGTGAGGTTCTGATGGATTATGGACAGGTAAGAGTTTGTCAATGGTTTTGAT  
GAAGAATAACTTGTTAACTGGTCAGCTTCCACATAGAGTGGCATCAAATTTGTCACAAGTTGATATCAGC  
AATAACAAGTTTTCGGGGGAATTACCAGCTGGTATGGGTACTTGGTACAATCTAAGTGAGTTCAAGGCA  
AGTAATAATCTCTTAAGTGGTCAAATCCCTCAAGAATTGACTCTTCTCCAGGGATAACTAACTTTTTCT  
TGATGGTAATCTACTATCTGGAAATTTCCATCGAATATATCGTCGTGGAAGACTCTTGTCACATTAAATA  
GCAGAAAAATCAGCTTTCAGGTCCTATACCTTCTGCACTTGGCCTTTTACCAAATCTCATTGATTTGGAC  
TTGTCAAGTAACCAATTTTCAGGTGTTATTCCAACCTGAATTAGGTAACCTTGAGGTTTACTTCACTTAACCT  
GTCATCCAATCGCCTGTGCGGTGAAATCCCATCTCAGTTGGAAAATGCAGGTTTTGGTAAGAGCTTCTTG  
GATAATCCTGGTCTTTGTGCAATTAATCCATCAGTAGAAGTCGCGTCTTGCAAGAGGGAACTAAGTCA  
GATAAGTTTCTGTTGGACTTGTTGCTGCTCTTGCTAGTGTAGCAGCAGTTACTTTCTTGTTGGCAGTTCT  
GTATGGTCTGTTTGTGTTGAGAAGTCATAGAAAAAGAAAACAAGAATCAGTTTTGACATGGAAACAAC  
ATCATTTACAAATTAGACTTCACGGAATCAGACATTGTATCCAATCTGACCGAAAACAACATAATTGGA  
AGTGGAGGATCGGGACAGGTCTACCTCGTGCCTTTAAGCCGATCAGGTGACTATGTTGCTGTCAAGAGG  
ATTTGGAGAAACCAAAGTTGGATCACAAGCATGAGAAACAGTTTCTTGCTGAAGTTCAGATATTAGGC  
ACGATTGACACACCAATATAGTGAACTCCTCTGCTGCATCTTCAGTGAAGAGTCGAACTTCTTGCT  
ACGAATATATGGAGAACAGGAGCTTGATATATGGCTTCACTCAAAGAATAGGTTGAACAATGCCTCAA  
GATCAACACCACATCTGGTCTTGAATGGCCTAGGAGGCTGCAAATCGCGATAGGAGCTGCCCGTGGTA  
TTTGCTACATGCACCATGACTGCTCACCACTATTATTCATCGCGATGTGAAGTCAAGCAACATCCTATTG  
GATTCCCAATTCAATGCAAAAATTGCAGATTTTGGCCTTGCCAGGATGTTGCTCAAGCCTGGAGATAACA

CAGTGACAGCAGTAGCTGGCTCTTTCGGATACATTGCACCAGGTATAAGGCCATCAACTTATCTATAACA  
TCATTATAAGTTTAGAAGTTGGTTAATCTCTTACATGGAAAAAGTTTCCTATGCTACACAATTCAATAA  
CATATCAAGGGGTCGTTTTGTTACGTAAGTACTAGCTATGCATGAGTTGTAACACGGGTTGTCTATGTAGAGA  
TTGTTATGCAAGTAGTTATTCTTAGTACACTAATTCTCGCGTAACTCATATAAATGCTAATATATTCATGAT  
GGTATTTAGAGTATGCACGAAAACTAGAGTGACAGAGAAAATTGATGTGTATAGTTTTGGAGTCATA  
CTATTGGAAGTGGTACTGGAAAAGAAGCCAATCTTGGAGATGAAGATTCATGTCTTGCAGACTGGGCA  
TGGCGTCACCTTCAAAAAGGGAAACCGATGGCTGATGCATTAGATGAGGACATCAAAGAAACGCGATA  
CTTGAAGAAATCTTCATTGTGTTAAGCTTGAATCTTTTGCACCAGCACATTTCTTCATCAAGGCCAA  
CAATGAAGGAAGCTCTGCAAATCTTGATCCAATGTAGCAACAGTTCACCGACATCTGGAGAAAAGAAAA  
ATGAAACAGAACAGGATGTTTTGCCACTCCTCAAGAACTCAAGGAGTGACAGGATTGAAGAAAATGAT  
GATGTTGGTTTAAACATCACTTGTTTGATGGCATTACAATATGATTAGAGTGACGGAGAGCCTTGACGTAA  
CTGGTAAAGTTGTTGTGGAAATAGTCTCTTGCAGAAATGCAGGGTAAGGTTATGTACAATAGATTCTTGT  
GGTCCGGTCTTCCCAGGACCTTGCTCATAGTAACTTCGTGCACCGGGATGCCTTTTTTTAAACAATAT  
GATTAGAGTAAGAAATAGCAAAGAATAAGACCAATAGATAATGTATCAGGTAGTGAAAAGTACGATTGT  
ACATACACTGTATTGGATCCATAGTGTGCTTTGCATTGTTTTGCTACATAAATTTTGTCTTTTCCAATGTTT  
TCTTTACTCATAAAATAACTGTCAAAAAGGTACATTAACCATAAACTATTGAATGGAGGATAGATTTT  
CTAAAAATCCAGAAAAAATAGAAACAAGTTTGAAGTACCTCAGTACTTTAACTTTTGGCAACCATAACAAC  
AACATATCCGATGTAATCCCATGAGTCCCAAGCTTTTGGCAACAATACAACAACATATCTGATTTAATCCC  
ACAAGTGGCTCTGGGGAGGGTAGAGTGTACGCAAATCCTACCCATATCTCGTAGAGATAGAGAGGTTG  
TTCCGATAGTAACTTTTTGGCAACAATAAATCTTGTAAGATCACACAAAAATGTGGCTACTAGAAGA  
ACTTTATTTGTATCCTAGCTTTATTTCTGGCTAGTGAGGAAAAAATTTAAGTTTACACTTGGGATAAAGAT  
GATCCTTAGAGGCACCAGGAGTGAAAAGGTCAGCATATTGATGTTTAGCTGAAGAGAGATGTGCTCATT  
TGATACATTGAACTATGGCTCACTTCAAAGCTCACTCTTGCATGATGCGGTGCACAAGGAAGCAAGAAA  
TATTTCAATCATCTCGGAGAAGAAAGTAAGAAGAGGGTTCTTTTAGCAAGAAGAGGGGTGATTGTAAA  
CGTACAACTTTGACTAGGCACTTTTGGTTGTGCACTCTGACCATGATCATGATTCCTCGAGATCTGTGT  
ATTGGGAATGCGAGGCAGCCAAAAGTGCAGCTCCAACACCTGAACCATCATTAGAAAGCTCAATGACTA  
TGCTGTCCGCAGTGTCTCCAGTAACTCTTCATAGTTTCTCCAAGCAATTTCTGAACTTGGTGTAACGC  
TCAAACAATGCACCGTCCACAGCTATGACAGACCTCTGGTTCTCTCCGTCCTTCAAAGTGTCTTTTCCAA  
TTTCTTGAGGATGCCACGATTCTGCTGCAGAAAGACGAGCTCCACGAGAGGTGATAATGTCGCATAG

CTCCACAAC TATTTTCCTCATT TTTCAAGGTAG AATTAGGTACCTGTGAAAAAATGTATATATAGCAAATA  
GGATGAGAAAGACGTTCTCCACTTAATTAAGCCTAGCCAACCTTAGTGATGTTCCAGCCAGGAGCTAGGAA  
TTTGAGTTTATGGGTTCCGGATAAATTATTTACACATATTAAGTGGGGTTTTTCAGTACAAATACAAAGCT  
ACTGGTTTTTTGTCTATCATATATAGGACAAAAAAGATGAGAACTTCAAAGACTAGTAATGTTTCACTCT  
AAGTCAAATGTTTGATCTTAATACCTCTAAGATATCCTTCAGTTTATTGCCAACCCACCTTGAGATCAGCCG  
ACTCGTCGTGATGCATAGCAGCCATATCCGGAGTCTGCATGTGTGGCAGTAAATAACCTTTTTCACAAT  
ATTTGACAATTCAAAGCTTACATATGCTTAATAAACGTACACGAATCTAGTCCAACAAGAAGCATAACTT  
ACAGTGTAAGAGATTAGTGCAATTACATAAACCTTAAGTTGCACTAATTGCATGGAGAAGAATAAGGTT  
AAAATTGATGAATGCAAATAGGGCCTGCCAAAAAATAAATTACTGCCGTAATAAATGTGTTGGTCAAAG  
CAATACCCTACCTCAATATGAAAGGAATTTTCAGTTTGGATGGGACATAATCACCGAATAATGAAGCTTC  
TTAGCCATTCTACACAATACTCTACGCAAAATTTCTCCAAGATACATCCCGGAGATCATCTTTTCATAAA  
TCTGTGCAGTTTCCGAAAGTTCAACAACAGATGTAAGATAGAAAATGTAGAAAGGAAGGGGATTGTCTT  
AGTTACCTGCTCCCCGGGGTTTAAACTCTCAACATCAAGATTTTGGTCATATTCTGTTACTGGAAGATGTG  
ATGAGAGGAAATTACCCCATTCATGTTGATAACCTTTAAAGACCAGTCAAATTACGTTTAAGTAAACA  
AACGTGTATGAATCTACCAAGGAAAATATTTTTAGGAAATGAATTAGGCACATATCAAGTCATGAAGGT  
GTTATGAAATGTCATAAGCATCTACCATCTCTCCGGATTTCCGGCAACAGACCATGCCATTTGGGAATCGC  
ATGAGCCCGTTCAACATATGCTGCATTGGTTCCAGTACCCAAAATTACTGCAGCAATGACATCAGGATTA  
TTGTACCGACCTCCTGCTAACGTTCCAACAGTATCATTGACCTAACAGCCAAGTCAACTAAGAAATTCA  
GGCTCAGGAATTGCTTAAGATTA AAAATCAGAAATATCACACATACAAAAACCTAATACATGAAAATCAT  
CAGCTTACTTATATTTTATCGAATTTGATTGGGAAAAAACTTACTAAAGCAGCCACACGCACATCAAGG  
CCGGCCCTTTCCATTGCTTTTGCTAATTCTCCACCACATCTTGGCCAACCTATGTTAGATTCCATGAGGA  
GTAGTTCAGAATTGAAATACAATAAAACGTTACAAAAGGAACTCTTTATAACGTACTTTAAATCAAATCG  
GTGAAAATGCAATGAAACAATGATCAACTTTGCTTGTATAAAGTTGTATGCATTAATCCTCAACAATGC  
CAACCTATGTTAGGCCATGAGGAGTAGTTCATCATTGAAATACAACATAACGTTGGAAAAGGAAATCCT  
ACAACGTATTTTAAATCAACTCAGTGAAAAAGCAATGAAATATACGTTGTCGGACTCTCCAATAATATTG  
CCGCACCTGTGTGAGATCCTTCAAATGTACTGCTTTTGAAGGATCCTACAAGCACCTGGCCAGTGGCGA  
AATTTTTGAAGAGTCTGAGCAACATAGATGGTATAATCATCAACGTTGCATGCATAAAGTTGTATGCATT  
AAATCATCATCAATGCAAACCATACATTGAAATGAATGGACTAAATCTAAGGTTGATTGTAGGCATGAT  
CAATCGGAAGTGAAAATCAGAACTCTGTATGACTAACCACGTCTTCTATGGAGAAGCCCTTTGTCCATT



TAATAAGAGTTCCTGATGCAATTGACAATTGTTTCACAGGGAAAGAGAAGGTAAAGCCTAATCCCTTTG  
TCTACCAGGTGGAAGATGAAAATCATCACCTTCTGTAGCTACAAATTCTGCAAGTGCCGTGGCAATAAA  
ATCAAATAACACCTGCAATTAACAGTTTGAAGTTTAATAATGTGAGTACAACCTTGATTGTATTAATAAA  
GTTGCAGGATGCATGGCTGATACAGCTTAAGACTTACTTCAGATGATGATCCAGCCATCACATTCTGTGG  
AATTGAAACTTCTTTAACTTCATGTTTAACTATACGCTTTTCGTTCCCACTGCACACGCATCACACG  
AAAGTTTGTGCCGCTAGATCCAATGCATAAAACAGACCTTCTTCGTCCCTAAGATGAAGGAATAAAAGT  
AATACCAGTCGTTAACTGAAGATACAAACATACATGGAAAACATACCCCACTTAATGCACTACAGA  
GGTCTATTGGCAGCAGCTTTTGAAAATTTGTCGATACATGTGAATTTTTATACCCAATTTTAGTAAGTTTA  
TCACAAGAACATGGAAATGTTACCAAGTCCCTACCTCCGCTACTACTATAGGTATGCCATTTTTAACTT  
TAGAGAATGTCAAACCTGATTCATATGTCATATATGCTTTTCTTATGGATCTAACTTCATTATGTTGAACAC  
AGAGATGTCTGTGTAGACAGCACAGTAACAAATAATGAGCAGACAGAAGAAGATGGAACCTGAAAAATT  
TACACACATTATAAGTGTTAATGAATGGAACCTAGCAATGTAAAATTCAAAAAAGGTGGTCAAGATACAA  
AACAGTAGAAGAGAATATAGAATAAACATCAAACCTCAGGATCCATAGATAACAAGTGACCTGATCACTT  
GTCAGTTAGAACTTCTTAGTGGACTCCAAGTTCAACAAATACTTCAAATAATAGAGTTTTCATTTTTGCTT  
TTTGTGATTTATAACGATGCTCAAGGTAATCACCTTAAGAACATCAAAGAATCATAATTTAGGACTAAA  
AAATAATAATTAACAAATTTGAAAAGTACTTAATCAATTATCCAAACATTACGAAAGTGAAATCAATC  
TCCATGATCACAGCTTTATTCAAAAAAGAGAAATTCTTGACACCCAAATTAGCAAAAATCAGTTTGTGCA  
CATATACACACACAAATACTCATCCAATGTGGAGGCTATCAACTTAGCTAATAAGCATCTTAAGTTTGCC  
AATGAATCGTTAGTAAAACACACAATCTGATATAACTCTCCACCCATAAGCTAAAATCAAGAGACAACA  
CTACCAAGATCACAGCTTTATTGAAAAAAGAGAAATTCTTGACACCCAAATGAGCAAAAATCAGTTTATA  
CACACAAAATACTCGCCAGTCGGATGGTTATCAACTTAGGTAATAACCATCTTGAGTATGTCGATGAA  
TCAATTGTAAAACACAAAAAAGAACTGACATAACTCCAACCCAGAAGCTAAAATAAAGAGACCACCTC  
CAACCGAGGTGGAGCTAGAATTTGATGTTTATTGGTTCTGAACTTGTTGAGAAAAAACTATTAGGTTTCAT  
CCGAACCTGTATCTAATATGTAGCTCCACCCCTGCCTCCAAAATCACAACTTTACTAAAAAAGAGACAAA  
TTCTTGAACACCCAAATAAGCAAAAAGACAGTTTATGCACATTCTTAAACACCCAAATTAGCAAAAAACAG  
TTTATCCACATTCATAAACACCCAAATAAGCATAAAAAACAGTTTATCCACATTCTCAAACACCCATATAAG  
CCAAAAAACAACAGTTTATGCACATTCTTGAACACCCAAATAAGCCAAAAACAGTTTATCCCACTCTT  
AAACACCCAAATAAGTAAAAACAGCTTTTCTTAAACACCCAAATAAGGCACTCAAGGGTGTGGCCTAG  
TAGTCAACAACGTGGATTGAGCACCATGAAGTCTCAGGCTCAATTCCAGCTCCTATCTATTCTAGCCTT

GGTGGACTCAGTGGCGAATTTATGTGTAAAATTCGGGTCACCCGAACCCGTGCTCCTCCGACTAACTTG  
ATATATTA CTGTATAATTATTAAGAACATATTAATAAACACTTGTTGAACCCGTTCTTAAAGTTGCTT  
GATGGTTTACTGGTTTGAGAGCTAGATTTTAAACACCAAGGTCCTGAGTTCAATCCCAGCCAGCCACAATT  
CACTTCTAATTTTTTTAGTAACTAATAACACTAGTTTTTACAAAAAAAACGAAATTCTAAAGCAATGGTG  
CACCCGTTTTCTTGAAATCCTGGATTGCGCTCTGTGGACTGAATACTGATACTTATTGTTGGTGTGAGATG  
CCAAGATTTAGTTGAGGTGCGCGCAAGTTGATCCGGATATCAAAACAAAGAACACCCAAATAAGCAAAA  
AAAAACAGTCTATACACATTCTTGAACACCCAAATAAGCAAAAATCAGTTTCTCACACACACAAAACA  
CAAATACTCACCCAGTAGGAAGGTTATCAACATAGCTAATAAGCATCTTGAGCTTACTCCCACCTCAGA  
AGCAAGTCCAGCATGCATCTCTACAGTCATAGCATCAGCTACCTGCTTAAGTTTCCCATTGGAGTTGCA  
CACTTCTCCTCAAATCCTTCAATAAAGCTTCAACTTTTTCCCCTCCCAGAAATTCTTCATCCTGCGCTTC  
ATTAACAAAACCTGCCACCCACATACTACAGCAGCAGTACACACAACCTGATACACCTACAACCAATTTTC  
CCATATTTTCTTGAAAAAATCAAACTTTTTGTGTATATTTGAGTGAATATACTGTAAAGATTGAAACTT  
TTTTGGTTGATTTTAAATGGGGTTTGTAAAGATTCAGAATTTGATGTGTGGAGTGACAGAGAAAGAAG  
AAAAATGGGAGTTGCAGAGGATATTTTATT

>PGSC0003DMG400000358 LRR-RLKs

TTTTTACCAAATGTTTCATAGAACTTAGAAAAATCACCAAAAAAATGTCCAAAATTATTTTTCACTTTT  
CATTTTTCTGCTTTTCATCATTCTCATGGAAAATCCCAAGAATCTCCAAATCAAGAAAAGGCCATTTTACT  
CCAACAAAACAACACTGGTTTACTTCACCAAATGTCACAAAATGGATTTTCATCATCAAATCATTGTTCTT  
GGGATGGAATAATTTGTACCCAAAATTTAGTTTCTGGTATTCAAATCCCTTTTGGAAATATCTCAAACCA  
ATCCCAAATTTCAATTTGTGATCTTAAAAATCTCACCTTTCTTGATTTGAACCATAATTTTCATCCCTGGAAAC  
TTCCCTGATATCTACAATTGTTCAAATCTTGAATCTTAGACCTTTCTTATAACTACATGGCTGGTAATCTC  
CCTGATGAGATTAACCGTCTTTGAGTAATCTAAAATACCTAACTTAACTTCCAACAACCTCAATGGTGA  
TATCCCTAAAGGAATTGGTGGATTGAGTCAGCTCAAAGTACTTGACCTGAGGGGGAATTTGTTAATGG  
ATCTTTTCTGAAGAGATTGGTGAATTGTTGAATCTTGAAGCACTTATGTTGAGCTCGAATGGTTTTGCTC  
CACAGGCTATACCATCACGATTCACCAAGTTGAAAAATTTGAAAATTTTTGGATGACAGAAGCACATTT  
GATTGGAAATATCCCGGAATATATTGGTAACATGACAAGTCTTGAATTTTTGGATTTGTGCAACAATGGA  
TTGAGTGGTAGTATCCCTGATGGTTTGTTCAGCTCAAGAACTTGAGTATTGTGTATTTATTTACTAACAA  
ATTGTCAGGGGAAATACCACAGTCAGTTTCATCAATGAATTTAGATGTTGTTGATTTGTGTAACAACAGT  
TTGACAGGAAAAATACCAGAAGATTTGCGAAAGTTGACGAACTGAGTGGATTGGCTTTGTTTTTCAAT

CAATTATCAGGGGAAATACCTTTGAGTATAGGCAAATTATCATCATTGGTATCTGTAAAGTTGTTGGGA  
ACAAGTTATCAGGTGAAATTCCACCTGATTTTGGTCGATTTTCGAAACTTTTTGACTTCCAAGTTTCAGAA  
AATCAACTTGTTGGAAAGCTACCTGAGGGTATTTGCAATAACAAGGCATTAGCTAGGATGGTTGCTTTTG  
GCAACAATCTAACAGGTGAACTGCCAAGTTCACCTGGAAGTTGTGACAGTCTGAGGTATCTTCGAGTCG  
AAAATAACCGACTTTCTGGTGAGGTTCTGATGGATTATGGACAGGTAAGAGTTTGTCAATGGTTTTGAT  
GAAGAATAACTTGTTAACTGGTCAGCTTCCACATAGAGTGGCATCAAATTTGTCACAAGTTGATATCAGC  
AATAACAAGTTTTCGGGGGAATTACCAGCTGGTATGGGTACTTGGTACAATCTAAGTGAGTTCAAGGCA  
AGTAATAATCTCTTAAGTGGTCAAATCCCTCAAGAATTGACTCTTCTCCAGGGATAACTAACTTTTTCT  
TGATGGTAATCTACTATCTGGAAATTTCCATCGAATATATCGTCGTGGAAGACTCTTGTCACATTAAATA  
GCAGAAAAATCAGCTTTCAGGTCCTATACCTTCTGCACTTGGCCTTTTACCAAATCTCATTGATTTGGAC  
TTGTCAAGTAACCAATTTTCAGGTGTTATTCCAAGTGAATTAGGTAAGTACTTCACTTAACCT  
GTCATCCAATCGCCTGTGCGGTGAAATCCCATCTCAGTTGGAAAATGCAGGTTTTGGTAAGAGCTTCTTG  
GATAATCCTGGTCTTTGTGCAATTAATCCATCAGTAGAAGTCGCGTCTTGCAAGAGGGAAACTAAGTCA  
GATAAGTTTCTGTTGGACTTGTGCTGCTCTTGCTAGTGTAGCAGCAGTTACTTTCTTGTTGGCAGTTCT  
GTATGGTCTGTTTGTGTTGAGAAGTCATAGAAAAAGAAAACAAGAATCAGTTTTGACATGGAAACAAAC  
ATCATTTACAAATTAGACTTCACGGAATCAGACATTGTATCCAATCTGACCGAAAACAACATAATTGGA  
AGTGGAGGATCGGGACAGGTCTACCTCGTGCCTTTAAGCCGATCAGGTGACTATGTTGCTGTCAAGAGG  
ATTTGGAGAAACCAAAGTTGGATCACAAGCATGAGAAACAGTTTCTTGCTGAAGTTCAGATATTAGGC  
ACGATTGACACACCAATATAGTGAAACTCCTGCTGCTGCTCCTCAGTGAAGAGTGCAAAACCTTCTGTCT  
ACGAATATATGGAGAACAGGAGCTTGGATATATGGCTTCACTCAAAGAATAGGTTGAACAATGCCTCAA  
GATCAACACCACATCTGGTCTTGAATGGCCTAGGAGGCTGCAAATCGCGATAGGAGCTGCCCGTGGTA  
TTTGCTACATGCACCATGACTGCTCACCACCTATTATTCATCGCGATGTGAAGTCAAGCAACATCCTATTG  
GATTCCCAATTCAATGCAAAAATTGCAGATTTTGGCCTTGCCAGGATGTTGCTCAAGCCTGGAGATAACA  
CAGTGACAGCAGTAGCTGGCTCTTTCGGATACATTGCACCAGGTATAAGGCCATCACTTATCTATAACA  
TCATTATAAGTTTAGAAGTTGGTTAATCTCTTACATGGAAAAAAGTTTCTATGCTACACAATTCAATAA  
CATATCAAGGGGTCGTTTTGTTACGTAAGTACTAGCTATGCATGAGTTGTAACACGGGTTGTCTATGTAGAGA  
TTGTTATGCAAGTAGTTATTCTTAGTACACTAATTCTCGCGTAACTCATATAAATGCTAATATATTCATGAT  
GGTATTTCAAGATATGCACGAAAACTAGAGTGACAGAGAAAATTGATGTGTATAGTTTTGGAGTCATA  
CTATTGGAAGTGGTACTGGAAAAGAAGCCAATCTTGGAGATGAAGATTCATGTCTTGCAGACTGGGCA

TGGCGTCACCTTCAAAAAGGGAAACCGATGGCTGATGCATTAGATGAGGACATCAAAGAAACGCGATA  
CTTGGAAGAAATCTTCATTGTGTTTAAGCTTGAATCTTTTGCACCAGCACATTTCTTCATCAAGGCCAA  
CAATGAAGGAAGCTCTGCAAATCTTGATCCAATGTAGCAACAGTTCACCGACATCTGGAGAAAAGAAAA  
ATGAAACAGAACAGGATGTTTTGCCACTCCTCAAGAACTCAAGGAGTGACAGGATTGAAGAAAATGAT  
GATGTTGGTTTAAACATCACTTGTTTGATGGCATTACAATATGATTAGAGTGACGGAGAGCCTTGACGTAA  
CTGGTAAAGTTGTTGTGGAAATAGTCTCTTGCAGAAATGCAGGGTAAGGTTATGTACAATAGATTCTTGT  
GGTCCGGTCTTCCCAGGACCTTGCTCATAGTGAAACTTCGTGCACCGGGATGCCTTTTTTTTAAACAATAT  
GATTAGAGTAAGAAATAGCAAAGAATAAGACCAATAGATAATGTATCAGGTAGTGAAAAGTACGATTGT  
ACATACACTGTATTGGATCCATAGTGTGCTTTGCATTGTTTTGCTACATAAATTTTGTCTTTTCCAATGTTT  
TCTTTACTCATAAAATAACTGTCAAAAAGGTACATTAACCATAAACTATTGAATGGAGGATAGATTTT  
CTAAAAATCCAGAAAAAATAGAAACAAGTTTGAAGTACCTCAGTACTTTAACTTTTGGCAACCATAACAAC  
AACATATCCGATGTAATCCCATGAGTCCCAAGCTTTTGGCAACAATACAACAACATATCTGATTTAATCCC  
ACAAGTGGCTCTGGGGAGGGTAGAGTGTACGCAAATCCTACCCATATCTCGTAGAGATAGAGAGGTTG  
TTCCGATAGTAACCTTTTTGGCAACAATAAATCTTGTAAGATCACACAAAAATGTGGCTACTAGAAGA  
ACTTTATTTGTATCCTAGCTTTATTTCTGGCTAGTGAGGAAAAAATTTAAGTTTACACTTGGGATAAAGAT  
GATCCTTAGAGGCACCAGGAGTGAAAAGGTCAGCATATTGATGTTTAGCTGAAGAGAGATGTGCTCATT  
TGATACATTGAACTATGGCTCACTTCAAAGCTCACTCTTGCATGATGCGGTGCACAAGGAAGCAAGAAA  
TATTTCAATCATCTCGGAGAAGAAAGTAAGAAGAGGGTTCTCTTTAGCAAGAAGAGGGGTGATTGTA  
CGTACAACTTTGACTAGGCACTTTTGGTTGTGCTCACTGACCATGATCATGATTCCTCGAGATCTGTGT  
ATTGGGAATGCGAGGCAGCCAAAAGTGCAGCTCCAACACCTGAACCATCATTAGAAAGCTCAATGACTA  
TGCTGTCCGCAGTGTCTCCAGTAACTCTTTCATAGTTTCTCCAAGCAATTTCTGAACTTGGTGTAACGC  
TCAAACAATGCACCGTCCACAGCTATGACAGACCTCTGGTTCTCTCCGTCCTTCAAAGTGTCTTTTCCAA  
TTTCTTGAGGATGCCACGATTCTGCTGCAGAAAGACGAGCTCCACGAGAGGTGATAATGTCGCATAG  
CTCCACAACATTTTCTCATTTCCTCAAGGTAGAATTAGGTACCTGTGAAAAAATGTATATATA

>PGSC0003DMG400000728 LRR-RLKs

CTTCTCTTACCTATCAAAGTGAAGAACTGAAAGAAAAAGAGTTGGTAGAGAGAAAACAGTATAGGG  
ATTAGCATTAGAACTCTTCTTTGCTTTATCAAGAACAAGAATCAAAGCAAAGCTTAGTTGATTCCTC  
AAAAAAGGTAATCCCTTAATTTTCTGACACAGAATGTATATTCCCTTTTTTATTTCAAGAATCACTATGAT  
ATAGAAGGGGTATAACAAATTAGAGATGCCATTTATATATATTTGAGAAATGATGAGAATTTTCGAAG

TTAAATGAAGGTTGAGCAAGAATGGCGAACCAACAGGGCAGAGTGGTTTTGTTTTGTTTTGTGTTTTCT  
TGCTGTTGACTCTACATTTAGCAGAGGGTTAGTTCTTCAGCTGAGAAATTTGCTTTGCTTCAACTGAGA  
TCTTCTTAGGGTTAAGAGCCAAAGAATGGCCTATAAAGGGTAACCCTTGTTCAACTGGGCTGGGATTC  
GTTGCAAGAATGGTCGAGTTACTGAGATCAACATATCTGGTTTTAAACGTAAGCTCGAGCTGGGGGTCAA  
CCCCTCAATTCTCAGTTGATGCTCTCCAAAATTTGACTCTTTTGGAATCTTTAATGCTTCCAATTTGTAC  
TTCCTGGTTCTATTCCTGAATGGTTTGGTCTTAGGCTTGCTCTTCGGGTACTTGATCTCAGGTCATGT  
TCCCTCATTGGTCCTATTCTTCCCTGGCAATTTAACTAGTTTACTCTCAATTTGTCCAACAAT  
GGTCTCACTGGACAAGTGCCTCGAAGTTTCGGTCAATTGTCACGCCTATCAAGTCTTGATCTTCGCATA  
ATAAGCTTCTGGGGTAATTCCTGATACATTTGTTTCTTTAAGAACCTTACCTTGCTTGATATGTCTTCAA  
ATTTCTTCAATGGGGCTATTCCTTCAGATATTGGGACTTTGCTTCAGTTGAAATCCTTGAATCTGTCTGAC  
AACAGCTTTTCTACTTCGATACCCACCCAAGTTCGGTAACTTTCTAATTTGGTTGATCTTAACCTCAGCTTC  
AATAGTCTAAGTGGAGTGGTCCCTGAATTAGGAGGATTACGGAAGTGAAGAGTATGGTAGTTGGGAA  
TAATAGGCTGTCTGGATCGTTGCCTAATGCTTTGTGGTCGATGCCTGGGTGCAATTCCTAGATGTCTCT  
GCGAATAACCTCACTGGTATTCTGCCAATGTTAGCTCCGTTGTCAATGCCACTGGTGCAGTGTAAATCT  
TTCTCATAATACGTTTTATGGAAATTTGCCGTCTTTAAACAGAAGCTTCAGTTTTCTAGATCTATCAGGAA  
ACTATTTTGAAGGCAAAGTCCCAAATTATGCACAACGCAACGCGTCAATTAGTAGCAATTGCCTCCAAA  
TGTGACAAGTCAAAGGAATAGGAGCGAATGTGCTTCTTTTATAGCGGACGTGGCTTGTGTTTGATAAT  
TTTGGAGAGCCAAATGCCACAGAGCCTCTCCAGCTTCTAAATCCAACAGAAAGAGTCACAGAAATAAA  
ATCATATTGGCGGCTGTTCTGGGTAGCGTTGGATTACTTGCCTTGTCTTTATCTGTATATTGCTGCTGAT  
TTTTTGCACCCGCAAACGGGGTGCCACGAATCAAAGAGCCACTGAGGTTGGGCCCGGTCCTGCCAGTTC  
AAGTCCACCACCTCCTGCACCTGGAGTATCATTGAATTTTTCAAGTTTAGGAGATGCATTTACCTACCAGC  
AGATTCTTCAAGCCACAGGTGAGTTCAATGATGCAAATCTTATGAAGCATGGTCATTCAGGTGATCTCT  
CCGTGGTACCCTAGAAGGCGGGACCCTTATAGTTGTCAAAGAATAGATGTGCAGTCTGCAAGGAATG  
AAGCATACTTGTGAGAATTGGACTTCTCAGCAAGGTTTCTCACTCAAGATTAGTACCTTTTATGGGGCA  
CTGTTTGGAGAATGAGAATGAGAAGTTCGTGGTGTACAAGTATATGCCAATGGAGATCTTCAAGTTC  
TTTGTGTTAGAAAAACAATTCAGATGATGATAGTTTGCAGTCATTGGATTGGATAACAAGACTGAAAATT  
GCTATTGGAGCTGCTGAGGGTTTGTCTTATCTACATCATGAATGTAACCCGCCTCTAGTGCACAGGTATC  
AAGGACTTGTCAATTACATTTATCTTACTTCCATGTGCCACCCTTTTATGGTTAATCTGAGAGAACTTG  
AATAGCAATGCTGGACTTATGTGATTTACTATTAGATTTCCATGTTTCGCATGTGCACTTATATTTCACTATC

ATGATTACAAGTTTTCAITTAACATGTTTATCATATATCTTGGAAGAGTTGCAGGCTACCAGCTACTCTT  
TCTATGTATATTCATTGGTTATACATAATTGGTGACTCTTGGGCTAGACTCAAGGTAATAAAGGATATGA  
CTTGATGACTTGGAGAGCGCCCTTTTTGGTTTGTACACGTTGGAGATACTAGGAAAAATGCTCTGAATGA  
AAGCTATCAAATATCAGTGTATTTTCGTGTCTCTGAATTAGGCGGGACAAGATTCCCATAGAAGGCTCTCA  
AATTTTCAGCCAAAAATTCAGTGCAGCGCAGACACTCTGCACGTTAAAGGTGCTTGCAACTTTATGGATT  
GTGCCCATGTCTGGTTCGACTGAAACTCATCTAAAGCCTATTTATAAATGATAAATATTAGATGTCTGCTTC  
GCTCTTAGCTTCTCGAGATTTATAAAGGAGGCAATTTATGGTTGATGGTTTTCTGATTTGCTATCAGTTG  
GAGATCTGTAATGTTTATTGCCTCGTGAGACTATTATTACAGAGTTCATCACATAAGGAATAGCCTCC  
ACAATATCTTGACCTGGAGCTTGACTCTATCAACTTGAGGGCTTCACTTACTATTTTTATGAGCTACACC  
TGCATGTAATAAAATTAAGAGCTTAGTAAACCTAAACCTGTCCTTTTAGGGCTTAGCAATGTAAAGTCA  
AGAGCCATGCACTTCTAAAATTGCTGTAAGCTCAGCTTCTATAGTTCATGCATGGCTGCGATATCTCTAA  
TCTAGGCAGTTTATATTGTGTTAGATTCGGTATGAGGGATGTGGCCTTAGAAGATCTTGATGACATTATA  
TTTCTATTGTGCAGAGATATTGTGAATGCAGAAATAGAAATTTTCTCAAACCTAAGAACAGTAATGTTTTT  
TAAAAATTGTTTTCTTTCTTATTATTGAACCTTCTCCATACATCAATCCTTCTTTTTTTGATAACCGTGGTG  
CCCGGGCTAGCTTGTGCACACCTCGACACAATCCCATCAATCTTAATCAACTAAAGGTAGTCCTCATATG  
ATACTCCTTATTGTACCTTTTATCTCCATGGAACCTAAGCCTGTCAGTGAACCTATCTTATTTCTCTAAACT  
TTTCATCTGCATGTTTTGGGTTCAACCATTATTCTTTCACCGGGCAACCCTTAGGGATTTGGGTTAGTGGC  
AAGAGCACAACCTCATTATGTGTGGGTTAAGATCACGTTATCAGTTTGAATCCTACCATAGACTAAAGCTT  
GGTATTTAAGTGGAGAAAGGTAGAAGGCTGGGACCCATTATCCACCGAGTTTTGGATCGTGCCCAATA  
GAGCTGGGAGGATTTCTCAGTTACAAACAAAAGATCCTTTCATGGGGAATCCAATAGACTTTTCTTGAACC  
GAATATCCATTTCAGAAGGAGTTTCAAAGGAGATGCTTCTCTAAATGTCCGTATAGTTTTTCTGCTGCA  
GTTACCGTGAAATTCTCAATGGTTTAATTGCATGAATTAGTTTCTTGGATTCAATCTTACCTCCACCCCC  
ACCCCCAAAAAAGAACCTTATTTCTGTCAGAAATTTTTAGTGCATCATGTAGTGACATCTTCTTTTTCTT  
TGCCTACTATTCTCGCAGAGATGTTCAAGCAAGCAGCATACTTCTTGATGATAAGTTTGAAGTACGGCTA  
GGGAGTCTAAATGAGGCCTGTGCACAAGAAGGAGAGGCCATCAAACCGAATTTCCAGGCTGCTCAG  
ATTTCCACAGTAAGTAGTTGTTGTTGGTAAATTCTATGTTCTAACCATCCTTTTCTTTTTGAAGGCTAACTA  
CTATTACTACTAGGTTGTTATGTAATGGTCAATTTTTGTCTCCCATGATGGATCTTAAAATCAGGCAGTTT  
TATTGTTAATATATCTGTCTCTCAATTTGATGTTATAGAACTACTTTGGCTTGGTTTCTAAATTGGATTT  
GAGTTCCACAGTTTTGCTGCCAGCTCAAGTCTTCTGGTGTATATTTATTAGCTCTGATATAAATGAGAAT

CCTAACGTTTCATGCAGCAACCTTACTCTTAACCTTGTTATCTGTTCTTATACAAAAGGGCTTTAGCTTTGTT  
TCTAAATTATGACAACCTTGTAATATAGGCCCTGACTAGTTTAGTCCTGATGATAGTTATCATGCAGCTGCA  
TATTATCTTATTTCTTCTCAGTATTCAAGTTACAAGGAACACCGTAAAGAACAGTCAGTCTAGTCTGAAAG  
ACCATCACCCACTTGTTAATTACTTGTTCCATCCCTCAGTAAATTATTCCTTTTCTACGTTATATGAATCTTC  
TTGCCTTGATTACCTATGTCTAGCGGGTGTACATGGGTGTTGTAGTTTAAGTAGAAATTAGCAAAAAA  
TTGTATGTACCCTTACTGTATACTTAAACTCATGTATGGGATATGCATGCGTAGCTGAATCCATGTAACA  
TAGTCCTTTGATGTACATGTTTTCACTTAAGGAGAATTTGTTGGTTTTGCTATTTGGTAGGGAATGCATAG  
TTCTCATTCTTTAGCTTTCCATCCTGTGCTGAAGTAAGTTAACTATTTCTTACTCTCATTGTCTAGCTTTA  
ACTATTACCTATTCTCGTTATGCCTACACATTGAATGCAGGAAATTATTAATTTTGTATTGTGGGGTAAA  
TACTAAATACTTCTGGAACGACCTAGATATAATGGCATGTGAAAAATTGGTTTGAAGTCCCTATGTTAGA  
TGCCAAAGATTTGAGGCCTTCTATTCTATTATTTAATCTTCATGGCTTCTGTTAAACTTTCCAGGTTCTC  
TTATTTTAGAAATTGAACTTACGACCACTGATCATGATTATATTCAATCATAATCCAGAAAGCTTTAGAAG  
TTTTTGTTTTATAGTGAAAACTTTTCCATATGTATTTCTGTCTTATGAATGGTTATCACTGTTTGTCCAGC  
TTTTCGTCGAAGCTTGTTGCATGATCTCAAAGTTTTGTTATATTCTTTCAACCAGTACTGTTTTATAGTTT  
ATACTGCTTGTTGACATAGTTCTCCCTTTCTATTTGCAGGACGTCGGAACAAGGTGCATCAGGTATGTG  
CAACTTTATTTAGTTCTACTTTCTTAAATAGAGTTTACTTGGATATTCTTAATATTTATTAATTGGTGCA  
AGTAACTATTTAAAATTATTTGCGTCACATTTCCGGTATTGTTTGGTGGGTAAAATCTCCTTAAATTG  
ATCTAGGCAACAAATCAAACCTGTAGATTCTCATTAGAAGTAAGAATAAGTGAACTATTAGGTGGAAA  
TTTACGATATAAAGCTGATTCCAAAGAGCGTAAAGGGCTGGAGATTTTGATGGCGATGTTTTGCTTTACT  
TTTTGTGGGAGTATGCTTTGTTGCTTGAACATCACTAGGGAATACTTCAAAGTCTACTTATCTCGTCCTA  
ATATTCTTTCTTACCCGAATGGACAGGTACACCTAGTGCCACTTGTGCGTATGATGTCTACTGTTTTGGAA  
AGGTTTTGCTCGAGCTAGTAACTGGCAAGCTAGGTATCAGTGCATCCAATGACGCCAGCATGAAGGAGT  
GGTTGGACGGTACGCTTAAGTACATTAGTATATATGATAAAGAACTTGTACAAACATTGTGGATCCTTC  
CCTAATCATAGACGAAGATTTATTAGAGGAAGTATGGGCGATGGCTATTGTTGCCAGATCCTGCCTCAAT  
CCCAAACCGTCAAGGAGACCCTTAATGAGATACATCCTTAAAGCTTTGGAAAACCTTTGAAGGTAGTTA  
GGGAAGAACACACTAGCTCAGCAAGACTTAGAGCAACTTCATCGAGAAGTTCATGGAACGCTGCACTGT  
TTGGCAGCTGGCGTAGCTCCTCAGATGTAGCAGCCGTACCTGCTGCAGCTTCAGCACATAAGTTGGAAG  
GAACAAGTAGTTTGAAGCAATCCGGAACAACAGGCTCTCAAGGAAGTGGTCCTAATGGGGACAACAAC  
GGTCATTCTTCATCAACTAGACGACAGTCCAAAGAGATTTTCCCTGAGCCATTGGAGGAGCACGATGTA

GAGAGAGGACCACAGGCGGAGTAGAAGGGAGGGTGATTGTCATTAATTCTTTGTTAATAATGCAGTAG  
GATCTGCATTAAGGTTGCATTTTTGTTTGGGGACACCTGTACATTCTCCGTTCCGGAATGCTTGAGTTT  
GCAAGCCATTATCTTGCCTGGTCTTGAAAATGGAGATGCATAGTTTACCTGGGGACAGCAAACATCAA  
ATTGTTTATTGGGGTTTTGGGATTTTAAGTTCTTTTTCTTTTTCTGGGGATAGAGTTGGAAAACAGGATTT  
AGTAGTGGTGGTGGTTCTTTTTGTTAATTTTGTGTTTTGGGGGGTTTATGTTTGCTTCCAAATCCAATTCT  
TTCTTATAATTCTTCTTTTTACTAGTCTCTCCATGGAATGTAAATTATACACAATCTTTCATTTTCCAATTG  
GAGGAGAGGAAAAAAGAAAAAAAAGAGTATCCC

>PGSC0003DMG400000996 LRR-RLKs

GGCTGTTGTCTCTTTTTGCCTTAACTTGAAGTCTTCTAAAATTTCTACTCCACATATTGCTGCAGGCA  
TGAAGTCTTTAATGTTTTCTTTGTGTTATGTTTTCTTGCTTATTATGTGTTCTTCTGTAGATGCATCTTC  
CAGGCTTGCTGGAATGAAACGGATCGGTTAGCCCTCCTCAGCATCAAAGCACAGATAACATATGATCC  
TTCTGGTGTACGAATCTTGAATGATTCCCTCCATCATTGTAGTTGGCAAGGCGTTACATGTAGTGCTC  
GACATCAAAGGGTGACTATGCTGGATTTAAGCTCTAAGCAGGTTGTAGGAACATTAGTTCCTCAGATAG  
GAAATATGAGTTTTCTTAGAGAACTAATTCTTCAAATAACACCTTTAACAGTCAGATACCACGCGAAAT  
CGGAAGGCTATTCAGGTTGAAGAATTTAGTGCTTAAGGACAACCTCATTACTGGTGATATTCCAGTGGA  
ACTATCAAATTGCTCTAGACTCATTTATCTTGATTTGGATGGTAATTCCTGACTGGGAAAATCCCCGTGG  
AGCTTAGTTTGTCTTTGAGAAATCTTCAGGTACTTTTTCTTAGATCAAACAATTTAACAGGTGAACTACCA  
TATTCTTTGGGTAATCTTTCATCCCTTATTGCCTTAGCAGCAATAGAGAATAGATTAGAAGGAAGTATTCC  
GTATTCGTTAGGCCAATTGACTAACTGAGTTATATCTCTTGGTGGTAATATGCTTTCTGGTTCAATTC  
CCCTTTCAGTTTTAACTTATCCTCTCTGTATCATCTTGCTGCACCAGTTAACCAACTTAAAGGAACTCTTC  
CCACTGATATTGGATCCACTCTCCGAGTCTTCGCATAGTTTTTTGTTCTCAAACCTATTAAGTGGTGTGC  
TTCCAAGTTCCATTTCTAACTTAAACCAATCTTGAAATTCTCTTTTATCAAGAAACCAGTTGTCCGGGAAA  
ATCCCTTCTCTGGAAAAGCTCCGTAATCTTCAAGGACTAGCTATGCATTTCAATAATCTTGGAAACCGGAA  
GAGAAGATGACATGGATTTCTTTCTTATTGGTTAACATTACCAGTTTTAAAGAACTGAGTTTGAGTGT  
GAATAATATAGCAGGCCAGCTGCCTAAGAATATTGGCAACTTAAACCAATTTCCGGTCTATTGGTTTTGCT  
AGGAACAAACTATTCGGACGAATACCTGATGGATTTGTTGATCTCAGCAACATGGAAGTGGTAAGTTTG  
GAGTATAACCAATTGACTGAAGAAATTCCAGCTAGTCTTGGTAACTTCAAAGCTCAAGTATTTCTATG  
TTAACGGAAACAACTCTCGGGGGAAATCCCTTCTCTATTGGGAACATAACATCTTTATATGGACTTAA  
TCTAGCTCAAACAACCTTAGAAGGGACTATTCCTTCAGTCTTGGAAACTGTCAGTTGTTGCAAATGTTG



TATCTTTCTCGAAACAGACTCAGTGGGACGATACCAAAGAGGTTCTTAGTATCTCATCCTTGTCTATCCA  
ACTAGACCTGTCTGGAAACCAGTTAAGTGGATCACTTCCCCTTGAAGTAGGAAGTTTAGTCAATCTCGGG  
TATCTTGATATATCCGAGAACAAGTTATCTGGAAAACCTCCGAGCACTTTAAGCAGTTGCATCAAGTTGG  
AAAACCTCTATGTTTCAGGAAAACATGTTTGAAGGTGTGATCCCATCATCTTTAAGTTCTTTGAGAGGGAT  
GGAATATTTGGACTTGTGCGTAATAATTTCTCTGGTCTTATTCCAAGGTACTTTGAAACTTTCATATCAT  
TGAAAAGCTTAAACTTGTCAATTAACAATTTTGAGGGTGAAGTACCTCGAGAAGGAGTTTTAGTAATGC  
AAGTGCAGCAATAGTCAACGGAAACAGAAATCTTTGTGGAGGTTCTCCGCGCTAAAACCTACCACAATG  
CAACTTTCCAACATCAAAGAAGGGAAGATTAATGTCATCAACCTTGAAGATAGCTATATCTATTGCTAGT  
GCATTATTTGGAGTAGCACTTGTCTGGTGTCTCCTAATTTTGTGTTTCTTAAAGAGGAAACGTAGCCCTTC  
ACTCGATTTATCAGATGATTCGTTCTTGAAAATCTCCTACGGGGAACCTTCTGAAAGCAACTAATGGATTC  
TCCTCAGATTATTTAATTGGTAAGGGTGGTTTTGGTTCTGTATACAAGGGAATTCTTGGTCCAGATGAAA  
AAACTGTCGCGATCAAAGCACTCGATTTGCAGCATAAAGGAGCTTTGAAAAGCTTCATTGCAGAATGTG  
AAGTCCTAAAGAACCTCAGGCATAGAAATCTTGTCAAGTTAGTAACTGCATGCTCAGGTACTGACTTTCA  
AGGCAATGATTTTAAGGCCCTCATTACGAGTTCATGGTTAATGGTAGCCTAGATGATTGGCTACATTCA  
TTTTCTAATGATGGAAGTCTGCACGTTTCGATATCTAGATCTTTATCAGAGAGTAAACATTGCATCAGACA  
TTGCTTTTCGCGCTAGATTATCTTCATCATGGAACCCAAACACCAGTTGTTTCATTGTGATTTGAAGCCAAGC  
AATATCCTTCTAGACAAGGACATGACTGCCCGTGTGGCGATTTTGGTTTATCAAGATTCCTCCAAGAAA  
CATCTCAAAGAGAAACTAGCACTATTGGTATCAAAGGATCAGTTGGCTATGCAGCTCCAGGTAAACATC  
TCTTTCCCTTTTTAGCAACTGTCACATTCCAACCTTTCCGCTGACATGTTTAAAGATCATACTATGTTTAA  
ATCGTAATATTCAAAGTCTTACATACTTTCTTAAACTTCGTGGCAAGTCCAAACCAGACAAACATAAAAC  
GGAGTGATTTTGATATGGACTAATGAATTTTTTCTGCAGAATATGGAATGGTAAGTGAAGTATCAACTT  
ATGGTGACATATACAGCTATGGAATCATCATACTGGAGATGTTAACAGGAAAAAACCGACAGACGAC  
GCCTTTTCAAATGGATTGAACCTTCACAACTATGCTAAAATGGCTTATTCTACTGGTAGAGTCATGGAAA  
TTGTTGATCAAATGGTTTACCACAACCTTGCAAGAAATGAAAACCAAAGATTACATTGAAGAGTGTTCAAT  
TTGTATGTGTAATTTGGGATTGCTTGCCTATAGATTCACCAAAGAAAGAAATGAGAATTAGTGATGTT  
ATTAAGAGTTGCAATTAGTCAAAGAACTTTATCTTAATGTGATAGAACACTATGATATTAGAAGTAAA  
TCATAAAACATTATCTATTTTGTCTATATATTGTGAGTTGGTAAAATTC

>PGSC0003DMG400001185 LRR-RLKs

TCAATGGTAGTTCCTCTTGTCTCCTTGTGTTTACAACCTTTTCTCTTTCTCATACTTTTCGTCTCCAACGTAA

CTGCTCAACCATCTAGCACAGACACAGACTTTTCATGCTCGTTTAACTCTTCCTTTTCTTGTGATACTTTTA  
TTTCATATCGTGCCCGTCCACCAAACCTATTTAGATGTCGGAAGTATATCTGATCTTCTTGAAGTGAGTCGT  
TTAAGTATAGCTACGGCCACAGGTCTAGCCTCAGAGGATACCGAGCTATTCCCTGACCAGCTTTTACTTG  
CACCCGTAAATGCTACTGCAATAGTTCTCATTATTTCTCCAATGTCACCTATCAGATCAAGAAAGGCGAC  
AACTTTTATTCAGTTTCAATAGGAGCTTTTGAGAACCTTACTAATTATCACGTGGTGCAAGATATGAATCC  
AACACTAGATCCAACCAACTTGACAATTGGCGCAGAAGCTGTTTTTCTTGTGTTTGTAAATGCCCCACAC  
ATTCTGATCTCGAAAAGGGACTTCAGTACCTGGTCACTTATGTTTGGCAGCCTTGGGATGATGTGTTGCC  
TGTAAGCAATATGTTTGGAGCATCTGCAGCTGACATTCTGGCTGCCAACAATTACAGAAATTTCACTGCT  
GCAATATATTCTCCTGTCTTGATACCAATAAACTTCTATTATTCTGCAATCTTACCCCTCTTCTGCAAGC  
AGTAGAAAATCCAAACATGGATGGATAGTAATTACTGTTTTAAGTATTATGGGGTTGCTTGCAGTTTTTT  
CATTTTGCTTGATGGTATACATGCGTCATCTAGACGAGAAGAGGAGGGCTAACTTAGCCATAACTCTTC  
TACTCTTGAACTTCTGAGCTCTTTCATACCAAGAAAGCCTCAGAAGGTGAAATTACGGACCATAAGAAC  
ATTCAAGATAAGCTTCTTCCTGGAGTTTCTAGCTACATTGGAAAGCCAATAATATATGACCTGAAGATCA  
TCATGGAGGCAACTGTCGACCTCAGTGAGAGATACAGGATAGGAGGATCAGTGTACAAGGTTACAATG  
AACGACCAAGTTGTAGCAGTCAAGAAAACAAAACAAGCCTCGGAGGAAATGACAATACTTCAAAAACCT  
ACATCACGCAAATCTAGTGAAACTAATGGGCGTTTCATCAGACGATCGTGGGAATTCCTTTGTAGTTTAT  
GAATATGCTGAAAATGGCTCACTGGATCAATGGTTGTTTCCCGGATTATCATCATCTTCTTCTGCCTCTGT  
CTTAGTGGCATCACTTGGTTGGAGTCGAAGATTACACATAGCCTTGGATGTTGCAAATGCTCTGCAATAC  
CTGCATGAACATACTCAACCTAGTATAGTTCACGGGGACATCCGAACGTGTAGCATACTTCTTGATTCAA  
GGTTTAAAGCCAAAATTGCAGGTTTCTCTACAGCCAGACATGCCACCAACTCAATGATCCTGAAAGTTGA  
TGTGTTTGCTTTTGGGATTGTGCTGTTGGAGTTGCTTTCAGGGAAGAAAGCAATGGAATCAAAAGATTA  
TAATGATGAGACTCTGATCATCTGCAAAGAAATTAGTGGAATCTTGAAGTTGAAGAGAACAGAAAGG  
AGAAGTTTAGAAAATGGATGGATCCAAAGTTGAGCTTTTACCCTATTGATGATGCTCTAAACTTGGCTGC  
CTTGGCGACAGCATGCACATCGAAGCAATCAGCAGAGAGGCCTAAGATGACAGATATTGTCTTCAACCT  
CTGTTTTCTTGCTCAATCATCTTTTCAAATGTATGGACCATCTTGGACTTCAGGTGAAGCTGAGGAGATT  
GTCCAGATTGTTAGTCCAGTAATAGCACGTTGAGTTAAAGATGGAGCGTAAATATAGTTCAAGAACTTTT  
GTCAGTTCGTCTCAAATTTGTAACATATTCTGGATTATAAAGCCACAGGAACAATAATCAAGCTGATCTC  
CAGAATATATTGCAAATTCGAGTTATCTTGTCCAGCTTTTCCCTGTATTTCTTGTGCTGCTAAGTTAGTTGC  
TAGAGTATATTCTTGTATTGGATGTTTTTCTCAACTTTGAAATAAGTGGAGTGCAATTTGACCTGTATTTT

TTTCGTCCTCTCAAAGAAAAACAGAAAAATTAAGTTTCTGAAAAGACACTGCAAACCTCGTTCTTATTTA  
TATTTATATATTTAAGATCCAGACGAGTACATGTTTA

>PGSC0003DMG400001301 LRR-RLKs

TAATTTCTTAGTAGCTAGCTTCTAAAGGCTCCACTCATACTTGTAATAACAGACTGGGTTTTCAATTTGT  
CAAGTCAAATGCCTCAACAGTCTTCATCTTCCTTCTCCTTGCTATTTCTACCTATTTCTTTCGCGCATATTA  
TCAAACACCTTGTGCCAATTACCCAAAACCTGCTGTTGGATCCCTAAACCCCCCAGCTAACGATGGCTCGT  
TTCAGATTTCTCCTTTTTCTTCTGTTGATTCTGATTTCTTGTTCCTCCGTGCCTTGATGCTACTGTAGTTG  
AAGATGATCTCAAGTGTTTAGAAGGATTTAAGAAGTCTTTGGAAGATCCAGATGGGAATCTGAATTCAT  
GGAACCTTTAAAATACTACTGTCGGAGCTATCTGTAAGTTTACGGGTGTTAATTGCTGGAATGACAACG  
AAAATCGCATCATCAGTCTCTCTTTTGAATATAAACCTCGGAGGGAAGGTTACAGAGCCTGTACAGTA  
TTGTGCCAGCTTGACAACCCTTGATCTCTCTGGTAATCGCTTTTCTGGTCCAATTCCTTCTCAAATTTGTAC  
ATGGCTACCTTTTTTGGTAACCCTAGACTTGTCCGGTAACGATTATTCCGGCCCTATCCCTGCTGATCTTG  
CTAAATGCATCTTTTTGAATAAATTATCGCTCAGTGATAACAAGCTTACTGGAAATATTCCCCCTGAATTT  
TCTAGTTTTGGTAGGCTTAAAAGTTTTTCTGTGGCAAATAATCAACTCTCCGGTAGAATCCCGGCAGCCTT  
CGATTCTTCTAACTTTAATTTTGAAGGAAATAGTCTCTGTGGTGGACCTTTGGGGAAATGTGGAGGACTA  
AGTAAGAAAAGCTTAGCTATTATTATGCAGCAGGAGTCTTTGGTGCTGCTGCTTCTATGTTGTTGGCTT  
TTGGTGCGTGGTATTGGTTTTTTACCAAGTCTGGAAAGAGGAAGAGAGGGTATGGAGTTGGGAGAGAT  
GACTCTGATAGTTGGGCTGATAAGCTGAGGGCTCACAAGCTCACTCAGGTTATGTTGTTCCAGAAACCG  
CTTGCAAGGTTAAATTAGCTGATTTGTTGATTGCCACAAATGGTTTCAGGACGGACAATGTTATCAACT  
CAACTAGAATGGGTACTACTTATAATGCTGTGTTACGTGATGGTTCTGCACTTGCCATTAAGCGGCTTAA  
TACTTGCAAACCTGAGCGAGAAGCACTTTCGTGATGAGATGTATAGGCTAGGACAACCTTAGGCATCCTAA  
TTTGGTGCCACTGTTGGGGTTTTGTGTTGTGGAAGAGGAGAAGCTTTTGGTTTATAAACACCTGTCAAAT  
GGTACTTTGCACTCATTCTTGAATGGGAATGCAAGTGAACCTGGATTGGCCTACTCGGTTTAGAATTGGTT  
TCGGTGCTGCTAGGGGCCTTGCTTGGTTACATCATGGTGTCCACCCACCTATCTTGACCAAACATATG  
CTCTAATGTTATTTTCTCGATGAAGACTTTGATGCTAGAGTAATGGATTTTGGGCTGGCAAGGTTGATG  
ACATCAGATGCAAAGAGTCTAGTTATGTGAATGGGGAGTTGGGTGAATTTGGCTATGTAGCTCCAGAG  
TACTCTAGCACAATGGTGCCTTCACTGAAAGGGGATGCTTATAGTTTTGGGGTAGTGCTTTTGGAGTTG  
GCTACTGGGCAAAAACCTCTTGAAGTTACTGCTGGTGAAGAGGGATTCAAGGGTAATTTGGTAGACTGG  
GTGAATCAGCTCTCTGCTTCAGGTCGCATTAAGATGCAATTGACCAAACATGCGTGGGAAGGGGAAT

GATGAAGAGATTGTGCAATTCCTAAAAGTTGCTTGTAATTCTGTGGTTTCTCGGCCCAATGATAGGTGGT  
CTATGTATCAGGTTTATGAAGCACTTCAGAGCATGGCTGAAAAACAGGGTTTCTCCGAACAGTATGACG  
AATTCCCGTTACTATTTGGCAAAGAAGGTGCTACTAGAAGCCCTGTTTGAAGCCGGAATTGCGAAATTAT  
TACTAAATGTTCCACTCCAAATGAACATGATGCATCCTGTTGTAAGTTTTAGTTTCTATTGGTGTAAAGTG  
GCATGGCACTGTTTTGATTGGCTCAGAAGTACACCCTTTAAATGTTTCTGTATTATATTTGCAAAATGCAC  
AAATCATTCTTAAGTATTTGCTTGCTTGATATTTGTAGTATAGGAAGCAGCTGTTAATTATTGTTTCATGTT  
TGTGATTACCATTGCCTATAGCATTAGATGTTATGTATTCAAAGGATTCTCAACTGAACGTCTCATTACT  
GGAAACTGGTCTATATTACTATTTACTGCCTGTCTAGCTCTTGTGGGAAGCCAATGGGGCCG

>PGSC0003DMG400002012 LRR-RLKs

TGGAAGTAGTTAGTCAAAATTGTGTCTAAATGAAAGGTTTTTGGTGGTTTACTGTTTCTTCATTTTTATAA  
GGAAAGTTGGTTTACTAAAATAACAACCCTATTGACTTGCTTATGGTATAGGGAAATGTAGGGTCTCT  
TGCTTTTGATTTGATGTATTGGTTATTGGTGAGTGAATTAATGGTGGCAATTTGCATTTTGGGACATTA  
TTGGTGCTGCTGTTGGACTTCAATGAATTTAGTGGCTGGTGTGTTGCTGCTTGTCTTTTATCTAGGTTT  
ATATACTCTCTTATTTCACTTACATAATGATTAGTGATGATTGTAGTTTGTGTTAAAAATTTGCTAATTC  
ATTTTCTGGGATTCTTGAAATGATTGTGCAATCTTTAGTCTTTCTACTTGGTGGGGTTTGTCTACTTTCTTG  
GCCATTCTGAATTATTAGCTTGTCAAACGCTGTCTTTTTCTTTTTAGTTCAGTATTATATGTAACCTCT  
CTGTTAGTGTACACACGGGTTTTTCATTGGGAGGAAATGCAATCTACCATTTGTTTAGTGCTGCTATTTTA  
GTTGAGTTAGCTAAAGGAAGCTTAGATTTGGATGCTCTTTTGGAGTTTAAGAAGGGAGTTTTGAAAGAC  
CCTTCTGGGAAAGTACTTTCTTCATGGGATTCTAAGTCATTGGGACCAAATGGTTGCCCCAAAACCTGGT  
TCGGTATCGGTTGCAGTGATGGCCATGTCACCTCAATTGAACTAAATGATGTAGGTCTGATTGGAGTTTT  
GGATTTTGCAGCTATTAGTGGCCTAAAATGCTGCAGAATTTGTCTGTTGCAAACAACCAGTTAAGTGG  
GAAAATTACTGAGGAAGTTGGGTTGATTATGTCATTAGAATTTTTGGATCTTTCCAAGAACATGTTTAGG  
GGTTCTATACCCTCTAAGCTGACTAGTTTAAAGAACTTAGTATCTCTTAATCTTTCTTTAAATAGTCTCGAT  
GGAATGGTTCCCACTGGGTTTGTAGTCTTGAGAAATTGAAGTATCTGGATTTGCACTCTAATGCCTTCT  
CAATTGATATTATGCTTCTTCTGGCCTCATTGGGGGATGTAGAGTATGTAGACCTCAGTAGCAACAAGTT  
TGTTGGATCACTTGACCTGCAAGTAGGAAATTCGAGCTTTGTCTCGTCAATTCAGTATCTGAACATTAGT  
CATAATAACCTGGATGGAGAGCTATTTCTCACGATGGAATGCCATATTTTGCAGTTTAGAGGCGTTTG  
ATGCAAGTGACAATCAGCTTACTGGTACTATTCCGTCCTTCAATTTTGTAGTCTCCCTTCGAATTCTTAGG  
CTCGGGAACAATCAGTTGTCTGGATCACTCCCCGAAGCTCTTCTAGAGGATAGCTCAATGATTTTATCAG

AATTGGACCTAAGCCAGAATCAGCTTGCAGGTGTGTTGATCCTTTCTTCTTTAGTTAATTTGTTTGGTTGA  
AGTCAATCTAAGTAATCTATGGTTAATTACTACTCCCTTTGTCCCAATTCATGTGACACTTTTTATTTTTG  
AGAGTCAAACAATTTAAGTTTGACCGGAAATTTGCGCGTGAATCTTCAACTTTTTGAAATGAAATTTA  
TATATTTGTAACTACGTAAAAAGTACTATAAGTCACAATAATTGGCAATTCAAAATAATTTAAAGATAT  
ATGATAAATTTACGGTCAAAGATAGAATTGTTTGAATCTCGAAATCCGAAAAGTGCCACATAAATTGGG  
ACGGAGGGAGTACTATCTATGATCTGAGGTTGTTGTCAGTTAGATAACAAATGAATAATTTAGATTGC  
TATCTGCTGGAAAGCATGCTTGTTTTGGTTGCAATCAAATGTAATGTATAGAACACAATTCCTGAGCACT  
TCGGAATTGTGTTCTAGAGGAATGCTGTACAATTCTCTGCTTATGTGTAATTATCATACACATTGTTCCCA  
ATTCTTCCCTAGGTTGGAGATATTTCACTTAGACTCAACTCTAAGGCAATTATTGCTGTACTTGCATTTT  
AATTAGTGGAATGTTCCAGTGTCTTTTTGATTGTTTTTTTTGCTGCATTATTAATTTTCATCTCTCCTCGAG  
CCGAGGGTCTATTGGAAATAGCCTCCCTACCCTCACAAGGTAGGGGTAAGGTTTGCATACATGCTACCCT  
CCCCAGACTCCACCTATGGGATTATACTGGATTTGTTGTGGTTGTTGTTGTTGCTGCGTTATAACAAGC  
TGCATAAAGATATTTTTCATGTGGTTGGAGTTCTGGTGTATTTTAAGTCTTTCGTTGTTCTTTAATTATTA  
TATTTAGTTGTTCTTACCACAGGCCTAATCCAAGCTACTTCCCTTCCAACTATTTTCATGAAGCCATTTGCT  
ATTTTGGCAGGTCCCATTGGAGGTATAAGTGTGTGAATCTCAAGCTTCTAAATTTATCATATAACCAGC  
TCTCAGGCCCTTGCCTTTCAGGTTGGGCGCTGTGCCATCATAGACCTGAGCAACAATCGGCTAACTGG  
AAATGTGTCCCGGATCCAAGGTTGGGGAAATTATGTTGAAGTTATTGTGTTAAGCTCAAATGCATTGAC  
AGGAACCTTCCCCAACCAAACTTCCCAGTTCTTGAGGCTTACTTCGTTAAAGATTTCAAACAACCTCACTTG  
AAGGTGTGTTACCAACTACGTTAGGTACATACCTCGAACTTAAACAATTGATCTTAGCATTAACTCACT  
TAGTGGTACTCTCCTTCCCAGCCTTTCAACTCTACCAAATTGACTGATATTAACGTTTCTTCAACAAATT  
TACCGGTAGTGACCTATCATGGCATTAACTCAGAGAATCTAAGCTTGATTTCTCTAGATGTTTACATA  
ATGCATTAGCTGGTCCGTTACCTCCGGGGCTGGACAAGTTCCTGGACATGGTAAACCTGGATCTCTCTGA  
TAACAAATTTGAAGGTGGCCTTCTAATGATCTCTCAGACAAATTGGAATTTTTAATGTGGCTAATAAC  
AATTTTTCTGGACCTGTGCCACAAAATTTATGGAGGTTTCTGACTCCTCATTCCATCCGGGAAATCCCTT  
GCTTGTACTTCCAAAGCAAGCCAAAGCTCCTCAGAGGGAGATTCAACTTTAAGCTTGAGAAGTCATGG  
TTCTCGCATGAAATCTACCATCAGGGCTGCCCTCATTGCTGGGCTGATCTGTGGTGTATCTGTTATAGCTT  
TGTTGACATTAATAATCTACCGTAAGGCCCATCAGCGAGATGGCGGGAAGGACGATATGAAAGGAACC  
AAGGAAAAGAAAGGTATGGAACCTTCTTCTTCTAATAAGACAGGTGATCAGATCAACTGATACTAATG  
CCTTTTCATTTCCACAGGTTTGTCTTATCTGATATAGAATGTGGACATGACACTAGAGAACACAGCGTG

CCAGTATCAACAGTTCAAATGAGCCATTATCTTCACCTATATCTGTCATGTCGTCCGCCAATCTCTCTCCT  
TCTAAGGTTCAAGATCAATCCAAAAGCCCAAACCTCTCTCAGGGTTTCTTCTCCTGATAAACTGGCTGGAG  
ATTTGCATCTACTAGATAACGCCTTGAAGGTCCTGCTGAAGAATTATCGTGTGCTCCTGCCGAAGCTGT  
GGGCAGAAGTTGTCATGGAACATTGTATAAAGCTACTCTTGGTTCAGACCAAGTACTTGCTGTCAAATG  
GCTTAAGGAAGGGATAGTGAAAGGCAAGAAGGAATTTGCTAGAGAAGCTAAGAACTGGGGAGTATT  
AGGCATCCTAATTTAGTTTCTCTACTGGGTTACTACTGGGGTCCCAAGGAGCATGAGCGGCTTCTCATAT  
CAAATTACACCGATGCACCATGTTTAGCTCTTTATCTTCTCGTAAAGGTCAGTCTCCCCTTTTCTATCTAT  
AGAGTATATCACCTGCATCTATTTCTGTAGCTTTTCTGATTTTTGTATGGTGCTGAAATTGTGATCCAGTTT  
TACCAAAGAAATTAGTAGTACTCCTTCAATGAAATCAAACATAATGGACCGTGAATGCGCACAACCTTGA  
ATGTGTATATTGTTATTGTAGTTGTCAAGATTGCTCATACTGATATGCTGAAGTTTAATCACCATCTTGC  
CACTTGATTCCATTCCGGTGCCTCAAGTGTACTTTACTTCCAAAAGATATTCTAGCTTGCTGGTTGAATA  
TGTATCTGAGACTATTAATACACATTTACATAGCAACTTTCATGAAATTTATAAATGGAGCTATCTTCCA  
AAATCTGAACTTTTCAATTCATATATATTAGCAATGTTAGAATTACATATAGCAGAAAAGATACACACCTG  
ATTTTTGCTTTCATGGTAATACTAAAAGGTAAAACAGTTCACCTTCGCTAATTATGCCTTGATGGTGATA  
GTGGGAGAGTCAAAGTCGAAAAGAGGATTCCTCTCTTGTCTCTCATTCAAACCTGTGCATGAGAATT  
TTATCTCACGTGGCTCATTGTTGATTACTTTGGTTGGGCTCGATTGATGTCATTTTGATAAGGGCAT  
CCCGGTGCACTAATTAGAGACTGCTACTTTGAATTCCGCTTATTGCATATAGCACTGTACTTTGTTTTCTA  
GTTTTGAGTGATGATATGGATGCCGGTTTCATTCTTTGATGTATGCAGATGCAGAACCCTGTAAGCTACA  
TCCTTTATCTCTCGATGATCGACTCAAGATCTCTGTAGATGTTGCTCGTTGTCTAAACTACCTCACCATGA  
AAGTGCCATACCTCATGGCAACCTGAAATCCACAAATGTACTTATAGACACGTCTACCGTGAATGCCCTA  
CTAACTGACTATAGTCTTCATCGGTTGATGACATCTGCTGGAACAGCTGAACAGGTTCTAAATGCCAGTG  
TACTCGGTTATCGTCCACCTGAATTCGCGAGTACAAGTAAACCTTGCCCGTCATTGAAAAGTGACGTCTA  
TGCTTTTGGTGTTATCTTGTGGAACTTTTGACTGGAAGAAGTTCTGCAGAAATTGTTCTGGGAACTCA  
GAAGTGCTGGATTTAACCGAATGGGCGAGATTATTGGCCTTTCAAGACCGTTCAATTGAGTGTTTCGATC  
CATTCTTATTGGGAAAGCAAAGCAACAACGAAGACATGCATACGATTCTTGATAGCATGCTTCAGGTTG  
CACTAAGGTGCATTTTGCCAGCTGATGAAAGGCCTGATATGAAATTTGTTTTGAGCAACTTTGCTCGAT  
AGCGCAATAACACAAGTTGAGGGGAGGGGTAAATTTGAATACTATGTAGTTGTAGATTTGTATCTTAAA  
AGTTGATATGTCATTCATGTTCCATTTTTAATTCAATTGTTTTAGAAACAAATTCATTTGTGAATTAGCACA  
TTAAGTGATGAATGAAGTTGTTGATTCTTCACATTTATTGACAAGAAATAAAGTTTTCTTGAT

>PGSC0003DMG400002689 LRR-RLKs

TACACAAATTCAACTCTTTTGTTCCTTAAATTCAACTTTGTGTTTTTTTTGTTCTCTTCTAACTTCCCGCGCT  
TTATGCCATAAACCCAAAAAATGAACCGTTTTTTCTCCTTCATTCTCCTCCTCACACTTCTCATCTCCGCC  
GTGACCGCCGCCGTAACCGCCACCGGCGACGGCAACGACACCGCCGCACTCCTCCTCTTTCAGTCCCAA  
ACTGACATCCACGGCACTCTCCTTCACAATTGGACACTTCCGGTGA ACTCCACCACCGCTGCACAGCTC  
AATGGCTTGGTGTAAAATGCATAAACACCGTGTCTCCGCCGTAATTCTCCCGTCGTTCAATCTCCGGGG  
ACCCATTACTGCTCTCTCTTTACCCTTACTCCGCCTTCTCGACCTCCGTAACAATCGCCTTAACGGAAC  
CCTCACACCCATTACCCAATGTACTAATCTTAAGCTATTTACCTCTCCGGCAACGATTTCTCCGGCGAAA  
TTCCGCCGGAAATTTCTTCTCTCCGTCGTCTCCTCCGCCTTGACGTTTCAAATAACAACCTGAAGGTTCA  
ATTCCGACCCAGATTGCGAATTTGACCCGATTACTCACACTTCGTTTACAGAACAATGAACTTTCTGGAAC  
AATCCCAAATCCCTAAATTCTCTTCAAATCTTAAAGAATTGAACTTTTGAATAATGAGCTTTATGGGT  
CTGTTCAAATGGTTTATATAATCATTTTTGGTGAAAATAGCTTTGATGGAATGAGGGTTTATGTGGAAT  
TGGAATTTACCTCAATGTTATATACAGGGGAAATAGTTCCTTCAAACCCTAGCTCTTGCCTACAACCT  
CCACTGCAACAATCGAAGAACCCACGAAAAATCGCGAAAAGGGTTGAGTAGAGGAGGGGTTAGTAGC  
AATAGTGATGGTGAATGTGGTGGCATTGTTAGTTGTAGTGTCAATTTATGGTAGCATATTACTGTGGGAA  
GTATTCAAGAACTCAGAGTTTTTCAATGTCAGGAAGTGAGTGTGGGAAGAGGAGGAGTAGTTATTCGA  
GCGAAAAACGAGTTTACGCTAATAACAATGGTGGTGGTGGTGGTGGTATAGTGATGGTACAACAGCTACT  
GATAGAAGTAACTCGTGTTTTTCGATAGGAGGAAGCCATTTGAGCTTGAGGAATTGTTAAGAGCATCA  
GCTGAGATGCTTGGTAAAGGGTGTTAGGTACTGTTTATAAGGCAGTTCCTTGATGATGGGATTACAGTT  
GCTGTAAAAAGATTGAAAGATGCAAATCCATGTCCAAGAAAGGAGTTTGAACAGTATATGGATGTTATT  
GGAAAGCTTAAGCATCCAAATATGGTGAACTTAGAGCTTACTATTATGCCAAGGAAGAAAAATTGCTT  
GTTTATGACTACTTGCCTAATGGGAGTTTGCATTCATTCTTCATGGTAAACATTAGTAAATGTTTATGTC  
AAAGATTAAGATTGTTTTGTAATCAAGATTGTCTTTTTGGGGTTGTTAAGGTCTATATTGCTCGGA  
CTCTTCAAATGTCGATGGGGTGTGTCCGATCCTCAAATAAGTGCATTTTTGGAGAATTCTGACGTTG  
TAATTCAAGATTGTCTTTTTGGGGTTGGTAAGGATTATATCCTTGGACTTTTCAAATAATCGATGGA  
TGTGTGTCAGATTCTCAAAGTCTCTAGAAATAGTGCATTTTTGGAGAATCTTACACGGGTGTGACGTG  
TTTTGTAATTCAAGATTGTCTTTTTGGGGTTGGTAAGGTTATATTGCTCGGACTTCTCATAAATGTTGG  
CAGGTACGTGTCGGATCCTCTAGAAATCTCCAGGGATAGTGTATCTTTGGAGGATCTAACGCGGGTATG  
GCAACATTTTTGGAGAGTCCGAGCAAGTTGTAGGTAAGATACTAATATTGATGGGATTTTTTTTTCTTGA

TTCTAATAGGAAACAGAGGACCAGGTAGAAATCCATTGGATTGGACAACAAGGATTAGCTTGGTGCTAG  
GGGCAGCTAGAGGGCTTGCTCACATTCATGAAGAGTATGCAGATTCAAGAATCCCACATGGGAATGTG  
AAATCATCTAATGTGTTGCTTGACAAAAATGGTGTGGCTTGATATCTGATTTTGGGTTGTCATTGCTTTT  
GAATCCTGTTTCATGCCATAGCTAGATTAGGAGGATACAAAGCGCCCGAACAACTGAAATCAAGAGGCT  
ATCTCAAAAATCTGATGTTTATAGCTTTGGTGTACTGTTATTGGAAGTGCTCACTGGTAAAGCTCCCTCAG  
AGTACCCTTCACCGACTAGGCCTCACGATGAGGAGGAAGAATTGCCAGTGGATTTGCCTAAATGGGTTT  
GATCAGTAGTAAGGGACGAGTGGACTGCTGAAGTGTTTGATCAAGAACTGTTGAGGTACAAAAACATT  
GAGGAGGAATTGGTGTCAATGCTACATGTAGCCATGGCATGTGTAGTGCCACTACCCGAAAAAAGGCCT  
ACTATGGTTGAAGTTGTTAAGTTGATTGAGGAGATTAGAATTGAACAATCTCCATTAGGTGAAGATTAT  
GACGAATCGCGCAATTCTCTTTCCCCCTCCCTAGCCACCACTGAAGATGGACTCCCCGGTTACTAATTTTC  
GATCATCGTGGCATTGATGTTTCATAGTCCTAGTAGTATATGTTCAAATTTGCAGCATCTTACTGCAAATT  
GGGAAGTTCAAAGCTATGGACTTATGTTTAGTAGTTATTTGATTGCTTTGTGTTATTCCAAATTACTGCA  
CTTTTGAAAAATCTGATGATCCAACAAGCATATAAGAAGTGCAGCAATCAGTCCATTATGTTTTTTTTTAA  
TGTAATGTAATGTAATGTTAATTCTTTGTATTTAATTCATTTTCAAGATTTGTGTTCTAAGGCAAAAC

>PGSC0003DMG400002870 LRR-RLKs

TTTTTTTTATAATATTAATAATCTCATTTCATTGTGGGTAGTTCTTTTCTTGAATTCTTGAATTAGTAA  
AAGCAAGAAAAATGAAGGCTATTTTGGGTTATTTGTACTTATTCAACTTCTTGGCTTATTATGCTCATGCT  
ATGCTTACTCCAGCTGGTGTCAATTATGAAGGTTAGTTCTTGTGATGAAATATTGGGCTTTTGTGCTTTGA  
TTATTGTCTTATTTTGTGTTGTTATTGTTAATTTTTTTGTATGTTATGTATTTGTTATCCATTTTGCATTTT  
TTCGTTGTTATTACTGGGACGGAGCTAGCAAGGGCTGAGGTGCCTTCCACGGAAAGTTATATCGTTTATA  
CATGGTTAAAATTATTTTTATGTATACATAGTAGATGTTAAATCCCTTTGGTTTCTTTGTCTGGTTACTTTT  
TATATTTCGAACTCCTTAGTGAAAATTCTGACTACACCAGTCGTTGTTACAATTTTTTTTTTAAAAGCTAAG  
GGTTTATTGAAAACAACCTCTTTGAGGTAGGATAAGGTCTGTGTACACTCTACTCTACCCTCTTCAAATCA  
TGCTTGTAGAGTCACACTGAATATGTTGTTGCGGATTTTGAATTTAAAAGCTCAAGATTTTTTTTTTTCTTT  
GGCAGTGCAAGCTTTAATGGAGATAAAGAAGAATTTAGATGATCCTCATAATGTTTTAAACTGGGATGG  
AGATGCTGTTGATCCTTGTAGCTGGAATATGGTGACTTGTTTCATATGATAAATTTGTCACTAGCCTGTAA  
GTAAAACAATTTTCACTTATTCTAAAAATAGTACACCTAACAAAGATTTCTTAATATAGTTGAATTATTGAT  
TATGCAGGGAAAGTCCCAGCCAAAATTTGTCTGGCAAAATATCACCATATATCCACAACCTTGACACACCT  
TGAACCTATGTGAGTACTTACTTAACCAAAGTAAATAAAAAACGTAATACATAAACGTGTCCTTTAACTT



GGTGTTATCTATCATCTATGCCTCCAATATGGATGTGCAGAAGTAGGCATACACGTCCTATGTGAAAATT  
CTCATCCTACGTGTATTATGCTACGTAGGATGTGAGTGTGCCTACTTGTGCACCCCCAAAGTTGGAGGAT  
AGATGTCAGGTGACACCAAGTTAAATGACATATTTATGTATTAGGCCTGAATAAGATATCAAGACATTTG  
AGTTTTGATTCTTATTCTTAGATGTTAATATGAGTGTCTGTTTTTACAGACTTCTACAGAGCAATAATATA  
TCAGGATCAATTCCTATGGAGCTTGAATGCTTAAAAAACTCAAGACAATTGATCTTTCTGATAACAAGT  
TAACCGGCGAAATCCCGTCATCTTTAGCTCAGCTGAAAGGCCTTCAATACTTGTAAGCAAAGAGAATTCT  
GAGATCTTATACAAACAAGTTTTTTTTGGGGTTAAAACTAATGATGTTTGTCTTGATTTTTGATGATTAT  
AGGAGATTAAACAACAACAGTCTAACTGGAGCTATTCCTTTGGACTTGGCCAATATGACTCAGCTCTCAC  
TTATGTAATTTTCTAATACCATTTTCATGTTATGTTATGTTATATGTTCTTTATAACAACATTTTGCTATAGC  
AGCTAAAAAATATCCAGACAAATGACGTACGTAGTTATAGAGAGGTTTACTGTATTTTTCACTTTGGAC  
ATATATGTATTATGGAGTTGTGTGTTTTGCATGTTTAGGGACTTGTCTTTCAACAATCTCAGTGGTCTGT  
ACCAAGGCTTCTAGCCAAAACATTCAAGTAAGGTTCTTGAAGAATTCTCTGTGTATCACTTTTTCTTAAT  
ATCAGTAAATGAAACCAGTTTTTTGTATTTATTTGTCTTTTTTTTAAACCTTATTGACACAGTATTTTGGG  
AAATCCAATGATATGTGCAACTGGAAAAGAGTCAGAGTGCAATGGAACAACACCAATGCCCTCTCCTT  
CTCTTCAAGCAATCCACAGAGTAAGAATAACCTTATTTTAACTGCCAAATGATAGTTTTTTTTGTTTTTTTT  
ATGACCGTATTGTCTGAGCTAGCTTTTGTACACCTTAACTAATTCCACGAGATACCTACCACCTCCCACCA  
GCAACATGTACCAGGTAACCTCTCTCCACCAAGGTTAGGATGGAGGGGAGAATCACCTGAGACCTCATGG  
CTCTTAACCACTTCATTGACCAGTAGGCCACACCCTTGGGTGCACAACCAAATGATAAATAAGCGCCTCT  
CTACCTCACAAAGGTAGGGGTAAGGCTACATACACACCACCCTCTCCAGACCCCATATATGGGATTACA  
CTGGGTATGTTGTTGTTGTTATTGTCTGGTTCGATATAATGATTATGGTGCTTTTACTAGTCATACAGATTTA  
TGAAGTAAATTTGCTTCACTGGTTTAAATTTCTCTGCTGATAGATTCAATATTTATAGTTCATTCCCAGCTA  
AAAATATTCTGTGTTATCTCAGATGTTTCTGCTGATAGATTCAATATTTATAGTTCATTCCCAGCTA  
TTGGAACAAGTCTAGGATGCATCTTCTACTAATCGTTGGGTTTGGATTCTTTCTGTGGTGGAGACAAAA  
GCACAATAAGCAAATTTTCTTTGACAGTAATGGTGAGTATTGCTTGATCAGAACATTTTGAAGTTACGGT  
CTAGCTCATCGATCCTCTCTTATAAACGTTACTGTCATAAATTGCAGAACATCATATTGAAGAAGTGTGTT  
TAGGCAACTTAAGGAGGTTTCAATTCAAGGAACTTCACTGCTGCCACAAACAATTTTCAAGCAAGAACAA  
TACTAGGGAAAGGTGGTTTTGGTAATGTTTATAAAGGTCGTCTTAGTGATGGGATTATTGTAGCTGTGA  
AAAGGCTCAAAGATGGAAATGCAGTTGGAGGCAATCAACAATTTTCAAGTGAAGTCGCGTTGATCAGTC  
TGGCAGTTCATCGGAATCTCCTCAGGTTGTATGGATTTTGTATGACACCAACTGAAAGGTTGCTGGTGTA

CCCTTACATGTCTAATGGAAGTGTAGCTTCGCGTCTCAAAGGTAAACATATCTAAAAACCTGTCTCCTTTG  
GCCTATAATTACATTATCCTTCTTATTTGCTCAGCTCATAACGTATCATTTCTTGCAGCCAAACCAACCTTG  
GATTGGGGTACAAGAAAAGGAATAGCTTTGGGATCTGCAAGGGGTTTATTATATCTACACGAACAATGT  
GATCCAAAGATCATTATAGGGATGTGAAAGCTGCAAATATATTGCTTGATGATTACTGTGAAGCTGTTG  
TTGGAGATTTTCGGATTAGCAAAGCTTTTGGATCATCACGATTCACATGTCACAACCGCGGTTAGAGGAA  
CTGTAGGACATATAGCTCCGGAATATCTCTCCACAGGACAGTCCTCTGATAAGACGGACGTCTTTGGTTT  
TGGTATTCTCTTGCTAGAGTTAATCACTGGACAAAGAGCTCTGGAATTTGGTAAAGCAGCAAACCAAAA  
AGGTGCCATGCTTGATTGGGTAAGTACAACAAATCCCTATAATTATAGTTACATTTCTCTTTTTTCAGCATG  
CTTTGACATGACTTCTTGAGCCGAGGGTCTATCACAACAACCTCTCTACATCCCAAGGTAGAGGTAAGG  
TCTGCGTACACTCTACCCTCACCAGACCTTATTAGTGGTATTACACTGGATATGTTGTTGTTGTATATCTG  
TAAGGTGTGCATTAACACTATCTAAAATATGAACTCTATAAGGTATTAAGAGATGCAATGAACGAAGTA  
CGAACCATCTTTAAATCCTGGATCCGTCCTTCTGTGTTTTTTTACCTGCAGGTAAGAAAGATTCAACAAGA  
GAAGAAGCTAGACATGTTGGTGGACAAAGACATGAAAAACGAGTACGATACGATAGAGTTAGAGGAA  
ATGGTTCAAGTAGCATTATTGTGCACTCAGTATCATCCAAGTCATAGACCAAAAATGTCTGAAGTTGTAA  
GAATGCTTGAAGGAGATGGACTAGCAGAGAAATGGGAAGCATCTCAAAGAGCAGAACCAACAAGATG  
CAGCAGAGCTAATGAATTTTCTTCTTCAGAAAGATACTCTGATCTTACTGATGATTCTTCATTACTIONGTAC  
AAGCAATGGAACCTATCTGGTCCAAGATGATAATTGAATTAAGACACAATGTCACCTTTGCTAATGGGAG  
GTGACAAGTCCCTCGTGGAAATAAGTCGAAGTGCCTGAAAGCTGGCTCAGACATCACATACATAAAAAAA  
AAACATGTGTCATATTGAGCTTTGTTTATAAGTTTATACAGAAGCTGCAAATAGAATATCATACTTCTGA  
TTGTAAAGGATAATATAATAACTTTGTAAGGCTGAGAGTTGTTTTTCTTTTTTGGTTCTTGTGTTTGA  
GTGGAAATGTTTATGGGATGTTATAATTTGCTTATGTGTATATATAATTAGAAATAGAAC

>PGSC0003DMG400002902 LRR-RLKs

AGAAAAGAAACAGAGACGCATTTGCAGATTGTTTCTTTAAGGGGAAGGTGGACATGTCTAGTAAACAT  
GGCCGCCGTTCCCCTAATCCTTCATCTCCTTCTCAAGCATCGTCTCCGAAAAACACCATCTTTTCTTAT  
TCATATCTCCATTTTCTCCTCATTTCTCTATCTAATCCACAATTTCTTTCTCCATTTCCGAGGACGATGCC  
TTGATCAAATTCAAAGAATCTTTAAAAACACAACATCTTTAGATTCATCTTGGCTTAAAGGTACTIONGTCC  
ATGTGACAAAAACAAGAAATGGGATCGTATTCAATGCGAAGGGAACGTGGTTGAAGGCCTCCTTTTAG  
GTGAAGCTGGCTTATCAGGAGAACTAGATATTGATCCTTTGATTGCACTTCCAGGTCTCCGAGTTCTTGA  
AATCGCGAATAATTCATTTTCAGGCACAATCCCTGAATTCTTCTTGCTTGGTGCACCTTAAATCTATATATAT

AGATGGAAACCAATTCTCAGGTGAGATTCTAAAGATTTCTTTGCCAAAATGGGGTCTCTTAAGAAGATT  
TGGTTTGCACGAAACAAATTCTCCGGTTCAATTCCTGAATCTTTAACCAACTTGAAGTACTTGATGGAAC  
TCGTCTTGAAAGTAATGCATTTTCAGGACGCGTCCATCTTTCTCACAAGTGAGTTTAAACATCTATTGATC  
TTTCGAATAACAAATTACAAGGCGAAATCCCTCAGGGGATGTCAAATTTGGTGCTGATCCTTTTAAAGG  
AAATGCAGACTTATGTGGACAACAATTAGGGAAAGAATGTAATAAGGGAATCAATAAGACTCAAGGTG  
CACCAATGTCAAATGAAATGGATCATTCTTGGTATAGTAGTTAGTCTTTTATTGGTGACCATTCTTTTT  
CGCGTCAAGCGCAAGGAAGATCATTTCGACAAGCTTGGGAAAGAGAATCTTGATGAGGGGTTGCACGT  
TGGTAGCTCGATTAGGAAGAGCATGAGCATTATAGCAAAGGAGGTGATTCTGGTCGTGGATCAACAC  
GAAGGGGAGGGTCACAAGGTGGTAAGGCTATGGGAGATCTCGTGTTGGTGAACAACGAAAATGGTAC  
ATTCGGATTGCCTGATTTGATGAAGGCAGCTGCTGAGGTACTTGGAAACGGAGTGTTAGGATCAGCTTA  
CAAGGCCAAAATGGGAAATGGAATGTCTGTTGTGGTTAAGAGATTGAGAGAGATGAATAAAATGAATA  
GAGATGTATTTGATGCAGAAATGAGAAAACCTTGGAAAGTTAAGACACAAAATTTACTTCAATTATTGG  
CATATCATTACAGAAAGGAAGAGAAATTGATGGTATCTGAATATGTTCCCAAAGGCAGCCTATTATATCT  
GTTACATGGTATGACAATTTCTTTCATCTACAGTCAAACCTCTCTATAACAACATCGTTTGTCTAGATAAG  
TTTTTGGCTGCTATAGCGAAATGTTGTTATCTAGAACATAAGTTTCATATCTCAACTGTTACTCCCTTTGTA  
TTGAAACATACCTCGATGATGAGTTGGCCTACACACACCTGTTGTTGATTGAGAACAGATATTTGACCAA  
CTCAACATCGAGGTGTGTTTTGATACAAATGGAGTGAATAGTTAAGGTAGGTAAAGAGAAAAATGGATA  
GTTAAAGTATGAACTCGTGAAAAAAGGATAGTTTAGGTGTGTTTTTGACCATTATGGTAAAAATCTATT  
CCGAGAAAACCTGGTCACTATTATAGTGAAATGTTATTATAGACAATGATTGTTATAGAGAGGTATGAC  
TGTATATCAAATCATTAAAGGTCTTCACTTCTTCTTGACATTTGTATGAGTAGATTTTATCTGATAATGTGAT  
CCGATCTATACTTACCTGTCCCTTCCAAGACATCCGGTCACAATTGGGACGATACAAAGAAGATTAGCAT  
GATCCCACAAGTTTTAGGATTCACAGTTTACAGAAGGATTGCTTATGACTGTTAGTACATTCATATACATT  
TTGTTCTTCTATGTCAACTATCCTAATTTTGAATTTTCGTGCATACTTTTCAGGTGATCGAGGGATATCACA  
CGGTGAGCTAACTGGCCTACTCGTCTAAGGATCATCCAGGGAGTTGCTAGTGGAATGTGTTATCTTCAT  
TCCGAGTTTGCATCGTATGCAGTGCCTCATGGAAACCTCAAGTCTAGCAACATTCTACTCAATGAAAAAT  
ATGAGCCACTTCTATCAGATTACGCCTTCTATCCACTGATCAACAACACGCAAATTGTTCAATCCCTTTTC  
GCGTATAAAGCACCAGAAGCCATACAACATCAACATCTCACTCCAAAATGTGACATATATTGTCTTGGAA  
TCATAAATACTTGAATCCTTACAGGGAAATCCCTTCTCAGTATCTCAACAATCAAAAAGGTGGAACGGA  
CGTTGTTCAATGGGTGCAATCAGCTATAGCTGACCAAAGAGAATCTGAATTGATTGATCCAGAGATAGC

GTCTGCAACAGACTCCGTTGAACAAATGGTGAAACTCCTTCATGTAGGAGCTGCTTGACTATAAGCGAT  
CCGGATAAGAGGATTGATATGAAGGAAGCATTAAAGGAGGATAGAAGAGATAAGTTTAATATGATGAAC  
ATAAACCTTCCAAAAGGTAATAGGTTAGTAGATTTCGTGTGAAGCTTTAGTTTCGTTACCTGCCAGAGCGA  
TCCTTAGCCTCCTTTGATTCCGTTTTATCTCAGTTAAACTCCACAACGTCTCTCGACTCGTTCAAATGAATG  
TTGATGCAGGAAACAAATGTCATTTTCTTCAAATACTGGAGCTGAGGTTCAATTTGCCAAACAAAACAGAG  
TTTACTGTATATAAAACACCAAATGAGACTTCTAAATTACCAAAAACATAAAGTTGATTACTAATTCTAC  
ATGTTTTGTTTTATTGTATAGAATTTGTTTCTTTTTTGTGTGTGTGAGTTAAAGAGGGACATGGATCCTC  
AAGGCAATGATCAATTTAGACATAGATTTTGAAGACAACCTCCGGCTTGATCTCCTCCTTTCTGCTTATG  
TTAGCTCACGTTGTCACACAATCTAATCTAACGCGCTCCCATCAAGAGATCGTTTGATGATTTAGCAAAC  
AAGATGATCTAGCTTTGATTTGTCAAAAAACCTATGTTGTTCCGGACTCTCCAGAAGGGTTTTCGTGCACTT  
GTTAGATCCTCCCAAATGCACTACTTTTGAAAGATTTGACATGCATCCTATGACATTTG

>PGSC0003DMG400003002 LRR-RLKs

ATGTTTGACACAACACTGTATGTGATGAAACAGTGACCAGAGATGCATTGCTCAAGTTTCTTGACAGAGGTAT  
CTAACAATAATAGTACAATTCTTGGTACTAATTCGGGCTGGAACCTCGACATCTGATCCTTGCAAGGACAA  
GTGGCTTGGTGTACATGTAACGCGAAGACTCTCTCCGTGGAGAAAATCATTCTTGATGGTTATGATTTT  
TCGTCTGGAACGTTTGATGTTACCACGATTTGTAATGTGGAGCCTATCGCGCACACCCTTTTCTTCTGAG  
TCTGAAAAATGGCCTACTTCAGGGGAAAAACTTTGACAGTATAGATAAATGTAAGCATCTAAGACATCTT  
GTTCTTGGTGGAAACCGGTTCTCAGGTAGCATTCCACAATCATTTTCAAGATTGAATAACTTGAAAAGAC  
TTGACATATCCAACAATAGATTATCAGGTGTTCTCCCTGATTTATCTAGGATTTCCGGGCTTGATTGAATTC  
GAGGCTCAGAATAACCAGCTATCAGGAGAGATACCTGAATTTGATTTCTCAAACCTTTGTTGTATTTAATG  
TCTCTTTCAACAATTTAGTGGATCGATTCCGCCTGAGGGTGATAGTTTCCCTGTTAGTAGATACTTGAA  
AATCCTCTGTTGTGTGGCTCCCCGTTGGCTGGAAAATGCTCATCACTGTCCGAAGATTCAGAATCAGCTG  
ATCATGACAAGCCAAAGAGCAGCTTGTC AAGAGATGAAATTCTCATGTTTTCAGGTTATTTCTCATAGG  
CCTGGCTCTGGTTCTTCTTATCCTACTATGCGTCTATAGAAAACGGAAGCAGAAGCAGCAGAAGAAGAA  
AGAATCAAGAATCGAGCTGATGAAAAAGGTTGCTACAGTTGATCATGACAGTACTACTACATCAATGGA  
TCAATCAAAGAAAGGCGGAGCAATTCAGATATCTCATCAGCTGTCATTTCTCCGATGACAGCAACACC  
GCAGTTTCACAGTCACTCGTGGTTCTTACGAGTCCTGAGGCGAATAACGGATTGAGATTTGAGGATTTG  
CTTAAGGCTCCAGCAGAGTTGCTTGAAGAGGGAAACATGGTAGTATGTACAAAGTGATGTGTGACAA  
TCCCAAATGCACTGGCTGTTAAGAGGATAAAAGATTGGTCAATAACTGGTAGTGAATTC AAGAAGAG

AATGCAGAACTAGACAAAATCAGGCATCCAAATGTGTTGCCTGCTGTTGCCTTTTATTCTTCTAGACAA  
GAGAAGCTTTTGGTCTATGAGTACCAAGACAATGGCAGTCTTCTCCTACTTCTACAAGGTAATCACTCT  
ACTAGTCTATTCTTCTGTGTATTGAATTGTGCGACCATTTTCATCTAGGCATATAAACAGACACTCGAACTT  
GGCCTCAACTGGCAAGTAAGCACTCAACTTTGAGAGAGTGCACATCTAGACACCTCAAATTGGTCTCAA  
CTGACGAGTTGAGGTGTCTAGATGTGCATACTCAAATTTGGAGTGTTACTTGCAAGATGATGCCAAAA  
TTTGAGCGTCTGTTGATGTTTTATCAATTATGACTTTCAATTAAGAACGTAAGTTGCATGAAGGTCTGATT  
CTTTTTCATCAGCTAAGCATGTGAACATTCTTATTCATAATAGGTGCATAAAGGTTAGATATCAATATGTT  
CTATTACCATATGAAATTGTGAGACGTGCTCATCTAAAGACTTAAAAACTGTTAAAAAGCGCGAACTTTT  
GCTTACTTAACGATGTTGGATCAATGAGTAGTATTAAGGCTTTTAGGCATGTGAAAGACTTTATTTAAGG  
TACTTATTGTCCCCTCATGATTTAAACATGTCAAAATTCTCTTTTAGAACCTCAGTTAGAAACCTCTGTTTG  
CCTTATTATCTTCAACTGGTGTATGAATTTGCTTTTCAGGAATCCAGACAGGCCAAAGATTCCATTGGA  
GTAGCAGACTTTCTATAGCAGCAGGTATCGCCGATGCTTTAGCTTTCATGCATCAGGAGCTTCAACATGA  
CAGAATTGCACATGGAACTTGAAATCATCAAACATTTTCTTGACCAACAACATGGAGCCAATGATCGGC  
GAATATGGCCTTATGAGCATTGCAGAAATCAGTACTACTACAGCAAGCAATTCCATTATGTCTTCCCTAT  
AACTGATGAAAATGTAGGAGCAATCTTTAAAGAAGATGTTTATGCATTTGGTGTCAATCTTTTGGAGTTG  
CTAACAGGGAAAGTGCAAAACAATGGAATAGAACTTGCAAGTTGGGTTGTTTCTGTGCTAAGAGAAGA  
ATGGACAGTTGAAGTGTTTGACAGAACTTTGATACAAGAAGGTGCTAGTGAAGAAAGGATGGTTAATTT  
GTTACAAGTTGCTGTAAATGTGTGAACCATTCTCATGAAGCTAGGCCTAGTATAAACCAAGTTGCTCTC  
ATGGTTACCACTATACGAGACGAGGATGACAGATCCGTGATGTTTCTGCAAGTACTAGTACTATCATCT  
GA

>PGSC0003DMG400003175 LRR-RLKs

ATGGGTGGTAGATGGAATACTTATGGATTCAAGTTATCATATCTTGCACTTCTGATTATTCTTTATCACGT  
TCACGAATGTAGCTCACTCAATTCTGAAGGTAATTATATTCTATGTTTGGACTGTCCTACTGGTTTTGGTG  
TTTATGTCTTAGTTGTATCTAGTTTGTATGTCCATTTGAATATTGGATTGGTCTATTTTACAAAACAAGG  
ATTGGCATTGTTAGGACTACGATCTAAAGTGGATTGTGATCCATATGGAATCTTGCAAACTGGAATCTT  
GATCATTGTGACCCATGTATGTGGTTTGGAGTACAGTGTCTGGCAGGCAAAGTGCAAATGTTGTAAGTC  
CCTTGTTACATACGATCATATCTGTTAATGAGTATTCAATTCCATAAACTTACTTTATAATTGTAATGTTT  
TGTTTCTTTTTTAGTTAAGAACAAATCTGTTAGATTTATTTAATGACAACAGATGTGCAAAAGATGAACT  
CATATGTTTTGACTTTTGGAGCTATCTCTCATGTTGTTAATTATTTCTTTTTCTTCTGTTTAGGGATCTTC

ATGGGAATTCTTTGGAAGGCACATTGGCACCAGAGCTTGGGAATCTCACTCACTTAAGATCAATGTAAG  
TTCTTACCTACGACAAAATGTTTTTGTCTTTTTAGTTCATAGGTGCAAATTTGTGGGGAATGAAAGAGA  
GATTGTTGCTTGTTCATGGTTGAAAATTGATTAAACTTAGTATTGGTTGAAAATAGCCTGGCAGCTTAAA  
AATACCTCCTTCTTTGATTTCTTTTTAACATGCAATTTTTATAAAAAAATTGATTTTCCTCTTCTTCTT  
TGGTTTTGTGCTTAAAAAACTCCCTAAATAATCTTGTCTTGTGGGAAGCTCTTTGAAAGAGCTTGCCT  
CTGGACAATGATAGGATTTGAAAGGAGTGTCTAAGGATCGTCTTCCGTTACAATATTCCATAAATCA  
TAGGTTTCAAGATATGAATTCATTTTCACTGACCAATCTGATAGTTTTTGGTAGTGAAAATTTATGGGAC  
AATGAAAGAGAGATTGTTACTTGTTCATGGTTGAAAATTGGTTTAAAATAGCCTTGCGCATTGAAAATAA  
GCATAGGTTGAAAATAACCCCTAATGAGTTCTAAAAAATGGATTGAAAATAGTCCTGGTGGGTTAAAAA  
TAGCCTTGACAAGTTAAAAATGGGTTGACAATAGTCTTTAGAAGAACTCACAGATCCATAAGATCAAT  
GGGGCTTTGGATACTACTGTTGCTATTTTTTAAAGATGGTGCAGCTAAATAATGTTGAAAATGTCTCTC  
AATTTTTATTAGGCATAAGAGGGGTTTAAATAGACAACCTTGAAAACATAACTTGCAGAAAATCTGCATAAC  
AAAAAGTAGTAGATTAGTAAATTGGGTGGAATAGACTAAAGATAATTAGTTCATGTCTAATAATCATA  
GTTTTTCATCATCTTGCATGTTGTATCTTCTTGTGTGTTGTGTATGACTCCTTTTTTAATCTTAACAATTTAAA  
CATTTTTTTCTCTATGATTGACTCACAGTGTGCTGTCAGAAAACAATTTTTTGGTGCCATTCCAAAAGA  
ATTTGGATGACTTCGAAGGTTGGAAGTGCTTGACTTGACAGATAATAATTTGAGTGGGAGAATTCCAGC  
AGAAATAGGAGACCTGCATGCGCTAAGAAGCTTGTGAGTTCATAATTTAATTTGTGTGCATGTGAAGAT  
GTGTGCTGCCTATATTAGTTTATATATGTGAGTATTCATGAGGAAGAACCATTAAAAAGATTCTTTTGAA  
CCGTGTCTTATACTTTTACAGGTTGATTCGTAACAACAACCTTGAAGGAAAAATTCCATTTGAAATTG  
GGAAGCTTCGTTTGCTCTCAAATTGCAATTTGACGAAGCACTCACCCCTGCTGCTGGGGGAACATGCTG  
TTAAATAGAAAATTTGCACACTGGTAAGGTTGTTTTGGTTTTATTGGACCTTTTATATCTGTGTTCTGGT  
TCTTGTTACATTTATGTAACCAAATATCAACATGCAAAGATGTTTGAATGTATGAAATTTGTATTTAAGC  
CATTTCAGGCTGCCATTATTTTCAGAAATGGTCATAACTCCTGTCATAAGGTTTTCTTGGTGGGAGTGAG  
GGGGTGGGTGAACACAAGTTGATAAAGTTGAGTATTAATGACAACAAGGAATATTGTGGTTTATGTGA  
ATTCAAATAAAGCCTGGGAGATAGGTGATTTTCATAGATGTGGCGATGCAATGACTTGTGCTGCTAATGC  
TTGAAATTTACTGTCTAGTTTGACATCTAATACTAATACTTGACCATACATCAACTCAAACGAAAAAGCTT  
TGTAAACTACAAGGAGGTGATTTTCCAGTCATTGCATCCATCCAAGGCTGGGGTTGAGGATGAGGGATG  
CAATATATTGGAGATCTTGGGATTGATCCTGGAATCAAGAGAGCATCAAGTTATCATATTGGTTCTAATT  
TATTTTAATTTTTTATCAAGATACTCTTCTCAGATAGCTTTAACTCTTACATAGAATACTGACTATCAAACA

TAATAGCATGGTTACTTTCAATAGCACTTACCTTCTTAATCAGATATTTTCATTTGCCTGCTTCTCTCTGGT  
AATTTGATGTCTGTTTCTGGCAGCATTGTGCATGGCAGTTTGATACCATTAAAGACCGTAGACTCCTTTAT  
CAGACCACTTAAAGGGACACTTGTGCGTTATTTCACTCTGTAAGTAACTAAATGGTTTTCAATCACCATGT  
GTTTCTACTTACATTTTATCACTCTAGAAGCGTCTTTGTGTCAATAAAGGTTCTCCAGACAACCTGGAAGT  
GGCTCATTGGATAATCAGATAGGGTATTCCTCTGACAACCTACCAAGTGAGTGAAAAAGTTTTACCCAC  
ATCATTAGCAGGAATTATGTTGAAAGTGCACAAAAGATTGTTTTCACTCTTCTTTTTTAGCAGGTTTCATCT  
AGGCCTCACATCATCCATACTATTTAGAACCAGGCGAATATCGCACGCCACAAGTTAGTAGAACAATCTA  
GCAACCTTGCTGCTGTTTCTGCCAATGCTGGGAAACATTTGGGTCCTATTGTTTCAGTGCCAAGCACCAG  
AAGTAGTGGGTCATTTTCATGCTGTGAAAAATACCTAAGGAACACCTCCTACACCCTTACCTGCCTCGCAA  
CGACAGCCTGAGTCTCAATCCAAACCAATCCAATGGGACAGTCAAGTAGTGTTGTTAAATAGCCAACT  
AATAGACAAGCTCCACCTGCCAAAAATCTGGTGATACATGGAAGTATTTAGTTGGAGGTTTTGGGTTTT  
TTCTGCTCATTGTTGTTGTAGCCGTGTTCTTAGTTTACAGAAGCAGAGCTGCAAAACCAATAGGCCCTTG  
GAAGACTGGGTTGAGTGGACAGCTGCAAAAAGCATTGTGCATCGGTACTTCAATTGAAATTTGTGACAA  
GAATTACTGTTAATATTCTGTCCACATTCTGATATTCAATGACAAAATCACTGTTGGTTGATAATAGTCCT  
AAATCACAGCCATAAAAGAAGGTATAATCCTGATGTTGATTGCAAAAAATTGTTTCTCATTGCAGGGGTC  
CCTAAGCTTAACAGGTCTGAGCTTGAAACAGCATGTGAGGATTTTAGCAATATAATTAGTAGTCATGATG  
CATATATAATCTACAAGGGAACTCTTCTAGTGGAGTAGAGATTGTTGTTGCCTCGACTACTCTAACTTCT  
CTCGAAGATTGGTCTGAGAGTTCAGAAATAGCCTTTAGGAAGAAGGTTTGTTGTTTCCATTTACATCAAA  
AATAAAATATTATCTCTCCATATATCTCACAGTCTTACACTTACATAATGACATTGTTGTTATCTCTTCAT  
CCTTTTCGGTTGTAAGACATGACATTTTGTGATTGTGTTATTGAACAGATTGATACACTTTCAAGAGTG  
AACCACAAAAATTTTGTTAATCTTATTGGATACTGTAAGGAGGATGAACCTTTCACTAGGATGATGGTCT  
TTGACTATGCTCCAAATGGAACCTTTCTGTGCATCTACACGGTAAGATTCTTTGTTGTCCACAATTCAGC  
TTTAATTACTACAATGATGGCTGGAGTTAGTTCAGAATAACACTTCTTATTATTTTATTTTAAAAAAAAG  
ATGTTTAGAATGACTTAAAATATAAGTTTAATTGTGTCAATTGAAGAAACCGATCCTCTTGAATGGTCTG  
CAAGGATGAGAGCCATAATGGGGACAGCATATTGTCTTCAGTACATGCATGATCTAAATCCTCCAGTGC  
CCCATTCCAGCTTAGATTCAAATGCCATATTTTTGACTGACGATTATGCTGCTAAGGTCTGCTCCATCTTCT  
TCAATATGTATATAACAATTTATCTACCATATTGAACTAAAACCATTTTTTCATTTGTATTTTCATATTGAAGT  
AGAATTTTTTATATTTTACAGATTACAGAGATTGGTTTCTGGTCAGAACTAATAGCCAAGTCTAAGGAC  
TCTAGGGATGATTTAGAAAATCTGAGCTGTCAGCTCTTGCTGATCTTGAACAAATATCTATAGTTTTG

GGATTCTGTTACTAGAAATAATTTCTGGAAAGTCACCTTATTCAGAAGAACAAGGATCTCTTCTGAACTG  
GGTAAATCTCCTTCATATGTTCCCTTATTTTCTTATACTTGATCGTTACAATGCGTTCCTAGTCTGCATG  
CATTTTCTTGTGTGAATGTCTTTTCTTTCAGACTTATACCAATGCAAAGCATATTGATAACTATTATTTTA  
TTTAGGCGGAGCAATACCTTAAAGATAAGATGAATGTGAGCTCCTTGGTTGATCCAACACTCAAGTCCTT  
CAAAAATAATGAGCTTATGGCTATCTATGTGGTAATTGAAGAATGCCTTCAAGAAAATATAAGGAAGAG  
ACCAACGATAACTGAAGTCATTGCAAATTAAGGGAAGCGATTGATATATCGCCTGATGCTGCAGTTCC  
AAGGCTTTCTCCCCTCTGGTGGGCTGAACTCGAGCTTATCTTCTGAGGCAGCTTAG

>PGSC0003DMG400003210 LRR-RLKs

TCGCAGTATGGATCTAAAAACGTGCTGTATTATATTAAAAAAAAAAAAACTGACAGAGACTGACTCCCTCA  
TTAAGAATTATTGAACAACCAGCCAAAGCAAAGCATTAAATATTCTCCTATTTTGGTTGTTTCCTAAGTCA  
TTCATTACCAAATACCACACTAATTAAGCATATGATTAGCTGAGGACACATATTATGAAACAACATTCTCT  
GGCGCCTCAGCCAAAAATTAGTTCTTGAAGTAGCAGCTCAGTGTTTTAAGAGGTCAGAGATGTTCTTGT  
TTCTGGTTAATTGCCTTTTCTTCTTGGCCAATTTATTTGCAGTCTTTTCGACCTCATCGCCTCAAGATTCTGT  
TCATCTACTTGGGTTTCACAGCAGTCTTCCAGAGCTCTCTCAACAATTGCTCCCTTGGGAATCAGTCTGTCT  
CACACTGCCGATGGAAAGGTGTTACCTGCTATTCAGACATAACTTCTCATGTCAAATCATTGATTCTAACA  
GACTTATTGCTACCTGGAACCTTGGACAAGGCCTTTCCTAATCTCTGCCGTCTTCCTCGCTTGGTTTCTCTT  
GATCTCAGTGGCAACCATTTCACTGGTGGCATCCCTGATATGCTTGCTAACTGCAGCCAACTTGACACGA  
TTCTACTCAATGAAAACAGATTTTCAGGATCCATCCCACCAGAGATTTTCAAATCAAGCAAACCTCATAAA  
ACTTGATTTGGGTTTAAACCAGCTCACTGGCACTATTCCCTCTGAGGTAAGCCTTTCTACAAACCTTCAAC  
ATCTCGGGCTGTGGAACAATTTCTTAGTGGAATATTCCAAAAGAGCTATTTGATTTGCCAACTTGAC  
ACATCTCCACCTCTACACAAACGAGCTGACAGGACCTCTACCCGACTTCCCATTCTCGTGCTCCCTTTCCG  
AGTTCTTTATTTATGAGAACCGTTCTCAGGTTCTTGGCCAATTACCCTAGGCAATTGTCACAACCTTACTT  
CATTCTCTGCATCATCTGCTCATCTTGGAGGAGTTATTTACCAGAGGTTTTTAGGGACCTTTCAAATCTT  
GAATTTCTCTATTTGGATGAGAACAACCTTGAAGGGGAATTCTGAGACCTTATGGGATGGGAGCTTA  
CAAGAGTTAGCTCTTTCCTTGAATAAATTTAATGGTAGTATATCCGAAAAGATTGGTGGTTCTCTTCAGAT  
AAATTACATTGATTTGTCAGTTAACAATTAACCTGGTCAGCTTCCAAGATCAGTTGGACGTCTGAAGAAT  
CTGAACAAGCTTTTTCTGTATGATAACATGCTTAGTGGTTCATTACCAGCAGAACTTGGGAACTGCACTT  
CTCTTGTGCGATAAGTCTCGCCACTAACTTCATCGGTGGGGAAATTCCTCAAGAGCTCTGCAACCTTCA  
CTCCCTAATAAAAATTTCAAGTGTACGGAAATCAAATTCAGGGCCAAATTCAGAATGCATTGGCAGAATA



AGTGGACTGGAGGAGCTGGATCTTAGTGAGAACCGATTGATCGGCAAGATACCACCTGGAATCACAAA  
TATGACGAAACTTGTGTTACTCTCTTTGGCTCATAATAATCTTACAGGGGAGGTACCACCTAATATTGGA  
AAAAACAATTTTCTGGGTTATTTAAGGTTGATTTAGGTTATAATAACTTCAGTGGACCAATTCCTTCTGA  
ACTATGTAATGGCAACAGGCTTGGAGTCCTGGTTCTTGAAAACAACAGTTTTAATGGAAGCTTCCCAACA  
TATATAGCAAATGTGAATCCCTCTATAGGGTAAAAGTCCCAACAACAATCTGCAGGGGAGTATTCCT  
GACTACATTGAAAAGAATGAGAACATCTTACTTGAATGTTGCGGGAAATATGCTTGCGGGAAGGATT  
CCAGCAGCATTTGGTTATTGGACCAATCTTTCAACGATTGATCTTTAGAGAATATGTTTTCTGGTTCCAT  
ACCTGCCCAAATTGGGAAGCTGCAAAATCTGTAAGACTGAACATTTCTTCAAACAGACTGACAGGAAA  
AATTCCTCTTCAGTTAAGTTACTCTGCGAAACTGGAAGAGTTGGATCTCAGCAACAACAATCTTTCGGGA  
AGAATTCCGAAAGAAATTGCATCATCTTTAGTACTGACAAATCTTCTACTCCAGGACAACAACCTTTCTG  
GTACTCTCCAGACACTTTCTCCTCCTCACAAAAGCTTGTAAGTTGCAGCTCGGGGACAACCTTGCTTGA  
AGGCTCAATTCCATGCAGTCTGAGTAACTTAGGGAACCTAATGTTGCACTGAATCTGAGCATGAATAA  
GTTTAGTGGTCAAATTCCTAAGTGTCTGAGCAATCTAGACAATTTAGAAATCCTTGATATATCAAGCAAC  
AACTTGTCTGGAGCAATACCATCAGAAATGGACAAGATGAGGTCCCTTTCGTTTCTCAACATATCATTTA  
ATAACTTTTCAGGGAAGGTACCCATTTATGGGGAAAACCTATTAAGTTCACATCCAGGAACTTCCCAGGG  
AAATCCAGGACTCTGCTTATCAGACACTGAAAGTAGCAGCTGCAAGCATGTGAAAAAATCACAAAGAAA  
CTGGAAGACCTTGGCTGGTGTAAATTAGTGGATGTGTGTTTTCCGTGGCAGTCATAGCTGCGGCAATATA  
CTTGCTAGTGACTCGGATTCAGCACCTTCCCTGCTGAATAAGCATCGGCTCGTCAAGTATCATGCAAAA  
ATTGAAGATCTGCCAGATCGTATAAATTTGAGGACATTGTACGTGCAACAGAAGGCTGGAGCGAAAAA  
TATGTAATTGGAAGAGGCAAGCATGGAACCTGTTTATAAGATGGAATCTGCGAAATCCAAAAAGCTTTGG  
GCTGTCAAGAAGGTTGACTTAGCTCAGAGAGCATTAGCGATGAAATGAGAAGCCTAAATTCTGTCAGA  
CACCGCAATTTGGTAAGATTGGGAGGACACTGCACCAGACATGGATATGGCTTCATTCTAACAGAGTTT  
ATCCCTGGAGGAACTCTTCATGATGTCCTTACCAGAGAAAACCACCTGTAGTCCTGGACTGGGAGCCCC  
GCCATCGTATTGCTCTTGGTGTGCTCAAGGTCTGTCTTACCTTCATCATGATTCTGTCCCTCAAATCATTC  
ACAGAGATCTCAAATCAGATAATGTAATGCTGGATACTGAGATGGAGCCAAAGATTGGAGACTTCGGG  
ATTGCTAAAACAGTATCAGACTCTGATGAAAACCTCGACAAACTCCAAAATTGTTGGGACACTAGGATAC  
ATTGCTCCAGGTTAGCCACACGTTACTATGCTAGTCTTCAGTAATAATTTAGTTGGCAGATTACTTTTGAT  
GATTTAATAAATTTTATTATTTTCTCCCCGGTCCCCCTCCTTCTCCTTGTCTGTCCATCAATTCAGAGAAT  
GCGTACTCAGTTCAATTGACAGAGAAAAGTGATGTCTATAGCTATGGAGTTCCTTACTGGAGCTCTTCT

GCAGAAAATGCCAGTAGACCCCAGCTTTGAAAAGGATTAGACATTGTTTCCTGGGTGAGGAAAAC  
TGCACAGAAGCGACAACAATTCCTTCACTTGCTTGATGAAGAAATTAGTTTTTGGTACATAGAAGAACA  
ATGGAAGGCCCTGAAAATGGTGTATCTAGCGCTTCAATGTGCTGAACTCGAGGCAAGCACCAGGCCTGC  
AATGAGGGATGTAGTAAGGTCTCTTGTCGAGTTAAATCATAGATGTAAAAGTGAAGAAATGAACTTTG  
AATAGTGAAAGCCATAATCAACTTTTCCATATTCCAACGTCTTTTTTTTTCTTTGCTTACATAAAAATTGAA  
CCATTTCTCGATTTGTGTGTGTCATCCTTGCATTCAAGGGCTAAATTCCAACATAACCTGATCGTGGGTGT  
TTCTGTTTAACTTTGTGACATCCACTGCAACATTATAGATTAAGAAAATGCATGACGTTTCAAATCAAATT  
TTGGTAAAAGCGTTTTTCGCATTCTAGCCATAGCTCTTTTCATAATGGATCACTGTCCTTAATCAACTTTT  
GCTTGTTACTTTCTCCAGCTGCTCCAAAATCTGAACAGTTTTGAG

>PGSC0003DMG400003211 LRR-RLKs

TAAAATGATGTTTGCGGGATACATAGAGTTGTGCACGGGATACATTAGGTTTAATACATCCCACGTAG  
CGGATACATAGCGTTGTGCACGGGATACATAGCGTTGTGCACGGGATACATAGGTAAAATAAGGGAT  
TTTTGAAATTTTTGAAATAAGTAGGGATAAATGGATATTAAGGTAAGTAAAGGAGTGTAGTTAAGTAAT  
TTGTCCTAAAATAATCTCCTATATTCATTGTTCCCTCGGTTTCACACGTATCTTGAAAAACAGGCTGACC  
TCAACTTAAAACCTAAATAATAGTCTCAGGTTCCAGCCAAAATAGTTTTTGAAGTACTCCTCATTGG  
ATGCAGCTTCTTTAAAGAGTTCAGAAATGTTCTTGTTGATCTTGTTCACTGTTTTATCTTCTTTGCCAGC  
ATTGTAGCGGTTTTTTTCGGAATCATTGCCTCAAGATTCTGTTTCATCTACTTGGGTTTCGAAGCAATCTTCC  
AGATCCCTCTCAACAATTGCTCCCTTGAATCAATCTGTCTCACACTGTAAATGGAAAGGTGTTACCTGCT  
ACTCAGACAAAACCTCACAAGTCAAATCATTGTATTTAGAGACTTCTTCTATCTGGAATCTTGGACAAG  
GCCTTTCAAATCTTTGCCATCTTCTCGTTTTGGTCTCCCTTGATCTCAGTGGCAACCATCTCACTGGTGGC  
ATCCCTGCTATGCTTGCTAACTGCAGCCAACTTGACACGATTTTCTCAACGACAACAGGTTTTTCAGGATC  
CATCCCACCAGAGATTTTCAAATCCAAAAGGCTTGATACCTTGAGTTGGGTTACAATCAGCTCAATGGC  
ACCATTCTTCTGAGGTGGGCCTTTTCGACAAGCCTTCAATATCTTGGGCTGTGGAACAATTTCTTAGTG  
GAAATGTTCCAAAAGAGCTATTTGGTTTTGCCAACTTGACAGATCTCTACATCCACACAAATAATCTAAC  
GGGACCTCTCCCGGACTTCCCATCCTCATGCTCACTTTCCAGCTTCTTATTCATCAGAATCGCTTCTCAGG  
TTCTTTGCCAATTTCCCTAGGTAATTGTCAACCTTTCTGCATTCTATGCAACATCTGCTCATCTTGGAGG  
AGTTATTTCCCCAGAGGTTTTTAGGGGCTTTCAAATCTCGAATTAATCTCTTTAGATGACAACAACCTTG  
AAGGGGAAATTCCTGAGACCTTATGGAATGGAAAATTACAAGAGTTGGTTCTTTCCATAAATAATTTTAA  
TGGAAGTATATCAGAAAAGATTGGTGGTTGCCATCAGATGACTTACATTGATTTGTCAGCTAACAAATTA

AGTGGTCAGATCCCAAGTCAGTTGGACGTCTGAAGAATTTGTACAAGCTTCTTCTGTATGATAACATGT  
TTAGTGGTTCATTGCCAGCAGAAGTTGGGAAGTGCACCTTCTTCTGCTGAGATAAGTCTTGTGTAAGTCTT  
CATCAGTGGGGAAATTCCTTCAGAAATTTGCAGCCTTCAAACCTAGAAACATTTAATGCATTCAAAAAT  
AAAATTCAGGGCCAAATTCAGAATGCATTGGAAGAATAAGCGGGCTGCAGGAGCTAGCTCTTTATGA  
GAACCGATTGACCGCAAGTTACCGCTTGAATTACAAATATGACGAAACTTTCAATTTCTGTCGTTGGCT  
CATAATAACCTTACGGGGGAGGTACCACCTGATCTTGGAAAAGATAATTTTCTGGCTTAGTTAAGGTTG  
ATTTAGGTTATAATAACTTCAGTGGACAGATTCTTCTAAACTGTGTAATGGCAACAGGCTTGCAGTCCT  
GGCTCTTAAAAACAACAGGTTAATGGCAGCTTCCCAACCTATCTAGCAAAGTCAAATCTCTCTATAGG  
GTAAAACCTCCCAACAACAATCTGCAGGGGAGTATTCCAGACGACATTGAAAAGAATGAGAATATTTCT  
TACTTGGATGTTAGACAGAATATGCTTGTAGGAAGGATTCCAGCTGCATTTGGTTACTGGACCAATCTTT  
CAATGATTGATCTTTTCAAAAATATGTTAATGGCTCCATACCCACAGAAGTGGAAAACCTTCAGAATCTT  
GTAAAACCTGAGCATTCTTCAAACAGACTGACCGGACAAATCCCTTTCAGTTGAGTAACTCTGAAAAAC  
TGGAGGAGTTGGATCTCAGCAACAACAGTCTTTCAGGAAGAATTCCTAAAGAAATTGCATCATCTTCAGT  
ATTGACAAATCTTCTACTCCAGGACAACAACCTTTCTGGTGCTCTTCCAAGCACTTTCTCCTCCTCACAAT  
GCTTGTAAGCTGCAGCTGGGAAACAACCTTGTCTCGAAGGCCCAATTCATGCAGTCTGAGTAAGCTTAT  
GCAACCTGGTTTTTCACTAAATCTGAGCATGAATAAGTTTACTGGTGAAATTCCTAGGTGCCTAGGCAAT  
CTTGACAAATTGGAGGTCCTTGATATATCAAGCAACAACCTGTCTGGTGCAATACCATCAGAAATGGAA  
AAGATGAGTTCCTTTTCTTTCTCAACATATCATTTAATAGCTTGTGAGGGAAGGTACCCAATACATGGG  
AAAACTATTAAGTTCACGTCCAGGATCTGCCTGGGAAATCCAGGACTTTGCTTAATAGACACGGAAG  
GTAGCAACTGCAAGCATGTGAAAAAATCACAAGTAAAATGGAAGACTTTGGCTGGTGTAATTAGTGGAT  
GTGTGCTTTCCATGGCAATCACAGTTGCTGCAATGTACTTACTAGTACTCGGATTTGGCACCCATCCCT  
GCTGAATAAGCATCGGCTCGTCAAGTGTCAATCAGGAATTGAAGATCTACCTGATGGTATAACTTTTGA  
GGACATTGTACATGCAACAGAAGGCTGGAGTGAAAACCTATGTTATTGGAAGAGGCACGCATGGAAGT  
TTTATAAGATGGAATCTGCCAAATCCAATAAACTTTGGGCTGTCAAGAAGGTAGACTTAGCTCAGAGAG  
CATTCAATGATGAAATGAGAAGCCTAAATCTGTGACACCCGCAATTTGGTAAGATTGGGAGGATATT  
GCATGAAACATGGATATGGCTTCATTCTAACAGAATTTATACCTGGAGGGACTCTTCATGATGTCCTTCA  
CCAGAGAAAACCACCTGTAGTCTTGGACTGGAAGTCCCGCCATCGTATTGCTCTTGGTATTGCTCAAGGT  
CTATCATACCTTACCACGATTCAGTGCCTCAAATCATTACAGAGATCTCAAATCAGATAATGTAATGCT  
GGATTCCGAGATGGTGCCAAAGATTGGCGATTTGGGATTGCTAAAATGGTATCAGATGAAGAAAATTC

AACGAACTCCAATATTGTTGGGACTCTAGGATACATTGCTCCAGGTTAGCCACACGTTACTATGCTAATT  
TTCAGTATAATTCAGTTGGCAGATTACTTTGATGAACTAATAACTTTTACTACTTTCTCCCTGGCCCCCTT  
TCTCTTTTTGTCACTCCATCTATTAGAGAACGCATACTCAGTTCAACTGACAGAGAAAAGTGATGTCTAT  
AGCTACGGAATTCTTCTTTTAGAGCTTTTCTGCAGAAAAATGCCAGTAGATCCCAGCTTTGAAGAAGGAT  
TAGACATTGTTTTCTGGGTGAGGAAAACTGCAGAGAAGCAACAATTCCTTAGTTTTCTTGATGAAGA  
AATTAGGCTCTGGAATGTAGAAGAACAATGGAAGGCCCTGAACTAGTGGATTTGGCGCTTCAATGTGC  
TCAACTCGAGGCAAGCACCAGGCCTGCAATGAGGGATGTAGTAAGGTCTCTGTGCGAGTTATGAAGAG  
AGGAATGCAAGATGATTTGAAGGCAGGTGCAGTTCAATCCAGAAGATCAAGAGCTCCTGCATTTCTCTT  
CTTTATTTTTGGCGTAAAGAACAGTTAGTTGATGATGTTGAATCATTACTAGACTCTATGGCCTCTTTGTA  
AGTTTTGTTGAGGCTGTATCTGTAGATATGATATACCAGGTCTTTATTAGGGTGCTGATGAATATAATA  
TGTTACCAAATTCAAAAAGAGAATAGATGTAAAGATAAGTAATGAACTTTTAGTAGTGAAACCTGTGA  
TCAACTTTCCAAATTCACATCTCATTTTTTTCTTTTTTGCTTACATCAAAAAATTGGACAAAGAAAATA  
CATGATGTTTCAGTTTAAACAAAATCGTGATCTTGGGTTTTTCAGTTTAACTTTGTGACATCCAATGTAGCA  
ACATAGACTAAGAAAATGCATGATGTTTCAAATCAATTTTTGGTAAAAGCAATTTTCACCTTCTAGCCATA  
GCTCTTTTCATCATGGATCACTGTCCGTAATCAGTTTTTGCTTATTACTTTCTCCAGCTTCTCCAAAATCTG  
AACAGTTTTTCAGGTATCACAATTAATGAGAGTGTGAAGGAACAAGGCTTTGCTACAAGCTAGTCCTT  
ATCTTATGGACTATAACATTCCGGATTATAAAAGAAATCAAAAGAACAACCCCCACCCAAAAAGATAAG  
CTTTTGTTGAATTTGGTCGTAATAATGATGGTTCCTGCGAAAGAGTGCAGAAGACCTCCGCCTTACCGGT  
CTTTCTTTGTGTTCCAACTTGCAGTAGCAGAATTATTTGCAGAAAATATAGATATGATGAATAGAAATG  
GCTTGTGGACAATCATTGTATTTCAAACAAATACAGATATTCAAATAAGGTAGATATAACTCAGATATGA  
GTTACCAACAGGACTTCTAACAAGACTTAACAGACGAATGGCAAATACATAGGAATATCAGATCAGGAG  
AGTAAAATAATAGTCCTTGAAGAATTGATCAGAATTCAGTAGAAAGGAAATATGAAAGAAGTGCAAGA  
ATAAACTGGAAGAAATACTCTGCAGGTGACAAATAGATGAAAGACATACCTCAGTTACGAAAAGTCAA  
CACCCGAGCACAATACGATGCGCACCTAAATCATCCAAGTAGGAGAAGCCCACTTAAATGTCCCAGAT  
TCCTTTTTCGTATTTTTTATGTAGTTGACTTGGATGTGCATTACAAGACAAGTGCACAAGATTTGAGAA  
TTTTTCATGTTAAAATATCCACCAGAATTTGCATTGGATATATTCACATGGCACCACATATGCTGACAAAT  
CTCAGACTTCTAATAATAGAGATTCCATTCTGAGACAGATCCACTAAATCCCAAGTTTCTGCTCTTAGCA  
AGTGCAGCACCATCACATATGATGATAAGTCTAGGACCTCTAGTAATAAAGCTTCCCTTCTGAGCCAAAT  
CCACTAAATCCCAAGCTTCTGCTCTTAGCAAGTGCACTTTTGTGCAAGACGATTAGAGACAAACTCCAG

GAATTTGGTGCTTGCTCTAATACCAAAGTTACAAGCAGCTCAAAGAGAAAATATAAAACACTAAACCA  
CATTAAAGAAAAGCTAGGAAGCTAAAACCAAATTTGAAGAAGAAAAGTTCCACACTGTTTCTCTTAAC  
AGAACAGGTGAAATTTCTCATAAAGAGCTGATCATATTCTATATCCAATCACTTTACTGAAGTTAGAGTA  
CAGATAAATGTTTGAAAACCCTAGTGTCCAAGATAGGGACAATAGAAATATGAAGCTGTAAAATGCTC  
CAAAAAAAAAATAATTAATTACTGAGAGGATTTCCAAAATAGCCTCGAGGTAAAATATTTATACAAGGTT  
AAACTTGTCTGCTTCCTCAGTCCAATAAAGCAGAGTTCAGGAGTTTTACTTTGAAGAGACCGAACAAATT  
TAGAGAACTACTCCATTACTGGCTATGTAACCTATGGCTAACTAGATTAAATTAGAAGCTCAATGTGCAT  
AGACGTGGTGTCTTGGGTTATACTTAAGACCAGCTAACTGAAGAAGAATTCATTAGTATACATGGTTA  
CGGACTGAGGCACAGTGCAACAGGATAATATTTTCACTTAAGTAAGAAATTACCATTAGAAAGATAGG  
ATGTCCTTGATCACATCATA CAGAATTAGATACCTAATGGAGCTTGCATGTCTGCTTAATTAACACTAAAC  
AATGTAACTATTGCATATCCTCGCCACTTGAATATTTTCATGCAACATATTTTGTCAATTTGGATGTATAT  
ATGTTGAATGAAATTAAGGAACCTAAAAGTCAGTTCACCAGACAATCTATAATCAGTTATGTACCACATC  
TTTTTACCTAATACATTTTTTGTCAATCAACACCACTATTTATACCCTATACTACATATCAAAGGGACAAGA  
TGAAGTTTGCAAGGATCAATGCCTAGTTTATACTCAGCATACAAATAAAGTCCATATAAGATACAAAACC  
AACTAAACCTCTTTTCATCTCCCAAATATAGTTTGAGCAATAAAATAGAGAGATGGAAAAGTATTATTTG  
ATCGCGAAATTATGAACCAGAATAGATTGTGGCAGCAACACCAGACCTCAGTCACAGTCATACTAAGTC  
ATCTACTTTGTTGTTTTTACATACTTTTCTGCTTCAATTTTAATCAAAGCAGAATGCTGATAGCCTGATA  
TGCATTCAACTACAGATGTATGGATCCTTTTTTTTTTTGATGACAAGGGAAACCCGCAGGTGCGCACAG  
GGTAAAACCTCTCGCTCCTATGCAATAGCTCGCAAACCACATAGGAGAGGTAACCCGTGGGTGCGCACAG  
GGTAAAACCTCTCGCTCTTATGCAATAGCTCGCAAACCACATAAGAGAGATAACCCGCACTAGGCAAGGC  
TGGTGCACGAGCTCGACCCAGAGACAAACCCCTTGCTTTCGCTGGCAAGGGGTTTCGAACTTGAGACC  
TCCAACATGGAAGTGCCAAGCCCAAACCACTGGGCCACCCCGAAAGGTCAGATGTATGGATCCTTTTCA  
CCTAGATATTCAACATCAAGGCATCTCAGAATTCTCAAATCAATTTACTCCTGGCAACTTCTAATTTTGA  
AATCCCTAAGATCATAAAGGGGCTGTGCCCAAGCATTAGAAAACCTAGCATTGCCTTCGAAGGTCAAATT  
ATCGATTTAATCAATGGTACAGAGGGCTTTTAGAAGCGGAGAAATTGGGAACAGCATTGTACCTGTTAA  
TTGTTGATGGAGTCATCGGAATCAAAGTAACTCAAATTAACGAAGACAAATAAATAAAAAATCTCATTT  
TCAACTCAAATAAATTGGATGGGCATAAATTTGTGGAACCCATTAAGCTTTTTTCTCCAACTTGC  
>PGSC0003DMG400003280 LRR-RLKs  
GGAAATTCTGTCTCTCTCTGGAGAGCGGCTCATTGTTTCTCCACAAAAAATGGCCGCTGTCTCTTCCAGC

TCCACCACCTTATTTCTTATTTGTTTTTCTATCTCATCCAACCTCCTTGTGTTTCCATTGGAGATGATCA  
AGTCCTTCTTGAATTTAAAGAATTGTTATTAATACCTCACTTCTTGATTCTTCTTGGAAAAAGGAACAA  
ATCCTTGTGATAATAATAACAAATGGTTTGGTGTACAATGTGATAATAAAAATGTTATTCAAGCCCTACTT  
CTTGGTGGGGTTGGCCTTTCAGGGAATCTTGATGTTGATGTACTAATTAGCCTTCAAGGCCTTAGAGTTG  
TTAATCTTGCAAACAACCTTTTCTCAGGAACAATTCTGATTTTTTTAGGCTTGGTGCTCTCAAGTCTTTAT  
TCATTAATGGAAACCAGTTTTCCGGAGACATCCCTGGAGATTTCTTCTCCAAAATGGGATCTCTCAGGAA  
AATATGGTTTTTCGCGGAACAAGTTTTCAGGGAAAATCCCTGATTCTTTAGCAGGTTTAAAATATCTTTTAG  
AACTCCATTTGGAGAATAATGAATTCACAGGACCTATTCCAATTTTGTACAGGCTAATCTAGCAACTAT  
AACTTCTCAAACAATAAATTACAAGGTTTAATTCCGCAAAGTTTGTCTAAGTTTGGTTCGAACCCCTTTC  
AAGGAAATCCTGATTTGTGTGGAAATCAAATAGGGAGGGAGTGTAAAGGCTGTAGCCTCTGGTGAAAAG  
TCTGAAGTTTCTGGAAGTACAAAATGGATAATTATAGGCTTAGTGGTTGTTTTGCTATTGGTGGCTATAT  
TATTTAAGTCAAAGCGTAAGGATGATCAATTTGAAAAGCTTGAAAAAGAGAGCCTTGATGAGGCTGTGA  
AGGTGCACCTTAACAAGAGAAGCATGAGCACGCGCACCTCTATGCGTTCATCAAGGAAAGGACGCTCAA  
GAAGTGGCAGCGATATGGGTGATCTAGTTGTGGTAAATGATGAAAAGGGTATATTTGGGATGCCTGAT  
TTGATGAAGGCAGCAGCTGAAGTCCTTGTAATGGAGGATTGGGGTCAGCTTACAAGGCGGTATTGGG  
GAATGGAGTGTCCGTCGTGGTGAAGAGGTTGAGGGAAACCAATAAATTTAACAAGGAAAGTTTTGATG  
CAGAGATCAGACGACTCGCTAGGATAAAGGCACAGGAACATATTGCAACCATTAGCATAACCATTACAGGA  
AAGAGGAGAAGTTGGTGGTGTCTGAATACATTCCCAAAGGCAGCCTGTTATACCTATTACATGGTATCG  
ATATTTCTTCTTGCCTCTCATGTCTCATCTTCAATGGTAAAAGAGTCCATGAAAACAGCCTATATATTATT  
GTGTACAACCTTAATGCTAGCTTCTATTTTCATGTGCATAAGTAGAGACTATCTCATTATGGGATATCATTTA  
CGTTTATCAAATGGTCTGTTAATCATTCCCTTGAAATGACTCTTTTAAAGTTTTGGGATTACATAATTCATA  
AAAATGATCTTAGATAGCCCGAAACATTTCCATTCTTGTAATTGAGGTAATATTCACATTATGTATTTAGC  
ATGCCAATTTGGGATCTGCTTCTATCAATATTATAAACTCTTTTTATCCAAAATTTTCAGGTGATCGGGGG  
ATAGCACATGCTCAGCTAAATTGGACTATTTCGCGTTAAAATCATCCTGGGAGTTGCCAGTGGAATGAAA  
TTTCTTCATTCAGAGTTTGCATCATATGATGTACCTCATGGGAACCTTAAGTCTAGCAACATTCTTCTTCT  
GCAAATAATGAACCACTTCTCACAGATTATGCGTTTTATCCACTACTCAACGATTACAAGCTGTCCAATC  
TCTTTTTGCTTATAAATCCCAGAAGCCATACTAAACCAACAAGTCACTCCAAAAGTATGATGTATATTGTC  
TTGGAATCATAATACTTGAATCCTAACTGGGAAATTCATCACAATATCTCAGCAACCAAAAAGTGTGG  
AACTGACGTTGCACAATGGGCGTGGTCAGCAATTGAAGAGAATAGAGTATCAGAATTGATTGCTCCAGA

GATAGAAACAGAAAAGGATTCCCTTGAAATGATGGAGAAGTTCCTTCATATAGGAGCTGCATGCACTGA  
GAGTGATCATGATAATAGAATCGACATGAAGGAAGCCATAAGGAGGATAGAAGAGATAACAAATTTAA  
TGTAGTAATTGGTTAGATGATCAGGAGGTTTCAATTTATTTTAGGGAGGAGGGAAAAAAAGGTACATAA  
ACCTGTTTGAGTTCTCCAATAATGATCCACGCACGAGCTCTCCAGTAGAATGTGGGCATTTTACGTTT  
CCTGAGATGAATGCTGTTTTCAATTTGATTTGACTTGCCTGTATCGAACTGGTGTGACATGGGCGTGGATA  
CTTTGTGAGGATTCTTCAACATGCACTTAATGTTAGTAGGAACTTAAAGTACCCATACGAAGAATTACA  
CAAAGTGTATATTGGATACATTAACATTATGCATTTTCAATTTTTCTCTCTATAGTTTCAATTTTTTCAGAT  
AACCAATGCAGATACTCG

>PGSC0003DMG400003429 LRR-RLKs

AAGCAACACGTCCACACTTCCAAACCACAAAAAATAAAAAATAAAATGTCTTCTAGTCATTTTCTTTTCAT  
TCCTTTTCTTTTCTTTCTAATTTCCGGGATCTTTTCGGACCTTAACGCGGATAGAGCCGCTCTACTCCACC  
TGAGTGCGGCCATCAAAGGCCGCACTCTTAGGTGGAACACAACCAATTCAACCCCATGTTTCATGGGAAG  
GTGTGCAATGTGATACTACAATCAACCGTGAATTGAACTCCGTCTCCCCGGATATGGTCTATCCGGTGA  
GATGCCCTTAAATTCCATCGGAACTTAACTGAACTCCGTACTCTCAGCCTTCGGAGTAACTCTTTATCCG  
GTCTTCTTCTTCTGACATAGGATCATGTACAGAGCTACGTATACTTAATTTGGAAAACAACGATTTCTCT  
GGTTCAATTCCAACGACTTTTTTCAATCTGAACAATCTTATACGCGTGAGTTTTTCAGGGAACAGGATCTC  
CGGTGAGATATCGGACGCGTTTAAACAATCTGACTAGGATGAGAACTCTGTATTTGGAGAATAACAACCT  
TTCTGGCTCACTTCTGATTTGAAAAACCTCTCACAGCTCAATGAATTCAATGTGTCTTTCAATAGATTAA  
CCGGTTCGATCCCTTCGAGTTTAGGTGATTCTTAGCTTCTTCATTTCTTGGAAATCACTCTGTGGCTCTG  
CTTTCTCTTTAGTCCTTGTCTGAAAACAATAGCCTCACCAGTCAATCTGATAAACTTTCCGGCGGAGCA  
ATAGCTGGAATAGTAATTGGCTCGATTATCGGATTGTTCACTACTATTAGTTTTGTTTATGTTAGTGAG  
ATCAATTTATAGGAGTAGAAAAAGCTTCCGTCAAGTGAATGTGTCTCCTACGCCGAATCAAGTACTTTCA  
AGTCCTCATGATTCAATAGTGACAGAAAATCATGATATCGAAAATGTTTTTTTCGGAGAGGAAAGTTTGTG  
AAGATAGGACAAAAGGGATGGTGTTTTTTGGGGAAAGTTTTGAGTTGTTTAGTTTGGAGGATTTATTGA  
TGCGTCTGCGGAGGTTTTTGGGGAAAGGGGCAACTGGAACACTTATAAAGCATATTTGGATAGAGAT  
GTTGAAGTTGTTGTGAAGAGGTTGAGAAATGTTTGTGTTTTAGAGGAGGAGTTTAGGGGAAAAGTGGA  
GCAATTGGGAGGAATTAGTCATGGGAATTTGGTGCCTCTTAGAGCATATTATTATGGAAGGGATGAAAA  
GCTTGTTGTTTATGATTCTATGCCTACAAGTTTGTATGCTGTTTTGCATGGTAAGTATCTTATATCTAATAA  
ACTTTAGCTTATTGTTGTTTTAATAATAATTTTGTACTTGTCTTTTAGGTAGTCTCTGGTTTTGGTTA

GGGAGTAAATCAAGTTAATTAATAATTCTTAGCTTAGATTATATTAGCTTCTAGTTAATTGTTTTTTAGCTTT  
AGCTATGAAAACGAAATTATGTGGAAGAGATGGTATGAAAACAGGGGAAAGGAAGAAGATCATTGG  
TAGTTCTCTTTTACATTAGTTAATTGTCATCAGATCCACTGTCGCTACTCGCTATAGGCTTAGCAGAATTTA  
CAAAGAGTGTTAAAATGTAAAGTCACTAGTAATTGCCTCTAAAATATATTTAGCAGCAATTAAGCTATT  
GTCGTAAATTAATAGTGGCTAAAGATAACTTTTGATGTTGTGTATATTGATGTTACATCACAACTAATG  
AAGGACCCATGTAATATTATTAGAGAGAACAAGAAGCTTTCTGTGTAGAGGGAAAGCCTCCTTAATTAGT  
ATTTAGTTGAATAGGCCTTCTATCAACTCACATTCTATTAATGTTACGGAAACGAACTATAGAATTTTAC  
TAGTATTAATTATTTTCGTATTCTAACCAATTACTATTACTATGAGTTAGTTTTAACCTTTCTGATTTTGTAG  
GCGAAGGAAAAGAAGCATTGACATGGGTAATAAGGAGCAGAATTGCATTAGGAGTTGCCAATGGTATC  
GAATATCTCCATTCACTAGGCCTTAAAGTCACTCATGGCAACATCAAGTCATCTAACATCCTCCTCACACA  
CTACTACGATGCATATCTATCCGAATTTGGCATAACACAGTTGATTTCTTCAACATCAAACCTCCAAAATGA  
CTGGATACTACGCGCCTGAGGTGACAGATATTCGTAATGTTTCCCAGAAAGCCGATGTCTATAGCTTTGG  
CACGATTCTGTTGGAACCTCTAACGGGTAAAAATCCTAGTAGTGTCATCAACGACGAGGGGAATTGACCT  
GCCTAAATGGGTGAAATGTATAGTTGAAGAGAGGGGGACAACACAAGTGTTTGATCCTGAGTTGATTA  
GATTTGAGAATTGTGATGAAGAGCAAATGGTTTCATTGCTGCATCTTGCTATTTCTTGACATCCCACCAC  
CCCGAAAGGCGGCCCTATGGCTGACACTACCAGGAGGATCAAAGAAATTGTTATGTGAGTTTTGTTA  
ATGTTTGATCTTCCCCCTCATTCTTGCCAAATGAAGGGGCGAATTCATACCTTCAAATTTGGGCACGTG  
AATATGTGATCTCTATAAACTAGATATTTTATGTATATATATTTTGAATTAATATAATATTATTTATTG  
CCTC

>PGSC0003DMG400003551 LRR-RLKs

GTTAAAAGTGCTGGTCCTTGTTTTGAAAAGTGCTCATTGTCACATTCTCCACTTCTCCCTCACTCTTCTT  
CTCTGTGTCACTCTGTGCCTCTGTGCAAAGTGAGGGGGCCTCTGCTATGGCCATTAACACTCATCTTCTCC  
ACTTTATCATGCACCCATTTTAACTTCATTATAAACCAAGCCAACCTCTTTTTCTTATGTTCTTGATTTCTT  
CTTCTTCTTCTTTCATGGCTGCTTATCTACTTCTGTTTCTGTTTTTCTCTACATTATGCTCTGCTCAGAG  
AAACTCACAAACCCTTTTGAAGTTCAAGCGCTTACTTCTTTTAACTTAGTATTCATGATCCACTCGGTG  
CACTCACTGACTGGGATTCTTCTTCCCCTTTTGTCCCTGTGATTGGCGAGGTGTTTTCTGCGTCAATGGC  
CGGGTCGGTGAACCTTCGTCTCCCTCATTGCAACTCAGTGGGCCACTCACTACCCAAATTGGTAACCTGC  
GCATGCTGCGCAAGTTAAGCCTCCGGTCCAACCTCTTTAATGGTACTGTTCCAGCTTCGTTATCCAAATGT  
ACCCTTTTGCATTCTGTTTTTTTACAGGGTAACGCATTTTCCGGTAATCTTCCGCCGAAATATTTAACCTT



ACTGATTTACAAATCTTTAAAGTTGCCGGAATCAGTTGTCTGGTGAAATCCCCGGAGAGCTTCCTCAGA  
GTCTACGATACTTTGATCTTTTCGTCAAATTTGTTTTAGGAGATATTCCGAGGAAATTTCTGACAGGTCT  
CAGTTACTTCTGATTAATCTTTCTTATAATCGTTTTTCCGGCGAAATCCGGCGAGTCTCGGCCGGCTTCA  
ACAGCTTCAGTACCTTTGGCTTGCGTACAACAACCTGGTAGGAACTTTGCCCTCTGCAATTGCTAACTGTT  
CATCGTTGGTTCACTTGAGTGCTGAAGGAAATGCTATAGGGGGTCTTATTCCGGCAGCCATTGTTGCTTT  
ACCGAAGCTTCAGGTGATATCTTTATCACATAATAATCTCTCTGGTTCCTTACCAGCTTCATTGTTCTGCAA  
TGTTTTCCATTTATCCTCCCTCCCTTAGGATTGTTGAGTTGGGTTTCAATGCATTCACGAATATTGTCAAGCA  
AGAGTCTTCTAAATGTTTTAGTTCTTTGCAAATTTGGATCTTCAACACAACCAAATACATGGTGAATTC  
CTTTGATTTTGACGAACATTTCTGCATTGACGTCGCTGGATGTGTCATGGAATTTGTTCTCTGGAAAAATC  
CCAAGTGCCATTGGGAACTTGTGGAGATTGGAGGAACTGAGAATGACAAATAACTCATTGGAAGGTGCT  
CTTCCATTTGAGATTACGAACTGCAGTGACTTGAAAGTTCTTGATCTTGAAGGGAATCGAATGACGGGT  
GACATTCCAATGTTTTTAGGTGATCTTAGAAGCTTGAAGACATTGTCACTGGGAAGAAATCAGTTTTCGG  
GTTCCATTCCTTAGTTTTAGAAATTTGAGTAATCTCGAAAATCTCAACTTGGGAGGAAATGGTCTCAAT  
GGAAGCTTGCCCGAGGAGGTAATGGGTTTGAGCAATTTAAGCACACTGAATCTCAGTGGAACAAGTTT  
TCTGGAAGTATGCCAGTTGATATTGGGAATCTTCAGCAGCTCTCGGTTCTGAATCTGAGTAAAAATGGCT  
TTTCAGGCACTATTCCTTAGCATTGGGACTTTGTATAAGCTAACGGTTGTTGATTTGAGTGGACAGAA  
TTTCTCAGGTGAAATACCATTTGATCTTGCTGGTTTGCCTAATCTACAGGTTATAGCTTTGCAAGAAAACA  
AGTTGTCTGGTAATGTTCTGAAGGTTTCAGTAGCTTATTGGGTATGCAATATTTGAATCTTTCTTCCAAT  
TCCTTTTCTGGCCATATAACCATCAACATTTGGGTTCTTGACTTCATTAATTGTACTTTCTTTGTCTAACAAAC  
ACATAAATGGTTCGATTCCCTCCGACTTGGGCAACTGCTCTGCTCTGGAGAATTTGAATCTTCACTCAAAT  
TCATTGAGTGGCCAAATACCTGCTGATCTCGGACGTCTTTCCCACTTGAGTGTGCTAGATTTGGGTAGAA  
ACAACTTAACAGGTGAAGTCCCAGTAGATATTTCCAATTGTTTCATCCTTGACATCACTCGTGCTCGACTTG  
AACCATCTTTCAGGGAACATAACCAGAGTCACTATCCAGGTTATCAAACCTAACTGTCCTTGACCTCTCTAC  
TAACAACTTCACTGGAGAAATCCCAGCTAATCTTGCCATGCTCTCTAGCTTGGTGAGTTTCAATGTGTCAA  
ACAATAATTTGGGTGGCCAGATTCGGGAGATGTTGGGCTCCCGTTTTAACAACTCATTGAATTATGCTGG  
CAACCAAGGTTTGTGTGGGGAGCCATTGGAAGAAGATGTGATACATCTGGTGATGGTGGGAATAAAT  
TGATTATGTTCAATTGCTGTGGCTGCCAGTGGAGCTCTTCTCTTTTATCATGCTGCTGCTTATATACTTACA  
ACTTCTTGAGGTGGCGCAGGAAGCTCAAAGAGAAAGCAGCTGGAGAAAAGAAGCATAGTCTGCAAG  
GGCTAGTTCAAGGACCAGTGGTGGTCGTGGCAGTGGCGAGAATGGTGGACCCAACTTGTTATGTTCA

ATAACAAAATCACACTCGCTGAAACAATTGAAGCAACTAGAGAATTTGACGAGGAACATGTGCTAAGTA  
GAACACATTATGGAGTGGTCTACAAGGCCTGTTACAATGATGGAATGGTGCTCTCAATTCGTAGACTTTC  
AAATGGATCACTAGGTGAGAACATGTTTCAGAAAAGAGGCAGAATCACTTGGCAGGGTGAAGCACAGGA  
ACCTAACAGTTTTGCGTGGGTACTATGCTGGCCCGCCTAACCTCAGACTACTTGTCCATGATTACATGCCT  
AACGGGAACCTTGCAACACTGCTTCAAGAAGCATCCCACCAAGATGGTCATGTCCTCAACTGGCCAATG  
CGCCACCTCATTGCACTTGGCATTGCTCGTGGCCTGGCTTTCCTTCACTCATCCCCAATGGTCCACGGAGA  
TGTTAAGCCGCAGAATGTCTATTGATGCAGACTTTGAAGCCCATCTTTCAGAATTTGGCCTAGGCAAG  
CTTGTAGTAGCCACCAACCGAGCCCTCCACATCAACTTCAGTTGGTACCCTAGGCTATATATCTCCAG  
AAGTAGCATTAAACGGAGAAACCACAAGAGAATCAGATGCTTATAGCTTTGGCATTGTTTTGCTGGAAC  
TACTAACAGGAAAAAGACCCTTAATGTTACACAAGATGAGGACATAGTGAAATGGGTGAAGAGACAA  
TTGCAAAGAGGGCAAATTTCCGAACTATTAGAGCCAGGATTGCTCGAATTGGACCCTGAATCATCAGAA  
TGGGAAGAGTTCTTGCTAGGAATTAAGTAGGCTTGCTATGCACAGCACCTGACCCACTTGATCGTCCCA  
CCATGGCCGACATTGTGTTTCATGCTCGAAGGCTGTCGTGTGGGACCTGATATCGCGTCTCAGCTGATCC  
CACATGCCAACCTTCACCCGCCTGAATCCCCGAGGTTCAATTCTAATTCTTTTCCCTTTTTTATTATTAGCT  
CTGTATAAGTTGTGAGAGTAAATTTGCAATGCAATGCAACGCAACAGTAGCTAGCTAGCAACTTAGTCG  
TTCAATTTTCATGCTTTTTTTTTCTTGTAGATTTTTTAAAGTAAAAGAGAAACAATATTTCTCTTTTATTGAT  
TCTTGTTTTATGCTATTATTCAAACACCTCACTCCCCATGGTGCCGGGATTTTTCTCCTTTGGCGTGGGGA  
CCAAAATGTAGTGCTATCAATAAGTCAAAGAAAGCTAA

>PGSC0003DMG400003714 LRR-RLKs

GCTCAACACATGGCGTTAGTCTTTGTCAAGTGTGCTTCTTCTCTCCTTCTGAAACTGAAACTGAACTTT  
TTTTTTTTTTCAGCTCATACGCTCCTCTCTTCCCCTTCCATAACAACTCCATTAACACCCACCATTCTTGA  
TTTTTCCCCATTTGATCTTCTTCTTCTCTCTATCATTACTCACCACCACTCTTCTCATGTCAACGGCTA  
CTTTTCTTCTCTCTCCGCCATTGGTGGTGGTGGCACTTACATTGCTATTTTCTGTGTTTTTTCCATGGCCG  
AAAACGTTACAGAGACGGAAATGGCAGCCTTAATGTCGTTCAAACGGAATTTGGAAGACCCACTTGGG  
GTATTAGACGGTTGGGATTTTTCTACCTCATTAGCTCCGTGTGATTGGCGTGGGGTTCTGTGTGATGCCG  
GCAGAGTTCGTGAACTCCGCCTACCTGGGTTGCAGCTGAGTGGACGGCTAACTGACCAGGTTGGTAATT  
TACGCCAGCTACGGAGGTTAAGCCTACATTCTAACAACCTTTAATGGCTCTGTCCCACGCTCTTTAGCTCAA  
TGTGCTTTGCTACGCGCTGTTTACTTCCATTACAACCTTTTTTCCGGTGAACCTCCCGCCGGCTATCTCGAA  
CCTCACTAATCTTCAAGTTTTAACTTTGCTCACAACCTTCTTCCGGTCATGTCTCTGGTAATGTTCCAGC

AAGTCTCCGGTTTCTCGATCTTTCTTCTAATCTCCTCTCCGGTGGCATTCCGGGTAACTTTTAGTTGGTTC  
TCAGCTCGAACTGTAAATTTGTCGTTAAACCGTTCTCCGGTGAAATCCGGCGAGTATCGGAGCTTTA  
CAGAAGTTAGAGTATCTCTGGCTTGATTCTAACCAACTTTACGGCACTATACCTTCAGCAATCTCTAACAT  
TTCCACATTAATACACTTGAGCACTAGTGATAATCATCTGCAGGGATTAATCCCGGCAACAATCGGTTCA  
CTTCCAGTTTACAGGTAATCTCATTGTCGCAAATCAACTATCTGGTGTGGTCCCTGCATCATTTTTCTGT  
AATGGGTCAGTAAATGCTCATGCTATTAGGATCATTGAGCTGGGTTTCAATGCATTCACGGGTTTAACTA  
AACCTGGGAATGCAACATGTTTGAGTGCTTTAGAGGTCTTGACCCTTCACGGGAATCACATTAATGGTGT  
TTTTCTGAATGGTTGACGAATTTTTCGTCGTTGAAGTTCTTGATATCTCCGGGAATGCAATTTCTGGAA  
CTCTGCCAGATGATATAGGGAATTTAAGGTTTCTTGAGGAGCTTAGACTGGGTAACAACACATTAECTG  
GTGATATTCCTGCTAGTATTGTGAACCTTTGGTTCATTGGGGGTACTTGATTTAGGTGGAAATCGGTTTTC  
TGGATTGATTCCACAGTTCTTGGGTAAATTGACAGGGTTGAGAATGCTGTCTCTTAATGGGAATCGCTTT  
TCTGGTTCGATTCCGGATAGTTTGGGGAGTCTTTATCAGCTGGAGTTTTTGGATTTGAGCATGAATGATT  
TGAATGGGAGTTTGCCTCAAACCTTATGTTGCTTAGCAATTTGACTAGTTTGAATTTGTCCAGCAACTG  
TTTTATGGTGAAATCCAAGAGGAATTGGAAGCTTGCATGGGTTAGAGGTTTTAAATGTTAGCAATTGT  
GGGTTCTCAGGGAACATTCCGACTAGTATCGGAAGTTTGTGAGGCTGACAACCTTTGACGTGAGCAAG  
CAAACCTATCTGGTGAATTACCCTTTGACATTTTCGGGTTGCCAAGTCTACGAGTTGTGGCTTTACAAG  
AGAACATGTTAACTGGGGATGGTCTGGAAGGTTTTAGCAGTTTATCTGGTCTGGAATATTTGAATCTGTC  
ATCTAATGCCTTTTATGGACAAGTTCCGAAGACATATGGTTTTCTTACATCCTTGAAAGTTCTTTCTATGTC  
TAAAAGTGGTATTAATGGCTCAGTTCCAGCAGAGTTGGGTAACCTGTTCCGGCCTTCAAGTGCTTGAGCTT  
CGAGGAAATAAGTTAACAGGTCAAATCCGAAGGATTTCTCACATTTATCTCATCTAAGGAAGCTTGATT  
TGGGCCACAATGGATTAACCGGGGAAATCCCTGAAAACATCTCTAATTGTTTATCTTTGGCTACTCTCTTG  
TTGGATTCTAACCATATCTCAGGTCACATACCAGAGTCGTTGACGAAATTATCAAACCTGGAAATGCTGG  
ATCTCTCTTCAAATAATTTGAATGGATCAATTCCTTCAAGTCTGTCCCTGATTTCCAGTCTGAAGTATTTGA  
ATATTTCCATAATCATCTCGAGGGTGAGATTCCAGAGGCATTGGGTTCTCGGTTCAAGGACCCTTCTTT  
GTTTGCTGCGAATAATGCTTTGTGTGGAAAGCCATTGAAGGAGTGCAATGACGGTAAAAGGAAAAGAA  
AGAAGTTGATCTTATTCATTGTTTTGGCTGCTGTAGGGGCCTTTTTTCGTGGCAGTGTGTTGTTGTGGTA  
CATCTACAGCCTTATACTTTGGCACAAAAAGTTAAGAGGTTTCAGCTGAAGGGAAGAAGCGAAGCCCAG  
GCCGTGCGAGTTCAGGGGGAGAAGGGGGCCGTGGAAGTGGAGAGAATGGAGGTCCAAAGCTTGTTAT  
GTTTAAACAACAAGATCACTTATGCAGAGACTTTAGAAGCGACACGACAATTTGATGAGGAAAATGTGTT

GAGCCGTGGAAAGTATGGCCTAGTATTCAAAGCCACTTTTGCAGATGGAATGGTCTTGGCTATCCGCCG  
CCTTCCTGATACATCAATCGAAGTGAACACATTCCGCAAGGAAGCTGAATCCCTCGGCAAGGTGAAACA  
TCGCAATCTGACTGTTGTTTCGTGGATACTATGCAGGACCACCACCTGATGTTGATTTGTTGTATACGATT  
ACATGCCTAATGGAAATCTTGCCACACTTTTACAAGAGGCATCGCATCAGGATGGCCATGTGCTCAATTG  
GCCAATGCGCCACCTGATTGCTCTTGGCATTGCTCGTGGCTTAACTTACCTTCATTAGTTTCATTGATCC  
ATGGAGATGTAAAGCCACAAAATGTATTGTTTGTATGCAGATTTTGAAGCTCATCTTTCCGATTTTGGTTT  
AGATAAACTAAGCCTAGTAGCAACTCCAGCAGAGACTTCAACATCTTCCACCTCAGTTGGAAGTCTAGGC  
TACATAGCACCTGAAGTGGCATTAACTGGACAACCCACAAAAGAAGGTGATGTATACAGTTTTGGGATT  
GTATTGTTAGAGATACTAACAGGAAGAAAGCCAGTAATGTTCAATGGGGACGAGGACATTGTCAAGTG  
GGTGAAGAGACAACACTACAAAGAGGCCAAATTTTCAAGATTGCTCGAGCCGGGGTTGCTTGAAGTGGATC  
CTGAATCATCAGAATGGGAAGAGTTCTTGTAGGAATCAAAGTTGGTTTGCCTTGCACCATGCCTGATCC  
TCTTGAAAGACCATCGATGACCGATATTGTATTCATGCTCGAAGGCTGCAGAGTTGGTCCTGACATTCCC  
TCTTCAGCTGATCCTACAACCTTCCCTTCCCAATGTGATATGAAAATTCAATCTTTGCAATGAAATCAAT  
TTGCAAGAAAATGTCCTTCATTTTTCTCAGTTCAATATTGTTTCATGCATTTCTTCAATGTATTGCTACTCCA  
TTCATTATCATTTTTGTTTGTACATTGTTTCATTCAAGAGTTGGCTGGTTTTGTGCA

>PGSC0003DMG400003790 LRR-RLKs

TTGAAAACCAAATATTACAGATGACAACATTTTACTACTACCTTAGTTTACATCTTGTATGTGCTACTTCTTT  
TTTCACTTCCATTAAGTATCACATCTTCAGCAAGAACAGAAGCTGAATCTCTTGTCAAATGGAAGAGAAA  
TTTACCTTCTACTTCTTTCTTGGACACATGGTCCATTTTGAATCTCGAAAACCTTGTGCAATTGGACATATAT  
TGTGTGTAATGATGGTGGAAACAATTTCTGAGATCAATCTTTCTGATGCAGCCCTCTCAGGCACACTTGAT  
CACCTTGATTTCACTTCATTTCCGAGTCTCGTGAATTTCAATCTTAATGGAATAACTTCAGTGGATCGAT  
ACCTTCGAGTATTGGCAATGCCTCATTGCTCACATTCTTGGACCTGAGTAACAATATCTTATCAGGTGTCA  
TACCTGAAGAGATTGGAAAATTGAATCAACTTGAGTATCTGAGTTTTTATAACAACAATATCGAAGGTGT  
GATGCCGTATCAGATTAGCAATCTGCAGAAGGTAATGCACCTTGGATCTTGGATCAAATTTCTTAGAAACT  
CCTGATTGGTTGAAGATGAGAAATATGCCTGTGTTGACGTATCTAAGCTTTGGTTATAATGAACTGAGGT  
TAGAATCCCTGAATTCGTACTTTCGTTGTCATAATCTAACATATCTTGATTTATCGATAAATCATTTCAATG  
GTTTCGATTCCTGAAACAGTATTTACCAACTTGATCAACCTTGAAGACTTAATCTTTTCATCTAATTCATTT  
AAGGTTTCATTGTCACCAAATTTTACTAAGTTGTCTAAGTTAAAAGAACTTCAGCTAGGTGTTAACATGTTT  
TCTGGTTAATTCCTGATGAAATTGGCTTGATTACTAGTCTTGAAGTTCTTGTACTTTTCAACAATTCATTT

GAAGGAAAGATTCCATCTTCTATAGGTAGACTCATAAATCTTCAAAGTTGGATCTTCGAAAGAACGATT  
TGAATTCAACTATTCCTTCTGAGCTTGGCTTTTGTACTAACTCACTCTCTTAGCTCTAGCAGAAAATGAC  
CTGCAAGGGTCATTGCCTTTATCATTCTCCTCTCTTGCAAAGTTATCTGATTTGGGGTTGTCTGATAATAG  
TCTTTCTGGTCAAATCTCATCGAATTTATCACCATTGGACTGAGTTGACATCTTTGCAGCTTCAAACA  
ATATGTTTACAGGGAAAATCCCACCCGAAACCAGTCAATTGACAAACCTTGATATCTTTACCTCTATCAT  
AACAAATTCCTGGTTCCATTCCCTATCAGATTGGGAACTTGCAAACTTGTTGGATTTAGACTTTTCTGA  
TAACCAGCTTTAGGCATAATACCTCCAACCATTGGAAATCTGACCAATCTAAAGATGTTGCAACTTTTTC  
GCAACAATCTCAGTGGAAACCATTCCCTCCTGAGATTGGAAAATTGATATCCCTTGAAACCATCGACATCAA  
TACCAACCGACTAAGTGGTGAGCTGCCGGACAGCATTCTGACCTCAGTGAGCTGAAGTTTCTTTCTGTA  
TATACTAATGATTTCTCAGGCAGTGTCCCTAAGGACTTTGGAAAGAACAGTCCTCAATTGTCAAGTGCCA  
GCTTTGCAAATAACAGCTTCACTGGTGAACCTGCTGGATTGTGTAGCCCGAATCTTGAGGAGTTGAC  
GATAAATGGGAACAAATTCAGTGGGAAGTTACCAGATTGCTTGAAGAACTGCACACTTCTAAGACGAGT  
ACGGCTTGAAGGCAACAATTTATCTGGTAATCTTGCAGATGCATTTGGAGTGCACCCGAAACTTGTTTT  
CTTTCTTTAGTGACAACCAACTTTTCAAGTGAACCTCTCACCTGACTGGGGGAAATGTGAAAATCTCACAA  
GTCTAAGAATGGATGGAAACAAATTTTCTGGTGTAAATCCCAAGTGAGCTAGGGAACCTGAGAGCGTTGC  
GCGTGTTAGCTTTGGAAGGAAATGAATTGACTGGTGAATTCCTCTGAACTGGGAAGGTTAGACCTGC  
TCTATAATCTCAGCTTGAGTAAAAACAATCTTACTGGAGGCATCCCTCAGTCTGTTGGCAATTTAACTAA  
GCTCCAGTATCTTGATTTGTGACAAACAAGTTAAGTGGTAACACACCAGTAGATCTTGGAAGTGTGA  
GAGCCTGTTGAGCTTGAATCTTGGCAACAACCTCATTATCAGGTGGCATTCCATCTGACCTTGGTAATTTG  
ATGCAGTTGAGTATTCTTTTGGACTTGAGTGGCAATTCCTAACGGGAACCTCCACAAAACCTTGCCAA  
AACTCACCTCATTAAATGCATCTCAACCTCTCACATAACAACCTCTCAGGTAGAATTCCTCCAGCATTATCTC  
AGATGATCAGTCTTCAGGAGATGGATTTTTCTACAATGAGTTTTCTGGACCAATCCCAACCGATGGAGT  
ATTTCAAAGAGCACCCGCTAGATCTTTTCTTGAAACTCTGGTTTGTGTGGAAATGTAGAGGGATTATCC  
TCATGTAATTTGGATACTCCAATGACAAGTCCAGAAATAATAATCAAAGATCCTCATTGGGGTACTTG  
TACCGGTGGTCAGCCTCATACTTTTGGCAATCCTGTTTGTGTCATGTCTCGTGTCTCGAAGGAAGGCTAA  
GCAATATGATGAGGAGATCAAAGCTAGCCAGATACATGAAAATACAGAATCTCTGATTTGGGAAGAG  
AAGGGAAGTTTACATTTGGTGACATAGTAAAGCTACTGAAGATTTAGTGAAAAGAACTGCATTGGAA  
GAGGAGGCTTTGGAAGTGTCTATAAAGCTGTTTTGCCCTCTGGGCAGATTGTTGCAGTCAAAGACTCA  
ACATGTCAGACTCAAGTGATATTCCATTGACTAATCGTCGAAGCTTTGAGAATGAGATTAGAATTTGAC

AGAGGTGAGACACAGGAATATAATTAAGCTCTTTGGTTACTGTTCCAAGAATGGATGCATGTACTIONGGT  
TTATGAGTACATAGAAAAGAGGTAGCCTGGGGAAAAGTTCTATATGACAATGAGATGGGAATGGACTIONG  
GATGGGGTACAAGAGTGAAAATTGTGCAAGGAATAGCTCATGCACTCGCTTACTTGCATCATGACTGCT  
CTCCGCCATTGTTACCGTGATGTATCATTGAATAACATTTTGCTTGAATCAGAATTCGAGCCACGACTC  
TCTGACTTTGGCACAGCAAAGTTGTTAGCTTCAGACTCATCAAATTGGACCACAGTTGCTGGTTCTTATG  
GCTATATGGCACCAGGTATGTTACATACTCATTACCTAATGCATCCATATTTCTGTTGATTAAGTAGTATA  
TTCATTGGAAGGATACTTCAATATTATTGTGTCTTTCTTCTGTGCAGAGCTTGCACTTACCATGCGTGTT  
ACAGAAAAGTGTGATGTTTATAGTTTTGGAGTCGTAGCGATGGAGACTATGATGGGAAGGCATCCAGG  
GGAGCTTTTAACTTCATTATCAGCATCAACAACATTGTTTCCAGAAATACTTTTGAAGGATGTTCTTGACC  
AAAGACTTCCACCTCCCACAGGCCACTTGGCAGAGGCAGTGGTTTTTGTGATCACGATTGCCTTGGCATG  
TACACGTACCACTCCTGAATCGCGACCAACCATGCGTTCTGTAGCACAAGAATTGTCTGTTCCAGACTTTG  
CCTTACCTTCCACAGCCATTGGGGACAATAGAAATGAGCAAATAACAAGTTTTTCAGAAATAATGAGAA  
GATAGAGCCTCATGTACAGGTGTGAAATGTACAGGCTGTAGAGTTTTAGTGTTGTAATGCAACTTCCTCA  
AGATCTAGAATCTATATAGTATCAAGGATGAAACCTTGATCTATTCAAATTACTATGTTTTGGTTGCACT  
TTTCCCTAGAAAAGAAAATAATATCATCCTGTTAATCATGAATGTTACAAAGTTGGTATATTAATTTG  
GACAAGTATGAATGTTACAAAGTTGCACAACCTTATCCTAGTTTTCACTTTATTGCTAGGCCAAAACACTA  
GCAAAAAGATACAATGTGTTCACTTGTAAATAAAAATAGCAACCTAACAAAAATTTGGCAAAGAATACAT  
CACACAGAAACCAGGCATGGTACTTAGCATTCCACTCCACACTGCTTGAGTATAGGTCCCTTCTGCTTTG  
GTAGGAATGGGTCTATTTCGTACCCAAACGAGTGAGAAGATTGAAGCAAGAAGGATTGACCAGAGGACC  
ACAATGGTGGGAGTCCTGTTCTGCCTGCCATCAATCCCTTTAGGAAAGGATAGAGATGCACAATAACC  
CAAAAGGCAAAGAATAACTTTCCGAAGAGAGGACCCCATGAACCATAACCATTGTTGATGGCATCCGAA  
ACACCAGCTACAACACCAACCATATTCAAGATGATCAGAGTGGTTGGTGGGATGAGAAGTGTGGTCCAT  
TTGAAAAGGTAAAGCTCCCCAAATTCAGCGTCATCAGCTGCTTTTGATGTTACAGTGAAGTTTGTGTCTA  
CACCAGCAAGAACTTTAAGAAGGCCTTGGAAAAGTCAAACAAATGTGCTGAAACACCACCGATGACCC  
AAAATTGCTCGTTACGCCACCAGGCCTCAATGCTTACTCCACTCCATCGCAGCTCGAGTACACTTGTGGC  
TATGATGGAGATAAAGAGAGCCATGAACCAAATGCTTGCAAAGTTGTTAAGCTACAAAACAAACATGGA  
TTTTGATTTATAAAATCTAAATCAAATCTTTATATTACTIONGAACCAAATGACTTCAGTTCACTTACTGTGGG  
GACGATAAATTTTCCAGTGAGAAGGCATACAGCTGGAAGGGTGCAGTAAGCTAGCAGAGCAATGGAAG  
TGAATGGGTAAACAATAGTGTTAATGTATGCTAGCCTTTCCAACCACTTGAGTTTTCCACCCAGGCATA

CCAAAGGGGACAATGACGACTCATGAAGATTTGACAGAACCAAGAGCCCATCTCAGGACTTGGTGCA  
ATCTATCTGATAGATTGATTGGTGCTGATCCCTTAAAAGCGGCTCTCTTCGGACAGCAATAAACCGATCT  
CCATCCTCTGCAATGCATCTTGAATCCAGTCAAATGTCCTCTGTGACAGAACCATAAATCCATCCAA

>PGSC0003DMG400003918 LRR-RLKs

TCTATCTGGGAATCTTTTAGTAGGAGAAATACCACAAAACCTGTACAACTTGTCAAACCTTGTATATCTTG  
ACTTACATCATAACCAACTGAATGGAAGTATTCCATCAACCATTGGAAATTTGTCTAACTTGCACTTTTTG  
GATTTATCACAAAATCTGCTATCTGGGTCAATCCCTGTTGCTCTGGGGATTTGCAAAATTTAACTCATT  
TAATGTATCTTACAACCTTTTATCTGGTGCTATTCCCTCAATTGAGAGCATCAAGAAGTTTGGACCCTCTG  
CCTTTTTTCATAATAGTGGTCTTTGTGGTGATCCTTTAGAAGTTTCATGCTCTGCCAGTGGCACTACTCCT  
GCAAAGGGAAACCAAAATTGAGTGTCTCAGCTATTGTTGCTATTGTCGCTGCTTCAATAATCCTTACAG  
GCGTTTGTCTGATAACCATCATCAATATGAAGGCTCGACGGAGAAGGAGGAGAGAAGATGAAACATTC  
GTTGTAGAGAGCACGCCACTGGCTTCAACAGATTCAAATGTCATTATAGGAAAGTTGGTTCTTTTCAGCA  
AGACTTTGCCTTCAAATATGAGGACTGGGAGGCTGGCACAAAAGCCTTGCTAGACAAGGAGTCTTTGA  
TTGGTGGGGGGACAATTGGATCAGTTTACAGAACTTCTTTGAAGGTGGTGTATCAATTGCAGTGAAAA  
AGCTCGAGACATTGGGGAGAATCAGAAATCAAGATGAATTTGAGCATGAAGTTGGCCGGTTAGGGACC  
CTTCAGCACCCCAATCTTGTTGCTTTACAAGGGTACTACTGGTCCTCTAGCATGCAGTTAATATTGTCGGA  
GTTTGTCCAAATGGAAACCTATACGACAATTTACATGGACTTAGTTATCCTGGAAGTACTAGCACTGGTGCT  
GGTAACCCAGAATTGAATTGGCCAAGAAGGTTTCAGATAGCAGTTGGAACAGCTCGAGCACTCACATAT  
CTTACCATGATTGCAAACCTCCAGTCCCTCATCTAATGTCAAGTCCACTAATACTCCTGGATACAAA  
CTATGAAGCCAAATTGACTGATTATGGCCTGAGTAGGTTCCCTCCCCTGCTGGATAACTATGGACTAACC  
AAGTTTCACAATGCAGTTGGTTATGTTGCACCAGAGTTGGCGCAAAGTCTGAGACTAAGTGATAAATGT  
GACGTTTACAGTTTTGGGGTGATTCTGCTGGAGTTGGTCACTGGGAGGAAACCAGTAGAGAGCCCAGT  
AGCAAATGAAGTGGTGGTCTTGTGTGAATATGTTAGAGGATTGATAGAAAGGGGTGCTGCTTCAGACT  
GTTTCGATAGAAGTTTGAGGGGCTTTGCAGAAAATGAGCTGATTGAGGTAATGAAGTTAGGCTTGATTT  
GTACTTCTGAAATATCCTCAAGGAGACCTAGCATGGCTGAGGTAGTGCAGGTTCTTGAGTCCATCAGGA  
ATGGCTTGGGATCATAGTAAAGAATCAGTAGAGCCATAAGACTATTTGAAACAGCAGCTGTTTCATAGAA  
TGAGAAGAAAGCAGTCTAGCTGTTGTGCTAGACTCACTTCTCATGAGATTTGATGAGGGAATCAGAAAG  
GGTCTCAAATAAGAGAGACGCGCAGACCAATTAATAGTATCAGTCATATTCTTGAATTTGGAATCAGAG  
TGATTAGGAGGTGACAGCTTTTGGTACAAAGAGAAGATTCTTTAGTATTTGATTTGTGATTCTTTAATCA

ATTGGTCATTGTAAGTTTACAATAAAGCAATTCTTTTCCTGTAAGATGCAAAGGTATTTTGATGTCTCATA  
TGCAGCTTGGCAACTGCTTTTTATAACCATTCAATATTGCTCTTCATTTACTGTTAAGAATTACCTTTGACA  
TGCATATATCAACAACCTTTGAAGGGATGAAAGAAATCGATTCAATTTCTCGAATTACATATCTAGTGCTA  
ACACAAGAATGAATGTGAACAAATAATGAGTCCATACATCTACCTGTAECTATAACAACATGAGATAATA  
AGAAAATATCAAGATTTAAGACCGACCTTATTGACACAAAGAATTTGGAAATGGATTTCAATTTGAAGCCA  
TTTCTACATGCTATATGTTTTTCCTTGCATCAACTTTGACTGCTAATTTAGCTATCTTCAAATCCATAAACT  
GGGAGGAGGAATGCATTTGTGAAAATGACAGTTGGAGAGGACCAAGAACACACTTCTGGAATCATCTG  
CATACAATCTGGCTTTTTTTTTGTTTGTCTTCTCATGTAGTTCTCAGTGCTGCTGCATTCTGATCTCATT  
TCCGAACATTGATAACTTATGGATCCATTAATCACATAACACGCGACCCTTAAAATCTCTGCATAAGTTT  
TGGACCTTTGGTTACGGTTTACTGTAAGGGATCATATCATTAGCAACTTAACTCAGAGACTTACGTAECT  
CCAAAACCTTTCTGGATACGTTGCATAACTGTGGAAATGTCCTTCTCACTTAATGTCGAAAAACATAACCT  
GAACCACCCAGGTTCAACACAGTGGCAGGAAGAACCAGGAGTTGCATTGATCTTAGCTACATTTAGTAG  
ATTATCCCAAAGCTCAATCTCACCTTCTCATTATACGACCGAATTAACCTGCTCATGTCAGCCCAACAAT  
AGAAACCCCCACTACTTTTTGGTGCCTCAATTCCCAGCTGCTTCAATCCACTGACAAATAGAGAAGACAT  
CTTCTTAGCCTCTCTGTTCTTTTTGATAAATTGTTGTACAACTTTGCATCTGATAGCATCTGGATGAT  
TAAATGCTGTGTTGGGGCTGAAATGGATGAGAATCTTGTCAACTTTTTCGCAGCAGCTAGAACATTTTCA  
TTGCAAGAATATATGACCCCCACCCTGAAACCAGGAAGAGAAAGGTCTTAGAGAGACCATACACAATG  
TGTACCCTGCTCCTGTCAAATCTTCAGAATCAATTATCTCTGCTATGCTGACAAATTCTTCACGTCCATAA  
GTTGACCCTGCCAAGATTTCAATGGATATTACATGGATGTTCTTCTCAGTTGCAAAGTCTAAGAGGTTAT  
AAAGTGTCTCCCTAGAGAAAATATTTCCACAGGATTTGAGGGGTTAGAAATGATAATCCCTCGTACTTT  
AAGGCCACGTTTCTTAGCTTGGTTAAAAGCTCGGTCAAGAGCGTCAATGCTCAAGTTAAAGTTGTCTGCA  
CTGCGGCAAGGAACAGGTATAATCTCCACTCCAGTTCTCCATTTGACATCCCTATCAAGACTGCAAACGC  
ATTGAGCTCATTTTATACTATATACGTAAAGATGACCAAAGATTGAAATTTATTTGGGAAGGAGAAT  
AAAACACTCACTCAGGATAATATGGTGAGGGAACAAGAAAAGCATTTCAGGATCAGCTAGGCAGAAGCT  
CAGTATCTCAAGCGCAGGAGCGGCACCACCAGTTAGAACCATCTGCGAGGGGGCTGAAGGACACTGATC  
TCTCCAGAGCTTGAGACATAAATTCTCCACAGCCTGCATACAGGTGAGGAAACATGAAAATCAATTCAA  
AGAGATAACCATAAATAATGTAGAATCACACAAAACACCTATTGTTTTATGAATCGATCTTCATAGTGGC  
TCAAGGATGATTTATATATTGCTGTTATACAATTCTCAAACCCACAATTTTAAAAGGTAAATCCATCAGA  
TCATCTCCCACCCTAGGATACCCGATGACAAAGGTAGCCACTCATATTTCAAAGAGGCCAAAATTGCCTT



CCATCTTCAACAGATACTGCAAATCTAGCAATAGATCCTTCAACAGGTTACACAATGATGAGTATCGAGG  
TGAGTATTTGTCAAGGAAATGATAGATCACCTCTCAGAACAACCTGAGTCCATTATTTCACTATTAACCTGCT  
TATAACGAAAACCATGCAAAGTAAAGCAGGTTAACTATTCTCTTATGTGCTCAAACCTAGATTTTTTATCA  
TATCACACTGCAAGGGATCCTATTGTTCCGGTCAGGACAAACATAACTCAGAAAATCATCAAATGCTGAA  
ACAGCATAAATGACTGAGCTAGATCAACAATAATTATGAATTTCCAACCTCAAGTTTTACCAATGTAACGC  
TCAACTAGGAGAAGATATTTACCACAAAAAACACCCCCATCCCTCTGGATACTGTTTCAATGCTTTGGC  
TGGTCAAACACATTTTCAGGTTTCAAATTTTCCTATCATTTCTTTCTTTTGTATTTAACCTCCTTTATTA  
GACAATCATGGGCTCCAAAAGCTCAAGAAAAAAATCAAACATTCAGAACCGTGTTTATTTTTCAAAGTG  
TTGCTTAGCGTCGATAGCGTAGAAGTTAGAGCATTGACGAACTTTTCAGAAGTTAATTGGCACTGTAAA  
ATGAACGTGAAGCTTATTCAATGCTTTTCCTTATGTTTGTTGCACTTTATAGACTTAGAAAGCTAAAGACG  
GGACATACTAAAACCTTGTATACAATAGGTAATTTGGGATTGTCAAATGCCATAACCAATCCCGCATCC  
AGGGGTTACATTTCAAATTAACCAGCTATAAAGCACACTGGACTAGCGGATGGGTGATTGATATGGA  
GTAAGTGTACACAAGCATATGAACATAACATTTTTGAAATTATATGGACATGACATGAGCCCATCCTAG  
GTTACAACATAAACTAATACCACCCAAATAGGTATCTCGTTGATTTAATCCTATAGTCTAAACTCAAAGT  
AGCAACTTTAAATTATACATACAACTTTTTCAAGTAAATTTTTTGTTCATTTCTTCTCTAGCCTGTAAA  
AACTATAACCATATGAACAACACTACTAGTACTTTATTAGTTCAAGAAGAACATATTATATCCAATACATGTC  
AACATTATATCAACAAACAAGTCACTAGTAGTGTGCAAGGAAAAATCAAAAAGCTTACCACTTTCAACTC  
CAACAACCCATCAAATGGCTGATAAGTAGCTATTCCGGTTATACTCGAATCTTGAGTCATCATCCATCTTG  
ACACATTTTCTGCAAGCCATTCTTGAACATAAATCCAATGACAACATAACCATACAAATAGAGACAAAAT  
TCAAATCATTGAAACAACAAACAAAAGTAGATTCCCCAACAAGAAATGTACTGCATTTGGTACATTTCT  
CTAGAAAATGATTCAATATATCCAAACATTCAAATTTATTAGTACCTTGTTTTCTGCTAATCCTAGCTGAA  
TAACACCATCTGGATTACTTGACTCATCATAAGGGTCTTCAGAAGCTCTTTTCAATCCAACATAGTAAGG  
GCTACTATCAATTTGTTTTGAAATAATCGAATTAGCTCTAGCAGATACCTGAGATTGCCAGTAGTCCCT  
TCGGTGACAGTAAAACACGTGAGTGAACCCTTTGTAACCCAGACCCAGAAGACACTTCCGGCAAATGGG  
TCGACGACGTTGACCTCGCCGGAGCCGTAGATTGCGCGTTATTGTCACCACCGGAGGAACGATTTCTTT  
TAGGTAGAGTTGCCAAAAATAGAAAAGAGCACAGGGTATAACTGAACCTAAGAAAAGACCACCCCGAC  
CTTGAACACACTTGTAAAGGGTACTATCACCTCATCGCCGTCGTGGCTCCTCCTCCGTCTCTGCCGCCG  
GCGCCGCCAGTTGAAATGGTTGTTGTTGTTCTAGTTGGTGAACGGTCTCGTGACCTTGTACATAACTG  
TGACATAGTGGGGGCAGAGAGAAAGACGTCACCTTGTCTGGAGTATGACGTCAGTCAGCTATCTGACCG

GCGAGACGGTGGACGGAGAGTACGAAGGGAGGTGAGTGATGGAGAAGAGATTTGGAGAAAATGGTG  
GCAAATAGTTGGTTCGAATTATTATTTATCTTTTTGTCCGCCTAAAGTTGTTTATTTT

>PGSC0003DMG400003945 LRR-RLKs

ATGAGAAAATTAGGTACATTTGTTCAATTGTGTTGTTCTTGTTTGGTGTTTTTGTGTTGCTTGAATTGGAATT  
GGTATCTCCCATCACTGAAAAGGAGATCCTGCTTCAATTCAAGGGTAACATTTCTAGTGACCCTTTTAATA  
GTTTAGCTTCTTGGGATCCTAATGGAACACCTTGCTTAGACTTTAGTGGTGTTTTCTGCAATTCTGTTGGA  
AATGTGGTGAAGATTGTGTTGTGGAATACTAGTCTTGGTGGGGTCTCTCCCCTGCCTTGGCAGAACTTA  
AGTCTTTGCGCATCCTTACCTGTTTGGGAACCAATTCCTGCAATATTCCTGCAGAGTATGGGGGGAT  
TGATTCATTGTGGAAGATTAACCTCAGCTCTAATGCCTTTTCTGGTTCAATTCCTGAGTTTCTTGGGGATT  
TATCAAATATAAGGTTCCCTTGATTTGTCAAGAAATGTGTATAGTGGTGAATTCCTGTGTCTTTGTTTATG  
AATTGTAACAAAACAAGGTTCAATTCCTTGTACATAACAATCTTTCAGGTCCAATTCCAGCATCAATTGG  
AACTGTCAGAGTCTTGAAGGAATAGACTTGTCTTTAATGGTCTTAGTGAAGTTTACCTTCACAAATTT  
GTGACATTCCAGGATTAGTGTACTTGTCTGTGAGGAGCAATGCACTATCAGGACTTGTTCAGAAGCAGG  
TTTCTCCATGTCAAAGGTTGGAGCTTTTGGATCTTGGTAGCAATGACTTCTCTGGTTTGGCTCCTTTTGGG  
GTTCTTGAGCTGGTGAATCTTACATATTTCAATGTTTCAAGTAATGGTTTTGAAGGGGAGATTGTTAACT  
CTGGGACTTGTAGTCAGCGACTGGAAGTGTGGATGTTTCAAGGAATATTTTTTTTGGTGAATTCCTT  
GAGCATCTCGAAATGCAGCGCGTTGAAGTACTTGGACATGGCATATAACAGAATTAATGGAAGTATCCC  
TATTGAGCTTGCAGATTTGAATAGCCTTCCGTTATGCGATTGGGTGATAATTTGTTAGGTGGGACAATC  
CCAACGGAGCTTGGTAGTATCGAATGGCTTGCAGTTTTGGACCTCCATAATCTCACCTATTTGGTGAAA  
TCCCAAATGAGATAAGCAACTGCAAGCTTCTTCTCAACTGTGAGTATATCACCATCTTAGTTTAATTTGT  
TTTATTTTCATCATTGCTCTGATCTGGAATTGAACCGTCTAATATTTGCTGCAGGGATCTATCTGGGAATCT  
TTTAGTAGGAGAAATACCACAAAACCTGTACAACCTTGTCAAACCTTGTATATCTTGACTTACATCATAACC  
AACTGAATGGAAGTATTCCATCAACCATTGGAAATTTGTCTAACTTGCACTTTTTGGATTTATCACAAAAT  
CTGCTATCTGGGTCAATCCCTGTTGCTCTTGGGGATTTGCAAAATTTAACTCATTTTAATGTATCTTACAA  
CCTTTTATCTGGTGCTATTCCCTCAATTGAGAGCATCAAGAAGTTTGGACCCTCTGCCTTTTTTTCATAATA  
GTGGTCTTTGTGGTGATCCTTTAGAAGTTTCATGCTCTGCCAGTGGCACTACTCCTGCAAAAGGGAAACC  
AAAATTGAGTGTCTCAGCTATTGTTGCTATTGTCGCTGCTTCAATAATCCTTACAGGCGTTTGTCTGATAA  
CCATCATCAATATGAAGGCTCGACGGAGAAGGAGGAGAGAAGATGAAACATTCGTTGTAGAGAGCACG  
CCTACTGGCTTCAACAGATTCAAATGTCATTATAGGAAAGTTGGTTCTTTTTCAGCAAGACTTTGCCTTCAA

ATATGAGGACTGGGAGGCTGGCACAAAAGCCTTGCTAGACAAGGAGTCTTTGATTGGTGGGGGGACAA  
TTGGATCAGTTTACAGAACTTCCTTTGAAGGTGGTGTATCAATTGCAGTGAAAAAGCTCGAGACATTGG  
GGAGAATCAGAAATCAAGATGAATTTGAGCATGAAGTTGGCCGGTTAGGGACCCTTCAGCACCCCAATC  
TTGTTGCTTTACAAGGGTACTACTGGTCCTCTAGCATGCAGTTAATATTGTCGGAGTTTGTCCAAATGG  
AAACCTATACGACAATTTACATGGACTTAGTTATCCTGGAAGTAGCACTGGTGCTGGTAACCCAGAATTG  
AATTGGCCAAGAAGGTTTCAGATAGCAGTTGGAACAGCTCGAGCACTCACATATCTTCACCATGATTGC  
AAACCTCCAGTCCTTCATCTTAATGTCAAGTCCACTAATACTCCTGGATACAACTATGAAGCCAAATT  
GACTGATTATGGCCTGAGTAGGTTCCCTCCCTGCTGGATAACTATGGACTAACCAAGTTTCACAATGCA  
GTTGGTTATGTTGCACCAGAGTTGGCGCAAAGTCTGAGACTAAGTGATAAATGTGACGTTTACAGTTTT  
GGGGTGATTCTGCTGGAGTTGGTCACTGGGAGGAAACCAGTAGAGAGCCCAGTAGCAAATGAAGTGGT  
GGTCTTGTGTGAATATGTTAGAGGATTGATAGAAAGGGGTGCTGCTTCAGACTGTTTCGATAGAAGTTT  
GAGGGGCTTTCAGAAAATGAGCTGATTCAGGTAATGAAGTTAGGCTTGATTTGACTTCTGAAATATC  
CTCAAGGAGACCTAGCATGGCTGAGGTAGTGCAGGTTCTTGAGTCCATCAGGAATGGCTTGGGATCATA  
G

>PGSC0003DMG400003958 LRR-RLKs

TATTTTCTAACTAACTCTCTTTTCTCCTTTGACAATTCACACCAATAAACTCCCCATTTTTCTTCTCTACT  
GTGAAGCACCATTGAAATCCAATGCAAAAAGCTCACTAGTACTTCATAAAAACTCAACTTTTCACTCAA  
TCTGAAAGTTCACAAAGTTCAGAGAAATGGGGTTAATTATTTCTCTTAACTTTTCATTTTTGCTCTGTTT  
GTTCTTGAATTTTCTTGCATAGAACCTGTTTGTGGAATGCTGAGGTGAGAGCTTTGATGGAGATTAAT  
CAGCTTTGGACCCAGAAAGCAAGAACTTTCTTCATGGACAAGTGATGGTGATCCATGTAGTGGTTCTTT  
TCTTGGTGTGATTTGTAATGAACATCATAAAGTAACAAATATTACTCTGACAGATAAAGGACTTACTGGA  
AAGTTGTCACCAGCAATTGCTGAGCTGAAGTGTTTGTCTGGTCTTTACTTGCATTATAATTCTTTAACAGG  
GGAAATACCAAAGGAACTTGGGAATTTGACTGAGTTGAATGATCTTTATCTCAATGTGAACAATCTTTCT  
GGGATTATACCACCAGAACTTAGAAACATGGCAAGTCTACAAGTTTGTAGCCTTTGTAAACACCTTTCT  
GTTTAAATTTGAGGGAGAATGTTTCTCTTTTTTCGTAGCTCCCACCTTTTGTGCTTGTGACTCGATC  
TGTCGTGATTTCTAAAAACAGTTGTATTAATGATTTGTCATTTTGAAGTTTAAAGATAAAATAATTATC  
CTTTTCTCATTCTACTTTTAAATAGTAATTGTTCTTGAAGATCCTGTTTTGGTACTCGAACCGACAACCTTA  
AAGTTGGAGGTAGAGAGTGCTTACAACCTGAGCAACCCCTGCTATCAGGGAAATTGCTTGCTGTTTCATT  
TACTGTTTTTTGTGTGTGCTGCTGAATAATGAGTCTACATGAATTTAGGTAAACAGAGTAGACAGGTTG

CAAAATTTCTTAGAGATCTATGCAGATTTTTTGGTTCTGTAAAGATAGGACTTTGTGGGGATTGATGGTT  
TACTCGTTTTTTGAGTTCCTTCATCCATAAATTAACAGTGCAAGTTTGAGAGAAAATAAAGTGTTACTA  
GTATATATATGAATTGTTGAATTTCTAACATAAGGAAAGCTTTAAGTACAACAGTAGAAGTGGCTCAAA  
ATTGCTTTAAGTAGCAGATTCGAATCCAAGTATCCCTTGTTAGAATTCCTACTCCGCCACTGTTGCACC  
CACACCCCTTTTCTGGTCTTTATTCTTTCTTGTTAATTATATTTTTGGTCTGAACAGCATACTGAAATTTCT  
TTTCAAATAAGGTGATGAAAGAAATGCAAGAACTCTTTTTTTCCCTTTCTACAATGATATGTGCTCTG  
AGATGATTTGTGCATTTTGTGGTCCACAGTGCTGGACTTGAGTTGTAACCAGTTGACAGGGAGCATACC  
AACAGAGATTGGGTTCTTGAAGAAGTTGAGTGTCTTGAATTGCAACGGAACAGGCTGACAGATAAAAT  
TCCAGAGAACTTAGGAGTCCTCGGGACGTTGAAAAGCTATATTTGGGATTCAATCAGCTATCTGGTCC  
GATTCCATTAATAATTAGCTGCTGCTCCCCAGTTGGAGGTTCTAGAAGTACAAAATAACACCCTCTCTGGA  
GTTATTCCTCCAGGTTAGTTGCCCTTTTTGAGTCTCAACATTTTATAAATCCTTTTTGCCTATCTTGAAGTT  
ACATCTTTTGAATGTGTTTTGATTTAAACCTCTTTTTCTTTTTATCTGGACTGTTTGTAGCTCTAAGGA  
GATTAAATGAAAAATTCAATTATGAAAGCAATCCTGGTTTATGTGGTACTGGATTTACTTCATTGAGAGT  
TTGCACTGCCTGGGATCATGTCAATGTGAATCAAGTTGGTCTGATGTACCTGATTCCAATAATAACGGT  
GTCCCTATAGATGTCCCAGGAGCTGCTCATATTAGTCCGTTGCCTTGTAATCAAACCTCATTGTTCAAGATC  
ATCAAAATTTCTCAAGCAATTATCGTTGCTTCTGTGATTACAGTCACTGTAACTTTGGTAGTAGCTGTAG  
TTTTCGGTATATTTAGACGAAGAAGGCTAAAACAAAGAGTAGGGAACACAAGTGATGCATCTGATGATA  
GGCTTAGCACTGATCAGGCAAAGGAAATATACAAGAGAAGCCCTTCTCCACTACTTACTGTTGAGTACTC  
AAATCGTTGGGACCCTATGACCCTGAAAAGAGTTGCAATAGCATGTTCAATGAGTCTTAAGTGGATTCC  
AAGTTCAATTTGGAAGAGGTTGAGTCTGCAACTCAGCATTTTACAGAGACAAATCTATTGGGACGGAGC  
AATTTCTCTGCCGTCTATAAAGGAATTTTAAAAGATGGATCTACGGTAGCTGTAAAAGCATCAGCGTGA  
CAAGCTGTAAGTCGGAGGAGACGGAGTTCATGGAAGGATTGAGCTTATTAACCTCCCTGAAGCATGAA  
AACCTTGCAAGCTAAGAGGTTTCTGTTGTTCAAAGGGAAGAGGCGAGTGCTTTTTAATCTATGATTTGG  
CCTCTAAAGGGAACCTTTCTCAGTATCTTGATGTTGAAGTAAACAGCAACCATGTTCTTGACTGGTCCAA  
AAGAGTTTCGATCATCAAGGGGATTGCAAAGGTTGGTCTTCTTTGCTTTTGTTCATCATTACATCTTCAG  
CATTCTCTACAAATTTCTCAGAATATTTTAAAGTTTGAAATATTATGGTTGTATAATATTTTCCCATAAT  
GTGGAGTCTTCTAAGAGTTCCATTGCATAGGCAGTTTATTACCACTAAAGTGCTTCTCACAGGAGTCAGG  
AACAGGAAGTGACTGTAGATTCATTTGCATGGTAATTAGTGGCAGAGTCAGGAGGGGTTCAAAGTATG  
AAGAAGTAAACACACAAAGAAGCCGAAGGGGTTCAACATTTACTATATATACATAAAAAATAATTTTAA

CCATGTATAAACACGCAATTTTCTGCCGACCACCTCGGCCTACCTAGCTCCACCCCTGTGGTTAATATAT  
TATCAAATTACTCCTCCATCCCAAATAAGTGTCGCTTTAGTTCATTTACGCCCATTAAGAAAAGTAATA  
CATGCAAGGCATAGTTTACTAAGTCACCCCTAGTTATTAGATGAAGGAGGAGTAGTTCTTTAATATAAAG  
GTATTGTTGGAACAAGGAGTACTATTTTGTCTTGACTTCTAAATAGACAATTATTTTGGGATAATTTTTT  
ATGCTAAAATGACACTTATTTGGGACGGAGGGAGTAGTATGAATACAGAGAGAGATTGGACTTATTGCT  
TTAATTGAGAATTAAGTTCCCTTGCCATCAAGGAAAGCAGTAGGACATGTCTCAAGAACCTCATTAAATA  
TGTGCATTTAATAGTTCTCCTATGTTCACTATTTGAAACCAGTGCCTTTGATTTGATTAAAGATGAAATA  
GCACAGGTGCACCATCACTGCATTAACCTCAGTTATTCATATTAGAACAACAGGCAACAGATATTTGGGC  
TAAGTTTTAGTATAGCTAAGGTCTCTAATTAATAAAATCTTTAATACACTATGATGGCGAATGATTTCAAC  
TTACCAACTATATTGTTTTGTGAGAATCAGGGAAAACCTACCCATGTTTTTTGCGTTCTATCTTAATATGA  
TTCCTTCATATTTCTTTTACTGATACCAATCGTTATGCATCTTTCTAACAGGACTAGGATATCTGCACAG  
CACCGAACCCAGACAAACCTTCCATGGTTCATCGCAACATATCTGTGGAAAAAGTCCTCCTTGATCAACAG  
TTCACTCCACTAATACTGGACTGTGGCCTACTAAAGCTACTTGCTGATGATGTTGTTTATTCAGCACTTAA  
GGTCAGTGCTGCACTAGGATATATGGCTCCTGAATATATTACAACCTGGACGATTCACAGAAAAGAGCGA  
TGTATATGCATTTGGAGTAATTATCCTTCAAGTACTCTCTGGTAAAGGACTTCTGGACTGCTCAATGAGA  
CTTGCTGCTGAATCTTTTAACTTTGAGAACTTCATTGACCCTAATCTCAAGGGAGCATTCTCCATAAGTGA  
AGCAACTATGCTAACTAACTTGCAGTAAGTTCACCCCTTGAGGATCCAGATAGCAGGCCAAGTATGGT  
TTAGTAAATGAAGAATTGAACAGGTCTAGTTGTGGTTGAAAAAGGAAAAATTGAAGTCCTTTTTGTTCG  
CGTTGAAATTTGTTGATGATTATTAACCATAGGGAAACACGTGCCATAGCGATAGAGCTGCAGTTTTCTAT  
CTATTATGCAATATCACTTGTCTGTATATAATGAGGCAGATTGAACAAATCTTTTGTGTTTGAAGG  
TGAAACTGGGACGCCGTTGGCATCCTTGACTGTTGTAGCTCTCAGAAGAGATAAAGAGGAAGCTAATG  
AACTTGTACCATTATTTGATCTTTTCACTGTATTTAATGTCTTTTTCAGGGCCAATATTCTGATAAATGCA  
TTAGTCTTTGTATCGAGTGATCCAAATCAATACAGTGCCTATGGCATATGGGTACAGACAAA

>PGSC0003DMG400004146 LRR-RLKs

CAAACATGAAAAAATTCATCTGTTTTGCTTGTTACTTTTGTAGTGTTTTTTCTTTGTTTCATCAAATAAG  
GATGAAGTTTCTATATTGTTAGCAATAAAGTCTAGTCTTGTGATCCAATGAATCATCTCAAAGATTGGA  
ACTTTTCAAACAATGAAAGTTCTATTCATTGTAATGGAATGGTGTGATTGCAACTCAAAAAGCTATGT  
AGAGAAGCTTGATTTGTGAACATGAATCTTAGTGGCAGAGTTTCAGATCAAATTCAGGACTTCAGAG  
TCTATCTTTACTTAATCTTTGTTGCAATGACTTTTCCACTTCATTGCCAAAGTCATTAGCTAATCTGACATC

TTTGAAGAGCATTGATGTGAGCCAGAACAACCTTTGTTGGGAACCTCCCTGATGGTATTGGAATGTCGAA  
TCCTGGTTTGAATATGTCAATGTTTCAAGTAATAACTTCGAGGGGGTTCTCCCTGAGGATCTTGGAAT  
GCTACGTTGCTCGAAGTCATGGATTTTCGAGGGAGTTTCTTTGAAGGTTCAATCCCTGGATGTTACAAGA  
ATTTGAAGAATCTGAAGTTTCTTGGCTTATCAGGGAATAATCTTTCCGGAGATATCCCTCGTGAGCTTGG  
TGAATTGAAGGCTATGGAGACTATGATTCTTGGATATAATCAGTTTGAAGGTTCAATACCAGCTGAGTTT  
GGTAATATGAGTAGCCTTAAGTATCTTGACTTGGCTGTTGGCACTTTAAGTGGACAAATCCAGCTGAGT  
TAGGTAAGTTGAAGAACCTCACTACAGTGTACTTGTATCAAAACAGTTTTGAAGGTAAGATTCCACCTGA  
AATTGGAAATATAACATCTTTAGTTTACTTGGATCTTTCTGATAATAAGATCACTGGGGAGATTCCGAAT  
GAATTAGCAGATTTGAAGAATTTGCAGCTGCTAAATCTCATGTGCAATAACTTAACGGGTCCTATTCTA  
CCAACTTGGTGAGTTAGAAAATCTTGAGATACTTGAAGTATGGAAAAATTCTTTAAATGGCTCTTTGCC  
AATGAATCTTGGGAAAAAATCTCCCTTGAATGGTTAGACGTTTCTTCGAATTTCTGACAGGTGAGATC  
CCTCCTGGCTTGTGTGATTCTGGCAATCTAACAAAGCTCATTCTGTTTAATAATCCTTCTCAGGATCAAT  
CCCATTAGGCCTGTCTAACTGTTCTTCACTCGTTGAGTTAGAATCCAAAATAATCTTCTATCAGGAATGA  
TTCCGGTTGGGTTTGGAACTTCCCTATGCTCCAAAGATTGGAATTGGCTAAAAACAATCTCACTGGTGA  
AATTCCTGTGGATTTCACTCTCTCCACCACTCTTTCTTTTATCGATGTCTCCTCGAACCACCTTGAATCATCT  
TTGCCTTCTAGCATTGTTGTCATTCTAGCCTGCAAACCTTCATAGTTTCCAATAACAATCTTAAAGGCAAC  
ATTCCTGACCAATCCAAGATTGTCCTTCCCTTTCTTTGCTTGATCTTTCAAGCAACCATTTCTCGGGGAAA  
ATTCCTCAGAGTATTGCTTCATGTGAAAAGCTGGTGAAGCTTAATCTAAGAAACAACCAATTCAGTGGTG  
AAATCCAACCTCACATTGCCACATTGCCAACTTTATCTATTCTTGATCTATCATACAACCTCGTTAGTTGGAA  
AAATACCAATGGACTTTGGTAGCTCTCCAGCTCTAGAAATGCTTAATCTTTCTACAACAAGCTTGAGGG  
TCCAGTTCCAAGAAATGGGATACTCATGACTATTAATCCCAATGATCTGATAGGAAATGCTGGTCTTTGT  
GGTGGCATACTCCACCGTGTCTCAAAGTCTCACCATAACTTCAAATGCGAGAAAGAATCGTGTCAATC  
ACATAATCGTGGGATTCATTGTTGGAATCTCAGTTATCTTAGCTGTTGGGATCATGGTTCTAGCAGGGAG  
ATGGATGTACAATAGATGGTACTTGTGCAACAGCTTTTTCAAGGAATTTCGGTTCAACAAGAACAACCTCA  
GAATGGCCTTGGAGGCTTGTAGCATTCCAGAGGCTTAACTTACAAGTACTGATATTCTGGCTTGCTAA  
AGGAGTCAAATGTGATAGGCATTGGTGGCAATGGAATTGTCTACAAGGCTGAGGTTCTGAGGCCACATT  
CTGTTGTAGCAGTTAAAAAGTTGTGGAGATCAGATGGAGACATTGAAGCAGGAGATGATCTCGTTGCA  
GAGGTTGATCTTTTAGGGAAGCTTCGTACAGGAACATAGTTAGGTTACTAGGCTATCTTACAATGAG  
ACTGATATCATGATGTTATCTGAATACATGCCTAATGGAATCTTGGAGCTGCTTTACATGGAAAAGAAG

ATGGAAAAATGCTCGTAGATTGGTTGTCGAGGTACAACGTTGCCCTTGGTATTGCTCATGGACTCGCTTA  
TCTTCACCATGATTGTCATCCACCAGTCATACATCGCGATGTCAAGTCAAACAACATTCTCCTAGATTCAG  
ATTTTGAGGCAAGAATTGCAGATTTTGGCTTGGCAAGGATGATGCTTCACAAGAATGAGACTGTTTCTAT  
GATAGCAGGATCATATGGCTATATAGCACCAGGTTAGTTACATTTCTGATAATGCCACTCACAAGAAAA  
TTCATTTCATTTTATATAGTCTCATTTTCCTTTCTCTGTTGTTTTTGGCAGAATATGGATACACATTGAAGG  
TTGATGAGAAGAGTGACATATACAGCTATGGGGTGGTGTCTTTTGGAGCTTGTAACAGGAAAAATGCCAT  
TAGACCCTTTGTTCCGAGAGTCGATTGACATTGTAGAATGGGTTAGAAGGAAAGTAAAGAACAAGGCA  
TCAGAAGAAGCATTAGATGCTGATGTAGCTGGCCAATGTAAACATGTCCATGAAGAGATGCTTCTTGTC  
CTAAAAATTGCACTTCTTTGCACTGCCAAGCTTCCCAAAGAAAGACCATCAATGAGAGACATTATAACCA  
TGCTTGGAGAGGCAAAACCAAGAAGGAAAAGTATTTGCCAGAATTGGGGTTATAGTACTAGTGCTAAT  
AAAGACAAGTTAATCTTTGCTCATTACCAGTTATAGGCCTTCTATAAGTACCAAAACCTTATTTTTCCACT  
TCAATATCTAGTATATCTTCATTTTCATTAGTTCAAATGTAAA

>PGSC0003DMG400004667 LRR-RLKs

ATCAAAAGCTGTCACCTTAGCTTACTGATGAAAACTCATAAACCCAAAATTTTCAACAAACAATCCCAAA  
AAAAAAAAAAAAAACTTCAAAATTTTGAAGAATCATAGCAAAAAAAAAAGGTAATCTTTGCCAAAAAAATTC  
AAGAACAATAGCAAAAAAAAAAAAAAACTCCATTGTTGATTGTTCTAGATCTCTAAAACCTCCATTAATG  
GCACCCCAAGCTTTTTTTTTCTGTAACTTCTTCTTACCTTCATTTCAATCACATTTTCCGATGACAGCA  
CCGTCATGTCAAATTTTCTGAAGGGTCTGTCTAAACCACCATCTGGTTGGGATGCTTCAAATCTTACTGT  
GATTGGAGTAAAGTTAATTGTGATAAATCGAGTAATACTGTTGTTTCCATTAATCTAGATTCTCAAGGTCT  
TTCTGGGGTTTTGCCTTCTGACCTTAATCAACTGTCAAATCTCAAACCTTTTTCAGTTCAGAGGAATTCAC  
TTTCTGGGGTTCTTCATCTTTTCGCAAACATGTGCAATTTAGCTGAGATTTACTTGAATGACAATGGATTC  
ACATCTGTTCTCAAGATTTCTTTTGGGTCTTACTAGTTTGCAGATTTTATAGTATTAGTGAGAATGGGAA  
GTTGAGTCCTTGGCAAATTCCTAGTTATTTGATTGATAGTAACAATTTGGTTAATGTTTATGCTAGTCATG  
CTAGTTTGTGGTGTATACCTGATTTTCTTGGTAAATTCCCTAATCTTCAGGATTTGAGATTGTCTTATA  
ATAATTTTACTGGTCTTTTGCCTGCTAGTTTTGGGGATTCTGAGATTAAGAATTTATGGCTGAATAATCAG  
GTTAAAGGGTTATCAGGAACTATTGATGTGATTTCAAGTATGTTTCAGTTGTCACAAGTGTGGTTACATG  
CTAATCTTTTACTGGTCTTATACCAATTTGTCGAAATGCGAAAATATATTTGATTTGCAGTTAAGGGAT  
AATGATTTTACTGGTGTATACCTGATTCAGTGATGAACTTCTAACTTGTGAAATATATCTTTGAAAAA  
CAATAAGTTGCAGGGTCCAATGCCAGAGTTCAGAAAGGAGGTTAAGGTGGAGATTGAGGGTACTAATA

GTTTTGTTGGATACTCCTAGACCTTGTAATTCACAGGTTATGACGCTTTTAGATGTGGCGGGTGGTTTT  
GGATATCCAGGGTTTTGGCTGATTCTTGAAAGGAAATGATGCTTGTAATGGATGGTCACATGTAAGT  
TGTGATGGATCGAAAAGAATGTGGATGTTGTAACACTTGGTAAGCTACGTTTATCGGGTTTTATATCTC  
CTGCTTTTGCTAAATTGACTAGTTTGAGGAATTTGTTCTTGAATGATAACAATCTTACCGGATCTATACCG  
GAAAGTTTGGCAGCGTTGCCTATGCTTCTAACTCTTGATGTTTCTAATAACAATTTATCTGGTCCTGTACC  
TGCCTTCGATCAAATGTGAACTTATTAATGGTGGTAACGTGTTTCTTGGAAAGAATATAAGTGATGGA  
CGGGGTAGTGGTGGATCACCGGGTCTGGGTCAAGTAGTGATGGTGGAAATTCATCTGGTGGTTGAA  
GGGATCCTCAGTTCAACCTGGAGTGGTTGCTGGTGTGTTATATCTGTGCTTATATTTATCCTTGTCTGT  
TGTATGTGTCTTACAAATGTTACATAAGGAGACGGCATAAGAGATTTGGAAGGGTTCAGAATCCGGAAA  
GAAGCAATGATATGGTTAAGCCTGGTGTAGTGATAGGTAATGGATATGCAGGAGTCCCTAGTGAATTAC  
AGAGCCAGAGCAGTGGGGATCATAGTGAGATGCCGATATTTGAAGGTGGAAATGTTGCCATTTCTTTC  
AGGTGCTTCGACAAGTGACAAACAACCTCAGCGAAGAAAATATCTTGGGTAGAGGAGGATTTGGAGTC  
GTTTATAAGGGTGAATTACATGATGGGACTAAGATTGCTGTGAAGAGGATGGAATCTGGCGCGATGGG  
TACTAAAGGAATGAATGAGTTCCAAGCTGAAATCGCGTCTTACCAAAGTTAGGCATAGGCATCTGGT  
CGCTCTTCTGGTTCCTGTGTTAACGGCAATGAAAGACTTTTGGTGTATGAGTACATGCCACAAGGAACT  
TTAAGTCAGCATTTGTTTGAATGGCAAGAACACGGGTGCCCAATTTTGACCTGGAAGCAAAGGGTCACA  
ATCGCATTAGATGTTGCAAGGGGAGTCGAGTATCTCCACAGCTTGGCACAGACAAGTTTTATCCATAGG  
GATTTGAAGCCCTCTAACATACTTCTTGGGGATGACATGAGAGCCAAGGTTGCAGATTTTGGGTTGGTT  
AAGAATGCCCCGATGGGAAATATTCTGTTGAGACACGGTTGGCTGGAACTTTTGGCTATCTGGCGCCT  
GAATATGCTGGTAAGTCTGTCTTCTCTGCTGATCTTTAATCCTTTTAGTTGTAAACTGGTAGAAA  
AAAACAATATCCTATCATTAGCTTTCATGTTCTTTTTAATCTTCACTATATTAGAGATAAATGGAGAGGTG  
TTAGCTTCATTGAAGTTCATTTCCATGTTCAAATGCTAGTTTGTTAATCTCGATCTGATTCGTGGATTGAT  
ACCGCAAACGTTGTCCAGTAAATTAATAATGTTAGCAAAAAAGAGTACGATTTGAAAGACAAACATAA  
GGTAGAAATCTAGAAGCCCACTCATCCGGTTTTCAAATTGAAATTCGGATGTTGGTACAGCGTGTGTGA  
CTGATCCCATTGTATCTAAATAGAAATTTGGCTTTCGGAATATCACTCTTCTTCAAGACATTAAGTTCAAC  
ATATCTAGATTTAGTGTGGCTGTCAATAGTTTTCTGCTCGTAACATGTTTAATTTCTTTAGAGATCTTGT  
TCTGGCCTATTTCTTGCATGTCTTAGCAAGGTTGTCTGTGATCATTACAAAATTTGGATTAACGTGACTG  
CTCCTCTTTATTTACAGCTACTGGACGAGTCACGACCAAAGTAGATGTGTATGCGTTTGGAGTTGTTCTA  
ATGGAGATCATCACTGGTAGAAAAGCATTAGATGAGACCTTGCCAGATGAGAGGTCTCATTGGTCACC



TGGCTTCGCAGGGTCCTTGTCAACAAAGACAACCTCCGAAAGGCTATTGACCCAACCTCTTGATCCTGACG  
AGGAAACATATGAGAGCATTGTGAAGGTTGCCGAGTTAGCAGGCCATTGCACTGCACGAGAACCATTCC  
AGCGCCCTGACATGGGACATGCAGTCAATGTCCTTGCCCCCTCGTAGAACTGTGGAAGCCTACAAGAA  
ATGAAGACGAAGACAGTGGCATCGACCTCCAAATGAGCCTTCCTCAAATTCTTCAGAGATGGCAAGCTG  
ATGAAGGAACTTCAAGAATGTTTCGATGACATCTCCTTCAGTCAAACACATTCAAGTATACCCCTCAAACC  
TTCTGGATTTGCAGATACTTTCAATTCAACAGATTGCAGATGACATTAAGGCAACAATCAAGAAAGGCAC  
ACAATTCATTTGGTTAATTGGTTTCGTCTTAACAACGCGTTTTACTTCGTCTTTTACAACCCTTTTGGTGA  
TAGATCATTAGACCAAAGAAGCTAAGGTGGATAGCAGAGTTTATTTGTGGTTTTGTTAGAAGAGAAAAA  
TTGTATTAAATTCTTTAATCTTACATAGTTGATGTAAATAGATTTGAGTTCTTGTGTTAAACATGCAAAAT  
ATACTCTTCTTATTAAGTTTTTTACTACAAGATTTTATTATTTGTGCCACTAAGTGTGTA

>PGSC0003DMG400004963 LRR-RLKs

CTTTTATTTCTTCTCTCTAAGAAAAACAATTTAATACAAATGACTATTCAAAAAATTATCACCCCTTGT  
GTTATTTTTCTTACTTTGACGTCCACTTTTGTCAAGGTGATCAATCTCAGTTCTTTGTACTCATGAAGAA  
ATTTGTCACAGGGAGTTCTTTGTCTAATTGGGATATTGGAAAACCAATTTGTCAATACAAAGGTGTCCGT  
TGTGATGAAAGGGGAGACGTTATCAAATTAACATATCGGCCTGGTATTTATCAGGCCAATTTCCAAGT  
GATGTGTGTAGTTATTTCCAAGATTGAAAAGTCTTCATATTGGTCATAATAATTTCCAAGGTGGTTTTCC  
TAAGTACCTAACAAATTGTTCTTTTTTGAAGAATTGAACATGACTAAAACATCACTTACAGGACAAATTC  
CTGATTTGTCACCAATACAATCTTTGAACTACTTGATCTTTCATGTAATCAATTGACAGGGGATTTTCTT  
TGCAATTATTAATCTCACCAACTTAGTTATCCTGAATTTCAATGAAAATCGCCATTTCAATCCGTGGCGA  
TTACCAGAGGACATTTCCAGGCTTATAAATCTCAAGTGGATGATTTTAACAGCATGTAATATGCATGGGA  
CAATTCCAGTGTCAATAAGTAACATGACTTCTTGTGATCTTGAATTGAGCGCGAATCGCCTTGTGGT  
AAGGTGCCTAGAGAACTTGGGAAGTTGAAGAATTTGAACTCCTTGAGCTTTTTTACAACCTTACTTGATG  
GTGAAATCCCCGCGGAGCTAGGGAATTTGACAGAACTTGTGGACTTAGACATGTCCGCGAATAATTTCA  
CAGGGAGAATTCCAGAGTCTATAAGCCGGCTTCTAAGCTGCAAGTGTGCAACTTTACCATAACGCGCT  
ATCAGGAGAGTTTCCAGCAGCACTTGCTAATTCACAACCTTTAACTATCCTGTCTCTTTATGACAATCTGT  
TTACAGGAGAAGTTCCACAACACTTTGGTCTTTCATCAGCTTTGTTGGCATTGGACTTGTGAGAAAATCG  
ATTTTCTGGAAAGCTACCGCCTTTTCTGTGTAGTGGAGGTAAATTGAGTTATATTCTTTTACTTCAAACA  
TGTTCTCAGGTGAACTGCCTGATGGATATGTGAAATGTCAGTCTGTTCTTCGCTTTCGAGTGAATTACAA  
TCAGTTGGAGGGAAGAATACCACAAGAGCTTTTTACTCTTCCACATGTTTCAATCATTGATTTGAGCTATA

ATCATTTTAGTGGTCCAATTCACAACAATTGGAAGTGCTAGGAATTTATCAGAATTGTTTATGCAAAG  
TAACAAGCTTTAGGTTTGCTTCCTTATGAAATATCTACATCTTCTAATCTTGTGAAGCTTGATCTTAGCAA  
TAACCTTTTGTATGGTCCAATTCCTTCTGAAATTGGTGGTTTAAAAAGCCTCAATTTGTTACTCTTGCAAG  
GTAACAAGTTCAATTCTTCAATCCCCGAGTCACTTTCTTCGCTTAAATATCTCAACTATCTTGATCTGTCTA  
ACAATCTTTTGATAGGAAAGATCCCTGAGAGCCTAGGTGAATTGTTACCAAACCTCTATGAACTTGTCAAA  
CAACTACTTTCCGGTGCTATACCTCTTTTGTATAAAAAGGAGGTGTTTTGGAAAGTTTTTTAGGCAATC  
CGGGACTTTGTGTCCCTACCTCTTTGAACTCATCAAACACAAGTTTTCAAACATGTTACATAGCTATAAC  
CATAAGAAGAGGAACAACATTGTTTGGGTTATTGGGACATCGGTGGGGATAGTCATTGTTGGATTAGTC  
TTGTTTATCAAACGATGGTTTGGTAACAAAAGGAGGTGATGGAACAGGATGATCATTGTTGTCATCA  
TCATTTTTCTCCTTTGATGTTAAGAGTTTCCATCGATTAAGTTTTGATCAACGTGAGATCTTTGAAGCTAT  
GGTTGAGAAGAATATTGTTGGATATGGAGGGTCAGGGGCTGTCTATAAGATCGAGTTGAGTAATGGAG  
GAGTAGTTGCTGCAAAGAAGCTGTGGAGTCACAAACATAAGCATTCTGTTTCTGAGGATAAATTGGTTT  
TGGATAAGGAACTTAAGACAGAAGTTGAGACTCTTGGTAACATAAGGCACAAAACATTGTGAAATTGT  
ACTGTTATTTCTCAAGTTTGGATTGCAGCTTGTGGTTTATGAATACATGCCTAATGGAAACCTTTGGCAT  
GCTCTTCATGGTGGGAAGTTCGTGTTGGATTGGCCTATTCGTCATCAAATTGCACTCGGAATAGCTCAAG  
GATTGGCCTATCTTCACCATGATCTTATGCCACCGATTATTCATAGAGATATCAAATCCACCAACATCCTC  
CTGGATATTGATTATCAACCAAAAGTCGCGGATTTTGGTATAGCCAAAGTGTGCAAGCCAGAGGAGGC  
AAAGATTCCAGCACCACGGTCATCGCAGGAACTTATGGTTACTTGGCACCAGGTATAATTTCCCAATTC  
ATAAGTGTTACTTCAATCTTTGAGCTTGATTGAGTAGATTAATTAATCCTTTATGTGCAAATATCATCC  
CATAGTTGAAGTGTTTCATATTGGCCTAATGTTACTCTAAATTGGCCATTTAATATAGTGAAAAATTTAGAA  
CATTGCCTAACGTTAAGAGTACATTTGACCCTTTTTCGTTCTTAATTATGGCTTTTTATGTTGTAAAAACA  
TCACATATGCTCAAGTTTCTTGATTGAACTTTCATTTAATACATGTTTAAGTGTGAAATTAGGCTAATGTT  
ACTCAACTTTGGTGTAAACAGAGTATGCATATTCTTCAAAGGCAACTACAAAGTGTGATGTGTATAGTTTT  
GGAGTTGTTCTAATGGAATTGATTACTGGAAAGAAGCCAGTGGAGCCAGAATTTGGAGACAACAAGAA  
CATTGTTTATTGGGTATCAACAAAAGTGGAGACTAAAGAAGGTGCATTTGAAGTATTGGATAAAAAAGT  
CTCAGATTCTTTCAAAGAGGACATGATTAAGTTCTACGTATAGCTATACGTTGTACGTATAGTACACCA  
ACACTTCGTCCTACCATGAATGAAGTTGTTTCAGTTGCTAATCGAAGCGGATCCTTGCAAGTTCAATTGTT  
GCAACATGTCAAATAAGAAGAAGAATGACACAGAAGAAGTGATCAATAAGCCACCAAAGAACATATGA  
GTTGTAAAAATTTAGTGTATCAAACCTAGTATACAAGGTATATAGAATATGTGTACTGAGATATTACACC

CTCAAAAGAATCAGTCTTTATGTTTTCTAATAAATGGTACTACTTTTTATTAGTATATATATAGATTCTCCA  
ATTAGTGTTACCTTGCTTTTTATATTTTTGGCCTGTTGTAAGTATTTGGGAATTTTATGAA

>PGSC0003DMG400004966 LRR-RLKs

GCGCTCTTCATACTCGTCTCCTTCACACGTTTTCTGAAGGCGGAAGAAAAAACTTCTCTTCGTCAACTT  
CTTCGTCAGCTATGGCGGCGCTATTCAATTGCCGGCCGGAACCTATCCACTTCTTCTCTATTTTCTCCTTCT  
TCCTTCTCTTCCCCGTCGCTTTTTCCGACGAGCTTCAAACACTTTTATCCATCAAATCCTCTTTATCAAACCC  
CACCACCAATGTATTCCAAAATTGGGAACCCAATACTCCTCTCTGTAAGTTCACTGGCATCACATGTAATT  
CCGATGGGTCAGTCAAAGAAATCGAGCTTTCGAGTAAAAAAATTTCTGGGTTTGTCCTTTTGATAAAAT  
ATGTTCACTTAATTCATTGGAAAAGCTCTCTCTGGGTTACAATTCACCTTTCTGGGGAAGTTACGGATGATT  
TGAACAAGTGTGTTAGCTTGAATTACTTGGATGTTGGTAATAATGAATTTACTGGGTATTTCCCTTATGTA  
TCTTCACTCAGTGAGTTAACCCATTTTTATGCAAATAACAGTGGGTTTACAGGAAAATTTCCATGGAATTC  
TTTTGCGAATATGAGTAATTTGATTGTGCTTAGCCTTGGTGATAATCTGTTTGATCGGACACCGTTTCCTG  
AAGTGATTTTGAAGCTTAATAAATTGAATTGGCTCTACTTATCGAGTTGTGAGCTTGAAGGGGAAATTC  
TGAAGAAATTGGAATCTTACAGAGCTGATTGATTTAGAGCTGTGATGAATCACCTTACTGGTGAAATT  
CCTTCTGGAATTACGAAGCTGAAGAAATTATGGCAGCTTGAGTTGTATGAAAACCAGCTTACAGGGAAG  
TTGCCGTTGGATTTGGGAATTTGACAAGTCTGAATATTTTGATGCTTCGGCTAATAATCTGTACGGTG  
ATCTGTGCGAAATTCGAAAGTTGAATCAATTGGTAAGTTTGCAGTTATTGCAGAACCAATTTTCAGGGGA  
AGTACCAGCAGAATTGGGAGAGTTCAAAAAGCTGGTGAACATTTCTTTGTACACTAACAACTCACTGG  
TCAGCTCCGCAGAAGTTGGGTTCTTGGGCGAATTTGATTTCAATTGATGTATCAGAGAATAGTTTCACT  
GGTCCAATTCACCGGACATGTGTAAGATGGGGACGATGAGAGGATTATTGATACTTCAAACAATTTTC  
ACTGGCGGAATCCCTGAAAGTTATGCTAATTGTACAACAATGACGCGGATTCGAGTGAGCAAAAACCTCA  
CTCTCCGGTGTGATTCTGCAGGAATTTGGGGGCTACCAAAGCTCGAAATCCTTGATGTTGCAATGAATG  
AGTTTGAAGGTACTATTACTTCTGATATTGGAATGCAAATCTTTAGGTGAAATTGATGCGGCTAATAA  
CAGATTCTCTGGTGAATTGCCTTTTATATTTTGAATGCTTCTTCTTCTTAGTGAAAATTGATTTTAGTAACA  
ATCAGTTTTCCGGTGAAATTCGGGAACAATTGGGGAGCTTAAAGAAGATTGGTAATCTTAATTTACAGA  
ACAACAAGTTTTCTGGTTCAATACCAGATTCTTTAGGCTCTTGTGTTTCACTAAGCGACATTAACATGGCT  
AACAAATTTGCTTAGCGGCTCTATTCTGTTTCTTAGGATCATTACCGACTTTAACTTCATTAACCTTGTCG  
GAGAATCAGCTTTCAGGGAAAATTCGACGAGTTTATCAAATCTGAAGTTAAATCTTCTTGATTTTTCCAA  
CAATCAGTTGACTGGAGCAATACCAAACCTCCCTATCAATTGATGCTTATAAGGGTAGCTTTGCTGGGAAT

AATGGTCTTTGTAGCCAAAACATTAAGAACTTCCGTAGATGTTATGGTGAATCTGGAAAGCCTAGAGAA  
TGGTACACTCTGTTGATATGTTTATTGGTGGCTGTGATTGTGGTGCTCGTTTCATTTGCGGGTTATTTGTT  
CTTGAAGAAGAAAAGTCATAAGGAACATGAGAGGTCTTTGAAGCAAAATTCTTGAATACAAAGTCATT  
CCATATATTGACCTTCACAGAGGATGATATTCTTGATGGAATCAAGCACGACAATTTGATTGGAAAAGGT  
GGTTCTGGTAGTGTATACAGAGTGCAGCTTTCAGATGGAACAGATTCGCGGTGAAACATATTTGGACT  
TCTGATTCAGGAAACAGGAAAATATCAGGAACAACATCACCAATGTTGGGAAAACAGGGAAGAAATT  
GAAAGAATTTGAGGCTGAGGTTGAAACACTGAGCTCAATTCGACATGTGAATGTGGTGAATTTGACTG  
TAGCATAACGAGTGTGACTCGAGCTTGTGGTGTATGAATATATGCCAAATGGAAGTTTGTGGGATCG  
ATTGCATACTTGCAAAAAGATGTCACCTTGATTGGGAGACGAGGTACGAGATAGCTCTTGGTGCAGCCAA  
AGGACTGGAGTATTTACACCATGGTTGTGATAAGCCAGTGATTCATAGAGATGTTAAATCAAGTAACAT  
CTTGTTGGATGAGTTTTGCAAGCCAAGAATCGCTGACTTTGGTCTTGCTAGGATTGCTCAAGCTGATTCA  
ACCAAAGATACTCATGTCATTGCTGGAACACATGGATATATTGCTCCTGGTAAGAAGCTCATTATAT  
TGTAGTTGATTTTATACGTAGAATTTGAGTATATCTACTTAACACTAACCATGTATTCATTTTTACCATCG  
GTAAAATTGACTTACGAAATAGGCAACTCCCCATATCAAGCAATATGGTATCTTGAAAGATATAGTGAAA  
ACTTGCTATAAACAGTTGGATCACTATGTTGCTCGGATCCTTCAAAAATGTCACTGCACCTGTGTTGGTTC  
CCTCAAAAATAGCGCATTCTTGGAGGATTTGACATGAGTGTGACAACATTTTTGAAGGATCCGAGCAAC  
AATTGAATTGACTAATAAGAGTGTGAAACAATATTAGTGTTAATTAAGTATCCTATCTTGATTATCT  
ATTCATTTGGTCATAGTGAGTGTCTCATTCTGGCATCCTTTTTGAACTTATTTGAATTGAATTGGTGTTC  
AGAATATGGATACACACACAAAGTGAACGAGAAAAGTGATGTATATAGTTTCGGAGTTGTATTGATGGA  
GCTTATATCTGGGAAAAGGCCAATAGAATCCGAATACGGAGAGAATGGCAACATAGTTACATGGGTGA  
GCAGCAAATTGAAGAGCAAGGAAAGTGTATTAAGCATAGTGGATTCAAGCATTCTTGAAGCTTTCAAGG  
AAGATGCAATCAAAGTCTTGAGGATTGCTATTGTATGCACATCTAGGCTTCCCACATTAAGGCCAACAAAT  
GAGAAATGTAGTCAAAATGCTGGAAAAAGCAGAACCTTGCAGATTGGTTGGGATAATTGTAAGCAAAG  
ATGATGGTAGTATCAAGACAGAACAATTGAAGGATCACACCAAGATGTAATTAGATCCCCGTCTTTGCT  
CGTTTCACTCTTCAACCTGATCTCTGTCCTCCATGGAACGTGAATCTTGTAGCAGTATGTAAAGTTTTGA  
AGATGGCCTCTTGGCCTTGTAAACATATAGTAGAAGCTAGATCCATACTAGTATGTGGAATTAGATTGAAT  
TTAGAGATGCATGGCATAAGTGTATAAGATGTAATACTTGTATGTGCTAAATAAAAATGGTTTAGTTAT  
TCAAATCCCTTTTACCCTGCA

>PGSC0003DMG400004972 LRR-RLKs

GTTTCATGCTCTAAATAACTTCAGGGAAGCTATTTATGAAGATCCACATCTGGTGTCTCAAATTGGAATG  
CCTTAGATTCAGATCCTTGTGGATGGTCTGGAATTTTTGCTCAACGGCACGAGATCATGTCATAAAAT  
GTGAGAGAAGTGCCTTCTGCATATGGCGTTTTCGTTTTCTTCTATCTGTTTGTGGATTGATTTTTCTCAA  
TTGGATGCAACTTATTTCACTTTTTGATACATGTTAGTAGCACAAGTACTGAGCCTTTACTAACGAGTTTA  
CAACGTCTCCTGTCTATGTAATTTGCAGTAACATTTCTGGTGCTTCTTTGAAGGGTTTTCTTTGCGCGAA  
CTTGCAATTTGATTTCTTATTTGCAAGAAGTGTAAAGCTGTTCCCTCCATGAAAACTTATACTTGTAACCCG  
GTGCATAAAAGATTTGGTAAAAGCTTAATGCTATGTATTGGTGATATGCAGGATATTGCATGGAAATGT  
ACTGATTGGTACAATACCGAAGGAGATTGGCTTGTGAAAAATTTAAAGGTCTTGGATTTGGGTTCTAAC  
CAGCTCGCAGGACCAATTCCTCTCGAGCTTGGCAATTTGTCAAACATTATTAAGATGTTAGTGCAATTTG  
AGTGTTCTTTTTGTATGTGTACTTTCTTTTTGACTTGCATGAAGCTTCTTATCTCATCTAGTTTTGTTAT  
GTCTCTGCAGAACTTCAATCCAATGGATTAACAGGTAAATTGCCCTCTGAGCTTGGTAAATTGATATA  
CCTTCAGGAACCTTCGCCTGGACAGAAATAAGCTCAAAGGACCACTGCCTCCAGTAATGGCTCAAATTT  
ACATCTAGTGCGTATGGGATGTAAGTCGAATATGGACAGTGCTATTTCTTCAATTCTATGCGTTTTTAATC  
TTTTGGATTTGCTGTTATGTAGTTTTACATTATCATGTTGGTAGAAGATTTAATGTTGCAAATGCTTTTGA  
GACGTGGTTCAATTTGATTTTTCAATCTTGTACACTATGAAGTTGCCTTTTTCTGCTTTTTGGGGGAGGGG  
GTGGATATCTGAAGCTTCAAATCTTTATTTAAGCCGTTAACTATAACCCTTACTAAATGATTCTCTCTAAA  
ATGTAATGTTTCCAGGACTTACGAGCATTATACATTCAAAATTTTTGGAATATTTGAAGCTTGATTAAATT  
TATATATCTTTTTAATCTTCTAAGGAGCCCATAGTATCTCAATTAGCATAAGATTTGCTGCAACATTTTTGG  
CTGCAGTTTGTCTGGACATTTACAGAGGCTTAAAATTCAAAGATTATGGCTAATGTTAATCTTTTTGTGC  
TCTTGATTGATAGTGCTGGACTTCTGTTGACATGTATGTCTGTTGTACTTGAACCTAATTTAATACATTTGT  
TGTTCTCCTAGAAATTTACACAATTACTGAGTGTAAATGAAATCTTAAAGGGTTCAACATGTATATTCAA  
AGTCATCACCGACGTTATCGGCAATATTCTGTATAGTTTTCTGGAAAAATCAGTAAAAAGCCTCCTATGC  
TTGCTTGAACCTGTAATTGCTCTACATAGATCCCTTAAAGTTTTATCTCACAGTTGGTTTCTTAGTAATCGT  
CTTTATTTTTGTTTAGGCATGCCTCTGGTGCCAAACCTACTGGTCTTTGTCGTTTATCTCAACTGAGAGTT  
GCTGATTTCTCCTTCAACTTCTTCTTTGGTAGCATACCGAAGTGTCTGGAGTACCTTTCAAAGTATAGTTC  
TTAATTCGAATCCACAAGAATTTTTATACTCTTATATCAATTTCTGAGTGCCTATTATTTGTTCTTTCTA  
TAGAACTAGCTTTCAAGGAAATTCCTTCAAGCAAAGATCCCAGGCAGCGTTCTACTGCTTTATGTGGT  
ATGTGTAATCTGCTAGACAACCTTACACTTTAGCATAATCATTAGCCAAGCCTTTGAATCTTTTATGCAT  
ACATTAGTGTGCGAAAATGCAAGCTGGTCATGCTTACTTTTGATTGTATATCCTAAAGAGGCTTCTGCGA

GTAAGTTCGCCCATTTCACTAACAGTCGCAGTTGAACAGATCAACTTTAAAATAATTGAATTGATTGTTGT  
AACTTTTGCATTATAGGAGGCACTCCACCTTTCAAAGCAATCCAGCACAGAGCAATAATAAGCACCGG  
ACTGTTGAAGGAAGAGCCAAACATAAGTCTGCTTCAAACCTACCTGGCTTTTTGTGTTAGAAGTGGTAA  
CTGGAGTTATTGCGGGTCTCTCTTCTTGTGGCTATTTGGCTGCCATTCAGAAGTGTAAAGAACGAATC  
TTCTATTATCATCCCTTGAAGAAATCAGCAAGTATGAAAGACCATTTGAAAGACCATATGGCAGTTTAT  
GTAGGTGAGTACCATGCAATTCAGTTGGGCGATTACAGTTAAGAATTGCCTTTAAACATTTGTATTACT  
TGATTCTTTATTGACTTAGGGTGTGTTAGGTATGAAGGAAAAATGGTTTCCTTGGAAAATGTTTTCCAGA  
AAATAAGTGGATTTCTTACTTATTTTCTTGTGTTTGGTATGTAAGTAAAAACACCACCCTAATAAGATTT  
GTATATAATCTAGGCAAATACTATGGGAGGTGGGAGTAGGGGTCCCGGGTGGTGGGGATGGGGGTGA  
GCTGAGGTGTGTTGGAGGGTGGGGAGGACACAATTGATGTGAAATACCACTTGTGGAACCTGTTTTCCC  
TACCTCCATACCGAACACGCCCTTAATTCCTTCTCATATAGGATCTGATTCTTCAATTTAGTACTACTAATG  
TTTCTGTTACTTCAGTTATCTTACTATTATTGTTGTTAATACATAAATATGCCCTTTAAGCCACATAGGAC  
TCATGTGCCTACTTGTTTAACTTTATAACAAGTTTAAAGTGTCTGCTTGTGCACATCCAAAGTTAAATGACAT  
AAATGTGAAATGAGGCCAAATTAAGGCACATTACTGTATTATGCCTTTTTCTTTCTATGATGTTTTCA  
CAATAGCTTCCTTACTCTTGTAAATTTAAAACCTGTTTTGGAAAACATTTTTCTTGAACCGAGGGTCTATC  
GGAAACAACCTTCTTACTTCCACAAAGGCAAGTTAAGGTCTGCATACACCTCACCTCCCTAGACCCGA  
CTTGTGAGCTCACACAGTGTATAGGATCACAAGTTCAGAAGCATTAAATTATAATTCACATTTCTATTAGTA  
ACAAATGTTTCTTGTGAGATACTGAGATGCTAAAGGACGTTGTAAGATATAGCAGACAAGAAGTGTGAG  
GTAGCTTGTGAAGATTTAGCAACATTATTGGATCTCACCAGACAGCTTGGTCTATAAAGGAACTGTGA  
AAGGCGGACCTGAATTAGCTGTAATTTCCATTTGTGTCAAAGAAGAGCAGTGGACCACCTATCTAGAGC  
TTTATTTTCAGAAAGAGGTGAAGCCTGTTCTCTCTTTAAAATACATGGCTACTGCTGAGCTCTCGTGCGCA  
ATAAAAATTTTATCTTTGCTGCAATGCTCTAACTTGTATGGCTTACAAACTCAGGTGGCAGAATTGGCCA  
GAATAAATCACGAGAACACTGCAAACTTCTAGGTTACTGCAGAGAGAGCAGCCCCTTACAAGGATGT  
TGGTGTGAGTATGCATCTAACGGGACTTTATATGAACACCTCCATTGTGAGTGGAAAAACTATTTTA  
CACATTTGCTTACTGTATGTTTTAGAGGCTGAAATCCGAACTCTTGAACCTTATCACAGATGGAGAAGGA  
TGCCAACTTTCTTGGACGCGGCGAATGAAAATAGTTATTGGCATCGCTAAAGGACTGAAATATCTCCATT  
CAGAAGTTGACCCGCCATTCATATATCAGAACTGAATTCAAATGCTGTATATCTCACAGAAGATTTTTCT  
CCAAGGTAAGCAAAGATTTCTGTATCACTGCTGCAAAACCAATTCGCTGTAACTTTCTGGTTAATCT  
TACTGTCAATTGTGCTCATCCATAAGACAATTTTAGTTTACTCTCCACGGTTTCTGCTCATTTAATCTTTGA

ACTCGCCGAGTTTCCTTACAAACAATTTGGGCTTACATTTTTCCATTTTTGTTTCCTTCAAGCTCAACCCTT  
TGTGCTTTTTAACCCGAGTAATAAAAGGCTGATTTTTCATACCCTTTTCTCTCAAAGTTAATTTATCTGGT  
GCAGCTTGTTGATTTTGAAAGTTGGAAAACAACATTTGCCAGATCAGAAAAGAATTCCGGTGCTATCAG  
TAGTGAAGGAGCAATGTGTGTCCTTCCAAATTCTCTACAGAGCCGTCATCTTGACATGCAGGGTAACATC  
TATGCATTTGGAGTACTACTGCTCGAAATAATCAGCGGAAGACCTCCATATTGCAAAGACAAAGGGTGC  
TTAGTAGATTGGGTAAGCATTCTTTTCATGAAGTTTTTGTATAGGCATAGTACATAAATATACTCAAA  
CTTGGCCTCAGATGGCAAATAAGTACTCCAATTTGAGAGTGCACGTCTAGACGAGTTGAGTTGTTTAG  
ATGTGCACTCTCAAAGTTGGGAGTGCTTACTTGCTAGCTTAGGCCAAGTTTGAGTGTCTGCTTGTGTATT  
ATGCCTTTTGTATAATGATAACTCTCTCTGTGGAACCTGGACTCGTGCTTTATGGAATCTGAAGTTGAC  
TTTGATATGGCAGGCAAAGAATTCCTTGAATTACCAGAGGTATTGCCTTATGTTGTAGATCCCGAGTTG  
AAACATTTAGATACGAAGACCTCAAAGTGATTTCTGAAGTGGTTAATCTCTGTATCCACCCAAGTTCGA  
GTAGCAGGACTTCGATGAGAGATTTGTGTGCTATGCTGGAGAGCGACATTGACACATCCATAACTGCAG  
AGCTCAAGGCATCGTCTTTAGCATGGGCTGAGCTTGCACTCTCATCCTAA

>PGSC0003DMG400005103 LRR-RLKs

CTCATGGCCACCCTCTTGAGAAAAAATTCTCCACTTTCTCTCTCGTGGATTTTCATGTTCCACAGAAACCA  
AACATCAAACATAGCCATATCAAATTTCTTCTCTATTCTTCTTACTAGCGAAAAAAAAAAAAATGTCAGC  
CAGTGCCAACTTTTTCCGGCCATGCCCAATTTTATTGCTCTGTTTTTTCATATTCTTGATTTCTCCTTCTCAT  
CAACAAGATGAGTTACAACCTTATGCAATTCAAATCCACTCTGAAAACAACACAAATTTACATCTTTT  
TGACACGTGGACACCTCAGAATAACATTTGCAACTTCACTGGAGTTTTCTGTGATTCTGACAGTAAATTG  
GTTAAAGAAATCATTCTTTCTGAACAGAATCTATCTGGGGTTGTCTCTTTTGATTCACTATGCTCTCTGAA  
ATCACTAGAAAAAATTTCTTGGTACCAACTACTTGTATGGTAGAGTCAGTGACCATTTGAAAACTGT  
ACAGAGTTGCAGTATTTGGATTTGGGTAACAATCTTTTTTCAGGGGAAGTTCCAAATTTGCTTCTTTAAG  
CCAATTGGAGTTTTTGAATCTCAATAGAAGTGGATTCTCTGGTTCATTTCCATGGAGTTCACTTGGAAATC  
TTACTAGTCTAACTTTCTTGAGTTTGGGTGACAATTCATTTAATAAAAGTCCATTCCTCTTGAAATCTTGA  
ATCTTGATAAGTTATATTGGGTTTACCTTACCAATAGTAGTATTGAAGGCCAAATTCAGAAGGTATTGG  
AAATCTTACTCTGCTTGAATCTTGAGCTTTTCATATAATGACTTGTGAGGCAAATCCCAGATGGAATA  
ATCAAATTAAGCTTAAACAGCTTGAGATTTATTCTAATGGACTAACAGGAAAGTTCCCTGTGGGGT  
TTGGGAATCTCAGTAGCCTTGTCAATTTTGTGCTTCAAGTAACAATCTTCAAGGTGATCTTTCAGAGCTC  
AAGTCTTATCTCTTCTTGAATCTTGCAGCTGTTTGAAAACCATTTTTCTGGTGAGATTCTGTTGAATTT

GGAAATTTCAAGTTTACAGAACTGTCATTGTACAGAAACATGTTTTCTGGTTCTCTTCTCAAATATTGG  
ATCATGGGCAGAACTTCAGTACATTGATGTTTCTGAGAATATGTTCACTGGTTCAATACCACCTGATATG  
TGCAAGAAAGGGAGTATGACTGATCTTTTGCTTCTCCAGAACAACCTTCACTGGTGGGATACCTTCGAACT  
ATGCTACTTGTGGTTCGTTGCAGCGTTTACGGGTTAGCAACAATTCCTTTCAGGAGTAGTCCCTAGTGG  
AATTTGGAGTTTGCCAGATTTGGAAATCATTGATCTCACATTGAATCTATTTGAAGGCCAGTGACATCC  
AATATTGGTGAAGCAAAGTCTTTAGCACAGTTGTTCTAGCCTACAACCGTTCAATGGTCAATTACCAC  
AGACAATATCAGAAGTTTCTTCATTAGTAGCCATTAATCTGAGCGCGAATCAGCTCTCTGGTGATATTCC  
AGCAGCAATAGGTGAACTTAAGAAGCTTAATACTCTTCATTTAGAGTATAATTTGTTTTCTGGAAGTCTTC  
CAGATTCTATTGGATCATGTGTTTCTCTCTGTGAAATTAATCTTGCTGGTAATTCCTTCTGGTGCAATTC  
CCGAAAGTCTTGGCTCTTTGCGTAGCTTGAACCTCTCAATCTATCTGATAACACGCTCTCAGGTCAAATT  
CCAGCGACCCTTTGAGTTTAAGATTAAGCCTTCTTGATTTGTCAAACAATAGGTTGAGTGGTAGCATAAC  
CGGATTCTTTATCAATAAAAGCTTTTAGTAATAGCTTTTTGGGAAATCCAGATCTTTGTAGTGAGAATTTT  
GGTAGCCTCAGGCCATGTTTCATCAGATCCTCACACATCTAGAGACCACAGGACAGTCATGTTGTGCTTGA  
TAGCTGGGGTAGTTGTTCTTGTCTGTCACTTACGTGTTTCGTGTATGTGAAGTTTAAGCACATAATCA  
GAACACTCCCGTAAAGAGACTTGATTCTTGGGATATCAAACAGTTTCATGTATTGAGCTTTAGTGAAGAT  
CAAGTCTTGAAGGCATTGAAGCAAGAAAATTTGATTGGAAGAGGTGGTTCAGGGAATGTGTACAGATT  
AGTCTTGAATTGTGGAAAACAGTTGGCTGTGAAACACATTGTTAAATCCGATTCTGGTGACCAAAAAAG  
TTACCGGGACAGCTCAGCCATACTGGTGAAGGAGAATAGAAGATCAAAGGAGTATGATGCTGAGGTGA  
CCACGTTAAGTTCCATTAGGCATGTCAATGTTGTCAAATTGTACTGTAGCATCACAAGTGAGGACTCAAA  
TATGCTGGTTTATGAATACTTAATAATGGAAGCTTATGGGACCGATTGCACACGTCTCAGAAAAGTCAAG  
ATGGATTGGTTGGTGAGATATGACATTGCATTAGGTGCTGCTCAAGGGCTTGAGTATCTGCATCACGGA  
TATGACAGCCCCGTGATGCACCGGGATGTCAAGTCTAGCAACATCTTGTTGGATGAACAGATGAAGCCA  
AAAATTGCTGATTTTGGATTAGCCAAAGTTTTGCATGTTAATGGTACTAAGGACTCTTCTCAGGTTGTAG  
CTGGGACGCATGGCTACATTGCTCCTGGTAAATATTTTTCTCTTCCCTTTCCATTTCATAGTCACTTAAAA  
ATTATTTGGCAAATTCTAAATTTTATTCTTTCTTCATTGTTTGTCAACAACAGAGTATGCTTACACAACCAAG  
GTGACCGAGAAGAGTATGTTTATAGCTTCGGGGTGGTGCTAATGGAATTGGTGACTGGAAAGAAGCC  
AGTGGATGCAGAGTTCGGGGAGAACAGTGACATAGTCCAATGGGTTTGTAGCAAGATAAGAAACAACA  
CTAGCATGATCGATTTGGTGGATTCAAGCATTTTCGAGGGGTTCAAAGAAGATGCTGTTGAGGTTCTTA  
AAATTGCAGTTCATTGCACATCAAGGACGCCAGCATTAAAGACCTTCCATGAGGATGGTAGTTCATATGCT



AGAAGAAGCCGAGCCTTGCAAGCTGACAAATGTAGTCGTAAATTCACCGAATGAGGATGGCAGGAAAC  
AAGGACTTGCTAACTAATGGCAAGTCATGATGTTGAACTATCTCGTTGAGAGCAATGGAATTTTGCAGA  
ATATTGAACTATGTTGTAAGTTCACAAAGAATGCTTAGTGTACATATGACACTTTTGAAGAAATAGTGTA  
TTTCACAGCTGCATTAATAAATCCAAGTAAATGTATTTACATCCAAATTAATTATACAAACTGA  
GCAGTTGATCTACCCTACAACCAATTTCAATTTTCT

>PGSC0003DMG400005254 LRR-RLKs

AAAGATTTAAAAGGTAATTGGCACCTTGCTTTTTAGTGGCCTACAATGGAAAGAATGACTTTATTGCCAA  
AAGGACTTTAGGCAAAGTATGCAATAAATCCTCTTCCCACTCACATTGAAAATCTGTCTTCAGTAGTTCAA  
TTAGTATCTGTCATAATTCTTGCCTACTGGATTGATCCATTTTCAATATGAAGAGGTAGTAAATCAAATGA  
AGTTTCCCTTTCATTGAACAACACAACACTCTCAGATCCCTTTCATGCATATCATATAAAAGTAAGTAACTT  
GTGTGCCATATATTTTAGAACTAAAAGAGTCAGTAAGGCAAATCTTGGCTTTGTCGCAATAACCAAATG  
AATTTTTTCTATTCTGAGATAGAGTTCTTCTTTTTCGTTACTTCTTTAGCTGATACTATTTCTGGATTGTAT  
AGTTTTCTTGCATTGTGTTAAAGCTTTTTTATTGTAATGGTTTCTTATAGCAATCTGATTTTATCT  
CTCTTTCACAGTGGCTAATGAGCTCTGATTTTGTCTAATGCTCTTCAAAAATAGTCAAGGAGAGAGGGAA  
GAAGTGAAGGACTGCTGTAAGTACTAGGATCTTGCCTTTGCATTTTTGTCAGCCAGATCAGTGAAAACATAAT  
GAAGCTTCAGCCTTACTGGCAGCTATTGCTTTTCTTATTCTGCTGCTATCAGTATTTCTTCATGTTATAGC  
TGATCTTGATTCCGATAGACAGGCGCTACTCGACTTTGCAGAATCTGTCCCTCATATACGAAAACCTCAAC  
TGGAATTTGGCTCTCCCTATTTGCAAATCTTGGGCTGGTATAGCTTGTAACAAAGATGGAACGAGAGTCA  
TTGCAATCCATCTCCCTGCTGTAGGACTTTTTGGTCTATCCCAGCTAATAGTATAGGCAAGCTAGATGCT  
CTTAAAGTCCTTAGTCTAAGAGCCAATTATCTTAATGGAAGTGTTCCTTCTGATCTCCTTTGATACCGTCT  
CTCCAATCTGTCTACCTTCAGCATAATAGCTTCTCTGGTATTCCTGTTTCTTATCTCCTCGTCTTGGT  
GTAAGTACTCTCTCCTTTAACTCTTTTACTGGAGAAATCCCTCCACAATCAAGAACTTGACGCGATTATC  
TGTGTTGAACCTTCAATTCAATTCATTGACAGGAGAAATCCCCAGCCTTGACACCCTCAGGTTAACTAAC  
CTGAATTTGAGCTACAATATGCTAAATGGCTCCGTTCCAGACCCCTCCAGAAGTTTCCACTTACATCATT  
CGCAGGAAACTCTCATTTATGTGGTACACCTCTAAATAGCTGTTCTCGACCCCGTCACCTTCTCCAGCAG  
CTGATGGCTCTGCAATCCCTGAAAAACAGAAGGCTGTCCACTCTAAGAACTAAGTACCGGAATCATCAT  
TGCCATTGTGGTAGTGGTTTCTTTAGTAATGTTTCTCCTAGTTTTAGTAATCTCCTTCTGCTGCTTGAAAA  
GAAAGTGAGTCATAGCACTAGCATAATTAAGAGAAGGTGGCTAATGGGGGAAGAAGTGAAAAACCC  
GAGGACTTTGGAAGTGGTGTGCCAGATGCTGAGAAAAACAAGTTGGTGTTTTTCGAAGGTTGCTCTTAC

AGCTTCAATCTGGAGGATCTTCTTAGAGCTTCTGCTGAGGTTCTTGGAAAAGGGAGTTATGGTACAGCTT  
ACAAAGCTGTCTTGGATGAGGCAACAATTGTAGTGGTGAACGGCTGAGAGAAGTAGGGGTTGCCAAA  
AAGGAGTTTGAACAGCATATGGAGATAGTTGGAAGGGCTGGGAGGCACCCTAATATCGTTCCACTCCG  
CGCATATTATTATCCAAGGATGAGAACTTCTTGTTAATGAATACATGCCTGCTGGTAGCTTGTGAGCG  
GCCTTGACGGTATAAATTGCTAACCTCTATCTAACGTATGTTGCTCAGACTTCCAAAATGTTGCTGCAC  
CCGTGTTGGATCCTCCAAACATGTACCTGTCCACATTTTTGAAGAGTCCGAGCAGCACAACCTCTAACT  
TTTTCTTGACATTAATTGCTTTGATCATCTGTAATGATTCATATTTTTACGCAATCTTGATAATGAATGA  
CAGGTAATCGAGGTATTGGAAGAACTCCACTAGATTGGGATTCAAGATTGAAGATATCTCAGGGAGCA  
GCAAAGGAATTGCCACATCCACACTGAAGGTGGTGTGAAATTTACTCATGGAAACATCAAGTCCTCC  
AATGTACTCCTCACAAGAGACCTAGATGGATGCATTTCTGATTTTGGCTTAACACCTCTGATGAACTACAT  
ATCATACAAATATAGATGTGCTGGTTACCGCGCACCAGAAGTTATTGAAACACGGAAAGGGACACAAAA  
ATCCGATGTTTATAGCTTTGGAGTGCTGCTCCTTGAGATGCTAACAGGTAAATCCCCTCTCCCATTATCAG  
GGCAGGATGAGGTAGTTGATTTGCCTAGGTGGGTCCGGTCCGTTGTAAGAGAGGAATGGACAGCTGAA  
GTTTTCGACGTAGAGCTATTGAAGTACCAGAATATTGAAGAAGAGATGGTGCAGATGCTTCAGATTGGA  
CTAGCTTGTGTAGCAAAGGTGCCTGATATGAGACCTGCTATGGGAGAAGTGGTTAGAATGATTGAAGA  
AATTCGACAACCAGAAGGTGAAACGAGACCTTCCTCGGAGGACAGCAGGTCCAAGGACTCTAATGCAC  
AAACACCTGAATGAAAAATGCAGTTTTAGTCATTCAGCTTTCAATTCTTGATCATTTTTAAGAATGCAATTT  
ATCTCCATTGCCAACTTTTGCATGTTCTTGGACATACAAGTAGTGTTATTTTTATTTTTATTTTTATCTTGA  
TGTTATATCCTATTCTAGAACTTATCAGCTCAACATAAATGAGAACCTTTGTTTTTCTCTATTTTTAAATC  
TTTG

>PGSC0003DMG400005485 LRR-RLKs

AATAAAGATAAAAAATAAACCTAAACTAACCTACACTACCCATTAACCCCTTATACTACTACCCACTCC  
ACTCACAACCCACAGTCCCACATTAATCCATCACTCCCCTCAACCACACACACGTACCACACACTACTAA  
ACATCAACAACACACCCCTTCAACCCATATACACAGAGTCACAAAAACGAAGAAGGACGACTCAAG  
AAAACAAAAAGAAAACTTCCATTTTTATTTCAATTATCCTCTTAAAAATTCACCAACACATTCACATTCCTC  
TTCTTTCTCATTATTATTTTCATATAAACACCATACATATACCACCACACACACTACAAAATTTGTGGGT  
ATTCTAATTGAGCTTCAGTTAAGATTTTGCGGTATTCAACTTACCTTATCTTTCTATTTATTTATTTATGGA  
ATTTGATGTAATTTTATGACAAGTTCTTTTTATTTTTGTTTCATTCATGAATTTGATTGGGATGATTAATT  
TGTTAGTTGTTATATCTCTATTTTCATGAATAAGGTAGCTTTAATNNNNNNNNNNNNNNNNNNNNNNNNNN

NNNNNNNNNNNNNNNNNNNNNNNNNNNNNNNNNNNNNNNNNNNNNNNNNNNNNNNNNNNNNNNNNNNNNNNNNNNNNNNNNNNNNN  
NNNNNNNNNNNNNNNNNNNNNNNNNNNNNNNNNNNNNNNNNNNNNNNNNNNNNNNNNNNNNNNNNNNNNNNNNNNNNNNNNNNNNN  
NNNNNNNNNNNNNNNNNNNNNNNNNNNNNNNNNNNNNNNNNNNNNNNNNNNNNNNNNNNNNNNNNNNNNNNNNNNNNNNNNNNNNN  
NNNNNNNNNNNNNNNNNNNNNNNNNNNNNNNNNNNNNNNNNNNNNNNNNNNNNNNNNNNNNNNNNNNNNNNNNNNNNNNNNNNNNN  
NNNNNNNNNNNNNNNNNNNNNNNNNNNNNNNNNAAATATATGACCCGTTTCAAAGGTCGGTTTCAATTAAGAATGTG  
GTTAAACATCTTTCTTTGGAACACTTAAAAAACTCAAGGATGCAGTGACGCACCTTGTCCAAATTGTT  
TTAATAATTATTTTTGTTAATTCAAACCAAGAGGTGTAATTGAAATTATTAAGTGTTATGAAATCGAGA  
GGGAAGACAGTTATGTCTCTAAATGTCAAGATCGAGAATGCAGTTATGCATCCGGTTTAAGACTAATA  
AAAATTCAACAATTAATAAAATAAGTGAACCATGGCCTTAGACACAAATTATCCAAAATAGTAAAATA  
TGTATAAGTCAATAAAAGCGACCGTGCTAGAACCACGGGACTCGAGGGGTGCCTAATACCTTCCCCTCG  
GTCAACAGAATTCCTTACCCGAATTTCTGGTTCGCAGACTAATATAAAGAGTCATTTCTTTTGATAAGG  
GATTAACAAAAAGGTGACTTGGAACACCATAACTCAATTCCAAGTGGCGACTCTGAAAAATAAAATA  
ATCCCTAAATCAATAACGTCACTTAAATTGGAAAAACCCTTCCGCCCTTGCGCAAAAAGGGGTGTGA  
CACTAACACGATAAATCTTAGGAATAATAGCTTCCATGGTGAAGTCCCTATGGAAATTGGCAACCTCTT  
GCAACTGCAACATCTTAATCTCACTTGAATTCATTTACTGGAACCATTCCTGCTAATCTGAGTTACTGTA  
AAGAAGTTAGATCACTTGCTCTAGAATATAATAGTCTGGTTGGTAAAGTTTTACCTGATCAGTTCAGTTCA  
CTTTCAAAGTTGAATTATTTAGGCCTTGAAGCAACAATCTAACAGGAGGTATCCCATCTTGGATAGGAA  
ATTTTTCGACTCTTCGAGGTCTTCCCTTGCAATCAACAATCTACAAGGACCAATACCTCGAGATATTGGA  
CGTTTGTCAAAGTTGCAAATATTCCAAGTTTATGGAAATCAGTTGAATGGTACAATTCCTCAATCTCTTTT  
CAATATATCCTCTGTTTACTATTTCTCTGTTACTCAAACTTGTTGTATGGAGAGCTTCCATCAGATATAG  
GCCTTACTCTCCGAATCTTGTGGTGTGCTGGTGTGTGAACGATTTCACTGGACCAATTCCTGTTTCA  
TTATCAAATGCAACAAAAGTTGGTGTACTTGAATTGTCTCAAATAAGCTCACCGGAAATGTCCCTACGA  
GTTTAGGACAATTGCAAGGGTTGTATAGGATGAACTTTGAGATCAATAGTCTTGAAGAAACACAAGTG  
GGGATTTGAGGTTTCTGATTTCTAGTTAACTGCACAAGTTTGAAGTTCTTAGCTTTGAGGACAACATT  
TTGGGAGGTGAATTGCCTAAAACAATCGGTAACCTTTCCACGAGGCTAGAAATATTTGCTCTTGGTTATA  
ATATGATAGTTGGTCTCTTCTACAGGACTAGAAAATCTTGTTAATTTGACCCTTCTATCACTGGATAAT  
AACTACTTGAGAGGCAGTGTTCTGAGTCTTTAGGTAAGCTTCGACGCCTGCAAGGACTGCTGTTGAAT  
GGAAACAAGTTATCAGGAAGGATTCCATCTTCTATTGGTAACTTAACATCTTTGTCTACTTTACACATTGA  
GGACAATGAATTAGAAGGAAACATACCTCCGGAGCTCGGGCAGTGCATCCGCTTATCAAGGCTAAACCT

TACAGGAAATAATCTTGTTGGTTCATACCAAAGGAGCTTGCAGGTCTTTCTTCTTTTCGATTTCTTAG  
CCTTAGCGAACAATTCGTTGACCGGTTCTTGCCAGCTGAATTTGGAAAGTTGATAAATCTCAAGGAAAT  
GGATATTTACATAACAAATTATCAGGTGAAATTCOAAGTACTCTAAGTAGCTGTGTGAGCTTAGAGCGC  
TTCATAGCGAATAACAATCTGTTTCGAGGAGAAATTCCTGAATCCTTGCAAGGTTTAAGAGGCTTAGAA  
GAAATTGATTTGTACACAATAACATCTCAGGAGGAATACCTGAGTTTCTTGGGAAACTTCATATCTTA  
GGAAGCTTGATCTTTCATTCAACGAACTTGAAGGCGAAGTACCAACTGAAGGGATCTTTCGAAATGAAA  
CCGCCGTCTCAATCTCAAGGAATGATGAACTATGTGGAGGTCTCCAAACTACAATTTTCTACATGCC  
TAAACAAAAGATGCATCATCAAAGAAACACATTAGTTCAAGGATAAAAGTAGCAATTATTATTTTCGGTT  
GCATTTCTATTTTTACTTTTTGTGTTCTTTTGCAGCTTGCTATATAGTAATTAGGAAGTCGAGAAAAAGAGA  
TCTTACTGGACGGTCTCAAGAGAAAGGCAGTCTGATCATTTTGATGATGAAGAACCAACTTTATTTAAG  
GATCCAATTTTGACAGCAAAGATAACTTACCAAGATATATTCAAGTCAACCAATGGATTTTCTGAGGATA  
ATCTAGTCGGTACAGGAAGTTTTGGTTCTGTTTACAGAGGAAAGTTTCAGTTTTTGTATAAAGTAATGGC  
AGTGAAAGTATTGAACCTTCAACAAAGAGGTGCTTTGAAAAGCTTTTCGGATGAATGTAGAGCTTTGAA  
AAGCATAAGGCATCGAAATCTACTTAAGATAATAGCTGTTTGTTCAGCATCGATTACCAAGGTAATGAT  
TTCAAATGCATAGTCTTTGAGTTCATGGAAAATGGAAGCTTAGATGACTGGCTGCACTCGAAAGGTGAT  
GAGAAATACCTCAATATCATCAAAGACTAAACATCGCAATAGATGCTGCTTCAGCACTTGATTATCTCC  
ACAACAATTGCCAAGTATCAATTGTTCACTGTGATTTAAAACCGAGCAACATACTCCTTGATGAAGAGAT  
GACTGCCCATGTTGGTGACTTTGGATTGGCAAATTTCTCTTCAAATCATCATGGAACAAACATACATCT  
ATTGCACTAAAGGGTCTATTGGTTATATCCACCAGGTATGTCATTAATCCATGTTGATTTCTCTTGCAT  
ATCTATTTCCCTTATCAGGGGTGCTAACATGTAAGATGTTTGTGTACCTCAATCTCATATACTCCCTCCGTT  
TCAATTTGTTTGTGTGGTTTTGACTTGACACAAAGTTCAAGAAAAATAAAGAATACTTTTGAATCTTGTCG  
TCTTAAACTAAAGATACATAGAATGTACGAACATGCCCTTTAATCTATTGAAATTTAAAGAGTTGTCAA  
AAGCAAAGAGACTCTTTTATAAACGGACTATAAAGGAAAGTAAGACAAATGAATTGAAACGAAGGG  
AGCTTATCTTTCTGATGCTTAAGGTGTCGAATGAACAAATCAATAACTAAGCATTATGAGGTTGTCA  
TTTTCATGTGAGTGAACATATGTTCAAGTGTCCCAACATAATTCATCATTATCTTGCAGAATATGGATCAGG  
TGTAATGTGTCCACTCTAGGAGATGTTTATAGCTTTGGTATCATGTTGCTAGAGTTGTTTACCGGTAGA  
AGGCCAACCGATGAGATCTTCAAAGATGGCCTGAATATTCACCAATATGTCAAATCCCATCTGCCTAGAC  
GTGTCACGGAGATTGCTGATGCATCATTGCTTTTAGCATATGAAGAACACAATATATATGAGGACAATG  
CAAGTGATTTGGAAGAAAAGGCAATACTTCAAGATGATGAGTATATATCCAAGCTAAACACCAGCACTA

TTATACAAGAATGCTTGATCTCAATCATGAAAATAGGACTTTTATGTAGTAGCTCATCGCCAAGAGATCG  
AATGCCAATAAGCATAGCTTTGAAAGAGATTACACAATCAAGAACTTATTTCTAGAATCTAAGAGGATA  
AATAATAGTATAGATAGATCAGATGGTAATAAGCTAATCAAATTATCATCTTCAGAATTTTATTGATGAA  
GGCAAATATACATAGAATTACAACCTTTGAAATAGATATTATTTACAATTAGTACTATAGATAGCCTCACA  
AAATGTGAATTGTAACCAAGAAATTAAGGGATATGATTGAGTTTTTTTTTTTTTTTTTTGAGTAATGGATGG  
AGTTCCTTTTTCCATCCTATCCCATTACC

>PGSC0003DMG400005896 LRR-RLKs

GAGAAATCAAAGGACAGAAGGAGACAGAGAAAAAAGGTGTCATGAATTTGTACTTGTCTTTAGGGTT  
TGATCCACAACCTTTTGCTAAACTCATCTCTCTTTCTTACAAAATTCCTCACATTATTAATAAAGGTACC  
ATTTTTCCAACAATTTATAGTTATTATGTACTTGCATCTTTATATGTTACTGTTATGTACTTTGTTCAATTTGG  
GGTTCACAATTCTTGAGAAAAAGTACTATGTAATTTTATGATAATCTTGAATTTTCATCATGTGTGTATA  
TAAGTATTGTGATTTTCAGAGGTGTTGTTATATACTTTTGTACATTAGGTGATTTCTTGTAATGTTGTTTC  
TGGTGTAAACAAATTTGAATGATTTCAAGATTTTGAAGTATTTAGAAATGGATTAGAGAATCCTGAACTA  
TTGAAATGGCCTTCCAAGGGGAATGATCCTTGTGGTCCCTGCATGGCCTCATGTGTTCTGTTCTAGTG  
ACAGAGTTACCCAAATTCAGGTTCAAGATTTGGGTTTAAAGGGTCCCTTACCTCAGAACTGAATCAACT  
TGATAAGCTTCAAATCTTGGCCTTCAAGGGGAATGGTTTTAGTGGGAAATTACCTACTTTCAATGGATTA  
TCTGATTTGAAATATGCATACTTGGACAACAATGAATTCGATACGATTCTGGTGATTTCTTTAATGGTCT  
TAGCAGTGTTCAAGTTTTGGCTTTGGATTATAATCCGTTTAAATGAGAGTGGATGGTCTATTCCGATTGAG  
TTGCAAGATTCAGCTCAGTTGACGAATTTTTCTGTGTGCAATGCAATATAGTTGGACCTGTGCCTGATTT  
TTTTGGGAAATTGCCTTCACTAAGTGCCTTGAAGCTGTCGTATAATCGTTTGACCGGTGAGATACCAGAC  
AGTTTTCGTGATTCAATGCTTCGGATTTTGTGGTTGAATAATCAAGATAGTCTGGAATGACGGGTCCAA  
TCGACTTAATTGGTACTATGGATCAGCTTATGTTGTTATGGCTTCAAGGCAACAGTTTTAGTGGACCAAT  
TCCTGATACAATTGATGATTTAAATGACTTGAAGGAGCTGAATTTAACGGAAATCAACTCGTTGGTCTG  
ATTCCGCAAGGTTTGGCAAATCTAGACTTGAGTGTGTTAGACTTGAACAATAATAAGCTCATGGGTCCTA  
TCCCAAAGTTTAGAGCTGCGAATGCTACATATTCCTCAAATCTTTCTGTCAGCCAACCTCTGGTGTTCCT  
TGTGTTCCCTCAAGTTAATGCACTTTTAGATCTTCTTTGCGGTTGGAATTATCCAGCCAACCTTGCTCCTGA  
ATGGAGTGGCAATGATCCATGTACAGGTCCTTGGTTGGGAATCAGTTGCAATCCTAAAGGCCAGATTAC  
GATTGTTAATCTACAGAACAAGAACCTTACGGGTACGCTTAGCCCTTCACTTGCAAACCTTGATTCACTG  
CTTGAAGTTCACTTAAAAAGAAATAGTTTGCATGGTCGAGTTCCTGCAAACCTAACAGAGCTCAGATCCT

TGAGATTGTTGGACTTAAGTGGGAACAATTTTGATCCACCATTACCGAAATCCGGGATAGTGTGAAAG  
TCATTACAGACGGAAATGCTCATCTTGTTGCTAATGTAAGTGCAGCTCCTCCTCTGAGTATTAGCCC  
ATTTCTCCATTGAGCCACAGTCTAAATCAAGCAAGGAGTTACCATCGAAAAGCCATTTCCCGGTGAT  
AATCAGCCAACATTACCAGATACACCGCCCTCCCAGAGAAAAGTTCAGGTTCAGACTCAAAGTCTCCCA  
GTGGAACCAAAGGGCAGACCACATCAGAGAACCATGATAAGACCATGATCATTGTAGTTGTGAGTGCA  
GCTTCTTTGTTTTACTCTTCTTGCCGTTGTTTTGTATTTCAAGAGCAAGAGAAAACGAGAGAAGGATTC  
AGGTACTATTGTTATCCACCCCAAAGAGCCATTGATCAAGATAACATTGTTAAGATCACTATCTTAGAA  
GATCCCATGATGTACAGCTTACAGAGTGGTACTACAACAATACTACAATACTAGTGGTGGAAACAAAAGGT  
AGTCGAGTGATTGAGATTGAAACCTTGTCATTTCAACCCAGGACCTTCGGAGGGTAACCGATAATTTT  
GCACCAGAGAATGAGCTTGGTCGTGGTGGCTTTGGAGTTGTTTACAAAGGCCTAATTGAAGATGGAATT  
CAAATTGCAGTGAAGAGAATGGAATCTGCCATTATCAACAGCAAGGCATTGGATGAATTTCAAGCAGAA  
ATAGCTGTGCTTTCTAAGGTTTCGACATCGCCATTTAGTTTCACTTTTGGGTTATTCCATTGAAGGAAATGA  
GAGGCTTTTGGTATATGAATATATGTCAAAGGGCGCTTTGAGTAGACATCTTTTTCGCTGGAAGATCCTG  
AACTTAGAGCCTTTATCGTGGACAAAGAGACTCAATATTGCTCTAGATGTCGCTCGAGGGATGGAGTAC  
CTTCATAATCTGGCACACCAGAGCTTCATACATCGCGATCTCAAATCATCAAACATTCTTCTAGATGATGA  
TTTTAGAGCAAAGTTTCTGATTTTGGATTAGTGAAACTCGCTCCTGACAAAGAAAGGTCCGTTGCAACA  
AGGCTTGCAGGAACATTTGGATACCTTGCTCCCGAGTATGCTGGTATGTGTGCATTTTTTTCCATTGGTAT  
CTCTTTCTTAGACACTCGTTTTGACTGTTCTGGTAAATATTATCATTTAAGCATCAATTGTATTTTTTACGC  
TCGGGTAAGCTGTTACATGAACACATCTCTACCTGAACGAAACCAATACTCTTTTAGTCCCTCTATTTTAA  
GAAATGCATCAGTTCTATAATGAGAATCCAGACTGCTAAATTGCGCTTCTGACCTTCCAATCCCTTCCTTC  
TCCAGCCAAAATAGAACAGAGTAACCAATGGAGCATTACGTTTTTCTTTTTGTTGTGGTGTGCGCTA  
GCTACTAAATTGATATACCTCGGACATTGATGTATCAATCTCGCATCATTAGTGATATTCTCATTCTGTTT  
ACTATCTTTGTTAAACAATTCAAGTAGAAGGTTTACATCCTCTCTCCATATGATCATTAGAGCATAGTT  
ATCATCTTGACTCCACAAAAGAAACAGAACTCTATCCCTTTAAAGATACTTTTCTTTGAGGCATGGTA  
CTGAAATATGTTTGCCTAAAGCTGTTCAACAAGCATGTCATACCTGTTAATTTTGGTGTAGAACTATTG  
CTTACTTTATCTTTATGTTACCCGTATATTTTAGTTCTCAGTCTTGTGTAACGAATTACCTAGTCACCTTCA  
TATATCCCAACTCACATTTTACCTCTCCAGTGACCGGAAAAGTCACAATAAAATAGATGTCTTCAGCTTT  
GGGGTGGTGTGATGGAACCTTGACTGGACTAACTGCCCTTGATGAGCATCGGTCCGAGGAAACTCG  
ATATCTAGTTGAGTGGTTCTGGCAGATAAAATCGAATAAAGAAAACCTCCTTGCTTCCGTTGATCCAGCT

CTTGACGTGAAGGAAGATATCCACAAGAGCATTGGCACTATGGCTGAATTAGCTGGACATTGCACTGCG  
AGAGACCCCAATCACAGGCCTGACATGTCACACGTTGTGAATGTGCTTGGCCAACTAGTTGAGTCTTGG  
AAACCCGTAGAAGAGTCGGATGACTATTCAGGAATTGACTACAGTCTACCTCTTCCAGAAATGTTGAAG  
GACTGGCAGGATGAAGACACTGGAGACTTCACCAGTACTAGTCAAGATAGCAGAGGAAGTATTCCTGC  
TAAGCCAAATGGATTTGCGGATTCTTTTACATCCAACGATGCTCGATAGGTGAAGTTGGTTTTGGCTACC  
AAAGTCCATTGCTTCCTTACTATTAGTTTTGCTAGCATTTCGACATGAATTTTGCTTTTGGCTCGTGAAAA  
TAATCTATGGAGGCGTTGCGTCCAGTCTATATATGGTGAATATACATATAACGGGTTGTCATGAATGATT  
GATCAAGAGATCAAATTGGTGTGCTCCAGATACAGAGCAAAAAACAGAAAAAACTTTTCAATTTAATGT  
TGCTTACACAGTTATTTGTTTTGAATGTTGCTTGTAAGTTATATTTATAATAGGTTGGTCCAATTTGCT  
GTATAAGTTATTTACATGACACTCTTGAGAATCTTATGCATGAATTTGAGAGTGATGCTCAAATTAATAAT  
GCAAAAAAAG

>PGSC0003DMG400006065 LRR-RLKs

ATGGAGAAGCACATTTTCTTATTGATTCTTCTCTTCTAGTTCAATTTTCTGTATCATTTGCTAACTCAAAT  
GTGACAGACAAAGAAGCTTTACTAGCTTTCCAAAATCTTATTACAAGTCCTACTCATTTTTTGGCCAACAA  
TTGGACCAACAATACTTCTTTTTGCTCTTGGTTTGGTGTGAGTTGCAGTCCAAAAAGGCAAAGGGTTGTA  
GCCTTGGATCTTTCTAGTTTGAATCTTCGAGGTACAATTTCCCGTCTTTGGCTAATTTGTCCTTTCTCAGA  
GAGCTTAATCTTGGGAACAACAACCTTTCATGGCGCCATCCCTTATGGCATTGGCCACTTGCCTCGCTTGC  
GAGTGATTGATATCAAACAATCAGCTCCAAGGAAGTATTCCAACAAGCCTATTTCAACACCAGAAAGT  
TCAAAGATTTTATTGGCTTTCAATAAACGCAGTGGTGAATGTGGAATGGTTCATGGTATGTACCAGA  
ACTCAAGGTCTTGTATCTCACCAACAATAGTCTCACAGGCATAATCCCGCCTTCTATTGAAATTCACAA  
AGTTGAGGAACTTCAAGTTTGTACGGTAATAGAATCAATGGCAACATTCCGAAGGAGATTGGTAATCTTA  
GCCAACTTGCAGAGTTGTCCTTGGGAGATAATCAATTAACAGGTTCCATTCTGCAACACTGTTAATAT  
CTCGTCGCTACTTATTGCATCTCTGAAAATCAATAACCTTTCTGGTCCTCTCTTGTGCTTATGAAGGGAATA  
TTGTGTCAAATCTGAAGCATCTAAGTATATCTAAGAACCAAAATTTCTGGTATCATTCTTCCAATATTTGC  
CAACTCAAAGAGCTCAAAGTGTGTCATATCTTTCAACAAGATAACTGGAGATATACCCAAAAATATTG  
GTTGTTTAGCTAAGCTCGAGGTGTTCTATATCGGAGGTAACGCACTAAGTGGGACTTTTCTGCTTCAAT  
GGGAAATATATCTACTCTGAATATCTGGATTGTCCAACAATTGCATAGGGGGGCAAGTTCCTCCAGA  
ATTAGAGAAGCTGTCAAATTTGAGGCAATTAACCTTGGCCAGAATTATAATATTATTGGTCAAATTCGG  
AAGGCTATTTTTAACATGTCCTCTTTGGAAATGATTGCTTTCAATCTCAACAACCTCTCGGGTAGAATTCC

AGCCACTACAGGTCTTCATCTTCCGAACCTTGAAAGACTTTACTTGTCTAAAAATCATCTCGAAGGGGAA  
ATTCTCCGCACATCACAAATGCTTCCAACTTAAGACATTGGAGCTAAATAGTAACTTTTTTCAGTGGCA  
GTATTCCAATAATTTGGGAAATCTTCGTGAGCTGCAACTGCTGCACCTAGATCATAATCAACTTACCAAT  
GAACCAAGAGAGCATGAGTTGCTATTCTTCAGTTCTTTGGCGAACTGTAGGATGTTGCGAGATCTAGAT  
ATGAGTACCAATATGTTGAATGGTACTCTGCTCAATACTATCGGAAATCTTTCATCTACTATTGAATTCTT  
TGCAATAATAGATGCATACATCAATGGCCCCATCCCCACAGGTATAGGCAACATGAGCGGTCTAATATCT  
CTAAGCCTTCATGGAAACAACCTGGTGGGAGGTTTCCCTTCTGAGATTGGTAAGCTTAAACAACACTACAAG  
GACTATATCTAAATAACAATAAATTGCAGGGACATATTCCAGAGGTGGTATGTGCTTTATCTAATTTGGT  
TCAATTAGCTCTAGATGATAATGAGCTCTTTGGGTTAATTCCAGCATGTATAGGAAATTTTAGCATGCTA  
CAATATCTTTCATTGAGTTATAACAATTTTGCATCAAAGCTTCCCTTTGAGTCTTTGGAAGATGAGTGGCCT  
TCTCCACCTAGACGTGTCACAAAATTCTATAGAGGGAGAAGTTCCACTGGATATTGGAGAACTGAAAGC  
AATTGTAGATCTATATCTTTCTAGTAACCGCCTTTCGGGCATGATACCAAACAGTTTGGGGGAACTCCAA  
ACCCTGGAGTCTTGTGACCTGTCAAACAATTCATTTTCAGGCCAAATTCCATTATCCTTTGCCAACTTGAT  
AAGCTTAGAATTCATGGATTTGTCTTTAAATGCCTTGGCAGGTAATTCCTAAGTCTTTGGAAAACTCT  
TGTACCTTAAAGCCATCAATGTTTCATTTAATGAATTAGAAGGTGTAATACCTAGTGGTGGTGTGTTTGC  
AAATTCCACTTTGCAATCATTTCTTGGTAACAAAGGCCTATGTGGAATGCACATATTGGATGTTCTGCTT  
GTGCTGTCACTAATCTTGGACATCAATCAAAGTTTAAGAAGCTTGTGCTAAAAATTGCTATTCCAGTGGT  
TACTTCATCCTTTCTAATATCCTTGTTTGCTTCAATTTGGATGATGAAACGACAAAAGAAGGGAAATTCCA  
AAGACGTGGAAAAGGTACCGGAGGTCAAGACACATCAATTAGTATCTTATCACGAGATTCAAAGAGCTA  
CAAATTATTTTGTGATGGATCAAACCTAATTGCTGTGGGAGGTTCTGGCTCTGTGTACAAAGGTACATTATC  
TAGCGGAGTTGTGGTTGCAATAAAGTTCTAGATTTGCAAATGAGGAAGTATGCAAGAGGTTTGATAC  
TGAATGTGAAGTGATGAGAAATGTTAGGCACAGAAATCTTGTATCGGTGATTACTACTTGTCTAGCGA  
ATACATTAGAGCTTTTGTCTGCAGTATATGCCAAACGGGAGTCTTGAGAATTGGTTGTACAAAGAAGA  
TTGCCACTTGAACCTTCTTCAAAGGGTTTCCATAATGTTTGATGTGGCTGTGGCTGTTGAATATATGCATC  
ACAGACATCACTCATATTGTTTCATTGCGATCTAAAGCCAGCCAACGTTCTTTTGGATGAAGAAATGGT  
GGCACATGTTGGTGATTTTGAATTTCCAAAATCTTAGCTGTAAGCAAGTCCATGGCATCTACCGAGACA  
TTGGGCACTCTCGGATATATTGCACCAGGTATACTAGTCTCTTTCTTTTTACTACACAAATTATAACTAA  
GCCCTTCCAAAATCTAAACAAAAGCAAGTGTTTGTGTTTGTGTTTATATTGGATGAATAATTTTTTTT  
CATCTTTTGTCTTTTAAGAATATGGCTTGGAAAGGAATAGTGTCCACTAGTGGCGATGTCTACAGCTATG



GTATCATGCTAATGGAGGTTTTGGCAACAAGAAGACCAACTGATGCAGAGATATTCAACGAAAATCTTG  
GCTTGAGGGAGTGGATAAGGCGAGCATTTCCAAAACTATCATAGAAGTTGTGGATGCCAATCTTTTT  
CTGAGGAAGAACAATCACTTCTAAAAGTGAAATCTGCATAATTTCTTGATAGAATTGGCTTTAGATTG  
CGCAAAGGAAAGGCCAGAGTCAAGGTTAACCATGAAGGATGTAGTCAAGAGGCTTAACAAAATCAAGA  
ACACATTTTTGGAAATATGA

>PGSC0003DMG400006280 LRR-RLKs

CCAAAGCCAAAAATTACTATCATATTTTATCAGTATCAATGGAATCTTTCAAAATACTTGTTGCATCTTCT  
CTTCTTCTTACCTTTGATGTTTTCCGAAGTATTCGAACTTCAATCACTAGTTATCTAAATGGCTACTTCTAA  
CACAAGTCTCTTCTTTTTCGCGTATTTCTTACTCGTGTTCCCTCATTACTCCATCTCAATCGCGTAACGTGTCT  
CTGAGACGACAGGCTAAAACCTAGTTTCATTGAAACAAGCATTGTAGTATCCTCTGTTCTAGTACTCT  
GTCTACTTGGAACATGTCAAATTATATGTCTATATGTTGTTGGACCGGTATCACCTGTGATGATACCAAAT  
CAGTAACTACCATTGATATATCCAATCTAAACATTTCTGGCTCTTATCACCTGATATTCATGAGCTCACTA  
GACTTCGCGTCCTGAATATTTCTAACAACCTTGTTAGGTGGGAACCTGAGCTGGGAGTATCGAAAGTTTAA  
CGTACTTCAAGTGTGGATGCTTATAACAACAATTTCACTGGTCCACTCCCCTGGGAGTTACTCAACTTC  
TGCAGCTGAAGTATTTGAATTTGGGGGTAACCTTTTTCAGGGAAAATTCCTTTGAGTTATGGTAGTTT  
TAATCAGCTTGAGTTCCTGTCTCTTGCTGGGAACGACTTGCACGGTCCTATACCAAGGGAGCTGGGCAA  
CGTTACGAGCCTCAGGTGGTTACAGTTGGGTTATTATAATCAATTTGATGAGGGGATTCCGCCAGAGTT  
GGGAAAACCTGTAAATTTGGTTCATCTAGATCTTTCTAGCTGTAACCTTGACGGGTTGATTCCAGCAGAA  
TTGGGCAATCTTAATATGTTGGATACTTTTTCTTGCAAAAAAATCAACTTACTGGTGTATTTCTCCTCA  
GCTAGGGAATTTGACAAGGTTAAAATCTCTTGATATATCCGTCAATGAACTCACAGGAGAGATACCAGT  
TGACTTGTGAGGACTCAAGGAGCTCACATTGTTGAACCTCTTTATCAACAATTTGCACGGTGAGATTCTT  
GGATGTATCGCGGAGCTGCCAAAGTTGAAATGTTGAATCTTTGGAGGAATAATTTCACTGGATCGATT  
CCTTCTAAGCTTGGGATGAACGGTAAACTAGTTGAAATTGATCTTTCTAGTAATAGACTCACTGGCTTGA  
TACCAAATCTCTATGCTTTGGGAGGAATTTGAAAATTTTGATTCTGCTTGATAATTTTCTGTTTGGACCT  
TTACCTGATGATTTTGGGAGTGTGCAACCTTGTCAGAGTCAGAATGGGACAGAATTACTTGAGTGGA  
TCAATACCAACAGGGTTTCTTTATTTGCCTGAGTTGTCCTGTTGACTGGTGGAACTGCAGAACAACCTACATCAGTG  
GACAACCTCTCGAACGAGAAAACCTCAGCGTCTTCTAAACTTGAAGGGCTGAACCTGTGGAACAATCGCT  
TGCTGGTGCCTTCCCAGTGCTATTGGAAATTATTCAGGGCTGAAGAATCTTGTTAACTGGAAATGG  
TTTCTCAGGAGATATCCCTTCTGATATTGGCAGACTAAAAAGCATCTTAAAGCTGGACCTGAGTAGGAAC

AACTTCTCTGGCACAATCCCCCTCAGATTGGTAACTGTCTTTCCTTAACTTACTTGGATTTGAGCCAAAA  
TCAACTTTCTGGTCCTATCCCAGTTCAAATTGCTCAAATTCACATCTTAAATTACATCAATATTTCTGGAA  
TCACTTCAACGATAGCCTTCCCGCGGAGATTGGCTCGATGAAGAGCTTAACTTCAAGCAGATTTTTCCAC  
AATAACTTATCTGGATCAATACCTGAAACAGGACAATATTTATATTTCAACTCAACTTCCTTCATTGGCAA  
CCCTTATCTCTCTGGATCCGACTCGACTCCTAGCAACATTACATCCAACCTCACCGTCAAAACTTGGAGACG  
GAAGTGACAACAGAATAAGGTTCCAACAATATACAAGTTCATATTTGCATTTGGGCTCTTATTCTGCTC  
CCTCATTTTTGTTGTCTTAGCAATAATCAAGACAAGAAAGGGGAGTAAGAATTCAAATTTGTGGAAGCT  
GACAGCATTTTCAAGCTTGAATTCGGAAGTGAAGACGTCTTGCAGTGCTTGAAAGACAACAACGTCAT  
AGGGAGAGGTGGAGCAGGGATAGTGTATAAAGGAACTATGCCAAATGGTGATCATGTGCGGGTGAAG  
AAGTTGGGAATAAGCAAAGGCTCACATGATAACGGCCTATCTGCTGAACTTAAAACATTAGGAAAGATC  
AGGCATAGGTACATTGTGAGACTGCTCGCGTTTTGTTCAAACAAGGAAATCAACTTGCTAGTTTATGAGT  
ACATGCTAAATGGAAGCTTAGGTGAAGTGCTTCATGGGAAGAACGGCGGGCAACTCCAATGGGACACT  
AGGCTAAAAATTGCCATAGAAGCTGCCAAGGGCCTTCTTATTTGCACCATGATTGCTCCCCTATGATAA  
TCCACCGCGATGTCAAGTCCAACAATATATTGTTGAACTCTGAACTTGAAGCTCATGTTGCAGATTTTGG  
TTTAGCCAAGTACTTCCATAATAATGGTACCTCTGAGTGCATGTCTGCAATTGCAGGGTCTTATGGTTAC  
ATTGCTCCAGGTAAGTATTTGTTTACATATTAGTTGATTTAATTTCTTCTCGACTGGCCTATTATGCACTC  
GGACCAATCTACATCCTACTAATAATGGTCTTTACATGTTATCTTTTTGTATAGAATATGCATACACGCTG  
AAAATTGATGAGAAAAGCGATGTGTATAGCTTTGGAGTGGTGTGTTGGAGCTTATAACAGGACGAAG  
GCCAGTTGGTAATTTTGGAGAAGAAGGAATGGACATTGTACAATGGGCGAAAACGGAGACAAATTGGA  
GCAAAGAAGAGGTGGTGAAAATCTTGGATGAGAGGCTAAAAAATGTTGCAATTGTAGAAGCTATGCAA  
GTATTTTTTTGTAGCAATGCTTTGTGTTGAAGAGTACAGCATTGAGAGGCCTACAATGAGGGGAAGTAGTC  
CAAATGCTTTCTCAAGCTAAACAACCAATACTTTCAAATCCAATGATCTAATTGTGGCTCTACTAATTC  
TTATAGTATATCTTTTTTTGTTTCTTGTGTGCTTGGGAAGACCCCTTTTGTAGCTTTGCAAACAAATTGCA  
ATTATGTTAGATCTTAGGGCATGATATCTAACTATCCTCTCAACTTGGAAATAGTGTATTGGATGTGTAGA  
ACTAGTATTAGTATCCGCGTGATGTGTGGCGAATATCAAAAGAAATTGATTACATAAAATGAATCTCTCT  
GTTTC

>PGSC0003DMG400006364 LRR-RLKs

ATGAATCTTGCAAATTATGGGATTAGAGGTAATCTTCACCATCTAAATTTCACTTCTTTTCCTCATCTTCAA  
TTGATTAACTTTTCCAGTAACTCACTCAATGGTACACTTCCAAAAACATGTTCAATCTTTCAAGATTAAG

TTTCCTATATTTGAGTTACAATCAATTTGATGGAGTGATTCCACATGAAATAGGGCTATTGAAGAATCTC  
AAGCAGTTAGACTTGTCGATAAATCGTTTTATTGGCTTTATCCCTTCATCTATTGGTAACTTGATTAACCTT  
GAGTTGTTATTTTTATCAGGTAATGAACTCTATGGCCCTGTCCCTTCAAGTTTTGGTAACTTAAAATCCCT  
TGTGCATTTGTGTTTGCTTAGAAATAAACTCAATGGATCACTTCCAAAAGAGTTTGAAAATCTTACACATA  
TGCAAACCTTTTCAAGTAGCAGAGAACAATTTTTCTGGTCATTTGCCACAAAATGTGTGCCTTGGTGGATC  
ACTTGCTAAATTCATAGCATATGACAATAAATTTATTGGTCATGTCCCTAAAACCTTGAAAAATTGCTCTA  
CGCTATCAAGAGTTAGGCTTGATGGTAACCAATTGTCTAGCAATATATCAGAAGCTTTTGGTGTCTATCC  
AAGTCTAGTTTACATGGATTTGAGTCACAATAAACTATATGGCGAGTTATCGTCACAATGGGGCTTTTCT  
CATAATCTAACAAGTTTGAAGATCTCCAAGAACAACCTGTTTGGTGCCATACCAGTTGAAATAGGAAATT  
TGATCAAACCTAGAAATGCTTTATCTCTCTTCAAATCACTTGACCGGCGAAATTCCTAAAAGTTTLAGAGAG  
GCTAACTCTCTTGCTGGAACCTTGATTTACATGAGAATAGAATTTAGGAGAAATACCTATAGAAGTGGG  
GAAGTTGTCTAAACTTACAAAACCTTGACTTAGGTGCGAATAATATGAGTGGAACGATTCCAGGAGAAAT  
AGGAGATTGTAGGCAGCTTTGGTACTTGAATTTAAGCAAGAACATGCTGAACACAACCTATTCTTCTAAT  
TTAGGTAACCTGCACTCTTAGCCTATCTTGATCTCAGTTATAACATGCTCAGTGGTGAGATACCGTGGCA  
CATAGGGAGTTTGAGAAGTTTGGAAAGAATGAATCTTTCGCGTAATAACTTGTCTGGTTCAATCCCGCCT  
AGTTTCAATGAACGCGTTAGTTTLAGGTCAATTGATATATCTTGCAATCAATTGGTTGGTCCCTTCCCAA  
GATCGTGGCATTTCAAAATGCATCGCGTGAAGAATTAAGAGATAACAAGGATTTATGCAGCAATGATCA  
TACTGGTATGAGACCTTGCTCTTCATTGAGGAAAAAAGAGAGAACAAGTAGAAAGCTTATACTGACCTT  
AACTCTGTCTCTAATTTTGGTTGCCTTGCTTCTACTTGTGATTACTTGTATACTTTTTCGAATGAAAAGGAA  
AAGAAATAGAAGTATTCAGCTTAGAGAACCATCCAGAAATCTTTTTTTCAGTTAGGGGCTTTGATGGGAA  
AATAGCACATGAAAACATAATTGCAGCAACAGAAAACCTTTGATAGCAAATATTGCATTGGGAAGGGAG  
GACATGGAAGTGTCTATAAGGTTGAGTTACCATGTGGTCAAGTTGTTGCAGTGAAAAAAGTTCATGCTT  
TAGAAGATGAAGAATCTGATGACAACCTTGATCAAAAGCTTTTCAAAGAGATACAAGCTCTAGTAAACA  
TCCGCCATCGGAATATTGTGAAGCTTTATGGGTTCTGTTACACGCGCGCCATTCTTGGTTTATGAG  
TTGTTGGAAGGAGGAACTTGTACAAAACCTTAGCAATGAGGGTAGAGCAAGAGATTTAAATTGGCTC  
AAGAGGGTTGATATTGTCAAGGGGATAGCAAACGCGTTGTGTTACTTGCATCACGCGTGTTCACCTCCT  
ATAGTTCATAGAGACATATCAAGTAACAATGTTCTTCTTAGATGATGAAGGCAATCCCATGTTTCTGATTT  
TGGTACTGCTAAACTCTTAAGGCCTAACTCCACCAATTGGACATCGTTTGTGCTGGAACCTTGGCTATGTA  
GCTCCAGGTATTTAGTCTTCTTACTTTCTAAACTTCGTGTTAAGTCAAATCAGACAAACAATGAAAC

AGTAACTAGGAATTCATTACTTCAAATCGTTCACTCTTTCACACAATTTCTAATTTGTTTGTAGAGCTTG  
CTTACACAATGAAGGTAAATGAGAAGAGTGATGTTTACAGCTTCGGGGTGCTATCACTAGAAGTTATTC  
TAGGTCATCATCCAGGTGATATTATTCAAGCTATATCATCATTTTTCGCCAGCATCAGGAGTGAATGGAAC  
GCTGTAAAGGAATTGATTGACAAACGGACACTAGCTCCTGGAAAACAAGAAGCAGAAGAATTGATCA  
AGATCACAAAAGTATTGCGTGTCTTCATCAGAGTCTCTAGCTCGGCCAAGTATGAAGCAAGTTTG  
TGCATCTTTATCAAAGAAAATTGGCCTTCAAAGGCTTGTTCTCCACTGTTACATTAGGCCAGTTGCTTG  
AACCAACTACTAAGATGTTGA

>PGSC0003DMG400006502 LRR-RLKs

CAGCACTTAGCCATGGCCTATTATCTTGACAAGATCTTCTTCTCCTATTTCTCTTCACACTTAGTTCTTCTC  
CAAATCAGATAATATGACAGATATTGAAGCACTCTTGTCTATCAAGAATGAAATACTTGATCCCTTTGA  
ATCTTTGATTTGATGGAATGAGTCTGTTCTTTATGTCAATGGCAAGGTGTGGTATGTGGAACGCGAAGT  
CAACGAGTCACTGAACTAACCTTCTTGACCATAAGCTGGGTGGTGTGTTATCACCATTTGTTGAAATT  
TGAGCTTCTTGTACGACTAGACATCGAAAACAATACCATTTCTGGCAATATACCTCCTGAATTAGGCCG  
TTTGACAAGATTAAGCCATCTATATTTGCAAAAACAATCATTACATGGTGAAATTCCTGTCAATCTATCAT  
TTTGTAGTAACCTCGTTGAGTTATGGGCACACAAGAACAATCTTGTAGGTGTGCTTCCGAAGGAGCTTG  
GATTTCTTCCCAAAGTCAAATATTTTGATTTGAGTTACAACAAGCTCATTGGTGAAATCCCGAAATCTTAT  
GGTAACTTTTCAGGTCTCTTGAAATGTACCTTTTGTATAATGATCTTGTGGGTAAAATCCCTGATGAGTT  
AGGGAAACTGAAAAGCTTGAAATATTTGACGCAGACTTCAATAGGTTATCAGGTAGAATTCCGAGCTC  
ACTATTCAATCTTCTCCTTGAAAGTCAATTGATGTGTCAGATAACCAATTCGAAGGTAATCTGCCTCGGG  
ATTTAGGGATCAACCTTCTAACCTGGAGTGTCTCAGCATTAGTGAGAATCAATTCAGTGGATCGCTTCC  
TTATTCATTTTCAACCTCTCAGGACTCGCGTACCTTCTGTTGGCAAAAATAACTTAGGAGGACGTGTTT  
CTAGGTTTGATAAGTTGCATAATTTGTATATTTAAGCATGGAAAATAATCAGTTTGGGAGTGACAAATC  
TGATAATGAGTTGACCCTCATGTCCTCCTTAACAAATGCAACTAACCTGAACTGGCTGTATCTGCAAAAC  
AACGCGTTTGGAGGGACATTTGATGAGTTTTTTCAGCAACCTTTCAAGTAATCTGGTATATGCAGACTTGT  
CAAGGAATCGGTTTTTCAGGACATATCCCGATAGACATTGGGAAATTCATCAACTTGAAGAGCTTAGGC  
TGAGCGGAAACCAACTCACAGGTATCATCCCTCCGACTATTGGGAAGCTTTATAAGCTACGATATTTATA  
TCTGTCCCAAACAAGTCTCAGGTAGTATAACCATCTTCCATTGCAAATCTGAGCCTTTTAAACAGAGTTAA  
ATCTTGATCATAACAATCTTAGAGGTAGAATAACCTTTAAGTGTTGGAAAATGTCAAATTTGTTGTATCTT  
AACCTGAACCGAAACTATTTAATCGGTTCAATACCCAAAGAAATTTGTCTCATCACTTCTTAGTTGTTCT

AAACCTTTCTAGTAACAACCTGACTGGCGCCCTTCCCAAAGAAATCGGTAGCCTGAAAAATCTCTTATCA  
TTAGATGTCTCTTTGAATAATCTCACTGGTGAAATTCCTAGTACACTTGAGAGTTGTGTGGCTATTGTAA  
TTTAAACAATGAAAAGGAATTTATTTTCGCGGGATCATTCTTCTACTTTCAATTCCTAAAGAGTCTTGAAG  
TTTTAGATCTTTCACAAAATAAGCTATCAGGTATGATTCCAAAGTACTTGGAAGGATTTGCCTTGCATTTT  
TTAAACTTATCGTTTAATGATTTTGAAGGTGGCCTTCCACAACGAGGCATCTTTGAGAACGCGAGTGTAG  
ATTCTTTTCGTTGGAATCCTAGAATCTGTGGTGGTGTACCTGGCTTGAACTTTCCAATTGCAATTTCACT  
CATTCAAAGAAAATAAACTTTAAGCTTGTTATTTTAGTAATATTAGGAATTTTGGGGCTAGTTGTTATGGT  
TTTTGCTTTTTTCTTCTATCGATTGAGAAAGGCCAAAAGAACATTTCTTTCATTAGATAACAATCTAAACCA  
ACTCATAGCTATGTCCTATCAAAGTATTCTCAAAGTTACCAACGGGTTTTCTGCGAGCAACTTGATTGGT  
GTTGGGAGTCATGGATATGTTTACAAGGGAATATTAGAAACGGATGGTAAACACGTTGCTATAAAAGTG  
TTGAATCTTTTACAATATGGAGCTATCAAAGTTTTCATAGCAGAATGTGAGGCCTTGAGAAATATTAGAC  
ATCGGAATTTAGTTAAGCTACTTACTGCATGTTCTGGTGTGATTATCGTGGCAACGAATTCAAGGCATT  
GGTTTACGAGTTTATGGCCAATGGAAGTTTGGAGGACTGGTTGCATCCAGATAATTCAAGACCAAATGT  
TCAGCCAAGAAGTTGGGATTTCTACAAAGGCTGAATATTGCTATTGATGTTGCTAGTGCAATTCATTAT  
CTTCATAATGATTGTCAAATATCAATAGTTCATTGTGATCTCAAACCAAGTAATATACTCCTTGACAATGA  
ATTGGTTGCCATGTTGGGGATTTTGGATTGGCAAGATTCCTATATCTTACTGATGAAACCACTTGTAGA  
ATTCAGACAAACTCTTCAACTTTTAAAGGATCTATTGGCTACATAGCTCCAGGTAAATTTCACTCTATATA  
AATGCCTCTAAAGACTTTAGTGACTCTGGATGCAATGACATTAECTCAGTTGCCGCTATATTTTCATTGCA  
GAGTATGGTATGGGAAGCGAGGCATCAACGCAAGGTGATGTGTATAGTTTTGGTATCGTCTTACTTGAA  
ATGTTAACCGGGAAAAGGCCAACGGATGACATGTTTGGCGGTGATTTAAGCCTTCATGATTTTGGTAGG  
ACTGTCATGCCTGATGGAGCACTTGAAATAGTAGATCCACTTCTTAATTTGGAAGAGGAAGAGATAAGC  
AGAGAGAGGTCTCAAATCCAAGATTCATGAGAAGGCAAAAAATGGTAGAGGGTTTAAATCTCCTTATTT  
GGAGTTGGTATTGATTGTTCAATGTATGATTCAAGTAAAAGAAAAACATGAAGGAGGTTGTTAGAGA  
GTTGTGTTCTATAAGAGATTCTCTTGTGGTTGTACAATATGAAACACTTTTCTGTTTTGTTTTGTCTTG  
TAAGGTTCCAATAATATTTAATGATGAATCATTTG

>PGSC0003DMG400006563 LRR-RLKs

AGTAAACATACAGAGCTAAGGAGATCAAGTGTCAATTACATTTCTGTATATTTAGGTCTCTGAAATGCATA  
GCATAGTTATTTAAAATTTATGTTTACTTGTGAGTAAGATTTTGGAACTTGC GTTGTATTTTTAAAGGTGT  
GAAATTATGAACCAATGCAGGTATTCTTTAAAGCCAATAATTGAAAAGTTGGATAAACATATGTTTTTTG

CTCATGGAGCTGTTAATTGTATAACGCCTGGCCATTTCTTTCATGATTACGGTGGTGTCTTGTGAGGACC  
TTGATTGTTCCAACATATACCTGCATTTACCTCTAAGCATTAGGCATATAAGGAAGAAGATGCCTAACTCT  
TTTTTGTGAGCTAGGATTCAAACCTAGATTTTCATGGTTCTATATTCATCGATCACTAGACCACACCCTTG  
GGTTTGTATCCCTTTTCGACTTTTCAGCTTGTGCATTTCTTCATCTGTTGTATTCCCTTTCTCTCTTTTGATAA  
TGTTTGACCCTTTATTTGCCTTGTGGTTTCTCTTTCCTATTTCAGTCTATCAGGAAAATGGTGTGAGGGTTC  
AATAAGTTCACTAAACATCTGAAGACTAAGATGCTAATATTGATAGTGATCAGTTCAATTTCCACCTTTAA  
CTTTTCTAAATTGCATCGATCCTAGCAGAGCTCTTATTCTATTTTTACTTTTCTTTACATGTTAGATGATGA  
TGGAGAGAAAGGGTATGAAGGTATAACAGATATAATGAATTCATGATACATGTTGTGAAAAGACAACCTT  
ACCAAAAAGTTATATATGAGAAAGGAATAAACCGAAACATATTTTGGACTCCACATTATGTTTGAATTT  
TTGAAAGACAGATTATGGAGTATTTTATCATGATAGAACATGTTGGTAGAAATAAACATGAAGTTAGGT  
CCTCATCTTGCACACTTATTGAAGATCAAATGCTGCTTCTGGTATTGCAGAAGTGCAGAAATTGCTCTTT  
GCAGGGATCCATTCTGATTTTCAGCAGAATTGCAAACCTAAGCTATCTGTAAGTGCAGATTGTTATTGT  
TTTGTCTTCTTCTTTTGTAAAGCTTTATCTGTATATTTTTACTTCAAGATTGTTCAACTAGTAGATCTCTGA  
AAATGTCTAGCTTCTGCTTGTATACAGTGATCTCAGCTGGAATCAACTTTCTGGATCTATACCACAGAAT  
AAGCTTTCCAACAATATGACAACCTATGTAAGCCTTTTGTATTGGCCTCGATAGTTTCTTCATATAGTTATA  
TAAATTGACAGATGTTGGCTTTTGTTCACAGCATTGAACTGGATTGCCTGGGTTCTTTTACTTTTTA  
GCATATTCTAATGTATATTTCAAATGCATGATGCAGTATTCTATCACATAACCGTCTTAATGGATCTATAC  
CCAAGAACTTTTCTCTCCTTCCCTGCAGAACTGTGAGAATCTGGACTTCGTCTTGCAATATCTACT  
ATTTCACTGAAGGAAATGTACCATTAACGAATTGGTGGGACAAATTTGTCACAGGTCTCTTGAGAACAA  
CTTTCTGAATGGTTCCATTTCCACTGACATTTGGCAAAAACAAGATCTTTAATAACAACCTCCAGACTTGTGA  
TGTAAGATGTGAAGCAGAAAAATAACAGATCTTATTTCAATAGAAGTATTTACTTCCAGAGTCAAACCTT  
TGAATGAGGATTTCTTTCTAACAACCTTTTCATTGATTTTGCAAACCTAGTGATCTGCGGAATAATTCAGT  
TTCAAACATTTCCGGTGCTTTTGAACCTCCTGTAAATGTCACACTAAGGTATGATTTCTTCTTTCAAATTCA  
AAAATAGAACAATTTGAATGTCGGTTTATGTCCTCATGGGCCACATAAATAGGACAAACAATGGGTAA  
AGAACTAGAATAACAGAAGCAATATGCCATACCAAAAAGGGAAAGTACGTGATTTTCTCTCGTGTGTG  
TGACAACAATTACTTAAATTACTTGAAGAAGCACAAATGCATGGAATCACTTCTGTTATGTTTTATCCACA  
CACACCGATACACATGCTCTTAGCAAATTCATGTATGGTGCTTTATAAAATGTAAACAAAATGGAAAGAA  
CAAGGAGTTGAGAGAACCTTTGTGGTTTTTCAGTTTTTTCATTGTTTGAAAAATTTAAGTATGCTTAAAAA  
GGAGGTATAGATAGAAAAGGGAATTCTGAAATTCTTAGTCACATATTTTCATCTAGTTGCAGTGGAAAA

GGATGAAATGATGAAGGGCCCTATAATATTGGTTATGGTCCTGATCAGCGTAAATCTTGAAAAAGTACA  
AAGTTTTACCCAATAATATAAATGAGAAGTGTGTGTGGGGTGGGGGGGGTGGGGGGTAAAAAGA  
TATAAATAGAGGGAACTATGAGCATAAAAGGAGTTTTGTCTTTGTTGAGTCTCTCATTTATTCGTTGA  
AAGGAGGCCTGAACAAATGGAGAGGAAGGAAGTTTCTGTAAAATTTGAGTCCACTACATGCCTTATGAC  
ACATCTAATCTAAGTTGCTCGGACTCTTCACTTTTGGTGCCGCACCCGTGTCGACAGGATATGGGTGTGG  
GATTCGTGTCCGATTTTGGGTATTTGGACCAAATTGATGGAGAAAGTCTGGACAGTTTTAATGATTTTT  
ATAATCAATACAAAAGCTAAGGTGAAATTGAAGAAAATGGAATACCTTTTATATAGAAATTTCTATGTCA  
CTCATTTTCCTTTGATCTCCTTCCAAGATTCTTCAAGTTCTCCACATAATATCTCATAATATAGGTTTTAT  
AACTCTTTTAGATATTTCAATTATATTTAGGCGAATCCCTGCACCCGTATCCATTCATGGATCCATATCCCT  
GAATCTTAAAAGTTATATCATATCATGAAGGATCGGACCTTTAGATCCGCACCCGTATCGGACACCCACA  
CCCTAGTCCAAGCAACTTAGATTCTAATAGTTTGTGAACTGAGGGAGTTTTTCTGCAGTATATCACATC  
AAGACAAGTGATATAAACTGGTATCATTAAATTCTTGAAGAAGGAAAACATCACATTTAGGAAAGTGGAA  
GAATGGAAATTGTGCCAAACAAAAGAGTTATTGGTCTAAAATTAAGTGTACATCTTTGTTACTGTCTCT  
GGAGTTCATGTTTTAGTTATGCACTCATTCTTGTGTCCAATTATTCATAAATATCTGATTTTGACAGTGA  
ATTGAGGTCATCTTTCAAAAATTAAGTACTGATCTCTTTCTATCTCATGAGGTCAATTCATCTTGAATTCCT  
AATTGAAAATCTGCTCAATGTTTCTCAAAAGAAACATGTCAATAAAAATGTTTTAGATTTTGTACTATGTT  
AAAATTCATTTATTATTTTCATAGTCTTCCCCTAACTTTAGCAGACGATTTCCAGGTTCCAAAGCAATCCCA  
TCTGCAGCAGTACAAGTATCAGAAACATTGGTAAATACTGTGGCCCTGACTTTGGAGCAGATGACGACG  
AACCTAGTAATTCAACAAATCCAAGTGGTGTGTTGCCTATTCATGCTTGTCCAAGTCAACTATTATGAA  
TATGTTCTGCATCACCTAAACCATGCTTTTGTGCCTCACCTCTTAGAATTGGGTACAGGTTGAAAAGTCC  
TAGTATTTCTTATTTTATGATCCGTACAAGCAACTATTCGAGTCTTATGTGACTAGTTCCTTCAGTTGGATCT  
TTACCAATTGTGGATCGATTCATATTTTTGGGAAAAAGGACCTCGTCTGAGGATGTATTTGAAGCTTTTC  
CCGGTGGTTGGGGACAATACATTTAATGAAAGTGAGATTCTTCGTATCAGTGAGATTTTTGCCTCTTGGG  
AATTCCAAGGAAGTCACCTATTTGGACCATATGAGCTCCTGAACTTCACACTCCTCGGACCTTATTCACAC  
TGTAAGTATTCACAGCTTAAATAGATTCTAATTCAACTTGTAACTTAGGCTGTGTTACTACAATTGCA  
TGACAATTGAATCATTGACATGCAGCATGTGGATAAGATTGAAATATTTGACTATCATTGCCACTTCTAG  
CCAACAAGTATAAGGATCTTAATTCATATAATCAAATAGTTTAGATAAGCAACAAAAGACTATGATCCAT  
GATCTTCTAAGGACTTCATATATATTGGGTTGAAAAAGACAATGAAGTCTTTGTTTATATCCAAAGTTTTT  
TTAAGACTTCAGATATTTTACGTTGAGGAACCTTGAAGGATCTCACTAACTTGATTAAGGTTGAAACT

TCAAGGGGTTCAAACCTTAGATAGTTTGGTCCAGTCTCTCTTCAAGAGCTTCAATTCTGGAGGTCTCAGCC  
CTTACAGTTTTTGTGGGATGAAAGTGGATAAAAAAAAAATGGACCTTAGGCCTCCAAAAAGCTAGCTC  
ATGAGGAGGGGATTGTCCAAAATCATATAAGGAGAATAACCCTTGCTCACTCCAACACCTTGCTGCACTCC  
CAAGAATTGACATTGGAGCGTGGACAATATAATAAGGGGGGGTTCAACACCGGAAACAATAAATTGGG  
ATCAGTGTGGATCTGAGACCATGTGAGAAATAAAGAAGAAAAATATTACTCCCTCTATCCAGTTTATATG  
ACTTACTTTTTCTTTTTAGTCAGTCCCAAAAAGAATAACACATTTCTATATCAAGTAATAATTTATTAATG  
TCAATTTTACCTTAATGAAATGATTTATAGCCACACAAATATCTATCACTTTTTTTTAGACCACAAGTTTAA  
AAAGTCTTCCTTTCTTTCTTAAACTCCGTGCCAAGTCAAACCTCACTATATAAAATGGGATGGAGGGAGT  
ATTAATAATTATGTATTCTTTTATTACATTGAGCCCTATTTATAGATTCTACATTACAATTCATTTCCAAGTA  
GGACAATATACACAATCCTATTGAACTCCCTTAAAGCTGGTGCATACAAGTCAGATGTACCGAGT  
TTGTTAAGATGTAATTAATATGAGGATCAGTGAGGGACTTGGTGAAAATATTTGCAAACCTCATCACTCGA  
CTTCACAAATTTTGTAACAATATCTCTTGGGATCATCTTTTCTCTGACAAAGTACCAGTCAATCTCAATGTA  
CTTAGTCTTCTCATGAAATACCACCGATTTGATGTGATATCAAGGGCTGCTTGGTTATCACAGACAAGAT  
AATGGCTCAATTGTTGATTTCTTTGTACAAGCTTTGATTTCTTATATTATCTGCAGTGAATCCTGAAATG  
AAAGGTAAAAGACAAAGCAAAGGCGTTGTGATAGCTTGCATTGTAGCAGCAGGTGCTTTTGCTGCCTTT  
GTTTCCTCAATTGCCACTATATTAATCACAAGACGACGTGCTAAGTATCAAAGATCTTGTCAAGAAAAC  
GTTTGTGTAAGTCCTCTTATTAGATTAGCTATAATTTACTTTATCAAGTCTGCTATTTTTAATTCTTTCTGC  
AAAATTGATGACTATGGGTTTTTGTGTCAGCTTCAAGCCTCTCTATAAAAGTAGATGGCGTTAAAAGTT  
TCACCTCAGAGAAATGACTTCGGCCACTAACAACTTTGATACCTCAACTCAAGTTGGTGAAGGAGGATA  
TGGTCCGTCTTTAGGGGAATTTAGCTGACAAAACAGTTGTTGCTATCAAGCGAGCAAAGTAGGATC  
CCTGCAGGGGCAAAGGAATTCTTGACCGAAATAGAACTATTATCAAGGTTACATCACCGTAATCTGGT  
TGTGTTGCTTGGATACTGTGACGAAGAAGGAGAGCAGGTATGACAAAAGCTGAAAACCTTTTCAATTCC  
AACTGTTTTAGTTACTAATAATTCACACCATTATCATTTTTTAATCATAGTTAGTCATATTTTTTTAGTGTA  
GCATCATAAACCTTCTTGTATTCTTTCTCACTTCAGTTGCTAATGATCAGACTGAATGTGTAGCAGACTAA  
ATGCTTTCTTGAGCTACTGAAGTCTTCTGTTTAGCACAAAGAGTGATATAGTCGAGCAATTATGAGTCTT  
CTGTATACATTTGCAGATGCTGATTTATGAGTTCATGCCCAATGGAACCTTTGCGAGACTGGCTTTCTGGT  
AAGAACTGTTTCCTGGTTGTTTCTAGCTTTTATATGATTAATCCTCCTCAATTTCTTTCTTTAGTTTAGTAG  
TGAAGATCCAATGCGGAGTTGCAATGTTTATAGATGTTCTTGCACATGTTGTGTCATTAGTAGTACTAT  
GGTGAATTGATAATACAGGCTTCAGTATTTTATTGTGTTTGTGGAGAAACCCTTGTC AAGGTGGTGATCG



ATCTAAAAGTTGCATAATGGAAAAGATATTGCAGGAAATCTAATAGTCAGAGAAACATAGATTCCATCTT  
CTTTTTCTTATCAGAACAAGAAAAGTTGTTAGTTTCTTATGCGGCTGTGATAAACTTAAAATTGACATC  
GGTCAAGAAACTTTTGTATTGCTATCTAAGTAGGTGATTTCCATCATTGACAGCCAAATGTAAAAAAA  
TTTGAAGTTTGGAGCAAGGTTGGGGATCGCACTGGGGGCATCTAAGGGCATCCTTTACCTCCATACTGA  
AGCTGATCCACCCATATTCCATAGGGATATTAAAGCCAGCAACATTCTTTTACTCTAAACTCACTGCCA  
AAGTTGCTGATTTTGGATTGTCTCGGCTTGACCTGTCCAGGATGATGAAGGTCTTCTGCCTAATCATGT  
GTCAACAATGGTGAAGGGGACACCTGTAAGTCTGTCTATGCTCTAGATTTAAGGAAATAATTGTGCAAT  
GATCTTACTGATTTTCTTATGTATATGCACAGGGTTACCTTGATCCCGAATATTTCTTGACCCGTAAAATG  
ACAGATAAAAGTGATGTCTACAGCCTTGGGGTTGATTTCTGGAGATCTTAACTGGCATGCATCCTATCT  
CACATGGAAAAACATTGTCCGTGAGGTATTTCTGTGCGCTGAACACCTATTGGAATACAAAAACAGTG  
AATGTTTGTCTAGCATTTTAGCAATAAAAGCATAGGTGTATGTATATAACCTTTAACTGTCCATGACAGG  
TAAAAATGGCTCATAAATCGGGAGTAATGTTCTCCATTATGGATAAGAACATGGGATCTTACCCCTCCGA  
ATGTGCGGAGAAGATGGTGGAGTTGGCCCTGAAGTGTGCCAGGACAAACCAGAAGACAGACCCTCAA  
TGCTGGAGGTGGTTAGGACGCTAGAAACCATACTCCAAATGATGCCATATACCGACACCGATCCTTTGG  
ATAATAAAGCCAGTTTCAGTGAAACTACATCATCAGCTTCATTTTCTAATACTAGAAGTGGAGACCTATTT  
ATATCATCATCCAATGTATCAGGTGGTGTATCTTATTAGTGGTGTACTCTTAATATTACACCTCGTTAACA  
TTAGCTTGTCTTCCACTGCATAAACATTGACTTGTACACTATGACTAGTAGGAAGTCTATACGACTTGTCT  
TTTATGTTGTATACGAGTGTACAATAATACCATCTTACTGCTTCTAGATTTATGTATATTCCTCAAGAATCT  
GTTGTGACAGACAACCCTTGTATATGTATAGTACATTATACATGAAGTGCCTTATCACTGTCCATAGAAA  
TGCTACATGTAGTTGGTTATCATCCTTGCA

>PGSC0003DMG400006923 LRR-RLKs

TTTTGAGGACTGTGAAGTAAAAATATTGATGAGAAGCCCATCTCTTTCTTCTGCAAGAACCGAACCCAA  
CGGAAAGGTCACCATTAATGGCGGAAACCTCATGAAACTCGCGACACTACCTATCTTCTTCTCATTCAAT  
GCATGTAGCATTAAATTCCTTCTTCTGTCTATAGCAACCCAACCTTCTCCATTTTTCTACATTATATACTAC  
TCTACTTTACTCTTCTCCACTTTTGTGCTTCTTTAATTTACCTCTTAAGCCGTACAAGACCCATTTATTAG  
TGCTTCATTATAGAGTTCTCTGTTCTTTTTGCTTCTTTCTTCTTGACCCCCAGAGTGGGTTTTTGTCTATTTG  
TTTTCTTCTTCCAAAATATCTCTGCCAGGAAAAAGCAAAACATTCTTCAATGTGCAGTTTAGTTTGTTT  
GTTTGTTTTTTCTTGATGGGTCTTTGTCAAGATTTGTGTTTGGTTCAGAATTAGTTTAATTTTACCCAAAA  
ATATTCTATCCATTTGGAGTTTTCCGCAGATTTAGACATAAAAAAATGCTTGACGTCTGCAAGAATTGAA

GCTCAAATTGTTCCCTTCAGTTTATTCATAAATTTCTGTTGAGTATTTAGAGGACTGTGTTAAATGGGGTG  
CCTAAAGATATTTGTCATAGTTGTATTTCATGTGGGCTTTATTGATCCCAAATTCTCATCAATTAGGGTCCT  
ATGAAACTCAAATCTTCTTCAGTTACGGAGGCACTTGGAATATCCAGTGCAGTTGGATGTTTTGGAGAA  
TTACAATGGGGATTTTTGCAGTTTGGGTTCAACATTGAATATGAGCATTATTTGCGAGAATAACTCTGTT  
ACTGAGCTCAAATCAAGGGAGATAAGCTAGTAAAGGTCAATGAATCCATGGAGTTGCAGTTCCAAAC  
AATACCTTATCTGAACGTTTCTCCATTGATTCATTTGTTACCACTTTGACAAGGTTAAGCAGTTTAAAAGT  
TCTCACTTTGGTTTCTTTGGGCATTTGGGGACCTCTCCCTGTTAAAATTCATCGGTTGTCTTCTCTAGAAGT  
TCTGGATATGAGTTCAAATTTTCTTTTTGGTAAGGTTCCATCTGAGATGTCTACAATGGTGAAGCTTCATA  
CTTTGACATTTGATGGCAATTTTTTCAATGAGAGTCTCCCTGAGTGGTTTGATTTGTTACCTAATATCACT  
ATTTAAGCATGAAGAATAATAGGTTGAAGGGTAAATTTCTCATTCAATTTCTAAAATCACAGGCCTAA  
CTGATATTATTCTGTCACATAATGCTCTTTCTGGTGAATTACCTGATTTAAGTGCTTTGTCCAATTTGCATT  
TGTTGGATTTAAGAGAAAATCATTGGATTCTGAACTGCCACTGTTGCCACAAGGATTGACCACTATTCT  
TCTTAGTAGTAATGCTTTCTCTGGTGAGGTCCCAGAAGAATTTGGCAAATACTACTTCAACACCTTG  
ATCTGTCAAATAATGCTCTTACCGGAACGCCGCTGCTGATTTGTTCTCTTTGCCAAGTATTAGTTACTTG  
AATTTAGCGTTTAAAGTTCTGAGTGGTTCACTTCTGAACATCTCAACTGTGGGAGTGAACCTGGTTTTGT  
TGATATTTCTGATAATAGACTGCTTGGTATGCTTCTTCTTCTTGAACGCCAGTTCGGATAAGCGAATTG  
TAAAGGTCAGTGGAAACTGCTTGTGGATACACAATATCAGCACTCTGAGTCCTACTGCAAACAAGCTA  
GTTTGGCAAAGAAACAACCACTGGAAAAGAGATAGCAATATTGGTAGGTGTTGTTGGGGGAATTGTA  
ATACTTGTGGTGTTTTTGGCTGTTGTTCTTCTCATCTTTTGTAGAAGACAACATGCACGTCACGATGTGGA  
CCGGTACATGTTTCCCAAAGTTGTGCAAGATAATGGGCAACCAATATTTCTGCTGAGCTCCTGGCAAAT  
GCTAGTAAGTTGTAGTTTGATTTCAATTTTCAGTGTCAACTGTAAATTTTTTCCGGGATTTGATAAGAGTT  
TCTTTAACTTATTTTACCTCAGGAATCATTCTCAAACAACAGCACTAGGATCACAAGGTGCCCCATCATA  
TCGGGTGTTCTCCATGGAAGAGTTGGAAGAAGCGACAGAAATTTTTGATAAATCAGCATTACTCGGTGA  
AGGCTCCATTGGAAAAGTACTGCTCTGAAACTATTTATGACTCCCAAATAATTGTAGGAAGAGGACTTA  
GCGTATTGTTTCTTGCATATATCCATTCAAATTCATTTTATATTTTGTTCGGAAGAATAATTTTTTGTG  
CTTATTTAGCTTTTGTCCATATGATGCCATATTATTCCAGAGGTCTTGATCTCCGTTATCAATTGAAGCAA  
ATCAAATTAGTTTTGTAGGTAGGTTTCATTGAATAACTCGTATCAGACAATTAACAGATGCACAAGTCG  
TCAATATAGGCAGTTGATTAACAGTTTTTTGCCTTTATGATTGATTGTCTGTGTTTCATGAATGCTATATG  
CATCTTGACTTTGCAATTTAATACCATATAATGGTGGTCACAGTTAAAAGTAATGTTTCGTTTTGATTTGGT

ATCTACTGAACTTTGACAATTAATATCAATAAAGTCAGTGCGCTTGATTGCTTATTTAAAGTGCATATGC  
AGTGAGTTGATATCTCTTCAAGCCTTCTGTCCCAGGATTTTTCTTTCTTGGGATCAAGTTGGACAATTTTT  
ATTTAACTAACACCCTTCTATGTCATTCTCTCTATCTCAGATTTACAAGGGAAAATTAGAGAATGGAACCT  
ATGTTGCTGTAAGGGAATTGACTGTTTCATAGACGATGCACTAGTTGGAATTTCAAACCTTCGAATGGATT  
GCTGTCAAAGTTTCGCCATCCCCATTTAGTTAGCCTTCTGGGTCACTGCATTGATGATGGGGTGCAAGAT  
GACTCAACAGTCCACAGACTTTTTCTGGTTTATGAATTTATTCCTTGTGGAACTTCCGTGCTCGTCTTTCA  
GGTCAGTAGCGTAAATATTTAGTACCAACAGTTGCATAGACATATACTTGATTGAATATGCAAATGCTG  
CAGGTATATTTCTGGTTATGCTGATTGCTAATTTTCAGATAACTATTTAGTATGATAGTTTTGGTGAATCT  
GTCTTTTTTTGAATATTGTGCGGGGAAGGGGGTTAAGGATGAGAAACACATGAATTTATTGCGTCTTTT  
GTTATTTATTCTCTAGTAAGTACAAATACAGAGTATTGTTATCTTCTGGATAGTTTCTTTCCGTCTATTTGT  
CCAAGCTTGCATCTGAAATTTTACAACAAAGTGAAAGACAATTATTGTAGTTTGATGAAGCAATCTGTG  
TTAGCGTTTCATTGATTTGTCGAGATATACTTGATCGTATGTTCTTTGCATGGTCTGTTAGCCGACACTTG  
CACTGCAAATGTTTTGACCATCTTTTTCTTTGTGTTGTTCAATTTATTTATCCCGATATATCCAATGAACC  
ATAGGGAATACATGTTGACCTTGTGTAAATCATCATTTTCACTTGCAGAACTACTCCAGGAAAAGTCTCT  
CAACTGGTCAGACAGGTTGGCGGTTCTGATTGGTGTGCAAGGCTGTGCACTTTCTCCACACGGGTGT  
AATCCCTCCTTCATTCGGCAATAGCTTGAAGACAGATAGTATATTGCTTGATGAGCATCAGATTGCAAAA  
CTTAGTGATTATGGAATGTCAATCCTTATAGAAGAAAGTGAAAAAGTTGAGGTATGTTGAAATGATATT  
CATATGATGAAGGGTAGGGGTAAGGTCTGCGTACACCCACACCCTCCCCTGACTGTTATTACACTGGG  
TTGTTGATGTTTTAGGGTAATATCTGATACTGATGATATTCTTTTTCAGGCAAAGGAGATGGCCACAAC  
GCCTGGTATGTAACCTTTTTGCCAAATAGAGTCATACATCAGTCTGTTTGCAACTTCTATTCTAGAAAA  
ACTGATAGATTTTTCTTAGTGCCTCTTCTGACTATGGCATCCCTTAGAGATAGATAAAAATGCTTGGCAA  
TGACAGTTCAAGAATGTTGAGCAGAGACATATTCTCAACATTTAAATTTTGTGCATTTCTTCTCATGCAG  
GAACACGAGGAAGAAAGAGGATGATGTGTATAACTTTGGTTTCATATTACTGGAGTCGCTGGTGGGTCC  
TTTTTTTAGTGAAAAGGAGAAACATTTTTGCTCAATGAAATGGTATGGAACACTAATTTTGATTTTTGA  
TATGCAACTCCTTTCTCATTGGCAGTAGCACAGAATGCTCTTCAGCATTGTTTCTACTGTGGATCACAAAC  
TTTCGTCCCGTTTGTAGTTAAGGAGTTTTGAAATGAATGTCTGTGACACTTACTATGACTTGGAAAGGTAA  
GCAGTAAAGTCTTTTTTTTTCCGATGACAGACATCCTTTGGTAGCCAAGATGGTAGGCGTAAAATTGTGG  
ATCCTGCTGTGCTAACCCTAGCTCCCAAGAATCTTTGTCAATTGTAATATCACTCACCAACAAATGCATC  
TCTCCCGAGTCACAGAGTCGCCCTCATTTGAGGATGTCTCTGGAACCTACAATATGCAGCTCAAGTCC

AGGCTACAGCCGATACAGATCAAAGATCTGATGCAACTTCATTGTCATGAGGTATTCAAGAAATTCAACT  
GCATCTCATCAGCAATACTTGCTCATGCCGTTGTCTCAATTGGGATGCAGGCTGAATGCATGATGTTTGT  
GAAGCACAAAATGGTTGCAAACCTCAGCCTCATGTTCAATCTTCTAGTCCTCGTTATCATTTTCTTTGTAT  
AAAAATGTAAATTTGTCGATTCTTTGGATTTTAGAATTTAGAAGTGGGTGATGTTGCAAACAGAGACTA  
GTCTTCACATGAATTTGTATTACCCTCCTTCAGAAAGGATAGAAATGAAAGTGACAGAAGGCTTAGTAG  
CCGTGCAACCTCAAAAATTGCCCTTCATGCTTATGTGTAAGATAAGCATAACATGTATATCAACATCAGAC  
TAATAACTGATCTTCATTGCCTTGGTACTTGCATTGATCCAGATATGAGAAAATCAAAGAGACTAGAGTC  
CCTCCAATTCTCCTAAAC

>PGSC0003DMG400006942 LRR-RLKs

GGTGCTTACTCAGGGGAGTCCACTCCATTAACAGGACTAACACTAAATTAACCTTTACAAATTCTCTAAA  
TCCATAATTCCAAGGTTCCACTTCATCATTCAAAGTCAAATGTCATCTTCCATTCTTTTGCTTTTTTCATACA  
CTTATATTTCTCATGTAAACAATTCATCAAACACCTTCTATGCATCCCTACTCCCTAAAGCTCAAAGATGA  
AACTTTTCAGATTTTTCAATCTTCCCCTTATAGTATTCATCTTATTGATTCTTGTATTTCAACCCTTCTTCAT  
TGTAATGCTATTGCTGGTGTAGCTGAAGATGATATAAAGTGTTTAAAAGGAGTCAAGAACTCCTTAA  
CAGATCCAAAAGGGAACCTGAATTCATGGAATTTGCTAATTCTACAGTGGGGTTTATATGTAAATTTGT  
TGGTGCTTCTTGCTGGAATGACCGTGAAAATCGTCTCATAAATCTGAACTTCGGGATATGAATCTTGGGA  
GGTAATGTTCCAGATTCGTTAAAGTATTGTGGAAGCTTGCAAACCTTGATCTTTCTGGTAATCGGATTC  
TGTTCAATTCCTTCTGATATTTGTAATTGGCTACCTTTCTGGTAACCCTTGATTTGTGGAACAATGAATT  
TACCGGTTCTATTCCGTCTGATCTTGTTAGTTGTTCCATTTGAATAAATTGATGCTTAATGATAATAAGCT  
TTCTGGGAATATAACCACCTCAGTTTTCTAGTTTGGGGAGGCTTAAGATATTTTCTGTGGCAAACAATGAT  
CTTTCTGGTAGGATTCCGGAAGCTTTTGATTCCGGTTGATTCGTTTGAATTTGGAGGAAATGATGGGCTTT  
GTGGTGGTCCGTTGGGGAAATGTAGGAGGCTTAGTAAGAAAAGTTAGCTATTATTATTGCTGCTGGTG  
TGTTTGGTGCTGCTGCTTCTCTGTTGTTGGTTTTGGGGCTTGGTATTGGTATTTTACGAAGGCAGGGAA  
AAGGAGGAAGATGGGGTATGGATTAGGGAGAGTTGACTCGGAAAGGTGGGCGGATAAGTTGAGGGC  
TCATAGGCTTACTCAGTTACATTGTTTAAAGAAACCGCTTGTGAAGGTTAAGTTGGCAGATTTGTTGGCT  
GCCACGAACAATTTTAGTACGTCGAGTGTGATAAACTCGACTAGGACAGGGACTACATTTAGAGCTGTT  
CTACGTGATGGTTCTGCGCTTTCTATTAACGGCTTAAAGCTTGCAAGCTGAGTGAGAAGTTGTTTCGAA  
TGGAGATGAATGGACTAGGACAAGTTAGGCATCCTAATTTGGTGCCACTTTTGGGCTTTTGTGTTGTTGA  
GGAGGAAAAACTTTTGGTTTATAAGCACCTGTCAAATGGTACTTTGTATTATTGAAAGGGAGTGCA

AGTGTGTTGGATTGGCCTACTAGGTTTAGGATTGGCTTGGGTGCTGCAAGGGGCCTTGCTTGGCTTCAT  
CATGGTTGTCAGCCACCAATATTGCACCAAACATATGTTCTAACGTTATTTTCCTTGATGAGGATTTTGA  
TTCTAGAATAATGGATTTTGGGTTGGCAAGGCTAGTGACACCTCCAGATGCAAAAGAGACTAGTTTTGT  
GAATGGGGAGTTGGGTGAATTTGGCTATGTTGCTCCGGAGTACTCAAGCACAATGGTGGCTTCACTGAA  
AGGGGATGCTTACAGCTTTGGGGTTGTGCTTTTGGAGTTGGCTACTGGGCAAAGACCTCTAGAAATCAC  
TGCTGCTGATGAAGGTTTTAAGGGAAATTTGGTGGACTGGGTAAATCAGCTCTCTGTTTCTGGTCGGATT  
AAAGATGCAATTGATAAGCATATTTGTAGAAAGGGCCATGATGAAGAGATTGTAAAATTCCTCAAAT  
GCTTGCAATTGTTAATTTCTCGGCCCAAGGAGAGGTGGTCTATGTATCAGGTATATGAAGCACTGAAG  
AGCATGGCTGAGAAACATGGTTTCTCTGAACATTATGATGAATTTCCCTTACTATTTAACAAACAAGAGA  
CCAGCAGTCCCATTTGATACATGAATGGGAAAGCACTATGAGATGTTTCACATCTGGTGAACACAAATG  
CATTATGGTATGTTCTTCACTCCCTTAGGTGCAAGTGAATCAGGCACGATACATATGGTTCTGTGAAG  
TACTACCACAGATATTGCTGTATTATACTGTGAAGTGTCAAACATTCTGAGGTGTTCTGCTCGAAATTTA  
TGTTACAGATAGCTAATATTATTGGTATCTTAGGTTTATGTTTCTTCTGCTCATACTTATGCATTAACA  
AGACAGTAAGCAAAGCTGTCACAGTTTATTTGAAAGCTATAATACCTACTAATTTAACTGTTTATAACT  
GACCTGGGCATTGGCCTTTTTAGGGTCGAGATATATTCAGTATGTCCCGTACAGTCATTTATGGTTTGTA  
AGATCAAATCACCTAGGTTTCCCTAATGGATTGGTTCGGTAGAATATCTGCCTCCACACTGATATTAAT  
CATCTAATCGGAATGCTATCAAGCAGAGTTATTAGTAATTACCCCTTCTGATTAATTTTGGATGATGTTGA  
TCAGTAATTGTAGGTCCTTTTGCAAAAATTGTGTCTGATTGGGAATAATTTTCACTAAAATGGAAGTTGA  
ATGGGCTTTCTGAAAGTTATGTGCCCTCTTAAATTTGATTTGGCAGCTGAAATTTTCACTTCACTTGATTCT  
AATCTGCTTCTTACAATCTCAGAAACATAATGCACAATTATAGTTTCCAAGTAGGAAAAAAAAAATTCTTG  
TTGACAGTTGAAACTCTTTGCAATAGAAGTTATCAAGCCTTACTTTTTCCCTCAAGCTCAAGCTCGGAT  
GCGTGTTTCCATATGCTCTCCTGCTTCCCTGAAAAGTCATTTTGTAAATTTCAAACAACACTACTTGATGTC  
TAATAATAGTAAATGAAGGGAAAAGGTCTGTTAGCAAGTTATCTCATATCTGTC

>PGSC0003DMG400007234 LRR-RLKs

CTCATCTTTACATACCTTATTTTCCTCAACCAATTTTTCTTACAATCTCTTAACCATGAACCATTTCTTCTC  
ACTACAATTTTCTTCTTCTCATAACAATTTTCACTTGTTTTCACTACTTCAAATTTTCTTCAACTCATTTCT  
ACTTTTATCCTTAAAATCTTCAATTTCAAGATCCAAACAATACATTTCAAGATTGGAATCCTACATCAACTTT  
CTCAAATTTTGGTTCACAGCCCTTTTGGTGTTCATGGTCAGGCATCAAATGTGACACAAAAACAAGTCAC  
ATTACATCACTTAATCTCTCAAAGAGGAACCTTTCTGGTAAAATACCTCAAATATTGCATCCTTGATACA

CTTACATCACTTAAATTTAAGTGGAAATTCATTTGATGGACCTTTACCATCCATCATTTTTGAATTTCCATT  
TCTTAGAACACTTGATATTAGTCATAATTATTTCAATTCAGCATTTCCTCTTGACGGGCTAACGAATCTCA  
AGTCCCTAGTACACTTGAATGCCTATAGCAACAGCTTTACAGGCGTGTTGCCTGTAGAGCTTGTTGGGCT  
ACAAAATCTTGAGTATTTGAATCTTGGTGGCAGTACTTCACTGGTGAATTCGGCAAGTTATGGGAAT  
TTCAACAAGTTGAAATTCCTACATTTAGCCGGAAATTCAGTGGGAAAATTCAGAGGAATTGAGA  
TTGTTGAACCAACTCGAACATCTTGAAATTGGATACAACAATTACACTGGAAATGTTCTCTCTGGATTTTC  
CTCGTTATCGAATTTAGCTTATCTTGACATCTCACAAAGCTAATCTTTCAGGTGAAATCCAATTCAGCTTG  
GAAATTTAACAAAGATTGAATCTCTATTTCTTTTCAAGAACCATTTTATCGGTACAATTCCTCGAGTTTTT  
CCAAACTCACATTGCTGAAATCACTGGATTTATCGGATAATCGTCTCTCAGGCAACATTCCTTTTGGATTT  
TCAGAGTTGAAAGAGCTTATCATGTTGTATTTGATGAACAATAACTTATCAGGTGAAATCCCTGAAGGG  
ATTGGTGAGTTACCAAATCTCGAATTGTTAGCTCTTTGGAACAATTCCTCACTGGAATTTTACCGCGAAT  
GTTAGGATCAAATGCTAAGTTACAAAACCTTGATGTGTCTTCAAATAATTTGACTGGTCCAATTCCCCAA  
AATCTCTGCCTCAGCAACAACCTTAGTTAACTCATTCTGTTTTCGAACGAGTTTACTGGTGAGATTCCTTC  
ATCCTTAACTAACTGCAACGCTTTATCCAGGTTGAGAATCCAAGACAACAACTCAATGGCACGATTCCA  
TCAGGATTCGGTTTTTTTGCCTGATTTCACTTACATGGACATCAGCAAGAACATATTTTCGGGGCAAATTC  
AAAAGATTTTGGAAATGCCCCGAAAATGATGTACTTGAACATTTCTGAGAATTTTTTCGGTAGTAACTTG  
CCTGATAATATCTGGAACGCCCGAATTTACAGATATTCTCAGCAAGTAACAGTGGCCTTGTTGGAAATC  
TCCCTGATTTTAAAGGATGTCAAATCTCTATAAAATCGAACTCGAAGGAAACAATCTCAATGGTAGTAT  
TCCATGGGACATTGAACATTGTGAAAAGCTTATTTCTCTAAATCTTCGACGAAATTCATTTACAGGAATCA  
TTCCTTGGGAAATATCTGGTATTCCTTCGATAACAGACGTTGATTTGTACATAATTTTCTCACAGGAACA  
ATCCCTTCCAATTTGAAAAGTCTAGCACGTTGGAACATTTCAACGTGTCGTATAATCAGCTCACTGGTCC  
ATTGCCTTCTCAGGGTCTATGTTCTCAACGTTCCATCCTTCGTCTTTCGTAGGAAACGAAGGTCTTTGTG  
GTACTATCATAATAATCCGTGCAGGACGGATGAACTCAAAGATGGAAAGACAGATTTTTCGAACCATT  
CAAAGAAAACAGATGGTGCATTGATAGTATGGATTGCGTCTGCAGCATTGGAGTAGTAATTATCATTCT  
TATTGTGGCAATTCGATGTTTTTCAATCAAATTACAATCGAAGATTTCCATGTGACAAGGAAATTGGACCG  
TGGAAGTTAACAGCATTCAAAGGTTGAATTTACAGCAGATGATGTACTCGAAAGCATAGCAATCACA  
GATAAGATCATCGGTATGGGGTCTGCAGGTAACGGATCTATATTGTTAGTTATAATGAGTTCAGTT  
GAACCCGCAATTTTTTCAATTAAGTATATGTGGTGGAAAATCATACAAAATTGGTGTACATATATATTTTTT  
TTAAAATGCTAACATCACCTAGACAAGTTGGCAATGTGGACTTTTATCAATATAACTCTCAAATGGAAAA

GTATAAGATAGACTAGATCTTACCTTAAAATTGTTACATAAATATTTAGTTTTGAGTGCACCTTCAAATAA  
CTTCGATCCTTAAAGCCATTAAGATTATATTCTAGATCTGCCTCTATCTATAGATATAATGTACAATTTCCA  
CCTTGAACCTAGAATGGGGTCCGCGCGTAGTGGATGATCTGTAGTGTGACGCAAAGTCGAAATGTACAAA  
GTCTCTTAAGCAATAGTAGAATAAATATTACATTTCAAATCATGTTTTCAAATAAGTTGGAATCTTGAAT  
ACTAAGATTATATTCTAGATTCGCCTCTGTCTGTGGGTATAATGTACCATTTCTAGGTGAAACTCAAATA  
TGGTCCGCAACTAGTGGATGATTTATAGTGTTAGTGAAGTCGAACATATATAGAGAAATGTGCAAATC  
TCTTTGACATTAGTAATTTTAAAAGAAGCTTGAATCTTGAATACTAAGATTATATTCTAGATTTGTCTTTGT  
CTATAGATATAATGTACAATTTCAAGTGAAACTCAAATGGGGTCCGCAACTAGTAGATGATCTATAGTG  
TTAGTGAAGTCGAACATAGAGAAATCATGTGCAAAAATCTCTTAAAAGTACATGAGTAACTTCCAAAATA  
GTTTGAAAGCTTGAATACTAAGGTTATATTCTGAATCCACCTTTGTGTGTGCGTGTCTATATATAGGTACA  
GTGTACAAGGCGGAAATGCCAGGTGGCGATATCATAGCGGTGAAGAAGCTATGGGCGGGGAAGCAAC  
ATAAGGAGACGACGAGGAAACGACGTGGCGTGTGGCAGAGGTGGATGTGTTAGGCAATGTAAGACA  
TAGGAACATTGTGAGACTACTAGGTTGTTGTAGTAACAATGAATGTACTATGTTGTTGTATGAGTACATG  
CCTAATGGTAGCCTTGATGACTTGTACATGACAAGAACAAGATGCAAATTTGGTTGGTGATTGGTTTA  
CTAGGTACAAAATTGCACTTGGTGTGCACAAGGGATTTGTTATCTTCATCATGATTGTGACCCTGTCATT  
GTTTCATCGTGACCTAAAACCTAGCAACATTCTTCTTGATGGTGAAATGGAAGCTAGGGTTGCTGATTTTG  
GGTTGCTAAATTGATTGAATGCGACGAATCGATGTCCGTCATTGCTGGATCTTATGGCTACATTGCACC  
CGGTAAGTAATTTGAATCTCCCTTAATTTTTTAAACTATTTTCTAAGGTTGATTTAGCTGTCAAGAGGTT  
ACAATTTAACTGACAACGTGCACGAATTTGAAATCTAATAGTTTCATGTTGTGTTATATGTATGTTTGTAG  
TCTTTATAGGGGTCCATACTCCGTATTAGTGGCGTTTCTATAAAACCTGTCACGAATTATTATAAATCGTG  
ATGATTGAGCTAGTTGTCCGTAACATTATTACTTACGATGGGTAGTGGGAACCCCTAAAATATTACTTTT  
AGTGACAACTTTTAAGGTGGCCATGAAAAAACATCACCGAAAATCACATTTTTCATAGTCGATTTTTTA  
AAAAAATTATCTTAATTTTAATTTTCATATTGTTTTTCCAACCTAACACTTTAAACATTATTATTATCTTTAACA  
CTCAAAAAGTTCATCAAATGTTTCCGATTTGCCAATATTAGTAACAATAATGATTATATACCCAGTTAAA  
TTGTTTTCTATAAATTTATCAATATTAAGCTTGATATTTATTA AAAAGATAGACATATGAATCTTTATTATA  
TAACTTTTTGAAAGATATTTTTCATTAACCAACCAAATATTA AAAACACAATTTTCATAAAAATATTTCCCCAC  
AAAAGACTTGTGTGAACAAAAAATCGGATTTATTCAAGCTTATTATTTTAATAAATAAATAAAAATAATTA  
AGGTTTGTGTTGTGCTTTTTTTATTTTTTTTACGTTGTGTTATGTTTATCCAAAATATTTTCGTCATCGATCG  
TGTCGGTTTAGTCCGTTGTGTAGGGTGACGAAAAGGGTCATGACTTGCGTGCTTAACGTGGTATCATGT

CATATTGTATTTTTGGTGAACCTCATCATTTTTGTTTGGTCCTTTTCAATGTGTCCACTTTCTTTGTGAATCCT  
CTTCCTTGGACGGACTTCAGAAATTCAGTAATTTTTGTACGGTTATATATTTGTATTGAGAAATTCAGTTT  
AAAGTGTGTTGTTGGTTCAGTGATGATAGAAAAGGCCTAATTTGAGCTCTTTCAAGGGGGGGGGGGGA  
ATATTTCCGTTGATCTTGTATAAGGGTGACATGGCACCTAGAGGCGAACTCACATGTATAGGTGGGGTG  
CACGTGCACCAGTTAACTTTGGAAAAATCATGAACATATGTATATTTATTTTGTAGAACTGACAACAAC  
TAGATATAATTAACAGTGTTCCCATGAAAAGTATAGAATGACACTTGGAACAGGCCAATGCATCCGCCCT  
CGCGACCTAGGTTTCGAGCCTAGTCAAACCACATTTTATAGTTTTTATTATAAGTGATTCTAGATAAGG  
GATTCAAGTTTAGAATCATTAGTAGAACAACCCATGATGCACCCAAAGTCTTCAAATCTTAGATTCGC  
CTCTGATGGCACCACCATTACCATTTTTATTTTTGCTCTTTTTCTCCGTGATTTACTACTTATAATTGTTTTA  
ACCTTTTAGGGACCATGTCCACTATTGCGCGTGAATTATCCCTTGGCTCTTGAGGCTTTTGATTTTCACTT  
TATGTTATTTCTTTGGGCCCAAAAGATTTTCCCAAAGTATAATATATGAATCTTCATGATTATAAAACCC  
TTAATTTATTAGTCCTAGTACTATATTCTTTATTAACATATAAATTCAAAGTCAAATACTTTGGGCTAT  
AAAAGCCAAAATGTTATGATAACTCGATTTCTTGTGTGCAAGATAGTTGTGATCTCACTTAATTATCTTAC  
TTGCTAGTGCTACTTGTAATAAAAATCGAATCAAATATAATCCTATCAAATATGTTTAGGATTTAATCTT  
TTTTACACTATATAATAGTAAATAATATAAGATTCAGATCACTAATCTAACTTTGTACATTTATATATTT  
TTATGATGCAGAATATGCGTATACGTTGCAAGTGGACGAAAAGAGTGACATTTATAGCTATGGAGTGGT  
GCTAATGGAAATTTGTCCGGAAAAAGATCGGTAGATTCGGAATTTGGCGATGGAAATAGCATTGTGGA  
TTGGGTAAGGTCCAAGATGAAGATTAATAATGGTATAAATGATGTTTTAGATAAAAATATTGGTGCTTC  
GTGTCCTCGAGTGAGGGAGGAAATGATGTTGATGCTTAGGGTGGCGTTGCTATGTACTAGCCGGAACC  
CGGCTGACCGCCTTCCATGAGGGATGTTGTGTCCATGTTACAAGAGGCCAAGCCCAAGAGGAAGTTG  
CCCGAAGTGGTGGTGACAATTCAATTGCTCTTGTGTTTGGCACAAAAGGCCAATGTGGAGTGTTAA  
TATAATTGGAGATTTGGGGTTTCTTTCTTTAGTCTTTTTTTTTTTTCCAATTGTGGGGGATTGGTATAATC  
GTATAGGATAAGTACTCAATGTTTCCTTTAAAACCTTTAATTAGTGGAATTTTAGGTATTATGATTTCTGA  
G

>PGSC0003DMG400007517 LRR-RLKs

GGCATGTTGTTTTGCTCTCACTTTTTACCACCAAAAACCTCTGTTTTTTATTTGTTTTTTGAAAGAGTC  
TGACATAAAGCTGTTTAAAACCTTTGAGTGAGTGAGTGAGTGAGTGAGTGCAAGTTTTCTGTAAAATGAA  
GCAGCAAAGCATGAGGAATTGTACCACTTTCCAATGATTTGTGTTTTTATTTGTGAAAAACCAAGTCCC  
AAATCTTCTTTATAAAAAAAGATCTCATTTTTACTCTTTGTTTAGCTGTTTTCTTGTTAAGACAAATGG



AAACAAGAAGTGTTTTGGTTTTGTGGTGTTGTTGAGTTTCTTGGTTTACTCTAATGCTATGCTTACTCCT  
GGTGGTGTTAATTATGAAGGTTAGTTCTTGTTATTTTTAATAAAGATTTAAACTTTGAGACATTATTGGAA  
TGAGATTGATCATATTAGAAAATATCAAGAATTTTAAAGTATGATTTACTCCTGTTGGTGTTAATTATGAA  
GGTTGTTTCTTGTTGGTTTTTCTCATAAAGATTGAACTTCATGACTTTTTTGTGAAAAAATCATATGGGG  
TGTTTGAAATTTTTGAAAGGAATGAGATTTTGATCAAATTTTAGAAATATCAAGAATTTTGAAATATGCTT  
ACCTTGTTGGAGTTGATTATGAAGGTTAGTTCTTGTTGGTTTTTCTCATGAAGATTGAACTTTATGACTT  
TTATTTGAAAAAATCATATGGGGTGATTGAATTTTTGAAAGGAATGAGATTTTGATCAAATTTTAGAA  
ATATCAAGAATTTTGAAATATGCTTACCCTGTTGGAGTTGATTATGAAAGGTTTAGTTCCTTGTTGGTTTT  
TTCTTCATTGAAGATTGAACTTTATGACTTTTTATTTGAAAAAATCATATGGGGTGATTGAATTTTTGA  
AAGGAATGAGATTTTGATCAAATTTAGAAATATTAAGAATTTTGAAATATGTTTACCCTGTTGGAGTT  
GATTATGAAGGCTAGTTCTCATAAAGATTGAACTTTGATACCTTTTTGTGAAAAATCATAAGGGGTTT  
CTGATTTTATTTTTTTGAAAGGAATGAGATTTGAACAAATTTAAGATATTTCAAGAATTTTCATCTATTTAA  
CTTTCTTGTTATGTTGATTTTGGACAGTGCAAGCTTTAATGGAGATCAAGAACTCATTACATGATCCACTT  
GGTGTGTTTGAATTGGGATGAAAGTTCTGTTGATCCATGTAGCTGGAATATGATCACTTGTTCAAATGATA  
AATTTGCACTGGCTTGTAAGTATACCCGATTGTCCGGTATCTGCATTGGAGCCCGACTGACAAAACCTT  
TCTATTCTAATACTTGAACCTGAGACCTCTAGTTAAGGATGAAAGTGCTTACAAGTTTTCTTGAATTGTG  
CAGGGCTTGTTCAAGCCAAAGTTTGTCTGGGAAAATATCACCATACATCCATAACTTGACTCACTTGGAT  
CTACTGTGAGTACTTTATATGAAGAAAAAATAATGAAATTTCAAATGATTGATTATTTGAATCAAGAATA  
TAGAAAATAGTAGTACTAATATACTTTTTAACTTTTTTTTTTAAACAGGCTTCTGCAGAGCAATAATATA  
ACAGGACCAATCCAACCTGAACTTGAATGCTTCAGAACTTAATACAATTGATCTTTCTGATAATCAACT  
CACTGGGAAAATCCCTTCATCTTTAGCTCAATTA AAAAGCCTTCAATACTTGTAAGCAAAGAAAATTTTAA  
AGATTTTGATATAAAAATGAGTTCTTGAATTATAAAAAGTTAATGATTATGGTTTTTTTTCTTTTTCAATT  
GTGTTATAGGAGACTAAACAACAATAGTCTTAGTGGAGCTGTTCCCTTGGAATTGTCTAATATGACTCAA  
CTTACTCTTCTGTAAGTTCCTTAGCCTCATTTAGTTTTGTTTATTTTCTCATACTTGAAGGGGAGCCTCGGA  
GCAACAGTAAGCTTGTCTCCTTGTTATCTATATAGGTCACGCGTTCGAGTCAGGGGTAGGCTGCCTATAG  
TATACCCTTTGGGGTGCGGCCTTTCCCAGACCTTGTGTGAACGTGGAGTGCTTTGTGCACTTTTTCTTA  
ATTGCTTTCTGTTTTCATGAGTATATTTGATGGGATTTTGTGTTTTTTCTAGAGACTTGTCTTTTAATA  
ATTTGAGTGGTCCTGTGCCAAGGCTTCTAGCTAAAACATTCAAGTAAGTTTCTTGAACAATCTTTGAATT  
TCATTTTTTTTCCCTTTGCTAAAGATTAGAGAAAATAAATCATTTTTTCTCTCATTGATGCAGCCTTTTGGG

AAATCCTATTATATGTGCAACTGGAAAAGAACCAGAATGCAATGGAACAACAACATCCATGCCTTTGCC  
TTCACCTTTGAACAACCTCACAAAGTAAGAATCTTGAATCATCCTCCTAAGTTTTTTTTTCGAGCCAGCTTGTG  
TGCCCTCGACTATTCCACAAATCTTGGTTGTTGTCAAGTCTCCTGCTTTCAACGTCGTTATGATTA  
AACTCTATTATAAGGATTCATCATGAAGTCTTGGATAGTTTCTGTGTTGTA  
CTATTCCAACTGAGAAGTC  
TCTTGTATATCTCAGATGCTCAGCCTTTTGGAAAGATCTAAACTCACAAAATTGCCTTAGCCTTTGGGAC  
AAGTCTTGGATGTATCTGCCTACTAATTATTGGGTTTGGAAATATTTCTATGGTGGAGACAAAAGCACAAC  
AAGCAAATTTTCTTTGACATCAATGGTGAGTATGATATGCAGCTAAAACCTATATTGCTCGAATCTCGAG  
ATACTAGTAATGTCTTGCTTAAACCAAGAGGATCATGCTTGTGATAATTCAGAACAACATCATGAACA  
AGTGTGTTTGGGAACTTGAGGAGGTTCCAATTTAGGGAACTTCAAGTTGCCACAAACA  
ACTTCAGCAA  
CAAGAAGATACTGGGAAAAGGCGGTTTTGGAAACGTGTACAAAGGTTGTCTTAGTGATGGC  
ACGATTG  
TTGCTGTAAAAGGCTCAAAGATGGAAATGCAATCGGAGGAGACAAACAATTC  
CAAACAGAAAGTTGAA  
ATGATCAGCTTGGCAGTGCATCGCAATCTCCTACGTTTGTATGGGTTCTCCATGACACCAACTGAAAGG  
C  
TTCTGGTTTACCCTTACATGTCTAATGGAAGTGTGCTTCTCGTCTCAAAGGTAAAAGAAACAACCTTA  
GAGAACTAAAGATTCTGCAAGTATTCTTAAATATGGTGGGATGGTTGAGATACCGTCATCCTTAACCATA  
GTAGGCTTATCTGTGTGAACCGGAATAGTCGAACTAGTGGACTTCAGATACCTGATGGTAGATTTCTCTA  
TTTCTGTTGTTTCTTGCAGCCAAGCCACCATTGGACTGGACTACAAGAAAAGAATTGCATTAGGAGCTG  
CAAGAGGTTTACTATATCTACATGAACAGTGTGATCCAAAGATTATCCACAGGGATGTGAAGGCAGCAA  
ACATATTGCTCGACGATGACTGTGAGGCTGTTGTGGGAGATTTTGGATTGGCAAAGCTATTGGATCATC  
GTGATTCACATGTCACA  
ACTGCAGTTAGGGGAACTGTAGGACATATAGCTCCTGAGTATCTCTCTACAGG  
ACAGTCCTCTGATAAAACAGATGTTTTTCGGGTTTGGAAATCTCCTGCTAGAGTTGATATCTGGCCAGAGA  
GCTCTAGAATTTGGTAAAGCAGCAAATCAGAAAGGCATTATGCTTGATTGGGTAAGTATTACACATTCCA  
AGATGTGACAAAACCCTCCGTTTCAATTTTTCTACTTTTCGTTTTAGTCTGTTTAGAAAAAAATGCCTAC  
GACCATTCTATATCTACTAAGTATGTTTTTTATTTCAACATTCTATTTACCTTCAAAGGGTATTTGGTGA  
CAAGATTCAAAGTCGTATTAACATACTGAACTTTGTGCTCGATCAA  
ACTAAGACAAACAAAATGAAAC  
GGAGAGAGTATCTCGATTCTTGTGGGGTTGATAATATCAATGTGCATATTTGTTGCAGGTA  
AAGAAGA  
TTCACCTGGAGAAAAAGCTTGATTGCTGGTGAGCAAGGACTTAAAGGACAAATATGATCGGATCGAGC  
TTGAGGAAATGGTACAAGTAGCTCTAATATGCACTCAGTATCACCTAGTCATAGACCAAAAATATCAGA  
AGTGGTAAGAATGCTCGAAGGAGACGGACTTGCAGAGAAATGGGAAGCTTCTCAAAGAGCAGAATCTA  
CGCGCTGCAGAGCCAATGAGTTCTCCTCTTCAGAAAGATATTCTGATCTTACTGATGATTCTTCATTGCTT

GTTCAAGCAATGGAATTATCAGGACCAAGGTGATGTAGATTATACAAGATAGTCAATTAGATGAAACAA  
AAAAGGGCATCTGAGATAGAATGCTGAAGTAATATATGTATGTTATTGAGCTTGTTTTTATTTCTTCTT  
AGATAACTGAGAAGTCCTCGAGGGTCAATAGTGCACGGTTCATAACTCAGTGGATCATAGACACCCCC  
TTTACTCTTCTCCACTTATATACCAGACGTGGTAGGGTTCGATTGAGCTTGTATATATGATCATATGGAAG  
CTGCATAAAGGAATGGGATATGTTTCAGACTGTCTAGGAAAAAGATTTATGAGCAACTGACCTCCCCAAC  
CACACCCACAACCCCTACTTTTTTTTCTTCTTCTGTTTTGAGTGATAATTTTTCTGGGATGTGGAATTGTA  
ACTTTGAGCTTGTAAGAATAATATTGTTGAAATTCAATTCAGCTTATAAATATTGTATCATAATTCTCATT  
GAAAAATATTGTTCAAAGGGATTATCTTTTCCATTCAAAA

>PGSC0003DMG400007634 LRR-RLKs

TATATATTCATTTTTATCAATTTGGCATCTTCTTCACACCTCCAATGTTGACCAAACCTTCCAAAATCAACT  
CATAATTCTAACCCCCACCTTTTTTTTTCATGGAGTTTTCCATTTTCCGACAGGCATCTTCGCCGGAAAAC  
AGTCCCTTTATCTCATTTTACTACTAACTTCATACCCATTTTCGTAACCTTCACAATCTCCGGCCACTACTG  
AACGTGACACTCTACTGAAGATTAAGCGTCAATGGGGTAACCCATTAGCACTTGACTCATGGAACCTCTAC  
TTCTTCTCCTTGTAGCTGGCCGGAGATTGAGTGTGATGATGGGAAGGTTACCGGAATAATAATTCAAGA  
AAAAGATATTACTGTTGAAATTCCAAGTTCTATTTGTGAACTTAAAAATCTTACTTTTCTTAATCTCCGGTT  
GAATTATCTTCCCGGGAATTCCCAACTTTTCTTTACAAATGTTCCAATTTGCAGCATTGGATCTATCTCA  
GAATTACTTTGTGGGTTCCATTCCGGAGGATATTTACCGGCTTGGGAAACTCAAGTATCTTAATCTGGGT  
GGTAATAATTTACCGGAGATATCCCGCCGTCAGTCGGGAATTTGACGGAGCTGGAGACCTTGTGTATG  
AATTTGAACTTGTTTGATGGGAGTTTCCCGCGGAAATCGGCAACTTAGCCAATCTTGAAAGTTTGGGG  
TTGGAGTTTAATGAGTTTTCTCCGATGGCACTACCGCCGGAGTTTGGGAAGCTGAAGAAGATAAAGTAT  
ATTTGGATGAGAGATACGAAATTGATCGGTGAAATCCCTGAAAGTTTCCGGGATTTTGAAAATCTTGAG  
CTTATTGATTTTGCTTACAACAATCTGGAAGGAAAAATCCCTTCTGGGTTGTTTCTGTTGAAGAATTTGAC  
GATGATGTACTTGTACGGTAATCGGCTTTTCAGGTCGAATCCCTGAAACTTTTGATTCATCAAAGTTGATG  
GAACTTGATGTTTCCAACAATTTAACTGGAACAATCCAGAAAGTTTTGGAGGGTTTAAACATTTGG  
AAATTATGAATCTGTTTGGTAACCAATTGTATGGAGCAATTCCAGAGAGCATAGCCAAGATTCCATCTTT  
GAAGGTATTCAAAGTGTTTAGGAATAAACTGAATGGAAGCTTACCATCTGAAATGGGACTTCATTGAA  
ACTCGAATCTTTGAAGTTTCACTGAATTCCTTCACTGGAACTTGCCAGAGCATTGTGTGCTGGAGGA  
ACTCTGTTTGGTGCTGTAGCTTATGCTAACAATTTGTCTGGTGAATAACCAAATCACTCGGAACTTGTT  
TAGTCTACGTTTCGATTTCAGCTCTACAAGAATCAGCTTTCGGGTGAGATTCCATCTGGGGTTTGGACTTTG

GTTGACATGACAAGTTTGTGTTGAGTGATAACTCATTTTCCGGGGAGCTACCAAGTAAAATTGCATTCA  
ATTTTACGCGGTTAGAGATTAGTAACAACAGGTTTTCTGGTGAAATTCCTGTGGGGATATCTTCTTGAG  
GAGTTTAGTGGTGCTTTTGGCAAGTAACAATTCATTTTCAGGTCGGATTCCAGTGGAATTGACTAGTCTT  
TCTCAGATAACTCAGCTAGAGCTTGATGGTAATTCGTTATCTGGAGAACTTCCAGCCGATATAATATCAT  
GGAAGTCGTTGACAATATTGGATCTTGCCAGGAACAACTCTCTGGCAAGATTCCAGCAGTTATAGGTTT  
AATCCCTGATCTTGTGCTCTAGATTTGTCTCAGAATCAATTTTCAGGTCCAATTCACCTCAACTAGGTG  
TAAAAGGATCACTAGCCTTAACGTATCATCGAATCAACTACCGGGAATATCCCTGATGCATTTGCTAA  
CCTAGCCTTTGAAAACAGTTTCTTGAACAATCCCAGTCTTTGTACCACCAACTCACTTCCATATCTTCCAAG  
TTGTAATAATGCGAAAGTCGCCAATTCAAAAGATTGTCCCATAGAGTCCTAGCCCTAATTCTAGTCCTT  
GCATTGCTGTTTTCTATTTAGTGTGTATCGACCTTGTTTCATGGTTAGAGACTACAGGAGGAAGAAGC  
ATAAGCGCGATGTTGCAAGCTGGAAGTTGACTTCATTCCAGAGGTTGGATTTACAGAGGCCGAACATTT  
TGCAAGTTTGACGGAAAATAACATGATTGGAAGTGGTGGATCGGGTAAGGTGTACAGAATTTCCATTG  
GCAGACCAAATGAGTATGTTGCTGTGAAGATGATTTGGAGTGATAGGAAAGTAGACTACATTCTGGAA  
AGGGAATTCTTGGCTGAGGTTGAGATATTGGGATCAATTAGACATTCCAATATAGTGAAGTTATTGTGTT  
GTATATCAAGTGAGGATTCAAAGTTGCTCGTTTACGAGTACATGGTAAATCACAGTCTTGATGGATGGCT  
TCATGGGAAGAAGAGAGTTTCTTGAGTAATAAAGTCATGGATTGGCCAAAAGATTGGAGGTTGCCAT  
TGGAGCTGCTCAAGGACTTTGTTATATGCACCATGACTGCACTCCTCCGATCATTTCATCGCGATGTAAAA  
TCAAGCAATATCTTGTGATTCTGATTTACAGCCAAAATAGCTGATTTCCGGGTTAGCCAAGATTTTAG  
AGAAGAAAGGAGAGCTTAACACCATGTCTGCTGTTGCAGGTTCTTTGGTTACATAGCTCCAGGTAAAA  
GCAAATCCAATCTTGAACCTCGTATTACCTCAATTTTCGTCAAAAGAATGACTAACTAATAATCTACTGTT  
TGGTTGCAGAGTATGCTTATAACAACGAAAGTGAACGAGAAGATTGATATCTATAGCTTCCGGGGTGGTGC  
TATTGGAGCTAGTGACAGGAAGACAACCAAATTTTGGGGACGAGCATAACAAGCCTGGCAGAATGGGCA  
TGGAAGCAGCACGGAGAAGGGAACACTGCCATCGATAATATGTTAGATACAGATATCAAAGAAACATG  
TTACTTGAAGAAATGAAGACTGTGTTGAGACTCGGGCTTATATGCACGAGCAACTTACCTGCAAACAG  
GCCTTCCATGAAAGAGATTCTGCAGATACTTCATCGATGCAAGTCCTTTAGGTATTCTGGAGGAAAATCA  
CCAGATACAGAGTATGATGTTGCTCCTCTCCTTAGCGGGAACAACAGCGAAAAATACATTGCTAGTTACA  
AACGTATTAATCCAATAAGGTAATAGATGATAGTAGTGATGATGGTCTAATAATTTCCACTGTGTAATA  
TTGGAGATGCCAAAGTAACTGAGTTGTTGTAATGAGTGCCACTTAAGTAACGTACAAGTTTTGAGG  
ATGTTGTTAGAATAGAAAACCCCTATAAGAACGTTGCTTTTCTAGTGTACTCTTGAATTTGTTCACTGCTT

GTAGATTGAGTGAAATGCATATTTAACTTTTGCTAGTTATGTAGATTGGAAAAG

>PGSC0003DMG400007709 LRR-RLKs

CATCAATCCAATGCAATCCCTTCAGTCCAATCACTCAATAGAAAGTTAACTTTGTAAAACCCAATTGCTTA  
CTTCGTTTCTTTTCACATACATAATAAACAAAGGGATTCTCTTTTAAAAAACTGACCACATCTCTGTATCT  
GTGAGTTTTTGGCCTATGTTTTGGCTTTTTCTGTTGTGTTTGTATCTTTGTGGTATATATTACTTAGTTAAT  
AATAGAGGGAGAGGATGTTGATCTTGAATGGATATGGTGGAGAGTTTCATTGAAGGAGAAAAATAGCT  
CAAACATAGAATTTGTTGGGATTAGTTCATATTCCAATATTATTAGATCTCAAGGTTACCACCTTAGTCTT  
TTTTCTTTATCAAGAAGATTCCCTTTTTATTCACTTCTAATTATAGATGGATGCCATTTCTCATAATTG  
TGTAAGATAGCAACTTTGGTGTGTTTGAAGAAATATTGGAAGCTGAAAAGAGCAGGATTTGTGGTTGCT  
ATTGAGTGAAAACAGCATCTATCTTCTCTCTTTTTTTTTTAGCAAATTGGTTCTGTTCTGATTCTGAGA  
GTGACCCTTTATGGATGAAGAAGTGGTTTTGATGTAAAGAATGTATTCTTGTGCTTAATGTTTTATGG  
GGAGGTTTTGTTAGGCAAGTAATCCATTTTCTGACAAGGTAAATTGTAGAAAAGTAGAGAATGGACAGA  
AAGTGGTGTATGTTCTGTATGTGGTTTTAACATTGATGGAGAGTTGTTATGCTTCTCTTTCCCCTACTGG  
TATCAACTATGAAGGTAACTTCTTTCCTACATTTCTTCTCTTGGGGTGAAAATCATCTTCATCTCA  
CATAATTATATGCAGTTGTTGCCTTGATTGAAATTAAGAAGGCCTTACATGATCCTTACAATGTTCTTGAG  
AATTGGGATGTCACCTTCTGTTGACCCTTGCAAGTTGGAGAATGGTTACATGTTCAAATGATGGATATGTTT  
CTTCTCTGTAAGTAGTTGAGCTTCAGTAATTTTCACTCTACATAATCATAACACCTAAAGTAACTCTTTTT  
TCTTCCCTTCATCAGTGGACTACCTAGTCAAAGTTTATCTGGAACCTTGTCACCTGGAATTGGAAACCTCA  
CTAAATTGGAATCAATGTAAGTTCTTCACTGTATTTTTCTTTAGTACTTCATTTGATTATATGTTAGCTAA  
ATAGTAATACTATTCCCAATATCGTGTAGATTGCTGCAAACAATGCTATTTATGGTCCTATTCCTGATGT  
GGTTGGTAATTTAGAAAAGCTTCAGACACTTGATCTCTCCAACAACAAGTTTGATGGCGAAATACCTGCT  
TCTTTCGGAGATCTCAATAATTTGAATTATTTGTGAGTTCAGGAAATTTTTCTTATTTTTCACTGTTTCTTAT  
CAAACACTACTTGAATCTTATTGTGTATCTTCGCTGTTGAGCAAGACAGACGATTAACAACAATAGCCT  
CACAGGAACCATTCTCAATCTCTCTCAAACATTGGAGGCCTCGCTCTCGTGTACGTCTCCATACCCTCCT  
TTACCATCGAAATTTGTTATGCTTATCCTTGAAAGACCGGTCTAAATTAATGTTCTGTTTCTTCTCCT  
GTACATTTTACTGATTTAGCTGATCTTGATTGTAGGGATGTTTCTTTAATAATCTAAGTGGTCCATTGCC  
CAAATATCTGCAAGAGCTTTCAAGTGAGTCACCTTTTCTTCTTCAATACATAATTGCTGCAGTTGAAGT  
AGTAATTCTCAATATTAATGAAATTGACTGGTTCATGACTCTGTATATATACTTCTCATTAAACAATAATTAT  
GTAGTGCTTCTAGGATAATGGAAAGTATTTATTTTTGATAGATTAGTGAACCTTATTATATTGAATTTAAG

TTTCTCATCATGATTTTCAGAGTTATTGGAAATCCTTTGATTTGTGGCCAAAGTTCGGGGAACAATTGTTT  
AGCAGTCTATCCAGAACCGCTGTCCTTCCCGCCAGATAGTTTAGGAGGTCTGCATAACATCACTCACTTT  
CATTACCTTCCGTTCTTTTCATTTAAAAATGGAAAATAGTAACAGACACAGGAGGTTTTGCTATCTCTAT  
TGTTGAAATTGTATTGTCTGTTTTCTCAATTTATAGATCAAAGAGCAGGAAGTAAAAACCATCATGTG  
GCTGTTGCTTTTGGAGCAAGTTTTGGTGCTGCTTTCTTGGTTTTAGTAGTCATAGCACTGGTTCTTTGGTG  
GCGCTACCGACATAATCAGCAGATCTTCTTTGATGTCAATGGTTAGCTGATTTTCTTTTGCTTTTTATCCAT  
TTAAGATAATTCAATTTCTTTGATTTTTTGTTTTTCTATTTCTGATTCATTTGGTTATGTACATATTTTCTCG  
AATGTATTAACCTCCGTAGATTTGTCATTATTTGATTATTTTTTTCAAGTAAGGGTGTTCAGAGTTTGG  
TGGCTTGTGGTTTAACTGGTTATCTTAGCTTCTCAATATACATCTTTCATTTAATCTGACATAGAAAAGGT  
TTACATTGACATTTGATTGTAAATCTAGTAGTCTAGTATTATGAAGGACCCAAATTTGCAAGTAGTAGAT  
ATCTAACAGCAGTTCTACATTTACATCGAGAATATGTTGAATAAAAATGCTATAATCCACATCTTGGACTA  
GATAACTCCCTGCTTTAGACCAGCTTAATTCATATCCTGACCAACCTTGTGAGGTGAATCAATTGTTATT  
TGCTCCCCCTCCATTGAGAAGAAGTTTTCCCTGACAACTTATAGGGTGGTTGCATATTGTGGACAAAT  
TTTGGGGACTTGTCACTACTCATTCTTCTCATCCCTTTCCTTGAGCATTAGTATTTTTCGTCCGTCTGTAC  
CTGCTATTTCTACAGCTGTATCTGAGCAATGATTTCTCAAATGCAGAACAAATATGATCCAGAGGTATGCT  
TGGGTCACCTGAAAAGGTATGTCTTTAAAGAACTGCGAACTGCAACTGATCATTTCAGCTCAAAAAATAT  
TTTGGGTAGCGGAGGATTTGGAGTTGTGTACAAGGGACGCTTAAATAATGGAAGTGTGCTGGCTGTCAA  
AAGATTAAGGACTACAATGCTGTTGGTGGTGAAATCCAATTTTCAGACAGAAGTTGAGTTGATTAGTTT  
GGCTGTCCATCGAAATCTTCTCCGCTTTGGGGTTTTTGTTCAACTGAAAGTGAACGGCTTCTTGTTTACC  
CCTATATGCCAAATGGAAGTGTAGCAGCACGATTAAGGTCAGCCTCTTGGCCCGCATGTTTTGTTAGT  
AATAATTGCTATGCCTCCTAGCTTCAGATCATTCTCCAACATATATGTTCTGTGAAGTTTGACCTTTAAG  
GAAGGTGTTTGTAACTAATTTCAACTGTGGTTACCTTTCTTTTACATTTTLAGGTGCCTGGTCACACCTT  
CTAACTCATTATGGGAAGTTAACTAGAAAATACTCTCTTAAAGCTGCACAATTTTCTATTACAGAAAGTG  
AGGCTTAACAGACTAACGTATTATCTTACAAGAACAATCTTGTGAAGAAATGGACATTGGATCTAATTC  
AACTTAAAAGTTAGCTCATGAGGTAAGTATTGCTCAAAGACCACAACCCATTCCCTCAACCTATGTGGG  
ACTTCTTAAAGGTAGATGAGCTTAGCTGATCTTTAATTCATACGCTGTAAAGTGTAATCAGTTTCTTTT  
CTCCGATATGAGAGTGTCACTAGGGCTTGAATACCAACAAACAAAAATTGGATTCTTTTCCCTTAAGCTG  
GGACTTGATAATATTGCTTGTTTAAGGACTCCCCTCTTGCCTTCTCTCTATCCAAGTTAAAACCTTGTTAAT  
TTTAGAGAGGTTATCCTCTTCTCATTCTCTCAGTTTTATGCAATTTGGAATAATGAAGGAAGAAAGTGAA

TTAAAATTTAAATTTTACCATTGCACATGATAAAGCTTTTGAAAAGAGAAAGAAGTTTATTCATCTTATAC  
AACAAATTTGCTTCTAAAAAGCATTATGAGACTTGTGATAATTTATGGCTTAAGGAGATTAAGTGGGTTT  
GAACCATTACGTAGTCCATATTTTACCCATATTTATGTAGATGGATTCCAGTTTATCTTCCTTTAACCCCTG  
AAAAGAGCATATGCATCCCAGCTTTTTACGTTACGCTTCAATAGAACGAATTATCTTTACTTCAATAATA  
GATATTAGGCCTTTCAGCAGGTTAGTTCACGAATTCTCCTATTTTCAGTAAGAGACGTGTTTGGGCCTGCT  
TTGAAGACAGCCAGTAACTACTAGCACAAAGATCCAGTATTTGAAAAGGTTCCATACCCATAAGGGTTCCA  
AGCTTCAACCCACTGCTCGAGCAACTTGCTATCTATTTTAACTCAATCCACCCAAATCCGGTCCAATGCAC  
CCATTTGCCACCACTATAACTGATACTATCTTTTATTTTTTAGTACAAGCTTTTAAATGTTTGACCCATCCTAT  
TTTGTGTCCCTTATCATATTTCTTCTTCTTGAAGTATATGGTAGGCCATCATCAGCGACCACAGTGATGCA  
GTTTATTCTGGCGAACATTGCCTTCCATTAACCATGTCTTTTGTGGTTCCTAAATTTGCAGATCACATCCAT  
GGCAGGCCAGTTTTGGACTGGTCAAGGCGGAAAGGAATAGCAGTAGGTACAGCAAGAGGGCTAGTAT  
ATTTGCATGAACAGTGTGACCCCAAATTATCCATCGTGATGTCAAAGCAGCGAACATTCTGTTGGATGA  
GGAATTTGAAGCAGTTGTTGGAGATTTTGGGTTAGCAAAGCTCTTGGATCACCGGGATTCTCATGTAAC  
GACTGCTGTCAGGGGCACAGTTGGTCACATTGCTCCAGAATATTTGTCAACGGGTCAATCGTCTGAAAA  
GACTGATGTGTTTGGGTTTGAATCTTGCTGCTTGAGCTAATTACAGGTCAGAAGGCTGTGGACTTTGG  
ACGAGGGGTGAACCAGAAAGGTGTTATGCTTGACTGGGTAAAGAACTTCATGCAGAGAAAAAGCTGA  
ACCTTATGGTGGACAAAGATTTGAAGAACAACCTTTGACCGGATTGAACTTGAAGAGATGGTTCAAGTTG  
CTCTTCTGTGTACCCAATTCATTCCAACCTTATCGGCCAAAGATGTCCGGAGGTATTAAGGATGTTGGAAGG  
AGATGGATTAGCTGAAAAATGGGAGGCTTCAAAAAAGTTGAGACACCTAGGTACAGAACATCTGAAA  
ATACACCGAAGAGATATTCTGATTATATAGAAGAATCATCACTAGTAGTGAAGCAATGGAGCTTTTCAG  
GACCTAGATGACAACATCTGATTCTATCCTTGAGTTGAAATATGAGAAATAGCTGTTGGAATGCCTGTAT  
TATTAATCTGTAAAAAAGAACACAAAGCTCATGTATAATTCGATCAACACCTAACTTCATACTTCTCTCCC  
TCTCAATTTTGATAAAATGTGCCATTCATTTTTTGAAGATGGGGGCACAAGTCAGCCATCCTCATGTACA  
GTGGTCTGATTGTCATGGTGGATGAATCATGAATAAGTTTTCGGTTTTCTTCTTTTGTTCATGTACTGAA  
ATGTTTAGTCTCGTCATAGTGAAGGGAAAAATGAAAATATGAAGAAAGGTAGTAGTAGGTAGGGGTGT  
CAAAAATGAGCCGTTTAAATCGGATCATAATTTTATGGGTTGAGCTCAACAT

>PGSC0003DMG400007862 LRR-RLKs

TTTTGTTATTTGTGGGTGATTGAGTCTTTTTCTTGCATTTTTATGCTTGAGGAAAACACTGACATTGATGTT  
TTGTTTTATTTGGTATTTGCAGTTTTGGGAACTTTTTGTGTTGGCTATGCAGAATTGTTTTCCAAAGAAA

GATTGAATTGAATTGAAGAGAAAAGATTGTATTTTTGGGGCAATGGATGGGAAGAGATTTGTTGTATGC  
TGTTTGAATTTGGAGATTTTGGTGTGGATTCTTTTAGCTTTTGCTGTTTCAGCTTTCAGATGAAGCTAACCC  
TGGAGATGGTAAGGAACGACAGTCGCCAAGTCTTCGTAGGCGTTTGGACATGAATTGAGTGATATACG  
AAAAAAAAAAGATTAGTATTTGATGTTTCAGTTGAAAAATAGTAGTATTTAGAACTGAAGTTGTGTTTCG  
ACATGCATTTTAGTTTTTAAAAAGAGTTGTAACAATGTTTTGAAAAGAGGGATAACAAATTCATGTCC  
AACGGGTAAAGTAATTTCTGTGTAATGCTCATAAGGGAATCCAATTCATGTTTTGTGCAATGCTGA  
TTATGTGAGAATATGTAATTATCTAAGCGAGTTGTTGATTTGAGCTCAAAGTGAATGCATTTGCTTATT  
GTCCTTGATATTTGAACTAGTAGGTGGTCTTCTTGCTTCTTATAAAGTTTGTACCTTTGTTAAAAAAA  
TTGAGGATAGGGTAAATGGTCGAGGGATTACAAGGTGGAGAATCGAACTCTCATCAATAAGGTAAAAG  
TTCTAGTAGCCAACCAGTTCAGCTACTAAGATTTCCCTATAAAGTTTGTACCTTCACTTGCATTGTCCTGA  
CATTTTATTGGGTTTGTAAAGTTGAGGACTAACAGCTTTTGCCTATTCTGGTTAATTGCCTCTCAGGGA  
AGTTCGTAGTTAGCCTTTGTTAATTGATTGGGTTCTAAATTTCCACATGGTTTGTCTGTAATTGATTGG  
ATTCTAAATATTTATATGGTTTCATGGATCAGTTTCTGCACCTTCTTCTTTATGTTTGGAAATTTCTTAACAAT  
TCTCCTTTGTATTGGTTAAGTTGCTGCTATTAATAACTTATATGCTTCTCTGGGATCGCCATCCCTCCGG  
GCTGGGGTGCTGTTGGTGGAGACCCATGTAATGGACTTTGGCAAGGGGTGCAATGTGACAATGGAAAC  
ATACTGACAATGTAAGGACTTACCATTTACTACATTGCGTAGATTTTTGTGGAAGTAAATGCTAATCCTA  
CTTATCATGTTGTAGTCGACTCAATGCTGCTAACTTGGGAGGTGAACTTGGGGATAACTTAGGCTCATT  
TCTTCTCTCAAATAATGTAAGCTTCTCTCATATCTCCTAACTTAAAAGTTTGTGTTTGTATGCATGTGT  
TTTTCATAGACATAATACGTGAACACACTCAACTTGGCCTCAGTTCGCAAGTAAACACTCCAAGTAGA  
GAGTGGACATCTAGACACCTCAACTGGAACTAAACACTTCAACTGGTCCCCACTGCATCTCGTGGTTTG  
GAGGTGTTTAGATGATCATTTTGTAGTCGGAGTGTGAACTGACACGAGTTGAGGTGTCTGGTGCATA  
CTCAAAGTTGGAGTACTTACTTGCCAGTTGAGGCCAAGTTTACGTGTCTGTTATGTATTATGCCTTTTTCC  
TATTATTAATGTTTCCATTTAGTGGAGTCCACTGTAATGATATGTGAATACTAATTGTGGTCATCTCCTG  
TGGCAGAGATCTGAGCAACAACCATATTGGCGGAAGCATTCCGTCTAATCTGCCAGTTACCTTGCAGAA  
TATGTAAGTTCTACCATTTGACTTATGAAGGATCCCCAGAAACACGAGAAAAAGAAAGAGGACATATTG  
ATAAACCTAGCTTTACTTATTGAGTAAAACAGTTGATATTCTTTACCTTGGACAGTTTTCTTTAGCTAAC  
GCATTCCTGGAAGTATCCCTACTTCTTTGTCTTCCCTGAGTCAACTTTCAGCTATGTAAGTATCACTTTTA  
GTGTAGATAAAAAGTTGCTTACTTCATAAAGAATCAAACCTCAGGTATTTGCTGTGTGTCTGCAGGTCTC  
TGAATGCCAACCATTTGACTGGAGAAATTCCTGATTCCTTTCAAGGCCTTACCGCTTTGGTCAATCTGTAT



GAAAGCAAACAAAAGCTTTTACATACTTCCATTTAGTTTTTTTCATATGAATAACTGGTTTGGGTGTTTAT  
CTTTCAACAGTGATTTGTCAAGTAACAATATAAGTGGATCATTGCCACCATCTGTAAGAAATTTGTCTTCC  
TTGACCACTCTGTGAGTAATTCAACATTATACAGTTTGTTTATAACTTCATAGTTTGATCAATATGATAAA  
ACTAACTTCTTGATTTCCAGATATTTGCAGAATAATCAGCTTTCTGGAACTCTTGATGTTTTGCAGGATCT  
TCCCCTTGCAAATTTGACTCTTCCAAACTAGATTTTACTCGAATATAATTCAAGTTCACTAGAATGATAGA  
ATCTTACTAACATCTCTTCACACTCCCTGTGTCTTTATAGGAATGTGGAAAACAACCTGTTTTCTGGGCC  
CATACCTCAAAGTTGTTCTCTATTCCCAATTTCAAGTAAGTACATTCATTTTATGCTTTCATATACTCGTTT  
CATTTCTGTTTATGTTGAGTCAACATCTTGATATTTAAATGTAATCTTGGTCACATTTAATATCAATGTAT  
CCCTCGTCGTTTGTGGAGATATCATTTGACATGTAACATATCCCACAAAAAAGATATATAATCATAGAA  
GACAATAGACATGTATGTCGAAACCGCGGAAACAAATATCTTTTCAAGTTCAATGTTACTTAATACTGCT  
CCTTATTTTCCAATAATGCCTCACTTTTGTACTATGTACCAGTGGTTATAACCAAACATATAACTTTTCTAG  
CTCCAATATCCCCCTTTAAAGCTTGAGAACTTGTATCGTCTGTGCTATGCTTCATACACACAAGTAAGCC  
TTTCAGAAACTGCTTGTTTACAAGTTCCTGAAATCTTACTTAGTAAAAAATGGATGTGCTTGTATGCTATG  
TTGCTCGGACTCGTATTGGATCCTCCCAAAGTAATCCGACACTGGTGCAACAACATATTTGGAAAGTCCG  
AGCAACATAGCTTGTATGCTGCAAGGTCATTTTGTACAAAATGACCAGAAATATAGGCTTAATGTCTGAC  
ATGGATATGAATCCTAAACTTGCCCTTAGCATAAATGAAAGCTCAATGAGTAAAAGTAAGAATAAAACA  
AATAAGAAATTGACCTGAAAAAAGAAAAAAGAATCCTGACAAGCATGTCATTTAAATACATGAATTCT  
ATCATATGGCCAGTCCCTCAAACCTTGGAAAGTAAACAACCTCATATAGACACAATAAATAGACAACAGAT  
ATAGGTATAGATTTACAAACCGTAGTACAATATGCATATGAAAACATACAAACAGTTAAGTTATGATATT  
CATGACCTGTAAAATACACAAAATTGCAAGTTATTTAGTTTAGCAAGCTGGCTCTTGGTCTAAACTTGAT  
CATAATTTAAGTTCACATTCCATGGTGGCTATACTCTAGTTAGGTCACCCACCTTAATCATATATCGAGCC  
CCTAACTTTCAGGAGGCAAAAATAACATGGAAGTCAGGCAGTCTTATTTATTAGCTGACTTAAATGGTAC  
AAGTTGGTAGATATATTTGATATATGCAAAGATCAATGTATCAGTTGTTGGATCATTTTGTACCATCTGA  
TACATGCCTTGTGATTATGATCAGTGATGGTTTGTACTGTCTTAGTTACCGGTTTTGTTTTTCGTGCAGA  
AAAGATGGAAATCTTTTCAACAGTAGTATTGCTCCTTTACCTCCACCCACATCATCAACAGCACCTCCCAT  
TTCTGGGTCTCCAACCTCAGCACAGACGCCATCTTCTCAAAGCAAACCTAAAACACAGGCCGATGGACCA  
TCAGCATCTGCAGAATCAAGTTCAACAGGAAAAAAAAAAGTCTTTATCTGCTAAAAGGGTGGTCTGGATA  
TCAATTGCAGCAGTTTTGTCATTTATCATATTGGTTTTAGCAATCCTTCTCTGTCTGCCAAAGTGCCTCAG  
GAAATGGCACGAGACTCAAAGAACGCCCAAACACCATGAAATAGCCCCTTATATGGGTGCTAGAGAGA

ATCTTGGAGATAGTGGTTCATTAGTCCAACCTGGCCATGATATAGAAAAAGGTGCTACAAAATACTCAAT  
ATCTATGTTATTTTATGATATCTTTTATCACTGTTTCTTAAAGTTCAACTTTTCCCCCTTAGGGTTCGTTTGG  
TAGGATGTATTAGAGAAATTAATACATGTATTAGTGATTGTATTATTTAATCCTTTGTTTGATAGGATTTT  
CAGCATATGTATAACTAATACTATTTAATATTATAGGGTGTATAACTTATACATAACCAACCATGGTATTA  
GTTAAACAATGGTATTATAACATGGATAAGTATGGTTAAAGACAGAACTGTCCTTAATATATCAAATA  
AACCGTGGATAAGAACTATATCTAGCATAACTAACCCCAACATAATTAATCCCAACATTACTCATCTCG  
GCACTACTAATACACCCTATTTCAATACTATTATACGTGCTACCAAACGACCCCTTAGTTACTTGAAAAA  
AAAAGATACTGGGTCTGTTGTGTTGATGCACTTGAGCCAAGGGTCTTTCGGAAATAGCCTCTCTACCATC  
ACGAGGTAATGGTAAGGTCTGTATACACTCTACCCTCCCCAGAACCTACTTAGTGGGATTTGACTAGGTA  
TGTTGTTGTATTGGAAGTCTGTTGTGCAGCATTTAGAAGTAAAGTTAATGAATCTCAAAGTTTAACT  
TCTACTCTTTAGTCTTTAGTGATAAGTGGTTTTCTTATGTGTTAAACAGCTCCCCTAGTTGTGACGCCAAA  
AGAAAAGCAACCAAGAAGACCGTTCCCGTTCCGAAGCCACAAGATGAGCAGCAGGTAATGTGCAAA  
CCATGAGTGCAGTGCCAAAGAAGGATGATAGTGAGATAAACCTTGGCAGATTGGATATTGATTTGATGC  
CACCACCTCCGCCTCCTCCTCCGCCGACTCTCCGCAAGAGAGAGTTATTGTCAAGCCGATTGCGCCTGC  
TGAAGATACAGCAACGAGGCTTCCAACCAGGCCACTTCCACTAACTTCTGTGAAATCTTACACAATTGCA  
TCACTTCAGCAATACACTAATAGCTTCTCTCAAGATAATCTGTTGGGATTAGGAATGCTGGGTAGTGTAT  
ACAGGGTGGAGCTTCTAATGGAAAGGTACAACCTTCAATCGGCATGAATTTATTATGATGTACCAATTT  
ATTAAGTGTAGTTTCTACTTCCACTAGATTGTCGAGAGTCTTGACTTACTGCTTTTTCTCTCCTTTTATTT  
TCCATCATGTTTGGTATTCTGGAATGCTAAATTATCAGCAAGTAGCATCAAATTCCTCTTTATCTCTAG  
TATAAATTGTTAGGTTGCTTAGATTTATCAAGAATGGTTGTGATACAAGCACAATTATATGCAAAAAGGC  
CTTTTTAATGGAAAATTCACCTTCATATATCCTTAATTAGAGCACTCCTTAGCAAATCTATTAATGAATT  
CTACCTATTTTATCTGATATAATGTTTCTTGAATTACTTTAGCTAGTTGAGACCTGCTTAAGGACAAAAGT  
TGTAATTGCAATATTTTCCCTCTAGGTTTCTTCTAGTTCTTTTCTTTTCCCTCGTTCCAAATTAATCTCAACT  
AGTATTTTTTTTTCCAGTAACCAACATCATCGATGAAATCTTGTCTAGAAAGTGTATTTCAAATTTGTTAAA  
ATGAAAAACAGCCTTTTATACTATTTTCTGCCTTGACTTGTCTCACTTTATAAGAGGAACCGCCAGATACT  
GCTGCATCTTTTTTCTGGTCATGATTTTAACTATTAAGGTAAGTATATGCATGCTGTTTCATTTATATAAA  
TTACTTGGGGATGTATATGCATTTCTCTGGCATTCAAATCTTACCGCTCTTCTTCACTTGCCTATGCACC  
ACATCATTCAAGTGGTTGCAACATTTCACTTCTGACACATGCTCCTTTTGGATGCTTCTGCAGTTGCTTGC  
TGTCAAAAAGCTGGACAAAAGAGTTTGCGATCAACAAAAGGATGATGAGTTTCTTGACCTAGTAAACAA

TATTGACAGAATTCGTCATGCTAATGTTGTTGAGCTGATGGGCTATTGTGCAGAGCATGGTCAAAGGCTT  
CTGGTCTATGAGTATTGCTGTAACGGGACACTACAAGATGCACTGCATTGCGACGATGAATTCAAGAGA  
CAACTTTCATGGAATACTCGCATGAGGATGGCTCTTGGAGCTGCAAGAGCGTTAGAGTACGTCAAATAA  
CATTACATACATTTAATTATGCACATCATGTTTGTGCACACTCGCGTTCATGCGTGTGTGTATAAGTGTTT  
TGGGACCTATAATAAGTGTTTCTGCACACACTATATGATAAATCAGTGCTATTAAATACTGAACAATAAA  
ATGGTTCTGGTATAGTGATAAATCAATAACAAGCTCATTTTAGTCCTCAACTTCTTGTGTTGTGTATAT  
TACATGATAAAAAGCCACACAAACGACCTGGAATGGTCTTAACTATATGCAAATGTTAGATGTAGCTGT  
CTTTTGCTTCTCCTCTCCTTTCTTTCTTCTGCATGTCCAAGAAAAAGATGAACAAAATTAATTAAGTGGTT  
GCACTGCTATGCTGTAAAAGGGAAGCCCGATGCACAAGGCATCCCGCATTAGCAGTCTGGGGAAGGTC  
CATACACCAAGGGGTGTGATGTAGACAGCCTATTCCAATGCAAGCAGTAGTGGCTGCTTCACGGCTCGA  
ACCGGTGACCTTATAGGTCACACAGAGACAATTTACAATTGCTAAGCAGTCTGATTCTCATTTTTTAATT  
AGATTTGCATGAAAAAGTGAGGTAGACTGCTAGAGTATGTTTAAATTAATAATCATTCTTGTGTTGATGAA  
ATGCAGGTATCTCCATGAAGTCTGCGAGCCACCTATTATTCATAGAACTTCAAGTCTGCCAATCTTCTGC  
TTGATGAGGAGTTGGCTGTACATGTTTCAGATTGTGGTTTGGCTCCACTTATATCATCTGGTGCTGTGAG  
TCAGGTAAGTTGTGACCCCAATGTTATGGAGTAGAAAGAATTGAAATGCTTCTTGGATTATTAGTTTCC  
TCTATGAGCTGCAAGTGGAAAGAAAAGTGAATTTCTAGTGTGTTGATAGAAGTGGACATGGGAGCTGAA  
TATATAATTTAAAAAAGGAACAGTAGTGATGGTCAAAGCGTTTTCAACAAGATGTTGGAATAAGGAGCA  
GTAAGAATGAATTCCCGTAAATGTGTAAAGTATATTCTTTGGGAAATGTTGGTTACACCCTGTAGGAT  
AGGGTGAAGTGTGTCGAAGGCGCGCTTAAAGCACGCTTGAGCCCTGAAGCGAGGCTCAAATGTGTT  
TAGCATTTCACATCGCTTAATGTGAGATTAGGGTCTATAGGAAACAACCTTTCTACAGTTGAGGTAGG  
GGTAAGGTCTGCGTACACTCTACCCTCCAGACTCCACTGCGTATGTTATTGTAAGTAAACACAAATGG  
TGAAGGTGCTCTTCTCATGATGTGTTTTATATGAACAGAAAATTGCTCTAGGATGCATGTGGATCATCTA  
TCTTGCTGTTATTTGTTGTTCTTTTGATAAAGTAGTCTTGCTTAGTCTTGGGTTTGATTACTGTTACGTTCA  
ATTAAGGTATGTTAAAACTATATCAAGTTGACATTACACTGATTTTTTCAGTTGTGGGACAACCTCTCAC  
AACATATGGCTACGGTGTCTCCGAATTTGAGTCAGGGATTTACACTTCCCAAAGTGATGTTTACAGTTTT  
GGTGTGGTGATGCTGGAACATAAACAGGCAGAATGTCATATGACCGGTA AAAAAGCCTTCTGCATCCT  
TTTGAGCTAATATAGGTGTGCCTCATTCTAAGTTAACACACCTGCATATCATATTCAGGACACGGAGTC  
GAGGAGAGCAGTTCTTGGTCAGGTGGGCAATCCCTCAGCTACACGATATTGATCTCTTGACAAGGATGG  
TTGATCCTGCTCTCGATGGAAAATACCCCATTAATCACTATCACACTTTGCTGACATAATTTCTCGCTGT

G TTCAGGTGAGTTATTCTGTTGTTCC TTCATGTGAAACACATAAATGCTTACTAATATACATTGTCTAATC  
GCTGAGTGGACCGAATAGTCTTAGATTGTTGTCATCTCAATCGGTTGGAAGGATATTTCTAGGATCTAG  
TTGTGGAATAGGTTTGCCTTCAAATGTCACTTAACTTTTAACTCTTATACAGCATGAGCGAGAATTCAG  
GCCACCAATGTCAGAAGTTGTT CAGGACCTCATACAAATGATAAGAAGAGAGTCTCACAAAAGATCTGA  
TGGTGAATGATTTGAGTTAGACGCGCATACTGGGAATTCAGCCGGTGAGAACTAAGATTATTTCTTCTT  
CGAAGGAGCTGAGATACTCGGAAAAAGAAAGGCGGTTTGCAGGCCAAGCACCGTGCTAAAGACA ACTT  
CAA ACTGAAGCAAATGCACCTCAAAGAAGCGGATT CATGAAAATACCAACACATGCAGGCGACTTAA  
TGACCTGTAAAAACAGCTTGCTCATCTGATTCTTGCAAGCTGCATCATTTTAATGTT CATTTAGGCTTAC  
ATGTGAGCACCAATGCATATAATTCATTGATCTTGACAAAATGGTATATTTTCTTGAAGTTGTATATCTTT  
ACTTGCTGCAACATGTACAACTTCATTTGGTTGTACAAGGATACCTTCATTCTTTCATGTACTTGTGG  
CACATGCCAAAGTTATTTACTACTAGTCATTACCTAAGGAGTTGGAGACCTACAACCACTCAACCATGTA  
ACAATATGTAAA

>PGSC0003DMG400007948 LRR-RLKs

TTAATAATTAATCCTAAAATAACTTATTTTCGACCGTGAAACATTATGGCCATGGCTGACACAGAAACAG  
AGAGAAAAATAGCCAGACTAAATATTGGAAGTCCCCACTTTTCTTTTTCTTTCTCAAAAATCTTCACGTG  
AATCTGACTCTGCCTTTTGCCATATCTTCTTAGACAGCTGCTTCTCTTCACTCTCCACCTCTACACATAT  
TCCACAACAATTCAATCTGGAAAAAATTTCTTAAACAAGATGAAAATACAACAATTCTTACTACTTACCAT  
TCTTCTGTTTTTATCTGTTTCTTTTCATTCCACTGTTTCGTTGATTCTTCTGATGCATCAGCATTGTTAGCA  
TTCAAATATAAAGCTGATTTGGACAACAACTTGCATTTTCTGCTAATACAAGTTCCAGATTCTGCAAATG  
GAAAGGGATACAATGCTCGGAGAAGAAAGTGATTTCGTATTGTTATCGAAAGTTTTAGCTTACGAGGTAC  
GTTTCCAGCTAATACATTGTCTATGCTTGATCAACTCAGAGTATTGAGTTTACAGAACA ACTCACTTACCG  
GTCCGATTCCGGACCTTCTCCACTTATTAATCTCAAAGTTCTTTTCTGGACCATAATTTGTT CACCGGTT  
CAATACCAGCTTCCATTTTCACTCTTCATAGGCTTAAAACCCTTGATCTCTCCTATAATAATCTCACCGGTT  
CAATACCCGTTGCAATCAACGGGTTGAACCGGTTGACTATCTCCGGCTTGACTCGAACCGGATAAACG  
GATCAATCCCACCGCTGAACCAATCTACCCTCCATATCTTCAACATTTCTACAATGCCCTTCTGGTCCTA  
TTCCGGTAACGAAAACGTTATCCCGGTTTAAAACGGCGTCGTTTT CAGACAATAAAGGACTTTGTGGTGA  
GATCGTACACAAAGAATGCCGTCCAATACAACCGTTTTT CAGTCCATCCACCGCTGCCTCCACTAAAATTA  
CGCCGCCGCCGTCTAAA ACTCCGGCAGAACTCGGCCAAAACGAAGAGTTACGACAGGGTAGCCCGTTA  
AACCGTAAAGAAAACAAATCACATAAAAGATCCTTACTCATTATTGGAGTTTCAACAGCTTGTTTAGTCCT

TTTATGTTTCAGTCATACTATTAGCATTAGCGTCTGAAGAAGCACAGGAACTCGAAGAAATTGGGAGAAAC  
TAAGAAATCCGTATTCGATCCAAGTGTTAGCGGCAATGCAGAAGCAGTAATAAGAATTGAAGAAGACA  
ACAATGAACTGGAAGAGAAGGTGAAGAGAGTACAACAAGGAATGCAGCAAGTGATGGGTAAAAGTGG  
GAGCTTAGTATTCTGTGCAGGTGAGGTGCATGTGTATACCCTGGAGCAGCTGATGAGAGCTTCTGCTGA  
GCTTTTAGGTAGAGGAACAATGGGGACTACTTACAAAGCAGTGCTTGATAACCGTCTGATTGTATGTGT  
TAAGAGATTGGACGGTGGGAGATTGGCGGGTACAAGTCAAGAAGAGTTTGAGCAGCATATGGAATCA  
GTGGGCGGGCTTAGGCACCCGAATTTGGTTCCTTTTCGGGCTTATTTTCAGGCCCGACAAGAAAGGCTTT  
TGGTTTATGATTATCAACCCAATGGCAGCCTGTCTTCTTATTTCATGGTACGTTCTTCTCCGTATATCTTG  
TACTTATTATTTATTAAGATGCGCATAAACTATACGAAAAATATTATTAATGCAATTATTTTGACGAGAAG  
TAAATATAATAAAATGAACGGAGTATTTTGAAGGTGTTGTCCAATCAAATAGGGTCCATACACCATACC  
CTATTGTTACAGTTTCTCAACCCCAATGTTCTCCCAAACACAGAGAATCTTGCAGCTGACCCTGATGACAT  
TTTTGGACACATATTTCTGTCATCGTAAAATACTTTTATATTTGTTTAGTGTCTAATCATAGATTATAGTA  
TTATTATTGAAGCTAGTTCTGTCTGCATTAAGAATGTTATTGTTTCACGTGTGGTTGCGTAACGTGAAGTT  
AATAAGAGTACGGTGGTTAGCATTAAATAATTCATAAAGTAATATAAATAATAGCTTTATTGCATATACTG  
AATTTTTTGGTCAATCTGACGTGGCATATGAAATAAAGTTTGACTGGTCAACCTGCCACGTGTACAGGT  
CCAAGTCATCAAGAGCAAAGCCACTTCACTGGACTTCATGTCTGAAAATAGCAGAGGATGTAACCTCAAG  
GACTTTCCTACATCCACCAAGCATGGAGGCTTGTCCATGGCAATCTCAAGTCATCTAACGTCCTCCTCGG  
CTCCGATTTTCGAGGCGTGCATAACCGACTACTGTCTCTCCATCCTAGCTGTCCCCTCAGACGATGACAATC  
CTGATTCTGTAGCTTATCAGGCTCCAGAAATTCGGAAGCTGAATCACAACAACCACCACCACCACCGCCA  
AGCTAGTGCCAAGGCTGATGTCTATTCGTTTGGTGTCTTTTGGCTTGAACCTTAACGGGTAAGCATCCTT  
CAGAACATCCATATCTAATGCCAGATGATATGTTACATTGGGTGAAGTCTACTAGAGAGGATCATGATG  
GTAGCATTGGAGAAGATAGTAAGTTGGAGATGCTTCTTGAAGTTGCTATGGCTTGTAGAGTGAGCTCAC  
CAGAGCAAAGACCAACAATGTGGCAAGTGTTAAAGATGATACAAGAGATTAAGAAGCTGTTGTAATG  
GAAGATAGTAATGAAATGGACCTTCTCACTGGCCCTCCTAAATCCTAATTCTTATTTAAATCTTAGTTATT  
ATAAAATTGAATTTGTATTATATTCACTACATGAGACTTTTCAATATTAGTAATTGCAAAAGAAAGGAAC  
AAAAGGGGAAAGACTTATACTTTTGTACATGACCCTCATTACCCTATTATATTGGATAACTATGTCTCA  
CTTCAAACAATCGGTATGTTTTATGCTAGTTGTCAGCCTACTACAACCCTCCTCTTTATCTGGTCTCGG  
GATCAACATGTTTGTGTTGGCAGTGTTTTTCTCAATAACATATTTCAATTTGAC

>PGSC0003DMG400008146 LRR-RLKs

AGTTGTTCAAGTTTGTATCTTTCTTCTATTTGTACTIONAAAAGTTGCAATTTTTATCACTTCTGCAACTTATTTG  
TTGTTTTTGGTACATGGGGTTTCATTCTTGAGTAGTAAAGATTGCATCTTTATTGTTCTGTTTCATTTTCAAG  
ATTCTTGAAATGGGTCAATTCCTTTAAGTTGTTCAAGTTTGTATCTTTGTTTTCTAAACCCTTCTGTTTCTA  
CTCTAGTTGTCTCTACAAGGTTTCTGGTTTTGGGTTCTAGCATTGTTTCTTTATGGTTTCTTGATTGTT  
CCATTTGGGCTTTTTTCTTTTTGGGGAAAAAAGGGAAGAAATTGAAGATTTTCTGAAAAAACAACCTTA  
AAAATGGTAACTTTGAGGTTGTTCACTGTTTTGCTGGTGGGGTTGTTGTTAAGGTCTCAATTTGGGATTG  
TAAAGGCTCTTCATGAACAAGCCATTTTGGGAAGCAATTGGCAAAGAGCTAGCAATACCTGGTTGGGATC  
TGAATAGCACTGATTTCTGTTCTTGGCATAGCATTAGTTGCAGCAGCTCAAACAGTTCAATGGTGGAAAG  
GCTGAATCTTTCCGGTTTTTCGATTACAAGGTAATGTGACTCTAATATCTGAGCTCAAAGGATTGAAATGG  
CTGGACCTTTCTAATAACAATTTCCAAGGTTCAATCCACAAGCATTGTTGGGAATTTGTCTGAGCTTCAGTT  
TCTTGATTTGTCTTTAACATGTTTAGAACTCTATTCCTGGTGAATTAGGTAAGCTCAAGAACCTTAGAG  
CATTGAATCTTTCAAACAATATGCTCACTGGTTCAATACCTGATGAGCTTGAAGGGATGGAGAATTTGCT  
TTATTTCCAATTATTTACCAATAAATTGAGTGGTTTTATTCCAATGTGGATTGGGAATTTGACTAATCTTA  
GAGTGTTCGAGCCTATGAGAATGAGTTTAGTGGTGATATTCCAGTTAACTTAGGCTTACATTCTGAGCT  
TTTGTGTTAAATCTTCATTCAAATCAGCTTGAAGGGACAATTCCTGAGAGTATTTTTACTATGGAAAAGC  
TTGAATTTTTAGTTCTGACTAATAATAAGTTGACTGGCACTATTCCTGATTCAATTGTGAATTGCAAAGGC  
CTTTCAAGCATTAGAATTGGGAATAACAAGCTGATAGGTGGTATCCCTAAAGGAATTGGAAATATAAGT  
AGTCTTGCTTATTTGAAGCAGATAATAATACACTTTCCGGGGAAATCGTCTCAGGATTTGCGAAATGCT  
CTAATCTCACTCTTCTTAATTTAGCTTCGAATGGATTTCCGGAAGTATCACTCCAGAGTTTGGTGAGCTC  
GATAATCTACAGGAGTTGATTGTTCCGGGGAAATAATCTCTATGGAGAGATTCCAACCTCAGTTCTGAGGT  
GCAAGAATCTCAACAAGCTTGATTTAAGTAACAACAAGTTCAATGGAACCATTCCAGGAGATATATGCA  
ACACAACCAAATTGCAGTTCTTGTTGTTGGGACAGAATTCCTGAAAGGGGAAATACCCCGTGAGATAG  
GGAAGTGCGTAAAAGTCTTGAGTTGCAAATGGGGAGTAACTATCTTACTGGAAGCATCCCTTCTGAGA  
TTGGTCATATGAAGAACTTACAGATTTCAATTGAATTTGAGTCATAATCATCTCCATGGACAGTTGCCTAA  
GGATCTTGGAAGAACTTGACAAGTTGGTTTTCTTAGATGTATCTAATAATCAGCTGTCGGGGAAATATTCCG  
TTGGAATTGAAAGGCATGTTGAGCTTGATAGAGGTTAACTTTTCGAGCAATCAATTCACAGGACCAATA  
CCTGCTTTTGCTCCATTTGAGAAGAGCTTAAATTCAGCTTTCTTGGAACAAAGGGCTCTGTGGTGAGC  
CTTTGAGTAGTGATTGTGGATATGATTTTGAACACAACGGTAATCATCACCGAGTTTCTACCGGCTCAT  
CTTGGCTGTTGTTGGTTCTGGTTTTGGCAATTTTTACAGTTGTCACAGTGGTTGTTTTACTATACATGATGA

GGGAGAAACAAGAGAAAACCACCATGGAAGATGGAAATACCACTGATGAACTTGTAGCAAACCAGTG  
ATCATAGCAGGGAATGTTTTCGATGAAAATCTCAAGCAAGCAATAGATTTTGATGCAGTTGTAAAGGCA  
GTCAGGAAAGATACAAATAAGATTAGTACTGGAACCTTCAGTGATGTGTATAGAGCAGACATGCCTTCC  
GGGATGATTTTGTATGTTAAGAGCCTAAAGTCGATGGACAAGACTATAGTTCATCACCAGAGCAAGATG  
ATCAGAGAGCTTGAAAAGCTAAGTAAACTCTGTCATGATAATCTGACGAGGCCTCTCGGGTTTGCAATCT  
ATGAGGAAGTTGTTCTACTCTTACATCAATACTATCCCAATGGGACATTGGCTCAGTTTCTTCATGAGTTT  
AGCCAGAAACCTGAGTACGAACCTGACTGGCCTACAAGACTTTCCATTGCCATTGGCGTTGCAGAAGGG  
TTAGCGTTCCTTCATCATGTGGCCATAATCCATCTTGATGTTTCTTCAGGGAATGTGTTTCTTGATTCTAAA  
TTCACCCCTTTGGTTGCTGAAGTTGAAATATCCCGACTTCTTGATCCATCTAGAGGGACTGCAAGTATTA  
GTGCTGTTGCTGGCTCATTGGATAACATCCCCAGGTATATTCTATGGCTTGAAAGACTTGGCTAATCAT  
TTTACTACCTCGTGTTCATTTGTTTGTCTTACTTTCCTTTTTAGTCGGTTTAAAAAAAATGTCTTTCCTTT  
CTTTGTAACCTTTAATTTTAACTTTACACCTGACATTATTAAGACCATGGACATTTTGTATATTCTATCTG  
CCAGACAAACAAATTGAAACGGAGGGAGCATTTTCTTTTTGTGGAAAATATCTGGTGTCTGACTAGTTCC  
TTTTTCTTCAACAGAGTATGCATATACAATGCAAGTAACAGCTCCCGGAAATGTTTATAGCTATGGCGTT  
GTTTTGCTCGAGATCCTTACCACCCGACTACCCGTTGATGAAGCTTTTGGTGAAGGAGTTGATCTGGTCA  
GGTGGGTACATGGTGCTTCTGCGAGAGGAGAAACACCAGAGCAGATACTTGATGCAAGACTTAGCACC  
ATTTCTTTTGCTTGGAGGAAAGAAATGCTTGCAACTCTAAAAGTCGCATTGATGTGCACCGATACCATTC  
CAGCAAACGACCAAGAATGAAGAAGGTGATAGAAATGCTTCAAGAGGTTACACAGAGTTGAATCAAA  
ACTCGTATCATCCAAAAGTCTCTGCTTAATCTCAGACCTGCAGATCATGAAAACCCCTGTAGAAATACAA  
AACGGTATGAATCACTGTTCTTAGCGTAGACTAGTGGTCTAAAAATAGTTAAACTATGTATATTGTCTG  
AGGTTGCTGTTCTTCTCTGATGATCAGCTCCGAGGTTGTAATTTTGATTTTCATATTGGAGCGAGTAAGG  
AGGTTATATGGTAAGGGTTAAAACCAGAAACAGTTCTTGATATGTACCATTCTGTACAAGGCCTTCAATC  
ATATATACTTCTTTTTCTTGTCTATGTGTAAATGGAGCTTTGGCATTTCATATGCAACAGTAAAATCTTTA  
TGATATATAATATACAGTAGATGTTGAACCCTCTTGGTG

>PGSC0003DMG400008296 LRR-RLKs

TTATGTAACCTAGGTTTCGAGTAGGAGACGAAATTCTTGTTGCTTTTCTTGTGTGGGGGTACATACAA  
CTTGTTCTTTAACACGGAGCATCCTAGATTAGAGGCATGCTTGGTATTTTGTAAACAAATTCATAGAATGC  
AAGTCATTTTCTTGGTGTGAATGGATGACTAGTTGACTGCCACTGAAAGCAGTGATTCATCTGTACGATT  
CACTAAGAAATGTGTATAAAGGCTTCATTGTCAGCATAAGTTTTTTCAGTGAGTGAAGCTTCTTCTTTTG

AAACAATGATGTCAAAGACAGTTGTATATGCATTAGCCATATTTTCTATTACCTTTCTACATACCTCTGTCAT  
CTGGGCAACATCCAAGCTTTGAAGTTGAAGTTGCTGCTTTGAAAGCTTTCAAGAGCTCAATCTCTGACGA  
CCCTTTGCGTGCACTTGTGGATTGGACGGATGCAAATCACCATTGCAACTGGTCTGGAATCATATGTGAT  
CCTTCTTCAAGCCATGTCATCAACATTTGCTTATTGAGACGCAGCTCAAAGGCGAAATTTCTCCGTTTCT  
AGGAAACCTCTCCAACTCCAGGTTCTTGATCTAACTTTGAATTCATTTACTGGAAATATCCCACCCCAGC  
TGGGGTATTGCACAGACCTGGTTGAGCTCGTTTTTTACCAAACCTCTTTTTTGGTGAAATTCCTGCCGA  
GCTGGGAAACCTAAAAAACTGCAGTATATAGATTTTGGAAATAACTTTCTAAATGGGAGTATACCTGAT  
AGTATATGCAACTGCACTGAATTGTCGTTAGTAGGCTTCATCAACAACAATCTCACAGGCAAATTACCGT  
CTGAAATTGGTAAGTTGGCCAATCTTCAGTTGTTTGTAGCTTATACAAACAATTTGTTGGTTCTATTCT  
ACCTCCATTGGAATGCTTACAGCTTTGCAAACCCTTGATCTGAGCGAAAACCAGTTATCTGGACCTATAC  
CATCAGCAATTGGCAACTTGTCAAGTTTAGGAATTCTTCAGTTACATCTCAACTCTCTTTCTGGGAAAATC  
CCATCTGAACTTGGCCTCTGTATCAATCTTTTTACCTTGAACATGTATACTAATCAATTTACTGGAAGCAT  
ACCTCCTGAGCTTGGAAATTTAGAAAACCTGCAAGTGCTCAGATTGCATAACAATAAGTTGAACTCCAGT  
ATACCTGCCTCAATATTCCACCTGAAGTCATTAACCTCATTTAGGACTCTCACAGAATGAACTAACTGGTAA  
TATTCCTCCCGAGTTGGGATCTTTAACGTCCTAGAAAGTGCTTACCCTTCACTCAAATAGGTTATCGGGG  
GAGATCCCATCAACTATAACAAACCTGGCAAACCTTGACATATTTGTCTTTGGGCTTTAATTTATTGACTGG  
ATCACTCCATCGGAATTTGGGTTACTCTATAATCTGAAAAATCTAACTGCAAATGATAACCTCCTGGAA  
GGATCTATTCCATCGAGCATAACAAATTGTTCTCATCTTCTTGTTTTAAACCCTCGCTTATAATAGAATAGC  
GGGAAAATACCAAATGGGTTGGGGCAATTGTCCAATCTTACATTTTTGTCTTTGGGATCAAACAAAAT  
GATGGGGGAGATTCTGATGATCTCTTCAACTGTTCAATGCTTGAATTTCTAGATCTGAGTGATAACAAT  
TTCAGCGGGAACTCAAATCAATGATTGGCAGACTCTCTAACTTCGAGTTTTAAGAGCTCGTACTAATT  
CATTTCTTGGGCAATCCCACCAGAGATTGGTAACTGAGTCAACTCGTGGATTTAGTGCTTCACGAAAA  
CAGTTTCTCAGGTGCGATACCACCAGAAATTTCAATGCTTTCAAACCTTCAGGGTCTTTTGCTATCTGACA  
ACAAGCTGGAAGGTGAACTTCTGTGCAGCTTTTTGAGCTCAAACAGCTCAATGAACTCCGGCTGAAGA  
ACAATAATTTCTTTGGTCCACTACCGCAACATATATCCAACTAGAATCACTGTCGCTCATGGATCTGAGT  
GGAAATAAGCTTAATGGCACAATCCCAGAGAGCATGGCGAGCCTCCGCAGATTGATGACCGTAGATCTT  
TCACACAACCTTCTTACCGGAACTATTCCCAGAGCAGTACTTGCCAGCATGAGAAGTATGCAACTTTACT  
TGAACGTTTCCAGCAATTTGTTGCACGGAGAGATCCCAGATGAGATAGGCGTGTTAGAAATGGTTCAAG  
AGATTGACATGTCAAATAATAATCTGTCAGGCAGCATTCCCAGATCCCTAGAACGCTGCAAAAACCTTATT



TTCACTGGACCTATCAGGAAACATGCTCTCTGGTCCTGCTCCAGGTGAAATTTTCACCAAATTAAGAGAG  
CTTGTGTTCTTGAACCTCTCAAGGAACAGATTAGAAGGTAGTCTTCCTGAAATAGCAGGATTATCACATC  
TTCGCTCTCTTGATGTTTCACAAAACAAGTTCAATGGAATCATTCCCGAGAGATTTGCCAATATGACTGCA  
TTGAAATATCTCAACCTTTCTTTCAACCAACTTGAAGGTCACATTCCAAAGGGGGGTGTATTCAACAATAT  
AAGGTCGGAGGATTTACTGGGAAATCCATCTCTATGTGGAACAAAGTTTCTCAGTCCATGCAACATAAA  
AAGAAACCGAACAAGTTCTCATGGTTTTTCCAAGAAAACCTGGATCATACTTGCAGCACTTGGATCTGTT  
TTCAGTCTCATTCTTCTGTCTGGGAATAATTTTATTTTCATCGGTACATGAAGAAGAAGAAAAAAGTGA  
ATGACGCGGAGGATACAAATCCAAAGTATACCGCAGCATTGAGCCTCCAGAGATTTTATCAAAAAGGATT  
TGGAACATGCTACCAATAATTTTCAGTCCGGAAAACATTATTGGAGCCAGCAGTTTAAGTACTGTGTACAA  
AGGTACACTGGAAGATGGGAAGATTGTAGCAGTTAAGAAGCTGAATCACCAGTTCTCAGCAGAATCTG  
GTAAATGCTTTGATAGGGAAGTCAAGACTCTGAGCCAACTCAGACACAGGAACCTAGTTAAGGTGCTAG  
GTTACGCTTGGGAAAGCAAGAAGCTAAGGGCTTTAGTTTTAGAATACATGGAGAATGGGAACTTGGAC  
AACATGATTTATGGTCAAGTGGAGGATGACTGGACGTTGTCCAATAGGATTGATATTTTAGTTTCAGTTG  
CAAGTGGACTGTCATACCTGCATTCAGGCTATGATTTTCCAATAGTGCACTGCGACATGAAGCCTTCAAA  
TATTCTTCTGGATAAAAATATGGAAGCACATGTGAGTGACTTTGGGACAGCTAGGATGTTGGGTATTCA  
TCTCCAGGATGGGAGCAGCATATCATCAGCATCCGCATTTGAAGGAACTATTGGTTACATGGCGCCAGG  
TAATAATTCTTACAACCTTCTTGACCCACACTTTACTAACTAGATTATGTGTTACAATAGCATGAATACAAG  
ATGTCTACAATGTAAACGAGCTTATATGGGTACCACAAATAATATTTTGTCAATGGTGAATGTTTCAAAT  
ACATTCATTTTAGCATCATTAGTAGTAACATCACTTCTGTCAATCACAATATGCAGCACAGCAGATTTT  
TTTTTCCTTTCAATCACAAAATACTGATTTAACTTTTATGTGGAAGAATAGACAAGCAAGTAAATGATGCA  
ATGTTTAGAACATATAATCTGTAAAGTATTATTTTAAATGATAATGTCAGTTTTAATCTATCCAAAATCT  
AGCGCCAGCTTTTACATGCTCCTAATTTAATTTGAGACCTCACTTACATGAAATGTTATCTATGCAACAGA  
GTTTGCATATATGAGGAAAGTGACCACAAAAGTAGATGTATTAGCTTTGGTGTCAATTGTGATGGAGAT  
CATTACAAAAGAAGGCCAACAAGTCTTACCGGAGCAGATGAATTACCAATGACTTTGCATCAAATTGTT  
CAGAATGCCCTTGCGAATGGCATAAACAAGCTAGTTCAGATTGTGGATCCTAATCTAGCTTCATATGTCT  
CCAAGAAACAGGATGTACTAGAGGGACTTCTTAACTTGGCTTTGTCTGCACCTCTGCTGATCCTGAAGA  
TAGACCTGACATGGAACAAGTTCTGTCTTCTTTTCAAAGCTAAGTAAGATGGACTGCATGCCTTCACAT  
TTGGTAAAAGATTAAATTTGATGTAGAAGAAGCTGGAATATCATCACTCTTAAAGTGAACCACCACCAA  
GTTTCTCATGGGGCTAATGGAAGTACTTAACTTAAATGTATTTACTATTTAAATAAATTTTCCGTAT

TTCAAGCCATAAATGATCTCTCGAGTATTCCTGCTTTACTAGAGAGATATAATGGAAGTGTCCCGTCAGA  
TTATTTTGAAGTTGACATGCATCATGAAAATGAACAA

>PGSC0003DMG400008403 LRR-RLKs

AGTGACCATATGTATGAAAAATCAAATTAGTTATTTGCTGATCTGAAGCAAATTTTTGAACAATGGCAGC  
CACTCGGCTGTTACTCTGCTTTATCATCTTCTCGTCTGGCATCGATTCATATATACTGTTACAGATCCCAG  
AGATGGTAAGAAGCTTTGTATAAAATTGTCGGATCCAGTATTTAACTTTATGAGTTTTACTATTTGTTGCA  
GTTTTTGTGAAGCTTTACTTATAAATTTATGTTCTGTGTTGAAAGTACTGAGTTCAGATAATAATGTTGTT  
ATGAATAAGTGTGAAGTTGTTGATTGCAGTAACGATACTTCGATCACTGAAAGATCAGTGGGAAAATA  
CGCCGCCTAGTTGGCAGAAATCGGATGATCCTTGTGGAACATCTTGGGAAGGTGTAACCTGCAACAAC  
CAAGGGTAACTGCATTGTGAGTATGCTTTTTCTCTTCCAATATCTAGGGATCGTTTGGTTTACGTTCTAGT  
TATACGATGACTAATAACACATGAATTGTTATGCATGATTGTATAATTTAAGTGCATTTCCGCCTTTAGAT  
GCTCTTATCCACGTATTACTCGTACATGTATTGTTGTTCCACATTCTATCTGTGAAAAATAATATATAGATT  
CTCGTCTAAGTTATACAAGGTTTTAGTTTTCCAATATTAAGTTCGCATGACTAGTGCAGAGTTTAATATCG  
GAAACAAAACATCATGTTAGTTATATGGAACTATATTATCTTACAAGTTTTAAGATTGAAAACCAAATG  
TAGTATAAGTAATACGAAAATTTATACATAAAGTTAATTTTTTAGGAAAAAATACATAATTAGACATCCTT  
CGCTATCATATATATATCATTACCTATACTTTCAAACGTATCTTACCACTAATTAAGAGTTTCCTAACATA  
TATTGAGGAAGATGCACTTAGATACATGTATTTTTGCTACCAGATACAGTAAAATAGGGAGAGAGGAGA  
GCGAAATGGGGAGGGAGGCGAGCGAGATATGAGAGTGGTGGGTGAGATGGGAGAGACGCGAGAGA  
CAAACGAGATCTGTTAAGTATCCTAGATACATGTGAATCACTTGGATACAATATATCTAGAACAATTAC  
ACCTAATTTTTACCCTATGTATCCCGAGATGCATGTTCTGGATGTATGTGGACGCAACAAATGGTAAGAT  
ACATAATATTGCAAACCTAGAGTGTATCAAAGTAATTAGCTCCTAAATTAGTGGGATTTATGTAAGTTTTTC  
ACTTTTTATACTTCAAACCAAGCCACATCTTAGTTTTTGAATTGTTGTTTCACCAACGAAGCAGTTGTTA  
ACAATTGATTGTGTTTATTGTTTCTTTCAGGGGATTATCAACAATGGGACTGAGAGGAAAATTAAGCGGT  
GACATTGGAGGGCTCACTGAATTAATTTCTTGTGAGTTTGGTTTTTAAATCCAATAAACTTCTGTTGATT  
ATTAGCAATAAGGTTGTATTTGTCACCATAATTTGCTCACTTCAGTTGCTAACTTGTATTGCAGAGACCT  
GTCGTTCAACCGAGGACTTACAGGTTCTTTTCTCCGCGGATAGGAGATCTGCAGAACTAAACATATTG  
TAAGACTACGAAAACCTTGATCATCTTGATTGTATAGTGTATACCTGCTATGTACATAAAATTGACATTTAT  
AATATTTTCGTCATAGAATGATCATTGATCAGCTTTCTTCTCGTAATTTGTATCATGATTCAATGACATA  
CATAACTTACATGTACGTGAATATATCTATTTACTTTTCAGAATCCTTGCGGGCTGTAGCTTCAGTGGTAG

TATACCGATGGAGTTGGGAAGACTTGCTGAGTTATCATTCTTGTAAGAATTTCTCAGCCATATTAAGTTGT  
GATCATTTTAGGTGTATCGTCAACTCATTTAGTTCCATGTCAATTTCTTGACAGGGCACTTAACTCAAAT  
AATTTACCGGTGAGATTCCACAACTCTGGCAATCTGTCAAACTGTACTGGCTTGATCTAGCAGATA  
ACCAGTTAACAGGACCAATTCCTGTTTCAACCTCCTCAAGTTCGGGGTTAGACCTTCTAAAAAAGCAAA  
ACACTTGTGAGTAACTTTATATGTCCATATTACATGCTGTTCTTAAGTTGGGATATATACCTCTTAAGGT  
CTGACTTCTACGTTATGTCATTATCGCAGCCATTTTAACAAAAACCAACTTTTCAGGCTCCATTCCGGACAT  
TCTTTTTAGTGCTGACATGGTGCTAATACATGTGTAAGTCAAGAACTAAAGGGTGATTACACGCTATTCT  
TCCTGCCCTCCTTCTCACTTTGTGAACCTCTGATATGGCAGACTGTTTGATGGAAATCAACTTAGCGGGA  
GCATTCCATTTACACTAGGACTTGTTTCAGACACTTGAGGTTCTGTGAGTAGAACTGACCGTCTTATTTATC  
CTATCTTTCATGCTACTTCACCTTCTGTTTTGGATTATATGTTTGTACTCTTTTATCTGTTGCTGGTATTCAT  
GTCACCTAACATATACAGTCGGCTCGATAGAAATGCCTTAAATGGTAGCGTCCCATCAAACCTCAACAAT  
CTCACAAGCGTTGTAGAGTTGTAAGTATACTTTTTCCCATCATTGCTCACTCAATTTTCTGCTTCAAATCAA  
TAACTTGTAGATTGAAGTTGTACTTTTGTGCACTTATTTCTGTTTTTCAGGAACTTAGCTCACAACGAACTG  
TCCGGTCCACTACCAGATTTAACTGGAATGAATCCCTTAATTATCTGTAAGGAAAATATCCAGAATCCT  
GATTTTCCCTAGTTGTTTCTCAATGTTGAAGTGATACATCATATTTTGTCTCTTCCAGGGACTTGAGCA  
ATAATTCCTTCCATAAATCGGAGGCGCCTATATGGTTCTCGACTTTAGAGTCTCTCACCCTCTGTGAGTA  
TTAATCAGTTATGAATGCACCTATTAGTTTCCAAAAAGTTTGATGAATCTAAGTAGGAAGAACTGATGT  
AATGCTCAGAGTCATTGAGTATGGCTCACTCCATGGATCAGTGCCTCAGAACTTTTCGCTTTACCTCAAT  
TACAACAAGTGTGAGTATCGCGATCCTAACTGAATATTCATGTGTATTACCTGCAATGAAGAGGTTGTA  
ATGATCGTAATAACTTATGCAGGAACTGAGGAACAACGCATTGAATGATACGTTGAACATGGGTGGCA  
TCAGTGGCAGGCAACTCACACTTGTGATTTACAAAACAACGAGATCTCCTCAATAACACTTGGCTCTGG  
TTACAAAAATACCTTGATGTGAGATGGCTCATTTCTCCTTTTTCGTCAATTAGATTATGTTTTGTCTCTTTC  
TTTCTCCTTGATTGCTTTGTGGTTGTCGTCAGACTGATTGGAAACCCTGTATGTGACACGGCCCTTGAA  
ACACAACTACTGCCAGCTTCAGCAGCAATCTGCAAAGCCTTACTCAACCAGCCTAGCTAACTGTGGGAG  
CAAATCATGTCTGCTGATCAAAAAGTTAGCCCACAAAGTTGTGATTGTGCTTATCCGTACCAGGGAACA  
TTCTACTTTAGAGGACCCTCTTTAGGGAGTTGTCCAATGATAATACGTTCCATTCACTCGAAATGAGCCT  
GTGGGTGAAGTTGGATCTCACGCCCGTTTCAGTTTCTCTGCAGAACCCTTCTTCAACATTGATGATTATC  
TTCAGGTGCAGTTAGAATTATTTCCACCAACAGGAAAGTATTTAATAGATCAGAGGTTGAGAGGATTG  
GATTCTCCTTGAGTAACCAAACTTATAAGCCGCCTCACGAGTTTGGACCGTACTATTTTATAGCATCTCCT

TACACTTTCCAAGGTATAATTACTGAGTTTCTTTACAACCTGTAACCTCTAGACCAATATACTGACTTAATAC  
TAAAACTGTTTTAGCCGAACGTGGAGAACTTCTATTAGCTCAAGACAAGTTATAGGAATAGCTACCGG  
GTGTACCATCCTGGTCCTCTTGCTTGTGCTCTTGCAATATATGCTATTCAACAAAAGAACTTGCTGAAA  
GAGCTATTGGATTGAGTAGACCATTTGGTAATGTCATCTTATAGAAAAAACAGATGAGTTATAACTA  
TATATACATTCAAGCCTCTCTATAACAGTCATCCTATATGATAACATTTCACTATAACGACCAAGTTTTCTT  
TAGAACTGATTTTTCATGTTATGTTGAATTATATGTTCTCTTTAACAATATTTTCGCTATAGCAGCCAAAAA  
AATATCAGAACAAACGACGCCTTTATAAAGAGGTTTGACTGTATGTCCAGAATGCAAGTAGGATTGAAC  
TCAAATGTCTGATTACTTTGACCTTCTGTCCAGCATCATGGGCTCCAAGTGGAACGACAGTGAAGGT  
GCACCACAACCTAAAGGGAGCAAGATGGTTTTCTTATGATGAACTTAAGAAATGCACGGGTAACCTTCTCG  
GAGAGAAATGAGATTGGTCCGGTGGCTATGGGAAGGTTTGCTATGAAAATCCATTGTTTTAGAATAAA  
TTAAAGAGGATAAACTCTTCAGCTGCTTTTCTTATTTCGCGTGTGTTCTGTTTCCTAGGTCTACAGAGGAAC  
CCTCGCAATGGGCAAGTAATTGCTATCAAAGGGCTCAACATGGTTCATGCAAGGTGGACAAGAGTT  
CAAGACGGAAATTGAGTTGCTTTCACGGGTTTCATCACAAGAACCTAGTTGGTCTGGTTGGATTCTGTTTT  
GAGCAAGGCCGAACAAGTACTGGTATACGAGTATATGCCAAATGGTTCACTCAGGGAGAATCTGTCAGG  
TAAGTTACATCCTCTATACATTAAGGCTACTTCTATTTATAGTAATTTACACTAAAAAGTTCTTAATAT  
TTCCATTTCTCTGTAGAAGTTAATTTCCACTATGCTCTACAGGGAAAACGAGCATTATCTAGATTGGAAG  
AGGAGACTTCGTGTTGCGCTTGGTTCAGCCAGAGGATTAGCTTATCTGCATGAGCTTGCCAATCCTCCTA  
TAATTCACAGAGATGTGAAATCAACTAACATTTTGTGGATCAGAACTTAACAGCAAAGGTCGGGGATT  
TTGGCTTGCCAACTTGTATCAGATAGCTCAAAGGGTCATGTTTCTACTCAAGTTAAAGGCACATTGGT  
CAGTACCACATCCTGCACATTTTCGCTTTCTATTTCAAGAAAAAGATTGAATTTTGTGAACTCGTGAAGC  
ATGAAATTGAATTTAAGACTATTGACTACATTGCAGGGTTATCTAGATCCTGAGTACTATATGACTCAAC  
AACTAACCGAGAAGAGCGATGTGTATAGCTTTGGTGTGTAATGCTAGAACTCATAACTGCAAAACAAC  
CAATAGAGAAGGGGAAATACGTTGTTGAGAGATGAGAACAGCAATCAATAAGAACGACGAGGAGCA  
TTATGGCTTGAGCAATATGATCGATCCAGTCATTAGAAACATGCCAAATCTAATTGGTTTTACAAGGTTT  
GTGGACGTGGCGATGCAATGTGTTGAAGAGGCTGCTGCTGATCGTCCAACGATGAGTGAAGTGGTAAA  
AATGCTTGAAAGTATTCTGCAAAATGATGGTCTGGAAACAATTCTACGTCTGCATCATCATCGATAACA  
GATTTTGGGACAGCAATAGCTGCTTCTAGACATCCTTATAATAAAGAGGCTCTACAGAGAAAGGAGATA  
AATGATACTCATGCTTTTGATTACAGTGGTGGATACACTCTTCCAACAAATGTGGAACCAAAATAGTGAC  
AACCAAAAAAAGGACTTGTCTCTACTGTCTCTCATTCTTTAATTTATTCTCTATTAAAAAAATTGGAAAA

TTGGTGAAAGGGATAAGAGAATTTAGTTGTTGTATTGTCCCTATATTGGCTACTTTTCGCGAAAACAATC  
ACGTATATTATCAAGATCGAAGTTCAGATTTTCTATTGCCAAGGCTTACAGTCTAGTAGTATCAGTGAGA  
GTCTCCTATACTAAGTGTGAGTTCGATTTTTACTGTCCCCTATCCTCAAATGTAATAGAAAAGAGTTAT  
AAGGAAAAAAAAGATTTTGTACATCAAGGCAAAGATTTTGTATATCAAGGCTTACAGTCTAGTGGTACA  
CGTAAGAGGTCTTCATACACTAAGTGTGAGTTCGATTTTTACTATCTCCTTTCCCGTTCCATGATTCTAC  
AATGTAATAGAAAAAATAAAAAATTTAAAAGTTCAATTTTC

>PGSC0003DMG400008581 LRR-RLKs

ATGAATTTATTAACCATTTTCATACTCTTCTTGTCTACTATTACAGTTTTTTTTGCTAACGGGGTGTTTGCG  
AAAGTTGATTTGAATGATGAGGTGTCTATTCTACTTTCTATTAAGAAAGTCTCGTTGATCCATTGGATCA  
TCTTCGTGATTGGACAGTGCCCAATAATGCAGCTGCAGGGAACAATAGAAGTATTATTGTTCCCTGCAGC  
TGGACGGGAGTTGAATGCAACTCCCATGGGGCTGTCGAGAAGCTTGATCTGTCCCACATGAATCTCACT  
GGCACAGTGTCTAATGATATCCAAAAGTTGAAGAGTTTGACTTCTCTCAATCTATGCTGCAATGAGTTTT  
CATCGCCATTGCCGAAAAGTTTGTCAAATCTAACTGCATTGAGAAGCATTGATGTGAGCCAGAACTATTT  
TGTCTATGACTTCCCTGTAGGTCTTGGAAATGTCAGAAGCGCTTATGTATTTGAATGCTTCGAGTAATAACT  
TCTCCGTTATCTTCCCTGAGGATATTGGAAATGCTACATTGCTCGAGACATTGGATTTTCGAGGGAATTT  
CTTCGAAGGTTCAATTCCTAAATCTTATAGGAATTTGGGGAAATTGAAGTTTTTAGGTCTTTCAGGGAAC  
AATTTGACTGGCTACATTCCGGGAGAGCTGGGGCAGCTTTCGTGCTTGAGACTGTAGTACTGGGATAC  
AATCTTTTTGAAGGTGGAATTCAGCTGAATTTGGAAATCTGACAAATCTCAAGTATCTTGATCTTGCTAT  
TGAAATCTTGAGGTTCAATTCCTTCTGAGCTAGGAAAGCTGAAGCTGCTTGATACGATTTTCTTGAC  
AAGAACAAGTTTGAAGGCAAGATTCCGCCAGAGATTGGCAATATGACTTCATTGCAGTTGCTTGATCTG  
TCTGATAACATGCTTACGGGTGAAATTCAGCTGAGATTGCTGAACTTAAGAATTTGCAGCTTTTGAATA  
TAATGTCGAACAAATTATCAGGTTCAAGTTCCTTCCCTGGGATTGGAGGTTTACTCAGCTGGAAGTAGTTG  
AGCTGTGGAATAACAGCTTATCAGGTCCTTTGCCAAGTGATCTTGGAAGAAATTCGCCATTGCAATGGG  
TGGATATTTATCCAACCTCATTTACCGGTCCAATTCCAGCAGGATTATGCGCAAAGGTAACCTCACTAA  
GCTTATCATGTTTAAACAATGCTTCTCTGGTCCAATTCAACTGGTTTATCAACCTGCACGTCCCTCGTTCC  
TGTAAGAATGCAGAACAATCTTCTTTCGGGGACGATCCCAGCAGGTTTTGGTAAACTTGGGAAACTACA  
GAGGCTGGAAGTGGCAAACAATAGTCTGACAGGACAAATCCCAAGTGATCTTGCTTCTTCTACCTCTCTT  
TCTTTTATTGATTTCTCTAGAAACCACATTCAGTCTTCTATTCTTCATTCTTCAATTCCAACCTCTTC  
AAAATTTCAATGCCTCCGACAATAAGATGACAGGCGAAATCCCGGATCAATTCAGGATTGTCCTTCTCT

TACTGTTCTGGATCTATCCACAAACCATTTCACTGGAGATCTCCAGCTAGCATTGCTTCCTGTGAGAAGT  
TAGTAACTTTGAACCTTCGAAACAACCAATTAACGGTCCAATTCCAAGAGCTATTTCCATGATGCCCCAC  
ATTAGCTATTCTAGATCTATCCAATAATTCTTTAACTGGTGGGATACCTGAGAAGCTTTGGCAATTCACCAG  
CACTAGAAATGCTGAATGTTTCTATAACAACTGGAGGGTCTGTTCCGGAAAATGGCATGTTGAGAA  
CAATCAATCCAGATGACCTGATTGGAAATGCCGGTCTATGTGGTGGAGTGCTTCCTCCATGTTCTCATAA  
TGCAGCATAACATCAAAGCAGAAGAGCTTGCACGCGAAGCACATCATCACAGGATGGCTAACTGGTGT  
AGCAGCTCTTCTGCTTTTTTTGACAGCAGGTCTGTAGCTAGATCTCTATAAAGAGATGGCATGAAAAT  
GGGAGCTGCTTGAACCAAGCTTTGAGATGAGCCGTGGTGAATGGCCATGGAGGTTGATGGCATTCCA  
GAGGCTAGGATCACTAGTAATGACATCTTGGCTTGCCTTAAAGAGTCAAATGTCATTGGAATGGGAGC  
AACAGGGGTTGTATACAAAGCTGAAATGCAACGCGAGAATATGGTTGTTGCAGTAAAGAAGCTGTGGA  
AATCTGGAAGCTGATATTGAGATGGGGCACAGTGATGATCTCGTAGGTGAGGTGAATGTTCTTGGAAAAT  
TGAGGCATCGAAATATTGTCAGGCTTCTGGGGTTCCTTACAACAAACGTGATGCAATGATACTATACGA  
GTATATGCAAAATGGTAGCCTTGGAGAGGTTTTACATGGTAAACAAGCAGCAGGGAGACTGCTTGTGGA  
TTGGGTCACTCGATATAACATAGCCCTTGGAGTGGCACAAGGCCTTGCTTATCTCCATCATTACTGCCATC  
CACCAGTTATTCACCGGGATGTCAAGTCAAATAACATACTTCTTGATGCAAATCTAGAGGCAAGAATTGC  
AGATTTTGGTTTGGCAAGAACGATGCTCAAGAAGAATGAAACAGTTTCCATGGTTGCTGGATCTTATGG  
ATACATAGCCCCCGTAAGTCCTTCAAATTTTTTCATCAATGTTTACTCTAGAGTGATTTTTGTTACTAATAT  
TTAACAATCATTTATCTGGATTTTGACTTTGCAGAGTACGGATACACGTTGAAAGTGGATGAGAAGAGT  
GATATTTACAGCTATGGAGTTGTTCTCATGGAGCTCCTAACGGGTAAACGACCTCTAGATCCTGAATTTG  
GGGAATCTGTTGACATTGTAGAGTGGTTTCGGATGAAGATCCGAGACAACAAGTCTTTAGAAGAAGCAC  
TTGACCCACATGTAGGAGCAACACAACATGTTCAAGAAGAAATGTTGTTAGTTTTAAGGATAGCAATTCT  
ATGTATAGCCAAACTCCCCAAGGACAGACCATCCATGAGGGATGTTTTGACGATGCTCGAAGAGGCCAAA  
GCCTCGGAGAAAAAGCAGTAGCAACAGTGGAGATAGCCATGATGCTACTACTAACAAAGATAAGCCAA  
TATTCAGTACATCACCTGTAAATGGTCTTTTGTA

>PGSC0003DMG400009068 LRR-RLKs

CGTGATTAAGAGTGGTTAATTTCCCTTTCCCTTTTCGTAATAGTAATGTGTGCTTCCTTTAGTGAAGAGC  
TTCAAAAAAATGGCGGAAATGGTGGAAAATGCTCTTCTGGTGTCCCTGCCTTACTGGCACCCACTTCCC  
CTCTTCTTCTAAATCCAAGCAAATTGTTAAAGAATTGATTTTGTGTACTGTAACTTAACTTCTTCATA  
TCATAGTAGTAGTAGTTCCACTTTTGTCTCCACGTGCTTTTCCCACTCTTTTCGCTTCGTTGTTAACCAAAT

ACATACATATACCCCATTTCTTTATTTGCTTCTTCTTCAAATTAAGTGCCTTCAATCATTATTTGTCTC  
TCACCCACTCCCCCTTCTTCTCATTTAATCATTGTCTCTCTAGCTACTTACTTAATTCTGCATTTACTTC  
CCATCATTTCCTCTTCATCTACTCCTTCTTTTCAGTTTACTCTACCAAGTGTTTGATTTTTGCCTCACTGG  
TACTTGCTAGTATACTATAACAGTTTCTGAATTTGTGGGGTTTTCCGTTTTCTCCATTTTGATGTGATTTGG  
CTATCTGGGTATTGCTATTCAGGTTCAATGTTCTTTTTGTTATTGCCGACAGTTTTCAAATTATGCA  
TACTTTGCTTTAAGGTCAAGAAAAGTGTTAAAAATTCAATCTTTTTATGTGTATGTGCTTGAAATAGGT  
GAAGAACGTGAAATGCCTGTTGTTCTTTTTCTTTTTCTTTTTTTTTTCATTTTTTGGCAGCCCCAAAAGTT  
GACGGAAGAAATTTGTAGCTGGTCTTGTTTTACTTTAGCTATTCTGTTTATTGAAACCTAACTTTTACTT  
AACTTGCCTGGTTGACCCAAAACAAAATGTGTTCTGAGTGTCTACGTAACTTTAGCTGCCCTATAAATT  
GTATATTTATGGTTAAGAAACGGTCTCTAGTTTAAATGGTAATTATTTATAGTGAATAATGAACATCATA  
CCGTTTCAATGTCTGATTCCATTTTTATTTTTTTTTGAAATTCTTGAGAGATGAAGGGTGCTGTTACTAGA  
AGCTGATGCCTTTGTAGTTTAAAGCTCAGATGAGGAGAAGGATGGCTACAAAGTTCCTGTTTTTTTCAGTT  
TTATTCTGCACAGCTCTGTTCTGGCTAGCAAGTAGTGAACCATATGAAGACAAAGAAGCGCTTCTTGATT  
TCCTTAATAATGTTAATCATACCCGAAACCTGAATTGGGATGAGAGAACTTCTGCTTGCAGTCTTGGAC  
TGGAGTCACCTGTAATCATGACAAATCAAGAATTATAGCAATTAGGTTGCCTGGAGTTGGATTCCGTGG  
TTCGATTCTGAAACACTCTTAGCCGCTTGCTGATCTTCAGATCTTGAGTTAAGGTCTAATAGTTTTA  
GTGGTAGTTTACCTACTGATTTTGCTAAACTTGGAAATCTTACTTCTATTTATCTTCAATCCAATAACTTTC  
AAGGTCCATTGCCTGCTGATTTTTCTGCTTGGAAAAGCCTTTCGGTTTTGAATTTGTCAAATAATGATTTT  
AGTGGGAGTATACCTTCTTCAATATCGAACTTGACTCATTTGACTGCTCTGGTCTTGCTAATAACTCGCT  
TTCTGGCAGTATTCTGATCTCAATCTCCCTAGTTTGCAAATATTAGATCTATCCAACAATAACTTCACTG  
GAAGCATCCCCAATTCTCTTCAAAGATTTCTGGTTCAGCTTTTGCTGGTAACCAGCTTCTCCTGCAAAT  
TTTTACCTTCATTTCTCCAGTTCCTCCTCCAAGTGTCACCAAAAAAGAAATCGTTTAAACTCCGTGAA  
CCTGCAATACTTGGGATTGTAATTGGAGGGTGTGTTTTAGGTTTCTTGGTAGTAGCTGCAGTGCTGATTA  
TGTGCTTTTCGAAGAAAGAGGGTAAAAGTGGGGCCACAGAGAAATCAATCAAGAAAGAAGATATAGTC  
AGGAAGGGAGTTTCCAGCAGTCAGCATGGAGTAGGGAATCTCGCATTCTTTGAGGGTTGTAATCTTGCA  
TTTGACCTTGAAGATCTGTTGAGAGCTTCAAGCGAAGTGCTTGGAAAGGGAACATTTGGCACTACATAT  
AAGGCAGCTTTGGAGGATTCTACCACAGTTGTGGTGAAGAGATTGAAGGAGAGTGTGGGAAGAAAAG  
ATTTTGAGCAACAGATGGAGGTTGTTGGCAATATCAGGCACGAGAATGTGGCTCCACTGAGGGCATACT  
ACTATTCCAAGGATGAGAAGCTCATGGTATATGATTTCTACAGCCAAGGGAGTGATCTTTGATGCTGCA

TGGTATGTTGAGCACCCAACCTTCTACTACTCTTGCAGTTTTATTTTTGAACCGAACCATAGAGAACTGATT  
ATCAGGACCAAAAAGATAATGCAGATCATTTTTAGCTATGATGTGTCTTGTGCAGTAGTATTTGAAATTG  
CTTGTAGGCTAATTCCAACGTAACCAATTACCTTTGAATTAATAGAGTATCTGCTGTTGTTGCCTCTTGA  
TAGTTTTTTTAATCACCAATAGTTTATAGGACAGCATAAGTGTCTCGAAGCCATAACTACATGCCACTTTT  
AGGCCATGTCTTAGTGCAACTTCTGTTTTAATTTGTCAAATTCAAGAACATCATGTTGCTCGCGAACTTT  
GCTTTGGTGTACAGTCAACTTTTATCATTATTAGGTGGATAGTCTCTTAACTGCACCTTCAAGTATTCT  
ATCATTATATCTGATGCACTCTGTAATTGCAGCAAAGAGGTCTGCTGATCGAGTTCCTCTGGACTGGGAA  
ACCCGACTACGCATTGCCATTGGTGCAGCTAGAGGCATTGCTCAAATACATGGACAGTCTGGGGGAAG  
GCTTGTCCACGGGAACATAAAAATCCTCAAACATATTCTCAACTCCCAAGGTTTCGTTGTATTTCTGATC  
TTGGCTTGGCAACTATAATGGGTCCAATTGCTACACCAATCGTGAGAGCTGCTGGTTATCAACCTCCAGA  
AGTTACAGATTCAAGAAAAGTATCTCAAACCACTGATGTCTACAGCTTTGGCGTCTAATACTTGAACTT  
CTCACTGGAAAGTCACCTACACATGCCACAGGTAAGTACTAGCGACATTGTCCACTTAGTCAGGTGGGTACATT  
CTGTCGTTTCGTGAGGAGTGGACTGCTGAAGTATTCGATGTGGAGCTTTTGAGGTATCCAAATATAGAAG  
AAGAAATGGTAGAGATGTTACAAATAGGTTTGACTTGTGTATCCAGAATGCCAGAGCAGAGACCAAAA  
ATGACAGAAGTAGTAAAGATGGTAGAGGGTGTAGGAGAGTGAATACGGGGACTCGAACATCCACTGA  
AGCTTCTACACCGAACCTGACACCACCGATGACTGAAATAGGGTCGTCTTCCATTACACACTGATATTTCT  
TTGTTATTTAGTGATTAGTACTGTTCTATATGCTCAATTGTTTCATTGTTATAAGTTTTTCTCAGACTTC  
TGTCAAAACATTATTTTCTCAGCTACAAAATTGAATAGAAATATTTACTTGATC

>PGSC0003DMG400009180 LRR-RLKs

CCAATATTAATCAAAAATAAAAATAGGAAAGTTCTGACAAAGCCTTTCTTCTGTTCCCGAGCTGAAGCTTG  
GGTTTTGTGTTTTGTGGTGCCCGGCACTGGTGGTGAAAGAAAACCTCCGACGGCTGTGACTGAGGTGG  
AAGAGGAGAAAACGACGCCGTGAAGATGAGGTTGCTGCTGCTGCTGCCGATACTCATCGGCATTTTTCT  
GTATTGTGCTAATTATGCCATTGCCGACACAGATCCAAATGACGGTCAGCTATTGCTTTTAATCATTCTCA  
TTTATTGTTCTATCTGTTTGTCTGTATGCTTACTGATCATTAAATGGAGGTTGATTGATTTGGAAAGTCAA  
TGAGTAATCTACCTGACAATGAACTCGGCAACCGTCGCAAATTTGTTTGATATTTTCTTACCATATATAT  
GTAAAATGCGACAAGTTCCTTTCTGATCAGGGCATGAATCATATAGAGGGAGCTCTCTTGGATTCTTAT  
ATATTATGTATGTATTGGCCATGTCGGTGGACTTTTAGTACTGTTGAATCTTTCATTATTACTTCCATTCA  
TTCTGAGAACTGACATATTGAAACTTCGTCGGACATATTTGACTGAGTTACCATTTTCAGCCAAGTTGCTC  
CAGAAGATTTTGGCTTTTCTTCTTCTGCTGCTTGGAAAGCGGGACAGGGTAGTGGAGGTGGGCCGCCAA



AACAAGTGAGGTTAAAAATGATCAAGGGCATTATAACCTAAAAGACTCTTCTCCCAGTGATAATACACAT  
ATAGGTTTCATGGCTTGATCAACGCACTTGTTGCGTTTCACCATGTTTATTGATGTCTTGATAGATATACCAC  
TCGTTAACAGTTTGATTACTCTTCAAGCTATTATTAATGAAAAGAACTTTTTGTTTGAACAGTATAAGAA  
TATGTTGACCTGTAAGTATGCCTAGCTGATTTTTTTGGTGGCGCTTTGATTTTCAGCATCTGCTCTGAGAG  
TTCTGTATAGCAGCCTAAATTCACCTGGACAGCTAACAAAATGGAATGCCAATGGTGGTGATCCTTGTG  
GAGAGTCTGGACAGGTATTACTTGCTCGGGCAATAGAGTTACTGAAATGTGAGTTCCTCTCTTCCTTAC  
TGTTGTAAGTAATTATTGTTGATGTTTTCTTCTTTATCTTCTTCATCATGTTTCAATTCTTGAATTGTTGA  
CTTGGTGATTTCTGATGCTTTCTCCCTTTTCATTTTCTCCAGCAAGATATCAGGTCTTGGACTCTCTGGT  
TCACTGGGCTACCAATTAGCAAGTCTTACATCGGTGACTAATTTGTAAGATAAATGGCCTTCAATAATGT  
CCTCATAAATGTTTCTTCGATCTATATCTATATCAAATTCTTACACACTTCTAATTTTGCAGTGACATAAGT  
AATAACAATTTGGGAAACCAGTTACCTTATCAGCTTCTCCAAATGTGCAAAGATTGTATGTCTCGTAGTT  
AGTATATTTTCATCATTCCAGATGCTATTTTTCCACCTATCTTTCTTAAACCTTGCCTTGCAATGCAGAAAC  
CTTGCTGCTAATGGTTTTAATGGTGCCTTCCATATTCCGTTTCGCAGATGACTTCCCTCCGATACTTGTAT  
GTAAAATCTTTGAATTTGACTGCAATTTGCTTTCCAGCAATAAGCTTTTGGTTAAGGTTGAGCTTTTCAA  
TGACTTTAATATTTTTATCTGGCTGTAGAAATGTCAGTCATAATCAAATTC AAGGACAAGTGACTGTCGC  
GTTTCGACTCTCTGTCTTCTCTCAATACATTGTAAGCCGATCTTCTCTCATGCCATTGCTTGTGTGTTTTAA  
TATTACAAAGTTGTGGTCATAACTCATATATGAGGTGTTGTAGGTAAAACATGTCATTCTTACTTCATTAG  
TATAAACTTTTCTTCTCCCATCCGAGTTGTTGACTTGTGCTTTGGTAAAGAAAGTCAATATCATGAAAGA  
CAGTATCTGATCCTTGTTGTAATCTGTAACTTATGTGGTTGTCCCAGTTAAGTCAACTAAGAAGCTGTAT  
ACATTTTCGAGATATTCTTAAGTCAAGTCTTAAAAACCTCTAAATGACTAGTTATCATTCTCTGTCTCATAGT  
TTTTGATTGATTGATCTGTATGCTTCAAGGATTTCTCATTCAATGCTATGACGGGTGATCTTCTCAAAGC  
TTCAAGGCACTGACTAGTATGAATAAAATGTGAGCTAATAAATTTCTGCTTCGTCCTTGTAGACAATTG  
GTTGAGTCCTTCAGTGGTGAAGTTTACATGTTGAAGTATGCAGGTATTTGCAGAACAACCAGTTTACAG  
GAACTATTGATATCTTAGCCAATCTTCTCTTGATGATTTGTGAGTTTTCAGTCTATGCTTCTTTTTAGATG  
TTATCCCTGATGTTTTATCTTATTTATATAGACTCGATTGAAAGCATGGTTGAAAGTCATGTGTATTCCTT  
ATGCTTTAGGAATGTTGAGAACAACCGTTTTACTGGCTGGGTTCTGATCACTTGAAGGGATCACGAA  
GTAAGTATATCATGTTAGCGTAATAAATTTGAACTTATGTCAGAAGTATTTTGAATTTATTCAGGGTTT  
GTGACATTTCTGTTACAGATCAAATGGTAACTCATGGAACCTCAGGATCTGCACCCCTCTCCACCTGGC  
ACACCCCTGCAAGCAGGCCGCACCACAAATCTGGAGGCAATAATAGCCCTACTGATGGTGCAAGCAGT

GGTGATGGTGGTGGTAAATCGGGGATAAGGGGTGGAGCCATTGCAGGCATAGTGATATCTGTTCTAGT  
TGTTGGGGCAATTGTAGCATTCTTTGTTATCAAGAAGAGATTGAAGCGGTCATCGACGGACATTGAGAG  
ACATGATAATCAGCCATTTGCTCCTCTTGCTCCCCCAGGAAGTACATGGTACTTCTTTTCATAATTTCTT  
GGTTTTATCAGTTAAGATGCCTTTTAGACCCTTTCATGGCCTCTGTGATTGTTATTTAACTGTGGAACATA  
TCAATCAACCACACTATCATCAACCTCATTCTGTATCCTGCTTAAAAAGGTGTAATAGACCTGCTGCA  
TAAATGGAAATTTTATGAAAGTGAATTTGGAGAATCAATCTTAACCTTTGTGCTTTATCACTGCCTGTG  
GTGTATAGCTAATAGTGGATCAACACAGCTACTGTCTTCGCTATAAAAGAAAAACACCAAAGTAAAAAC  
AACTTTATATCGAAATGTAACCGCTAAGGCTGATAGGTCCTATCTTCCATGGAAGCAAACTTCTTG  
CTTACTGAAAAGTTCCAAGAACTTGATTGTAGAAATCTGAACTGATGTTTAGACTCTGTATTGCCTGTTG  
AAGCTGATAGTGGGATAAAGCGAACTTCAGCTTTTTTGATAATGAAGAAAACCTTCAGCTTTTTGATCTCT  
TTCAATGGATCTGGTTCTATGCTTGTTATAAGTTAGCTCCCCTTGATGGTTTTCTTCTATAAACTACTA  
TTCATAAATCTTATTGACCTTTATAGAACAATATTGCTTCAAAATGCAACTCTCAGCTAAGTAAAGTTT  
CTCCATTCTAAACATTTGTGCTCACCACCAAATTCACCTCTTGCAAATCTAATTCTTTGCTTTTCTCAA  
CTCCATCACTCGTGGTGCATAGTTATGCCTTTTAAGCCTCATCTCACTCCGTATCTCATTAAATCCGAACCT  
GAGTATGCATTTGCCTGTTTGTAACACTAACAGTCTTGCTTCTTCTGTCTGGATTTTCTGTTCAATCA  
TTGTCCTTGTTTTTACTGCAGAATTGAAAATAATGAAGCTTCTCTGCGCCAATAGTGAAAGTATTTGA  
AGCTCCTGCAGTAGTAAATCTAAGACCTCCACCTATTGAACGCCACAAGTCATTTGACGAAGTTGACATA  
GCAGCAAAACCAATTGTCCCACCAAGAAAGTTAATACAGCTAAAATAGATGCAAGACAATATTCAATC  
GCAGACCTACAGATGGCGACTGATAGCTTCAATGTTGATAACCTTATTGGCGAGGGATCATTTGGGCGT  
GTTTATAGGGCTCAGTTTGATGATGGAAAGGTATGATTTCTCTTATGACTAACTGACTATCTATGTGA  
AGAAAATGGCTCTCTAATTGGATAAAAAATTCATATCATGAATTTTTATGTGCTGCGAATGAATGTTT  
AAGCAAGATAGTTGAAATGACAGATAAATGTTCAATATGAAAAAGTACCTATCTAAAGAAAATGAAAGA  
AAGAAGTTTGATCATTAAAAATTAGTTGAAAAATTATGTTTGTTCAAAACTCAGTTCGGAGCTACTATCA  
TCTTGTCCTGTGTAACCTGAACCATCCTCGTAAGTTCCTTTCTAATTTTTGAAATGCCATAGGTTCTTGCAGT  
CAAGAAAATCAACTCTTCTGCACTCCAGAATCCTGAAGATTTCTCGATATTGTTTCTGAGATATCACGGT  
TGCACCATCCAAATGTTACTGAGCTGGTTGGATATTGTTTCTGAGACACGGGCAGCATCTGCTGGTTTATGA  
ATTCCACAAAATGGTTCTCTGCATGATTTCTGCATCTGTTAGATGAGGAAAGCAAGCCTCTAACATGG  
AATAGCCGAGTTAAGATTGCACTAGGCACAGCAAGAGCACTAGAGTGAGTTTCCATGATCTACAAAGAT  
ATTTGATGCCATTTTATAATGTTACGGAGCTCATAACAAGGTTTTATTTTTCTTGTACCATTGGTTGA



CCAGCACTCGAGGGGCTCTATCCTGTTAAATCTCTATCACGCTTTGCTGATGTAATAGCTCTCTGTGTCCA  
GGTAATATTTTGAAGTGAAGTGAATGATTAGCTTTTACGAAATCTGCTACTTAGTTTTTCTTAATCTAGTT  
CCTTAATTATCTCAATGGACCTCTCATTTTTTTTTTTCTTTGTGGCAGCCTGAGCCCGAGTTCAGGCCACCTAT  
GTCGGAAGTGGTTGAAGCATTAGTTCGGCTAGTGCAACGAGCAAACATGAGCAAGAGGACATTTGGTG  
CTGATCAGGGTACTTCAAGGGGTGAAACAGATGGCCCGACTATGAACCATAGTTTCCATGTGACGTTG  
AGTACTCAACATGTTGCCTATTCTAACACGTGGAGGTGTTTTTTTTTTGTTTCTATTCATGAGAAATGAC  
TTCGAGCCTGTTGTTTTGCAGACTTGGAGTGCATTGTACCAAACGAGACGCTAAAATCTGTTTCATAGTG  
CATAATTTATTTTCAAGTTCTTTTCTCTTCTTCTAATTTGTTCTTACCAGCGGGATTAAAGAAATAATATT  
ATTTTCATATTTTTCATATGGTGTACATTACAACTATCATCTGAACAAACATGTATGTACTAGTGCCTTATT  
CCAACA

>PGSC0003DMG400009181 LRR-RLKs

GGAGGAATTGAGGAGAGGAGAATAGTATGGTAAAGTCTCTCTCTCTCTCTCTCTCTCCACGTATATTACAC  
GCTTTCAAATATCCATAGAATAAAACAAAGTCCACCAGCCATCTATCTATCTAGCCGTCCCAAAAAGTAAA  
CGCTTTATTTCAAAAACCTACACCTCACCTTTTTGCTACATAAAAATTGCACCTTGCAACATCAACTACAC  
TCTCTCTTTCTTTTCATGGGGTTAGACTAAAGTCTGCACGATCAACAGGACAAAGAATTGCCAAAAAAA  
TACCCACATGGTTGATTGGAGTATCTTGGCATCTTCAACTGTCTTTCTTCTTTCATCTTTAGTTGTCTAAAA  
TAATAATGATCATGGATAATAAAGACAGCCGCCACCAATCTGGTCTGACATATCATCAATTTGAGCAGC  
CATGCTTCTTACTTCTTTTATTCTTCTTCTTTACCCACCATAAATCTTTCTATCCAATAATATTGATA  
GTTGTTCTACTTCTTTCTTCTATTGCTACCATCTGTCATGCTTCTGCAATCAGCTTGATCGTGACTCTTTGT  
TATCATTCTCTGTTGGTATCTCTTACCTTCTCTTTGAATTGGTCTCTTCCGAGGATTGCTGCACCTGT  
GGGAAGGTGTTGGTTGTGATGATAATGGCCGAGTAACCGCTCTCTGGCTTCCCTCAAGAAGCCTTTTTG  
GAAACATAACCCCTGCTATTGCAAATTTGAGCAAACCTCTCTCAACTCAGCCTGTCAAATAATCGATTTTTT  
GGTCCCCTCCAGATGGATTTTTCAAGTCATTTAGTAGCTTGCAGATCATTGACTTGAGTTATAACCGTTT  
ATCAGGACGATTGCCGCTATCAGATAGATTGCCATCACCCATCAAGACAGTAAATCTCTCTAGCAACCAC  
TTCAATGGGACAATTCTATCATATTTCTCGAGCCAGCAATTAATTTAGAGAGTTTCGATATTAGCAACAA  
TAGCTTCTCTGGTCCAATACCCTCCTTTATTTGCAGCTACTCAGCCGCTGTCAGAGTTCTTGATTTCACTTC  
CAATGACTTCAGGGGCCAGATGCCCCAAGGGTTTGGGAGTTGCTCCAGTTTGGTTACTTTGAGAGCAGG  
ATTCAACCATCTTTCCGGATTCTTCTGATGATATTTATAGTGTGTCAACACTGCAAGAAATCTCTTTAC  
CTGGCAATAAATTTTCTGGACCCATCCCAGAAAGCATTGTCAACCTTGTCAACCTCAGAATCCTCGCACTC

TATGGCAATGAATTGACAGGTTTGATCCCTCAAGATATTGGAAGGCTCTCCAGATTGGAACAGTTGCTCC  
TCCATATAAACAATCTAAATGGCACTGTGCCGCCATCGCTGATGACTTGACCCGTCTCACTGTGCTCAAT  
TTAAGGGTCAACTTCTTGAAGGTGAACTCTCAGCTCTTGATTTCTCCAACCTTAGTCGACTTGGCATAAT  
CGACCTTGGAAATAACTTCTTCACTGGAAGCATTCCACAAAGCCTTTTTTTCATGCAGGTCATTAAGTCAA  
TCCGTCTGGCTACTAACTATCTGACAGGAGATATCTTGCCTGGCGTAACGTCTTTACAAGCTCTGTCCTTC  
CTCTCGGTTTCCAATAACAGCCTAACCAATTTTGCAGGGGCAATAGAAGTCCTTAAGGGTTGTAAGAATC  
TTACCACACTAATCCTCACCAAAAACCTTTTATAATGAAACGTTGCCTGATAATGGGAACCTGATTGGGTCT  
GAAGATTTTCAAATCTCCAATTCTGGGTTTAGGTGGTTGTAATTCACCGGACAGATACCCACATGGC  
TGGTTAACTTGGGAGGGTAGAGGTTCTAGACCTTTCTATGAATCAAATCACAGGCAAATTCAGGTT  
GGTTGGGGACTTTACAGAATCTATTTTACCTGGATTTGTCTCAGAATTTTCTATATGGAGGCTTCCCAGTT  
GAACTTACTCAACTGCAAAGACTCGCATCACAAGAGGCTGCTGATCAGGTCGACAGAGGTGCTTTAGAA  
TTGCCTGTGTTTGTTCAGCCAAACAATGCCTCAAATCAGCAATATAATCTACTGTCAAACCTGCCACCAGC  
TATTTACCTTGGAAACAACAACCTTGATGGCAATATTCCAAGTATGAGATTGGCCAGCTGAAGTACATTCAT  
GTTCTTGATCTGAGCAAGAACAACCTTTACAGGAAACATTCCAGAAACAATATCCAACCTCACTAATCTGG  
AGAACTAGACCTCTCTGCCAACACCTCTCAGGTGAAATTCCTTCTTCACTCAAGGGTCTTCATTTTTTG  
TCTTCTTTCAGTGTTGCTCACAACAATCTTGAGGGACCTATTCCAACAGGAGGTCAGTTTGATACATTTCC  
TATCACTAGTTTCTTAGGTAATCCAGGACTGTGTGGTCAAATCCTGCAGCACCTTGGCCTGATCGATCA  
GGAACACTACACAACCTTCTGCAGTTAGAAAAACCGCAAAAAGGAAAATCTTAATTGGACTCATCCTAGGA  
ATCTCCTTCGGCATTGCCTTCACAGTCATCATAGCATTCTGGATATTCTCCAAGAGGAGGATCCTTCC  
AAGAGGTGACGCCGAGAAAAATGACTTGGAAATTGTGTCCTACAACCTCACTTCTGGATTGTCTGCTGA  
GATTGGAAAGGATAACAGCATGCTTGTATGTTTCCAACCAATAAGGATCAGATTAATGATCTCACAATT  
TTTGACATTCTGAGAGCCACGAATAACTTCAACCAAGCAAACATAGTAGGTTGTGGAGGCTTTGGTCTG  
GTCTATAAGGCAACTTTAGCAGATGGAACCTATGTTGGCTGTTAAGAACTTTTCAAGGAGATACGGGTTTA  
ATTGAAAGAGAATTTAAAGCAGAGGTGGAAGTTTTATCCAAGTCCCAACATGAGAATTTGGTCTCTCTTC  
AAGGTTACTGTGTGCATGATGGCTGTAGGTTGCTGATCTATTCTATATGCAAAACGGAAGTCTGGACTA  
CTGGTTGCACGAGAAAACCTGATGGAGCATCCCTACTTATTGGCCAACTCGACTGAAGATTGCACAGGG  
GGCAAGTTGTGGGCTGGCTTACATGCATCAGATATGTGAACCACATATTGTTTCATCGTGACATAAAGTCC  
AGTAACATCCTCCTTGATGAAAAGTTTAAAGCGCATGTGGCAGATTTTCGGATTGTCCAGAATGATTCTTC  
CTTACCAAACCTCATGTCAACCTGAACTGGTTGGTACCCTCGGCTACATCCCACCAGAGTATAGTCAATC

ATGGATAGCCACTTTGAGAGGAGATGTCTATAGTTTTGGAGTTGTGATGTTAGAACTCCTGGCTGGCAG  
AAGACCTGTGGACATGAGCAAACCAAAGATGTCAAGGGAATTGGTTGTATGGGTGCACCTAATGAGAA  
ATGAGGGTAAACAAGAAGAAATATTTGATCCTATACTGAGAGACAAGGGTTTCGAAGAAGATATGCTTC  
AAGTGCTTGATGTTGCCTGTATGTGTGTCAGCCAGAATCCTTTCAAAAGGCCAACTATAGCAGAAGTGG  
TTGAGTGGCTCAACAGAGTAGTATCCAACGAGGGAGCACCTAAATAAGGTGGTGGTACACATAAATTTG  
ATGTAGATGTGAGTGTCTGTATAGGTGAACTTTTGCTTTTTACACGTAGGAAGTTAACATATAGGAATAA  
ATGTATAAAGTGAACAATTTCTCAATAAATTACATTTACGATTTTGCGTCATGGCTAACATTGGATGACA  
GGTAATG

>PGSC0003DMG400009196 LRR-RLKs

GGTTATGCCTCAAATTGATGGTGGTTTGTATGTGGTTAGGCAAAGGAAGGATGATGACGGAGGTGGAGG  
ATACCGGCCGGTCACCAGTTACGTTTGCATGTTCTTCATCATCATCATCATCAAGAAGAAGATCATAAC  
AATGCATTGTGTCTCATTTTCCTTGTGTTGTTGTATCCTTGATCACATTTGTATCGGCTCAACCGGACGAT  
GACGACACCGGCCAGATGATCATCATTATCTTCCCAGTCAAAGAGCTCTTCGGAGGCCCTCTTCAACT  
TTAAAAGCTCACTATCTACATCTTCAGGTAAAGGAAAAGATGTTCTCGGGTCTTGGGTCCATCGACAAG  
TCCCTGTACCGGGAACAATGCCAATTGGTTGGGAGTAATTTGCTTCGAAGGGGATGTATGGGGTTTGCA  
ACTAGAAAACCTGGACCTCTCAGGTGCAATTGATATAGATTCATTGCTTCCTTTGCATTTCTCCGGACCC  
TAAGCTTTATGAACAACAACCTTCAAGGGGGGAATGCCTGATTGGAACAACCTGGTGCCCTCAAGTCAT  
TGTAATTGTCCAATAATAACTTCTCTGGTCAGATCCCCGATGATGCCTTCAAGGGTATGACTTATCTCAAG  
AAACTTTATTTGGCCAACAACCAATTCCTGTTAACAATTCCCACCTCCCTCGCTACCTCCTGCCCCAGGCT  
CTTCGAGTTGACCCTCGAAAACAACAATTCACTGGCTCTATACCTGATTTCCGCCGTGGCCTTCTCAAAC  
TCCTCAATGTATCCAACAACCAACTCGAGGGTCCAATCCCTCCTTCTTTCTTTAATGGATCCAACAACA  
TTCGCAGGTATCATTGGTTAATTTAATTATGTACCGATCTAGCCTTTTTAATTTATTATTATTATACATATA  
CATGACAGGGAACAAAGGCATGTGTGGGAAGCCTTTGGAATCAGTTTGCAACTCCCCAATTCCAGAAGC  
AAATACTACTACTCCGCCTAACAGTCTCAACTCTACCATCAGCACCCAATTATCTGGTGATATAAATAAGA  
AGTCTCCCTCTCTCTGAGTAGAGTGATGTTGATCGTTGCAGTTTGTGGTGGTCTTATGTCTCGTGATT  
GTGTTAATTCTTATCATTGCCGCCGAGCAGCAGCCAAAATAATTCACAACCTACCAGCCGGGCTGTTG  
AGTCAAATAATATTGATGGGGATCAAACATGACCTTTTCATCATCAGCTCTTCTGATATGACGATGAG  
CGGCAATCCAACCTTATGCAAGACACGATAACAATAACAAGGCAGTAGAGGCACCACCAGCAGCAGCAG  
CACCAGGCGCAACGGTGGTGGGTAAGTTGTCCTTCGTTAGAGATGACAGGACAAGATTTGATCTACAG

GACTTGCTAAGAGCATCCGCGGAGGTGCTTGGCAGTGGGAACCTGGGGTCCTCTTACAAGGCACTACTT  
ATGGATGGCCAAGCCGTTGTGGTGAAGAGGTTTAAGCAAATGAACCATGTCGCTAAAGAAGACTTCCAC  
GAGCACATGAGGAGGTTGGGCAGACTAAGCCACCCGAACCTACTCCCCCTTGTCGCTATTATTATAGG  
AAAGAAGAGAAGCTGCTTGTATGACTATGCCTCCAATGGTAGCTTGGCCAGTCACCTCCATGGTATGT  
ATATGTATATTAATTAATTAGAGTATATACGTGAGTTTAAATTATTAATTACTCGGCTCTGTGTGTGTATA  
TATATGTAGGCAATCACTCTAGGCTGGACTGGTCAAGCCGCTTGAAAATCATAAAAGGAGTTGCAAAGG  
CGTTGGCCTACCTTACAATGAGCTGCCAAGCCTAGCACTTCCGCATGGTCACCTCAAGTCATCAAATGT  
ACTTCTGGACAAATATTCTAATCCGTTGTTGATGGATTACACATTGGTGCCCTGGTGAATCTTTCCCAAG  
TCCAACATCTTCTAGTGGCTTACAAAGCTCCCGAGTATGCACAACAAGGCCGCATCACAAGGAAGACTG  
ATGTTTGGAGCCTTGGGATTCTAATACTAGAGACCCTCACCGGTAAACTCCCAACAAACTACCTTGCTCT  
CAGCACTGGCTATGGCACCGAATTGGCTACCTGGGTCGACACCATCATTAAGATAATGAATCGGCTTTT  
GACAAAGAGATGGACCAGCTCACTCATCAAGGACAGATCCAAAAGCTTTCAACATTGGAGTGGCTTGC  
TGCAAGAAGATTTGGATAACAAGGTGGGATCTCAAGGAAGCTATTGAAAGTATAACAAGCCTTAAATGAC  
AAGGTCGACGATCAAGTTGATGTTGGATTTTAAATTTAACATCGATCGTACGTACAACAATACATATACT  
CAACCCATTAGTTAATTCCCCTCTCTATATTTATATGTGCATTACATATCATGTTTGTACACATTTTCATTG  
TATAGTACTTCTCTAAATTACTCAAGGCGTAACTAGACTTGCATGCCAATCGATCGGTCTCTCACTCCATA  
AGTATTCGACCCTACCATTTGCAAGTATATATGTACATCTAGAACTTTGTTTAGCTCTAAAATTT

>PGSC0003DMG400009238 LRR-RLKs

ATGAAACACAAAACATTTGTTCCCTTCCCTCCCTTATTTACCTGAGCTCAGAGAGTATATGCAAAT  
CTTGACATAGATTTTCTTGAAACCCATTATCATTTTCTTGAAGTTTTAGCTTTCTGACTGTCAAAGCCAA  
AAACAAAAAAAAAATGAACTTAAGGTATGCTCCCATATAGTTATTACTATATTCTTGTCTTTTTCTCTTCA  
AATTGTGTTTTCTCAATTGCCCCAAATCAAATTAATGTCATGAGAAGTGTCTATGATCTGTTTCAGAATG  
ATACTGGTGCTTCTTTTGTATGGAATGGAAGTATAAAGCTTCAACCCCATGTTCTTGGAAAGGGGTTTC  
TTGCAATTCTAATAATTCTTCCCTTACCAAAGTCACCTTTTCATTGTTCTCTATTTCTAGCTCTGAATTCTTG  
CCTTTTATTTGTCAAATTGATACTTTGGAGTCTTGTATGTTTCCCAAACCTTTTGGAGTCTATCCCAAAT  
GAGTTCATCACTGTTTGTGGGGGAATTAGTGGGTTGAAATTGTTGAACTTTAGTGGGAATAAATTGGGG  
GGTTTTTGCCTACTTTCACTGGTTTTGGAAAGTTGGAGTCTTTGGACTTTTCTTACAATAACATGAATGG  
GAAAGTTGACTTGCAGTTGGATGGATTAGACTCACTCAAGAGTTTGAACCTTAGCTTTAACATGTTTAAAT  
GGTCCAGTTCCTACCAGTCTTGGAAAATTTATTCTTCTGGAGGAGCTTCATCTTTCTGCAAATTCCTTTGA

AGGTGAATTCCCCACTCAAATTGTGAACTTTGGCAACTTAACTTTGATTGACCTATCTCTAAACAGCCTAT  
CTGGTGTAAATTCCTGATAGATTAGGTGAACTTTCAAATTGCAAGTTTTGATTTTGTGAGCCAATAATTTG  
AGTGGCACAATCCCACAATCCCTTAGGAATATCACAACGCTGACGCGTTTTGCTGCAAATCAGAATAATT  
TTGTTGGAAATATAACCCTTTGGTATAACCACATACCTGAGGAATTTGGACCTCAGTTTTAACAGATTAAT  
GGTACTATTCTCAGGACCTCTTATTCCAATGAATTTGCAGTTTGTGATCTCACTCCAATAAGTTAGA  
GGGACCTGTTCCCTCAAACATGTGATAAATTTGATCAGGTTGAGATTGGGGCAAATGCTTTGAATGG  
GTCATTTCCATCTGCTTCTTTGAAAGCCTTCAAAGTTTGACCTACTTGGAAGTGGACAACAACCAGTTAA  
CTGGACCAATTCCTTCTGAATTGGGAAAGTGCCAAAAGCTGGCCCTTTTGAAGTTAGCCCAGAATAAGCT  
GAGTGGTGTATTCTGTTGAGTTGGGTGATATTTCTAATCTTCAGGTAAGTCTCAGTCCAATAATC  
TAGTTGGAGAAATCCAAGTAACATTTACAGTTGAACAGATTGCAGAGGCTCAATTTAGCTCGAATTC  
ATTGACTGGTTCCATTCCAAGTTCGTTATCAAGTTTGAGAAGTCTCACAACTTGAATTTGCAGGGGAAT  
AATCTAAGTGGTCGAATTCCGGTTGACATTAGTAACTTAAATGTGCTGTTAGAACTCCAATTTGGAGGGA  
ACCAACTCAGTGGGCCTATTCTGATATGCCTTTGAGTTTACAGATTTCTTTGAATCTGAGTCACAATCTT  
TTTCAAGGACCTATACCAAGTAGTTTTCTAGATTGACTTCATTGGAAGTTTTGGATCTCTCTTACAACAG  
GTTCTCGGGTCAGATTCCAGACTACCTGACGGGAATGGGAGGCTTACTAGGTTGGTGCTTTCAAACAA  
TCAACTGTCTGGAGTTGTTCCAAAGTTTGGAAAGCTTTGTCAGTGTGAGACAGATGGAAATGGGGGTCT  
GATCTATCCTTCCCAGTTGTGCCACCACAAGCTGCTGCAAAAAAGAGAAAATCAATAGTTGTTGCAGTT  
GTTGTCCCAATTGCATGTGTAGCAACAATTGCCGTTTTCTGGTGTATTGCTATTTCAATCTCTAGAAGATA  
TTACAGGATCAATGATGAACATTTTCACTCAGGATTAGAAATTTCTCAATCCCCTGTCGTTAGGGAAAG  
GTTTTAACTGCAAACAGCATTACAAGTCAAATATAGACTTCACAAAGGCAATGGTAGCAGTGTCTGATC  
CCTCAAATGTTGTGTTCAAGACAAGATTTTCAACCTACTATAAAGCTGTTATGCCATCAGGTACAACCTAT  
TTTGTCAAGAAGCTTAATTGGAGTGACAAAATATTTAGTTGGGAAGCCATGAACTATTTGGGGAAAGAG  
CTAAAAAATATTGGAAAGCTGAATAATTCAAATGTCATGATTCCACTAGGCTATCTTTTGGCTGCTGATA  
GTGCTTATCTCTTACGAATTTGCCCCATTGGCTCATTATATGATGTTCTTCGTGGTAGCTTGGGCTAC  
TCGTTAGATTGGGCAAGTCGCTACAGCATAGCTATTGGAGTAGCTCAGGGTTAGCTTTTCTTCATGGAT  
GTGAAAAGGGTCCAATCCTCCTCGACCTTTCCAGCAAGAGCATTCTCTTGAAGTCCCAGAATGAGGC  
TCAGATAGGAGACATTGAACTCTACAAGGTGATGGATCCTTCGAAGAGCACAGGCAGCTTTTCTGCTGT  
TGCTGGTTCTGTGCGTTATATTCTCCAGGTAATGAACTATTACTTGGTTAATGGTTAAAGTTTAAAGATCC  
TTCGACATTGATTTATACTCCTTAAGGGTAATGTGACGTTTTTTGTCTAACTGTCGTACCATGCTTTAAA



CTCATCTTTTTGTGTTTAATCTTCATATAGTTATTGTTGTTTTCGAACTTAAACACTTCATTATATCCTCCCA  
CCATGAAACGGTGTGAACTGTCTTCGATATCTAAAGTGAAACAGTGTGTCAGTATAGCCTAGAGAGG  
GAGGAGCGGGTTAAAATGTAACATGAGAAGCCTCAAAGTTGAGCATATATTAAGTGATGCATTTCTTT  
TTGTGTTACAGAATATGCATACACAATGAGAGTCACAATGGCTGGAAATGTATATAGCTTTGGGGTTGT  
CCTGCTGGAATTGTTGACAGGAAGGCCTGCAGTTAGTCAGGGAACCGAGTTAGCCAAGTCAGTGCTGA  
GCAACTCTGAGAAGCACAGCAAGTGGGATCACATTCTGGATTCTAGCATTCTAAGACATCGCTCAACAT  
TAGGAGCCAGATGTTAGCAGTCCTCAAATTGGCTCTAGCTTGTGTCAGTGTATCACCAGAAGGCCGGCC  
AAAGATGAAGAGTGTGCTTCGAGTGCTTCTCCATGCAAGGTAATCGGATGTCAAAGGAAAGTTAAGGA  
GAAAACAGCCAAGATGGTTTTCTTTTTCTTTTGGGGAGGAGCTGCAAGTGGTGAAGGTGTTGTGAG  
CTATGCAGAATATGCCAGTTTTGCCAGTTTATACATATTATATTAATGTAAACATATAGATATATGATGAT  
AGTAGTTACATAACTTTGAATATGATGTTAGTTCTCAGTGTAAACATAGTCCATTTTTCTTGTTTCATGTGA  
ATATATATATATATTATATATAAAAGGTCTTTGGGAGTGAATCCAATTT

>PGSC0003DMG400009380 LRR-RLKs

AAAGCTTACACTATTTTAAACAAGCTCAGCAAACACCCATTTACCATTATTACAGAAAAATCTCTGTATCT  
TCTTCTGTGCATGAAAAACCATGCAAATGAACTATTACTCTTCTTTCTGAGTACATTCCCTTTGATTTTT  
GCTTTAAATCAAGATGGGTTGTATCTACAAAACTGAAACACTCTTTGTCAAGCTCAGATCAAGGGGTAT  
TTTCTACTTGGTATGAAAATGATCCTACCCCATGTAACCTGGACAGGTGTCACCTGTAATGACGCCGGAGA  
TTCTCCTTCCGTCGTCGCTGTTAACCTCTCCGGTGCTTCTCTCGCCGGAACCTTTCCGGTCTTCTCTGCCA  
TCTTACTTCGCTTTCGTCACTCTCGCTTTCGAATAATCTTATTAATTCTACTCTTCCGGTTTCTATTTCTGAA  
TGCCGTAGCCTCACGTACCTTGACCTTCTCAGAATCTCATCGGTGGAACCTATCCCCGACACTATTTCCGA  
TCTTCTTACCTCAGGTAACCTCAGTTTGAACCTCAATTTGCATTTCCCCTGTTTTTTTTCTTTCAATTTTC  
GAAAAATATCAACTAATTGGGACTTACATTTAGCCATATATGCGTATTTGGGTCTGTTTTAAGGGTGAAT  
ATAAGATCTATAGTTAGTGTATATAACATGGTATGTGTAGAAAAAGACAGTCCAGTGCACAAAACATCTC  
ACGTTAGCAAGCTGCGGGGAAGGGGCTGTAAGCAATGATTTAGCTGAACCAACATAACCCGTATGGAT  
TTGCTTGTGGTGTATAGTAACTCTAAATTATTGATTGTTTGAATAAAAATGCAGATGGAACGAAATGA  
ATATTATGATCTTTTATTGCAGATTTTGTATTCTTGTGTTTCATTAGTATATTATGATCTTTTATTGCAGG  
TACCTTGATCTTAGTGGATGCTATTTTTCGGGGAATATTCCGGCAAGTTTCGGAAGATTCAGGCAACTGG  
AGACTCTTATTCTGACTGAGAACATTCTTACTGGTGAAGTTCCTCCTGCATTAGGTAATGTAACGAGTCTC  
AAGACACTTGAACCTTGCTTACAACCCTTTTGCGCCGAGTCAGTTTCTCCTGAACTCGGTAACCTTGACGA

ATCTTGAGACATTATGGCTAAGTATGTGTAATCTTGTTGGTTCAATTCCAAAAAGTATTGAGAAATTGAG  
TCGATTGACTAATTTTATGATGTGTCCAATAATGGACTGGTTGGGTCAATACCAAGTGCAATTTTCCAACCTA  
ATAGTATTGTTCAAATTGAGCTCTACAATAATCCCTCACCGGAGAATTGCCTTCGGGATGGTCTAACTT  
GACCAGGTTGAGAAGATTTCGATGTGTCGACTAACAAAGTTAAATGGGACTATTCTGATGAGTTGTGTGA  
GTTGCCACTTGAGTCACTCAATTTATTTGAGAATCAATTTGAGGGGTTTCTTCCAGAAAGTATAGCTAACT  
CTCCGAATCTGTATGAGCTTAAGTTATTCTCTAACAGATTTTCTGGTTCATTGCCTAGTGAAGTGGGGAA  
GAACTCGGCTTTACAGTATCTTGATGTTTCATACAATACATTTTCTGGTAAAATTCCTGAAAGTTTGTGTG  
AGATGGGAGCTTTAGAGGATCTTATAGTGATATATAATTCGTTCTCTGGGAGTATTCCGGCTAGTCTTGG  
CAACTGCCGGAGTTTACTTAGGGTCAGGTTTCGGGATAATAAGCTATTCCGGGAAGTCCCAACTGAGTT  
TTGGAGTTTGCCTCAGGTTTATCTCTTAGACCTTTTTGGCAATGCATTTTCAGGAAATATATCACACATGA  
TTTCTGGTGCCAAAAATTTGTCTAACCTACAAATATCAAGAAACAAATTCTCAGGGGTTATACCTAGTGA  
AGTAGGAAAGTTGAAGAACTTAGTTGAGTTTTCTGCGAGTCATAATGAGCTAACGGGAGAAGTCCAGAA  
CACATTAGTGCAGCTAGGGCAGTTAGGTACCCTTGATCTTAGTTTCAATGAGCTATCAGGGAAAAATCCCC  
TTCGGAATTCACACAATGAAGCAACTCAGTGAGCTTGACTTGGCAAACAATGGATTTTCTGGGGAAATT  
CCGGAGGAAATTGGGACTTTGCCAGTGCTTAATTATCTTGATCTTTCTGGGAATTACTTCTCAGGGGAAA  
TCCCACTCAGTCTGCAAAGCTTGAAGCTTAATAAGCTAAATTTGTCTAATAATCAGCTGTCAGGGATGAT  
TCCTGCAGTTTTTGATAAGGGTGTTTATAGAGACAGCTTTGAGGTAATCCAGGTTTGTGTCAAGGTGTT  
GCTGGTCTTTGTCTACCAAAGGTAGAGGACAGCATGAAGGATACTTATGGACTTTGAGAGCTATCTAT  
ACAGTTGCTGGCTTCGTTTTTCTTGTCGGGATTGCTATGTTCAATTTGGAAGTATCAGAAATTCAGAAGA  
TTAAGAAAGGAAACACTATGACAAAGTGGACATCATTCCATAAGCTTGGATTTAGTGAATTTGAAATACC  
CGTTGGCCTAGATGAAGCTAATGTAATTGGCAATGGAGCTTCAGGAAGAGTGTACAAAGCTGTCCTAAG  
CAATGGTGAGGCAGTAGCTGTCAAGAAGCTATGGGAGAGAACAGTTAAAGATGAAACCCCTTATGGTG  
CTCTTGAGTCTGATAAAGACGAGTTTGAAATTGAAGTTGAAACTCTGGGTAAAATTAGGCACAAGAATA  
TTGTGAGATTGTGGTGCTGTTGCGTTACTGGGGATAGCAAGCTCTTGGTATATGAGTACATGCCAAATG  
GAAGTTTGGGCGATTTGCTGCACAGTTGCAAGGCCAAATTGTTGGATTGGCCGTTGAGGTTCAAGATCG  
CTTTAGATGCTGCTGAGGGGCTTTCTTATTTGCACCATGGTTGTGTTCCCTCAATTGTTACCGTGATGTT  
AAGTCAAACAACATATTGCTGGATGATGAGTTTCGGGCCAAAATTTAGATTTTGGTGTGGCAAAAATT  
GTTAAAGCAGACAGCAAAGGTGACGTTGAATCCATGTCTGTAATTGCTGGTTCCTGTGGTTACATTGCAC  
CAGGTATTGATTTGTCCAAACTATATCACTGGCTTTAGTCATTTTTACCGATATATTGGCACATCTAGCTT

ATATTTTTGGAAAGATTGCAATTTCATTTTAAAGTAGCCAAAACATAAGTGAAATTCATTGATTGCA  
GAGTATGCATATACTCTTCATGTGAATGAAAAAAGTGACATATATAGCTTTGGAGTGGTCATTTTGGAGC  
TGGTGACAGGCAAAGACCAGTCAGTCCAGAATTCGGGGAGAAAGATCTAGCTACTTGGGTACACACG  
ACGTTGAACGAGAAAGGAGTTGATCAGTTGCTCGACCCAAATCTAAACTCCAGCTTCAAAGAACATATA  
TGCAAGGTTCTTGATGTTGGTCTACGTTGTCTTAACCAAACCTCCAGCTAATCGCCCCTCAATGCACAGAG  
TGGTGAAAATGCTCCAAGAATCAGCTCCTTATAATGTGCCAGAAATGGAAAACAAGAATGGTAAACTTT  
CCCCCACTTTCCAAAGTCAGTCTAGTTAATATATTAGATCAAGTAATAGAGCAGGAGTGTTTCTTGTC  
GAATTGGCAAGGAAGAATCTGCATAATGAAAAATTAGTAGTCTTTTTCAAGAATTAAGCATATTGTA  
TTTGAATTCTACAACCCTTTATGAATCTATATTACGAGGATTCATCATGAATTAACAAATTTTACGCTAGC  
TGTCAGCCTACCGCAACACAGATGGGGTGGGTACTGAAAGTTGTAAGTATTCTTAACTAATGCCTTTGAT  
TAAGTTTGTTAACTTAGGTCCTACTTTGCTGTCCATCATTCACTGAGCTGGGGCCTTTAGAAGTAAA  
>PGSC0003DMG400009561 LRR-RLKs

AAAAATAATATTCTTTCTCCACCTTTCTTTTGGCTTCAAAACTACATAAAAAGGTAGCATTCTTTCATTTG  
TAGGAGCCCTTTGAGAGGGCGCGCACCTGCAAGTGCAGCGCACCCAGAAAAAACAACAAAAAGTTTT  
AAAAATAAAGAAGACTGTCTCTCTCTATGCAATCATGGCATCACAAAAAACTACAAAAACA  
CAAAAAACAACATGTCCTCCTGTTATCATCATGTGTTTATTAGCATTGTGACAGAGGGAAAATTAT  
CAGAGCCTGAGGTTCTTCTCAAGTTTCGTCAATCGTTAAAGTTTCGATGGAGATCCCTTCTCGACGTGGGA  
TATTAATGTACCACCTTGCATCAAAGAGAACAATAAGCCTAAATGGAACAATCTATTTTGC  
GAAAGTGGAAAGGTTTATGGTTTGAATCTTGAAAATCTAGGGTTAAGTGGTACCATTGATTTGGACATACTTAAAGACT  
TGCCAAATTTGAGAACCATAAGTGTTCAAAAATAAATTTGAAGTTTCTTACCAATATTAATAAATTG  
CCTGCATTAAGACTGCTTATTTCTCAAATAACAAGTTTTCTGGTCCAATTGATCAAAGATATTTGAAGG  
GATGAATTCATTAAGAACTTCACCTAGCAAATAATGAATTTACAGGACAACCTCCCTCCTATTTTGGTG  
ATATGCCAAATCTAAGGGAGTTGAATATTCAAACAATAAGTTTGAGGGTCCAATTCCTCCTCCTATTC  
ACATCTATATTTTCTGCTTATGATGGTAATTCCTACCTCTTTTCTTTTTATATTTTATTAATTATTGTGTC  
CAATGAATTAACACTTTTTTTGTTTATCATCATTATGCCATGTTTTCTTCCAATCCTAGATCATAAAAAG  
ATCATATCATTGGCTACATAATAAACAAAAGATCATTAGATTCGGGTCATCCATGTGTGTCAACTCGGAT  
CCATGTAATAATAAGGGAAAGAGACACAACCTATTAGATTATTTCTGAAAAGTAGTAGTACTCCATCTCT  
TTAGAATTATAAAGAATTGTCTTAATAGAAACCAACAACACTTTTTTTTTTTTTTTGAGAAAAAATAAC  
TTGATAGACAATCCTCCTCTTCTTTCAAGTTCTTGTGAAAGGATTCATAGAACAACCTTCTGTAACAG

GTACGCGATTTTACTATGGCTTAATTAATATGATGTATGTAGTTCGTCTTTATATGTGATTACATCTAG  
TGAAACCAAATTCAGTATTGATATATTATCTAACTAAACATAAGTATTTTTCTTCTTCTTCTTATAAAA  
TAGGCAATGATGGTCTTTGTGGTCCCTTTAGCAAATCATGCAATAAGGAAGATGAACAAAAAAGC  
AAGAATCATCATCATCGTCATCGTCATCAGGTTGGAAGATTGCCCTTATTGTGGTTATAGTAGTTGTAGT  
GATAGGCATTGTTGTGTTTGCCTAATCAATCGTCGCAAGAAGAATCACCAACAAGAAGTAGTACTTGG  
AGGATCATCATTAAAGTTCTTCTCACCAACAAGTCAAGACCAAAAATAATCCCTCAATCTCATGATCATC  
TAAACAAAATGGAACAAGGCCAATCATCAGCTGCATCTACTCTGATCGCGCGTCTAATGATGGCGGTA  
AAAGAGCTGAAGTTGCTGGACAAAACCTTCTATTCTTGAAAGATGACATTGAGAAAATTTGACTTACCTGA  
TTTGTGAAAGCCTCTGCTGAAGTATTGGGAAGTGGAGTGTGGTTCAACTTATAAAGCTGCACTTAGT  
ACTGGTCCTGTCATGGTTGTTAAGAGGTTTAGACATATGAATAAAGTTGGTAAAGAAGATTTCCATGAA  
CATATGAGAAGGCTTGGAAGATTGAGTCATAAGAAGTTGCTTCTGTTATTGCTTTCTATTATAGGAAAG  
AGGAGAAGCTTCTTGTCTTTGAATATGTCAACAATGTCAGCCTTGCTGTTTATCTTCATGGTACCTATCTC  
TACTCTCTTTGTTTCAATTTGTTTGTCTCGTTTTAACTTGACATACAGTTTAAAAAATAAAAAAACCTT  
TGAGACTTAAAGATACTTAAAATGTAGTAGAATATCCTTTAATTTAATTTTGTGGTATGAAAAATTTTCATC  
AGTAAAGTTGGAATTAAGGTTCCCTAAAAGAAGAAGAAGAAACATTCTTTTTGAAATCAACTA  
AAAAGATAAAATAGAGTATTAATTATCCTTTCTGTCCCAATTTAATGTCTTACTTTCACTCTTGTTCTGTT  
CTAAAAAGTGTGTCGGTTTCTATATTTAGTAAGTTTTCAAATTGTGACATTCTACTTGCTTAGTTAAGAT  
CACAAAATTAAAAAAATAATCTTTATTTTTTTAAACCTATTTACTCACTTAGATTAAGACACTTAAAT  
TGAAAGGAAGGATGACTCCCTGCATCTATCTTACTTGTCCAGTATATGGGATGTCCAATAATACTTGTG  
CAGTTTATAAAACCAATGAATAATTTTTCAATTTATGTCTATTTTACTTTTGTATTAAATACTATTCAATTT  
TCAATGTTTAAATGACTTATATTTAATAAGAGTGATTTAATAAACTACCCCTATCATTTACTGCTTCATA  
ATCCATGTGCCAAGTCAGTAGTGTACGACGAACAGAGGGAGAGGGAGTAATATTTTGTTCATAGTTTTG  
ACCACCTTTTCTGATTTTTTCAAGTAATAGCAAATCACGTGGTAACCAAAGTCTTGATTGGCCAACTCGTT  
TGAAAATTGTGAAAGGAGTAAGCAAAGGAATTTTATACCTTTACAATGAGCTACCAAGCTTAACATCACC  
TCATGGTCACCTCAAGTCTTCAATGTTCTTCTAACTGAAAACCTTTGAGGCAGTTCTCACAGACTATGCCT  
TACTACCAGTAGTAAATGCTGAACATGCACATGAACACATGATCTCATACAAAGCACCAGAGTTAAAAC  
AATCAGGCAAATCAATAGAAAACTGATGTTTGGACACTTGGTATGTTAATCCTTGAGATCTTGACTGG  
AAAATCCCTTCAAATCTTTTAGGCAAAGGAACACAAGATAGCGATGATTTAGCGACATGGGTGAATAC  
TACTCTTGGAGATGAATCATCAGAGAAAGAAGTGTGGATAAAGAAATGAAAGGAACAAAAGATTGTG

AGAGTGAAATGATGAAGTTATTGAAGATTGGACTAAGTTGTTGTGAGGTTGATGTGGAGAAGAGATGG  
GATATAAAAGAGGCAGTTGAAAGGATTGATGAAGTAAAAGAGAAAGGTGATTCAGCTCTAATGTTGC  
AACTAATGAAGTTGACAATATGCATACTTCAAGATAAAAAAATATTTTTGATTGATAAGCTCATGATCAT  
AATATGGAAATTTTGATTATATTGGATGCATATTGCATGACTATATATACTTTGGGTATATGATTTTGTTT  
TGTCATGGTGGAGGATAAATTGAACCATGATGTGGGGTACTACAAAAGAAAAAAGAAAAAAAAGA  
AAAAGAAAAATAAGTGATAGAAAAATGAAGTACTTAATTTTTGTTTGCATATTGTAAATTTGTCCTTTAT  
GAATCTATAGTCTAGGTGTGTTTCTTTATTTATTTTTATTATTCATTCATCAAGCTTATTTGGGACTTGCTT  
TACAAAATTGGC

>PGSC0003DMG400009843 LRR-RLKs

TTAGAGACTATTTTGACCCTACGGCCAAAATTAATGGACCATATTTGTCATTTTCTTCTTCTCACCTAC  
CCCTCGTTTCCCACTTCACTCTTCTCCATAGTTCCTCACTGTCTCCGAAAATCCAGTCCATTTTTCAGACCTC  
CTTTCACGCACAAAATGACAACAACAACACTAACTTGGCCACTAGTCAACTAAACCAAATCACTCGAC  
ATTTTTAGTTGCATAACTTGAATGTCTCCATTGATGCTTCTGCTCTGTTTTCTTCTTCAACTAATCTACAGT  
TTCTACTTTTGTCTTCTTCTTCTGCTGCTGCTGCTACCTCTACCCCTTCTGCTCCATTCAACTCTTTGCTTCC  
TTCCGACGCTGTTTCGTTATTGTCATTCAAGTCAAAGCTGACCTTGACAACAAGCTTCATTACACACTTA  
ACGAGCGTTTTGATTACTGTCAATGGCAAGGAGTGAAATGTGTACAGGGTCGTGTTGTGCGTTTAGTTC  
TTCAAGGGTTTAGTCTCCGGGGTACTTTTCCGGCGAATAGTTTAACTCATCTTGACCAACTCCGAATACTC  
AATCTTAGGAATAACTCACTTTCCGGTCCTATTCCTGATCTTTCCGGTCTTCTAACCTGAAAACCTGTTTT  
CTTGATCATAATTTTTCTCCGGAACCTTCCCTTTTCTGTTCTTTCTATTCACCGTCTTGTTATTCTTGATCT  
TTCTCGTAACAATCTCACTGGTTCCTGTTAGGCTTACTGTTCTTGACCGGTTGAACTATCTCCGGC  
TTGATTCCAACCTGGTTTAAACGGTTCGATTCCGCCGTTGAACCAGACCCAACCTCAAATTTTCAATGTGTCT  
AATAATAACCTCACTGGTCCAGTACCTGTTACTCCAACCTCTGAAGAAATTTAACATACGCTCGTTCTTACG  
GAACCCTAGTCTTTGTGGTGAGGTTGTTGATAAGCCGTGCCGTTCCGGCACCGTCTTTGATTGCCTTCTCCT  
CTGCTGCCTCTCCGCCACACCGTTATACCAAACGCACAGTCGCAGGGTATTCTTATTAGTCTCCACCT  
CAGCACAAACACAAAAAGTTGGTGTCGTTTTGGGTTTTGTAGTTGGAACATTGATTTTGATTGCAGCTG  
TTCTCTGTCTTTTTGCTTTTGTGAAAAAGAGAAGAGAAGAACTGAACTGAATCAAAGCAACAAAAT  
GTACCATTGAGACCATCACTAATAGTGCGGCGAACGCAACGGTTTCTGAGCCAGATGATAGTAGCCAAG  
AGATTAATTAGAAAAAGAAATGAAAGTGCTTCAAGCCCCAACAAACAGATGAAGAGTGGAAATCTG  
ATATTTTGTTTCAGGGGAAACAGAGTTGTATTCTTTAGAACAACCTAATGAGAGCATCAGCAGAGTTGCTTG

GAAGAGGCACAATTGGAACAACGTATAAAGCTCTGATGGCTAGTCAGTTAATCGTTTCAGTAAAGCGAT  
TGGATGCTGGTAAAACCTTCGATTACGAGTGCAGAAGCGTTTGAGCAACACATGGAGTCAGTTGGGATGT  
TGAGGCACCCAAATTTGGTTGCAGTCAGAGCATACTTTTCAGGCTAAACAAGAAAGGCTTGTTATCTATG  
ATTATCAGCCTAATGGCAGTCTCTCAATCTAATTCATGGTAAAGTTTCTAACTTTTTAATATATCATTACT  
AGTTCTACAAATTATTCATCTGAAATGGATCAATGTTTATTTTTTCATTTTTGGTAATTCTGCTAATTGGTCA  
ATGTGAAGTCAATTTGGTGGACCTGTGATGGAGAAAAAGTGGAAAGAGTGAGTTGTCTGTGGCTACTG  
GCTAATCACTATCTAGCTTCTTTTTTTTTCTTTACAGAAATTAGTTGTAGTGTGGATCTTTCAGTGGT  
TGCTATGGTTGTAGTAGCAGGGGACTTTTTTAGCTTTTAGTGTGGATGCCTAACATGGCTCCCACTGAGT  
TCACTACCGACAATTGCAAAGTTTGTGTTTACAGGGCAGCCAAATAGTAATGTGTTTTAGTTTCAGGCTG  
TCACTGACTGACCGGTATGGGTTGATAGCATTATATTCCTCAATTTTTTTATCATGCATTGAGGCAAATG  
GTCCTGGCTCTTGCGTCTGTCTTTTTGGTATTTATGAGTATGTTTGCTTCTCTTAAAGTTGAATAGGATG  
TTGACAGTAACTTTTTGGTGTTCCTTTACTTGTCCAAATGTTCTCTGTTTCTTAAATATTAATTTACTC  
AAGTGAACGTTAACGTTGTTAGATAGAAGGATTAAGGGAAAGAAGTACTAGAACATCCTTGGAATTCTTAA  
TGTAGTGACAGAAATGGTATGAATTTGCTTAATTTACATTATTTGAATCCTAGGTATTGCATTTTTTGT  
TCCCCTTGATACGCTATCAAGAAATTGGAATTTCACTTTCATAGATTACTCTGCTCAAGAAGATTGATT  
CCTCTATATAATTCTGTGTGTTAAGTGGTTGGTCTTTTACCTAAATCCTGATAATCTGTTGTTGTTTAC  
TTATATATTGTGTTCAATTTTCTATTGTTTCGTGGCAGGTTCAAGATCAACAAGGGCAAGGCCTCTTCACTG  
GACATCGTGTCTAAAAATAGCAGAAGATGTGGCTCAGGGCCTTGCTTACATCCATCAAGCGTCAAAGCT  
CACTCATGGCAACTTGAAATCCTCCAACGTCCTTCTAGGGTCTGATTTTGAGGCCTGTCTAACAGACTACT  
CCATCATCGCGCTTGACAGATATTTCTTTGGAGGATGATCCTGATTCAGCATGCTATAAAGCACCAGAAGT  
GCGCAAATCAGCACGAAGAGCCACGCCTGGGTCTGACGTATATGCCTATGGCATTCTGTTATTAGAGCT  
TTAACGGGCAAACCTCCATCTCAGCATCCACATCTCTCTCCCCTGATGTACCGGATTGGGTTAGAGCTA  
TGAGGGAGGATGATAATGAGGAGGATAGATGGCTTGCAATGCTAATTGACCTTGCTAGTATATGTAGCT  
TGACATCACCAGAACAGAGACCAACAATGAGGCAAATCTTGAAAATGATACAAGATATAAAGGATAGC  
GCAATGGTGGAGAATAACAAAAGAGATGCACATAATGGATACTCATAGCTTCTTCTGAATTGCAGTTAC  
ACCATTAATCAGCGAGGGTACATGGTCAATTGTAAGTAAGTGTATCTCTCCCCTTGCAAAGTGCCATTG  
ATCGACAACATATCTGTAATTGAGTTTTTTCCAGATAGACCAAATGACTTATCAACTATAATGGTGCTTGT  
ACCTTCACTACTCAGCAGTAAACACCTAAAACCTGACAGGTTAAGGTCTATCTGCTAGAACATGGTCAACT  
TAGTCACTGAAGATTATGACACATTTTGTCCCCTCGTCGAAATCCCTCTTTTTTGGTCACACAAACATAT

GGTGCCTATATTTTTAGGGCATATTGTAGTAGGTGGTTTTGGTTGATTCTTTTTCTAAAGAACTTCAAAT  
GTATTCGCTTACCTTAATGGCAGAAGAATATTGTATAATCTTGAATGGTAAAGCTAACCCAAATTCTGA  
ACTTCCCTTCTCTGCATGGTTGGTTAGTATCAACTTAGCAGGAGAAGAGTTGTTAATG

>PGSC0003DMG400009941 LRR-RLKs

CTTCAAATACCCTTGAACTATCCTAAAATTTGTACAAACCAGACTAACTAACAGTGAATAATGTCACT  
CCCCAAAAAATATCCCTTTTCTCAAATTTTCATTTTTTTTGTCTCCATTAATGCAAACCTCTGATCTT  
GAAACCCTTTTGAAGCTCAAAGAATCCATGGTTGCTCCTGGAACCTCTGCACCTTCTTGATTGGAACAACA  
ACACAAATTACCCTTTTCCCATTGTTCTTTTTCTGGTGTACGTGTAACAATAACTCTCATGTTATATCTAT  
AAACATCACTAATGTTCCCTCTATTTGGTACTATTCCACCAGAAATTGGTCTTTTACTAAATCTTGAAAATCT  
TATTATTTTTGGTGATAATATACTGGTACACTCCCTTAGAAATGTCACAACCTTCTTCTATTAACATGT  
TAATCTTCTTACAACAATTTTTCTGGTCCTTTTCTAGAGAAATCTTGTTGGGGTTAATAAAGCTTGAATC  
TTTTGACATTTATAACAACAATTTCACTGGTGAACCTCCTACTGAGTTTGTAAGTTGAAAAAGTTGGAA  
ACTTTACATCTTGGTGGAAACTATTTTCATGGTGAATACCAGAAGTTTATTCTCATATTGTAAGTTTAAA  
GTGGTTGGGTTTGGAGGGAAATTCCTAACTGGGAAAATACCAAAGAGTTTGGCTTCGTTACCAAATCT  
TGAAGAACTTAGATTGGGCTATTATAATAGTTATGAAGGGGGTATTCCATCTGAGTTTGGTAATATTAGT  
ACACTTAACTTCTTGATCTTGGAAATTGTAATCTTGATGGTGAAGTTCCTCCAAGTCTTGGAAATTTGAA  
GAAGTTGCATACTTTGTTTCTACAAGTGAACAGACTTACAGGTATTCATGAACTCACTATTTGTTAATTAG  
TTATACAATCAAATCTATCTTTAATAACGTCGTTTGTCTGAATATATTCTAGTTGCCATGGTTGAATATTGT  
TGTAGGAAACATATTTGTCACAAATCATTTTCCAAGATGTAAGACTGAAAATCAAATTGTGTTGAAATAC  
TCAATAGTAATAGTTGTTTCTTGAGTGACGTGCAGAGTGCCAGTATATAAGTAAAAAGTGAATGGAGTG  
AGAATATCATAAAAAGTTTCTTTGAGAAAACTGTATTTATAGTGAATGATGTTAGAGTATGTGTTAAT  
AGAGAGGTTTTTGTATAACATAGATGTATATGTGCAAAATATTATGTATATAAAGTTTTGAAGTCATATA  
TCTGATAAATTTTAGAATCTGAATTCGTAAAACCTAAATCTTGGATTCGCTTATGATTTACAGGTCGCAT  
ACCTTCTGAACTATCTGGTTTAGAGAGTTTGTATGTCGTTTGAATTTGCTTTTAATCAACTGACCGGAGAAA  
TACCAGAGAGTTTTGTGAAGTTCGAGAATTTGACATTGATTAACCTGTTTAGAAACAACCTTGCATGGTCC  
AATTCCCCCTTTTATTGGTGACCTTCAAATCTTGAAGTGTGTCAGATTTGGGGAAACAATTTTACTCTTG  
AATTGCCCGAAAATCTTGGGCGTAACGGGAGGTTTTTGTCTTCTGATATTTCTATTAATCATTTTACTGGA  
AGGATACCACCTGATTTGTGTAAAGGAGGGAAGTTAAAGACACTGATTCTAATGGAAAATTACTTCTTT  
GGTCCAATTCCTGAACAACCTTGGTGAGTGCAAATCGCTTGCTCGAATTCGCGTTAGGAAGAATTACTTAA

ATGGTACTATTCCAGCTGGTTTTTCAAGTTACCTGCATTGGATATGCTTGAACCTTGACAACAACACTATTTTC  
ACTGGTGAGCTGCCAACGGAGATAAACCGGAATAATCTCACTAAACTTGTACTTTCCAACAACCTGGATCA  
CGGGGAACATTCTCCATCATTAGGGAACTTGAAGAATCTAGTCACTCTATCACTTGATATGAACAGATT  
ATCTGGTGAAATTCCTCAAGAAATTGCGAGTTTGAATAAACTCGTGACCATCAACTTGAGTGGTAACAAT  
TTAACAGGTGAAATCCCAAGTTCAATTGCGCTTTGTTGAGAGCTAACATTGGTTGACTTGAGCAGAAACC  
AACTGGTTGGTGAAGTGCCAAAAGAAATCACCAAGTTAAATAGCTTGAACGCTCTGAACTTGTCAGAA  
ACCAACTGAGTGGCGCCATTCTGGAGAAGTCGGAGTGATGAATGGCTTGACAGTTTTGGATCTTTCTT  
ACAATGATCTTTCTGGAAGGAGACCGACCAACGGACAACACTAAAGTTCTTCAATGACACTTATTTTGTAGG  
AAATCCAAAACCTCTGTTGCGCTCATGCTACTTTTTGCCCCTCAGCTTCCAATTCACCACAAAACGCGCTCA  
AAATCCATTCTGGGAAGTTCACAACCTATCCAATTGGTGATTACAATAATCATCTTAGTCACTGTTGCATTG  
CTGTTGGCAGTTACCGTGTTGTTTCAAGAAGGAAAAGTTCAAGAATTCGAAACTTTGGAAGTTAACA  
GCATTCCAGAACTTGATTTGAGAGCTGAGGATGTTTTGGAGTGTTTAAAAGAGGAGAACATAATTGGG  
AAAGGTGGAGCTGGCGTTGTGTACCGAGGGTCTATGTCAAATGGCATCGACGTTGCAATTAAGAACTT  
GTAGGCCGAGGAACTGGACACCATGATCACGGATTCTCAGCTGAAATCCAAACACTAGGAAGGATCAG  
GCACAGAAACATCGTACGATTACTAGGATATGTCTCAAACAAAGACACAAACTTGTGTTGTACGAATAC  
ATGTCGAATGGGAGCTTAGGTGAAATGTTACATGGTGCCAAAGGAGCACATTTGAAATGGGAGACGAG  
GTACCGTATTGCTGTGGAAGCTGCAAAGGGATTGTGTTATTTGCACCATGATTGTTGCGCTTCGATTATT  
CATAGAGATGTCAAGTCCAATAATATTCTGCTGGATTCCGATTACGAGGCTCATGTTGCTGATTTTGGCC  
TAGCCAAATTCTTGCAAGGATGCTGGTGCATCAGAGTGCATGTCCTCTATTGCTGGCTCATATGGTTACAT  
TGCTCCAGGTAAACTAATACGGTTACAATATTTATCATATTTATAACAATTATGAATTTCCGTATTAGTTTTC  
TTTTATTACTGGCTCATATGGTCATCATATTTATAACAATTTGGTGGCATATAATGTAGTTACAGGTAAAAA  
TTAATGATAATCTTAAAATGTGATACTAATAACTTGCTATAATAGATTAATTATGATGATACTATGAAGT  
TTGTATGCTATTGTGCATATAACCTTGAGCTATGTTGCTCAAACCTTTAAAAAATGTCAGTGGGGTACAT  
GTCGGATCCTCCAAAAGTAATACTTTTTTGGAGGATTGACACGGATGCAACATCATTTTTTGAAGAATA  
CAAGCAAAATAGATCCTTAAGTCCTTTTATATACCTGTGTTATTGGTCAATATTTTCTATTTTCATGAAAG  
ATACACTTCACTAACTTTTAGTACCAATTACCAAGACCTATGAACTTTTAGAATTTACTGAACTGGGGTTA  
AAAATAGTAGGTATTTAAAAGCTATGCTCCAGGACAAAATCTATTTAAAACATTTGTCCAAAACATTAAA  
TTGTGCAATTAATGTTTTTCTGAGGTGCATTTTTGTTTGGATATGAAACAGAGTATGCATACACATTGAAA  
GTTGACCAAAAGAGTGATGTATACAGTTTTGGAGTTGTTACTGTTGGAACCTTATCACAGGTCACAAGCCA



GTTGGTGAATTCGGGGACGGTGTAGATATAGTCAGATGGGTAAATAAAACAATGTCCGAATTATCTCAG  
CCGTCTGATGCAGCCTCAGTTTTAGCAGTCGTTGACTCGAGGCTACATAGTTACCCTCTTGCAAGTGTTAT  
CAATTTGTTCAAGATTGCTATAATGTGTGTTGAAGAAGAGAGTTGTGCTAGGCCTACCATGAGGGAAGT  
TGTTACATGCTTACAAATCTCCTCAGTCTACTACTACTCTCCTTGCCCTTTGAAATTGCGCGGATAT  
CAAGTGTCTGGTTGAAAACCTCGTGGAGTTTGAGGCCGGGAACACGAGTCTCATGAGTCTATTTGGGTAC  
GGGGAACAAAAAATTGTGCAAGTAGAGATATGTATTTGAAATGTATTGCTTGTTTTATATTTTTGAAG  
TTGTAGGCAAGTTGTTGTATAAAAAGGGGCATGAAAAAAGAAGGAAAAAACTCCTTAATTACTTAT  
TATGGGTATTGAGTATGAATATGTGGCCTTAGGAAATAAATTTCAAGATGGCAATTAGTCAATACTTGCT  
TTAATAACATGGCCTATGTAATGTTCTTAAGAGTTTGCAAAGTTAAAACCTG

>PGSC0003DMG400010055 LRR-RLKs

GACTGACAAGACAGTAATAAAATGATTTTCTGGCATAAAAAGCTATAGTTTTGTTCTCAATCTAAAAGA  
TTATTAGAAGAAAGAAAATCCAATAGAGGGGTTTGTCTCTCTGGTATTCATTTGAGTTTCTGTTTCTTTCT  
TGAAATTTAATGGAAAAGAAAAGAGAGATAAAGGTTGCATTCTTGATGTGGCTACATTCTTGGTTCTTT  
GGAGTTCTGCAGCAGGATTGCTTTCTCCTAAAGGTGTCAACTTTGAAGGTAATTAGTATTATTTTGATAA  
AATTCTGCATAATGTATACTGAAAATACTAAGTTTTCATCTGAGATGTTCCCTCTTTTTCTTTTTTTTTCTCA  
GTGCAAGCTTTAATGGCCATAAAAAGTTGCTTTGAAGGATCCTCACGGGGTTCTTGATAATTGGGATAGT  
ACTTCTGTTGATCCATGTAGTTGGGCTATGGTTACTTGTTCTTCTGAGAGTTTGGTTATTGGCTTGTAAGT  
ATTTCTTGCAAAGATGAAATCTTTTTCTTTGTTTGTGTCTTTGCAATTCAAAAGTTGAATTATTTTTTTACC  
TTTCTGTATTATGCAGAGGGGCACCAAGCCAGAATCTGTCTGGTACTTTTTCTCCTAGCATTGGCAATTTG  
ACAAATCTTCAGATTATGTGAGTTACTAAAATCAGTGATTTGAACCTTTCTTGATTGTTTCTGTTACTTTTT  
TGAATAACCATTTTTTTTTCTTTTGAACAGATTGCTGCAGAATAACAATATAACAGGACCAATCCCAA  
AGAAATTGGAAGGCTCTCAAACTTCAGACTCTTGATCTTTCTGATAACTTCTTCACTGGTGATATTCCTG  
TTTTTTGGGACACTTGAGTGACCTCAAGTACATGTAAGAATCTTAACAGAGAGCCAGTTCTCATACTAA  
ACTTCATTTTTCTATCTTCCAACAGTTTCAATATCAGTTTCTTATATTAATTTGTTTCAGGAGGCTCAACAA  
TAACAGTCTATCAGGAGAAATTCCAGTCTCATTAGCCAACATGTCACAGCTTACTCTAGTGTAATCCTTA  
TTGCTTTACTTATCTTTTTCTTTTATCCTTTTCAAACTTGAGATTGATTTTGGTATTTAACCTTTTGATTCA  
GGGACTTATCCTTCAATCACTTGAGTGGACCGGTACCTAGGTTCCCTGCTAAGAAATTCAAGTAAGCTAA  
TTAACAGTTTATTCATGTCTTGTTAATAGAAAGCTGGAATGTTAAGAATAATTTATGTTGTTCTGTGATTG  
TAGCATTGTTGGAAATCCATTGATCTGTGAGACGGGGTCTGAACCAGACTGCTATGGAATGCAATTGCT

GCCAATGTCAATGACATTGAATGGTTCAGAATGTATGCATTATAGAATGCCATTTTCCAAATCTAACCATT  
TTTTCTTACCTGTAATTTTTGATTTTTTCAATTTCTTCTGTTTCACCTCACTTTATTGCTCCGTGTTTGTTATCCA  
GCTTCGCCTTCTGGGAAGCAAAAAGGTCATAAAATCGCGCTTGTATTTGGCTCGACTCTTGTTGCATTT  
TTTTGCTCGTTCTTGGAATTGGACTCTTTCTATGGTCAAGGCATAGACACAATCAACAAGCCTTTTTTGAT  
GTTAAAGGTTGGTCATCTGTTCTAAACTTAAGCTCAATGTTCTCATGAAAGTTATGATCATTGCTTCATAC  
TCATTTGTATAATTTGCTATTATTAGATCGGCATCATGAAGAAGTTTCCCTTGGAATTTAAGAAGATTTCC  
AATTCAAGGATCTCCAAATTGCAACCAACAACCTTCAGCAACAAAAACATTTTAGGAAAAGGTGGTTTTGG  
TAATGTTTATAAAGGCCATCTCCCAGACGGTACTCCTGTGGCTGTAAAGAGGCTAAATGATGGCAATGC  
AATTGGTGGTGAGAAACAATTCCAAACAGAAGTCGAAATGATAAGCTTAGCAGTGCATCGTAACCTCCT  
CAGGCTCTATGGATTTTGTATGACACAGTCGGAGAAGCTTTTGGTTTACCCTTTTATGTCCAATGGTAGT  
GTAGCTTCGCGTCTCAGAGGTAAAAAAAACATATGAAATTAGCAAAGTGGCATTTCAGATATCTTATTTG  
TCTTTTGTGAAATATAGTCCATGTTACTTTCTATAGTAAACCTGTGTTGGATTGGGGAACAAGGAAGC  
GAATAGCTATAGGAGCTGCTCGAGGACTGTTATATCTTCACGAACAATGTGATCCAAAGATAAATTCATA  
GAGATGTTAAAGCAGCAAATATATTGCTCGATGACTTTTGTGAGGCGGTTGTGGGAGATTTTGGGCTGG  
CAAAGCTTTTGGATCACCAGGATTCACATGTCACAACCTGCTGTGCGCGGTACAGTAGGGCATATTGCCCC  
TGAATACCTGTCAACAGGACAATCATCTGAGAAAACAGATGTGTTTGGATTTGGGATCCTTCTACTTGAG  
CTGATCACAGGAATGAGAGCTATAGAATTTGGAAAAGCAGCTAACCAAAAAGGGAGTAATGCTTGATTG  
GGTAAGTATCAATTGACATGCCTCAAATAAGTTCAACACTTTCTATATTTGAAAACCTTTAACTTTAGAC  
TTCTCATTTTACCCTTAACGACATGCTCTTATAGTCAGAGAAATGTTATGGCATGTTTCGCGACATTGTAT  
ATATCCTGTTAAGTGTAACATTTGGTTTACATTATATCAGGTTAGGAAAATTCATCAAGAGAAGAACTT  
GATGTCCTTGTTGATAAAGATTTGAGAATCAACTATGATCGAATCGAGCTAGAGGAAATGGTTCAAGTT  
GCTCTCCTCAGCACACAATATCTTCCAGGACACAGACCAAAAATGTCTGAAATCGTTTGAATGCTTGAAG  
GTGATGGACTTGCAGAGAGATGGGAAGCATCCCAAAAATTTGATGGTAGTAACAAGTACAAAACATAAA  
GAGCTATCCTCATCCGAGAGATTTTTCAGATCTCACCGATGATTCATTGTTACTTGTACAAGCCATGGAGTT  
GTCTGGTCTAGGTGAGCAAGTCATTTACGTATATTTATAAAAAAAGTAGAATTCACACTTAGAGAGGT  
AATTTATTAACCTATGTGGTAATGTATAGTAATGAACCATCAAAGATTCAAAGAACTTTGATGTGTTCTG  
TTATTTTTTTTTGTTTCTTTATTGTATATGTTTCATCTTTAAGTTAAATGATTTCAATCGAGAGTTTCGATTTTTT  
TTCCTGGTACAACCTGTATTTG

>PGSC0003DMG400010230 LRR-RLKs

AAAAAAGAGAAAAAATCTTGTAGAGAGAGAAACAAGAGAGAGGAAAAA ACTTTTTTTTCCCACCATTT  
CCCCATATTTTCCCTCTTGTTCCTCCTCAACCATATTTCTGAGAAAAAAAATAGTTGAAAAGAAGCCCCTG  
TTTTGAAATCACCTGCAA ACTGCAGTCAAGAAAAAAAAGAAAAGATATTACACTATTTTTCACAAAAAA  
AAAGATTGATTTTTTCTTGTGTGATTTCAATTTTCTTCTTCAATCTCTGTTATTTCTTTAATTTTTTCAAAAA  
AGAAAAAATAAATTTTGTCCCACCACCTGCATTTTCTATTGCAGTTATTTGATTTTTGGCTTTTTTCAA  
GAAATGTGACGAATTGTCATTTCCAGTTCTGCAATAAAAAGCAGAAAAAGATTTTCATTCTTGTCTGGTAA  
GTTTTACTCTTTACATTTTACCATCTTTTGGGTTTTTGGATTTTTATTTTTCTTTTGATTGCTTGCAAATTCA  
GTTATTCCCTCATCATCTTTTCTTTTTCTTTTTCTGTTTCTCTTTTTTTGATGGGGCTTGTGAAGTGTCTT  
AGTTTTTTCACCAACCCCTTTTCAAGAAACATATTTTACTAATTTTTTCTTTTGTGTTTATTCATTTTCCA  
GATAAAAATTGAATCTTGGAGATTAATCAATCGAGTTTGTGGAAGTGTGGTGAGGGAGATGTTGTTA  
TAGTCTAAATTTTAGAACTGGGAAAAATGAGAGACCCCAATTTTGTCCATTGTATCAATAGGGTTAATA  
GTTTTTCTTTTAACTTGTAATATAGTTTTACATTGTAAAAATTGAATGATAAGCAAACAGTGGTGTATTTG  
CTCTCTTTTTTTCAACTTGTTTATATTTACGAGTGAATTCAATTGTTTGGAGAGTAATTTTGTACAAGAAA  
GCTGGCGATTTTGTATAGAGTCCTCGCTGTTGACAGATATTGTTACTGCCTCAACA ACTGATCCATATGG  
TTGTGCAAGCTATGGGTGGTAGATGGAACACTTATGGAATCAAATTGTCGTATCTCGCTCTTTTGATTAT  
CATTTTGGATATTCGCGGTTGTTGTTCTCTTAATTCGGAAGGTAATTCTTATACTTGAGTACAGTTCTATT  
GGTTTTGTAGTTCTGTCTTAGGCTAGTTTTAAGTGTTTGGTATGTTTTCTTGTTTGCTAATTATTGTTGGTG  
TGAGAAACAGGATTGGCACTATTGAGATTCCGCGTGAAAGTGGATTCTGATCCGTATGGCATTCTTGAA  
AACTGGAATTCAGATCATTGTGACCCGTGCTTGTGGTCTGGTGTCCAGTGTATGGACGGGAGAGTGCAA  
ATGTTGTAAGTCTCTTGTTAAATATACCCAAAAATTTCTAGTGTGAATCCTTTTCTTATAAATTTATATGT  
GTTGCTTTGCTATCGACAAGCCTGTTGAAATGATAATGACAGACAAAGTGCAAACACTGAGTTGTGAGT  
TTTTCTGTTTGTGGTTCTTCGGATATTGTTAACTCATTTGTCTGTTCTCTATTTAGGGACCTTCATGGATAT  
TCGTTGAAAGGAAAACTCGCAGCAGA ACTTGAAATCTGACTCACTTAAAATCACTGTAAGCTTCAGCTA  
TACTTATATGCTTCTCATTTGTTTCTTTAGCTCATATTCCTGACCTCATCATCTGAAAAAAGATTGTTCCAA  
TCATTGATGGTTTTTTCTACTTACGAAATGCTTTCATGATTCTGGTCTTAGTCTAGAAATAATATTTAGTGT  
GCTATGTCATGGA ACTAATACTTCCCTATCTTGGTAGACACTATCTTATCACTATACAATTTGAAATTGCA  
CTAAATTTACATGTCTGGTCAGTACAGGTTTCCCTTTTTCGTTCCCATTTGTTACTTAGGAGATGTCTCAA  
ATATAAAGAGCGTCATATACATTGGGATATTTAGCATATTTGGTCATGCAAATTGCACCAAAGAAAACT  
TTACCTTTTTTTTTTCCCAAAGAAAAATGTATAAAGTGAATTGGGTAGATTTCTGGTAATCAATGTTTCAC

CTTCTGTTCTGCATCTATGTAATTAATAAACTTTCTCCTCTTTGAATGCTTTTCTCCACAGTGTG  
CTTTCTGAAAACCGTCTTTTTGGTGCTATTCTAAAGAATTTGGACGCCTCAGAATGCTGGAAGTCTTG  
ACATTAAGAACAACAATTTGACTGGAAGAATTCCAGCAGTAATAGGAGATTTGCAATCACTTAGAAGCT  
TGTAAGTTGATAATTTGTTGTGTTCCGTCTTATAATATATTTGTATGTATTTATGCTACAACATTGCTAAC  
AAAATGTTTTGAATTGTGCTTGATACTCTTTCCAGGTTGATTAGGGACAATAACTTCGAAGGGAAGA  
TCCCTTTGGAGATCAGAAAGCTTCATCTGCTCTCGGAATTGCAATTTGATGATTACCTCACCTCTGGTGT  
GCTGCCGGAAGTGGTGCATAAATAGAAAATTTGGGCGTTGGTAAGACTTCCGTAGTTGTTTGGTCCTT  
TATCTTCATGTTTCAGCTGTGCTGCATTTTAAAGTCGCAGACTTGTCTATGTTCAATTATATTGAAAATG  
CATAAAATCCATCATTGAGGAACATATAACCAATATACTACTTTCATACTAACTACCTCCTGCTATAAGTTT  
GGTATTAACATTAATAAGTGCAAGCAATTATCCCATGGAGTTGCACTGAAGATCTTTGAGACATTTTC  
TATGCATAGTGTGTCCTCACTAATCTCTCATACTTTCTTACAATAGTGAAGCAACTATGATGGTGATTGT  
CGAAAGCAATGCCATGGGGCACTTGATACTTTCTGTCTCCAACCCTAATTCATAGGGGATTAGAGTT  
TAGTGTCTTAAAGTTGTGATTCATCTTCTTATTCATCAAGATCTGTTTATGTGGAAATTTGACTGATCTAT  
TGCATAATATTTGTTTATTTGTGCGACTTTTCTGTACATTAACCACTAAAATTGCTGGAAATGTGGTACTC  
TTCCCATGAGTAGAAGAACAACCTGGATATTATCATATTCCTGTTTCGTAGCATGAACTTCAGCCAGCTA  
TATGAATAAATTTATTCTATTCATCCCGTTGACTCTGTTGAATTCTGGATCGAGATACTCATCTTGGACA  
AGTACCTTCAGCTTTACCCTTGTAAGTATGTCAGATTACAGACTACCTCTTAATATGCTAATGTTTTATT  
CTCAATCACGCACTTTTAAGTTCCATACTCCGCTCTGAAAATTTGGTGCCTTTTTCTTGCAGCATCTGGCAT  
GGCAGTTTGTGGCCATATAAGACTATAGGCTCCTTTCTCAGACCAATTAAGGGATGCTAGCATGGTATT  
TTAGTTTTTTCACACTGTAAGTAACTAAATAGGTTTTTCCACCTTATGCTTTCTAAATAAGTTAATGGTT  
CAGAAGCAACTTTTTGTTTCTAAAAGGTTCCCGGTTTTTTGGATGCTCAGGCAGACTTCTGCTCTGAC  
AACCTACCAAGTGAGTGAGAATATTTGTGACATATCTTTTATTGGATTTCAAAGAATTGTACACAAAA  
AAAAAAAAGTATTTTATTCTTTTTGTTTTGCAGGTTCAACTAGGCCTCACAATATCCACGATGTAGAGA  
ATCAAGCAAACATTGAACGCCGTAAGTTAGCTGAGCAATCCAGTAACCTTGCTGCTGCTCCTGCTAACGG  
AGGGAAACCATTGGGACCTGTTGATCCTGTTCCAAGCAGCAGAAGTAGTGGTTCATTTCTGTGCTGTGCC  
AAGTACTGAAGGAGCTCCTCCTCCTCTGACTACACCATCACGGACCACACCTGATCATCATCCGCCTC  
CAAATCCTGGGGGACACTCTAATGATGCTGTAAACAGCCAATTGCTAGTCAAGCCCCACCTGGTGGAA  
AGTCTGGAAGTACATGGAAGTATATAGGAATTGGCATTGGGGCTTTTCTGGTTGCTGTTTTTGTGTGCCT  
GATAATCATCTGCAAGAGCAAAGCTGCGCAAACAATAGGCCCTTGAAGACTGGATTGAGTGGACAGC

TGCAGAAAGCATTATTACAGGTA CTTTTGATTTAATATTGTGTCAAAGCTGATGAATCCATATGTTCTAG  
TTCAACTGTTGGATTCA TTTTTCTCTGGTGGATATAATCCGAATCTTCAACGCCTACAATAGTTTTTGTTC  
ATACTCCAAGAAGATGTTAAAAGCATGTATTAATACTCCTGTGCTATATTGTTTCTCATGTCTTATGCATG  
AAATCAATTTTGCAGGGGTCCCAA AACTAAACAGGCCGGAGCTTGAAAATGCATGCGAGGATTTTAGCA  
ACATAGTTTGCCATCAAGATGCATTTACAGTCTACAAGGGA ACTCTATCGAGTGGAGTAGAGATTGCTG  
TTGTGTCAACTGCTATAAATTCTTTGAAAGATTGGTCCAAGCGTTCTGAATTGGCCTTCAGGAAGAAGGT  
TAGTAGTTGCCATCTCCTTCACA AATAAAAACTGCTTCATAACTTATTACCATCTCACTCTTTCTGTTGAA  
ATATCCTAGTCGTCTCGGTTTTTTTACTTATAAGATTTCTACTTATTGTGCGCTTGGGTAGATCGATTCACT  
CTCAAGGATAAACCAAGA AATTTTGTTAATCTAATTGGATATTGCGAGGAAGATGAGCCTTTCACTAGG  
ATGATGGTCTTCGAGTATGCAACA AATGGAACACTTTTCGAGCATCTGCATGGTAAACTAGTTAATAGTT  
CAAGTTTCAAGCTTCAAGCTAATCA TTTTTGTGATTTGGTTTTGATTAATGCAGTCTACATGTTTTGTTGTT  
TCAGATGATGAACTTGAACCTCTTGACTGGCCTGCAAGGGTACGAGCTATAATGGGAACAGCATATTGT  
CTCGAGTACATGCACAATTTGAATCCTCCTCTGTGCGATTCTGATGTGAATTCACACTCCATATTTTTTACA  
GACGATTATGCTGCTAAGGTATGCTTTATTTCTGATACCACATTGAATTTAGAAACGTTTTACTTCGTGTA  
ATGTCTTGAATTGAACGGATCTTTTTTTATTTACACAGATTACAGAGCTTGCTTTCTGGTCAGATATAATG  
GTGAAGTCAAAGTCCTCTAGTGGT GATCTAGAGAACTCTGAGCTGCGACCACTTTCTGATCCCGAAACA  
AACGTCTATAACTTTGGGATTTT GTTGCTGGAAGTAATTTCTGGAAAGTCACCTTATACGGAACGAGATT  
CTCTTATGAGCTGGGTATCTATCTA AACTCTATTTTATACGAAAATCCCTTATTTTCTTCGGTGTTAATATA  
GACTAGTGAACGTTCTTCTCTGCT TTTGTTTAGGCGGAGCAATGCCTTAACGATAGACAGTTGGTTGAT  
CCAAAATTGAAGTCGTTCAAGAATA ATGAGCTTATGGTTATGTGTGAGGTGATGAGAGAATGTCTTGGA  
GAAGATTCAAGGAAGAGACCAACAATAAAA GAAGTGATTA AAAAGCTAAGGGAAGCGATTGATATCTC  
CCCTGATGCTGCAGTTCCAAGGCTATCTCCCCTGTGGTGGGCTGAACTTGAGATCCTATCCTCTGAGGCA  
GCCTAATACTGACTATTGTGTCTACTTTTGTATGTAAGTAGAGAGTTGCTTTGCTATGCATAAATGTTT  
TGAATTATACTTCACTTAATGTCAACTGCAAGTCCTGTGTACCACATTTTTCTGTTCTAAATATATTAGTTC  
ATTCTTTT

>PGSC0003DMG400010348 LRR-RLKs

ATGAACACCAACATTATTCCTAGTACCTCAATACAAAATTCTGAGGATATTT CAGAATTACCTATGACCAC  
CACCAACATCTCTGGTTATTCATCAACGGATAAGAATTCTTCGAAAATAACTTATCCAATTACCGTTGATG  
ACTATTCGTTATCTTATATATATTTTCATGGGATGCAAAGATAATACTAGTGAGAAATTACAAAATCACTCC

ATCAAGTCTAAGTTGATGGTTGGTCAGCAAAATGGAATTTTGAGTTCCTTGGATAGTGAATTCCCACAAA  
ATACAAGGTTTATTTTCTTTCCCTATTTTAATTTCAAAAATACATATGTTATTGATGATATTGCCAATTATT  
ATTTTTTTATTACATATTTTCAAACTTTTATTTAATCAATTCTTAGATGTAAGTAAATTTTGTTTTGTCATTT  
TGGTTTAGCAGTAGGAATGGCGGTCCTATAAGAAGGTCACCTAATAGGACAAGCTCAAGATACCAACCA  
TTTGGCAAAGAAATTGATCCAAACAATCAAGGATTAGATAGGCATGTTTTCTCTCTTTTATTCTCCAAATT  
ATCATCAATATATTAATTAGTAATATTGTATCTCCCATTTTCAATCACATTAGTTTACATATTATATGAGTG  
TGTTCCGGTACGGAGGAAACATATGGTTTTCAATTATTTTATGTTTGATTAGTGGGAATATTTTCTCATGTT  
CTTTGAAAATGAGAAAAATGATAAATAGTTGCATCTATCATATATATATAATAAAAAGATCTCTTTAGAC  
AATGACAACGCTCAATATAATTCATCTCATCTTGTTTATATTTTTTTCAGGATTCGTCAAAACAGTTCAGAGG  
CGATCTTCAACACACCACACAATTTCAATGAACATACTCAAGGGTATGGCTATTCCAATGAAGCGATTAC  
ATTGAGAAGTTTGAAGAGTAGGAGAGAAAATGAAGATGAAGCTCCTGCTCAGTTACAGTCTTCTTCAAT  
ACCCCAACCAACTTGCCTCTATATTGAATCTGCCTAGTTTCGCAAATAAGGCTCAAATACTTGTACAATGT  
GTCTTGGACGTTCAAGATATATCATTTTTAGAACAAATGTTTTATTGCCTCAAACAGTATATATATATATGG  
AACAAAAAATATGGAAAATAGTGTTTCAGCAAATAAATAATCCTTTTATGTTTCGATTCTCTGTGTCTT  
CATTTCTTCGTCATTAATGCAACGTCGCCACAATAACCAGAAGTGATCATAGGACATTTAGGTTGACA  
TTTTTGGCAAACATCTCATAAAGGCAATATTAGCACTGACACTGACGAAGCAAGAAATGTGATAACTTCT  
CGTTGTTGGGTTAGGATGTTGCATAATTTGTCACCTCTATATATATTGATTCTACAGTTACTTCTTTCGAAC  
ATTGCAAGGTGAATACTACTGGATATATGGATCGTAAGACAATTGTGTTTTACGGTTTAGTGTGCGAGGT  
GAGTGTGATGATGTCAGATTTTGTGAGTGGCTTACACTTACATACAAGTAAATGATGTGCTAAACCTATT  
AATTATTACCAATCTCAAATAGCATTGATGAAAAAATTCTCTCAAGTTTCATAAACAAACATACAATGTTT  
TTGCACTGTATTTTACTGACAATAAGAAGATACTCCTATGTGAAACCGTCATCAGCAATGAAGGCTCTGT  
TGTTAAGAGAATTTGTGCTTTCCCGATCTAAGAAAAACTTGGACCAATATGTTGATTTTGCCACATCAAA  
CCATAATTTATACTGTAAACACCCAAATAAAGCCACAGGAACACCAACACAAGCTGCAATGAGCTTTGGT  
TCCCAACCCATATGATTACTATAGACCAAAAAGAATGTTGCTGCAAAGCCAAGAGCATGCTAACTATCG  
AGACAAACAGCATTGTGAGTCCAACAATAACTTGGCTGGCAACGACACAAGAAAATCATCTTCAGCAT  
AGTGGGATGTCACAATGGACAAGAACAATAATGATGGAACTATTGAGGTGAATAGTGCCACTGCATCT  
GAATTGACAAAGATCCTAAATCCATACAATTTTAGCAATATGGGAATGCAATTATCACTGTTATTACCGC  
CTGGCACAGTTAATCCAGCAGCAAAGACCATGGTGGCAATCAAAGTAGCGACAATCATACAAGAATTTG  
CAGTGTCTTTCATCCACCTTTTCCCTTCTTTCAGTAATAACTTATGCTCTTCTGTGAATATTTCTCTAGGGG

TTTTCCATCTTTGTTTTGTTAGTGCAAAGTTTTAATGATAAACAACTTATTCTTGCATCAAAAAGGAAAG  
AATCAAGAATGTGTACATCCTTGACTCTGTAAAAAACAATGGAGGACATATATGCCTAGCTTCAATGAC  
TGATGATCCCTGGATTTGGCACAAGAATTTGGCCATGCAAGCATGCGACTAATAGAGAAATTAGCTAAA  
AATGAGCTTGTAATTGGACACCACCACCTTTTGTCTTTTTAGTTATTCCAAAATCCTTGAAAATAA  
AAATAATTCAAAGTAAAAATATAAATATGAACAATTAECTCTCTTGAECTTATCACTTAGAAAAGGTAAA  
TGAAAGACAAAAATGGAAGAAATTTTTAACAACTCTCTTGAACATTGAATAATTGAAAAAATGTCAAAA  
GTTCAAATAGTATGGACTAGATGGAGTAAAATATATAGTTTATATTTTATTAGTCCATATATCATAAAACA  
ATTTTTTTTTTTGTTTCTAGTCAATAGTAATATGAATTTTACACATCATATTAGGCCTCTTATTGTAATTTGA  
AGTAATTCCGTTGACCCATCCCTGTGTAACACACTTGTGGAGATGTGTAACACATTATGAAGGGTAGAG  
AGGACTATTGATAGACCCAAAAATCACGCCAAAATAATGGCAGTATTCAAATGCAAGGCCACAAGTA  
GTGATCAGAAAGACCAAGATTCTTGACATTTTATTGAAGGCAAAAAACATTTTCCCTGTAGGTCACTAA  
TGCCATTTTCTAGTCTTCACTAAAAGAAGTTGTTGAECTCAAATTGTCACTCTAAACCAAAAAATACTCC  
AGTCATCAATTCTTGTTTTAGGAAAAAGAGAAACCTGTCAGTTATAGTTATGGGAAGAAGTTGCGATCTT  
CTCTTTGCTCTTTGTTTTTATTCTGCTCCATACTTCACTATCTATTAGTACTGATGAAGCTGCTCTTCTG  
CCTTCAAATCTCACATTTCTTCTTAATCCTAACAACATCTTAGCAACCACTGGTCTTCTTCCACCCTTGT  
TTGCACCTGGATTGGAATCACTTGCACCTCCCCACACCATCGAGTCGCAGCTTTAGACATTTCTAGTATGC  
AACTTCATGGTACCATTTCTCCACACCTTGAAACCTCTCATTTCTTGTTCCCTCAACATTAGTAACAACT  
CTTTCCGTGGAGATTTGCCCAAAGAGTTGGCTCATTTGCAGAGGTTGAAATTGATTGATGTCTCAAGCAA  
TAACTTCACTGGTGCCATTCCATCATTTTTAAGTTTGCTAGTAGACCTTTGCATTTTGTGCCTGTGAGCA  
ACCAATTTTCAGGAAAAATCCCATCTTCACTTTCCAATCTAACAAAGCTGGAGGTGTTGAAAATAAAGGG  
AAATCTTCTTGAAGGAGAGATCCCTCGAGAACTTGGTGATCTTATTACATGACTGCTTTAAACCTGGGA  
AGTAACCACCTTACTGGCTCTATACCACCATCAATTTATAACATTACAACCATGCGAATCATTGCTCTTAC  
CAACAATAATCTTAGTGGTGAGCTTCCAACAATATATGTGACCATCTTCCAACTTGAAGGGCTTTGC  
CTCTTAGAAAACATCCTAGGTGGCGTTATTCCACCAAATTTGGAAAAATGCAAAAACCTCAAATTTTGT  
CATTGTCTGTAAACGAGTTCACTTGAACCATACCAAGAGAGTTAGGCAACATAACAGATCTTACAGATA  
TAGCTCTTGAATACAGCACTTGGGAGGTAGTATTGCATCTCCTAGCAAGAAATTTGAATTTTCTTCTT  
TTCACCTTTCGACCAATTTGGTACTCATATATATTTATATTTCCCACTTTACAGGAAAGATACCAGTGGA  
GCTAGGTAATCTTAAGAACTACAGATTCTGTCATTAACGACTGTAAGCTTACTGGTTCCATCCCCGCA  
AGCATTTTCAACATGTCAGCACTGCAGCTCCTAGGAATATCAGAAAACAGGCTTTGAGGTACTCTACCTT

CAGATTTAGGTCGTGGAATGCCAACCTAGAAGGATTCTCTGTTTTCAGAATAGTTTGAGTGGTTTTCT  
CCCTGCTTCTATCTCAAAGTCTTCTAGACTCAGTGTACTTGAACCTCCTATAACAGTTTTACAGGCCCAAT  
TCCTGAATCAGTTAGTACTTAGAATACATTGAGATTTTGAACCTTGGGGGAATAATTTTTTCAGCAAT  
TCAGCATTGAGCTTCTTGACATCTTTGACAACTGTAGGAACTGAAAGAAATCACTTTTGCCGAGAATC  
CCTTGGACGGTTTTTTGCCTGCCTCCATTGGGAATTTCTCTGATTCTCTGCAAATTTTCCAAGGATGGTAT  
TGTAAACTGAAAGGCTTCATTCTGGAGAAATTGGCAATCTACCGGTGTGATAAAGATGGATTTGTAC  
AAAATGAGTTGACTGGATATATCCAAAACCATCCAAGGCTTGTCAAACCTCAAGAATTTACTTAGG  
TGGCAACATGATAAAAGGAACCATAACCAGATGTTATGTGCAATTTAAATAAACTTGGAGCATTAGATTTG  
TCAAAAATCAAGCTTCTGGTTCATACCACCATGCTTAGGGAACGTTACCAGTTTGAGGTATCTTTATCT  
AGCTAACAACAGGCTGAACTGGACCTTACCTCAAGCTTGGGGAGCCTTCAAGATCTCCTAGAATTCAAT  
GTTTCGTCCAATTTATTAAGTGGGAAGTTCTATAGAGATTGAAATTTAAAGTTGCAACAATAGTTG  
ATCTGTCAAAAATGATTTTAATGGTAAGATCCCTAGCACACTAGGGGTCTGGATAGATTGATGAAAC  
TTTCTTAGCACATAATAAATTAGATGGGCCTATTCCAGATTCATTTGGCAAATGCTGGCCTTGGAAATC  
TTGGATTTGAGCATTAAACAATGTTAGTGGTGAAATCCAAAGTCATTAGAAGCTCTCGTGTATCTCAAT  
ACTTGAACCTTCTCATTTAATGAACTCAGTGGAGAGATTCCACGGGTGGTCTTTTGCAAATGCCACAAG  
TCAATCTTTCTTGAAAATTATGCCCTTTGTGGCGACTCTAAGTTTCATGTTTCACCATGCGTCATCAAATC  
TCCAAGAGGTCAAAGAAAAAAGGCAATATTGGTTTTGGGAGTTGGTATGCTATTTCTTGCATTAGC  
CCTCACATATGTATTTTTGAGATTGAGAAAGGAAAAAAGAATGCAGGTCAAGCTGATGTGTCTCTGAT  
AAAATGTCATGAAAGAATTTCTATTATGAACTTGAACAAGCAACCGAAAGATTCAATGAAAGCAACT  
GCTTGGTAACGGGAGTTTCTGCAAGGTCTACAAAGGGAGACTAAAGGATGGTACTCTTTTGGCAGCAA  
GGTATTCAATGTGCAATTGGAGGGTGCATTCAAAGTTTTGATACAGAATGTGAGATGTTGCGCAATCT  
CCGCCACCGAAATCTGACCAAAGTCATCACCAGTTGCTCCAACCTGATTTCAAAGCCTTAGTGTTGGAA  
TACATGTCCAATGGGACACTTGATAAATGGCTATACTCTCACAACCTGTTCTTGGATTTATTACAGAGATT  
AGCTATAATGATAGATGTTGCATCTGCAATGGTCTATCTCCACAGTGGTTGTTCAAATCCGGTGGTGCAT  
TGTGACTTAAAGCCAAGCAATGTCTTGCTAGATCAAGAAATGGTTGGCCATGTCAGTGATTTTGGCATTG  
CAAATTTAGGTGCAGGGAAGACTTTTGTCAAACAAGGACAATAGCAACCATTGGATATATTGCTC  
CAGGTATTAACCTTTTACATCTTTCTCATGTTTTCAGAATACCCAAAACATTAATTCTTTTCCCGATATA  
TATGATCAGTTTTAGCCTATTACTCGATAGTTAGGAAGCATTTTTGATCATTTTCAACCCATGATTGCAGA  
GTATGGACAAGATGGAATGGTATCCACGAGCTGTGATGTTTATAGTTTCGGCATCCTGATGATGGAGAC



ATTTACAAGAACCAAACCAGGTGATGAAATATTTACTGGAGACTTGAGCATACGACGTTGGGTAAGTGA  
TTCTTTTCCATATGAGATTCATAAGGTGGTGGATGCTAATTTGGTAGAGCTAGAGGATGAACGGATTGA  
CGCAAAGATGCAGTGTGTTGTCTATCATAGAGTTAGCTTTGAGCTGCACTTTAGTGTACCTGATGCA  
AGAATTAGTATGGAAGATTCTCTTTCAACACTTCAAAGATCATGCTCCAGTTGGTCAATAGTCACCGCT  
AGGTGAAATTAGACCATCCTCTTATGATTGATGCTTGATTACCTATGTCAATTCTGCTATTTAAGATGAAT  
TCAGTTTTGTACTTCATATTATGACTTTTTCACTTTCTAAACATCACAGATTTCTTTCAACCATATGCTAGC  
TGGAATGGTGATTTTCCAGCTACTGGAGTTCACAATTAGTCTTTCTAATCCATAATTAATTGTCTCCTGGA  
TATCTTTCAGAACAAGTTTTATGACGTTGCTGATAAGAGCTTATGCCTTTTGGTGTTTTGATGATCTCCTC  
ACAAATGCAGGGACCTGGTCTCTGCAGAGTATGCTCGTCCAGTGTGGAAGTGCAGGTACAGCTGTAAAA  
GCTGTCTGCGCAAAGTGCAGGTACAGCTGTAAAAGTTGTCTGCGTCAGAGAGTTGGTGAAAGCTGCAGA  
GTACTTCACCAATCAGAAGCAAGGAGGTTGCTTGACGTTTGGTAA

>PGSC0003DMG400010350 LRR-RLKs

ATGCAACTTCATGGTACCATTCTCCATACCTTGGAAACCTCTCATTTCTGGTTTCCATTATAATCGACAAC  
AACACTTTCATGGAGAGTTGCCAAAAGAGTTGGCTTATTTACAGAGGTTGAAACTGATCTCGGTAAGA  
AGTAATAACTTTACTGGTGCCATTCCAACATTTCTAAGTCTGTTACCAAACCTTCGCATTGTGCATCTTTG  
AGCAACCAATTTTTCGGGGAAATCCCATCTTCCCTTTCCAATATAACACAGCTGCAAGTGTTGGATATGTC  
CAAAAATTTTCTCGATGGGGAGATCCCTCAAGAACTCGGTGAACTTCATCACATGACTTTGTTCAATCTG  
GAAAATAACCAGCTTACTGACTCTATACCACCATCAATCTTTAACATTACAACAATGAAAAAGATTGGTCT  
CACCTACAATAATCTTACGGGTAAGCTTCCAGCAACTATATGTGACCATCTTCCAACTTGGAAAGAGCTT  
CACCTCTCAGCCAATCACATACATGGCGTTATTCCACCAAACATAGGAAAATGCAGAAAGCTCCAAATCT  
TGTCATTATCTAGAAATGAGCTCACTGGAAGTGTACCAAGAGAGATAGGCAATTTAACGGCACTTACAA  
GCTTATACCTTGGAACTTTGCATCTGGAAGGTATTATGATACTTACTTTTCAATTTTATCTTCTGCCAAATTG  
GTACTAATCATGTATTTTCTCACTTGACAGGAGAGATTCCAGCAAGTATTTCTAACATGTCAGAACTGC  
AGAACCTAGGATTTGCAAGAAACAGGCTTTCAAGTAATTGTTGTGTAACAAAGAATCTGAAGTGTTTAT  
GTAAATATATGACACGTGAGCCTAACTCAACCCTAAAACTAGCTCATGAGGGGAGGATTTCCCAATTCC  
ATATAATCTGACCACCTGTCTATTCCCAAACAATGTGGGACTTTTGTAGATACTTAACACCCCTTTACAC  
CCAGGTCCAACCGGAGCGTGGACCGGCAGCCCAAAGGGGATGGCCTGACCCAGATAACCATGTAAAGAT  
ACGACATCCTCTCCTCATGAACTAGCTTTTGGAGGAGAGTTAGGCCATGTGTCATATCATACATGGTAT  
TAGAGCCACGTCCATTCTCGTTTGGACTCCCAATATTTCACTCCAGTTAGGCCTAGGCAAGAAGGGGTTGT

TAGAGAGGTTAAAAGTCCCACATTTGTTGGGAATGAACAGGTGGTCTGCTTATATGAACTTGGGCAATT  
CTCGCCCATGAGCTAGCTTTTGGGATTGAGTTAAGCCCAGGTGCCATATCTTTACGTTCTCAAGTTCTAAC  
ATGTCAACTCATATATTTCCCCCTCTTGACAGGAGAGATACCAATGGAAGTCTTACAGAACTA  
CTGTTTCTGTCATTAGACACAAATGAGTTGACTGGTTCTATCCCTGCAAGCATTTC AACATGTCAGCACT  
GCAGATCTTAGGAATTGCAGAAAACAGGCTTT CAGGTA CTCTACCTTCAGATTTAGGTCGTGGAATGCC  
AACCTAGACGGATTCTATTGTTATCAGAATAGTTTGAGTGGTTTTCTCCCTGCTTCTATCTCAAATTTTCA  
AGACTCAGAGTACTTGA ACTCTCTTATAACAGTTTCACAGGCCCAATTCCTGAATCAATTAGTGACTTAG  
AATACATTGAGGTTTTGAACTTAGGGGCGAATAATTTTGT CAGCAATTCAGCATTGAGCTTCTTGACATC  
TTTGGCAA ACTGTAGGAACTGAAAGAAATCACTTTTGCCGAGAATCCCTTGGACGGTTTTTGCCTGCC  
TCCATTGGAAATTTCTCTGATTCTCTGCAAATTTTCCAAGGATGGTATTGTAACTGAAAGGCTTCATTCC  
CGGAGAAATTGGCAATCTTACCGGTGTGATAAAGATGGATTTGTCACAAAATGAGTTGACTGAATATAT  
TCCAAAATCCATCCAAGGCTTGTGCAACCTTCAAGAACTTA ACTTAGGTGGCAACATGATAAAAGGAATC  
ATACCAGATGTTATCTGCAATTTATATAATCTTGGAGCATTAGATTTGTCAGGAAATCAAGTTTCTGGTTC  
CATAACCACCATGCTTAGGGAAACATTACCAGTTTGAGGTATGTTTATCTAGCTAACAACGGGCTGAATTTG  
AGCTTACCTTCAAGCTTGTGGACTCTTCAAGATCTCATAGAATTCAATATTTCTGTTCAATTTATTAAGTGG  
GAAAGTTTCTATGGAGATTGGAAATTTAAAGGTTGCAACACTAGTTGATCTGTCAAAAAATGATTTTAGT  
GGTAAGATCCCTAGCACGCTAGGGGCTCTGGATAGATTGATGAAATTTTCTCTAGCACATAATAAATTAG  
ATGGCCTATTCCAGATTCATTTGGCAAATGCTGGCCTTAGAATCTTGGATTTGAGCAATAACAATCTTA  
GCGGTGAAATTCCAAAGTCATTAGAAGCTCTCGTGTATCTCAAATACTTGA ACTTCTCATTTAATGAACTC  
AGTGGAAGATTCCACAGGTGTTCTTTTGCAAATGCCACAGGTCAATCCTTCTTGTCCAATTATGCACT  
CTGTGGTGATTCTAAGTTTCATGTTTCACCATGCGTCATCAAATCTCCGAAGAGGTCAAAGAGAAAAAAG  
ATAATCTTGGTTTTGTACATCCTTTTAGGAGTGGGTATACTATTTCTCTCATTAGCCCTCGCATATGTATTT  
TTAAGATGGAGAAAGATAAAGAAGAATGCAGATCAAGCAGATGTCTTTCCGGTAAAAGGGAAATATGA  
AAGAATTTCTTACTATGAACTTGAACAAGCAACAGAAGGATTTCGACGAAAGCAACCTGCTTGGTAGTGG  
GAGTTTCAGCAAGGTTTTCAAAGGGATACTTAAGGATGGTACTTTTTGGCAGCAAAGGTATTCAATGT  
GCAATTGGAGGGTGCATTCAAAGTTTTGATACTGAATGTGAGATGTTGCGCAACCTCCGCCATCAAAA  
TCTTACAAAAGTCATCACCAGCTGCTCCAACCCTCACTTCAAAGCCTTGGTATTAGAATATATGCCAAATG  
GGACACTTGAAAAATGGCTATAACAATCACA ACTTTTTCTTAGACATGTTGCAGAGATTAAGTATACTGAT  
AGATGTTGCATCTGCAATAGACTATCTCCACAATGGCTATTCAACACCTGTGGTGCATTGTGACTTGAAA

CCAAGCAACATCTTGCTAGATCATGAAATGGTTGGTCATGTCAGCGATTTTGGCATTGCAAAATTGTTAG  
GTGCAGGGGAAGATTTTGTTCAAACAAGGACAATAGCAACCATTGGATATATTGCTCTAGGTATCGTAA  
TTATAGATTAGTACTCAGTTTTAGCATGTTCCCTCGGTAAGTACTAGGAAGTTTTTTGTGATTATCTTTTACCAT  
GATTGCAGAATATGGACAAGATGGAATAGTCTCCACCAGCTGTGATGTTTATAGTTTAGGCATTGTGAT  
GATGGAGACATTCACAAGAAGGAGACCAAGTGATGAAATATTTACCGGAGGAATGAATATACGATGTT  
GGATTAATGATTCTTTTCCGAGTGGTATTCATAAGGTGGTGGATTCTAATTTGATACAACCATGGGATGA  
ACAAATCGATGCAAAGATGCATTGTTTGCATCTATCATGAAATTAGCTTTGAGTTGCACTGTAGTGACA  
CCTGATGCAAGAATTAGCATGACAGATGCTCTTCAACACTCGAAAAGATCAGACTCCAGTTTGTCAATA  
GTCTCCGCTAG

>PGSC0003DMG400010351 LRR-RLKs

GATTAGGCAAAACACAAAACACTATTCATATTGACTAATGTGCCAGAGTTTATGTAATCAAAGTACTAAAT  
ACTCGTTTAGTCTCATATTACTTGGCCTTGTTAACTAGTAAAAGTTGACTCTTTAAGTCTTAACCTAA  
AGTATACTCCAAAACACTAATGGCAGTACTCAAATGCAAGGCCACAAGTACTTATCAGAAAGACCAAGA  
CTTAAATTTGAGGTTCAAGTTTCTTGCACATCTCATTAAACATAAAATACATTTTCCCTGTATTGTGCCAT  
TTTCTATTCTTCACTAAAAGAACTTGTGCGAACTAACTCGATATTGACTCTAAACCAAATATACTCCAT  
AGACTAATGTCAGTATATTGGTATTCGTGTGAATTTGATATCAATCATGACTATATGAAAAGTCCACATA  
TGGTGAATAATGCCAAAGAAATATGACTTGAGAATTTCCATGGACTGGTTGAGGGGAGGAGACTGGAC  
TGTTGACTCAGACTCACTAATACTAAGTACTAAAAAATTTACTCTCAATGAATTTGATATCATT  
AGATATAACATAATCTAAGATCATTATTTGCCTCATCGATCAATTTCTGTTTTAGTAAAAGAGAGATA  
TCAATCTGCTATTAGTTATGGGAAGAAGTTGCAATCTTCTCTTGCCTTGTGGTTTTCTTCTGCTCCATA  
CTTCAATCTCTACTGTTCCAAATATTAGTACTGATGAAGCTGCTCTTCTTGCATTAATACTCACATTTCTT  
TTAGTCCTAACAACATCTTAGCAACCAACTGGTCTTCTTCCACCCCTGTTTGCACCTGGATTGGAATCACT  
TGCACCTCCCGACACCATCGAGTCACAGCTTTAGACATTTCTAGTATGCAACTTCATGGTACCATTCTCC  
ACACCTTGGAACCTCTCATTCTTGTTCCTCAATATAATAACAACAGATTCCATGGGAATTTACCCC  
AAGAGTTGGCTCATTGTCAGAGGTTGAAATTGATTGATGTCACAAGTAATAACTTAACTGGTGCCATTCC  
AACATCTTTAGGTTTGTAGTAGACCTTCGATTTTGCCTGTCTAGCAATCAATTTTCCGGAAAAATCC  
CATCTTCCCTTTCCAATCTAACAAGCTGGAAGTGTTGAGAATAACGGGAAATTTCTCGAAGGAGAGAT  
CCCTCGAGAACTTGGTGTCTTCAATACATGACTGCTTAAATCTGGAAAGTAACCATCTTACTGGCTCTA  
TACCACCATCAATTTATAACATTACAACCATGCGAATCATTGGTCTTACCAACAATAATCTTACTGGTGAG

CTTCCAACAACACTATATGTGACTATCTTCCAACCTTGAAGGGCTTCACCTCTCAACAACATCCTAGGTG  
GCATTATCCACCAAACCTGGAAAAATGCAAAAAGCTCAAAGTCTTGTCATTGTCTGTCAATGAGTTCAC  
TGAACTATAACGAGGGAGTTAGGCAACATAACAAATCTTGCAGAATTATACCTTGGATTGCTGCACTTC  
GAAGGTAGTATTACATCTCCTAGCAAGAATATTTAATTTTTCTTTTTCACTTTTCCACCAATTTAGTACT  
CATATATATATTTCCCACTTAACAGGAGAGATACCAGTGGAGCTAGGTAATCTTAAGAACTACAGATT  
CTGTCATTATCCGGCTGTAAGCTTACTGGTTCATCCCACAAGCATTTTCAACATGTCAGCGCTGCGGG  
CAGTCGTA CTGACGAAAACATGCTTTCAGGTAATCTACCAGCAGATTTAGGCAGTGGGATCCCCAGCCT  
AGAAACATTGTTTTGTGCAACAACACTATCTGAGTGGATTTATATCTGCTACTATCTCAAATGCTTCAAGAC  
TCAGTGAGATTGATCTTCAATCAATAGTTTCACAGGTCCAATTCCTCAATCACTTGGTAACTTAGAAAAC  
CTTGAGGTTTTGGACCTGCAGGTGAACAATTTTGTGACGATTGAGCATTGAGCTTCTGACATCTTTGA  
CACACTGTAGGAACTGAGAGAACTCACCTTGTGTAAGAATCCCTTGAAGGTTTTTCCCTGCATCAAT  
TGAAATTTCTCTGATTTTCTGCAATTTTTCGAAGGATGGACTTGTAACACTGAAAGGCTCCATTCTGGA  
GAAATTGGTAATCTTACCGGTGTGATAAGGATAAATTTTTACAAAATGATTTGACTGGACATATTCCAA  
AACTATCCAAGGCATGCTGAACCTTCAAGAATTTTACCTAGAGAGCAACAAGATAGAAGGAGTCATAC  
CAGATTCTATCTGCAATTTAAGAATCTTGGAGCATTATTCTTGTCAGGTAATCAATTTTCTGGTCGCGTG  
CCACCTTGCTTAGGAAAAGTTACCAGTATGAGATATCTTCTCTAGCTGATAACATGCTTAATTCGAGTTT  
ACCCGAAAGCTTGGGGAGCCTTCTGATCTCATAGAGTTCAATTTTTCATCCAATTTATTGCATGGCAAA  
ATTCCTATTGAGATTGGAAATTTAAAGTCTGCAACACTCATTGATCTGTCAAAAATGATTTTTTGGTAT  
GATCCCTAGCACTCTAGAGGGTCTGGATAGATTGATTAGTCTTCTCTAGCACATAATAAATTAGATGGG  
CCTATTCCAGATTCATTTAGAAAAATACTGGCCTTGAATACTTGGATTTGTCCAGTAACAATCTTAGTGG  
TGAAATCCCAAAGTCATTAGAAGCTCTTGTGTATCTCAAATACTTGAACCTTCTCATTTAATGAATTCAGTG  
GAGAAATCCCACGGGTGGTCCTTTTCAAATGCCACAGATCAATCTTCTTGTCCAATTATGGGCTCTGT  
GGTGATTCTAAGTTTCATGTTTCACCATGCGTCATCAAATCTCCAAGAGGTCAAAGAAAAAAAAAAGGCAA  
TTTTGGTTTTGTACATCCTTTTGGGAGTAGGTATGCTATTTCTTGCAATTAGCCGTCACATATGTATTTTTGA  
GATTGAGAAAGAAAAAAAAAGAATGCAGGTCAAGCTGATGTGTCTCTGATAAAATGTCATGAAAGAATTT  
CCTATTATGAACTTGAACAAGCAACCGAAGGATTCAATGAAAGCAACTTGCTTGGTAAACGGGAGTTTCA  
GCAAGGTCTACAAAGGGATACTTAAGGATGGTACTCTTTTGGCTTCAAAGGTATTCAATGTGCAATTGG  
AGGGTGCATTCAAAGTTTTGATACAGAATGTGAGATGTTGCGCAATCTCCGCCACCGAAATCTGACCA  
AAGTCATCACCAGTTGCTCCAACCTTGATTTCAAAGCCTTAGTGTTGGAATACATGTCCAATGGGACACT

TGATAAATGGCTATACTCTCACAACCTGTTCTTGGATTTATTTACAGATTAGATATAATGATAGATGTTG  
CATCTGCAATGGTCTATCTCCACAGTGGTTGTTCAAATCCTGTGGTGCATTGTGACTTAAAGCCAAGCAA  
TGTCTTGCTAGATCAAGAAATGGTTGGCCATGTCAGTGATTTTGGCATTGCAAATTTAGGTGCAGG  
GGAGACTTTTGTTCAAACAAGGACAATAGCAACCATTGGATATATTGCTCCAGGTTTTTAACTTTTACA  
GATTCCTCATGTTTTTAGAATACCTGAAAAATATTAATTATTTCCCATAAATATGATCAGTTTTACATAT  
TCCTCGATAATTAGGAAGCTTTTTTTATATCATTTTCAACCATGATTGCAGAGTATGGACAAGATGGAAT  
AGTATCCACGAGCTGTGATGTTTATAGTTTCGGCATCCTGATGATGGAGACATTTACAAGAATCAGACCA  
GGTGATGAAAGATTTACTGGTGACTTGAGCATAACGACGTTGGGTAAGCGATTCTTTCCAGATGAGATT  
CATAAGGTGGTGGATGCTAATTTGGTACAGCTAGAGGATGAACGAATTGACGCAAAGATGCAGTGTCT  
GTTGTCTATCATAGAGTTAGCTTTGAGCTGCACTTTAGTGACACCTGATGCAAGAATTAGTATGGAAGAT  
TCTCTTTCAACACTTCAAAGATCAGGCTCCTGTTTGTCAATAGTCGCCGCTAGGTGGAATTAGACCATCC  
CCTTATGATTGATGCTTGATTACCTATGTCAATTCCGCTATTTAAGATGAATTCAGTTTTGACTTCATATT  
ATGTACTCTTTCACCTTCAAACATCACAGATTTCTTCAACCATATGGTAGCTGGAATGGTGATTTTCCA  
TCTACTGGAGTTTACAATTAGTCTTTCTAAATATTGACACTCTTAAGTCTTAACCAAAAAACACTCTGAAG  
ACTAAACAACACTATAGGGCCTCCAGGTTGCCTGTAGCATAGCCAATACCATTTCCAGTCCATAATAAT  
GCAGTAACCTGTTCCATCATCTACATATCCTTTCATA

>PGSC0003DMG400010400 LRR-RLKs

GGCATTTAAATCGAGCCTTCGATTGGAACCTCACCACATTTTGTCCAGAAATTGGAGCTCAGACACACAC  
TTCTGCAGCTGGTATGGAGTTTCATGCTTGCACCAGAGAGTTGTAGCTTTGCAACTTCTAATTTGGCCA  
TTCAAGGCAGAGTTTCTTCAGAAATTGCCAACTTGACTCAACTTGCTCTTCTTGACCTTAGTAGCAATGAT  
TTGAATGGCAATTTACCAAGTGAGTTGGGCTTCTTGCAACAACCTGAGACTTTTTAATGTGACTGGGAATT  
CTCTTGATGGAATTCCTCTGAATATAAGCCGTTGTCGTGTACTGCAAGAACTTCATTTATCAGATAAC  
ATGATCAAAGGAAGCATACTCAAGAACTTGGCCTGTTAAGTCAACTTAGAATTTTGCCTCAACGACA  
ATAATCTGACAGGAAAGATTCTACCTTTATTAGGAACTTATCAAAGCTGGAATATTTTTATCTGCATGA  
AAATGATTTGGAAGGTGAAATACCTGATGAAATTGGTGATCTTACCAATTTGAGGCTCCTTTCCTTCGT  
GGCAATGATTTCACTGGAGCGATACCTGCTTCAATTTTCAATATTTCAAGATTGCAAATTTGGGATCTCTC  
GATAAATGCCTTATCAGGGGAACTTCCAAGTGATTTGGGTAATTGTTTTCTATCCTTGAACATCTTTTTC  
TGGACAGCAACAGGATCACGGGGAAAATCCCGGTTTCTTTATCAAATGCATCAAAGATTACTCATCTCTT  
CTTCACTGAAAATGATGTGCAAGGAAATATTCAAATGAGTTTGGTAAGTTGCATGAACTAGTCTGGTTT

GAATTTGAATATAATCGAATTTCTGGTGCCATTCCATCCAGCTTATTCAATATTTTCGTCTCTTGAAATCCTC  
AAAGCCAGGCATAATTACTTAAATGGGCATCTTCCATATGATCTTGGTACTTGGCTACCTAACTTGCAGG  
AGATTTTCCTTTGGAGATCTACCCTCTGCAATATGCAATGCTTCAAAGCTTTGAAAATCTTGAAGTTGCAA  
ACAACAGTTTTACTGGACCGATTCCCATGATGTTAGGTAACCTGGTGAACCTTATAACTCTAAATCTGCA  
AAATAATCTGTTGGAAAACAAGCCTGGAGCCACACAACCTTGACTTCTGAATTCATTGGTAACCAGCAG  
GAATCTGGTGTACCTGATTCTTGAATCTAATCCTTTGAATGGAATTTTTCCAGAATCAATAGGAAATTTAT  
CAAGCAATATCAGGGTCTTGATGCAGCAAACCTGTGGAATTAGAGGCAGTATGCCAACAAACATTGGAA  
ACTTAAGTGGCTTGATTTTCCTGGGATTAGCAAGTAATAACATTGTTGGCAATGTGCCCCCTCGTTTGT  
GGCCTGCAAAACCTGGAAAGGCTGTATCTTACTAGAAATAAATTAGAAGGGACATTTCCAGCTGAACTG  
TGCAGCATAGGAAGATTAGGTCTACTGCATTTGGGAGAAAACAGACTGTCAGGAGAAATACCCTCGTGT  
ATCGGAAATCTGACTGAATTAAGAGTAATGTCAATTGCTGCCAACAAATTCAGCTCAAAGTTACCTTCAA  
GTTTCTGGAGATTAGTAAAGCTTGATGGTCTGAACATATCGAGAAACCTGCTGCATGGTTTTCTCCCTTCT  
GATGTGGGAACCTCTGAAAGCAATGAGCATCATGGACCTCTCTTTCAATAGGTTTTTTGGTGAATACCCA  
ATTCCATAGGGTCCCTTCAATATCTAGTTTCACTAGATATGTCAAGAAATGCATTCCAAGGTCCCATACCG  
GACACATTTAGCGATCTAATAGTTCTTGAGGGTCTGGATTTGTCTACTAATGCTCTATCAGGTGTGATTCC  
CAAATCTCTTGAGCTATTGCGAGATCTCAAGTATCTCAATGTTTCTTTCAACAACCTTGCAAGGAGAAGTTC  
CAAAGAAAGGGGTGTTTGCAAATGTTAATTACCGTCTTGATGGGAAATCCAAGACTTTGTGGAGCAA  
TTGACTTATATATTCCTATATGTCCAGCTCAAGGTAGAAAGACAACAAGGAAAAAGTCCATTATTCTTAG  
AACAGCAGTACCTGTTGCTGTAACATTTCTGATATTGGTGCATTGTTTTTCACATGGATGATTTGGTCAA  
GAAAAAACATGTGATTGAAACAATGAATCGGATTACCCTCCTAGAATTGCACATCAGAAAATCACTT  
ATTATGAGCTTCTCCAAGCTACAGAAAATTTCAAGTCAAGCTAGTAGGAAGTGGAAGTTCTGGTA  
CAGTCTACCAAGGTACATTTTCTGATGGTGTCTTTGCAATCAAAGTTTTTGATATGCAATGGCAACG  
GGATTTAAGAAATTTTGATTCAGAATGTGAAATTTTGAGCAACGTAAGACACAGAACTTGGTCAAGAT  
AGTGTCGACTTGTTCAAATTTGGATTTACAGCAATTGTGCTGGAGTACATGCCTAATGGAAGCTTAGAC  
AAAAGATTATACTCTGATGAAAATTGCTTGAGCCTGGTTGAAAGACTCAATATAATGATCGATGTAGCAC  
TTGCCATGGAGTATCTTCATCATGATTATACAGTGCCATTGTGCACTGTGATCTGAAGCCAGGTAATGT  
TCTTCTTGATCAGGATCTGACTGCTCATGTAGCAGATTTTGAATTGCAAAAATGTTGGCACAAGAAGGA  
AACATGGCTCAAACCAAGACTCTCGAACTATTGGTTACATTGCTCCAGGTATGATAATCATGTCTTGAA  
ATGAAGGTGTCCTATGTTGGTTACTTTTTCTTTATGTCTACCATAACTTTATACTGTAACATGGATAACT

ACACATTTTAACTGGGAATTTGTTGAAACAGAATATGGTTTAGACGGGCAAATTTCCACTAGCAGTGATG  
TTTATAGCTTTGGGATTTTGTGCTTGAGACATTCACAAGAAAGAAGCCTACGGATGACTTGTTTAGCGG  
AGATTTAAGCTTGCATAAATGGACATCTCTCTCCTTTCTGATGCTGTACTGGACATTCTGGATGCTGACC  
TTGTTAGCGACATTGGCTTTACAACAGATGAAAACCAAAGCGAAATCAAACAATTGCTGGTTTTGATAAT  
AAATGTTGCATTCTGTGTTTGAAGAGTTGCCAGAGGAAAGGATAAACATGAGAGAGGTTGTGGTGC  
AGCTAAACAAGATAAGAGCTGAATTAACCAAGCTTTAACTCAATCCCATTCAAATTTTCAGAAAGAGGAT  
TGATGCAGCAACAAGCAAATTCAGTTTTCCACCTTCTATGACCTGTCAAACATCTGTTATTTCTTAATATT  
TTCTTTCTGTTTAGTGTAGGGGCATTTTAAATATTATAAGAATGTTACATTTTAGCATTGATCGTTTGCCCCT  
AAGTCAGTCATTA CTCCCTCTATT CATTATTGCATTAGAATATGCATTGGTTGACTTTCATTTGTTGTAGTA  
TGGTGGGAGTTAATGGAAATCTTTTGCTGCCGTTTGGACCATTAAGTTGGTGCATTA CTCCATAGAGTA  
ATTGCATATGTTACTAATTCCTTGGTGAATTGCAGCAGGTT CAGCCGTTGGTGGCTGTAAGCTTTTTTAT  
CCCATTACTTCTTACTCTTACTCCTCAATTATTC

>PGSC0003DMG400011160 LRR-RLKs

AAAAAATCTCTCTTCCCTCTCTCTGAGTCCTCTCACTTTCCTGATTTTCTTCATATCATCTCCACACCTGAT  
TCTCTTACACCAAAAACACAGTACAAAAAATTAGTAAAAAAAATATTTGAAAAAAAACACAAACA  
AACTCAGATAAAGCAAAGGAGAAACAGAGTTGGTACAAATACCAACAAAATAGACAGACTGATAAAG  
AACCTGTTTCTTTTCTTTTACTCCCTCTCACTTTTTTTTTTAGTTTTTGACTGAAAAAAGACACAATTTTT  
AATCATTTATATGAACCAAATGTTAAATAAATTCATGGGGTTTGCTTAATATATGTGTTGAATAATTTGA  
TTTCACTTTCTTGGGTTTTTTTTTTTATCGTCAATGGCTTCCATTTTCTTGATTTTTGTTCTCTCTTTGCTTC  
TGTTTTACCTTTTCTTTGTTTTTTCATATGAAGCTAGGAATCATGAAGGTAAACAAAAAAAAGAATCCCA  
TTTGCTTATTTTTT CAGTTTTTTGTTTTCAAATTTGATCTTGTTGTTTTGATGTATAGTGGAAGCTTTGATTG  
CTATAAGGAGAAGTTTGGATGACCCAAAAGAGCTTTAAGTAATTGGGATGAAGATTCTGTTGATCCTT  
GTAGTTGGGCTATGATCAGTTGTTCTTCTGAAAATCTGTTATTGCACTGTATGTTTAATAGTATTTTTTTT  
TTTTGGAATTTTATGGTACTATATGATTATATTGGTTGTTAAAGATTGAACTTTTACTGTTTTATCAACTA  
AAAAAGTGTTTTTTTTTTGTTTGTAGAGGAGCTCCAAGTCAAGTTTATCTGGGGTTTTGTCTGGGATGAT  
ATCAAATCTTACAAACCTTAAACAAGTGAAGAGACAATTTTTTAATGTTTTTGTGTATGTAATTTCAA  
TTTTGATGACCACATTTGGTTAATTTCTTGTATGTTGAAAATTGTGTAGTTTATTGCAAACAACAACAT  
TTCTGGGCATATTCCAAGAGAGCTAGGGAACTTCTAATCTTGAACATTGGATCTGTCTAATAATCAT  
TTCTCTGGTCATGTTCTGATTCTTTGGGTCTGTTAAACAGTCTTCAGTATCTGTAAGTGTATTAACTTTC

AAAATTTTCATTTTTGTGTGATTATGATTATGTTTTAGAGTTGAATGGTCTAAAACACACATGCAGTATC  
ACGTTTTTGCAGTTTGGCTACGAATTATCACCTAAAACATATCTCAACGCCATCTCATAGTTGTGTTTTGA  
TAAATAGTTGGTGATGGTTTAAGAAGGAAAATTGAACACATGATAGTTTAGGTAGAAAACGTGCGAAAT  
CTTGATACTTCAAAGTGTGGTTTTACCATTATCTCTGTTTTCCGAGTACCCTTTTTCTTTAATTGTTGT  
TTTCTCATGTAGACAATGTTAAGTGCTATCTTATTCTTGACTATTATGTTTTGTTTTTGTGATGTCTT  
GTTCTGGGGTTTGTCTTGTAAATGGAGTAGAAGGTTGAACAACAACAGCTTGTCTGGTGTATTCTCTTT  
CTTAGCCAGGGTCCCTCAGCTTGCTTTCTGTGAGTATTGCTTCTTGAATCTATGACTTTTGTGTTGATT  
TGTTTTATTTTTTGTCTGATTGTCCTGAGAATTGGAATTATCTAGTCACTTTCTTGAATCAGCCTTATGTT  
AAAGCTTTTTTGTAAAGGAAATTGAATAGTTTGTCTGTTTAGGGTATTATTATATTTAACTTATTA  
TTCACTTTTATTTATTTAGTATGACGATGATATGCAATGAGCTTAAATGAAAGTGGGGATTTCATATTGT  
GACTCCAACCTGTTTGGGACTGAGGCATTGTTGTCGTCGTCGGATAGTGTTTTTTTTTTTTTGTATAAA  
GAAATGATTAGTGTGTTCTGATTAGGGTATTATTATATTTAACTTATTTTTACTTTTTATTTATTTAGT  
ATGACGATGATATGCAATGAACTTAAATGAATGTGGGGATTTCATTATGCGGACCCCACTTCTTTGGAAC  
TGAGGCGTTGTTGTTGTCAAATAGTGTGTCTGTTTTGTGTAAGGAAATGAATAGTGTGTTCTGTTCTGG  
GTTATTATTATATTCCTACTTATATTTCACTTTTATTTAATCTAGTGTGACGATGATATGCAGTGAGCTTAA  
ATGAAAGTGGTTATTCATATTGTCGACGCCAACTGTTTGGGACTGAGGCGTTGTTGTCATTGTTGCCGT  
TGAATAGTGTGTTCTGTTTAGGGTCTTTTTATCTTCTAACTTATTTTTCACTTTTATTTAATCTAGTATGA  
CAATGATATGCAATGAGCTTAAATGAAAGCGGGGATTTCATATCGTGGACTCTAACTGTTTGGGACTGA  
GGCGTTGTTGTTTTGTTTTATTGTTGAATAGTGTGTTCTGATTTTATGAACCTTATTCTTTTCAGGGAC  
TTGTCTTTCAATAATCTGAGTGGACCTATTCCTAAATTTCTACGAGAACTTTCAAGTATGGATTCTCTGC  
CCAACCTTATTATGTTACTTATAATTGTGTTCTTTGTACATACAAATTGTCTTGTTAAGTTCTAATTGTG  
ATTTTTCTTTATCCTTGATGTTTTCGTAGTGTGTCGGGTAACCTTTGATATGTGGAAATCACTCTGCTGA  
GACTTGCTTCGGATCGGTTAACCTGATGCCCTTTGTTTCGACATTGATTCCACCGGTAAAGTTTAGAAA  
AGTTTCTCATGATTCAACAATGTTTAGACATAAATACAATTTAATTATCTTAACTTCTTTCTGTTGTAACC  
AGGTAAGCGAAACTCGAAAAGACTAGCCATTGCTATAGGACTTAGTGTGACGTTTCATCTCTTTTTCTCT  
TGGGATTCGGATTCATAATTTGAAAAGGAACCAAAACAGGAAACAGTCTATTCTGAACATTAATGGTG  
AGTCTTAGTAGCATTTTGTGATTTGATGACGGTTCAAAGTTATTTACGTTTCGATTTTTGTTCCAGATAT  
GCAAGAGGAGGATCTAGTTAGACTAGGGAATCTCAGAAGCTTCACATTTAAGAACTTCAACGTGCGAC  
AAACAGTTTCAGCTCTAAGAACATTCTGGTGCTGGAGGATTTGGCAATGTTTACCGTGGAAAGTTGGG



GGATGGCTCGTTGGTCGCGGTGAAACGATTGAAAGATATTAGTGGAAGTCTGGAGAGTCACAGTTCC  
GGACGGAATTGGAGCTTATAAGCTTGGCAGTACATAGAAATTTGCTCAGATTAATTGGTTATTGTGCTAC  
CCCAAACGAGAGACTTCTCGTGTATCCTTTCATGTCTAATGGCAGTGTGGCATCAAGACTTAGAGGTAAA  
CACCTTGTGTAAGTCTTTTCAGCCAATCGCATGCCTTACACATTGTAAGTCTTTCGTTTCTATTGTTTGTCTG  
GTTTTGATTTGACACGGAGTTTAAGAAAGTAAAGAATGATTTTTGAATCTTGAAGTCTTAAACTAAAGAT  
ATGGAGAGTGTACCAATATGTCTTTAATCTTGTGGTCTTAAACATGCCATGTGGTCTTAAAAAATTGA  
TGGAATGTACACATTCTTAATCCATTTTTCGCGATGACAGGAAAACCAGCACTAGATTGGAATACTAGGA  
AGAGAATTGCAATTGGAAGTCAAGAGGTCTTCTTTACCTCCACGAGCAATGTGATCCAAAGATAATCC  
ACAGAGATGTGAAGGCGGCAAATGTCCTATTAGATGACTTCTGTGAAGCTGTTGTGCGGGACTTTGGCC  
TTGCAAAGCTCCTCGATCATGCTGACTCTCATGTTACCACAGCTGTTTCGTGGAACAGTTGGCCATATAGC  
GCCAGAGTACCTTTCCACCGGTCAATCATCCGAAAAACGGATGTGTTTGGATTTGGTATCCTCTTATTA  
GAGCTTATAACTGGGATGAGAGCTTGAATTGGGAAAAACAGTAAACCAGAAAGGAGCAGTACTTGA  
ATGGGTATGTATGTTGCTTTATTCATCTACCAGTTATTGAATTCTATGTTGCTCGAACTCTCCAAAAATGC  
ACTACTTTTGAAGGCTTCGATACGCATGTGTTTTCATTTTTGAAGAGTCCGAGCAACCAATATTTCTTTA  
AATAAAAGTGAAAAATGGAGCTCCAGTAGCATCACTTACTTAGTGATTTTTTAACCTTTGTTAGTCGGAC  
TCTTCAAATGTAGACTGGTGCATATCGAATCCTCGAAAAACTAGTACATTTTTTGATAATCTGATACG  
GATGCAACAACATTTTTGTAGAGTTCGAGCAAAGTAGGTTTTAACAAAAAGAGTCTTGCTTAGATTTTCT  
CATGAACTGCTGCTTAACAACAAGTGTGGCTTGATTGCAGGTTAAGAAAATGCAGCATGAGAAGAACGT  
CGAAGCTCTCATCGACAGAGAGCTTGGGAGCAACTACGACAGGATCGACGTAGGGGAGATGTTACAAG  
TGGCTATACTCTGTAAGTCAATACCTACCGTCCCACCGTCCCAAGATGTCTGAGGTGGTCCGAATGCTCGA  
AGGTGATGGCCTTGCTGAAAAATGGGCTGCATCTCATAACTATGATGGCTTTTCTTAACCAAAAACAGT  
AACAAAACCTCAGACTAAACATTCTATGGTGCCTCTTGATATGATGACAATGATCATGATCATTGACCG  
TGTTTGGGATGATGGATGATGACTATGACACACATGCCATGGAGCTTTCCGGTCCAAGATAATAGCGAA  
ATATCATCGAGGTCTGGAGAGGGTACGATGTACACAAACCTTACCCCTATTTCTATGGGATAGAGATGC  
TATTTCCGATGACCCTCGGCTCGTAATAGCAAAATATCCAAAAGGAAAAGAAATTGAACATAGGTACCT  
AATTCTTTTCAAATTTTTATAAGTTAGTACCACAATTAAGTCTATCAAAAAGCATGTTGGAGAGGAAAAA  
GAAAGTAGTTCTTTTTTAAAATTTTTTTTTGTTGGTTTTCTTTAGATGGTGTGAAAATAGGAGTTTGCTAT  
GTTTGATAAAAGTACACTTTTAAGGAGTTTATGGGACTAATGTAATAACCCTCTTCATCAAAAGTATCA  
ATCTTTA

>PGSC0003DMG400011205 LRR-RLKs

ATGTCTATGATTGTTTCTGATCCATTTTCATGTATTAGAAAAGTTGGAATTCTTCCAACATTCATGTATGTAAT  
TGGACAGGAATTGTATGTGACAAGAAAATTCATAGAGTTGTTGAGCTTGATCTTAGTCATCATTGTTAC  
GTGGAACGATTTCTCCTTCTCTCTCTGGGCTCTCTTCTTGCAGATTCTTGATTTGTCTGGTAACTTATTAG  
AAGGACAAATCCAGCTGAATTAGGCAATCTTGTTAAGCTAAATCAGCTTAGTTTGTCTTCTAATCTCCTC  
GAAGGAGAAATCCCAAACGAGTTAGGATTCCTTCATGAATTGAAGTATCTTGATTTGGGAACAAACAAT  
CTTTCTGGTGCAATTCCTCTGTCTTTGTTCTGTAATTGCTCTGCTTCATTACAGTATATGGACCTTTCTAAC  
AATTCGCTTCGCGGTGAGATCCCTATGAATGATCATTGTGAGTTGAGTGGTTTGAAGTTTCTTCTTCTATG  
GTCTAATGGACTTGTTGGTGAAGTTCCTATTGCTCTTTCGAAATCTACAAAGCTAGAATGGCTTGATCTTG  
AATCGAATTCGTTGAGTGGTGAAGCTTCTTCTGATATTGTAAGTAAAATGCCAAAGTTACAGTTTTTGTAT  
TTGTCTTACAACAACCTTTGATAGTCATAGTGGTAATACTGACCTGACGCCTTTTTTTCGCGTCTTTAGTTAA  
TTCTACTAACTTGCAAGAACTTGAGTTAGCTGGGAATAATCTTGGTGGGGAGTTGCCTCCTATTATCGGT  
AACATCTCCAAGAACCTTGACAGATACATCTCGACGATAATCTTATCTATGGTCCTATCCCAACACAAAT  
TTCGAGTCTTGTAATATTACTCTATTGAACTTGCTAGTAATCATCTGAATGGTACAATTCCTCCTGAGTT  
GTGTCGAATGGGGAACTTGAGAGGCTTTATCTGTGCAATAACTCACTCTCTGGTGTCAATTCCTTCTGCT  
TTTGGAAATGTTTCTCATTTAGGCCTTCTTGATCTGTGAAAAACAACCTCTCTGGATTAATCCCAAATAC  
CTTTGCTAATCTCCGCAATTAAGGAGGCTTTTGTTCATGATAATCACCTCTCTGGAACGATTCCCCGA  
GCTTAGGTGATTGTGTTAACTTGAAATACTTGATCTTCTCACAACAGAATCACGGGGACGATTCCAAG  
TGCAGTTGCTGGATTGAGTAGTTTGAAGCTCTATCTGAACTTGCTAGTAATTAATTACATGGTCCAATTC  
CTTTAGAGCTCAGCAAAATGGATATGGTGTGGCAATTGACTTGCTTTCGAATAATCTTTCTGCTAATGTC  
CCTTCACAGCTTGGCAGCTGCATTGCTCTCGAATACTTGAATCTATCGCGTAATTCCTTAGAAGGACCTCT  
TCCATCTTCGATAGGAAGATTGCCTTACCTTAAGGAAATCGACGTTTCATTCAATGTGTTGAGTGGGGAA  
ATACCACAGACATTTCAAGCATCGTCGACTTTGCAGAACCTCAACTTCTCCTATAACCATTTCTCGGGGAA  
CGTGACAGATACTGGTGCATTTTCATCACTAACCATGAGCTCATTTCATGGGAAATTTAAGCTTTGTGGC  
TCAGTACAAGGGATGAAAAGTTGCCATAAAAAGAGGGGTAGACATTTTCATTATCACAATCCTCCTTTTCAT  
TGCTTATTACTCCTATATTTTGCATAGTCGGGTACCCTCTCCTCCTAAGATCAAGATTCAGGAACCAATTC  
GCGAGTTTTAATAAAAGCAAGGTAATTGAAGATGTGGAGCAAGGAGGTGGGAGGAAAGAGCAAAAGT  
ACCCGAGGATATCTCGTATGCAGCTGATTGAAGCAACGGGAGGTTTTAGCAGCTCGAGTTTAATAGGAG  
CAGGACGATATGGGCGTGTTTATAAAGGAGTGCTGAAGAACAACATGAGCATAGCTGTTAAAGTGATT

GACACAAAAGGAGGTGGAGAGATATCAGGGAGTTTCAAAGGGAATGTCAAATCTTGAAAAGGACTA  
GACATAGGAACTTGATAAGGATCATAACGACATGTAGCAGACCGGACTTCAAAGCTCTCGTGTTCCCTCT  
GATGTCAAACGGAAGCCTAGAGAACCATCTGTACCCGAGCCATGGGCTGAGACATCAACTGACTTAGC  
TCAATTGGTTAACATTTGCAGTGATGTAGCAGAAGGAGTGTCGTATCTCCACCACTATTCGCCTGTAAA  
GTCGTGCATTGTGATCTAAAACCAAGCAATATCCTTCTTGATTACAACATGACAGCTTTGGTGACTGATT  
TGGGATTTCAACATTAGTAAAAGCTGTTGAGGAAAATACTAATCCTATCGACGAATCAGTTAATTACAAC  
TCAACAGATGGATTACTTTGTGGATCAATTGGTTACATTGCTCCTGGTTAGTAACAAATAATAGTTCTATT  
CTATGATTCTATCTAATTCATTTCAATTTATATGACTAAAGTTTCTGTTTCTTTGATTGTAGAATATGGAAT  
GGGAAGGAGGGCTTCAACAAAAGGAGATGTATTTAGCTTTGGAGTTTTGTTACTCGAGATTGTGACAGG  
TAAACGTCCCACAGACGTTCTATTTCAACAAGGCTCGAGCTTACACGAATGGGTGAAGAGTCAGTATTC  
ACATAAACTCGAGGCTATGATTGATGAAGCATTACAAAGATGTACAACAGTTCAACGCGATAGCAATTT  
ATGGCACGATATCGTGTTAGAGTTGATTGAACTTGGCTTAATGTGTACTCAGTACAATCCATCAACTAGG  
CCAACAATGTTGGATGTTGCACTTGAAATTGGAAGGTTAAAACAGTATGTTTCAAGTTCTTCAAACAGTG  
TACTGAAGATGTCACAACAAAAAGTTGAACAGTTTTTTTTTTAATATCTAACAATGTACCTTTTAACTTTA  
TTCATTGTACTTCTATGTTCTTTTTTTTTTACCTTTTTAATTGTTCCCTTCTGGGGTGCGGACCTTCTCTGGA  
TTCTACGTGAACGTGGGATGGTTCGTGCACCAAGACTACCCTTC

>PGSC0003DMG400011509 LRR-RLKs

ATGAAAACATGGAATGCATCCACACACTTTTGCCATTGGTCTGGTGTAACTTGTGGACGTAAACATGTTA  
GAGTCATTAACATAACGTCGAGAACCAAAAAGTATGGCCATTGTCATCCTTATTGGGAACATGA  
GTTTCCTCAGGTCTCTATACCTGTCGAACAATAGCTTCCGTGGTGAATCCCTTCAAGAGATTGGTCGTTTG  
AGAAGACTACACCGATTGTATCTTGTAACAACACTATTTTCATGGAGAGATCCCCTCAAATTTATCAAGGT  
GCTTGAATCTTGTATCCCTTGCCTTGAAGGTAACAAGTTAGTAGGAAGCCTTCGTCCGGAGCTAGGTTTC  
CTTGTCCAAACCTCGAGTACTTGTTACTCACTCGAAACAACCTTGACAGGTGAAATCCCTTCTTCTTTGGAA  
ACTTAACATCATTGATAGGATTCTATGCACCATTGAATAATCTTCAGGGGAAAATCCCTGACTCATTG  
GCAGCTGAAAAACTTAGAAATTATCGGAGTAGCTGCAAACCAATTGTCAGGTACTATCCCTTCTGAAATC  
TTCAACATATCTTCATCACAACATTTGATGTTGGAATGAACCAATCCAAGGTACACTTCTTCAAGTTT  
GGGAATCACCTCCCGAATCTTGAATTATTTATCATCGGTGGGAACAACGTTTCTGGATCGATCCCATCT  
ACATTGTCCAATTCATCAAAGCTAGTGTATTTTCTTGCTGGAAGAAATCACTTACTGGAAGGTACCAA  
GTCTTGAGAACCTGAATGAGCTTCAACAGTTAACAATTCCCGGAATTATCTTGGAACCTGGAGAATCAG

ATGATTTAAGTTTCATCGCCTCTCTGACTAACGCATCTCGTTTCAGAATTTTGGAGATTCAGTTCAATAGT  
TTTGGAGGGGTTCTGCCTGCATCCTTCAGAAATCTTCAACTGAGCTTCAGGTTGTGCAGTTGTCATACA  
ACAGAATACGTGGTAACATACCGTCTGAGATTGGAAAGTTCGTCAACGTGGAAGAATTCAGGTGAGG  
GAAAACCTTACTTACTGGTACTATTCCAATTAATTTGGTAAAGTTAAGAACTGCAGATTTTGGATTTGTC  
TCAGAATAGATTTTCAGGGAATATTCCATCATCTCTAGGAAATCTTAGTGTAGTATCCATCCTTCTTCTGC  
ACGATAATAATCTCACCGGTGAGATCCCAGCAAGTTTAGGAAATTGCAATTACATGATTGAGATATATGT  
TGCTAAAATAACCTGTTAGGACAGATACCTAAGGACCTTTTTGCTCTCTCTTCTTAGTTGCTGTAGACA  
TTTCTGAGAACCATTTAGATGGTTTCATTCTTGAAGTTGGAAATATGATAAATCTTGAATATCTTAAT  
GTTTCCGTAAATAACTTGACTGGTAAAATCCCAAGTACTATTGGTAGCTGTGTGACACTAGAAGCCTTAG  
ACATGAAAGGGAACCTTCTTCAAGGGATTATTCTTCTTCTTTCAGCTCTTACGAGGTCTCCATGTTTTA  
GACCTTTCTAGAAATAATTTGTCTGGCCAAGTACCAAATACTTGAAGATTTCAAGTTTCAACTCTTGAA  
TTTATCATTCAATGATTTTGAAGGAGTGTACCAAATGAAGGCATCTTAAAGAATGCAACTGCAATATCA  
GTAATTGGGAATCCAAAACCTTGTGGGGGTGTGCCTGACATACATCTCCGGAATGTGACATCAAAGA  
TCAAAAAAATCGGTTGAGGTTTATCCTCAAGATTGTCATCTCTGTTGTCTTTGGTATACTAGGACTTGG  
TATGCTTGTCACTTTACTATTTTGTCTTGTAAAGAAACCGAAAAGGGTGCCTGTTTCAAGTTCATTGG  
GTGAGTCTCTATAAATGTGTCTTACAGAAGTTTGTCTCAAGCTACTAATGGATTCTCTGAAGACA  
GATTGGTGTCTGGGAGCTATGGATCTGTTATAAAGGAACTCTCGATGGAGGAATGGTTGTGCGAGTTAA  
AGTGCTAAACCTCTGCGACATGGAGCTTCCAAAAGCTTTATGGCTGAGTGTGAAGTCTTGAGAAACAT  
TAGACATCGGAATTTGGTTAAGGTTCTCACAGCATGTTGAGGAGTTGACTATCGAGGGAACGATTTCAA  
GGCTTTGGTTTACGAGTTTATGGTTAATGGATGCCTCGAAGACTGGTTGCATCCTAGTCCAAGTGAAGAT  
ACAAGTCAGGCAGCTGAAACAAAAAAGTTGAATATTCTTCAAAGGCTCAACATTGCTATAGATGTTGCTT  
CTGCAATCGATTATCTTCATCTCCACTGCGAGACTCCAATAGTTCACTGTGATCTCAAGCCAAGCAACATT  
CTTCTAGACAACCAATTGGTCGGGCACATTGGTGATTTTGGTTTGGCAAAGTTCCTTCAACCAACTGCAC  
AAAATTCTTCTATTTTGGGAAGGAAGCTCTGGTCTTGTAGAGGAACAATTGGTTACTGCTCCAGGTAA  
CAATTAATACATAAACAAACACTCGAACGCCCTTTTTTCTCTCATTCTTCTATTTTTTCTTGAAAATGATA  
AATTCATAGCAAACACACTGCTTAACCATAACTTTCTTCGACAGAGTTACTTTATCAATATCATAAACC  
ATCTCTTAATTGTTACACACATACTGCCATTACTTTTATAAAATCAAGTCATACTAAGTTATGTCCCTATTA  
GGAAAGTTATTGTTCTTGTCTTTTTTCTTTTGTGAATTTTAGAATATGGGATGGGAAGCGAGCTATCGA  
CTTGTGGTGTGTGTACAGCTTCGGGATCCTTTTACTAGAAATGTTACCGGAAAAAGGCCTACTGATGG

AATGTTTAGGGATGGTTTAGACCTTCCAAGCTTCGCTAAACATGCATTGCTTAATGGAGCTATGGAAGTC  
ATAGATCCATCCCTTATTTACGGAAGTGAAGAAGACGAGAAAGGTAAAAGCACAAATATCTACCAGAAT  
AAGGTGTATCTGGTTTCTGTTCTTCGAGTCGGGGTTGCTTGTCTGCATATTCTGGAGCTGAAAGAATGA  
ACATCACTGAAACTGTTCCCAATTGTA CTCTATCAAGGAAGCTCTTCTGCAATCAGAAAAAATTCAGG  
AGCACGTTGA

>PGSC0003DMG400011580 LRR-RLKs

AATAAAGGTTGAATCTTTCTCATTTTTATCCAACCCTTTTTCAAATCTTGCATGTATATAGGAAGATCCCC  
ACCATTATTGGA AAAATGTTGGAGGTTCTTGGTTTTAGATATAGTATAATCTTTGATTTTATCTTTTCCTCA  
ATTCATGAGTTTTATGGTCTTTGCTCTGTCATCATCTAAAGGAATTACTTGAGAGTTCTTTGCTTTTTCTGG  
GTTTTGGTGGAATTCAGCTCTTTTGACAAGGTGATGGGCTCAATAGCCTAGAGGTATGCTAAAGCTTA  
GATCTTAATGAGTTTCTTATTTATCCTGAATTACTCCTTTATTTAGTTGAGTTTCTGGGCATTTCTGAG  
TTGATTGGATTCTTTGAAGTTAGTTGATTAATTGGTATGCATAGA ACTTTTTCTGGTTTGTCTAGTTTATCT  
AGTTAGTATTGTCTCTTCTTGATGATTGACCTTAAGGGTGTGGAGGGTAGGACTTGGATTAGGGTAGTA  
GGTGGCAATGCGTTGTCTTGTGTCGTT CATATTAGTAGTCATACTATTGCTCATTCTGTTACTATCTATT  
TGATTCCTTATACCTCGATTGTGTA CTGTTTTGTTGTAGTTTTGTTCTGCTATTCTCTATTGTTTTGCTATT  
ATCTGTTGATTCTTGTACTTCCATTACTTCATTTCTGGACTGTTTTTCTTGAGCCGAGGGGCTACCGGA  
AACAACTCCCTACCTCTGAGATAGGGGTAAGGTTTGAGTACACTATAGTCTATACCCTCCCGAGTCCCC  
ACTTTGTGTGACTACACTGGTTATGTTGTTGTTGTTGTTGATTTTATAAGTATTGACACATAGTTGGATT  
AACAGGTCAA ACTGAGACTGTCTTATTGGAAGTTTGTTATGATGTCTGGAGATTTTGAATCAAGAAGTG  
GTTTAGTTCTTCTAATTTGGATAAGTGCTTTGGTGGCTGCTGTACTATTGCTGGTTTCTCCTGCCGAAGGA  
TTGAATCAGGAAGGAATGTACCTTCTTGAATTGAAGAAGAATTTCCAGGATTCGTTTAACCATTG GGGGA  
ATTGGAATCCAAATGATGAAACTCCTTGTGGCTGGGTAGGTGTGAATTGCACTTCTGATTATAATCCAGT  
TGTGCAATCTCTTTATCTGAGCTATATGAATCTTTCAGGCACGTTGAGTTCTAGCATTGGTGGTCTTGAAT  
ATTTAGCTTATCTTAACCTGTCTTACAATCAATTCACCGGGAACATTCCCAAAGAGATTGGAAATTGCTCA  
AAATTGCAGTCTCTCCAGCTCCATTTAATACTTTTTACGGTCCGATTCTGCTGAACTGTATAACCTGTCT  
AATTTGAAGGATGTGAACATGAGCAGCAACATGATCTCTGGTCCTATTGCTGAGGAGTTTGGGAAACTC  
TCGTCTCTAGTTACTTTGTTGCATACACCAATAATCTTACCGTCCAGTGCCTCGATCTATTGGAAGTTT  
GAAAAATTTGACAATATTTGAGTGGGGCAGAATGCACTTTCTGGAAGTTTACCTGCAGAGATAGGTGG  
TTGTGAGAGCTTGAATCTTGGTCTAACACAGAATTGCCTGGAAGGAAACATACCAAAGA ACTTGG

CATGCTTAGTAAGTTGAAAGAGCTTGTGCTTTGGGGAAATCAGTTCTCTGGTTATATTCCAAAGGAACTT  
GGAAATTTAACACAAATTCAATTGCTTGCTTTATATCAGAATAACCTGATTGGAGATATTCCTGCTGAAAT  
AGGTAAACTCAAACCTTTGACGAAGTTATACCTATACCGGAATGGATTAATGGTAGCATTCCAAGGGA  
GATTGGGAATCTTTCTATGGCAACAGAAATTGATTTCTCAGAAAACCTTTCTGAAAGGAGAAATTCAGTT  
GAGTTTGGCCAAATAAAAAGTCTGAAATTGTTGTTTCTTTCCAGAATCAGCTCGAAGGCGTTATACCAG  
ATGAACTTACTACATTAAGAAGTCTGATTAGTCTTGATTTGTCAATTAATCACCTAACAGGTCCTATTCCA  
TTTGGTTTTTCAGTATCAAAGGAATTGGTTCAGTTACAGCTTTTTGAGAATTCTTTAACTGGTACTATTCC  
TCAACGTCTTGGCATTATAGTCGACTTTGGGTGCTTGATTTAAATAACAATCAACTCACAGGAAGAATT  
CCTCCATTCGTTTGTGAGAATTCCAATTTGATTTTGTGCAATCTTGCATCAAATAAATTGCATGGATATATT  
CCATCTGGTGTCTTAAATGTGATTCATTGGTGCAACTTCGTCTGAACGATAACAGGCTAACAGGGACAT  
TTCCTTCTGAGTTGTGCAAATTGATAAACCTGTCTGCTGTTGAACTGGGGCAGAACAAGTTCCTGGTCC  
AATACCTCCTGATATTAATATTGCCAGAAGTTGCAGAGGCTTGATTTCTCAGGCAATAGTTTCAACCAG  
TTGCCAAGGGAGATAGGAAATCTTACCAGGCTTGTGACATTCAACGTCTCAGCAAATTCGCTCACTGGA  
CCGATACCTCCAGAAATTCGGAAGTCAAGGCACTACAAAGACTGGATCTCAGCAAGAACAGATTTACT  
GATGTTATACCTGATGACATTGGTAGCTTGTGCGAGCTAGAACGTCTTTTGCTTTCAGAGAATAAGTTAT  
CTGGAAAGATACCAGCAGCATTGGGGAGCCTCTCTCATTGACTGAGCTGCAGATGGGCAGTAATCTAT  
TGTCAGGTGAAATACCATCAGAGTTGGGTAATCTTAGTGGCTTACAAATTGCAATGGATCTTAGCAACA  
ACAATCTCTCTGGCAGTATACCACCAACCTTGGTAATCTTATCCTATTAGAGTACCTATATCTCAACAAC  
AATCATTTGAGTGGTGAATAACCAAGCACATTTGGAAACCTGACAAGTCTCTTGGGCATTGACTTCTCAT  
ACAATGACCTGACTGGACCACTGCCGGATATACCACTCTTTCGGAACATGGATATCAGCAGCTTCATTGG  
AAACAAAGGTCTTTGCGGTGGGCCTCTAGGGGAATGTAATGCATCTCCAGCTTATGATGCCAATAATCCT  
CCTAGAGTCGAGAGTGCAGATTCTCCTCGAGCAAAGATTACTGCAGTTGCCGGTGTAAATTGGTGGGA  
GTTTCTCTTGTGTTTATTGTTGTTTGTACTATATGAAGCAGCATCCAGTTGAGATGGTGGTAACCC  
AGGATAAAGACATGTCATCTTCAGATCCAGACATTTATTTCCGTCCCAAAGAGGGTTTCACTTTCCAGGA  
CTTGGTTGAGGCTACAAACAATTTTCAGGATTGTTATGTTCTTGGGAAGAGGAGCCGTCGGAACAGTTTAC  
AAAGCAGTCATGCAGTCTGGACAAACGATTGCAGTCAAGAAGCTTGCTTCTAACAGAGAGGGTAATAAC  
ATCGACAATAGCTTCCGTGCAGAGATCTTAACTCTAGGAAAGATTAGGCATCGTAACATCGTAAAGCTAT  
ATGGATTTTGTATCATCAGGGTTCTAATTTACTTCTCTATGAGTATATGGCCAGAGGTAGCTTGGGTGA  
ACTGCTTCACAGTACATCTTGCAGATTGGATTGGCCAACTCGCTTTATGGTGGCTGTTGGAGCTGCTCAA

GGACTTTCTTACTTACATCATGATTGCAAGCCCCGGATCATCCACCGTGATATAAAGTCCAATAATATTCT  
GATTGATGAGAAGTTTGAAGCTCATGTTGGTGATTTTGGTTTGGCAAAGTTGTTGATATGCCTCAATCT  
AAGTCGATGTCTGCAGTTGCTGGCTCATATGGCTACATAGCCCCTGGTATGTCTTTCTGTTTTCTCCCGGA  
CAACTTCTTATGTTCCCTTGTTATCTATAGAAATATGTCGAGAAATGTACTGCCATTTGATCCTTATTCCCA  
CATATTTATCTGTATCTTCACTCTGAAAGTGTTACCTGTTTTTGGTTGATATGAATAGGATTTTCTTGTTGAG  
ATTAGATAGTTAGAATTGTATGCAACGTCTATTTCTTCGATTATCTGAAGACAACAATGAAATGCTTTTAA  
CTTTTATCTGTGTATACTTCTCATTTTATATGTGTTCTATGCCAGGAGAAGCCATACAACTGCTCTATGTA  
TCTTAGGCGAACTTTGGGGACTCTCCTGATACATATGGAGCATTCTTGTTCCACATATTTATGTTTCACT  
TTAGATATTCGACCATGTGTTGTTCACTTTGAAAATCTAATTCTTCTCTTTGTGATATGAAATGCATATCTT  
GTTGAAGTTTGATAGTTAAAATTGTTTACGAACAAGTTAATTTCTTTGATGAAATGACAGAATACAAGAA  
AAAATGCTTTTAACTTTTCTCTGTCTATGTAGCTTTTAAATATCCCTCTCGTAATTTTCATTCTGTGTTATAAA  
ACCATTTTTTCCTTTTCAATTGATGTTTTCTACCTTCTCTGTTGCAGAATATGCTTACACCATGAAAGTTAC  
GGAAAAATGTGATATCTATAGTTATGGGGTAGTCCTTTTGGAGTTGCTAACTGGAAAAGCACCCGTACA  
GCCCCTAGAACAAGGCGGTGATCTTGTCTCATGGGTGAAGCATTATGTTAGGAACCATTCAATTGACACC  
AGGGGTACTCGATAGCCGATTGGATTTGGAAGATGTAATTAAGTTAGTCATATGCTTACAGTTCTTAAA  
ATTGCTCTAATGTGCACTAGCATGTCCCCTTATGATCGTCCTTCAATGCGCGAGGTTGTTCTGATGCTGAT  
TGAGTCTGATGAGCAAGAAGGGAACCTTCTCTCATCTCCAGTTTATGATCTCCCTCTGAAAGATAATTCCT  
TCTAGATGCATGTAAGAAGCACATCTCAATTAACCTTTGATAATTTTTTAGTACTAATTCTCCTTGATTTTT  
TTTCTTAATGGCTAAATTATAGATATCCCATGTATATTTCTCATAGTGAAAATTTCAATCACTTTCTA  
GAACTAGTTTGGAGGTGATTGATGTTATTTCAATAGTTCTCCATCTGATGGTTATGGAAAATAATATGCT  
TTATGCTTTTCTCACTATATATTGAGGGCTACCTAGAT

>PGSC0003DMG400011833 LRR-RLKs

CTCTTCTTCTTGTTCCTTACTTTTCACTACTACTACTGATGCAAGTCCCAATGGGGAAAAAACTTTT  
TCAGCCTTTGTACATCACTACTACTTTCTTGATTTTTCTATCTTTGATTCTTGTTTTCCCTGTTTTAGCTGTTG  
ATCCTTTTACACAAGGACTCTTGAGCTTAAAACTGAAATTTGATAATCCAACAGTTTGAAGATTG  
GATTTTGCCTTCTGGTTCAACTGATAAAATTCATGCATGTTCTTGGTCTGGTGTGAAATGCAATGAAAAT  
CTTCTTTGATTATTGGATTGGATCTTTCTGTGAAAATCTTGGTGGGGTTTTGTCAGAGAATCAATTTAGT  
GTTTTTTCAGACCTTGTGAGCTGAATTTGAGTCACAACCTCAATTTCTGAGAACTCCCTGTTGGGATTTT  
CAAGTTGAGAAAATTTGAGAAGCTTGGATATTAGCAGGAACAATTTTTCTGGTCATTTCCCAAGTGGGATT

TCAAATCTTGATTCTCTTGTCATTCTTGATGCTTTTAGTAACAGCTTCTCTGGTCCTTGCCTAAAGATGCT  
TCAGAAATTGAGTCACTCAAGGACTGTTAGGGTTTGCTTTGTTTTTTGAGAATTATGGACAACCTTTCT  
TCCACATCTGATCACATAACAACACACTAGCATTACAAGTGTAGTCGTTAAAAGAGTCTTGTTTATAGA  
TGGAGAGATAGTTCTCTCCATAGTTTCTATACTTTCTTTTAGAGTTTTTAATGGTCAAAAACAAGTTTGAA  
TTATGTTTTTTCACGAGTTTCACTCTAACTATCAATTTAATACATAGATGGTAATAGTTCAGGTAAAA  
AAAAGTGAACAATAAGTTGGATTGTGAAATTTCCAAAATAGATAGTTTAGCCGCATCTTTCTTTTAT  
ACTATTAGTTTTATGCCTGTTTTAGTATAGTTCTGTTTGTCTATTCATTTATCGTCGTTCAAGATTTGCTTG  
TTGGATTCTGCATGACGCGTTGTTATTTGATCCCAACAGGACTGAATTTGCAGGGAGTTATTTCACT  
GGTCCAATTCCTTCTGAGTATGGCTCATTCAAGAATCTTGATTTCACTTAGCTGGAAATCTTTGAG  
TGGTAAAATACCACCAGAATTAGGGATGCTGAAAACAGTAATTCATATGGAGATTGGTTATAATTTTTAT  
GAAGGAACCATACCTTGGGAACCTGGGAATATGAGTAAGCTTCAGTATCTTGATATTGCTAGTGCAAT  
TTATCTGGTTCAATACCAAAGAGCTGACTAATTTGACCAATCTTGAGTCACTTTTTTTGTTTAGAAATCA  
GCTTAGTGGTAAAATCCCATGGGAGTTTGGAAAATCATATCTTTATCAAGTTTGGATCTTTCTGATAATT  
ATCTTTCAGGCCCAATCCCCGAGAGTTTCTCGGAGTTGAAAAATCTAACTTGCTTAGTGTTATGTACAAT  
GACTTAAGTGGAACTGTTCTGAAGGAATTGCAAAGCTTCCACAGCTTGATACACTTCTTTTATGGGACA  
ATTGGTTTAAAGGTTCACTCCCAAAGACTTGGGCAAATATTCAAAGCTGAAATATGTTGATGTTTCAAC  
AACTATTTAGTTGGTAGCATTCCACCAAGTATATGTTCAAGTGGGATGTTACAAAGGTTGATCCTTTTT  
CAAATAATTTCACTGGTGGACTCTCTCCATCACTTTCCAATTGTTCTCTCTGTTCCGGATCCGTATCGAAG  
ACAATTTATTCTCAGGTGATATCTCATTGAACTTTGGCAAGTTTCTGATTTGTCATATGTTGATATGTCTA  
GAAATAGGTTCACTGGAGGGATTCTACTGATATTGCCTTAGCTTCCAATCTTGAATACTTCAATGTGTCT  
AATAATCCAAATCTTGAGGGCGTAATCTCGGAGAAGACATTGTCTTTGTATGCACTACAGAATTTCTCAG  
CTACAAATTGTAGCATTTCAGGAGATTTTCTCCTTTTGGACCTTGCAAATCCTTACTGGTTCTTGAATTG  
AGTACGAACAATGTTTCCGGGATTCTCCCTCAAAGCATAAGCAACTGCCAAAATCTTGTGAGCTTAGACT  
TGGCTAACACAATTTAAGTGGTCAGATACCTGTTGGACTTGCTAGCCTTCTGATATTAGTGTGTAGA  
CCTGTCACACAATAGTTTTAGCGGTTCTATTCCGGCCAAGTTCGGAAGTTCTTCCAGCTTGCAACTTCTTA  
ATGTGTCATTCAACGATCTCTCAGGTTTGATTCTTTTGTATAAGAGTTTTAAGGTGATGGATAGTAGTGC  
CTTCTGGGGTAATCCTAAGCTTTGTGGGACACAGTTGAGGCCTTGTCTGGACCGAATGGACTGGAGTT  
AGGAAGCAGAAAGACACAGAAGCTGGCATGGGTTCTCATAACCTGTGGAATCATAGTGTGGCTATTAC  
AGCTGCATTTTTCGGAGTATTTTACTTCAGAAGAAGAGGTCAAGGGCAGTGGAAAATGGTTTCTTTTAGT



GGATTCCTCGGTTTACAGCAAATGATGTTTTGAGGAGCTTCAATTCTATTGAAGAAGCCACAGATATGG  
TGCCACCCTTGGCAGGTTCTGATTGCAAAGCTGTTCTGCCAACAGGAATTACCGTCTTGGTGAAGAAGAT  
CGAATGGAGACCGGAGAGAATGAATGCTATGATGGACTTGATATCAAGAATGGGCAATGCAAGGCACA  
AGAATATGACCAGATTGTTGGGATTTTGCTACAACAAGTGTATGGCTTACCTGTTGTGTGACTACTTGCC  
TAATGGAAATCTGGCTGAAAGGATCAGGACGAAGAGAGATTGGGCGACCAAGCATAAAATCATTGTGG  
CAGTTGCTAAGGGGCTGTGTTACCTGCATCATGATTGCTACCCCGCGATACCTCATGGGGATTTGAAGAC  
AAATAACATTGTGTTTATGATAAATGAAACATGGAACCTCATTGACTGAATTCGGTGTTAAATTCTTGATTCAAT  
TAAATAATGGTCCGTCGGTAGCAAGAGTTGGAAATGAAGCAGGTATGCACCTATACTTTGATGTAGTCT  
GCATTAATATTTGTTAATTAGTTAGCAATCTTAATATAAGATTAGTTATTAGACAGAATTCGGTTGCTCCA  
AGGAGACGCGACTTGACTGTTGCTCCAAGGCTCCGCTTCAATTCTAATTGAAGTGTTAATGATCTTAAT  
TTGAATGACATAGCGAGAATCCCTATTACTGGTTGTGAATCTTGTTAATTGTGTCAAACAGGTGAAAT  
CGAACGAGCTATACAGGAAGAAGTTTACAGGGACATATACAACTTTGGTGAGCTCATTCTGGAAATCTT  
AACCAACGGGAAGCTGTCAAATGCAGCGACGAGCATTGAGAACACCTCCAAGGAGGTTCTTTTGAGAG  
AGGTTTTGGATGAGAATGATGTTGCTCCATCGAGCTCGGTCCAAGAGGAAATAAACTGGTTCTTGAAG  
TTGCTTCACTTTGCACCAGAGTTAGACCCTCAGATAGGCCATCAATGGAAGATGCACTAAAGCTTGTTAC  
TGGTTTGAAGAAACAAAGCTAATGATGTTCTTGAAGTAGGATGCCAATATTTAGACATGATTAGAAATTT  
TGAAGCACAAAATATGTTGTAAAAGTCTTTTATTTTTCAGTTGTTTTTTGTTACTTCATCTGGTCAAGAAGTT  
GATGCCTTTTCTTTTGTGAGGAATAGAATGTTTTGATGTAAAGTAGAGGAATGTAAGTAAGTTCTATCCT  
CAGCAATATAAGGTCTGTTATTCTATTTTTTTTTTTTTTTTTTTTATGTTGTTTAAAAACAAAATATGTTGTAAA  
AGTCTTTTATTTTTCAGTTGTTTTTTGTTACTTCATCTGGTCAAGAAGTTGATGCCTTTTCTTTTGTGAGGAAT  
AGAATGTTTTGATGTAAAGTAGAGGAATGTAAGTAAGTTCTATCCTCAGCAATATAAGGTCTGTTATTC

>PGSC0003DMG400011932 LRR-RLKs

ATGTCACTGCTAGCATTCAAGAATATGATCATTGATGACCCTTTCAAGATCATGGACTCCTGGAATGAAG  
CTATACATTTCTGTGACTGGCCTGGGGTCTCATGTGGTCACCGTCATCGCCGAGTTACAGTTTTAAATCTT  
ACTTCTCTGAAATTGAGGGGTTCTCTGTCACCAAGCATTGGTAATCTGAGCTTTCTTTATATCCTTAAGCT  
CCAAAATAATAGTTTTTTCAGGTGAAATCCCATCAGAGATTGGCTACTTACATAAGTTACACGTTTTACGCC  
TTGATAATAACTCATTCACTGGTCATATTCCTTCAAACATTTCTGGTTGCTTCAATCTCGTTTCTGTTGGTC  
TTTCGTATAATATGATGGTAGGCAAATTCAGCAGAATTAGGCACATTGTTGAAACTCAAACAACCTTTC  
TCTTGTCTTAACTATTTTACAGGAGGAATCCGCCTTCATTTGGTAATCTTTCTTTACTTGATACCTTTTCC

GCAAGCAAGAATAATTTGTTAGGGAAAATACCTGATGAATTATGTCAATTGCTCAACTTAAAGTACTTTG  
TAGTGAATGAGAACAACCTTGAGTGGTACCCTGCCTCCTTGTCTTTTCAATCTTTCCTCTATCGTGGCCATA  
GATGTTGGAACAAACCATTTAGAAAGGAAAATTGCCTCCATTGCTTGGTATTACTCTTCCTAGTTTLAGAGTT  
CCTTAGCATTATAGAAACAATGTAAGTGGAAATATTCCGGTAACATTGTCAAATGCTACGAATCTTCAG  
TCTCTTATTGCTAGTAGAAATGGACTCACAGGAAAAGTACCACCCCTTGGAAATTTGCTGAAAATGCGG  
AGATTTTTAGTTGCTTTCAATTATCTTGGGAAGGGGGAGGATGATGACCTTAGCTTTCTCACCACATTGG  
TGAATGCCACCAGCTTGGAGCTTTTGGAGCTCAATACAAATAATTTTGGTGGAGTCTTACCTGCATCTGT  
TAGTAATCTTTCGACTGAGATTATAGAGCTTTCGCTGTCTTATAATCAGATTTCTGGAGAAATCCCAAGA  
GGGATATCCAATCTCAAGAAGCTTCAGGCTTCTTTGTAGCTTACAACAGATTTACGGTGAAATTCCGT  
CTGAAATTTGGTGTCTGATATATTTGCAAGAGCTGGCTTTACTTGGAAATCAGTTCTCTGGCAAATTC  
AATCTCATTGGGAAATTTAGCTTCTTTAACCAAACCTCAATTTAAGAGAAAACAATCTCCAGGGGAGAGTT  
CCTTCCAGTTTAGGCAAATGCCACAATTTGGAAGTGTGGATCTTGGTTCAAATAACCTTAGTGGGTTCA  
TACCATCAGAAATCTTGAAGTCTCATCCTTGTGCGAGGGCGTGGACCTATCTCAGAACCAATTAAGTGG  
GTTCTTCCGATGGAAATTTGGGAAGTTGAGAAATCTAGGCTACTTAAACCTGTCTGATAACAAGTTGCA  
GGGCCAGATTCCTACCAGTATAGGTACTTGTGTGAAACTTGAAGCACTAGACTTGAACAACAACAACCTT  
CAGGGTAGTATTCCTCAACCATGAATAGTTTGCAGGGCCTGGAACCTTTTAGTCCTTTTCTCACAACAATC  
TGTCAGGTGGAATCCCGGGATTCTGAAGGACTTTAAATTTCTGCAGATTTTAAATCTGTCTAGCAATAC  
TTTGGAAAGGTGCTGTCCCAACAGGAGGCATCTTTAGTAATGCTACTGTGGTTTCCATCATAGGAAATAGA  
AATCTCTGTGGGGGTGTACCAGAGTTGGACCTTCCGGCTTGCAATTGTAGAGGTAAAGAAAGAAAGGAA  
ATCAGGTTTTCCCTTGAAAATAGTAATTCCTGTAGTTAGTGGGCTTATAGGATTGACATTCATAGTTTGT  
TTCTTGGCATAACGACAGTTTLAGTAGATCGAGAAAACCAACACCTACAGATATACCTGAAAACCTCAACCT  
AAGAGTATCTTATCGGTGTCTACTTAGGGAAACTGATAGATTTTCTGCATCAAATTTGCTTGGAGTGGGT  
GCTTTTGGGTCTGTATATAAAGGAATTTCTGAACACGATGGTACGTTTTTTGCTGTTAAGGTACTGGACC  
TTTACACCATGCAGCTTCCAGGAGTTTTTTAGCTGAATGTGAGGTTCTAAAGAACATTAGACATCGTAA  
TCTTGTAAGGTTCTAAGTGCATGCTCAGGTATTGATTATGAAGGTAATGAGTTCAAGGCCATAGTTTAT  
GAATACATGGATAAGGGAAGTCTACAGGACTGGTTACATTTCACTACTCAGGAGAAATCTGAGTCACAG  
GAAGAGCACAAGAAGCTCCGGTTTATTCAAAGATTAAACATTGCCATTGATGTTGCCTGTGCTCTGGATT  
ATCTCCATAATGATTGCCAACCCCAATAATTCACCGTGATCTGAAGCCAAGCAATATTCTTCTCGATGAG  
AACATGACTGCACATGTTGGTGATTTTGGTTTGGCAAGATTTGTTCCACCAGCAATTCCAAACTCATCAG

CAAATTCAAAAAGCTCTACAGGTGTAGGGGGA ACTATTGGTTATACACCTCCAGGTAATAATAAATCAA  
GGTTTCTGCTGGCTGTCATATGTATGTCTTTTGATAAGAATATCTCTAATTCTGTAGTATTTCTTGTTGACA  
GAATTAGGTATGGGAAGCGACGCCTCAATCTATGGAGATGTATACAGCTTTGGCATTCTGCTCTTGAA  
ATGTTTACCGGGAGGAAACCAACTGATGAAATGTTCAAAGACAATTTAAACCTTCATAACTATGCCAATG  
CTGCTTTGCCAGACAGAGTGATGCATATTGCAGATCCCATTCTTCTCCAGGAAAGAGATGAACTTGGAAT  
GAAATACAAAGTTGATGACAATACAAGCAGTGCTGGTGACATATTTCTGTCATTCTTAGTTAAGGTGATT  
CAAATCGGAGTTTCTGCTCCGTTGAATCTCCAAAAGAAAGAAAGCGGATCAGTGATGTCGTTGGAGAA  
CTCAATTCATTAAGGAAGTTGTTCTTGAGCAAGCATACCCGAAAGAAAAGGTTATAAGCTTCAACCTGC  
ATTGA

>PGSC0003DMG400011989 LRR-RLKs

CACAACCTCATCACAAAACCAAAAACAATCAATCATTTAGCCTTGATGATGGTTCCCACAATATTTTGTAT  
CCTTCCCTTCTTATATCTTTTCATAGTTATAACTTTTGCTTCCACTGAGGAAGCAACTGCTCTTCTTAAATG  
GAAAGCAACATTCCTAAACCAGAACAATTCCTTACAGGCTTCATGGACACTAAGTAGTCCTGCTGGTACC  
AAGAATTCTCCAGAATTGAAGCGACGAGTTCTGATGCATGCAGGGGCTGGTATGGAGTTGTATGCGTT  
AATGGTCGGGTTAACAGGTTGAATATTACAAATGCTAGTGTCATTGGCACACTGTATGATTTTCCATTTTC  
ATCACTCCCTTTTCTGAATATGTTGATCTTAGTATGAACCAGCTCTCTGGCACCATCCCACCTGAAATTG  
GTAAGCTCGCTAATCTTGTCTACCTTGACTTGTCTGTCAATCATATTTCCGGGCACAATCCCACCACAAATC  
AGTTCACTAACAAAGCTTGAGACCCTCCACATCTTTGGCAACCAATTAATGGTTCCATTCCGAGGGGAAA  
TAGGTGCGCTAAGGTCTCTTACTGATCTAGCTTTGAGTTCTAACTTTCTTAGTGGTTCAATTCCTGCTTCAT  
TGGGGAATTTGAACAATTTGTCTTTTTTGTATCTTTATAATAATAAGCTTTCTGGCTCCATTCTTCAGAAA  
TAGGAAAACCTTGTCATCTTGTTGAAGCTTATATTAGTAGAAATCAATTAACAGGTCATATTCCTCCAGA  
AATAGGTAACCTTGATCAATGCAAAATTGTTCTATGCTTTCTACAATAACTTGTCTGGTCCTATTCTGATG  
AAATAGGGAAAATGAAGTCACTTGAGTACTTAAGCTTCCAGACAAACAATCTCTCCGGTCCAATTCCCAA  
AACACAGGTGACTTAACTGAGCTCAAACCTTGCACCTTTATTCCAACGAACTTTCTGGTCCCATTCTTA  
GTGAGTTGGGGAAACTGAAAAAATTGAATGATCTGCAATTATCCAATAATCAACTTACCGGTCCTATTCC  
TGGTTCATTTGGCAATTTGAGAACTTGAATTTCTGTATCTCCGTGCCAACAACTTTCTGGTTCTATTC  
CAAAAGAACTTGCATATTTGGATAACTTGGTTATTATGCAAATGGATGAAAATCAGTTTTTCAGGCCATTT  
GCCTGAGCATCTTTGCCAAGGTGGGAACTTGAGAACTTCACGGTGAATAGTAACAAACTGACAGGGCC  
AATACCAAGAAGCTTTAGCAAGTGCTCGAGTTTCAAAGAGTTGCTTGGATAACAACAGTTTTACTGG

GAATTTATCTGAAGCTTTTGGCATCCATCCACACCTTTACTTCATTAATTTGAGTGAAAATGATTTTCATG  
GTGAACTCAGCAGCAACTGGGGGAAATGCAAGAGTTTGACTGATTTGCGGGTAGCCAGAAATAACATT  
AGTGGTAGCATACCACCAGAGATTGGAAACCTCAAAGGGCTTCAAGGACTTGATCTTTCATCCAATCATT  
TGGTTGGACAGATACCTAGGGAATTAGGAAAATTGACCTCTCTGGTTAAGCTTTCTGTACAAAACAACA  
ATATTTCTGGCAATATTCCTATAGAACTTGGGTCACTGACAAAGTTAGAGTCCCTAGATCTGTCAAACAA  
TAAATTGAATGGGTTCGATCCCAACGTTTATAGGAGATTACCAGCACCTATTTCACTTGAACCTGAGTTGT  
AACAAAGTTTGGGCAGAAAATTCCAAAGGAGATAGGGAGGATAACTCATCTTAGTGTACTTGATTTGAGC  
CATAATCTTCTTGATGGAGAAATACCTGCTCAGTTAGCTAGTTTGCTGGACTTGGCGAACTTCAATCTTTC  
CCACAACAGCCTTTCTGGGCGCATTCCCTGAAGAATTTGAAAGTTTGACCGTTTTGCAGGATGTTATCTTG  
TCATACAATGAGTTGGAAGGTCCAATCCCTAATAATAAAGCTTTCATGAATGCCTCATTAGAAGGTAATA  
AAGGTCTTTGTGGTAATGTGACTGGATTCCAACCTTGCAAAGGCCATCTTCTATTGTGAAGAAGCACTC  
AATGGCGAAGGGACTTAAACTCATCCTCATCACTGTACTTCTGTTATGGGAGCACTAGTACTACTCTGT  
GCTTTCATTGGTGTCTCTTTATGTGTAATAAAAAGAAGGAGAGTTAGAGACGTTGAAAGAAGGGATTCC  
AGTGATGATGTTGATGGTTTTGATTTCCATATCCACATTAATGGAAATGCATTGTACTGGGATATCATAA  
AAGCCACAAAGGAGTTTGATGCAATGTTTTGCATCGGAAAAGGAGGATCTGGAAGCGTTTACAAGGTA  
AAGCTTCCAACGCTTGAGAATGTAGCTGTGAAGAGACTTCATTCTTCATTTGAGGTTACCCATCGCAAAA  
GCTTCATGAATGAGATAAGGTCATTGACAAGGATCAAGCATCGCAACATTGTGAAACTCTATGCCTTCTG  
TTCAAATGCACAACACTCATTCTTGGTTTACGAGTACATGGAGAAGGGTAGCTTGTCTAGTATTTTGAGC  
AGTGAAGTAGAGTCCAAGAAATTGGATTGGCTTACAAGGGTGAATGCCATCAAAGGTGTTGCTTATGCT  
TTATCTTACATGCACCATGATTACTCACCCGCGATTGTTTCATCGAGACATATCAAGCAGTAATGTTTTGCT  
TGATTCCGAGTATGAAGCACGTGTTTCAGATTTTGGCATAGCTAAGATTCTTAAGCCAGACTCATCCAAT  
TGTACTIONACTTGCAGGCACATATGGCTATGTAGCACCAGGTAAGATCTAACTTCTTATCCTTTTTTTAGT  
TCATGAGTTATTTCTGCACAGTCTATGTTGTTTCTATCTCATTTGGAACCTTATTGTTTCAGAGCTTGCCTA  
TACAATGAAGGTGACGGAAATGTGTGACGTCTATAGCTTTGGAGTATTAGCATTGGGGGTAATCAAAG  
GAAAGCATCTTGGGGATTATATTACTGTGCTAGCAAATTCATCGTCTAGAGATCATGTGCAGCTTAGCGA  
TTTGCTAGATGAACGCCTTCCATATCCTGAAGATAGCGTAAAGAGTTGGTTTTATCATCAAGCTAGCAAG  
CTCATGTTTGTGTTGAAACTCCAAAATCAAGGCCAACAAATGCACTTCATCTCCAGTATGTTGTCAATGGATC  
CACCTGTTTCTCAAATAACCTCTATGAAGGCGAAAAGCGTCCCCGAGATGTAAGGTGTCTATGTATGGG  
GAAAAAAGAAGCAAGTTTTGACACCAAGTGGTTGTGAAGTAAGAATAAGAAGCTATTATTACTGGGA

CTAGTATTTGTCTATTTTATTGTTAGTTGTGCTTATCTAGTTTAGTGTTTCAACCTGAAGGATTCTGAGCTC  
TTGTACTAGAGGTAATACAATATCAAATAAAATGTAATATTTCAATTTTCTTGTGCCAATTAGTGCTAATA  
AAAAT

>PGSC0003DMG400012218 LRR-RLKs

TAGCTATTGTGTATTTATGAGAAAATATTCGAAGTTTGATCAATCATAGCGACGCTGGTAAAGGCCACACA  
CTTCCTTTATTCCGCCGCTCCTTCTATTATCTCCTTCTCCATTTTCTGCTTGATATTTTGTCCCTTATAATTT  
TAACATATAGTTTTTAACCCCAAATTTCTTCTTCTCAGCACATAAATTCTCTGTTTCTAGACACCAAATCT  
CTCTTTGAACCCAAGTTTTATTTTTATACTAAGTTGGTGACACTTAATAGTAGATTCCACTCAAAGGGG  
TTGTTACTGATTTAGATTCTTGAATCACTCTTAAGCTTTGTTAAGTTTTCTTTAGTGTTTATCTTTCCCCC  
TCACTTGTA AAAAAGACAACCTTATCTTTTTCCAGCTTTTTTTTTGTTTGTTTTCATCTACTGTCTTGCGTC  
TTTTCTTGTTTTCTTTTTCAATTTTGTGGATTATTGCTTTTTGAATCTTTTGCTTCTGGGTTTTCTTCTTT  
TTGTTGATTGCTTAAGTTCTTGGAGACTGTTTCTTAGATGGGTTCTTCAGTTCTGGGGTTTTGTAGAAA  
CTTAGTGTGTTCTTGTGGTGAGGAATTATTTGGGGGAAAAGATGAGACTTTGTGTTGTATTTCAAGTTTT  
AGTCACTGTTGGACTAGTTCTTGGGATCTGTGATGCTTTTTCCATCAAATGAAGGTGTGTATTATCAACTCA  
AGTTCAGATCTTGATGTAGTTACTGCTGCAAAGATTCAATTTTTGTCTTTTAATTGAGCATTAGTGTTGT  
AATGCAGTGTTGTTTCGGAAAGATCTTGTATTTCTTGTTTTGAGATACTTGCTGTATTTGATGTCATAT  
ATTCTTGCTACCATGGTTCAAATTGTCTATTGGAATAGTCTCTCTACCCTGCAAAGGTAGGGGTAAGAT  
CTGTGTAGTGCGTACTATGTTATTTGTTGTTGTTGTAGATAGTTGCTGTATTTTATGAGATTGTAATTCAA  
AGAGTAGGTAGTTTATTGTGAGTGAATCTGATTGGGGATTCTTTGTTGATACAGTTTATGCTCTCAATAC  
CTTCAAGGAAGCTATATATGAAGACCCTCTTCTGGTTTTGTCAAATTGGAATGGTTTAGATTGAGATCCTT  
GTGGTTGGGCTGGAGTCTTTTGTCTATGGCTCAAGATCATGTCATAAAAATGTGAGTTAATTGTCTTCA  
ATTTTATGTGCTATACATGGATAGGTTGTTGGTTAATGATTTTTCTCAACTAAAATGCAATCTAGTGAAT  
CTTTTATGGACTCAAGTTTAGTGCAAATGAGTCTCTAATACGCATTTCCACTGGATCGTGTGACAGAAAC  
ATTTCTGACGCTTCGTTGAAGGGATTTCTTTCACCCAACCTGCATTTACTCTCTCTTTGCAAGAATTGTAA  
GTTATTTCCGAATAGATTTATAAGAATTACGTAGTTCTGGTTGTTCTTTTATGTGGTTTTGTTAAAGGTTA  
TGCTATGCACTGGCAATATGCAGAATTTTGCATGGAAATGTGCTGATTGGCACAATTCCTAAGGAGATT  
GGCCTATTGAAAAACCTGAAGGCGTTGGATTTGGGTGCTAACCAGCTAACAGGACCAATTCCTCCGAG  
CTTGGCAATTTGACAAACATTATGAAAATGTTAGTCTAACTTGAATTTTTTAGGTTGAGTTGACTTGCCCT  
TTACCTATCCTTGTGAAGCTCCCTTACTTTTCTAGCTTGCATGTGTCTCTGCAGAAACCTACAATCTAATG

GATTAACAGGGAAATTGCCTGCTGAGCTTGGTAACTTGAAATACCTTGAGGAACTTCGGTTGGATAGGA  
ATAAACTCCAAGGACTAGTGCCTGCTAATACTGGATCAGATTTTACATCTGGTGTACGTGGAATGTGAGT  
TGATTAGCTACATCTTGTACTTTATCGTTTTTCTTTGAATTTTCTGGTATGTGGATAGGGATTAATCCATG  
ATTCTCTGTTTACTTACAAGATATTTTTGGTTGTCCTTAGAGCGTTTTCCGTCTGGCCCTCTAGGATTCTG  
TCAGATATTTGAAGGATTGAGCGACCCAAGAATCTAATTTTCTGATCTTTATGACAGTCATTGTCGGGGA  
TGATGATGACAGAGTTCAGAAAAGAGATGCTTATGGGATGATGTCTGTTCTTTCTGTCAGCATTGTTTGA  
TATGTACTGCCTGCAGATTGACTGATGGCTGTTTTACTTGAATCTAGTGTAGTACATTCAGTGTGACG  
ATAGAAAGTGGGGGTTAAACAGTGTGTTTGTATGGTGAATTGGGGTACCCCAATGGAGTGTTTTTTGC  
TATAGCCTTTAATATTTGACCAAATGAGAGCAATGTTACTGAGTTCAGAATGTATGTTTCAAAGTTTAA  
CGATGATGTTCTTGAAATGATCTGTATTTCTATAAAGAAACAATGAGTAAACTGTTTGATGTAGCCTTA  
TGTCCATCACATGTATCTTTATCTGACTGTTTTTTCTTTTTCTGTTTTACCATTTTAGGTATGCCTCTGGTG  
CCAGCACTACTGGTTTTTGTGCGACATCCCAGCTCAAAGTGGCTGATTTCTCATTCAACTTTCTTATTGGA  
AGCATACCAAAGTGTGGGTTACCTTCAAAGTCAGTTCTTAATTCTACGCCATAAATCTGTTTTATCTT  
ATCTTCTCTATTCTGAATGCCTGTTAGTTTTGTTGCTGTAAATCTATATCCAAAGTAGCACTCTGATGCTC  
TACTAGTGTGTTTCTTTACCTTTTCGGTTTCTTAATGCCTGTTATTTTGTGTGTCTATAGATCTAGCTTTC  
AAGGAAATTGCCTTCAGCACAAAGACCCGAAGCAACGGTCTGCTGCTTTATGTGGTAAGTAAACAATCA  
TAGTTACAATTTTCAACTACGCATTGTTTGTGACGCTCAGTCTAGGAGAATTGATATCTCAACCTTTTT  
TCTTTAATATTTGCAGTCAAATAGATTTATTTATTTTAGTAAGAAGTGAAGTGGTTGTTTTGACATTGCATT  
ATAGGTAGCACTCCGCCTCCCACTAGCCATGCATCGACTCAGCAATAAGCACCAGCCTGTTGAAGAAGC  
CGAGACATCAGACTTCTTCCAAGCCCACTTGGCTTTGGCTTTAGAAGTGGTAACAGGAGTTATGGTGG  
GTTCTCTCTTCATTGTAGGTCTTGTGACTGGCCTTCAGAGGCTTAAGAACAATCGTCAATCATACTTTGG  
AAGAAATCAGGAAGTGAGAAAGATCATATGACAATTTATGTAGGTTAGTACTATCATGCAATTGAACTT  
GAGCACTTAGTACTTTCAAAGCATTGAGCCTAATCTTCGTTTCTGTTTACCGCTGATGTTTCTTTGTAGA  
TACTGGTATGCTGAAAGATGTTGTAATATACAGCAGACAAGAAGTGGAGGTTAGCTTGTGAAGATTTGAG  
CAACATCATTGGATCCTCACCAGATAGCATAGTTTACAAAGGAACCATGAAAGGTGGACCTGAAATTGC  
TGTAATATCCCTTTGCGTCAAAGAAGAGCACTGGACAGCCTATCTAGAAGTCTTATTTTTCAGAAAGAGGCG  
AGACTCAATTCTTTTTTTCATGATCGCTATTTATCTCTTCCAAAAGTTTGCATCTTAAGTTCCATGCTCTAAC  
TTCTGTTAATTTACATTTAGGTGGCAGAATTGGCCAGAATAAATCACGAGAACGCTGGGAAACTTCTAG  
GCTATTGCAGAGAGAGTAGTCCCTTACGAGGATGTTGGTGTGTTGAATATGCATCTAATGGGACATTATA

TGAACACCTTCATTGTGAGTAAAGTGAAATAGTTTTCGCATGCACTTCATTTTATGTTTTCCAAAGCGAAC  
TCCTAACTCTTTGAATGTATCATAGATGGAGAAGGATGCCAACTATCTTGGACACGCCGGATGAAAATA  
GTTATTGGCATCGCTAAGGGACTGACATATTTCCATTCAGAACTTGACCCTCCATTTACTATATCAGAACT  
GAATTCAAATTCTGTATATCTCACCGAAGATTTTTCTCCAAGGTAAACGAGAGACCATTATTTATCATT  
TCGTATAAAACAGTCCTAAACAACCTCATCCCATTTTTATTACCTTAAGCTTGTGTACCCACCCCATTATGC  
TCTTAAGCAGTCTACAAAAGGCACTGGCATTTTATAATTGTCTTCTCAAAGTTTATTTCAATTTGGTGCAGC  
TTGTTGATTTTGAAAGCTGGAAGTCGATAATTTCCAGATCAGAAAAGAATTCAGGTGCTATCAGTAGTG  
AAGGAGCAATATGTGTCCTTCCAAATACTCTCGAGAGCCGTCATCTCGATGTCCAGGGTAACATTTATGC  
ATTTGGAGTACTTCTACTGGAAATAATCAGTGGGAGACCTCCATATTGCAAAGACAAAGGGTGCTTAGT  
AGATTGGGTAAGCATTCTTTTCATGTGAAATTTTTCTACTGTAAAAGACTTCCCTGGTAGAACCAGCT  
TCTAAACGCGTTGGCAGGACCTAAAGTCGACCTTTTATGTGCAGGCTAAGGAATTTCTTGAAGTGCCGG  
AGTTTTATCCTACGTTGTGGATCCCGAGTTGAAACATTTCAAACAGGAAGACCTCAAAGTGATATGTGA  
GGTATCAACCTTTGCATCCACCCGACTACGAGTAGGAGGACATCCATGAAGGACCTGTGTGCTATTCT  
GGAGAGCAACATTGACACTTCCATCACTGCAGAGCTCAAGGCGTCTTCGTTGGCATGGGCCGAGCTTGC  
ACTTTCATCCTAACTGACAGAAGGCTAACACAGTATATATATCTGAAATATGTAATTGTCTAGCGCTTCT  
CCTTTTCGTTTTTTGACCTCTCGATTTTCGTTCCCAATGTGTTCTGGAGTGATGGTTGAGTTCATGTAAATTT  
TGAGTCTGTAGGATAAAATTAGAGTTGAAGAGAAGCTACTGTTGATTCTTTGTAACAAAGTGGTTCTTG  
TTAAATGAATGAGTGTTCATAGTGAATGAGGCACCAACCATATTTTTTGAGTTTCAAAGAACTCGCTCG  
AGTTCTCGAGTCGCAACTCAAATATAGGTTTTGGACTTAACTCAACTCCAAAAGAAAAGTACAATACAG  
ACTTTCTT

>PGSC0003DMG400012307 LRR-RLKs

TTTTTCCATGAACAAGAAGAACAAGTGAAAAATCAAGAAAATGTGAGAATTTTTCTACAAAAAAA  
TTCCCAGTGTCTTGGTTTTGGCATTCAAATGGAAAGTTAAAGCGCAAAGAACAAGAAAAGCTTCTTC  
TACTACAGATTCTGACTAGCAGCTACTTTCATTTTAAATTACACCCTTTTGACCCTAACTTCCCCTATTT  
AAACCTTGTGAGTGACCTCCAATTTTTTAAATCACATTTTTTTCAGAACCCACATTGCTTTTTGCAGACCC  
ATTCTTGGGAATTTGACTCTTTTTTCTCACACCTATATACATATATACACATGCATCTTCATATTGTTGT  
GTCAGAGTGCATTTCTTTTTTGTGTTTCTTCTTCTTTTTTCACTTTAAGCTTGTGTTAAGCTGCT  
GCTACTTCTTTTATGAGGTTTTGAATTAAGTTGTGAGCTTTAGATTCTTGTGGGTTGAGGGTGTGTTG  
GAGAGTTTTTGAAATAGTTGAAAAAGTTTTGAACTTTAGAATCTTGATGCTTGCTTACTTCATCTTATGTG

ACTTATAAAAGCTAAGTTCTTGAGGGGGTTTTTTGAATTAAGTTTTGAGCTTTAGATTTCTTTTGTGG  
ATTGAGGGTGTTTGTAGAATGTTGAAATAGTTGAAAAGTTTTGAACTTTAGATTCTTGATGCTCTTTCT  
TTTTCTTATGTGTCTACAAAAGCTAAGTTCTTGAGGGTTTTTTTTTTGAATTAAGTTTTGAGCTTTAGATT  
CCTTTTGTGGATTGAGGATGTTTGCTGAGTTTTTGAAAAGTTTTGAACTTTAGATTCTTGATGCTCTTTT  
GTTCTTCTTATGTGACTACAAAAGCTAAGTTTTTGAGGGGTTGGGGGCATTCAGAGTCTTGAAATGGTT  
AAAGTTTTGAGCTTTAGGGAGTGGTGGGGGATTGTTTCTTGGGTTTCTTGGTGGGATTGTTTCTGTTGT  
CACAAGGCACTGTTGCTCTTCTGAAAATGATAAGCAAGCATTGTTGGATTTTGTTAATCAGTTGCCTCAT  
TTGCACCCTTTGAACTGGGATGCAAATCTTCAGTTTGCAAGAACTGGACTGGAGTGGGGTGTAAATGAA  
GATGGTTCTAGAGTGATAGCACTGAGGTTACCTGGGGTTGGTTCAATGGTCCAATTCCTAATAATACA  
CTGAGTCGTTTGACTGCATTGCAGATCTTGAGCCTTAGATCTAATGGTATCAATGGCACTTTCCCTATGG  
ACTTTGATAACCTCAAAAATTTGTCTTATCTTTACCTTCATTACAACAATTTCTCAGGTCCTCTGCCTTTGA  
TTTCTCTGTTTGGCAAAATCTCACCAGTTTGAACCTGTCAAACAACAGATTCAATGGCACCATTCTAGCT  
CGATATCGGGTTTAAGTCATCTTACTGCCCTTAATCTTGCTAACAACACTCACTTTCTGGTTCAATTCCTGATC  
TGCATTTGCCCAACTTGCAGCTACTGAATTTGTCAAACAATAACCTTATAGGTACTGTGCCTAAATCACTT  
CAAAAATCCCAAAGAATGTGTTCAATTGGTAATAATATGTCTTTACTTGACTATCCTGTTTGAATTCTTCT  
ATTGTTTCCCTGCCTCAGCAACCAAATCCAAAATCAAGAATGATGGTAAATTGAGTGAGAGGGCTTTGC  
TTGGGATTATAGTAGCTAGTAGTGAATTGGGATTCTTGGATTTGGTTTCTTGATGGTTGTTTGTGTTTT  
AGAAGAAAGAAAGATGATGGTTCGTTTCCAGCAAGATGGAGAAGGGAGATATGTCTCCTGATAAGGC  
GATTTCAAGGAGTCAAGATGCTAATAATAGATTGGTTTTCTTTGAGGGTTGTAACATGCATTTGATTTA  
GAAGATTTGCTTAGAGCTTCCGCGGAGGTATTGGGGAAGGGCACGTTTGGTATGGCGTATAAAGCAAT  
ATTAGAAGATGCTACCACAGTGGTAGTGAAGAGGTTGAAAGATGTAGGTGCTGGGAAGAAGGAGTTTG  
AGCAGCAAATGGAGGTTGTGGGAAGTATAAAACATGAAAATGTAGTCGAGCTTCGAGCATATTACTATT  
CAAAAGACGAAAAGCTTACTGTCTCTGACTATTTCAAGTGGGGTAGTGTTGCTGCAATGCTCCATGGTAT  
GATCACTTTATGCACTCTCTAAATTTTATAGTTTTGAACTTTTCACTTTGTCACATTTTGTAGCATATTCA  
TACTGCTCCGTTATTTGCTTTGAATCAGTAGATTAGTTAGTATTTTTGAGTATGATTGTTAAAACAAGTTA  
TTTGTATCCCAAACATGTTGACTCTAACTAAGTTGCTACGACTCTTCAAAAATGCCGCGGGGTGCAT  
GTCGGATCCTCCAAATAGTGCATTTTAGAGTATCCGACAAGGGTGTGACAACATTCTTGGAGAGTCCG  
AGTTACATAGTCCCTAAGTGAGTTCTTACAATCAGACATGTTAGTTTAGTGAATTGAAAACATAAAGCA  
ATTA AAAACAACATAGAATCTTCCAAACTGAAGGCCAACTAATATAATTTGTTGTGTTATGGGTAGGGCC



AAGATGGAATCCACATATATTATATGCTCCATATATTCTCTTCCAGCTTAATAGTTAGTTGTACCCACA  
GGATGATAATATATATATCCGTATCAAAAAAAAAAATGTGGATGATCCTAACATGTGGTTTACGCATCT  
CTGTGGGGCAGTGACTCCTTCTGTAAACAAAATAAGCAAAATCCTATCTCTATTTTAAAATCCATACAAA  
TCATTGTCACCTCTCCTTGTCACTAGAGTCTTTCAGCTATTACACTATTTGACTGAATTATTCATAGCAT  
GTGGATAATCATTCTGCTTTTGTATCTGTTAGTCTTTTGTGTTTCAGTTACCGCATTATTCGTGTCTTT  
GTTGTTACTGTTCTTTTTCTTGATGTCCTGTACTGCTTCCGTATTAATTGACATAATTTCTCCACTGCTGTT  
CTTTCTTTTTTACATAACTACTTTGATTTGTTGCAATTGAACCGAGAGTCTTTTGGAAACAGCCTCTCTACCT  
CCACGAGGTAGGAGTAAGGTCTGCGTACACTCTACCTCCTCAGATCCCCTTGTGGGAGTAAGCCGGT  
TATGTTGTTGTGGATAATCATTCTGCTTTTGTATCTGTTAGTCTTTTTGTGTTTCAGTTACCGCATTATTT  
CGTGTCTTTGTTGTTACTGTTCTTTTTCTTGATGTCCTGTACTGCTTCCGTATTAATTGACAGAATTTCTCC  
ACTGCTGTTCTTTCTTTTTACATAACTACTTTGATTTGTTGCAATTGAACCGAGAGTCTTTTGGAAACAGCC  
TCTCTACCTCCACGAGGTAGGAGTAAGGTCTGCGTACACTCTACCTCCTCAGATCCCCTTGTGGGAGT  
AAGCCGGTTATGTTGTTGTGGATAATCATTCTGCTTTTTATCTACTTTCTATAGCAAGTCAAAATAGTTC  
ATGATTTTGTGCGAGGTCCCAGCGTCCTTTTTCCCAATTCTTTGTCCACCAGGCAAATGCACATGATGTCAA  
AGTGCATGAATGGCTAAGCTTTTCTGATAATTTATTTGGAGTTGGTTGGCATCTTTCATTACAATTTTAC  
TGGTGGGACCTGATTTAATTAAGTGGAGTTAGGTTAAGGAATCCTAAGCTAATGTCAACCTTAATATG  
CTTAGAATCTATTGAGAACATTACAACAAAATTCTTTTTGGTTATTTGCTTATTTACTCCCCTAATTTTGT  
GTTAGAGCTAGGACTTCTGTTTGTCTTCTCAAACGAAATGAAGTGAAATGGAACTTGTAGAAAGTGTT  
ATTTCTTTTGTATCTCAGTTATGCTAACCTAATATTTTCATCCGCCGTAACTTTTGTGAACAAAAGGAAAA  
GAAAAGAAGATCATTGTGTAATGAGTAGCTTCCACTTAGATGATAAGTCCTGCAAGGGATATTCTAA  
ACTTTTAAGCACTTCGCGATTTGCTTATTCTAAGTTAAAGGATCGACCAGGAGCTACAAGGATACTGATT  
ACTCTAATATTTGGCATGTTATAGAATGATAATTAATATGAACAAATGAGAGACAAAGGATTGAACG  
CGCGATCCTTTGCTTTTGTAAAATTGGGATGGTTACCTGTGGTATCAGAGGTCGTTTGGTAGGCAGGAT  
AAGGTGAGATATTCTAGGATTGACTGTGCTACCAGTTATTCTCCTTTTCAATTCTCTACCTTTTGTAGGC  
AGTTCATATCATTGTGATCTCTGTGTTACCTGTTATCAAATATTGCTTTTGTATTGATCGTGTGACACC  
TATTAATGCAACTTATAGGTAAACGGGGAGAAAACAGGATCCCTTTAGACTGGGAACTCGACTTCG  
GATAGCAACTGGAGCAGCGAGAGGTATTGCTAGGATACATGCTGAGAATGGTGGCAAGCTAGTCCACG  
GAAACGTCAAATCCTCAAATATCTTCTGAACTCTAACAATACGGTTGTGTATCTGATGTTGGTCTGTCA  
ACAATAATGAGTTCGTTAGCTCATCCAGTTGCACGTGCTGCTGGTTTTCGCGCTCCAGAAGTAACAGACA

CACGTAAAGCCACTCAACCTTCTGATGTGTACAGCTTTGGTGTGTTGTTATTAGAGCTCTTGACAGGCAA  
GTCCCCATCCATACAACAAACGGAGATGAGGTCATACACTTAGTCCGATGGGTTTCATTAGTTGTCCGA  
GAGGAGTGGACTGCTGAAGTATTCGACTTGCAACTATTGAGGTACCCGAACATAGAGGAAGAGATGGT  
GGAAATGTTACAGATAGCAATGTCTTGTGTGGTAAGGATGTCAGATCAAAGACCAAAAATGTTTGAGGT  
TGTTAAAATGATCGAGAACGTTTCGTCCCACGAGCTTAGAGAATGAGCATTTCATCTGAAGGAAAAGCAGA  
AACTTCAACACCAAGAGCAGAAGCTACACCTGTGCCTGATACACAATCTGATTCTCAATGAGTTGGCCAT  
TTTTATCATAGTTTACCATCTTAATTCATGTTGAAAATGCTTTACTTCACTCTCTCAGTGAAATATTGAATA  
CTTTGTAECTTAATCCAATAGGCACCTTATTTAAGGTATTCTTGAAATAGTACTTTGATTACAAATCTAA  
GTTCTCTTTCTCACTCTCAAAGTACCATCTCTCCATGTTCTTGATGCAATGATCACAAGAACATGGTTGAT  
GTGGGACGAATTCAAGATTTAGAGTCAGTAAGTTCGGAGTAGGTGTGCATTATTTTGTATGCATTTGTAT  
CTTCTCTTTTTTTTCGATTGTAGTAGTACTTGTTTTCTTTCCTTCAACTATTGAGTTATTTGTAATGCTACTT  
GTTCTCTTCTTAATTGTTGTAACATGGTTTTTTTTCTTCG

>PGSC0003DMG400012443 LRR-RLKs

CTTTGTCTAATCTTAATAATAACTGTTCCCTTGATTTGAAATCTCAATCTCTATCAGCTTAATTA AAAACTG  
TACAATCTTTTTTTTTCTTTATTAGATTCTGTCCCTCTTCTTGAAATTA ACTAAAAGAGTTTGCTTGAGTTG  
AAAGTTGGGTTCTTGCTTCTTTACAAGTGATGGGGTGTGAAAAAATCTCATCTTTTTTCATTTTTCTTCC  
TAGTTTTAGGCTTTGAGTTTTGTAATCTAGTGTATTTATTTATGATTTGGAGTTAAGGGTTTGTTAATTCAT  
ACAAGTAGTTAGAGGCTTGCTTTAATTACAAGTAGTTGGTAGCCTTTTTCTTTGAGATTTTTGAGGTGTT  
TTCTTGGGATTTGTGTTAATTGAAGTTTCTGCAACTGGGGTCTCTTCTTCTTACTATAATAATAAGGG  
TGGTGGTGCCCTGCTGCTACCGTTAAGTGCCTTGATTTTTTCAGTCTTGGGATCTGATTTGATTTTTGGTA  
CTAGGGGATCTGAGGAAGGTTCTTCTTGGTGCTAATTTGCATCAAAGGTGGAACTTTTCTTCATTTGG  
AACTGTGAATTTGGAATACATGGTGGTGGAAATCTTGATTTTGAGCTGTTTATATAAAGATTTGTGTGTT  
TCATCAATGGTGATTTGGGAGTTTCTGCCAATGAGTTTTCTGTGTTGGGTGTTTTTGGCTTATCTTTTTTG  
TACATCTTTGAGTCTTGAAACCCAGTTCAAACCTGTCATCCATATGATTTGTTGGCATTGAAAGAAATTG  
CTGGCAATCTAACAGATGGGGTTATTCTATCAGCTTGGTCTAATGAACCTAATTGCTGTAAATGGGATGG  
GGTTGTCTGTGGTAATGTTTCTGCTCAAAGTAGAGTGATCAGGCTAAATTTGTCAAGAAAAGGTTTGAG  
AGGTGTGGTTTCACAGTCCTTGGAGAAATTGGATCAGTTGAAATTGCTCGATCTTTCGCACAATCACTTG  
GAAGGTGGATTGCCTTTGGACTTGTCCAAATGGAAGCAGTTGGAAGTTCTTGATTTGAGTCATAATGTG  
TTGCTTGGACCAGTGTGAGGGTGTGATGGATTGGAATCAATCCATTCTCTCAATATATCAAGCAATT

TGTTCACTGGAAATTCAGTGAGTTTGGTGAATTCCTAACCTTGTCGCATTTAACATAAGCAACAATTCG  
TTTACTGGTAGTTTCAAGTTTGAATTTGCAGTTTTTCCAAGAAGCTTAAGTTCTGGATATATCACTTAA  
TCATCTCACTGGTGATCTTGGAGGACTGGATAATTGCAGTTCATTGCTCCAGCAGCTACATGTGGATTCT  
AATGATCTCGGGGGTCACCTCCGGACTCGTTGTATTCAATGACATCTTTGGAGCAACTTTCACTGTCTGC  
CAATAATTTCTCAGGCCAGCTAAGCCCACAGCTTAGTAAGCTTCCAACTGAAATCCTTAGTTTTATCAG  
GAAATCGCTTTCATGGTTTGCTTCTAATGTGTTTGGTAATTTGACATTGTTAGAACAGCTAGCTGCACAT  
TCTAATAGATTTTCAGGACCATTGCCCTCTACGATTTCTGTATCTTTCTGTGCTTAGGGTGCTTGATCTTAG  
GAATAATTCTTTGTCTGGTCCTGTTGATCTTGATTTTACTAAATTGACAAGTCTGTGCACTCTTGACCTTGC  
AACTAACCATTTCAAAGGTAACCTTCTGTATCGCTCTCTAGTCGGGAGTTGAAAATCATGAGTCTTGCC  
AAAAATGAATTCACCGGGCCAATTCCTGAGA ACTATGCCAACCTTTCATCCCTTGTTCTCTCATTGTC  
CAATAATCCCTTTCGAATTTGTCTGGAGCTTATCTGTTCTGCAGCACTGCAGAAATCTTCAACTCTTAT  
TCTCACCAGGAACTCCGTGGTGAAGAGATTCCGAAAAATGTGAGTGGATTTGAGAACCTGATGATATT  
TGCATTGGGGA ACTGTGGTTTGGATGGGCGAATTCCGATATGGTTATACAATTGCAGTAAATTGCAAGT  
GCTTGACCTGTCATGGAATCATTGGATGGCGAAATTCCTCCTTGGATTGGTGAATGGAAAAATTGTTCT  
TACTTGGATTTCTCGAATAATCACTCACAGGTGAAATCCCAAAAAATTTAACTGATCTAAAGAGCCTCAT  
TTCCCCACACA ACTACGCCTCTAGTCTGAATTCTCCCACTGGTATACCGTTGTTTGTCAAGAGAAATCAGA  
GCGGTAGTGGTTTGCAGTACAATCAGGCTTCAAGCTTCCCTCCGTCTATCTTATTGAGTAATAACAGACT  
AAACGGGACAATCTGGCCCGAAATTGGTCGTCTGAAACA ACTTCATGTCTTGGATCTCAGTAAGAACAA  
CATTACGGGGACTATTCTAGCTCGATTTCAAATATGGGGA ACTGGAAGTTTTGGATCTTTCATGTAAT  
GATCTCAATGGATCAATTCCTGCTTCAATCAATAAGCTCACATTCCTTTCAAAGTTCAATGTAGCTAATAA  
TCACTTGCAGGGAGCGATTCCAACAGGGGGCCAGTTCTTGAGCTTTCCTCAACTCGAGCTTTGAGGGTAA  
TCCTGGACTTTGTGGAAAAATCATTCTCCTTGTGCTGCCAGCAATTTGGACCTCCGACCGGCTAGTCCTC  
TTGCTTCTAGTAGCAGTAAGCTTGGCCGAGGCGGAATTATTGGAATTACAATCAGCATAGGGGTAGGAA  
TTGCACTTCTTCTGCAATAGTGCTGCTTAGAGTGTCTAGAAGAGATGCTGGTCACCAGATTGGGGACTT  
CGAGGAAGATTTCAGCAGACCACCTCGATCGTCTGATACTTTTGTTCCTTCTAAGTTGGTACTTTTTT CAGA  
ATTCTGATTGCAAGGAACTGACTGTTGCAGACTTGCTTAAATCTACAAACA ACTTCAACCAGTCGAACAT  
TGTTGGATGTGGAGGATTTGGTCTTGTTTACAAGGCAGAACTTCTAATGGCATAAAGACTGCGATCAA  
GAGGCTTCTGGGGATTGTGGTCAGATGGAGCGTGAATTCCAAGCTGAAGTGGAAAGCCCTCTCGAGAG  
CTCAGCACAAAAACCTTGTATCCCTTCAAGGTTACTGTCAGCACGGGAGTGATAGATTACTGATATATTC

TTACATGGAAAATGGAAGCTTGGACTATTGGCTACATGAAAGAGTTGACGGGAGCTCATTAAACATGGG  
ACATTAGGTTAAAGATTGCACAAGGAGCAGCTCACGGATTAGCATATTTGCATAAGGAACCAAATATAG  
TTCATCGCGACATTAACCAAGCAACATTCTTTTGAATGAGAGATTGAAGCTCATCTAGCTGATTTTGG  
ACTATCAAGGCTGTTGCATCCCTATGATACTCATGTGACGACAGATCTCGTTGGAACCTTAGGATACATT  
CCTCCTGAATATAGTCAAACATTAAGTCTACTTTTCGGGGGGATGTTTACAGCTTTGGTGTGTTCTACT  
TGAGCTTCTGACAGGCAAGCGTCCCGTGGAAAGTATGCAGGGGGAAAACTGCAGGGACTTGGTATCAT  
GGGTTTTTCAACTGAAATCTGAGAACAGAGTGGAGGAAATATTCGATACATCGATATGGGATACAAGTT  
ACGAGAGGCAGCTTTTGGAGGTGTTAAGTATAGCTTGTCAATGCATAGTGCAAGATCCACGCCAGAGGC  
CCTCGATCGATCAAGTTGTCTTATGGCTCGAGGCAATCGGAAGTGTAAGAAAGATGAGATTCAACTA  
GTTTTTCCTTGTAGACTTGGCTTCTTTGCTTACAAAGTGAAAAATATCAGTGTAAGCAACAGAAAATTT  
CAGTTTTATAGAGTTAGTTATAAACTTATGAAATGCTTTGTTGGTTCACTTTGTTTCATACACAAAAAA  
TAGTGATAGTTGTGTTTGTATACATATGCTTAACTTGGGGACAAGTCCTTTACCAATATACAACAAATTAC  
TCCCA

>PGSC0003DMG400012514 LRR-RLKs

AAGAAATTGGTAGCTTGCAAATCTGATATACCTTTCTTTGAGAGACAATAAATTGCAAGGATCAATACC  
TAGCTCAATGAGCAGCGTGACATCTTTGGAATTTCTAGACCTTTCTCATAACAATGTTTCAGGATTAATTC  
CCACGTCTTTGGAGAAGCTTCAAATCTCAAGTATTTCAATAAGTTAGTTGGTGAATCCCTCGAGCGG  
TCCATTCAAGAACCTCTCCGGTCAGTCTTTCATATCCAATGAAGCATTGTGTGGTTCTCCAAGATTCTGT  
TCCCCATGCCACACTAGTACTTCAAAGTATCTATCCAAGATGAAAAACTACTTGCTCTAATTCTACCAG  
CTGGAGTTGCACTTGTATTAGTCTCCATCGCCTTTGTGATTATATTGTATGGATAAGGTGTATAAGAGGT  
AAAAGAAAGCAAGCAGTCGATTCATCGTATGTCGTCTCAACAAGAGGAAGAATTTCATACTATGAATTG  
CTCCGAGCAACTGATTCACTCAGTGAGAGTAATTTGATTGGTTCTGGGAGTTTCGGCTCTGTTTACAAAG  
GAATCCTCAGAGAAGGGACTTCTATTGCAGCTAAAGTTTTCAATCTGCAATTACAAGCGGCATTTAGGA  
GTTTTGATACAAAATGCCAATTTTTGCGCAACCTCCGTCATAGGAATCTCACCAAAGTCATCACTAGTTGT  
TCAAACCTTGAATTTAAGGCTTTGGTACTAGAGTACATGTCCAATGGGAGCCTCGATAAGTGGTTATATT  
CGCACAACACTCCTTATACATCAACCATCATGATATTTGCTTCAAATAGGCTAGTTTTGTGTCTTTAATT  
CATAACATAATAGCTTCAAGTGGTACTCTTTTAGTTTTCAATAACTTGTCTTATGTCCAGAATTTATCCAA  
GTGGTACTCTTTTGGTTTCTTCATCTCTCAAGTCAATTTCACTATTATTCGATTGCTTTCTGAATTGCTCTTA  
ACAATTGTTGTCCAGGTCTCAACTTTCAATAGTGATTTTCACTTGAATCTTCTCTACTACTCTTTTAGGTTT

TGCTTTGCTGGTTTCTTACTCAAATTTCCCAAGTTGTTGAATTCTTTCATGTTTCGTTTCGTTTTGGGCTTA  
ATAAGCAAAGGTGGCTTTTTGTTATTTCTGAACCTAAAACCTATAAATGTTAAGAACTAAGCTACATTTAT  
TTAGAGTAATGTGCCTGACAATGTTGAAAATTAGGAACTTGTATTGTTTTGAGCTTGAGTAGGGGGCT  
GCACACCGCGCAAGTACAGAGTGTAGACAAGGAGGGACTTTTTCTTTGTTGAAAGGTATTGGCCAAA  
TCTTTTAATAAATCTCATATTGTTAGGATCTTGATTAGATTCAACTGATGTGTGCAATCTCCTGAATGAAG  
GATTCAGATCTTCACCATGGATGATAGAACTCCTCCCGGAAGTGAAGGCAGGAGTAAAGCCTATTGATT  
CACCAGTTTGCTAATGTACTTGGTAAAGCCTATTGATTCACCAGTTTGCTAATGTACTTGGTAAAGCCTAT  
TGATTCACCAGTTTGCTAACTTACTTGTGGCTACCCGCACTTTGTAACCAGAATAGGGCTCTGGGAGGG  
AGTTGTCAGTGTATTGGGAGTTGCTTTGCTATGCGTTATTCATGGTGCTAGAGAAGACTTTATTTGAAGA  
CAGTAATGGTGCATATACATTCCGTACTTCTAACCCAACCTCAAGCCGAAGAACTCATATATCTTTTGACT  
CTATTTATGTAGGCACCTGATATTTATGAGGTTTCACTCACCCAGTTACCTATTTGAGGTCTAGGTCAAG  
ATTTAATAATCATGACGGTCCTTGATCCAACAGGATATTGGCTAGATGGAAAGCTTGGACCTCGAGAAT  
CTGTGTACCGCCATTTTTCTTGGACTGTGAAATCACGTGTTCCACTCTTATTATCCTACATGGATATATT  
TTTGTCTTAATTATTAATAATTTGCTCTCAATTTAATTCTTCTACTCACTCAATATTTAATACAAATATGCAGA  
AACCCCAAATAGATGAGCAAATGTGTTGTGTTTGAAGTACTGATAGCATATGACATACATTGGCACGCG  
TTGATTAAACATCACATATGCAATAAAGTGAATAATATTATATATAACAAGTGACAAGTGAACTAACAGC  
CACCTCTTCTGCACTGTAATTACACTGCTCAAATCTGGAATTTGTTCTTAGCATCTCAAATCTGAATTGG  
ACAATGCCAGAACGTACATCAAACGTGTTGAAGAGCTGGGTAAGGAGAGGAGGCACCAAGAGCCAGA  
AGAGATGGTGGAGGTTAATACCATCATGTATATGGTGGTCAGTTTGAAGGAAAGGAACAGTAGATGT  
TTCGACAATAGATCCAATTCATACACAAGGTCAAATGGAATTGTATAGTATCTCTACTTTTTGGTGTA  
CAGTTGTGTATAGTAGATACAGACCAGATTGTAGATTTGATAGGAAGTTTGTAAATTGACACTTTTTGGTG  
GTAGCCAGCATGCCCTTAATGCTGAAGAATACAACCTTACCAGTTTCAAAAAAAAAAAAAATATTATATAT  
ACACGCTTGTATACAAGGTTGATACGGTATTTACACTAAAGTGAATAATATTATATACTGGGGTATAGAA  
TAATATTATACTGTTGTGGAATGATTTAAGGTGTAACCTGAAAATATGCTTAGAGGGTGCAACGTGTTA  
TGTTTGAAGGTCACATTATTCCAGAAACGAAATACACATGCATTTGGAGCCAATGTGTTTTACGAGTGC  
CTTATCTTTTTGACATATGAATTTGATTGTTGTTTATTCAAATGTATAATGAGACAATCAATGAATGTGTT  
TGAAAGGAAAATGTTTTTTTCAGAAAACAAGTTGATTTCTGACTTATTTTCTCATGTTTGGTTAGTAAGTG  
AAAAATTTTTTTAGTATTTGGTTGGTAAATGAAAAATTTTTTCAAAAAATATCTTTTATTATTGGTTAG  
AGCTTAGAGACTAGAAAATACTTTTTAGGAGATTAATTTCTAACCCAAAGATCCGAACCTGACAACCTGA

ACCAACACACGACCTCAATGACCGATTCCGGGATCCGAACCCAATACCCAACATGTGACCTGACCTCAACC  
CCAACACCCGAATTAACACGACCCCGATGATCAATCCGGGGATTGGACCTCAAGACCCAACCCAAGA  
CTTGGCCCAGACACCCGACGCATGACCCAACCCCAACACCCAACCTTCAAATCGAGACCCGACCTCGACT  
CTTGATGCGGATCCGACTTTTGAAGTAGGACCCAACCTCGACACCAGATCTAGGACCCAGGACCCAACCT  
CGACACTCGAACCAAGACCCAACCTCGACCTTGACTCCGGACCCAGGATACGACTTCAAATCGAGACC  
CAATTTAGAATCCCGACCTAGGACCCGATTCTGATCATGTACCCGACCTTGACACCCAACCTCGAGATAG  
GAGTTCAAATCGGGATCTGACCCCGACACAATAAATGATCCAGGATTCGACCTCGACTACCGAATCTG  
ACTTCAAATAACAACCTCGACCCCAACACCCAACCCGGAATTCGACTTTCAAATTGGGACCCGCCTTTTCG  
AATCAGGATTTGACCCCTACATCCAACCCCAACTCCCGACTACGAAGATCAATCTGGGACCTAAAACCCA  
ACACCTAACTTGGGACCCGACCTTGACTCTCAATTCGAAACACAATTTCAAACCCAATCCCAAATCTAA  
CCTCGAATCTTGACCCAGGACCCGACACCCAACTAGGATTCGAAACCAACCCAACCCAACCCAAAAGTT  
GGGTCTCAAATTGAGGTTGGGAGTCGGGTCTCGAATCGAGAATCAGGAGTTGGATCTAGCATTAGTGA  
TGAGAATCGGTACCCGAGAGTTGAGTTAGGGTGGAAAATTGAAGTGTGCTGAAAAAATCTTCGACGC  
ATCCTAATTCTCATTGAATTCAGGGCCCAAATCATTAAATAAGGACTCATCCTCGACCATTTGGTTTTCATAT  
TAGATAAAAGGAAACTAAAATGGGGCACTTGTAAGCAATTGAAAAGAGACCAGAACTACGTGAAAA  
GATGTTTCATATATAAGCAAACATTATTATTGTGGACCAAGGGAACCTTATATACATAAAAGAAATGGCCT  
AAACCCCTTTCACTCATTAGCTCCACCCCTGCGTCCGATACTCAACACACATAACTCATTCTACAGTTCTT  
TGTAATAATTGTGTATAATTAGCCTTGTAACATTCAAATCCTTAATATAACCCTTTTCTTTCAAATCCCT  
CTTCGTTATGAACTAAATATCTATGGACTATATTTAGAATATTTACTTCAAATCATCACAAAAAATGT  
AAAAGATGATTAATACTACTACTACTATTCCAGGCTGTTATTTGCTGAAGAAAATTTGATTTGATCAAC  
AAAACGTTACTAACATTAGTCAAGTCACACGGTCCCCTTAGAGGAAAATGGAGAAAAGACAATGAAG  
ACCAAATGGAGATCAACTGATCACTGCTATTTAAAGTCTCATAGCCCCATTGTAAGTACTAGCCATGCCAAG  
TTCTTTCTAATTTGTAAAGTACTAAAATGGAGAAAGCCACCAACACTTTTTTCTTCTGTTTCACTTGGTTG  
TGGCTAGTATAGCCATGACTCACACCAATATTACCAATGATCAATTAGCTCTTCTTTCTTTAAAATCCCAA  
ATCATTCTGACCCCTTTCCTTGTGGATGAAAGTTGGTCTCCAACACTTATGTCTGCTATTGGGTTGG  
CATTACTTGTCTTCCCACCATCGAGTGACGATGCTGAATATTTCCAACATGGCTCTTACAGGCAAAATTC  
CTCCTGATTCGGGAATCTCACATTTCTGTTTCTTCTGACTTGAGTGGCAACAATTTCTATGGAAATTTG  
CCTCAAGAAATGGCACGTCTACGTCCGTTAAGGTTTGTATGCTTGGTTTTAACAACTTCAATGGGGAGG  
TTCTTCATGGTTCGGGGTCTTACACCAACTTCAAGTTCTGAATATAAGGAATAATAGTTTTAGTGGTTCC

ATTCCCTCTTCAATTTCTAATATCTCTACGCTTCAAACCTTTGGATTTGACATACACCTCCTTAGGGGGCCAA  
ATGCCAAAAGAAATTGGAAATCTTCAAATCTAAGGGTTTTACGAATATCTGGTAACAATCTTATAGGTT  
CTATCCCTCTGTCTCTCTCAAATGCCACAAGGTTGATGACTTTAGAAGCTTTCTGTCAATTACCTTGAAGGA  
AACATCCCCAAAGAGATTGGAGAACTTCAAACCTAAAAGTTTTGGCAATACAAGCTAATCAACTTATAG  
GTTCTATACCATTCTCGATCTTCAACATTTTCGGAATTAAGTCATTGGATTTTCATATAATACCTTATCAG  
GAGATCTTCCTACTGATATGTGTGATCGACTTCCAATGCTGAAAGTGCTTTATCTAGGTTTCAACGAGCT  
ACACGGTCATATGCCTCTAAGCTTGGCAAACCTGTTCAAACCTTCAAACCTTTGTTTTATCTGATAACAAGT  
TTGATGGACCCATACATAGTGAAATTGGACATTTAAGTAATTTGCAGGATTTGTCTCTCGAAAATAACCA  
TTTTGAAGGTTTGGCATTGAATACTAGCTTGTGGTTATTTTTCTTCTAACTAACTACTTCTGAAAAATTC  
AATCACATAATTTTTCTTTTGCAGGGAGAATTCCACAAGAAATCGGGAATCTTGATAATTTGGTGTCCAT  
AAATCTTATGGCAAACCGATTACCGATTGTATCCCAATCTCCATATTCAATATCTCGTCACTACAGTTTCT  
CTCATTGGATGACAACAATCTCCTTGGGCCCTTGCCAGGGGAGGTTGGCAACTTGACCAAATTGCAGTA  
TCTACTTCTTAATGAAAATATGCTTACAGGTAAGTTATTGCAGCTATCTTGCTACAAGTGAACCTAACAAA  
GTTTAAAATCATTACACGTTGTTGCTTAATTATATCTCCATACATACATTGACAGGTGAAATACCGAAAGA  
GGTAAGCAATCTCATTGACTTGGCTGAAATGGGGTTGGGTTTCAACAAGTTTACTGGTTCACCTCCAATA  
GAGATCTTCAACATATCAGGGATAGAAACAATTCAACTTACTTCCAATAATCTGACAGGAACCCTACCAT  
TAAACATGGGTTCTACGTTACCCAACATTGAAGTTCTTATCTAGGTCGTTAAATCTTTTTGGGACTATA  
CCTCATTCTCTTCAATTGTTCCAAACTCACTCATCTAGACCTTGCTGTAAACAGACTCACCGGTATGATT  
CCAACCTCTCTGAATATTTGACTCAACTCAAGTACCTATTCTTGGGGGGAACTATTTAATAAGTGACAC  
TAAGTTAAGCTTCTTGACTTCTTATCAAATTGTAGAGATTTAGAATTTCTTTCTTATCTTTGAACCCTCT  
GAATGGAGTGATTCCAGTTTCTATAGGAAACCTTCCAGTGCTTCTCCTCTATGGTTTAGAGCTTTTGAAT  
GTGGAATTAAGGGGAAATTCCTAAAGGAATTGGGAACTTAAGCAGCTTAGTAGACCTCGACCTTTCTG  
GAAATGGCATAACTGGATCGATTCCCGCAACAATTAGAAATTTGAGATTCCTTCAGCGCTTAAAGTTGAG  
TCAAACAAACTTTCTGGATCTATTGGAGAAGATCTATGTAAATTGCAGAACTTAGGCTATTTACACTTG  
ACTCAAATAAACTTTCAGGATCTATTCCTAATTGTTTGGGGAACCTTAACTTTCCTTCAAGAGATATTTCT  
AGGTTCCAACAAATTGTATTCGAACATACCAGCAGGTTTAGGGAACTCAAATACTCTTGAGGCTAGA  
CTTATCCTCAAACAACTTGGGTGGCTCATTACCTCTGGAGATTGGAAACCTAAAGGCTGTCATATATATG  
GATCTATCAATGAATGCACTCTCAAATGGCATAACCGGAGAAATTGGTGGCTTGCAGAATCTAATACACC  
TTTCTTTGAGAGACAACAAGTTGCAAGGATCAATACCTGGCTCAATGACCAGCATGTCAGCTTTGGAATT

TCTAGACCTTTCTCAGAACAATGTCTCAGGATTAATTCCCAAGTCTATGGAGAAGCTACAAAATCTCAAG  
TATTTCAACGTTTCATTCAACAAGTTGGTTGGTGAATCCCCACTGGCGGTCTTTCAAGAACCTCTCCAG  
TCGGTCATTCATGTCCAATGAAGCATTGTGTGGTCTATAAGATTCGTGTTCCGCATTGCAACAATAGTA  
CTTCAAAACATAGATCCAAGAGGAAAAAGGTA CTCTATTTCTACTAGCTGGAATACTAGTTGTATTAAT  
TCCTATCGTCTTTCTGCTTGTATGGATAAGGTATATAAAAGGTAAAAGAAAGCAAGCAGTTGACTCATCC  
TTTGTGCTCTCAACCAGAGAAAGAATTCATACTATGAATTGCTCCGAGCAACTGATTCACTCAGTGAGA  
GTAATTTGGTTGGTCTGGGAGTTTCGGCTCTGTTTACAAAGGAATCCTCAGAGATGGGACTCCTATTGC  
AGCTAAAGTTTTCAATCTGCAATTGCAAGCGGCATTTAAGAGCTTTGATACAGAATGTCAAGTTTTGCGC  
AACCTCCGTCATAGGAATCTCACCAAAGTCATAACTAGTTGTTCCAACCTTGAATTTAAGGCTTTGGTACT  
TGAGTACATGTCCAATGGGAGCCTCGATAAGTGGTTATATTCGCACA ACTACTCCTTAAACATTAACCAT  
CGACTAAGTATAGTGATAGATGTGGCATGTGCGTTGGAGTATCTCCACCATGGCTGCTCATTGCCCGTG  
ATTCACTGTGATTTGAAGCCTAGTAACATCTTGTTGGATGAGGATATGGTTGCCACATAAGTGATTTTG  
GCATTTCAAACACTGCTTTCTGATGATGAGAGTGCTTCATACTAAA ACTCTAGCAACATTGGGCTATATT  
GCACCAGGTATGTACTCTCTTAACTAATTTCTTTTGAATACTTCTCTCAAATGCTGACTTTAAAAATTGGCT  
GATTGTAGAGTATGGATTGGAGGGATTGGTGTCAACAAAATGTGATGTTTATAGTTATGGCATCATGTT  
GATGGAAATATTTACACGCACAAAGCCTAGTGATGAAATGTTTGATGGAGATTTTAGCTTGAAGCAATG  
GGTGAGCAATTCCTCCACAGGCAATAATGGAAGTTATCGATGCCAACTTAATAACGCCACATGATAAT  
CACTTAATGAGAAAGATAGATTGTGTGGTATCCATCATGAAAGTGGCAATGGATTGTTGTGTTGAATCTC  
CTAAAGGAAGAATTGACATGAAAGATGTTGGGAGGTTAAAGAAGATCAAGATTCAACTTCTTGCATGTT  
GA

>PGSC0003DMG400012588 LRR-RLKs

ATGGGCTCATCTAGTCTCTTCATCAAGTACTATGTTGTCTTGCTTTTCATGATGAAATTATGTACCCTGTCC  
ATAGCCGAAGATGGTTCTACGGTAGGCTATCATGGCACAGAAAGGGAGGCTCTTTGGGCGATTTCGAGC  
TGAATTCAACAATCCTAAATTGCTCCAAAAAAGTTGGAACAGCCTCATGTGTTACATGAATAACACTCCA  
AATTGGTATGGTATTAGCTGTATCAACGGTCGAGTCACTGGACTTGTGCTAGAAAATCTTGGCCTTACTG  
GGAAACTCGAGGCAAATGCACTTGTCAATCTCACTCAATTACAAACACTTAGCTTCAAGAACAATTCCAT  
ATCAGGGAACTTGATGAACTTCTCCAACAACCAAATTTGAACAACATTGATTTATCCGGTAACAGATTT  
GACGGAGAAATTTACCTTCTTCTAACACTTAATTCGTTAGAGTCATTGCAGGTACAGAATAACAAT  
TGAACGGTCCAATCCCAGTTTTAATCAGTCAACTTTGAAAGTTTTCAATGTCTCAAACAACAATCTTTCT



GGTGAAATTCCAAGCACAAATAGCTCTTCAAAAATTTGGTCCGTCCTCGTACTTAAGTAACCATGATTTAT  
GTGGTCCCTCTTTTACTAACACAACGTGCATCACGATCAAGGATAATGAGTCATCTACACCAACTCCAAG  
TGATAGTTCACATAATGAATCTTCAAATAGTTCAAAATTATCCATGTAACTCCAATCTTGGTAGTAATTA  
ACGTTGTGGGCATTGTTGTTCTTTTATATCTAGTCATTTACTACTTTAAAAAACAAAAAGCTTAAGAAA  
ATGCTGATGAATAGTAATACAAGATTAACGGAGGTTGATAAAATGGAGACTAGCAAAGCTGAGATCAC  
AACACGCCAACAGAAACCAGGAGTGTGGAATCAAGAAGTGTGGCATCAGAGGTTGAATTAGAGAAA  
GGCAAATTGATATTCTTAGGTAGTGAAATAAATTTTGAATTAGATGACTTACTGAGAGCTTCAGCAGAA  
GGTTTGGGAAATGGAAATTTTGGAAATTGTTACAAGGCAATGTTGGTAGATGGACCAACTGTTGTGGTG  
AAGCGTTTGAGGGTTTTGAAACCTTTAACAAATGACGAATTTGTGAGACAAGTAAGAGCTATTGGTGAT  
ATAAAGCATCCAAATTTGTTGCCTATTCTTGGTTATTACTATACAAGGGATGAGAAGTTGCTTCTCTTGAA  
ATCTGCACCTAACGGAAGCTTATACAACCGCATTACGGTATCTTACTGTGATCCACTTTTCTTGTAGTC  
TATCATATAACATTTATAATTACTCAAATACATAACTGATTTTTTTTTTCCGTGGTTGGTTGAACAATAGGA  
GGAAAAGGGACTAGAGATAGGATACCATTTTCGATGGAGCTCAAGATTATCCGTTGCTCGTGGTGTTGCT  
CGAGCACTAGAGCATCTACACCTGAACGTCAGTTCCTCCCAATTCGTTGTTCCCATGGCAACCTAAAAT  
CCACCAATGTTTTACTTGACGAAAATGATGATGTTTCGTGTTGCTGACTTTGGTCTCACTTCCCTTATTGCA  
CTTCCCATCGCTACTCAACGAATGGTTTCCTATCGATCACCCGAATATCTGGCTTCCAAGAAAGTGCCAA  
GAAATCTGATATTTGGAGCTTTGGTTGCCTTCTCCTGGAATTATTAACAGGTATTTGTTTTCTTGATTGA  
TCAGGCAGAATCAAATATTTGCGTATATATACTACATTATTAGTTATCTAGCGATGTATATATTTAGAGCA  
TACAATACATATATTTTGATGGTATATTATATTGATCACATTGTTGTATACCATTGATATATATAAGTAAAT  
AGAAAATGTACCATCGGGCTGATACTCAAACCACTTATAAATCAAATTATAATAAGAGACTTTGACACA  
AGTGTGTGCGCTATAATTGTAACAGGTAGAATTTCTTACATTCTGCTCCACCGGGGGTGACCGGTGCG  
GATCTGTGCAGTTGGGTTTCATAGGGCGGTCCGAGAAGAATGGACGGCTGAGATTTTCGACACGGAAAT  
TGCTGTTTCAGAGAAGTGCCAACTCAGGAATGTTGAAATTGTTGCAGACTGCTATAAGCTGTTGTGATAA  
GTCGCCGGAAAAACGACCGGAGATTAGTGAGCTGTTGAGGGAAATGGAAAGTATTAACGGGGCGGTA  
CCCGAATCGGAAGACGAAGATGATCTCTCCTTCTCAATGGATCAATCTATGACAGATGACTCCATAGCAA  
CTGCAACTCCGTCTCGATAA

>PGSC0003DMG400012594 LRR-RLKs

ATGCTGTAAGCAGTAACGAAATACTATTTCCATGGACAGAATCCCTCTGCCGCAGATGTTCCATTGACA  
ATTTAAACACATTTTGAACCTCCTTTTCTTTCTCTCAAAGGTGTAGCTTGTGGATGCACTTATTAATTTT

TAATGTGCTACATAGCTATGTGATGACTAATGTATAGCCCCTTAATTTTTACAGATTGTGTGGTCTGTAAG  
TTTTAGAACTGATTTGCTTACGACCTCTTTTTCTAATTGCAGGGAACCTTTATAGTAATAATATAAGTGA  
AGAATTCCTTATGAACTGGGGAATTTGACGGAGTTGGTGAGCTTGGATCTTTACCTGAACAAGTTAGTT  
GGTCCAATCCCCGACACTTTGGGCAAGCTTCAGAACTACGTTTCCTGTATGGGTTACACATCCTTTTTCC  
TCTTCTATATGTTTGTTTTCTTTTTCTTTGCTTGGTTGAATAGTTTCTTTAGCCATGAGCTTTTATTTCTG  
AACATTTTGCTTAGTCAAGAAAGGCCACCTTCTATTTTAGAACATGTTAGTGGCTCTGTACTCTGTAGTAC  
TATTTCTCTTGTAGTTATATGGAAATAGGGATAGACTTTGCTCCTTATTGGCCAAGTGGCAGACATGA  
AGATAAAAACATTTCAAACACCTGGAGTATCATTGCCAATGAGACAGCATCATAATTTTCTCTGTGGCTT  
AAATTATTCATAAAGAGAGAGAGAGGAAGAGGAGGCGGAAGAAGAAAACCTGAAGCAGCTCATAGAA  
GTACCCAAAGTGGGTGTCTTAGGGTGTCCAAAGTGCAGGACATGCATGTCTGAAAATTCAAAAATATA  
CAGGAAGTTAGACACACACATGCTCAATGTGTGTCCAACACCAGTACTTGACAATGAAATTTGTCCATCA  
TCCTTGGCAGTCATCGTTCCTATTTCCCTTATATAGGCTTGCAAAGGCTAGGTGGATTTGAGTGGTTGA  
TAAATTGTGGTTGCTGCTCTATAAAGGCTCATTGGTGTGCTGCTGAACAGGATAAAAAATTTACATG  
CTATTCTTGTATTTCCCGAAGCTCTGAAAAGTACTTCTGATGATCATATATATGAACATAAATCTC  
AACCTGCTAACAGTGTCAAGAAGCTTTCTTAGATATTGGGCATGAATTTTGTAGCATCTTCTAATACTACT  
ATTTCTTCTTATTAGTCAAGTATTTACTACAATGTACACATGGACTGATTAATTAGCCGAGTTCTGTCTGT  
TTAAGCTTGATCAAACCTTTTTTTTTCTTATTGTTATTGTTTTCTTTTTGCTAAATTGAAGGAGGCTTAACAA  
TAACAGTTTGACTGGGCAAATTCGATACTTTTAACCACAGTCACTTCACTTCAAGTGTCTGTAAGTATAAA  
GCTGGCACTTTTTTATCATGTGGTTTTTTTCGCCATCAGTATTTTCTAATTCTTAGGTAATAATGTTCAATCC  
TCGCAATGCAGTGATTTGTCAAACAATAATTTAACAGGACCTATTCCAGTCAATGGTTCCTTCTCGCTTTT  
TACTCCTATCAGGTCTGTGAAAAGCACTAGTTTATATTTAAGTTCTGTCACTGGAATCATGATAATGAAA  
TTCTTACATCTGAATGTCTATATTTAGTTTTGCTAATAATCCATTGGATACTCCTCCAGCTTCTCCACCTC  
CACCTATTTCTCCAACACCCACTTCTCCAGGTTTGTTAAAATAATTTATGTTTTATGGGTTAAGGCACTGC  
GCCCCCCCCCAAAGGAAGAAGGCAAAGGGCTGACTGTTTTAGGGGAAGAGATTTGCACATTATAAT  
GAGTTTTAGTAGTGTATGTGAGATAAATTTACAGGTGATTTTGGGGTTATCTACTGTTTGATAGTTTG  
AATAAATAGATTAACTTACAAGTGTATTGAAGAGTGGATAGAAGTGTCTACATCAGGAAATGCAAC  
TGTATGCATTGGATATTGTGACTATAAAAGGACCCAACTTCAGAATTTATTGTCATACATTCTCTCAATT  
CTTTCCCATGTGTCTTATTTCTCACATGGTATCGGAGCTTTGGTGAAAATAGTTTCAGTGCATTTACC  
AGCAACACGCGGGAGAAAAATCTCCTTGCTGTGCAATTCTCATTGACCATGACTGCTGTCAAATGTATC

CTTGCCGTCTCTGACTACTGTACATAAATCAACACCACCAAAGGCCGAATAACAAACAAGTACCTGTTG  
TTATGAATAAACTGAAGGATCTTTACCTATTTCTGCATCTTTTCTATTTTGTTAGCACTTTAGCTTTACAAC  
ATAGTCCTCGGTGCGAGTGTAATGGTGAACTACCATATCCCTTTTCTCAATTTTTTTGAACTACTTGT  
GTTAAGTTTTTGTATCCATCAAAAAAGGGAATTAACCTTAAATTTTGAATTCCTAGGTGTGGGAAA  
CAGTGCAACCGGGGCGATTGCTGGCGGTGTTGCTGCAGGGGCTGCTCTTCTGTTTGCAGCTCCTGCGAT  
TTTGCTTGCCTGGTGGCGCCGAAGGAAACCGGAAGACCACTTCTTTGATGTTCCAGGTGGGAAGCCTCA  
ATCAAACACCTGAATTAGTTTTTTGTTTTCAAATTTAATTTAATTTAATGAGTTCTTGCAATTTTACGTTCT  
TTTGCACTGAGGAGGATCCAGAAGTTCATCTTGACAACCTCAAGAGGTTCTCCTTGCGCGAATTACAA  
GTTGCAACTGACAGTTTTAGCAACAAAAATATACTTGGAAAGAGGAGGATTTGGCAAGGTTTACAAGGGC  
AGGTTGGCTGATGGCACTTTAGTTGCTGTTAAAAGATTAAAAGAGGAGCGTACTCAAGGCGGGGAGTT  
ACAGTTTCAGACAGAAGTTGAAATGATTAGTATGGCCGTGCATCGAAATCTACTTCGTTTATGGGGCTTT  
TGCATGACTGCAACTGAACGGTTGCTTGTATCCATACATGGCGAATGGAAGTGTGCTTACGCTTAA  
GAGGTATCTCTTAGTCTTGAATTTCCATCCTTCTTTTTCTTTGCTCCATTGAGTCGAAATACATCAGATCA  
AGCACTTGAAAAAGCTGAAAAATGATAACAACGTTTTTTTTGAACTTTTAAGTTATGGTCTGGTAATATA  
AGTTATCTGGAGAAGTTATTGCAGATGTGTACATCATTGTGTAACTTGGCATTATTGGATATTGTCGTG  
GTTGTATTAGGAGTTAGTTTGTATAGTTAGAATATTCAATCCCGTAGTTAGAAGTTGTTGTTCTTTGTGA  
TTTTACCCGTGGTCTATCAAGCAATTTCAAGAGCATTGCTATCCTTGATGTCCTACCAAATATTAAGATTT  
CCGTTCAAGTTTTATGTTCTGAATTCATAGTGTGAGATATGGAAAGTAATCTTCATTTATGCATGAACCGC  
ATATATCAATTAATTAATTTGCGTTCAACCTAAAATGGGAACTTGAACCAGTTTACTTGACATCTTGAAC  
TGTCTTACAGTAAAATTTTTCTTGTAGAGCGGCCAGAGTCAGATCCACCCTTGGCTGGCCAATAAG  
GAAGTGTATAGCACTTGGATCTGCAAGAGGCCTTGCTTATTTGCATGATCATTGCGACCCTAAGATCATC  
CACCGTGATGTCAAAGCTGCAAATATATTGTTGGATGAGGAGTATGAAGCAGTTGTTGGGGATTTTGGG  
TTAGCCAAACTCATGGACTACAAGGATACTCATGTTACTACTGCTGTACGTGGTACAATTGGGCATATCG  
CCCCGGAGTATTTATCCACGGGTAAATCTTCAGAGAAAAGTATGATGTGTTTGGCTACGGAGTTATGCTTCT  
AGAGCTCATAACTGGGCAAAGGGCGTTTGTATCTTGTCTGACTTGCAAATGATGATGATGTCATGTTGCT  
AGATTGGGTAAGGATTTACTAACCTACATGCTCTAGTTATTCTACTTCTAGCTTATGTCTTTTTCTTTTT  
TTTATACGTTGAACTTTATACTACTTACAATTGCTAATTTTTATCGTGCAACTGACTTCAAACATGGAAG  
TGAGCACGGGTGAGAAGATCTCACTTCTGCTGCTCCTATAAGCAGAACTCTATCATTGCTGCA  
CTCAACATGATGAAAAGCTGATTTGTAGACCCACTACAAATTAGGACTGGCGAATAAGACTGTCATG

TCCATTCTCTTCCCCTGCGTTTTCTTTAATATCCCCAATCCCGTTCCTGTTCTGTTATCCCTTCCCTACCCC  
GTATGTAACCCACATCCCATAATCTCGTTTTATATCCTCATCCATCAATGAGAAATCTCAGCTTCATCTCAT  
CTCCCTCACTCTTTTGACATATTACACACACTCATAGCTCTCTTTGTTCTTTACTCAAGTCTCAGGGCTGC  
AGTTCTGTTTAAAGTAAAAAGTTTTATATTGACCCCCCTCCCCCAAAAAAATAAATTAATAATAAAAA  
AAAAATTGTTAGCTCTAGTAGGTTTTGCATTGCAGTTTGGCATGTATGATTTCTGTAATCTTTGATACTAC  
ATCATATGAAACATCCAAATTTCCAAAATAATTTGATTCCTGGGACTTGTATTTGTGCACATTCTTCGTGT  
AATCTTTTTGTTTCTTTCTAGAACTTAACCATCTTGCGAAAACATTTGTTGCATTAGCTGTATGGTCAGG  
GTGGATCACTTTCATTATCGTGTAGTAGCAGATTGTTCTGGAATTGCTTTTTAGTGTTAAAATCTTTTTCCC  
TTTGGTTAGCAAAGCACTCGTATAGCATATTGCTATATCAGAAGATTTAGATACTTTTTCCATGCCATAT  
TGACTGTCGCCTTCTGTGCAGATAAACTACATCTTTTTTTTTCCGTTGTATGGAATTGCTAGGCTATTT  
CTCTGTATTTGCATCAGAGAGTAGGTGAGATAGAGAATACACTTTACGAGAGGGGACTTCTTTGGGAGG  
ATCCTCTAGAAAGGGAACCCACCCTTTAGGACTTGGGAGTGCAGAAGATGGTCAATTCTTTCACTATGGT  
TGAACCGTTGAAGTATAGAAAATTGAAAGACAAGTGGCTATCTGAACTTGAAAGTAAATAAAGTGGCT  
ATCTGAACTTGAAATTCAATATGGTTCAAATATGAGCACAGAGAATCAGGAGCCTCATGCTCTCTGATT  
TTCTGTCTTTTCAGTCTCCCTATAGGGCTGCTTATCAAAAATCTCAACAACCTTCTATGGTGAATGCTTTGTT  
ATTTTAGTGATGAAATTAATTATTTGCTGACATGATGAGGAAAGTCCGCATGCACTGTGATTTCTTTTTAA  
AAAATGGCACTCATGTGAAGAAAATGGTTATGTACCTTATTTGACCTCAAAAATTGTGTTAAAATTTAG  
GTAAAGGGACTTCTTAAGGACGAGAAGTATGAAACATTAGTAGATGCAGATCTTCAGGGTAATTACAAT  
GAAGAAGAGGTGAAACAGCTTATTCAGGTAGCTCTACTCTGCACACAGAGCTCTCCTATGGAACGTCCA  
AAGATGTCGGAAGTGGTCAGAATGCTTGAAGGTGATGGCCTTGCTGAGAGGTGGGAAGAATGGCAGA  
AGGAAGAGATGTTCCGTCAAGACTTCAACCATGCTCACCATCCTCACACTGATTGGATTATTGCAGACTC  
CACTTATAATCTACGACCCGATGAGTTATCAGGGCCAAGATGA

>PGSC0003DMG400012817 LRR-RLKs

GGCTTAATCACTTTTTCCAGAAAAAATCCACTAATCCATTCATCTCCTTCAACAATGCATCTTCAAATCTT  
GCTTATACTTCTATTACCTACATTGATTCTCTCAATAAACCAAGAATCCCTTTATTTACACACCATAAAGCT  
TGGATTTGATGACCCAAATGGTGTTTTTTCAAACCTGGAATCTCCATGATAACTCCTCACCTGTAACCTGGT  
TTGGAGTAAAATGCGACTCTTTAACTCGTTCTGTTACATCTATTGACCTCTCCAACACCAATATCGCCGGC  
CCATTTCCGGCTTCTCTTTTCCGGCTCAAGTATATCAAGTACATTTCACTTACAATAACTCCATTAAC  
TCGACACTTCCGGTGGAGGAGTTATCCGCTTGAAATCTCTTGCCATCTCGATTTAGCTCAAAATTTGTT

AGTGGGTAGTCTTCCATCGAGTTTGGCGGAGCTTCCTGAGCTGAAATACCTTGATTTGACCGGAAATAA  
CTTTACCGGCGAAATCCGGCGCGTTTTGGGGCTTCCGGCGACTTGAAGTTCTGGGTCTGGTTGAAAAT  
TTGTTAACTGGGACTATCCCGCTGGAGATTGAAACATTTGAGTTTGAAGCAGCTGAATTTGTCGTACA  
ACCCGTTTTCTCCGGGTCGGATCCCGCCGGAGATTGGGAACCTCACGAATCTCGAGGTGCTATGGTTAA  
CTGACTGTGGGTTAATCGGTGAGGTTCCGGGTACATTAAGGGGATTAATAAGCTTGTTAACTGGACC  
TTGCGTTAAACAACCTGTACGGTCCGATTCCGAGCTGGCTCACTGAGTTAACTAGTGTTGAGCAAATTGA  
GCTGTACAATAACTCGTTTTCCGGCGAGTTTCCGGTGAATGGGTGGTCAGATATGACCTCGTTGAGGCG  
GGTCGACCTGTCGATGAATCGGGTTACCGGGTCGATCCCGAGCGGGTTGTGTGAGTTGCCACTTGATTC  
ACTCAATCTTTATGAGAATCAATTGTATGGTGAGTTACCTATAGCCATTGCAAATTCACCCAATTTATATG  
AATTAAGCTCTTTGGTAATAGGCTAAATGGAACCTTACCTAAAGATCTTGGTAAATTTTCGCCATTGGT  
ATGGATTGATGTTTCAAACAATGAGTTTTCAGGTGAAATCCGATGAATTTGTGCGGAAATGGGGTTTTA  
GAGGAGTTTTGATGATAGATAACTCGTTTTCCGGTGAATTCCGGTGAGTTTAAGCCAATGCCGGAGC  
TTATTACGTGTGAGATTAGCTCATAATAAGTTCTCAGGTGATGTCCCTGTGGAATTTTGGGGGCTGCCAC  
GCCTTTTGCTGCTTGAGTTAACGGACAATTCATTTTCTGGTGTAATCGCGAAAACCTATAGCTGGTGCATC  
GAATTTATCAGCTTTGATTTTGTCAAAGAACGAATTTTCGGGTAATATTCCTGAAGAGATTGGCTTTTTGG  
AAAGTTTGGTTGATTTTGTGGGAAATGATAACAAGTTTTCAGGGTCGTTACCGGTTAGTATAGTGAATCT  
TGAGCAATTGGGAAGAATGGATTTTCACAACAATGAATTAAGTGGTAAGTTTCCTAGTGGGGTTCATTCT  
TTGAAGAAATTGAATGAATTGAACTTCGCAAACAATGATCTTTCTGGAGAAATCCCGGGAAATCGGG  
AGCTTGTCTGTTTTGAACTATCTTGACCTATCAGGAAACAAGTTTTCGGGGGAAATTCAGTTGCGTTGC  
AGAATTTGAAGCTCAATCAGCTGAATTTATCGAATAATGGCCTTTCGGGTGGTATTCTCCTTCATATGCA  
AAGGGAATGTACAAGAATAGCTTTCTGGGGAATCCTGGTTTATGTGGAGATATTGGAGGTTTATGTGAT  
GGAAAAGATGAAGGTAAAACCTGCTGGTTATGTATGGTTACTGAGATTGCTTTTCATACTTGCTGTTTTGG  
TGTTTGTAGTTGGGGTAGTTTCGTTCTATTGGAAGTATAGGAATTACAAGAAAGCAAAAAGGTTGGATA  
GATCGAAATGGACCTTGACGTCGTTTCATAAGTTAGGTTTCGATGAGTATGAAGTACTGGAAGCTCTAG  
ATGAAGACAACCTGATTGGTAGTGGTTCTCCGGGAAGGTTTACAAGGTCGTTTTGAGTAATGGTGAGG  
CTGCTGCTGTGAAAAAATTTCAAGAAGTTTGAAAAAACAGATGAGAGTTGTGACATTGAGAAAGGTA  
ACTATCAGGATGATGGATTTGAAGCGGAGGTTGAGACATTGGGCAAGATTCGACACAAGAACATCGTT  
AGGCTATGGTGTTGTTGTACAACAAGGGGTTGCAAACCTTTGGTTTATGAGTACATGCCTAATGGAAGC  
TTGGGCGATTTGCTACACAGCAGCAAAAGTGGGTGTTGGATTGGCCTAAGAGATTTAAGATAGCTATG

GATGCTGCAGAGGGACTCTCATATTTACATCATGATTGTGCTCCTCCGATTGTTACAGAGACTTGAAGT  
CGAACAATATCTTGTTGGACGGGGAGTTTGGAGCTCGAGTTGCTGATTTTGGTGTGGCAAAGGCGATTG  
ATGTCGATGACAAGGGAACACGTCTATGTCAGTCATTGCAGGGTCTTGCCGTTATATTGCTCCAGGTTA  
GAGGATTAATCCTTCACTTTGGGAGTTCTACTAACATGATTTTGTGAATTTGGTTTATGCCTTCCATTGC  
AAATTGTAGTTAAGATGTATGCCTAAATATAACATATTTTCATATCTTGTTATATTATAATTAAGCGTCGAA  
TAAGGTCTGCTGTACTCTACCCTCCTCAAGCCCCACTTGTGGGATTACACGGGGTATATTGTCATTGAT  
GATTGTTAAACGTCCAATATCTATAATTAGGCAGACAGCTATATATGAGTAATTTTGGTCCATTCTTGAGC  
TATGTTGCTCAAATCCTTCAAAAAAATGTGGCATGTCTTTGTCGGATTCTCCCAAAGGTATTCAATTTTGG  
AGGATCCAATACAGGTGTAACAACATTTTTGGAGGATCCGAGCAACATAGTACTTGAGTGCCCTTATAC  
ATTAACACTCAGGTTTGTCCAAGAACAGGTCATTCTTTGTTTACATTTGCTTTCTGGTTCTCGTAGAGCT  
CCTCCGGTTGAACTAAATTCTGTTGCTTGCAGAATATGCCTACACACTTCAGGTGAACGAGAAGAGTG  
ATATATACAGTTTTGGCGTGGTAATCCTCGAGCTAGTGACAGGGAACTCCCTGTAGGTCCTGAATACG  
GGGAAAAGGATTTGGTGAAGTGGGTTTGCCTACTCTAGACCAGAAGGGTATAGATCATGTTATTGACC  
CGAAACTCGACTCTTGTTC AAGGAGGACATAAGCAAAGTCCTAAAAATTGGCCTCCTCTGCACTAGCCC  
CCTCCCAATTAACCGACCCTCGATGAGAAAAGTCGTAAAAATGCTGCAGGAAGTTGGTGGCGGAGACCA  
GCTCAAGACAGCGTTAACAGATGGCAAGTTGACCCCTTATTACCACGAAGACGCATCAGATCAAGGAAA  
TG TAGCTTAAAGATAGTCAACATATCTTTGCTTAGATGTAGCGACATGGACAGTGATGATTCATATGGTC  
GAGACTCGAGACCAACTTGTCTGGCATTGAGGCATAGTCGTTGTATCGTGAAAGTGAAGATGTGTGAAT  
TTTTTATTTGCTAATTGCTTAATACTTTGCTATCAATACTTGATTTTGGTTTAATTTTGGAGAGAAGGGG  
AAAACAGAGTTGAGATGAAGTGTAAGGATG

>PGSC0003DMG400012929 LRR-RLKs

GCTGCCTGCAGTAACACCTTGAAAACCGTACCTCATAGAAGCAAAAAACAAGAGTGTGGTATTGTTGCT  
GGTTAAATGATGAATGTTGTTGTAGTTGTGATCCTTAGTTTTTTCACATTTTCAATCTCTGTTATATTTTCA  
TTGAATTCAGATGGTGTCTCTGTTAGCTTTGAAATCTGCAATTTCTAATGACCCATCTGAGTTTCTTTCT  
TCTTGGTCGGAGTTAGACTCATCAGCATGCCATTGGAATGGAATCACATGCGATGAAAATCAGAAGGTG  
ACTTCTATTTCTCTGTCGTCGAAGAATTTGAGTGGTTACATTCCTTCTGAAATCGGAGCACTTTCTTCTCTA  
TCAATTATTTCTCTTTCTACAACAACCTTTTCAAACCAATCCCTATTCATCTCTTCAATGCTACTTCCCTTC  
ACTCCCTTGACCTCTCTAACAATGCTTTTACAGGATTCTTACCTCAACAATCACATCCCTTATAAACCTTA  
AACACCTTGATCTTTCTGCTAATTTTCTCAATGGCTCACTTCCCAAAGAGCTAACTCATCTTACACTTCTCA

CTGGAAC TTTAAATCTTTCATACAACAGATTTACCGGCCAACTTCCGGCGAGTTATGGTAAGTTTCCTGTA  
ACATTGAGTTTAGACCTTCGGCATAACAATCTGACCGGAAAGATACCTTCAATCGGGTCGTTGTTGAATC  
AAGGGCCTACTGCATTTTCCGGTAACCCTTTTCTTTGTGGGTTTCCATTGGAACTCCGTGTGCAGAACCA  
GAAGCTCAAAAAC TACCACCGAACCCGAACCCTAATGAGGAGGAGGTGGGGTTTGTAGGAAAACGGAA  
ATCGGGAAATGGGTCAATGGTGGTTTCTTTGCTCTCCGGCGTATCGGTTGTGATTGGGGTGATGTTTGT  
TCAGTGTGGTGTGAGGAGAAAATGGAAGTTGGATGAGGATAAAATAGGAAAAGAAAAGTTGGAGA  
AGCCAGAGGAGGGGCAAAGGGTAAATATGTAGTGTTAGACGAGGGGTTTGGGATGGAAGTAGAGGA  
TTTGTAAAGGGCTTCAGCTTATGTAGTAGGGAAGAGTAGGAGTGGGATAGTTTACAAGGTGGTGGCTG  
GCGCTACGGTTGTTGCTGTTGACGATTAAGCGAGGGGGATGTCACGTGGAAGTTCAAGGAGTTTGAG  
ACGGAGGTGGAAGCCATTGGGAGAGTACAACATCCAAATGTGGTGAGGCTTAGGGCTTATTACTATGC  
AAGTGATGAGAAATTGCTGGTAACTGATTCATCCGCAATGGCACCTTGCACAATGCTTTACATGGTAAT  
CTCACTTCATTCTTACTTGGAAATTTCTTTACTGTAAAAGAAAATTCACTCTAAACATACTACTTACGGAG  
TATTATTCTAAATCACTATAAGGATAAACTTTTAGTAGTGCTGGAGTAAGTTATCCTGCCTATGCGAGTG  
AGAAAGGGTGTACTTTTTTGGAGAAAATTAGATCAAATCCTCATAAGCAGTATTATCTCTGTGTCCATGG  
TACTTCAGGGGTTTTATTAATATATCAGACAACCTTGAAGGTGGCATTGTATTTGATATTTATGCAAAAA  
AAGAAGTTTAATGTCTACTCCATTGAAGTAAGTGTTTACAACCTAAGATGTCCTTAAAGCTGCTCATGATT  
ATTCGTTGAAGTATTCTCTAGGCACATTTAACAATTTCTGTCATGGTTTCAAGCATTCTTTGATAAATATTA  
ATGATCCCAAATTATATGCTTTTAAAGTCGTTAGCTGCTTACTGTCCTTATCTTCTTTTATGATCAAGAATAGGC  
AACCAAATGTAAATTATGATGAACAAGAAGTAGTTTGGGGTAGTGGGGTGGGGAGGGGAATAATACGT  
GCATGGTTCATTTGTTTTATCTGAGCAATTGGCATTGTTGTTTTCTGCTTCTGGAAAACATCTATGCAA  
GTGTTAAGCTATTGAGACCTTTTGGGCTCCACAATTCAACATCTGTTGGTTTATTGTAATTCAGTATTT  
TGGTCCCCATTATGGCATTTCCTTCTGCTTCTAGGGAGTACATTTTATGTGGCCTAAGATAC  
ATTGAGAGAGGCTTTAAAGTTGAAGTAAACATTCGGAAGTTACACTAAGGAAAAAACATTAGATCTAT  
CAATTGGATGTTAAGCTATTCGTTGATTACATTCATTAGGAATTGAACTAAGCATGGTTACACATAAA  
ACGTGAATCCAAAGTCTGAAATTTTTGCAGAACAAAATATCGACTAATCATAAAATGTTGTAGTTCCTCC  
TTGTAACATCTATCATTGTCAAGTTCATTTAGGATGTTGGACTTTATGTAAAAGAGGCATTGAGCTGAC  
ACCGAGAAGAAAAC TATTACACCACAGGTTATTTTTGTCTTCAAATCTTTTTTAACTAAGTGGAGAAGTC  
CACGACGTTAAGCTTTCTGATAGGTAAATATAAAACAAAAAAGATAATAAGTAAGACACGAAATTCAT  
CAGATTCCAAGACTTGGTAAGTCATTCCCTGTTTCTTTAGTCTGTTTGTCTTGTATTTCAGAGGTGTTGTT

TAATGTACCTATAATTTGTATTGTGGTTATAGAATCCCTGAATAGGCAGTTACTGGACTTGTGTTAGCCTT  
GTATTTTGCTCTCTTTATTTTCAGAACCTTGCACTTCACAAAAACATTAATGTTCAATTTGAACTCCAGTCCG  
TTTTCTTAACTTCAATCTTTGTGTACAAGTCTTCTCCACATAATCCTTACCTTTTTGCTCGTACTTTGGTAT  
TGCAATTGTGAACCAATCCTATATAAACACAAGTGGAATGAAGATTGCACCTACTTTGGGGTGGCTTC  
TTGAGAATGTGGTTCCTCTAGTTCATATTGATAATTTTTTTGTCTCGACAAAATACCAACTGACCTATTTCTT  
GTTTTCTTGACTCAGACTTCCATTGTTTCAAGCACATATTTTTGTACCAATTTCAAGGATTTGAAGTGAAA  
AATGTTCTATTCGTTATTCTGAAAAGCTGTCGTCGATTTGGCATGAATCACTTTTTAATTTATCTTCCACAA  
GTCCAAAATATTTTTTGGATTTCAAACCTTGCAATTTCCGGCAAAAATTTCTCATGGAAAAAACACAT  
ACACAACTAATTTCTCTAGAGAACTGGGTGATTTCTTTTTATGTTGGAACATTATCCTTGTTAATCAATCT  
TTTTATGTTTATTTTTTACAATTGCAGGAGGACTTGGTAATAACTTGCCACCTATGTCATGGGCAGCTAGA  
CTGAAGATCGCTCAAGGCACAGCTCGGGGTCTAATGCACATTCATGAGTGTAATCCCAGGAAGTATGTT  
CATGGGAACATAAATTCAACAAAATCCTTCTTGATGATGACTTGCAAGCCTACATATCTGGTTTTGGAT  
TGACTCGCCTTGTTTCAGGCTGCTCCAAGGCCATAAACAGTAGTACCAAAAAGCTAAGTACAAGTCAAAT  
CATAATAAGTCCTCAAACCTCAACTTCGTCTTGACTATGTACATGGCACCTGAGGGTCGAGTGCCTGGC  
TCCAAGTTCACCCAGAAAAGCGACATCTACTCATTGGTATGGTACTTTTGGAGATTCTGACTGGTCAGT  
TGACAGATGGAGGATCGGAGGTGGAGGATGATGGGAAGGGGCTTGAGAGTCTTGTTAGAAAGTTTT  
TAGACAAGAACGACCCTTGCTGAGATCATAGACCCTGCTCTCTGAATGAGGTTTCATGCTAAAAAGCAA  
GTTGTTGCAGCATTTTCATATCGCTCTCAACTGCACAGAACTGGATCCTGAGCTTCGGCCAAGGATGAGAA  
CAGTTTCTGATAACCTTGATCGCATCAAACCTGCAGTAAAAGAACTTGATCAATGTAAAGGCTTTCAATG  
TTTTGCTGACTGCCTAATGTAGAGCTGTTTAGTAATTGTGAATCAGAATTTTCAGTTTGTGTTGTGCCAAA  
TCCTACATTTGGCGTTTCTATTGTAACCTCTACTAATTCAATGTTCTATTTGTTGAATCATCAATTGAAAATT  
GCTTGTGCTAGCGAATCTTACAAAGCTATTTGTGTTTGATGGTACGGACATGATCTGAATTCCAGATAAC  
ATGCAAAGGAGCATGGTCAGACCCTGCCTAATCAAATGATGTAGTTCAATAGTTGGAAAGTTCTGTATG  
AATTCTTGATTGCCATCACCTATTCAATCTTTTGAACTACACTCCTCTATTCTCTATTCTACCAAGTG  
AAGTTGCTAC

>PGSC0003DMG400012955 LRR-RLKs

CACCCCATTCCAACAGAGAAATACAGAGAGAAAGAGCAAAAATACAAAAGAGACACCAACTCATTGCCC  
ACTCTACCCCGAAATATAAAAACCCTAATTTCCCTCTGTTTTTCTCCTTTCCCAACTCTTCCCCACTCCCC  
ACTCCCCACTCCCTCTCTCACCACCCACCTACCCTAATCTCTCTCTGTCTGAAGTCTGAACTCTTCTTGA



ATTTCTATGGTGCTCTCTCCATAGTCATCCTTAAGCTTTTCTCCTTTTACCCTTTTTCAGATTTTCCTTCTTT  
ATCTCAATGCCTCATTITTTAGCACTTAAATCACATTCTCAGCCCAATGACTCTCTCTCAATCTCTCTTTAC  
TCCTCCTTGTACTTGTGTTTCGACTCAATGGGTCTTCTGCTGCAGAAGATGAAGTTCGATCACTTTTGGAG  
TTCAAAAAGGGTATTA AAAACGACCCATTAAGTAAAATCTTCAGTTCATGGAGTCAAACGGGTCTTTCAA  
ATCTATCAGCATGTCCAAAGTCATTTTCATGGTGTGCTTTGTGATGAAAACCTCCGATTATGTTTTCTCCATT  
TCTCTTGACGGGCTTGGGCTTGTGGGTGACTTGAAGTCTCAACTCTTAGTGGGTGAAGCAGCTCAAA  
ATTCTTAGTCTTTCTGGTAACTCTTTTACGGGTAGGGTGTTCCTGCTTTGGGTCTATGTTAACTCTTCAG  
CATTTGGATCTCTCTGGAAATCAGTTTTATGGACCAATTCCAGCACGAATTAATGAGCTTTGGGGTTTGA  
ATTACCTCAATTTGTCCAATAATAATTTTACATTTGGTTACCCAAGTGAATTAGTAATCTTCAGCAGTTG  
AGAGTACTGGATTTGCATAACAATGGGCTTTGGGGTGATATCGGGGAGTTGTTTTGGAGTTGAAGCGT  
ATTGAGCATCTTGATTTGAGTAACAACCTCGTTTTTCGGATCTCTCCTACGAGCCCGAAAATGTATCGCT  
CTCTTCGACAATTCAGGTCATGAATTTGAGTCACAACAAGTTGGGTGGTGGTTTTTTTCTGGAAAATTG  
TTGGAGGCATTTGAGAATTTGATGGTTTTGGATTTGGGGAATAATGCTATAATGGGGCAGCTTCCTTCTA  
CCGGGTTTATGCATAATTTGAGGGTTTTAAGGCTTGGGAATAATCAGCTTTATGGATTGATTCCCGATGA  
GCTCTTGCAGGGAACAGGTCCATTGGAAGAACTGGATCTTAGTGGCAATGGATTTTCAGGTTGGGAAAT  
GGATATCAGTTTTTTGGAATATTTGCATTTCTTAGATCAGTATATGTTGTTGTTGTTGAATGATCATAATC  
AAATACACCTTTTATTTGTATAGTGTTTTTGTGGATGCCTTGAACCTTCATGCCTCTTAATTTTTGGAGGTG  
GACTAAAATTGGAACTTTCTTGTGTTTTAGGCATTGAACTTTTACAGTTATGCAAAGTTGCGGGGACT  
CTTCACTTTTGTATGCCGCACCGTGTGGATTTTCCAAATATACTACTTTGTAGAATCCGACACGCACCC  
GTTGACATTTTTGAAGAGTCCGAGCAACATAACAGTTGTGAATGTAAAATCTCGTTCTTTTTGTTTTCTTG  
TCAGGTTATAATTAGTTTTCTTGTGTGAGTAGTGGTTGACAATCTATATAACAGAGAATAGAAATCTTCA  
GCTTACGCCAAATACAGAAAAGTTTGCTTTTTGTGTAAGTAGGTTTTAAAAAAATGTTTTAACAAAAC  
CAAATTTGAACAACTTTTACCGCCAGCTTTTTTTGTTTGCCTCAACAGAACGTGAGCAGCGTGGACTG  
CATAGACTAATTTGAATTGCAAAGCATGTTCAATAGAACTTGCCATAATAAGTAGTCAACAAAGTGTTT  
CCTAATTGTAGTAAATTTAATAAAAAGCCCTAATGGAATAGTTGCATGAATGATTGCATCATTAGTAGCC  
ATAAATAATCTTTTTGCAATGGTATAACTGTATGCTCAAAGTTCATGGCAAGCTAGCTGGAACAATATTT  
AGCCCAGTGTCATCAAAGGCGCGCTTAAGCCCTGAAGCAAGGCTCAAATCGTGTTGAGCGCTTCGCTTT  
GCTTAATGTGCGCTTCTGTGTCGTTATCAAGGTTCTAAGGCATACTTTTCTTATGTTTATATATTTGTCAT  
TCATGCTTAGGACTAAACATATATATTTTTATTTTTCTCCCTTTTCGCCTTTTCCATTAAGCCCAATCAA

ACCTTAGAGCTTTTTACTCTTTTTGCTTTCGATAAGACTGATTTAGCCTTTATCTTGAAAAGTGAAAATGT  
TGAATTTTTCTTCTGCTTCCAATATCCAATGCTATAGCACAATATTTGTACCTACAGTAAAATGAGTTTTA  
TTTCATTAATGAGCTATTTGCTCTTAATATGCTCATCTTTCTATTTTGTTATCACTGCATTACACCGTCCAG  
GGCTCCCCCTTCCCTCCAGTGTAGGCCACTCATGATGACGTTGGGCCTTAGAATCAGAAAATAATTGAT  
GACTACATTTCTTTTTGATAAGGAATTGATGCCAACATTCCTGTCTTCATTATTATCAAATCAGTACTCAA  
ATTAGAGAAAAGAATGGAGTTGGTGAGACTTGATTATTGAAGAAAAGCAGAGCAAATTTACAAGGGTG  
ATAATTTGGGTCTCTGAGCTTAAACTCCTCGGTGACAATCTGATAGGGAAGTTTGTTCTGTTTCATGAG  
CTACAGAGAGGGTTCACAATTCATATTTCTTTAGTTACACTTGATATCTTTCATCATAGGACCAGAGCG  
TGGTCCACTTAGAGCCTAAATGTGGAGATCCTCTGTCCAGAAGTTGAATGGTGCCGTTGAGTGATGAC  
TGATATTTCACTTCTCATCTTGCATTTATTCTTTGAGGAAGCGACTCTCAGATCAGCTAGATAGTTTTGT  
ATACTTGTCTCACTTATATACTTTTTGCCTTCTAATTTTTTTTTGGCTATATAGTATTTCTACCATATTATT  
AGCTAGAAATAGTTGCACTTAGACCTGAAAGTTAAATTGGATGTTTAATAACAATGCACATTTTTTTCAAT  
AATATGAGCTCTTTTTCTGTTGGACTTGTAACCTTATTCTAAAGAGATATTTAAAGTTTAATATTTTCGTTT  
TACGCATGCAGGTTCAATTCCGATTGTGAATTCAACAAAGTTGAGAGTTCTAAATATTTTCATCGAACCAC  
CTATTAGGTTCACTGCCATCCTCCATAGGAAATTGTGCAGTTGTGGATCTGAGCAGAAATATGCTCGTGA  
ATGGTATATCAGCTATTGAGAGCTGGGAAGCCAATTTGGAATTTATTGATTTGAGTTCAAATAGGTAAAC  
TGGAATATTCCCACTATAACCTCTCAGTTTCAACTATTGACTTCACTTAATTTCGGAAACAATTCTCTTGA  
GGGAACCTTACCTCAGCACTGGACACCTTGCCAAGACTGGTTAACTTGATCTCAGCACCAATAAACTT  
GGTGGACCGATTCCATCTACATTTTTACTTCGACGACATTGATGAACCTAAATATATCTGGAAATCAGTT  
GTCAGGATCAATTCCTCTTGAAGGCTCTCATGCTAGCGAATTACTTGTTCAATCACCATACCCTGCACTGG  
AGTCTCTTGATCTTTCAGAAAACACTTTAACAGGTAATTTGTCTTCTGCCATTGGTAATTTGCGGAGGCTT  
CAAGTGCTAAATCTTGCTAAGAATCAGTTATCAGGCATGCTGCCTACTGAATTGGGTGACCTTAGAAGTT  
TGGAATTCCTTGATATATCTAACAACAATTTTAGTGGTATGATCCCCGAAAATCTTTCATCAAATTTGAGG  
GTGTTTAATGTGTCTAACAATGAATTAAGTGGTGCTATCCCTGATAACTTGAGAACTTTAATGAAAGTT  
CATTTGCTCCTGGAAACTCAAATTTGGCAATCCAAGCAACTGGTTACATGATAATCATGGCGATCCTGA  
TCAAATAGTCAGCACCATCATAACTCGAAATCCAGTATCAGGGTGGCTATTATTCTTGCCTCAGTTGGA  
GCTGCTTTAATGATTGGTGTGTTCTCCTGGCTTACCATCGACAACGGTTCCAAGATTTCCACTTACCAAG  
TGGATTTAACAGCCAATCTGCTGGAAGGGATGTTAACTCGGGAGGTTCCAGCCGGCCTGGAATTTTCAA  
GTTCCATGGCTCCTCAGAACCACCACCAACTTCCTTGAGTTTCTCTAATGATCACTTGCTCACAGCGAACT

CGAGATCTCTGTCTGGGCAAATTGAGTCTGGTACAGAAATTGTTGAGCATGTTTTCCAGAGGGAGTAA  
CTGCAGTTTCAGCATCTACGCATCTTGGCACTGTGGGTAATAATCCTGCAACATCTGGCCAAAGATCCTC  
TCCAGGCTCTCCAATAGCTTCTCCCCTCGTTTCGTCGACACAGTTGAACAACCGGTGACATTGGATGTG  
AATTCACCGGATCGATTGGCTGGGGAATTGTTCTTCTGGATGGTTCACTGTCATTTACTGCTGAGGAGT  
TATCTCGTGCCCCTGCTGAAGTTCTGGGTAGAAGTAGCCATGGCACATTGTATAAAGCTACTCTGAATAG  
TGGGCATGTTCTTACTGTCAAGTGGTTGCGGGTTGGTTGGTAAAAACAAGAAAGAGTTTGCAAAGG  
AAGTAAAAAGATTCGATATATTAGGCACCCAAATGCTGTTCTTTACGAGCATTTTACTGGGGACCTCG  
GGAACAAGAAAGGCTTATTTTAGCAGACTACATAACCAGGAGATAGTTTGGCGTTGCATCTCTATGGTAA  
GATTTACTTATGAATAACTTCAACAATGATTTTCCATGTCTTCCATTGTTGTTTGGTTACTGTTATTAGAAA  
GTTACCTTTTGCTGGTCTGGTGGGTGATTATCTTGTGTTAGGACCAATATCTAGTATCCTTCGCATAAATA  
GTTTCTATAGCAGCATAGCTTATTTCTTGTGGTGGTTTTCTAATTGCTGAGATCTCGTGTTTTGTGGGATT  
GTTTGATAAAAATTATGGAGGATAAAGTTGACTTGGCCCTATTATTTATTTTTGGTTGGCCTCTCTTGCAA  
ATGTCCCTCTTTTACATGTCTTACAATATGCAGATAGTGATGAGATCTTATTTGGATCTGTCGTCTCTTAT  
GAATCCAGTGGTAGAGTTGTTGATCAAATGGAAAAGGAAAAAATACTGCAATTGTAGAATCTGAA  
TGTTTTTTACAAAATTATGTTTGTGTTAGAATGTATGTGCAGATCTTATGTGTCATCTGGTAACCTTCAAAG  
GAACTCCAAAAGGTACAAAAGATCTCTGGTTCACTAATTGCCGTACGCCAACAGCCACACATCAATAGC  
CCATCAAAATTAGGGAGTAGACCTATTCTACGATCTCGTTAACATGACCTAGAATGTAGTGATAGTTGCT  
CAACAATCTGCTTTAAATAGCATTTCATTGTTTCTGAGTCATTCATGATGGTAAAACCTTGATAAATATGG  
AGAGTTGGCTTTGTCATAGTATCCCCGGTGCAGTGAGGACTGATTACTGTAGACATGTTGGGGGCTGT  
TGGAATCTTTTACTTTTTGTAATTTTTCGCAGTTTTAAATTTTTAATGAATGTCTACTTTTTACAGAGACAA  
CCCCTCGGAGGTA CTCCCCGTTATCCTTCAACCAAAGGTTAAAAGTTGCCATTGAAGTTGCTCGGGGTTT  
GGCATATCTGCATGAGAGAGGGCTGCCTCATGGAGACTTGAAACCTACAAATATAATCTTGGTTGGTGC  
TGATTACAGTGTCCGCCTCACTGATTATGGTCTCCACCGCCTGATGACTCCAGCAGGGATTGCAGAGCAG  
ATACTGAACCTAGGGGCTCTAGGATACCGTGCTCCTGAACTTGCTACTGCGACCAAACCTATCCCATCAT  
TTAAGGCTGATGTATATGCTCTTGGTGTGATTCTAATGGAATTGCTGACGAGAAGAAGTGCTGGAGACT  
TAATCTCAGCACACTCTGCTGCAGTTGATTTAACTGATTGGGTTTCGGTTGTGTGATCAAGAAGGTAGGG  
GAATGGACTGTATCGATAGGGACATCGCAGGAGGAGAAGAACA CTGCAAAGCGATGGATGATCTGCTA  
GCTGTGTCATTAAGGTGTATTCTTTGATAAACGAAAGGCCAAACATCAGACAAGTTGTTGAAAATCTG  
GGTCCATATCTGTGTGAAATTTTTGTACATGTTGTCTTGAATTACAATCTTTTTCTTTTCCTTACATT

TTTTATTATGTCCTATTGGTTGCCTTCTAATGTTGGTCAATCCTTACATATCCCCATTTTCTTTTCTTCCCC  
CCTTCAATTTTTGTGTAAAGGGATGATCAGTCCATTGATTGATTGGTTGACATTTTTCTCTAATTAGAAAA  
GATTGCAATTATTTATGTGTAATTTATTTTTTGC

>PGSC0003DMG400012992 LRR-RLKs

ATGAAGTCACTTGAGGTTTTACTCTTAGATAGAAACAATCTTTCTGGTCCAATTCCAACAACACTAAGTG  
ACTTAACTGAGCTCAAACTTTGTACCTTTATTCTAATCAACTTTCTAGTTTTATTCTAGAGAGTTGGGA  
AATTTGAAAAGCCTCACTTTTTTGGATTTATCAATTAATCATCTTACTGGTCCTATTCTAGTGAGTTGGG  
GAATCTGATAAATCTCACAGAGATAGATTTATCTAAAACACTCACTTACTGGTTCAATTCCGATTACTATAG  
GTAECTTAACTGAGCTCAAAATTCTATACCTATTTTCTAACCAACTTTCTGGTTTTATTCTAGAGAGTTGG  
GAAATTTGAAAAGCCTCACTGATTTGGATTTATCCACTAATCATTTTACTGGTCCAATTCCTGGTGTGTTG  
GGGAATCTGATAAATCTCACAAAGATAGATTTATCTAAAAGTCAACTTACTGGTTCAATTCCGATTACTAT  
AGGTGACTTAACTGAGCTCAAACTTCTATACCTTTTTTCTAACCAACTTTCTGGTCCCATACCTAGTGAGTT  
GGGTAATTTGAAGAACCTCAATGGTCTGTCCTTATACGAAAATCAACTTACTGGTCCAATTCCTGCTTCTT  
TTGGCAATTTGAGAAGCTTGCAATTTTTGTATCTCAATGCCAACAACTTACTGGTCCAATTCCTGCTTCC  
TTTGGCAATTTGAGAACTTGCAATTTCTGTATGTGAGTGTCAACAACTTTCTGGTTCTATTCCAAAAGA  
ACTTGCATATTTAGATAACTTGGAAGAGCTGATAATAAGTGAAAATCAGTTTTCAGGTCATTTGCCTGAG  
CATCTTTGCCAAGGTGGGAACTTGAGAACTTACGGTGAATAGTAACAAGTTGTCTGGGCCAATACCA  
AGAAGCATGTCCAAGTGCTCGAGTTTCAAAGGGTTCGCTTTGATAACAACAGTTTTTACTGGAAATTTAT  
CTGAAGCTTTTTGGTATCTATCCGGAGCTGCAATTTATTAATTTGAGCAAAAATGATTTTCATGGTGAACTC  
AGTAGCAACTGGGGGAAATGCAAGAAGTTGACTGATTTTCGAGTAGCCAGAAATAGAATTAGTGGTCA  
CATAACCAGAGATTGGAAATCTCAAAGGTCTTCAAGGACTAGATCTTTCAGCAAATCATTGGTTGGG  
AAGATCCCTAGGGAATTTGGAAAATTGACCTCTCTAGTTAATCTTTTTCTGCAAAAACAACCAGATTTCTG  
GCAATATTCCTATGGAACCTGGATCAATGACAAAGTTAGAATCCCTTGATCTATCAAAAAATATGTTGAA  
TGGGTCGATCCCAACGTTTATAAGAGATTACATACACTTGTTTCAGTTGAACCTGAGCAACAACAATTT  
GGCCAAAATATTTCAATGGAGATAGGGAAGATAACTCAGCTTATTGTACTTGATTTGAGCTATAATCTTC  
TGGTTGGAGATATATCCCCTCAGTTAGCCAATTTGAAGGTCTTGGTAACTTAAACCTTTCCACAATGG  
CCTATCTGGGCGCATTCTAAAGAAGTTGAAAGTTTACTGGTTTGCAGGATGTCGTATTGTCATACAAT  
GAGTTGGAAGGTCCAATCCCCAATAATAAAGCTTTTATGAATGCTTCATTAGAAGGTAACAAAAGTCTTT  
GCGGCAATGTATCAGGACTCCAGCCCTGTGAAAGACCATCTCCTGTGGTGAACAAGCACTCAATGGCGC

AAGTCATCCTCATCACTGTACTTCCTGTTATGGGAGTACTACTGCTATGTGTTTTTCATTGGTGTCTCT  
TTATGTGTAATAAAAAGAAGGAGAGTTAGAGACGTTGAAAGAAGGGATGGTGATGGTTGGCTTTCAATA  
TCCATGTTAGATGGAAAGGCATTGTACAGGGACATCTTAAATGCCACAGAAGAGTTTGATGCAAATTT  
TGCATCGGCCAAGGAGGACACGGAAGCGTTTACAAGGTAAACCTTCCATCATTAGGGAATATAGCTGTG  
AAGAGACTTCATTCTTCATATCAGAATACACATCCTAAAAGCTTCATGAATGAAGTAAGGGCATTGACTG  
GGATTAAGCACCGAAACATTGTGAACCTCTATGGCTATTGTTGAAAGCACAACATTCACTCTTGGTTTA  
CGAGTATGCGGAGAGGGGGAGTTTGTCTAGTACTTTGAGTGATGAAGTTGAGTCCAAGAAATTGGATT  
GGTTTAAAAGGGTGAATATCATCAAGGGTGTGCTTTTGCTTTATCTTACATGCACCAGGATTGTTTCATC  
GAGACATATCAAGCAGTAATGTTTTGCTTGATTCAGAGTATGAAGCTCATGTTGCAGACTTTGGCATATC  
AAAGCTTCTCAATCCAGACTCATCCAATTGCACAACGCTTGCAGGGACATATGGTTATGTTGCACCTGGT  
AATTAAGTTTAAAATATTTTCATGAACTAAAGCCAAACACTCCATTGTTTATATCTCATTTACACGTTTATAT  
TGTTTTGGAAATTGTATTGTTTCAGAGCTTGCATATACTATGAAGGTTACGCAAATGTGTGATGTATATAG  
CTTTGGAGTATTATCTTTGGAGATAATCAAAGGAAAGCATCTTGGGGAATACATTACCGTGCTAGTAAAT  
TCATCGACTATAGATCATGAGCAACTTAGTGATTTGTTGGATGAACGCCTTCCATATCCTGAAGATAGAG  
TAAAAGAGGTTTTGATTTTTATCATCAAGCTAGCATGCTCTTGTGTTGCTTGAAACTCCAAAATCGAGGCC  
ACAATGCACTTCATCTCTCATAAGTTATCATCGATGGATGTACGTCCATCTACTCATGTAAAGCTAGTTCA  
ATTCTTTAATCCGTGA

>PGSC0003DMG400013198 LRR-RLKs

GATTCTCTCCATTTACACATCCTCACATGCTATGTTTCACTACTCTTTCTTCTACTAGTATTTATCTCTTTCT  
TTCCCTTTTCTCTTCATTTAAACTTGAAAAAAGTTGAGGGGAGGAAGAAAAAGAAGAGTTTAGCATTCT  
TTGTTTAAGTTCTTCTTCTGATTGGAGATTCTGAACTTGTTTTAAGTTTATGGATAGGTGGGATACTTCAC  
TGAGTGGATTTTACAACTACCCTTTTCGATTCTTGAATTTATATTCAGAAATTAAGATGGGTCTAGCTGG  
GTTTCATGACAAGAAAAAGGAAAAATGGAAGCTTTCTTCTTCTTGGCATAATACTCTGTTCTTGTGTTGT  
GATTGTGTTTTCTGTTTTTCTATTATATCAGCTGGGAGGAATTCAGATGGGGTTATTGTGACTCAATCTG  
ATTTTCAAGCTTTAAAAGCTATTAAGCATGAATTGATTGATTTTAGGGGAATATTGAAGAGCTGGAATGA  
CAGTGGTCTTGGAGCTTGTGCTGGTGGTGGGTAGGAATTAAGTGTGTTAATGGGGAAGTAATAGCTAT  
ACAGTTACCCTGGAAGGGATTGGGTGGAAGAATATCTGAAAAAATTGGGCAATTACAAGCTCTTAGAAA  
GCTTAGTCTTCATGACAATGTTATTGCTGGTCTGTTCCAACCTCTCTTAGCTTCTACCAAATCTCAGAG  
GTGTTTACCTTTTCAATAATCGGCTTTCGGGTTCAATCCCACCATCAATTGGAAGAATCCCTCTTCTACAG

ACTCTTGATCTTAGCAACAATCAGCTCAGTGGTACTATCTCTCCCAGTCTTGCAAACCTCCACCAGGTTATA  
CAGACTCAACTTGAGCTACAATGCACCTTCAGGGTCAATCCCAGTAAGTTTCACTCAATCTCCTTCTCTTA  
CTTTTCTTGCACTTGAACATAACAATCTATCTGGATCAATTCCTGATACTTGGGGCAGTGTGGTTGTGAAC  
AAGTCTTATCAACTTCAGTATCTTACACTTGATCACAATCTTTTATCTGGGAAGATTCCAGTTTCAATTAGT  
AAGTTAAGCATGCTTGAGGAGATTAATCTTAGTCATAACCTTATTAATGGGACTATTCCTGATGAATTAG  
GTAGTCTCTTAAGGCTTACTGTTCTTGATTTATCTAATAATACCATAAATGGAACCTTCTGCTAGTTTCT  
CAAACCTTCAGCTCTTTCTACTTTGGATTTAAAGAGTAATCTTCTTGATAGCCAAATCCCAGATACCATG  
TATAGAATGAAAAACCTTTCAGTGCTGGATTTGAGTAACAACAAATTCATTGGTCATATTCCAGCTACTA  
TTGGAAATATTTCTAGGCTCACCTCACTTGATTTATCTGGAAACAATTTCACTGGTGAAATCCAAACTCT  
CTTGTTTCTTTGGCAAATCTGACTTCTTTGGATGTGTCTTATAACAATCTTTCTGGGATTGTCCCATCTCTT  
CTTTCTAGAAAGTTCAATGCAAGTGCTTTTGTGGAAATTTAGAGCTTTGTGGATATAGTCCATCAACTCC  
ATGTGCTTCACCACCCCTCAAACCTTCTCTCTCTGTTAGTGGGGTTGTCAAGCCTCACCGCCATCGTA  
AACTTAGTACCAAAGATATCATTCTCATAGCATCAGGTGCTCTTCTAGTTGTTCTGCTTCTTTTGTGCTGC  
ATGTTACTTTGCTGCTTGATTAGGAAAAAGGCAAATTCGAGAGCGAAAAATGGTAGCAAAGCCGGTGG  
CCTAGCTACCACTACAGGAAGAGGTGCGAAGTCAGTTCAGCTGTAGGAGGAGCTGAAGTTGAATCAG  
GTGAAGCTGGTGAAAGCTAGTCCATTCGATGGACCTTTCGTGTTTGCAGCGGACGACTTGTTGTGTG  
CCACTGCAGAGATCATGGGGAAGAGCACTTACGGGACAGCATATAAGGCAACATTGGAGGATGGTAAT  
CAAGTTGCAGTGAAGAGGCTACGCGAGAAGATCACGAAAGGGCAGAAAGAATTTGAAGCTGAGGTTG  
CTGAATTAGGAAAGATTGACACCCAAATATTTTGGCGCTTAGAGCTTATTAATTGGGACCAAAGGAG  
AAAAGCTTCTTGATGATTATATGTCTAATGGAAGTCTCTCATCCTTTCTTCATGGTAAAATTGTCTAC  
ACTCACTCACTGTTTGTGTTGATATTCCTTTTGGTGTTCCTTATCATGTGACAATCCTAACATCATACTTG  
TGTTCTCTATATGCAGCTAGAGGTCCCGAGACAACGATAGACTGGCCAACAAGGATGAGGATTGCTATC  
GGTATAACAAAAGGAATCTGCTTTCTGCATACCAAAGAAAACATAATTCATGGGAATCTTACATCAAGCA  
ACATTTTACTTGATGAGCAAACAATCCAAAGATTGCAGATGTTGGACTCTCCAAGCTTATGACCACTGC  
TGAAACACCAACGTGATTGCCACTGCAGGCACGCTAGGTTATCGTGCACCAGAGCTTTCTAAATCAA  
GAATGTAAGCACAAGACTGATGTCTATAGTCTTGGAGTGATCATTTTGGAGCTCTTAACTGGAAAATCC  
CCTAGCGAGGCAACGGATGGTCTCGATTTGCCTCAGTGGGTAGCTTCTATTGTGAAAGAGGAGTGGACT  
AATGAAGTGTTTGTGTTGATGTTGAACTTATGAGGGATGCACCTAATATTGGTGATGAGTTGCTTAACACATTG  
AAACTAGCTTTGCATTGTGTTGATCCCACACCAACTGCTCGACCCGAAGCTCCGCAAGTATTACAGAAAT

TGGAGGAGATAAAACCAGAGGTGGTGTAGCAGCCACTAGTTCTGGAGATGATGGCACAACAGTTCAA  
GAAAAGAGTGATGAATAATAATCTCACAAGGCTGATTGGAAATTTTTGAGCTTTTTACTTGATATCTATTT  
GTTTATTCTTTCATTTTTTTTTTACAGTTAGTAGTGGAAATGCTGTTTTATACCAAGATCTACTAAAAAACTG  
TATATAGGAGATTGTGATTGCTGCATAGGTTTTACTGATGAAGAAAAACATTTTATTCAATTCTTTCAATA  
AAATAAACG

>PGSC0003DMG400013489 LRR-RLKs

GTTACTAACACATTCCTAGATCTCACGTTTCCAGAATTCCAGGCTTTTTTAGTCATTGTTTTGTTTTTTTT  
CTTCTCGAGAAAAATTCTGTCTTTATTTCTTTTAAGCTCAAATGTTGCCAGTTTTAGCATAATTGAGTA  
AAAGAAATAAACTTGGCATTGGGTGTTTTGAGGTTTTCCAGTTCTTGAAAGTGCTAGTTGTGTAAAGA  
CTGAAACTTTGTCATTTGGGTGTTGAGGTTTTCCAGTTCTAGAAAGAGCTAGTTGTATAAAGACTGG  
AACTTTATCATTGGGTGTTGAGTTTTTCCAGTTCTTGAAAAGCTAGTTGTGCAAAGACTGAACTTTA  
TCATCTGAGTGTTGAGGTTTTCAATCTTGAAATGATCTAGTTGTGTAAAGACTGAACTTTGTCATTTGG  
GTGTTGAGGTTTTTCCAGTTCTAGAAAGAGCTAGTTGTATAAAGACTGGAACCTTATCATTGGGTGT  
TTGAGTTTTTCCAGTTCTTGAAAAGCTAGTTGTGCAAAGACTGAACTTTATCATCTGAGTGTTGAGGT  
TTCAATCTTGAAATGATCTAGTTGTGTAAAGACTGAACTTTGTCATTTGGGTGTTGAGATTTTCCAAT  
TCTTGAAAGCTAGTTGTGTAAAGATTGAACTTTGACATTTGGGTGTTGAGGTTTGAATCTTGAAATG  
AACTAGTTGTGTAAATACAGAGACTTTGTCATTTGGGTGTTGAGCTTTTTCCAGTTCTTGAAAGAGCTA  
GTTATGAAAACACTGAACTTTATCATCTGTGTGTTTGAATTTTCAATCTTGAAATGAGCAAGTTTATCA  
GGTGTGTTGGAGGGGTTGAAAATGGATAAAAAGGGCATTTTTTTAATGATAAATTACGAGTTTTGT  
TAGAAAAATTACTTTGTTGAGTAGGTGAGATTGTAGAAATTTGACTGGAAAGAATGTTGTATCTGTTTT  
GGAATGTGGGGCTGCTACTGTTTTGTACATTGATGGAGAGTTCTTCTGCTACACTTTCTCCTGCTGGTGT  
AACTATGAAGGTTAGCTTCTTTCTTGAAATTTCTCACTTGACTGAAAATTTCTTCTATCAAATTAAGCT  
TAGAGTAGAAGAAGTTGTTAATCCTCTGGATCAGGGTTAGAGCCACATGGGTGCAAGGGGTTTATCTG  
AATCCCCTTCGACGGAAAATTAAGTGTATATCTAAGGTTACAAATATTTTTATGTATATATAATAGACAT  
TGAATCCCCTTGATTGCTCCTGTGTTTACTTCTTATTGATTTTGAACCCCTTAGTCCTTGAATGTATATG  
AGTATGTGACTATGTGTTCTATCTTTTTCTTTATGATTTCTCTCGTTATATTGAATCTTTGATGCAATGA  
CAAAGTAAAAGTAAAACAGTGAAGTAATCTAATAGAGTGACTGTTTTTCCATATAATAATGTGCAG  
TTGTAGCTTTGACGGAAATTAAGAAGGCCTTACATGACCCCTATAATGTTCTGGACAATTGGGATGTGAA  
TTCTGTAGACCCTTGAGTTGGAGAATGGTCACTTGCTCCTTGGATGGCTATGTGTCTGCTCTGTAAGTT

GTTTGGATGAAAGAGTATTTTAGCAGAACTTAGTTGGCTCATGAAAAGGCCTGATTTAATCCAGTAAAT  
TTATTGCTGAATATTTTCTCTTGCATCAGAGCACTACCTAGTCAAAGTCTAGCTGGCACCTTATCGCCTGG  
AATTGGCAATCTTACTAECTTGAATATGTGTAAGTTCTTGACTATATACATCTCTTAGTTGCTGCTACTTG  
GTTCCGTAATACCTAAGGTCACCTTCTTATATGATTTTCTTAGTGTTATTAAGACATTTTCTCGCAAACCTGTT  
CTTGACTTGTTTCATGTAGATTGTTGCAAAACAATGCCATTTCTGGTCATATTCCTGATGTGATTGGGAAGT  
TACAAAAGCTTCAGACACTTGATCTTTCCAACAATAAATTTGAAGGCGAAATACCCACTTCCTTCGAAGA  
CCTGAAGAATTTGAATTATTTGTGAGTTCATGAATTTTCATTTTCACCTATTATTATTCACTTTCAAGACTC  
CAACCATATATTTCACTCTGTCAGATTGAATACATCATGTTACCTATTGACTCAAATCTTCTGTTTCGTCT  
CATCCCTGTGATTGACTTAGCTGATCATTGCTTGCAGGGATGTCTCTTATAATAATCTAAGTGGTACCCTT  
CCTAAAATATCAGCGCGAGCTTTCAAGTAAGTCAGCCTTTTCTATTGCCGTAATATACTCAGTTATTTTCAT  
TTTCAAGTAGTTATCTTAATATTATTGAAGTTAAACTATTGCTGTACGGCTGTACCTGTAAATCTCGATGC  
TTAGTTGATAAAAATCCATTATTA AAAATACATTCACAAATCCTTTTGGGTAAACTGGTACTTGAAAAGTA  
TTTCATTAGTATTCGCACTATAGTGAGATTGACTTCCTCTTCATGGCTTTTCAGAGTGCTCGGGAATCCTT  
TAATTTGTGGTCAAGGTTCTGAGAATAATTGCTCAGCAGTCTATCCAGAACCACTGTCCTTCCCACCTGAT  
AGTCTGGCAGGTACATATAGCATTTTCATGCTCAAGTCCCTTCCCTTGCACCTGAAAATGGACAACCTGTT  
AAAACATATTATACATACTGAGGAAGTTTTGCTATTTGTGTTATTGAAAATGTGTTGCATCTATTATTTT  
GATATCACAGATCAATCTGGTGCTGCACGCAAGAGCCGTCGCGTGGTTGTTGCGTTTGTGCAAGTTTTG  
GTGCTGCTTTCTTGGTCATAGTAGCCCTGGCTTTGCTTCTTTGGTGGCGCTACAGAAATAATCAGCAGAT  
CTTCTTTGATGTCAATGGTTAGTTGATTTACTTTCCCCCTCTTCTCTATGATAATTTGAGATTTTATTAGTT  
CTGCATTTCTGATTCTTTTCTGCCACAGATATATAAGTTGAGCCAAGTGAGCTTTTCATTATTGTCTGAG  
TGATTGGTGTAGGTATCATGTGAATATTTTTTAAGCTAGGATGTTACAGAGTCACCTGCTTGTGGTTTG  
AATCTTTATTTAATCTCTAAAAGATTTTTGTGATTGTTGATTTAAATTCATTTGTTTTGTTTTAGAGAG  
GACATGAGTGGTCAAGTAATAGGAATTGGGGATAAATTCTGTGTTTACCATAATCAATAAACCTGTTGA  
ATATGAAGAACTTTGAAACCCCGTCAATTAGAAAATTATGCCCTTTGGCATACTCAGTAGTTCTGGTCAA  
TTTTCTAGTAAGGACTCAGAAAAGTTGTTTGAATTCGTTGTTATCGGGACAAGTCCTGATCCACTACA  
GGCTACCTTAAACATTTAGTTCCAAACATTGACAGAATAATTTGTTAATCACATATCTGAATAATTACACT  
TGCAGTTTCTTGTGCAAGTTGAAGTAAATATTTCTGTAAAAGGAAGATGGTGTATGTTCACTCTCTCG  
GGCCACCATGCCTGGTGAATTGCCTTGCACATTTATTGCGTTGAAAGTTACTCTTGATAATCTTGTACTT  
TGGTTGTCTGATTCATATAAGTGGATCAGTTTTGGGACCTTTTTGCCAACCTCTATTATTTTCTCCCTGTCT



CACTTCTCAAAGATTTTCTCCATCTGTCTCTAACTAGTCCTCAAAGCTGTATCTGAGTAACGACTTCTCAA  
ATGCAGATCATTGTTATCCAGAGGTATGCTTGGGTACCTGAAAAGGTACACCCTTAAGGAACTGCGGA  
CTGCCACTGACCATTTAGCTCAAACGTATTTGGGAAAGGGAGGATTTGGGGTTGTGTATAAGGCCA  
GCTTAAACAATGGTACTGTTGTGGCCGTCAAACGATTGAACGACTACAATGCTGTTGGTGGTGAAAATC  
AATTCAGACAGAAGTAGAATTGATTAGTTTGGCTGTCCATCGGAATCTTCTCCATCTTCTGGGGTTTTGT  
TCAACTGAAAGTGAACGGCTTCTTGTTTACCCCTATATGCCAAATGGAAGTGTAGCATCACGATTAAGG  
GTTAGCTCTTGCTCCATGTGTTAATACATAATAACTACTATTGATTCAGATAATGAATCCAACATTTCC  
ATTTATAAAAGTTAAATATTCTCACATGGTGTGGTTTGTACTACTCCCTTATTCAATTTGTTTGACAGA  
TAATTAATAGGATACAGAGTTTAAAATTTAATCCACTCATTATTACATTGGAGGAGAAGAATTTTTTT  
AAATAGTGGTTATTATACTTGTTAAAGAGAACATCATATAAATTTAGAAATGTGGATAGTATGAATTTGA  
GTTCTTAAAGTTGTAAAAGGTGTACGGACAAATATAACTAGAAATAGAGCCAAATTTGGACCATGTCT  
AATTTAAAAGAAGTCATGTTAGTGAACAGTTCCTACTTCCAATGTATTGCCATTAAACATCAGTGAGTG  
CTCTGAAAACCAGCAACCGCTGTCATTGGTGAATTGAGGCCATAAGATTCTGGTTAAGTACAAGCTTAG  
ATGTTACGACCCACCCTTACCTCAGTCCATCCTTGAGCCCGCGGTGGGCTGCCACCTAACATACTCTGT  
ACTGCTGTAGTTATATGATAAGACATTATCAGTTTGTCTGGCTGAAGCCATTGTTGTATGTTTCTGCAT  
GTTGAAAAGCCAAGCTCATTGCTTTTCTGGAACCTCATCAGCTACTTTTTAATAGTTTCCAAGTAACTAA  
ATTTTGTGTCAGTTGAAGCTGATACATATATTGGCTTGATTGAAAATGCATTGTGGTTTCTAAATTTGCAG  
ATAGCATAAATGGTAAACCAGTTTTAGACTGGTCAAGGCGGAAAAAGATAGCACAAGGTACAGCGAGA  
GGGCTAGTTTACTTGCATGAGCAGTGTGATCCCAAATATCCATCGTGATGTCAAAGCAGCAAACATTC  
TGTTGGATGAAGAATTTGAGGCAGTAGTTGGTGAATTTGGGTTGGCAAAGCTCTTGGATCACCACGATT  
CCCATGTGACTACTGCTGTTAGGGGCACCATTGGCCACATTGCTCCAGAATATTTGTCTACTGGCCAATC  
GTCTGAAAAAACTGACGTTTTTGGGTTTGAATCTTGCTACTTGAGCTGATTACAGGCCAGAAAGCTATG  
GACTTTGGTCGAGGGGCCAACCAGAAAGGTGTTGTTATGCTTGATTGGGTGCGTCTCTCCTCTTTCTCTT  
TCTCTGGATGTTGTAAGTACTTTTTGAAATATGTAAGTGTGGGTTGTGAGAGGAATAAGCTATACAGA  
GGCAGGTTGTGCGTCTCTCCTCTCTCTCTCATAGCTGTTTTCTTTTTCAGTTATAAGGAGTTGTAGG  
TTCAAACCTCAGATATAGCTAGCAAGTATTGTGTACATCTAGTTTACAAGGCTCTTTTTCCATTAGCATA  
TTCAACGAACTCTCTCGTTTAATTACTGCTAATGATATGCAGGTGAGAAATCTGCATCAAGAGGAGAAAT  
TGAACCTTATGGTAGATAGCAATTTGAAAAATAACTTTGACCAGATTGAGCTAGAAGAGATGGTTAAAG  
TTGCCCTTCTATGCACCCATTTCAACCCTTCTCATCGCCAAAAATGTCCGAAGCATTAAAGGATGTTAGAA

GGCGATGGATTGGCTGAAAAATGGGAGGCATCACAAAAGCTCGAGACTCCAAGAAACCGAGCTTTTGA  
ACATACACCACAAAGATATTCCAACCTTCGTCGAAGACTCTTACTAGTTGAACCAATGGAACCTTCTGGA  
CCTAGATGACATCCATTTTTCGTTCTCGATTCTTATCATCCTTGAGTTGCTAAAGTTGAAGTGAGAAGTAT  
TTCATTGCTGTTGAATGTATGTATTCATTTTGAAAAGAAAAGGGAATAAGTCATGTGTAAGCTGAGTTC  
ATATATGATATATTCCCTCTTGTCTTTCAATTTTTGAAATGATATGCTATGTAATTATGATTTCAATTTGTTT  
TTTTATAAGAAAGATTTTGAGATTTATGAGTAATAAAACGCCATAGGCTTGCCATTCTCATTAAGT

>PGSC0003DMG400013500 LRR-RLKs

ATGGTTGGTTCTTTACCTCTCAAATCGGAAATTTAAAGGCTGCAACACTGATAAATCTGTCAATGAATC  
AATTCTCAAATGGAATTCCTATAGAAATTGGAGGATTGCAGAATCTGGTGCACCTTTCTTTGAGGCACAA  
CAAGTTACAAGGATCTATACCTGACTCATTGAGCAACATGGTAGGTTTGGAAATTCCTAGACCTTTCTCAT  
AAAAATATATCGGGAACCATTCCCTATGTCTTTGGAGAACTTCAAACATGATGTATTTCAATGTTTCTGT  
CAACAAGTTGCATGGTGAATTCCTCGGAGGGTCCGTTCAACAACCTCTCGAGTCAGTTTTTCATCAAC  
AATGAAGCATTGTGTGGTTCTTCAAGGTTAGTGTCCC GCCATGCCCCACATCATCAAAGCATAGATCAA  
ATAGGAAAAAATTGCTTGTCTATTTCTTATCCTCGGAGTTGCACTTGTATTTGTTCTATTACCCTTTTGT  
TTGTATGGATAAGGTATAGAAGAGGTAAGAAATACCCTCAACAAGATGATTCATTGTCTATTGCAACGA  
GAGGTAGAATTCATACTATGAATTGCTCCAAGCAACTGATTCTCTCAGCGAGAGTAATCTGATTGGTTC  
CGGAAGTTTTGGCTCTGTCTACAAAGGCATTCTCAGAAGTGGGACTGCTATTGCAGTTAAAGTGTTTAAAT  
CTGCAACTGGATGTGGCATTAAAGAGTTTCGATACAGAATGTGATGGTTTGTGCAACCTTCGCCATAGG  
AATCTCATAAAAGTCATCACTAGTTGTTCCAACATTGATTTTAAAGGCTTTAGTGCTCGAGTATATGCCTAA  
TGGGAGTCTTGAGAAGAATTTGTATTCTCACAACACTTCTTGGACATCCAGCAAAGACTATGCATAATG  
ATAGATGTGGCATGTGCATTGGAATATCTCCACCATTGTAACATCCGGCAATACGAAATAATTGAAGAG  
GCTTAG

>PGSC0003DMG400013525 LRR-RLKs

GTAAACTCCATCCAGCTGCAAGTTGTAGCTCATAATAAACCTCTAAATTATGTCATAAATTTCAATTCTC  
TTAGCTTAATTCCTTCAAATTCCTCATTAAATGGGGTTTTTCATCGAAATGGGTTTTTGTATTTACGTTATTT  
CATTATAAAACTTTCAATTTCTGATCCAAGAGCAACAGAAGCAGCTCTAATTTGTACAAACAGAACAGC  
TGCACAATCCGATCGACAAGTTTATGTAGCAACTTTTCTAGAAGCCATGGATTCCATTACGCCATTAGTG  
GGGCGAGACAAATTTGGAGCAGTAATTAACGGAACAGGGAATAATACAGTTTATGCGTTTTGGTGAATG  
TATGAAGGACTTATCACAAACAGATTGTAATCTCTGTTTTGCTCAGTGCAAAACTCAAATCCTACGATGCT

TACCTTTTCAAAGATTAGTACTGGTGGGAGATTATATTATGATGGGTGTTTCCTAAGGTACGATTATTAT  
AGATTTTTTAATGAAAGTTTGAGTTCTGTTGATAGGACGATCTGTGGGAACACGAGTTTTTCTGGGAATC  
AGAGTTTGTTTAGTGAAAATGTTGGGAAATTGGCGAGGGATTTGGAGTTTGGGGTTTGAGGAATGAT  
GGTTTTTGGACTGCAGTTGTGAGTACTGGGAATTTGACTGTTTATGGGTAGCTCAATGTTGGGAATTTG  
TGAATGGAAGTGCTTGTCAAAGGTGCTTTCTGATGCAGTTTTGAAGATTGGTTCTTGTACTCCTAAGGA  
AGAAGGAAGGGTGTGAATACTGGTTGTTATGTTAGGTATTCTACTCAGAGGTTCTTTAATAATTCTGCA  
AGTGATACTCCTCCTGCTGGAAATGGAGGTATGTTCTTTCTTTCTTGAATGTATGAAATGAATAAATTGTT  
TTCGTTTAGTTGTGCGATCATTTACCTAAAAGTGTAAAGCTATTAGAGATAGTACTTTTTCCGTGACATAT  
GTCATATCTTTACATGGTATCATTGGGTCTGACCGTGAAGGGGTGTTAGAATGGTTAAAGTTTACATTG  
GTTGGGGACTGACTTGAGCAATTCTCTCGTGATGAGCTAGCTTTTGGAGTTGAGTTAGACTCAAATGTCA  
TATATCTTTACGAATATCATGTTAATTGTGTAATCATCTTATTTAACATATGCTTGCATGTTTCTTGTT  
TCATTAGTTATTTCAATCTTATCCAATATTCAATGATCTTAAATGTTAATTTTGTAGATTGCAAT  
GATACTTGCTATAAGCCTAAAACCTATTGGATGTAGAGCAAGAAAAAGTTCAACTGTTCTGCCCAATTAT  
TATTTTCTAAAAAAAAGATACCTACTTTGTCATTTGGAATGATTTGAAAAACGGTGGTTGGAAATCGAGG  
TGATTTTGACATTTCTTGAAAAGTTGCTCTTGTATCTGTTTAAAATGTGGTAGTTTGTATTTCTTGATT  
TAGTTCCATTCCAGGATTTAATAACTATCTAGACATTACTTGTGCTGATGTTTCTTTTGTGATCTGATAAG  
TTGAAATGGTTGACATATATATATACATGAAATGAATGAAGAGTGAATCAGCATTGAGGCAAATGCAGA  
CAATGAATCTTTTAAAACCTGTGATAAAATAAAATGTTTATACAAAATTATGTCATTCATGTTGTCGTATT  
ATGATTAATTATCAGGAGGATCGAATCGTTTGGCTGTTATTCTTGAACAACCTCTGGGTATTTCTGCTTTC  
TTGCTATTTGTATCGGCTGTTTCATTCTTTGTGCGGAGGAAGTTCTAAAACAAAAGAGAGGTACAAATT  
TCTAAGTCAAATCATTTTCTTTCTTTCCGACAAAAGAAATCTCATTTAAGTCTGATTGATCAAATGGCAAT  
TTGACTTGAATTTGCTTCGATGATATAGAGAAGAAGCAGCTAGGAGCTCTCATAAGAACGGTTAATAAA  
TCAAAACTGAATATTTCCATGAAACTCTTGAGAAGGCGGCAAATTACTTTAACAACTCGAATAAATTGG  
GACAAGGAGGTTCTGGTTCTGTTTACAAGGTAATTTCTTTGAACATTATATTCATTTTTCTTATACTAATG  
AGATTTGCCTGACAATAGTCGTGTTTATACATGAAATAGGGGATCTTGCCAGACGGGCAGGTTGTTGCT  
ATAAAGAGGCTCTTCTTCAATACGAGGCAGTGGGTTGATCATTTCTTTAATGAGGTCAATTTGATTAGCG  
GCATCCATCACAAAACCTGGTAAAGCTATTGGGTTGCAGCATTACAGGGCCGAAAGTCTTCTAGTGT  
ATGAGTACGTGCCCAATCATAGTCTTGCAGGATTACGTCTTTGGTAAGTATCCAATCCACCTAAATTTATGA  
AATCTTAAATTGGTGTAGTCGTCTCTCGTTATGTAATGCCTTTGTTTTGCACTGAATCAGACACAAAGAA

CCTTCAGCCACTTACATGGAGTCAAAGATACAAAATTGTATTGGGTACTGCTGAGGGATTGGCTTATCTT  
CATGAAGAATCGAAATTAAGGATCATCCACCGTGACATAAAGTTGAGCAATGTTCTTCTAGATGAAGATT  
TCATGGCAAAAATAGCTGATTTTGGTCTAGCCAGGTTATTTCTGAAGATAAGAGCCACATTAGCACAGC  
TATTGCTGGCACTCTGTAAGTTCAATACCTTTTTCCGGTACTTGTTAATTTTTCTTTAATCAATACACTAA  
GAAAGTGCTGAATTAATAAGTTTTGGCATTGCAGCGGTTACATGGCTCCAGAGTACGTTGTACGTGGCA  
TACTGACCGAAAAAGCTGATGTCTATAGTTTTGGAGTCTTGTTGTGCGAAGTCGTGTGTGGAAAGAAGA  
ACAATTATGTTTTCAAGAACACTAATTCTTCTGCAGCAGGTACTTTCTTGATATTTTTCTTTCCTTA  
ACGGACATTAATATAGTATTTACTCAACTCATGTCATTGTGGTTTCTAGTTGTGGAACCTTGATGGGATG  
GGGAAATCTTATGAAGCAGTTGACCCTTTATTAGAAGGTAACCTCAATAAAGAGGAGGCATCTAAGCTG  
CTGCAAGTAGGTCTTCTTTGTGTACAAGCATCAGCAGAACTACGACCCTCCATGTCAAGTGTCGTGAAAA  
TGCTCACCGAGAACCATGAAATTCCTCAGCCAACACAACCACCATTCTCAATTCTGGTAGTTCAGAATTT  
AGTCCATTTAATCTGCATGGCAAAAGATTTTTCGGTCAACCAAGCTCCTCTACACAATCTTCTGGGAATAA  
ATTGACGGAGAGTTGGATTGAGCCCAGATAAACTAAGTTGATCATCTGGAATTGGTATTTGATTTTGTTT  
TCAGCAAAGGCCAACTTCTTGAAGGTGAATTGTTAGCCAACTCTAGTTTTTTCTGTGATGAACTAGTACT  
CACTACTCACTCTCCATTTTCTTACTGATATTTGTTTATAGTCTTATTTAGTCAACTTCCTTTTGTGAATAC  
CCCAGTGAGCTATTTCAATGTAATAAATTTGTATAGTATCTGCAGGAGTTCCAATTAATCTATATC  
TACTGTTTTCGATTTTGGATTTTGGATTTTTCGATTTAGTAATTTTCATCAAGGATTATGCTTCACAATTGTC  
ATCATCTTGTCTTAGAAGTGGCTATTCAGAATCCCCTGCCTAAAGTCACAGGCATTGGTGAAACTATTCA  
TTACAATTACATCTACA

>PGSC0003DMG400013682 LRR-RLKs

CTAAGCTTCTCTCTCCCTCACCTCGCTCCCATCTCTCTCTCTTTGTGCTTCCCATGCATGCCACACAATC  
CCATTTCCCTAGAGATGTTGAAATCTTTTTGCATGCCCTCTAAATCATAGTATTTTCTCATTTGTAATTGC  
CCTTTGTAAAGGGCGCGCACCAACAAGTGTCGCGACCCCTACAAGTCTATGCAATGTCGGTGGCTT  
ATCGTTATAGCAACCACAATCGCCAGTATCGTCATCACCATCACCATCTCTAATCCTCGTTGTGTTATTAT  
TACTAGTCGTTGTCCCGATCAAATCAGATAGTTCTGAGGCAGAAATCCTCTTTTCGATTTAGCAAGTCCTTG  
CAAAAAAATGGCGCAACAGCTAATTGGAATACGAAAGTATCGCCTTGCATAAAAATACAGATAAACCC  
AATTGGGATAGTGTTATTTGCGAAAACGATTCTGTTTTCGGGTTGCAATTGGAGGGTAAAGGCTTAAGT  
GGGACAATAGATGTGGATGCTCTTAAAGATTTGCCTAATTTTCAGGACCATAAGTGTTATGAACAATAATT  
TTGAAGGACCTTTACCGAATTTAAGTAAACTTGCGGGGTAAAAACGGCATATTTCAAAAATAACAAGTT

TTCTGGCCAAATTGACAATACTCTTTTTGAAGGGATGCATTGGTTAAAAAACTTCATCTTGCTAATAATC  
AATTAAGTGGTAAAATCCCATCTGTTTTGGGTCAATTGCCTAAGCTTACGGAATTGAGAGTTGAAAACAA  
CAAATTTGAAGGCCAAATACCTGATTTTGTTC AAGAGAGACTTATGGATATGAATTTTGCTAACAACTCT  
CTTGAGGGTCCAATTCCTCATGGCCTTACTAGTCTCAAACCTCAGCATTGAAGGTAACTTTTTTTTTCAT  
GTGTAGGATAAATCCATTTTTTGA AATTATTGTAACACTTATCTAGCTACGACGTACACAAATGTCTACA  
TTTTAAAATGTAGTCGTAAAGATATGTCATGTATGCCTAACTCCACCTTAGAAGCTAGCAAGGATTGATC  
AAGTTCATATCATCAGCAGATCATCAATCCATTTCCAATCAATGTGAGACTCTTTAACACTTCTTTCAGG  
CCCATCTCCCAAACGGAGATGAACCTGACTCTGACACCATATAAAGATATGACGTTTGCATCTAACTAA  
ATCTCAAAGTTAACTCACGAGGAAAAAATTGTCAAAGTCCATATTAGCAGACAATCAACACATTCCCCA  
TATGGCGCTTTAACCCACATTCTAACAAATAGTTCTTCGTCATATTGGCATTAGAAGAATTGTAGTTCATAA  
CAATTTTTATATAGTTTTTAAATATCTAAATTTAACTTCAAATATTAAGTTAATCTAAACATGCTCTCATT  
TTTGTTCAATTTGGTACAATAACAGGTAATGATCTTTGTGATGGTCCATTATCGAAATGCACGAGTGAA  
CCAAAAGTAGCCCTCTGGACAATTATATTGGTGGTTATCGCAGTTGCAGCAGCAGTAGCAGCAATTGTT  
GTTGTTATCATCATTCTTCGTCGGGGCAAGCAGACACCCGAAACAGAAACAAGACCAACGCCTACACCCT  
CTGGAGCTGCAGGGGGCGCTACTAACCAAACAGGAGCGCCCTCAGCAGCAGATCTAAACAAAATGGAA  
CAGGGCAGCAATCAAGCAATGGCTGCTCCTGCTCCTGACCAGTCTCCAGAGGGGACCGGTGGACTAAAT  
AATAATAAGAGGCCTGAAGTACAAGCAATACAAAACTTCTATTCTTAAAAGATGATATTGAAAAATTTG  
ATTTGCCAGATCTACTAAAGGCTTCAGCTGAAATATTGGGTAGCGGTGATTTGGTTCGACTTATAAAGC  
TGCACTTAGCATGGGACGTGTTATGGTTGTCAAAGGTTTAGGCAAATGAATAATGTAGGCAAGGAAG  
ATTTTCATGAGCATATGAGAAGGCTAGGTAGGTTGAGTCATAAGA ACTTACTTCTGTTGTAGCTTTTTA  
CTATAGGAAAGAGGAAAAGCTTTTGGTCTCAGAGTATGTCAACAATGTCAGCCTTG CAGTTCATCTTCAT  
GGTACGTATTTCACTTTTTAAGTTTCCGCGCTAAAATTAGATCATAAAATCATGATTTGCGCTACCAGTT  
TATTATATTA ACTCAATCTATTTTGACCTTTTTTTTTATTCAATTCATTTCAAACAGAGTTGAGATATGCAA  
CTCAAATCTTTTGAAGAGGGCTCATTTGTTGTTCTCTCTACCTACTCTACTAGCTAGAGTGATGATCTGAT  
GTGTGATTATCTCATCTAAGATATTACATTTTTACTATGATGAATTCTGTGATCATCTCATTACACATTGTT  
TATTTTTTTT CAGGTAATAAATCGCGGGGGCAACCAAGTCTTGATTGGCCA ACTCGATTGAAAATTGTAAA  
GGGAGTAGCCAAAGGACTATTGTACCTCTACAACGAGCTACCAAGCTTGACAGCACCCACGGTCACT  
CAAGTCCTCGAACGTACTTCTAAACGAATCCTACGAGCCCCTCCTCACG GACTATGCATTACTACCCGTA  
GTAAACCTAGAACACGCTCAAGAACACATGATTGCTTACAAATCTCCTGAATTCAAACATAGTGGTTCGTA

TCACACGTAAAAATGATGTGTGGACGCTTGGAAATATTAATCCTCGAGATCATAACGGGCAAATTCCTCGTC  
TAATTTCTTGCAACAAGGCAAGGGGAGTGACACGGATTTGGCTACGTGGGTAAGGTCCGTGGTAAATG  
AGGACATGATGGAGGTAGATGTATTGAGAAGGAAATGAGAGGTACGACGAATTCAGAGGGGGAAAT  
GATGAAGTTATTGAAGATAGCTTTGGGTTGTTGTGATCTTGATATGGAAAAGAGGTTTGATATGAAGGA  
AGCAATGGAGAGGATTAAGGAAGTAAAAGAGAGAGATGGGGATGATGATTTTTACTCTACAAGAGGAT  
TATCTGATGATTATACGCAAGTTTCGATGAACATTTGAAGAGTGTTGGTTATACATACTCATAGTTCGTGT  
GTAACACCTTTTTATTAATTTGTTCAAAAATCATCAATGGTAAATATGGGATGGGACTTTTTATTTGTTTG  
ATGCATGGTTGGGGGTCGTATATATTGGTCAATGAAACCACAAAATAAATAAATATGAAAACAAAAAAA  
AGAGATAGAAAAAATGAAGTTCAGTGTTTTTTTGTGCGATTCAATTGAAGCAAAGGAACATGTAAATT  
GTCCTTGATGAATCTAGTTTAGCTAGTTGCCTTCACTTTTTTTCTTTTTTGAAACTTTATCTAGTTTATTATA  
TTTGGGGTTGTAAAAATTAATCCAAAAGCATGCAAGAACAACGAATTATGGATCTTTCAATTGCAG  
>PGSC0003DMG400013953 LRR-RLKs

ATGGTTGTGGCCTTGGATCTTCTAATTTGCAACTTCAAGGTACAATTTCCCCTTCTTTGGCCAATTTGTCC  
TTCCTCAATGTTCTCAATCTCCAGAACAACAGCTTCCACGGTGGCATCCCTTATGGCATTGGCCATATGCC  
TCGCTTGCAGTCATTGACGTTAAAAACAATCAGCTCAACAGAAGTATACCAACAAGTCTATTTCAAAC  
CGGAGAGTTCAAGTAATTTCAATTGGATTTCAATGAACTCAGTGGTGAATCTGGAGAGGCCCTTGGTAT  
GTACCCGAACTCATAGTCTTAAATTTTAGGAACAATAGCCTCACGGGTATAATCCCTCCTTCTATTGGAAA  
TGCCACAAAAATGATGATATTCAGTTTGTCTGGGAATAGAGTCAGCGGCAACATTCCAAAGGAGGTCGG  
TAATCTGATCCAGCTTGCATTTTTTCTTGTTCATAATCAATTAACAAGTTCCATTCCCGCAACACTGTT  
TAATATCTCGTCACTACTTGTGCTAACTCTGGCAAAGAATAGCCTTTCTGGTCCTCTCTTGCTAGATGAAG  
GCAATATTGTGTTGAATCTGTACTTTTTAAGTATATCTCACAACCAATTTCTGGTTGCATTCCTTCCAACA  
TATGCCAACTCACGGAGCTCCAAGTTTTGTCCTTATCTTTCAACAACATAATTGGAGACATACCCAGAAAT  
ATTAGTTGTTTATCCAAACTCGAGAAGTTTTATATTGTTGATAATCTAATAAAAGGACTATTCCATTCATT  
GGAAATATTCCACTCTACATACTTAACTGTGCAAACAATTGGATAGTGGGGGGAATTCCTCCGGAATT  
AGGGAAGCTATCAAATTTGATGAAATTATGCTTTGACAATAATTCTAATCTTATTGGTCAAATTCCAGAG  
GCTATTTTCAACATATCTTCTTTGGAAGTGATTGGTTTCAGTTTCAATAACCTCTCCCAACCTTGAAGGA  
CTTACTTGGGAGTCAATCAGTTCAAAGGGAAATTCATTGTTTATAACAAATGCTTCCAAGCTTCAGAT  
ACTGGAGCTAAATAATAACTTTCTGACAGGAACTATTCCTAATAATTTGGGAAATCTTCGTCAGCTGCAA  
ATGCTGCTCCTATATAATAATCAACTTACCAATGAATCAAGAGAGCGTGAGTTGTTACTCTTCAATTCCTT

GGCGGACCGTAGGATGTTGAAATATCTACAAGTGGGTAACAATCCCTTGAATGGCGTTCTGCCCAATTC  
AATTGGGAATCTTTCATCTACTATTGAAAACCTTTCATATAGAAGATGCACACATCAATGGCCTCATCCCCA  
AAAGTATAGGCAACATGACCGGTCTTACATCCCTAAGCCTTGACGATAACAACCTTGACAGGGAGTATTC  
CTTCTGAGATTGGTAAGCTTAAACAACCTCCAAGGGCTGTATCTATATAACAATAAATTGCAGGGACATAT  
TCCAGAGGGGGTATGCCTTTTATCTAATTTAGACATATTAGCTCTAGAAGGTAATGAGCTCTCTGGATTA  
ATTCCAGAATGCTTTGGAAATCTTAGCTACAACATCTTTATTTGGATTCTAATAAATTTTCATCAAATTTTC  
CGTTGAGCCTTTGGAAGATGAATGGTCTTCTCTATCTAGACGTGTCACAGAATTC AATAGAGGGAGAAG  
TTCCCCAGGATATTGGAGGACTGAAAGCCATTGTAGA ACTACATCTTTCCAGTAACCACTTTTCAGGCAT  
GATATCAACCAGATTGAGGAATTCCAAAATCTGCAGTATCTTGACCTATCGAACAATTCATTTTTTGGCC  
GAATTCATTATCATTGCGCAACTTGATAAACTTGGAATTCTGAATCTGTCTTTAAATGCATTGTCAGGT  
ACTATTCCTAAGTCATTGGAAAACTCTCATACCTTAAAAGCATT AATGTTTCATTTAATGATTTAGAAGG  
TGAAATACCAAGTGGTGGTGTGTTTGCAAATCCACTCTGCAATCATTCTTNNNNNNNNNNNNNNNNNN  
NNNNNNNNNNNNNNNNNNNNNNNNNNNNNNNNNNNNNNNNNNNNNNNNNNNNNNNNNNNNNNNNNN  
NNNNNGGAATGCACATATTGGAGATTCTGCTTGTGCTATCACTAATCCTGGAAAACAATCAAAGCTTA  
AGGAGGTTTTGCTAAAAATTGTTACTCCAGCGTTACTTCATCCTTTCTGATATTCTTGTTGGTTTCAATTT  
GGATAATGAAACGACAAAAGAAAGGGAAAGTCCAAAGATGTGGAGAAGGTA CTGGAGATCGGGACTCA  
TCAATTAGTTTCTTATCACGAGATTCAACGAGCAACAAATAATTTTGATGAATCCAATTTAATTGGTGAG  
GGAAGCACTGGCTCTGTGTACAAAGGCACATTATTTGGTGGA ACTGCAATGGCCATAAAGGTTCTGGAT  
TTGGAAAATGAGCAGGTATGCAAAGGTTTAATACCGAATGCGAAGTGATGAGAAATGTTAGACACAA  
AAATCTTGTTCCAGTGATTACTACATGTTCTAGTGACTATATAAGAGCCTTTGTTTTGCGATATATGCCCA  
ATGGAAGTCTTGAGAATTGGCTGTACAAAGAAGATCGCCACTTGAACCTTCATCAAAGAGTCACTGCAA  
TGCTTGATGCAGCTATGGCAGCTGAATATCTACATCATGGTCATGTCACTCCAATAGTTCATTGCGACTTA  
AAGCCATCCAATGTACTTTTGGATGAAGATATAGTGGCTTATGTTGGTGAATTTGGAATCTCTAAAATTT  
TATCCATAAGCAAGTCCATTGATGGTGTCTTCCCGAGCTGCATGTTAATATGATGCTTTTTGCTTACCTG  
TAG

>PGSC0003DMG400013956 LRR-RLKs

ATAAGAGCCTTTGTTCTGCAATTTATGCCCAATGGAAGTCTTGAGAATTGGCTATACAAAGAAGATCGCC  
ACTTGAACCTTCATCAAAGAGTCACTGTAATGCTTGATGCAGCTATGGCAGTTGAATATCTACATCATGG  
TCATGTCACTCCAATAGTTCATTGCGACTTAAAGCCAGCAAACGTA CTTTGGATGAAGATATGGTGGCT

CATGTTGGTGATTTTGAATCTCTAAAATTTAGCCATAAGCAAGTTCATGGCTTATAGCGAGACATTGG  
GGACTCTTGGATACATTGCACCAGGTATAAAAAATCTACTCTCATTGATTTTCTCTTATCATAATAAAGCC  
TCTCCAAGTTATAGAAGTAAAAAGAGAATTATTGTTGTATTTCAATTGAGTAACTTTTCTTCAATCCATTTT  
TAAGAATATGGCTCAGAGGGAATAGTGTCCACTAGTGGTGATGTTTATAGCTACGGAATCATGTTGATG  
GAGGTTTTGACGAAAAGAAGGCCAACAGATGAAGAGATATGCAATGGAAATCTTGACTTGAGGAAATG  
GATTACACTATCATTTTCAGGTAGTATGATGGACGTTGTGGATGTCAATCTTTTTTGTGAGGAAGAACAA  
ATCACTAGTAAAAGTGAAATGTGCATAGCGTCCATGATAGAATTGGGTTTACTGACGCAAAAGGAAACG  
CCAGAATCAAGAGTGACCATGAAAGAAGTAGTGAAGAGGCTTAACAAAATCAAGAACGCATTTCTGGA  
AACATAGAAGTGATCAGCATCTGTTCTTTACTGAGCTGCAAATCAGTTGAGAAAGTAATTATGTGAGGG  
CGTTAGGCCAGCGGTAACAAGGAATGCAACTCATGCATACTATTAACATATCTTTTTCCGCAGTCCCAT  
AGATTAAGAAGTTAAGCCTGCTAATGTATTAGTGAGAACTAAAATGATATGATTAATATGTAATTCACAT  
TAGATTTCTTATCTTTAACACATTTTGTGCACTCTCTGTTTAATAGATCAAAAAGTGCCATGATCCACTTTT  
TGGCAGTTTTTCTCACTTGTCTGTGAGGATCAGGAACTCGGTAATTAAGTGCAGTTTATTCTCCTA  
TTATATTTTATCTACAAGTTAGGCATGTGTACAGATTGTTTGCATCAGTAACAGATTGATACCGAATTCAA  
AGGAAAAATATATGGTGGCTCATTTTGCAGCTGCTATATTCAGGATGGAGCCGTAATA

>PGSC0003DMG400014281 LRR-RLKs

ATGGCTACTGGGTTTTCTTCTACTACTGCCATTGTTGTCTTTCTTCTCTGTTTCTGTGTTTCTAATGTTGTTT  
TACAAAGAACAGAGGAGGACCCAGAAAGACAAATCTTGTTTTCTTTCAGGAGTTCTCTTGAAAATCCTTA  
TGTTTTGTCTACATGGACCCCAATTTACATTGCAAATGGGATGGTGTCTTCTGCCAAAATGGTCAA  
GTTGTTCCCTTATTCTTTCTTCTTGTCACTCAAAGGGCCTATTTACCCACATTGCTTCATTGAAGAGT  
TTAAGAGTGTTGGATTTGAGTAATAACCAGTTGTCTGGTGAGTTACCAATTCATCTCAGTGAACTTTCTCT  
TTAGAAACAATTAACCTTGTTTCTAACTGTTTTACTGGAGAAATATCGCCGGAGTTTGGACGGTTGACG  
GAGATGAAGTTACTTGACCTTTCAGGCAATGCACTGACTGGAAAAATTCCAGCCCAACTGGTCAGCTTA  
CTAAGCTACAAGTTTTGGCACTTGAAATAACCTTCTTCTGGTTCTTTATCTGCAACACTTTTTACAAAGC  
TTCAATCTTTAACTTCTTTGATGTTTCTAATAACACCCTTCTGGTATTATTCCACCTGAAATTGGGGGAT  
TGAGAAGCCTTACTGATCTTTACATTGGGGAAAACAGATTCTCTGGCCATTTGCCAGCAGAAATTGGTGA  
ACTTTCAAGACTCGAGATTTTCTTGGCTCCTTCATGTTTACTTGAAGGTCCATTGCCTGAATCCATCTCAA  
AGTTGAAATCTTTGAAAAGATTTGACCTTCTTATAACCCATTGAAGTGTTCAATCCAAAAGCTATAGGT  
AGTCTTGAGAATTTGACTATACTGAACCTTGCTTACTCTGAGATCAATGGTTCAATACCTTCTGAGCTTGG



AAAGTGTAGAACTTGATGTCAGTAATGCTTTCTTTCAACTCACTCTCTGGGTCTTTGCCTGAAGAACTTG  
CAGAGTTGCCTGTGCTATCTTTTTCTGCAGAAAACAATCAGCTTTCTGGTGCATTGCCTTATTGGCTTGGA  
AGATGGACTCAGATGGATGCATTGTTGCTTTGAGTAACCGGTTTTCTGGGAAAATTCCGGCTGAGATT  
GGGAATTGTTCTATGTTGAGTCATATTAGTTTGAGCAATAACTTACTGACTGGTCCAATACCTAAGGAGC  
TTTGCAATGCCGTGGCACTCGCGGATATTGAGCTTGGAATAACTTTCTCACAGGCACCATTGATGACAC  
ATTTGTCAAGTGTGGCAATCTGAGTCAGTTGGGATTAATGGATAATAGTATTGCTGGGATGATTCCGGA  
GTATCTATCACAGCTTCCTTTGGTGGTTCTTGATTTGGATTCCAACAATTTGACAGGTCCAATCCGGTGA  
GTCTCTGGAATTGACTTATATGTTGGCGTTTTCTGCTGCGAATAACCGGTTATGGGGTACTCTACCGGT  
GGAGATTGGCAATGCTGTGTCATTGCAGAGTCTTGTTCTTAGTAACAATCAGATAACTGGTGTCAATCCT  
AAGGAGATTGGTAATTTAACCTCTCTTTCAGTGTTGAACTTGAATTCCAATCTTCTTGAGGGTTACATTCC  
TGATGAGTTGGGTGATTGTGTCTCTTACAACATTGGATCTTGGGAATAACAGGCTGCGTGGGTGAT  
ACCGGAGACTGGGGCATCTGCCTCAGTTACAGTGTTAGTCTTTACACAATGATCTTAGTGGTGCT  
ATTCCTCTAAGATTTCCAAGTATTACCGGCAAGTTAGTATCCCTGATTGAGTTATGTGCAGCATCATGG  
AGTTTATGATCTGTCTCACAACAAATTGTCTGGCTCAATACCTGAAGAGCTAGGGAGTTGTGTTGTTATA  
GTGGATCTTTTGCTCAGCAATAACATGCTATCTGGAGAGATACCACGATCACTCGCCCGCTGGTGAACC  
TCACTACGTTAGACTTAACCGGGAATTTGTTAACAGGCACCATTCCAAGGAATTTGGCAACTCACATAA  
GCTGCAAGGATTTTATCTGGGGAATAACCAGCTTACAGGATCAATCCCTGAAAGCATTGGCCAAGTAAA  
TAGTTTGGTGAAGCTGAATTTGACAGGGAACATGCTTTCAGGTCCAATACCCTCAAGTTTTGGGAAGTTA  
AATGGGCTGACTCACTTAGATTTGAGCTCAAATATACTTGACGGTGAATTCCTCAGTCGCTTTCCAGGA  
TGGTAAACCTTGTTGGCCTTTATGTTGAGCAGAACAGGCTTTGCGGCAGTCTAGATAAGCTATTCTCAA  
CTCTGCAGCATGGAGACTTGAGATTATTAATTTGGTACTAACTCCTTCACTGGAGACTTGCCACCATCA  
TTGGGCAACTTGTCGATTTGACGTTTCTTGATCTCCATGCAAACAGTTTAACTGGTGAATTCAGTTGA  
GCTAGGAAATCTTGCAACTTGAGTATTTGGATGTCTCAGGCAACAGTCTCTCTGGCAAAATTCCCGAA  
ACAATATGTGCCCTTCCAATTTAGATATACTAAATTTTACGGATAACAACTGAAAGGAGCTATACCGA  
GGAATGGAATTTGCCAGAATCTTTCAAAGTCTCAGTGGCTGGGAACAAAGATCTCTGTGGGGGAATCG  
TGGCTCTAAAATGCCCTGCCAATAGTTTTGTTAAAAGATCATTGTTGTTAATGTCTGGGGAATCTTATCA  
GTGGTGGCTGGGACTATAATTATCACTCTTACTATTGTCATTGTGATAAGGATATGGGTTAATAGAAGCA  
GCAGAAAGAGTGATCCCGAGGATAGCAAACCTTGACAGTGATGATCAGCACCTTTATTTCTTAGGCAGCA  
GCAAGTCGAAAGAGCCTCTTAGCATCAATGTGGCCACGTTTGAGCAGCCTCTTCTCAAGCTGACCTTGGT

TGATCTTCTTGAAGCCACCAACAACCTTTTGCAAGACTAAAATTGTTGGTGATGGAGGGTTTGGAACTGTC  
TATAAGGCTACTTTACCTAATGCTAAGACAGTTGCAGTTAAGAAGCTAAACCAAGCAAAAACCTCAGGGT  
CACCGCGAATTTTTAGCTGAAATGGAAACTCTAGGCCAAAGTGAAACATCGAAATCTTGTTCTTTGCTTG  
GGTACTGTTCTTATGGTGAGGACAAAGTGCTTGTTTATGAGTATATGGTTAATGGGAGCTTGGACCACT  
GGTTGAGAAACCGTACTGGAACACTTGACGTGCTGGATTGGAGCAAACGACTTAAGATTGCAGTAGGA  
GCTGCTCGTGGTTTGGCATTCTTCATCATGGATTCACACCACACATTATTCACAGGGACATTAAGCCAA  
GTAACATCTTGCTCAACGAAGACTTTGAGGCCAAAGTTGCAGATTTTGGGTTGGCAAGGTTGATCAGCG  
CCTGTGAGACGCATGTAAGCACTGATATTGCTGGTACATTCGGTTACATTCTCCCGAGTATGGGCAGAC  
ATGGCAGTCTACAACAAAAGGAGATGTTTATTCTTTCCGGCTGATCCTTCTTGAATTGCTGACAGGGAAA  
GAGCCAACAGGACTCGATTTCAAAGATGTCGAAGGTGGAAACTTGGTTGGTTGGGTACTCCAGAAGAT  
CAAGAAAGGTCATTCAGCTGATGTTCTTGATCCAACAATACTTGATGCAGATTCAAAGCAGATGATGCTT  
CAGACATTACAGATTGCTACAATATGTCTCTCTGATAATCCGGCTAATCGCCCGTCTATGCTCCATGTCTT  
CAAGTTCTTGAAGGAATCAATGGGGAATAA

>PGSC0003DMG400014576 LRR-RLKs

CTTGCAATTAATTGCCCCACAATTGTCACATTATTTTCAACATTAATTACTATCACCACCTTTCTCTCTTCTTC  
ACCTTTCACTCTGTTTTTCTCTTCACTCTTCAATGGCTACTACTACTCTACTCATGAACTTCCATTACACTT  
TTCTCTCATTCTTCTTCTCTTACCCTTCTTGAATCTTCCCCAAACCCAGATATTGCACCATTACTAGCTTT  
CAAATCAGCTTCAGATGAAACAAACTCACTCTATAACTGGAACCTCATCAACTCACCCCTGTTCTTGGACTG  
GTGTATCTTGTCTTAACAATAGAGTTTCTAGACTTGTTCTTGAAGGTCTTAATCTAAAAGGGTCTTTCCAA  
AATCTTGTATTTCTCAAAGAGTTAAGAGTATTGAGCTTGAATATAACAATTTTTCCGGTTCTGTTCCGAA  
TCTTTCGAACCTTACTGCTTTGAAGCTGCTGTTTCTTCCATAATGAGCTTTCTGGGGAGTTTTCTGAGTC  
GTTTACCTCGCTTTTTAAGCTTTATAGACTTGATCTGTCGTATAATAAGTTTTCCGGTGAGATTCCGGCGA  
AGGTGAATCGTTTGACCCATTTGCTTACTCTTCGTCTTGAAGGAAATGGGTTTTCCGGTGAGATTTCTGG  
GGTTAATCTACCTAATCTTCAAGAGTTTAAAGTTTCTGGTAACAAACTCGTTGGAGAAATACCCATTTCCG  
TATCTCGTTTCCCGGAATCTGCATTTTCAAGAACCGGGTTCTTTGTGGTTCTCCGTTGCCAAACTGTACG  
GCGGCGGTTCTCGTGAACCGTCGTGTCGGCAGGAGCTTTAGCTTCTCCGGTTAGTCCTAAAACCTACCA  
TTGCATCTTCTCCGAGCTCATTGCCGGTGACCTCTGCAACTTTGAGTCCAAAAAATACCCATCATAGTAGT  
GGTAAAATGAGCTCATTGGCCATAATCGCCATTATACTAGGTGATGTGTTGGTTCTATGTGTTGTGTGTA  
TTTTTCTTACTGTTTCTTCTGCATTAGGAAAGTTTCTTCTCAGAAAAATGGGTCACACATTCTTGAAGGT

GAGAAGATTGTGTA CTCTAGCCCGTATCCGAATACGGGCCAGACGAGCGGGTTCGAGAGAGGGAA  
AATGGTGTTCGAAAGGGGCGAAGAGGTTTGAGCTTGAGGATTTGTTGAGAGCTTCAGCTGAAATGT  
GGGAAAAGGGGATTTGGGACTGCTTATAAGGCTGTGTTGGATGATGGAAATGTTGTTGCTGTGAAA  
GATTGAAAGAGTTGAATGTTTGTGGGAAAAGAGAATTTGAGCAACAAATGGAAGTTTTAGGAAGACTT  
AGACACCCAAATTTGGTTAGTTTGAAAGCATACTACTTTGCTAGAGATGAGAAGTTGTTGGTGTATGAGT  
TCATGACTAATGGCAACTTGTTTTGGCTTCTTCATGGTAAGTTTTGTTCTTCAAGAAATTCAATAGTACTA  
ACATATTTTAAATGGAGCAACTTTGCTGGATTACACTGAGTATGTTGTTCTTGTTATTGATATGTGATTG  
TGTTGTTGAACTTGTTGATTTTGAAAAGAAAAATGTGATCTTTAGGATTGTTTTGTTGAAATCGATTGATT  
TGGGTGATAAAGTTTGGCAACTAGTAGCAAAGTCACATGTGGTTGGTTTGTGTCTTGTTTTTTTTTTTG  
GATTTTAGTTGCTTTTTTTGGCTGCAACTGTCAATAAGGCCTGGTCTCTAATGCATATAAGAATAGAAACC  
TAAATTTGGATAGTTTGAAAGCATATTACTTTGCTAAAGATTGAGTAGTTGTTGGTGAGTTTGGTGTATG  
ATTCATCACTTGTTTTGGCTTATTCATTTGTTTTGTGTCTTTTTTTTTTTTTTTGGATTTTAGTTGCTTTTTT  
GGCTGCAACTGTCAATAAGGCCTGGTCTCTAATGCATATAAGAATAGAAACCTAAATTTGGATAGTTTGA  
AAGCATATTACTTTGCTAAAGATTGAGTAGTTGTTGGTGAGTTTGGTGTATGATTCATCACTTGTTTTGG  
CTTATTCATGGTAAATAGTATTCAACCTTTTGTCTTTAAGAAATTCATAGTACTAAAATATTTGTGAATTA  
CTTGTTTCTTAAAGAAAAGTGTGATCTTTAGTTTTTTGTTGTAGAATAGATTATTGATTGACCAATAAGGA  
TTATAGTGGAGTTGTAAGTACTTCGTCATCTTTAATCAGACATTTCAAGTTCGAGCCTTGAGTATGGACTT  
GCCCTTGTTAGGTAACGGTTTGTCCCTATGTGGGACTTCTAGCGCAAACCTGTATCCAGCTCCAATGCA  
GTTGCCGTACACCGGATGGGTAAAAGGAGAAGATTATTGATTGATTTGGTGGTAAAGTTTGGCAAGTA  
GTATAGCATAATCACATGGGGTTTGAGTTTGGCCTTTTGTCTTTAATTGCTTTTGGTCTGCTACTGTTAAC  
CAGGACTAGCCTTCTGATGCAATAGGAATAAAGATGGGATGCCTCAATACTAGACGGTATTTGCTTTAG  
TTAATGTTTCTATTTACATAATTGAAACTAGCCATGTGGGGATACTGAAAATCTATGTTGCTCGGACTCTT  
CAAAAATGTCGATGAGGCATTTTTGGAGGATCCGACATGGGTAAGTCTACATAGTCTTTTCAAGCTAAA  
ACTATAGAATATTGGAGTTTCTGGTCAAGGTATGTTGGTTCATTAACAATCTTTGTCACATAAGCTATTCT  
TGATTTTCAAATGTAGGGAAGTAAATTTAACAATCTTTATCATCTTATTCTTGAAAAAGCTTTTAAAG  
GAATCTAATTTACTCATGATGGTCCTAAAGTGACAGAAGATTAGAGCAAAGGACTTGTTGTACCAGATG  
AATAGAATTATGTGTTCCCTCTGATTTTTGGGCCAAGCAAAGAAAGAAATTCACACTTTTTAGGCAAGA  
GATGCCCTACTGTCCATTGTGCTCTACAGTTTTTTGCTTGCTTTTTGACCTCACTTAGTATTCATATCTT  
GCAACTGTTTTGGTAGGTAGTAGTGAATATAACCTCTTGTTTTTTCTGATTCAAATGGTAAAGAATCA

ACTTCTTGTTGAATTGCACCTGTCATTCATGTAACAGGAGACAGCTGCTTCATATGTTAAATTTCTCATT  
TAGAAATATGAACAATTATGTATTACTATTCTACCATCAAAGTCTATTGTGTCAACTTCATACTCCTTGTC  
CTCTCTGCCCATGTTTTGTTCTTTGTCTAGTTAAAAGTTGCCCTTTATCTTTCTATAACAATTCTCCCTC  
CGTTTCAATTTGTTTGTCTGGTTTTGATTTGGCACGAAGTTTAAGAAAAGTATAGAAGACTTTTGAATCTT  
GTGGTCTTAGTTCTTAAACATGTCATGTGGCCGAAAACGGGAAGAGGCAAATAAGCGAAAATGTGCAA  
GTGCTCCATTTTATAGTAGTTTGAAGTAAATGTTTTGATGGGCATGAATCTTCTTGCTACAGGTAACAGAG  
GGCCTGGAAGAACTCCTTTAGACTGGACAACAAGGTTAAAGATTGCAGCCGGAGCAGCTCGAGGTCTA  
GCCTTCATCCACAACATCATGCAAGTCCTGAAACTCACTCATGGCAACATCAAATCAACTAACATCCTCAT  
TGACAAGAGTGGCAATGCACGTGTCTCCGACTTTGGTCTAGCCATCTTCGCCACACCATCTTCCGTCCCA  
AAAACCAATGGCTACCGAGCCCCTGAAGTCGCATTGGATGGTCGTAATAAATACTCAAAGTCCGACATC  
TACTCATTGGGGTCTATTACTCGAGCTGCTAACCGGTAATGCCCTCAGTCGTGGACAATGGTAGTG  
GCCTCACAACCGGCTACGGAGGGTCTGGACTTACCGAGATGGGTGCAATCCGTGGTGAGGGAAGA  
ATGGACTGCGGAAGTGTTGATTTGGAGTTGATGAGGTATAAGGACATTGAGGAGGAAATGGTGGGG  
CTATTGCAGATAGCTATGGCATGTACTTCAACATCACCAGATCAAAGGCCTAAAATAAATTATGTTGTGA  
AAATGATTGAAGAGTTGAGAGGTGTTGAAGTTTCACCTTCTCATGACACTGCTACTGATTCTGTTTCTGA  
CTCTCTGCTGTTTCTGAAGATAATACATGTGGTGCAGCTAGTCAGTAGTAAGAGTTTTTTTTTCTTCTTA  
TTTTCTAGTTTGTATTCTGAGTTATGTAAATTAACCTCTTAGTTTTAATCCTTTTATCTATAAGATATAAG  
AGAAAATTTAGGAGAAGTTTTATA

>PGSC0003DMG400014917 LRR-RLKs

GTTCACTACTACTATTTTTATTTGTATCTCAATTTTGTCAAAAATAAAAAAATCCCCAACAAATGATGTGG  
AGGATATCCGTTTTTCTTGTCTTTTACTCAATTCTCATAACCGATTTTGTCTAACTTCCGACGGACTTTCA  
CTTCTATCTCTAAAATCCGCCATGGATGATGGCGGTGGTGGTACAGTTTTCTCCGATTGGAATGAAAACG  
ATGATACTCCTTGACTTGGACTGGCATTTCATGTGCTAACATTTCTGGTTCTTCAGAGCCACGTGTGCTT  
GGGATTACTCTTTCCGGTAAGAATCTCCGGGATACTTATCGTCTGAGCTGGGAACGTTACTCTATCTCC  
GGCGACTGAATCTTCATGGAAATAATATTTACGGTCTATCCCTGACCCTTTATTCAATGCGACGTGCTT  
CATAGTATTTATTTGTATGATAATAATATCTCTGGTATACTTCTCCTTCTGTTTGAATCTTCTCGTTTGC  
AGAATTTGGATATTTCTGATAATTCATTTCTGGAACCTTCTCTAAGGATCTACGTAATTGTAGGCAGTTA  
CAGAGGCTTATTCTAGCTCGGAATAAATTCTCCGGTGAGATTCCGGTGGGGGTGTTCCCGGAGTTGGCG  
AATTTGGAACAACCTTGATCTTTGTCGAATTTGTTCAATGGTTCGATTCTGAAGATATTGGTGAATTGAA

GTCACTATCTGGAACCTTGAATCTTTCTTTAATCATTITAGTGGAAGAATTCCCAAATCTGTAGGTGATT  
TACCTTTAACTGTTAGTTTTGATCTAAGGAATAATAATTTATCTGGTGAAATTCCTCAGACGGGTTCTTTT  
GCTAATCAAGGTCCGACGGCTTTTTGAATAATCCCTTGTTATGTGGATTTCCTTTACAAAAAACTGTAA  
AAATAGTTCAAACAATTCAACACAAGTTCAGGGTTCGTCTGATAACGAGGGAACGAATTCGCGCAAGGG  
GTTAAAACCTGGATTCAATTATATTGATATGTTTGGCTGATGCATTTGGAGTGGCATTATAGGACTAGTG  
ATTATTTACTTGTATTGGAAAAAGAAAGACTCTGGTGGTTGCAGCTGTACTGGAAAAGGGAAATTTGGT  
GGAAATGAGAAGAGAATGCTTTGTGGTTTCCCATGTATTAATGGATTTCCAAATAATGATTCGGAAGTT  
GAGTCTGAGAAGGGAGGTGGCGGTGGGGCTAGTGGTGGTGGTGTAGTGGTGGGGAGGGTGATCTTG  
TGGCTATTGATAAAGGTTTTAGCTTTGAGCTTGATGAGCTGTTGAGGGCTTCTGCTTATGTATTGGGAAA  
GAGTGGGTTGGGGATAGTGTACAAGGTTGTGCTTGGGAACGGTATCCCAGTGGCAGTGAGGAGGTTA  
GGGAAGGTGGGGAACAGAGATATAAGGAGTTTGTGCGGAGATTCAGGCAATCGGAAGGGTTAAGC  
ATCCTAATGTTGTGAAGTTAAGAGCTTATTATTGGGCTCCTGATGAGAACTTCTCATTAGTGATTTTATT  
TCCAACGGCAACTTGGCTTCTGCTCTTACGGTGAGCTTTTATTATAGTAAAACATCTTCAGTTTTGTTT  
GTCTAGTAGATATAACCTGTTGAAAGAATCATTAAACGCATTCATATTTTAGATATCGGGGTATACTATATT  
CTTATCATTTAGTAGCATGATACACTGATGGATGTTTCGTACATTCCAAGATCGATATGTGTAAATTGTAA  
TTCTTTTGCTGGATTGGTATTTTACTTATTGATCACTCTTTTGGAGGAGTGGAATACAGTACAAGACTTTT  
GGTATTAGGTTAGTTAGGAGTTTGGGATGTTCTAGTATTTATTCACTAGTATAACTGTTTAATATATTCCC  
AATGACAAAATAATGACTTTTAGCTGTTGTGTGTTTCTTGATGATTTTGAATAGCAATTATTCATATGCCA  
TCTAGTGATAATTTTATATTGAATGTGTCCCATGTGCTTGAATCCTTGAGTGAAGGATGAGTTTTGTTTG  
CGACTTGATAATGTGTAGGATTTTTGCCTAATTGTATCAGCTGATAGGATAGTCTTTATTATGTATCATAG  
ATGAAAAGTTATCTGCATAAAGGGTAAACCAACAACCTAACATTTTCCATCCATTTCAATGGATGTTAAA  
GCACATCGTAGTATATTAACCTTATAATGATCCAGCCCAAGTCAATTTGCAGACTTTAACGATTTACTGCCG  
ATGCAATAATCATATGTTGACAGCATATCGAACCTGGTAGAAAGGGCATTAGGCATGTTTTGAAGAAT  
TTAGTCTCTCTTTTTTTCATGTGACATATGGTTGACTGCCCCGATAAACCTTGCAGGAAAATGATTTATCATC  
AATTAGAAGCAAACCAATAAGTACAAGGGGCCAAGAAGTGAATTATGTCATGTACTAGGTCAATTCCTT  
AAGTTGTGGAGTTACGTATTCTGTCTCTCAAAAAAGTCTAGATATTACATCGTTTTTATTATGTCTTTTAGA  
GATGTATTACCTGATTTGCATATACTAATATTCAAGAATTTGCGAATCGCTCCGCCTGGTGCAGTTTGACT  
TTACAGATGTTTAATTTTTCGAAGCAAACCTGGAATCTGCAGTATCTGGTCTGGTAACTACCATCTAGCAT  
GAGCGGGACTTATACTCCCTTGAGATGGATTATAGACTTCGAATTTTTAAAAATTAGTGTCTGCAATTG

AATTTTGCCTGTTGCTGTTGGTATAGCTGCTTGAATGTTACATTTTTAAAAAGAATTAGATTTTTTCCCCT  
GATACAAATTGTTGTTTACATTTATGAATATCTACTTCACTGCCTCATATACATGTCACTATGAATCTATAA  
CACATTCGTTACCCAAGAGTAACTGCTTCTGAGACAAATATATTTGATGACCTTTGGTTCTATGGT  
ACCTGATGTTCCCAGTTTCTTAATTTACCTGTTTTTAAATTATGTAGCTGGAATTTGACAGTACAGTAACTT  
ACTTTTGCATTCTGAAGAAGTTGAGGAGTGTGTTTCTGCATCTCTTTTTCCAAATTGTTTTGCCATGC  
TAGATCTGTATGTATTGACGTAGTGACAGTAGTTTCATGCTCTAGCTGATTGAGATTAGCCGAATTAGTG  
TGAACACCGATTTGCCTATTGAGCTGAAAAGTTATTACCTTGATCTTCTTCGTCATACTGTGGTAAATGT  
TGTGATGACAATCTCGTTTGGCTTTATACAGGGAGAAATGGGCAACCATCACCTAGTTTAAACATGGTCAA  
CGAGACTGAAAATTGCTAAGGGAACAGCGGAGGTTTAGCCTATCTCCATGAGTGTAGCCCAAGGAAA  
TTTGTCCATGGAGACGTCAAACCTTCCAATATTCTCCTTGATACTGAACTGCAGCCATATATATCTGATTT  
TGGCCTCAATCGATTAATCAATATCACGGGAAACAACCCCTCCTCTTCTGGTGGATTTATGGGTGGAGCT  
CTTCCTTACTTGAAGCCTGCCCAACCAGAACGTCCAATAACTATCGAGCACCAGAAGCTCGAATCACTG  
GTAACAGACCCACCCAAAAATGGGATGTGTACTCATTGCGGGTGGTCTTGCTTGAAGTGTGACTGGAA  
AGTCTCCTGACCTCTCAGTTCCTACAACATCCACTTCAACGGAGTTCCAGATCTTGTAAGATGGGTAAG  
AAAGGGATTGAGGAGCAAAATCCACTGTGCGATATGGTAGAACCAATGTTGCTTCAAGAAGTCCATGC  
TAAGAAGGAAGTACTAGCTGTATTTATATAGCTCTTGCATGCACCGAGGCAGATCCAGATATTCGACCA  
AGGATGAAAATCTCAGAAAACATTGAGAAAGTTGGAGCTTAACTTTTTCGGTACTCATGTCAAG  
GAGTTCCTGAGTTTCATGGACTTCTTTAATCTTTTTTTTGCAGTAATTGCTCCTATTATTTTTTTTCTTTAG  
AGGTTAATCAAATCTTTAACTTAACTACAGTACAAAATACCAGTGTGCTGCAACAAAATTCCTGTCATTT  
TTGAGAAGTTAATTAGTTGCTTATCTCTTTAATCTATTTCTGTAATTCTGATGTTAAAACAACCTTTTCATGG  
CCAA

>PGSC0003DMG400015081 LRR-RLKs

ACACAACAAGTTGCAAGGATCTATACCTGACTCAATGAGCAACATGATAGGTTTGAATACCTAGACATT  
TCTCATAATAATATATCAGGAACCATTCCTATGTCTTTGGAGAACTTCAAACTTGAAGTATTTCAATGT  
TTCCGTCAACAAGTTGCACGGTGAATACCCTCAGAGGGTCTTTCAAGAACCTCTCGAGTCAATTTTTC  
ATCAACAATGAAGCATTGTGTGGTTGGTCAAGGTTTAAATGTCCGGCCATGCCCCACCTCATCAACGCATA  
GATCAAATAGGAAAAAATTGCTAGTTCTATTTCTTTTGTAGGAATAGCACTTTTATGTGCTCCTACTACC  
CTTGTGTTTGTATGGATAAGGTATAGAAGAGGTAAGATCTCCTCAACGAGCTGATTCATTGTCTATCA  
CAACAACGGAAAGAATTCATACTATGAACTGCTCCAAGCAACTGATTCTCTTAGCGAGAGTAATCTGAT

TGGTTCTGGAAGTTTTGGCTCTGTCTACAAAGGCGTTCTCAGAAGTGGGGCTGCCATTGCAGTTAAAGT  
GTTCAATCTGCAACTGGAAGCGGCATTCAAGAGTTTTGATACAGAATGTGAAGTTTTGTGTAGCCTTCGC  
CATAGGAATCTTGTGAAAGTCATCACCAGTTGTTCCAACCTTGATTTTAAGGCTTTAGTGCTCGAGTATAT  
GCCTAATGGAAGTCTTGATAAGTATTTGTATTCCCACAACACTCTCCTAGACATCAGACAGAGACTAAGC  
ATTATGATAGATGTGGCATGTGCGTTGGAATATCTCCATGATGGTTGCTCCTCTCCGGTGATTCATTGTG  
ATCTGAAGCCTAGTAACGTCTTGCTGGACGAGGATATGGTTGCCACCTAAGCGACTTTGGTATTTCAA  
ACTGCTTGGTGAAGATGAGACTGATTTATACTAAAACCTTAGCAACATTTGGTTATATAGCACCGGGT  
ACGTCTCTTTGTTTTGCTAATTTGAACATTGATTTTTCTTCTTATTCTTTTTTTTCCAATCAAGAAAGTATA  
TTGCATCTTTTAATTAATTGTTTGACTGTAGAGTATGGACTGGATGGACTGGTGTCAATAAAATGTGATG  
TCTATAGTTACGGGATTATGTTGCTGGAACATTTACTAGGAGAAAGCCTAGTGATTTTGAGGGAGATC  
TTAGCTTGAAGCAATGGGTGAGTTATTTACTCCCAAAGGCAGTACTGAACGTTATGGATGCCAACTTGG  
TTACACCAATGGATAATCGCTTACAGAAGGAGTTAGATATCGTGGCATCAATCATGAAAGTAGCATTAG  
ATTGTTGTGCTGAATCTCCGACAAGGAGGACAAACATGAAAGATGTTGTAGGGATGCTACAGAAGATC  
AAGATTCAACTTCTTGCATGCTGAGCATGTTCTCTGAATCTCTTGTCCGAATTGATCACTTTTTTGTTTTG  
TTTTAGCACTTGATTTGTGCATGATTCTGTTTTTCAGAAATGCT

>PGSC0003DMG400015157 LRR-RLKs

TTCAGAACCACCAAGCAACTAAAAGAGACATCCTACTCCTCAAGCACCACCAGTGTGGTGCCTCATCCAA  
CTCCCAATCCACCACAATACTGCACCAATCCGATGGCCTTACAGCCTCACATATACACCTTTCTTTTTTG  
TCTTTTTTCACTGTGATCCTTCTTGTTCAGCAAACTCAACCTTTACTCACCTGATCACAGTGCTCTTTTG  
CTTGTCAAAAAGGCTTAGGCATCCCTGCTCACCGCAATGCTCTTGAGAACCCATGCAACTCCGTTGGAA  
TATCATGCGAAAAACGACTCACAAACAATTCATACGTGCTAAGAGTCACAAGGGTTGTCTTCAAATCCTA  
CGGGTTGAAGGGTACTCTGTCTCCTGCCATTGGGAGGCTTTCTGAGCTCAAAGAACTGTCCCTCCAAAAC  
AACAAACTCTTTGACAGAATACCAACTGAAATCGTTGACTCCAGGAAATTGGAAATCTTGAACCTTCAA  
ACAACCAATTTTCTGGCAAAGTCCCACCTGAATTATCATCTCTAGTCCGCCTTCGTACCCTTGACCTTGGC  
TCTAATGAGTTATCTGGGAACCTGAACTTCTTGAATACTTTCTAACCTTGAAAACTCTCCCTTGCTGA  
TAACATGTTTACTGGCAGAATACCTCAATCCTTGAATCTTTCAGAAATCTCCGGCTCCTCAACATTTAG  
GCAATAGTTTCTTGAAGGTACGGTGCCTGCCGTGAGTCAAGTTGAGCACTTATCAGCAGACTTAAATC  
GAAAAGATTATGTTCTAAGCGTTACATTCTTGCTGAGAATGAAAGAAGGCCAAGGCACACCCCTGCAA  
TGGCACCAGAGTCCAAATCAGGATATGCCCAAGCTCCAGGACCTAGTACAGTTGTAGTACCAGTAAAAA

AAGACAAACACAACAAGATCAGAAGGAAGGTAGGCGCCTGGATTCTTGGATTCTTTGCTGGAGTTTTTCG  
CTGGGGGCTTATCGGCGTTGGTCTTCTCTGTCTCTTCAAGGTGCTTATGTTTTTAATCAGAGGGATCAG  
AAATGATTCAGGCTTAACAATTTTCAGTCCATTGATTAAGAAAGCCGAGCACTTGGCCTTTCTGGAGAAC  
GAAGATGGATTGGAATCACTAGAACTCATTGGGCAAGGTGGATGTGGAAAAGTTTATAAAGCTGCGTT  
ACCTGGAAGTGACGGAAAGATTATAGCCGTAAAGAAGATCATACAACCACCAAGGGATGCTGCAGAAC  
TCACTGAGGAAGATAGCAAGGCTATGAGTAAGAAAATGCGCCAGATTAATCAGAAATCAAATTTGTA  
GGTCAAATCAGACACCGGAATTTGCTTCCCCTACTGGCACATATGCCAAGACCAGACTGCCATTACTTGG  
TCTATGAGTACATGAAAAATGGGAGCTTACAGGATACCCTCCAGCAAGTCAGAGAGGGGACACGGGAA  
CTAGATTGGTCTGCACGTCACCGAATTGCAATGGGAATAGCTGCTGGACTCGAGTATCTCCATATAAATC  
ATACTCAGCGTATAATTCACAGAGATCTAAAGCCAGGCAATGTCCTCCTTGATGATGACATGGAAGCTC  
GAATTGCGGATTTTGGCCTTGCAAAGGCTGTCCCAGATGCTCATAACATATTACAATTCAAATGTGGC  
AGGAACTATAGGATACATCGCTCCAGAATATCATCAGACACTGAAGTTCCTGATAAGTGTGATATATAC  
AGCTTCGGGGTGCTGCTAGGCGTGCTAGTTATGGGAAAGCTTCCATCTGATGAGTTCTTCCAGAACACTT  
CTGAGATGAGTTTAGTGAAATGGATGAGAAATGTCATGACTTCTGAGGATCCAAACAGAGCAATTGATC  
CAAAGCTGATGGGTAATGGAATGAGGACCAAATGCTTTTGGTTCTCAAGATTGCCTGTTTTTGTACCCT  
GGAGAATCCTAAGGAGAGGCCTAATAGTAAGGATGTTAGGTGCATGTTGATGCAGATCAAGCATTAAAG  
TATGTAGTGGATAACTTACAGTAAATAAAAGTTTGTGATGAACTAAGAGAATATTTCTTGTGTATGACG  
GTCCTTGTGTATTCTGTTACATCTCCAATATGAGAGACTGTCCTTGTGTGTTTTGTTTCCTCTCCAAAATGA  
GAAGTTTATATTTAGCTGTATGAAAGTTCTTTCGAGAAGTTTCTCTGCTATATTATAAAGCATGGTACGA  
AATGTGAATCGAATTCTTCCACTAGA

>PGSC0003DMG400015162 LRR-RLKs

TTATGACACCTTGGTCCGCACATTCTACACTCACTCTTTCCTTCCCCTTTAAACAGTCATGCATTTACATAA  
AGACAGTGACTGTTTTTCTCTCTCTAAAATTTTCATCTTCTTTCATGGCTTCTCGCCGGAAAATCAAGAATT  
CCCGCCGGGAACTACATTCTTGATTCGCATTCTTCTTTAAAAGGGTCGGAACAAGAAAACAAAGGGTGT  
TTATAAATGGCGGTGTTTTTAAGGTTTGTGTTTTTATTCTTTGCTTTACTCGGATTGAGTCGTTTC  
CGGGTTTTTTCAGAGCCTACACAGGATAAGCAAGCTCTCCTTGCTTTTTTCTCTCAGATCCGACATGCGAA  
TCGGGTCCAATGGAATTCTTCTGCTTCTGTTTGTACTTGGTTCGGAGTTGAATGTGACCCGAATAACTCTT  
TCGTTTATTCCTGAGACTTCTGCTGTTGGTCTCGTCGGAAAATTCCTTCTAACAGTTTGGGCCGGCTG  
AGTCAACTTCGAGTTCTTAGTCTTCACGCCAATCGTCTATCTGGTTCAATTCCTTCGGATTTTTCTAACCTT



AAGCTTCTTCGTAGTCTCTATCTTCAAAAAATGACTTTTCCGGCGAGTCCCGGAGAGTATTCCCGGGTT  
GACCCGGTTAAACAGGCTGGATCTTTCGTCAATAACTTCACTGGTACTATCCCTTCTCTATCAATAATC  
TGACCCATTTGACTGGACTTTTATTGCAGAACAATAGCTTTACTGGTACTCTTCTAGCATTAAATCCGCCT  
GGTTTAGTGGATTTCAGTGTTTCGAATAATCAGCTTAATGGGTCAATTCCTACTGCACTTTCCAAATCCC  
AGCTTCTCTTTTACTGGTAACATTGATTTATGTGGCGGCCATTACCCCATGTACCCCATTTTTCTTC  
TCCTTACCTTCCCCTGAAACAGAACCACAAAACCCCTCCGTCAATTAAGAAATCCAAGAAGCTTTCAACA  
GCTGCCATTGTTGGAATAATTATAGTTCAATAATTGGGGTCTCCTACTCTTGTTACTCCTTTTCTTCTGT  
TTAAAACGAAGAAAAACGACACATCAAAGGTACAAAACCTCCGGTAGCATCAAGAGCTATCGGGGC  
AGTAACAGGGGCAGCGGCTGAGGCAGGTACATCGTCGTCTAAAGACGATTTAACAGGTGGTTCAGGTG  
AAGGGGAAAGGAATAAACTTGTGTTCTTTGATGGGGGTGGGTATAGTTTTGATCTTGAAGATTTGTAA  
GAGCTTCTGCTGAGGTTCTTGAAAAGGGAGTGTGGAACAAGTTATAAAGCTGTTCTTGAAGAAGGTA  
CTACAGTTGTTGTTAAAAGGCTTAAAGATGTCGTTGTGCCAGAAAAGAATTCGAGCAACAATTGGAAG  
TAATGGGGAAAGATGAAACATGAAAATGTGCTACCTTTGAGAGCATTTTACTATTCTAAAGATGAGAAAT  
TGTTGGTATCTGATTATATGCCTGCTGGAAGTTTATCAGCTCTTCTCCATGGTACGCTGCTCTTATTATTT  
TAGTTAAAAGTATGTCAAACCTGTTTCGTTTTAGTGTATAATTTGCTCTATTATATGTTACTGCAATTCTGTG  
TCTGTTGTTTGCTCTGAACACTTAAAAGTTCCATTTTTTACCAATGTTTTAAAACTTTAAATGGCAATAAAG  
ATAGTAGCATTCAATTCTTGCTAGATTTTAGTGACTTTGTTCTGATTCTTGAAGAGTCTTGAAGGGGGTTA  
GGTGGGTATAGGTATGAAAAGATTGAATTTTTATTTGTTTCTTTTTTTGGAAGAATAGATGGGGCTT  
CAATCTAATACACGTGCAGATCATGTACACATTGTAGCCATAGTCTTACAGCCCTTCTGAACTGGCATTG  
CATTATTGTTTCACTCAATTATTGAAGTTTGGTACCACTTAATTTACTTCGTTAGTACATTTATTGTCAATT  
CAACCGCAAATTGCGCATTTTGTCTATAATTCCTTAAGCTACAGAACATTCTTTTTTGAGAGAAATGGA  
ACAATGACTTTTTTATTATGATTTATTCGAATCGAGAGCATATCGGATACAATCTCTCTATCTTAACGGAC  
ACACTTGTAGATTACACTTTTACTCTTTCTTTTTTATGAAACGAACGTTACAATGCAACAGACTAGCATG  
ATTCCCTGCCTTAATAAATGATGAAATGAGTTTAAAAGTGGAAGAAAGGCTTCTTTCTTGTTCAAAG  
ATTTACCTTTTAAATTGCTACATTGCTTGTGTCTATGCCTTAAGGTCTTTGCTCCATAGTTCTCAATTTTTG  
CCACAATCAACAACTACCTCTATTATTGTAGTTATATAATATATATATTTTTTTTTATTATACATAGGGGAA  
ATGGGGGAGGGGAATAACAAAGTGTGTGGAGTTTGGTGATATCAAATATATTAATTAATTAATCTTT  
TGTTTTCTAATCCCACAATTTTCAAATCATGATTTAATTAGTAGTAATTGCTGTAAGTCTAAACAATACTAC  
CATACTTAAAAGTTTATATTACTTTGGCTTTAAGCTATTTGGTGGTTATAACTGTCTGATTATTATTCATCT

AATCTTGATTCTTTTGCTTTACTTTATTCATCATTGTTTCTTGCTGTCCCCATTTTTCTTCTTTTGTGAAAT  
AACGTGCTGCTTTACTCTATTGTCCATTGATTCTTGCTGTCACCCATTTTCTTCTTTTTTTTTGGTGAAGT  
AAAGTGCAAAAGAAAAGCTAATAATAACAATGTGTCCTCTTGAGTCTTGAGTAGTTCAACTGCTTTGAATT  
TGAATCCAACATATTAATTTGCATTGACATTAGTTTGTTAACAAACATAACCAGTGTAATCCTACGAGTGA  
GGTTTGACTTTTGAGTAGGGTAGGATGTACACAGACCTTATCCTTACCTTTGGTTGTCATTGGTTTGGTT  
GTCTAATAAAATGTTTTCTTTTGGTTAATTCTTGATAGGTAGTAGAGGATCAGGGCGTACGCCACTTGAC  
TGGGATAGTCGAATGAGAATAGTGTTAGGTGCAGCAAGAGGCATTGCGTACCTCCATATTTAGGAAAA  
GTTGTACATGGAAACATCAAGGCTTCGAATGTTCTCCTTAAACAAGATAACCAAGATGCATGTGTATCCG  
ATTACGGATTGAACCCTCTTTTCTCTACCTCAGCACCAAGTGAACCACCGTGTGTCAGGATATCGTGCACCT  
GAGGTTCTTGAAACTCGAAAAGTCACATATAAATCCGATGTGTATAGTTTTGGAGTGTTAATGTTGGAGC  
TCTTAACGGGGAAAGCTCCAAACCAAGCTTCACTAGGTGAAGAAGGCATTGATTTGCCTAGATGGGTCC  
AAAGTGTTGTAAGAGAAGAATGGACTGCGGAGGTGTTTGATGTTGAGCTAATGCGATACCATAATGTG  
GAAGAAGAGATGGTACAACACTTTCAGATAGGTATGGCATGTGTTGCTACCATGCCAGACCAACGACCT  
GCCATGACCGAGGTGGTTAAGATGATCGAAGAAATGAATCATGGTGATACAGATGATGGTCTTAGACA  
ATCCTCCGACGATCCCTCTAAAGGTTCTGAAGGCCAAACACCTCAGGAGTCTAGAGGTTACCTCATGGT  
GTAACACCATAAAATGAAATTAATCATAAAAATGGATGGCTTGATTTGTCAAAAATTCTCAGAAAAGCCT  
AAAGTAAATTGTATTAGATTCTTAGTGGGGGGAGCCTTTTATGTGTTTTTATTTTATTTTCATTTTTTTTCT  
TCTTGAAATTATTATTTTGAGAAAATTTGTGGAATGATTTTTACAGATGGTTAGTTGAGAATTTGAATATT  
TCAGTGAAGTGATTGGGAAATTGAAATTTG

>PGSC0003DMG400015276 LRR-RLKs

GCTGTCTATAACTATTTTTCAACTTTTTAATGTGTTTGACATTGTTTGAATTATACCCCAATGTTCAATTT  
TACTTCACCTACTACATACAACTGGTAAATTCTCAATCTATTAGAGTATTACTTACTTATCTATTATTCTTCT  
ACGTCAAGGTTGCCACGACCAGAAATGCGTAGGACGATCCTATTTTTCGCGTTGTTTCTGGTGGTGGAAAT  
CAGCCGAATTTTTCCCAAATGAAAGAGATGCTTTGTTGCAGCTGAGAGATAGTGTAATTTCAAGTGTCT  
TGATTTACATTCACATTGGACAGGGCCTCCTTGTTACAACAACCAGAGTAAATGGGCTGGAATTTGCGT  
TCTAATGGGCATGTAAATCAACTTGTTTTAGAAGGAATTCAGTAACTGGCTCACTTCCACCAACATTCTT  
GTTGCACATAGCATATTTGACAAAATCAGCTTTAGGAACAATTTATTGTATGGTCCTGTTCCAAATCTCA  
CAGGACTAATCTACCTGGAGTTTGTCTGTCAGAAAATCGATTTTCGGGTTTGATTCCGTTTGGGTAC  
ACTGAGTTAAAGAACTAACAGAATTGGAGCTCCAGGGGAATGATCTTGAAGGTTCAATTCCACCATTT

GATCAACAGACTTTGATTGATTTCAATGTGTCGTCGAATAAACTGGAAGGACCTATACTGAAACTCCTG  
TCCTGAAGAGATTTTCGAAGAGTTGTTATGAGAATAACGCGAATTTGTGTGGTGAAGTTGTAGGAATAC  
CTTGTTCAATATCACCTGCAAGTCCACCTAAAGCACCAAGTGAAAAGAAAAAGAATGGCCTTAAAGTAT  
GGAGTATTGCTTTGATTGCAGCAGCAGTAGCAGTACTTGTCTTATTTCAATCATGTTCAATTTTGTCCGT  
TACTTTAGAAGATCTAAAAGAATGGAAACACAAGGAGAAGACAAACAAGGTAACAGTTTTATTGTATCA  
TCTATGTTATCCTAGCTAGTGCCAGTTATTCTGAGGGGAAAGTTATTACTACTTAGATTGAATTAGATGAT  
GAGGTTATCTGGTGTAGGGCTGTTTTGGTGATACGGAACGAGACAGGGGAGAGGAAGTTGACTGTATT  
AGAGGGCTGACTGTATTTTTTCGAAATAGTTTAAACCATTTTTGTTAATCGCTAAAAGAAGGTCATTCAG  
AACTCGTTGGCTCCAGAATGGGGCAGCTCCAGAGGTGCTAAAGATGGTTAATTCGTGATAGGAAGAAA  
ACCAATACATGTCCATTATGAAGTCGAATTCATCATTCTAGCTCAATAAGATGAGAACTAGTATCTCG  
CCCCTGAATTGCGGCTATAACAACAATAACATACTAGTATAGTCCCACAAGTGAGGTCTGGGGAGAG  
TGAAGTGTACGTAGACCTTACCCCTACGTTTGTGGGATAGAGAGACCGTTTCTGATAGATATTGTGGCTA  
TACAACATAGAACTAGATTAGCTAATTCATTAAACTTAAAAGATCCATGTGATTATGGAGCAGTTAATA  
TTGTTGTTATTACATCTTTAACATTTCCAATTTCCATTTTGACAGGTAATATTTCAATAGAGAATGTGGTA  
AAGAGAAGTTATTGGTCCAAGAGTACAGAAGATCCAGAAAAACATTGGACTTAATATTCTTTGAAAAG  
GATATGTCAGTCTTTGACATGGATGACTTGTTAAGAGCATCAGCTGAAGTTTTAGGAAAAGGAAAGCTA  
AGCACAACATATAAAGCAATCCTGGAATCTGGTTCTGTTGTTGCTGTTAAGAGACTCAAAGAAATGAATT  
CTTTGAGCAAAAAGGAATTCACACAACCTGGTGCAGTTGCTTGGGAAATTGAAACATGAAAACCTTGTGG  
AGATGTTGTCCTTCTACTATTCCAAGGAGGAGAAGCTCATTGTTTATGAATATGTTCCACAAGGAGACTT  
GTTTGGGCTCTTACATGGTTGGTTCATCAACTTTCTTTACTTTTGGGAAAATGTCTAAAGTTAACCCCTC  
CTGAACGAAATACCTTAATTTTATCTTTTATTACTTTGAGATTATTCATATCCTTATCCTTAGTAAAACG  
TCTCGTGTATACTTCGAGGTCATTCATATTCATTTCTGATTCTAAACTATGAACTCATGATCAAATGACTT  
TTGAGGTGGGCTTTCCCTTCTCTATAGTGCTACTGTGAAAATTGAAATTGCTTAGAGGTAGGTGTAAGGT  
CTGCGGACACTCAACCCCTTGTGGAATTATACTGAACATGTTGTTATCGTCTTATAGTAGTAATAGAGGA  
ATATCTTTTACCATTTTCCCATCTTTTTTCCCTTAAGATTCAACCTTGTA AAAACTTATGATTCTTGATTC  
AGAAAACAGAGGAATTGGGAGACAACCACTAAACTGGACAGCAAGAATATCCCTCATAAAGGATGTAG  
CAAAGGGTCTAAATTTCTTGCAACCAGTCTTACAATCACATAAGGTGCCACATGGGAACATCAGATCAAA  
AAATGTTCTAATCCAGCAAGACCAAAGCAAGAACTACCATTCTAAGCTGACAGATTATGGATTCTTTCT  
TTGCTACCATCTAAAGAATCCTTAAGAAAAATAGCAGTAGGAAAATCTCCAGAGTTCTCTCAAGGGAAA

AAGTTAACAAGAAAAGCTGATATCTACTGCTTTGGTATTCTTCTGTTGGAAGTGATCACTGGAAAAGTAC  
CAGGTGAATTGTTTTACCAGAAAATGGAGTACTAGTTATGTTGATGATGATTTGTCAGAGTGGGTAA  
GGACAGTGGTGAATAATGATTGGTCAACAGACATTTTGGATATGGAAATACTTGCACAAAAAGAAGGAT  
ATGATGAAATGTTGAAGCTTACTGAATTGGCTTTGCAGTGTACAGATGAGGCACCAGAAAAGAGGCCTA  
AAATGAGTGAAGTGTGAGAAGAATTGAAGAGATTGAGCTTGAACCAAAGAATTTAGTCACTGATGTG  
GAAGATGATTCAGTCTCTTAGTTGAAGACTTGGAACTTTCCCTCCCAAAGTGAATCAAGCCGTAGCCGC  
AACAAACAATATCCAGTATAATTTTCATCAGGTGGAGCTTGAACAATATATTCAGTATAATCTCATCAAAT  
GAAATCGGAGTCTGAAGAGAATTTCAAGTAGAGTCTGAACAATATATTCATATAATCTCATCAAGTGG  
AGTCTGAAAAAATAGAGTGAATGCATACATTATCGTAACCCAATCCTATGGGAGTAAAGAAAGGGTAA  
AATATGCACGTACTTTACTCTGATTCCAACCAATGGGATCTTTGAGAGAATAGAGTATGCGCATACCTTA  
CCCAACAAGGATAGAGAGACTGTTTCCTAAATTGTAATCAAGAAAATAGATTAGAAATTTAGGAACAGG  
CTTTTAG

>PGSC0003DMG400015391 LRR-RLKs

CAAGAATTTGGTGTCTTCTAAGTGCATGACAGCTATAATCTTTTTTATGCAGGGATATATCATACAACAAT  
TTCACACAAATATCTACTTCAGTATGCGATTCCCTCTACCTTGTGAGCATTGTTCCCTCTCATTGGAACCTA  
CATTTCATCTACTATTTCTTTTTTTTTATAAGTGAAAATTTGGTCCTTAACTACATTACTTACAAACCTTCC  
CTCTTTAACAGAACTTAGCTGCCAGCTATTCAAATACAATAAACACGCTCAACAACCTCGTAAGTCCTAA  
ATGTTGTCTTATGCATCAACTGCTAGTTTGTGATGCTTTCTGTCTATTGTCTATAATTATGTGGATTAAT  
CTATTTGAAATTGCAGGGATGCCTGGTGTCTATGAAACCCCTCATTGTCCCACAGAAACGAAATGTAA  
GAGTTACAGCCTATAAACCTTTTTTTTTATACTTGGAATTTCTTAACTTGACCCTTGAGAGGGCCTGAAGTA  
GCAGTTTGTCAAAGGACCTCAGGGGTGGCAGCCTGTGCACTTTTAAGTACAAAAGCATAACCTTGGAGT  
TGAGAGATAATTTCACAACTCTTCCATGTTATGCTCTTTATGTCAATTGCAGATACTTCGCTATTCATAA  
ACTGTGGAGGACCTAGAACTTCATTTGAGGGAAATGATTATGAGGGGGACACGACCGACAGAGGTCCA  
TCATATTTTTCTTCACCCTCCGACAGATGGGCTTTCAGCAGTTCAGGAGTGTACGTGGGTCTTCAAGCAG  
CCAGTTATGTTGCAACAATAACATTTTCACTGAATGTGTCCGGTCTGACTTTTACAATACAGCACGCCTT  
GCCCTAATTCTCTCAAATATTATGGGCTTTGCCTACGAGGAGGTAGCTACAGAGTGCGCCTTCACTTTG  
CTGAAATAATGTTTTCTAATGACTCAACATATAGCAGCCTTGGAAAGGCGGATATTTGATGTAGCAATACA  
AGTAAGTTTGAGGCCTAACTTCTTTGTAAATAAGGAGTATGTAATCTAAAATGTTGATTTATTTAGTTCT  
GATATGATTGGCAACTTTCTGATTTAATATTGAAGGTACCAATTTGTTGGAGATAATGTGGTATATTTTG

ATTTCTTACACAGGGGAGAGTAGTTTTGAGGGATTTCAACATTATGGAGGAAGCTAACGGTGTGGAAA  
AGTCATTACCAAGGACTTTGCTGATGTTACTGTTAGTAGCACTCTGGAGATTCACCTGTATTGGACCGGG  
AAGGGGACTAACGCTATTCCAGACAGAGGTGTATATGGACCGCTGATTTTCAGCTATCACAGTGACACCA  
AGTCCGTATATCTCTGCCTATAGACTTTACACTTATCTTCCCACAATATTATCTTAATAAAAATCCCATTTTCT  
TCTTGCAGACTTTGATGTTGATACAGGCAGTGGGTTACCTGTCGGAGCTGTTATTGGCATTGTA CTGCT  
TCAATTGTGGTGGTTCTGCTAGTTTTATTTGCTCTGTGGAAGAAAGGCATTTTTGGAGGGAAAAATAATC  
AAGAAGAATTAGGTAATACACTTAAAAGAATTTTTTCACTCTTCCATTTGATAAAATGGGGATTCTTC  
TGTTGTGATAAATAGAATTTTTTACGAGATTTCTAGCTGCGACAGACAAATAATTA ACTCCCCGTAATTG  
ACCAGCATTGAGATGATTGTTCTGTTGGTGGATCGACATCATGACATATCATAGATAGTTAAACTGTCTT  
CATCATA CAGATGTTCACTTTTTAAAATTGTTGTTTCATCATA CAGACGTTTTAGAAAGATCTATATATACT  
GACGTTTGCAATATTCTTCTCATTACAGAACTCAGAGCCCTTGATTTACAAACAGGTCATTTTAGACTTA  
GACAAATTAAGCTGCTACAAATAACTTCGATCCTGCCAACAAAATTGGTGAAGGAGGGTTTGGACCAG  
TTTACAAGGTATCAATTCTCTATCCATACTGATTTTGCATAAGGACAGCGGGTTTTTGGTGATATTTCTTA  
CTGGTTATCCTTGATGTCACGTTTATAGGAAAATAGAGTAGTAATAGTTGAAGTAACCCGTATCCTTCTTC  
TGTCTGTAATATGATCGTTGTGAATTAATCTTGCTATCTGTAGGGAGTACTCGCCGATGGTGCCATCATA  
GCTGTTAAGCAGCTGTCTTCCAAGTCGAAGCAAGGAAATCGTGAATTTGTCAATGAGATAGGCATGATT  
TCAGCTCTACAACACCCAAACCTTGCAAGCTTTACGGTTGTTGCATAGAAGGGAACCAGTTATTAGTGA  
TATACGAATACATGGAAAATAACTGTCTTGCTCGAGCTCTCTTTGGTAATGCTTTGCAACAACATTTTAAG  
AATCATTAAATTAGGCAGTGATAGTTTATGCTTTACATTCCTCTAATTCTCGTTTCTCAGGCCGTGACGACC  
AGAGGTTGAACATAGACTGGGCAACCAGAAAAAGGATATGCTCAGGAATAGCAAAGGGTTAGCTTAC  
CTTCATGAAGAATCAAGGTTGAAAATCGTACACCGAGATATAAAGTGTACCAATGTGCTTCTTGATAAG  
GATCTGAACGCTAAGATTTTCAGATTTTGGATTGGCTAAATTAGATGAAGAAGAGAACTCATATTAGC  
ACCCGAATTGCTGGAACAGTGTAAGCCTTCTTATCATAACTGTCTCTGTACTATCATGTGATGAGAGAGT  
TACAGTTCTGTGCGTTTAAATTTGTTTCATCATCAACATTACTATCGTTACTTTGAAGTATCTTACGTTTTGT  
TTTTTTTTTTGAAGAGGTTATATGGCTCCGGAGTATGCAATGAGAGGCTACTTGACAGATAAAGCTGAT  
GTTTATAGCTTTGGAGTTGTTTTATTAGAGATTGTCAGTGGGAAAAGCAACACAACTACAGGCCAAAA  
GAGGAATTTGTTTACCTTCTGACTGGGTAAACTATCTTCTTACTTTCTTAAACTCTGTATACGTCAAAC  
TAGACAAACAAATTGAAACGAAGGGAGTATTTGCTTTGATACCTCCAAAGAAAATATTAGAATCAGAGT  
TGTTTCATTAGTTCTGATTCTTTTATCCTGATATGCGGATGTCAATGTTTGTCTTTGTCATGCAGGC



TTGTTTATCATGGTTGGAGTTTTTGGTGGAGTTGGTGTCTTATGCTTATGGCACTAGTCATTTTATTGTT  
TTGGAAGGTATGCTATAGAGGGAATCAAACGAAAGAGTCATATCGAATGTTAGTCCTGTTGTGGAAGG  
AGGCAATAATCAGGCACCAGTAAAGTTCTCTCGTGATACATCTGGTTCAATTGAATCATTTACTTATGATC  
AGATACTAAAAGCCACAAGCAACTTCAATGAAACAGATCTTATCAAGAATGGTCATACTGGAGACATTTT  
CCGAGGAATATTAGAAGGCGGTGTCACCGTAGTTATCAAGAAAGTTAATGTACACCATATCGAAAAAGA  
AACATACAAGTTGGAGTTGGATTTGTTAAATTGGACAACACACCATAGGCTTGTCCCTTTTTTGGGACAT  
TGCTTAGATCATGGGAATGAGAAGTTTTTGGTCTATAAATATATGCCAAATGGAGATTTGTTCAATTTGT  
TGGCCCGGGATACGGATTTAGAAGACGAAAATGGACAGTCTTTGGATTGGATAACAAGATTA AAAAATT  
GCAACAGGAGCTGCAGAAGGCTTAGTTTTATTTGCATCATGAGTGTAATCCTCCCCTTGTTTCATAGGTATT  
TTTTTCTTCCACTTTGTTGCATTCTTGTTTGATAATGTTGTACACCAAGCTAATTATATTCTGCATTTTCTGG  
TTCTTGAAGAGATGTTCAAGCTAGCAGTATCCTTCTCGACGATAAATTTGAAGTAAGGCTGGGAAGTTTG  
AGCAACGTGTGTGCACAGGAAGGTGATAGCCAGAATTTGATCACAAAGTTTTTCCGCACGACAAAGTAA  
GTATTACTATGATCATAGTTTGATCCTAATACAAGATTTTTTCAGAAATGTAATAGACATTTAGTTAGATTT  
ATGTGTTTACATTTCTGTATATTGCTTTTCGTTCAATGTTCTAAGATATATTATGTTTCTTCTTGACAATAA  
ACAGGAATCCTGAGGGAGAGCCTGCTGGTATGTACTATTCTTTTCGTAAAAGAACGTATAGTTGAATAG  
AGTTATTTATCTGAATTTCTCATATGCTGCCTTTATACATGGACAGGATCTTCATTTACAAGTTGCAGTACT  
TATGATGTATACTGTTTCGGGAAGGTCTTGCTCGAGCTTGTAAGTGGTAAGGTTGGCGTAAGTCATTTAG  
ATGATGCCTCAACCAAGGAGTGGTTGGACAACTTCTTCTTTTCATCACTATACGCGAGAAAGAACTACT  
GTCCAAGATAGTCGATCCATCTCTAATTATAGATGATGACTTACTTGAAGAGATGTGGGCTGTAGCAATA  
GTAGCCAAAGCATGTCTTCATCCGAGGCCTTCTAGACGTCCTGAAATGAGACGCGTCCTGAAAGCTCTTG  
AGAACCCGTTCAAGGTTGTTAGGGAAGGAAGTTTCAACTCTATAAGGCTACGAAATACTTCATCGAGGC  
GATCATGGAGTGCTGCTTTTCTTGGTAGTTGGAATCATAGCTCACAGGATAGTGTTAATGCTAGTGGCCA  
AATAAGCAAAGAAGCTGGCATGAACCTGAAACAGTCAGGAAGAGTAGGATTATCTCATTCTATTAGCAG  
TGGGAACGAACATTCATCATCGTGTAAGAGATCATCGAGTGAGATTTTCCCCGAACCTCAGGACACACT  
AGATATAGAGAGACAAGACATGAGCTAGCCATCCAGCACGAATCTATGCCAAATGCATTTCTGCAGGCA  
GGGGTTTTGTAAGTATCAGGAGCTTTGATTTTTTATTAGATGAGCGGCAGTACTATGATCATTCTGAAGA  
CATGGGGCCTACACGCTACACACATGTTATGCGGTTGGTAAACTCTTTCCTTCTGCAACAGCCGATCAAA  
TCGGATCAGTATTTTTGAATATGTTGTGTTACATCATGTACATGTATTCTGTTTTCTCTTTTCTTTTAGTGT  
GTCACAAATGCTCATGTGCTTTGTAAATTTTCAAAAAGTTTACTCTTGTTCTGTGATGATAGAACAAGTA

TATAATTGTGTCAAGAGTGTACACTATCTAATCCAGATTCACATTTCCATGATCTCATATTTTGCAATTGC  
ATGAAAAAGTATGATATAAATGAATAATAAACCTGCACTTTCTTGAGCCGAGGGTCTATCGGGAACAA  
CCTCTCTATTGTAGGTAGAAGTAAGGTCTGCGTACATCCGGTCATCTCCAGACCTCATTGTGAGATTAC  
ATCAGGTATGTTGTTGTAATTGGATAAATAGGGCATCAAACTGTTATAGTGTGTCAATCCCTTGGTGGC  
CTAAATAAGGACAAGTAACTCAATACATGTAGATGCACCTGAAAGTTACAATGAGC

>PGSC0003DMG400015666 LRR-RLKs

CAAATCCCACTAGTAGTATTTCTTTATCTTCTCCAGCTCAGACACAGACACACAGACACACAGTAGACA  
CAGTCCATTCTTCTCTCTCAAAATCAACCAACAAGAAGATGAACAACATGTTTACCACTACTTTGAACAAG  
AATTGAATCAAGAAATCAAATTACCCAGAAAAAATCCTGTTTGGGGTTTTGGGTTTACCCAAAATCTT  
CAAAAAATGAGCTCAAAAATCTTGTTTTTATTCACCATTTCTGTATCAATTTTCACTCTTTTCTTGCCGACA  
AACTCCGACATTGTTCCGATCGAGCTACCCTTTTATCTATCCGATCTGCTCTTCGTGGACGTTCACTTTTA  
TGGAATATCACAAAGTCCAACCTTGTCATGGCCTGGTGTATTTGTTACCTGATAAATCTTCTGTTTTAGA  
GCTTCATCTACCTGGAATGGGACTTTTAGGCCAAATCCACCTGGGCTTTTCTCAAATTTGACTAAATTGA  
ACTTTCTCAGTCTCCGGTATAATGCACCTTTCCGGTGTAAATCCGGCGGACTTGTTTACTTCACTTCATGATT  
TGCGTAACCTGTACCTTCAAATAATCTATTTTCCGGTCCAATTCCTGATTCAATCTTCTCTTACCAATCT  
TGTCGCCTTAATCTTGCTCATAACAATTTCTCCGGTTCAATACCGGAATCTTTCAACAATTTGACTAGTTT  
GGGTACACTTTACTTGCAGGGAAATGGGTTTTCGGGTCAGATACCGGATCTGAATTTACCTGGTATGGT  
TCAGTTCAATGTATCGAATAATCAGCTAAACGGGTCAATTCCTAGTAAACTTGCGGGTCAACCCAAGGAT  
GCTTTTTTGGGTACTTCACTTTGTGGTAAGCCACTTGATTCATGTGATGGTAGTAGTAGTAGTAGTA  
GTATTGGAGAAGGTAAAAAGAAGAACTTTCTGGTGGAGCAATTGCTGGTATAGTAATTGGTTGTGTTG  
TTGGTTTGCTTTTGCTTCTTTGTTTGTGTTTTCTGTTGTAGAAAAAGGGGTAAAAAAGAAACAAGATCT  
GCTGATGTTGGTGTGTTAGTAAGCAGGTTGAAGTTGAAATGCCTGAAGAAAGAGGGGTTGAGAGTAA  
TGGTGGAAAAGATGGATTCTTGGGTAGTGCAATTGCAGCTATTGGTGTGGAGGGGGTAATAAGGATA  
AAGGTAAAGCTGAGGCTGTTGTAATGATGGAAAAGTTTGGTGTTTTTTGGGAAAATGGCCAAAAT  
TCAATTTGGATGATTTGTTGAAAGCTTCTGCTGAAGTTTTGGGAAAAGGGACATTTGGTACTGCTTATAA  
AGCTGCTTTGGAATCAGGGATTACATTAGTTGTGAAGAGATTGAGAGATGTTACTGTACCTGAGAAGGA  
GTTTAGAGAGAAAATTGAAGATGTTGGGAAAATGAATCATGAGAATTTGGTTCCTTTGAGAGCTTATTA  
TTATAGCAGAGATGAGAAGCTTCTGTTTATGATTACATCTCAATGGGAAGCCTTTCTGCACTTTTACATG  
GTGAGAAAATAACTTTTTTTTTCTGTCATTCTTTTTCATGTCATTATATTGCTGTTATGCTGTTTCTTGAAT



CGAGCGTCTATCGAATCATGTCATTATAGTGCTGTACTIONTACCATTACATGATCTGCAAATTTTA  
GTTGTCTGATTGACACTGATACTGCTGCTTCTATGTTGCCTAGACTCTTAAAATGTGGTGCTTGTCCGAT  
CCTGGATCCTCCAAAAGTAGTGATATTTGGAGGATCCAAACACGAGTCCGAATAACATAGACTGTTTTT  
GCTGATTTTATGAGGCTAGTAAGTTGGATGACCATTTGTTTTCTTGGATCTTGTTATCTGTTACTGAACT  
GGTGCTGTTGTGTAACGTTGCTGCATTTGGCTGATGTGTTGTAGTTGCATTATTGTGCCCAATTGTGTTT  
AGCCACTAAAATTTATGTTTTTTTTTTTACATTATTGTGCTGTTGTTGCATTGTTGTTTCATGTTAATCAGAT  
TTTATCGTAATCTAATGTGATGAACATTGTGTTAGTGAATATGATATCTGACATGTTTTATATAAATC  
AACCTGGAATGGCTTTACTATGTCCAATTGTTGCTGTTCAAACCTCGTGTTTCATCATTTAGATTGAATGTAT  
ACTTTATCCACAAGTGATCTGCACAATTTTTAGATTCCTAAGCCCGAGAGTCTATCAGAAACTACCTCTCT  
ACCTACAGAAGGTAGAGGTAAGGTTTGCCTGCATCCCACCTCCACAGACCTCACTTGTGAGATCTCATT  
CGGTATGTTGTTGGAAGAGTTTAGGAAGAAGTCGTAAAATTGAATATATGTGTAGGACAGGTTCACTGC  
GTTCAACAGGACGAAACAGGATCATTTAACATTTAATCTGTTTGTATGGATTTAAGCCAAATGTACCTTT  
GTTAACTTATCGACTATATGTTGTGTA AAAACTATGAATTATTTGGGTGCTTTATTCGGCATATTCCACTG  
CTACTATATCATGTCACAATAGTTTTGTCATTCAACTGTCTTTTTCTATAGGCAACAAAGGAGCAGGTAGG  
ACACCGTTGAATTGGGAAACAAGGGCTGGCATTGCCCTTGGAGCTGCACACGGGATTGCCTACCTTCAT  
GCACAAGGGCCCTCAGTATCACATGGCAACATTAAGTCATCCAATATCCTCCTCACCAAATCATACGAGG  
CCCGTGTTCAGATTTTGGCCTTGTCAACTCGTCGGTCCATCATCAACTCCCAACCGTGTTCAGGTTAC  
AGGGCACCAGAGGTA ACTGACCCTCGTAAAGTCTCCAGAAAGCAGATGTCTACAGCTTTGGTGTCTTG  
TTGTTGGAACCTTCTAACAGGGGAAGGCTCCCACACATTCGGTACTGAATGAGGAAGGTGTCGACCTACCA  
AGATGGGTGCAATCAGTGGTACGAGAGGAATGGACAGCCGAAGTCTTTGACCTTGAGCTCCTTAGGTA  
CCAAAACGTCGAGGAGGACATGGTCCAGCTATTGCAAGTTGCAGTTGATTGCACTGCTCAGTACCCGGA  
CAGACGCCCTTCAATGGCCGAGGTCACTACTCGCGTTGAAGAACTCTGTCGTATGGATTCTGGAGGTGG  
TGACATAATTGACAATGATGCAGAAGTGCAA ACTGCATGAAATTGAACAAGAAAAAATAGTTCCATCAC  
ATTATTTCAATTTTTTTCTTTTTCGTTTTCGATTGAGCATTTCGATTACTTTGTTTATTCTTGGAGTTCTTCA  
GTGAAGATAAATTGTTCATTTTATTTTATTTTTTTGAATTTATTTTCCAGTAGCAACATAGTTTTATTAAG  
ATCTGGTTGGTAGTTGAAATGGAGCTGTTTTTTGTTTTATAGATATTGATGTATTCTTTTTTTGAAGGTGTG  
ATGAACTGTATAAATAATTGAGATGACCTGTAGTTACA

>PGSC0003DMG400015806 LRR-RLKs

ATTTATGAGCTTTGTGCTTGAGGGGTAGTCAACAAAGTGTGAGCTTTCCAAAAAGAAAAACCCCAAGA

AACAAGTTCTTCCACTTCCTTCACTCATCACATTTTCCTCTTTTTCTCTTTCATTCAATGGCACTTCAGAGG  
GTTCTTCTTCTCCTTCTACATTGTCTTTTTCATAGCCTTCACTACTACTTCTGCTGCATCTGATGTTCAGC  
TTCTGTTACAGAACATTAAACCCTCACTTCAGGGTAACACTGATAATTTGTTGTTATCTTCATGGAATATT  
TCAGTTCCTCTTTGTCAATGGAGAGGTCTCAAATGGGTTTTACCAATGGTACTTCTTTGCTCTGTAGTGA  
CCTATCTTCACCTCAATGGACAAGTCTTTCTTTACAGAAACCCATCTTTGCATCTTGTCTCTACAGTT  
ACCATCAGCTAATCTCTCTGGAACACTCCCTAGGGAGCTTGGTGAGCTTTCTACACTGCAAAGTCTTTATC  
TTGGTGTGAATGGACTACATGGGTCCATCCCTCTGAGCTTGGCTACAGCTCTTCTTTCTGATATTGAG  
TTGAGTGGCAATAGTCTTACTGGGACACTCCAACCTCAATATGGAATCTTTGTGAGAAGATGGTTTTCTT  
TCAAGATTCATGGTAATTCTTTGTCTGGTTCTCTCCTAACCTGCATTACCTGATGCTACTTGTAAAGAATT  
TGCAGTTTCTTGATTTTGGGCAAACAGGTTTTCTGGGGATTTTCCTCTGTTTATAACTAGGTTTAATGGT  
CTTAAAGAGCTTGATTTAGGGGATAACAATTTTTCTGGTCCTGTTCTGAGACATTAGCTGCATTAAAGC  
TGGAAAATTGAATCTCTCACATAATAATTTAGTGGGGTGTGCCAAATTTGGGGAATCTAAGTTTGG  
TGTGGATGTTTTGAGGGAAATAATCCTACTCTTTGTGGACATCCTTTGGGGCCCTGTAGTGGAAGCTCT  
GGAATGAGTCCTGGTGCAATTGCTGGTATTGTTATTGGTCTAATGGCTGCATTGGTGGTTGTGGCATCAC  
TATTGATTGGGTATTTTCAAGGGAAAAGAAGAGACATGCTGATGAAGAAGAGGAGGAATTTGAGGAA  
GTTGAAGATGAGGAAGCTGGTTGTGGTGAGGGGAAGCTCATCTTGTTCAGGGAGGTGAGCATCTGAC  
TCTGGAGGATGTGCTGAATGCGACGGGGCAAGTCATGGAGAAGACTAGTTATGGGACTATTTATAAGG  
CAAATTAGCTGATGGTGGAECTATAGCTTTGAGGTTGTTGAGGGAAGGCAGTTGTAAGGATGGAGGT  
ACATGTTTAACTGTGATTAGACAGCTGGGAAGAGTTCGACACGAGAATTTAATTCCTTTGAGAGCCTTCT  
ATCAAGGGAAGAGAGGAGAGAAGCTTCTCATATATGATTATCTCCCAAACAGGAATCTTCATGAACTCT  
TACATGGTAAATTCTAGCTTCTTATGTTCTCATGTTTGCTCTTTCAAGTTTTACTAATGAAAATCAATGCA  
AGCTCAATTACGTTGACGTTATTGTATTAAGTGTTCCTCATAGGGAAGTAGCAATAGTTCTTAGGCTCA  
TTTTCAGCAGCTTTGGTTATTTGCTTGAGAGACTAAGATATGTGGGCTTCAAGTTGTTGCCTTTTCACACG  
GTGGGGTTGTAATTGAAGTATTAGTGCATAAATAGATCATTTACAACAGCCTGAAAAATATAAATGTAG  
CTGAACTTAGCATCTTAAGAGAACTGAATTAGTTATTGAATGCACAATATAGAGATATTACGTTACACG  
AATATAGAGAATGTTCCATTTATTCTGACCGATATCCTTTTCGCTAAGTTAAGTTGATCCAACCTATATCCT  
CTCCTGTGCATCATCTTCCAATACACGAACTGCCATATGTATACCTGTTTGGTCAACAAAGAAAAAGTATC  
CCTATCATATATACTTACTCATCCAAGAAAAATGGAAAAAAAAGAACTAGCACATTATCATTAAACTGC  
CGATGCAACTATCAGATGCCTTGATCAACCATTCAATTTATAATTTTCGCTTTAAGAAGTCTGTGGCCCTAG

ATCAACTGATGAAAGCTCATTTCCAAGCATTTGAGCTTGGTGTAGTAAGCTTCTTTAGTTCCTTTTGCTTG  
ATGCAATCTATTGATGCTCTGGTTGTTTCTGTTCCCTCATTTCTTGTACTGCTAATTTAGCAGTAGTTTGGT  
CATTGAGAGTAGTTTGCGCCAATAAATGTTGGAACCCACAAATTTTTATATCCTTGTTGTTCAACCTTA  
ATAGCTCTAAGGATTAGTGAATTTGATTATGATATTTTCTGATTGTCTACAGAATCAAGAGTTGGGAAGC  
CAGTGTGAATTGGGCTAGAAGACACAAAATAGCATTGGGCATAGCCAGAGGACTAGCACACCTTCATG  
GTCTGGAAACTCCCATTACTCATGGGAATGTTAGATCAAAGAATGTTCTTGTTGATGAATTCTTCGTTGCC  
AGGCTTACTGAATTCGGACTTGACAAAATAATGATCCCAGCTGTAGCTGATGAAATTGTATCAGTTGCAA  
AAGCTGAAGGTTACAAGGCACCAGAGCTGCAAAGGATGAAGAAGTGCAACTCAAGAAGTGATGTTTAC  
GCTTTTGGTATCCTACTGTTGGAGATTCTTCTAGGAAAGAAACCTGGTAAGAATGGTAGAAACGGGGAC  
AATGTTGATTTGCCTGCACTAGTTAAAGTTGCAGTTCTGGAAGAAACGACTATGGAGGTATTCGACATG  
GAGCTTTTGAAGGGAATTAGGAATCCAATGGAAGAAGGTTTGGTACAGGCCTTGAGACTTGCAATGGG  
ATGTTGTGCTCCTGTTGCTACTGTAAGACCGTCGATGGATGAAGTAGTAAGGCAGTTAGAGGAGAATAG  
ACCTAGAAACCGGTCTGCGTTGTACAGCCCTGCTGAAACTAGGAGTGGAAGTGGTACTCCCTTTTAAGC  
TCATGTTGTGACTTTAGTAATGAATATTGTCGCATATTATGCCTGTTTTTCTCCTAAAGGAAAGAGGGCT  
AAATGGCTATAGCTTTCTTACTTACTATTTCAACTATTTACCTTTGGCTTTGCATTGTTGGGGAATATCTTA  
TCATAGACAAACTGACAATAGACAATGTGTCACATTAGGCATCAAATTGGATATTACAGTGTGCCTTTCT  
TTTTTCAATTTGTTCTGCAATTAGCCTACCTTCTATAAATATATATATGCAAAAAGAAATCAATG

>PGSC0003DMG400015814 LRR-RLKs

ATGCCAATGTGCGAGGCGATTCTTGGACCTCCCAAATCTTGTTGTCTTTCTAACCTTTTTTCTTCTATTACAT  
AACTTTGCTCTTCCTTCAAATGAAGTTGATGTCCTGTTTTCTTGGCTTCATTCTACTAATTCACCAATTCCTC  
AAACATTCTCAAACCTGGAATCCTTCAGATTCCACTCCTTGTAATGGTCTCATATAGTTTGTCTTCTAATC  
TTTTCGTTACACAAATTGATATTCAGTTTATTCAGCTGGCTCTTCCTTTTCTTCTAATCTTTCGTCTTTACA  
ATCCTTGCAAAAACCTGATCATTCTGGTGCTAATCTCACTGGAACAATCCCACAGGATATTGGAGATTGT  
GTTTCACTTGTAACACTTGATGTTAGTTCAAATGGTCTTGTTGGTACCATACCGAAAACCTATTGGTAACCT  
TATAAATCTGAAGATTTGATTTTGAACCTAATCAACTAACAGGGGAAATTCCAGGAGAGGTTGGCAG  
TTGCATTAACCTGAAAAATCTTATTATCTTTGACAATATGTTTAGCGGAAATCTTCCTTCCGAACTTGAA  
AACTTGAGTTTTAGAAAATATAAGAGCAGGAGGGAAACAAAGATATTAGTGGGAAAATTCGGATGAG  
CTTGGGAATTGCAAGAACTTGATAGTGTGGGACTTGCTGATACGAAAATTTAGGTTTCGCTTCTCCAT  
CGTTGGGTAACCTGGGAAAGCTTCAGGTATTATCTATTTATACTACAATGCTTTCTGGCAAAATACCTTCA

GAAATAGGCAACTGCTCAGAGCTAGTTGACTTGTATTTATACCAAATAGTCTGTCAGGTTCACTGCCTG  
CTGAGTTGGGAAAGCTTCAGAAAGTAGAAAAGATGTTGTTTTGGCAAATAATCTTGATGGGCTAATTC  
CTGATGAAATTGGGAATTGCAAAGTTTGGTTATTCTTGATCTTTCTTTGAATTTTTAAGCGGGAGCATT  
CCGTGGTCATTTGGGAACCTTACTAATCTCCAAGAGTTGATGATTAGTAACAACAACATTTCTGGTTCAA  
TCCCATCTGTTCTTTCTAATGCGACAACTTGTTACAGTTTCAGATGGATACGAATCAGATTTCAAGGCTCA  
ATTCCTCTGGAAATGGGGCAGTTGAAGGAGCTAAATATATTCTTTGCTTGGCAGAACAAGCTTGAAGGA  
AGCATTCTCTGCATTGGGTGGTTGCAGAAGCCTACAAGCTCTGGATTTATCACATAATTCTCTTACTGG  
TAGCTTACCTCCTGACCTTTTTAGTTAACTAATTTAACGAAGCTTCTGTTGATTTCCAATGATATTTCTGG  
TTTTATCCCACCTGAGATAGGTAATTGTAGCTCTTATTTCGTATACGACTTATTGGCAATAAACTTAGCG  
GACAAATCCAAGAGAGATAGGATTTCTAGACAACCTAAGTTTTCTTGATCTCTCTGAGAACCACCTTAC  
AGGATCCGTTCTGAGGAGATTGGCAATTGCAAGACACTGCAAATGCTCAATCTATCTAATAAACTCTA  
AGTGGGAATTTACCTAGCTCTCTTTCTCTCAGTAGGCTAGAGATTTTGGATGTTTCCTTGAATCAGTT  
TAACGGACAGATTCCAGCAAGCTATGGTCAACTTGCTAACCTTAACCGGCTTGTCTTAGTAAGAATGCC  
TTCTCTGGATCGATTCCCCAACTCTCGGCAATTGTTCAAGCCTTCAATTGCTTGATCTCAGCAGCAATGA  
GTTCTCAGGGAACATGCCAGTGGAAATTGTTTGACATTCAGACACTTGACATTGCCTTGAATTTAAGCTGG  
AACATCTTGAGTGGGGTAGTCCCACCGCAGATATCTGCCTTAAACAACTTTCAGTACTAGATCTTTCCC  
ACAACAAGCTTGAAGGAGACCTATTGTCTCTTTGGGGCTTGAAAATCTGGTTTCCTTGAATGTTTCCTAC  
AACAAATTTACCGGCTACCTCCCTGATAATAAGTTATTCAGGCAATTATCATCAGCAGAGATGGCTGGCA  
ACAAAGGTTTGTGCTCATTGGGACATGATTCTTGTTCCTTGAGCAATGTTGAAGGCGGGGGAATGATGA  
GTAATAGCAATGTAAGACGGTCATGGAGGCTGAAATTGGCAATTGCACTCCTTTCTGTGGTGACTATAG  
CTTTGGCACTCCTTGAATGCTGGCAGTGTACAGAGTGAGAAAAATGAGCAGAGAAGATAATGATTCTG  
AATTGGGAGGAGGGGATTCATCAGCTTGAAGTTTACTCCATTCCAGAAGTTGAATTTTTCGGTTGAAC  
AAATTTGAGATGCCTAGTGAATCCAATGTTATTGGAAAGGGATGCTCCGGCGTAGTTTATCGTGCAG  
AACTAGAAAATGGTGAAGCAATTGCAGTCAAGAAGCTATGGCCAACCACATTGGCAACTGGATACAACT  
GCCAAAATCAAAGTCAGGAATTAGTGGATGTGTTTCGCGATTCTTTCTCAACCGAGATAAAAACCCTTGG  
CTCCATCCGTCACAAGAACATCGTTAAGTTCTTAGGTTGCTGCTGGAATCAAACACTAGATTGCTCATG  
TATGACTACATGCCTAATGGAAGCCTAGGTAGCCTTCTACACGAACGAAGTGATGGATGTTTGGAGTGG  
GAATTGAGATACAAGATTGTCCTAGGTGCAGCTCAAGGGCTTGTATTACACCACGATTGTACACCTC  
CAATTGTTATAGGGACATCAAGGCCAACAAACATTCTCATTGGCCTTGACTTTGAGCCATACATTGCAGA

TTTTGGTATAGCCAAACTCGTCGATGATGGAGATTTTGCTCGATCTTCCAATACAGTAGCTGGCTCCTAC  
GGATACATAGCACCAGGTTCCGGCACAAGTCGTAGTACCACCTTTACAATATTACACTATAATTATATACAT  
TATATCTTTAATACACATGTATATATTATCTTGTGCAGAATATGGATACATGATGAAGATAACAGAGAAA  
AGTGATGTTTATAGCTTTGGAGTAGTTGTGTTAGAGGTGTTAACAGGAAAGCAGCCAATTGATCCTACA  
ATACCGGATGGAGTACACATTGTGGATTGGGTGAGGCAGAAAAGAGGCAGTGATGAAGTTTTAGATGT  
GAGCTTATGTGCTCGTCCCGAATCAGAAGTTGATGAGATGATGCAGACTATAGGAGTAGCTATGCTGTG  
TGTTAATCCATCACCAGATGATAGACCAACGATGAAAGATGTCGCAGCAATGCTGAAAGAGATAAGACT  
TGAAAGAGAAGAGTACCAAAAAGTTGATATGCTCCTTAAAGATGGAGGAGACAATAAGAGTAGTAGTG  
ATGGAGGGCCATCTTCAAAGATGCATAGCTTGTACTTGCAAAGCAATAATACAAGCTTTTCTGCATCTTC  
ATTGTTACATTCTTCTTCCCAACACCAAGAATATTGGTTTCAAATAGACTTTTGTTCCTTCTTATAGTTA  
GATTTGTTTTCTCATTTTTCTTCCCGGG

>PGSC0003DMG400016015 LRR-RLKs

TTTTTTCCAATATATATCCTTTTTCCATTTCTCTTCATAGTAGTATGTTTCAAGTGCATAGTAACATCATGG  
AGAAACACATTTTCTTATTGATACTTGCTATCTTAGTTCAATTTTACTTTGTTTCTTCTATATCAGCTACTAT  
TTTCTCAAATGAGACTGATCAAGAAGCTCTATTAGCTTTTCGAAATCTTGTTACGAGTGATTCTAGTCAAT  
TTTTAGCCAATAATTGGACCAAAAATACTTCATTTTGCTCTTGGTTTGGTGCACTTGTAGTCCAAAAGG  
CAAAGGGTTGTAGCCTTGACTCTTCTAATTTGCAACTTCAAGGCACAATTCGCCTTCTTTGGCCAATCT  
ATCCTTTCTCATAGAGCTAAATCTCACGAACAACAACCTCCATGGTAACATCCCTTATGGCATTGGCCACT  
TGCCCTGTTTACGAGTGATTGATATTCAGAACAACCAGCTCCAAGGTAGTATTCCAACAAGTCTATTTCA  
ACACCGGAGTGTTCAAATCATTTCAATTGGCTTTCAATAAACTCGGTGGTGAAATGTGGAACGGTACATG  
GTATGTACCGGAACTCAGAGTCTTAAATCTCAGGAACAATACCATCACAGGTAGAATCCCTCCTTCTATT  
GGAAATGCCACAAAGTTGATGAACATCAGTTTGAATTGGAATAGAATCAACGGCAACATTCCAATGGAG  
ATCGGTAATCTAAGCCAACCTGTAGAGTTGTCGTTGTCTCGTAATCAATTAACAGGTTCCATTCTTCAAC  
ATTGTTTAATATCTCCTCCCTTCTCGTCGTGTCTCTGGCATAACAATAGCCTTTCAGGTCCTCTGTTTCTGA  
TGATCGACGTAATGTTCTTTCATCAAACCTCGAGCATATAGGTGTATCATAACAATCAAATCACTGGTCAC  
ATTTCTTCCAACATCTGCCAATTCAAAGCTCTCAAAGTCTTGTCCATATCATAACAACAATAACTGGAGA  
AATACCGAGAAATATTGGTTGTTTAGCCAAGCTCGAAGAGCTTTATATCGGTTATAATGCAATAGATGG  
AACAATCCTACTTCATTAGGCAATATTTCCACTCTTCAAAAACCTTCAATTGTGGAAACAATCACATGGAGG  
GAGAACTTCTCCGGAATTAGGAAAGCTATCAAACCTAAGACAAATCAATTCGAAGAAAATTATAATCT

TATAGGTGAAATTCCAAATGCTATTTTCAACATATCTTCTTTGGAATTCATTGCTTTCACTTTCAACTACCT  
CTCAGGTAGAATTCCAAATCTTCTTCATCTTCCAAACCTTATACAACCTTCTCTTAGCAAACAATCAGCTCG  
AAGGTGAAATTCCTCGGTACATCACAATGCTACCAATCTTGAGCTATTGGAACATCAGATAACCTTCT  
CACAGGCAGTATTCCTTATGATTTAGGAAATCTTCGCGAGCTGCAAGAACTTTTCTACATCATAATCAAC  
TACTGAGTTGGGATTCTTTGATTCTTTGGTGAATGTAGGATGTTGAGATATGTACAAGTGGGATCGAA  
TCCGTTGAATGGTGTCTGCCAAGTAGTATTGGCAATCTTTCATCTACTGTTGAATACTTTTCATATTGGAG  
ATGCACAAATCAATGGATTCAATCCCACTAGTACAGGCAACATGAGTGGTCTTACAACGCTAGTTCTTCA  
AGATAACAATTTGACAGGAAACATTCTCGTGAGATCGGTAAGCTTAAACAACCTCCAAGGTTTATTTCTA  
GTTAACAATGAACTGCAGGGGGATATAGCAGAGGTAGTATGTGATTTATCGAATTTGGTTCGATTAGCT  
CTGTCTGAAAATGAGCTCTCGGGGGTATTCCGGAATGTCTAGGAAGTCTTACCATGCTACAACACCTTT  
TTTTAGGTTCTAACAAGTTTGAATCAAAGCTTCTTTAAGCTTTTGAAGATGAGTAGTCTTCTCTATGTA  
AACATGTCGCGTAATTCTATAGAGGGAGAAGTTCCATCAGATATCGGAGAACTTAAAGCTATTGTAGCA  
ATTGAAATCTCTGGTAACCACTTTTCGGGGATGATACCAAGCAATTTGGGGGAACTTCAAACCTTGAAGT  
TACTTTCTTATCGAACAATTCGTTTTCAGGTCCAATTCCATTATCCTTTTCAAACCTTGAAAAGCTTGGAA  
TCTTGGATTTGTCTTTGAATAACTTGTGAGTACTATTCCTAAGTCTTTCGAAAAGCTTTTGTACCTTACAA  
GCATCAACGTCTCGTTAATGTTTTAGAAGGTGAAATACCTAGTGGTGGTGTGTTTGCAAACCTCCACCCT  
GCAATCATTTCGCGGGAACAAAGGTCTATGTGGAAGGCAAATATTGGAGGTTCTGCTTGTGCTGTCAC  
TACTCCTGAACAACAACAACCAAAATCGAAGAGGCTTGTGCTAAAAATTGCTACTCCGGTGGTTATTTCA  
TTCTTTCTGATATTCTTGTGGTTGTCTCAATTTGGATAATGAAACGAAAGAAGAAAGGAAAGTCCAAAG  
ATATTGAAAAGGTTCCGGAGATGAGGACTTATCAATTGATTTCTTATCATGAGATTCAACGAGCAACAAA  
CAATTTTGATGAATCCAATTTGATTGGCGTGGGAGGTTCTGGCTCTGTGTACAAAGCCACATTACCTAGT  
GGAATTGTGGTTGCAATAAAGGTACTGGATTTGGAAAATGAGGAAGTATGCAAAGGTTTGATACTGA  
ATGTGAAGTGGTGAGAAATGTTAGACACAGAAATCTTGTTTCGGTGATCACTACGTGTTCTAGTGATCAC  
ATAAGAGCCTTCGTTCTGCAATATATGCCAACGGAAGTCTTGACAATTGGTTGTACAAAGAAGATCGCC  
ACTTAAACCTTCGTCAAAGAGTCACCATAATGCTTGATGTAGCTATGGCAATTGAATATCTACATCATGG  
TAATGACACCCCTATAGTTCATTGTGACCTCAAGCCAGCCAACGTTCTTTTGGATGAAGATATGGTGGCG  
CGTGTTGGTGATTTTGGCATCTCAAAGATTTTAGCTGTAAGCAAGTCTATGGCACATACAAAGACATTAG  
GCACTCTGGATATATTGCACCAGGTATACTACTATACTAGTCTCTTTCCATTTCACTTATGTATCGAAGA  
CCTTTCAATTATTGTTACATCGGATGAGTAATGCTTTTTTCATTTTCATTCTTTAAGAATATGGCTCGGAGG



ATTATCGCACTTTCTTTGGTGTAGTTACTGGTCCTTTCTTAGAATGCTTTGTCATACTTTCTATAGTATTTT  
GCTATGATCCCTTCACTTCAGTATTTCTTTTTCGATCTGCTTTGATATACTTTTCCTTGAGCCGAGGGTCT  
TTTGGAGACTGCCTCTCTACCTCTATGAGGTAGGGCTAAGGTCTGCATACACTCTTGACTCTACCTCTCC  
TCATTTGTGGTATTACACTGGGTATGTTGTTGTTGTTCTTGCATCAAATATCTCTTTTACATATTTAATTAG  
GCTTAGCTGTTCTCCTTGAGGTTATACTAATTTTGATCGTAGTAACCTTTCTAATATATTATGCAGAACTG  
CCATTTGTCATTACCAAGGAAGATAGTGCTTTATGTTACAGTGATGAAGGGGAACAGGTTTACTTGATCT  
ATAGAATTGAACAGCAACTGCAATATGGAAGTGTTCCTTGCAATTCTGATATTAGCATGTCTCTACTCATC  
TGTCTCACCTGATCAGCAGGGTACACATTTCTCCATTTTCTACTTTAGCAAATAACAAAGAGATGCCCT  
TAGCTGTCTTTAGTCTTTTATCTATTCAAAGGTATAAATAAAAATTTAGAGGGGTTAGATAATTTTGCTTG  
TGCTGACTTAATGTTGTCTGTATTCTGCTCGTAAAGTAGTGTGACATTCGTTATTTTGTAACTCTTGATCA  
GGAGATGCACTGTTTGCATTGAAGAGTTCACTAAATGCTTCAAATGATCAACTTTCTGATTGGAATCAGA  
ATCAAGTTAATCCATGCACTTGGTCAAAGATAACTTGTGACGATAACAGCAATGTCTTGATGGTGTAAAGT  
TGAAGTTACTTTGCGAGCCATATTGATCACCATGTACATGATAAAATTATGGTCCCAAACACTTGAAAAG  
TTGGTAACTACCATTCTGAAATCCTATATTTAATGTTGTCTGTGCTTTATTTGCAGGTCGTTGTCAAATAT  
GGGGTTCACTGGCACTTTAACTCCAAGATTAGGTGTTCTAGTGCATCTTAATACTCTGTACGTATAGAGA  
ATTTGTGGAATTATTTTCAATTGAATGCTAATGTGTATCTATGATGTACTTATAGAGATCAGGTGTGCACT  
TTAATCATAACGTCAGTAGATAAATCACTCCATTTACGAAAATAAGTGTGATCAACTGAAACAAA  
CAAAAACATAACCAGTGAATCCAACAAGTGGGATCTGGGGAGGGTAGATTTTGCTTGTGCTGACTTTAG  
GTTGTCTCTGTACTGTTGTAAGTAGTGTGTCATTCGTTATTTTGTAACTCTGACCTTTGATTTGGATG  
ATAATTTTGAGTTTCTTGTTCTTAGGGGAGGAAATAACATTGAACTTTCAATTTGAAACCATTGTGGAAA  
ATGTGATGGTGAATAAAAATATGGTTTGTAGGTTATGTGCTGTCAATTTTCTGCTGAATGCCTCTCAA  
AGTGAGAGAGTCTTTCCATTATATAGAGAGCATAAATATTACACATCCCTATAGATCCGTCATTCCTATCC  
CTAAAGATCAGCTATTCTATCTCTACAAATCTGCTATTCAATCCCTCTAAATTTGCTTTGCTATCCCTCAA  
CTCAACTATTCTATCACAATATTTATTCCTCTGATTCTACAACAATCTATATGATAATACTAATTCATATC  
ACTATATAATTACATTAATATATACAATTATCCATCATGCTAACATGTGCTACTCTAGAAGTCTATATTTAT  
CGATTTCTTCATCAAGCTGATTAATCTACTCATGATATTGGCACATTACTAACTGCTCTTGTTTGGGG  
ACTGGTGATTGCTTGATCTTTGCCCGTGCATGGTTTGGGATCTTAGCCTTTTCCGATTGTACTACTTTCT  
ACCCACACAAGCATGTGTAGAAATCTACTCGCAATTTTGGTTCTCAATATTCCAATAAAGAGTAGTATTC  
TTTTAAGTTAATAATTAGGAAACGACATTCTTGAGTGTGGTTCATGCTTTTGCCAGAGTGTGGATATTT



CATCTTCATTTCTTGTCCGTTATCACATTATTCTCGTAGTGCCTCTGATAAGCATTCTAAGGTCATAACTGG  
TAACATTTTCTAAGATCTCCTAAAAATAAGTTTTATCCTTGTCTGTAGGAAGTTCTACTTTAGTGAGATCT  
GTGAACTCATCAATTTTCTTGTCCCTAGTTGTGTTATGTATTGAACTGACTGGGCGGTCAATATCCTGGCA  
GTTCTTTGCAAGGAAATGGAATAACTGGTAAAATTCCTGAAGCATTAGGAAATTTAACCAGCTTGACCAT  
GTTGGATCTGGAAAAAACAGTTTGTGAGGAGAAATACCAGCTCCCTAGGCAATCTAAAAAAGCTTCA  
ATTTCTGTAAGTAATATTATTTTCATTGATTATTGTTTTTTTTAAACTGAGTTTTACATTTGGTGTGTTGACTT  
GGGAGTCTATTATAATGTTTCTTTGAATAGGTTTTGAGTCAAACAATCTGTCTGGGACTATCCCTGAGT  
CACTTTCAGGCCTTCCCAACTTGATTAACCTGTAAGTGATTCCTTAGCCTGATCTTTAATGTGCTTACAAC  
GTGTGCCAAGTGATATTGACCTGACCCGGTGATATCTCTTTTCCAGTCAGCTTGCATTAATGATCTTACT  
GGAAAAGTTCCTGACAGTTTGTCCAAGTCCCGAAATACAAGTATGCAGATCTCAATTCTTGCATTGTTT  
AATTTGATGATAGATTGAAGCTGCTTAATAATTTGAACATTTTAAAAAGGTATAATACATAAATAGACAC  
TCAAACCTAGTCTCAACTGGCAAGTAAGCGCTCCCAACTTTGAGCGAGGACATCTAGACACCTCAACTTG  
GTCTCAACTGACAACTACACACTCTAACTCGTCCCCACTGTGTCTAGTGGACACCTGATGCTGACGTGGC  
ATCTAAATTTTGGTGGTGTCTTGATGATCTTTTTGTAAGTTGGAGTGTCAACTGACACAATGAAGACGA  
GTTGAGGTACCTAGATATGCATACTCAGTTGGAGTGTGTTACTTTCAAGCTGAAGCCAAGTTTGAATGTAT  
GTGTATGTATTATGCCCTTTTTATAATAGCCCCTGCCTCTTTTGCATGGGTCAGAACTGTTGATATTAGTTT  
AACTCAGTTTGCCTACTAGTTTTTCAGAGAACCATTTGAATTGTGGCTTAAACTTCAGTCGTCGTTGTGTA  
TCTGACAGTGAAGGTAATTAATTGAAAGAGCAAATACCACATTTTTGAACTACAAGTATTTACCTTAGAA  
GTTAGACGTTGCCGATATGTTTGGCAGTTGGCTGGTTTATGCACCCTGGTACAATTCTAAATTCTAAG  
TTGATATTCTGGCAGGTTCTCCAGTAAATCAAAGACTGGTCTCGTAATTGGTATCGTTGGTGGATTTCTT  
GGAATTATCCTTCTTGGGGGATTAATGTTATTTTTCTGGCGGGGAGGCACAAAGGCTACAAACGTGAA  
ATCTATGTTGATGTTCCAGGTCCTTATCACCTGTTTTACACAGTATTAACCTCAATATGTGTTTGTAGCTC  
ATCAAAGAAATACTCCCTCCATTTCAATTTGTTTGTCTTGCTTGCTTTTTTAGCTCGTTTAAAAAGAATGCC  
CCTTTCCCTTTTTGGCTACTCTTCAATTTCAACTTTTACGCGGCATGTTTAGGACCACAAGATTCAAAG  
TCTAATTTACTTTTTTAAACTCCATGCCAAGTCAAACAACAAACAATTGAAACGGTGGGAGTATGT  
GTTAGCTCTCCTGAAAAAAAAGAAAGAAGGCTGAAGTAGTTACCTATTGCTACATTTCTTTGTTCC  
ATCTTACATTGGAGACTAGATTTTTATGAGCATTACTTTAGTTCACCTGCAGTGTAAGATGGTATAGGTC  
CATTGAGTATGTTGTGACGTTTTTCTTGTGTCTGTTCCGGTGTGCCAGGTGAGGTTGACAGACGAATTC  
ATTTGGTCAATTGAGGAGATTCGCATGGAGGGAATTGCAACTCGCTACTGATAACTTTAGTGAAAAGAA

TGTTCTTGGACAGGGAGGTTTTGGCAAGGTTTATAAAGGAGTGCTCAGTGACAGCACTAAAGTTGCTGT  
GAAACGCTTAACTGACTATGAGAGTCCTGGGGGAGATGCTGCATTTTCAGCGTGAAGTTGAGATGATTAG  
TGTTGCTGTTTCATAGAAATCTTTTGC GGCTTATAGGATTTTGCACCACACCGACTGAACGCTTGCTAGTGT  
ACCCGTATATGCAGAACCTAAGTGTTCCTATCGTCTACGAGGTA CTTATTTTTCCACAATAGTGCTTAGA  
TCTTGGTTTGCAGTTTTCCCAAGGCTTTCCTTGTTTCATCTCAATATCAAATTTTCCTGGGATCACTTATTTCT  
TTTGCTCCAAACTCAGCTGAATTTCTATAGAAGTCTGGAATTTGATGGTCAAATGCTTATGTCAATAGTCT  
AACTGTCTAATAGCCTATTTGGCCAAGCTTCTAAAATCAGCTTATTTTGATTTTAGGCTATTAGACTCCTAT  
CAAAGGTCTAATCACCTACTTTTTCTAGTGATCTTTAGTAGAGTAGACAAGTTGAACAGATAATAAAGG  
AGGGTATTTGCGTAGGTA C TCGTATTCCTAATATTCTTAGAAGTGTGTGAGTTCTTGAAAATTTGTTTCTC  
TTCAGTCTTCAAGAGCCATAGTTGGATTGTACCTCGTCACGAGGGA ACTTCCATCACGTATGAATTGACC  
GATATCCATAATGAGAGCTTAAATGAGTTCATGAATTCATTCTTGCGCATTATCATTCCCCCGAGGTG  
ACTTTTTTGAAAACCTTGCATGAATTGAAGATGACACATGCAGTAGTCGGTCAA ACTTTAAAATTCAGCA  
TTTATCTCCCAGAGATGATGAGATTTTGGTGGCTTCTTATTTGTAGTATTTTGTAAATGCAGAACTTAAA  
CCTGGGGAGTCTGTTTTAATTTGGCCAACCAGAAAGCGTGTGGCACTGGGCACTGCACGTGGACTTGAA  
TACCTGCACGAACACTGTAATCCAAAAATTATTCACCGTGATGTTAAAGCAGCCAATGTTTTACTGGATG  
AAGATTTTCGAGGCTGTAGTTGGTGATTTTGGCCTGGCAAAGTTAGTTGATGTTAGGAAAACCAACGTGA  
CAACGCAAGTTCGGGGTACTATGGGCCATATAGCTCCTGAATACTTGTCCACTGGGAAATCATCAGAAA  
AAACTGATGTTTTTGGATATGGAATCACGCTTTTGGAGATTGTA ACTGGTCAACGCGCTATAGACTTCTC  
ACGCCTAGAAGAAGAAGATGATGTCTTGTTACTTGACCATGTGAGTGTACATAACTCAACGACTGATATT  
AACTTGATGATTCTATTGGTCTGCATATTACTTTAACGTGTCCTCTAAAATTATTAGTTTTCTTCTAAGTTT  
ATTTTTTATCTTATACTTTCACTCTTCTCGAAGCTGCATATTGGTGGATGGCTCATTGTCCATCACAAGAC  
ATTCTCATGAATTATATACGTAGTTCTTCTTTTTATGTTGCTTCTTGGTATATGTTGTAATTTTATATTCA  
ACAGGAAGGAGGGACAAAAAAGAAGTTTCATTTTCCATATAGCACTCTTACGCAAATTCTTTTGCATGTC  
AAACATAGGTCTTAATACTCAGCCTCTTTTGTCCGATACCCTTTT TAGGTGTAAAGTAAATTAGTGAAAA  
AAGGTGAAATAACATTGAGAGGACGCAAATTTCTAATTAGGGTAGAAGGATAGTAGATAGTGCA TTT  
TCTCGCTATCCGTCCATTCTAGTAGTTGTAGTAGTGCTCCTTTAGTTTCTTGTCTATGTTTTTTGTTACCAT  
CTGTTGTTTCTTGATTTTCGCTTGTCTGATTATTTTGTAGTATTGTTTTCAGCATGCTTTGCTATGCTTTC  
ACATCCATTACTTTTTCTGGACTGCTTTTGTGTTTTTCTTGAGCCGAGGGTCTATCGGAGACAACCTCT  
CTATTCTGAGGTAGGGGTAAGGTCTCTATGTAGACTCTATCCTCCCAGATTCCA CTTTGTGGGAGTACAT

TGGGTATGTTGTTGGTACTGAATGGCTGCATGTGTCATCTTGAAGGTCAAAAACTGCAAAGGGAGAA  
AAGGTTGGATGCTATTGTGCGACCGCAACCTACATAAGAACTATAACATGGATGAAGTAGAGATGATGAT  
TCAAGTTGCGTTGCTGTGTAICTCAAGGATCACAGAGGATCGTCCAGCAATGTCAGAGGTAGTACGAAT  
GCTTGAAGGAGAAGGACTTGCTGAGCGGTGGGAAGAGTGGCAGCATGTCGAAGTTACACGTAGGCAA  
GAATACGAGAGATTACAACGACGATTTGATTGGGGCGAAGATTCAATCTATAATCAAGATGCAGTTGAA  
CTGTCTGGTGGAAAGATAACAAAATCTGTATCTCCAAACAAGTACATAATTTCTGTAAATAGTCTCTCCTTG  
ATACATATAACTTGTGCTAAGTGGCAATCATTCCACGTTTTTCATATTGCTTGTGTCATATCTTGATTGTAT  
TGTTTTTCGTATGCTTCTTATTTAATCGATTTTTTCCCTGTATGATTGGCCTGTGCAGCGACATAATATA  
TATCGACTTTCTTTTTGTTTCAATTGTAACATCAATCTTTGTTATAGTGATTTGAGTTTTGC

>PGSC0003DMG400016654 LRR-RLKs

CTCCCACTCACACCAGAGAGAGAGAGCGCTTTAATAAATGTTTAACTGACTCGCGGTCGCCGAAAAC  
CATTCTCCCTCCGGTGGATTTTTGTCTTAATTTCATTTTTGGATAAGGACAAGTATCCGGCGCCGGTGGTT  
TCTTTCCCGGAAAAAATCTCAGCTCACATTTGTGCTGCTTTTAGTTTGGAGGTTGAAACTTCTCTTTCTCG  
CTAAATTAACCTCAACCGAGCTGTTTTTTTCAGTGAATTCGTAGGTTTATGCGTTTTTTATTTGTCTGTTC  
TTCGTTTGGGTCTTTTATAGTTTACTCTTTTTTAGCAGATTTGCACAACTTTTTTCCAGTTTCAGCTGTATT  
TTAGAATTCTAGGGTTTTGGGTTGAATTTTTACCCTGGACCCATTGCGTGCTTATTTAGTTGTAAGTGG  
TCATTTCAACTCCTATTTTGGAAAGTTGATTTTTTTTTGTCTTGAAAAACAAGTAGGGCCTCAACATTGTCTT  
CAGCTGACCTTGTCTATGGAATTATAAGCAACATTGGTTTGGAAATGAGAAAGGTGTTTGTACTGTGTT  
TTTTTTTCTGTTGGTGGAGGCTGTGTTTGTGGAAGCTTTGAACCCATCTTTGAATGATGATGTAAGTGGGA  
TTAATTGTGTTCAAATCGGACGTTCAAGATCCATATGGAAAGCTGAAATCTTGAATGAAGAGGATGAT  
AGTCCTTGTAAGTGGGACGGAATCAACTGTAACCCAGATCCAATAGGGTGACTGAAGTTGTTCTTGAC  
GGGTTTGGTTTATCTGGAAGGATAAGCAGAGGCCTTTACGCTTGCAGTTTCTTACAGACTTTCACTAG  
CAAAGAACAATCTTACAGGTAGCATTAGTGTTAGTCTTGCTCAACTTGCTTATCTCAAGTTTCTTGACTTG  
AGTGAAAATAACTTATCTGGTAACATTCCTGGCGATTACTTTCAACAATGTGGGCCGCTTAGATCAATTT  
CTTTGGCTAACAAACAAAATTTCAAGGCAGATCCCAGAAAGTTTGAAGTCTCTGTGTTACACTTGCCTCCCT  
TAATGTATCGTCAAATCAGTTTTTCAAGGTTGGTGCCTTCTGGGATTTGGTCTTTGAATGGACTAAGGTCT  
CTTGATTTGTCAAACAATTTATTGGACGCGCAAATTCAGTGGACATTCAGGGTCTGAGTAATTTGAGAG  
CATTAACTTGGGGAGAAATAATTTCAAGGGTGAATTTCCGGATGAAATTGGAGGTTGTTTGCTTTTGA  
GGTCAATTGATTTGAGTGAAAATTCTCTCTCAGGAGAGCTTCCAAGCACAATGCAGAAGCTTAGCTTGTG

TAGTGAATTCATTTTGAGACGTAATGCTTTTGTGGGCATTGTTCCCTAAATGGATTGGAGAAATGAAAAGC  
CTTCAGATTCTTGACGTTTCTGAGAACAACCTCTCTGGTATCATTCCAACCTCAATAGGGGAACTTGAGTC  
ACTGAAAGTATTAAAGGTGTCACGGAACGGGATTTCTGGAAGCTGCCTGAGTCCTTGAGCAGTTGTGT  
TAAGCTTCTGGAATTGGATGTTAGTCATAACTCTTTGGCGGGTAATCTTTCTACTTGGGAATTTAAATTGC  
AATTAATTCAGGTTATGTTTTCCGTGAATAAAATTAAGTCCCAATCTAAATAATGCATTGCTACACAACCTC  
TTATCACAATCTTGTAGCAGTGAGAGTTATCTGGTGAATTTAATTAAGTCTCTGAACTTCTCTTGCAGG  
CACCATTCTAAGACTGTCGGCCAATTGAAATCCTTGAATATTCTTGATTTGAGTGAAAATCGCTTATATG  
GTATTGTCCTGTGGAAATTGGAGGAGCAAATCTCTCATGGAACCTAGTCTGGAGAAAAATTCCTTGA  
CTGGAGAAATTCCTAGTTCAATTGGCTATTGTTCTTCATTAGTATCCTTGTAAGTTCTCGAACCTCCTTATG  
TTTCATTAATTTGTTTTGGACATTGCCTTTCTCTGCTTGAAGATTCTTAGAGGATAGTATAGTGGTATCT  
GGTGTTAAAGTTCTCTATAGTTTTAGGCCAGGGAATATTGTGTTAGAGGCAAGTTCAAATACGAAACCA  
TGTTTGATATTCTCAATCATTTTCTGCTGAAATTTAGTGGCTCTAGTAATCATGTAGAGTTTATAATTTGCA  
ATGACAATAAAATGGGATTATCAGCTTCTATTATAAAAGCTAATTGCAGAGTAGTATTAGTGGTAATGTG  
CCTAACTGTATCTGAATATAATTTGAGTGGTTATGACAGTAATATCTTACATGAGGCATGAAAGTAACAA  
CAATAATATATTAATAGGCTCTCAATGATCTATCTATTTATATCCATTATGTTTTGGCTGGTGTACCTGAA  
TACGAATTTTTTGCTACAATTAGTTAATGTTTTACTTCAATCAACTTGGCAGGTCTTTATCACATAACGGTC  
TAACTGGTCCTGTACCTGAAGCCCTAGCAAACTGACTTATCTTCAAAGTGTTGACTTATCCTTTAACAAA  
TTAACGGGAGTGTTGCCAAAGCAGCTTGGAGATCTTGGCCATCTCTCCTTATTCAACATTTACACAACC  
AGCTACAGGGCGAACTACCTTCTAATGGTTTTTTAATACTATTTCTCCTTATTCCGTGTCAGCAAACCCAT  
CTCTATGTGGGGCTGCTGTCAATAGGTCTTGTCTACAGTCATGCCCAAGCCAATTGTTCTGAATCCCAAC  
TCTACTGATTCTTCTCCAACACTGTCCCTCAAAGTATTCGCCATGAGAAGAAAATCCTAAGCATCTCTGC  
CCTCATTGCTATTGGTGCAGCTGCTGTTATTTTTGTTGGTGTGATTGCCATTACTGTGCTCAATATTCGTG  
TCCGGTCAGCGGCACCTCGCTCTGCTGCTGCAGCCCTTACATTTTCTGGTGGAGATGATTTTAGCCATTCT  
CCATCCACGGATGCGAATTCTGGTAAGCTTGTGATGTTTTCTGGTATCCCGACTTACAGCACAGGGGCAC  
ATGCTCTGCTTAACAAAGATTGTGAGCTTGGGCGAGGTGGTTTTGGAGCAGTGTATCGCACTGTCCTTG  
GGGATGGGCATCCAGTGGCCATTAAGAAGCTTACCGTTTCCAGTCTTGTTAAGTCTCAGGAAGATTTTGA  
GAGGGAGGTTAGGAAATTGGGAAAAGTACGTCACCATAATCTGGTCACCCTGAAGGTTATTATTGGAC  
ACCATCTTACAGTTACTTATATATGAATTTGTGGCTGGTGGAAATTTGTACAAGCATCTCCATGAAGGA  
TCTGGTGGGTGTTTCTCTCATGGAATGAGCGTTTAAACATCATTCTCGGGACAGCAAAAAGCTTGGCTC

ACTTGCACCAAATGAATGTAATCCACTACAACCTAAAGTCCAGCAATGTCCTAATTGATAGCTCAGGTGA  
GCCTAAAGTTGCAGATTATGGCTTAGCAAGACTATTACCCATGCTTGATCGATATGTCTTGAGTAGCAA  
ATTCAGAGTGCACCTCGGTTACATGGCACCTGAATTTGCATGCAAACTGTGAAGATAACCGAGAAGTGT  
GATGTGTATGGATTTGGAGTTCTTGTCTGGAGGTAGTCACTGGAAAGAGGCCAGTTGAGTATATGGAA  
GACGACGTGGTAGTACTGTGTGACATGGTACGTGGAGCATTAGAAGAAGGCAGGGTAGAAGACTGTAT  
AGATGCAAGGTTGCAAGGAAAATTTCCAGCAGATGAGGTGATTCCTGTGATGAAGTTAGGATTAATCTG  
CACATCACAAGTCCCATCAAACCGGCCTGATATGGGAGAAGTGGTTAACATTTTGGAGCTGATTCGATG  
TCCTTCAGAAGGCCAGGATGAACTTGTATGATGTTCACTAGATAAACACAGATTGTAAGATAAATGTCTC  
ATCATGGCAAAGAAGAATGCGGTTCAATTTATTCAGAGAAGTTGGAATTTGTTGTTGTAAGAATATTTTGT  
CTTAATTGCTATAAAAATCCCTCCTTTGAATTACATCATTGTTATTTGCTTCTCTATGCCACTCATGGATT  
CCTTTTACCTGGTTCCAATGTTGGACTCACATGCTTATTACTCTTTTCTTCTCTCAGGGTTTAAGTC  
ATCTGCCGCTCCTTAAAATTGTGCTCATGTTTCACTTAGACACA

>PGSC0003DMG400016685 LRR-RLKs

GAACATTTCTTCTTCTTCTCCACCATTTCTGCTCTGCTCACTCTTCCCTCCACCATTGAAGAAACATGCG  
TTTTCTTCTCCTTCTTCTTCTTCCCTTATTCTCCATTTCCATCTCCTCCACTTCACCACCGCAAACACCTT  
ACGTGCCGGAATACCGGGCATTACTCTCCCTGAAAATTCCATTACCGATGACCCACAATCTGCTCTTCTT  
TCATGGAATATCTCAACAAGTCATTGTACATGGAGAGGTGTCACGTGCGACCGGTATCGTCACGTGACT  
TCTCTCGACATCTCTGGTTTTAATCTCACCGGTA CTCTCACGCCGGAAGTTGGTCATCTCCGTTTTTTGCTC  
AATCTTCTGTAGCTGTTAACAGTTCTCTGGACCCATTCTATAGAGCTCTCGTTTATACCAAATCTGAG  
TTACCTTAACCTCTCTAACAACATTTTCAATTTGAGTTCCCTCCCAGCTTACCCATCTCCGGTACTTGAA  
AGTTCTCGATATTTATAATAACAATATGACCGGTGACCTTCCGGTTGGGGTTTACAATTTGACTAATCTTC  
GACATCTTCATTTGGGTGGCAATTTTTTTAGTGGCAGTATTCCACCGGAGTATGGTAGATTCCCATTCTTA  
GAATACCTTGCAGTTTCTGGAAATGCGCTCGTCGGTATGATACCACCGGAGATCGGAAATATTACCACA  
CTTCGTGAGCTTTACATTGGATACTACAACACGTTTTCCGGTGGTTACCGGCGGAAATAGGGAACTTGT  
CGGAGCTCATTGGTTAGATGCTGCAAACTGTGGACTTTCCGGTGAGATTCCGCCGGAGATAGGGGAAGC  
TTCAGAAATTAGATACACTGTTCTTGCAAGTGAATGGTCTTTCTGGGTCTGTTACACCGGAATTGGGGAA  
TTTAAAAGCTTGAAATCTTTAGATCTATCAAACAATATGCTCTCCGGTGAAATACCGTTCACATTCACAG  
AGCTGAAGAATCTAACCTGCTAAATCTTTTCCGTAACAAGCTTTACGGGTGATACCGGAGTTCATAGA  
AGATTTGCCAAAACCTGGAAGTATTGCAGCTTTGGGAAAACAACCTTACCGGAAGTATTCCACAAGGTTT

AGGCAAAAACAGTAAGTTAACAAACGTTGACATCAGTACCAACAAATTAACCGGAAATTTGCCCCAAA  
CATGTGTTCCGGCAACAAGTTACAGACGTTGATCACTCTCGGAAACTTCTTGTTGGCCCAATTCCAGAA  
TCTTTAGGTGAGTGTCAATCACTTAATAGGATTAGAATGGGAGAAAATTTCTAAATGGGTCTATTCCAA  
AAGGGCTATTCAGTTTGCCGAAGCTTTCACAAGTAGAACTTCAAGATAATCTTCTCACTGGTACATTTCCA  
GTGACTGGTTCTGTTTCATCAAGTCTTGGACAGATTTGTCTGTGCGAATAATCGTTTCACGGGGCCTTTGCC  
ATCGAGCATTGGAAATTTACTGGTGTTCAAAAGTTGCTTCTTGATGGGAACAAGTTTTCTGGTCAAATT  
CCAGCTGAATTAGGGAAATTGCAGCAGCTGTGCGAAAATGGATTTTAGTGGTAACAGTTTTTCAGGCCTG  
ATTCCACCGGAGATAAGCCGGTGCAAGGCTTAACTTATGTTGATCTTAGTAGGAATAAGCTATCTGGTG  
AAGTTCCTACTGAGATCACTGGTATGAGGATACTGAATTACTTGAATGTATCGCGGAATCAGTTAGTTGG  
GAGTATTCCTGCACCTATTGCAGCAATGCAGAGTTTAACTCGGTTGATTTTTCGTATAACAACCTATCTG  
GATTGGTTCCGGGTACTGGTCAGTTCAGTCAATTACACATCATTTATTGGTAATCCAGATCTTTGC  
GGACCCTATTTGGGTCCTTGCAAAGAAGTATTGTTGATGGGGTTAGTCGACCTCATGAGAGAGGTGCA  
TTTTCGCCTTCTATGAAGCTTTTACTTGTATCGGGTTGCTTGTGCTCGATTGTGTTTGCTATTGCTGCA  
ATTATTAAGGCTAGATCGTTAAAGAAGGCGAGTCAGGCTCGTGCCTGGAAGCTTACTGCTTTCCAACGC  
CTGGATTTCACTTGTGATGATGTATTGGAATGTTTGAAAGAGGATAACATTATTGGTAAAGGAGGTGCT  
GGAATAGTATAACAAGGGGGTAATGCCAAATGGTGAACCTGTTGCTGTTAAAAGGTTGCCGGTTATGAGC  
CGTGGTTCTTCCCATGATCACGGGTTAATGCCGAGATACAGACACTTGGGAGTATTCGACATAGACATA  
TTGTTAGATTATTGGGATTTTGCTCAAATCATGAAACAAATCTTTTGGTTTATGAGTACATGCCTAATGGG  
AGCCTTGGTGAAATGCTTCATGGAAAGAAAGGTGGTCACTTGCATTGGGATACCAGGTATAAGATAGCA  
TTGGAGGCTGCAAAGGGACTTTGTTATCTTCATCACGATTGCTCGCCTTTGATCCTCCATCGTGATGTAAA  
ATCAAACAACATTCTTCTGGATTCCAGCTTCGAAGCTCACGTTGCTGATTTTGGGCTTGCCAAGTTTTTG  
AAGACTCGGGAACATCAGAATGCATGTCTGCTATTGCTGGTTCTTATGGCTACATTGCACCAGGTATGCT  
CTCAAATCTTACTTCTTTGTAGTCTTGGTTTTGATGTGTGTTGTTCTTTCAAAGAAGTTTATTATTGTT  
GTAAGTTGACAACATAAATTGTGATTTATCAGTCTCTTCAAGTGTTTATTATGGTACTTCTTGATCCTTTAA  
AGCTGGTAATGATCAGTCTCCTTGTTAAAACATGGAACAACATGACACGAATATCAGTCCTTGATTGGTA  
GTTAACAAGAACAACAACAACAAATGATAACTACGTGTCGAAAATGAATGCCTCTGTTTCATAGATGAGCT  
GCTAACTGGTGCTTTGATGAATTCAAATTTGGTTACTTGCTGTTTGGCGTTAAGTTGTTTCATTTGACTT  
ACAAAGTTTGCTTATTGCTTGAAACACAATCTCTTTTTTTGTATGTGCCTAATTCGTTTTTCATTTGAAC  
TGTGCAGAATATGCATACACACTCAAGGTAGATGAGAAGAGTGATGTATACAGCTTTGGTGTGGTTCTG

TTAGAATTGGTGAGCGGGAAAAAGCCAGTTGGGGAATTTGGTGATGGCGTTGACATAGTCCAATGGGT  
AAGGAGGATGACCGATGGGAAAAAAGAAGGAGTTCTAAAGATCCTTGATCCAAGACTCTCAACAGTTC  
CCCTTCATGAGGTGATGCATGTGTTCTATGTTGCAATGCTGTGTGTCGAAGAGCAAGCTGTTGAACGCC  
CAAAATGCGTGAGGTTGTGCAAATGCTAACTGAGCTTCCCAAGCCATCTGGTCCAAAAACAGAAGATTC  
AACAATCACCGAGTCGCCCCATCATCAGGTCCTGCATTAGAGTCTCCCACTTCGACTCCCGGAGACACG  
AAAGACCAGTACCACCATCAGCCATCACCTCAATCTCCTCCACCTGACCTACTCAGCATATGACCTACAAT  
GTTCCCTTCTAATAGAGGATGTAGTTCTCTCCTTTAGTTTTATTATCAGTTTTATTGGGGGTTGGTTTATT  
TATTAGGCTATAAGCTTTTCCTAGGAAGTGAGTTTCATTGTACAGTAAGATTGGCTAAGGTATCTGAGTA  
ACTTTATCCTTCAAATTTTCCATTTGCTGTTTAGCTTTTTGATATTGAAAGAATC

>PGSC0003DMG400016709 LRR-RLKs

CGACACCTATAGATACACACTGCCAGTGGAGTCTTCTTGATAAATTTTCTCTCTCTTCAATAAAGG  
AATGCTTGGAATCGGAGAGTCTCTTAACGATGGTGACACCTACCGCTACTGACGATGTTACCTTCTTGTC  
ATTTCCCTGTCTTTCTTTGCCATGCTTCTTCTTCTTCTTACCTCTGTCTCTGCACAACCCCTTTAATTCT  
TGACTAACAAGAACC AAAACAGAAAATGAATAGAAATAGCTGTAAGCAAGACACCCTTTTACCCTTTTG  
CCAGTAGTGGTGATTGTGGTAGTGGTTTTTTACTCATCTTTTGTGTGGAAGGAAACACTGATCCGAATG  
ATTGTGAGTTTCTTCACTGGTTGAAAATCTTGGATCCGTTTTTAGAGCTTCATTAGTGATTTTGAGCTTAG  
TGGTTTGGGTGTTTTTTCTGTTTTCTTGATTGTGTTGAAGGAGGAGGGTTTTTTTTGTTTTTTGTTTGTCA  
CTCTGTGAATGTTGTGATATAAGAATGCCTTTCTTGTGATTGTTTGAATGCCTGATTTGGTTAATGGGGG  
TAATGTATTTGTTGCCCTTTTCTGGGATCTTTTTCTTCCCCTTTTTGTTGGGTTTCTAGTCAATGCAAGT  
CAAAGATTGATGCGTTAGTACAAAAAATATGGATTCTTGATCTTATACTAAAAATTATATGACTGGGAT  
TTTCTGTGATTATAATGTGAGGACGCATGCAATTGAATTTGAATGCTAAACTGGTTGATTTGGTAAGAT  
AATATGTTTTCTTGCCCTTTCTTGGTGTCTTTCTTGTATTTAATTAGTTTCAGAGCCAACACTAGCTTAAGA  
TTGAGGCTGTACTTGTGAATCTTGATAAGATATATATTGAATCTTGGTTTTCTGTTGGAGAGATGTTCT  
GGCTTTGGCTTTGTCGTTGCCTGACTCTTGAATCTGCAGTGCAAGCTCTCAGGTCTTGTATGCTTCACT  
GAATAGTCCTTACAGCTCTTAATTGGAAGTCGAATGGTGGCGATCCCTGTGGTGAGTCTTGAAAGG  
AATCACTTGTGAGGCCTCTTCTATTGTTTCAATGTAAGTTTGCATAGCATTAACTTTGTGCGCATCATTATA  
CATTTTAGTTATGATTTGATTGATATAATGGTTGGTTCTTGCTGAAACAGTCAAATTCCTGATTTGGGACT  
CAATGGAACGTTGGGATACATGCTAAATGGTCTTACCTCGTTAAAGAACTTGTAAGAGCTTGTCCTTTTA  
GTGGTAAAGGGTAATATAGAGGACCTACTATCACAATAAAATTGAACTTCTGCAATCTGTTGTCTTCAGG

GATATGAGCGGCAACAACATTCATGATTCTATTCCATATCAGCTTCCACCCAATCTCACTAGCCTGTAATG  
TTGACTCCTTGTTATGAGTTTGTGGTTTGTGGAAAACCTCCCGGTTTATGACTGTCTCACTGGAAATATAATC  
ATTGTCAATGCAGGAATCTTGCAAACAACAATATAAGTGGCAACATTCCGTATTCTTTGCTGGCATGGT  
TACACTTAGCTATCTGTGAGTGGCCAGACTCACTAGGCACTTTCCAAAACAAAATAACATTTGCTTGGT  
CTTCTCTTTATTCTATTGAATCATTTCAGGCAACTATTTAAAATAGCTTACCCTACGATTCATTTTTCAGG  
AATCTTAGCCATAACTCACTCTCTCAAACAATTGGAGAATTGTTACCAATCACTCCGATCTGGGAGCTTT  
GTAAGTGTCTACTTAATCTTTAATTGATTGATCCTTTCTGGTAATTTTTTTTCTTTTTCTTTTTTTCTAA  
TAGAGTTCATTCAATGCCACACTTGAAGGGCCTCTTTTCTACACCAGTCCAATTAGTTACTAGCTTGAAT  
TCATAACACCATGGTGTCTCCGACCCACAGTAGCTGGCCCTTCATTTGTTTTGACGTGCCTGCAATGTACA  
GACATGACTGCTTCCAAATATGTTCTCAAACAATATAGGATATAATCATATACAAATGCCTTTTTAGAA  
TCATTATCTGCTTAATTTAATGAACAATGAAGTCTGGAGGCTTGTAAGTCCAACATTTTATTTTCCTTC  
GTAGCCTTTTTATGTGGAAATTCGTTTTGATTGTATTAGGATAGGTGCCCTGCTCCTCTTTGAAGCTTTCA  
GTTGCCTTTTGTTCATTTATTTGTTCTTTTCTTTTCTTTTCTTTTCTTTTCTTTTCTTTTCTTTTCTTTT  
CCTGCTACAAAGAGCTTTCTGGCGATATTGATTCTCATGTCTTTTGAACATCTGTTTCACTAGTTAATAG  
TTATAAATTTTCACTGATTTGCTGCTACTGCAGGGATCTGTCCTCGAATAATTTTTCTGGAGATCTCCCTC  
TTCATTCAAGTTCGTTGACAAATCTTTCCATACTGTAAGCATAATAACTTTCTACTAATAGGATTTGCTGTT  
CGTTACTTGACTTACCCATGAAATTGGCATCTCTTGTAGTCATCTGGAAAACAATCAGCTAAGTGGCCCT  
CTCAATATCCTGGTTGGTCTACCGTTGACTAATTTGTAAGTTTCAATACCTCTTCTTGAATTAATGGGCTT  
AGCTCGTTTCGATTCAATGCCAGTAGAGTGTGGTATGGGTAAAACAAAACCTTTTTGCAGAAATGTTGCAA  
AGAATCATTTCAATGGATGGATCCCGAATGAGCTTCTATCTATCCCTAACTTCATGTAAGTAATTTACAT  
CCTATATATTCTTACATGGTTTGAATGTTACAGTTTCAAGGGGTGTGACATAACATCTAATATGACAGA  
TACGATGGGAATTCCTTTGCAAATGGTCCAGCTCCTCCCCACCACCATACTGCACCTCCTCCTGGAA  
GATCTCGCAACAATCGTAGCCATTCTCCTCCTAGTTCACGTACAAGACCAGGTTCTGATGGCCAGCCATC  
TCCAGAAAATGGTGATAAAAAAAGGGATTGACAACCTGGAGCTATCATTGGCATAGCTCTTGGATCTTC  
TCTTGAATTCCTTTTGTCTCTGGTAGCACTTGATTTTTGCTTCCGGAGGGGCAAGGGCAAGGAAATTGCT  
ACAAGACCCTCTACAGGAAGTCTTCCAGTTGGCACAGATAAAGGTGTGTTCCCTTGAACTTTTTCTTCC  
TACTCAATATTGTCATTGGTGCTAATACCCTCAGATGACTAACAGTTGTGGTGTGATGTGCCATCTTAAT  
TTGGAAATTGGTACAACTTGGTTGATTTCTCATGTATGCTGTTAATCTTAGTGAATATGGAGGTACAA  
GAGCAAAGGGCGAATCCTGTGGCTGCTGTTGCTGACTTGAAGCCCCACCTACCGAAAAGGTGACTGTT



GAAATGATACAAGGGAAGAATGGATCTGTCAGGAGAGTGAAGTCTCCAATAACTGCATCTGCTTATACT  
GTTGCTGCATTGCAAACAGCAACAAACAGCTTCAGTCAAGAAAATCTCATTGGTGAAGGATCTCTGGG  
CGTGTTTATAGGGCAGAGTTTCCTAATGGGAAGGTAATTCAGATGTTTAAACGTTGTAACCTTACCTTT  
CCTACTTGTGATGTGCATTCAAACACTATTTGAAGCTGAACAATATTGAATAAATTCAATCTGTCTCTCATC  
GACATCTTTCATTTTTGATGCTTCGGAGAATCACATACTTGTGAGTTGTATAACGTTTCATCAGATACATAA  
GGACATCAAAGGGGTATATCAAGATGTTGGCCACTCCACCTATCACCTATTGCTAAGATGCTTTAACA  
TAGTATCAAGCCGTTACACGTGTGGGACAATGTTGCGTTACCTAATGTCCAACCTCGGGTAAATGAGCCT  
GTAAAGATATGGTAACTCAACCCCAAAGCTAACTCATGAGGGGAGGATTGCCCAAATCCATATAAGGA  
GACCACCAGTCCATTCCCTAACCAATGTGAGACTTTTACCCACTCTAACACCCCACTTCACGCCAGGCC  
AGGCCCGCTGGAGCATGGACCGGGAGCCCAAATGGAGATGAACCTCTGATACCATGTAAAGATATGGC  
ACCTGGGCTTAACTCAACCCCAAAGCTTAGCTCATGAGGGGAGGATTGCCCAAGTCCATATAAGGAGA  
CCCCAGTCCATTCCCCACCCAATGTGAGACTTTTACCCACTCTAACAAAGGCATCCAAAGTAGTATATAA  
GGTTCTTGTCTACTATATCCATTGCCTTAACGTTATGGTTGAACCCTTAGATCCTTTCACAATATTTGTCA  
AACCGGGCAAACACTAAAAGGCTACATACTTGATCTATGTGTTACTAAACCTGAGTAGAAGTTAGTAGA  
CTTCTTGATACTCTGCTCGCATGGGAGTTAAAGTATTGGGTCCTCTTGCTAGTACATAATCTGTTTTGAGT  
GATTCTCTTAACTGAGATTAAGTCCTTGATACTCTTGATTCAACTTGCTCTTTAGATCTTTCACAAAGTT  
GATTGCCACAGTAGGCTCATATTCTGATGAACACATGTCAATTGTTCACTCCTCTGGGTGGTCTGGCCA  
CATCTTTGCTTTTATCTGTCTTGTGATGTTTGTGAGGTTAATTATATGGTCACTTTGATGGTCATCTCACT  
TCTCTTCTCAGCCTGAATTA ACTATGATACTATAACCTTGTCTTTGGTTACATGATGCAGTCCTAAGCAA  
AATTATTCTTAGCAGTTTCAAAGTTTGACATTATATATCTTCTACTTTGTGGTTTATTATTGGATGTGCTAC  
TGGTTATTTCTTTTTGAATGAACCAATTGTGTTGACTATTTCTCTGCTCCAACTTGATGCCAACTGTGTTT  
CAATAAATGATTTAAGAATTTTCATGTGTCAACAACATTTTTGATGAGGAACTTTTAGTTTTTCATTCATG  
TAGTTTCTACGGAAGGTGCCAACTGAAAATCTCAATTGATCTTTTGAACGTCTTACCAGATAATGGTC  
ATCAAAAAGATCGACAGTGCTGCACTGTCGCTGCAGGAGGAAGATAACTTTCTTGAAGCTGTCTCAAAT  
ATGTCAAGGCTGAGACACCCAAACATTGTTCAATTGATAGGATATTGTGCTGAGCATGGACAGCGTCTT  
CTGGTTTATGACCATGTTGCAAATGGTAGCTTGCATGATATGCTGCACTTTGCTGATGAGAGGAGCGAA  
TTGCTTACTTGAACGCCCGGGTTAGAGTAGCACTTGGCACTGCTCGAGCTTTAGAGTATGCTATAGCTG  
TATAGTATTTACCTCTCTTGCCCTTTCTTGTTGGGTTAGCTTAAAACCTTGACCGTCTTCTTTTCAGGTACT  
TGCATGAAGTCTGTCTACCTTCTGTTGTACATAGAACTTCAAATCCGCAAATATTTTACTAGATGAAGA

GCTCAATCCCCATTTATCAGATTGTGGGTTAGCAGCTTTGACTCCAAACACAGAACGCCAGGTGAGTAAA  
GAAGATTTAATCTACGTCGTCGTTTTAACAGAAGGTGTTGATAATATTGGGTGGTACGTGATGCATATAA  
TGTTTGTGAGGTGATGTCAATCAACTTACCTAGTACTGTAGTAGGAGCAATATTAATAAGCAACTATTTT  
TAGGTAGATCTTTACAGACTTAGTCATGAAATTGGAGATTCTGATTGTGGCAGCTTAGTTTTGTTTTCTAA  
TTCTTCTGGAGCAATCTTGTTAGATGCTTAAACACTTGGCTTACCATAGTGCACAACTTTAAGGAAGAC  
CCCTTCCCCCTGCTTGAAATTCCATTTAGTTCTGTGAATTATTTCTGTGAAAAGAGAACCTTCTTGACAG  
AAGTTCGGGTGAAGGAAGCTAATGTGGGAAGGCTAATTGACTCTGTTATGGGCATTGCCTAATATTGTA  
ATTACTTCTGAATGTTGACAGGTGTCATCCACACAAATGATTGGTTCATTTCGGTTATAGCGCTCCTGAATT  
TGCTTTATCTGGAATATACACGGTAAAAAGTGATGTATATAGTTTTGGTGTGGTGATGTTGGAATTGTTG  
ACAGGAAGGAAGCCACTTGATAGGTAACTAGATCTTTTTACATTGCTAGTCAACTTTTACACTATTGAA  
TTCTTTTAATGAATTCATTCTTGTTAACAATCATGTAGTTCAAGGGTGAGATCGGAACAGTCCCTTGTGAG  
ATGGGCTACGCCTCAACTCCATGATATAGATGCCTTGTCAAAAATGGTTGATCCTGCACTAAATGGCATG  
TATCCTGCAAAGTCTTTGTCCCCTTCGCTGATATTATTGCACTCTGTGTTTCAGGTGAGCTTTACTTGCAT  
GTTCTTTTCATTTGGAACATAACAGTTGTTAACATGTGAAGCTTAAAAGATGAAACCACTTCTAAAATATCT  
TTGATGGAGGCGTAAGTCAATGATCATAGGGAATTTACCCACTTAAGGACCAAACCTTGACATTCTAACCC  
GTCAAATAAATGATACACTACCAGTTTTTGCATTCTATATAAATCCAAATTCAGGGGCGTGGATAAATTG  
GGACCACCTGCACTCTGAGTTTGCTCATGGCTCAGTGCTGAAGTGAATCGATGTGCTTCAGCAAATAGAT  
GACCTTTCTTACACATAACCCGGTGATTCTTGGAATGGCGAGAGCACCCATCTTGTTAAGTTAGTTTGGG  
AACTTCCAAGGCGTAATCCTTGCATACCATGGTCCATAGTGGCTTTGGGTGCTTAGTCTTTAAATGAGAA  
ATTCTTAATTAAGCTTTTCTTGATCTAAGGTGACTTCAAGACTCACGAAGAAAAATCTGATGGACTCGAC  
AAAATTATAATGAATACTTGCTCATTGACATATCTGAAGTGAATTACTTTACTTGCAATAATTTGAATGCG  
ACTGTTTTCTCCTTGTAATAACTTTTGACATCTATTTCTGTACAGCCTGAACCAGAGTTTCGACCCCCAA  
TGTCTGAAGTTGTGCAAGCACTGGTTCGGTTAATGCAAAGGGCGAGTGTGGTCAAAGGCGATCCAGT  
GATGAATCAGCTTTCACATAAAGACTCCGGATCATGAGACGGTTGACATGCCATAGATAAACATACAC  
GACGAAGCAGCCTTTGCAATTTTGAAGTAACTTCTGTGAAGGTCAAGAGCAACTATGGCAGATAAAAC  
TCCGAGGTGTCAATACCAGGGACATTAATAAATGTAATTATTTTTCACATCTTCTCGTTAAAAAAGAAG  
AAGCTTTTTTGCATCCCAATTTGAGGTACATAATTCAGTACCAATGTCTCCAGAGTATATTTTCAAACCA  
TCTTGGGCTACTGGATATAATTTATTGTCAATAAGAACATTGCTACACATTATCATTCTGTGTTTGTATA  
TTACAGTTTTTCCAATAACTTTTGGCTAGCCTAAGAGCTAACTGTAGTGTGCATCGGTTCGGTTCGGTT

>PGSC0003DMG400016872 LRR-RLKs

ATGTCTGGAGTATATGACTCAAGAACTGGTCTAATTCTGATTTGGATAGTTATCTTGTGGCTTCCGCGA  
TGATGGTTTGTCTCTGCAGAAGGATTGAATGCTGAAGGAATGTACCTGCTTGAGTTGAAAAAGAATTTAA  
ACGATGAGTTTAAACAATCTTGAAAATTGGAATCCTAGTGATGAGACGCCATGTAGATGGAAAGGTGTAA  
ATTGCACTTCTGATTATAATCCAGTTGTGCAATCTCTTGATTTGAGTTTTATGAATCTTTCAGGCACTTTGA  
GTTCTAGCATTGGTGGTCTCGTAAGTTAACCATACTTGACTTGTCTTTCAATGGATTCACGGGAGAAATT  
CCGAAAGAAATAGGGAAGTCTCGAAAATGCAGAGTCTTCAGCTTCATGATAATGAATTTTATGGGCAG  
ATTCCTGATGAATTGTATAACCTTTCTCATTTGAAAGACTTGAATTTGTTCAATAACATGATATCTGGTCCT  
ATATCAGAGGAGTTTGGGAGACTTTCTTCTTTAGTTTCTTTTGTGTCATACACCAATAATCTCACTGGTTC  
ACTCCCTCGATCACTCGGGAAACTAAAAAGTTGGAAACATTTGAGTGGGGCAGAATCCGCTTTCTGG  
AACCTTACCTGCTGAGATTGGTGATTGCAAGAGCTTACAAGTTCTTGGTCTTGACAAAAACAATATAGGA  
GGAAATATAACCAAAGAGATCGGTATGCTTAGAAGATTGAAACAACCTGTACTTTGGGACAATCAACTC  
TCGGGCTATATCCCGAAGGAAGTGGAAACTGTACAAAACCTGAACTGCTTGCTTTATAACCAGAACAACC  
TGGTTGGAGAAATTCCTGCTGCAATAGGTAAGCTCAAATCTCTCAAGAGGTTATACCTATACCGGAATG  
GATTAACCGGTACAATTCCAAGGGTCATTGGGAATCTTTCGTCAGCGATAGAGATTGACTTCTCAGAGA  
ACTATCTAATAGGAGACATACCAATTGAGTTCAGTCAAATAAAGGGACTGATATTGTTGTATCTGTTTCA  
TAACCAGCTCAATGGTGTGATACCTCGGGAAGTCTTAGTTTAAGAAAGTTGGAACGTCTTGATCTGTCTG  
ATTAACGACTTATATGGGTCTATTCCATTTTCATTTCAAGTATCTCACTGAATTGGTTCAGTTACAGCTCTTT  
CAGAATCTTTAAGTGGAACTATTCCCAAGGTCTCGGGAAGTATAGCCGACTTTGGGTTGTTGATTTTTC  
TAACAACCTCACAGGAGGAATTCCTCCGAATATTTGTAGGAATTCTAATTTGATTTGGCTTAATCTTG  
GTTCAAATAACTTGCATGGAGACATTCCATCTGGTGTATTAAGTGTGACTCATTGGTACAACCTTCGTCTT  
GACGGTAACTGGCTACAAGGGAGTTTTCTTCTGACTTGTGCAAACCTGAGTAATCTATCTGCTCTTGAAT  
TAGGACAGAACACGTTCCGGTGGTCTAATTCCTCCTGAGATTGGAAACTGTCAAAGTTGCAAAGACTTG  
ATCTTTCAGGCAATTATTTACACATGAATTGCCTCAAGAGATAGGGAATCTTGAAACACTTGTGACGTT  
TAATGTCTCGTCTAATTTGCTGACAGGTCAAGTACCACAAGAAATTCTGAAATGCAAGGCGTTGCAACG  
ACTTGATCTCAGTAGGAACAGCTTTAGTGGTGTCTATACCTGCTGAAATTGGAAAACCTAGCACAGCTTGA  
ACGTCTTTTGGTTTCGGATAATAAGTTCTCTGGAAAGATACCAGTAGCATTGGGGAGGCTTTCTCGTTTG  
AACGAGCTGCAGATGGGTGGAAATTCATTTTCAGGTGAAATACCATCAGAATTGGGTGATCTTACTGGT  
CTACAGATCGCGATGGATCTTAGTGACAACAATCTCTCTGGTTCAATACCACCTAAGCTTGGAAATCTTA

TCCTACTAGAGTGTCTCAATCTCAACAATAATCATCTGAGTGGTGAATACCAATCACATTCGGAACTT  
GACGAGTCTAATGAGCTGTAACCTTTCATACAATAACCTCACTGGACCATTGCCGGATATACCACTCTTTC  
AGAATATGGATGTCAGCAGCTTTATTGGAAACAACGGGCTTTGTGGTGGTCGTTTAGGTGGATGTAACG  
AATATCCTCCGTTCAATTCTGATCCTCCAATAAAAAATGCAGGTGCTCCAAGAGGAAAGATTGTTATTGT  
TGTTGTGGCTGTTGGTAGTGGTGTCTTCTTGTGTTTATTATGGTAATTTTGTATGTGATGAAGCGGAAA  
CCAGTTGATCAGATGGTTGCATCAGTAAAAGATAAGAACGCGTCATTTCCAGCTTCGGACATATATTTCC  
CTCCCGAAGAGGAGTTCACTTTCCAAGACTTAGTTGAGGCTACAAACAGTTTTTCATGACAGTTATGTTGT  
TGGAAGAGGAGCTGTTGGGACAGTATACAAAGCAGTCATGCAATCTGGACGAAAAATCGCTGTAAAA  
AGCTGGCTTCTAACAGAGAGGATAATAACATAGAAAAGAGTTTCCGAGCAGAGATTTCAACTCTCGGAA  
AGATTAGGCATCGTAACATTGTAAAAGTGTATGGCTTTTGCTATCATCAAGGTTCTAATCTGCTTCTTTAC  
GAGTACATGGACAAAGGTAGCTTGGGTGAATTGCTTACGGTGCATCTTGTAGCTTGGATTGGCCTCAA  
CGCTTCATGATAGCTCTTGGGGCAGCTGAAGGACTTTCTTACTTACATCATGATTGCAAACCACAGATCA  
TCCACCGCGATATAAAGTCCAATAATATTTTGTCTGATGAGAAGTTGGAAGCTCATGTTGGTGATTTTGG  
TCTTGCTAAAGTTATCGACATGCCTCAAATAAGTCGATGTCTGCAATTGCTGGATCATATGGCTACATA  
GCCCCTGGTATGTACATTTTATTATTTTTTATTAGAACTTGTGTAGTATAGCCGTCTACTGTCTGCGAA  
TAATGTCAAGAAACATATGCCTGTCTAGATTGCTCTAACAAGACTAATATATTTTAGGTAAGCAATGATT  
ATAACTCTTCATCGAAAAATCTCACGTATAGTTCCTCCCATGAGCTGACTAGTGTATGTTAGTTTTCTCA  
CACTTTGACTAGCAAATAGTACTAGTGTTCCTTGGTGAACGTTTTTGTCTCCTTTGTTTATACTCAACAAC  
AACATATCCAGTGAAACCCTATAAAGTGCATCTGGAGAGAGTAGAGTGAACACAGACCTTATACTCAT  
ACCTCGTAGAGGTAGAAAGACTGTTTCCAAAAGACCCTCGACTCAAGTGAGGTGAAGAGAACAATACA  
ACTAGTAGAAAAAAGTGCAGAGCATAACATGCAAGGAATGATATTTGAAGTAAGGTAATACTATTTGAT  
GAACTATTTGAAGAGAGTAAGCAGACGCGTCTACTTTGTTAACGGTTCTGCTTTTCCATTGCAGAATA  
TGCTTACACCATGAAGGTAACAGAAAAATGTGATATCTATAGTTACGGAGTAGTCCTTTTGGAGTTGCTA  
ACAGGAAGAACACCGGTGCAGCCACTCGATCAAGGAGGTGATCTTGTCACTTGTGTGAGGCATTATATT  
AGAGACAATTCGTTGACACCAGGGGTACTCGATATCCGATTGGATTTGACAGATAAACTACTGTTAGT  
CACATGCTTACAGTCTTAAAATTGGTCTAGTATGTACTTGTGTTTGTCCCCGGCTGATCGCCCTTCAATGCG  
CGAAGTTGTGTCAATGTTGATGGAGTCTGATGAGCAAGAAGGTAACCTCATCTTGTCTCAAAGTTGA  
>PGSC0003DMG400017291 LRR-RLKs  
TTTCTCTTCTCTATTATTACTATACTATAACAAAATGCCAATAAGGAAGTGAAGAGCTGAACT

CTTTGGATTTTTGTACTGTTTTTTGTACAATCTAATAGTAGCTGGAAATGAGCATAATGAAGATTTTGTTT  
CTTCAATCTCTGTTATTTTCTCTTTTTCTTGTTTTCTTCACAGTTTTAGCAGCAACTTCAAATCTAAGCTCC  
CACAAGAAGAAGGTAACCCCATAGTAATCTTTTCAGTTTCTACATGTTCCCATTTTTGTTTTCTTGAAAA  
TGTCAGAAAAAGTTTCAAACTTTTGTGTTTTGAAGTTTGCTGCTTAGTTTTTTCAATTACCCATATGTTCA  
GTTTGTGGAAAATTGAAAAAGTTTGGAACTTCTGTTCAAGTGAAGTCTGTTGTTAGTTTTTTCAATTAC  
CCATGTTTCATTTTCTTGAAAAATTCAGAAAAAGTTTGAACTTCTGTTCAATTGAAGTCTGCTGCTTAAT  
TTTTAGTTTTACTTTCTCAATTTCAATGTATAAAAGTAAGTCTCTATTACTTTTTCAGGAACTTTTTAATTT  
CTAACTTTCCAGTTTACACGTGACATGTTTAAGAGCATAAAATTAATAAACAATTTGGTACATTTGACAA  
ATCTTTTAATTGAAGGCCATTTAAAAATTGTTCTTTGCTTTTTTTAACTTCGTGTGAGTTAAAATAGGAC  
AAGCATATTGAAATGGAGAGAGTACAAATTACTCATATGTTTCATTTTCTTGAAAAATATCAGAAAAAGT  
TTGGAGCTTTCTGTTCAATTGAAGAGTGCTGCTTAGTTTTTTCAATTACCCATATGTTCAATTTCTTGATGTG  
CAGTGATAGCATTGAAAGTGATTGCAAAAAAGTTTGGGAAAAAAGATTGGGATTTTAACAAAGATCCTT  
GTAGTGGAGAAGGAAATTGGAGTACTGCTATTACTGTTAAAGGATTTGAGAGCTATGTTGCTTGATGATT  
GCTCTTTTAACAACAATTCCACCTGCCATATCACCTCCATGTATGTTTTAGTCTGTTCCCTATTAAATTGAA  
ATTATGTTGTTCCGGACTCTCCGAAAATGTAGCAGCACCTGTTCAACTCCTCCAAAAATACACTTCTTTTGG  
AGGATCTGTCACATACTTGACTATATTTTTGAAGAGTCCGAGTAGCATAGAGGTGAAGATTTGATTTTTT  
TTAAAGCAGCAACAATTAATCTGCAGTTTTAAGTAGCTTCTTTGCAAGAGAAAAGATTAAAACTTTTCTT  
TTTACAAGTTTGAAAGGTTGAGACTTTTTACAAGTTTGAAGTATTAGTGTGTGAATAGGAAATGAAATG  
TGTGGACTTTAAGTACCCTTTTCTATGAGTTGACTGAAAATTGAGTCAACTTCTTATATGGCAGCCCAGC  
TGTAATGAGGTGTCTGGAGTGTGGACATTATTTTTGTAAAGTATTTCAAACCTCAAAGACATTTCACTTT  
CAAAAAAATTCTACAAGATAATTTTTAAAAAATACTTGTTGTAACAAATTACATGTCTTATAATTCAGGTT  
ACTAATTGAATTTTGTTATGTATAATTAATTACCTGTAATTAGTTTCTAGTTATCTTGAAAAGTACTAATTA  
TCTTTTGAAACAGTTAGTGAATGAAGTTAAAGCTCTTCTTCAAATTACCAAACAATCAACATTGTATA  
CTTCTGTTTATGTTAACTTGCATGTAATGCAATGAAGTAGTCAAAAATAACTAACTAAATATGCCACAG  
AGCTTTGAAAGCACAGAATATTCAGCAAATATCCACCAGAATTCGCGCAACTTCGCCATCTTAAGCAC  
TTGTAAGTCCTTGTTACAGAATTATCACTCAATAGACTGAAGCACCTGATATTACTATGTTGAAAACCTAG  
GAGCTGCACTAATCCAATACTAAATGATGATTATGCAGGGACCTCAGTCGCAATTATCTCAATGGTTCA  
ATCCCATTTCAATGGGCGTCACTGCGCTTGCTTGACCTGTACATACTATTTCTCACCTAACTATTCTTCAT  
TAGTGCTTAAATTTTTCTTCTGTTTAGAATAAGCTATTTGACATGAAAATAATTGTTATTTGAATGTG

CAGTTCTTTCATGGGAAACCACTTGTCTGGTCCATTTCCAAAAGTTCTCACCAGAATTACGACGCTTAGG  
AACCTGTAAGATCAAATTTCTTCTGATGCCTACTTGTCAATTTTCAGTGTTGTATACTTGCACCTAATCTG  
TTTTACTATTGAATTTAAGTTTTATTTATGACTGCATAAAGTATTTACACAATCGAGTTTAAGTTCTATTCTG  
CTGACTATATAAGTAATTACAAGTAAAATCTCTATGATAAACACTAATTGGTAACCTGATAAAAATGTTA  
ACTTAAGTCATTTACCATTTCAATATGGCGATTCAATTGATTCAACATATATATTATACTGTAATTTGGTACT  
GAAGTGAGAATGCGGAAAAAGATCTCTATATGTCATGTCTGTCTGCAACAACAACATACTAGTGAAA  
TCTCGTAGGTGGTGTGGGGGAAGCTAGAGTGACGCAGAACTTATTTCTCCTCGTAGAGGTAGAGAG  
GCTGTTTGTGAAAGACTTCGGCTCAAGTAAAACATATCAAAACAGATTCTCTTTTCCTAAGGCATTTTATT  
TCAAAAGTTAACTGCTGCTCTGACAAGAATTTTTGATCACCTGTATTTGATTCCATGAGAAATAAAATGCC  
TCTTCTATAACTTTCAATACAGGAGCATTGAAGGAAATAAATTTTCAGGAACAATACCTCCAGAAATCGG  
CAACTTGGTTCATATGGAAAACTGTAATTCTCTTTTTCTGTTTTAATTTTGTCTGGAAATCTTTATTCTG  
TTTCACGTTGTATTAATGCATCTGTGCCTTAATTCTCAGCGTGCTATCGTCAAATAAATTAACCGGAGCTT  
TGCCAGCCACACTAGCCAAGCTAACCACTTAAGTATGTGAGTTCACAGTTTTAACTCTTTCTCATT  
TGGTCATTCCTTCTGTCCCTTGTGAATTGTGATGGATGATCACATAATTAACTTTGCCGATATATTAGGAG  
GATAAACGACAACAATTTTACTGGAAAGATACCAAAATTTATCAGCAGCTGGACAAAAATTGAGAACT  
GTAAGCTTTCTTTTTCTTTACTTTTCAGACTTCAGTAGATGAAGTCTAGTTTCTAGCTTTATAACAAAAGG  
GCTTCCCGGTGCACTAAGCTCCCTCTATGCGCGGGTCTAGGGAAGAGTTGGACCACAGGATCTATTGTA  
CCAGCCTTAGCCTGTATTTCTATGACAGGCTGTTTCCACGGCTTGAACCTCATGGAAACAGCCTCTTTCTGG  
AATATTAGAAGTTTATACCCCAATTTTTCTGCATATTTACAGTTATTGCTGTGATCTCATGAACCTCCAAT  
TATACTATAATTTTTGCAGGCATATAACAAGGCTGTTCTCTTGAGGGTCCATTCCCTCCTCTATATCTTTCC  
TGACAAGTTTAATTGATTTGTAAGCCAATGTGAACTCCTTTTTGATGTCATTTGTGGTTGCTTTGAGAAG  
TAAAATAATTTGTTATTTTTTTCTTTTCATGAATTTCAGAAGGATCAGTGATCTAAAAAGTGGAAAATCTGG  
TTTTCCACCATTAGATAACCTAGAATCCATAAAAATACTGTGAGTTTCTTTACTTTTTCTTTTAAATGGA  
CTGCTTGAAGGACATTTCAATTCGATTTTCGGAATCAATTTCTGATCAAAGATTCTGAATTCCTCTTGTGCA  
ATGCAGAGTACTAAGAAATTGCTTAATTCATGGAGAAATGCCTGAATATATTGGGGAAATGAAGAAATT  
GAAGACACTGTAAGTTTGAAAAAATTCATCACTTTTTTTTTGGTTTCAGTTTTCTGCATGTTGATACCTTTT  
CTGTTTTCATGCTATATAGTATATACACATTCTTCAAGATTCTGAATCTTTTTTAGCTGAAATTTGTTTTCC  
ATGGAACCTACTATTTTCTGCTTTGTGATTTTAGGGACCTTAGTTTTAACAGCCTGTCTGGTGAGATTCCA  
TCAACTTTTGTACACCTATCCAAAGTAGATTTTATGTAAGTGGATATTCTTCAGATATCTTTATTTCTTTGT

AGCCAGATGCTTATCAATATTAGGCTTCTGTTTTTTCTTTTCTCTAATTGTTCTGGTACTTTGCAGATATTT  
GACAGCGAACAACTTACTGGACTTGTTCTGGATGGATTTAACCAGAAACAAGAACATGTGTGTGTTT  
TCGCAACTTAATTCGTACTTCCCTTTTTAGTCCGTCCCAAAAAGAATAACACAATTCCATATTTAGTAAC  
AATTTAACTTTAAAATGTTCAAAACATCGATGACTTGTTTTAGACCACAAGTTTTAAAAGTATTTCTTTC  
TTTCTTAACTCCATGCCAACTCAATCAACATCACATAAATTGAGATGGATGGAGTATAAATGTGCAAAA  
AACTTGATTGCTCTTTAAAGTTTTCACTTACTGACCTACATGCTTTTATGCAAGTAGAGGCTTTAGAATGT  
ATTCAATATTGAGTAATCTATTTTTGCCAAAAAAGAATGGTGAAAAGGAACTAAAAAATGTAAAAGA  
TCATCTCTAAGCTTCAAAAAGTTATTAGTATTATGGACTTGCGAACTTCTAGTCTAATTTTGTTGTCTATT  
TTGCTTCACAGAGATGTTTCAACTAACAATTTTACATGGGAAACCTCACCTTTTGAATGTCCCCGTGGAAA  
TCAGTAAGTTGTTTGATAAAATTGTTTTCTTCATTTGACTTATTTGTTTGTGATAATTTCTAACATCAAG  
ACGATTTATTCAGAACTTGGTGGAGAGCTATTCTGCATTGGGACAAGAATCGTAAGACTAATGTGCCT  
ATAATAAATTTATCTGTTGCACTGATCTTACAGAGGAACTATTGTTTCTGAGTTCACCTATAACTAAGA  
GTGAACTCTTACCTACTATAGAAAACTTTTGTAGCACTCTTAACAACTTTTTCTTTTGTGTTTCTGTGTTGCA  
GAAACAAAATTCATCCTTGCTGAAGCAGAATTTCCCTTGTTCTGAGCCAATAGATCAGCGTAAGTAAAC  
TTTTATGTGTCCATTTCTGTAATTGATAGCACAAACAAATCTGTCTCCTGTACATAAATAGGTGTACTTG  
TAGTGTGAGGTCAGCTAGTGGCAGAAAATATAACAACAACAACATAGCCAGAGTAATCCCACAAGTG  
GGGTATGGGGAGGGCGGTGTGTACGTAGTCTCACCCCTGTTAGAGTGGGTTAGAGTCCTACATTGGTT  
GGGGAATGGATTGGTAGTCTGCTTATATTGACTTGGGCAATCCTCCCCTCATGAGCTAGCTTTTGGGGTT  
GAGTTAGGCCCAGGTGTCATATCTGACTCCTAGTAACAACAAAAAATACAATTTAAGAGTTTGGGACTG  
ACTGCTGTCTTCTGATCTGTCCATTGTGATTTTCTGCTGAATTCTTGTTAAGAGTGCCCTTGTCTACTGGTT  
TGCAGAACAATATTCTATCCACATTAATTGTGGAGGCAAAGAGGTAACCATCAAGAATGGTACAAAATA  
CACAACTATGAAGCTGATTTAGAACCCAGAGGTGCTTCTATGTACTATTCAAGACATAACTGGGCGTTT  
AGCAGCACAGGAAATTTTATGGACAACGACGTTGAGTCTGATGTCTATATCAATACCAATGTCTCTGCCC  
TGCAAAATGTCAAGGCCCTGAACTTGAACATACTACTGCACGTATATCTCCTCTCTCCCTCACATAT  
TATGGACAATGTCTAATGAATGGAACTACTGTCAAGCTCCATTTTGC GGAGATAAATTCACAAATG  
ATACTTCATTCAACAGCCTTGGAGAGCGTATATTTGATGTCTACTTGCAGGTAAATTTTATGCTCTGGGG  
GAAGGTGAAATGTGTGTGAATTTTATGTTTGTGCCACCAGTGTATTTATTCAATCTTCTTGAGACAGGA  
AAAGCTGGTGTGAAGGATTTTAAACATTGCAAAGAGGCTGGTGGGCCTGGTAAGCCCATTGTGAAGA  
CGTTCCTACTGTGAATGTGACAAGCCACACGCTGAAGATACATTTTTACTGGGCAGGAAGGGGGACTACAG

GAATCCATTTAGAGGGGTTTATGGTCCTCTAATTCAGCTATATCAGTTGTTAATAGTATGTTCCTTTAC  
TCTCTTCAAGTTTATATCTGTCTTGCTTACAGTTGTATGCTCAACTCTTCTTTAATGAATGCCATAGGGATC  
ATAGGACATTATTCTAATGTACTAGTCCTTAAAAAACCTTCCGAGACCAAATTAATCTACATACCAAGG  
CTTAATAAGTTTTGTTAACCATCTTGATGTTATAAATTCTATTCTACTGATTCATTATGCATCTAAAACCG  
CTGTCAACATATTCTTTCAGGAAGTTTATGTGTATCAGAACCTAAGAACTTCATATACCCTTAAATTTCA  
TGATGCATTTTGAATACAGTGGGGAGACCACTTATAGTGTCCCCAGTTCAGTTCCTTAATCTTGTCTGGT  
AGTGGAAGCATCAAGACTTATACTAAGACTTCAAAGGAAAATGTTTCAAATTGCATATGCAAGTCAATTA  
AAGCTTGCTAAAATCATCACAAGTTTTGAGATGTCATATTATTTTTTCTTCCGTGCAGAGTTTCCCCCTC  
CTCTGCCTGCTCGTCTGCCTGCTCATCTGCCTGCAGATCAAAGAGTAAAATTAATGTTGGCATACTAGC  
CGGCATAATAGCTGGATCAGTATTTCTTGTCTTCTGATTATTGGTATCTTGTACAAGGGAGGCTGTCTA  
GGCGAAAATGTATCTACTGATAGAGGTAATAACTACAAGTATTTTACTTTTGAAAGTTTAGTATCCATTTA  
TTTGACCTATGAGTCAGCAATAATGTTCTCAAGTTAAATGCTAAACTACATAATTACTTTCTAGCCAGTAT  
TTCAGTTCATACCAAATTATATCAGCTCAAATACTTGAAGTTATGCTTTACGTTCTATTGACTTGCTTGTT  
ATCTCATCAATCATTTATTCATTTTAGGCTTCAAATAATCATTAAATGGTCTGAAGCACTTGACCAAAGTTT  
ATATGAACCTTGAAGAAACATAGTGTATAGCCATTAGCTTCCACTGAGATACTTTTCTTGAACAGA  
ACTTAAAGGACTGGATCTACAAGCTGGACTATTTACTCTCAGACAGATCAAAGCCGCGACAAAGAATTTT  
GACCCAGCAAACAAGATAGGGGAAGGTGGTTTTGGTTCAGTTTATAAGGTAATCATCTTTTCTTGTCTA  
TTTTAAATCAAACACATAACTATAAATGTCATTATATTAGCATGAGAAGGATCATAATGACATGGTGCAG  
ATGCCTCTTAAGAGAGAAAATGAAAGACTAAAATCTTAAATTTATAAACCTTCAAAGGAAGTGTGAAT  
ATTGCCTGTAATGAGGAGACTGTACAGGCAATGCTCTATTACCATATGTGTTTCTATAGCCCTGAGAAG  
TTGGAGTAATTTACTGATCTTTTCCATCAACTAAGATGCAGAGTTCTTATCTTCGCGACATAGGATTCAA  
TCTATTATAATCTTACTTGCTGATCATAAGCTGCAGAAGTCTGAATAGAGTTTTGAATCATGACTTTTGTA  
CACAGGGTCTATTATCTGATGGAACAGTAATTGCGGTGAAGCAACTTTCTGCAAAGTCAAACAAGGAA  
CTCGAGAATTTTTGAATGAAATAGGGATGATCTCTGCTGTACAACATCCAAATCTTGTAAGCTTTATGG  
ATGTTGCATTCAAGGAAACCAATTATTGCTAGTCTATGAGTACATGGAAAATAACTGTGTATCTCGTGT  
CTTTTTGGTAAATACTTCTAACTCTGATCAATCAAATATGTCTGCTGCTTATGCACTTGACATTGTTTAT  
CTAACTGAGCTGGTATATACAACCTTTTTCTTTTTGTTTGTCTCTCTTACAGGCAAAGGTCCAATTGGCA  
AAATGAAATTAGACTGGTCTACTCGGAAAAAATTTGCCTAGGAATTGCAAGAGGTTTAGCATATCTCCA  
TGAGGAGTCGAGCCTGAAGATAGTCCACAGAGACATCAAGACCAGTAATATTTTGCTTGACAAGGACTT



CAATCCAAAAATATCTGATTTTGGCTTGGCAAACTACATGAGGATGATACTACCCACATTAGTACCAGG  
ATTGCAGGAACTGTGTAAGTATTATGAACTAGTTCCTCTTGTCCGATCCCATTAGCAACAACATTTGGT  
TGATATGTTCCATAGAAAATGGCTCAACATTTAATCCACTCATTTATCTTGAAACACTCGTGGTACTGTTC  
TCATCCGAAAGCAACTTTGCAGGTATAATCTGCCAAAAGTAAAGCAAGCCAAGAACTTATTACCTGCCTA  
AAGAACTTAACTTTTCTAGATATTAACAGCCTTTGTAGAACAGTAACATAGAATTTTATTCGTCAATGG  
TAAAACCACCTCTCTTTCTTACCATATTTGTAACCTATTGGTTTGTCTAATTATTAGCACCTCAACGTCTCA  
CTTCAGTCATAATTTTACATTTTGAATTCACATAGCTATAGGTGAACTTTCAAGAAAATATTTTCTTGCT  
ACTTCAAATTTAAGAAATGTGAAGATTGTTTGTATCAGAATTCTCTGTAATTAGCAAGTAACTGTATTAA  
TGATGAGGAAACAAAGATCTAATAAGTTGGAACATCTTTGGTATTTGGTGGTACAGGGGTTACATGGCT  
CCAGAATATGCGATGCGAGGCTACTTAACTAGCAAAGCAGATATTTACAGCTATGGAGTTGTTGCATTG  
GAGATTATTAGTGGGAAAAGCAATACAAATTATAGGCCAACGGAAGATTGTGTTTATCTTCTTGACTGG  
GTAATTTAATATTTCTCTCTACAACAATAAACCCAATGTAGTCCCAAAGCGGGGAATTTCACTACTTCT  
CTCTATTGACCAATATCTGGGCTTCCATCATCTTAAATCACTTCCCCTTCTAGTTTCATCTCAACCAGA  
GAACGTTTTATCAACATTCCGAGTAATGCTAATAGCATCTTATTAATCTTCCCCTGCATCAACTTGTACATT  
TAGAGCCAAAGTACTTTAAAATTGGCTTTGGCAAATGAACATGTCATACTTTTTTAGTACATTAACTGTTC  
TTCATTTTCTGTTTTGATTAGGCTTATGTTTTGCAAGAGCGCGGGAGTATATTGGAATTGGTTGATCCAG  
ACTTGGGTTCTGACTACTCGTCACAAGAAGCAATTGTGTTACTGAATGTTGCCCTTTTATGCACTAATGCA  
GCTCCAACACTTAGACCAATAATGTCTCAAGTGGTAAGCATGCTCCAAGGCCAACTCTTGTTCCAGGATG  
TCCTTTCTGATCCAGGGATGTCAACAAGCGGTTCCAGGATTCAGATCAACGAGAAGTCACTTCTGGCAA  
CTCAAAGCCTAACTGATGGTACGCTTACTGATTCCACTCTCTCAACTGGAAATGCGGAAGAAATTGGCAT  
TCTTCAAAGAGTAGAGCCTAATGTATCTAACAGTTAAACAAAATGTCTGTTAACACAAGCAAGTGTATAT  
ATGAACATCAAATGTTTAAATGAAGATTAAGTTAGTCTTTACAAAAGTCTAACTGGTCCTCCTTTTATA  
GTACTTCATTTGTTTATTTTCTAAGCCAACCTCATTGTTGCATAGTTCTATCAATTCCTTCTTTATTTTC

>PGSC0003DMG400017645 LRR-RLKs

TGTCACAAAAATTGTACAACACTAGACTAGCTATAGACAAACACATCTGTACTCCATTATTTAATCTCATCAT  
TTAAAAATCCCTTTTCTCTATGTATCATTACTCACTCTATTATAGATTCTTGAATTATTTTATTCCCTCACTTC  
TCTTTAATCACTTCAAAAAACAAAAAAGTGCTCACTCTTTTGTGAGCTCAAAGAGTTTTTTGGGATT  
TGAGTCTTTTAGCTATGAAGGGTTTCTGTTTCTGGTTTGTGTTTTGTTTTTCTAGTTCCATTTTCATCATC  
TCAGTTAGTTCCTGCAGAAAGTAGAATCCTTTTTCAAATTCACAGTTTCTTGAAAATCCACCTGTTCTTC

AAGAATGGAATAAATGGACAAATTTTTGTTTTCTCCACAATCTCCTTCTCTTGTATCACTTGTTCTGGTA  
ATCATATAACTGAGTTAACAATTGTTGGTAACAAAAAATCCCCTTTGAGTCTTTAAAATCCTCTTCTCCA  
CAAGCCCTTTCTGGGAAATTTCAATTGATTCATTTTTACTGTTGTTACTAAGCTTTCTAGTTTAAAAAAG  
TTGTCTTTAGTTTCTTGGTTTTGTGGGGTTCATTGCCTGCTAAGATTAGTAGGCTACATTCCTTGAGGT  
ACTTAATATAACTTCAAATTTCACTTGGTGAGATTCCATCATCTATAGTGAATTTCAAGAACCTGAAAT  
CTCTTGTTTTGGCTAGAAATTTGCTTAATGGAAGTGTACCAGATCTGAAAGGGTTAAAAATACTTGAAGA  
GTTGGATTTGAGTGGTAATAATTTAGGACCAAAGTTCCATCTTTAGGTGATAACAACAACAATCTTGTT  
TCACTGAATTTGAGTAACAATATCTTTAGATCAGAAATACCTAATGGACTCAACAAGTTTACTCATTGCA  
AAATCTTGATTTGTCTTCTAACAACTTGTGGTCCAATGCCTGCTTCTGTTTTCACTTCCAGCAATTCA  
GTCTATTAGTATTGCTAAGAATCAGCTTAGTGGTGCTCTCCAGGAAGTGTGTCTTGTAGCAACAATCTA  
AAATTTGTGCGATTTTTCGAGTAATTTATTGATGGGAAAGTTGCCTGCTTGTCTTGGATCAAGTTCAAGTTC  
AAGAAACAGGACAGTGATTAATGTTTGAATTGTTTGTCAAGTACTAGTACTAAGTCTCAACATCCACAT  
ACATTTTGTGAGAAACAAGCTATAGCTGTTAAGCCCCCTCAAGAAGTACTAGTATGAGAAGGAACAATCC  
ACAGTTAAGCTTGGTGTGCTTAGGACTCATTGCTGGAATTGTTGTAGTTGTGGGTGCAGTTGGTTTCC  
TGATCTTTTTTATTGTCAAGAAAGTTGTGAGAAATAGAGATCAAGGATATAAAAATGACAGCTTTGCTTT  
TGAGAAGAATTCAACCCTTTCCAAAAGTCTGATGGAGGTAATTTCTTAATGATTAGGGTCTATCGGA  
AACAGTTTCTCTACGTGTCAAGGTAGGGGTAAGGTCTGTGTACACTCCCCACTAGACCCACACTGTGT  
ATGTTGAATCTTGAATAGTGATAGGGGTCTATTGGAAACAACCTCTCTACCTCCCGAGGTAGGGGTAAG  
GTCTGTGTACACTCTATCCTCTCCAAACCCACTTGTGGAATTACGCGGGGTTTGTGTTGAATCATGAAT  
AGTGATAGTGCATCATTATGACAATTTTATTGATAACTTGATTTAATCAGGGAATGCAAGGAGGACAAT  
GAGGATGGTATCATTAGGACTTCCACCATATCATGTTTTCACTTTAGAGGAAATGGAAGAAGCAACAAA  
CAGTTTTGATCCAATAATCTGGTTGGAGAAGGTTCCAGGGTCAGGTAAAAATGTTGATTCATTATAAA  
TAGCAAAAAAATGATATTTATTACTATATCCTGTCCATATTATTCGTCATTTTGGACGCCGAACAATTCC  
ATTCTAGTCAAATACATAATCTACATGAGTATAACAAGTCCGTAGATACTCATATTGCTATACTTCTAGTCT  
AGACCCAAAAAGTACCCTAAAAGTCAACCTGAACAACACTTGACATTTTAGAAAACTAAAGATAGTA  
ATATGGATATGCTTTTCTTAAATCTTGGTGAATACAACTTGTGTTTTGAACATTGGGATTGATGTTATTA  
TTAATGACAGCTATATAGAGGTTGGCTTAGAGATGGATCAGTGGTCTAGTGAAATGTCTGAAATTGAA  
GCAGAAGCATTACCTCAAATCTGCAGCAGCACATGGAGATGATATCAAAGCTAAGGCATCGACATTT  
AGTAAGTGTACTTGGACTGTGTTGTTACTTACCAAGATCATCAAATACAGCTAGCACTGTATTTATTG

TGCTTGAAAACGTCGTCAATGGATCACTAAAGGATCATCTTAGTGGTAAGCTATTACGAGTTGATTTCTC  
TCATGGCCACTCAACTAATAGTTATTACCTCAAAGTCACTTTCGAAAAGGTGACTTTTGAGATAATGAC  
TATTAGTTGAGTTACTATCTAATAGTCATTACTIONTTCTTCAGTCGGAACGATGAAGGACTGAATTTTATATT  
CCGGGATTCGTTCTTTGGCAGATTGGAGGAAAAGGGATGTATTGAAATGGCCACAAAGAATGGGAATA  
ACGATGGGCATTGCAAAGGAATTCAGTATTTGCACACTGGAGGAGTCACTGGAAATGATATAAAGCTT  
GAGAATGTTTTGTTGGATGAAACTCTTACTGCTAGAATAAGCAGCTACAATATATCGTTGCCACCTAAGG  
TAATGCGATTAAATCACTATACGTAAATCTTGAGAACTGTATTTTTGACCATCTAAATTTTTACAGTT  
GGTTCGAAAAGTCTCTTGCTGGACCCGACATTTTACCAGGTATTATTCTGCAGCTACATTCACCTTACT  
TTCTCTATTTCTGCTATCATTCTGAATTGTCTGCTAATATAAACTTCATATTCAGCGCGAAAGAAGCAG  
AAAAGGAAGACATTTATCAGTTGGGAGTTATTCTACTAGAAGTTATTATTGGTAGACCAATCAACTCTCG  
AAGCGAAGCAGAGGACCTTAAGCTTCAGGTATCAATAACAATATCCTAATAACTCTCAAACGATAGAAA  
TATATCATATCGTCACTCAACTAATAGTAATTATTTAGAAAAGTCACCTTTCTTCTTGATTCAGATGTTCTT  
CTGAAATAATAACGATTTGTTGAGTGACCATATGAGAAATCAACTCGAGAAATAAGAGATATGCGATAA  
AGAAATTAGAAGAATGCACACGAATACAAATGTCTTACATGATATGAAGCAATACACATGTTTACATATT  
GCATAAGAGTCTAGTCTATTTACACAATCTATCTAACAACTTGAACCAAATTGCCTTTTATGACATTCAG  
GTGGAGACTGCCTTAGCGGAATCACCATCAAAGCTACGAGATTTAACAGATCCTTGTATACGAGGTACA  
TTTGCATATGACTCATTGAAAACGACAGTCCAGATAGCAATAAACTGCCTTGAAAAAGAACCAAGCAGG  
CGGCCATCAGTCGAAGATGTTCTCTGGCATATGCAATACTCAATTCAGGTTCAAGAAGGAACAACCAAC  
AGTGGAACCTCAGTGGGAACCAAAGTGGGAACTTAGTGAAAAATAAGTGGAAATCTTAATAATAA  
GTTGTAAGTACTGATAAGAGAGAACTGTCATTATATTGTTATATCTTGTTGTTTAGTCATTTGTATGCATCTTGT  
ATAGCATAGTTCAGTAACTTACTGAATAAATGTTTTTGCCTTCTACATCACAAAAAAATGTACCCAAGTT  
TACAATACAAAGCAAATTTTCATGGAAGTTGAGAATCTCGGGGATCTCGCGAAAACTTATCAACACCC  
GGTGTTTACATCAACTCAATGAAGACATAAAATGTATCTTCATGTGCTTTGTTATGTCTAAGTCCTTCAA  
ATAAGTAACTAGCGGAAGATATAACTAAAGTAAATAACAATGCAGTCTCTACAGTCATGATATGATTCAA  
TATCGTATCAGAGCAGGCAAAAATCATCGGTTTATATCTCACCACCAGAAAATTTTCATGTGCGCTTGGCA  
CATTATAAGACCTTTACACGTGAGGGGGCGTGTGGAGGATATAATAAAGTAAACACTAAAAGTATGTCT  
CTCCAACAATTGAACTTCTAGATGAAATGCTCACAACATACCTTTGTTGACTCAAAGGGTACTTCTTGAA  
GTATAACTTCGCCTTTCTATACCATTTTCAGCAGCCACGCCTGCCACGGTGGCTGCATGCAACAGCAGA  
ATCTGCTGTTTCATCGTTGGTGTCTCAAGAGCACCGACATCAATTACCAATTCCAGCCACAACAGCTGAAT

TGGCTGATCAGGCTGCTGCTTCTATCTCTGCATTCTCCAGCACCCAAAGAACAATAGCAGAGTAGTCAAG  
TATTCCCAAGTATCTTTCTCTCCAGCCATTACTTTGTGCGACTACTAAAAAATCACTATTTTCTCCAAGAA  
ATTTCTCACTGATATTTTGATTAAATCGGTGAGAAAAGAGTAATGTTTTCGTACAAAAAACTAGAAAGT  
TTACCACTATTTCAATTGAGAATCTGTTTCCCACCATGCATATTCCCAGTGAAGTACTGATTTGGTGGAAATGAG  
TGAAAAACATGTTCTATAACACAAATTTCTCACTAATTCACCGTGGAAAAAATCTATTACTACTACTCATC  
ATTAGTACTTCATCCGTTTCATCTTATGTTGAACTTGATTGATTAGGCGCGGCTAAGAGCAACATGGGAA  
GTCTTAAAGTTCAATTTTTTCCAAATATAGAAAAAGACCCTTTTTATAACGTAC

>PGSC0003DMG400017690 LRR-RLKs

CACATGTTAGTTGGCATGTCTCATCTTAAGCGGCATGGTGGGCAAATTCTCAGAATAACTTGCTAATGAT  
CTTTTTTTTTAATTTCAAGGGAAGTTTATAGTAATAACATAAGCGGAAGAATTCCAAATGAACTGGGGAAC  
TTGACAGAGTTGGTTAGTTTGGATCTTTACCTGAACAACCTAAATGGTCCTATCCCTCCCTCATTGGGCAA  
GCTTCAGAAACTACGCTTCTGTACGAGTTATACATTCTATTTCTCCGGTTTTTTTTCTTCTTTTTTGT  
CTTTTCAGTTTGGTTATTTTTTTTTCAATGTTTCAAATCTTTAGCATATATATCTGAAGTTTAGTTAAATCAG  
AAATGATCACCTTCTATTTTTATTTTTATCAAGAAAGCAGCGTCTATGTTAAGGATCCGTTTGGTCATAGA  
TTCCCAAGTAAAATTTGGGAGAAAATTTGGCATATAGTGTGGTCCATACAATTTGCCATTATTTGGCAA  
ATAACCCAAATTTCCCAATACTAGAAAAAACTAGTATTTGGGCCAAATCTCATTATTTGGGATCTTTAAAA  
ATTTAAATTCTACACCAAACCTTTTATGTTTTACAAAAACACCCTCTATAGTAGTTGTTTGC GTTGTATTACA  
TAATTTTTTACGTAAACACCAAACACCAAAGTAGTGATGAAATATTCAGTGAATATGAAGTTGATCATAT  
GGTTATTGATGAAAATGATGAACAATTGGCTCAGGGTAACAAAGTCATGTGCTTTGTCTACTTGACGAT  
GTATGGAATGATGCTTGTGCACTCACTCTGAACTACCATATTGCTCCAATGTCATGGACTGCTTGTTA  
TTTGTGCAACGAAGATCCAATTGACTTGTAATATAAACTTATGGTTAGTTTTGATAGTTTTTAAACTTTT  
ATAAATCATATTTCTAAAAAAGTGAAATATGTTTCCCAAATACTATGGCCAAACACATAGTGAAATTTCA  
CCCAAATTTTAAACACAAATAATATTTGCCAAAAATATTTGGAAATCTATGGTCAAACGCTAGCTAAATCAT  
GCAAATGGGGTTGTAGTTTCTAATTCTCTAAGCAAATCTGTATGATGTTCTGTAACCTTTCTGTTTATTAT  
GTTTACATTGATGGGTTCTGTCCAAAAAAATTTGATGTGTGGAAGCATTATGAAAATCACTACTCCTGTC  
AGCGAACAAACCTTTGTTGTTTGGAGAGGTCAACAGGGAATATATCTGTATGATTCATTCTGTCTTTGCTCT  
GTAGTGGAAAGTTAGTTGATATGCTTGGCAAACCTTGTCTTGTGTTCCCAAATACTGTATGGTTGCTGAG  
TGAAGACCAGGTGACTGGACTGGACTCTTTTTTTGTACGACAAACAGAGATAAATAAGTAATAATATAA  
AATGTTAAGAATAATATGAATCAACTTGAATAAAAAATATATTCTAAAAGTTTCAATTATTATCTGATTAAC

AAAGTTGTGCTTGCTTGGTCTCTCTCGATATAGACTCACAGCCGTGCAGCTCAACTGAAAGTGACAATTC  
TGAGATACTTCTCATCTTATCAGGAAAATGGCCTGTGGATTTAGTTCATTGCTAAAATACTTTATCTATGA  
ACTGTGATTCTCAACCTGCAAACACTATCAGCAAGTTTTTCTAGCATATTGGAATTAATCTTTCTGGAGT  
ATCTAGTCCTATATATATAAATGTATTTGTCTTTGTCTACCTTTAGCACATGTACGCTACATTTAGCACATG  
TACTGAGTAATGAGCTCTAGACCAGTATTCGCTTTGACGAACTTCTTTTCTGTCTTGCTTACTCTTGATCA  
ACCTTCCTTTTATCCTTTTTTTTTCTTTGCTGAATTGAAGGAGGCTCAATAATAACAGTTTGAATGAAGGT  
ATTCCCGTGTCTCTAACCACCATTGTTGCACTTCAAGTACTGTAAGTATAAAGTTGTTCTTTATTTATCAA  
TGCTGTATGTTGTCTGTGTTGTCTAGTTCCTCTGGGTTACTTATTGTCATTGCCTTGCAATGCAGTGATCTC  
TCAAACAACCATTTGACAGGACCAGTTCAGTCAACGGTTCCTTTTCACTTTTTACTCCTATAAGGTGTGT  
TGGAAGCATAAATTTGTAGTTCCTTCTGTTCTGAAGTTACAATAGTGAATATCTAAAGATTGAGTACCT  
ATATTTAGTTTTGCTAATAATCAGTTGGAAGTTCCTCCAGTTTCTCCACCTCCTCCCCTCCTCCTACGCC  
CTCATCGTCATCTTCAGGTTTGTGACATAATTTGTGTTTATGCTGTTATGAAATTGTGCTACCTCTCCTTT  
TTCCCTATTCCAATTTAGTTTTCATGAAAATCCCTTAAGTTATTCACAATAAGGGGAGATGGCAATGGGA  
AGAAAGGAAAGGCCTGGTTGCCTAGGGAAAGCTGAAGAGATGAGCCCCAGACTGGATTCCCTTATGAA  
AGCACTTTCTTTATGAAAAAACTACCATTACGTTAGGCACTATAAATTAGTTTATTTAGATCAATTATAC  
AGGTATTGGGGTCTTGTGGTTATCCAGCATTGACTTTCCAAAATAAAAAATTCAATAAGCTTGGAG  
ATACTATCAACATCTTTTTCTTTGTTGGAATTAGATTTACTGTAACTCTGAAGTTCGAGTGATACGTGT  
GTCAAAAGTACCATATATATTTTAGAATTGCCTGTATTTTAAAATTTAGGTCATACAAATAAAAAGTTAAC  
TCAATCATCTTTTCAGTGGGCAACAGCGCAACTGGAGCTATCGCTGGAGGAGTTGCTGCAGGCGCTGCC  
CTTCTATTTGCAGCTCCTGCAATTTTTATTGCTTGGTGGCGTCGGAGGAAACCGCAAGACCACTTCTTTGA  
TGTTCTGGTTTGGCAAACACATTGAATCTGAGTTAATTGTACTTTCAACTTGGATGTGTTCTCACTCTT  
TATAACTACTTTTGCAGCTGAGGAGGATCCAGAAGTTCATCTGGGACAACTCAAAGGTTTTCTTGCGT  
GAACTACAAGTTGCGTCGGATAATTTTAGCAACAGAAATATACTCGGTAGAGGTGGATTTGGTAAGGT  
TATAAAGGCCGGTTAGCTGATGGCTCTTTAGTTGCAGTGAAAAGACTAAAAGAGGAACGTAAGGT  
GGAGAGTTACAGTTTCAGACAGAAGTAGAAATGATCAGCATGGCTGTACACCGAAACCTACTTCGTTTA  
CGGGGATTTTGCATGACACCCACTGAGCGGGTGCTTGTATCCGTACATGGAGAATGGAAGTGTGCA  
TCACGTTTAAAGAGGTATCTTTTTTAATTTTTCATGTGCTTGCCTCTACTTTTTGCTCACCTTTAGGCAGGC  
TCACAACAACCACAACAACAACATACCCACAAAGTGGCGTCTGGGGAGGGTCGAGCATATGCTGACCTT  
TCCTCTACCTCAGATGTCAGGTAAAGAGGTTGTTTCCAATAGATTCTTGGCTCAAGACAAAAATAGTCTA

GAAAAAGACATAATTGAAGTACAAGAGAAAATAGATAGCAACAAAAACAACAGATAGTATCAAAACAG  
TACTGCACAAAGTAATACTGTAATAGAACTACATAAAACATCATATATCAACAAAAATCGAAGAACAAG  
AAACTACAAGCATAGTACTACAACACTACTAGTAAGGGCAACAATATAACGCACTCCTACCTACTAGTATGG  
ATGTACTTTTACCTACTAATCTTCTACCCTAATTTGTGTCCTCTACAACCTTTCTATCTAAAGGTATGTCCTTG  
GTAAGCTGCAATTACGCCATGCTGTGTCTAATCATCGCTCCCCAATACTTCTTCGGTCTACCTCTACCTTTC  
CTAAATCCATCCATAGCCAACCTCTCTCACCTCCGCCCTTGGCATCCGTGCATCTTTTCATCACATGTCCAA  
ACAATCTCAACCTCACTTTCCGCATCTTGTCTTCCACCAATGTCACTTCCACCCTGTTTTGGATATCCAAAT  
CCTTAATCCTATCTCTCCTAGTAAACCCACACATCCATCGCAACATCCTTATCTCTGCCACTTTCATCTTCTA  
AATGCTGGCCAACACTCTGACCTTACAACATAGCTGGTCTAACCACAGAAAAAAGCCAATAGCTAATGT  
TAATGACAAGCCTTTAGTCTTTTAACTTTTCTTTCATAAATTTGTAACAAATTTGAAAAAGTTACTGCAGA  
AGTGTAAGCCAGTGGTGGAAATCTTACATCAATTTCAATTGTGCTATTAGTTATTATAGTGATTGAATTTTT  
TATGAGTTCTCATGATGGGTATGTATATTTAACAAGGTGTCAATGTTGTTTATGATTTTGCTTGTGTTCTA  
TGGACCAATTTACAAGTGGTGCTATCCTTGATATCTTACTGAATATAGAGACTGCAGTTCATGATAAAA  
TTTATTTAATGAGCACATCTGAAAGTCAAAAAGAATTAATGTCTTGAAAGAGAATACATATTTTTATTAT  
TGTATGAAACTGGATAAGTAATGCCTCATGACTTGGTGTTCATGATTTAGAGTGATATTGACCCAAAAA  
GATCAGTTTTCTTTTTATACTTATTCAAGCTTAAATAGGAACCTGTTCCAGTTTGCTGAATAGCTTGAAT  
TTATGCTCATGGGATAATTTACATTTTTCTAGAGAGGCCTGAATCAGAGCCCCCACTTGACTGGCCAAAA  
AGGAAGCGTATTGCACTTGGATCTGCAAGAGGCCTTGCTTACTTGCATGATCATTGTGATCCTAAAATTA  
TTCATCGTGACGTCAAAGCCGCAAATATCTTGTGGATGAGGAGTTTGAAGCAGTTGTTGGGGATTTTG  
GGTTAGCTAAACTCATGGACTACAAGGATACTCATGTTACCACTGCTGTACGTGGTACAATTGGGCATAT  
TGCCCCTGAATATTTATCTACTGGTAAATCTTCTGAGAAAAGCTGATGTGTTTGGCTATGGGGTTATGCTTC  
TAGAGCTCATAACTGGGCAAAGGGCTTTTGATCTTGCTCGACTTGCGAATGATGATGATGTCATGCTGCT  
AGATTGGGTAAGCATTATACTGTCCTGTATGCTTAAGTTATTTTGCTTCTGCTATCAATCAGCAATTTGG  
ATTTGCTTAAAGATCAAGTCACTTCTGCTATCAGTGAACAGTCTTGAATGTTCTGAAAAGATCAAGTCA  
ACTCTCTCTTCTCTTATAAGTCAAAGTTTGATGTCTTTTTCTACTGTAGTGTTAGTTGTTGAACACTGAT  
GTGCTCATCCTGAAGAAATGGTGTGGTACGAGACCTGCATCGTTGCTTATTATTTATTGTGGTTTTGTGG  
TGTGAAAGTAACATTCGTTGCAGTTCCTGTGAGTAATTTTTTTTTAAAAAAGGCTTAGATGTTTCAGGAG  
GATTTAACCATTCATTGCTAAAATTGCACGAGCATGTAGGTTATAATTAGAGTGGATTACTTTCATTATCT  
TATTCTTGCAAGGTGCTTCAACAGTTAGGTTGCCAAATTCGTCCCCTCAATTTGTGACTAATCTAGAAAATG

TGCATCTCCACTTCTCATTCTGATGCTATCTGAAGATTAGAAAAATATACTTTTTTCATTTTCATTCAAAT  
AAGCTAAGGTGTATCTGCAACTGCCATATTAATGTCACTTCAGTCATGTTGTTTTGGGGGTAGATATAG  
TATACTTTAGGACAGGTAICTCATTGAGGAGCATCCTTGAGAAAGGCTAGTCTTATGTGGGATCGCCATCC  
TGGAGAAGGAAAAGGAGATGGTCAAAGTGTAGGAAGTGAATATAAAATTAAGCTTTTCTGAACCT  
CTTGCGTCTCTGATGGATACAAAACTGTAATAGCAACATGAACACTAATAGACAGCAATGCCACTAATG  
TCAATCAGAAACACTTGGCTGTGTTGAGCCTCATGCACTGATGTGCTGTTTTCTTAGTCTCCCTTCAGAT  
CTTACTAGCTTTTCTAGTGAAGTGTGCTCTTAGAGATGGCACATATGGTTGCATGCATGGCTATTATTTGAC  
TTATAACATTCCACTGGATATTCAGGTGAAGGGACTCCTGAAGGACAAGAAATATGAAACATTAGTTGA  
TGCAGATCTTCAAGGTAATTACAATGAAGAAGAAGTGGAACAGCTTATTCAGGTAGCTCTACTTTGCAC  
GCAGAGTACGCCTACGGAACGTCCAAAGATGTCAGAAGTTGTAAGAATGCTTGAAGGTGATGGCCTTG  
CTGAGAGGTGGGAGGAATGGCAAAGGAGGAGATGTTCCGGCAAGATTTCAACCATGTCCACCACCAC  
CATACTGATTGGATAATAGCTGACTCCACTTCAAATATCCGACCGGATGAGTTGTCAGGGCCAAGATGA  
TCTTTCAATTTATTCTGCCATCAGCACATATAGGACCGACTCTTTTGAGGGAAAATCCTCTTTGTATCCTTGT  
ATCTGTAATCGGTATATGTCATCTTCTTTTTTTTTGGGTTAATTGGTATATGTCATCTTTGTGCATACCATTT  
TCCTTCTTTTTTTGTTTCAGTCAGTTATATTGTATTTGATTATGTCCAAATGTGTATAGGTGATTGGGTCAT  
TACAACAGGTCTGAACATGAAAATCAACTTATAGCAGGAATGGCTGTAGAAAGCATCTTTGCACCTTCTC  
TTTTCTAATGTATCAGATAGAGTGGCGTTTGTTAAAGAATATACACTTTGTAAACTTAAAGTAATCATAG  
TTTCTTTCATGTTTCAGTGACAGTTTGTCTCCTCCTTGTATGGCTGAATTTTGTAGTATTATAG

>PGSC0003DMG400017713 LRR-RLKs

CAAAAACAATCTTTTAATTATTAGCAATGATGATAGTCCCACAATTTTTAATTTCTTCAGTTTATTACTA  
TCTTATATTTTTTACAGTTACATTTGCTACCACTGAGGAAGCAACTGCTCTTCTAAAATGGAAAGCAACT  
TTCCAAAACCAGAACAATTCCTTATTGACTTCGTGGACGCTAAGCGGTCCTGCTGGTACCAACAGAATTG  
GAGCGGCGAGTTCTAATGCGTGTACGGACTGGTATGGAGTTACATGTTCTAATGGTAGGGTAAACATGT  
TGAATATGACAAATGCTGGTATCATTGGCACACTCTATGATTTTCCATTTTCTTCACTCCCTTTTCTTGATT  
ATCTTGATCTTAGCATGAACCAACTCTCTGGCACTATCCCACCTGAAATAGGAAAGCTCACTAATCTTTTC  
TATCTTGACTTGCCATCAATCAGATTTGCGGCACAATTCACCACAAATCAGCTCATTAAACAAAGCTTGG  
GACTCTCCACATCTTTGTCAACCAATTAATGGTTCCATTCCGGAGGAAATAGGTCACCTAAGGTCTCTTA  
CTGAGCTAGATTTGAGTTCTAACATTCTAATGGTTCTATTCTGTTTCTTTGGGGAATTTGAACAACTTG  
TCTGTTTTGAGTCTGTATGAGAACCATCTTTCTGGTTCCATTCCAGCAGAAATAGGAAAACCTTGCAATCT

TGTTGAACTTTTACTTGATTCAAACAACCTTAAGTGGTCATATTCCTCCAGAAATCGGAGAACTTGTCATC  
TCGATAGAGTTTATCTTGATTCAAACCAATTAAGTGGTCATATTCCTGCCGAAATAGGGAAGATGAAGTC  
ACTTGAGGAGTTGAGCATAAACACCAACAATTTTTCTGGTCCAATTCCTAAAATATAGGAGAATTAAGT  
GAGCTCCAACCTCTGTACCTTCATACCAACCAACTTTCTGGTCCCATTCTAGTGAATTGGGGAATCTGAA  
AAAATGAATTATCTGCAGTTATCCACTAATCAACTTTCTGGTCCGATTCCCGATTCTTTCGGCAATTTGA  
GAACTTGAAAATTTGTTTCTCCGTAACAACAACCTTTCTGGTTCTATTCCAAAAGAAGTGCATATTTG  
GACAACTTGGTTGTGATGGAAATGGATGAAAATCAGTTTTAGGCCATTTGCCTGAGAATCTTTCGCAA  
GGTGGGAAACTTGTGAACTTACGGTGAATAGTAACAAGCTAACAGGGCCAATACCAAGAAGCTTGAG  
CAACTGCTCAAGTTTCGAAAGGGTTCGCTTTGATAACAACAGTTTTACTGGGAATTTATCTGAAGCTTTT  
GGTATCTATCCGGAGCTGCAGTTCATTAATTTGAGCGAAAATGATTTTCATGGCGAACTAAGCAGCAACT  
GGGGGAAATGCAAGAATTTGACTGATCTTCGGATAGCCAGAAATAGAATTGGTGGTCGCATACCACCA  
GAGATTGGAAACCTCAAAGGGCTTCAAGGACTAGATCTTTCATCCAATCATTGGTTGGGAAGATTCCTA  
GGGAATTTGGAAAATTGACCTCTCTGGTTAATCTTCTTTGCAAAAACAACCAATTTCTGGCAATATTCCT  
ATGGAAGTGGGTCATTGACAAAGTTAGATTACCTTGATCTTTCAGACAATAGATTGAATGGTTTCGATCC  
CAACGTTTATAGGAGATTACCATCACCTGTTTCACTTGAACCTGAGCAACAACAATTTGGCCAAAATAT  
TCCGAAGGAGATAGGGGTATAACTCAACTAATGTACTTGATTTGAGCCATAATGTTCTGGTTGGAGA  
AATACCCCTCAGTTAACCAATTTGAAGGTCTTGGAAAGCTTAAATATTTCCACAACGGCCTTTCTGGCC  
ACATTCCTGAAGAATTTGAAAGTTTACTGGTTTGCAGGATGTTGTCTTGCATACAATGAGTTGGAAGG  
TCCAATACCTAATAATAAAGCTTTCACAAATGCCTCATTGCAAGGTAATAAAGCTCTTGTGGCAATGTA  
ACAGGTTTCGTGCCATGCAACATACCATCTTCTATGGTGAAGAAGCACTCAATGGCGAAGGGACTTAAA  
CTCATCCTCATCACTGTACTTCTATTCTGGGAGCATTAGTGCTTCTTGTGCTTTCGCTGGTGCTCTCTTT  
ATGCGTGACCAAAGAAGAAGAGTTGGAGACATTGAAAGACGGGATTCATAGACAAAGATGATGGTCT  
GCTTTCATATCCTCATTACATGGAAATTCATTATACTGGGATATCTTAAAAGCCACAGAGGAGTTTGAT  
GCAACATTTTGCATTGGGAAAGGAGGGTTCGGAAGTGTTTACAAGGTAATCTTCCATCATTGGGAAAT  
GTAGCTGTGAAGCGACTTCATTCTTCATTTGAGATTAAGCATCGCAAGAGCTTCATGAATGAGGTAAGG  
GCATTGACAGGGATTAAGCATCGGAACATTGTGAGACTCTATGGCTTTTGTTCGAATGCACAACACTCGT  
TCTTGGTTTACGAGTATGTGGAGAGGGGGAGTTTGTCTAGTATTTTGGCAACGAAGTAGAGTCTAAGA  
AATTGGATTGGCTTACAAGGGTGAATATCATCAAAGGTATTGCTTATGCTTTATCCTACATGCACCACGA  
TTGCTCACCCCGATTGTTTCATCGGGACATATCAAGCAGTAATGTTTTGCTTGACTCCGAGTTTGAAGCTC



GTGTTTCTGATTTTGGCATAGCTAAGATTCTCAAGCCAGACTCATCCAATTGTTACTGCACTTGCAGGCAC  
ATATGGCTATGTAGCACCAGGTAAGATCTAACTTCTTATCCTTATTTTAGTTCATGAACTATATCTGCACA  
CTCTATATTGTTTCTATCTCATTGCAACTTTATTGTTTCAGAGCTTGCCTATACATTGAAGGTGACGGAA  
ATGTGTGACGTCTACAGCTTTGGAGTATTAGCATTGGAGGTAATCAAAGGAAAGCATCTTGGGGAATAC  
CTTACTCTTCTAGCAAATCCATCAACAAGAGATGTGCAGCTAAGTGATTTGCTAGATGAACGCCTTCCAC  
ATCCTGAGGATGAAGTAAAAGAGTTTTTGGTTTTTCATCGTCAAGCTAGCAATCTCGTGTTTGCTTGAAAA  
TCCAAAATCAAGGCCAACGATGCACTTTCATCTCATATGTTATCAATGGATCCACCCAATCATCAGATTC  
CATGAAAGTGAGATTCTCGAAATGTAAGGTGCCCTGGTATGGAAAAGATTATGCTCAGCACCAAGTGG  
TTGTGAAGTAACAAGTATGTTGATCAGAACTTTCACAGCAAAATATTATTAAGATTAGCCTTTCTGTATTG  
TTGAGTTGCTTATATAGATTACTTATTTCAATTTGAAGGTTTCAGAGCCTTTGTTACTAGAATATATACAAA  
TTACAGTAATATACTGATGTTAAGTAATAAAAAGCA

>PGSC0003DMG400017864 LRR-RLKs

ATGAATATGAAGAAGTTGGAAAGAAGAAATACTATTGTTATTGTTATGTTAGTTGTTGCATTTGATCACT  
TACTGCTTCTTTGGCTAACATTGCCACTGATGAAGCTGCTCTTCTTGCCTTCAAATCTCACATTTCTTCTT  
CTTCTGATCCCAACAACAACAACGTAGTCGTCTTGCAAACCAACTGGTCTTCTTCAATTCCATCATCAGTT  
TGCACCTGGATAGGGATCACTTGCAACGGGCGCCATAGAGTCACTGCTTTAGACATTTCTAGCATGCAA  
CTTCATGGAACCATTCTCCACACCTTGAAATCTCTCATTTCTTATCCCTTGACATTAGTAACAACACT  
TTCCATGGAGATCTCCCCGAAGAGTTGTCTCATTTGCGGAGGTTGAAATTGATTGATGTTACAAGAAACA  
ATTTTAGTGTTACCATTCCATCATTCTTAAGTTTGTACCTAACCTTCGATTCGTTTACCTTTCAAACAACC  
AATATTCAGGGGAAATTCCATCTTCCCTTTCCAATCTAACAAATCTTCAAGAGTTAAGAATACAGAGGAA  
TTTTCTTCAAGGAAAAATCCCTCCTGAAATTGGCAATCTTCGTTACTTGACTTTTTTAGACCTGCAAGGTA  
ATAGACTTACTGGCTCTATACCGTCGTCAATCTTCAACATGACTTCCTTGACAACACTTGCTATAATACAC  
AATCGTCTTGTCGGTAAACTTCTGTAGATATTTGTGACAATCTACCAAATCTTGAAGTACTTTTACTCTC  
AACAAACAACCTGGATGGCCTAATACCACCAAATTTACAGAAATGCTCAAAGCTACAACCTGCTGACATTG  
TCTGGCAATGAGTTCCTGACTGACCTATACCAAGAGAACTTGGGAACCTTAACTATGCTCACAGTCTTGCATC  
TTGGAGAAAACCATTTAGAAGGTACGTCATATGAATTACTCCCTCTGTTTCAATTTGTTTATCTAGTTTTG  
ACTTGGCACTGGTTTAAAGGAAGTAAAAGGACTTTTGAATCTTATTGTCTGTAAAATGTACCAAATACC  
CAATAATCTTAGAGTCTTAAACAGGTCCGGTGAAAAGTTGAAATTAAGAAGAAAAGACGAACTGACTAA  
AAAGGGAAAGTAAGACAAACAATTGAAACGGAGGAAGTATATCTTTATGCTTTTGTGTTTATTTTAAGAT

TTCTCAAAGCTAAGCAATATCAATATGTACTAATGTTTATGCATTTTACTCTAATTGACAGGAGAGTTAC  
CGGTCGAGATAGGTAACCTACAAAACCTCCAAGTACTTGGGTTAAGAAATAATAAGTTAAATGGTACTA  
TTCTGCAGAAATTTTCAACATTTTAGCATTGCAGATATTGACAATGTATGGAAATCAGTTATCAGGTAG  
TTTACCTTCAGATTTAGGCGTTGGAACGCCTAGTCTTGAAGAAGTTTACCTTGGATCAAATGAACTCAGT  
GGACGAATTGCTCCTACCATCTCGAATTCTTCAAAGCTAACACTTCTAGACCTTGCAGACAACAAGTTTAC  
AGGTCCAATTCCTGATTCCTTGGTTTATTAGAGTTTCTTGAAGTCTATTCTTGGGAGGTAACAATTTCA  
TTAATGAGCCATCTTCTTCTGAGTTAAGATTCTGCTCGTCCCTGACTAATTGTAGATATTTAAGAGAAGTG  
GTCATTGAAGATAATCCTTTGAATGGTTTTCTTCCATCTCTATTGGAACTTTTCTGATTCTTTTCGGATG  
TTTGTTCACGTAGAACCAAACCTGAAGGGCACAAATCCCGGAAGAAATTGGAAACCTGAGTAGCTTAGGT  
GTGCTAGCTCTGTCTCATAATGACTTGACTGGTTCGATACCTGAGCAGTTGAGAAGCATGAAGAATCTTC  
AAGAATTTTACTTAGAAAATAACAGCCTAAGTGGAAACAATACCTGATGATATCTGCAGTTTACGAAATCT  
TGGAGCTTTAAAATTGACTGGAAATCAAATATCTGGTTCAATTCAGCATGTTTAGGAAATGTTTCTACTT  
TAAGATATCTTCATTTAGCTTTCAACAGATTGACTTCCACCTTACCTGAAACCCTGTGGAGCCTTCAAGAT  
CTCTTGGAACTCAATGCATCAGCAAATCTGTTTAGCGGGCACATACCTCCTGAGGTTGGTAATCTAAAGG  
CTGTGCTACTAATTGATCTGTCAAGAAATGATTTTTCTGGTAATATTCCTAGTACTATAGGGGCTCTTGAA  
AAGTTGATTAGTCTTTCCATGGCACACAATAAATTGGAAGGGCCTATTCCGAGTTCATTCGGGAAAATG  
GTGGGCTTGGAAATCTTGGATTTTTCTTACAACAATCTTACTGGTGAAATTCCAAAGTCACTTGAAACACT  
CTCACATCTCAATTACTTTAACATCTTTTTAACAAATTAAGAGGAGAAATTCCTAGTAGTGGTCCATTTG  
CAAACCTCACAGTCAATCTTTCAATTCGAATCTGCACTCTGTGGTGCTCCTCGCTTTAATGTGTCCGAT  
GCCTCATCAAATCCACCAAGAAATCAAGGAGACACAGAGTTCTAACAAAGTCTGTATATCGTATTAGGTAT  
TGGATCAATGATTCTCACATTGGTTCTAGGATATGTTTTGTTAAGGTGGCAAAGAGAAGGAAGAATTC  
AGGTCAAACAGATGCATCTTTGGTTAAAAGACATGAAAGAATCTTATTATGAACTTCAGCAAGCAACG  
GAAGGATTCAGCGAGAGCAATTTGCTTGGTACCGGAAGTTTCAGTATGGTATACAAAGGGATACTTAAA  
GATGGGAATCTTTTGGCAGCTAAGGTATTCAATGTGCAATTGGAGGGAGCATTCAAGAGCTTTGAAACA  
GAATGTGAGATACTACGCAACCTTCGCCATAGAAATCTAACAAAGAGTGATCACTAGTTGTTCCAACCCAG  
ACTTCAAAGCCTTAGTATTGGAATACATGCCCAATGGAACACTTGATAAGTGGCTACACTCTCATGACTT  
GTTCTTAGACATGTTGAAGAGGTTGGACATTATGATAGATGTGGCATCGGCATTAGATTATCTCCACAAC  
GGGTATCCAACACCCGTGGTGCATTGTGACTTGAAGCCAAGCAACGTCTTGCTCGATCAAGACATGGTT  
GGTCATGTGAGTGATTTTGGCATTTCAAAATTGCTAGGTGATGGGGAGACTTTTGTACAAACAAGGACT

ATTGCAACCATCGGATACATTGCTCCAGGTAATAGAAATTTCAAACCTGTCATCCTTTAGATTTTCACATT  
TCAAACTTTATCTAACAAGATTTCTCCCATGATTGCAGAGTATGGACAGGACGGAATAGTATCCAAATGT  
TGTGATGTTTATAGTTTTCGGTATCATGATGATGGAAACATTTACAGGTATGAGACCAAGTGATGAAATGT  
TTACGGGAGATTTGAGCCTAAGATGTTGGATTAATGATTCTTTTCCTAATGGAGTTGTGGATGGCAATTT  
GTTAAGGCCAGAGGAAGAACATATTAAGAGAAAATGCAATGTGTATTGTCTATCATGGAATTGGCTTT  
GAGTTGCACTTTAGTGTCACCTGATGCAAGAGTTAACATTGAAGATGCTCTTTCAGCCCTCCAGAAAATA  
AGATATCAGTTTGTCAATAGTTGTGCAAGGACTTAA

>PGSC0003DMG400017943 LRR-RLKs

AAGAATTAATAGTGGGAATTTCCACTTCGGAGGGTTGCCAATTGTGTGTGCCTTATGAATGACAGCCAA  
TGAGTAGTTGCAGAAGGTGAATGTTATAGTTAAGCTAGCATAAATGGTTGAAAATGATAAGCAAGAAG  
TAGTTGGAGAGGTAACCTCGAGATCTGTGCTAGGATAGCTTAGATTCCGTTTGCTTCACGAAGAAGCTC  
AAACATTATTCTTTATTTCTTTTGAAAAGAAAAGTTTTTTCCTCCTACTGCTTTGTTTTTTCCTACCGGTAC  
CACCAGCTGCTGCTGCAGAGGGAAGTAAAAGAATAATCTGATTTTGCAAAGTAAAAAAAATGCCGTAC  
GTTGGAGTAGCAAGTTTAGAGGGGAATTGTAAGGCACAAGACTTCGACCTTTTTTCTCAATTCTCAACCG  
TTATATATTAAGCTCTCACCCATTTTCTTCATTGCAGTAGAGTTCACCATTTTTCAAGGTATACTCTTTCCC  
CTATTATTTCAACTCTCTACTACCTTTGCTTACATTAGTGTTGATACTCCATTTTTCAAGGCACACCCCTCT  
GGCTCTGGCCATAGATTGTGTGTGGTAAGTGTTGGTTCATCAAATTTACTCATTATTTCAACTTCATTCAA  
ACATGTTTTCACTCATGTCCTAACACAACCTAACTTTCAAATTTTGGATATGACAACCAATTTCTCAACTTA  
AGACATTTAACTACTTTCTTTGTCTAATGCTATGATGGAATGTTGAAATTAGGAAATAGAGGGTGGTAA  
TGCAGAAAAATCAAATCTTTTTCATACATGTCCTGTCTGCTCGGTATGGGATGCATCTAATAAGTTCATAG  
GGCTTCAGAATTTAGGATGTTTATCTCTAAACAAGGTTTTTACTCTTATTATGAATCCAAGTCTAAGCTT  
CTTTTCGCCTTGTTGACTACATATGAGAACGCCACAAAGTGTCCTTTGCTCTACGGGGAATTAATTGTCT  
CTTCATTTCACTGTGATGGGGATATTTCCATATATCTAACTTCTCTGCCACATTTTTGTTTACCATTGTT  
ACTAGGTGATGCAAATGGATGACATACAAAGTTGATATCTTATGGCAACTTGAGTTGACTTGGCAAGTC  
CAGGAGTAAATAGATTTAAATGATGAAGCTACACCAATAATAGATCTACTTCCTCTTTCTCTTCTCTAT  
TTTTGCTCCTCTTCTCAAATGTTATTGCTGACCTTAGCTCAGATAGACAAGCACTACTTGACTTTGCTTCTG  
CAGTACCTCATCTTCGAACTTCAAGTGGAACACTAACTCTTCCATTTGCACATGGCATGGCGTAAGTTG  
CAGCTCAGATGGCACTCGTGTAGTTGCACTTCGGCTTCTGGTATTGGACTTTATGGTCTATTCCAGAC  
AATACCATAGGAAGACTGGATGCACTAACAACCTCAGCCTTCATTCCAATGCCCTCACTGGAAATCTTC

CTTCAGACATCACCTCTCTCCGTCCCTCCGTTTCATATTTATACAACAAAACAAATTTTCTGGTGAAATAC  
CTTCTTCTCTATCTCTACAGCTTAACTTCATTGATCTCTCTTTCAACTCCTTCTCAGGGGAAATTCCAACAA  
CAATTCAAATCTGACACATCTTACTGGTTTAAACCTACAAAACAACTCCCTCACAGGATCCATTCTAAT  
GTAAACCTACCAAGGCTTACGCAATTGAATATGAGTAATAATCAACTCAATGGTTCAATTCCACCATCCCT  
TGCAAAGTTTTCTGCTTCTTCAATTTCAAGGAAATTCTCTATTATGTGGACAACCCTTGACTCAATGCCCTC  
TTTTGCGCCTTACCGTCTCCATTCCCTTCAATTCCACCTTCTCCTTTGAGTCTAACACCACCATCTCGTTCT  
CCGAGCGTCTGCCAGCCTCACCAACAATTCCTGAAAACCATAAAGGCAAGAAAAGCTTGAGTACACGG  
GTTATCATTGGCATTGTTGCAGGAGGTGTTGGAGGGATCCTATGTCTAGCTGTGTTGATTTTCTTGTGTT  
GTATGAAGCGATATTATACTAAGAGAGGTGTACAGCAAAGAAAAGACTTTAATGGAGGAGGAAGTCCG  
AAGCAAACAGAGGACTTCAGTAGTGGAGTACAAGCAGCTGAAAAGAACAATTTGGTTTTCTTTGAGGG  
TTGTTCTTTCAATTTTGACCTTGAAGATTTGTTGAGAGCCTCAGCTGAGGTTTTGGGTAAAGGGAGCTAT  
GGAACAACCTACAAGGCCATCTTGGAGGAGGGAACGACTGTTGTTGTGAAACGGCTGAAGGAAGTTGT  
TGTTGGGAAACGAGAGTTTGACCAACAGATGGAGACAATTGGCACTGTGGATCAGCATCGAAATGTTG  
TTGCTCTTCGTGCTTATTACTTTTTCAAAGATGAAAACTTCTTGTCTATGATCATGTACCGGCAGGCAGT  
TTATCCACTCGAATGCATGGTAACATTTCTCCTTCTTTTGTCTCCCATTCCTTTAGCTGTCATACCCATCC  
AGGTGCTTGGGAATATCCTTAGTTACTAAGACTGGCAAGAAAATCAGCTGTAAAAGTTGCACGAGATCA  
TAGATTCCGAATGTGAAATGAAGTACCTATATTCTTTAGAAAAGCCCCTAGACAAGCATTATAAATAAAC  
ACTCCTGAAATAGGCATGCAAGTTTGTCTTGAAGACTTTATAACATGTGATATTGGTTTCATGCACTCATA  
GTTCTCCATATTATTTGAAGCAAGATGCAACTTGCAAGTTGTTGAATGTCAGATTAGTTGTTTCGGTGCTA  
TACATAATTTTCAATCTAACTGTTTATACAAGAAAGTTCTTTTCTTTTATTGCTCCTTGTGTTATTGATTATAG  
GCAACAAGGACTTGGGAAGAACAAGTGGATTGGGAATCTAGATTGAGGATTGCCCATGGAGCTGCAAGT  
GGTATTGCCCATATCCATGCTGTTTCTGGTGGCAAATTAATTCATGGAATATCAAGTCATCCAATGTGCT  
TCTCACCCACGATAATAATGGATGCATCTCAGATGTTGGTCTTACACCTTTAATGGGTTTTCTACTATCC  
CATCAAAGAGTGCAGGATATAGAGCACCCGAGGTGATAGAGACCAAGAAATGTAAGTACTCAGAAATCCGAT  
GTTTACAGCTTTGGTGTCTGCTTCTTGGAGCTCCTTACTGGGAAAGCACCAGTGCAGCCACCTGGCCATG  
ATGAGGTGGTAGACTTACCAAGATGGGTGCAGTCTGTTGTGAGGGAGGAATGGACTGCTGAGGTATTT  
GATGTTGAGCTCATCAAGTTTCAAATATCGAAGACGAAATGGTGCAGATGCTGCAGATTGCAATGACT  
TGTGTGGCAAACGTGCCTGAAACAAGGCCTGACATGAGTCAAGTTGTCCAGATGATCGAAGATATCCAA  
CAAATTGATTCTGGAAATAGGCCATCATCTGAAGATAACAAGTCTAGGAGCCCAACTAGTCCAACGCCA

TGATAACTCATGCATTTCTTACTACTCAATTCTATTACCAAATGTGTATTTGAACGTCTTTTCTTGTTTTCAA  
GTATAATTCAGACCTTTTAGATACTATCATTCTTCATCACTGCCTATATCTAAAAATTCAATCCTATTATGT  
CTAGCTCCACTTTTATTTT

>PGSC0003DMG400018024 LRR-RLKs

GGTTTCACTACGGACGAACAATCTCAAGGGATCCTTACCACGCGAGATTGGCAACTTAACCAAGATGCA  
AATTTTAATTCTAGACGAGAATAGGTTTACTGGTACGTATACATTCAATTTAAGTGATAGCAATCTGAAC  
AGTTTAAGAGGTAAACTCATTCTTTCTTCAGGTGAAATACCCAAAGAGATAAGAAATCTCGTTGAGTTGG  
AGAAGCTTGGTCTTGGATCTAATAGTTTTAGTGGTTCACCTCCAATGGAGATCTTCAACATATCACGATT  
GAGACATATTGCTCTTACAAACAATAATCTATCAGGAACTCTACCACCAACATAGGTTCTACCTTACCCA  
ACATTGAAGGACTTTATCTGCATGGCTTAACCAATCTTGTGGGACTATTCCTCATTCTATCTCCAATTGTT  
CAAAGCTTACTATTCTAGAGCTTTACAAAACAAAACCTCACAGGATTGATTCCCAATTCTCTGGATATTT  
GACTCATCTAAACATCTTAACTTGCGGAGAAAACAATTTAACAGTGATTCATTTTTAAGCTTCTCACT  
TCCTTAACCAATTGCACAAGATTAACAGTTGTTTCTCTATCTTTCAACCCTCTAAATGCCATGCTTCCGGTC  
TCCGTAGGGAACCTTCTCCAATCTCTTCTAACCTTTTATGCCGATGCTTGCAACATTAACGGCAAGATTCC  
AAATGAAGTTGGAACTTAAGCAACTTATTAAACCTTGATCTTTCTGATAATAACTTGATTGGATCAATTC  
CTACATCAATTCACAACCTTGAGAAGCCTTCAGCGCTTCAACTTGAGTTACAACAAGCTTACGGGATTTATT  
GGAGATAATTTATGTAAATTGCAACATTTGGGAGAAATTTACTTGGGACAAAATCAACTTTCAGGATCTA  
TTCTAATTGTTTAGGGAATGTTACTTCCCTTAGATTGATATATCTTACTTCCAATAAATTGAGTTCCAATA  
TACCAACAAGCTTAGGAAATCTTAAAGATCTAGTGGTCTTGACTTATCGTCAAACAACATGGTTGGTTC  
TTTACCTCTGGAAATTGGAAATCTAAAGGCTGCAATATATATGGATCTGTCAATGAATCAATTCACAAAT  
GGAATTCCTAGAGAAATTGGAGGATTGCAAAATCTGGTATATCTTTATTTGGAACACAACAAGTTGCAA  
GGATCTATACCTGACTCAATCAGCAACATGGTAAGTTTGGAAATTCCTAGACATTTACATAATAATATATC  
GGGAACTATTCCCATGTCTTTGGAGAACTACAATACCTCAAGTATTTCAATGTTTCTGACAACAAATTGT  
ATGGTGAAATACCCTTGGGGGGTCTTTCAAGAACCTCTCGAGTCAGTTTTTCAGCGACAATGAAGCATT  
GTGTGGTTCTTCAAGATTTAGTGTCCCGCGATGCCCCACTTCATCAAAGCACAGATCAAATAGGAAACAA  
ATGTTTGCTCTATTTCTTATGCTGGGAATTGCACTTGTATTTGTTCTATAGCCTTTCTGTTTATATGGATA  
AGGTATAGAAGAGGTAAAAGAGCTCCTCAACAAGCTGATTCATTGTGTATTGTAACAACAGAAAGAATT  
TCATACTATGAACTGCTCCAAGCAACTGATACGCTTGGCGAGAGTAATCTGATTGGTTCTGGAAGTTTTG  
GCTCTGTCTACAAAGGCGTTCTCAGAAGTGGAAGTCCATTGCAGTTAAAGTGTTCATCTGCAACTGGA

AGCAGCATTCAAGAGTTTCGATACAGAATGTGAAGTTTTGCGTAGCCTTCGCCATAGGAATCTCGTGAA  
AGTCATCACTAGTTGTTCCAACCTTGATTTTAAGGCTTTAGTGCTCGAGTATATGCCTAATGGAAGTCTTG  
ACAAGTATTGTATTTCGCACAACCTACTTCTAGACATCAGGCAGAGACTAAGCATTATGATAGATGT

>PGSC0003DMG400018171 LRR-RLKs

TAAACAAATCCGAAAAAACACCCATCTAAAATTCCTCCCCACTCTCTTACATAATGGCCTAGCTGTTC  
TTGGATCCGGAGATTCTGGCAACTTTTTCAAATTTTATATGTAACCTACATAAAATCCATTAGCCCACAA  
GACATGATTTGGTTTTCTCTCTTTGTCTCTCCTCCTAGGCTTAAACCTCTACACCAAACCAAGAACAA  
GGCTTCCTTTCTCTGCTTAATCTTGAAGTTTGTAGCAGCAGTCACATATTTGTTCTAATCTAATGCCTGTTT  
ATTCATGGACCCTCTTTTTCTTTTTCTCCTTCTTTCTTTTACTACCTCTGCTCTCAACCCTCAAGGTCA  
GGCTCTTCTTTCATGGAAGACAAGCTTAAATGGATCATTAGATGTGTTGAGTAATTGGGATCCTACTGAT  
GAAACTCCATGTGGTTGGTTTGGTCTTAGTTGCAACTTCAATAAGGAAGTTGTTGAATTGGAATTGAAGT  
ATGTGGATTTGCTTGGGATTGTTCTTCTAATTTTAGCTCATTGGTGTCTATTGAACAAGCTTGTGTTGTCA  
GGGACTAATCTTACTGGTGTAAATCCAAAAGAGATTGGGATGCTTCAGGGACTTAAGTTCTTGGACTTG  
AGTGACAATGCATTGACAGGTGAAATTCGAAGTGAATTTTTCACTTGCCAAAGTTGGAGCAACTTCATA  
TCAATTCAAACCGGCTGGTTCGGATCGATCCCAGAGGACATTGGTAACCTCACAAGCTTGGTGTGGCTTA  
TATTCTATGATAATCAGCTGAGTGGTGGAAATTCGAAGTAGTATTGGGAATTTGAAAAGGCTGGAGATTA  
TTAGAGGAGGTGGAAACAAGAATCTTGAAGGTCCATTGCCTCAAGAAATTGGCAACTGTAGTAATTTGG  
TTATGTTAGGATTGGCAGAAACCAGCATTCTGGTTTTCTACCTTCTTCTTGGCCAGCTGAAAAGACTC  
GAAACGCTTGCTGTTTACACCTCCTTGCTCTCTGGACAAATCCCACCGGAGCTCGGGGATTGCTCCAAGC  
TCCAAAACATTTATCTTTATGAAAATTCCTCACTGCTGTTCAATCCCAGCTCGGCTTGGTAACCTCAAGAAC  
CTTCAAACCTCCTTTTGTGGCAGAATAATTTGGTTGGAACAATCCCTCCCGAGCTTGGGAACTGTCAAC  
AATTACAAGTCATTGACATTTCAATGAATTCATTAACCGGAAGCATTCCGGAATCATTGGGAGATTGAA  
TTCAATGCAAGAGTTACAGCTGAGTGTTAATCAGATTTAGGTCGGATTCCAGCACAAATTGGCAACTGC  
ACTGGTCTTACTCACATTGAGCTCGACAACAATGAGATAACCGGTTCCATACCATCGGAATTCGGAAACT  
TGTCGAACTTAACTTTGCTGTTCTTGTGGCAAATCGTCTTGAAGGGAAAATCCCTTCTTCAATTTCTCG  
TGCCATAATCTCGAGGCTATTGACTTGTCGCAGAATGCATTGACTGGTTCGATTCTAAAGAGATATTGG  
ATCTTCAGAAGCTGAACAAGCTACTCTACTGTCTAATAATCTCTCTGGTCCCATTCCACCAGAGATAGG  
GAACTGTTTCATCGCTGATTGACTTCGGGCAAATGATAACAAGCTGACCGGATCACTGCCACCGGAGAT  
TGGGAAATTGAAGAACTTGAATTTCTTGATGTTCGGATCCAATCACCTCACCGGGATCATTCCACCGGAA

TTATCTGGATGCCGGAATCTGACATTTCTAGACTTGCATTCCAACCTCAATCAGTGGCAATTTACCGGAGA  
ATTTGAATCAGCTTGAATCCTCCAGTTCATTGATGTTTCTGATAATTTAATTGAAGGCACCTTGAGTCCG  
AGTTTCGGCTCACTGACTTCACTCACCAAACCTGTTCTGGGTAAGAACAGGTTTTCTGGTCTATTCCAAC  
TCAACTCGGTTCTGCATGAAGCTTCAGTTGATTGACTTGAGTGGTAACCAACTCTCCGGCGAGATTCCG  
GCGAGTGTGGTAAAATCCCTGGTCTAGAAATTGCACTGAACCTCAGCTGGAATCAGCTTTCCGGTGAA  
ATTCCGGCAGAGTTCGCCGCATTGGACAAGCTTGGAGTGCTTGATCTTCTCATAATCAGCTCTCGGGGG  
ACCTCCATTTTCTCGCGGACCTACAAAATCTCGTGGTTCTGAATGTCTCGCACAATAATTTATCGGGGCAC  
GTGCCTGACACCTCATTCTTCTAAGCTCCCCTCAGTGTACTTGCTGGCAATCCAGATCTATGCTTTCCC  
GGCAACCAGTGCTCCGCCGACAAGGGCGGGCGGTGTCCGTCTACCAAAGCGGGCAGGGTGGCGATGG  
TGGTGTGCTTTGCGCAGCTTGCCTCTCCTTGTGGCAGCTCTCTACATTATCCTCAGCGGCAAAATACG  
GAACCGCAAGGCCACGATTACGATCTAGATGGTGACAATGACGTTGAACTTGGCCCACCATGGGAGG  
TCACAGTATACCAAAAACCTCGACTTATCTATAACTGACGTCGCAAAATGTTTAACCGTTGGTAACGTCCTC  
GGCCGTGGTCCGGTCCGGAGTTGTGTATAAAGTGAATATTCCGTCAGGATTGACGATCGCTGTGAAAAGA  
TTCCGAGCATCGGACAAGCACTCGATGTCGGCATTCTCGTCGGAGATTGCCACGCTGGCAGCAATTCGA  
CATCGGAACATTGTTAGATTACTTGGATGGGCAGCAAATAGAAAGACTAAGCTATTGTTCTATGATTATT  
TACCAAATGGTACATTAGGTTCAATTTTACATGAAGGTTTTGGAGGGTTAATTGAGTGGGAAACCAGATT  
CAAGATTGCATTAGGGGTGGCTGAGGGATTAGCTTACTTGCACCACGACTGCGTTCCACCCATCCTCCAC  
CGCGATGTCAAGGCTCAGAACATTTTGTAGGTGATCGTTACGAGCCGTGTTTAGCTGATTTTGGACTTG  
CTAGACTCATGGAGGAGGAAAATTTCTCAGTTACAGCAAATCCTCAGTTTGCTGGATCTTATGGCTACTT  
TGCCCCAGGTAAATATTTCTTCTTCTTAGTTCAAGTTCATTTCTTTGAAAATCGACTAGTTATGATTCA  
TTTATTACTTTAGTTATTAGGGGAATTCTCCTCTAATGCAATTATGTGAGGTTTCATTTATCACTTAGTTCA  
AGTCCATGGTGGAGCTAGAGGGTGAAGGGAGTTCATTTGAACCCTCTTCGTCACATAATCACACACAT  
ATATAAGAACTATTTTTTCAATATATATATATATGGAAATTGGAAGGAAGTAATCTCAAATACGCTTGA  
TATCAATACAGACTTAGGTAAGATAGTACAAATGGAAGAAAAGATCCATGTAGGTGATAGCTTAATG  
TTAAGGATATTTTAAAGACTCGTATGAAACTTTAATCATGATTATTATTAGTATTTTATTTTTTACTGATG  
ATATGATGTGAGCTTAAATGAAATTAGGATTCATATAGCCAACCCCAAGTTTGCCTTTGGATTTTTTCCGT  
TTTTTCTTTATAGAAAAAGAAGAACTGAATGCGAGGTAGCAGAAGAGAACAGATATAAAGCACTGCA  
AACAGAGAGCAAGAAGGAGAATTCAGTTAAGTTGCTTCATACGGATGGAATTGTGTCACCTATTTTGA  
CAATATATGCATGTGAAGCCATGTGCTAGCTTTAACTATGTGCAAAACCAAGTTTGTGTCATGACATACTTG

GCAGCTACAGTGCTATTTCCCATCTTTTTGCCTGTGTATGGCCCCCACTAAAGATACTTAGGATGGGG  
AATACTCTAAAAAACCATAACCAAGTTAGTGGTCACACTTTACAGCCAAGCATGGACACATTGCTGCT  
GTCTCCATACCCCTTTGGCCATTGCTTGTGTCGATTGCGATATGTGAAAAATAATCGCCCAACAAATGC  
CTTTGTTATGTTTCAAAAAGCATCAAGATCAAATAGGTGATAAATATCTGGCATGAAAAGGACTAAACTC  
TGTTCTATTGTTTTGTCTTTTGCAGAGTACGCTTGTATGCTAAAGATTACAGAGAAGAGCGATGTTTTAG  
CTTTGGAGTTGTGTTGCTAGAAATCATTACTGGGAAAAGCCAGCCGACCCATCCTTCCCTGATGGCCAA  
CATGTTATACAATGGGTTGCGGACCACCTAAAGAGCAAGAAAGATCCAGTTGACGTAATTGATCCAAGG  
TTACAAGGACATCCTGATACACAAATTCAGGAAATGCTTCAAGCCCTTGAATAGCCTTGTGTGTA  
GTAACCGGGCTGAAGATCGTCCAACAATGAAAGATGTGGTGGCATTACTCAAGGAGATTATTCATGAGC  
ATGCAACAGGAAATGAAGCTAAAAAGACATTGAACAACCTCTCAAAAATGTCCGATACTTCATCATTTTC  
CTACTCGTCTTCATCTGTCACTCCAGCTCAGTTGCTACGCCTCCAAGGGTCTTTTAATTGCTCTTACTCA  
CTCATCCTCCTCCGTTAGCTATAGCACCAGCAACCAATAATAATGTAGCGATAGTCATGATAGATCTGTT  
ATTCTTTTGAAGTAGATAGTATTAGCAACCGTAAAGAGCTAGGTAGAGGGAACCTTATTGTCAATTTAAT  
TGTTAAGCAAATGAAAATGAAATCCATTGTACAGCAAAGTCAAAAATTTCTTTATCTCCC

>PGSC0003DMG400018253 LRR-RLKs

TCATTTCTGGAGCTCTTTTATTCACTCTGTTTGGTTTTTCATCATTAAATGGGCAGGGTTTCTGAATATTTG  
GAGATTATAGGATGGAGGGGTGTTCTTAAATAGTTGAAAGAATTGATTTTTATGCAGTTGGTTGGTGCT  
GGTGTGTTTTTTCAGTAAGATTAGCTACAAAAGATCCTAAAGAATTGATTTTTATGCAGTTGGTTGTGCTT  
TTTTTTCAGTATGAGGAGTCGTAAGAATGTTCAAGAATTTTTTCACTACTGGGGTGATGAAATTTTTTGT  
CTTTATCATAATACTTCTGAGTTGTGGTTTTTTTTGTGGTGGTGTCAAATGCAAGAACACTGCCTGAAAATG  
ATCAAGTAGAGAGGTTATTAGACTTCAAGAAGTCCTCTGTTGAATCTGATCCAAATGGATTCTTGAATGA  
ATGGACTTCATCTTCTTCAAGTCCTTGCCTTGGAAATGGGATTTTCATGTTCAAATGGTCAAGTTGTTGAGC  
TTAATCTGTCTAGTGTGGGCTTGGTGGTCCACTTCACCTCACTGATCTCATGGCTTTGCCTACTTTGCTA  
AGAGTTAAGTTTAAATGGCAACCATTTCTATGGCGATCTTTCCTCAATAGCTAGTTCTTGTGGCTTTGAGTT  
TCTTGATTTATCAGCTAATAGTTTTAGAGCCTTTGTTGAAGTCTGTGATAAAATTAAGTACCTAAATGTC  
TCTGGGAATTCAATTCAAGGGGTTGTTCTAAAGTTTGGACCTTCACTGTTGCAGCTTGACTTATCAAGTA  
ACACCATTTAGATTTTGGCATTTTAAGTTATGCACTGTCCAATTGCCAGAATTTGAATCTGCTTAATTTTT  
CCTCAAATAACTTAATTGGAGAACTCAATGATCTTGATTTTGGGACTTGTCAAAAATCTCACTGTCCTAAAT  
TTGTCTTTCAACAACCTTACCTCAACTGAGTTTCCAGCCTCTTTGGCAAATTGCCAGAGCCTCAATACACT



GAACATTGGCCATAATTCGATCCGAATGGAGATTCCTAGCAAGTTATTGGTGAAGTTGAAGAGCTTGAA  
GCAATTGGTGCTAGCCCACAATCAGTTTTTTGATAAAATTCCATCAGAATTGGGGCAGAGTTGCAGCACA  
CTTGAGGAGGTTGATCTTTCTGGAAACCGGCTTACTGGTGAACCTCCTTCAACTTTTAAATTGTGCTCCTC  
ACTTTTCAGTCTCAATCTTGGTAACAATGAGCTATCGGGTGATTTCTTACATACTGTTATCAGTTCATTGA  
CAAATCTTAGGTATCTTACTTGCCATTCAATAACATAACTGGTCATGTACCAAGGTCTTTGGTAACTGT  
ACAAAACCTTCAGGTGCTCGACCTCAGTTCCAACGCATTGATTGGGAATGTACCTTTTGAGTTGTGTTTAG  
CAGCCTCGGGGTTTCCACTGGAGACGATGTTGTTAGCCAGTAATTATCTTACTGGAACGTGCCTAAACA  
GCTTGAACATTGTAGGAACCTCAGGAAGACTGATCTCAGCTTCAATTACCTGACTGGTTCGATCCCATTG  
GAGATTTGGACCCTTCAAATCTTTCGGAATTGGTAATGTGGGCTAATAATCTCACAGGTGAAATTCCTG  
AGGGCATTTCATCAATGGAGGAAACCTTCAAACACTCATTCTCAATAACAATTCATCTCAGGGGCACT  
TCCACAGTCCATTTCAAATTGTACCAACTTGGTTTGGGTTTCGTTGTCCAGCAATCAACTTTCTGGAGAGA  
TACCACAAGGAATTGGGAATCTTGCAAATCTTGCTATCCTTCAGTTGGGTAATAACTTACTTACTGGACC  
GATCCCTCGGGGATTAGGTAAGTGCAGGAACCTTGATATGGCTAGATTTGAATAGCAATGCTCTAACAGG  
TTTGATCCCTCTTGAACCTTGCTGATCAAGCTGGCCATGTTAATCCGGGAAAGGTTTCTGAAAAACAGTTT  
GCTTTTGTGAGAAATGAGGGTGGAACTGAATGCAAGAGTGCTGGTGGACTGATTGAGTTTGAGGGTAT  
CCATGAAGAGAGGCTTGAGATTTTGTCTATGGTTCACTTGTGTCCATCAACTAGGATCTATTCTGGCAGG  
ACGATGTACACCTTACGAGCAATGGGAGCATGATTTACCTTGATCTTTCCTACAATTCTTATCAGGAAC  
TATTCCTGATGAACTTCCTTCAAGTTCTAAATTTGGGACACAACAATTTAACTGGAACCATTCCATTCATC  
TTTGGAGGTCTAAAGATAGTTGGAATTGTTGATCTGTACATAACAACCTACTGGGATTCATTTACCCTC  
GTTAGCAAGCCTTTCATTTCTTAGTGATCTTGATGTTTCAAACAACAACCTATCGGGAATGATTCCTTCTG  
GTGGACAGTTGGCTACATTTTCAGCTTCAAGATCCGAAAACAATTTGGGCCTTGTGGCGTCTCCCTTCT  
CCTTGTGGCCCAGGCAATGAACACCATTCCAGTATTTACCATAACAAGCCTACAACCTATAGGAATGG  
TGGTTCGTATTATGGTATCGTTTGTATCTATTACTATTATTATCCCACTTGTTATCTGAAATATAAGAATAA  
CTGCACCACAAAGTCTAATTGAATTACCCATTTGATAAGATAATATATCTTCAAAGACCCCTAAATAAA  
>PGSC0003DMG400018263 LRR-RLKs

GAGATATTATCCTCTTGCTGTTTAGAGAACAGTTTAACTCCTCAAACAAACCAAACTTGTGGTTTCTCT  
TTCTTCCCATACTCTTCTTTTCTTTTCTTTTCTTTTCTTTTCTTTTCTTTTCTTTTCTTTTCTTTTCTTTT  
ATGGTGGTGGATTTAAACAATGGTCCAAACAAGAACAATCCAACCTGATCATCTTTTGTCTGCTTATTATT  
CTATGCAAGTTTTGGTGCAGCTGGGAGCTTCAACAAATCTGGTGACTGTAAGTCCTACTTATCACATCT

CTTTTGTTGTTTTTTAACTGTATAATTATGAATTTAACTTATATACACCATATCGCGAATAAAAAATAAAG  
TTATACTAGTACCTAGCACAGTTTAAACATGTTATATCGTAAGTTACTTATTGTAAATAGTTCTTGTTTTAGA  
TGATCTGAGTTATGAAAGCAAATTGTTTTCAATTCCTTTCTTTTTTTTTTAGTAGGGAATATATTAGTGTCC  
ACTATTTTAACTCCAATTTATTTTGATCCCTTTTTCGAGTTCATTAATAAAGGTCATTTCAATTATTGAAC  
ATAGTTATGTTTTTCGTTGTTTTGTATCAGAAAAGTCAAATATGATTTTCTTCATCAATTCATTCCGTATG  
TTCTGAATTTTTTTAAAAATAATTAGTGTATGGTATTTTTGTTCAAAAATAAAATGATTGGTGACAGATGTT  
GTGTTAGAGCCACTGAAGGAAGAGTGGGAAAACATACCTCCAAGTTGGGATGGGTCTGATCCTTGTA  
CGATCCATGGGAAGGCATCGACTGCAACAATTCACGTGTTATTTCTATGTAAGCTTTTTTTTTTTGTGATT  
AAATTTAAATTGTTAAAAGAGAATCATATTAATCGGAAATAATAACAATATTACCACTCTTTAAATTATTC  
CTAAATTTATGAATAAAATGTTGAAATTAAGAAATAAAAACACAAGTGCCTCTGTCAAAAATTCATTT  
TTCCTTAGCTCGACAACGTCACATGTTTAATTCAATGTTACCCACCTCATTTATGCCAGCTAAATAATATC  
TTCGATTTTTTAAAAATAAAATAAAATTTAAACACTAGAATAATTAAGGAACTATTTCCAAAAAACAGC  
AAAATTTTTTTTTCTTAAAAATCTTAATTAGTAAGAAAGTACAAAATATGTAAGTGTACTGTATTTA  
CTCTCCATTTTGGTCAGTTCATGTGTATATATAATAATAAAACTAAAATGCTTATTATCTAATGAAACTA  
GGTAAAATTAATCATATTAATTTTGTAAATGACATTGCTAATTGTAATTTGAGGTAATAATGAT  
TGTGAATTCAGAAAATTATCAAGCATTAACTGAAAGGGGAGCTATCTGGAGATATCGAAGGCTTGTC  
TGAATTGCAGATATTGTATGTCTTCTACTCATCATAATTGAAAGTGTTAAAATTTGGAGAAAAAAAATTG  
TCTTAATTATGTTGCTCTGTTTCAATTTATTTGTCTGATTTGAATTTGACACATAATTAATGAAAGTAAAT  
AAGATTTTTGAATCTTGTGTGGAATATGACCATTTTTGTTTTGTGCTCGCCAAAGTGTTCCCTAAAGGATT  
CATTACAAAAATAATAGTTTAATGATTTTATTTGGTGCGATAAAAATGAAAGTTGAGTGATCATCTGTGA  
AATTAATCCTGTTCTTGAAGCACCATTTTGTGTTGATCATGCATTGCATGCACACAAATATTTTTGACTG  
TTGAAAAGTTTTAAATTTCTGTTCTGATTATCTGTTTCCTTAATAGGGATCTATCATACAACAAAGGCTT  
GACAGGTTCACTCCCTCAATCAATTGGAAATTTGAAGAGTTTATCAATTCTGTAAGGGTATTATTACATG  
ATAATGATTAAATGTTGTTAAATTCACCAGCTGATTTTATTAGAGTAATTGCTCCGAGCTGCCTCGCAGG  
ATCCTTGTTGGTTGTGGGTTTTCTGGACTGATACCAAACACAATCGGATCCCTTAGCCAGCTGGAATATC  
TGTAAGGATATCAATTTCTTCTGTTTGCAACTTTTTATGCTTAACGAATTCAGATATTGAGTATTTGAAG  
AACTTTTAGTCCTTATGTTTTGTATAAAATTGGAAATTTGGCATGAGATGAGTTGGATGGAGTAACTTG  
GTCAGTGAGGATTTATATAGCCGACCCCAACTGTTTGGGGACTAACGCTTAGTTATTTTTGTTGTTGTA  
GTAATTCTGTATCCCTTACGTTGTCAAAGTCTTAGAGCTTCAGGTCTCTAGATATGGTATAC

TAGATTGAAATATTTTTCTGTTTCTTCTACTGGGCTACATTTCTAAAATACTATCTGAATCATGCAGATCT  
TTGAATTTAAACAACCTTTATCGGACCGATACCAGCTTCTGTTGGTAATTTATCAAAGTTACATTGGCTGGA  
CTTAGCTGATAATAAGCTCAGTGGACCTCTTCCAGTTTCACCTGGTCTAGACATGCTTGTTACACAAAAGC  
ATTTGTGAGTAATACTGATTACTGTCAGTTTCTTAAGTAACACCTTCGTCTCTCATTTTTCATCTGATATAACC  
ACTTACCTCGCAGTCACCTGGGGGGAAATCAGTTCTCAGGTGAGATTCCAGATCAGCTATTCAGCTCAA  
TATGACTCTCAAACATTTGTAAGTTCCACTGAACTGGAAGTGATATATTTTTGAGAATTATTTGATGGAT  
CAACTTCATTATTGTCCCACTCCAACGCTATGGTGCTAGCTCTGACACTTGTTGCAAACCTACACCCGTTTG  
GCTAATGGTTTCTTCTGTTTGGGTCTTGTAAATTGCACAGGCTGCTTGACCAAACAGCTTACTGGAAAA  
ATACCCCTTCATTAGGACTCGTGCAGACTCTGGAGGTGGTGTAAAGTATTTCCAAAATCCATCATGCTCTT  
AAAGAATTCTAATAAGTGTCCATCTTTCTTGCTTTTGATTACCTGGTGAAGTTTTATTAAGTAGATACCCAT  
GTCCACTGTAGTCGTCTTGACAGGAATTCATTAGACGGATCGATTCCATCAACCCTCAAAAATCTCGCAC  
TTATGAGTGAACGTGAGTGGACAAGCATTATGCTAATAAAAAATCCTTTTTATGAGTGTATCAGACC  
ATCTATAAATTTCCGTATCACTTGCAGCTTCTTATCAAACAATAAATTCAGTGGCCCCCTGCCCAATCTTG  
CTGGCATGAATGCCCTCTACTACTTGTAAAGTTCCTTGAAACTCTTTTCTGCTAAGAAAATGCAGCAATCTT  
GATATTGTGATAATTACAGATTATGTCTTTCGGTACTTTAATTTGATTTTGTTCCTATGGTCATGTTTTG  
CAGAGATATGAGCAATAATACATTCAGCTCAGCTGATTTTCCGCAGTGGTTTTCAACTTGCAGTCATTG  
ACGACTTTGTATCTATCTCTCTCGCTTCTCTTTTTCTCTAACATGCATGTGTGTATCTGTCCCTGAGTT  
CACGTGCCTCAGCAGAACTCACATGCGTCTGAGTGTATATGTTATCCTAATGAAGTGGTTCATAGAATTT  
GTTATGCACCTCATTTGTATTTGTTCTGCTCATAGGGTAATGGAGAACACTCAACTTCAAGGAGAAATTC  
CGCCAACCCTCTTCAGTCTTTTTCAGTTGCAGACTGTGTGAGTGTCTTTTACTTTTAGTACATGGTTCATG  
TCATGCAACTATTCTCATTTTCGCTGTGTGCTAGTCTTGTACAAAGTTTGAAAGGTAGTACAAAGTGACCT  
AGTATATAATTCTATGTTTTGCATTTTCGATTTTACGACAATGAGGTGGTTATTTATGACAGCAACTTGAGG  
GGAAACAAGATCAATGGAACCCTGAATATTGCATCCAACCTATAGCAGTCAATTAACACTGATTGATTTGC  
AGAACAATTCCATCGATGCATATACAGTAAGACCTGGATTTCTTTTCAAATAATGTAAGTCCTCAAGCC  
ACTTTTTCTCCACTTTAGCAATGAGAAAGAATAATGGATCATTGTTAGGACATTTGATTGCTCTGAA  
TACAATTTAGTCGTTTAAACAATCTCAGTTTTCTACTTGGTCACTTGGCAGACTTATGCATAATCCAGTTTGT  
TATGAAGAAAGATCAGAAGACTATTGTGGCATTTCCAAACGAACTTTGTATATTCAACTCCACAAGAAA  
ATTGCCTTAAACACAATGCAGTTCTGATCAAATCTTAGCCCTACCTGTAAATGTGCTTATCCGTACACA  
GGCGACTTATTCTTCAGAGCTCCTTCTTTTCTGACTTGACAAACACAAGCATTTATGAGTCACTTCAGAA

GTCTATGCTATCTTCTTTTAGCCCAAATCAGGTGCCAGTAGATTTCAGTTTCCTTGAGTAATCCAAAAAAGA  
ACTCAGAGTACTACCTTGTGTTGCACCTGCAAGTTTTCCATTTGGCCAAGATCATTTCAACCGTACAGGG  
ATTGCCACAATTGGATTTGCACTTAGCAACCAGACTTACAAACCCCAACAAAGTTTGGACCATTCTTTTT  
CAGTGGTGAAAGCTACAAATACTTCGAAGGTGATTGGTCATTTTCATTTTCATTGATATGTAAATGTATTTCC  
TATGCACAAGTTTCATCTGATAGCCGTAATACTATTAGTCGTGGTATTACTCTTGTAGTTTATTGCCCTTTGAG  
TTAGGTTATCGTCTATAGTTTTTTTACACTTCGATATATTGTTTTTCAGTTGGATCAAGAGGAACTCACAAG  
TCAATCACTAAAGGAATTATAATTGGAGCAGCTGCTGGTGGTGTCTGCTTTTAAATTTTATCAGTAATAAT  
AGGAGTTTTAGTTTGCCAAAAGAAAAGAGATCAAGAAGCTATTAGAAAAGAGTAACCTTTTCGGTGTGTT  
CTGTTACTGTTCTTTAGTGTGCTTCTAACTTTTTATTTTCGCTGATGGTTATCGTCTTTTTTATCTGTCCAGC  
TACATGGGATTCTATAAAAGACAGCGGTGGTGTCCACAGTTAAAAGGTGTCAAATGTTTCACATTTGAA  
GAGTTGAAAAAATACACCAATAATTTTTTCAGAAAAGCAATTACATTGGATCTGGTGGTTATGGGAAGGTT  
GGTTTCTATTGACTTTTTGATAATACAATGTTATATTATGATGACTGGTTAAAAGCTGTTGCTTTAATTCT  
ATCCATACTATCTGCACCATCTTTCGGGCAAGCTAAAGTTAGTTGATCACTTAAAACCTCTCGTGAACCTA  
CAGGTATACAAAGGCACACTTCAGATGGACAACCTATTGCAATTAAGAGAGCAGAACAAGCATCTAAG  
CAAGGCGCCCTCGAGTTTAAAACCTGAGATTGAGATTCTTTCAAGGTTTCATCACAAAAATGTTGTCAGCC  
TTGTAGGATTTTGTTCAGGCAAGGTGAACAGATGCTGGTCTATGAGTTTATACCAAATGGATCCTTGAA  
AGAGAGTCTTTCAGGTATTTTGAACCTCTCATCGACTGTTGTTTTGAAAATCAGCTGTAGGTTGGAATGTC  
TGGGCATTGATAAGTTAGTGTTAACTTCTGCAGGAAAGTCCGGGATTAAGTTAGATTGGAAGAGGAGA  
CTTCGGATAGCCCTTGGAGCAGCCAGAGGTTTGAATATCTTCATGATCATGTTGACCCTCTATCATCCA  
CAGAGATATCAAATCGAATAACATCTTGCTGGATGAGCGCTTGACTGCAAAGTTGCTGATTTTGGTCTT  
TCCAAGACGATGTATGAGCCAGACAAGGGTTACGTCAGTACTCAGGTTAAAGGAACAATGGTAAGTCCA  
GACTTTACAAATGTTGTCATATGGTAGCATTCTCAGTTTCTATATTTCTTAAGTCACTGGAAACTCCTGTC  
CTTTAATAGTTATAGACTGGTGTGATCGTCTTGGTTCAATTCTTAAAAGTTAACTGAAGTTGCGTCCTGAT  
CAATTACACATTGTGCTGAACTTATGTATGTAAGTTCATACAACGAAAGGAGTTCATTGGTTAACTGCT  
TAAAAGACTAAAACAACAGTTGATTTGTAATTTTCGCAGAGTAGAAAACCTGAAACCTGAACACTTGAT  
ATCAACATTGTTTGAAGAATCTGTAACAGAACATTTAATTAATACGAGCTGCTTTGTACATTTATCGGCTT  
AGGGCTACATGGATCCAGAGTACTACACAACACAACAGTTGACTGAGAAGAGTGATGTCTATAGCTTCG  
GAGTTCTGCTGCTAGAGCTTATAACAGCACGGAGTCCTATTGTGAGAGGAAAATACATTGTGAAGGAAT  
TGAGGCAAGCGATAGACAAGTCTAAAGACATGTACAACATTGATGAGTTTGTGATCCTGCTATCCCCTC

AAACATGACACCTATAAGCTTCAGGAAGTTTGTGGATCTAGCTTTCACATGCCTCGAAGATGCAGGAGC  
TAATAGGCCAACAAATGGCTGAGGTAGTGAAAGAGATTGAGAATATCATGGAAATAGATGGATTGAACA  
GTTGTGCTGAATCCAGATCAACTTCTGTGAGCCACGAAGGAACCAGCGCAACCTTTGATCATCCTTACAG  
TGAGGAAAGCCTAAATCGTTACAATGGGGTCACCAATTCGCGATAAACACCAACTCTTCTCCTGGAACCA  
GGTACATTGTCATAGAAATGGAAAGTGATTCAAGCAACTGTTGTGCTTTTGTGTTAGCTGTGTACATTCT  
GTGAACCTCTGTGTGCGGCGTAAACAGCCTTGTATGTTTCAACTGTTTGCTTCTGATAATCCAGGAGCTA  
GACTCCGTGGATTCAAATGAGTGATTTTATTGTACGTATACATTTTAATTTTGATTTATTTTTACCTATGT  
ATACATAATACGAATCAAAAAGTAATGCTTCAATTGAACCTACACAGAACCACCCTAGATCAGGAA

>PGSC0003DMG400018264 LRR-RLKs

ATGGTAGTTTCTATGGCAATGATGCTGCGAATTTTCGTCAGTTTTCTGGTTGTTTTGATCCAAGTTCTGTC  
AGTAGCAGCACGAACTAATCCTGTTGATTGTAAGTTGCTTTTGTCTTCTCTATCAAATGTTTCTTAACCA  
GTGTACAGAGATATTTGATTTATCTGTGAGTACTGGTGTCAAATCTTAGTTCCTTTTTGTAATCATATGA  
AGAACTTGTCTCTTAATTGCAATAATCTTGAGGGAACATTAATATTTCTGTTCTCTTAGATATGGTC  
AATTAAGTGTCTAGTGACGAACTGATTCAATATTTTATACAGCTGCTGCTTTAAAGTCTCTCAAGGATTC  
TTGGTATGGTCCTTCCAATTGGACAGGAGAAGATCCCTGTGGGAGTAGTTGGGAAGGAGTTGGATGCA  
GAAATTCACGAGTGATTTCTATGTAAGAATTCGGTGTGTATCCTTTTGTCAACTGCTTAAAATTACAGAA  
ATCATATGGTTGATGCCATCTTTCTCAATTTCAGAACACTGTCAAGTATGGATTTGAACGGTCAGCTATCT  
GGAGACGTCCAAGGATTATCTGAATTGGAGACTTTGTAGGTCTTCCTTTCACATTTCTGTGTTTCTACTTCA  
CTCCCTTTTTTCTTTTGACGGAGCAATACTTTGTCAGTTCTAATTATGGACTGCTCCTTATAGGGATCTATC  
ATACAACAAAGATTTGACCGGATATCTTTCTCAGTCTATTGGAAAATTGACAAAGTTATCAAATTTGTAA  
GTGAATGTGAATAATCATCACTCGAGTATTCACCTACCAGCTAATCTCGTGATAATATGCTGATGTTTTCT  
TGATTTTATGACAGGATCCTTGTTGGTTGTGGATTTTCTGGACCAATACCAGACTCCATAGGATCTCTGA  
CCCAGCTGTTTTTCTGTAAGCATTATGTGGCACTCTTTGTACTTTGAATGTGCGACCAGTACGTGACATA  
TTTTACCAGAATGCAAGGGTCATACACTATCTGCTTAAAATTGTTAACGTAATGTGTGCTTTTGGTGCTAG  
CTGTACTCAAATTTTGGTCCATCTCTGGGACAGGCAATGCACTTCTAAACAGAGAAATCAGTTCATGAGG  
AGTTCAATCCATACTGCTATTCTTGTGTTTTATACGTTATCAAAAAGTTGAACTGTTGTGTTTACCATATCTA  
TCTGTATATGATTTCTTTCAACCTTCTTCTGGTATATGCTCTAAAACAGCCCCATTCTGTATTATGCAGAT  
CTTTGAACTCTAACAAATTTACTGGAGGAATACCTGCTACCATTGGCTATCTGACAGAGCTTTATTGGCTC  
GATTTATCTGACAATCAGATAGAAGGAAACATTCCAGTCTCTAGTGGGAGCAACCCTGGTCTTGATATGC

TTGTTAACTAAACACTTGTACGCATCTCCTTTTTCTTGATGTTGTTTCGTCTCTCAACTGCATTTTCTAA  
GATTATTTACATTTCTTCAGTCACTTTGGGAAGAATCAGCTATCCGGTGAAATTCCAGCTCGTCTTTTCCA  
TTCTAAAATGACTCTGATACATCTGTAAGTTCATCGAATTGGAGAATGGAGTGAATGAATAATTTTGTC  
CGTAAATATTGGGGACCTCACTTGTAGTTGAGCTTGCCTTTTGATATTCTTGTTAGTGCATGTTTTACTTC  
TGAGAGTAGTCATGTGAAAGAAGCTTGATAATTATATCACAAACAACCTTTCCTTTACGGTTTCCTCATGCT  
TGTATATTCCAACCTGTAGGCTAGTTGAGAACAACAGGTTTACCGGGTAATCCCAGATACATTAGGATT  
TGTCCAGACGATGGAAGTGCTGTAAGTATTGCTATCTTGCTGCTTCCCTTTATCATCTAGTAAAGTTGCTT  
TCTGAATTGTTTCTGGTATTGCAATAGTCGTCTTGACAGGAATTCATTCAGTGGATCTGTTCCACAAAACC  
TCAACAATCTCACACATGTCAATGAACTGTAAGTAGAAAATGAAACAATTTTCTGAACCTACTGTAGGTC  
CTCTTGATTTTTTTGAAGTAGTATATTTTGACCATGTATTACAGCGACATATCAAACAACAATTTGAATGGC  
CTTTTGCCGAATCTCACTGGCATGAATGCCTCAACTACTTGTAAGTTGCTTATCCTAAGTTTTGTGTCTTT  
ATCCCTTTGAGTTGACAATCCATTATTCTCAACATAGTACTATAAATATTTCTCCCAATCACGATTCACGG  
GCACTTTTTTTTTGCAGGGACATGAGTAGTAATACATTTAATGCATCAGATATTCCATCATGGATCCTAAG  
CCTGCAATCATTAAACAACATTGTATACTCTCTCTCTCTCTTTTTTACTAGATTTGGGAACGTGCGTTGCA  
CGTTTATCCCAAATACTTATATAAATTTTGTATTGCAAATGACATATTTTATCCCTTCAAATCTTTGGTA  
TTTACAAAGAAAAATCTATCATTGTTTCTATAGGAACTACATATATCTTCCTAATTAATAAAAAATATACCTT  
TAACTATAAAATTGACTAAAAGTTAATAAAGTAAAAATAACTAACTATTGCACAAATTCAATATTCAAAT  
GAGGATACTAAAACACCACATGCTAGGCTAATGTATACAAAACAACAACCATGATAAATTCTCAATAAT  
AACAACACAACAATAGAAAGTTGTACAATAACAACAACAAGAAAAATAAATGTTAACTAAACAATA  
AAAAGAGACAAGAGAAGAGAGCATAGAGATTTTCTCATATTTTTTTTCAATTGGTTAAGTGTGTAAATT  
ATTGTGTCAAATGTCATTATTTATAGGATAGCATTGAGGAACACAAAGAGTTGTCATAAATATGATATTA  
ATCCATTTGAGATTATTGATGAGAGTAAAAACATAATGAATATAATTGGTGGGAATTACATACATATAAT  
GAAGAGTTAGTGGTAATTTATGTATACTAATATGATGATTTACTATTTACTACTATTTAATTTATTAAACA  
ATTTATAACATTTAAATATAATGTAGAAATAAAACCGTTATCTAAGGATAAAATATGTAAAAGAATTCAA  
ATATATTAATGTGTAGTAAAAATCATTATGACTAATTATTAATAAAATTCATAGTAACTATGATTATGAA  
AAATCATTACTATTACTACATGGAAGATGTAAAGATGGTTGTTTTTTTCTTGCTAATAATAACTTACAATT  
TAATAATGAGTATTGAATTGTAAGTCTAGCTGGAAATAGGAGTGTTAACTACCATAATACGAACAATCAA  
AATTCATTGAATCCCAAATAAATATTAATGAAAAATAATATTTTAAATAAATTCAGAAAAATAAATT  
AATAGTTAAAGGGTATTTTCGTAATTCACCTTTTGACTTAGATTCTTCCCACTTTTAAATAACTAGTTCTC

GACACGTGCGTTGCACGTGCATCCCATATTAAGTAATATAATTCATAATTAATTGGAGGTTAATGAGCA  
ACAAATTATATGGATATGCTCCATGTATGAAATTCAAAAGTCCATGTTATATGGATATGCTCCATGAAAT  
GAGGAAAAGAAGTTGCATGTTATCAGAAGTCCAAAAGTCCAGGTAAGATGGATATACTCCATGTATGAA  
ATTAATTAATGAATTTAATCATTAACTAACGAAAATTATAATGCCATAACTACAGAATCAAAATGC  
AATTGCTAGACTTCTAATTCAGTAAATAAAATATGATTATTTCAATTAATTTACTGGTTAATTAATATTTA  
ATTATATTTTAATTTAGTGTGGGGTAAATTCGTAATTCACCTTTTAAGTTATGAGCTTCCCACTGTTAATAT  
AAAATATAAAATAATAATATGATTTATTGGTTAATTATATTTTAATTTAGTGTGGGGTAAAATCGTAATT  
CAACTTTTAAGTTATGAGCTTCCACTTTTAGTATTACTAGTATCTGGACACGTGCCATGTTATTTTGTTCAA  
ACTTATTCATTAAGATGGAGGGAATATATAATAGTTAAATATATTGGTTTTAAAAATGAAAGCTTATAC  
TTACTAAAATAAAAAAATTACAACACATATCAATTCTCTCTTACATATAAAGTAGAAACAACTGCTAAAA  
GTATAACAAGAATATTTGAATCCTAAAATTAATTAATTACATGTTGGAATAATAACATAAACATTGTG  
CATTACAATAAATCTGTATTGAACTTTGTTTAGTGAAGTTGATGTTACTGGCTAATCGAACTCTAGACGCC  
AATAGCTTTAGATACTTTCCATTCTCTCAAATTGTTGCTTTCTCTCAAGAACAAAAAGAAGATGAAATT  
AATTAATAAATTAATTAATGCAAGAGCCTATAAAAATGGTGAGAAAGAATTCAAGAATCCTTTCTTGCC  
TTTTATAGCTATTTTTGAGTAAGAATTCAAGAATCCTTTCTGTTTTTTATAGCTATATTTCAATTTTCAT  
TCCTTGAACCTTTCTTTCATTAGTCTACATTTAATTATTCAATGCAACTCTTCTATTCTCCAACTATTTA  
GCAATGAATAACGCACACTTAAATTTGATTAATGGGTAAATCATTAAAGGGCTACATTTAAATTGGACTTT  
TGAATATCTACAGATTCACAAATCTCATGTAAATTTAAATACAATTACTACTATTTCAATTAGATTAGGCA  
TTTTATTTAATTAATATAAGAGAAAAATTGTAATCTAACTTTAAACACTTGTTTTATTTTTCTCATTTTT  
ATTCATGTTTAGTACATTCACCTCAGACTAATATTCTACTTTGAACAGAAATAACACAAAGCAATAAATAT  
ATAGAGATACATATTCCAAGCCATAATAAATGTCATTATTTTTATTATGGATACATTCACCTCAGTTCTCA  
CTCCATGAATTTCCGTAACATTTCAATTTGACTGGAAACATAATAAGTATCATTATCTTTTAGTTGGA  
ATATGAATGTCAAAGAGTGCCCTCTCTTTTTTTGTGTGGATAATTTAGTGATTTTATTTATGTATATTAA  
TTTTGAAGAGATAATACATTTTTATTATTATTTAGATTAGATGTTGTATCTATTACATTTTAATTAAG  
TATAGGGGTAAAATTGTAATTTAACTTTGAAGATAGGTGCTTCCCACTTTTAGTAATTAGTAAAAATTACT  
CCCTCTATCCCTAATTACTTGTTCACTTTTGAATTGACACACCTATTAAGAAAACAATTATTGACATAGTG  
AGTGTACCATTTTACCCCTATTATTAATTATAAAGTGGATGGATTAATAAATTTAAGATTTTCAAGAAATTT  
TACCTTTTTCAAAGTATTTAATTGAGGGTATAGTAGGTAAAATTATTTGTCCTTTCTTGATTTGTCAAAT  
GAACAAGTAATTAGGGATAATTATAAAAGGAAAAGTGGACAAGTAGTTAGGGACAGAGGGAGTAGTA

AATTAGTAATATATATAATATATATATAATATAATATATATGATATGATGTGTGTGTATGCACGACCATG  
AGCAGGTGCATGTGTGTATGGGGCTCGTGTATATGCCTGCATCCATTTGAATATGGACTGATTTTATTTT  
TTCTTGTTTTTATGGATTCAATTCCTAGATGTTCTTTTTAACGTTTGACTGACCTTGTATTGTCAGGGTGT  
TGGAAGACACGGGACTTCAGGGATCAGTTCAGCTAACCTTTTCAGCCTACACCAGTTGCAGACAGTGC  
AAGTGTCCCTTTTACTTTGTGTCGTTTTTGTATGAAGTATAGATTGAGTATCTGAAGTTGAATTTATCTTT  
GCTGAAATTTCCGAACTCTGTATTATGCTGATAGTTGTTGACAATGTGCTCGTTGCTTACAGCATCTTGAG  
GAATAACAACTCAACGGCTCTCTTGAACTGGAACCACATATAGCAACCAGTTGAAGCTCATTGATGTG  
CAAAATAATCTTATCGAATCATTTACTCAAAGACCAGGGTATCCCTTTCAGATAAAGTACGCACTATTCCA  
TGATTCTTCAAGCCATAAAATCTCCAAGTTGATAAGAAACACCATACGCGAGACAGTTTTTTGCCTAGCT  
TGTTGTGTCGTGTGATTATTCTATGCTCAACTGACTATATACTCGTTTATTTACTTTTTCTATGCAGGCT  
TGCAGGCAATCCTATCTGCAATGAAAGAGGAGAAGGGAGAAAACTTACTGTATGGAACTCAACAAA  
CTGAGACATACTCAACCCACCAGAGAATTGCTTGCCAACTGAGTGCAGCTCTAATCAAGTTTCTAGTCC  
TACCTGTAAATGTGCCTTTCCATATACAGGAAACCTAGTCTTCAGAGCTCCTTCTTTTCAAACCTGGGAA  
ATAGAACTACTTATGAGACTCTCCAAAAGTCTTTGTTGCTTTTCTCCAAAAACGTCAACTGCCTGTGGAA  
TCAGTTTCCCTCCGTAACCCAATAAGAGATTTAAATGACCACCTTGAATACAGCTGCAAGTTTTTCCATC  
TAGCCAAGATCGTTTCACTTGGACTGGTGTCTGGAATAGCTTCTGTGCTTAGTAATCAGACTTTCAAG  
ACCCCATCGTCATTTGGACCTTTCTTCTTATTGGTGAACCTATAAATACTTTGTCGGTAATAGAACTATT  
TCCTTTTCTATTTATCACTCATTCTCATCTCTACATATATGTGCAGCCTAATCTATAATTACAGAAAGTT  
GGTGGCTGAAGAAACAATATATATTTGAAATCTTGATGATTAAGTTTGTATGTACTTTCGTTTGACAGAA  
GAATTTACTGTATTTTTAAGACTTTGAACGTGAATAGCAACTATTACAGATCTACTGTTTTGATAACTATA  
TCAATCCTTTCTGAAGTATTCAATTTAGAAGTACAAGACCCAAAAAAATTGTCTAGTCATTGAATTTGA  
GACAAAGATACGATAAAAAAACTAAAAATTTAGGCTACGTGCATGTGATGGATCAACTTTCGTTTATTGT  
TACTAGTGATTTTTCTGTTAGAGTTTGCATAAACTTCAATGGATTTATTAATAACGTTTTAGTATAGACGC  
AGTTATTCTGATCGGTCTCCTTAGAAAACTGGTTCATTAATTGACAGCTGAAAATTCAAATTATTGTTT  
GGAACATTATGGAGCTACATCTAAACGTTTCATGTTACTGAAGTCTGAGGCTGTGCTTGCTTTTTCTAG  
GGGAATCCACAGGATCAAAAAAATCAGTTAGTACAGGCATTATTATTGGAGCTACAGTTGGTGGTTCTG  
TCCTTGCAATTTTAGCACTAATCATTGGTATTTATGCTTCCGGCAAAGAAAAGAGCTGAAGATGCTGC  
AAAGAGGAGCGATCCTTTTGGTAAGAGTTGGAACACTATTAGGCCATTTACCTATTACTTCATCTTAC  
GGTTGTTGTTGCTATCTTCTTCTAATGCAGCATCCTGGGACTCAAATAAACATAGTGGTGCTGTTCCAC



AGCTGACAGGAGCTAGATTTTTCTCATTTGACGAACTAAAAAATGGACTAATAATTTTTTCAGAAACCAA  
TGTTATTGGTTGTGGTGGTTATGGAAAGGTCAGCTTTTATGCTCTGATACACTAAGCATGTGTTCTGTTA  
GCAGTACTGCAGCCTTCATTCGTTCTGATCTTAATCATCTTAGACTTAGTAGTTAGTACTACCAGTTTCTTT  
GTCAAAGTGTCAGGCTATTTACAGACGATAATGAACTGATTGTATATTTGGATGGAGAAGTCTTGATTCT  
TCCACCCAAGATAATTCACATATTTTTGGTTTCGGATGTAATACAATAGCTCTAATCTATTTAATTAATAAG  
ATCCGGTAAGTATGGATATTTTTTATCTTGTTTGTACCAGCTTCTCTTCCACTGAAAAGAAAATTTCTCGA  
CTACAATTGAACTGTATTAAGTTTTAACTGTAGAAGTGTGGCTCTACAGGTTTACAGAGGAAGTCTT  
CTGAACAGAGAATTGGTTGCAATTAAGAGCTCTACAAGGGTCTATGCAGGGGCACACATGAGTTCAAA  
ACTGAGATAGAGCTTCTCTCAAGGGTTCATCACAAGAATGTCGTTGGCCTTGCTGGCTTTTGTTCGATC  
AAGCTGAACAGATGCTTGTGTACGAGTACATTCCTAATGGCACCTTAAAAGACGGTCTTTCAGGTATATG  
TTGATCCCTTCTTGTTGATTAATTGAACTAGCTCCTTTAACTTAACCAAATGCAAATGGAATGAAATT  
TGTAATTGTAGGTAAGACTGGGGTCAGGTTAGATTGGATGAGGAGATTGAAGATAGCCATTGGAGCAG  
CCAGAGGTTTGCAGTATTTGCATGACCATGTCAATCCCCCATTGTACACAGGGACATCAAGTCCAACAA  
TATTTTGCTAGCTGATCACCTAAACGCAAAGTTGCTGATTTTGGCCTGTCCAAGCTTCTAGGTGAAAGG  
GGTCATATTACCACTCAAGTCAAAGGAACAATGGTAAGTAAAGATTCTATAAACACCTGCCTGAACTTGT  
TTCGTTTTAGAATAATGTATGCTCCCTCAAATTTCTGATGTCCAGAAAGTTCAGAAATTAATGTGTGAT  
AATTTCTAGTCCTGTAATAACCATTACAAGCACTATTTTATTGTCTAGTAAGAACACCTGAAGCTCCTCCT  
TTCTCATCGACCACCCTTCCCTCCACTAAAAATGAGTAAATAAATAAGTAGGAACAGGAAAATACGAAAA  
CGTTTTATTTATTTCTTGATATTCTCTCAAGGTAAGGGACTTGTAGGTAATGATGCTTAAAAACACCAAAT  
TTAAGGAGAAATACTACCTTGATTAGGAAACAATGAGTTATTGCCATAGCAGATAGAAGCTTTTTAACG  
TTCATATAATGTGATCTTGCCATGTATGAAAGGAAACAAGTTGAGATGTTGCAGAAAAATGTGTGAGTA  
TTACCTTATAATCTATGTCCTTTTGTGTTGCCTTTTATTTATTAGGGATACATGGATCCTGAATATTAC  
ATGACAAACCAGTTGACAGAGAAGAGTGATGTTTTTAGCTTTGGAGTGGTGCTGCTTGAGATAGTCACA  
GGAAAAGTTCCTATTGATAAAGGAAGATATATTGTCAAGGAAGTGAAGGATGCAATGGACATGACAAA  
AGATTTGTATAACCTTCATGAAATTTTGGATCCTGCAGTTTGTTCGGGTGCAACTCCTAGAAGCTTAGAG  
AAGTTTGTGGATCTAGCACTCAAGTGTGTTGAAGAAAAAGGAGTCAATAGACCTAAAATGAGTGAAGT  
GGTGAACAGATTGAATATATTATGGAGATCGAAGGCCTGAACCCCGATGATGAATCTGCATCTACTTC  
AGCAACCTATGAAGGAGCAAACAAAGGCTTGAACCATCCTTATACTGAAAGTCTCTTTGTCTATAGTGAA  
GCATAA

>PGSC0003DMG400018367 LRR-RLKs

CTCTGTTAAAACAATGCTTTGCTTGCATTTTTAGTTTTGTTCTTTTGTTCAGCTCAATATCATGATGTT  
TTTTCTCAGCTTCTCCTCATTATTTCTTCATAATTCACCTTCATATTTGGTGGGTTTTTCCTTCTTGTTACTGT  
ACTTCAATTTTTACTTCTCCTTCTTCAACTGTCCAGAGTTAGTTTTTTTTTTTTGTTTCTAGATTTGTTCTAT  
CCTTTTCTCAATTTTTGAATACCCATTTTGTTATCAGTTGGGTGTCATTGATTGCTTCTTTTTGGTTGTGT  
ATGATGAATTTTGGGTTTGATTGAAGTACTGATTTTTATTTTTGGGCTCTTTCAGATTGGAGGTTTATGTA  
TTGGTTATGCAGAGTGTGTTTCCAAAGAAAGAGTAGATTGAAGAAAAGGGTTACAGTTTGGATCAATGG  
GTGGGAAGAGATCTGTGTTAGGGTGCTTGAATTTGGAGATCTTGGTGGGGATTTTGTTAATTTTTGCTGT  
TCAGCTTTCAGATGAAACTGACCCCGGAGATGGTAAGGAACAACAATATTAGTATTATATTTTCGAGTTG  
TTTTGCGTTGAAGGAGAGGAATGCTAATTTTCATGTTTTGGGGAATGCTGGTTATGAGGGACTGAATTA  
TGAGCTGAGCTAGTTGTTAACTTGAACTTTATTTTGGGTAAACGTTTTCAAGTCGGGGGCGAGCTGGAG  
TTATCGAAATTGGTCGGTTAAATGAATAGTCTTTATCCATTTCCGGAATTAAGTTGGGGCATGACGTTAG  
ATATGAGGTTGCATAGGAAATGGATTAGGTAGAAGATTAGTAGGTAATGGAGTGTTGTCTTGCTTATCC  
TTTGATGCTGGTAGTCGTAGTATTTCCCTTGGTAGTTTCTCGTCCTTGGATTTGTGTTACTATTATTGCACT  
GTTTTGTTGCGGTTACCGTTTGTTTTTTCTTCTCAGAATGCTTTGCCATGCTTTCTATAGTATTTTCGCCACT  
ATTTCTTCACTTCTGTTATTTCTTTTTTCGATATGCCTTTTCTTGAGCTGAGGGTCTATTAGAAACAACCTCT  
CTACCTCTTAAGCTAGGGGTAAGGTCTGCGTACTCTACCCTCCCCAAACCCCACTTGTGGGATTACATTG  
AGTATGTTATTGTTGTTTGAATTAATTTACAAACAACCTCCATCATAACAAACAAAAACCTTAAAAATAA  
CCTAATCGTTTCACTTACATTCTCAAAAAACTTGCATGCCGCAGTTACCAATTCTACTAACAGTGGACAAG  
CTGTCATTATTTAGAAAAAAGAAAAAGAGACAGTCCAGGAAATTGAAGGGGGGAGAAGAGGA  
AATGAAGTACTGACTCCTAGGTTGCTAGTCAAGTGTAGGGGGCTATGGCCTCGTCAAGTGATATGTAAA  
TTCAACACATATTATTGTCCTAAATATCTACTAAATTGCCATCTTGATCGTGTAACCTTTGCTTGGTTTGAA  
GTTAGCATGCTTTAAATGTTTGAATCAAATTTCTAGTTCATTCATGATCAATATCAACAATATTCTTATA  
TGGTTTGAAATTTCTAACTATGGCATTTTCTTTCTGCTGGTCTAGTTGCTGCAATTAATGCCTTACATGCT  
TCCCTGGGATCACCTCCCCTTCTGGCTGGGGTGTGCGTGCAGACCCATGTGATGGACAATGGCAAGGG  
GTCGTATGCCAGGAGACAAATATAATATCCATGTAACCTACCTCTTATTCGTTGCAGCATTTTCATGGATATT  
TGGAAGTCGTAATGTTAATCCTTCTAATCATCTTCTTTGCAGTCAATTAATGCTGCTAACTTGGCAGGTG  
AACTAGGGGATAACTTAGCATCATTTTCTTCTCTCAAACGATGTACGTGTACCCACAGATATATCTCCT  
TCGACATATATTTGGTTGTGTTTTCTGTGCATGTGCTGCATATATTATGTGGATGCTTCTTTTCTAGAGG

TTTCTTTTATTGTGTGACATGTGAACAATAATTGTGGAACTTCTTGTGGCAGAGATCTGAGTAACAATC  
ACATCGGCGGAACCTTCCCATCCAGTCTGCCAGTTACATTGCAGAATATGTATGTATTATCATTATCCTAG  
AAGGGGAAACAGAGAATGAAGCTTGAACATCACAGCTTACCTTTTGAGCAAACCATTTGATAGTCTTTA  
CCTTTTGGCAGTTTTCTTTAGATAATGATTTAGCCGGAAGTATCCCCAGTTCTTTATCTTCCCTAAGTCAA  
CTGTCAGCAATGTGAGTTTCAGCTTATATTTAGATTGGAGATTTCCCGTTACCGTAATCATGGTTCCAGT  
CAGCTATACTTCTCTTTTGTTCAGGTCTCTCAATGGAAACCAACTGACTGGAGAACTTCCTGATTCTTTT  
AAGGCCTTACAGCATTGGTTAATCTGTATGACACCAAGACAAAATCATTCAATATTTCCATAGAGGTTTT  
TAATTGTCCATAACTGGTGGATTAATTGTATACTTGCAGTGATTTGTCAAGTAACAGTTTCAGCGGAGCT  
TTGCCGTCATCAGTAGGAACTTGTCCCTCCCTGACCACTCTGTGAGTGATTCTACATATTGTTGAATTGGT  
TTGTAATTTATGACCAATAGAAAAGCAGCTTATTTCTTTCTCTCCAGACATGTGCAGAATAACCAGCTTTC  
TGGAECTCTCGATGTTTTACAAGATCTCCCCTCGCAGATTTGACTCTTCGTCACCATTTTTAACTCAAAT  
ATTAATTCAGGTCCATAGAATGATATAATATCGTACTAATATCTCCCATCTTTTGTGTCCCTCCAGGAAT  
GTGGAGAATAACCTGTTTTCTGGGCCCATACCTCAGAAGTTGTTATCTATTCCAATTTCAAGTAAGTACA  
TTTCACTTTCTGCTTCTAATATTGTTGTTTATCTTCCAGCATGTAATCTACAATATATTCTTGGCCACCTATT  
ACATTCTTGTGCAGTTGTGCCTCTTTGTTTCGACACAATCTGCTAGACAGATATTCAGAACTATGGAGAC  
AGATTCCTTGTGAAGTTGATTATTACATGCCAACTGCTCTGTACTTTTTGTTAATACTTAATACCCTCT  
TTCTTAAATCTGAGTGACAACCTTGATCAGCTTGTTATTCATGGACAATTAAGGCAGATAAGATCTGAAG  
GGCTACAATCGTTAACATAAACAATAATTGTACTCCACCCTCCTAAAGCTGCAGCACATGTATCATCTGTA  
CTCAGCTTCATATCCCTACCCACTTCAGACCATACTAACTTTTAGTTAACATACTGGTGAATATCAAAT  
TCACTAAAGGGGAGAGTTTCTGTGCAAAATGACAAGACTTGAATAGGCTTCATCATCTCATTAAAGTATAG  
ATCAGCGGAAGAGTTCAGAGTGGCTTCTTTATTACACCCAAGTTTGTGGTTGGCAAAAAAATGCAATTG  
CTATTGGCAAACCTTCTCAATTTTCTGAACCTATACGTTTTAGACATTTTATGTGCGTAGAAATTTGTGTGT  
GAGTGTGTGTGTGTGTGTGTGTGTGTCTGTTTTTATGTAAGTTTGTGAATGCAAGACCTCGTTAAATTCC  
TATAAGCTAGAAAAACCTTGATCTGAACTACACTCTTTCTCATAAGCAGGAAAAATATTATGAAAT  
GTGTGTCGTGCTAGTCTGTATGTTAGCTGCACCATCTTAAACAATAGTATTTTAGAAAAATTGTTGAGTCCC  
ACATCGTGTAGCATGAGGAAGTTGACTCCTTATATGGTCTTGGGCAATCTTCATCTCTTGAGCTAACTT  
TGGGGTTGAGTTAGGCCAAAGTCTTTTTTATACTATCGGAGATCTGATATGTTGAGGAGTATATTTATG  
TTGCAAAACCAGATTATGCTTACAGGTTTATGGCACTGACTTAGATTAGAATTGCTAGTGGGCACACTGC  
ATATCAACAGCTTGAGTCCTAAATGTTAGAATAATTTCAAATTACATTAGGTAAAGTAGCCAAATTTTGA

TATCATCAGCACAATTACCTAAAAAAGAATAATCCTAACACTATGCTGCTCAATTTAACAATTGGATAA  
AAAAACATCTAGCCTACACAATAAATTGGAAAAAATGTGACGTATACAAGCTAAAGGATTATAGTAGCA  
CAAACCATATGACACCCATATATGATGTATATGTCACGCTGGACCATGGACTGCCAAGCTGGATCATG  
GACTGCATTTTGGTCATATTTAAGTTCACTAGCGGGCTAACATTTATTTAAGTTTTGAACACAGGCGTGAT  
TTTCATATCATGTTGTTCAATAAGATTTGTTTGCCGGGAAATTTGATTTATTGAACAATATTGGTAAGGGT  
ACATATTGATCCATGCTAGGAAGATGTATCAGTTGTTTCATTATTTTTTTCAAGTGTCTTATATAGGTTTTG  
ACTCTTGATTGACTTTAATTATGAGAATTGATGGCTAATGCTTTCATGTACTIONACTAATTTTGTCTTGACG  
TGCAGAAACTGGAAATCCTTCAACAGTGTCTCTCTTGTCTCCACCCAACAGTAGTATTGCCCTTT  
GTCTCCACCTACTTCATTTACGAGACCCCTCCAGCACCACCAGGACCACCCTTTTTTAAGCCTCCAACCTC  
AACACAGACACCACCGACTTCAGACAGAAAACCTGGACAAAAAGCTGATGGACCATCAGCAACTGCAG  
AATCTAGTTCAAAGGAAGCAAAAAGTCTGTTAAAAGGGTAGTCTGGATATCCATTGCATCAGTTTTGTC  
ATTTATAATATTGGTAATAGCAATCCTGCTCTTCTGCCAAGATGCTTTAGGGAAAGGCAAGAACTAAT  
TGGTCCAGACGGCACGGAATAGCTCCTTATGTGGGCTCCAGGGAGAATCGTAGGGATAATGGTTTTATTG  
GTCCTACCTGGACATGATGTAGAGAAAGGTACTGCAAATTATTAACCTTTCAACTTTTATATCGTGTGT  
ATTGTTGCTAGTATTTGTTAGTCTGGCTTTTTTCTTAGTTCTTACAGGGAAAAGTACTCTTTAATTTA  
GGCTCTATTTGAATCTGCAGTCTTGACATCTAAGTATGCAGCTAAATATATAGTGGTTATCCATGTGCCCA  
GGGGCGGACCCACCCTTACCCAAGGCCTTCGTCAGAAAATTACATGGTATATAGAGGTCAAATTTTGATT  
TAATAAAATATATACAAGTATTGACACCTCTTGACACAAGTTAAAGGTTTCAGTCTAGTGGTTAAGACATT  
GCTTAATGACTACAACCATTGACACCCCTAATGACAATGGCCGCTACAGTATTGTCAAATTCTCTATTAC  
AATCATAAACGCCCTACAAAAGATTCGTGAATTTGATATCTGTTTTTGCAACATTCAGAATAATAAGCTA  
TGACTIONACTTAACTCTTCTACTCTTTGATGATAAGTGGACTTCATATGTTTTGAACAGCTCCTCCTCTGGTGA  
GGCCAAAGGAAGAGCAACAACCAAGGAGACCGGCCCGCACTCCCATGCCACAGCAGGAGCAGGAGTT  
AAATGTGCAAAACCTGAGGGCAGTACCAAAGAAGGATACTAGTGAGATAAACCTAAGCAGAATTGATA  
TTGATTCGATGTTGCCACCACCTCCACCCACCACCACCTCCGCCACCGCCACCACCCTTTTCTCAAGAG  
AGAGTTATTGTGAAGCCAATTCACCTGCCGACAATACTTCAATGAAGTTTTCCCACAGGCCACTTCCAC  
TAACTTCTGTGAAATCTTACACAATCGCATCTCTTTCAGCAATACCAACAGCTTTTCTCAAGATAATCTG  
ATAGGATCAGGAATGCTGGGAACTGTGTACAGGGCAGAGCTTCCAAAAGGGAAGGTATAAGTTATGAA  
TGATATATAATGTACTGTAATTTGATACTCGAAATTACCAACTGTTTTCTACCCTGCTGTATTCTCTTGAA  
CCTAGATTGTCAGCTTTTCTTCTTATAATTTCTTTTTTGGGGGTCTTACGGTGTCTGTGAGCACTAA

AGATGCCTCTTATCTGTTGTTGCATTACGTATCTTGCTCTTGCAATTTCTATGCTTAATTGCTTAAGAATGAT  
TCACGGACTGATCGAATCATATGTAAATATGGTTTTGTTGGTGGAAATCCAAAGTCATATATATTAGGGT  
AAACTGTATTTCATAAATACAGATAAAAGCAAATGACTTCCAATTGCTTCATAAGATATTTCTTGTAAC  
TAAATTTTCTTTAGGACGTTTTTTGGTTCTTATCCTATATAATCTTTAAGTGGCATTTTCTTCAAATAAAC  
AACACCATTGATCAACTGTTGTCATAGAACAATCAACATTCAAGTTGCATGAGCTTATCATTCTGATTTGT  
ACCTTAGTTTTGTCATTTGCTGTATAGCAGGATCTGCCAAATACTGATGCATCTTTTCTAATGAGAAACTA  
TTTTATAATCAGAATATACAATGTCCCTGTTTTATTTTCAGTGTACATTTATTTATCTGGCATGCAATCTTA  
ACTCTCATCCCATTGCTAACATTATTTGAATCATTTGGTGGTCACATTGTGTTACTTCTGACACTTGACCCT  
TTGAATGCTTATGCAGTTACTTGTGTCAAGAAGCTGGACAGAAGAATTTCCAATCAACAGAAGGATGA  
TGAGTTTCTTGACCTAGTAAACAATATTGACAGAATTCGTCATGCTAACGTTGTCGAGTTGATGGGCTAT  
TGTGCAGAGCATGGTCAAAGGCTTCTGGTTTATGAGTATTGCAGTAGTGGGACACTACAAGATGCGCTG  
CACTCTGATGATGAATTCAAGCAACAACCTTTCATGGGATACACGGATCCGGATGGCTCTTGGAGCTGCA  
AGAGGCTTGGAGTAAGTAAATAACCAGTCACATATACATAGAAACCACATGCAAATATACGAGTATAT  
ACATATGAGCTATGGAAAATCTGATGTTGAAGAGTTATTTGGCCGTGATCTATAAGAAATTTCTGTAAGC  
AGTACTAATAATAATTTAGCACTGGAAGGTAGCAAAGAACTCAAATCACAACTAGTCCTGAACTTTTCAT  
GCCATGTACATACTACATGACATAAATGATAAAATACTGTTGGGAGATGGTCTTTATAAGTATATGTTAA  
CATTATATTTGGTGTGTATTTGTTTTATACTACTTTCCATTCCCTCCACATGAGTTCATACAAGGGAT  
GCTGAACACGATTGTTGAAAGAAAATATCCTCATAGTCATCCCACCCGTTAATTATTATTAGTGGGATTG  
CTAGGTGATCTAATTCTTAGATTTGCATGACAAGCGAGTTAAAGCAAATTTTAAATCTCATGTATTAATTA  
TATTTGTTCTTTTATGCAATGAAGGTATCTCCATGAGGTCTGCGAGCCACCTATTATCCACAGAACTTCA  
AATCTGTCAATCTTCTCCTTGATGAAGAGTTGGCTGTGCATATCTCTGACTGTGGTTTAGCTCCACTGATA  
TCATCAGGTGCCGTGAGCCAGGTAACCTACCATCCAAATATTATGGATCAGACATTTACCTCTTGGGGTG  
GAATGGTCATTTTCTGCTTGCATTTCCAGTTGAAAGAAAAGCAAGTTTCAGGTTTATGATGGAAGTGAAA  
ATGTGGACTAAGTAGTAGTTGTTAAGAAAGGAGTGAATGATGATCAAAATGCTTCCAAGTAACACACC  
GGAGTAGAGCAGTAATTAATACTACAAATGCAGTTTCTCGTAAATGGATAACTTATTGTTAGAAATAGTTG  
ATTTTGTAGTAGTGCCAGAAGTTATACGGTCAATTTCAGAAGGGTCAAGTCTTTTTCCCTGTAAATCTGG  
AAATCAGGAAACAAATCTAGCTAGTCTGAGACTACCTGGTTGCCAGCTAGTCTGAAGTATTTGTCATGT  
TTTAGGCTTTTATAACATTTCAATGCTTCACGAGATCTAATAGACACTAGTGGAAATTTGTAAGCAGGAGA  
GTAGATCCTTTCCAACATATGCTGGACTTGCCTTCTCATCTTCACCCCTTGACAAAGAGATGAAATTTAGT

GATCCTTGAAACTGTTCCCAACATTCTTCAGAAGTAGTTTTGCCGCTGCACATTTAATATGATGGTGACAA  
GCTCCTGTATTTTTTCCCTGTTGGAGAATTTGACTTCTAAAGATGTGGGAAGAACAGTTTCACTATGTT  
AGTTTGACCTAGTCATACATAAAGACACTCTACAGGTGCTTTTGTTAGATGGGTTTTCAGAACTTAAATT  
CTATTTATTTTTATGAAGTCCACATTATCTCCTCTCATTAAATAAGAAACAGTAAAACACAAGATTGAACT  
AAACAAGACATCACGGATATGACTGGTTTTTCACTTGTACTTCGTATGATTATAGATCTGCTACTCTAGG  
AGCATGTGGATCATCAATCTTTGCTGAAACCTTACCTTTTTTGTTCCTTATGCACTGTGCCGAAGAATTT  
GAAATTGAATAAGTGAAGTTGTACTTGATTTTCAGTTGTCAGGACAACCTTCTTACAACCTATGGCTATGG  
TGCCCCAGAATTTGAGTCAGGGATTTACACTTCTCAGAGTGATGTTTACAGTTTTGGCGTGGTGATGCTG  
GAACTCTTAACGGGCAGAATGTCATATGACCGGTAAGGCCATTTGCATCTCATTGAATAAATTTTGTGT  
CATGTTTTCTCCAGCTTTATCATTACCTATATATCATATTCAGAACTCGAAGTCGAGGAGAGCAATTCTT  
GGTCAGATGGGCAATCCCTCAGCTACATGATATTGATGCCTTGACAAGAATGGTTGATCCTTCTCTCAA  
GGAAAGTACCCACTTAAGTCATTATCACATTTTGCTGACATAATTTCCCGCTGCGTTTTGGTGAGTTTTTT  
AATCCTTTCTTTTATTACAAGTGAGTAATTTGTCCAAATCTCCATTTTCTTCAATCCTAATCAAACCTTTGG  
GTACAAATGAGGAAAAAGGTAACATGGAAAATGATTTATTTCTGTACAGAAAATAAAAATAAAAAGTAA  
AAGGAAGGAGCTGTACTGTGTCAAATAGGAACTCTACACATGGTGTCTTTTGTTCCTTATAGCCACTAG  
ATTATGAATTATTTACCAGTTAAGGACATCTGTGAATCTGTAGTATGAGATGTACCAGGTTTATAGGCA  
TAGTTAAAAGTTACAGGGAGTGGAAACATCCCATGTCGATGTTCCGATATCGTTTTCTGCTCAGGTGTCT  
GAATGCCTTTTCATGACTCGTTGAAGAGTGTGTGTATGTTGTAGTTGAAGCAAACAACACTAGGAAAGT  
CTGGATCAATGAACAATTTACCAATAATACCCTATTCACCAAATTAATCTTGTGGCAGAATACGCATGG  
TTAACTAGCACACAATCACACACCAAACAATAAATAAATAAACAAGGAATTTACTAGGTTTGT  
CAAACCCATTTCTCGGGGAAGAAGCGGAGAGAATTTTCCACTATAAAAGATAAGAAAACAGTACCAA  
GAGATCCCCTATTACAACCCTTTTAAATACCCAAGTGTTTGCCCAATCCAACCTGCCCCAGTCTAACAATAT  
AAGCAAATAATAGTGGTTCGAAGCTTTTCGGGGTTGGGTACATTTCCGATCTGCCAGAATCCAGACAC  
AAAGCTGTAGAAGCAACAGATATATTATATTGCTTTCCTTCTTCTGCTTATTGTTCTCCTGTCTTATTGTT  
TATTCGGTGGGTGTTGGATTTTTCACTAGGTAATATGCAATTTTTGTACAACCAAATGCTTGTGTATGTG  
GGGGAGAAGAAGAATGAGGCACCACTCTATTGATTGGATATTTGATTGCAACTGATATATCCATTGTATT  
TATATAATGGTCAAATTTTCAATGTTTCAATGAACAGAAATCGATACTGATAAGTTAAAAGGAACCAAGT  
AGTTGGTGTAACTCCAATGTGAAGCCTGTTACAGTGTCTCCCATTTATCATCTTTAGTTACCCTTCTA  
GCAATGACAGAGAAGAGATTAATGCATCATATGATTTCTTAGGGACTATTTCCATTTGGCTCCACCTTC

CATATCCTATTCCCGCTATCTTATAGATTGATCGCACTCACAATTGTGTGCAGAACAAC TAGTACAGAGTA  
CTATATTACTGTTAATCAAGGAAGAGTGAAGTAGTTTTCGTGTGGCTGTTTTCTGAAGCCCATCTCATATC  
TCTTCCTAGCATGACTAAGATTTAGCTGTTGTATAGGATTTGCCTTTGCATTTTGTGTA ACTATCTTTAAT  
ATTTCTTGCAGCCTGAGCCTGAATACAGGCCACAAATGTCAGAAGTGGTTCAAGACCTCATACAAATG  
ATAAGAAGAGAATCTCCAGTAGATCCGATGAAGAATGATTTGAACCAGACATGCATGCTATAGCAGAT  
TCAGGCATGGAGTAACCAAGACTTCCAAGATTTTTTTACTTTTGCAAAGA ACTTAACTCGAACTGAGATA  
CTTGGAACCAAAGATTTTGAGGCTGTAGATGCAGTGCCCTGCCAGCAAAGCTTCATACCTCCAAGACAA  
AGGGCTGGCTAGAACTGCACGATTTCCACCAACACAGCTCGGGTTATCCTGATTCTTAGTACAATTTTT  
TGCAATCATTCTAATGTTTCATTTATAGTCCAAACAGAAACCACAATGCATAAAATGCACTAACCCCATGT  
TTTGAGAGCTTATTTATGGTTGTTAATTGGTATATCTGAAGTTGTAAATCTTTATTTGTTCTGCTGTACATT  
TTCAATTGTTTGTACAAGAATATTCTTCACACTTTCAATATGGACTTTCTGTAGCACATTTTTTCAGCCTTCA  
GTATCATCATGGATATATTTAATAATCACTTGAAG

>PGSC0003DMG400018752 LRR-RLKs

TTGAGAAGTTGTTCTGTCTGGTTCAAATCACGAATTTCTTGAGAAAAAAAAAATCCTTGACAAGATGGAG  
AAAAGCTATGTTCTTTTCCTTATCTTATTAGTATTTCAAGAATCAATTTTTTCCCTATATGCAAATTCCACA  
AATGAAACAGACATGGAACTTTGTTATCTTTTAAACAACTCATTACAAATAACTCTTCTTTCTTTCCAA  
GAATTGGACATCAAATACTTCATTTTGCTCTTGGTTTGGTATCACTTGTAATCCACAAAACCAAAGAGTCA  
TAGCTTTAAATCTCCCAAACATGAATCTTCAAGGCAAATTTCACCATCAATAGCTAACTTATCCTTTCTTA  
CTAAACTTAACTTTAGTAACAACATTTTTCAAGGCACTCTTCTTATGAACTTGGAATTTGCCTCTTTTGG  
AAGTCATTGATGTTCATAACAATCAACTAGAAGGAACTCTTCATCCTTTTGTGGTAACATTACAAAGTTA  
GAGAGATTGAGGTTAGATGGAAATAGATTTAGTGGTAAAATCCTACTGAGATTGGGAATCTAAGCCAA  
CTTGTTGAGTTAGATTTGTCACATAATCAGTTTTCAGGTTCAATCCCTGGATTGATCTTCAGCATGTCGTC  
GTTACGTGCTGTGTATTTGGTTAACAATAGTCTTTCTGGTTCATTCTTGGTTGATGAAATGAAGGGTGTG  
ATGAATCTTGAAGTTATAGACCTTAGTTATAATCGAATCATCGGTGAGATTCTTCAAGACTTTGTCAATT  
CAGTAAGCTAAGA ACTCTTGTCTGTCTTACAACAATTTAACAGGTCAAATTCGAGAAATATTGGTTGTT  
TATCAAGGCTTGAGAGTTTTTATATAACTCAGAATGCAATAAGTGGTACAATTCCTAAAGAATTAGGAA  
ATTTCCACATTGCAATTTCTTGGTTGTGTGAACAACCATATAAGTGGTACAATTCCTAAAGAATTAGGAA  
ATTTACCGAACTTGAAGATGTTGGGATTTGATTTCAATAATCTTACTGGTGTAAATACCTGAATCTATCTTC  
AATATATCTTCTTTGGAGTACATTGCTTT CAGTGATAACGATCTCTCAGGGCGAATTCCAACCACTCTTGG

ACTTAAACTTCCAAACCTTAAAGGAATTTTCTTGCCTGATAATCAACTTGAAGGAGAAATCCCAATGTATA  
TCACAAATGCTTCTAACCTTATTGAGCTAGAGTTGTCCTATAACTTGTTACAGGCATAGTTCCAAGTGAT  
TTGGGAAATCTACGCCAGCTCGAGTTCTTGAATCTTGGTGGTAATCAGCTTACAAATGAACCAGGACAA  
CAAGAGCTTGGATTTTTGAACTCTTGGTGGATTGTAGGAGGCTGCAGTTCCTGATATTGGCTAACAACC  
CTTTGAATGGCGTCTTGCCTGATTCGGTTAGTAATCTTTCGTCTACTATTGAAATGTTTAAACATAGAGAAT  
GGTCAGATAAATGGACAAATTCCAAGAGGAGTAGGCAATATAAGCAGCATGTTATCGCTAGTCTTGAAC  
GGTAAACCAATTGACAGGAACCACTCCACCAGAGATTGGTGAGCTAAAGCAACTTCAGAGGCTTTATCTA  
AGCAAAAACAAGCTACAAGGTTCAATTCCAGAGGAAATATGTGACTTGGTAAACTGGGAGATACATTT  
CTACACGAAAACGAGCTCTCTGGGGCTATTCCAAGTTGCATTGGAAAACCTACTAGGCTGCAAAGGCTT  
TCATTTGGCTTCAATAAGTTCACCTCAAGCCTACCTTCAAGTCTATGGGAAATGGATAGCCTGATTTTTCT  
AAACGTGACGCGAAATTCATACAAGGGGAACTTCTATTGACATTGGAAAATTGAAATCTATTGAAGG  
TATAGATTTTTCAAGCAACCAACTTTCCGGTGTGATTCCAAGTACATTTGGAGACCTTATAGGCCTGAGG  
TATCTTTCCTCTCAAACAACCTCGTTACGGAGTGCAATTCCTTCATCATTTGGCAGTTTGTAAAGTTTGAA  
GTTCTTGGATTTATCTTCAAATGAGTTATCAGGAAACATCCCAAAGTCCTTAGAAAACTTCAGTTCCTTA  
ATGAAATCAATCTTTCCTACAACCACTTTAGAAGGTGAAATACCTTCTAGTGGTGTGTTTGCAAACCTCTCT  
TCTCAATCTTTTGTGGAAATAGAGGTTTATGTGGAAAACCTATATCAGAAGTTTCTCAATGTGCTACGA  
ATAGTGCAACGAAACGATCAAAGTCTAGAAAACATGTGCTAGTAGTTGTCATTCTGTGATTGCATCAAT  
TCTCCTCATATTTGTTGTTCTGTTCTGATGGATTAAGCGAAGATCAAGAAGAACAAAACCTTCAAGACCAT  
GATCAAGAGTTAACAGAAATCACAACACACCAGTTGATCACATACCGTGAACCTTCAACAAGCAACGGAT  
AGTTTCAGTGGCTCTAACATGATTGGTTCAGGAGGTTCTGGTCTGTTTACAAGGGCATATTGGCTAACG  
GAACAATGGTCGCGATAAAGGTTCTAAATATGCAAAATGAGGAAGGATGCAAGAGGTTTGATACCGAA  
TGTGAAGTGATGAGAAGCATTAAACATAGAAATCTTGTCAAGGTGATCACTACATGTTCCAATCAATACG  
TTAGAGCCATCATTCTCGAGTATATGCCAAATGGAAGCCTTGAAAGTTGGTTGTATGATAAGGAACATC  
AAGTCTTAGACATGTTTCAAAGAGTTAGCATAATGCTTGATGTTGCAATGGCATTGGAATATCTTCACTA  
TTGTTATGATACACCTATAGTCCATTGTGACTTGAAGCCTCAAATGTTTTATTAGATGCTGACTTGGTGG  
CACATGTTGGTGATTTTGGCATTTCAAAGATTTTAGGTGAAAACAACCTCCATGGCACAAAACCTAACACATT  
GGGCACTATTGGCTACATTGCACCAGGTAAACAATTCTTCTCTGACTACTCTACCTTATATAAGGCATATT  
TTTGGTCATTCTTCTCTGAAAAATAGAATATTGGTCAATTAAGTTGATTTCCGGTGCTACTTACTATGCC  
TGAATCTAACGCTAGGCTAAGTCTTGAACCTTTGAGCTGACCGTTCACCTTCTTAGTAGCAAGAGGGCTT



CTCTTTGCCCTTTATTGGTTGTATCAACTAACTGCCCTTCCATATAGATCGTAGCAACATGAACTATT  
ATTAATAGATTCTCGCTTCTTATAATCTTGAAAAGTTCTAGCTTAGTCTTTTTTTTTGTTAGAATTATC  
TTTTAATTAGACCGGACCCACTTTTATACTTATCCTACAAGTGCTATTGGGGACCCACTCAAAAAAAAAA  
AACTTGAAGTTAGAAAAGTCCACCCCTTAATAGATTAGGGTAGAATCAACTGGATTTAACTTATATCTAC  
TGATAGTATAGAATATATGTTTAATTCGTTATAACATATTAATTCCTTTCCTTTTTGTGTTTTAGAATAT  
GGCTCAGAGGGAATAGTGTCCACGAGTGGTGATGTTTATAGTTATGGTATAATGTTAATAGAGATATTG  
ACAAGAAGAAGACCAACAAATGAGTTTTTCAATGAAAACATGAACTTGAGGCAATGGGTGAGTGAATCA  
TTTCCAAGTTCTTTGAAGACAGTTGTTGATGAAAATATTTATTTGGAGAAAATGAGATTTTCATATTTAG  
TATGATGGAGTTGGCTTTGGAATGCACAAAAGAAAGACAAGAAGAGAGGGTAAATATGAAAGATGTAG  
TGAATAGACTTGGTAAAATTAAGAGGACCTCTTCTTGGAAACAAAGAAGAAAAAATCTTAGGAGTAAA  
ATTTTGTTTATTTTTAGTTTATGGTTTAGTTATTCTTT

>PGSC0003DMG400018811 LRR-RLKs

ATAAAAGGGGCACTAGTAATTTTAGTAATTGAAAAGCAAGTGTATAGAGAGAGATAATGAGAGAGAAA  
GAGTAAGTACACTACTACTGCTACTATCCCATATAGCTGTAATGTTGCAGGTCTGATTTTTGCAGTTGCA  
GACCCCTTCTTGGCACAAGCTCTTTAACTTTTATCTTCTCAAATAATTCTCTCTCTCTCTCTCTCTTTT  
TCTCTTTTACATTGTGAGGAACTGAATACCCATTGTATGTATTAGTGTGAGGCCTATCTGCCACAAGG  
ATGTGATGGAACACTATGCTTCTCTGCTAAAACCCACAACCCCAAACTCTTTTTCACTTCACATTTAAT  
CACAATTCCTCAGTGAAATTATTCTGTTGCTCTCTAATTTCAATTTCAATGTCGGTAAGTCCAAGAAGT  
GGTTTTCAATTCAAAGGAGCTGAGTTAGTGCAACACTTGAGTTTTGAGTTTTGACAGAGACTTGAGT  
CTCAGAGAACTACCATGACATCATTTTTACTTCAAAGATGTAATCTTTTCTTTGAGGTTCTTCTTTTGG  
GGTTCTTGAATTTCTTCAGCTTTGGTTCTGTGGTGTCTGATGATGGTGAGTGAGTAGAGTAGAGTAGT  
ATAACATTCTGCTTCTTATGTTCTAGTTAATGTTTTGTTAAATGTTGAAAAGACAAAGTGCCTTTTTTT  
AATCATTTTTTAAATGGTGTTTTTGATTAATCCACGTTTTGTAGTTGTTATTTGTTAAAGGTTTATTTTTT  
GTCTCATTATTATAATAATAATTGGAAAATAGGTTCTGCATTGTTGGAGATTAAGAAGTCAATTAGGGAC  
GTGGAGAATGTGTTATATGACTGGACTGATTCTCCTTCATCTGATTACTGTGCCTGGAGAGGTGTTACCT  
GTGATAATGTCACCTCAATGTTGTTCAACTGTAAGCCATAACTCAAAAAACACTCTTGTTACATTATTAT  
CATTTGGGATTCTTTAGTATAAAGTTGTAATCTTTTGACATTATCTTGTAGTAATCTTTGAGTTTAAATCT  
TGATGGGGAGTTGTCTCTGCAATTGGACAGCTCAAAGGCCTTATATCTATGTAATATCTTCTCCCATTAT  
CCCACATTTTCCCTTTTTGTTTGATCTTTGACTTAGTGTACATTTAGATTATGTTTGTTAATTTATTTATTT

TCGTAGTGATGTAAGGGGAAATCGCCTTTCTGGCCAGATACCAGATGAGATTGGTGACTGTTCAGCACT  
GAAAACTTGTAAGTATAAAATGCTTCTGATTCTTGTGTTATTATTTGGAAAATAAGTAACCATTTTTTC  
CCTTAGGGACCTATCCTTCAATGAGCTTTATGGTGATATCCCTTTTCCATATCAAACTTAAGCAACTGG  
AATATCTGTAAGTTTTGATACTCTTCTTCTAGGTGTTGTATCATTTGCTTTCCAAGATTGTCAATTGAT  
CATGCTTGTCTTCTCAACTTAGGATTTTAAAGAATAATCAGTTGATTGGACCAATTCCATCTACATTGTC  
ACAGATCCCCAACTTGAAGGTCTTGTAAGTATATTCTTCTGCTTTGTCATGATATTGGTAGATTATGAA  
TAATTTCAATTAATCCAAGAACTTCTCCAGGGACCTAGCTCAAAATAGGTAAAGTGGAGAAATTCCTA  
GGCTGATATACTGGAATGAAGTCCTGCAGTATTTGTGAGTGTTTTAATTCAGTGCTCCTCTTCTTGGTT  
TCTAGAATACCTTAGGAGACTACCATTTTGTATATGGATGATCATATCTGTTGTATGTTTTTCATTGTATA  
GGGGACTGCGTGGCAACAACCTTGGGTGGATCACTTCTCCTGATATGTGTCAGCTCACCGGCCTGTGGT  
ACTTGTAAGTTTGAATCTTATGCTCTTCAGATCTTACTATAGCTCCTTAGCTGATGACATTAACCATCG  
TTCATTGTTTTGTGCAGTGATGTTCCGAACAATAGTTTGACTGGTCCATTCCTCAAAATATTGGCAACTG  
TACTGCTTCCAGTTCTGTAAGTATCTATAACAATGAATGAAGTTGGACTATTTTCTAAATGTTTGGTT  
GGCATAACACCTTGTGTTTGTGCTATCAGAGATTTGTCTTATAATGACTTGACTGGAGAGATTCTTTCAAC  
ATTGGTTTCCTGCAAGTAGCGACCTTGTAAGTTTATGCTGCTTCTTTATCACAAAGCCATTCATTATAT  
GGTTATAAGTTTGAAGTGTACTTTCATCATTCCAGGTCTTTGCAAGGTAATCGCCTTTCAGGGCAGATCC  
CTTCTGTCATTGGATTGATGCAAGCTCTGCAGTTTTGTGAGTTTTTGTGCTTGTATCTCAATCCAATGC  
TACTGAATCATGAACGAGATTTCTTGAAACCAAAAAATGCATCTGTTATTTAAGTTTTTCTGACCCTTTT  
ACTGACAGGGACTTGAGCTGCAATATGTTGAGTGGAACAATTCCTTCAATTCTTGGGAATTTGACTTACA  
CAGAAAAATTGTTAGTACTATAATAATTTAATTTAAGAGCAATTTGGATCATTTTGTGCTTCTAAATTGT  
ATACTGGATCAATTAAGTTCGCATTGTATTGCAGGTATCTACATGGGAACAAGCTATCTGGTTCC  
ATTCCTCCAGAGCTGGGAAATATGACAAAGCTTCACTACTTGATGAATGCTTCTATTAATCATTTTTTG  
TTGGCTTTGTTTTGTTCTTCTGTTCAAACCTTTTAAATGAATGCAAGCATTGTTTGATTAGTGAGCTTT  
TAGGCAACCACTGATTTGATTGATACAAAGCTGTTTTGAGAATTTTTATAAGAGACTTTCCTCAATCTCA  
AGGCTCAAAGATGGTAATTTGCAGAGAATTGAATGATAACCAACTTACTGGACGCATACCACCAGAACT  
TGAAAGCTGACGGAGTTGTTGACTTGTAATCCCGTTTCTTTCATCTTCTACTTTGGACTTGTTAACA  
TCATTATTTATTTACTTATGTGGTATGTTTCAGAAATGTTGCAAACAACCACCTTGATGGGCCATACCTT  
CCAATCTTAGCTCATGTACCAATTTGAATAGTCTGTGAGTGTTTTTCATATCCGATGTGTTTCAATTATGT  
ATGATCATGCTTGTGTTGGGAGTTATTGACACCTAATTTGGTTGCAGCAACGTTTCATGGAAACAAATTGAA

TGGTACAATTCCACCTGCTTTTCAAAGCTGGAAAGTATGACCTATCTGTAAGTTCTTACTTTTTGAATTTT  
TCTTTTAGAGAAATATGTGCAAGGTTATCTAGTTATCATTCTACCCATTGCGCTGTTAAGGAAGATTGTA  
AACTTACTGTGCCAATTTTATATTTAAATTTTACCAACGTTGTATTATTTTGCACAGAATTCATTTTATTAT  
CTTGCTCTCAAATCGTTACTGGCTTATCCTTGCATGAAGAATCATTCTATTGTGCGAGAGCTTTCAGCTAT  
GTGTGTCATATAATTTTTTTAATTATTAAGTATTTTATTTAGAGCCTCTGCATCATCTAGTTATGCGAATTT  
CAATTGCTTATTCTGCATACTCTGAGCATAACTGCATCTTTTTTTTTGTTAATTGCTCAAGTAATCTCTCCT  
CCAACAACCTCAAAGGCCCAATCCAATTGAGCTTCTCGTATTGGGAATGTAGATACACTGTAAGTGCA  
AACTTCTCATCCACTTTCATTTCTCTCATTGCAATTATGGTTGCGGGAAAAGCACGTTTTGACAGTTTAA  
GAACTCTCAACATTTTTTTGGCTTAGGGACTTATCAAACAACAGGATCAGTGGTCGTATAACCTTTGTCCC  
TCGGTGATTTGGAACATCTTCTTAAACTGTGAGCATAACCGTCAGGTTGTTATGTTATCATCATATATCTG  
TTGTACTTACATTCTTTTGTCAATGCTGTAGGAACTTAAGCAAGAACGAAATAAATGGAACTTGCCAG  
CTGAATTTGGCAATTTAAGGAGCATCATGGAGATGTATGGAACCTTGCTAAATTTAGTTACTTCAAATTT  
ATGTTTTGCTTGATTTTCAGCTTTTGTGACCGCACTCTTAATTGTAGTGATCTGTCAAGCAATCACCTCTCTG  
GTCCCTTGCCTCAGGAACTTGGTCAGCTTCAAATCTGTACTTGCTGTAAGTACTTTAGATTTACTTTCGAG  
ACTCTCATCCTCTTAGCCATTGGTAATAATCTGTACAGTGAATAAGTATGAACTTCTAAACTGGGAAAGT  
TAGATTTTAAATTATTTTGGATGCCATTTTCAAGAAAGTAGAGATGAAGTGGTGTTGTTGCGATTGGTTT  
ATATTATCTGGCTACATATGTTAATTACTTTGGTGTTGTCTCAGTTTTTCTTTATATTGCATTATTGTACGG  
GGCTCATAGGGCATCATTTCTCTATCTTCTTTTCTTGTAGGCCTTATTCTACAAAATAATGAACAGGA  
AACTGGAAAACAACAATTTATCAGGCGATGTGATGTCCTTAGCCAGTTGTCTCAGTCTAAATGTCCTGTG  
AGTTTTCAAGCTAGTAGTATTACACCAGTACAAATGTTTTGTAATCTAATCAACCGTTTTTTGGCAGAAA  
TGTCTCATAACAATAATCTGGGAGGGAATATTCCAACAGGCAATAATTTCTCTAGATTTTACCAGACAGG  
TAAGTGGAGCGATGAAGATTCCATTGATCTTCTCGTCATATGCCAAGTTCACACAAGTCACAAGC  
ATTTATTGGTTTGTTTTAAATCTTTGCTTCTAATTTTTTCTTTTGTATGTTTCCAATAAAGCTTCATAGG  
AAATCCAGATCTGTGTGGGTATTGGCTCACTTCTCCCTGTCATGCATCTCATCCAGCAGAGCGAGGTATG  
ATCAAAGTGTAGCCATCATTTGACCTTTATTCTATTGCATTCTTGAAGTTTCATTTCACTTTAGACACTTGC  
AACATTTATTAAGCGCGATGGACAGATATTGATTAATGAGGAATTACCCCTTGGTTGAGCAAATTTAATT  
CTGTGTTAGTCTGGTAGTAGGGTGCACGATCACGGTTTCTCTGTTTACAATCCTTGATTGTAACACTTG  
GATGTGTGCAGTAACACTTGGATGTGTGCACATATTAATTAACATGAAATAATATTCAATTTGCTGGAGT  
TACATTGACGTAAAGATGCCTTAGCTGTCAAATGAAACTGCATTAGTTTTATCCCCATCATCAGTACATTA

AGGGGTCATTTGGTAGAGTGTATTAGTAAAAATAATGCATGCATTAATTACATGTGTTAGTAATCCCTTG  
TTTGATGCATTTTTTCATGCTATGTATAACTAATGCTATACACTCTATTGTGTATTGAGGAGTGTACTACTA  
ATACCATGGATTTCTAGGTATTAGTAATGCAAAGGATTTAATACATGCATTAATATGGTTAAAGACCCAA  
TTACCCCTCAAAGTACTTCTACATCTTTTTACCATAATTGTGAAGGATACTTTTGTAATAAATATTTTA  
TACAATGCATACTATTTTCATACACCAAACCAAACAATGCATAAGAAATAATATATGCATAACTAATACA  
AGTATAATTAATACATGCATTAATAATGCTTGCATTAATAACTCTATTGGGTATTATTTTTATACACT  
CTACCAAATGACCCCTAAGTGCATAAATATTTTAACAGTTGTCTAATGAAAAAAGATGAATTCATTGGAC  
AATTGCAGTTTCAATTTCTAAAGCTGCTATACTTGGTATTGCTCTGGGTGGCTTGGTGATTCTTCTGATGA  
TACTAGTAGCAGCATGCCGGCCACAGAATCCTGCACCTTTCATGGAAGGATCTATTGATAAACCAGGTA  
CAATATTTTCTGGACGGTTGGATAGTGTTTGGAGACGTTTCATGTCTTAAGGACAGTCATCAGAGTTAATT  
GAAGTTGCCATGTATTGATTATTTAACGTTTTTGATGAACAGTTTATTACTCATCTCCAAAGCTTGTGATC  
CTTCATATGAACATGGCACTTCATGTTTACGAGGACATTATGAGGATGACTGAGAACTTGAGTGAGAAG  
TATATAATTGGTTGTGGAGCATCAAGTACTGTATATAAATGTGTTTTGAAAAATTGCAAACCTGTAGCTA  
TCAAGAAATTGTACTCTACAACCCGCAATACTTGAAGGAGTTTGGAGACTGAACTTGAGACAGTTGGGA  
GTATTAAGCATCGTAATCTTGTCTGCCTCCAAGGATATTCTCTTCTCCATCTGGCCATCTTCTTTTCTATG  
ACTACATGGAAAATGGTAGCCTTGGGATTTGCTTCATGGTTAGTAAATCCAAAATGGTTTAGGTGATTT  
GGTTCATTGAACTTGTGTTTTAAGCATTTTCGTAATAATCCCTCTTATATCTTTTTTGCAGGTCCTACAACAA  
AGAAGAAAAAACTTGATTGGGTTACTCGCCTTCGAATTGCATTGGGATCAGCTCAAGGGCTTGCTTATCT  
TCACCATGATTGTAGCCCTCGAATTATCCACCGTGATGTTAAATCATCAAATATCTTGTTGGACAAAGACT  
TTGAGGCTCATCTGACTGATTTTGGCATTGCCAAAAGCTTATGCATATCAAAGACCTATACGTCCACATA  
CATTATGGGAACCATTGGTTACATTGATCCAGAGTATGCTCGCACTTCTCGCTTGACAGAGAAGTCTGAT  
GTTTACAGCTATGGAATTGTTCTATTGGAATTGCTCACTGGAAGGAAAGCTGTAGATAATGAATCTAATC  
TACACCATATGGTATGCTCTTGTAAATTTAGTTAATATGAACTTGTGCTATGATGTATCTTCATATAATTATA  
TAAAGATTCAATTGATCTCAACAGTTTTGCATATGTTACAGATTCTAACTAAGGCAGCAAACAATGCTGT  
AATGGAAACAGTGGATCCTGAGATCACAGGCACATGCAAAGATCTTGCAGATGTGAAGAAGGTTTTTCA  
GCTTGCCCTTCTATGTTCCAAAAGACAGCCTGCTGAGAGACCAACAATGCATGAAGTGGCAAGAGTACT  
TGAAAGCCTAATACCCGTCGCTGAAACGAAACAGCCAAATCCAACCCCTCACTTGCATTACTTCCATCT  
GCTAAGGTACCTTGTACATGGATGAATATGTCAACCTCAAGACACCCCATCTAGTGAATTGTTTCATCCA  
TGAGCACTTCAGATGCCAACTTTTCTCAAGTTTGGAGAGGTCATATCCAGAATAGTGGCTGAAAATA

ACATGAGAGTAGATTTCTTGAGATTTTGTGTAAAAATGTAGTGCCATTATCATATTATTATTGTAGGTAGT  
TGTTGTAAGATGATGCATGCAATAGTGGTCCAGTCTACTTTTTCCACTACATAGGTCTAGTGTGTGTAAA  
AATATTTCACTTTTTACCATGATGAAATTGGAAGAGGTAGCACTTAGTAGAGTATTGTAATATTGGTTTTT  
GGGACCACTGATGCTGAGTATGGACTATACTGTCTGTAAAATTTTTGGCACACACTTTGAGGTGGCCTTA  
GCACTGCCCCTCTGTGTATAGCAATAATGGATTGCATTGTGGACCTAAGTTTGACAGTCTGCCGCTCTCT  
CTTGACAGCTGCAGTACATTAGTGCATTTATTTGGTGGACTACTCAGAAACACGAAAAATAATTTTGACAT  
TTTAATTACTCTACTTCCTCAGATTATTAAT

>PGSC0003DMG400018849 LRR-RLKs

ACTTAACCCACTAAAATCATCATGAAACACACTCTATTTTTCCAGCACTCCTAAAAAGCATTTTTCTCTCAA  
ATTTACCTCTCTTACATACCCCATTTCTCAACCATTTCCACCATAAACAACATCACCATGAGACACTTGTT  
TCCTTTCTTTTTACTACAGTTTTCTTCTTCTAACAAGAATTTCACTTGTTTTCTCCATTACCAATCTACCTC  
TACAACTTATATCTCTTTTGACTTTAAAATCTTCTTTGCATGATCACCACAATACCTTCAATGACTGGGATC  
CCACCCTCGCCTTCGCTAGACCGGGTTCTCACATTTGGTGTTCCTGGTCTGGTATCAAATGTGACAAGAA  
AACTAACCAATCACCTCTCTTGATCTGTGGAAGCGCAATCTTTCTGGTACAATTCCAGAAGATATCAGA  
AACTTGGTACACCTTCATCACTTGAATTTGAGTGGAAATGCTTTGGAGGGTCCTCTTCAAACAGTCATTTT  
TGAATTGCCTTTTCTCAAGACACTTGATATTAGTCACAACCTGTTTAATTCACTTTTCCCTCTGGTGTATC  
AAGGCTCAAGTCACTAACATACCTAAATGCTTATAGTAATGACTTCGTAGGCCCTTGCCTGAAGAAGTT  
GCTCAAATCCCAAATCTTGAGTACCTTAACTTTGGGGGAAACTATTTCAAGGGTGTGATTCCAAAAGTT  
ATGGTGGCTTAGCAAACTGAAGTTTTTGCCTTGGCTGGAAATTTATTGAATGGTCTGTTTTGCCTGA  
GTTGGGTTTTTTGAAGCAGCTTGAACATGTAGAAATTGGTTATCAGAATTTCACTGGAGTTGTCCCTGCT  
GAATTTCTTCTTTGTCAAATTTGAACTATCTTGATATCTCATTAGCCAATCTTTCTGGTAATCTTCCTGTTG  
GACTAGGCAACTTGACAAACCTTGAAACTCTGCTTCTTTCAAGAACCATTTTTATGGTACAATTCCATTG  
TTTTTTGCCAGACTGACATCCTTGAATCATTGGATTTGTCTGACAACCATCTCTCCGGAACAATCCCCGA  
AGGGTTTTTCAGGATTCAAGGAGCTTACGGTCTTGAATTTGATGAACAATAACTTAACAGGTGAAATCCC  
ACAAGGCATTGGTGAGCTTCTAATCTTGAATTATTGGCTCTATGGAACAACACTCACTCACTGGGATTTTA  
CCACAGAAGTTGGGTTCAAATGCAAAGCTACAAAACTTGATGTCTCTTCAAATTATCTCTCAGGTCCCA  
TTCCACCAAATCTTTGTCTCAGCAATAGCTTAGTGAAACTTATCCTGTTTTCAAATCAGTTTATTGGTGAG  
ATCCCTTCTCCTTAGCAAATTGCACTGCATTATTCAGGTTTAGAATTCAAACAACAGACTCAACGGGTC  
AATACCATTAGGCTTCGGTATTTTGCCCAATTTAGCTTACTGGGACTTGAGCAAAAACAATTTCACTGGTC

CAATTCAGAAGATTTAGGGAATACTGCGACATTGGCGTATTTGAACATATCGGAGAATCCATTCAACA  
GTGAATTACCGGAGAGTATCTGGAGTTCACCATCTCTACAGATCTTTTCAGCTAGTTACAGTGGCCTTGT  
CGGAAAATCCCAATTTCAAAGGGTGTAAGCTTTCTACAGAATCGAACTGGAAGGAAACAATCTCAC  
AGGAAGCATTCCATGGGATATTGAACATTGTGAGAAGCTCATTTGCATGAATTTTCGACGAAATTCGCTA  
ACGGGAATCATTCTTGGGAAATTTCTGCAATTCCTTCTTAACAGAGGTTGATTTGTCTCACAATTTCT  
CACTGGAACAATTCCTTCGAATTTGCGCAATTCCTACTACCATAGAAAACCTCAACGTATCCTACAATCAGC  
TCACTGGTCCAGTTCCTTCTCAGGCTCAATTTCTCCAGCCTACATTCCTTCTCCTTCATCGGAAACGAAG  
GCCTCTGTGGTACTGTCATTCAAAGCCTTGCGGGACTGACGGACTCGCAGCCGGAGCAGCGGAAATCA  
AGCCACAGCCGAAAAAACAGCTGGCGCTATTGTCTGGATCATGGCAGCAGCATTCCGGTATTGGTTTAT  
TCGTCTCATCGCCGGTAGCCGCTGTTCCACGCGAAATACAGTCAGCGATTTTCAGTAGAGAGAGAAG  
TTGGGCCATGGAAATTAACCGCATTTCAAAGGTTAACTTCACGGCGGATGATGTACTTGAAAGTTTGA  
CAATGACAGATAAGATCCTGGGAATGGGTTCAACAGGGACAGTGTACAAGGCGGAAATGCCAGGCGG  
AGAGACCATAGCAGTAAAGAACTATGGGGAAAACAGAAGGAAACGATCAGGAAAAGGCGAGGCGTT  
TTAGCTGAGGTGGATGTGTTAGGCAATGTGAGGCACAGGAACATCGTGAGGTTGTTCCGGCTGTTGCAG  
CAACAACGAGTGCACCATGTTGCTGTATGAGTACATGCCTAATGGTAGCCTGGATGATCTGTTGCATGG  
TAAGAATAAGGATGCTAATTTGGTGGCTGATTGGCTCACTAGGTACAAAATTGCTCTTGGGGTCGCTCAT  
GGAATTTGTTATCTTCATCATGATTGTGATCCCGTCATTGTTTCATCGTGATCTTAAGCCTAGTAATATTCTT  
CTGGACGGTGATCTGGAGGCTAGAGTGGCTGATTTTGGTGTGCTAAGTTGATTCAGTGTGATGAATCT  
ATGTCCGTGATTGCTGGATCTTATGGCTACATCGCACCAGGTAAGTTAGTACTCCCTCCGTTTCAACTGA  
CATGAAATTTAACAAAGTAATATTCAACTTTTTATCGTGTTCTTTAATTTAATTATAATGGCAGGAATATT  
TGTCTGTTTGTGATGGAATTACATGATTGTTTTGGAGTTCAAGTTTTTTTTCTTGTGCGGCTTATTGCTAT  
CCAAAATTATTTGTTTCAGATCAGTTTAGTTCGTTCTGTAGGGTGACGAAAAGAGTTCACTTGCCTGCT  
AAAACGTGGTGTCAATAGCATGATGTATATTGTTTTTTTTTCGTCCACTATCGTCATTAAATCTTC  
TTTGCCACACAATTGTCAAATTCCTCAACTGCTTCATACTAGTGGAATCTTCTTTTAATCATAACCAGATC  
TTGGAGGCACTAATTCATTTTTGAATTTGAGCGCCACAATATAATATAAATATCTAAATGTTGAACTTT  
TATTAGGAAGTTAAAATAATATTCTTATGAAGATTCTAATATTAGTGTAGTGAAACAGGTAATATAATTTT  
TTTTCTTAATAAAGGGTATCAAGTATTTCTTTTCTCATACTTCTTATGACAATTGGTGCAAATATTTATTC  
TCTTTGTTTTGTCCATGATTTTGTGGTGCTTAAAGAGGGCATGGCGCACTAGTTGCGCGTGAATAACTC  
CATTAGCCTTTAAGCTTTTATTTTACACTTTTTGTTATTCTTTTGGACCCACCAAGATTTTGTCTTAGTTACT

TATCTGTGATTAACCCCTTTGATTTATTAGTATATAATATAGTACTAGTACTACATTCCTTGACTTTAATGCT  
TAAAGTCAACCATTTTTGGGCACTAGTAGACAGAGTGTTATGATAACAAATTATTTTTATATAGTTATTGT  
ACTAAATATGTTTGTGATACAGAATATGCATACACATTGCAAGTTGATGAGAAGAGTGACATCTACAGC  
TACGGGGTTGTGTTACTTGAAATTTATCAGGGAAAAGATCGGTGGAACCAGAATTTGGCGATGGAAAT  
AGCATTGTGGATTGGGTTAAGTCGAAGATCAAGACTAAAAATGGCATAAATGATGTGTTGGATAAAAAAT  
GCTGGCGCTTCATGTCTTTCAGTTAGGGAGGAAATGATGTTGTTGCTGAGGGTGGCATTGCTGTGTACT  
AGTCGTAACCCGGCTGACAGGCCATCGATGAGGGATGTTATATCTATGTTGCAAGAGGCTAAGCCCAAG  
AGGAAGTTGCCTGAAACTGGTGATAATGCAATTGCTGCTATTCCTTTGGCTCAAAAAGCTAATGTGGAG  
TGTTGATATTATAGGAGGAGATTTGGGGTTGTTTTGATTTTACAACCTTACTGATGAATTGTGGGGGAAAT  
TGGTATAGGAGAAGTTTAAATAGTTTTATTTGCTTCTTAAATTTTTGCATAGTAGGAAATCCCGAGTGTT  
GTCATTCCAATGTTGTGATGAAATGGGTATCTTTCCAACAAATTAATCTTCGATAGCATACTTGTCTAGA  
C

>PGSC0003DMG400019051 LRR-RLKs

ATGATCGGTCTTACATCCCTAAGCCTTGACAGAAACAACCTTGACAGGGAGTATTTCTTCTGAGATTGGTA  
AGCTTAAACAACCTCCAAGGGTTGTATCTAGATAACAATAAATTGCAGGGACTTATTACAGAGGCCGTAT  
GCCATTTATCTAATTTGGTTCAATTATATCTGAATGATAATGACCTCTTTGGATCAATTCTAGAATGCTTA  
GGAAATCTAAGCATTCTACTACATCTTATTTGGATTCTAATAAATTTTCATCAAAATTTCCGCTGAGCCTT  
GGGAAGATGAGTCGTCTTATCTATCTAGACGTGTCACAGAATTC AACAGAGGGAGAACTCCATCAGAT  
ATTGGAGGACTAAAAGCCATTGTAGA ACTATATCTTTACAATAACCACTTTTCAGGTGTGATACCAACCA  
GATTCGGGGAACTCCAAAACCTGCAGTATCTTGACCTATCCAACAATTCATTTTTTGGCCAAATTCCATTA  
TCCTTTGCCAACTTGATAAGCTTGG AATTCTTGAATTTGTCTTTAAATGCATTGTCAGGTAGTATTCCTAT  
GTCTTTGGAAAAACACTCTTAAAAGCATT AATGTTTCATTTAATAATTTAGAAGGTAAAATACCGAGTGG  
TGCGGTGTTTGCAAATTCACCTTTGCAATC ATTTCTAGGGAACAAAGGTCTTTGCGGAATGCACATATTG  
GAGATTCCTTCTTGTGCTATCACTAATCCTGGAAAACAATCAAAGTATAAGGAGGTTGTGCTCAAATTTG  
TACTCCAGTGTTATTGCATCCTTCTTATATTCTTGTGTTTCAATTTGGATAATGAAACGACAGAAG  
AAAGGAAAGTCTAAAGATGTTGAAAAGGTACCAGAGATCGGGACTCATCAATTAGTTTCTTATCACGAG  
ATTCAACGAGCAACAATAATTTTGATGAATCCAATTTAATTGGAGAGGGAAGCTCTGGCTCTGTGTACA  
AAGGCACATTGTTTGGTGGAACTGCAGTGGCCATTAAGGTTCTATATTTGGAAAATGAGCAAGTATGCA  
AGAGGTTTGATACTGAATGTGAAGTGATGAGAAATGTTAGACACAGAAATCATGTTCCAGTGATTACTA

CATGTTCTAGTGACTTTATAAGAGCCTTTGTTCTGCAATTTATGCCCAATGGAAGTCTAGAAAATTGGCT  
GTACAAAGAAGATCGCCACTTGAACCTTCATCAAAGGGTCACTGTAATGCTTGATGCAGCTATGGCAGT  
TGAATATCTACATCATGGTCATGTCACTCCAATAGTTCATTGCGACCTAAAGCTAGCCAACATTCTTTTGG  
ATGAAGATATGGTGGCTCATGTTGGTGATTTTGGAAATCTCTAAAATTTTAGCCATAAGCAAGTTCATGGC  
TTATACCGAGACATTGGGCACTCTTGATACATTGCACCAGATATAAAAAAATCTACTCTCTTTGATTTTC  
TCTTATATCATAATTAA

>PGSC0003DMG400019415 LRR-RLKs

ATGGCCTATTATCTTGACAAAATCTTTCTTCTTATTTCTCTTCACACTTAGTACTCCCTCAAATCAGCTA  
ATATGACAGATATTGAAGCACTCTTTGCTATCAAGAATGAAATAATTGATCCCTTTGAATCATTAAAGTTCA  
TGGAATGAGTCTGTTCTTTATGTCAATGGCGTGGCGTTGTATGTGGAACGCGAAATCAACGAGTCATT  
GAACTAAACCTTCTTGACCATAAGTTAGCCGGTGTGTTATCACCTTTGTTGGAAATTTGAGCTTCCTTAT  
ACGACTAGACGTCGGAACAACACCATTTCTGGCAATATCCCTCCTGAATTAGGCCGTTTGACAAGATTA  
CGCCATCTATATTTGCAAAAACAATTCATTTTATGGTGAAATTCCTGTCAATCTATCGTTTTGTAGTAACCTC  
GTTGAGTTATGGGCGTACAAGAACAATCTGTAGGTGTTCTTCCAAGGGAGCTTGGTTTACTTACCAAAC  
TCAAATATTTTGATTTAGTTACAACAAGCTCATTGGTGAAATCCCGAAATCTTATGGTAATTTTTCAAGT  
CTATTGGAAATGTACCTTTTGGATAATGATCTCGAGGGTAAAATCCCGATGAGTTTGGGAAACTGAAG  
AGTTTGGAAATATTTGACGCGGACTTTAATAGGTTATCTGGTAGAATTCCGAGCTCATTCTACAATCTTAC  
CTCCTTGAAAGTCATTGATGTGTCATTTAACCAACTCGAAGGTAAGTCTGCCTCGGGATTTAGGGATCAAC  
CTTCCTAACCTTGAGTGTCTCAGCATTAGTGAGAATCAATTCCTGATCGCTTCTTATTCACTTTTCAAC  
CTCACAGGACTCGCGTACCTTTATGTTGGAAAAAATGACTTAGGAGGACGTGTTCCAGGTTTCGATAAG  
TTGCATAATTTGTATATTTAAGCATGGAAAATAACCAATTTGATAATGACTTGACCCTCATGTCCTCCTT  
AACAAATGCAACTAACCTCAACCGTCTGTATCTGCAAAAACAACGCGTTTGGAGGGACATTTTCATGAGTTT  
TTCAGCAACCTTTCAAGTAATCTGGCGTTTGTAGACTAGTCAAGCAATCAGTTTTTCAGGAAATATCCCGA  
TAGACATTGGGAAATTCAACAACCTTGGAGAGCTTAGGCTGAGCGGAAACCAACTCACAGGTATCATCC  
CTTCGACTATTGGGAAGCTTTATAAGCTACGATATTTACACCTGTCCCAAACAGAATTTCCGGGTAGTAT  
ACCTTTTCCATTGCAAATCTGAGCCTTTTAACTGAGTTAAATCTTGATCATAACAATCTTAGAGGTAGAA  
TACCTTCAAGTGTGCAAAATGTCAAAGTTTGTGTATCTTAACCTGAACCAAACAATTTAATCGGTTTCG  
ATACCTAAAGAAATTTGTCTCATATCTTCTTAGTTGTTCTAAACCTTTCTAGTAACAACCTTGACTGGCGCC  
CTTCCCAAAGAAATCGAAAGCCTGAAAAATCTTATCATTAGATGTCTCTTTGAATAATCTCAATGGTGA



AATTCCTAGTACACTTGGGAGTTGTGTGACAATTGTTAACTTAACAATGAAAAGGAATTTATTCCGCGGG  
ATTATTCTTCCACTTTCAGTTCACTAAAGAGTCTTCAAGTTTTAGATCTTCTCAGAATAAGCTATCAGGT  
ATGGTTCCAAAGTACTTGGGAAGGATTGGCCTTACATTTCTTAACTTATCGTTTAATGATTTTGAAGGTG  
GCCTTCCACAACGAGGCATCTTTGAGAACGCGAGTGTAGATTCTTTCGTTGGAAATTCTAGAATCTGTGG  
TGGTGTACCTGGCTTGAACTTCCCAATTGCAACTTCAGTCATTCAAAGAAAATGAACTTTAAGCTTGTTA  
CTTTAGTAATATTAGGAATTTTGGGGCTAGTTGTTATGGTTTGTGCTTTTTTCTTCTATCGATTCCGAAGG  
TCCAAAAGAACAATTCCTCATTAGATAGCAATCTAAACCAACTCATAGCTATGTCCTATCAAAGCATTCT  
CAAAGTTACCAACGGGTTTTCTACGAGCAACTTGATTGGTGTGGGAGTTATGGATATGTTTATAAGGG  
AATTTTAGAAACGGATGGTAAGCACGTTGCTATAAAAGTATTGAATCTTTTACAATATGGAGCTATCAAA  
AGTTTCATAGCAGAATGTGAGGCCTTGAGAAATGTTAGACATCGGAATTTAGTTAAGCTACTTACTGCAT  
GTTCTTGTGTTGATTATCGTGGCAACGAATTCAAGGCATTGGTTTACGAGTTTATGGCCAATGGAAGTTT  
GGAGGACTGGTTGCATCCAGATAATTCAAGACCAAATGTTCAACCAAGAAGATTAGGATTTCTACAAAG  
GATGATTATTGCTATTGATGTTGCTAGTGCAATTCATTATCTTCATAATGATTGTCAAATATCAATAGTTC  
ATTGTGATCTCAAACCAAGCAATATTCTCCTTGACAATGAATTGGTTGCCCATGTTGGGGATTTTGGATT  
GGCAAGATTCCTACATCTTACTGATGAAGCCACTTGTAGAATTCAGACAAGCTCTTCAACTTTTAAAGGA  
TCTATTGGCTACATAGCTCCAGGTAAATTTCACTCTATATAAATGTCTCTAAAGACTTTAGTGA CTCTGGA  
TGCAATGACATTA ACTCACTTGCCGCTATATTTTCATTGCAGAGTATGGTATGGGAAGCGAGGCATCAAT  
GCAAGGTGATGTGTATAGTTTTGGTATCGTCTTACTTGAAATGTTAACC GGAAAAGACCAACAGATGA  
CATGTTTGGCGGCGATTTAAGCCTTCATGATTTTGTTAGGAATGCCATGCCTGATGGAGCACTTGAGATA  
GTAGATCCACTTCTTATTTTGAAGAGGAAGAGATAAGCAGAGAGAGGTCTCAAATTC AAGATTCATC  
AGAAGGCCAAAAAATGGTGGAGGGTATAATCTCCTATTTGGAGTTGGAATTGTTTGTTC AATGTATGATT  
CAAGTAAAAGAAAAACATGAAGGAGGTTGTTAGAGAGTTGTGTTCTATAAGAGATTCTCTAGTTGGTT  
GTACAATATGA

>PGSC0003DMG400019698 LRR-RLKs

TCTTCACATTCTACTACTCCTTTCCCTTCTCTATTTGTCTGTTTAAACTTCTACTAATCCTATCTTTCTTTT  
CAGAAAAATATGGAACCCCTTCAAGAACTCAAGCTATAGATTCAAGAAAATCTCCATTTAAGCTATAAAG  
TTTCAATCTTTGAAGATGAAAGCTCACAAA ACTGTGTTTTACCAACACCCTTTAAGCTTAAACAAGCTTTT  
CTTTGTTCTTCTTCTTATCTTCTTTCTCCTCCAGCTTACCAGCTTCTGTTAATGGTCTTTTTTAAAGACTCCC  
AACAGCTTCTTTCTTTAAGCTGCACTTCCACCAACCCTACTCTGCTTCAGAACTGGTTGCCATCTACTG

ACCCTGTAGTTTCACTGGTGTTCATGCAAGAATTCTAGAGTTTCTTCTATAGATCTCAGTAACACTTTTT  
TAAGTGTGGATTTCAAGTTGGTCACTTCTTATTTGCTTCTCTTTCTAATTTGGAGTCTTTAGTGTTAAAGA  
ATGCTAATCTTAGTGGTCTTTAACTTCTGCTGCTAAATCCCAATGTGGGGTTTCTTTAGACTCCATAGAT  
CTAGCTGAAAACACAATTTCAAGGACCTATTTCTGATATCTCTAGCTTTGGTGTGGTTCAAACCTTAAGTC  
TCTTAATCTTTCTAAGAATTTCTTGGACCCTCCTGGTAAAGAAATACTTAAAGGTGCAACCTTTAGCCTCC  
AAGTTCTTGATCTTTCTTACAATAATATCTCAGGTTTCAACTTGTTTCCATGGGGTTTCATCTATGGGGTTTG  
GTGAACTTGAGTCTTTTCTCTCAAGGGTAACAACTAGCTGGAAGTATTCCTGAATTAGACTTCAAGAA  
TTTGTCACATTTGGATCTTTCTGCAAATAATTTCTCAACTGTTTTTCTTCATTCAAAGATTGCTCCAATTTG  
CAGCACTTGGATTTGTCATCCAACAAGTTTTATGGTGATATTGGTCTTCACTTTCTTCATGTGGGAAGCT  
CAGTTTTCTCAACCTTACCAATAACCAGTTTGTAGGTTTGGTCCCTAAACTACAAAGTGAAAGCCTACAGT  
ATTTGTACTTAAGAGGGAATGATTTTCAGGGTGTGTACCCAAACCAGCTTGCTGATTTGTGCAAACTGT  
GGTGAATTGGACTTGTCATACAATAATTTCTCAGGTATGGTTCCTGAGAGCCTTGGTGAATGTTCAAGT  
TTGGAACCTGTTGATATTTCCAACAATAATTTCTCTGGTAAGTTGCCTGTTGATACTCTTGAAGTTGAG  
TAATATGAAGACTATGGTCTTATCATTCAACAATTTGTTGGTGTGGTGCCTGATTCTTTCTAATTTGCT  
GAAATTGGAGACTTTGGATGTGAGTTCTAATAATCTCACAGGGGTTATTCCATCTGGGATTTGCAAAGAT  
CCTATGAATAACTTAAAAGTGTGTACCTTCAGAATAACTTGTTTGAAGGCCCTATACCTGACAGTCTAA  
GCAACTGTTACAGCTGGTGTCACTTGATCTTAGCTTTAATTACTTGACTAGGAGAATACCATCTAGTTTG  
GGTTCATTGTCAAAGCTGAAAGATCTCATCCTTTGGTTGAATCAGCTTTCAAGGGGAAATCCCACAGGAG  
TTGATGTACTTGCAGGCTTTAGAAAATTTGATTCTTGATTTAATGACTTAACTGGACCAATACCTGCAAG  
TCTTAGCAACTGTACCAAGTTGAATTGGATTTATTGTCAAATAACCAATTGAGTGGTGAGATACCGGCT  
TCTCTTGGTCGTTTGTGCAATCTAGCCATTCTTAAGCTTGGAAACAACCTCAATCTCAGGGAATATACCTGC  
TGAGTTGGGTAATTGCCAGAGCTTGATATGGTTGGATCTCAATACTAATTTCTGAGTGGCTCCATTCCA  
CCGCCTTTGTTCAAGCAATCTGGAAATATTGCAGTGGCATTGCTGACCGGAAAACGATATGTGTATATTA  
AGAATGATGGGAGTAAGGAGTGCCATGGAGCAGGGAATTTGCTGGAGTTTGGAGGGATTAGACAAGA  
ACAGCTGGGTAGAACTCAACAAGGCATCCTTGAATTTCAACAAGAGTTTATAGAGGTATCACTCAGCCA  
ACATTTAACCACAATGGCTCTATGATATTTCTTGATTTATCTTATAATAAGTTGGAAGGTAGTATCCCAA  
GGAATTAGGGACCATGTACTATCTGTCTATATTGAATTTGGGGCATAATGATCTGTCTGGTATGATTCT  
CAAGATCTTGGAGGCTTGAAGAATGTTGCAATTTGATCTGTCATATAATAGGTTCAATGGCCCGATCC  
CGAATTCCTCACCAGTCTTACATTGCTTGGAGAGATTGACCTGTCAAACAATAATCTCAGTGGAAATGAT

TCCTGAATCTGCACCATTTGATACATTCCCTGATTATAGGTTTGCAAATAATTCTCTCTGTGGGTATCCTCT  
CCCCCTACCTTGTAGCTCGGGGCCGAAATCGGATGCAAATCAGCATCAGAAATCTCACCGCAGACAAGC  
ATCGTTGGCAGGGAGTGTGGCGATGGGTTTGTATTTTCCCTCTTTTGTATCTTTGGTTTGATTATTGTTG  
CCATAGAGACGAAGAAGAGGAGGAAGAAGAAGGAGGCTGCCCTTGAAGCTTATATGGATGGTCATTCA  
CATTCTGCAACTGCAAACAGTGCCTGGAAGTTTACGAGTGCTCGTGAGGCGTTAAGCATTAACTCGCA  
GCATTTGAGAAGCCTCTCAGGAAGCTCACATTTGCTGATCTTCTCGAAGCCACCAATGGTTTCCACAACG  
ACAGTCTTGTAGGCTCTGGTGGTTTTGGTGTATGTCTACAAAGCTCAGTTGAAGGATGGCAGTGTTGTAG  
CCATTAAGAAGTTGATACATGTCAGTGGACAGGGTGATCGAGAATTCAGTCTGAAATGGAACCATAG  
GGAAGATCAAGCACAGGAACCTTGTCCCTCTTTGGGCTACTGCAAAGTAGGGGAAGAAAGACTACTG  
GTTTACGAATACATGAAGTATGGAAGTCTTGAAGATGTCCTGCACGATCGGAAGAAAATCGGGATCAA  
GCTGAATTGGCCTGCAAGAAGGAAAATCGCCATTGGAGCTGCGAGAGGGTTGGCTTTCCTACACCATAA  
CTGCATTCCACACATCATTACCGGGACATGAAATCAAGTAATGTCTTGCTTGATGAAAATTTGGAAGCC  
AGAGTATCTGATTTTCGGAATGGCAAGGTTAATGAGTGCTATGGACACTCATTTGAGTGTCAGCACTCTTG  
CAGGCACTCCCGGATACGTTCCCTCCTGAATATTACCAAAGCTTTAGATGTTCAACAAAAGGAGACGTTTA  
TAGTTATGGTGTCTGATTACTTGAGCTTCTAACCGGCAAACAGCCAACAGATTCAGCTGATTTTGGTGAC  
AACAATCTTGTGCGATGGGTAAAGTTGCACGCTAAAGGAAAAATAACTGATGTCTTCGATCGAGAGCTA  
TTGAAAGAGGATCCAAGCATTGAGATTGAACTTCTACAACACTTAAAGGTAGCTTGTGCTTGCTTAGATG  
ATCGACATTGGAAACGTCCCACGATGATACAAGTTATGGCTATGTTTAAGGAGATTCAAGCAGGGTCAG  
GCATGGATTGACATCCACAATCGGAGCTGATGATGTCAATTTTAGTGCAGTTGAAGGAGGGATAGAAA  
TGGGGATAAATGAAAGTATAAAAGAAGGCAATGAGCTAAGCAAACACCTTTGAATGCAGCAGCACTAA  
ATCAAGAGTTTGTGAAAGCTCACAAATTTTCCAAAATCATATGCAAAGAATTGCCAGTGTAATTTTAG  
CCAATTATTGTATGTACCACTAGTTCCCATCCATAAAATCTTGTGTTATTATACATAAAAGGAAGGTTGTT  
TTTCTTTTTTAAAACATGTAACAGTGTTGTATATAAATAGTGTATGAGTTTGTTTTTGC

>PGSC0003DMG400019801 LRR-RLKs

ATGGTTTCCATGACTATTATTATAGAATTGCTAGTTTTGTTAACGTACCTCTTGGATACTAATGCATCGAA  
CATTTCAACTGATGAGGCTGCTCTTTTAGCTTTCAAAGCTCATATAACTTCAGATCCAAATGGAATGTTGT  
CGAAAAACTGGACCAAAGGGACTCACGTTTGAATTGGATAGGCATATCTTGCAGTATAAGGCATCAAA  
GAGTGACATCACTAGACCTCAACGGCCTCAGACTAAGAGGTTCAATTGCCACAGAAATTGGGAACCTCT  
CATTTCTTAGTTTCTGGACATTGGCAACAACAGCATCCACAGCAAATCCCTGATGAACTCGGCTATTT

GAGGAGGCTAAAGTACTTGTCTTGTCAATGAATAATCTCACAGGTCAAATCCAGCAAGTCTAGGATTA  
CTGAGAAGGCTCGAATCACTTGATCTTTCTGAAAATGATCTCCTTGGATCTGTTCTTCATCTATCTTCAAT  
GTCTCTTCTTTGAAGGTCATCAATTTGATTTATAATGCACTGTCTGGGACTTTGCCGAATGACATTTGCCA  
TAATCTTCCGCGGCTGGAGGGATTACAAATAGCAAGAAATCAACTCTCTGGCCAACTACCAAGCAACTTA  
AACAAATGCAAAGAGCTTACATACTTGTCTTGTCAATAACCAGTTCACAGGTAAAAATACTGAACCAA  
TTTCTTTTTCTGCTACTTTTTGGTTCATATTGACAATAAAGATTGCAACAATTTTTAGTGAAAACAATGATAA  
GCTGTTGAGAGGTATAACTTATTGTAACGTCTATTACAGGAACTTGCTAGAGACATGTGGAACCTTGAC  
AAAACCTCAACATCTATTTCTTGGATGGAATAACATAACAGGTACTTATAATGTTCTAGTTAACTGAATC  
TGCCTACAACCTGCATTTATTGCTGGACTTCTCACCTCGTAGCACTAGAGATCTTTGACATTTCTAACTTG  
CTCTTCAAGTCATTTATATGAAATTAGTATTTGCATTTCAAAGGGTAGTAGCAGAAAATGTTAGTATAGC  
TCTTTGTTCTTCATTTTCAAACAACAACAGCAACTACTCCATAGGTTCAATGCTAGTTTGTGATGTGAATC  
CTCATTATCCATGTTGATCCATTTAGTCCCATCTTCAAGAGGACGTTAAAACAGATTGCGAGGATTGCTG  
AACTATTTAAAAGGCATACAACCTAACAGTTTTCTGTTATTTATAGTAACTTATTGACTGTAAAGCTGTTAT  
ACAGTATTGGACATTTCAAGTGTAGTAACCACACAATTCGTCATATATTTTACAGGACATATACCAAGTGA  
AATTGATAACCTATCAGCAATTCGAAGATTAAGTCTACGACGGAACAATTTGGTGGGAAGTCTTCCACCA  
TCTATTGGAAATTTGTCAAATCTAGAGATGATAGACCTAGGTGACAACAGTCTATATGGTGGCATTCTC  
AGGAGTTTGAACATCTTGTAATTTGAAAGAAGTGTATCTTGGTCCAAACAGATTATCGGGTGAAGTTCC  
AAGGCGTATGTACAACATTTCTGGACTAAAAAAGATTTTCAATTTGTAGCAAATACGCTTTCAGGAACACTT  
CCCCCAAACATAGGCCATACTCTTCCAAATCTTGAAGGCCTTTACCTTGGGGAAAACCAGTTCACCGGGC  
TGATTCCTACCTCCATTGTGAATTCACCAAGCTTATCCAGCTTGATTTTGGTTCGCAATCTGTTTAGTGGA  
CCTGTACCTATGAATCTTGGAAAGCTACAACAGCTTCAATTCATCAACTTGCAAGTAAACCAATTGACGA  
ATGATCAATCTACAGGCGAGTTAAGTTTCTGACTTCATTATCTAATTGCAAGTATTTGAAAACCGTTCAA  
ATAGGAGGTAATCAATTTAATGGAAGTCTTCCAAAATCTCTAGGTTTCCAGGAACTGGTCTTTTTCCCTTG  
AATATTTTATTGCCATTCAAAGTGGTATCACAGGAAAATTCCAACCTAACATCAGTAACTTTAGGAACTT  
GGAGTGGTTAACATTGGGAGACAATAAGCTTATAGGATCTATTCTCCAGATTTGGGGAACTTGAGGAA  
TTTGAAAAGATTTAGCCTGGAGAAAAACAATTTAGATGGTATTATACCAACTAGCTTGTGTAACATGGAA  
AACTTGACCAAATTATCTTGGGGAAAATCAACTTTCTGGTGAATTACCAAGTTGTTTTGGGAATCTTTC  
TTCTTTAAGAGAATTCTACTTAGATTCCAATACACTAATTTCCCATATTCCATCAACTTTTTGGAGGAACA  
GAGATATTTCAATTCTCACTTTGTCTCCAATTTGCTGAATGGGTCTCTTGCAGTAGAAATGGGGAAATTA

AGGAGTTTGCGGATATTACATTTACATGGTAATCAGTTCTCTGGTCAGATTCTAGCACAATTGGCCAAC  
TACAAAATTTGGTTAGCCTTTCATTGTCAAAGAATATGTTAGATGGTTCCATACCTGAACTATTTGAAGAT  
TTGGTTTCATTGGAACACTTGGATCTATCTAGCAACAATCTATCAGGCATGATCCCCAAGTCCTTGAGGA  
ATCTTGAACATCTCATTTATTTCAATGTCTCGTTCAATGGGCTCATGGGTGAAATTCAGATGAGGCCATT  
CGTAAATTTTACAGCTGAATCATTATCGGTAACCCTGCATTATGTGGATCATCACGCTTCCATGTGATGC  
AATGCAGAGCCACAAGTCTTGAAAGAAAAGAAAGAGTAGAGTCTTAACTTCTGTTCTTGCATCAGTTTC  
CTCAGGAGTTGTAGTACAACCATTTTCATCATTGGTTTCTGAAATGCCGAAAAGGGGTACGGAACCT  
CCTCTAGTTGATACATTTGGTCAGGTACATAAGAGGATTTCTGACTATGATATTTCTCAAGGGACAAACA  
ACTTTGATGAAGCAAACCTTGATTGGAAGGGGTAGCCTTGGTTTGGTGTACAAAGGGACACTAGCAGAT  
GGAATGGTTGTGGCAATAAAGGTATTCAATACAGAACTGCAACACGCATTTAGGAGTTTTGAAGTGGAG  
TGCAAGTTTTACGTAGCATTTCGACACAGAAACCTTGTTAAGGTGATAAGTAGTTGTGCCAATTTTGATT  
ATAAAGTGTTGGTGCTAGAGTACATGCCCAATGAAAACCTCGAATGTTGGCTTCACTCTACTGACAAATT  
ATTGGATTTAACTCAAAGACTAAAGGTGATGATTGATGTGGCTTCTGCTGTGGAGTATTTACATGGAGG  
TCATTTGTTTGTAGCCGTCCATTGTGATTTGAAACCAAGTAACATACTTTTGGATGGAGATATGGTGGCA  
AAAGTGAGTGACTTTGGGATATCCAACTTCTAACAGCTGAGACGCTAATAGCACATACCAAGACTTTG  
GGTACTATCGGCTACATGGCACCAGGTAAATGTTATTATCATGTTTCAATTTGAAGATTTTAAATGACGTTA  
ATTATTTTCACTAATGATTGCGTGATTTTTTTGCAGAGTATGGATCAGAAGGCAAAGTATCAACCATGGG  
AGATGTTTATAGCTTTGGTATTTTGTTAATAGAGACTTTTACAAGAAAGAGCCCCGTGGATGATCTATTC  
GTTGGAGACTTCACCTTGAAAAGATGGATATGCCAATCATTACCAAACCGAGTGGTGGATGTAGTGGAC  
ATTAATCTATTTTCACTGGACGAAGAAAATCTTACTTCTAAAGAGAGATGCTTCAAATCAATCATGGAAT  
TAGCTCTTGAATGCACAAACGATTTGCCTGAAGAGAGAATTTGCATGGAAGATATTAATCTGCGACTCAA  
GAAGATCCTAACTCAATTTCTGCAAAATGTTGTAACAACTAA

>PGSC0003DMG400020594 LRR-RLKs

CCCCAACACCCCCACCCACATCTCCATTCTTCTTATTTATGCACCCACCACCCTAACATCTCCACCACAG  
CCCCTTACAATCAATGGCTTTCCACCACCACCACTACCTCCTCCACCTTCTCATTTTCTTCACTTCCCTT  
TCTTTCACCTTCTCAGATGATGCTGATGTTATGTCCAAGCTTCTTGCAGCTCTTTCTCCAACCTCTTCTGGT  
TGGTCAACTTCTAAGCCTTTCTGTTCTTGGACTAATGTCATTTGTGACAAGTCTTCAGCTACTGTAACCTC  
AATTAATCTTGATTCTCAATCTGTTTCTGGTTCTTTACCTTCTGAAATTACTCAACTTTCCAATCTTAAAACC  
CTTTCTCTTCAAAAAACAAACTTTCTGGCCCCTTACCTTCTTTTGCCAACATGTCAAAATTAGCTGAACTT

TTCTTGGACAATAACCAATTCACCTTCTGTTCCCTCAAGATTTCTTTTTGGGGGTTCCCAATTTGGTAACTTTA  
AGCATTAGTGAAAATGGGAGACTCTCTCCTTGGCAAATCCCTATTTATTTAACTGAAAGTACAAATTTGG  
GATCTTTATATGCTAGTAATGCTAGTATTGTTGGTGTCAATCCTGATTTCTTTGATGTTTTTCCTAATTTAC  
AGAATTTAAGATTGTCTTATAATAATCTTACTGGTTCTTTGCCTGCTTCTTTTGGTGGTTCTGAAATTATGA  
ATCTTTGGTTGAATAATCAAGTTAAAGGGTTATCAGGTAGTATTGATGTGATTGGAAGTATGACACAATT  
GTCTCAAGTTTGGTTACATGCTAATCTTTTACTGGTAGTATTCCTGATTTGTCAAATGTGAGAATATAT  
TTGATTTGCAGTTGAGGGACAATCAGTTTACTGGTATTGTTCTGAGTCTGTGATGTCTCTTCCCAAATG  
TTGAATATTACTTTACAGAACAACAGGTTGCAGGGTCCAATACCTCAGTTTAAAGATGGGGTTGAGGTT  
AAACTTGAACTACTAATAGTTTCTGTAAGGACACTCCGGGACCGTGTGATCCACAGGTCACTACACTTC  
TTGATGTGGCTGGTGGTTTTGGATATCCATTGTCTTTGGCTGAGTCTTGAAAGGGAATGATGCTTGCAA  
TAGTTGGAGTTTTATAAGTTGTGATACAACAGGGAAGAATGTAGCTGTTGTTACCTTAGGTAAGAGGGG  
ATTTTCGGGTACTATTTACCTGCTTTTGCGAATTTGACTTCATTGAGGAGCTTGTTTTTGAATGATAATA  
ATCTTACTGGTACGATCCCGGAGAGGTTGACAACCTTTGCCTAGTTTACAAGTTCTTGATGTGTCTAATAAT  
AATTTGTCTGGACCTATACCATTGTTTCCACCTAGGGTGAAGTTTACTCATACTGGTAACTTGTTTCTCGG  
GACAAATATAACTACTGGTGGTGTGATGGTGGGGGAAGTGGTTCCGGATGGTTCTGGATCGAATTCCAGTG  
GTCGAGGTGGAAGTTCATCTGGTGGTTCGAAAGGGCCTTCAGTTGGAATGATTGTTGGTGTGTTATAG  
CAGTTGTTCTTTTTGTTTTAGTAGTGTGTTTGTGTCTTACAAATGTTACATGAAGAGACACCATAAGAGA  
TTTGAAGGGTTGAGACTCCAGAGAAAAGCAATGAAATGGTTAAGCCTAGTCTCCAAGTGTCGTGGGT  
GGTTCGAATGGATATACTGGTGGCACCAGTGAGTTACAGAGTCAGAGCAGTGGCGATCATAGTGAGAT  
ACCAGTTTTTGAAAATGGAACGTGGCCATTTCCATCCAGGTCCTTCGACAAGTGACGAACAACCTTCAGT  
GAAGAAAATATCTTGGGGAGAGGAGGGTTTGGAGTTGTTTATAAGGGTGAACACACGATGGGACTAA  
AATCGCGGTGAAGAGGATGGAATCTGGGGCAATGGGTACCAAAGGAATGAACGAGTTCCAAGCAGAA  
ATTGCGGTCCTTACCAAAGTCAGACATAGGCATTTGGTTGCTCTACTTGGTTCATGTGTTAATGGAAATG  
AGAGACTTTTGGTGTACGAGTATATGCCGCAAGGAACTTTGAGTCAGCATTGTTTGAATGGCAAGAAT  
TAGGCTACAAACCTTACTTGGAAAGCAAAGGGTAACGATAGCATTGGATGTGGCAAGAGGGGTGCAA  
TACCTTCATAGCTTGGCACAACAAAGTTTCATTCATAGAGATTTAAAACCGTTAAACATCCTTCTCGGAGA  
CGACATGAGAGCCAAGGTTGCAGATTTTGGTTTGGTTAGAAATGCCCTGATGGAAAATACTCTGTGGA  
GACACGTTTGGCTGGAACCTTTGGCTATCTTGCACCTGAATACGCGGGTAAGCATTCTACTCCTTGTATC  
ATTACGTCTTTCTTAACTGAGAACTGATTTGTATGCCCTAGCTGTAACTTCAGATTTTAGCAAATTTTG

AAATTATTCGATCATCTGCATTGCTAGGCATTGTTGTCTTCATTACATTTAAAGACATTTGGCATATAATG  
TAGAGGCAATCTCCATGCGTAAATGCTGCTTTGCAATTTTTATCGAACTCATGAACTATATACTACTATTA  
TAAAAGATAAGTTTCCATTTTCGTGTGGATCAGCATCTGAATAATTATCCTATTACATCTCCTCTTTGTTACA  
GCTACTGGACGAGTCACAACCAAAGTAGATGTTTACGCCTTTGGCGTTGTTTTGATGGAGATCATTACTG  
GTAGAAAAGCGTTAGATGAAACAATGCCAGATGAGAGGTCTCATTGGTTACATGGTTCCGCAGAGTCC  
TTATCAACAAAGAAAACCTCCGAAAGGCTATTGACTCGACACTTGATCCTGATGATGAAACATATGAAA  
GCATCTCCAAGGTTTCCGAGTTAGCTGGCCATTGCACTGCTCGGGAACCTTTTCAGCGACCTGATATGGG  
ACATGCTGTTAATGTCCTTGGTCCCCTTGTAGAGCAGTGGAAAGCCTACAACAAGTGAAGATGATGACGG  
CTATGGCATTATTGACCTCGACATGAGCCTTCCCCAAGCCCTTCAAAGGTGGCAAGCTGATGAAGGAAC  
TTCAAGAATGTTTCGATGACTTCTCAATCAGTCACTCGCAGTCGAGCATACCCTCAAACCTTCCGGATTC  
GCAGATACTTTTCAGTTCAACAGATTGCAGATGATATGCAAAAAATTTGACAACAGTTCAAGCCATGCCAT  
GCCACACCTCGCGCGGTTTTAATCCTTTGTGGATCAACATAGAGTATGCCAATATTCATTTGATTAATTGG  
TTTCTTATTGTCAATGTCATTACTTTTTATGTGATTACATATTAAGTTAATATAGTCTTGATGTAAGGTGTG  
TGATAACAGTTGTAAAGTCAGGTGAATGTCACATTTTTCTTTTGCCTTTTTGGAGACAACAGAAAATTGT  
AACAAATTCTTTCATATTACATTGTTAATGTAAATCAAATTTTCGAGCTTCCCCCTCC

>PGSC0003DMG400020697 LRR-RLKs

ATAATGGAGAAAGTCTTCACATATTTTTACTTAATAGCACTCATGTTGCTTTACTTGGGTGTGGCTAGTTT  
AGCCATGACTCAAACCAACATTACAACCTGATCAATCCGCTCTTCTTTCTTGAAATTCAAATCATTTTCGG  
ATCCCTTTCACTTGTTGGATGAAAGTTGGTCTCCAGCTATTTCTGTTTGTATTGGGTTGGAGTCACTTGT  
GGTTCACCACAAAAGAGTGACGTCATTGAATATTTCCAACCTGGATCTTATAGGCCAAAATTCCTTCTG  
ATTTTGGGAATCTCACATCACTTGTCTTCTTACTTGGAGTAGCAATAATTTCTACGGAAAATTGCCTCAA  
GAAATGGCACATCTTCATAGGTTAAGGTTTGTGAACTTAGTTTTAACAACTTTAGCGGAGAGGTTCCCT  
CCTGGTTCGGGGTCTTACACCAACTTCAAGTTCTGACTCTAAGGAATAACAGTTTCAATGGTCCCATCAC  
CCTCTCTTTATTTTCTAATATTTCCACACTTCAAACCTTTGGATTTGACATAACAATTCCTTAGAGGGCCAAAT  
ACCAAAAGAAAAAGGAAATCTTGAAAACCTGAGGGTTTTAAGATTATCTGGCAACAAGTTTATAGGTTCT  
TATCCCTCCGTCTCTCTCGAATGCCTCAATGTTGATGACATTAGAACTATCTCACAATTTCTTGGAGGAA  
ACATTCCAGAAGAGATTGGAAAACCTCAAACCTAAAACCTTTTGTCAATAGAATCCAATCAACTTACAGG  
TTCTATACCATTCTCGATCTTCAACATTTCTGGAATTGAGATCATTGCATTTACAAATAATACCTTATCAGG  
AAATCTTCTTATGATATGTGTAATTGTCTTCCAATGCTCGAAATGCTCTATCTAAGTGACAACAAGCTAT

ATGGTCATATGCCTGTAAGCTTGCCAAATTGTTGGAACCTTCAAATATTGTCTTTATCTAATAACAAGTTT  
GACGGACCCATACATAGTGAAATCGGGATTCTTAATAATTTGGTGATTTTAGCACTGGATACTAACCATA  
TTTCTGGTCATTTCCAATCTCCACATTCAATATCTCCTCATTACAGGTTTTGGTACTGAATCACAACAATC  
TGATTGGATCCTTGCCAAGGGAGGTTAGCAATTTGACAGAATTGCAAATTCTAGATCTTGCCGATAATAA  
TCTTACAGGTATATATGTATTCAAATCATTACTAGCTAGCAACATAATTTCTTAAATCTTAGTAATTACTAA  
CTATACATATACATACATTGGCAGGTGAGATACCGAAAAAGTTTAGCAATCACATTGAGCGGTTTTGATCT  
TAGTTTTCAACAAGTTTACTGGTTCACTACCAATGGAGATTTTCAACATATCGGGTATGAGAGAGATTCAA  
GTTATTTTCAATAATGTGACAGGAECTCTCCATTAACATAGGTTCAACGTTACCCAACATTGAAGTTAT  
TCATCTGGGCAACTTAAATCTTTATGGGACTATACCTCATTCTCTCTCCAATTGTTCCAAACTCACTAGTCT  
AGACCTTTCCCTCAATAGACTAACCGGTATGATTCCCAACTCTCTCGGAAGTTTGACTCATCTACAGTCCC  
TAAGCTTGGCAATAAACAATTTAATGGGCGATAGTAGGTTAAGCTTCTTGACTTCCTTGTCAAATTGTAG  
AGATTTAAAATTCTTTTCTCTCTCGAACCTCTATATGGTGTGCTTCCAGAATCCATAGGGAACCTTTCC  
CAGTACTTCTCTTCTAAGGTTTAGAGCTATTGATTGCAAAATTAAGGGGGAAATTCCAAAAGGAATTGG  
GAACTTAAGCAGCTTATTAGAGCTCGATCTTTCTAGAAAACGGTTTCACTGGACCAATTCCACAACAATC  
AGCAACTTGAGATCCCTTCAGAGCTTGAAGTTGAGTGTCAACAACTTTCTGGATATATTGGAGATGATC  
TATGCAAATTACAGAACTTGGGTTATTTAACTTGACTCTGAATCAACTTTCAGGATCTCTCCGAATTGT  
TTGGGAACTTAACTCCCTTCGGGAGATGATTCTAGGTTCCAACAAATTGCGTTCAATCATTCCAAAAA  
GCTTAGGAAACCTCATAAACCTCTTGAAGCTAGACTTATCCTCAAACAACCTGGGTGGCTCTATACCTCT  
GGAAATTGGAAATCTAAAGGCTGCGATATATATGGATCTATCAATAAATACACTCTCAAATAGAATTCCT  
AAAGAAATTGGTAGCTTGCAAATCTTATATACCTTTCTTTGAGAGACAACAAATTGCAAGGATCAATTC  
CTGGCTCGATGAGCAGCATTTAGCTTTGGAATTTCTAGACCTTTCTCATAACAATGTTTCAGGATTGATT  
CCCAAGTCTTTGGAGAAGCTTCTATATCTCAAGTATTTCAACATCTCATTCAACAAGTTGATTGGTGAAT  
CCCCTCGAATGGTCCTTTGAGAACCTCTCCGGTGAGTCTTTATGTCTAATGAAGCATTGTGTGGATCTC  
CAAGATTTTGTGTTCCCCATGCCACAGTAGCACATCAAAGCATAAATCCAAGAGGAAAAAAGTGATTG  
TTCTTGTTCTACCGGGTGCACCTGTATTAGTCTCCATCGCCTTTGCCCTTTTATGGATAAGGAATACAAGA  
GGTAAAAGAACCGATCCTCAGCAAGCAGTTGATTCATCCTTTGTCGTCTCAACAAAAGGAAGAATTCAT  
ACTATGAACTGCTTCGAGCAACTGATTCACTCAGTGAGATCAATTTAATTGGTTCTGGGAGTTTCGGCTC  
TGTTTACAAAGGCATCCTTGAGATGGGACTTTCATTGCAGCTAAAGTGTTCAACCCACAATTGCAAGTG  
GCATTTAGGAGTTTTGATACAGAATGTCAAGTTTTGCGCAACCTTCGTCATAGGAATCTCACCAAAGTCA



TCACCAGTTGTTCCAACCTTGAATTTAAGGCTTTAATACTCGAGTACATGCCCAATGGGAGCCTCGATAA  
GTGGTTGTATTACACAACACTACTTCTTAGACATCAATCATAGGCTAAGTATAATGATAGATGTAGCATGT  
GCATTGGAATATCTCCATCATGGTTGCCATTGCCCGTGATTCATTGTGATTTGAAGCCTAGTAACGTCTT  
GTTGGATGAGGACATGGTTGCCACCTAAGTGACTTTGGAATTTCAAAGCTGCTTTCTGAAGATGAGAG  
TTCTTTATACTAAAACATTAGCAACGTTTGGTTATATTGCACCAGGTACGTGATCTCTTAATCAATTGC  
TTTTGATTATTTCTCTTTCTTTTTTCCACTAGTAAATGTTGAATTTCAAATTGATTGATTACAGAGTATG  
GACTGGAGGGATTGTTGTCAATAAAATGTGATGTTTATAGTTACGGGATCATGTTGATGGAAACATTTA  
CTAGGAAAAATCCTAATGATGAAATGTTTCGATGGAGATTTTAGTTTGAAACAATGGGTGAGAAATTCAC  
TCCCACAAGCAGCAATGGAAATTGTCGATGCCAACTTAATATCGCCACATGATAATCACTTAATGAAAAA  
GCTAGATTGTGTGGTATCCATCATGAAAGTGGCAATAGATTGTTGTGTTGAATCTCCTAAAGGAAGGAT  
TGACATGAAAGACGTTGTGGGAAGGTTAAAGATGATCAAGATTCAACTTCTTGCCTGTTGAGGAAGATC  
TTATTAGAACTTTTTCTTCCAATCATCTCATGTGTAACAACATTTGCAATAATAGTTAGCTTCAAATAA  
GTTATAGCGTTATGTCTTTCATAACATAGAGAATTGATGGGCATGTATACCTCTTTGGTCTTGAATTTGTA  
CAGTGGTTTTGGCCTAATACCTTTACTTTTTTCCATCTTTTTAACTTTAACAATGTAATAGAACTCTCAAT  
ATTGAATAACGGAATTTTCG

>PGSC0003DMG400020744 LRR-RLKs

ATGTCACTACTAGCATTCAAGAATATGATCATTGATGACCCTTTCAAGATCATGGACTCCTGGAATGAAA  
CTATACATTTTTGTGACTGGCCTGGGGTTTCATGTGGTCGACGTCATCCCCGAGTTACAGTTTTAAATCTT  
ACTTCTCTGAAATTGAGGGGTTCTCTGTCACCAAGCATTGGTAATCTGAGCTTTCTTTGTGTCCTTAAGCT  
CCAAAATAATAGTTTTTCAGGTGAAATTCATCAGAGATTGGCTACTTACATAAGTTAAAGTTTTTACTCC  
TTGATAATAACTCGTTCACTGGTCATATTCCATCAAACATTTTCAGGATGCTTCAATCTTGTTTCTGTTGTT  
TTTCATATAATATGATGGTGGGCAAATTCAGCAGAATTAGGCACATTGTTGAAACTCAAACAACCTTTC  
TCTTGTTTCTAACTATTTTACAGGAGGAATTCCGCCTTCATTTGGTAATCTTTCTTTACTTGATACCTTTCC  
GCAAGCAAGAATAATTTGTTAGGGAAAATACCTGATGAATTATGTCAATTGCTCAACTTAAAGTACTTTG  
TAGTGAATGAGAACAACCTTGAGTGGTACCCTGCCTCCTTGTCTTTCAATCTTTCCTCTATCGTGGCCATA  
GATGTTGGAACAAACCATTTAGAAGGAAAATTGCCTCCATTGCTTGGTATTACTCTTCTAGTTTAGAGTT  
CCTTAGCATTATAGAAACAATGTAACCTGGAAATATTCCGGTAACATTGTCAAATGCTACGAATCTTCAG  
TCTCTTATTGCTAGTAGAAATGGACTCACAGGAAAAGTACCACCCTTGGAAATTTGCTGAAAATGCGG  
AGATTTTTAGTTGCTTTCAATTATCTTGGGAAGGGGGAGGATGATGACCTTAGCTTTCTCACCACATTGG



CTGCTTTGCCTGACAGAGTGATGCATATTGCAGATCCCATTCTTCTCCAGGAAAGAGATGAACTTGGAAAT  
GAAATACAAAGTTGATGACAATACAAGCAGTGCTGTGACATATTTCTGTCATTCTTAGTTAAGGTGATT  
CAAGTCGGAGTTTCCTGCTCCGTTGAATCTCCAAAAGAAAGAAAGCAGATCAGTGATGTTGTTGGAGAA  
CTCAATTCATTAAGGAAGTTGTTCTTGGAGCAAGCATACCCGAAAGAAAAGGTTATAAGCTTCAACCTGC  
ATTGA

>PGSC0003DMG400020832 LRR-RLKs

ATGGACACAAGTTATACTCTCTCTTTGCTCAACTTTCAATTTTCATTCTGCTTCTTAACCATACTTCACTTG  
CTAATATTAGCACTGATGGAGCTGCTCTTCTTGCCTTAAATCACACATTTCTTCTCATCCTAACAACATCT  
TAGCAAGCAACTGGTCTTCTTCAACCTCGGTTTGCAGCTGGATTGGAATCACTTGCAGCTCCCGCCACCA  
TCGAGTCACTGCTTTAGACATTTCTAGCATGCAACTTCATGGTACCATTACTCCACACCTTGGAAACCTCT  
CATTTCTTGTTTCCCTCAACATCAGTAATAACGCTTTTCATGGAGATTTGCCACAAGAGTTGGCTCGTTTG  
CAGAGGTTGAAAGTGATTGATGTCACAAGCAATAACTTCACCGGAGAATTTCCGTCATTTTTAAGTTTGT  
TACCAAATTTACACATTATGTACCTCTGGAGAAACCAATTTTCAGGTAAAATTCATCCTCCCTTTCCAATC  
TGACAAAACCTGCAAGTGTTGTCAATACAGAACAATTTTCTCCAAGGAGAGATCCCTCGGGAACCTCGGTC  
ATCTTCGTTACCTGAGTATCCTAGACCTGCAATATAATGGACTTACAGGCTCTATACCATCATCAATCTTT  
AACATTACTACAATGCAAGTAATTGCTCTTACAGGCAACAATCTTACTGGAAAGCTTCCAAAACCTATAT  
GTGACCATCTTCCAAACTTGGAAGGGCTTCACCTCACAAGCAACTCCCTAGATGGAGTTATTCCACCAAAA  
CCTTGAGAAATGCCGAAAACCTCAAATATTGTCATTGTCTTACAATGAGTTTATTGGAATTGTACCAAGA  
GAGCTGGCCAACTTAACAGCTCTTACAGAATTATATCTCGGAGATCTGCATTTGGAAGGTAGTATGATAT  
TTCCTTACAAGAAAAATGAAAATTTTCTTCTTTTCTCTCTTCCGCTAAACTGGTAACTCATATACTTCTG  
AAATTGACAGGAGAGATCCCTCGAGAAATCAGTGATCTTCGTTACTTGACTATCCTAGATCTGCAATTTA  
ATCAACTTAGTGGCTCTATACCACCATCAATCTTCAACATTACCACAATGCAAGTAATTGCTCTTACGGGC  
AACAACTTACTGGAAAGCTTCCAAAACCTATATGTGACCATCTTCCAAACTTGCAAAGGCTTTACCTCTC  
AAAGAACTCCTTAGATGGAGTTATTCCACCAAGCCTTGAGAAATGCCGAAAACCTCAAATATTGTCATTG  
TCTTACAATGAGTTTATTGGAATTGTACCAAGAGAGCTGGCCAACTTAACAGCTCTTACAGAATTATATC  
TCAGAGCCCTGCATTTGGAAGGTAGTATGATATTTCTTACAAGATAAATGAAAATTTTCTTCTTTTCTC  
TCTTCCGCTAAACTGGTAACTCATATACTTCTGAAATTGACAGGAGAGATCCCTCGAGAAATCAGTGAT  
CTTCGTTACTTGACTATCCTAGATCTGCAATTTAATCAACTTAGTGGCTCTATACCACCATCAATCTTCAAC  
ATTACCACAATGCAAATCATTGATTTTACTGGCAATAATCTTACTGGTAAGCTTCCACCAAGCCTCGAGA

AATGCAGAAAGCTTCAAGTCTTGGCATTGTCGCTCAATGAGTTTATAGGAACTATACCAAGAGAGATAG  
CCAACCTAACAGTTCTTACAGAATTATATCTCAAAGCTCTGCATTTGGAAGGTAGTATGATATTTCTTAC  
AAGAAAAATGAAAATTTTCTTCTTTTCTCTCTTCCGCTAAACTGGTAACTCATATACTTCTGAAATTGAC  
AGGAGAGATCCCTCGAGAAATCAGTGATCTTCGTTACTTGACTATCCTAGATCTGCAATTTAATCAACTT  
AGTGGCTCTATAACCACCATCAATCTTCAACATTACCACAATGCAAATCATTGATTTTACTGGCAATAATCT  
TACTGGTAAGCTTCCACCAAGCCTCGAGAAATGCAGAAAGCTTCAAGTCTTGGCATTGTCGCTCAATGA  
GTTTATAGGAACTATACCAAGAGAGATAGCCAACCTAACAGTTCTTACAGAATTATATCTCAAAGCTCTG  
CATTTGGAAGGTAGTATGATATTTCTTACAAGAAAAATGAAAATTTTCTTCTTTTCTCTCTTCCGCTAAA  
CTGGTAACTCATATACTTCTGAAATTGACAGGAGAGATCCCTCGAGAAATCAGTGATCTTCGTTACTTG  
ACTATCCTAGATCTGCAATTTAATCAACTTAGTGGCTCTATAACCACCATCAATCTTCAACATTACCACAAT  
GCAAATCATTGATTTTACTGGCAATAATCTTACTGGTAAGCTTCCACCAAGCCTCGAGAAATGCAGAAAG  
CTTCAAGTCTTGGCATTGTCGCTCAATGAGTTTATAGGAACTATACCAAGAGAGATAGCCAACCTAACAG  
TTCTTACAGAATTATATCTCAAAGCTCTGCATTTGGAAGGTAGTATGATATTTCTTACAAGAAAAATGA  
AATTTTTCTTCTTTTCTCTCTTCCGCTAAACTGGTAACTCATATACTTCTGAAATTGACAGGAGAGATCC  
CTCGAGAAATCAGTGATCTTCGTTACTTGACTATCCTAGATCTGCAATTTAATCAACTTAGTGGCTCTATA  
CCACCATCAATCTTCAACATTACCACAATGCAAATCATTGATTTTACTGGCAATAATCTTACTGGTAAGCT  
TCCACCAAGCCTCGAGAAATGCAGAAAGCTTCAAGTCTTGGCATTGTCGCTCAATGAGTTTATAGGAACT  
ATACCAAGAGAGATAGCCAACCTAACAGTTCTTACAGAATTATATCTCAAAGCTCTGCATTTGGAAGGTA  
GTATGATATTTCTTACAAGAAAAATGAAATTTTTCTTCTTTTCTCTCTTCCGCTAAACTGGTAACTCATA  
TACTTCTGAAATTGACAGGAGAGATCCCTCGAGAAATCAGTGATCTTCGTTACTTGACTATCCTAGATC  
TGCAATTTAATCAACTTAGTGGCTCTATAACCACCATCAATCTTCAACATTACCACAATGCAAATCATTGAT  
TTTACTGGCAATAATCTTACTGGTAAGCTTCCACCAAGCCTCGAGAAATGCAGAAAGCTTCAAGTCTTGG  
CATTGTCGCTCAATGAGTTTATAGGAACTATACCAAGAGAGATAGCCAACCTAACAGTTCTTACAGAATT  
ATATCTCAAAGCTCTGCATTTGGAAGGTAGTATGATATTTCTTACAAGAAAAATGAAATTTTTCTTCTT  
TTCTCTTCCGCTAAACTGGTAACTCATATACTTCTGAAATTGACAGGAGAGATCCCTCGAGAAATCA  
GTGATCTTCGTTACTTGACTATCCTAGATCTGCAATTTAATCAACTTAGTGGCTCTATAACCACCATCAATCT  
TCAACATTACCACAATGCAAATCATTGATTTTACTGGCAATAATCTTACTGGTAAGCTTCCACCAAGCCTC  
GAGAAATGCAGAAAGCTTCAAGTCTTGGCATTGTCGCTCAATGAGTTTATAGGAACTATACCAAGAGAG  
ATAGCCAACCTAACAGTTCTTACAGAATTATATCTCAAAGCTCTGCATTTGGAAGGTAGTATGATATTTCC

TTACAAGAAAAATGAAATTTTTCTTCCTTTTCTCTCTCCGCTAAACTGGTAACTCATATACTTCCTGAAAT  
TGACAGGAGAGATCCCTCGAGAAATCAGTGATCTTCGTTACTTGACTATCCTAGATCTGCAATTTAATCA  
ACTTAGTGGCTCTATAACCACCATCAATCTTCAACATTACCACAATGCAAATCATTGATTTTACTGGCAATA  
ATCTTACTGGTAAGCTTCCAACAACATATATGTGACCATCTTCCAACTTGGGAAGGGCTTCACCTCACAAG  
CAACTCCCTAGATGGAGTTATTCCACCAAGCCTCGAGAAATGCAGAAAGCTTCAAGTCTTGGCATTGTGCG  
CTCAATGAGTTTATAGGAACTATAACCAAGAGAGATAGCCAACTTAACAGTTCTTACAGAATTATATCTCA  
AAGCTCTGCATTTGGAAGGTAGTATGATATTTCTTACAAGAAAAATGAAATTTTTCTTCCTTTTCTCTCT  
CCGCTAAACTGGTAACTCATATACTTCCTGAAATTGACAGGAGAGATCCCTCGAGAAATCAGTGATCTTC  
GTTACTTGACTATCCTAGATCTGCAATTTAATCAACTTAGTGGCTCTATAACCACCATCAATCTTCAACATTA  
CCACAATGCAAATCATTACTTTACTGACAATAATCTTACTGGTAAGCTTCCACCAAGCCTCGAGAAATGC  
AGAAAGCTTCAAGTCTTGGCATTGTGCTCAATGAGTTTATAGGAACTATAACCAAGAGAGATAGCCAAC  
TTAACAGCTCTTACAGAATTATATCTCGAACTCTGCATTTGGAAGGTAGTATGATATTTCTTTACAAGAA  
AAATGAAAATTTTTCTTCCTTTTCGGAGCTCTGCATAAGGTAAGTGTAACCTCATATATTTCCCAAATTGACA  
GGAGAGATACCAATGGAGCTAGGTAATCTTAAGAACTTCAGGTACTGCAGTTAGCAGAAAATGAGCTT  
ACTGGCTCTGTTCTGACAGCATTTTCAACATGTCAGCACTGAAGATTATAGATTTTGGACAAAACAAGC  
TTTCAGGTACTCTACCTTCAGATTTAGGTCGTAGAATTCCCAACCTAGAAGTATTTCTTTGTGGAGGAAAT  
AATCTGAGTGGTTTTATCTCTGATTCAATCACAATTCTTCAAGACTCAGAATGTTTGACATCTCATTCAA  
CAGTTTCACAGGTCCAATTCCTAAATCATTGGTAACTTAGAATACCTTGAGATTCTTAACTTAGAGATGA  
ATAATTTTATCAGTGATTCATCATTGAGCTTCTTACATCATTAAACAACTGTAGGAACTAAGAGCACTC  
CGATTTAATGAGAATGCATTGGATGGGGCATTACCAGCGTCTGTTGGTAATTTCTCAAACCTCGATGCAAA  
ATTTTCAAGGAAATGGCTGTAAGCTAAAGGGCGTCATTCTCGAGAAATCGGTAATCTTACTGGAGTGA  
TACATATGAGTCTGTTTAAACAATAAGTTGGCTGGACATATCCAAATACTGTCCAAGACATGTTGAACCT  
CCAAGAATTTTATCTACATAGCAATGAGATTAAGGTACCATACCAAATGTTATATGCAGTTTAAAGAAT  
CTTGGTGCATTAGACTTGTGAGGAAATCATTTTTCTGGTTCAGTGCCCTCATGCTTAGGGAATGTAACCTA  
GTTTGAGGTATCTTAATCTAGCTTACAACAGGCTGAATTCAAGATTACCTGCAAACCTTGGGGAGCCTTCA  
AGATCTCATTGAATTAAGTGTTCATCCAATTCATTAAGTGGTCATATTCCTCTGGAGTTGGGAAATTTAA  
AGGCAGTAACACTAATTGATTTGTCAAAAAATGATTTTTCTGGTAAAATTCCTAGCACTTTAGGAGGTCT  
AGCTGAATTGATTAATCTTCCTCTAGCACATAATAGATTAGAGGGGCCTATTCCAGATTCATTTGGCAAA  
TTGTTGGCATTGGAATTCTTGGATTTGTCTTATAACAATCTTAGTGGTGAAATTCCAAAGTCATTAGAAGC

TCTAGTGTATCTCAAATACATGAATTTCTCATTCAATAAACTCAGTGGAGAAATTCCCATTGGTGGTCCTT  
TTGTAAATGTCACTAGTCAATCCTTCTTGTCCAATGATGCACTTTGTGGTGACTCCCGGTTAACATAAAA  
CCATGTCAAATAAATCTACAAAGAAGTCAAGAAGAAAAAGAGTGCTTATAGGTTTATATACGCTGTTA  
GGGATTGGGTCGCTCTTTGTGTTGGTAGTTGGATATGTGGTGTTAAGATTGAGAAAGACAAAGAAGAAT  
GCAAGTCAAGCAGATGTGTCTCTGGTAAAAGAACATGAAAGAATTCCTATTATGAACTTGAACATGCA  
ACAGAAGGATTGACGAAAGCAACTGCTTGGTACAGGGAGTTTTAGTGTGGTCTACAAAGGGATACTT  
AAGGATGGTACTCTTTTGGCAGCAAAGGTATTCAATGTGCAATTGGAGGGTGCAATTTAAAAGTTTTGAT  
ACGGAATGTGAGATACTCCGGAACCTTCGCCACAGAAATCTGACCAAAGTTATTACAAGCTGTGCCAAC  
CTTGATTTCAAGGCCCTGGTGTGGAATACATGCCCAATGGGACACTTGATAAATGGTTATACTCCCACA  
ACTTGTTCTTGAECTTATTACAGAGATTGGATATAATGATAGATGTTGCATCTGCAATTGACTATCTCCAC  
AATGGCTATAACAACGCCTGTGGTTCATTGTGACTTGAAGCCAAGTAATGTCTTGCTTGATCAGGAAATGG  
TTGGTCATGTCAGTGATTTTGGCATTGCGAAATTGCTAGGTGAAGGGGAGGCTTCTGTTCAAACAAGGA  
CAATTTCAACCATTGGATATATTGCTCCAGGTATATTAAACTTCTTAAAGTTTTTCTGTTTCTCCTTTCA  
GTTTTGGCATATTCCATTTTAACTAGGAAGCTTTTATGATAATTTTTTAAAAATAATCGTAGAGTATGGAC  
AAGATGGCATAGTATCCACGAGTTGTGATGTTTATAGTTTTGGCATCCTGATGATGGAGGCATTACAA  
GAAGAAGACCAAGTGATGAAACATTTACCGGTGAATTGAGCATAACAGCGTTGGGTTAGTGATTCCTTTC  
CGGGTGAAATTCATAAGGTGGTGGATTGCAATTTGGTACAGCCAGGGGATGAACAAATTGATGCAAAG  
ATGCGATGTTTGTATCTATCATGGAATTATCTTTGAACTGCACTTTAGTGAAACCTGATGCAAGAATTAG  
CATGAAAGATGCTCTTTCAACACTCAAAAAGATCAGGCTACAGCTTGCAATAATCGGCATTAG

>PGSC0003DMG400020848 LRR-RLKs

ATGGGAAGAAGTTGCAATCTTCTCTTGTCTTGCAGTTCTCATTCTACTCCATCACCATACTTTACTTGCT  
ACTCTTCCTAATATTAGCACTGACGAAGCTGCTCTTCTTGCCTTAAATCACACATTTCTTCTTATCCTAAC  
ATCATCTTAGCAAGCAACTGGTCTTCTTCCAGCCCGGTTTGCAGCTGGATTGGAATCACCTGCAGCTCTC  
GCTACCATCGAGTCACTGCTTTAGACATTTCTAGCATGCAACTTCATGGTACCATTCTCCACACCTTGGAA  
AACCTCTCATTTCTCGTCTCCCTTGATATCAGTAACAACACTTTCCATGGAGATTTGCCAGTAGAGTTGGC  
TCATTTGCAGAGGTTGAAACTGATTAATGTCAGAAGTAATAACTTCACCGGAACCATTCCATCATTTTTAA  
GTTTGTACCAAACCTACGCTTTGCGTACCTCTCGAGCAACCAATTTTCGGGGAAAATTCCATCATCTATT  
TCCAATCTGACAAAGCTGGAATTGTTGACAATACACACAAATTTTCTCGAAGGAGAGATTCCTAAAGAAA  
TCGGTGATCTTCGTTACTTGATTGTCCTAAACATGCAAGATAATCAGCTTACTGGCTCTATACCACCCTCA

ATCTTTAACATTACTACAATGCAAGTAATTGCTCTTACTGACAACAATCTGACCGGAAATCTCCACGAAC  
TATATGTGACCGTCTTCCAACTTGGAAGGGCTTCACCTCTCAAGCAACTACCTAGGTGGAGTTATTCCA  
CCAAACCTGGAGAAATGCCGAAAACCTCAAATACTGTCTCTGTCTTACAATGAATTTACTGGAAGTGTAC  
CAAGAGAGCTATCCAACTTAACAGCTCTTACAGAATTATATCTTGAATACAACACTTGGGAAGGTAGTAT  
GCTATTTCTCACAAGATATTTGAAATTTTCTTCCTTTCTCTCTTCACCAAATTTGTACTCATATATTTCCC  
AAAATTGACAGGAGAGATACCAGCAGAGCTAGGTAATCTTAAGAACTACAGCTGCTGATGTTAGACCA  
GAATGAGTTTACTGGTTCTATCCCTGAAAGCATTTCATATATCAGCAATGCAGATCCTAGATTTTTCAA  
TGAACAAGCTTTCAGGTACTCTACCTTCGGATTTAGGTCGTGGAATGCCCAATTTAGAAGAACTTTATTG  
TGGAGGAAATAATCTGAGTGGTTTTATATCTGATTCAATCTCAAATTCTTCAAGACTCAGAATGGCTGAT  
CTCTCAGACAATAGTTTCACAGGTGTAATTCCTGAACTACTAGGTAAGTACTAGAGTACCTTGAGGTTCTGA  
ACTTGGAGCTGAATAATTTTATCAGCGATTCATCATTGAGCTTCCTTACATCATTAACTGTAGGAAA  
CTAAGAGCACTCCGGTTTAAATGATAATGCATTGGATGGGGCATTACCAGCGTCTGTTGGTAATTTCTCAA  
ACTCGCTGCAAAAATTTCAAGGAAATGGCTGTAAGCTAAAGGGCGTCATTCCTCGAGAAATTGGTAATC  
TACTGGAGTGATATATATGAGTTTGTATAAAAATGAGTTGACTGGACATATTCCAAATACTGTCCAAGA  
CATGTTGAACCTTCAAGAATTTTATCTACAAAGCAACGAGATTGAAGGAACCATAACCAATGTTTTATGC  
AGTTTAAAGGATCTTGGTGCATTAGACTTGTGAGGAAATCATATTTCTGGTTTGGTGCCATGCTTAGGGA  
ATGTTACTAGTTTGAGGAACTTAATCTAGCTTACAACAGGCTGAATTCTAGATTACCTGCAAACTTGGG  
GAACCTTCAAGACCTCATAGAATTCAATGTTTCATCCAATTCGTTAAGTGGCCATATTCCTCTGGAGTTGG  
GAAATTTAAAGGCAGTGACTCATTGATTTATCAAAAATGATTTTTCTGGTAAAATTCCTAGCACTTTA  
GGGGTCTAGCTGAATTGACGGATCTTTTTCTAACACATAATAGATTAGATGGGGCTATTCCAGATTCAT  
TTGGCAAATGTTGTCACTGGAATACTTGGATTTGTCTATAACAATATTAGTGGTGAATTCCAAAGTC  
ATTAGAAGCTCTTGTGTATCTCAAATACATGAATTTCTCATTCAATAAACTCAGTGGAGAAATCCCACTG  
GCGTCTTTTTAAAATGTCACCAGTCAATCTTTCCTATCCAATGATGCACTCTGTGGTGACTCCTGGATT  
AATGTAACCATGTCAAAGCAAGTCAACAGAGAAGCCAAGAGGAAAGAGAGTGCTTATCAGTTTATAT  
ACATTGTTAGGGATTGGATCACTCCTTGTGTTGGCCGTTGGATATGTGGTGTTAAGATTGAGAAAGACA  
AAGAACAATGAAAGTCAAGCAGATGTGTCTTTAGTAAAAGAGCATGAAAGGATTTCTATTATGAACTT  
GAACATGCAACAGAAAGATTGATGAAAGCAACTTGCTTGGTACCGGGAGTTTTAGCATGGTCTACAAA  
GGGATACTTAAGGATGGTACTCTTTTGGCAGTAAAGGTATTCAATGTGCAATTGGATGATGCATTCAAA  
AGTTTTGACACGGAGTGTGGGATACTCCGGAACCTTCGCCACAGAAATCTGACCAAAGTCATCACCAGC

TGCTCCAATCTTGATTTCAAGGCCCTGGTGTGGAATACATGCCCAACGGGACACTTGATAAATGGTTAT  
ACTCTCACAACCTTGTTCTTGAACCTATTGCAGAGATTAGATATAATGATAGATGTTGCATCTGCAATGTAC  
TATCTCCACAATGGCTATTCAACGCCTGTTGTGCATTGTGACTTGAAGCCAAGCAATGTCTTGCTAGATC  
AAGAAATGGTTGGTCATGTCAGTGATTTTGGCATTGCAAAATTGTTAGATGCAGGGGAGGCTTTCGTTT  
AAACAAGAACAATTTCAACCATTGGATATATTGCTCCAGGTATATTAGTTAAGCAATCTTCCCTAGAT  
ATGGATTGATGCTTTCAGTTTTGGCATATTCCATTTAACTAGGAGGCTTTTATGATCATTTTTTACCATGA  
TTACAGAGTATGGACAAGATGGAATAGTATCCACAAGTTGTGATGTTTATAGTTTTGGCATTCTGATGAT  
GGAGACATTCACAAGAAGAAGACCAAGTGATGAAATATTTACCGGAGAATTGAGCATAACAACGTTGGA  
TTAGTGATTCTTCCAAGTGAATTCATAAGGTGGTGGATTACTCTTGGTACAGCCAGGGGATGAAC  
ATATTGATGCAAAGATGCAATGTTTGTATCAATTATAGAAGTAGCTTTGAGTTGCACTTTAGTGACACC  
TAATGCAAGAAGTAGCATGAAAGATGCACTTTCAACTCCAAAAGATTAGGCTCCAGCTTGCAATAGT  
CAACTAG

>PGSC0003DMG400021008 LRR-RLKs

TTCTTTCAATATGCTATCTGTCATGGTATTTGTAGTGGTTGTAATCAAGGTGACTGGTATTGATTTCTT  
GTTCTAAGTGAACCCATTTTACCTTGTGGTGTAGAAATGAAGTTTATCAAGTTCTTGATGATTTTTGTTT  
TTATTTTGGCTCTGTCATTGGGCAGCTTCCCTCTCCGGACATATTGGCTTTGCTTGAGTTAAGAAAGGT  
GTCGAACATGATCCAACGGGGTTTCTTCTTGAATCTTGAATGAGGAGTCTATTGATTTCAATGGATGCC  
CTTCATCTTGAATGGGATAATGTGTAATGGTGGTAATGTTGCAGGAGTTGTTCTTGACAACCTGGGTTT  
AGTTGCTCATGTTGATTTGAGTGTATTTGCTAATCTTACAAAGCTTGTTAAGCTTTCAATGGCTAACAATT  
CAATTGCTGGGAAAATGCCTAATAACATAGGTAGATTTAAGAGCCTTCAGTATCTAGATCTCTCAGGTAA  
TCTATTCAACTCTTCTTACCCCCAGAGGTTGGACAGTTAGGGAGGTTAAGAATTTGTCATTAGCTGGT  
AATAACTTCTCCGGTATGATACCGGAGACAATTCAGGGCTTGTGTCTGTGCAATCTTTGGACTTGAGTC  
GCAATTCTTTTTCTGGGGTCTACCTTCATCTTTGATGAAGTTGGCTGGTTTGGTATACCTGAATCTATCT  
GTTAATGGATTCACAAAGGAAATTCCTAAAGGATTTGAGCTGATGGAAAATCTTGAAGTGCTTGATTTG  
CACGGAAATATGTTTGATGGCAATTTGGATGCAGAAATGTTGCTGCTTACCACTGCAACTCATGTTGACT  
TGAGTGGAAAATTTGCTGGTGAACACTGCTTCTCAGCAGCAGAAATTTTTGCCAGGTTTATCGGAGTCGGT  
GAAGTATTTAAATCTTAGCCATAATCAGCTAAAGGGTTCACTTGTAAGTGGAAATGAAGCTCAGATATTT  
GGCAACTGAAGTTTTGGATTTGAGCTACAATCAGCTCTCAGGGGAATTGCCTAGTTTCAATTTTGT  
ATGATCTACAGGTGCTTAACTTGCCAACAACCTATTTTCCGGATTTATTCCGAATGATCTTTTGAAGGA



GATGCATTGCTTCTCACTGAGTTGGATTTAAGTGGAACAACCTCACTGGTAAATACATGAAACCCCTTG  
GTAAATAAAGTTATCTGTTTGCTAACAACTCTTTTCGCTGTTTTCTCAATCTCTTCATTTTGTAGGTTCAA  
TAAGCATGATAACATCCACAACATTGCGAATGCTTAACTTATCCTCCAATGCTCTTTCTGGTGAACCTCCC  
TTTGTGACTGGAACCTTCTGCGGTGCTTGATCTCTCGAAAAATCAGTTCAAAGGTAATCTAACTAGAATGC  
TGAAATGGGGGAACATTGAATTTCTTGACCTTAGCCAAAACCGTTTGACTGGAACATCCCTGAGGTTAC  
GGCTCAGTTTCTGCGTTTATATCACCTCAACCTTTCGAGCAATACCTTGACAGGATCTCTCCCGAAAGTTA  
TTTCACAGTTTCTAAGATCACTGTCCTTGATCTCAGTTTCAACCAGTTGGATGGGCCTCTTCTACTTCTC  
TACTAACTTTGCCACTATTGAAGAACTTCACCTACAAAACAATGCACTTGTTGGAAGCATTGATTTCTCT  
CTTCCGGCTAGTACTCCTAAGCTTCGTGTTCTAGATCTTCTCATAATCAGCTAGCTGGTTACTTTCTGAT  
GGATTTGGGTCATTGATTGCACTTCAAGTACTCGATATATCAGGAAATAATTTCTCTGGATCTTTCCTAC  
TTCCATGGGTAATGTTAGCTCTCTTACTTCTTTAGATGTTTCAGAGAATCATTTCTCGGGTGAAC TGCCAA  
AAACCTGCCTAACAGCCTCCAAAGCTTTAATGCATCACTCAATGACTTCTCTGGTGTCGTGCCTGAGAA  
TTTGAGAAAGTTTCTTTATCATCTTCTACCCGGGAAACTCTCAACTTCAATTTCCAAATCCTCCCTCAGG  
ATCTGGTCAAGCTTCAACAGAAAAGCATAAGAGCAGGCAACTTAAACTATTATCAAAGTGGTGATCAT  
TGTTGCTTGTGTGGTTGTTCTTGTGTTTTAATCATGCTAGCCATTTTTGTATTTTACTTGCGGGCATCGAG  
GAACTCTCAGGCACATGTTACTGACAAAGACATCCGCCGTCAAGCCCAATCAAATCCTTCTGGTTTTAGC  
AGTAGAGAAGGTGCAGTAGTTTCAGCACAAGATGTTACAGCTGCTTCACGGAAAGCATCATCATCAGAA  
GTAATTAGTGCTGATGAGAAAACGACAGGTTTCTCCCTTCGAAAACAAGTCATTTCACTTGGTCACCAG  
AGTCAGGGGAATCATATACTGCAGAAAGCCTTGCTGATAATTTGGCTGGAGAGCTGTTCTTCTTGATG  
ATACAATCTCTTTTACAGCTGAGGAACTATCTAGGGCCCCAGCTGAAGTCTTAGGCAGAAGCAGCCATG  
GGACATCTTACAGGGCAACACTAGATAACGGGTTGCTCTTGA CTGTGAAATGGTTGAGAGAAGGAGTG  
GCCAAACAGAGAAAGGATTTACAAAGGAGGCTAAAAAGTTTGCCAACATTAGACATCCAAATGTGGT  
GGGATTAAGAGGTTACTACTGGGGTCCCACACAACATGAGAAGCTTATTCTTTCAGATTACATATCTCCC  
GGAAGTCTATCAAATTTTCTATATGGTAAACTTTATCTTCTTGCATCAACCTTGCAGTTCCTCTTATGCATA  
TCGTTTGCTATAACACTTTGAACTCATAAAACACTTATAATCTTCTTCTTTGATATTTTTTAGTATTTCA  
TGGCAAACAATTTGTCAGTTTGATATCTTGACAGTTCTTGTGGTGCATGTATTTTCTCAGTCTGTGATACA  
CGAATTAAGGATAAGAAGCCATTTCCATTTTTAGTTAGCATAGTGAGTCCAGCTAATTCATTCATTCA  
TACAGCTTGTAATCAGTTCATTCACAATCATATATGAAACTACACTCTTCTCTTCTGAATCTATTCTCTCA  
ATATTTCTCCTTCTTTAGCTGTTCTTCTTGAGGGAACTCCTGAAACAGTCTCTTGATCCTCGAATTCCTGCA

ATCAAGTAACAGTTTGTATTATCATGAAATATAGTATCACTTTCCTGTGGAATTCTTCAACTTAAACTGC  
TGAAGTCTAGCTTCTGATTTATTGTTGGAAAACCTTAACTTGTCCAAGGCCCTATACACTACGTCCGACC  
GGACGTGTAAGCAGGCCTTACTTTCTTAATATCTCTGCACTGGCAGTAAGGTTTCAGCAATTGTGGTACT  
TTGCTCATAAAAAGGTCACAATGAACTGCAAATACTTCAATGCTCAAATACCTTATTTTCGATTGGTGATT  
CTACCTGCTCAACTTCTCTACTATTTTGTATGCTTTTGTGTAGTTTGTATAGTGTAAAGGTTTCTGTATATAC  
ATTTAACGTGCGGCACCTTTCAGATCGACCTGGAAGAAAAGTCCACCACTAACCTGGCCCCAAAGAC  
TCAAATATCAGTTGATATTGCGCGTGGCCTGAATTATCTCATTGACCGTGAGGTTTCTCATGGAAA  
CCTTAAAGCAACCAACATCTTGTGGATGGTCTGATCTTAATGCACGAGTTGGTGATTACTGCCTTCACC  
GTCTTATGACTCAAGCCGGTACAATTGAACAGATTCTTGATGCTGGAGTGTTAGGTTATCGTGCACCAGA  
GTTGGCTGCATCGAAGAAACCAGTGCCTTCCTTCAAATCAGATGTATACGCTTTTGGAGTCATTTTGTG  
GAGGTCCTAACTGGGAAATGTGCAGGTGATGTTGTTTCTGGTGAAGATGGTGGTGTAGACTTGACTGAT  
TGGGTAAGGTTGAAAGTTGCAGAAGGTGGAGGATTCGATTGTTTTGATAATGCATTGTCATCTGAGATG  
GGAAATCAAACAACAGAGAAGCAAATGAAGGAGGTTCTTGCAATAGCTCTAAGATGCATACGTTCCGGT  
ATCTGAGAGGCCAGGTATCAAGACTGTATATGAGGACCTTTCATCTATTTAGTTTTCTCATTGCTTT  
TTGCTTGGGAATCAAATAGCTCATTGGCTTCCCTTGAGTTGTAGAATTAGCCAGTTTAGTGTGTGAATGG  
GCTAGTTTTATTAACCATTGTTTGTGTAATTGGGGCATATTTATAATGTATACAACCTTTCACCCCCACC  
CACCCCC

>PGSC0003DMG400021017 LRR-RLKs

ATGGAGGAGTACATTTTCTTATTGATTCTTCTCTTCTACTTCAATTTTCTGTATCATTGCAACCTCAAAT  
GAGACAGACCAACAAGCTCTACTAGCTTTCAAAATCTTATTACAAGTCCTAGTCATTTTTTGGCCAACAA  
TTGGACCAACAATACTTATTTTTGCTCTTGGTTTGGTGTCACTTGCCTTCAAAAACCCAAAGGTTTGGGG  
CCTTGACTCTTCTAATTTGCAACTTCAAGGCACAATATCCCCGTTTTTGGCCAATTTGTCCTTCTCGATG  
TTCTCAATCTTGGGAACAACAACCTCCATGGTGGGATCCCTTATGGACTTGGCCACTTGCCTTGCTTGC  
AGTGATTGATGTTCAAACAATCAGCTAGAAGGAAGTATTCCAACAAGTCTATTTCAACACCAGAAAGTT  
CAAGTATTTTATTGGGCTTCAATAAACTCGGTGGTGAATGTGGAAAGGGCCATGGTGTGTACCGAAA  
CTCAGAGTCTTAAATCTCAAGAACAATAGCCTCACGGGTATAATCCCTCCTTCTATTTGAAATGCCACAAA  
GTTGCTTAACTTCAAGTTTGTATGGAAATAGAGTTGGTGGCAACATTCAAAGGAAATGGTAATCTGAG  
ACAACTTGAATTTTTGTCCTTGGTCGATAATCAATTAACAGGTTTCGTAACCTGCAACATTGTTAATATCT  
CATCACTTCGTGTCTATCTTGGAAATCAAAGACTTTCTGGTCCTCTTCTTGGTGTGATGAAAGGAATATT

GTGTCAAATATAGAGTTTCTAAGTATATCTAACAAACCAAATTTCTGGCTGCATTCTTCCAACATATGCCA  
ACTCACAAAGCTCAAAGTCTTGCCAGAGCTTTCAACAACATAACTGGAGAAATACCCAGAAATATTGAT  
TGTTTATCCAACTTGAACAGTTTCTTATTGGTGATAATCCAATAGAAGGGACTATCCCCACTTCATTGGG  
AAATATATCCACTCTTCAATATATTTATTGTGGAAACAATCGCATAGTGGGGAAAATTCCCCAAGAATTA  
GGGAAGCTATCAAATTTGAGGCAATTAACTTTGCCTCTAATTATAATCTTATTGGTCAAATTCCAGAGG  
CTATTTTTAACATATCTTCTTTGGAAATCATTGATTTCAATTTCAATAGCCTCTCAGGTAGAATTCCAGTCA  
CTACAGGTCTTCATCTTCCAAACCTTAAAGTACTTGAGTTGGGAGCCAATCAGATCAACGGGGAAATTC  
ATTGTTCATAACAAATGCTTCCAAGATTGAGAACTGGTACTAGCACGGAACCTTCTCACGGGCGCTATT  
CCTAATAATTTAGGAAATCTTCGTGAGTTGCGATTACTGTTCTTGCATACTAATCAACTTACCAATGAACC  
AAGAGAGCATGAATTGTGATTTTTCAATTCTTTGGCGGATTGTAGAATGTTGAAATATCTAGAAGTAGGT  
TCCAATCCGTTGATTGGCATTCTTCCAATTCTATTGGGAATCTTTCATCTACTGTTGAATACTTTGAAATA  
GGATATGCACACATCAACGGCCTCATCCCCATAAGTATAGGCAACATTAGCGGCCTTACAGCCTTGTACT  
TTGAAGACAACAACCTTGGCAGGGAATATTCCTTCTGAGATTGGTAAGCTTAAACAACCTCCAAGGGTTGT  
ACCTATCTAAAAATAAATTGGAGGAACATAAGAGGCGGTATGCCATTTATCTAATTTGGTTGAATTAGGT  
TTGGTTGATAATGAGCTACCTAGATTAATTCCAGAATGCTTAGGTAATCTTAGCATGCTTCAAAGCTTTA  
TTTGGGTTCTAATAAATTTTTATCAAAAATTCCTTGAGCCTTTGGAAGATGAGTAGCCTTCTCTATCTTG  
ACGTGTCACATAATTCAATAGAGGGAAAAGTTCTCGAGGATATTGGAGGACTGAAGGCCATTGTAGAA  
CTACATCTTCCGGTAACCACTTTTCAGGCATGATACCAAGCAGATTCGGGGAACTCCAAAACCTGCAGT  
CTCTTGACCTGTCAACAATTCATTTTTGGACAAATTCATCTTCTTTTCCAACCTTGATAAGCTTGGAA  
TCTTGAATTTGTCTTTAAATGCATTCTCAAGTACTATTTCTATGTCTTTGGAAAACTTTTCATCCCTTAAAA  
GCATTAATGTTTCATTTAATGATTTAAAAGGTGAAATACCTAGTGCGGTGTGTTTGCAAATTCCACACT  
ACAATCATTCTCGGGAACAAAGGTCTATGTGGAGTGCACATATTGGAGATTCTGCTTGTGCTATCACT  
AATCCTGGACAACAATCAAAGCTTAAGGAGGTTGTGCTAAAAATTGTTTCTCCGATGGTTATTTATCCTT  
TCTCATATTCTTGTTGGTTTCAATTTGGATAATGAAACGACAAAAGAAAGGAAAGTCCAAAGATGTGGA  
GAAGGCTTTAGAGATCAAACTCATCAATTGATTACTTATCACAAAGATTCAACAAGCAACAAATAATTT  
GATGAATCCAATTTAATTGGTGTGGGAAGTTTTGGCTCTGTGTACAAAGGCACATTATCTGGGGGGAAG  
TGTAGTGGCAATAAAGTTCTAGACTTGGAAAATGAGCAAGTATGCAAGAGGTTTGATACTGAATGCG  
AAGTGATGAGAAATGTTAGACATAGAAATCTTGTTCCAATGATTACTACATTTTCTAGTGACTATATAAG  
AGCCTTTGTTCTGCAATTTATGCCCAATGAAAGTCTTGAGAATTGGTTGTACAAAGAAGATTGTCACTTG

AATCTTCATCAAAGAGTCACTATAATGCTTGATGTAGCTATGGCAATTGAATATCTACATTATAGTCATGT  
CAATTAGATAGTTCATTGTGACCTAAAGCCAGCCAACGTTCTTTTGGATGAAGATATGGTGGCTCATATT  
GGTGATTTTGGAACTCTCTAAAATTTTAGCCATAAGCAAGTTCATGGCTTATACCGAGACATTAGGCACTC  
TTGGATACATTGCACCAGGTATAAAGAATCTACTCCTTTGATTTTCTTTATTATAATTATGACTCTCCAAA  
TTCTAATGGTAAAAAAGGTAAGTCTTTATTTATGCAGAATTATTGTTTTATTTCAATTGAGTAACTTTTCTT  
CAATCCTTTTTTTAAGAATATGGCTTGGAGGGAATAGTGTCCGCTAATGGTGATGTTTATAGTTATGGCA  
TCATGTTGATGGAGTTTTGACCAAAGAAGGCCAATAGATGAAGAGATATGCAATGAAAATCTTGACT  
TGAGAAAATGGATAACACAATCATTTTCAGGGACTATGATGGATGTTTTGGATGCTAATTTATTTCTAA  
GGAAGAACAATCACTTCTAAAAGTGAAAGTTGCATCGCCTGCACGATGGAAGTACTTTTTGATTGCAC  
AAAGGAAATGCCAGAATCAAGGATAACCATGAAAGATGTAGTCAAGAGGCTTAACAAAATCAAGAACA  
CGTTTCTAGAATCATAG

>PGSC0003DMG400021018 LRR-RLKs

ATGAGTGGTCTTCTCTATCTAGACGTGTCACAGAATTCAATAGAGGGAGAAGTCCATCAGATATTGCTG  
GACTGAAAGCCATTGTAGAACTACATCTTTCTATAACCACTTTTCAGGCATGATACCAAGCCAATTGGG  
GGACCTCCAAAACCTGAAGTCTCTTGACTTGTGCAACAATTCGTTTTTCAGGCTCAATTCATTATCCTTTG  
CCAACCTGATAAGCTTGAATTCTTGAATTTGTCTTTAAATGACTTGTGAGGTACTATCCCTATGTCTTTG  
GAAAACTCTCATCCCTTAAAAGCATTAAATGTTTCATTTAATGGTTTGGAAAGGTGTAATACCCATTGGTG  
GTGTGTTTTCAAATTCCACTCTACAATCATTTCTCGGGAACAAAGGTCTATGTGGAATGCACATATTGGA  
GATTCCTGCTTGCACTATCACTAATCCAGGAAAACAATCAAAGCTTAAGGAGGTTGTGCTAAAAATTGTT  
ACTCCAGTGGTTATTTTCATCCTTTCTAATATTCTTGTGGTTTCAATTTGGATAATGAAACGAAAGAAGAA  
AGGAAAGTCCAAGGAAGTGGAAAAGTACCGGAGATCAAGACTCATCAATTAGTTTCTTATCACGAGAT  
TCAACGAGCAACAATAACTTTGATAGGTCAAATTTAATTGGTGAGGGCAGCTCTGGCTCTGTGTACAA  
AGGCACATTATCTAGTGGAAGTGTGGTGGCAATAAAGTTCTGGATTTGGAAAATGAGCAAGTATGCAA  
GAGTTTTGATACTGAATGTGAAGTGATGAGAAATGTTAGACACAGAAATCTTGTCCCTGTGATTACTACT  
TGTTCTAGTACTATATAAGAGCCTTTCTTCTGAAATATATGTCCAACGGGAGCCTTGAGAATTGGTTGT  
ACAGAGAAGAGTCCCACTTGAACCTACTCCAAAGAATCACTATAACGCTTGATGTGGCTGTGGCAATCG  
AATATCTACACCATGGTCATAAACACTCTGATAGTTCATTGCGACCTAAAGCCAGCCAACGTTCTTTTGGAT  
GAAGATATGGTGGCTCATGTTGGTGATTTTGGAACTCTCTAAAATTTTAGTCGTAAGCAAGTCCATGGCAC  
ATACCGAGACATTGGGCACTCTTGGATATATTGCACCAGGTAAACGAGTCTCTTTCTATTTTCAGAAAAA

TCACAATTGAGCCCTTCCAAATTCTAGAACTAAATAAAAAGCAAGTGTCTGTTAATACATAATTATTGTTAT  
ATTCAAATGAGTAATCTTTTTCTTTTTCTTTTTAAGAATATGGCTTAGAAGGAATAGTGTCTGCTAG  
TGGTGATGTTTACAGTTACGGCATCATGTTGATGGAGGTTTTGACCAAAGAAGGCCAACAGATGAAGT  
GATATGCAATGAAAATCTTGACATGAGGAAGTGGATCACACAATCATTTTCAGGGACTATGATGGACGT  
TGTGGATGCCAATATTTTCTCTGAGGAAGAACAAGTCACTTCTAAAAGTGAAATCTGCATAGCCTCCATG  
ATAGAATTGGCTTTAGACTGCACAACGGAAATGCCAGAATCAAGAATTACCATGAAAGATGTAGTCAAG  
AGGCTTACCAAATCAAGAACACATGGGCCACGAGGGGTTAG

>PGSC0003DMG400021184 LRR-RLKs

TTTTTTTTAGAGAGAGAAGCTGAGAGTTGTAAGAGAGAGAAAATATGTCTGCAAGAAGACAAATGTTG  
AGTGTCACTGCCATTTCTGGGAGCTGTGAGGTTTCTCTTTCATTCATATACAAAACAAGACTAGGGTTTTA  
CCATTGTGGTTTGGTTTTTACTGAGCTCATAGAAATCTTGAACCTCATTATCAAGATTTCTAAAGGGCT  
AAATACTTTGCTGGCCATTTCATTTTCTTGTACTTTAATGCAGATTTTTTTTTGAGGCCACCAGTTGAGTGC  
ATTAAGAAGCTTGAGGTTCCAAGATAACCTGAAGCTGTAATCATTGCAAGAAGTTGAATTTCTTCAGTAA  
ATCTTTGAAAAAGACTCTTCTTTTTTTGTTTTCTTCTAGTTGAGCTGATGTTCTTGGTAAGGGAATGCTG  
AACTGTTTTACTATCTTGAATCTTTGAAAGTTCAGTCTGTACTTTGTTTTTGTCACTCATTTCAGCTTGAT  
ACCTAGAAAAGTTTCTATTTTAAAAAGACTGGTGATTTTGGGTTGAAGTTGTGTACTTTTCCCCCTGTT  
GTTTTACTGCTTTGAACTGTGATGGTTGTTGTGAAAGATGGTTTTTCATATGTTGAGGTTTTACTTAAAGTG  
ATTCTCATACTTAAAGCTGCTCTTTTGGATTTCTTGAAGGTTGAAGATTTAGTTGTATTTTTGGGAGTG  
AGTTTGTGTCACTTGGGCTAGTAAAGCTTTTTCTGGTGTTGCAATGAACCTATTTAGGTTTTTGTGCTT  
GTGCTTTGTTTTGGTTCTGCAATGGGGCAGCTTCCTCCAGGACATTTTGGCCCTGCTTGAATTTAGGA  
AGGGTATCAACCATGATCCAACCTGGTTATGTACTGCAGTCATGGAATGAGGAGTCCATTGATTTCAATG  
GTTGCCCTTCATCTTGAATGGTATAATGTGCAATGGTGGTAATGTTGCAGCAGTTGTCCTTGACAACAT  
GGGTTTATCTGCTGTTGCAGATTTGAGTGTGTTTGCTAACCTCACAATGCTTGTGAAACTCTCTATGGCTA  
ACAATTCAATTGCTGGACAAATGCCAAAGAAAATTGGTGATTTTAAGAGTCTTGAATATCTGGATATTTT  
AAACAATCTATTCAACTCCTTTTACCACCAGAGATTGGGAAAATAGGAAGCTTGAAGAATCTTTCACTT  
GCTGGTAACAACCTTCTCTGGCCCAATCCCTGATACTATTTAGAGCTCATGTCAATTCAATCTTTGGATTT  
GAGTCACAATTCTTTTCTGGGCTACTTCCTTCTTTTAAACCAAGTTAAATAATTTAGTATACCTCAATCT  
TTCTCTTAATGGATTTACAAAGAAAATCCCTAAAGGTTTTGAGCTAATGGCTAACCTTGAAGTTCTTGACT  
TGCATGGAAATATGCTTGATGGTACTTTGGATCCAGAGTTCTTACTGCTTACTACTGCAACTTATGTTGAC

CTAAGTGGAAATTTACTCGCGAGTGCCGCTTCTCAACATGAGAAATTTTACCAGGCATATCATCGTCAG  
TCAAGTACTTGAGTCTTAGCCATAATCAGCTTACGGGGTCACTAGTAAGTGGCGGTGAAGCTCAGGCAT  
TTGGAAACTTGAAGGTTCTGGATTTGAGCTATAATCAGTTGTCCGGGGAATTACCTGGCTTCAATTTGT  
TTATGATCTTCAGGTCCTGAAACTCAGCAACAACAGATTTTCTGGTTTCGTTCCAAATGATCTTTTGAAG  
GAGATACTTTAGTTCTCGCAGAATTGGATTTAAGTGGAAACAACCTCACAGGTATATTCCAAACTGCTCT  
CTGAAATTCATTTTGCAAATTAATAGTATTTGTTGTGTTGAACTTGAGTTACAACAAAGTAGTTAATTT  
CTGGTCATTTTGTTAGTGTGCTTTACTCAGTCCCTTCAATTTACAGGGTTCGATAAGCATGATAACATCAAC  
AACTCTGCGGTTCTTAACTTATCCTCCAATGCTCTTTCTGGTGAACCTCCACTGGTGACAGGTAGTACTG  
CAGTTCCTTGATCTCTCGAAAAACCAATTAGAGGGGAATCTAACTAGAATTCAGAAATGGGGAAATGTTG  
AATTTCTTGACCTCAGCCAGAACCAATTGACTGGAAACATCCCTGAGGTTACAGCTCAGTTTCTGCGATT  
AAATCGTCTAAACCTTTCTCACAATGCTCTTACTGGATCTCTCCAAAAGTTATCACACAGTTTCCCAAGA  
TCACAGTCCTTGATCTTAGTTTCAACCAGCTGAATGGACCTTCTCACTTCTCTGCTAACATTACCCACTA  
TTGAAGAACTTCACCTTCAAACAATGCACTTGTTGGAAATATTGATTCGCTGCCCCCTCTGCTACACCC  
AATCTCCGCGTTCTTGATCTTTCTCATAATCAGCTTGCTGGTTCTTTTCTGAAGGGTTTGGTTTGTGACT  
GCGCTTCAAGTACTTGATATAGCTGGAAATAATTTCACTGGGTCTCTGCCTACATTGATTGGTCAAGTTG  
GTTGCTCACTTCTCTAGACATTTACAGAATCATTTTACTGGTCCTCTGCCGATGAACCTGACTGATGGC  
CTCCAAAGCTTCAATGCATCACTCAATGACTTATCTGGTGTGTCCTGATAATTTGAGAAAGTTTCTTT  
ATCATCTTTCTACCCTGGAAACTCTGAACTTCAATTTCCAAATCCTCCCTCAGGATCTGGCCAAGCTTAC  
CAGAAAACCAGAAAAGTCGATCACTTAAACTATAATCAAGGTGGTAATAATAGTTTCTGTGTAATTGC  
TCTTATTATTTTGGTCTTGCTAGCCATTTTCTTTTATTATATACGAGCTTCAAGGAAGCGTCATCCTCGTGT  
TGCTGAAAAAGTTGTTTCATCGCCAAGCCACATCAAATCCTTCTGGCTTAGCAGTAGGGAGGGTGCCGG  
TGGTGCAGTTGTTTCAGCTGAAGATCTTATGACTTCACGGAAAGGATCATCAGAAATAATTAGTCCAGAT  
GAGAAAATGGCTGCTATAACTGGTTTCTCCCTTCAAAGGTAGCCATTTCTTTGGTCAACCAGAGTCTG  
GAGATTTCGTATACTGCAGAACTTTTGCAAGATTGGATGTGAAGTCTCCGGATCGTCTGGCTGGAGAGC  
TGTAATCCTTGATGATAAATTTCTTTTACACCTGAGGAACTTTCCAGGGCTCCGGCTGAAGTCTTAGGT  
AGAAGCAGCCATGGTACATCATAACAGGGCAACACTGGAGAATGGGTTGCTCCTGACTGTGAAATGGTT  
GAGAGAAGGAGTAGCGAAGCAGAGGAAGGATTTGCAAAGGAGGCTAAAAGTTTGCCAATATTAGG  
CATCCTAATGTAGTAGGATTAAGAGGTTACTACTGGGGTCCCACACAGCATGAGAAGCTCATTCTTTGCG  
ATTATATATCTCCTGGAAGTCTTGCAAGTTTCTCTATGGTAAGCTTCATGTATTCTAAACTCTCATATTAT

GTTTTGCTAATAAAGGTAAAGGCCTTGTGTACCTGTTCTTTAATCTAGTCATTTTCCTCTGACTGTGTGAT  
ATATCTTACAGTTCATATGGTTTTCCCATGCACATTATATATGAGCACTTTAATCATTGCTGTGTGATCCTG  
TAGTGGGAATTTGTGTGAACGACAGTATTTAGTCCTTGGTTTGATGTGGTAATACTTTAGTACATCTAGA  
GCCCAATATATTATGCATGTCTTTTGTATGTAACTTTCACACCAAGTAGTAATACAACAATCACCATGT  
GCTCTTCGTGATGGTCACTACATAGGCTGTGAGGGATTGCAATATGGTACTTATTATTTCCAGTAGCTA  
AAATTCTGTATGATTGAGTTCCTAATGGATCTGAAAATTGTGATGTTTAGCTTTTGTTCATGATTAACTTT  
GTTAGAAATCAGCTAGAATATGATACATTTTCCTTCTTTTATGAATCCTTCAAATGGACTTGCTTTCTATT  
ATTTGACTAACTAAATGTTTTCAATCAGTTGATAATTATATATGTGGTCATTCTCAATATACTTCTCTAATG  
TGCTGCACGTTTGTAGATCGGCCTGGTAGAAAAGGTCCACCACTAACCTGGCCCCAAAGACTCAAATA  
TCAGTTGATGTTGCACGTGGCTTGAACCTCCATTTTGATCGTGAGGTTCCACACGGAAACCTTAAAG  
CAACCAACATCTTGTGGATGGCCTGACCTAATGCAAGGGTTGCAGATTACTGCCTTCACCGCCTCAT  
GACTCAAGCCGGCACAATAGAACAGATTCTTGATGCAGGAGTGTTAGGTTATCGTGCCCCTGAGTTGGC  
TGCGTCGAAGAAACCACTGCCTTCTTCAAATCAGATGTATATGCTTTTGGAGTTATTTTGTGGAGCTGC  
TAAGTGGGAAGTGTGCAGGTGATGTTGTCTCTGGTGAAGATGGTGGAGTAGACTTGACTGACTGGGTA  
AGGTTGAAGGTGGCAGAAGGTCGTAGTGCTGATTGTTTTGATAACGTGTTGTCACCTGAGTTGGGAAAT  
CCAGCAATGGAGAAGCAAATGAAGGAGGTTCTTGGTATAGCCGTGCGATGCATTGTTCTATATCTGAG  
AGACCTGGTATCAAGACTATATACGAGGACCTTCTTCTATATAGTTTGTACCAAACCTACTTTGGGAAT  
CAAATAGCTCATTGACTTCCCTTTTGTAGTAGTAGAATTAGCACAGTTAGTGTGTGAATGGGGCTAGTTTT  
ATTGACCATTGTTTGTGTAATTGGGGCATATTTAATGTGTAAACAACTTTTCTCCCCTTTTGGCCTAT  
GAGCTATCAATGTTTGTGAGTCTTTCGGAGTAAATACTTGTGACTTTATTTTCCAAGTTTTGCAGCACAGT  
TTCACAGAACATTCTCAGATGGTCAATCAAACACAATGCTGACATCAACATTGCAGTGCAAACCTGACCGA  
AAAAGGTGTTCAAGAGAAAGTGCCAGGTTATGAACAAATGCTACTGGTTTTTCTTGTCCACTATTCAATA  
AAAGTTCAAATGCAACATCATTATAAGACACCTAAGGTGGAAAAAGGAAAAGTTACAAGAACCTAGTTA  
TGCCACTAGTTACTATGCAAGTGAGGAGAGGGGTGGGATAAAGGTATGAATTTAAACAACAGGAACTC  
TAAATTACATGAAAATACATCATAAGATGCAACATATTTTACTGTTGCAACTTTAACAATGTATGTTGCTC  
AAACCTGAATCCAGCCATCTCTGCCTCCTTGCAGATATCCTTGCACCTTAGCTACCCTTCCAGATGCCATAT  
AACTTTGATCAAGCTGCAGTATATGTCAAAGTTGGACTAAAACCTGCTTCCTTAAGTTTAGAGAAATA  
GCGTACAGCCCTTGAGAGATCGTTCAAAGCAACAAAAAGCTTAATAACTACACGATAAGCTGGAAGATC  
AAAAAGGCAATTTGAAGCCTCCATTTCCCATAGCATGTCTATTGCCTCTCTATAGTTGTTGCTGAATAAC

GACAGTGAATCAGAGTAGTATACATAACTACACTTGGATTACCACCAGATTCCTGAACCAGTCATATAG  
TCCCTCCACGATCTCAAATCTCCAGCCTAATGCAAATCTTCATGATAGCTGTACAGTCCTGTGGTGCA  
AATTCAGATCATCTCTCACAGCAAGCTCCTCTAATAATACCAAGACAAGTGTGCTTTTATCAGGATCCTTA  
CCAAGCTCTAAGATTAGCTTAGCATAACCCCCAGTATCAAGCACTCTGTTAGATTCCCTTAGCCATTGAAA  
GTAGCTTCAAAGCAAGCTTCAGGCTTCCTCCTTTAATATAACCCCTTAACATTGCTTCATACACACCCCGA  
CTTGCCAAGCCAGTGAACCTTGCCAAATCAAATGGCACTTTCAACTCATTTGACCCTGCCAAAACCTTCAAT  
GGTAGAACCAAGAATATGATCATCTGGGAAAAGATGGGGTTGTTTCTTCACCCAACAGAATGTTTCAAG  
AGCTCTCTCCGGAAGCCCCAAGTAACCCAACCTCTCGGATTGTCAACGACAATGATCCTTTCTAAGAAAT  
GGACTCCATTTACTGAGAACCTTTGATACATTTTCTCAGTTGAAAGGCCTTGTATCTCTTTAGCCAAACC  
AATCAAGAAAGTAGGATTCTTGTACACTTGC GTTGATATGGATTGCCTTGAACGATTTGTGAATCCCTTTT  
GTGTAGGAAGTCCTAAAGGTCTGAATCTTGTAAAGGAAGGGGCAGAGGTAGAGGCCTCTCTCTATCCAATT  
TTCCAGGCTTCTGAGGGATCCTCCCTTTAAAAGAGATGAAATTGCTTCCATCTCATCCGACTCCCATATA  
ATTCCCCATCATCATCACACATCCTTCTTTTTCTACTTCCAGCTCCAATTCTTCATCCATTCCATCAGAAC  
AAGCCTCAGTTGCAACTCCCTCATCCTCCTCGTACAAGACCCTATTA AAACTATAGTCCATATCTGGTGGT  
AGCTTGGGTCGTCGAGGATTTCTAAGGTTCTTTGGAAGTTTTCTATGATTAGCTCTGTTATTAGATACAG  
CCATGAAAACAACCTTCCCTTTCTTCTTCCAAAACCTAAAGGTGTTCCAGAAGCAGCTGTACTGGCACTA  
CTAGACTGCGAGATAGAATATGTGGGTGAAGACCAAGTAGAGGACTCATAAGTGGCCGAGAACATGCA  
ATAACTCCTGCTGAGCATTGGTTCGAGCAGGTGGTCCGACAAATTTATAAACAAAGGAATATGAGAGA  
CCTTATAGTGTGACGGAGTATAAAACCAACTGTTAAATGAAAGTTGAGCAGTATTTTTGACATATAAGTT  
ACTAT

>PGSC0003DMG400021353 LRR-RLKs

AGCATTCTCATATGAAAAATCCACTCTTTATGGTCATTTCTTGCTACTAAATCTTCACTTATAAAAAAAAA  
GATTAATTTTTTGGATTACTCTGTAAAACTACTGTGTTGTCAGCAAGAACAACACCATAGTAGTAGCA  
ACTAGCAAGCATTGTGCTTTTTCTCACTCCAATTATCACTCTCTTTCTCCTTTTTTGTGTTGGGGTTTAGTGA  
TCTGAACCCCATGTTTTCCACCTCTTATTGTCTCAAGATTTGACATGGGGGTCTTCAAGAATCAACCTCAT  
TAGGTGGCAAAGATTGTAGCTTTCTTGATTTTTGTTGTAGTGGGGTTTTTCTTTGTTGAATGTTAATGCAA  
ATGCTCAAATGTTGTTGCTTTGTGGATCATCTATGGAGGTTTTTTTTTACCACATATGGTTTGTGTAGCT  
CTGTTTCTTGCTTTTGTCTTCACTTGTCTTCACTGTCACTGACCCTAATGACTTGTCTGTTATCAATGAGTTTA  
GAAAAGGGTTGGAAAATCCTGAGGTCTTGAATGGCCTGAAAATGGTGGAGACCCTTGTGGTTCTCCA



GTTTGGCCACATATTGTGTGTAGTGGTAGTAGAATTCAACAGATTCAAGTTATGGGGTTAGGGTTAAAA  
GGCCCTTACCTCAAACTTGAATAAGTTGTCTAGGTTGACACATTTGGGGTTGCAAAGAATCAATTTA  
GTGGAAAGTTGCCATCTTTTAGTGGTTTGTCTGAATTGAGCTTTGCTTACTTGGATTTCAATCAGTTTGAC  
ACAATCCCATTAGATTTCTTTGATGGACTTGTGAATCTACAAGTTTTGGCTTTGGATGAAAATCCTCTAAA  
TGCCACTAGTGGTTGGTCATTGCCAAATGGGCTTCAAGATTCAGCTCAGTTGATCAATTTAACAATGATA  
AACTGCAATTTAGCTGGTCCTTTGCCTGAATTTCTTGGAACTATGTCTTCTTTAGAGGTTTTGTTGTTGTCT  
ACAAATAGGCTTTCAGGGCCTATTCCAGGTAATTTCAAGGATGCAGTGCTGAAGATGCTTTGGTTGAAC  
GATCAGTCGGGTGATGGTATGAGTGGTTCAATAGATGTTGTTGCAACAATGGTGTCACTTACACATCTT  
GGCTTCATGGGAACCAATTTTCAGGTAAAATCCCAGTAGAGATTGGTAATCTAACAAATCTGAAGGATC  
TCAATGTGAATACAAATAACCTTGTGGATTAATCCCTGAAAGTTTAGCAAATATGCCATTAGACAATCTT  
GATTTGAATAATAATCATTTTATGGGACCAGTTCCTAAGTTCAAGGCTACTATTGTTAGTTTTATGTCCAA  
TTCTTTTTGTCAAACCAACAAGGAGCAGTATGTGCCCTGAGGTTATGGCACTTTTAGAGTTTCTTGAT  
GGTGTGAATTATCCTTCTAGGCTTGTGAATCATGGTCTGGAAACAACCCTTGCGATGGACGTTGGTGG  
GGAATAAGCTGTGACGATAACCAAAAAGTTAGTGTCAAACTTGCCTAAGTCTAATCTTCCGGGACCT  
TGAGTCCTTCAATCGGAACCTTGAATCCGTTACTCGCATTATCTTGAATCAAATAATCTTCTGGTTTTG  
TTCCATCTAGTTGGACTAGTTTGAATCTCTGTCTATTCTTGATTTGAGTAATAACAATATTTCTCCACCTC  
TACCTAAATTTACCACCCCTTTGAACTTGTCTAAATGGAAATCCAAAGCTGACTTCTAGTCCTCCTGGA  
GCAAATCCTTCAACCAACAACAACACAACGCCTGCAGCATCACCTGCGTCGTCTGTACCATCTTCACGAC  
CCAACAGTTCAAGCTCTGTGATCTTTAAACCCGGTGAACAGTCACCCGAAAAAAGGACTCAAAGTCAA  
AGATAGCCATAGTTGTGGTTCCTATTGCTGGTTTTCTACTTTTGATTTTTCTTGCTATTCCACTGTACATTT  
ATGTCTGTAAGAGGAGTAAAGATAACCATCAAGCTCCAAGTCTTGTGGTTCATCCTAGAGATCCATC  
TGATTCGGATAATGTGGTCAAGATTGCGATCGCCAATCAGACTAATAGAAGTCTTCCACAGTAAATGCA  
AGTGGTTCTGCTAGCATAACAGTGGTGAATCCCATATGATTGAAGCTGGGAATTTGCTCATATCGGTTT  
AAGTACTTCGGAATGTGACTAAGAATTTTTCTCCGGAAAATGAACTTGGGCGTGGTGGTTTTGGTGTGG  
TTTATAAGGGAGAATTAGATGATGGGACACAAATAGCTGTCAAAGAATGGAGGCTGGTATTGTTAGC  
AACAAAGCTTTGGATGAATTTGATCTGAAATTGATGTTCTCTCAAAGTACGGCATCGACATTTAGTGT  
CTCTACTGGGATACTCTGTTGAAGGTAGTGAAAGAATTCTGGTTTATGAGTACATGCCACAAGGTGCACT  
TAGTAGACATCTTTCCGCTGGAAAAAGTTCAAGTTGGAGCCTCTCTCTTGGAAAGAAAAGGCTTAATATT  
GCCTTAGATGTTGCTAGAGGTGTGGAGTATCTACACACACTAGCACATCAGAGTTTCATTCATAGAGATC

TCAAATCCTCAAATATCTTGCTGGGTGATGATTTCCGAGCAAAAGTATCCGACTTTGGACTCGTGAACT  
TGCTCCTGATAAAGAGAAATCTGTGGTCACCAGGCTGGCCGGAACCTTTGGATATCTGGCACCTGAATA  
TGCTGGTAAGCAATTTTTGCTTACTTTGTCAAAGAGAAAAGATGATTTTTAAAATGCATGTTTATATGA  
CAATTTTTACTTTTGCAGACACCTAGAGTTTGCTCAACTCAATTCTGATGTATAGCATTTTATTTTTTGCA  
TACCAATGTACTGTTTTCCGAACTAACATGAGATGTTTATTTGATCCAGTTACGGGTAAAATCACCACGA  
AAGCTGATGTCTTTAGCTTTGGTGTGTGCTAATGGAGTTGTTAACTGGGATGATGGCACTAGATGAGG  
ATAGACCTGAGGAAAGCCAGTACTTGGTTTCGTGGTTCTGGAATGCCAAATCCTCTAAAGAGAAGCTTA  
TGACAGTCATTGATCCAGCTCTAGACGTGAAAGATGAGATAACCAAGAGCATTTCACCTTAGCTGAACT  
TGCTGGTCATTGCACTGCAAGAGAACCTGGTCAACGGCCAGATATGGGCCACGCTGTAAACGTGCTCTC  
CCCCTTGTGAGAAATGGAAGCCTCTTGAGGATGATCCAGAGGACTATTGTGGTATCGACTACAGTCTT  
CCCCTCAATCAAATGGTCAAGGGCTGGCAAGAATCGGAAGGAAAAGACTTAAGTTACGTGGACCTCGA  
GGACAGTAAGGGTAGTATCCCTGCAAGACCAACTGGATTTGCAGATTCATTTACATCAGCTGATGGTAG  
ATAATGGAGGTACTTCTATGTAGTAGATGTAGATATCAATTTTCTTTGTATTGTGTGAGATTTTGATCGTA  
TTTTCCACGTGCCTTCGTTCAATTTCTCCCCCTCAATGTGAATGTATTAGATATTCAAACCTATGTGTAGCCT  
CAGTTCCTTCTGTAGATACAAAATAGTGATGAAGGAGAACTATAACATCGGTTAAACTCCTCGCTCAGTCA  
CTATTTTCATCTTCTATATACTATTGTGAGATTTAAGAGCATTCTTACAACCTTGCTTATTTTCGTCGTCTA  
GTTTGCTGCTTCAGAAGTTCTGTGTTGAGAAACATACTGATGTTGAGATAGCCTTGTAATAGAATATGTC  
GCTTGATTGAT

>PGSC0003DMG400021394 LRR-RLKs

AATTTGGCTGTAAAGTGCCAAACACTTGCAACAAGAACAAGTAAATTACATTTATTATTCATTTCTCTT  
TTCTCTTGTTCAATCCTCCAATCTCTAACAACGTAGATGCAATTCACAGGCTCAAGTAGTTTTCTTTTTAT  
CTAAAATTGATCATCGTTTTGTTGGGGACATTTTGTGATGCCGATCCTCGGATTTGAGAAGCAGGGCAGG  
TGTGTGGCACTAACATGACATTGCCGTCCATTATCATCCCACAGTATACTAAAGAAATGCAAGTGATTAC  
CCAGCTTGTGAGTGAACATGGATGGGGCAGCAGCTATGCTGTTAATTCAACAGATATTTGATATACGC  
TTTAGCAAATTGTTACCAAGATCTTCCACCTAACGACTGTGTTCAATGCTTCTTATAAGTTGTTCTACACT  
CCCTACTTGTCTCCCTGCTGTCTCTGGTCGTGTATATCTTGATGGTTGTTTCATCCGTTATGATTATTACAA  
CTTCTTCGGGGAACTACTGATTCTTTCAAAGATAAAGTGAAGTGTAGCAGTTCGTTTGGAAAGGGCTGTT  
ACTGATTCAGATCAATTGGCTTTGGCTGCTGCAGCTGGAAATTTGATTGAAAACGTGACGAAAAAAGCA  
ATTAATGAGAATGATGGATATGCAAAGGGGAAATTGAATGGAGTTTATGGATTGGCACAGTGTGGAG

AACAGTGAGTAAACAAGGTTGCAGAGAATGTTTGGACAAGGCAAGTGAAGCTATAAAGGGATGTTTGC  
CTAATAGGGATGCTAGAGCTTTAATGGCTGGTTGTTATTTGAGGTATTCCACTCACAATTTCTCAGTCAT  
CATTCTCAGGCTACTAATAAAGGTATCTATATCACTTCTCTTTTACCATACCAACTCTATTCTTCGGTTAA  
TCCATAGACTTTTGAAAATTTACTTCCTCATCAACATATCTCTTTTTATTTCTTCTTTATTAAGGGCTCGTTT  
TGTAGGTGGATAAGAAATAAGTTATTTATGTTATTAATTTCTGCATAACTTATAATACTACAATTGGCAAG  
TATATAGGAAATAAGGTATTCATTTATAAAATTAATAGGACATTTGAATGACAATTTAGAAACTCGCATA  
AATAATATATGTATAAGTTATGAGATAATTTTTATATATATTCTACAGAATAGAATGTGGAATAAGTATTA  
GCACATGTATAACTAATATCTGCATAAAGTAATACATAAATTCACTCATAACTAATCCTACATTACTAATA  
CCTCTATAATTCTCACCAGCAACCAAAACAACCTAAGGGTGTGTTTGTATGGAAGAAAACATTTTCGCTA  
CAAAAAACATTTTCAAGCTGTTAAGGATTATAATTTGTAAGTAGCCAACAATGACGAGAATTGCTAAGAA  
AAGAAAACACTAAAAATTTCTTCAAGGGATTCAATAATACAGAGAAAGAAAGATGAAAGAATGATAA  
ACAACCTCAGATTAAGTTGTGGTACCTTTTTTTTTGTTTTTGTGAGTATTTTAGATTGGCTTAATGAAA  
ATAAAGAAGTATGAAAGGGAAGTGATGGATACGTACGTTCCGGTGCTTTGCTGTTAAACATTATTTTTCAA  
TATAGATCTAGCAGATCATAAATCTTATTTTTAGCCAAAGAAATTTCTATTCTTTGGGTTAATACTTCATT  
AAATGGTGTCTCAACATGTAATGTTTTGAAAATAATCCCCGCATCAACTCCTAGTTTTCTATTTTGAACA  
CCTCTAGTTATGGGAATTACATGTTTAATGATTGATTGGAAAACTTCATTGAAAAATTGATTTCAATCT  
CAAAAAATTCATCTTCAGAACTCATTGCATCTCATGAAAATGTCTTGAACCTATTATTTTCAATACAAGG  
AAAAATGTCCAAACAAGATCTTAGAACGATATATATCCTGTTTGCTAGCTTTACTAAAGGCATTTTATGA  
ACGTGTTTCCCCAAAAGAATTTGATATTCTCCTACCAAACTCAAATTTATTTTTTAAAGTATTTATTTT  
AAAATATAAAATCATATATAATTTCCGTCCTGTTTGATTATCTCAAGGAAAATAAAAAATGATATTATAGG  
AATATCTTGACTATGTGGGATGGTCAAACCTAACGCCATATTTGCTTTAAAAACAAGAATGGTCCAAAGT  
CCGAACCTATATGAGTTCTCTAACATCCTTCCTTTTGTCTTATTCCCCTAATCCAACCTATAATTCACATTGTA  
CAAAAAAAAAACAGCATAAATCATTATTTTAAACGGATAGCAAATTAATAATTCATAACACATTAGCA  
CCTAAGATTAATTAATTTGTTAAAAAAGCTCAACTGTGGAAATAATTCTTATTTGATTTACTAAACAACG  
CAAGTTAGACTCTATGTTTTTTTCAAGTACTAAAGCCAAATATATGCAAATTGGAAGGCAGAAAATTTCA  
AACGTATCGATAATGACATCCATATGACCTACTCCTACAAAGATGTATTATAAATATTTCTGTTGGGTCAA  
GTCTATACGGATCGACAGAGACATTTTAATGGTATGTAAAATAATTATTTTTCTTTGTTGTTATATTTTGA  
TTTTGGTGAAAAGATTGGAAGTATATATTTATATATATACAACTAGCTGAATTAATAAATGTAGAAAGT  
ATAAAATATAAAACATCAATTGTGCTATTGTGGAATTGACTTGTCTTATAAGTTGAAGTAGAACCAGCTC

CTCTCCTCTCGGACTCAGGTGTAGTTCAGTTCCTCAACTAAACATTTTCTTAAAAGAAAAATAGAAAATAA  
ATATTCAAGAAAAATAACTCCCTCAGTCCCTTTTTATTTGTACAATTTGGACTTCTTACTTGTTAGTTTTG  
ACAAATCAAGAAAAATAATATATATTTTTTTTACGTATTATACTCTCAATTTATTTACAGAGTTGATATTTA  
AAAAAAGATAAACCTCTTTAATAAGTAAATTGATTTAGAATAGTAAACTCATTATGTTAATTATTATTT  
TTCTTAATAGATGTATCAAATAAAAAGAGTATTATTGAACAAACAAAGTTTTTACTGATATACTAGACTAT  
AAGGGATTGGGTTGTGAGAGTCTATAAAAACAATCTCAGAAGTACAAATTTAAATCTGCTACCTTATAC  
TCTCAAGACCCCATTTTGTGAGATTACATCAATCAATATTCTGTTGTTATTGTTGTAGTATACTATAAAAC  
TTTATCTGGCTCCTCTTTGACTGCTAAACTTGAAAGCTTGTTCTTTAGAGACTTTCAACTCTGTTTTTTTTCT  
TTTCTCTCAAGGACAATAATACTTTGCTTTTTGACTAATTTGTAAATAAATGCTCTTGTTTTGAGGCTTAA  
GCAAAGGTGTGATAATAGTTATCGTTTTTGAATGATAGCTTTCTCCATGCTGTTTCTTTTGTGCGTAC  
GTAGCTCGTAAAAAATCGTTAAAGCGAAAACAAGGTATCATAAAAGAACTAACCTTAATTTGTCAATTT  
AGACAATCGATCAGTCGTATATGTTATAAAATAATTACATAAATGTTTGCAATTTTTCTTGCCACAGAAT  
TCATTAATCTTGGCAAGATATCGAATTCATACAAGAGGTCCAGCTTGAACCTTTAAATATGAATATCTTGA  
AAAGGCAACACACTACTTTGATCCATCAACAATAGTAGGCCAAGGAGGAAATGGTTCTGTATACAAGGG  
GACTCTTCTAATGGGAAGGTTGTTGCAGTTAAGAGACTGTTTTTCAATACAAGGCACTGGGTTGATGA  
GTTCTTCAATGAGGTTAACCTTATCCATGGGATTGAGCACAAAAATCTTGTGAAGTTGTTGGGTTGCAGC  
ATTGAAGGCCCGAGAGCCTCCTTGTCTATGAGTTTGTGCCTAATAAGAGCCTAGATCAATACCTTAATG  
GTACGTTAATATCGATGAATTTATATCTATAAATGCAGTGACAATTAGGGACGACTTCTAATTGAGTTGT  
TCAAATTTTTGTTGTGTAGATAAGAATAAGATAAAAGTTCTAAGTTGGAAAGAACGATTACACATCATAG  
TCGGAACAGCAGAAGGCCTTGCCTTCCATGGAGGTTGAGATATGAAAATCATCCACAGGGACATCA  
AGAGCTCCAATGTACTTTTGGATGAAAATTTTGGAGCGAAAATTGCTGATTTTGGACTAGCTCGGTGTCT  
TGCAGCTGATAAACTCATCTTAGCACTGGAATTGCTGGGACATTGTAAGAATGATAAAACAGCATTCA  
CAGCCTTCTTTAACTACTTAATTATAACTAGTGATTTTATTTGTTGCGTAGAGGATATATGGCGCCTGAA  
TATCTCGTAAAAGGACAACCTCACAGAGATGGCTGATGTCTATAGCTATGGAGTGCTTGTCTTGAATTTG  
TTTTGTGGAAGAAAAACATTTCTTTGGCAGAGGATGACTCTGGATATCTACTGCAAAGTGAAGAATTTAA  
TGTTGTACATTTCTTAAAAGTTTGTGGTAACAAATTGAACCTGTCATTTTTTATTTTACAGGTGTGGAAA  
CTGTATACAACAAATCAAGTGACTAAAGCATTAGACCCCATCTTGAAGATGATTTTTTACCAGAAGAGG  
TATCAAAAGTCCTCAAAGTAGGGCTTTTGTGCACTCAAGCTTCTGTTACATTAAGACCATCAATGTCTGAT  
GTTGTCAAATGCTAACAACATTTGGACAACCGATTCCGGAACCATGCCAACCACCATTCTTACGTTCAA

GCAGTAGCATAAAAAGATTTCGTCTCCGATACACTATCCAAACTTGATGAATCTTGTATCTCCTCTGCCATG  
CATAGCTCATCAGATGGACCACACATTAAGTCAAGAAATCTTTTCAAACCGTCTCTACTGGAAACAT  
ATATACAAATTAAGAAGTCAAATTCATGATGTATGTAAGTGAAAATGAAAATTTTGCACAACATTTT  
TGTACCGTTCGAACTAGTAGTGATTACATGTTGCATTTTTACGATTTGATTTTACTTTAACTCTTCG

>PGSC0003DMG400021609 LRR-RLKs

CACAAAACACACAAGCCCACTACACTACCAATCTTAGTCATTATTTCTCTATCTACTATCACTCTTGTGAAT  
GCAGTTACTTCATTTTCTTTCCACCTTGACACATGAATATCTAACAATAATCCCAAACCTCAACATTCATT  
CAATGAACTTGTACTCCATTACCTAAAATTCACACCTTTTTCCCTTTTTCATTTCCATTCCCTTCTCTAACT  
ACTCTGAAAAAACATTTGTTTGCTTCTCTTATTGTAGGAACTAAAAACCCATCATAAAAATGAGATCTT  
TTAGTCCCTTTTTAGTTCTAATACTTTATTTGGCTTATTGTATGGATCTTTATTAGCTGATGATACTACTAT  
GCAGCTTAATGATGATGTTTTAGGCCTCATTGTGTTCAAATCAGCTCTTCTTGATCCTTACTCAAACCTCTT  
GTCATGGAGTGAAGATGATAACTCTCCTTGTCATGGGAATACATCAAATGCAATCCAATGAATGGTAG  
AGTCACTGAGCTCAACTTAAATGGCTTAAGTTTATCAGGAAAGATTGGTAGGGGGCTCGAGAAGTTGCA  
ATCTTTAAAGGTACTATCTTTGTCAAACAACAACCTTTACTGGTGCAATTAGCCCTGAGTTAGCCTTGTTGA  
CAAATCTTGAAAATCTCAACTTTAGTCATAATGGCTTATCAGGGAATATCCCTGGATCTTTTTCAAATATG  
ACATCTTTACAGTTTCTTGATCTGTCTGAGAATGCTTTATCTGGACCTGTCTCTGATACCATGTTTGATAAC  
TGTGGTGATTGCTACGTTATCTTTCTCTATCCGGGAATTTTCTTGAAGGTTCAATTCCTAAAACAGTTTCA  
AAATGCACTAGTTTGAATCATCTCAATCTTTCAAGAAACCATTTTTCTGGTGACCCTGGATTTTCCGGGGG  
TATCTGGGGATTGACAAGGCTTAGAACATTAGATCTTTACATAATGAACTCTCTGGATTAGTACCAATT  
GGTGTTCAGTTTTACATCAGTTGAAAGAGTGTTTGTACAAGGGAATCATTTCACTGGAGATTTACCAG  
CTGATATTGGTTTCTGTCCACATTTGAATAGATTAGATTTGAGTAATAATCAATTCACAGGACAAATTCCA  
ATGTCACCTCAAAGGGTGAATGTTCTTTCTTTCTCAGTTTATCAAACAATATGATAAATGGAGATTTCCC  
TCAATGGATAAGTAACATGAGCAGCTTGGAGTACTTGGATCTTTCAAGCAATAGTTTAGAAGGAGCATT  
GCCTGATTCAATAGGAGATTTGAAAATGTTGAAGTACTTGAGTTTATCTGGTAATAAATTGAGTGGAAA  
CATTCCAAAGTCTATGGTGTATTGTACTAGTTTATCGACTATTCGGATGAAAGAAAATGCATTGACTGGT  
AGCATTCTGAAGGATTGTTTGGTATAGGATTGGAAGAAGCAGATTTTTCAAGAAATGAGTAACTGGT  
TCAATCCCTCCTGGTTCTGGTAAATTCTTTGAATCACTTCAAGTTCTTGATCTATCAGGAAACAATCTTACT  
GGGAATATCCCAGCTGAAGTGGGACTTTTCTCCAAGTTGAGATACTTGAATCTTTCTTGAACAATTTTC  
AATCTAGATTGCCTCCTGAAGTTGGATACTTTCAGAATCTAACGGTGTTGGATCTTCGACACAGTGCTTT

AGTTGGATCAATTCCTGGTGATATATGTGATTCTGGTAGCTTGGGAATTCCTCAGCTTGATGGAAATTCA  
TTCCTGACCTATTCTGATGAGATTGGAAATTGTTTCATCCCTCTACTTGTTGTAAGTATATTTATTCTGA  
TTTATCTCATTATAGTATGGTACAGCCTCTCTATAACAGTCATTTCACTATGAGAACCATGTTTTTTGTGGA  
ACCAATCTCTCATGTTATGTTATCTATTACAACATGTTGCTATAGCAGCAAAAATAATATCGGAACAAACA  
ATGTTGTTATAGAGAGGTAGCAAGGGATATGTTTATTTGAAAATGAGGTTCTGTATCACTTTTGCTTTGT  
CTATTTTCCCTGTAGTTCTTGAATTGAATGTCAAATTTGTTAAATGCAGGAGTTTGTACATAATAATTTA  
AGTGGCTCAATACCAAGGTCCTTTCAATGTTGAAGAAGCTCAAGATTTTGAAGCTAGAGTATAACCAAT  
TGAGTGGTGAAATACCACAAGAAGCTGGCAAGTTAGAAAATCTTCTGGCTGTTAATATATCCTACAACAG  
GCTCGTTGGACGCCTTCCAATGAGTAGTATATTCCAGAATTTAGACCAGAGTTCATTGGAAGGGAATTTG  
GGAATTTGTTACCCCTTGTGAAAGGTCCTGTAAGATGAATGTGCCAAAGCCTTTGGTTCTTGATCCTTA  
TGCATATGGAAACCAGAGGGGAGGTCAAACCGGGACGATGGAAGTTCAAGAAGCAATAACAAAAGTT  
TCAAGAACCATAGATTCCCTCAGTGTTCATCCATTGTTGCAATCTCTGCTGCAGCTGTGATCGCGGTTGG  
AGTCATGATAATAACCTTACTCAATGCTTCTGTTTGAAGGAGGATCACATTCGTTGACAATGCCTTGAA  
AGTATGTGCTCAAGTTCTTCTAAGTCAGGGAGCCTTGCCACTGGAAAGCTTGTGTTATTGGACACCAAAT  
TGTCCCGGATTGGACTAATAGCAGTCTTGAATCAATCCTAAACAAGGCATCTCAAATCGGTGAAGGTG  
TCTTCGGGACTGTTTACAAGGCTCCATTGGGAGGGGAAGGAAGAATAGTAGCTATCAAGAAGCTTGTA  
ACATCAAAAATCCTCCAATATCCTGAGGACTTTGATAGAGAAGTTAGAGCTTTAGCAAAAAGCAAGGCAT  
CCAAATCTAATATCCTTAAAAGGGTATTACTGGACTCCTCAACTTCAGCTTCTAGTATCAGATTATGCACC  
AGAAGGAAGTTTACAAACCATACTGCACGAAAGGCCTTCGTCTTCAACTCCCTTCCCCTGTCTTGGTCCA  
CTCGATTCAACATTGTGCTCGGAACAGCCAAGGGACTAGCACATTTGCACCATGCGTTTAGGCCAGCAA  
TCATACACTACAACATAAAGCCTAGCAACATCCTCCTTGATGAAAATTC AACCTAG AATATCAGATTT C  
GGGCTGGCAAGGCTAGTGACAAAACCTCGATAAGCACATGATAAGCAACAGGTTCCAGAGTGC ACTAGG  
CTATGTAGCACCTGAATTGGCATGCCAGAGCTTAAGGGTGAACGAAAAGTGCGACGTGTATGGTTTTGG  
AATGTTGATTCTTGA AATTGTCACAGGTAGAAGGCCAGTTGAGTATGGAGAGGACAATGTGTTGATACT  
CAATGATCATGTGAGAGTTTTGCTTGAGCAAGGCAATGTGTTGGAATGTGTTGATCCA ACTATGAAAAC  
TTATCCTGAAGAGGAAGTTTTGCCTGTTTTGAAGTTGGCATTGGTGTGCACTTCTCAAATACCATCAAGT  
AGGCCTTCAATGGCTGAAGTGGTTCAAATCTTGCAGGTCATCAAAACACCTGTTCTCCTCAAAGAATGTCAG  
CATACTAAACATGTCACAAACTTGATGAATTTCCCTTTCTTTGGCTTTCTATCATCCTATTGTTGTTATG  
TTAACCTCCTAATTTGATGTTTTTGGACTAGATAGTATAGAGAGAGTTTTGTACTTCTCTGTCAATTTGAT

GAAATATATGAGAGGTTGGTTC AATGACTTCAATCATGTTTGTTG

>PGSC0003DMG400021789 LRR-RLKs

CTTTAATGTTTTGTAGACATATTTTCATGGAAGATGGTGTCTTATGTCACAGTGATAAATTGCAACAAGG  
ATACTTGACATAAAGTGCTATATCCGAAAGATGGTACTGTTCTTTGCAATTGTGATATTGGCATGTCTCC  
GCTCATTGTCTTACCTGATGGGCAAGGTACCTGGTCTTCCAGTTTTACATCATAAAAACCAACTTTGTT  
TTATTTATCTACTCAAATGGATAAAGAATAATTTAGATGTGACCACTATATCTTGTTTACATTTTGCTTCT  
GCCGGTGAAATGTTGTCTTTGTTCTTCTAATAAAGTAGGGTGACATTTGGTTTTTTATACTCTGGCCCATT  
TTAGGAGATGCACTGTACACATTGAAGAACTCACTAAATGCTTCAAATGGTCAACTTGCTGATTGGAACC  
AGAATCAAGTTAGTCCCTGTACTTGGTCCAAGATCACTTGTGATGATAAAGGCAATGTCATTATGGTGTA  
AGTACTATTGTTAGAGCCATTAGAATCACTGTGTGCATATACTATGATGTTACTGTTTTTATGCACTAGAA  
AGGTTAATCTTTGGTTGGTCAACTTCCTTACTGGATGTAATTTTGATAATGTCTGAATCTGTATTTGCAG  
GTCATTATCAAGTTTGGGATTCTCGGGCACTTTAACTCCCAGAATAGGTGTTCTAAAGAATGTGAATACA  
CTGTACGTTTAAAGTACTCGGGCTGAGTTATTATTGATAGAATGATGTCTTGAATGCTGCCACATATAA  
TTTTCTAGATGCTATTTATTGCTATTTTAAAATGTTTATTTAAATTTTGTCTGAACATACAAGTTTGATGT  
CATGGCATTGCACTAGAACA AAAAATCCCTTCAAATCATCAGATGTTAACTAAAAGTTGAGAACACGATGA  
TTAATATTTTCAAGGGAGCTTCACTTAGCGGAAGGGGGAAAAAGAAAAGGAAAGTACCTACATATTGT  
GGTGTATAAATGAACAAGGAGAAATATTTGGCCATTTACAAAGGCAAACAGCTTTAAGAGAGATGGA  
AGCTGTATGAACTGATCTAGCAAATGGGAGTCTCTGTTCCGATGGCTGTCTTTTTTCTGTGGTAACTGT  
GTGGTGTCTCTACACTTGTAAGTCTGGTTCGTTGGACTAAGAGCAACCTAAGCCATTTACGAAGACT  
AGAAATGTGAACTATAACAAGATTAATCCTCAGTATCAGTGACTTTATCTTTTTTCTGAGTGGTCATTCCG  
TCACATTGGTATTTGCACTTTGTCTACTTCTTAGGGTCTATTTTAGTATTTGACTTATATATATTTCAAATC  
AATAATTTGGATGCATAACCATACGTAAGGGTACATAGTTCTTTGATGTAGCTCTTGATGAACTTTGATT  
GTTAGTATGTTGTTGAGCTCAAAATTGTAAGGTCTATGACTAAAATTTTTGGGATGATTTCTTGCTTCTT  
AGATCCATGACTAAAATTTTTGGGATGATTTCTTGTTTTCTGCTTCTAACCTAGCTGACTATGTCGCATAC  
ACTCCCTGCAGGTCCTTGCAAGGAAATCGTATAACTGGTGAAATTC CCAAAGAGATTGGAAATTTAACA  
AGCTTGACAATGTTGGATTTAGAAAATAACCGTCTTTCCGGAGAAATACCAGCTTCGTTGGGCAATCTTA  
AAAAGCTTCAGTCTCTGTAAGTCATATTATTTCAATTAATCATTTGAGATATAACTTAGTTTACTTGGTGAC  
TGGAATAGGTGTGAACTCTATTATCCATTGAGCAGGTTTTTGAGTCGAAACAATATCACGGGGACTATC  
CCTCAGTCACTTTTGGGTCTTCAAACCTTGATGAACCTGTAAGTTATTTATCTTGCCTTTTCTTATTCCAA

GTATAAATTACTTTTCTGAATAGGAGAATAATACATTTTCTTTTGGGATGTCAACTTCAGACTTCAGTGAT  
CCTTAACCTGTTACCTGTATCATTGATATTTGACTTGATTCTCTGATTCCGCTTGCAGTCAGCTTGGTTC  
CAACGGTCTTACTGGCCAAATTCCTGAACAGTTGTTCCAAGTTCCAAAATACAAGTACGATTACAGTTCTT  
ACTTTAGACAGTAGCTCAAGGCTTCTTAGTTTTTGCCTTCTCTACTAATGCATAATCTTTAATGTTAGTATA  
ACTTCATTTTATTCTAGTTTTACAGGGAATCATTGAATTGTGGCTTAAATCTCACTCATCATTGTGAATCT  
GCTAATGGAGGTAAGTTCTACCAGCAAATATGTGAATTTTTGAACTGTATATGCTTCATGCTTCTCTGTAT  
TCTGGAAGAATGAAAGTAATGTAGCTAAATTTTTGAAATTTACTGCCATTATCTTGATTTTATTTGTTATT  
ATCTTTTAGCTAGAAAGGAGGCTTTATCTTTAGTTTACTTTATTAGAGAAAAAACTTTAGTATTTTCAAG  
ATGTCTAGCTTGTTAGGGGTTTCATATTCTATATCTAGTATAAGTGTGTACTTTGTTTGGAACGACACTTG  
ATGAATAGACTCTATTAATTTCTTAATACAACAACAACATACCCAGTGAAATCCCACTAGGTGGGG  
TATTAATTTCTTAATATGTCATCTATTTTTCTTGTTCTTCCGTTCCATTCTTACTTAGTCCCTTCTCCC  
TTTTCTTGGTGCTATTTCTCCTTGACTCAAGACATGGAACAAGATTAAGTTCTTAGTGTTATTTAGAG  
TTATACTTGCCATTGGCTGTGGGATATGTTTGTGTGGTATACTGGTATCTAATTTAATGGATGGAAG  
AATCAAGCACCTCATGGTGCTGCCTGCACTAAAAAGTATGAGTTTCTTCCATTAGTACATTTAATCTTGG  
AGAGGTGTAACCTGTAACACTGACTTACTTGTAGGTGCCAAGCATTCTTAACGGAGGGATAATGATGTA  
GCTGAAAAATATAGCATTATTTACTACCTTACTGTTGATCTATTGTCGTCATCTTTTAGTTAAAGTTTGAG  
GTTTGATATATTTTTTTTAGAAATACTATCATATTATAGTAGGAGAGAATTTAATAATTTTAGGAGTTGT  
AATGCTTAAAAAAAAGAATTTAGTAATTCTAAGAGTTGTAATGATTCTAAAAGAAAAATTATTTAACTCT  
AAGAGTTGTAATGATTAAAAAATAGAATTTAACAATTCTAAGAGTTATAGTTATCTAGGTTCCCTAATCT  
ATAATTAGAGTCCATAATTCCTTGCTTGGAAACAACATTTGATGAGTAAATATTGTTGATCTCTTATTATA  
TCTCTCGTCCCCTTTCTTCTCGTTCTCTCCCTTAATCATCATGCTCATTCTCTCTCCTTTTGGTGCTACATCT  
CAGAAAGTTTCTGAAGTTGATTACCTATCCGATGTATTACTATTCGTTTAGCAAGGAAATCGTCATTTAAC  
ATATGCACCTTGTTGAACTTTCTGGACAAACCAAATCTAAAGTTGAATTTCTTGCAGGTTCTCCTAGTAA  
ACCAAAGACTGGTCTCATAGTTGGTATTGCTGTTGGATTTCTTGGACTTCTCATTCTTGGAGGATCTGTGT  
TATTGTTCTGTAGGAGACGGCACAAAGGCTATAGTCGTGAAGTCTTTGTTGACGTTGTAGGTTTGTGTCA  
CATATTTTTGACAATAATTTATCAGTTTAAATGTACTTGTATTCTTCGTAAGGGAAGAAGATATTCTGGC  
CATGCATTGTTGTATCTTGAATTCATCTTAAGTTAGTGACCTCATTCTTATACACCAGTACTTAGTTTT  
CATTTACCTTCAAGATGGTATGATTCCTTTGAGTATATTATGATATTATTTTTATGTTTTATTTGGCGCAC  
TCAGGTGAGGTTGATCGACGAATTCATTTGGTCAATTGAGGAGATTTTCATGGAGGGAATTGCAGCTT



GCTACTGATAACTTCAGTGAAAAGAATGTTCTTGGACAGGGGGTTCGGCAAGGTCTATAAAGGAGT  
GTTCAATGACGGCATTAAAGTTGCCGTGAAACGGCTAACTGATTATGAGAGTCCTGGGGGAGATGCTGC  
ATTCAGCGAGAAGTTGAGATGATAAGTGTGGCTGTTTCATAGGAATCTCTTACGGCTTATAGGATTTTGC  
ACCACACCGACTGAACGCCTGCTAGTATACCCATATATGCAGAATCTAAGTGTGCTTATCGTCTACGAG  
GTATTGTTTCTTCATAGCATTGCTTTTATTCAATTGTAGTTTCTTTTACATCCTGAGTATGCTATTTTCCCTTA  
CTGTGCCTGTTTCATCTAATTTATTTTATCCCAATCAATAGATCCTTCATTTTATTAGTCTTACATTTCTGT  
GGCGCATATTTTGATTTTGTGAGCTTGGTTGTAAACGATCACGAGTCATTTCCCCGTTTCGATCTGCGAAG  
AAAGCGTGCATTTGTCATTGTACGGTCTAAATTGACTATTAAGTACTGTAGAAGTCTGATCCGGTAAA  
AGAACTTGTACATGGCATCAAGCTCGAGGGGCATGTTTATAGAGCTAATGTGTGTAGCTTAATTGGCAG  
AAGCATAAACCTTTAATTTGTGTTTTTTCATGCTTCAGAATCTTATTCTTTTTCTTCTCAAAAAGAATCTT  
ATTTCTTCAACTTTGAATGAAGTGCTAGAAGTTTAAATGCCTTAGGGTTGCATCACCATGAGTACAATTTGT  
ATGCTTCCTTTTTTCTCCCAGAATATGGTAGGGAAAGACAAGTTCTGAGCAGATTTAAGGGTTCTGTAGA  
AGTATTTTCTGATATTCATTGAAGGGGTTGAGTGTTCGGAGATTGCAATTTTCTTTGGTCAAATCAAGAG  
CAATACTCAAATCATACCTCATTAAATCATTAAATAGATGTATTCAGTTTTTTTTTAAAATCATTAAAAGATGT  
ATGTGCGTTAAGTTGGTATCACAGATCGTGATATGAAAGAGCTATGTGACTTCATAAATTGATTCTTGTG  
ATCCTGGCTTGAAGTAGAAGGTGTTACATGAAGTAGTTAGTGCAGCTTAAGATTTTTCAGCAGTTTTCTGCT  
AGAGTTGATGTGTCTGTTATTAGTTTTTTCAGTGGTGTCTAATTAATTTTTTAAATCACTTACAGAACTTAAAC  
CTGGGGAGCCTGTTTTGAATTGGCCAACTAGGAAGCGTGTGGCAGTGGGTAAGTGCACGTGGACTTGAA  
TACCTACATGAACACTGTAACCCAAAGATTATTCACCGTGATGTTAAAGCAGCTAATGTGTTACTAGATG  
AAGATTTTGAAGCTGTAGTTGGTGAATTTTGGCCTGGCAAAGCTAGTTGACGTTAAGAAAACCAATGTGA  
CAACTCAAGTTTCGTGGTACAATGGGCCATATAGCTCCTGAATACTTATCCACTGGCAAATCATCAGAAAA  
AACTGATGTTTTTGGCTATGGAATCATGCTTTTGGAAATTGTAACCGCCAACGTGCAATAGACTTCTCA  
CGCCTAGAAGATGAAGATGATGTCTTGTGCTTGACCATGTGAGTGTACTTAACTCAATGATCTTCATAT  
ATTTTCAAATGGGCATCAAATTATTGCATCAAACTTTTTTCATATATCTTATCTCTACTGACCAATCTTTGTTT  
CTCTCCATATTCTATTGGGACGACTCATTGCATGAGAGCCTCTTGGATGGATATACATTCGTTTATCTTTC  
TCCTATTGGTGAAACTGCTGCAATTTTTCTATGATAATTGAAATGGTGTAACAATTATTATTTTTTCGCGT  
GGCACCAGGGTACAAATGCTTTGAATATGAGCTAGGTCTTAATATTGAGCCTTTTAGGCACAAGAAATA  
TGATGACTATATATATTTGATGCTAATTTTTTCTCTCTTTCAAAGTGTGGATATGTGGACCCTGAGCCTC  
TCTTATAACTTTACATGATTATTCTTTAAGCTTCATAGGACCTTTATGTAGTAATAGTTGCTAAAAAGAGA

TCGTCTTGAAGGTCAGAAAAGTCAAAGGGATAAAAGACTGGATGCAATTGTAGACCGTAACCTGAATA  
AGAACTATGAGCTGGATGAAGTGGAGATGATGATTCAGGTGGCATTGCTGTGCACTCAGGCATCACCA  
GAGGACCGTCCAGCAATGTCGGACGTGGTTAGGATGCTGGAAGGAGAAGGGCTTGCTGAGAGATGGG  
AAGAGTGGCAACACGTTGAAGTCAACCGTAGACAAGAATACGAGAGACTCCAGAGACGATTTGATTGG  
GGAGAAGATACAATGTTAATCATGATGCTGTTGAGTTGTCTGGTGGAAAGATGACACATGAGTAATAAC  
TTTGAACCACAAAATGTTTCTTGATATATAGATGCCTGGTTGCTAAATGTTTTTTTTAAATTATTTATGG  
AAAACCCCTTGTTCTAACTAGGCAGATCAACAGTGGACCTGTATTTATGTAAGTTTTAGTCATTATTTCA  
TGTTCCATTAATACTCCTGGGAGTGGGAATTTGATTCCTCAAATTGTTACATATTTTTCTCACTAAACTA  
TTTTTCATTTATA

>PGSC0003DMG400022000 LRR-RLKs

ATGGTTCCAGGACTATAATTATAGCATTCTAGTTTTGTTAATATACCTCTCAGTTACAAATGCATCGAA  
CATTTCAACTGATGAGGCTTCTCTTTAGCTTTCAAAGCACAGATAACTTCAGACCCCAATGGAATATTGT  
CAAAAACTGGACAAAAGGAACTCACATTTGCAATTGGATAGGCATATCTTGCAGTAAAAAGCATCAAA  
GAGTGACATCATTAGTCTCACAAGCTTTGGATTTAGAGGTTCAATAGCAATAGAAATTGGGAACCTCTC  
CTTCTTAACAAGTTGGATGTTGGAAACAACAGTTTCCACGGCCAAATCCCCGATGAAATCGGGAGTCT  
GAGGCGTTTAACTTCTTGCTTTGCAAATGAATAATCTCACTGGTCAAATCCCAGAAAGCCTTGGATTTT  
TCACAAGGCTTCAACTTCTTGATCTTTCTGAAAATGATCTATTTGGAAATGTTCCATTTTCCATTTCCAATG  
TGCTTCTTAAAGATCATTGATTTGGGATTTAATCGGATTAGTGGGAATCTCCCAAGGGGATTTTGTAC  
TAGGCTTCAAATCTGCAAGGTTTATTTCTCTCAAAAAATCAATTAGCAGGCCAAATCCCAAGTGGGCTG  
AATCAATGCACACAACCTTATTTACCTTTCTTGTCATATAATCAGCTCACAGGTAATTAGTAATGTTAATTC  
AATTCTGGACTATATACTTGATTCAGAATCATTTAATCCTTTTACACTGTTATGAGGCTATCTGATTGT  
GTTTCATATATGTATTAACAGGAAGTTTGCCAAGAGACATGTGGAATTTGACAAAGCTTCGAGAATTATAT  
CTTGGATGGAATAACATAACAGGTATCTTGGTTCTAAGTCTAATAATTTCTAGTTAATTAGATATTGTAGT  
AGTAGCAAAAAATGTTTCATATAGCTCCTTGTTATTCATTTTCAAACAACAATGACTACTACTACATCGGCT  
CAATGCTAGTTTGTGCAACTTTATGAATCCTCATTATCCGCGTTAATCCATTTAGTCCCATCTCAGTTCA  
AGGTTCAATAATTTAAGTTTTCTAACATTAATAATTTCTCTATATTTTCTGTTAACATACAAAATATCTAACAA  
TATTAAGCATCCTAGCGAACATTGAGTAAGTTGGAGGTACCAACATGATTAAGCTTTAATATCAACTA  
GTTGGTATCACCTTTATGGATCTTACCATTCCATTTGCTCTACTTTTCACTGAGTCAAATGGATTCTAAC  
TTATAGTTGGTCTTTCTTTCAACTTCTCCCATGTGATTTTAGATCTACCTTGTCTTTTTAACAAATCCAAT

CACCATATATAGTTTCATACCTGCAGACCAGTGCATCTAGAGATCCATGTAAGACTGAACTAACCATGGT  
AGTTTCTAATGTCTCATCTCAAGTGACTCACATATCCATCTTAATATAGATAATTGACTGACGATCAAATA  
GTTTAAGCTTCCTTTCTTCAGTTACCATATAAGAAGAGAGGAAAAGAGAATAGCAGAAGTAAATGAATA  
GTTCTCATGTTGCCAATATTTAAAATTTAAATGCCCTAATTAACAGAAAACCTTTCCTAGGCTTGTTATTGT  
TCGTCTTCAAGAGGACGTTGAAACAGAATACAAGGATTGCCGAECTATCCGTGATTCTAATTCTCTTACA  
CAATATTGTACGTTTTAGGGTTGTAACCACACAATTTAATATATATTTTACAGGACATATCCCAAGTGAAA  
TTGATAACCTATCAGCAATTCGAAGATTAAGTCTACCACGGAACAATTTGGTGGGAATCTTCCACCATG  
TATGGGAAATTTGTCAAATGTAGAGGTGATAGACCTAGGTCAGAACAGTCTACATGGTGGCATTCCCCT  
AGAATTTAAACATCTTGTAATTTGAAAGGATTGTTTCTTGGTCAAAACAGATTATCGGGTGAAGTTCCA  
GGGCCTATGTACAACATTTCTGGATTAGCAATGATTTCAATTTGTAGGAAATGGGCTCTCAGGAACACTTC  
CCTCAAACATAGGCCATACCCTTCAAATCTTGTCCGCCTCTATCTTGGGAACAACCAGTTTACAGGGCT  
GATTCCTACCTCCATTGTGAATTCCACCAAGCTTATCCAGCTTGATTTTGGTCGCAATCTGTTTAGTGGAC  
CTGTACCTATGAATCTTGAAAAGCTACAACAGCTTCAATTCATCAGCTTGCAATTTAATCAATTGACGAAT  
GATCCATCTACGGACAAGTTAAGTTTTCTTACATCATTATCTAATTGCAAGTATTTGAAGACAGTTCAAAT  
AGGAGGTAACCAATTTAATGGAAGTCTTCAAAGTCCTTGGGATCAGGCAACTGGTCCTTTTCCCTTGAA  
TATTTCAATGCCACCAATAGTGGTATCACAGGAAAAATACCAACTAACATCAGTAACTTTAGGAACCTGG  
AGTGGTTAAGCTTGGGAGAGAATAAGCTTATAGGTTCTATTCTCCAGATTTGGGGAECTTGAAGAATT  
TGCAAAAGTTTTACCTGCAGATAAACAATTTAGATGGAATTATACCAACTAGCTTGTGTAACATGGAAAG  
CTTGTAACCAAGTTATCTTGGGCAAAAATCAACTTTCTGGGGAATTACCAAGTTGCTTTGGAAATATTTCTT  
CTTTAAGAGAACTCTACTTAGATTCCAATGCACTAGTTTCCCATATTCCATCAACATTTTGGAGAAACAAA  
GATCTTTCAGTTCTCGATTTGTCCTCCAATTTGCTGAATGGATCTCTTGCAGTAGAAATGGGAAACACAA  
GGAGTTTGC GGATGTTAGATTTATCTGGCAATCAGTTCTCAGGTCAGATTCCTAGCACGATTGGCCAAT  
ACAAAGCTTGGTTAGCCTTTTATTGTCAAAGAATATGTTAGATGGTCCTATACCTGAACTATTTGAAGATT  
TGGTTTCATTGGAATATTTGGATCTATCTAGCAACAATCTAACAGGCATGATCCCCAAGTCCTTGAGGAA  
TCTTGAACATCTCATGATTTCAATGTCTCGTTCAATGGGCTCATGGGTGAAATTCCAGATGGAGGGCCA  
TTCATAAATTTTACAGCTGAATCATTATGCGGTAACCCTGCATTATGTGGATCATCACGCTTCCATGTGAT  
GCAATGCAGAGTCACAAGTCTTGAAAGCAAAGAAAGAGTAGAGTCTTAACTTCTGTCTTGCATCAGT  
TTCCTCAGGAGTTGTAGTCACAACCATTTTCATCATTGGTTTCTGAAATGCCGAAAAGGAGTACGGAA  
CTTCTCTAGTTGATACATTTGGTCAGGTACATAAGAGGATTTCTGACTATGATATTTCTCAAGGGACAA

ACAACCTTTGATGAAGCAAACCTTGATTGGAAGGGGGAGCCTTGGTTTGGTGTACAAAGGGGACACTAGCA  
GATGGAATGGTTGTCGCAATAAAGGTATTCAATACAGAACTGCAAATGCATTTAGGAGTTTTGAAGTG  
GAATGTCAAGTTTTACGTAGCATTGACACAGAAACCTTGTTAAGGTGATAAGTAGTTGTGCCAATTTTG  
ATTATAAAGTGTTGGTGTAGAGTACATGCCCAATGAAAATCTCGAATGTTGGCTTCACTCTACTGACAA  
ATTTTTGGATATAACTCAAAGACTAAAGGTGATGATTGATGTGGCTTCTGCTGTGGAGTATTTACATGGA  
GGTCATTTTTTTGTAGTCATCCATTGTGATTTGAAACCAAGTAACATACTTTTGGATGGAGATATGGTGG  
CAAAGTGAGTGACTTTGGGATATCCAACTTCTAACAGCTGAGACGCTAATAGCACATACCAAGACTTT  
GGTACTATTGGCTACATGGCACCAGGTAAATGTTATTATCAAGTTCATTTGAAGATTTTAAATGACGTT  
AATTATTTTCACTAATGATTGCGTGATTTTTTTTTGCAGAGTATGGATCAGAAGGCCAAAGTATCAACGAAG  
GGAGATGTTTATAGCTTTGGTATTTTGTAAATGGAGACTTTTACAAGAAAGAGCCCCGTGGATGATCTAT  
TCGTTGGAGACTTCACCTTGAAAAGATGGATATGCCAATCATTACCAAACCGATTGGTGGATGTAGTGG  
ACATTAATCTATTTTCACTGGACGAAGAAAATTTTACTTCTAAAGAGAGATGCTTCAAATCAATCATGGA  
ATTAGCTCTGAATGCACAAATGATCTGCCGGAAGAGAGAATCTGCATGGAAGATATTACTCTGCGACT  
CAAGAAGATCCTAACTCAATTTCTGCAGAATGCTGTGACAAACTAA

>PGSC0003DMG400022139 LRR-RLKs

GTTTTCTTGAAGATTTGGAGATTGTAGGATGGAGGAGTGTTCTTAAATAGTTGAAAGAATTGATTTTTAT  
GCAGTTGGTTGGTGGTGGACTGGTGGTGTGTTTTGTTTTAGCAAGATGAGCTATTAAAGATTCTAAAGAAT  
TGATTTTTATGCAGTTAGTGGTGTGTTTTTACAGCAATATGAGTCATAAAAGATGCCAAGAATATTTTTCAC  
TAAATGGGGTGTGAAAATGTTGTCTTTATGATAATACTTCTGAGTTGTAGTTTTTTTTGTGGTGGTGTCA  
AATGCAAGAAAAGCTGAAAATGATCAAGTAGGGAGTTTATTAGCCTTCAAGAAGTCTCTGTTGAA  
TCTGATCCAAATGGATTCTTGAATGAATGGACTTCATCTTCTCAAGTCTTGCACCTTGGAAATGGGATTT  
ATGTTCAAATGGTCAAGTTGTTGAGCTTAATCTGTCTAGTGTGGGCTCAGTGGTCTACTTCACCTCACTG  
ATCTCATGGCCTTGCCTTCTTTGCTCAGAGTTAATTTCAATGGCAACCATTTCTATGGTAATCTTTCTCAA  
TAGCTAGTTCCTGTAGCTTTGAGTTTCTTGATTTATCAGCTAATAATTTCTCTGAGGTTCTTGTTTTAGAGC  
CTTTGTTGAAGTCTTGTGATAAAATTAAGTACCTAAATGGCTCTGGGAATTCAATTAAGGGGTTGTTCT  
AAAGTTTGGACCTTCACTATTGCAGCTTGACTTATCAAGTAACACCATTTCAAGTTTTGGCATTTTAAAGTT  
ATGCACTGTCCAATTGCCAGAATTTGAATCTCCTTAATTTCTCCTCAAATAAGCTTGCTGGAAAGCTAAAA  
AGCTCCATTTCTTCTTGCAAGAGTCTATCTGTTCTTGATCTTTGCGTAATAACTTAACTGGAGAACTCAA  
TGATCTTGATTTTGGGACTTGTCAAATCTCACTGTCTAAATTTGTCTTTCAACAACCTTACCTCAGTTGA

GTTTCCACCCTCTTTGGCAAATTGCCAGAGCCTCAATACACTGAACATTGCCATAATTCGATCCGAATG  
GAGATTCCTAGCGAGTTATTGGTGAAGTTGAAGAGCTTGAAGCGATTGGTGCTAGCCCACAATCAGTTT  
TTTGATAAAATTCCATCAGAATTGGGGCAGAGTTGCAGCACACTTGAGGAGGTTGATCTTTCTGGAAAC  
CGGCTTACTGGTGAACCTTCTTCAACTTTTAAATTGTGCTCCTCACTTTTCAGTCTCAATCTTGGTAACAAT  
GAGCTATCGGGTGATTTCTTACATACTGTTATCAGTTCATTGACAAATCTTAGGTATCTTTACTTGCCATT  
CAATAACATAACTGGTCATGTACCAAGGTCTTTGGTGAACGTACAAAACCTTCAGGTAAGTCTGACCTTAGT  
TCCAACGCGTTTATTGGGAATGTACCTTTGAGTTGTGTTTAGCAGCCTCAGGCTTTCCACTGGAGATGA  
TGTTGTTAGCCAGTAATTATCTTACTGGAACGTGCCTAACAGATTGGACATTGTAGGAACCTCAGGAA  
GATTGATCTCAGCTTCAATTACCTGACTGGTTTCGATCCCATTGGAGATTTGGACCCTTCCAAATCTTTCCG  
AATTGGTAATGTGGGCTAATAATCTCACAGGTGAAATTCCTGAGGGCATTTCATCAATGGAGGAAACC  
TTCAAACACTCATTCTCAATAACAATTTTCATCTCAGGGGCACTTCCACAGTCCATTTCCAATTGTACCAACT  
TGTTTTGGGTTTCGTTGTCCAGCAATCGACTGTCTGGAGAGATGCCACAAGGAATTGGGAATCTTGCAA  
ATCTTGCTATCCTCAGTTAGGTAATAACTCACTTACTGGACCGATCCCTCGGGAATTAGGTTTCGTGCAG  
GAACTTGATATGGCTAGATTTGAATAGCAATGCTCTAACAGGTTCAATCCCTCTTGAGCTTGCTGATCAA  
GCTGGCCATGTTAATCCGGGAATGGCTTCTGGAAAACAGTTTGCTTTTGTGAGAAATGAGGGTGGAAC  
GAATGCAGGGGTGCTGGTGGACTGGTTGAGTTTGAGGGTATCCGTGAAGAGAGGCTTGCGATTTTACC  
TATGGTTCACCTTCTGTCCATCAACTAGGATCTACTCTGGCAGGACGATGTACACCTTCACGAGCAATGGA  
AGCATGATTTACCTTGATCTTTCCTACAATTCTTTTTCAGGAACCATTCCTGATAATTTAGGTTTCATTGAGC  
TTCCTTCAAGTTCTGAATTTGGGACACAACAATTTACCGGAACCATTCATTCAACTTTGGAGGTCTAAA  
GATAGTTGGAGTTCTTGATCTGTACATAACAGCCTACAGGGATTTCATTCCACCCTCGTTAGGAGGCCTT  
TCATTTCTTAGTGATCTTGATGTTTCAAACAACAACCTTATCGGGAACGATTCCCTTCTGGTGGACAGCTGAC  
TACATTTCCAGCTTCAAGATACGAAAACAATTCAGGCCTTTGTGGTGTCCCCCTTCTCCTTGTGGCTCGG  
GCAATGGACACCATTTCATCGAGTATTTACCATCATGGGAATAAGAAGCCTACAACCTATAGGAATGGTGG  
TTGGTATTATGGTATCTTTTGTATGTATTATACTACTTGTATTGCCCTTTATAAGATTAATGACTCAGA  
ATGAGGAGGAGAAGAGAGATAAATACATTGATAGCCTTCCAACCTTCTGGCAGTAGCAGCTGGAAACTAT  
CAACCGTTCCTGAGCCTTAAGCATTAAATGTGGCAACATTTGAAAAACCATTCAGGAAGCTGACCTTTGG  
TCATCTTATAGAAGCGACCAACGGGTTTCAGCTCTGAAAGCATGATTGGCTCTGGAGGTTTTGGTGAAGT  
CTACAAGGCTCAGCTGAGAGATGGCAGTACTGTTGCAATCAAGAAGCTCGTGCACGTAACAGGTCAAG  
GAGACAGAGAATTCATGGCTGAAATGGAGACTATTGGAAAAATCAAACATAGAAACCTTGTCCCTTTGT

TGGGATATTGCAAGATTGGGGAGGAAAGGCTTCTCGTATACGAATACATGAAATGGGGAAGTCTTGAA  
TCTGTTCTTCATGATGGGGGGAAAGCAGGGATGTTTCTTGATTGGCCAGCTAGAAAGAAAATCGTGATA  
GGATCAGCAAGAGGATTAGCATTTCTTACCACAGCTGCATGCCACACATAATTCATCGCGATATGAAGT  
CCAGTAATGTACTTTTAGACGAAAACCTTGAGGCACGAGTTTCTGATTTTGAATGGCAAGGCTGGTAA  
ATGCTCTGGATACTCATTTAAGTGTGAGTACACTTGCTGGTACTCCAGGTTATGTTCTCCAGAGTACTAC  
CAAAGTTTCAGGTGCACCGCAAAGGGGACGTGTACAGTTATGGTGTCACTGTTGGAGCTTCTTTCA  
GGGAAACGGCCAATAGATCCCCGTGTATTCCGGTGATGATAACAATCTTGTTGGATGGGCAAAGCAACT  
CATAACGAGAAACGAAGTCATGAGATTCTTGATCCTGAGCTGATAACAAACCTATCTGGTGATGCTGAA  
CTCTATCATTACTTGAAAGTTGCATTTGAATGCCTTGATGAGAAATCTTACAAAAGGCCAACAAATGATAC  
AAGTGATGACAAAGTTTAAAGAACTACAACTGATTCAGAAAGCGATATTCTTGATGGCATTTCAGTGA  
AAGTTCTATACTCGAGGAATCGCAAGAAAGGGAACCGTAAATCAATGATATTTGATCTTTTTGTGGTTA  
GAATTCTGTTCTTTTTTCTTTTTTTGGATTGCCTCATGGATAGTAGTAAAACTTTTATCTTTAATGGTT  
CTTACCATTGAGATTGATAAGAGTTTATACTTCAGATTTTGCCTACTGTGTAAATATTAGAACACGACGA  
TGAATGGGAGATGTGAA

>PGSC0003DMG400022189 LRR-RLKs

ATGGACAATCTTCTCAAGTTCATTGTAAGTGTTTTACTTTCTTCTTTTTATCAGATTCTGTAATGGAGGC  
GAGTTTATCGAATCCAAATCATTTATCAGTTTTCTGTTGCTATTGATCCAAACAATGTACTAAACGTTGA  
TCGAAATGCTTTGTTTTCTTACCCTTGTTACTACAAATTACATGGTGTTAAGTGTGATTTACGTTCCGAAG  
AAATCATAGAAATAAGACTTGAGAACATGAATCTTAGTGTTAATTGATGCAGAGTCACTCTGTAAACT  
CTCAAACCTGAGAGTTCTTAGCTTAGCTAGGAATAAGATTGAGGGAAGTTCCTGAATCGATATCATCG  
TGTAAGTTTAACTGTTCTTGATTTAAGCAGCAACTTTCTTAGTGGAAGTTCATTAGTACTAATGCAGTC  
ATTGACAAGGATCAAGAATCTTAAAAACTTAACATTTCTAAGAACAATTTCACTTCTCACAACGTATGA  
TGAGTCTACACGCGTTGAGACGTGTAACATTAAGAATCTTCATCTTCAACTACAGTAAGTGACGATAA  
GAAGACAAATAATCATCATGTGAGTCTGATGGTTGGTACTCATATCTTGGAACTGTGATTGTGTTA  
GTAGTTTTAGTATTCTTGATATGAGATGTGTTGGGACAGTTAAGGATAAGGAGGTTATAAAGGAAGTA  
GTTGATTATCCGTCTCCTCGAAAACTCCCTCAGATGAAGTTGTGGATGGAGTGTGTAACACTGAAGAG  
AAAAGCTCAGAACCTTACTTCTTCATGGAAGATGTTGAGAAGTTTACGATGGACGATCTTCTTGAAGCAA  
CTGCTAACTTAACAAAACAAGGCATTTGCAGCAGCCTTTACAAGGTTTCATATCAGTAGAAGTGGTGTGTT  
TGCTCTCAAGAGACTGAAGAACTACAAGTGGGGTTCAAGGAGTTCTCGCGAACGATGAAAAAGATAG

GGAGCTTGAAGCATCAAAATGTACTTCCACTTGTTGCTTATTACTCTAGCAATGATGAAAAATGCTCAT  
CTACAAATATCAGAACAGTGGAAGTCTACTAACACTTTTCGAAAGTAAGTAGTCAAGAACTTCAAATTC  
TCATCTTGTAATTCAGAATTTTATATCATATTGTTGTTGTTTATTGTTGCAGATTATGCAGAGGGGAAATG  
GAACTCCCGTGGAACCTTAAGGCTGTCGATTGCAGTTGGCATAGCAAGAGGTTTCGCGTACATATACAG  
AAGTTCAAAGAAAGGCAATGTCATTCTCATGGCAACATTAAGCCATCAAACATTCTATTAAGCGATAAC  
GGGGAGCCATTGATAAGTGAGTATGGCTATTACAAATTCTTAGACCCTGACAAAAGTTGCCTCTATAAA  
GACAATGGTTATACAGCCCCTGAGAAAACGTTGACAGAAGAACTGATGTCTATAGCTTCGGGGTGATT  
CTGCTGGAAGTCTAACAGGTAAAGTTGTGGAGAAGACAGGATTAGACCTTGTCAAATGGGTGAAATCT  
ATAGTGAGGGAAGAATGGACTGGAGAAGTGTGGATAGTGAAGTTGCCAACTATGAAATGTATGCTTTC  
CCTCTACTAAACGTTGCACTCAAGTGTGTGGATCGTTTGCCTGATGAGCGACCTACTATGACAGAGGTCT  
TGGAGATAATCGAAGAAATTGTGAATGATCAAGAAGACATTTCTCCTTCTTCTATGACTTCTTTTGAATCC  
ACCCCTGGTTCAATGAAGCATGTGTATGCCCTTTAG

>PGSC0003DMG400022264 LRR-RLKs

GTTCAATAATAATAATAGAAAAATCAAAGTGCTCTTGGATCCAGATCTTCTTCTGTTTTCTTCTATAAAC  
AAACATGGGGTTCCCCATTTACAATCCCAAAGTCCTCAACTTTCTCTTCCCTCTTAGCAGCAGCAAA  
CAATGCCTGCTCCTTCAAGAAATCCCTTTCTTCTTCTTTTACTTTTCTCTTCTTGTATTCACTTGAT  
GTACAAACTCAAACACTTCTTGCATGGAAAAAACATTAAACATAACTTCCAATGATGTTTTAACATCATG  
GGATTCTTTAGATAAAAGTCCTTGAATTGGTTTGGCATAAACTGCAATTCCAATGGTCATGTTGTTAGTA  
TAAGTCTTAAATCAGTTGATTTACAAGGTCCATTGCCTTCAAATTTTTCAGTCACTTAAATCTTGAACACTC  
TTGTTCTTTCATCTGTTAATCTTAGTGGTCCAATCCCAAAGAGTTTGGAGATTATCTTGAACCTAAGTTC  
ATTGATATTAGTGATAATTCAATCACTGGTGTTCATTCTCAAGAACTTTGTAAGCTTATAAAGTTACAAAC  
TTTATCACTTAGTTCAAATTTTCTTGAAGGTGATATCCCTTCAGACATTGGGAACTTGTCTGATCTTAAGA  
TGTTCTTGATTTATGACAATCAACTTAGTGGTGAAATTCCAAAGGGTATTGGAAAGTTGAAGAATCTTGA  
AGAATTTAGAGCTGGAGGGAATCAAATCTTAAAGGAGAACTCCCTTTTGGAGATTGGAAACTGTTTGAA  
CTTGGTTTTTTTAGGCCTTGCTGAAACAAGCATTTTCAGGGAATTTGCCAGTGTCAATTGGAAACCTGAAA  
AAGATTCAAGCAATTGCAATTTATACAGCTCTTTTGTCTGGACCAATTCCAGAAGAGATTGGGAATTGTA  
GTGAACTACAGAACTTGTATTTGTATCAGAATTCGATCTCTGGTTCGATTCCAAGGAGTATAGGGGAACT  
CAGGAAGCTTCAAAGTTTGTGCTTTGGCAGAATAGTATAGTTGGTGTGATTCCAATGAGCTTGGGAA  
TTGTAAGGCTATTACAGTTATTGACTTGTCTGAGAATCTCTTAACAGGTAGTATTCTTACAAGCTTTGGTG

AACTTTCAAGTCTTGAAGAGTTGCAGTTGAGTGTCAATAAGTTATCAGGTACAATACCTACTGAAATATC  
AAATTGACTAAATTGTCTCATTGGGAAGTTGACAATAATGGCATATCAGGTGAAATTCCTAATGAAATA  
GGTAAGTTAAAGAGCTTGACTTTATTCTTTGCTTGGCAAATAATTTAACAGGTGAAATTCCTGTTACATT  
ATCTAACTGTGAGAATCTTCAGGCTATAGACCTTTCTTATAACAATCTTTTTGGTTCCATACCAAAGAAA  
TCTTTAGTTTGAAAAATCTAACAAAGTTGTTGCTTCTTCCAATGATTTGTCTGGTTTTATACCAACTGATG  
TTGGAAACTGCACAAATTTGTATAGACTTAGAGTGAATAGGAATAGGCTAGGGGGTACTGTTCCATCAG  
AAATAGGAAAGTTGAAGAATTTGAATTTTCTTGACATGAGTGGCAATCACTTTATGGGAGAAATTCCTTC  
AGCAATATCAGGATGTCAAATCTTGAGTTTCTTGATCTCCATTGAAACGCGTTTACTGGTTCTTTACCAG  
AGAAACTGCCAGGGAGTCTACAGTATGTGGATATTTAGACAACAGGCTTTTCGGGTTGTTAAGTCCAA  
GTGTTGGTTCTTTAACAGAATTAACAAAATTGAATCTTGGGAAGAATCAACTTTGTGGTAGAATTCCAGC  
TGAGATAGTTTCTTGTAGTAAGCTTCAGCTGTTAGATCTCGGGTACAATGGCTTATCAGGCGATATACCT  
AAAGAGTTGGGTGCAATACCATCCCTTGAAATCTCTTAACTTAGTTGTAACAGTTTACAGGAGTGA  
TTCCAAGTGAGTTTTCAGGTCTTAGTAAATTAGGAAACCTTGATCTTTCCACAACAAACTCACCGGGAA  
TTTGGACGTTCTCACGAACCTTCAAACCTTGTTCCTCAATATATCATTCAATGACTTCTATGGAAAAC  
TTCCAATGCTCCATTCTTTCATAATCTTCTTTGAGTGATCTTACTGGAAACCAAGCTCTATACATTTCTG  
GAGGGGACGTGATCCAAACGGGGCCTGCTGGACATGCTAAAACCACCATGAAGCTTGCTATGTCAATCC  
TAGTCAGTATAAGTGCTGTGCTGGTGTGCTAGCCATCTACACATTGATCAGGATGCAAATGGCGGCAA  
AGTATGGACCAGAAGTTGATACTTGGGAAATGACTCTTACCAGAAGTTGGACTTTTCAATAGATGACAT  
TGTTCATAATCTAACATCAGCTAATGTCATTGGCACTGGGAGCTCTGGGGTTGTCTACAGGATAATGACC  
GAAAATGGGGTGACTTTAGCAGTCAAGAAAATGTGGTCATCAGAGGGATCAGGAGCATTGGTTGAGA  
AATTCAAACACTTGGTTCAATCCGGCACAAGAACATAGTACGCCTTCTCGGCTGGGCTTCAAACCAGAAC  
ATGAAACTTCTGTTCTATGACTACCTTCCAATGGGAGTTTGAGCTCATTGCTCCATGGTGTGGCAAAG  
GAGCAGCAGAATGGGAGAACAGATTTGATGTGGTCCTTGGAGTAGCTCATGCACTTGCATACTTGCATC  
ATGACTGTGTACCCCTATAATGCATGGAGATGTCAAAGCAATGAATGTATTGTTAGGCTCTAGAATGG  
AGCCTTACCTGGCCGATTTCCGGTTGGCAAGGATTGTCAACACTGATGTTGATGCAGACTTGTGAAGG  
AGAGCCAAAGGCCTCATCTTGCTGGTTCTATGGATATATGGCTCCAGGTAATTATTTTTACTGCATTTTT  
ACTCATTATCTTAGATTGATGACGGAGAACGTAAAACACTAGTCAATTTATGATGAATCCTCACAAACAAA  
AGATATTGTTGGTGTGTACTIONTAGTCCTTATATCAGCTTGATTAGTTGCATCAACTTTTCTTGAATTGA  
CAAAGACTCTTGCTTATTATGTGTCCACAGAACATGCTTCGATGCAACGGATCACAGAAAAGAGTGATG



TATACAGCTTTGGTGTGGTCCTCTTGGAGGTAACAGGAAGGCATCCACTGGACCCAACGTTGCCCG  
GGGGTGCACACTTAGTACAATGGATACGCGATCACTTACAAAGCAAGCGCGATCCAAATGACATTCTTG  
ATCCAAAGCTTAGAGGCAGAGCTGACCCTGAGATGCATGAAATGCTGCAAACCTTAGCTGTTTCATTCTT  
GTGTGTGAGCACGAAAGCTGATGATCGTCCGATGATGAGGGATGTTGTAGCCATGCTCAAGGAAATTC  
GGAATGTTGATCCTGTTGTGTCCGAATCCGACTTGTGAAGAAAAAGCAAGTGTAAACACCTCTTCCAAA  
ATCACCTGGCACCAAGAATGTGGATTCTCAAATGTCTTGTAGCTGCTCTTTTGTATTTTCTGATAACTCTA  
TCTCCAAATAAGTCATCAACACAGTGAACAAATTTGTGAATATAGCATGTTTTATTAGCAGTATGAGTTA  
GAGCAGATTATAGATTTTAAAAGGAATATCATGTATCCAATTAATTTAGCATAAGCATTATAGAGTGAAA  
>PGSC0003DMG400022425 LRR-RLKs

CTTTTGGTTGTTGGAGATTTGTCTGTTGTTTATGTTAAAGTGAAGATCTTAGTGTGTTTTGCAGAGTGTTT  
TCTTTTTGCTGGAAGTGTGAAGCAAAGATTTGAAGGAAAAAGGACAGAGGAAGAGGAAGCAGGAAATT  
TGTGTTCTTGGAGTGTCCCTGGTGATGATTGGTCACAAGATGTGTGGACTATATATGAAGATTTTGTTT  
GTATTTGCAGTTTTTGTCTGTTCAAATTGCCAGGGTTTACTGATCCTCGTGATGGTATTAATAAATCTCT  
CTGTGGTTTGAAATTTGTGTATTATACAGTATAGAATGTCTCAATAGTTTGAATTTGTTATCTTTTCTATTA  
GCTTTATTGAAATTACAGTTTGATGTTTTGTGTAAGAAAGGTGAAGTTTATGACTTTGTGTTCTTTTCT  
TGCTCTCCAGTATTTGCCATAAATAGTTTATATACTAGTCTGGGCTACCCCTTGCTCCTGGATGGGTGCC  
ATATGGATTAGACCCTTGTGGTGATCTATGGCATGGTGTACTCTGTGTCAATTCCAATGTAAGTGAATG  
TAAGATTTCTTCTTTTTTTTTTGTCTGTGTTTCTCACATGGTTTGTATACTTTATAATAGATTTCTTTTCTT  
TTTTTGGCAGAGTACTAAATGATTCAAATTTGGGAGGTGAATTAAGTGAAGGCATAGGAAGCTTTGCTT  
CAATCATACAAATGTTGGTACCATCTTTATCTTCATCATTGCATTGATTAACCTTATGTTGCTGAAATTTGC  
CTTGTCATTTGGTTCTGTGCACTTTGTCCTTCCCTGCATCATTGGCACCCTATTACATTGTTAATTCTAT  
GGCTTAGTTAACTGCTACGTATTAATGTCTACGCTTTGTGTTATGATCAAACCAGAGATCTCAGCAAC  
AACCATATTGGAGGCAGTATACCATCCAATTTGCCTGTCACCCTCAAACCTTGTAAAGTTAATAATCTTTG  
TCCTTACTGAGCTTCTTCAACCTTTATAAGTTATTTGCTCCACATACATCCACATTTTTAATCCTATTATGG  
TATTTGTGTATATACAGGTCTCTCTCTGGTAACCAGCTTACTGGGAGCATTCCAGATAACATATCCTCGTT  
AGGGCAATTAACAGACTTGTGAGTTATATTTGACTTATCTTGATATACTTTTTCTATGACCATGCTTTTGT  
GCCATTACATTTAATCCTTCCCTGTAGGTCGTTGAACAACAATCATCTCAATGGAGTCATTCCAGATGCC  
TTTCTGCAACTTAAGACTTTGATTAACATGTACTCATACTTCTTTTAGCTTTTTACCTTTTCGCAGTGATGA  
AACTACTTTTCTGGTGTGTTGTTGATTTATGGCTTCATGCTCTTATTTTGCAGGGACTTATCTGGGAACA

GTTTAAGTGGTCAGCTGCCTCCTTCAGTGGGGACTTTGTCATCACTTAGTACCTTGTATGTATTTCTCCTT  
GTTGGTATGATAATTAGGGAAATATTAGGAAATGAACTACTTTTCTGGCTATGAGGAATGAGTGCTTTC  
CTCTCTCTAGACACTGAATAGAAGTTCAAATAAGTCCTTAATTCCTTCAGAAATTTAACATAAGTTCTGCT  
CATACATAATTTAACTGATAAATTTGTAAAGATAAATATAGTTTTTGACATTTCAATTGCATATGTA  
ACTATTGTATGGTTGTGCTGTATGTTGGTTTGTCAAGATGTGTTTTCTGTGAACAAGCTAGAGGAATGATATT  
TGAGGATAAATACTTCACAAAGTTGATTAATTTTGTCTAGAATCTCAATTTGCAACCATTCACTTAATATA  
CTTGGATGGTAAAAGGATGTTAACATAATTTCTCACTGAACTTGTGAATATACTTGTATTTATGGTGAA  
TTGTGATACTCTAGTTTTGATTTTTGAATATATACTTTTGGCTCTATGCAGACACTTACAGAACAATCAGC  
TTTTCTGGGATCCTTGACGTTTTGCAAGATCTTGCTCTAACGGATTTGTAATCTCCTGGACTAATAAATTTT  
CCATCATTATAGATAATGTCATCACTATGTCATTTTCTGCTCAATGTGTGCTTAAATTTGGTCACTTTCTT  
GTTCTGCAGAAACATAGAGAATAATTTGTTCTCTGGGCCTATACCACCAAATTTGTTGAGCATCCCGACC  
TTCAGGTAAAACCTAGGAATTTTTTGCCTCTTTAGTTTGAGTTTTCTTTAAGCTGATGAAATCCATTT  
TATTCTATCTTCACTTCTGTAATATGAATTGGAGTATCTTATTTCTCTTTGTTTTAATTTGGCTTCATCTCT  
CTGTGTACTTCCATCAATTTAAAATTGGATAAGCATTGGTCACTGTGGTAATGGGACAATGTGACTTAAA  
AAATTTAAAACAAAAGGGAGTTGTCTCTTGGGCTAGAGATTGCACTATTTAGATCTAATTTAATTGCCAA  
TTGTGCTTGCAATGAATATTTATGGGAAGCCAGTATAACTGTTGTTTCTAATAAACTTGACACCATTCCAT  
GAGCTGACCATGAAAATGTTGGTTTTACAAGTTTTAGTTTCTATAACTTTGTCATGCATCGATCTGATAAA  
TAAATCAGTACACTGGCTGATAAATGGGTAAAGTAGCAAACCTTGAAGATATGGCATGTAATGATATTAC  
TAAATAGTATGGTCTTTTTGATGAAGACTGCATAGTACACCTTATGAACCAATTTCTTACTCCATCAATCA  
ACCATCCTCAATCCCAAATTAATTGTGGATGGCTATATGAATCCTCTTTATCCGTTCTACCTTATGCATCAT  
CCTACATGTCACTCTTAACTTTATCTAAAATTCTATTTTGTGCAAGATTGATAATAGATATTTAGTTGGTGT  
TTGTTGTGAAAGCTCTTTTGGAGTTCTTTTAAAGACCTTATTTAAACCATGTTTGCTTTAGTTCTTATAAGA  
CATTTTTCATTTCAATGAAGAAGGGGGTTTGGAGGATTTTCATTAATAAAACAATTCTTCTTCCACTTA  
TAAAAGTGCTCACAAATCTTCAAAGATCACTGTGTAAACACATTTGTTTTGCACATCTACAAAAATATT  
TCTCCAGAACCATTTGATTGGTTAAAATGAAATTACAATGGATAACCAATCAACATGATGCATTTTTGTG  
ATAGACTAGCCTTAGTCATGGCCTCAATTGTTTAGTTGATACTCTTTGGGGGAAGCGAACTATGGTAGTC  
TTTTCTTCTCATGAAAGGTTCAATTTGTATACTTATAAATTTTGTGCTTACATGGTGAAATCTATGTTTTT  
TATCAGACGTGCAGGGAATCCTTTTAACTACTATCATCCCTTACCACCCATGATATCGCCTTCTCCAG  
CACCATTTGCGCTTTCTCCAGATTTAGCCCCTTCACTGCCATATATTGTACCGCCAGGACAGGAATTACAG

CCCTCTGGAAGGCAAAGAGTAGTAATTCAACCAAACATGTCAAATTGATTGCTATAGCTGGATTAGTAT  
CCCTTGTCACTTGGATTGGGTGTTTGCCTATTGATGTCACGATTCTGCAAAGAAGAAGAGAGACCCA  
AAAAGAAACCAAGAGACATGAAACATATGATCATAGTTTGCCCAAGGCCAAGGGTAACCCTAAGCATG  
ATCAATCCCTGCAAAAACCATATTATGATGCAGAAAAAGGTAAATAGTTCATATGTGTACTTTCTTCTTAT  
AGATTTATGTTTATCGTCAGTTACCTGTTGTTTTAATGGCATTATGATGACAAAATGGATATGTCCAAAA  
GAAGCAGGTTTGAGGCCAGTGGCTGGAAATGGGAAAGCTCAGGGTAGGAACATGTCAATGAATACTTC  
AGAGGCTGTGCAGCAGAAAGACGTGAAGAGCACTATATCATATACAGACGATGAGCTGGGCTCGGAGA  
TGGAGTCAATGATATCGGATGTTCTTCCACCACCGCCACCACCTTTTCTTCAAACCTTTTCTGCTGAGAGG  
ATGTTGTAAATCCAATTGTTCCCCCAATTACCTCAGGCAAGCATGCTATGAAGAATGTAAACTCTGCAG  
AGTTCTTACCATTGCCTCTTTCAGCAGTATACAAATAGCTTTTCTCAAGATAATCTTATTGGAGGAGGC  
ATGCTTGGAACAGTCTACAGAGCTGAGTCTCCCAAACAGTAAGCATCTTATTTTACGAGCTTCAAAT  
CAGTAAATACTGTGTGCTTGCATGCATTGTGACTGCATCAGTACCACATCTTGATCTTCATTTCACTTTTT  
AAAGGTGGAAATTACTCGTTATTTTTTTATTAAGCATGGTTTTCTGTGACAGACATTATATCTATTTTA  
CATTGAACTGTAGATGTTTTGTGGGTCTGTAATGTTTGACTCGAGTTTTGCATAATAGAAGTAGTCCAA  
CCTTGATAGATGGCAACAGTTTCCATTAGTAGACTGTGTAGATATACCTGACATGCCTCCTGATTCATTA  
TTAGTTTCTGTTTTCTCAATAACCACTTGTACTTGTGCATGTTTGTATATAACCTATTTAGTTGCCGTACA  
GGCTAGAAGATGCTGAGACTTTGCTATTTCTTGATGCCTTTTGTGTTAGCTATTGGCGGTCAAGAAA  
TTAGACTGCTATGACCAAGCGTCAAAGTGATCAAGAATTTGTTGAAATGGTTTCCAATATCTCTAAAC  
TTCAGCATGAAAACATTGTCAAACCTGTGGGTTACTGTTTCAGAGCATGGACAACGGTTGCTGTCTACGA  
GTAAGTGTAGAAATGGTACCCTCCACGAAGCATTACACTTAGATGATCAGATCCACAGAAAACCTTCTGG  
AGTACACGTGTACGCATTGCACTTCAAGCAGCAAGAGCATTAGAGTAAGTACGAAAAAAAAGCTAAATG  
ATATTAGTTTATAAGTGCTTGTAACTTGTGTTTAAATGAATTGTGATGGTTAAATAAATTATAAATTGGCTGT  
TAAAGTCAGCTCTGCATGTTTCCCGGGCTTAATGTTTGCTACACCACAATTAATTTTGTAGTTTTATCCTTA  
GCTTGTAACCGTTTAGAGATTGAGTTGCTTCTGTTTCACTGAAAGGTAAGTGCATGAAGTTTGTCAACC  
ACCTATTGTCCACCTGAACTTCAAGTCCACTAATGTTCTCCTTGATGATGAACTTGTGTACATATGTCAG  
ATTGTGGTTTGGCACCTCTGATGTCATCTGATTCCATAAGACAGGTAATCCCTTCAATCCTCAAACCTAGAA  
ACAAGAATAACAGGAGATTTGACTTGCAAACCTGTAGTTATTCTGAATTCGTAATGGGAAAATTTATCCTT  
TTGGACTGTGATCTTCATTGAACTTGTAAACCTTCTTCTCAACTTCTAGAACTGATTCATTATTCATTA  
GTATGAAAACCTAGGTGCCAATTGGCTGCTAAAAATTGGTGCATTCTGTTTAGAAATGGTTGTATGTTTCT



CTTCAACAACCTCAGTATCTTATGCTTGACTACAATGAGTTAGAAGGAACAGTTCCTTCTGCAATTTGAA  
CTGTTTCGTCGTTGGTGCATTTGAGTGCTGAAGGGAATGGTATTACTGGTGTATACCGGCGGGGATTGC  
TGCTCTCCGAAGATTCAGGTGATAAATTTATCGCATAATAAGCTTTCTGGATACTTAGCAACTTCATTTT  
TCTGCAATGGTTCTGTGTATCCTCCTTCCCTTCAGATTGTTGAGTTGGGTTTCAATGCCTTCGCTGAGATTC  
TTCACCCACAATCGTCTAGATGTTTTAGTTCATTGCGAGTTTTGGATATTCAACACAATCAGATACATGGA  
GATTTCCCTTTTTTCTTGACAGACAATTCTGCATTGTCGTCCTTGGACTTGTGAGGGAATTTGTTTTCGGG  
TACAATCCCAGATTCATTGGGAATTTGTTGAGGTTGGAGCAACTGAGAATTGGAAATAATTCATTCGA  
AGGTGATATACCGGTTGGGATAACGAAATGTAGTAGTTTTGAATGTTCTTGATCTTGAAGGGAACAGATT  
CATAGGGGAAATTCAGCTTTTATAGGTGATCTTAAAAGCTTGAAGATTTTGTTTCATGGGAAGAAATCA  
GTTTTCGGGTTCAATCCCTTCTAGTTTTAGCAATATCACTAGTCTTGAAGTTTTGAATTTGGAAGGAAACC  
GTCTTACGGGAAGCTTGCCTGAGGAGTTGATGTTTTGAGCAATTTAAGCACATTGAATCTTAGTGGA  
ACAAGTTTTCAGGTAGTATTCCCGTTGGTATTGAGAACCTTCAGCAGTTATCGGTTCTAAATCTGAGTAA  
GAATGGCTTCTCAGGGACTATCCCGTCTAGCATTGGAACCTTTGTATAAGCTGGTAGCTCTTGATTTGAGT  
CGACAGAATTTATCAGGCGAATTGCCATCTGTTCTTGGTGGTTTGCCTAGTTTACAAGTGATTGCTTTGC  
AAGAAAACAACCTGTCTGGAAATGTTCTGAAGGTTTTAGTAGCTTAATGGGTTTGCAGTTCTTGAATCT  
ATCTTCCAATTCATTTTCAGGTCATATACCGTCTACGTTTGGGTTCTTGACATCGTTAGTTGTCCTCTCGTT  
GTCTAAGAATCACATATCTGGTTCAATACCTCCTGACTTGGGTAATAAACTGCTCTGAAGATTTTAAATC  
TGAGGTCAAATTCATTGAGTGGCCAAATTCCTTCTGATCTTGACAGTCTCTCCCGTTTGAGTGTGTTGGAT  
TTGGGTAGAAATACCCTGACAGGTGAAATTCAGAAGTTATTTCCAATTGTTTCATCCCTCACATCAGTTGT  
GCTGGACACGAACCATCTTTTCGGGAAACATTCCAGCATCACTCTCCAGCTTATCAAGCTTAATTACCATTG  
ACCTCTCCGGAAACAACCTTGAGTGGAAAAATCCCAGAAAATCTTACAGTGCTCCCAAAGTTGGTGAACCT  
CAATGTATCGAACAATAAGTTGGAAGGCCAGATACCAGTGAAGCTCGGTTCTCATTTTAAACGATCCATCG  
GATTCAGTGGCAACCAGGGTTTGTGTGGGGAGCCATTGAATAGAAAATGTGAGCGAACTGGTAATGG  
TAAGAATAGACTGATTATGTTTATTGCAGTGTCTGCTAGTGGAGGTCTTCTCCTTGCATCATGCTGCTGTT  
TTTACATATACGCCTTGCTGAGATGGCGTAGGAAGCTCAAAGAAAAAACAGCTGGAGAGAAGAAGCAT  
AGCCCTGCAAGGGTTAGTTCGAGGACCAGTGGTTCTCGTGGCAGTGGCAACAATGCTGGGCCAAAACCT  
GTTATGTTCAATAACAGAATTACAGTCGCTGAAACAATCGAAGCAACTAGGGAATTTGATGAGGAAAAT  
GTTCTTAGCAGAACACGCCACGGAGTCCTATTCAAGGCATGTTACAGTGATGGAATGTTGCTCTCGATCT  
GTAGACTACCAGATGGATCACTAGATGAAAACACATTCAGAAAAGAGGCTGAATCGCTTGGCAGAGTG

AAGCACAGAAACCTAACTGTTCTACGCGGGTACTATGCTGGCCCTCCAGACCTTAGACTACTTGCATATG  
ATTACATGCCAAACGGGAACCTTGCAACACTCCTTCAAGAAGCATCTCATCAAGATGGTGGTCATGTTCT  
CAATTGGCCAATGCGACACCTCGTTGCACTTGGCATTGCCCGTGGGCTTGCTTCCCTCCACGCAGCCTCT  
ATTATTCACGGAGATGTTAAACCACAAAATGTACTGTTTGATGCAGACTTTGAAGCCCATCTTTCAGACTT  
CGGCTTAGACAAGCTTACTGTAGCCACACCAGTCGAACCTCCTCTTCAACATCAGTTGGGACTATAGGC  
TATGTGGCGCCAGAAGCAACATTAACAGGAGAAGCCACAAGGCAATCAGATATTTATAGCTTTGGCATT  
GTATTACTGGAAGTCTAACAGGGAAAAAGTCGTTAATGTTCTCGCAGGATGAGGACATTGTGAAATGG  
GTAAAGAGGCAATTACAGAGAGGGCAAATTCAGAATTGTTAGAGCCAGGATTGCTTGAAGTGGACCCCT  
GAATCATCAGAATGGGAAGAGTTTTTATTAGGAGTAAAAGTAGGCTTGCTTTGCACAGCACCGGACCCC  
CTTGATCGTCCCACCATGACCGACACTGTGTTTCATGCTCGAAGGTTGTCGTGTTGATCAAATTTCACTCTC  
CTGAAGAACCACGACCGGCAATGGTGACACGTAAAACCCAAGTCTCATCCTAATTCTTGGCCCTTCTTA  
TTGACTCTTTGATTTTTTGAGGAGTTGCATTGCAATGCAACAATTGCTAGCACTAGAACTTAAGTTTTTTG  
TTTAAGGAAAAGAACAAAAAGAAAATATTCTCAATTTTTTTTAGCTATAGCTATTTTATTGATTTTGGTTTT  
CTATTACAAAAGTGCCTCTTGAGTTGAAAACAATGAAATGAATTCTTTTTAAGTAATTCAAG

>PGSC0003DMG400022632 LRR-RLKs

CAAACCTCAGTCAAATGACAACAAGCACAGCCTCTTCATTCTTGTTTTGCTCTCCCCCTCTGTTCTTCTT  
CTTCTTCTAACCCCTTCTCACTTCACTTCTCCACACTCAACCCACCCACCATGACAGCAAAAATCAACTAA  
CCCCATCTTCTTCTCACTCTTTTCTCCTCATTTTACATTAACCCCATCTTTTTCCATTGAAAATGATGTTA  
AATGTCTTGAAGGTATCAAATCTGCACTTTCTGACCCTTTAAACAAGCTCTCATCTTGGTCATTCTCCAAC  
ACTTCTGTAGCTTCAATTTGTAAACTTGTGGTGTCTTCTGCTGGAATGAGAAAGAAAACCGCCTTCTTTC  
TCTTCAACTTCCTTCAATGTCTTTATCCGGTTCCTCCACCTGCCCTTCCAGTTCTGTACTTCTCTTCAATCT  
CTTGATCTCTCTGGTAACTCTTTTTCCGGTCCAATCCCGGTTCAAATCTGTTCTTGGTTACCTTATCTCGTC  
AATCTCGATCTCTCCAGCAACTCTTCTCCGGTTCATACCCCTGAGTTTATTAATTGCAAATTCTTGAAC  
ACCTTGTCTAAATGACAACAACCTTACTGGGTCGATCCCATTTGAGATCGGCCGGCTCGACCGGTTGA  
AACGGTTCAGTGTGTCCAACAATGGCCTTTCCGGTTCGAATTCCTGATGATTTAGACCGGTTTTCGAAAGA  
TGATTTGATGGGAATGATGGGCTTTGTGGGAATCCAATTGGATCTAAATGTAGTAATTTGAGTAACAA  
AAATCTGTTATTATTATAGCTGCTGGTGTTTTTGGTGTCTGCTGCATCACTGATTCTTGGATTTGGGATTT  
GGAGATGGTTTTTAGTTTCCAGCCTAGTAAGAAAGATAGAGAATTCGGTGACGGTAAAGGTGGTGGTGGT  
ATCAGTGATGATTGGGTGATAAATTGAGAGCTTACAAGCTTGTTCAGGTGACATTGTTTCAAAAACCTA

TTAATAAGATTAAGCTGAATGATTTACTAGTAGCTACAAATTCATTTGCTAGTGAAAATATTGTTATTTCA  
ACTAGAACTGGTATTTCTTACAGAGCTATGTTGATTGATGGATCAGCATTGGCTATTAAGGTTGAGTA  
GTTGTAAGTTAAGTGAAAAACAGTTTAGGTCTGAGATGAATCGATTAGGACAGCTTAGACACCCGAATT  
TAGTCCCATTATTGGGATTTTGTATTGTTGATACTGAAAGGCTTTTGGTTTATAAGCATATGCAGAATGG  
AAGTTTGTATTCGCTTTTACATGGTAATCTTAGTACTGGTATTAGAAATGATAGTTCTGAGCTTGGTTGGT  
TAGCAAGGGTTAGGGTTGCTGCTGGTGCAGCTAGAGGACTAGCTTGGCTTCATCATGGGTGTCAACCGC  
CATACGTGCATCAATACCTTAGCTCGAATGTGATTCTGTAGACGATGATTTTGTAGCTAGGATCACGGA  
TTTTGGGCTTGCAAGGCTTATTGGTTCTGCTGACTCGAATGATAGTTCGTTTGTGAATGGGGATTTGGGA  
GAGTTTGGTTATGTAGCTCCTGAGTATTCGAGCACGTTGGTTGCTTCAATGAAAGGGGATGTGTATAGT  
TTTGGAGTAGTGCTGCTTGTAGTTGGTGACAGGGCGGAAGCCTCTTGGTGCGGGTAATGCAGAAGAGGG  
ATTCAAAGGTAGTTTAGTCGATTGGGTTAATCAGCTTTGAGCTCAGGTCATAGTAAGGACGCGATTGA  
CAAAGCTTTTGTGGAAGTGGTCAAGATGATGAAATTTTGCAGTTCCTTCAAATTGCATGTTTCGTGTGTG  
GTTTCAAGGCCGAAAGATAGACCTTCGATGTACACAGTGTATCAGTCCTTGAAGAGCATGGTGAAAGAA  
CATTGTTTCTCTGAACACTTTGATGAGTTTCCAATCAACTTGACCAAAGAAAATCATGATCATAAAGATTA  
GGTTATAACATTGAAATGATTAGACAAATGTTTATGAATTTTGAATATTCTAGTTATGGCATTGTATTTC  
TTGATAACTCTGTATAGTTTGAAGAAGTAAATGCATGATCTTTGTACTTTCTTGACACATTTT

>PGSC0003DMG400022900 LRR-RLKs

AAAAATTATACTAATTCTACCTAACAAAAAACAAGTAAATTTTTCTTGAGATAACAAATGAAAAATCCA  
GAAATTTACTTCATAACGGGGACGAATATAGTAATTTTGAAGAAATAACATGGACATTTTTCGTGTTATG  
ATCAAAACATGCCTTCTTTGCATCGTCTTCTTGATCAATTACCCCGTGAAAATAATTTTCAGTTTCCGATACT  
GATGCTTTGTTGAAGCTGAAACAATCATTTACAAATGCAGCGTCATTGGAATCCTGGAAACCTGGAACG  
GATCCGTGTGACAAAAATATACGTTGGTTGGGTGTTTTTGTGAGAAAAAATGGTTACTGGACTTCTTC  
TTGCAGAAACGAATTTATCTGGAATTATAGACGTTGAGGCATTATCACAAATGCCTGCTCTGCGTACACT  
TAGTTTTCAAAGCAATTTATTTTCTGGACCAATCCGGAATTCATCGAATGGGTGCTTTAAAAGGTCTTT  
ATTTGTGCGAAAAATCAATTTTCTGGTGAATTCATCAAATTTACTTCGAAAAAATGTTGTCGTTGAAGAA  
GTTATGGCTCTCCGACAACAAATTTTCCGGTGAATTCGCTTCATTAATGGAGCTGCAATATCTCATTG  
AATTGCACCTGGAGAACAATCAGTTCACAGGTCCAATACCGCCAATCTCGAAGCAGTCAACATTAGAATC  
AATCGATCTTTCTAATAATAACTTGAAAGGGGAAATCCCTGTTTCGTTATCAAGATTCAATGAGAGTTCG  
TTAAGGGGAATTCCGAGCTTTGTGGTGAAAAATTAGGCAAAGCTTGTAAATCCAACCATAAATAGCAGC

AACGACAACAACACTAATAATAACGCAAATAATGGCACTCAACAAAGTCCGGATAGTAATTCGAATAAA  
AGCATCTCAATGTGGATTATGATATCATCAGTTGTTCTTTTATTGATCATGATCATAGTAATATATCTCATA  
TGTCGCTACCAACAAAATCGCCGTGCTTCAATTGAAAGTTTTGATGAGCCATCACTTGGGAGGCGAATTT  
CGAGTGATAGCAAGAAGTCATTTGAACTAAGTAGACGTGGCAGTTCGATTAGAAAAGGATCGATAATG  
GGAAAACGTGTAGGAGATTTGACAATGGTGAATGATGATAAAGGTGAGTTTGGTTTAGCAGATTTGAT  
GAAAGCTGCTGCAGAGGTGTTAGGGAATGGGCCATTGGGTTCTTCTTATAAGGCTATGATGTCAAATGG  
ATTGACAGTTGTGGTAAAGAGGATCAAAGAAATGAACAAGATCGGAAAAGATGGTTTCGATGCAGAGG  
TTAAACGTTTAGGAAGATTGAGACATAAAAAATATTCTAACACTTTTGGCTTACCATCATCGCAAGGAAGA  
GAAGTTGTTTGTGTATGAGTACATTCCCAAAGGAAGCTTGCTGTACATATTGCACGGTAAAGTACCTACC  
TCTAATTTTATCAAGTCATACTAGAAATGCATGGTAAGACTGTGTACAATAAACTCATTTTTGTTAATTT  
GTGCATGTGCTTAGAATAGGAGACCAAAAAGCCAAAACTTCTACAAGTAAGTAAGTTTACATTGTATTA  
GTAGTCTAGTTGTCAAGTGTTTCATATTAGTTGAGGGAACGGAAAGTAGTCTCCTTGTATGATCTTGGCA  
AACTATACGTCTATATCCATGAACTAGCCTTGAAGTTGAGTGAGGTCTAAAGGTCCATTTGATTCACAAG  
TTATCAAAGCCAGACTCGTATGTACTCTTGATATCCCGATGTAGAGTTCCCATCTTACATTGGGATTATTC  
GCACCTTGTGGTTTTTTTTCAAGACCACTTTTTGAATTATGTTCCCGTTAGCCCAGTGGGTTAAGGGGAAC  
ATAAGTTAAATAGAGACCTCAAGAAAGGTCAATTTCTACAGTTGTCCTGTTATTTTCTCCATGTTAATTAGT  
TGAGGAGTTGAGGGACGGATTTGAGCTATGCTTAACTTATGAACTAGTTTTCGAGGTTTAATTAGGCAT  
AATATTCATTTTCTTCGCGCTAATTAGTCTGTGCATGATTACTTATAAAGATTGCTGCTGCTTTATATGAAT  
GATCACAGGTGAAAGAGGGGCTGCCCATGCTGAGCTCACCTGGCCAGTGCCTCTAAATATTATACAAGG  
AGTAGCTGAAGGACTAAATTATCTTCACACTGAACTTGCTTCTTCTGATTTGCCCCATGGCGATTTGAAAT  
CGAGCAATATACTCATAAGCACAAACCACGAGCCAATACTCACAGGTTACGGATTCTGCACCTTAATGAA  
CAACGCGCATGCAGTTCAAGCACTAATCGCGTTCAAGTCACCAGAAGCAGTACAAAATAACCAAGTTAC  
ACCCAAATGCGATGTTTATTGCCTTGGAATTGTGATTCTTGAGATAATAACAGGGAAGTACCCGTCTATA  
TATCTTAATACCGGTAAAGGAGGGATAGACATAGCACAATGGGCGAAATCCGCGATTGCTGAGGGAAG  
AGAACTGAATTATGTGATCCAGATATAATAGCAAGCGCGAAAGATTCAATGAGTTCAATTAAGGAACT  
AATTCACATTAGTGCAGCATGTGTAGAGAGTAATCCACAACAGAGGATAAATATTAGAGAAGTCATTAG  
AAGAATTGAAGAAATACAACAACAAAACGGAGTAGGCCAAACAGGACAAACAACAACAACACGCCTC  
AGTCTCAAACGGGACAAGCAATTGAGATAATGCAGTCTCCAAGAGATGGAGATGCTGAAATACAAGTG  
TCGGAATCCTAACAAGGAACAGCAAATCATTAGGAATTTTAGCAGACTCCGGTAATTCAAGGCGTGGTT



AATATTGCAGCTTCTCCTATGGTCATCAGACTAATGATAGTGTTTTTTTTCTTCATTTTTTAAGGTTTCGTT  
AACTAGGGATAGTACATATATACTGACTAAGTTTTAGTTTCATTTTGTAGTCTGATGACCATTATCTCCC  
CTTGTAGAACAAGAAATGAGAGGAGAAGCTGTATCCTGTGTAGAGATGAAAGAGCTTACTGCTTGCTTT  
AGAATTGTATATGCAATACAATTTCTGTTTCTACTACGTTGAGTACCAACTATTGTAGACTAAAAATTCG  
TAGCGTACTTTGACCAACTCCAAGGGATACTGTCATTTTCAACCAGTAACATGTATCAGGTAACCTGCTT  
CCAAGGATAGAACACATGAGAAAGAAATTACCTAGTGTTTTATCCATATTGATATTTGAACCTGAAACC  
TCATGATTCTCGACCTACTTCATTGATCACACTCTTGCGTACCTGTATGTTAATTTTTTTCACACAATAATA  
AACGGAGAAGTATGGAAGGCCCAATCAGATAACTATAAC

>PGSC0003DMG400023004 LRR-RLKs

CTACTGCCCAAAGAAAAAAGAAACCAACTGAGTCAGTATAGTACTTCATCTCTGAAACAAAGCAAGA  
ACCTCACTCTCTCACCATTTCCAGTCAAAGGTAGGTAACAATAACATGGGTTTTCTCCATTATTCCTCT  
GTTTTCTTTCATACTCTTTTCACTCTCTGTAAGTGGAAATGCTGAGTTACAACCTCTAATGGACTTAAAA  
GCCAGTCTTGACCCTGAAAATGCTTTACTCACTTCATGGACTGTTTCTGGTAATCCATGTGATGGTTCTTT  
TGAAGGTATTGCTTGAATGAAAAGGGTCAAGTTGCTAACATTTCTCTACAAGGTAAAGGCCTTAAAGG  
GAAGTTGTCACCAGCCATTGCTGGGCTAACTCACTTGACTGGACTCTACTTGCATTATAACTCATTGTATG  
GAGAGATACCAAGAGAAATTTCTAATTTGGTTGAACTCACTGATTTGTATTTGAATGTTAATGATCTCTCT  
GGTGAGATCCCTCAAGAACTTGAACCATGTCAAAATTGCAAGGTCAGTGACTAAGAACTAACTTCTC  
TGTTTTGTGCGTTATGCTTTGCTTGGTTTTGGGCTATTTTAGATTTTGAAGTTACAACTTGAACTTGA  
AAATTTGAATTTTTGTTACTATGATAAAAATAAGATATTTTTACATTTCTTTGTTCTTTCTGAATATTTGT  
CCAAATGTGTTGAGCTCTAGTTGGAAAAAGTAGGGGCTTCTGCTGTTAATCATTTATGTCTCACTGAAAA  
AATTGAAGTCACAACTGGAACCTGTTCCATTTGGGAAATCATAAAGATTGTTTTTTCCCCCAAATTGTT  
TTAGAGTTCAATTTAGTCTAGTAGTTCCATCCCTTGATTCTTTTCACTACTAGTTTCTTGTTCTATGAT  
TTTGTATTTTGGTTATCGTATGATTTTGTGTTAGTTACTGCATAGAATGATTTGTCAGGCTTTGTATAGTAT  
TTTGTCTGACTTCTTCTTCTATTATTTCTTTTCTGACTACTTTGAACTTTTTTTTTCTTGAGCCAAGGGT  
TTATTGGAAGCAAACCTCTACCTCCAAGGTAGGGTAAGGGTAAGGTCTGTGTATACTTCACCCTTCCCG  
GAGCCTACTTTGTGGGATTACATTGGGTATGTTGTCGTTGTTGTAGTTCATCCCGTATGTTCTAAAGGT  
GGCTTAAAGTTTTGTTTTGGGTGTTTATTTACAACCTCATTTTGTATAATGGAGTCTGTCTCACTTTAGTTT  
ATTGTCTTTTTCCGTATTGTACAGTTTTGCAACTATGCTATAACCATTTTACTGGTAGCATACCCACTCAAC  
TAGGGACTCTAACAAAGCTCAATGTCTGGCTCTGCAATCCAATCAGTTAACTGGTGCGATCCCCGCTAG

CTTGGGTGACTTGGGAGTGTTGATGAGGGTGGACTTGAGTTATAATAGTCTTTTCGGTTC AATTCCTTCA  
AAACTGCGGATGCTCCCCTACTTGAAGTCTTGGATATCCGAAACAACAAGATTTCTGGCAATGTGCCTC  
TTGGTAATGAATTTTCTCGCCCTACATTGTA CTCTCCGTTGGAGTTTCAAGAGTCAATCAAGTTTTTTTT  
TAGTGGCATTTCATATATGCCTTTTAGATAATTTAGTTGTTAATTATTGTGTTTCATAGTACTTATTACG  
TAGTTTTCAAATATGAGTTTTTTTCAAAAACTTGAAGCTTCTATGTCCGATTCATGGTCAAAGTTTAGAC  
GTTTGAATCTTGAAATCCAACCGTGCCACATAAGTTGAGGCAGAAGGAGTTATGTATATGTAGCCCCAT  
AAGAGTCGTACGTATAGTTTCTTGGTAAATTATATCTTATCTAGTCTTTTGTCTTGTGTAAGCTTT  
GAAGAGATTAGTTGGAGGTTTCCAGTATGAGAACAATCCAGGACTATGCGGTGTGGGTTTCCCATCCTT  
GCGAGTTTGTACATCTTTGGATCGCTCGAATCCTAATAGACCAGAACCCTATGGAGTTGGCTCAAGTGGT  
TTATCTACTAGAGATATTCCAGAAACAGCTAATCTCAATCTAAATTGCAGCGGAAATGCCTGCACAACGT  
CGTCTAAAACCTCACAGGCATCTGTTGTTGTAGGGGTTATTGTGGTACTATTATTGCATCTGCTATAGG  
AATTCTTTCTTCACACACTATAGAAGACGAAAGCAGAACTTGGAGGTGGACTGGAAATGTGTGATAG  
CCGTCTCAGTATCGATCAGGCCAAGGAAGTTAATAGGAAGAATGGTTCTCCCCTAGTCAGTCTTGAGTA  
CTCGATTGGTTGGGATCCGTTGGCTGAGGGCCGCGTATGGTGGAGTTTCCCAAGAGATTCTGCAGAG  
ATACAGATTCAATTTGGAAGAGGTGGAGTCAGCTACACAGTACTTTGCTGATAAGAATCTATTGGCTAA  
GAGCAACTTTTCAACTACATATAGAGGGACTCTAAGAGATGGATCACTTGTGCTGTTACGAGAATTGCC  
AAAATTAGCTGCAAGTCAGAAGAAGCTGAGTTTTTAAGAGGACTAAACATTTTGACGTCTCTGAGACAT  
GATAATTTAGTTAGGCTGAGAGGTTTCTGTTGCTCTAAAAGCCGGGAGAAATGTTTTCTCGTTTATGATT  
TTGTGCCAAGAGGAAACTTGTGCACTACCTAGATTTGAAGGAGGACGAAGCTCATGCTCTTGAATGGT  
CCACGAGGGTATCTATCATTAGTGGCACTGCAAAGGTCAGTTTTTGAATCAACTCTATCTTATAAGATC  
TAAAGTACAGTAGTTTGACATTATATTACTTTTTTTGAGCTTACTGTCAACAATTCAATAATGCCTTTTTAT  
CTATCTTGAGCAGGCGTTGAGTATTTGCACGGGTGCAAGGTGAATAAGCCAGCTCTAGTGCATCAGAAT  
ATCTGTGCTGAAAACGTGCTCCTTGACCAACGATTCAAACCATTGCTTTCAAATTCAGGCCTGCATAAGC  
TCCTCACAAATGATACCGTCTTTTCAACTCAAGGCAAGTGCTGCCATGGGATATTTAGCTCCAGAGTA  
CTCCACTACAGGCCGATTTACTGAGAGGAGTGATATTTATGCCTTTGGAGTGCTCATTTTCAAATTTTAT  
CTGGCAAGCGAAAATTCACCAGTTCAATGCGTGCTGCTGCTGAATCGTCCAAATTCACGACTTGATGGA  
CGTGAATCTCCGTGGAAGGTTCTCTGAGTCTGAAGCAACAAA ACTAGCGAAAATCGCTTTGTTATGTACA  
CATGAATGTCCAGAGGAGAGACCAACCATGGAAACAATCGTACGAGAAATTGGTAATTTAGCTAGTCCC  
TCCTAATGCTAATGATCTTCTCCATCTACTATTGCCTGTGGCAAATTTTCAATCCTCCTACTTATTAGCTG

GAGATAGATTTCGTAACCTCTCACGAGTATTGGAGCTTCAAATATTTAGTCAGTCTGAGAACTTCTTC  
GACTGAGGACTTGACCATTTTGTGAATGTATCTTGTATGCCATTTAACCTTAGGATTTCTCATGTTGGAG  
GATTTTCCTCCGTTTATCTCATGGATTCTAATTAATCTGTTTGTAAAAAGATGAATGTTCTTCTATTTACCT  
ACGATCATTGCTTCGTTTTTGTTCCTA

>PGSC0003DMG400023057 LRR-RLKs

ATGTCGATGTTTAACAAATTATTGTTGGTTTGGTTTTTGTGTAACACTGGTTCTTGGATATGTGTTTTCT  
GAAACAGAGCTTGAGGTTCTGTTAGAGATAAAGAAGTCATTTCTTGATGACCCTGAAAATGTTTTGTCAA  
ATTGGTCTGATAAAAATCAAAATTTCTGTCAATGGAGTGGTGTTCATGTGAAGAAGATACATTGAAAGT  
TGTGAGATTAATCTTTCTGATTGTTCAATTAGTGGTTCAATTCACCTTCTTTTGGCTTTTTGCATGACCT  
ACTCCATCTTGATCTTTCTTCTAATCTATTATCAGGTCCCATTCCACCTACTCTGTCTAATCTTTCTTCTTAC  
AATCTCTTCTTTTATTCTAACCAACTCACTGGCCCCATTCCCAATGAAATTGGCTTGTGAAGAATCTCC  
AAGTTCTTAGAATTGGTGATAATGTTGGCTTAACAGGGCTAATTCCAAGTAGTATTGGTGATCTTGAAAA  
TTTGGTACTCTTGGTTGGCTTCATGTAGTTGAGTGGTATGATTCCTCCTGAGTTGGGAAAACCTCGGG  
CGGGTTGAGAATATGAATCTGCAAGAAAATAATCTTGAAAATGGAATTCCTGCTGAGATTGGTAACTGC  
TCTAGTCTTGTGCGTTCAGCGTTGCAGTTAACAATCTCAATGGATCAATCCCGGAGGAGTTATCTATGC  
TTAAAACCTTCAAGTTATGAATTTAGCGAATAATAGTCTTTCAGGACAGATTCCTACTCAGCTTGGAGA  
AATGAATGAGCTGCAGTATCTCAATTTGCTTGGTAATCAGTTGGAAGGTTGATACCAAAGTCGTTGGC  
AAAGTTGAGTAATGTTCCGAATTTAGACTTGTCTGGTAATAGACTTACTGGTGAAATTCCTGGAGAATTT  
GGGAATATGGATCAGCTACAGTTCTTGGTTCTGACTAGTAATAATCTTTCGGGTAGCATACCGAAAACAA  
TATGTAGTTCTAATCGAAACAGTAGTTTGGAACACATGATGCTATCTGAAAACCAACTTTCTGGTGAGAT  
TCCTGTGGAGTTGAAAGAATGCATTTCACTAAAGCAGCTTGATTTGTCTAACACACGCTTAATGGTTCCG  
ATACCAGTAGAGCTGTATGAGTTGGTTGAGTAACTGATCTCCTACTTAACAACAACACATTGGTTGGTT  
CAGTTTCTCCGTTGATTGCAAACCTAACCAATCTGCAAACATTGGCATTGTCGCATAATAATTTTCATGGC  
AATATACCGAAAGAGATTGGGATGGTCGAAAATCTTGAGATTCTGTTTCTATATGAGAATCAGTTCTCTG  
GAGAAATACCAATGGAGATAGGGAATTGCTCCAGATTGCAAATGATCGATTTTTATGGGAATGCATTCT  
CAGGACGCATTCCCATTACAATTGGAGGGCTGAAGGAGCTGAATTTCAATTGATTTTACAGAGAATGATC  
TCTCTGGTGAGATTCCTGCCAGTTTGGGAAAACCTGTCATCAGCTGAAGATCCTTGATTTGGCGGATAATCG  
TCTATCTGGTAGCGTTCCTGCTACGTTTGGTTATCTTCGAGCATTGGAGCAGCTTATGCTTTATAACAACT  
CACTTGAAGGTAATCTTCTGATGAACTGATCAATCTTCAAACCTTGACAAGAATAAATTTTTCTCATAAC

AAACTGAATGGTAGTATAGTTTCCCTGTGTAGTTCGACGTCTTTTCTTTGTTTTGATGTTACAAATAATGC  
ATTTGATCATGAGGTTCCACCCATTTAGGATATTCACCATTTCTTGAAAGGTTAAGGCTAGGAAACAAT  
CGTTTCACCGGAGAAATCCCTTGACATTGGGATTAATCCGTGAGTTATCACTGCTCGATCTCTCTGGAA  
ATGAATTGATTGGTTAATACCTCCACAGCTTTCTCTGTGTAGAAAGCTCACACATCTCGATCTCAATAAC  
AACCGGCTTTATGGATCAATTCATCTTGCTCGGAAACTTGCCACTTTAGGTGAGCTTAAGCTGTCCTC  
AAATAAGTTCTCGGGACCTCTTCTCGAGAATTGTTAACTGCTCAAAGCTTTTAGTGCTATCTCTAGAAG  
AGAATTCTCTCAATGGAACTCTGCCCTTGAAATTGGTGAAGTCAAGTCCCTAAATATCTTAAATTTCAAC  
AAAAACCAACTCTCTGGTCCCATTCCATCTACCATTGGCAACTTAAGCAAGCTATATATACTCCGTCTCTC  
GGGAAACAACCTTAACCGGTGAAATACCAAGTGAGCTTGGGAGAACTCAAGAATCTTCAAAGCATACTGGA  
TTTGAGTTTCAACAACATCATTGGTCAAATTCCTCCTTCTGTTGGGACACTTACTAAGCTTGAAACACTTG  
ATCTATCTCATAACCATCTCACCGGAGAAGTTCCTCCTCAAGTCGGTGAAATGAGCAGTTTGGGAAAGCT  
TAACCTCTCCTACAACAACCTTCAAGGCAAATTGGACAAACAGTATGCACATTGGCCAGCTGATGCATTC  
ACGGGGAATCCACATCTTTGTGGAAGTCTCTACAAAATTGTGAAGTCTCTAAGTCCAACAATCGGGGTT  
CAGGACTAAGTAACTCGACAGTTGTGATCATTTCAGTGATATCGACTACTGTGGCTATCATACTTATGTT  
GCTTGGAGCTGCCCTCTTTTTCAAGCAAAGGCGAGAAGCCTTTAGAAGAGGAAGCGAAGTGAATAGTG  
CTTACTCATCCAGCTCTTCTCAAGGACAAAAGAGACCACTTTTCGCAAGTGTAGCTGCTAAGCGTGATAT  
CAGGTGGGATGACATCATGGAAGCAACAAATAATCTAAGCAACGACTTCATAATCGGATCTGGTGGTTC  
AGGAACTGTCTATAAAGCTGAGCTGTTTAAACGGAGAGATCGTGGCAATCAAGAGAATACCAAGCAAGG  
ATGATCTCTTGCTAGACAAAAGCTTTGCAAGAGAAATCAAGACACTTTGGAGGATAAGGCACAGACACT  
TGGTGAGGCTACTTGGATACTGTAACAACAGCGGAGAAGGTTCCAACGTATTGATTTATGAGTACATGG  
AGAACGGAAGTGTGTGGGATTGGCTTCACAAGCAGCCAGCTAATAATAACAAGAGGAAAACATGCCTC  
GATTGGGAGGCAAGGCTGAAGATAGCGGTGGGATTAGCACAAGGAGTTGAGTACCTTCATCATGATTG  
TGTACCCAAGATCATTATAGGGACATCAAATCAAGCAACATTCTACTAGACTCAAACATGGAGGCACAT  
TTGGGAGATTTCTGGGCTGGCTAAAGCCGTTTATGATAACTATAATTCTTACAACACTGAATCAAACCTTGT  
GGCTTGCTGGTTCATTTGGTTATATTGCTCCAGGTATATATCATTCTGAATTCTCGAGTATTAGCATTCTG  
AAAATAGTTTTTTATTTTTTTATACTAAGTTGCTTATTTGTTTCGCAGAGTATGCTTATTCTTGAAGGCAA  
CAGAGAAGAGTGATGTTTATAGCATGGGGATTGTAAGTACTGATGGAGCTAGTGAGTGAAGGATGCCAACT  
GATGGGAGTTTCGGAGAAGACATGGACATGGTGAGGTGGGTTGAATCGTGCATCGAAATGTCTGGGAC  
AGTTAGGGAAGAGCTCATTGATCCTGTTTTGAAACCATTGTTACCTAATGAAGAAAGTGCTGCACTTCAG

GTGCTGGAAATAGCACTTGAATGCACCAAACTGCACCTGCTGAAAGGCCATCTTCGCGCAAAGTTTGT  
GATCTGTTGCTACATGCATTCAACGACAAGGTGGTTCATTCTGATAAGATGAGTCCAGACAATTACGTCT  
AG

>PGSC0003DMG400023192 LRR-RLKs

ATGACAACCTTTGTCATATTTTTTCATTATATTCTTCTTCTTGTAAAGTTGTTTGAGTCCAAGAAGAGTGAAC  
TCTCTGTCTTCTGATGGAAAAGCTTTGCTCTCTTCTCAAAGCAACTTATGACCCTTATGCTAAATCATCA  
TCATCTTTTGTACTTTCTTCTTGGAAATGCTTCAACTTCAACTCCATGTTCTTGGCAAGGCATTTCTTGTCTC  
CTCAACAAAGAGTTATTTCTGTTTCTATTCCAAATACATTCTCAATCTTTCTTCTTTTCTTTTGAGCTTTT  
TTCACCTTTCATCTCTTCAGCTTCTCAATCTTTCTTCTACTAATATATCTGGCTCAATACCTTCATCTTTTGGTT  
TGTTTACACATCTTAGGCTTCTTGATCTTTCTTCTAATTCTTTTCTTTCAGGACATGTTCCCTCAGAACTTGGTG  
GACTTACCTCACTTCACTTCTTTTCTTGAATTCAAACAGATTGAGTGGTAGAATCCCATATCAACTTGCT  
AATCTTTCTTCATTAGAAATACTCTGTCTCCAAGATAATCTCCTTAACGGGTCGATTCCGAAATATTTAGG  
CTCATTGGTATCACTCCAACAGTTCAGGATTGGAGGGAATCTAGAGTTGAGTGGTGAATACTGCAGA  
GCTAGGAATGCTACCAATCTTACGACGTTTGGTGTGCGGCTACTGGACTTTCAGGGGTTATTCCACAT  
ACATTTGGTAATTTGATCAGTCTACAACTCTGGCAGTATATGATACTGAAGTGTGGTTCAATACCTCC  
TGAACCTGGGATGTGTTTCAAGAGCTCAGGAACTTGATTTGCACATGAATAAGCTTACTGGTCCAATCCCT  
CGTCAGTTGGGTAAGTTGCAAAGATTACTAGCTTGTCTTTATGGGGAAATTCGCTTACTGGCCCTGTCC  
CGGCTGAGCTGTGCAATTGTTTATCCCTTGTGGTTCTTGATGTCTCTGCAAATGACTTGTCTGGCGAAATT  
CCGGGTGATTTAGGGAAGCTTGAAGTTCTTGAACAGCTTCACTTATCTGATAATGCACTTAGCGGGGCTA  
TTCCAATGCAGTTGAGTAACTGTAGCAGCTTAAACAGCTCTTCACTTGGATAAGAACCTATTATCCGGCAC  
GATTCCTGAGCAAGTTGGTGAAGTACTTGCAGATTTTCTTGTGTTGGGGGAATTCGGTTTCAGG  
AACTATCCCGGCTGCTTTCGGAACTGTACTGAACTGTATTCACTTGACCTCTCAAGAAACAATCTCACTG  
GTTCAATACCTGAAGAGATATTCAGTTTGAAGAAGCTGAGTAGGTTGTTGCTTCTTGGGAATTCGTTAAC  
GGGAAGATTGTCTCCGAGTGTGGCAAATGCCAGTCTCTGGTCAGGTTGAGGATTGGCGAAAACAGT  
TTTCTGGACCAATACCTGATGAGATAGGACAGCTGCAGAATCTTGTGTTTCTTGAATTTATACATGAACCA  
TTTCTCTGGTGAATTGCCTTCTGAAATTGCCAACATTACGGTTCTTGAAGTGTGGATGTGCATAACAATT  
ACCTAACCGGGGAAATACCATCATCGCTGGGAGAGCTCGTGAATTTAGAGCAGCTTGATCTCAGCAAGA  
ACAGCTTCACTGGTGAAGTCCGTGGAGTTTTGGTAATCTCAGTTACTTGAACAACTTATTCTTAGCAAT  
AATCTGCTTACTGGTCCAATTCCAAAGTCATTTAGCAACTTGCAGAAGTAACTCTACTTGATTTGAGCTC

CAATAGTTTATCTGGTGCAATTTACCTGAGATTGGTTACATGACAAGCTTAACAATCAGTTTAGATTGA  
GCTCAAACCGATTACAGGTGAACTCCCTGACACGTTATCCGGATTGACTGTTGCAATCTCTTGATATT  
TTCATAATATGTTGAGTGGAAGAATCACAACCTAAGCCTCTTGACCAGTCTCGCTACTCTAAACGTATC  
GTATAATAATTTCTCAGGACCTATTCCTGTAACACCCTCCTTTAGAACTCTAACATCAAACCTTTTTCTTGA  
GAATTCACCTCTTTGTGAATCAACTGATGGCTTCACTTGTCTGCACATATAACTAGAAGGAACGGATTG  
AAGTCTGCAAAAACCATAGCTTTGGCTGCTGTGATTGTGACTTCTGCATCCATAACAGTCGTGGCAACGT  
GGTATCTTGTGACAAGGAAGCATAGATATGAATTTGAGAAATCACCTGGCATGTCGGTCTCTGCAATAG  
GGACAGAAGATTTTTCTATCCGTGGACTTTTCATCCCTTTCCAGAAGCTCAATTGCACCGTTGACAACATC  
TTGGATTGCTTGAAAGATGAAAACATTATAGGGAAAGGCTGTTCCGGGAGTTGTTTATAGAGCAGAAATG  
CCAAATGGCGAGTTGATTGCAGTGAAGAAGCTCTGGAAAACAAAGAAAGATGAGGAACCAATAGATTC  
TTTCGCTGCTGAAATTCAGATTCTTGGTCACATTAGGCATCGAAACATAGTGAAGCTCCTCGGATATTGT  
TCAAACAGGAGTGTTAAGCTTCTTCTCTACAACACTACATTTCAAATGGTAATCTTCAACAGCTCTTGCAAAG  
TAACAGGAACTTGGATTGGGAAATCAGGTACAAGATTGCAGTTGGATCAGCTCAAGGCCTTGCTTATCT  
TCACCATGACTGTGTGCCAGCAATTCTTCATAGAGATATCAAGTGCAACAACATACTCCTCGACTCTAAA  
TTCGAGGCTTATTTAGCAGATTTTGGACTTGCAAAGCTGATGAATTCTCCAAATTATCATCAAGCTATGTC  
CAGAGTAGCAGGCTCTTATGGCTATATAGCTCCAGGCAAGTATCTTTCAACTTTTATTTCTCATCTTAACC  
TAAATGTTGTGCAGCTATATGATGCTTTAAATCCTTGTGTTGAATCGTGTGATCATCGCATCTCTAAAAGC  
TTAAGTTATTAGAAAGGATACACTTTTTCTCTACTAAATCATATCTTCAACACATGCGGCTCTGATTCTTGC  
CAAGCACGTGGATAATGGGTGACGCTTAGACTTCAACCTAGGATACCATGTTGAAATGTGTGACTCTCTC  
ATTTAGTTAAGTTATTAGAGATGGTACACATTTATTTACTTCATTATATCGTCAACAGTTCCAGATATA  
GGTCAAACGAGAGTCACAACGTTATGAGCTATAGTCAAATTTGGAAGGATAAACTAAACAAGTTATGC  
TTCATAGATGTTAACACTATTTTTTACCACTATGGTTGCAGAATATGGATACACAGTAAATATAACAGAA  
AAGAGCGATGTCTACAGTTATGGAGTGGTGCTGCTGGAAATATTGAGTGGACGTAGTGCGATTGAGCC  
TCAGATTGGTGATGGACAACACATTGTCGAGTGGGTGAAGAAGAAGATGGGAAGCTTTGAACCAGCTG  
TTACAATTCTGATTTGAAGCTACAGAGTTTACCGGATCAAATGGTGCAAGAAATGCTTCAAACACTTGG  
AATAGCTATGTTCTGTGTGAATTCATCACCCACTGAAAGGCCAACTATGAAGGAAGTAGTGACACTTCTA  
ATGGAAGTGAAGAGCCCAACTGAAGAATTTGGAAAACTTCTCAGCCTTTAATCAATCAGTCAACTCAA  
AGTTGA

>PGSC0003DMG400023282 LRR-RLKs

AATGAACCATCCCTCTTTCTTCATTTTCCTTTCCTTCCACTCCACAATAACACTCTCTTCCCTTTTAACAAAATTTTTT  
CTTCTCATTAGATTTCTGAATTCTGCTGCTCAAACATGAGACTAATTAAGCACACATTGTTACTATTATAT  
TTTAGGTAAGTAACTCTGTTTCCTCTTAACTCTTTCTTCATTATTTTTGTAATATTATGTATGCAACAAATTC  
TTGAGTTATAGTATAACATGTTCTTTAATAGCAAAGATGCATTCTACTTTTTGTTGTACTTAATGTCTCTG  
TTTCTGTTAAATTAAGAGTTAAATGATTTTAGGCACAAAATATATGATTTTGGTTGTTAGGACTCAATT  
ATGAAAGTTATATGTTTTTTTTGTCTGTCACCACTCACCCTTTCTCTTTTTCTTCTCTGTATGTATATGC  
CATACTCATTCCCTCTCTTTTTTTTTTTGATGATTTGTCATATTAGAATCTCCCAATTTGTTCAATCAATA  
ATAAGTGTGTGGGTCAATTAAGCGCATCTTGATTAATTTTATGACATATTTGCCATCTGTTATTTCATGCA  
TTCAGATTAGCAAATCAGAAACAATTAAGATGAAAAGAAAAGAATTTTCTATTCACACCTTTAAAACCC  
AACATCATCTCACATCAATAATAAATAGCATGTAACCTCTATTTACCAAGGTTAGGACAGATGAAAAGTAA  
TAACCTAGTGTTTTTGTTTCTACTGGGATTTGAATTTATCTCATAGTTTTCACCTACTTCATTGATTAATA  
GGCTGCACTGGTGGTGAATAAGTTTAGAACTATTCGGTTCAAGATTTAATCTTTTCTGGTGCTATGTTCC  
TATCCCACTCTAGTCAGATCCTTCCCCGGATATGAAGAATTTGATTGTAGGAAAGATGAAAAACAAAG  
GCCGCTCTTTAGTATCTTTCTTATAACAAAAGACTATAAAGTCAAGCGAAACATTATATACTTGAGTCAC  
TTCAAAGAAAGATGTAAATTCATTTGCAATATAGTAAACCCACAATAAATAACAAATTGACATGTTAAAC  
ACATCAGCCAATCACCAACATCCTTTGTCTGTGTATATCTGTTAACATCTTTTCATATGTGCTTTACTCAA  
TTCATAAGCTATCTTATTCTTTTTAAGTGATATTTTTAATTTCTTATTATACAACAAACATTTGATTAGGTAT  
ACATTGCTTTTAAAGTAAAAGGGGTTTGTATATGTTTATTCTTGTTTCTATACTTTATTGTTTGGTTACTG  
ATTGCTACTTCTCTTCTTCAGTTACTCATTAGAATGGGCATCCATCATATCTGTTATGGAGTTTGTGCATC  
CCCTTGTAATGACTCTTTAGCCCTTCCCATATTCAATCATGTCTAGAATTCAACTCTCCATTCCCTCCA  
AATCCTTGTTATTTCTTGAAGTTTCTTGTTTTCTTAATTCATTGTCTGTTGAGACAGAAGCACTTCTTGA  
ATTTAAAAGCATCTTGTTGACCCTTTGAATGTCTTGGAATCTTGGAATATTCAGATTCCCCGTGTAAT  
TCTATGGTATTCAATGTGACAAACACACTGGCTTGGTCACTGAAATTTCACTTGACAATAAGTCCCTTTAT  
GGAATTTTTCCCTTCAATATCTGTCCTCAAAGCCTTACTTCTCTAGTGCTTCTTCAAATTACCTGTCT  
GGAAATCTTCCAAGTGAATTGGCGGATTGCACCAATCTCAAAGTATTGAATGTTACTGACAATAACATGA  
ACGGTACGATACCTGATTTATCTAGCTTGGCTAAGTTGGAGGTGTTAGACTTGTGAGATAACTGTTTTTC  
TGAAAGTTTCCAGCTTGGTTTGGAAAGTTGACTAGTTTGGTTGCATTAGGCCTTGGTGAAATGAGTA  
TGATGAAGGTAACTTCTGATTTATTTGGGAAGTTAAAGAAAGTTTATTGGCTTTTCTTGGCAGGGTCA  
AATTTGACAGGACAAATCCCGGAATCTATTTTCGAAATGAAGGCACTAGGTACATTAGATATTTTCGAAAA

ACCAGATATCCGGGAATTTTCCAAAGTCGATAAACAAGCTGCGAAATCTCTTCAAGATTGAACTTTATCA  
AAACAATTTGACCGGGGAATTGCCAGTAGAACTTGTAGACCTTATACATCTGCAGGAAATTGATGTTTCT  
AGAAACCAGCTGCATGGGACTTTGCCTAAGGGGATTGACAACCTGAAGAATATAACGGTTTTTCAAATA  
TTCAAGAACAATTTCTCTGGGGAAATCCCTCCAGGCTTTGGAGATTTGCAGCATCTTAATGGCTTTGCTG  
TGTACAACAACAGTTTTACTGGAGAAATTCCAGCTAATCTTGGCCGGTTTTCGCCACTGAATAGCATAGA  
CATATCTGAGAACAAGTTTAGTGGTGCATTTCCAAAATATTTATGTCAAACAACAACCTTGCAAAAATTTG  
CTTGCTGTTGAAAACAGTTTCACAGGGGAGTTTCAGGTAATTATGCTTCTTGCAAGACTTTAATGAGAT  
TGAGGGTGAGTCAGAATCAACTTTCTGGGAGAATTGCTGAGGGTTTATGGGGGCTTCCAGAAGTCACA  
ATGATAGATTTTCAGTGATAACAACCTTCACTGGAAGTGTATCTCCTGGAATCGGCGCTGCGACTAAGTTGA  
ATCAGTTGGTATTATCAAACAACAGATTTGCAGGTGAGCTTCCAAAAGAAGCTTGAAAGCTCACACAGT  
TGAAAGGCTATATTTGGATAACAATGAATTCTCTGGCATAATACCATCTGAACTTGGCTCATTGAAGCA  
AATTTTCATCTTTGTATTTAGAGAAAACTCACTTTCCGGTTCGATACCATCGGAGTTGGGTGAGTTTCCTA  
GGTTGGCAAACCTGAATCTTGCTTCAAATCTTCTCACAGGCAACATACCGAATTCGTTGTCAATGATGGC  
CTCGTTGAACTCTCTGAATCTTTCGAGTAACAACTCAGTGGCTCAATCCAACAAGCTTGGATAACCTG  
AAGTTATCTTCATTGGACCTCTCTAACAATCAGCTAACTGGAAGAGTTCCTACAGATCTTTTGACGGTGG  
GAGGAGAAACGGCATTATAGGAAACAAGGGGCTTTGTGTTGATCAAAGCATCAGGAATGTCCGAAGG  
AACTCAAGCATCGGCGCTTGTAGTGGAAAGGCTGCTCAGGAAGTGTTTCATGAAGAGCAAACCTAGTTGT  
GTTTTGCATTGTATTACTTTCTTTGGCTGTTCTAATGGGTGTTTTCATGCTTGTGAGTTACTGGAAGTACA  
AGTGCAATGCTGAAGCTGATTCAGAAAAGTGTCTGGGACATTCAAATGGAATGAATCCAAAATGGAAG  
CTTGAAAGCTTCCAACATGTGGAACCTTGATATAGATGAAATATGTGATGTTGGTGAGGACAAGCTGGTA  
GGAAGTGGGGGCACAGGAAAAGTTTATCGTTAGATTTGAAGAAAGGTTGTGGCACAGTGGCAGTAA  
AGCAGCTTTGGAAAGGAAATGAGGTGAAAGTTTTGACAAGGGAAATGGACATTCTAGGAAAGATCAGG  
CATCGAAATATAGTTAACTGTATGCCAGTCTAATGAGAGAAGGTTTCAATATGCTGGTTTTTCGAGTACT  
TGCCAAATGGTAATTTATTCGAGGCACTACACCGGGAAGTCAAGGCTGGGAAGACAGAATTAGATTGG  
TACCAGAGGTATAAAATTGCAGTTGGAAGTGCAAAGGGAAATCGCTTATTTGCACCATGATTGTGTCCCG  
CCTATTATTCATAGAGATATCAAGTCAACAACATTCTACTTGATGAGGAGTATGAAGCAAAGTTTTCTG  
ATTTCCGGGGTTGCAAAGTTTCAGAAATTTCTCTAGAGTCTCCGAGTTCAGCTGCTTTGCAGGCACTCA  
CGGCTATTTAGCTCCTGGTATGTTTCAAAGAGGATAAACCAAATACTATGTTTCCACTTCTTTCTATTTTCA  
CTCTTGCTAGTTTCTAACATCACATTTAAATTTGTTTTATTGACAGAGATAGCATATACTTCCAGAGTGA



CAGAAAAGAGCGATGTATACAGTTTTGGAGTTGTTCTATTAGAATTAGTAACCGGAAGGAAACCAATAG  
AGGAAACCTACGGAGAAGGCAAAGACCTGGTTTATTGGGCATCAACTCATCTTAATGACAAAGGAAGT  
GTTCTGAATATTCTTGATCAAAAGGTGGTTTCCGAGCTTATCCAAGATGACATGATCAAAGTTCTGAGGA  
TTTCTGCCCTATGTACGACTAAGCTTCTAATTTACGCCCCAGCATGAAAGAAGTAGTAAATATGCTTGTT  
GATGCTGAACCTTGAACATTTAGTCTTCAAGCAAATGCGAGAAAAATGAGAAGGATCCTTTGTAGTTTTC  
TCCTTTCCCTCTTACCATATAGTTTAAATCCAACTTCAGTATAGTTTTAGTTTTCTCATTATGGATATGC  
CATGTAAAATTGTATCCAACCTTGTCTGTACAAGTTCATTTGTAAATGGAATGCATATTTCTGGTTGAG  
CTTATAA

>PGSC0003DMG400023283 LRR-RLKs

ATGATTGTCTTGAACCTAGTGAATTGTTTGGTCCATTGTCACCAGCAGTTGGTAATCTTAGTTTCCTCAG  
GGTACTTTGGCTCAGCAGAAACAGTTTCACTGGCCAAATCCCTGGAGAGATAGGAAAGCTATCGAGATT  
ACGGAGGTTGAACTTAGCAAACAATTCATTTTCTGGTGAAATACCAAGAAACATATCGCGGTGCTCCAAT  
CTTAATTATATTCATTTAGGTAATAACAATCTGAGTGGAAGCATTCCAACAGAGTTGAGATCATTGAATA  
AACTTGAGAATTTACTACTTCAGTTGAATAAATTGACTGGAGAAGTTCCAGCTTATCTAGGTAATCATTCT  
TCACTCTTGGCAATTGCATTAGGAGATAATCAATTACATGGAAAGATACCTGATATTTTTGGTGGACTCA  
AACATTTGGTGTTTCTTGATTTTGCTTTGAATTATCTGTCTGGAGAGATTCTATGTCAATTTCAACTTGT  
CATCATTGCATACACTTCAGATAACTTTAATAAACTTGAAGGGGCTCTCCATCAGATATGGGGTTCAAT  
CTTCCAAGTTTAAAGTTCTTTCTCCTTGTGGGAAATCAACTGACAGGAAAGGTTCCACTTCAGTACTGAA  
TTCTACATCACTTATGGAATTTGGTATCGACGGGAATAATTTCACTGGACAAGTACCTGCCTTTGAAAC  
CAAAGGATTTGTACTGGCTTGGACTTGTGAAAATCATTTTGGAAATGGAATGTTGGATGATTTGAAG  
TTTATGTACTCCCTACAAAATTGTACTAGTTTAGAGCAGCTAATATTGGAAAACAACAATCTTGGAGGAG  
TACTGCCAAGCTATATAGGCAACATGTCCAATCTTTACGGCTTTCTGTAGGGGGGAATCTCATCCAAGG  
AAACATTCCCACAGAGATTTTACAGCTTGAAAACCTGCAAGTACTTGGTCTCGAGAAAAATAATTTTACT  
GGTATGATTCTGAGTCTATTGGACAATAAGCCAATAAGTAGGTTATACATTCACCACAACAGATTTT  
CAGGTGAGATTCCACATTCTTTGGAATTTGACGAGGTTGATTGAACTCGATTTGGGATCAAACAATTT  
GCAAGGTACTGTGCCTTCAAGTCTTGAAGCTGCAAGTCTTATCACTCTTGTATCTGAATGGAAATCAA  
CTTAGTGGTCTTATACCGAAAGAACTGTTTGGAGCTCTCCCTTATAGAATTTGACCTCTCAAACAACCACTT  
GACGGGGTATTTTCTGTAGGGATTGGCTCTGGAACTTACTGGATTGATAAACTTGTCTACATGAAC  
CATTCATACAACAATTTATCAGGTGAAATACCAAGCAGCTTTGGCACTTTGACTAGTTTGAGGGAGCTAT

ACCTTGGTAACAATGCCCTTCAGGGAGTTATTCCTGCATCCTTGAGTTCTTTGAGAAGTCTTGAATATATG  
GATCTTTCTCATAACCACTTTGTAGGGAGGATCCCAAAGTTTCTGGATGAACTTGTCTCCTTGAAGTTCTT  
AAATTTGTCTTATAATGATTTGGAGGGTGAGGTGCCTTTGAAAGGAGCTTTCAGAAACATGAGTGCTGT  
TTCACCTGTTGGGAACAGTGAGCTATGTGGTGGTATTCCAGAGTTCAAATGCCAAAGTGCAGCAACAA  
AGTAGCGTCAAGAAGACGAAGGTTATCTCATAGATTGATAATAGTAATGCTGGTTATTGGAGGATTATT  
GGCAGCAACCACAGTGGCCCTTCTATTTTCTTGTGTGCTAGAAGAAAAAGAAGTCCACTTCATCGGAG  
AATTCATCGTTGGACGTGATCCCAAGAGTGACTTACAATAGTCTTACAAAGAACTAATGGCTTCTCTA  
CGTCAAACATGATTGGTTCGGGTGCATTTAGCTTCGTGTACAGAGGCATTCTAGAGGAAAATGGAAAAT  
TTGTTGCCATAAAGGTGCTCAAACCTCAAGTTAGGGGAGCTTCTAAGAGCTTTCTTACTGAATGTGAAGC  
ACTAAGGCATATCAAGCATAGAAACCTGGTAAACTCTTAACATCATGTTCAAGCATTGATTACCAAGGT  
AATGACTTCAAGGCTCTCATTATGAGTACATGGCCAATGGTAATTTGGCAAATTGGTTGCACAATAGAA  
GTACAGATGGTGAGGAAAATCATGAGCCTAAACTTTGAACATGCTACAGAGACTCAATGTAATAATTG  
ATGTGGCATCTGCATTAGATTATCTTCATCATCAATCTGGAACGCCATTGACACATTGCGATATCAAACCA  
AATAATGTGCTTTTGGATGAAGATTTTGTGGCTCATTAGGTGACTTTGGACTTGCAAGGTTTCTGCCTG  
ATGCTGCAAATCTGCTCTCCTTAAGCCAATCAGCCAGCTCTCTCAATATAAGAGGAACTATTGGATATGT  
TCCACCTGGTAATTAACCTTCTCCCTCTCTAAACATCATTTTATATTTATGAAGGTCCTCTTACTTATCAA  
GTTTGTCAATTCATGTATGTGCAGAATATGCTACATGCAATACGTTTTCGACCTATGGAGATGTCTATAGT  
TATGGAATTCTACTGTTGGAAACATTTACTGGACGAAGTCCAAGTATGAGATTTCCAAGGATGGTCTAA  
ACCTTCATGATTTTGTAAAGAGAGCCATACCTGAGCAAGTGAAAGATGTTTCTGATCCTAAACTTGTCTAT  
GATGAAATGGGCAGACTGATCAGCAACAATAAAACAATCGAGTGCCTCACATTGATTTTTCAAGTTGGG  
ATTGCTTGTTCAAGTGAATCTGCAAAGATCGCATGGACATTGCCAATGTTGTTAATGAACTGAATGTAA  
TCAAAGATGCCTTCTGAGGAACTAGCAATATTGGCTATGAAGTTTTTGAAGTTTTCATTATAAAGATACTA  
CTTATATAAGTTATATACTCTTTATCCACTTTTCCCTTCCCTTTTCTGCTTCTCCTTATGTAATGGAAATT  
>PGSC0003DMG400023329 LRR-RLKs

CAAATTTGTTCTATTCTACTTTCTTGAATGCTTTGTGTGTCCCACTTTACACATTACACTAAACCCCAAT  
TGCCATTTGAATCTCACCTATTCATCATGTCATCAATTATCTACTATTACTCTTCTTGTATAACTTAATCAT  
TCATTCAACTCTTCAAATCCATGGCTATTAGTCCAGGTCACCTTTTCTTACTAACTTGTATATTTACATATT  
ACTATTTGCATATATACACGTTGTGAACCTCATATAGTCGACCTCAACTTGTTAGGGACTGAGGCCTAAT  
AGTTGTTATACATGTTGTGAAGCTTATATAGTTGACCTCAACTTGTGAGGGACTGAGGCCTAGTAGTTGT

TATACATGTTGTAAAGCTTATATAGTCGACCTCAACCTGTCAGGGACTAGTAGTTGTTATACATGTTGTG  
AAGCGTATATAGTCGACCTCAACTTGTTATGGATTGAGGCATGGTAGTTGTTATACATGTTGTGAAGCTT  
ATATAGTCGACCTCTAACTTGTTAGGGACTGAAGCATGGTAGTTGTTATACATGTTGTGAAGCTTATATA  
GTCGACCTCAACTTGTTAGGGACTGAGGCGTAATAGTTGTTATACATGCTATTATATAATTTTCTTGATAT  
TTTTTGGGTATATTGAACTAAGTTAATTTTGCCTTAGCTTTTAAATGAACCTATGTTAAGGGGATTCAAC  
AATCTAATATATATATGTGCCTATCATTTAACATACGTATGTCATTTAGTTTTGTACCTTTGTCATCCCTC  
AACCCCTCTCCAATCTTTTCTATCTATCATTAGAAGTAGGACGGGTAATATTCCGGTGAAGTGGATAAAA  
ATTAGTTTAAAGGCTTTATGTTTTGATGATCATTGAGAAATTAACCTTAGGAAGACTAGTCGCTCAGA  
AATAGTCATTTTGATTCTTTTATTCTTACTCAGTATGAGCATTAACTTATTATTGGTAGCACAAAAGAAGT  
GGATACTTCTTGAACCTAATTGGTAATATTTTCATTGTGTTGCAGCTACAAGGCCTATTTCTTTGACATCAT  
ATTCTCCGACCTAGACTTGTTTGAGATTGAGGCGTAATTATTGTTGTTGTTGTTATATAGAGTATTGGAA  
ACAAGGAGAAGGATCAATTAGAAGCTCTCCTCTGGTTGATAGAGAAAATTCAATGCCTACAGCCTTTTC  
GTTCCGGAATTTTCACTTGAACCTGCTGCTATTCCTACTTTTATGCAGCAATGGTCTCTCCTCAAATGATTA  
TGATGTTGAAGGTATGGAGTTATAGGTTTTGGTTACTGTACCTGTGAAAATTTTCATATGCTTGCAAATA  
ATGTGCTAATAAAAATCGCGATAACTGTTATTCTCTATTGAAATCATATATCATATATACATCATTTTCAGGT  
CATGCTTTAATTGAGTTGCTGAGGGCTCTGAATGATTCACACAATAGAATCAAAGATTGGAACATTGATT  
TTGTGACTCCATGTTTCAGTTGGTCTCATGTTACATGTAAAAATGGAAATGTCATATCCCTGTAAGACTAA  
TTCTTTCTTTCTGTTATAAGTAAATCAAGTAGATTCATATAGTCGACCTCAACTTGTTTAGGACTGAGTC  
GTAACCTATTGTTGTAATCAAACAGGAACCTTAGCTTCTAATGGATTCTCAGGAACACTTTACCGTCGATA  
ACCAAATTGAAATTTTTGGTTAGCTTGTAAGTATACTGCACCTTTGTATTAAAATTAGAGTTACTGGTCAAA  
AACACACCTAAAGTATCCCTTTTTTCGAGTTCCCTATCACCAACTATTTATCAAAAACACACCTCAACTATT  
AGTTGCTCCCTTTTTCTACCTGAGATATCACCATCGTTCAGGCAGGAAAAATGAAATGTTGCTAATACTT  
GATGTCTCGCGAACCTAGGAAAGTTTTGTGAAGTGTGCTAAAATGTTAATGGAACCTGTGCAGGGATTT  
ACAGAACAATGATCTATCTGGTGCCTTACCTGATTACCTTAGCAGCATGTCAAATCTACAAAACCTGAAT  
CTTGCAAACAATAATTTCAATGGCCCTATTCCACCAGCTTGGGGTCAGCTCTACCAACTTAAATATTTGTA  
AGTACTTGTTTTCTTTGTTTCTTTGTTCTCTCCGTTTTCTAAAATATCAAGGAATGTCACTCGGACTCTTC  
AAAAATGATGACAGGTTTCGTGTCAGTTCCTCCAAAAGCAGTGCATTTTTGGAGGATCCAACACGAGTGT  
GACAACAGTTTTGGAGAGTCCTCTCTGACCTAACATAGCTCTTATTAAATAGTTCTTGTAACAAAGTCTT  
TCTATGATATGTCCTTTTGTCTGTCATCAGGGTCATGAGGGGAAATCACATAACTGGAACCTGTTCCAAAT

TCACCTACAAATATCACAGGCTTAAAAGAAGCTGTAAGAAGCTATGTTTACCTTACGGGCATAATTTACTCTT  
TGTTTGAAATTTTCGGTTGGATTGAGGCCTATGTTGCTCAGACTCTTCAAAGCTACTATAGTATGTGTGTC  
GAACCCCTCAAAGGTACCATTTTGGAAAGTCCGAGCAACATAGAATGAGTTGTTATTTGATGTTTTTCAT  
TTATTTCTGGTTGTAGTTCTTACTTGTTTTAATTCTTCACAGGGACCTGTCCTCCAATGATCTGACTGGAG  
GTATCCCACTGCAGTTGTTTTCAATACCAACATACAGGTAATGTCATCATTTATTCTTCTTTCTTGCCAACT  
TGTTTAGCCTTCCCATTTTGGATGTTGAGCTCTCAAAAAGGGCTACTTGATGCACAAAACAGCCATGGGGG  
TGTGACATAGGCAGTCTACCCTGGTGTAGCATCAGTAGCTTATTCCACAGCTCGACCTCATGACCTATA  
GGTCATATGGAGACAACCTTACGTTGCTCCAAGGCTCCCTTCAACTGATAAAAAAATGAAAATTTGTTAC  
TCATGACTGCATTATTCAACTTGAAGCTATTATTATTGACTTAGTTGCTTAACTATGTTGTTTTAACAAATCA  
TTCTATACGTCGTAATCAGTTTTTCAGGAAGCTCATCTTGCTTGTGGCAATAGATTTTCAAGAAACCCTGTGTT  
TCTAGTTCTCTGCTCCAGGTTAATAGTCTTGTCCCAATGCATCTTTTAGTTCTTAAATCTTTGCCAACCA  
AATGATTATTGCTCAAGTGATATTTTTTTCAACAGCTTCTAGCAGAAGACCAAAAAGCTGAGGTTGCTATTA  
CTGGTGCAAGTTGTGGTGCATTCCTTCTTCTTAGTTGGGGCTATCGTCACATATCGTTGTAATTATAAA  
CGTAAACTCAAACAAGATCAATTTTTTGGATGTGGAAGGTATATGCTTTACTCCTATTTCTTCAACAGAAAG  
AGTATATGGTTTTTCTGTAAGTGAACAAATTTCTTAACTTCAAATGCCATCTACTTGTATGGCATTTTA  
GGTGACGTTGAGCGCAACATTTTATTAGGCCAACTAAGAAGGTTCTCATGGCGCGAACTTCAAGATTGCA  
ACGGACAATTTTCAAGTGAAGCAACGTTATAGGACAAGGAGGTTTTGGTAAAGTTTACAAGGGCTATCTT  
TCAGACAACACAAAAGTGGCAGTGAAGAAAGCTCACTGATTACCACAATCCTGGTGGAGAGGCTGCATTT  
CTAAGGGAAGTGCAGCTGATTAGTGTGAGTTTTCATCGAAATCTCCTACGTTTGGATCGGGTTCTGTACAA  
CCTCTTCTGAGAGAATTCTTGTATCCATTTATGCAGAATCTTAGTGTGTCATATCGGTTAAGAGGTATG  
CCCCCTTACTCAACCACTTTTTTTGACATTCTTGATACTATTCAGTCTGTTAAGTCTGTGTTTGTGTTTT  
TCCTCTCTTTTCGACAGATTTAAAACCTGGAGAGAAAGCTCTAGATTGGCCAACGAGGAGACGGATAGC  
ATTTGGAGCAGCACATGGTCTAGAGTACCTACATGAGCATTGTGATCCTAAGATCATTATAGAGATCTA  
AAAGCAGCAAACATCCTCCTAGATGATAACTTTGAACCTGTTCTTGGAGATTTTGGACTAGCAAAGCTAG  
TTGATACAAAAGTACTCATATTACAACCTCAAGTTTCGCGGAACAATGGGCCACATTGCTCCAGAATACTT  
GTCTACTGGAAAATCATCTGAGAAAACAGATGTATTCGGATATGGTATTACACTTTTAGAAGTTGTAACA  
GGGCAACGTGCAATTGACTTTTCGCGTCTTGAAGAAGAGGAAGATGTGTTGCTACTGGATCATGTAAGT  
CCCTACTTCCACACACTTTTCAATTTTTGAAGAGTTAGAGCAACATAATGGATACCTTTTTACTTCTACAG  
ATCAAGAACTACTAAGAGAGAAAAGGCTAGGTGACATTGTGGATGGAAACATGAAAAGTTATGAACC

CAAAGAAGTAGAGACAATCCTTCAAGTTGCATTGCTATGCACCCAAAGTTCACCTGAGGAACGTCCGAA  
AATGGCACAAGTAATCACCATGCTAAAGGGTGTAGGTTTGTAGCTGAAAAATGGGCAGAGTGGGAGCAAC  
TTGAAGAAGTAAGAATTCAACAATTTTCGCTCATGTGCGGACAGTTTATGTGGGCTGAAGACTCAACACA  
TGATCAAGAAGCTATACAATTGTCTCAAGCAAGATAAACAAAAGGAAGATGCAGAGAAATGTATGTATA  
AGTACTTCTGCAATAAAATTTAAGAGTAGTTTTAGCTTCTGCTGCAGCTAGCTAGTTATGTAACATGTAA  
GAGTAATTTTATCATACTAGCTAGTTATGTATCATGTAAGAGTAAATTTATCATACTATATAAGGCG  
CTAAGGAGTCTTTTTTAAATTTACGATGTATATATAGAGAGAGAGACCATCTATTACTGAATTCACCT  
AATTCCTAGCTCGTTGACTAAAGTTCCTGCTCGATACTAATACTAAAGTTCAT

>PGSC0003DMG400023550 LRR-RLKs

ATGTTGAGATATCTAGAAGTGGGTAACAATCCGTTGAGCGGCGTTCTACCAAATTCTATTGGGAATCTCT  
CATCTACTATTGAAAAAATCATTTAGTAGATGCACACATCAATGGCCTCATCCCCACAAGTATAGGCAA  
CATGAGCGGTCTTACATCCATAGACATTCAAGACAACAACCTGGCAGGGAATATTCCTTCTGAGATTGGT  
AAGCTTAAACAACCTCAAGGGTGTATCTAAGTAACAATAAATTTAGGGACATATTCCAGAAGCGGTAT  
GCCATTTATCTAATTTGGTTAAATTAACCTGCAAGTTAATGAGCTCTCTGGATTAATTCAGAATACTTT  
GGAAATCTTAGCATGCTACAAAAGCTTTATTTGGCTTCTAATAAATTTTCATCAAATTTCCGTTGAGCCT  
TTGGAAGATTTAGTGGTCTTCTCTATCTAAGTGTGTCACAAAATTCATAGAGGGGAGAACTCCATCAGA  
TATTGGAGAACTGAAAGCCATTGTAGGACTATATCTTTACAGTAACCACTTTTCAGGTGTGATACCAACC  
AGATTCGGGGAACCTCAAACCTGCAATATCTTGACCTATCGAACAATTCATTTTTTGGCAAAGTCCATT  
ATCCTTTGCCAACTTGATAAGCTTGGTATTCTTGAATTTGTCTTTAATGCCTTGTCTGGTACTATTCTAT  
GTCATTGGAAAAGCTCTCCTACCTTAAAAGCATTAAATGTTTCATTTAATGATTTAGAAGGTGAAATACCG  
AGTGGTGGCGTGTGTTGCAAATTCACCTTTCGCAATCATTTGCGGGGAACAAAGGTCTTTGCGGAGTGAC  
ATATTGGATATTCCTGCTTGTGATATCACTAATCCTGGAAAACAATCAAAGCTTAAAGGGGGTGTGCTAA  
AAATTGTTACTCCACTGGTTATTTATCCTTTCTGATATTCTTGTGGTTTCAATTTGGATAATGAAACGAC  
ACAAGAAAGGAAAGTCAAAGATGTTGAAAAGGTATCAGAGATTAGGACTCACCAATTAGTTTCTTATC  
ATGAGATTCAACGAGCAACAATAATTTGATGAATCCAATTTAATTGGTGAGGGAAGCTCTGGCTCTGT  
GTACAAAGGCATTTTATCTAGTGGAACTGTAGTGGCCATAAAGGTTCTGGATTTGGAAAATGAGCAAGT  
TTGCAAGAGGTTTGATACTGAATGCGAAGTGATGAGAAATGTTAGACACAGAAATCTTGTGTAACATCC  
GACAATTTGAAATAGCTTTGAAGAGGCTTAGGATTGGAAATTTTCATTTTTGAAAGGATTTAAAAATCT  
GGAAGAATTTGGCTAAGTGTAGAAATCAGTGATTTTTTGGCCAACTTTGAGAAGTCATAACTTCCAGCTC



NNNNNNNNNNNNNNNNNNNNNNNNNNNNNNNNNNNNNNNNNNNNNNNNNNNNNNNNNNNNNNNNNNNNNNNNNNNNNNNNNNNNNTTGT  
TACTCCAGTGGTTATTGCATCCTTTCTGATATTCTTGTTTCGTTTCAATTTGGATAATGAAACGACAGAAGA  
AAGGGAAGTCCAAGAGGTGGAGAAGATACCGGAGATGGGGACTCATCAATTAGTTTCCTATCACGAG  
ATTCAACGAGCAACAAATAATTTTGATGAATCCAATTTAATTGGTGAGGGCAGCTCTGGCACTGTGTACA  
AAGGCACATTGTTTGGTGGAAGTGCAGTGGCCATTAAGGTTCTGGATTTGGAAAATGAGCAAGTATGCA  
AGAGGTTTGATACCGAATGTGAAGTGATGAGAAATGTTAGACACAGAAATCTTGTTCAAGTGATTACTG  
CATGTTCTAGTACTATATAAGAGCCTTTATTCTGCAATTTATGCCCAATGGAAAGTCTTGAGAATTGTCT  
GTACAAAGAAGATCGCCACTTGAACCTTCATCAAAGAGTTTCTGTAATGCTTGATGCAGCTATGGCAGTT  
GAATATCTACATCATGGTCATGTCACTCCAATAGTTCATTGCGACTTAAAGCCAGCCAACGTTCTTTTGG  
TGAAGATAATGGTGGCTCATGTTGGTGATTTTGGCATCTCTAAAATTTTAGCCATAAGCAAGTCCATAGC  
TTATACCGAAACATTGGGCACTCTTGATACATTGCACCAGGTATAAAAAATAATCTCTCTTTGATTTTCT  
CTTATCATAGTTAAGCATTCTAAAAGTAAAAAAGCAAGTCTTCATTTATGCAGAATTATTGTTGTATTTT  
AATTGAGTAACTTTTCTTCAATCCTTTTCTAAGAATATGGCTCAGAGGGAATAGTGTCTTCTAGTGGTGAT  
GTTTATAGCTATGGCATCATGTTGATGGAAGTCTGACCAAAGAAGGCCAACAGATGAAGAGATATGC  
AATGAAAATCTTGACCTGAGGAAATGGATAATACAATCATTTTCAGGGAGTATGATGGACGTTGTTCGAT  
GCCAATCTTTTTTACGAGGAAGAACAATCACTAGTAAAAGTAAAATCTGCATAGCGTCCATGATAGAAT  
TGGGTTTAGATTGCACAAAGGAAATGCCAGAATCAAGAGTGACCATGAAAGATGTAGTGAAGAGACTT  
AACAAAATCAAAAACGCATTTTCTGGAAACATAG

>PGSC0003DMG400023554 LRR-RLKs

ATGTGGAAAGGGCCATGGTATGTACCCGAACTCAGAGTCTTGATCTCACCAACAATAACCTCACGGGT  
ATGATCCCTCCTTCTGTTGAAATGCCACAAAATGATGAACTTCAGTTTGTGGGAATAGAGTCAGCG  
GCAACATTCAAAGGAGGTCGGTAATATGAGCCAAGTGCAGACTTGTCTTACTGATAATCAATTAAC  
AGGTTCCATCAGTGGCGAATTTAGAGCCAAAAAAGGGCACCCGCACCCATGGTCTTTTCGTAAAATT  
AGTATATTTTATATGTATATTTTTAAGATTTTGTATAATATTATATTCTTGCACCCGACTACAAGAAGTC  
TCATGGTTAAATGTTGAGCTTTTACCTTGGAGGATTAAGGATCAATTTTCACTTCAATACATTTTACTTGG  
TGCACCCATGTTGAAAAATCCTAGATTGCCTCTGGGTTTCATTCCCAGAACTGTTTAATATCTCGTGC  
CTACTTGCCGTATCTCTGGCAAACAATAGCCTTTCTGGTCCTCTCTTGCTAGATGAAGGCAATATTGTGAC  
GAATCTGTACTTTTTAAGTATATCTGACAACCAATTTCTTGTTGCATTCCTTCCAACATATGCCAACTCAC  
AGAGCTCAAAGTTTTGTCCGTATCTTCAACAATATAACTGGAGACATACCCAAAAATATTGGTTGTTTAT







ACTAATTTGGGAAATCTTCATGAGCTGCGATATCTCTTCTACATCATAATCAACTAACCAATGAACCAAG  
AGAGTGTGAGTTGTTATTCTTCAATTCATTGGCGGACTGTAAGATGTTGAAATATCTACAAGTGGGTTTC  
AATCTGTTGAATGGCGCTCTGCCAAATTCTATTGGGAATCTTTCATCTACTATTCAAACCTTTCATATAGG  
ACATGCACACATCAACGGCCTCATCCCCACAGGTATAAGCAACATGAGCGGTCTAATGACCCTATACTTT  
CAAGGAAACAACTTGACAGGGAGTATTCTCTGAGATTGGTAAGCTTAAACAACTCCAAGGTCTGTAT  
CTACGTTACAATAAATTGCAGGGACATATTTCTGAGGCAGTATGCAATTTATCTAATTTGGTTCAATTATA  
TCTGGAACATAATGAGCTCACTGGAGTGATCCAGAATGTATAGGAGATCTAAGCTTGCTACAACATCTT  
TATTTGGATTCTAATAAATTTTCATCAAATTTCCGTTGAGTCTTTGGAAGATGAGTGGTCTTCTCTATCT  
AAGTGTGTCACGAAATTCCTTAGAGGGAGAAGTTCCATCAGATATTGGAGAAGTCAAAGCCATTGTAGG  
ACTATATCTTTGCAGTAACCACTTTTCAGGCGTGATACCAACCAGATTCGGGGAACTCCAAAACCTGCAG  
TATCTTGACCTATCCAACAATTCATTTTTGGCCAAATTCATTATCCTTTGCCAACTTGATAAGCTTGGAA  
TTCTTGAATTTGTCTTCAAATGCATTGTCAGGTAATCCCAAGTCTTTGGAAAACTCTCATACTTAAA  
AGCATTAAATGTTTCATTTAATTATTTAGAAGGTGAAATACCGAGTGGTGGCGTGTTTGCAAATCCACTC  
TTCAATCATTCTCAGGAACAAAGGTCTATGTGGAATGCACATATTGGAGATTCCTGCTTGCCTATCAA  
TAATCCTGGAAAAACAATCAAAGCTTAAGGAGGTTCTGCTGAAAATTGTTACTCCAGTGGTTATATCATCC  
TTGTTGATATTCTTGTGGTTTTAATTTGGATAATGAAACAACAAAATAAAGGAAAGTTCAAAGATGTTG  
AAAAGGTACGGGAGATTGGGACTCATCAGTTAGTTTCTTATCATGAGATTCAACTAGCAACAAATAATTT  
TGATGAATCCAATTTAATTGGTGAGGGAAGCTCTGGTTCTGTTTACAAGGCACATTATCTAGTGGAAGT  
GTAGTGGCCATTAAGGTTCTGGATTTGGAAAATGAGCAAGTATGCAAGAGGTTTGATACCGAATGCGA  
AGTGATGAGAAATGTTAGACACAGAAATATTGTTCCAGTTATTACTACTTGTCTAGTGACTATATAAGA  
GCCTTTGTTCTGCGATATATGCCAACGGGAGTCTTGAGAATTGGTTGTACAGAGAAGATTGCCACTTGA  
ATCTTCATCAAAGAGTCACCATAATGCTTGACGTGGCAATGGCAATTGAATATCTACATCATGGTCATGT  
CACTCCAATAGTTCATTGCGACTTAAAGCCAGCCAACGTTCTTTTGGATGAAGATATGGTGGCTCAAGTT  
GGTGATTTTGGCATCTCTAAAATTTTAGCCATAAGTAAGTCCATGGCACATACCGAGACATTGGGAACTC  
TTGGATACATTGCACCAGGTAGACTACTTTCTTTCTTCTCACTTATATAATAACCTTTCTATTTGATTTTTT  
TCTTATCTAAATCAAGCCCTTGCAAATACTAGAATAAATAAAAAGCATGTCTTTGTTAGTACGCGCACTA  
TTGTTATATTCAAATGAGTAATTCATTTTCATTTGTTTAAAGAATATGGCTCAGAGGGAATAGTGT  
CCACTAGTGGTGATGTTTATAGTTATGGCATCATGTTGATGGAGGTTTTGACCAAAGAAGGCCAACAG  
ATGAAGAGATATTCCATGGAGATCTTGACTTGAGGAAATGGATAACACAATTATTTTCAGGGACTATGA

TGGACGTTGTGGATGCCAATATTTTTCCGAGGAAAAACAGATCACTTCCAAAAGTGAAATCTGCATCGT  
GTCCATGATAGAATTGGCTTTAGACTGCACAAAGGAAATGCCAGAATCAAGAATAACCATGAAAGAAGT  
AGTCAAAGGCTTAACAAAATCAACAACACATTTCTGGAAACATAG

>PGSC0003DMG400023612 LRR-RLKs

ATGGAGGGGCAAATTCCTCCGGAATTAGGGAAGCTATCAAATTTGAGGAAATTAAGCTTTTCAGAGAAT  
TATAATTTTATTGGTCAAATTCAGAGGCTATTTTCAACATATCTTCTTTGAAATGATTGATTTTCAGTAAC  
AATAACCTCTCGGGTAGAATCCAACCACTACAGGTCTTCATCTTCTAACCTTAAAGTACTTGAGTTGGG  
AGTCAATCAGCTGGAAGGGGAAATTCATTGTTTCATAACAAATTTTCCAAGCTTCAGATACTATCGCTA  
ATTGATAACTTTCTCACAGGAACTATTCCTACTAATTTAGGAAATCTTCGTGAGCTGCAAGAACTGTTCT  
ACATACTAATCAACTTACCAATGAACCAAGAGAGTATGAGTTGCGATTTTTCAATCTTTGGCGGACTGT  
AGGATGTTGAAATATCTACAAGTAGGTTCCAATCTGTTGTATGGCATTCTGCCAATTCTATTGGCAGTCT  
TTCATCTACTATTCAAAATTTGAAATAGGAGATGCACACATCAATGGAATCATCCCCACAAGTATAGGC  
AACATGACCGGTCTTACATCCTTAAGCCTTGCGGAAACAACCTTGACAGGGAATATTCCTTCTGAGATTG  
GTAAGCTTAAACAACCTCAAGGGTTGTATCTAGATAACAATAAATTGCAGGGACATATTCCAGAGGCAG  
TATGCCATTTATCTAATTTGGTTCATTCTTATCTAGATAATAATGAGCTCTCTGGACTAATCCAGAATGCT  
TAGGTAATCTTAGCATGCTACAAAAGCTTTTTTTGAGTTCCAATAAATTATCAAATTCAGGGAACCTT  
TGGAAAATGAGTGGTCTTCTCTATCTAAGTGTGTCACAAAATCTATAGAGGGAAAAATTCATTAGATA  
TTGGAGAACTGAAAGCCATTGTAGAAATACATCTTTCTGGTAACCACTTTTCAGGCATGATACCAAGCAC  
ATTCGGGGCACTCCAAAACCTGCAGTCTTTGACCTATCAAACAATTCATTCTTTGGCCAAATTCATTAT  
CCCTTGCCAACTTGATAAGCTTGAATTTCTGAATTTGTCTTTAAATGCATTGTCAGGTAGTATTCCTATG  
TCTTTGGAAAACTCTCATACCTTAAAAGCATTAAATGTTTCATTTAATGATTTAGAAGGTGTAATACCAAG  
TGGTGGTGTGTTTGCACATTCCACTGTGCAATCATTCTGGGGAACAAAGGTCTTTGCGGAATGCACATA  
TTGGAGATTCTGCTTGTGCTATCACTAATCCTGGAAAACAATCAAAGCTTAAGGAGGTCTACTAAAAA  
TTGTTACTCCTGTGGTTATTTTCATCCTTGCTGATATTCTTGTGGTTTCAATTTGGATAATGAAACGACAG  
AAGAAAGAAAAGTGCAAAGATGTTGAAAAGGTACTAGAGATCAGGACTCATCAATTAGTTTCTTATTAC  
GACATTCAACAAGCAACCAATAATTTTGATGAATTCAATTTAATTGGTGTGGGAAGTTCTAGCACTGTGT  
TCAAAGGCACATTATCTAGTGGAAGTGCAGTGGCCATTAAGGTTCTGGATTTGGAAAATGAGCAAGTAT  
GCAAGAGGTTTGATACCGAATGTGAAGTCATGAGAAATGTTAGACACAGAAATCTTGTTCAGTGATTA  
CTACTTGTCTAGTGACTATATAAGAGCCTTTGTTCTGAAATTTATGCCAATGGAAGTCTTGAGAATTGG

TTGTACAAAGAAGATCGCCACTTGAACCTTCATCAAAGAGTTACTGTAATGCTTGATACAGCTATGGCAG  
TTGAATATCTACATCATGGTCATGTAACCTCAATAGTTCATTGCGACTTAAAGCCAGCCAACGTTCTTTTG  
GATGAAGATATGGTGGCTCATGTTGGTGATTTTGGTATCTCTAAAATTTTAGCCATAAGCAAGTCCATGG  
CTTATACAGAGACATTGGGTACTCTTGGATACATTGCACCAGGTATAAAAAATCTACTCACTTTGATTTTC  
TTTTATCATAATAAAGCCTCTCCAAATTCTACAACATAAAAAACAAGCTTTTATTTATGCAGAATTATTGTT  
GTATTTCAATTGAATTAACTTTTTTCAATCCTTTTTAAGAATATGGCTCGGATGGAATAGTGTCTGCTAGT  
GGCGATGTTTATAGTTACGGCATCATGTTGATGGAGTTTTGACGAAAAGAAGGCCAACAGATGAAGA  
GATATGCAATGAAAATCTTGACTTGAGGAAATGGATCACACAATCATTTTCAGGGAGTATGATGGACGT  
TGTGGATGCCAATCTTTTCTCCGAGGAAGAACAGATCACTTCAGAAAGTGAAATCTGCATAGCGTCCAT  
GATAGAATTGGGTTTAGACTGCACAAAGGAAATGCCAGAATCAAGAATAACCATGAAAGATGTAGTCA  
CGAGGCTTAACAAAATCAACAACACATTTCTGGAAACATAGAAGTCA

>PGSC0003DMG400023614 LRR-RLKs

ATGCCTAGAAATATTGGTTGTTTATCCAAGCTCGAGAAGTTCTTGATTGGCAATAACCCAATAAAAGGGA  
CTATTCCCCTTCATTGGGAAATATTTCCACTCTGCAATATATTTATTGTGGAAGCAGTCGCATAGTGGG  
GCGAATTCCTCCGGAATTAGGGAAGCTATCAAATTTGAGGCAATTAAGCTTTGACAACAATTCTAATCTT  
ATTGGTCAAATTCAGAGGCTATTTTCAACATTTCTTCTTTGGAAGTATTGGATTGCTTTCAACAACCTC  
TCCGGGAGAATTCAAGCTACTACAGCTATTCATCTTCCGAACCTTAAAGAACTTTTCTTGGGAGTCAATC  
AGCTGGAAGGGGAAATTCCATTGTTTATAACAATGCTTCCAAGCTTGAGACACTGTCGCTAGCACGGA  
GCTTTCTGACAGGAACTATTTCCACTAATTTGGGAAATCTTCGTGAGCTACGAAATCTGTTTCTATATGAT  
AATCAACTTACCAATGAACCAACAGAGCGTGAGTTGAGATTCTTCAATTCCTTTGGCGGACTGTTGGATGT  
TGCGATATATATCAGTGGGTTCCAATCCGTTGAATAGCGTTCTGCCAATTCTATTGGGAATCTTTCATCT  
ACTATTGAATACATTTATATAGGAGATGCACACATCAACGGCCCCATCCCCACAAGTATAGGCAACATGA  
GCGGTCTTACATCCCTAGTCTTTAATGAAAACAACCTTGATGGGGAGTATTCCTCCTGAGATTGGTAAGCT  
TAACTACTCCAAGGGCTGTATCTATTAACAATAAATTGCAGGGACATATTCAGAGACGGTATGCCAT  
TTATCTAATTTGGTTCAATTATATCTGGACGGTAATGAACTCTCTGGATTAATTCCAGAATGCTTTGGAAA  
TCTTAGCATGCTACAACATCTTTATTTGGATTCTAATAAATTTTCATCAAAATTTTCGTTGAGCCTTTGGCA  
CGAAATTCCTTAGAGGGAGAAGTTCCATCAGATATTGGAGGACTGAAAGCCATTGTAGAACTACATCTT  
TCCAATAACCACTTTTCAGGCATGATATCAACCAGATTCGGGGAACTCCAAAATCTGCAGTATCTTGACC  
TATCGAACAATTCATTTTTTGGCCAAATTCATTATCCTTTGCCAACTTGATAAACTTGGAAATTCCTGAATT

TGTCITTAATGCATTGTCAGGTAGTATTCCTAAGTCTTTGGAAAACTCTACTACCTTAAAAGCATTAAAT  
GTTTCATTTAATGATTTAGAAGGTGAAATACCGAGTGGTGCCGTGTTTGCAAATCCACTCTGCAATCAT  
TTCTTGGGAACAAAGGTCTATGTGGAATGCACATATTGGAGATTCTGCTTGCCTATCAATAATCCTGG  
AAAACAATCAAAGCTAAAGGAGGTTCTGCTAAAAATTGTTACTCCGGTGGTTATATCATCCTTTCTGATA  
TTCTTGTGGTTTCAATTTGGATAATGAAACGACAAAAGAAAGGGAGGTCCAAAGATGTGGAGAAGGT  
ACTGGAGATCGGGACTCATCAATTAGTTTCTTATCACGAGATTCAACGAGCAACAAATAATTTTGATGAA  
TCCAATTTAATTGGTGAGGGAAGCTCTGGCTCTGTGTACAAAGGCACATTGTTTGGTGGAAGTGCAGTG  
GCCATAAAGGTTCTCGATTTGGAAAATGAGCAAGTATCCAAAAGGTTTGATACCGAATGCGAAGTGATG  
AGAAATGTTAGACACAGAAATCTTGTTCAGTGATTACTACGTGTTCTAGTGAATATAAGAGCCTTTG  
TTCTGCGATATATGCCAATGGAAGTCTTGAGAATTGGCTGTACGAAGAAGATCGCCACTTGAACCTTCA  
TCAGAGAGTCACTGTAATGATTGATGCAGCTATGGCAGTTGAATATCTACATCATGGTCATGTCACCTTCA  
ATAGTTCATTGCGACTTAAAGCCAGCCAACATTCTTTTGGATGAAGCTATGGTGGTTCATGTTGGTGATT  
TTGGAATCTCTAAAATTTTAGCCATAAGCAAGTCCATAGCTTATACGGAGACATTGGGCACTCTTGGATA  
CATAGCACCAGGTATAAGAAAATACTCTCTTTGATATTCTATTATCATAATTAAGCCTCTCCAAATTCTA  
GAAGTAAGAAAAAAGCAAGTCTTTATTTATGCAGAATTATTGTTGTATTTCAATTAACCTTTGTTGAATC  
GGCCTTTTCTAAGAATATGGCTCAGAGGGAATAGTGTCTACTTGTGGTGATGTTTATAGCTATGGCATCA  
TGTTGATGGAGGTTTTGACCAAAGAAGGCCAACAGATGAAGAGATATGCAATGAAAATCTTGACTTGA  
GGAAATGGATCACACAATCATTTTCAGGGACTATGATGGACGTTGTGGATGCCAATATGTTTTCTGAGG  
AAGAACAATCACTTGTAAGTGAATATGCATAGCCTCCATGATAGAATTGGCTTTGGACTGCACTAA  
GGAAACGCCAGAATCAAGAGTGACCATGAAAGAAGTAGTGAAGAGGCTTAACAAAATCAACAACACAT  
TTCAAGAATCATAG

>PGSC0003DMG400023638 LRR-RLKs

ATGAAGAAGCACATTTTTATATTGACTCTTCTCTTCTAGTTCAATTTTCTATATCAATTGCCTCCTCAAAT  
GAGACGGACCAAGAAGCTCTACTAGCTTTCCAAAATCTTATTACAAGTCCGAGTCATTTTTTGGCCAATA  
ATTGGACCAAAAATACTTCTTTTTGCTATTGGTTTGGTGTCACCTGCACTCGAAAAAGGCAAAGGGTTGT  
GGCCTTGACTCTTCTGATTTGCAACTTCAAGGCACAATTTCCCGTCTTTGGCCAATTTGTCCTTTCTCAG  
CGTGCTCAATCTCCGGAACAACAATTCATGGCGGCATCCCTTACGGACTTGGCCACTTGCCTCGCTTG  
CGAGTGATTGATTTTCAAACAATCAGCTCCAAGAAAGTATTCCAACAAGTCTATTTCAACACCAGAGAG  
TTCAAATCATTTATTGGCTTTCAATAAACTCGGTGGTGAAATGTGGAAAGGGCCATGGTATGTACCCGA

ACTCACAGTTTTAAATCTCAGGAACAATAGCCTCACAGGTATAATACCTCCTTCTATTGGAAATGCCACAA  
AGTTGCTGAACTTCAGTTTGTATGGGAATAGAGTCAGCGGGAACATTCCAAAGGAAATCGGTAATCTCA  
GCCAACTTGAATTTTTGTCCTTGTTTCGATAATCAATTAACAGGTTCTATTCTGCAGCACTATTTAATATCT  
CCTCGCTTCTTGTCGCATCTCTAGCATTCAATAGCCTTCCGGCCCTTCTTGCTTGATGAAGGGAACGTT  
GTGTCAAATCTAGAGTCATTAACCTATATCTAACAACCAAATTTCTGGTTACATTCCTTCCAACATTTGCCA  
ACTCACAGAACTCAAAGCGTTGTCCATATCTTTCAACAAGATAACTGGAGGAATACCCAAAAATATTGGT  
TGTTTATCCAATCTCGAGGAGCTTTATATTGGTGACAATCCAATAAAAGGGACTATTCCCGCATCATTGG  
GAAATATTTCCACTCTGCAAAATCTTTATTGTGGAAGCAATCACTTGGAGGGGCCAATTCCTCCAGAATT  
GGGGAAGCTATCAAATTTGAGGCCAATTAGCTTTGTCCAAAATAATAATCTTATAGGTCATATTCCAAAG  
GCTATATTTAATATATCTTCTTTGGAAATAATCGATTTAGTTACAATAACCTCTCGGGGAGAATTCCAAC  
CACTACAGGTCTTCATCTTCCAAACCTTAAAGAACTTTTCTTGGGAGTCAATAAGATCCAAGGGGAAATT  
CCATTGTTTCATATCAAACGCTTCCATGCTTGAGATACTGGGGCTAAACAGGAACTTCCTCACAGGCAATA  
TTCCTACCAATTTAGGAAATCTTCGTGACCTGCGACGCTTATACTTAGAGGGTAATCAACTTACCAATGA  
ACCAAATAATCATGAGTTGCAATTCTTTAATTCTTTAGTGGACTGTAGGAAGCTGCAATATCTAACAGTG  
GGTAACAATCCATTAATGGTATTTTGCCCGATACTATTGGAAATCTTTCATCTACTATTGAATCAATTCA  
CATGGGAAATGCACAAATCAGTGGCCTCATTCCCACAGGTATAGGAACTTAAGCGGTCTAATGTCGCT  
AGCTTTTGTGGAAAACAACCTTGATGGGAACCATTCCGTCTGAAGTCGGTAAGCTTGAACATCTCCAAGG  
TCTGTATCTATATAGCAACAAATTGCAAGGGAATATTCCAGAGGTAGTTTGTCAATTTATCTTATTTGGTTA  
CATTATCTTTGCATGTTAATGAGCTCTCTGGGGTGATCCCAAATGTTTAGAAAATCTTACCACGCTACGA  
GTTCTTTTCATTGAGTTCTAACAAATTTTCATCAAAGCTTCTTTGAGTCTTTGGAAGATGAGTGGACTTCT  
CTATCTTTTCATGTCACGAAATTCTATAGAGGGAGAAGTTCCACAGGACATTGGAGGATTGAAGGCCAT  
TGTAAAACTAGATCTTTCTGGTAACCACTTTTCCGGCATGATACCAAGCCAATTGGGGGACCTCCAAAAC  
ATGAAAGTTCTTGACCTGTCAAACAATTCATTTTCAGGCTCAATTCCTTATCCTTTGCCAATTTGATAAGT  
CTAGAATACTTGAATTTGTCTTTCAACGCATTGTCAGGTAATTCCTAAGTCTTTGGAAAAGCTTTCATA  
CCTTAAAAGCATCAATGTCTCATTTAATGATTTAGATGGTGAGATACCTAGTGGAGGTGTGTTTTCAAT  
TCCACTTTGCAATCATTTCTTGGGAACAAAGGTCTATGTGGAGTACACATATTGGAGATTCTGCTTGTG  
CTATCACTAATCCTAGAAAACAATCAAATCTAAGGAGCTTGTGCTGAAAATTGTTATTCCAGTGGTTAC  
TTCATCCTTTCTGATATTATTGGTTGTGTCAGCTTGGATAATAATGAAACAAAAGATGAAAGGAAAGTCC  
AAAGACTTGGAAAAGGTACCAGAGATCAGGACTTATCAATTGTTTCTTATCATGAAATTCAACGAGCA

ACAAATAATTTTGATGGATCCAATTTAATTGGTACGGGAGGTTCTGGCTCTGTGTACAAAGGTACATTAT  
CTAGTGGAAGTGTGGTGGCAATAAAGGTTCTCGATTTGCAAATGAGGAAGTATGCAAGAGGTTTGATA  
CTGAATGTGAAGTGTGAGAAATGTTAGGCACAGAAACCTTATTTTCAGTGATTACTACTTGTCTAGTGA  
ATACATAAGAGCCTTTGTTCTACAGTATATGCCCAATGGAAGTCTTGATAATTGGTTGTACAAAGAAGAT  
TGCCACTTGAACCTTCTTCAAAGAGTCAACATAATGCTTGATGTGGCTGTGGCAATTGAATATCTACACC  
ACGGTCATGATACTCCAATAGTTCATTGCGACCTAAAGCCAGCCAACATTCTTTTGGATGAAGAAATGGT  
GGCACATGTTGGTGATTTTGGCATCTCTAAAATATTAGCTGTAAGCAAGTCCATGGTACATACTGAGACA  
TTAGGCACTTTTGGTTACATTGCACCAGGTACGTACACTAGTTTTCGTTCTTTTCACTTATCATTAAACCTT  
TCTCTTATCAGAATAAGCCCTCCGAATTCTGGAATAAACAGAAACCAAGTCTTTCATTGTACAAAACA  
ATTATTATCTCCGATTGTAATTTATTTTTCATTTTCATTCTCCTAAAGAATATGGCTTGGAAAGGAGTAGTG  
TCCATTAGTGGTGTATGTTTACAGCTATGGCATCATGATGATGGAGGTATTGACAAAAAGAAGACCAACT  
GAAGACGAGATATTCAACGAAAATCTTGGCTTGAGGCAGTGGATAAGACGAGCATTTCGGGACAAT  
TATGGAAGTCGTAGATGCCAATCTTTTTCATGAGGAAGAATCTGTCAATTTCAAAGTGAAATATGCATA  
GCCTCCATGATGGAATTGGCTTTGGATTGCACAAAGGAAATGTCAGAGACAAGGATAACTATGAGAGA  
CGTAGTCAAGAGGCTTAGCAAATCAAAAACACATTTTTAGGAACATAG

>PGSC0003DMG400023639 LRR-RLKs

ATGGAGAAGCACATTTTTTTATTGACTCTTCTTTCTAGTTCCATTTTCTATATCAATTGCTTCTCAAATG  
ATACGGACCAAGAAGCTCTACTAGCTTTTCAAATCTTATTACAAATCCGAATCATTTTTTGGCCAATAAT  
TGGACCAAAAATACTTCTTTTGTCTTGGTTTGGTGTCACTTGCAGTTCAAAAACGCAAAGGGTTGTGG  
CCTTGGCTCTTCTAATTTGCAACTTCAAGGCACAATATCCCCGTCTTTGGCCAATTTGTCCTTTCTCAGAG  
AGCTCAATCTCGAGAATAACTTATTCCATGGTGGCGTACCATACAGACTTGGCCACTTGCCTCGCTTGGC  
AGTGATTATTGTTGAAACAATCAGCTAGAAGGAAGTATTCCGACAAGTCTATTTCAACACCAGAGAGTT  
CAAATCATTTTCATTGGCTTACAATAAACTCAGTGGTGAAATGTGGAAAGGGCCATGGTATGTACCCGAA  
CTCAGAGTCCTAAGTCTCAGGAATAATAGCCTCACAGGTATAATCCCTTCTTCTGTTGGAAATGCCACAA  
AGTTGCTGAACTTCAGTTTGTCTGGGAATAGAATCAATGGTATCATTCCAAGTGGATTGGTAATCTTAG  
CCAATTATAGAGTTGCATTTGTTCAATAATCAATTAGCAGGTTCCATTCCCGCAACACTGTTTAATATTT  
CGTCGCTAATTAGAGCATCTCTAGCAAGCAATAGCCTTTCTGGTCCTCTTACTTGATGAAGGGAATATT  
GTGTCAAATCTGAAGTATCTAAGTATATCTAAGAACCAAATTTCTGGTTGCATTCCTTCTAACATATGCCA  
ACTCACAGAGCTCAAATTTTTGTCCATATCTTATAACAATATGATTGGAAAAATACCCAGAAATATTGGTT

GTTTATCCAAAATCGAGGAGTTTTATATTGGAAATAATCCAATAACAGGGACTATTCCCACTTCATTGGG  
TAATATTTCCACTCTGCGGAATCTTTATTGTGGAACAGTCGCATAGTAGGGCAAATTCCAAAGGCTATT  
TTAACCTATCTTCTTCGGAAATGATTGATTGCAGTTACAGTAACCTCTCGGGTAGAATTCCAACACATC  
AGGTCTTCATGTTGAGAACCTTAAAGAACTTTTCTTGGGACACAATCGGCTCGAAGGGGAAATTCCATTG  
TTCATAGCAAATGCTTCCAAGCTTGAGATATTGGGGCTAGAAAATAACTTTCTCACTGGCACTATTCCTAC  
TAATTTGGGGAATCTCCGTGAGCTGCAAGAACTGTTCTACATGATAATCAACTTACCAATGAACCAAGA  
GAGCATGAGTTGCAATTCTTCAATTCTTTGGCGGACTGTAGGATGTTGCGATATCTACAAGTGGGTTCCA  
ATCCGTTGAATGGCATTCTGCCAATTCTATTGGGAATCTTTCATCTACTATTGAAAACCTTTCATATAGAA  
GATGCACACATCAATGGCCCCATCCCCAGGGGCTTACTCAACATGAGCGGTCTAATAGCCCTAAACCTTG  
GAGAAAACAACCTTGGCGGGAAGTATTCCTTCTGATGTTGTTAAGCTTGAACAACCTCCAAGGTCTGTATCT  
AAATAACAATAAATTGCAGGGACATATTCCAGAGGCAGTATGCCATTTATCTAATTTGGTTCAATTAAGT  
CTGGGTGGTAATGAGCTCTTTGGATTAATTCCAGAATGTTTAGGAAATCTTAGCATGCTACAAGCCATTA  
TGTTGAGTTCTAACAAATTTTCATCCAAGATTCCTTTGAGCATTGGGAAGATGAGTAGTCTTCTCTATCTA  
ATCATGTCACAAAATTCTATAGAGGGAGAAGTTCCACAGGATATTGGAGGACTGAATGCCATTGTAGGA  
CTAGATCTTTCTGGTAACCACTTTTCAGGCATGATACCAAGCCAATTGGGGGACCTCCAAAACATGAATA  
CTCTTGACCTGTCAAACAATTCATTTTCAGGCTCAATTCATTATCCTTTGCCAACTTGATAAGCTTAGAAT  
ACTTGGATTTGTCTTTAAATGTGTTGTCAGGTAATTCCTTCCAAAGTCTTTGGAAAAGCTATTATACCTTAAA  
AGCATTAAATGTTTCATTTAATGATTTAGAAGGTGTAATACCCAGTGGTGGTGTGTTTGCGAATTCCACTCT  
GCAATCATTTATTGGGAACAAAGGTCTATGTGGAATGCACATAATGGAGATTCTGCTTGTGCTATCACT  
ACAACCTGGACAACAATCAAAGTCTAAGAAGCTTGTGCTTAAAATTGTTATTCCAGTGGTTGCTGCTTCTTT  
TCTGATATTTTTGTTTGCTATAGTTTGGATAATGAAACGACAGAAGAAAGCAAACCTCCAAGATGTGGA  
AAAGGTACCGGAGATCAGGACTTATCAATTGGTTTCTTATCACGAGATTCAACAAGCAACAAATAATTTT  
GATGGATCCAATTTAATTGGTGTGGGAGGTTTCGGGCTCTGTGTACAAAGGTATATTATCTAGTGGA  
GTGGTGGCAATAAAGTTCTCGATTTGCAAATGAGGAAGTATGCAAGAGGTTTGATACTGAATGTGA  
AGTGATGAGAAATGTTAGGCACAGAAATCTTATTCCAGTGATTACTACTTGTCTAGTGAATACATAAGA  
GCCTTCTTCTACAGTATATGCCCAATGGAAGTCTTGAGCGTTGGTTGTACAGAGAAGATCGCCACTTGA  
ACCTTCTTCAAAGAGTCACCATAATGCTTGATGTGGCTCAGGCAATTGAATATCTACACCATGGTCATGA  
AACTTTGATAGTTCATTGCGACCTAAAGCCAGCCAATGTTCTTTTGGACGAAGAAATGGTGGCACATGTC  
GGTGATTTTGGGATCTCAAAAATATTAGCTGCAAGCAAGTCCATGGCACATACTGAGACATTAGGCACT



CTTGGTTACATTGCACCAGGTACGTACACTAGTCTTATCCCTTTTCACTTATCATTAACTTTTCTCTAATC  
AAAATTAAGCTCTTTGATTCTAGAAATATATAAAAATCAAGTCTTTGATTGTAAAAACAATTATTATC  
TTTCGACTATAATTTATATTTTTTTTATTCTTCTAAAGAATATGGCTTGGAAAGGAAGAGTGCCAGTAGTG  
GTGATGTTTACAGCTATGGCATCATGATGATAGAGGTATTGACAAAAGAAGACCAACTGATGACGAGA  
TATTCAATGAAAATCTTGGCTTGGACAGTGGATAAGACAATCATTCCCAAGACAATTATGGAAGTTGT  
GGATGTCAATTTTATTTCATGAGGAAGAACATTTCAATTCAAAAAGTGAAATATGCATAGGCTCCATGATG  
GAATTGGCTTTGGATTGCACAAAGGAAATGCCAGAGTCAAGGATAACAATGAGAGACGTAGTCAAGAG  
GCTTGACAAAATTAAGAACACATTTTTGGGAACATAGAAATTAGCATCTTTTAAAGTGGTGTCTTTTTTA  
GTTGAAGTTAATATGTTGATCAGCTTTTTCTGTTTAAATGGTTTATATAAGGAATGAAGTTCGAGGATTA  
AAATGGAGCAAGGTTGGGATGGAGTACCAAATGAAATTTGGTGCAAGTTAGAGGGGCTATCTATGT  
ATTTGACCTTGTGTGAATGTACG

>PGSC0003DMG400023643 LRR-RLKs

ATGGAGAAGCACATTTTCTTATTGATACTTCTCTTTCTACTTCAATTTCTATATCAATTGCTTCCTCAAAT  
GATACTGACCAACAAGCCCTACTAGCTTTCCAAAATCTTATTACAAGTCCCAATCAATTTTTGGCTAATAA  
TTGGACCAAGAATGCATCTTTTTGCTCTTGGTTCGGTGTACGTGCAGTGCAAGAAGGCTAAGGCTTGT  
GGCCTTGGCTCTTCTAATTTGCAACTTCAAGGCACAATTACCGGGATTAGGGCATTGCTTGTGAGAGAG  
CTCAATCTCGAGAACAACCTTATTCAATGGGGGCATCCCTTACGGACTTGGCAAGTTGCCTCGCTTGAGAG  
TCATTGATTTTCAAACAATCAGCTCCAAGGAAGTATTCCAACAAGTCTATTTCAACACCAGAGAGTTCA  
AATCATTTTATTGGCTTTCAATGAAGTCAAGTGGTGAAATGTGAAAGGGCCATGGTATGTACCAGAACT  
CAAAGTCTTAGATCTCGCGAACAATAGCCTCACGGGTATAATCCCTCCTTATGTTGGTAATGCCACAAAA  
TTGATGAAGTTCGATTTGTCTGGGAGTAGAATCAATGGTACCATTCCAATGAAATTAGTAATTTGAGCC  
AACTTGCATCTTTGCTTGGTTGATAATCAGTTAACAGGTTTTATTCTGGATCACTGTTTAACTTTTCAT  
CACTACTTGGCGTAACTCTGGGATTGAATCACCTTTCTGGTCTCTCTTGGCTTGTGATGAAGGGAATATTGA  
GTCAAATCTGAAGATACTAAGTATATCTTTCAATCAAATTTCTGGTTCGATTCTTCTAACATATGCCAAC  
TCACACAGCTCAAAAATTTGTCCATATCTTTCAATAACATAACTGGAGACATACCCAAAAATATTGATTGT  
CTAGCCAAGCTCGAGATGTTCTTAATTAGTGAGAATGCAATAAGTGGAACTATTCTACTTCATTGGGCA  
ATATTTCCACTCTGCAACATCTTGATTCTGGGGGACAATCGGTTGGAGGGACAAGTTCCTCAAGAATTAG  
GGAAGCTATCAAATTTGAGGGTGTAACTTTCACAAGAATTTCAATCTTATTGGTCAAATTCCAAAGGC  
TATTTTCAATATATCTTCTTTGGAAGCGATTGATTTCAAGTTTCAATAACCTCTCAGGTAGAATTCAGCCA

CTACCGATCTTCATCTTCCGAACCTTAAAGAGTTTATGTTGGCATTCAATCAGCTCGAAGGAGAAATTCCT  
CAATACATAGCAAATGCTTCCAAGCTTGAGATACTGGCGCTAAATTATAACTTTCTGACAGTTGCTATTCC  
TACTAATTTAGGAAATCTTCGCGAGCTGCAATCACTGTTCTAGATCATAATCAACTTACCAATGAACCAA  
GAGAGCCTAAGTTGTTATTCTTGAATTCTTTGGTGAAGTGTAGGATGCTGAAATATGTAGATGTGAGTTT  
CAATCCGTTGAATGGCGTTCTTCCAATTCTATTGGGAATCTTTCATCTACTATTGAAGTATTTGATATAA  
GAAATGCACACATCTATGGCCTCATTCCCACAAGTATAGGCAACATGAGCGGTCTTATATCCCTAGTCTT  
TAATGAAAACAACCTTGACAGGATATATTCTCCAGAGATTGGTAAGCTTAAACAACCTCAAGGTCTGTAC  
CTATTTAACAACAATTGCAGGGACATATTCCAGAGGCGGTATGCCATTTATCTAATTTGGTGAATTAG  
AAATGGATGGTAATGAACTCTCTGGATCAATTCCAGAATGTTTAGGAAATCTTGGGATGCTACTATATCT  
TTCGTTGGGTTCAAATGAATTTTACCAAAAATTTCCCTCGAGTCTTTGGAAGATGAGTGGACTTCTCTACC  
TAAACATGTCACATAATTCTATAGAGGGAGAAGTTCCACCAACTATTGGAGAACTGAAAGCCATTGAAG  
AACTACATCTTTCGGTAATCACTTTTCAGGCCAGGTACCAAGCAGATTGGGAGACCTCCAAAGATTGAA  
GTCTCTTGACCTATCAAACAATTCATTTTCAGGCTCAATTCCATTATCCATTACCAACTTGATGAGCTTAGA  
AGACTTGGATTTGTCTTTAAATGCATTGTCAGGTAATTCCTAAGTCTTTGGAAAACTCTCATACTTA  
CAAGCATCAATGTTTCATTTAATGATTTAGAAGGTGAATTACCCAGTGGTGGTGTGTTTGTAAATTCCAC  
TCTGCTATCATTCTCGGGAACAAAGGTCTATGTGGAATGCACATATTGGAGCTTCCCGCTTGCCTATCA  
CTAATCCTGGACAACAATCAGTGTCTAAGAACTTGTGCTAAAAATTGTTACTCCAGTGGTTATTTTATTC  
TTTCTGATATTCTTGTGGTTTCAATTTGGATAATGAAACGAAAGAAGAAAGGGAAGTCCAAAGATGTT  
GAAAAGGTTCTGGAGATCAAACCTTATCAATTGATTTCTTATCATGAGATTCAACGAGCAACAAATAATT  
TTGATGGATCCAATTTAATTGGTGAGGGAAGCTCTGGCTCTGTGTACAAAGGCACATTCTCAAGTGGAA  
CTATGGTGGCCATAAAGGTTCTGGATTTGGAAAATGAGCAAGTATGCAAGAGGTTTGATACAGAATGC  
GAAGTGATGAGAAATGTCAGACATAGAAATCTTGTCCAGTGGTACTACTTGTCTAGTGACTATATAA  
GAGCCTTTGTTCTGAAATATATGTCAAATGGGAGTCTTGAGAATTGGTTGTACAGAGAAGCTCGCCACTT  
GAACCTTCTTCAAAGAGTCACTGTAATGCTTGATGCGGCTATGGCAATTGAATATCTACATCATGGCAAT  
GACTGCGATAGTTCATTGTGACATAAAGCCAGCCAACGTTCTTTTGGATGAAGATATGGTGGCGCAT  
GTTGGTGATTTTGAATCTCTAAGATTTTAGCCGTAAGCAAGTCCATGACACAAACCGAGACATTGGGC  
ACTCTTGGATACATTGCACCAGGTATACTAAAATTATAACCTTTCTATTTAATTTTTCTCTTATCAAATCA  
AGCCCTTGAAAATTCTAGGACTAAATAAAAAGCAAGTCTTTGTTAGTATGAGCATTATTACTATATCCAA  
ATGAGTTAGTCTTTTTTCATTTTCGTTCTTTAAGAGTACGGCTCAGAAGGAATAGTGTGGCTAGTGGT

GATGTTTACAGTTACGGCATCATGTTGATGGAGGTTTTGATGAAAAGAAGGCCAACAGATGAAGAGAT  
ATGCAATGAAAATCTTGACTTGAGGAAATGGATAACACAATCATTTTCAGGGAGTATGATGGACGTTGT  
GGATGCCAATCTTTTTTCCGAGGAAGAACAAATCACTTGTAAGTGAATCTGCATAGGGTCCATGAT  
AGAATTGGGTTTAGACTGCACAAAGGAAATGGCAGAATCAAGAATAAGCATGAAAGAAGTAGTGAAGA  
GGCTTAACAAAATCAACAACACATTTCTCGAAACATAG

>PGSC0003DMG400023953 LRR-RLKs

TTAATTCTATTCTTTAAGATTGGAAATGAGAGATCAAGATCGAGTTTTTACTAGTTTTGAACCATACCCTT  
TTCGAGTTGTTAACAAGTTTTAACTCGAAAAGGAGGAGCTGGTAGATGTATAATTTCTCATCTTGCAAA  
AAGATTCTTTCTTTTTGCTCAACTTTTTCTTGTTATTTCACTTACTGATATTTGGGATTCAGCCAACTTCAGG  
TGAAGATTGGGATGGGATAATTACTGCAGCAGATTTCAAGCACTTCAAGCTTTTAAACAAGAATTG  
GTTGATCCAAAAGGGTTCTTGAAAAGCTGGAATGATAGTGGATTGGAGCTTGTCTGGTGGATGGCTT  
GGTATTAATGTGCTCAAGGACAAGTTATTGTTATTCAGCTTCCATGGAGAGGTTTAGGTGGAAGAATT  
ACTGAAAGAATTGGACAATTTAGTCTCTTAGAAAAGTCAAGCTTACATGATAATGTCATTGGTGGTTCAA  
TTCTTCTACTTTGGGACTCATACTAATCTTAGAGGACTTCAACTTTTTAACAATAGGTTATCTGGTTCTA  
TTCTGCTTCTTGGTTTATGCCCTCTTCTCAAACACTTGATCTCAGCAATAACTCATTCTCTGGTGCAA  
TTCCAGATAGTCTTGTTAATTCAACTAAGCTTTATAGGCTTAATCTTAGCCATAATTCTTTGTCTGGTTCAA  
TCCCCACAAGTCTCACACAATCTCCCTCAATCATCTTTCTTGATCTCAAGTATAACAATCTTTCAGGCTCAA  
TACCAGATACTTGGGATGGAAATGGAAATGGAAAAGACTCTTCCAACCTCAGTCTTACACTTGATCA  
CAACTTCTTTCTGGAAGTATGCCTGCTCCTTAGGCAAGTTGAATGAACTTGTTGAGCTTTCACCTTAGTC  
ATAATCAATTGACTGGAGTTATCCCAAGTCATATTGGGGGACTCTCTAGGCTTACAACACTTGATTTGTCT  
TATAATGCCATTAATGGAAGCTTGTCTGATAGCTTCTGAATCTATCCTCACTAGTGGTCTTGAACCTTGA  
AAGCAACCAACTTGATAACCAAATCCCAGCAGCCATAATAAAATTGCAGAACTCTCAGTTCTCAACTTG  
AGGAGTAACCACTTTAGTGGTGATATTCCAGTCACTATAGGAAACATCTCTACTCTTAGACAACCTAGATT  
TAGCTCATAATAATAAGTGGAGAAATCCCAGCTTCTTTAGATACTTTACCAAATCTTAGTGCCTTCAAT  
GTCTCATATAATAATCTGTCTGGTCTGTTCCAACCTCATCTCGCACGGGAATTCAACTCGAGTGCCTTTGT  
GGGTAATCTTCAGCTATGTGGTTACAGTGCATCAACCCCATGTCCAATCTCTCCAGTTAGCCCATCCCCG  
AAACACCAAAAAAGCAACGTCGTAAGTTAAGTACTAAGGACATAATTCTCATAGCAGGAGGGGCACTTC  
TCATAATCTTGCTATGCTATGTTGCATTCTCCTATGCTGCTTGATCAGGAAAAGATCTGCAGCTGAAGC  
AGGGAAGGATGGTCAAAGCACGAGTAGGGCGGCTGCAGCAGCCAGAGGTGAAAAGGGTGTTCACCA

ACTGCTGGAGAAGTTGAAGCAGCAGGAGGAGGAGATACAGGAGGAAAGCTTGCCATTTTGATGGACC  
TATTGTGTTACAGCAGATGATCTTCTTTGTGCAACCGCCGAAATAATGGGAAAGAGCACTTACGGTAC  
GGTGTACAAGGCCACGTTAGAGGATGGCGATCAAGTTGCTGTGAAAAGATTGAGAGAGAAGATCACAA  
GAGGTCAAAGGGAATTTGAGAGTGAAGTCAATATTCTTGGCAAGATCAGGCATCCAAATCTTTTGGCCC  
TTAGAGCATATTACATGGGACCTAAAGGAGAGAACTTCTTGTTTTTACTACATGCCTAAGGGAAGTTT  
GGCAACTTTTCTTCATGGTAAGCACAAAATCAGTTTTCCATTTCACTTTGTATTTGTGAGAACTTCAGATT  
ATAAAAATCTTACTGTTTTTGCAGCTCGCAGTCCTGATACACCAATTGATTGGGCAACAAGGATGAGAA  
TAGCAAAGGGTACAGCAAGGGGATTGCTCTTCCTTCATACAAATGCCAACATCATTGATGGGAATCTTAC  
ATCGAGCAATGTTTTACTTGATGACAACACAAATGCAAAGATTGCAGATTATGGTCTTTCACGCCTAATG  
ACTGCTGCTGCAAATGCAAATGTTATTGCAACTGCTGGAGCACTTGGGTATCGGGCACCTGAACTTTCAA  
AACTCAAGAAAGCAAACACAAAGACAGATGTATACAGCCTTGGTGTATTATACTGGAACCTTCTAACTG  
GGAAGTCACCAGGAGAAGCAATGAATGGTGTGGATTTGCCTCAATGGGTTGCATCAATTGTGAAAGAG  
GAGTGGACTAATGAGGTATTTGATTTAGAATAATGAGGGATGCATCCGTTATCGGTGATGAATTATTG  
AATACCTTGAAATTGGCTTTCATTGTGTTGATCCCTCACCATCAGCTCGACCAGAAGTTCAGCAACTTCT  
CCATCAACTAGAAGAAATTAGACCTGAAACAGCTACCAGTTCTGGGGACGACGGTGCTGCAGCTCCCTC  
AGCAAGCGATGATTAGATATTAGATTTCTCATCTAAGTCATTTTTAGGCAGGTGTGTTAGGAGTTAGGTG  
CCACAATTCTTTCATTCTTGAATTAGGTTGATTAAGAGAGTGATTTTTGTTCTTCTACTGTCTGTAGATACC  
CACCCAAGTGTGCTATTTTGTCTGTTATTTTGTGAGCAGCAATGGAATCCTCTTAATTTCTGGCCCTAGAGA  
CAGAAAATACACTAAAACTCCACACACATGTCTATTTTCAGGTCATTCTTCTATACAAC

>PGSC0003DMG400024485 LRR-RLKs

ATGTTGCTAGTACTTGCAGGTTGAGAACTCTGGAAGTGAGACGAGCATTAGTTAAGTTTATGAACAAG  
ATATCACTTGGTAACATTTCAAAGAAGTAACTTTGGATGGGATTTATCATCTGATCCATGTACCAACA  
AATGGGAAGGGATAACTTGTGATTCAAGAAACCAACATGTAAAAAATATTGTTCTTGATCAGAAGAATC  
TCACTGGAATTCTTGATGCTTCTTTTGTCTGTGAGGCTACTTCCCTTGCTGTAAGCTTGAACGAAAAC  
GAAATTGTTGGAACATTACCTCAAGAAATATCAAAGTGCAGACGTCTCACACATTTTTATCTGCGTGGCA  
ACAAATTATCAAGCAACTTACCAAGCTCTCTTTCGCGGTTGAGCAATTTGAAAAGGTTTGTAAATTCAGA  
CAATGCCTTCTCGGGGCAGATACCGGATATGTCAAGAATCTCAGGGCTGATAACTTTTTTGGCTGAAAG  
AAATCAGCTAACAGGGCAGATACCAGAATTTGATTTTTCCAATCTGTAGAATTCAATGTCTCATACAAT  
AATTTAACTGGTCCAATACCTGATGTCAAGGACCAGTTTAGTTCCAGCAGTTTTTTGGGTAATCCTGGATT

ATGTGGAGTGCCATTGCCAAGCATATGTCCACCCTCGCCACCGCCACCTCCCCATCCAGTTGATAAGGAG  
AAAAAAGTTTCATACTTTATTTATCTTGGCTATGCTATTCTTGGGCTGATTATCATACTTCTACTTGTATGG  
AAGCTTTTTAAGTGCATAAGGAAGAAAAAGAGCAATAGTACTCCAATGGATCACAACAAGACTATTAGC  
TCTTCTGGTGTACAAAGACTCCTAAAAATAGGTCAGAATATTCAATAACATCTAGTCCCGAAAACCTCTAT  
GCTCTCAGCATCATTTGAAATCCTTTCAAGTCCTCTGGCTAATAAATTGAGATTTCGAGGACTTGCTTCGAG  
CTCCAGCTGAATTGATTGAGAAAGGAAAACATGGAAGTGTTCCTCAAGGTCAATGTTGATGGAGTGACAT  
TGGTAGTAAAGAGGATCAGTGGTTGGAATATTTGAAATACGATTTCAAGAAGAGGATGCAGAGAATA  
CATAGAATGAAGCATCCTCATGTGTTGCCCTTGTTCCTTCTATAGTTCCAAACAAGAGAAGCTAACAG  
TTTACAAGTACCAACAGAATGGCAGTCTATTCAAGCATCTCCATAGTAAGTTTTATTAGTGCAAACCTAAT  
TATTCTCACTTGAATTTCAAGCCATAGAATGATACATGAGTAATAGGCCTTCTGTAAGAACTATCAAGA  
ATTGATATCAGTAAAGGAATATGTTAGATAGAACTATAGTTCAATTTCCAGATCCAGGGTCTAGCTAAGT  
CAAATCTTTTTAAGTATTTTGTGCGTCTACGTTGCTTTGACTCCAAAATGTTGCCACACCTGTGTCAGAT  
CCTCCAATAATGCATTACTTTTGGAGGATCCGACACACACCTGTATGACATTTTTGAAAAGTCCGAGCAA  
CATTGTTGTCGGTTGATTAAGTAAGAAAGAACTTTACTAATTAGTATTATTAGTTTTGGGCAGCAAGATA  
TAGTCATGTTTTATTGGAATCTAACTTCTGATTCTGAACCTAGTTCAAAGATAATGTCAACATATCAGC  
TTATAGGATTTTAGGTATTTACATTGGCAATACAAAGCTAACCTATAATAGCAAGTCAATTACCTATAATT  
AGTTACCATAACAAGTGATCTAATCGTATAAGTATCTTTTACGCAGTCAGTGAATAGACCTTAAACTCTTAA  
AAATAATCAAGTAGTAAGTACTAGTTTGTCTATTATTCTTTGAGAATGAACATGGAAAGGTAAAGTTACTGCA  
TAACTGTTCAATTCAGCATCTCAGGGCAGTAAAGTTTTCGAGTGGGCGAGCAGATTAGCTATTGCAGCCA  
GTGTCGCAGAGGCCTTAGCATTATGCATGAAGGCCTTCAGAATGACAATATTCCTCATGGAAACATGA  
AATCCACCAACATTATGCTGAACGATGACATGGAAGCCTGTATCAGCGAGTATGGTCTAATGCCCAACA  
ATCAAGACCAGTCATTTGTTGCTCAAAGTGATCATAGCATCAGAGAAGATGATTCAGTTGCAATTACTAC  
ACGTAACACCTTCAAGATGGATGTTTATAGTTTTGGAGTGATTCTTCTTGAATTGCTCACAGGGAAGCCT  
GTTTCAGGCTAGTGGATATGATTTGTCTAGGTGGGTAAATTCAGTAGTTAGAGCGGAATGGACTGGTGAA  
GTTTTCGACAAGTCCCTTATTACAGATGGTACAAATGAAGAAAGAATGATCAATCTGTTGCATGTAGCTC  
TCAAATGCATAAATACATCACCAGATGCAAGGCCTAACATGAAGGAAGTTGCGTTCATCATCAATTCTAT  
TAAGGAAGATGAAGAGAAATCCGTGTCTGCGTTCAGCTAA

>PGSC0003DMG400024661 LRR-RLKs

TTTGTATTA AAAAGTTTGGTTTGGTCCATTTTGCAGGCCCTCCCTTCTGAAATTCAACTCCATTTTCCCAT

GTTTATTCCTTGCACAGAGATATTGTTTCTGAACTACCAAACCCCCTTTCTTAAACATAGTAAAATACCA  
TTTCTTTCTTGTTTTGCACAAATTTCTATAACAACAACAACACTCATCTGTACACAACAAAAATAAATAAA  
AAAATAGAACAATAGTACTGGAAGAAATCAAGATTCAAGATTGAGTTATGTCAGAAGAGGAATCTGAT  
ATTCTTCTTCTGTTGTATTATTCCACTTCTTGCTTCTAATCACTACTGGTAAGTCTGAGTTTTTTTTTTTCG  
ATTTTTCAAGATTGTACTCAGAATTCTGATTGTTGTTTTATGAGGTTTTTAGCTGATTTGTAATACTAAAGT  
TTTGATTTTTATTTATAGTTTGTGGAGATACCCTGGAGAGTGACAGGCAAGTGTTACTGAGTTACAAGTA  
TTTTCTTGAACATCAAATCCGGTTAATAAAGGATACAGGCATACAGAATGGAATGCTTCTGATTCGCT  
CCGTGTAATTGGCGTGGGGTTTTTTGTGATGGTGGAGTTGATCGTGTTACTCGAATTGATCTCTCTGGTG  
ATAGTTTGGCTGGGAATATGTTTTACAACCTTCTCAGCTATGACAGAGTTGACATATATTGATTTGTCTATG  
AATACAATTGGAGGGTCTATTCCTGCAGACTTAGGCCAATGTAAAAACCTGAGATTCTTGAATTTATCGC  
ATAATATTATTGATGGGGAGCTTAATTTGACTGGTTTGAACAATTTGCAAGTTCTTGATTTGACCATGAA  
CAGGATTCATGGTGAGATCAGTTAACTTTCCCTGGAATTTGTGATAGTTTGGTGGTTGCTAACATTTTCG  
AATAACAATTTTACTGGTGAGATTGGAAGTACTTTTGATCAGTGCTGGAATCTTAGATATCTTGATTTGA  
GCTACAATAACTTGACTGGAGGATTGTCATTTGGTTTTGATAAGCTTAAGGAGTTTTCGGTGTCTAAAAA  
CAAGTGTAATGGCTCTCTGCCTTCGTCATTTTTCACTCAAACCTGCACCTTGCAGGTGTTGGATTTATCAG  
AAAATGGATTCGTTGGAGGAGTGCCTAAAGAGATATCGAATTGTAAGAACTTGGAGGACTTGAATTTGT  
CTGGAAATAACTTTTCAGGGCCAATTCCTGAGGAAATTGGATCAGTTATGAGTCTTCAAGCACTTTACTT  
GGGAAGCAACAATTTTTCAAGGGATATTCCAGAGAGTCTATTAAGTTTAAGTAACTTAGTGTTTCTTGAT  
CTTAGTAGAAACAACCTCAGAGGAGAAATACAAGAAATTTTCAGGCAATTTACACAGGTAAAGTTTCTTC  
TGTTGCATGGTAATTCTTATACTGGAGGTATAGTTACCTCTGGAATCCCAACTTAGTGAACCTTTCTCGA  
TTGGACTTGAGCGATAACCAATTCTCCGGTCCATTGCCAGTTGAACTTTCCAAGATGAAAGGGTTGAAGT  
TTCTGATTCTTGCATATAACCACTTTAATGGAAGTATACCATCAGTATACGGGGATATTCCGACACTTCAG  
GCCCTTGATCTTTCATCTAATAAGTTAACTGGCTCAATACCACCAAGTTTAGGGAAGCTAAGCTCACTTTT  
GTGGTTGATGCTTGCTAACAATTCCTGACCGGTGGAATCCCACCCGAGTTGGGAAATTGCAGTAGCTT  
ATTGTGGTTGAATCTTGCAACAATCAGCTTTCTGGTTCAATTCCACCTCAGTTAGCAAGAATTGGCTCAA  
ATCCTATGCCTACTTTCTTGTGCAATAGGGCTAAGGATAAGGTGACTGCTGGCTCGGGGGAGTGCTTTG  
CTATGAAGAGATGGATACCAGCTGATTACCCTCCATTTAGCTTTGTATATCCTCTCCTTACCAGGAAGAAT  
TGTAGAAGCCTATGGGATAAATTGCTCAAAGGGTATGGTTTTATTTCCAGTGTGTGAACCGGGTAGTAAT  
GTTTCGTTCAAATCAGATATCAGGCTATCTTCAACTTAGTATGAACAAATTTTCTGGTGGGATCCCTCCTGA

AATTGGCAGCATGCAGAATTCAGTATGCTTCATTTGGGTGTAATGAATTCGGTGGCAGCTCCCTTCA  
GAGATTGGAAAAATGCAGCTAGTAGTCCTTAATATTTACAAAACAGAATATCTGGTGAGATTCCAAGC  
CAGATTGGCAACATTAAGTGCTTACTGAATCTTGATCTGTCCAGCAACAATTTCTCTGGTCTGTTCCCAGC  
TAGTTTTAGTAACTTGACTGATCTAAGCAAGTTCAATATCTCTTACAACGCGTACATCTATGGTACTATAC  
CAGAAAGTGGGCAATTAGCCACATTCGAGAAGTCATCATACTTGGTGTTCATTGCTGCACCTTCCACC  
TTTCATTGATAACACTAGGAATAATACTATAAACAAGGGTGAAGTTTCAAAGGCCTACAAAGGTTGG  
TACAGTTTTGGTATTCATGGCTTTGCTACTGGCTTTGCTAGTTTGTGGACTTATGACACTTGTATCTGCCT  
TGTTCTAAAATCTCCGATAGATACACCAGGATACCTACTGGAGGATTCAAAGGGCCGACACGATCTTGC  
ATCGAGTTCAGGTGCATCCTCACCATGGTTGTCTAATGATGTTAAGGTTATCCGCTTGGACAAAACAAGC  
TTCACACATTCTGACATATTGAAGGCCACAGGCAGATTCTCGAATGACAGAATTATAGGGAAGGGAGGA  
TTTGGGACAGTTTATCGCGGAGTCTTGCCTGATGGAAGGCAAGTGGCGGTGAAAAAGCTACAAAGAGA  
GGGAATTGAAGGGGAAAGAGAGTTTAGAGCTGAAATGGAAGTACTAAGTGGAAATGACTTTGGTTGG  
CATCCGAATCTTGTAACACTTTACGGTTGGTGCCTTAATGGATCAGAGAAATTGTTAGTCTATGAATACA  
TGGGAGGTGGAAGCTTAGATGAGATCATCACAGATAGAACCAAATTCACATGGAAGAAACGACTCAAC  
GTGGCAATTGATGTTGCACGTGCTTTAGTCTTCTTACACCACGAGTGTTACCCTTGTATCGTCCACAGAG  
ATGTCAAGGCTAGCAACGTGCTGCTAGACAAAGACGGAAGGGCAAGAGTCACAGATTTTGGCCTAGCT  
AGGTTTATGGATGCTGGAGATAGTCATGTTAGCACAATGGTTGCTGGTACAGTCGGGTACGTTGCACCA  
GAATATGGACAGACATGGCAGGCCACAACAAAAGGCGATGTCTACAGTTATGGAGTGCTGGCAATGGA  
GTTAGCCACAGGGAGACGCGCTGTAGATGGAGGCGAGGAATGTCTAGTTGAATGGGCGAGACGTGTG  
ATGGGAGACGGAAGGCATGGATTCACCAGAGCCATAATACCAGTTTCTCTTTTGGTATCAGGCCTAGCA  
GAGGGAGCAGAGGAATTGTGTGAGTTGCTTAGAATAGGAATAAGGTGCATTGCTGATAGTCCTCATGC  
TAGGCCTAACATGAAGGAAGTATTGGATTTGTTAATCGCGATTTTGCAGCCAAAGATCAGGATCCAG  
TCGTAGCACTTCTCCTTCATTTTGATCAATTTTTGTTTCAAATTACACAGCAAAGTGTC AATAGTTTTTTTT  
CTTCACATTTGTAACATACACACATTACATTCTTCTTGTAACAGTTCTTTTTAGATTCTTTGTT CAGGCAC  
TCTTGTTTGT TAGGATCATAAGAG

>PGSC0003DMG400024795 LRR-RLKs

CCTATGGCCAACCCTGTCCTACAACACTGTGTCAAGTGTCCATCTTGACAATGAATCTAATTGAAGACAG  
ATATATTTGGAGGAAAATCAAGATTTCTGAAAATTCATTTGTTTCTTTTACATAAAATTCTGCAAG  
AATTTAACTGTTGTGCATTTCCAACACCAGCAAACCATGATAAAGAAATCATTGCAGATAACCTCTTATG

ACTACATTTGGTGCAAAAAGAAAAGTAAATAGAAAGTACAGTAGATCAGAGAGTACATACACACCCTC  
ATTGTCATCATAATCATAATCATGTCAGGCAAACAACTAACAGTCATCTTATTCTTCTTGTCTCAACATATCT  
TTTTATTCCCAACATCCATTTCTGGTTTAAATCAAGAAGGGGTTTCTTTAATGTCATGGCTTTCCACTTTT  
AACTCTTCTGCTTCTGTTGCACCTTTCTTTCATGGAATCCAAGTCATGAAAATCCATGCAAATGGGATTA  
TATCCAATGCACCAGTAATGGATTTGTTTCAGATATCAAGATCAGGTCGATCAATCTTCCCGCGATATTCC  
CAAGTCAAGTTCTTTCTTTTCACTTTCTGGAAGTGCTAGTTTTATCAAATTGTAACCTCACTGGTGAAATTC  
CTGCTTTTATTGGAAACTTGTTCATCGTCTCTGAGGATTTTGGATCTCAGTTTTCAACGCTCTAACAGGAAGT  
ATTCCGCCTGAAATAGGAAGATTATCACAGCTAAAGCAAATTTTGTGAGTTCTAATTTCTTTGAAGGTC  
AGATACCAAAGGAGATAGGAAGATGTTCTGAATTGCAGCAGCTTGAGCTCTTTGACAATCAGTTTTCTG  
GAAAGATACCTGAAGAGATCGGTCAGTTAACGAGTCTTGAATCTTTCGTGCTGGTGGGAACGTGGGA  
ATTC AAGGAGAAATCCCAATGCAGATATCAAGCTGCAAAGAGTTGGTCATTTTGGGTCTTGCAGATACC  
GGTGTACGGGTCAGATTCCACATAGTATAGGTGAACTCAAGAAGCTGCAGACTCTTGCTGTTTACACA  
GCTAATTTGACTGGTGAAATCCCTCCAGAAATTGGGAATTGCACCTCTTTAGAAGAATTGTTTGTCTATG  
AGAATCAAATTACAGGAGAAATTCCAAGTGAACCTCGGTCTCTTGAAGAATCTTAAGAAGGTTTTGCTTTG  
GAAGAACAATCTGACAGGGGAAATTCCAGGAAATCTTGGAAACTGTTCAAGTTTGAAGTGATTGATTT  
CTCTGTGAACTATCTATATGGTGAAATCCCTCCGTCTTTGAGAATTTAGGCACATTGGAGGAGCTTCTAT  
TATCAGAAAACAGCATTCTGGAGAAATCCCATACTATATTGGCAAATTTTCCAGCTTGAAGCAGCTTGA  
ATTGGACAACAACAACATTTTCAAGGTGTGATTCCACCTACCATTGGGAAACTAAAGGAGCTAAATCTGTTT  
TTCGCTTGGCAGAATCAACTTACGGGAGCATACCGACTGAGCTAGCAGATTGTCGGAAACTTCAGTCTT  
TGGATCTTTCTCACAATTTCTTACAGGGTCCATCCCAAACACTTTATTCAATCTCAGGAACTTGACTAAG  
CTGCTGCTGATATCAAATGTTCTGTCCGGTGGAAATCCACCTGATATTGGAAATTGCACCAGCTTATCCA  
GATTACGCCTTGGATCAAACAGGTTAGATGGTCCAATTCCTCCAGAAATAGGGCGTCTACCGAGTTTGA  
GTTATCTTGAAGTGTGGGAAAATCAATTCCTGATCAATCCCTCCAGCTATTGGCAAAGTCCGCAGCT  
AGAAATGGTTGATCTTCATGGAAACAATCTTCAAGGAACAGTTCTTCTCTTTTGTGTCCCTCACTGGTC  
TTAATATATTAGACCTATCCATGAACAGAATATCAGGTAACATTCCAGAAGATATAGGGAAACTCATATT  
ACTGAACAAACTCATACTGAATGGAAACAACATAGACGGAACGGTTCCTAAATCACTTGAAGTCTGCCA  
GGATTTGCAGTTGTTGGATTTAAGCAGCAACAGACTCGTGGGCTTAATCCCTGAAGAGATTGGTAACCT  
CCAAGGACTAGATATTCTGTTCAATGTAAGTCGTAATTTTCTGACCGGACAGATTCTGAAAGCTTCTCTA  
ACCTCTCCAAGCTAGCCAACATGGATATTTCTCATAACATGTTGACTGGAAGTCTTAGAGTACTCAGTAA



CCTTGATAACCTTGTTTCTCTGAATGTTTCATACAATAACTTTTCTGGTGTTCTTCCTAACACAAAATTCTTT  
CAAAGTCTCCCTCCTAGCGCTTTTATTGGTAATCAAGAGCTCTGCACTGACAGAGCTGCATGCCACTTAA  
GTGGTGATCACCATGGATTAAAATCCATAAAGAAGATCACCATTGCTATTGTA CTACTCAGCATTTCATGAC  
CATGCTAATTGTGACAGCTTCTATTGCCATCTTTATCCGAACACAGGGAGAGATATGTCAGAAGGACGA  
CGAAGAAAATGGTTTGCAGTGGGAATTCACCCCATCCGAAAGCTTAGCTTCTCTGTA ACTGATGTAGTG  
CCAAGACTTAGTGAATCTAACATTGTTGGAAAGGGCTGCTCAAGCTTTGTTTATCGCGTTGAGACTCCAT  
CAGGACAGGTGATCGCGGTGAAGAACTATTGGCTAAGAAAATCGGTGAGGTTCTCAGAGGGACTTT  
TTTTCTGCAGAAGTTAGAACACTGGGATCAATCAGGCATAAAAACATAGTGAGGCTTCTTGATGTTGT  
AATAATGGCAAAACAAGATTGTTGTTGTTTATTACATTAGTAACGGGAGTTTATCGGGACTTCTCCATG  
AGAAGAGGGTATTTCTGGATTGGGATGCTAGGTTAATATCATATTAGGAGCAGCTCAGGGCTTAGCTT  
ATCTTCACCATGACTGTAGTCCTCCTATAGTCCATCGTGATATCAAACCAATAACATTTTGGTAGGTCCA  
CAGTTTGAAGCTTTTCTTGCACTTTGGACTTGCAAAGCTATTAACACATCATCAGATACTTCAAGAG  
CCTCCACCATAATAGCTGGTTCCTATGGGTATATAGCTCCGGGTGAGTACATTTCTCAAATTTCCGCCCT  
ATATATTCAAATATTTATTAAGTGCTCAACATTTTGATAACATGATTATGCTAGTACTATTGAATATTAGCT  
TTAAAGAAACACTTGAAGTTCACTATATTAGTCTTG TACCCCGTGAAATTCGCTGTGCAAGACATATAGT  
AGGTATATATACTATGTTTGGACAGCATTCTAAATGTTTTGGTCCTACATTGCAGAATATGGATATAGTCT  
AAGAATAACTGAGAAGAGTGATGTCTATAGCTATGGCATTGTGCTTCTCGAGGTCCTAACGGGGATGGA  
ACCAACTGATTCCCGGATAACCAGAAGGCAGCCACATTGTCACCTGGGTCAATCAGGAGCTAAGAGTAAA  
ACATAAGGAATTCACAACAATTCTTGATCAGCAATTACTTTTAAAGTCTGGTACACAACTCAGGAGATG  
CTTCAAGTTCTTGGGGTGGCACTACTTTGTGTTAACCCATGCGCGAATGAAAGACCAACAATGAAGGAT  
GTAGCAGCAATGCTAATGGAAATCAGGCACGAAAATGAAGATCTTGAGAAGCCTAATCGAGGAGTGGT  
ACCGAATCCTAAAGAAGCAATTAGTTGTCCTAGTTTCTCTGGTTCATCTCAACCTCTCAATAGATCCCCTC  
CTCAGTAACTCTAGTTAACTTAGCCTCTCTCTAGTTCTAACTAGTTGATTCTTTCAAGTAACTAATAAGGAT  
GTATAGATTATCAATATTCATTTACAAAATAAGAAC TTA CTCTTAGTCCCGACTATAAGTCGTTTT  
GACA

>PGSC0003DMG400024890 LRR-RLKs

ACCATTTAATTTAGGCTAAAACTA ACTTTGATCTTCTATGTAATGTGTTGTTCTTCAGTGAGAGATAAAA  
GGAAAAAAGCAAAGAGAGGAAAAGGGGAGGCTTAGCTTCTCCTTGATCTTGAAGACTCACTTTCTTT  
CTTTTGAAGATGTTTATTCTTTAAATCTATCTATACCTGAAGTTTCTCAGATTCCCTTAACTTTTTTCTCCT

TTTACATTGCCTCAAAGTCTCATAATAACTCACTTTGTTTCTTCTTCAAGTCCAAACAAATTCACCTTCCTTG  
AAAAAACTTCCAAGAAAATATGTTGCCACTTATTCTTGTACACTCTTTACTCTTGTATGCACTTCCATTC  
CTCCTCTTCTCTTCTATTAGTACTGATTTTCATGCTTTGTTGAGTCTAAAAAAGGATTTGACTTCTCAA  
TTCTGTTTTGAGTTCATGGGATAGTTCAAATCCTAGCTCAGTTTGTCTTGGATGGGAATCAAATGCTTAC  
AAGACCGAGTTGTATCGATAAACTTATCCAATATGGAGCTTTATGGTTCTGTTTCCCCTGCTATTTCAAGG  
TTAGATAAGCTTGTGAGCTTTCAATTGATGGAAACAACCTTCACTGGTGAAATCAAGATTGAGAACATGA  
GGAGTCTTGAGTCACTCAACATTTCAAACAACATGTTTAGTGGGAGTCTTGATTGGAACACTACACAAGTTT  
GGCTAATTTGGAGGTTCTTGATGCTTACAACAATAACTTCTCATCTTTTCTTCTGTTGGAGTTGTTAGCTT  
GGAGAACTCAAGTACTTGGACTTAGGTGGCAATTATTTCTATGGACGAATACCGGAGAGTTATGGGGA  
TTTGATTGGGTTGGAATACTTACAACCTGCTGGAAATGACCTGCATGGAAGAATCCCTAGAGCTTTGGG  
GAATCTTACCAACTTGAAAGAGATTTATTTGGGATATTTCAATGTTTTTGTAGGTGGGATTCCTAAGGAA  
TTTGAAAGTTGGAGAATCTTGTTACATGGATATTTCTAACTGTGAATTAGATGGTCCAATTCCTCCTGA  
ATTAGGGAATTTGAAATTGTTAAACACACTTTTTCTACATATAAATCTTCTTTCAGGTCCAATTCCAAAGG  
AACTAGGCAACCTTACTGGCTTAGTCAATCTTGATCTTTCAGCCAATGCACTTACTGGTGAAATCCCATT  
GAGCTCATTAACCTTCAGCAGCTACGCCTTTTCAACTTGTTTCATGAACAAATTACATGGTTCTATACCGGA  
TTTCATCGCTGATTATCCTGACCTGAAGATTCTTGGTCTCTGGATGAACAACCTTACCGGTATAATCCCGG  
AGAAGTTAGGCCAAAATGAGAAGCTACAAGAGCTGGATTTGTCTTCAAATAAGCTCACTGGTACAATTC  
CTAAACACTTGTGTGCTTCTAAGCAACTCATAATCTTGATTTTACTGAAGAATTCCTCTTTGGTTCAATCC  
CAGAGGATTTAGGCACATGTTTAAAGTCTTGTTAGGGTGAGATTGGGACAGAACTACTTGAATGGCAGTA  
TTCAAATGGATTCATTTACATGCCTGACCTAAACTTAGTTGAGCTTCAAGATAACTACCTGTCTGGTACC  
TTATCAGAAAATGGTGACACTTCTCAAAGCCAGCCAAGTTAGGTCAATTGAATTTATCAAACAATCAAC  
TTTCAGGTTCTTTGCCATTTTCACTTTCTAATTTCTTCCCTTCAAATCCTTTCACCTGGAGGGAACCAATT  
CTCTGGTCCTATTCTACTTCTATAGGTCAACTCTCACAAGCTTTAAAAATTGACCTCAGTCAAAATTTTCT  
TTCTGGTGAAATCCCCCTGAAATAGGCAATTGTGTCCACTTGACTTATCTAGACTTGAGCCAGAACAAC  
TTCTCTGGCTCAATTCACCTCGAGTATCCGAAATTCGAATCTTGAACACTTGAACCTGTCAAGAAACCA  
CTTGAATGAGACCATAACAAAGTCAATTGGTACCATGAGGAGTCTCACTACTGCTGATTTCTCATTCAAT  
GATCTATCAGGCAAGCTGCCAGAATCAGGCCAATTTGCTTACTTCAATGCTACTTCTTTCGCGGGCAATC  
CTCAACTCTGTGGTTCTTTATTGAACAACCCTTGCAATTTCACTAATCACTGATCCACCAGGAAAGTCT  
CATGGAGATTTCAAGCTGATCTTCGCCCTCGGATTGTTAATCTGTTCACTAGTCTTTCAGCTGCAGCTAT

CATAAAGGCCAAGTCTTTCAAGAAAACAGGCGGGACTCTTGAAAATGACAGCATTTTCAGAAGGTTGA  
ATTCAGTGTTGTTAATGTTCTTGAATGTGTAAGATGGCAATGTGATAGGCAGAGGAGGAGCCGGGA  
TTGTGTACCATGGGAAAATGCCAAATGGAGTTGAAATTGCAGTGAAAAAACTGCTTGGCTTTGGGAACA  
ATAGTCATGATCATGGTTTCAAGGCGGAGATTCGGACACTAGGCAACATTCGACATAGAAACATTGTAA  
GACTAGTTGCTTTTTGTTCCAACAAGGAAACGAATCTCCTTGTGTATGAGTACATGAGGAATGGTAGTTT  
AGGAGAGGCGTTACACGGGAAAAAAGGCGGATTCCTTAGCTGGAATTTGAGGTATAAAATTGCTATAG  
AAGCTGCTAAAGGATTGTGCTATCTCACCACGACTGCTCGCCATTGATCGTTCACAGAGACGTCAAATC  
CAACAACATTTTGCTGAATTCAAACTTTGAAGCTCATGTTGCTGATTTTGGACTAGCAAATTTCTGGTAG  
ATGGTGGTGCCTCAGAATGCATGTCTGCTGTTGCTGGCTCCTATGGTTACATTGCCCTGGTACACTT  
TTAACTTTTACTCACACATTCTCAATAATCAATCGTTCATATTAAGTGAAATTAATAACCTCGAAAGATAA  
AATACAACTTGGTACAACATGTCAAATACACATTGTATAGAGGGGACAATTATTGTGTAAAAATCATAT  
ATGTACGTTGGTTAGTTAATTTAGTTAGGTATGTAGACATTACCTGACAAAGTGATTTTTGCCTGGTCGT  
ACATACAACAACAATTAGTCTTATCAATTGGTCATAAAATCAAACCTTTTAAGATAAAATATTATATTGCAT  
TTTTTTCTTTTAGTTTGGAGTTTGTGAATTCGATAGAAATTTGGGCTAAAGTGAAGAGGCCCAAGAT  
CACCCGTGATTGAAGGCATAGAGTTTAGGGCTTTGTTGGAATTTTCTGGGTAATCGTAAATCGTATCATG  
GGCCCGTTTTTCGAGAGAGCACTTAATTTCTGTGCCATAGAGAGAGTTCTTAGTGGGGGCCCAATAGAA  
GATCACTCTGCTAAAGTAGGTCAAAAACTGACTTGACTGACACACAAAGATAATTGGGCCCCCTCGATT  
GTCGTGCTTGCCAACTCAACATGCACTTGTTCAAAGGAATTCAACTAAATGGAATAGAGTATATAATAT  
ATAGTCACAATATTACATATTTTACTGTATAACTCTTTAAAGTAGTCAACTTTTTTAAATTAAGGAGGG  
AGAGAAAGCAATAGTGTGAATAGCGATGAAGTCAAGATATTCTATTTGTCACATATATTTGAGGGGTGT  
TAACTGATCTCAAATATTGTTAATGCATTTATATTAATTTGTATATACATTGTCATAAATGTTAACCTAT  
TTTTTTAAAAAATTGTTGCAGAATATGCATATACTTTGAGAGTAGATGAAAAGAGCGATGTATATAGTT  
TTGGTGTGGTTCTATTGGAGCTGATCACCGGGCGTCGTCCGGTGGGTGAATTCGGAGACGGAGTGGAC  
ATAGTACAATGGAGCAAGAAAGTGACAAATTGTAAGGGAACAAGTAACACACATTGTTGATCCAAG  
GTTAACCACTGTGCCTGAAGATGAAGCCATGCATTTGTTCTTTATTTCTATGCTATGTATTCAAGAAAATA  
GCGTAGAACGTCCAACAATGAGGGAAGTCATTCAAATGTTGTCCGAATTTCCACGACAATCATCAGAAT  
ATAATCAACCTTCGTCTTCAAAGTTGTTTTACAGAAGCTAAAAAGCCTTGAGAATGACCAAACACTTG  
TCCGAAGATTCGGAAAGAACTTTTGGTCTAACCAATTTTCATTTTTATATAATATGGTCCTCTTGGCAAGT  
TGTTTTAATTTAACTTTGTATTATTCTTTATGCTTATTTAAGGTTAGGGGTTTTGTGACAAAGAGAAGTA

GGAATATAATTAGTACTATGTACTACTAAGTAGTTAATTAGTTGCTTTTGATTAGTTGTTAGGGTACTTGG  
GGGTGTTTTAAGTTCTTGGCAAAGGCAGACCAGGCCCAATTAAGTTGGTTCTGAATGCTTTTTGTATCAT  
ATGGTTATATACAGGTATATATTCTTCCTTTAACGGGTGAATTGATTCTCGATCCAATAATGTTAATTGT  
TTATTGTTGGTCATGTTGTTATGGATGAATTGGTTCTCG

>PGSC0003DMG400024954 LRR-RLKs

GGAAGGTTGGTTTTCGATGAGCTGTGTCTTCTTCTCTCAATATTTATAAACTCCCTTCACATGGTCC  
CCTTTTTATCATAAATCTACATTTATTCTTCTAACTTTTTTTTCTATTCAATTCCTAAAAAAAACAGAGATG  
TGGGAACATTTAGAGACACCATGAAATCCAAACCTTTGATCTTGTCTTCTTCTTTTTCTACTACTTGAAT  
ATCAAGCTTCTGGGCTTAACAATGATGGACTTCTGTTACTGACATTCAAGTACAATATTCTGAGTGACCCT  
TTAAGTGTCTGCAGAACTGGAATCTTGGGATGATACACCATGTTTCATGGAAAGGGGTAGGTTGTGGA  
AATCCAAATGCTTCAGACCCAAACCTTCGAGTGACAAATTTGTCTCTCCTAATTCTCTGCTTCTTGTTCT  
ATTCCTTCTAGTCTTGGTATGATTCAATATCTTACAAATCTTGATCTTTCTAATAATTCCATTAATGGCTCT  
ATTCCTTCTACTCTTTAGTGCCCCTGAGCTTCAACGCCTTGATTTTTCTAACAACAGAATATCCGGCCAG  
TTGCCTGAGCTTGTGCGACATTTAAATAATCTTCAGTTTCTTAACCTCTCCGGTAATGCTTTGACGGGAAG  
ATTACCGGCAAATCTTGGTAATCTAACTGTTGTTTCTTTGAAAGATAATTATTTTTTTGGTGCTGTTCTTT  
TGGGTTTGATTCAAGTTTTAGATCTGTCTTCAAATTTGATTAATGGGTCATTGCCTCCTAATTTTG  
GGGGCAGTAATCTCCGTTACTTTAATGCTTCTTTTAATAAACTTTCTGGAGATATCCCACCGGAATTTGGC  
AGCAAATCCCTCCAAATGCAACTATAGATCTCTTACAACAATTTTCAAGCGGTGCAATTCCAGAGTCAA  
TTGTTTTTATCAACCAAATAGAAAAGCTTTTTCTGGTAATCCAGAATTATGTGGTGCGCCGCTGAAAAA  
TTTATGCCCAATTCCGTCAACAGTAACAACCTTGCCAAATCCCCTGAACCAACTTCTTCCCAGCAATTG  
CAGCCATTCCGAAACCCACAGACTCAAACCCAGCCGCGAATCTCCAAAAGAGGGCAAAAATGGGTTGA  
GAACTGGCACAATTATAGGCATAATAGCAGGGGATATTGCAGCAGTAGGAGTTTTAGCACTGATTTTCA  
TGTACGTATACCGAGCCAAAAAGAAGAAAAGGAACATAGAAAATAGCATTAAAAAAGAAGCTGAAACT  
GCAAAAGATTTTGACTGGGCATCGTCAGCATCATCAGAAGAATACAACCTGGTTAAGGTCATGGACTTGC  
TTGAAAAACAAGGCACGGAGATGACGACGAATTATCAGAAGCTTCCATTAGAAAAGTGA AAAATTC  
CAATTGGGTCATCCTCAGCAGAATCACGTGCATACAGAGCAGAAAACAGGTGAATTAGTAACGGTTGAT  
GGAGAAAGGGAACTCGAATTAGAAACACTACTAAAAGCATCTGCATACATTTTGGGAGCTAGTGGGTC  
GAGTATAATGTACAAGGCTGTGCTAGAAGACGGTACTACACTGGCGGTGCGACGAATTGGTGAAAGTG  
GTGTGGAACGGTTCAAAGATTTTCGAGAATCAAGTAAAGGTAATTGCTAAATTGGTGACACAAAATTTGG

TTAAAATCCGTGGCTTCTATTGGGGCGCTGAAGAGAAATTGGTCATCTACGATTTGTTCCCTAATGGTAG  
CCTTGCCAATGCACGTAACAGTAAGTCCACTTTTTCCCATATACATTATGTTTTACATCAAATAACGTTAC  
AATTATTGAGTAGAATCGCGTCTTTTGTTATTTGTTTTACTATTTTGCTCCTGTTTTACAGTGGAGAATAAA  
TTGAAACAAAATTGACTAGTCATTATGTGTGTACATTGTACCTAATCATCTCTAATTCTAATTTGTTTCAA  
TAAGTATCTTTGAATAATTGCGAACATTTTGAATATAAAAAGTTCGGAGTAGGTTTGTACTTTTAAGAC  
ATTTGGTTATGCTTAATATTCAAAGAAAGACGTAACAAGTCACTCAAATTAAGTTCACACATGTATAAA  
ATTGTGCGCAAATTAGAAAAATATTATGAATTTCTGTAAAATGCGCGGGAAGTAAAGGAGATAGTGGAA  
CCTTGGGGTGGAGTAGTTGAAACTTTAGTGTTTGTTTTTAATGTGGAAAGTAGCAGTAGTTCCTCACTG  
CAAGTCAACCGTGTCTGTTTCTAAATGGGGCGCCCCACAAATTCATAAATACCGCCAAACGCCCCCTTCT  
ACTGTCACCTACATGGAAAATGACTACCTTTTAAAAAAAATATTACTCTGTAGGCCATAAGTATGCTCT  
TTTGTTATGTCAAATTCATGCATTTCTTTGCCACAACACCAATAATGTAAAAGAATCTTCACCTTATTT  
ACCATTTATAGTATGTTGTTTATTTTATAGATATTATTGTGAGAATCTTAGCGCTCAGTTGATTGACTACCT  
GATGTAATTATAACGTGTGCATTTTCATGGTTTCAGGAAAGGCTGGTTCTTCGCCATGTCACGTACCCTG  
GGAAATCCGGCTGAAGGTTGCTAAAGGTGTGGCTCGTGGGCTCACTTACATTCATGAAAAGAAGCATGT  
CCACGGCAACTTGAAGCCCAGTAACATTTTACTAGGGGAAGATATGGAGCCCAAGATTGGTGATTTTGG  
AATTGAAAGGCTTGTAACAGGAGACAGTAGTCATAAGACCTATGGATCTGCCCGTAATTTTGAAGCAA  
AAGGTCCACAGCATCCCGTGAGAGCTTCCAGGACTTTACATCTGGGCCTACTCCAACCCCAAGTCCAAGT  
GCATTGGGCATATCTCCTTACCATGCACCCGAATCGCTTCGTAGCCTCAAGCCCAACCCGAAATGGGATG  
TATTCTCATTGGGGTAGTCTTGCTGGAGTTGCTAACTGGAAAGGTGATTGTCTCGGATGAAATGGGAC  
CCGCATCGGTCATCGGTGCTACCACATCAGCAGAGGAAGAGAAGAGTAAAGTGTTACGGTTGGCTGAT  
GTGGCGATACGTGCTGATGTGGAAGGGAAAGAAGATGCTTTGTTGGCACTAATGAAAGTAGGATATAG  
TTGTATATCACCAACACCTCAGAAGAGACCAGGCATGAGAGAGGTTGTTCAAGCATTGGAAAAATTTCC  
AACTAATTCAACCAGTTCACCATACTATTATGGACCTTAATTAGCACTGATTAAGATGGACACAATTGT  
AGAGACAAGAGACTTTGTATGTAATGAGACTGACATCTTTGTTATTTTATTTTTTTCAATTTTTTTGGTTT  
GTGTCTTAATATAGTATTAGCCATTGGTTTTCTTTTTAACAGTGATTAGTGTAATTGTCCGTGCTTTGTTG  
TGTTGTAGTTTTCTAAACCTTATGGTGACTTTGGATTACCAATATATATGACAACCTTATTATGTG

>PGSC0003DMG400025076 LRR-RLKs

TAATCTCTTTGCTATTTAAATGTATAGTTTCATTTGTTTGCTCTTTAGTTTCTCAAGAACTGTCACTCTCACT  
CAAATCCTCTCCGCCACCGTCAACCGCCGTCAACCACCGTCCGCCCGCATGAAAAATGCAAAATG

ACAAATGTGTTTGGTTCATGCTAGTGACCATTTATCTTCACCACCATCATTAGTAAGCTACTAGCTAGCGC  
CGCCGTGTACGGAGGAGCAAGGAGCAAGGAGGAGCTGTTTTCTCCAGTAAGAGAACTTTAATAGTAGC  
AGTTTAGTAAATGTTTCATTAAGATAAACAAGAACTTTTTAGTTCACATGCATGGTAAGTAAATTTTTTG  
AGTTAGTGTGAGTTTGAAGCAAACCACCATTAACACACCACATGTATGTTGTCTTGTTAGAGTGAACTTT  
CAAACACTATTATCATTTTTTTCAACAACCCCATTTCTTGACTTTGATTTTCACTCAATAATGGAGAAGAAA  
AGCTACCATTTTTACACTTTCCCTTCATGTTATTTCTTGTTTTGTTGATTTCTGGTTAAGTTTGAGTCCAA  
AGATTGATTTTTAGTGAGCTCTGTTTCTTCTGATGGACAAGCGTTGCTTTCTGCTTAAAGCAGCTGAA  
CCTTATACTAAATCATCATCTTCTGTGCTTTCTTCTTGGAACCCCTCAAGTTAACTCCATGTTCTTGGCAA  
GGGATTACTTGTTCTCCTCAAGAAAGGGTTATTTCACTTTCTATCCCAAATACTTTCTAAATCTCTCGTAT  
TTGCCTTCTGAACTCTTTCCCTTCATCTTTGCAGCTTCTTAATCTTTCTTCTACTAATATTTCTGGAACAA  
TCCCTCCATCTTTGGTTCTTTTTCTCATCTTAGGCTTTTGGACCTTTCTTCTAATTCATTTTTAGGTTCTATT  
CCATCAGAACTTGGTAGGCTTAGTTCACCTCAGTTCTTGTTCTTGAATTCAAATAGATTGACTGGTAAGAT  
TCCACCAGAGTTGGCTAATCTTTCTTCACTAGAAATCTTTGTCTTCAAGATAATCTCCTCAATGGGTCAA  
TTCCATCACAGTTAGGGTCCCTAGTGTCACTCCAGCAGTTTAGGATTGGTGAAATCCATATTTGAGTGG  
TGAAATTCCTGCACAGTTAGGCCTGCTACCAATCTTACCATGTTTGGTGTGCGGCGACTGGTCTTTG  
GGTGTATTCCACCTACGTTTGGGAACTTGATCAATCTTCAAACACTGGCAATTTATGATACTGAAGTATT  
TGGTTCGATACCGCCTGAACTCGGGATGATTTGCGAGCTTAGGTAAGTTGATACTGCTATGAATAAGCTC  
ACTGGTTCGATACCTCCTCAGTTGGGTAAGTTGCAAAGCTTACTAGCTTGCTTTTATGGGGAAATTCAT  
TAACTGGACCTATAACAGCTGAGTTTGAATTGTTGTCCTTGTGATTCTTGATGTTTCCGCGAATGAA  
TTGTCCGGTGAAATCCCTGGTGATTGTTGGGGAAGCTATTGGTTCTTGAACAGCTTCATTTGTCTGATAATG  
CACTTACCGGTTCTATAACGTGGCAGTTAAGTAATTGCACTAGCCTGACAGCTCTTCACTAGATAAGAA  
CCAATTATCAGGGCAAATCCCTGGCAAGTTGGTAAGTTGAAGTACTTGCAGAGTTTTTTCTTGTGGGGG  
AATTCGGTTTCAGGAACCATTCCAGCTGCTTTTGGAACTGTACTGAGCTATATGCACTTGATCTTTGAG  
GAACAAGCTCACTGGATCGATCCCTGAGGAGATATTTGATTTGAAGCAGCTGAGTAAATTGTTGCTCCTT  
GGGAACTCGTTAACTGGGCGATTGCCTCGAAGTGTGCGAGATGCCAGTCTCTGGTGAGGTTGAGGCTT  
GGTGAGAATCAGCTTTCAAGACAGATTCTAAAGAGATTGGTCAATTGCAGAATCTCGTGTTTCTTGATT  
TGTACATGAACCATTTCTCTGGAGGCTTGCTTCTGAAATTGCCAACATTACAGTTCTTGAGCTGTTGGAT  
GTGCACAACAATTACCTAACTGGGGAAATACCACACCAGATGGGGGAGCTTGTGAATTTAGAGCAACTT  
GATCTTAGCCGGAACAGCTTTACCGGTGAGATCCCTTTGAGTTTTGGCAATCTCAGTTACTTGAACAAAT

TTATTCTCAGTAACAATCTGCTTACTGGTTCAATCCAAAGTCTTTTAAGAACTTGCAGAAGTAACTCTA  
CTTGATTTGAGCTCGAATAGTCTTTCTGGCGAGATTCCATCTGAGCTTGGCTATGTCACAAGCTTAACAAT  
CGGTTTGGATTTGAGCTTGAATCGTTTCACGGGTGAACTTCCTGAAACATTGTCCGGTTTGTACAGTTG  
CAATCTCTTGATATTTCTCATAATTTGTTGAGTGGAAGGATCACAATTCTAAGCTCCCTGACCAGCCTTAC  
TTCCCTGAATGTTTCAGACAACAATTTCTCGGGGCCTATTCTGTACACCATTCTTTAGAACTCTTACTTC  
AGATTCTTTTCTGGAGAATCACTCTGTCAATCAGTTGATGGTTATAGTTGTTCTTACATATAATGGGAA  
GGAATGGGTGAAGTACCCGAAAATAGCTCTGGTTGCGGTGATTCTGACATCTGTAGCCATAGCAG  
TCGTGGCTACATGGATTCTTGTGACGCGAAACCACAGATATGTGTTTCAGAAGTCCCAAGGCATGTCAG  
CCTCTTCGGTAGGAGCAGAAGATTTTTCTACCCTTGGACTTTCATCCCCTTTCAAAGTTCAATTTACC  
ATAGACAACATCTTGGATTGCTTCAAAGATGAAAACATCATTGGGAAAGGATGTTCCGGTGTGTATAC  
AAAGCAGAAATGCCTAACGGTGAGGTGATTGCAGTGAAGAAGCTTTGGAAAACAAAGAAAGACGAGG  
AGCCAGTAGATTCTTTTGCAGCAGAAATCAAATTCTCGGACATATTAGGCATCGAAACATTCTGAAGTT  
ATTGGGATATTGTTCAAACAAAAGCGTTAAGCTTCTTCTCTACAACACTATTTCAAATGGCAATCTCCATC  
AGCTCTTGCAAAGTAACAGAAATTTGGACTGGGAAATTAGGTACAAAATTGCAATTGGATCAGCTCAAG  
GCCTTGCTTATCTTACCATGACTGTGTTCCAGCCATTCTTCATAGAGATGTCAAGTGCAATAATACTG  
ATCGACTCCAAGTTTGACGCTTATATTGCAGACTTTGGACTTGCAAAGCTAATGAATTCGCCAAACTATC  
ACCACGCTATGTCCAGTGTAGCAGGATCTTATGGATATATTGCTCCAGGTATGCATGCACTTAGAATATT  
TTCAATTAATAATTTCAACATAAAAGCCAAATCGATCATAACATCTTTTGAATATTTACTTTATGAGTCA  
TAGTTCGTTGAGTGTGACACAAATATTTGTCAACGGTTGCAGAATATGGATATACAGCGAATATAACAG  
AAAAGAGCGATGTCTATAGTTATGGAGTGGTGCTGCTGGAAATACTTAGTGGGCGTAGCGCTGTTGATT  
CTCAGATAGGTGATGGGCTTACATCGTTGAGTGGGTAAAGAAGAAAATGGGAAGCTTTGAACCAGCT  
GTTACAGTTCTCGACACTAAGCTACAAGGTTTACCCGATCAAGTGGTCCAAGAAATGCTGCAAACGCTTG  
GAATAGCGATGTTCTGTGTCAACTCATCGCCGTTGAAAGGCCAACAATGAAGGAAGTTGTGGCACTTC  
TAATGGAAGTAAAGTGTTACCTGATCAAGAATTTGGGAAAATCTCAGCCTTAATAAAACAGTCCTC  
AACTCAAAGTTGATTAATTTGTTATGTTTTTTTTTTTTTTTTGCTTTTGTCTAAGAGGAGTAGGAATTAGT  
TTTCTTTAGTTCCCAAGATATGATCAACTCATTGTTCCAAGCATTGGATAATGTCTTGGGGTCCATTGTGT  
ACATATTTAGAAACATTTATGTAGTTTATTTGCTTCTTCTTCTCCTATCCATCTCTCCATCTCTGTGCT  
GAGATTTTAGCTTTCAAATGCTTGCAGTTGCACCATATAATATTTAGTTTACCATAGTTTCAAAAAAG  
AGAAATATAGTTTGACCTATTCAGAAAAATTGATTGTTGGTGTATGAATGTGGTTTCAAACCTCCGGT

GATGCTAAAAGTAGTTTCAGAAAAGAGAAATATAGAAGAAGAAATCAAAGAAGGGGAATCTTGGAGCA  
ACGGTAAAATTATCTCATGGGTCAAACGTGGAAGCAGGCATTAATGCATTAGGTAAATTGTCTACAT  
CATATCCTTTGAAGTGTGGCCTTTCTCTGAGCCTTGCTAACACATGATGTTTTGTTTCATTGAGTTGTTGT  
AGAAAGAAGAAAACAAACAACTCTTAAAACCAATATAATACTCATGTAATGTCATTAGAGACTATTGGT  
CTAGTGGTAAGAGTGTAGCGCGTAATGCGTGGGTAGTTGTGTC

>PGSC0003DMG400025330 LRR-RLKs

TTTTGAATTCTCCACTGGTGTCTGGACAACGGTTCTTCTCTTTTTTTTTTTCTTTCTTTCTATTATACACAA  
CTTTCTAGACTACTTTCAAAGTAAAGTCTTCTCTTTTTCAAATACACACACCCCCCTCCCCTCTTCCTCTTT  
TTCTCACTTCGTGCTTGAATTTTCATTATTATGGATTTCCATCTGTAAGAAGTGAATCATACCCATTGTT  
TCTATCAAACCCACCATTTTAGCTTTACTCTTTTTTTTTCAAGATCTGTATTGATTAGTGAACCTTGCTAC  
TACTCCACATTGCACTTGATATTTATAGTCAAAGTGAAGAAGTAAAGCTCAAATCTGCATTTTTCATCAA  
GAAATCGAAATGGGTGTCTCGGATTTGATCTTTTTGGGACTATTTACGATGACCATTTTCAGTAGAAGCT  
GTTTTTCACTAACCCAGATGGTAAAGTTACTTCTTTGTGGGTTTTATCTAGTTTTTTTCAGCATTGTATGT  
TGTTCTTGAGCTAAAAAGATTGTACTTTTTTAGGTTCTGCTTTGTTGGAAATGAGAACCCTTTTGAATGAT  
ACAAAAAATGTTTTGAGCAACTGGAATGATTCGGATGAGTCGCCTTGTAAGTGGACAGGCATTTCTTGC  
TATCCTAATGACCAAAGAGTTCAATCTATGTATGTTCAATTCATTTTTTTTTGTTTTCACTATCAGTGCTTT  
ATTCATTTGTTTAGTTCTGTTTGCTTGGATTCATTTCTGCATTTTGTTTCTGAATTTTCAGCAACTTACCT  
TATATGGAACCTTGAGGAATTATATCTCCTAGCGTTGGTAAACTCACCAGATTGCAGAGATTGTAAGTCC  
CATAGTCATTGAGGCAATGCAACAAAATTGTATTAGGGCTAAAGTTTCTGTCTTGCTACTTGCCTTGATA  
AACTATGTGTTCTTTCTAAAACCAGGGCACTTCACGAAAACAGTCTGCACGGTGTGATTCCTAATGAGA  
TTGGCAATTGCCCTGAACTCAGAGCTATGTAAGTAGGAGTTTCATATATAACTGAGTGATAACATGTTTT  
CTTGGAGATTCCACATGTTTCTTGATGAATTTGTCACAAGCTAGGTGTTATTTATGCGTACAGATACCTCA  
GGGCAAATTTTCTTCAAGGAGGCATACCATCAGATATTGAAATCTTTCAATACTGACCATATTGTGAGA  
TATATATATTTAATTCACCATCTTATTATATAGTTAATGAGGTTGTTGTTTTAATGATTGGTACCTTTTAA  
TCCTTTTTAGAGATTTATCAAGCAATTCATTTAGGGGTGCTATACCTTCTTCTTGGTCTGCTCAGACATC  
TTCGTCTTCTGTAAGTCCAATTTCTGTTTCATTGTAAATTTTTAATTTGATAACTTAATGCATTACACACTGA  
TGTGTTAAACATGAAAATCAATTCAGGAACTTGTCAGCCAATTTCTTCTCGGGTGAGATCCCAGATGTTG  
GAATACTGAGCACTTTTGGTAACGATTCGTAAGTTCTCCTCCATTGGAATATAATCCCACATTTGATTTTG  
CCCTCTGTGTTTCATCATTTTCTATATACTCTAAATAAATTTAGACAGATGGTTCAAACCTCAGAAAATACA



ATTTATCGTGAATAATGCTTCACATTATTATATGTATAGAAGTGCAGCAAATATTCACATTCCATTTGGC  
ACTACAATCACACTTATAGGAAATACAATACAAGATAAATCAGGTCTTTGCACACCAGTTTTCTGGTGAT  
TAACTGCTGTTTGCTGCATAGGCTAGGTTTGTGGCAGTGTTACAATGACACCCAGCAAATACAACTAAG  
CAGAATACCCATCAAAGATTGATGTATTAACATAACAAGTGCAGTTGAGATTTTTTACAACCTGAACAAA  
CCGAATCTATCAATTGATAGTCCTTTAATCATGATCCTAGAAGTTAAATACCATGTGATAATTGAGATGG  
GAACTACACTAGCAAATTGATGGTGCTTCAATTTTAAAGATGGTGATTAATTTGTAAGTATACCTGACTT  
AAATTTATGGTACTCCAATCATGCAGTATGTGTTGCATATGTTAAGATAGACTTTTTGGTGTTAAATTGCC  
TAGTGGGTGATTGGCTGCTACATAGTTGAACTAGGAATCTAGTCCTGTATCATGATCAGTTTTACTTGT  
GTACCTTGCAAAAATTATTCTTCCCATCATCTCAAAGGGAAGCTTGATGCTCTCAAAGTCTCAAATAGT  
TAAGCTTATAAAGTATTTTCAAATGTCACAAGGGCAAGAATGTATGTGACGGGTCAATTCACGTAGGTTT  
CTTTCTGGAGTAAATCTTAGTCATCCATTGGTAAGGGTGTTCATCACCAACACTAGCTAGAAACAACT  
TGTTTAACTGGAGTCTCGTGAAGTGCCTGCGTTTACCTTTCTTTCATAGTCTTGGGAGATAATATTT  
CCAGTGTTAAATTTTTCTATTAATGGCTATCTTATAGCAGACTATTCTGATGAGGATAATGCTTATGCTTA  
GGTTTATTGGCAATTTAGATCTCTGTGGTCAACAAGTCCGCAAGCCTTGCAGAACATCTATGGGATTCCC  
TGTAGTATTGCCTCATGCTGAAAGCGATGAAGCTGCAGGTTGTTATTTGCTACTGCTTCATATCTATTTCC  
TTTTAGAAGTTTACTGGCTTTTGGAACTCCCTTCTCCACCAACTGAATCTATTTTTTTCTCCTTACTT  
CTATGTAGAAAGCTTGATTTGTTGCTAAATTAATGTGATTTCTGCAGTCCCTACGAAGCGATCCTCTCACT  
ATATTAGAGCAGCAGTTATTGGTGCAATATCTACATTGGGTTTTGTACTIONTATTGTGTTCTTTATTTTCTCT  
GGGTTTGGTTGTTATCTAAGAAGGAAAGGACAGCAAAAAATACACAGAAGTCAAGAAACAAGTCCAC  
AAAGAGCCAAGTAAGTGGGTGAATAGTACAATACCGTTTCTTTTCTTCTCCCAATTTTTGTCTTAATTTG  
TGGAGGCTTCAGGTGCCAAGCTTATTACTTTCCATGGAGATCTTCTTATCCTTCATGCGAGCTAATAGA  
GAAGATTGAATCCCTTGATGAGGAAGATGTTGTTGGGGCAGGAGGGTTTGGTACTGTATATCGGATGG  
TTATGAATGATTGTGGAACATTTGCTGTTAAAAGAATAGACCGGAATCGTGAAGGCTCTGATCAAGTCTT  
TGAGAGAGAGTTAGAAATCTTGGGTAGCATCAAACACATTAATCTGGTCAATCTACGAGGTTACTGCAG  
GCTTCTACTGCAAGGCTTCTCATCTATGATTATTTGGTCATGGGAAGCTTGGACAATTTCTACATGGTA  
TGTTTCCAGCTTTTCAAATTTGTCCCAGATCCTTCTCTCTCCACATCTCCTCTTAAGCTTATACAAGA  
CATCAAATATGGAAAGTGTGTATATTTTTGCCATACATTTTTTATTTGGTTTATCCCGAATACAACCATTAT  
TTTCAGTCATCTGTTTTTAACTGGAGAGGGGGAAAAGCACTATTGCTTTCATTTAAACAATCTGTTTTTC  
TTGGCTATTCATTGCATGCATCTTTATTGTATTTTTGCAGAACGTGTGGATGATCGGTTGTAAACTGGAA

TGCACGTCTGAAAGTAGCTCTTGGTTCTGCAAGAGGATTGGCCTACCTACATCATGACTGTTGTCCTAAA  
ATAGTTCATCGAGATATCAAATCAAGCAACATACTCCTTGATGAGAATCTAGAGCCTCGTGTTCAGACT  
TTGGCCTTGCCAAGCTTTTGGTGGATGAGGAAGCTCATGTCACGACTGTGGTTGCGGGTACTTTTGGTTA  
TTTAGCACCAGGTATGCATATTCACCTAAATCAGCAAGGCATAAAGATAGATTCACACATATGTTGCCTT  
TTAATTGCAAGAATGGTTTATTTTCTTATTTTTTCGCTTGGATAAACCTTAACCTATTCTTCTTTTTATAATC  
ATCTATATGTAGGTTTGACTTGCTTAACCTCTATAAATTGAAATTCCAACTCACCTCATCTTCTAATGAAA  
TGCTGACCAACGATTTCTGTTTGTATATTGTAATATAACCAGAGTACTTGCAAAGTGGAAGAGCCACA  
GAGAAATCTGATGTGTACAGCTTTGGGGTTCTCCTTTTAGAGCTTGTGACTGGAAAAAGGCCAACAGAT  
CCATCCTTCGTAAACCGAGGCTTAAATGTGGTTGGCTGGGTATGCATGCTTCCCTTGAAACTCACCAAAT  
TTTTGAACTTCATGAAGACTCATTAAATTTTTAACTTCCCTTTTCTGTATTTAGCTGTACAATATCCACATA  
TTGATAGTGTACAATTTGAAAAATGAACAGATGAATACCTTGCTGAAGGAGAATAGACTGGAAGACAT  
CCTTGATGCGAGTTGCAGAGAAGCCGATGCAGAGACGGTAGAAGCAATTATAGAAATAGCTGCAAGAT  
GCACTGATGCAAATCCAGATGATAGACCTACAATGCAACAGGTGCTGCAATATTTGGAGCAAGAGGTCA  
TGTACCATGCCCCGAGTGATTTCTATGACGAGTCTCATTAGATTATTCTTGATGTATGGAATAATTTCT  
GGGACCAAATATTTAGAAACAATTTGCAGCCTGATGCTGAAATGTGTAATCTGCCATTGCAGATACTCTG  
TATGCTCCTTGCTTTTGGAGCCCTGCTGCTTTTCTCCTAATGTCTTTGTGCATCACTTGTGCCTTTTTATGT  
AGATACCTGCAGTTAGTTTTAAAGCTACAATTATGAGTCCTAACTAGCCATGGCATTATGTAGTATTTATA  
ATCTATTTATCACTAGTGAATTTTTCTTCACCTATAATAGAGTTTAGGTTCCCTCCTAAGAAAGTTCTTTAA  
GAAAATTTGATGAAATATGTGAGGACACTCAACTACTGGTGGATGTCATATCTGCAAAGCATATTTGTAT  
GCCACTCAATTATCA

>PGSC0003DMG400025635 LRR-RLKs

ATGCGTCTTATATCACGTATTGGTGCTCCAATACCAACAACGACATTTCTGAGAGGTATCATCTTTTGCTT  
CTTGACATTTTCCAGAATGGAAATTTTACAGCGAGTTTTAACTTCCACACCTTTCTGGCTATACATGCTG  
TGTTTCTTGTTTCTTATTCTCATTCTCTCCAACATATTGTATCAGCTGCTTTTCTTGGCAATGAAACTG  
ACAACTTGCTTACTTGGATTCAAGTCCCAATAACTGAGGATCCAGCAAGAGTTTTCGCCTCTTGAA  
CGATTCTGTTTCTTCTGTCAGTGGACTGGAGTAAAATGTGGCCTGAGACACGGAAGAGTCATCCGTTT  
GAATCTCAAAGGGCGAGGCTGGCAGGTATGATCTCAGGTAATCTTGGAACTCTCTTTTCTTAATTCTC  
TTGACCTTGCAAAAATGCCTTCCATAACAAAATTGAGGCTTCTTGGATTGTCAGTAAATAGCTTATCCG  
GGGAGTTCCCTCCTCCGTTGTACAATTTGTCTTCCCTGGAACCTAATATCACTTTCCTTTAACAACTTTTCTG

GTAATCTCAGATCCGGTTTAGGCAACTACTTCCCTAATCTCCAAATACTTTACTTGGCGAAATGTCAATTC  
ATTGGTCCATACCGTCCTCTTTGGCCAATGGTTCAAATTGCTAGAGCTTGATTTTCTGTAAACAATTT  
CACTTGAAATATAACCAAGGGTTTTGGTAACTTGCAGATTTTCTTGTGGCTCAACGTTTGGAGTAACCAA  
CTTGGATACAGTAAGCATGATGACCTTGACTTTGTAATTTTTCTTACCAACTACCAGCAGTCTACAAATGC  
TCCATTTTGGAGACAACCAGTTTGTAGGTACATTACCTCATTCAACAGTCAACCTTTCTAGTCAGTTACAA  
CGCCTACTCTACTAGGAAACAGAATTACTGGAAGCATACCCAGAGATATCTCAAACCTGGTGAATATGC  
ATCTACTCGAGATGAGTAACAACAATCTTACAGGTAGCACTCCAGGTTCTATTGGAAGACTGACAACTT  
GGGAGGTCTCAACTGGGTAACAGTCTCTTGACAGGGGTCACCCCTTCTTCAATAGGAAACCTCACTGA  
ACTCATCTATCTTTATTTGGGACTAAACAGGTTAGAGGGTAACATACCTTCAACATTGGGAAACTGTAGC  
CAACTGCTAAAATTGGGTATTTCTGAAAACAACCTAACAGGCACTATAACCACAACAACTTTTTGTCTCTC  
ATCCCTCACAATATTTATGCATCTTATAACTCTTTGACAGGTCCATTACCAGTCTATATTAGTAACTGAA  
GTTATCTTACTTATCTTGATTATTCTCACAACAATTTTTCGGGGATGATTCCACGAACTCTTGGAAAATGC  
TTGGCCTTGGGGGATCTATTTGAAGGGAAACTCCCTCCAAGGGACCATTCCCAATTTAGAAGATCTGCC  
GGATCTCCAATCCTTGGATCTTTCCCAAATAATCTATCAGGGCCAATTCCTCACTTCATTGCAAGTTTTA  
CTTCTTACTCTACTTGAECTTATCTTTTAACAATCTAGACAGTGAGGTTTCATGTCACCGGAATATTTCAA  
ATTTGAGTGCAGATGTATTAACCTGGAECTCCGAGCATTTTGGTGGGATTCAAGAGCTGCATTTACGACC  
TTGTGTTTATCAAAGACACAGAAGAAGCATGTACTTCCCTCAAGCATGATACTTACAGAATGAATATC  
ATAATATGTGGCCTCTGCACTTCATTATCTTACCATGAGTGCCAAACACCCATGATCCACTGTGATATAA  
ACCACAGAACATTCTTCTTGATGAAGATCTCACAGCTCATTTGGATGATTTTGGTTTGGTGAGACTCATT  
TTGATGAAGATCTCACAGCTCAGTTTAGCTCACTTGGAGTTATGGGAACCATTGGCTATGCAGCTCCAGG  
TGGTGTCTTAGGTTAACAAAACTGTGATATGAAATTTCTTCAAACAATAGTTGTTTATTTATAAGCTAA  
ATTTGCTTGTGCAGAATACGGCATGGTAAATAAGGTCTCCGCTTTAGGAGATATGTACAGTTTTGGGAT  
TCTCATATTGGAGATATTCACTGGAAGAAGACCCACAGACACTTTGTTCCAAGCAAGCTCTAGTCCTCAC  
CACTTTGTGAAACAGCGTTGCCAGAGAAAGTTATGGAGATTCTAGACAAAACAACTTTTTTCATGGTGAG  
ATGAGTAAAGCAACCAACGTCAAAGAACACTGGGGCAGTATCAAGAAAGAAGAGATGGAATGCTTGGT  
TAGCATACTTGAGATTGGTGTGCATGTTTCACTGAATCCCCAAGAGACAGATTGACCGTGACACAAGT  
TTACAGTAAGTTGACACTAATGAGAGAACAATTTCTACAAAGGGGAGGTTGAGGCCACAGGCTACAAGT  
GAAAGCATTGGATTTTCATCTAAAATGGTTTAAATTCTGTCTACTTGGTAAGAATGCTAACATTCTGTCCAG  
CATGCAGAAGAATAAGGTAGTGTGAGATTTCTTGTACTTAATGGATTTAGTCTAGAAACATCAGATAT

TAGTTCTTAATGTCTACATCAGATAATACGTTTCATTCATGAATGTAAAGAATCAGATGTTTTAGGAGATC  
ATAAGGCAAGATCAAATGGTCATGGTGAGAATGTTCTAAAAGGTTGTGATTCTAGACACAGATGAGGT  
ATTCTTGTCCCAAAGTTGGAGCATCATGATCAATACTTGGAGGGTTAGTGAGAACACTGTTGATCTTTGC  
GTTGCTTTCTTAGCTTTGCTTGTGCGTTTGCCTTGTCTTTATTTGAATACCAATGCCATGCCACATGACA  
TTGTTTAGCCTTCATCTTGTCAAGTCCACACCAAGTTGCCTTGCCTCAAGTCCTTGGTCCTCACTTACCAC  
TTTGAATCAAGCCTTGGTGCTATTGTGCACACCTTAGCTTTGTCAACCGTCCGTCGCCAACTTAG

>PGSC0003DMG400025771 LRR-RLKs

CAACACTTTCTTTTTTTGCCTTAACAATTCTCCATCTCTTGCTGCCTTTTTGGTCACCAAACAACCTTCTCC  
AGTAGTTGGTTTACCTCTTCCTCTTTCTTCTTATGTATATAGAAAGTAATCATGAATAATCACTTCAAGAA  
ATGATGACTATCTCAGAGCATTACTATTCTTTCTGGTCATTTGGGATCTTTTTCTTTCTTTTATGTCCTT  
CATTTGGTCTCAACATAGATGGAACCTCTTGTGTTGCTTTCAAATACTCTGTTCTTGATGACCCTTTATCAG  
TTCTTGATAATTGGGACTATAATGATGCAACCCCATGTTTATGGAATGGGGTAACTTGTGCACCAGACAT  
GTTTAGAGTCATTAGTTTACTACTCCCAAATTCTAAGCTTATTGGTTCTATTCCAGAAGAATTAGGATTTA  
TTCAACATCTTCATACTATTGATCTTTCAAATAATTTCTTGAATGGAACACTTCCTCTTTCACTTCTCAATGC  
TTCTGAACTTCAAGTTCTTTCACTGTCAAACAATGCTATTTCTGGTGAGCTTACTGAGTCTATTGGAGTGT  
TAAAGAGCTTAAAGGTTCTAAATCTTTCTGTCAATGCATTTGTAGGAAATATCCCACAAAAGCTAAGTTC  
TTTGCAGAATCTAAAAGTTGTTTCTTTGAGTAAAAACCTATTTTCTGGTGCAATACCAAGTGGATTTCACT  
TTGTTGAAGTGTGGATCTTTCTTCTAACTTGTGAATGGAACATTGCCAGATGATTTTGGTGGTGATAG  
TTTGAAATACTTGAACCTTTTCATCAAACAAGTTATCTGGTTTGTGTCACCACAATTTGCCAAGAAAATAC  
CAACAAATGCTACAATTGATCTTTCTTTCAACAGCTTTACAGGTGAAATCCCAGAGTCATTAGCTTTATCA  
AACCAGAAAACAGAATTCTTTGCAGGAAATACAGATCTTTGTGGCAAACCACTCAAGAACTCTGTACA  
ATCCCTTCAACACTTTTCATCTCCACCTAATATAACCACTAATCCTCCAGCAATTGCAGCCATTCCAAAAGA  
AATTAACCTCAACCCCATTTCAAGATTCTGATGGAACAACCTCAAACCTGCAGCTCAGAATCAACAACAACAT  
GGGCTAAAGCCAGGTACCATAATGGGAATCATAGTTGGTGACTTAGCTGGTGTGGTGTCTTGCTATT  
GTCTTTCTTTATGTCTACAAATTGAAGAAGAAGAATAAAGCAAGTGAGGCAACCATAGAAAGCTCAATT  
GACAAAGATCAAAAATACAACAAAACACCAGAACCATCAATACTTGTGTAAAAGAAAAAGACACCATT  
TTTCTAGTTGGCCATGCTTGACCATAAATCAAGAAAGTTCAGATACTGATGACAGCAAAAACCAAGAA  
AGTGAAGACCAAATTGAGTATGAAACAGAACAAAAGAATGAGAAAAACAAGAAAACAGAAAGGTCATT  
TGTAATGGTGGATGGTGAACAGAATTAGAGCTAGAGACTTTGTTGAAAGCTTCAGCTTATATTTTAGG

GTCAAGTGGAGCTAGCATAGTTTACAAAGCTGTGTTAGAAGATGGAAGTGCATTTGCTGTTAGGAGAAT  
TGGAGAGAGTGGTGTGATAAATTGAAGGATTTTGAGCAACAAATTAAGGAATTAACAAGCTAAGGC  
ATCCAAATCTTGTTTCGTGTTAGAGGATTCTATTGGGGAGATGATGAGAAATTAGTCATCTATGATTATGT  
TACTAATGGAAGCTTAGCCAATATTGGTTACAGTAAGTTACTTTTCTTTCATCTTCATTATCTTATCATAGT  
TATAGTTTTGATAAATCTTTTCTGTCCTTATCATAATTACCCCAAATATTCTGATTAGTCAAGTGTACTTG  
ACATTTAATGTCACTGGTATATTTGCAGCAACATTCTTGATTTGTCACTTAACAAAAACATTAAAGCCTA  
TAGTTTAGCGGTAGTAATAAATATTGTTACTAAGGGGTCGTTTGATAGCTGGTTAGAGTTATGCATGTATT  
AATCATGTAGGAATTGGTATTATTTAATTAAGTGATTAGTTACTCCACATTCTATGTTGTATAAAGTAATA  
CATAGCTTTCCTCGTAACTTATATATGTATTAGTTATAAGGGTTTTTAAATTACAAACCAGACAACCTCCCA  
AAGATAATACAACCTTACGTCTAAACCAACTACCAAACGAGTACTTTTTTAAGTACACTGTCTGTCATTAGA  
AAAAGTACTTTAGTTTTAGTGTACATATACTACTCATAGGCATGGATTTTCGTTACTAAATTTTGCAGATA  
CTATACTTCATATGTGGTTGTGTTTGAGGCTCCCAATGGTCTCCATGTGACATTGTCATAATCCGTGAAA  
GTCCCAAACCTATACTACAATACATATAATACGTCAAATACATGTGCACCCCTTCTCCTCCATATTGTAG  
TACCACAAACGTTCCCGAGACTTGATTTTTTCAAACCTCCACGTTTGATCAGATTATACTGAGTATAATATT  
ATTGTTTAAATTTTTCAGAAAAAGTTGGTTCCTCTCCTTACCATTTATCATATGAAGTCCGGCTCAAGATA  
GCAAAAGGAATTGCAAGAGGATTGACCTACATCCACGAAAAGAGACAAGTACATGGCAATATTAACCT  
AGTAACATTCTCTTAACACCAGATATGGAGCCCATAATAAGTGACATTGGGCTTCATGGGCTAATGCATG  
GTAAAAACACCTCTAAACCGGATAATTCGGGCGCGCATTTCGGTAGCAAGCGGTCCACATCCTCCTCCCG  
GGACGGTTTTAAATGATCAACCGGTTTCATGGAAGTCTTACATTGCCCCAGCCGGGTTTCGTGGTAGGGTG  
CACGTCCCCCTACCACGCCCCGGAGTCGTTGGAGAGTCTCAAACCTAGTCCTAAATGGGATGTTTACTCA  
TTTGGGATTGTGTTGCTTGAGCTTTTAACCGGGAAAGTATTCTCGGACCGGGAGTTGAGCCAGTGGACC  
ACCGGTTTCAGTATCGGATGACGTGGACCTGGTTTTAAGGATGGCTGATGTGGCGATTAGAGCTGACGTG  
GAGAGCAGGGAAGAGACCACGGTGTCATTGTTTAAGTTAGTTTTAGTTGTGCATCATTGAATCCACAA  
AAAAGGCCTACAATGAAAGATGCCCTTCATGTGCTTGATAAAGTACCAGGTTATTCACTTACTAATCAT  
TATGTTGGGACCAAGAAAAGCTATAAAAAGCTGTTTAGTTCCCTTTAATTTGTTCTTCTTTTGACTTGAA  
AGATTTTTGCTCCATAAAGATGAGAAGAACCGTTGTGTTGTAATTGGTGAAAGTGTGTTGTAAGTTTGACA  
AATTGATCAACAGTGTATTTATTTGAGTTTTTTAATAATAGTAGTTTTTTTTTTCACCCGC

>PGSC0003DMG400026004 LRR-RLKs

TTCTTCACAAAAGCCAACACTCCTTTCTTGAAATTTGTCACTAAAACCAACTTTCCCTACAAACTTTTCCTT

CCATTTTTCTTGCAAAAACCAAATATGGGTTTTCTCTGTTCTCTCTTCCATTTTCCTTTTCATCCTAATAT  
TAACATCCCACAACAAAGGGTTTCTTCTGAAGCCATTAATGATAGTACTAAAACCTCTTTATCTTTGCTT  
ATGACTATCAAAGCTTCTTTGGACCCAAAAAGCCTCATTCTTTCATCATGGTCACCTACTTCTACTGACCC  
ATGCAATGATTCTTTGAAGGTATTGCTTGTAAATGAGCTTGGTCAAGTTGTTAACATTTCTTTGCAAGGCA  
AAGATCTTACTGGAAAAATCCACCTGAGATTGGTCAGCTTCAAAGCTTGTCTGGATTGTACTTGCACCT  
TAATAAGCTACATGGGGTTGTACCTAAAGAAATTGCTAACTTAACTCAGCTCTCAGATTTGTATCTTAATG  
TGAATAATCTCTCTGGTGTATTCTCTGAGGTTGGCAACATGTCTAGTCTTCAAGGTAGGTTCTTTTT  
GCTTTGTTGTCTTGACTAGTTATGGTAAAAAGCCTCAGTCTTGATGCTTAGTTTTGACTTAATTTGAATGA  
ATGTTTGAACCTTGCCAAATAGATCTATACCTCTATTAATGAAATGGGTAGCTCAATAAAGAGTCCAATA  
AGTGATAATGCTGTTAGTTATTGAGTAATTTACAATGCCTATGGCTTTTCTTGAAAAAGATTGGATTTT  
TAGTACTCATTAGTCATTGAAAGTCTATATTA AAAAGGTTCTTGAAGTATCTTTTATGAGGTGATTTTTGT  
TCCTATGTAGCTAACAGCTAGGTGCTTAGAACATGAAACACTTGAAAAAGCCTCCATCTTTGGTTTTATG  
TTAAGCTTTTCTCTGTCAATTTGTCTCTTTCCCATTTGATTTGAGCTTCAATATGGGCTAATGCTTGAATAAA  
GTTTCAACTTTCCTGGCAAACCTGCAAAATTCCTAGTCTCTTGTGGGTGGCTTTTTCTGCATTTTTGGTG  
GAATAAATCTCAAATAAAAGTAACCGAGCTCCATTTGTTTTCTGTTTTTACACAGTACTGCAACTATGTTA  
TAACCAGTTGACTGGAAGTATACCTAATCAACTGGAGCTGTGAAGAACTGAGTGTTCTTGCTTTGCAA  
GTCAATCAGTTAACTGGAGCAATTCCTGCAAGCTTGGGGGATTTGGAGATGTTAACCAGGCTTGACTTG  
AGCTTCAATAATCTTTTCGGGTCTATTCCAGTGAACTCGCGGATGCTCTAAAGCTAGAAGTTCTTGATAT  
CAGAAATAATACCCTTCTGGCAATGTCCCTCAAGGTAGTTCTATTTGATTTTCTTGATAGTACTTTAATC  
CTATTTCAATTGCTTAATATGCTTAAGAAATAAAGAAATCTTAGGTTCTTTGATTCCCCTAATATCAATCCA  
AATGTTTACTAATATTAGACATTATAGTAGAACTAACTCTTTTTGGTCTTTTTGGTTTGGGCAATGGAT  
GAAATGAAGCCTTGAAGAGACTGAATGAAGGATTTAGTATGCAAACAACCCAGACTTGTGTGGAATTG  
AATTTTCTCCTTGAAACTCTGCACTGTATCTAGTCTAAACCAAAACAGACCACAACCATTTGAACCTGGT  
TCGAATCGTCTTCCACAAAAGACATTCCAGAGTCTGCAAATGTACAAACAAAACAAATGAGTCAGTCAA  
GAAAATCACAACTGCTGTGGTTGTTGGTGTATTGCACTTTTTGTGTCAGTAGCAGTAACTGGACTTTT  
CACATTTTCGTTGTACCGTCGAAGGAAACAGAAAATTGGAGGTACTCTTGATACCTCCGATAGGCGACTC  
AGTACTGATGAGGTGAAGGAGATCTCTAGAAGAAGCGCGTCGCCCCATCAGCCTGGAATATTCCAAT  
GGCTGGGATCCTCTAGGCAAAGGCCGAGGTGGAAGTGCTTTCTCTCAGGAAGTATTTGAGAGCTTTATG  
TTCAATTTGGATGAAGTTGAGTCAGCTACACAGTACTTTTCAGAAGCAAACCTGTTAGGCAAGAGTAATT

TCACAGCTGTTTATAAAGGGACATTGAGGGATGGGTCTGTTGTTGCTATTAAGTGCATTTCCAAGACTAG  
CTGCAAGTCAGATGAAACTGAATTTCTCAAGGGACTAAAACCTTAAACCTCATTGAAACATGAAAATCTT  
CTGAGGTTGAGAGGCTTTTGTGTTCAAAGGTAGGGGGGAATGCTTTCTGATCTACGATTTTCGTTCCAA  
ATGGAAATTTGTTGCAGTATCTTGACGTGAAGGATGGAAAAGGAAAGATCCTTGATTGGTCTACCAGAT  
TTTCTATAATCAAAGGCATTGCCAGAGGTGAGCTACTGTTTGATTAGTCCCATGTTTGATGTTTTCTTTAT  
AGCTCTTTGACGACCAGATTTGAATAACAACATTTGTTATCTATTGTTAACAGGTATTCATTAATTGCAT  
AGAAACAAGGGAGGCAAACCTGCTCTAGTCCATCGAAATATATCAGCTGAAAAAGTACTTGTTCGATCAA  
CACTACAACCCATTGCTCTCGGATTCTGGTCTGCATAAACTACTAGCAGATGACATTGTCTTCTCAACACT  
CAAGGAAAGTGCTGCAATGGGATACCTAGCTCCTGAGTATACAACCACTGGACGGTTCACCGAAAAGA  
GTGATCTTTATGCATTTGGCATGATCATATTTAGATTCTCTCCGGAAGACGTAAAATCACCCCTTCTAAC  
CACCAAGGGGCAGAGTTGTGCAGATTTGAAGACTTCATTGATCCGAATCTTTGGGGCAACTTTGTTGAA  
GCGGAGGCAGTTCAGATGGCAAAGGTAGCTCTACTTTGCACGCACGAGTCACCAAATCAGAGGCCAGA  
CATTGAAATCGTCATGCAAGAACTGAATGATTTAACCTCCAGCAAGTCGTAAAAACTATTGCAAACAACA  
TCCAAGTTCTCCAATGACCATTAGGAGCCTGATATTAACATCTTACTGATGCCAGGAGTAGGCACCATTT  
TCCCATCCTTTTGATCCTGCATGACTTGTGCCTGAGGACGACACATGAATGCCAGGTGCCTGTTCCACAT  
AGTTTATTAGTACTAATGCACCTCGACGTAGGTAGGCCTCAAGTGATCAGTTCTCTTGTATTATGTAACCT  
AACCATAATTCTAAGCAAGTCTTCTCCACTTGCAAACACTAGTGTACCAGAAGTGCAATTTCTATTTAGTATC  
ATATGAGTTATGACCTCTTGC

>PGSC0003DMG400026072 LRR-RLKs

CTAAGACCTCATTTTTCTATCATCACTAAATGGACTAAAACTAACAACTCTGCATTCAGAACTTCTTTT  
TCTTTTATCTATTTCTGGTGACTGACACTGCAAATTTCCATTTTCCCTTTAGAGGGGTCTCATTCAAACCTT  
TGAATTTTTTGGGTATTCAAGAAAACAAAAGTTTGAAGCTTACTGCCTCTTTATGTGTGAATAAATAAG  
AGAAACAGAAAATCATCTTACTATTTAGGTATAACTCATGTTTTCTTTAAGCCTTATTCATTTGTTAGTCT  
TTTAATTACATAAAAATCCAACTTTATGTGTTATATGAGTTATCAGATGATTCTTAACAACCTAAGCTATC  
ATTTAGCCATAGATTTTAGATGATATTTGAAAATTTATATTCCTATCTGTTTGGCCATGAAATTTGATATT  
TTTGGAGTTTTGGGACTTTCCCTCTTAAAACCTCAAATCTATAGCCAAACAGGACCTAAAGGATGCATG  
TACTTATGATTTCTAAGAAAGTTTACTTTTTTGTCTATGGATATCTCTGTTTCTGTAAAATTATGGAA  
GCTGTTTGTCTGTCAATTAGTTGATTTCCATGTTCTTGTGCTATTGTAGTTTGCTACAACCTTCTG  
GGAAAAAAGTTGTTTTGTTATTGTTACAAATATGGAAATCCTAGATTTCAATCTTCTTGCTTATATTCCT

ATAATTCTTGCAATTATGTTTCGAGGGGTCTATTGAAAAAGTCTCTACCTACCCAGATTCCACACTTGT  
GTTTTTGGGGTAAATGAGTATCTTCTTTCATCTGGACAGTCTGTAAAATAAGGTGAAACTATTATATTTTG  
AGTCACTTTAAAGGGAGATAATTTAATTTTTATATAGTGAATTCACAACAAATGAGAAATTGACATCTT  
AACATAAGTTTATTTCTTCCCAACCCACCCAACAATTCCATCTTTTATAATCTAGACTTCCTGTATCTGT  
AAGTTTTCTTTTTCTGAACTACAATTTTTATTTTCATGTTGGAAAGTTATATGAAGTATATGACAAACATTT  
TGTTAGGTATACATAACAACACTTTAAAAAAGACAGCTTTTTTTGAATTGGATATCAGTATTATCTTGTTT  
TTTTAATAGACCACTTTATCTTAGTGTGGATATCTGAGTTTCCACTGTTTTTCTGACAGCTGCTTCTTG  
ATGGACACCCATCATGGCAATAATGGAGTCTTGATTGGATTGTGTCCCTTTATGAAATGACCCTTTTG  
CCCTTCTCAAATTTCAAGAATGGCCAGAATCCAAAACTTCAAACTCTCTCTCAATTCTTGCTGTTTTCTT  
GTTTTGAATTTTTTGTCCAGACATGTAAGTCCTAACCTCAGAAAGTGAGGCTCTTTTGCATTTCAAAG  
AGCAGCTTAATGACCCTTTGAATTAATTGGATTCTTGGAAGGACTCAGAATCTCCTTGCAAGTTCTATGG  
AATTACATGTGATAAAAATACTGGTCTTGTTATCGAAATTTCCCTCGATAATAAGTCGCTTCCGGGGTG  
ATTTACCTTCAATTTTTCACTCCAAAGTCTTACTTCTTGTGCTACCTCAAATGCACTATCAGGGAAA  
CTTCTAGTGAAGTTACCAACTGCACCAGTCTCAAAGTCTGAATGTCACTGGAAATAACATGAACGGAA  
CGATACCTGATTTGTCTAAGTTGACTAACTTAGAAGTGTGGACTTGTCGATTAATTTTTCCGGGGA  
ATTTCCATCTTGGGTTGGAATATGACTGGTTTGGTTGCGCTAGGGCTTGGAGATAATGACTTTGTTGAA  
GGTAAAATTCCTGAGACTCTTGGGAATTTAAAGAAAGTGTATTGGCTTACCTGGCAGGTTCAAATTTGA  
CAGGAGAAATCCCGGAATCCATTTTTGAAATGGGGGCACTAGGTACATTGGATATTTCAAGAAATCAGA  
TTATTGGGAATTTCTCTAAGTCAGTAAACAAGCTGAAAAATTTATGGAAAATTGAGCTGTTTCAGAATAA  
GTTGACAGGGGAACTTCTGTAGAACTGGCAGAGCTCTCTTTTTGCAGGAATTTGATATCTCTAGCAAC  
CATATGTATGGGAAGCTGCCTCCAGAAATCGGGAACCTGAAGAAGTTAACAGTTTTTCAAGTATTCATG  
AATAACTTCTCTGGTGAAATTCCTCTGGTTTTGGAGATATGCAGCATCTTAATGCCTTTTCTGTGTACAG  
GAACAATTTTTCTGGGGTATTTCCAGCAAATCTTGGTCGGTTTTCCCCCTGAATAGCATAGACATATCTG  
AAAACAAGTTTACTGGTGGATTCCCAAAGTACTTGTGCCAAAATGGGAACCTGCAGTTTTTGCTAGCTAT  
TGAGAACAGTTTCTCAGGGGAGTTTCCGAGTACTTATTCATCGTGCAAGCCTTACAGAGATTGAGGGTC  
AGTAAGAATCAACTTTCTGGGCAAATTCCTAGTGGTGTATGGGGACTTCAAATGTATTTATGATGGATT  
TCAGTGATAACAAATTCAGTGGAACATATGTCCCGGAAATTGGGGCTGCTACTAGCCTGAATCAGTTGG  
TATTATCAAATAACAGATTTTCAGGTGAGCTTCCAAAAGAACTGGGAACTCACACAATTGGAAAGGCT  
TACTTGGATAACAATAACTTCTCGGGCGCAATACCTTCTGAACTTGGTAAACTAAAGCAAATTTTCATCTT



TGCATTTGGAGAAAACTCATTCTCGGGCACTATCCCATCAGAATTGGGTGAATTCCTAGGCTTGCAGA  
CCTGAATCTTGCTTCAAATCTTCTTACAGGTAGCATTCCAATTCCTTATCAACAATGACCTCTTTGAACTC  
TCTGAATCTTTCACACAACAGACTCACTGGTACAATACCAACTAGCTTGGACAATCTGAAGCTGTCTTCAT  
TGGATCTCTCAAACAACCAGCTATCAGGAGAGGTATCATTAGATCTTTTAACTGGGAGGAGACAAGG  
CATTAGCTGGTAACAAAGGACTTTGTATCGACCAAAGCATCAGATTCTCGATCAACTCAGGCTTGGGCA  
GTTGTGGTGGAAAGGCTGCTAACATAAGTTAAACAACTAGTTGTGTCTTGCATTGTGTTGCTTTCCTT  
AGCGGTTCTAATGGGTGGGTTATTGCTCGTCAGTTACCTAACTACAAGCATAGTCATGAAGTAGATCAT  
GAAGAAAACTGGAGGAAGCCAAGGGAACAAATGCAAATGGAAGCTTGAGAGTTTCCACCCTGTGGA  
ATTTGATGCAGATGAAGTTTGTGATTTGATGAGGACAATTTGATCGGAAGTGGAGGTACAGGAAAAG  
TTTATCGGTTAGATTTGAAGAAAGGTTGTGGAACAGTAGCAGTGAAGCAGCTGTGGAAAGGGATTGGT  
GTGAAAGTTTTGACAAGGGAAATGGAAATCTTGGGAAAAATCAGGCACAGAAATATAGTTAAGTTGTAT  
GCCAGTCTAATGAAAGAAGGTTCAAATATCTTGGTTTTCGAGTACATGCCAAATGGTAATCTTTTCGAGG  
CACTACACCGAGAGATCAAGGCTGGCAAGCCAGAACTAGATTGGTATCAGAGATATAAAATAGCCCTTG  
GAGCTGCAAAAGGAATTGCTTATCTGCATCATGATTGTTACCCTCCTATTATTCACAGAGATATCAAATCA  
ACCAACATTCTACTTGATGAGTATTATGAAGCAAAGTTTCAGATTTCTGGGGTTGCAAAAGTTTCAGAAA  
TTTCTTCAAGGGGATCCGAGTTCAGTTGTTTTGCAGGCACTCATGGTTACATGGCTCCTGGTAAGTTTCA  
AGAAAACCTTAAATTGAGTGACCATTTTGTCTCTCCTTGTTACTTTCCATTCTTGAATTTGCATTTACTTTC  
CTATATGTTTGCTTGACAGAAATGGCATACTCTCAGAGTGACCGAAAAGAACGACATTTACAGCTTTG  
GTGTCGTGCTATTGGAGCTAGTAACTGGAAGAAAACCAATAGAAGAAGCCTACGGAGAAGGAAAAGAC  
CTGATCTACTGGACCTCAACTCATCTAAATGACAAGGAAAGTATTAACAAAGTTCTTGATCAAAAGGTGG  
TATCTGAACTTGTTTCAAGGATGAAATGATCAAAGTGTGAGAATTGCCACACTTTGTACTACTAAGCTTCT  
AATTTGCGTCCCAGCATGAAAGAGGTTGTCAATATGCTCGTTGATGCTGAACCTTTGACGTTTAGGTCTT  
CAAGCAAATCTGAGAAAAAAGGGAACAGTTTTTCTGAGGTCTAGTTTCTTCTTTTTTTTTTATTGGGTTT  
TCCCTGTTGATAGTTGCTCTGTAGTATGATTCTCAAGTTAGTTTTAGGTATCTGATATACATAAATTTATA  
CCATGTGATGTGATATTCCACTTTCTTTATGTAAAAGTTTGAATTGTGTAAGAAAAATGTACTTTTTTCTG  
CTGTGATTGGAACTTCAGAAGTGGGATTAATCAGAAATGTGGGTAGTTAATGTCCATGATTAAGAGTC  
CCACATCGGCAAAAATACATTAGATATGTTGAGTATATAAATAAGCAGGCCTTACACTCAAATAACATGT  
CTTAAAGCCGCATAGGTGTAGACTCAAAGCTAACAATATTGCCTTACACAAAACTTGTTTTGTTGTAAA  
CTTTGAATCTGATTCAATGAATATCCACATAGATAGTTGGAAGCAAACCTGATATACATAAACATTTTCAT

ACATTTGTATAAGAGGGATGGCAACCAACAATGTTACTCTTTTATCTTTTGTGATCCTCCTCAGTATTACA  
TGGTACATTCTGCAGATTTTTCTGCTCTCTATGACATTACGGTTCCAAATCTTCACTCCTTTGCTTCAAGA  
AGTTGAGTTAATGCAGCATCAATTTGAGCAAATACCTCCTCTTTGGAAACGCTCCCGTCCACCTGAAATT  
AAAATAGGTCAGAGAAGATAGAAGTTTTAACACTGAGAAATGATAAGAACACGTTTCATGCACGCGTATT  
GAAAGAAAGAACATACAGTATCCTTGTTTCAGTGAAGAAAAAGAGAAGGGTAAGCAAAGGGGAGTCCT  
TGATTAAGTATATTTCCCCCAGATTGTTTGGTATGAATGTAAACTCAAAGGATTTGCTCTTCTTTATCT  
AATTGAGGAGAGATGAATAATTTAAGATAAAAGTGGATGTATAGCCCTTTTGCTTTGGCTTCCCTTGTT  
GTTTTAACAACTGTGTGAGTATGGATCAGTCTGGATGAACTGGAACATAATTTAAATTGAACATTTTGTA  
ACCTACATGTCAAACAACATAATCTTATAACCATATCATTATTCTTTGCGCAATTAGAAAACCAAACACTCTT  
TTTCTCAAACCATTTCCAACCAACCCCTCCACATTGTCTTTTTTATGGACTATATTCCTGTAAACCAAGA  
CCTTGAAACCATCAAACAACCAACAACACTATGAATCAAGCATATAAGAATGATTCCACGTTTTGAAGGT  
GAGTGTTCAATCTGCATTCCCGAGTGAAGCAACTGCACCACATCTGTGGCAAAAAGAATACTGGAATA  
TAGTATCTTTGTACATTGAGAGAACTGATTCCACATTTTGATGGTGAGTGTGCAGACGCAGCTTACCTG  
TAAATGGTAAACTGAAAAAGAAATAAGACAAAAATGAAGCTGATCACAACATAAATTTATGGTGTTTTA  
GAAACCTATACTTAAGTCAATTATCTACAAGGGGACTTGAGTAAGCAAGGGAAAAGAACATCAAGAATG  
ATAAAG

>PGSC0003DMG400026749 LRR-RLKs

CTCAAACCCACAGGTTACTAGTACTAATATTTGCACTAATGGAGAAAGCCTTCACTATTTTTCTCTTAACA  
ATACTCTTGTTGCTTCACTATGTTATGACCCAAACCAACATTACTACTGATCAATTAGCTCTTCTTTCTTTA  
AAATCTCAAATCATTTCCGATCCCTTTCACTTCTTGAATGAAAGCTGGTCTCCCGCTATTTCTGTTTGTCAT  
TGGGTAGGAGTCACTTGTGGTTCTCATCACCAGCGAGTGAAGTCCTTGAATCTTTCCAACATGGCTCTTA  
CAGGCAGGATTCCCGTGATTTTGGAAACCTCACATTTCTTGGTTCTCTTGACTTGGGAAGCAACAATTC  
CAGGGATATATGCCTCAAGAAATGGCATATTTGCATCGGCTTAAGTTTCTTGATTTAAGCTTCAACAACCT  
TAGAGGGGAAAATCCTTCTTGTTTTGGTTTTTACACCAACTTCAAGATCTAAATCTTGAAATAATAGT  
TTCATTGGTTCCATCCCTTCTTCATTTTCTAATATTTCCACACTTGAACTTTGAATCTGAATTTCAATTCCA  
TAGAGGGTGAAATCCCAGAAGTGATTGGAAGTCTTATAAACCTTAGAGTTTTAAGCTTGTATGGAAATA  
ATCTCATAGGTTCTATTCTCCGTCACTCTCGAATGCCTCAAGGTTGGAGGCATTAGATTTATCTCGTAAT  
TACTTCAAGGGAACATTCCAGAAGGGATTGGCAATCTACACAAGATGAAATTGTTGTCCATACAACATA  
ATAAACTTACGGGTTCTATACCGTTCACAATTTTCAATATTTCTAGAATCAAATTCATTGCATTTACAGAC

AATAGCTTATCAGGAAATCTTCCCAATGGTTTATGTAATGGTCTCCCAATACTCAAAGGGCTTTATCTATC  
CACAAACAACTTGGTGGTCATATGCCTACAAGCTTGTCAAATTGTTCACAACTTCAAATATTGAATTTAT  
CAGGTAATGAGTTTGACGGACGAATACATAGTGAAATTGGAAGATTGAGTAACTTGCAGATATTGTATC  
TCGGATCTAACCATTTACAGGTACGATCCTAGCTACAACATTATTAATTCTTTTATGAATACTTGTAATAT  
TGAAGTTGAACTGCAGGAATAATTCCACAAGAGTTAGGAAATCTTGCTAATTTGGCGGATTTAGGCATG  
GAGGATAACCAGATTAGTGGCTCTATCCCGATCAACATATTCAATATCTCCTCACTGCAACGTTTTGGACT  
ATGGCGGAACAATCTCAAGGGATCCTTACCACGAGAGATTGGCAACTTAACCAAGATACAGATTCTAGA  
TCTTAGAGAAAATACATTTATTGGTACGTATTTGAAGTGATAGCAAATTATAAACTTGTACTAGCTTGA  
ACTAACTCATTCTTAATTTCTTTAGGTGAAATACCCAAAGAGATGAGCAATATGATGGAGTTGGAGGTAC  
TTAGTCTCGGGTTAAATAGTTTCAGTGGTTCACTTCAAATAGAGATGTTCAACAGTACTTCACGCTTGAG  
GATAATTTCTCTTACAAACAATAATCTATCAGGAACTCTACCATCAAACATAGATTCTGTCTTACCCAACA  
TTGAAGAGCTTTATTTGGGTGCCTTAACAATCTTGTTGGGACTATTCCTCATTCTATTTCCAATTGTTCAA  
AACTTACTAATCTAGAGCTTTCAAATAATAAACTCACTGGCTTGATTCCCAATTCTCTTGGATATTTGGCT  
AATCTACAGTTCCTAACTTGGCAGCAAACAATTTAACAAGTGACTCATCGTTTAGCTTCCTCACTTCCTT  
AACCAATTGTAGAAATTTAACAATCTTTTTCTATCTTTGAACCCTCTAAATGGCATGCTTCCAGTATCTGC  
AGGGAACCTTTCCACTTCTCTTACAATGTTTTACGCCAGTCTTGCAATATTAAGGGCGAATTCCAAATG  
AAGTTGGGAACCTAAGCAACTTGTTAGAGCTTGATCTTTCTGGAAACAACCTGGTTGGATCAATTCCCAC  
ATCAATTGGCAACTTGAGAAACCTTCAACGCTTCAACTTGAGTTACAACAACCTTACAGGATTTATTGGA  
GATTTAATTTGTAAATTGCAGCATTTGGGTGCTATTTACTTGGGACAAAATCAACTTTCAGGATCTCTCC  
TAATTGTTTAGGGAATGTTACTTCCCTTAGATTGATACATCTTGGTTCCAATAAATTGATTTCCAATATACC  
ACCAAGTTTAGGGAATCTTAAGGATTTAATGGAGCTTGACTTATCCTCAAACAACATGGTTGGTTCTTTA  
CCACCAGAAATTGGAAATCTAAAAGCTGTGACACATATGGATCTGTGATGAATCAATTCTCAAATGGA  
ATTCCTAGGGAAATTGGAGGATTGCAAAATCTGGTGCATCTTTCTTTGAGACACAACAAGTTGCAAGGA  
TCTATACCTGACTCAGTGAGCAACATGGTAGGTTTGGAAATCCTAGACATTTCTCATAATAATATATCAG  
GAACCATTCTATGTCTTTGGAGAACTTCAAACCTTGAAGTATTTCAATGTTTCCGTCAACAAGTTGCAC  
GGTGAAATACCCTCAGAGGGTCTTTCAAGAACCTCTCGAGTAAGTTTTTCATCGACAATGAAGCATTGT  
GTGGTTCTTCAAGTTTTAGTGTCCACCATGCGCCACATCATCAAAGCATAGATCAAATAGGAAAAAAT  
GCTTGTCTATTTCTGTGCTGGGAATTGCACTTCTTATGCTGGGAATTGCACTTGTATTTGTTCTATTAC  
CTTTGTGTTTGTATGGATAAAGTATAGAAGAGGTAAAGGTGATCCTCAACAAGCTGACTCATTGTCTACC

GTAACAAGAGAAAGAATTCATACTATGAACTGCTCCAAGCAACTGAGTCGCTTAGCGAGAGTAATCTG  
ATTGGTTCTGGAAGTTTTGGCTCTGTTACAAAGGTGTTCTCAGAAGTGGGACTGCCATTGCAGCTAAAG  
TATTC AATCTGCAACTGGAAGCGGCATTCAAGAGTTTTGATACAGAATGTGAAGTTTTGCGCAGCCTTCG  
CCATAGGAATCTCGTGAAAGTCATCACTAGTTGCTCCAACCTTGATTTAAGGCTTTAGTGCTCGAGTAT  
ATGCCTAATGGAAGTCTTGATAAGTATTTGTATTGCGACAACAACCTCCTAGATATCAGCCAGAGACTAA  
GCATTATGATAGATGTGGCATGTGCGTTGGAATATCTCCATCATGGATGCTCCTCACCCGTGATTCATTG  
TGATATAAAGCCTAGCAACGTCTTGCTGGATGAGGATATGGTTGCCACCTAAGCGACTTTGGTATTTCA  
AAACTGCTTGGTGAAGATGAGAGTGATTTATACACAAAACTTTAGCAACATTTGGTTATATAGCACCAG  
GTACGTCTCTTTGTTTTGCTAATTTGAACATTGATTTTCTCTTATTCTTTTTTTTCCAATCAAGAAAGTA  
TATTGCATCTTTAACTAATTGTTTGACTGTAGAGTATGGGCTGGATGGACTGGTGTCAATAAAATGTGA  
TGTCTATAGTTACGGGATCATGTTGCTGGAAACATTTACTAGGAGAAAGCCTAGTGATTTTGAGGGAGA  
TCTTAGCTTGAAGCAATGGGTGAGTTATCACTCCCAGAGGCAGTAATGGACGTTATGGATGCCAACTT  
GGTTACACCAATGGATAATCGCTTACAGAAGGAGTTAGATATCGTGGCATCAATCCTGAAAGTAGCATT  
AGATTGTTGTGCTGAAACTCCGACAAGAAGGACAAACATGAAAGATGTTGTAGGGATGCTACAGAAGA  
TCAAGATTCAACTTCTTGCATGCTGAGCATGTTCTCTGAATCTCTTGTTCCGAATCGATCACTTTTTTTGTT  
TTGTTTTAGCACTTGATTTGTGCATGATTCTGTTTTAGAAATGCTAGTTGGTTGCAATAAATGTCACTGT  
TTCCTCTTAAA

>PGSC0003DMG400026760 LRR-RLKs

CCAAATTTCAAGAAAAATAGAAAAATAAATAAAAAATTTGTTTTGTTTTAGAATTGTTTGGTTGGTG  
GTGGGTATTGGATCCAATGTCACCAAGTAAATGTTTTAGTTATCCAATGTGTTTTCTTTTTAAAATTCA  
GCAAAAAAAAAAGTGATTTTATTAGACACACAAATCATTGTTTTTAGAAGCATTTTTGGGTGTCTCTGC  
AATCTCTGAGGTCTGTCATGTGAAGTGTAGGGAAAAATAATTCAAGAAACCAAAACCCCAAGTTTTGAA  
TTTTTTATTTTATTATATGGTATTTTTTTGTAATTTTTTTGGGTTTTGGGTTTTATGAAAAGTGAAAGT  
AGTAGTAAAGAGTGAAAAAAGGGTAGTGATGGTGATGAGGAAGTTCAATAAATTGAGTTTGTGTTGG  
AGTTGTTGATTTTATAGTTTTGTGGTCAAAGTTTTTTGTTTGTCAATTGATGATAATGACACTAATTGGTAG  
ATCTGAAGATTCTTGTTGATAGTGATCTTGTTAAAACTTTTATAGACAGAAAGGAAAATGTCTTTTGG  
ATCTTTTACATTTCAAGATTTAATCATCAAATAAGAAAATACTCTACTTTTGTCAATATGAAAATCCAAAA  
AAAAAAAAAACTTCATTTTAAATGAACTTTCTGTTTCCATTCATCAATGGTGACACCCCAACCAATCAA  
GAATCCATTTTTTTCTAGGTTTCTAGTAGATCCCTTAGTGGCAAGACTCCATTTTTAATTCTGCATATTA

AACTTTGTAGTTTGGTGACACCCAACCAAATCAAGACTCCATTTTTAGCTCTGCATTTTGAACTTTCTAGTT  
TCCCATTCAATGGTGACACCCAACCAAATCAAGAATCCATTTTTGCAGACCCCTTTAGTCTCAAAACT  
CCATTTTTAACTCTGCACTTTGGACTTTCTTGCTTCCCATTCAATCCATGGTGACACCCAACCAAATCAAGAA  
TCCATTTTTGCAGAGACCCCTTTAGTCTCAAGACTCCATTTTTAGCTCTGCATTAGATCCCTTTAGTGTTAA  
GACTCCATTTTTAGCTCTGCAGTAGATCCCTTTAGAGTCAAGACTCCATTTTTATCTCTGTAAGTTGAGTA  
TTTTAGTGCAAGACTCCATTTTTAGCTCTGTATTGAGCATTTCAGTGCTCAAAAATTGTCAAGTTCAATG  
AAAATCAAAAACCCCTTTTCTCTAGAATTGAACAACCTTAATGCTCAATCATTCAACAATGGAAATGTCA  
ATTTCAATGGAAATCAAGAACCAGTTTTGTTCTTAAGGTACTGTTCTAGTCACAAATTCTGTTTTTCATT  
TTCTCAATATTTTCCATAGTTTTCCCACTTGTAAGATCAGATGATGCTGAAGCTCTTTTAGCATTGAAATCC  
ACAATAGACCCCTCAAATTTTCTTGATTGGAAAAAGGAACTGATTTTTGCCAATGGCAAGGTGTTAAAG  
AATGCATGAAAGGTAGAGTTACTAAGCTTGTTGTTGAAAATCTCAATTTGAGTGGTTTATTGGACCAAAA  
TGCTCTCAATCAACTAGATCAATTACGAGTTTTAAGCCTCAAAGAAAACCTCCATTTCCGGCCAAATCCCAA  
ACCTTGCCGAACCTTCCAATCTGAAATCCCTTTTCTCAACAACAACAACCTTTTCCGGTGAGTTTCCGGCT  
ACCATTACCCTCCTCCACCGTATCAAAGTTGTGGTTCTCGCCGGAAACAAACTCTCCGGTGACATTCTCC  
GGCCTTAACAAATCTATCCCGGTTGTATGTTCTTTATCTAGAAGACAATCACTTACCCGGAGAAATCCCAC  
CGTTGAATCAGCTCAGTTTAAGGTTCTTTAATGTGTCAAAGAATCAACTTTCTGGTGAAATCCCGAATACT  
CCGGCGTTATCTCGGTTCAATGAATCATCTTTCGCCGGAAATGTCAAATTGTGCGGAGTACAACCTGCATA  
ATAACTGTCCTTCAACTAGTCCATCGTATCCCATCATTCCAGAAGATGTATCTCATCATAAAAAAAGCAAA  
AAGCTTATCATCATCATTGTCCCAGTGGTCGCTGGAATCTTGATCCTCTGTGTTTTGATGGCGATTTTTAT  
AGCATGTGTTTCGAAAACGAAGAAGAAAAACTCAAGATGGAAAGAGTAAAGGAGTTGAAGCCGGTGGAA  
GGCGGGGGAGGGGGAGGGGAAGAAGAGGGGACTAGTCGCGGTGGCAATGGCAGTGGTGGTGGTGG  
TGCCAGGGATGGTAATAATGGTGGAAAAGAAGGGGCATTTTCATGGGATCAAGGAAGTGGAGGACTA  
GGGACATTGGTGTGTTTTGTGGACCAGGTGATCAACAAATGAATTACACCTTAGAGGATTTGTTGAAAGCA  
TCAGCCGAGACATTAGGGAGGGGTATAATAGGAAGTACATATAAAGCCGTGATGGAATCCGGCTACAT  
TGTGACGGTGAAGCGGTTGAGGGATTCGAGGTTCCGAGGTTAGAGGAATTCCGGAGGCATGTGGAG  
ATTATTGGTAGGCTAAGACATCCTAACTTGGTCCCCTCCGAGCATATTTTCAAGCTAAGGAAGAAGCTT  
TGCTCGTTTATGATTATTTCCCTAATGGCAGCCTCTTCTCCCTCGTTCATGGTATGTATTCCGTCATTCATT  
TATTTATTTATAGTATATTTGCTTTTATCCGTTTTTGTGTACTGAACTCTCGTGAAGGAGGAAAAAACAG  
GTATAGTTGAACTCATGAATAGTGAAGGAAGTTAAAAAGGGATAGATTTGGCGGAGTGAACCTGCAC

TTGAGTGGTATAAGGTGGAATAAGATAAGGGTGAGGTAACCTATTTACGTCTAGTATATGCATCGATTC  
AATAGATGCATTACATGTGTTTTTTTACTAAATTAGTTATCGAATAGTTTATCCTCTCTTGAGGTTAAACTA  
GTTTAGTTTTGTGCAAATACCAAGTGGGGACAAATTCTTTTTCATGAGATCACTAGTTTATAACTCAATCT  
CTCGAAGATTCGGCTCCTTATTGACATGAGTCATTTTCTATTTTGAATTCAAATTTGTTACCTCTTTATG  
CTTGGCTGTTTTGTGGTGGAGCATTGGAGGACTTTAGTGTCACCTTATTTTCTATTTTTTTGTGTTTATAT  
TTGTGTACTTTGCACATTTTCTTGAATTGTTTATACTTTTTAATATGTTTCTTATCTTCTCAGTATTCTGT  
CCCTTCTATTTTGTTTTTTTGTTATTTTTGAATAATTTCCATATAATTGGTTTGGTAGTGTATCACTTTCTG  
GTCTCTCCTGTGGGTTCTGTTTGGTGATGGTGGGGAAGAGAGGGCCAACAAAGGAAGCTTGTAGGAGC  
CAACAAAGAATTGAGATAGCTGGCCAAGTAGGACAAATATGTAAATTTGTAAAGGAAGTTCCAAACTTG  
CTTTGGTATACTGATGTGAAGATTATAGAAAAATATTGTTTAAATAATTAAGTTAAAAAAAATGAATAAT  
CAAATAAGTAACTCTTCTCATCTTGTCTCTACGACTACGGATGCTATACGAAAAGAAGATAAGGAACA  
AAAGGGGAGTATAGTTATATATTGGCCTTTTGAATCTTACAAAGGATGATATTTGTTCAAATGAATTG  
TGAAAAAAGATGTTTAGTGTGTTTTTGCATTATTTGTTGTTGTTACTGTTTCTTTTATGAATGCTTTGTGC  
TTTCTTATTATTTGCCATATTTCTTCAATGTCATTTTCCCTTTCATAACTACTTTGTTTAGCTGCACAAGAG  
CCTAGGATCCTTCGAAACAACCTTTCTATCTCAACGAGGTAAGGTCGCGTATACTCTACCCTCTCTAGAT  
CCCCTTGTGGGATTTCACTTTGTTGTTGTTGGATTGTGAAAAAGATGGCCCTCTGGGAGGAGGAAACT  
CAAATTAGGAATCAAACAATGATGTCACCGCTACACTCGCATATTTTGGCCTTATCATTTATTGCATAGA  
GCCAAAAAAGTTGTCCACCATATATGGAGATAAGGCATGATACTTTGAAATTAGAAAGACCCTGCATATT  
GCTCAAATTTGCATACGTAAGAGCTTCTTTCCTTGTGCTGATTTCACTTCTCTGGTAAGGTGTTAAT  
CGTTAAATTGACCAGTGAGCTTCAAAGATACCTGGAAAAATCAACATTTTCTTCTGATTCAAAAAGAA  
CAACAACAACAACGTACCTAGTGTAGTCCCACAACACTACGGTCTGGGGAGGGTGGTGTGTACGCAGAAA  
AACAGAATTTTTCTGACACTAGTCACTAGCGATTAGAAGTTCCATTGCTATTTATAAAGTTTCATAATTGT  
CTGTACTATTTAGCTTTTAAACATCTGCTCAACATCTCTTGTCTCTCCACATTATATCTTGTGATATAGTTG  
AGATGTTCTAAATTTGATTTGTTCTAGTAAACTGAAGTTGCACCTACGTTGTATTCCAGAGTGTGTTCAA  
TATGATATTTACTTTTCTTCTATTTAGGGAAACTAGAATGCAATACACCATTGACAAGAACAAAAAAGTTC  
AATATCATATAAAACTATTGTCAACCGACATGTTGAACTCCGAGATCCCTACATGTAAGTATAGCAAATT  
GGGTAATAATCAAGAATAAGGTAGTCTAGATGCTAGTCTTTTCTTCCAAGTAAAGTTGTGGTGATGCAGT  
GAAAGGCATTGAAAATGAGTTGCTTTGTTAGGCCATTAGACCATTTCAAGGCACTAAATCACCTATGGCG  
GAATCACAGAGCAAAGGCACACCGAAGTTTATTTTTGGAATAAGGACAACGTGGAAGGTGCTATGCA

ACAACAACAACATACTCGGTGTAATCACACAAAGTGGGGTAAAGAGGTGGTTACAATAGACCCTCGGT  
CGAGGAAAAAAAAATTCAAAGCAGTTCGGATGGAAGGTGATTTATGCGTCTAGCAATTGTATACGCCGTA  
TGCAAGTACCACCTCAAATAGTGTGTTACCTTTCATGTGGTCTTATCTTGTTACTAGTCATTGTAAGACCA  
CATCTGATGTTTAATACATGGGGGTGCCAATCGAATATTTGAAGAGAACATATTCAAAGTTAGCCGGGA  
CTCTCTTATTTTCATGTATCTGGACAACCAATATGTTTTGTTATTCAAAAAATATTCCAGATGATAACTAAG  
CTATATTTTTACAATTTGCTAACTTTTTCAGGGACAAGGGCTAATAGTGGTTCAAAGCCTCTTCACTGGAC  
TTCCTGTCTCAAATTCAGAGGATGTGGCTACTGGATTGCTTCATATCCATCAGAACCCTGGTCTGACT  
CATGGAACTTGAAATCATCAAATGTACTCTTGGGGGCCGACTTTGAGTCGTGTCTTACAGATTATGGCC  
TCATGCCATTTAGGAATCTAGATTCTCCTGAGGAATCAGGTGCTTCTCCCTCTTCTATAGAGCTCCTGAG  
TGTCGTGACATTCGAAGGCCACTTACCCATCAGGCCGATGTCTATAGCTTTGGTGTCTCCTATTGGAGC  
TCCTCACGGGAAAGACTCCATTTCAAGATCTTGTTCAAGAACACGGATCAGACATAACCGAGGTGGGTGA  
AATCTGTTGAGAAGAAGAACTGAATCAGGTGATGAACCTGTTTCTAGTAATGAAGCCTCGGAAGAGA  
AACTCGGTGCTCTCTTAAACGTAGCTATGGCTTGTGTTTCACTTGTACCCGAGAATCGACCCACAATGAA  
GGATGTTTTGAGGATGATCCGGGATGCTAGAGCAGAAGCTCAAGGGTCTCCAATAGCAGTGACCATTC  
ACCAGGAAGATGGTCAGATACTGTCCAAAGCTTGCCAAGAGATGAACATTTGAGCATATGAGTTTGTAC  
TATACTTATGGAGGCCCCGAATAACGTGTCTTGATTCTTTTGGAAAGGCAGAAGTTACTTCGTAAGTTAAG  
CATCATCGATGTATCTGAGTTCTCAGAGATTTGTTGATTGATTCTTGTAAAGTCTCAAGGGCTTTCTACT  
TTTCTTGTTTTTCTAGGTTTAGTTGTTTGTATGTAGGAGATTTGCTTTTATACCACTTGGATTGACATTCAC  
TAGTTGATGATACATTCCTGATTCAAAGTTGTCATTGTGTTTTGTGAGAGATGTAATTGTAATTGAGGT  
TCCAACACTTCTTTAACATAGTTTCTTATTCTAGTGGTAAGAGTGTATCACGTGATGTGTGGATTAGGAGT  
ACGACAACCATTCAAACCTTGCCCTAGACAAAAATATGATTGCTACTTTCTTACTTGGGGCATTACATTT  
CGG

>PGSC0003DMG400026792 LRR-RLKs

CGGCGTTAACTCTCTCTTCACTCCAAAATTGTCTAATTTTACTATACAAAATCATTGTAATCCACCTCC  
TCAACAAAGAACCAGCCTTGATGAACTTTTCTCTCACTACTCACTGTCTTTCGTCACTCTCTTCTCTAA  
AACTGTCCTCCCCCTTTAAGTTTCTCTCTTCTTCTGATTCCAACCTGTCTGCTTAAACACCCTTTTTCTCCTC  
TCCATCACACACACATTCTTGAGAATACCCTTTTTCTTCTACTCTATCTTCAACCACTGACAATGTTTCTTT  
TATCACTCAATCTATTCTTTAACCTTTATGTTTTGTTTTCTTATATATGCAATTTACATATCTCTTACCATA  
TATTTCATTTTTGTGGAGACAAAATGTTGTGGCATATAATAACTGTTTTATCTTTAGCTCCATTTCTGGTA

CACTCTTTAGACCCAGCATTCAATGATGATGTAATGGGTTTAATTGTTTTGAAAGCTGGATTCACTGACCC  
TAAATCTAAACTTGCATCTTGGACAGAAGATGATCCTACTCCTTGTAAATTGGGTTGGTATAAATTGTTATC  
CTCAATCCAATAGAGTTTCTGAGATTTTACTTGATAATTTCTCTCTTTCTGGACATATTGGGAGAAGTCTC  
TTGAGGTTACAATTCTTAAAGGTTTTGTCTTTGTCTAACAATAACTTTACTGGCAATATCAATCCCATTTTA  
TCCCAAATACCTAGCTTGAGGGTTATTGATTTGAGTCACAACACTTTGTCAGGTTCAATCCCTGATGAATT  
TTTTCAACAATGTAGCTCTTTACAATCTGTTTCTTTTGCAAACAACAATCTTACTGGTGAAATCCCTCAATC  
TTTAACATCTTGTTCAACGCTCCAAAGGGTTAACTTTTCATCCAACCGCTTTTCGGGTCCGTTGCCTTCAG  
CTTTATGGTCCTTAACCTCTCTTCAATCTCTTGATGTTTCTGATAATTTAATGGAGGGTGAGATTCCTAAA  
GCAATTGAAGGTTTATATTCTTTGAGGTCAATTAATTTACATAAAAACAAGTTTACTGGTTGGCTGCCTG  
AAAATATTGGAACTGTGTGCAGCTCAAGTCAATTGATCTCAGTGACAATTTGTTGAATGGGGAACTTCC  
TGAGTCTATGAGAAGATTGGGTTTTTGTACCAATATGGAGTTAAGATCAAATTTGCTTAATGGGCAGATT  
CCAGATTGGATAGCAGAGATGAAAAGCCTCAAGTTTTGGATCTTTCTGCGAATAATCTTTCTGGTAGG  
ATTCCAACCTCTATGGGAGATGTTTCATTGCTAAAGGAACTCAATTTGTCAAACAATTACTTCGTTGGAA  
GCTTGCCTCGGTCCTTGATGAAATGCAATGACCTTGTAACTTTGGACATAGGCAACAACCTTCTGACTGG  
TAACCTTCCTTCTGGACCTTTGAATTGGGTGTAGAGAGTATTTCTCTTTTCGGGGAATAGGTTTACCGGG  
CATATAGATTATCCGTCCATATCCATGGATGCTTCTTATCGAAGCCTTCAAGTTTTGGATTTGTCTTCCAAT  
GCATTATCTGGTGAAATACCAGCTGCCATTTGGAATATCAGTAGCTTGCAGGTCTTGAATATTTCCAGGA  
ACTTTTTGTCTGGTACTATTCCAGAAGCTGTAGGTAACTAAACGCAACTCGAATTCTTGATTTAAGTCAC  
AATCAACTAAACGGAAGTATTTCCAGTGAAATTGGGAGTGCTGTTTCATTGCTGGAAGTGAAGCTGAGA  
GAAAATCATTTGAGTGGTACAATTCCTGCAGATATAGCGAATTGCTCTGCTCTAAGTTCATTGTAAGTTTC  
CTGCCACTTCCATCTCATTTTTATTCAATGTGTTGAAAACTTTTGTATTTAGCTTTTCGATCATGTTATCTTC  
GTTTAAATTGCAGTTATGTGCATCATGATGTTTGCATTTGTTATGTCTGTGTGATTCTAAGAGTCATTTGT  
TCTGCATTTTCGATTGTGTAGGGACTTGTACACAACAACCTCACTGGCCCTATCCCTCCAGAGATTGCTA  
AGTTGACCATTCTTGAAGTGGTAGATTTCTCCTTTAACCAATTTTCTGGAAGCTTACCTAAAGAACTAACC  
AATCTTTCGCACCTTGCCACATTTAATGTCTCCCACAACCATCTCAAAGGTGAACTTCCAGTAGGTGGCTT  
TTTCAACACCATTTCTCCATCATCTGTTGTTGGTAATCCATCCCTATGTGGTTCTGTTCTCAACCACTCCTG  
CCCTGCTGTCCATCCAAAGCCTCTTGTACTAAACCCCAATTCATCTGACCCGAATCATGCTTCTGTTACTTC  
GCTTGGTCATAAGAGAATCATGCTCAGTATATCATCTCTCATTGCCATTGGAGCAGCAGTTTTTCATAGCA  
CTTGGAGTAGTGGTCGTTTCTATTCTCAATTTGCATGTGCGCTCTTCTATGGCACTCTCTGCTGCAACTTTC



ACCTTATCTGGTGGCGATGACTTTAGCCATTCACATGGTACAGAAGCCAATCTAGGCAAGCTTGTTATGT  
TTTCTGGTGATGCAGATTTTGTGTTGGAACCTCAAGCGCTGCTCAACAAGGATAATGAACTTGACGTG  
GTGGTTTTGGATCTGTATAACAAGACAGAAGCTCGGAGATGGACGTTCTGTTGCCATTAAGAAGCTCAACA  
TTACAAGTTTGATCAAGTCCCAAGAAGATTTTGAGAGGGAAATGAAAAGTCTCGGAAGCATCAGGCACG  
AGAACCTTGTGGCACTTGAAGGTTATTATTGGACACCTTCTCTCCAGCTCCTGATTAATGAATATGTATCT  
GGAGGCAGCTTGTACAAATTAATCCATGAGGAAAGTTCCAAAAGGAGTCTCTCTTGGCAGCAAAGGTTT  
AACATTATTCTTGATACTGCGAAAGGCTTAGCCTATCTGCACCAGCTGAACATAATTCATTACAATATGA  
AGTCAACCAACGTCCTCATAGATGATGGTTCTGCCAGCACAAAAGTTGGAGATTTTGGTTTGGCTCGTTT  
ATTACCAGTCTTGGATCGTTACATATTGAGCAGCAAGATTCAGAGTGCACCTTGGATACATGGCTCCTGAA  
TTTGCATGCCAGACGGTGAAGATAACTGAGAAATGTGATGTCTATGGATTTGGCATCTTGATTCTTGAG  
GTGGTGACAGGGAAAAGACCCATGGAGTACATGGAAGATGACGTGATTGTATTATGTGACATGGTGCG  
GGGAGCACTAGAAGAAGGCAGGATAGAAGAATGCATTGACGGACGGCTCCAAGGTAACCTCCCTGTGCG  
AAGAGGCAATTCCAGTTGTGAAACTTGGTTAATATGTGCATCTCAAGTTCCATCCAATCGACCAGACAT  
GGAAGAGGTGATCAAAATTTTGGAGCTAATTCGATGTCCGTCAGAAAGTCCAGAGGAAATAGAGTAAT  
GTTATAAGGTGTTTGTGGAAAACCAGATTATAGAGAATGAGTCATGTGGTGAACAGGAATTCAGTTTTG  
TTTGTTACATTTGGAGAAGGTCACTATCCTCTTGTTATTTTGTGCATATCCATACATGTTAAATCTTTATATG  
TTATTTAAATAACTGGATTCCTCTTCACCAGCTCCAGTTTGGGACCCTTGTTAGATTTGGATAGACTGGCA  
TTGTCTTTATATAGTATTCAGACATCCAACCTGTTGTCTTGTGCTTGTGTTGATGTTGTTGCCATACAAAGC  
TGAAAAAATAACATCAGTTGTATTCTTATAGAAGAAGACCCACATGGATTCCTAATGAAATGAAAACATC  
AAAGTAGCCCACCACTCA

>PGSC0003DMG400027071 LRR-RLKs

CAACCATTTTTGATTCATATAAACCACCAATACACACTTATAAAAAAATCCATCAACCACCACAGCCTGGT  
TGCCTCATTACCTCTCTCTTCCCTCCGTCGGCCTACCGGAAAAACAAGAATCTCAATGGCTTCAAATTT  
CCACTTTTTTCTCTTATACCTTGTGACCCTTTTCTTTTTGCTCAAGCAAGACTGAATCTTTATCCACAAGAT  
CATGCTGCACTTTTGTGTTCAAAAAGACTTAGGCATCATTGCTCTTAACAACCCCTGTACGCTCGCAGG  
AATATCCTGCGAGCGTAGACCGGTAACAGAACACAAGTTCTGAGAGTTACCCGTATTGTATTAGATC  
CAATGGATTGAAGGGAACCTTGTCTTCTGCTATTGGCAAACCTCTCTGAGCTCAAAGAGCTTTCTTTCCG  
ACAATCAACTATCTGAACAAATCCCAATTCAGATTCTTGATTGTCGGAAATTAGAGATTCTTGAACCTCAA  
AGAAACAGATTTTCTGGAAAGATTCCGTATGAATTGTCATCTTTAAACCGTTTAAGGGTAGTTGACTTTTC

ATCGAATGAGTTTTCTGGGAATCTTGATTTCTTGAAATACTTTCCTAATTTGGAAAACTGTCTCTGGCTG  
ATAATATGTTCACTGGAAAAATACCCTTTTCATTGAAATCTTTCAGGAATCTTCGTTTCCTCAACATTTTCAG  
GGAATAGTTTTCTTGAAGGTCCAGTACCTGTCATGAGTCAAATTGAGCATTATCAGCAGATTTGAATCG  
AAACAATGCCGTTCCCAAACGTTACATTCTTGCTGAGAATTCAACAAGGTCAAATCAGATATCTGCAATG  
GTGCCTGCTCCAGCTCCAGCACCGGTCAATCGTGTGTACCGGTGGTACATAAACGTAACAAGAAGAAA  
AGGAAGTTAAGATCTTGGTTTCTTGTTTTCTAGCTGGAACTTTTGCTGGGGGTATATCTGCTGTGATCT  
TTTCGTTGCTATTCAAGCTCGTAATGTTCTTCGTAAGAAGGGGAAAGAACGATAGTTCAAGTTTAACGAT  
ATTTAGTCCGTTGATCAAGAAAGCGGAGGACTTGGCTTTCTTAGAGATGGAAGATGGAGTGGCATCACT  
TGAAATGATTGGAAAAGGTGGATGTGGAGAAGTTTATAGAGCCGAGTTACCGGGGAGTAATGGGAAG  
ATTATAGCTATAAAGAAGATTATACAATCCCAATGGATGCTGCAGAGATCACGGAGGAAGATACTAAG  
GCGTTGAACAAGAAAATGCGTCAAGTTAAATCAGAAATCAAATTGTAGGTCAAATCAGACACCGGAAT  
CTGCTTCCATTACTGGCGCATATGCCAAGGCCAGACTGTCATTACTTGGTGTATGAATATATGAAAAATG  
GGAGTTTACAGGATATCCTGCAGCAAGTCACAGAAGGCACAAGAGAATTAGATTGGTTGGGACGACAC  
AGAATTGCAGCGGGGGTAGCTGCTGGTCTTGAGTATCTCCATATAAACCATACTCAACGCATAATTCACA  
GAGATCTAAAGCCAGCAAATATCCTACTTGATGATGACATGGAAGCTCGAATAGCTGATTTTGGGCTTG  
CAAAGGCAGTTCAGATGCTCATAACATATTACGACTTCAAATGTTGCAGGAACTATGGGATATATTGC  
ACCAGAATATTATCAGACACTGAAGTTTACAGACAAGTGTGATATATACAGCTTCGGTGTGGTGCTAGCT  
GTGTTGGTTATCGGAAAGGGTCCATCGGATGAATATTTCCAACATACTTCTGAGATGAGTTTAGTTAAGT  
GGCTGAGAAATGTAATGACTTCTGATGATCCTAAAATAGCAATTGATCCTAAGCTGAGAGGGGAATGGAT  
ATGAGGAGCAAATGCTTTTGGTTCTCAAGATAGCTTGCTTTTGTACTCTCGACAATCCAAAGGAGAGGCC  
TAACAGTAAGGATGTTAGGTGCATGTTAACTCAGATCAAGCATTAGCTAAGTCATACGGGGTATACGTT  
GGTTATGTAACATAAGAATGTGTTCTGTATTTTCAGTTTTTGTGTAATTGTGTTATACATGTCAAATCTGT  
ATGTTTACTGCAGTGTTAATAATATTATTTCCACTTCGCTACTTAAATACTAAAACCTCTA

>PGSC0003DMG400027115 LRR-RLKs

TTCTTGTGGTGTGTGTAAAAAAACACTGTCCCTATCCCATTTTTATACTTATCAAAAAGCAAAAAAACA  
GGGATGTCAACTGAAAAATCCCATTTTTCTAACAAAAAATGGAAAATCAAGACCAAGTTCAAGACTTT  
ACCTGTTTTTACCAGCACCCATTAGGGGTTTTTCATGTTTTTAATCCAAGAAAGAAATGTGGGGTGTGTTA  
AAAAGAAGGAAAAATGGATACCATTTATCCAAATTTTGTGTTTTTGCAGCTGATGATTTGTGGAGCTCA  
GTTAGCTTTAGGTCAAGTTTGGGATGGTGTAGTTATCACTGAGGCAAATTATCAAGCACTTGAGGCGCTT

AAACATGAGTTAGTTGATCCCAGAGGGTATTTAAGTAGCTGGAATGATAGTGGTTATGGAGCTTGTTCT  
GGTACTTGGGTGGCATAAAATGTGCTCAAGGACAAGTTATTGTTATTCAGCTTCCGTTAAAAGGATTTG  
GGGAAGAATCACTGAAAGTATTGGTCAATTTCAAGCACTCAGAAACTTAGTTTTCATGATAATGAAAT  
TGGTGGTTCAGTGCCTTCATCTTTGGGTTTTTTACCCAATCTAAGAGGTGTTCAATTGTACAATAACAGGT  
TTTTCTGGTCTATTCTGGTTCAGTTGGTTTATGTCCAGCTTTACAAACACTTGAAGTTAGTAACAATTCTT  
TATCTGGTGCAATCCCTGATAGTCTTGTGAATTCATCTAAGCTTTATAGACTTAATCTTAGTTACAATTTAT  
TGTCTGGTCCATTCTGTAGTATAACTCAATCGCGCTCTCTAGTCTTTATTGACTTGAAATATAACAACT  
TGACAGGGTCTATTCCGGATTCTTGGGGTGGAAATGGAGATAGACAGTTTAAATTAGAGTCGTTGACGC  
TTGATCATAACTCTTTGTCTGGTGGAAATCCTGTTTCTTTGGGAAGTTGAGTGAGCTTCTTGAGATTTG  
TTGAGTCATAATCGTATCGTTGGTGTCCATCCCAAATGATATTGGAAGGCTTAGTATGGTTAGGAATCTTG  
ATTTTTCTTATAATGAGATTAATGGTAGTTTGCCAGAGAGTATAACCAATCTGTCCCTCCCTCATGGTTCTC  
AACTTGGAAGTAACAATCTTGATGGTGAATCCCGTTGGATGTAAAGAAGTTGCAAAGTTGTCGTTT  
CTTAACCTGAGGAATAACCGGTTTAGAGGTGATATTCCAGCTGCTATCGGGGACATTTCTGGTCTAGTCA  
TGATAGATTTGTCTCGTAACAATCTAACCGGAGAAATCCCAGAGTCTGTTAGTGAGTTACCTAATCTTAG  
TTCCTTAATGTTTCATATAACTCTCTGTCTGGTCTGTTCCCTACTTATCTTGCTAAGAAATTC AATTCAAG  
TGTGTTTGTGGGTAATGTTTCAAGTTATGTGGCTATAACTTTGAATCCATGTCCTGTTACGCCTTCTCCAG  
TTACACGAGGTAGTAAACGAAGTATTAAAGACATTATTCTCATAGTAGTAGGGTGTCTTATAATAGTCTT  
GTTTCTACTCTGTTGCATTCTTCTCTGCTGTTTGATCAAGAAAAGAGGTGTGGCCAAAAAAGCAAAGAT  
GTAAAGGATGTTCCCTCCAAGTCCCGGAGAAGTTGAGGCGGCTGGGGATAACGGAGGAAAAGTTGTCCA  
TTTTGGTGGAGGTATGATGTTTCAAGTGCAGATGATCTTCTATGTGCTACTGCAGATATATTGGGAAAGAGT  
ACTTACGGTACGGTGTATAGGGCTACATTAGAAGATGGAAGTCAAGTTGCAGTGAAAAGAATGAGAGA  
AAAGATCACGAAAGTTCAGAGGGAATTCGAGAAAGAAGTCAACGTTCTTGGAAGATAAGGCATCCGA  
ATCTTCTGGCTATTAGGTCTTATTACTTAGGTACGAAAGGCGAGAAGCTTCTTATTTTCGACTACATGCCT  
AAAGGAAGTCTCTCAAATTTTCTTCATGGTAAGCAGAAAACAGATTTCCATTTGACATTCTTTTGCTTCTG  
TTTTTTGAGAATCAGATACTTTCTCTGTCTCATTTTAACGTAATGAAAATTGGATTATGTATCATATCGGA  
AACAATTCTCTAACTCACACAACGTAGGTAAGGTCTACGTACTCTACTCTACTCTACTCTACTCTACTCT  
ACTTGTGAGATCGCATGGGGAGGAAATTGTTATGGAGGGGGTAATATAGCTTTATTGTTTTTGTGTCAG  
CTCGTGGACCGGATACACCAATTGATTGGCCAACAAGGATGAGAATAGCAAAGGGACGACGAGGGG  
ATTGCTGTACCTTCATACTGATGCCAACATCATTTCATGGGAATCTTACATCAAGCAATGTTCTACTTGATG

AAAACACAGATGCAATAATTGCAGATTATGGCCTTTCACGCCTTGTAGCTGCTGCTGCAAATTCAAATGT  
TATGGCCACAGCAGGGGCACCTTGGTTATCGTGACCTGAGCTTAATAAGCTCAAGAAAGCCAACGTGAA  
GACGGATGTCTACAGCCTCGGAGTCATCATACTTGAACCTCTAACTGGAAAGTCTCCAGGTGAGGCAGT  
GAATGGTGTAGATTTGCCTAGAAAGGTGGCGTCAATTGTGAAAGAGGAGGGAACAAAAGAGGTATTTCG  
ATTTGGAACATAATGAGGGATGCATCCATAATTGGTGATGAATTGTTAGTTACACTAAAATTGGCTTTGCA  
CTGTGTTGATCCCTCGCCATCAGCTCGACCAGAACTTCAGCAAATTCTCCAGCAACTGGAAGACATTAGG  
CGTGAAACGCCAACTGCAGGTCCCTCGACAAGTTACTAGATACTCAGTTTTTATTATTAACATGATTCT  
TTTCATTCTTGAATTTTATTGCTAGAGTACTAGATCTGTTTCAAGTGTCTTTAAATAAAAAGTGTGCAACAT  
TGTGAAAAGTGTGGAGCTTAATGGATTCTAAATACCATCCCCTTTTGGCCTAAAGAACATAACTTGAG  
ATTGAG

>PGSC0003DMG400027467 LRR-RLKs

ATGGGACTAATAGGTGAGTTTCCGCGAGGCATACAAAATTGCACTTCTTTAACTTCTCTGAATCTTTCAA  
ACAACGAGCTATATGGAACCATCCCTTCCGATATATCAAACTAATCGTATATGCTGTAATCGTTGATCTC  
TCGAGCAACCTATTCTCAGGCGGATCCCAAGTGACATTTCAAATTTCTTTTTCTCAATCCCTCAAATTA  
GAAAACAATAAACTAGAAGGACTGATCCACCTGAAATTCGCTTGTACAGCGACTCAAGACGTTTAAT  
GTTGCAAATAATATGTTGACAGGGCCAGTGCCAAATTTGTCAATGCTACTTTTCCAGATGAAAGTTATG  
CAAATAATCCAGGACTTTGTGGTAGTCCTCTGGAATTATGTGTTACAGAACGCGTAGTAAGCCGTCATAT  
TCTGTTTGCTTGTGGTTTTGTGACGGTGGTTCGCTTTCTACATTACTTGGTGTATATCTTTTTTTCTTTGG  
TGTAAGAAGATGCTTCTATTGATCAACAAGAGAACAAGGTAATGGTGATTGATGGAAATGAAGTAA  
ACAATGACCCAAAGGTAATTATGTCTACCTGCTCAATTATATACAAGTTTAAGTATCTATTTGTGCACATT  
CAAAGTCGGAGGGCATAGATTTTAGATGAGGCCAAGTTAAAGGGAATGATTATATTATGCCAATTTGGA  
AACAATTTCACTTAGTGACCAGCTTTTATAGCCAGACAGTGTATGGCACGTTTAACTACAAGTTTAAA  
AAAACCTACCTTTTTTTTTTTGAAAATTTGGGCCCTGTCAAACCTATGTTAGATAAATTGCGACGAAAGGGG  
AACTACTTAATAAAAAAACTGTTGTTGTAGAGGAGAAATAAATGTGGTAATGGTAAATATGTTTTTTTC  
CTCAGATTTTAAAGCTGGAGAAGATTGTTACAAGAATGAGTTTTATGGAACCTATCAAAAGCGACTTTGA  
ATTTAGCCAAGACAATGAAATCGGGAACGGAATGCTGGGGAATTTGTACAAAGCACTAGTCCCAAAT  
GGATGGACTGTTGCCATAAAGAGGCTCTAAAGTTCCGAGGATTTGGAGGAAGAGTTTGTTCGGAGATC  
ACAACCTAGGTATTTGAGGCATCCGAATTTAGTGCCCTAATCGGATTTTGTATGAGAGGGACAAGC  
GACTTCTGGTTTACAAATACATGCCTAATGGAACTTACATGAGTGGCTGCATTCAACTGACGACAAGGC

AAGACTCTGGACTTCCCTCTAAGGGTTAAAATTGTTGTTGGTGTGCGGAAAGCCCTGGCTTGGCTTCAT  
GATGGTGGAAATTCGATCCCAAGTTATCCAATTTTTGGGAGGCAACATTTGTAGAACCAAATGACATA  
GGTTCAAACCTTGAGTCTATCGCCAATGGTTCGAGTTTTTAGACTTTACAACATACAAAAAAGATGTCTATA  
AATTTGGGGTTGTGCTTCTCGAGATTTAACGGGGAAGGAATCTTACGAATTGAGCTGCTCGAGTCTAA  
ATTTGTCGAGCAGCTCTTTTGCCAGTCCTCTTGATGTGGATAAACTACTGTTAGGCCAAGGATTTGATAA  
TATGGTAATGCAACTACTTGAAGTAACTGCATGAAATTCATCCCGGATCAAAGACCAACGATG  
CAACAAGTGATCAGATTGTTGCTGCGATTGCTCGAGTCCATGACCAAACAGGGGACTCTGAAATACAA  
TTGCACTTGGACTAG

>PGSC0003DMG400027468 LRR-RLKs

TTTCAACAATGTGTAAGTCAACATTCCTTACTTAGTACTACCATTTTTCTACTATTTTGCAGCTTTTCTCT  
AAGATGCAACGCGGTGCAGAGTGATATCGATTGCTTCAAATCGATTAAAGATTCGTTGATAGACCCTTT  
AAACATCTTGAATTCTACATGGAAGTTCGATAATCAGACAGAAGGTTTTATATGCAAATTTACAGGAATA  
CAATGCTGGAATGCCGATGAGAACATAGTTGTATCCATTAGTCTTCCAGACATGGGACTAATAGGTGAG  
TTCCGCGAGGCATACAAAATTGCACTTCTTAACTTCTCTGAATCTTCAAACAACGAGCTATATGGAAC  
CATCCCTCCGATATATCAAACTAATCGCATTGCTGTAGACATTGATCTCTCGAGCAACCTATTCTCAG  
GCGCTATCCCAAGTGACATTTCAAATTTCTTTTTCTCAATTCCTCAAATTAGAAAACAATAAACTAGAA  
GGACTGATCCACCTGAAATTTGCTGGTTACAGCGACTCAGGATGTTAATGTTGCAGATAATATGTTGA  
CAGGGCCAGTGCCAAATTTGTCAATGCTGCTTTCCAGCTGAAAGTTATGCAAATAATCCAGGACTTTG  
TGGTAGTCTCTGGAATTATGTGTTACAGAACGCGTAGTAAGCCGTCATATTCTGTTTGCTTGTGGTTTT  
GTGACGGGTTGGTCGCTTCTACACTTGGTGTATATTTTTTTTTTGGTGTAAAGAAGATGTTTCTCTT  
GATCAACAAGAGAACAAGGTAATGGTGATTGATGGAAATGAAGTAAACAGTGACCCAAAGGTAATTA  
TGTCTATCTGTTCAATTATATACAAGTTAAGTATCTATTTGTGCACATTTAAAGTCGGAGGGCATAGATT  
TCAGATGAGGCCAAGTCAAGTTAAAGGGCATGATTATATACTATGCTAATTTGGAAACAATTTCACTTAG  
TGACAAGCTTTTATAGCCAGACAAGTGTATGGCACGTTTAACTACAAGTTTAAAAAACTACTTTTTTTTT  
TCTGAAAATTTGTGCCCTGTCAAATATGTTAGATAAATTGCGACGAAAGGGGAACTACTTAATCAAAAA  
TTTTTATTGTAGAGGAGAAATAAAATGTGGTAATGGTAGATATGTTATTTTCTCAGATTTTAAAGCTGG  
AGAAGATTGTTACAAGAATGAGTTTTATGGAATATCAAAGCGACTTTGAATTTAGCCAAGACAATG  
AAATCGGGAACGGAATGCTGGGGAAATGTACAAAGCACTGGTCCCAAATGGATGGACTGTTGCCATA  
AAGAGGCTCCAAAGTTCCGAAGATTTGGAGGAAGAGTTTGTTCGGAGATCACAACCTCTAGGTATCTTG

AGGCATCCGAATTTAGTGCCCTAGTCGGATTTTGTATGAGAGGGACGAGCGACTTCTGGTTTACAAAT  
ACATGCCTAATGGAACTTACATGAGTGGCTGCATTCAACTGACGACAAGGCACAATTCTTGGACTTCCC  
TCTAAGGGTAAAAATTGTTGTTAGTGTGCGGAAAGCCCTGGCTTGGCTTCATGATAGTGGAATTTCCAT  
GTCGTGCATAGTAACATTAGCACACAATGTATCTTGCTCGATGAAATCTTACATATTGAGTTGCTCGAGT  
CTAAATTTGTCGAGCAGCTCTTTTGCCAGTCCTCTTGATGTGGATAAACTACTGTTAGGCCAAGGATTTG  
ATAATATGGTAATGCAACTACTTGAAGTGAAGTGAAGTGCATGAAATTCATTCTGATCAAAGGCCAAC  
GATGCAACAAGTGTATCAGACTGTTGCTGCGATTGCTCGAGTCCATGACCAAACAGAGGACTCTGAAAT  
ACAATTGCACGTGGACTAGAAGCAGGGGCGGAGCCACCAAAGGGACGTGTAGCTTTGGCTCAAACCAT  
GTATTTGTGATGAAGAACCATTTTCATATGTATAAATAATCCATCTAGACTCATGTGCTACAAATTCTGGCT  
CCGCCTCATACTAGAATCACCAGCTTTTGGAACCGTGTTCCTATGGTTTCTTTGTTTAGCAAGAATGTAT  
GTCTTCCTGAATTGTTGTTTTCAATATTGCAATAACTATGCTTCAGAATGATCATCATTA

>PGSC0003DMG400027482 LRR-RLKs

ATTTGGTGCCTTTAATCGGCTTTTGTCTGAGAGGGACGAGCGAATTCTGGTTTACAAATACATGCCTAA  
TGAAACTTACATGAGTGGTTGCATTCAACCGACGACAAGGCAAGACTCTTGGACTTTCCTCTAAGGGTT  
AAAATTGTTTTAGGTGTGCGGAAAGCCCTGACTTGGCTTCATGATGGTGGAATTTCCATGTTGTGCATG  
GTAACATAAGCACACAATGTATCTTGCTCGATGAAAATTTGATCCTAAGTTATCCAATTTTTGGGAGGC  
AACACTTGCAAAAACAAATGACATAGATTCAAAGTCTATTTCGAATAGTCGAGTGTTTAGACTTT  
ACAACATATAAAAAAGATGTTTATCGATTTGGGGTTGTGCTTCTCGAGCTTTTAAACGAGGAAAGAATCTT  
ACATATTGAGCTGCTCGAGTCTAAATTTGTCGAGCAGCTCTTTTGCCAGTCCTCTTGATGTTGATAAAGTA  
CTGTTAGGGCAAGGATTTGATAATATGGTAATGCAACTACTTGAAGTGAAGTGCATGAAATTTA  
TTCCGATCAAAGGCCAACGATGCAACAAGTGTATCAGACTGTTGCTGCGATTGCTCGAGTCCATGACC  
AAACAGGGGGTTCTGAAATACAATTGCACTTGGACTACAAGCAGGGGCGGAGCCACCAAAGGGACGTG  
TAGCTTTGGCTCAAACCAATGTATTTG

>PGSC0003DMG400027499 LRR-RLKs

GTGACTGTATTCTTTAAAAATGCATGCAGCTTCTTCAACCCCATCATTTTCTTGAAGTTTACAGCTTTAATT  
CCTCAAAGAAATCAGCAAAAAAATTGCATTTGCCATGGGAATTGCAAAAACAGTGCAGGGCTCATGTTG  
GCTTCTTGATTCATGTTGTTTTTCTGTTTAATTTATCAGATGAGTTCTTAGAACCTTACAATCTGAAGC  
TATAGTGAAAATCAAGCAGCTTTTGAAGTCCCTCAAGATTTGAGTAGTTGGAGTGACAATACAGACTTT  
TGCAATAGTGAGCCAAACTGCCTTGCACTCATGTGTTATGAAGATAACATAACACAGCTTCATATTT

CTGGCTATAACTGGTTTCCTAATTTGCCTCAGGGGTTTTCTACAGATACCCTTTTCTCTAATCTTGCTCTTT  
TGCCTAATTTAAAGGTACTTTCTTTGGTTTCTTTAGGTTTGAGAGGAACTTTACCTAAAAAGATTGGATT  
TTATCTTCTTTGGAGATTATTAATATCAGTTCAAACCTCTTTTATGGTGAGATTCCAGGAGAGATTTCATA  
TTTGAAGAGTCTTCAGACACTTATATTGGATGATAATAAGTTTACAGGTCAAGTTCCTGAAGGGGTTGGT  
TACTTCATTCTTTGTCTGTTTTGAGTTTCAAGAACAATTCATTTTCAGGTTCATTGCCTAATCTTTGTCAA  
ATTTACAAACCCTAAGAATCCTTTCTATTTCTGGTAATAATTTTTCTGGGGTTGTTCCAAACCTTCATAATC  
TGCAAATCTACAAGTCTTGATTTGGAAAGTAACAATCTGGACCTAATTTCCCTAATATTTCCAACCAAG  
TTGGTATCTTTGGTACTTAGGAAGAACAAGTTCAGTTTAGGGGTACCAAAGAAGTACTGAGTTCATGTTATC  
AGTTAAAGAAACTGGATATTTCTTCTAATGAGCTTGTTGGACCCTTTTCACCAACAATTTTATCATTGCCA  
TCACTAAGCTATTTGGATATTTCTGGAAATAAACTAACTGGGAAGCTTCTAAAGAATGTGACATGTAGTC  
AAGACCTTTCTTTTGTGAATTTATCATCAAATTAAGTACTGACAGGGGAGTTGCCTGATTGCTTGCACCCTAGT  
TCTGGTTCCAAGATTGTATTGTTTTCTGGGAATTGTCTGTCGAATAAAGAGCAATGGCAGCATCCTTATTC  
ATTTTGCATAATGAAGCTTTGGCTGTTAGTATTGAGCCTCATAAGGGAAAGGTTAAAGGGGGAAATGG  
TAAAGCTGTTCTTGCATCAAGTATGGTAGGAGTTTTGTTGGAGTAGTAGCGATTGTCGGTTTTGGCTTTC  
GTGGTTGTTAGAAGAGAGTATGCCAAGCAGAAAGCTAGCAAAGCCCCTCAAACAAGATTGATACTTGAA  
AAGGTCTCTCCTGCTCACACTCTTAAGCTGCTTAATGATGCAAGTAAGCTCTCTCTTTCTCTCACACAAAC  
ACATTTTGTTAATGATTTCAACTTGTAAGTTTTTAGATCCTGATAATTGTAAATCTAATGTTCTGTAAG  
GTCTATGTACACTCTACCTTCCCCTAATCCCGCCGGTGGGATTACACTGAGTATGTTGTTGTTGTTATTGT  
TGTCATTGTACTTGAAAAGGCTATAAACATTTGAATTTAAGCATTATTCCACAAAAGGAGTTTCTTTATAT  
ATAGATTGAAAATATCAATTTGCTTCAGGAAATTGTCCAATACTGTGTTATTGGAATAAACTCTGTTCTTG  
CCTAAATTTCAAGATGTATCTTGATCTTTGATTCTTGATAGGGTATATTTCTGAAACGAGGAAGTTGGGA  
TTGCTTGGGGCCCCTCCTTATCGAACGTTTGTCTTGGATGAGCTTCGAGAGGCCACTAATAACTTTGATA  
TATCAAATCTAATTGGCGCAAGCTCCAGTGGACAGGTATGGATTTCTTACTAAATACTGTAAGACTGTT  
TGAACAATGTTAGTCCACATGGACTGTTTTGTAGTTCATTCTCAATTCTCTTGCATCTATGGTGAATGCT  
GATTGTGCTTTTCTATACTCTGAACAATAGATTTACAAAGGGCGTCTCACAGATGGCACTGTGGTTGCTA  
TAAAAAGCATAAAAATGAGGAAGAGGCATAGTGTCCAGTCTTACACTCACCAACTCGGGCGTATTTCAA  
AGATCAGATACTGCCACTTAGTTAGTACTATTGGACACTGCTTTGAGTGCTACCAAGATGACTCAAGTGT  
TAGCCGAATATGTTTAGTCTTTGAATTTGTGCCAAATGTGACGCTGCGGGGGGTCATATCAGGTATATAG  
TCTAGATAACTTCATCTGCTTCGCGAGTTATCATTGGCACAACAAGTTCGCAACAGTTTATAATTGAGCATT

TAGTTTACTTATTTGACTATTTCTACAATATTACATAAATTATACTAAGTCTAAGTAAATGACTTCTTGGTA  
TG TAGACGTTATAGAAAACAAGCATCTTTGCAACAATCTGTTCCATGTTGTTTTGATATATATTACTAGAT  
TGT CCTCAATCACGACAAGTACCTACTACATTGTACTTCTTGTCAAAGTGCTGATGAATTTAAGGAGA  
CATGAAATGCTTTTAATTACTTTCTCCTAGATTATGCAACGCGTTGTTTCTTCTTTGCCCGATGCTTAAATG  
TACAGGTGTTTATTGTCTTTAAGACAGTTGTTCTGAATTCTTTGCAAATGCTCGGTTTTGTAGGAGCAAAT  
TCAGCTCAAAGTTTACATGGACGCAACGGATGTCAGCTGCAATAGGGATAGCAAAGGGAATTCAGTTC  
CTTCATACTGGAATAGTACCAGGGATATTCTCCAATCAATTGAAGATTACAGATGTATTACTGGATCAGA  
ATTTCCACGTAAAGATTAGCAAATACAATCTGCCTTTGTTAATTGAAAATAAGAAAATGGTATGCAAACC  
TCTCTTCTACTATATTCTCTATTAATCACTCATTTCATTCTTGAACATTCACATTTTGTTATTGCAACTGTT  
CTTAGGATACTGGACCGTCTTCTAGTGGATCAAAGGGAAATGATGGGCAAAGGTAAATGATCTCATCAT  
TCTCAGCTGCTACTGCTGCATTTTCGCTCTTCACTACTCCACTTTTATGGTTTCGATTTTCAGAAGCACCTATT  
GGAAACTAATCTTGTATACTTCTAAATGCAAATTGGTCTAAAAGGTTTTAGAGAATCTTAAGTGTATCT  
CGACCAATTCTAGACAACACCTCTCCAGCCACTGCTATTTATTGGTTATGATTCTTGAAGACAATATATAG  
AGCCATAGACTTGGACCGTCTTAGGAGATTCCAAGATAGTGCTCTACCGTTTAGTAGACTACTAATGAAT  
TCCTTCTTTTGTTAATATCTTCTTGAATGCAGGTTAAAATACGAGGAGAAAGATGATGTGTATGACTTTG  
GAGTAATCTTACTTGAAATCATATCGGGAAGGACAATCGATACAAAAAATGATATAGATGTTTCTAAAG  
ACATTGTAAGAGTCACTTATGACATTTATGAGAAATTCTTTCATGTCATCAAGTTGAAGAACTATTTTGTT  
AAAACCTTTTCTTGTGTTCTTATTGCAGCTAATAGTTAGCTTAACAGCTGACGAAATAGCTCGGAGGAA  
CATCATTGATCCAGCTGTTTCGGAAGGAATGCTCAGATAGTTCTTCTTAGAACATTAATGGAECTATGCATA  
AAATGTCTTTCAGATGAACCATCGCAACGTCCTTCTGTAGAAGACTTGATATGGAECTTGCAGTTTGCAG  
CTCAGGTCCAAGACCCTTGGAAATAGAGACACTTATGGCAACCAAGAGTCCCCTGGTCATGTGTAAGAAC  
TTCCAATGATCAATGGACCTTTTCTTGTACAAAATGTAACATTATACCACTAGGATAGTAGTTCCAATTAT  
TTAGTAGTCTCTATTGCAACACTTTTGGCTATATGAGGTTTCAGTACTCTTTGGAGGTTAAACTCTACATT  
TGAGCCAAAATTTGTGAGCAAATGGCTATTTCTTGCACTTTTTTTTTAACGAACCTAAAATTTAAAAGGTG  
GGCCTTTCACCGACCATCCAATGGACCATGACTAAACGGCACCCAAAATGTATGGGAAAATTTTCAA  
AATGTCAATATTTTAGCATTAAATGGGACCTCTTATCAACATTTTCAATATTTATT

>PGSC0003DMG400027536 LRR-RLKs

CTCTGCGCACACAACACTCAGTAGAGAGAGAAAGAGAAGCAGTACAAAATGTGAAAAGTTGCAGCAG  
ATAAAAAAAAAAAAAAGGGGGTTCATCAGAAGAAGGAGAAGAACTAACTGAACTGAGAAATACAAAAA



AGGGTTGTTCAAGTGAAGAGTAAAAGGGGTAGCAAATCTTGGTAAACAAGTGTA AAAAATTTGATCTTTT  
TTTGTGGGTTATGAGATGAGATCGATTCTTGGGTTTTGAGCTTTGTGGGGGTGTTTATCTTGGTTCATG  
GTAATGAGGGGTAGGGTTTTCTTGAATTTTTGGGTAAATGCTGGCTTTTTTTGAGTTTGCTTTACTTGGATC  
TACGAGATTGTTTTGTCAGCTGGCTGCTTGATTTGTAAAAAAAACAGTATTTTGATGGTGAAGGTGA  
TGGAGAAGGATGCTGTGGTGGTGTCACTGGTGGTATGGCTAATCTTGGTTGTACATCATCTTAAGCTCA  
TTTATGCTAATATGGAAGGTTTGTGGGACCATCATCCTCATTTAGTTAATTTTTAGGTCTATATTTGTTGTT  
CTATTTTGTGAGATGAGTTTCAAATGTCGAAACTTTTTCGTACTAGAAATTAATATTTGCTGAAAGTGAA  
ATGAGTATGTGCAAATTGGATTTTGAATTTGACTAATGTGTGAGTTGTTGAATTTTCCCAAAGGGTAA  
GCAAGATGTGCAGTGAGCTCCCTGCATTGTTACGGTGGCAAGCAGTTTAGTTTTAATGTCAGTTATATGT  
TAAAGTTTTTAGTTATCATTGCCATTCAACCTTAGTGCATTATGTTTCCTATACAAGCTTGAATAATTTGAT  
GTGATTTAATTTGGTTGTTGCCAAAATCTTGATAAACTGTTTTATTCAAGTGAATAGATTAATTTTTTATGT  
GCATTTTGGTGGATTAATATCGTTTATGTTTTCTAAATGGATACACGAACAGGTGATGCATTGCATAG  
TCTACGCGTCAATTTACAAGATCCTAACAATGTGCTACAGAGCTGGGACCCTACCCTTGTTAATCCTTGCA  
CATGGTTTCATGTTACCTGCAACAATGACAACAGTGTATAAGAGTGTAAAGTGTGTAAGAATCTGTTGTCTGGTTTAC  
CTCCGTTTTAATGGATTTGCAATTCCACTCTCTTGTGGTGGTGGAGCAAATCTAATTGCAGTTTGTGCTTCC  
ATAACACTTGTTATATGATCAACCTTTCCAGTGATTTAGGAAATGCAGCTTTATCTGGTCTGTTAGTCCCA  
CAGCTTGGCCTTTTGAAGAATTTGCAGTACTTGTAAGTCTCACTTCATGAACTATGTTTGGAAATTTTTTA  
CGAATTTAGACTTGGAAAAGTGGCATTAAAGTGTATTGGTTTTTCCAGATGTTGAAGATTTTTTCATATTACC  
TCTAGAATTTGCTGCTGGAAATACCATAGATGGCTTGCATATTAACCTTCGCATAAAAACAAAGCTGTTGT  
AAGTGGCAAAGCGAGCAGAGAACACTTTCTCCTCTCCATCTCTTGTTCCTTGGTGTGTTAGTCAATT  
GCATAGTTGTTAATGTGTTCCCTGAACAACACAAATTTGAATGTATACTTCATAAAAAAAGATTTAAATTT  
GTGTTTCACAATACATACTAGTAAATTAAGAACTCGGATACTTGGATGAGACTAGCAGTGAATTAACTT  
ATGTGGCAAAGTAGTGTCTGTAATTGCTTGTGAAAACATTGTAGTTGAACTTAAATTTCTGTCATACACTC  
CCCTATCCAAAGTAAGCATAGATTCTAAATACCATTACTAATGCCAGTACCCTAAGCACTCTTTATTCTTTT  
GGTTTCCACCCGGTGTCCGGTACCCACATTGGAGCCTGACTAAATCCGGATTCCGCGCTGGGAAGTCCC  
ACATTGGGGGTAAAGCGCTCCCTAACAAAGGTGACTCCGTACCCAAGAGGGGCTCGAACCCAAGACCTCT  
TGGTTAAGGATGAAGGAGTACTTACCACTCCACCACAACCCTGCTTGGTACCCTAAGCACTCTTAAACAA  
ACTTCCAACCTCATATCAAATCCTTTATTCCCTCTTCTTGTCCCAGGTAGCGTCTAATCATGATTTAGGAT  
GATGGAATAGGATAAAGCAAACAAGAGAAACAAGTCCATTGTAAAAGTAAAGCAAATCTAGACTTAG

AAAGAGGAAATATGGCTTGAGGGTAGGTTGATATCTTGGAGGAGAAGATCTGAAGTTTTGTGGTCATA  
TAACAGATGCTATTCTGGTTTTCCACCACGAGTTTGAATCATGATTCAATTAAGCATAGATTTTGTACCTGT  
GTTAGCTTAGTTTTGGAGTTTGATAATATACCGTTCACTTAAATTGTCAACGTGCTATAGGCATATTCTGTC  
TCAAAGTGGCTTTCAAGTTCTTATTGTAACCCATGCTCTTTGAAGATGCAACTGTATGGAAGTTCACAGA  
GACAGTGAGTGCATGTGCACCTGGTGAAGCTGGGCATTACATGATGTATACTGATGCATCAGACAATGT  
TTAATGATGGGCATAATTATTACCTAGTGAAGTCTTCTGCTCACACATTCATATATTCCTATGGAT  
GCCTAGATTTGCTGGAGGCTTGTGTAGTATGTGTGCTAAGTATTTCCAAGTGTATGCAAGTGACAATCA  
CATCAAGAATGAAACAATATAAAAAGAACATCAAGAATGCTGATGGATTTAACGATCACTGGGCATAC  
ACACTGTTTAGATGAAGTTTCAAATAAACATAATGACAGACGTTAATTTTTTATTGATGAGCTATAAAGA  
TTGTATAAAATGTTTGACGAGCTGATCCTTGCAGCACATGGGATGACAGGTTTTTATCTAGCAAATGC  
TTGTAACCAAATATAAGAAAATTCCTCCATGACATATACATTGGTAACTAGTTATAATTGTTAGCTTGGAA  
CTCCCAGACCTTTCTCATTTGTTGACATTTAACTGTAGCTTGATGCCAGTTTTGATGAATGTGTGAACCTT  
GCTTCATTATCTTGGTTGTCCATTATCCTAGGGATGTCATTGGTATGATCTGTGGAATTAATTCATTCTCT  
GGTTTTCTTGTACAGGGAGCTTTACAGTAATAACATAAGTGGTCTAATACCGAGTGATCTTGGGAATTT  
GACTAATTTGGTCAGCTTGGATCTCTACTTGAACAACCTCGTCCGGTCCCATCCCAGATTCCTTGGGCAAG  
CTGTGCAAATTGAGATTCCTGTATGTATTTTTATTCTATATTAGATTTATGTGGATATTGTGATGCCAAT  
GTGTATGTCATCAACCAAGATGGACCTGCTTTTGCCGGCATGTTGAGAAAGGAAAGGAAACCTGAATTC  
TTTTCTAGTTTTACATAAGATTACCTCTATTAGTATTAGGTTTTCACTAAGTTTTGATGGTAGAAGGTA  
TTTGAGGACTTTATGGGACTGATATCATTATAAAACAGATCTTACATATAAGTCTTTTTATTCTCCCTT  
TGTTCTAATCCTTATATAAAGGAAAAGAGTAGAAGCCTATGCTTTGTCTGATATTTGGGCCTGATATTGT  
AAAATTAAGCAGAGTTTAGTAATTGGTGTTTTTATTTTTCTCCATTGTTGGGATCCTTTCTAGAAGAGAA  
AAGAAGTTTAGAATCCCATGCTTCATCTTACATTTTTCACTGCTGAAGTTTCTTGTCTAATGCTCCACAA  
ACTTCTTTCTTTGGCTTGACTGTCTAAGAAGTGTACCAAATAAGTTCTATTATGCAGACTCAGCATGAAG  
CCTCATTAACTGCATCTTGGGACTTACTATAGAACTATTGCAGTACTGCCAATGTTGACTGACATGATTTA  
GTCCAAAAGTGTTCAGTTTCTGTTTGTGAGGGGGAAATGTTTTGAGGCTGTTTATTGTTGTTCTGA  
ACTGACAACCTTCATTTCCAGCTGAAGTGCCGGTCTGGCTTGAAGTTTGAATATGTTTTACATCCACATAT  
AAATAATTTATTAAGATGATTCTACTTGTCAATAAATAAATAAATTAAGATGATTCAATTAGTAGCCTTTT  
CTTCTGTTTTATTCTCCAATTATTACTTATACCAAAGTGAAGCTCATTCTGTACACCTTTGTGATTTTTT  
GCAAGGATAGTCGGCTCAACAATAATAGCTTAACTGGTAAACATCCCTATGTCACTGACTAATATCTCATC

ACTACAAGTGTTGTAAGTACACTAGTTATTTTGTGACTTAACTTAGATAATTCTTTCTGTCTTCCATATCTT  
TTCATTCATTTCCTTTTCTTCTAGTGCATATACAGATATACTCATGCTCAATTCTTGTCTCATCTGTATATA  
GGGATCTGTCAAACAACCGTCTCTCAGGTGTTGTTCCAGATAATGGTTCCTTTTCTCTATTCACGCCTATC  
AGGTATATTTCAATTAAGGTGGTGCACCATCAAACCTGGCTGGTGGTTTTAGTATGCTGCTATTTGCTAAT  
ATATTTTGCTTGAATTTACAGTTTTGCGAATAATTTAGATCTTTGCGGGCCTGTAACCTGGACGCCCTTGTC  
CGGGATCTCCTCCATTCTCCCCTCCGCCTCCATTTGTTCCACCACCACCAATTTCTGCTCCAGGTGGTTCTC  
TAAATTGGTGTGGATAGGTTGTTTTCCCTTTTTTTTTTTTTGCTTGTGTTGAGTTTGGTGATTTTTGTTGGTC  
CATCCATCTTGCCTCTCTTAGTTTTTCTAACCTAAGTGAGAATTTGTGCTATAGAAGTACTGACAAGAAA  
GGGGCAGAAGAGGAAAGCCCATCTTAGCTAGTCAGGCATTTTGGTTAAGTAGTTCTTATGGGAAACTGG  
TATGCACGAGACTACATTTAGTCTCTAAGCATTCTGGTCTTATACAAATTTAATTCAGCATTGTGGAGAT  
CTTTCTTTGGTCCCCTTGTAATTATTATCTGTGGTATTTGAAGTCGAGTATGTCTGAATGAAATTAATC  
ATATTTAAGCCAGAACTTGTGAAGATTTTCTTTGCTTTGTAAAATCTATCCTGGAAATTAGATCTGAATGA  
TAGATACATATTTGTGTTCTTTCTTTTTGAAGTGATTTAATAATGAAGGGCCAAAATTGTGTGTTAAATA  
TAGTCTGGATCATATGAAGGAAATTAATCAAATTTATGGGAACTTCAGGAGGAAATGGTGCAACTGGAG  
CAATTGCTGGAGGTGTAGCTGCTGGTGTGCTCTACTATTTGCTGCTCCTGCCATTGCATTTGCCTGGTG  
GCGCCGTAGAAAGCCACAAGAATATTTCTTTGATGTACCAGGTTAGCAGTATTCACAATACCCAACCATA  
AGTCCATAACTCCTACTTGCTCCCTCGCGTGTGTTGTGGTTTCTCTTGCATGTTTATTTTTGGCTCCATAAT  
TACCGTTTTTGCTTAAATTTATTGCAGCTGAAGAAGATCCTGAAGTTCACTTAGGTCAACTGAAAAGGTT  
CTCCCTCCGAGAGCTACAAGTTGCAACCGACAGTTTTAGCAATAAAAATATTCTGGGTGAGGTGGATTT  
GGTAAGGTATACAAAGGACGCTTAGCAGATGGATCATTGGTGGCTGTTAAGCGGCTTAAGGAGGAGCG  
TACTCCTGGAGGGGAGTTGCAATTTCAAACAGAAGTTGAGATGATTAGCATGGCAGTGCATAGGAATCT  
TCTACGATTGCGTGGTTTCTGTATGACACCAACTGAAAGACTGCTTGTCTACCCCTACATGGCGAATGGA  
AGTGTTCATCATGCCTGAGAGGTGACGCCTTCTGAAATCTATCACTCCGTAACATATTTGGATGTTCTC  
ACTTTTAATTTAGAGGGTATTATTACATAATGCAAGAACATCTTTGCTGGTTAACGTTCTATCTGGCATA  
ACATACTCTTATAATAAAAACATATTCTTGTATGTTATTCCTGTAACCTGGTAAAGGTAGAAATATAATTT  
ATTTTGTATTCTCTTGACAAAATAATTTATTTTATCAGAACGACCGCCTTCTGAACCGCCACTTGATTGGC  
CAACGCGAAAGCGCATTGCTTTGGGGTCTGCCAGGGGATTATCGTATTTGCATGATCATTGTGACCCTAA  
GATTATCCATCGTGATGTGAAGGCTGCAAATATATTGCTAGATGAAGAATTTGAGGCTGTTGTTGGAGA  
CTTTGGTTTGGCTAAACTTATGGACTACAAGGATACACATGTTACAACCTGCTGTGCGTGGTACAATTGGG

CATATAGCTCCAGAATACCTGTCCACAGGGAAGTCTTCAGAAAAGACTGATGTTTTGGGTATGGGATC  
ATGCTTCTGGAGCTAATCACCGGCCAACGTGCTTTTGATCTTGCTCGGCTTGCAAATGATGACGATGTCA  
TGTTGCTTGACTGGGTATGTTGTCATGCCTGCTTTACATGTAACATGACACGAGTACCATAATGTGCTCAT  
TTTTAATCTGTACAATCATAACACTAGCTGATTAATAAGTGTCTGCCTTTAGCAGGAATCTTTACATCT  
ATGTCTGAACTTGTTGAGGTTCTTGTTTCAGGTGAAAGGACTCCTCAAAGAGAAGAAATTGGAAATGCT  
GGTTGACCCTGATCTTCAGAACAAGTATGTGGAGGCTGAGGTGGAGCAACTGATCCAAGTAGCATTGCT  
TTGTACACAAAGCAACCAATGGATCGGCCTAAGATGTCGGAAGTGGTGAGAATGCTTGAAGGTGATG  
GTTTGGCTGAAAGATGGGATGAGTGGCAGAAGGTAGAAGTTCTCCGGCAGGAAGTGGAACTTGCACCA  
CATCCTGGTTCTGATTGGCTTGTTGACTCAACAGAGAATTTACACGCAGTGGAATTATCGGGTCCAAGGT  
GACCGACCTCGTACTACCCCAAGTAAAGAAAATCAAATCATTAGGAACTTTTTATTTTTGTTGACCTTGTG  
AAAGTTTTTCTTTGTGAAATTTAATGAAAATCTCCAGTTGTAAGCCCATGAAGTGTGTCTGTTACATTGTG  
CATACAAATTTGTAAGTACTGACAGGAAATCCAAATCCATGCCCTGACAAGTTGGCACATAGGCGTAGTAGTT  
AAGTGCTTTAAAATTGTCCAACACAGTACACTACTGTCAAGCAGACTCTTGTTTTGAGTACATTGAAAA  
TGCTATCAATTTGACAAGGTTATTTACAAGATTTTGGATTTTACAATCAAAGAATAGTGCTTCACATTCTC  
TTACGGTTTTTATCATAATCTCGTGCTACAAGATAATGGCAGATATTTTCATCAATAGGGCACTTGCAGAG  
TTTGTTTTGCCACTCTATGCCCAAATTTGGGCTCTTTCTGACAATTCAGATTAGTACCAGACGCTCTGAT  
ATAAGTACAAGATCTGCTCAGTGATACTTTTCGATCATTCTGTCTATTATTTTTACTCCAAAGAAAATTC  
TTACATGCAAATTTTTGAACTGCATACTCTTCAACATAAAGGATCCATCGAATGTACTACAGACCAAAG  
GGCAATAGAATAAACAGAAGAATCTCAAACCTCACAAACAAACCAAGAGCCTGCAGAAGGTA  
GAGAAATACACTTCACTTATCATGGCTGGACCTGATATTATCTTTGAATGACTGTGAACGAGAACCAGGA  
TTAGAGCCATTTGTTGCATTAACAGGTTTGGATATGAATAATATGTTTCATCGTCCATGGAAGGCAATC  
TCTGTGGTTGGTGAAGACCCTGACCAGGATGATGAATATGGGAGATGGGAGACTCAACACCCACTGTT  
GAATCATCGTATGAAGGAATATTCGACACCTGATGTTCCAATGGACTGCCATGAAGTGGGCTGGGGATA  
CCATCAGAGTTTGACGATTGGCGTTGGAGGTCTAAGTGAGGCTTTTCTAGGATGTGAGATTCTTGTTTCT  
CAGCATAAAAGGGGTTCTCACTGGGGCTTACAGGCACCTCTTCGCTCCTTTTCTGGTAAGCTCGCTGAT  
TCTAACCTGAGCAAGGCTAGCTGCTGAGCGAGCAGCAGCTGCACGTTCCGGCTGAATCAGCAGCTG  
CTTGGGCAGCAGCCAATACATCTTGCAAATCTACATCAGTCTCAACTTTGGTCTTTGTAGTAGAGGGTGG  
TTGAGTACTTTGGGTTGTGGTTCTTTCTGTTGAGGAGAATGGAGGTGATTTTGGCGGGGGAACCATGAA  
TGCCAAAACCTGTTTCTTCTTCCGGTGCAGATAAACTATCAGCTGATCCAAAATCTTTTGAACACTACCT

TCTCTTGCAAAAGTTCATCTCGCTCCACATCTTGTTTGTGAGATTTGAGCTCACCGTCTTCAGAAGACTTA  
GCTACCTCCTCATCGGAGTCAGATAGTGCAGAGGCTGGGAAAGGAAGCATTTCAGGGGCAGAAACTCC  
ACCGGTGCTAGGTCTAGTGGCTGCTTAGGGACTTCTGGAAAATCTAAGTCAAATCAGCCTCAGATTC  
CGTTTGTATCAAAGACTTGATCTGATGCAGAGTGCTGCACCTCATCCAACCTTTCTTTGGGAAGTGGC  
ACCTTAGCCCCACTGACAAATTGTGTGGGCCATTCTGCAAAGCAAAGGGAAGAAATCATGATGATTGA  
AAAGAGGACAAAATCAAAGCCAGTACAGACTGAAATATAACCAGCAAGTCCTCATGTGACTTCAACAGCT  
CAGTTTCAGAAGCACTTGATCCCAATCTAGCTGATGCTCCTCCGCAATTTCTTTAGCAGCTTCATTTTC  
ACATCAGGAGCAGGAGCTCGAATAGACAGCAACTCTATCAACTGTCAGAGACAAGAAAAAGAGAGAA  
AAATCAGAAACAAGAAACAGTTCCTCTTTCTCGTTTAGCTATGGCATAAAGGAGAAGTAAGGTAACCTG  
GCGATTGACTCCGCATTCTGGCATGAGCTCTGTAGCAGCAGCAATGAATTCCTTCCCATATTTACCAGCA  
AACATCATCTGAACCTGCAGCAATTCGGAAGATCTGCACATCTTGGTGCAGCAAAACAAACACTTGAA  
ATAGCTTCTTTCAGATCTAGAGGGCATTCCCTGGACATTATAGAGTTTGGGGGTTTCAGCTCTTCCAAA  
ATTCAAGTTAAGAAAATTATCAACAAAATTCAACTAGAAGTCTAGAATATTAAGACTTGAAACAAAACC  
TCCACATTGCAGGACAGTCAAGTTCAAGAGTATCAGTTTGCTTAAACAAATATCGAAGATGAAGCGC  
TTTGGGTCCATCTTGAACTAGAGATCCACATTTATGGTCTCATGTAGATGATCAAATTATTTAAGTTT  
CACACTCCATAACACAAGCAAGAATGTATTGTTCACTATGCCCTAGATACTTCTCGGTCATATAAGCA  
GAAAGTTAACGTAGTTAATCCTTGTTGGCTAAAATTGACTTTATGCAAAGGATCAAACATGCTGCTGC  
TCGGATACATGCACATACTTCCATTTAATTGACCTACAACCTAGACATTTCAAAGTTGGTAACTTTTTTCA  
GAATGCATGAAATTTAGCAAATTAAGGACTGTGATTCATTAATTGAACTAGAGTCGCTCCATGAAAA  
GTATCCATATCTAGGGCAGATAATTCTCGCAAACAACAGCTAGGGTGGAGTATAGTAGATCTGAAAGTT  
TGGTATTGAAGGAGATATGGAACATAATGTTAACAGCAGCATAGACAGCAAAGGCAAGAGGCAAGCAA  
GGAAGACAGAGAGGAACATTTGGGACCCGTTTGGCCATAGATTTCCAAGTAATATTTGGGGGTAAATT  
TGGCAAATAGTGTGTCCATACAATTTGCCATTATTTGGCAAATATCCCAAATCCCAAATACTAGTTTT  
TTCTAGTATTTGAGCCAAATCTCATTATTTGGGATCTTTTAAAAATTGAAATTTTACACCAAATTTTATCT  
TTTACAAAAACTCCCTCTATAGTAGTTGTTTGC GTTGTATTACATAATTTTTTTTACGTGAACCAAAGTAGT  
GATGAAATATGAAAGTGATGATATGGTTGTTGATGAAAATGATGAACAAACGGTCCAGGGTACCAAAG  
TCATGTGCTTTGTCTACTTCACGATGTATAGAATGATGCTTGTGCACTCACTCCACACACCACATTGCTC  
CAGTGTCATGGACTACTTGTATTTCGTTGCAACGAAGATCCAAGTACTTATAATACAACTTATGGTT  
AGTTTTGATAGTTTTTAAACTTATGGGTATAAATCATATTTTTTCTAAAAAGTGAATATGTTTCCAAA

AGATTATGGCCAAACACATGGTGAAATTTACCCAAATAATATTTGCCAAAATATTTGGAAATCTAT

>PGSC0003DMG400027555 LRR-RLKs

CAGCTGAAGAAGATCCTGAAGTTCACCTTAGGTCAACTGAAAAGGTTCTCCCTCCGAGAGCTACAAGTTG  
CAACCGACAGTTTTAGCAATAAAAATATTCTGGGTTCGAGGTGGATTTGGTAAGGTATACAAAGGACGCT  
TAGCAGATGGATCATTGGTGGCTGTTAAGCGGCTTAAGGAGGAGCGTACTCCTGGAGGGGAGTTGCAA  
TTTCAAACAGAAGTTGAGATGATTAGCATGGCAGTGCATAGGAATCTTCTACGATTGCGTGGTTTTCTGTA  
TGACACCAACTGAAAGACTGCTTGTCTACCCCTACATGGCGAATGGAAGTGTTCATCATGCCTGAGAG  
GTGACGCCTTCTGAAATCTATCACTCCGTAACATATTTGGATGTTCTCACCTTAATTTAGAGGGTATTAT  
TACATAATGCAAGAACATCTTTGCTGGTTAACGTTCTATCTGGCATAACATACTCTTTATAATAAAACAT  
ATTCTTGTATGTTATTCCTGTAAGTTGGTAAAGGTAGAAATATAATTTATTTTGTATTCTCTTGACAAAATA  
ATTTATTTTATCAGAACGACCGCCTTCTGAACCGCCACTTGATTGGCCAACGCGAAAGCGCATTGCTTTG  
GGGTCTGCCAGGGGATTATCGTATTTGCATGATCATTGTGACCCTAAGATTATCCATCGTGATGTGAAGG  
CTGCAAATATATTGCTAGATGAAGAATTTGAGGCTGTTGTTGGAGACTTTGGTTTGGCTAAACTTATGGA  
CTACAAGGATACACATGTTACAACCTGCTGTGCGTGGTACAATTGGGCATATAGCTCCAGAATACCTGTCC  
ACAGGGAAGTCTTCAGAAAAGACTGATGTTTTTGGGTATGGGATCATGCTTCTGGAGCTAATCACCGGC  
CAACGTGCTTTTATCTTCTGCTCGGCTTGCAAATGATGACGATGTCATGTTGCTTACTGGGTATGTTGTC  
ATGCCTGCTTTACATGTAACATGACACGAGTACCATAATGTGCTCATTTTTTAATCTGTACAATCATAACA  
CTAGCTGATTAATAAGTGTTTCTGCCTTTAGCAGGAATCTTTACATCTATGTCTGAACTTGTTGAGGTTCT  
TGTTTCAGGTGAAAGGACTCCTCAAAGAGAAGAAATTGGAAATGCTGGTTGACCCTGATCTTCAGAACA  
AGTATGTGGAGGCTGAGGTGGAGCAACTGATCCAAGTAGCATTGCTTTGTACACAAAGCAACCCAATG  
GATCGGCCTAAGATGTCGGAAGTGGTGAGAATGCTTGAAGGTGATGGTTTGGCTGAAAGATGGGATGA  
GTGGCAGAAGGTAGAAGTTCTCCGGCAGGAAGTGGAACTTGCACCACATCCTGGTTCTGATTGGCTTGT  
TGACTCAACAGAGAATTTACACGCAGTGAATTATCGGGTCCAAGGTGACCGACCTCGTACTACCCCAA  
GTAAAGAAAATCAAATCATTAGGAACTTTTTATTTTTGTTGACCTTGTGAAAGTTTTTCTTTGTGAAATTT  
AATGAAAATCTCCAGTTGTAAGCCCATGAAGTGTGTCTGTTACATTGTGCATACAAATTTGTAAGTACAG  
GAAATTCAAATCCATGCCCTGACAAGTTGGCACATAGGCGTAGTAGTTAAGTGCTTTAAAATTGTCCAA  
CACAGTACACTACTGTCAAGCAGACTCTTGTTTTAGTGCATTGAAAATGCTATCAATTTGACAAGGTT  
ATTTACAAGATTTTGGATTTTACAATCAAAGAATAGTGCTTACATTCTTACGGTTTTTATCATAATCTC  
GTGCTACAAGATAATGGCAGATATTTATCAATAGGGCACTTGCAGAGTTTGTGTTTGGCACTCTATGCCC

AAATTTTGGGCTCTTTCTGACAATTCAGATTAGTACCAGACGCTCTGATATAAGTACAAGATCTGCTCAG  
TGATACTTTTCGATCATTCTGTGCATTATTTTTACTCCAAAGAAAATTTCTTACATGCAAATTTTTTGAAC  
GCATACTCTTCAACATACAAGGATCCATCGAATGTACTACAGACCAAAGGGCAATAGAATAAACAGAAG  
AATCTCAAACTCACAATCAACAAACAAACCAGAGCCTGCAGAAGGTAGAGAAATACACTTCACTTATC  
ATGGCTGGACCTGATATTATCTTTGAATGACTGTGAACGAGAACCAGGATTAGAGCCATTTGTTGCATTA  
AACAGGTTTGGATATGAATAATATGTTTCATCGTCCATGGAAGGCAATCTCTGTGGTTGGTGAAGACCCT  
GACCAGGATGATGAATATGGGAGATGGGAGACTCAACACCCACTGTTGAATCATCGTATGAAGGAATA  
TTCGACACCTGATGTTCCAATGGACTGCCATGAAGTGGGCTGGGGATACCATCAGAGTTTGACGATTGG  
CGTTGGAGGTCTAAGTGAGGCTTTTCTAGGATGTGAGATTCTTGTCTCAGCATAAAAGGGGTTCTCAC  
TGGGGCTTACAGGCACCTCTTCGCTCCTTTTCTGGTAAGCTCGCTGATTCTAACCTGAGCAAGGCTAGC  
TGCTGAGCGAGCAGCAGCAGCTGCACGTTGCGCTGAATCAGCAGCTGCTTGGGCAGCAGCCAATACAT  
CTTGCAAATCTACATCAGTCTCAACTTTGGTCTTTGTAGTAGAGGGTGGTTGAGTACTTTGGGTTGTGGT  
TCTTTCTGTTGAGGAGAATGGAGGTGATTTTGGCGGGGGAACCATGAATGGCAAAAATGTTTCTCTTC  
TTCCGGTGCAGATAAACTATCAGCTGATCCAAAATCTTTTGAACTACCTTCTCTTGCAAAAAGTTCATCTC  
GCTCCACATCTTGTGTTGTGAGATTTGAGCTCACCGTCTTCAGAAGACTTAGCTACCTCCTCATCGGAGTCA  
GATAGTGCAGAGGCTGGGAAAGGAAGCATTTCAGGGGCAGAACTCCACCGGTGCTAGGTCGTAGTG  
GCTGCTTAGGGACTTCTGGAAAATCTAAGTCAAATCAGCCTCAGATTCCGTTTGTATCAAAGACTTG  
ATCTGATGCAGAGTGCTGCACCTCATCCAACCTTTCTTTGGGAAGTGGCACCTTAGCCCCACTGACAAAT  
TGTGTGGGCCATTCTGCAAAGCAAAGGGAAGAAATCATGATGATTGAAAAGAGGACAAAATCAAAGC  
CAGTACAGACTGAAATATAACCAGCAAGTCTCATGTGACTTCAACAGCTCAGTTTCAGAAGCACTTGGAT  
CCCAATCTAGCTGATGCTCCTCCGCAATTTCTTTAGCAGCTTCATTTTACATCAGGAGCAGGAGCTCGA  
ATAGACAGCAACTCTATCAACTGTCAGAGACAAGAAAAAAGAGAGAAAAATCAGAAACAAGAAACAGT  
TCCTCTTTCTCGTTTAGCTATGGCATAAAGGAGAATAAGGTAACCTGGCGATTGACTCCGCATTCTGGC  
ATGAGCTCTGTAGCAGCAGCAATGAATTCCTCCCATATTTACCAGCAAACATCATCTGAACCTGCAGCA  
ATTCCGGAAGATCTGCACATCTTGGTGCAGCAAACAAACACTTGAAATAGCTTCTTTAGATCTAGAGG  
GCATTCCTGGACATTATAGAGTTTGGGGTTCAGCTCTTTCCAAAATTAAGTAAAGAAAATTATCAA  
CAAAATCAACTAGAAGTCTAGAATATTAAGACTTGGAAACAAAACCTCCACATTGCAGGACAGTCAAG  
TTCAAGAGTATCAGTTTGCTTTAAACAAATATCGAAGATGAAGCGCTTTGGGTCCATCTTGGAACTAGA  
GATCCACATTTATGGTCTCATGTAGATGATCAAATTATTTAAGGTTTCACACTCCCATAACACAAGCAAG

AATGTATTGTTCAATTCTATGCCCTAGATACTTCTCGGTCATATAAGCAGAAAGTTAACGTAGTTAATCCTT  
GTTTGGCTAAAATTGACTTTATGCAAAAGGATCAAACATGCTGCTGCTCGGATACATGCACATACTTCCA  
TTAATTGACCTACAACCTAGACATTTCAAAGTTGGTAACTTTTTTTCAGAATGCATGAAATTTAGCAAAT  
TAAAGGACTGTGATTCATTAATTGAACTAGAGTCGCTCCATGAAAAAGTATCCATATCTAGGGCAGATAA  
TTCTCGCAAACAACAGCTAGGGTGGAGTATAGTAGATCTGAAAGTTTGGTATTGAAGGAGATATGGAAC  
TAAATGTTAACAGCAGCATAGACAGCAAAGGCAAGAGGCAAGCAAGGAAGACAGAGAGGAACATTTG  
GGACCCGTTTGGCCATAGATTTCCCAAGTAATATTTGGGGTAAATTTGGCAAATAGTGTGTCCATAC  
AATTTGCCATTATTTGGCAAATATCCCAAATCCCAAATACTAGTTTTTCTAGTATTTGAGCCAAATCTCA  
TTATTTGGGATCTTTTAAAAATTGAAATTTTACACCAAACCTTTTATCTTTTACAAAACTCCCTCTATAGTA  
GTTGTTTGC GTTGTATTACATAATTTTTTTACGTGAACCAAAGTAGTGATGAAATATGAAAGTGATGATA  
TGGTTGTTGATGAAAATGATGAACAAACGGTCCAGGGTACCAAAGTCATGTGCTTTGTCTACTTCACGAT  
GTATAGAATGATGCTTGTGCACTCACTCCACACACCACATTGCTCCAGTGTCATGGACACTACTTGTTAT  
TCGTTGCAACGAAGATCCAACCTGACTTATAATACAAACCTTATGGTTAGTTTTGATAGTTTTTAAAACCTTAT  
GGGTATAAATCATATTTTTTCTAAAAAGTGAAATATGTTTCCAAAAGATTATGGCCAAACACATGGTGA  
AATTTACCCAAATAATATTTGCCAAAAATATTTGGAAATCTATAGCCAAACCCTAGCTTGGTATCCTATA  
CTATTTTTATTAGGAAAAAAATGCCAAAGAACCCCCCCCCACCCACCCACCCCGACTTGTAGCTTT  
TTAGTTAGTGAGCACCTAAACTATCACTCGTATTAATAACCCCTGGAATTTGTTTTTCAACCGTAGCGTA  
CACCTACGACGTTTAGATCCCTCAACCGTGTATACACGCACGTGACACGGTGAAAATATGACAAATGTG  
GATGTCCATGTAGATAAATAATGCCCCACCCCTCTCTAATATTTACCCTTTTTCAAAGCTTTTTATATAAT  
CCCCAATTCACACAAATCAACCCTAATTACCCGATCTTCTCTTTACACAAATACTCTCTAAATAATCAAA  
TCCTAAGAAGTTTAAACAGTCGGAGTTAAGGGTAGATTTTGAACATTTCTGGCTCTGCTATTTGAATGTTTT  
CTCCTCAAATAGTACAGTCCATTTGGGTGAAGCTTTTTATTTGAGTGGATTTTTCTCCGATCTTGTCTGAA  
ATTCTTATCAAGTAAGTGATTATCCATTCTTAAAATGTATTTTTGTTTGTTCCTCGAATAGCCTTGGTC  
AGTTACAATCCAATTACGTCCGGGGTAGTCATATGACCATGAAATTCTCACAATCGGAGGACACCCACAT  
GCACAAACAAGCATCCTATTATAATTCATGGATTCATCAATTGCAACTTTAGAAAGACGGAGGAGAGAT  
AAATTATAGGCAAAGAAAAGAAAATGATGGCAAAGATAGGTATTTTCAAGAAAATTGAAAGTGATGGAGAA  
GAAGGGTTTAGGGAGAATAAATAGGAAGAGAATGAAGAGAGATGCTGTGCAAAAAAGGAAAAAATA  
AAGAGAAACAAGAATTTTTAATGTTTTTACCATTGAAGTAATATGATGCGGCAAAAAATTTACTCCCTC  
ACGCACCTAGCTGAGCTTGTGTGTCAGTTTCTATGCCAGGTGGACGTTGTAGGTGTATGCGACGGTTGAA



AAAACAAGTTCCGGGGGTATTTTCATATGAGTGATAGTTTAGGTATTCACTGAATAAAAAGCTACAAGGT  
CGGGGGGTCTCTAGCATTCTGCCTTTTTATTATTAAACTGGTGTATGCGACGGTTAAAAACAAGT  
TCCAGGGATATTTTCATATGAGTGATAGTTTAGGTATTCACTAAATATAAAGCTACAAGATCGGGAGGTCT  
CTAGCATTCTGCCTTTTTATAATTATTAAACCTCATTAGCTGACTATCCTAGTCTATATCAGGTGTAACC  
CAGTTTATTGACTTATTGCAGCTAGAGTAAAGTTAAATGGAGCTATTGTTTTAGAGCACAAATACAGCTAT  
AAAGATACATATGACCAGCATAACTACACAAGATGACAATATACTTTACTTATGAAAACGGAAGAAGAA  
AAATAAGCTAAAAGGCAATTCTACAAGTAGGCCAACCTTACAGCTGGGATTTACATCTGCCAACGGTGT  
CAAAAAAATCATATAACCACGAAAACCAAAAACCTTGCTGTTCTATAGGCACTTCGCCAAAACATCATAGG  
TGATCATCTAATGCATCATAAAGGAACCCTTTTATATTCTTTGCCATTCGCCCCATACATTCTTTATCCTAA  
GAGCAACTAAAAGCATATTCAGTTGCTCATCAATAAACTGAAGAACCATCTTAGGATACTGTAATGTTC  
ACACCATATAGAATATCAAGAACATTAACACAACAGATAACTCATTACCTTTGTGCTTCAATAATTGGAA  
GACGAACCGATATAAGCTCGCAGAATAGCTCAACAATCTCCTGCGCTGCCATCATTTTTCTTTCTTTATG  
ATATGCTCTACCTAAACAAGCAAACATCACAGTCAAGCTCATTACTCTGTAAAACCATCTATCAAAATACA  
TAATAACCTTTAGTATTCAAATGCGAAGAACACACAGCCTAGCACAAATTATATCAGCATGAATCGATG  
AATTTAAGCAAAAATAAGAGTCAGTTTATACCCGAATTCGAGCAGTAGCTTCTGACCAGTCTCTAGTAGC  
TTAGCTATTTCTTTCTCATCTGCTTACAGCTGAAACTCCCTACGATTCCCTCAGTAGTTTGATCCGAGGAATT  
GTCAATTTCAACATGGTTTTACTGCAAATTGATAGGTACCATCAGCAAATTCCCATATAAAAAAGACAAC  
ATTTTTCTCAAAAATTTGAAAAATTGAAACCCCATGATTTCAACAATACAAAATTTCAAATCTGCATCAT  
AAGAACCCTTAACTAAAAGATCCAAATCATAAAATCTGACAAGAACCTTCAATAAAAGACAGGAAAGT  
GGGAAATTGAGGATTACCATTTGGCAGCTTTGAAACCTTTGCTGAAGAAAGAATCCATTATAGACTTGAT  
TCAGATCTTCAATATCCGTGTACCCTTTAAAATTCTTGACAGTAAAACCTTATGAATTATCACTTACCTAAAA  
CCACAAAATAATTAATCAAACCTTGGTAGTATTTAGATTAAGCAAAGAATACCTTTTTATTTTTCAAAAA  
AAGAAAAGAAAAGAGATCAAAGATCAAACCTGATGACGAAGTAGTTAAGAAAATATGTGTTTTTTGTG  
GAAAGCACAGAAAGTGAACCTGCTCCGCTATGCATATAAAGACAAATGGAACGCGGACAAAGCTTTCA  
ATGTCTACGACAACAAGCAGCTTCTTAAGCTCTAAGCATTATTGGATTTCAACTTTCAACGAGTATTATT  
TTTGG

>PGSC0003DMG400027581 LRR-RLKs

ATGAAACTACAAGATTTACGTGCAACTATCGTCTTTCTTCTATCCTTGCTAGCAATTCTTCTCACATTATT  
GCTAATCTTGATTCAGACAAACATGCTCTACTTCAATTTGCTGCATCTGTCCACATCTTAGAAAACCTCAA

CTGGAACTCTGCTTTGTCAATCTGCAATTCTTGGATTGGGATCACTTGCAACAAAGATGGAACGCGAGTA  
GTTGCAATTCATCTGCCTGGTGTGGACTTACTGGCCATATCCCAGCAAACAGCATTGGCAAACCTAGATG  
CTCTCCAAGTCCTTAGCCTAAGAGCAAACAATCTAAATGGAAATCTTCTTCTGATATTCTTTCAATCCCTT  
CTCTTTACTCTATCTACCTTCAACATAATAACTTCTCTGGTGATATTCTGTTCCTTTTCATCAACACTTGG  
TG TAGTAGATCTCTCGTTAACTCTTTTACCGGAGAAATCCCCCAAGATCAAGAATTTGCCTCGACTAT  
CCATGTTGAACCTAAAGTTCAATTCATCTGATCAATTCCCAATCTTGATGTGTCAAGGTTGAGTTTT  
CTGAATTTGAGTTACAACATGTTAAATGGCTCAGTCCATATTCCCTCAGGAAGTCCCACCTTCTTCTTTT  
GTGGGGAACCTAATTTATGTGGAACACCTTTGAGTAGCTGTTCTTCGAGATCTCCATCACGTAAAGGTG  
ACAACTTTAAGAACTTAGTAATGAAATTATCATTGCAATTGCAGTAGGTGGTCCTTCTGTTATAATTCTC  
CTTGTTTTATTTCATCTACTTCTGTTATTTTAAACAAGAAGGTTGATAACAACACAAGCATGGTTGAAGAGAA  
GAATGAGAAGTTAGAAGACTTTGGAAATGGGGTTCAAGATTCTGAAAAGAACGAGTTAACTTTCTTTAA  
AGGGTGCTCTTATAACTTTGATCTTGAGGATCTGTTAAGTGCTTCTGCTGATTTTCTTGGTAAAGGGAGT  
TATGGAACCTGCTTACAGAGTTTCTTTGGATGAGGTATCGATGATAGTTGTGAAAAGGCTGAAGGAAGTA  
AGGGTTGTTAAAAAGGAGTTTGAACAGCATATGGATATTGTTGAAAAGATTACAAGGCACCCAAATATA  
GTGCCATTTCTTGCTTGTATTACTCAAAGGATGAGAACTTCTTGTTTGTGAATACATCCCTTATGGTAG  
CTTGTCATCCGCCTTATATGGTATAAGCTCCTTGACTCTTCTTATATAAACTACTTCTTAGAACAGATCAT  
GCTTGCTGCACATTATGCTGTTAATAGCTATTCCAATTCGGCTTTATGCTTACATGGTCTTAGCTTAAAT  
AGAGCGACATGATTATTGGTGGTGATTCATATAGCCGAGTAGTAGTTGTTGTTTCGTA CTGTTACATGAT  
CTTGTTTATAACTAGCTATATGCCTACTGTTAGCTTGTC AACAGCCTTG CATGGTATACAAAATTACACTG  
TTTATACATGATTA AAAATTACTATTTATGTATATATAGTAGATGTTGAACCTTATGGCTTTT GCGTCTTTT  
GAACCTCCTAAGTGAAAATCTTAGCTCTGTCACTGACGGTATATGTTGCTCAACTCTGATTGAACTGCA  
GTGTCATCGATCACTTGCTACAGATTATTAATGATTCCTGTTTTGGGCTTTATTTTTACATGATATTGGTTA  
TAGCAGGTAATGGAAGAACTCGACTAGACTGGGATACCAGATTGAAGGTCTCTCTTGGAGCAGCAAAA  
GGAATAGCACATATCCATTCTGAAGGTGGAGTGAAATTTACTCATGGAAACATCAAAGCATCCAACATA  
CTTCTTACAAGGGATCTAGATGGTTGCATTTCTGATTTTGGCTTAAGCCCTTAAATGAATTACACAGCCAT  
CAAGAATAAGGCTGCTGTTACCATGCTCCAGAAGTGATTGAAACGCGAAAAGGCACACAAAAATCAG  
ATGTTTATAGCTTTGGAGTGTTGGTACTTGAGTTGCTCACTGGCAAATCTCCTCTGCCATTGCCAAGGCA  
CGAGGACGTAGTCAATTTGCCTAGATGGGTACGAGCTGTTGTTAAAGAGGAATGGACAGCTGAAGTTTT  
TGATGCAGAGCTGATGAAGTACCATAATATTCAAGAAGAGATGGTGCATATGCTTCAAATTGCACTTTTA

TGTGTAGCAAAGGTGCCTGACATGAGGCCTTCAATGGATGAAGTGATTAATAATGATTGAGCAAATTAACATCTATAA

>PGSC0003DMG400027585 LRR-RLKs

GAGAGAGAAAGATAAAGAGAACGTTAATAAATGCTCCCCTGACCCGCCGTCCCCGGTAACACTTTACTTTTATCTACTTTCTCCGGCTTATTCTCCCTACCTCATCAACAACCTTCAACTTCACCGGCGCTTTACATTTCCGGCGAAACCCCAAATTCCTCTCATTGTCTCCTTCTTCCCTTCAGATTTCCCTTTTTCTGCTGCCAAATTCAACTGTTTCTTCCACTCATTCTACATTTTCTTCTTCCACTTTGTTTCATTAATAAATTCCTCTTCCGGATTTCTAGGGTTTTTAAGAACTGGGTGTTTTTAGAAAAAATTCTTACCCATTTTATTGGCGGTTACGTTCTTCTTGTGCTAAAGATTGTATCTTTTGCTTGTCTTGTATATAATTATGCATACCCATTTGGGGTGTGATGAGGATTATGAGTAACTTATATATTGCTTGTGATTATTGAGCTGGGAGAATGGAATGAGGAAAGTTTTTGGTATAGTAATATTGTGATTTTAGTATCTCCTATTTTTGTTAAAGCCTTGAACCTTATCTTTAATGATGATATACTGGGGTTGATGGTATTCAAGGCTGATGTTCAAGATCCACAAGGGAAGTTGGTGTCTTGAATGAAGAAGATGATAGCCCCTGCGGCTGGAATGGTATCCATTGCAACCCAGATCCAATAGGGTCTCTCAGATTGTTCTTGATGGGTTTGGACTTTCAGGTAAGATTAGTAGAGGTCTTATGAGGTTGCAATTTCTCGAAAGCTTTCTTTCGGAAGAATAATTTACAGGGAGTATAAGTAGCAGTGTTGTTCAACTTGCTTATCTAAGGATTCTAGACTTGAGTGAGAACAACCTATTTGGGACGATTCCGGGTGATTTTTTTGAACAATGTGGCCATTGAGATCAATTTCTTTGGCCAAGAATAAGTTTTCAGGGAAAGTTCCAGAAAGTTGAACTCATGTGTGGCATTGGGGTCTTTAAACTTGTCTCAAATCAGTTTTCAGGATTGTTACCTTCTGGAATTTGGTCTTTGAATGGGCTAAGGTCCTTACTGATCTGTCAGATAATTTGCTGGATGGTGAAATTCAGTAGGTATTGAAGTATGTATAATTTGAGAGCCATAAATTTGAGGAAAAATCATCTCAAAGGTGAAGTTCCTGATGGAATTGGAAGTTGTTTGTCTGTTGAGGTCAATTGATTTGAGTGAAAATCTTTCTCTGGAGAACTTCTTAAACAATGCAGATGCTTAGTTTGTGCAATGAGTTGATTATGAAACACAATGCATTAGTTGGTAGTGTACCTGAATGGATTGGAGAAATGAAAAGCCTTGAGATGCTTGATCTTTCTGGGAACAACCTTCTCTGGTCAGTTCCCGAATTCAGTTGGGAAGCTTCAATCACTGAAATTACTGAACGTGTCGCGAAATGCTATTTCTGGGGACTTTCCCAAGTCCATGAGCAGTTGTGTTAATCTTATGACTGATGTTAGTCAACAACCTCATTGACGGGTGATCTTCTCTTTGGGATTCAAATTAGGATTGCGACATGTTTTGTTTTCTGAGAATAAATTAAGTAGGGGCTTGAAGAATGCTATTGCTTCTTCACTGGAAAACCTCTCGACAAAAGCTTCTAGTTCTCGATATCTTGTCAATGAGTTAGCTGGTGAATTCATTTGCTATTGGTGATTTTAACAGCTTGCAGTCATTGAATTTATCTAGAAATTCCTTG TAGGGAAAATCCCTGAGACTGTTGGCCATCTAAAGTCACTGGATGTTCTTGACTTAAGCGAGAATCAGTT

AAATGGTAGTATCCCTCTGGAGCTTGGAGGAGCCTATGCTCTCAGGGAAGTAACTGGAGAAGAATG  
CCTTGACAGGAGAAATCCTACTTCTATTGGAACTGTTCTGCTCTTTTGCCTTGTAAGTTCTTGTTTCTC  
TTTATCGTTCATTTATAACTTTTCAATTTGAGATAATCTCTCTGCTTGGAGGTTTTTCATAAGGACAATGTAGT  
GGTAAGTTATTGTACAGAAGAACCTGATTGATATATAGTTTGATAATTAAGGAACTAGCATTGTCATTCT  
TTTTCGCAGTTTCCTCTCAGACAACGTTGTTTTGGATTGTCAAAATTCTAGTGAATAAATCAAGCACGAAT  
CCTTATATTAGAGATTCTTTATCATGTTCTACTAATTAGTTAGTTCTAAGCTTCTAGCAATCATTTAGAGTT  
TCCATATTGAGTTAATCAAGTAGCTTCTAGTGCATGATTTTAGATAAAATCCTTTTTTTTTTCTAGATAAGG  
CAATTCCTATACTTAATATTTTACATAAAGTATAATGTAACAACATCACATTACCTGGTTTTTCGATGTTTT  
TATGTGACGTAGCCTGTAAATTTATTTATGAAGTTGTCTTTGAATATCAGCTTTCCTCAAAGCTTGGTTAA  
TCGGTTTTGTTCCATCAACTGGCAGGTCTCTGTACATAATGGTTTAACTGGCCCTGTACCTGCAACCC  
TTGCTAAACTATCTAACCTACAAAATGTTGACCTTTCCTTCAACAAATTAACCGGAATCTTACCAAAGCAG  
CTGGTAAATCTTGGTCACCTGAGTTGTTCAACATCTCACACAACCAGTTAAAGGGCGAACTGCCTTCTG  
GTGGTTTTTTTAAACTATTTCTCCCTATTCAGTGTGAGCCAAATCCATCTCTTTGTGGAGCTGCTGCTAATA  
GGTCTTGTCCAAGTGCCTTCCCAAGCCGATTGTTCTGAATCCCAACTCCACAGAATCTATTCCTGGTACT  
ATCCCTCTGACTGTGGGCCACGAAAAGAAAATCCTAAGCATCTCTGCCCTCATTGCCATTAGTGCAGCTG  
CTATTATTGTTGTTGGTGTATTGCCATTACTGTGCTAAATCTTCGCGTACGGTCTGCAACATCTCACTCT  
GCTGCTGCCCTTACATTTTCTGGTGGAGATGACTATAGCCCCTCACACAGTACAGATGCAAATTCTGGTA  
AGCTTGTATGTTTTCAGGCGAACTTACTTACAGCACAGGGTACATGCTCTGCTTAAACAAGGATTGTGA  
GCTCGGACGTGGTGGTTTTGGAGCCGTTTATCGCACTGTCCTCGGAGATGGGATGCCTGTGGCCATTAA  
GAAGCTTACTGTCTCAGGTCTTGTAAAGTCTCAGGTAGACTTTGAAAAGGAGGTTAAGAAATTGGGAAA  
AGTTCATCACCTAATGTTGTGGCTCTTCAAGGTTATTATTGGACTCCGTCCTACAGCTACTTATATATG  
AATTCATAACTGGTGGAAATTTGTATGATCATATCCATGAAGGTTCTAGTAAAAACATGCTCTCATGGAA  
TGAGCGGTTCAACGTTATTCTTGGGACAGCAAAGGCATGGCTAACTTACATCAAATGAACATAATTAC  
TATAACCTCAAGTCCAGCAATATTTTATTGATTGACAGCTCTGGTGTATCCTAAAGTTGCAGATTATGGGTTAG  
CAAGGCTGTTACCGATGTTAGATCGATATGTTTTGAGCAGCAAATTCAAAGTGAAGTGCCTCGGTTACATGGC  
ACCTGAATTTGCATGCAAGACTGTGAAGATAACTGATAAGTGTGATGTGTATGGGTTTGGAGTTCTTGTT  
CTGGAGATAGTCACTGGAAAGAAACCGGTTGAGTACATGGAGGATGATGTTATTGTATTGTGTGACATG  
GTACGGGGTGCATTGGAAGAAGGCAAGGTGGAAGAGTGTGTTGACAAGAGGCTGCATGGAAAATTC  
CAGCAGAGGAAGCGATTCTGTGATGAAGTTGGGTTTAACTGCACTTCAACAAGTCCCTTCAACAGGC

CTGATATGGCAGAAGTGGTTAACATATTGGAATGATCAGATGTCCTTCAGAAGGCCAGGAGGAACTA  
GTATGATATCCCACTAAACTGATGGAAGTTTTTTAACATATGCTATTAGTCCCGGAGAAGAAGAATCCGC  
TTGATCTATTCATATTATGGTCATTTAAAGTTTCAATTTTTTTAATTATGTTATTGGTTCTCTGTTGTTCCG  
GGTTACCGGATTCTTTTCACCGGGTTTTAGTATGTGAGGATCCTTTTTTCACGGTTCTTTATGTAACAA  
TTGATTCTAACATGTAATTCCAGTAACCTCTTGCGTTTGTGTTCAAATGAAGGAAGGTCCAAATGTTGAT  
AGTGGATGTGCCAATAAGTATATTTTCATGACAAAATGATCAAACAAGC

>PGSC0003DMG400027586 LRR-RLKs

GCTCAACAAGGTATATAATTAAGAAACCTTGTGACATATATAGTTATGGGCAGAAGTTGCATTGTCC  
TCTTTGGTCTTGCAGCTGTTTTATTCTGCTTCATAACCAAACCTTCACTTGCTACTGTTCTAATATTGGCA  
CTGATGAAGCTGCTCTTTTTGCACTGAAATCACACATTTCTTCTCGTCCTAACAAACATCTTAGAAAGCAAC  
TGGTCTTCGTCCAGCCCGTTTTGCAGCTGGATTGGAATCACTTGCAGCTCCCGCCACCATCGAGTCACTG  
CTTTAGACATTTCTAGCATGCAACTTCATGGTACCATTCTCCACACATAGGAAACCTCTCATTTCTTGTTT  
CCCTCAGGATTAGTTACAACGCTTTCCATGGAAATTTGCCAGCAGAGTTGGCTCATTTGAAGAGGTTGAA  
ATTGATTAATGTTAGAAGCAATAACTTCACTGGAGCCATTCCATCATTTTTGAGTTTGTACCAAACCTAC  
GCACTGTGTCCCTCTGGAGCAACCAATTTTCGGGGAAAATTCATCTTCCCTTTTCAATCTAACAAAGCTG  
CAAGTGTGAGTTTGCAGAGTAATTTCTGTAGGAGAGATCCCTCGAGAAATTGGTGATCTTCGTTACT  
TGACTGTCCTAGACCTGCAATACAATCAGCTTACTGGCCCTATACCACCATCAATATTTAACATTACGACA  
ATGCGAGTGATTGGTCTTACCAACAACAATCTTACTGGAAAGCTTCCAACAACCTATATGTGACCATCTTC  
CAAACCTGGAAGGGCTTTATCTGTCAAGCAACTCCTTAGATGGAGTTATTCCATCAAACCTTGAGAAATG  
CAGAAAGCTTCAAAGATTGTCATTGTCGTCCAATGAGTTTATTGGAAGTGTACCAAGAGAGCTAGCAAA  
CTTAACGGCTCTTATAACATTATTTCTTGGACAACAAGTACACTTGGAAAGGTATATAGTATGATATTTCT  
TACAACATTATATCTAAAAATTTGATCTCTTCCGCCTAACTGGTAATATTTCAAACAATTGACAGGAG  
AGATACCTGTGGAGCTAGGTAATCTTAAGAACTACAGATGCTGGGATTAGCCGAGAATGAGTTTACTG  
GTTCCGGTCCCTACAAGCATTTTCAACATATCAGCACTGCAGTTCCTAACACTTTCCTAAACAAGCTTTCA  
GGTACTCTACCTTCAGATTTAGGTCCGAACCTAGAAGAATTTTACTGTGGAGGAAATAATCTGAGTGGTT  
TTATCTCTGATTCAATCTCAAATCTTCGAGACTCAGAATGCTTGATCTCTCATTCAACAGTTTCACAGGTC  
CAATTCCTAAATCACTCGGTAAATTAGAATACCTTGAGGCTCTAAACTTGGGAAACAATAGTTTTATCAG  
CGATTCAACATTAAGCTTCTTGCATCATTGAATAACTGTAGGAATCTAAGAAATCTCTGGTTCTATAATA  
ATCCTTTGGATGCCATTTTTCCGGCATTGTTGGTAATTTCTCCGACTCCTTGCACGGTTTTGAAGCAGAT

GGTTGTAACTTAAGGGCATGATTCCCAAGAAATTGGTAACTTACTGGTTTGACAAAGATGAGTCTAT  
CTAACAATGAGTTCACCGGATTTATTCCAAATACCATCCAAGGCATGTTGAGCCTTCAAGAACTTTACCTA  
GATAAAAACAAGATAGAAGGACCCATACCAGATGATATGTGCAGTTTACAGAATCTTGGTGCATTGGAC  
TTGTCACAAAATAAATTTTCTGGTTCCGTGCCACCATGCTTAGGAAAATTTACCAGTTTGAGGACACTTCA  
TCTAGATTACAACATGCTGGATTCTAGATTACCAGAAAGCTTGGGGAGCCTTAAAGATCTTTTAGAATTT  
AGTGTTTCATCCAATTTATTAAGTGGGCAAATTCCATTTGAAATTGGAAATTTACAGGCGGCAACAATCA  
TTGATTTGTCAAAAATGATTTTTCTGGTAAGATTCTAGCACTCTAGGGGGTCTAGATAAATTGATTAAT  
CTTTCTCTAGAACATAATAGACTAGATGGGCCTATTCCAGATTCATTTGGCAAAATGTTGGCATTGGAAT  
TCTTAGATTTGTCCTATAACAATCTTGTTGGTGAAATTCCAAAGTCATTAGAAGCTCTTGTGTCTCTCAA  
TACCTCAACTTTTCATTCAATAAACTCATTGGAGAGATTCCCACTGGTGGTCCTTTTTCAAACGCCACAGG  
TCAATCCTTCTGTCTAATGATGCACTATGTGGTGATGCCAAGTTTAAATGTGACAACATGTGTCATCCAAA  
CACCCAAGAGGAAAAAGGCTAACTTAGTTTTGTACATCAGTTTGGGAGTGGGTATGTTACTTCTTGTATT  
AGCCCTTGCATATGTATTTGTAAGATTCCGAAACACAAAAAGAATACAGGTCAAACAAATGTGTCTCCA  
TTAAAAGAGCATGAAAGAATTTCTATTATGAAATTGAACAGGCAACAGAAGGATTCAACGAAACCAAC  
TTGCTTGTAATGGGAGTTTCAGCATGGTCTACAAAGGATACTTAAAGATGGTACCCTTTTTGCAGCAA  
AGGTATTCAATGTGCAATTGGAGCGTGCAATTCAGAAGTTTTGACATAGAATGTGAGATACTCCGAAACC  
TTCGCCACAGAAATTTGACCAAAGTCATCACCAGCTGCTCCAACCTTGATTTCAAAGCCCTAGTGTTGGA  
ATACATGCCCAATGGGACACTTGATAAATGGTTATATTCTCATAACTTATTCTTGAACCTTGTGTCAGAGAT  
TAGATATAATGATAGATGTTGCATCTGCAATGGACTATCTCCACAATGGTCATTCAACAGCTGTGGTGCA  
TTGTGACTTGAAGCCAAGCAATGTCCTGCTAGATCAAGAAATGGTTGGTCATGTCAGTGATTTTGGCATT  
TCAAATTTGTTAGGTGTAGGGGAGGCTTTTTGTTCAAACAAGGACAATTGCAACCATTGGATATATTGCTC  
CAGGTATAGTACAACTTTTCAAAGTTTTCTCATATCGTTTAAATACTCAAACAATTCTTCTCCCCTAGAT  
ATAAATGGATTTTCTTTGTTTTTGCATATTCCATTTTAACTAGGGAACTTTTATAATTGTGATTTAGAGT  
ATGGACAAAATGGAATTGTATCCACAAGCTGTGATGTTTATAGTTTTGGCATCATGATGATGGAGATGTT  
CACAAGAACAAGACCAAGTGATGAAATATTTATCGGAGGCTTGACCATAACGTTGGGTTAGTGATTC  
CTTTCCAGGTGAAATTCATAAGGTGGTGGATTCTAATCTGGTACAGCCAGGGGATGAGCAAATTGATGC  
AAAGATGCAGTGCTTGTGTCTATCATGGAATTAGCTTTGAGCTGCACTTTCGTGACACCCGATGCAAGA  
ATTAGTATCGAAAATGCTCTTTCAACACTGAAAAAGATTAGGCTCCGGCTTGTGAGTAGTTGGCACTAGC  
TGGTGGAATTGGACCGGCTACTCTTGTATGCTATTTGATTAACTATGCCAGTAACATTAAACTTTCAATTT

TGC

>PGSC0003DMG400027683 LRR-RLKs

GTCGTCGCCTGTCCCCGTTTAACTCTTTTTCTTTTTTCAATTTCTTTGCAAGTTTTAGTTCTC  
ACTGTTAGCCTTCTTTCTTTGACCAAAGAAAACTGTATCATCAAAAAATACTCTTTTTTTGCCCTTT  
TCTTCTTTGTAATTGACCATCAAGATCCAGCATTGATATCCTCAACTGGGCTGTAAGTATCTTGCATCTA  
TAATTTCTTGGTCTTCTTTGGTATTTTTATGCTCAATTTGTTTATTGGTAGAATTTCTTATTAATAAATTGT  
TTCTTTATTATGTTGTTGCTTGCCTTTGACTAAGGACTGGTAATTTGTTGAATTTGAAAGTTGTGTAGA  
AAGGGTCTGGACTTAATTTATGGAAATTGAAGTTTTTTGGTATTTTTGCCTAGTTGCTATAAAAAGATTG  
ATTTTTTTTTAATTGTGTTGGTAGCTGCTTTGAATATGGACTTTGTAAATTTGTTAATTTGAAAGTTGCA  
TAGAAAAGCTCTGGACTTGTATTTCTGGAAATTGAAGTTGAATTTGGCCTTTTGTGTTTGATCTTAAGAA  
CCTTTTTTGGGTTTTGTGGATTGTGTGAGATGGGGTTTGTGTCTTATATCAAGTAGAGGTCTTTTTCTTT  
TTTGAACCTTCCTTTGAAGGTCTGAACTTTTGTGCTTGTGGATGTGGAAGATCAAGTAAATTCTGTATCT  
CGGAAACAATCTCTTACCATCTCAAGGTAGGGGTAAGGTTTGTGCAGTACCCTCCCTAGACCCGACCTG  
TGGGATTACACTAGGTTTTGTTGTTGCCGTTGTTGTTGTTGTTGACCTTAGTGATTAACATAATTATTAC  
TAACCATTTCTTTAATACATTGGCTGCCTTCTTGAGTACTTTGAACAAGGACAGTGGTTTATTATTGTTG  
AAAATTTGAAGGTCATGGTCAAAAAGCTCTCAACTTCAATTAATTTTTTTTTGGGATAGGAATTTGCTCTCT  
TGTTGTTTGATTTTCAGAACCTTTTCTGGGTTCTATTAGACTTGCTTGTGGGATTCCCTGTATATCAAGTA  
AGGGGGCTTTTATCAGCTTCCTTCTTGAGGTGTGAAGTTTGTGCTTGTGGCTTTGTAAGTTCAGATAAA  
ACCAACTCCATCGTGTGTTTTGTTTATATCAAGTAGGGGTGTTCTTTTTTTCAACTCCACGTAAAAGG  
CGTGAACCTTTTATGGTTGTCAATGTAGATGATAAGGTGAAATCATCTTTTGAATGAAGTTTTACTTTTGT  
GACGATAGTTTTATGGAAGTGCATCTCTTGGATTGCTGTTATTGTGCTTTTTTCTCTCCCAAGTCTCTTTT  
GCTTCCTTGTGTTGCCGTTTTTCCATTAAAATCTGTGAGGAACAGTTTTCTGCTTGTATCTGACTTGCCTT  
CAATCTTTATTTGGTTGTCTGTAACTGTGGGATTTGAGTACCTCTACTTCTGGAGAATCACTAGTTCGC  
TTAAGAAGAAAAGTTATCTAATGTTGATATGAAATGAGTCCGAATAGAGCGGATGAAACGTAGATTCAT  
ATAGTTTTTTTTTACTAGTTTGGAAAGTGAGGCAGCATTGACTGATTGATAAACTGATTCATCATCTTAT  
TTTTTCTTGCAGCCTTACATTTTGTCTTCTTAACTCGGGAGAAATTGGATTTGTTCTTGAATGGATTTTTT  
GGGGTTGCAAAGTCTATAGAGATCTTAAATGTTTCACTACTTAATTAGGACCTTCGATTGTT  
GCGGTTATGACTGGGCCTCTACCAAGATGGCTTTGGATAACAGAGCTCTTACTACCTTTGCTGCTATTTT  
GATCTACTTGGTCTTGTGCTGTTGCTCTGCTCTTCAAAGCGACATTGACTGTCTGAAATCTATAA

AAGATTCATTTGAAGATCCATTGAAGTTCTTGAACACAACATGGAAGTTCGATAATCAGACCGAAGGTTT  
CATCTGCAAGTTTGCTGGGATTCAGTGCTGGCATCCTGATGAAACCAGGGTCTGAGTATCAGTCTTCT  
GACATGGGTCTCAAGGGCAAGTTTCCACGTGGTCTTAAGAATTGCACCTCTATTACATCATTAGATCTTTC  
GAGCAACAACTCCATGGAAGTATTCCAAATGATATCTCCAAAATTATAGGTTTTATGGTAACGCTGGAT  
CTCTCATCCAACAATCTATCAGGGGATATCCCAGTTAATCTTGCAAACCTGCTCTTTTTTGAATAGCCTTAG  
ACTTGACAACAACCAGTTTACGGGTCAAATTCCTCCAGAAATTGCCCTGCTTGGTTCGGCTCAAGAATTTT  
AATGTAGCAAACAATCGATTGACTGGACCAGTTCCACGTTTCATAAATTCAACTTTTTCCCCAGAGAGCT  
ATGCCAATAATGCCGGACTGTGTGGACCACCATTAGCTCTTGTGAGGGTTATGCTAAGAAATCCCCTAC  
TGGAATCATTGTCGGTGTCTGCTGTTGGTGGGGTGACTTTAGGCGCTGTATTATTGACCATCGGTATGTT  
TTCTATATGAGAAAGATATCCAGGAAGAGGAAAAAGGAAGATGATCCTGAAGGGAATAAATGGGCGA  
AGAGTATCAAGGGTTCCAAGGCAATCCAGGTGAGAATTCTGTTTCGTGCTTTGTTGATAGGTCATAAATC  
AATTCTAGTGGGTTGTGGTTTGTGTTTACGGGTTCTACTGTGGCATTGCGATCATATTTAGAACCATAAA  
TTCGTGTTTTAATATAAGCATTAACTAATGAATTTTTACCATAAGCTCGTGTGAGTTTTCTCTTGCTCAA  
GCATTCTTAATTGACTTAAAGTGCCTTATTTTCAGCTTTCATGTTTGAGAAATCTACTTCAAAAATGAGA  
CTAAGTGATCTCATGAAGGCCACCAACAACCTTCAGCAAGAACAATATTGTTGGGTCAGGAAGAACCGGG  
ACATTCTACAAAGCAGTACTTGATGATGGCACTTCACTTATGGTTAAGAGGTTGCAGAATACTCAACACT  
CAGAGAAAGAGTTTACATCCGAGATGGCTACGTTGGGAAATGTAAAGCACCGTAACCTGGTGCCTCTTT  
TAGGTTTCTGCATGGCGAAAAAAGAAAGGCTGTTGGTCTACAAAGATATGCCAAATGGCACCTTGCATG  
ATAGGTTGCATTCGGTGAGTGAAGGGGAAAAAACTCTTGAGTGGCCTATGAGAATGAAAATCGCTATT  
GGAGCAGCCAAAGGATTTGCATGGCTTACCACAACCTGCAATCCTCGTATCATCCACAGAAATATTAGTT  
CTAAATGCATCTTGCTGGATGTGGAATATGAACCTAAAATATCGGATTTTGGACTTGCTAGGCTCATGAA  
TCCAGTTGACACTCATTTGAGTACCTTTGTAAATGGGGAATTCGGGGACTTTGGTTATGTTGCACCTGAG  
TACGCGCGAACTCTCATGGCTACACCAAAAGGTGATGTGTACAGTTTCGGTGTGTACTTCTCGAGTTAG  
TTACAGGTGAGACACCAACTTCTGTCGCCAAAGCTCCCGAGACCTTTAAGGGGAATTTGGTGAATGGA  
TCACACAACCTCTTGGTGAATCTAACTTCAAGATGCGATTGACCATTATTGTCTAGTAAAGGTTATGA  
CAGTGAGATCTTCCAGGTCCTTAAAGTTGCTTGTGATGTGTGTTGGCTGCTGCTCCTAAGGAGAGGCC  
AACAAATGTTTGAACGTACCAGCTTCTGAGAGCCATCGGAGAACGATATCATTTCACAACTGATGATGAC  
ATTATGATGCCTGAGAGTGATAGCGGATTCCAAATGGACGAGCTCATTGTTGCTCAATAAGTAAATGAA  
GCCCTTCGATAATGGTCGAGTAAGATAACAATAACTAGATCATTTTCTATCCTGTACAAATACCACGGT



TCACTATCTATATAATATCATTCTATTTCTACTGTAAGTCCCTTATTCATAGCTACCCAATATGTAATTTGT  
GCTTCTTTTTCTGTATTTTAATGGTGAAGAGATTTCTACAGATTGGTGTAGTCAGTATTTTTCTCTTTT  
CAGATTTACTGCTTGAACAGTGTAGTCTCATCTTCCAGTAATTATAAAATGCAAAGTTGGAAAAAATCCA  
TCACTCAAAGCTGAC

>PGSC0003DMG400027703 LRR-RLKs

TGAATCCTGATATTCAAGCTAAACATAAAAACAAAGGTGCTATCATAGCTATCGTTGTATCAGGTGTTTT  
TGCTGCATTTGTTTCAGCAATTTAACTGTGTTAATAAAAAACGACATGCCAAATACCAAAGTCTCCTAT  
CAAGGAAACGGCTATGTAAGTTATCTCATTTTGGTTATAAGCTACCTTACTTCATAAGAATATGTTTCTT  
TCAATTCTTCCCGCAAAATTGACTAGCATAAAATGTTTAATTCATAATGCCAGCCGCAAAGCTCTCTATA  
AAATTGGATGGCCTTAGAAGCTTCACTTTCAGAGAAATGACCTTGGCCACTAACAACCTTGTACTCAA  
ATCAAGTTGGTGAAGGAGGATATGGGGCTGTCTTAAAGGGAATTTTAGCTGACAAAACAGTTGTTGCTA  
TCAAACGAGCAAAGAAGGATCAGTACAAGGGCAAAAAGAATTTTTGACTGAGATATCTTTGTTATCAA  
GGGTACATCACCGGAATCTAGTTTCATTGCTAGGGTATTGTGATGAAGAAGGAGAACAGGTATGATAAA  
CCTCAAACTTCAAAATCCAAATCTTTTTGAATCCACTCATTAAACATGGAATTCATCATGTTGATCCTTTC  
CTCGGCTATATGAGTAGTTCAGGCTCACATTGTATGCTATAGCTTCTTTTTTTGCTCCGTAGCAATCTCTT  
GTCATTCGTTCTGACATCTCTTGGTATATCATCTATGTGAAGCAATTAGTGTGTTTCTGTTTATGTATTT  
GCAGATGTTGGTTTATGAATTCATGTGCAATGGAACCTTTCGAAACTGGCTTCTGGTAAAGAAACTGTT  
CCCTGGTTTATTCTGATCCATCATCTTCTCTGCTTTATTTTTGGTTAGGGAAGCTATTGAGCCAGGAGAG  
GAATTTGATATTTATCATTATTCTGATAATTGTGTTGTGTAAGCTGGCTTGCCTTGCCTTGGACTAATCTAT  
TAAATACGTGCTACCTCCCCTAGCACAAATATCAGATAACTCCATCCTTCAAGGTTTAGGAAGATGGAT  
CACCTCTGTTGGCGTTCCAACCTTAATTACCAAGTTTATTACTCCAAATCTACCACCACTAGGCCACCTTTC  
TATGTTCCCTAAGCAAATAGTAGCAGTATCTTTGAACTGGTACAGTAGACTGGTAATATATGCTCTTAAA  
CATTGTTTTTTAAGTCTATAGATGGAGATCAGATGTCAAGAAGCAAACCTTGTATCTAATAACTGTATGCT  
ATATGGATATCACCTAATCTAGATTATCTTGTGTTAGTTACTGCTCCGTTACTATCTGCTGTTTTTGTACT  
ATGTGTTGTTTCTGTACTTCTGTTACTTCTTTTTCTGGACTGCTTGGACTATTTTTCCCTGAGCCGAGG  
ATCTATCAGAAACAGCCTCTCTACCTCTAAGGTAGGGGCAAGGTGTACTCTACCTCCCCAGACACCA  
CTTGTGGGACTACACTAGGTATGTTTTGTAGTTGTAACACTTGATATCATTTTTTGACAGCTAATTGTA  
AAGGAACCTTGTCGTTTGTACAAGATTGGAGATTGACTAGGTGCAGCAAAGGGCATTCTTACCTCCA  
TACAGAAGCTCATCCACCAATATTCCATAGGGACATCAAAGCCAGCAATATTCTTCTTACTCAAAAATG

GCAGCTAAAGTTGCTGATTTCCGGATTATCTAGGCTTGACCTGTTCCAGGATGATGAAGGTGTAACCTA  
ACCATGTTTCAACTATTGTGAAGGGAACACCTGTAAGTCCTTCACTACATCATTATGTTCTATTTGACCTC  
ACTCGTATCATTTAAATTTGATGCATTGAGACTCTACTTGTATATGCAGGGTTATCTAGATCCCGAATACT  
TCTTGACCCGTAAATTGACAGATAAAAGTGATGTTTATAGCCTTGGGGTTGTGTTTCTAGAAATCTTAAC  
CGGAATGCGTCCCATCTCACATGGAAAAACATTGTCCGCGAGGTATTACTCTCATTGTTAACTCCCGA  
TTCCATGTCTTATCGTGTGCATATGTTTGATAGATGATTTATCCGCACACAAAGTGAAATACTGCTGACT  
GATGCAAGGGTAGGAATAGAGGCAGATTCATGAATTAACCTGTAATGCTCTTAGTTCCTACCATTGAAC  
ACACTACATGTCGCACAAAATGACGCTTTTAGAATTTATATTTTATGGATACATTTTAGTGATTTTACATA  
TGTATGTTATTTTTATGGTGCATCCTCCTCTGGGCTGAGAAGGGCTAGGGGAAATGTGAACATAATTTTT  
ACGCAATCTTTCCTTGCAATTTCTGCTATGAAGCTTCACACCTCGAATCTAGCTCCACCGTGTTAATAGTCC  
CTTGTACCATCAATGGCAGGTAAATTTGGCTCATGGCTCTGAGAAGATGTTCTCAGTTATGGACAGTACA  
ATGGGATCTTATCCTTCTGAATGTGTGGAAAAGTTTGTAGCTTTGGCCCTCAAGTGTTGCGAAGACAAAC  
CAGAAGACAGACCTTCAATGTTGGATGTGGTCAGGGAGCTGGAAACTATTCAGTCTATCCTCAATCTGA  
TGCCAGATATTGACACTGATTGAGTAGATTCTAAAGCAAAATTTAACGAACCAAAGACATCGTCTTCATT  
TTCTGATTGCACTAGCAAGGACGCGTTTTTATCGTCCTCCAATGTATCGGGAGCTTACAGTATCAGTGGT  
GTCAGTCTTACTATGCCTCGCTAACAGAATAGACAATAGTTGCTCATGTTTTGTACTAGAAAAAATAGCA  
TGTAGAATAGAGAGTTGTACCATTTAGCTTCTGTTTTATATATGTATATTTCAAGGATTTGTTAAACAAAA  
CCTCTTTATCATAGCCTTCTGAGTTCTGACAGTATGTGTATGCTATCAAAATCCAAAACCTTTGCTACAAAA  
TGGACTCTGAGATAGGTAAGTACTGCTATTTGTTTGAAGGAGTTGCACCAACCAATTCCTCAAAACAAGTAC  
AACAAACAGACAATGGCAGAGCTAAAGGGGGCGGAAGGGGGTTCATCGCCAGAAAATCACACTGTATAT  
ATAAAAGGTCGATCTTTTTATCTATATAAATGATGAACCCTCTTGTAAATCCAACATCATTACCAGAAATAG  
AAATATTATCTAAGCTATGGCTACAATGAGAGTCGTACAACAAAACAGGCAAAACCTCGTAGTTTTGAAG  
TAATGTTAGCTTTAGATCACATAACATGTCATCGTAAACCACACAAAGGAACAGAAAACAAATCCTCAAA  
TCAATATGAGGAAACTCATGTTTTGTTCTATGGAACCAAAGTTAGACATGGTTGACACACTCCAAGCTCC  
TACAAGAAGTCAGAAGACTATTTCTTGACTAAAAGACAGCAAAGTTCATTTTTATTTATAGATCATAG  
TAAGAGAGCAGCGGGTAAAATGGCTCTACCGGGAGGGAGGGAGGGAGCCGGTTTTGGATTGGTGTGT  
ATTTGAAACAAATATTGATAATCACTTTGAAGCAGCATCAGCAGTATGCATACTGTCATTCTGGTCCAGC  
AACCTCTCTTCTCTCCAAGTGTGTCTTCAACACGAACAACCTTTCCTTCATCTGGTTTATCTGCTTTCT  
GTGATCCTGTGAACTTTGCTAACATGACGAATGTCATTCCCCAAGAATGTTATTTGCGCATCTCAAAGC

AATAACCGAGGTCTTAAATACCAAAGGAGGAAGACCTTTAGCTAGCACAAACTCAACACCGTTAAGTGT  
TTGATATCTTAAATTACTACTGAGACCCATGTGTATTGCCAAGTTGCTGCATTCAAAAGTGTAGGAGGT  
GGCTTGTTTGGTGTTCGAAATTCGGATCCATCTTCTTCTCAACTTGATTAACCATTAGATAATGCAGT  
CCCAACAAGCCCTGCTGCAAATCCAACTGCAGCAAAGTGCAGTTCTTTGTACACAAATGTACCAAGCCTA  
CTCAATAAACCGTAAGAACCAGACTGAAACATGTGGCTCGGTGGACAAGTGGCGAACATCAAAGGGAG  
AGTTTGGATCGAAGCAGATGCCGTTGGTGCCAACAGATACATCAACACAAAATTCATAATTGAACCAAC  
AACAAAGTGTGAAAACACAAAATCTAATTCATTAAGCCAAAATTAGGCCTTGATGCCATATCTCCAAGA  
ACATTAGCACTAACACCAACCAATTCCTCCATAAGAACCTTAAAAGGAAACTGTGGATCTGCAGCCACCC  
TTGATCTCCAGCCATTAACAAAAGCACCAATTGGTCCAATACTATCCCAAGAAGACTTTGAATCATCTGA  
ATCTCCACCTTTACTCCAATCACCCTACCCCCACCCCCACCACCCCCACTACCCCTTCCAATCCCAATACT  
TCCTCCATCACCTCCACCAACACAAGGAACCTTGATACCTCAGGTGATCCACTTGTTTAGACACAATATACC  
CAGTTTTCAAAGGGTTAAAACAAACCCTATTATCACAAAATCTGGCTGAAACACCAGAAAGATCACGACT  
TTGATTATGATTCTGATAGTAACCCGTAAGAGGAGAACAACGAAGCTGAGACATCGCCACCATTTTCTAC  
CAACCAACCTAATAAAAATGAGAAAATAGAAAAGTAATGGCTATATTATTCATCCCATCAACAAACAAAGAT  
TCAGATTCATAAAAAGATCAAGAAAGACTCTTTCTTTGACACAAATAATATATATAAATACATACACACAC  
AACAAAAAAGATGCAACAGAGTTAAACAATAAATCAAGAAAAGGAAAAGGGGTTACCTTTTATGAAGAG  
ATGTGTTCAAGGGGCTGCACATCAAGTGATCTGAGCAGAGCAAAAAAAGATGGCTGCAGCGGCTAAAGT  
GACTAAAATGGGGATCTGCATGAAAGTGGGAATCTTTATAACCTAAATAAAAATACAGGCGGCAGGGC  
CGAAGTTAAAGAAAAAC

>PGSC0003DMG400027710 LRR-RLKs

ATGAAGTACCTGGAAGATTGGGAGAAGGGTGATCCATGTACATCTAACTGGACAGGAATTCATTGTTTT  
AACAAAGTTGGAGCCAATGGCTACTTGCATATCAAGGAACTGTATGTCATTATATTCTTCTCTTATTAG  
TTGTTATGTTTTCTTCTTCTTATACCTGGAATTGCTGCACTTGAGTAGAGGGTCTTTCGAAAACAGTTTCT  
CTACCTCCACAAGGTAGTGGTAAGACCTGCACACACTCTACACTCTCCAAGCCCCGGGATTTACTAAGT  
ATGTTCTTGTTGTTGTAATTAGGTAGATTCAAAGCCAATTTACTCTAGCAAAACTTGGGTTGGTGTGTTGAA  
AAACCCGAACCAACCTTGCCTATGTACACCTCTACTTTGGGCCATAAAAATACCCTTGATGTTAGAAAATC  
TTTGTATCTTTAATCGAGTTCTAGTGCGGTGGATTTACGTGTAAGAATATATCAGGAAAAAGGTCTAAA  
TTTACCCCTTTGCTTTTGGTTGTGGTTAAGAAATTACCTTTTATTATGCTTCAAGTTGGAGTTCCTCTAGCA  
TTAACAGCAAAAAAAGAGACTTGGTTCTTTCGATATCTGCATAATACTCCTGCAATCCAGTTAGCAGCA

TAACTAGTATCTCCAAGGAGGGACCTGGTTCCTTTGTAGTTGTTTGTGATCATCAAAATCAATTTAAGCT  
CATCTCAACAGTTTGCTAACGACAAGGGCATGAATAACTAAGTTAACTCATAAATTAGAGCACTTAGTTG  
TAAACTCTAGCAAAAGATGCGTCTTTACTACTTTGAGTTATGACTATCTTGTATTCTTGTGTGAGGGTGAT  
GCATGACGCATTAAGCATATTATATTTCCCCTTTGTGCAGCCGTATGATGGCTATGAATCTTTCTGGAAGT  
TTAACACCTGAGCTTGGACAACATCTCATCTTCAGTTTCTGTGAGTTGTTACACATATTACTACGTTGTA  
CAAATATTTTGATTTAAGATATAGTAGGGTTTATTAATTTTTCTATCTGTTTTACTTATTTTTATCTTTATA  
ATTCACCTTTCTGAAAGGAATTCATGTGGAATGATTTGACTGGGAGTATACCGGAAGAAATTGGAACA  
TCAAGTCTTTGAAACTTTTGTAAGTTGAACGAAATTTGATCCGTTTTTTTTTGGTCCCATCTTCTGATTTT  
GCAGTCACCCTACATGTTTCCCCGAATGCTTTGAACCCTGAACTATCTCATCTAGGAGATCTAGATAATCA  
TTTGGCTATGATGGTGGTATACTTTATGTTGGATAGAACAGGTGGATTTATGATTTAAGTTTGATGGTT  
TCAATCTTTATGTTCTTATCACGGAGTCCATTACATTTTCAAACCTAGGGGTTCAAAGTTCAATATTTTTAA  
ATTTATAGTGATTTGTCATGTATGTATCTGTGCTTCCCGTCGAAAATGTTGAGTTCAGTTGAACCTATTAA  
TTAGATCCTTCATCCGCCACTGGATAGAATTGAGGAACATTTTTTTCTTGAATTTCTTATGAAAATTGTG  
CTTAATGTAAGATTGTTTCAAGAAGAAGTAAAACCTAATATGCTTGGAAAGATCATGACTATGTGCGATTG  
GTTTAATCCCTTCGGAATTATGTCCATGCAGGCTCTTGACTGGAAACAACTTTTCCAGGATCTTTATCTGAT  
CAGCTTGGGTATCTTCAAACCTGAGAATATTCCAGATAGATGAGAACCAGATTTCCGGAAGAATTCCTA  
AATCCTTCTCCAATTTAAACAGTGTCCAACATATGTAAGTGCAACTCATTTGATTGTTTTAAACAGTGGAA  
CAAGTCTAAGGTTCTACCTTTGTAATCTTATGTGATATATCATGTGTCTACAGCCACTTCAACAACAACAC  
ACTGATTGGCCAAATCCCTCCCGAGCTTTCCAATTTGTCCACTCTGCTTCACATGTAAGTTTCTTAGTTTCT  
CTTCTTCAATAGACATGCATACTCTCAGTAGAAGTTAGAGCGAAGCAAGTTTTTGTAACTTCTAAAATGA  
CCTTTATCTCTGCTTATGTCTGTAACTAACGGAGTAATGTTTTTGTGATGATACTTTCTTTTTGTCAACAG  
GCTTATGGACAGCAATAATCTTTCAGGATACCTTCTCCTGAGTTTTCAATATTACCACGTCTTCGAATAA  
TGTATGTCCCTACTCACACACACATATATGATATGCATATATTGAACCTCATATGCAACTTTCATTAGCTG  
TATTTTGTCAAGAGGTATAACTAACTGTTACAAAAACAATGGTTATTCAGAGGCAACTTTAAACTGA  
ACTTTCTGAAGTAACTAGTTATAAATTTGAAGGAATGCTGATTCCTTACTACCTATGAGTGAGACTGTCTA  
TGTTTGTCTTAGTTGAAGTGGCGTTATTGGCCAGATGATCGAACAACCTGAAGCTGAGAACATTTTCGTTAC  
AGATCTATCTCAGAACCCTTAATTATCATCTTCAGATCTTTCTGTTGATTATAAAATTCATCGATAATCTT  
TGCTTGTAAATATCCAATGATAAAAAAATGATTTTATATAAGACAAATATAGTAATCCTTGTACATAAATAA  
CTGCTATGCCATTTGCAGTTCCTGAGAAAGTGCATGGGTTGAAATTTATGATGAAGTTCTGAATTTTCTT

ATGCAGACAACCTTGATAACAATAATTTAGCCGTTCCGAGATTCCAGCTTCGTATGGGAACATGTCATCA  
TTAGTGAAACTGTAAGTGCTCCTTGAAAATGTTCTCTCTTTTATTCTTCCCCTATTCTCTATGACTCAGCA  
TTATAAGTTATACATTTGAAGGACAACAATAGTAAATAATATGTACAAACATAAGCATATATTCATTGTG  
CACAAATGTATATGAAAGAGAGAATGTTTCAGGACATCTTATTATGACGGTTCGGGTAGATAGAATAAGAT  
GTAATAGTTGAATCGTACTGTCACCTAATCAAATGGAGATTCAATGCTTCTGATAATATTGCAGTAGTCT  
CAGAAATTGCACGTTGCGAGGATCCATTCTGACCTTAGCAGAGTACCGAGTCTACACTATCTGTAAGTT  
CAAGTTTTGAAATTGTTTCTTCTGTTCCCGTTGATTTGTGACCTTTTTACTTCATGCAACATGATTATAAGA  
TTTTCTAAAATGTTAACACTTCTTGCTTACTGTTTGTGCAGTGATCTCAGCTGGAATCAACTGTCTGGATC  
TCTACCAAATAAGCTTTCCAACAATATGACTTCTATGTATGCTTTCTATTTTCATGCTACAGATTTCTTCATA  
TATCTAGCATCTTAGTTCAGCCATATTTTGTGTTAGTTCATTATCTCATGTTGTGAAGAGTTCTACATCAGC  
CCTTTAAGAAACATTACTAAAGAGCTAGCCTTTGGGGTTGAGTTAGGCCCTACATCCATAACACAAGTTA  
AACATAATTTTTATCATGATTGCACATTTCTCTGTGTTTTTCTGTCAATTTCCCTAATCTAATGTGTTGTTG  
TACATTCTCATGCAGTATTCTGTACACAATCGTCTTGACGGATCTATTCCGGAGAGTTTTTCATCTCTTCC  
TTTGTTCAGAAACTGTGAGGATCTTCACTGTGTCTTGAATACATTCTCTTAGTACTGTTTCTTTAACAT  
TTCAAAGCTCAATTTTCTATATAACAAATTGATTTGACGGACTTGTACAGGACAATGGATAACAACCTT  
TTGAATGGTTCCTTTTCTACCGACATTTGGCAAACAAGTTTACTTCAACGTCGTCGCTGTTGATGTAAGA  
CCTGAAGCTAAATTGTAACATCAAATATCTGATATGAAATGTACTATCATTTACACAGAAGTCTGGGAGT  
CTTTTTAACCTTCTATCTTCTTTGCAAACTAGTGATCTTCGGAATAATCACTTTCCGGACATTTCCGGTA  
CTCTGAACCTCCTCTGAATGTCACTCTAAGGTAAGGTTTTTCTTTCCATATTCAACGACAAAACCTAAGA  
GAAGCCATTGAATTAATAATTTTATGATCTGACTATCACTTCATATCCACATTTTCAATAATAAAAGACAT  
TATTTTCAGGTTGCAGGGCAATCCTGTCTGCAGAAATGAGAATGTAAGAAACATCGTCAAGTTCTGCGG  
CTCTGAAGCCGGAGCAGAACATAAGACGAATAACTCAGTGATTGTAAGTGGTGCTTGTCTATTGTTGC  
ATGCCCAAAGGATAACTATTATGAATATGTTCCAAACTCACCTGTTCCCTGCACTTGTGCCTCACCTCTCA  
TAGTTGGCTGGCGGCTGAAAAGTCCAAGTTTTTCTTACTTTGATCCATATGTGCATCAATTTGAGCAGTAT  
ATGACTAGAGATCTTCATTTGGACCTTTACCAAATGTTGATTGAGTCAAATTTGGGAAGAAGGACCTC  
GTCTACGAATGCAATTGAAGCTTTTCCAGTAGTTGGGGTCAGTACATTTAATAAAAGTGAAGGTCATTTCG  
TATCAGCGACATTCTGCAATATTGGGAAATATCTGTAGTTGACCTTTTTGGACCTTATGAGCTCCTTAGTT  
TCACTCTGGAGGGACCTTATTCTACTGTAAGTTCTCAGCGCTTCATTGTGCTTCATGGTTGATCTTTGTT  
ATCATGATTAGTATCTTCTTCTCAGAATTTTGGTTTATCATATGATGCATGTTTTTCTGCAGTGAATCCT

GATATTCAAGCTAAACATAAAAAACAAAGGTGCTATCATAGCTATCGTTGTATCAGGTGTTTTTGCTGCAT  
TTGTTTCAGCAATTTTAACTGTGTTAATAAAAAACGACATGCCAAATACCAAAGTCTCCTATCAAGGAA  
ACGGCTATGTAAGTTATCTCATTTTTGGTTATAAGCTACCTTACTTCATAAGAATATGTTTCTTTCAATTCT  
TCCCGCAAATTGACTAGCATAAAATGTTTAATTTATAATGCCAGCCGCAAAGCTCTCTATAAAATTGG  
ATGGCCTTAGAAGCTTCACTTTAGAGAAATGACCTTGGCCACTAACAACTTTGATCACTCAAATCAAGT  
TGGTGAAGGAGGATATGGGGCTGTCTTTAAGGGAATTTTAGCTGACAAAACAGTTGTTGCTATCAAACG  
AGCAAAGAAGGATCAGTACAAGGGCAAAAAGAATTTTTGACTGAGATATCTTTGTTATCAAGGGTACA  
TCACCGGAATCTAGTTTCATTGCTAGGGTATTGTGATGAAGAAGGAGAACAGGTATGATAAACCTCAA  
ACTTCAAATTCCAAATCTTTTTGAATCCACTCATTAAACATGGAATTCATCATGTTGATCCTTTCCTCGGCT  
ATATGAGTAGTTCAGGCTCACATTGTATGCTATAGCTTCTTTTTTTGCTCCGTAGCAATCTCTTGTCATTCTG  
TTCTGACATCTCTTTGGTATATCATCTATGTGAAGCAATTAGTGTGTTTCTGTTTATGTATTTGCAGATGT  
TGGTTTATGAATTCATGTGCAATGGAACCTTTCGAAACTGGCTTCTGGTAAAGAACTGTTCCCTGGTT  
TATTCTGATCCATCATCTTCTCTGCTTTATTTTTGGTTAGGGAAGCTATTGAGCCAGGAGAGGAATTTGA  
TATTTATCATTATTCTGATAATTGTGTTGTGTAAGCTGGCTTGGCTTTCGCTTTGACTAATCTATTAATACG  
TGCTACCTCCCCTAGCACAAATATCAGATAACTCCATCCTTCAAGGTTTAGGAAGATGGATCACCTCTG  
TTGGCGTTCCAACCTTAATTACCAAGTTTATTACTCCAAATCTACCACCTAGGCCACCTTCTATGTTCC  
TTAAGCAAATAGTAGCAGTATCTTTGAACTGGTACAGTAGACTGGTAATATATGCTCTTAAACATTGTTTT  
TTAAGTCTATAGATGGAGATCAGATGTCAAGAAGCAAACCTTTGATCTAATAACTGTATGTCTATATGGAT  
ATCACCTAATCTAGATTATCTTGTTGTAGTTACTGCTCCGTTACTATCTGCTGTTTTTGTACTATGTGTTG  
TTTTCTGTACTTCTGTTACTTCTTTTTCTGGACTGCTTTGGACTATTTTTCCCTTGAGCCGAGGATCTATCA  
GAAACAGCCTCTCTACCTCTAAGGTAGGGGCAAGGTGTACACTCTACCCTCCCAGACACCACTTTGTGG  
GACTACACTAGGTATGTTTTGTAGTTGTAACACTTGATATCATTTTTTGACAGCTAATTGTAAAGGAACC  
TTGTCGTTTGCTACAAGATTGGAGATTGTACTAGGTGCAGCAAAGGGCATTCTTTACCTCCATACAGAAG  
CTCATCCACCAATATTCCATAGGGACATCAAAGCCAGCAATATTCTTCTTACTCAAAAATGGCAGCTAA  
AGTTGCTGATTTTCGGATTATCTAGGCTTGCACCTGTTGAGGATGATGAAGGTGTACTACCTAACCATGTT  
TCAACTATTGTGAAGGGAACACCTGTAAGTCCTTCACTACATCATTATGTTCTATTTGACCTCACTCGTAT  
CATTTAAATTTGATGCATTGAGACTCTACTTGTATATGCAGGGTTATCTAGATCCCGAATACTTCTTGACC  
CGTAAATTGACAGATAAAAGTGATGTTTATAGCCTTGGGGTTGTGTTTCTAGAAATCTTAACCGGAATGC  
GTCCCATCTCACATGGAAAAACATTGTCCGCGAGGTATTACTCTCATTGTTAACTTCCCGATTTCCATGT

CTTATCGTGTGCATATGTTTGATAGATGATTTATCCGCACACAAAGTGAAATACTGCTGACTGATGCAAG  
GGTAGGAATAGAGGCAGATTCATGAATTAACCTTGTAATGCTCTTAGTTCTTACCATTGAACACACTACA  
TGTCGCACAAAATGACGCTTTTAGAATTTATATTTTATGGATACATTTTAGTGATTTTACATATGTATGTTA  
TTTTTATGGTGCATCCTCCTCTGGGCTGAGAAGGGCTAGGGGAAATGTGAACATAATTTTTACGCAATCT  
TTCCTTGCAATTTCTGCTATGAAGCTTCACACCTCGAATCTAGCTCCACCGTGTAAATAGTCCCTTGACCA  
TCAATGGCAGGTAAATTTGGCTCATGGCTCTGAGAAGATGTTCTCAGTTATGGACAGTACAATGGGATC  
TTATCCTTCTGAATGTGTGGAAAAGTTGTAGCTTTGGCCCTCAAGTGTTGCGAAGACAAACCAGAAGAC  
AGACCTTCAATGTTGGATGTGGTCAGGGAGCTGGAACTATTCAAGTCTATCCTCAATCTGATGCCAGATA  
TTGACACTGATTCAGTAGATTCTAAAGCAAAATTTAACGAACCAAAGACATCGTCTTCATTTTCTGATTGC  
ACTAGCAAGGACGCGTTTTTATCGTCCTCCAATGTATCGGGAGCTTACAGTATCAGTGGTGTGAGTCTTA  
CTATGCCTCGCTAA

>PGSC0003DMG400027967 LRR-RLKs

ATGGATCCCAAATACTTTATTTCTTCTCTGGTATATCTCTTCACAATTACTTTTGCTCCACAGAGGAA  
GCAACAACCTCTTCTTAAATGGAAATCAACTTTCAAAAACCAGAATAATTCCTTATTGGCTTCTTGGACACT  
ACGTCATCCTGCTGCTGCCAAGAATTTTCGAGCCATGATCCATGCAGGGACTGGTATGGAGTTAAATGC  
TTAATGGTGAATAAACAGGTTGAATATTACAAATTCTGGCGTCATTGGTACACTCCATGATTTTCCATT  
TTCATCTCTACCTTTTCTGAATATATTGATTTTAGCATGAACAACCTTTCTGGTCCCATTCTGCAGAAAT  
AGGGAAACTTACCAACCTTGTGCAAATTGATCTTGATACAAACCAGTTAACAGGTCATATTCCTCCGGAA  
ATAGGCAACTTGATCAATGCAAATTTGTTCTATGCTTACTCCAATGAATTGTCTGGTCCATTCTTATTGA  
AATAGGGAAGATGAAGTCACTTGAAAGTTTAAGCTTACAGAAAAACAATCTTTCTGGTCCAATTCCAAAA  
TCTTTAGATGACTTAACTGAGCTCAAATTTTGTACCTTTATTCTAACCAACTTTCTGGTCTCATTCTAGT  
GAGTTGGGGAATCTGAAAAACCTCAATGAGCTAGATTTATCCGATAATAAGCTTAGTGGTTCAATTCCAA  
TTACTTTAGGTGACTTAACTGAGCTTGAACTCTATACCTTCACTTCTAACCAACTTTCTGGTCCCATTCTC  
GAGAATTGGGGAATTTGAAAAACCTTAACGATCTGGATATATCCGATAATAAGCTTAATGGCTCAATACC  
AATACTCTAGGTCAGTCTGAGCTCAAATCTTGCATCTTTATTCCAACCAACTTTCTGGTCCCATTCC  
TAGTGAGTTGGGGAATCTGAAAAAATTGAATGATCTGCAATTATCCAATAATCAACTTACCGGTCCTATT  
CCTGGTTCATTTGGCAATTTGAGAACTTGCAATTTTTGTATCTCCACACCAACAAACTTTCTGGTCTTATT  
CCGAAAGAACTTGCAATTTTGGATAACTTGGTAGAGCTGATAATAAGTGAAAATCAGCTTTTACGGCCATT  
TGCCTGAGCATCTTTGCCAAGGTGGGAACTTGAGAACTTACGGTGAATAGTAACAAGCTTACAGGGC

CAATACCAAGAAGCTTTAGCAAGTGCTCGAGTTTCAAAGAGTTTCGGTTGGATAACAACAGTTTTACTG  
GGAATTTATCTGATGCTTTTGGCATCCATCCACACCTTTACTTCATTAATTTGAGCGAAAATGATTTTTATG  
GTGAACTCAGCAGCAACTGGGGGAAATGCAAGAGTTTACTGATTTGCGGGTAGCCAGAAATAACATT  
AGTGGTAGCATACCACCGGAGATTGGAAACCTCAAAGGGCTTCAAGGACTTATTCTTTCATCCAATCATT  
TGGTTGGACAGATACCTAGGGAATTAGGAAAATTAACCTCTCTGGTTAATCGTCTTTTTCGAAACAACCA  
AATTTCTGGCAATATTCCTATGGAACCTGGATTATTGACAAAGTTAGATTACCTTGATCTATCAGACAATA  
GATTGAATGGTTCGATCCCACCGTTTATAGGAGATTACCAGCACCTGTTTCACTTGAACCTAAGCAACAA  
CAAATTTGGCCAAAAAATTCCAATAGAGATTGGGAAGATAAAGTCACTCTTAATGTACTGGATTTGAGCCGT  
AATCATCTTGTGGAGAGATCCCCCTCAGTTAGCCAATTTAAAGGTGTTGGTAAACTTAAATCTTTCACA  
CAATGGCCTATCTGGGCGCATTCTCAAGAATTTGAAAGTTCAACTGGTTTGCAGGATGTCGTATTGTCA  
TACAATCTGTTGGAAGGTCCAATCCCTAATAATAAAGCTTTTATCAATGCCTCATTGGAGGGTAATAAAG  
GTCTTTGCGGCAATGTAGTAGGAATCCATCCCTGCGGAATGCCGTCTTCTGTGGTGAAGAAGCACTCAA  
TGGCGAAGGGACGTAAACTCATCCTCATCATTGTAAGTCTCTGTTATGGGAGCACTTGTTTTACTCTGTGTT  
TTCATTGGTGTCTCTTTATGTGTGATAAAAGAAGAGCTGGAGATGTTGAAAGAAGGGATGGTGATGGT  
TGGCTTTCGATATCCATGTTAGATGGGAAGNNNNNNNNNNNNNNNNNNNNNNNNNNNNNNNNNNNNNNNN  
NNNNNNNNNNNNNNNNNNNNNNNNNNNNNNNNNNNNNNNNNNNNNNNNNNNNNNNNNNNNNNNNNN  
NNNNNNNNNNNNNNNNNNNNNNNNNNNNNNNNNNNNNNNNNNNNNNNNNNNNNNNNNNNNNNNNNN  
NNNNNNNNNNNNNNNNNNNNNNNNNNNNNNNNNNNNNNNNNNNNNNNNNNNNNNNNNNNNNNNNNN  
AAGGGCATTGACTGGGATTAAGCACCGGAACATTGTGAACCTCTACGGCTATTGTTTCGAAAGCACAACA  
CTTGCTCTTGGTTTATGAGTATGTGGAGAGGGGGAGTTTGTCTAGCATTGTTGAGCAACAAGGTTGAGTC  
CAAGAAATTGGATTGGTTTAAAAGAGTGAATATCATCAAGGGTGTGCTTTTGTCTTATCTTACATGCAC  
CAGGACTGTTACCCCCGATTGTCCATCGAGACATAAGTAGCAGTAATGTTTTGCTTGATTCTGAGTATG  
AAGCTCGTGTTCAGACTTTGGCATAGCGAAGCTACTCAAGCCAGATTCATCGAATTGCACTGCACTTGC  
AGGCACATATGGCTATGTTGCACCTGGTAAGTTTTAAATATTTTCATGAAAGCCAAACACTATTGTTTTTAT  
CTTATTTACAAGTTTAAATTGATAATATTGTTCTGGAACTGTATTGTTTCAGAGCTTGCATATACTATGAA  
GGTTACACAAATGTGTGATGTCTTAGCTTTGGAGTACTATCATTGGAGATAATAAAAGGAAAACATCTT  
GGGAATACATTACCGTGCTAGCAGATTCATCGACTATAGATCCTGAGCAGCTTAGCGATTTTCTGGATG  
AACGGCTTCATATCCTGAAGATAGAGTAAAAGAGGCTTTGGTTTTTATCATCAAGCTAGCATGCTCTTG  
TTTGCTTGAAAACCTCAAAAATTCAAGGCCAACAAATGCACTTCATCTCATAAGTTATCATCAATGGATG



CACGTCCACCTATTCATCAGAGAAACCCCATGTAAGGCGAGCAATATAA

>PGSC0003DMG400027971 LRR-RLKs

ATGGATCCCAAATACTTTATTTCTTCTCTGGTATATCTCTTACAATTACTTTTGCTTCCACAGAGGAA  
GCAACAACCTCTTCTAAATGGAAATCAACTTTCAAAAACCAGAATAATTCCTTATTGGCTTCTTGGACACT  
AAGTCATCCTGCTGCTGCCAAGAATTTTTGAGCCATGATCCATGCAGGGACTGGTATGGAGTTAAATG  
CTTTAATGGTCGAATAAACAGGTTGAATATTACAAATTCTGGTGTCAATTGGTACTCCATGATTTTCCAT  
TTTCATCTCTACCTTTTCTTGAATATATTGATTTTAGCATGAACAACCTTTCTGGTCCCATTCTGCAGAAA  
TAGGGAAACTTACCAACCTTGTGCGAAATTGATCTTGATACAAACCAGTTAACAGGTCATATTCCTCCGGA  
AATAGGCAACTTGATCAATGCAAATTGTTCTATGCTTACTCCAATGAATTGTCTGGTTCATTCTATTG  
AAATAGGGAAGATGAAGTCACTTGAAAGTTTAAGCTTACAGAAAAACAATCTTTCTGGTCCAATTCCAAA  
ATCTTTAGATGACCTAACTGAGCTCAAAATTTTGTACCTTTATTCTAACCAACTTTCTGGTCTCATTCTAG  
TGAGTTGGGGAATCTGAAAAACCTCAATGAGCTAGATTTATCCGATAATAAGCTTAGTGGTTCAATTCCA  
ATTACTTTAGGTGACTTAACTGGGCTCAAAATTTTATACCTTTATTCTAACCAACTTTCTGGTCTCATTCT  
AGTGAGTTGGGGAATCTGAAAAACCTCAATGAGCTAGATTTATCCGATAATAAGCTTAGTGGTTCAATTC  
CAATTACTTTAGGTGACTTAACTGGGCTCAAAATTTTATACCTTTATTCTAACCAACTTTCTGGTCTCATT  
CTAGTGAGTTGGGGAATCTGAAAAACCTCAATGAGCTAGATTTATCCGATAATAAGCTTAGTGGTTCAAT  
TCCAATTACTTTAGGTGACTTAACTGGGCTCAAAATTTTATACCTTTATTCTAACCAACTTTCTGGTCTCAT  
TCCTAGTGAGTTGGGGACAGGGCCAATACCAAGAAGCTTTAGCAAGTGCTCGAGTTTCAAAGAGTTGCG  
GTTGGATAACAACAGTTTTACTGGAAATTTATCTGATGCTTTTGGCATCCATCCACACCTTTACTTCATTA  
ATTTGAGCGAAAATGATTTTTATGGTGAACCTCAGCAGCAACTGGGGGAAATGCAAGAGTTTGACTGATT  
TGCGGGTAGCCAGAAATAACATTAGTGGTAGCATACCACCGGAGATTGGAAACCTCAAAGGGCTTCAA  
GGACTTATTCTTTTATCCAATCATTGGTTGGACAGATACCTAGGGAATTAGGAAAATTAACCTCTCTGG  
TTAATCTTCTTTTGCGAAACAACCAATTTCTGGCAATATTCTATGGAACCTGGGTTATTGACAAAGTTA  
GATTACCTTGATCTATCAGACAATAGATTGAATGGTTCGATCCCACCGTTTATAGGAGATTACCAACACC  
TGTTTCACTTGAACCTGAGCAACAACAATTTGGCCAAAAAATTCCAATAGAGATTGGGAAGATAACTCA  
ACTTAATGTACTGGATTTGAGCCGTAATCATCTTGTGGAGAAATCCCCCTCAGTTAGCCAATTTGAAG  
GTGTTGGTAAACTTAAATCTTTCACACAATGGCCTATCTGGGCGCATTCTCAAGAATTTGAAAGTTCAA  
CTGTTTGCAGGATGTCGTATTGTCATACAATCTGTTGGAAGGTCCAATCCCTAATAATAAAGCTTTTATC  
AATGCCTCATTGGAGGGTAATAAAGGTCTTTCGCGCAATGTAGTAGGAATCCATCCCTGCGGAATGCCG

TCTTCTGTGGTGAAGAAGCACTCAATGGCGAAGGGACGTAAACTCATCCTCATCATTGTACTTCCTGTTA  
TGGGAGCACTTGTATCCTCATCACTGTACTTCCTGTTATGGGAGCACTTGTCTACTCTGTGTTTTATT  
GGTGTCTGTTTATGTGTGACAAAAGAAGTAGAGTTGGAGATGTTGAAAGACGGGATAGTGATGGTTG  
GCTTTCGATATCCATGTTAGATGGGAAGGCATTGTACAGGGACATCTTAAACGCCACAGAAGAGTTTGA  
TGCAAAATTTTGCATCGGGCAAGGAGGACACGGAAGCGTTTACAAGGTAAACCTTCCATCATTAGGGAA  
TATAGCTGTGAAGAGACTTCATTCTTCATTTGAGAATACACCTCCCAAAGTTTCTTAAATGAAGTAAGG  
GCATTGACTGGGATTAAGCACCGAACATTGTGAACCTCTATGGCTATTGTTTGAATGCACAACACTCGC  
TCTTGGTTTATGAGTATGTGGAGAGGGGGAGTTTGTCTAGCATTGTTGAGCAACAAGGTTGAGTCCAAGA  
AATTGGATTGGTTTAAAAGAGTGAATATCATCAAGGGTGTGCTTTTGTCTTATCTTACATGCACCAGGA  
CTGTTACCCCCGATTGTCCATCGAGACATAAGTAGCAGTAATGTTTTGCTTGATTCTGAGTATGAAGCT  
CGTGTTCAGACTTTGGCATAGCGAAGCTACTCAAGCCAGATTATCGAATTGCACTGCACTTGCAGGC  
ACATATGGCTATGTTGCACCTGGTAAGTTTTAAATATTTTATGAAAGCCAAACACTATTGTTTTTATCTTA  
TTTACAAGTTTAAATTGATAATATTGTTCTGGAACTGTATTGTTTCAAGAGCTTGCATATACAATGAAGGT  
ACACAAATGTGTGATGTCTTTAGCTTTGGAGTGCTATCATTGGAGATAATAAAAGGAAAACATCTTGGG  
GAATACATTACCGTGCTAGCAGATTCATCGACTATAGATCCTGAGCAGCTTAGCAATTTTCTGGATGAAC  
GCCTTCCATATCCTGAAGATAGAGTAAACGAGGCGTTGGTTTTTATCATCAAGCTAGCATGCTCTTGTT  
GCTTGAAACTCCAAAATCAAGGCCAACAATGCACTTCATCTCTCATAAGTTATCATCAATGGATGCACGT  
CCACCTATTCATCAGAGAAACCCCATGTAAGGCGAGCAATATAA

>PGSC0003DMG400028123 LRR-RLKs

CAGTTACAAGAGAGCATAATGTCTAATGCAATGTCAAGAAAGAATATGGTTGATCCAGCAATTAGAAAT  
TCGTGCTCGGATGAATCATTGAAGACGATGATAGAGATATGTTGCAGGTGTTTGAACAAGATACAGAA  
GATATGCCCTCAGTTGAAGATGTAATATGGAATTTGCAGTTTGTCTCAAGTTGAGGATTCATGGAGA  
AAAGACTCTTCAAGTAGTGATGCCTCTCCAATTTACATCTCTACAGCTTCAAACCCAACTTGTGCGCAA  
TAGCAATAGCAATAACAATAGCAATGGCACGTCTGTGTGACAAGCTATTTCTAACGTGGATAACTAATCT  
CGATACTATTATCCATCCTGTGACAAGAATAACTAACTAAACAATTTATGTAATAATTTTCTTTCATAG  
CTTATACAAAAAAGTAAGTTTTTATACAATCTTTTTTCTAACAAGCAGATGCCATAGCATTTCCTTGTGT  
ATATACCAACCCAACCTTAATAGTACCTAGATATTACAAGAGCAACATATAGTGCAGAAACCTATAATAG  
ACATGGATGATAAAAAACAAAAACAAAAGAATGCAAAGAGGGACTAGTTAATGGAAAAGGGAAGCATT  
ACAAATCGATTTTTTATAGACAGTAGAAACAGAATATCTATTCGTTTGCAGGAGGAGTTTCCATTTTCTGAA

CTTGAGGGGCTGTCACTGCCACTAAGCTAAGATCAGATGAGTTTGAATCTCCAGATCTTTCATGGATCTC  
TCGGTACTCCTGGCATATGGCACATAAGTGGCAGAAAAAGTGTGTGGCGAAGTCTCCACATGGAGCTTC  
CTGCATATATATCAGGACACACAAAATTGTTAAATGCAGAAATACTGATGTAAGCAGTTTGCATCTTTCT  
ATTCAGGCATGGAACCATAGTATTTTCGTAGAACAGAAAAGGGGGGCGGGAGCTAATGGGAAGAGAGG  
AAGGTGAAGAATTCAGGGTAACTGGTTATAGATGCTGCAGACTCATCTGATAATAAACTCAAACTAAG  
ATTTCTAACTCGGACAACCTTCTCAATGTAAACCAACAGAAAAGGAAAGTACAGTCAGTTCTCTTTCTAC  
ATGGAGTCCTGATTTTCTGATTTTCAAGTTGTTGATAGTTTATCGAACTGAAGTCCACCACTACTAATTC  
AAATGAAGTATAATCATCTCTGCCGTGGAGTCGATTACACACTGTAACCTTTAATCTTTTGTAGCTTCTA  
CGGATAACATCCAATTCAAAGAATGTATGTGGAATTTAAGACATTTCTGATTAATTTTTCTTTCTAATG  
AAAAGGTTAACTTCAAATCATCATAGAAGTCTTAATATAGTCATTAATATTAATATATATCACACCAT  
AATGGGGAGTTTATGCATAGACGTAAAGAAACATCCTCAAAGGTGTGCACATCAGACTATCCTCCTAT  
GCATAGCCCATGTTATAGGAGATACAACCTATGAATATGGAAGGTTAGATTGAAGGTAAATTTTCAAGCA  
ATCTAACTTCACTCATTTTTTCAAATGTCTTTCCTGTTGAATCAATAGAGCTACTGATAATATGCTAAACCA  
CATTCTCATCCATGTGCACTATAAACAGCAAAACAACAGAGATGGCTACCTGAAGATTGTACTTTGATCT  
CAATGTCTTTCGATAGCCACAGGCATAACATGCAACAAAGCACCCAGGCAAACCCAGAAGAATGCCTTC  
AGTTAAGAAGCAGAAAATTGTGTTGAAAAAGCCACAAAATAAAGTGAGTTGTACATGATCCCATCAA  
GGTTCCTGACCCCAAGAAGTCCGCATTTTTTCAAACAGAAAGCAAGGGCAAAGAAGTCCAATAAAACC  
TGTGCTCAAATTTTGAATTAGTGCTAACTCGAGGTTGTCAACCAACATCTAGTGTATTCTCTGGGAT  
GACAGAAGAGCCATTGCTTAGGAACAGGTGTTGGAATTTTAAACATAAACACACATAATTAACCCTCAA  
AAGAGAAGTCCACAATCACACTTTCATCTTATTATATGTTTCAGAAAGGAATGATTGATCTAGTCCCATC  
GGCACTGCTGAAAACCAGTTTCGGGAAATTCCGGCAGTTGTATTATTTATAACTTCATGAATATGACAAA  
CAGTGAAACCACAAGGGGGAGCAAATAGCAAATAATCTGGAACAGAATGGAAGCAGTGTTGACTGTT  
GAGAAAAGAAATGCATGTGTGTTATCCAGAACTCTATGGAATTACACTACACTGGGTATGTTGTTGTTCA  
TAAGAATATATACATAAATCCTGTGGGATTACACTACACTGGGTATTATTTTGTGTTGTTTCATAAGAATA  
TATACATATATCCTTATGGGTATACTTTTGTCCCAGCAAAAGAGCACCAAGAAGTTCTGTATATGTACA  
GTATACAAAAACTCAGATACCCCTTTATAAATGCAGGGCACTGAGGAACTCTAGCAAGGCACCTAAATC  
ATACACACTTAAGCATGTTACACCATAAATAAAAAAAGTACAGGCACTTCTAAGTTCCTAAGTCTGGATA  
GGACTAGTTTTGCAAATTTGGTAAGAAAGTGATTTTCAAAGGCATACCAACTTCAAGCTAAATTTTTATC  
TAAGAAGCATATAAGCAGAGAAAAATACTTCATTCCATTATAGAGCCCGAGGAAAACCTCAATTAATGT

ATGGCTTATAATAGCTTCCTTAGTGGTTCCTCAGAGATTTATCATTGTTTTCCATCTAATAAGATAAGAG  
GGTAATTAATCATGAATCTTATTTTACTACCCAAAATGCACCTTCATTCACTTTTTCCCTTCTCATAAA  
GCAAGATCACAGGGACGAGAGTAGCGTACAGCTCTGTGGATCATCAAACAAGCACAGATTCCAGAAC  
TCCACTGAGCATGGTCATCTTTTTGGTCTGTTGAATTTCTCCGCAGTAGAACTTGTGGTACTTCTGCA  
TCCGACTGATCCAGAGGAATATAAGGTGGAGGTGAATAATTCTTGTGCCCTACCATTATTAGTCAGGTG  
CAAACAGCAACCTGCAGCACAAATTCAAGAGAAAAGCAAAAATATCAATTAAGAACAAGCGAGTTACAC  
ATAAACATCCAATCAGTTCTCTGATTTTCATGAAGGACGGTTACTTTTTGACTAAGTTGCTCGGACTCTCCA  
AAAATGTTGCCGCACCCGTGTTGGATCCTTCAAAAATACATTATTTTTGGAAGATCCGACACGCACTTGT  
CGACATTTTTGTAGAGTCCGAGCAACATAGCTTGTGTGGGGGGGGGGGGGGGGGGGGGGGATTTTAAA  
AATCCTTAGGGGTACATGCCCCCTCCCCCTTAAATTCATCTCTGAATGTCTAACACTTACTAGATTCCT  
TTGCTAAACTCTACAGAGTTCTTGTGGACATTGGAECTTAGATAGTTTGTCTATACTGTACGGGTTCAAC  
AAATATATTTCAATATCTTTGTCAAATTACTCCAATTGATGTAGTTTAATAAATAAACGGCATCTATA  
ATATTCTCTATTGGTAATTTTATAAATACATCGTAGATTTATTCTTTTTAGTTCTTCTATATGTGTATACTCC  
AAATTAACACTTTCTCTAACCGTGCTTATAAATGTCTGGTACTCATTTTCACAACTATAGTGTCTTATCAC  
AGGTGAAATCTCGAATACACCCGTGTTAGTTCTGCATTAATTTGTAACCTTAACGTATATAAGAGAGT  
TATCCTTCGTATTACTTATCAACTAAGTTGCTCGGACTCTCAAAAATGTTGCCGCACCCGTGTTGGATCC  
TTCAAAAATACATTATTTTTGGAAGATCCGACACGCACTTGTGACATTTTTGTAGAGTCCGAGCAACAT  
AGCTTTTTGATGAAGTTATAAATCATCTGCCATCGTTTCAAAGAAAAGAAACACACACACAGATATTGA  
CAGGAAAGAGAAAAGAAAGATGCTTAACATTACAAAATCGATTCTAAGTTGTCAAAGTAAATGTT  
TACCAACAAAAAATTAGCACTGTGTAGATTGACCACATTGCAGATTGGCTCCACTAGGACTGACGATTAT  
TTTATCATGTAATGCTTACGATTAAGTATTTCCAATTTCAATTATGGGTGTTTCTTAGAAAGGATTGCAC  
CCAATTTGTGCACTTCTTTATTTTTGACCTTGTAAATCACAAAAGGAAGCTTTCTAGTGCTTGCCTGTT  
TACAATGTGAAAATTCGGGCCAGCTTGTCTGCACCTCAACTAATTTAACGGGACACCTACTACCTCCCA  
TCAACACAAGTACAAGATAACTCTATCCACTAATGTTTGGACATATGGGAGGAAATCATCTAATATTATT  
GCACTTGGAGCCTCATGGTTCTCAAACCAATTCATTGACCATTAGCCACAGCCTCACAACCTTGGTGCA  
ACTATTCAGAATTTTTTATCAATAACTATTAACCATAGCCATTTCTGATTTAAAAAATTAGACTAGATGCA  
CCTGATACCTGTTGCTACTTGTGCTGGAGGGAGGTAACACGTATCCCGTGAAATTAGTCAAGGTGAGT  
GTAAGCTGACTCAAACACGACACGATTATCAAAGAAATTGTAATGTGGTGTAAACGGTAATTAGAAGGA  
TTTGACAAATGATTAGCAATTCATGACAGTATGTTTCGATTCATCTATCGGCCTTAATTTTTTTTCATTTTC

TTCAAACAATTGATAAGCAATACTTCAATGCAATTATTACTCAGATCTCAACTATAGAGCCATGACAAATA  
ACGACATAGTATCGAAATTCAAGCTTTATTCATGCAGTGTAACGAATTTAAAGCATTGAATCCAAATAT  
CAAAAACAATATCGTCTATTTTACCGCTAAGAATCATTGTTGGGATGAGGTTTTCGTTTTTTTTTGGCTCGTA  
AGAGAAAATAAAAAGGCAAAATCTGGAGAAGAAAGAGACAGACCGGAACTTACAGCTCGATGTCGCC  
GGAGAGAAGGATATTGCTGAGGATTTGCGCCGGAGAAAGAGATCGCCGGGCAATGAACTTCGCCGAAAA  
ACAAAACAAGGAGTAGTTTCCAGAGGACAAAAAGTGGCGTTTTGTT

>PGSC0003DMG400028147 LRR-RLKs

TCTCACTCCAATTATAACACTGTATATTACTATCTCTCCATTATTCTTGGCTTTGTAGTGATCTGAATCAAC  
CCATGTTTCCCACCTCTCCTTGTCTAAATTCTAACATGGGTTTGTACAAAAACAGCCATTAGTTGGCACA  
AAGAAATCAACTTTATTGATTATGTGATTCTTGTCAATACATGCTGTCTAGTGGTTCTTGGTGAAATCATC  
ATCAATGGAGGCTGTTGAGCTAATGGGGTTTGTCTTACACTCTTCATTTCACTTTTTTCAGTTGTTTACA  
GCGTTACAGACCCTAATGACCTTGCCATTATCAATGAGTTCAAGAAAGGGTTAGAAAATTCTGAGCTTTT  
GGAATGGCCAGTTAATGGTGATGACCCTTGTGGTCTCCAGCTTGGCCTCATATAATTTGACTGGAAAC  
AAAATTCAACAGATTCAAGTTATGGGGTTGGGGTTAAAAGGCCCTTGCCTCAGAACTTTAATAAGTTGT  
CTAAATTGACTAATTTGGGGTTGCAAAGAACAATTTAGTGGAAAGTTACCATCTTTTGGTGGTTTGTG  
TGAGTTGCGCTATGCTTTCTTGGATTTCAACATGTTTGATAGTATTCCATTAGATTTCTTTAATGGGCTTGT  
GAGTTTAGAGGTGTTGGCATTGGATGATAATCCTTTGAATGCAACTACTGGTTGGGGTTTGCCTAATGA  
GTTGCAAAGTTCAGCTCAATTGACTAACTTGACTTTGATGAACTGTAATTTGGCTGGTTCTTTGCCTGAGT  
TTCTTGAAATATGTCTTCTTAGATGTATTGTTGTTGTCCAAGAATCGACTTTGCGGGACTATAACCAGGT  
ACTTTTAAGGATTCTGAGCTCAAAATGCTATGGTTGAATGATCAGTCTGGTGATGGCATGAGTGGTTCAA  
TTGATGTGGTTTCAACAATGAGATCACTTACTAGTCTTTGGCTTCATGGGAACCATTTTTCAGGTAAAATT  
CCAAAGGAGATTGGTAATTTGACATATCTGCAGGATCTTAATGTTAATAGCAATGATCTTGTTGGTTTAA  
TTCCTGAATCTTTAGCAAATATGTCATTAGGCCATCTTGATTTGAATAATAATCATTTTATGGGGCCAATA  
CCAAATTTCAAAGCTATAAATGTTAGTTATCAATCTAACTTTTTGTCAAGCCAAAATTTGTGCACCTGA  
GGTTATGGCACTTTTAGAATTCCTTGATGAGTTGAATTATCCATCTAACTTGTGTAATCATGGTCAGGA  
GATAATCCTTGTGACGGGCCGTGGTGGGGATTAAGTTGTGACATTAACCAAAAAGTTATTGTGATAAAC  
TTGCCTAAGTCCAATCTTTCTGGTACCTTGGATCCTTCAATTGCAAATTAGATTCTCTTACTCATATTTAT  
CTTGGATCTAACAATATTTCTGGTTCTATTCCATCTAGTTGGACTAGTTTGAACATTTGGTTCTGCTTGT  
TTGAGTAATAACCACATTTCCCTTCTCTGCCTGAATTTACTCCCCCTTGAAACTCGTCCTGAGTGAAAA

TTCGTTACTGAACTCTAGTCCTCTTATAGCAAGCCCTTTGCAAAAGAATAGTACATCCACTTCTGTTTCAC  
CCTCTTTGCCGACCAATAAGTCAAGCTCTTCCAAGTCTAACTTAGTCATTTTTGTGGTTCCTATTGCAAGTT  
TTGCACTTTTAGTTTCTTTTGCTATGCTACTATATGTTTACGTTGAAAGAGGAGTATGGATAGGCACAAA  
GGTCCAACCTTCTAGTGGTTCATCCTAGAGATCCTTCTGATTTGGATCGGATGGTCAAGATTGCAATTC  
CGATGAAACTAAAGGAAGTCTTTGATACTAACTGGAAGGGTCTTCTAGTATACACAGTGGTAAATA  
CCCTGTGATGGAAGCTGGCAATTTGGTCATATCAGTTCAAGTACTTAGGGATGTAACCAAGAACTTTGCT  
CCAGAAAATGAACTCGGGCGTGGTGGTTTTGGAGTGGTTTATAAAGGAGAATTAGATGATGGAACAAA  
AATAGCTGTCAAAGAATGGAGTCTGGAGTAATTAGCAGCAAAGCGTTGGATGAATTTCAATCTGAAAT  
TTCTGTTCTTTCCAAAGTCAGACATAGGAATTTAGTGTCTCTGTTGGGATATTCTGTTGAAGGCAATGAA  
CGGATTCTGGTTTATGAACACATGCCACAAGGTGCTCTTAGCACGCATCTTTCAACTGGAAAAGCTTGA  
ACTTAGAGCCTCTTTGCGTGAAGAGGAGGCTGAATATTGCATTAGATGTTGCTAGAGGAATGGAATATC  
TACATACATTGGCTCATCAGTGCTTCATACACAGAGATCTCAAGCCCTCAAATATCTTGCTGACTGATGAT  
TTCCGAGCAAAGTATCAGACTTTGGACTCGTGAAACCCGCCCTAATGGAGAGAAGGGCTCTGTGGTC  
ACCAAGCTAGCTGGAACCTTTGCGATATTTAGCACCTGAATATGCGGGTAAACATTTCAATTCCTGTTCTTT  
TATTCCTAACATGACATTTTATTTTGTAACAGGAAACAGATGTTCTATTTGCCATTTGATGTTCTCTTTG  
GTATGAGTACAGTTACATAAACTCAAATAGTTTAGTTACTGTTGTCTGTTTTGGGGTGGATAAGTTAAG  
GACTATAATAAATCTGTTACCGATAAGATGATATTGAATATCAACTTTAGTGACTAATTCTGTAGACAC  
CTAGGATTTTCTTTAGATGATTCTGTCTTTCCGCTGCTGGTTTTCCCAACTCATTTTGCCTGCTGTTTTAAT  
ACAGTTACTGGTAAAATCACCACTAAAGCCGATGTCTTTAGTTTCGGTGTGTCCTTATGGAGTTGTTAAC  
TGGATGGATGGCACTTGATGACGACAGACCAAATGAAAGCCAATACTTAGTTGCATGGTTCTGGAACAT  
CAAATCCTCTAAAGAGAACTTATTGCAGCAATCGATCCAGCTCTGGATGTGAAACAAGAGAGTACATTT  
GAGAGCATCTACACCGTTGCAGAACTTGCTGGTCACTGCACAGCAAGAGAGCCTGGCCAACGCCCTGAC  
ATGTCCCATGCTGTGAATGTGCTCTCCCCGCTCGTTGAGAAATGGAAGCCTCTTGAGGAAGATTGAGAC  
GACGATTGTGGTATCGATTACAGTCTTCCACTCAATCAAATGGTCAAGGGCTGGCAAGAATCAGAAGGA  
AAAGACTTGAGTTGCGTGCACCTGAAGACACTAAGGGTAGTATCCCCTCAAGGCCTACTGGATTTGCT  
GAGTCCTTTACATCAGTTGATGGTAGATGAGAAAAAAGGTTACTGCACTACTTCTAGTGTAGTTGATCTGA  
TATTCTTATTCAGTAAATGTGGATAGCATTTTTGTTTGTGTTTGTGTGATATTTGATCCTGTTTTTATCTA  
TGCTTTCTTTCACTTTTATTTGTAGAAAATTTACTCCAATGTATAGTCTTTTGAAGTTATGTGGGATGTAG  
ATATGGTATAGTATGATTGATGAATGAAAACCTGTTTCCA

>PGSC0003DMG400028429 LRR-RLKs

TGAATTCTAAAAAGGACTTTTTCTGAAAGCTCTGCACCAAATCTTTCTTTGGGTAATTTAGCTTTTTG  
GGTCCAAATGGTAACTTTGCTACTCATTCTCATTCTTTCTTCATTGGGTGGCCACCACTCCAGCTTCCAT  
GGGTTTTCTTTACCTAAAGGTGTCAACTATGAAGGTAAAGATTAACCTTTACTATAATCCAATCATTTC  
TTGTTTTTTTTCCAGTGAAAAATCCAACTTTATTGCTTAGCACTTGTTATTTTTGTTTCATAGTTTAGA  
GTGGTAAAGATGAAACTTTACTACAATCCAAACATTTGTTGTTGTTTTTTTTCCAGTGAAAAATCCAAAC  
TTTGTTGTTTAGCACTGTTTATAAGCATTATTTGTTTATGTTTCATAGTTTAGAGTGGTAACTTTACTTA  
AAGATTTGTTGAATTTATTGTGGGGTAAGCAGTGGCAGCATTGATGTCTATGAAGAATAGAATGAGAGA  
TGAATACCATGTGTTAGATGGATGGGATGTAAATTCTGTTGATCCTTGTACTTGGTACATGTTGGTTGT  
TCTTCAGAAGGCTTTGTTATTTCTCTGTGAGTTTTCTCCCTTCTCTTACATCTTGTCCATTTCTTTCCCTT  
CTGTGAAAATAATTTATTATTATTCTTTGGTTATATATTCTTGGCAGTGAAATGGCAAGTATGGGATTATC  
TGGCACACTTTCCCTAGTATTGGGAATTTAACTCATCTTCGGACGATGTAAGACTAATTTGACATGAAT  
TTCCCACTTTATTCTTATTTTGATGTGATGCTGCTCATATATATCTTGGAGATACTTGAAGTTGAAATCACA  
TAGTACTTGTTAATAATTAATAATTAGTAAGAGTAACATTAAGTGCTTTAATTGCAAGATATGTTGAAA  
AATATCTTTAATATGATCTGTAAAGTCATTTTTGCATTGGTTTTTGTGTTAGGTTGTTGCAGAATAATCA  
TTTATCGGGTCCAATTCCTGCTGAAATTGGACAGCTCACTGAACTGCTGACCCTTGATTTGTCTGGTAATC  
AGTTTGTGGAGGAATTCCTAGGGCGTTGGGTGCGCTGATTTATTTAAATTACCTGTGAGTGTAGGCTAA  
ACTCTTGATTTTGTCTCTCTTTATTATTATTCATATGTTACAGTTCCCCTTGTGGCTGTGTATGTAATCCTCTG  
GTGTGTCAAATTCAGGAGGCTTAGCAGGAACAGATTGTCTGGACAAATTCCTAAACCTGTGGCATA  
CTTTAGGTCCTTCATTCTTGTATGTCTCCATCCATGACATTTATATGTCCAATACAAGGGCTATATGAGA  
GTTAAATTAAGTGTGGATGGTGTGTTGTGTAGGGACTTATCATTCAATAACCTTAGTGGTCCAACTCCAAAA  
ATTTTGGCCAAAGACTACAGGTAAGATCCAAGGAAATATTATTATATCTGTCTCAATGTTTGGTCCTCAAT  
AGTCGGTGAAGTGAAGAATCCCTCGGGTCTCTAGTTTGTGATGAATCAAGGAATTCAGGGTTTACACTTTT  
ACTATGAGGAGGATGGTATATGTCACAGTACTGTGCCAGAATCTTATTCATTAATGGAGTTTAAGATAAA  
CACCTTGATCTTAAATTCAACTGCAAAAATAGAAGCTTGATTCAATATTGTTGCATCTGCGACATGCCATAT  
GGCGCAGTGCCACACATAATGTTTCTCTCGTAATAAAGTTATGCTTTCTATAGTTTTAGTAACTGTTATCT  
TGCATTCCAGTTTGTGTTGTGGTATGTCCCTTCACTGGAAACCAGCAGTCAGTTCTTGCAGACCTGAAA  
GTAATATCTCAAATCTCATTATCAAAAAGAAGAAGAAAAGAAGAAGTAATATCTCAAATCTCCATATCAA  
AAAAAGAAGAAGTAATATCTCAAATCTTATCATTGAAGTATTATCTTCTTACCTGGTCTAATGGAACCTCC

ATGATGTTTGTGGATATAATTCCTATATTTCTAATCTGCTAATGTCAAGCAGAATATTTGCTTGAGATAA  
TGTCTGATGTTATAGAGGTTTTCTATCCTACTTGCAATGCTTGTTGATTATCTTCCCCCTGGCATCATACTA  
GCAACCCTTCGGGTTCTTTTTATTCTATTTAGCTTATATTTGGTTGTTGCCGCCTTAGTATTGCAGGAA  
ACAGATTTCTTTGCTCTGCATTGACCACACAAATTTGTGGGGGTGTGCCAAAACAGTAAATGGTATTGT  
TGAAATTTTACCAGAACTTGTCAATTATATTGAGGCTGATGTTTTAATCAAACCTCTATTTTTACCATGCAG  
AAACATCTTCAGACAAGAGGATTAGCAATCATCATCGATGGGTTGTTTCTGTTAGCATTGGGGTCAGTTG  
CACATTCATAGTTGCAGTCACGCTTCTGTTTGTGGGTGCATTGGTACAGATCTCGTGTCTCACAGGAT  
ATGGTAATTACAAAATTAGAAACACATCTCCGATTTCTGCACATTAAGACTAGATACATTATGAGTCTCT  
GATCATTGATCTGCAGTGCAACACGATTGTGAGTTCGCCACTGGCCACCTGAAGAGATTTTCATTTCTG  
GAACTGCAAATTGCCACCGGAAATTTAGCTCTAAGAACATAATAGGACAAGGTGGATTTGGAGTGGTT  
TACAAAGGATACCTTCAAATAGGACAGTAGTGGCTGTCAAAGATTAAGAGATCCAAGTTTCACTGGA  
GAAGTGCAGTTTCAAACAGAAGTTGAGATGATAGGCTTGGCTGTGCATCGGAACCTTCTACGTCTGTAT  
GGATTCTGTACGACTCCCGAGGAAAGATTACTTATTTACCCTTATATGCCAAATGGGAGCGTTGCCGATT  
GCTTGAGAGGTTTGCTTTGAAGTATATTTGCTTGGTGTCTTTGCTGAAGCATTCTTTTTCTTGTACAAT  
GGATTTCTGAAACTGATCAAGTTTAAACATATGCATTTCAATTATTCCTAGTGCTCTCAATGTTAATCTGAC  
AAAACTCTTGAAAGGTCATGGTTTATGGAAATCGAGGACTTTGTGCTATATTTTTACTGTACATCTGAA  
AAAACCAGGGCCCTATGATGAAAACAACTTTTGATTGATTATCTTAGATAGTTAAATTGGATTTACATTG  
TCAATGTTTCTTGTGAAAGTGGAATGAAATCTATTATCAACATATCAATCAACAATGCATCAAACCCAAA  
CTAGTTGGGGTTGACTATATGAATATTTTGTATCCATTGCAATTAAGACTCCTGATGTAGTGCATTACCTA  
AGACTCTAGCAATCTATTGCGACCTTACGTGCTATTAAGCTTAATTTTTATGTGACAAAGTTTCTATCCAT  
CTTCTGAAACTCTAATGCCATTTATGGTATCGACTTACATTATCCATGAATAAAATAAATTGTTATTTGGC  
AGTAAGGTAAGTGTGTTGTCATTAATTTTTAGCATGACCAATTCAAGTCAATTTTTAGGTATATGAAC  
ACAAAATCAAGTTGGAATTATTGGAATGTTAACGCATTAGCTTGATGTAGTGACTGTGTCATCTTTTGT  
CTGTTCTCACATAATCTTTTGTATCTACCAGACAATGGCCGGGATAAACCATTTTTGGATTGGAGAAAG  
CGCATGCATATAACTCTTGGAGCTGCCAGAGGTCTTCTGTATTTGCATGAACAGTGAATCCTAAAATAA  
TTCACAGAGATGTTAAGGCTGCTAATATTCTGCTTGATGAAAGTTTTGAAGCTGTTGTTGGTATTGTTGG  
TCTTGCCAAGCTTTTAGACTGTAGAGATTCTCATGTTACAACCTGCAGTTCGTGGTACTATAGGTCATATAG  
CACCAGAGTATTTATCAACTGGTCAATCATCTGAGAAGACAGATGTCTTTGGATATGGGATACTACTTTT  
GGAACCTATTACAGGACACAAGGCATTAGATGCAGGAATTGGTCAGGGTCAGAAAGGAACTATTCTTG



ACCGGGTGTGTAGCTTCTAACCCCTCCTACTGTTTGAAGCTTATATAGTTGTGCATATAATTTCTAGACTT  
TATTTGATTAACCAGTTAATAGTTAATCTTCTTGCAGGATTTTGTGTTGAGTCATAATCAATATCAATATTTG  
ACTTGAAATTTTTCACTAAAATTGACGCAATAACTAATGTCTAACGCAGAAGTTGCTCCACATCTTATGAG  
AGAAGTACAGTTCCAAAATTCTGAATCATTGCTCGAAAACCTGTTCTTTTTACTGACTGCATAATCTGTAG  
GAATTATGGACAACATATTCAAGGTTTTTGAATCACTTACTGATCAGTGCAATAAAATTATTGCTGTGTAT  
TACCTTACTGTTGCATACTTAAGCCCTTAAATATAAATTATTTGGTTGATTTTTTATCACATATAATGTTAC  
TCTTGCATACTTTAAGCCCTTGATTAACCTTATTTGGTTGATAATTATTACATTATCATGCAAGTCTGAACAA  
CCATGTATTATGCTAGAATAGTTGTGTGAAAAAAGGTACCCGTTCTATGCTTCTTCAATTATGATTTTTCT  
TCCCTCTCAGGCTGTTTTATGTGGAGTAAAGATTTTCAGAACATGATAGAGCTCAGAGTTTGTATGTCT  
ATTATTCGGGCCTATTCATTCTGACAACCTATCCAATTTACAGGTCCGGAATTTATTTGAGGAAAAGAAA  
GTGGAAATGCTTGCGGATAGGGATCTAAGAGGATGTTTTAATGCAGAGGAGCTAGAGAAAACAGTTGA  
AGTGGCTCTACAGTGTACTCAATCTAACCCCAATAATCGGCCTAAGATGTCGGAAGTTTTGAGAATCCTG  
GAAGGCGTTACAGAACAAATGGGGCATGTGGACGAATCACAAGGTGGAAGCAACACATGTCAAACAA  
GGGCTTTCAGCTTCTCTAGGAATTTTAGTGATATTCATGAAGAATCCTCATTACCTTTGAACCAATTGAG  
CTTTCAGGACCCAGATAACAAAAGTAGCCTGCACTGGCCTTGTCATAATAAGTGTGCAATCTTGATATAT  
CTAGTTCAGCCATACATACGAGTATGTTGTTGCTTTAAGTCAATGTCCTAGTACTCTGTAAGTTACTGTAA  
TTTGTAATTTTGTGCAAAGCATTCAATATACTAGTTCTTGGTGGTTCACAACCTGTGTTAGAAGTACTAGC  
TAGACTAACTTCACTTTGGAACCTTCACTTTTGGAAATGACAACTTC

>PGSC0003DMG400028435 LRR-RLKs

ATGTTCCAACCTCAAGCCGAATCTTTTCTGCAACAACACCAGCCAGGATTTTCATATATACATTGAAATTGG  
AAGGGCAACTCAAGGTTTCGACCAATGCAACTTGCTAGGCTCTGGAGGTTTTGGCTCTGTTTACAAGGG  
CATGTTTGAAAATGGGATGACTTTGGCAATCAAAGTGTTCAATTTACGGATTGAAGGTGCATTCAAGAG  
TTTTGATATTGAATGTGAAGTTCTACACAACCTTCGCCATAGAAATCTTGCCAAAGTTATCAGCAGTTGTA  
CTAACATGGATTTTAAAGCATTACTTCTAGAGTACATGCCCAATGGGAGCCTGGAGAAATGGTTACATTC  
TGATGATCACTTCTTGGACATAATCCAAAGATTAGACATTAATGGTTGATGTTGCATCAGCTTTGGAGTA  
TCTCCATCATGGTTATTCAACAGTCGTTGTACATAGTGACTTGAAGCCTAGTAATGTCTTGCTAGACGAA  
AGATTGGTTGGACACGTGAGTGACTTTGGCCTGGCCAAGTTATTCGGAGAAGGGGAATCAGTTGCTCAT  
ACTAAAACACTTGCTACAATGGGGTACATTGCACCAGGTAAATTTCTTTTAGTCCTTTTGTACCACATAT  
AAAGTGTTATTTTACATCACATTAGAAGTGGTGAAGCATAATCAAATGGCCAAGTTAGCTCATAGAT

TGAATCTGTATATTATTACCTTTAATCTGCCAGAAGTCATATTGTTTCAATTGATTACCTTACTCTTGTTTT  
ATTCCCATTATACCTTTAATTTCTTATTTGGCTCGTCAAGAACTAATTACTCTGGTAACATTGGATCAGA  
GTATGGATCAGTAGGATTAGTTTCTACAAGATGTGATGTGTACAGCTACGGCATTATGCTCATGGAACT  
TTCACAAGAAAAAGGCCATATGATGAAATGTTTCAAGAAAATTTGAACATGAGGAGTTGGGTCTGTAAT  
TCACTACCTGTCGCACCAGATGATATTATTGATGACACCTAATTTCTGTTAGGATTTTGCCTGATTTTCTT  
ACCTTCTTTGAAGTTTATTTTTCTAAAAGAAAAGACAAAACATTACCATAAATGTTTTACTTTTTCTTGA  
AAGGAAAATATAATATTCTTTTCATATTTGGTTTATTCTTTCTTTTAGGAAAATGTTTTGGAGTAGCTA  
GTTCTTTTCTAGTAGGAAAGTTTTAGGACTCTAAAATATAGGTTTGTCTTCTAACTCAATAACAATA  
ACATCCACAATGTAGTCGTATAAGAGTCTTGTTTATGGGGAAATTTAATCTCTCAACAGTTATAATATTTT  
TTTCTTTTAAATTAGTTTTCATATTAATAATATTATGTTTTAGTATCGCTTATTTGTCATCTAATTTATCAC  
CGTCTTGATTGCAATTGTAAGCTTCCGCATGACGCCAACTCACCTTCATAACCCAACAATTTCAACCTGA  
AGAGATTGATTTTGAGAAAAAGTTGTGTTTTGTGTCCTCTATTTTGGACTTGGCATTGAATTGCACAGTT  
GAATCTCCTAATGAGAGGCCGAACATGAAAGATGTCCTGGCAAATATCAATAAGATCAAGCATGAATTT  
CTTCACAGATGATGCACCAAGGTTTATGCAAACGGTAGGCATCCAACATAGCTCCTAGATTTAACTTTT  
CTTGTTTCTTGCTTTTCTCTCGTGTATATTTCAAGTTTGAGTGAGTGTGTCAAATAACTTAAGTACATA  
ACATGTTTACTACAATTGGAAAGGAAGAATGCCCTGTATAATATGATTAATGAGGTTATTATGTTAATTT  
CAACTACAATAGTACACAAAGAGTGGTGTATAATGTTGAACTAAAATTGAACTTTTCTTTGTTTATTGCTT  
TCCTCTTGATGTACCAATTTGAGTGTTTCTCTCAAATATAAGTGTAATATAGGACAAGTATATATAAG  
ATGTGTACTAAAGTTGTTATAGAAGAATGCCCTGTACAATATTAATGATCGTTATTGTTTTGATGTATCTA  
CTTTCAGATGTGAATCCCTCCGCTTAAGCTTTTTAGATGATATAGTCAGACACTTCAATACTCCTTTATG  
TTACACCACGCTGCTCCTTTCTCAAATAACTTGATAGAACATTCAAAAAAGACGTAATCTAACACCTTTT  
TTGGGACAGACTTTAGTAAAGTCAAGTCGACCAACTGTGGAAAATTTATAACTAGGGGTGTACAAAATC  
GAACCAAACCGCAAATTAACCAAAAAAAAAAACCCTAGTGGTTTGGTTTACTTGGTTTGGTATTG  
GAAAAAAAAACCCGACTATATTTGGGTTGGTTTGGTTTTAACTAAAAAATCAACCCGAGGCCAAACCAA  
CCCGACGTTATATATATAATTTTAAAATATTATTTTATACATAAAATAGATATAATTTTTAAATATTTCTTA  
TACTTTTTCATAGTTTTTGTCTTTTAAATATATTATTTCAAGTTTGTAAGTTAGAAATTATGAATGTTCCAATAA  
AGATTATAGTCCACATATGTTGGTAATTATAATAAAGCTCAAATCAAATCAAATTAATGCTAATGCAAA  
AAGAAAATCAATTCAACACTAATAATGACAATAATATTGAATATTTGTTCTTTAGTTTTACATTGGTTTAG  
ACAATTAATAACATAATCTAATTTTAAATTTCAATTAATATTTAGTCATGTAAGTAACTAATACTTATTGAACTTA

TTTTAGCATGATTTAGTACTTTTTAAATTATGATCATTTTCATTATGAATTGTTAATTTGCAATTTTTGTTTTA  
CGCGATTTTATTATTATTTTTGTTGGATATTCTAGTGTCATTAATTATATCACATTTTGTGTTATTTTT  
TAAGAAACAACCTTAGATAGTTGTATTTTGATAGGACTAAAGAAATATTTGAAATACAAGTAAATTATATG  
TTTGTATGAATACTTTACCAGAAAAACCCGAAAACCCGAGGTTGAAAAACCCGAGTTTTTTTTGGTTTGGT  
TTGGTTTATAAATTTTAAAATCCGACATAAATGGTTTGGTTTAATATTTGAAAAACCCAAACCAACCCGAC  
CATGTACACCCTTATTTACAACCCCTTATCTACGGCATTGCTTGGCCCTCTTTCCTTGATAATAATTA  
TCAAGGAAAAAGGTTTGCATAACATTAGAAAGGTATGCTGTACTGTCCATATGGTTTAAACAGGAAATA  
ATAAGAAAACCTTTCATCATAATAAGAGCTCAGGTAAAGATCGGATATTACCGTTGACAATATAATTA  
TAATATAAAAGTTTGTCTCTCTAATCGCTTAAGTTTTTAGATGAGATGGTCACACAATTCAACAATTATT  
AGTGGAACCTAATTTTTCTAGTACTGTTGAACTAGATAAGTATTAGGTAAATTATATAAATTTGTATTT  
CTGCTTATTTAAAATACAAGAAAATATACTAAAAAATATTTTTCTCCGACCCTACTCAATCACTGAA  
TTAATGCCTATTTGGAAGGAGAAAAAACTCTCTAAGAAGACCTAGTAAATCCAACCTAATTTCCATA  
TACTGCTCTTTGATATAGCACATGAAGTCAAGTCACTCTGGAAAATTTATAGCCCCTTATCTACGACATTG  
CTTGGCCCTCTTTTATCCCTATTTAATGACTAGCTTGGTTTGATTTTTCATTTAAAAATAACTAAATGAATT  
ATATTGATGTATTAATCTATAAATCAACCCAAATTAACAAAAAGTGTTTTCAATTTTTGGTTTTTTTA  
TAATTATACAATAATTGAAAAAGAGATCAAATATATTTTCACTTACATATGTGATAGGCTAAACCTAAA  
GAGATCAATTTTACTTTATATTACGAAAGAATTTTAGAAAGAAAAAAAAAAGACAAAAAAGAGAGAATT  
TTGCTTTAAAACAATTGACAAATAATAAGAAGAGAGAAAATAGGAACAATAAATAATGAACTTTTTATT  
TTCAAAATATATATGATAGATTAATATAGTCAAGAACAATGATAAAAAAATGATTAATATCATCGTGTA  
CACAGGTTGAATGTAGATGCGAAGGAGAAAATTTAGGCAAAAAAGAATATATGCATGTATGAAAAA  
ATCTTAAAGAGATAAACAAAAAAGTAAAAAAGTTGAAAAAGTTGTTATTACCAAAGAACTGT  
TTAAAATAAGAAGAGAGATGAAGAAATGATAAAAAATAATTATACTTTTTCAATAAATAAAGGAAGGAA  
AGAAAAACATTTCTTGAAAAGGCAAAGAAAAAAGAGTAAAAGAGAACATGGCTAATAAATGAT  
AAATAGATTTTAAGAAATCTTTTTTTGCTAAAAAGTTATAAGTGGGCTATTTATTGCCAATTTAATTATA  
AAACATGTCATGATGTGCCATTTTTCTTTTTAATATAGTGTACAATTATTATTGGATGAAGGGATTACCA  
TAGTAAAGAAAAGTTCTAAAGAAATTTGGATGTCTGATGAAATAATATATTATCTCAAAACAAAGACTTG  
GGGACAAAATTTAATAAAGTCAAGCCAACCACTGTGGAAAATGTACAAATTACAACCCCTTATCTACG  
GCATTGCTTTTGTTCCTTTTTTTTATACAAATAAGGGACCCAGTCCTTAGCAACCTTTTGTCCCTATTTAGC  
TCAACACTTGTTCCTTATCTTATGTGCAATCACATGGAGAAAGCATACTCTTCTTTCTTCACTACTACT

CTTGACCTATACTTGTTAGAGACATGCATTAGCAAAAACATAGTAATTAACACAGATCAATCAACTCTA  
CTTTCATTGAAAGCTAGTTTTACTCTAAACTCTTCTCATCCCTTAACTCAAAATTGGTCTTCTCAAGCTTCA  
GTTTGTGATTGGATTGGAGTCACTTGCGGCTCTCGCCACCATAGGGTGAGAGCACTAAATGTATCCAAC  
TGAACATTCTTGAAACATTCCACCACAATTGGGAAACCTCTCATTCTCGTTTCGTTGATCTTAGTAGT  
AATAATTTCCAAGGAGACCTCCCTCAAGATTTGTCTCGTTTACGTAGATTGAAGGTGATGAATCTAGCAA  
ACAATAACTTCACTGGCCAGATTCCCAAAGATTTTGGTAACCTTATGAGGTTAGAGAAGTTGGTTCTAGT  
CAGTAATAAACTTAGTGGCTCAATTCATTCTCCATTTTCAACATTTCTCGTTGGAAATTTTAGCTCTCAC  
ATATAATCAATTATCAGGGAGTCTACCTGTAGATATATGTCGTCGTCTTCAAAAAATAAAGAGTATTTCA  
ATCATTTCOAACCACTTGAGTGGTCAAATTCCAACAGGTTTGTCTAACTGCACAGAATTGTATGAATTGTC  
ATTGTCATACAATAACTTCAGTGGAAACCATTCCACCAGAAATTGTAACTTGGAGAGGCTTCAGTTCTTA  
AACCTTGGGGGAAACAACCTTGCAAGGTACATTCTGCATACTTTAATTTCTCAATGTGAATATATAACATC  
CTACTTTGCATATATATGTAAGCCACAATATTTAGGGTGTGTTTGGTACCAAGGAAATTTTCTACTTTC  
CTATTTTTTATGTTTGGTGCTTAGCATGAGGCTAAGCACCAAGTTTGTAAATTGAGAATTAACACCTTG  
AGCAACATCATAAAAATTTGCAAATTTGTTTGCCGTTTGTGAAATTTGCAGGCACAATTCCAGCAAAGA  
TTGGTAATTTAGGAAAGATGCAGCAATTACAATTGGAGAACAATCGCATCGTGGGTTCAATACCACGCA  
CCATATCGAACTTATCATCACTATGGATGCTTAATTTGAACACAAATAATTTATCAGGTACCTTGGTCTTG  
TTTGTGATGGAATTAATTGTTGGTTTTTATCAACTCTTATATATACTGATGGGCACAATCAAATAAAAGTA  
ATTTAGATATATTCTTTCGTGTGGCAGGTATTATACCCAGAGAGATTGGAAATCTTCACAACTGGAGAT  
ACTTTATTTGCAAATTAATAAGTTAAGTGGTTCCATACCGGAAGGGCTCTTCAATATCTCTACACTAACAG  
AGGTGTCAGTTTTCTTCAATAACCTTTCGGGTAGTCTTCCATCTGCTTCAGGCTACTGGCAAACAAATCTA  
CAGCTTTTGAATCTTGGTCAAACAACATTGGTGGAGTAATACCCACTTCAATCTCCAATTCATCAAATCT  
AGAGATTATAGATCTTAGTATAAACAATTCAGTGGCCAAATTCCTAACTCGTTGGGGGATTTGAGGGA  
TCTTGAATATCTGGACTTGTTTCGTTAATAACTTATCGTCTCCGCACCTAAGTATCTTAACTTCATTGGTGAA  
CTGCAGATATTTGAAAGAAGTAATATTAGGGGAGAATCCTCTGTATGGTGTCTTCCAGATTCCATTGGC  
AATCTCTCATTCTATCATGGAACCTTGAGTTATATAGTTCTGAAATTAGAGGCCAGATACCATTAGGAAT  
TGGAATTTAAGTAACTTAAACACTTTGTCCCTATCCGGCAATGACTTGACTGGATCAGTGCCAACAACC  
TTATGTGATTTACACATTCTTCAAAGGCTAGGACTTGGTCTTAATAGGTTGAGTGGATCCTTGCCAGAGT  
GCCTTTGCAAATGTCATCGTTGGGCTTGCTTTCTTTGTAATAATCGGATTTCTGGTCCGATACCATCT  
TGCATTGGTAATGCAACCTCTTTGAGAAACGCTTATCTAAATTCAAATAGGCTCACTAACATACCCACAA

GTCTATGGAGCCTCAAATATCTTTTGGTGCTTAACTTGTCAAATAATTCTTTGATTGGTTCTATACCTCCA  
GAATTAGGGAACCTTGAAAGCCATAACATCCATAAATCTGTCCAGGAATCACCTTTCAGGAAGTATTCCCT  
CCACAATTGGGAGACTTGCAGAGCCTAGTTTATCTTTCCTTGGCTTATAATGAGTTACAAGGTTCTATTCCA  
GAGTCACTTGGGAAAATGATAAGTTTAGAATCGGCGAATCTATCCAATAACATTCTTTCAGGTACCATT  
CAAAATCATTAGAGTTGCTTCGGTATCTGAAGAATTTCAATGTATCATTCAATAGATTAGAAGGTGAAAT  
CCCAAGTAAAGGACCTTTTCTCAATTTCAACTCTCAATCTTTTATGGGAAATGGAGGGTTATGCGGCGGT  
TTAGTTTTCCAACCTTGATGACTAGGTCTTTTCATCATTCAAGGAGAGGCAAACCTGCTTCTGATTACT  
TGTCTCACTGGGAGCTGCGGTAATGGTACTTGGCTCAATCGTTGTGTTTATGTTAAGGAGACGTTGGAA  
TAGAAATATTCCAACCTGAAGCTGAATCCTTTGCTGCAACAACACTAGCCAGGATTTACATACATTGAAATT  
GAAAGGGCAACTCAAGGGTTTGACCAATGCAACTTGCTAGGCTCTGGAGGTTTTGGCTCTGTTTACAAG  
GGCATGTTTGCAAACGGGATGACTTTGGCAATCAAAGTGTTTAATTTACAGGTTGAAGGAGCGTTAAAG  
AGCTTTGATGCTGAATGTGAAGTTTTACGCAACCTTCGTCATAGAAATCTTACCAAAGTTGTCAGCAGTT  
GTACTAACTTGGATTTTTAAAGCATTACTTCTTGAGTATATGCCTAATGGAAGCCTAGAGCTGTGGTTACA  
TTCTGATGATCGCTTCTTGAATATGATCCAAAGATTAGACATAATGATTGATGTTGCATTTGCTTTGGAAT  
ATCTCCATCATGGTTATGAAACAGTTGTTGTACATAGTGATTTGAAGCCTAGCAATGTCTTGCTAGACGA  
AAAGTTGGTTGGACATGTGAGTGACTTTGGCCTGACCAAGTTATTAGGAGAAGGGGAATCAATTGCTCA  
TACTAATACTTGTCTACAATGGGCTACATTGCACCAGGTAACCTTCTGTAAGTCCTTTTATCATCGCCTA  
TGATGTGTTATTTTACATCAAATAATTAGTTGACTGGTTCTAATAATAATGCATCACATTAGAAGCTGGGTGA  
ACGCCTAAGTGGATGGCTTATTTTAATTGGAAGTTATCACCTAGTGTTTTTTGTCACTTTGTTGGAATTTA  
ATCCACTTCATTGACCATTAAGCCACAATTAGCCTTGGGTATAAATATAGATAGTATTTTGATTTCTTTGG  
CTCGTCAAGAACTAATTACTCTGGTAACATTGGATCAGAGTATGGATCAGTAGGATTAGTTTCTACAAG  
ATGTGATGTGTACAGCTACGGCATTATGCTCATGGAACTTTCACAAGAAATAGGCCATATGATGAAAT  
GTTTGACGGAAATTTAAGCATGAGGAGTTGGGTCTGCAATTCAGTACCTGCAATGCCAGAGGATATTAT  
TGATGTCACGTTAATGGAACCAGAAAAGACTCACTTTCAGGAAAAGTTGTGTTGTGTGCTTCTATTTTG  
GAGGTGGCGTTGCATTGCACAACCTGAATCTCCAATGAAAGGTTGAACATGATAGAAGTCCTTGCAAT  
ATCAAGAAGATAAAGCAGGAATTTCTTCGCAAATGATGTACGTAGCAGTGGTAAATATCCAACTTTTTAA  
AAGTATTCTGATGTCATCTAGATATATTATTTCTTATTCAAGAATAGAAATGATTATTGTCTTGTGAGCT  
TGCTATATCGTACAAATATATTGAATTGGATATTCTGGTTTTCCATACAAATATATCCCCTTGTATAAGA  
AAAAACAAGAACTAATTGAAGCATAACTTAATTCATGATTATAAGTAGAAGAACCCAACATTTTTGCCTA

TGGAAATTTGAATTGTGATGAATGTTGAAAACCTGAAGTAAACAACCTCAAGTCTGTGTTACTATTAGTTTA  
TTTTGTATGTGCTGTGCCAGCTCAAGTTTAATCCTAATTGAAAATTTGTGCAGGTTGTACGTGCTGCCTT  
TTCTCCTGGTTTAGCAAATTTGGGTGATACCAATTGAGATGAAAAATCAACATTTGGTCCGAGATTTGAA  
CTTTTCTTGTCTGTTCTTGTGAATATTTGACATTTGGTAAAATAAGTCTAATGTATAAGATGTGTACTA  
CAGTTGGAATAGAAGAATGCCCTGTATAATATTGGATTGTTAATGTATAATATTGAACTAAAA

>PGSC0003DMG400028436 LRR-RLKs

CCTAAATATTTATTTCTTGAAAATTATATATACCTCTCACTTTCTTATTTGTCCCTACCTGAAAACCTTAATTT  
GTTCCCAATCACTTGGAGAGATCATACTCTTTCTTGCTTTCACTACAATTATTGACACTTTACTTGTTCTGA  
GGCCATCGACATAAAAACAGATCAATCAGCTCTACTTGCCTTAAAAGTTAGCTTTACTCTAAACTCTTCTC  
ATCCCTCAACTCAAATTTGGTCTTCTCAATCCTCCGTTTGTGATTGGATTGGAGTCACTTGCAGATCTCGT  
CACCATAGGGTGAGTGCCTAAATATATCCAACATGAACATTCTTGGAAACATTCTTCAAACCTGGGAA  
ACCTCTCCTCCTCGTTTCTTGTGATGTGAGCCAAAACAATTTACATGGAGACCTCCCTCAAGATTTGTCTC  
GTTTGCGTAGACTGAAGGTGATGGATCTTGC GTTCAATAATTTAGCGGAGAGATCCAGTCATGTGGT  
TCGGTTTCATTTCAAAGTTAGAACTTTGAGTGTGAGAAACAATCGTCTTCAAGGCAATATCCCTAAGGA  
GATTGGGAATCTTGAGTATCTAAAGGAGTTGATTTTATTTGAAAACCAATTTACTGGCTCTATCCCGCTCT  
CCATTTTCAATATGTCGTTGTTGGAAATTTTAGGTCTATCACATAATCAATGAACTGGGAGTCTTCTGTGA  
GATATATGTCGTCGTCTTGCAAAAATAAAGAGCATTTCATCATTTCCAACCACTTGAGTGGTCAAATTCC  
AACAGGTTTGTCTAACTGCACAGAATTGCATGATTTTTATTGTCATACAATAACTTCAGTGGAACCATT  
CACCAGAAATTGTAAACTTGGAGAGGCATGAGCTCTTAAATCTCGGGGGAAACAACCTTGCACGGTACTC  
CTTTCGTCCACTTTTACTTGTTCAATTTAGAAAATAATTGTATTTATATTGCTGCTTAAGGATGGCCATCCC  
ATTTGGCAAATACATCTAACTGGTCTTTAGTTTTCATTTTGATACTTCATCTCAACCTTGTACGTTCCATT  
TTAACCTCCCAAAGCTATCATTTTATTTCACTTTATAAAAATAAGTTTATCCATATTCAAAGCCTTCTAG  
CATGAGGCTAATTTGAAGTTTGTAAATTGAGCAACAGGATAAAAAGTTTACAAGTTTGTGGCCGCTTG  
TCAAATAATTTGCAGGCACAATTCCAGCAAAGATTGGTAATTTACGAAAGTTGCAGCAAATACAAGTG  
GAGAACAATCAAATTGTGGGTTCAATACCGCGCACCATATCCAACCTATCATCACTATGGGTGATTAATT  
TGAACACAACTATTTATCAGGTAGCATACGTGGTCTTGTGGTTATCCGGAGGCAATAAAAATAAATTA  
ATCGAGATATATGTA CTCTTTCATGTGTCAGGTGTTATACCCAGAGAGATTGGGAATCTTCACAAATTGG  
AGACACTTTATTTGCAATTTAATCAATTAAGTGGTAATATACCAGAAGAGCTCTTCAATATCTCTACACTT  
ACAAGGGTTTCTCTCCTCTCTAACCACCTTTGGGTAGTCTTCAATATGCTTCAAACCTACTGGCCAACAAA

TCTAGAGATTTTGAATCTTGGTGTAACAACATTGGTGGAGTTTTACCCACCTCAATCTCCAATTCCTCAT  
ATCTAATGAGATTATATCTTAATGGTAACAAATTCAGTGGTCAGATTCTAACTCATTGGGGGGTTTGAG  
GCATCTTGAACATCTGGACTTGTCCAATAATAACTTATTATCTCTGCACCTAAGTATCTTAACTTCATTGAC  
AAACTGCAGATCATTGAAAGAAGTTTACTTAGACCATAATCTTCTCGATGGTGTTATTCCAGATTCCATTG  
GCAATCTCTCCACTACCATTATGGAATTTTATTTAGACAGTTGTGAAATAAGGAGTCAGATACCATTAGG  
AATTGGGAATTTAAGTAACTTAAACACTTTGTCCCTAACCCACAATGACTTGACTGGATCAGTGCCAACA  
GCATTATGTAATTTACATATTCTTCAAAGGGTAGCAATTGAGGATAATAGGTTAAGTGGACCGTTGCCCC  
AGTGCCTTTGCAAATTATCATCCTTGGGCATGGTTGATTTTTCTAATAATAGGATTCGGGTCCGGTACC  
GTCTTGCAATTGGTAATGCAACCTCTTTGAGAAATGTTTATCTAAATTCAAATAGGATCACTAACATACCCA  
TGAGTCTATGGAGCCTCAAAGATCTTTTGGATCTTAACTTGTCAAATAATTCCTTGGTTGGTTCTATACCT  
CCAGAGTTAGGAAAGTTGAAAGCCATAGCATCCATAGATCTTTCAGGAATCACCTTTCAGGAAGTATTC  
CCTCCACAATTGGAGACTTGCAGAATCTATTTTATCTTTCGTTGGCTTATAATGAGTTACAAGGATCTATT  
CCGGAGTCACTCGAGAATACGATAAGTTTGGAAATCAGCAAATCCATCCAATAATTTTCTTTCAGGTATGA  
TTCCAAAATCATTAGAGTCACTTCGACATCTGAAGGATCTCAATGTATCATTCAATAGATTAGAAGGTGA  
AATCCCAAGTAAAGGACCTTTTCTCAATTCACCTCTCAATCTTTTATGGGAAATGAAGGGTTATGCGGC  
GGTTTAGTTTTCCAACCTTGTATGACTAGGTCTTTTCATCATTCAAGGAAAAGCAAAGTCTTTTGATTAT  
ACTTGTCTTCTGGGAGCTGCAGTAGTGGTACTTGGCTCAATCGTTGTGTTTATGTTAAGGAGACGTTGG  
AATAGAAATATTCCAAGCTGAATCCTTTACTGCAACAACACTAGCCAGGATTCATACATTGAAA  
TTGAAAGGGCAACTCAAGGGTTCGACCAATGCAACTTGCTAGGCACTGGAGTTTTAGCTCTGTTTATA  
AGGGCATGTTTGCAAATGGGATGACTATGGCAATCAAAGTGTTAATTTACAGATTGAAGGTGCGTTAA  
AGAGTTTCGATGCTGAATGTGAAGTTTTACGCAACCTTCGTCATAGAAATCTCACCAAAGTTATCAGCAG  
TTGTACTAACTTGGATTTTAAAGCATTACTTCTTGAGTATATGCCCAATGGAAGCCTAGAGCTGTGGCTA  
CATTCTGATGATCGCTTCTTGAATATGATCCAAAGACTAGACATAATGATCGATGTTGCATTTGCTTTGGA  
ATATCTCCATCACGGTTATGAAACAGTTGTTGTACATAGTGACCTGAAGCCTAGCAACGTCTTGCTAGAT  
GAAAAGTTGGTTATGTGAGTGACTTTGGCCTGACCAAGTTATTAGGAGAAGGGGAATCAATTGCTCATA  
CTAAAACACTTGCCACAATGGGCTACATTGCACCAGGTAACCTTTCTTTTAGTCCTTGAATATCGCATATGA  
TGTGTTATTTACATAATAATTAGTTTACTATTACATCACATTAATAACTCGGTGAAAGCCTGAGTGGATAGC  
TTAATTAAGAAATGTAATATATCACAGATTAAGCGTGAACAAAAATGGTATAGAAAACATTGAAATAT  
GACTGTCAAAGTCTATATGCATGCATCTACGAATTTCTTTTATCAAAGTTCCTCAAAGGATATTAAT

AGATGAGCCAAAGGGGCATAGAGGGGGACTACGCCTGACCTCATCAATACAAATTTACGATACTAGGA  
GTGAGGAAAAGAAGAAATGTGGGGGGGGGGTTAAGGGTTGCCCCACATCAATTAAGCATACAAAAA  
GATAAATTCTAGGATTTTAGAGCAAGCAGAGAAGACTCAGCCAGGATCAAAAAGAAAGCTGTTCTCTTA  
ACTTAGATTCTAATGTTAGGCTTGCCAACTACATCATTCTTAAACGGAAGATTTATAGGCCTAGTCTCAGT  
GAAGAAGGTAGTCATTTTGCCTATTGCAAGCAAGTTAGCAAGCATGTGAGCAGGAGTGTTACCTTCTCTT  
AAGGTATATGTGAAAGTGAAACGACTAAGTGAACCTCATAGATTGGATCTGTCTAATATCATCTTTTATCT  
GCTAGAAGTCCATATCGTTTCGATTGACTGCCTTATACTTGTTTCATTCCAATTATACTTTCAGTTTTTAAA  
GTCCTTATCTACTCAAGGTAAATTCAACTATTTTCAATATCTAGTAAATATATATATATATATATACACA  
TACAGACACACACACATATATATGTATAATATTTTCATTTCTTTATCGGGCTCATCAAGAACTAATTACT  
CCAAATATTGGATCTCAGAGTATGGATCAGTTGTATTAGTTTCTAGAAGATGTGATGTGTACAGCTATGG  
CATTATGCTCATGGAACTTTCACAAGGAAAAGGCCATATGATGAAATGTTTCAAGAAAATTTGAACATG  
AGGAGTTGGGTCTGTAATTCCTACTACCTGTAGCACCAGATGATATTATTGATGACACCTTATTGCAACCTG  
AAGAGATTGATTTCAACAAAAAGTTGTGTTGTGTGACCTCTATTTTGGAGTTGGCATTGAATTGCACAGC  
TGAATCTCCTAATGAGAGGCTCAACATGAAAGATGCCTGGCAAATATCAAGAAGATCAAGCATGAATT  
TCTATGCAGATGATGTAACAAGGTTTATGCAATGGTAGGTATCCAACCTTTTTAAAATATTCTAATGTCATA  
TGGAGAAATTATTTCCATTTTCAGGAATAGAAAAGATTACTGTCTTGCTATACCATGTAGAAATGGGTTT  
TTTCATACAAATAATAATAATAAAAAATAAAAAATAAAATAATAATAATAATAATAATAATAACTTTTTT  
TTTTATTAATAATAATAACTTAAATCAAGGAGAACTTCATTAGTTTTGAAATTGGTCACATAATCAAGGA  
GAACTTCATTAGTGAGTAAAGTAAATCAAGAATTCATGAGGACCAACATTTGGAAATTATGATGAATGTT  
GAAAAGGGAAGCAAACAACCTCATGTATCCGTACAATTAGTGTATTTTTGTGTGTGCTATGAGTTTTTATC  
TGCAATGACTGCCAACTCAAGTTTGTATGCCATTTAAATTTTTGTACAGGTAGTGCCGCCTTTTATGCCTGT  
CGTTGGCAAATTTGGGTGACACCAATTGAGTTGCCAACAAAGATTTGGTCTGAGATTCGGACTTCTCTTA  
TTTCTTGTGCCTCCTCTTGTGCATGTTTCAAGTTTGTAGTATGTTTATGTAACAAATCTAATATATAAGATG  
TGTAATAAGTATAATACCGGTGATCATGAATTATTATTGAGATAGCAGCTTGAATAGTCTATGAAGA  
>PGSC0003DMG400028437 LRR-RLKs

AATTTTCAAATGGTATTCCAAGAGAAATTGGAGACATGCAAATCTGATACACCTTTCTTTGGCACAAAA  
CAAGCTACAAGGATCTATACCTGACTCAATTGGTAGCATACCGAGTTTGGAAATTTCTAGACCTCTCGAAT  
ACAATCTATCTGGATCAATTCCGATGTCCTTAGAGAAGCTTCGGTATCTCAACTATTTCAATGTTTCCTTT  
AACAGCTTGCAGGGTGAAATTCCTTTAGTGGTCCTTTCAAGAACCTTTCCAGCCAGTCATTCATGTTCAA



TAAAGCCTTGTGTGGTGCTCCAAGATTTCTGTGCCTCCCGTGCCCCACTTCTTCAAACCATAGATCAAAGA  
AGAAGAAGTACTTCTGATAGTCTTTCCTCTACTGGGAGCAGCTGTGATAATTGTTTTGTAACATTGGC  
GTTTGTGTGGATGAGGTACAGAAGAGAAGGAAATGTTCCAATTGAAGCTGATTTGTTAGCTACAATGGA  
AAGAATTCATACTATGAAATCATACAAGCCACTAATGATTTTAGTGAGAGTAATTCATTGGTTCGGGG  
AGTTTTGGTTCTGTTTACAAAGGAATTCTCAGAGATGGGACTACCATTGCAGTTAAAGTGTCAACCTAC  
AAGCTGAAGGTGCATTCAAGAGTTTTGAAACAGAATGTGAAGTTCTTCGCAACCTTCGCCATAGGAATC  
TCACCAAAGTCATTAGCAGTTGCTCCAACCTTGATTTCAAGGCTTTAGTGCTCGAGTACATGCCTAATGG  
GAGCCTTGAAAAGTGGTTGTATTCACACAACACTTCTTAGACATCCTGCATAGACTAAGCATAATGATA  
GATGTGGCATGTGCATTGGAATATCTCCACAATGGTTGCTCAGCACCTGTGATTCATTGTGATCTGAAGC  
CTAGCAATGTCTTGCTAGATGAAAACATGGTCGCTCATGTAAGTGACTTTGGCATTCTAAACTACTCAG  
TGAAGATGAGAGTGATTTACACACTAAAACCTTAGCAACATTTCGGCTACATTGCACCAGGTAAATCAAAT  
CTCTTATACTTCTTTTTTCAGTATTCTATCTTTGTTTGCCTTTTATTTTCGATTATATGATATTATGATAAACC  
GTAAGTGTGCTTTTATTGTAGAGTATGGAAGGGAAGGATTGGTGTGCGCCAAAATGTGATGTTTATAGTT  
ATGGGATCATGCTGATGGAAACATTTACGAGGAGAAGGCCTAACGATGAAATATTTGATGGAGATCTTA  
GTTTAAAGAAATGGGTGAGTGATTCACTCCCAGAGGCAACAATCAAAGTTGTAGATGCGAATTTGCTAA  
CGCCAGAAGATGAAAAATTCATGGACAAGATAGATTGTGTAGCATCCATCATGAAAGTGGCACTGGATT  
GCTCTGCAGAATCTCCTGAAGAAAGGATCAACATGAAAGATGTTGTAGGAATACTACAAAAGATCAAGA  
TTCAACTTCTTTCATGTTCTGCAAGTACATAAAAACATTTGATTCATGTCACTTGAGGGTATAGAAAGTGT  
TTGTTAACTTTTTAGCTGCATACCTAGACTGTTTTCTTTCTTGCTGCATAAGATTCTTTTCTGTAACACTA  
ATGTAATATCGG

>PGSC0003DMG400028438 LRR-RLKs

ATGAAGAGAAAAATCAATTTCCCTTCTGTAGTTTCAGTAATATGGCATCATTTGCTGATATTATC  
AGCCACTGCAGAAGTCAATCTCAAACCTGATGAAGCTGCTCTACTTGCTTCGAAATCCTATGTTACTTCTG  
ATACTTACAATATCTTGACAAGCAACTGGACCTCACTACTTCCGTTTGCAATTGGATTGGAGTCACCTGT  
GGCTCTCGCCATCAAAGGATCATAACCTTGATATTTCCAATATGGGATTAATAGGTACCATCCCTCCTC  
ACTTGGGAAATCTGTCCTTTTTGGTTTCTCTCGATATCAGTAGCAACGGCTTCCAAGGAATTCTGCCACGA  
GAGTTGGCTAATTTGCATAGATTGGAGTTTATAAATGTCACTTCTAATAAGTTCACAGGAGATATTCCCT  
CATGGTTCTCTTTTTGCCAGAACTCCAGCACTTGCATCTAGCTTTAACAGTTTCACAGGTATTATTCCAC  
CAGATATTTGTAACGCTTCCAACCTTGAGAGTTTAGTCTTGGGATTTAATCAGTTACAAGGGGAAATTCC

AAATGAAATTGGTAATCTTCAGAACTTGACTTGGTTGAGCTTGGGATCAAATCAGCTAACAGGCTCTGTA  
CCACTTAGCCTGTACAACATTTTCATCGTTACAACGTTTGGTTTTGACAAAAAATAGTTTGTCTGGAAATCT  
TCCTGTGATATATGCTTGAACCTTCCAGAACTTATGGTGCTTGCACCTTCTGACAATGAATTTGATGGTC  
AAATTCCTTTGGGGATAGATAAGTGTTCAAAGCTTCAAGATTTTGTTCATTGTCATTCAACAAGTTCAGTGG  
ATTGATACCTAACAGATTGGGAACTTGAATGTGCTGTCTATTTTATATCTTGGTTGTAATGACTTGAAA  
GGTGAGTTATACATATTTGCTTTTAGGTTCTTCTTGTGCATACATGAAACATATTTTTTGGAGTCATGTAT  
GCACTCCTTAATTGATATACTGCAGAAAGTAACTTTCTATTTATGATTTAATTTGCAGGTGAAATTCCAG  
AAGAGATTGGAATCTTCGTAATCTAGAGATATTGGATGCACAGAAGTGTAGCCTAAGTGGTCCCTTACC  
ATCTTCTATAAGTAACATAACTTCACTTCAATCACTCAATCTTTATGGCAATAATCTCTCTGGCACATTGCC  
CCGGTATATATGTTTGAACATGCCTGATCTCAGAGCATTGATCTTGGGAATAATTTATTCAGTGGAAAC  
ATTCAAAAGAATTTGGAACTGCACTTCACTTACTGACCTCTTCTTAAGAGAAAACAACCTAACAGGTA  
TCATCTTGTCAATTTATTTTTCCAAGATTTGGTGTATGTTCCCTATGCTTTTCATATCCTAATGAGTCGCTCA  
AATGTCATCAGGTGAGTTACCAAGGGAGATTGGTAATCTTTTCAATTTGGGAAGATTAGATCTACATTAC  
AATTTCTAACAGGTCCATTCCATCTACAATATTCAACATGTCAAACATAAGGGGCATTTCAATTTTAGG  
GAACTTCTTACTGGAAGTCTACCATCAGATATAGGACTTGGTCTTCCCTAATCTTGAAGAACTTTATCTTG  
GTTACAATAACCTTACTGGAGCCATCCCTAATTCTCTCTCAAATGCTTCCAATATTTCCGGCTTGGAAAT  
GGATATAATGACTTTTCTGGTCATTTTCCGAGGTCGTTTGGTAATCTAAGATGTTTAGAGTACCTCAACGT  
GAACGGCAATCATTTACAAGAGAGCCTTCATCTCCAGGATTGATTTTCTTTGATTCCTTGACAAATTGCA  
GACATTTGAGAAAAGTGTGGATAGGTTATAATCCACTCAATGGAAATCTCCGGCTTCTATTGGAAATCT  
CTCAAGTTCTCTCGACTACATTTATGCTGTTAATAGTGAAATCAGAGGCTACATTCCCAGTGAAATAGGA  
AATTTAAGTGGTTTGTCTTTCTGTTACTTCAAGGCAATTAATTGAGTGGGTTCAATCCAAGAACAATAGG  
GAATTTAAAGAATCTTCAAGCCTTGAATTTGTATGACAACAAAATGATAAGTGGACCTATCCCTGAGGAA  
CTCTGCAATTTAAAGAACTAGGATTCTTGAGCTTGGGAAATAATGAGCTTTGCTGTTCTATACCAGCAT  
GTTTAGGGAACATTACATCTTTAGATACATTTACCTAGGTTCCAACAAATTGACTTTTAGCATACCTCCC  
AGCCTGTGGAACCTCAATGATCTTTCATCTTGCATCTTGTATCCTCAAATTCCTTGAAAAGCTCTCTACCTCC  
AGAAATTGGAAATCTGAAAGTCGCAACGTTGCTGAATATATCGAAGAATCAAATCTCAGGAAGTATACC  
GAGCACAATTGGAGGCATGCAAAATATGGCTGAACTTTCTTTTGCAGAAAATAGACTAGAAGGACCAAT  
TCCAGAGTCAATGGGGAACATGATCGCCTTGGAAATCGTTAGACTTGTCTCATAACAAGCTCTCTGGTGGC  
ATTCCCAAATCATTGGTAGCTCTTTCACATCTCAACTATCTTAATGTATCTAACAACAGATTGAGTGGTGA

AATTCCAATTGGAGGTCCTTTCTGGAACCTTCTTATGATTCATTCCTTTCAAATGAGGCATTATGTGGTG  
CTGCTAGGTTGCAGATACCAGCATGTAGGTCTAATTCTCCTAGTAGGAAAAGAAAAAGATGGTGCTTC  
TTATTGTGTTGATCTTGTTGGTGGCTTCTTCAGTCATAATGCTCTCAGTCATGCTCACCATCTTTTTGGTGA  
TTAGAAGTCGAAAGAGGAAGACAAACATTGCTACTCATCAGGCGGATGCCTCTCCAGCCACGGTACATG  
GAAGAGTTTCATACCATGACCTTCAACAAGCAACCGACAGATTCAGTACAAGCAACTTGCTCGGTTCTGG  
AAGTTATGGCTCTGTTTACAAAGCAACATTTGGGAGTACTATAGTGGCCGTTAAGGTATTCAACTTGCAA  
ACAGAAGGCGCATTCAAGAGTTTTGACACAGAATGTGAAGTCTTACGCAACCTTCGTCATAGAAATCTG  
ACCAAAGTCATCAATAGTTGCTCCAGCATTGATTTCAAAGCCTTGGTATTAGAGTACATGCCTAAGGGAA  
GCCTGGATGATTGGCTTCATTCTGAAACTTGTTCTTAGATATAATGAAGAGAGTAGACATAATGATTGA  
TGTGGGATCAGCATTAGACTATCTTCATCAAGGCTATTTTGTGCCCGTAGTTCACTGTGATCTAAAGCCTA  
GCAATGTCTTGCTCAACGAAGAAATGGTTGCACATGTGAGTGACTTTGGCCTGGCAAAGCTATTAGGGG  
TAGGAGAAAGTATTGTACAAACCAAAACACTTGCAACCATTGGATACATTGCACCAGGTAATAATCATGT  
CAACAAGCTTCATTTCTCCTTCAAATTTCAACCATTTTAAAGATACCATATTCTCTTGATAAATTGTTTTATT  
TCAATGTAGAGTTTGGATTGGAAGGACTCGTATCTACAAGGTGCGACATTTACAGCTACGGTGTCATGTT  
GATGGAAACCTTTACGAGAAAGAAACCAACGGATGGAATGTTTGCTGAAAATTTAAGCCTGAGGGAGT  
GGATAAGACAATCATGGCCACACGGAATGGACGAGATAATAGACCCCGAGCTTATGATACCAGGGGAG  
AAGAACAAAACAGGAAAGGTGCAGTTCTTATCATCCATCATGGAATTAGCTCTGAGGTGCACTTCAGAC  
TTGCCAGAGGAAAGAATGAATATCAAACATGTTCTTGCTCAACTGAAGAACGTCAGAACTATGTTGGAA  
AATGTAATAAATCACTAA

>PGSC0003DMG400028473 LRR-RLKs

ATGAATATTAGCACTGATCAATCTTCTTCTTGCCTTGAAATCCCACATCACTTCAGATCCTTTTCATGTT  
CTTTGACGAACTGGTCTTCTTCTACCTCTGTTTGTGATTGGATTGAAATCACTTGATGCTCTCGCCATCA  
ACGAGTGATTGCACTGAATATTTCAAACATGGGTTTATCGGGTACTATCCCGCCACAACCTTGGCAACCTC  
TCCTTTCTTGTTTCACTTGATCTAAGCAAAAATGATTTCTGTGGTGAACCTTCATCAGAATTTTCTCATTTA  
CGGAGATTGAGAGTCATTAACCTTAGTTACATCAACTTCACCGGAGAAATTTCAATTGGAATAGCCCCTC  
TTCCGAGTTTGATACGGTTTTCCATGGGATACAATAAATTACTCAATGGCTCCAATGTGCTCTCTAAATTC  
AACATCTCAACCCTTGAATATTTGGATCTCAGAAATTCTGGTTTAACTGGTGATTTCCCTTCTGATTTATGT  
CATCGTCTCCTAGATTGCAAAGCTTGCACTTGGCAACAACATGTTAAGCGGAGAGGTACCAAGAAAC  
ATATCTGAATGCTCAGAGCTTCAACTCCTAATGTTGTTTCAAATAACTTTGTTGGAACAATTCCAAGAGA

TATAGGTAACCTTGCATCAGCTGCAACATTTAGATCTTGCAGATAACACGTAAAAGGTATGGCTTTACCAT  
TTTTCTCGGGACATTAGATTTAACTTATTTAAAAGAAAATGTATTTTAGAGAGTTGAAGTGTTTGGACAA  
TCTTTAAAAAATGTGAGTATTTTTTAAATAGTAGCATAAGAAGATTTGTTTGTTCCTACTAATTGCTCCGT  
CACTTCTCCTCTCGCTTTGTATACTTGTAGCCGTTTGACCAATCTTCCGGCATAACCCATTTGGAAGTTAA  
GCTCTTGTTAAATATATGATTTTTATGTGATATTTCTGTTTAAACAATATGACAGGCACAATTCCTGATGAG  
ATCGGCCATCTTTATAACTTAAAGAACATATTCATGGATAAAAATTATTTAACAGGCTCAATCCCTTTAAC  
CTTATTCAACATTTTCATCACTTGAAATGCTATATATGAATGATAACAAGCTTGAAGGACCTTTACCAAGAC  
AGGTTGGAAATTTACTATGCTTGCCTGGTTTGATCTTTCCAATAATTACCTGGCAGGTACGGGGAAAAA  
ATCTAATTCAAGTCATGTTAGAATTTTTGTTTTTGGGATACGTCTTCTGATCATAATTATACTGAATTTT  
TCAGGTGTAATCCACATGAAGTTGGTAACCTTCAAGAGTTGACAGACCTTCCATTGTTTTACAATGAATT  
TAGTGGGTGCATCCCTATTGGTATCTTTAATATCTCATCTCTTGTAACCTATTGGACTCACAGAAAACCACA  
TTTCAGGTAATCTTCCATCCACTATAGGCAATGGGTTACCTAATGTTGAAAAAATATTTCTAGGTGGAAA  
CAACATTAATGGTGTTCCTGACTCTCTCGGAAATTTAAGACAACCTTGAACCTTCTCAACTTGTACGGTA  
ACTCCTTTACAAGTGAATTGAGCTTCATTACTCCTTTGGCCAATTGTAAACACTTGAGAATATTGATATTG  
TCTTTCAATCCTCTAAATTCAATGCTCCCGAGATCCATTGGCAACATCTCTTCTTCAATCATTATTGCT  
GTAGGCTGTAACCTCAAAGGCAATGTTCCAAGTGAGATCAGAAATATGAGAAATTTATCTACTTTGTCTC  
TGGGAGGTAATAACCTTACTGGAATTGCCCCGACGACATTAAGTTCTTTGAAAAACCTGCAACGGCTTTT  
TCTTGATGCAAACAGAATAACTGGTCTTTCCCAATTGTTTTATGTGAGCTACCCCACTTGGGGATACTAA  
GCCTTTCACAAAATAAAATTTGGGGAGATATTCCTAGTTGCTTGGGGAACATGACATCCCTAAGGGAGG  
TTTATCTTGATTCCAATAACCTCACTGCTAGCATACTTCAAGTCTATGGAACCTCAAAGACATTTTGAAG  
ATGAACTTGTCTTCTAATTCCTTCATTGGATCTCTACCACTAGAAGTTTGAACCTCAAAGCTGCACTACT  
TCTGGATCTTTCCAGGAACCAAATATCAGGCAACCTTCCAAGTACATTGGGAGGTCTACAGAAATTGATT  
CAACTATCTTTGGCTCATAACGGAATTGAAGGATCTATTCCTGAGACATTTGGGGAACCTCCTAAGTTTGG  
AAACATTAGATCTTTTCATATAACAAAATGTCTGGTGTGATTCCAAGTTATTAGAGGCACTTAAGCAGCT  
AAACTCCTTTAATGTCTCATTCAATAGGTTAGATGGGGAAATTCGAGTGGGGGACCTTTTCTTAATCTC  
CCTTACCAGTCTTTCATGTGGAATAAAGGATTGTGTGGTAACCTCAAAGCATGTCCAGCTTGTCTTCTC  
TTATTCAAAGAATTAGTCTAAGTCGAAGAAAAGAAATCTGATATGGATTATAGTTGCCTCTTCAGTTATC  
TCTGTAATAGGGCTTGCTTCAGCAATAGTTTTTCATGTTGATGAGACGCGGGGGTAAAACGATCAATGTT

GAAGTTGAGTGGTCTCCTGAGGTAGCACCACAAAGATTTTCTTACTATGAACTTCAAAGAGCAACTCAG  
AGTTTTAATGAAAATAACTTGCTTGGTAGTGGAAGTTTTGGTTCTGTTTATAAAGGGATGTTGGCTGATG  
GGATGATTATAGCTGTTAAAGTTTTCAATGTGCAGATGGAAGGAACATTTCAAACCTTTGATAGAGAGT  
GTGAAATCTTGCGGAATCTTCGTCACAGAAATCTCACAAAGATCATTAGCAGCTGTTTTAACTTGGATTG  
CTCCAGGTGAATTCTTTATTTAACTAGTAACAATGTTATGGTTAATGCATTA AAAATGCTGACTTATTTT  
CTTTTTCTTTTTAGAGTATGGTCTGGAAGGCCTTATATCCAAGAGGTCTGACGTTTATAGTTTTGGCATC  
ATGCTGTTGAAAACCTTTACCAAGAAGAAACCCAGTGATGAAAAGTTCGCAGGAGATTTGAATTTGAGA  
TGCTGGGTGCATAATTCACCTTCTGATGAGTTGGATCAAATCATAGATGCTGACTTACTAACAGTCAATG  
AACAAAACCTTAAGTCAAAGCTGCAATGTGTGTCATCCATTATGGAGTTAGCCATGAATTGCACAACCTAG  
TATTCCAGTTGAAAGGATGAACATGACTGATGTTGTAGAAACATTGAACAAGATCAAACAAAAGCTTTCT  
TACTGTTATTGAACTACCTAACACATGACATCAGGTGCTTTTCATATCCCTTCTGAAAAGAACGAGGTTA  
TAAGTTCAGTAGCATTGACCATCAGTAAGTGTTCCTTGTATTGCAGGAGATTATGTGGCTATTGGAAG  
TTAAAAGGATTGAAGTTCATATACTTCTTACGTCAAGAAGTTGCTATGATTTTGGGACTACGTA CTATTAT  
AAAAAGCCGATGATAGCTTGTGTACTTCTTCTTTTTCTTGTGTAAACCAAGAGGGCCTTTCCATAACCTG  
ATGTTCTAAGCACCTTCCAATTTGATGATACAAGGAATGTAAGCCATTTAAATAAACTATGTTGAATCC  
ATTGTATATATCTCAAGTTCTCCAAGTATTCAACTGACTTAAAAAATTTCTCCAAGAATAGAGCAGCA  
AGATATGCATATTCCTTGATAGTTTTCACTAGTTACTTTGACATCGGAGTTCCTTCTGTTACTGATCTATC  
CATATATATATAGTCAACTAGTCAAGGTTTTACCTTGTATGGCATTGAACATGCATGAAGGAGAACTTT  
CATACAGCCACAGATAAATGAAGGGTAAACAAGAAAATATCTTAGGCAGAAAGGGAGTTGAATTTGAA  
GTTCTTGATTTGTACAGTCAAGGGTGTATGAACTGGGTGCCAAAGAGGGCAACTAGTGGGGCAAATAG  
TGAGTCGAAAAGGGTTGTAAATTTCCAGAGTCAACTCAAATAGTTTATTTATTAATGACTGCATGAAG  
CCTGGAATAAATTCATTAATTCAAATAGTTTAGGGTATTGATGCAAAGATCCAACCTAGGAAAGTTAACG  
ACCTAGCTAGAGAGTCAACTCTTATTCCACTCTTTTGTATGTCTGTATACTGATAACCACAAACAAATTTT  
CTATGCCAAAATCTAGATAGCTGTGTTTAGCAACATCTCACCATTAGCAAAGTTTCTTCTCTTTAAGTAA  
CAGATTAATTTAGTTCAATATATGGTGCAAAGTCAACTTCTTAGTGAGTAATATATTACTTAGGCCATA  
AACTTATATTTAATGTATTAGCATTTATTAGCTAGCTACCAGATCTTGAATAAATTTACTTGCACAATTA  
CGGACTAAATAGTTGCTAGAAGCATTTTACAATCCAAGTATTATGTTGGTTTCAATAATATAGAACTAT  
GTA CTAGCATTATATTTTCGATTATAAATCTAATCAGTTTCAATAGGTATAGATCATTATATTGCTGCAAT  
GATCAAACCAGAAAACCTCATCAATGGAGAAAACATCCTCCTCCTCTTCCGCTTCTAGAAATTTTATTAA

TATCTTTTCATGTTATAACGACATGCTTAGCCATGAATATCACTATATCAGCACAGATCAATCTTCTCTTCT  
AGCCTTGAGAGAACACATCACTTCAGATACTAATCACATTCTCTTGACAAACTGGTCTTTTTCTAACTCAG  
TTTGTAAGTGGATTGGAATCACTTGTAGCTCTCGTCATCACAGAGTTATTGAACTGAATATATCAGGTAT  
GGATATTACTGGTACCATCCCACCGGAACTTGGCAACCTCTTTTTCTTGTTTCACTTGATCTAAGCAAAA  
ACAATTTCCATGGTGAACCTCCACCAGAGTTGCTTCGCGGAAGTTGAGAGACATTGATCTTAGTTACAAC  
AACTTCACCGGAGAAATACCAAAGGAATAGCCACTCTCCAATTTGAAATGGTTCATCTTGAGATGCA  
ACAAATTACTCAATATCTCATCTCTTGTAGTTCTGGGAATCTTAGGAAACCACATTTGGGGTAGTATTCT  
TCCACTATAGGCAATGGCTTACCTAATATCGAAGGAATTTATCTAGTTGGAAATAACATCAATGGTGCTT  
TACCTAGTTCCATCTCAAATTTGTCTAAGCTTGAATTTCTCGAACTAGGTGGAAATGAACTTACGGGTTCA  
ATTCCCGAATCTCTAGGAAATTTAAGACTACTTAGAAATCTCAACTGTACGGTAACTCCTTCACAAGTGA  
ATTGAGCTTCATTACTCCTTTGGCCAATTGTGAAAACATGACAAGATTGTTATTGCCTTTCAATCCCCTAA  
ATGCAATGCTTCCAAAATCTGTTGGCAATCTTTCTTCTTAATTATTTTTCGGCAATAAGCTGTAACCTCA  
AGGGACAAATTCCAGATGAAATTGGAAATATGAGAAAGTTATCTACTTTGGAGTTGGATGACAATGACT  
TAACTGGAATTATCCCGACAACGATAAATTCTTTGAAAAACCTTCAACGGCTTTCACTTGGTGCAAACAG  
AATAAGTGGTCCTTTCCAAATTGTTTTATGTGAGCTACCCAACCTGGGCATGCTAAACCTTTCACAAAATC  
AAATGTGGGGAAATATTCCTAGTTGCTTAGGGGATGTGACTTCTCTAAGGGAGATTTATCTTGATTCCAA  
TAACTTCTCTGCTAGCATACTTCAAGTCTATGGAACCTCAAAGACATTTTAAAGTTGAACTTGTCATCTA  
ATTTCTTCAATGGTTCTCTTCCACTAGAAGTTGGAAACTTCGAGGCTGCAACTCTTCTGGATCTTTGAGA  
AACCATATCTCAGGCAACATTCCAAGTACATTGGGAGATCTACAGAAATTGACTCAACTATCTTTGGCTC  
ATAACAGAATTGAAGGATCTATTCTGACACATTTGGGGAACTCATAAATTTGGAAGCGATGGATCTCTC  
GTATAACAAAATGTCTGGTGTGATTCCAAAGTCATTAGAAGA ACTTAAGCAACTACGCTCCCTTAATGTC  
TCATTCAACAGGTTACATGGAGAAATTCCGAGTGGAGGGCCATTTGTTAATCTCACTTACCAATCTTTCAT  
GTCGAATGAAGGATTGTGTGGTAACTCTCAAGAGCATTTCAGCTTGTCTTCTAATTCAAAGAATCAT  
TCTGAGTCAAAGAAAAGAAGAATGATATGGATTGTAGTTGCCTTTTCAGTTATCTCTGTGATAGTGCTAA  
CTTCAGCAATAGTTTTCTGTTGATGAGACATCGGGGCATAACAGTCACTGCAGAAGACGAGGGATTGC  
CTGAGGTAGTACCACAAAGAATATCTTACTATGAACTTCAAAGAGTGA CTGAGGGCTTTGATGAAATTAA  
CTTGCTAGGTAGTGGAAAGTTTTGGTTCTGTTTACAAAGGGACATTGGCAGATGGGATGATTGTAGCTGT  
TAAAGTTTTCAATGTGCAGATGGAAGGTACATTTCAAACCTTTGATAGAGAATGTGAACTCTTAAGGAAT  
CTTCGTACAGAAATCTCACAAGATCGTTAGCAGCTGTAGTAACTTGGATTTCAAGGCATTGATACTTG

AGTACATGCCAAATGAGAGCTTAGACAAGTTGCTATATTCTAGAGATTTCTGTTCAAGTATGATGCAAAG  
ATTGAATATCATGGTTGATATTGCATCTGCTCTGGAATATCTCCATCATGGTACTCAGTAGGAGTTATTC  
ATTGTGATCTGAAGCCTAGCAACGTGTTACTTGACAACGACATGGTGGGACACCTGACTGACTTTGGCA  
TTGCGAAACTTTTAACCAAAGAAGAATCTATTGCTCACACTAGTTACATTGATCCAGGTGAATGCTTTATT  
TAACTAGTATAACAGTGTTATGGTTAATGTGTTAAAAATGCTGACATAATTTATTTTTATTTTCTAGAGT  
ATGGTCTGGAAGGCCTTATATCCAAGAGGTCTGATGTTTATAGTTTTGGTATCATGCTGTTGGAACTTT  
TACCAAGAAGAAACCCAGTGATGAAATGTTGCGGGGAGATTTGAATTTGAGAAGCTAG

>PGSC0003DMG400028474 LRR-RLKs

AACACATTTTCTCCATTCACTCAGAAAAAATGAGGATTTCAATTAATGGAGAAAAATCCCTCTTTTCAGC  
TTCTAACAATTTTGTTGTTCTTCTTCATGCTCTAGCAACTTGCTTAGCCATGAATTTTAGAACTGATCAAA  
CTTCTCTTCTCGCGTTGAAATCCCAAATCACTTCAGACCCTTATCAAATCTTTCAACAACTGGTCTTCTT  
CTGCCTCTGTTTGTAAGTGGATTGGTGTCACTTGTGGCTCTCGTCATCAACGAGTTACTTTACTCAATATT  
TCAGACATGGGATTTTCGGGCACCATACCGTCACAACCTGGCAACCTCTTTTTCTGTTTCACTTGATCT  
AAGCTACAACATTTCCATGGTGAACCTCCACTTGAGTTTTCTGTTTGCGAAAATTGAGAGCTATTAATC  
TTAGTTTCAACAACCTCACCGGAGAAATCCCTAAATTCCTCGGTGATTTTCAAGACCTTCAAATATTGTCT  
CTTGAAAACAATAGTTTTAGTGGGTTCACTTCTTCTATCTCAAATATGAAGAATCTTGGATTCCTGAA  
TCTGAGGTACAACAATTTAGAAGGAAATATTCCAGCTGGAATAGCCGCTCTTCGGAGTTTGAAATGGTT  
GAGCTTTGGATTTAATAAACTCAATGGTTCCAATGTGCTCTCTATGTTCAACATCTCTACACTAGAATATT  
TGGATCTCAGAAATGCTGGTTAACTGGTGATTTTCCATCTGATTTGTGTGGTCGTCTTCCAAGATTGCAA  
AACTTGGACTTAATTTCAATATGTTAAGTGGAGAGATCCCAAGACGTATATCAGAATGCTCGCAACTTC  
AAGTCTTACTGTTGATGGAAAATAACTTGATTGGAACAATTCCAGGAGAAGTTGGGAAATTACAACCTGC  
TGCAACAATTAGCTCTCGGAAATAACAAGTTAGAAGGTATGCAGCTTCCAATCTTAACAATATCTACATA  
TATAGTAATAAATCGAAGATATTGTTTTGTGCTGAGCACATGCATTCACTTTAATTTTTCAGTTTCGACAAG  
AGGTTAAGTGTTCAATTTTCTCTCTTAAACAAGCATATGTATGGTTTTGACCTGGTGTGAGAATTTGTTA  
CATCACCTTTGCTTATACCTGTCTGTTAAATTATTTAATGAGGTATTGAGATTGGTTCACTTAATTCCTTA  
AGACTTTCATTCGATAATTTTGCATAACAATTTGACAGGCACAATTCCCAATGAAATTGGTCATCTTCATA  
ACTTGAAGCAATTGGGATTGGAACAAAATGCATTAACAGGCTCAATCCCATTAAGCATATTCAATATTTT  
ATCACTTCAAGTTTTATCAATGTGGGACAACAAGCTTGAAGGGCCTCTACCAAGAGAGGTTGGAAATTT  
GACTATGGTTAACGTACTTGATCTTGAATGAATAGCTTGACGGGTATGGAATAATATTTTACCACAGGA

TTTCAGAATGCTAGTTCTTTCAATACTTCTTCTAATGGTAATCTTACTTCATTCTGCAGGGCTACTTCCAGA  
TGAAATCGGTAACCTTCAAGAGTTGCTGATGCTGAAGTTGGATTTCAATAATTTAGTGGGTCGATCCCT  
ATTGGTATATTTAATATCTCAACTCTTGTATCTATTACACTCACGCAAACCGCATTTCAGGTAATCTTCCT  
AACACTATAGGCAGCGGGTCACCCAATCTTGAACGAATTTTTCTAGGTGCAAATAACATTGATGGTCTTT  
TACCTAGTTCCATCTCAAATTTGTCTAAGCTTACTGTTCTCGAACTCAGTGCGAATGAACTCACGGGTCA  
ATTCCTGACTTTCTAGGAACTTAAGACTTATTGAAATCCTCAACTTGCAAGGTAACCTTCACTAGTGA  
CTCTTCAATGTTGAGTTTTATTACTCCTTTGGCCAATTGTAATACTTAAGAGAACTGATATTGTCTATCAA  
TCCTCTAAATGCAATACTTCCAAAATCCATAGGGAATCTTTCTTCTTCAAACGTTTGAGGCAATAGGTT  
GTAATCTCAAAGGCCATATTCCAAATGAAATTGGAAATTTGAGAAATTTATCTTATTTGAAGCTGGATGA  
AAATGACTTTACTGGAATTGTCCCTTCGACAATAAGTTCTTTGGAAAACTTCAACAGTTTTCACTTAGTG  
CAAACAGAATAAGTGGTCCTTTCCAATTGTTTTATGTGAGCTACCCAATTGGGCATGCTAAACCTTTCA  
CAAACCAAATGTGGGGAAGTATTCCTAGTTGCTTAGGAGATGTGACTTCTTAAGGGAGATTTATCTTG  
ATTCCAATAACTTTACTGCTAGCATACCATCAAGTCTATGGAACCTCAAAGACATTTTGAAGCTGAACTG  
TCTTCTAATTTCTTCAATGGCTCTCTACCATTAGAAGTTGGAAATCTCAAGGCTACAATACTTCTGGATCTT  
TCCAGGAACCAAATCTCAGGCAACATTCTGGTACATTGGGAGGTTTACAGAAATTGATCCAGCTATCTT  
TGGCTCATAACAGAATTGAAGGATCTATTCTGAGACATTTGGGGAACCTCATAAGTTTGAAGCATTGG  
ATCTTTCAAATAACAATATTTCCGGTGTAATTCCAAAGTCATTAGAGGCACTCAAGCAACTACAGTCCTTT  
AATGTCTCATTCAACAGGTTACACGGGGAAATTCCGAGTGGTGGACCTTTTCTTAATCTCCCTTACCAGTC  
TTTCTTGTGCAATGAAGGATTGTGTGGTAATCCTCAAAGCATGTCCAGCTTGTCAATTCAAATCAAAG  
AATCATTCTAATTCAAAGAAAAGAAGAATGATATGGATTGTAGTTGTCTCTTCAAGTTATCTCTATAATAG  
GGCTTGCTTCAGCAATAATTTTCGTGTTGATGCGACATCGGGGTAAAGTAATCAAAGGTGAAGATGAGT  
GGTCGCCTGAGGTAACACCACAGAGATTTTCTTATTATGAACTTCAAAGAGCAACTCAGGGGTTTGATG  
GAAATAACTTGCTAGGTAGTGGAAGTTTTGGTTCTGTTTTTAAAGGGACATTGGCAGATGGGATGATAC  
TAGCTGTCAAAGTTTTTAATGTGCAGATGGAAGGTACATTTCAAACCTTTGATAGAGAATGTGAAATCTT  
GAGGAATCTTCGTCACAGAAATCTCACAAAGATCATTAGCAGCTGCTGTAACCTTGGATTTTAAAGCATTG  
GTAATTGAGTACATGCCAAATGGGAGCTTAGACAAGTTGCTATATTCTCAAGATTATTCTCTAAATATAA  
TGCAGCGATTGAATATCATGGTCGATGTTGCATCTGCTCTGGAATATCTCCATCATGGTTACTCTGTACCT  
GTTATTCATTGTGATCTGAAGCCTAGCAATGTCTTACTTGACAAAGACATGGTGGGACACCTAACTGACT  
TTGGCATTGCAAACTTCTAACAAAAGAGGAATCTATTGCTCAAACCTTTGCCACAATTGGTTA



CATTGCTCCAGGTGAATCATTTATTTAACTTGTAACAAAGTTTTTGATTAACAGTTAATCAGATTTACGCC  
TTTTAAGTTCAGTTGCTGACGTATTTAATTTTTCTTTCTAGAATATGGATTGGAAGGCCTTATATCCAA  
GAGGTCTGATGTTTATAGTTATGGTATCATGTTGCTGGAACTTTTACAAAGAAGAAACCTAATGATGAA  
ATGTTTACGGGCGATTTGGATTTGAAAAGCTGGGTACATAGTTCACTTCCTGATAAGCTGGATGAAATCA  
TAGATGCCGACTTACTAACAGTAGATGAACAAAAGCTAAATGAAAAGTTACAGTATGTGTCATCTATCAT  
GGAGTTAGCCATGAATTGCACAGCTAAATCTCCGGCTGAAAGGATGAACATGACTGATGTTGTAGCTGC  
ATTGGAAAAGATCAAGCAGCAGCTTTCTTCATGTTACTGATCGAATGGCTTAATGACATGACATCAGGTA  
CTTTTTCCATATCACTTTTGGGAAGTAAAAAGGAAATATGTAAATTCATTAGCATTTTAATCAGTAATTG  
CTCTTCAAATGCTTTTGCAAGAGACTATGTGGCTATTGTAAGTGTCTTTGTTGAGATGAGTCTTCTGTAC  
AATGTATTGCTAATTAAGGATCAATAAAATGCAGTGCTTCTTAATTTAAGTGAAGTGATCCCCATCTGG  
CCTTATAAATATCATCCAAAAGAGTCATTTGCCCTTGCTTTAATCTTGTATCCAGTGAAAATGATAAGTGC  
TAACACTCCTAGATGTTTTGATGATCTCCTCACAAGTGCAGGGACCTGGTCCTCTGCAGAGTATGAATAC  
TCGTCCAGTGGTGAAAGTGTTGAACAGCTGTAAAAGTTGTCGTGTCAGAAAGTTGGTGAAGTTGCAGA  
GTACTTCACCAATCAGAATGGGCGTAGTTGTTGTACATTGGACAATGGCTTTTCATGGTTGATATATTC  
AACACTCAAACAACAAATTCATTATTCATTCAAAAAGAGATTTTTCAAGCTTCAAAAACAGCAGGGACCT  
GATCGATTGCTTAAAGTGCTTCTGTATCAGTTGTTACTTTGTTTGCTTGTAATAGTTCTTATATGTATGAT  
TCGTTTCACTTGTAAGAAACGTTTCAAACCTTGTAATCATTGTAAGAACTAGGTTAAGGGTAACTT  
AGTTTCTTACTCTAAAGTCTATATTAATCAGTTAGGATTAGTATAGTGGGCAGTGTTGTATTTGCTCTGGC  
TCAGCTAAATGATAGGAGATATTGCTTAGTGTGGAGATTAGCAGGCTAATCTTCATTTTGTAAGTGGCT  
TTTACTTTTGCTTGAGAGAAGATTAGTGGAAGCAGTTTGAAAAGTCTATTGAGAGCAGGTCGTGGTTTTA  
CTCCCTTGAGCAAGGAGGTTTCCACGTAAAGTTGTTTGTGCAATCTTACTTTTCAGCATTTATTTACTGTT  
TGTTATTGTAATTGTGCTGAGGACTTGGTCCCATCAAAATCGGTG

>PGSC0003DMG400028478 LRR-RLKs

CAATTATATTGGACTTACTTACCTCCACTTGAAATCCCCTTAATACATCTACTCTTATCAACTCTATATGGC  
ATTTACATCAACTACTTCCAAGTAAAGAAACAATCACAAGTCCCACAACAAAAAATGAAAATCTTGTT  
CACACTCTTCATCTTTCTTTCTTTTTCACATTCTCAAAATCAGAATCCCCTTGCAAAAACAACACAGATTT  
AGATTTATATCTTGTTTCCAAGGCTTTCAGTTCTGTTTATGGTTTCAACATCTCTTGGTTCAACTCAAACCTG  
TTCTTCTCAATAACTGAAATAAACTTATCTTCAAGAAACCTCACTGGCATAGTTTCATGGAAGTACTTAA  
CAAATTTGTCTCATCTTCATACTATAGATCTATCAAATAATTCCTTAAAGGGTCTGTTCATCCTCTGTTTT

GGTCCATTTTCATCTTTGGTTCAAGTCAATTTGTCAAAGAATAAGCTAGGTGGGGCTGTTGCTGTAGCAAG  
ATCATCATCATCTATTCAAAGACTTGATCTTTCTTTCAACAGGTTTACCAACTTAGGCTCTGTATTTTATGG  
TTTTCTAATCTTACTTCTCTTGACCTTTACATAATGATATCAAGTCTTTACCTTTTTGGTTTACCAACCTA  
ACTAAGCTTGAAAATTTGAGCATTCTAGCTGTAACATTTATGGTAATCCAGAACCCCTTTCACATATCAA  
GTCACTGAAGCATTAGATGTTTCTGTCAACCATATGGATGGTAAATTCCTAATGATTTTCCTCCTCTGT  
CTAGTCTCAATTTCTGAATATCTCATTCAATAACTTCACTGGGGAAATACCCAAAGACCAGTTTGCTAAA  
TTTGGGAACTCTTCTTTCATTCATGCTGGGCACTTGCAAATCAAGAATCTTTACCAATCCCAAGAATTC  
CTCACAGTTACACATTAATAATCATAACTTTACTACCCCAACACACAAAAAATGTTGCCTTCGAGACACA  
AACCTATCAAACCAAACACACACAAGAAAAGGCCCAAATCAAGAAAGAAAGTTTTAACCATAGCTATTT  
CCTCTGCTTCAGCATTCTAATCTTGGCCATGGGGTTAGTCATTTTGTGTCTATAACAAGAGGAGAAAAAC  
ATTGGCTAGGAAGAACAATGGCTAATTTCAAAGCCAATACAAATACCATTTAGAATGGACAAATCAGG  
GCCATTTTCATTTGAAACAGAGTCAGGGAATTCATGGGTTGCTGACATAAAAGAACCAAGTTCAGCAGC  
TGTAGTTATGTTTGAGAAGCCATTGATGAACCTAACATTCAAAGACCTCATAGCAGCCACAACCTCACTTT  
GGAAAAGAGTCATTGTTAGCTGAAGGAAGGTGTGGGCCCGTTTACAGAGCCGTACTTCCAGGTGACCTC  
CACGTGGCAATCAAGGTCTTGAACATGCTAGGGAAGTACTAGCCCATGATGATGCTATTATCTTGTTTGAAC  
AACTCTCCAGGCTTAAGCATCCTAATCTGTTGCCTATTTCTGGTACTGCATTGCAGGTACTAATCTTCTTT  
CACTTATTACAGCATCTTCTGTTAATAAGTACAATTTATGTGATACAATTCGAATTCTAGCAGTAAAAAAT  
ATCTAGAGGTGAGCATATTGAATGCATTCACGTGGGAGGATGGGATGAGAAATAGGACAGACAGTAGT  
AAATGAGACAGAAATCTTTGCAACCATAGAAACGTAGGCAGTAGTTATGATTACATACAACAAGATGAA  
GCAGTAAATAGGAATGCGTGACTTATTTGGATGTTAGTACTATGACTACATCATTCAAATTATATGTGCT  
TTAATGCTCTTTGTAAATTGTGTCCATTTTTTACCCTACAAAGTCAAACCTTTCAAATCTTATGCCAGATTG  
GGATTTGAAAAATACTGAAACTGCAGTATGGTTTGGTTCGCAGAATTACGATAACCAATGATATTCTATG  
AATTGAGATATTTACGACATTTATTTATCGTGAAATTAATAATGGTAGAATAAAAAAATTTGTGATTAA  
TTAATATCTCAAATAAACATGGAAAAAATTAATTTTTAATTTTATTTTCGAGATTATTATTTGTATCACATA  
TATCACCACGACATTTATGATGATGCTCTTGGTAAATTGTGTCCATTTTGCACGATAAGGTCAAATCTTTA  
AAAATCTTACCAGATTGGGAGTTCTACTGTTGAGCCTTGATTTATGATTTTTGGAAGAATGTTGCACAAAT  
ATTATCCATAAAGTATTATTTTATGGAGGCGTTATTGAATTAATAAAGATAAGAGGATATTTTAAAAGCAT  
TAATGGTTCAGAAGAATGTCATTTTCAATTGAAAATGCTTAAAGTTGGAAAATTTTTCATGACATGCAT  
TGATTGATCAATTGTAGTATCAAAGTCCTTGTCAAATATTTTTGGAAGACTTTTCTAGCTAGGAACCAAAT

TGCTCCATTTGATAAGAACAGAATCCAATTATATTTTCTTTCAATTAAGTCATATTTAAAGCTAATTTAATA  
CTTCCCTTTGATGCAGGGAAAGAGAAGCTAGTCTTATACGAATTCATATCCAATGGTGACCTCCACCGAT  
GGCTACACGAGCTTCCAACCTGCTACCACCAACGTGGAAGATTGGACAACCGACACGTGGGAGTTACAAA  
ACGGTTCTCAAATTACGTCACCCGGGAAAATGGAATGGCACACGCGCCACCGTATTGCCGTTGGCGTAG  
CGCGTGGACTAGCCTACCTCCACCACGCGCAGTCGAAACCTGTGGTCCACGGTCATTTGGTGTCTATCTAA  
TGCTTTACTAGCCGATGACTTTGAGCCTCGGATAGCCGATTTTGGATTGAGCCAAAACCAAGCCGAGGG  
ATCTAGTGAGACGGATGTGTACGATTTTGGAGTCGTATTAGTAGAGCTATTAACAGGGAAAATCGGCTC  
GGATGAGACGATTAATGGGTGAGGAGGCTAGTGAAGGATGGACTTGGAGCTGACGCGCTTGATTGCG  
AGACTAAGACTCGGTGGTGACTIONCAGTGAGTGAGATGGTGGAGTGCCTCCGAGTTGGGTACTTGTGTAC  
GGCGGAGACCCCAAATAAACGGCCTAGAATGCAACAAGTTTTAGGTTTGCTAAAAGACATACAGCCCCA  
CTACCAACTCGGGAAAACGCAAATTTATAATCTTTAGGTAAACCACTCTCACTCCAGCGCGTGATTTAC  
ACGACGAGGAAGATTGATTGGCAGCATTGCATTATTGTACTIONCCATGTGTTTGGTTGACCATTGAAAAGT  
CAAAAGTACAAGGCATCTATCCACTTCATCAATGGTATTTAGTCACGTGCAGATCACGTGATGAAGTGC  
AGTGAGAGGAACATGTTTGCTTGCTGTCTCATTTTATTCTCTCTTTTTTTTTTTTTTTTTTTGTAGTTTTGTA  
TAGTATTAATTAGAAAAATGAAAAAAATTGTGGGTAAATCTTTTTTTTTTATATATAAA

>PGSC0003DMG400028688 LRR-RLKs

TTTTGCTTCTCTATACAACTCTCCTCATTCTTAGCTTTCCAGTTTTCTGTGGGCCCTTTTTCTCATGTGCTT  
CCTTCTTCTTCTACTCTCAACTCTGCAAAAACCCCTACCACATTGCACAATGTTTCTTCTAATCTTGAA  
AAAAGATTGAATTTTGTATAAAGAACAATTGGTTTCTTGTTTTCTTCAATTGTCTTGCAAAAAGTTTCA  
ATCTTTGCAAAAGAAATGAACACCCTTCTTGTTAAAGCTTGTATCTTTACTTGTTCTATAAAGAACACT  
TGGGTTCTGTTTTGTCAAAAAGTTTCAATCTTTACAAAAGAAATGAGCACCCCTTCTTGTTAAAGCTTG  
TATCTTTACTTGTTCTGTAAAGAACACTTGGGTTCTTGTTTTTATTTCAATTGTGTTGTCAAAAAGTTTCAA  
TCTTTACAAAAGAAAACACCCATCTTGTTTAAAGCTTGTAGCTTTACTTGTTCTATAAAGAACACTTGGG  
TTCTTGTTTTTTTTTTCATTGTCTTATCAAAAAGTTTCAATCTTTACAAAAGAAATGAACACCCTTCTGGTT  
TAAAGCTTGTAGCTTTACTTGTTCTATAAAGAATACTTGGGTTCTGTGTTTTTTTTTTCATTGTCTTGCAAAA  
AGTTTCAATCTTTACAAAAGAAAACACCCATCTTGTTTAAAGCTTGTAGCTTTACTTGTTCTATAAAGAA  
TACTTGGGTTCTGTGTTTTTTTTTTCATTGTCTTGTTGTCAAAAAGTTTCAATCTTTACAAAAGAAATGAACACCC  
TTCTTGGTTTAAAGCTTGTATCTTTACTTGTTCTTGGTATTTCTGCATTTTTTTTTGGGTGTTGAGTCTCAAG  
ATGATGATGTTTCAGTGATGTTAGCTTTGAAAAAGAGCTTAAATCCACCTCAAGAAGTTGGATGGTCAG

ACTCGGATCCATGCAAATGGAACCATGTGGGTTGTTTCAGATAAACGGGTCACCCGGATCCAAATTGGGC  
GCCAGAACATTCAAGGTACTCTCCCTCCAGAAATCTCTAACTTACTGAACTTGAACGTTTAGAGCTTCA  
AGGGAACAATATTTCTGGGCCTTTGCCTAGTTTGAAAGGTTTGAGTTCATTGCAAGTGTTACTGCTTGGT  
GAAAATCAGTTTAGTTCAATTCCTGCTGATTTCTTACTGATATGTCTTCATTACTATCTGTTGATATGGAT  
AAGAACCCTTTTGTGGTTGGGAGATCCCTGAAAGCCTTAGAAATGCTTCTTCACTTAAAACTTTTCAGC  
AAATTCAGCAAATGTAATTGGGAGAATTCCTAACTTTTTAGTCCTGATGAGTTTCTGGATTGGTAAATT  
TACATTTGGCTGGCAATAACTTGAAGGTGAATTGCCCTCCAGTTTTCTGGCTTGCTGCTTGAGTCTTTA  
TGGTTAAATGGACAGAAGCTTAATGGAGGAATTGATGTTCTAACAAACATGACATTCCTGAAGGAGGTT  
TGGTTGCATTCCAATAACTTTTCGGGGCCGTTGCCGGACTTTTCAGGATTAAGGCTTTGGAGACATTGA  
GTCTTAGAGATAATGCCTTACTGGTCCCCTGCCAAGTTCTTTGATGAATCTTGAGTCTTTGAAGCTCGTT  
AATTTGACGAATAATTTCTTCAAGGACCAATGCCGGTGTTCAAAGGTTCTGTTGTTGTTGATTCCGGCAA  
AAGGTACAAATAGCTTTTGCTCGTCACAACCAGGTGATTGTGATCCTAGAGTAAATACATTGCTTTCAAT  
TGCAAAAGCAATGGATTATCCAACAAATTTTGCGAAGAAGCTGGAAGGGAAATGATCCCTGTGCTGATTG  
GTTTGGTCTTACTTGCAGTAATGGTAACACTACTGTCATAAATTTCCAGAAAATGGGGCTTTTCAGGAACA  
ATTTCTCCTGAATTTGCTTCACTGAAGTCGCTACAAAAAATAGTTCTTGCAGATAATAATCTGACTGGTAC  
AATTCCAGAAGAGCTAACCACATTGACAGGCCTTACAGAGTTAGATGTGTCAAACAATCAAATTTATGG  
AAAGGTACCAGCTTTTAGGAAAAATTTGATTCTGAAATTTAGTGGTAACCCTGATATTGGAAAGGATAA  
GAGTGATGCACCTTCCAAGGCAGTTCTCCAGGTGGTTCAACAGGCTCTGATGATGGAAATGCCCAAGC  
AGCTCGTAAGAAGTCCAATCGCCGGGTTGGAATTGTGGTGTCTTCTGTAATTGGAGGTGTATTTATGCTT  
TGTTTGATTGGAGTGGCAGCTTTCTGTCTGTACAAAAGCAAACAAAAGCGTTTTAGCCGAGTGCAAAGT  
CCAAACACCATGGTGTTCATCCACGTCATTCTGGTTCTGACAATGATAGTGTGAAAATCACAGTTGCAG  
GATCTAGTGTGAGTGTGGTGCAGTTACTGAACTCATACTGTTTCTGCTAGTGAAGCCGGTGATGTTCA  
AATGGTTGAAGCAGGAAATATGGTGATTTCCATCCAAGTACTGAAGAATGTGACCAACAATTTTAGTGA  
AGACAACATACTAGGCCGGGGAGGCTTTGGCACTGTCTACAAAGGTGAATTGCATGATGGGACTAAAA  
TTGCAGTCAAAGAATGGAAAATGGAATCATCACTGGGAAGGGACTAGCTGAATTCAAATCCGAGATT  
GCTGTTTTGACCAAGGTCAGACATAGGCATCTTGTGGACTACTTGGGTACTGTCTTGATGGAAATGAG  
AACTTCTAGTCTATGAATACATGCCTCAAGGAACATTAAGCAGTCATCTTCAACTGGGCAGAAGAAG  
GGCTTAAACCCATGGAATGGACAAAACGATTGACCATTGCATTAGATGTTGCTAGGGGTGTAGAGTACC  
TCCATAGTTTAGCTCACCAGAGTTTCATTCACAGGGATCTGAAGCCTTCAAATATTCTTCTAGGGGATGA

TATGAGGGCTAAAGTTGCAGATTTTGGCCTTGTGCACTTGCCCCAGAAGGGAAAGGTTCTATAGAGAC  
AAGGATTGCTGGGACATTTGGATATCTGGCACCGGAATATGCAGGTATGCTCTTTGCTTACTTATATGTG  
TATGCTAAATTGCTGATAAAATACTTGTATGCAATTTGTGCCTAGATAAACTTGGTCTTAAGTCCAATACC  
TCTAAAGTATGAATTATGTGAACCTTAGGGGTTTGTCTCAGGATGCTTCCAGAGAATTAGCATTCAATTT  
GACTGATGAGAGTCAGATGATACTAACTGTACTCCAAGAACTTAGCCTGTTTTACATTAATCAACTTTT  
GCCCTATAATAGGTCTGTAACAGTATATATTAATGTTTTGTCTTTTTCTCAGTCAATTATACTTGTGCTCA  
TGGTTAAGAACCTGCCATTCATACATTGTCATATATCAAATATCCTTATTGATTCTGTCATCCCCTTTAATG  
CTATGATTACTTAGTTTTCTAAAAGTGGATACCCATCCTACTGGAAACACTTTTTCTGATGCATTTGCTTA  
ATGCCACCGTTTTCTACTTTGGCCTCATCACACTTTAAACATGTTATTATCCTATGACAGAAGATCCTC  
TTGTTTTCTTTCCCTTAGTGGAATTTAAGGATAGCCAAATTTGTTATTTGCTCACTTTCTGATTGTGAT  
TTGTGCATAGGAGTTCTTGAATGTAGATACATCATTATCTAACTTGATTTTTATCTTGTTCGTCTGCC  
AGTAACTGGGAGAGTGACAACCAAGGTGGATGTGTTTCAAGTTTTGGTGTGATTTTGATGGAGCTCATCAC  
AGGAAGAAAGGCTCTTGATGAAAGCCAGCCTGAGGAGAGTATGCATCTAGTAACATGGTTCCGAAGAA  
TGCATCTGAATAAGGATACATTCAGAAAGGCAATTGACCCCGCAATTGACCTTAGTGAGGAAACACTCA  
CCAGTGTGAGCACTGTAGCTGAGCTAGCTGGTCACTGTTCTGCAAGGGAGCCATATCAAAGGCCTGACA  
TGGGCCATGCTGTCAATGTTCTTTTCTCTCTTGTAGAGCTCTGGAAACCATCCGACGAGTGCTCAGAGGA  
CATATACGGCATTGATCTCGATATGTCATTACCCCAAGCGCTTAAAAAGTGGCAGGCTTATGAAGGTACA  
AGTCACATGGATTCATCCTCCTCTTACCTTCCAAGCTTGGATAAACTCAAAGTACTAGCATACTACTCG  
CCCCTACGGATTTGCCGAGTCATTTACATCTTCTGATGGTAGGTGAGAAGTTGACACTCTTTGATCTAGG  
TTTTGGTTGTTTCTCTCTGTTTTCTTCTCATCGGAGTCACACATCATTTTTTTCTTCTTTTTTTTTGCTT  
TTAACTCTGATGCTTTTACCTTAACTCATTGTTAGTTTTGGCACTGTGGTGAATAGGGATTCTTTTTAAGA  
TTTTTGATGTCTTTGACTCTTATTGTATGATGAATCTCTCTCTTTTTCCATGTGAATACATTGTGGTTTG  
GTTGGAATGAAAGGGATGCCATCAATTACCAGTAGATCATGGTACTTTTGTATTCTTGAATTGTTTTTT  
GTTAGAAAAATTTGTAGGTGCAAGCTGTATTGAAATGTAAAGTGGCTTTGAAGTGTGCAAATCATAAAG  
TTAGCTTTTTGCTTATGATGCTTTTTCAAGCAAATGTAAAGTTTTTTGTTATGATTACAGATCAACTGCTG  
>PGSC0003DMG400028801 LRR-RLKs  
AACACATCCTAGAACTACTAAGTACACACTTTTCATCACTCCTACAAAGAACACCATTCTTTCTTCTTACTT  
CTGCTACTACATTTCTCTCTGCTATGAATTTCTAGCAGTTCTTGGTTCTTGCGCCATATTCAGCTAAAACAA  
GTAGGCACTGCCATTTCAAGTTGGCTAGTTCAATTTCAAGTTTCACTGTCAAATTTGACAATGGTGTGTTA

ATCATCTTCATAATTCATGTTTTATGTTTGTAACAGCTTCGTCCGATCTTAGCTCCGACCGTGCTGCACTT  
TTAGCTTTTCGCTCCGCCGTGGGTGGCCGTACATTTCTCTGGAACACCACCAGTACCTCCCCATGCAACTG  
GGCTGGTGTACAATGTGAAAACAACCGTGTTACAGTTCTCCGGCTACCGGGCTCAGCTCTCTCCGGTACC  
CTTCCGGTGAACACAATTTCCAACCTCACTCGTCTTCGTACACTTAGTCTTCGTCTCAATCGCCTTTCCGGT  
CCTCTCCCTTCTGATCTCTCAAATTGTGTTGAGCTCCGTAACATTTATCTCCAGGGTAACTTTTTTACCGGA  
GCTGTTTCTTCTCCTTCTCTGGGCTTCACTCTTTAGTTCCGTTAAATCTCGCCGAAAACAATTTTTCTGGA  
GAAATTCATCTGGGTTTAAACAGTTTGATCCGATTGAGAACATTTCTACTTGAGAAAAACCAGTTTTCTG  
GGTTTATGCCTGAGCTAAAGTTTTTCCCAAATCTCGAACAGTTTAAATGTGTCTTTCAATAGATTAATGGG  
TCTATTCCGAAAAGTTTGGAGGTAATGCCAGTGAGTTCTTTTACTGGGAATTCTCTATGTGGAAAGCCTA  
TTAATGTTTGCCCAGGAAGTAAGACTCAGCCTGCTATAGCTACTGATGGAATCGAAATTGGGAATTCAA  
ATAACAAGAAGAAGAAGCTATCTGGTGGAGCTATTTCCGGTATTGTCATTGGGTCTGTTGCTGGATTTTT  
CATTCTTTTGTGATTTTTGTTTGTGTTAGGTAGGATGAAAACCGGTGATAAAACAAGGTCTCTTGATGTT  
GAGACAATTAAGTCACCGGAAACAGAAGTTCCCGGGGAGAAACAATTGAGAAACCCGATAATGGAGG  
TGTAATAATGGGAATTCAGTTGCTGTAGCAGCACCTGCTGCTGCAGTATTGAATAGTGGTGAAGAGAA  
TTGGGGAGAAAATGGGGTTAGGAAAAGCTTGTGTTTTTTGGAGATTATTATAAAGCATTGGAATTGGA  
GGATTTGTTGAGAGCATCTGCTGAGGTTCTTGAAAGGGGACATTTGGAACAGCTTATAAGGCAGTTTT  
GGAGATTGGTACAATTGTTGCGGTTAAGAGATTGAAAGATGTGGCAATATCTGAAAGGGAGTGCAAGG  
AGAAAATTGAAGCAGTTGGAGCAATGAATCATGAGAATTTGGTGCCTCTCAGAGCTTATTATTTTCAGCA  
GGGAGGAAAAACTTCTGTCTTTGACTATATGCCAATGGGAAGCTTGTCTGCTCTTCTTCATGGTAAAGTT  
TTAGTACACTCTTTTACTGTCAATTCATGTTGTTCCGGACTCTCTAAAAATGTTACCACATCTGTGCGAAATC  
ATCAAAAAATGCACTACTTTGGAGGATTCGACACACACTCAGTGGTATGGATCCTCTAACAATACACTAC  
CTTTTTGGAGGATCTCACATGCACTTAGCAGCATGGGTCTCAAATATGCACTACCTTTGGAGGATCCA  
ACACTCAGTGGCATGGATTCTCAAAAAAAAAATTCATATTTTTGGAGGGTCCGACATGTATTGGTCGATA  
TTTTAATGAGTTCAAGCAACATAGCTACCAATATCTGGTGTTTTACTTGCTTTTCCCTTATTCAGTAGATG  
CACTATATTTGTTCCAGATTTTGACATTTTGTTAGAGTAATTAGTTTGACTTGTTGCTAACAGTGTAACAT  
GCAATGTCTGTAGATTTGGCCCTCAATCCAATGAAAATGTGATCCTAGAATTAAGCATTAAATTTCTTAT  
CATTACCTTAGTCTTCATTATGTAAAGCATGCTTCTAATATAAGAAAGTATGTAAATCTAAAGTTGTTTG  
TAATTAAGAGCAATAAGTAGTACTCCATTTCAATTTAGTGCTTTTATTATAGCAAAGGGTCTTTGTTCTT  
TATAGATACCCTGTCCATATGCAGGGGAAAGGTGAACAAGCACACATATAATCTTTCCTTGGCCCTACA

GTAGTAGGGTCTATCATTATATGTTCTTTTTCTATCTAGAGCATCTGTATAGGACTAGAATTTTGAATCTC  
CGAAGCTAATTATTCAACTGGTGATTAGTTTCCTGGCTTGTGAATCTTGCATGAACATGTACATTTTTCGC  
CTTTGGTATACTTGAACTTGTTAAAGTGACTAAGAAGCTGTAATGAGCTGTATGCTGCAACTCTACTTTC  
TATTCACTACAATTTCTTTAATTTACTAGGAAGCAAGGGGGCTGGCAGAACACCATTGAATTGGGAAATC  
AGGTCCAATATTGCCCTCGGAATTGCACGTGGCATCGAATACCTTCACTCTCAAGGTCCTGATGTCTCCC  
ATGGGAATATCAAATCATCCAATGTTCTTCTACCAAATCATACGAAGCACGTGTCTCAGATTTTGGCCT  
GGCTAACTTGGTTGGATCGCCATCTCCCCTACTCGAGTTGTTGGATATCGTGCTCCAGAGGTAAGTATG  
CCTCGCAAGGTTTCCAAAAGGCTGATGTCTATAACTTTGGAGTATTACTCTTGGAGCTTCTTACTGGAA  
AAGCACCTAGTCATGCCCTCTTAAATGAAGAAGGTGTTGATTTGCCAAGGTGGGTTCAATCTGTCGTTCC  
TGAAGAATGGCCTTCTGAAGTTTTTGATATTGAGCTCCTCAGGTACCAGACTGCTGAAGAAGAGATGGT  
CCAACCTTGCAGCTAGCAATAAATTGTACAGCTCAATATCCTGATAAGCGACCTTCAATGGCTGAGATC  
TCTAAACAGATTGAAGAGCTTCGACGCCCAACCTCACATGATAACAAGAACTCTCTGATCTTGCCAATG  
CAACAGAGTGAAGTGGTCATTATTAGTCCCCCTCGAGATGTGCAGTAATTAAGCTAAACTCAGATTCATC  
ACCAATCTTTTTTAAGCATATTAAGTCTGTTGTTTGGGGGAGGGGTGTCTCATCTTCTTTCAGTTTGA  
ATTAAGTATCATGGCCCCTTTTTCTCTATGTTTCTGTAGTAGACTAGTGGTTACCCCTTTCATTTTCTTTA  
GATGAGGGGCCAAAGCCAATATCTGTACCATTTATTCTTGTGGATGTATAATGCTTTCTGTAATTATTAC  
TGCTTCTGCTTTTACTTTTGCTTTTTCAGTTGCAACTGTGCATGGCTATTCTGTGTGTATATGAGGCATGCA  
TGCATGTGGTCTTGATATGCTGAAGCCAGCAGGGAGATTGCATTGAGAGTTTTTCATAGATGCTGAGTT  
GGCCAAATATTG

>PGSC0003DMG400028845 LRR-RLKs

TGTGTGGCTTTGGATTCTGTAGCTGAATAGTGGTTTTTCTTTAGAATGGCAAAGCATCTGACCCTTTTC  
TTCTTTTAGTGTCTTTTTCTCACTCTAAAAAGAGTCTTTCTGTGTTGTTGGTGTGGGAGAGATGAGGTTGT  
TGTTGCTACTGGCAGTAGTACTGTTGGTGGCCATTTTGGCGAATTTTTCAAGCTTTGTTAATGGTGATAC  
AGATCCATCTGATGGTTAGCCCCTTTTGATTTATTCATCATTCTCTTTATTTATTTCTTTTTTAGTATGTGAA  
GTAGTAAGTACAAGTCCAGTTTTCTGTTCTCAAGGAAAAATTTAGCTGAGAGTGGGCTTGAGTCTTGA  
CAACTCATGAAATGAACAAACCAACTGAAAAAAGTGTCTTTGTTGAAGCCCATGATATTGAAAAGAAA  
ATAGCATTGAAAACACTAGGTCTAGGCTTGGTAGATAGAGTTATGTGGTACATGTTGTTGGTATATATC  
CTTGAATTAGTTAGTTGCACACAAGCTGGCTCGGACACTGTGGTTATCATAAAAAAGAAATCTTTGAAA  
ATGATGGATATAATAAGTCTTGCTTGGGCTGCATCAATGGTAGTCTTCACTTTTCGAGTATGGGAAATACT

CATTA CTTATGGCTGAACAACCCCTTAGTCTTGTCGACTAGATTGAGTCATAGTTATTGTAATTGTTGAAT  
T TACTGTTGCCGATGCACTTAATAGTTACAACAACATATCCAATGAAATCTTGTAGCTGGGGTTTGGGAG  
GGTAGAGTGTATGCAGACCTTACCCTACCTCGTGGAGATAGAGGGGAGACTCTTTCGGGAAGATGCACT  
TAATAGCTAATAGAAAACGTCAACCTTCTCACAATAATTTCTTTCATTA AAAAATTGAACAAGTCTGGGTA  
AAAGGTA AATCCTTACAGAACTTGTGGTTTGTGAATGTGATTGGTTTTAGT TACTATTGCCAGCCTTATA  
TAAGCAATTACTGGATAATGTTTTCTACTTTATGTGGTAAGGGGTGACAAACACCAATGAGTTTGAAGTT  
GATCAA AACCTTAATAAAGCTATATAATTTACTTTTGGACTCCTGATGATCCAAAGAGTTTCACAGTAATG  
GTTTGGTTAAGTTGCTCGCTACTTTGTACCATGCTGGTCAAGTTGCCGTAGCTGCACATTCTTTAACAGA  
TTGTCCTATGTAAAATCTGTCTCTTGAGCCGTTCTCTGTCCATATATAACTATTTCTTTATCATTAAAATTCC  
TTACACAATCACATATGTCTTGATTTAAATTAATCTAGTTGACTTCTGTTTGGCTTTCAGCATCTGTTCTG  
AGAGTCCTGTATACCACCCTAAACTCACCAGGGCAGCTGACAAAATGGAATGCCAATGGCGGTGATCCT  
TGTGGAGAGTCCTGGACAGGCATTACCTGCTCGGGCAATAAAGTTACTGAAATGTGGGGTTTCGGTCTTC  
CTTTTTGTCTTCATCTCCATGTTGTTTCAACTTTTTGGAATTATTGACTAGGTAAACTGATGATTAGTTTCT  
TTTCATTTTCCGTCAGCAAGATGTCAGGTCTTGGGCTCTCAGGTTCAATTGGGGTCTCAGCTAGATAGTCT  
AAAATCTGTGACCAATTTGTAAGATAAATGGCCTTTGTTTGTTCCTTATTAATTGGATTTATGTTGAATTC  
CTGAATGTGGTCATCTTTGTGAATGTTGCAGTGACATAAGCAATAACAATATGGGGAGCCAGTTACCTTA  
CCAGCTTCTCCAAATGTGCAAAGATTGTATGTTTGT TATTGTCATATCTTCTCCTTGCAGGTTCTATTT  
TCTTCTCTTATCTTTCTTAGAACTTGCCTTGCAGAAACCTCGCTTCTAGTGGTTTTAGTGGTGGCCTCCCA  
TATTCCATTTACAGATGACCTCCCTCCAGTACTTGTAAGTGAATGCTTAAATTAATTTGCTTAAATAC  
TTGGTCCTCTTCATTCTCTTTGGGGCTCCTTATGATTCTTTGCAATGTTTATGCCTGGTTGTAGAAATGTCA  
GTCATAATCAAATTC AAGGATCAGTGGTTGTCTCGTTT GACTCGCTCTCTGCACTCAACACATTGTAAGG  
CCGATTCATCTCCTTCCATTACACCAGAGTTTTCATATTGCTTAATTATGATCTGAATGAGAATAGTTTGCT  
GTTCTCAAATGTTATGATGAAAGTACACTTATTCTATTATTTAAGTTGTCTCGATTTGAGAAAGAGGTAA  
ACACACTTGTTCCATTTCCACACTTACTGTGCAGAAGTGAGTCATGTCTTTGGTCTGCTGCCAAAGTATTG  
AATTATGCCAATTGAGCTTAGTTGCTACTTAGATTGTACTTATTCTTAAGCAAGTATTA AAAGCCTCAAAG  
GTGCGCTTATGCCCTAAAACGAGGTTTAAAACGTGTTGAGCGCTTTGCCTTGCTTAATGTGTGCTTTAGT  
GTCATCATCAAGGTCCTAAGGCATACTTTCCCTTGACTAAACAAGTGATATTTCACTTTATCGTAAAAAAA  
TCCAATTTCTTTGTT CATATATTTGTCATGCATGCTTATAATTATTAGTCTTGGACTAAACATATATACT  
TGTATTTTTTTCTCCCTTGCACCTTTTTTTTCATTA AAGCTTACACTTTATTTGCGCTTTAAGCCCAATGGA



CCTTAGAACTTTTTGTGCTTTTTGCTTTTGATAACGCTGGTACCTTATCATATTTTCTTGTTTAAAACATAA  
TAGTTTGAAATTTATCATTCTCGGTCACAATTTGATTGATCTTTTTAATGCTTCAGGGATTTCTCTTTCAA  
TTCTATGACGGGTAATCTTCCTCAAAGCTTCCAGTCACTAACTAGTATGAACAAAATGTAAGAAGAGTTT  
TCATACTTCATCTATCTATTTGCAAACCTCCATCAGATATAGAAGTTTTGTTGTTATAATATGCAGGTATTT  
GCAGAACAACCAGTTTAGTGGAACCTATTGACGTCCTGGCCAATCTTCCCCTCGGAAATCTGTGAGTTGTA  
TGCCACATGTGTAGATATTATGTCTTATGTCTACATCTCCTTCAGTTTCAGTTAAATCCATTGGTTGAAAA  
CCATGTTCACTTCTATTATTTAGGAATGTTGAAAACAACCAATTTACTGGCTGGATTCCAGATCAGCTT  
AAAGGGATAGTGCAGTGAGTGTCTTAGATTGCAATAATTTTCATTCTTCTTTGCAAATCTTTGGGGAGT  
TCTTTCTAATTGTTTTCTGGATTTATGAATCTTTCATAACAGATCAAATGGTAATTCATGGATCTCTGGACC  
TGCACCCCCACCTCCACCTGGCACACCTCCTGCAAACAATCCCAATGGAGATCACAAATCCAGAGACAAC  
AGCAGCAATTCGGGCAGTAGGAAATCAGGTATAGGGGGTGGAGGTGTTGCAGGAATAGTGATATCTAT  
TCTAGTTGTTGGAGCAATAGTAGCATTCTTTATTATCAAGAAAAGATCAAGAAGGTCGTCCACAGACATA  
GAAAACTTGATAAGCAGCCACTTGCTCCTTACTCCACAGAAAGTAGAAGGTATTTGGCTTTCATAAT  
TCTTGATATTGTTAGAAATGTCTTGAATTCTCTTAACTCTTTGGATATTTCTAACGTATAATTATAATC  
AATTGCGGTGTTACTATTTACTCAGTTGCTTGGGAATATGGAAAATGATGTCTAAGCCTCTATCCTTACCT  
TGCTAATGATTGGTCATAAACCATGCAAGTAGTATCAAAATTTTGCAAGGGGTTGTCATTGATACAGAA  
GGAAGCAGCAAAGCTGGAAAATATTTATCTTCGAAGTGGAAAACTGTATGGATTTGAAAGATCCTAAG  
TTCTGAACAAACAAAAGTTTTACTACTTTATTGGTAGTCCCGTAGGTATAATCTTTAGAAATTCAAACTGAT  
CTTTTGGAGGAGTCTAAATTACGTGGTGCTTTTAAAGCTTATGATTATTTTTTGACAAATTAACATCAG  
CTACCTTGATGGTTTAACTTCTGGGAGACAAAACTCTTGAGAATATAGTTGACCCGAAGAACTCTTG  
CTTCAGACTGTAACCTGTCAGCACAGTGAAGGAGTCATCTTCAGGTTTCATATTTGGGAAGTTGCTTTCTCC  
TTTTACTCCATCAAAGCCACAAAACAAACCGTCTCTTACAATACGAGTTCCTTCTCATTGCAACTTCA  
TCAGTAATTTTCCAGTTCATGCTTATAACTTTTCATGCCTCATTTCATTATTGACTTCAATGATGTCATGGAA  
TCCGAGTTGGAGCTTGATTTGCTTATGTCTAACTTTTTTATTGCTGTGTTGCTGTTTTTTTTAAAAGGTAA  
CGTCACTGTTATATTTTGTGTTTCTGGAATTCCTACTCATTGTCTGTTTTTGGTTGCAGAGTTGAAACCT  
TATCAAACCTTCTCCACAGTAAGCATGGGCACATTTGAAACTCCCACTGCTGTAACCTAAGACCTCCACC  
TATTAATCGCCTTAAGTCCTTTGATGAGGTTGACATGTCACCGAAACCCATTGTTCTCCCAAGAAAATTA  
ATACAGCTCAAATCAGGGCTACACAGTTTTCAATTGCAGACCTACAGATTGCTACTGATAGCTTCAATGT  
TGAAAACCTTATTGGCGAGGGATCAATTGGGCGTGTTTATTGCGCTCAGTTTGATGATGGCAAAGTAAT

ACTTCTCTCTATGAGTACCCATTAATAAAAACTTTTTTCTTTCTTATGACTATATAAGGTGATTTAGTGATG  
CTAACACATGTTTAAGCAAAAATGTATTATCAGAGAACTACATACTTATTGTGTTCCCTTTCTGTTATTTG  
AAATGTTGTAGGTTCTTGCTGTCAAGAAAATCAATTCTTCTGCCCTCCAAAATCATGAAGATTTTCTCTAT  
ATAGTTTCTGAGATATCACAGTTGCACCATCCAAATATAATTGAGCTTGTTGGTTATTGTTTCAGAGCATG  
GACAGTACTTGCTAGTTCATGAATTCCATAAAAAATGGTTCTCTGCATGATTTCTGCACCTGTCAGATGAA  
GACAGCAAGCCACTGGCATGGAATAGCCGAGTCAAGATTGCACTTGGTGCAGCACGAGCACTAGAGTG  
AGTTTTTGCAATCTCAGAATTATTTTATCATATTTTATATTCAATTGGTTACAGTTATGCGGGACTATTTCC  
TTATTGATTCATTCCAGAAAGGATGACACGTTGCTGTATTTGGAAACAATTCACCTTATATTTCCCATTTT  
ACCATTAGTGAGAAGTTTTATAGCAACACAAATGTTATGGTATGTTTAAGGCCACAAGTTTCAAAGTTT  
TATAGTCAGACAAATGCTATGCCATGTTTAAGATCGATCACAAAGTTTCAATTTTTTTTTATCTCTTTCTTAG  
ATTCAATGCCGATTGGAECTATGTCACATAAATTGGAAGGGGGAAGTAAAATTCATGGAGCATGCAGCA  
ATGCTATGTTTTCTCTTATTTATTGATGGCTAATTACTAGTAGTTTACATGAATCTTCTGCTTATCTATAT  
CGGAGATTCATAGAATAGATCTTCTGGGTAGAAGAAAAGGGGATTCTGTGAAAGTCAATACCAAGCACT  
TAGTCGTGACTCGTGATGAACTTTACCAGAGGATCCATAGTAATATTGCATTTAGAGGTCATACTTGTTG  
GACTAAAAGACCACTATAGAGTTTAGTCTTTTTTAAACATTGATGACTAGTAAGTTAACATAAAGAAGA  
GTTCAATTTATCCTTTTAGTTAGAGCCTAGTATCCTAAATATGCCGGTCTTGCCAATATAAAGCTAATCAA  
AACTTCAATGCTCCCATCATTTTGTTTTATATGGTGGTGTGGAGTGGGGACAGAGTTCAAAAAGAAAGA  
AAGACTTCTGGAECTTGTGGTCTTAACTTGCCATGTCATTTGTGTGGCTATAAAGCATGTCATTAGGG  
TAACAATGAATATTTGAAGTTAAAATTGTTTCAAATATAGGAAGGCGTCAATCTTCTTGAAAAGGCTTA  
AAAGGAAATCCGCCATATAAAATGATACAAAGGGTGTAAACAAATTTCAATTTATGTGGTTTTTCATATCTG  
TTCATTTCTGTTTTCCATACACAAATTTCTTCACTAGCTAATATAGGCATCCTTTGCAGGTATCTGCATGA  
AGTTCATTCACCATCATTGGTTCATAAAAACATTAATCGGCAAATATTTTACTTGATCTGGAECTCAATC  
CTCATCTATCAGATTCTGGATTAGCAAGCCTTATTAATGATGCAGATCAGGTGGCTTTAAGCTCCTTACTT  
TATGCATTGTTGCAAAGTGTTCGGTGGATTGATATAGAAGCATGCATGCACATAAGTACACATGTATT  
ATATAGGCATGTTTTGACATACTATTGGCTGTGTATGTGTCCTTTTCAAGGAGATAAGAAATATCAAAC  
ACCACATGGTTGAAACGTCATTTGTTTCAGGAGAAGCTTTGTTTTGTGCACAAACCTTTGAAACATGAAA  
TCATTTACAACAGTTTCTGGGGTTCATAAATTGGATTCCAAGAGAAGTTGTCAAGTAAAAACAGAAAAT  
TTTATCAAATCTAGGGCATGGAATTATCCAGTATATTCTATAGAAGTAACACTACCATATAACTCATTTT  
AATGAACTAGTCTTTCTATGGTCCCTGTTGCTTATCTCCTGCTCTTCTCTACTTACTCAATTGGTAAAAT

GTAGCTGTTTCTTCTTCTTAAAAGATTCACCTTCATTATCATCTTCTCAAGATATTTGGAAGTGATCATCTTT  
GCAGGCACTAAACCATAATACAGGGTCTGGATATGGTGCACCTGAGGTAGCTATGTATGGGCAATGCAC  
CATAAAAAGTGATGTCTACAGCTTTGGAGTTGTTATGTTGGAACCTTCTTACCGGACGGACACCTTTTGAT  
AGGTAAAGTTGCTTAGGCATCATGATATTGTGTCAAATTA CTAGAGACAAACAGGAAGAAATTCAGAA  
AGTCTTAACTTTCTTGATCAATATGTATGCTCTTGATGCAGTGAGAGACCAAGATCTGAACAATCTTTAGT  
TAGATGGGCAACGCCACA ACTCCATGATATTGATGCCTTAGCTAAGATGGTTGATCCAGCACTCAAAGG  
GCTCTATCCTGTAAATCCATTTCCCGCTTTGCTGATGTAATTGCTCTTTGTGTCCAGGTAATATTTTGAT  
AGACGGTGTGCCTAATTCATAAATCTGCTGTGTTTATCAAGAACTTGATTCTGTTAGTTCAGTCAACACTA  
TCTCATTGTCATGTATACTATTGTGGCAGTCTGAGCCTGAGTTCCGGCCACCTATGTCAGAAGTGGTTGA  
AGCCTTAGTTCCGGCTAGTTCAACGAGCAAATATGAGCAAGAGGACATATAGTATTGATCGGGGTTCAAG  
GGGTGAAACAGATGCTCTAGACAACCAACCTTAGTTCCGATGTAATGTAGCCTTTTCTACCAGAATGTCT  
CTCTTTATAGTTTGTGTTTATGGGATCTATCAGCTTATCTGTTCCAGCAAGATCTTGTTGGTTGCATTGGTT  
GTACACACTGCTAGATACTAAAATCTGTTTCATAGTGCATATTCAATTTTCATTTTTCCCTGTATCTGCT

>PGSC0003DMG400029146 LRR-RLKs

GGAAAATGAAGGATCATTCTATTAGAAAAAAGTTACTCAAGCTTTATTTAGTTCCTCTTTTTCCATGCAA  
CTTATGATATAGAGCTTTCATATCTAGCTAGAGAGAAAAAATGGCCAGCATAGGATCAAATCGATCAT  
GTGTTTGATCGTGTCGTGCTATTTTACATGCAGCAAGTCAAAGTAGCTCTGAGCTCGAGCTACTTTTTAT  
CGATGAAAACATCGATGAAGGATCCATTAGGATCTTTCATGATTGGATTCCGCGGTCTCAATCTTTTTG  
CCATTGGAATGGTGTGTTTGTGATGACTTGTACATGTTGCAAAAATTGAGCTATCAGGGAAGA ACTA  
TCTGGAAAATTATCCGAGACTATTTTCAACTTTCCATACGTTGAATCGATTGATCTCTCGAATAATCAACT  
CTATGGAGAAATCCAAGCAATATCTCAACTTGTGTTGGCGCTGAGATTTCTCAATCTGAGTAACAATAAC  
TTCACAAGTCTACTTCTCAAGGCTCGAGAATCCCACTTCTCGAGACATTGGATCTCTCAAACAACATGAT  
TTCGGGGAAAATCCCCGAAAATATTGGTTTATTCTCAATGCTCAAAGTTCTTGATTTTGGTGGAAATGTG  
TTGGTTGGAAGCATTCCAAGTCTATTGCAAATATTTCTAATTTGGAGTTCTTGACTCTTGCTTCAAACCA  
ACTAATCGGAGAAATCCCTCGAGAACTAGGTCTTTTGAAGAACTTGAAGCTTATTTATTTGGGATACAAC  
AATTTCTCTGGTGGAAATACCGGAGGAGATTGGTGAATTGTCTTCTTTGTATCATCTCGATCTCGTGTACA  
ACAATCTCACAGGTGAAATCCCTTCATCTTTAGGTAATCTCACCAATCTTGAATACCTTTTTCTTTACATAA  
ACAAGCTCACTGGCCCGATTCCAAGATCTCTATTTAATCTCAAGAAAATCATCTCGCTTGATTTAAGTGAT  
AATTTCTTGTCTGGTGGAAATTCCTGAGCTTATTTCCCAATTACAAAATTTGGAAGTTCTACAATTGTTTCG

GAACAATTTCACTGGTAGAATTCCAAATACTTTATCTTCCTTACCTCGACTTCAAGTTCTTCAATTATGGTC  
TAATAAATTATCTGGTGAGATTCCCAAGGACCTTGGGAAACACAACAATCTCACAATTCTAGACCTTTCC  
ACCAATAACCTCACGGGTAAAATACCCGAAACCATATGTTACTTCAACCATCTTTTCAAACCTCATACTCTT  
TTCAAATTCACTTCATGGCGAAATCCCTGTAAGCTTGAGTCATTGCAAAAGCTTACAAAGGGTCCGCCTT  
CAAAACAACCACCTCACCGGTGAATTGTCCCAGAAATTACAAAACCTCCCACTTGTTACTTCCTTGATAT  
CTCGGGCAACAATCTATTTGGCTCCATTAGCGAAAGACGATGGGATATGCCATCACTTCAAATGCTAAAT  
TTGGCTAAGAACAAGTTTTTTGGTACCTTGCCTGATTCTTTTGGTAGCAAGAACTCGAAAACCTGGACT  
TATCCGAAAATGATTTTAACGGTACTATTCCCTAAGAATTCGGAGAGTTATCAGAGTTAATGGAGCTCAA  
ACTACGAAGCAACAAGCTTTTCAGGCGAAATCCCAATGAATTGTCTTCATGCAAGAAGATTGTGAGTCTT  
GATCTGAGCCATAATCGATTTTCAGGTCAAATCCAACCTAGTCTCTCCGAAATGCAAGTTCTTAGCCTTCT  
TGATTTGTCAATGAATGAATTATCAGGTGAAATCCCGCCTAATTTGGGGAAAGTTGAATCACTTGTCTTG  
GTTAACATCTCTCACAACCATTTTCAGTGGATATTTACCGTCCACCGGAGCTTTCCTAGCCATAAATTCAAG  
TGCGGTGGTTGGAAACCAACTATGTGCCCGTGGGGACGACATTACAAGCGGCTTAACGCCTTGTAATC  
ACTCAAGAAAAGCTCAATTTGGTGGTTCTTCTTGACATTTCTTCTTGGAAATACTAGTTTTGCTAGTATTCTC  
GGCTTTAGTTATTGTATTTATTCAAAGAAGAAGAGAATTGAAGCTAAAGAAAGTGGAGAGTACTACTCA  
AGATGGTAATAATTGGGAAATTCAATCTTTGATTCAAAGCCTCAAATCCATCACCTAGATGACATC  
TTAGGGATTGGAGTTTCGTACAAAGGGTTTTATTCTGAAATAAGTAACATGCAAGTATTCGTGAAGAAG  
TTGAATGTGAATATTCCAACAAGTTTTTTGGACAAACATCCAAGAACTAGGAAATATTCGACATCCAAATG  
TTGTGAAGATATTGGCTGCATGCAAATCGGAGAAAGGAGGTATTTTGGTTTATGAGTATGTAGAAGGG  
AAAGATTTGAGTGAAGTGATTCGAGTCATGAGTTGGGAACGTAGACAAAAAGTTGCTATTGGCATATCT  
AGAGCATTGAAATATTTGCATTGTTCTTGTTCAAAAGCATTTTCATCGGTGACCTTTCTACCCGGAAAGT  
TATCATTGACGGAAAAGATGAACCTCGCCTGAGATTGAGTCTTCCCACTACGTCCTACGTTGGTCCAGGT  
AAATTTACCATTTTACCCTTGTCATCTACGGTACTTCTCTTGTGTTTTGACATTTTTTAAGAGTTTAAGTAAT  
ATACAATCGTAAGCTAAAACATCATATATTCTATCAGGTAACATGTCTTATTTGCAAGATTATAAGCTTAC  
TTACATACATCTTTCAACTGACTAGATCATGTAAATTAATTTATACTGATAATGCATATAACTTAATTAAC  
CGTTAGTTTAATAGTTAACAACCTTTGTTATAACTTAAACAAACCACATATAGTTTCTAAAGAGTGTAACG  
TAGCTATGATGACTTTAATGAAAATTGATTTTTTCAGCTTTAGCATTGATGTGATAGGAATGTCATGTTAT  
GTTGAAAATTATTTGATCTAACTAAAAGAAATTTGTATTTTTCTAATTATTAGAATAGAAATAATTCTTA  
GAATTTACGTACTTGGTCTTTATTTGGTTTCTATTTTAACTTTAGTTCTCATAGTCTCTAGGAGTAATGATA

AGGTCAAGGAATTAAGCAAACAAATGTCATGGAGGCAATCATGAATGTTTTTTTCTCTTAAAATAAATGT  
AGAGACATAAATCTTATCATTCTTTCTTTACGTAGAAAACAATAAATCTAGTCTAGTGTAACAAAAGTCA  
TGACCTTTTATGCCATGCACGTACAATACTGTTACTTAATTACGAGTTACAACCTTTTCTATAAATTGTAG  
AATACAATGGAATATCGGAGAGGAGCGATATATATGGATTTGGGCTTGTTTTGATCGAGTTATTGACTG  
GAAAAAATCGCGGTGATGCTGAATTTGGGAAGCGTGAGAGTATAGTTGATTGGGCGCGATATTGTTACT  
CAGAATGTCATTTGGATACATGGATTGAACCACTATTGAAGAGTGATGCAGTGAATAATCAGAATAAAA  
TGGTGGAGATGATGAATGTGGCTCTCAATGTACTGCTAGTGAGCCAGCAGCAAGGCCTTGCTAGTG  
ATGTTGCAAAGACATTGGACTCTTTGTTAGATCAAATTCTTGTTGGTTAGGGTTGAAAAGGTGTGGTAG  
TGTTTAGATTTTGGGATTTCTAACTTCAAGTCCAAGATTTTTGTTTTTATGTTAATGTTACTTTCTTTTTTT  
GGTTTACTTTGTATTGGGCATAAATTAATGAGTGTTGCTCAATGTTTTGGATGTTATTTGAGTGTA AAAAT  
GTAGATATGAAACTAAATGCTAATATATAT

>PGSC0003DMG400029442 LRR-RLKs

TTTCAACACTCACTAAAAGCTTACTCTCTAAGCTCTCTTCTTTCATTTTTTTTCTATCTATCTATTTTCTCTA  
TTCATCATGGACAACATGAACACCAACTCTGCTATAACATTGCTCATTGTCTTGTTTTTTTCTTGATTCTT  
GCATCCGTAAACGCGGTATCTTCTCCATCAAACTGATGCTGAATCACTCTTGCTATTCAAGAACATGAT  
ACAAAAGACCCTTCTGGTGTTTTATCAGGATGGCAACTTAAAAACAATCCATGTTTCATGGAATGGTGTA  
ACTTGCAATAGTCTTGGAAGAGTAACAAATCTTGATCTTCAACAATCTGAACTTGTTGGAGAGGTTTCTT  
TTTCTCCTTTCAATTCTCTAGATATGTTAACTGTCCTTAATCTATCATCGAATTCGTTTTATGTAAATGCATC  
AACCTCTTAACTCAGTTACCTTATAGTTTGAAACAACCTGAACTTTCATTCCTGCTTAGCAGGCTATG  
TACCTGAGAATTTCTTTGCAAATGTCCAAATCTTGAATATGTTAGTCTTTCTTTCAATAACATAACAGGT  
TCTTTGCCTCAGAATTTCTTGTTGCATACTGATAAGTTACAGTATCTTGCAATGGACTATAATAATCTTAC  
AGGATCAATTTCTGATATCAAGATTGAGACTTGTAATTCATTGTTACGTCTCGATTTGTCAGGGAATCAG  
ATAATGGATTCAATTCCTTCTGCTTTATCTAATTGTACAACACTTCAAGAATTGGTTTTGGCTGAGAATTT  
CTTCTCTGGTTCAATTCCAACCTCTTTTGGTGAGCTTATAAGTTTGCAAAGATTGGATCTTTCTAAGAACC  
ATTTATCCGGTTGGATCCCATCTGAATTAGGAACTCATGTAGTTCACCTGTGGAACCTCAAGTTTTCTAAT  
AACAATATCACTGGTTCAATCCCGAATTCATTCTCATCATGTTCTTCTTCTTCAAATCTTGATTGTGCAAT  
AATAATCTAACCGGTCCATTCCCTGATTCCATCCTACAGAATTTAGCTTCTTTAGAGTCTTTGCAAATGAG  
TAGTAACAAGATTTCTGGTTCAATTCCTGCTTCTTTTCAATTGCAAGAACTCCGCGTTGTAGACTTTA  
GCTCCAACATGATCAATGGGATGATTCCACCAGATTTATGCTCTGGAGCTTCATCATTGGAAGAGCTGAG

AGCACCTGATAACTCACTTTATGGTCCAATTCCATCTCAATTGTCTCAATGTTACAGCTCAAGACTATTG  
ATTTTAGCTTGAAGTATTTGAACGGTTCGATTCCATCAGAGCTAGGAAAACCTGAGAAAACCTGAGCAGCT  
TATTGCTTGGTACAATAGTTTGGAAAGGGAGCATAACCAGCAGAGTTGGGAAAATGCAGCAACTTGAAGA  
ATCTTATACTTAATAACAACACTACTTGAGTGGGAAAATTCCAGTTGAATTGTTTAATTGTGGTAATCTTGAG  
TGGATTGCTCTCACAAGTAATGGACTAAGTGGTGAGATTCCGAAAGAATTTGGCCATCTTTCAAGGCTG  
GCTGTTTTGCAACTAGCAAATAATAGCTTGAGTGGTCAGATTCCAAGTGAATTAGTCAATTGTAGTAGCT  
TGGTTTGGTTGGATTGAGTAGCAATAGGTTAACCGGGGAGATCCCACCGGACTTGGTAGGCAGCAA  
GGGGCAAAGCATTGAGTGGGATTCTATCAGGTAACACTTTGGTGTGTTGTTGCAAATGTAGGAAATTCG  
TGCAGAGGCGTTGGAGGATTGCTTGAGTTCTATGGGATACATCCTGAAAGGCTTTTACAGGTTCCATCAT  
TAAAGAGTTGTGATTTCACTAGGCTGTATTCTGGTCCAGTTCTTAGTGCTTTTACTCGGTATCAGACTATC  
GAGTACCTTGATCTTTCGTACAATGAGCTTCGTGGGAAAATCCCTGATGAATTTGGTGATATGATAGCTT  
TGCAAGTTCTTGTTATATCACATAACCATTTGTCAGGAGAGATTCCCTTCATCACTTGGAGGGCTAAAGAA  
TTTGGGAGTGTGTTGATGCATCACATAACAGATTGCAGGGTCAAATTCCTGATTCATTTTCGCTTCTTTCTT  
TCTTGGTGCAGATTGACTTGTCTAATAATGAATTGACAGGACAAATTCACAAAGGGGTGAGCTCAGTA  
CACTTCCTGCAAGCCAATATGCAAACAATCCAGGACTCTGTGGGGTTCGTTGTCTGAATGCCAGTATAA  
CTCACCTGCCACGAATACTGGAGACGGAGGAGGAGGAAAAAGAAGTTCAGCTGCATCATTGGCTAATA  
GCATTGTTCTTGGAGTTCTCATTTCCATTGCCTCAGTATGCATTTTGATTGTTTGGGGTATTGCTATGCGT  
GCAAGGCGTAGAGAGGCTGAAGGAGTGAAAATGCTTAGTAGTTTGAGTACTAACTATGCAGCTTCATCA  
TGGAAGATTGACAAAGAGAAGGAGCCATTAAGCATCAATGTAGCAACTTTCAAAGACAACCTTAGGAA  
GCTGAAGTTCTCACAACCTTATCGAGGCCACGAATGGATTCTCAGCTGCAAGCCTCATCGGTTCTGGAGG  
ATTCGGAGAAGTCTTCAAGGCAACATTGAAGGATGGATCAAGTGTGCAATCAAGAACTCATCAGGTT  
AAGTTGCCAAGGAGACCGAGAGTTCATGGCTGAAATGGAGACATTAGGAAAGATCAAGCACAAGAACC  
TTGTACCCCTCTTAGGATACTGCAAGGTTGGTGAGGAAAGACTTCTAGTTTATGAGTTCATGGAATATGG  
CAGCCTAGAAGAAATGCTTCACGGGAAGACAAGAATGCCTGATAGAAGGATCCTAACATGGGAGGAAA  
GGAAAAAATAGCCAGAGGAGCAGCCAAAGGACTCTGCTTCCTTACCACAACCTGCATCCCACACATCA  
TACACCGCGACATGAAGTCAAGCAACGTGCTATTAGACAACGAAATGGACGCCAGGGTGTCTGATTTTG  
GGATGGCAAGGCTGATAAGCGCGCTGGACACACACCTCAGTGTGTCCACACTAGCAGGAACACCAGGT  
TATGTGCCACCTGAGTACTATCAGAGTTTTAGGTGCACAGCAAAGGGAGACGTGTACTCGTTTGGAGTT  
GTGCTTCTTGAACCTTGACAGGGAAAAGGCCAACAGATAAGGAAGATTTTGGTGACACAACTTGGTA

GGATGGGTGAAAATGAAAGTAAGAGAAGGAAAATCAATGGAAGTAATTGATCAAGAATTGTTATCAGT  
GACTAAAGGGAATGATGAAGCAGAAGTAGTAGAAGTTAAAGAGATGGTAAGGTAAGGACTTAGAGATAACA  
ATGCAATGTGTAGAGGATTTTGCATCAAAAAGGCCTAATATGTTACAAGTTGTGGCTATGTTGAGAGAA  
CTTATGCCTGGAAGTAGTTCAAGCAACAGTGGCTAAACAGCAAACCAGAAACAAAAAAGGAAAAA  
AAAAACCAAAGAATGTAAAATTCTTTCTGTTTTGTTTGTGCAAGTATTCATCTGCATTTGTATTTAGTC  
AACAACTTCTCTATTTTTTTGCAATATTATCCCATGTTTTAAGAATCTTGTGTATGGATATTGATAACAT  
>PGSC0003DMG400029644 LRR-RLKs

AAAAACAGAGCAAAACCAAGAAACCAAAAAGAAGGGATTTTTACTTAGTTTTTGTATGCAATTGC  
AAACCAAGAAGAAGTTTTTGAATTTGAGGCAAAGATGTCTTCTTCTTCAAATCCCAACAAAAAAT  
ACCATTTTTTCTTTCTTGGTTACCCTTTCTTCACTTCTTCTTCTTCTTCTGCTGCTGTTACTGATGTTGT  
GCACCATTTCAAATTGGGACATTCTTGATGATACCCCATGTAAATGGTCTTTCATAAAATGCAACTTTCA  
AGTTTTTATTACAGAAATCAATATTCAGTCTATTCATCTTGAACCTCCTTGCCTACAAATCTTCTTATA  
TAAGTACCTGAAGAAGCTTGTTATTTCTGATGCTAACATCACTGGTACAATACCCTTTAACATTGGTGACT  
GTTCTTCACTTGTTACTATTGATTTGAGCTCAAATGGTCTTGTGGGTACCATTCTTTAAGCATTGGAACC  
CTTGTAACCTTCAAGATTTGATTTGAACTCAAATCAGCTTACTGGGAGAATCCCAGTTGAGATTGGGA  
ACTGTAGAACTTGAAAAATCTGTTCTTTTTGATAACAGGCTTAGTGGTGGTTTACCAAGTGAATAGG  
GTTGTTGTCAAATCTTGAAGTGTTAAGAGCTGGTGGGAATAAAGATGTTACTGGTAAAATCCCAAATGA  
GTTTGGGGATTGTGGGAATTTGACTGTTTTAGGCTTAGCTGATACAAGAATATCTGGTTCTTGCCTGTT  
TCTTGGGTAAGCTTAAGAATCTTGAACCTTTGTCTATTTATACTACAATGTTGTCTGGTGAGATACCTTC  
TGATTTAGGTAACCTGACTGAGCTTGGAACCTGTATTTGTATGAAAATAGTCTTCTGGTTCAATCCCAT  
CTGAGCTAGGGAACCTTAGAAAGTTAGAAAAGTTGCTTCTTGGCAGAATAATCTTGTGGTGTTATTCC  
AGAAGAGATTGGGAATTGACTAAGTTGACTATGATTGATTTGTCTTGAACCTTTGTCTGGGAGTATA  
CCATTATCTTTGGTGGTCTTGTGTTACAAGAACTTATGCTTAGTAACAACAATGTTTCTGGTTCAAT  
CCCTTCTGTTCTTTCACAATGTACAAGTCTTGTGCAGTTGCAGTTTGACACAAATCAGATATCAGGTTTGA  
TTCCTTCTGAGTTAGGGAATTTGACTAGTCTTGTGTTGTTTTTTGCTTGGGATAATCAACTGAAGGAAGT  
GTGCCTTAACTTTGGGTAGTTGTAGTAACCTTCAGGCATTGGACTTGTACATAACTCACTTACTGGTAG  
CATTCTCCAGGCTTGTTCAGTTGAAAAACCTTACTAAGCTACTGTTGATTTCTAACGATATTTCGGGTA  
CTATACCTCGAGAAATTGGATATTGTAGCTCATTAGTGAGGCTAAGACTTGGAAACAACAGGATTGCTG  
GTGGAATTCCGAAAGAAATTGGAGGTCTTAAGAGCTTAACTTTCTTGATTTGTCCGGTAATCGCCTTTC

TGGACCAGTTCCTGATGAGATAAATAGCTGTACTGAGCTACAAATGGTAGACCTCAGCAGCAATACACT  
GGAAGGTCCCCTGCCTAACACTCTGTCTTCACTATCAGGGATTCAAGTCTTGGACGTTTCGAATAACCGG  
TTTGGAGGGCCTATATCGGCTAGTTTTGGGCGTCTTGTGTCCTTGAACAAGCTGATTCTCAGTAAGAACT  
CGTTCTCAGGGTCGATACCTCCATCTATCGGCCTGTGTTGAGTCTTCAATTGCTTGATCTTAGCAGCAAT  
GAGCTCTCGGGAGGCATACCGATGCAGTTAGGAAAGATTGAGTCCCTTGAAATCACTCTCAACCTTAGT  
TTCAATGAACTAACAGGTCCAATTCCTGCTGAAATTCCTCACTAAGCAAGCTGTCGATACTTGACCTTTC  
GCACAACAAGCTTGAAGGGAACCTGAATCCACTAGCGAGGCTCGATAATCTTGTCTCACTGAATGTCTCA  
TACAACAACCTTCACTGGTTATCTTCCGGACAATAAGCTCTTTCGACAGTTACCATCATCAGACCTAGATGG  
AAATGAAGGTCTATGTTTCATTTCGGAAGGCCTTCGTGTTTTCTCAGCAATATCGATGGAGTAGGAGTAGCT  
AAAAATGGAAATGATGAGGGAAGGTCAAAGAAGCTCAAATTAGCCATTGCATTGCTAGTCATCATGACA  
ATAGCAATGGTGATCATGGGAACCTATTGCTATCATAACGAGCACGAAGGGCGATGAGAAGGGATGATGA  
TTCAGAGATGGGAGATTCTTGGGCTTGGCAGTTTACTCCATTCCAGAAGCTCAATTTTTCAGTGGACGAA  
ATACTCAGATGCCTTGTGGATACTAATGTCATTGGAAAAGGGTGCTCGGGGATGGTCTATCGTGCAGAT  
ATGAACAATGGTGATGTCATAGCAGTGAAGAAGCTTTGGCCAATAACCATGACTACAACCTAATGGAGGC  
AATGATGAGAAGTGTGGGGTACGTGATTTCGTTCTCTGCAGAAGTTAAGACGCTTGGTTCAATTCGACAC  
AAGAACATTGTTTCGATTCTTGGGGTGTGTTGGAACAGAAGCACAAAGATTGCTCATGTATGATTACATGC  
CAAATGGGAGCTTAGGAAGTCTTCTCCATGAGAGAGGTGGTAACCCCTTGGAAATGGGAATTGAGATACC  
AAATATTGCTCGGGGCAGCGCAAGGGCTCGCCTACTTGCACCATGACTGTGCTCCTCCAATTGTTACAG  
AGACATCAAGGCCAACCAACATTCTCATTGGTCTTGAGTTTGAGCCTTACATTGCAGACTTTGGCCTCGCA  
AACTAGTCGATGATGGTGATTTTGGTTCCTCCAATACAGTTGCTGGTTCTTATGGCTACATTGCTCC  
AGGTAAACATGTTTTTTTATTTTCATGTCAAGTTACAATTCGTCATCATTTTCTAATTCCTAGCATATTATTC  
CGAGTATACATTTTGCTTAGTTATAGTATAAGCATTGATTGCACATTGCAACAACAACAATATACCCAGC  
GTAGTCCCATGCAATGCAGTCTATGAAGGGTAGAGTGTACGCAAACCTTATGCCTACCTCAGAGGTAGA  
AAGGTTGTTTCCAATAGACCCTCGCTTCATGGAAAAACAAAACAAGGCAATCTAGAAAAAGAAGTAAC  
AGATGCGACAACGATTACACATTGCATTTATCACAAATTTTTTCAAAGAATATCAGTAGTTCCTTGATGATCA  
TTGATCCAAGTGCTCCAATGTTGTTTCATTTTTTATTACAGAATATGGCTATATGATGAAGATAACTGCAAA  
GAGCGATGTCTACAGCTACGGAGTGGTTGTATTAGAAGTCTTGACAGGTAAGCAGCCAATCGATCCAAC  
AATCCCAGAGGAGTGCATCTAGTTGATTGGGTAAGACGGAAAAGAGGTGGAATTGAAGTCCTCGATC  
CAAGTCTACACTCGAGACCAGAATCAGAAATCGAGGAAATGTTACAAGCATTAGGAGTAGCCCTGTTAT



GTGTCAACTCCACTCCTGATGAAAGGCCTACAATGAAAGATGTAGCAGCAATGCTAAAGGAAATCAAAC  
ATGAAAGGGAAGAATACGCCAAAGTCGATGTTTTACTCAAAGGCTCTCCAACAACAACAACTACTACTG  
ATCATAATCAAGAAAACAACAACACTCATCAAAGGGTGTTTTAGCAACATCTTCATCAGGACAGAAAGCAA  
GAAGTATGTATACAATGAGCAATAACACAAGCTTCTCTGCTTCATCATTGCTTTATTATTCATCATCATCA  
TCAAATGCCAAAAGTCGATTCTTGGGGTGTTGTTGGAACAGAAGCACAAGATTGCTCATGTATGATTAC  
ATGCCAAATGGGAGTTTAGGAAGTCTTCTTCATGAGAGGGGAAGAATACGCCAAAGTCGATGTTTTACTC  
AAAGGCTCTCCAACAACAACAACACTACTACTGATCATAATCAAGAAAACAACAACACTCATCAAAGGGTGTT  
TAGCAACATCTTCATCAGGACAGAAAGCAAGAAGTATGTATACAATGAGCAATAACACAAGCTTCTCTG  
CTTCATCATTGCTTTATTATTCATCATCATCATCAAATGCCAAAAGTGGTGTTTAAGTGATTCAACAAAAC  
TTATTACATTTGCATTGAATAGAAGTTTGTCAATTAAGTTACTATTAGTTTTAAGTTTCAATAATCCTTTGT  
TTGTTTGTGGAAATTTCTGTAAAGAGAATTAGAAAGGTAGATATGTGTGACAAGTTGAAACAAAACA  
AGCCAACCTATGCTAATTTGGCTTTTTGAGCATTTTTAAGCTTTCATGTAGCTACTAAAGTCAACTTTATTC  
CTCCTGGTTTTAAGGTTCATTTTGAAGCTTTCAAACAAATATTTG

>PGSC0003DMG400030035 LRR-RLKs

GGCTAGGGTACCAAATGAAGTTTCCAAGTAAAGTCCTTGAATAAACAAGTGAAGATTATAACAAAGGGC  
TTTGTCAATTATGATGATCTGTCGTTAGCTTTTACTCAGTCATCAAACCTTGTGAATCTTCAATCTCTCT  
CTCAAGTCTCAACCATTTTTCTACGTCATAGTTTTTTTTGAATAGAAGAAGTAGGCAACTTGTATTGAAAAT  
TCTATCTGAAACTCAAAAAAGAAAAATTCACGTTTTTTCACAGTAAACCTTCTTCTCCTTGTTTTTCTATTG  
GCAAAGAAGACAATACCATTTTTGCCTAAAGTGAATAAAGTCAAAAAAGAGCTTCCAGTTTTTGTGGT  
TGGTTTTGTTGTTTTTACGCGTTTTTTCGAACAAACTCAGTCTCCTATTTGTTTTTCCCTCTTCTCTACTA  
TTTTATTTACTGGGTTTATTCAATTTCTGGGTTTTGGAGCGGTGGACTTTTAATTAATTGTGAATTTAGC  
GATTGTTTTTCAAGTTTTGGGTAAGATATACTAGTGGGTTTGTATGTTTTGTGTGAAATGAATTGGC  
AATGGAAATTCAGTGAGAATAGCTTGTGTTGGTTATTGTGCTGTTCTTGTGTTTGGTGCATCAGGAATT  
GTGTTTCTGTTGGTCTCTCAATGATGAGGGTATTACTCTTCTTCTGTTATTATTTGCTATTTAAGACTTAC  
TTTGTTAGAAATGGCAATAAAAAATTTGTTATTTTGTCTAAAGTTTTAGTCTTTATTGCTGCAGGTTTTGGC  
ACTGTTAAGATTCAGGGAGAGAGTGGAGAGTGATCCATTTGGGGCTTGTGTAATTGAAAGATGGTG  
ATGGAGTGGAAAATCCATGTACTTGGTTAGGAGTTGGGTGCGTTAATGGGAATGTTGTGTCTCTGTAAG  
TACTAAAAATTGCTCTTTTCTTGTATTGTTCTGCAGAAGTCTTCTTTTTCAATTTGATCTGGTTGG  
CTTATATAGATGATTCTAAATTTGGTCTCTGATTGAATTCTGAAACTTTTTGTTCCATGAGTTGGCGGTGAT

TCCAGAAGGGGTATGATCAAAAGACAGATAAATGAGAAGCTTTTGGCACCAATTCCTGTTGAAGCTTTA  
GTATAATGAACATCTTTTGGTGTGTTTGTACCTGGAGTGTAGCTAATGTGTTCTTGTAAGAGGGAGCTAT  
TTAAAATTTGATTTTTATTACTCAATATTTGAGAGGCTAAGCACAACTTATGATATGTTGGTGATCAA  
GATAATTAACATAGCCTCGAGAATGGATGTAATAAGTTGATGTCTAAATTCAGAATGATGAAGCATC  
TGACCGTGGGTCTAATGGAAGGGAGAGATTTGGAAAACCCGCCCTCCTCTAGAAAGGGCAAACATGGC  
GTTAGATATAGTAACAAAGATATAAATATTATCAGAGATCAAATAAAAGGAGGCAAATTTACATACTA  
CCTTCGATGTCAACTTTCTCCAGTTTATTTATTTTCTCAAATAAATGTAACTAGATAATTAGAGCTACAT  
GTATAACATGATCTCTTTGTTTCTTGACCTGATACATGATTCTATATTTCTATGAATTAECTGGCAGTCGA  
ATTTTGTGAAACGGGTAATTATATCATAGATAGAATATATTCATCCCTAGCTAACTTTAGAAACGCATTTT  
ACTGTAGTCATTTTCGTAAATGCAATAATTTTCATACACAATTATCTCCATTTATTATCATGAATATAATTT  
TCAAGTCGGTAAGTAGCATAGTGTCTAAGTTGAATTGGCTATTGTAAAAATTATCCATGATACTGATGTT  
CTAATCTGTGTTTTTATCTACTCACAGGGACTTGAAAGATCTCCATCTATGTGGTACCCTAGCTCCTGAT  
CTCGCGCACTTGGTTCCTTGAAGTTTATGTATGTGCACATTTAACTAGATGTCTTCATTTTCCTAGTCG  
CTGTCATTACAACTCTTAATTCAAGTCTTTTTCTTTAAGATAATTCGCAACTCACTGGAGACTTCTTTACA  
GAATTTTACATAACAATTCCTTTACTGGGTTCCATACCTGATGAGATTGCAAAGCTAAAAGAATTGGAGAT  
TCTGGACCTGGGATCTAATAACTTTAGCCAGCCGCTGCCTTCCGAGCTTTGCCATAATCCCTCTCTGGAAA  
TAATGTGAGTTCAAACAGAGGTGGTGTCAATTTCTAATTTTACCACCTGTTCCCTTACTTACAGAGTTAC  
ACTAATGCAGCTTATCAGACAACAATGAGCTGTTTAGCAGCATATTTCTGGAACCGATAGACTTGAAT  
GGTCCCAATGTCCAAGAAAATAACAACCACGCTACGAGAGCCCAACCTTTGCTCACTTCCCAATGGGAG  
ATTGATATTAAGGTAAACATCTTTCAATCAAATGAAATGTATATTTTAAAGAGCAATCATGTGTATTTGTAA  
CTTTAAATGTCCAACATAGTAATAGTAAAATGACTTAAATCATTAGATTCAGTTATTGGAATACATATTCC  
TGGAATAAGTATGCATCTGTAGCAATTCATTGCTTGTCTTTTGACCCCCCTGATGCTTGCGAAGACGTTT  
AGAAGTCCCATCAATTTCCCTGTCTTCTAGTTGTCTTTCAGTTTTCTTATGGTTTGCCCTTCACATTGAAC  
ATCTCTTGTTTCCCTAATGGCCTGATAGGTGATTGTTAAGCACATTTTGATTCATGTTTGCACAAACAAT  
GTTCAAGTTAATTTCTGATATTTCTGAAAAGACACTACTAATCTTTTCTTTTCATCTTGTGATAATTTTCTC  
ATTTTCAATCAAGCTTTGCACTAGCTTCTTTTATGGGTATATACTTCTATGGTAACAACCTTACATAGTTATC  
ATGAAATTTAAATTATTTGTAGGACTACTGAAGCACTTGGAAATGTAGCTGGAAGAAAATTAAGAG  
TATCATCTTTTTCTGTCCTGAATAACTTCAGAAGCAATTTCTGCCAGTCTTCCGACTTCTAGACCGTCGTG  
AAGTTGCTGTTGAGAACAGCGCACCTTCATCATCACCATCTCCATCACCGAGTCCTTCTCTTTCCCGTCT

CCTACACCGGCAATTACTGCAGAACCTCATATGGCTCATTACCAAGATCCTCTCCTTCTCCATCTTCACTT  
CCCAGTCCTGCAGAGAACAGCAGTAGAGTTGAAGATGCCAGACGAAGTAATCATCGAGTTTTAATATTG  
TCTGCAGCTATAGGAGGTTCCGTTCTACTAATAATATTGATAACTGGCACTATCGTCTTTCGAAGCAACA  
AAATGGCTGTTGTAAAGCCTTGGGCCACTGGATTGAGTGGACAGTTGCAGAGAGCATTTCGTTACTGGTA  
ATTTTCTATCTTTCGATGAATGAATAGTATTTCTATTTTTAGAACCAAAATAGTTGTCTTAAAAATCAGATC  
CATAAAATAGAAGCTTATATGAACATGTGTAGCTGTAAAACCAAAATTTTTCTTAAAAGTATTACCCAA  
ATGGGAGAAGCTTAAATGGACCTTTTCGCTCCATTATGAGCTTGTTACAAGCTTCTTTTCTAATTGTTA  
ATGATCTTTCCCTTTCCCTTTTTCTTCTTGATATCTCGAACTTTTGTTTATCAATATGAGCAAATAGTC  
TTAGATAGAGAGCTGAGTTCTATCATTCTTACTGTGAACAGGTGTGCCAAAGCTTAAAGAGATCAGAACTT  
GAGTCAGCCTGTGAAGATTTAGCAATGTGATCGGTTCCCTCATCTGTTTGACATTATATAAGGGCACAT  
TATCCAGTGGAGTTGAGATAGCTGTGATATCTCGTACAGTGGCATCTACTAAGGATTGGTCAAAAGATA  
TGGAAGCCCATTATAGGAAAAAGGTGATTTAGATTTCCAGTTGGAATTTACATCTCATTTTTTCCAATA  
TGCGAGTTTCTAAATGCTTTTCTCCTCTTTTACCAGATCGATACATTGTCAAAGGTCAATCACAGAAGT  
TTGTCAGCCTCCTTGGGTTTTGTGAAGAAGAGGATCCATTTACCAGAATGATGGTTTTTGAGTATGCTCC  
TAATGGGACCCTCTTTGAACATCTTCACAGTAAGTTTCTGATTCTAATGGTGTATCTGTTGTGATTTACTC  
AATATTGTTACCCAACTCGTCTACATCTGCTTGATTGAACTGCACTAGGATATACTTTTATATAGCAGGTA  
AAAACATACCTGCATTTGGTGTTTACACAAACCATATTAATTTACCATTGTTAAGTGATAAATTGACGTGA  
GAATGTGTATTAATTAACCTTTGGTTCAATGATACTAGTGGGTGTGAAAACACATCTTATGTATTCATTGG  
GTGGTGTAAACACCAAGTGTGAATAAGTTTTTCTCTACCTCGAGTATGATGTATACGGACGTGTCTTTG  
GTCTCGTGTGATAATTTGTCTGTAATTTGAGAAGTAACCATTTTCACTTTAGCCTCATAAGATGTGTTCA  
CACCTGTACAAGACATCTTTGGTATTCATTTACATGCTCTTTCAACAATTTATGTTTAGCTTTCCCTGTGG  
TAAACAACTATTCTTATGTAATCTATTATGACCGAAAAGATCTCTAATTCTAGTGTGTTTGTAGTAAGGGAA  
GCTGAACACTTGGACTGGGGGATGCGAATGAGGATAACAATGGGAATGGCATACTGCCTTGAGCACAT  
GCACAATTTGTCGCCATCGTTACCTCATAAAAACCTTGACCTCCTCTGCCGTATACCTCACAGAAGACTCTG  
CAGCCAAAATATCGGATTTTGGGTTCTGGAATGAGACAGATGCAGCTGAAATGGTGTGAGTCCAGAA  
AGTAATGTTTACAGCTTTGGTGTCAATCTGTTTGTGATGATGACTGGTAGGCTCCCTTACTCAGCAAACA  
GTAGCTCTCTTGACGACTGGGCATCAGACTATCTTAGGGGAGGAGAATCCCTGAGAGAAATGGTTGATC  
CAACTTTAAATTCTTTCCAAGTAGAGCAGCTAGAGAGAATAGCTGTTGTGATTTAAATGTGTGTACATCC  
CGAGCCAAGACGAAGACCGACAATGAGAGAGGTTTTCTCCAGATTGAGAGAGATAACAGATATTGGAC

CAGATGGGGCAACCCCAAGACTCTCTCCTCTATGGTGGGCTGAGCTTGAGATTATATCAACTGAGGCTT  
GTTAATGCATAGGTACCTCAGTTTTGCCTTAGATGGTAATTAATATATAGGCTGTATATACAAAGATTTT  
TCTTTTGTGTGGATAACAAGAGCATATCGACTGTGGGGGCTAAAGAGAAGTTGTTGGGTACAAAATG  
GAAAATTTAGTAAGTAAAAAAATTTCTTTTTTATTTTATATTTTAGTATGTAAGTAATTTCTAAATCGCC  
TTAATTTGCTTTCTTGGCGGCTTGGGATCAATTCTATTGCTTATGAAACTATAAGGACCCTAGACAAAA  
GGGATAAACCTAAGGGGTCGTTTGGCTTTATCGCATTAAACAAAAC

>PGSC0003DMG400030113 LRR-RLKs

CTTCAGTCTTCATTACCATATGAAAAGAAACACAAGGGAAGCATCATTTTTAATATGCTCCAATCAAGAT  
CTAACCGTTTTTGGCTTAATTTGCAAATCTTCTTCTAATTAGCCTGTTTTTCCAAGAAACCTTACAATTTT  
GGTCAGGGAACAGTCCATATTACTAAGCTTGAAACGACACTGGAGGGATTCCGAGTTCCTCCAGTCATG  
GGACTTGAATTCTTCAGCATGCACTTGGTCAGGAGTTTTGTGCATCGATGACCGGGTAGTGACTCAACTA  
AATCTTGGAGAAAAGAACATTACTGGAAAATTCCATCAACAATAATATGTCAGCTCAAGAACCTTAACT  
TCATTGATCTCTCCAACAACAACATTTTCAGGAACTATTCCAGTAGGCCTGAAAGATTGCTCAATGTTACA  
ACATTTGGACTTGTCCAATAATTCTTTGATCGACCGGATTCCAGGTGAGTTGTTTGGGATGAAACAGTTA  
CTCAGTTTGTATCTTAATGGTAACATGTTGTCTGGTGAGATGCCAAAACAATATCATCTCAACTGGAAA  
ATCTTGATCTTTCTGAGAATCACTTGAACGGTTCGATACCAGAAGATATTGGAACTTCAAAAATCTTTTG  
AAATTGGATCTGTACATAATTCTCTCAGTGGTTCAATTACAAGCAAGTTGTTTCAGTTGCATGATTTGCG  
TCACCTGTCGCTAAGTTCCAACACTTGTCCGGTGTGATACCTGATGAAATGGACTTGTTTAGTTTATACG  
ATATGGATCTTTCACATAACCAATTGACTGGTTCTATACCAAAGGGATTTTCAGTATTTACCTGGACTGCAT  
GCCCTGGATTTGTCTTATAATCAGTTATCAGGAGACATTTCAAAAAGTATAGAATATCTTAGGCCTAGAA  
ATACTTTAAGGCTTTGTTCCAACAAATTCTCAGGAAGAATTTCTTCTGAATTTGTTAAGCTAACATATGAA  
GTGAATTGCTTTGATGAGTCCAATCTTTGTTCTACATCCAACAACCGAAAACCTTTGAGATCACAACACTT  
GATTATTCCTATTGTAGGAGTGGGGTTGGCTATACAGTTATCATGGATCTTTTACAGAACAAGAAAGCAT  
TGGTGGAAAACAAGAAGCAGAATGTCAAAGATGACATGAAGTTCATTTCAATTCAGAAGTTGAAGGTG  
ACTACAGAAGACATTTTGTCTAGCTTGAAAGACAAAACATAATAGGAAATGGAGGATCAGGGGAAGGT  
CTATCGAGTTGTGATAGACCAAACAGGCAATACTTATGCTGTTAAAAGCATAGGGCATGGAGAAAAATC  
AGGTGGAAGACCCCAAAAGGAGTTCCTGGTAGAAGTTAGAACCCTTGGTAGCATTGACACAACAACAT  
TGCAAGCTCATCTGTTGCATCTCAAGTTTAGACAGAAAGCTTCTAGTCTATGAATACTTTGAGAAACAA  
AGCCTCGACAAATGGCTTCACAGAAAGAAAAGTGTAGTATCATCGGGTCAAAGTAGTACCCCGGCCCTG

GATTGGCAAAAGAGATTAAAAATAGCCACTGGTGCAGCGCAAGGACTCTGCTATATGCACCACGACTGT  
ACTCGATCCATCATTATAGAGACATTAAGTCCAGCAATATCCTTCTGGACTCAGAATTCAATGCAAAAA  
TAGCAGATTTTGGACTAGCAAAAATACTATCCAGGAGGGATGATAATCCTGAGACAGTTTCTGCTATTGC  
TGGAACATTTGGTTACATTGCACCAGGTATATTACAGTTTAAATATCTATTGTACCTCGAGAATTTACAA  
AAGAATTATACTCCAATATTAATTTTAAATGTTTGGTCTCACAGAGTATGCCTCGACATTTAGAGTGAAT  
ATAAAGACAGATATCTATAGCTTCGGAGTGGTGTCTATTGGAATTAACAACAGGGAGGCAACCCATTCTC  
AGAGAGGACCAAATGAATCTAGCACAATGGGCTCAACAGCGTTACAGAGATGGGAATTTTATTGTTGCC  
CTTGATGAAGAAATCATGGAACAAGTAATGTGGAACAATGAGAGGTGTTTTTAACTAGGACTAATG  
TGTACCGGAGCATCACCATCTAGTAGGCCGTCAATGAAGGAGGTCTGCAACATTCTTCAAAGTCTCAGA  
GACCCCATATTTTGGAGAGAATAGAATGTTTCGCCTTACATAGATAAATGTAGTTGTATTTTTTTAACAGA  
ATGAGAAAGTCGTGTTGATAACGATTTCTTCCAGCAATGTATACTTTAGTAATACTGTCAGAGGACATTT  
TTTATCCTCAGACAGATCAATAGCCTCATCTGGTTTAAAGTGGTGTCAAACACAAGGGCTTGTAAGCTTTA  
CCTTAGAATGTGATTCCTTGTTACTTGGAGATGTGCGGAGGCAAGAGCTAAGTGTGCTGGCAATTACA  
GTGTATATATATATATATATATCTTTTTTTTAAATTCTTCAGAACTCTCCAAGGAAGCTTTTGAACATACAGGT  
TTGATGAACTGCAAATGCCTTCTTTCAAACATAAATCCTTCTCATGATAATCTTGTAGGAAGTCTAGTTCT  
TGTGGCAGAGGTTGTAGCGGCTGGGGATTATCCTGGGGTCCCAAAAAATAAAAAATAAAAAATTCTAAC  
AGTTTTACACAATTGATAAAAGCTAAAACCATTGATTAGATATTCATTAATGGTCTAGGCTAACTTATATG  
ATTGGAAAAATGAAATGTTTCTATAAGCGATCAAGTTTTTCTACTCGTTAATTCTTTTGGTACTTGTTTTAA  
TTAGTTTGTAGAATTGTTCTGACCCTCAGTGATACTCCTGATGGAGCAGGGTCAAGTAGGACTAACAGA  
CTTCTAGGTTTACAAGCTTCAAGAGATGAGGTGAACATGACATCTTAG

>PGSC0003DMG400030117 LRR-RLKs

ATGTTCTTCCGCATTTTTTTTCGTCTAATTAGTCCGTCATTGCAAGAAAGTTTACAATTGGAACAGTCCGT  
GTTGTAAAATTGAAACAACACTGGAGCGATTCCGGAGTTCCTTCAGTCATGGGATTTGAATTCTTCAGAA  
TGCACTTGGTCAGGAGTTTCGTGCATCGATGGCAGGGTAGTGACAGAACTACATCTTGGAGGAAAAGA  
CATTACTGGAACAATTTTCATCGACAATATGTGAGCTCAAGAACCTTACCTTCATTGATCTCTCCAACAACA  
ATATTTAGGAATCATACCAGTAAGCCTGAACGATTGCTCAATGTTACAACATTTGGACTTGCCAATAA  
TTCTTTGAATGATCGGATTCCAGGTGAGTTGTTTGGGATGAAACAATACTCAATTTATATCTTAATGGT  
AATATGTTGTCTGGTGAGATGCCAAAAGAAATATCATCATCCCAGCTGAAAAATCTTAATCTCTCTGAGA  
ACTACCTGAACGGTTCGATACCAGAAGATATTGGTAACTTGAAAAATATTGTGAAGTTGGACATGTCAC

ATAATTCTTTAAGTGGTTCAATTACAAATCAGTTGTTTCAGTTGCATCATTTGCGTCACCTGTCGCTAAGT  
TCCAAC TATTGTCCAGTGTGATACCTGATGAAATGGACTTGTTTAGTTTGTATGCTATGGATCTTTCTCA  
TAATCAATTGACTGGTTCTATACCAAAGGGATTTCCGGTATTTACCTGGATTACATGCTCTGGATTTGTCGT  
ATAATCAGTTATCAGGAGATATTTCTCAAAGTATAGAACATCTTAGGCCTAGAAATACTTTAAGGCTTTG  
TTCCAACAAATTCTCAGGAAGAATTTCTGCTGAATTTGTGAAGTTAACATACGAAGAGAATTGCTTTGAC  
GAATCAAATCTTTGTTCTACATCCAAGAACTTATCCGTCCCTGTCCTACCAAGCTGTTCTCTGATGATGA  
GGTTCGAAAATCTTCGAGACCAAACACTTGATTATCATTATTTCTGTTGTAGGAGTTGGGGTAGCTATA  
CAGTTAACATGGATACTTTACATGGTCAGAAAGCATTGGTGGAAAACAAAGAAGCAGAATGTCAAAGAT  
GACATGAAATTCATTTCAATTTCAAAGTTGAAGGTGACTACAGAAGACATTTTGTCTAGCTTGAAAGACG  
AAAACATAATAGGAAAAGGAGGATCAGGGAAGGTCTATCGAGTTGTGATCGACCAAACAGGCAATACT  
TATGCTGTTAAAAGCATAGGGCATGGAGAAAATTCAGGTGGAAGACACCAAAGGAGTTCCTGGCAGA  
AGTTAGAACACTTGGTAGCATTGACACAACAACATTGTCAAGCTCATGTGTTGCATCTCAAGTTTAGAC  
AGAAAGCTTCTAGTCTATGAATACTTTGAGAAAACAAAGCCTCGACAAGTGGCTTCACGGAAAGAAAAGA  
GCAGCATCACTAGGTCAAAGTAGTACCCCGGCCCTGGATTGGCGAAAGAGACTAAATATAGCCATTGGT  
GCAGCTCAAGGACTATGCTATATGCACCATCATTGCACTCGACCAATCATTATAGAGACATTAAGTCCA  
GCAATATCCTTCTGGACTCAGAATCAATGCAAAAATAGCAGATTTTGGACTAGCAAAAATACTATCCAG  
GCGGGATGATGATCCTGAGACAGCTTCAGCTATTGCTGGAACATTTGGTTACATTGCACCAGGTACATA  
ACAGTTCAAACATGTATGAATATTCAATCTTTCAAATCCAATTCTACTATATCAAATTTTAATATTTGGTC  
CTGACAGAGTATGCCTCGACATTCAAAGTGAACGTAAAGACTGATATCTATAGCTATGGAGTGGTGCTA  
TTAGAATTGACAACAGGGAGAGAACCCATTCTCAGGGATGAGCAAATGAATCTAGCACAATGGGCGCT  
ACAGCGTTACAGAGAGGGGAATTCCATTCTCGAGGCCCTGGATGAAGAAGTGATGGAAACAAGTAATT  
TGGAACAAATGAGAAGTGTTTTTAACTAGGAGTGATGTGTACAGGAGCATCACCATCTGGTAGGCCAT  
CAATGAAGGAGGTTTGCTATGTTCTCAAAGCTGCAGAGAGTCTAATATTTGA

>PGSC0003DMG400030119 LRR-RLKs

CTTTGCTGTTTTTTCTTGGCCACAGTCCACAGACGTCAGTGAAGTCAATTTTTGTTTCTTATCTTTTTAAAA  
TTTAAACAAGTCAAAC TTTGTTAGCATTATACAAATTTTCGTCCATGTTGACTGACTTGTGTTGTATAATAC  
ACGTTTTCTTCAAAGCTAATTCATGATCCACAAAATAAAGAGGACAATCAAACCAAAGGAGCCATGAAA  
ATCAACCATATTCATGTTGTAAAATCTACATTCTCAATCCCAGGAAACAAGTTTACCTTTTCATTGTCTCC  
TTACTTGCCTTTATGCATTTCCAGGGCGGTTTACAGAGTGACGTCTACGAAAAGGAGAAGAACAATTTTGT

TGGAGCTGAAGCAACTATGGGGATTGCATCAATTATGGGATTCCGATTCCGATTCCCTCACACTGCAGTTG  
GTATGGTATAGGCTGCAGAAATGGTTCTGTTACAAGCATCTCGATTATGAAGGGAATCTACTTTCCGGA  
ACAATTTCACTAATCATATGTGAACTCAAAGCCTGCAATTGATAGACCTGAGTAGCAACTATATCAGAG  
GAGAATTTCTACCTCCTTGACAATTGCTCAAAGCTGGAATATCTTGATATTTCTTGGAATCAATTCAT  
GGACCACTGCCTAGTGACCTTCATCGTTTGTGCGAGGCTAATCCATTTAGATATTGCTGGAAATAACTTCA  
GTAATATCCCAGAAGCCATAGGTCAGCTTTCTGAATTGCAATATCTATCTCTTAAGTTCAATAATTTCAAC  
ACTTGGATATCCCGAGAAATTGGAAATTTATCAAAGCTTGAGACCTTGGATATATCCTATATTGACAGCT  
TTAAGCAGGCAACAATCCCAGAGGAATTAAGAAGACTGAAGAAGTTGACAGCCCTTTTCATTGTACGGT  
CAAATTTGAAAGGGGAGATTCCAGAAACATTTTCCGCTCTTTCAGGTCTCGAAGTCTTGGATCTCTCAAT  
GAATTACTTAAAGGGGTCTATCCCAAGTTACTTGTGTTGAATGGAAGAAGTTGACGAATCTTCATTTGGAG  
TTTAACCAATTTTCCGGTAGGTTACCAATGTTGGATGCAAATATGGAATTGATGGGGAGAACTCAAGAA  
ATGTTTTCTAATCTTTCTGGTCTCCAAGTCTTAGATCTCTCAGGAAATCACCTAAATGGTTCAATTCGAAG  
CTACTTATTTTATTGGAAGAATTTAACATCTCTTCTTTTGGGGGATAACCAATTTTCTGGGAATTTACCTA  
GTATAACTGGAAATTTGAGATTAAGAACATTGGATCTTTCATCGAATCAGCTTTCTGGACATATCCACA  
AGAGTATGACAAGAATGAATACTACTTTAGAAATAATCTGAATCTATGTAGCAAATATACCAACCATTAC  
ATCCAAGTTCCACGTTGAAGTGGAAAAACAAGAGTTGTAATTGCCGTTGTGGCCCCTGTTGCATTTTTAG  
TCATGATAACATTATTATGTTACACATTTAAAAAGAATTGGACTTTCTCCACAGACCAACTCATGTGGAG  
GAAGAGGCATGAGAACCAAGATCCTGAGTGGATGTTCAATTTCTTCCAGCAGTTAGGATTCACAGAATT  
TGAAATTCAGGTGAATATGACAGAAGAAAATTTGATTTGAAGTGGAGGATATGGGAAGGTCTATCGAG  
TTGGTGTCAATCCTAATGGGAACCTTGTGGCAGTTAAGAGAATATGGAACAAGAGGAATTTAGACCACG  
GGCTTGAGAAACAGTTCCTTGCAGAAGTTGAAGTATTGGGTAGCATTGACATTCTAATATTGTGAAGTT  
GTTATGTTGCATTTCTAGAGGAAACTCAAAGGTTTTGGTGTACGAGTACATGGAAAATCAAAGCTTAGA  
CAAGTGGTTGCATCACAAGAGAAGAAGTGAAAAAGATATTACTGCCTCAGCACATTGTGTATTGGAATG  
GCATACTAGACTGCAAATTGCAATTGGTGCTGCCCCGAGGTCTATGTTACATGCATCACGAGTGCTCTACG  
CCAATCATTATCGTGACATTAAGTGCAGTAATATCCTTTTAGACCATGAACTGAATGCCAAAATTGCAG  
ATTTTGGACTAGCTAAGATTTTGGCCAAGTGGGGAGAGACAGAGACTGCTTCTGCTATCGCTGGCACGT  
TTGGCTACCTAGCTCCAGGTATATTTCACTGTTCTCATAATGAAATAAACAAAAACACACCAGAGTGTAC  
GTATGTATCGTGTCTTCTCATTGATTTTATCCTAATACCTTGTATTCTAATTGGAATTTAGAGTATGCATA  
CACGTCGAAAGTGAATGCCAAGATTGATGTCTACAGTTTTGGTGTGGTGTATTGGAGCTGGTTACCGG

GAGAGAACCAATTAACGGAGACGAGCATATAAACCTTGCACAAAGGGCATGGAACCACCATGAAGAAG  
GCAATCCAGTGGTTGATGCTATTGATGAAGAAATCAAGGAAGCATGTTTCTTGAACGAAATGAGTTCCA  
TGTTCAAGTTGGGGATTATTTGCACCAGTACTGTACCTTCTGCTAGACCTTCCATGAAGGAAGTTCTGCA  
AATTCTATTACTTAGCCTTAATACTTCTCCTAGCAATTGGCTGCGAATCCAGGATTATCGTTGCTTCTTTA  
TTTGCCTGAAAAATTAAGTCCAAA

>PGSC0003DMG400030169 LRR-RLKs

CTTTTCTTCTCAAGAATTTAGGGTTTCTTCTCCACCGACGGGAGGCGTTATTTTCCTCCTTCTTCCAC  
AATTCTTCTCGAATTTCTTCTATATATAAGTGGGGTTCTCGTTCTTGATCCTTTTGATTTCTTATTCAAGCT  
GCTCGTATGGGTGAAAACGATTCAGAAAGCTCTGAAAGTGCCAAACCAAGAATGTATCTGAAAATTCC  
GACGGAGGTGATGAATTGACGGGTTTAGAGGAAGATTCGAGCAAGATGGTTTCTGGGTTTGATTCAAG  
TTTTGATATTTGCGGGAAAAGTTTGGATTTTCCATTGTTGGAAGGTGTAGAAGGTGGGGTTGAAGGTTT  
GTATATGTATAAGAATGTATTTAATTTGATTCCTAAGGCAATTGGTGCACCTGGGAAGGTTAAGATACTT  
AAATTTTTTGGGAATGAGGTTAATTTGTTTCCAAGTGGAGAGTTAAGGAATTTGGTTGAATTAGAGAGTT  
TGCAAGTGAAGGTATCATTTCTGGGATGAGTGGATTGGATTTGCAGAAGTTAAAGAATTTGAAAGAAT  
TGGAGCTATGTAAAGTTCCCTCTAGACCTTCCAGCTTTCCACTTTTAAGAGATATTGCTGGTCTTAAGCGC  
CTGACTAAGCTCTCTGTCTGTCAATTTTCTATCAGGTTAGATCTGTTTCTTCTTGAATAATTCTATCTAAG  
TTTATTTACGCTAAACTCATGTTTACTATAGACAAATTACCTGTAGTTGGCTGTCAGTTAACTTGATAACA  
TAAAATTTCTGACTTTGTCAATGTATAAATATTAACCAATTCGATGATGTTTCTCTGTGAACCTGTCTATA  
TTGTTGCACTAAATTCATGTGCAGGTTGCAGCTCAATGTGCTTTTGGTGTATTGGAAGATTAGGTTGCA  
TCTGCACTTTTTCGCTTTTGTCTGCATTCCTTAAAGTAATTTGAATTTAATAGAACAAGTTTATTGCTAAACT  
ATTGTTTTTACAAGTGCTAGCTGCTGCAACTATAAGCCCCAAGTTAAATAGTATTAAGCAGGGTACATGA  
TCACACAACTTCCATTAATACAGGGGAAACTAGGTAGGTAGAGCATCCTACCAGGATGTTTTTTGTGGT  
CTCTTTAAGGAGGTAAAGACAGGGAAAAAGTATTTGCAGGTTAAATGGTTAGTTTCAGTTTTCGGGTA  
CAAAATTTTCTGTTAGTTCAAACCTGTTTTGTAGATTGACATGACCAAGCAAACAATTTTATGCATGAT  
TAGTAAAAGTTTTACAAAACAACAGATCTTCTCAAAGAAATTTGGATGTGGTAACACAGCTGGAGCAT  
AAAAGAAAATAAAGACTTGTTTTTGCTGCTTAGATGCTTCATGAGATTGAAGTTTGTTAATTAGGACCAA  
AAGATATGCACAAAATTTGTAAGTTGTTTATCGGGAGTTTAGACTTTAGCATTCTTCAAAGGGTATCAG  
GTTCTACTCTAGGACCATACTAAGTTCAACCAGGATATGATACGATATTAGGATTAGTCGATAGTACATA  
GCATAACTATCCCTTGGTTAAGGGTCGTAAGAGTGTTGTTTTTAACTATTTATTTGTGTTTCTTTAATT



GAAATTTTTATTTTTGTTTATGGGATTTCTTATCCTATAGTGCATCTTAGTTAGGTTAAAATCATCTTATT  
ATTTTACCTCATGTAATTTGACAGCTGAAGAGGTTATATGGTTTGCCTTTATAATGGATAAATTTATTATT  
TTGAGGTTGGCATTATGCAGCCACCAGAAGACTTTTCCCTTCATCTCCGTCTTGTTGTTTCTTGCAACTAC  
AACGAGTTAAAGATTTTGAGACATTA AAAATCTGGCTGGTTAATCAATTTGCAGCATATTGGTTGCTGTT  
GTCTCCTGGCAATTATACCCTCTCAAGGTCCACATTTTGTGGAGAATTATCTTTTGGTCCCTGAAGACAT  
CATTCTACTTTTGATTAGCAGGTGTTATGAAAAGCCTATGCACGAGTACATCACATAATTTTAAAGTTATA  
GACGTCTTAAATCTCACAGGTCTCCAATAGGAAAAAAGAAAAGGGAAGTATATGAAGTGACTTTGTTC  
GCTTGGAGTATGGAATATAGAATATGCTGCCTCAAGGAGTTTGGAGGTGCAAAGGTGTCCACACACTTC  
ACACTTCAGAATTGCGAGCCTGTTGCTGTCACATCTTCCATCACAGTAGTATGTCCTATAGCTAATAGCA  
GATTAAGTGAAC TTTTGTAGCATGTGTAATTTATCAGTTGTATATCATTGCTTAATGTTGGTAGGACTG  
GAAATTAGTCGTTTTTGCAGTTGGAAGGAGGATTCAAATTGGAAATAGGTGTTAGGATTTGTATTTTATA  
GTGTTCTTTTATTGGGTGCAGTTACGCCAGAATATTGACTCTTCAGATAAAAGTCATGTTTAAAGTTGTT  
GACACTTGATACATTTTGTAGATGAGGTCTGATATCTAAAAATATCTGTACATCACATTTTATTGTTTTG  
ATATCTGAAAGGCTAAAACCTTCATTCTGCTACTCTTTTGGCAAGCAGTGCTTTACTTTTGGTTGCTAGAGG  
TTGAAAGTTGTGAACCATAAACTTGTAGATTCAGTTCATATCTATAAACCATTTTATCTTTTTTTTATCATT  
GTACTCCATTATAATGCCATTGTTCTTGCTGTTCTTGCAAGATTTTACCTCCTGAAATAGCCTGCCTCTCT  
AAATTGGAGTGCCTTGATCTTTTATTCAATAAGATGAAGAATTTACCTGTTGAGATAACTCATCTTAACTC  
CTTACTGTCACTGAAGGTTGCTAATAATAAACTGATTGAAGTACCTCCGGGGTTGTCTTCTCTGCAAAGA  
TTAGAGAGTTTGGACTTTTCTAACAATAGATTAACATCCTTGGAGAATCTTGATCTCCTTTCAATGTATAA  
TCTGCAGAGTCTCAATCTTCAGGTATGTGTTACTGAAATTACAGTTTCTTTCTAGTCTTGTTGCTTTTAGGC  
TTTTTCTAGTTTCTTTTCTTCTCTGATAAATGTTTATAACATGAGAGGCATCTACTCTTAATGTGGATG  
AAATTCTTGCATCCCACTGGAAAAAACC CGAAATGTATTTGTCTCAATTGTCTAGTCAAGTAACTTGATA  
TATTATAATTACCTTATCCTGACCCATATATCTTCATTGAAATTTGCTGAAGCACAATAAGCTTCGTAGGT  
GGTGTTCGATTCTTCATGGGTATGCTGCAATTTGGAGGGGAATTTCATAGATTTGTCCAAGGATGACAC  
CACCAGTTCGTCTTCAGAAATGGACGTGCTTGAAGTTATGAACAGGAAACTTCTGAGAATACCCAAAA  
TGGTGAGTTCCTCGGAATCTCTTGTCTCCCCTCCTTATATCTATTGCTATTTCTGCACATTCTGATTCTTTG  
AATCTTGTGTTGTTGCCCTTCTAAGAAGTGTTGTTCCGAAGGGTAGTACCTTTGAGAAGTCTGATGTGTGA  
ACTTTTAATTGTGTAGGAGTTTCTATCAAATTGTCAGGTCATTTATGTGGCTCATCACCCAGTCATCGATG  
TTTTCGGCCTCGAAAATCCAAGAAATGGAAGCGGCAGTATTATATGCAACAGAGGGCTCGTCAAGAGC

GATTAAACAACAGCAGGAAATGTGTTGCCTGCAAACATTCTAAGCTAATTGATGATTCTCTGGTGGAGG  
CCTCATCAAGCATAGTGGATGATGATACACATGATAAAGAAGCTGATTCCTGAAGAAGCTGAGTGCAAAG  
GCTCTTTAGCTAGTGGTATTGATGAACATATCAGATTAAAGGAGGACAATTATATAGGAAGACCTTCAT  
GTGTTGCTTCTGACTCCATTGAAACATGCATAGATATTCAGAATTGTAAAACATGTGATGCTTCAGTAGG  
TTCTGTTTCTGATGCTGCTGATGTGGCTGAGGAAAGTTTGTCTTCAGAGGTGTCTAATAGTCCTCCAAA  
TCGAAAAGGCACCTGGATGGGGTCATTGATAATCCAAAACCATGCAAACCCGCAGACCAACAGATCAT  
TCAGAGGTATCCTGCAAATACAGCATGATGTCTTCTGTGGTATTGATGATTATTTACCAGATGGCTTTTA  
TGATGCTGGGCGAGATCGGCCATTTATGTCGCTGAGGAGTTATGAGCAGAATTTGCATCTTGATTACG  
GGAAGTCATTTTAGTTGATAGGTAACCTCCATGTTTGCATGCCATTAATAGACTAATAGTTATGGACCTC  
AACTACTAACTTCAGGGAATGCTTTGCCTCTCTACTCATTTTGATTACTTATTTAATCTGTTTAGGCAAAGA  
GATGAAATGCTGGATGCCATTGCTCTACGTGCTCAAGCTCTAATCTTTCATTTAATCAGATAGATGGTCT  
GTTTAAAGATAGAGAACATGTTGCTGTAGACAACTTGCAAATTGCATCACTGCTTGCCCTTTTAGTGTCG  
GATCATTTTGGTGGAAGTGACAAAAGTAATATTGTACAGAAGGCAAGGAAAGATGTATCTGGGTCGAA  
CTATAGCAAGCCTTTTGTCTGCACATGCCCTACTGAAAATGATGACACTACCAGCATGGTCACAAAAGAG  
AGTCCTAGCATCTCAGAAGATATACTTTTCCTTAATCTTTGTGAGAAAGCACTTCACTCAATAAAATCAAG  
GCAAATTCTATTGTTGTTCTATTGGGAGTTTGCAGTTTGGTGTATGTAGGCATAGGGCCTTGCTTATG  
AAGGTATTTTGTATCAGACATGTTTCTAATTAGATATGGTGGTTCTGAATTTAGTTTATTATTATGAACT  
GATAAATTTCAATTTGTCTTCTGCAGTACCTGTGTGACCGAATAGAACCTCGAATATCTTGTGAGCTTGTTA  
GGGTTATTTGGATTTTACCAGCATGCGTGGAATGTGATCGTGGTAAAGAGGGGTGAATCATGGGTTT  
GAATGATAGTTGATGCGTGCATCCCCTTGATATCAGAGAAGAGACAGATCCAGAATACTTTTGCAGGT  
CAATGATTTTCCAATTCTGTGTTACTTTCTTCATGACTAATTTCTGGTACTACAAGCATTTATATCAATACA  
CGTGTATGACGATATTGCATTTTCAATTTAGCCAGTGTGATTATTGGTTATTTTGGGGTGAATTTGCCAG  
CTTCTTGAGTAGTTCCTTAGTTACTAAAAATCTCTAGTTTACCTGAGTTATGTCCGAATGAAAATGGCCAG  
ATCACTGAGCTTGCTGTTTCTTTCAGGTATATCCACTGAACCGGATAAATGTTCTGTTGTGCCAGATGC  
TAGTCCTGGTCAAGTTAGTTCTTTTCTTCTAACCAGGTGCTGATAAATTCATAAAGCTCCCTCCTCAAC  
CCTCGTCCCGTGTAATTTGGGATCCCTGAGACTCTGGCAAAGGTGTGGTTCTGATTGCCTTTAAGTTC  
TCCAGTTATTATTATGCAAATATACTTAAGTTCTTATTCCAACTTCAATGACTTGAATTAATATGTTTTA  
TTCTTAGAGTGACTGAACTACATGTTTATGTGTTAACCACAACAATTAGAAAATGATTTTTCTGGCTTTA  
TTGTACTTTCCATTATTGACTGGAATTTACCAGTCTATCTGGTCTTGTGCTTTTGATTTGTTTTGGAAATTT

GAAATAGATAAGAAGCAAAGCAATCCTTTTTGACTTATTCTGCTATTCAGCTGGAATCCATTATATTGCA  
GGCTTATGCTTTTCATTTTGCAAATTTTTCATTTATCTGCTGATAAACTTGATTAATTAGTGACACGTATT  
ATACCACTAGAATGTGGGAATTTTCTCGGCTAGCATCTTTATTGACGAGGCATAGTTGATTTTTTTTTAA  
ATTTATTCTGCTCAATTAACCTGAATTGAGCGGAATGAATATAAAAGAGTCATATGACTGATACCGACTA  
GTTTCAGGATTGAGGTTTAGATGATTGAATGAACATTTTGGCACTGCAGGTGCGAACTCTAGAGATGTCC  
AAGTCCACAGCGGATGAGATTAAGAATTTGAGTTTAACTGTATTGGAGAAGTTAGGGTGTTGGGTGTC  
TTAAACAGTTCGTGCATTGTCAAATATTATGGTCATCAAATATCTTCAAGATGGGTTCCCTCATCAGATGG  
CAGTTCAGAAAGTCGTACTTTGCAGTCTGCCATTTGATGGAGCATATTAAGGGGGTTCCTAAAGGT  
ATATGTTTTCTAGAACTCTTCTCGTACCTGACTTTCTCTCCTTTATTTCTTTCCCTTTGAGGTTGGAAG  
GGTATAAATAACACCTGATTGCCTTTTGTATTGAGCTCATTTTACTTTCTTGTCTTAACTGGCAGAAACAT  
GTAGATAAGCTATCTAATGCTGGTGAGAAGCGTCTTCCCGTTGAGCTGTCGGTATTTATTGCCCGAGATG  
TAGCAAGTGC GTTGACAGAGCTGCATTCTAGGCATATCATACATCGTGATATAAAAAGTGAAAACATCC  
TGATAGATCTGGATAAGAAGAGAGTTGATGGTACCCCTACAGTAAAGCTATGCGACTTCGATATGGCAA  
TTCCCTTCGTTCATACTTACATACTTGCTGCATTGCCATGCTGGAATTCCTCCACCAGATGTTTGTGTTG  
GTACACCTCGTTGGATGGCTCCTGAGGTCTTTCAGGCGATGAATAAGCGCAATATCTATGGGTTGGTAA  
GTCACCAATCCTTCTGACCAAAAAAAAAAGTCACCAATCCTTGAAGTTAGAATCCTAACCATTGAATTCTCT  
ACTAACAAGTACCAATTAATGCCCCACCGGGTGCTCTGATCTGCTAAAACAATGTGGTTCTTTCTGATTT  
GCCAATTTGTCACCCTGGGGTAAAATCAATTCAACACAATCAAGA ACTTACCACCTTCAAAGACACACA  
TTTTCTACTAAAACTGATATATCACTCATTCTCTATTAAGTTGAGCTTTATCTTGTCTATTATTA ACTTCA  
AATGTTTTAAGCTAGAAAAGAAAGCATATTTTGTCTGCTCTATTGCTGCACTGCTACTGATTAAGAACA  
ATAATATGTA CTATTGACAAATTCAAATTTTACCTTACTTTCTTGGTAATTTGTTTGTAAATTTCTCTCA  
TTTTTGATGCTTGAATCTATTTCCGGAGATGAGGATTTTTGTTTTGAGAGACTATTTTTATATGACGGCTA  
ATCTCAGAGGATGTATCCTGTGGCAAAGGGGTTGGGGAATATTATCTCTTACTTCTTTGAAGTTGAAAA  
GGTCTCTAGGTTATAGATGAGTTGCTTCAAGGTAAAAGGTTTTTCTTGCTTTGACTTTGCAGGTTCCCC  
GTTTCAATAGGTAGATGAAAGCTAAATAGGACCTAAAATAAGTCCACTATGGCCAAAAAATATCAGGAG  
GGGCGGGTGGATTATTTACCCCTTAACCCAAATTC AATAGATGGGTAAATTGGCTAGAATGGGTTATTG  
AACAACAAAAAAGTATTTATAGGTGCTAATTTCTGTATTATCTTTTTCTTTTGAAGATGAACAAATGAG  
TTTAATTGCTTTGAGTTGGTGACTTGAAAGATAAAGTGAGTTTTTGTCTGTCTAACTGCAATTCTAGCT  
TAATGTATTCAAAGTTTTCCGA ACTAGGTTTTTACTTGTCTTACTTTGGATGTAGGGTGCTGATATTTGG





TCATTGCGACCTAAAGCCAGGTAACGTTCTTTTGGATGAAGATATGGTGGCTTATGTTGGTGATTTTGG  
ATCTCTAAAATTTTAGCCATAAGCATGTCCATGGCTTATACCGAGACATTGGGCACTCTTGGATACATTG  
CACCAAGTATAAAAAGAATCTATTCTCTTTGATTTTCTCTTATCATAATTAAGCCTCTCCAAATTCTACAAGT  
AAAAAGAGCAAGTCTTTATTTTTGCAGAATGATTGTTGTATTTCAATTGAGTAACTTTTCTTCAATCCTTTT  
CTAAGAATATGGCTCGGAGGGAATAGTGTCTACTAGTGGTGATGTTTATAGCTACGGCATCATGTTGAT  
GGAGGTTTTGACCAAAGAAGGCCAACAGATGAAGAAATATGCAATGAAAATCTTACTTGAGGAAAT  
GGATTACACTATCATTTGCAGGGAGTAGGGGCGGCTCAACATAATTTGTGGCCTAAAGCGAAATTTTAA  
TTAGAGGCCTAAAATCTATATAAATTTTATCTATATCTATTTATTTTTCTAAATTTCTAGACATAAATTACT  
ACTTAATATCTTTTATATAAATGATTTTTCAAACACTTTTTTTTTAATTATTAGTTTTAAGTAAGATTTTATC  
AATTCAACATTGAAAAACATCCTTTTATTGAGAAAATTATTATATGAATTATTAGCACAAATTTTATAAGTA  
ATAAGTTGATAAACTTTAAAGATAAGAGTTAGAATTATAGAATTTGATTCAAAAAGTTGATAACTTGGTA  
TACCTACTTTAATATGAAAATTAACAAATAAATAAAAAAAGAATTTGTAATGCACTTTGTTCAACACTTT  
TCGACTATTGATTCATATTTTTGAGAGTGTTTACTCTAACTATCAAAGATTTGAAGAAATAGAGTGCAAA  
AAGAGTTACAAATTAAGGATAAATAATGTGAGTGTTAACGAAGAAAATGTAAGAATCCAAAACAATGT  
TTCCTTAATTTCTTCTATTTGAATGGGGTTAAGATACATAATTTTTTATTTATAAAAATTTGAGGCCCCCAA  
AAGGCCAATGCCTAAAATTTTATAGGCAAGAGCCGGCCCTGGCAGGGAGTATGATGGACGTTGTGGAT  
GTTAGTCTTTTTTCTGAGGATGAACAAATCACCAATAAAAGTGAAATCTGCATAGCGTCCATGATACAAT  
TGGGTTTAGACTGCACAGAGGAAACACCAGAATCAAGAGTGACCATGAAAGAAGTAGTGAAGAGGCTT  
AATAAAATCAAGAACGCATTTCTGGAAACATAGAAGTTGAGCAGCATCTCTTTTGATATGATGCTTTTTG  
TTTCTTCAATAAAGTTGTTGTATAGTACTACTTGAAGTCATGTATTGTTTGGTAATGTAACATCCGACAAT  
TTGAAGTGGCTTTGAGGAAGCTTGAAATTTGGAAATAGTCATTTTTGGAAAAAAATTTGAAATCTGGA  
AATTTGGCTAAGTGTGGAAATCAGTGAGTTTTTTGGCCAATTTGAGCAGTCATAACTCTTAGCTCAGGG  
TGAGTTAGGAGTAGTTCCAGTTATGGTTGCGAAGCTCGTGGAAATGACCTTTTCAACGCCACCAAATTTTC  
TCGATTCCGAGTTCATATGAAGGGAAATCCGTCCGGAAATTTAAGGGCATTTTGGTCTTTTCACAAATCA  
TTTCTTTTGAGCTTATATTGTTGTATTAGGCTGATCTTTGGATCATTTTTGTACCCATTTTGAAAGAGAAA  
GAGTTAGGGTTCTTGAGAGTGAAGAAGAGAAGAAGAAGAGAAGAAGAGGAGAAAGGAGATCAACAA  
GTTTCCGTCGTGGATTATCGTCGGGGGTGATCCCTATCAAGGTATGTGAGTTTTCGTGTGGGTTGATCCT  
TTCCCTCACACACACCAAGCTTATTCTATGATTTGAGAAAAGATTGGAATTTGTTGTTGAAGTTATTGTT  
GTTGTGAGACATGATTGGGTTGTGTATTTAAGTTGAAACCTATTGTATGTTGAGGGAATTATGATTCTAA

GAGTTATGACCCTTTTGAAGTTGATTCATCATCAATTCTCAGCAAATTTTGGCTATCGTTCCCATCTACG  
GGCGTGACCTACGGACCGTAGATCGATTGACGGTCCGTACTGGTCAACCGTCAATCGGGACAGAAGTT  
GGGTTTTTGGGGCATCGATCTACGGGCATGACCTACGGTCCGTAACCTGGACCTACGGACCGTAAGTCC  
GGACCGTAGGTCAACACTTAGTCATTTTAAAAAAATGAATTCTGGGGAAGTTCTGTCACGATCTACGG  
ACCTGCAGGACGGACCGTAAGTCCATCTACGGTCCGTCGATGGCGTCCGTAAGTGCCATCTATGTCACC  
AGAAATCTAAAGTCTCAGCCAAGTTTCCCCATTTCTTTTCCCACTTTCTCATGCATGTTCCAAAGTATTATA  
CCTATATTTTACAGTTGTTTCCGACACTCCAAAGTACGTCTAAGAGTTCAAGAATCCCTCCATAACATATG  
ATCGAACACCTTGAATTCATAATTCCGGTTCAAGGAAAGATAGTTCCAAGTCAAGTGAAGTTAGAAGCC  
AAGTAAGAGTCTCAAGTTTCAAGTAGAGTAAGAGTCTCAGTTTCAAGTTAAGTCATGAGTTTAAAGTTG  
AGTTCGTTTCTCAAAGTTATTAGGGAACTATGTATTCCCAAAGAAGTTTTAAAAAATGTCTTTACATTT  
AAATAAGGTTGGAAACTGAGATTTCCAAAGGGGCCTTCGGGCTAGTTTTTGGAGTAATTATCTCAACTAAA  
GAAAAAATGTGTTTAAAGACAATTATGAGCCAAAGTATTTCTGGGAGTAGTATTGAGCACCGAATTGGG  
GACACGAGTTCTGATTTACTCAACTCTCCATAAGAACCATGTGCCAACATGGGATTTCTCGGATCATACTT  
TTTAGATGATCACGAAAGTTAAGCTAGTGGATCCACTAAGTAAAGTTAGCTTCTATATCGCGGCAAGGT  
ATAGGATGGTCCTTGGGCAACGCGAGGTAATCGTTGTATCATCACTAGGGCTCATAGTGGTGGTTGTC  
GGTTAAAGAACCTCCCACATAAGTTATATTACTTTTATATAAGTACAGTTGAGTTGTTATTGTTTTATCATT  
AACAAGCTAAGTTGTTTATACTGTTTTACAAGCTTTATATATTGCATGCGTCTTATTGCTTTAAATATTGAG  
TTTAGTTAGTCATGAGTCGTACAGAGCCGAGGTAATGTTCTCTTGCATTTCTTTCAAGCTTAAGTTGTG  
TTTTGGCTTTCCCGCTCACATACTCGTACATTCCATGTACTGATGCCAGTTGGCCTGCATCGTTTGATGAT  
GCAGATTCAGGTACCCCGGATCAGCATCCTGCACGTCGTTGATCCAGCTGAGCACTCCAGAGTCAGTGG  
TGAGCCTCCTTGCATTCCAGAGGACTCAATTATTTTGGTGTCTTAGTTTTTGTCTTATTAGGATGTTGCG  
GGGTCTGTCCCAACATCCATCTCAGTATTTTAGAGGCTTCATAGACAGACAGTCAGTCAGCTAGTTTCGA  
GTCTCTTATCTATATATATATGTAAATATTCTATTTTGGAGATTTGGGTTGCCTTATGGCCATATTTTATAAG  
TTAAGTTGTTTTTGTAAATATTGCATTGCATTGAGTTATTCTGTTGAGTTAGGTTTCCGCTGAGTTAAGAAA  
GCCAGGCCGAGGGTTCGCTTTGGGCCAGAAATGGTCTCCGGGTGCCGGTCCCGCCAGGGTGTAGGCT  
CGGGGTGTGACAGGTAAACTGTGTGGGAATAGACATGACACAGCCACGTTGGCGCTTTTGTCAATCAAC  
AACACGTCTCAATGTCAAACAAGTTTGGACATATTTTGTGATAGTTTACTTAAAATATTGACTACTAT  
TTCATGACGAATTAATAAAACCTCTTAACAAGAATTCTTGTATCTATTATGAGTTAGTCGACTTTTATT  
CCATTTTGTGAAACACAACCGAAGTAGTGCAACTGTCAAGGAATAAATGGATAAATTCCTTTTCTTATTT

TCCTCATCCATATTAATCTGTTTTACATTTTGGAAATTTGAGACTATTTATTTAAATTAATGAAGGTATTT  
AGCTGCAACTGTTTTGCTTTTTTTTTGCAAACCTCGGAAATCTCTCTTTTCGCCTCTCTCCTTCATTTGTATT  
TGCCTCAGAAGTTTTACACAGTCAATGTGTAGAGCCTAAACTCTAATGTGATTA AAAACATGAATAGATT  
AAGCACCTTATCCATTTTTTTAATCTCTTCCGGCCCGACTTGGTTTTAAAAAAGTTTTTCATATGACAATTT  
CCATTCATAAAAATAATTTTGTATTTTGTACTTTGCTTATTATTGACGAGTGTAAATTCATGTATTAGAGT  
ATGTTAATAGAACCAATTTAAATCAGGATAAGATGTTTAGATCGTCATAAGCAAAGTTAAGGTTACAAA  
TACGATATAGTATTATGAAACAATACGTAACAACAATAGTGAAATCAAGGTCTATTCTAGATTTTTTAAA  
AAAAAAGAGGAAGAGAAAATACAGGTAAAAATAAGATTTTCGTGTA CTCAAATTTGATTTTGAGATACA  
TAATTCTCTACATAAGATACTTGTGTTTAAGAGACATTATATTAAGTTAATGTATTTAGATGATCACTGGA  
TACATAATTTTAGTATCAAACGGATAATCAAGTTAAAGTTAAGTATCTATCGATGTATTTTAGCAAAAAT  
AATGGCATTAAACAATGAATGTTGCCTTTTTCATTTGAATTTGATTGAATATATTATTTTTGGAATAAA  
AAGATGAAAAATTTAAATAACATTTGGTACAAGATTTGTGTATCTTTGATTGTTGTAGCAAAATGAAATT  
CACGAGCTGAATGATTTGCTCCAGATTTTTCTTTGTATCACTAGGAAACAAAGATAGTGCTTCACAACT  
AAATGCCTTTTTTGTTGGGTGTCTTTAATCTAAGAAGAAGATGTTACCCTTTTCTTTGAGTTTTTTTTATTT  
TTGTACTTCTGTCTTTGTTAAGAGCGTAAATCATCTATTTAAAAAAGGGATTGTTTACGTTGGAATAGTTA  
CAAAAATTGTTCCCTCCCTTATTTTAAATTAGCATTATCCCTTTTACAGATAGCATTGCACCAGGTATAAA  
AGATCTTCTCTTTTTATTTTCTTATCATAGTAAAGCATTCTAGAAGTAAAAAAGCAAGTCTTCATTTA  
TGCAGAATTATTGTTGTATTTCAATTGAATAACTTTTTCTTCAATCCTTTTCTAAGAATATGGCTCGGAGGG  
AAAGTGTCTTCTAGTGGTGATGTTTATAGCTATGACATCATGTTGATGAAAGTCTTGACGAAAAGAAGG  
CCAATAGATGAAGATATATGCAATGAAAATCTTGACTTGAGGAAATGGATAATACAATCATTTTCAGGG  
AGTATGATGGACGATGTTGTGGATGCCAATCTTTTTTCCAAGGAAGAACAATCACTAGTAAAAGTGAA  
ATCTGCATGGCCTCCATGATAGAAATTGGGTTTAGATTTTACAAAGGAAATGCCATAA

>PGSC0003DMG400030443 LRR-RLKs

ATTTGATCCATCCCTAAATTTATATTCTTTCTTTCTCTTTATAAACTTTGTGTGAAGTTAATTAATTTGG  
GCGAACAAGAGAGTACTAATTCAAATCGGCGAGCTTTGAAACCAGAACGCACACTACAACATGCTATCC  
CTGGGATTCTCACTTCCTCCTCCTTCCAATAATAAACTAATTGTTACCAACAAAAACCAATATAATTTTCGT  
ACCAATTTAGCCAAGGTTTGTCTAATAATGTTAATGCAGCTGGGGATCAATTAGTGACACTGCCTGAGG  
GCCTCAAGCATGTTGCAGTGATCATGGATGGTCATAGAAGGTGGGCAAAAACAAAGGCTTGACCGTA  
AAGCAAGGTCACCGCGCTGGCGGAGAGAAAATCCAAGTCCTCACCCGCCTTTGTAGCCAGTGGGGAGT



CAAAGTTCTCACCATTTTTGCATTCTCTACAGAAAATTGGGTTTCGCCTCAAAGTAAGTCATTGTATTCTT  
CCATCCCAATTTACATGACACAGTTTGAATTTGAGAGTAAAATAGTATAATTTTGATTGTGATTCCGGG  
GAATCTCTAACTTTTGAATAAAAATTTACATATTTGAAAAGTGGTTAAAAATACTATAAGTCACCATAAT  
TCATAATTCAAGATGTTTACATGAAAAATCCGGTCAAATAAAGATTTATTTGAATCTCGAAATTTGAAAT  
TAGGTGCACCATAAATTGGGGAATGAGGGAATAACTTTAATGACGATCTATCAAGCATGTTAAAATAAA  
TCATCAAGAAAATAAATTAATAAAGAATAACAATAACATATTCAGTGTAAATTTATAGGTGAGGATCTG  
AAAATGATATAATGTACGCTGAACTTACCCCCACCTCGAAAAGATAATAAAAGTTGTTTTAAAGATCAT  
TGACCCAAGTAACCTGTACAAAATCAACGAATATATATATATCAGAGAAAGTGACTTTCTTTTCTAACAAT  
GAAATTAATTATACAAGAAATGAATCATATGTCTGATTATATTTAACTATATATAATTATAATTGCATATG  
ATTTGTTTATTTAATTTCTAATACACCAATGTTTTGTTTTATTTGTTAACAACGCAACTCTAACTTGAGTG  
CCGCAGGAGGAAGTTGATTTTCTTATGAAGTTGTTTTAGAGCTGATAGGCTCACAAGAAAAGTTGGAT  
GAGTGGACAAGGTATTCTATATATGTGATAAATAAAAATATCTTGTGTGATCAGCTATCCGACTATCTAT  
ATAAGAGATCGTTAATTCACCATTTTAAATGCAAAATGGTTCCCGAAATTAATTCCCCATGGTTTAGTAA  
AAAAAAGGTGGTATTTGATATTCATTTTGAATTTCAACTTATTCGAATTAATTAATTATATTATGTGATAGGGA  
TGGTAGACGAGTATCATTTATTGGGGATAAATCAATCCTTTCCAAGTCTTTACAGAAAGCTCTTACTGTA  
ATGGAGGAGAGAACAAAATGTAATTCTGGACTACATGTTATAATGGCAATCAATTACAGTGGACGACAT  
GATATATTACAAGCAACCAAAAAGCATTGCCAGTAAAGTGAAAAATGGACATTTAACTGTAAAAGACATT  
GATCAGAGCCTATTTGAACAAGAAGTGGAACTCATTGCGCCGAATTCCTGAACCAGATTTGTTAATTA  
GAACAAGTGGAGAGAAAAGAGTTAGCAATTCATGTTATGGCAATTAGCTTATACTGAATTCTATTTTCG  
GAATAAGTTATTTCTGACATGGAAGAAGCTGATTTTATGGAGGCTTTAATGTCGTTTAAGTCGAGACAG  
AGACGTTATGGTGGACAAAATATCTAGTAATATTTTCAAGAAGTCCATTACTGAGAATTAACCTAGCT  
CGAAATATGAAGAATTATTGATTAGATCTCTTGAATTTCTCTTGCTATTAGTACTATTAATAATTTTATG  
GTGGTCGATTGTATCTATAACCAGCACTATATAAGCATGAAATATCATCATGCTAGTTATGTGGTTTGTGCT  
GAGTTTTTCTTTTCTTTTCCCATCGCCCCATTAATTTGTATCACACACCGAAGGACTCGTGGCACTCCAA  
CAGGATATTCATATTTTCATAAAAAAAGAAGAAAAAAGGAGGGGACGGGGTGGGGACAACGCC  
GGAAAATGAGACTATAAAAAGTACTCAAAGTCATATGCTTCCAAGATGTCAATCACATCACCATCATTCA  
TCATTTTGTGGTTCTAAGTATGAGTGGATATAAAAATTTTCAATTTTACATCACATTTGATTTTGTCTAG  
ACTATAATATAGTAAATTAATTATAAAAATTGAGGCGAAAAATATAGTATATTAATTAATCAATAAT  
AATATCATATATTAATTGAATTAGTATTAATCGTAACTTGTCTTTTGTAGCAATCCTTAAATTTATTTTGTAG

ATGAGGGAAGTTCACCTTTCTTAAGTCAAATGTCAACTCACTAGTCATTAATCATCTTATTATTCAAAGATC  
CAGTGAATTTTATTACAATCCATGGAAAATAAAAAGATTTGACAAACAAATAAGAAATTTTGGTGT  
CTCCTTTCTCTTAAAGGGAGAGCCGTTTACCTATACAAGTCTATATTTGTGCGACTCTTAAAGTCATTGGC  
CATACTTTGACTCAAGGGGTGGTATCCTGTTTGATTGGTAAATCTAGAACCTTTTTATTATTATTATAGTC  
GTGGTATTACAGATCACCTTATAAGCACCTTGTTAATTTACAAGATATGTTACCTCCATCAACACAAGTA  
CCGAGTAAGATTTGCTAAGAAAGTATCCTTTCCCTTCACATGATCTTCTTTTTTCAGTACAAGTTATATGC  
ACTAATTGAGTCAAATAACTACACAACCATGTCGCTTGTAATAAATTCATGTAAATATGACAGTATAT  
ATTATTGATAACCCGAGAAAAATAATATCTAATCTGATATAATAGGTTAAATTACTGAAAATGGTTGT  
AAAAAATTTGTACTACTACCATTGTGTATAACTTTAAGCCCTTTTTCTCAAACACTTTGGTACCCACATAA  
GGAATAATGAACCCATTATAATTAGCAGAATCAATTGTGACTCAGTATTATCCTCTTTGTCCACATATCAC  
CTAACCTCCCAATCCCCAAATGGAGCTTCAAACACTTTTGTTCATTCAAGCTCTCTTTTTTTCTGTCAAT  
CCATGCTATTCTCTTCATGTTCTATACTTATCTTTCCAGAGTGTGCTTCAGCAGGCATACTTGGGAATC  
AAACAGACAACTTGCATTACTTGATCTTAAGTCCCAAATAACTGAAGATCCACAAGGACTCATGGATT  
TTGGAATGCCACTCTCAATGTCTGCCAATGGCCTGGTGTACATGTGGCCATAAACATCAAAGGGTCATT  
TCTTTAGATCTCAAAGACCATAGATTGGCTGGCACTATATCACCTAGCATTGGCAATCTTTCATTTCTTCG  
AATTCTTGACATCTCGGATAACTCCTTTCATGGTGTAAATCCCTCCAGAGCTTGGCCAATTGATCAGACTTC  
AAACCATGAACTTAAGCTTCAACTTCTTGAGAGGTGAAATCCCGCTTACCCTATCTCGTTGCGTTAACGTT  
GTTAACCTTATTCTAGACCATAATATCCTTGAAGGACACATTCCTACTGAACTTGGTTCATTGACAAAGCT  
GGAAATGTTGTACTCAAGAACAACAATCTCACAGGAAATGTTCCGAATTTTGTGGAAATCTTACATCT  
CTAAGAGAGCTTTACATTTCTACAATGACTTGGAAAGGTGAATTACCTGAAACAATGGCCAATATGCGA  
AGCTTGATTGAGTTAGGTGTTTCAGTGAACCTCTGTCCGGAGAATTCCCCCTGCACTCTACAATCTTTC  
ATCTCTTACACTTTTAAGCTTGTCAATTAACAAGTTCAGAGGCAGACTTAGACCAGATATTGGCCTTGCCT  
TCCCAAATCTTCAGAGACTGTATTTGGCCAACAATTACTTCACAGGTTCAATACCAGCTTCATTGTCCAAT  
TGTTACAGATCTTCTGCGGCTTGATATTCCTCTAAACAATTTACAGGAAATATACCATTGAGTTTTGGAAA  
CCTCAAGAATCTCTTATGGCTTAATGTTAACGATAACCAGCTTGGAGTTGGTGCACCTGATGATCTAAT  
TTCATAAATCTTTAACCAATTGCAAATGCTTGAGTTCCTGGACATTGCAAACAACAAATTTGGAGGTA  
TGTTGCCTTACTCTATAACTAATCTCTCGACAACCTTGACAAAGCTACTGATTGGATAACAACAGGATAAGT  
GGAACCATACCTAGAGAGATCTCCAACCTTGCAACTTGGATATGCTTAGCATCCAAGGAACTCTTATCA  
ATGGTAGCATTCTGATTCTATTGGAATGTTATCAAACCTGAAAAATCTGCACATGGAATCGAATCAGTT

GACAGGAAATATCCCCTCTTCCTTAGGAAACATTAGAGGATTGCTGTACATTTATTTGCAAGATAATAGC  
TTGGAGGGAACCATACTTCAAGTTTAGGAAATTGTACATCTCTCCAAACCTTAGACATCGCTCAGAATA  
AACTCAGCGGTAGTATACCCAAACAAGTCATTGCACTCTCCTCCCTTCGGTACTCCTTAATATGTCTTAC  
AACTCTTTGAGTGGTCCCTTGCCTGTTGAAATAGGTAACCTGACCAATCTTGCTGCACTTGACATATCGA  
ACAACAACTGTCTGGTGAAATTCCACACTCACTGGAGAGTTGTTTCATCCCTTGAAATACTCTACCTGCA  
AGAAAACATCTTTGAAGGAACGATTCTCCTCTGGATGATTTGAAAACATTCAGTATCTTGATCTTTCAC  
GTAATACCTTGTGAGGCAACATTCCTAGGAGTATACCAAGCATGTTTCATTACAGAACCTCAATTTGTCA  
TTTAACCACCTTGACGGAGAGGTGCCAGTTC AAGGTGTTTTTCTGATGCAAGTAGAATTCAAGTGATGG  
GAAATATGAATCTTTGTGGGGGAATTGAAGAGCTGCATTTGCATCCATGTCTCAAGCATGCAAATAAAA  
GACCCCGAAGCACATTGCCCTCATTTTGGTGCTGGCACTGGGTACTAGTGCTGCATGTTAACTTTGTT  
GCTGCTAGTTTCGTATTGCTGCGTGAAAAAGGGGAAGCATAGGCCTAGCACAGCATCTTCATTCAGGAA  
AGGATACACCCAAGTTTCCTATGAAGAACTCTTAAATGCAACTGGTGGGTTCTCTTCAAATAACTTGATA  
GGATCAGGAAGTTTTGGCTCCGTTTACAGAGGAAATCTTCTCCAGAAGGAACAATTGCAGTAAAGGTA  
CTAAACTTGAAAAAAGGGTGCTTCGAAAAGCTTTTTGGCTGAATGTGAAGCCTTGAGGAACATAAGG  
CACCGGAACCTGGTGAAGATCTCAACTGTTTGCTCAAGTGTTGATTTTGATGGCAATGATTTCAAAGCTC  
TCATTTATCCATTTATGGAAAATGGGAGCCTAGACGAGTGGTTGCACCCGAAGGAGGGACAGATGCTGC  
AGAAGAGATTGAGTATCTTACACAGATTAACATCACAATAGATGTGGCTTCAGCACTGCATTATCTTCA  
CAGTCAATGCCATACATCTATAGTTCACTGTGATCTTAAGCCAAGCAATGTTCTACTGGACAATGATCTA  
ACTGCTCTTGTTAGCGACTTTGGTTTGGCAAAGTTCCTGTCTGACTCGGGTCAAATGCCGATGTAAATC  
AGTTCAGCACAAAGTGGGATTAAGGCACAGTAGGTTATGCTGCTCCAGGTAAATATTATAGTGGGGATC  
TTAGTCTAAATATTGTCTGAACTCTGAAATCCATTTTTTTTTCTCCATAAGACCATAACATAATAACAATTA  
AGCAATTACATACTTCCTTGAGAGACTCCGGATGCTCCTTGTCTAAGCCCCAGGCATCCGTTACCTTTGC  
AGATCACTACCTCATGATTTTGTGCTATTGATTCTTATAACCAGAGGCAGAGGCAGCTTTAGTTTAATGG  
ATTCAACCAAATCTAGTATTTTCGACACTGAATATGGATATATAAGTTTAAAAAACTACTTAAATTACAAT  
AAATATCATATTTTGAACCATAATTTCAGAAGTACAATGAGTTCAGTTCCTAAGAATCTTAGACGTTGAA  
CCCATCAAATTTAAATCCTGGATGTCTCTTCTCTCAAATATAATTCCTGACTAGTCATAGTTTTTCTAAGGA  
CCTTAATAAGAGGTTTCAGCTTTCTAGGGCATTTTACATAACATTCTCTATTGGAAAATCGATACAAGTAA  
TCTGTGTTGCTTAGGCATTTTTGACAAATGTTTAGGATCCCTAATATTACTATGAAACACCTTCTCTGATA  
CATCAAATTTTTCAGAATATGGCATGGGTGGTCAGGTATCATGTCAAGGAGATGTCTATAGCTTTGGGAT

TCTTCTATTAGAGATTTTCACTGGACGAAGACCAACCAGTGAAC TATTTGAGGACAATGAAACTCTTCAC  
AGTTTTGTTAAGCAGGCATTGCCCGGTCAAGTGATGGATGTTGTGGATCAATCTGCTTTGTACGAGACA  
GAACCAGGGGATCTTATGGATATACTCAGCTGCAGAAGTGACTTCTCGGATGAATTTGTTGAATGCTTA  
GTTTCTATTCTTACTGCTGGAGTTTCTTGTTTCAGAGGAAACTCCACACGCCAGAATAAGCATGGGTCAAG  
TTATTTTGGATCTCATTTCATCAGAAACAAATTGAGCAGAATTTTAGTTCATTTCAGAGAAAGTGAAAAT  
CTCAAGAAAAGGTGAATCATAA

>PGSC0003DMG400030474 LRR-RLKs

AAAAAACAGATTCATTACAAAAAGCTGAAATTCCTTTTACCATTTCTCCACCTCTCACTCTTCACTTTGTA  
CTTGGCACTAAACACTCCTCCTTCTTCTCCATTAACACAGATCCAAATCTCTTACTACTTCAGCTCAAGCTA  
AACGGGTCGGGTCGGGTCTTATTCTGCGCAAATGTGGTTACTGCAACTCGATGAATTCGATTTGATGTT  
CATGTTTACTGTTAATTTACCTCAGAACCTCAGTATTACTCCTAGAACTTCAAGTGCTTTCTCTATTTTAT  
AGGTAATTACACTGCGATTTTCATATTGTTTGTGAAATTTATAATTTTGTATTTGTTTAGCTTGATTTCTTTT  
GTGTTTTCTGCTAATTTTGGTGGCAGATCTGTTTGCTTATTTGTTTCCTATTTGTTTGGCATTGTTAGATTG  
AACAGTCAATTTTTATTTATTTTAAAATATGATTTTTGAAGGTTTTCTGATAGTATTTTTTTTTTTTGTAGCT  
TTAAATTTGATTTTTAAAAATTAATTAGGAAATCCGTGATGAATTCATGCAGAAAATTAGACTCATTGGA  
GGGAGGAGTATTAAGTAGCGGCGGAGCTAGGATTTTCACTAAAGTGATTGAAAAATAAAGAAAGAAAT  
ATAATGATAAACTATGTATGATTTTTTTCTATTTCTTTTTTTTTGAACCTGTATATATGGTATGATTTTCCAG  
CTTTCACCCCTGGCTCCGGCGGTGGACTATTAAGTAGCAAGACCATGTTAGGTTCTGTATGTTGTTCAAGT  
CTTCAGTGTTTGCTTCTTTGATAATGTGGAAGTACAATGAATTGAGAAATTGAAAATGTTGTTAGTCATT  
ATGAACTATCATTGGATTATATTTGTGTAAAGGAAGCTTAGGATTCCCTATTACTGGGACCTCATATGAG  
TTGGGGTTGTTCAATAGTCTTAATTAACCCAACCTCTCTTTGACATTTACTTGAAGAAGAATTATGAATGTG  
GTAATAGGTAATCCCCAACCCCAAAATAGTAATAATAATAATAATAAAAAATCCCATGATCTGGTAGATT  
TTTTGATGTAGTTCTTCTTCATCAACTGTTTCAAGCTCCAACCTTGAATAAGAATTATCATGACATCAGGA  
TTGAAAACTTGTAATTAATGGGTTAGTCTAGTCCCGGTTGACTTGATGGAGTGTTATTTTCTTCC  
CGTTGCTTATTAGATACTATCATGTTAGAATACTTAAGTGCTAGCTATTTGTATGTTTTTTTTTTTTTCTCAA  
AACATCTCTTGTATTAATAATATAATTACAAAAGAGGGTGACCTAAGGCCTAACACCATTTCTCACACG  
TAACACCAAAAAAAGAGTTTCCATCCCGGAAGGTTTCTTCTTCAGTTAGAGTTTTTACCAAAACCGAG  
GGTGGCTCATAATGCCAACCGAATGGTTTTCTTTTTTTGAACCTAAAGGAGGCAAGGTTAAGTTTATCC  
ATCCTCAGAAGGCTTATTTGTATGTATTAGCTCTTGCTCTTCTACTTCAAGACTCTTTTGTTCATGAAATTG

AGAATGGAATATTTGTGAACCAAAGTTTTTCTGTAAATGTTTCTTCTTCTACTATATTCTTTTCTAATCTC  
GCTAATTCTTCTGTTTTGAGCTGTTAATATTGTACATGGTTTGGTATATCTTAGCATCTTTTTATTTTATTT  
TGGTGAATCATTTCATCCATCTGTAACATTTTCGCCACTTCATTGTTAAGGTTTTCGTTATTTTTGGCTTA  
GAAAGTGATATGGCAAGGTTTCTGGTTTTTGTTCAGCATCTTTTTGCATTTTGTATTTCTTGGCATC  
AGTATCTATGAGATTGAATAGCTTTTGAAGTAATTATAAGTTGTTAGTATGGTGGATATGATTTTAAACC  
AAGTCAGCAGAGCTTTCATCATACTATGTTATTTGACTGACTGTTTTTTCTTTTTTTATTCTTCTTTTTATT  
CCATGAGAACATGATTAGTTTTATTAATCTTCTTCTGTAGATGGTGAAAAATTAGTTAAATGTAGAACAA  
TTACTATTTGGCATTTCATAAGAAATTGTATAAGTCTAGTTCATTGCTAAGTGCTTTTGGAACGAATGTGCA  
AAGAGAAACATTAGTTGGACACATAATAATTGTTAATTGGAATCCATAAAAAGTTATCCAGTTTTAGTTC  
ATGAAAATTTAGTGCAGATTCCAAACATATTTCTTGAGGATATTCTTATATCTTTGACTGCATAGATGCTT  
GCTATGTCAAATGTCTTTGTTTATCCTTCTCTCACCTTTGGTGTTTGTGGTTCTCAAATGTTTATC  
TACTGAATTATTCCAGGACGACCACAATACTGGCAGCATAGTGGCTTTCAATCTGTTGAAGGTTTCTCA  
TGAGAATCTACCACCAATCAACTGCTACATTCTTTTTGTTGTAGCAACTCTTCTTCGCTGTGCCGTG  
GTGATCTAAACTCAGACAAACAAGCCCTTCTTGACTTTGCTGCAGCAGTCCCACATGGCTGGAAGATCAA  
CTGGGATCCTGCCACTCCTATTTGCTCATCTTGGGTAGGCGTTACTTGTAGTAATGATGGAGCCCATGTG  
GTGGAAGTACGACTTCCAGGAGTTGGACTCATTGGTTCACTTCCAAAAATACTTTGGGAAGATGGAT  
AGCTTAAGGATTATCAGCCTTCGATCCAATCGTCTCAGTGGAAACCTTCTTCCGCTATCACTTCACTTCC  
TTCTCTCAAATCCTGTTCTTACAGCAAATAACTTATCTGGACCTATTCCTTCTTCTTTCAAATAAACTG  
AATGTTTTGGACCTATCTCATAATTTCTTCACTGGAAAGATACCTGAAACAATTCAGAATTTGTCTCAGCT  
AACAGGTTTAAGCCTCCAGAATAACTTGCTTTCTGGACCCATACCCAATATTACTCTTCCAAGGCTAAAC  
ATATTAATATAAGCCACAACAATCTTAATGGTTCTATTCCATTATCCCTCCAAAAGTTTCCAATTCCTCCT  
TTGTGGGGAACACTACTCTTGTGTGGACTACCCTTAAATCCTTGTTACCTGTTCTACCACCATCCCCTCCT  
CCCCTTCCCCTTCCCACCTGCACCCTCCCCAAACACTCAAGAAAAAAGTTCAAAAAAGAACTTAAACTA  
GGAGTTATTCTTGCTATTGCTGCTGGAGGGGTTGTGCTGGTCTTGCTGCTAGTTGTGATCCTCGTTTTGT  
GCTGCCTGAAAAGAAAAAGGGGTGATGGCAGAGGTGTGCGGAAAGGGAAATCTCCGGGTGGAGGAA  
GGAGTGAAAACCGAGGGAAGAGTTCGGTAGTGGGGTGCAAGAACCTGACAAAAATAAGCTTGTTTTC  
TTGAAGGCAGCTCTTACAATTTTCGATCTCGAGGACCTATTGAGGGCCTCAGCTGAAGTGCTAGGAAAG  
GGGAGTTTTGGAAGTCTTATAAGGCTATTTTGGAGGAGTCATCAACAGTGGTGGTTAAAAGACTAAAA  
GAAGTCATTGTGGGGAAGAAGGACTTTGAACAGCAGATGGAAATTATTGGTAGAGTTGGACAGCATCC

AAATGTGGTTCCTTTACGTGCTTATTACTCCAAGGATGAGAAGTTACTGGTGTATGGTTATTTCTCAA  
TGGGCAACTTGTCAATGCTCTTGCATGGTAAGGCATCATATGCTCTCATCGTCATTTCTTTTTCTATTTCT  
AGCGTTTGGTGGAGTAACTTGATTCACTCTTTGTGATTGAATGCCTGATAGTAAGCTTCTAACACAATAC  
AAAATGCACTCAAGTAATGTCCTAAACGAATCTAAACAATGTGAGTTTGAACTTTTAACTTGTGAACTG  
GTGTGAAAAGAAGCATTCTTTCTGTAGCTTATTGTAAAGTTAGAGAAGAAAAAGTCTTCTTTAGAATAT  
ATGCATCAGTTTGATCTTTATAGGTCTATTATATGAGTATAAACAGCTCTTATGTTATTCTGTATCTATTGT  
TTCTGTAGCAACATATTGACTTGTGGCTTTCTTTTTCTTACTGCTAGTTTATTGCTCGCACTATCT  
TGCTGTTTGTCTAACTGGAAGCTGCTAGTGCTGAAGAATTCATGTATGATATACCTATTATCTATCCTG  
GAAGACTACACCAGAAGTGAATTCATCTTCATTCCTAACCTGCATAAACTTATCAATGTTAAGTATACTG  
CCAATGATGTTACGTACTGCTGATATTTCTGTTCTCTAACCTATCAAACCCCACTATCATTTAGGAAACA  
GGACTCCGGGAAGGACTCCATTGGACTGGGAGTCGAGAGTTAAAATATCTCTTGCAGCAGCAAAGGGT  
ATTGCCACATCCATTCAATGGGTGGTCCAAAATTTACTCATGGAAATATAAAGTCCTCAAACGTCCTACT  
CAAGCAAGATATGGAAGCTTGCATCTCAGATTTTGGTTAGCCCCTATAATGAACCTCCCTGCAGCCCCA  
TCTCGATATCCAGGGTACCGTGCTCCTGAGGTGATAGAAAGCCGAAAGCATAGTCATAAATCAGATGTC  
TACAGCTTCGGTGTCTTACTACTCGAGATGCTTACTGGTAAGCAGCCTATGCAATCACCAGGGCGTGATG  
ACATGGTTGACCTCCTAGGTGGGTCCAATCAGTTGTCAGGGAGGAATGGACGTCAGAGGTTTTTGACG  
TCGATTTGATGAGATTTCAAACATTGAAGAAGAGATGGTACAAATGCTGCAAATTGCTATGGCATGTG  
TTGTAAAGGTCCCGGACATGCGACCCAACATGGAGGAAGTTGTTAGAATGATTGAAGACGTCAGGCAA  
TCTAACTCCGAAAACAGGCATTCTCAGAAAGAGAATAGATCCTATGATTCAAATGTGCATATTCCTTGG  
ATTTCTGACTTGCAATTTGTAAGTCCTGTGAAATTCATTGATTGATTACCCAGTGCAACAACATACATG  
TTTTCTTTCCCTAAATTTCTGATTCAATCCTATTGACAAGTGTATCTAGGAAAGTGTGGATTTGTTTTCT  
TAGGAGATATAGTAGACAAGTTAATCATCTTCCTTTTTCTTTTCGTTAAGAACTCTTGTCATTTGTTGTAA  
GATTCAATCTGCACTGCACTTATTAACATCTGATTTATGCAACATGTGGAAGCAATTCATTTGCTGTGTG  
TTGGATTTTGGTGTGAAATCATTTTTATGGCATTCAAACACCAAGTAATT

>PGSC0003DMG400030572 LRR-RLKs

CTATTTTCCCAACGTCTCTTTATTTTCTTAGCTGAAATCAACTTTACCTTTTCTCACTCTCAAAGTCTCACC  
TTTCACTCTTTTTTCTCTCTTAAGCTCCATTCTTGGTTATCTGGTGTACAAAAGGTAAGGTCTTTGAGAC  
ACCTTTTGCTCATTTTTCATTTTTAGCTGTCCTGTTGATTTTCATCATATTTGTAGATAAAAATGCG  
ATCTTTTTGTTTTTTGCATTTCTTATTCTGTGTAGTTGTGTTTTTGTACTTCTTTGAATGATGAAGGG

ATAGCTCTTTGGTCATTCAAAAAGGTATTGGACAAGACCCTGAAGGGTCACTTAAAAATTGGAACTTTT  
CTGATGAAACCCCATGTTCTTGGAATGGTGTACATGCAAAGACCTAAAAGTTGTATCTGTAGTATAACC  
TAAAAAGAACTCACTGGGTTTCTTCTTAGTCTTGGATCTCTTACTGGGCTTAGACATGTTAATTTGA  
GAAGTAATTTGTTTTCTGGTAGTTTGCCTGTTGAGCTTTTTGAGGTTCAAGGTTTGCAAAGTTTGGTTCTT  
TATGGGAATTCCTTTCTGGGGTTATACCTATTGAGGTTGGGAAGCTAAATTATCTCAAACCTTTGGATTT  
ATCACAAAATTTCTGAATGGGTCTGTGCCTATAACACTTCACTGTAAGAGATTGAAGTTTCTTTATT  
TAAGTCATAATAACTTTACTGGTGTGTACCAGAGGGGTTTGGGGTAATTTGTCTGCATTGGAAGAACT  
TGATCTTGGATTCAACAAATTTGATGGTAAAATTCCAAGTGATTTGGGAAATTTGTCTAATTTGCAAGGA  
ACTGTTGATTTGTCTCATAATATGTTAATGGTTCGATTCCGGCTAGTCTTGGTAATCTTCTGAGAAGGT  
GTATATTGATCTGACTTATAACAATTTGAGTGGTCCAATTCCACAAAATGGTGCTCTGATTAACAGAGGA  
CCTACTGCTTTTATTGGAAATCCTGGGCTTTGTGGACCTCCGTTGAAAACCAGTGTCTGCACAAAGTG  
ATGCAAGTTCACCGTCCCTCGGAACCTTCTTGCCTAATAACGTACCTCCCTTAGATGGTGCTGGAGGGGA  
TGGGAATGGTAGAGGTCTGAGTAGAGGTGCTGTAATTGCGATAATCGTGGGGGATGTGGTTGGAATTT  
GTGTTATTGGGTTGTTATTCTCGTATTGTTATTGAGAATCTGTGGTTGTGGGAGGAAAAAGGATGAATC  
CGGATTTGGTTTTTCAGAAGGGGGGAGGGAAAGGAAGGAAAGAGTGTTTATGTTTTAGGAAGGATGAG  
TCGGAGACGTTATCGGAAAATGTTGAACAATATGATCTAGTGGCACTAGATAATCAAGTGGCATTGAT  
CTTGATGAACTTCTCAAGGCATCTGCTTTTGCCTTGGTAAAAGTGGTATCGGCATTGTGTACAAAGTTG  
TGCTTGAAGACGGACTTAACTTGGCTGTGAGGAGATTAGGCGAGGGTGGTTCACAGAGATTTAAGGAA  
TTCCAGACGGAGGTGGAAGCAATTGGAAAATGAGACATCAAATATTGTGACTCTTCGTGCCTATTATT  
GGTCTGTCGACGAGAAGCTACTGATATATGACTTCATTCCAAATGGAAACCTTACCACCGCAATTCACGG  
TATGCTTCAAACCTTAGGCTGTTGCATTCTCGTTTATCGTTTTTCTTTGATTTCCACAACCTGTTTTAAGCTTT  
CGTGATTATTAAGTTATTAACCTGTCTTTTTGCTTGTGTAATCAACTCTTAGGAAAACCTGGTATGGTGTC  
ATTTACACCGCTTTCGTGGTCCATTGACTGAAAATAATGAAGGGAAGTTCGAAAAGGTTTGGTTTATTTA  
CATGAGTACAGTCCCAAGAAATATGTTTCATGGTGATCTAAAGCCATCTAATATATTACTTGGGCACGACA  
TGGAGCCCAAATCTCCGACTTTGGACTTGGACGTCTTGCTAATATAGCCGGAGCATCTCCTACGTTGCA  
ATCCAACCACATGACCTCTGACAAACCACAACAAAGTAAGCAAGGCAGTGCATATCAGAGTCCGGGAC  
AGTTACATCAACTACAACATCTGGTTCTTGCTACCAAGCTCCCGAGGCATTGAAAGTGGTGAACCATCT  
CAAAAATGGGACATTTACTCGTATGGAGTGATCTTGCTTGAATGATCACGGGAAGAACCCCGATTATC  
CAAGTAGGTTCTACAGAAATGGATCTAGTAACTGGATTCACTGGTGCATTGAAGAGAAGAAGCCACTT

TCGGATGTATTGGACTCATATTTAGCTCAAGATGCTGATAAAGAAGAGGAAATGATTGCGGTTTTGAAG  
ATTGCAATGGCGTGTGTTACAGCAGCCCGGAGAGAAGACCCTCAATGAGATACATATCTGATGCATTA  
GAAAGACTGCAAGCTTCTCTGAATGAACGATCGAAACAGAACCTGAAGGCTACACATTGCAGAGTAAG  
GATCACAGCATCTAACCGATAACTATGGAGCACGATCACTGCTTGGCGCGCGATCATATTGACTAACAG  
TAGTAATCTCCACTTGTCTGTTTGAATATTGGCCTTCTTGCTCTCTAATTGCAAGTTTTTGTGTGTCTAT  
TTGTTGTTTCCTTCTATTGATGAACATAAGTTATTTGTTCTTTTATTACTACTACTATTCATCTTTGTGTGT  
CACAAATGAGTTTATGTAAATAAAAATGATTGTCAAATAATAAATAAGATAGGTGTAAGCAATAACTAT  
GTCTGTTGTGAGTCTGCAAG

>PGSC0003DMG400030625 LRR-RLKs

ATTTACTCAAACAAAAGAATATACACCAAACGGATTACCCACCCCCTCCTCACTTTTGCCTTTCTCACTCT  
CACTGAGTGAAACCGCAAACCAAACAGTTGGTGGGCATTAGATTAAGGAAGGAAAAATGCGTCTTCTTT  
TTCTTCTTCTTCTTGTATGCATTTTACCGACTTTTCTGCCGGTAAACAACCACGGTTACCGGAATACCAG  
GCTTTGCTTGCCCTGAAAAGTCCATTACCGATGACCCACAGTTAACTTGCCTCATGGAACATCTCCAC  
CAGTCACTGTACGTGGAATGGTGTACGTGCGACACGCATCGTCACGTGACCTCTCTTGATATTTCTGGG  
TTAATCTTACCGGTACTCTTCCGCCGGAAGTTGGGAATCTTCGTTTCTTACAAAATCTGTCTGTTGCTGT  
TAACCACTTACTGGACCCATTCTGTTGAAATCTCCTTTATTCCAAATCTCGGTTACCTTAATCTTTCTAA  
TAACATATTCGGGATGGAATCCCTCCGCAGTTAACCCGTCTGCGTAACCTCCAAGTCCTTGACCTTTACA  
ACAACAATATGACCGGTGAACTTCCCCTTGAGGTGTATCAGATGACTAACCTTCGACATCTACACCTCGG  
CGGGAACTTTTTCGGTGGCCGCATTCTCCGGAGTATGGAAGGTTCCCGTCTCTAGAGTACCTCGCAGTT  
TCAGGCAATGCACTGGTAGGAGAGATACCACCGGAGATTGGAAACATCACTACACTTCAGCAGTTGTAT  
GTAGGATACTACAATACCTTACCGGTGGGATTCCCCGGCAATAGGGAACCTTATCGCAGCTCCTCCGGT  
TTGATGCTGCTAACTGTGGACTTTCCGGGGAGATTCCACCGGAGATTGGGAAGCTTCAGAACCTTGACA  
CTCTCTTCTGCAAGTGAATTCTCTGTCTGGGTCATTAACCTCCGGAGATAGGTTATCTGAAGAGCTTGAA  
ATCTTTGGATCTGTGAATAACATGTTCTCTGGCGAGATACCGCCAACATTTGCGGAGCTTAAGAATATC  
ACTCTTGTTAATCTTTTTCGGAATAAGCTTTATGGGTCAATACCAGAGTTCATAGAGGACTTGCCGGAGC  
TAGAGGTGTTGCAACTTTGGGAAAATAACTTTACGGGAAGCATTCCACAGGGGTTAGGCACAAAGAGC  
AAGCTCAAAAATGTTGATCTCAGTTCCAATAAATTGACTGGAAATTTACCCCCAAACATGTGTTCCGGTA  
ACAATCTGCAGACAATTATCACTCTAGGGAACCTTCTGTTTGGCCCAATTCCTGAATCTTTGGGTAGGTGT  
GAATCACTTAATCGGATTAGAATGGGAGAGAATTATCTGAATGGGTCAATTCCAAAGGGGCTCTTAAGC



TTGCCACGTCTGTCACAAGTTGAACTTCAGAATAATATTCTCACTGGTACATTTCTGATATTTCTTCCAAA  
TCTAATAGTCTTGGGCAGATTATCCTTTCAAATAATCGCCTAACTGGACCTTTGCCGCCAAGCATTGGAA  
ACTTTGCTGTAGCCCAAAAATTGCTTCTTGATGGGAACAAATTTTCGGGACGAATTCCAGCAGAAATAG  
GAAAGCTTCAACAGCTATCCAAAATTGATTTAGTCACAACAACCTTTCTGGACCCATGGCTCCGGAGAT  
TAGCCAGTGCAAGTTGCTGACTTATGTTGATCTCAGCAGGAACCAACTTTTCGGGTGAGATTCTTCTGAG  
ATCACAGGTATGAGGATACTCAACTACTTGAECTTATCGAGAAACCACTTAGTTGGGAGTATTCTTCCC  
CTATTTCTAGTATGCAGAGTTTAACTTCTGTTGATTTCTCATATAACAACCTTTTCTGGTTTAGTTCCTGGAA  
CCGGGCAATTTAGTTATTTCAACTACACCTCATTCTGGGCAATCCAGATCTTTCGGGACCCTATTTGGGC  
CCTTGCAAAGAGGGTGTGTTGATGGGGTTAGTCAACCTCATCAACGAGGAGCCTTATCGCCTTCGATG  
AAGCTTTACTTGTTATTGGTTTGCTTGTCTGTTCTATTGTGTTTGCTGTTGCTGCAATTATAAAGGCCCGA  
TCTTTAAAGAAGGCAAGTGAAGCTCGTGCCTGGAAGCTCACTGCTTTTCAGCGCCTAGATTTTACTTGTG  
ATGATATTTGGACAGCTTGAAGGAGGATAACATTATTGGAAAAGGAGGTGCTGGTATAGTCTACAAG  
GGGGTAATGCCGAGCGGGGAACATGTAGCAGTTAAGAGGTTGCCAGCTATGAGCAGGGGTTCTCTCA  
TGATCATGGGTTCAATGCAGAGATACAGACTCTTGGGAGGATCCGACACAGGCACATTGTTAGATTATT  
AGGATTTTGCTCGAATCATGAGACAAATCTTTTGTTTATGAGTACATGCCTAATGGAAGTCTTGGGGAA  
ATGCTTCATGGCAAGAAAGGCGGTCATCTACATTGGGATACCAGGTATAAGATAGCCGTGGAGTCTGCA  
AAGGGTCTTTGCTATCTCCATCACGATTGCTCTCCTTTGATCCTCCATCGTGATGTGAAATCAAACAACAT  
TCTGCTAGACTCCAGCTTTGAAGCTCATGTTGCTGATTTTGGACTTGCTAAATTCTTGCAAGATTCAGGGA  
CATCAGAATGCATGTCTGCTATTGCTGGTTCTTATGGGTACATTGCTCCAGGTATTTGTAAAAGCCTTCG  
TATCTTGAAATTCTTAGTTTCTAACTGTGTTTCATATTTATTTTCTTGTCACATCATGCTATGCGAGTTTGT  
GCCGAAGTTACAACTTACTGATGAACTAAAATTTATCAGCTGAGACTAATTATCAATCTGTTAAAATGA  
AGCTTAGGTGTTCTAAACATCATAAATGTGCTATCCTGTAGTCTTGTATTTCCACTACTAATAATGTGACG  
ATGAAGGACAGCATTAAAGACATGGATAGTGGGGTCTTGACTGGTAGTAACTAGAGGATTGGGCCT  
TCTTACTTTTGAAAAGGATCTCTAACTACTTCGGTGATGGTTAGGTTGGAATTTATAAATGCTTATGTCAC  
TTGATAAGTAAGGCAACTGTGTTGCATGCTCCTGAAGCAAAGCAACATTAATAAGTGGTACTGGTACT  
GATGAACTATTTACACTGTTGGAACGGGTAAGGGGATGTAAAACCTCTGGTTTCTGTTTAGTTATCTAAC  
AAACCTACTGATTGCTAGCAATTATTTGTTCTGTTCTATCGTCTACTTCTCATTAGCATCTTATTTTCGTTTT  
TGCAGAATATGCTTACACGCTTAAGGTTGATGAGAAAAGTGATGTATATAGCTTCGGTGTGGTGCTATT  
AGAAGTGGTAAGTGGCAAAAAGCCAGTTGGAGAATTTGGTGATGGTGTGACATAGTCCAATGGGTTA

GGAAAATGACTGATGGGAAAAAGGATGGAGTTCTCAAGATCCTTGACCCAAGACTCTCAACGGTCCCC  
TTAATGAGGTGATGCATGTCTTCTATGTTCGATTGTTGTGTGTTGAAGAGCAGGCTGTGGAACGCCCA  
CCATGCGAGAGGTAGTGCAAATACTAACTGAACTTCCCAAGTCACCAGGCGCAAATCAGATGACTCAA  
CCGTCACTGATCAGTCACCCCCACCATCAGACTCTGCATTAGAGTCCCCAACCTCAATTCCCGAGGAAAC  
AAAAGACCACCATCAACCAACACCTCAATCACCTCCACCTGACCTACTCAGTATCTGATTGCAATGTTCT  
TGAAATAGGAGTGTTTTATTTAGTTTGATTCTCTAGTTCTATTATGATGAATTGTGCTAGCTTTGTTCTTT  
TTAAAAAAAATCGGGTCTTTTTAGGCTCAGGGTTTATTCTAACTCTAAGATGGGTTTAAATGCTCAGAA  
GTTTTCTCTTGTACAGTAAGATTGGTAGGGTTTTCTCAAGTGTATTAATGGAAAAATTGCCCTTCATTTG  
CTA

>PGSC0003DMG400030626 LRR-RLKs

TTTTATGCCATATAATATTTTGTAGTCCAAAAACCTTATCATTACTCTCTGCTTCAAGTTACTGCAACTCTTG  
TCTTGTTCTTCGCCATTAGAGTCCAATACTAGCTTTTTTTTTCTTCTAATGTGTGAACACTCTTCACGCTTCA  
GTACTATTTCTTCTCCTTAAACTCTGCTTCCGTTACACTTGTAAATCCATGCAAAAATTCCCCCACCTCTTTC  
TAACTCTTACCTCCCAACATTCAACCTCCATTTACAGATGTTTATGATTAATCGGTTCTTGCCTTTTTAAG  
GACTTGGAGGTAGGGGAGATTCATTCAGTCATCAATGGATTACATGAAGCTTCAATTTCTGATACTCGTT  
TGTTTTTTTCTTTCATTGTTCCGGCGAGTTCATCGCCTCGGGATATCGCTATTTTACTCCGGGTAAAGTCC  
GGCCAACTCGATGACCCGAATGGGTTGCTTGATGATTGGAACGGGTCTGCTCCAAATGCGCCTTGCAGC  
TGGAACGGGATTAAGTGTGATCGGAAAACCGGTCAGGTTGTGTCCATTGATTTTGAAGTTTTGGAATC  
GCTGGTCTTTTTCTGCTGATTTCTGCCGGATTTGCACTTTGCAGAACTCAATCTGGGTGATAACAGTTT  
TGGTGAGTCCATTTCTCTGACTCATGGTCACTCTGTTTCGCATCTACACTTTTTGAATATTTCTTTAAATTT  
CTTTGTTGGCCGGCTGCCGGAGTTTATTACCAAGTTCGATAACTTGACCATCCTTGATGTTAATTCAAACA  
ATTTCTCCGGTGAAGTTCGGCGAGTTTAGGCCGTTTACCAAATTAACAAGTGTGAATATAGCTAACAA  
TCTCCTCAATGGTTCAATTCCTGAGTTCTTGACGAATCTTACCGAGTTGACTCGATTGGAAATTGCTGCAA  
ATCCGTTTCAGCCAGGTCCATTGCCTTCCTCAATCGGCCGACTCGGTAAGCTTCGAATTTTCTATGCTCGG  
TATGCGAACCTTATTGGAAATTTTCCAGATTCTATCAAAGACCTGAAATCTATTGAAATTTGATGTGGC  
AAACAACAATCTCTCCGGAAAAATTCAGAAAAGCTTCGGAGAACTCAAACCATAACAACAATAGAGCT  
CTTTGGAAACCATTTTTTTCAGGCGAATTGCCGGACATGTTTTCCGGTCTTGGTTCTTTTCCAGGTTTGACG  
CTTCTGAGAACAATCTCACCGGGAAAATACCTGAAACCCTTGCCATTTGCCATTGGAATCTCTAAATCTC  
AATGATAACCAATTAGAAGGCGAAATTTTCAGAAAATTTAGCTCTTAACCCAAATCTTAGTCAGTTCAAGC

TTTTAACAACAGATTTTCAGGTACTTTACCTCAAAATTTTGGTTTAAGTTCAGATTTAGATGAGTTTGAT  
GTCTCCGGCAACAATCTAAAAGGTTCTTTACCTCCCAACCTATGTTCTAGAAAGAACTTAGGATTTTGA  
ACCTGTTTGATAATAAGTTCAATGGGCCAATCCCAGAATCCTATGGGCAGTGTTATTCATCATATGT  
GCGTATCTATAACAATCAATTCTCTGGTGAATTACCAACTGGTTTCTGGGGATTTGATGGATACACATTT  
TTGAACTGCGAAACAACAACCTTTCAAGGTTCAATTCCAGCTTCAATCTCCAATGCTCGAGGCCTGACACA  
AATTCTTATCTCCGGCAACAAGTTCTCCGGGGAATTGCCAGCAGAACTATGCAATTTGGAAGAGGTTGT  
GATCATGGACATTAGCAAGAATCAATTATCAGGGGAGTTGCCTTCGTGTATCACAAGATTGAAAACATT  
ACAGAAGCTTGATCTTTCACAAAATAGGATCAAGGGTCAAATCCCAAATCAGTTAGTTCTTGAATGAC  
CTGACTGAATTGAATTTAGCTAACAAATCAATTGACAGGTGAAATTCCTGGTGAGCTTGGGACGTTACCG  
GTCTTAACCTACTTAGACCTTGCCACAACTTGCTTTCTGGCGAAATTCCATCTGAGCTGAGCAAACCTCAA  
GCTCAACAAATTCATGTATCAAATAACAGGCTGGAAGGGAAAGTTCCACTTGGGTTTGATAACGATTTT  
TTCGTCTCAGGTTTACTGGGCAATCCGGATCTTTGTAGTCCGGATCTTAAGCCTCTGCCCAATGCCGAA  
GACCCAAAAGTGTAAGCTTGTACTTGGTGTGTATTTTATCAGCTTTTGCCTTCATACTTGTCTGGGTCACTT  
GTTTGTGTCTTACTCAAGGCCAGTAAGCTGCTACCAATCCGTAGCAAGCGTAAAAGTGTGTGGAGAATT  
ACTGCATTCCAACGCGTCGGTTTCACAGAGAGAGATGTGTTAGATGCACTGATAGAGGAAAATCTCATT  
GGAGCTGGTGGGTCGGGTCGTGTGTACCGGGTCAAATTGAAAACGGACAGATGGTAGCAGTGAAGA  
AACTTTGGGCGGCTAAACGGGAAAGAGAATCCGAGGAGGTGTTCAAGTCTGAGGTGGAGACATTAGG  
GAGAGTCCGGCATGGAAACATAGTCAAATTACTATACACTGGCATTGGTGATGACTTTAGGATATTGGT  
GTACGAATACATGGAAAATGGAAGCTTAGGAGATGTATTACATGGGGAAAAGGTGGCTTGTTATTGG  
ATTGGCCGAGGAGATTTGCCATAGCAGTTGGAGCAGCTCACGGATTGGCCTATTTGCACCATGATTCTG  
TGCCAGCAATAGTGACAGAGATGTTAAGTCTAATAACATTTTGTGGACGAGGATTTAGGCCCAAAG  
TGGCTGATTTTGGGCTAGCTAAGGCAATGCAACGGGATGCTGAGGAGAGTGAACAAGCCATGTCCCAC  
ATTGCTGGTTCCTACGGCTACATTGCACCTGGTAACCTTAAATTCCTTATTGTTTTTACCATTTATTTAG  
GTCCAATGACTGTTAGAAATTTTCTAGTCTTGTTAGAAATTTATTTGCCAATAAAAAATGTTGAAAAAATC  
TAGTGCTAAGGAGACTATTTAAAAGAAAAAAATATTGAACCAAGATAGGCATAAATGAAGTGGTATG  
GACAGCAGGAATTCATAATGCTAACCTCTACTTGTTGGGATCAGGGCCTAATTATTGTTGTCGTTCAAC  
TTTTTGTAACTTGTTGTGAAAAGATATTTAATATCTTGCGTTTGGCATACCAAGGACATCCAAAATAG  
TTTTGTGGAAGTTTTGGTAACTTCACATACTATCTTAAAATTTTGATTTGATTTGATTTGAAATCTTTTA  
TATGAAGCCAGAGAAGATTTTAGGAGATGATTCAAACCTAGAAGTAGATTGGAACTTTAATAATATCC

ATTTAATTGTAGCATCTAGTTTCATTCCTCTAACTGGACGTTGTTTCTGAAGTCTGCATATTCTTGTTTGGC  
TTGCTAATGCTTGATTATATGTTTAAACAAGGGGATTTGTCAAAGTAAAATCAAAGAATGATTGGGCATCC  
CATTTTTGAAGTCTGCATGACTATTTAGTTTTAACTACCTGTAATATTTAATCCTGAGTTTCGTTTGGGATT  
TGTCAAAGTAAAATCAAAGCATAGTTGGGCGCTCCTTTTTCTGAAGTCGGCATGACCATTTATTCTACAC  
CGGTAGTAATATTTAATTCTGAGATCACATCAAATTATTGAATGATTTTGTACCCAATGTTTGTTAACAC  
AGTCAAGATTTGTTTGAAAGAATAAAAAATAGGAGGGTCATGTGTGTCTGTACCTAGCATTGTTAAC  
ATATTCAAGATTTGATCTAAAAGAATAGGATTGAAAGAGACATGTGCCTAAGTATTGTTACTTATTTATC  
TAATTTATCGATATCTTAAATTCTATTTACTCCCATAAGTCCTCTTTGATTGGACATACAGTTTCATCTTTT  
TGTAAGCTGACACTATCCGGTCTGTGGCTCTGCCATGTGCCCTTCTTTGCAAACTGAGAGAATACA  
GAAACCAATATCGTTGATGGATATTTTTGATGGCCTTTTGATACTAGAAAACATTCCGGTTGCAATGAC  
AAACAGTTTGTTAAGTTGATCTTGGCTACTTAACGATTAGGAAGATGCTAAAGTTTGCTAAATATCTCAT  
GGGATGGCACATGTGTTATCCAAGTTTTTCAGCTGCACGTTTAACTTAACCTCGATTCTTTGTTTCAAT  
TGCAGAATATGCATACACTCTGAAGATCACTGAGAAGAGTGATGTTTATAGCTTTGGTGTGGTACTGTTG  
GAACTAATAACTGGTAAAAGGCCTAATGACTCCTCTTTGAGAGACAAGGACATTGTCAAGTGGGTG  
TTAGAGGTTGCAACATCGTCTAAGAAAGATGAAGGAACTGGCCATATTGTTACGTGCGCAAGTGGTATT  
CTTGATTTGAACCAGCTAGTTGACCAGAGAATGAATCCATCTGCAAGCAATTATTCAGAGATTA AAAATG  
TTTTCGATGTGGCTTTGCTTGCACCTCAGCATTGCCTATTAATAGGCCCTCCATGAGAAGAGTTGTTGAG  
TTGCTGAAGGTTATCCCCTCTGCTCGCTCTAAAACAACCCATTAGCTTTTACAGTTTCAACATGTCCTTGC  
TCAAGTAACTTGATACTATTGTAACTGTAAAAGAATGTGTGAAATTAGGTGTGTTTAGGTCTGCTTCAT  
AGGTCGATTTAGTTTGCTGTGGTTTAAACAAGTACCTGTTAGATACTCCAGTACTACACAGAGTAG  
CTTAACTAAAAGTTTGCTGACCCTGTAAAACCTCATGTTGTAACGACTAAACCTTAAGAGTTTTTGTGCAA  
TATATGAACTTTACTATCATATACAAGTATTCTATTCTGTATCCATG

>PGSC0003DMG400031028 LRR-RLKs

ATGGAGGTGAGCGTGAAGATGAAATCCCCTCACAAGCACTACTGTTGGCTCTATTGCTTGTTTTACCGA  
TCGTTTTAGCTCTCACCGAAGAAGGTAACATTTTTTTGAACACCTAGAAGCTGTTTTGGTGTCTTCTAGC  
TCCTCTGTTTTTATAGCAGAAGGTAGTGCTATGTGTGCTATCTAGGAAATACGAAAGTTATTGTTGCAAT  
TTAGTTTTTATTTTCAGTTTCTGGAGCAGCATTCCATGCTATTTAACTCTGATAACGAAAAATCCGTGTTAT  
TTAAGATATATTTAGGCTCCAGTTTATGGCATAACTACTGGAATACTAGTTGATGAAAACCTGAAAATGGT  
TATGACTGCTTGCGCAGGCAAAGCATTAAATGTCGATCAAGGCATCGTTTAGCAACGTGGCAAACGTGTT

GCTAGATTGGGATGATGTCCACGACGAGGATTTTTGCTCATGGCGAGGCGTGTTGTGTGGAAATTTCTC  
CATTTCCGTCGTTGCCCTGTAGGTTTTCCATCCTTGTCTCCTAACTTTTACTGATACACCAGAACAAGAA  
GTAGCTGGACTCTGATGACCTGCTAGCTATTGTATAGCACTTTGTTATTTTAGCTAAAACCTATACGTCTT  
TTATTTAAATTTGCCTTCTCTGCTTGCGAAGGAATCTGTCTAATCTTAACTTGGGCGGGGAAATTTACCA  
GCCATTGGAGATTTGAAGAATCTAGAGACATTGTATGGTCCATGTTCTCTTTTACTGTTCTTGGTCCATTG  
ACTGTTATTTTTCCGTGCTAATATTATATTCCAATTTTAATGACAGAGACCTTCAGGGAAATAAATTA  
GGTCAAGTCCCAGATGAAATTGGCAACTGCATTTCACTGATCTATCTGTAACTGTTTTTAACCTATGCTT  
TTAATATCTATTTCTTGCCTGTCAGTAAATTTAAAGTGTTCCACTAGTTGATTTGCTATTTTCTGCAGTGA  
TTTGTCTGATAACTTGCTCTATGGAGATATACCTTTCTCAATTTCTAAGCTCAAGCAGCTAGAGTTATTGT  
GAGTTATTTAATCACGTAAATTGATGTCTTCTCATATCTAGTTGATATGGTTATGATGAATTAATTCATAT  
GTGGTACAGGAACCTGAAAAACAACCAGTTGTCTGGCCCAATCCCATCCACATTAACCTCAAATCCCTAAT  
CTAAAGACGCTGTGAGTTTCATGACTTTAGTTTATCTCACTCAAATTTAGTCCAATATACATGGTTACTA  
ATGGTTATTTGATGGTGAAGTGATCTGGCTCGAAACCAGCTCATTGGTGAGATACCAAGGTTGATCTATT  
GGAATGAAGTTCTGCAATACCTGTGAGTGCATGTTCTGGTGTGTTTGGAGGTTTTCTTTTTGTTTGTGAA  
ATTTACAATGTTATAATTACCTTCTGTTTTGCAGTGGCTTAAGAGGCAACATGTTGACAGGAACATTGTCC  
CCTGATATGTGCCAGTTGACTGGTTTGTGGTATTTGTATGTGCTCTGCTACAAGTTGTCTATACGGAATG  
CTGTGTTGTCTGTTTGGTGTATGTTTATTCTAACAATAGAAGTTTCATATTATTTAGTGATGTGCGGGG  
CAATAACCTCAGTGAATAGTTCCAGATAATATTGGGAATTGTACAAGTTTTGAGATACTGTCAGTGCC  
TCTCCTCGCTCTTGTAACATTAAGCTACGGTTTTTACTCCTACTGCTGCCAATTATAACAAAGTCTTTTTT  
TTCGTGATTTAGGGATATCTCATACAATCAGATAACTGGAGAAATCCCTACAATATTGGATTTTTACAA  
GTGGCTACCTTGTTAGTGAATTACTTTTAAATGATTTTTAGCTGTTGTCATTTTTACCTTGTCTGTTCTGTT  
ATGGGGTTCATTTCTGTGAATTGTAAATGGTGATTGTGGTCCTTTCAACAGGTCTTTGCAAGGAAATAGG  
CTAACTGGGAAGATCCCAGAAGTGATTGGTCTAATGCAAGCTCTTGCTGTTCTGTGAGTATTCATACTAT  
TACATTTTTTTTTTAACTCCATTTCTTACTATTTACTACTTGCAAGTTAGAAAGTTTCATGATGTTTGT  
TCCTCTGTAGGGACTTGAGTGAAAATGAGTTGGTGGGACCAATTCCTCCAATCTTTGGCAATTTATCCTA  
CACTGGGAAACTGTAAGTTTTCACTACTATTTAATGCATATACTTTTCTACGTGTGGCTCGTTTGTCTGA  
TTCACTTGTACATTCAACAGGTACCTGCACGGCAACAACTTACAGGGCCAATACCACGGAGCTAGGA  
AATATGTCTAACTTAGTTACTTGTAAAGAGGGTTAATTCACAATTTAGATGCATTATGCGGTCACCTTTT  
TTTTTGTCTCATGCATTGAGCTATCTTATTTACAGGCAATTAATGACAATCAGCTAATGGGGCGAATTC

CCTCCGAACTTGGCAAACCTGGACCAGTTATTTGAATTGTGAGCCTTTTATTCTGTAGTATATAAATATGG  
TTCCATTTCTCTTAGAATATTGTGTTCTTAGCTTTCCCTTACCAGGAATCTTGCAAATAACAAGTTGGAGG  
GACCAATTCCTGAAAATATCAGCTCCTGCTCGGCATTGAATCAACTGTAAGATTGTTGCGTATCCTTTTGG  
AACTTCTTTTTTTTTCTTTCTCTTGCTATTTCCATTCTGAGTCTAAACATATTTGTTTCTTTCTTTTCAG  
TAATGTTTCATGGCAACAACCTTAAACGGGTCCATTCCCTCAGGGTTAAGAATCTTGAGAGCCTGACATAT  
CTGTATGTTATATGCTTCTGGTTTGGCTAGTGATCATGAAAATGATTTTGAATTTCTTTCATATGGTACAA  
ACTCATTGGTGATATTTTGTGATATATACCTGGCAGAAATCTTTCAGCAAATAAATTTAAAGGTCACATA  
CCCTCTCAACTAGGGCGAATCATCAACCTTGATACATTGTGAGTCTTGACTGTCAAGGTCAATAAAAATTT  
ATTAGTTCAAGTGATTTCTTGACTAAAACCTGTATTCTTTAGGGATCTCTCTGGCAATGAATTTTCTGGG  
TCTATCCCTGGTTCTATTGGAGATTTGGAGCATCTCCTCACACTGTAAGATTTTAAACATTTTGATGTACA  
AGGAGTTTGTATCATATTGTGACTTGAACATAATCACAATATCACTGCATATTGTAGGAATCTGAGCAGC  
AATCATCTTGATGGACAAATTCCTGTAGAATTTGGCAATCTGAAAAGTATACAGACCATGTGAGTTTCTG  
CTGAGAGCTTTGGTTACACTGCCTTCAAATGTGTACTTTTTTTTAGTATACTGATTTTCTGTTCTGAGAT  
TGGTTTCTATTCTTTCAGTGATATGTCATGCAACAAGATTTCTGGTGCCATCCCAAAGAGCTGGGACAG  
CTGCAGACCATGATAACTCTGTAAGTACATTTAGTTTTTGTCAAGTAAATTGATGTAGTGTTAATCAGTT  
GTCCTTAATATCAGTCAATTCTAATGAATTTTGGATTGGCTTTGTTTCTTATGAAGTACTTTGACAGCTAA  
CGATCTTAGTGGAGCAATCCCTGACCAATTGACCAATTGTTTCAGCCTAACTAGTTTGTGAGTTCATCTAT  
CTTTCCTTAACATCATAGACATTCTAATTCTTCTACAGTTACTGATCTTATGCCATTTTCTTTAGGAAT  
ATATCCTACAACAATTTAGTGGTGTGTTCTCTTTCACGGAATTTCTCGCGGTTTGCACCTGACAGGTA  
TTTTCCGTATAGAATGAAGCTTCATCATTATATATGAGCATTAGTACAAGTTAATGATCATCTTACTATGG  
TCATCAGCTTTTTGGGGAACCCATTTCTTTGTGGCAACTGGAAAGGCTCAATATGTGACCCCTATGCACC  
AAGGTCTAACGGTATGACTTCATTTTTGTGCATTGGTTAGTGAATCTTCTGGTATGCTAGAGTCATGTGC  
ATTAATGACTTGTTACTTTTGCAGCCTTGTCTCTAGAACAGCTGTTGTTTGCACAGCATTGGGTTTCA  
TAGCACTCTTATCCATGGTTATAGTGGCAGTGTACAAGTCCAACCAACCACACCAGTTTCTGAAGGGGCC  
TAAGACCAATCAAGGTAAAAATTAGTACATGTCCATTCTGTTCTTTTGTCTTTTTCAGTACTTTTCAGGTATTTA  
TGTTAGCTTTTATCTTGTTCCTCTAATCCCTAGGTTCCCCAACTTGTGGTTCTTTCACATGGATATGG  
CCATCCATACATATGATGACATTATGAGGATTACTGAGAACTTCAATGAGAAATTCATCATAGGATATGG  
TGCTTCCAGCACTGTATATAAATGTGTTTTGAAAGATTCCCGACCGATTGCCGTTAAGCGACTTTACACTA  
CACATCCGCACAGCTTGCAGAGATTTGAGACTGAACTGGAGACCATTGGAAGCATCAGGCATAGAAACC

TTGTTAGCTTGCATGGTACTCCCTTTCCCCTCATGGGAATCTCCTTTGTTACGACTACTTGGAGAATGGT  
TCACTCTGGGATCTACTTCATGGTTAGTAACCCTCTTTTCCTTGTAACTCTTTTATAAAGCATCTTCATGTAA  
GACAGTGTTGACTATTAGTTGATATTTGTTACTGTTTTCCCTGTCGGAGAATGGTGCTATAAGCCAGGAT  
TGATTTGAAAATGGCTAATTATCAACTGAATACATGTCATAGGGCCTTCCAAAAAGGTGAAGCTTGACTG  
GGAAACACGTCTGAGGATTGCTGTTGGTGCTGCTCAGGGTCTTGCTTATCTTCACCACGATTGCAACCCA  
AGAATCATCCACAGAGATGTGAAATCTTCAAACATTCTTGTTGATGAAAATTTTGAGGCTCATCTTTCTGA  
TTTTGGGGTTGCAAAATGCATCCCTTCTGCAAAAACCTCATGCATCAACTTTGGTGTTGGGCACCATAGGT  
TACATTGACCCTGAGTATGCCAGGACTTCCAGGTTAACTGAAAAATCAGACGTCTACAGCTTTGGCATTG  
TTCTCTAGAGCTTTTGACAGGAAAGAAACCGGTTGATAATGACTTGAACCTGCATCAGCTGGTATTATT  
CTCCTCTGTAGTCTACGTTGTTGCTTGTA AAAAAGATTTAACTCAGACTGGATATAGAAAAGAACA  
TATCTCAAATTTTCTACCTTCTCCAGCATTGCGATGTTATCATTCCATCAAATGTCTTTTGTCTTTTAA  
TCCTGTATTATATTTGTTGTCTTTATAGAGTACTTTGATTTGTGTTACAGATAATGTCAAAGGCGGATGAT  
AACACCGTGATGGATGCTGTTGATCCTGAGGTATCTGTTACATGTATGGACTTAACACATGTGAGGAAA  
ACTTTTCAGCTTGC GTTGCTGTGCACAAAAAGATTTCCATGTGAGAGGCCAACGATGCATGAGGTTGCTA  
GGTACTTGTTTCTTGCTTCTCCCCCGCCAACCAAACCTTGTTTAGACCCACCTCCCAAATCCATTGATT  
ATACAAAGTTTGTGATTGGGAAAGGACTACCGCAAGTTCAGCAGGGTGATGATTCTCCGAAGCACAGT  
GGCTTGTTAGATTTCAAGAAGCTATATCCAAAACTCCCTTTGACTTGGGTTTCATAGACACACTTCATATC  
AAATCAGAAGCGAATATGGAACATATATATGTTGGCCAAAGGTTTTTTGATGTTAGAGATTTCTCCTATA  
AGATGGTTAGGTACACGGTAATAGCTAGTGTATTTACATTTGTAGATGGAATGTTTTATGGTGGATGA  
GATCCACAATAGGTTAGATCTACAACCAGTGCAGTTCAACTTAAATCTTTGTTGA

>PGSC0003DMG400031103 LRR-RLKs

CAATTTTATCATCACCATATAGTTGTATTCAATCACATATCACACTCACATGTTCTAGTACTCCTTCCATTCT  
GTAAAGTTCTAGTTGACTCTCTCCCTTTGTGGTCCTTTTCCATTTTCTTGCCTTATCAATCAATCAACTTTT  
TAGCCAATTTTTTCTCTGTTTTCGCATCCCTTTTTATCCTCTTATTTAATTTTAGCTAAACCCCATTTCTT  
GATTTTGTAGTCTTTTGCATGTCCTGAGTAGCATTATTTTCAAGATTTTCATATTATAGCTAAACCCCATTT  
TTGATTTGTATTATCTTGTCTTTTGCATGTCTTGAGTAGCATACTATCCAAGATTTTCATATTATAGCTAAAC  
CCCATTTCTTGATTTGTAAAACCTTTGGTGATTTGCATGTCTTGAGTGGCATGTTTTTGTGGTCATTAAG  
GTTAAAACAATTCAAGATTTCAATTTTCTTTGCTTCTTCAAATTGGGTTGAGTTGTATACTGAGAGTTA  
TGGGCCCTGGAATCTCAAACTTGCTTAATGGTATCTGTTTCTGGTCTGCCATTAGCTCTGTTACAACCT

TTGGGCATTGCCATACTCATAAGTTTCCTAATTTTCATCCATAAGAAAAATATTGACATGACTTTAGTGTA  
AACTAAACAGCATGTCATTCATGCTCTTTTATCCTTGGAATGGCAAGTTATAGTAACTCTGCAATCCAAC  
AGCATTGTTTTTGTGCTGTTGATTCTTCTTTTCTTACTGGTTTTGCTGAATCTTTAAATGAAGAGGGAC  
TTATTCTTTGGAGTTCAAAGAATCCCTTAATGATCCTGATAACAATCTTGAAAGTTGGAATTCTTCAAAC  
TTGAATCCTTGCAAATGGGATGGTGTTAAGTGTAGCAAAAATGATCAGGTGATTTCTCTCAATATCGATA  
ATCGTAACTTGTCTGGTAGTTTTTCTCAAGAATTTGTGAACTCCTTACTTGACAGTATTGAATGTGTCA  
TCAAATTTCAATCTGGTCAAATCCTGATGATTTTGCCTCGTGCATAGTTTGGAGAAATTGAACCTTTG  
TACCAATAGGTTCCATGGAGAGTTTCTCTCCAATTATGCAATATTACCTCACTTAGACAGCTTTACTTAT  
GTGAGAATTACATTTCTGGTGAAATCCCTCAGGATATCGGAACTTGTCACTTCTTGAGGAGCTTGTTGT  
TTATAGTAAACAATCTTACTGGAAGAATACCTGTTTCAATAGGTAAATTGAAAAACTTAGGATCATCAGG  
GCTGGGCGAAACTATCTGTCTGGCCCTATTCTGCTGAAGTTAGTGAATGTGATAGTTTACAAGTGCTTG  
GTGTAGCGGAAAATAGGCTAGAAGGGCTTTTTCCAGTAGAGCTACAAAGGCTTAAGAACCTCATCAACT  
TAATTTCTTTGGGCTAACTCATTCTCTGGTGCAATCCTCCTGAGGTTGGGAACTTCAGTAAGTTGGAATTA  
CTCGCGTTGCATGAGAATTCATTCAGTGGACAAATCCTAAAGAGATTGGGAAGTAACTAATTTGAGA  
AGGTTGTACATTTACACTAATCAGTTGAATGGAACAATTCATGGCAAATGGGGAATTGTTTGAGTGCA  
GTTGAGATTGATTTATCCGAAAATCAGTTGAGAGGAAGCATTCCGAAAAGTTTGGGGCACTTTCTAAT  
CTGCGTTGCTTACCTTTTCGAGAACAGATTACATGGGAAGATTCAAAGGAGCTTGGAGAGTTGAAG  
CTGCTTAAGAATTTTACTTGTCTATAAACAATTTGACAGGTAGAATTCCAGCAGTGTTCAGCATCTTGC  
ATTCTTGAGAATTTACAACCTTTTTGACAATCACCTTGAAGGTCCTATTCCGCGATTTATTGGCCTCAAAA  
GCAACCTCACTGTAGTGGACCTGTCCAAGAATAATCTTAAAGGAAGAATACCTTCAAATCTTTGTCAGTT  
TCAGAAGTTAACATTCCTGAGCCTCGGGTCTAACAAGTTGTCTGGCAATATCCCTTATGGCCTAAAGACT  
TGCAAGTCCCTCGAGCAGCTAATGCTAGGAGATAACCTGCTCACTGGGAGTTTTTCTTTTGATCTTAGCA  
AGCTGGAGAACCTTTCAGCTCTTGAGCTTTTTTCACAATAGATTTTCTGGATTGCTACCACCAGAGGTGGG  
CAACCTTAGAAGATTAGAGAGGTTGCTCTTGTCAAATAACAACCTTTTTTGGGCAAATTCCTCCTGATATTG  
GAAAATTTGTGAAGCTTGTTGCTTTAATGTTTCTCCAACCGGCTCTCGGGTGATATTCCTCATGAATTA  
GGGAATTGTTAAGTCTCAAAGGCTTGATCTTAGCAAGAAGTTCGTTGCTGGAATCTCCCGATGAAC  
TTGGTAGGCTAGTCAACTTGGAACTGCTTAAGCTATCTGATAATAAGTTTAAATGGACAGATACCTGGTGG  
CTTAGGTGGACTAGCACGACTAACGGATTTGGAATGGGAGGCAATTTCTTCTCTGGTAGTATTCTTATT  
GAGCTTGGCTACCTTGGAACTCTCAGATTTCTCTGAATCTGAGTCACAATGCTCTCAATGGATCGATTCC



TAGCGCCCTCGGGAACCTTGCAGATGCTTGAAACATTGTACTTAAATGACAACCAGCTTATTGGTGAGATT  
CCAACCTCAATAGGGCAGTTGATGAGTCTGATAGTATGCAATCTTTCTAACATAACCTTGTGGGATCAG  
TACCAAACACGCCTGCCTTTAAGAGGATGGACTCGAGCAACTTTGCTGGAAATGTTGGGTTATGCACGT  
CCGATTCCATCCACTGTGATCCTCCTCCGGCCCCTTGGATTGCTCCAAAGTCAAACCTGGTTGAAACACGG  
TTCTTCTAGGCAAAAAATAATTACTGCTGTTTCTGCGACTGTTGGGATGATCTCTTTGGTATTGATTTAG  
TTATATGTAGGATCATTAGAGGCCACAAAGCAGCTTTTGTGTCCGTGGAAAATCAAGTAAAGCCGGATG  
ACTTGAATGATCATTACTTTCCACGAAAAGGGTTCACGTATCAGGACCTTGTGATGCTACTGGAAATTT  
CTCAGACAGCGGATCATAGGAAGGGGAGCTTGTGGCACTGTCTACAGAGCTCATATGGCTGATGGTG  
AGTTTGTGTCAGTTAAAAAGCTGAAGCCACAAGGAGAAACCGCGAGTGTTGACAGCAGCTTCCAAGCT  
GAATTATCTACACTTGGTAAGATAAATCATAGAAATATTGTCAAGCTATATGGTTTCTGCTACCATCAAG  
ATTGCAATCTTCTTGTATGAGTACATGGGAAACGGAAGCCTCGGGGAAGTACTTCATGGGAATAAGA  
CAACTAGTTTACTAAATTGGAATAGCAGGTACAAAATTGCCTTAGGAGCTGCTGAGGGACTATGCTATTT  
GCACCATGACTGTAAGCCACATATCATTACAGGGATATAAAATCGAACAAACATTTTGTGGACGAAATG  
CTTGAGGCACATGTAGGAGACTTTGGCTTGGCAAAGCTAATTGACTTCCCTTACTCAAAATCCATGTCCG  
CGTTGCTGGTTCATACGGCTACATTGCCCTGGTAAGACCGGTGTTTAGGCACTTAAAACGATACTCTT  
TATTAGCATTACTTACATACAGAAGCTAACTAAGTTCTAGTTTTTCTTTTTTTCAGAATATGCATACACAA  
TGAAAGTGACAGAGAAATGCGACATCTATAGTTATGGCGTTGTTTTGTTGGAATTGATTACTGGTAGATC  
TCCAGTTCAACCCCTTGATCAGGGAGGCGATTTGGTGACTTGGGTAAGGAGATCAATTCATGAAGGAGT  
GGCACTAACTGAGCTTTTTGACAAAAGACTGGATGTTAGTGTGCAAGAACAAGAGAGGAGATGTCTCT  
AGTTCTCAAGATTGCTATGTTCTGCACCAATACATCCCCTGCCAATAGGCCTACAATGCGAGAAGTCATC  
GCCATGCTGATTGAAGCCCGGAATTTGTGTGCACTTACCACCATCACCATCCTCCGAAACTCCTCTGA  
GTGAAGCTGATGCTAATAAAGGTGCATAAAAACAACCTTCTCATCTTTCAATCTTTTCACTACAGTCAAAT  
ATCTCTATAACAGTCATCCTCTATAACAACATTTCACTATAACAAACGGGTTCTCTATGGAACATAATTTT  
ATGTTATGTTACATTACATGTTCTCTATAACAACATTTCACTATAACAAACGGGTTCTCTATGGAACATA  
TTTCATGTTATGTTACATTACATGTTCTCTATAACAACATTTCACTATAACAAACGGGTTCTCTATGGAAC  
AATTTTCATGTTATGTTACATTACATGTTCTCTATAACAACATTTCACTATAACAAACGGGTTCTCTATGGA  
ACTAATTTTCATGTTATGTTACATTACATGTTCTCTATAACAACATTTCACTATAACAAACGGGTTCTCTAT  
GGAACATAATTTTCATGTTATGTTACATTACATGTTCTCTATAACAACATTTCACTATAACAAACGGGTTCTC  
TATGGAACATAATTTTCATGTTATGTTACATTACATGTTCTCTATAACAACATTTCACTATAACAAACGGGTT

CTCTATGGAACAAATTTTCATGTTATGTTACATTACATGTTCTCTATAACAACATTTCACTATAACAAACGG  
GTTCTCTATGGAACAAATTTTCATGTTATGTTACATTACATGTTCTCTATAACAACATTTCACTATAACAAA  
CGGGTTCTCTATGGAACAAATTTTCATGTTATGTTACATTACATGTTCTCTATAACAACATTTGCTATAGG  
AGCCAAATATTGGAACAAGTAAACTGTTATAGAGATGTTTGATTGTATATCATTTAAACACATATCGAA  
TCAATACCTGTGTTTATAGCAGCCCCAAAAGAAAGGAATTCTCATTTTTTCATGTCCATAATTCTAAGTTTA  
GTTAATAATAAAAGGAATTATTCAATACTGAATGGATGTTACAAAGAAAAATCAGCTAAATCACATGCA  
TGCTGTTTACTAACAGCAACCAGTTTCTACATTTTTTTAGTAGCATTGTGTATTGCTATACATGTTT  
GATAATTTTGATTGAGAATGTTGCGCATACTCTCCAAAAATATCGTCAGACACTACTTTGGAGGATCCG  
ACATGCATCCAGCTGATATTTTTTTGGAGAGTTGAGCAACATAGATTGAGATTATATCATCCACAAAAA  
ACTAAAATGCATCCACTTTATGTTTCTTGCAGGTTCTAATTAAGCAACCATAGACCAAAAAACAGAAAAT  
TGAAGTTGTGGCTCATCTCAAGCTCTGCCAAATTTCTAATAGAGTTAGAAGCATCTTATTATTCATGTACA  
CACAACCTTTGATACCATACTTCCCCTCTAATAATTATTAGTTGGCATTCTTATCTATTTATCTTTCTAA  
ATTATATCTACTTCTATGATCTGTCTCCACATTAAGTCC

>PGSC0003DMG400031228 LRR-RLKs

CAAACCTGCAGGAGTCTTAGGAACTGCAACTTGCAAGGAACAGTTCCTGATCTAAGCACAATACCACAC  
CTTCTTTACTTGTAAGCATACTTCATCGAGAAATTCATGCGTCCAGTTAAACCACATGTTGAGGCTTATGT  
TCTTGTGTTCTAACCTCTTGGTAATGTTGATATCTGCTTAATAATTCTTATATGTCATCTGCTTAATAATTC  
TTATATGCCAGATGTAGTTGAACTCATCTGCCACTCAATTTGTGCTGAATATAGAAAGTTAAATTTACAGC  
CAGTGGCAATTCATCTGATATAAATTTCTCATGTACAGAGACCTTAGCAGAAACCAACTCACGGGAAAT  
ATACCTTCCAATAAGCTGTCTGATAATATCACAACCATGTAAGTTTCTGGAAGTGTTAACTGCTGATATC  
TTTCTGGTTTGATTACCCATCTTTAATCACACTTCTTCCCCCCCCCCCCCAACTCTCTATCGATATCTGT  
GAATAGGTGGTTGAATGGACATTAGTGTTTAACATGCACTCTTTTCTTCTTGATGTTTGAGTAACTTGGT  
CTTGGTATCAGACCCTCAATAGTGAACAACTACTTTGATGATGATTGCAGCATTCTGTCAGGAAACATG  
CTTAATGGTTCTATCCCTTCGAACTTTTCTGTCTTCAAATCTGCAGAGGCTGTAAGGAACTTCATCTGC  
TCAATCCTGTTTCTTGATCTCTGTCTGTTTCAAATTTTCATGTGATACTCTAATAAATGTAGTATTGACA  
CTACCTTCTTAAATATTTTTCTTGTAGGTCACTCAACAATAATAGGTTAAGTGGTTTTGTGCCAACTAC  
CATTTGGGAGAATAAGACATTTTCCCAGGCGCAAACTTAGATTGTAAGTGTATCATTTGTACATTTTCC  
TCTTATCAGTAATTTGATTTTCATGTTTCTGTTGTCTGCTGCCCAATCTATTGGCCAGTTAAAGTTTTT  
AACTGTAAGATACAGACAAAAGCTTTTTGTAGAGAATCAAGCCAAATTTGATTCCATTTTCATTTTGGTA

GCTAGTCAGTCCACATGTAGTTTTGGATATACAAAGAAAGTATCCCGGAAAATAATAGTACAATCAAGG  
AATAGTGTGTCCATTGTCAACAAGGGTTTCCTATCTCTATACAGTTAATATATAACAAGGAATAATATGTC  
TGGTGTTCGTTTCGTTTCGAGGTAATGTAGCATGTATTCTTTCCTCTTACTAAACCAGGCCATGTGACTAG  
AAAAGGCCCTCAGATGTTAACATATCAGATAGCCAGGCTGATCCAGTTGTTCTCCTTTGTGCAGGAACT  
TTCAACGTAATTTCTCTCAGATATTTCCGGTATTCTTGATCCTCCTCAAATGTCGATATTATGTAAGACC  
TTGTTTCCGGTAGTCTTGTACATACATATTTGCGGACTTACTTTCAGTTCTCGGCTTTTATAATTATATGTG  
GCGAATCAAGCTCCCCTAATTCAATTGCTATCTAACTTTCATTATCCTATTTTTTATAAGCTTCAAATTACA  
AAGTAATTCTGTGGAGTCTTAGTTTCTATTTTCAGATTTCTGTGATTCAACAGAACTACTATCATGAAGAAG  
GCAGAAAACTTGCTATAGCATATCCCATGACAACATTTGGGATAGTTGCATAAACTGCCTTCATTTG  
CTGTTTTCTGCTAAACTCTTTCTATCAGTATAGAGATTTACTTTCGAATATCCATTGATGAAGATAGAGTA  
GTGAACCAACACAGTTTCAACTTCTTTATTTTGTGCATCGTTCAAACTTCATTTCTTGTGAGAAGATGGG  
TAGTTTTCTTGCTAGCAGTGCACCTTATATGGAGCTCGAAAACAATGGGGTCAAATTCATATATGTGAAT  
TTCTTTCATATGATATGGTAATATGACAAAGCTAGGGTTATGGGGGAGAAGTTGGTGGCTATGGGAGA  
CTGGGGAAAGCAGTGGGGATGCGACCAATATGTGGGATAGGACCGCTAGTTGCATAAGGGAAGCGGCT  
AGAGAGGTCTTGGGGGTTTCAAAGGTAAGTCTAGTGGACACCGAGGAGATTTCTGGTGGAAATGACAA  
AGTCCACGTAAGGTAGAGGCAAAGAAGGTGGCTTATGTGAAGTTGCTGGAGAGCAAAGGATGAGGA  
GGATAAGAGGGGCGACGAGAGAAGTATATAAAGTGGCAAGGAAGGAGGCGAAGTTGGCAGTTATGGA  
GGCAAAAATGGCAGCTTTTGAACGCCTGTATGAGGAACTAGGGGACGAAGGCGGAGATAAGAGGTTG  
TATAGGCTAGCCAAGGTGAGAGAGAGGAAGACTCGAAACCTGGACCAATAAAGTGCATTAAAGATGA  
GAAAGGCAGAGTATTGGTGGATGAGAGGCAAAGTTGGCAGTTAAGGAGGCAAAAATGGCAGCTTTCG  
AATGCTTGTATGATGATCCCTGCATTATAATCTTTTTATTTTTATTACAATTCTGGCATAACTTGCCTCTAA  
ACCAGACAATAACTGGTTACATACCGAAGTAGTAACAGGCTTTCGAATTTGATGGAGAGATCACGCCT  
CAGCAATACCTTTCAAGCTGTATATATTTAATTCTAAAAACAAATTGTTCAACTTCTATCATGGTTAAATA  
AATTCTGGTTCACCTACTAACTTTATTTTTCTGAAGAGCAGCTTACCTACTAACCTTATACATGTTTGTG  
GCAGTTTTGTGTGCCATATTTGCTGATTTTCATGAATAACATAAATAATGAGTTTGTGTTTTGTTTTAAC  
CATTTACTGGTACTTTAACGTGCAAATATTTTCAATGGCATAGAATCCCTACACACATTTTGTCTTATCACT  
CCTTTATATTTCTGATTAAGTATTCATTAGGTGTGACAAAGAACTGTAACCTTCAGGCTTTATGGAAATCC  
TGTTTGTGGAAATGCAAATGAGCGCCAGATTACCCAATTTTGTAAATCAAGAGACGGAGGTGAAGAGTA  
TGGAGGCTTGAACAACCTTATTCCAAGTTGTGCAGCCCAGCTGCCTTTCGATGTGGATTTTGAACATGTC

CCAGCATTAAATGGATGGCTGCTTTTGTGCAGCACCTTTGGAGTTGGTTTGC GTTTAAGAAGCCCTAGCA  
TTTCAGACTTCCACCACATTATAGTGACTTTGAACAGTGGATAACAAAAGCGTTAATTTGAATGATTAT  
CAACTGCAAATTGATTCGGTTTCATGGCAAAGCGGTCTAGGCTTAGGTTCTTTTGA AATTCTTCCCTCC  
ACGTGCAAATGACTCTGGAACCAATGATTTTGGCAAATTAATGACAGCGAGATAGTACGGATCGCAA  
CAAGTTTGCCTTTTTTAATCTTACTGGAAGTGATATCTTTGGCCCATATGACCTGCTCAATTTCACTGCCAT  
GGCATATAATTCTGGTATGTCTCCAAATCCATTATGTTCTTGCATAAGTAGGATATAATAATACATTAACA  
TGTGGACATTTTCAGTTGTAGTTCTGTAATGATTTCTGAGGAATTTAAAGTAAAACCAATGTGAACAAT  
AATAGAAACAAACGTCAATCTCGTTTGT TTTTTACA ACTTAGATCATGCACGGAGAGTGGCAAAA ACTCA  
ATTTTTTTAGTTTAAATTTCTCTAGGGAGGCACAAGAACCCAAGTTGAGATTAGCATGCAAGCCGAGA  
GAAACACCTTTATTGTAAA ACTTGTTTCTTCAGTTCTTATTTTGTGTTTAATGCCAAATATTGGATACTTTT  
CAACTGGACTGGAAGTCTGGA ACTCTTGTGCACCCGCATGACTAATTTTTCTTTTGTCTTGCTGAATCTT  
GAATATAATTATTATGATTATTATATTTCTTTTATCTTTACTGGTCATGCTCGGATAAAAAATTCCCTTTCC  
CATTGTGCTCCATTTCTGTTTCTGAAAATGTCTATTTATATCGTTTACCCTGTGATATAGAACATAGTTTTTT  
CTTCTTGT CATAGAAGTATGCGAGTATGAAAATTCAATGAAATGGTTTAGATATCATGCATGCTTTGAAG  
CTTAACATCCTCATGAACATGGTAACCTGACAGAGATGCTAGTAATCTCTTAGATACTCAGTAAGGGTCA  
AGAGACTAAATTGACTACCTTAGTACAAGTTCTTGATTAAGTAAAATCTTAGGTGAACCATATGGTACTG  
TCAAAACATGTGAATATCCCCATT CAGAACTCAAGATGAATTGGCTACTTTTGT TTTATTTTTGGTGTAT  
GAAGAATTTGTTAATGACGCAGAATCTGTGTGAAGAAGCCTTATAGAATCTTTGTAAGCAGAACAAGGA  
TTTACTTTTCTTTTTTTTTCTATTTGAGATGTCTCGCAACACAGCCTTTGTCCTGAATATAAATATATCATTG  
TTAAATATATGCTATCATATAAGAGAGCCACTCTGTTCTTGTCTTTCTTTCTGCTTTCTCAAGATCAAATAA  
CGAATGTTTTTCTTCTTGCAGTCCTTTTCTCCGTTGGGAGGAGAGAGAAGCAGAAAAACAGAGGC  
ACTGTGGTTGGAATTGTCTTAGGGTCCATATTTGCTGCAGCTGTGCTACTTATGGCCTTAATATTCGTGTT  
GTTTAAAATGCGGCGGAGGTTACACGTTTCAAAGATCAACCATGTGAGTTAATCTTCAGTAATTTTATG  
TGACTTTTCTCAGCTATGGGGAGTTTCTTCTCCATTTCTTTCATTACCCCATTAGGACCTGTTGGTTAAG  
TAGTCAATACGTTTAACTTTTCTTGGGTATTCTGTTGAATCGCCAAAAAAGAGGACATGAAACCACATTC  
TTTGAGTGCTTCATGCATATAATGCAA ACTTTGCACCTGATAATTTCCAATTTCCATCTTCTGAAAAACAA  
AAAGATGCCAAAAACCATAAAATCTGTCTTCTTACTGTTATTTTCTTGTTTAAAGTTCTCTATTTAATCAAG  
AAATAACACAGAATTGCCAGTGTCAACCATCTTTTCAATGTGGCAAATTATTTTCTTAGTATGTATACT  
TGTAATTTAGCTATGATACTGCTTGATGTTAGTTTTTTTTAAGGAGAGAGTATGGTGCTTTAATTCCTCACA

TGGACAGATAACTTTACGGTTTTATGGGAAGTTTGTGCGTATTTATGATGAGTAAACTCTCCGGCAATGC  
CCCATCACCTTAGAACAAAAAGTGAATAGAAATAAATAGGAAGTGTGTGCTGGACAATTGGCATGTA  
TATCTAAGTAATACTCTTGTTGTAGTGCTTCTGTTATTTGTACATCAATTAGACGATTATTTATGTTCTTTT  
CTTAGTCAGATTAATTGATATTCTTAAAGTGAACAAAGTTAGCTGAAGCCAATATTGTATCAAAGGTTT  
ATTTGCATTAAAGTTATGCTACCATCACCTAAGCTTTTTCGTTTTATTCTTTTTATGTCAACTTTTTATGCT  
TAAGTTTTCAATGAATATCTGATTTTTAATAAATTGAATCTTGTGGCAATGATGTATTTCTTGCTTAAACA  
AACTTACCCAGGACCACATGGCACTCATAGTGATATTCCTTTCATTTCTTTTGTAGTACCAAATTTCCAAT  
GCGAATAGAAGGTGTTAAGGCAATGGGTTTTAAGGAATTAGAGGCAGCAACTAACAATTTTAGCAGTA  
CTACTGAAATTGGCCAAGGAGGCTATGGAAAGGTCTACAAAGGCACTTTGGCAGAGGGGAACAATAGTG  
GCAATTAACGTGCACAGCAAGGCTCATTGCAGGGTGAAAGAGAGTTCTATACTGAGATAGAATTA  
TCACGTGTGCATCATCGAAATCTGGTTTCCTTGGTGGGATACTGTAATGAAGGAAGTGAACAAGTAAGA  
TTCTCCAACTGGAAATGTAATAGACACACACACACACACAGAGCCAAGTCCATGTTGCTATTCT  
GCATCCAGATGGGAGAGGGGAGTATGTTTCGGTGGGAATAAGTTCTTTGATGTATCAGTTCAGCCACTTGT  
TGAATTCTGATTGCCAGTTCTGGTTGAATACCTAGGTCAAAATTGAATTTTTTGCATATCCTTGATCAT  
TTTGGATGCCTCATTGCCGTTGTGCAGAACCAATCAACCATAATATCAATTACCTTCTACAACCTTGAGAA  
ATCCATTTGATATCACTCTAGATGCAAATGAAATTACAAGAATCACAAATGATAGTTAAATTGCAGGGCA  
AAGTTCAGACTTAGCTGATTCATCTGTAAAGTAACTCGAGCAAAAGTCTTCTGAGATAGTATTTTCATC  
ATACTTCTTTTTTGTACCAATTATTATCACACGTTAAGTGATTCAATTTGTGAGCATATCCAGTGTACAG  
TACTTAGATCACCTAATATTAAGTTCAACCAAATTTCCATCTATGAGTAGCTCATCAGTTACATCCCTCTTA  
TACTTGCGTAGTCTGGGCACATTAGTGAAATGCATGTCTTCTGAAAAAGTAATCAAATAATCAAGCAGAT  
GGAAGGATAAGAACGGATATTATGTTTTATGTTTTTTATTCTACTTTTGTAAATAGTTGGTTACATGTGCA  
TGCAGATGTTGGTGTATGAGTTCATGCCAAATGGTTCCTTGCATGATCTTCTAAAAGGTATGTGATGTAT  
CCTTCCTTGCCTATGTTGTCATTTGATTTCTTTTGTAGAATCAAGCACATCTATTCTCCTCTTATCACTT  
ATTTTTCTGGTGTAGTACTTCTTATACGAAAAGAGGGTGAAAGATATGTCCTCTAGTAAAGAATAT  
TGTATAGATGAAAGTAAATCAAATTATCTAGTCACTCAGATTTTCTTTTCTGAAGTTTTTACTTCATTTTG  
ACTCCTGAAAGTCACTGTTAGTTTTCTACTTTCTTCACTTGGGTGGTCATCAACAAGTTTATCACATGGA  
ACTTTATATTCTTAATTTTAGTCATGTGTCAGTTCCAATATGCATATCAAACAGGTATCTCCAAAGTACAA  
TTATTAAGATTTTTTACTTATTTTTACAGCTAGATATGGGGAATGTCTGAGTCTTGGAAACAAGGTTATA  
CATTGCTTTAGGTGCTGCCAGGGGCATCCTCTACCTCCATACTGAAGCTAATCCTCCAATAATCCATCGTG

ATGTCAAAGCAAATAACATACTGTTGGACTCTAAGTTCACCGCAAAGTTTCTGATTTTGGAACTCTCAA  
GCTTGCACCATTACCTGATGCTGAAACGAGTGGGCATGTATCAACTGTTGTGAAAGGAACTCCTGTAAG  
GCTTTACTCGTCTTATATGTTGAAGCCTGCAATAGAAAAGCTAGAAAATCGCAATGAGATAAGATCTGCA  
ACTTGAGTAATCTAGGTAGCATTGCTACAGACCAGGAAAACCTTCATTCTCT

>PGSC0003DMG400031752 LRR-RLKs

GTCAGCTTTTACTACTCCCTTTTCCCAAAAAGAAAATTGCAGTCTTTCTTCTTCTTCTTTGTTCTTTCTT  
GATCCCCAGAAAACCAAAAAATGAAATCTTCAATTTCAATAATGTTTCTTCAAATCTTGGTTACCCTTTTG  
CTCCCAACTTTGATTTTCTCACTTAACCAAGAGGGTCTTTATTTACATAATGTGAAGCTTGGATTGATGA  
CCCTGATAATGTTCTTTCAAACCTGGAATGAATATGATGATACACCATGTAACCTGGTTTGGTGTTCATGTG  
ACCAATTGACTCGCACTGTTACATCATTGGACCTTTCTAATGCTAATGTTGCTGGTCCTTTTCCGACTCTG  
CTTTGTGCGGTTGAAGAAGCTTCGTTACATTTGTTGTATAACAACTCTGTGAACAGTACTCTTCTTGACGA  
TTTATCTGGGTGTGAAGCAGTGGAGCATCTTGATTTGGCGCAGAATTTCTTGGTGGGTACACTTCCGGC  
GAGTTTATCTGAGCTCCCAAACCTTGAATATCTTGACTTGTGCGGTAATAACTTTACCGGAGATATCCG  
GCGAGTTTTGGTCTTTTTCAGCAGCTTGAAGTCTTGGGTTAGTTGGAACTTGCTTGACGGGAGTATAC  
CGGCGTTTCTCGGGAACGTTACGACGTTGAAGCAGCTGAATCTGTCGTACAACCCGTTTACTACGGGTC  
GGATCCC GCCGAGCTGGGGAATCTGACGAATCTTGAGGTTTTGTGGCTTTCCGACTGTAATTTGATTG  
GGGAAGTTCCTGACACATTGGGGAGCTTGAAGAAGATAGTGGATTTGGACCTAGCTGTTAACTACTTGG  
ATGGGCCGATTCCGAGTTGGCTCACTGAGCTGACTAGTGCTGAACAAATTGAGCTGTATAACAACTCGT  
TTACCGGGGAGTTTCCGGTGAATGGGTGGTCGAAAATGACGGCGTTGAGGCGAATCGACGTTTCGATG  
AACCGGGTAACTGGTACGATTCCGAGGGAGTTGTGTGAGCTGCCACTTGAGTCACTCAATCTTTATGAG  
AACCAGATGTTTGGTGAATTGCCACAAGGCATTGCAACTTCACCAAACCTTGATGAGTTGCGCCTTTTTC  
ACAACCGTTTTAATGGGAGTTTACCTAAACATCTTGGAAAAAATTCACCTTTGTTGTGGATTGATGTGTC  
AGAAAACAATTTTTCTGGTGAAATTCCGGAAAATTTGTGTGGGAAAGGGTTGTTGTTGGAGCTTTTGAT  
GATAAATAACTTACTTTCCGGTGAAATTCCGGCGAGTTTGAAGTGAATGCCGGAGCTTACTGCGCGTGAG  
ATTGGCACACAACCAGTTATCCGGTGATGTTCCGGAGGGGTTCTGGGGTCTGCCACACCTTTCTCTGCTT  
GAGCTCATGGACAATTCCTCTCCGGTGATATCGCGAAAACCTATAGCCGGTGCTTCAAATTTATCAGCTT  
TGATTTTGTCTAAGAACAATTTTTCAGGTTCCATCCCAGAGGAGATTGGTTCTCTGGAAAATCTTCTTGAT  
TTTGTGGGCAATGATAACCAGTTTTCTGGGCCTTTACCTGCAAGCCTGGTGATTCTTGGACAATTGGGAA  
GGCTGGATCTTCACAACAATGAGTTAACTGGTAAGCTTCCAAGTGGGATTCATTCTTTGAAGAAATTGAA

TGAATTGAACTTGGCAAACAATGATCTTTCTGGAGATATCCCCAAGGAGATTGGGAGCTTGTCTGTTTTG  
AATTATCTTGATCTATCAGGGAACCAGTTTTTCAGGGAAAATCCCAGTGGAGTTGCAGAATTTGAAGCTCA  
ATCAGCTGAACTTGTGCAATAATGACCTTTCCGGGTGATATTCCCCCTGTTTATGCAAAGGAAATGTATAA  
GAGTAGCTTTTTGGGGAATGCTGGTTTATGTGGAGACATTGAGGGCTTGTGTGAAGGAACAGCTGAAG  
GTAAAACTGCTGGTTATGTTTGGTTATTGAGGTTACTCTTCACCCTTGCTGGATTGGTGTGTTGTTATTGGG  
GTTGCTTGGTTCTACTGGAAGTACAAGAATTTTAAGGAAGCTAAAAGGGCTATTGATAAGTCTAAATGG  
ACTTTGATGTCGTTTCATAAATTGGGTTTCAACGAGTATGAAATCTTGGATGCTCTTGATGAGGACAAC  
TAATTGGCAGTGGCTCTTCTGGGAAGGTTTACAAGGTGGTTCTGAGCAAGGGTGACACTGTTGCGGTGA  
AGAAGATTTTGAGAAGTGTGAAAATAGTAGATGAGAGTAGTGATATCGAGAAAGGTAGCTTTCAAGAA  
GATGGATTTGAAGCAGAGGTTGAGACGTTGGGGAAGATTCGACACAAGAACATTGTTAAGCTATGGTG  
TTGTTGTACAACACTAGGGATTGCAAACCTTCTGGTCTATGAGTATATGCCTAATGGAAGTTTGGGTGATTTG  
CTACACAGCAGCAAAGTGGCCTTCTAGACTGGCCTATGAGATCTAAGATAGCCATGGATGCAGCTGAG  
GGACTCTTACTTGCATCATGACTGTGCTCCACCTATCGTTCACAGAGATGTTAAGTCAAATAACATCTT  
GCTGGATGGTGAGTTTGGAGCTCGTGTGCTGACTTCGGTGTGCAAAGGCGGTTCGATGCCAATGCTAA  
GGCAATCAAGTCCATGTCTGTTATTGCAGGGTCTTGTGGTTACATTGCTCCAGGTTAGTGGATTAACTTT  
TTCACTTTTCAGCTTCAGTTTCATGAGTTTGTGTTGAATTTGTTCAATTTGAGTTTTACTAGCAAATTGTTA  
TGCCTGTAAGTTTATGGATTACTGTAGCCTTTCAAAAATGAGATCTAGTATTACTGTAGCTATGTGGCAC  
CTATTGTGTAGAAGGCTAGATCTATACTACGATATTTCCCTAGATATCCACATTTGTTAAGTAATTGGC  
TCATATCTGGAGTACCCCTAATACAGTAACAGTGTACCATTGCTCTAGATCATAGTTTGTGAACAGTTA  
AGTAGGCTCCACGAGTTTCCGGCTCTTGGCACAAGACTGTATTAGGACTGTAGAAAAAGATATACT  
TAGCTTTCCACTTATGATGTTTGAATCTTAACAGCTAGCTATATTGTGGGCGGCTGCTAAGTTTAATAAC  
CACCCACCATATTTTTGGTTTCATGTGGTCATTCTTTGTTGTGTTGTTTCCTTGCAACAACCTTAGTTGACT  
GAATCTTTTTTGCATTCCAGAATATGCATACACACTGCGGGTGAATGAGAAGAGTGATATATACAGCTT  
CGGTGTGGTCATCCTAGAGCTTGTAAACGGGGAAACGCCCTGTGGATCCTGAGTTCGGGGAAAAGGATC  
TGGTGAATGGGTGTGCAGTACATTGGACCAAAGGGCATAGATCATGTAATTGACCCTAAACTTGATA  
CTTGTTC AAGGAGGAGATATGCAAGGCCCTAAACATTGGCCTACTCTGCACTAGCCCTCTCCAATTAA  
CCGACCCTCGATGAGACGAGTCGTTAAAATGTTGCAAGAAGTGGGTGGTGGGAACTTGCCCAAGGCTG  
CCTCAAAGGATGGCAAGTTGACACCCTATTACTATGAAGAAGCATCAGATCAAGGAAGTGTAGCTTAAG  
AATGTCTCAACAAATTTTGTCTTTAAAAGTGAGACTCAATTAACCTTTTGTTCATCTGCTAACTACTCAA

TTCTTTCCCACTAGATGTTTGGGTTGAAAGAATTGAAGTTAAATGAAAAAAGGTGAGAACAAAAGAAT  
ATTAGGAAAAAAAATGGAGTTGGAAGAATCTGTTTTTCATTGTAAAAATCCCATCCAACCTACCAAAAG  
TTATTGCAGTAAGTATTTTACTATCTGGCACTAAAAGATCTTAAATGTGCTACCTATACTCTATTTCTTG  
>PGSC0003DMG400033049 LRR-RLKs

GAGGAAAACAAGATTGTAATTAAGTGACACACTAATTATCATGTCTGAAGTGGAATCTCATGTTCTTCTT  
CTCATTGTATTACTCAATTTCTTCATTCTCATAACAGGTATGTATATATCCTCATGTCATATTTGATAGCTTT  
AATTTGATCAAGTTTAGTATTAGAGTCTCATTTTGTACATAATTA AAAAGAATCAATTTTTTAAACAACAT  
TTATTGCAGCAAGACTAATGTTTTTTTTTACTTAGCAAATCATAGGACCAGTCTTGTTTGTGTTACTCCA  
ACACCAAGCATTAAATGTTGTTCTGTTTTGTTTTGGGAGAATTGACTTGTATTTATTGTAGCATGATTAG  
TTTATGCAAAATATTATATAGGTAGGCTTGTTTGTGGAGACTCAATTGAGACAGACAAGCAGATGCTGCT  
GAACTTGAAGTCATTTCTTAAGGAACAAAATCCTGTTGACAAAGGATTCAAATATAACCATTGGAATCCT  
ACAGATTTGTCACCATGTAGATGGCCTGGAATATCATGCAGTACCTCTATCAATCGTGCTACTGGAATCG  
ATCTCTCGGAAAGTAATCTGGCTGGGAAATTGTTAATAACTTCTCAGCCATGACAGAATTGAACTCTCT  
TGACCTGTCCAAGAACACATTTTCAGAGTCCATTCCATCAGACTTAGGCTGGTGTAGAAATCTGAAGTTC  
TTGAACTTGTCACACAATATCATTGTTGGTGAGCTCAACTTGACAGGCCTGAACAAGCTGGAAGTTCTTG  
ATTTGACGATGAACAGGATCCACGGGCTAATGATCCCTGAGATTTGTGACAACCTTAGCTGTTGCAAATAT  
TTCTAACAACAATTTCACTAGTGGGAGTGGATTTGAATTTTCTCACTGCAAGAACTGAAGTATCTTGAT  
CTGAGCTACAATTATTTGACAGGGAATCTGTCGTTCTGGGCTTGATATGCTGAATATGTTTTCAGCATCTC  
ATAACAACCTAAGTGGCTCTCTGCCTTCTGGATTTTCACTCAAACCTGCTCTTTGCAAGGTTTGGACTTA  
TCAGAAAATATGTTCTTTGGTGAATTGCCTACGTCTATTGCGAACTGTAAACGATTAGTAGAGTTGAATT  
TGTGGGGAAATAGCTTTTCAGGGTCAATCCCTAGAGAGATTGGATCAGTACAGAGTCTTAAAGAACCTT  
GCTTGGGAAGTAACAACCTTTCAAGTGATATTCCAGACACTCTATCAGGTCTAAACAATTGGTATTTCT  
GGACCTAAGTAGAAACAACCTTTGGAGGAGAAATACAAGAAATTTTCGGGAAATTGACACAGGTAAGAT  
TTCTCATGCTGCACGGAACTCATATATTGGAGGCATAGTGTATCAGGAATTCCAAACTTGGTGAACCT  
TTCGCGGTTGGACTTGAGTGATAACCACTTCTCTGGTCCATTACCAGTTGAAATTTCTGAGATGAAAGGT  
TTGGAGTTTTTGATTCTTGCCACAATCAGTTTAGTGGCAATATACCTTTAGAATATGGAGATCTTACTGC  
ACTTCAGGCTGTTGATCTTCTCTAATAGGATCAATGGTTCAATACCACCAAGTTTCGGGAAGCTAAGG  
CCACTACTGTGGTTGATGCTTGCAAACAATTCATTGAGTGGTGAATCCCATCAGAGTTGGGGAAGCTAAGG  
AGCAGCTTGTTATGGTTGAATCTCGCGAATAATCAACTTACTGGTCCAATTCCTCCTCAATTAGCAAGTAT



TGGTGCAGATCCAATGCCTACTTTTTTGTGAATAGGGGAAAGGAGAAGCTCACTGCTAGCCCAGGGGA  
TTGTTTTGCCATGAGGAGGTGGATACCAGCTGACTACCCTCCATTTAGCTTTATATATCCTCTATTGACAG  
GGAAGAGTTGTAGAATCCTGGGGGATAAGTTGTTTATGGGAGATGGTTAATGCCACTCTGTGAACCTG  
GTAGTAATGTCCGAAAGAATCAGGTACCGGGCTATATTCAACTTAGTGATAACAAATTGTCTGGTGAGA  
TCCCTCCTGAGATTGGCAACATGAAGAAAATGAGTATGATGCATTTGGGTGCAAATGAATTTTCTGGAA  
GGCTCCCTTCAGAGATTGGACAAGCGCACCTAGTAGTCCTTAATGTTTCACAGAATAAATTTTCTGGTGA  
AATCCCAAAGCAGATTGGCCATCTTAAGTGCTTGCTAAACCTTGACCTTTCATTTAACAATTTTCTGGTC  
CATTCCCAGTTAGCTTTAGTAACTTGCATGATTTGAGCAAGTTCAACATCTCTTACAACCCATACATCTAT  
GGAGCTGTACCAGAAATCGGGCAACTGCTTACATTTGATAAGTCATCATTCTTGGTAATCCGTTGTTGC  
GTCTTCCATCCTTCATGCATAACTCTAACAACAACACAGAACGAAACAAGAATGACAATCACAAAAGCC  
CAAAAAGGTGGGTGCACTTTTGGTAATTGTGGTTCTGGTACTAGCTTTCCTAGTCTGTGGAGTCATGTCA  
CTCCTTGTCTGCCTCCTTATCAAAGTGCCAAGGGGTTCCCCAGGAATCTTACTGGAGGATACAGAGGGC  
AGACATGATTCTCCATCAAGTACTAATGCATCCTCCTCACGGTTGTGTGCATCCTCATCACGGGGTTCTGA  
TGATGTTAAGGTTATCCGTTTGGACAGAACAAGCTTCACACATTCTGATATACTGAAGGCCACATGGAAC  
TTCTCGAATGATAGAATTATCGGGAGGGGAGGATTTGGGATAGTCTATCGTGGAGTCTTGCCTGATGGA  
AGGGAAGTAGCAGTGAAGAAGCTACAGAGGGAGGGAATCGAAGGAGAAAGAGAGTTCAGAGCTGAA  
ATGGAGGGGCTCAGTGGGAATGGCTCCGTTGGCCTCATCCCAACCTTGTAACCTTTATGGGTGGTGC  
CTTGATGGATCAGAGAACTTCTAGTCTATGAGTACATGGAAGGTGGTACCTTAGAGGACTTCATTACA  
GATAGAACAAGGTTTGCATGGAAGAGCAGAATTC AAGCAGCAATCGATGTAGCACGTGCTTTAGTCTAC  
TTGCACCATGATTGCTATCCTTGCATTGTCCACAGAGATGTCAAAGCTAGCAACGTGCTTCTTGACAAGG  
ACGGAAGAGCAAAAGTCACCGACTTTGGCCTTTCTAGGGTCATGATTTCTGAACATACTCATGTTAGCAC  
AATGGTGGCAGGGACTATTGGTTATGTTGCACCAGAATATGGGCAGATAATGCAGGCCACTACAAAAG  
GTGATGTCTACAGCTATGGGGTGCTAGCAATGGAGCTAGCAACTGGGAGACATGCTATAGATGGGGGT  
GAAGAATGTCTAGTTGAATGGGCGACAAGGGTCATGGGAGACAGAAGGAAAGGGTTCACCAGAGCCA  
TTATACCAGTTGCTCTATTGGTACCTGGCCTAGTAGAGGGAGCAGAGGAAATGTATGAGTTGCTTAGGA  
TTGGGATAAGGTGCACAGCTGAGACGCCTCATGACCGGCCTAACATGAAGCAGGTATTAGATATGTTGA  
TTAGTATTCCTAGCAGCCAAAAGGGATCCAGCCGTAGCTTTGGATCAAGTCGTAGCACTTCTCCATTATT  
ATGATAGACTTTCTTGAACCCAGAGATAAAAACGTCAATAGTTTCTTTACAAGATGTGTAACATACCTA  
GCAGATTCTTCTGTAAAACAGTTTTTCTTTTTTTCACATTTGTTAGTCTAGGAAAATGTAAGTCAATTTTGT

TTGTTTGGATCACAAAATGTTCTCAAGGATATCAATTTTTGCTATGAAATTGAAGCACACAAAATATTTGAC  
CCACCTACAAAGTTACTACAGTAGGTGGCAAGATTGTTCCCCTTATCAGGTACATTATTTGTCTGGTG  
CAATTCAAAGTCTCTATTTCAAACAAGATTCCTCTACCAGGGACTGTGCAATAGCAACTACAAACAGGAG  
TGTCTCCAAATTTCAACTTCTGGACCACATCTGATGGAAAATTTAGTATACTTCCACTACATCAACACAC  
CACCAATTGTCAACGCCACAATACTCATTTTCATATCAGGCTAGCTTCATCATCCGTGGGAATAATGTGG  
ATATGCACTCAAGCATCATACTGATTTCAAGTTAAGGCTCAAAATTTAAGTCACTCTCTGATGTATAAAC  
ACTGCTAATAGAAGAGTACAAATTCTGTCTATCTGCTTAAGAAAAAGAACTACAGATAACGTTTAGTG  
AAACTCTAATGGTGTGAGACCTTTAAGAAAAACATTGCGAGGTTGGATGAAAACCTACCAGTATCCTAC  
CATGTTAAGAATGTCTTTGGGCTAAACATAACCATGTATACCCCCATTAATCTAGAGGTCACCTATG

>PGSC0003DMG400033667 LRR-RLKs

CAATTTGGCATTTCCTTACACCTCCAATGTTGACCAAATTTCCAAAATCAACTCATAATTCTAACCCAC  
CTTTTTTTTTTTCATGGAGTTTTCCATTTTCCGACCGGCATCTTCGCGGGAAAACAGTTCCTCTATCTCATT  
ATTCTACTAAACTTCATACCCATTTTCGTAACCTTACAATCTCCGGCCACTACTGAACGTGACACTCTACTG  
AAGATTAAGCGTCAATGGGGAAACCCAGTAGCACTTGACTCATGGAACCTACTTCTTCTCCTTGTAGCT  
GACCGGAAATTGAGTGTGATGATGGGAAGGTTACCGGAATAATAATTCAAGAAAAAGATATTACTGTT  
GAAATCCAAGTTCTATTTGTGAACTTAAAAATCTTACTTTTCTTAATCTCCGGTTGAATTATCTTCCCGGA  
AAATCCCAACTTTTTCTTACAAATGTTCCAATTTGCAGCATTGGATCTTCTCAGAATTACTTTGTGGGT  
TCCATTCCGGAGGATATTCACCGGCTTGGGAAACTCAAGTATCTTAATCTGGGTGGTAATAATTTACCGG  
GAGATATCCCGTCGTCAGTCGGGAATTTGATGGAGCTGGAGACTTTGTGCATGCATTCGAACTGTTTTG  
ATGGGAGTTTTCCGGCTGAAATCGGAAACTTAGCCAATCTTGAAAGTTTGGGGTTGGAGTTAATGGGT  
TTTCTCCAATGGCACTACCGCCGGAGTTTGGGAAGCTGAAGAAGATAAAGTATATTTGGATGAGAGAGA  
CGAAATTAATCGGTGAAATCCCTGAAAGTTTTGGGGAATTTCAAATCTTGAGCTTATTGATTTTGCTTAC  
AACAATCTGGAAGGAGAAATCCCTTCTGGGTTGTTTCTGTTGAAGAATTTGACGATGATGTACTTGTTCA  
GTAATCGGCTTTCCGGTTCGAATCCCTGAAACTTTTGATTCATCAAAGTTGATGGAACCTTGATGTTTCAA  
CAACAATAATTTAACTGGAACAATCCCAGAAAGTTTTGGAGGGTTTAAACATTTGGAAATTATGAATCTG  
TTTGGTAACCAATTGTATGGAGCAATTCCAGAGAGCATAGCCAAGATTCCATCTTTGAAGGTATTCAAAG  
TGTTTAGGAATAAACTGAATGGAAGCTTACCATCTGAAATGGGACTTCATTCGAAACTCGAATCTTTTGA  
AGTTTCACTGAATTCCTTCACTGGAAACTTGCCAGAGCATTGTGTGCTGGAGGAACTCTTTTTGGTGCT  
GTAGCTTATGTTAACAATTTGTCTGGTGAATAACCAAATCACTCGGAACTTGTCTAGCTTACGTTTCGAT

TCAGCTCTACAAGAATCAGTTTTCGGGTGAAATCCATCTGGGGTTTGGACTTTGGTTGACATGACAAGT  
TTGTTGTTGAATGATAACTCATTTTTCCGGGGAGCTACCGAGCAAATTGCATTCAATTTTACGCGGTTAG  
AGATCAGTAACAACAAGTTTTCTGGTGAAATTCCTGTGGGGATATCTTCTTGAGGAGTTTAGTGGTGCT  
TTTGGCAAGTAACAATTCATTTTCAGGTCCGATTCCAGTGGAAATTGACTAGTCTTTCTCAGATAACTCAGC  
TAGAGCTTGATGGTAATTCGTTATCTGGAGAACTCCAGCCGATATAATATCGTGGAAGTCGTTGACAAT  
ATTGGATCTTGCCAGGAACAACTCTCTGGCAAGATTCCAGCAACTATAGGTTTAATCCCTGATCTTGTT  
GCTCTAGATTTGTCTCAAAATCAATTTTCAGGTCCAATTCCACCTCAACTAGGTGTAAAAAGGATCACTA  
GCCTTAATGTATCGTCCAATCAACTTATCGGGAATATCCCTGATGCATTTGCTAACCTAGCCTTTGAAAAC  
AGTTTCTTGAACAATCCCAGTCTTTGTACCACCAACTCACTTCCATATCTTCCAAGTTGTAATAATGCGAA  
AGTCGCCAATTCCAAAAGATTGTCCCATAGAGTCCTAGCCCTAATTCTAGTCCTTGCATTGCTGTTTTCC  
TATTTAGTGTTGTATCGACCTTGTTTCATGGTTAGAGACTACAGGAGGAAGAAGCATAAGCGCGATGTTG  
CATGCTGGAAGTTGACTTCATTCCAGAGGTTGGATTTACAGAGGGCAGCATTTTGCCAAGTTTGACGG  
AAAATAACATGATTGGAAGTGGTGGATCGGGTAAGGTGTACAGAATTTCCGTTGGCAGACCAAATGAG  
TATGTTGCTGTGAAGAGGATTTGGAGTGATAGGAAAGTAGACTACATTCTGGAGAGGGAATTCTTGGCT  
GAGGTTTCAAGATATTGGGATCAATTAGACATTCCAATATAGTGAAGTTATTGTGTTGTATATCAAGTGAGG  
ATTCAAAGTTGCTCGTTTACGAGTACATGGTAAATCACAGTCTTGATGGATGGCTTCATGGGAAGAAGA  
GAGTTTCCTTGAGTAATAAAGTCATGGATTGGCCAAAAGATTGGAGGTTGCCATTGGAGCTGCTCAAG  
GACTTTGTTATATGCACCATGACTGCACTCCACCGATCATTATCGCGATGTAAAAACAAGCAATATCTT  
GTTGGATTCTGATTTACAGCCAAAATAGCTGATTTTGGGTTGGCCAAGATTTTAGAGAAGAAAGGAGA  
GCTTAACACCATGTCTGCTGTTGCGGGTTCCTTTGGTTACATAGCTCCAGGTAAAAGCAAAATCCAAGCT  
TGAAGTTCGTATTACCTCAATTCGTTAACATTATATCAAAGTATGACTAACTAATAATTTACTGTTTGGT  
TACAGAGTATGCTTATACAACGAAAGTGAACGAGAAGATTGATATCTATAGCTTCGGGGTGGTGCTATT  
GGAGCTAGTGACAGGAAGACAACCAAATTTTGGGGACGAGCATAACAAGCCTGGCAGAATGGGCATGG  
AAGCAGCACGGAGAAGGGAACACTGCCATCGATAATATGTTAGATACAGATATCAAAGAAACATGTTAC  
TTGGAAGAAATGAAGACTGTGTTTCAAGTCTTGGGCTTATATGCACGAGCAATTTACCTGCAAGCAGGCCT  
TCCATGAAAGAGATTCTGCAGATACTTCATCGATGCAAGTCCTTTAGGTATTCTGGAGGAAAATCACCAG  
GTACAGAGTATGATGTTGCTCCTCTCCTTAGCGGAAACAACAGCGAAAAATACATTGCTAGTTACAAAC  
GTATTAATTCAGTAAGGTAATAGATGATAGTAGTGATGATGGTCTAATAATTTCCAGTGTGTAATATTG  
GAGATGCCAAAGTAACTGAGTTGTTGTAAAATGATCATAGAATAGTGCCACTTAAGTAAAGTACAAGT

TTGAATTTCTAGGTA CTCTTGAATTTGTTCACTGCTTGTAGACTGAGTGAAATGCATCATTAACTTTTGC  
TAGTTATGTAGATTGTAAGGAAGTGTGAAATTGGAAAATGAAAATGCCAATTTATATAATCAAAGAGAA  
ATGACAGTAGAGTGTGAAATTGGAAAATAAAAATGCCAATTTCCAGGTCAACACGTAGTTCATTAAGAA  
GATTTGGTTTTGACTGAAAATGACTCAATAGGAGGGTATGGAGAGGCGAT

>PGSC0003DMG400033914 LRR-RLKs

CTGGCAAGTGAGGCCAAAGTGACCACAATACATGTCCATGTCAGTGGCCACTACCTTCTAACCTGCCCG  
GAGAAATTCAACTCTGCGAACTGACACACGCATAGGCATCGGTGTTTCTTTTGGTGGCACAACTGGGG  
GAAAACACCGGGCAAACCACCCCTTTTAATTAATCTTCTGATTACAGAAGTGGTTTAGGGTTGGGATG  
GGAATCGTGTGCAGTTCTCAGCTCCACACCCCGTGTGACAACTTAGCTTATGCTTTTAAATCAC  
TATGTTTCCTTTGAATATCCGATGTGGGACAAAGAGGCCATTAAAGTGATTTTGTATTGCATTATGAAG  
TGAAGGCTGTATTTGTTCTCTTTGACTGCCTCTGTTTTATCCAACCTCCATCGAAGTGGGAGCTTACAC  
ACTGTATAAAAGTAGAAAAATGGAGAGGTTGCGCTTAACTACTTCTCCCTCCCCTTTTCACTATTTTTAA  
GTATTTCTCTGTCACCCATCAACTGAAAGAAAAGAATAACCCA ACTATTATAGCACTTGTATACTTTTCA  
AGAGGAAGAATCAAACCCAGACCTTCTGATTCAGTACAACGCTGAATGATAAGCAGTGGGGTTTTGCC  
TCACTTGTATTCATATTTGTATACCCCAAACCTTCACAAGTTTCAATGAAGGTTGAGCAAAAATGAGGCAC  
CAACTGGGTTACCTTTCTTCTCTTTCTGCTTTTTATTCTACATTCCAGCAGCACGAAGATAGATTG  
GCTTTACTTCAATTGAGATCGTCTTTAGGATTGAGAGCCAGAGAGTGGCCTATTAAGGGTACCCCTTGT  
CAAATTGGAGAGGTATTTCTTGCAACAATGGTAGAGTTACTGGGATTAACATTTCTGGTTTTAAGCGAAC  
ACGAACTGGGAATCAAATCCTCAATTCTGGTTGATTCCCTCAAATTTGACTCTGTTGGAGTCATTTA  
ATGCATCTAATTTGCACTTCTGGGTTCTATTCCTGATTGGTTTGGCATTGGACTTGCATCTCTACAGTT  
CTTGATCTTAGCTTCTGTTCAATAACTGGTGCTATTCCTCAACTATTGGTAATTTGAGAAGTTTAGCTGTT  
TTATACATATCTAATAATGGTCTTAGTGGAATGGTGCCTTCAAGTTTGAGTCAATTGTTAAGTCTTTCAGT  
TCTTGATGTTTCACACAATGCACCTGGTGGGTCAATTCCTGCATCATTGGGTCTCTGGGAATCTTACTT  
TGCTTGATATGTCTTCAAATGTTTTGTCTGGGGCTATTCCTCTGTAATTGGGACTTTATCTCAGTTGAAA  
TTCTTGAATCTTCTCGGAATATGTTGTATGGGAATCTGCCGCCTGTAATTGGGAGATTGAGTTTTCTTGA  
TATATCAAACA ACTATTTTCAAGGCAAAGTTCCTCAGTACTGGCAAAGCAATGTGACCCTTAATAGAAAT  
TGCCTACAAAGATTGGAAAGTCAAAGGGATAACAAGAGAATGTGCATCTTCTATGATGAGCGGGGCTTG  
ATATTTGACAATTTTGGAAATGCCTAATGCTATGGAGCTTCCGGTTCTTATATCTGAAAAGAAGAGTCCCA  
AAAATGTGATCATATCAGCTGCTGTTCTAGGGGTTGTCGGATTTATTGCTACTGTGATGCTCTTTGTAGT

GCTGCTGATTTGTTGCTGCAAGAGGGGCGTGACGAATCAAAGGGTCACTGGTGTAGGGCCTGTTCTCTAC  
TACTGCAAGTCCTCCCCACCTCCAGGACCATCATTGAAATTTTCAAGTTTAGGAGTAGCATTAACTACC  
AGCAGATCCTTCAAACAGCCGGTCATTTAGTGATGTAAATCTTATTAAGCATGGACATTCAGGTGATAT  
TTCCGTGGAATCCTGAAAGGTGGAGTTCATGTAGTAGTAAAAGAATTGATTCCAGCTCAGTTAAAAA  
GGAAGCATACTTGTTAGAATTGGACTTCTTCAGCAAAGTTTCTCATTCTAGAGTAGTCCCTTTTCTGGGAC  
ATTGTTTAGAGAGTGAAAATGAAAAGTTTCTGGTATACAAATATATGCCAAATGGAGATCTCTCTAGTTC  
TTTGTTAAGAAAAACAATGCAGATGATGATAGTTTGCAGTCACTTGATTGGATAACGAGACTGAAAAT  
CGCTATTGGAGTTGCTGAGGGTTTGTCTTATCTGCATCATGAATGTAATCCACCTCTTGTGCACAGGTATT  
TTAGAGCTTGTTGTGATGCATTACTIONTACTTCCACTTATCACGCTTAATCTGACAACTTTTAAATTGCAGT  
AACAAACCAAATCTATTATCTTTATACTGCCTATCTGAATCATAAGTTATCATTGTGATGGGACACTTGAT  
CATGAATCTTGGAAGAGTAGTTGCATATTCCTCTACATATGTTTCTTTGGTTGTAGACTTTTGGCGAATTA  
GCATAATAAATGATATGCATGTTTTATTAATACATGATATTCAGAAAATTAATAATCATCCATTATTCATG  
AAAGATGAAGTGCTTAAGTTTCTCCATACTAATTGGCGTCACTGAAAAGCCTCTTCTTACTGATAAAA  
TTTGGCCAAGTTAATGCTGGCACCATTTTGTACTTCATGAATTTCAACTGTCTATCAGTGCCAATTAGGTC  
AATACTATAAGAGACATGAGTGAAAGATATAAGCTAGAGCTGGATGGTTTGGCAATTAAATATACTCTG  
AGGTGTTCTTTTTTGGAACTAAGTGGCCACATGATACAAACCGGAGCTGGATATTTAGCAATTATATAC  
AATCCAAAACCTGTTCTTAGCAGTGATCTAAAAGCTTGCTAGGACACATGAATTGGGCAAATCCAATCATA  
AACTATTTACAGAAAATATGAAACCAAACCTTTGTCTTGAGATACCCCTGTTACAACCTACAAGAGTAAGG  
GTGAATAGAATAAGTCCTTACTCTTTTGGCCGTGTATTACTTCACAATCTTGGGCTAACTACTCCAGACG  
TACTGAGTGAAACCTAATGACAAAAAACTCCTATTGGCAAACCTCGGTCTAAATTTTGACAAAACCTCCTAT  
CACTGCCATCTTCTGAACAACCTGGATCACAGCCCAAATGTTAACCTTCTTCGGAATTGTCCTTTTTA  
GAAAAGATTTCTATTTAATTTTCTCATATTGTTTCATCAGAAGCTTGTAGAGAATGATAACTCAATGAACA  
ACTTTGTGGATTTAATAACATGTCTGGTTGTTGAAATTGATCCAGTATGTAGATAAATAGCAAAATATC  
AGATGACAGCTGCGACAATTAGCTTCATGAAATTTTACAAAGACAAAGAAAAGGAATAGACAAGACTTC  
ATCCTTGTTTTGCTCTTCATTATATGTTCTCTATGTGTTATTCACGTGCAATAAATTACAAATTTTCCATAAC  
AAGACGATTTGGCCAATGAGGGGCCATGGTTATGTACACTTGTACTAGCTATTCTCTCTAGTTGCATGCA  
TGTCTATTTCCACTTAGCAAGTTCTGGTTTCTTCTAGATTCTATATCTAGTGACATGGCTTAAGGTTCACT  
GTTACTAGATCTTACTGCTCTAGCATATTAATTTATTTCTGAAACTACGGCGAATTGAGGTAGCTTT  
GCTTATTAATTTTTGAAAACCTTCTAACATCGAGGTCTTCTTGTGTTTGACATGGGTGCCGCTTTTGATA

CTGAGATTTTATGAGATCGCTAAACTTGTTTAGTTGAGTACTAGCTGGTAAATATGTTAGGTAGGTCATT  
TAGAAATCTCATAATGTAGAAGTGACCTTTTCTTATTTTTTTCATCAAAGGATTTCTAATAGGATAGCACTT  
TGA CTGACTTTTTTTCATTTTAAAACATCAGCATAGCTCCTTGACATATCACATACTCGTGATAAACTATGT  
ACAGATTGATTGAGCTGGTATAACCGTGACTATCAAATTTATTTCTTGGATTTCTTTGTACTTCAGTAGA  
CCCATCGAGCTTCTTTCTGAAGTTAGTTTGAATATTTACTAAACTTGCAAAACAGGTTTAGATATCACCAT  
GATTTATGTCCATTTCTTCCCTCCAATTTAATCATCTTCCAATTTAATCATGAATGTA CTCTATTTCACTA  
TAGGTTACTACACTTTCTCAAGCTGTTCAACCACATTTTTTCAGTTAAGTATTATTTTTTTTATGTGGCAAC  
TAGAATTTCTTAAGCCAGCATGCATAAATAATTATATTCTTATCTTCTCTCTGTTTCTTTTCCACCATACCAC  
GTGGTAGACAAAAGATGGTCTAAGCTGGAACCTCCCAAACGCCTCATAATAGACCATACTTAAGGTAGT  
GCATGAAAAGGAGAAACCAATTGCACAAATTTCTGCATTTTCCCTGAGCTATATCAGTGA ACTGTAAAAA  
AGACGGATTTTATACTATTCTTAATGGTTACATTGTCTTTCTGCTGCATTGCAGATGAAAATTCACATAAT  
CTCGGTTATATAATTTATGCCTTGGGGTACTATGGTGAAACACCTTTTTTTGAACCTTGCTTGCTATATTTA  
CAGAGATGTCCAAGCAAGCAGCATACTTCTTGATGATAAATATGAAGTACGGTTAGGGAGTTTGAGTGA  
GGTCTGTGCACAAGAAGGAGACACCCATCAAACAAGATTTCCAGGATGTTGCGGCTGCCACAGTGAG  
TAGTTGTTGCTTTTCTTTTCATTTTATTTTATATGACAATATCTTTATTTGGGATTGAGGCATAAGT  
>PGSC0003DMG400038191 LRR-RLKs

ATGGGTTCCCTGCCAATGGAGATTGGAGATATAACAAACCTTGCAAGTTTTGACCTTTCTTACAACAATT  
TCTCCGGCATGATTCCAAGCACCATAGGGAAATGTTTGGCCTTGGAACTTTTACATGCAACACAATTC  
ATTTGAAGGGTCCATCCCGTACATAGCTGACTTACAAAACCTACGGGAGCTAGACCTTTCAAGAAACAAC  
TTATCAGGAGAAATTCACCTTGGACTATGAATCTTCCCTCCCTACTGTACCTGAATCTTCCAGACAACAA  
TTTAGAGGGTGAGGTTCCCGTCCAAGGAGTATTCTCAAATTC AACCGCATTACAAGTTGAGGGGAATCC  
CAAGCTTTGTGGTGGAAATCCAAGAGTTTGATTTACCACCTTGCCCGAAGCAAGAAAACAATAGAACAAA  
GAGGAAGCGTCTTACACCCGTTCTGACTACAATTATCAGTATTGTTTTATTTGCTGCAATAGCATGTTTTC  
TGCTTTCTATGTTTTTTATTA AAAAGATCCAGAAAACGAAGAGATGCAACATCTACATCTGGGCATCTCATC  
TTCCCATGATTACATATAAGGAGCTTCATGATGTA ACTAATGGTTTTTCTTCAGATAGGTTGTTAGGATC  
AGGCAGTTTCGGCACTGTGTACAAAGGAATTTCTCACTCATCGAATGAAAATCCAGTTGCAGTCAAGGT  
ACTCAACCTCCAAAGTCACGGTGCATCTAAAAGCTTCATGACTGAATGCCACGGCTTGAGAAACACCCG  
GCATAGAAACCTGGTGAAAGTCAGAACTGCATGCTCCAGCATTGACATCAAAGGAAATGACTTTAAGGC  
CATAATGTATCAGTTCATGGAAAAGGGAAGCTTGGAGGAGTGGTTACATCAAGAATACTGCAATGGTTG

CTGA

>PGSC0003DMG400039680 LRR-RLKs

ATGGGAATAGGCATTCTTGTTCTTTCTGCTTTTGACTGTGTTCTTAGGCCTTGCTTGCCAACAGCC  
AAACTGATGGATTTTTGTGTCTGATTTCTTCAAAGATGGGGTGTCTAAAGTTCACAACTTTTCAG  
CTCACTTTGTTCTTGAAAGGGGTGGGATGTGATTCCAAGGATGAAAATGTTGTTAATTTGACAGCTAA  
AAGTTTTGGTTTATCTGGTGTGATTCTGATAACACCATTGGTAAACTCACAAGCTGAAGTATTTGGAT  
CTGAGCAACAATAAACTCACTGGTTTGCTTCTGATATATGGAGTTTAGGTTCACTAAAGTACCTAACCT  
CTCACATAACCATATCTCTGGTGACCTTTCAAGTAACATAGGCAATTTGGTGGTCTTGAAATCATGGACT  
TTTCTGTCAACAATTTCTCTGGGAAAATCCCAGATGCCATTAGCTCCCTTTCAAGTTTGCATTCTCTTAATC  
TTAGTAAGAACTTGTTTGATTGAGAAATCCCTTCTGGAATTTGGGCTGTCATTCTTTGGAATCCCTTGAT  
CTTTCAGAAAACAGACTCACTGGTTTTCCTAATGATTTTGGTTCTACATTTCACAAGCTCAAGTTCTTGAA  
TCTTGCAGAAAATGAGATTCTTGGTAAAGATTGAGATTTTTCAAGAATGGGTTCAATCACTCATATCAAT  
ATTTGAGGCAATCTGTTTAAGGGTCTGTTGTTGGTCTTTTTGAGGGGCCATTGGAAGTGATTGATTTGA  
GTAGAAACCAGTTTGATGGTCACATTTCTCAGGTAAACTTCAGTCCAGCTTCAATTGGTCTCATTTGGTT  
TATCTTGATTTATCTGAGAATCACCTTAGTGGAGGGATCATTAGAGAATTAAGAATGCTCGAAATCTTC  
TATACCTTAATCTTGCAGATAATAGATTTTACATCAAGAATTTCCACAACTGATATGTTATCTAGCTTA  
GAGTATCTGAATTTGTCTGGAAGTAGTTTGATTGGCCAAATTCCTCAAGAGCTCTCGTCGTTGAGTCGCT  
TGAAAATCCTTGATATATCCAAAACCATCTTAGTAAACGCATTCTCCGCTGAGCAATAGAAATCTCCTG  
GTTCTTGATGTTTCATACAACAATTTGACTGGTGATATCCATTGCCACTGTAGAGATACTCCAAGGAT  
GGAAAGGTTCAATTTTTCTTACAACAATCTAACTCTTTGTGCTACTGAATTCTCCCCTAAAACACTCCTTTC  
GGCGTTTATCGGGTCATCAAATGGATGTCCTATTGCTGCCAACCCAGCTCTCTTCCACAAGAAAGCTCCG  
AAACACAGAGGACTTAACTTGCTTTGGCATTAACTTTCTCTATGGTTTTTCTGCTTCTTGTTTTACTGTTT  
TTGGCATTGTTGTTGTCGAAGGAAAACCACGATATGGGCGGTTAAACAGAACTTACAAGGAAGAACA  
GACTATTTCTGGTCTTTTTTATTCCAGACTGATTCAACAACCTGGGTTGCTGATGTTAAGCAAGCAA  
CAGTGCCTGTTGTGATTTTCGAGAAGCCACTGTTGAATTTACATTTGCAGATCTCTTATCTGCAACTTCT  
AATTTGATCGAGGCACATTGTTAGCTGAAGGGAGGTTTGGTCTGTTTATAGAGGCTTTTTACCAGGTG  
GCATTCATGTGGCAGTGAAAGTTCTTGTTGTTGTTCCACTATGACAGACCATGAAGCTGCAAGAGAGC  
TCGAGTATCTTGGCCGATAAAACATCCTAATCTGTTCCATTGACAGGATACTGCTTGGCTGGTGAGCA  
AAGAATTGCCATTTATGATTACATGGAGAACGGGAATTTGCAGAACTTCTTCTGACTTGCCACTCGGG

GTTCGAACTACTACTGAAGACTGGAGCACGGACACGTGGGAAGAGGAGGATGATAATAACAGTATTCA  
GAATGTTGGTTCTGAAGGATTGTTAACCACTGGAGATTTAGGCACAAAATCGCGCTTGGCACTGCTAG  
AGCACTTGCATTTCTACACCATGGTTGTTACCTCCCATTATACATAGAGATGTCAAAGCCAGCAGTGTTT  
ATCTTGATATGAACTTGGAGCCTAGACTATCCGATTCGGATTGGCCAAAATCTTTGGCACGGGACCCGA  
GGATGAGATCACTCGCGTTACCTGGATACATTCCCCAGAATTTCTTCATCCAGAGAGCAGCTCACCT  
AAATATCCTACACCAAAGTCAGATGTGTATGGATTTGGAGTCATCCTTTTCGAGCTAATTACCGGGAAAA  
AACCAGTTGAAGATGATTATCCACAACACAATGATGCGAATTTGGTTGGTTGGGTTAGAGGATTAGTAA  
GGAACAACGAGGGATCAAGAGTTATCGATCCAAAATTCGTGGAAGTGCATCACAGACACAAATACTAG  
AAGCCTTGAAAATCGGTTATCTATGCACAGCTGAAGTTCCCGCGAAACGACCAAGTATGCATCAAGTAG  
TTGGACTGCTTAAGGATATTGAGCCTACACAACAATGA

>PGSC0003DMG401000515 LRR-RLKs

TTTTATCATATAACTTAACTCAGTATATTGTCATTTTGGTTTCAGGTGTGGAAGCTGTACACAACAAATCA  
GGTAACTGAAGCATTAGATCCTCTATTGAAAGGCGATTTTCCGCCAGAAGAGGCATCAAAGGTAATAAA  
AGTGGGGTTGTTGTGCACTCAAGCTTCTGTGCTTTAAGACCATCAATGAGTGAAGTTGTCCAAATGCTA  
ACGTGTGAGGGCTATCAAATCCAGAACCATGCCAACCACCTTCTTAAATTCGAACTTATTAGTTGGCG  
GTTTCAGTCAAATCCAGTATAAGAAGTTTAGTATCAAGTGCCTCTATAAACTTGATGAATCATCATCTTAT  
GCCACCACCACTGGGTCTCAAGTATGCAAAGCTCATCAACTGGACCACACAAAAGTGAATTCCTTT  
TAAAAGAGTCTGAAAATAGGAAATAATTGCAAAGACAAATATAGAAATGGAAATTTTGAGAGATTTTTT  
ATCAGTACATTTTTTGTACAGTAATAGAATTGCTGTAGTTGTGCATTTTTATGATTTTTATTTTTGCATTTTT  
GGTGAGTGATGATACAAGAAAGTGTAGGGGTGGCAATTTTCAGCCCATATAAGTGAATGAAACCATTTT  
GCCCATATTAATTAATGGATCACTCATTTTC

>PGSC0003DMG401002925 LRR-RLKs

TGGACTTGTAGACTTGAATCAAACCTGTCGCAAATTTTTATCATAAGCTTGGTGAGGGGTCAAACATG  
TCTATTGAAGGTTATGGAATGAGCAATGCTGGTGGTTCTGGTGCAATGTCGGTGGATAACAGCAGTGTT  
GGATCAAATGATTCACACTCATATTCTAAACCAGCAGGGTAATCACATCCACAATAACGATTCTGTTG  
CTGCTAGCGTAGTCAGGGGGAGAGTTACTAGGTTGAGCGATGATGCCCTTGCTCAAGCCTTGGTTGATC  
CTCAATTCCTCACTATTGGGCTTGCATTTATCATGAGTGGACAATTGACTTGAGGAGGCTTACCATTGG  
ACAAGCATTTGCTCAAGGATCTTTTGGGAAACTCTATAAGGGAAGTATAATGGTGAAGATGTTGCCATC  
AAGCTTCTAGAGAGGCCAGAACATGATCTTGAGAAGGCTCACTTTATGGAGCTGCAATTTTCATCATGAG



GTCAAAATGTTGGCAAATTTGAAGCATCCAAATGTAGTACGATTTATTGGTGCATGCCGTAACCCATGG  
TGTGGTGTATTGTGACTGAATATGCCAGAGGGGGATCAGTGCCTCAGTTCCCTCACGAGGCGGCAAAC  
CGAGCTGTGCCATTGAGGTTAGCAGTTATGCAGGCCTTGGATGTGGCAAGGGGGATGGAGTATGTGCA  
TGGCCGGAATCTGATTCACCGAGATCTGAAATCCGACAATCTACTGATTGCTGCTGACAAGTCAATCAAG  
ATTGCAGACTTTGGTGTGCTCGAATTGAGGTGCTGACTGAAGGAATGACACCAGAACTGGCACTTAC  
CGCTGGATGGCTCCGTAAGCATCTAGACTCTTAGCAGCCTTGTCAAATCTGGTGTCTTGATCCAGTTTG  
AGTTTATTGCCAACTGTATAATAGAGCTCTTAAGCTTTTTATCCTATTCTTGTGGGCTATTTTTCTCTGT  
CTGCATTACTTTCTGAATTTTTTTTCAAATTTGCTTTGATATGTGTTTCTTAGCCAAGCATCTTACGGAA  
ACAACCTCTCTTCCACGAGGGCAGGCTAAGGTCTGCTTTCTCTTACCCACCCCAGACCCCCTGAGT  
GGGATTTACAGGGTATGTTGTTGTTGTAGCATGCTGAATCCCTTTATGGAATAAATTTATTAGAACT  
GAAGTGAAGAGCATGGTGGTTGATGGGTTCAAGTCTGTATGTCCTTTTGTATGCCACCTCACTGATTGTG  
ATTGTATTTTCTATTGTATACCTAGTGTCTTCCAGTTAACTTCTTAATTTAGTTCTGTACCTGTTAATGAA  
GGATAAAGAGTTGATTGACTTTACTTTCTTTCAATTCCTTTCCCTCCTTTTCTTTTCTTCTTGCCATG  
ACTTGTAACCTGATTCAAGTTAGACACACTCAAGGGTGTCACTTAGTTGTCAATGAAGTAGGAGCAAACC  
TTTGGAGATTAGGGTTCAATCATCCCAGAGACAGAAAACACCAAGTGTCTCTTCCCATATGCCTAAACC  
TTAAACCTTTGTGGGTATAGTTACCCGAAATCGAGATGCATGCAAGTTGGATTGGATACCATTTTCAGAA  
AGAGTAAAATTGCATATATCTGAAAATGGGTCTAGGATATTAACCTACCACACTGGGTTCACTTTCAGGAT  
GTGTCTGAGAGATATGAACCACAATTCTATTCTTATTGAATATGTAGATGAAAGTTCTATGGGAAGTATA  
TTATCTCTTTCTCTCCTTTGTGAGTGTGACCTTCCAGCATCATCTTTAGCATCACCTCTTTCTCAAAGCA  
GTGAGGCTATTTTGGAAATAATGTATGGGTAAGAAAGAGAATGGGGAGGTGCGATTACCAGAGATCT  
CTCTCTTTATAGGATGACATACATCCACAAGAGTCGCATTGTTTGTGCTGCTGGAGAACTTAAAAAGA  
GCAAGGGAATGACATGTCTACCAGAAACATTTCTTGTTTAGAGTGGAAGTTGGTTGCCGAATGAAAGTT  
TTAAGTTGTTAGTAGTTGAACAGCATTCTGTTTGTGCTGCTGCTAACTTTCTCAAAGCACTGAAAT  
GAATCAGTTAAGAAGGATTGTTTAGGACATGTTATTTGGACATACACTGGTGTCTCTGGAATCTGCAG  
GGCTCTGTTAACTTTCTCAAAGCACTGAAATGAATCAGTTAAAGGAGGCCTGTTTAGGACAATTTAATT  
GGACATACACTAGTGTCTCTGGAATCTGCAGGTAGATTTTAAGTTGTGCAGGTGGAAGTCATTGCTCTGT  
TGGAGGATGGCAAACAAAACATCGATTTTTTTTTATGACAAAGGAAACCCGAGCTGCTATCCATTGG  
GTGTGTACACGGTAAAACCCCGCTCCTATGCAATAACTCACAAAATTCGGAAGAGAGGTAACCTGCAC  
AAGGCAAGCTCGGTGCGACGAGCTTGACCCAGAAGACAAACCCCTTGCTTTTGTGGTAAGGGGTTTTG

AACTTGAGACCTCCAAAATGGAAGTCCCAAGCTCAAACCACTAGGCCACCCCAAAGGGTAACTGACATA  
TCTATTCTGATGTTTTTGAAGGAATTCTAGGAGGGCCTTACAGAACTAGACTCTACAACGATAATATG  
ATTCTCCGCTGAGTTACTACATAGACTTTTTTCATCATTAGACAATCTCTACAGAAAGGTAGAAGTGAA  
TATTTGGTTCAATCTTCAATGAATCTAAATCATTTATTGGAACCTTCACTATTCTTTAGGAAGAGGCCTCT  
TAAAAGCATAAAAAGCGACAAGGTGATGTTTCTATAATCTACAACGATTATGTGGATTCTGCATTGAGTT  
GCTACATGGACTTGTTCCGTCCATAAGACTATTTCAATCTCTATGGAAAGGTAGAAGTGAATACATGGC  
TTAATCTTCTCATATTAAGCAAAAACGATCCATGGAGTAAAAGCTTGGAGTGAAGCATACAAGTT  
ATGGAAAAGTATAATGAAGTACTATCCACAAAGAAATTTAGTAATCTTCTCATGAACTTGAAACATTTGT  
TGAAACCTCTAATTATTGAGAGTACTGTTATTAGAAGCGAGAAACACAAAAGCGACAAAGTCCATGGA  
GTTTGAAGCAAATAGCGAGAAGTGAAGCACAATGGCTATAAGAAGTAAGTAATGCCGAACATAAAAGG  
ATTTAGTACAATAAAGATGCAAATAAATAAATGGTTTTTGCATCTAGTTTACTTAATATTGATATTGATC  
TTGCTCTTCAAAGTCGAGATTCAAAAAGTAGATCCTTTCTCGTTAGGATCATTTTCGCACGTCATTGTTTA  
AAGCAGTGCAAGGCTTCAAGAAGTAATCCCATTCTTCAAATTGCTTTAAGCGATGGCTTTGAATAATAAT  
GTGGGAGAGATGTTGTGACACATGATGAAATCAATGCCAGTAAGAAGAATGATAAGAATGCCTTATTT  
GGTATTAAGTCTTACAACACGTGTTGCTAGACCTGATTTGACAAATGCCTTATATAAGTTGAAGTAGATC  
TTTTAGAAACAAAAGAGCATGAAAACCTCATAATGATCAATCAATTAGTATAACTTGTTAAATTACGGA  
GATCCTACGTCAGGCCGATTATGACTTAGTATTTCTGACATCTAACTTTTAGTGCCTCACATACTATGTTG  
TATCGGTCCTTTGCATTACATACATGTTAAAATGGGTGTGTCATGGTTGCGCGTACTCTTCAAATACACA  
AATAATTTACAAAAAATGCACGTACCTATAATGATACTTACATCTGATAAAATTCATACTCAAGGACGA  
GTCCAGACAAGAAGATTTAGGATTTAAAGTTAATCGGTTCCCAATGATATCAAGTTCAAAAAGTAAATTA  
TTATATGTGCCAAGGGGAATCGAGCCTTCAATGAGGAGGGCAATAAAGCTCAAGCAAGTTCCCATTTA  
TGCCGCTGGACCAAGAGCTTACTTTGTTAGTAGATCCCAACAAATAGTTTTATATATTTAATTGACTGGAT  
TCCACAAAACCTACACATGATACTTTAGGTCCGCCCTGTTCAATAGCAGCAACAACATACTCGGTGCAA  
TCCCACATGTGGGGTTTGGGGAGAGTAGAGTGTATGCAAATGTTACCCTTAACTTGTTGAGATAAAAAG  
GTTTGTCTGAAAGACCCTCACTTTAAATAAAACTGCCAAACAGTTTGCAAAGGGGAATACAAATATTC  
GGAGCAATCACAATGACACATTTATGTAATAATGGCAAGTGTTACATAACAAACAAGTGAATAATGCAA  
TAATCGACACACAAAAAATCAAGAGTAGTGCTAATACTACTGATAAGAATACCAGTGAAAGCCTATCT  
CGCAAAGAAGCAAGAGAATGCTCAATTACCAACTAACCATTTACCCTAATACACGACCTCTATACTCTCCT  
ATCAAATGCCATGTCCTCGGTAAGATCTAGATGCACTCCGTCTAATCACTTCTCCCAATACTTCTTCGGC

TCGACTTTACCTCTCTTGACGTCCTCCCTTGCCAACAACCTCACACCTCCTCACTGAGGCGTCTATACTCCTC  
CTCCTCCTCACGTGTCCAAATCATCTTAGTTTTCACTCCCTCATCTTGTCCAACATGGAGGCCACTCCTACC  
TTGTGTGGAATATCTCCATTCTTAATCTTGCCACTCTTAGTATGCCACACACCCACATCAATATCCTCATC  
TGAACGATTTTCTTCTTCTGAACTCGAGATTTCTTAATAGGCCAACACTCCGCCTCATAAAACGTGGTCGG  
TCTAACCACTACTCTGTAGAACTTACCCATCTATACTCCATATAATATGGATTTTCATGTTATTTAGTTGTG  
GAAGAATAAGTATATTTGAAACATTTTGGATTTCTCCACTAAAACCTCATCACCTCTAAGAATGATAGAAA  
AAACGAAAGCATCAAAATCTATTTAGGTGGCACGGGTGTCCACATGTGCTTGATTTGCCAAGTTTGTTAAT  
ATGTACTATGAAACGCCAAATTAATTTAGAAAGTATGCATTAGGTATGTAAGAATATATTTTACTATTTGT  
TTTATGTATTACGGTGCATGTATAGGCTGACTGTTGTATTGATTCATGCATTAGCGCCTGATTGTTAACT  
GTTGAAAATTTATTGACATCTATTGGAAGATCTTCTTGGTTGGCACAATTTGACCTAGAGGCTGCAAAAA  
TTATGACAATAAGAAAATTACTTCATTTTGCTCACTTTATTGTTCTACTGATACATGGGGTTTTCTGTAT  
TTAGGGGTCGTTTGGTGTGAGGGATAAAAATAAATAGTCCTGGGATAAAAAAACATGGGATTAATTTT  
GGTGTCTTGTGGTTGCCATGTTTGGGATAACTTATCCCACTATTTATACCATAGTGATGGGATAAGTTA  
TCCCATATACATGGTGAATAAGTAATCTCAGGATAACTAATCTCAGGATAATTAATCATGGGATAACTT  
GTTCCCAACCAAATGACCCCTTAGAGTCTTATTTAAGAGTTGGTATATTTAGTGACTCTTTTGAGAAAAAA  
ATTTCAAATCACGATTTTCTTAGGATTGTGCTCTTAGAAGTTCAGTTATTTGTGTCTCAGGCATATATGG  
CAGTTAGAATTTAAACCTTGAATTAGATCATCAATTCAGGTTGGTTTAGAGAATATGGTATAGAGTTAAA  
TAAATCCCTTTCAATCTGGTGGAGATTGATTGCTATATCCAGTTGAGTGTAGATTACTGATGATAGAACT  
GGCATTTTTTTATTTCTTTTGACCTGGACAGAAGTATCACCATCAGTTTCCGTTTGGGTTTGTACCTTACAC  
AATGTTAGAGAGGAAAGCATATTCCTATAAGCTAAGTGAGTTGGAGATTAAGCTTTTGTCTTCTGAGA  
TAATGTGATAACTGGAGAAGTTTCGATTTCTAATATGACATTTCTTTCAGACTTGATCAAAGATATGTGTT  
CATGTCTGCCTGAAATATTTTCGAAATGGTTGCGATCAGAAAGGATTTAGGAGGTTGACCTGGTGAGTG  
GTGGTAATTTTATAGTCTTCTCTGTGTGATAATAGGCTAGTATGCATGAATGACTTTCCTTGGGGAAATA  
GACAAAAATAATATGCTTGCTTTTGTTAATTTGATGTGATAATGAAAGATCTTGCCAAAACAGGTGTGG  
ATCGAATCTCAATATCTGGTAAAACCTCGAATACGTGCAGCCAGTCTGACTCTTTGTATAATTCTAGTATGC  
TCAAATTTTTATTCTGATTAACCTGAGAAATGAAGTTACTTTTCAAGTTTACTCTTGAGAAATTAGTTATTCA  
CATTCTGCAGATCCTATCCCGTTTAACTTTGTGAATTATTGGCAAGTGTGTCTGGTTTCTTCTTTTTCAGA  
AAAAAGAAAAATGGATGTTCAAAGTTGTTAGCAATAGCATCTGTGTTTCGTTGTGGATCGCTAAGCGTTT  
GACTTTGTTTTGTAGGGAGATGATCCAGCACCGGCCATACACCCAGAAAGTTGATGTTTATAGTTTTGGC

ATTGTTCTGTGGGAGCTCATAACAGGGTTGCTTCCTTACCAGAGCATGACTGCTGTGCAGGCTGCTTTTG  
CTGTTGTCAACAAAGGCGTCCGTCCAACAATCCCCATTGATTGCTTGCCTGTCTTATCTGATATCATGACC  
TGCTGCTGGGATTCTGACCCCGATAATCGGCCAACTTTCTCTCAGGTGGTCAAGATGCTTGAGGCGGCT  
GAGACAGAAATCATGACTAATATCAGAAGGGCACGTTTCAGGTGCTCCCCTCATCCTACGGCTACAGGG  
TAAGAGGAAACTGGAGGCAACTGATTTTGAATGGCAAACTGATTTTGAAGTCTGCCATGTGTATCTATC  
AGGCACAATTTCTTTTCAGACAGAAAAAGGGTTATAGTTGTGAGAAAAACTAAACATTTCTCTGCTGT  
ATTTTGTTCCTTTCTTTAATCCGTGTATTTAAGATGGTGACTAGTTGGTAACACAGGATATCTGATGTGC  
ATCTATGCATGTCAGATTATGGCTGTATTTGCTGAATTTGTTCAAAGTTATATCAGGTTCTGAATTA

>PGSC0003DMG401006401 LRR-RLKs

GTTAGCCTTCGACATGGTTCCCAGAGTATTTTATCTCCTGCCTCTCTTATATCACTTCACAATTACTTTTGC  
TTCCATTGAGGAAGCAGCTGCTCTTCTAAAATGGAAAGCAACTTTCCAAAACCAGAATAATTCCTTATTC  
GCTTCTTGACACTAAGTCATCCTGCTGCTGCCAAGAATTCTTCCAGCCATGATCCATGCAGGGACTGGT  
ATGGAGCTAATTGCTTTAATGGTCGGATAAACAAGTTGAATATTTCAAATTCTGGTGTCAATTGGTACT  
CCATGATTTTCCATTTTCATCTCTACTTTTTCTTGAATATGTTGATCTTAGCATGAACAACCTTTCTGGTCCC  
ATTCCGGCAGAAATAGGGAACTTGTCAATCTTGTTGAAGTTGCTCTTGATACGAACCAGTTAACAGGTC  
ATATTCCTCCGAAATAGGCAACTTGATTAATGCAAAATTGTTCTATGCTTTCTCCAATGAATTGGCTGGC  
TCCATTCTATTGAAATAGGGAAGATGAAGTCACTTGAGAGTTTAAGCTTACAGAGAAACAATCTTTCTG  
GTTCAATTCAAAACATTTAGGTGAATTAACCAAGCTCAAAATTTTGTACCTTTATTCTAACCAACTTTCTG  
GCCCCATTCCAACAGAAATAGGGAACTTGTCAATCTTGTTGAAGTTGATCTTGATACAAACAAGTTAAC  
AGGTCATATTCCTCCGAAATAGGCAACTTGATTAATGCAAAAATATTCTATGCTTTTTCCAATGAATTGT  
CTGGTCCCATTCTGCAGAAATAGGGAAGATGAGGTCACTTGTGGATTTACTGTTCCAGAGAAACAATC  
TTTCTGGTCCCATTCTAGTGAGTTGGGGAATCTGAATAACCTCAATGATCTGGTTTTATCCGAAAATCAA  
CTTACTGGTTCAGTTCCTACTACATTTGGCAATTTGAGAACTTGCAGACACTGCATCTCCATACCAACAA  
ACTATCTGGTTCATTCCAAAAGAACTTGCATATTTGGATAACTTGCAGATTCTAACAAATGACTAAAAATC  
AGCTTTCAGGCCATTTGCCTGAGCATCTTTGTCAAGGTGGGAACTTGAAGGTTCCACGGTGACTAGCA  
ACAAGCTGACAGGGCCAATACCAAGAAGCTTGAGCAACTGCTCGAGTTTTAAATGGGTTGCTTTAATA  
ACAACAGTTTCATTGGAACTTATCCGAAGCTTTTGAATCTATCCAGAGCTTCAGTTCATTGATTTGAGC  
GACAATAATTTTCATGGTGAGCTCAGCAGCAACTGGGGGAAATGCGAAAATTTGATTGATCTGCGTGTA  
GCCAGAAATAACATTAGTGGTAGCATACCACCAGAGATTGGAAACGTCCAAGGGCTTCTTGGACTTGAT

CTTTCATCGAATCATTGCTTGGGCAGATTCCAAAGGAATTTGGAAGATTAACCTCTCTGGTAAGGCTTTC  
TGTGCAAAACAACAATATTTCTGGCAATATATATGAGGAACTTGGGTCCTGACAAAGTTAGAGTCCCTT  
GATTTATCAGACAACAGATTGAATGGATCAATCCCAACGTGGATAGGAGATTTTGTGCGGTTGTTTCAGT  
TGAATCTGAGCAACAACAAGTTTGGACAGAAGATTCCAAAGGAGATAGGGAGGATAACTCATCTTACTT  
TACTTGATTTGAGCCATAATCTTCTTGATGGAGAAATACCTGCTGAGCTAGCCAGTTTGTGGACTTGTC  
AAACTTGAATCTTTCCACAATGGTCTATCTGGGCGCATTCTAAAGAACTTGAAAGTTTACTGGTTTG  
CTGGATGTTGTATTGTCATACAATGATTTGGAAGGTCCAATCCCTAATAATAAAGCTTTTATGAATGCTTC  
GTTAGAAGGTAATAAAGGTCTTTGCGGCAATGTAACAGGATTCCAGCCCTGCAAAAAGCCATCTTCTGT  
GGTGAAAAAGCACTCAATAGCAAAGGGACGTAAACTCATCCTCATCACTGTACTTCTGTTATGGGAGC  
ACTAGTACTGCTCTGTGTTTTATTGGTGTCTCTTTATGTTTAATAAAGAAGGAGAGTTAAAGACGTTG  
AAAGAAGGGATGGTGATGGTTGGCTTTTCGATATCCATGTTAGATGGAAAGGCATTGTACAGGGATATCT  
TAAATGCCACTGAGGAGTTTGATGCAAAATTTGCAATTGGGCAAGGAGGACATGGAAGTGTTTACAAG  
GTAAACCTTCCATTATTAGGAGATATAGCTGTGAAGAGACTTCATTCTTCATTTTCAAGATACACATCCCAA  
AAGCTTCATAAATGAAGTAAGGGCATTGACTGGGATTAAGCACCGGAACATTGTGAACCTCTACGGCTA  
TTGTTCAAAGCACAACACTCGCTCTTGTTTTACGAGTATGTGGAGAGGGGGAGTTTGTGCGAGTATTCT  
GAGCAATGAAGTTGAGTCCAAGAAATTGGATTGGCTTAAAGGGTGAATATCATCAAAGGTGTTGCTTT  
TGCTTTATCTTACATGCACCACGATTGCTCACCGCCAGTTGTTTCATCGAGACATATCAAGCAGTAATGTTT  
TGGTTGATTCTGAGTATGAAGCTCGTGTTCAGATTTTGGCATAGCGAAGCTTCTCAAACCAAACCTCATC  
CAATTGCACTGCACTTGCAGGAACATATGGCTATGTTGCACCTGGTAAGGTCTAAATTTAATTTCTATTTT  
ATTCAGACTTCGTGAACTATAGCCAAACACTCTATACTGTTTTTATCTCATTTACACATCTAAATTGTTATA  
CCATTTTTGGAAATTGTATTGTTTCAGAGCTTGCCTATAACAATGAAGGTTACGGAAATGTGTGATGTCTA  
CAGCTTTGGAGTATTAGCATTGGAGATAATCAAAGGAAAGCATCTAGGGGAATATATTACTGTGCTAGC  
AAATTCATCGACTATAGATCATGTGCAGCTTAGTGATTTGCTAGATGAACGCCTTCTATATCCTGAAGAT  
GAAGTAAAGGATGTTTTGGTTTTAATCATCAAGCTAGCAAGCTCTTGTTTGGTTGAAATTCCAAAATCAA  
GGCCAACAATGCACTTCATCTGTCATAGGTTATCATCAATGGATGCACGTCCACCTACTCATGTAAAGTG  
ATCTTTG

>PGSC0003DMG401009161 LRR-RLKs

ATCATTTTTCATAGTAGCACAATTATGAAGATAGCTGTAAAAATTTTCATCTTTTTTACTGCTGCTGTTT  
CTCTCTGTGGGGTTATGCTGTATATGCTCTCACTTCTGATGGCACCGCTTACTTTCCCTTTCTAGTCACTG

GATTGGTGTACCCTCTTCTTGGGAATGCTTCAGATTCCACTCCATGTTCTTGGGTTGGTGTGAATGTGATA  
ACAACCACTTTGTACACCTCTTGAACCTCTCTGGCTATGATATCTCTGGCCAATTGGGACCTGAAATTGCT  
TATTTGAAGCACTTGCTTACCATTGATTTGAGTTATAATGCTTTCTCTGCCTCCATTCTTCTCAACTCACT  
AATTGCACTCTTCTTCACTTGGATCTATCCTACAACACCTTTACTGGACATATTCCTTCAAACATTGGA  
AATTTACACAAGTTAACCTACATAAGCCTCCTCTAATTCATTGACTGGTAATATTCCTGATTCTTGTTT  
TCTATCCCACATTTGAAAACCTATCTACTTTAAACAAAACAGGTTAAATGGTTCATCCCATCCAGCATTGG  
TAACTTGACTCACCTTTTATCTCTATCTTTATCAGAATGACTTGTCCGGTCCAATTCCGTCTTCCATAGG  
AAACTGTACTAACTTGCAAGAATTGATTTGAATGATAATCATTTAGTTGGTAGTTTGCCTGAGAATTTTG  
ATAAGCTACAACACCTTGTTTATTTGGACTTGAGCAATAATAGTCTACAAGGAAGTATCCCTTTCACTTTA  
GGTAACTGCAAACATCTTGACACTCTGGTCTTGTCATCCAACACTTTCAATGGGGAACTTCTCCAAGTTT  
GATGAATTGACTAACCTAAAAGTTCTTGCTGCTTTTTCTTCTGGTTTAAAGTGGCCCTGTTCTGCTTCTCT  
AGGCCAGCTCACAAAGTTGGAGAAGCTTTACCTTACTGACAACAATTTCTCTGGAAAAATACCACCTGAG  
CTGGGGAAAGTGCCAGGCCTTGCAAGGAATTACTTCTACCGGAAAACCAACTGGAAGGTGAAATTCCTAGT  
GAACTAGGATCACTCAGCCAGTTGCAGTATCTCTCTATATTCCAACAAATTGAGTGGTGAGATTCCCC  
GCACTATTTGGAAGATTCAAAGTCTTCAACATCTTCTTGCTATCGGAACAACCTGACTGGGGAGTTACC  
TCTTGAAATGACTGAGTTAAAACAATTAAGAACATATCCTTATTTGAAAACCAGTTTACCGGAGTTATA  
CCTCAAGGTTTGGGGATTAACAGCAGTCTAACGCTGCTGGATTTACAAACAACACCTTCACAGGTCCTG  
TTCCACCTAATCTTTGTTTTGGAAAGAACTGGAGAAGCTTATTTTAGGTTATAATCATCTCGAAGGTGG  
CATTCTTCTCAATTAGGACAATGTTATACTTTGACGAGAGTAATTCTCAAAAAAATAATCTGTCAGGT  
GCCATTCCAGATTTTGTTAAGAATATAAATCCTATTTTCTTGGATCTCAGTGAGAATGGCTTCAGTGGGA  
AAATATCCCCAAGTTTGGCAAATCTTGAAATGCTACATCAATTGACTTATCAGTGAATAAGCTTTCAGG  
GTTTGTACCACCAGAGCTGGCAAACCTTGCAACCTCCAGGGTTTGAATCTTTCGTACAATGGTTTGGAA  
GGTGTACTGCCATCTCAGCTTTCAAACCTGGCAGAGACTGTTGAAGTTTGTGCAAGTCATAATTTGTTGA  
GTGGATCGGTCCCATCCATTTTTGGAAGCTTGGAAAGAGCTATCCATTTTGTGAGTCTGAGTGAGAATAATCT  
TTCAGGAGGTATTCCAACCTCCTTGTGTTGCACTCAAGAAGCTCTCCAAGCTGCAGCTTGGTGGAAATGCA  
CTTGGTGGGGAAATTCATTGAGCAATTGCGACTGCATCAAGAGAAACACTGAGGTGTTTAAATCTGAGT  
AGTAACAGGTTGACAGGTGAACTTCTGCGGAGCTAGGAAAATTTACTTTCCTGGAGGAGTTAGATATA  
GCTGGCAATAACATTTCTGGAACCTTAAGAGTTCTTGATGGAATGCGTTCATTGATATTCATCAATGTATC  
ATACAACCTCTTTTCTGGTCCAGTACCTGCACATCTGATGAAGTTCCTCAACTTAACTCCTACCTCTTTCTC

GGGAAACTCGGGCCTTTGCGTGCACTGTGATCCAGAAGAAGGCTCAAATTGCCCTGAGAATATCACGTT  
AAGGCGCTGTGATCTTCAATCAAACAATGGAAGGCACCTGAGTGTAGCAGAAACGGCAATGATTGCACT  
TGGGGCACTGATATTTACCATTTCTTACTCCTAGTAATTGCTTACATGCTTCTGTGGCGCAAAGTTCTG  
GGAAAGGAGTTGCAATCTCTGCTCAAGAAGGTGCATCGTCCCTGCTTAATAAAGTATTGGAAGCTACTG  
GGAACCTAAACGATAAGTATGTCATTGGGAGGGGAGCTCATGGAGTTGTATATAAGGCCATCTTGGGTC  
CAGGGAAAGTGTATGCTGTGAAAAAGCTGGTGTGTTGGTATAAAGGATGGAAGCAGAAGTATGGTT  
AGAGAAATTCAGACAATTGGAAAGTTAGGCACCGCAATCTTGTCAAATTAGAAGACTTCTGGCTGAGA  
AAGGATTATGGGCTGATTCTTTATAATTACATGGAGAACGGGAGCCTTCATGATATTCTCCATGAGACTA  
AGCCACCTGTAACATTAGAATGGAGCGTTCGGTACCGAATTGCTATTGGAGTTGCTCAAGGGTTGTCAT  
ATCTCCATTTGACTGTGATCCTGCCATTGTGCATCGAGACATCAAGCCCATGAATATCTTGTTGGACTCT  
GATCTGGAGCCTCACATATCAGATTTTGGTATTGCCAAGCTTCTGGATCAGTCTGCAGCAACTCCGCCT  
CCAATGCCCTTCAGGGCACTGTTGGATACATGGCTCCAGGTATGTAATTTTCATTTTTTTCTCACACTTCCT  
TTCAGTTAGCTGTCTCTTTAGAGATCTAGTCATCTGTAGAAAAATAATATTGTCTGTGTCTTGTCTGTTTT  
GTTGACAGAACTGCATTTGCAGCTACAAAGAGCAAGGAGTCAGATGTTTATAGTTATGGTATTGTCCT  
GTTAGAACTTATAACTCGAAAGAAGGTGTTGGACCGTTCACTCTATGGGGATACAGATATTATGTGTTG  
GGTTAGGTCTGTTTGGACTGAACTGAAGAAATTGAGAAGATTGTGGATCCAAGACTTTTGGACGAATT  
CATAGACTCAAGTGTGATGGAACAAGTAATTGAAGTGCTTTCAGTCTCTTAGATGTACAGAGAAGAA  
AGTCAGCAAAAGACCCTCAATGAAAGAGGTAGTCAAGCTATTAACAAGGTCAAGTTCGAGTATACGAA  
GCAAGTACTAGCTAGCAGGGACATGTAGTATCTAGTGTATCAGTCAGAGGGGGTTTCATATAAACGCCT  
GATGTGTTCTAGGTACTCTATTTTCCAGATTAAGTAGTCCTAGCTTCCAGCTTCTGAATCCATGTTACA  
AAATGCTCCCTGCAGGTTCAAGTATCTTTTTATTGGTAGAGGGTGATAAAAATATATTTACTTCTGTAGTTT  
AGAAAGAGAAGGCGTGTGCCTTTAGCTGTAAATGTTCTTTTCCATCACATGAACATGGATGAAAATAA  
AGATAACTTACTGATTTTCATCTTAGTTAATCATATTCTCAGCAAAAAGCAGTTCCTTTTGCCATTCTAGC  
AGGATTTGTTATGGTAAAGCCATATTGTTTTCTCCCTAGCTATTTGCAACTGTACAATTACTCCAATAAAA  
TAAGCTTTC

>PGSC0003DMG401013731 LRR-RLKs

GCTTTGCTGTCTGGTGATGCTTATCCTGCCTGCTTCTGATAAGAATTATTTACTTGCAGGGACCTGAGCA  
ACAACATGTTGAATGGTTTAATCCAGATACATTTAGTCAGTTGCACTTTGATAACATGTAGGTACCTTG  
AAGTGAACCTTTACAAGTTGAAGCATAAATGTTGTAATGTTTTTTTTTTTCTCAAAGTTTTCTTTTCAGT

AACAAGAAGCAAAGTTTTATCTGTGATGCAGGTTTCTTGGTAACAACGCATTAAGCGGAGCAATTCCC  
AGCTGGGTGTTAGTAGTGATAAGAACATGTTGGTATTTGCTCAATTTGTTCCGTTTTCTCATCTAAGTA  
GTAAACTTTGGTTATTATCATGCCAGCACACTTCAAAGTTAACAGTTTTTCCCAAACATTTTGATTGCT  
GAAAGGACGCATTTGCAAGAATTTGGTGTCTTCTAAGTGCATGGCAACTATAATTTTTTTTTGCAGTGA  
TATATCATAACAATTTACCCTTATATCTACTCGAGGATGCCAGTCTCTATCATGTGAGCATTGTACT  
TCTTTGTTTGGGAACCTACATCCGTGTATTATTTCTATTTTTATTAGTAAGAATTTCCGGTCATTTAACTACA  
TAACTTACAAACCTTCTTTCTTCAAACAGAACTTAGCCGCCAGCTATTCAGATACAATGAACACGTTCAA  
CAACACGTAAGTCCTAAATGTTGTCTTATGCATCAGGTGCTAGTTTGTGGATGCTTTCTGTGTATTGTCT  
ATAATTATGTGGCTTAATCTATTCGAAATTGCAGGGATTCTGGTGTCCATGAAACCCCTCATTTGTCCC  
ACAGAAGCGAAATGTAAGAGTTACAGCCTATAAAAGGACCTCAGGGGTTATGTCTGGATCATTTACCAC  
TGAACCAACTCTTGGAGTGGCAGCCTGTGGACTTTTTAAGTACAAAAGCATAACTTTGGAGTTGAGAGA  
TAATTTACAACCCTTACTCATGTTACGTTCTTATGTCAATTGCAGATCATTCATTCATAAACTGTGG  
AGGAGGTAGAATTACATATGAGGGAAATGATTATGAGGAGGACTTGACCACTAGGGGTCCATCATATTT  
TTTTTCGTCCCCTGATAGATGGGCATTACAGCAGTTCGGGAGTGTACGTAGGTCTTGCAAATGTTAGTTAT  
ATTGCAACAAATAGATTTTTACTGAACATATCCGGTGCCGACTTTTACAACACAGCACGCCTTGCCCCTAA  
TTCTCTCAAATATTATGGGCTTGCCTACGAGGAGGTAGCTACAGAGTGCGACTTCACTTTGCTGAAATA  
ATGTTTTCTAATGACTCAACATATAGCAGCCTTGGAAGGCGGATATTTGATGTAGCAATACAAGTAAGTT  
TGAGGCCCAACTTCTTTGTAAATAATAAATATGTAATGTTGATATACTGAGTTCTGATATGATTGGCAAC  
TTTCTGATTTAAGATTGAAGGTACCAATTTGTTGGAGATAACGTGGTATATTTGATTTCTTACACAGGG  
GAGAGTAGTTTTGAAGGATTTCAATATCATGGAGGAAGCTAACGGTGTGGAGAAGTCATTATCAAGG  
ACTTTGATGATATTACTGTTAGTAGCACTCTGGAGATTCATTGTATTGGACCGGAAGGGGACTAACG  
CTATTCCAGACAGAGGTGTATATGGACCGCTGATTTAGCTATCTCAGTGACACCAAGTCCGTATATCTC  
TGCCTATAGACTTTACACTTATCTTCCCACAATCTTATCTTAAGAAAATCCCATTTTCTTCTTGCAGACTTC  
AAAATAGGTCGCAGGTTACCTGTCCGAGCTGTTATTGGCATTGTAICTGCTTCAATTGTGGTGGTTCTGA  
TAGTTTTATTTTCTCTGTGGAAGAAAGGCATTTTTGGAGGGAAAATTAATCAAGAAGAATTAGGTAACAC  
ATACCTCAAAGAATTTATTCATCTCTACATTTGATATGGCGATACTTCTGTTGTGATAATCAGAATTATG  
TACGAGATTTCTAGCTGCGACATACAATAATTATCATAGATGATTGTTCTGTTGGCAGATAGACATCAT  
GACATATCATAGATAGTCAGCACACAACAAAATGTTTATAACATATCATAACAGATGTTTATTCTTTAAAA  
ATTGTTGTTTCATCATAACAGATGTTTTAGAAGATCTATATATACTGACGTTGATATTATTCTCGTTTACAGA



ACTCAGAGCCCTTGATTTACAAACAGGTCATTTTAGACTTAGACAAATTAAGCTGCTACAAATAACTTT  
GATCCTGCCAATAAAATTGGTGAAGGAGGGTTGGACCAGTTTACAAGGTATCAATTCTCTATTTATATC  
TATCCGTA CTGATTTT GCGTAAGGACAGCTTGAGGTTCTGTGGTGATGTTTCCTACTGGTTATGAAGGTC  
TGTAATATGATCGTTGTAATTAATCCTGCTGTCTGTAGGGTGTACTCTCCGATGGGGCAGTCATAGCTG  
TTAAGCAGCTCTCTTCCAAGTCAAAGCAAGGAAATCGTGAATTTGTTAATGAGATAGGCATGATTTGAGC  
TCTACAACACCCAAACCTTGTCAAGCTTTACGGTTGTTGCATAGAAGGGAACCAAGTTACTGGTGATATAC  
GAATACATGGAAAATAACTGTCTTGACGAGCTCTCTTTGGTAATGCTTTGCAACAACATTTTGAAAAGC  
ATTTATCATGCAGTGATAATTTTATGCTTAATACTCCTCTAATTTTCCTTTCTTAGGCCGTGACGACCAGAG  
GTTGAACCTTGACTGGGCAACCAGAAAAAGGATATGCTCAGGAATAGCAAAGGGTTAGCTTACCTTCA  
TGAAGAATCAAGGTTGAAAATCGTCCACAGAGATATTAAGAGTACCAATGTGCTTCTTGATAAGGATCT  
GAATGCTAAGATTTGAGATTTTGGATTGGCTAAATTAGATGAAGAAGAGAACA CT CATATTAGCACCCG  
AATTGCTGGAACAGTGTGAGCCTTCTTATCATAACTGTCTCTGTACTATCATGTTTTGATGAGAGAGTAA  
CAGTTCTACCCATTTGAATTTGTCGTCATACATTAACATGGTCAGTTTGAAGTATCTTACATTTCTTTTC  
CTCTTTTGAAGAGGTTATATGGCTCCGGAGTATGCAACGAGAGGCTACTTGACAGATAAAAAGCTGATGT  
TTATAGCTTCGGAGTTGTTGCTTTGGAGATTGTCAGTGGGAAAAGTAACACAAA ACTACAGGCCAAAAG  
AGGAATTTGTTTACCTTCTTGACTGGGTAAACTATCTTTTTACTCAACTGTCATTATTCCCAAATACTAAAA  
TCTTTAAAAACTGCTGCAACATCATGTATTATAAGTCTTGCATGTACATGTTTAGTTTAATTCCACTCTGAA  
TTATAAGCCAGAAAAA ACTTCTCTTGTAGTGTGTTTGTGCAAATATATACTCCATCGGTTTCAATTTGTTTG  
TCTTACTTTTATTCATAGTGAGTTTCAAAAAGGTCTCTTTTCTTTTTTGCCAGCTCTTATTCTAACTTTCCA  
CGTGACATATTTAAAACCACATGATTTAAGGGTATTTTGGTACATTCTACATATCTTTAGTTTAAATTTAAA  
ACCAGACAAACAAAGTGAAACGAAGGGAGTATTTGCTATGATACCTCAAAGAAAATATCAGAATCAGA  
GTTGTTTCATTAGTTCTGCTCACATTCTTATAGATGCATCTTTGCGTATTTAGTTTTTCTTTTCTCCAATTC  
ATCTTGCTTTGTATGTCAATTTTGTGTTTAGGCTTACGTCCTACAAGAACAGGGAAATCTGTTAGA ACTAGT  
GGATCCACGT

>PGSC0003DMG401017953 LRR-RLKs

GGTCTCCGGAAAATTTTCATTTATCATAAGAGTTGTTGAGCCAGTATTGTGGTGATGGGAAAAGAAATG  
GGAGTTGAAAAGCTTCTGGTTTTGTTTTGGTACTAATCTCAATCAGATATTCAGAGCAATTACAATCTTC  
TCAAGTGCAAACACTTTTGAGAATTCAACATCTTTGAACTATCCAACAGCTTTGAGTAGTTGGAGTAAT  
GAGACAGATTTCTGTAAGATTGAGCCAAGTTCAACTGTTACTGTTGTGTGCTACGACGAAAACATAACTC

AGTTGCATATAATAGGGAGAAAAGGGACTTCCCCATTACCTAGAAAGTTCTCCATTCGTTTCATTTCTCAA  
CGCGCTTGCCAAGCTTCCTAGCTTGAAAGTCCTTAGATTAGTTTCTCTTGTTTATGGGGGCCGTTGCCT  
GACAACTTTCAAGACTTTCAGCTCTCGAGATACTTGACTTGAGTTCAAATTACTTTACAGTGGCATAACC  
TGAAGCAGTTTCATCCTTAACGGACCTCCAACTTTAGTGTTAGATGGAAATAGGTTGACTGGCGGAATT  
CCAGATGGCCTTGTTCACTTTAGTTTTGGCAGTTTTGAGTTTGAAGAGCAATTCAGTAGATGGACCTT  
TGCCAGATACTGCATGATTTGAATAATCTTCGTGTACTTTCACTTTGAAGAATAATTTTAGTGGTGAT  
GTCCCTGATCTTAGCAGTTTACAAAATCTCAAGTTTTAGAATTAGAGGACAACCTCATTGGTCCAAAGTT  
TCCTCAAAGTGAAGTAAAATTGAAAGTATTGCTCTAAGGAATAACAAATTCAGTGCACATACCCAGA  
GAAAGTTCAGTCCTATTATCAGCTTGAACATTTTGATATTTCTTCCAACAACCTTTATGGGGCCATTTCTCC  
GTCGTTGCTATCTTTGTCATCCATCACTTATCTGAATGTTGCAGGAAACAAGTTAACAGGAATGCTCTTTG  
AAGATAATCCATGTAACACAGCATTAGATTTTGTGATCTGTCTGGTAATCTGTTGACAGGATCATTACCT  
AATTGCCTTCTGTCTAGTTCTAGGAACCGGATTGTGCATTTTTCCAATAACTGCTTAGCAACCGGAGATG  
GACTCAACATCCATTTTCATTTTGCCGGAATGAGGCTTTGGCTGTTGGTGTCTTACCTCAGCATCAAAGA  
CAAAAACATGCTTCTAAAGTGATTCTTGCCTTGATCATATGTGGTAGCATCACCGGTGGAGTCATACTCG  
TATGCCTGACCATCTTGATTGTCAAATCTTTTCTTGCAAAGAAGGCTTCTGCCAAAATACCCACCCAGA  
TTTATTTTCAAAGATGCATCATCTTCATATACCTCCAAGTTATTCACAGATCCAAGTAAGGTTCTCTCAA  
TAACCAAATTACTGTTTAAAATAGAAGCTTAGGGCAAATATATCTGCTCTCTGCGCCCTAGATGCCTGAA  
GGCGAGGGATTTCTTCAATTCCTCAAGTGCCAAGTATACTAACTTGATACTTTGTATTTCTTGTATAAGG  
ATACACTACTCAAGCAATGAAGTTAGGAGCACTTAGTCTTCCATCTTATAGAATATTCTCTCTAGAAGAAC  
TTGAGGCGGCAACGAACAACCTTTGATACAACAACCTTTTATGGGTGAAATTCCTAATGGCCAGGTATGGT  
ATATGAATTCTATTATTCTTTCTGCTATAGCATTGAGGTCTTTGGGTGTTATACTTATGGCCATATTAGTA  
ATGTAGCTCACGTGGCAGATGTGGACAAGTCATTCCAAGAAAGGGAGTTTCAAGTATTTGGGGTAATA  
ATCCATGGAAATGGAGAGATTGATGATGATGTTACACATCGTATTGGAATGAGGTGTATGAAATGGAA  
GCTTGCATCTAGTGTCTTGTGTGATAATAATGTGCCACCATGTTTTAAAGGCACGTTTTATAAAGTGGTG  
GTCAGACCAATCATGTTGTATAGGGCAGAGTGTGGCCGTTCAAAAACCTCGCATGTCAAGAAGATGAGA  
GTAGCGGAAATGAGAATGGTGAGATGAATGTGTGGACACGCTAGGAGAGATATGATAAGGAATGAAG  
CTATTCGGTACAACATGGGAGTGGCCAAGATGAGGGAGGCAATACTGAGATGGCTCGGGCAAGTGAA  
GAGAAGATGCACAGATGTTCCATTGAGGAGGTGTGAGAGGTTGGCTATAGTGGTATTAAGAGAGGTAG  
AGGTATGCCAAAGAAATTTTGGGGAGAGGTGATTAGACATGACATGACTTACGTGTAGCTCACCGAGG

ACATGACCCTAGATAGGAAGATATGGAGGTCGAGGATTAGGGTAGAAGGTTAGTAGGTCAAGAGTGG  
TGTCTGGTTTCCCTTTTTAGTATTGTTACTACTACCCTTCTATGATCCTATTCTTCGATATTAGTTTTACTGG  
TTTTTCCTTTGCTTCAGTTATCGTATTATTTTGTGTTGTTGCTACTAATCTTTCTTCATTGTTTTCAGCAT  
GAATTCCTCGACTATGTTTGCTTACACACTTTTTTCTATATGTTTTACTTGAGCCGAGTATCTTTCAAAA  
CAACCTCTTACCTTCACAAGGAAGGGGTAAGGCTGCGTACACCCACCCCACTCTCCCAGATCCCCT  
TGGGATTATACAGAGTATGTATCAGTATGGGTGTTATATTAGAGAGGTGGTGTGGACATGTAGTAGTAA  
TGCCATCTGTTTGTCTCTATCATTGTCACAAAAGGATGAGTTTACTCTTGAAGAGTAAACCTATTAA  
TATTACCAGCTGTTCTCGAGGACTAAGGCTCACAAACGTTTTCTGTTTTGGATTGAGTGTACAGAGGGC  
AGATGAGAGATGGTTCCTACATTACGATTAGATGCCAGATAATGAAAAGAAGCAACACTAGGCCAAAATT  
TTATGCATCACATAGAGTTGATATCCAAGCTCAGACATCAGCATTGGTTCAGTGCTCTTGGACACTGCTTT  
CAGTTTTACTCGGATGATTCAAGTGTGAGCAGAATTTTTCTCGTCTTCGAGTATGTACCTAATGGGACCCT  
AAGGAGATGGATTTCTGGTAATTACTTGACAAGCAGATATATACCCCTTCCCTATTGTTGGATGTAAATG  
TGCTTCAGTAATTTGATGTTCTCTGTTGCTTAATTGCAGATAAACATGCTAGACGGAACTAACCTGGAC  
ACAACGTATAGCAGCTGCTACAGGAGTAGCGAAGGGACTACAATTCTTGCATAATGGAATTATCCCTGG  
TCTCTTTTGAATAATTTGAAGATAACAGATATTTGCTGGATCAGACCCTGTGCGCCAAAATTAGTAGCT  
ACAATCTGCCTATTCTGTGCGGAGAATGTGCGGAAGGTGTGAC

>PGSC0003DMG401021514 LRR-RLKs

CAATAATCACTACATAGCTCGCTATAAGTTCAACAGTATCCAAAACAAGCAACGTAATGATGATG  
GTTTCATAGAATATTGCTCTTTTTTTTATTTAGAGTTTCTTTTGTGCTTCCACTGAGGAAGCAATAGGTCTC  
CTCAAATGGAAAGCAACTATCGAAAACCAGAATACTTCCCTATTGTTTCTTGGACAATAAGTGCAAGA  
ATTCTTCCAGCCATGGAGAAGCAAATCCTGATGCATGCAGGGGCTGGTATGGAGTTAAATGTTTTAACG  
GTCGGGTAAACATGTTGAATATTAATAATGCTGGTGTGATTGGTACACTCCGTGATTTTCCATTTTCATCT  
CTCTCTTATCTTGAATATGTTGATCTTAGTATCAACCAGCTCTCTGGCATCATCCCTGCTGCAATAGGAAA  
GCTCACTAATCTTGTCTATCTTGACTTGGGGTCTAATCAGTTTTTCAGGCACAATCCCACCACAAATCGGCT  
CACTAACAAAGCTTGAGACCCTCCGCATCGTTAACAATCATTTACATGGTTCCATTCCAGGGGAGTTGGG  
GAATTTGCAAAACCTCACTAGACTTGCTTTGTACGATAATCAACTTACTGGTTCTATTCTGCTTCATTG  
GCAATTTGAGAACTTGCATATTCTGAATATACGTGCCAACAACTTTCTGGTTCCATCCCTAAAGAGCTT  
GCATATTTGGATAACTTGGTAGTGATGATAATGAGTAAAAATGAATTTTCAGGTCATTTGCCAGAGAAG  
CTTTGCCAAGGTGGTAACTTGAGAATTTTACAGTGAGCAGTAACAACTTTTCAGGGCCAATACCAAGA

AGCTTCAGCAAGTGCTCGAGTTTTAAAAGGGTTCGCTTTGATAACAACAGCTTCACTGGGAATTTATCTG  
AAGCTTTTGGTATCTACACGGAGCTTCAGTTCATCGATTTGAGCGACAATGATTTCCATGGTGAECTCAG  
CAGCAACTGGGGGAAATGTATGAATTTAACTAATCTGCAGGTGGCTAGAAATAACATTAGTGGTAGCAT  
ACCACCAGAGATTGGAAACATCAAAGGGCTTCAAGGACTTGATCTTTCATCCAATCATTGGTTGGGCA  
GATACCTATGGAATTTGGAAAATTGACCTCTCTTGTTAATCTTTTTTTGCAAAACAACCACATTTCTGGAA  
ATATACCTAGGGAACTTGGGTCACTCACAAAATTACTGTCCCTTGATCTATCAAACAATAGATTGAACGG  
GTCGATCCCAACATTTATAGGAGATTACATGAACATGTTTCTCTTGAACCTAAGCAACAACAAGTTTAGC  
CAAAAAATTCCAAAGGAGATAGGGAGGATAGTTCATCTTACTGCACTTGATTTGAGTCATAATCTTCTTG  
ATGGAGAAATACCCCTCAGTTAGCCAGTTTGCTGGACTTGGCAAACCTGAATCTTTCCACAATAGCCT  
CTCTGGCCGCATTCTGAAGAATTTGAAAGTTTGACTGGTCTGCAGGATGTTGTATTGTCATACAATGAG  
TTGGAAGGTCCAATACCAAATAATAAAGCTTTTACAATGCCTCATTGGAAGGTAATAAAGGTCTTTGCG  
GCAATGTAACAGGATTTGTGCAATGCAAAATGCCCTCTTCTATGATGAAGAAGCAATCAATGGCAAAGG  
GACGTAAACTCATTCTCATCACTCTACTTCTGTATTGGGAGCACTGTTACTATGTGCTTTGTTAGCATT  
CTCCTTATGCGTGTTAAAAGAAAGAGAGTACTTAGAGACGTTGATAGAGGAGATGATGGTTTGCTTTG  
ATATCAATGTTAGAAGGAAAGGCATTGTATAGGGATATCATAAACGCCACAGAGGAGTTTGATGCAACA  
TTTTGCATCGGGAAAGGAGGGCATGGAAGCGTTTACAAGGCAAATCTTCCATCATTAGGGAATATAGCT  
ATAAAGAGACTTCATTCTTCATTTGAGAATTCATATCACAATAGCTTCATGAATGAAATAAGGGCATTGA  
TAGGGATTAAGCACCGGAACATTGTGAACCTCTACGGCTATTGTTGGAATGCACAACACTCGTTCTTGGT  
TTACGAGTATGCAGAGAGGGGAAGTTTGTCTAGTATATTGAGCAACGAAGTTGAGTCCAGAAAATTGG  
ATTGGCTAAAGAGGGTGAATATTATCAAAGGAGTTGCTTTTGCTTTATCTTACATGCACCATGATTGCTC  
CCCACCGATTGTCCATAGAGACATATCAAGCAGTAATGTTTTGCTTGATTCCAAGTATGAAGCTCGTGTC  
TCTGATTTTGGCATTGCTAAGATTCTCAAGCCAGACTCATCCAATTGCACTGCGTTGGCAGGAACATATG  
GCTATGTTGCACCAGGTTAGGTCTAACTTTACATTTCTCTTTTTTTCAAACCTTATGAACTATAGCCAAA  
GACTCCATTCTGTTTTTATTTCAATTTACACATTTGAATTGTTACCTCTTTAGTTCAATTTGTTTGTCTTACTTT  
CATTTTTAGTATGTTTAAAAAAGTTGTCTCTTCTTAATGCAACTCTTGAGTTTCAACATGTCATATAGCA  
TGTTTAAGACCGTGAGATTAAGAACATTTGGTTGCAATACATATCTTTAGTTTACAATCACAAGATTTAA  
AAGTCTTCTTTACTTCTTAAATTTTGTGGCAAGTCAAACCTAAGACATACAAATTGAACTTAGGGAGTAAT  
ACTTTTTCGTAAATTGTGTTGCTTCAGAGCTTGCATATACAATGAAGGTTACACAATGTGTGATGTCTAT  
AGTTTTGGAGTATTAGCATTGGAGATAATCAAAGGAAAGCATCTTGGGGAATACATTACTGTGCTAGC

AAATTCATCGACTAGAGATAACGTAAGTGCAGTTTAGCGATTTGCTAGATGAACGCCTTCCATATCCTGAA  
GAGAGAGTAAAAGAGGTTTTGCTTTTTATCATCAAGCTAGCAAGCTCTTGTTGCTTGAAACTCCAAAAT  
CAAGGCCAACAAATGTAAGTTCATCTCTCATAGGTTATCATCAATAGATACGCATCCACCTATTTATGGAAG  
GCGATATGAATAACCTTTGACACCAAGTGGTTGTAAAGTTCCACAAAATGTTATTACTGGGACTAGTATT  
GTTGGTTTAAATCTTAGGGTGTCTAACTGGTTTATTGTACTAGAGTGTATGCAGTGTAAATGTTGAAGGTA  
ATTATCTAATTTCCATAGTATTTTGC

>PGSC0003DMG401023552 LRR-RLKs

ATGTTGACATATCTAGAAGTGGGTAGCAATCCGTTGAGTGGCTTTCTGCCAAATTCTATTGGGAATCTCT  
CATCTACTATTGAAAAAATTAATTTAGCAGATGCACACATCAATGGCCTCATCCCCACAAGTATAGGCAA  
CATGAGCGGTCCTATATCCCTATACATTGAAGAAAACAACCTTGATAGGGAGTATTCCTTCTGATGTTGGT  
AAGCTTAAATGACTCCAAGGACTCTATCTATCTAACAATAAATTGCAGGGACGTATTCCAGAGGCGGTAT  
GCCATCTATCTAATTTGGTTCAATTATATCTGTATGGTAATGAGCTCTCTGGGTTAATTCCAGAATGCTTA  
GGAAATCTTAGCATGCTTCAACAGCTTTCTTTGAATTCTAACAATTATCTTCAAACCTTTCCGTTGAGCCTT  
TGGAAGATGAGTAGTCTTCTCTATCTAAGTGTGTACAGAATTCAATAGAGGGAGAAGTTCCATCAGCT  
ATTGGAGGACTGCAAGCCATTGTAGAACTACATCTTTTCAGTAACCACTTTTCAGGCGTGATACCAACCA  
GATTAGGGGAACTCCAAAACCTGCAGTATATTGACCTATCAAACAATTCATTTTTTGGCCAAATTCATTA  
TCCTTTGCCAACTTGATAAACTTAGAATTCTTAGATCTGTCTTTAAATGCGTTGTCGGGTACTATTCCTAA  
GTCATTGGAAAACTCTCCTATCTTATAAGCATTAAATGTTTCATTTAATGATTTAGAAGGTGAAATACCGA  
GTGGTGGCGTGTGGCAAATCCACTCTGCAATCATTTCTCGGGAACAAAGGTCTATGCAAATGCACAT  
ATTGGAGATTCTGATTGTGTTATCACTAATCCTGGAAAACAATCAAAGCTTAAGGAGGTTGTGCTAAAA  
ATTGTTACTCCAGTGGTACTTCATCCTTTCTGATATTCTTATTCGTTTCAATTTGGACAATGAAACGAAAA  
AAGAAAGGGAAGTCCAAAGATGTGGAGAAGGTACCGGAGATCGGGACTCATCAATTAGTTTCTTATCA  
TGAGATTGAGGAGCAACAAATAATTTGATGAATCCAATTTAATTGGTGAGGGAAGCTCTGGCTCTGT  
GTACAAAGGCGCATTGTTTGGTGGAACTGCAGTGGCCATTAAGGTTCTGGATTGAAATGAGCAAGT  
ATGCAAGAGGTTTGATACCGAATGCGAAGTGATGAGAAATGTTAGACACGGAAATCTTGTTCCAGTGAT  
TACTACATGTTCTATTGACTATATAAGAGCCTTTGTTCTGCAATTTATGCCAATGGAAGTCTTGACAATT  
GGTTGTACAATGAAGATCGCCACTTGAACCTTCATCAAAGAGTTTCTGTAATGCTTGATGCAGCTATGGC  
AGTTGAATATCTACATCATGGTCATGTCCTCCAAAAGTTCATTGCGACCTAAAGCCAGACAATGTTCTTT  
TGGATGAAGCTATGGTGGCTCATGTTGGTGATTTTGAATCTCTAAAATTTTAGCCGTAAGCAAGTCCAT

GGCTTATATGGAGACATTGGGCACTCTTGGATACATTGCACCAGGTATACTAGTCTCTTTCTATATATTTT  
CACAAAAATCAGAATTTAGCCCTTCCAGAATCATAAAAGCAAGTGTCTGTTAGTACATAAATTATGCTATA  
TTCAAATGAGTAATTCTTTTTTCATTTTCATTCTTTTTTAAGAATATGGCTCGGAGGGAATAGTGTCTTCTA  
GTGGTGATGTTTATAGCTATGGCATCATGGTGATGGAGGTCTTGACGAAACGAAGGCCAACAGATGAA  
GAGATATGCAATGAAAACCTTGACTTGAGGAAATGGATCACACTAATCATTTTCAGGGAGTATGATGGA  
CATCGTGGATGCCAATCTTTTTCGTGA

>PGSC0003DMG401027271 LRR-RLKs

GTTTTCTTCATTTCTTGATATGGCTTCTTCTTAGATAGTACTCACTACTGCTGTCTATTTCTAAATTTAAG  
GGCTTCCTAGCTTTTTGGTTATTTTACATTTTCAAGATTCCTCAAATGGAATACTCCCTCACATTTCTTGAG  
CATTTCAAGACTCAATCTTTTTCACTCTAAACTCCCTTTTGTCTTCTACACCCACCCCCACAATCTCCAATT  
CTGCAGAAAGTTTCATGTGATGGATTCTTGATGGGAAAAGGAGGAAGAAGTTGAAGAAAAGGTGTTTT  
CTTTGTAAACAACCTCATAACCATTTCAAAGATTCAATCTTTTTCACTGTAAACCCCTTTTTTACCCCCCTT  
AATCTCATCAATGGATTCTTGATTGTTCTATCTAGTTGTTTTGGAGGGAAAAGGAGGAAGTAATTGAAGA  
AAAGGTGTTTTCTTGAAAAGAAAAAACTCAAGAATGACACTTTTGAGGTTTCTGTTAACTGTGTTTTTTC  
TAGTTGGTTTGTTATCAAGATTCCAACCTTGTAATTCCCAGTTGGTTTTTCATGATCAAGATGTAGTGGAA  
GCAATTGGGAAAGAGCTATCAGTACCTGGATGGGGTGTGATGAACACAACCTGATTTCTGCTCTTGGCAT  
GGAGTTATTTGCAGCTCAAACAGTTCAATGGTGGAAAGACTTGATCTTCTGGTTTTAGATTACAAGGTA  
ATGCAACTCTAATATCTGAGCTCAAAGGTTTAAAGTGGCTAGACCTTCTAATAATAACTTCCAAGGTTCT  
ATTCCATTTGCATTTGGGAATTTATCTGAGCTTCAATATCTTGATTTGTCTTTTAAACAATTTGGAACTCA  
ATACCTAGTGAATTAGGTAAGCTCAGAAGCCTTAAGGCATTGAACCTTTCGAAAAACTGGCTCACAGGA  
GCTATACCTGATGAGCTTGAGGGGTTAGAGAATTTGCAAGATTTTCAAATATTTACTAACAACCTTGAATG  
GTTCTATCCCAATGTGGATTGGTAATTTGACCAATCTTAAGGTTTTTGCTGCTTATGAGAATGAATTTAGT  
GGTGGTGTCCGGTTAACTTAGGACTGTACTCTGATCTTTCTTTGTTGAACCTTCACTCAAACCAGCTTGA  
AGTACTATTCTGAGAGCATTGTGCTAATGGGAATCTTGAATTTCTGTTCTAACTCAGAATAAGTTG  
ACCGGAACGATTCTGATTGATTGGGAATTGTAAAGGACTTTCTAGTATTAGGATTGGGAATAACAAG  
TTGATTGGAGGTATCCCTAAATCAATTGGGAATATCAGTAGTCTTACTTATTTTGAAGCAGATAGTAATA  
GTTTGTCTGGTGAAATTGTCACAGAGTTCGCGAAGTGCTCGAATCTCACTCTCCTTAATTTAGCTTCAAAT  
GAGTTTAAATGGAACCTTCTCCTGAGTTTGGTCAGCTTAACAGTTTGAAGAATTGATTGTTTCTGGTAA  
TAACCTTTATGGAGAGATTCCAACATCAGTTCTTAAGTGAAGAATCTCAATAAGCTTGACTTGAGCAAC

AACAAGTTCAATGGTACCATACCGGCAGATATCTGCAATACGTCCAGATTGCAGTATTTGCTGTTGGGG  
GAAAACCTCGATTGAGGGGAGATACCTCATGAGATAGGGAATTGTGTAAAGTTGCTTGAGTTGGAAAT  
GGGGAGTAATGAACTTACTGGAAATATCCCTCCTGAGCTTGGTCATATGAAGAACTTGCAGATTTGTTG  
AATTTGAGTCATAATCGTCTCCACGGAAAATTGCCTCAGGATTTAGGAAAACCTTGACAAGTTGGTTTCTT  
TAGATGTATCTGATAATCAGCTCTCTGGGAATATTCCACCGGCATTGAAGGGCATGCAGAGTTTGATAG  
AGGTTGATTTTTCGAGCAACCAATCACTGGTCCAATACCTACTTTTGCACCATTTAGAAAAGTCCTAAT  
TCAAGTTTTCTTGAAACAAAGATCTCTGTGGTGATCCTTTGAGTGGTGGTTGTGGGGATTTAAATGGTT  
ATGACCACAGCGTTTACGGTCACAAGGTCTCTTACCGAATCGTTTTGGCTGTTATCGGTTCTGGTTTGGC  
AGTTTTTGTATGTGTCACAGTGGTTGTTTTGCTGTTTCATGATGAGGGAGAAACAAGAGAAAGCTGCCAA  
GGAAGCAGCTGGAAATACCATTGATGAAATTTCTAGCAAACCAGTGATACTGGCGGGAAACGTCTTTGT  
TGACAATCTAAAGCAAGCAATTGATTTTGTGATGCAGTTGTAAAGGCAGTCATGAAAGACTCGAATAAGAT  
TTGTGTTGGTACTTTTCCAGCACTGTCTATAAAGCAGACATGCCTTCCGGGATGATTTTGTCCGGTGAAGAAG  
CTAAAGTCAATGGACAAAACCTATAATTCATCACCAGAGTAAGATGATCAGAGAGCTTGAAAAGCTTAGT  
AAGCTCGTTCATGATAATCTTGCTCGTCCTATCGGATTTGGAATCTATGAAGATGTCGTTCTTCTGTTGCA  
TGAATATTATGCCAACGGAACGTTGACTCAATATCTTCATAACTCTAGCCAGAAACCTGAATATAAGCCC  
GACTGGCCAACAAGACTTGCCATTGCCACTGGAGTTGCAGAAGGATTGGCATTCCCTTACCATGTTGCTA  
TCATCCATCTTGACATTTCTTCCGGGAATGTGCTTCTTGATTCTAATTTAGGCCTTTGGTTAGTGAAGTT  
GAAATCTCTAGGCTTCTCGATCCATCTAGAGGGACTGCAAGTATTAGTGCTGTTGCTGGTTCATTCCGGAT  
ATATTCCTCCAGGTACATATCATTTGAACACACATACTCCCTCTGTTTCAATTTGTTTGTCTGATTTAACT  
TGACACAAAGTTTAAAGAAAGTAAAGAAAACCTTTTGAATCTTAGTGTCTTAAACTAAAGATATGTAGAATG  
TACCAAATGCCCTTTAATCTTGTGGTCTTAAACATGTCACGTGAAAAGTTTGAATTTAAAAGTTGCCAA  
AAAAGGAAAAAGGCATTCTTTTTTAAGTATGACAAACAAATTGAAACTATTATCTCTCTTTTCGCATTTGT  
AGAGATTATAAATCTGTTATTGACTTGTTTTTTTTTCTAAACAGAGTATGCATATACGATGCAAGTAACA  
GCTCCTGGAAATGTTTACAGCTATGGGGTTGTTTTGCTTGAGATCCTAACCACCCGACTACCTGTTGATG  
AAGCTTTTGGTGAAGGAATAGACTTGGTTAAGTGGGTACATGGTGCACCTACAAGGGGGGAAACACCG  
GAGCAGATACTCGATGCAAAGCTCAGCACCATTTCAATTTCTTGGAGAAAGGAAATGTTAGCAGCACTA  
AAGGTTGCGTTGCTATGCACTGACATGACACCAGCAAAGCGACCAAAGATGAAGAAGGTGGTAGAAAT  
GCTGCAAGAAATCACGGAAAGCTAAACAAAGTTCGTATCATCAAATCAAAGTATGTCTTGATCTCTGTCT  
CTTCATATGTGAATGCTCCTGTAAAAATACAAGGTACGACATTCTTAGTTCGAGAGGACAAAATGGTCCG

AACTCTTAAGGGTATGATGTGTCTTACTTCAATCATATGATCACCAGTTCTTTTTCTCCAAAACATGTAGA  
TGGAGATGTAGATTAATTTCTCACAAGGAGAATATGTTTACAAATAGCATTATCTTTCATTTCCATTTCC  
CCTTTCTGGTACATTGCTTCCAAATCAAGTATAGATTAATCATAGTGAAAGATTAAGGGAATGCTACTA  
TTCAAC

>PGSC0003DMG401029358 LRR-RLKs

CTCTTGTTTTATAATCCCCAAGTGTGCCATCCATTCTTATTTGTCTATTCACTTATTCCAACCTCCATATGTT  
TGAAAATTCTGTGATGAGAACATCAAACCAAGAATTCAAGAATCATCGCTAAATGAAGACAAAAATTGA  
AACTTTGTCATTGCTACAATATGTGTGAACCATGGAGAAAACCAATTCCAGAACAAGACCTTTCTTTTTCA  
TCTGCGCATTCTTGGCTTTCTATTGATATTACTTAGCAGAATTTGTGTCTGCAGTGCTGCAGAAAGTGAT  
TTGATTGCTTGAAATCAATAAAAGATTCATTACAAGATCCTTGTAATTCCTGGGCTCTGGGATTTGAG  
CAATGTTACCGAAGGCTTCATCTGCCAATTTAGAGGAATTGAATGCTGGCATGATTATGAGAATAAGGT  
AATGAACATTAGACTTTGAGACTCAGGACTAATAGGTGAGTTTCCACAAGGCATTGCAAATTGTACAAGT  
TTGATTGGTTTAGATCTTTCAGACAACAACCTGTATGGAACCTATCCCTTCAGATATTTCCGTAATAGTTGA  
ACATGTTACAACACTTGATCTCTCAAGTAACAAGTTTTCTGGCAATATACCACCTGACATAGCTAATTGTG  
AATACCTTAACCTTTCTAATGTTGAACAACAATAATCTAGGAGGTGAAATTCGAAGTAGAATTGGTTCTCT  
ATCTCGCCTTAATACATTCAGCGTAGCCAACAATAACTTGACAGGGCCAGTGCCATCATTGTTAACATA  
CAAATCACAGCTCACAGTTTTGCAAACAATTCAGAACTTTGTGGGAAGCCCTTGAAAGAATGTGAGTATT  
ATGAGGATTCTTGGATTTGGAAACATGTAGATCGTGCTTCATTTATCGAGGCATTTGTGTGTGGTTGGGT  
ACTTTTCTTTACATTAGTTTTAGTCCTTTGCTTCTTTAAATTTCTGTCAAGGTTATCAACAAGATAGTCTC  
ATTAACATATGGAAGCTGAGGAAAGAGGACTTAACTTCAGGAAGTGAAGAGGATTTAAGCAGCCACC  
AGAAGGTAAAGATTTTGCTAACTTTCCGTCTTTTCTCCTGCATTGTTAAGATACATATTTTTGCTGTAGCTC  
TAGTTTAGTTATTAGTCCTTACAAATCCATCATGGTATATATTCTTGACTAAAGAGATGAATCGAGGTATA  
AATCTTTATTGATGATCGAATGTGATTGAAGTAAGCTTCTCAAATTTCTGTTCTGTTCTGTGTATGTTCC  
AATGATTCAACTTGCTGTTTTACAGATATTAATGTTGGAGAAGTTTGTACAAGAATGAGCTTCACCGAG  
CTGGAAAATGCAACTTCTGATTTTAGTGAAGATTATTTGGTAGGTAATGGAATGTTGGGCAAAGTGATC  
AAAGCAATTCTACCAAATGACTGGACACTTGCAATCAAGAAGCTGAATGACTCAGAGAACTTGGAGGAC  
GAGTTTGTCTCGGAGATTACAACCTTGGTGGTCTGAGGCATCGGAACCTATTGCCTCTTATAGGTTTCT  
GTGTTGAAAGGGAAAAAAACTTCTCGTTTACAAATACATGTTTAATGGAATCTTCATGAATGGCTGCA  
CTCGAACGAAGACAAGGCCAAGATTTTAGACTTCCGTCTTAGAGTTAAAATTGCACTTGGGATAGCAAA



AGGTGTAGCTTGGCTTCATCATGGTTACAAATTGCACGTTGCACACGGAAGCATAAGCACACGATGTAT  
CTTGCTAGATCAAAATTTTGAGCCCAAATATCCAACTTTTGGGAAGCAAAAATTTGGAGTAAGAATGAT  
ACAGCATTAAAGTTGGAGTCTTTTCCCAGTAGCTGAATATTCATGTTTAGGTTCTTACAAGAAAGACATCT  
ACTGCTTTGGCGTCCTGCTTCTCGAGCTGGTTACAGGGAAGGAACCGCATGAATTGACAAGCTCGAGAA  
ATCTGTTTGATCACTCGCCTTGTCTACTTGATGCAGATAAAGATTTGCTTGGGAAAGGAATCAACGATTT  
GATCCTCGAATTTCTAGAGTTATCTTGTGACTGTGTGAAGTTCTTTCTAATGAAAGGCCAACAAATGCTG  
AAAGTTTATGACAACTCAAGACAATTTCTCAAGGTCGAAACGACGACTAGGTATAGAAACTCCCTTAC  
ATTCAACTGGCATTGGAAGTCTATATATAGGACTAGTACTATTGTTTATAGTTTACACTATTGGAAAGTTA  
TATTGATTGCATTTGTGGTTTTTAAAAGAATCTACTGATGCTGCATTGACTAGTTAACTTCAACCCCTGTA  
CCTTTAACTAGAGGTCTCGAGTTTGAGTCCCTAGGGGCTAGGAATGGAAAAATCACGTTGAGAGCGCT  
GCTCCTAGAAATGGACCCTTCAATGCCGGAATTTGACTTTAATGGGGCCCTTGATTCCCCTGCTACTTG  
ATCAGTAATATGTATTAGATGCTAACTACATTATTGAGTCTACTCAGATTGAGGCACCTAGATTGAGGCC  
ACTATATGTGTGTT

>PGSC0003DMG401030114 LRR-RLKs

AAATATTTTGTAAAGGAGAGTATCAAGTCATGGTGGATAAGTTAAAAGGGGGAGGGAGTAAATTAGT  
AGCTTGACTTGGTCAAAGGAGACAAGTCAACTAGCCAATTATTATGGTTTGATTCTTCAAAGCCAAATAGTTGG  
CTCTAAATGACTATTTTATTGTTGGAATAAGAGTTGACTTGACAGACTTCATTATCAAATGAAAAGAAAC  
ACAAGGAAAGCATCAAATTAACATGATCCAAGCAAGCTCTAAACTTTTTTGGCTCAATATGCAAATCTTC  
TTCCTAATTAGCCTGTCTTTCCAAGAAACCTTACAATTTTCAAGGCACGGAACGGTCCACATTACTAAGCTT  
GAAACAACACTGGAGGGATTTCGGAGTTTTTCCAGTCGTGGAATTTGAATTCCTCAGAATGCAATTGGTTA  
GGAGTTTCATGCATCAATGACATGGTAGAGACACAATTAATCTTGGAGAAAAGAACATTACTGGAACA  
ATTCATCAACAATAATATGTCAGCTCAACAACCTTACCTTCATTGATCTCTCCAACAACAACATATCAGG  
AACTATACCACTAAGCCTGAAAGATTGCTCAATGTTACAACATTTGGACTTGTTCAATAATTCTTTGAGCG  
GCCGGATTCCAGGTGTTGTTGTTTGGGATGAAAACACTAGTCAATTTGTATCTTAATGGTAACATGTTGT  
CCGGTGAAATGCCAAAGCAAATATCAGCATCCAACCTGAAAAATCTTGATCTTTCTGAGAACCACTTGAA  
CGGTTGATTCCAGAAGCTATTGGTAACTTGAAAAATCTTGTGAAATTGGATCTGTACATAATTCTCTA  
AGTGGTTCTATTACAAGCAAGTTGTTTCAATTGAACCAATTGAGTCACTTGTGCTAAGTTACAACACTT  
ATCTGGTGTATTACCTAATGCAATGAACTTGTTTAGTTTGTATGATATGGATCTTTCTCATAACCAATTGA  
CTGGTTCTATTCAAAGGGACTTGCAAGTTCAACTGGACTGGATGCTTTGGATTTGTCGTATAATCAGTT

ATCAGGAAACATTTTCAGAAAGTATAAAACATCTTAGGCCTAGAATTAGTTTAAGGCTTTGTTCCAACAAA  
TTCTCAGGAAGAATTTCTTCTGAATTTGTTAAGCTAACATATGAAGAGAATTGCTTTGATGAGTCCAATCT  
TTCTTCTACATCCAATAGCTTATCTATCCCTGGGCTACCAAGCTTTCTCTCTGGTGATGAGGTTCAAAAA  
TTTCGAGATCACAACACTTGATTATTCCTATTGTAGGAGTTGGGGTAGCTATACTGTTATTATGGATCTTT  
CACAGAACCAGAAAGCATTGGTGGAACAAAGATGCAGAATGTCAAAGATAACATAAAGTTCATTTCA  
TTTCAAAGTTGAAGGTGACTACAGAAGACATATTATCTAGCTTGAAAGACGAAAACATAATAGGAAAT  
GGAGGATCAGGGAAGGTCTATCGAGTTGTGATAGACCAAACAGGCAATACTTATGCTGTTAAAAGCAT  
AGGGCATGGAGAAAAATCAGGTGGAAGACCCCAAAGGAGTTCCTGGCAGAAGTTAGAACACTTGTA  
GCATTGACACAACAACATTGTCAAGCTCATGTGTTGCATCTCAAGTTTAGACAGAAAGCTTCTAGTCTA  
TGAATACTTTGAGAAACAAAGCCTAGACAAGTGGCTTCACAGAAAGAAAAGAGCAGCGTCACCCGGTC  
AAAGTAGTACCCCGACCCTGGATTGGCAAAGAGATTAATAATAGCCACTGGTGCAGCTCAAGGACTCA  
GCTATATGCACCAGACTGTACTCGACCCATCATTATAGAGACATTAAGTCCAGCAATATACTTCTGGA  
CTCAGAATTCAATGCAAAAATAGCAGATTTTGGACTAGCAAAAATACTATCCCGGAGGGATGATGATCC  
TGAGACAGCTTCTGCTATTGCTGGAACATTTGGTTACATTGCACCAGGTATATTACAGTTCAAATATATAT  
CGTACCTCGTGAATTCTCAAAGAATTTATCCAACCTCTAATATTTTTTAATGTCCGGTCTCACAGAGTAT  
GCCTCGACATTCAGAGTGAATATAAAGACAGATATATATAGCTTCGGAGTGGTTCTATTAGAATTAACAA  
CAGGGAGACAACCCATTCTCAGAGAAGAGCAAATGAATCTAGCACAATGGGCTCAACAGCGTTACAGA  
GATGGGAATTTCAATTGTTGAGGCCCTTGATGAAGAAATCATGGAAACAAGTAATGTGGAACAAATGAG  
AGGTGTTTTTAACTAGGACTGATGTGTACTGGAGCAACACCATACGGTAGGCCGTCATGAAGGAGGT  
CTGCAACATTTCAAAGCTTCAGAGACACCATATTTTGGAGAAAACAGAATGTTTAGCCTTACATGGATA  
AATGTAGTTGTATTTTTTAAACAGAATGAGAAAGTCTCAATAGCCTCAGCTGGTTAAGTGGTGTCAAAC  
ACAAGGGCTTGTAAGCTTTACCTTAGAATGTTACTCCTTGTTTATAATTGAGATGTAGCGAGGCAAGAGC  
TAAGTGTCTTGGAATTACAGTGTGTTGTATATATCATTCCGGGAGATTAGACAGATTTTAAGCACACTGAG  
CATTAAAGGTCTAACAAATGCTTTAGGAAGGATAATCATGATGCAGATGCTTTAGCTAAATGAGTAATGGA  
GGTTAGACCCATATCTTTTTTAAATCTTCAGACAACCTGCCTATTTCCCAACCAATGTGGGACTTTTACCCA  
CTCTAACACGGGAAGTAGATTTCTTTCATGAATAGAGATGCTGGTAACAGAACCATTTCTGCAGCCTATA  
GCATACCAACTGCAGTGTGAGGAACTGGAATCCAATAATTGATGAAATCCCATAGTTGCTTCAGCTCCA  
ACAAAATGCTCTTCTCATTTTCGTAGACGTCCTCTGTAAACCACCCTGGAAATGCATAAAGGCAAGTAA  
GGAAACAATGAAATGGTAAACTTGTTTCTGGGAATTGAAAATGTAGATTTTACAACATGAACATGGTT

AGTTTTCATGGTTCCTTTGGTTCGATTGTAAGTACTAGCTACCTCATTCTCTACAATCTCTTGTTTTATTTTTTCA  
AGTGTTTTGATTGGATAGTTAATTAGCTTTGAAGAAACCGTGTATCATACAACACAAGTCAGTCAACATG  
GACAAAATTGTTGCTGAC

>PGSC0003DMG402002925 LRR-RLKs

GTTCACTTCTCTTAGTTTTACTTCGATTTTTCTCCGGAGCTCCGGTGGTCGGAAAGTTGATCGGCGTCC  
GAAAACAAGTAGGATTATAAATTTATAATCACAATCGAGGTAAATTTGCTTTTTCTCCTAATTTTGCCC  
GTTGATCATTATTTTTCTGAATTTCTGTGTTTTAATTAAGTTAATTTTTCTGTGATTCTGTAGTTAA  
AGTTGAAGCTTTGGGAAGTAGTTTGAGTTAGAGATGAAAATGGTGAACCTTTTTTTTTACTTGGAATTGA  
AACCCACCCCCACCCACCCATAATTGGAAGAAAATGTAGGGGTGAAAGTTGAATTTGGAGTTTTT  
TGTGATTTGGAGTTGGTTTGAATGTGTATCTTTCTGGTTTTATGTTAAAGTTTGGAGCTTTTTTGCTTA  
GGGAAGTAGTTTGAGCTGGAGATGAAAACATGTTTTGTTAATTTGGAATTGAAACAGAAAAATTTGTC  
TTGTTGTTTGATTTTTGATAAGTCTGAAACTAATAAAATGAAAGAGGTTAGAATGATGACATTTTGTCT  
ATCATTATTGGAAGAAAGATGTAGATGTAGGGGTGAAAGTTGAATTTGGAGTTATTCATCTCTTTATTT  
TATTAGTTTTATTTTTTTTTTTGATTTTTTTTTCTGTGGTTTTGGGAAGTTCAGCATATTGGTTTATGCTTTA  
AGTTTGGATTCTTTGGCTTATGGTGTGTTTTGTTTTACTTGAAATAAAAACCCCATATTTGGAAGAAA  
AATGTAGAGGGTCAAAGTTGAATTTGGAGCTTTTTCTTCTTTGTCTTGTAGTTTTATTTTTCGACTA  
GTTCTTTTTTTTTCTGTGATGGTGGTGTGGTTGAAGTTTATCTTGATGATTTATGTTTAGTGTGGAGC  
TTTTTTCTCCCAAATTTTAAACATAAACCAAGAAGATAAACTTTCAACCAACTCCAAAATTACAGAGAAAA  
AAAAGAAGCTAATCAAAAATAGAAATAATAAGAAAAATGAGAAAATAAACTCCAATTTCACTTTTAC  
CACTACATTTTTCTTCCAATTATAGGGGGTCAATTTCAAGAAGAACAAAAGGTCACCGTTCTTATCTTT  
GTGCTGGAGATAAGAATAGTAACCTTTTGTTTACTTGAAATTGAACCCCTATAATTGGAAGAAAAATG  
TAGGGGTGACATCCATGAGGTCTCAGGTTGAATACCCCAAAGACAAAAAACTAGGTGATTTCTTTCC  
ATCTGTCCTAGCATTGTTAGATAGAGTTGTTTGGTACTTGTGCTAGTGAAAGTGACAGGTATCTCGTGG  
AATTAGTTGAGGTGCATGCAAGCTGGTCTGGACACCAAGGTTATATAAAAAGAAGAGTTGAAAGTAGC  
TCACCCTGTGAGGCTACTTAGAAGAATTGATTTTTGATGTACCTAACCTTTTACATTTTTTATGTTTTGCAG  
TGTCTGTGGAGGTGTGGTTTATTCTAGAAATCCTCGTGCAAAAATAATAAGTCGGATTGGAACTTTTCT  
GCTGTAGCTGCTTTGTCAGGAAAAATGATGGAGGCTCCAAAATCTTTTGGACTTACAGGCTTGAATCAA  
AACCTGTCGCAGAGCTTTTACCATAAGCTTGGCGAGGGGTCAAACATGTCTACAGAGAGTTATGGGATG  
AGCAATGCTGGAGGTTCTGTTGCAATGTCGGTGGATAACAGCAGTGTGGATCAAATGATTCTCACACT

CATATTTTAAACCACCAGGACAACCACATCCACAATAACTATTCTGTTGCTGCTAGCATAGTCAGGCGGA  
GAGTTTCTAGATTGAGCGATGATGCCCTCGCTCAAGCCTTGTTGATCCTCAGTTTCCCACCATTGGGCT  
TGAAATTTATGATGAATGGACAATTGACTTGAGGAGGCTTACCATTGGACAAGCTTTTGCTCAAGGATCT  
TTCGGGAAACTGTATAAGGGAACCTATAATGGTGAAGATGTTGCCATCAAGCTTCTGGAGAGGCCAGAA  
AATGATCTTGATAGGGCTCATCTTATGGAGCAACAATTTGAGCAGGAGGTCATGATGTTGGCAAATTTG  
AAGCATCAAAATATAGTACGATTTATTGGTGCATGCCGTAAACCCATGGTGTGGTGTATTGTGACTGAAT  
ATGCAAGAGGGGGATCAGTGCCTCAGTTCCTCACAAGGCGGCAAACCGAGCTGTGCCATTGAAGTTA  
GCAGTTAAGCAGGCCTTGCATGTGGCAAGGGGGATGGAGTATGTGCATGGCCTGAATCTGATTACCG  
GGATCTGAAATCCGACAATCTGCTGATTGCTGCTGACAAGTCAATCAAGATTGCAGACTTTGGTGTGCT  
CGAATTGAGGTGCTGACTGAAGGAATGACACCAGAACTGGCACTTACCGCTGGATGGCTCCGTAAGC  
ATCTAGACTCTTTAGCAGCCTTGTTAAATCTGGTGTCTTGATCCAGTTTGGGCTTATTGCCAAACCCTATA  
ATAGAGCTCTCTGTCTGCATTACTTTCTGTATTTTATTTCTTTTTTAAACTCCTCTGATATGTGTTACGT  
GAGTCGAGCATCTTTCAAAAAAACCTCTCTACCTCCACGTGGGAAGGGTAAGGTCTGCTCTCAGTCTAC  
CCACCCAGACCCCACTGAGTGGGATTTCACTGGGTATGTTGTTGTTGTTGTAGCATGCTGGGTTCCCT  
TTATGGAACAAAATTTTTAGAACTAAAGTGAAAAGCATGGAGGTTGATGGGTTCAAGTCCTGTATGTC  
CTTTGATGGCACCTCACTGACTCACTGATTGTGATTATTTTTCTATTGTATACGTGCTGTTGCTAGGAG  
GGAGAAATTATTTGTTTCAGTTAGCTTTTTAACATAGTTATGTGCCTGTTAATGAAGGTTAAAGAGTTGA  
GTGACTTTATTTCTCTTTCAATTTTTTCCCTCCTTTCTCTTCTTGTCCCTGATTTGTAACCTGATT  
CAAGTTAGTCACATCCAAGGGTGTGGCTTAGTTGTCAATGAAGTAGGTGCAAACCGTGGAGATTAGGGT  
TCAATCACACCAGAAGTGCTTTCTCCCATATGCCTAAACCTTAAACCTTGGTGGGTATCTATTCATGTCT  
GTTTATTGATCCAAATAAATGGTAAAGTGCCTTAGTTGATAACTCCCAGCACCAACCACGTCATATCCAT  
GAACTTATCATCCCAAAGTCATTATTAACAGGAAAAGAACTAATCTTAAAAAAAATAGTTCTTTTTCTG  
TCAATAATCACTTTGAGCTGATAAGGTTTCATGGAATATGACGTGGTTGGTGTGCTGGGAGTTATCAACTAA  
GGCACTTTACCATTTATTTGGATGCATTCTCCCCGATGAAGATGATAAGTTCTACATTGTGGTGGAAATTT  
TGGCCTTTTAAACAGGCATCTTAGAGAAGCATGGGAGGCTTTACTTCAAATCTTAGAAGAGGCACAAAAA  
CACTAGGTGATTTACCTGATACTTGTGTTAGTGGGGTATTACAAGTACCTCATAAAATCATTGTCGGCA  
TGCCTAGTGATCTTCGAGGATTTCTCGATTATCAAAAAGAAAAATCTAAATAAGTTCTATTCTTAGACAT  
AATTAAGTTTCAACACTTTTATGCCTCCCAACTTATTTATGCAGTTGTTATAATTGATATATTTAAGCGACT  
AATTAATGGATTCAAAAACAAAAACTGGTTACACCATAACTCAAGTATGGCTCTTTTAGTTTCTTTGCTAG

CTCTGAGTTGGAAAGAAGTTCGTTCTTCTTTGGCTGTTTCCGAAAGGAATTCCAGGAGAGGCCTTACAAA  
AACTAGACTCTACAACGATAATGTGATTCTCCACTGAGTTACTACATAGACTTTTTCCATCATAAGATCAT  
CTCAATCTCTACGGAAAGGTAGAAGTGAATATTTGGCTCAATCATCCATGAATCTAAATCATTGTTGG  
AACCTTCGGTCATTCTTTACGGAGAGACCTCTTTTATAAAGCATAAAAAGCAACTAGGTGATGTTTCTAG  
AATCTACAACGATTATGTGGATTCTCCATTGAGTTGCTACGTAGACTTGTCCATCCATAAGATTATCTCA  
ATCTCTACGGAAACGTAGAAGTAAATACTTGGCTCAATCTTCTCACGACCCTAAATCATTGTTGTAACC  
TCCGAGCATTCTTTCTGGAGAGAAGTCTTATTAAGCAAAAAGGCGATTTCATGGAGTTTGAAGTAAAA  
GCTAGGAGTGAAGCATGCAAGTTTTGGGGAAGTAAAAAGAAGTACCAAACACATACAAATTTAGTCATC  
TTCTCATGAACCTGAATCGTTTGTGAAACCTCCAATTACCGAGAGTAGTGTTTTTCGAATCGAGAAATG  
CAAAAATGGCAAGGTCCATGATTTTGAAGCAAAAAGAGAGAAGTGAAGCGCACTAGCTATAAGAAGT  
AAGTAATGCCAGACATAGAAGGATTTACTACTATAAAGATGCAATTAGAATAACTGATCTTTTCATCCAA  
TTTACGGTAATATTGATATTAGTCTAGCTCCTCAAAGTCGAGATTCAAAAAGTAGACCCTTTCATTAGG  
ATCGTTTTACATGTCATTGTTTAAAGCCCACTTCTCTGAAATGCATGGCTTCAAGTGGTAACCCTTACT  
TCAAATTGCTTAAAGCGATGGCTTTGAATAACACTGCAGGAGAGATGTGATACATGAAGAAATCAATCT  
CCGGTAAAAAGAATGATAAGAATGCCTTATTTGGTATTTAGTCTTACAACACGTGTTGCTAGACCTGATT  
TAACGAATGCCTTATATAAGTTGAAGTAAGTCTTTTAGAAACAAAGGGAGCATTAAAACCCCTTAGTAAT  
CAATCAACATGAACAACCTTGTTAAGTCAGGGAGAGCCTACGTCAGGCCGGTTATGACTTAGTATTCCCG  
ACGTCTTACTTTTTGTGCCTCACATACTATGTTATACCGGTCTTTGCATTACACACCCGTTGAAATGGGT  
GTGTCGTGGCTGTGTGTA CTCTTTAAAATACACAAAAAATTAACAAAAAAGAAAAATGCACGTA CT  
ATAATGATACTCTCGTACA ACTGATAAAATTCATACTCACAAATGAGGCCATACTTAGAAGCGGGTCTAG  
AATATGAAGTTTATGGGCTCCCAACGATCTCAAATTA AAAATAAAAAATTATTATAAGTGGTCAAAGGG  
AATCAGACCCTCAACGAGGAGGGCAACAAAGCATAAGCAAGTTCATTATGCCGCTGGAGCAAGAGCT  
TACTTTGTTGGTAGATCCCAACAAATAGTTTTTATATATTTAATAGATTTTTTCAATAAAAATACAAAAGTT  
AGTGGATTCCCCAAAACCTACACCCGATACTCTAGGCCACCCATGTCCAACAACAACAATGTACCC  
AGTGCAATCCTACAAGTGGGATTTGAGGAGGGTAGAATGTACGCAAATCTTACTTTTACCTTG TAGAGA  
TAGAGAGGCTTATGAAAGACCCTCGTCTTTAAATAAACATGCCAAAACAGTTCAAAAGTGGGATAAAAA  
TATGGGAGCAATCAGAACGACACGTAATGCAAATGGGAAGTGTTACATGACAAACAAGAGAAAGAAC  
GGTAACGAAAACAAAATAATGCATAATCAATGCACAAGAACTACACGAGTAGTGCTAATACTACTGGT  
AAGAACACCATTGAAAGCCTATCTCGCAGGGAAGTGAGAGAATGCTTAATTACCAACTAACCTTCTACCC

TAATATGCGACCTCCATACTCTCATATCTAACACCATGTCCTCAGTAAGATCCAGATGCACTCTATCTAAT  
CACTTACTCCTAATACTTCATCGGCCTGCCTTTACCTCTCCTGGCATCTTCCACTACCAATTGCTCACACCT  
CCTCACTGGAGCGTCTACACTCCTCCTCACATGTTCACTTAGTCTCACTTCCCTCATTTTGTCCAACAT  
GGAGGCCACTCCTATCTTGTATCAGATATCTCAATTCTTAATCTTGTCTCTTAGTATGCCCCGACATCTA  
CCTCAACATCCTCATCTCAACGACTTTCTTCTTCTGAACATGAGATTTCTTAATAGAACAACACTCAGCCCC  
GTAAAACATGGTCGGTCTAACGTCTACTCTGTAGAACTTTCCCGTCCATACTCCATATAATATGGATCACA  
TAGTACCTTTAGTTGCTGAAGAAGTAATATTTGAAACATTTCAAATTTTGGATTTCTCTACTAGAATTCA  
TTACCTCTAAGAATGATAGGAAAAACGAATGTATCAAATCTATTTAGGGGGAATGGGTGTCCACATGGG  
CTTGATTTGCCAAGTCTGTTTCATATGTATTATGGAACACCAAATTAATTTTAGAAGTAATGCATAATTAGT  
ACGTAAGAATATATTTTACAATTTGTTTTATGTATTGCGGTGCATGTATAGGCTGACTATTGTATCAATTC  
ATGCATTTGCGCTTGATTGTTAACTGTTGAAAATCTTTGTTTTATTGATATCTATCAGAAGATCTCCTTGG  
TTGGCTCAATCTGACATAGAAGGTGCAAAATAATGACAACGAAGATAATTATACTTCAATTTGCTTAGTT  
TATTGTTCCATTGATACATGGGGTTTTCTGTATTTAGAGTCTTATTTAAGAATGGGTATATTTAGTGAAT  
CTTTGAGAAATTTTTTCTTATCATGATTTTCTGGAGTCTTTAGGATTCTGCTCTTGGAAGTTCAGTTATT  
TGTTTTCTCAGGCATATATGGCAGTTAGAATTTAAACCTTGAATTAGATCACCATTTTCAAGATGAGAGAGA  
GAATATGGTATAGATTGATTGCTTTATCCAGTTTATGAGTATGGATTACTGATGATAGAACTGGCATTTC  
TTGATTTCTTTGTCCCGGACAGAAGTATCACCATTAGTTTCTGTTTAGTTTTGCTCCTTACATAATGTTGG  
AGACGAAAGTATATTCTTTATAAGCTAAGAGAGTTGGAGATTAAGCTTTTGATTTCTTGAGATAATGTGA  
CAAAGTGAAGTTTCCATTTCTATTAGGACATTTCTTTGAGACTTGAATCAAAGTAAGTTTTTTCATGTCTG  
CCTGAAATATTGTTGAAATGCTTGCATCAGAAAGGATTTAGGAGGTTGACCTTGTGAGTGGTGATAAT  
TTTGGTGACCTAGTGCAGTCGTGAAACACCACATCCCTGCGATGGTGGATGATGTAGCAGTGCAATATA  
GTTCTTCTCTGTGTGATAATAGGCTAGTATGCATGCTAGACTTTCTTGGCGTAATAGACAGAAGAATCT  
GCTTGCATTTGTTAATTTGATGTGATAATGAATGATCTTGCCAAAAGAAAATGATATTGAGCGATCTTT  
GCCAAAACAGGTGGGGATCGGATCTCAATATCTGGTAAAACCTGTATACGTGCAGCCAGTCTCTGACAT  
TTGATTCTGATTGACTGAGAAATGAAGTTACTTTTCAAGTTCACTCTTGAGAAATTAGTTATTCACATTCT  
GCAGATCCTATCTTGTTTAACATTGTGAATTTTTGGCTAGTGTGTCTGGTTTCTTCTTTTTCAGTAAAAG  
AAAAACGATGTTCAAAGTTGTTAGCATCTGTGTTTCGTTGTGGACCGCTAAGTGTGTTGACTTTGTTTTGTA  
GGGAGATGATCCAGCACCGGTCATACACCCAGAAAGTTGATGTTTATAGTTTTGGCATTGTTCTGTGGG  
AGCTCATAACTGGGTTGCTTCTTTCCAGAACATGACTGCTGTGCAGGCTGCTTTTGCTGTTGTCAACAA

AGGCGTCCGTCCAACAATCCCCATTGATTGTTTGCCTGTCTTATCTGATATCATGACCTGCTGCTGGGATT  
CTGACCCCGATAATAGGCCAACTTTCTCTCAGGTGGTCAAGATGCTTGAGGCAGCTGAGACAGAAATCA  
TGAATAATATCAGAAAGGCACGTTTCAGGTGCTGCATTCATCCTACGGCTACAGGTTGATTCGGGAAAG  
AGGAAACTGGAGGCCAAAAAATGTTGAATGGCAAACTGATTTTGAGTCTGCCATGTGTATCTATCAGG  
CACAATTTCTTTTCAGATAGAAAAAGGGTTATAGTTATGAGAAAAAACTAAACATTTCTCTGTTGTATTTT  
GTTTCTTTTCTTTAAACTCTGGATTTAAGACAACGACTAGTTGTTAATACAGGATATCTGATGTGCATCTA  
TGCATGTCAGATTTTGGCTCTGTGTTGCTGAATTTGTTCAAAGTTATATCAGG

>PGSC0003DMG402004902 LRR-RLKs

TCCTATTAECTATTCCGATCCGCCATTAATCTAATTCTTCAGTCAGCTTTACTGACCATATATTTATAGATC  
ATCCATCGGTATCATTGATCATATACAAGAAGATTTGCAGATCGTCCTTTTCTTCTCCTATTAATTTGTCA  
AGAGGATTACTCTCTTTTTTCTGATAAAGCCTTGATTTTTTTTCGAGTTCAGAGACATAGACGAATTTA  
GAATTTAAATTTGATGGATCAACCTTTTAAGTTATGACTATTGAATCCATCTGATCACATTATGAGTTCGA  
AATTTAATGTTACAGTACTATTTGATAAAATTCCGTATTAATAATTTGGGTTCAATTGAACGCGAAGAAG  
GTGGGGGCAGGATGAGCTTGGTGGTAAAGGTGGCCCTACTCTTCTTCATTTTGCATGGCTGCAGCTTCA  
TCAATGCAGACACAGATCCATCCGACGGTCAGCTTAATTCTACTGCTACGTAGCTTAATTATAAAGAAAT  
TAATATATTCACGGCACTTATGATTAATTTGGAAGTTACTAACAAGTTTCTCTGTAAATAAGAAAGAATT  
TCGTTGTCAACTTATAATGTGAGCGTGGATCACTTGGTGAACAACCTTTTTTTGTCTGGTGTTCGATATCT  
TGCTTTATTGGCTTGCACTAAATCGAATTTGTCTATCCTAAAACCTCGTTAGAGTCCTATCTGTAATTTTCA  
TTCTCAAAACTCAAACCTGAGACTTTTTATAGCTAAGCTAGGTTGCTAATTTTCACTAAAAGCCGGACG  
ATAAGCCAAAGAGTTCACAACATGCAAAAAAAAAAAGAGTTATAAAATTTAGTAACAAAATAGTGGAATT  
CGATTTATATATTTTTGGAGCTGTTCTTAGTCTCTGTGTGTATATTTATATGTTCTCAATAATTTGTTGGT  
GGCGTGCAACTTTGTTATCAGGTTCTGCCCTGAGAGTGATGTATAGCTCCCTAAATTCACCGGGGCAG  
CTTACAAAATGGAGCTCATCAGACGGTGGTGTATCCTTGTGGAGAATCCTGGAAAGGCATTACTTGCTCG  
GGCAATAGAGTAACTGAAATGTAATTATGTTCTTTCGCCATCCTCCTATAGTTTTTCGATATACACTTTAT  
TTTTGGTAACTTCTCGTTAGTTAATTGATTTGGCAATTGCTGATTTTCAGTTTTCGTTTCATTTTCTTCAGC  
CAGATATCCGGTTTAGGACTATCCGGATCAATGGGATACCACTAATGAGTTTAACATCCGTAACCAACT  
TGTAAGATGATCAATGGTTTCAATTAATTTCTTACTTTCGTTCTGTTATTTGTATTTACATCGTAAAATG  
TTGTAATTTGCAGTGACATAAGCAACAATAATCTCGGAAACCAGATACCTTACCAGCTTCTCCAAATGT  
AAAGAGACTGTATGTGTTTTTATGCCTAATTTCTTCTTTCTTGTCAATTCCAGGCTCTAGTGTTTTTTAC

AAAGTTGCTTACAAAATCTTTCTGTCATTTGCCTCGTATTGCAGTAACCTTGCTGGTAATGGTTTTACCGG  
TGTCTACCTTATTCCGTTTCACAAATAACTTCCCTTCAATACTTGTAAGTGAATTTTTAAAATTAATTTA  
CATGTATAGTATTATTACACTCGTTGTTCTGATTTTCTCTCCGTTGTATGTGCCTGATTGTAGAAATGTCA  
GTCATAATCAAATCAAGGAGAACTAAATGACATGTTTGGATCACTTTCTTCTCTCAACACATTGTAAGG  
CCTTGTCTCGATTTCTTCTTTTCTTATACAGATTGATATTACCCTGTGATGATTGAGATTTTCAATGTATC  
TTGTGCTATTCTCGATAGATAAATATAGTATCTTCTGTTTATCATGTGAACTGTTCTCACGGAGTGAAA  
GTATCTTTTCTTCTTGGTTGATTATATTATGTTATATCCCGTGGTTTCTTACTTTGATTGTTTACATTTAT  
GCTTCAGAGATATCTTTCAATTCAATGACCGGTAAACTTCCCTCAAAGCTTAAAGTCACTGACTAGCATG  
AAGAAAATGTAAGACGCGTATCTTCTGATTCATTATTGTAAGTGTATTGGTCCAGTGTGATTGAACTTTCTA  
GTATTGTTATGTTGTGCAGCTACCTGCAGAACCAACAGTTCCTGAAATATTGATGTCCTCGCCAATCTT  
CCTCTTGACGATCTGTGAGTTATGCAACATCTTTGTGTGTGTGAATGTTATCGATCTCTGAATGTTCCA  
TTTCAAGGCTTTCGCAGTACTATATTGTTGATTCCTTATGCTTTAGGAATATTGAAAACAATCAGTTTAC  
TGGTGGGATTCCAGAGAAGTTTAAAGGGATAATGCAGTGAGTGGTTTCACTGCAAAATTTTTTTCATCC  
TTGAATATTTGTAGAAAATAACTTTCTAACTGAATTCGCGATTTGTGATACAATTGTAGAACTCTAACAG  
TAACACAGGGAGCTCAGGGCCTGCAGCCCCTGCGAACAAAGTCCACTCAAAGTCACAAATCAGGAGGCA  
ATGGCAATTCTTCAAGCGGTGGAGGTAAAAGTGATAGTGGTGAGAAATCTGGTATCGGTGGTGGAGGC  
GTTGCAGGCATAGTTATATCAGTTTCACTGGTTGGAGCAGTTGCAGTAATCTGTATTATCAAGAAAAGA  
CGCAGGAAGTCGTCAACAGACATAGAAAACTTGACGTTTCCAGCCATTTGTTCTGAGTCACATGAAGTA  
CAAGGTATATAATTTTATGACTTCTTTTTTGGGTCAATTGAGAACATAGCTGGTTAGTTTACTGATACTT  
CAATATCTCAACATTTATACACTCTTATGGTGGATAGGATCCTTTTCTTCCATGTTATCTAATTTGAATAT  
AGAGTTGAATTTATTGTGGTACACAAAGGGGAGCCCTGGCGTAACTAGTAAAGTTACTTCCATGTGACT  
AGGTTTCGAGCTGTGAAACATCCTCTTGCAGAAATGCAGGGTAAGGTTGCATACAATAGACCATTATGG  
TCCGACCCTTCTCGTATCCCACATATAGCGGGAGCTGCACCAGGCTGTCTATTGCAAATGTAGTTGTC  
TTTATATAAACACACTTTTAACTCTGGATGCAAGTTCCAGCAAAGATACTGAATCACCTTAGGTGAATTTT  
GGAAAATTAGTTTTCTTTTGAAGTTCGTCGTCCTTCATTTTCAAGTCAAGTCAAGTCAAGTCAAGTCAAGT  
ATTATCTTTCCCTTTTGCAGCTTCATTTGTAACCTGGTATTTTATACATCTTAAGCCTTACCTCAATTGTTT  
AAGTTCTGTAGCATCATTCCATCAGAGTTCCAGCTAATATTTTCCCTTTTCTGGTTACTAGTATTATTGATT  
TTAATCATGTGTTAGTTTTGGAACCTATATTTTCTATTCATCACCTATTTTGGCTGCAGATACGAAACTC  
AGTCAAGCTCCGTCCACAATAAGCATGGAAGCTACTGAAACTCCCACTATAGTATCTCTAAGACCTCCAC



CTATTTATACTCATAAATCCATTGGTGGAGATGACATTTTCAGAAAACTCATTGTTCCACAGAAGAAAAC  
TCGTACAGCTGAAAGAAAAGTTGTGCAATTTTCAATTGAAGACGTACAGATAGCTACTGACAGCTTCAG  
TGTAGAAAACCTTATTGGTGACGGATCTATTGGAAGTGTATATCGAGCTCACTTTGACAATGGCAAAGT  
AATATCTATTAGTTCTGTTTGTGTTAACTGTTTCTTGTTCAGCTAACATTACCTATGCTGATGTAAGTG  
ATTCTGATCGTTTAAAGTTCCTATTCCATAGGTTCTCGCTGTCAAGAACTTTATTCATCTGAGCTCCGGAA  
TCCTGAAGATTTTCTAAAGATGATTCCTGAAATATCCCAGCTGGATCATCCAAATGTAACAGACCTAATT  
GGTTATTGCTCAGAAGATGAGCAGCACCTGCTAGTTTATGAATTCCACAGAAATGGTTCTCTGCATGATT  
TCCTGCATCGGATGGATGAAGACAACCTGCCACTAGCGTGGGATAGCAGAGTTCAGATTGCACTTGGCA  
CAGCAAGAGCACTAGAGTGAGTTTCATAATTTACAAAATTACTTTTCATTAGGCATCACATAAGATTAATG  
CAGCTTGGAGAAAACCTTTGTTTGTGTTTTCAGATATTTTTTTATGGTAACTACCCTATCTATCATAAA  
TCTTCTAGTTTTCTTAAAACATTGATGATAGTAAGCATGTAGAAGTGTTCATAAATATTTTGAATAGAA  
AAGCAATTATATTGTTTTAAGTTGTAGAACACCGCGTATGCTGGCTTCCACTAGATCTAATCAGAATAA  
ATTTTCTATTTTGGCCGCGACCTCTCCAATTCTTATGAGTAGGTTTATTCTAGTAGCTAAATCTAAGCTTCC  
TTTAATTTGCAGGTATCTACATGAAGCTGTTCTCCATCTTTAGTTCATAAAAATATAAAATCTGAAAATA  
TTTTACTTGATGCTGATCTCAATCCCCATCTATCAGACAGTGGGTTAGCAAACCTTATGGCTGATGCAGAT  
CAGGTAACACTTTATAAATTTGTTGTTTTGCCTTACTCTAAAGTATAATTTCTAAAACCTCCACATCAGTAT  
CTTCTTAATGGCTTCAACTTGGACCCCTTATTTTTGCTCCGTGTAGGGATTGAACCATAATATAGAGTCTG  
GATATGGCGCACCGGAGGCTGCTATATCTGGGAAGTGTACCACCAAGAGTGATGTATACAGCTTTGGA  
GTTGTTATGTTGGAACCTTGTACTGGTCGAAAACCTTCGATAGGTAAATGTTAATTTAATGATATTGAAC  
CCAAAATCTGTTTAAGACAAATAATAATATACGTGTGTTCTTCTCTTCTCCACTCAGCTCAAGATCAAGAT  
CTGAACAGTCTTTAGTTAGATGGGCAACCCCTCAGCTTCATGATATTGATGCCCTGGAAAAGATGGTTGA  
TCCAGCTCTCTCTGGATTATATTCTGTCAAATCTCTTTCCCGTTTTGCTGATGTTATTGCTCTCTGTGTTCA  
GGTAATACTCTCGTTGTTTCAATTCATGTGACTAGACACAAAGTTTAAAGATAGAAATGCAAACATTTGAA  
ACGTGTGGTCTTAAACATGACATAACATCTCATTAGAGTAATATGAGAAGTAGTTCGTTTCAATTTGACT  
GAAAGCTGCTACATGCCATGTGTTCAATTTTCAATAGAGTACTCCCCTAAATCGCGCTCACTATCACAAATG  
GTTTGTGTATGTTGTGTCAGCTTGTGCTGAGTTTCGGCCACCTATGTCTGAAGTGGTTCAAGCATTAGT  
CCGGCTAGTGCAACGAGCAAATATGAGCAAGAGGTTACACAATAATGATCAGGACTGAAGAGATTTGC  
TCAAGACCTGCTAATTGTTACACCAAATGGTTCTTAACTGTTTGTGCTATGGGAGATCATCTGATGC  
TGATCAGCCCAGCAATATCTTCTTCCGGTGCAGTTGTATTTGATTAATAACCATATGCTAAAATATTTCTCC

TACATAAGCTCCTCCACTGTTGTAGCTGATTCCCCATTTGTTATGTTGAGCTAA

>PGSC0003DMG402005482 LRR-RLKs

AAATGCCAATTGAATAAATATAGTACAAAGGATAAAAAGAAGAAAAGAAAGGATTTTTACACCAAAAA  
GCACAGAATAAACCAGCTAGCTACCTCATTCTTGAATACATTGTCTGTAAGAAGTATGGTTTTTTCTCTAG  
ACTTCAAGATTCCAATGCCATTCTGTTCTTTTGTCTATCTAATTACCCTCCTTTCATTCATGTTCAATAT  
CTCACATGCCTTGAAGTTACAGAATGGTAATGAACTGATATCCAAGCCTTACTTGCCATCAAAGAAAAG  
GTAECTCAAGATCCTCATGGTATTTTTACTTCATGGAATAATTCAGTCCATTTCTGCAGCTGGGAAGGTGT  
CACTTGTGGCCATCTTCATCAAAGAGTCACTAACTGCACTTAACATCACTTGACTTAGTAGGTACTTTGT  
CACCTTTCATAGGAAATCTTACTTTTCTTACTAGTCTCAAACCTTGAGCTCAACAATTTCCATGGAAAAATC  
CCACCACAGGTTGGTGGTTTGTAGGCTTCAGCATCTTAGTTTGACTAATAACTCATTCTGGAGAGAT  
ACCTGTAAATCTTTCTAGTTGTTGAATCTTGTTATACTTGGTGTGGTTGGAATCAGTTGTCTGGAAAGA  
TTCCATTTGAACTTGGTTCATTGCAAAGCTTGAGAGATTGCAAGTTCATAACAACAACCTCAATGGACC  
AATCCCGGAAACCTTAGGTAATCTTCCGCAATCAAATCACTTTCCTTATCGGTTAACAATTTGGAAGGA  
ACTATTCCAAGTTCTCTTAGTCAAGTGAAGACATTGAATGTTCTTGGTTGGGTATAAATAAGTTATCTGG  
TATTGTACCTGCTGAAATTTTAATCTTTCATCTCTTGAGATATTCACAGTTTGTATAATCAGTTGTATGG  
AACTTTGCCATCAGACTTTGGTTTAAGTCTTCTTAAGTTGAAAGTTCTTAAGATTGGTCATAACTGGTTTA  
CTGGACCCCTTCAAAGTCATTATCTAATGCTTCAAATCTAGTTGAACTTGATGCATATGGTAGCAATTC  
ACTGGCAAAGTGTCAATTGACTTCGGGGGGTTATCGGATCTTGGTGGCTGATTCTTGCATCAAATTCCA  
TTGGAACAGGAGAAGTTGATGACTTGAGTTTTTCAATCTTTGAGTAGATGCAGAAACCTGAAAGTTCT  
GGATTTGAGTGATTGCAAATTTGGAGGTGAGCTACCTGATTCTATTGCAAATTTATCGACGACTCTTCTG  
TCACTAAGATTGAGAGGTAATCAACTATTTGGTTGTATTCACTCAGGAATAGGGAATCTTGTTAACTTGA  
CTGAATTGCAACTGCAAAGAATGATTTTTCTGGTAGCATTCTGAAGTCGTTGGCAATCTTCGTAGGCT  
TCAGTACTGGATTTGTCCGAAAACAAGTTTTCAGGAAGTATTCCACCTTCAATGTCTAACATGACTCGGT  
TATATTCATTCATTTGGAAAAGAATGAGTTAACTGGTAATATTCCCCTTACTTTTGGCAATTTCCGGTAC  
TTGCAAGATTTAGACCTTCTCAGAATCATCTAAGTGGTACCATAACAGATGGATTTATGAGTTTGTCTTC  
CTTAACAAATTCTCTTAATCTTGCTGACAATCAATTGTCTGGTCCGCTGTCAGTTGAAATTGGAGCTCTCA  
ATAATCTTGAAGATTGGATATTTCTAATAACGTGTTGTCTGGGAAAATTCCTAGTAGTATAGGGAGGT  
GTGTAGCTTTGGAAAGCCTTGTTTTAGCTGGCAACTTCTTTGAAGGTATAATTCCTTCATCCATTAGTTCT  
TTGAAAGGTCTCGAAGAATTGGATCTTTCGCGCAACAATTTATCTGGGCAGATTCCAACATCTCTTCAGC

TCATTTCTTAAAAAAGTGAACCTGTCTTTCAACCAGTTTGAAGGTCAGTTGCCAACTGAAGGTGTTTT  
AGGAACGCAACTGCAATCTCCGTATCAGGGAATAGGAACTTTGTGGGGGTATACCGGAACTGGAGTT  
GCCAATATGTCCGAACGCTGACCCTGATGGTAGTGATAAGTCCAGAAGCATTAAAGCTAATGATCCCTCT  
CTTTCTGGACTTGTTGCACTGGTTTTATCATGTCTTTAGTCATAATCATTCCGGTTAAGAAAGGCAAGGG  
GAGAGCCTTCTTTAACATCTTCACCGGTTACTTATGAGAGCCTATATAGAGCGACAAATGGATTCTCTTCT  
GCCAATTTGATTGGAAATGGTAGCTTTAGTTCTGTTTACAAAGGGGTACTTGATCCAGGTCAATGTATGG  
TTGCGGTGAAGGTGATAAACATTGACCAACAAGGGGATACTTCTAAGAGCTTCATGGCTGAGTGTGAG  
GCCTTGAGAAACATAAGGCATCAAAATCTTGTTAAGATCTATAATGCCTGTTCAACTAGTGATTTTGAGG  
GTAATCCGTTTATAGCTTTAGTTTACGAATACATGCCTAATGGGAGCTTAGAAAAGTTGGTTGCATCCTATT  
CCGGGAGCTGATGCCTCAACTAATGAGGTGAGGATACTAGGTCTAGTTGAAAGACTAAGCATTCTATT  
GATGTGGCTTGTGCACTGGAATATCTTCATAACCATTGCCATAATCCAATTGTGTTCTGTGATTTGAAGCC  
AGACAACATTCTTCTCGACAATGACATGACTGCCCATGTAGCTGATTTTGGATTAACAATGTTTTTCTCAG  
AAACCATGAGCAAATATAGTTCAATTGGATATGCTGCACCAGGTAACGTAGTTGATAGTCCCTTGAATTT  
TAGACTATCCTTGTTGAGAGCACTAACAGTCTCCATGTTTACAGTATTGCTGCAGTTTTAGTCCGCCCTC  
AACTTGTCTCTTTTTTATTGGGATTGAGAGGTTTATTGTGTTAGATTTCTCGTGCAACAGTACAAAATT  
TTCTTTCTTGCAACGTTATTTGTCTACAATAAACTGATATAGTTGAAAAACAAAGGTAGATTCTTGGTT  
TAGCTGCAATGATGCTTGGACTAGTTGTACAGAACGAAGAGCACATACGCTTCGTCTCACCTTCTCTCTC  
ATGGTGTTATTGTTTCTACTAAACATAAAGGATGATGACTGAACATTTTATACTAAATTATGGACAAA  
ACCAATGTATTAATAGACGGACATTTGAGGGAGGACCAAAAGTGCATGCACCAATATTGCGAACATAG  
GGACTACAAGTACTCCGTGTGAAAAAACAAGATGACTTTTAAGTCTTAGTCCAAAGATAAGGGACTA  
TTTTGGGTCTTTTCTCGTGTCTTCTTGAGAAAGTTTTCATATTTGATTTTACATGTTTTAAGTTGATTACAT  
GTTTTCTTCTCTGTGGGCAGAGTACAGCATAGGAGGTAAGGCTTCCGAATTTGGTGACGTTTACAGCT  
ATGGGATCCTTCTACTTGAGATGTTTACTGGAAAGAGACCTACTGACAGCATGTTGAAAATGGACGGA  
GTCTTACAGTTTTGCTAAGACGGCTTTGCTTGATGAAATAGTAGACCCCATGCTTCTACCTAGCAACAG  
CAGAGAAAGACAAGAGGCTGAGGAAGAAGGTGTACTTATCAATCAAGATGATACTAGTATAAAACAAG  
CGCAGGAATGCTTGATCTCGATAATACAGATTGGAGTTGCATGTTGAGCTGAATCCCCGAGAGAAAGGA  
TGGATATCGGGATGTTGTCAAGGAACTTCAACTAATTAGAGACATTCTCCTTGCTTCTCATGCAATTCA  
CAGCTCCACCAGCGGGTAAATTCGCTCTACTAGCTTTGTTTTCAATCGTGATATTGAGTTCCTCTGCTAGA  
TATTGAGAACTAGTTTCTAAACACATGTGTTGCACGTGTATTGCCTGTGTAATTTCTGTAGATCCATT

AGAACGATGAAAGTTCTATGAAGATATGCATGTGTTTACCATGTAAATTTTCTTCTTCTTGTTAATCGTTG  
TCTTTCTTTCTTGGTTTCAGGAGCTTGAGGTTCTGAAGGGTCTTCCAGTCGTTCTGTTACTAGTAACTGGC  
AAAATTTACATCATTTTCGTTTGCCTTGATGTTTTTGTAGCTCTTATATAACAAATTACTTTAGCAGATTGAAG  
ATGTTAATCATCAGTTCAATCATTGTTTGTAGTTGGCCTAATGCTGGTTAGTTTGTAGTTGAGCTTAAGCAAAT  
GGAATTGGAATTGTCTATGTATATGATGTTATGACTTGGCCAAACACATACACGACCCCGTTAGCTCGTC  
TCGAAATCTC

>PGSC0003DMG402008032 LRR-RLKs

AAAAAAGTTCTCTTTCAATGCATTGCTTCATTAATAATCCCATTACTCATTCTGGGTAGTCTTTTTTTTTT  
TCTCTCTGTATTTGTTTGCATGAAAAATGCCGTCTTTATGGAAAGCATTTCCTACTATCTTCAAGTTCTCAA  
CACTCTTCTTCTTACTACTACTGCTAGTACTACTTCTTCTCCGGCCGATTCACCGAATACCCGGCGGATT  
TACGGCGGCGGAAGGAAGCTTACTAGGCAGAGGAAGTTGAGACATGTTAGTGATGATGATCTTGGTTT  
GCGGAGACCTAATATTCAGGCACTGATTATTGATGAACGTTCAAAGTCTTGGCCGGTTCTCCTGATTCT  
TACGCTGATTTAGGGTCGGGTTCTAGGTCGTCTACCACCACCTCCGTCCTGTTCTAACTCCTCTGCTGT  
GCCACTGCCGTTGCCGCTCCCTGAGCTCAATTCTCTGCCTAAACAGAACTCGGTTGACTCTAATTTGCCG  
GCTAGAGTTGACAGGGAGCTTTTAAGTCCTCCTCTTGCCAGGTTAGTCTTGAAATTGAACCCATTGTTT  
AGAATTTATACTCAATTTCAAATTTTGTAGCTTACTTTTCGTTTTAGTCTGTTTCGAAATGAATGAGTTTTCC  
ATTTTTGGCAACTCTTTAATTGTAACCTTCCACCTTACATATTTAAGAGATTAAATGATATTTTGATATATT  
TTATGTATTTAGTTTAAAGATCACGAGATTCAAAGTGGTTTTTACTTTGTTAAACTTCGTGTCAAGTCAAA  
ACCAGTCAAACAAATTGACATGCTGGGTATGTTTATCAAACCTTTTGTAGTTTTTCTTACATGTATGTTTTAT  
GCTTTAAGTAAAAAAAATGCTACCTTCTGAGTGAAGTATTGTTTGTAGCCGATTCATACTGGTTTGGGATT  
GAGGGGTAGTTAATTTGGTTTGTAGTGAAGCTTTTCCACATAGGTAACCTCTGTATGTAAAGGGATT  
AGTAGTAGTAGGTAGTTGGTTTGAATTTGAAGTAGTTTTTGGGGTGGATTGATTGCAGTAACACTTTATA  
GGTCATTACCATAAAAGAACCATTTTTTCTTTTTTGGGTTGTGGATTAACCTGCAGTAACCTTTATAAGGT  
TCACCATAAAGGTTGGTTTGAATTGTGAAAGAGCATGTGGTTTGTAGTTGTTTCAAATGATGATTTGTA  
GTGTGCTACTTTGTTTTGGGGTAAAATGTTTCGATTAGCTATGATGATTTTGTAAAGCAAAAACCGAAC  
GCGGAAATGTTAACCTGTTGCGAGTTGCAGGGAAACTTTTGGTTCGAACTCCAGCTGAGGTGAAAAGTTC  
TCAGCATCCAAGATCATCTACTCCAACCTTATCGGCGTAGGGGGTTCCCTCAGGATCTGAATGCTGAGGG  
CGTTGAATTCAGGTTGAATGTTCTGCTAGAAGTGCCCCGAGTAGTGGTTTTACAAGCCCCGTCCGAAGC  
CCAAAAAGGTTTAGTACACAGGACCTTTTTTTCATCATCCCTTGCATCAGGCCTCATCATCACCTTCAGAGGC

TTACTCTTTCCAACTTTCACCCACAAGGATTATAAATAGCGCTGATCATTCTCCACTGAGTAGCCCAATTTT  
GCCAAGTTCAGCTAGCAGAATCAGGAACAGCAGAAGTGGTGCTGTGCATTACATCATAAATCTCTTCC  
GGAAAGTTCTCTAGGTTGGAATGAAGCTAACAACAACAATGTGCATCCACTCCCCCTTCCACCAGGAGTT  
CCACGACAACCAGAATCATGTACCATGCACAGCAATATGGATAAACCATGTGTATCACCAGCAAAGGGT  
CAATGGCTAAAGGGGAAGCTTTTAGGTCGTGGTACATTTGGAAGTGTATATGAAGCTACTAACTGGTAA  
GGGATAGAGCTTGCTTAGTAAGTAACTCGGTAGGAATGTAACATTTGCTTCTTTTGTTTTCTTCTTTTA  
CAGTGAAACCGGTGCTTTATGTGCAATGAAAGAAGTTGATCTTACTCCTGATGATCCTAAATCTGCTGAA  
TGTATAAAGCAGTTAGAACAGGTGACGTCCTCATGTCTTCTTAGGCTACATAATCAAATTTGTATATAA  
ACTGCAATTGTATGAGATACACGGTGAGAGAAAACATATTTTAAAGGCCAAATCTTTGTTAAGTGAAGT  
GAACTTTAAAACAAGTACTTACTAAGCATGTTATATAATATGTCCTGGTTGTCTAACTTGCATTAGCAAAT  
TAGTCAACTTAAGGTTATGTCCAACCTTGAGCTAACTATCATGTGCCTGAAGATGCAAAAATCAATATCG  
TATCCATGGAGCTACTTTTATTGATCATATTCTTTGACTTCATAAGCCTCCTTACGTTTTGCATCATTGAG  
AAAATATTTTCGGAATGTTGGTAACTGACTTGGGAAAAAAGTTTCATATTGTGGAGTTTTTTATTCTACTT  
GCTTATACATAGTTTGTGATGGATTGCAAAGACTATGACATGTTTTTCACTTGTTTATGCTATTCTAAATC  
GATTCAGTTTCTTCTTACTTCTGCTGTAGGAAATAAGAGTTCTCCAGCAGTTAAAGCACCAAAAATATTGT  
TCAATATTATGGCAGTGAAATAGTAAGAACATTTATCTTTCTTGGCCATGTTTCAGGTATTTCTTTAGAAT  
ATTGAAAGATAAATGTTGTTGTTGTTGTTTCAGATGGAAGACCGCTTTTGCATATATTTGGAATATGTGCA  
CCCCGTTCAATTAATAAGTATGTTTCGGGAACATTGCGGAGCTATGACAGAGTCAATAGTTTCGAAACTTT  
ACTAGACATATTGTATCAGGGTTGGCTTACTTGCATAGCACTAAGACAATACACAGGTAGATACTGGGTT  
ACATCGATGTGGTGTATGTCACTTGATTTAAAGATTCATTAACGGAACACTAAAGCGTCTGTGTTGCAAT  
TCCTTGTTATAAGCAAGGAAGAACTATTTTCTTTGCCATTTTTTTTTAAAAAAGTTTTTCGTTGACAGTGA  
TGCTCAGTCTAATGGTTGGTTTCAATGATTTTTTCTGAGTAGGGACATTAAGGGAGCAAATTTGCTTGTA  
GATGCATCTGGTGTGTCAAGCTTGCAGATTTTGGGTTAGCAAACATGTAAGCTTTCAGAAGTCTAATG  
CCAACTGAAAATGCTACTTTCTATGTTTCGTTCTAATCTAGTATTTTTCTTGTAACCTGATCTGTGGTGA  
AAATGAATGAGCTTGATCTTTCATCGATTATTTTTCATGCATATCTTACCCTGTAATTTATAACGTTTCTC  
TTTTCCAGCTTTCAAGCTGTGCAACTGATCTTCTCTGAAAGGGAGCCCTCACTGGTTGGCTCCAGAG  
GTGGGCATTGTTAAGCTATTTTTCGGGCTACTGCCTCTGCCTGGCTTCAGTTTTCTTCCCCTTTATTAATTG  
GCTTGACTTATGTCTGGACTTAACTTTATATGCAGGTAATGCAGGCTGTGTTGCGCAAAGATGCCAATC  
CAGAGCTTGCCTTAGCTGTTGATATATGGAGCCTGGGTTGTAAGTATTGAGATGTTTACTGGACAGCC

CCCTTGGGGAGAACTTAGTTGGGTAAGTGTAAAGCATCTCATTGAGAACAAATGTAATCGCATTACA  
AGCTTAAATATATTTGTGAGCTTTTAGGTTGTCAATATAGCATCATAGCTTGTTAATATACGAGCAAGGC  
TGAAGTGTCTTAATGTTTCATGCTTTGGCTTTATTAGGTGCAAGCAATGTTCCGGTGTCTTGAACAAATCACC  
ACCTATACCAGAAAAATTATCACCAGAAGGAAAAGATTCCTTCAGTGCTGCTTTCCGGAGGAAACCTGCA  
GATAGGCCATCAGCTATGATGCTACTTGAACATGCTTTTTACGTAGTACTAGTTCCCTTGAGCATAGTAT  
CAATGTTGCTGGTTGCTCAGAAGATTATCCGGGGAAGAAATTCCATGTGAGTGGTACATGCTGCTAGCC  
TGCTACTGATGTGACATTAAGGGTTAACGTCCTGTATTATTTGTGAGATTCTCTAAAAAAAATTCCAA  
ATGATTTTAAACTCTGAATTCATTACATTTTCAGGATACCCTGAGTCCTAAGAACCCAATCAACCATAAAAA  
GGAACAAAACCCTGTTACCAGGAACATCTGGCAGGCATGCAAATCACCATGTAGCAGGTAATAACT  
GACTTGTGTTTGTGATGTTATATACCAAACACTTTATTCTGTGAGATTATTTTTTCGCGTATTAGTATCTA  
CAATTGCAGCCAGATACTATATCTTGTGTTGTGCCATTGACTGTCACGTCCATCTTATGCAAGTTAACTG  
TGCTCTTCCAGTGAACTTGCCGGCAAACCTCAAACCTGTGACTATGGAGCAGCTTCTCACCAT  
TCTCCACGTTCTGCACTTGAAGTCTTTCCCTGTATTTCTTCAATGGAGCTGAACTCGAGTTCACGTGCAGC  
CAGCCCATCAAGCATCCCTAGTAGCTTTGCCTGGGACCTGAAAACAGAAGTCCTTATAGAATCATATCA  
TAGGAAAGGAAATTCCAAACCTCTGTATAAGATCATAAATGAATGGAGAGGGGGAAAACCTCATGTACA  
GATCAGGAGAATTAGATACAGAGAACTTCAGTTGGATGATTAGTCAAATGTTGCCATATGTGGGAGA  
GATCTCAATTCCCGTATGCATCCACATCTTCTGTGTAGTATTGATGTTTGTATTTGAAGGCAAACATATCT  
TTGTAACAGATTCATGAAGTACTGAAGATGATTCTGAAGTTAATAGTGTATTTAGATTGAAAACATGAT  
TTAGTGTACACAATTAATGATTTATGCTAAATTCATGAGTATCTTTTTCCCTCATTTTTACAACCAA

>PGSC0003DMG402014186 LRR-RLKs

GCAGCAGCAGCTGCTGCCATGACGGCTACTGGAAAGGGAGGAGAGATCGGTGGAAATGGTATTA  
AGCTGATCTTTTTCGGGTCTGATAGATCGTTTGATTTAGAGGATTTGTTGAGAGCTTCAGCTGAGGTTTT  
AGGGAAGGGGACGTTTGAACAGCTTACAAGGCAGTGTGGAGATGGGCACAGTTGTAGCTGTTAAGA  
GATTGAAGGATGTAACCATATCTGATATGGAGTTCCGGGAGAAAATCGATAAAGTTGGACAAATGAATC  
ATGAGAATTTGGTTCCTCTTAGGGCATATTATTACAGCAGGGAGGAAAAGCTTCTTGTCTATGACTACAT  
GCCAATGGGAAGCTTGTCTGCACTTCTTCATGGTGAAGTCAAAGTTATACTTTTTCTTATAAATTGATGAT  
TTTTGTTGTTGTAATACTGAGGGCAATCTCTATTGCTTTTCTTGCTTTAGTCTGTGGATTGGTTAGTTG  
GACTTGTAGCTTATTGTAGTACTACATGCAATGCATCTTTTTGTGGGAGAACATCTAACTGAAGTGTG

CATTTGATGAATTTGAACATTTCTTTTTGATGAATTTAAAAGCACGAGTTCAATTATTGATAATGTCCT  
CTCATTTCTCTAGATTTGGTAGAGTTGTATCTGTGAAATGTTGCTTTTATAGCCTGTGAAACTCGGAACT  
TATTA AATTGCTAATAGATTGTAAGATGTTTGTATAATTTTATTCGTGCTATTCACACTAAGCTCTGTAA  
TTTTCCAGGAAATAAGGGGGTGGCAAGACTCCACTGGATTGGCAAGTCAGGTCAGGCATTGCCCTTG  
GCACTGCTCGGGGCATTGAATACCTGCACTCTCAAGGTTCAAACGTCCATGGGAACATTAATCATCCAA  
TGTTCTTCTCACCAAATCATATGATGCACGAGTGTGAGATTTTGGCCTAGCCCAGCTGGTTGGACCTCCA  
ACTTCCCAACTCGAGTTGCTGGATATCGTGCTCCAGAGGTAACGGACCCACGCAGAGTTTCCAAAAG  
GCAGATGTATATAGCTTTGGTGTATTGCTTCTGGAGCTTCTTACTGGGAAGGCACCCACTCATGCCCTCC  
TGAATGAGGAAGGTGTTGACTTGCCAAGATGGGTGCAGTCCATCGTTCAAGACCAATGGACTTCACAAG  
TTTTTGATATTGAGCTCCTCAGGTACCAGAGCGTTGAGGAAGAAATGGTGCAACTCTTGCAGCTCGCAAT  
AGATTGCTCGACTCAATATCCCGACCACAGACCTTCTATGTCTGCTGTCGTTGAGCGAATTCAAGAGCTC  
TGCTCTCAAGCTTGCGGGTACTCAAGAACAGTCTGACTCTGTCAATGAATCTGATTGAGGTGGTCCTT  
GGTCCTTTTACATGTGCAGTACTTGA ACTAAAGAAGCACCATCACCAATTTACAGAACCCCTTTAAGCA  
TATTA AACTTTAATGCTTTCTGTTGGTTAGTAGGGCCTATCTTCTTTCATTTAAATTTAACAATTTATGCC  
CCTTTCTTTTTCTCAGTTCTCCATTGTAGTTGAGCTAGAGCCCTTTTCATTTTCTTTGTGTGGGGGGCCA  
TTCTCTGTACCATTTGTTCTTGGTGGGATAATGGTTGCTGTAATTACTTTTACGCCTTTACTTTGCT  
TTCATTTAACCAACTTTGTTGAGA ACTTAATACCTACCTTTACTTTGTAGTACTTTTATTTAGGAGGTTTG  
TTGTTTGGTAGTAGTAAATTAGTGAAGTTTTTTTTTTGGTTTCCCACCTGGTGTCCCGTAACTACATTGG  
AACTCGACTATTCAGGGGAAGCGCTCTCTACCAAGGATTGCCATGCTTTGTTTGTGATCAGGACAAAGT  
TTCTTTGGTTTACGGATTGTGTACCCTCTTTTACTTCGTTTTTGA

>PGSC0003DMG402015976 LRR-RLKs

ATGGCAACAACGAAAGAATTTCACTATGCACTGCTCCAAGCAACTGATTCGCTTAGCGAGAGTAAT  
CTGATTGGTTATAGAAGTTTTGGCTCTGTTTACAAAGGCGTTCTCAGGAGTGGGACTGCCATTGCAGTTA  
AAGTGTTCAATCTGCAACTGGAAGCAGCATTCAAGAGTTTCGATACAGAATGTGAAGTTTTGCGTAGCC  
TTCGCCATAGGAATCTCGTGAAGTCATCACTAGTTGTTCCAACCTTGATTTAAGGCTTTAGTGCTCGAG  
TATATGCCTAATGGAAGTCTTGACAAGTATTTGTATTCGCACA ACTACTTCCTAGACATCAGGCAGAGAC  
TAAGCATTATGATAGATGTTGCATGTGCTTTGGAATATCTTCATCATGGATGCTCCTCTCCGGTGATTAC  
TGTGACCTGAAGCCTAGTAACGTCTTGCTGGATGAGGATATGGTTGCCACCTAAGCGACTTTGGTATTT  
CAAACTGCTTGGTGAAGATGAGAGTGATTTATACACAAAACCTTAGCAACATTTGGTTATATAGCACC

GGGTACGTCTCTTTGTTTTGCTAATTTGAACATTGATTTTTCTCTTATTCTTTTTTTCCAATCAAGAAAG  
TATATTGCATCTTTAATTAATTGTTTACTGTAGAGTATGGACTGGATGGACTGGTGTCAATAAAATGT  
GATGTCTATAGTTACGGGATTGTGTTGCTGGAAACATTTACTAGGAGAAAGCCTAGTGAGTTTGCGGGA  
GATCTTAGCTTGAAGAAATGGGTGAGTCATTCCTCCAGAGGCAGTAATGGACGTTATGGATGCCAAT  
CTGGTTACACCAATGGATAATCGCTTACAGAAGGAGCTAGATGTTGTGGCATCAATCATGAAAGTGGCA  
TTAGATTGCTGTGCTGAATCTCCGGCAAGAAGGACAAACATAGAAAGATGTTGTAGGGATGCTACAGA  
AGATCAAGATTCAACTTCTTGACGCTGAGCATGTTACCGGAATCTCCTTTTCCAAATTGA

>PGSC0003DMG402020263 LRR-RLKs

CTTTAGTGGCCTAGGTTAAGACGGCCCTGGTGGCACAGTGCTTTTCTGAGACTCTGTGAAAAGAAA  
GTCACCATTAAAGCCAGAACTTGAATCGGTCCCCTGTTTTTCTCCTTGACTTGCTCTGCATGCAACT  
AAATGCTTTCTCTTTGTCAACTACCCTCAATTTGCTCTCTGTTTTTTATTTCAATATTGTTCTTCCCA  
AGAAAAAAGAACATTCTTTAATTTGCAATTATAGGTCAATTTATTCGCATTTTTAATGGGGTTTTATCA  
AGATTGTAGCAGCATTAACTGTTTGGTAGCTCAATCTTGACTTGCTGACATTTAGACTTTAATGCTTTT  
CATTTTCACTGAATTAGAAAGGGTCCACCCATGTAATTTTCTTATTCATGATTAGCCAAGAACGTAAAATG  
GGTTGCTTCAAGATTGTTGGAACTTGGCTCCATTTGAAGTCACTGTAAATGGGTTTCTTCAAGCTTTT  
TGTGATAGTGTGGTTATTTGCGCTTTCTTTATAGCAAATACTTATCAGTTACAGTCCTATGAAATTCAAG  
CTCTTCTTCAAGTTGAGGAAGCACTTGGAAATATCCAGTTCAGTTGGATGTTTGGGAGAATTACCATGGAGA  
TTTTTGCAGCTTGACTTCAACTGCATATGAGCATTACCTGTCAAGATAACTCTGTTACTGAACTCAAAA  
TCAAAGGAGATAAGTTAGTTAAGTTGAATGAATTTTCAATTTGCAATTTCAAACCAACATTATCTGA  
GGGTTTCTCCATTGATTCTTTGTTACCACATTGACAAGGTTAAGTAGCTTAAAGGTTCTTACTTTAGTTT  
TCTTGGTATTTGGGACCCCTTCTGATAAAATTCATAGGTTAGCTTCACTTGAACTTTTGGATATGAGTT  
CAAATTTTCTATTTGTTCTGTTCTTTTCAAGATTGATTAAGCTTCACTTTGACATTAGATG  
CCAATTTTTTCAATGAACTTTCCCTGATTGGTTTATTCTTACACAATCTTACTATATTAAGCTTGAAGA  
ACAACAGGTTGAAGGTCAGTTTCTTCTTCAATGTCTAAAATCACAACCCTCACTGACATTGTTCTGTCA  
CACAATGTGCTTTCTGGTAAATTGCCGATTTAACGGCCTTGCTAAGTTGCTTTTATTGGATTTAAGGGA  
AAATCATTGATTCTGAATTGCCACCCTGCCAAAAGGACTTACCACAGTTCTTCTTAGCAGTAACGTTT  
TTACGGGTGAAATCCAGTAGAATTTGGCACACTAAATCAACTTCAACACCTTGATCTGTGGAATAATTC  
TCTCAGTGAATGCTGCCTGCTGGCTTATTCTTTGTCTAGCATTAGCTACTTGAATTTAGCGTCTAATG  
TTCTTAGTGGTTCACTTCTAGCCATCTCAATTGTGGGGTGAACCTGGTTTTGTTGATATTTCTGATAAT



AGATTAGTTGGTGGGCTTCCTTCTTGCTTGAACACTATTTTCAGATAAGCGAATTGTTAAGGTTGGTGGAA  
ATTGCTTGTCTCTTGACACTCAATATCAGCATTAGAGGGCTATTGTAAACAAGCAAATTCGGATAAGAA  
ACAGATCACAGGAAAACAAATAGCATTGTTGGCGGGTGTATTGGGGGAATTGTAATTGTTGTGGTGT  
TCTGTTAGTTGTCCTTTTCATCTTCCGTAGAAAACGACATGCGCGTAACATGGTGGATAAGCACATTCTC  
CGAAAGTTGTGCAAATAACACAGCCCGGGTTCCTCTGAACTCCTAGCAAATGCCAGTGAGTTGATGT  
TTTTCTTATTTCATTTTAATCTGTTAATTAATATGAAGGAAATGTTCTCCAGAAAAGCTTAATCTCAATC  
TTCGAATTCTCAGGAGTCAATTTCTCAAGTGGCAAACACAGGATACAAGGTTCCCATCATATCGAGTGT  
TCTCCATGGAAGAATTGCTAGAAGCAACAGAAAATTTGATCAGTCAGCATTACTTGGTGAAGGGTCAG  
TTGGAAAAGTATGGCTTCAAACAATACTTATGGTTCTCATTGATAATATATATCTTGATGTTTTCCATTC  
AATCAATGGTCACGCTGAATTTTGGCGCAAAGTGATATACTTGCTGTAAAACCTGAATAAACGAAGCAG  
GACGTAGATTTTGTTCATAGACCATGTCCAACAATGATAATGCAATGAATGCACTAGTTCACCAAAGTA  
CAAATGGATTTAGGTGTTTTTTTTTTTTTAAAGTGCTTGCCTATCATATTCGCATTCTACATGTGCATC  
TGTGACTTCTTTTGTGATAAAAACCTGGTGTACCAATAATGCTTTTGTGCATTTGATTTTCATATCTAATG  
AACACATGACAGTTCAACTAAATATATCGAATGCCCTTAAAGGCAAATTAGATAGTCTCACACGTTTGA  
GTGCCTATGCAGTGAGTTGACATCTGTGCTATTTTGTGATTGACATAAACAGGTGTTAGCCTTATTATGTCTT  
GCTTGAATAAGACAGTTATTTTAGTTATCAGCAATTCCTCAATATTTATCTCCATTTAGATTTACAAGG  
GAAGATTAGAGAATGGAGCTTACATAGCTGTAAGGTCACTAAATGTGTGCATAGTTCACAAAAGTTAAA  
AATTGTTTTAGGTTTTTTTTTTTTTTAAAGTGCTTGCCTATCATATTCGCATTCTACATGTGCATCTGTGA  
CTTCTTTTGTGATAAAAACCTGGTGTACCAATAATGCTTTTGTGCATTTGATTTTCATATCTAATGAACAC  
ATGACAGTTCAACTAAATATATCGAATGCCCTTAAAGGCAAATTAGATAGTCTCACACGTTTGTGAGTCC  
TATGCAGTGAGTTGACATCTGTGCTATTTTGTGATTGACATAAACAGGTGTTAGCCTTATTATGTCTTGTG  
AATAAGACAGTTATTTTAGTTATCAGCAATTCCTCAATATTTATCTCCATTTAGATTTACAAGGGAAGA  
TTAGAGAATGGAGCTTACATAGCTGTAAGGTCACTAAATGTGTACAAAAGATACTCTAACCGGAACCTC  
AAACTACGATTGGACTTACTGTCAAAGTTTCGTCACCCCATTTAGTTAGCCTTCTGGGTCACTGCATTGA  
TGGTGGAGCACCAGATGATTCAACTGTCCCAGAATTTTTCTCATTATGAATATATCTCTAATGGAAACT  
TCCGTGCTCATCTATCAGGTCAGCTAAGTAAATCCTTAGCATGAGCATTGCATGTGTTTTGATGCTTGGT  
TGAATATGGAAATATTATATGATGCACATATGGAGTGCTGGTTGGATTCTTTTCTCCAGAAATGATTGG  
GATACCCTTGTGATGAATCTCTATCTAGCATTGCAAGTATTTTTGCTACTTATGAGCTTGAGGCATCTTA  
TTCATCATATTAATTTACACATAGTGGTATTCAGTATGCAATTAAGTGTGAGTTTGGATTGAGCAACAATGT

AATGATTCACCTGCACGAAGTTCTGTTGGTTGAATTCATACTGAGTTGGACCTTTATTTTTGTTGTTATAT  
ACTTTCATTTAACCTGCATGTCCAATAAGTACAGAAAATACAAGAGACACGCCATAACGTATTCAGCTT  
ATCTCAAACACTTGTACTTGCAGAAAATAGTTCAAGAAAGATCCTCAAGTGGTCAGACAGGTTGTCGGT  
GCTGATTGGTGTGGCCAAGGCAGTGCACCTTCTCACACAGGTGTAATTCCTTCTTCATTTAGCAACCGCT  
TGAAGACGAGTAACATATTGCTTGATGAGCATAACATGGCAAAATTAAGTGATTTTGGGATGTCCATTCT  
TATGGAAGAAAGTGAAAAGGTGGGTATTTTAATATTTTGTGTGAAAGGTGAAAATTCAAATTTAGGAT  
AGATGGTAATTTCTCATACTCAATATGTCTTTTTTCAGGCCAAAAGGAGATGACGTCACCTCCTGGTATGA  
AACTCTCACTCATGTATTCCGTAACGTGCCTTACCAACTTCCTTTTACTAAACCAACTGGGATTCTATTTT  
AAGAGTGTCAACTAGAGGCATATATATCATCTACTATAGCTGTTTGCAGGATATAAATCAGTGATATTTT  
ATTCTTGTGTAGGCATATGACAAAGAAAGAGGACGATGTTTATAACTTTGGTTTCATTTACTGGAGTCG  
CTGGTTGGCCCTTCTGTCAAGTGGAAAAGGAGAAGCATTTTTGTGAATGAAATGGTATGAAACTGCTAT  
ATTATTATGTATGCAACTCCTTTGTCATTGACAGTAACGTAAAGTATTCTTCAGCAATTTGTTCCCTTTAGG  
ATCCTAAACGTTGTTGCAATGTTGGATAAGTAACAAAATTTTCGTTGCTCTGCAACCTAACTTTACAATC  
AGTACTAATATAGATTAACAGAACTACACACATTATTCAAGTTTTATTAGGTAAACCTTCTGATATGCAAG  
TACCATAGGGAGAAAAGTTGAGCCTGATATACAAGAGTCAAAGTCTTGATTTTTTCACTGGTGTGTTAC  
ATAAATATCTCTGGATTTTCTCTTTGAATGACAGGCATCCTTTGGTAGCCAAGATGGTCGACGCAGAATT  
GTGGATCCAATAGTGCTAGCCACTAGCTCCAATGAGTCATTGTCAATTGTAATATCCATCACCAACAAT  
GCATATCTACAGAGTCATCAACTCGCCCTCGTTTGGAGGATGTTCTCTGGAACCTACAATATGCTGCTCA  
AGTTCAAGCTACAGCTGATGCAGATCAGAAATCTGATGCTACTTCACCGTCATAAGCTATTTGAGAAGTA  
CAACTGCATCGAATCAACGATATTTAATTTGGTCAGATCATAGGAGAATGTTAGCTGATTAATTTTATGA  
TGGTTGTGGGAGTACCAACCGGTAGGCTACTAGCCTTAAAGCTCAAGTTTACGCTACAGGTCCTCCATA  
TTTTCTTTATTTTGTATCAGAATTGTAAATTTGTTGATTCTAGTAATAGGTGATGTTTTTATATAGTATAG  
ACCCTCGTTTTAAATTCTATCATTGCAAGTAGGCAATTGAACTCGTAGAAGTCTAGATTTCAGACAAGACA  
ATACTTTAGTCATCATATATATGTTTGGTGCAACGGAAAAAAGATATGGATACCGCAAATGCAAG

>PGSC0003DMG402026747 LRR-RLKs

GACTTATCATCAAACAACATGGTTGGTTCTTTACCTCCGGAATTTGGAATCTAAAATCTGTGATACAGA  
TGGATTTGTAGATGAATCAATTCTCAAATGGAATTTCAAGAGAAATTTGGAGGATTGCAAAATCTGGTGC  
ATCTTTCTTTGAGACACAACAAGTTGCAAGGATCTATACCTGACTCAATGAGCAACATGGTAGGTTTGGTA  
ATTCCTAGACCTTTCTCATACTAATATATCAGGAATCATTCTATGTCTTTGGAGAACTTCAATACCTCAA

GTATTTCAATGTTTCTGACAACAAATTGCACGGCGAAATACCCTCGGCGGGTCCTTTCAAGAACGTCTCG  
AGTCTTTTTTTCATCAACAATGAAGCATTGTGTGGTCTTCAAGATTTAGCGTCCCTCCATGCCCCACTTCA  
TCAAAGCATAGGTCAAATAGGAAAAAAATCTTATGCTGGGAATTGCACTTGTATTTGTTCTATTACCC  
TTGTGTTTGTATGGATAAGGTATAGAAGAGGTAAAAGATCTCCTCAGCAAAGTATTGTTCTATGGC  
AACAAACGGAAAGAATTTCACTACTATGAACTGCTCCAAGCAACTGATTCGCTTAGCGAGAGTAATCTGATT  
GGTTCTGGAAGTTTTGGCTCTGTTTAAAAAGGCGTTCTCAGGAGTGGGACTGCCATTGCAGTTAAAGTG  
TTCAATCTGCAACTGGAAGCGGCATTCAAGAGTTTTGATACAGAATGTGAAGTTTTACGCAGCCTTCGCC  
ACAGGAATCTCGTGAAAGTCATCACTAGTTGCTCCAACCTTGATTTAAGGCTTTAGTGCTCGAGTATAT  
GCCTAATGGAAGTCTTGACAAGTATTTGTATTCGCACAACACTTCTTAGACATCAGACAGAGACTAAGC  
ATTATGATAGATGTGGCATGTGCGTTGGAATATTTTCATCATGGATGCTCCTCTCCCGTGATTCACTGTG  
ATCTGAAGCCTAGTAACGTCTTGCTGGATGTGGATATGGTTGCCACCTAAGCGACTTTGGTATTTCAA  
ACTGCTTGGTCAAGATGAGAGTGATTTATACACAAAAACCTTAGCAACATTTGGTTATATAGCACGG

>PGSC0003DMG402029358 LRR-RLKs

ATTACAAGAAAGTTGAGTTCCTAGCCTTACTAGTTTACTGACCCCATTTGCTACAAATAACTCAATAAGTT  
TAAAAAAGTGATATTTTCTTCTTGATTTGCTAGGAAGTCTCTCAAGAATATCAAAATATGGAGAAAACC  
AATTCAGAACATTTCTTGGTTTTGTATTAGTATTACTACTTAGCAGAATTTGTGTCTGTTGTGCTTCAGA  
GAGTGATGTTTATTGCTTGAATCAATAAAAGATTCATTACATGACCCTTTCAATTCTTTGGGCTTTTGGG  
ATTTAGCAATGCTACTGAAGTTTTATATGTAATTTTCAGAAGTTCTTTGCTGGCATCCTGATGAGAAT  
AAGGTACTGAGCCTCTCACTTTAGGCTATGGATTAATAGGTGAGTTTCTCGTGGCATTCAAATTGTA  
CAAGCTTGACAAGTTTAGATCTTTAGGGAACAGCTTATATGGAACCTATCCCTTCTGATATTTAGCAATA  
GTTGAACATGTTACAATACTTGATCTCTCAAATAACACGTTTTCGGGTGATATACCACCTGATATAGCTAA  
TTGTCAATACCTTAATGGTCTAAAGTTGGATAATAACTATCTAGAAGGTGAAATTTCAAGCAGAATAGGC  
TATTTGCCTCGCCTTAAGACGTTCAAGTGTAGCCAACAATTACTTGACTGGGCCAGTGCCATTGTTTTATAG  
AGAAAGTATCACAGTTGAGAGTTTTGAAAACAATTCAGAGCTTTGTGGGAAGCCCTTGAAAGGATGTGA  
GGATTCTTCGATATGGAAACATGTAGATCATGCTTCGTTTCATCAAAGCGTTTGTGATTGGTTGGGTACTT  
TTGTTTACATTGGTTTTAGTCCTTTGCTTATTTAAATTTCTACCAAGGCTATCAACAAGATAGTCTCATT  
AACATATGGAGGCTAGGGAAAAAGGAACATTTAACTTCAGGAAGTGAAGAGGAATTAAGCAGCCAACA  
TAAGGTAAAGATCTTACTAAATTTGCTGCACTGCTTGTAGTCTGTAAAGTTACCTTTTCTTCTGTAGTTCT  
AATTTTGTGATTAGTCCTTGCTAGTCCATTATGTTATAAATTTCTTATTCGATCGATGATCAAACATGATA

GCAATAAGGTTCTCAAGTTTCTGTTCTGTATATGTTCAAATGATTCAACTTGTTGTTTTAATTACAGATATT  
AAAGCTGGAGAAGTTTGTACGAGAATGAACTTCACGGAGCTAGAAAATGCGACTTCTGGTTTTAGTGA  
AGACTATTTAGTAGGAAATGGAATGTTGGGCAAAGTGTACAAGGCAATTCCTCCAATGGCTGGATACT  
TGCCATCAAGAAGCTCAATGACTGGGAGAATTTGGAAGACGAGTTTGTCTCGGAGATTACAACTCTTGG  
TGGTCTGAGACATCGGAACCTATTGCCTCTTATAGGTTTCTGTGCTGAAAAGCAAGAAAGACTTCTTGTT  
TACAAATACATGGCTAATGGAAGTCTTGATGAATGGCTGCACTCGAATGAAGTTAGCGCCAAAATTTTG  
GATTTCCCTCTGAGAGCTAAAATTGCACTTGGGATAGCGAAAGGCCTGGCTTGGCTTCATCATGGTTACG  
AATTGCACGTTACACATGGAAGCATAAGCACGCGATGTATCTTGCTAGATCAAAATCTTGAACCAAAAAT  
ATCCAACTTTTGGGAAGCAAAAATTTGGAGTAAGAATGATTCTGCATTAAGTTGGAGTCTTTTCCAGTA  
GCTGAATATTCTGGTTTAGGCTCTTACAAGCAAGACATCTACTGTTTTGGTGTCTGTGCTTCTCGAGCTGG  
TAACAGGGAAGGAACCACATGAATTGACTAGCTCAAGAAATCTATTCGATCACTCGCCTTGTCTACTTGA  
TGCAGATAGAAATTTTCTGGGAAAGGAGCTGATGATTTAATCCTCCAATTTCTTGAATTGGCTTGTGAC  
TGTGTGAAGTTCTTTCTAATGAAAGGCCAACAAATGCTGGAAGTGTATGACAGACTCAAGAATATTTCTC  
AAGGTCGAAGGGACTGGATACAAAAGATACCATTATCAACCGATATTTCAAGTAAATATGACTAGTGCT  
TATGTTTTTATGGTTACTGAGAAAAACAAATTAGGAATACACTACATTAAAGCATGAAATCCGTGCTTCG  
AGTCTGTATGCTGATAGCTTCTGTTGCAACTTTAATATATATATATGAATACGTATATAATCTACAACATT  
GGAAAGCCTTACTGACTGCAGTTTTCAAGTCTGGCATTAAACATCTTGCAGTTTCTTTAGTTAGATAGTTTT  
TATTTGCATATTGTAAAGAAGAGAAGTTGACTATGAATCTGCATATACTAATAGAACAAATCAATGGTAT  
TTAATAGTTGACTTCATTGTGCTATATTGTGTAAGTTGACAGAACAATATATAAATCATATTATTGAAAG  
CTTT

>PGSC0003DMG402030114 LRR-RLKs

CCAGAAAACGATTATCAATAACATAATCAACATGTTTTTGTGTAATCTAAAGAACTGCCAATTATTTAT  
TTGAATTATTAATAATGGGAAAACCTCAATTAGCTCAAATTCAACATAATATTAATAAGAAATAGCTTTTGA  
ACCTAACTCAACTGTAAAAACAAGCTAAGAATTGTCCGAACTATATAAAGAGACCAAATCCATCATCCC  
ACTACAATTTTTGTGCAAGCACAAGAAAGTGCACCTACAAATTCATTTTCACAGTCTCTTTTTCTTCTCAC  
ATGACTTCACATATTTTATAATGAGGGTATCAAGTCATCGTGGGTAAGTACAAAGGAAGGGAGGGAGT  
AAATTACTAGCTTACTTAGTCAGAAGGAGACAATTATTATGGCTTGATTTTTCAAAGCCAAATACTTGG  
CTCTGGATGACTATTTAATTGTTGAAATATGATTTCTTTATTAATCCCACTGACTTCACAGACTTCATTA  
TCAAATGAAAAGAAGCACAAGGGAAGCATCAATTAACATGTTCCAGCAAGCTCTAACCATTTTTTTGCTT

AATATGCAAATTTTCTTCCTAATTAGCCTGTTTTTCAAGAAACCTTACAATTTTCGGGCACGGAACAGTC  
CATATTAAGCTTGAAACAACACTGGAGGGATTTCGGAGTTCCTCCAGTCATGGAATTTGAATTCCTCA  
GTATGCACTTGGTCAGGAGTTTCATGCCTCGATGACCGGGTAGTGACACAATAATCTTGGAGAAAAG  
AACATTACTGGAACAGTTCCATCAACAATAATATGTGAGCTTAACAACCTTACCTTCATTGATCTCTCAA  
CAACAACATTTTCAGGAACTATAACCACTAAGCATGAAAGATTGCTCAATGTTACAACATTTGGACTTGCC  
AAGAATTCTTTGAGCGGACAGATTCCAGGCGAGTTGTTTGGGATGAAACAATTAATCAATTTGTATCTTA  
ATGGTAACATGTTGTCTGGTGAGATGCCAAAACAATATCATCTCAACTGGAAAATCTTGATCTTTCTGA  
GAATCACTTGAACGGTTCGATACCAGAAGATATTGGAAACTTCAAAAATCTTTTGAATTTGGATCTGTCA  
CATAATTCTCTCAGTGGTTCAATTACAAGCAAGTTGTTTCAGTTGCATGATTTGCGTCACCTGTCGCTAAG  
TTCCAATACTTGTCCAGTGTGATACCTGATGAAATGGACTTGTTTAGTTTGTATGATATGGATCTTTTAC  
ACAACCAATTGACTGGTTCTATACCAAAGCGATTTAGGGATTTACCTGGACTGGATTCTATGGATTTGTC  
TTTTAATCAGTTATCAGGAGACATTTCAAAAAGTATAGAACGTCTTAGGCCTAGAAATACTTTAAGGCTT  
TGTTCCAACAATTTCTCAGGAAGAATTTCTACTGAATTTGTAAAGTTGACATACGAAGAGAATTGCTTTG  
ACGAGTCCAATCTTTGTTCTACATCCAACAACCTTATACATCCCCGGCCTACCAAGCTGCTCCTCTGGTGAT  
GAGGTTTCGAAAATCTTCGAAACCAAAACACTTGATTATTCCTATTGTAGGAGTTGGGGTAGCTACACAGT  
TATCATGGATCTTTTACAGAACAAGAAAGCATTGGTGGAAAACAAGAAGCAGAATGTCAAAGATGAC  
ATGAAGTTCATTTCAATTTCAAAAAGTTGAAGGTGACTACAGAAGACATTTTATCTAGCTTGAAAGACGAAA  
ACATAATAGGAAATGGAGGATCAGGGAAGGTCTATCGAGTTGTGATCGACCAAACAGGCAATACTTAC  
GCTGTAAAAGCATAGGGCATGGAAAAAATCAGGTGAAAGACCCCAAAGGAGTTCCTGGCAGAAGT  
TAGAACACTTGGTAGCATTTCGACACAACAACATTGTCAAGCTCATGTGTTGCATCTCAAGTGTAGACAGA  
AAGCTTCTAGTCTATGAATACTTTGAGAAACAAGCCTCGACAAGTGGCTTACAGAAAGAAAAGAGAA  
GCGTCACCCGGTCAAAGTAGTACCCCATCCCTGGATTGGCAAAGAGATTAATAATAGCCACTGGTGCA  
GCTCAAGGACTCAGCTATATGCACCACGACTGTACTCGACCCATCATTATAGAGACATTAAGTCCAGCA  
ATATACTTCTGGACTCAGAATTCATGCAAAAATAGCAGATTTTGGACTAGCAAAAATACTATCCAGGCG  
GGATGATAATCCTGAGACAGCTTCTGCTATTGCTGGAACATTTGGTTACATTGCACCAGGTCTATTACCG  
TTCAAATATATATCGTACCTCGTGAATTCTCAAAAAGAAATTTATCCAATCTAATATTAATTTAATGTTT  
GTCCTCACAGAGTATGCCTCGACATTCAGAGTGAATATAAAGACAGATATATATAGCTTCGGAGTGGTG  
CTATTAGAATTAACAACAGGGAGACAACCCATTCTCAGGGAGGAGCAAATGAATCTGGCACAATGGGCT  
CAACAGCGTTACAGAGATGGAAATTTCAATGTTGAGGCCCTTGATGAAGAAATCATGGAAACAAGTAAT

GTGGAACAAATGAGAGGTGTTTTAACTAGGACTGATGTGTAAGTGGAGCAACACCATACGGTAGGCC  
GTCAATGAAGGAGGTCTGCAACATTCTTCAAAGCTTCAGAGACACCATATTTTGAGAAAACAGAATGTTT  
AGCCTTACATGGATAAATGTAGTTGTATTTTTTTAACAGAATGAGAAAGTCTCAATAGCCTCAGCTGGTT  
TAAGTGGTGTCAAACACAAGGGCTTGTAAGCTTTACCTTAGAATGTAATTCCTTGTTTACATAATTGAGATG  
TCGCGAGGCAAGAGCTAAGTGTCTTGGCAATTACAGTTTATGTATATATCATTTCGGGAGATTAGACAGA  
TTTTAAGCACACTGAGCATTAAAGTCTAACAATGCTTTAGGAAAGTAATCATGATATCCGCATGGAGGTT  
AGAATCATATCTTCTTCTTTTTTAACTCTTCAGAACTCCCTAAGGAAGCTTTTGGAACTTACAGGTTTGAT  
GAACTGCAAATGCCTTCTTTCAGATATAAATCCTTCTCATGATACATGGGGATAATCTTGTAGGAAGTCT  
AGTTCTTTTAGTTAAGTTGAATGGGATCGTCCATTTTCGAAAAGGGGGCACAACCTTGAAGGCATAATTG  
ATTGGAAAAAATAATCGAAAGATATAGGAGAGTGTTTTTTAAATGAATAAGTCCTTATTGTAGTTGA  
GGAGATGATAATCAACTTCAAGAAGAACTTTCATCTCAAATACTAAAAAAGTTTTTCATACTATCAA  
TGTTATTGAATTGCCTCTGCATATGAATATACTTCATAATAAATGTGGGACTTCTCACCGCGAATCTGAAT  
TTAGTTAAACCTCAATGCATGTACCGGACATTGGGTGAAAACAAAAAAGGATAGTATGAAAACTATCC  
CAAGTGTGCAAACCTATTAGCTGGAAGTGTCTCGCACTGAATGTAGAAATGCAATATTGATGGCTCCT  
CTAATGAAAATCCAGACCCCAGATCGTGGACCTTTTTGTATCAGAGATATTATGGGAGAGTTAATTTATG  
CTACTACTAATGTCATGAATCATGATTAACACTACTAGCCTATGTGCTGAGGCTAAAGCAATAGAAAAGG  
AGTTGGAATATTCTGTGAGCCATCAATACAACCTCTTATAATAGAGACTGATTCAACCAAGTTGCGGATT  
TTTTAGCTAATTATGTGTTTATTATCAATATCTACTATATGAAGCAAAGAAATTATTGAACATTGATAAGC  
AACAAGTTCCCGGTGATATTTTAAAAAAGGCAGGAACTAGCAACAAGAACAACAAGCAGGCTACT  
CAATCAACTATCACAATAGACTATCCATACAAAATATACAAATCTTCATGAGTACAACCAGAGTAATAAC  
AAAATACAGATGGTGAATTAACCTTGACAAATCCTCAAATATTTTCTTATCAAAGTGGTATCAATCTCA  
AACAAGGTTCAATCTTTTGGGGAGGAAATATTAGAGGACTATCTCGGGGGTTTTTGACACTTTACTCGCT  
TCTTGAAACTATTTTGGAGGATGGTAACATGTTACACCCCAACTTAGGGATGCAACTAGCACCTGGTGCG  
ACACTTGACCCTGAGTCGATCCTTGCTGGACAACACTACGCTACCAACATAACACCAGCCACAAAATCAAAA  
AAACAAACAAGTATATTTCAACTTAAAAATAAGGCCTCTATCGGCAAGGACCCTGTCAACATAATCTTCA  
ATAAACTCAACTACTCCCAGCAATTCATATAGAATAGAACTAAATCATTTATTGCCCGTCAAGGTCCTG  
TTATATCTAGAAACATATAAACTGAACACATATAGTCATATATGATTAAGGCCAACAAGCCACTAAGCTA  
AAAGGGCAAAAACAACAAGGCCAGCATAGCCAACAACACACATCTATTCAATCGAAAGTTTGCAAGCCTC  
TAAGAGTAATATACTTGGTTCGGGACCCTTATACTTCTGTCCCGACCTACCTATTAGTTGAATATGACAAA

ACACTAGCAAACCTTTAAATTTGGCAACTCTAGAAGAAATAGAGCTGACCAATCTTCTGGAACCTCAGCTA  
CACTATTGAGGAGGCTTGTTTAGCTGTCTGTCAGGATCTGCAGGCAAAAATGCAGCACCCCTGCCCCAG  
GTATGAGGCGTCATTATGAATTGATATATCGAGTATAAAAGGCAATAGAATAACTGAGCAGGTATCATA  
ATGTACCAAAGTAATCAGGTAAGGAAGTCAAGAATTAGATGAGTGTACTGACCTGTAACACCTTAGAA  
TTTGGCAAGTGTGGTTTGGAAAGTGTGCATGGTTTTAACGGGCAGGTTTCATGGACAGTGAAGTGGTCCAC  
GACCTGCCAACCCATCCGTGAACCCTACTCCCCAAGGCTCAGGAGAAGTTCATCCCTCACGGACGCCTGA  
ACGGTCTGTGGAAGGGTAAATGTCCAGTTGATAGGGCCGTGGTGATTGGCAATAAAATCCCATTTTTTC  
TCTCTTGTTACAATCACCTTCATGGACCGTGAAGTGATAACCGGTCCGTGAAGGCCTCCGTACAGGGGT  
CCCGTTAGCTTTTAAGTCAGGGCTATTCTAGTATTTTCTATGCGTCTAATACCTAAGCTATGTTGTTTTGA  
CCCCTATTCTAAGACCTATATAAGTATTTTAATTCCTAAAACCTACCCATTCTAAAATCATTCTCCTAAAATC  
TCAAATCCCTTCAAGTTCTTCCCCAAATTCCTCTCTCTCAAGCAAAGAAAAGAAAAGCTAGGGTTTCAC  
TTCAAGGTCTCCAATTCACCATAAAAATTTGGGCCTTGATCATCAAGATATGTTACTATTCACCTATGGAGT  
CTTTTCTCCATTGGGTTCCCAAAGGTCCCAATTCTACAAGCTAAATTTTCAATTCAAAGTTAGGATTTTAT  
TCAAATCCATGAATTCTTCTCAATTATGATTCAATTAGTTATTTCTAGCTTCTAATGCATGAATTGAAGT  
ATTTACATGATTTTGAGTTGAATTCATATGAACTCATGCATCCATGATTTTTACTATGAACACATGATGAA  
ACTTATGAACTATGCAATATGAATATATGAAGATATGCATGTTTTTGTGAAATTAATGTATGACTTGAGG  
ATGCTTTAGATGAAAAGTATCAATAAGATTGTGAAAAGTTTTCTCACATGCTACTATGATCATGATTGTAA  
AAGTTTTCTTACATAAGGTTGAAAGGTTTTCTCACCTAACTGAACTAAGATTTAAGGAGCTATTCTAAA  
TGACTTTAGCTTGATTGGTAGCTTAAACGTGCCTTTCCATGGATGATGAATATGATTAATGACTATTCTG  
TGGGATTTTACTTAGCACCGAGAGGATATTGAGATGGAGGCTCTCCAATTAGTAGAGGTCGGGTCTCTA  
GTAGCAATCTCCTTGCCCTAACTACGTGCCCCGTAGGATTTCTTAGCTAGTGGATCCACGTAAACTAG  
AAGTTTATGGTCCTTACTTAGCAAGTAGGACATCTCGAAATAGACACCGGATTTTCATGTTTTAGAGCACA  
TGTTCCATATCGGTTAATGGAAAACATCCCACAATAATGAACTAGATTATTTTCAAAGTATCTCACCAAGT  
GTTTTAAATATGTTAACCTTGCAATTGACCATGATTATGACTTGTGTTTCTAACACCGTATCTTATGCTTTAT  
CTTGGCTATTGCATATCATGTAAAGTCTTTTTAGCATGATTTTCATATTGTTTGTGCATTGTTATCATACTTA  
GTATATTCCATGTACTAATGTATACTTGTGCCTATATTGTTTCCCTAATGTAGGGTCCGATGCTCCTACCTC  
GCATACTTGTGGCTAGTTGATCTCTCTTGTCGATTTGAAGATTGGTGAGTCATCATGTTCCGAGGACCAA  
GACACTTTTATAGCTTTTCTTTATTTTTCAGTTTTTTCAGACATTGTACGTGGCGTATGGGTTATATCCCAACCAC  
TTCTTTTATGATGATTAGATGGCTTGTTGAAACTATGTTAGACTTCCGCTTTGTCAAAAAAATTTATGATAT

GAGAATATTTCTTTGAAATCTTTATTTCTATTATCTAGTATGATACATGGTAAGTGACTAGCATAGGGCCT  
CTCGGGGTTCTATACGCTGTATTACACCTAGGGTATACTTTGGGTCGTGACAACTTGGTATTCAGAGCA  
CAAGGTTTAGAAAGGTCCTAGGATGGCTCACAAGCCACGTCAAGTAGAGTTTGTTTCATGAGTGTGAAGC  
GCACCATATTTATGAATAGGAGGTAATAGCCTATAAGATGTTTAGGAAATCCACTTCTTTCTTTATTCTA  
AAGTCGGGCGATAGAGTATAACTCTGTATGTCTCTCATAATCCTTACCCGATGCTTTTCGGGATATGG  
CTCCTCGAAGAGCCTACGTTAGAAGGAATGCTGGAGAGAATGTGGAATAAGAAGCTCATCAATTTCTGG  
CCGACCCTTTTGCCGAACAAATGACTAATGCGGAGTTCTGATTTCGTTTTTCATGTTTTGCCCTCAAGTTCA  
TAGGTATTGCAATCACATAAGTTTTATGTCAAATAATTGTAATGATGTGAATATCAACAAGGAGTGATA  
TGCAGCTAATTACAAAGCCATTAAGGCATCAACAACGTAATGAGCTATCAATACCCCATCTAAGCAATGA  
CAATTTATCCAAGAAGATTCTTACGTCGCTTTTTAACATGTATCACCAACTAAACAAGAATAATCCAATA  
AGGAAAGCTCACATGTATACATATATAACTCTAGCAACCAACTCCATCAACAACCTATTATGACTATGA  
GTACTATGGTGATAAAGAACAAGTCGCATTACCTATACGACAAAGAACTTGCCGAAAAAGTTAAGCT  
TTAACATACCTTTTTTCATCGAATTTACTCTGTATATTACTTCTGCCCGCACCTTATGATACTCGCTGCAG  
ACACCCAAAGAACTTTCAAGAACTCAAAACACAGCCAGATCCCTACTGACACAACCTTCCACAGAGCTACA  
CCGCACAATCCACAGAGAAAAATATACCAAACAAAGAGCGCGAGACGTAGAGCAATTTCCGTTAAA  
GACCCAAGACAAGATCATAAATATATATATGGATGATTTAAAGGTTGAATATCTCGC

>PGSC0003DMG400000386 LRR-RLPs

ATGGTGTTTGAGAATGATAGAATCAAGAATGCTTATATTGCTTTACAAGCATGGAAACAAGCTATCATT  
CAGATCCCTTAAATATCACTCTCAATTGGGTTGGTCTAATGTATGCAGCTACACCGGAATCTTCTGTGCT  
CCGGCTTTGGATAACCCCAAAATCCGTACAGTTGCCGGCATTGACCTTAACCATGGTGACATTGCAGGGT  
ACCTCCCGGAAGAGCTTGGGCTTCTTACAGATCTTGGGATTTTCCATATCAATTCAAACCGTTTCTGTGGT  
ACAATACCAAGAAAATTCAGCAAGTTGAAGATACTGTTTCGAGCTGGATCTGAGTAATAACAGGTTTGCT  
GGGAAGTTTCCTTATGTTGTTTTGAGTTTACCCAAGTTGATATTTTTGGATATTAGGTTCAATGAATTTGA  
AGGTAATGTACCTTCACAGCTTTTTGATAAGCCATTAGACGCCATTTTTATTAATCATAATCGATTTGCGT  
TTGAGTTGCCGGAGAATTTGGGAATTCGCCGTTTCTGTGATAGTTCTGGCGAGTAACAGTTTCCATGG  
GTGCTTCCGGCGAGTATTGGGAATATGAGTAATCTTAATGAGGCGATTTAATGAACAATGGGTTGCG  
TTCTTGTTTGCCGGCGAGATTGGGGTGTGAAAAATTTGACTGTATTTGATGTGAGCTTTAATCAGTTG  
ATGGGTCCGTTGCCGGAGAATTTGGTGATTTGGTGAATTTGGAGCAATTGAATGTGGCACATAATATG  
CTTCTGGGACAATTCCGAAAAGTATTTGTCAGCTTCTAAGCTTGAGAATTTTACGTATTCTTATAATTTT



TTCACTGGTGAACCGCCGGTGTGTTGGGGTTGCCGGAGTTTCATGATGAACGGAATTGTTTGCCCAAC  
AGACCGGTGCAACGCTCTCCGGGACAGTGTAAGGCCTTTTTGTCTAAAAAATTCATTGTAGTGCTTTCA  
GGTGTCATAAATTTGTTCTGTTTTGCCACCTCCTCCGCCACTTTCACCGCCCTTGCTGCCCTCCGCCAC  
CTGTTTATTCGCTCCGCCACCAGTTTATACTCCTCCTTCTCCTTCCCCACCACCTCCTCCACCTCCAGTTTA  
TTCACCACCGCCACCACCACCCTCTCCACCTCCTCCATCACCTCCCCGCCTCCACCACCAGTCTATTACC  
TCCACCCCCACCTCCATCTCCTCCTCCACCATCACCTCCACCACCACCCCGCCATCTCCACCTCCACCACC  
AGTTTATTCATCACACCACCAGCCACCATCTCCCCCTCCACCATCACCTCCACCTCCTCCCCACCCGTTTA  
TTCGCCACCACCATCTCCACCTCCTCCATCACCTTGCCTTATTGTATACGCTCACCTCCACCACCAATTC  
CCCACCTCCTAATTCTCCACCTCCACCGCTTGCTCACTCGCCTCCACCCCTTACCTTACTATTACAATTCA  
CCAGCACCTCCGCCCCCAAATTCGCCGCCTCCACCACCAAAATTCGCCTCCTCCTCCACCAGTATGCATATA  
CTCATCACCTCCGCCACCAAAATTCACCTCCTCCACCACCAACATACGTATATTCTTACCTCCTCCACCTCC  
TTCCCCATTGCCTTGTATAGAACCCCTCCACCACCTCCTCCTTGCATTGAACCACCCCCACCTCCCTCCCC  
TTCACCATCACCTCCTCCACCACCAGTTTATCATTACAATTCTCCGCCCCACCATCTCCATCTCCTCCACCA  
CCAGTTTATTATTACAATTCTCCACCCCCACCATCACACCACCTACTCCAGTATATGAAGGGCCATTGCC  
ACCAATAATAGGAGTTCAATATGCTTCACCACCTCCACCACCCTTTTATTAA

>PGSC0003DMG400000819 LRR-RLPs

CTCTTATTCTACCTTAGCTTTCTATAAACATTTTTAACAAGCACCTTCTTCTTTACTTCTTTGTTCCCTCCAT  
TTCCCTGTTTGATTGGATACTTTTACCATTTTCCACCACTGCCCAATAAAACAAAAAAGTACACATTTTTT  
TTTATATTTATGAAATGAAAGCATTTTAAGATACCCCTCTTGGAGTTTCTTCAATGTTATAAGTTCTAGTT  
TGGCTTTAAACACTTTTTCTTGCATAGTTGACAAAGTTTATTACTTTCAAGATTTTGTCAACCCAACTCACTT  
TCAAGCATTTTTTTGGGTTTTAAAGAGTGATGGGGGTCTTCAAGAACTTGTTTATGTGATAAAGTTGTTA  
TCTTTGATCACTTTGTGTACTCATTTTCAAGAAATTTAGCTTCAAAGAGTGATGGGGGTCTTCAAGAAC  
TTGTTTGTGTGACAAAGTTGTTTTCTTTAACACTTTGTGAACTCATTGTGTGATAAAGTTGTTATCTTTGA  
ACACTTTGTGTACTCATTTTCAAGAAAATTTAGCTAAGATAGGGGTCTTCAAGAATTCTAACTAGTTTGTCT  
TATGTGACAAAGTTCTAAACTTTCAAGAATTTGTCAACTCATTTTCAAGAACTTTTTTGTCTACAAAAAG  
TGATGAAGGGTTTCAAGAATTCAAGATTGTGTGTGTTAGTTATCTTCTTCTCCTCCATTTTGGTGTGG  
TGCAATGGTGATACTGAAAACATGGGAGCTCAAATGGAGAAAAATGAGATAAATTCTCTTACTCAACC  
ATTCAAGGCTTTGTTGGTAAATGGTGAATGGTTCAGATCTTATCCAGATCCTTGTGGTTGGACTCCAA  
TACAGGTAACACAAAAAAATTACATAATTTTTTCACTTTTTAGTTACTTTTCTGCCTTAAGGATTCTGTT

AAGTAAAAGGTAAAAAAAAAAAAAAAAAAAAAAAAACTATCTTTTTGTGCATATGGTTCTAATTGCCTTT  
TATTATTTGTGGTATACATGACAAGATATGACTTCTCATTGTATATAGATTGTTTTAAAGCTTTAAGTGG  
CAATTTTTACTATGACATATAATCAAAGAAATTGATAGTATATTTGGAATGATAGCTAATTAGCCATAG  
AAGTTTGATGAACCAACTTCAATAATGAATATCAGTACATTCTGGCTTGTTTTGTTTAGCAGTTTTGAC  
AGACCAACATAGACAGAATATGTTTTAAACACAATGATAATACAGGACAGGACAGAGCTTATACTAAA  
TATACTCCGTTTCGTTTCAATTTGTTTGTCTGGTTTTGATTTGACACGTAGTTAAAGAATGTACCATAGTTTT  
CTTTAATCTTGTGGTTTTAAACATGTTATGTAGAAAGTACAAAAGATGCATTCTTTTTGGAACATACTAAA  
AACGGAAGTAAGACTAACAAATTGAAACGGAGAGAGTGAGAGTGATATAGTTGATGCATTATACTCAT  
ATTTCTGATTTGTTTTGTTTCTATTTCTCTGTCCAGGGTGTATCTTGTGACCTGTTTGATGGTTTTTGTA  
TGTTACTGACTTAAACATTGGACCTATACATGATAATTCTCTAAGTTGTGCACCAAATGTGGAATTCAGCT  
CCAATCTGTTACATTAAGCACCTAAAATCTCTCACATTTTTCAATTGTTTCGTGTGCCTCGCCATCATC  
CAACTTCAATCCCAACAGAGAGGTGGGAGTTTCTTGCTAGTAGTTTGGAGTCACTCGAGTTTCGATCAA  
TCCCGTCTCATTGGCCAAATCCCAAGTACATTTGGTAGACTCATAAAGCTCCAATCTTAGTACTAGTAG  
AAAATGGACTCTCTGGTGAAATGCCACAAAGTCTTGGGAATTTAGTGAACCTTGAAAAGACTAGTTCTTG  
CTGGAACAAACTCAACGGCGAAATCCCGGATACTTTTGGAAGGTTCACTCAACTTTTGATATGTGATTT  
AAGCAGAAACAACTATCTGGTGTCTTGCCTAAACCATTATTTGGAGGTTTGATCTCACTTTTGAACTTG  
ATTTGAGTTACAACAACCTACAAGGCAAAATCCCACAAGAGATCTCACAATTGAAGAATTTAACACTTTT  
AGACCTTAGTAACAACAAGTTATCAAGTGGATTACCTAAGTCAATTCAAGAAATGACATGTTTGGAGGA  
GTTAGTCTTGTCAAACAACCAATGGGTGGATTCTTGGATGTTCTTGATTGGTATAGCATGATAAAGTTA  
ACAACTTTGGATTTGTCAAACATGAATTTGACAGGTGAGATACCTAAGTCTATAGTAGAGTTAAAAAAGT  
TAAGATTTTTGGGACTTAATGACAATAAACTCATTGGTAAAATCCCAAAGAATCTTGAAAATTTGCCTAA  
TGTAAGTGCTATTTACCTATATGGTAACAATCTGACAGGTGAACTTCAATTCTCTCAATGGTTTTATAGGA  
AAATGGGAAGGAGATTTGGGGCATGGGGGAATCAAATTTATGTTACACTTTTGGTTTGGTGTCAAGTG  
ATGTTCCATTTGGGGTAAAACAGTGTCAACAAGAACTCAAGTTTGTTATTGATGTTGAGATGAACTCAAG  
TTTTGTGGATTTTCAATCTTCAATGGGATATTTGAATGATTGTGGGATTTGGAGATTTTTGTAGTTGAAC  
TATTCATGGTTATTCTACTATTGTTGAAATGAAAGGAATTTGACAATAGTGATTTACCTTTTTTTTTTTTG  
ATATTTTGTGTTGTTTTACTTGAAATGTACCACACATTTTGGTTTGTCTTTTAAACATATGAATGAATGAAT  
GTACATATTTTACC

>PGSC0003DMG400000888 LRR-RLPs

ATGGAAATCAATGATGTTTCGGATTGTGGGGATCTGGGGAATGGGGGGAGTTGGTAAAACGACAATAGC  
AAGGGCTATTTTTGATACAACTCAAATCGATTTGGTGGTGCTGTTTTCTGCGGATATTAAGAAAAC  
AAATGTGGAATGCATTCTTTGCAAATATCCTTCTCTCAGA ACTATTGAGGAAAAGAGATAATTACGTGA  
ATAATAAGGAGGACGGAAAGCATATGATAGCTCGTAGACTTCGGTTTAATAATAAGGAGGACGGAAAG  
CATATGATATTTTCGTATGTATTGAAAAAACCAGTGCATTTGTATGTATGTCTAGTCGAAAAGCTTTTCCT  
GCTGGGATATAACGAAAAGCTTTGCAAACGACAATAGCATGGGCTATAATTAACAGAAGCTGTAATTAT  
GGTTTTCAGTACAACCCATGTACTGGTTTTGTCAATACATACGAATGTTACCTTTCTCAAAAAAAAAAAG  
TAGCTTTTCGACTCGACTCTAAAACCTGAGAAATTTGAGACTATTGTGTATAAGCTTTGGCATTGTATTAA  
TTTATTGAGTGATAACATACGCAGGGAGTGTATTTATACACATACAAGAGTTAGACTTAACCTAAGACTA  
GTTCTTCTAATACAATAGGGAGACTAACTAGTTGGATTCACTACTCTTACCTTGTCTCTGAAGAATATGGT  
GGTCCTTGCTAGAGTCTTTGTATGAATGTCAACTAGTTGATCTCTTGATCTGACAACTGAGGATTAGTT  
ACAAAGTGATAATCCAATTCTACATGTTTAGTTCTAGCATGTAGA ACTGGATTTGTTGTCATACATAGTGC  
ACTCATGTTATCACA AATAGCGTAGGAGCAGACTTGATGTGTATCCCTTTATCCATGTGAGCTCAACAG  
CTGTAGCTGCTAAGGCTCTATACTCAACCTCTGTACTTGACCTTGGCTAATTCTTTAAAATTTGGATAAT  
CATAATGAAATTATAGCCAATTGTCAAGTTTAAGGGGTTTAGATATTCTACCTTTATTTATGGTAGTAAC  
TCTTTATTTAGTTTCTTTCTGTGTTTTGAATAGGAGCTTTTGCCGTCTCTACGAAAGCTAGATCTCAGCTA  
CTCCAAAAGCCTGATGCAAGCACCAGATATCACAGGGATGCCAAATTTGGAGTATTTGAATTTGACGGA  
TTGTATGAGTCTTGAAGAGGTTACCATTCCCTAGGATATTGTGAAAACTCATTGAGTTAAGTTTGACT  
TGGTGTTTCGAGGCTTGAAAGTTTTCCATGAGTTAACGTGGAATCTCTGCATCTAGTGGCTTGCTCTAGTT  
TAGACAAATTTCCAGAAATCCTCGGAAGAGTGAAGCCTGAGTTAAAAATTTTCATGCATTTCTCTGGGAT  
AAGGGA ACTACCATCATCTATTGTT CAGCACAAAGCTTGTCTTCCAGAGCTAGATTTTAGTTCTAAGGAA  
AATAAAGCAGCAGTTCTAAGTTGAAAGGTTTGGTGTGTGCGGTTGCTCAGA ACTGAAAGCTTGCCAGA  
AGAGATAGGCTATTTAGAATACTTGGAGGTGCTTGGGCTCACAGTCTCCGCCTCCGCCTTCAATCTGTAA  
TTTGTGTTTCAGAATATGTCATCATTGCTGCACGACATCTCTGCTTCAAATTCTGCTACTAAGAGTTCTTA  
CTACCAGTGGGAATATCCAAGTTGGTTCCACCGTCGGGGAATTGGTAGAATTGTATCGGTCAATTTGCC  
TGAAAATTGGTACGTTAGTTATAACTTCTGGGATGACCCAACAATTTGCCTCATCCAACCATT CAGATTT  
TGATACCAAACCTACTATTAATATTTTCTTGGTATCTTTTGCTGGCTTATGGAAAAACACCAAATGACTAT  
GGACTCCTTGTGTTATGTTTATCTGGAGAAGTGAAGGAGTTTGGACTTCGTTTCTTGTATAAAGTTGAAC  
AAGAGCTTGATGCCTTGTTACAAATGAGGGAAAATAATAATGAACAGATATGAGCACCATGATGAAGCC

AGTTTCTCCTCTTCGAAGAAACAAATATCTTATTTAATATAGGTGGGAGCTGTCTTTGAGAATCTGCAGC  
AACAAAGTAGAGGCACCAGTTTATTCAGAACTTTCCAGGTATTTCCCGCAAGCCAAAATTTTGGCATAA  
AAATAGGTATATACCTCATGATTTGTTTTCTTACTAGTTGGTAGTGAAATATAGTTTACGTATGTATTT  
ATGTCAGTTAATCTAAGAACTCCCTAAATGAAAGAATTGAATTATGAAAGATGTTTGAAGTTCTAAGGA  
GTCCAGAGAAAAGGCAAAGGGTTGTTACTTATTCCCTAAGGTATCCACTGATCCATGGGTTTAAAAT  
TTATTAATAATATCATTTTGATGCAAGGAAATCTCTGTTTTAAATACAAATATCTCTCAGGTTATGGCAGGG  
AGTTTGGGAGCACAATGTGAGACAGTGGAGGAAGCTGGAGTACACGGTGAGGTTAGTAAATCACCTCA  
CATCTTATGATTTGCATCATATCGTGGTGCTCCATCTGTGCAAGCCATTATTCTGCTTTTCTTAGTACCAG  
TTTCAGATTTTGATGCTAAGGTTGTACTIONTCAAGTTTTAACTATACTGTTCCCTTGATCATGTCTTTCTGCA  
GATGTATACCCTACCAATATAAATATTTACCGTGTGCATCGTTGGTAGATGAGGATGCCTTATAAGTTCTT  
CTAACAATCCACAGAGAAAAGGCAAAGTGTGTTTCAAAGGTAGCCACTGATCCATGACTTCAAACCT  
AATTACTAGTTCAATTTGATGCCCTCTTGTATGGAAGGGAGTTTGGGAAAAGATAAACTCATTGAAG  
GTCCAGCACAGTGTGAAACAATGGAGGAAGCTGGAGTACGAGGTTAATTTGAGGTTTCGTTTCCCTCGTG  
ATCTCTTTACCTCTTAGTTTTGTTTTAAATTTTCTATTACATCAGATAAAATATGTTGCCATTATCGAAAA  
CATCAGAATACTAGCTGTGATAGAGTTGGCTTATGACCTTCCATCTCTCTCTCTCTCTCTTTTTCGTAAA  
TATTGAATGCTAGATTAGTAAGCCAAGACTGAATGCACCAATTCATGATTAGATGTTGTAATCGTTGTTG  
ATTTAGGAATATGCGACCTTTTTATCTTACTGTCTTCTGTCTCGCTTGTGGCTTTGATCTTCACAAAAGTA  
ATAACAAGTAGCATCTATGTTTTGATTACTTATTTCAAGTGGTTTTAACAAGTTTCACTCTTTTGGTTTTGC  
AGTGCCTGTGAAGGCACATTGTTTTCTGCGCTCGTAACAGAACAACCAGACCCTTTGCCTGAGAAAGAG  
ATTCACGGAACGACAAAAGTTATCCGTTCTCTTCAAATCTTATATATCAATTTACTGGTCTTATTAGTAA  
AGGTGACACAACCCCTCTCTTGGATCAGAATACCACGTTTTCAATTTGAAATAAAAATTATGTCTTCACATTG  
CTGATGAGTAGCCTGTCCAAAATCATATAGCAGATGAATGTGCGCGGAAGCAAGAAAGCTATGCTAA  
AAAGGGTCAATGAAAGAAACATTGGAACACTATATCTACTACTCTGCATATATATAGTTTCATAATCAA  
TTATTGGTAATGGTAAGGAAGATTTCAGAAAAGCTGTGCAATTGTAGACACTAATATTTGTTTTAATTAA  
TTTGTCAACTCTTCTTATTGCCCTTTTCAAAGTTAGCTGTTATCTGGTGACACAAAAATTGTTTAGATTA  
TTTTTATTGATTCAGTCTGTTGAAGACTGAGCAATACTTTGCTGGATTAAAGACTTTTAGCTGTCCATTGT  
GTACATATTACGATGAAGTTTTCGTGTAGGGGACTGGTCTTTGAAGGAATTTCTAATACCACAATATTT  
CTAATCAACTGGAGTAGACATTAAGAAGCTTCACAGAAATTTCTATTACTTCTATAGTTCTATTAATATT  
CAATGAAAATGTACCACATATAATTTGACTAGATCCAACAATAATAATTTATTTAACTGGAGTAAACCGA

ATGCTCATAGAAGCTTTTTGTTTCTTCTTCTGTATATAACTTTGTCCAAAATATCATCAATTGATCTCAT  
CCATACAGTCTATTTTTCTTTTCAGACAATTAATCAAATATATGGCATCATCTTCTTCTTCTGTGAGTAATT  
CACAGTACTGTACTCGATGGAAGTACAATGTCTTTCTAAGTTTTAGAGGCAAAGATACCCGGAGAAATTT  
TACGAGTCACTTGTACGAAGGTTTGGACAATAGGGGAATATTCACCTTCTAGACAATAAAAGGCTAGA  
GAATGGCGATTCCATTCCACAAGAGCTCTTGAAAGCTATCGAAGAGTCTCAAGTTGCACTCATCATTTTC  
TCAAAGAATTATGCTACATCCAGGTGGTGCTTGAATGAACTAGTGAAGATCATGGAATGCAAGGAGAA  
GGAAAATAATGGAGAAACAGTCATACCGATCTTCTATGATGTGGATCCATCACATGTTCGAAACCAAAA  
TGAGAGCTTTGCAATAGCATTGCGCAACATGAATTAAGTATAAGGATGATGTTGAGGGGATGCAGA  
AGGTGCAAGGATGGAGGAATGCCCTAAGTGTGCCGCAGATCTAAAAGGATATGATATCCGTCACGGG  
TGAGTTAAAAACACATAAATTGTTTTATGAAAAAGGAAATGGAATAATTTCCATCCAAATTTAGATGCT  
TCTACGAAACCTAGACTTATTCTACAATACAACAGGAATCTATACCTTCAAATGAGTTAATTTAGTTAGA  
GAGAATACACAATAATCTTCAAATGTGCAAGTTTTATACTTCAACTGTAGAGTGTGCTGTTTCCCTGAA  
CTACAATGTTTCTATTTGATTAACAATATGAAATACTTACTACTACTTGACTTTCACATTTTCCACAATCA  
ATCTTCTTATTTATGCAGGATCGAATCAGAGAATATTCACAAGATCGTCGATCACATCTCTTCCAAATTAT  
GCAAGACTTCTTATTATTTATCTTCTTTGCAAGATGTTGTGGGAATAAATGCTCATTTAGAGAACTAAAA  
TCCCTACTTCAGATAGAAATAAATGATGTTCCGATTGTAGGGATTTGGGGAATAGGTGGAGTTGGTAAA  
ACGACAATAGCAAAAGCCATCTTTGATACTATATCTTATCAATTTAAAGCTTCTTGTCTTCTGCGGATGT  
TAAAGAAAATGCAAATTATAATCAATTGCATTCTTTACAAAATACCCTTCTCTCTGAACTATTAAGAAAA  
AAGATGATTATGTCTATAATAAGTATGATGGAAAGTGCATGATTCAAAGTAGGCTTCTTCTAAGAAGGT  
GCTAATTGTGCTTGATGACGTAGATCATGTTGATCATTTGGAGTATTTAGCAGGTGATGTTGGTTGGTTT  
GGTAATGGCAGCAGAGTTGTTGTAACAACTAGAAATAAACATTTGATAGAGAAGGATGATGCAATATAT  
GAAGTATCTACACTACCTGATCATGAAGCTATGCAATTGTTCAATCGACATGCTTTCAGAAAAGAAATTC  
CAAATGAATGTTTTATGAAGTTCTCATTGGAGGTAGTAAATCATGCTAAAGGCCTTCTTTAGCCCTCAA  
GGTGTGGGGTTCTTTGTTGCATAATAAAGGCCTAACTCAGTGGACAAGCACTGTAGACCAAATAAAGAA  
AAATTCTAGTTTAGAAATTGTTAAAAAGCTCAAAGTAAGTTATGATGGGTTAGAGCTTGAAGAGCAAAC  
AATATTTTATAGATATAGCATGTCTTTACGAGGAAAAGAAAAAACTAGTCATGCAAATCCTTGAGAGC  
TGTGATTTTGGAGCAGAACACACATTGGATGTCCTAATTGATAAATCTTGTGTTTCATCTCAAAAAATG  
ATAAGATTGAAATGCATGACTTAATTCAAGATATGGGTAGATATGTGGTAAAAATGCAAAAAAATCTG  
GAGAACAGAGTAGACTCTGGAATGTTGAAGATTTTGAAGAAGTATGGTCAACAATATAGTAAGTACTA

AGTAGGCTAACAAATGCAATGATATTTATTAGTCTTCATGTTTTACTTTTTATTTAAAAGAAAAAATTGTT  
GGTACTGTCTCAATTACTACTTCATTTTATCATAACATGATTTTTTTTTTTTCAATTTGACTCTTTAGAACTT  
GTCAAAAATTGTAATACTAGAAATTAGAAATATAGAATTAATTGCATAAAGTATTTCTCTTTAGCAACATT  
TTTCTTAAGAAAGTCCTAACTAATATTTTACCTCTTTTTTTTTTTTTTTTTTTAGTGTTGCTAGCTTTTCAAGC  
GAAATAATAAATAATGCAAAATATGATGAAATTTGGCATTGCAAGGAGTTATAAAGTAGTCATGAGATT  
TTAAACAAACATTTGAAGTTGTGCTTTGTAGACTAATGGATCTTTTATCAGGGGACCAACGCAATGGAAG  
CAATTTGGATACATGGTGTTCAAAACTATGCTTTAGTGAAAAAATCATGAAAAAGCTTAGATTATTATC  
CATCATCAGCTTTCATAACATGATGACTCCATTGAGTATCTGCCAACAACTTGC GTTGGTTTGTTC  
ATGATTATCCTTGGGAGTCATTATTAGAAAATTTGAACCTAAAAAGCTTGTTTATCTTGATCTCCAGCAC  
AGTTTGCTGCTTCAATTATGGACTGGAACAAAGGTACAATTACTGAATACAGTTTTATTTATGCTTCTTTT  
TGTCAAATACATCTTGACCATTCTAATTGAAAACTTGACATAAAAAATAAAGTAAAACAATTTCTAATTTT  
ACACAAAATATTGTGTTGACTCTCATAATCTGAATGTCCTTACTCATTTTTCGTGTAAGGGAGTAAAATTA  
TACGATTGCCACTAGCCTAATTCGCATTCTTTCTATGTTCTGAATTGCAGCATTGCGCTCTCTGCGAAA  
GCTAAATCTTAACCACTCCAAAAGGCTGTTGCGAACACCAGATTTACGGGGATGCCAAATTTGGAATAT  
TTGAATTTGTGTAAGTGTAGTAATCTTGAAGAGGTTACCGTTCTTGGGATGTTCCAGAAAACCTCATT  
GGTTAAAGTTGTATAATTGTGAATGTCTTAAAGGTTTCCATGCGTTAATGTGGAATCTCTTAGATCTCTG  
GATCTACGATATTGCTCTAGTTTAGAAAAATTTCCAGGAATCCTCGGAAGAATGAAGCCAGAGTTAGAG  
ATCAAGATGAGACGCTCTGGGGTAAGGGAAATACCATCATCTTTTATTCAGCAACACGCATGTCGTCTTA  
CAGAGTTAGATTTGAGTTTTATGAAAACTTGTATCTCTACCAAGCAACATTTGTCAGTTGAAAGGTTT  
GGTGAAGCTAACTGTATCCTGCTGCTCAAACTTGAAAGCTTGCCAGAAGAGATAGGTGATTTAGAAAA  
CTTGGTGACGCTTAATGCCGAATGCACTCTTATTTACGAGCCCCGTCTTCATCACCTGGTTGAACAAGC  
TTAAATACTTGAGTTTTGCATATCAAGAATCAAATTTGGGGTGTCCTTTGTGTTCCCTGAGGTGAATGA  
AGGTTACGCTCATTGGAATCTCTGAATCTCAGTGACTGCAATTTAATAGATGGAGGACTTCCAGAAGA  
CATTGGATGCTTATCCTCGTTGAAAACAATGTATCTCAATAGAAATAAATTTGAGCATTGCTCGAAGC  
ATTGCCAACTTGGTGCTTCAATCCTTGCTTATCAAATTGCATGGGGCTTAAAGAGTTGCCAAGTTT  
CATGGGGATGCCAACTTGGAGACTCTGAATCTCAGTAACTGCAATATGATAGATGGAAAACCTCCGGA  
AGATATTGGATGTTTATCGTCTTTGAAAGAGTTGAATCTCAGTGGAACAGTTTTGAGTATTTGCCTCGA  
AGCATAGCCCAGCTTGGTGCTCTTCGATCCTTGGACTTATCAGATAGCAAGAGGCTTACACAGCTGCCAG  
AATTTCCACAACAATTAGATACAATAGGTGCAGATTGGACTAATGATTGATCTGTAATTCGTTGTTTCA

GAATATCTCATCATTGCAGCATGACATCTCTGCTTCAGATTCCTTGCCACTAAGAGTGTTCACTACTAGAG  
GGAATATCCCAAGATGGTTCACCATCGGGAAAATGGTAGAAGCATATCAGTCAAATTGCCTGAAAATT  
GGTATATAAGTGATAACTTCTTGGGATTCGCTGTATGTTACTCTGGCAAATTAATTAACGCAGAAGCTCA  
CTTGATTTGTTATGATGGGAGGCCAGTGACGTGTATCACCCAGAACTTTCCTTATCCAACCATTCAAAA  
TGCCTGCAGAATCTGCTATTCATTTTTCTTGGTACCTCTTGCTGGCTTATGGGACACATCTAAGGCAA  
TGGAAAACACCAAATGACTATGGGCGCGTTAAGTTATTTCCCTCTGGAGAAATGAAGGAGTTTGGACT  
TCGTTTGTGTATAAAGATGAACCTAAGATTGAGGTCAGTTTCTCCTCTTCTAAGAAACAATGA

>PGSC0003DMG400001016 LRR-RLPs

ATGTTCCCTAGTAATTTATGCAATTATGAAAAAGCCAATTGCTCTTTCCTCTTGACACTCTTGTTGCTTCAC  
TATGTCATGGCTACTTCAGCCATGAACCAACAACTTTTCTACCGATCAATCTGCTCTCCTTTCCTTAAAA  
TCTCAAATCATTTTGGACCCTTTTCACTTGTGGATGAAAGTTGGTCTCCAACACTTCTGTTTGCCATTGG  
GTCGGAGTCACTTGTGGTTCTCGCCACCAGAGAGTGAGATCACTCAATATTTCCAATATGGCATTAAATCG  
GAAAATTCCTTCTCATATCGGGAATCTCACATTTCTGTTTCCCTCGACTTGAGTCACAACAACCTGTAT  
GGCAATTTGCCTCAAGAAATAGCACATCTACGTGCGATTAAGGTTTCTTAATTTGGGTGTTAATATGCTTA  
GCGGGGAGGTTTCTTTCATGGTTTGGGAACTTACACAACTTCAAGTTCTGAATCTTAGGAATAATAGTTT  
CAATGGTTTTCATCCCCTCTCTATTATCTAATATTTCCGGGCTTCAAACCTTAAATTTGAGATTCAATTTT  
AGGTGGTCAGATACCAGAAAAGATTGGCAAACCTCAAACCTTAAAGGAATTAATATAGAAGCTAATCG  
ACTTACAGGATCTATACCATTCTCGATCTTCAACATTTCTGGAATAAAGGTCATTGCATTGACAGATAACA  
CTTTATCAGGAAATCTTCTCCTGATATGTGTGATCGACAATCAATGTTGGAAGAGCTTTATCTAAGTTTC  
AACGAGCTACGTGGTCATATGCCTCTAAGCTTGCCAACTGTTGAACTTCAACTATTGTCTTTATCAGT  
GAACAAGTTTGTGAGCTTATACATAGTGAAATTGGACATTTAAGTGACCTACGTATTTTGTATCTCGGA  
CAGAACCAATTTGAAGGTTTGTGTTGAGTGCTAGATTTTCTTCTAACTAACTATTTCCGAAAAGAAACCA  
TCACACATAAATTTATATGTATGTTATTGTTTTGACAGGGACAATTCCACAAGATATTGGGATTCTTGATA  
ATTTGGAGGTTTTGGGGCTAGAGAGAAACCATCTAACTGGGAGCATCCCAATCTCCATATTCAATATCTC  
CTCGTTGCAAACGATGTCATTGGAATGAACAATCTCATGGGATCCTTACCGAGGGAGATAGGCAACTT  
GAACAAATTGCGGATTCTATATCTTGGTTACAATATGCTAACAGGTATGTAAGTAGTCATTGGGTTATTG  
AAAACATAAATTCAGCAACTTGAACATTAGTCACGGAAGTGGTCAAACAATAACGTAAAAGAATTGG  
CAGGGACAATACCACAGGAAATCGGGATTCTTGATAATTTGGTGGAAATTAGGACTAGATAGCAACCAGA  
TTACGGGTCATATCCCAATCTCCATATTCAATATCTCCTCGCTGGAGACGTTGTATTTGGAAAGGAACCA

CCTCATTGGATCCTTGCCAGGGGAGGTTGGCAACTTGACCAAATTGCAGAGTCTACGTCTTACTGAAAAC  
AAGCTAACAGGTATGTACATATATAGTAAAAAAGGTACTCCTTTCATCCCAATTTATGTGATGTAGTTT  
GACTTAATACAAAATTTAAGAAAGAATGTCTTTTGAACTTGTGGATATTTGTATGGGTACAAATAATTT  
TTAAAGTTAAATTGTTACTACATATAGAAATATATTATTCTTTTTTGACGGACTAAAAGAAAGTAAGTCG  
TATAAATTAAGGCAGATGGAACTAAAGTATCATTACTAGTTGTACCTTACTATTTAACAATCATACAT  
TTGCAGGTAAAATACCAGACGTAAGCAATCTCGTTGAATTGGTTGAAATTTACTTGGGTCTCAACAAGTT  
TACCGGTGCACTTCCAACGGAECTTCAACATGTCAGGGATGAGAGTGATCGAACTTGTGCGAAATAA  
TCTGACAGGAAGCGTCTCCATTGAGCATAGGTTCTATGTTACCCAACATTGAAGGTCTTTATCTATCTA  
GTTTAAATCTTTTTGGAECTATACCTCATTCTCTCTTCAATTGTTCCAAACTCATTATCTTGACCTTTCTTA  
TAACAACTAACCAGTTTGGATCCCAAECTTTTCGGATATATGACTCATCTAAAGTACCTAGGCTTGGGG  
GGGAACAATTTAATGAGTGACACTAGGTCGAGCTTCTTTCTCCTTATCAAATTGTAGAGAATTACAATT  
TCTTGATGTATCGTTGAACCCGTTGAATGTTGTGCTTCCAGTTTCAGTTGGAAATGTCTCTCTGTAAAGT  
TAATGGTTGTTGAATGTGGACTTAAAGGGGAAATCCGAAAGGAATTGGGAACTTAAGTAGCTTAATAG  
ACCTCGATCTCTCTGAAATGGTTTGGTTGGATCAATCCCAACAATTAGCAACTTGAGACTCCTTCA  
GAGTCTTAAGTTGAGTGGCAATAAACTTTCTGGATTTATCGGAGACAATCTATGTAAATTGCAGAACCTG  
GGGTATATACATTTGGATCAAATCACTTTTCAGGATCTCTTCTAATTGTTTCGGGAACTTAACTTCCCT  
TCGGGAGATATTTTTAGGTACCAACAAGTTGCATTCAAACATTCCAGCTAATTTAGGAAACCTCAAAAAT  
CTCCTAAACCTTGATTTATCCTCGAACAACCTTGACTGGCTTTTACCTCGAGAAATCGGAAGTCTAAAGG  
CCATGATACAGATGGATCTTTCGATGAATAAACTCTCGAATGGCATACTGAAGAAATTGGTAGCTTGCA  
AAATCTGATACACCTTTCATTGAGAGACAACAAATTGCAAGGTTCAATTCCTAGCTCAATGAGCAGCATG  
TCAGCTTTGGAATATCTAGACCTTCTCATAACAATGTCTCGGGATTAATCCCAAGTCTTTGGAGAAGCT  
TCTAAATCTCAAGTATTTCAACGTTTCATTCAACAATTTGGTTGGTGAATCCCCTCGAGCGGTCTTTCA  
AGAACCTATCCAGTCAGTCTTTCATATCCAATGAAGCATTGTGTGGTTCTTCAAGATTTCTGTGTCCCCCA  
TGCCATAGTGGAECTTCAAAGCATAGATCCAAGAGAAAAAAGTACTTGTTTTGATTCTACCGGTTGGA  
ATTGCACTTGTATTAGTGTCCATCGCCTTTCGTTTTGTATGGATAAAGTATATAAGAGGAAAATCAACTG  
ATCCTCAACTAGGAGTTGATCCGTCCTTTTTGTCTCAACAAGAGGAAGAATTCATACTATGAATTGCTC  
CAAGCAACTGATTCCTCAACGAGAGCAATTTGATTGGTTCAGGGAGTTTCGGCTCTGTTTACAAAGGC  
ATCCTAAGAGATGGGACTTTCATTGCAGCTAAAGTGTTCATCTACAATTGCAAGCGGCATTTAGGAGTT  
TCGATACAGAATGTGAAGTTTTGCGCAATCTTCGCCATAGGGATCTCACCAAAGTCATCACTAGTTGTTT



CAACCTTGATTTTAAGGCGTTGGTACTCGAATACATGTCCAATGGGAGCCTCGATAAGTGGTTGTATTCA  
CACAACACTTCTTAGACATCAAGCATAGGCTGAGTATAATGATTGATGTAGCATGTGCATTAGAATATC  
TCCACCATGGCTGCTCATTGCCCGTGATACACTGTGATTTGAAGCCTAGTAACATCTTGTTGGACGAGGA  
CATGCTTGCACACCTAAGTGACTTTGGCATTTCAAAAATGATTTCTGAAGATGAGAGTGCTTTATACACT  
AAAACCTTAGCAACATTGGGTTATATCGCACCAGGTAAGTTATCTTAATTAATTGTTTTTTTTTTGAATAT  
TTTTTTTTCTTTTTCTGCCAAGAAATGTTGAATATAAAATTCTCATTGTAGAGTATGGATTGGAAGGAA  
TGGTGTCAACCAAATGCGATGTTTATAGTTATGGGATAATGTTGATGGAAACATTTACAAGGACAAAGC  
CTAGTAATGAGATGTTTGATGGAGATCTTAGCTTAAAGCAATGGGTGAGCAATTCCTCCACATGCAG  
TAATGGAAGTTATCGATCCCAACTTAATAACACCACAAGATAATCACTCAGTGAAAAAATTGATTGTGT  
GGTATCCATCATGAAAATAGCAATAAATTGTTGTGTTGAATCTCCTAAAGGAAGGATTGACATGAAAGA  
TGTTGCCGCGAGGTTAAAAACCATCAAGATTCAACTTCTTGAATGTTGAACAAGTTCTCAGGTTAAACAA  
ATGTTTGCTAGAACATTGATCCTTTAAATATGCTATAGATTTACATCTTTTCATCACCAACATAGAGAACA  
AATGTTATGTATACCTCTTCCATCTTGAATTTTTGAAGTGGTTTTAGTCTAATCCCCATTACTTTATTTTAT  
ATTTCTTTTTATCGTTGATAGAACTCAATACATAACTTCTAATGGCTTTCATTAATAATGTTTCATATGT  
CACTACAACAAAAACAAATTTTAGTCGCGATAAATATACACATTAACAAAGAGTGCTAATTTTTTTACCA  
GCATTAGTTAATTGTCATTGGATTCAATGTCGCTATAGGCTTTAGGGACATATGTCGTTTGAGTCTCAA  
ATAGAATGACACCAAGTAAATTGAGATAGATGGAAACATTGTTTCGTGACAAGACAAAAAACTCGTTAG  
GTATGGGCAAATAACAATAATTATACAACCATCAACCTTCATCTATATACCTACTATATCCCAATACTGGC  
CATATAACATGTATGCAAGACAAAATTAACGCCACTACTTTGGTTCTCTGTTACGTATATATACGAAGA  
AATAAAAACTCATTTCCAGAAGATCACTATTATATTATAACAATGGAGTCCATAATTAGATGGAGAAAAC  
CGAGTCTGAAACCAATTGAAACTAAGGATAAAGCCATTGACGCATCTGAAGATCGAAGAGCCATTGAGT  
CTGTCATCGAGGCTATTTTCATGACCCCACTTCAACGTGCACGTTCTAGCTATTTTGGGCATCAAAACAA  
GAGCCAGCACTGAGCAAGCTCCCAGAGAGCATGTGGCTAATACTTTGCTTAAACATCCTGTTTCTCCAGC  
CTGCCGTTACCAGTATAACACTTTGTTTGTCTTACTTTCCATTTTAGTAGGTTAAAAATGAATTTCTTTTC  
GTGACAACACTGACAACCCTTTAATTCTAACTTTCTCATTACATGTTTAATTAGACGACAAAATAACAACAC  
TTTGGTACATTCTATGTGTATTTAGTTTAAAGACCGTAAGATTTAAAAGTCTTCTTTACTTTCTTAAACTCGG  
TGTC AAGTCACAAATAACAACCTTTAAACAGAAAGAACACTATTTTCTGATTAATAATCACCAAGATGAAT  
AGATGTAAAAGACAATGAATTGATAACCTGCTGCTATCAAATAAAAACATACATTACACTTGATGGTAGC  
CAATAAAAATTGAAACTACAAGTACTTAAGAACAAGTCTAGTGTACTTCTCCTCAGTAAGTTCAATACAT

AAATATTGTAAACTAATAAAAAGGGAGAATTGTCAAAAAGCATAAAACGCTCGTATTCAAAGATCTTGTTT  
TACTTTTCATAGCCCTCATGGTTAATTCCTGAGGTTATTGATGAGGGAAAAGGCGGAGAAATGAAATG  
GGTGCGGACAAAGGTGGACTTAGATCAGCACATTGTGGTGCCACAAATTAATGAACAGAACCTGCAGG  
AATCACCATACAAATTTGTGGAGAATTCTCTTATTTCCCTTCTCTTGGAGTGTACACACCAAAGTCTGTA  
TCCAGATAAAGTTCCACCTATTCATGGAAGTAAAAAGAGGCTTATTGATTCTTCAAAGCATTCCAATAAG  
GGATTGCGGCGACATGTTACAAAATTTGGTCTTTTATGATATTGTTTGGGTACACAAAAGTGGATGTGT  
TGATGTTTATGGCTACAACATGTTCTTGAAGGACACAGCTACACCGATTAAGAGTAGACCTGGTTATGA  
GTCTAATCCTAGGTGATTTGTTTACCGGACAATAAGTCTTGACGATATGAAATTGGTGAAAAATGCATAA  
AATATGTTAAGCCATACAAATTAATTCTATATTGTAGCAACATCCTTCTCTTCAATTTTGAATGTAGAT  
GTTTATAGCGTGTTGTTTATGATGTTGTTGTCGGACTTTGTCATTTCTTGCACAGACAGTAACGGATGTCGCT  
TTGGGAGTAACACAAGATGGTTTGTCTATCTATCTTAATAGAAGATATGGTAAGTTTCTGTTTCATGTATT  
TGGACTTATTAAGCTTAGTATTAAGAAGTCCCACATCGGTAAAGGGATGGGAAATTGGTCTCCTTATATG  
GACTTGGACAAACCTACCCTCATGAGCTAGGTTTTGGGTTGAGTTAGGCCAGGTGCATATCTTTACATG  
GTATCAGAACTAGACCCATCCCAAGTTGTTGTTACCGATGTTGGCCCCATTTAGAAGTGTTCACGCTC  
CAGTTGAGTTCTGGGCGTGCGGGGAGTGTTAAGAAGTCTCACATCGATAGAGGGATGAGAAATTGGTC  
TCCTTTATGGACTTAGACAAATCCCCTTCATGAACTAACTTTTGGAGTTGTGTTAGGTCCATATCTTTACA  
CTTAGTTGATCGAAAATCTTACGGAAGAAATCTTAATGCAAAAATTTTGCAGGTGAGGTAAGAAAGACA  
GGAGCAACAGAGAAAAAATAATCTCCGATGAACATTAGACTTAGATCAACTATACTTATGAACCTAA  
GACCGGCAGTCGGAATTCAGGTGATGGAATCCATTCAAATTTTAAATCAGCACTTAAGTTTTCTTAGATTA  
TATACTTAAAGTTATTAACATTTTTTTGGGGCTTTCTTTCATGTTTAATTAATTAGCAAATAGGCTTTTGT  
GATATGATGGAGAATGACACTGAGGCAAATGGGGGAATTGGATTGGTTTTGTTCTTTTCCCCTTAAAA  
GTTGCATTACGAGATGATCCATTAGATTATATCAGAGAAGCTAAGGCAACTATTGGTCGAAAGAAGAAT  
TCACTTGAAACTTTCTACACATTTTCTATTTTCAGAATTAGCACTCAAGATTTTTGGGATTAAGGTAACCTAA  
TTTTATTCTCAGTTCTTAATCCTACACATGAGATATCTTATTGTAAGATGTGACTCTTTTTTTCAGACATC  
AAGTTCGATATCGCACAGAACTATACCAATACAACAATGTGCTTTTCTGTCTGCCTGGTCCTCAAGAA  
GAAATTTGCTTCTGTGGGCATCCTTTGGCTTACATTGCACCCAGTTCTTATGGCTCATGTAGGTGTTTTAC  
TCTTACTAATTTCAAGTTTTTGTCTCCATTCTCAGCTAGATTTTGGGGTGTGAATTAG

>PGSC0003DMG400001072 LRR-RLPs

TATCTCTTCTTCTCCACAAAACCTTCATCTCTCATCTCACATTTTGTCTTAAAGATTCCATTTTAAAACCAA

AATAAAAAAATTCCCCAAACCCCATTTCTCAAATCCATTTTTCTTCATAGATCTTCACTTTTTTCATCTCACA  
TTTGGTTAAAGATTCAATCTTTGAACAGAAAAACGCATAAAAAACAAGCAGTCTTGATTATCAGATGAC  
TCATGTGAGATGAAGGAGAAAACCTCAAACACCCATTTGCTCTCTGTTTTTCTTGTGCTCTGTTTTTGTG  
TTCAGTTTTTACTGAACACACAAATGCTGAGTTTACTGTCTCTGAAAATGGCCCTTAACTGATTCTGAAG  
CTCAGTTCATCAAACACAGGCAGCTTTTGTATTACAGAGATGAGTTTGGTGATAGAGGTGAAAATGTGA  
AAATTGATCCATCTATGGTGTGGAGAATGATAGAATCAAGAATGCTTATATTGCTTACAAGCATGGAA  
ACAAGCTATCATTTCAGATCCCTTAAATATCACTCTCAATTGGGTTGGTCCTAATGTATGCAGCTACACCG  
GAATCTTCTGTGCTCCGGCTTTGGATAACCCAAAATCCGTACAGTTGCCGGCATTGACCTTAACCATGG  
TGACATTGCAGGGTACCTCCCGGAAGAGCTTGGGCTTCTTACAGATCTTGGGATTTTCCATATCAATTCA  
AACCGTTTCTGTGGTACAATACCAAGAAAATTCAGCAAGTTGAAGATACTGTTTCGAGCTGGATCTGAGT  
AATAACAGGTTTGCTGGGAAGTTTCCTTATGTTGTTTTGAGTTTACCCAAGTTGATATTTTTGGATATTAG  
GTTCAATGAATTTGAAGGTAATGTACCTTCACAGCTTTTTGATAAGCCATTAGACGCCATTTTTATTAATC  
ATAATCGATTTGCGTTTGAGTTGCCGGAGAATTTGGGAATTCGCCGGTTTCTGTGATAGTTCTGGCGAG  
TAACAGTTTCCATGGGTGTCTTCCGGCGAGTATTGGGAATATGAGTAATCTTAATGAAGCGATTTTAATG  
AATAATGGGTTGCGTTCTTGTGTTGCCGGCGGAGATTGGGGTGTGAAAAATTTGACTGTATTTGATGTG  
AGCTTTAATCAGTTGATGGGTCCGTTGCCGGAGAATTTGGTGATTTGGTGAATTTGGAGCAATTGAAT  
GTGGCACATAATATGCTTTCTGGGACAATTCGAAAAGTATTTGTCAGCTTCCTAAGCTTGAGAATTTTA  
CGTATTCTTATAATTTCTTCACTGGTGAACCGCCGGTGTGTTGGGGTTGCCGGAGTTTCATGATGAACG  
GAATTGTTTGCCCAACAGACCGGTGCAACGCTCTCCGGGACAGTGTAAGGCCTTTTTGTCTAAAAAAATT  
CATTGTAGTGCTTTTCAGGTGTCATAAATTTGTTCTGTTTTGCCACCTCCTCCGCCACTTTCACCGCCCTTG  
CCTGCCCTCCGCCACCTGTTTATTCGCCTCCGCCACCAGTTTATACTCCTCCTTCTCCTTCCCCACCACCTC  
CTCCACCTCCAGTTTATTCACCACCGCCACCACCACCTCTCCACCTCCTCCATCACCTCCCCCGCCTCCAC  
CACCAGTCTATTCACCTCCACCCCCACCTCCATCTCCTCCTCCACCATCACCTCCACCACCACCCCCGCCAT  
CTCCACCTCCACCACCAGTTTATTCATCACACCACCAGCCACCATCTCCCCCTCCACCATCACCTCCACCTC  
CTCCCCACCCGTTTATTCGCCACCACCATCTCCACCTCCTCCATCACCATGCTTATTGTATACGCTCAC  
CTCCACCACCAAATTCACCACCTCCTAATTCTCCACCTCCACCGCTTGCTCACTCGCTCCACCCCCCTCAC  
CTTACTATTACAATTCACCACCACCTCCGCCCCCAAATTCGCCTCCTCCTCCACCAGTATACATATACTCAT  
CACCTCCGCCACCAAATTCACCTCCTCCTCCACCGCCAACATACGTATATTCTTACCTCCTCCACCTCCTT  
CCCCATTGCCTTGTATAGAACCCCTCCACCACCTCCTCCTTGCATTGAACCACCCCCACCCCCCTCCCCTT

CACCATCTCCTCCTCCACCACCGGTTTATCATTACAATTCTCCGCCCCCACCATCTCCATCACCTCCACCAC  
CAGTTTATTATCATTACAATTCTCCGCCCCCACCATCTCCATCACCTCCACCACCAGTTTATTATTACAATTC  
TCCACCACCACCATCACCACCGCCTACTCCAGTATACGAAGGGCCATTACCACCAGTAATAGGAGTTCAA  
TATGCTTCACCACCTCCACCACCCTTTTATTAATTCTTTCAGAAATTTCACTAACTCTTATCCTCAGAGCAC  
AAAATAGTTCTACAATTATTATTTCTCAACTCTTCAAGCCATCAACAAAATCGAGCTAATATGTGATCA  
CGAACCTTAAATGGTACGACAGAAAGAAAGATAGAGGAGGTAAAGAGGAGAAAGATTCAATCTCCAAT  
GATTTTATTTTTGAATTGTTATCAAATAGATTGAAGTTGTGGAGAGAATAAATTGGCAAAGTAAAGATTG  
AACTTTGCTGGAAAATGTATGTATAGAGAGATCATAATCTTGAATTAGAAACCAGTTTACAGTGCTTGC  
TGCAACTGGTTTTATTTAATGATCATACTTTGATTTCTTTGTAATTTTTCTTTTTTTTTTTGGATCTTCCAAA  
CTATAGTATAAGATGAGCTTTTTATTTCTTTTAAAACCTGTATTGATTCCTCATAATTCAGATGAT

>PGSC0003DMG400001252 LRR-RLPs

ATCAATTTAGAAAATTTTAGAGAGAGAAACAAAACAACACCCTCAGGATGGGCAGCTTCATGTACATT  
GTCATCCTGCTTCTTGCCATAATCTCAACCGTTCATTCCTGCTCGCCATCAGATCGGGCAGCATTATTATCT  
TTCCGAGCTGCCCTAAATGAATCTTACTTAGGAATTTCAACTCATGGAAAGGCTACGACTGTTGCCATG  
AATGGTACGGGGTGAGTTGTGATCCCACTCACCGCGTAGCAGACATAAACCTCCGCGGTGAATCCG  
AAGATCCACTCTTCGAAAAGCTCATCGTACCGGTTACATGACCGGTACGATCTCTCCATCTATATGCAA  
ATTAGAAAGACTATCAAGTCTCACTATAGCTGATTGGAAAGGCATCACTGGACCTATACCATCATGTATT  
ACATCCTTACCCTTCTACGAATCATCGACTTAGTCGGAAACAAGCTCACCGGCTCAATCCCTTCAACTAT  
AGGTGATTAAGTCGACTCACAGTGTTAAACGTAGCTGAAAATCAACTTACTGGCTACATACCTCGATCA  
TTAACCAACTTATCATCTTTAATGCATTTAGATCTCCGAAACAACCTCATCTATGGAAACATCCCAACAAA  
TTTCGGAAAATTACGGATGTTGAGTCGAGCTTTACTGAGTCGAAACAAGTTAACAGGTCATATACCGTAT  
TCGATTTGATATTTACAGGCTTTCAGATTTGGATCTGTCATTGAACAAACTTTCCGGTAGCATACTCC  
GTCTCTAGGTAAAATGCACGTAAGTAAATCTTGAATTTGAGCAAAAATGCTATTGAAGGTTATATTCTGA  
CCTAGTTTGATTAATTCACGTATCAACATTTTGAATTTGAGCAAAAATGCTATTGAAGGTTATATTCTGA  
TTCATTTGATGAAAGATCTTATTTTATGGTAATGGATTTATCTTACAACAAATTAAGGAAGGATCCAA  
AATCGATATCGTCGGCGACGTTTATCGGTCACTTTGACGTTAGTCATAACCATCTTTGTGGCCAGATTCC  
GGAAGGTTCTCCGTTTATGATCATCTTGAAGCTTCATCTTTTACTTACAATGATTGTCTATGTGGGAAGCCTC  
TTAAACCTTGCTACTAAAGTGTGACTATTATTAGGTAAATTTAATTTTACTTTTCTTTTTTGGAGATTTTTATT  
AACACTACATATTGGTGAATATGTTTGTATTATTATGTGATACTGAAAAGTAAAGTGTTTTTTTTTAGCATA

TATTTGTAATTTTAAATGTATAATTGTGCCTTGAGATATATGAAGGCTTTCTTA

>PGSC0003DMG400001829 LRR-RLPs

ATGGAGTACCAAAAATTGGTAATGGTTCTTTCTATACTTTTTGTCCAACAATCTCAGCTTACGTATTCTGG  
GAAACATCTCTGTCCCCGCGATGAAGCTTTTTATTTGCTTCAATTTAAGCAAGAAGCTCACATTTCTTGATA  
CAAGATCTTTTTACTTTTCATAATGTCTGTGACGGCGAGACCCAAGCCAAGACTTTTTCTGGAATGTTACA  
GGAGATTGTTGCGAATGGGATGGTGTACTTGTGATGGATTTACGGGTCATGTCATAGGCCTCGATGTT  
TCTTCGAGCTGTCTCATGGGAACCATCAATGCTAACAGTAGCCTCACAAAAGCTGGTTCATCTCCAAAGAC  
TCAACCTTGCCTTCAACTACTTGGATGACTTTCCACTTGGAAATAGTATTAGTGAATTCAGTATTGACG  
CATCTCAATCTTTCAGATTCTGGATATATGAAAGGGAAGATGATCCCACAAGGATTATCCAACCTTGTCTA  
AGTTGATTTCACTTGACTTCTCCAGGAATTACATCCAAGTTGGCCGAACAACCTTCACTAGTTTGGTGCAC  
AACTTAGCCAACCTTAGAGGTACTGTTGTTTCACAAAGTGGACGCACCATTTGAGTTACCTAAGAGTTTTC  
CTTCTTCCCTTAGGAAATTAAGTCTTGAGGGCACCAACATGTTTGGGAAAATAACTGATTCTCAGCTTTTT  
CATCTACCAAACCTTGCAAGTACTGAGATTGGGATGGAATCCTTCATTAACCGGCACTTTGCCAAATTTTA  
ATTGGAGTTTCAGTAAAAGTATTTTAGAGTTGGACTTTTCCAATACTGGCATTTTTTGGGAAGGTACCTGA  
TTCTATTGGAAACCTCCATTCTCTTTGCTATTTAGATCTCTTACAACCATTTATCCGGCTCGATTCCAGA  
ATCCATTGGCAACCTCACTGCAATCACAGAGTTGACTTTTACGTAACAGCTTCACTGGTAATGTTCTCT  
CAACTATTGCAAAAATTAACAAACTCGTTTATTTAGAACTCTATTCCAATTATTTTCAAGGCTTGATTCCA  
GAATCCATTGGCAACTTCACTGCAATCAAAGAGTTGTCACTTTTCAAGATAACAACCTTCACTGGTAATGTTCC  
CTCAACTATCGGAAAGTTGAACAAACTTAACTACTTATATCTTAATTCCAATAATTTTGAAGGCTCGATTC  
CAGACATCTTTGCCAACTTTTTCAGAGCTATCTTTTTTAGATTTTACGGTAACAATTTCACTGGCCCATTCC  
CCTGTTCAATTGCAACCTTGACTCACCTGCAAAGGTTAGAGTTGCAAATCAATTCATAACTGGTCCACTT  
CCCTCTAATATAACCGGACTTCAAAATCTAGACATACTTGATTTGTCGTTCAATTATTTCACTGGCACAAC  
ACCCTCTGGTTATTCCATCTTCCGTCCTTGACTTCTTTATCTGTTCAAGCCAATCAATTAAGGATTGCC  
AAATGAGCTCAAGAGAAGTTCTCAAATACTCTAGAATTGATCTTTCGCACAACAAGCTGCATGGCGAA  
ATCCCTGATTGGATGTTATCCATGAGCATGAGAAGTCTGGATCTCTCATAACTTTCTCACAGGCTTTGA  
AAAACAAGTGTGGCGCGCAGAGAAGTTGCTTACCTTAATTTGGGAGAACAATTTTCTTCAAGGGCCTTTG  
CATCAATCCATTTGTGACTTGATTAACCTTGAATCCTCATTTTGGCTCAAAACAATCTCAGTGGTTCAAT  
CCCAGGATGTTTAGGTAACCTCAGTAGGTTCATTTTATTTTAGACTTGCGAATGAACAATTTTCATGGAG  
AGATACCAACATTCTTACATAGAGGGTTAGAGTATCTTGGTTTATATAGCAACCAATTGAGGGGACAAG

TCCCCGATCCTTAGTTAACTGTACAAGATTGGAAGCTCTTGATTTGGGGAACAACATGATAAATGACAC  
GTTCCCATTATCTGCAGAACTACAAAACCTACAAGTTTTGATTCTGAAATCAAATCTCTTTCACGGTC  
CAATTGGTGACTTGGAGTCCGAATTTCCATTTCTAAGTTACGGATCTTTGACCTTTCCTTTAATGGGTTT  
ACAGGAACTTTGCCATCTAATCTTTTCAAAGTTTTAAAGGTATGATGGATGAAGAAAAACAGCAAGT  
ACAAGCACTCGCACGGATTACCTTTACAATATTAGTTTGGTGATAAAAGGCAATGAGTATGATATGAGA  
ATCACGTCAATTATGACGAGTGTTGATTTATCAAGCAACAGGTTTGAAGGAGATATTCCAAATTCCATTG  
GAAATCTGAGCTCACTTGTGTTACTCAACCTGTCCACAACAGCTTCCGTTGTCGTATTCTGCAGAAATTT  
GCAAAGTTGCAGGCGCTCGAAGCATTAGATCTCTCATGGAACAGACTCATTGGAGAAATTCAGGTCAA  
TTGTGAGTTTTGACATTTCTTGAGGTCTTAAACCTTTCATACAATCATCTGGCTGGGCGCATTCTATTGG  
GAAACAGTTCAATACATTTCCAGATGATTCATATTGTGGAAATCTTGATTTATGTGGATTTCCACTATCAA  
AGAAATGTGGAAACAATAATATGCGAGATGAGTCAACACTTGAACAAGATGATGATGATTCATTTTTTAT  
GAGCGGGTTCACATGGGAAGCTGTTGTAATAGGTTATGGTTGTGGTATGATATTTGGATTGTTGATGGG  
AGGCCTTATGTTCTACTGGAAAAACCAAATGGTTTTCGAACTTTGCTGAAGATATTGCTCAACAAATT  
GCTGCTAAGAAGCGAACAAGGCAAAAGAAGAGACGTCAAAGACGTGGTCTAAGAATGAATTAG

>PGSC0003DMG400001831 LRR-RLPs

ATGGAGTACCAACAATTGCTAATAGCTTTCTGCTTCTATTCACTTTTTATAATTTTTCCCAACAATCTCAG  
CTTACATATGCTGGGAAACATCTCTGTGCTCGCGATGAAGCTTTTTATTTGCTTCAATTTAAGCAAGAACT  
CAGAGTTGATTCAAATTATGAGTACTGTGACAACAAGGCCCGAACCAAGAATTTGTCCTGGAATGTTAC  
AGGAGATTGTTGTGAATGGGATGGTGTACTTGTGATGGATTTACGGGTCATGTCATAGGCCTCGATCT  
TTCTTCGAGCTGTCTTTGGGGAACCATCCATGCTAACAGCAGCCTAAAAAACTTGGTCATCTCCAACGA  
CTCAATCTTGCTTCAACAAGTTGGGCGAGTTTCCACTTGGAAATAACATTAGTGAACCTCAGTAGTTTGA  
CGCATCTCAATCTTTCGCATTCTGGAACCTTGTGATGCACATCCCACAAGTATTATCAAACCTGTCCAAATTG  
GTTTCACTTGACCTCTCCTGGCATTGTTGGCTGTACTATTCCATTTGGTCAAACAACCTTCAACAAGTTTGCTT  
CAAGACTTAACCAATTTGGAGGACTGTTTCTTGACAACGTATACGCACCATTTGAGTTACCTAAGAACC  
TTTCTTCTCCCTTAGGTACTTAAGTTTTCAAGGCACCGGCATTTTTGGGAACCTAAGTGAGTCTCAGATT  
TTTCATCTACCAAACCTTGAAGTGCTGCTATTGGGAGAGAATCCGTCATTAACAGGCACCTTGCCGAATT  
TCAATTGGAGTTTCAGTGGAAAGTATTTAGAGTTGGACTTCTCCAATACTGATATATTTGGGAAGCTACC  
TGATTCAATTGGTAATCTCCATTCTTTTTACATTTGAACATCTGGTATTGCCATTTATCCGGCTCTATTCC  
GGAATCCCTTGGCAACCTCACTACAATCACAGAGTTGAGACTTCCAGGTAACAGCTTCACTGGTAATGTT

CTCTCAACTATCTCTAAATTAAGCAAACCTTGTCATTTAGATCTCTCTCACAACCATTTTCGAGGCTCAATT  
CCAGAATCCTTTGGCAACCTCACTGCAATCAGAGAGTTGCGACTTTCAGATAACAGCTTCACCGGAAATA  
TTCCCTCAACTATCCAAAAGCTAAACAACTTAGCTTCATATCTCTCTCTTCCAATAATTTTGAAGGCTCGA  
TTCCAGACATCTTTGCCAACTTTTCAGAGCTAGATACTTTATATTTTGAAAGTAACAATTTTACTGGCCCAT  
TCCCCGATTCAATTGCAACCTTGACTCACCTTGAAAGTTTAGACTTGCAAAAACAATTCATAACTGGTCCA  
ATTCCTCTAATATAAGCGGCTTTCAAGAGCTACAAATACTTGATTTGTCGTTCAATTATTTCACTGGCAC  
AACACCCCTTGTTATTCCATCTTCCATCCTTGCTTTCTTTATATGTTCAAGACAATCAATTAACCGGGAA  
ATTGCCAAATGAGCTCAAGAGTAATTATCTAGAATACTTTAACATTGATCTTTCATACAACAATCTGCATG  
GAGATATCCCTTATGGGATGTTATCCAAGAGCATGGGTAGTCTGGATCTCTCTCATAACTTCCTCACAGG  
CTTTGAAAAAAAAGTATGGCACTCAGACTCCTTACAATACCTTAATTTGGAGAACAATTTTCTTCAAGGG  
ACTTTGCATCAATCCTTTTGTGACATGATTAACCTTGATTCTCATTGCTCAGAACAATTTCAAGTGGT  
TCAATCCCAGACTGTTTGGGTAACCTCAATAGCTCCATTTCTATTTTAGACTTGCGAATGAACAGTTTTCA  
TGGAGAGATACCAAGATTCTTACCTACAGGGTTACAGTATCTTGGTTTATATGGCAATCAATTGAGGGG  
ACAAGTCCCGGATCCTTGGTAACTGTACAAGCTTGGAAAGCTCTTGATTTGGGGAACAACAAGTTAAAT  
GACACGTTCCCATATGGCTGGAGAACTTCCGAACCTACAAGTTTTGATTCTGAAATCAAATCTCTTTCA  
CGGTTCAATTGGTGATTTGGAGTCAGAATTTCCATTTCTGAGTTACGAATCTTTGACCTTTCCTTCAATG  
GGTTCACAGGAACCTTGTCTAATTTTTTCAAAGTTTCAGAGGTATGATGTATGTGGATGAAGAAAA  
TACAGGAATTAACGAGCTACTAATAGGACTCACAGAGATTACCTTACCATGTTAGTTTGGTGATAAAA  
GGTAATGAGTTTGATATGAAAATCACGTCAATTATGACGAGTGTTGATTTATCAAACAACAGGTTTGAA  
GGAGATATTCAAATTCATTGGAAGTCTGAGCTCACTTGTTACTCAACCTGTCTCACAACAGCTTCTG  
TGGAGTTATTCCTGCAGAAATTGCAAAGTTGCATGAGCTCGAAGCATTAGACCTTTCATGGAACAGATTC  
ATTGGGGAAATTCAGGTCAATTGTCGAGTTTGACATTTCTTGCAGTCTTAAACCTCTCCTACAATCATCT  
GGCTGGGCACATTCCTACTGGGAAACAGTTCAATACATTTCAAATGATTCGTATTGTGGAAATCCTGAT  
TTATGTGGATTTCCACTGTCAAAGAATGTGGAAACAATAATGAATCACCCTTGAACACGATGATGATG  
ATGATGATGATGATCATTTTTATGAGCGGGTTCACATGGGAAGCAGTGGTAATAGTTTATGGTTGTGGT  
ATGATAATTGGATTGTTGATAGGAGGCCTCATGTTTCTACTGGAAAAACCAAATGGTATGTGAACTTTG  
CTGA

>PGSC0003DMG400001832 LRR-RLPs

GTACATATAAAAGAGAAAAAGTTACAACAAAGATGTAATCAACAACCTAGCGCAGGAAAATGAGAAATT

TCAAAAATATATACTCTAGAAAAATTCCTTCAAATAATCACAGTAACTAAAAATACTATATTTCTCACAG  
CTATAGAGAAGCCAACAAATAGTTGACTTCTTTGCTAAACAGGCCTCTTCAAGTGAAGTGGTACCTTCT  
ATTATTTTTTTCATCAATTCCTAAAGAGGGGAATAGACTATTTCTACTAGATAAGGGACAACCTTCTAGC  
ATAAGGAGAAGATACAACAAATGTAATTTTTTTTGTAGTTGAACCATTGTTTTTGGCTTATAGTATGAAA  
GTCTATGTCACCTTTAGCCTTTCTGTAGATATTGCTGCTCAGAAGCAAAGAAGGCAAAACAAGAGACGTC  
AAAGAAAAATAAGCTTTAGACATAGCTACCTCTGCACTCTGTTTTTGGATGGATGGATGGATGTCTAAAC  
AAAAATAGGCTTTAGACATAAAAACACCATTTTTTCATGAAAAGGCCCTCAAAGTTTGAATTCAAAAATGA  
GGATTTGATGTTGAATTCATGAAGAACTAAATGGGTAATGGAGGATTGGGGTTGAAATCACTTACCCAA  
ACGTTATTTCTTAAAATCGCCTACTCCAAGCTTCCAAGGTCCAAAAATGGAAAAATGGGGAAGAAACCC  
AAATTGGGAAATTTCAATAAACTGCCAAGCCATTTGGTCTTCGCAATCGCGGAGACCAGACGGAATAAC  
CCTTCACGAACGCAGCCACTCTGACCCTCCACGATCGCGCCAAGCTCCACCAACGCGAAGGAGGCACC  
AGAAGACAGCAAACAGCAAATACCAAGGCATAAAAACATTCACCCAATGGACCCTTGAATCCCGAGCA  
CACAACTACTACCCAATAAACTCGACGTTTCGGACTCAATGGAATCATCGAAATATGGATTCGAGGTC  
TCCGTGACCCGGCACCCATTAAGGAATTAATATCTCAGGTGATCACTCAACTAATTTCTTCTCTGAAAG  
TCACTCAATTTTGATTTTTAACTCAAAGTCACTTAACTATGAATTTTTCTCATAAAGTCACTCAACTAT  
AGATTTTTTCTCAAAAAGTCATTCGACTTTGAATTTAACTCAAAGTCACTCAATTATGAGTATTTTACT  
TACAAAGTCACTCAACCTATTCAAATAATTTTTTAAATTAATAATTTACTTTAATGAAATTTTTATTCTAAG  
CAAAAATAAAAAATCAATAAAAAAGTATCCATTTGACTGCCAATTATATTATGCTTAAAAATATCCAATA  
TCACCGTCAATATACTATACTTAATTATTTTTTAAAACTGGAATAATGTTCTATAAATACGTGTTAAAA  
GTAGTGTAGAAAATAATAATAAACTCATGGAATTTAAAGGTTCTTAAAATAATTAATGCTAACTATTAT  
ATTTGGGGGAAAGGTAAAATAAAAGGATCACTATTATATTTTTAGTGGATCGAGTCAAGTAGGTGGGT  
CATCTTTTACAATTTTAGTTAGAAATAAAAATTCATGTAAGTAAATTTAATTAATAATAATTAATAAT  
AGGTTGAGTGACTTTCTAAAAAAGAACGCATAGGTGAATGACTTTCTGAGAAAAGAAATCATAGTTGA  
GTGACTTTTGAGTTAAAAACCAAAGTTGAGTGACTTTCTAAGAAAAGAAATCAATAGTTGAGTGACTTTTG  
AGTTAACAACCAAAGTTAATTGACTTTCTGAGAAAACAATCAATAGTTGAGTGACCATCTGAGATATTAC  
CTACTCGTTAAAGCCACAATTTACCAACTTTCACCCAAAATATTAATAATAATATTAGTGGCAGTAAAGTTT  
TGAAAAAATATTAATAATTGTAGTAGTGGTAGTAAAGTTTTTGAAAAAATATTAATAATAATATTAGTGG  
TAGTAAAGTTTTTGAAATTGTATTAGTGGTAGTAAATTTTTGAAAAAATATTAATAATAATATTAGTGG  
AAGTAAAGTTTTTGAAAAAATAATAAACTTGTAGTTGTGGTAGTAAATTTTTGAAAAAATATAAA



AATTGTATTAGTGGTAGTAAAGTTGTTGACTAAATAAAGGAGGAAATTGTGTTAATTGAGTTGGGTGA  
ACAACAATAATGCATTATCGATCACACTGTATGTATAAAAACTAGTTCTAAGAATGTGCATGTGTAACAC  
GTTTGACCTCTACTGCTATATAAAGATGGAGTACAAGTTCGTAGCTAGTTAGATATAGAGAATGGAGTA  
CCAACAATTGCTAATAGCTTTCTGTTTGTATGCACATTTTATACTTTTTGTCCATCAATCTCAGCTTACATA  
TGCTGGGAAACATCTTTGTGCCCGTGATGAAGCTTTTTATTTGCTTGAATTTAAGCAAGGCCTCATCGTT  
GGTCGAAATGATTATTACAATGGTTGTGACAGCAAAGCCCAAGCCAAGACTTTGTCCTGGAATGTTACA  
GGAGATTGTTGTGAATGGGATGGTGTTACTTGCAATGGATTTACGGGTCATGTCATAGGCCTCGATCTTT  
CTTGCAACTTTCTTAGTGGAACCATCTATGCTAATAATAGCCTCACAAACTTGTTTCATCTCCAAAGACTC  
AACCTTACCTTCAACTACTTGAATGACTTTCCACTTGGAATAGTATTAGTGAACCTCAGTAGTTTGACGCA  
TCTTTTGGCAATCTCACTAGAATTAGAGTGTTGAACTTTCATTTAACAACCTTAAATGGTAATGTTCTCTC  
AACTATCTCAAATTAACAACACTCGATCATTAGATCTCTCTTACAACGATTTTCAAGGCTCGATTCCAG  
AATCTTTTGGCAATCTCACTAGAATTAGAAGTTTGGATCTTCAATGAACATCTTCACCGGAAATGTTCCC  
TCAACTATCGGAAAGCTCAACAACCTTCACTCCTTATCTCTTTCTTCCAATAATTTGAAGGCTTGATTCCA  
AACATATTTTCCAACCTTCTCAGAGCTATCTTTTTTAGCTTTTGACACTAACAATTTCACTGGTCCACTCCCC  
TATTCAATTGCAACGTTGACTCGTCTTGAAATATTATACTTGCAAACAATTTACTAACTGGTCCACTTCC  
CTCTAATAAAGTGGACTTCAAGAGCTACAACAACCTTGATTTGTCCTTCAATTACTTCACTGGCGCAACAC  
CCCCTTGGTTATTCCACCTTCCATCCTTACTTTCTTATATGTTCAAGACAATCAATTAACCGGGAAATTGC  
CAAATAAGCTCAAGAGTAATTATCTAGAATACTTTAACATTCGTCTTTCATACAACAAGCTGCAAGGTGA  
AATTCCCATTGGATGTTTTCTACAAGCATAGTTAGACTGGATCTCTCTCATAACTTCTCACAGGCTTTA  
AAAAACAAGTATGGCACTCAGACTCCTTACAATACCTTAATTTGGAGAACAATTTTCTTCAAGGGACTTT  
GCATCAATCCTTTTGTGACATGCATAACCTTGACTTCTCATTGTTGCTCAGAACAATTTCAAGTGGTTCAA  
TCCCAGACTGTTTGGGTAACCTCAATAGCTTCAATTTCTATTTAGACTTGCGAATGAACAGTTTTCATGGA  
GAGATACCAAGAATCTTACCTACAACGTTACAGTATCTTGGTTTATATGGCAATCAATTGAGGGGACAA  
GTCCCGCGATCCTTGGTTAACTGTACAAGCTTGGAAGCTTGTGATTTGGGGAACAACAAGATAAATGAC  
ACGTTCCCATATGGCTGGAGAACTTCAAACCTCCAAGTTTTGATTCTAAAATCAAATCTCTTTACGG  
TTCAATTGGTGATTTGGAGTCCGAATTTCCATTTCTGAGTTACGAATCTTTGACCTTTCTTCAATGGGT  
TCACAGGAACTTTGTCATCTAATTTTTCAAAGTTTCAGAGGTATGATGGATGTGGATGAAGAAAAAAC  
AGGAATTACTCGAGAAAGAACAAGCAATGACACAGATTACCTTTACCACATTAGTTTGGTGATAAAAGG  
TAATGAGTTTGATATGAGAATCACGTCAATTATGACGAGTGTTGATTTATCAAGCAACAGGTTTGAAGG

AGATATTCCAAAATCCATTGGAAATCTGAGCTCACTTGTGTTACTCAACCTGTCTCACAACAACCTCCGTG  
GTCATATTCCTGCAGAAATTGCAAAGGTGCAGGCACTCGAAGCATTAGATCTCTCATGGAACAGACTCA  
TTGGAGAAATTCCAGGTCCATTGTGCGAGTTCGACATTTCTTGAGGTCTTAAACCTTTCCTACAATCATCTG  
GCCGGGCACATTCCTATTGGGAAACAGTTCAATACATTTCCAAATGACTCGTATTGTGGAAATCCTGATT  
TATGTGGATTTCCACTGTCAAAGAATGTGGAAACAATAATGAATCACCACCTGAAACACGATGATGATG  
ATGATTCATTTTTATGAGCGGATTCACATGGGAAGCAGTGGTAATAGGTTATGGTTGTGGTATGATATT  
TGGATTGTTGATAGGAGGCCTCATGTTCTACTGGAAAAACCAAATGGTATGTGAACTTTGCTGAAGA  
TATACAAATTGATGCTAACAAGCAAACAAGGCCAAAAGAAGAGACGTCAAAGACGCTGTTTAAGAATGA  
ATTAGCAATATAACCAGGTATGTATCAAACCTTTTGTGTTTGAATCAGGAACAGCACTATAGAGGTTGTTG  
GATAACTATTTTCTAAATATTCAAAAACCTCAATGTCTCTGCAGAGGTTACTGGAGAATTGGACAATTTA  
ATTAGCAAGTTAGTGTGATGTTTCGTGCAAATATCAAAGGATGCATTTGTTTCTTCACTTTATGCCCATGG  
TTGCCAAATACATAATAAGTTACAGTTGATTTCTATAGTTTTGTGGCAAATAATAAATTAGCTTTAGACAT  
AGCAACCTCTACCCTCTGTTTGGATGGATGTCTCATAATGTATCGTATTATATTGTATTGTATTGTTA

>PGSC0003DMG400001870 LRR-RLPs

CTTGATAAATAAAAATTGTCGATCGACTGAGTCTGTGTGTGCTCTTGTACTATTCTTTCGTTTCGCTGAAG  
TTATTGAAGTTTGAGATACCGCTACTTCTTTAACAGGTTAATCCGTTTTATCTTGGGAGGAATTAATCTAC  
AACCTCGGGTACAGTGAGGGGATTAATTTCTTAAGGAAACACAGTGGTTTCTGTGGACTCGGATTA  
ATTCATTCTGTCTATTTTCATCTTTTTTTGTTTCTGTATTTTTGACTAACCTAAATACAGGAGATAACACTTTC  
CACTTGGAATAGTATTAGTGAACCTCAGTAGTTTGACGCATCTCAATCTTTCGGATTCTGGAATATTTAAT  
GAAAGGGAGATGCAGATCCCATCAGGATTATGCAAGAGTTGTCTAAGCTGATTTCACTTGACCTCTCCTG  
GAATTACATCCAATTTGGCCGAACAACCTTACAAGTTTGCCGCACAACCTTAACCAACTTAGAGATTTTGT  
TGTTAGACTTCGTGAACATAACCATTCAAGTTACCTAAGAATTTCTTCTTCCCTAAGGTACTTAAGTCTTC  
AAGGCACAAATATGTTTGGGAACATGAGTGATTCTCAAATTTTTTCATCTACCAAACCTTGAAGTGCTGAG  
ATTGGGATCAAATCCTTTATTAACAGGCACTTTGCCGAATTTAATTGGAGTTTCGGTGGAAGTATTTTA  
GAGTTGGACTTCTCCCGTACTGGTATTTTTGGGAAGATACCTGATTCAGTTGGTAATCTCCATTCTCATTG  
GCATTTGGACCTCTTGAATTGCCATTTATCTGGCTCGATTCCAGAATCCATTGGCAACCTCACTGCAATCA  
GAGAGTTGATACTTTCAAGTAACAACCTTCACTGGTAATGTTCCCTCAACTATCTCAAATTAACAACACTC  
GTTAATTTAGATCTCTTTCAACCATTTTCGAGGCTCGATTTCCGAATCCATTGGCAACCTCACTGCAAT  
TAGAGAGTTGACGCTTTCAATTAACAGCTTCACTGGAAATGTTCCCTCAACTATCGGAAAGATGAACAAT

CTTAACAACCTTATTTCTCTTTTCCAATAATTTTGAAGGCTCGATTCCAGACATCTTCGCCAACTTTTCAGAG  
CTATACTTTTTAGCTTTTGACTAACAATTTCACTGGCTCATTCCCCTATTTCGGTTGCAACCTTGACTTAC  
CTTCGAATCTTAGAGTTGCAAAACAATTTACTAACTGGTCCACTTCCCTCTAATATAAGCGGACTTCAAGA  
GCTACAACCTACTTGATTTGTCATTTAATTATTTCACTGGTGCAACACCCCCTTGGTTATCTGTTCAACACAA  
TCAATTAACCTGGGAAATTACCAAATGAGCTCAAGAGCAATTACAAAGAATTCTTAGGTAACCTCAAATGAT  
GCCTCCACCACCTCAAATAAATTATTGCCAAAACAAGTATGGCGTTCAATGAATTTGGTGCTACTTAATTT  
GGAGAACAATTTTTTTCAAGGGCCTTTGCATCATTCTATTTGTGACTTTATTAACCTAAAAGTTCTCATTTT  
GGCTCGGAACAATTTTCAGTGGTTCAATCCCAGACTGTTTGGGTAACCTCCAATAGGTTTATTTCTATTTTAG  
ACTTGCGAATGAACAATTTTCATGGAGAGATACCAAGATTCTTACCTACAAGGTTACAATATCTTGGTGT  
GTATGGCAATCAATTGGGTGGGAGGGGGGGATCCCACGATCCTTGGTAACTGTACAACTTGGTAGCT  
CTTGATTTGGGGAACAACACAAGATAAATGACATGTTCCCATTTTGGATTGTTGATGGAGGCCTCATGT  
TCCTACTGGAAAACCAAATGGTTTTCGAACTTTGCTGAAGATATTGCTCAACAAATTGCTGCTAAGAA  
GCGAACAAGGCAAAGAAGAG

>PGSC0003DMG400002118 LRR-RLPs

CAATCCTTCAGAGATGTCTGAAGATGAGGAGCGTCCTTGTCTTCAGATCTCACCGGTGGCGCCACTGCA  
AAAGCAAGGAACTGTTGCTTTAACGCCGCCGTTACCGGTGGCGGAGGGGGGATTTTTAACTTTTCGCCA  
CACCCAGATCAAGTTCTTGAAAATGTGCTGGAAAATGTTCTTTGCTTCTTAACTGATCGCCGTGACCGTA  
ACGCTGCCTCTCTTGTAAAGCAAATCTTGGTATCGGGCTGAGGCTTTAACCAGATCCGAAGTGTTTATTGG  
CAACTGTTATGCTGTTTCGCCGACCCGGGTTACGACCCGTTTCAAAGGGTGACCTCTGTGGCCATTAAA  
GGGAAACCTAGGTTTGCTGATTTAGTTTCTTCCAGATTGGGGTGCTCACTTTACTCCTTGGGCTTC  
TGTTTTGGGTGATTCTTATCGTGGGCTTGAGAAATTGTACCTCAAACGTATGTCCATATCTGATGATGAT  
CTAGGTTTGTGGCGCGTTGTTTCCCAGTTTCAAAGAGCTTGTCTTGTATGCTGTGATGGTTTTGGGAC  
TAGTGGACTTGCTATTGTAGCTCGTGATTGCAGGTTAGTATTGTTTTGTCCGGATATAGATCTGTTTATGT  
GATAACCCTTTTGGTAAAAGTTTAGATTTTTAATTTCTAGAAGCTGAATTCTTCTTTCTGTAATGGGAAA  
TTAACAGCTTAACTAGTGTAGATATATTGTGTTATTTGAATTTGTGCTTCATGTGTGCTGGTGTGTTGAAT  
TAGTTATGTGATTGAGTTGTTCTTTAACTGTTTTATTTCTGCATTTGAACTTAATGATACCTTTTGAGGAC  
ACTAGCATTGAAGTTATAATATGTGGTGACTTGTTGTATTGGATTTGTGAGTTTGCAAGCTGTGAAATAT  
GGTTTGGTAGTGTGATTTTCTTGTGCATAATAGAAGTTTTTACTGCAGGCAAATTAGAGTGCTTGATCT  
GATTGAGTCTGAGGTATCCGACGATGAAGTGGACTGGGTTTCTACTTTCTGAGAACAAAACGTGTTT

GGAGTCTTTGACCTTTGATTGTGTTGAATGCCCTATTGATTTTGAGGCATTGGAGAAGCTAGTAATCAGG  
TCACCTAGTTTGAAGAGACTAAGGTTGAATCGGTTTGTCTATTACTCAGCTGTACCGTTTGATGATTCCG  
AGCTCCACAGCTTACCAATCTGGGAACAGGCTCTTTGGCTCCTCAACGGTCATTGATGAACCAGATCCT  
GATTATGCTTCAGCATTGCTGCCTGCAAATCCATTGTCTGTCTCTCTGGTTTCAAGGAAATTGTTCTGA  
ATATCTGCCTGCAATCTATCCAGTTTGTGGCAATCTGACCTCTCTTAATTTAAGCTATGGTGCCAACATTA  
ATACTGAACAATTCAAGTCTGTCATCAGTCGCTGCCATAAGCTCCAAGTATTGTGGGTATGTGGTTTGAA  
TTTTCGCTAAATGTTCTTTTAAAGAAAATTGTACTCTGTAATAGCGTTATATTGAGTTCAATTTTGATGTTT  
CAGGTATTTGATTCTGTATGTGACGAAGGACTTGAGGCAGTTGCTGCAACATGTAAGGATCTGCGGGAG  
ATTCGAGTTTTCCCTATCGAAGCTCGGGAAGATGCAGATGCCCCAGTTTCTGAAGCAGGTCTCCTTGCGA  
TTTCTGAGGGTTGCAGTAACTTAAGTCCATCTTATTTCTGCCAACGAATGACAAATGCGGCTGTTAT  
AGCTATGTCAAAGAACTGCCAGACCTTGTGGTATTCCGACTATGCATTATGGGTGCGCACTTGCCTGAC  
CATGTTACTAATGAACCAATGGATGAAGGCTTTGGGGCTATTGTCAAGAACTGTAAGAAGCTTACTAGA  
CTCGCTGTATCTGGTTTACTGACTGATAAGGCTTTGAGTTACATTGGACAATATGGAAAAGCTTAGTCAGAA  
CCTTATCAGTTGCTTTTGTGGAACAGTGACTTGGCTCTGAAGTATGTGCTCGAGGGCTGCCCTAAGTT  
GCAGAAGTTGGAGATCAGGGATTGCCATTTGGAGATTTGTCTTTGCGTTCTGGTGTACACCACTATTAC  
AATATGAGGTTCCCTTTGGCTGTCATCTTGTAGAGTAACTCTACAAGGTTGTCAGGAGATTGCTCGCCAAT  
TGCCCCGTTTAGTAGTGGAAGTGATAAGTGGTGTGAGGAAGGGAGTGAGACTGGTGAGCATGTCAAT  
ACCTTGTACATGTACCGATCTCTTGATGGACCGAGGGCTGATGTACCATCATTGTGCAAATACTGTGAC  
CGGCCTTTTTAGAAGATAGGAATTTCTGCAGTAATTGATTGGGACCTTTGAGAAATGATTAACTATTTTC  
TTGGGAAGAGATGCTCTCCGGAATCTGTTGTGACCCATATGAAGGTGCAAGTTTCTTCTTGAGAAAA  
CGAATGGTGCACCACTTGCAAAGGCAGTGAGCAATCTATAATGTATTCAATGCTGGTCCCATGGATATC  
ATTGTATATGGTTCAGTACAGAGATTGTTTTTTCCAGCAAAGCAATCTAGAAGACAAATGTTCTCTGTAT  
CAGTAATCTTTTCTATTCACTTTCTTCTTTCATATTCATGGAGCCTTGAATTAGTAAGTGGAGTCATTGGT  
AAGGCCACAGCAAGGGTAGATGTTCCAAGCTGCACGGTGGCTGATCAAATTGCAGCTCAATGAGATTTTC  
TCAAAGGCTTTGCGCAGAACCAACACTTGTGGAAACACCTGCATGCTCGGTCAGGATACTGGCTCGTCA  
AGTAGTATCTTTTCATACAATTGAGGCCCTTCTATTTTTTTGTTTCATTGTTAGTTTAGAGTTGAAGTTTTT  
TATTTTTAGTTGGTGTAGCCTAATGGTCAGAAGGATACCTACCGCAGTTGGATCTCTCCATCTCGCTTTC  
TAGAAATATTTGTTCTTTCCAGGATGTGTTGTTTCGTAGCACCTGACTGTTGAATTTATTATTGTTATTTTT  
AGAAGAAATGTGAGATGGGTAATAAATGCCAAATATGCATGGACCAGATGATGCTCTAGTGTGTGTTTG

TGTTTGTCTTTGCTTTTTCTTTATGTGGAATGATCAGCTTGATAGTGAAGACCCATAAATGATGTGTGGAA  
AGCCTTGACAAGTACAAAAATGCAGGACCCTCCTCCTTCACTCACTCTCTTTGTGGGATCCATTTATG  
AGTCTTATCCTCTATTACCTTTCCAGCTGATGAACGGCCCTTCTCTGTCTCATCTCTTGTATCTGAAAGAGC  
CAAGAGCAGGGAGTAGACTGTAGTAGTGGAAGTATAGATGGATACTACAGCACACCCCTTAATTTTTTA  
GCTGATGCCAACTTTATCATTATTCTTTTGGATAACAGTCTTGAGGAGCCTGTTGTGTTATCCTGTTTACTT  
TTCATATGCTGCTGCTGCCTCTATCATTGACTACAACCTCAC

>PGSC0003DMG400002426 LRR-RLPs

CTTCTCAAATTTCAACAAATTAACCAATAAATGGCATCTGCTTCTTCTTTTGGGAGTGATTACAATACT  
GTGCTCGATGGAAGTACGATGTCTTTCTAAGTTTTAGAGGTGCCGACACTCGGGCTACATTTACAAGTCA  
CTTGACGAAGGTTTGAAAAACAGGGGAATATTCACCTTTCAAGATGATAAAAGGCTAGAGCAAGGTGA  
TTCCATCTCAGAAGAACTCTTAAAAGCTATCGAAGAGTCTCAAGTTGCACTCATCTTTTCTCAAAGAATT  
ATGCTACATCGAGGTGGTGCTTGAATGAACTAGTGAAGATCATGGAATGCAAGGAGGAAGAAAATGGA  
CAAACAGTCATACCGATCTTCTATGATGTGGATCCATCAAATGTTTCGATACCAAAGTGAGAGCTTTGCAG  
AAGCATTTGCCAAACATGAATCGACGTATAAGGATGATGTTGAGGGGATGCAGAAGGTGCAAGGATGG  
AGGAATGCCCTAACTGCTACTGGAATCTAAAAGGATATGATATTCGTGGCGGGTGAGTTGAAAACACA  
TAATATGTTTCTATTACCCTGAACTATAATGTTTCCTATTTAATACGCTCTTGAACATTAAGATGAAAA  
TACTTTCTCATACTTGACTTCCTCACATTGTCAACAATCAATCTCTAATTTATGTAGGATTGATCAATCAA  
GGAAATTGAGCAGATCGTCGACCACATTTCTTCAAATTTTGCAAGAGTGCTTGTTTTTATCTTATTTGC  
AAGATGTTGTGGGAATAAATGCTCATTTGGAGGAACTAAAATCCCTACTTCAAATAAAAATCGATGATGT  
TCGAATTGTTGGGATCTGGGGAATAGGCGGAGTCGGTAAAACGACGATAGCAAAAAGCCATCTTTGATA  
CTTTATCTGATCAATTTAAAGCTGCTTGTTTTCTTGCCGATGTTAAAGAAAATGCAAGAAAGAATCAACTA  
CATTCTTACAAAATACCCTTCTCTCTGAATTGTTAAGAAAAAAGATAATTACGTCAATAATAAGTATGA  
TGGGAAGTGCCTGATTCCAAACAGACTTTGGTCTATGAAGGTGTTGATTGTGCTTGATGACATTGATGA  
AAGAGATCATTTGGAGTATTTAGCAGGTGGTGTGCGTTGGTTTGGTAATGGCAGCAGAGTTATTGTAAC  
AACTAGAAACAGACAATTGATAGAGAAGGATGCTGCAATATACGAAGTGCCTACGCTACCTGATGATGA  
TGCTATGCAATTGTTCAATCAACATGCTTTCAAAAAAGAAGTTCCAGATGAGTGTTTTAAGAAGTTCTCG  
TTTGAGGTAGTAAATCACGCTAAAGGGCTTCCTTTAGCCCTCAAGGTGTGGGGTTCTTTGCTGCATAAGA  
AAGGCCTAACTCAGTGGACAAGAAGTGTGACCAAATAAAGAAAAAGTCTAATTTAGAAATTGTTGAAA  
AACTCAAATAAGTTATGATGGGTTGGAGCCTGAAGAGCAAAAAGATATTTCTTGATATCGCATGTTTCTT

CCGTGGGCATCATAGAAAAGAAATGAAATTTTTGATAGCTGTGATTTTGGAGCTGAATACGGATTAGA  
TGTTCTAGTTGACAAATCCCTTGTGTTTCATCTCTATGTATGGTAGAATTGAAATGCATGACTTGATTGAAG  
ATATGGGCAAATACATTGTGAAAATGCAGAAAGATTCCGGAAAACCTAGCAGAGTATGGAATGTTGAA  
GATTTCAAAGATGTGATGATGGACAATATGGTAAGTAAGCTAAACAATGCAATAGTATTCATATTTCAA  
GATATATATACATACTCTGTTCTCTAGCTTCATATACTCTAACTAATATTTGTACCTTAAATTTTGTTC  
GTGGTGCTAACTCTTCAAGAACTTCAAGTGTAAATAATAATATAAAAACATACATGACAAAATAG  
CATTGGGGGTAGACCGGTAGAGTAAGAAAGTAATGATATTGATAAGTGAATTGGACAAGAGGTGGCT  
ATATGTGAAGTTGTGATTTGTTGACTCATTACCTTTTTATAGGGGACCATGACAGTCGAAGTAATTTGGT  
TGACAGATTCTGAAAACTATGCTTTAGCAAAGAGGCAATGCAAAATATGCAAAAGCTTAGGATATTAT  
GCATGTCATATCATCCATGGGTTCCCTCAAAGGGCTTTCAAAGATACTCCCAAATCCTCTATTGAGTACCT  
TCAAACAACCTTGC GTTGGTTTGTGTGGCATTCTATCCTTGAAGTTATTGCCAGAAAATTTAATCCCAG  
AAGGCTTGTTTCATCTTGATCTCCGGTGGAGTTCATTGCATTATTTATGGAATGAAACAAAGGTACCATTC  
TATTTAGATACTTTCTATTTTGTCTTGTCTAAAATTATATTTGATTCTTGTGTTTAAATGAAAATAAGTT  
ATTAATTCCATAAACTCAAACATAAGTTTCTGAGCATGTAATTTCCATAGAAAGTAGTAAAATAAATAC  
GTTGAGTTATAATATAAACATGTCATTTACTATCATTCTTTCTGTGTTTTGAATTGCAGCAATTTCTGTCTC  
TACGAAGGATAGATCTAAGTGGCTCTAAAAGCCTGAAGAGAACCAGATTTCAAGGGGATGCCAAATT  
TGGAGTATTTGAATCTAGAGTATTGTAGGAGTCTTGAAGAAGTTCATCATTCCCTCAAGTATAGCAAAAA  
ACTCATCCACTTAGATTTGCATTATTGTAGAACACTTGAGAGGTTTCCATATGTTAATGTGGAATCTCTTG  
AATCTATGAATCTAAAATTCTGCTCTAGTTTAAAGAAATTTCCAGAAATCCTTGAATAATGAAGCAGGG  
AACTGCCAGAAAGATTATGATGTCATGCTCTGGGATAAGGGAAGTCCATTATCTTTCTTTGATCACCAA  
CCTCATCTTATAGAGCTACATTTGAATGGCATGAAAAACCTTGATTTTATTCCAAGCAGCATTGTAGTC  
GAAAGGTTTGGTGAAGCTATCTGTGTCGTATTGCTCAAACTTGAAAGCTTGCCAGAAGAGATAGGTGA  
TTTAGAAAACCTTGGAGGAGCTTCATGCCAGCAATACTCTAATCTCACGTCTCCATCTCCATCGTCCGGT  
TGAACAAGCTTATAAGATTGAGTTTTGGACAACATAGATCAGAAGATAGAGTGTACTTTGTGTTCCCTCA  
GGTGAATGAAGGGTACTCTCATTGGAATATCTGGATCTCAGTGGCTGCAATATAATAGATGGAAGACT  
TCCGGAAGACATTGGATGCTTGTCTCTTTGAAAAAGTTGAATCTCAAGGGAAATAATTTTGTGATTTG  
CCTCAAAGCATATCCAACTTGGTGCTCTTGAATACTTAACTTATCAGATTGCAAGAGACTTACACAGC  
TGCCAGAAGACATTGGATGTTTATCCTCTTTGACAAAGTTGAAGCTCAACGGAAATAATTTTGTGATTT  
GCCTCGTAGCATATCCCAGCTTGATGCTCTTGAATACTTGGACTTATCAGATTGCAAGAGACTTACTCAG

CTGCCAGAAGACATTGGATGTTTATCCTCTTTGACAAAGTTGAAACTCAACAGAAATAATTTTGAGCATT  
TGCCTCAAAGCATATCCAACTTGGTGCTCTTGAATACTTAACTTATCAGATTGCAAGAGACTTACTCA  
GCTGCCAGAAGACATTGGATGTTTATCCTCTTTGAAAAAGTTGAAGCTCAACAGAAATAATTTTGACCAT  
TTGCCTCAAAGCATATCCAACTTGGTGCTCTTGAATACTTAACTTATCAGATTGCAAGAGACTTACAA  
AGATGCCAGAAGACATTGGATGTTTATCCTCTTTGAAAAAGTTGAAGCTCAACAGAAATAATTTTGACCA  
TTTGCCTCAAAGCATATCCAACTTGGTGCTCTTGAATACTTAACTTATCAGATTGCAAGAGACTTACAA  
AGCTGCCAGAATACATTGGATGTGCATCCTCTTTGAAAGAGTTGTATCTCAAGGAAATAATTTTGAGCAT  
TTGCCTCAAATCATATCCGAACTTGGTGCTCTTCGATCCTTGGACTTATCAGATTGCAAGAGGCTTACTCA  
GCTGCCAGAATTTCCACAGGAATTAGATACAATATATGCAGATTGGAGCAATGATTTGATCTGTTATTCC  
TTGTTTCAGAATATGTCATCATTGCAGCATGACATCTGTTCTTCAGATTCCTTGCTACTAAGAGTGTTTAA  
GAGTTGGGGGGAGGGTATCCCAAGTTGGTTCAAATATCAGGGAATGGGCAAAAGTGATCAGTCAATT  
TGCCTAGGAATTGGTATGTAAGTGATAACTTCTGGGATTTGCTGTATGTTATTCTGGCGAATATGATAT  
TGATTGCATCAGAGCTCATTTGATTCCCTTATCATGTGATGATGGGATGTCGTCGATGACCCAGAAATTT  
GCCTTATCCAACAATTCACAATATTCTAATGTATGGTATATTAATTTTTGTTGGTACCTCTTGGTGGCTTA  
TGGGATGCATCTAATGCAAATGAAAAACACCAAATGACTATGGGTGCATTAAGTTAGATGTTTTTGGAA  
GAAAAGAAGACATTTGGAGTTCGTTTGTGAATAAAGATGAAGCTGAGCTTCACAATGGGATAAGGAA  
GAGCAGAGATGAAGAAGAGGCCACTTGCTCCTCTTCTAAGAAACAAAGGCAACTCTTTCCACAAGCTC  
GGGATTATAGATTAAATATAGGTATATACCTCATGAAATTGTGTTCTCTGTTTATATATAAATTATTTCTTC  
TCATTCTTTCTTCTATTGGGAATAGGTGATGTACGTATCAGTAATCAGCAGCGAGTTTGGGGACTGCC  
TATGAAGGGACATGTACGTACAATTTTGGGTGGCAAAAATTCATTCTTTTTATATTTTCAATTCGAAATATA  
ATCACATTTTCCATTTCTGACAAATAGATAAATTGCAGAAGCTTTGGAATCCAATGGAGCTCAAATAAT  
TTCTCCCAACCATCAAGTTCTACTGAAGTTGCATAGTCTCCGTTGATATCTACTGTAAAATGTTACATTCT  
TATTCTATTTTAATAAGTGCAAGAAACACATTTGATTAATCATCTCTAAAATTAATGTAATCTAATTAGCA  
AAGAACACTGCTATATAATTGAACCCCTCCCTATCCTCATTTCTTGTTCAATGTATTGCCAATGTCGAGCA  
CGAAACGATATTTACATCCGATTTCAAAGACGTTCCAACGTTGTGTTACATAGTCCATTGGCACAAC  
TTCAATATTTGGTGTTATGTTATGCTTTGCCGCAAAATCCAACATTTCTTGAGTCTTCATCCCTCCTATGCA  
ACTTCCAGCCACTAGCTTCCTCCTGTTTT

>PGSC0003DMG400002478 LRR-RLPs

CTTCCACTTGATTTGAGACAATGCTTTGAGTATTGTGCGGTATTCCCAAAGGACACCGAAATGGAAAAAC

AAAACCTTATCTCTCTTTGGATGGCGCATGGTTTTCTTTTATCGAAAGGAAACATGGAGCTAGAGGATGT  
GGGTAATGAAGTATGGAGAGAATTATACTCGAGGTCTTTTTTCCAAGAGATTGAAGTTAAAGATGGTCA  
AACTTATTTCAAGATGCATGATCTCATCCATGATTTGGCTACATCTCTGTTTTCAGCAAACACATCAAGCA  
GAAATATCCGCGAAATAAATATGATGATGTCCATTGGTTTTGCTAAATCGGTGTCTTCTTACTCTCCTTCT  
CTCTTGCAAAAGTTTGTCTCGTTGAGGGTGCTTAATCTGAGTCGCATAGGAAATGAACAGTTACCATCTT  
CCATTGGAGATCTAGTACATTTAAGATACTTGAACCTCTCTCGCAATAACATGTGTAGTCTTCCAAAGCA  
GTTATGCAAGCTTCAAATATGCAAACCTTGATTTACAATATTGCACCAGACTTTGTTGTTTGCCAAGAG  
AAACAAGTAACTTGGTAGTCTCCGAAATCTTTACTTCATGGTTGCTATAGATTGACTTGTACACCACCA  
AGGATAGGATCTTTGACATGCCTTAAGACTTTAGATTGCTTTGTCGTGGGCGAGAGGAAAGGTTATCAA  
CTTGGTGAACCTAAGAAACCTAAATCTCTATGGCTCAATTAATCTGGCATCTTGAGAGAGTGAAGAAT  
GATAAGGATGCAAAAGAAGCCAATTTATCTGCAAAAGGGAATCTGCATTCTTTAATCATGAGTTGGGAC  
AGCGGACCACATAGATATGAATCAGAAGAAGTTAAAGTGCTTGAAGCCCTCAAACCACACCCCAATCTG  
AAATATTTAGAAATCAATAGCTTCAGAGGATCCGTCTCCAGACTGGATGAATCACTCAGTTTTGAAAA  
ATATTGTCTCTATTGTAATTTACGACTGCAGAACTGCTCGTGCTTACCACCCTTTGGTGATCTGCCTGT  
CTAGAAAGTCTAGAGTTACAGTTGGGACCTGCGGAGTATGTTGAAGAAGTGGATATTGATATTCATTCT  
GGATCCCCACAAGAATAAGGTTTCCATCCCTGAGAAAACCTTGCATAAAATATTTTCGTAATCTAAAAG  
GATTGCTGAAAAGGGGAGGAGAAGAGCAATTTCTGTGCTTAAAGAGATGGAGATTTGCTATTGCCCTA  
TTCCGACCCTTTCTTCTGATCTTAGGACTCTTACTTCCCTCAATATTAGGGATAACGAAGAAGCTACTTCA  
CTCCGAGAAGAGATGTTCAAAAACCTTCTTAGGACTCTTACTACCCGCAATATTAGGGAAAGCGAAGAA  
GCTACTTCACTCCAGAAGAGATGTTCAAAAACCTTCAAATCTCAAAGACTTGAAAATCTCTAACTTCA  
AGAATCTCAGAGAGCTGCCTACCAGCCTGGCTAGTCTCAATGCTTTGAAGAGTCTGAAAATTCATATGTG  
TGACGCACTAGAGAGTCTCCAGAGGAAGGGGTGAAAGGTTTAACTTCACTCACTGAGTTGTATGTCTG  
TACTGTAAGATGCTAAAACGTTTACCTGAGGGATTGCAACACCTAACAACCCTCACAAATTTAGGAATT  
TGGGGATGTCCAGAAGTGGAAGCGGTGCGAGAAGGGAATTGGAGAAGACTGGCACAAAATTGCAC  
ACATTCGTATCTGAAAATATATTCCTAAGTATTATTTGTAATTGTTTCTTTGTTTGTGAGTCTTTTTGGTT  
CCTGCCAGTGGATGTCATTTTTCTAGGGTTGTCTGTTTGTGAGTCTCTCTCTTTGGATGTAATTTTTCTTT  
GGAAACAAATCAACAATCTATTTGTATTATACGCTTTCAGAATCTATTACTTCTTATTTGTAATGGTGAGT  
ATCTCTGTTTCCT

>PGSC0003DMG400002618 LRR-RLPs



TAGTAAAGTAAAATAATGGGGAAAGGAGCAATTTTGAAATTGAAAAAAAAACAAAAACAAAGAGTGGT  
GCTCTTATTCCGGAAAAGCAAGGTGGGAAATCTTAACAGGACTCGTCTCTTTTCCTTATCAGAATCAGA  
AGAAGAAAGAAGAAGATACTTTTTATTTCGTCTCTCAGGTATGGTGTTCTCTTACAATCAATCTATAATGC  
TTATGTTTGTGTTGTTGAGAGGCCGATCCGCCACCCTCATGATGGATGGGTCAAACCTGTTTTTTCCAT  
AAAAACAAACCAGACGCTCAACGTCTATCTTTCCGTTTTCCTTTTGAGTTTTGACCAATTGTTAATTAG  
ATGAAAATCAACAATAGGGTAAGAAAAGGGGGTTTGATTGAATTATGCTGGAATATTCTGTCTTGTTAG  
CATGTGTATTTGTGAACAAGGTTACCCGCACGCGTTATTTGACCTTTCCGTATTATATTGGGTCTTGTC  
TTCTAATTAATTAATCTCGTGCGTTTTGTGACAGCACAAAATTTGACAGCTATATAGTCTTGCTTGTTGGG  
GCTGTCATTATAGTTCATCTATATTGGCAGCCCAATTTCTGAGGTGTGTCTTCTTTCTTCCACCGGCAA  
ACAAATATATCATCATGGCTTACTTGTCTGGAATCCTCCAAAGACCTATAGTTGCAGCATCTGCAGTTGCT  
ATAGCTTCTGTATCTACTGATCTTCATGAAAAATTCTGGCCATCTAAGTCATTACACAACAACAACAA  
TTCCAAGAAAAGGAAAAGATAACATCTTGGGTCTCTCACATATATCTTTCTAAGCTACCCCATTTCTCCT  
CCTACCTCACCACAATACCTGTTCCCCTGCCTATTCTAAATAACACCAATTTTACTTCTTTCAACCCTCC  
TTTTCTACTTCTTCTCTGTTGCTCAACTCTTATCAATCAGCAGCATTGCCCAACTCTGCTAATCCCTCCACA  
TATACATATACACTTCTTCTTCCACTTCCGAGGTGTTGTATACATGGCACTTACCTGAGCCAAATGCATC  
ACGGAATTCTGATTCTTCACTAAAGTCTACCACTCTGGTAGTATTGTTGGGATGGTTAGGTGCAAAG  
CAAAGCATCTAAAGAGATATGCAGAGTGGTATGCATCAAGGGGATATCATGTCATTACATTTACTTTCC  
CAATGTCTGAGATTCTAAGCTATCAAGTCGGGGGAAAGGCAGAGCAAGATATTGAAATGCTTGTGAATC  
ATCTAGGTGATTGGTTGGAAGAAGAGCATGGAAAGAAGTGGTCTTCCACACTTTCAGCAATACTGGAT  
GGTTAACGTGAGTTCTTGATGATACTCATTAGTCTAGGAAGAGAACAGAAACATAACTATTTACATTTTC  
CTAATGCTAGCTTGATAATTATTGATTGACTTCTTTATTCTCTTGGCCTTACAGTTATGGTGTCATTTTG  
GAAAAGTTTCAGAAACAAGATCATGCTTTAATGAGAAGGATTAAGGGTTGATTGTTGATTCTGCCCTG  
TCGCAGCTCCCGATCCACAGGTATTGCTGACTCAAAAATTGTGATGATAAGATATCATTTTTATGTGCAA  
GTGTCAGAAGAGTGTTTCTTGGAGAGTAGTCTTATTTCTGAAAGTTAATGCAGAGCACTTGTTTAGAGCT  
ATACATTTCTATTGAAAACCAACCTTTTCATGCTTTTATTGGACAACCTATTACAAGTGCATATATAGTCA  
GGTTTTAGCCATTCAGAATTGCACAGTTGTTGGATTCTAAACAGGACCTGCTGTTCTCGTATTTTTATCC  
TGTTGCTTTCTTTTATCTTAGGGCCTTAACCATGCAGCCTGCTTTTCGAAAACCTATTCTTATGCTTGATAAC  
GTGAAAGAATCTTGAGAGTTTAGCTCTCTCTGACAACCTTTTAAACAGGAAGCATTCTATGCAACTTTTGT  
TCACGGTTCAAGCTTTAAGCCTACTTATTCTGGCTGAGAATAAGCCATCGAGGAATTTCCCTTGGAGCT

ACTAAACTGCACACGTCCCTGCGACTACTGGATCTCTCCAGTAACAACCTTTGGAGGAATGCTTCCATGAG  
GCTTCGACAGGCTAGAAAAGTCTCACATCCTTTTCAACAATAACAACCTTTACTGGAAATATACTGCCTCAA  
CAGGAAACTTGACTAACTTGAAGATTTGTACCTAATCCATAACATGCTCTCCGGAAGAATTCCAGTGGA  
AATAGGAAAGCTTCAAAGGCTGTGTGAACTACCTATAGCTATGGAAACCAGTTGTCAGTAACTACCCCC  
AGAGAATTGACAAATTGCTTAGTACGCATTGATTTCTTGGCTAATCAATTTTCAGGCTCTATTTCTGATGC  
CATTGGTAGGCTTAAGAATCTTGTTATCTTCAGCTAACTCAGAATGAGTTGTCTGGTCCGGTCCCATCAA  
GCTTAGCCTACTGCAGGAAGCATGAAAACTGGCCTTTGCTGATAACAACTTTTCAGGATAATTGCCACC  
AACTTTAAGATTTCTATCAGAGCTGGACCTGACTACTCTTACAACAATTGTTTTGAAGGTCCACTTCTG  
AATATCTTTCCCTTCTGAAAAATCTCAGCAAAGTTAACTTTTCTCACAATAAGTTCAGTGGAAACATTTCT  
CCGCTAGCTGGTTCAAATTCTCTGACAGTTGACATGACAAACAACAGCTTCTCTGGTCCTATCCCATCTGA  
GCTAGTGGTGTCCAAAAATCTGACCCATCTTCGCCTTTCTAACAATTTTTTCACTGGAAAAACCCCTTCTG  
AATTTGGACAACCTGAAGATCTCAGATGTCTTGACTTATTGTTCAAAAATTTGACTGGAGATCTAGCACC  
TTCCCTTGCTGGCCTGAAAACCTTCGCTGTTTTCTTATATCTAATCAATTTTCGGGGAAAATTTCCACA  
TGGTTTGTGGAGGAATGGAAGGTCTTGGTGAGTTCGATCTTTCATTCAACAACCTTCACTGGAACAGTTCC  
AGCAGAACTTGAAACTCTCCAAAATAACTCAAACCTTTTTCTCAGTTACAACAGATTATTAGGTGCCATAC  
CACCAGAATCAGGAAATCTCACAAGTTTAAATGTCTTGAATCTTCAATGAAACAATCTTTTTTGGCTCCAT  
TCCTTCAACTCTTCAAAAATACCAGAAGCTCTATGAGCTGAGGCTCTCTGAGAATAATATAAGTGGCTCA  
ATCCCTTACGAAATTGGCTCTTTATCCGAATTACAGGTGATAATAGACCTGAGCAAAAATCATTCTATTTT  
ATGTGCAAGTGCAGAATAGTGTATCTTCAAGCATAGTCTTATTTCAAAGGTTAATGCAGTGC AATTGT  
TAAGAGCCATACATTTCTATTGAAATCCAACCGTGCATGCTTTTATTGGATAAGTATTACAAGTGCATA  
TATAGTCTGGGCTTAGCCATTTAGGAATTGCTCAGTTGCTTGTACTCTTATCAGGACCTGCCGTTCTCTTA  
TTTCGATCATGTTGCTTTCTTCTATTTAGGCCTTAGACATGCAGCCTGCTTTTCAAAATATATTCTTACCT  
TGATAATGTGGAAGTTGTTCACTTCTGATTTAGTCTTCAAGGGAAGGTGGATGGCCTGGGGGTCAGCTG  
TGGACATTAGGAGGAGGGAGGGGAAGCTAGTACTTGTGTTAGTTGCATATAATAAATGTTAATCTGTGCT  
TTGGTAAGGTTAACTAATTTTGTCAAGTTCCTTCTTTGTTTGTATCAAGGTCTGGGCTTCTGGATTCTCT  
GCTGCCTTTTTAAAGAAGAATAGTGTGCAACAAAACGCATCATGACTTTAAACGACAGAGATGTGACA  
ATAGAAGCCAAAACCTTCTGTTGAACTAAGCCTGCAGTAACTGAAGCAGCGTTGCTATTAGTACTGGAA  
AAGTTCTTTGAGGTGGTTTTGAACCTCCCACCGTAAATAGGTAAGGAGATGTCTTCCAGAATCACCTTT  
TCTGCAAATGTTTATCAGCCTGCAGTATTTTTAAACAGCAGTACCAATATTAATCTACTTTTTGTCTTTGT

ACTCTACTCAACGTGCGAAGTAGACCTTGTGATATCATGTCCATTCACCAATGGATTGTAATTACATTTT  
CAAGTCATTAGTGTGTATAGCAAGTGCCAAAAATAGTTTCGTGTTTGTACTTACATTGATGGTTGTATGA  
AATTGCAGGAGGCTTTCTGACGTTCTAGATCTATTGACATCCCGGCAACCAAGTTGCCCTCAATTATACA  
TATACAGCAGTGCCGACAGAGTCATTCTGCAGTTTCGGTTGAGTCCTTTGTAGAAGAGCAACGAAGAA  
TTGGTCGCGATGTTAGAGCTTGCAACTTCGTTTCTACACCTCACGTTGATCATTTTCAGAAATGACCCAGA  
ATTGTATACTTCACAGCTTACCCAATTTCTAGAGGACTACGTCCTAAGCTCTTGCAAACAGCCTTCTTGAA  
TAATTCCTAACCACAACACATTGATTCTTTCTGCCCTTTTTTTCCCTCACTTCAACCAAATACTTGGTAAAG  
CTTCTGTTTTCCAACTTAAAGCAGATATACATTGATGTAGATTGTTACGTATACAGAGAATTAAGATTTT  
TTTTCTTTTCCATTCTTATTTAATTTAGTTGTATCTGTGGTCTCCAGCAACAGAATTGTTGCATTGTACCC  
AAAATATACTTTACTTTACTACATATATATAAAAAAGTTGGGCTTAATT

>PGSC0003DMG400002885 LRR-RLPs

ATGTGGCCTCTCTTTTTCATTTATTCACCTTTCTGTTGTGTATTTCTAAGTCTAAGTTTTTCTTCATCCTTTGA  
TCATCATCTTTGCTCTCCCAGTGAAGCTTCTGCTTTGCTTCAGTTAAGCATTCTTTAATATATTGGACTT  
CTCCCCGTGTGATACGTCTTTCCCAAAAACAGTTTCATGGAATGAGAGTAACGATTGCTGCACTTGGGAC  
GGGGTCACTTGTGACATGTTAAACGGTCATGTTATCGGGTTGGATCTTAGTTGTAGTCAGCTTAATGGAA  
CTATTTATCCCAACAGCAGCCTCATCCAACCTTCATCATCTTCAGACACTAAACCTTGCTAAGAACTACTTTT  
ATCCTTCTACGATTCCAAATGACGTTAGCCGGTTGAGGAATTTGAAGCATCTCAACCTTTCTGATGCTTAC  
TTTCAAGGGGAAATCCCAACAGAAATCTCATACCTTTCCAATTTGTTTTCACTTGATCTTTCTGTTCTTCT  
TATGTGAACGGATTACAATTTGATCAGAGAGCATTTAAAGCAGTGCTTCAGAACTTGACAAATCTAGAG  
GTACTTTCTCTCTTTGGTGTCAACGTCTCATCTCCGATACCTGTAAATTTGTCTTCTCCTTAAGGTACGTC  
GATCTTAAGGTAACAAATTTGGAAGGTGTTCTCACGGAGAGCGTTTTCTTCTGCCAAAATTGGAAACGC  
TCTATTTGAGTAATAACTATCTTCTCAAAGGAGTTTTACCAAAGATCCATCCAAGCAGCACATTGTTGGA  
GTTGGATATTTCATACACAGGAATCTCCGGTGAGCTGCCTGATTCAATTGGCACCTTGAGTTCCTTGACT  
CGCTTGTACCTCTATGGATGTCAATTCTCTGGCCGCATTCTGATTCCATTGGCAATCTTACACAAATTAG  
GTATTTGAATTTTGGTAATAATCATTTCACTGGCAATATTCCTCCACAATCTCTAAATTGAAGCACCTCG  
CAGTTTTAGCTCTTTTCATCTAACTCCTTCGGAGGTGAAATTCCTCAATTTTTCTCTAACCTCCAAGAACTAC  
GTTATTTAAGTCTTTCTAATTGCAGCTTCATCGGTCCGTTTCTTCTCCACTTTTAAGCTTGACACAACCTTG  
AAACCTTAGACTTGTGAGTAATTCCCTATCTGGACCACTGCCTAGAAATGCAAGCATGCTTCAAAGCT  
AGCCGAGCTGGATTTGTCTTACAACCTCACTGAATGGTACCATACCATCTTGGGTGTTTAGCCTACCTTTGC

TATCTTCAGTGTGCTCCATCATAACCGGTTAAGTGGTTCTTTTCCTCAATCACCTGTGAATCTCACAAAC  
CTTTCTACCTTGACCTTTTCATCAAATAACATCACCTTGATGCAGGAATACAAATCACTTTACCTAGCCTA  
GTAGTTTTACAGTTATCATCTTGTGAACTTAGGGATTTTCCACACTTCTTGAGAAATGTAAAGACACTTAT  
GGTCTTGGATATTTCTAACAATAAGATTCGTGGTCAAATCCCTAACTGGTTTAGCGGCATGAGGTGGGA  
CTCCTTGTGACCTAAACCTTTACATAACTCATTAAACAGGCCACCTACAGCCAGTGGCGGAGGCAGCA  
TGTAATGAGGGGGGGCACCCCCCTCGGCGAAAAATATTACTATTTATACATGGTTAAAATTATTTTTAG  
GTATGTATAATAGATGTGCAACCCCTTCCACTAGTTCGTGTGTTTACTTTTCAGATTTTGAACCCCTTAT  
TAAATTTTCTGGCTCCGCCACTGCCTACAGCAACTTCATTATAATAGTCTAGAGTCTCTTGATCTTAAATTT  
AACTTCCTTGAGGGGGCACTACCTTCATCCATTTGTAACATGAGCAGTCTTAGCCTTCTGGATTTGTCACA  
CAACTACTTCAGTGACTCGGCTCCGCATTGCTTGGGCAGCATGGTTGGGCTATCTGTGCTAGACTTGAGA  
AGAAATAGTTTCACTGGGAGTCTTCCACCGTTTTGTGCGCAGAGCAATTCATTGAGAACCATTGTCTTGA  
ATGGTAATCATTTTGAAGGAACTGTCCCGATGTCATTGCTCAAGTGTGATGGTCTAGAAGTCCTTGATGT  
GGGGAACAATGTTATAAATGACACGTTTCCAGCTTGGCTCGGAACTCTCAAGAGCTGCAGGTACTTAT  
ATTGAAGTCTAACAAGTTCCATGGACCTATAAGTACTAGGCTGAAGTTTGGTTTCCCCGTGTTACGGATT  
TTTGATCTCTCTCATAATGAGTTTGGTGGTTCCTGCCTGCAGAAGTTTTTGGAACTTCAAAGGAATGAT  
CAAAACAGATGAGAGAGACAAAGGAGAGATCGAATATATGCAACCACAGTCTTACATCGGATTTAGTA  
ACGTAATGTATGAGGTTTTCAGTGAGGTTGGTGATCAAAAGCCAGGAAATTCAGCTAGAAAAAATCACCA  
CAATTATGACAACCATAGATCTCTCAAGCAACCATTTTGAAGGTGTCATTCCGAAAACACTAAAGGATCT  
CAACTCACTTTGGCTACTCAATTTATCTCATAACAATCTCAAAGGAGATGTACCAATGGAAGTGGAGAAA  
TTGAATATGCTTGAAGCGTTAGATCTCTCTTGGAAATCGGCTCACTGGAAAGATTCCACAGCAATTGACAA  
GAATGAACTTTCTGTCATTCTTAAACCTCTCTCAAATCTCCTTGTGGACGCATTCCTCAAGGTTCACAAT  
TCAACACATTTGAAAATGATTCATATGGTGGCAACCTTGATTTATGTGGTCCTCCTTTATCAAAGAAATGT  
GGAACAAGTGATCCATCACATGTTCTCAACCATTGGAGGAAGAAGAAGAAGATGATGAGTCATATTTT  
TTAGTGGATTTACATGGGAATCAGTAGTCATAGGCTACAGTTTTGGACTCGTTGTTGGAAGTGTCTGT  
GGAGTCTCATGTTTAAATATCGTAAGCCAAAATGGTTTGTGGAATTTTTTACGGGCATCTTTCCAAGAA  
AATGAGAAGGCCAAAGAAGAGAGCTCAGAGACGACGGACATAATGAAAGATTGAAAGCAGTTCCTTTA  
ACTGTTTGTATATATGCAGTATAATTGTATGTGTTGTTTTAGCATTAGCTATTGAAAAGTGTCAATGTCC  
ATTTTTTGGTCATTTTTTACTTCATTATCAAGGGATTGGGCTGAAAATTTGCA

>PGSC0003DMG400002886 LRR-RLPs

ATGTTTCAGAACTTCACAAATCTGGAGATACTTTCTCTCTTATGTCAACATCTTATCTCCGATACCTGTG  
AATATTTCTTCTTCTTAAGGTATGTGGATCTTGCACATACTAATCTGCGAGGTGTTCTCACAGAGAGCTT  
TTTCTTATGCCAAACTTGAAAGACTCCAATTGAGAGGGAATGATCTTGTCAAAGGAGTTTTTCCAAG  
ATCCACCGGAGCAACACTCTGTTAATGGAGTTGGATATTTTCATCCACAAGCATCTCTGGTGAGCTGCCTG  
ATTCAATTAGCGCCTTCAGTTCCTTGAATATATTGTACCTCGAAGGATGTCAATTCTCTGGTTCCATTCCC  
GATTCCATAGGCAACCTAACCGAATTACGGAGTTGGCTTTGTCTTATAATCATTGGGATAATACATAT  
ATTTGACCTTAAACTTGGCTTCAAATTTTAACTTTGACCTCCAACCTTCATAGTGCACAAACAAGCACTTTA  
ACTATCCAATCTTTTAATAAATAAACACGTGATTTTTGGAGCCAAGAGCGTGAAATGCAAACGCTGCCAC  
GTGTATTAGCGAGCCACTCAATGGCTGCCAACTAATTAACACTTTACACGTCCATTTTAGAACTAAAA  
AAAAATAATTAATTAAGGGTAGAGTTGTCATTTGAGCATTTTTTTTCATTGTTGTGTGCCTCAAAAATTAC  
TTCTCACTCGCGCAAATGCGTGCACATCACGCGTTTTGCCAGGTAAGACACGCGTGTTATTTATTA  
AGTTGGATAGTTAAAGTGTCTATTTGTGCACTTTGAAAGTTGGAGGTCAAAGTTAAAATTTGAAGCCA  
AGTTAAGGTCNNNNNNNNNNNNNNNNNNNNNNNNNNNNNNNGTCCAACCTCTTTTCAGGTGAAAT  
TCCTGATGTTTTCTAACCTCCAAGAGTTACGTACGTTACTACTTTCTTATAACAACCTTCATTGTTTTGTT  
TCCCGCTTCACTTTTAAGTTTGACACATCTTGAATACTTAGGATTTACGAGTAATCCCTATCTGGCCCACT  
GCCTAATAATGTGAGCATGCTTCAAAGCTAACCAAACCTGAATTTGCTCTACAACCTCAATGAATGGTACC  
ATACCATCTTCTGTGTTTAGCCTCCCTTTGCTAGGTCAGTTGTGGCTCGATAACAATAGATTTAGTGGATT  
ACCCGATGAGCTCAAACAAACCCAACATTAGCACGCCTGGATTTAAGCCATAATCAACTCAGTGTTCT  
TTTCTTCAATCACTTTTGAATCTCACAAACCTTTCTATCCTTGACCTTTTCATCGAATAACATCACCGTCGAT  
GAGGGAATACAAATCACTTTTCTAGCCTACAAGATTTGTGGTTATCATCTTGTGAACTGAAGGATTTTC  
CAGTCAACTAAAGGATTTTCCACACTTCTTGAGAAATGTAAAGACACTTGTGTACTTGGATATTTCTAACA  
ATAAGATTTGTGGTCAAATCCCTAACTGGTTTAGCGGCATGACGTGGGACTCGTTGCAGTTCCTAAACCT  
TTCTCATAATTCATTAACAGGCCACCTACCACAATTTGTTACTATAACCTACAGTATCTTGATCTGAAATT  
TAACTTCCTCAGGGTCACTACCTTTATCTATTGGTAACATGAGAAAACCTTATCTTATTAGATTTATCAC  
ACAACACTTTCAGTGACTCAGTTCCACATTGCTTGGGAAGCATGGCTTCACTAGCGGTGCTGGACTTAAG  
AAAGAACAATTTACAGGGAGTCTTCCCCATTATGTGGACACAACACTTCATTGAGTACCATTGTCGTA  
AATGGTAATCGATTTGAAGGACCTGTTCTGTATCGTTGCTCAATTGTAATGGTCTACAAGTCCTTGATGT  
GGGGAACAATGCTATAAATGACACGTGTCCAGCTTGGCTCGGAAGTCTTCAAGCTCTGCAAGTCCTTAT  
ATTAGAGTTGAACAAGTTCCATGGACCTATAAGTACGTGTCAGACTAAGTTTTGCTTTCCAATTTGCGA



TTCATTGATGACCATTGTCTTGAATGGTAATCAATTCGAAGGATCTGTCCCTGCGTCATTACACAACACTGTG  
TTGGTTTAAAAGTTCTTGATTGGGGAACAACGCTATAAATGACACATTTCCAGCTTGGCTTGGAACTCT  
TGAAGAGCTGCAAGTCCTTATATTAAGTGAACAAGTTCCATGGACCTATAAGTGCTAGGAAGAAGTT  
TTGCTTTCCCAGGTTGCGGATTTTTGATCTCTCTCATAATGCATTCAATGGTTCACTGCCTGCAGATATTTT  
TAGAACTTCAAGGCAATGATAAAAAATGGCACAGACAAAGGTAACATTACATATATGGAAACATCAGT  
TTTCAGGTCATTGGTTGATTCATCGATCAAAGACTGGACTATGTATAAGCTAGAATTGGCCATTGATGAA  
GTGTACAAGGATTCAGTGAGGTTGATGATCAAAGGAAACAATATTGAGCTAGAAAGAATCAGCACAATT  
GTTACAGCCATAGATCTCTCAAGCAACCATTTTGAAGGTGACATTCCGAAATCACTAAAGGATCTCAGCT  
CACTTTGGCTACTCAATTTATCCCACAATAATCTCAAAGGTGATATTCCAATGGAATTGGGGCAATTGAA  
TTCACTTGAAGCCTTAGATCTCTCTTGAATCGGCTCACTGGAAAGATTCCACAGGAATTGACAAGAATG  
AACTTTCTGGCGTTCTTAAACCTCTCTCAAACCAGCTCGTTGGACGCATTCCTCAAGGTTCACAATTCAG  
CACATTTGAAAATGACTCGTATGGTGGCAACCTTGATTTATGTGGTCCTCCTTTGTCAAAGCAATGTGGA  
ACGAGTGATCGCTCACATGTTCCCTCAATCACTGGAGGATGAAGCAGAAGAAGATGAGTCATATTTCTTC  
AGTGGATTTACGTGGGAATCAGTAGTCATAGGCTACAGTTTTGGACTAGTTGTTGGAAGTGTGATGTGG  
AGTCTCATGTTTAAATATCGTAAGCCAAAATGGTTTGTGGAATTTTTTGAAGGCATTTATCCCAAGAAAA  
TGAGAAATAGGCTACAGTTTTGGACTAGTTGTTGGAAGTGTGATGTGGAGCCTCATGTTTAATTATCGTA  
AGCCAAAATGGTTTGTGCAATTTTTTACGCGCATCATGCCCCACAAAAGGAGAAGGCCAAAGAAGAGA  
AGGCTGAGACGGCAGACATAATGGAAGATTGAAAGATTGAACTTTTCTGTTTTCTGTTTTTCTGTTTGT  
GTTTGTATATTCTTCATACAAACCTAACTGTATGTGTTTTTTTTAAATTAATGTATCTTTTTCGGAGACTT  
GTTTGTGGTGGAAAG

>PGSC0003DMG400002906 LRR-RLPs

CGAGTGTCCAACCTTGTCAGCCCACTATTA AAAATGGAAAAACAACAATAGACCAGGCCCTTTCGTA  
AACCTGATATTCTAAGATAGGATTTTCGCCGCTATCTCCGCTTCTTCGCCTTAGCTCTCTTCACTGTTTCTG  
TACATGAACAACAATGTTGCCTCCATGTTACTGACCTTTATGCTTTTTTCCAGTTGTGTTCAAATTTTCTT  
CCTCTTGCTTTCTTTCTTCTCTCCCTCTTTGGTCTCTGATCCCATCATTCTGCAAGTGATTTTGCGA  
TGGAGTGCAAGGGTAGTTCAATTCCTCCATCTCCAGGTTAAAAGCTCCATCTTGACTCCAGATCCTCCCTT  
TTGCTGAGATCGCTTTGTTGACTGGAATAGCAATAGCATTTTCCCTGTTTTGTTGCCTTCTAACTTCTATGT  
AATTTTGTGTTTGTGGAAAAATATATGTTGTAGCCTTCCCTGTCCCCTATCCCCTAAGGATGATACTCT  
TAAATATGGGCATAGTAATTTTTTATTATTTATGAGTCTCCTCGCAAGTGTCTCCCTGTTAAAATTTGTGA

ATGTGCAGCTCCCTCGGTCAATAGCAAAGTTTGCCACATGATCTGCTAGCTTGTTTCCTCCCTTAGAATA  
TGTTGGAAAATAACTTGTTTATCTTGTAGACATGATTGAATCTCTGTCACCATTCTGCAATTATCCATGG  
ACATTCCCATTTCCTTTCTAATACCTTGACAAAAGCATTGAGTCAGTCTGTATGATTATTTGATTATGTTG  
TAACTTCTTGCAATGCTTGGATTCTCCAGAATAGCTTTAGCTTCCGCGACTCTATTAGTAGTATTTTCTAT  
ACTTGCTCCTCCACGTATTCTACATCTCCTTTAGCATTCTCAAACGAAGGCATAGGAACTAAGACCCG  
GATTTCTCTAGAAGTCCATCTGTATTGATTTTACCCACCCATTTGGTGGGAATTCCCATAAGACCCTTT  
TCACTTTCATTTTAGGTTTGTAGCTTGTCCATTCTATGAGCATATCAGGCCAGTTAACAGGACATGTCATA  
TAGGGTTTCCTGAGTCTTACCAGCATATACATGTTCTGGTGATATTGTGAATGACTCTTGCTACTGATGT  
CTTTTTCTTCATGCTTCATCCTGTTTCTTTCTCCACAATTCCCATATTATAAACTAGGAAGAGCTCTG  
TAAAAGGTCTCATATTTGTCCAATTTTTGTCCCCACCACAACATTATAACTTCTTTAGTTGGAGACCC  
TCCATGTTAAGACCTGTAAAAGAACAAAAATAGGACCAAGTCTGTAGCTGAATCAGATTTTACAGAAAC  
ACATGTTGAGGTCTTTCACAACACCAGCATTGGATGGGCCTTCAAGACCCCATCTTCTCATTATGTCATC  
AACGGGGATTTTAAATTTCCATAATCTCCACATTATGAAAGCCATTTTAAATGGTACACCCTTACTCCACA  
TCCATTTATAAATTTGTTTTCTCCGCCTTATGTCTGATATAATGCCAAGCAGATTTAACTGAGAACTTC  
CCCTTGCTCTAGCATCCAACAAGGTTTATCCATTGCTGTTTCTTCTTTTGGAGGATGAATATTCTGCAGA  
ATATGGTTCACCAATTCCTGTGGGAGTATCTCATGTAGTACCTCTGTATCCCACTCCCCTTGCTAGTTAA  
ATCCCTAACTGTTTTATATGTATCATCACATTGAAATTCTTCTCCAGTAATAGTGTACAAATCCCCTAGGCC  
CGTCCAGTTATCATGCCAGACTGATACTGATCCTTTCTCCATTTTCCATAAAATTTGGTTTTCAATGAGATC  
TCTAGCTTTAAGCATTTTTTCCATAAAATTTGGCTCGGAACTCTTCAAGAGCTACAGGTCCTTATATTA  
AGTCGAACAAGTTCATGGACCTATAAGTATGTGTTAGACTAAGTTTTGCTTTCCCAAGTTGTGAATTTTT  
GATCTTTCTCGTAATGATTTTCAAGTGGCTCACTTCTGCAAACGTTTTTGGAACTTCAAGGCAATGATCAA  
ATTAGATGGTGAAGACACAGGAAATATCAAGTACATGGAATCTGTGTTGAATTCGTCATTTGTCACATCG  
TATGAGGATTCAGTGAGTTTGGTAATCAAAGGGCGGGATATTGAGCTACAAAGAATCAGCACAATAAC  
GACAACCATAGATCTCTCAAGCAACCATTTTGAAGGTGTCATTCCGAAAACACTGAAGGATCTCATATCA  
CTTTGGCTACTCAATTTATCTCATAACAATCTAAGAGGTGATTTCCAATAAACTAGGACAATTGAGTAT  
GCTTGAAGCTTTAGATCTCTCTTGGAAATCGGCTCACTGGAAAGATTCCACAAGAATTGACAAGACTGAAC  
TTTCTGGCCTTCTTGAACGTCTCTCAAATCATCTCGTCGGACCAATTCCTCACGGTCTACAATTCAACAC  
ATTTGAAAATGACTCGTATGGCGGCAACCTTGATTTATGTGGTCCTCCTTTATCAAACAATGTGGAACG  
AGTGATTCATCACATGTTCTCAACCATTGGAGTCTGAAGAAGATGAAAGCGAGTCATATTTTTTAGTGG



ATTTACATGGGAATCAGTAGTCATAGGCTACAGTTGTGGACTAGTTGTTGGAAGTGCATGTGGAGCCT  
CATGTTCAAATATCGTAAGCCAAAATGGTTTGTGGAATTTTTGATGGACTCATGCCTCACGAAAGAACAA  
GGCCGAAGAAGAGAGCTCAGAGACGACGAACTTAATGGAAGATTGAGAGGGGCCAAGTTGTCTTTGTT  
TGATTGAACTTTTTGGTTGTGTGTTTAAATTTCTGTTTGTGTTGTATATGTTTGATAGAAACATAAT  
TATATGCATGTGTGTTATTT

>PGSC0003DMG400002908 LRR-RLPs

ATGAAACTAGGACAATTGAGTATGCTTGAAGCTTTAGATCTCTCTTGGGAATCGGCTCACTGGAAAGATTC  
CACAGGAATTGACAAGAATGAACTTTCTGGCCTTCTTAAACCTCTCTCAAATCATCTCGTCGGACCAATT  
CCTCAAGGTCGACAATTCAACACATTTGAAAATGACTCATATGGTGGCAACCTTGATTTATGTGGTCTTC  
CTTTAACAAAGAAATGTGGAACGAGTGATTCATCGCATGTTCTCAACAATTGGAGTCCGAAGAAGAAG  
GCGAGTCATATTTTTTAGTGATTACGTGGGAATCAGTAGTCATAGGCTACAGTTTTGGACTAGTTGT  
TGAACTGTCATGTGGAGCCTCATGTTTAAATATCGTAATCCAAAATGGTTTGTGGAATTTTTTGATAGA  
CTCATGCCTCACAAAAGAAGAAGGCCAAAAGAAGAGAGCTCAGAGACGACGGATTTAA

>PGSC0003DMG400002910 LRR-RLPs

ATGACTTCAATCCACATAAAATCATTGGCCGATTGAGGAATTTGAGGCATCTAAAACCTCTCTGGCTTTG  
ATGGGAAAATCCCAACAGAAATCTCATACTTTCTAATTTGGTTTCACTTGATCTTTCTGGTTATGGATTA  
GAACTTGATGAGAGAACATTTGAAACAATGCTTCACAACCTTACAAATCTGGAGTTACTCTCTCTTGGCG  
ACATCACATCACCGATACCTGTAAGTATTCATCCCAATAGCAGCCTCTTCCAGCTTCATCATCTCCACACA  
CTAAACCTTGCTGGCAATTACTTTTATCCTTCTTCAATCCACATAACATTGGCTGATTGAGGAATTTGAG  
GCATCTAAAACCTCTCTCACTTTCAAGGGAAAATCCCAACAGAAATCCCATACCTTTCTAATTTGGTTTAC  
TTGATCTTTCTGGTTATGGATTAGAATTGATGAGAGAACATTTGAAACAATGCTTCACAACCTTCACAAA  
TCTGGAGTTACTTTCTCTCTTATGTCAACATCTCATCACCGATACCTGTAAGTATTCATCCCAATAGCAG  
CCTCTTCCAGCTTCATCATCTCCACACACTAAACCTTGTTAACAATTTCTTTAATCCTTCTTCGATCCCATAT  
GGCATTGGCCGATTGAGGAATTTGAGGAATCTGATACTCGCTGACTTTGATGGGAAAATCCCAACAGAA  
ATTTACATACCTTTCCAATTTGGTTTCACTTCATCTTTCTTCTTATGGTAATGAATTACAACCTTGATGAG  
AGAACATTTGAAGCAATGTTTCAGAACTTCACAAATCTGGAGATACTTTCTCTCTATCAAGTCAACATCTC  
ATCTCCGAATATTTCTTCTTCTTAAACGGAGTTGGATATATCATACACAGGCATCTCTGGTTCCATTCTG  
ATTCAATTGGCACCTTAAAATCCTTGAATATCTTGATCCTCTATAGATGTCAATTCTCTGGTTCCATTCTG  
ATTCCATAGGAAACCTAACACAAATTACGAAGTTGATTTTATCTCATAATCATTTCACTGGCCATATTCT

TCCACAATCTCTAAATTGAAGCACCTCACACGTTTATATCTTTTCGGACAACCTCTTTTCAGGTGAAATTCCT  
GATGGTTTCTCTAACCTCAAAGAGCTACGTTATTTATATCTTTCTCACAACCTCTTTTCAGGTGAAATTCCT  
GATGTTTTCTCTAACCTCAAAGAGCTATATTATTTAGATCTTTCTGAAAACAGCTTCACTGGTCCATTTCCC  
GATTCAATTTTAAGTTTGACACAACCTTCATACCTTAGACTTGTGCGAGTAATCCCTATCTGGCCCACTGCC  
TAGCAACCAAAGCATGCTTCAAAGCTAACTTTTGTGGATTTGTCATACTCACTGAATGGTACCATA  
CCATCTTGGGTGTTTCAGCCTACCTTTGCTACATTCAGTGTGCTCCAACATAACCGATTTCAGAGGACTAG  
CCGATGAAGTGATCAAAACAACCCCAACATTAACAACACTGCATTTAAGCAATAATCACTCAGTGGTTC  
TTTTCTCAATCACTTGTGAATCTCACAACCTTCAAACCTTGAACCTTGAATTTTCATCAAATAACATCACCATTG  
ATGAGGGAATGAATCTACAGTATCTTGATCTGAAATTTAACTCCCTTCTGGGTCCACTACCTTTATCCATT  
TGTAACATGAGCTCGCTTATCTTATTAGATTTATCACGCAACAACCTTCACTGACTCAGTTCACATTGCTT  
GGGAAGCATGGCTAGTCTAACGGTGCTAGACTTAAGAAGGAACAATTTACAGGGAGTCTTCCCCCATT  
ATGTGCACACAGCACTTCGTTGAGTACCATTGTCATAAATGGTAATCAATTTGAAGGACCTGTACCTGTG  
TCGTTGCTCAAGTGTGGTGGTCTAGAAGTACTTGATGTGGGGAACAATGCTATAAATGACACGTTTCCAT  
CTTGGCTTGAATTTCTTCAAGAGCTGCAGGTCCTTATATTAAGTGAACAATTCATGGACCTATAAG  
TATATGTCAAATAAGTTTTGCTTTTCCAAGTTGCGAATTTTTGATCTTTCTCGTAATGATTTTCAGTGGCTC  
ACTTCTGCAAATGTTTTTGGAACTTCAAGGCAATGATCAAATCAGATGGCGAAGACACAAGAGAGAT  
AAAGTACATGAATTCTGTGTTGTATTCGCCATTTGTCACATCGTATGAGGATTCAGTGAGTTTGGTAATC  
AAAGGGCACGATACTGAGCTAGAAAGAATCAGCACAATTACGACAACCATAGATCTCTCAAGCAACCAT  
TTTGAAGGTGTCATTCCGAAAACACTAAAGGATCTCAGATCACTTTGGCTACTCAATTTATCTCATAACAA  
TCTCAGAGGTCATATACCAATGGAATTGGGGCAATTGAGTATGCTTGAAGCTTTAGATTTCTCCTGGAAT  
CGGCTCACTGGAAAGATTCCACAGGAATTGACAAGATTGAACTTTCTGGCCTTCTTAAACGTCTCTCAA  
ATCATCTCGTTGGACCAATTCCTCAAGTTCTACAATTCAACACATTTGAAAATGACTCATATGGTGGCAAC  
CTTGATTTATGTGGTGTTCCTTTAACAAGAAATGTGGAACGAGTGATTCATCGCATGTTCTCAACAATT  
GGAGTCCGAAGAAGAAGACGAGTCATATTTTTTAGTGGATTTACTTGGGAATCTGTAGTCATAGGCTA  
CAGCTGTGGACTAGTTGTTGGAAGTGTGAGTCTCATGTTTAAATATCGTTAA

>PGSC0003DMG400002914 LRR-RLPs

AAAAAAGAACCATTCTTTGTTTCTTCTCTCTCTAACCTCAAATCTTTCTCTCTCTATTTTTGCCCTACTTTGT  
TGGGGTTCTTGAAAAAAACTGGATTTTTGAGGGTTCTTGAAAAAATTTGGATTTTTTCATCTGGAATGC  
AAATCTGGTTAAAGATATAATCTGGGTTGTGTTTTCTTGGTTCAAATCTGATCTTTTTTGCTTTACAGT

TCGGGATTTCTTCTGAAGAACAGACATGCCTACTCTTGTTAATTACAGTGGTGAGTTTCAAAAACTTCAT  
TTCTTGTTTTATAAGTTATGGGGTTGTTTCATATTTCAATGAATTTTGAAGTTCAGTTACAATTTTTGATT  
TTTCATCATGAATTACTGAGATGGAGATGGATTGTTATGTTTAGATTCATATAAAGTTGTTTATCATGAA  
TAAAGTTTATAACTTTGTATAGGTAGATTATTGTTGAGATGAATATGAGCAATAATTTATTGAGATGAAG  
ATGAATCTTTTAAGGTTTAGATCCATGAATATAGTCTATAACTATGTATAGGTGCATGATTGTTGATAAC  
TTGAGATGAATATGGTTTATTAATTTACTGAAATGAAGATGATCTTTTAGGTTTTAGATCCAATCATGTTT  
TTATTTAAAAAAGGAAGTTGGTTTATGAGATAATAACTAAAAGTTGAGTGACTATCTAAGAAATTAACTC  
ATATAACTTTGTATAGGTGCATGATTGTTGAGGTGAATATGAGCATTAAATTTACTGAAATGGATAAAAAA  
GGGAAAAAAGTTATGATAAGACTAGATCCTTTGGCTTTGAAGATTAATTTCTGTGTTTGATAGATCTTTTT  
TTGTCTTATGTTCTGAATCTATATTAGAGATTGGTAATATATTGAAGAACTGTGGATTACTCTTTTGGGT  
TCTGTATCTAGAATCGTGTATTTATCTGATCTGATCTGAAGATTTATGTACATAATAGGTAGATCTAAAGC  
TTCAATTCACATGTGATAGTTGTTTCTCTGTTATACTTGAAGTTGAAGTGAAAATTCATAAGAAATGGGC  
ATATGGATGAATACTTGTAATAATTCTTTCATTAGACAAAATTTAGTATGCTTGCTTGTTGATTTAAGGGAA  
AATATAGCTGACAATGTATTTGCTCCTTGGATTTCAAGGTGATGATGAGTTCTATTCTGGTGGATCGTTTTG  
TTCTGCAGATTTGGGTCTCATGTTGTCTTTGGGTTCATGCTGATGTTTACTGTCCTCCTAGGAAGAGGGCA  
CGCATTAGTGGCCCGTTTGTGTCGAAGACCGGTCAAAGGATCCATCTTGAATTTCTTCTGATGAAT  
GCCTATTTGAGATCCTCAGACGATTGCCCGGTGGCCGAGAAAGGGGTGCAGCAGCTTGTGTTTCTAAGC  
GCTGGCTTACAGTGTGAGTAGCGTGAGGAACTCTGAAATCTGCAGGAGCAAGAGCTATAACAATCTAA  
ATGACGCAATAATGATCTCTAAAGATGAAGATCTTGAAGTTGAATGTGATGGATACCTTACTAGGTGTG  
TGGAAGGGAAGAAAGCTACTGATGTTAGACTTGCTGCAATTGCAGTTGGGACGTCTACCCGTGGTGGA  
CTAGGAAAGCTTTCTATCCGAGGGAGTAACTCAGTTCGTGGTATTACTAATGTCCGGTCTATCTGCTATTG  
CACATGGGTGCCCTTCTTAGGGTCTATCATTGTGGAATGTTCCCTTCTATTGGGGATGAAGGTCTCTT  
GGAGGTTGCAAGGGAATGCCGTTTATTAGAAAAGCTAGATCTGAGCCACTGTCGTTCAATCTCCAACAA  
GGGTCTTGTTGCAATAGCAGAGAATTGCCCGAGCTTGACTTCATTGACTATTGAATCCTGTCCAAGATT  
GGAAACGAAGGCTTGCAAGCTATTGGAAGATGCTGCACCAAACACTACAGTCTTACGATTAAGGACTGC  
CCACTTGTTGGAGATCAGGGAGTTGCTAGTCTTCTGTCATCAGGTGCTTCAATGTTGTCAAAAAGTGAAAC  
TACATGGTCTAAACATCACAGATTTCTCGCTTGCTGTCATTGGTCACTATGGCAAGCTGATTACCAATCTT  
AATCTTTGTTCACTTCGTAATGTGAGTCAGAAGGGATTTTGGGTTCATGGGTAATGCTCAAGGCCTCCAGT  
CTCTGGTTTCTTTGACAATCACCTTATGCCAGGGAGCCACTGATGTCGGTCTTGAAGCTGTTGGAAAGGG

ATGCCCAAATCTCAAACATATGTGCATTGCAAGTGTTGCTTTGTTTCTGACGGTGGGCTTGTTGCTTTCG  
CTAAAGAGGCTGGATCTCTTGAGAGTTTGATCTTGGAGGAGTGCAACAGAATTACCCAAGTAGGTATCC  
TTAATGCAGTTTCAAACCTGCAGGAAGTTAAAGTCTCTTCCCTAGTGAAGTGCATGGGAATCAAGGATCT  
AGCTCTACAACTTCCATGCTGTCTCCATGTGAATCTCTTCGGTCTTGTCTATCCGAAGCTGTCCAGGAT  
TCGGGAGCACTAGCTTAGCTATGGTCGGTAAGCTCTGCCCAAGCTGCATCAATTAGATCTCAGTGGGC  
TTTGTGGAATAACCGATGCTGGTCTTCTCCCACTCTTGGAGAACTGTGAAGGACTTGTTAAGGTGAATCT  
TAGCGACTGCCTGAACTTGACAGACCAAGTGGTGCTTTCATTGGCTACGCGACATGGAGAGACCCTTGA  
ATTGTTGAATCTCGATGGATGCAGGAAGGTTACCGACGCAAGTTTAGTGGCAATTGCAGATTATTGCC  
ATTACTTAATGATCTTGATGTTTCTAAGTGTGCAATAACTGATTCTGGTGTAGCTGCTTTATCCCGTGGAG  
TGCAAGTGAATTTGCAGGTCCTTCTTTATCAGGTTGCTCCATGGTATCAAACAAGAGTGTCCCTTCTCTT  
AAAAAGTTAGGAGAGAATCTACTCGGCTTGAATCTCCAACATTGCTCTGTTAGTTGCAGCTCAGTCGAGC  
TTCTTGTGGAGGATTTGTGGAGGTGTGACATCCTCTCTAAACCAAAGGGCACAAGGAAATGCATCAA  
AATGGTCAAAAAGAATAAGCAGAAAGCTATAATGGTTCATTAGCCTGGCAATTACAGAAGCAAACATG  
AGTGTTCTTTTTTAGCCCGTATATTCGTGGTTATCTAATACTTCAGTGTCTCGGTTGTTTTCCAGGAGGCT  
ATGGCATCACTTTTTCTCCATTTTTGCAGGCTTCGTCAAATCGAAGCCTGTTTCATCCATTTTTGGAGA  
CAACTCCATCATGCCATGGTTTCTGAGAATACAGTCACCTAGTACTGAGATTAATTTTTCACTCATGTT  
GCTCCTCGAAAGAATCAGGCCGTTTGAATCATTAGCTACAACATCGACAGACAATATCTATCGATAGTC  
TTTTAGTGTTCATTGTAAGTATTCTACTGTGTGCTTTTAGACTTTAGTTGCTTTGAGCAAATTTCTGTTG  
TTGTTGTGCCTGTTATTCTAGGGGCTTGGCCATTACAACCTTACCTAGGTTGTTTTTTTTAACCAGTCCCTT  
GTTTTTTGATAGGATTATCAATTTCTATTTTTTACCAGGTTCCACATATTCAGATTTGTACTCTTGCAACT  
ATGTTTTACATATATAATGAAGTACTAGTTTGTGTTTAA

>PGSC0003DMG400002937 LRR-RLPs

GAGTGATTTGTAAGAAGAGAACATCCATCCTTTTTTTGGCTGAATACGAAAAAGAAAGATGGGACATTT  
CTTTTTCTTTTATTCATTTCTGTGTGTTGTGTTGCTAATAAGTGAATGTTTTTGTCTTCTTTGAGCATCAT  
CTTTGCTCTCCCACTGAAGCTTCTGCTTTGCTTCAGTTAAGCAACACTTTGAGATTATATCTACCCTAAT  
TCCCTATGTCCTATTCATTTCCCAAGAACAAAGTCTTGGAAATGAGAGTAGGGACTGCTGCATTTGGAATG  
GAGTCACTTGTGATATGTTAACGGGTCGTGTTATCGCGTTGGACCTTAGTTGCAGTCAGCTTTGGGGAA  
GTATTCATCCCAACAGCAGCCTCTTCCAACCTCATCATCTCCACACACTAAACCTTGCTTACAATAACTTCA  
ATTATTCTTCAATCCCACATAACATCGGCCAATTGACGAATTTGAGGCATCTCAACCTCTCTGAGTCTGGC

TTTGATGGGCAAATCCCAACAGAAATATCATACCTTTTGAATTTGGTTTCACTTGATCTTTCTGGGTATGA  
ATTACAACCTTGATGAGAGAACATTTGAAACAATGCTTCACAACCTTCACAAATCTGGAGCTACTTTCTCTCT  
CTCAGGTCAACATCACATCTCCGATACCTATGAATATGTCTTCTCCTTAAGGTACGTGGATCTTGGATTC  
ACTAATCTGCGAGGTGTTGTCCAGAGAGTCTTTTCTTCTGCCAAACTTGGAAAACCTCAAATTGGGTG  
TGAATCTTCTTCAAAGGAGTTTTACCAAAGATCCCCCTGAGCAACACTCTGTTGGAGTTAGATATTTCA  
CTCACAGGCATCTCTGGTTCCATTCTGATTCAATTGGCACCTTAAGTTCCTTGAATATCTTGAACCTCGA  
ACTATGTCAATTATCTGGTTCAATTCCTGATTCCATAGGCAACCTAACACAAATTACGGAGTTGATTTTAT  
CTACTAATCATTTCACTGGCCATATTCCTTCCACAATCTCTAAATTGAAGCACCTCACACGTTTGGATCTTT  
CATCTAACTCCCTTTAGGTGAAATTCCCAACGTTTTCTCTAACCTCCAAGAGCTACGTTATTTACATCTTT  
ATGATAACAGGTTTCATCGGTTCAATTCCTTCTACAATTTTAAATTTGACACATCTTGAAAGCTTAGCCCTG  
TCGACAAATTCCCTATCTGGCCCACTTCCAGCTAATAAAGCGAGCATTCTTCAAAGCTAACCCAACTGG  
ATTTGTCTGACAACCTCACTGAATGGTACCATAACCGTCTTGGGTGTTTAACTCCCTTTAGCATCTTCATTG  
TGGCTCCATAATAATCAATTTAGTGGACTACCCGATGAAATCAAACAAACCCAAACATTAGAATACCTGT  
ATTTAAGCAATAATCAACTCAGTGGTTCTTTACACCAATCACTTGCGAATCTCACAAACCTTTCTACCCTT  
GACCTTTCAACAAATAACATCACCGGTGATGCAGGAACAAATATCACTTTTCTCGCCTACAAGTTTTGC  
AGTTATCATGTTGTGAACTGAAGGATTTTCCATATTTCTTGAGAAATGTAAAGACACTTGAGGTCTTGGGA  
TATGTCTAAGAATAAGATTCGTGGTCAAATCCCTAACTGGTTTAGCAGCATGAGGTGGGACTCGTTGGA  
GTTCTTAAATCTTTCACATAATTCGTTAACAGGCCACCTACCACAATTTTATTACCATAGTCTAGAGTATCT  
TGATCTTAAATTTAACTCCCTCAGGGTCCACTACCTTCATCCATTTGTAACATGAGCAGCCTTAACATTCT  
AGATTTATCACGCAACAACCTCAGTAACTCGATTCCAAGTTGCTTGGGAAACATGGCTAGTCTAACAGTG  
CTGGACTTAAGAAGGAACAATTTACAGGGAGTCTTCCCTCATTATGTGCGCAGAGCACTTTATTGAGAA  
CCATTGTCTTGAATGGTAATCGTTTTGAAGGAACTGTCCCGATGTCGTTGCTCAAGTGTGATGGTCTACA  
AGTCCTTGACGTGGGGAACAATGCTATAAATGACACATTTCCAGCTTGGCTCGGAACTCTTCAAGAGCT  
GCAGGTCCTTATATTAAAGTCGAACAAGTTCCATGGACCTATAAGTACTAGGAAGAAGTTTTACTTTCCC  
AGGTTGCGGATATTTGATCTCTCTCAAATGAGTTCAGTGGCTCACTGCCTGCAGAAGTTTTTCGAAACT  
TCAAAGCGATGATCAAATTAGATGACAGAGAGGAAGGCGAGATCAAATATATGAGTCAATATTTGAAT  
GGACATTCAATATATGAGGATTCAGTGAGGTTGGTGATCAAAGGCCAGTATATGGATCTAGAAAGAATC  
AGCACAATTATGACAGTCATAGATCTGTCAAACAACCATTTTGAAGGTGTGATTCCGAAAACACTAAAG  
GATCTCAGCTCACTTTGGCTACTCAATTTATCCATAACAATCTCAAAGGTGATATCCCAATGGAATTGG

GGCAATTGAATATGCTTGATGCCTTAGATCTCTCCTGGAATCGGCTCACTGGAAAGATTCCGCAGGAATT  
GACAGAATGAACTTTCTGGCATTCTTAAACCTCTCTCAAATCATCTTGTCTGGACCAATTCCTCAAGGTCC  
ACAATTCAACACATTTGGAAATGACTCGTATGGTGGAAACCTTGATTTATGTGGTCCTCCTTTATCAAAG  
AAATGTGGAACGAGTGATCCATCACATGCTCCTCAGCCATTGGAGTCTGAAGAAGATGAAGATGAGTCA  
TATTTCTTAAGTGGATTTACGTGGGGATCTGTAGTCATAGGCTACAGCTTTGGACTCATTGTTGGAAGT  
TCATGTGGAGCCTCATGTTTAAATATTGTAAGCCAAAATGGTTTGTGGAATTTTTGAAGGCATTTTCCCC  
AAGAAAATGAGAAGGTCAAAGAAGAGAAGGCCGAGACAGC

>PGSC0003DMG400002954 LRR-RLPs

ATGACTCAAGGTATTAACCTCTCCCTTTTTCCCTTTTAACTCTTTTCTAATAGATAGTAAAGGGTTGCTGCC  
GTTGAAGATAGAATCAGTGTTCTACCAAGTAACGTTATAGATCATATCCTCGAGCTCTTGATGGTTCATG  
AGGCTGCAAGAAGTATTTTTGTCCAAAGATTGGAGATATAGTTGGGCCAAGCTTCCCAATTTGGTGCT  
TGATAAGCAATTCTCCATGAAATTAGCTAAAAATCTCACAATGTCTTCAAAGAAACAATAGATATGATT  
CTCTTACAACATATTGGAGATATTGTGAAGTTTTATCTTGATGTTTCAGGAGTACATTTGTCTACATATGC  
AGATATTGATAGATGGATGCTTATGTCACCAGAAATGGTGTCAAGAAGCTAAAGCTTAACATGACAAA  
AGATGGTACTTACAACTACCTTCTTATATATTTAATTGTCCAACACTGACTCATTGAAACTCTTCAACTG  
CAACTCAAATTACCAAATCTTTTCTGGCTTACAGACTCTTACCGTCCTTCGGTTGGAAAAATAACCTT  
TGTGCCTGCAATAGAGTTTTATACTATCAATGTGCCCTTCTGTCAAATAACCATAGATTTATGTGATG  
GTACTCAATACCTCAACATTGTGTTCTCATCTGAGTTGAAATCCTTGGTTGTTTCATGAGAGTCACTATAAT  
CTTGACCTAAGTAACAACCTCTTTAAGAAGTGCAAAAAATTGACAGATTTATACCTTGTGATTGATAATCC  
AATACCTGCGGATAATAGATTAACCTTGGAAAAGCTTCTTTTTAGCTCGCCTACACTTGAGACACTTTGTT  
TGGGTAAATTTGAACTTGAGGTAAGAATCTAACGTGCTGTTTTACTTAGATATCTTCTTTGAGTGTGATCC  
TTCTTATTGTATAATGTTCCGTTAAAGCTTTTACTGCAGGTGTAGTCCCAAAGAGGCTTCTTGTATACT  
CAACTGCTTGTGGCATCTTGATTTAGATGTAACTTCAATAAATTGGGTCAGACTTCTTACACTCTGGAGT  
TGATTAAGGTTTTCCCAATTTTCGTGACCTTGAGATTTGGGTAAGAAATAGCAAATATATGTGGTCATA  
CATTCTATATATCAATGGTCTTGTTGTTTTGCATTTACGTAAGTAAAGAAGCTAAAATGACCTTGTATAC  
CATCAGGACAAAACCTACCGATGACATAGTTGAAGGAGTTATGAAATATCTAGACACACCATCATGTTTG  
GACAAAACCTCAACAAGCTTGAAGATGTTTCAATCCATTCTTTAACTATTCTAAAGTTGTAATATTT  
CGTAAAATTATTGTTTGCTCATGCTTCATCTTTGTCAAGGATGAGCATCTATCCGGATAAAGCTTCTAATT  
CCAAAGAAGAATTGAATGTTGCCACAGAGTTGATGCGTTTCCCAGAGTATCTCCTAAGGCAGAGCTAA

TCTATCATCCAAATGAAGAGTTGGATTAA

>PGSC0003DMG400002960 LRR-RLPs

ATACACAAGAGTAGTACATTATTTGATATCTTGAGTTACATCTAAAAAATTTTTTTTGTGTAATTCCTCTC  
CATATTGACTTGATGGCAGCTTATACTGCTGTAATTTCTCTTCTTCAAACCTTGATCAACCAAATATTTCA  
GAACTCTTTCATGATCACAGTACTGAAATGTTTCGATTCTCTTCGTGCTACAGCTGAATATTTTCAAGATGT  
TCTTGAAAACACTAGCAATGAGAAAATCAAATCTTTGGAGGAAGATATTAGAGTTGTTGTTAGTGAGGC  
AGAGGATGTTGTTGAAATGAAGATTTCTGAAATCATCAAAGAAGAAAGCTGGACATTTGGAATTTTACA  
ACACCATGATATGCTACCAGTTGTTGAAAAAATGGATACCACAAAGAAACAAGTGATGGAGATTCTTTG  
TCATGATGCTGATCAAATTCCTGAATTAACCGGGGATTCTTGATTGGCGCTTCTTCTATGAGTGATCCAA  
TGCTGTCAGATCAGTTGGAAGATGATATTGTGCAGGGACTTGATGGTGACTTGGAGATAATAGATAAGA  
GATTGAGAGGACCAACGTCGGATCTAGACATTGTCACCATATCAGGTATGGGTGGCATTGGCAAAACAA  
CACTCGCTAAAAAACTTATGATCATCTTCCAATCAGGTATCACTTTGACATTTTTGTTGGGTTACAATAT  
CTCAAGAATTTCAATATAGAAATGTATTGTTAGAAGCTTTACATTGCATTTCAAAGCAAAGAGTTATTGA  
GAACACAAAAGATTATGATAAGATGAATGACAGTGAGTTAGCTGATCTGGTGCAAAAGAGTCTAAAGG  
GTCCTAGATACCTTGTTGTTGTTGATGATATTTGGAGTAGGGATGTTTGGGATAGCATATCACAAATATT  
TCCTAATCGCAACAATGGGAGTCGAGTCTTATTGACTACTAGGGAAACTGATGTAGCAATATATGCAAA  
TACTAGTAGCCCTCATAAGATGAACCTCTTGGATTTAGATAAATAGTTGGAAGTTACTCCGTGATAAAGGTG  
TTTGGACTAGAATACGATCATCCTCCTGAGTTGGAAGAAATTGGAAAAAAATAGCAGAAAAATGTCAA  
GGACTTCCCTTAATAATTTTCAGTGATTGCAGGGCATCTCTCTAAAACGGCCAAGACATTA AAAAGTTGGG  
AGTATGTTGCCAAAACCTTAAATGAAATCATTGCTAGCCATCCAAATAAATGCTTAGGAGTGCTCGGTTT  
GAGTTACCATCACTTGCCTAATCGACTCAAACCATGCTTTCTTTCTATGGGTAATTTCCAGAGGATTTTC  
AAGTTGATACTTGGAGATTGATCCAATTATGGATCGCAGAAGGTTTCATAAGGGCACCTGCTGGAAGTC  
GTAAAAGCTTGGAGGAAGTGGCAAAATGTTATTTGGAGGATCTTATCAGCAGGAACTTGATAATGGCTT  
GAAAAAGGAGATTTAATGGTGAGGTTAAAGTATGCGGAATACATGATCTGCTGCGTGAGTTCTGTTTCA  
TAGAAGCTGAAATGACTAAGTTTATGCATGTTGTGAGA ACTCCATTTTACCAACACAAAAGCCTAATGT  
TCGTCGTTTCAGTATTTCAAAGGCATTTTTAGATGAGTATGCTTATAAGCTATTACCTCCTGTTGCCAGAT  
CTATGTACTACTTTTCTCTATTGAATCTACTTTTGAACCCCGTATTAAGCTTCTCGGGATATTGCCCATCT  
ACCGTCATGATCCTATAATACATGGATTTTTCTCTCGTTTCAACCTTCTCAGGGTATTGGCCATCTTCAATA  
CAAATGTCAGGTTTCGAGTCATTTCCAGTTGTGATTACAAAGTTATTTCAATTTGAGATATCTCCAAATTCGA

TGTTTTGGCAATATTCCTGAATCAATCTCAGAGCTTCAGAATTTGCAAACCTCTAATTTGTGATGGTCATTC  
TTTAGATATAACTTTACCTGAGAAGATATGGATGATGAAGAATTTGAGGTATATACGTTTAGGGGGAGC  
CAGTTATTTACCAAGTCCTAGAATAGATAACAAGATGCCAAATCTAGAGGAATTATTCAGTATTTGTTAC  
TCTAGTTGTACAAATGAAGTCTTTTCTAGCATTCCCAATCTAAAGAGATTGACCATTTCGTCTACCTTTGAG  
TGTCGGAGACAATATCCCTCTCAGCTCATCGATATGTCCAGCTTGAGAAAACCTCGAGTCAATCAAGTTT  
AACTGGTTACTTCCTTTCAAAAACCCCATCAACATATTTGCTTTTACAACATCACTTAGGACGTTGTCTTTA  
ACTGATTGTGCTAATTTTATTTGGAAAGACATATCATCAACTTTTATCATGTTACCAAATCTTGAAGAGCT  
CAAACCTAAAAGTTGTCGAGCCGAAGATGATGTATGGAGATTGAGTGATAAAGACATTTTCAAAAGCTT  
GAAGTTGTTGTTACTGAAATACCCAAATCTTAAGTGTGGGAAGCTAGCAGTGATAACTTCCCAAATCTA  
AAACGTCTCGTTCTCATGAATTGCAACAACCTGCAAGAAATCCAACAGATTTTGGGGAAATTTGTA  
TACAATCGATTGAGTTACATAATTGCAGCACTTCTGCTGATGAGTCTGCCATAAATATTGTACAAGAACA  
AGAGGAAATGGGAAATAATATCCTTAAGGTCTACATCAGCCACGGTAAGTTTTAAATGATAAATAAACC  
AAGAATAAGATTCCTTATTAGTTTAGGATTTGTTATCCTCTTGACCAACAAGTTTATAAATGTCAGGTACA  
ATGGTGAACCTTTCTGGTGGACAATGTATTGCACCTATTAAGTGAAAATGTGTTGTTAATAAAAAGCCGGA  
GATGTCGAATTCAGTAATTTATTGAAAGAAGTGCGATGTCTCAAACAGTTCGTTGACGTTGCATGGAAAT  
ACCACAGCGAAAGCAAGCAATGGGATGAATTGGTGAGAGATATTCAACTAACATTATTTAAAGCGGAA  
GATGCAATTGATGAATTTGTGATTCAATCGAAGCTGAATCGAGAAAAGAATAAAAATTGGAAGAGTTTTT  
GATAAAGTGAGTCATATCAGTAATGTTAGGGCTCTGGTAGCTGAGATCAAAGAGATTCATTATAAGGCG  
ACAAATTTTCGACAAAACAATTAACAAGCTTTTCAGTTTGTGTGTAATGTTGTAATTATTTTAAAGTAAAA  
AATCGATGATGGATGAAGAAAAATAATTTAGTTATGGACATCTCAATTAGGAGTGTACAAGTCAAATCG  
AA

>PGSC0003DMG400002961 LRR-RLPs

ATGACAAAGTTTATGCATGTTGTGAGAACTCCATTTTCACCAGCACAAAAGCCTAATTTTCGTGCTTCAG  
TATTCAAAAGGCATTTTCAGATGTGTATGCTTATAAAGCATTACCCCTGTAGCCAGATCTATGTA  
TTTCATACTTGGATCTACCTTTTGAACCCCATATTAAGCGTCTCCCTAGATTGCCATCTACCGTCATGATC  
CTATAATACATGGATTTTTCTCTGTTTCAACCATCTCAGGGTATTGGTCATCTTCCCTGCCTGGTT  
CGGCCATTTCATTTGTGATTACAAAATTATTTCAATTTGAGATATCTCCAAGTTCGATATTTTGGAAATATTCCTG  
AATCAATCTCAGAGCTTCAAATTTGCAAACCTCTAATATATGATTGTTATTCTTCACATATGGCTTTACCC  
GGGAAGATATGGACGATGAAGAACTTGAGGTATATACATTTAGGGAAAGCTAGTTATACACCAAATCCT



AGAATAGATAACAATCTTGTGACGGGGATGCCAAATCTAGAGGAATTTTTCAATATTTGTTACTCTAGTT  
GTACAAATGAAGTCTTTTCTAGAATCCCAATCTAAAGAGATTGAGCATTGTGCATCTTCTATAGTCAGA  
GAAAATATTCTCTATCGTCTTGGATATGTCCAGCTTGAGAAAACCTGAGGCATTCAAGCTTTACTGGA  
GATATATTTTGGAAAAGCCCATCAAAGATTTGTTTTTCCAACATCACTTAGGAAGTTGATTTTAGCTTGC  
TGTAGTCATTTTATTTGGGAAGAGATATCATCAACTTTTATCATGTTGCCAAATCTTGAAGAGCTCAAAC  
TAAATATTGTGCGAGCCGAAGATGATGTATGGAGATTGACTAGCAAAGACATATTCAAAGCTTGAAGTT  
GTTACTGAGCGAGCTAAATCTTAAGCATTGGGAAGCTAGCAGTGTTAACTTCCCATGTTTAAAACGTCTT  
GTTCTGAAGAATTGCCAGGACCTGCAAGAAATTCCAACAGATTTTCGGGGAAATTGGTACTTTGGAATCA  
ATTGAGTTACATGATTGCAACACTATTTCTGAGGAATCTGCCAGAAATATCGAACAGGAACAAGAGGAA  
ATGGGAAATAATATCCTTAAGGTCTACATCCATAACAACAACAGTAAGTTATAA

>PGSC0003DMG400002980 LRR-RLPs

ATGGAGGTAGTTGGTGGGGCATTCTCTCTTCAGCTTTGAATGTTCTCTTTGATAGGCTTGTCTCTCATGG  
TGATCTGCTCAACATGTTTCGGAAGCATAAGGATCATGTTTCAGCTTTACACAAGCTGCAGGACAATTTG  
CTTGGTCTTCAGATTGTGCTAAGTGATGCAGAGAAAAAGCAAGCATCAAATCGACATGTGAGCCAATGG  
TTAATAAGCTTCAGAGTGCTGTGGACGGTCTGAAAACCTTGATAGAACATGTCAACTATGAAGCTTTG  
AGGCTTAAGGTAGAAGGCCAGGATCAAATCTTGCAGAAACAAGCAACAACAAGTAAGTGATCTCAA  
CCTGTGCTTGAGTGATGATTTTTTTCTTAACATAAAGGAGAAGTTGGAAGAAACCATTGAAACATTGGA  
GGTGTGGAAAAGCAAATTGGTGCCTTGGCTTAAAGGACCATTTTGGTTCTGACTAAACAAGAACTAG  
AACACCTTCAACTTCTTTGGTTGATGATTCTGATATCTTTGGAAGGCAGAATGATATAGAGGATTTGATT  
AACCGTTTATTGGCTGAAGATGCAAGTGGAaaaaagctgactgtggttcctattgTTGGAATGGGCGGT  
GTGGGTAAGACAACACTTGCTAAAGCCGTTTACAATGATGAGAAGGTGAAGGACCATTTTGGTTTGAAA  
GCTTGGTTTTGTGTTTCTGAGGCATATGATGCTTTCAGAATAACAAAAGGTTTACTTCAAGAAATTGACT  
CATTTGACTTGAAGGCTGATGACAATCTTAATCAGCTACAAGTCAAATTGAAGGAAAGCTTAAAGGGAA  
AGAGGTTTCTAATTGTTTTAGATGATGTGTGGAATGACAACACTACAGCGAGTGGGATGACTTGAGAAATG  
TTTTTGACAAGGAGATATAGGAAGTAAGATCATTGTGACGACACGTAAAGAGAGTGTTTCCTTGATGA  
TGGGTAGTGGGGCAATCACCGTGGGGACTCTGTCTGATGAAATCTCTTGGGATCTATTCAAACGACATT  
CACTAGAAAACAGGGATCCTAAAGAACATCCAGAACTTGAAGAGATTGAAAACAAATTGCAGACAAG  
TGCAAAGGGTTGCCTTTAGCTCTAAAGGCACTTGCTGGTGTTTTACGCTGCAAATCAGAGGTGGATGAG  
TGGAGAGACATTTTAAGTAGTGAAATATGGGAGCTTCCAAGTTGTTTCAATGGTATATTACCAGCGCTG

ATGTTTGAGCTACAATGATCTTCCTGCACATTTGAAGCAATGTTTTGCTTATTGTGCAATATATCCCAAAG  
ATTATCAATTTTGAAAGACCAAATTATCACCTGTGGATTGCTAATGGTCTTGTACAGCAGTTGCAATC  
AGGTAACCAATACTTTCTTGAGTTGAGATCAAGATCATTGTTGAAAGGGTCCCAGAGTCTGAATGGAG  
ACAGGAGGTATTCTTAATGCATGACCTTGTCAATGATTTGGCCCAAATTGCATCTTCAAATCTTTGTATAA  
GGTTGGAAGAGAACAAAGGATTGCACATCTTGAACAATGTCGGCACATGTCCTATTCAATAGGAAAAG  
ATGGTGACTTTGAGAAATTGAAATCACTCTTTAAATCAGAGCAGCTGAGGACATTACTTCCAATGGATCT  
CCAGCGCCCTGATTATGGCCGAAGTAAGCTTAGCAAGAGGGTGTGCATAACATACTGCCAAGACTAAC  
ATCCTTAAGGGCATTATCATTGTCATGCTATCAGATTGTTGAGTTGCCGGATGCCTTGTATCAAATTAA  
AGCTCCTTAGATTTTTGGACCTTTCTGGGACATTGATTA AAAAGTTGCCAGATTCCATTTGTACATTGTAT  
AACTTGGAGACACTTCTCCTGTCATTTTGTGTTGATCTTGAGGAGCTACCGCTGCAGATGGAGAAGTTGA  
TTAACTTGCATCATCTTGACATACTCGATACTTGTGCTTGAAGATGCCGCTACATCTGAGCAAGATGAA  
AAGTCTCCATGGGCTAGTGGGAGCCAAGTTTCTTGTAGGTGGTCCCTGGTGGTTTGAGAATGGAAGATTT  
GGGTGAAGTACATAACTTATATGAATCTCTATCAGTTGTAGAGTTGCAAATGTGGTTGATAGAAGGGA  
AGCTGTGAAGGCAAAGATGTGGGAGAAGAATCATGTTGGGCAGTTATCTTTGGAGTGGAGTGAAAGTA  
GTAGTGCCAACAATTCACAACTGAAAGAGACATAGTTGATGAGCTACGCCACATAAAAACATAAAAG  
AAGTCGAAATCAGTGGATATAGAGGGCTAACATTTCAAATTGGCTAGCTGATCTTTTGTCTTAAGCT  
GGTGAAATTGTCTCTTAGCTACTGCAAGGTCTGTTATTCCTTGCCAGCATTAGGACA ACTCCCTTGTTTGA  
AAATCCTTTCCATTAAAGGGATGCATGGAATAACAGAGGTGACGGAAGAATTCTATGGCAGTTTGTCTCT  
CCAAAAGCCTTTAACTGTCTTGAGGAAATTAGTTTTGAAGATATGCCGGAGTGGAAAGCAATGGCAGC  
TACCAGGAAATGGAGAGTTCCTATACTTGAGAAGCTTTCCATTATAAATTGCCCTGAACTCAGTTTGGGA  
GACACCCATCCA ACTTTCAAGTTTAAAATGGTTTGAAGTTAGTGTTGTCCAAGGTTGGAGTTGTTTTT  
GATGATGCTCAACTACTTAGATCACA ACTTGAGGGAATGAAGCAGATTGAGGTATTATATATTGGTGAT  
TGTAAGTCTCTTACCTTCTTTCTTTTAGCATACTGCCACTACCTTGAAGAATATATGGATATCTGGTTGC  
CGGAAATTGAAATTGGAGCAGCCAGTTGGTGAGATGAGTATGTTTCTGGAGAATTTGAGACTGGATGG  
ATGTAATTGTATAGATGATATATCACCCGAGTTGATCCAAGCGCACATACATTGAATGTATCTAATTGC  
GACAACCTTACTAGGTTTTTGAATCCTACTGCCACTGAAAGTCTCTTCATTGGAATTGTGAGAATGTTGA  
AAA ACTTTCCGGTGGCATGTGGTGGGACCCAGATGACGTATTTGTATATTGACGACTGTTCAAAGCTGAA  
GTGGCTGCCAGAACGTATGCAGGAACTCCTTCATCTCTTAAGGAACTGCAACTGATTAATTGTCCAGAA  
ATAGAGTCCTTTCTCAAGGAGGATTGCCCTTCAATTTACAACA ACTTGGCAGTCAACAATTGCACGAAAC

TGGTGAATGGCCGAAAGGAGTGGCATTACAGAGACTCCCCTGTCTCACACAGTTAATCATCTCTCATGA  
TGGCAGTGACGAAGAGATTGTTGGTGGTGAAGAATTGGGAGTTGCCTTCCTCTATTCAAACACTTATCATA  
AACAACTGAAAACATTAAGCAGCCAAGTTCTCAAAGCCTCACCTCTCTTCAATATCTATGTATTAAGG  
GTAATTTACCTCAAATTCAGTCAATGCTGGAACAAGGCCAGTTTTCTCGCTTCAAAGTCTACACATCGA  
GGATATCCCTAATCTCCAATCACTTTCCGAATCAGCACTGCCCTCCTCCCTCTCTCAGCTGACCATCATCAA  
TTGCCCTAATCTCCAATCACTTCTGAATCAGCACTGCCCTCCTCCCTCTCTCAGCTGGAGATCTCCCATTG  
CCCTAATCTGCAATCTCTTCCAGTAAAGGGATGCCATCTTCACTCTTACACTATCAATTTCAAATGCC  
CATTACTCACACCACTACTAGAATTTGTCAAGGGGAAATACTGGCCAGAAATTGCTCATTTCACCAAT  
AGAGATCGATGAGGAATGCCTTTAA

>PGSC0003DMG400003195 LRR-RLPs

TGGAGCTTTAAATACTTCTTAATTACAAGTTCTAGAAGGAGTCAGAGAAATTTATGAGCCATCCGGGATT  
GAATCCTTATCTCTCATGCACTTTATCGACCACTAGACCAAATCACTGAGGTGACGGGTGTCTAGTCATTT  
ATATATAGAGTCGCAACCATCTGAATTTTTCTGTTTGAATGTCAAAGATACTCATAGCACGATCAAAC  
GTCAGTCAAACAAAAACAATAGAGTTGACATTTAACATATATGCACACAAAATTGCCTAACTATGATGCA  
AACTGCATAATGATTTGACAATCAATGAGGCTGGATTTTATTACTTGTCTAGAAGGAGTCAAGGAGAT  
GTTTATGAGCAACCCAGGATTTGAATCCTGATCTCGCATGCACTTTATCGACCACTAGATCAAATCACTG  
GGGTGACGGATGTCTAGTCATTTATATATAGAGTCGCAATCATCTGAATTTATCAAGTTTGAATGTCAA  
GATACTCCTAGCGGATCAAACCGTCAGTCAAACAGAAAAAATAGAGTTGACATTTAACATATACACAC  
ACAAAGTTGCCTAACTATGAATGCAAGCTGCGTAATGATTTGACGATCAATGATGCTGGATTTTGTTACT  
TGTTCTAGAAGGAGTCAAGGAAGATATTTACATCTCAAGTATATAAAAATCTTGTGAATTATTCCTTCATT  
CCTCAAGTACTTATTATTTTTGTGCAGATCATGGGCTGTCTATTTCTTCTTCTTCTTCTTCTTGTGTTGC  
AATATCCACTTGTTATCTTTTCAAGTCATCTATGTGACGAGACGAGAGTTTGGTTTTGCAAACCTGAA  
GCTTAACTGTCCATAGATGACTCTGCTTCTGCTGATTGTGAATCCAATGGTTACTTTCCCTATCCAAAGA  
CACTTTCTTGAATAGAACCACTGATTGTTGTACTTGGGATGGTGTAAACATGTGATAAAGTTACAGGTTG  
AATAACTCGTCTTGATCTTAGTTGTAGCCAACCTCATGGAACAATTGACTCCAACAGCACCCCTCTTCCAAC  
TTTCTCATCTTCAAACCTTAATTTAGCTTACAATGATTTCTCACCTCCCAAATTTCAAGCAAATTTGGAT  
GGTTCCGAGTTTGAACATCTTAATCTATCGCGTTCTGGTTTTTCAGGGACAGTACCTTTACAAGTCTCA  
TATCTATCTAAGTTGATATCACTTGATCTTTCTGCAGGTATTGAGGAGTTGAGAGTTGAGCCTCACACTTT  
CAAATGCTCCTTCAAACCTTAACTCAACTAAGGGAGCTTTACCTCACCTCAACATATATATCTTCATCAC

TTCCATCAAACCTTGTCTCTTCCTTACAAGAGCTGAATCTTGTCGGAACGGAATTGTCTGGGAAAATCCCT  
GATGACATTTTCCATTTACCAAGATTGCAAATGCTTAACTTAGGGAGCAACTTGTATCTCACAGGGCATT  
TGCCAACAACCTCAATGGAAGTGCAGCAACTCTTAAAGGGAATTAGATCTTTCTCCTCAGGCTTTTCGGG  
GAATATACCAGATTCTATTGGTCATCTCAACTCTTAAAGGAAATTAGATATATCAAGCTGCTACTTCTCTG  
GTAACATTCTCCAACCTATCGGTGATCTCACCGAGCTCACGAGTTTGCAACTCTTCTCCAACAACCTTCAAT  
GGTCAACTACCATCAACAATCTTAAAGCTGGTGCAACTTGTTGAGTTTGATATCTCATCTAACAACCTTAC  
AGGCAACATTCCAATATTTTCGGTAACTTACCAAGCTCAAATCTTTATCCTTTTCATATAACCTCTTTAT  
GGGCCTTTTTCATCCTCGGTTACAAACCTAACAGAGCTAGAGAGTTTAGACCTCTCAAATTGTTCTATAA  
CTGGTGCTATTCTTCTAGCGTCAGCACCGGATTCCCTAACCTCATCTTGCTCTTCTACCATATAACTCCC  
TTAGCGGAGAAATACCATCTTGGATATTCAATCTTCTTCTTAAATACTTAGTTTTGAGAGGCAATCAA  
CTTGCTGGTCAACTTAAGGAAGTTAGATACTTGTGTTAGAAAGTTGTTGATGTCAGTGACAATAAGCTGA  
ATGGACCTATTCCAACATCATTCTCTAAACTAGTGAAGTTGACAACACTTGATCTTTCTACAAACAACCTT  
TCTGGTGGTCTAGATATTGGGTTGTTTTCAAATGCAAACAACCTTCGACGTCTTGGCCTTTCTTTTAAACA  
TCTGTCTGTATTTCCAGTCAAAAAGATGCATCCTTGCTAGTTCTTCTTGGAAAGTTTGTATGCATCTTCTTG  
CAACATAAGGGAGTTAAATTTCTACGAGCTGCAAATACATTGGTAACTTAGATCTTTCCAACAACAAC  
ATGCATGGAAAAATCCTGATTGGGCATGGTCTAATTGGCAAGTCTCAGTGTCTTATTTGAATCTTTCTA  
GCAACTTTCTAACGGCTATTGACCTGCTTCATAACTTTGAGAGTCTTTACAATCTTGATATTGGATCTAAC  
TTGATTCAAGGAGAATTACCTGCTCCACCTCCCTTATTGTTCTTCTCATAGCCTCGAACAATAACTTCACC  
GGGAAGTTACCTAATTCACCATTATGCAAATGAGTTCCCTTTTGATTCTTGATTTGTCCAATAACAGCCT  
GAGTGGAGTAATTCAAAATGTTTAGTGAACATGAGCACAAGTCTCTCAGTGTGGACCTGCACAACAA  
TCATTTTAGTGGGACAATTCCAATAACTTTGGTAAGGGAAAGTAGTCTGAGAAGTCTCAATTTGCGGAA  
AAATAAACTAGAAGGAATGTTACCAAGAAAGCTTACCAATTGCAGAGGGCTCGAAGTAGTTGATCTCGG  
AGAAAACCTGTTGAATGATACATTTCCCAAATGGTTAGGATCACTTCTAGGCTGCAAGTTCTCAGTTTG  
AGATCCAATAAATTACATGGCCCGATTACCATTTCAAGAAACCAAGTCTTATTCTCAAAGCTGAAAATCCT  
TGATCTCTTATAATGACTTCACTGGAAACCTGTCAGAAAGGTTTTTCAACAACCTGAAATCCATGATAA  
TAGAAGATCAAACGGGAATTCCTTAAATGTATATTGGAGAAGTTGATACCATGATTCTTACATTGTC  
TATAAAAGGACAGCAGATTGAACTTGTGAGGATTCTTTCTATCTTACAACCATTGATTTCTCAAATAACA  
GATTTAAAGGTAATGTACCAAACCTCATTGGAAATCTTGGTTCACTTCGCGGGTTGAATTTGTCACACAA  
CAGCCTTCTGGACCTATACCTCAGTCTTTTGAAATTTATCTGTTCTTGAGTCGTTAGACCTTTTCGTGGA

ACCAACTTTCTGGGAACATTCTCAAGAAGTTGCTTCACTGAAATCTCTTGCTGTCATGAATCTCTCACAG  
AACCACCTGATGGGAAGCATACTAGAGGTCCACAGCTTGATACATTTGAAAATGACTCATATTCAGGA  
AATGCTGGGTTATGCGGATTTCCCTTGTCAGAAACTGCGGAGATAATGAGATGCCTCCTTCTACTGTGA  
CTGATATTGAAGACGAAGAAGATTCAGGTTTTATGGATTGGAGAGCTGCGATAATAGGATGTGGTTGTG  
GATCAGTGTGGGATGTTTATAGTATATATCATTTTCTAACAGGGAGACCAAATGGTTTGTGAGAAT  
TGTCACCAACAGATCAACAGGATCCTTTTGAAAATTGAGGCAAAGAGAAGAATTGAGGCAAAAAAGA  
GAAGACGGCAGAAAAGAAGAAGGATGAAGTTTTAGTATATACTTCATGCATTATTGTCTTGCAACATAC  
ACAGTTTCAGCTTACACTTTGTTTTGGC

>PGSC0003DMG400003380 LRR-RLPs

GAGGAAGTGAAGAAATAAACTATAACTGTGTGTTCTTCTTCCCAGTCCACAACAGTTTAATTCTTGT  
GTCACAAGGATGTATTTCAACAAAGAATTATCTAATCTGAAAGATCGACTCCTTAGCACGGTGCAAGATC  
AAAATTACTCGGATGTTACAAGGGATCGAATAAATTTCTTTCTATGGGACTTAAAATTCCTCGATTGTTTT  
CTCCATTTGAAAAGGTTGCCTTTTGCAAGTGAATGCGGTATGCTAAAAGTCTCACAGAAAATCATAGAAA  
TTTGGAAGTTTTAGTGTAAACCCTATGATTGTCCAGATCTATTTCCGTACAAGACTCTGTATGTTTACGAT  
TCATTTGGCTACTGGAAGGATGTAATTTGGAAGACTAAGCAAGAATTCAGAGCTGAATACTCTTTTCCAA  
ATACATCACTTGCAGCCAACAAGGTGGATGATGATGTAGCCCCAAATTTGTGATGGAAGTCATCGATGT  
TTTTGTGGAGAACCTCAATGTTCTAGTGAAGATCAATGATCCAATTCGTGGCTTTTTGTTCCAGAACACA  
AGGAACAAATAGAACAAGTGTTAAAGGAGTTGAAGTTATTGAGATTTTTTGTCTGCTTTGTTTCAAACAA  
ATGTATAGAGCCTCAATACCGACATACTACTTTTTATATTCATGCTTTAATTGAGGCTAGCCACATTGCAA  
TGGTTGTCTGGTTGCATTTGCCAGTCGTCTATGGAAATCAAGACGTGGCTCCAAGTGAAGTCAGTCGTTT  
GCTCTCTGATTTTCATGGAATTGAAGATTAAGTCCATTCAGCCAGTCATCAGCCGCAACAATTTTATATTG  
ATGTCCTGCAAGCTTTGAAGTCAACCATAACCACAAGCACAAAAGAAGCATGCAGCTGAGAGTAGCACTG  
TGGAGATTC AACACACAGTCTGACGGTTGTTTTGAGTGATCAAATGGCTAACCTTCAGGAGATGCTCT  
GCCTTCTAAGAGATAATCTCATTTCATCTGCCAATACTAGATCTGGAATTCATCTTCAAGATATGGATTCT  
GTTATTATTGATGCTGGACTTCTTATTTACTCATTATATGATATCAAGAGGGAGAAGGAAGACACAGTAT  
TGGATGATATGAACCGAGCACTTGGTTTTGATCTTCCAAGAAACATTGAGCCTATCAAGGCGATGGTCTA  
CCTCATCATGCAAAGGCATTTCAATGTAACCTTGCCAAGGATTCATGGACTAGGCTATGTCGATTTTCTAT  
TGAAAAACCTGAAGGATTTCCAAGGCCGTTATTCAGATTCATCGCTTCTCAAGAATCAAATTCAAGT  
AATTCAAACGGAATTTGAGAGCTTGCAACCTTCTGAAGGTTGTCGTAGAAGAGCCACACAATAAGTT

CAAGAGACTGAATGAAGATTGTGCTATACAGATAATTAGGAAAGCACATGAGGTGGAATATGTAGTTG  
ATGCTTGATAAAACAAAGGCATTCTCATTGGTGCCTCGAGCGTTGGCTCCAGGATATCATAGAGGAGA  
TACTTGTATCAAAGCAAAGATTCAGGAAAATAACACTGTTGACGATACAATGAAGACTGTCATTGCTCG  
TACATCATCACAACACTGGCAAGGACTCCGAGGATGAATGAAGAAATTGTTGGGTTTGAGGATGTCATAGA  
AAATTTAAGAAAAAACTACTGAATGGAACCAAAGGGCAAGATGTCATTTCAATTCATGGCATGCCAGG  
TTAGGTAAGACGACTTTAGCCAACAGACTCTATTCTGACAGGTCAGTTGTTTCTCAATTTGATATTTGTG  
CACAATGTTGTGTGTCTCAAGTATATTCGTATAAGGACTTGTTATTGTCCTTGATACGTGATGCTATTGGT  
GAGGATTCTGATCAGCATAGAGAACTTCATGACAATGAATTAGCTGATAAGCTTCGCAAAACCTTATTGC  
GCAGAAGGTACCTTATCCTTGTTGATGATGTGTGGGAAAATAGTGTTTGGGATGATTTAAGAGGTTGTT  
TTCCAGATGCCAATAACAGAAGCAGAATCATTCTAACGACAAGACATCATGAAGTTGCCAATTTGCTAG  
TGTTTCATAGTGATCCCCTTCATCTTCGTATGTTTGACGAAGATGAAAGTTGGAAGTTGCTTGAAAAGAAA  
GTGTTTGGTGAACAAAGCTGCTCCCCTCTCCTAAGAGATGTTGGGCTAAGAATAGCAAAAATGTGTGGA  
CAACTCCCTCTTTCAATTGTTTTGGTGGCTGGTATTCTGTCAGAGATGAAAAGGAAGTAGAATGTTGGG  
AGCAAGTGGCCAACAATTTGGGTACCCACATTCACAATGACTCAAGAGCCATTGTAGACCAAAGTTATC  
ATGTTTTACCCTGTCATCTTAAGTCTTGCTTCCTTTATTTTGGAGCATTTTTAGAGGATAGAGTGATTGAT  
ATTTCAAGGTTAATAAGGTTATGGATATCAGAATCATTATAAAAAGTTGTGAAGGCAGGAGGTTGGAG  
GATATAGCAGAAGGTTACTTGGAGAATCTTATTGAAAGAAATCTAGTAATGGTACTCAAAGGGCCGAT  
TCAGATGGTAAGGTCACAGCATGTGCCTTCATGATGTACTACTCGACTTCTGCAAGGAAAGAGCAGCT  
GAGGAGAATTTTCTACTATGGATAAACGGTAATATGATAAGTAATGGTACTTTCAATCAATCAAGTATT  
TCAAGTTATATTTGAAAATTAATGATATGATTTTGCTAATTGATATATTCACAGAGATCAGATTACCAAAG  
CTGTTTACTCTCACAAGCAGCATGCTCACTTGGCGTTCACTGAAATGGATAATCTTTTAGAATGGAGTAC  
GTCTGGCTCACTTGTGGCTCTGTACTTTTTAAGAATTATGACCAATACTTTGCCGATCGTCCCTTTTTCTC  
TCATGCTTTTGAAATTTACACATTTTACCACATTTCAAGTTTCTAAAAGTACTGGATTTGGAACACCAGG  
TTGTTATTGATTTTATTCCGACTGAGCTCCCTTACTTGAGGTATTTCTCTGCGCTCATTGATCAGAATTCAA  
TTCCTTCAAGCATATCCAATCTTTGGAACCTTGAACTCTTATATTAAGCGTAGATCAGCTGCCAGATAT  
AACAGGGTATTACTACCTAGTACAGTTTGGGATATGGTTAAATTGAGATATCTGTATATTCCTTACTTCAG  
CCCTGAAATAAAAAGCATTACTCGAGAACTCTCCAAAACCTTGATGATTTGGAACCCCTTTCCAATTCATAT  
TTCACTCGTGTTGAGGATGCAGAATTGATGCTGAGAAAAACACCTAATCTTCGAAACCTGACATGTAAA  
ATCGAGTGCTTGAAATACCCCATCAGTACCATGCATTGAATTTTCCAATACGGCTTGAAATACTAAAGC

TTTATGGATCAAAAATCGTCAAACCATCCCCTTTTACATCTCTGCACCAAATCTCAAATACCTGATACTCT  
GTGGCTTTTACCTGGATTCTCAGTACTTATCAGAAACTGCTGATCATCTGAAGAACCTTGAGGTACTCAG  
ACTGTCCTTCGTTATATTTGGTGGTCATATGAAATGGAAAGTGAGCAATGGCAAGTTCCTCAACTCAA  
ATCTTGAAACTAGAATATTTGCCCATGATGAAATGGATTGTAGCTGATGATGCCTTTCCTAACCTTGAAC  
AATTGGTTTTGCGTCGATGTCATGATCTTATGGAGATCCCTTCTTGTTTCATGAACATCCTTCTCTGCAGT  
ACATCGAGGTAGAAAAGTCAATGAGTCGGTTGTCAAGTCAGCCATGAATATACAAGAAACACAAGTCG  
AAGATAATCAAATACTAATTTCAAGCTCGTTCTCATCGAGGTACACTACTGAAAAAGCTTTATTCTGCA  
TGATTTTGATGACTCAGAAATAATGGCCTAAATTGTATGAACTGTTTTCTCTGTTATCTTTACCTGGTGGC  
CTCGTTTTACATTTGGGTTTTTCTTGGTTTTCTTGCAGAAAGAGACATACCCAAGGCATTTAAACAATT  
ACTTTTACTTCCAGGTACTACTTATTATTTTTCTTCTTCTTCTTTTTTGGAGTACACCGAATAGATAGATTC  
ATCTTTTTCTCCTGTGATATAAAAGGGATAGAATCAATTTCAACTGATATGAAAGAGAAGAACTTAC  
TGTGACCAGAGAATGTGGATGCTGATGAAGTTCAATTAGTTGTGGAGAACTGAGAAAGCGTGGCATG  
CTCTAACAAAATGCTGAACTCTGGTGAACCAACCGTATGGATTTCAAATAATGACAGGGTTGTAGTC  
CCAACCTGTCAACACAAATGTGCTATACTCATTTTTCTTACTGTAATACCATTTTCATGACACACACACAAA  
CATTAACTGTAGTAAAGTTTTGATGGATCAGCTGATATGTTAGTTCAACCCATTGTAATCCCGTTCAAATT  
CAACTCAAAAATGCCATTGAGTTATTCTTTAACAGGGTATCCAGAGTTTGTAGCTGGAGCAATTTGGA  
ATATCGCATGTAATTTCTTTATGAGTTATTTGTTTTAATAAAGATTCTGTAAAACGTCCAACGGCTGTTGC  
ATTCATTGTAAACTAAATACATCTCACAATGTAAGTGTGAACAAATTTTTTCATTCAAGTCCTTAAGGTTT  
GATGTAAGTCATTAGATTTTAC

>PGSC0003DMG400003543 LRR-RLPs

CTTCTTTGTTTGTCCCTTCTTGGACACACAATATATCCTCATGAATCCATTTAAAACTAATCTTGAAG  
GCTCTTCTTTCATCAATTCTCATTACGATAAAAAAACCACACAGAAAAATCCAGAAAATGGGTTG  
TTTTCAATTTCTACTGTTCTGTTCTGTATAGTTCTCTATGCTCTGTTCTTGCATGCGCATTCAACTACTCAC  
TGGCAAGACATTGAAGTCTTGAAGCAGCTGAAAAATAGCGTCGACCCCAATTCAGTGTACCTGGTTCA  
TGCCTGAATTCATGGGATTTCTCTGTAGACCCTTGTGATAATCTCGGGGGTGA AAAATTCATTGTGGTC  
TCCGTTGCGACCTTGTGTTTTCTCTGTTAGCCGAGTCACTGAACTCGCTCTAGACCAGTGGAACTACTCC  
GGTCACTCACTTCTGTCTCTTGAATTTGCCTTATCTCCAAAAGTTAGACATCACTAATAATGCCTTCTCC  
GGTTAGTACCTGAGTCACTCTCGAATCTAACTCGGGTTCAACGAGTCGGTTTATCAGGTAAGTTCGCTAT  
CCGGGTCAATTCGAGTTCCTGAGTTCACTTTCAAACCTTGAAGAGCTTTACCTTGACAATAATTTCTT

GAGGGAGAAATCCCCAAAGTTTCAACGGTCTCAAGAATTTGAAACGGCTCGAATTTCAAGGCAATCAG  
ATTACTGGCGAGTTTCCCGAGTTGGATCAGTTAATTAATTTGAATTTTCATCGATGCTAGTGATAATGCCAT  
CTCCGGCGAACTCCCGGGCAGTTATCCGGCTTCTCTCATCGAGCTTGCGATGAGAAACAACAGCATAGA  
AGGTAACATTCCGGCGAGCCTCATCGGACTGAATTTTGTACAAGTTATCGATCTGAGTCACAACAAACTC  
AGTGGGTCAGTGCCAGCGAGTGTCTTCACTCACCCATCCCTCGAACAGCTCACCTATCATAACAATCAAT  
TCGGGTTCGGTTCAGGAACCCGGGATCTCGTTTCAGAATAGTCAGCTTATTGCAGCAGACTTAAGCAACA  
ATGAGATCCGTGGGTTATTACCCGGGTTCTGGGTTAATGCCAGATTATCATCACTTCACTAGAGAA  
CAACAAGTTATCGGGTATGATACCGACCCAATATGCATTGAAAATGGTGTTCGGGGTGAAGGGGTGTC  
TCAATTTGAGAGGCTACTGTTAGGAGGAACTATTTATTCGGACCCATACCGAGTCCATTGTTGGATCTG  
AAAGCGGGTTCATTCACAGTGAGATTAGGAGACAACTGTTTGTACCGGTGCCCGTTGAGATTATTTTTAT  
GTGAAGGTGGGGAACAGAAATCATTATCGGAGTGTGAGGCTTTTGGTCCCATCATTCTTGAGTAATGT  
GATAATGTCTTTACTTTGAGGTCTCGTTTTCATTTTGTACTAGTAATTATTGTATCGTTTCAATTTATCG  
GAAGGGACCAGTAAGTATTGTATAAATATATTTTTTCTGCAACCTTACCCCATGTATGGGGTTTTAGAT  
ATGATCTATGGTAGAGTTGTTATTGTTGTGAAGAGTGAGACAGAAATATAAGATTTCTGACTTGATGTGT  
TGAAGTAGTAATTGTGGGACAGTTGAGAAAATTTTATTAGCGGAT

>PGSC0003DMG400003544 LRR-RLPs

CAAATATGGGAATTTTGGGTAGGAAAAATCTTTCTTGTTTCATCTTATTTTACATAATTTTTCTGTTTTG  
TTCCAAGGCCATTAGAATGTTGTCATTTGGTTGATAAAACATCTTTGTTAGACTTTAAACAAAAGTCACT  
TCTGATCCTTCAAACCTTATTGCAAACATGGACACTTTCAACTGATTGTTGCAAATCTGGGAAGGTATTGC  
TTGTAATTCCAATGGAAGGGTTGTTAACGTCTCTCGCCCTGGCCTTCTTCAGGGGACGATTTCAATTATCG  
ATACCTCAATTTCTGGAACCTTTCTCCTTCTCTTGCCAATCTTTCTTTTCTTGAATTGCTTGATCTTAGTAA  
TCTTAAGGACTTAACAGGGCCAATTCCACCTGAATTTGGCAAGTTATCGCGCTTGAGTTACCTCTTTCTTG  
ATACTAATAAACTCTCAGCATCTATACCTGTCACATTTAAATATCTATACCAACTTAAGAAGCTTTATCTCA  
GTGATAATACTCTATCTGGTACTATCCCTTCGAGTATTTTCGAACGCTTCCTTTCACTCTCAGAACTTGGTT  
TATCAGCAAATCAAACCTTCAGGTCCAATACCATCTTCAATTGGGAATTTAGTATCATTGACCAAGCTTGAT  
ATGAGTCGAAATAAGTTCTTTGGAAGCATTCCAGAGAGTATAGGAAGATTAATAAATCTTGCATATGTT  
GATTTGTCTGAGAATCAGTTATCTGGAAAGATTCCAAACTCTATTGGAAACCTTTCCCAAGTATCTCTAAT  
GTATCTGAACCAAAACCAATTGAGAGGAAAAATTCCTTCATCAATATCTGGTCTTAGATCATTGGTGTTTC  
TGCCGTTTATCCGAAAACCAGCTGAGTGGCAGTATTCCACCTTCTATTGGCAATCTTCAAAGATCGAAA



GGCTGATATTTGAGAACAACAAGTTAAGTGGAAAACCTGCCTGCAACACTTGGACATCTTGTAACCTCAC  
TGATATGTACTTTTCCAATAATCTATTTACAGGGAAAATCCCATCAAGTTTTGGTAATCTAAAGAATCTAC  
AGATACTAGATTTGTGCGAAAAATAAGCTCAGTGGTGAAATCCCTCATCAGCTTGTGAAGTTAGTGAGTTT  
ACAGACATTGGATCTGTCATTTAATCCTTTGGGGCTTTCAAGAATACCAAACCTGGTTCAAGAACTAAGA  
CTGTTTCGTCTCCTTTTGGCGAAGACTGGGATCAGAGGGAACCTCCCAAGTTGGTTGGCTTCATCGTCAT  
TATCAACACTTGATTTATCAAACAATGGTTTGACAGGAAAATTACCTACATGGATTGGTAACATGACCAA  
CCTTTCACTCTTGAATTTATCAAACAACGCCTTCTATTCATCAATCCCTGATGAGTTCAAGAACCTGACACT  
TTTGATGGATCTTGATCTTCACTCAAACAGATTTTCAGGCAACTTGATAGCAATTTTCTCCAAGAATTTTC  
AAGACCCCTTGGTCACTACAATTCTATTGATCTTGCATACAACATGTTCACTGGACCATTAGACGAAAA  
CAGCGGAAATGAACCTGTCATGGATTCTATTTTGTCACTAAGTTTGTCCACAATCCATTGACAGGACAC  
ATACCAAATCACTGGGAAATTTGACAACCTTGCAGGAAATTAACCTAGCTGAGAATGGGCTAACAGGT  
GAAATTCCAACAGAACTTGGGAATGCCAAGGAACTGAAAACAATTTTACTTTCAAATAACAATTTGGAA  
GGTGCAATACCAGCACAAGTTCTGAATTTGAAAGACCTTCGAGAATTTGATGTATCGGGAAATCGACTA  
AGCGGTAGTATCCCTCCTCATAAAGCTAATATCCCAAAGTCTGCATTTTTGGGAAATTATGGCTTGTGTG  
GAGCTCCACTTCCTCCTTGTAAAGCACACATAGTGGAAACCTTCAAACACAATATTTCCCTTTTCTTTATTTA  
TTTTTCATTTTCGACATGATTGTTTCGTCATAATGTATTGTATTTAGTTGTAATCACTCAAATGTTATTAGT  
AAATACTGAACAAAGTTGATTTTTCAAAGCAACCTTGCAGAATTCTACATCAATATCCTCAATGGTTTAA  
AC

>PGSC0003DMG400003710 LRR-RLPs

ATGAAAATGCAGTTTTTTCTTCATTTTTTTTCATTTTTTCATCTTCTTTGTATTATTAGCACAATGCAAAACTC  
ATCCTATTGATATAACAAGGACTTCAAATCTCAAAAATGGAATAAACCCAAAATCCATTAACCCGGTTC  
ATGCTTAAACTCATGGAACTTCACTATAGACCCATGTGATCACATTTTCACCGACCGGTTACCTGCGGTT  
TCCGCTGTGATCTCATCGTCTCCGGTTTTATCGAGTCACTGAAATCAGCCTAGACCAAGCCGGTACTCC  
GGTTCATTGCCTAATTCATTCAACCTCCCTCATCTCGAGATTTTAGATATGTCGTATAATTCCCTCTCCGGT  
TCAATCCCGAATTCATTTTCAAATCTAACTCGTCTCCGGCGGCTCAGTCTTTGAAAAACTCGTTCACCGG  
TCCAGTACTTCTTCTATCGGTTCTCTATCCCGTTTACAGGAACTATTTCTCGATAACAACAATTCACCGG  
TTCAATCCCGGAAAGTTTTAATGGTTTAAATCAATCTGAATCGATTTCGAGCTTCAACAAAACAATATCTCCG  
GTGAGTTACCTAATTTGAATCAGCTCGGAAATCTGATCTTCTTAGATTTAAGCAATAACAGACTCGCCGG  
AAATTTCTTACGACAAATTTACCTGATTGATGATTGAACTCTCAATACGCAACAATTATTTACACGGCG

AGTTTCCGTTGAACTTCGAAGAGTTGAAGTTCCTACAGGTGTTAGATCTGAGCCATAATTTGTTTTCCGG  
GATGATTCCGGCGGTGTTATTTCACTCATCTCTTCAGCAGCTTACACTTTCTTACAATAACTTTACGTT  
TTTGCAAGTGCCGGAAGATTTAGTGCTTCGAAGTAAGCTTATAGCTATTGATCTGAGTTACAACAATTTG  
CATGGCTTATTGCCGGCGTTTATGGCATCGATGCCGGAGCTGTCGGCTCTGAATTTGGAGCATAACAAG  
TTTACCGGCGTGATACCGATACAGTTTGCAGTAAAAGTTGTGGCTCCGAGGAATCATACGGCGTCGTTT  
GAGAGGTTATTGCTGGGTGGAAATTTTGTGGGCGATTCTGGGCCTTAATGGGCCTAAAGCCT  
GGTTCTGGAAATATTAGTTTGGTGGATAACTGTTTGTATATGTGTCCAGATTCCGGTATACATTTGTCATG  
GTGGGTATCAGAAGTCTTTATTGGATTGTAAAAGTTTGGGCCTAGGATTCCCTGA

>PGSC0003DMG400003802 LRR-RLPs

ATGTTTGAATTCGCCCCGAAATTGCAGAAGCGAGGCGGAGAGTTGATTAGCGAGTTTTGCAGTGAAATT  
GGAGTCGAAAAATGGGGTTTTAAGGTACGGTTGCACAATAGGACACCTTCAATTGATATATTGTCGGAA  
TGCTCATTCAAATAACTTTGTTGTCTTAGTTTTAAAGAAGCAACGCGGATGAGCATTCTTCCAAAAC  
ATGGCTGCAAGCCTGGTCGACTCTCCAAACTTGATTTCACAGTTGATTTTTCTAAAGGCAACGATATG  
AAAATAGTGGATGATATTATGGGGAGATATAGGGACGGAAAAATCCCTATAGAAAAGTTTGAATTA  
GAGTTGATGGTATTCTGAAAATCTTCCGTATGATTGATAAGTGGCTTGACATTGTACTTACAAATG  
GTGAAAAGACCTTACCATATCATCATATTCATACCCCTTGTTATTTTTGCAATCTTCACGGTAAAATCTG  
TGAGAAAATTGGTTCTGGAATCTTGTACTCTTTGCCTAGTGTTGTTGTAATTGCAATCTTTGAGAAAA  
CTTTCTCTATCTTATGTAAGATTAGATGAAAACATGCTTCAGGCTCTACTTAATAGCTGTCCGTTGATTGA  
ATCTTTCAATTTGAGTATTGCAAGGGGTTGGAAACAATGAATCCTCAAAGATTAAGTCGGTTTTCCCTG  
AAGTTCTGAAGATTCGGTGTGTGGGGGAATATGGGAGATTGATGCTCCAAATTTGGTATCACTTAAG  
TACACCTGGGAAGACATTCCTCAACTTAAAATTGTGAGAGAGTCAAGACAACCTGAAGTACTCAAGAATC  
GTTCTTCAATGCTTAGATAGTGACAATGTAAATGCAGCATGGTTTTGTAAGTTGAGGAAGTTTCTATCAA  
ATTCGATCTCTGGTCTGAAGTTTGCATTGAATCTTATAGATGCAATGACATCAACATTCAAATTTGCAA  
CTGGACCATAAAGATTCTAATCCCCACGTGGACGTTTTAAATGTCATCATTATATGGAAGAATGGGGAG  
AGCTCAACATTTGTGGATGCTTTGGTATGGAGTTGTCAGCCTAGGAGACTCAACGTGGATTCAACAAGA  
GAAAAGATCACATTTTTTATTGATCATTTGATGTATATGAAGAATTCGAGTCAGTCTACTTCTCATGGAA  
GCACGCCTCTTCTTAGTCAATTAAGGAGTAAAAGCCTACAAATTTGATAGGAAGAAGGAGAGTTGGC  
ATCCTGTGGAACACAAAAGTGGTGGAGCTGGTAACAACAACTCTGAAATGTGGGATTGGTGTATTTTT  
TATTAGATTGGTGA

>PGSC0003DMG400003814 LRR-RLPs

TTTTTCATGCTGTAGCCATTAAAGCTTCCACCTATCTCCACACGAGAACTCGTTTGCTTCTCACGGAAAAG  
CAATACCCAAAAGTCTCTACTTTTTTCCCCTTATATAAACCCCATTTTAATTTTACTCTCTCTCACCTCTG  
CAACAATTAATTAATCATGAGGTTTTTGTGTTGATGTTTCTGTTTCATGTTATTGTTATTCAACAATGTGG  
TGCAATGCTTCACCCCATGATTTCTTGGCTTTACAAGCGATTTCGTAAAACCCTCAATGATTTACCCGGTT  
CGAATTTTTTCTCTTCTTGGGATTTTACTTCCGACCCATGTAGCTTCGCCGGAGTTTATTGTGCTGGTGAT  
AAAGTGATCGCGTTGAATCTGGGTGACCCGAGAGCCGGGTCGCCGGGTCTAACCGGAAGATTAACCC  
GGCTATTGGGAAACTCTCTGCTTTAGCTGAGTTCACTGTCGTCCCCGGTAAGGTATTCCGGAGTATTGCC  
GAAAGTTTTTCTCAGTTGAACAACCTAAGATTTCTCGGAGTTAGTCGAAATTTCTATCTGGACGGATTCC  
GGCGGGTTTAGGTAAACTCCGGCGACTTCAAACCTTTGATCTTAGTTTCAATCAGCTCACCGGAAACATT  
CCATGGGCCATCGGAACCCTCCCGGCGCTCAACAATGTCATTCTCTGTCACAACCATTTATCCGGTTCAGT  
ACCGCCTTTCGTATCCCTTAGATTAACCCGGCTCGATCTCAAACACAATGCTCTTTCTGGTTCGTTATTGCC  
AATGTCACCTTCTTCTTCACTTCAATACCTCTCAATGTCATCGAACCCAGTTAACCGGTCCGGTCGACCATT  
ACTTACTCGGTTAAACCGGTTAAACTATCTCGACCTTAGTATAAACCGGTTACCGGTTGTATCCCGGGG  
AACTATTTAGATTTCCGATAGCAAATCTTCAGCTACAAAGAAACCAATTCACCAGTCGAATTTACCCGGC  
CGGTTTAGTAACAATCCGGTTGTGGACCTTAGCTTCAACCGGTTTTACGGCGAAATATCGCCATTGTTCT  
CCGGTGTACAGATTTTATATATGAATAACAACCGGTTTCATGGGTCAGGTTCCGGGGATCATGGTAGACC  
GGTTGTTATCGGCTAGTATACATGTTTTGTATTTGCAACATAATTTTCTAACCGGAATAGCTATCAATCCG  
GCCGCAGAAATCCGGTTCGGAGTTCATTGTGTTTGCAAGTATAATTGCATGGTTTTGCCGGTTCAGACCC  
CTTGCCATTGAAAGCCGGGAAGCAGAAGTCCCGGCCACGGCTCAGTGTGGGCAATGGAAGGGGTAA  
AATAGACAAATCACAAGTATGTTTTTTTTAATTATGGTTTTGTGGATTTCATTGATTAATTTTGAAATTAA  
AGGGTAAAAAAAATGTGGATAAAGAAGAAAAAATTAGAGTGAAAAAGGGTAAGAGTTTTAAGTTTAG  
TTATTTGTATGTTTTTTTTTGGTATTTCTTGTAATTATAGATATACTGATTTACCTTATTAAATATGTTGC  
AAATTTCTTGTTTTTTTTTTTTTGGTCTTATTTTGTAATGTTGCTTTATGGGGTTTTCTTTTCTTTTTTAT  
TCCTGTTTACAACAGCCTTATTGTTCTGATGATAAAGTGAAGTCTTTAGGGATATAGAGTATCTTTTTCC  
TGTTTTTAGGAAATTATATGTGATATACAGAGATTGTATACAGCCAAAATACAGCTGCACCAGCATATCT  
CTGTTCTTTGTGGTACTAAAC

>PGSC0003DMG400003822 LRR-RLPs

TTGAAAACCAAATATTACAGATGACAACATTTCACTACTACCTTAGTTTACATCTTGTATGTGCTACTTCTTT

TTTCACTTCCATTAAGTATCACATCTTCAGCAAGAACAGAAGCTGAATCTCTTGTCAAATGGAAGAGAAA  
TTTACCTTCTACTTCTTTCTTGGACACATGGTCCATTTTGAATCTCGAAAACCTTGTCGAATTGGACATATAT  
TGTGTGTAATGATGGTGGAAACAATTTCTGAGATCAATCTTTCTGATGCAGCCCTCTCAGGCACACTTGAT  
CACCTTGATTTCACTTCATTTCCGAGTCTCGTGAATTTCAATCTTAATGGAAATAACTTCAGTGGATCGAT  
ACCTTCGAGTATTGGCAATGCCTCATTGCTCACATTCTTGGACCTGAGTAACAATATCTTATCAGGTGTCA  
TACCTGAAGAGATTGGAAAATTGAATCAACTTGAGTATCTGAGTTTTTATAACAACAATATCGAAGGTGT  
GATGCCGTATCAGATTAGCAATCTGCAGAAGGTAATGCACCTTGGATCTTGGATCAAATTTCTTAGAAACT  
CCTGATTGGTTGAAGATGAGAAATATGCCTGTGTTGACGTATCTAAGCTTTGGTTATAATGAACTGAGGT  
TAGAATCCCTGAATTCGTA CTTCTGTTGCATAATCTAACATATCTTGATTTATCGATAAATCATTTCAATG  
GTTTCGATTCCTGAAACAGTATTTACCAACTTGATCAACCTTGAAGACTTAATCTTTTCATCTAATTCATTT  
AAGGTTCAATTGTCACCAAATTTTACTAAGTTGTCTAAGTTAAAAGAACTTCAGCTAGGTGTTAACATGTTT  
TCTGGTTTAATTCCTGATGAAATTGGCTTGATTACTAGTCTTGAAGTTCTTGTACTTTTTCAACAATTCATTT  
GAAGGAAAGATTCCATCTTCTATAGGTAGACTCATAAATCTTCAAAGTTGGATCTTCGAAAGAACGATT  
TGAATTCAACTATTCCTTCTGAGCTTGGCTTTTGTACTAACTCACTCTCTTAGCTCTAGCAGAAAATGAC  
CTGCAAGGGTCATTGCCTTTATCATTCTCCTCTCTTGCAAAGTTATCTGATTTGGGGTTGTCTGATAATAG  
TCTTTCTGGTGAATCTCATCGAATTTATCACCATTGGACTGAGTTGACATCTTTGCAGCTTCAAACA  
ATATGTTTACAGGGAAAATCCCACCCGAAACCAGTCAATTGACAAACCTTGTATATCTTTACCTCTATCAT  
AACAAATTTCACTGGTTCCATTCCCTATCAGATTGGGAACTTGCAAACTTGTGGATTTAGACTTTTCTGA  
TAACCAGCTTTTCAGGCATAATACCTCCAACCATTGGAAATCTGACCAATCTAAAGATGTTGCAACTTTTT  
GCAACAATCTCAGTGGAAACCATTCTCCTGAGATTGGAAAATTGATATCCCTTGA AACCATCGACATCAA  
TACCAACCGACTAAGTGGTGAGCTGCCGGACAGCATTCTGACCTCAGTGAGCTGAAGTTTCTTTCTGTA  
TATACTAATGATTTCTCAGGCAGTGTCCCTAAGGACTTTGGAAAGAACAGTCCTCAATTGTCAAGTGCCA  
GCTTTGCAAATAACAGCTTCACTGGTGAACCTGCTGGATTGTGTAGCCCGAATCTTGAGGAGTTGAC  
GATAAATGGGAACAAATTCAGTGGGAAGTTACCAGATTGCTTGAAGAACTGCACACTTCTAAGACGAGT  
ACGGCTTGAAGGCAACAATTTATCTGGTAATCTTGCAGATGCATTTGGAGTGCACCCGAAACTTGTTTT  
CTTTCTCTTAGTGACAACCAACTTTTCAAGTGAACCTCTCACCTGACTGGGGGAAATGTGAAAATCTCACAA  
GTCTAAGAATGGATGGAAACAAATTTTCTGGTGTAAATCCCAAGTGAGCTAGGGAACCTGAGAGCGTTGC  
GCGTGTTAGCTTTGGAAGGAAATGAATTGACTGGTGAATTCCTCTGAACTGGGAAGGTTAGACCTGC  
TCTATAATCTCAGCTTGAAGTAAAACAATCTTACTGGAGGCATCCCTCAGTCTGTTGGCAATTTAACTAA

GCTCCAGTATCTTGATTTGTCGACAAACAAGTTAAGTGGTAACACACCAGTAGATCTTGGGAAGTGTGA  
GAGCCTGTTGAGCTTGAATCTTGCAACAACCTCATTATCAGGTGGCATTCCATCTGACCTTGGTAATTTG  
ATGCAGTTGAGTATTCTTTTGGACTTGAGTGGCAATTCCTAACGGGAACCATCCACAAAACCTGGCCA  
AACTCACCTCATTAAATGCATCTCAACCTCTCACATAACAACCTCTCAGGTAGAATTCCTCCAGCATTATCTC  
AGATGATCAGTCTTCAGGAGATGGATTTTTCTACAATGAGTTTTCTGGACCAATCCCAACCGATGGAGT  
ATTTCAAAGAGCACCCGCTAGATCTTTTCTGGAAACTCTGGTTTGTGTGGAAATGTAGAGGGATTATCC  
TCATGTAATTTGGATACTCCCAATGACAAGTCCAGAAATAATAATCAAAGATCCTCATTGGGGTACTTG  
TACCGGTGGTCAGCCTCATACTTTTGGCAATCCTGTTTGTGTCATGTCTCGTGTCTCGAAGGAAGGCTAA  
GCAATATGATGAGGAGATCAAAGCTAGCCAGATACATGAAAATACAGAATCTCTGATTTGGGAAAGAG  
AAGGGAAGTTTACATTTGGTGACATAGTGAAAGCTACTGAAGATTTTCAGTGAAAAGAACTGCATTGGAA  
GAGGAGGCTTTGGAAGTGTCTATAAAGCTGTTTTGCCCTCTGGGCAGATTGTTGCAGTCAAAGACTCA  
ACATGTCAGACTCAAGTGATATTCCATTGACTAATCGTCGAAGCTTTGAGAATGAGATTAGAACTTTGAC  
AGAGGTGAGACACAGGAATATAATTAAGCTCTTTGGTTACTGTTCCAAGAATGGATGCATGTACTTGGT  
TTATGAGTACATAGAAAGAGGTAGCCTGGGGAAAGTTCTATATGACAATGAGATGGGAATGGAACCTG  
GATGGGGTACAAGAGTGAAAATTGTGCAAGGAATAGCTCATGCACTCGCTTACTTGCATCATGACTGCT  
CTCCGCCATTGTTACCGTGATGTATCATTGAATAACATTTTGCTTGAATCAGAATTCGAGCCACGACTC  
TCTGACTTTGGCACAGCAAAGTTGTTAGCTTCAGACTCATCAAATTGGACCACAGTTGCTGGTTCTTATG  
GCTATATGGCACCAGGTATGTTACATACTCATTACCTAATGCATCCATATTTCTGTTGATTAAGTAGTATA  
TTCATTGGAAGGATACTTCAATATTATTGTGTCTTTCTTCTGTGCAGAGCTTGCCTTACCATGCGTGTT  
ACAGAAAAGTGTGATGTTTATAGTTTTGGAGTCGTAGCGATGGAGACTATGATGGGAAGGCATCCAGG  
GGAGCTTTTAACTTCATTATCAGCATCAACAACATTGTTTCCAGAAATACTTTTGAAGGATGTTCTTGACC  
AAAGACTTCCACCTCCCACAGGCCACTTGGCAGAGGCAGTGGTTTTTGTGATCACGATTGCCTTGGCATG  
TACACGTACCACTCCTGAATCGCGACCAACCATGCGTTCTGTAGCACAAGAATTGTCTGTTTCAGACTTTG  
CCTTACCTTCCACAGCCATTGGGGACAATAGAAATGAGCAAATAACAAGTTTTTCAGAAATAATGAGAA  
GATAGAGCCTCATGTACAGGTGTGAAATGTACAGGCTGTAGAGTTTTAGTGTTGTAATGCAACTTCCTCA  
AGATCTAGAATCTATATAGTATCAAGGATGAAACCTTGATCTATTCAAATTACTATGTTTTGGTTGCACT  
TTTCCCTAGAAAGAAAGAAATAATATCATCCTGTTAATCATGAATGTTACAAAGTTGGTATATTAATTTG  
GACAAGTATGAATGTTACAAAGTTGCACAACCTTATCCTAGTTTTCACTTTATTGCTAGGCCAAAACACTA  
GCAAAAAGATACAATGTGTTCACTTGTAAATAAAAATAGCAACCTAACAAAAATTTGGCAAAGAATACAT

CACACAGAAACCAGGCATGGTACTTAGCATTCCACTCCACACTGCTTGAGTATAGGTCCCTTCTGCTTTG  
GTAGGAATGGGTCTATTTCGTACCCAAACGAGTGAGAAGATTGAAGCAAGAAGGATTGACCAGAGGACC  
ACAATGGTGGGAGTCCTGTTCTGCCTGCCCATCAATCCCTTTAGGAAAGGATAGAGATGCACAATAACC  
CAAAAGGCAAAGAATAACTTTCCGAAGAGAGGACCCCATGAACCATAACCATTGTTGATGGCATCCGAA  
ACACCAGCTACAACACCAACCATATTCAAGATGATCAGAGTGGTTGGTGGGATGAGAAGTGTGGTCCAT  
TTGAAAAGGTAAAGCTCCCAAATTCAGCGTCATCAGCTGCTTTTGATGTTACAGTGAAGTTTGTGTCTA  
CACCAGCAAGAACTTTAAGAAGGCCTTGGAACACTGCAAACAAATGTGCTGAAACACCACCGATGACCC  
AAAATTGCTCGTTACGCCACCAGGCCTCAATGCTTACTCCACTCCATCGCAGCTCGAGTACACTTGTGGC  
TATGATGGAGATAAAGAGAGCCATGAACCAAATGCTTGCAAAGTTGTTAAGCTACAAAACAAACATGGA  
TTTTGATTTATAAAATCTAAATCAAATCTTTATATTACTGAACCAAATGACTTCAGTTCACTTACTGTGGG  
GACGATAAATTTCCAGTGAGAAGGCATACAGCTGGAAGGGTGCAGTAAGCTAGCAGAGCAATGGAAG  
TGAATGGGTAAACAATAGTGTTAATGTATGCTAGCCTTTCCAACCACTTGAGTTTTCCACCCAGGCATA  
CCAAAGGGGACAATGACGACTCATGAAGATTTGACAGAACCAAGAGCCCATCTCAGGACTTGGTGCA  
ATCTATCTGATAGATTGATTGGTGCTGATCCCTTAAAAGCGGCTCTCTTCGGACAGCAATAAACCGATCT  
CCATCCTCTGCAATGCATCTTGAATCCAGTCAAATGTCCTCTGTGACAGAACCATAAATCCATCCAATCT  
GTCAAAAAAAGAAAAATGAAAACCAATTTATTAGAAGTTAGCTAAGCGAACACCATAACTCATAATTTA  
TTCATGAAATATAATGCTAACCTCTTTGCCCCAGTCAGTTTTCTTTCATACCCACAGCTAATAACATGAAT  
AGCTTCTTTTATGAGTGTTGTGGGTTTGTCCCTTCAGGAAGCCCACCATCTTCTTAAGTGTGGAAGCTA  
TGAAAACAGGGGACTGCCGAATCGTTTCTCAAAGTTCTTTTGGGACATGAGAGACGACTTCTCGAGCT  
CATCATATCCTTCAAGGCCTTCTTCAATTTCTCAAGATCAAAGACAGGTCCAGATGGCTTCTTAGTGTAG  
TTCTTTCCATTCAATTGTTTTCTTTTTCTTGCTGTATAGTCTCCAAGTCCAAGTAAGGCCTTGATGCTTCT  
TCTTGGACTTGGACTTGGACTTTGACTTTCTTGAACCACCACAACAGCAACTGGGCCAGCAATCACATGT  
CATCTTTTGACGCTTCTCTGAAACAGGTGGATCATAGCCGTATAACGCCGGCCTGTTAAAGACAGTACCT  
GTTCCAACATAAACTGGTCTTGAATCCATCCAGGCCTTTCATGTTGATCTGCCACCATGAAGGGAAAA  
AAGCATATTAATACCGGAATAAATCCTTTGTCAACACATTGCTGTATATATAGATCAACTTACATCAAAA  
AAGACAACATTACGATTGGCATATCGATCGTGGCGATCAATACCATCAAATCTCTGGGGAAATTGGACA  
TAGCATAGCTTCTTTCCAATTTGTGGGTCCATTA AAAAGCACATGGCTTCTCTAACTGCCTTGCTGTTGTT  
AAGGTAGTGATCACAATCCAAGTTCAACATAAATGGTGCATTCGTCAGGACTGCAGCGACTCGAACCTA  
TTTAGAAAAACAGCACAAATTACATAACATTAAGAAAAGGACTTAATAGGATGTCAAGGAAGCAAGCCA

GAACTAATACTAATTACTAACCAAAGCATTGATGGCACCAGCTTTCTTGTGGTGTTGATAGCCCGGT  
CGTTTCTCACGGGAAACATAGACAAGGCGAGGTAGCTCCTTACCTTCAATGTCAAGTGCACCTTCACTGC  
CAAGATAAACTTGAATCATACCAGGATGGTCTCTGGTGTTGTTACCGGGCCACGGAGTTCATCTTGCAT  
TACCCAGCCTTCTTCTGGTTTTTTCTGAGCTTTTGCTACTAATGCATTAATTCTTACTTTGAATTCTTCATAT  
TCTCTCTGCCACAAGAGAGTGAGTTTTCAATTTGCAGAAAAAATCTTATTTAAGCCAAAGAACTTAAG  
CCCCGATAAATGATACTCCTTCTATCCCACTTATATGACATTCTTTACTTTGGGCACGTCTAAAATGTT  
CGACACGATTCTTCTACAACCTTTTTAAACCTTGATATGATTGAGTCAACATTGTAGGCACTGCATCTC  
CTCTGATATAGTCGTATGAAATGAGACGAAGGAAGTAATAGATACATACCTTCATGGCCCTGCGATCCTT  
GACAAAGGTAGGCTGAACTTTATCTTTCAAGTAATCAATCTTTTCGTTGAAGTAGATATCAGGTGCTCTA  
GGCTCTACACTATATTTCTTACAAAATGGCACCCATCTCCTGGCAAATTCAGCTGTTTCTGCTAATGAATC  
AAACAACAGCATGGAAGCACCATCATCTGATACATAACAGCTAACCTTCTCGACAGGATAATCAACAGC  
CAAGATTGACAGAACAGTGTTCGAGTGATAATAGGAGGCTCCTTAAGAGGATCAACAGTACTCACAAA  
CACATCCACTGGGGCTAATCGATTAGGCTCGCCTTACGTTCAAACCTCAATGTCAATCGATCTAAATAA  
GTTTCACGGTTTATTGGTGACCATTTGGGGAAGTATCGAGTATCCATGATAATGCAAACCATATTTTAC  
ATATAACAGAGATAATCCATAATGGATAGGCATCATAGGCTGGTGTTAGGATCCGGAAATGGAAAAAG  
AATCCAAGAATTACAAGCCTGAGGATAATGACTATCCGATATGGACTGATTAACCTTGATGGAAGTGGA  
ACTTTTCGCCAGAGTGTTGCCGAGCTTACGCCAACTGCTTGGAATCAGTTAAGTCGTTATAATATTG  
AAATATACTGCAAGTTTTATATGCTTAACTTGATCTGTTTCAATTCATACACTCATTTCATGTTGAAAC  
ATTGTAGTATCTGATTCATTTTGTTAATAATATTATATGAAAAGTGTCAAATTATTTAACTATAACGCTC  
AGTCACTGAGTGATACATAACTACAAGTGACACAGACGATATATAACCGAAAATCCAATATTTAAAAGTT  
GTAAGGAGAATGAGGAGAAGGTGGAAACAAGACCAGATATAATTTGATCGCTATGAACAAAACCAAT  
ACCAGATTGACTGATTTGTTATAAATTTAAAGTATTTCTATAGCATGTTTTCTTTTCTTCTATGTTGTTTT  
CTCAATGATTCCTCACATAAAATCTTCTCATATTAACGACGATATAACTTCAACACTATCAAAGAGAGGCG  
GCAATTAGCTTGAATAATCAAACAACTTATCAATATTTTCTTCCACTACTAAGAATATATGTTAAATTCC  
CCTTCTAAGTCAAAGGTCTATCTAAAAAGCAAATCTAGTAGGGGTAAGGTGTGGTATATCTTACCCTCCC  
AACTTCACTTGTGGGATTACACTGGGTGTATATATCATGTTGAATCCCCTTCTAAACCGAGCTGTTAAT  
TTCCACTTCTAAACCGAGGGTCTATCAGAAACAGTAAAACCTACCCTGGCCCGCAAAGGTAGTGTTAAGG  
TGTGGTATATCTTACCCTCCCAAACATCACTCGTGGGATTACACCGAGGGTAAACAAGATGTAAAGTGA  
AAAGAAAGAGTACATACAGAAAGTCATCATCTTCATCAGGTTGATCATTTCACCATTATTAACAAGACC

TCTCTTTTCTTGACGATTCTCCATTTCTCAACCCTTCCCTTCCATTCTGCATCACCATAACTTTCTTTCTGCT  
CATCCTCCAATTCCTTCCCAGCAACTGTAAGTGATTTTCCATTGAAATAAAACAAAATCATGACACATATA  
TATAAAGTGCAACAATTACTCATTTTCGAAATTAAGTAATAGAGATCGATATAGCTTTACCGCTTCCAACA  
ATTGATTGATTAAGAGCAGCAGCACCATTGGTGTGTGATTATGCTCTCCATTCTCCTGCCAAACATACAA  
CAACTTGCTTTCAGTTCAAATGAG

>PGSC0003DMG400003834 LRR-RLPs

ATGAGCATTCTCTCCAAAACATGGCTACAAGAATGGTCGAATCTTCCCAACTTGAATTCACTATTAATT  
GTTGGGAAGGCAATATAAATACAGCGAACACAGCCATGGAGAGATATAGGAAGGGGAAAATCCCTATA  
CAAAGTTTGAATTATTAGAGACCTTTGCTAATTCTCATGAAGATTTCCCTCTCATTGATAAGTGGCTCGA  
TATTGCACTTCAGAATGGTGTAAAACATCTTTTTCTTAACTTTAAATCATACCCCATGCCTATTTAAGAAT  
CTTGGCAGCAAAATCTTTAAGAGAATTGGATGTGCAGGGTAGTATGCCTGATTGTTATCTAGTGGTGT  
GTGAATTGCAAATCATTGAGAAAGCTTTCTCTATCTCATCTAAGATTAGACGAAAACATGGTCCAGACTA  
TACTTAATAGTTGTCCCTTTATTGTCTCTTTAATCCTTGAGTATTGTACTGGGAAGCTTCAAAGATCAAG  
TCGATTCCCTGAAGGTCTTGAAGATACATCATCGCGGGATAGAGGAGATCGATGCTCCAAATTTGGTA  
TCACTTGACTATATGGGGAGTCAAATCCCGAACTTAATAAAATTGCAAGAGACTCAAAAATCAGGCTTG  
GATGCATCAACAATTTAAATGCAGCATGGTTTTGTAAGTTGAGGAAGTTTCTATCAAATTCGTCCTCGTG  
GTCTCATGTTTCCCTTAAATTTATGAATTGCTGTGAGATCAAGATGAAAGATTTGCATATGGACCACATA  
GGTTCTACCCCTCGGGTGGACGTTTTAAATGTGCATATTCAATGGATGAATCAGAATTTTGTGGATGCGT  
TGCTATGGAGTTGTCATCCAAGGAGACTCAACCTACTCTCAAATATTACTCCAACATTACACATTTTATT  
GGTCGTTTAGTGTTTTGACAAATCCAGTCATTCTACTTCTCATAAAAGCTTACCTTGGCATAGTCAATT  
AAAAGAAATAAAAGCTTTTGTGAAAAAACCAGTCGCTACAACCTCATAAATGGGGAGCTTGCAAAAA  
GGACCCTTATGGAGGGGGAGAAAGTTTATTTTTATTAGATTGGTGTAGTTAATTTGTTTCTATTTCA  
AATTGAATGCACTTATTCTTTTCTGCATTGGTGTACAGAGGTATTAGATATTATTAACAGAACTTAGA  
GCATAATTTAACTTGGATCTTATAGGCTTGCAAAGCAAAAACAATTTTTTAAAGAAAGTAATGAGTA  
TGCAAATTTCTTAAAGGAAAGAGACTTAATTTCTACATAATTAAGTGTTCACGTAACACTACAAAT  
GCCTTCGATGCCATACTTTCTAGGTAGCCCGTTGATTTCTAATTTTCTCAAACCTGTCTCGTGACATCATA  
AGAGAAACATAAAGTATCCGACATTGAGTCCAGGATGAATACAATCTCTTCATCACTGGACGTGCATGA  
TGATATAACTAAGGGTTTGTCTTCCACCACATCGAAGGGAAAGTCAATGATTTGAATTTTCCATTCTTCT  
CTTTCTGAGTTTGTCTAAAATCCACAAGTTGAATTATCCATGTTGCCAATATTCATAATCCATGATCGCTA



GTTTACCTTTCACCTCTAACAACCTCGTAATACCACCACGAGTTAGATGCATTCAATAAATCAATATATTTT  
GAATTTTCGATTTTAAACATCAAATGCATCTATAGTAAGTCTGTCCTGGAAAACAAATTTATAGATAACTCC  
ATTGATGCAAACCCCGGGCTTGACAGAAATAGGAGGGGTTATGCTTTGAGTCTCTCTCCATGATTTGTCT  
ACTCCTAAAGTGAAAATCCAATGTTTTATGTACCCTTTTATAATATGCTTTGTTGTGGAAAGAACTTTGTA  
CTTCTTTTCTTCTGGGTCAAACCGAATGAACAGTACCACATGGAAGAACCATCATTTAGGTCTGGGAAGA  
AATCTTACTTCTCTTGTACTAGGATTGAAAATTGCAGCAAAAATAATGGTTCCCAAATACAAAATAAACC  
AGGTCTTGGGTGAGATCTCAGGATCGGATTTTGGAAACGGTCTGTTGGGGTGTGTCCTAGTTTGGGTGTT  
AGGGTCTGGGTCTACATCGATTATCGGGTGTGATTTTTCGAGTTAAAAATTATTCTCCTAAAGAGAATTTTCT  
AGTCTCAAACAAAAATAAAAAGATTTTTTCTGGAAAATATTTTTTATTACCAACCAAACATTAATAATA  
TTTTTCAGAAGATATTATCTACTCATCAACCAATAAACATAAGAAAATAAGTTAGAAATCCATTTGTTTT  
TCCAAGAAAACATTTTCTTCGTACCAAACACACCCTAAAGAGTTATAAAAAAGAAAAAGGACAATCTT  
TTTTAAATGGATTTAATTGAAAAGTAAGGCAAATATGTTAATTGAAACATATGAAGTATTTTTTTTCGACC  
TTCTGGAATTTTTTTTAAAAACAAACAAAGAAGAAAGTCTAGGGGATAATTTTATATAGTTTCTTTTTTA  
CTCTTTTTGCTGACAAAGAACTTTAATATTTTGTACCTTATGTAGAAGAAAATATTTTAATTTTTTAAGTAGC  
GCATGATGTTTTCTTCTTTTTTAAAAAAATCAAGCATGATGTATTAATTTTTTTGTACATTTATTTTTATT  
TTTATTAATGAACCATGATACACGTGCAACACACACAATATTAAGCATGATTTTTTTTAGAATATAGAT  
TGAACAACTTTTTATCCTTCATTCAAATTTTACAAATAGGCAAAACAATCATAATATTATTCGATTTTTG  
CACACCTCTACTTTTCGATGCGAATCTAAATTTAATCGGAATCTAATGTATAAAAATAATGATTCATTCAA  
ATATTATTTGACCGTGTGACGAGGGAGGGAGATCTTTTAGTAATATAGAGCTCCTTATTTTTTTTTTTTT  
TTTTTTTTNNCAGCAAACCTCCGGCGAAGGTAAGAGCATTTTTCAGCTTCTCCGGCGAACTCATCAGCAA  
CTCCGGCGAAGGTAAGAGCATTTTTCAGCTTCTCCGGCGAACTCATCAGCAAACCTCCGGCGAAGGTAAG  
AGCATTTTTCAGCTTCTCCGGCGAACTCATCAGCAAACCTCCGGCGAAGGTAAGAGCATTTTTCAGCTTCT  
CCGGCGAACTCATCAGCAAACCTCCGGCGAAGGTAAGAGCATTTTTCAGCTTCTCCGGCGAACTCATCAG  
CAAACCTCCGGCGAAGGTAAGAGCATTTTTCAGCTTCTCCGGCGAACTCATCTATCTTCTCCGGCGACCAG  
CTCAGAAGAGAGACGGCAGTGCTACTGTTTGCCGCCGGAGATCAACCAGATCTGGCCGAAATTACCCA  
TTGATCACCGAAACCCTCCATCTTCACTGACCAGGTTCTATCTATCCTTTTCTCTCCCTTTTTCGCTGAACCT  
AGTTGCTGCTGGGCTCTGTCTTGCAGACTCCTTATCCCGGAACAGTATCCCCAGTTTTTAA

>PGSC0003DMG400003835 LRR-RLPs

ATGGCTGACATATTGCCTGAATGTTTCATTCAAAAAATATTGTCTTCTCTTAGTTTTGATGAAGCAGCGCG

GATGAGCATTCTCTCCAAAACATGGCTGCAAGCCTGGTCGACTCTTCCCGACTTGGTATTTAATGTTAAG  
TTTTGCAAAGGCGATATAAAGATATTGGACACAATTATGGAGAGATATGGAAACGGAAAAATCCCTATA  
GAAAAGTTTGATTTATCAGAGCTCTTAGGCAATTCTCATGAAGTTTTCCCTCTGATTGATAAGTGGCTTAA  
CATTGCACTTCAAATGGCGTAAACAATCTTGTCTTAATAAATCATACCCCGCGCCTATTTTAACAA  
TCTTGGCAGCAAAATCTTTAAGAAAATTGGTTCTGAAGAGTTGACTCTTTTGCCTATTTTCGTTATCCAGT  
GGTGTGTGAATCGCAATTCTTTGATAAAGCTTTCTCTATCTTATGTGAAATTAGACGAAAATATGCTTCA  
GACTCTACTTAATAGTTGTCCCTTGATTGTCTTTTCATCTTTGAGTATTGTTTCGGACTTGGAAACAATCG  
AGCTAGTGAATCTTCAAAGATCAAGTCGGTTTTCCCTGAAGGTCTTGAAGATTTCGGTTTAGTGGGAGCA  
TATGGGAGATTGATGCTCCAAATTTGGTGTCAATTTGAGTACATGGGGAATCAAATTCCTGAACTTCAAAT  
TGTGAGAGAGTCAAGACAACACTGAAGCACTCAAAAATCATTCTTACCCTTAGACAATATAAATGCTGAC  
TGGTTTTGTAAGTTGAGGAAGTTTCTATCAAATCAATCTTGGTCTCAAGTTTCCCTTTATTTTTATGAA  
TGCGCGGAGATTAAGATGAAAGATCTGCAACAACACCACAGAGTTGCTACGCCCCAGGTGGACATTTTA  
GATGTCAACATTCTGTGGCAGAATCGCGAATACCCTTCGTTTGTGGATGCTTTGGTATGGAGTTGTCAGC  
CTAGGAGACTCAACTTGAATTAACAAGAGAAATGGTTACAGTTTTTCATTGATCGTTTGTATGCATATGAA  
GAATTCGATTAGTCTACTTCTCATGGAAGCAACCCTTGGTATAGTCAATTAAGAAGTAAAAGTCCAC  
AAATTTGATAGGAAGAAGGAGATTTGGTATCCTGTGGAACACAACTTGGGGAGCGGGCAACAATGAA  
CCTTGATAGATATTATATTTTATTAGATTGGTAA

>PGSC0003DMG400004056 LRR-RLPs

ATGTACAGAGGTGTAGCAGATGCTTCTATATCTCCAATGGAGAAACATGAGAAAGAGGCATTGACTCT  
GCTATTCAAGGTTTTGTTGGAAATGAGTGAATGGTTCATTTCTTTATCCTGATCCTTGTGGCTGGACATC  
AATTGAGGTAATAATCTTTTGTCTAGATGTTCCCTTGTCTAATTTTCAAAGCTAAATTAGATTACATTAATT  
TGATATTTTAACTAAACATTTAGATATTCAAAACTATATAAAAAATACTATAAATTGTAATTTTTTGCAT  
ATTAATATGATGAAGTTAGTCAAAGTTACTCTAAAGAAAACAGGAAAACATGACAACTAAAAAGGAACG  
AAGAGTATATGATTTTATAATTTGCTAGTTGATTCTAGTCTATGTTTTTTTACCATTATTGACTTTTCTTGCT  
GTAGTTCAAATCAAGAAAACAGTAATGTCACAAAGCCATGCATGGATGTCCTCAATTTTTATTTTTATTT  
TTAATATAAAGAAATGGATCTTGGGCCTTACTCAACCGCATAAACTACATCATAGGAATTAGGATGAGT  
ATTGTTCAAGACATTTGAGATCAATTACCCATCCCATATTCGACTCTTGTGGGCAATATAATATGGAAGC  
ACAACATAGGTGAACAAAGAATTCGGATGAGCGGACTTTGGTAACATGATAAAAAAATGGATCTTGG  
CCTAACTCAAGACAAAAAATATCTCATAGGGTGAGGCTTATTCAAGACCATATAGGAGATCAATTACCC

ATCTCATATCCGATGTGGGACTCTTAATAGATCAAACCTGTCCTCTCAATGGTTGTTAATTAAGTGAAAA  
AGACTTTCTCAAAGTCTTACTTTTTCTGTTCTGGATTTGCAAACAGTGTTATATGAGTGTGTGTAAGAGAG  
ACATCACTAGTTAGGAGCTTTCCAATTTCTAACACACCTTTTCTGGTAGTACTAGTAAATATATATGCTAG  
TATTCTATTGGTAATTTGCAATATTTATTCCTAAAACCAAGTAGTTATATGTATTGAAATTATCGTTCTTGT  
ATGTTAACTTGACATAACAGTGTA AAAAATTCTTTACACCGTAACATAAACTCTTGTCTTAACACTTTAATCT  
ACTCTGTGAACTCTTATTTTTACTATAATTCACAGGGAGTATCATGTGATTTCTCCAATGGCTTCTGGCAC  
GTAACGGATTTAACTATTGGAGACCTATATGACAATTCCTTCGTTGCTCCCAAGCTGCAGAGTTCACAG  
AACACTTGTTTAACTCAAGCATCTAAAAAGACTTTCTTCTCAAATTGCTTCTCTCAGATCAGCACAAA  
TCAATTCCCATTCAAATTGGGATAGTCTCGCGAACAGCCTTGAATCGTTAGAGTTCCGATCAAATCCTG  
GTCTTATTGGGACAATTCCCACAAGTTTTGGCTACCTAAGAATCTTCAATCTTTAGTACTGCTGGAAAAT  
GGACTGAAAGGAGAAATACCAGAAGCTTTAGGCAATTTAACTAACTAAAGCGCCTCGTTTTGGCAGGC  
AACAAATTTTATTGGTCTATTCCAAGTCTAGGAAGATTGACAAATCTTTTGATACTTGACACAAGCAG  
GAATTTTCTATCTGGTGCATTACCTGTGACTATTGGTGATTTATCTTCGCTCATAAAGGTCGACTTGAGCA  
ACAATCGATTAGATGGAAAATTGCCTCGAGAAATTGGAGGACTAAAGAGTCTAACACTACTTGATCTCA  
GCCACAACAATTTCTCTGATGGTTTGCCAGAGACATTTCAAGAAATGGATTCCTTAGAAGAACTTGTGTT  
ATCTGACAATCCGATAGGCGATTATGTTACAAGAATTCAATGGAGGAACATGAAAACTTGGAATGTT  
GGATCTTTCAAACATGGGATTGAAAGGGAATATACCAAATTCATGACAGAAATGAAGAACTGAGATT  
CCTCAGCCTCAGTAATAACATTCTTTCAGGAATTATTCCGTCAAATTCGAGAAAATATCAACTATTAATG  
CTCTATACTTGATGGAATGATTTACAGGGAACTTGAATTTTCACAAAGTTTTATACAAAATTAAG  
GAGTCGTTTTCGAGCTTCAGGTAATGTGAACTCTGCTTGTCCCTCGAGTTAACGTCAACAAGTCATGTT  
CCAGAAGGAGTAAAACAATGTGAACAAGAAAGTACAGTAGATAGTAAAGAATCAGACTCCAATTTAAA  
AAATGAAGATTTGAGTCAGAATCCCACCATATTATAGCTTCTTTGGGGCATTGAGGACATGTTGTTAGT  
CATTTTACATTTTGTATGTGCAAGAATAATACTTATGTCTCTTCCATGGATCGTATTTTTATAA

>PGSC0003DMG400004190 LRR-RLPs

AATCCAACGACGCGCAGTGCAAGCTAAATAGCGCGTCGTGTAAAAAACAATTTGAGGAAAATTACC  
AAAGTGAGGATTCATTTACACACAGATCTTCTTCTTCACTTCCATCATCTCTCTCAATCTCGACTATAGT  
AATGTACGTATAGCTTTGCGTTTGGATTCCGGTTGATTCAGTAATTCTACTCCCTGAAGGTGATTAACCT  
ATTCAAATGGCTCGCCATGGGCATCTACCTTCAGTATTTCTCCTGATCTTCTCGTTATCCTTGATCCAAAGC  
GCTCTCGTTCACTCTAAAACCCTCAAACGTGACGGTACACATTTGATCCATTTACTTTTTAAACCTAATTT

ATTAGCAATTTAGGTGAGAAAATCAGTTGAATTTGATTGATAATAGTTTGGTTTTGTTATTTGTAGAGTA  
TGTATGCAGCTTCAAGTGAAATTAATTTTGTAGTTACAGAGAAAATGTAACGATGTTGAACTTTGTAGAT  
CTTATGTATTCTAGGTGCAAGGTTATAGTTTGTAGTGGAGTTTAATTGAATTTTAAACGTTCAAGTGAAAA  
TAGTTAGATTTTGTAGATTATATGCAGTTTGTGGTGAAATTTTGTAGTTTCAGCGAAAACAATATTGAAC  
GTTGTACATCTTATGTAATTTCAAGGTGTAAGCTTATAGTGTGAGTGGAAAGTAATTGAATTTTGTAGTTC  
AAGTTGTAGTAATTGGATATTATCCAGTTTCTAGGTGAAAGCTTATAGTTTGTAGTGGAAATGAACCTGGAT  
TTTATAGATTATGTGCAGTTTGTGGTGGATTTCATGGTTTCTGCGGAAACAATTGAAAGTAAGTGGATTTT  
ATGTAATTTCTAAGAGAGAGCTTATAGTTTGTAGTGGAAAGTAAGTGGATTTTATGTAGTCTAGAGCAACT  
TTATAGTTTGTAGTTGTAGAAATTGGATTTTATAGATTTTTTCCCAGCTTCTAAGTGCAAATTTTTAGTTTGA  
GTTGAAATAATTGGATTTATTCTATAAATTATATGTGGTTTCGAAGTGCACATGTATAGTTGGAAATGAT  
TGGAATTTATAGATTAGATGAAGTTGTAAGTGCAAGTTTATAGTTTGTAGCCAAAATAATTGGATTTTATG  
CATTAGCTGCTTTCTAAGTGTATGTTTATGGCTTTCCTGGAAGTAATTGGACTTTTTAGATTTTATGCAGC  
TTCTAAGCTCACGTTTATATATTTTGTAGTGGAAAGATTTTATGCTGTTTCTAAGTTTTACTTATTGTGTTTCA  
TCTGTTCTTACTATAATTTCCTTTTTCTGAATGTCTGTTTTCTGGTTAAGTAATTCAAGCTTTGCAATTTG  
TTGATTTTGTGAGGAATAGCTATTCGTTTGTATGTATAATCTTGATCTGTTCAATGCATTATCTATTATCTG  
CAATCAATAACTAAATCAGTGCCTGGAGTGCATTAAGTATAAATGTTTTCCCTTTTTTGTCTCGGAGA  
ATTCTATTTTCTAGTTGTTACAGGTAATATAGCTATCCTTGGAAAGTTAAACCGATTTATCATTCAATCA  
ATGCCAATTTAATATCTCTCCATGATTACATTGTATTAGTTAATTAATGGTAGTATAAGTAAGTATATAA  
TCGATCACGAGTATTTTATGGTTGTCAGAAATAAGAATGTCCACTGTAGGTCTTGAGCCCATGATCATA  
AGGTTAATAGCTTTGCTCTCTACACTTAGTGTGTTGGAAATGTTGTGGAGTTCCAATTATATCCACTCTT  
TCTCTGTTAACATTTCAATAAAATGATTTACACAGTTTAAAGGCCATTGATTGCATTTATGAGAAAACCGAG  
GAGTTATCGTAGTACCTGAATGTATATGTTTACATGGACTAATTTGAACTTCTGGAATATGACTGTAGTG  
AAAGCTCTGAATGAAATTAAGGCATCTCTTGGATGGAGAGTGGTGTATGCATGGGTTGGGGATGATCCT  
TGTGGTGTATGGTATTTACCTCCATGGTCTGGTGTACATGTTCAACGCAGGGTGATTATAGAGTAGTTA  
CTGAATTGTAAGTTTGTCTCACCAGTTCCAAGTAGCTTTTCTCTAAGTCTTCAAATCTGTATGAAGGT  
ACTCACAGAATTGAAATATCTTTACTTGTCACTTTTTACAATGTTCTTTTCTGTTTTACCACTTGCAGGGA  
AGTTTATGCTGTTTCAATTGTTGGCCATTTCTACTGCTGTCACTAATTTATTAGATCTTACTAGACTGTA  
AGATTCTTCTTCTTTGTCTTTTTACTGGAATCTAGTTTTTACAAAATTCAGCTACTTCTTACAGATTTTT  
TAACCTGTACAAATTGAGAAGTTCCCTAAGTTCCAATATGGATGTTTTTACACCTTCCAGTCTTAATTGT

TCATTAACCAACTTAAAGAATTGTTCTGCTTGGGTGTTGACTGTTACCTCAAAAAATGTGGGCGTTATCTA  
TAATGTGCATAGTCATTTTTTCAAATTTGATACTACTATTTAAGGCAATAGTTAGTGGACAATTGTGCCT  
GTA CTGTTGGATCTTTTGATTTTCAGTCTGAACTTCTAATCCATAATATTCTTTCATATGACAGGGATCTG  
CATAATAACAAGCTGACCGTCTCTTCTCTCAAATTGGGCGTTTGAAGCGTCTTAAAATATTGTATAA  
TCCTTTACTTGTATACTCCTATTGAAGTATCTATATTCACTAGCAATTATGAAGTGATATTTATGTTTAGG  
GCTTATGCTCTGTCTCCGAATAGCCTGTTTCTCCAGTTTCAGGATTAACATATGTTTATCCATTAACACCTA  
GCTAGATGGTGTTAATATGATTCAACTGTGTTGTACAAAGTGATTAAGTACATGGCTTTTCATCGAGATG  
AAATGTGTTAATAACAAGGAAAAGCTTACCTGATTAATGATTAATCCCAAAGAAGGGAGTGAGAGGGA  
GTCTGCCTGATATAATGTGCACCGAAGAAGAAAGATAAATTTTCAACTGAGAGAATATATACTCGTAGG  
CTTATATTCTAAAAAATAAAAAACAGAGTAGGTTTATTATCAAGGAAATGTCACTTAACTAAGAAGGCCTT  
CTATACTCTTTTTAGGATTGTATTAGATGTATATCTCAACATCTACTTTCTGTTGCCTGTATCCTACCTTA  
GGTTTTCTTTGTCCATAGGAACCTCCACGTTGTCCAGAATGTTAACTTTAAAATTACTTTTTATTGCTTT  
GTTACCCAACATACTAATATGAAATTATATCCTCTAGTTTCTAGTGTGTTGTAATGTTGCATTATTGATTA  
GTTCTTCTCCTGATTCTTTTTACCAGAAACGTGAGGTGGAATAAGCTGCAAGATGTCATTCCACCTGAA  
ATAGGTGAACTAAAGCAGTTAACACATCTGTGAGTGCTTTTTGAGCTTCTCTAGCTGTGCTCTTTATCCAT  
AGATCTATTTTGCTGTTATAGACTAATAACTGATATGTATATTTTTCAGCTACCTAAGTTTTAATAATTTCA  
AAGGCGAAATACCTAAGGAGCTTGCTAATCTTCTGAACTTCGTTATCTCCATCTGCATGAAAATCATTTT  
ATTGGACGAATTCACCTGAACTGGGTTCTTACAGTATCTTCGACACCTGTATGATACCATCTTAACTTC  
TTCTCTTGTTAACATATGGAACCTGTGTACACATGGATCTCACTGTGATCTCATGCAATTCAGGGATG  
TTGGTAACAATCGTTTGGTTGGAACATAAGAGAACTCATACGTATTGAAGGATGTTTTCCGGTTCTCCG  
CAACCTGTAAGTTGATTATTCTTGTTAATTGTCCTGTTGCTAGTGTTATGAATTATATGCTAATTC AAGG  
ATAACACGTGCTGCAACTTGCAGATACTTAAACAATAATTATCTTACTGGAGGCATTCCAGCGCAACTTG  
CAAATCTGACTAACTGGAGATCTTGTAAGTTTCCGGGAAGAAAGTTTCTCCGCGATTAGTGCTTGTCTTTT  
GGACAAATAACA ACTAATTTCTCCTGTA CTGGTTGATAAATATTATTATGCTTAATTTGATTGCTCTGGTT  
ATTACAGGTATCTATCCTACAACAAGATGACAGGAGTTATACCATATAGCATTGCTCATATTCCTAAGTTA  
ACTTACTTGTAAGTCCTCCTCTATGCTCTTAGCTACTCATTTATTACACTGTATGTGGACAGTTTGGACACA  
GAAAATTCAGAATTTTTGAAAGCAAATACAGAAACATTCTTAGCCTTAAGTTGAGATCTCTTTCTTTGATA  
GATTTTTGGGGCAACCTGGTCTTTGTGCATGATTTAGACGCCACGTTAGATACGATCAGGGACCTGTGT  
GTTATCATGCAGTAGTTTAGTGCTGTTTTCTGTTATCAATAGATTGCTTTATTAACCTATAAAAAATATTAGC

ATATTGGATGTGATGTCCAATGATTGTCTAGTGAGTGCAGTCTTCAAGGATCGTTCTTTCTTAAAAAG  
ATGAATTTTGAGGATTGTTCAACTTAAGGATGAACAAAAACAATACTTACTACTTAGTGAATCCTAC  
AAGTGGGGTCTGGGGAGTAGTGTGTACCCAGACCGTACCCCTACCTTAAAAAGGTTGAGATGTTATTTT  
CAATAGACCCTCGACTCAAACAGATGAACTCGGGACTAGCTAATGTGGTCTTGCAAGGGTGTTCCTTT  
TTAAGGAGATAAATTTTGAGGATTGTGCAATTTATGGATGCTGTGACAAAAACATTAGTAGATGGACTT  
GATGCTTGTGGCTGACCTTATTGGACCTTATCCGTAATGATTTCTCCGACAAGTAGTAATGTATAGAA  
ATTGCCTGGAGAAATTAGATGCAAGAGTGTTCCCATCCTAGTAGGTTCTAATTTTAGCACAAAAACACA  
ATCCATTTCAATAGTAAACATCTCATGTACTCAAGATTTTCAAGTTGAGCTATGTAGCAACAGCACAGTGA  
TACAGGGACGCGTGAATGACATGTTCAACTTTAATTATAGAAGATTGTCTGTTAGAACATAATAGTTTTA  
TTGGTATAATGTGTTAAAAAACTGTATGTATAATTCAAAAAAATATGAACACTGATGCATGCAAATCTT  
TAAGCGATTAACAAAGCCGATTTTGCACCTGGTTGTCAATATCCATTGCATTTCTACCCATTTTCTTCTT  
TCCTCCAAAATCCATGGTCTTTCAACACTTACATCCCCTCCATCCCCAGATTAGAAGTCATTATTTGTAC  
AAGTGAGAGGCTTGGATAATGCAGAAGGACCTGCATTTTGTGGTCAAACAACCAAGAATGTCAAGA  
GACAAGTCTACTTGTGTCAGATATATATCCCTGCTCAAGATATGCTGTGTTGGAAATGGGAACCTTGTTT  
TGAAGCTTAACCCACATACTTCTTTGACAAAACCTTTTATCACAATATTTTCTTTAAAGTGTTGGTGTTG  
GAGCTAAACCACACAAGCTGAACTAGGGCCTTCTCCATTTAAGTGGTTGTTAGTGTTGTCAAAGTGATG  
CTTGAGCCATGACTTGAGGCTCTGCACAAGTTTGTCCAATGAAGGTGGTAACTGGTAAGGGATATTTTC  
CCAAAACCAGCCAAGCAACTTCTTTTCTGAGAATATTAGATTAATTTGTGAGGTCCATAGGTTTCTTCTTG  
GATAGGGATTAAGCAACAAATATTCAATAGATAGCGAGCAAACCGATATATTAGTTGTTAGCGAGACTG  
TACTAATGATACATTATTGATTAGGAGTAAGAAGCTGTAAATTTAATGCAAGAAAGCTAGCGACTAAGT  
CTGAGTTGAAATTTTAAAGGTAGATGTTCTTAAAGCTTGCCACTCAGATTCAAATGCAAACCTTGATGA  
CCAATGATCCTTGTAAGTTGCAATATCCTAGATGTTCCCTTAAAGCTCAAATGGTCCTTGCAGTTGCATAT  
GTGAGTGTTTTGTTCCATTTATTTATTTATTTTACGTTCTTCGCCCTTGATAAATCAGGTGTTACGC  
ATCATTCTTCACTCTTCTTGATTGTATACTGGTAGATTTTGCACCAAAAAGAAAAATAGTTCTGCATGCA  
TTTGATAGTTGATGTCTGAGGCTGAATCTGATTTTCAAGGTATCTCGATCATAATCAATTTTCTGGGAGGAT  
TCCAGATGCCTTCTACAAACACCCTTTCTTGAAGGAAATGTGAGTGTTCAATTTTTGCTACTGACCATTCTT  
TGGCTTTGTGCAAATCCTAATAATATGACAAATTATGTCATAGGTACATTGAAGAGAACACGTTCCGGCC  
TGGTGTAACCAATTGGCCTGCACAAAGTGCTAGAACTTTCGGACGCAGATTTCTTGTTTAGAAAAA  
GCCAACTCCTGTTATTTGTTTATGAGCAAAGTGACCTAGGTTGTCGAAAGAAGCAGCCAGTCCCTGTTT

TGTC AAGTATCTATTCTTTAGTTGCCAGATGAGAAAAAAGGTTCCATCTTTTTTTGTGCAAAGAAGTAATC  
AACCAAACCTTAGTTGCGGTTGCTGCAGTTAAATAGTACCACGTTATGAATCATTATTAAGTAAGTGCGAC  
ATACGTCTCAATCAGTTCTCACTTGCCTTGAATTCTTGCAATTTGGTTTTTGATTATACATGATGCGATTTCA  
GAGTTAATATGAAAGGGTAGAGAATATGCTCTGATATGACAGGTTTTGGATAGGTTTTCCATTTTTTCGT  
TAAATGATACAAATACATACCTAAATTATCGTATTATTTTTTTGAGTTTCACACCCTAATTATAGTTATTAT  
CTATGTGCAAAAACACTTCGCTGAGTAGCTGATGGTATGCATGCTTTATTAGGTGCCAAAGTGGCAGTCC  
ATGTGGATAAATATTTTCACTGGAA

>PGSC0003DMG400004195 LRR-RLPs

CTAAACTCTTAACATAAATTGTTAAATATTTCTAACCTAAGTAGGTATTACCGAAAATCTTTAACACAGG  
GTGACATCGAGCTATGGAACATAAACAATTGGTAATTGCTTCACGCTATCTATTGCTCCTTTATTCATGAA  
TTCATGTATATAACAATGTAATTTTCTGTTAGAGGGGTTCGAACCTTCTGAGCCCATATGGTTCTGCCCTG  
ACATCGCTTATCTAGTTAAGCTCAATAATTTGAATATGTTCTTAAAAATATAATTTTTAGAGGCTTCATTG  
GTCAATTTGTTAATAAAAACAAGAATATTATAGAATGGGAACAGTGATATCCTCCATAAATGAAACTCAAC  
TACACTATTTGGTTAAGACTATGTTTGTGACTATAATAGTGGAGAAATAATAGTAGAAAGGCTTTCCATA  
TTATTTGTCATGACATTTTTACTATTTTTTATTGCTTTAATTGTTATGAATTATTTTTCTTGAGCCGAGGGTC  
TACCAGAAACAATCATTTATCTACACAGATAGGGATAATGTATGTGTACATACATTATCCTCCTCAGATCC  
CACTTTATGAGATTAACTTCAGTAGTAATATTCTAAGCAATTACAAAAATATTTCCACAAAAACGAAAA  
ATATACTAAGGGGAGACATAATATTGTGTTTTATAAAATGATGTTGTAGTAATTTGTCTATTTGTTTACTT  
TCTTTAAAATCAACATGGCTTGTGCAGAACTTGACGACATGAGATGCTTAATGTATCGAGCTACCGAAT  
CTATTATTGACATAATCATCCCTTTTTTGGCAGGCCAAAATGGCATCTCATCAATTTATTTGTTTCCTAGCA  
ATGATATCTCTTATGATTATCAATATTAGTGCAAACAAGGCATGCCACCCTGATGATCTCAAGGGTCTCA  
ATGACTTCAAAGCTAGCATAACATTCGGATACTTCTGGCAGACTAAGCAAATGGATAGGCCAAGATTGTT  
GCAATTGGCCAGGCATTTCTTGCAACTCTACAACCTAATAGAGTTGTAGAAATCTATCTACCTGGTCACTAT  
GTATCTGGTGACGATGAATCTCCAACTTCGTGTCAAGCACAATGAGTGGTTCAATCTCTCCTTCAATTC  
ACTTCTCACTTCACTACAAGTTATTGATCTTAACAACTAGTCGGACTAACAGGGCAAATTCCTGAGTCCA  
TTGGGGTTCTCAAGAATCTCAAAGAACTCAACTTACAAACCAATCAAATCTCTAGTACAATTCCAGAGTC  
AGTATTCACATTGACGTCTCTAACAACCTTGAACCTTGAAAATAACCACTTGACAGGGGAAATATCGGAG  
AATATTGGCAACTTACAAGCACTTCAAAGCTTTTTCTTGTCAAACAATTCGTTCACTGGAAAAATCCCAGT  
TTCAATAACAAAACACTACATTCCATTTCCACAATCCACTTAGAAAAAATCAACTTGTTGGAGAAATACAAT

TGCCTTTAACTCCTTCCCAATGGCCTTTAATTA AAACTTTGGCTCTTGACAACAATGCACTTACTGGAGCT  
ATACCTGATTCAATTGGTTATTTGACAACACTTTCATCACTCTCTATATCAAATAATCAATTTACAGGACCT  
ATTCTTCTAGTTTGGGAAACATAAAGCAATTGCAAATATTGAAGGTCAATAACAACAATTTGGCTGTTG  
AGATGTTGCCAACGACGATTTGTGGTCTTACTGAGCTAAGTGTGTTTGTATGTTTCTCAAACAAGATTCAT  
GGACCATTACCTGGATGTCTCTATTCAATCAAGTACTTACTAGATGTGCGATGTACCGTTCAAACGTACTGC  
CACTCTTCCTATGGGAGTACACAAATAATAAGTAATAGTGATGGAGCCAGAAATTCTGAAGGAAGTCCA  
AAAATGCCTCAATTTGAAATGTTATGTATGTCTACAACAACCAAAAAAAAAAACTTGTGTTTATTTATTATC  
TCTATGTTATATGAGACTCCAAGTCCAGAAATCACTGGCTAGTATGAAAAAATTCGAATACATAAAGTA  
CTTCTTTGTTTTATTTTTG

>PGSC0003DMG400004284 LRR-RLPs

AACTTTTTTCTTTCATTACCTACCATATTTCTTGCAAATGAGTCTCTTGTTTCTACTTGCATCTTTGTTTCT  
TTGTGAACTTGTTTTGTCTCATTGCAATATGCCCCAGAGATCAAAGTCTTGCCCTGTAGAATTCAACC  
AGTCTTTTGTGTTGATGCATCTGCATCTTTTATTTGTGACAAGCAGTCTTATCCTAAAACGAGTTCATGG  
AACATGAACAAAGATTGTTGTTCTGTTGGATGGAATAATATGTGATGAGATGACCGGTCATGTGATTGAG  
CTTGACCTCAGTTGCAGCCAACCTGTTGGGAAGATTGATTCCAATAGCAGCCTATTCCAACCTCTCTCATCT  
CCAAAGGCTCAATCTTCTAATAATGACTTTGACGGTTCATATCTCGCCTAAATTTGGTAGGTTAGCAA  
GCTTGACACATCTTGATCTTCCCAGGCAGACTTCTCAGGTCAAATTCCTTCTGAAATCTCTCATCTCTCCA  
AGTTACAGTCTGTTTTTTATCGTCTAACAGTGAGCTTAGACTCGTAGCTTACGATTTCAAGATGTCCCTT  
CAAATTTGACTCAATTAAGAGAGCTTCATCTTAGTGGTGTGAACATCTTCCACCATTCTCTGAATTT  
CTCTTCTCATTTAACGACGCTGGGGCTGACAAGTACAGGAGTGTATGGGATAATACCTGAGAGTATCTTT  
AACCTGCCAACCTGGAACACTTGACTTAAGTTCCAACGATCAGCTCAATGGTTATTTTCAAATACCAA  
ATGGAATAGCAGTGCATCTCTCATGGAGCTGAATCTCGCTGGGGTAAATTATTCTGGTAATTTCTGCCT  
GAATGTCTTGGCTATCTAACTTCACTGCAGAGATTGGTACTTAGTTCCTGCAATTTATCGGGGCAGGTTT  
CGAAATCTCTTTGGAACCTCACCCATCTGGAGTATATGGACCTTGAAGATAACCGTCTTGAAGGACCGAT  
ATTTCTCAGTTTACAAGTGGACTGCAGGATCTGAACACACTTAAGCTATCAAATAACTCCCTGAATGGA  
GAAATACCGTCTGGATATTCTCCCTCCATTACTGAGTGAAGTACTGAGTAAATAACCACTTTTCTGG  
TCAACTTAAGGAATTCAGTAACACTTCAGTACTAGTCGGTGTGATATAAGCGAGAATGAGTTGCAAGG  
ATGTCTTCCCAAATCACTTCAGAACCTTGGAACCTAGTCTGGATTGATTTAGCAAATAACCAAGTTGCAAT  
GTCTCTTCCCAAGTCACTCCAGAACCTCAGAAATCTAAAATTACTTGATCTTTTGTCTAACAATTTTAGTG



GGAGTGTAGATGTCAGTGTCTTTTCGAACCTCAAACAACCTTTGGTATCTTGATCTGTCATACAATAGTATT  
TCTCTGATCAATGAGAACAAAGTCAAGTCTACATTGCCCAATCTCTGAATACTTATATTTGGCTGCTTG  
TCAAGTAAAAGAACTGGATTTTTTGAGATCAGCAAATAACTTTTATACCTTGGATCTTTCATATAACAACA  
TTCAAGGAACAATTCCTGATGTGGTATTGTCTAATTGGATGCATTCCATAAAAAATCTTAATCTAGCCCAC  
AACATGTTGACTAGTATTGACCACATTTTCATCATTTCCTCAACTGATCTCTATTAACCTTATTGTCCAATTCT  
CTTCAAGGGACTACCAATTCCACCACCCTCTATAGAATTCTTCTTCATGTCAAATAATAATGTCAGTGG  
TAAGATCCCTTCTTCTATTTGCAATTTGACAACATTAATAATCCTAGATTTGTCAAATAACAATTTGAAGG  
GAGAAATTCCACAATGTTTGGGTAACATGAGTGATCAACTCGAGGTTTTGGATATGCGACGCAATAGTC  
TTTCTGGGAGTCTGCAAACAACCTTTTAGCTTGGGAAGTAAACTCAAAGTTTCAACTTGCATGGCAATAA  
TCTAGAGGGAAAACCTCCAAGATCCTTGGCTAATTGCAAAGAGTTGGAAGTTCTTGACTTAGGAAACAA  
TCAACTCAATGACACATTCCCTATGTGGTTGGGGACTCTTCCAAATCTACAAGTTTTAAGTTTGAGACTCA  
ATAATTTGCATGGACCAATTAGAACTTCAACTAGTTCGAAACTGTTTCCTCAGCTTCGGATGTTAGATCTC  
TCTCGCAATGCCTTTACAGCAGAACTGCCAACAAATCTTTTCAGAAATCTGAAAGCAATGAGGAGAATTG  
CCATTGATAAAACAATGAAGGCACTAGGTGATGAAGAAAAATCATATTACCAAGACTCGGTAACCTGTTG  
TAACAAAGGGAACGGAGTTTGAAATTGTGAGAATCTTGTCTTTGTACACCACTATGGATCTCTCAAACAA  
CAAATTTGAAGGACATATTCCTAGTATGATGGGAGACCTCATTGCACTACGCGTGTTGAATTTATCTCAC  
AATGAGTTGCAGGGTCATATACCACCATCATTGGAAAGTTATCTGTAGTCGAATCATTGGACCTTTTCAT  
CCAACAGGCTTTCAGGAGAGATACCAAACAACCTTGTTTCTTACATCTCTTGCAGTTTTTAATCTCTCTC  
ACAATCATCTTGAAGGATGCATTCAAAAGGGAATCAATTTGATACATTTGAGAACAATTCATATGAAGG  
AAATGATGGATTGCGTGGATTCCCAGTTTCAGGAGGTTGTGGAAGTGATCGGATACCGGATACAAACA  
ACACAACATTTGTGCCAGATGAAGAAAATGATTCAACATTTCTAAGTGAGCTCAGTTGGAAAGTGGTTCT  
TATGGGATATGGTACTGGATTGATTATTGGATTCTCCATAGCATATTTGATGCTTTCTTCTCAAATCCAA  
ATTGGCTTTCTGGGATAGCTGAAGATTTAGAAAACAGAATCATTATGAGAAGGCGAAAGAAGCAGCGA  
GGTCAAATGCATTACAGAAGAAGAAGAATAATGGCATCTAGATGTAAGTTCAAATTTATGAGA  
GATGTAGTCATGTTAAGCTCTATACTGATTCTTTTTGTTTACTGTAAGTGGTATTAAGAATGAGATTAG  
TGTTCTGTATCTGACTCTTTCTTTTGTAACTTTTATGTAGGCAAAGGGTGTATCCAGTTGAAATATCAAGA  
AGATGATGCCTGCAACAACAATATATCTTCTTGGAGGAAATTAAGTCTGAGCAAGAGATGCTTTTGATATT  
TCCTGGAGGTTGCTACTCCTTTTCTTCATAAAAAATAAAATAAATTCTAGGATTGAAGTATGTTGCTTTAC  
TATAAACAGTTGTCACAATGAAGTGTTTTTGTTCATCCAAGTGTTAGTAAAGAGAAAAAAGATATT

TGTCTGCAAATAATAGCTTTCTTTTGACATGTGTATTGACTTGGAATATTACATTTACCTGGAATACAGT  
TT

>PGSC0003DMG400004384 LRR-RLPs

CAACCCTCTTCTCAGGGATGGTCGAAGAGAGGTTCCCTCTTCTGAGATCATCCTGAACACAGCAGTCAAC  
AAAAAATATTCAAATAAAATAAAATATTTTTTTGGGATTTAATTCTACATTTATAAAAAATCCCACAT  
TTCCATTGGGTTAAATTTCTTGAATTTTTTTCAAGAATTTGATCTCTGTTTGCTTTTTCTGGTAAATCTT  
TCATCTTACCCCCACTTTTTAATTTTTGTTTGATTTGCTTGAGCATATGGTTATCTTATGATGGCCTTTT  
TGTTTTCCAAAAAAGATTCAATTTTTATTAATTCTTGTTGTTTTATGTCTGCATTTTCAGCTAACAAATTG  
AATCTTGGAATTTTTGAAGACTTGGGGTTTCTGCAATGATGGAGAAAACAGAGGTAATATTGCCTATATT  
ATAGAAATGTTAAGAAAATGAGAGACCCCATGAAGGGGTGGAGCCAGGTAGGGCCGAGGGGTTCAA  
ATTACGTTGTTTATACATAGTTAAAAGTTTTATATATATGTAGTACATGTTGAACCCCTTGCCTTGTAGA  
GGTGTTACTTCTTATATTTTGAACGTTGTTAGTGAAAATCCTGGCTCCGCAGTTGACCTCATTGTGCCT  
AATATAGATAGATTTTGTGTAATCTTTTTATTTTTGTGTCTAGTGTAGAGTTGTGCAGATAAGCAAC  
TGTGTGTTTCGTGTGTCGAGTGATTTTTGTTACTCGGGGGAGAGTCATTTTCATATCAAAAAGCTGGCGAT  
TTCGTGTGAGAATTTGTTTCAAGAACCTGGCTGTTGGCAAGAAATGAGGCGTAGATGGAACATTTATGGA  
ATCAAGTTATTGCTTCTCACCATTTAATTCTTCTTTTGGAGGTTTCATGAATGTTGCACTCTGAATTCTGAA  
GGTAGTTACCATTCTCTAGTTTCTTCTTTTCTTACTTCTGGAGGACCATAGTGTTCGCAATTCGGGCCAG  
CTTGCATTAATTCGACTGCTCCACTGTATATCCTCTACCTCCAACCAACATAGGCATCAGTTACTATGCCC  
ATCGAGGCTGAGGCATATGATGTGTTAGGCGAACCAAGTTCTACATTGGTAGCTAAAAAGATTGGAAA  
TCTACAATTCTACATAAGGTGTAGGATCTCTAACATGGTGTGAGGCCTTTTGTGAAAACCGTGCGGGCG  
TGCCCCCTAAGCGGACAATATTGCACCATGTTAAGAGTATTTTTGGGTTGACTTAGCCCAACAAGATGAA  
GTTACTTACTCCCTACATCCCATTTTATGTGGTCATGTTTTGTTGGACACAAAGTTAAGAAAGAAAGAAT  
TTTGTAGGTTGTAGTCTAAAACAAGTTATAGACATTTAAGTATGGGTGTAATTTGAATATTAAGATTA  
TTGTTTCTAAAGTCTAAACATGATGTTATTCTTTTTGTGACAACTAAAAGGAAAATGTGCTGCGAAAATT  
GAGACAGAGGGAGTCGAGTTTTTGGTCTTTGCTGGGATATGAACCTTGATCTTTCATGGTTTTTACTCA  
CTTAGGGCTGTGTCTTCTGTCTCCCTGGGCCGTGGGCTATTCTCTAGTTTCTTTAGTCTATTCATGTTATTG  
GCTTATTCTTTGTTTCGCTGATTACTGTTGATTTGAGAAACAGGATTGTCGTTGTTTGAATTCAAATTGAA  
TGTGTATTCTGATCCAAATGGAGTTCTGAAAACCTGGAATGCTGATCACTGTGACCCATGCATGTGGTCT  
GGTGTGAGTGCATGGATGGTAAAGTGCACATGTTGTAAGTCTCTTGTATAGATACTCAAGTTTTCTAG

TTAAGATAGTGCAATAAACTTTCTCTAATGGTTAGTGTTAGTGATTTGATTCTGGAACCAGTTTGTTGA  
ACTAATAATGATAAACCAATGCAACAGGGTGAAATTGTTGTTTCGACTCTTGATTTCTTCTATGTCA  
TTAAATTAGTTGACCTATCTTCTTTTTTTCATTCTGTTGAGAAATCTCCATGGATTTCTTTGGAAGGAACA  
CTAGCATCAGAGCTTGGAATCTCACTTACTTGAGATCACTGTAAGCTTTAGCTATACTAATATGCCTTTT  
CTTTAGGCTCCTGCTCATTAAAGCTTAAATGGTATTTTTTACCTGAACCGTCATCCGTAGAAGGTTGTCAT  
AATCTTTGAATAGTCTTCTATCTTCTTATGTAAATTCGAAAGAACGCAAGGGATCGTTTGGTGTATGATG  
GACAAGCATAGATAGTCCGGGATAAAAAATTAGTAAGGGCTTATCCCTTGTTTGGTTATTAATCCTGGTA  
TAAGTTATATCAGGATTAGTAATTATTATCGGTATAAGTTATCCTCATCAGAGGGTGAATAATAGTACT  
GGATTAGTTATCCTAGGATAAAATAGTGAAAATGACAAATATCCATGAAGTCCCTCAAACCTTTTTTCTA  
CTAAATAAGGTGGATGGTGTTTTTGTAAAAGAACTTCTAAGAAATTTATGCAATGCATGTTATTTTTAATA  
CAACAAACCAACAATCACTAAGCAATAATACATTACCAACATAACTAATCCCAACATAACTTGTCTTCAA  
ACTAAACGACCCCTAAGAGTTATGTTGGTCAAGTAAATTGGGAGGTAGAGACAAAGGTGGATAAGCTTT  
GGATATCTACTAATCAGCTCTCATCATCTTGTATTCTGCATTTACATTGTTCTCCGCATAAGTTGTGTTGA  
ATCTTAACAGTATTTCTTCTTGCTGTCTGGTTGCTTTTACAGAATGCTCTCAAGGAATCATTTTTTTCGGTGC  
TATTCCTAAAGAATTCGGAAGACTCGATATGCTTGAAGTGCTTGACTTGAGGGATAATAATTTGAGTGG  
AACAAATCCAGCAGAAATAGGAGACCTGCAATCACTAAGAATCTTGTGAGTTAATGATTTGTTGTGTGCA  
CGATAAATGGTTTGTGTGTGGATGATAAACGGTTTGTGTGTGCAGATGTATATATACATATGCATACA  
CATTCAATTATGCGAAGTGATTTCAAATGCTCATCAATCGTGTTTATTTTCGTTTTTCTAGGTTGATTCATAA  
CAATAACTTTGAGGAGAGTGTTCTTTGGAAATTGGGAAGCTTCATTTAGTCACAGAATTACAATTCGAC  
GAAAATCTCACTTCTGCTTTTGTCTGGAACCTCTCTGTATAAGAAAATTTTCGTCATTGGTAGGATTTT  
ATTTGTTTTAGTACCCTATCTTCATATTCAGCTGGTTTTTGCATATCAGATGCTGGGTCAGATGCTGGAT  
AGTATATCTTTGTGGCAACACACTATCTAATTGATCTAGCTCATTCTCAATTTGATATTTTGCATGTCTTA  
CAGCATCTGGCAAGGCAGCATGAAGCCATTCAAGACGATAACCTCCATTATTGAACCAATAAAATGTAC  
ACTTTTGCATTACCTCAGTTTCTTCCAACCTGTAAGTAATTAATAGTTTTTACATCACGAGTCATCTAGTT  
AAGTTTTATTATTGAGAGACATTTTTTCTATTTCTTTAGGCCATCTCCTGGAACGGGCTTTATGGATGACC  
GGAAAGACTGCTCTGACAACCTTCCAAGTGAGTAAACACGTCATATTTTTTAAAATAACTCCGAAGAACC  
GTTTACAAATAATAATTCTTCATTGTTTGCAGGGTTATCCAGGCCTCACATCATCCACACTATACAGCACC  
AAGAGGAGATTGCACGCCGTAAGTTGGCTGAACAATCCAGTAACCTTGCTGCTGCTCCTGCCAATATCA  
ATGGACCGTTGGGTCTGTCAATTCAAATGCCAAGAAGCAGTGGGTCTTTTCGTGCGGTGCCAAATCCG

ATGGAACACATCCTACAACTTACCATCACCACCTCCACAGCATGAATCTCAAGACAAATTACATCCTGT  
GGGACAGTCTGCAAGTGCTGTAAAACAGTCGCCTGCTGTGAAAAAGCCAACTAATAGCCAAGGCCCCC  
TGCTGGAAAATCGGAAAGTACTTGGAAGTACGTAGTTGGGATTTGCATTGGAGTAATTTTGCTCATTCTT  
GCTGCTTCTGTGTTCTTAATCTGCCGAATCAGAGCGGCTAGAACAATTGGCCCTTGGAAGACTGGATTGA  
GTGGACAGCTGCAAAAAGCATTGTTACAGGTACTCACATCATATTGTGCCGAAAAGTGATACTGCTAAT  
ATTCTGCTCCCCACCCTGATAGTAGTTGCATTGCTAACAATATTCTTAGCATAGCGTTACCTTATCAAAA  
AAATATTCTTAGCGTAGTGTGTTATAACAATTTAACTGGAGTAAAGGGAGGTAAGTATAATCTTCGCT  
TATGAGGAATTAGAGGACTAATATTCTCAGTGTAGCATTGTTATATACCCTTTTTCACTATATGTTTGCTA  
GGACGAGAAGGTTCAAATGGAECTATTTCTTCTTTCTCATGAGAAGTGAATTAGCTGAGACGTCAATAC  
TAACGCTTGAAGGCTGGAATCCTCCCCTTATACTTCTAAAATGTCGCTGATCTTCTCATACTTTGCTTT  
TGTCTAGCTTATATCCCCCCTACAAAGTTGCTTTTCAACGACAACCATAGGAATGTGCAATCCTTTATGT  
TAATCTATGATATTTTTCGTCTATTTTAATTCTTTTGCCCGTGAAAACATTGTTATAGGGGTTCCAAAAGT  
AACAGATCCGAGCTCGAAACAGCATGCGAGGATTTAGCAACATTATTACCAGCGGCGATTTCATATATA  
GTATACAAGGGAACACTGTCTAGCGGAGTGGAGATTGCCGTTATCTCAACTACTATAAGTTCTCTGGAA  
GATTGGTCCATGCACTCGGAAACAGCCTTCCGGAAGAAGGTTTATCATTCTTTGCTTTCACAAATTAACC  
ACCTCCA

>PGSC0003DMG400004529 LRR-RLPs

TTTTTGGCCTACGTGGCTGAGTCCGTGACTTCACCTATGTTAGGCGCGTGGGTGCAATTTTTAGACAACA  
CTGACCAATAAAAATTGACCACGTGTTAAAATAAACTTTATTGTTATTTATTGTTCTTCATCTTTAACTAAG  
TTTTCTTCTTTTATTGTTCTTCATCTTTAGAAAAAAAAAACCTCCATTATCATTATCATTCAAGTTAAATTG  
CTCCTTACTTCGAAAAGGTAAAGTAAAATTTTAGTATATTCTTTATATTTACACCTTTTTATTTGATTGTT  
AGTTCTGATTTTAAATTTCTTTCACAATTTTTATGTATAAATGTTAGGGTTATGACAAAATCCGAGTTGAA  
TAAGTTGTGTATGGAGCTAGGTGAAGGATGTCCCTTGCTGAGGGATATTGTGTTGTCTCACTGTCGTCA  
AATAACAGATGTAGGGTTAAGTTATATTGCTAATAGGTGTACCTTGTTGGAACTAGCCACATGGTCTAT  
TGCCCTGGTATCACCGCTGCTGGAGTAGCCACGGTGATTACAAGCTGCACAAATATAAAGAAAGTTCTT  
GTAAAGAAGTGGAAGTGAGTCCAAGAACCTAAAGGAGAGCAGGATCCATCATCTCCTATCTCTGTGTT  
GATCTGTAGATCT

>PGSC0003DMG400004561 LRR-RLPs

CGGAAATAGGAAAAGAAAATGAAGGAGAAATAGAGAAATTAGCAAGCAACTCATTGGTATGTTACTCT

GTCTGTTGTTTCTTGTACCTCGATTAGTATATTGTTTTGTTGTAATTTATGTTCTATTACTATGTGCTATTTT  
TGTTATTATTGTCTGTTGTTTCTTGTATATTCATTAGTTCCTTTTTGGGATTGCATGCTTAAGATTGTTTTG  
TTAAGCCGAGGATCTATCAGTAACAATTTATGTACCTTTGAGGTAGGGGTAGGTTTGATGTAAATTGTTT  
CTCTTGAGAAGTTGAAAGGAAGGATTTTTTAAATTCTTTTAACTACTTTGGCTTGATTAGTGAGAATGG  
AAAGAGGAAAAGAAAATGAAGGGCAAACAAAAGGGGAAGATAACAAAATCATTGGTATGTCATACAA  
AATTTAATTATTTTTTTCATTCACATAATTACATATTCCTGTAAGTATGTCTGTTTCTTTGTGTAACCTAGAT  
GGTGAATATAATCTTTATAACCTATAAGACTCAATGATTTAATCTTTCTGATATAAGTTAAACTCTATGTA  
CTAAATCATCTGCTATAGTTGATAAATGTAAGGGATTAAGAACTACGAAAGTAAGAGCTTTTGTTTAGAG  
AGATAGCGCGTAAACAATGAGAGAGCTTAGTGCACCAGGCCGTCATTTTTTGGTTAAGATTTGAGGTG  
TAACAGGACAAACATTTTGGCTTCTCTATTAGGCTATTCTGGAGAAAGTCCTCTGCACTTGTGACAGTTG  
CTTGTTGTAATAATTTAGAGCTATCACATTTTCGCGAGTTTCACACCTCAACTATATTAGTCGTTCCCTTTTT  
CTATCTAAATTATCACCATCTATGTATTAACATAATTTGAAACAACATTTGCTCTTGTGGCAGGTGTCATC  
CGTTGTACTTCGCGAGGACATTGTCAATCTTCTAGATTTTCATAGAGAGGTTAAATAGTTGGCGTGTTCGA  
ATTTCTCTTGACTTGTATCAATATAAAGAGTTGACATTGGAGCTGACGTTTGTGTCCGCATTTTGTCTATCT  
TTATTACTCTTTCTTTTTGGAAAGCTGTAATGACGAAATGTCCTGCATATCAAATAAGATTCATGATTTGG  
TTCAGTCACTGTTTCATCCAAGTGGAGAAGACATGCTGGTTAATATAAAGAATCATGACCTCTGGAGAA  
TATCAAAAGTTATATTAACCTCACATTGCTATGCTGAACCAAGTCGTGTAACCATGACCGAGGATCGTTTG  
GTTGAACTTTTAGATGCCATCCTCGTGTATCTCCAATGTCTACTCAAGTGTGTTCTGAATCTATTTTCCCA  
TCAATGACTCAATGTGAGCTTCTTCAGAATGTATTTGGCAATTTAAGAGATTTCCATAGGTTGAAAGTAA  
ATGGTTGCGTTGAGTATGAAACAATCGAATATGTCTTACCTCATCTTCAACTTATGGCTCTGAGAGTAGT  
AAACATCTGTTTTACTCTTTTGAATTGTCAACTGGACAAATTCGATGAATCAGATGTCTCTCTAGTTAACT  
CCAAGCTAGCTAATCTACTTGTGGAGGTTATTCCTGTTGAACTGGAGGTTATGCACATATGTTGTACAAA  
TTTGAAAGGTTCAAAGTCGGAAGAAGTTGAACGTTTCATCAAGCAGCTCGTAGAAGCCTCTCCGGACAT  
TCTTAGAGTATCTCTGATTCATCTACAAGAGCACATGGTTAATGCTGGTACTCCTAGAGCTTCTACGTGTA  
ACATTCATGTCATGATAGAGTTCTTATTGATTATTCTTAGTGATGTGCTCAAGGACGTTATTCGTCATGAC  
AAATTGTTTGTCTTGGCACGTGTTAGAGAAGTACCAAGGAGGTTATTCGTTCTTGTTCGCAACTTAG  
AAGAGAATATGAATGAAACAAGTGATGCAAATCTAACTTGCTGGAAAGTATTGAACTCCTCAAGGAAG  
ATCTCAAGAATGATTTCTTGAAGCCCGTGCAGACTCATCTCGGCTCTGCTTCCCCATGAGTGATGGACC  
GCTCTTCATGACTCTTCTGCTCACAACTTGAAAGACTTGGTCAATTCGAATGCTTCTTCAGTTTCTATGAT

AAAAGAAGAAATTAAGCAGGTGAAACAAGACCTGGAAATCATAAGATCGTTCTTTGGGTATGGTGAGC  
AAGAGTTACATAGAGATCTTTGGACTCACGTTCTAGATTTGTCATATGAGGCGGAACATGCCATTA  
AATTCTTGCCCGAGATCATGGTCTATTACAGCTTATCTTCATACTCCTGATACCGTAGAAAAGATCAAGC  
TTGTCAAAAAGAGGTACAAGAGAAGATCCCCAAGAGCAGCGGTATTATTGTTGCGAACGCTCCCAACA  
AGCCGTTGAAAGAACTCATCGAGTACAGTTGGTAAAATAATTGTAGGTTTTGAGGAGGAGACAGAG  
TGGATAATTAGGAAGCTCACCAGCGGACCAGCTGAGATAGATGTCATTTCCATAGTCGGCATGCCAGGG  
CTTGAAAACTACTTTGGCATAACAGAGTGATAATGATAAGTCCATTGTTGATCATTTGACGTTTGTG  
CTTGGTGACAATCGACCAAGAACGTAATGAGAAAAAGTTGTTGCAGAAAATTTCAATCAAGTTATTG  
GTTTGAAAGAAAGATTCAGTGAGAAGGACATAGATGATGACGTTGCTGATAAGCTGCGGAAACA  
TTTGAAAAACGGTACCTTATTGTCTTGGATGACATGTGGGATACTGNNNNNNNNGATCAGACGAAAG  
TTTGAGTTATTAGAGAAAAAGGTATTCGGAGAAGAACGTTGCCCTGATGAACTAAAGGATGTTGGAG  
AAAAGATAGCTCGAAAGTGTGATGGGCTTCCTTAGTACTTGATCTAATCGGTGGAGTCATTTCAAGGA  
AGGAAAAGAAAGAGGCTTTGTGGCTTGAAGTTCTCGATAATTTGAGTTCCTTTATTTTAAAGGATGAAGA  
GGAAGTGATGAAGGTTATAACAATTAAGTTATGACCATTTGTCAGATCACGTAAAGCCGTGTTTGGTTAC  
CTTGCAAGTTATCCAAAGGACAAAGATATAATGATCTCCGAGTTGAAAGATTTATGGATTGCTCAAGGA  
CTTGAGATGAAAAATGCAGAAGAAGTAGTGGATGTGTTAATTTCCAGTAGTTTGGTAATACCTTTCAATA  
ATTCTATTTGCAAATTCATGATCTTGTGCATGACTTTTGTATATAAAATCTAGAAAGGAAAAGTTGTTT  
CACTTCATAGGAGGTTCAAACGCTCCGTCTTCTTCAAATCTGATTCCGCGTGGAATTACCATTCATTA  
TAATGAAGGTCTCTTCATATGGATAGAAATTTGTGGTGTTTAATCCAGAAAAGAAGAATCCTTATGTT  
AAACACCTCCTCTCTCTGAAGGTGTGTGATGGGGTTAAGAATCGTCTTTCCTACAAGAGTCACCTAAAC  
AGTTGAGGCTTCTCAAAGTTTGGATTTGAAGGGCATAACATTGACAGATTCTTTACTGAATGAAATCGG  
TATGCTCGTTCATTTGAAGTACTTAATCATTGACGACGAAGGCTAAAGCTCTCCCTCCGTCAATTTCAAACC  
TCTGCAATCTAGAACTCTGGTGGTGGATAACCTGGAGGGATCATGCATGATACTATCGCCTTGCTTTTG  
GAGTCTTGCAAAGCTACGAGATGTGCGGATGAAGTGTGTGCTATCTTTGATCCA  
ACTGTGTTAGACGA  
GGAGTCAAGGTTAGAAAATTTAGAACATTATGTGGTCTCTACCTCCCGTTT  
TAGAAGAGACGGAGGA  
TATTTTCAAAGGTTTCTAATCTTGAAGCCGTTAGATTCAGGATCAAACAATTACCAGATCGGTCAGGA  
GAGAAGATTTGTATTCCAAGATTGGATGTCCTTAACGA  
ACTTGAACA  
ACTCCATTTAACTGCTTCTAGGG  
ATTCATTGAGTGAATATACACATGGCTTCCCTTTGAGCTTGAAGAAGGTGATGTTGAAAGGGCTTGCTCT  
GACATCCGATTCATTGTCAAGAATTGGTAGACTACCCAACCTTCAAAA  
ACTAAGTCTAAAAGACGCAATC

ATCGAGGAGGGGAAAGAATGGAACATGGAAGATGTCACCTTCAAGAATCTCAAATCTCTAAAATTGATT  
AATGTGTCATTTTCTGAATGGCAGGTTGATGCAGAGAAATCCTTTCCCGTGCTTGAGAACTAGATATAA  
CTATATGTGATATGCTTATGAACATACCAGACAGTTTTGGAGATATTGCGTCATTAAAGTTTATCCAAGT  
ATGGTTCAGCCCTCAGCTTGAAGAGTCGATCTTCAAATTAAGGAATATGTTGAAGAAATGACTGGAGA  
AGACAAGCTTGAGGTAGAATTCTATGCTTGAGGTATGTTGAAGAATATGTTGAACTTTTACAAATGTTAT  
GTGTTTTCCAATATATTACTTTTAACTTATATGTTCTTTGCGATCAGATCGAGCTAGCTAGCGCATACAAA  
TGATGAACCGATAGATTCTCAAGACAACCTTTCTCCATAGATTTGTGCCTAATTAAGAGCTCCCTTGCTGC  
AGCACCTCCATTATGAACACATTTTTGGGGCTTGCTTTCAAATGGAGACATGACGTGGTGGATTGGTA  
AAATCCTGTTTAGCCATTATTATGTTCAACTAAAGTAACTAAATTCATGTCATTATTTTTCTGTTTCTCC  
AATTTGCTCTCCTTGTAAGAAATCTTCTGGTGTGCTTGCTCTCGCCATGACTGACAAACACATTTGCTTTC  
TTAAGTTCCAGTTATGCTAAGCAGAAATGTCGTCTCGTTGTGAGTTGTCAATCCGACTTTGAAGTAGAGA  
TGGTTAAAGGTATAGAGGAAGCAGAAGAGGATTATGTTTGTATAGAAACAACAAGGAGGCCCTGAAT  
AAAGCTTAGTGAAGAAGAGTTCATTGCATGCCTTGTATTAGTTTTCGACATTTCTGAAAAAATTGCTTCA  
GACATGGCCTCATTGCTTTGTCTCTTGTTCATATTATTCTTGCAATTCTGCTTCGGAAACATTAATAAAT  
AACCCATAAAGAAGGTAGTAAGGTTAGCGTTCATCCTACCTTCCCAGATCCCACCTGTGGGATTAGAG  
AGTAAAGTTCTCG

>PGSC0003DMG400004722 LRR-RLPs

ATGCATTCAGAGGAAATGACTAAGATGGATGTTGATGGCACTACGGGAATTCACCTTTGAAGAAGATATA  
ATCACGGAAATCCTAAGTAGGTTACCTGTCAAGTCTTTTTTCGATTCAAATGTGTTATAAGGTCTTGGAT  
GACATTGATCTCTAAACCTTACTTTGTGCAAACGCATCACAATCATTCCAAGAATAACCAAAATTCCCAAA  
AAAATTGTCTTCAAGAAAATGCTTACTGTAGATACCTCATTAGTTTGGTGTAGTTACTCTTACCACACACG  
AGTTCATGGAACATGAGCAGAGATTGCTGCTCATGGGATGGAGTCGTATGCAATGACATGACTGGCCAT  
GTCACTGAACTTGACGTCAGTCTATTCAGGGACGAGAGCTTGAACCTGTCAAATTTTGACCATTACAC  
CACTATTGTTCTTTCAAGTAACAGATTTGAAGGACTTATTCCAAGTATCATGAGAGAACTCATTGCTCTTC  
GGGTGCTGAATTTGTCTCATAATGAATTGCAAGGTAATATACCATCATCACTTGGAAAGTTTATGTGTGGT  
CGAATCATTGGACCTTTCATCCAACCATCTTTCAGGAGAGATACCACAACAACCTGGCTTCTCTAACGACA  
CTTGAATTCTTAAATCTCTCCACAATCATCTCGATGGATTATCCCTCAAGGACCTCAATTCGCTACATTA  
AAGAAATATTCATATGAAGGCAATAATGGATTACATGGATTTATGCATTGCCAAATTCATCATTGCATAT  
GTTGGAGGAATATCAGGGGTCATAAAGTTTTATGAGCTTAAGTTGGCTCGAACTTCATGATTATTACCCG

TTGACATACTAATGACAAGGTGATATATAGAGTTGAAACGAGTTAGATATTTTTTCTTTTTGTTTTTCAG  
TAATCACCTCTTATTTGTTTTACTGTCATAAATCAACTTTCTGATGCAATATAGTTGAAAGTAGTACCTAT  
TATTTTGAAAGTACATAAATTCTGCTTATATGGATGCAGCTAAAGTATTTATGTACAACATACTTCCTTTC  
ATGATTCATAAATGTACACAACAACCTCATGACCCACTGCAATAGATTACGAAGTACCTTCACTTCAAATT  
GAATGAGTTGTAGCTTTCATTTGCAAGACGCGTGACTTTTTCTGTTACATAACAAATAAGGTGGCTTTCTA  
AGATAATTATCAATAATTGAGTGACAATATGAGAAATCAACTCTTGATGTCAGCTATATGAAATCTCAGT  
AGTCATATAGCTTTACCTAAACTCATCTCGATCTAGTACAAAGTATATTAGAGATATAATGTAGTCTAGA  
ACTATTGTTCTATGACATAATTGTTGGATTGGTCCACTAATTTAAAGGTGAGATTGAGAACCAAACATGT  
CCGCATCATGGCTGATAACACAACAAAACCTTTTTGGCCACTTGGTTAAGTCCATAGCTGAATTACATATG  
TAACCCGTGGATAAAAATAAAAAGCAAAAAGACAAGAACAACCAAATTTGCATTGAGAATGA  
GAACACTTTCTCTGATAAATATGAACAGACAAAGAAGTGTGAATAAGAGAGACAGAAGCCGAATTGGC  
AACATTTGGTGGCAGTCAAACATGTTTCGCTTTGATCTTTAATATTATGCACTATATAAAATTCTACGAAC  
TCTCTACAATTAGTTCATTGAAACGCAAAATATGATGATGGTTCCAGCAAAATATCCTCTCTACTTCAGT  
TTTTCACTCTTTTATATCTCTTTACAGTTACTTTTTGCTTCCACTGAGGAAACAACCTGCCCTCTTTAAATGGA  
AAGCGACTTTCAAGAACAAAATAATTCCTTATTGGCATCATGGACACGAAGTTCTGATGCATGCAGTG  
ATTGGTATGGAGTTATATGCATTAATGGTAGGGTAAACATGTTGAATATTACAAATGCTAGTATCTTTGG  
TACACTCTATGCTTTTCCGTTTTCATCCCTCCCTTTTCTCGAGTATCTTAATCTTAGCAGGAACAATTTATTT  
GGCACCATCCCACCTGAGATTGGTTATCTAACTAATCTTGTCTATCTTGACTTGCATATCAATCACATTTCA  
GGCTCAATCCCACCACAAATTGGCTCACTAGCCAAACTTCAGATCATCCGTTTATTTGACAATCATTTAAC  
TGGTCCTATTCCAGAAACAATAGGTTACCTAAGGTCTCTTACTAAGCTATCGTTGAGTATTAACCTCTCTTA  
CTGGTTCTATTCTGCTTCATTGGGAAACTTGACCAACTTGTCTTTTTGTTTCTTCATGTTAATCACCTTTC  
TGGATCCATTCTGAAGAAATAGGTTACCTAAGGTCTTACTCGTCTAGATTTGAGGAATAACTTTCTTA  
TTGGTTCTATTCTACTTCCCTTGGCAACTTGAAAAATTTGCAAGTTCTGCTTCTCAATGACAACAATCTAA  
TTGAGGAAATTCCTCCATCTATTTGCAATTTGACATCACTGGCAATCCTGTATTTGTCGAGAAACAACCTTG  
AAAGGAAAAATTCTGCAATGCTTAGGTAATATCAGTACCCTCCAGTTTGTGATGATGTCACATAATAATC  
TCAGTGGAGAACTCCCTTTGTCTATTTGCAATCTAACATCACTACAAGTTCTAAATTTGGGTAGAAACAAT  
CTGAATGGAGCAATTCACAATGTTTTGGCAACATGAGTGGTCATCTTGAGATTCTTGATATGCAGCACA  
ACAATCTTTCTGGTACTTTTCAAAGCACTTTTAGCATTGGAAGAGCACTCAGAAGCTTCAATTTGCATGGC  
AATAAGCTAGAGGGGAAAATTCCACGATCCTTGGCAAATTGCCAACGATTGGAAGTTCTTGATCTAGGA



GCTAATCTCCTCAATGACACATTCCCGATGTGGTTGGGGACTCTGCCAGAGCTACAAGTGTTAAGCTTGA  
GATCCAACAAATTGCATGGACCCATCAGAATTCAAAGTTCATGAAGAACTTGTTTCCTAAGCTTCGAAT  
CATAGACCTCGCTAGCAATGCATTTACAGCAGAGTTACCTGCAAATCTTTTTCAAATTTCGAAGCCATG  
AAGAGAGTTGATCAAAGTGTGGAGGATTCAAGTAATAAAGAAGGCGGTTATTACCAAGACTCCGTAAC  
GTCGTAACAAAGGGACTGGAGCTTGAAGTTGATTCAATCTTGTCTTTGTACATCACAAATTGATTTTTCAA  
ATAACAGATTTGAAGGACGCATTCCAAGTATTATGGGAAATCTCATTGCACTTCACATGTTGAATTTATCT  
CATAATGGATTGCAAGGTCATATACCGCCATCACTCGGAAAATTATCTTCAGTTGAATCATTGGACCTAT  
CAGCTAATCATCTTGAAGGAGAGATACCTAAACAATTACATCTCTTACATTTCTTGAATTCTTGAATCTC  
TCTACAATCAGCTCCAAGGATGCATCCCAACAGGACGCCAATTTGATACATTGAGAAGAAGTCTGATG  
AAGGTAATGATAGGTTACGTGGATTTCTAATTTGGAAGGTTGTGGAAACAGCAGGTTTCCCAAGACAA  
ACAACACGACACATGAGCTGGAACAAGAAAGTGATTCTACATTTCTGAGTGAAGTCAACTGGAAAGTGG  
TTCTTATGGGATATGTGTGTGGACTTATTATTGGATTCTCCATAACATATTTAATGCTTTCAGCTAAAAAT  
CCCGATTGGCTTTCTAGGATTGCTGATGAACTAGAATACAGAATCCTTATGAGAAGGCGAAAGTAG

>PGSC0003DMG400004725 LRR-RLPs

ATGGGGTCTGGCCAATTCTCATTTCTGCTCTTTCTCTGTTTGCTTTCTTTTTCTTCATCCATACCTCATCCAT  
GCCGCAAAGATCAAAGTATTTCCCTTCTAAAATTCAAGAAAACGTTTACTGTAAATTCCACAGCCTCTGAT  
TCTAATGTCTGTGAAATATTTTATGGTCAGAAGCCATATCCAAAAACGAGTTCATGGAACATGAGTATAG  
ATTGTTGTTTCATGGGATGGAGTCATATGTGATGAGATGACTGGCCATGTCATTGAACTTGACCTCGGCT  
GCAGCTGTCTCGTAGGAAAGCTTGATTCCAATAGCAGCCTTTTCCAAGTCTCTCATCTCCAAAGGCTCAAC  
CTTTCTGTTAATAACTTCTCTCGTGTGGATTCAATTCCTCTTCAAGTCTCTAGATACTATTGATTTGCGGTCC  
AATTTGCTTCAAGGTTCACTACCTATTCCACCAATTTCCACGAGATTCTTCTCATAGCCATAATAATCTC  
ACTGAAGAAATTCCTTCACATATTTGCAATTTGAAATCATTGGTAATGCTAGATTTGGCGAGAAACAAGT  
TGAAGGGAGCAATTCCGCAATGTTTGGGTAATATCAGAAGCCTCAAATCTAGATATGCACAACAACA  
AACTTTCTGGGACTCTTCCAACAACCTTTAGCAATGGAAGTTCAGTAAAGTCAACTTGCAGTGGAAA  
TAAACTAGAGGGGAAAATTTCCCGATCTTTGGCCAATTGCAAAGTGTGCAAGTCTTGTATCTAGGAGA  
TAATCATATCATTGACACATTCCCTATGTGGGTTGGAAGTCTTCCAAGCTTCATGTTTTAAGCTTGAGAT  
TGAATAAGTTGCATGGACCCATTAGAAGTAAATAAATGAAAACATGTTTCTGATCTTTCGAATTATAGA  
TCTCTTACAATGCCTTCACAGGAAATTTACCTACGAGTCTGTTTCGACATCTGAAAACCATGAGAACAA  
TTGATCCATCAAAGAAGAAACTAACATACCTTGAAGACTATTATTACCAAGATTCTATTATAGTCATAAGC

AAGGGATATGAGATTGAACTTATCAAAATTTTACTGTTTACGCCTCTATTGATCTTTCAAGTAACAAATT  
TGAAGGACATATTCCAAGTATCATGGGAGAACTTACTGCACTTAAGGCGCTGAATTTCTCTCATAATAGA  
TTGCAAGGACGTATACCATCATCACTTGGAAATTTATCTTTGGTTGGATCATTGGACTTATCAGTTAACCA  
GCTTTCGGGAGAGATAACAAAACAACCTTGCTTCTCTTAAGTATCTTGAATACTTCTTCACATCAGAAAATA  
ATCTCACTGAAGAAATTCCTTCATCTATTTGCAATTTGACATCACTGGTAATACTAGATTTGGCGAGAAAC  
AATTTGAAGGGAGTAATTCCTCAATGTTTGGTAATATTACTGGCCTCGTGGTTCTTGATATGCACAACA  
ACAATCTTTCTGGGACTCTCCAACAATTTTCAGCAATGGGAGATCACTGAGGAGCCTCAACTTGCATGG  
CAATAAACTAGAGGGGAATATTCCCGATCTTTGTCCAATTGCAAAGCGTTGCAGGTTCTTGATTTAGGA  
CATAATCATCTCAACGACACATTCCCATGTGGTTGGGAACTCTTCCAGATCTACAAGTTCTAAGCTTGA  
GATCCAATAAATTGTATGGGTCCATTCCACCGTCAAGTGTGGAAAGTATGTTTCCTAAGCTTCGAATCAT  
AGATCTCTTACAATGCCTTCTCAGGAAACCTACCTACGAGTTTGTTCACATCTGAAAACCATGAGG  
ACAATTGATCCATCCAAGACGGCACTAATTGATGGTTATTATTACCAAGACTCAGTAGTTGTAGTTACAA  
AGGGATTGGAGCTTGAAGTTGAGAGAATCTTGTTTTGTACACCACTATGGATCTTTCAAACAACAATTT  
TGAAGGACATATTCCTGATGTTATAGGAGATCTCATTGCGCTTCGGATGCTTAATTTTTCTCATAACAGAT  
TGCAAGGTCATATTCCATCATCACTTGGAAATTTATTTGTAGTCGAATCATTGAACCTTTCATTTAACCAG  
CTTTCGGGAGAGATAACCACAACAACCTCGCTTCTTACATCTCTTGCGGTCTTAAATCTCTCCCACAATCA  
TCTACAAGGATGCATCCCAAAGGACCTCAATTCAATACATTTGAGATCAATTCATATGAAGGTAACGAT  
GGATTATGTGGATACCCTTTTCTCAAGGTTGTGGAAGTAGCAGGATGCCAGAGACAGAAAACACAGCA  
TATGTTCTGGATGAAGAAAGCAATTCTACATTTCTGAGTGAATTTTGGAAATGGGATTCTCATGGGATATG  
GAAGTGGACTTATTATTGGATTCTCCATAGCATCTTTCATGCTTTCGAGTCGAAATTCGAATTTGGCTTTCT  
AGGATTGCTGAAGAACTTGAATACAGAATCGTTATGAGAAGGCGAAAGAAGAAGCAAGGCCATCACAG  
AAGATGA

>PGSC0003DMG400004727 LRR-RLPs

CCAAGTTAACTCTCTTCGTATCTCCACATTTTTTAACTTTTAACTAAGGAGCTAAGACTCACATCCCATG  
ATTTTAAATCGCTTCTTCAGAACCTTGACCCAATTAAGAGAGCTTGATCTTACTCAAGTAAACATCTCTTCC  
ACCATTCCTCTGAATTTTTCTTCTCATTTACGACTCTGAGGCTGTCAGAAACAGGATTGTATGGGATAAT  
ACCTGAGAGTATATTTACCTGCCCAACTTGGAAATACTTGACTTAAGTTACAATGTTTCATCTCAATGGTT  
ATTTTCAAAGGCCAAATGGAACAGCAGTGCATCTCTCATAGAGTTACATCTCAGTATGGTGAATTTTTTC  
TGATAATTTTCCAGAGTCTATTGGCTATCATCTAACTTCGCTGCGTTATTTGTCTCTTGTAAGTTGCAACCT

TAGAGGGCCTATTCCTGAATCTCTTTCAAATCTCACCCGCATTGAGTATTTGGTCCTTTCATATAACTCCCT  
GAATGGAACAATACCATCAGGGATGTTATCCCTTCCATCACTAAATACAATAGTCTTGAGTAATAATCAC  
TTATCTGGTCCCCTTGAAGATTTAAAGTCCAATTCATAATCTCGATATATTTAGAGGGCAACCAGCTGCA  
GGGTCATCTTCCCCTCAATTCAAACCTTGTGAACCTAACAGGCCTTATCCTTCTTCAATAATTTTAG  
TGGTCGTGTGGATGTCAGCTTCTTTCAAACCTTAAACAGCTTCGGTATCTTAGTCTTTCATATAATAATA  
TCTCATTGACCAATGACAACAACGTTACTTTGCCCGAATCTCTTGATACGTTAGAATTGGCCGCATGTGA  
AGTGAAAGAGTTGGAGTTTCTAAGATCCGCAAAGCTTCTCGGCATTTGGATCTTCTTCAATAATTTTA  
GTGGTCGCGTGGATGTCAGCCTCTTTCAAACCTTAAACAGCTTGTGGAACTTCGTCTTTCATATAATAAT  
ATCTCATTGACCAATGACAACAACGTTACTTTGCCCGAATCTCTTGATACGTTAGAATTGGCCGCATGTG  
AAGTGAAAGAGTTGGAGTTTCTAAGATCCGCAAAGAAGCTTTGGCAGTTGGATCTTCTCAATATAAGAT  
TCAAGGAAGAATTCCTGATTGGGCATGGTCTAACTGGATGTTTCATTGCAAGATCTTAATATATCCCACA  
ATATGCTGACGAGTGTGGATTCAATTCCTCTTCAGTTTGCAGATACTATTGATTTGCGGTCCAATTTGCTT  
CAAGGATCACTACCCATTCCATCAAATTCCTACTACATTCTTCTTCATATCTAATAATAGTCTCACTGGAGA  
AATTCCTTCATCTATTTGCAATTTGACAACACTGGTAATGCTTGATTTGGCGACAAACAATTTGAAGGGA  
GCAATTCGCAATGTTTGGGTAATATTACTGCCCTCCAGGTTTTGGATATGCGCCACAACAATCTTCTGG  
GAATATTCCAACAACCTTTCAGCAATGGAAGTTCACTGAGCAGCCTCAACTTGCATGGCAACAACCTAGA  
GGGGAAAATCCCACAATCCTTGACCAATTGCAAACAACCTGAAGTTCTTGATTTAGGAGACAATCACCTC  
AACGACACATTCCCCGTGTGGTTGGGGACTCTACCAAAGCTGAAAGTTCTAAGCGTGCGATTCAACAAA  
TTGCATGGTCCCATCAGAACATCAAGGATTGAGAACATGTTTCCAGAGCTTCGAATCATAGATCTCTCTT  
ACAATGCCTTCTCAGGAACTTACCTTCGAGTTTGTTC AACATCTGAAAGCCATGAGGACAATTGATCT  
ATCATTGGAAGCATCAAGATATGGTGCAGATCGATATTACCAAGACTCGATAGCTGTCGTATCCAAGGG  
ATATGAGCGTGAAGTTGTGAGAATCTTGTTTTGTACACCACTATCGATCTTCAAAGAACAATTTGAA  
GGACATATTCCAACCTATTATGGGAGATCTCATTGCACTCCGTGTGCTGAATATATCTCATAATGGATTGG  
AAGGTCATATAACGTCATCACTTGAAGTTTATCTTTGGTTGAATCACTGGACCTATCAAGTAACCATCTT  
GTAGGAGAGATAACCAGCACAATTTGCTTCTTACTTCTTGCAGTCTTAAATCTTCTACAATCATCTC  
GAAGGGTGCATTCTCATGGAATCAATTTAGACCTTTGAGAACAATTCATATGAAGGCAATGATGGA  
TTACGTGGTTTTCCAGTTTCAATAAGTTGTGGCAATGATCATGTATCAGGGAAAAATTATGCCGTAGATG  
ATGAAGAAAGCAATTCTGAATTTCTGAGTGATTTTCGAAAGCTGCTCTTATGGGGTATGGAAGTGGAC  
TATGTATTGGAATATCCATAGTATATTTTCATGATGTCAACTGGAAAACCGATATGGTTTGCAAGAATCAT





TTTCAGGATCGCTCATTTCACCTAAATTTGGTGAGTTTTCTAATTTGACGCATCTTGATTTGTCACATTCAG  
GTTTTAGATTCCGACCTCACAATTTAGAACTTCTCCTTAAGAACTTAACCCAATTAAGAGAGCTTGACCTT  
TACGGTATGAGCATCTCTCCACCTTTCTCTGAATTTCTCTTCTTATTTAACAACTCTACGACTTAGTGAC  
ACACTATTATGGGGGATACTGCCCGAAAGTGTTTTTCACCTTTCAAACCTGGAAACACTTGATTTATCATA  
CAATCCCAACTCACAATTAGGTTTCCCACGATCAAATGGAATAGCAGTACATCTCTCATGTACTTATCTC  
TACCTGAAGTGAATTTTATTGGTAAGATACCCGAATCATTTAGCTATCTAACTTCATTGCATTACTIONGGAT  
ATGAGATCTTGTAACCTCTCAGGTCCTATTATTAACCTCTTTGGAATCTCTCCACATACAAAGTTTGTAT  
CTCAGAAATAACCATCTTGAAGGACCAATTTCCAATCTTCAAATTTGAAACCTCAAGTTGTTATCACT  
TGGAATTAACAACCTTTTATGGCCAACCTTGATTTTTATCCTCCAACAGAAGTTGGACTCAACTTGAAGTGT  
TCGAAGTTTCTTCCAATTCCTTAGTTGGTCCAATTCCTCCGATGTAAGTGGTCTGCAAAGCCTACAATCA  
TTGTTCTTGTCATCAAACCACTTGAATGGGACTATACCATCATGGATATTCTCCCTTCTTCACTAGATGA  
ATTATACTTGAATGATAACTATTTCAAGTGGAGAAATTCAGGAGTTCAAGTCCAAAACATTGTGGGACGTT  
ACTCTAAAACAAAATCAGTTGCAAGGTCTATTCCGATGTCACTCCTAAACCAACAGAGCCTATCTTATCT  
TCTCCTTTGAAAAATAATCTTAGTGGACAGATTGCTTCAGCTGTCTGCAGTCTAAAAGCCTTGACAGTG  
CTAGATCTTGGGAAGTAATAATTTGAAGGGAACAATCCCACGATGTTTGGGTGAGATGAGTGAACCTTGG  
GTTGTTGATCTAAGCAACAACAGTCTTAGTGGGGCAATTAATACAACATTTAGTATAGGAAACACGCTCA  
GAGTCATTAATTGCACGGGAATAAGCTAGAGGGGGAAGTCCCACGATCTTTGGTCAATTGCAAGAGTT  
TGGAATGTCTAGATTTAGGTAACAATGAGTTGAGTGACACATTTCCAAAATGGTTAGGAACCTACCGA  
ATTTGAAGATTTTAAGCTTGAGATCAAATAAGTTCACGGGCCATTAAACTTCAAGGGCTGGAAACTT  
GTTTGTACATCTTCGAATAATTGATCTATCATCCAATGGATTTAGTGGGAATTTACCTATGAGCCTTTTTG  
AGGATTTGAAAGCTATGAAGATAAATGATGAGATCACGAAAATCCCACAGTATGTGGGAGAAGACTTG  
TATTATCATTTTTCTGAAACAATTACAACAAGGGGTTGGATCTTGAATTTCTGGAGTTTTGACTACAAA  
CATAGTTATCAATCTCTCGAAGAATAGATTTGAAGGTTGTATTCCAAGTTCATTGGAGATCTCATTGCAC  
TTCGTACTIONTTGAATTTATCTCATAATGGCTTGGAGGGTGTACACCAACTTCGCTGCAATACTIONTATCTGTA  
CTTGAATCATTAGATCTCTCATTCAACAAAATAAGCGGAGAAATTCACAACAACCTGCATCCCTCACATT  
TCTTGAAGTCTTAAATCTCTCTCACAATCATCTTGTGGATGCATCCCTAGAGGAAAACAATTTGATACGT  
TTGAGAATAGTTCATACCAAGGGAATGATGGGTTACGTGGATTGCCACTGTCAAAGATTGTGGTGGTG  
ATGAAGGGGTACCACAAACAACAACCTCCATTTGGGCTTGATCAAGGAGAAGAAGGAGACTCAACAATG  
ATCAGTTGGCAGGCAGTTCTCATGGGGTATGGTTGCGGTCTAATTATTGGATTATCCGTAATATACATAA

TGTTATCAACTCAAATCCAGCATGGTTTTCGAGGATGGTTGAAGAATTGGACCACAAGATTATTACGA  
GAATGAAAAAATACAAGAAAAGATATTAGTGTGCAACCTAGCCAGGTATTCAACTTGATCTTTATCATT  
ATAAGATTATTTTGTATATCTCAATGTATTATATATCTACCTCCTTCATCCTTAAAATTCTTAACTTCAATC  
TTCATTTTTTAAAATTGCAGGATTCGAGCCTAATATGTTGTTGGTGATGCAAATATAAGCTTTTATTTTC  
ACATTTTGTGATGTATCTAAGTATTTATCGCCCTATGAATAAAGACATGAGCTTTCTTCCTTTGAGCTTCG  
GCCAGAATTTTTAGAACGTTTTTAAATAGAGATTGTTAGCTTGAGTTCAGCCTAATAATAAGTTGAGTAA  
TTAGGCTCAACCGCAAAGTCA

>PGSC0003DMG400005395 LRR-RLPs

ATGGGCTGTTGTGTGAAAGCTAATGCCTCCAAGGAGATTAGAACCCGCAATCATAGACATGTAGGACTT  
GAAAAGATCTTTCGCCAAGTGCACGAACCTCTACTTTGCATTCTGGTGCCTTTGTGTATCTATTTCTAAGA  
TATCAAGATAGTTACCTATATAAACCAAGTTTCCATCGAAGTTTCCGGGTGCAGGTGTATCCTCAACCTA  
CTATAAACGGGCTTGCTAAATCCAGATTGAGGGAAATTCATGATTAATGTGTCTTTTAGTAAATATTAA  
CTGTGTTACTCTGTTGGAAATGCAAGGTTAAAGCAGTAACAATTTGTCCAAAATATAATGGCAAACACAA  
AATTAAGATATGCTGACAGCTTAACTTCAAAGGGAGATTTAAGCTATCGTAGGATAAGTCTTAGGAG  
GAAATAGCCCTGTGAAGGAGCTGTAATGAAAGTCAATTTTTTGTCAACGAGGTAATATGTGGTGGGTA  
AAAAGCCCAAGTGTACACCCGAAATCCACGCTTATTGCTCAAAGTACTTCCATGCTTGTTCTAGTACGTT  
TAATCACTTTTGGACTTTAGTATCCTTGCTGGTCCCCACACTTCCAACCTTGATCTGATTTTTTCAAGGTTT  
GAATTTTCGGGGTCTTACACCAAGTATACTAGTGGTGTACAAGAAGTGGACCTACACCAACACATATTT  
TGGTACTCCAAAATCTATTTAAAAAACA AAAAATCAGTTGTAATCTGTACAAGAGTCTCAAGACTCT  
ACTGGGATGAAAATCAGTTCTACCTGGGAAA ACTGAAAAGTGTCTGCTTCTCATTTATTCTTAAGGGACT  
CTTCATCTGGGTTTTACGCTGAATACTATTGATATTGACATATTGTAGGGTGTATTCTCTTAAAAAGAAA  
ATTTTATAAAGAGTTTGTATATCTGATTCTATCCAAAAATTGAGTCTGATTATTTCTTTTCAGGTTTTGG  
CTGATAACCTTATTGAGAATCTCCCGGTGAACCTGGGATTGCTTAAGTCTTTGAAAGTTGCAACACTTGA  
TGGGAATCGAATCAGAGCATTGCCTGATGAATGTAATTTCCACCGTCCTAGATCATATGTGAAGTTAAG  
CAGGATTCTCTGCTATAGAGTATCACACTCTCTATTCTAACACATAATGTTCTCATATTCAGTGGGCC  
AGTTGGTGAAGCTTGAGCGTTTGTCTGTCTCAGCAA ACTTGTAATGAGCTTGCCTGAGACTATTGGGA  
GATTGCAGAATGTGAGTGATCCATTCTGATGGCTAATACGGTGCCATCTCCGCAATTCTAAAAAGTGTG  
CCAGTTAATATATTATTTCTTAGCTTGCTTTACTGCTTTGTTATTTTTTTTTTCCGAGTATAAAGGTGCTAA  
GGTGTCTAATGAAATGGTGTCAATCTTG TAGAAAATGTT CAGCATATTGATATCCATATTAATGGATCAT

TTTGCTTACAACCTTTCTGTTCTTACAACCTAAAAGCCCTACTTTTTTTCTCTATTTCTATAGTGATGCCGCTT  
CTTCATGAATTTCTATTATCTTCTGGTAGTTGATGATGTCTCTTTGCTCTCTTATGTTAGTATTTTGGATT  
GGAATAGGGTCTGCAGCTCCTGGGGGAGGGTGGTTGAATTTGGAGAATAAGTGGCTCTATTGCAGGT  
TGTCTTGAGGTCCACCACCCTGAGTGCCGTCTGTTCTTCTTTTTATTCACTCTCTCCTTATATTGAATATT  
TTTCTTCTCAAGTTTTTTTCTTCAATGTCATTGATGAACCAAGTGTGAGAAAGAAAGACTCGGAAAATACT  
TTCAATATACGTAACTACATTATTACACAAAGCATTGTTTATAGACAATACTACAATCCTTTTCCATGT  
ATGGCACCATGTACAATCCTATTTGAGCACTCCCCCTCAAGCTGGTTCATGTAAGTCATATGTACCAAGCT  
TGGTACCTCCACTTGGATATATTGTGTCACCTCATTTATCACTTGGGTAAATAAAAAATGGGCTAAGAAT  
CGATCCATGGTGTAAACCCATCTCTACTAGGAAGTGTCTAAGTCTCCTCCCATTGTTCTCACTGGGTTTT  
GACTCCATCGTACATGTTATTAATCCCTCTAATGTATGCCACATGTACACCTCTGGGCTCCAAGCATCTCT  
ATAAAATCTTCTAGGGACTGTCATATGCCTTTTTTAAGTCAATGAACATCATTTGTAGGTTTCTCTTCTA  
TTTCTATACTCATCCAACAATCTCATTATAAAATGAATGACTTCCATAGTTGATCGCCCTGACATGAATCT  
GAATTGGTTCTCCAAAATAGACATATCCCTCTTCTTCTCATCGTCATCTCTACCACCCTCTCCCAATCCTT  
CATAGTGTGATTTAGTTGTTAATACCACTCTATAGTTGTTGTAATTTGAATATCATCCTTTTTCTGTAC  
AGCGGGATCATTGTCCTCCACCTCCATTCTTTGGGCAGTTAATTCATCCTAAAATGATATTAACAGCCTA  
GTTAGCCATTCAATGCCTACTTCCCCTGCGCTCTTCCAAAATCCATAGGCATCTCATCTAGTCTGTTGCT  
CTTCTGTTTTCATTTTACGAATTACCCCCTTGACCTCCTCAAACCTTTTTACACCTACAATACCCAAAATCAC  
GATGTCTCTTGGAGTGTTATAAATCACTCAACACAATAGTTCTAATTCATGCTCCCCTCTGCATTCAAGAG  
TACAAGTTCCATTTGACTGTTTTTTCTAAATTTAATTCTCTGCGCATTGACAAACAAAGACTCAGAAAA  
TATTATTAAGATACGTAAATATCACACTGAGGTCTACTTATAGATAATACTACAATCCTTTTCCATGTA  
GGACACCATGTACAACCTATTGTAACACCAAGAAGTATAGTGTTCACTTTTAGGTGTATATCTGATTCTCA  
TGGTTGCTGACATGGGATTATGAATTAAGTTTTTCAATCAAGTAACTAGCTCTATCCTCTAGTAGTGTT  
CATATCATTCTAAACACTTGCATATACTTTTACTCCAAATATGTTTTGATATTTGTGAGTTCAGTTCAATAT  
GATGATGCCGTTTTTTGTCTGTCAGAGATAGTCGTTGAGCCTATACTTAAAAGTATTCTTAATTCATCTTCT  
TTGGAAAATGAGGCCTTTGGAATTGACAGTAATGGTTTTTCACTGCAGTTGGTGCTGTTGGACATTTCAA  
ACAATAAGTTAAAGTTTTTTCTGAATCAATTGGAAGTTGCTTCTTTTGAAGAATTGCAAGCAAATGG  
TACCTTCAAATTTAGTGTCACCTCATCCATTCTGCTATTTCTCTATTTCTTTTTATTTTCTGGCACTGGAA  
CTCTGTATCAAATATCCATCGAGGAAAAAAAAACATGTTACCATCAACATAAAATTAAGTGAAATTTATG  
GCCGATGATAAAATTGGAGTGTTGGGTGACCTAGAAAGCTAAAGGAAAATCTACAAATTTTCTCTGTTA



AGCTTATAAGATAATATTCTTGGCACCATCCATTTGAACTGGTACATGATTTTCACGTTCTGTTTCTTATTC  
CTCAGTGTGGCATAATGAGGTTTACTGTGTTTTTTGGCAATCTTGCCTCGTGATAACAATATTTCTTTTC  
AGATAATTCCATTGAAGAGCTTCCTGCATCAGTTTGCAATCTTGTTCAACTAAAATCACTCTGCCTGAACA  
ATAACAATCTCAATCAGGTTAGTGTCTAATTTTACCTGTGTGTATGTGTGTGTGACCCTTGTTATTTTGAG  
GTCATATCTAGTATTCAGAGTTTACCTCGATTTGGTACTGCTCTCGTGGCCTGCACTGATACAGTGCTTTA  
CCTCTACATGTGCAGTCAACTGCTGTGCATGTGTGTGTGTCTGTCTCTATCATCGTCACACATAAAAAG  
TGCAAAGAATAGTAAACCACGTGGATCAAAGCTTACCTGTTTGTACACCCGAAAAGCTGAACTTATTGT  
TGTATTGGTGATACTTGTATGTGCTCTCTCTCACTTTCTATCTTAATAATACTATTAAGCAGAGTTAGG  
AACTCTCTTCGCATGATCTGTAAGCCTAGTTCACCTCCCCGTGTATGAGTGTTAAAAGGAAACTCATACAT  
TAACCTTAAAACGTGCATCTAAAAGCTTTTCCTTTTAATAAGACCTCATGAAGAAACGAAGATAATCAAA  
CAACCAGTAGCATCTACATTGCAAACCGCAATAAAGCCAAATACGCATAATGATCCACATTTGAGGTCA  
TTGGATTGAACCTCACGTATCTTCCATTTAAAGCATCATCATCCAAGTTTTTGTACTTGTGCCTATCAAGTA  
TATGTTTTTACTAGATAGTCATGCTTCCTTTTGGTAACTGGATTGTTCCAGATGCCTCTAAATTTGTTAAGA  
GAATGCAAGAGCTTGCAGACCATATCCCTGCATGGAAATCCGATTTCCATGGACCAATTTCAACAGGTTA  
CTCACTAATATTCTACTATTTAGTTCTGCAAGTACTAAAAAATCATTATGAAGAATTCTATTTGCCTTTT  
CTTTTTCCAGATGGATGGCTTCAAGGACTTTGAAGCCCGCCGTAAACAGAAGTTTGATAAACAAATTGAT  
TCAAATGTGATAATCAGTTCTAAAGGGCTTGATGAGGGTGTGACTTGTGATTCTCTCCGCAGGCGTTT  
TCTATAAGGCTCCGCGCAATCTTGTTAATCTCAGGTTTACTATTTTTTTGCTTCAATTCCCTGATGGAAAAT  
TTCCCTTTATTTTATGTATGACCATGTAGTAGCCACACTACACAGTTGTGCTCCTCAGTTGCTGTCAAGC  
TTTTAGTATTTCTAGTGTCTGTAATGCCTAATTTGGACAATTCATTCTTGTTACTTCATGCATGTCTCCGT  
TGCTCTTAGCTCCCAGCCTGGCGTGCCTGCATAGTTGCCTCTTCTCATTTATGTTCCAGTCTTCTAGTTTGT  
ATTACTCTCCATTATACCCGTGCCCTAAGTGTATATAATTGTGGTAATTATTAGTAACACCAATTTCAAA  
AGATTGAACACGAAAAAGCTTCTCATTATGTTCCATGGAAGCAGGACCGTTTTGTCCATTTAGTTTCTG  
AATTTGATAGGTAGTAGCTAATCCAGTGGCCAAATTAGTTCAAAAAGAAATTGCACTCGTTTTTCTAAAC  
TTCCAGTCAACTGGTGCTATTGATGATACAATTTTTTTTGAATAAATCATTATATCTTATTTACTGCAGGT  
TAAATTTGTTCCAGTTGGATGGAATTGCGACAGTTTTGACTTTGATGAAAGGTATTGCTTCTGCTTATTTG  
GCATGAGATATTTACACCTTTCTATAGTTTGTCAATTGATTGTAAGTTGTGACTTGTGCGTAATTGTATCT  
ATGCTGACTTGCTGAGTATGTTTGTGATTGTAATGACTCAACTCTAACAAATTCTGTACATTTAGCGAGC  
TGTATATCACTTTAAAATCAAACCTAACGATTTTTGTACCTAAAGATATTTGATTTTAATATGTTTGGATTGT

AACGATCCTTTCAACGTATCCAAGAGTAGGGCCTGGTGGCCAATAAAGTGGCTGAAAATTGTGGCCACT  
TTTTATCTCCGTCGTCGTTTTAAAATTAATTGAAACTAAGGGCGTGTTTATGATATTTTCATGTTTGGTTG  
GTTAAATTTTTGGAAAATATTTGCTCTAGTAAGTATTTCATACGCGAGCCATCATCTAAAATCAATTCAT  
CGATATCAAGTCAGCAACACAAGCATTATCTAGTGCTATATACTAGGAGTCAAGCTCACATAATCACAT  
TAATCAATTCAGGAAGAAAATCTCCAATTTTTCATATTCATGGCATTGGTACTCAAAGCATTTCATATTCA  
TGGCATTGGTACTCATAGAAATGCTTGTTATCTCTTTTATACCGGACCTCCATTATCCATTAACCTTTTATT  
CAATTAATAAATACACTTTAACATTTCAAAAAAGTTTCAACTTGCCTTAATTGGAATTCAAAAAGTTAAT  
GTGGATACCTAGGCACCCAAAGACAATGAAGGGTGTAGTAATCGACAAAATGCTTTAGGGAGTTGAAA  
ATAAGCATAGATTTGGAGATTCTCGAATAAGGTAACCTTTCAAATGCTATTGAATCCACGGGTAGGCA  
AGATACTAACGATTTGCTCTTCTTTTATGCCTTTGAACTATTTCAATTTGGTCATAAATGTAATTTAGA  
TGAGTATAAAGTTCGTAGACACACAAATTGGCACATAATTGGCTCGAAAATTGAGTGAAAAAGTCAAC  
CTTGAGCCTTACTGTCAAATTTGAAAATTTGTTTACCCATAGGTGGGTCAAAAATCCGCTAAAATGGATT  
GTTAATCGGTCCCCAAATCGAAAGCTACATAAATCATTCTTTGGAGAATTA AAAACCAACCAAATCCCC  
AATTCAAAAACCCCAAATTAATATCTATGAGCTTGTATAGCAAGGTGAGACCCTCCTCTTATTGGATT  
TAATTACTTTAAGTCACAAATAGTATTTTAGGATGAAAATTCATATCTTTGTCGGATTGTCATAGTACTT  
CTTGTTATTGATTGTTGAGTGAACCTATTGTTATAGTAATGTGGGGCTGTGGGAAAAAGTTATTGGATG  
GCAAAGAGTCAATGGAAAAAGGTATGATTAGGTTACTCTCTTCTTTTAGCATGTTTTCTTAAAAGGGTAA  
AGCTATATGTCAAGCGTACTTTGGATGAGCTACTCATAGCCATAAGTTTAGTGTGTTGGCTTCCTAGAGT  
TGTTATGTTGTCCTTGTGGGACTCCTATTATAATGATAGCGACCTCGTGCTTAGATACTTAGAGA  
TTACTCATATAGGTGCTTATAGTTGGTTTGCTTGCCTTAGGGCCACTTGATTGATGTTGATGCCTTTGGG  
CCATATGTTGGTTGTTACTTCTTTCGGGGGGGGGGGGGGGGGGTTTTGTGTNNNNNNNNNNNNNNNNNN  
NNNNNNNNNNNNNNNNNNNNNNNNNNNNNNNNNNNNNNNNNNNNNNNNNNNNNNNNNNNNNNNNNN  
NNNNNNNNNNNNNNNNNNNNNNNNNNNNNNNNNNNNNNNNNNNNNNNNNNNNNNNNNNNNNNNNNN  
NNNNNNNNNNNNNNNNNNNNNNNNNNNNNNNNNNNNNNNNNNNNNNNNNNNNNNNNNNNNNNNNNN  
NNNNNNNNNNNNNNNNNNNNNNNNNNNNNNNNNNNNNNNNNNNNNNNNNNNNNNNNNNNNNNNNNN  
NNNNNNNNNNNNNNNNNNNNNNNNNNNNNNNNNNNNNNNNNNNNNNNNNNNNNNNNNNNNNNNNNN  
NNNNNNNNNNNNNNNNNNNNNNNNNNNNNNNNNNNNNNNNNNNNNNNNNNNNNNNNNNNNNNNNNN  
NNNNNNNNNNNNNNNNNNNNNNNNNNNNNNNNNNNNNNNNNNNNNNNNNNNNNNNNNNNNNNNNNN  
NNNNNNNNNNNNNNNNNNNNNNNNNNNNNNNNNNNNNNNNNNNNNNNNNNNNNNNNNNNNNNNNNN  
NNNNNNNNNNNNNNNNNNNNNNNNNNNNNNNNNNNNNNNNNNNNNNNNNNNNNNNNNNNNNNNNNN  
TACCTTCAGAGTTATGGTTCATGTTTTCAAGGTTATATGTAGTTTGCCCAAGGGTAATATAGAGCCTTGT

GAGCTCGGATAGATAGTCTTATGTGCTCAGACATATAGAGCCTTTTGTGCTCGATTGTATAGTTATACAA  
CAAGGGTAGTATAGAGCCGAAAGAGTCCTCAACTATACAGAGCTGACGAGATCCTCAACTATACGAGCT  
AGTCAATTACACAAAGCTTATGGGGCAAATTGTTGCCAATAGGGGTATAGAGATTGATTTGTACATGT  
CGAGCTTATGGGGGATAGGGCAAGTGTATTAATTGTTATTTGTACTTGTCGATTTTATAGGGACTTGGTA  
AGTTGTTGTTAATTACTGTTGTATGATCCATGTATGAATTGTTGGATTTTGTGCTGTGACTATTCTTACTCCC  
TTGCAAGATTCCCTTTAGTATTGTATTTGTATGACATTAGTTGGCCTAGTTAGGCCGAATTGATTGTTGAG  
CTGAATATGGTTTCTGAGGTTTAAGCCAAAACATGTAAGTACGTTCTGACTATTTTACTCCCTATTT  
GATTACTTATAGTACTTTTATCATATCATTATTACTTATTCAATTTTCTTACATACTCGGTATTTATTTTCGTA  
TTAATGCTCTATTGTCTACAGGCTCTGCATTCATGCTTGCAGGTACTAACAACTAGTAGCCTGACTTCTT  
TAGTAATGTTGCCGAGTTTAGCTAATCAATAAGTTCCACTTCATTAGAGTTGCGAGGTTTAGAGTTTGA  
GAGTCTGTGATTATATATAGTTGATGGGTAGGTCGGGGCCCACTCCCGACTAGATACTATATTCTTGAGG  
CTTGACAGAGCTGGGTCATGTCATAGTACATCTCAGTCGAACGTATTGGCATTACTACTGTGTTATTATTA  
GCATGTCATGTTTGTGCTCTATATCATTGCTATTGTAGATATTATAATGGTCTTGTGACCCCGCATAGC  
AATTGATATGCTATTATTATGAAGTGTGGGTTAGCTAAAATTGTTGTTGCTGCGGGATTCTATGATTATA  
GCTTTCCCAACCTTGACTTTTA

>PGSC0003DMG400005538 LRR-RLPs

TATTCATCTATTCCACCATTCTCTGAATTTTTCTTCTCATTTAACAACTCTGAGGCTGTCAGAAACAGGAT  
TGTATGGGATAATACCTGAGAGTATATTCCACCTGCCAACCTGGAAATACTTTTCTTAGGTTTCAATTAT  
AAGCTAAGTGGTTATTTTCCAAAGACCAAATGGAACAGCAGTGCATCTCTCGTAGAGTTATATCTCAGG  
GGCGTGAATTTTTCTGATAATTTGCCTGAGTCTCTTGGCTATCATCTAACTTCGGTGC GTTATTTGTCTCTT  
AAAAGTTGCAACCTTAGAGGGCCTATTCTGAATCTCTTTCAAATCTCACCCGCATTGAGTATTTGGGCCT  
TCGCAATAAACTCCCTGAATGGAACAATACCACCAGGGATGTTATCCCTTCCATCACTAAATGCAATAGA  
CTTGAGTTTTAATCACTTATCTGGTCCGCTTGAAGATTTCAAGTCCAATTCATAATCTTGATAGAGTTAG  
AGGGCAATCAGTTGCAGGGTCATCTTCCCACTCAATTCAAACCTTGTGAACCTACAATATCTCTATCTT  
TCTTTCAATAATTTTAGTGGTTTTGTGGATGTCAGCTTCTTTCAAACCTCAAACAGCTTTCGTATCTTAGT  
CTTTCATATAATAATATCTCATTGACCAATGACAACAACGTTAATGCTACTTTGCCCGAATCTCTTATTGG  
GTTAGAATTGGCCGCATGTGAATTGAAAGAATTCGAGTTTCTAAGATCCGCAAAGAAGCTTCAGCAGTT  
GGATCTTTCAAATAATAAGATTCAAGGAAGAATTCCTAATTGGGCATGGTCGAACTGGATCTTTTCATTG  
CACGATCTTAATATATCCACAATATGCTGACGAGTGTGGATTCAATTCCTCTTCAATATCTATATACTATT

GATTTGCGGTCCAATTTGCTTCAAGGTTCACTACCTATTCCATCAAATTCCACTACATTCTTCTTCATATCC  
CATAATAATCTCACTGGAGAAATTCCTTCATCTATTTGCAACTTGACATCACTGATAATGCTGGATTTGGC  
GACAAACAATTTGTGTGGAGAAATCTGCAGTGTTTTGGAAATATCACTTCCCTCCAGGTTTTGGATATG  
CGCCACAACAATCTTTCTGGGAATATTCCAACAACCTTAAGCAATGGAAGTTTACTGAGAAGCCTCAACT  
TGCATAGCAATAAACTAGAGGGGAAAATTCCCCGATCTTTGGCCAATTGCAAAGAGTTGCAGGTTCTTG  
ATTTAGGAGATAATCATCTCATTGGCACATTCCCGATGTGGTTGGGAACCTACCAAAGCTGCAAGTTTT  
AAGCTTGCGGTTCAATGAATTGCATGGTTCCATCAGAACATCAAGGATTGAGAACATGTTTCCAGAGCTT  
CGAATCATAGATCTCTCCTCCAATGGCTTCTCGGGAAACTTACCCTTGAGTTTGTCTACATCTGAAAGC  
CATGAGGACAATTGATCCATCAATGGAAGCACCAAGTTATAGAGGAGATATATATTACCAAGATTCTATT  
ACAGTTGCAACTAAGGGATTTGATCGTGAAATTGTGAGAATCCTGTATTTGTACACCGTTATCGATCTTT  
CAAGTAACAGATTTGAAGGACGCATTCCAAGTATCATGGGGGATCTCATTGCAGTTCACATATTGAATTT  
ATCTCATAATGGATTGCAAGGTCATATACCGCAATCATTCCGGAGATTTATCTTCAGTTGAATCATTGGAC  
CTATCAGGAAACCAGCTTTCCGGGAGAGATACCACAACAATGGCTTCTCTTACGTCTCTTTCATTCTTAAA  
TCTCTCCATAATCATCTCCAAGGATGCATTCCCTCAAGGACCTCAATCTCTCACTTTTGGGAGCAATTCAT  
ATGAAGGAAATGATGGATTACGTGGATTCCCTGTTTCAAGAAGTTGCACATATGATCGGGTATTAGATA  
CAAATGATACCGTATCTGTACTAGACGATGAAGAAAGCGATTCTGAATTCAGAGTGATTTTCCGAAAG  
GTGCTCTTATGGGATATGGAAGTGGACTATGTATCGGATTATCCATAATATATTTTCATGTTGTCAACTGG  
AAAACCGATATGGCTTGCAAGAATCATTCTAGAGATGGAGCACAAAATTATGAGGGGAAGGAGAAAGA  
AGCAGCGAAGGCAAAGGAATTACAGAAGAAGAAATAATCATTTCTAGACAAGTTATAAGTTTTGACTTC  
AGGTAATAATCGGTGCTATATACTTTTCATTTTTTTCATTTCCAATAATTTCAAAGGGTCAGCATCAGTT  
GATGTTTAACTAAAATATTTTGATTACAGCGAGGAGCTAGTGTCTATGGAAGTGGAGAAAGGGGAAGAA  
GAAGTTATGGCAATGAATGGAACGAATGCCAATCAGTTTTTAAGCAATAATAATTGTCTAACTGAATAT  
TTTCGTTGAACAGTCTTAGATGTGGCTTCAATTCTTACTGTGTAGTGTAATTACAAATTTATGTAGTGTG  
TTTCTGTTGATATATAAAATCTATGAAATTTCTCAGTCTTACTGCTTGCCTAAGATGAGGCAACGCTGGG  
GCACCTAAATCTCATTCCCTAGTTACACTGTTAAGGCACTCATTGTAATTATGGATAATAAGATTGTTACGG  
CACTTATCAATTATGTGGAATGCAAATGATAATGCAAGTGAACCTCTGATTCATGCCTAGGTTAAAGAA  
AACTCTGCTGCTACACTTTTTAGCTACTTCAGAAACAGTAAATTTGTTGTATTAACTTCATATTATTATGA  
GACGAAGAAAGTATTATTTTTGACATTTTCTGGAAAGACTTTGTGCATTGATTTGAGAATGACAACATT  
TTGTGAACTTGAATTGATTGATGATTTGATATGGAGGCAGCAGTTCATACTTGACTTTTCCCCTTTCCTC

TCTCTTTTTGATAATAAAATTCGCAAGTAATTAATTTCAATATGAAAATTCAAAGTTAAAGGGATTTGTCT  
GATAAGTAACTTTTCATTGAAATTTCCGCAGCAAGACTCATTGCAATTACTTCATAATTCAAAGAACTGCAT  
TAATACTTCTAGGTGCAAGAAAAAAGATAATTGGAGGGACACTCTGTGCAAAAACCTGGTGTTATTTCCC  
TCTTTGATAGGCCTTACACGCCGAGAATCCAGATTATTCGGGATCCTAATCTGGATATCGAAAATCGAAT  
AGAAAATCAATTTATTTTTAGAAAAAGCCATTTCTCATTATAAATATGAGGTAAACAAGTCAATATCCTGT  
AATTATACCAAAAAGACACTATGGCATATGACTTAGTCGTGTCTAATATTTGAGAATGACATTTCTCTACT  
TTCTTTGAAATTTTCATAGGAAGACTTGTGCATTGACTTAAGAATAACAAACATTAATTTCCCTATTTCTT  
TTCAAATTTACTATTGGTGAAGGTGGAATTTGAAATAATTTCCCTATGCAATATGATTCTGGATTTGTTT  
TTAATTTTTTTTTGTTTGTAAAGAAAGCCTTTTCTTCTCCTTTTGGAGTAGCTAGGAATTTGCTTTGCCAT  
TTAGAGCCACTTTTATAACGAGGATATATGATATATATATATAAAGCTCTAAATGAAAAAGTTAGGGGG  
TATATTAGACCCTTTTCTGAATAAGAAAGTAAAACAACGTACAATTATTTTTAAGAAAAAAGATGA  
TTCTCTACTCCTTTTTTAAGCTTGTTTCTTAGAGAAATAAAACAACCCAAACTTGACTTGTGTTGAACAAT  
ATAAAATCCTAAGTTAGTTCATTGAAACCCAAAATAATAAAATAAAATATGATGATGGTCCCAGTAAA  
ATATTTTCTCTACTTCAGTTTTTCACTCTTTTATATCTCCTTACAGTTACTTTTGCTTCGATCGAGGAAGCAA  
CTTCCCTACTGAAAATGGAAAGCAACTTTCAAGAACCAGAACAACCTCCTTATTCGCTTCATGGACACCAA  
GTTCTAACTCATGCAGGGACTGGTACGAAGTTATATGCTTAAATGGTAGGGTAAACACGTTAGAATATT  
ACAAATTCTAGTGTCATTGATACCCTCTATGCTTTTCCGTTTTCATCTCTCCCTTTTCTTGAATATTTTGAAC  
TTAGCATGAACAAATTTTTAGGAATCATTCCCCCTGAGATCGGTAATCTACTAATCTTGTCTATCTTGA  
CTTGCCATGAATCAGATTTAGGCATAATTCCGCCACAAATCGGCTCACTAGCCAAGCTTGAGACCCTC  
CACATCTTGACAACCATTTAAGTGGTTCATTCCACAAGAAATAGGTTACCTAAGGTCTCTAACTGAGCT  
AGCTTTGTATAACAATTTTCTTAATGGTTCTATTCCCTGCTTCATTGGGGAATTTGAACAACCTGTCCTATAT  
GTATCTTTATGATAATCACATTTCTGGCTCTATTCCCTAAAGAAATAGGAAAACCTGTCAATCTTTTTGGAG  
TTTATCTTGAAACAAACCAATTAACAGGTCATATCCCTCCAGAAATAGGCAACTTGACCAATGCAAAATT  
GTTCTATGCTCCCTTCAATGAATTATCTGGTCCCATTCCCGCAGAAATAGGGAAGATGAAGTCACTTCAG  
GAATTAAGCTTACATACAAACAATCTTTCTGGTCTAATTCCAAGAACTACAGGTGACTTAATTGAGCTCA  
AATATCTACAACCTAATGATAATCAACTCGCTGGCCTAATTCCTAGAGAGATGGGGAATCTAGAAAACCT  
CAATGGTCTGGAATTATTCAATAATCAACTATTTGGCCTAATCCCTAGTGAGTTGGGGAATCTTAGTATC  
CTCTATCATCTGACATTATCCAATAATCAACTCACTGGTTCAATTCCTTCTCCTTTGGTAATTTGAGAAAC  
TTGCGAGTTCTGTATCTCCATGACAACAATCTGATTGAGGAAATTCCTTCATCTATATGCAATTTGACATT

CCTCATGTTCTTGCATTTGTCGAGAAACAACCTGAAAGGAAAAATTCTGCAATGTTTGGGTAATATCAGT  
ACTCTCCAGTTGGTGACTGTACATAATAATCTCAGTGGAGAGCTCCCTTTGTCTATTCGCAATTTAAC  
ATCACTACAGATTCTAAATTTGGGCAAAAACAATATAAAGGGAGTAATCCGCAATGTTTTGGCAACATG  
AGTGGTCATCTTGAGGTTCTTGATATGCAGCCAACAATCTTTCTGTGACTCTTCCAATGACTTTTAGAACT  
GGAACACTTAGAAGCTTCAACTTACGTGGCAATAAACTAAAGGGGAAAATTCCTCAATCTTTGGCCAATT  
GCAAAGAGTTGCAAGTTCTTGATTTAGGAGATAACCACCTGAATGACATCTTCCGATGTGGTTGGGAA  
CTCTTCCTAAGTTGAGAGTTTTAAGCTTGAGATTGAATAAGTTGCATGGACCCATTAGAACTTTAGGAAG  
TGAAAACATGTTTCTTGAGCTTCAAATATTGGATATCTCTCCAGTGCCTTCACGGGAAACTTACCTACGG  
GCCTGTTTAAACATTTGAAAGCCATGAGGACAATTGATCCATCAAAGAAGGCACCAAGTGATGGATATT  
ACCAAGACACGGTAGCTGTCGTAACAAAGGGATTTGAGCGTGAAATTGCGAGTATCTTGATTTGTACA  
CTGTTATCGACCTTTCAAGTAATAAATTTGGAGGGGAAATTCOAAGTATCATGGGGGATCTCATTGCAGT  
TCATACATTGAATTTATCACATAATGGATTGCAAGGTCATATAACCACCATCATTGGAGATTTATCTTCAG  
TTGAATCATTGGACCTATCAGGAAACCAGCTTTCGGGAGAGATAACCACAACAACCTGGCTTCTTTACGTC  
TCTTTCATTCTTAAATCTCTCCACAATCATCTCCAAGGATGCATCCCTCAAGGACCTCAATCCACACTTT  
TGAGAGCAGTTCATATGAAGGCAATGATGGATTACGTGGATTCCCTGTTTCAAAAAGTTGCAGCGATGC  
TCGGGTGTTAGATACAAATGATACCGTATCTGGACTAGACGATGAAGAAAGCAATTCTGAATTCAGAG  
TGATTTTTGGAAAGGTGCTCTTATGGGCTATGGAAGTGGACTATGTATCGGATTATCCATATTATATTC  
ATGTTGTCAACTGGAAAACCGATATGGCTTGCTAGAATCATTGTAGAGATGGAGCACAAAATAATGAGG  
GGAAGGAGAAAGAAGCAGCAAAGGCAAAGGAATTACAGAAGAAGAACAATCATTCTAGACAAGTA  
ATAAGTTTTGACTTCAGGTAATAAGGTGCGCTATACTATTCATTTTTTTCATTTCCAATAATTTCAAAA  
GGCTCAGCATCAGTTGATGTTTAAATAAGATATTTGATTACAGCGAGGAGCTAGTGTCTATGGAAGTG  
GAGAAAGGGAAGAAGAAGTTATGGCAATGAATGGAAACGAATGCCAATCAGTTTTTAAGCAATAATAA  
TTGTCTAACTGAATATTTTCGCTGAACAGTTTTAGATGTGGC

>PGSC0003DMG400005539 LRR-RLPs

ACAATTTATGACTATAAGAAGCTAAGACTCACAAACCCATGATTTTAAATCGCTTCTTCAGAACTTGACCCA  
ATTAAGAGAGCTTCATCTTAGTGGCATAAACATCTCTCCACCATTCTCTGAATTTTTCTTCTCATTTAAC  
AACTCTGAGGCTGACATATACAGGATTGTTTGGGATAATACCTGAGAGTATATTCCACCTGCCAACCTG  
GAAATACTTTTCTTAGGTTTCAATTATAAGCTAAGCGGTTATTTTCAAAGACCAAATGGAACAGCAGTG  
CATCTCTCGTAGAGTTATATCTCAGGGGCGTGAATTTTTCTGATAATTTGCCTGAGTCTCTGGCTATCAT

CTAACTTCGGTGC GTTATTTGTCTCTTAAAAGTTGCAACCTTAGAGGGCCTATTCCTGAATCTCTTTCAA  
TCTCACCCGCATTTGAGTATTTTGGGCCTTCGCAATAACTCCCTGAATGGAACAATACCACCAGGGATG  
TTATCCCTTCCATCACTAAATGCAATAGACTTGAGTTTTAATCACTTATCTGGTCCCTTTGAAGATTTCAAG  
TCCAATTCATAATCTGGATATATTTAGAGGGCAACCAGCTGCAGGGTCATCTTCCCCACTCAATTCAA  
ACCTTGTAACCTAACAGAACTTTCCCTTTCTTTCAATAATTTTAGTGGTCGTGTGGATGTCAGCTTCTTT  
CAAACCTCAAACAGCTTTCATATCTTAGTCTTTTCAATAATAATATCTCATTGACCAATGACAACAACGTT  
ACTTTGTCCGAATCTTTTATTGAGTTAGAATTGGCCGCATGTGAAGTGAAAGAGTTGGAGTTTCTAAGAT  
CCGCAAAGCAGCTTTGGAAGTTGGATCTTTCAAATAATAAGATTCAAGGAAGAATTCCTGATTGGGCAT  
GGTCTAACTGGATGTTTTATTGCAAGATCTTAATATATCCCACAATATGCTGACGAGTGTGGATTCAATT  
CCTCTTCAGTCTGTAAATACTATTGATTTGCGGTCCAATTTACTTCAAGGTTCACTACCCATTCCATCAA  
TCCACAAGATTCATCTTCATATCCCATAATAATCTCACTGGAGAAATTCCTTCATCTATTTGCAACTTGACA  
TCACTGATAATGCTGGATTTGGCGACAAACAATTTGAGTGGAGAAATTCGCGCAGTGTTCGGAAATATC  
ACTTCCCTCCAGGTTTTGGATATGCGCCACAACAATCTTTCTGGGAATATTCCAACAACCTTCAGCAATGG  
AAGTTCCTGAGCAGCCTCAACTTGCATGGCAATAAACTAGAGGGGAAAATCCCACAATCCTTGACCAA  
TTGCAAACAACCTGAAGTTCTTGATTTAGGAGACAATCACCTCAATGACACATTCCCCGTGTGGTTGGGG  
ACTCTGCCAAAGCTGAAAGTTCTAAGCTTGCGATTCAACAAATTGCATGGTCCCATCAGAACATCAAGGA  
TTGAGAACATGTTCCAGAGCTTCGAATCATAGATCTCTCTTACAATGCCTTCTCAGGAACTTACCTTCG  
AATTTGTTTCAACATCTGAAAGCCATGAGGACAACCTGATCCATCAATGGAAGCATCAAATATGGTGGA  
GATTCATATTACCAAGACTCGATAGCTGTCGTATCCAAGGGATATGAGCGTGAAGTTGTGAGAATCTTG  
TTTTGTACATCACTATCGATCTTTCAAACAACACATTCTGAAGGACATATTCCAACCTATTATGGGAGATCT  
CATTGCACTCCGTGTGCTGAATATATCTCATAATAGATTGGAAGGTCATATACCGCCATCACTTGGAAGA  
TTATCTTTGGTTGAATCATTGGACCTGTCAAGTAACCATCTTGTAGGAGAGATACCAGCACAAATTTGCTTC  
TCTTACATCTCTTGAAGTCTTCAATCTTTCTTACAATCATCTCGAAAGGGTGCATTCCCTCAAGGAAATCAA  
TTTCATACCTTTGAGAACAATTCATATGAAGGCAATGATGGATTACGTGGTTTTCTGTTTCAAAAAGTTG  
TGGGACAACCTTATGCCATATCTGGACAGCTAGACGGTGAAGAAAGCAATTCTGAATTTCAAGAGTGATTT  
TCGGAAGCTGCTCTTATGGGGTATGGAAGTGGACTATGTATTGGAATATCCATAGTATATTTTATGATG  
TCAAGTGGAAAACCGGTATGGTTTGCAAGAATCATTGTAAAGCTGGAGCACAAAATAATGATGAGAAG  
GAGAAAGAAGCAGCGAAGGCAAAGGAATTGCAGAAGAAGAAATAATCACTAATAATATTACTGTTATT  
TCTTTAAGGAAAAGATGTAATAAGTTGTAGACTTACTATCGTTAAATCCTGTTTGCTTAAAGTGTGTAGC

ATCATTAGGGTGAGATAATCTTTAATGATAAGTTATATGCAATATAAAATCTTATGACC

>PGSC0003DMG400005542 LRR-RLPs

ATGGGGTATGCAGTTATTATGCTCTTAATTGTGTTTTCTGTCATGAAGTTTCTCAATATCCATATTACCT  
CACAAACATCAAACCATTTCACTTCTAAAATTCAAGAACACCTTTACTATAGATCCGTCAGCCTCTGGCGT  
TTTTCACAGTAGAATCTTATTATTGTCCGAAGCCTTATCCAAAAACGAGTTCATGGAACACGAGTAGAGA  
TTGCTGCTCATGGGATGGAGTCGTATGTGATGACATCACTGGGCATGTCATTGAACTTGACCTCAGTTGC  
AGTAATCTCACTGGAACCATCGATTCCAATAGCAGCCTATTCCAACCTCTCGCATCTCCAAAGGCTTGATCT  
TTCTTGAATAACTTCTCCAATTCTCATATCTCCCCTGAATTCAGCAAGTTTTCGAGCTTGATGCATCTTGA  
TCTTTCTGGGTCCTATTTCTCAGGTCAAATTCCTTCTGAAATCTCTCATCTTTCCAAGTTACACTCTCTTCGT  
ATCTCCACATTTTATTACTTTTACAGTAACAACCTTTACAATAAAAAGCTAAGACTCACAACCCATGGTTTT  
AAATCGCTTCTTCAAACTTGACCCAATTAAGAGAGCTTGATCTTAGTGGCATAAACATCTCTTCCACCAT  
TCCTCTTAATTTTTCTTCTCATTTACGACTCTGAGCCTGTCAGAAACAGGATTGTAAGGGATAATACCTG  
AGAGTATATTTACCTGCCCAACTTGGAATACTTGACTTAGGGATCAATCATGAGCTCAATGGTAATTT  
TCCGAAGACCAAATGGAACAGCAGTGCATCTCTCATTGAGTTAGATCTCCGTGGCGTGAATTTTTCTGAT  
AATTTGCCCGAGTCTCTTGGCTATCATCTAACTTCGCTGCTTTATTTGTCTCTTGAAAGTTGCAACCTTAGA  
GGGCCTATTCTGAATCTCTTTCAAATCTCACCCGCATTGAGTATTTGCACCTTAATCGTAACTCCCTGAA  
TGGAACAATAACCACCAGGGATGTTATCCTTTCCATCACTACATAGAATAGACTTGAGTAATAATCACTTA  
TCTGGTCCCTTTGAAGATTTCAAGTCCAATTTGCTTCAAGGTTCACTACCCATTCTATCAAATTCCACAGTA  
CTCTTCTTCATATCCATAATAATCTCACTGGAGAAATTCCTTCATCTATTTGCAACTTAACATCACTGATA  
ATGCTGGATTTGGCGACAAACAATTTGCGTGGAGAAATCCGCAGTGTTCGGAAATATCACTTCCCTCC  
AGTTTTGGATATGCGCCACAACAATCTTTCTGGGAATATTCCAACAACCTTTCAGTAATGGAAGTTCACT  
GAGGAGCCTCTACTTGATGGCAATAAACTAGAGGGGAAAATCCCACAATCCTTGACCAATTGCAAACA  
ACTTGAAGTTCTTGATTTAGGAGACAATCACCTCAACGACACATTCCCCGTGTGGTTGGGGACTCTGCCA  
AAGCTGAAAGTTCTAAGCTTTCGATTCAACAAATTGCATGGTCCCATCAGAACATCAAGGATTGAGAAC  
ATATTTTCAGAGCTCCGAATCATTGATCTCTTACAATGCCTTCTCAGGAACTTACCTTCGAGTTTGTTT  
CAACATCTGAAAGCCATGAGGACAGCTGATCCATCAAAGGAACCATCAAATATGGTGGAGATTCATAT  
TACCAAGACTCGATAGCTTTTCGTATTCAAGGGATATGAGCGTGAAGTTGTGAGAATCTTGTTTTGTATA  
TCACTATCGATCTTTCAAACAACAATTCGAAGGACATATTCCAACCTATTATGGGAGATCTCATTGCACTC  
CGTGTGCTGAATATATCTCATAATGGATTGGAAGGTCCTATACCGTCATCACTTGAAGTTTATCTTTGGT



TGAATCACTGGACCTGTCAAGTAACCATCTTGTAGGAAAGATACCAGCACAATTTGCTTCTTACATCTC  
TTGAAGTCTTCAATCTTCTACAATCATCTCGAAGGGTGCATTCTCAGGGAAATCAACTTCACACCTTT  
GAGAACAATTCATATGAAGGCAATGATGGATTACGTGGATTTCTGTTACAAAAAGTTGTGGGACAAC  
TATGCCGTATCTGGACAGCAAGACGGTGAAGAAAGCAATTCTGAATTTCTGAGTGATTTTCGGAAAGCT  
GCTCTTATGGGGTATGGAAGTGGACTATGCATTGGAATATCCATAGTATATTTTCATGATGTCAACTGGAA  
AAACCGGTATGGTTTGAAGAATCATTGTAAAGCTGGAGCACAAAATAATGATGAGAAGGAGAAAGAA  
GCAGCGAAGGCAAAGGAATTGCAGAAGAAGAAATAA

>PGSC0003DMG400005590 LRR-RLPs

ATTGATTTGAGCAATTTGGAGTATCTGGATCTCTCGTATAACAATATAGAGAGCTTTGTGACTACCAAAG  
GTACACGAATCAATGCAGTTGCTCTAATGTTGAATGTTTTATTTAACCTTAACACATCCTACAGAATAAA  
ATACATCTCTACGGACTTTAGATTGAAAATTGTGGGATACAAATTAGATTTTAATAAGATCCAACCTATTCA  
TTCTTATTTAAAAATGTATATGATTTATTTATTCACCATTTAACAGGTAACAAAAGAATAAGTTCTCTGCG  
GAATTTACAATTGGGAAGTTCCTACTCCAACCTCAAGCAGAGTCATAGAATCCCTAAAATCATTCTCTTCTC  
TTAAATCACTTTCTTATGAATTTAGTGATCTCACTTCTCCAACCATAATTTACGGTAAGCTCAAATTCATAT  
ATACCTTAGCTTACTTCTATCGCCACTCTTTTCTTTTGATATGTACATTTAGTTTTCTTTTCATTTTTTGGACT  
CTATGATATAAGCATTAAAGAAATCTGAGCACGGTGGAGCACCTATATTTGGAGGGATGTTCTTTAAATG  
ACAACCTTCTCCCAAACATTGGACAAATGCCTTCTCTCTTGGTGTTTCAGTATAGCATTGGTGACAATGAT  
GGCACCTCCCTAATCAAGGTACCCTATTTTTCTTTTTTCCCTAATGCCCGCATTTTCATGTTGGAGGTC  
TGATTTTAGCATGTTTCAGTTGATCAAACATTATAATAATTTTTGTTTATTACCAAACACAAGAAAATAAGT  
AACACAAGCCACCTAATTTTCTAGAAAATATTTTCTTCGTATCGAACACATCCATAGAGACATAAAAAA  
AATATAATAAGATGTCACCTGTTATAGAAATTTGTTTTAGCTAAATGTTTCTTAATATATATATATAGGTT  
GGTGTGAACTCAAACATATTCAAGAGCTGGATTTTTTCAGCCAATAGTTTTCGGGGAACACTGCCTTCATG  
TTTTGGAAACTTGACATCACTTCGACGATTGAGTTTTGGGGGAATTACTTCAGAGGAAATATAGCGTCA  
GATTCTATTTGGAGGAGACTCACATCACTTGAGTACATCGATATTTTCATATAACCAATTTGATGTTCTCT  
GTCATTCAGCCAATTTTCCAACCATACAAAATTGATCTACTTGGATGTTAGTTCTAATACAATAATTACAG  
ATACCAAATTCAAAATCAGATCCCAAATTTCCAGTTGGAGTTTTTGGCTATCAAAGGATGTAAACACCTT  
AAAAAATTGCCTTATTTCTTCACTACCAATATGACTTGAGGATTCTTGCTATTGGAGGAAATCAATTGCC  
CGGGATCTTTCCAACATGGTTGTTAGAAAATAACACCAGACTTGCAGGGATTTATAGTAGAGATAATGC  
TTTCAGCGGATCATTCAAGTTGCCATCGAGTTGTCACCTCCATCTAGAGACAATTGATGTTTCTAATAACA

AATTAAATGGGCATATTCCAGATAAAATGAATTCAGCATTCCCAAAGCTTACTTATTTGAACATGTCACA  
AAATTATCTTGAAGGTCCTATACCTTCCAAGATAAGTAGCATTACATTTACATAATCTAGACCTATCTCACA  
ATTTCTTATTTGGAGGAGTTCCTAGTGATCTGGCAATTGGTTCTCCAGTATTAGCTTACCTTCGATTGTCA  
CACAACAAGTTAAAAGGTCAAATTTTTCCAAGGATGTCAAACCAAAGATGTTATTCTTTTTGTTCTTGAA  
TGAAATAACTTTGAGGGACCACTACCTTGCAACATGTTTATCACATCCCTTATTGTATTGGACGCTAGC  
AACATAATTTCTCTGGAGAGATTCCGAGATGCATTAGGGATAATACAAGATTGTTACAACCTTGATTTAT  
CCAAGAATCATCTCAAAGGTTCAATTCCAGTTGAGATTTGCAATTTAAAGCTCATTGAGGTCTTAGCTATA  
TCAGAAAACAGGCTTTTCAGGCTTTATTCCTTCTGTGTGAATTTTACCTCTTGAACACATCCATCTACAG  
AAAAATCAATTGGGTGGTGAATTGGAACATGCACTTTTCAACTTATCTTCTCTGATAACTTTGGATCTTGG  
GTACAACAATTTTACAGGAAGTATCCCACACACCATAGGCTCACTTAATACTCTCAACTACCTTCTCCTTA  
GCAATAATCAATTCGAAGGAGAGATTCCAAGTATGATGCTGAACAAGCTATCTATCGTGGATTT  
ATCTTTCAATAAGCTTTATGGTTCACTCCTTCCTTGTTGAGCTACTTAACACAAGCCAAAAGGATACAG  
AGATAAGTAAGACCAATTATCCTACGACTTCTAGGCGTTCATGGATAACTTTTTTGGCCTGGATGCGTTT  
GAAAAGGCACTACCACGATAGTCATGGATTTCTAAGTGACATATTTCTGATGGATGTGGAAACTCAGGT  
CCAGTTTTCAACAAAAGAACTCATACACTTATAAGGGAAGCATTCTAAAATATATGTCAGGTATGGAT  
CTCTCAAGTAACAGATTAAGTGGTGAATTTCCCGTTGAGCTAGGGAAGATGAGTAATATACCTGCATTG  
AATCTATCGCACAAACCATCTCATCGGAAGAATACCAAATACCTTCTCCAATCTACAGAAAATTGAGAGTT  
TAGATCTTTCCTACAACAACCTTGAATGGGAGCATTCTGTTGGTCTACTTGAGCTAAATTCTTTGGCAGTA  
TTCAGTGTTCATACAACAACCTTATCGGGTGCAGTGCCTGATTTTAAAGCTCAATTTGGAACCTTCAACA  
AAAGCAGCTACGAGGGAAATCCTTTTCTTTGCGGTTATCCATTAGACAACACGTGTGGCATTCTAAATT  
GTCATATACCTCCAAGATTAATGGAGGTGAGGAATCATCAGACTTGGAGGATATTCAGTGTTTTTACATT  
GGCTTTGTTGTGTCTTATGGAGCGATCTTGTGGGATTAGCTGCGGCACTCTGCTTCAATCGTTATTGGA  
GAAAAGCATGGTTTAGGATGATAGAGGCATTGATGTTTTATGGTACTATTTTCTTGGACAACGTTGT  
TACACCCATCAAGAGTATATGGTACAGGAATGTTGGTTAATTCTAGGTAGTTGTTTTACAATATTGTTGT  
ATGTGTATCACCATTATTAATTATATTGTCATTCTGTTTTATCAATATTCGACAAATAGGATCTGTTTGGAG  
TAGTTACAACCTCATAATTTAATACCCCCTGCATAGCTTCATTAGTGTGCTATTTATGTAGCCG

>PGSC0003DMG400005600 LRR-RLPs

CCCTGAGACTTAGTTACCATCACCTTCCATTTGATTTGAGACAATGCTTTGCATATTGTGCAGTATTCCCA  
AAGGATACCGAAATGGAAAAGCAAATCTAATCTCTCTCTGGATGGCACACGGTTTTCTTTTATCGAAAG

GAAACTTGGAGCTAGAGGATGTAGGTAATGAAGTATGGAATGAATTATACTTGAGGTCTTTCTTCCAAG  
AGATTGAAGTTAAATCTGATCAAACCTATTTCAAGATGCATGATCTCATTGATTTGGCAACATCTCTA  
TTTTCGGCAAGCACATCAAGCAGCAATATCCGTGAAATAAATGTAAAAGAATACCCACATATGATGTCG  
ATTGGTTTCGCAAAAGTGGTGTCTTCGTA CTCTCTTCTCACTTGCAAAAGTTTGTCTCGTTGAGGGTGCT  
TAATCTAAATAATTTAAGACTTAAGCATTACCGTCTTCCATTGGAGATCTAGTACATTTAAGATACCTAA  
ACTTGTCTGGCAATCGTAGAATTCGTAGTCTTCCAAAGCAGTTATGCAAGCTTCAAATCTGCAGACTCT  
TGATCTACATAATTGCTACTCTTTCTTGTGTTGCCAAAAGAAACAAGTAAACTTGGTAGTCTCCGAAATC  
TTTTACTTCATGGTTGCTATGAATTGAATTCTATGCCACCAAGGATAGCATCTTTGACATGCCTTAAGACT  
CTTGGTTGCTTTGCAGTGGGAAGGAAGAAAAGTTCTCAAATTGGTGAATTACGAAATCTGAATCTCTAT  
GGCTCAATTGAAATCACGCATCTTGAGAGAGTGAAGAATGATATGGATGCAAAGAAGCCAATTTATCT  
GCAAAGAAAATCTGCATTCTTTAAGCATGAGATGGGATGACGTTGAACGTGCACATAGATATGAATCA  
GAAGAAGTTGAAGTGATTGAAGCCCTCAAACCACACTCCAATCTGACTTGTTAACAATCAATGGCTTTA  
GAGGAATCCGTCTCCAGACTGGATGAATCACTCAGTTTTGAAAATGTTGTCTCTATTGAAATCAGGGG  
TTGCCAAAAGTCTCATGCTTACCACCCTTTGGTGAGCTGCCTTGTCTAGAAAGTCTAGAATTATGGAGT  
GTGTCTGCGGAATTGGAGTATGTTGATTCTGGATTCCCTACAAGAAGAAGGTTTCCATCTCTGAGAAAAC  
TTATTATAGGTTATTTTGATAATCTGAAAGGATTGCTGAAAAGGAAGGAGAAGAGCAATCCCTGTGC  
TTGAAGAGATGGAGATTTACAGGTGCCCTATGTTTGTTATTCCACCCTTTCTTCTATCAAGAAATTGGTAG  
CTTATGGGGAGAAGTCAGATGCAATAGGTTTCAGTTCGCTATCTAATCTCAGGACTCTTACTCCCTCCG  
CATTGGCCATAACGAAGAAGATACTTCGCTCAAAGAAGACATGTTCAAAGGCCTTGCAAATCTCAAGTA  
CTTGAAAATCTCTTTCTTTAAGAATCTCAAAGAGCTGCCTACCAGCCTGGCTAGTCTCAATGCTTTGAAGC  
ATCTGGATATTTATCGGTGTGACGCACTAGAGAGTCTCCCCGAGGAAGGGGTGAAAGGTTTAACTTCAC  
TCACACAGTTATCCATAACATACTGTCAGATGCTACAATGTTTACCGGAGGGATTGCAGCACCTAACAGC  
CCTCACAAAATTATTAGTTACGTATTGTCCAACACTGGCCAAGCGATGTGAGAAGGGAATAGGAGAAGA  
CTGGTACAAA

>PGSC0003DMG400005972 LRR-RLPs

AAAAATTGTATTGTTATTGAAACCAAATACTACATTAGACATGACAACCTTCTCATTGTACATTCATTTACA  
TTCTTCTACTTCTTTTTTCACTTCCATTCAAAGTAATCACATCATCAGCAAAAAGTGAAGCTGAGGCTCTTA  
TCAAATGGAAGAGTACTAACTTATCTTCTACTTCTTATTGGATTCATGGTCCATTTCCAATCTCGAAAAC  
TTGTGTAATTGGACATTCATTGCCTGCAATGCTGATGGAACAATTTCCGAGATCAATCTTTCTAATGCAA

CACTCTCAGGCTCTCTTGATCACCTTGACTTCACTTCATTTCCGAATCTCACGAGTTTCATTCTCAATGGCA  
ACAACCTTAGTGATCGATACCATCGAATATTGGCAATGCCTCTAGTCTTGAAGTTGTTGACTTCTCAAC  
AATTCATTTCAAGGGAAGATTCCATCTTCAATAGGCAAACCTTAGAAATCTTCAAACACTTGATCTTCGAAA  
GAATCGTTTGAACCTAACCATTCTTCTGAGTTAGGCCTTTGTACAAACCTCATTATCTTGGCTCTAGCAG  
AGAATGCTCTGCAAGGAACATTGCCTATATCTTTGCCTCTTTGATCAAGTTATCCCAGTTGGCGTTGTCC  
GATAATTTTCTTCTGGTGAGGTCTCATCAGATCTCATTTTACCAATTGGACTGAGTTGATAGCTTTGCAG  
CTTCAAACATTTACACTGATTTAGGAGATAATCACTTCAACGACACATTCTAGTGTGGTTGGGAA  
ATCTGTCAGAGCTGAAAGTTTTAAGCTTGAGATCAAACAAATTCCATGGACTCATTAGAACGTCAAGGAT  
TGAGAACATGTTTCCCGAGCTTCGAATCATAGATCTATCTTATAATGCCTTCTCGGGAAACTTACCTACGA  
GTATGTTTCAACATCTAAAAGCCATGATGAGAGTTGATCAAACAATGAAGGCACCAATATATCTTGGAGT  
GTACAGTTATTGCCATGATTCTATGACAGTTGCAACCAAGGGACGAGAGCTTGAACCTGTTAGAATTTG  
ACAACCTACACCACCATTGATCTTTCAAGTAACAGATTTGTAGGGAATATTCCAAGTATTATGGGAGAAC  
TCATTGCACTTCGGGTGTTGAATTTGTCTCATAATCAATTGCAAGATCATATACCACCATCACTTGAAAT  
TTATATGTAATTGAATCATTGGACCTTTGTTAACCATCTTTAGGAGAGATACCACAACAACCTTGCTTC  
ACTTACGTCTCTTGAATTCTTAAATCTCTCCTATAATTATCTCCAAGTATGCATTCTCAAGGACCACAATT  
CTCTACATTCCAGAACAACCTCATATGAAGGTAATGTTGGATTACATGGATTCCCAATTTAGATGGTTGT  
GGCAATGATCGTGTATCTGAAACAAATTACACCGTATCTTCTCTAGAAGATCAAGAAAGCAACTCTGAAT  
TTCCAATGACTTTTGGAAAGCTGCTCTGATGGGCTATGGCAGTGGACTATGTATCGGAATGTCCATAAT  
ATATTTTATGATCTCCACGGGAAATCCAAGATGGCTAGCAAGAATCATCGAAAACTGGAACACAAATT  
TATCATGCAAATGAGAAAGAAGCAACAAGGTCAAAGGAATTACAGAATAAGAAATAATCGTTTCTAGAC  
AAGTTATAAGTTTTGCTATTCAATCAAGCTCTACATTGATCTTTAGTTTATTGTAATTTGTAACCTATTATGA  
TATCTCATTGAGTGCTTCAGCTTCATGTGATATAATAACTGTACTATTTCCAGTGTGACTAACTGCAAC  
ATGTACTTTAATTTCTGCCTTTCTTACATTTAGACAGGAAACACAAAGGACCAAATAAATAACTGGACAAT  
ATATGGGCAGTAGGCCAAAAGAGAAAGAAACAAACCATAAAATAGGTTACATAATGAGAACTAAATAC  
ACATTACATATGAGGTATGGTCAAAGAATCTGCCAAATTCATTCTTGACATGAACCTTCTCGGGTTCA  
GGGACTCGTATACGCACTCCCTACAATATAACAAGGTACTTGATTACAATTAAGGGTAGAAAACAGA  
GCAAAGAACACAATTTAGATAAGTTTGGTCTCACTTGTTAACTAGCATCTATGGATACGAGTGATGAGT  
GAGACCATGACAAGCGTATTTGGCGCCAAGAATATGGAGCTCGCTACCCAAAGAATGGTCAAACCTAG  
AGTACAGGCCCTAGCTAGTATCATCATAACGGCTTAAAAATTGGATTATACAAGGATATACATGTTCTGC

GGCCTGCAGGCACCAGGAAGAGTATAAGTTGTTATGCAATAATAGAAACGGAAAAATAATAACAATGC  
ACATGCAAAAGATGCCTATTTACGGAGTTGTGAAAGTAAATAACGTATCATATTTCTAATCTAGGTAT  
ATTTAACTCTCAGGTTTACATAAGGAAACAAAAAACATTGAAAGGCAATTCCAATGTGACTAGGCAC  
CTCTCCACTTCCAGCATCTTTCTATTCTTTATCATCCTTTCTATACTCTGTCTGCTAATCAATCAACT  
AGACCTCAAATCCTCAATCCTATATCGGTAGGGTTTGGTTTTATAAATTCTCCATATCCAGTCCGGACTAT  
TCAGGTTAATCTCATTCTAATACTAAATAATGTCTTCAAAGCAAGCAAATTAATTTCTCTAAAACCTCA  
CATTTATTCCCAAATGAATACTAGTCTAAATCCAATCAGTTAATGTCACTCATATAGCTCCTTTGTTTCCA  
TTGTATTCTGTTCTTGTATTCCAAAAGAAGTTAAAAATTGTTAAAGTTTACATACCATGCGTCCCTCCACC  
AAGTCATAATGAGCATAATGCTGACCATTATCATCCCCAATACTTTGTAGGTGACCAAGTGCTCGGGGA  
TAAGCTTTGCCGTTTCTGCTTGAACCAATGTGTTGCAAGAAAAGAATTGTTAGAAAACCTTATCATCCTCTG  
ACAGAAAAATGAGCGGAAGTACTATGAAACATACCGCACACTGCTTCTGGTGGGCAGATTATGTCTTTA  
TCTCCAGCAACAGCCAACACGGGTACATTGGTTTTGTGAAGATTATCCTTGTAGAATATTTTACCACTTCT  
GTCACGGAGTCCCCCTTCTCGAAAAGCTGTAGTCAACTGCAAATAAGTTTAGCAGGAATAGTACCTGC  
CAGAAGATCTATTAGAAAATCTAAGTAAGAGGTACATGTGAAATCTCAAGAGAACATAGAAAGGGCGT  
GATCCCCAAAGGAATTTTTTAACAAAAGAAAGTGAACCTTTCAGGATCACCGTCAGACTACAGCCCTTATA  
AATCAGTTATGATAAACTATCCTTACTTTGATGGAAACACTCTTCCATTGAAGATCATCTATCAACACCGT  
TCCACAGTGTCAAGAAAACAACACAGGAGTGAAACTTGTGGGAGCAAAGAGTCAATAGTTCATCAAAC  
AAAGAGTCAAATAAATATATTGGTATATGCAGCTCTTTGTCAGAAGAGAAAATATCTAGCTGGCAAATA  
AATACAGCGGATGTTTACTTGATATAATTTTCTTTTTCAATCTGAAGATGTTAATAGTTCCTTCGTCGCTC  
ATTCTTTATGCGAACAAATAAGAATTAAGAATCAACTCTCAGTCTCTCACATAGTTTGTTCCTACTGATTA  
CCTTATTGCTCAGAAGCCTATAAGGAAAGACCTTTTTAGTTTTTAGTACCGACTCCTCTTGAGGCCAAGA  
AGGAGACCAACTAGACGAGACAGACCATTGTTCACTTCATAGGTTGGTTATAAGCAAGTACAAATCA  
AAATTCAATTTGGCTTGCCAAAGGACATACTTCAAACCTTTGGCTGTTCTTCTTGTATAACGCTGCATGAC  
TACTGTGAAAGATGAGATATACTAATAATCATAATTAATAAGTACATTTGCCTTCTAACTGATACCCATG  
AGGATGTATCTGAAATGTAGAATATTAGTTCAACTCAGACTCAACATATCATCCAGACAGAAAGTGGAG  
GGGAAAAGAATGTATTGGTGCAAAAACGCTGTAGACAGGAATGTGGGGCATAGCCAGATGGTCATTGA  
ATCATTCTTCAGAACATGTAAGTTTCTCACTGTTATCTTTAAAACCTCACTAAATATCTATGCCTATAC  
AACTTGAAACCTGCCTGCTCTCCATATAAATAAATTATAAAAACAAGAGGACCATAAATTTTTACAGTTCAC  
AATCAATTAATACTCCCTCTGTCCCAATTTATGTGACTTATTTTCTTTTAAAGTCAGTCCCAAAAAGAATGA

CACATTTCTATATTAAGTAACAATTTAACTATAAAAATGTCTATTTTACCCTTAATGAAAATGATTTACAGCC  
ACACAAATTCCTATGATTCATTTTGGACCACAAGTTTTAAAAGTTTTCTTTCTTTCTTAAACTCCGTGCCG  
AGTCAAACCTACCTCACATAAAATGGGACGGAGGGAGTAAGAAATACTGCTTATTGCCATTTAAGCACT  
TACAGAAGTTATTTAATACGAGCTTTTTTCAGCAACTCTGGATGCATCATGTCTGCAGCTGATATTAATCA  
TTAAGCCAAGACAACACATAAGGAGGGCGAGAAGAAAGAGGATAAGCTGCTGCAAGTAATGCTCCTAA  
AGGGACAACAGGTACATTGAGAGCTTGGGCAGGATCAGCCTGCAGCCAAGGTAAATAAATATAAGAAT  
ATGCTGAAAGGGCTTTTTGCTGCACAACGAGAGTTGAAAGACATTTATTTTTAGCTTACAAGGGGTAGG  
AGCAGTCTGAGTGCAGACTTCGAAGATGTGTAATCCAGTGATGAAGCCAAAGTTACAATAGCAGTTAAT  
CCAGGCTCTCTTCCTTGCAATCCTTTCCAAGATAAAACCAGAAACATATTTAAATTATGTCATATCTGTAT  
GATTCCCGGATGTAGTCAGTCTGAAAATATTTTTTTGAGACTGTGCCCACTGCACATTAACAAGGAATCA  
GACAATGCTCCAAGTGACTTATCTGTTAGTTGCGAAACCTTTTTACATCTAAAACCAGGTCAAATTCCTTC  
CAAATCAAATTGTCCCTTACACACTGTTAAAACGTATGGATAAAGTATAAAATCTTGCCTAGCTCCCTATA  
ATCTCAATAAGGTCAAAGATGGCTCATTTTCAGCTCTGTATGAAAGACGCTAGTAAGCAGATAAGTCCC  
ACTGTTAACCAGATCCTGTTTACCTTGGTGCACCCTATCATGGAATTTTTAAGTTAATAGGAGTACTGCAC  
TTGGTGGCTATTACAACCTATTCTCCCAAAGTTGTTGTGAACTATAGCATCTTTCTTATTTTTCAGCAAAAA  
GCTTGTGAAGTTGAGTCTGAAGATTTTGTCCATGAATATTAGGAATTAAGAACAATAAGTCAAGA  
GGAGACCAGGTTAACTCAAAGTTGCACCAAGTGAAGTGGTAGCCTTTGGAATTTAATCCAAGACTAAA  
TCGTATGATACTCCAGCAGGTTTCATGGAATAAATTTCTGGAATTATACTGCCTTCTTTATTTAAATAAAAT  
GTTTAAATATTACTGTTTTCTTATCAACTGCAACTACAGAAAGGATTCTTTGTTACTTTTTCAAACACTTG  
CACATTAATTTATTAGTCTCTTAAGTGGCTCATAAGTAGACCCGCCAGATCACGTAAGTGTAAACAACATT  
AATTCCATATAAACAACGAATGAATCTTACCACACTGTGATAGCCAAGCATAACAGTAATATTCCTCCATA  
GAATGTCCAATGGCAAGAAGTTTACCATCTTTTGGTGCAGTTTGGGCCTTAATGTATTCCATCTAGAATG  
AAAATAAATAATTAGACTAGTCAGAATAATAAATAAGAGTGAAAAATCAACAAATTCTGAATTTCACTT  
GGCTGCGTAATCTCAAGGACAATAATATCTTTATATTCTACAACATGGGAATCTGTCACCTCACCGCAGC  
AGGAACATCCTCTCCAGGTAATGATCAAAGTCCAATCATACTTGACAATCAAGTCAAGCTGTTTCTGG  
AAATCTTCTATGGTAGTGGTTAGACGTTTCATGAAGGTCAACTAACGGAGAAACAGAACGTTGGCCTTCT  
TCAATGATATTTACTAGCTTTTTGGCTAAGATCCTTTACTTGGTCAACAACGGCAGAGTTTTGCCCTGTCTC  
CAGCAGACTTAACAACCTTCCCCTAGTCTCGTTAAAGCGTTCATAAAGAAAGGAATCCTCTAATAATTTT  
GATATTTGATCAAATAGTTTAGCAGACATAATCCTTGATTGGCTTTCATTGAGGAAGCCAGAGACTCTTT

CTGACAAGCGCATAAATGTTTCCGTAAGCTCGTTTACTACTCTTGACTCATCCACATTGTTGCAATAGCT  
GTGGATTCTTCTTTGACCACAGCTGTGTCAGACTCTTCTAAGGTACTCTGGGGATCTGTTGACTGCTGTG  
CTGCAGAAAGAACTTTGTCAGTAGCATTATCAGCGGCAGCTTCCATCTGTTCTGAGACTGCAATTGCAGT  
CTTCTCAATGTTTGTGGAATCTGACTCCTGCACACTCAACCCAGCTCCACGAAGTTCAAGAACCCAAGTG  
TCAAATCCTTCACCAGACATGTACCGGGCGAAAGATGACTGCATAATTATTTTTAAAAGTAAAGACCGTG  
ATTAATAACTTTTAGAAAGAATTTAAAAAACCAGCCATACTATGTAAGATTTCTTTGATAAGCAGGAT  
GGACATGGTTGCCTGAAGTGATAAAGAATTCTAACCTCCACTGAAGAGTAGGGTGCACATACTTGCTT  
CAAGTGATAAAAATGAACTTAAAAGGATAAGAAGATGCATCAACAGAACTTTAAACAAAAAATAGACAA  
GAAATAATCCCAGTGAAATCAAGTTGACACTAGTTATTGCATTAACCAGCAGACATTTAGATTTGTCTCA  
CTAAAAAAGAAAAGATAGAAATCATCACTAGCAACTAAGCAAAAAATCGCCATCACAATTCATATTTAG  
AAATGTACAATCACAGAGAGTGCTAGCCACATGACTACCATCAACACCTGATTGATGCAGCCATAAAGC  
CATATAAAAAAAGGAAGATGAAATAGATAACAAGCCAGTAATAAAAAAATCACACAAGTAACTTTTA  
TACGCTTGAAATGCATAAAGTATGAGAAAAGGACGAAGTTTTTAACCGACCCACCATTTTGATCACCGCA  
CCACCATGTGTGCAGAAGGAAGTAGATGCAGATGCACTAGGAACTAGTTACCCTAGGACCGTAAACAAT  
CCATTTTGTATTATCTAGGGTCGGGATGTGACCCAACTACTTACAATGACCCACCCGTTGACACAGGTG  
GGGAACTACTAATGTTCTTGATCCCTAATTATATAATATAAGTATCCTTTTGATCAAAAAAAAAA  
AGTAGTAAGGATAGTACAACATCAAACCAGGGTTTACTCTAAAAAATTTGAGCATGCCATAGAATTCTA  
CCAGATTCAGAAACAAGAACCACTCCACGAAATAAAGAGTGAACTTTAGTGGAACCTGACATATCCAC  
TAAGCACTGATAATATACACATTTGACATCTGTCATTATGATCTATTAATGTGGCTATCAATGAACGATC  
CATGAAGATCCCCTAGTTCTGTTACCTATACAGGCATAAATCTGCAAATTAGAGTGTCCCGGCTACTCTT  
TCACGCAATACTGGACATAACAACAAACAGAAGAATGCACAAAGAATGGAGAGAAGGCAGACGAGTAT  
CATACCCAGGAGCAAGATCATATCCAATAGCATTAGTCCCCACACCAGACAACAGAAGCAGGGGATGA  
TTTCTCTTTGGAGCCTATCATCATCAAAAATCACACACCCTTAATGCAAAGCTCAAATCCTTGAACAAAA  
AATCATGTAACAGAAGTAAACCTTCTAGTATCACTCCCTGTGTTTCATTTTATATAACAGTATTTGAT  
AGAACACAAAATTTAAATATTCAATAGTTGAATTAGATAAAATGGCGTCAAATATTCTTAATGCCTTCAT  
GTCTTATATATTGGGACCAATTCTATATGACCACATTTACTTCAAGCCGAGTATCTATCAGAAACGGTCTC  
TCTACCTTCACAAGGTACGAATAAGGTTGCATTCGCTCCACCCTCCCCGGACCTCACCTGTGAGATTACG  
GGTTGTATTCTCTATGACCACATTTAATTGATCGCAAAATTTAAATTTGAACATATAGAAATGAAAGTG  
TCGAATATATTATTTTTTTCAAATTGTCATACAGTTAAGAGTAACAGTTCAAATTAAAAAACATAAAAAAT

TGAACCTGAGGAGGAGGAATGTAGCGCCAGAGAGCAAGTTTCCAATCGGAATTATTAACAGATACGTA  
GTGGAGTTCATCGGCAGTGCATAACGATGGCTTATTACAAACCTTCTGGACTGTAGTATCGCCATCATTG  
GTGGTGAAAGCTCTGAGTTTAAAGGCGGAGTTCACCGTAAAGCAGCAGTTCGGGGAGTTCCGGTATGA  
AATGACGGCGGGAGGAAGTCGCCGGCGGTGATTTGTGAGGTGGTGGTAATGGTTGTGGTGGCGGAAG  
ATGGCGGCGATTTGAATCGCCGATCGCATATCGGATTGAATTGGATAAACCATATTTTTTGGGATTCGTG  
ACAATTTGGATAAAGAAAATTAGTTTGATAAATCTTTACTCTTTGACTTTGGAAGGTTTGAGACGTAA  
ACTGTTTTTTTTTTTTTAATAATTT

>PGSC0003DMG400006027 LRR-RLPs

TAGAGGTGTCTACTTGCTATTTAATTCAAATCAAATTCATTCATTCAACAACACATTTTTACACTGTG  
AAAAAAAAAACTTCATTTTCTTCTCATAGCTTGAAAATCTCTATCAAATCCAGCAATGCGGCCTCCTAGC  
CGCAGCGTATTTATCTCTTTTCTTGTATCTCCCTCTTGTGCGTACCAGATCTCGAATGTGGTAGGACAAGA  
AGGTGATAACGATATCGATTTAGATGATATTAAGGCTAATGCTAGTAAGTTAAGTTTCGAAAACCCAAA  
GATTCGCGATGCTTATATCGCCTTGCAATATTGGAAAACAGCAATGTTTTCTGATCCTTTAACTTCACAG  
CTAATTGGACAGGACCTGATGTTTGTCGTATGGTGGAGTGTCTGTGCTCCTTCGTTAAACGATGATTC  
GATTAGAGTTGTAGCTGGCATTGATCTTAATCATGCTGACATTGCTGGTTCCTTAGTTGCAGAGCTTGGT  
CTTCTTACAGATCTGGTCTTTTCCATCTCAACTCGAATCGTTTTTGTGGAGTTGTACCGAAAACTTTTAGC  
CATTTGAAGCTTCTTAGGGAGCTTGATTTGAGTAACAATAGGTTTGTGGTGGGTTCCCTAAGGTAGTTC  
TTTCATTACCTTCTTTGAAGTTTCTGGATCTAAGGTTAATGATTTTGAAGGACCAGTTCCTTCCGAATTGT  
TCGATAAAGATTTGGATGCGTTGTTTCTGAATGACAATAGATTCGGTTTTGGCATCCCAGAGAACTTGGG  
TAACTCCCCTGTTTCTGTTCTTGTGTTTGCTAATAACGATCTTGGTGGGTGCATTCCCGCGAGTATTGGGA  
AAATGGGGAAAACGTTGAATGAGTTGATATTGATGAATGATAACCTCACTGGGTGTTTGCCCATGGAGA  
TTGGATTGTTGAAGAAGTTGACAGTGTGTTGATGTTAGCTTCAACAAGATTCAAGGCTCATTGCCATTAAC  
TGTGAGCAAAATGAGGAGTGTGGAGGAACTCAATGTGGCTCACAACAAGCTTACTGGGGTTATACCAG  
CTAGCATTTGCCAACTTCCAAGGTTGCAGAACTTTACGTATTCGTTCAATTACTTCACTGGGGAGGCTCC  
GGTTTGTGCTGCGACTAGATCTGGTGTGATGGTGCAGGAGAACTGTATAGTTGGAAGAAGAATCAAAGAT  
CTGCTAAAGAATGCTCTTCGGATGATGCAAAACCGTATGATTGTAAGAAATCGAAGTGTATAGCCCAT  
ATGCTACGTCTCCTTCGACGAAACCAAAGCCAACACCAACCAAAACCAAGAGGACCACCACCACCTA  
CTTGGAAGTCTTCGGGTTTCGATAACAAGCGATCTCCGCCACCACCTAAATCAACTCCTCTTCTCCACCA  
GCACCTTACAAAAGTCCCAGCGTATCGACATAGAAGTCCACCACCACCTACTCACAAAATTTACCTG



TAACTCATCATTACCTCCTCCACCCTCACCCGTATATTACCACCCATCTCCATCGTCCCCACCACCACCAG  
TTTATTATTCTCCACCACCCCCGGTGTATTACGAGCCACCTACTTACAAGCCTAAATCACCACCACCGCCA  
ACACCGTCATATGAACACCCAAAAACCCCATCACCACCACCACCAACACCATCATACGAACATCCAAAA  
CCGCATCACCACCAACACCATCATAACGAGCATCCTAAAACACCACCACCAACACCATCATAACGAACATCC  
AAAAACACCATCACCACCACCACCAACACCATCATAACGAGCATCCAAAAACACCACCACCAACACCATCA  
TAGGAGCATCCAAAACCCCAATCACCACCACCACCATACGAACATCCAAAACCCGCATCACCACCAACAC  
CATCATAACGAGCATCCAAAACCCCAATCACCACCACCACCAACACCGTCATAACGAGCATCCAAAACCCCA  
ATCACCACCACCACCAACACCATCATAACGAACACCCAAACCCACCTACCCACCTTGTAAACGAACCACCAC  
CTCCACCACCTAATTCACATTGGGAACCAAAACCATCCCCACCATAACCTACTCATCACCACCACCTCCA  
TCACCATCTCCTCCTCCTCCCACTTACTACTACTCATCACCACCGCCACCACCACCATCACAATCACCTCCC  
CCACCCACTTACTACTACTCATCACCGCCGCCACCACCACCATTTTACGAAAATATCCCTCTCCACCGGT  
AATCGGAGTTTCTACGCATCTCCACCACCACCAGTCATTCCATATTACTGAACAGGGGTTATCAATTAGC  
CTTTGATTTTCCATTATCAAAAAAAAAAAGAATTCATTTTTTTTTATGAATTATGTATACTTTGTTATTTAT  
TTTTGTAAATTTTTTATTTTGTAGTTTGTATTATTTTATGAAAAATTGGGATTATGGGCGGGAGTTAGTGA  
GGGGTTTAACTATCAATATTTTAAATATTGTTATAT

>PGSC0003DMG400006076 LRR-RLPs

AATTCCCCTTCAAGCAAAAAACATGGCCGCCACTGCTGACATATTCTCGGAATGTGTGATTACAAAAT  
ACTCTGTTATCTTAGCTATGGCCAAGCATCCCGGATGAGAATTCTATCTAAAACATGGCTACAAGCTTGG  
TCGACTCTCCGAACCTTGAATTCTTAGTTGAATATTTTGAAGAAACAAAAATAGTGGACGCAATTATGG  
AGACATACAGGGAAAACAAAATCCCCATTGACAAGTTTGGATTTTCAAATTGTTGAAATTCAATCGTGC  
TCATCAAGTTTTCCCTCTGATTGATAAGTGGCTTGACACAGCTCTTCAAATGGCGCAAGAGATTTAGTC  
TATGTAGATCTTCTACTCGGTACGATTATATCCTTTTCTATTTCTAAAGTCTTGGCTGCAAATCTTTA  
AGAGAATTGGTTCTGAAAGTTGTAACCTTATGCATGTTTCGTATCTAGTGGGTTGCGAATTGTCATT  
CTTTGAGAAAGCTTTCTCTATCTTATATAATTTTAAAGCAAAAATTTGCTTCAGACTTTACTTAATAGTTGTC  
CTTTTCATCGTCTCTTTCAACCTTGATCATTGTTCCGGGTTGGTAAAGATTGAGCTTATGAATCTTCAAAG  
ATCAAGTCAGTTTCCGTATCAATAAATAGAAACCAACATGTGAAAATCCAAGCACCAACTCTTGAACACT  
TGTTTTATAATGGTTATTTATCGGGAAATTTGGTTATCGTTGGATGTCAGAATCTAAAATCTTTAGAGCTA  
TCATATGTGAAGATATGTAATGGATTTCTCATAACCTTATTTCTAGATCGCAATCCCTAGAAGTATTGAA  
GATTCAGTATTGTATGGGCATAAGACAGATTGAAACTTCGAATTTGGTATCACTTGAGTATATAGGATAT

CAAATTCCTGAACTTAAAATTGCGAAAGCTTCAAGTCAATTGAAGCATTCAAAAATCGTTCTTCATGGCA  
ACAACAATTTAGATGCTGCATGGTTTAGTAAGTTGAGGAAGCTTCTATGGAATTCGGCCTCTTGGTCCCA  
AGTTCTCCTTTGTTTTCCCGAATACAATGAGATCAAGATTAAGATTTGCAGCAGCACAAACGGAGTTGCT  
TGCCCCAGATGGACGTTTTAAATGTCAACATTACAAGGTCATATGGGGAGTGTCCAACATTTGTGGAT  
GCTTTGCTATGGAGTTGTAATCCTAGGAGACTCAACCTATCATCAACGGTTGAAATGATTACATGTTTCG  
TCAGTCGTTTGATGTATATGAAGAATCTGAGTCATTCTTCTCGGAAAGAAGCAACCCCTGGCATAAGTCA  
ATTGAAAGAAATCAAAGTTTTTGATGTGAAAAATCAAGAGCTGCAACTCGTAAGTGGGGAAGTGGCGAT  
AAGCACCCCTTCGGAGGACAGGAAGGAAGTTATTTTTTATTAGATTGGCAATGCAATTAATTTATCACT  
ATTTCAAACGAATGCACTTGTTCACTTAACTTTATTAATCTGTTTTATGTCTAGCTTTAAATACTTGC  
ACTTTCTCACCATTGTATAAAATTGTGTTGAAGTTGAAGCATAAGATTCTTT

>PGSC0003DMG400006095 LRR-RLPs

ATGGGGACAGCTGACATGTTGCCTGTATGCCTCATTCGCAAATACTCTGTTATCTTAGTTATGAAGAAG  
CATCTCGGATTAGAATTCTCTCCAAAACATGGCTACTAGCCTGGTTGGATCATCCCAACTTGAATTCAC  
AGTCTCGTCGGGCAAACCATAACAATAGTGGATCATGTCATGGAGAGATATAAGAACGGAAATATTCC  
TATTGACAAGTTTGAATTACACAACCTCTACAAAGTCTGATCATATTTTTCTCTGATTGATAGGTGGCTCG  
GTATTGCTCTTCAAATGGTGTAAAGACATCTAGAGTACATAGATGTTGAACTTTCAACATCATACCCCTTC  
CCTATTTTTAAATTCTTTGAAGCAAATTTTTTACGAGAACTGGTCCTTACGGGTTGTGATCTGATGCATGT  
TTCGTTATCTAGTGCTAGTCAAGCGGTGACGTGTCATTCTTTGAGAAATCTTTCTCTATCTCTTGTACGCTT  
AGACAATAACATGCTTCAGACTATACTCAGTAGTTGTCCGTTCAATTGTTGATTTAATCATTGGGTATTGTA  
GTAGGCTGAAAAATATTGAGATACGGAATCTTCAAATATCAGGTCTCTTGTCAATTGGTAATGACCAACC  
CGTTAAAATCCAAGCACCGTCTCTTGAATACTTGTATTATAGTAGTTCTTGTGTTGAATAAATTGAATATTG  
TTGAACATAAGAATCTGAAAACCTTAGATATATCATGTACAGAGATATCTGATGTATATCTCAACCACCTT  
ATCTCCATACCTTACTGCCTGGAGAACTGTTATTAGCTAACATTGCTTTTGAAGATTCGACATTTGCAG  
GAGTCAATCCCTAAAGGTGTTAAAGATTCATAATTGCAAGATCATAGGAGCAATTGATGCTCCAAATTTG  
GTTTTGCTTGAGTATAAAGGAAATGATATTCCTCAGCTTAAATTTGCTCAAGAATCAAGACAATTGAGGC  
AATCACAAATGATTCTTTATCCCTTGTTCATGTAGATTGAGCATGGTTTTGTCAGTTGAGGAAATCTTTA  
TCAGATTCGACGATCTCTTGGTCTCAAGTTACCATTTACTTTCACAAATGCGAGGAGATCAACATGAGAG  
ATTTGCTACTGCAACCTAGAGTTGCTATCCCCAAAGTGGACATTTTAGATGTAAATTTTTCAAGGCCGAA  
TTGGGAGTTTCCGACATTTGTGGATGCCTTGCTGTGGAGTTGTCATCCAGGAACTTAACCTACAATCA

ACA ACTACAATTTTACATGTTTCATGTATCGTTTCATGCAGATGAAGAATATGCGTCATGGTCAATTAAA  
AGAAGCAAAAGCCTACAAATTTGATCAGAAAAGTAAGAGTTGGCATCCTGTAGAACACAAAAGAGGAA  
GAGATTTCCAATAAGGACCAGTAGCAAGTCGAAGAAATATTTCTTTTTATTAGATTGGTGA

>PGSC0003DMG400006226 LRR-RLPs

GTACA ACTCCATAATTCATTGCCCTAACCAAATGGCTACCATTATTATCTCTATTATTTTCATCCTTCAATT  
ATTTTTGCAAATTGTCTAGTCCTTGCTAGTCCAATTCTTGGCCAAAGTAGACAAGCTTTGGAGATAATCA  
TCGGCGGAGGTGGTGGAGTACCTCCACCGGATAATCAAGATTGTCCACCACCTCCTCCGCCACCAGAAC  
CTCCTTGCCCTCCGCCACCATCGCCACCATTGCTCCTCTTTGAAAGTAAACGTGTGAGATTGCCTATCAT  
GTCATCCAAAAGTTAAAGTCCAAAATCACATATGACCCTTTACATATTACAAAACATGGATTGGCTCTG  
ATGTTTGTAACAAGTACAAAGGTTTTCGTTGTGCCACGGTTCCTGACTTAAAGGTAAAAGCACTAGCTGC  
TGTGGACTTCAATCAGTACCAATTTGATGGCCCTGACCTTACTATTGACGGCTTTCTTGATGAATTACCAG  
ACATAACAATCTTCCACGCAAATACCAACAATTTTAAAGGTACAATCCCCAAGAAAATCGCGAATCTTCG  
TTATCTCTATGAGCTAGACCTTAGCAACAACAATATAATGGTGAATTCCCAAAAACATTGTTTTTGGT  
GCCAAGAAATTGTATTTCTTGGACCTTAGGTTCAATTCATTTCCGGGTTGGTTCCCCCTGAAGTTTTCTT  
GTTAAATCTCGATGTTCTGTTTCATCAACAACAACAATTTAATCCAAAACCTCCTGATAACTTGGGATCAA  
CTCCAGTTCTTACTTAACTTTAGCCAACAACAATTCACCGGTCCAATTCCTCGTAGCATTGGTCAAGCT  
TGTAATCATTACGCGAAGTTCTGTTCTTGAACAACCAGCTCACTGGATGCTTGCCTTATGAAATTGGGC  
TTTTAAGTAAAGCCACAGTTTTTCGATGCGAGCAAAAATCAGTTAACAGGAAAAATACCTCATTCAATTTGG  
ATGTTTAGCTAAGATGGAGATACTTAACTTGGCACAAAATCAGTTCTATGGAGCTGTGCCTGAACTCGTG  
TGCAAGCTCTGCAATTTGAAAAATTTGACGTTGAGTTACAATTACTTCACTGAAGTTGGACCGGAATGCA  
AGAAGTTAATTCAGAAAAAGGTTCTTGATGTCAGGATGAATTGCATTCCGGGCTTGCCTATGCAAAGAT  
CAGCAGAGGAATGTGCTGCGTTTTTCTGTAAGCCAAGATCATGTCCTGATGAAAAGTCAATGGGATTTG  
TTCCTTGTAGCATTGGCAGTTCTGAGCAGAATCAACAGAACGCAAGTGAGACCGCGCCAGCGCCAAGAA  
CTTACAGTGTGTTTGAACCGCATTGTTGTAATGCTCTGTTCTTTCCATGTTTGCAGATTGAACTATGGC  
AGCAGGAAATGTAAATTTGCCAAGTTTAACTTCTTATCTCTGTTGATGCATATTATGTTTGTAAATTATA  
ATAAAATAATTACGTTTGGATGAGATGATCACATTGTTCAATAGAATTAGAGATGGTAGGTTGTGTAGC  
ACAATGGCTCAACTAATGCATCTATGGTTTTGGATAGCA

>PGSC0003DMG400006255 LRR-RLPs

AAAAAATTTATTTCTCTCTTTTCATGAATGAAGCAAGACCAAAGAGGAGGACTTCCACAAGTCAGTCTTCC

ACAGAATGAACCAAAGGGATAACATCAAACAAGTAAAAGGAGTTAATTCAATCTGTACAAACGCGTA  
GTTTTCTTTGACATTTCCCAATAACCCTTCTCCTTATTAAGTTCCTTCTAACTGCGTACTTTAGTCATATTCA  
AGCTAACAAGTTGCATGAATATGACAACTCTCTACTTTCTATGGCTTTTCTTGATTCCCTTGTTTCAAATCT  
TATCAGGATATCACATTTTCTGGTTTCCTCTCAATGTTTTACGATCAAAGTCGTTGTTGCTACAGTTG  
AAGGGCAGCCTTCAGTATGATTCTACTTTGTCAAATGAATTGGCAAATGGAACGAGAAGACAAGTGAA  
TGTTGCAATTGGGATGGAGTTAAATGTGATCTCTCTGGTCATGTGATTGCCTTGGAAGTGGATAATCAGA  
CTATTTCTAGTGGAATTGAGAATTCAGTGCTTTTTAGTCTTCAGTATCTTGAGAGGCTAAATTTGGCT  
TACAACAGGTTCAAGTGTGGCATAACCAGTTGGTATAGCCAACCTCACGAACTGAAGTACCTGAATTTAT  
CCAATGCTGGTTTTGTGGGGCAAATTCGTATGATGTTATCAAGATTAACAAAGCCAGTTACTCTAGATCT  
CTCAACTCTTTTCCCTTACTCTGACCAGACACTAAAACCTGAGAATTCGAATTTGAGACATTTCAATTGACA  
ACTCAACAGAGCTTAGAGAGCTTTACCTGGATGGGGTTGATCTTTTCATCTCAGAGGACTGAGTGGTGTC  
AATCTTTATCTTCATATTTGCCTTACTTGACCGTCTTGAGTTTGCATGCTTGTCAAATTTAGGCCCTATTG  
ATGAATCACTTTCTAAGCTTCAGATTCTCTCTATCATCCGTCTTGACCAGAACAATCTCTCTACCACAGTTC  
CAGGATATTTTGCCAATTCACAATCTTGACTACCTTGTCCCTCGACTCTTGTAATCTGCAAGGAGCTTTTC  
CTAAAAGATCTTTTCAGGTACAAGTTTTAGAGATTTTGGACTTTCAAATAACAAGCTGCTTAGTGGTAGT  
ATTCGAGTTTTCTCGAAATGGATCTTTGAGGACGATATCACTAAGCAACACCAACTTTTTGGGTTTCATT  
ACCAGAGTCCATTTGAACTTCAGAACCTGTCCAGGTTAGAGCTCTCCAATTGCAATTTCACTGGACAG  
TACCTTCAACAATGGCAAACCTTATCAATCTTGTTCAATTTGGACTTCTCTTTGAACAACCTTCACTGGTTCTA  
TCCCATATTTCCATAAATCCAAGAACTCGCCCACTTAGACCTATCTCGTAATGGTTAACTGGTTTCCTCT  
CCCCGACTCATTTTGAAGGACTCTCAGAGCTTGTCTACAGATATTTAGGGAACAACCTTACTCAACGGGAT  
CATTCTGAATGTATCTTTGAGCTCCCCTCCTTGACAGACGCTTTTACTTAACAGCAATCAATTTGTTGGCC  
AAGTCAACGATTTTACAATGCATCCTCCTCTCTGTATGTAATCGATTTGAGCAATAACCACCTGAATGGT  
TCAATCCCAAGTCCATGTTTGAATAGGGATGCTTAAGGTCCTCTCATTGTCTTCCAACCTCTTTAGTGG  
GACAGTTCCACCTTGACCTCATAGGGAGGCTGAGTAATCTTACAAGACTGGAGCTTTCTTACAATAACTT  
GACTGTTGATGCAAGTAGCATCAACTCCACCTTTTCATATTTCCCAGTTGAGATTATTGAACTAGCTT  
CTTGTCGGTTGCAAAGTTTTCTGATCTTAAAAGTCAGTCAAGGATGATCCACTTAGATCTTTCTGACAAC  
CAAATACGGGGGGCAATACCAAATTGGATTTGGGGAATTGGTAGTGGAATCTGGCTCACCTGAATCTT  
TCCTTCAATCAGCTGGAGTACGCAGAACAGCCATACAATGTTTCCAGCTATCTTGATGCTTGGACTTTCA  
TTCCAATAAGCTAAAGGGTGACATAACCAATCCACCTTCTGTGCTGCATATTTGGACTACTCGAGCAAT

AATTCAGCAATTCCATCCTACTAGATATTGGCAATTATCTTGGTATATTTCTCTCACTTGCAAATAATCGG  
CTCGCAGGAAGAATTCTGAATCTATATGCAATGCCAGCTACCTTCAAGTTCTTGATTTCTCTAACAATGC  
CTTGAGTGGAACAATCCCACCATGTCTACTGGAATATAGTACAAATCATGGAGTGCTGAATCTAGGTAA  
CAATAAACTCAATGGCGTCATAACCAGATTCATTTCCAATTGGTTATGCTCTACAACTTTAGACGTCAGTG  
AGAATAAGTTACAAGGTAGGCTGCCAAAATCGCTTGTGAACTGCAAGTTGTTGGAGGTCCTGAATGTTG  
GAAATAACAACTTGTGATCGTTTCCCATGCATGTTGAGGAACTCAAATAGTCTGAGGGTTCTAGTTTT  
GCGTTCCAATCAATTCAATGGAAGTGTTCAGTGTGATGCAACCAGGAATAACTGGAAAAATCTCCAGAT  
CATAGATATAGCTTCCAACAACCTTCACTGGTGTGTTGAATGCAGAATCTTTTTCAAATTTGAAAGGAATG  
ATGTTGCAGATGATTACGTGGAGACAGGACGCAATCATATCCAGTACAAGTTTCTCCAACCTAAGTAAC  
TTATACTATCAGGACACAGTGATAATAACCATCAAAGGGCTAGAGTGGGAGCTTGTGAAAATTCTCAGG  
GTCTACACAGCTATTGATTTCTTCAAATAGATTTCAAGGAGTGATACCAGATACTATTGGGAATCTTA  
GCTCACTCTATGTTCTGAACCTATCACACAATGCCCTTGAAGGACCAATTCCAAAATTGATTGGGAAGCT  
ACAAATGCTTGAATCACTAGACCTGTCAACAAACCACCTATCCGGGGAGATCCCATCAGAGCTTGCAAGT  
TTCACATTCTTAGCAGCTTTGAACTTATCGTTCAACAAATTGTTTGGCAAAAATCCCATCGACTAATCAGTT  
TCAAACATTCTCAGCAGATTCCTTTGAAGGAAACAGTGGCCTATGCGGGCTCCCTCTCAACAACAGTTGT  
CAAAGCAATGGCTCAGAGTCCCTGCCTCCACCAACTTCGCTACCAGACTCAGATGATGAATGGAAGTTC  
ATTTTCGCAGCTGTTGGATACGTAGTAGGGGCAGCAAACACCATTTCACTTCTGTGGTTTTACGAACCAG  
TGAAGAAATGTTTTGATAAGCATAACGGAGAAATGCTTGCTTTGGTTTTCAAGAAAGTGATCCTTAAACCC  
ATAAATGATGAGTTTATTTAATCCTTGCTTTGTTAAATAAACACCAGGATCCAAATTCAAGTCAGTTTGT  
TATTTCCCTTGATGAATGTATACAATTTTCTACTATCAGAAACAGCACCCACTTTTGGATTAATAGCTTCC  
CACATTGCCTGCAAC

>PGSC0003DMG400006268 LRR-RLPs

AACCAAGCACTTGCCTATTTTTCTTTGACTATTTCTTCCCCTCATTTTCATCTTCTTTTCTACCTTCTCCCT  
TCGCTTCAATCACAAAGTGGAAAAACAAGTTTGATGGATTATAATTCTCCAAGACTTGAGCAATGAGA  
TTTTTACACTTTCTATGGATCTTCTTGATACCCTTTTTGCAAATTTTATTAGGTAATGAGATTTTCTTAGTT  
CCTCTCAATGTCTTGATGATCAAAGTCATTGTTGCTGCAGTTGAAGGGAAGCTTCCAATATGATTCTACT  
TTGTCAAATAATTTGGCAAGATGGAACCAGAACACAAGTGAATGTTGCAATTGGAATGGGGTTACATGT  
GACCTCTCTGGTCATGTGATTGCCTTGGAACTGGATAATCAGACCATTTCTAGTGGAAATTGAGAATGCAA  
GTGCTTTTTAGTCTTCAGTTTCTTGAGAGGCTAAATTTGGCTTACAACAAGTTCAATGTTAGCATAACCA

GTTGGTATAGGCAACCTCACCAACTGAAGTACCTGAATTTATCGAATGCCGGTTTTGTTGGCCAAATTC  
CTATGATGTTATCAAGATTAACAAGGCTAATTACTCTTGATCTCTCAACTCTTTCCCTGACTTTTACCAGC  
CACTAAAACCTTGAGAATCCCAATTTGAGTCATTTTCATTGAGAACTCAACAGAGCTTAGAGAACTTTACCT  
TGATGGGGTTGATCTTTCATCTCAGAGGACTGAGTGGTGTCAATCTTTATCTTCATATTTGCCTAACTTGA  
CCGTCTTGAGCTTGCGTGATTGTGAATTTGAGGCCCTATTCATGAATCACTTTCTAAGCTTCACTTTCTCT  
CTTTCATCCGGCTTGACCAGAACAATCTCTCTACCACAGTTCCTGAATATTTTGCCAATTTCTCGAGCATG  
ACTACCTTGAACCTCGCCTCTTGTAATTTGCAAGGAACATTTCTGAAAGAATATTTGAGGTGTCAGTTTT  
AGAGAGTTTTGGACTTGTCAACTAACAAGTTGCTTCGTGGTAGTATTCCGATTTTTCTTCGAAATGGATCTT  
TGAGGAGATTATCACTAAGCTACACCAACTTTTTCTGGTTCATTACCAGAGTCCATTTGAACTTTCAAAC  
CTGTCCAGGTTAGAGCTTTCCAATTGCAATTTCAATGGATCAATACCTTCCACAATGGCAAACCTTACCAA  
TCTTGTTTATATAGATTTCTCCTTCAACAATTTCACTGGTCTATTCCATATTTCCAACAGTCCAAGAACT  
CACCTACTTAGACCTTTCACGTAATGGTCTAACTGGTCTCTTGCTAGAGCTCATTTTGAAGGACTCTCAG  
AGCTTGTTAACATAAATTTAGGGAACAATTCCTCAATGGGACCCTTCTGCATATATATTTGAGCTCCCC  
TCCTTGCAGCAGCTTTTTCTTAACAACAATCAATTTGTTGGCCAAGTCCACGAATTCGCAATGCATCCTC  
CTCTCCGTTGGATACGTTGATTTGAGTAACAACCACCTGAATGGATCGATTCCCAAGTCCACATTTGAA  
ATTGGGAGGCTTAAGGTCCTCTCACTTTCTTCCAACCTCTTTAGGGGGATTGTGCCCTCGACCTCATTGG  
GAGGCTGAGCAACCTTTCAAGACTGGAGCTTTCTTACAATAACTTGACTGTTGATGCAAGTAGCAGAAA  
TTCAGCCTCTTTCACATTTCCCCAGTTGAACATATTGAACTAGCTTCTTGTAGGCTGCAAAAGTTCCTA  
ATCTCAAGAACCAGTCAAGGCTGATCCACTTAGACCTTTCAGACAACCAATAAGGGGAGCAATACCAA  
ATTGGATTTGGGGAATTGGTAGTGAAATCTGGCTCACCTGAATCTTTCCTTCAATCAGCTGGAGTACAT  
GGAACAGCCTTACAATGCTTCCAGCAATCTTGTTGCTTACTTGACTTGCAATCCAACCGTTTAAAAGGTGACT  
TACCAATTCCACCTTCTCTGCTATCTATGTGGACTATTCGAGCAATAATTTAAACAATTCATCCCCTAG  
ATATTGGAAATTCTCTTGCTCTGCCTCCTTTTTCTCGGTAGCAAACAATAACATCACTGGAATAATTCCT  
GAATCCATATGCAATGTCAGCTACCTTCAAGTTCCTTGATTTCTTAACAATGCCTTGAGTGGAACAATACC  
ACGATGTCTACTGAATAATAGTACAACCTTTGGAGTGCTGAATCTAGGGAACAATAGACTCCATGGTGT  
ATGCCAGATTCATTTCCAATTGGTTGTGCTCTAAAACTTTAGACCTCAGCAGGAATATCTTTGAAGGGA  
AGCTACCAAAAATCGCTCGTCAACTGCACGTTGTTGGAGGTCCTGAATGTTGGAATAACAGTCTTTTTGA  
TCATTTCCCATGCATGTTGAGGAACTCAACCAGCCTGAAGGTCCTAGTCTTGCCTCCAATAAATTCAT  
GGAAATCTTACGTGTAATATAACCAGAAATAGTTGGAAGAATCTCCAGATCATAGATATAGCTTCCAACA

ATTTTACTGGTATGTTGAATGCAGAATGCTTTTCAAATTGGAGAGGAATGATGGTTGCAGATGATTACGT  
GGAGACAGGACGCAATCATATCCAGTATAAGTTCTTCCAATAAGTAACTTGTACTATCAGGACACAGT  
GACATTAACCATCAAAGGCATGGAGCTGGAGCTTGTGAAGATTCTCAGGGTCTTCACATCTATTGATTC  
TCTTCAAATAGATTTCAAGGAATGATACCAGATACGTTTGGGCACCTTAGCTCACTTTATGTTTTGAACCT  
GTCACACAACGCCCTCGAGGGACCAATTCCAAAATCAATTGGGAAGCTACAAATGCTTGAATCGTTAGA  
CCTGTCACGAAACCACCTGTCCGGGGAGATCCCCTCAGAGCTTTCAAGTCTCACATTCTTAGCAGCTTTG  
AATTTATCATTCAACAATTTGTTTGGCAGTATCCCATTGAGTAATCAATTTCAAACATTCTCAGCAGATTC  
CTATGAAGGAAACAGAGGCCTATGCGGGCTCCCTCTTAACGTCACCTGCAAAGCGATGCTCCAGAGTT  
GAAACCAGCACCAAGTTTTCAAGATGACTCTTATGATTGGCAGTTCATATTTACGGGTGTGGGATATGG  
AGTAGGGGCAGCAATCTCCATTGCACCTCTGTTGTTTTACAAGCAAGGGAGCAAATACTTTGACAAACAT  
TTGGAGAGAATGCTTAAACTGATGTTTCCAAGATACGGGTTCACTTACACCAGATTTGACCCTGGGAAG  
GTTGTAGCTGTGGAAGAATATGAAGATGAGACCCAGATGATACCGAAGATGACGATGATGGGGGAAA  
AGAAGCATCTCTTGGGCATTATTGTGTCTTCTGTAGTAACTTGATTTTCAGAGAAATGAAGCAATGCAT  
GATCCTAAATGCACTTGCATATGTCATCATCCCCAATTCTTTTCTCCTACACCATCCTCTTCTTCACCT  
TATTAGTCATATATCACAAAAAGTTTTGATTCTTAAGCTTCTTCACATCTGCACATTTGTAATCTGTATATA  
GTTACAGGTAGCACAGGATTGATTCAAAGCAAATTAGTCTCTCT

>PGSC0003DMG400006279 LRR-RLPs

TTTGATCCCCCTCCATCCTGATCCCTGCCCTAATTTCAAGGACCTCAAATTTCAAACAACAGGAAGCAAGAA  
CAGAGGAAAATCCATGGAAATTCAGAGTCCGATGAAGCTAAAGAGATTGGTTGTGATCGGAAGGCATA  
AAAAAGACCGAATCAGTGATTTACCCGATGCCATCCTTCTTCACATCCTCTCTATGGTGCCGGACGGAAA  
ACAAGTTGTGCGAACCAGCGTACTGGGTAAACGATGGAGGTCTCTTTGGATGTCTGTTCCAATGTCAAT  
CGATTTCAACTTCCCCCAAATGAAAATCTAGTCGTACACTTGATTACCTGTCGTCCACACTTACAGAAC  
TTCATTACTGTAAGTCGTGCGATAAAATACCCAGATTTACCGTTGGGGGATTTAGGTACGAACACTGTTA  
TGCTAAGTATGTTGATTTATGGGTTAGTTTCGCTACTAAAGTTGCTAAGGTGGAAGAATTTTTGCTTGG  
TTGTTATCTGTAAATGATCAAATTTACTTCCCTTCGTATGCATTTAAGAATTCGTTGCTTAAGGATTT  
GGAATTGAGGAATTGCCAACTTAACCCTCGTGCTACTGTTGATTGGACTAATCTAAGCTCTCTTAAAATT  
GGGTATATCGATTTGACAGATGATGCTATGGAAAAGATATTATCTGGTTCCCCGAAGTTGAAAAGCTTG  
GAACTAGATAATTTTTCCGGCCTACAACGTCTCGAAATTAATCTGTCAAGTTGACACAACACTGATGATAG  
AATCTTATTACAATGACAATGATGAGATTTGGCTTGAATAGTAGCTCCCCATCTTCAGCATTTAGAAGTT

TTGGAATTGTGCAGTGAGATACGCATTGGCCAGAGAAATGTGCCTTCACTTGTCACTGCAATCTTTCGTT  
TAAATTTTAATTTTGAGAATGAAGAACAAGACTTGGAGATGGAATTTAGCTGTTTGAAGGAACTTCTTCA  
TAGTGTTGCCCATGTCCAGAATCTTGAATTGGGTACCTGGTGCATCGAGGTTTATTCATACACTTCATACT  
GCAATCTTGAATTTTTATTTACTATTGAATCATCACTATAGTAACTTTAACAGTTCACTACTTATAATCTGA  
TAACTAAGTTGGTCAGTACTAAAGAGTTTGCAATGGATAACAACAACATGTAAAATTTGGTTTGATTTACA  
CATATCACTTTTTAGTTATGTTGATAGGTTTTTCCAAGTGTTTAAAGGTCCATCTTTGGATTTGCAAGCG  
AACCATGAACACGTTGATATGTGTACAGTCATATAGTCCAAGTTGTTTTATGTTATATCCAACAATGTGC  
ATTTCAATTTAAGTATGCCATGTTTGTGTTTTGACATATTTGGTTTGTCTGTTTTGGTTTATCAGTG  
CGTGTCATCCTAGAGTTGAAAGGGTGGCGGCCTCCACCATCAAGCCGGAAATTCTTAGAACTGAACCT  
AGCCGTAATACAATTGGACTTCCCTGGAATTTACAGCTTTCTACAGAGCTCATCGGATCTTGAGACATTG  
ATCATTGGTTGTTGGTACAATCACAATGAAAGAGTAAGTTTCCTTTCGACCTTTATTTATATTACTTCATGT  
TATTCAAATCAAACAATATTAGTGGAGGAATAAGCTGATATATATCAACCTATTTCTAATCTTAAGTACT  
TCAGGAAAGAAAATTTATTTAAGTGTTTTTTTAATAGCAATCTCCTCAGTCACTTTACCATCCCAACTGT  
GCTTCCTCCATGAGTTCTATTTTTGTTTTTCCAATTCATCGTTTCCTAGGAGATATTGCAGCTTCCCTAG  
CTTCATTTTTAAAATATTCATCCAGTGTGGCATCCTCCTTGCTTCTCTCAAAAATGTTTGCACCTTGAGAAC  
TTCTTGGAGAAAAATCACTAGGTCTAACATGTAGTTGCTTACTAGTGTTAATAGGAGTAAGAGAATTCAC  
TCTTTCAATATTCGAACTCATCAGCACATCAAGAAGCGCCATGTCTATAGTATTATTAATCTTCTGAACAT  
TAGAACTGCTGCGCAGAATTCTCAGATGATGCATCTGCCAGTTTCGAAATTGTATGACATCCCTGTTTCT  
GGTGCATCTGTCTAGCACTTGAACCTGCAATTTCTTTGAACTCAACGCTCCATCTTTCATGATTTCCAGGC  
GATCGCTGCCCCAAGTGACAACTTCATTCCCCTGAATATTGTCTTCTAATATCTTCTCGTTCCCAGCAGC  
CTTCTTTAACACCTGATTGACTAAAATCTGTACCTCTGCTTTTGTGCCATGAATGGTCTTACACTCTTACCA  
ACTTCAGAACCTGTAGCATCTGATTTCTCACCCAAATTACGAACACTCTGTGCAGCTCGTCTTGAATTAAT  
AATTTCCCTAGCATTTCCTGATGCTTAATACCTTGCATATTAATCTGCATACTTCATCTCTATGGCCTCGA  
TGTTTGCATGTACGTCAATATGAAGGTTAATAATCATATGTTATTATTTGGTACACTATCAATTCATTCGA  
CTTTGGCTCTAATGAGCAATCTCACACGTTCCAGGCAAAGCTGCCAGTAAGTTGACTTCAACTTTAACTCTT  
GCTGTGCTTGGCCTTGTGATCTGTGATTGCTCTATCAACAACCAAAGGTCTGCCACTGCTGATGCTAA  
CAAATATAATGCCTCTCGAACGAAAAATTGCACCAGTAAATTCTGAAACGATATCCAAGTCAAAGCAATG  
GATTCCTTCTTTGGGATTAACCAAGGGGTCCAACGAAAAATTCTAAATTGATAGTCTTCTCCATGG  
ATTTTCTCCTTCTACCAATTGATGAAATAGCTATATGAATAGACAGCACCAAATCCTCATGTGCCGTCA



ATCGAATAAAATATGCCGTGAATCTAATGAAAATGTTTCATGCCCTTTAACCTTTAGTTGTTGTGGAAA  
ATACGCTCTCAACTCTGTCATTGCAAGTTTGCAACAAGATCATATCGCAAATTTTTCTCTTGAAATTTAT  
ACAGAGCACATTGCAAATTTTCCTCCTGAATATCAGATTATCAAAAATATAGTAGGTTCTCCATTGATT  
ATCAAAATTGTTGCACGCCCTCTAGCTTCTCATGCTAGTGAATTAAGCTGAAAATGTTAACAGTATGTT  
ACCTTGACTTATGATTCAACTCTTAATCTTTTTTTGTTGTTGGATGTACCACATTGTAACATTTGCTAAT  
ATGTTCCCTGAATTTAAAATTCTTCACCTTTTTGTTTTATCCACAATCAACTCCTTGCCTTCATGCTTTCTT  
CTAAGGACAATAATTGGTTAATATAGTGTATTCTTTCCTACAGAATCTGTTGGCAAGGTACACAGATGAG  
GATGAACTGAGCGAGAGGTTTGAGAAGCATAATGTTAAATGCTCATTTCACATCTGAAGACCATCACG  
ATCAATAACTTTTTCTGGATCATCAAGTGAAAATAAGTTTGTGCTGCAATTGGTAAAATATTTGCTCAAGC  
ATGCAGCCATGCTAAAAGAGTTTGTATTGCTTCCACATACCAATGGATGTCTCCGGAGTATCGTAAAAT  
GGCACAAAAGCTCTTAAGCTTTCCAATGTCTCTCCGCACGCTTCAGTTGTCTTTTCTGACATATAACCTTT  
GTCCCTTACAACATACCTTACTAACAATGTGTTTATGCTCTAACAGCAAGAAAGTTTGTGTAATGTTT  
TATTGACTTATACTCATTGTTTGTGAGAATAGTTTTCAAGATTCAGTTATGTGTCCAAGGGCTTTGTTTT  
GTTGGCCTATGTTATTTTTAATTGGTGAATGATTATTTCTCGACTTGGACAGTGAATGACCTTAGGAGG  
GAAGCAAGGCAGTGGAACCTTGTCCCAGCATGTTTTCTGGGGTATTACAAAAGGAAAGAAATAGCATGT  
GTATATCTGCAGAGTTCATATTAGATTAGTTTGTATCAGAACTTTTATGTTATTGAAGACTTTATGATAAT  
CTGTATGGTAAATTGTTGAGTCCTGTACTGTTCTC

>PGSC0003DMG400006422 LRR-RLPs

ATGGTCAAAGGAAAAAAGGAAGTGGGAGATGATGATGAGTTAAATTATTCCTACATTTTTGGAGTTTTG  
AGAGAGAGGGCCATAGTAACGAATAAAGGCAATAAGTACCAGTATGACACCATTTTGGCATTGTTTACA  
AGTATGGATATGTCTAGCAATAAGCTTTCTGGGGATATTCCTGTAAGTTTAAACAGGTCTTGTAGGATTAA  
GATCGTTTAATTTTTCTAATAATAACCTAACTGGTAAGATTCCAAATGACATTGGTGACATGAAAGTCTTG  
GAATCTGTTGATCTTTCAGAAAATAAATTTTACAATCAAATCCCACAAAGCTTTTCAAGTTTGTCCACTTT  
GAGCTTCTGAATCTATTTGATAATAATTCGTTATGTATGATACCATTGAGCACTCAACCTCAAAGCTTTG  
ATCTCACGAGTTTTCAAGGAAACAACTCTGCGGACTTCCACTCTTGATGAACTGCAGTTTAGATGACAA  
TATTCCAAATCACGAATATGAAGATGATGAGGGTGACAAAGATGAAGGGGATTGGTTTTACATTTTATT  
GGTTATAGGATTTGCGCTAACTTTTGGGGTGTGTTGTGGTTCACTGCTTTTCAAGAGATCATGGAGACAT  
GCTTATTTTCGTTTTCTAGATCGTAGCTGGGAAATGTTGCTTGCAAAGATACCAATATGGTGA

>PGSC0003DMG400006458 LRR-RLPs

TTTCTCCTCTCCATTCCCTATAAGTGTTTGTGTCACCACACACAAGTAACGACCCCTCAATTTGTCAATAAA  
CAAATAATAGGATTAGTTAATTAACAAAGGAAGAAGAAGATTATGGAATTTCAATGATGATTTGTGTTA  
GGATTAAGAGATCATGAAGATGAGGATGGAATTAGTTGAACCACGACGACAACAACAACGACAAGAAG  
AAAAAGGAGCCTTTGAGAGGAAGAGTAGTAGGGGAAAAAGTACAAGAAGAAAGATGACAATTAGTAT  
TGTTGAAGAAGAAGAAGAAGAGAGCCCAAAGATTGTGGATCTAAGTGGCATGTCATTAGACTCTCTCC  
TGTAATCCTACTATCAATTTGGGAGCTATATCCAAATTACATATTTCCAACAATAATCTTCAGGTTGGTC  
AGCTTTCGTACACCTCAATTAATTTTTGTGAAATATCTGTTATCTTCTATCAGCAATAAGCAATATGTACTA  
GATGACTCTGTTTCATAGAGGTTAGGATAGATGAATAGATTCACCTAGTGTTTTTTTTTTGTCTTCGCTAGA  
ATTAATTGAACAACCACTTCGTTGATCACTATATGCTATCATGAATTATTTATTTATGAGAATTTTATTCAT  
GATGGAATATTTTTAATCTTTGATTGGAAATTAAGTGAAAAATATCTTTTTTTGAAATAAGTGGTGGCTA  
AAGTATTTGATATGAAGATAAGATAATTATGAAGAAAAATGTTTTAGTCAAACCGAGTGAAGTATTTT  
CCTCATTTTGACCGGAGGCGAACTAGTTGATTGCTTTGAATTGTATCAGTAGCACAAGGACACTATTA  
AACACTATTGCATTTCATAAATGTACGATTAATTATATATTAGTTTATGTCGATATTAATAGGTGGACGTG  
CACTACCTATATAGGTGGATCTGCCTCTAATATAATTTTGACCAAAGAATATTTTTCTAAAAATATTTCTG  
ACAAGCACTCACGACTAGTATTTTGAAAACATTAATTTTTCAATCATACCAAATACAGTCGTTGCTTCCA  
TTTTAGTTGCTTTTGGTTCTTGACTTTCACAAATATTTAGTTTTGTTAATTTCTTCATATTTATGGAA  
AGAAATATATTTATCATTTACCTTCTTCTATTTTACGCAACAATAGTTATTATATGTTTCCTAGTTTTCAAT  
TTGTTTATTCAGTGTTGAGTTGATATTGAGTTTCAAAGGTGGATAATTTTTTTATTGTTATAGTCTTAAA  
CTAAAAATATGTA  
AAATGTATCAAAATATTTTTAATTTTGTGGTTTTAAACATGTCTTGTGGAAAGTTAG  
AATTAAGAGGTGTCAA  
AAATAAGAATTTAATGTACTACTATATTTTCTTAAATATTCCCCTTACTTGAT  
AATGAGTCGTTTATGTGA  
ACTATACCGTATAATATTTTTCAGGAATAAAAGGCAGTACTATTTTATTCTGTG  
TTAATACAAAACAA  
CAATATAAATTTTAAACGGATCAAATTAATCCAAATCAACCGTCCTAACGTCATA  
TTTTGTCGTT  
CATCATTATTTTAAATTGACCCAATAGTAAGGATAAAGTCTATTAGTTTATTTTTTACTTCA  
TTGATACATTTTAA  
AAAAATATATATATAACA  
ACTTGATAGTTTTCTAATTATTCGTATTAACGCAATAG  
TATATTTTTCTG  
GTTGTTATATGTATGTGTGGATTGTGGATTTACTTAAATATAATTGACAAAATTTCA  
AAACACGATAGTACATAACGTAACAACATTTTCGTTAATTATATATCCCGTCTTTGTTTAAAGTCTAATAC  
AATGTATATATCTCTTATTGTGTTTTACAATGTGTATGTGTCTCACTCATCTCTCTTCTATGTATTTGTA  
TTTTATAATGTATATGTGTCTCACAATTTCAATTATAAGTACCATACAAATATCTGATACACAAATACATC  
GACGGTTTATATTTTTTTTTTATATCAATGTATCTATTTTCATACATGTATCGATTTTAAAGTAGCATGAATTG

TATCATAGATTAACACTTTATCATTCTCTCTGTCCAACAATAGTAGTCCACTATTGACTTGGCATA  
CCCTAAGAAAGAATAAATAATAGGGGTAATATTACTATATTATCTTTGACTTTATTAATTTAATGTTTT  
GAGAAATGTGTTAGATGATAAATAGTATTTAACAGTAAGGGTAAAATAGATCTCTTGATTTTCTTAATTG  
GACAAGTATTATTGAACAACACTATTTTTAGTAGGAAAATGACAAATATACCCTCGAACTATCGTAAATGG  
TTTGGAGATACCCTTCGTCATACTTTTGGGACATTGGTGCCCTGTCGTCCAAAAAGTAGAGCATATATAC  
CTTTCATACTAACGGACATACACGTGTCACAATCTTATCCACTGACCCACATTTATTAATATCGAATCGA  
CAGATAAGATTGCGCCACGTATCCCTATTTAGTCTTCCGTTAGAGTGAAGGGCATATATGCTCTAGTTTT  
GGATGAAGGGGCACCAATGTCCCAAAGTATGACGGATGATATCTGCATACCATTTACGATAGTTCCGGG  
GTATATTTATCCTTTTTCCCTTTTTAGTATAGTGGACAACACTATTGTTGGACAGAGGAAGTACTAGACAC  
AATGATTTTAGGGTAAGTCACATTCTTATTTGGTTGGACGATTTCAATTATCATGTATCACTTGTGTATA  
TAAATACACAAACACACATCTGTATCTTCAAAGTTCCACTCATCTGCCATAGATACATAAATACATTGA  
TACACATATATATCTCGTCAAAGCTAAGCACTCAATTATATTATATCATGGATGCACATTTACATATATAC  
ACAAATACACATATATATCTCTTAAAAATATTCCACTCGTCTTTCATGGATACACAAATACACATTCATA  
GATACGCAATACACATATATATCTCTCAAAGCTCACTCAATTTGCAATAGATGCACAAAAATATAGAT  
ACACATATACACAAATATACATATGTATCTCTCAAAGTTGCACTCTAATTTGCCATAGATGCACCAATAC  
ATATAGTCCCTCTGTAAAGCGAGAGAGGGGGAGAGGGAGGAGAGTGGCGAATTTGCTACGAAAAAGG  
GAAATCTCATTGAGTTATGTAATTTTTTAAACTATAAATAGGTTGAGTAGATATATACTAGCTATGCT  
TGATTAATTATGTAATTTTTCATGTATAATTCTCACTTCATTGTTTTTGTGTATGTTTGACAGAGTATACC  
AGAGTCTTTAACAGCAAGACTACTTAACTTGGTTGAGTTAGATATGCATTCCAATCAGCTCAACTCCATTC  
CCAACCTATAGGTTGCTTATCAAAGCTCAAACCTTCTCAACATTTCTGGGAATCTCCTTCTTCGCTCCCTA  
AAACTATCGAGAATTGCAGGTTAGTCATCTAACATTTCTAATTCATAACATTATCACTACAACAAAAGA  
GATATTTAGTAGCAATTGAATTACTGTCATTGCATTCAGAGTCGCTAAAGCCTTTAGAACATAAGTATAA  
CCTTTTCTTCTACTTGCAGATCATTGGAAGAGTTGAATGCCAACTTCAATATGCTTACTCATTACC  
GGA  
CACCATTGGATTTGAGCTCATAAATCTCAAGAAGTTATGCATAAATCAATAAAATAGCATAACCTTCTT  
ACTCCACCTCCCCTGACCAATCTTCGCGTGTGGATGCTAGGCTAAACTGCCTTAGATCACTCCCCGAT  
GATCTTGAGAACCTAATCAACCTTGAATCCTTAACGTTAGTCAAAATTTCCAGTACCTCTCAAAGTTGCC  
CTATTCAGTAGGATTTCTCATTCTCTTCATGAAGTACTAGATGTTAGTTACAACAAGATTACTGAATTACCAG  
ATTCCATTGGATGCTTGAAGAAGCTCCAGAAGCTGAGTGTAGAAGGCAACCGCCTTGTCTCCCCACC  
GGAGGTAGTGGAGCAAGGGATACGTGCAGTTAAGCAATACTTATGTGAAAAGATAAATGGCATGCATG

ACAAGTCCCCTAAGAAGAAGTCATGGTTTGGAAAACCTAGCAAGATGTAGCACATTTAGTGGTGCTAACA  
TACCAAGAGATGATAGAGAGGACTTTGGTGTTC AAGCAATCGAACTATCGATGTAATTGCCTCACCGC  
GATTTATGGGAATGCTTTCTCCTCGTCGTCTTCTATCTCCAAAAACCTACTTCTCCAAATAAGGGACATTG  
CAATTTGCTTGGATATCATATTGTGGTAGCTCTTAGCTTGTTTTCTTTTACGTTTGAAATCGTGCAATGTGT  
GCTAGATCAAGCTGTACATTATGTTCTGTAGATTTTGTGTCTTTGAGATTGTACAGATTTTCATAGATGA  
TTAGCCTCATGAGTCATGGGTATGTTTGAGAGGTAGAGGTACAAATTTACCCGAACAGGGTGTTTATAT  
CAAATCATATGAATAATTACATCGAATCAAATTTGTTATCGTAACAATATCACTTGTACAAAACTCATT  
TTGTTCAATTAATTATCAAAAACCTCAAAAAAAAAATTATCTTACATAAACAGAACCATTAAAAAAACCCCAAAA  
AAACAGAACATGACTCTTAGAAAGCAAACAGAACAAATGAAAAACTTGCCAGAATCACAAATTATGAAT  
TAGTTTCTTGCACTTGCGATTCATTTCTTTGCAAATCCGATTCACTTCTCCTGTAAACGACCATTCTCTAA  
TGGTAGACAAAACCTGGCTCCATGCTCGCGATTTATTTGATCTTTCTCCAAATTTGCACGAAGTTGTGTTA  
GTTGCACCACTTTTAGCTATGCAACTGAGTTTTCTAGCTATTGGAATAATCCATTGGAGAAACACTTG  
ATTGAAATAAGGATTTAGGCAATAAATAGTAAATATGGCCTTGTCTAACTTAGTATCAGGGTTGAGAG  
GCTTTGAAGCAGCAGATAAAAAGTTGGGCATGAGTGAAGACAAAGTGTTTTTGAGATTTGGCCATGAGTT  
CATGTACACTAATAGGATGATCAAATCCTCTACATGACCATTTAAATGTACAACCTCTAATAGTCTTTAAT  
ATATCACAAGATTTGGGAGAAAAACAACAATATGTTATTTTGATGTACATATTGTTAATTTTTCTTATTT  
CTCTCTAGCTAGTGTGTA AAAAGGGCTCCAAAGAAGATGTCCTTTTATAACAAGGGGAAAGATGGTGTTGA  
AACCAGGTTGTGGTGCGGTAGTGGAATTGCTCCACCCTTAATCAAAGATCTCAGTTTCGAGCTCTGGGTA  
TGAAGAAAATCCTATTGGGAGTGCTATCCTCGGATGGGTCTTGCAAGTGTGCAAATACAGATTTAATCTAA  
GCTCCAATGCAGACTCCGAATATTGAGTGGAAAATCAAAAAAATGGTGGTGGGGAAGAGTTGTGGAGA  
TAGATGATGAGAACACGCTATTTAAGTTAGAAATTTTTTTTTATTTGCTTCAAGGCTTATGTGACGCTTCCA  
ATAGGATTTTCTTCATATTCAAGGTTCAAAAACCTGAAACTTCTGATTAAGATGGAGAAGTCTCATCA

>PGSC0003DMG400006486 LRR-RLPs

ATGGCAAAAAGAGTTTGTGTTGATGGAGAAGACAGAATATCAGAATTGCCTGTGCATATCATTATCAC  
ATCTTATGCCGCACTGACCTCGACGTCGAAGAGGCGGCGATAAGTTGTATGTTGTCCAAGAGATGGTAC  
TATTGCTGGACTTCAAGACCTAATTTGATATTCAATCAATTTCAAGGCTACAAATATAGGCCCTTGAAAA  
CTATGTCAAGTTGGTTGATCAATCTCTGCGATCCCATGTGCAAAAAAATTTACATCTTGAACAATTCATCC  
TTACATATAATGGTCAAGAAGTGGATCCTCACGTGGATACTTGGATTGAATTGGCGGTTAAACTCAACGT  
CACAGAGCTGGGAATTCACCGTTTCGGTTTAACATCATATAACTTACCTGATGTTATTTATGATGCTAAAA

AGCTGACAACATTGCAGTTAAGCAGGTGCAATTTTGAATTTGACAAAAGATTTTCTTGCTTGAGTCTCTT  
TCTTTGAATCATGTCCATATTTTCAGATGCCCAATTACAAAGAGTTATCGACAGATGCCCATCTATCAGGAC  
TCTAAGGACTCGTTTGGTGTAAAGGGATAATACCAAATAGTCCCGGGATTAATTATAGTACCGCTTATTT  
TGTTGTTTGGTTGGCAAGTTCGGGATAACTTATCCCGGGATTAATAATTAGTACCGGGATAAGTTATCCC  
TCTCCTTGGGTGGTATAGTAATCCCGGGATAACTTATCCCGGGATAAAATAGGTAAATGACAAAAATGT  
CTCTTTCAACCCTTTTGTGTATCACTTTTTACCTTAATGAAGGGCATTTTTGTAAATAAATAAATTGTTCT  
TAAAATTTATTATTTTGAATATAACAAACCAAACTCAATAAAAATAATCCAACACAACCTTATCCCATCA  
TAACTAATCCCAACATAACTTATCCCATCATAACTCATTTTCAAACCAAACGACCCCTAAGGTTACAGTGT  
TGTCAGGGTATAAGCAAATGTCATATTTTTGGCCTAGTACATCTCAAGTATTTTCGATGCTAGTTATTGCAA  
ACTCCATAGTGTATAGTCCAAGCTCCATATCTTCAATGCTTTAGATATACAGAACCTACTGAACAGGGC  
AATCTTCATCCTTGCCAAATTGCTATTTTGGATGGTTACAATACTTTACAAACACTCAAGCTCACTGGTGC  
CACCATCACAGACCAACAGTTTCGGGATGTATCCTATAAGTTCCCAAACATTTTCAGAATTGGATCTAGCA  
AGATGCTATAAGCTGAAAAATATAGAGATCCAGAGTGAAAACTCAAGAAATTCACCTTATTAGAAGAG  
TTGAACAGTCTGGAAAAATCACGATTCAAGCTCCAAATTTATTGAAATTTGATTTTCATGGTAGTAAAA  
TGCCCTTCACATATATGGATACTTCTTCCCTAGAAAGTGCCCGGCTCAATTTCTTCTTGCTGGCACAAC  
TTTGGATCAGTGGACAGCAGTTGGTACACGAGCCTTCAGCACTTTGTGAAAAAGTTCAACTATTCTAAAG  
ATTTTCATATTAATAATATTTTGCCACCAGGTAAATCAAAGTAGTTTACATTATTTTGTGCTTATGTCATTG  
ATTTATGCATTACTTGTGAATTTGGTTTAACTATGCCATTGACAAAATTCTTGCAGACCAGAAGCATCC  
TTATTTATAAAAATCTAGGAGAAATTGTTATTCCACCAAGTCACAAAGTCGAGATATTCATTGCATCCATG  
CTGCGTGTGAATCGATCATTGAAATAATAATGTTTCGAGTGTCCCTATATCATATCCATACTTCCATGTAC  
AGATAGCAAAGCACTACAGGTAATTTCTTGCTTGTCTCTTGTGCTTGTATAAACTAAGACATTAATTTGAG  
CTTACAATCAGAAAATTTGTTGTTAAATGTTGATTGCTCGTCTCATAAGCATTATTGTATAATATATCTTAT  
GTTTTTGTCTAAATGCAGGCGATGTCCACACTAAAAGGGTGTATACAAAAGCAAATTTGTGGCAAAGAA  
TGTCATCCGATACCGTCTGGCATCGTAACTTAAAAGAAGTCATCAGTTGTAGTGGGACATCTGAGGAG  
GGAATGGCTGCCTCCATGTGGAATCTCTGGTTGAAATCCACGTCTTTATTTGATCAAGTGAATAATTTTCG  
TGTTAGAATGGAAAGATGAAGCCTAG

>PGSC0003DMG400006487 LRR-RLPs

TATAAACCTAACAGCAAACGGCGGCACCTACCAAATCAGAAACCCTAATGGAAGAAAGTGTTGATGG  
AGAAGACAGAATATCAGAATTGCCTGTGCATATCATTATCACATCTTATGTGCGACTAACCTCGACCTC

AGAGAGGCGGCGATAACTTGTGTTTTATCCAAGAAATGGCAGTATTATTGGCTTTCAAGACCTTATTTGC  
TGTTCCGTCAATGTAAAGGCAACAATTGTATACCCCTGGAAATTTTTGTCAAGTTGATTGATCGACCCCTA  
CGAATCCATGTTGAACAAAACCTTACATCTTGCAAAATTCTTCCTTGCATATCGGGATCGAGAATTGGATC  
CTTATTTGGATCATTGGATTGAATCGGCTATTAAGTCAATGTTTTGGTGCTGGTGATTGATGCTCCGGA  
TATTGATTCGTCGTATTATAGCTTACCTGATGTTGTTTATGATGCGAAAAAGCTCAACACATTGTGGTTAA  
GCAGGTGCAAGTTTGAATTTGATATTAGCACCCTCATATAAGATTTTGTCTCTTGTGGCTCTTTTTTTGT  
ATAATGTTCATATTTAGATGCCCAAATGCAAAGTGTTATAGATAAATGCCCATCCATCAGGAATATAAG  
AGTACTGGCTTGCAAAGGTATGAGTAAATTGTATGTTGTTGGACGGTTACATCTACACTCTTTGGCTGTA  
CTATTATGCAAACCTCGATAGTGTGATTGTGCAAGCTCCGAACTTGAATCCTTTAGTTATACAGAATGTA  
TTGATCAGGGAAATTTTCATCCTTGCAAAATTGATATTTTGGATGGTAACAATACTTTACAAACACTCGA  
GCTCACTGGTTCCAGCATCACAGACCAACAGTTTCGAGATGTATTCCACAAGTTCCCAAACATTTAGTG  
TTGCATCTAACAAGATGTTATAAGCTGAAATATATAGAGATTCAGAGTGAAAACTCAACAAAGTCATCT  
TATCGAAGTTGGATAGTATCAAAAAAATCATGATTCAAGCCCCAAATTTATCGCAATTTGATTTTGAGGG  
TGATAAAATGCCCTTCTTATCTATGGATTCTTCTCCCTGGAAAGAGCCCGACTCAATTTCTTCTTGCCGA  
GGACAGTAATATCAAACCTTTGGAGATGTGGATAGCAGTTGGTTCACAAACCTTAATCACTTTGTTCAAAA  
CTTCAAATATTCTAAAGGTTTGTGTTAGTAATATTTTGCCGCAAGGTACTTTCCATTCTTTTTGTGCCATT  
GATTTATGCATTACTTGTGAAATTTGGTTTTAAGCTATGTCATTGGCAAAATCTTGCAGACCAAAAACAT  
CCTTATTTATGAAAATCCAAGAGAAATTCTTATTCCACCAAGTCATAATGTCGAGATACTCATTGTACCCA  
TCCTGAGCATTGAATTGATCATTGGATCATTATTGCTCAACCGTCCCAGCATCATGTCCATACTTCCATGT  
ACAGATAGCAAAGTACTCCAGGTAATTTCTTGCTTTACCTGGAAATCCTTTCAAAAAAACGTCCCTTGTGC  
TTGTAGACACTAATGCAGTAGAGCTTAAGCATTATTGTATTCTCTATAACTTATGTTTTTGTTTACATACA  
GGTGTTCCTGCATTAGAGCGGTGTACACAAAATCAAATTTGTGGTAAAGAATGTCCATTTAGTACCAG  
GTTTTTCCACAAGCATCGTATATTAGAAGAAATCATCAGTTGTTACTGGGACATCTGAGGAGGAAATGGC  
CTCCATTTGGTATACCTGGTTGAAATCTACGTCTCTAATTGGCAAAGTGAATAATTTGATGTTCAAATGGA  
AAGAACAAGCTTAGACCGAAGAATCTGGGGAATTCAGCATATAGTGTATTAGTGTGTTGAGAATAA  
AGTTCAGTTAACCCGCTTGTGGCTCTGTCAAATCCATGAAAGGTTCCCTAACCTTGTCTAGCTCTAAATA  
AATTGTGCTCAAATCTGTGGTTAATTTCAATTTGTTGATTGTACGGAATGAAGTTTAACTGTTAACAAC  
AGCATAAGAGGTCTTCATTTCAATTTTTTTTTCTGGCTCTGCCTCTTCTTACATTCCATTCAATTTCTCTC  
ATGCTTAGACTACTTGGAGGTGATTA AAAAGAAGTGAGCACTTGAGGTAGAGAGATGTAATGATGGAT

GCATATGCCTCCTACTTGTCTGAAATCTGGTATATATTCCTACTGTCATACTTGAAATGTAATATGATTTTTTC  
GTATAACTTTCTTTGTCA

>PGSC0003DMG400006580 LRR-RLPs

TATAGAAACTTTAATTGTGAAGAGTTGTCCTTATGTAAGTGTACCAGTGTCTTTTTGGCAAATGGAAAAAT  
TAAGGCATGCTCATGTTGATTGGGCTCTTTTTGGTAATCAGGGACTCTTTGAAGGATCCTCTAAATTGGA  
AAATTTGAGGATATTAAGAAAATTAGTGCATTTCCAATTGATAGGGTGGATGTGTTGTCAAGGAGGTG  
TCCTAATCTTCAACAACCTTCATATCGAATTTGATGTACATTCTGCAGATTCTTTTTGTCTCACATTGGAGAA  
TCTTACCCAGCTTCAATACTTCGCGTTTTCTTTAGCGGCCCCACATCATTGTATCTGGGTTGCAATTGC  
CTTCAAATTTAAACAAGTTGGTACTTAGAGGAATTCATATAGAAAGTGTCTATTCCCTTCATTGCGGGACT  
ACCAAGCCTGGAGTATCTTCAATTAGAAGAATGGAATTATGCAGAAGGGGAACCAATTTTTCTCAATC  
AGAAGAGTGGTGCCTTGGAGATATCACGGTCCATAACCTTAAGTTCTTGAAACTGGTGCGGTTAGGTAT  
CTCAAAGTGGGATGCCTCGGAGGAATCATTCCCCTGCTTGAAACACTTGTATAAAAAATTGTAGTAAG  
CTAGAGGAGATCCCCCTTAGCTTTACCGATATTCCATCATTGAAACAGATTAAGTTGATTGGGTCTTGGA  
AAGTATCTATGGAGGCTTCAGCTGTGAGAATTAAGGAAGAAGTTCGAAGAGATTGAAGGATGTGATCGT  
ATACACCTCGTCAAAGAACTGGCAGATTAGTGAGGGTTTTAATAGCTAATTATTGCAGCCATGCTCATA  
TGAAGTCTAGCCCATTCTTTTTATTGTAACACGACTACTATTTGCTATGTTTGTTTTAATTGATAAAACTC  
TTTTTATGTATGATTGGAGACAAATATATATCAGTTGGTCTTTCACTGATTTCTTGTTTT

>PGSC0003DMG400006625 LRR-RLPs

ATGAACAAATCTGGAGGAATCAAAGTACCTAAATTCATCGGTGCCTTAAAGAACTAAGGTATCTCAATC  
TATCTTCTGCGTCTTTACTAGTTCAGTATCGTCATTCCCTGGAAACCTCTCAAATTTGTAAGTTCTTGATT  
TGGGAGGTTTAGATCTTAGCAAAGCTACTAATTATTGGGTTCAAAAAATCAATGATCATATTCCTTCTCTC  
TTGGAGTTACACTTGCCTCGATGTAACTTTTAGACTTCCATCTTCTTTCCGTCTCTACATCTATCTTCCT  
TTTGGTACTTGATCTTTCCGACAATGCTTTCAATTCAAGTACATTCCCTCAATGGATATTAACCTTAATAA  
CCTTGTGCATCTTCACTTAAGCTCCAACAATATCTTTAGTGAACCTCCTGATGAGTTTGCAAAGCTCAATT  
TATTTGAATATCTTGATCTCTCTCCATTTATGGTATCAATGGGACACTAAAGAGAAGTTTGGGAAAAC  
ATGCAATTTGAAGACTTTGATCCTCTCTACAACAACATCTTGAAAACATAATCCATTTAATCGATGCCTT  
ATCTAAATGCCAAAGCAACAGCTTGGACATTGGATTTTATTTTCAATGACTTGACTGGAAATCTTCCTGAT  
GAATTACGCAACTTGTTGGAAGCTAAAAGATCTTCAATTGAGGTATAACTCACTGATATGCACAATAGTTG  
AAACTATAGGGAACCTTATCATCCTTAGAGACATTCTACCTCACATCTAACAAAATGAGTGGAAACCTCAC

CACGAATATTGGGCAGCTCATGTCATTGGTCTCATAGGACATCTTAGAGAATATGTGGGAAGGTATTGT  
CAAAGAATCCCATTTACTTGATCTTTCCAAGTGGCAAGAGTTTTCAATTGGCATGAACTTGGTACAAATA  
TAACCTTGGCATTCAATATCAGCCTGAATTGGAATCCTTCATTCAATCTGACATTCTTGACCATTGAGACA  
CGCTAATTAGGCACTGAATTCCCACATTGGCTAAAGGATCAAATGAGCTCAACAATATAATATTCAATA  
CCACAGGGATTTCAAATGTTGTTGCAGATTGGTTTGTAGAGTTGGATTTGAAGCTTGATAATCTAGACAT  
GGCTTACAACAAGTGGACAGGGAAAGTCCCAAAGCTCAAATTTCAAGCCAACGTGGATTTAAGCACCA  
ATCGCTCCGAGGGACCTCGCCACAATGGTCTTCTAGTGTACAACATTGTATCTAAGGGATGACTTATT  
TTCAGGACCTATTCTTGTTTCATCCTGTATTCTAAGATACTTAGAACAAAAGTTGAAGAATTTGGTAAGA  
AACAAACAAGTTTAAAGAGTATTTTCAAAGTAAAGTAAAGTAAAGTAAAGTAAAGTAAAGTAAAGTAAAG  
CAGATTAGAAACAATATACAAAATATTTTCTCAAAGAAGAAAATCGAGCCCACTGAATGCACAGTGTCCC  
CTTAAGGAAATTATTCCCCTCAAGTACCCGAGGTTAATGAAATATATCCTCCCAGGATAGAACGATCTTA  
CTCACTGGTGTATCGGTACCTACAATTACGGTGTGAGCGAGCCCACTCAACGGCAATAAAGTACACTTAG  
AATACTAGATTTAGTAATAGTAGAAGAAGTCCAGGAAATTGGTTCTTTCTTGTGAAAAATAAGAGGA  
AACTCTCTATTTATAGACAACAAAGGGTAGTGTGAAAAGTTCTTATTGTGCCTTACCGAAAGGTCACAA  
CCCTTTGGAAAAGTCACAATCTTTCAAAAAGGTCACAACGTTTCATAAAAGTCACAAGTTTTCATAAAAG  
TCACAACAATTCATAAAAGTCACAACCTTTTCATAAAAGTCACAACCTTTCATAAAAGTCGCAACTCTTCAT  
TTTCCATCCACACCTTTTAAAACCAACAATCCCCGCATGAATGGGGAATGACTCCAAGACAAAGAAAC  
GAACAAGTGTGTGACTTTACAAGTAAGAATTAATTGCATCTGGATAAGTAGGTTTTCTTTGAACTTTCT  
GTAGTGAACATATGTCGGATATACTCGGTCAATCGATAGATTTGGTATCTTTGAACCGTCAATCTTTGGT  
GTATATGTAGACAACCATATGTCACACAATTAAGTTTACCGTTTATGGTTCTTACGGTTGTGTTGTTTTA  
GCCATGAACACCTCCTGGTTTCATGAGTGTATAGAGGGATGGGCTTTTGACAATCATCATCTTTGAAGCG  
GCTTACACTTCACACTCACATAGGTGATTTCTAATCGTGTATCACGTAGGTACACTATTTGGTCAAATCT  
GCCAACTTAGCAAATCATTAAAAAACTATAAGCTTTATTAAGTCAATTAACAAGCCTTAATGTTATATTAT  
TGTTTCATAAGCATTATCTTCATCATGAGAATGGATTGAGTTGGTTGACAATGCGAACTGTCAGTCACAA  
CTTTGTTTTTCTTCTTGAACCTAGCTCTTGGGATCTCCAGTCTACTAGGTAGAGTTACCGCCATCATGACTT  
GTCCTAAGCCATAAACACATTCTTTAGATGATCTTTCAACTTTCTCTCTAGTTAGGCCTTTCTGTAAGTGG  
ATCCGACACATATCCTTTGACTTTACATAGTCAATTGTGATAATTCCACTAGAGAGTAGTTTTTAAACGGT  
ATTATGTCTATGTCATATATGACGAACTTTCCATTATACATCATGCTCCATGCCCCCTACCTATTGCATCT  
TGACTATTAAGTGTATGCATACTGATGCCAAAGGTTTAGGCCAAAAGGAATATTTATTAAGAAATTTT



GGAGTCTTTCTACTTATTCACCGGCCTTATCTAGAGCACCAAGCTCAGAGATCATTGTAGAGCTAGCGAC  
ACGTCTTTTTGGAAGATTTCCAAGATATTGCTCATCCACCAAGGGTAAATACAAATCCACTCATGGATTTT  
ACTTCATTTGATCCAGGTGATCCAATTTGCATCACTATATCCTTTCAATACTACTGGATATTGTTGTAATGC  
AAAACATAGTTTTGAGTATGTTGTAAATACCCCAAACTCTTTTCATTGTCATCTAATGAGTTCGATTGGG  
ATCACTCATGAACCGACTCAGTTCATTAATAACACATGTTATATCTGATCATGCACACTTCATGATGTACA  
TCATACTTCCCAATACTCTAACACAATCCAATTTTGAATCACTTTACCTTCACTCTTTTGAAATGCAAAGC  
TCACATTTATTGGAGTCTTGACAATATTGAAATCCAAATATTTGAACTAGTCAAGTACCTTTTCAATGCAA  
TGAGACCGTGACAATGCTAAACATTATGGAGTTCTAAGAATTCTTATACCTAAGATCGCATCAGCAACTC  
CAAGATCTTTCATATCAAACCTTTCTTTTTAGCATAACGTTTAGTAGCATTATGTCATTAGTGTCTCTACTAT  
GATCAACATGTCATCAATATACAAACAAACAATGACCTTGTGATTTAATGTAAACACATTTATCACTTCC  
ATCATTCTTAAATCTATTTGCCAACATGGTTTGGTCAAGTTTCTTATGTCATTGTTTGGGTGCTTGTTTTAG  
TCCATAAAGTGACTTAATAAGTTCACACACTTTCTTTTCTTACCAGGAACCACAAAACCTCAGGCTGTT  
CCATGTAAATTTCTTCTCCAACATATACCGTAACTAATGTAACATCCGAAGGAATGTAATTCTAGT  
TACTGGTAAGTATGTGTGCGACAAGATCAATACCTGTTTTGTCTAAAGCCTTTGACAAAAAGTCTTGCTT  
TATATTTGTCAACAGTTCATCGACTTTCATTTTCTTTTGAAGATTCATTTGAACCCAAAGTTTTATTCC  
TGGAGGAAGATCAATTAACCTCCAATGTGGTTGCTCAAGATTGAATCAATCTCATTAAAGACACCATCTT  
TCCAAAAGGATGAGTCCACAAAAGACATAGGAAATGTTATAAAATCAGATCCAATGGTAGTATATGTCT  
TTTGACATTTACTACGCGTCCGAATCTATTTATTAAGTACATTCTCTTTTTGTTATTTTCAAGGTCTTTTAGA  
CATTTGCTAGACTACTCAAGTCTAATTTTTCAGTCCACAGTCTTAGGTCCTATTTTAACTTTTTAGGAA  
TAGGAACTTGGACTTTGGCTAGACACCCCCACACTTTGAAATATTTCAAGTTGAATTTCTTCATTTTCATT  
TCTCATATGGAATAGATTGTGTCTTGAACAAACAAAACCTTTTTATTGCTTTCTTTCTGAAAAGTACAAAAC  
TTTTTTGTTGTTCCCTTTTGTGTAAGGATAGCTTCTCCACACAAGTTTTATGGTAAACCTGAACTTATAAG  
TAATGTAGCCATTACTTCTTAAAAGTTCGGTTTTTGTGTTTATTCTACAATTCCATTAGATTGAGGTGAA  
TAGGGTAGTAATTTGATGGATAAATCCACTTTCCAACATATTTCTACAAAAGGGGATTTATATTCTCCAT  
CCCTATAACATCTTTTTTTCCCAACTAATTTCAACTTCAATTTTAGTATTATGCAGTTTTTCAAGATTTTCAA  
GAGTCAAGATCGAAACGGAATTGATGCTACAAAATTTGTTAGGATTCATTTAAATGGCAGGCATTTTTTA  
CCTTTTTTCATAATTGTTATCATTCCAATACTACAGTCTACATTCAGCCCTTGTGGGCCACTTGAATTGCCA  
AGGAAGGTGGAATCTGCAGCACAGGGGGTTATCTGTTTTCTGGTCCCTGTTACACTATTGATATCCCTTC  
TTCTAAGGCATGTTCTCACCTTCAGAATGCTTAATTTCCATTTTGTGTTATTTTTTATGTCCATTTTCTGTTAT

CCATGAAGTAGATATTTACTTTGATGCCTTTGCACTTTTTCGATGGTCTCCTATTGTTTTCTGCGTATCAAC  
AATAATCTTGTAGACTAAATCGCCTAACTATTTAGAGGTATTGATGTTATAGACCGTAAATGATTATGCA  
ACTATTCATGCATTTATGTTGGAAGCATGTACATTATCTCCTCTTGCAAGTCGAGATTAGGCCAGTTTGT  
ATAATTTGGCATGATTTTTCTGCACTGAAATAGTGATTAGTTTGAACCTTTGGATGTAICTGATCAAAGAT  
GCCAATTGACCAAATATCAAATAAGGAGAAAGGGAATGTCTATTTCTTGTCTCCATGGCAGGAGATTAG  
TTAAGTTAGTTATGTTTAGCAATTTTTTTTTAAAGTACAACAACAATAACCGTAGTCCCTGACAAGTTGG  
GGTCGGCTATTTGAATCCCCTCTTCAATTAAGCTCATTTCTTGTATCCAACCTGACTTCTCTGCTTTTGC  
ATGTCCAAGTTCTTGTGTTTCATATGTTGTTTAGGAGTTTGATTGTTTTGGCTGTTGGGATTTGTACTGC  
AGGCACTTTTACTCTGCCTAGACGTTTCTATTGCTTCATCCCTACCATTGAGCAATAAACATAATTGTATCA  
AATGCAATTGTCAATAAAAGTTATGAGATATTTTTCCACCATGAGAAGATGTTGACTTCATATAAAGAA  
TGTAAGCGTAAATCAAATCTAACGGATTAGAATTCCTTCAACAGATTTATAAGAATGCTTAGCATACTT  
AGATTCAACACAACTTGACATTTTTATTTATTGCACTCAAAGGTTTTGTAATTTACATGTCCAAGTGCT  
CATGTCACAAACAGTTTGACTCAAGCAAGTAAGAACAATAAAAAATATTGAGTTTGAAAAGCTCTCAGT  
GAGGTAGCTTTTTCACACAAATATTTGTTCTATTTCTTACAATTTTGTGTGATACAAACATTGTTTAGAGT  
CATCACCTTGTCGAATATCCTTTTCGGAAGGACCTTTCCAAAACCTTCAATTTGATTGTTATAGAACTACA  
CATGAACAAAGTTTCATCGGGTCCAACAAAGACAATAGTCCAATGCTTCTTTTACAAAACATGACAAAT  
GACTATTCATAATATTCATGTCTATACAAATAGTTATATTTAATAGACATATCTTTTCATGAAAAATCCCA  
GCATTTTAAGTGACATTTTTTTCATAAAAGAACTCAATCATTTTGAACAAGTATACATATAATTTGGTAGTT  
TCATACTATACATACCGTATACTAGTAAAAGAGAACTCAGCGGCCACAATATCAAATATACTCCAAGAA  
TTTTGTGGGTCTAACATAATACAAAAGTATCATCGAATTTTCATATTTTGTGCTCCAATTTAAATTAGACA  
CTAAGTCTATTTTTATCTTTGTCATAAGCAAAGAACCCCCACATTTTAAATATGACCTCAAAAATATTTTT  
CAAATAGTTGAAAATAGTTTTTCCACATATTTCCAGACCATGAATGGCGGCATCAAACCTCTTTTGGAA  
ATATTATTCTACGAAAAAATATAGTGCTTCAATTCTCTTTGACAATCTTTACATGGTGTACAGTTCATTT  
CATAGAAGCACCTATTACAGACACAAAATCACACACTTTAAGTCACTGGTCGTTTTTCTATCACAATTAGA  
CATACCACTTAGTGTTTAGAATACTGATAATAAAGACAAAAACTTTTGTACATTTTTTTCTATTTAACAGT  
GAAGTTTATAGAAAACAATAAGTACAACACTGACTTATTAGATGAAGTTTTTCATATTCTTCAAACCAATTG  
CATAGTCTTATTTATCCAGAGTAGAAAACCTACAGAAGTTTTTACTCAACAAAAATAAGACACAATCAAAT  
TCACACAGAATACAAAACCTACAAAAGTTTTTTTTCTCCAACAGAATAAAACATATTCTTAGATAATCACA  
TAGAAATGCTTTTATTTTTAAATAGTCCTCCAACATAAACATTTTGTACATACTATTTTATCAAACATAAAAT

GTGCTCTCTCATTCTGCAAATAAAGAATTTTAAAGGAAACATTATTTGCCAAGGAAAATCCATTCCAAA  
ACATATGATTTGCAGCTATATTTCCAAACATACACATGATAAATATCAAATAATTAACTTTTAGAACTA  
TTTTCTCCTTAGATAAATAATAAGAAGGTTACCTGGTGAATCTTTAACCGGAATACCACCAATTTTTCT  
AGTACATTCTCAATTCGATCTTGCTAAACAAGGAACCAATTCTGAAGTAGTAGTGCATTAATCTTCTACT  
TCCATGTTTTGTTTTCTTAATCAATAGAATACAAGAAATACCAACCGTATAATAATTTCTTAAGATTGTT  
GTTTCATCATGTATTCCTAAGATACTTAGAACAAAACCTTTGAAGAACATGGTAAGAAACAACAAGTTTAA  
AGAGTATTTTCAAATAATAGAAAATTAACCTAGTAGAGAAAATAGAATCAGAAACAGATTAGAAACAA  
TATACAAAATATTTTTCTCAAAGAAGAAAATCGAGCCCACTGAATGCACAGTGTCCCCTTAAGGAAAT  
TATTTCCCTCAAGTATCCATGGTTAATGGAATATACCCTCCCAATATAGAACGATCTTATGCACCGGTGTA  
TCGGTACCTAAAACCATGGTGTGAGCGAACCCTCAACGGCAGTAAAATATACTTAGAATACTATATTTA  
GTAGTAGTAGAAGAAGTCCAGGAAATTGAATCTTCTTCTTGAAAAATAAGAGGAACTTTCTATTTAT  
AGACAACAAGGTTAGTGTGGAAAGGTTTTTATTGTGCCTTACCGGAAAGGTGACAACCTTTGGAAAA  
GTCATAATCTTTCGGAAAGGTCACAACCTGTCATAAAAGTCACAATTTTTTATAAAAGTCACAACCTTTCA  
TAAAAGTCACAACCTTTCATAAAAGTAAACAACCTCTTCGTAAAAGTCGCAACTCTTCATTTTCCATTACAC  
CTTTTAAAAGTCAACACTTATTCCTCTAAACATTGTGAAGCACTTCCCAGTATAGCAGACTTGGACATCTC  
TAGGAACAATCAAATGGCACAATTTCTTATGCATGGGAGATAGATATGAATCAGTGGACTACCTTAG  
CCTTCAATAATAACCAACTTATCGGACAAGTTCCTGATTTCTAGGGTAAGCTACCATATCTTACTAGATA  
GATATGTCAGAGAATCGCCTATCCATCCAAATTCAGACTCACTAGGCTCTCTTGTTATCTGATGTTCTT  
AAGACTCTCAGGCAATGATTTCAATTGAGAGCTGCCTTCGAGTTTGAGAAATTGCACGAAAATCATTAA  
AATTATCTTAGTAACAATCAGTTGTCAAGGCTTATCCCAGCTTGGCTAGGGGAAACAATGAGATTACTGT  
TATCCTTAGTGTAAGGAATAACAGGTTTTTCAGGCCACATTTCTTTTAAAGTTTGTAGCCTTTCAGGTCTTC  
ACATACTAAACCTTTCAAGAAACAACCTTATTTGGTTCTATCCTCTCTGTTTTGGAACTTGAAAGGCTTC  
AAGGTTGAGCTAACTGATGTAGAAGCTAGACATTATCAAGGGACATTGAAGCTTGAGGCAAAAATAAAG  
AAAAAAATTATGATAAAATCCTTTACCTAGTAAAATAGTATCGGCCTCTTGAGCAACAGTTTGTCTAG  
AGAAATCCCAGTAGAGATAACAACTTGGAACTTGAACCTTGTCCAGGAATCATTTGAGAGGAAATATA  
CCAACATATATCGGAAAGTTACGTTGGTTTGAAACGTTAGATCTTCAATAAATCAGTTAACAGGTTTTAT  
CCCACCAAGTATAGCTACTTTAGAGTTTCTGAGTCATTTGAGCTTGTCCATAGAATAAGTTGACAGGAAAT  
ATTCCTACTAGTACTCAGTTTCAAACCAAGTTGATCCAACAATTTTCAAAGGAAATGTTGCACTTTGTGG  
TCCTCCTTTGACTGAATGTGTTGGTGATGGAACCTACAACGACATCTGAAAGTGGAAGAAATGATGACGG

AGAAACAGATGATGAAGATAAACTTGAGAAAGTATGGTTCTTTGCAGTAGTTGGTTTGGGATATTGTCA  
CGACCAAGTCTACACCCTGGATGTGGCTGGCACTCAAGAACCATTGATGGTCCCCAAGTGA

>PGSC0003DMG400006652 LRR-RLPs

ATGGATCTCTCCTGGAATTGGCTCACTGGAAATATTCCAACCTGAATTGACAAGACTAAAATTTCTAGCAG  
TCTTAAACCTCTCTCAGAATGTTCTTGTCTGGTCCAATTCCTCAAGGTCTACAATTCAACACATTTGGAAAT  
GACTCGTATGGTGGCAACCTTGATTTATGTGGTCTTTCTTTATCAAAGCAATGTGGAACGAGTGGTTCAT  
CACATGTTCTCAACCATTGGAGTCGATTTCTTTAGTGGGTTTACGTGGGAATCAGTAGTCATAGGCTA  
CAGTTGTGGACTAGTTGTTGGAACCTGTTGTGTGGAGCCTCATGTTTAAATATCTTAAGCCAAAATGGTTT  
GTGGAATTTTTTATGATGGACTCATGCCTCACAAAAGAAGGAGGCCAAATTAAGAAGAGAGCTCAGAGAC  
GACGGACTTAATGGAAGATTGAGAGGGCCAACCTGTCTTTGTTTGATTTTATGGACTAATTAGTGAACCT  
TTCTGGTTCTGTTTTGTCTTTCTGTTTGTGTTTGTATATGTTTGAAAGAAACATAATTATATGTATGTTA  
TTTTAATATCAATGGTTATGTTAGTCTGTTTCTGTTTCAAGTTGACAAAAGTGATCTACACAGCCACTCAT  
TAGCTCAGATTTTTCAAAAAGTTATGTATTTCTTAAAGAACCAACACCATCATATTTAGGAACGCGGGG  
TTCTCATATATTAGCTTAGGTACAATAACGTGAAAGTCAAATATATTCTCAAAAACAAGCTAAAAGAA  
AGACATATCTGCATTTGAAGTTCGATTTTTGCCTTTTTTATATTCCGACATATTCATTCACTTTTGACTTAAA  
GGGCGTGTTTCATCCTTGTAAATGAGAATTGAGCATGAATGCTCAAGTGCCTGGACCTCGAGGAGGTGAAA  
ACTTTATAATATGTATTTAACTTGTTTCTCCATGATTTTAAACATCAAAGAATGAGTTGATTACATCTATA  
AAAGCAAAAGACAGAAAACAGTGATCCTTCTATACAATTAGTCTCTCAGTTTTCTTTGCCTGTGCATCACT  
ACACCTTTATCTTGAGTCGAGAGTCTATGGAAACAACACAAGAGACAATAATCGTCTAGAGAAAATGA  
GTACATAGGGGGTATTATTTTGTAAAGTCTTCTCCGTCCTTAAAAAGTAATTTGTGGGAAACACTACCA  
AAAATATGAAGTAACAAGTTGTTAGAAGTGAGTAGTACTCATCCATGGACCACAAGTTGCGTAGTTAGT  
GATGTCAAGGTTGTATTATTTTCTCTCATTATGCCAAATTTGGACAAAATAAATATTGTATAATAGTTA  
CTATCAAACAAGATTTGAAGACTTGAGTCTTTCTGGAAAATGACTCAAAACACTTTGGACAACCTTTTTTGC  
AATCACAATTAGTTAGTGGTAGATGTGGGGCAAATACCCCATTTTATTTGTCTGGATATGTTTCTTCTCT  
TTTTCCATTCACACCTTTTATTCATAAAATTATTCAAAACATACTAATTATGCAGGAAATTAAGACACATAT  
CAAACAAAAAATTGAATAAAAAGCAAATAAAAGAATAAAAATAAAATTCCACACGGTATTATTGTTAATT  
GTTTCTCACTTGACTTAGTCAAGAAATAGTTTCTCTCATTGGCAATTTCTTAGAAGTTCTGCAGAAATTTT  
TTCCACATAATGGGACCAATTTACATCATCTTACCTAACACACAATACGGCGATACTTACTAACCTCGAA  
ATGAACACAACATCTAGAGAAAATGAGGACATAAAGAGTATTATTTGTTAGGTCTTCTCCGTCCTCCTC

TAACAAGTCTTGTGGACTACAAAATATGAGTAACAAGTTGTTAGAAGTGACTAGTAATCATTTCATGGA  
CCACATGTTCTGTAGTTAGTGATGCCAACGTTGACTATTTTCTCACCATTTATCCCGAAGTTGAAAAAA  
ACAAATATTGTATAATTGGTACTATCAAACAAGACTTGACTTAAAGACTAGAGTCTTCCTGGAAATTGAG  
TTGACAACACTTGGGACAACCTCTTTTGCAACCACAAATTAATTAGTACCCCATTTTATACCTCATAGTCC  
CATGCATAGACAAGTCAACAACGTTACTTTATGAAATAGTGTTTAGTAACTGTTTACTTTATTTAATGTG  
GAGGTCGTTGTAATAATTAAGAAATCGAATAGTACTTAATTAATTATAGCATCCTTTCTTAAATATATATG  
TGGATAATGCTAGTTGATTTGTAAGAAGAGAACAACATCCTGTTATTTGCTGAAAACAAAAAATGGTC  
ATGAGTCTGTTTGATATCCACACGACCTAGATTGTTTTACGTTTACCAGACTTACTTAGGTGAACCAAG  
TTGCCTAACATGTTTCAAAGACAATGTAAAGACAGGAAAGTAAGAACACAATATTTTACGTGGAAACAC  
CCGGCTCAAAGGTGTAAAAACCACGACTTGTTCTCAACAGGATTTACCCCACTTCACTAAATAACTA  
CAAGTCTCAACCAACAAACAAGATTACAATAGTTTATCTAACCTAAAGATCAACTACTTAATCTCAATTCT  
ACCACACACCTCCAAGGTATGCGTTCTCAGTGTCTTCGAGTTGCCCTCACTTGAAGACTAAAATCCTAAT  
ATCAGTTATAAATTACTGATCTAGAAAATATAAAAATCACAAATACTAAGAAAACCTCCTAGATCTGTTCT  
TCTATATTCTTTGATCAGCAGCACTTCAGAAATCAATCTCTCAATTTTTTTGCTCTGTGGGTGCGTAATTAT  
TTTGAACGCCTCTTCTCCTATTTATGCTTTTGTTTCTGAAGTCTTCTACTCCTTCAGTGACTCCTCATTCTG  
TCAACCACTTTATTTCAATTTAGAGTTCTTCTTATACCTTTATTAATTAGAAGTCCTTCTTGAACAGTTTCTC  
ATCAACTCACTTTGCCAACGTGTTCTTGCATTTTGTGATGTATCAAATAAATACTTATCCCAACATTTTCT  
TTTATTCTTTCTCTGTTTTGTGTTGCTAATAAGTCTATGATTTTCTTCTCCTTTGATCATCATCTTTGCTCT  
CCCCTGAAGCTTCCGCTTTGCTTCAGTTTAAAGCAACCTTTCAAGTTAAATCCGACTACTCCCAGTGTGAT  
ACTTCTTTCCAAAAACAAAGTCTTTGAATGAGAGTGGAGATTGTTGTACTTGGGACGGAGTTACATGTC  
ACATGTTAACCGTCTTAGTTGTAGTCAGATTGTTGGCAATTTTCATCCCAATAGCAGTCTCTTCGAACT  
TCATCATCTCCAGACACTAAATCTTGCTTACAATGACTTTTATCCTTCTTCGATCCACATAACATTGGCCG  
ATTGACGAATTTGAGGCATCTTAACCTTTCTCGTTCTTTCTTTGATGCAAAAAATCCCAACAGAAATCTCA  
TATCTTTCCAATTTGGTTTTCACTTGATCTTTCTATGAATTGATTACAACAAATTGATGAGAGAACATTTGA  
AGCAATGCTTCACAACTTGACAAATATGGAGGTACTATCTCTCCTTCTTGTCAACATCTCATATCCCATAC  
TTGTGAATATTTCTTCTCCTTAAGGTACCTGGATGTTGAAGCTACTAATCTGCGAGGTGTTCTCACAGAG  
AGCCTTTTCTTCTGCCAACTTGGAACACTCAAATTGAGTGGTAATCATCTTCTCAAAGGAGTTTTTCC  
AAAGATCCACCCGAGAAACACTCTGTTAATGGAATTGGATATTTATACACAGGAATCTCCGGTGAGCC  
GCCTGATTCAATTGGCACCTTGAATTCATTGAATATCTTGAATCTCCAAGGACGTCAATTCTCTGGCCATA

TTCCTGATTCCATAGGCAACCTAACACAAATTACAGAGTTGATTTTAATCTTATAATCATTTCACTGGCCA  
TATTCCTTCCACAATCTCTAAATTGAAGCACCTCACAAGTTTACTTCTCGGTCCAACCTCTTTTCAGGTGA  
AATTCCTGATGTTTTCTCTAACATCCAAGAGCTACGCTTTTTAGATCTTTTTGATAACAGCGGTTGTTTTCC  
CTCTTCAATTTCAAACCTTGACACATCTTCAACGGTTAGACTTGTTGAGTAATTCCTTATCTGGCCCACTTCC  
TAATAATGCGAGCAATCTTCAAAAGCTAACCCAAGTGGATTTGTATGACAACTTACTGAATGGTACCATA  
CCATCTTGGTTGTTTAGCCTCCATCTGCTAACACTTTTTTTGTGCTCAGTAGAAATCAATTTAGTGGACT  
ACCCGATGAGCTCAAACCAAATCCAGCATTAAACAAAAGTGGATTTAAGCAATCACTTGTGAATCTCACAC  
ACCTTTATAACCTTGACCTTTCATCAAATAACATCACCGGTCCATTTCCCGCTTCAATTTAAGTTTGACAC  
ATCTTGAATAGTTAAACTTGTCGAGTTATTCCCTATCTGGCCCACTGCCTAGCAATGCAAGCATGCTTCAA  
AAGCTAACTTTTGTGGATTTGTCTTACAACCTTGCTAAATGGTACCATAACCATCTTGGAACCTCCCTTTGCT  
ATCTTTGTTGTGGCTCAATCATAATCAATTTAGTGGACTAGCCTATGAGATCAAAATAAACCCAGCATTAA  
GAATTTTTGCATTTAAATAATAATCAACTCAGTGGTTCTTTTCTCAATCACTTGTGAATCTCACAAACCTT  
TTTGCCCTTGACCTTTCATCAAATAACATCACCATTTGATGAGGGAATGAATATCATCTTTCCTAGCCTATC  
ATCTTTATTCTTATCATCTTGTGGACTGAAGAATTTTCCACACATCTTGAGAAATGTAAAGACACTTCAGG  
TCTTGGATAATTCTAACATAATATTTGTGGTCAAATCCCTAACTGGTTTLAGCGGCATGAGGTGGGACTT  
GTTGCAGTTCCTAAACCTTTCATAATTCATTGACAGGCCACCTACCACAATTCATTACTATAACGTAC  
AGTATCTTGATCTGAAATTTAACTCCCTTCAGGGTCCACTACCTTCATCCATTTGTAACATGAGCAAACCT  
ATCTTATTAGATTTATCACATAACTACTTCAGTGACTCAATTCGAAGTTGCTTGGGAAGCATGGCTAATTT  
AAGGGTGTGGACTTAAGAAGGAACAATCTCACAGGGAGTATTCCATTATGTGCACACAACACTTCAT  
TGAGTGCCATTGTTGTAATGGTAATCAATTTGAAGGACCTGTACCTGTGTCGTTGCTCAAGTGTAAATGG  
TCTAGAAGTCCTTGATGTGGGGAACAATGCTATAAATGACACGTTTCCAGCTTGGCTCGGAACCTTCAA  
GAGCTGCAAGTCCTTATATTAAGTCAAACAAGTTCCATGGACCTATAAGTACTTGTGAGACTAAGTTTT  
GCTTTCCAAGTTGCGAATTTTTGATCCTTCATGTAATGATTTTCAAGTGGCTCACTTCTGCAAAAAGTTTTT  
GGAACTTCAAGGCAATGATCAAATTATATGGCGAAGACACAAGAGAGATCAAGTACATGGAACCATCT  
GAGGAGCCATCGTACGTATCGTATGAGGATTCAGTGTGTTTGGTGGTAATCAAAGGGCAGAATATTGA  
GCTACAAAGAATCAGCACAAATTACGACAACCATAGATCTCTCAAGCAACCATTTTGAAGGTGTGATTCCG  
AAAACACTAAAGGATCTCAGCTCACTTTGGCTACTCAATTTATCCCGTAACAATCTCAGAGGGGATATTC  
CAATGAACTAGGACAATTGAGTATGCTTGAAGCTTTAGATATCTCTTGAATCGGCTCACTGGAAAGA  
TTCCACAGGAATTGACAAGAATGAACTTTCTGGCCTTCTTAAACCTCTCTCAAATCATCTCGTCGGACCA

ATTCCTCAAGGTCCACAATTCAACACATTTGAAAATGACTCATATGGTGGCAACCTTGATTTATGTGGTCT  
TCCTTTAACAAAGAAATGTGGAATGAGTGATTCATCGCATGTTCTCAACAGTTGGAGTCCGAAGAAGA  
AGGCGAGTCATATTTTTTTAGTGGATTTACGTGGGAATCAGTAGTCATAGGCTACAGTTTTGGACTAGTT  
GTTGGAAGTGCATGTGGAGTCTCATGTTTAAATATCGTAAGCCAAAATGGTTTGTGGAATTTTTCTATG  
GACTCATGCCTCACAAAAGAAGAAGGCCAAAGAAGAGAGCTCAGAGATGA

>PGSC0003DMG400006655 LRR-RLPs

ATGTCCAAAGAGTACTTTAGTTATTGGTCTGATGGAGATTCTTTCCCGAAAACAAAGTCTTGGAATGAGA  
GTAGGGATTGCTGCAGTTGGGATGGAGTCACTTGTGACTTATTAAACGGTCATGTTATCGGGTTAGACC  
TTAGTAGTAGTCTGCTTTGTGGAAGTATTCATCCCAATAGCAGCCTCTTCCAACCTTCATCATCTCCAAACA  
CTAAACCTTTATAACAACCTCTTCAATTATTCTTCAATCCCACATAGCATTGGCCAATTGACGAATTTGAG  
GCATCTCAACCTTTCTATTCTCACTTTGGTGGGAAAATCCCAACAGAAAACCTACACCTTTCTAATTTGG  
TTTTACTTGATCTTTCTGTGTATGGATTACAACCTTGATGAGAGAACATTTGAAACAATGCTTCACAACCTC  
ACAAATCTGGAGGTACTAGCTCTCTCTTGGCGACATCTCATCACTGATACCTGTAAGTATTCATCCCAA  
TAGCAGCCTCTTCCAGCTTCATCATCTCCACACACTTAACCTTGATAACAATTACTTTTATCCTTCTTCGAT  
CCCAAATGGCATTGGCCGATTGAGGAATTTGAGGCATCTAAAACCTCTCTGGCTTTGATGGGAAAATCCC  
AACAGAAATCTCACACCTTTCCAATTTGGTTTCACTTGATCTTTCTTATAGTTATAAATTCTTACAACCTGA  
TGAGATAACATTTGAAGCAATGCTTCACAACCTCACAAATCTGGAGATACTTTCTCTCTGGTATGTCAACA  
TCTCATCTCCGATACCTGTGAATATTTCTTCTTCTTAAGATATGTGGATCTTGACATACTAATCTGCGAG  
GTGTTCTCACAGAGAGCTTTTTCTTGTGCCAACTTGGAAGCCTCAAATTGAGTGGGAATGATCTTCT  
CAAAGGAGTTTTTCCAAAGATCCACCGGAGCAACACTCTGTTAATGGAGTTGGATATTTATCCACAGGC  
ATCTCCGGTGAGCTGCCTGATTCAATTGGCACCTTTAGTTCATTGAATATCTTGAACCTCGGAGGATGTC  
AATTCTCTGGTTCCATTCCCGATTCCATAGGCAACCTAACCCAAATTACGGAGTTGGCTTTGTCTTATAAT  
CATTTGGGATAATACATATATTTGACCTTAAACTTGGCTTCAAATTTTAACTTTGACCTCCAACCTTTCATAG  
TGCACAAACAAGCACTTTAACTATCCAATCTTTAATAAATAAACACGTGATTTTTGGAGCCAAGAGCGT  
GAAATGCAAACGCTGCCACGTGTATTAGAAATTCCTGATGTTTTCTTAACCTCAAAGAGCTACGTACTTT  
ACATCTTTCTAATAACAGCTTCATCGGTTTCGTTCCCTCTTCAATTTTAAAGTTTGACACATCTTGAATACTT  
AGGATTGACGAATAATCCCTATCTGGCCCACTGCCTAGCAACCAAAGCATGCTTCAAAGCTAACCGAA  
CTGAATTTGTCATACAACTCACTGAATGGTACCATACCTTCTGGGTGTTTAGCCTACCTTTGCTATCTTCA  
GTATCGCTCCAACATAACCGATTGAGAGGACTAGCCGATGAAGTGATCAAACAAACCCAAACATTAATAA

GAAGTGCATTTAAGCAATAATCACCTCAGTGGTCTTTTCCTCAATCACTTGTGAATCTCACAAACCTTGA  
AACCTTGGAAATTCATCAAATAACATCACCATTGATGAGGGTATGAATATCACCTTCTTAGCCTATCAT  
CTTTATTCTTATCATCTTGTCAACTGAAGGATTTCCACACTTCTTGAGAAATGTAAAGACACTTCAGGTC  
TTGGATATTTCTAACAATAAGATTTGTGGTCAAATCCCTAACTGGTTTAGCGGCATGACGTGGGACTCAT  
TGCAGTTCCTAAACCTTTCTCATAATTCATTAACAGGCCACCTACCACAATTTGTTACTATAACCTACAAT  
ATCTTGATCTGAAATTTAACTTCCTTCAGGGGTCACTACCTTTATCCATTTGTAACATGAGGAACTTATC  
TTATTAGATTTATCACACAACACTTCAGTGACTCAGTTCACATTGCTTGGGAATCATGGCTTCACTAAC  
GGTGCTGAACTTAAGAAAGAACAACCTCACAGGTAGTCTTCCTCCATTATGTGCACAGAGCACTTCATTG  
AGTACCATTGTCGTAAATGGCAATCGATTTGAAGGACCTGTTCTGTGTCGTTGCTCAAGTGTGATAGAC  
TAGAAGTCCTTGATGTGGGGAACAATGTTATAAATGACACATTTCCAGCTTGGCTCGGAACTCTTCAAGA  
GCTGCAGGTCCTTATATTAAGTCGAACAAGTCCATGGACCTATAAGTACGTGTCAGACTAAGTTTTGC  
TTTCCCAAGTTGCGAATTTTTGATCTTTCTCATAATGATTTTAGTGGCTCACTTCTGCAAAGTTTTTGA  
AACTTCAAGGCAATGATCAAATTAGATGGCGAAGATACAGGAAATATCAAGTACATGGAATCTATGTCG  
AATTTGCCATTTGTCAGATCGTATGAAGATTCAGTGAGTTTGGTAATCAAAGGGCAGGATATTGAGCTA  
GAAAGAATCAGCACAATTACGACAACCATCGATCTCTCAAACAACCATTTTGAAGGTGTCATTCCGAAAA  
CACTAAAGGATCTCAGCTCACTTTGGCTACTCAATTTATCCATAACAATCTCATAGGTCATATACCAATG  
GAATTGGGGCAATTGAATACGCTTGAAGCTTTAGATCTCTCTTGAATCGGCTCACTGGAAAGATTCCGC  
AGGAATTGACAAGGATGAACTTTCTGGCAGTTTTTAACCTCTCTCAAATCATCTCATCGGACCAATTCCT  
CACGGTCTACAATTC AACACATTTGAAAATGACTCTTATGGCGGCAACCTTGATTTATGTGGTCTCCTTT  
ATCAAACAATGTGGAACGAGTGATTCATCACATGTTCTCAACCATTGGAGTCTGAAGAAGATGAAGG  
TGAGACATATTTTTTTAGTGGATTTACGTGGGAATCAATAGTCATAGGCTATAGTTTTGGACTAGTTGTT  
GGAAGTGCATGTGGAGTCTCATGTTTAAATATCGTAAGCCAAAATGGTTTGTGGAATTTTTTGTGATGGAC  
TCATGCCTCACAAAAGAAGAAGGCCGAAGAAGAGAGCTCAGAGACGACGGACATAA

>PGSC0003DMG400006792 LRR-RLPs

CAACAACAGACTATACGGAAAGTTCCCCTCATGGATATCTGATGGTTTTCAAATCTTAGAATCCTCAGA  
TTAAGGTCAAATTCATTTTCCGGAGAATTCCTCTAGGAATGTCAAACCTGAGTTCATTGCAGGTGCTTG  
ATCTTGCAGAAAACAACATAACTGGCGCCATTCCAACAAGCATAGGAGACCTGAACGCCATGGTACACG  
AGAAAAAGTGAATGAATATCTGTTATATGGGAAGTATAGAGGGATTTACTATGAAGAAAGCTTGGTA  
GTGAATTTGAAAAACCAGTTCAAAAGTACACCAAGACTCTATCACTTCTTACCTCAATAGACTTGTGCGA



GAAACAACCTCAACGGAGCATTTCCTGTGGAATTGACAACTTGCATGGCCTCATAGTTCTGAACTTGTC  
TGGAAACCAAATCAGTGGAAAAATACCAGAAAACATTTCAAGCTTACATCAGTTAGCATCGCTTGATCTC  
TCGAGTAATACACTGTCTGGTGTCCATCAAGCATGGAATCAATGTCATTCTTGAGCTATATTA  
CTCAAACAACAACCTTATCCGGTATGGTTCCTTATAAGGGGCAGATGACAACTTTTACAGTGTCCGCGTTT  
GAGGGGAATCCCCATCTTTGTGGAGCTCCACTTGTAGTACTATGTCAAAATGGAACTCGGACAATAGA  
ACAGTACTAGAGAATGACAGCAGTGATGAATTTCTGATAAATGGTTTTATCTTAGTGTTGGATTGGGAT  
TTATTACAGGTATTCTTGTTCTTACTATATCTTGCTCGTTCGAAAGCCATGGAGACGAGCATATTTAGT  
TTCTTAGACACAGTCATCGACAGATTTGTCCAGTTAGAAGCAACAGAACAACCAGCACCAAAGATCA  
GATACGGGCACCAGCTAAGGCAAAGAAGTGTTCAATAGGTACTAGTCCTAGT

>PGSC0003DMG400006880 LRR-RLPs

CACAGAAGAAACTCTCTGTAAATAGAAAATAGAGAGTAATAGTACTGCATTTTGTAAATAGAGAGGAG  
AAATGGGTCTCACCGGAGTAACATTGTTGGTCACTCTCATGGTGGTGGCCGCGTCACTTTGCCGGCAA  
ATGCCTGTCTGCCGGCGGACCAAGCAGCATTGATGGATATCAAAGCAGCTCTTAAGGAGCCGATTTGG  
GCATTTTCAACACATGGACCGGCAGCAACTGTTGCCAGGGCTGGCATGGTGTAGCTGTGACCCGACTA  
CTCAACGGGTTGCCGACATTGTTCTTCGGGGAGAATCCGAAGATCCGATTTACGAGAAAGCCGGCCGGT  
CTGGTTACATGACCGGTTCACTCTCCCCTTCTCTGCAAACTCGACAAGCTCACTACACTCATCGTCGCC  
GACTGGAAAGATATCTCCGGCGAAATCCGGCATGTGTCACTTCATTACCAGATCTCCGTATCCTTGAGC  
TCATCGGCAACAAAATCAGCGGTCAAATCCCGGAAAACATCGGTGAGTAACTCACTGTTCTAA  
ACCTCGCCGACAATAAAATCTGCGGTTCAATCCCCGCCTCCATTGTCAACCTCGGAAAACCTAAAGCACCT  
CGAACTCAGCAACAATCAACTCACTGGCGAAATCCCGTCCGATATCGGAAAACCTCGGAATGATGAGCCG  
AGCACTACTCAACAAGAACAATTCACAGGTTCAATCCCTAACTCAATCACTCAACTTCGCCGGTTAGCC  
GATCTAGATCTGTCAATGAACCAAATCACCGGTTCACTCCCGGCTCAGCTCGGTTCAATGCCGGTTCTCT  
CAACTCTAAACCTCGATTCCAACCAAATCTCCAGTTCAATCCCCACTAATCTACTTAGCAGCAGCGGATTA  
AACATCTTAACTTAAGCAGAACTCATTAGAAGGAGAATTACCAGATGTGTTTTGCTCAAAAACGTA  
TCACACATCTGGATTTATCATACAATAATCTTCGAGGTTCAAGTTCCAAAATCATTATCATCAGCTAAGTAC  
ATTGGCCATTTGGATTTAAGCCATAATCATCTTTGTGGCCGATTCCAAACGGGTACCCCTTCGATCATCT  
AGAAGCTTCTTCTTCTCTAACAACGATTGTTTGTGTGGATCGCCATTACGTA  
TTACTTACTAAGTTTGTAAATTAATCGAAATTATCGGTTGATTACGCATAAATGGATGTGTAATTGTGTATT  
ATGTTGTTATGATTA  
AAAAAATATTCTTATGTGTTTAGCTTAATTATTATTATTATTGCTAAGCAATATGAT

GGATTATGCGGTTCTATCATGCATGCACGTGAAAATGCGTGACAGTTTACAAGAAAAATTATTGAAGAA  
ATTGTGTGCTATTGTTATTAGTAAATTGTAATATAATAAATCCCAC

>PGSC0003DMG400007033 LRR-RLPs

ATGGCCAGATCAGTAACTCCATTTTCTTAACCTTCTTGACATAAGTTTAATATACACACTCTCACCTTAT  
GTCAATGCAACAACCTTCACAATCTGATATTCAAGTTCTAGTAGCCATCAAGACGTCGATAGACCCTTTTTTC  
AATAACCCCGGATTCCCTTCTTAGTAGTTGGGATTTCAACTTAGACCCTTGTGAAACAACCTGGTGCAAGT  
TTCTTAGGCATTCTTTGCACAGTTCCTGATCAGGTAGACACTAATGCCACGAGCCGGATAATGGAGATTG  
ATCTAGAAGGTGATGGACTAGAGGGGTTCTTGACATCGTCTATCGGGAACTTAACAGAACTTGTTACTCT  
CAATCTAGGTAGGAACAAGTTCAGGGGACCAGTGCCAGAGAGTATTACTAATTTGAGGAAACTCACAA  
GTCTTCAACTTTATGAGAATTTTTTCTCAGGTAGTCTTGTTGATGACATTGGTGTCTTACAAAACCTTGAA  
ACTCTTGATGTCTCGAATAACAGGCTATCTGGCTCAATCCCTTCTCGATTACATCACTTAGAAGTTTAAC  
GCGATTAGACCTGTCTAACAATGAATCACTGGAAAATTTCTCAACTCAACGGATTATGGCAACTCTCTT  
CATTTGACATTTCAAATAACCAATTTATGGGAATTTACCACAATTCCCATTGAAGATCAAAACACTATCA  
CTAAGCCACAACCTGTTATCAGGACACATTACCCAGTGCATAAACTTAGACATTTAAGCACATTAGACC  
TTAGTGATAACAGATTTTCAGGAGGAATAAACAAGGGATCTTCATGTTACCTGAATTAAGTCACGTAAA  
CGTTTCAGTAAACCGTTTCACAGTGTGAGGTGGTAGAATTCTCTGATAAAAAATCACAGCTACACACG  
TTAGACGTACATGCTAATCGTCTACATGGTCATTTGCCTGTGAACTTGGTTACTTACCCAACTTAACAGA  
AATAAACCTTGGACATAACCTGTTTTCGGGTGAGATTCCATCAGAGTATTGGTCAAGACTCGGATTTTCA  
TGGAGAAGTCTCAACTTGAATATAATAACCTGGAGGGATCGGTGCCTCGAGAGCTCAACAGGACTTTA  
GAAGGGGTTTCAGGGAAGTTTTGAACACAACCTGTCTCATTGTCCAAAGGGATTGCAGCTATGTCATGGA  
CAGAGGACAGCTTCAGAATGTCATGGAGGAGACCATAATTAG

>PGSC0003DMG400007281 LRR-RLPs

ATGCCGGCTCTACGCCGCAAATTTCTACCCTCTCAACGGTTAACTTGAACAAAACGATCAACAGCTTCA  
TTGGTAACGGAAACCTCCAAGAAGCTCGGAAGCTCTTCGATCAAAGCCCCACTTGACAAATGTCGTATC  
ATGGAATTCCTTATCGCTGGTTACTTCAAACACAATCTCATCCAACAAGCAGAGTACCTGTTTGACAAA  
ATGCCTCACAGAGATGTCGTTTCTTGGAACACCATGCTCTCCGGATATCGCAACGCCAACAACCCAGAGA  
AAGTATATAGATGTTTTTAGATATGAACAGATGTGGAGAAATGAGACCCAATGAGCTCACTTTTGCAGT  
GTCAATTAGCTCCTTCTTATTTAGATTACAAGCATTGATCCCTCAGCTTCAAGGTCTCGTGCTCTGTTT  
GGGGATAAGTCTCAATGTCTTTGTAGGGTCAGCATTGATGAGGGGTTATGTTGATTGGATGATTACAG





ACATAGCAGTGGTATTGTCCGTACCTTTATTTCAATGGGTGTAGCTTTTCCAAAAGAGATGTGTTCCATTA  
TTTCAGAGTTCAAGTTGATTAAGGTGTTGGACGTGTTACCAGTCCTGTACGATTTCTCTAGTGAATACCT  
GAGCTTGTACATTTGAGATATGTTGCTGCAAGAATTGAGGAAGGTCTTTCACTAGCCAAATTGAGAAAT  
CTACAGACCATAAATTCTTCAAAGATATTTCTCCAGACCAACAACGTTGAAGCAGCCAGTAGATATCTGGA  
GTATGTCAGAGATAAGACATGTGGATATTCAATTTCCACTATATATATCAAATCCTGTTGAAGCAGAACA  
ACCTTTGTGCCTTCTGAATAACTTGCAAACACTTTATCCCTATAACTCTCCTTTTGTGAGGAAATCATAAG  
AAGAACTCCCAATCTAAAAAAGCTAAAGATTTTAGATATATCTGAGCATTCTGATTGGGCTGTTATTCTT  
GATTCTCTCAGTATTTTACAGGATCTGGAGACACTACACATACAAAACATTGATCCGATGATTATCTCTGA  
AGACATTTCTCTTCTAATCTTAAGGAGTTGAATTTATCAAATACTTGTATTCCATGGGAAGTTGTGAATT  
TGCTGGCTAATTTACCCAATCTTGAGAAGCTCTATGGGCATGCTGCATTGATGGAACAGATTGGAAAG  
TAGATGAAGATGTTGTATTTACAAATTAATAATCTACGTCTATATACGTGCAGAGATCTGGAAAGGTG  
GGAATTAGCAGCTGGTAGTGATAATTTTCCGATGCTTGAGAATTTAATACTGTTTGAATTGCCTAAACTA  
GAGGAGATTCCGGAGAGTATTGGAGAAGTAATGACACTAAAATTCATCCGAATAGTTAATTGCGGCTCT  
GGTGTAAGACAAGTGCAAAGAAAATTCAGGAAGAGCAAGAAAGCTTGGGAAATTATGAGCTTGATGT  
TCAAATCTACCCCTAA

>PGSC0003DMG400007684 LRR-RLPs

ATGAAACTCATCAACTTAGCCCTTAGTGGCTTCTTGTTTCATCATTTTCTTCTCTCAAACCCTCATTTCAA  
GCTTCAATCAAATATGAACCAAACCCTAGACTTTTCGATGCTTACATAGCTCTACAAGCTTGGAACATG  
TCATGACTTCCGATCCAAGAAACTTCACAAAAGATTGGTATGATTACAATGTTTGTAACTACACCGGGGT  
TTATTGTGCTCCAGCTCCAGATAACCCTAATATCACCCTGTTGCTGGTATTGACCTCAACCATGCAAATA  
TCTCCGGATACTTACCTGAAAACTTGGTTTATTGACTGATTTAGCCGTCTTTCATATAAATTCCAATAGA  
TTTGAAGGCTCAATCCCGAAATCTTTTTCTAAGCTTCGAATTTTATTCGAACCTTGACGTGAGTAACAATCT  
TTTTTGTGGTGAGTTTCCTTCCGTTGTGTTATCTCTTCTTTAAAATTTCTTGATATTAGGTATAACCAA  
TTCGAAGGAAAAGTCCCTTCAACCCTTGGGATCGAACACTCGATGCTCTTTTCATAACAACAACAAT  
TTCAATTTTCATGGCCTAAAACTTAGGTAATCACCCGTTTCTGCTTTGGTTATGGCAAATATTAATGTA  
ACGGGGTGTATACCATCAAGTATAGCAAAAATGTCGAAAACATTAATGAGATTATTCTCTCGAATTCGA  
GTTTAAGTGGATGTTTACCACAAGAATTAGGGTATTGAAAAATGTTAGGGTCTTGACGTGAGTTTTAA  
CAAGCTTGTTGGTGAGTTGCCGGAATCAATTGGTGAATGAAGAAATTGGAACATCTTAACGTGGCACA  
TAACAAGTTTTCCGGTGAGATTCCGATGAGTATTTGCTCATTACCAAAGTTGGAGAATTTCACTTACTCTT



TTCCTGAATTGCTCCGACTTCTGTGAATTCACATCCCTTCGGATTCTTGATCTTTCATTA AACTATTTTAA  
TACTAGGATTCTAGCTGGTTGTTCAACACAAGCCACAATCTTGTTTACCTTAATCTTTGAGA AAGTCAGC  
TGAACGGTTCACCTCCAAATGCCTTTGGCAACATGCGTTCACTTAGAGTTCTTGATCTTTCTG GGAAGTCT  
CTCCTAGGCAACAGTCCACATTCGTTTGAGAAAATGAGTTCACTTACGGGCTATTTACCACCA ACCCTGC  
CATCAAAGCTGAAATACTAGGATATTTCTGATAATCAAATGGAAGGTCCTTTAGCAAGAAGCATCACACA  
ACTTAAGCAATTAGTTGCTCAATGTTGCTCGGAACTCTTCAAGGACTCGATTACAGAACATTTCTTGA  
ATATAACTCATTTGAGAGTGTTAGACTTGTCTAATACTCATTTATTTTCAATGTAAGCGCAACTTGGATG  
CCTCGTTTTCAACTTGACTCTCTAAGCCTGCAGTTTTGCGGACTTGGTGCACAGTTTCCCCAGTGGATTCA  
GACACAAAAGAGTTGTCATTTATTGATATCTCTCGCACCGATATCTCAGGTGAAGTGCCCGATTGGTTC  
TGGAATTTTTCTGCCAAGGTTTATCACATAGACCTTTCAGGAAACAATTTCAAGTGGAGAAATCCCTGAAT  
TTACAGAAAGAGTTTGTCTTGCAAATTGGACCTGAGTGATAACAATTTTCATGGTCTTTGCCTCATTTT  
TCACCCAAGATGATGACGTTGATTTTGGCAAGGAATTCGTTTAATGGTACCATTGCCCTGTATGTGAAT  
CACTTGTCATGAATAACTCTCTGAGTCTTCTAGACCTATCTTCAAATTTTCTATCAGGACA ACTTTTCAGATT  
GTTGGAGATATGGGAAGAATCTGCAAGGATTGAATTTAGGCCATAATGATCTATCAGGGGAGATACCTC  
ATTCGATTGGAGATCTTACTAACCTCTTCTTTTTGCAATTGCAGAACAACAGTTTCTCCAAA AATCTTCCTT  
CATCATTGAAGAACATAACTGGACTAAAATTCTTGATGTTTCTGAAAATAGTTTATCTGGGAATATACC  
ATTTTGGTTAGGGGAGAATTTACATGCTCTTGAGATTCTTATATTAAGCAGAAACA ACTATGACGGAATT  
ATTCCCAGGGAGATTTGCCAGCTTAAATACCTATGTATTTTGGACCTTAGTTCCAACGCACTATCAGGAG  
TCATTCCAAGGTGTCTTGATAATCTCCACACCATGTCCGGAGAAGAGGAAGCCCCATCCTTTACTAATGG  
ACCCTATGCAAATTACAGGATTCATGGAATGCTCGTTCGTAATGGATACTTTAAGGAGTTCATTTTTAGCT  
GGCCCCGGATAGCAATTGATCTAGCAAAGAACCATTTATCAGGGGAAATTCCTGTGGAAATCACCAGGC  
TACTGCACTGAGGGGCTTGAATTTATCAAGTAACAATTTCAAGAGGAGCAATTCAGGTGACATTCACAA  
CTTGCAACTTTTGGAGTCTCTAGATCTTTCCAGGAATCAGCTGTCATGCTCCTTTCCTCCCCGTATGGGAC  
ATCTTATGTTTCTTGAGGTCGCGAATTTTTCTTTCAATGATTTGACAGGAGAAATTCCAGTTGGAGGTCAA  
TTCGCCACCTTTGAGAGTACTTCTTATGTTGGGAATGCAA ACTTGTGTGGATTCCCAGTCTCACGATTCTG  
CTCGGATCATTTACATGAGGACATGGTTCCTGACTGTAGTAACAATAATCAGGAGGTTCCAGGCCATTGAACA  
CGAAGAAAACAACA ACTGGCTCGATGAATTTTCGTTCTACATTAGTATGGGAATTGGATTCAATACAGGT  
TTCTGGTTATTTGGGTTACTTTAATGTTGAAAGAGTCATGGAGATATGCCTATATGAGGTTCTCTGGAAA  
ACATGGGCAATAAGATATATGTCTTTGCTGCCATCAGATTGAAA AATATTCAAGCAGCAAAGAGGCTGA

CAAATTTCCCAAATTAAGCTGCTTCTCTTACTATTCTCTGTTTCTTTTTTTTCTTTCTGTCTCTTCTTATAT  
TTTGGTTTTG

>PGSC0003DMG400007915 LRR-RLPs

ATGAGGTGGGACTCGTTGCAGTTCCTAAACCTTCTCATAATTCCTTAACAGGCCACCTACCACAATTTTCG  
TTACCATAACCTACGGTATCTTGATCTGAAATTTAACTCCCTTCAGGGTCCACTACCTTCATCCATTTGTAA  
CATGGGTTTCGCTTATCTTATTAGATTTATCACGCAACAACCTTCAGTGACTCAGTTCACATTGCTTGGGAA  
GCATGGCTAGTCTTAAGGTGCTAGACTTAAGAAGGAACAATTTACAGGGAGTCTTCCCCCATTATGTGC  
ACACAGCACTACATTGAGTACCATTGTCATAAATGGTAATCGATTTGAAGGACATGTTCTGTGTCGTTG  
CTCAATTGTAATGGTCTACAAGTCCTTGATGTGGGGAACAATGCTATAAATGACACGTTTCCAGCTTGGT  
TCGGAACCTTTCAAGAGCTGCAGGTCCTTATATTAAGTCGAACAATTCATGGACCTATAAGTATATG  
TCAAATAAGTTTTGCTTTTCCAAGTTGCGAATTTTTGATCTTTCGCATAATGATTTTCAGTGGCTCACTTCC  
TGCAAATGTTTTTGGAACTTCAAGGCAATGATCAAATTAGATGGCGAAGACACAGGAAATATCAAGTA  
CATGGAATCTATGTTGAATTCGCTATTGGTCACATCGTATGAGGATTCAGTGAGTTTGGTAATCAAAGGG  
CACGATATTGAGCTAGAAAGAATCAGCACAATTATGACAACCATAGATCTCTCACGCAACCATTTTGAAG  
GTGTCATTCCGGAAACACTAAAGGATCTCAGCTCACTTTGGTTACTCAATTTATCCAGTAACAATCTCAGA  
GGCGATATTCCAATGAAACTAGGACTATTGAGTATGCTTGAAGCTTTAGATCTCTCTTGGAAATCGGCTCA  
TTGGAAAGATTCCACAGGAATTAACAAGAATGAACTTTCTAGCCTTCTTAAACCTCTCTCAAAATCATCTC  
GTCGGACCAATTCCTCAAGGTCGACAATTCAACACATTTGAAAATGACTCGTATGGTGGCAACCTTGATT  
TATGTGGTTCGTCTTTAACAAAGCAATGTGAAACGAGTGATTTCATCGCATGTTCTCAACAATTGGAGTC  
CGAAGAAGAAGGCGAGTCATATTTTTTTAGTGGATTTACGTGGGAATCAGTAGTCATAGGCTACAGTTT  
TGGACTAGTTGTTGAACTGTCATGTGGAGTCTTATGTATAAATATCGTAAGCCAAAATGGTTTGTGGAA  
TTTTTCGATGGACTCATGCCTCACAAAAGAAGAAGGCCAAAAGAAGAGAGCTCAGAGACGACAGACTTA  
A

>PGSC0003DMG400007999 LRR-RLPs

CTCCAGTAGCATAATAACATCACTCAAACTTCAACTTCTTCAAGCAGAATGTAAAATCAGTTTGAAGTCC  
CCAAACATGGCGGTGACGGACTTTTTTCGTGCGCGAAATCACCACCGAACTCTTAAAAAACCTTCTGCTAA  
TAGTTAAAAAATCCACTTTATGCCGTTCAAGTGCCGAGAATCTCATCGACAGCATCAATGGTCTCCTTCCA  
ATCATCCAAGAAATCAAACAACCGGTGTTGAACTTCCACAGATACGTCAAACCTCAGCTCGACGATTTCT  
CCAAACTTCTCCGAGATGGTTACGAACTCGCCGAAAAGTTGTCCACTCCGGCCGTTGGAACATGTACA



GGTGTACCTTCTCATTGACTCTAATTACAGTGAATTGAACCTCTCCTGCTCTAATTAGGGTTATTGAA  
TTGTGCGAATCTGTTAGAAATTACTTAATTTATATTATGCCTTGATAACAGGAACCTACAGTTGGCTAGG  
AAAATGGAGAGGCTGGAGAAAAGAGTAGCGAGGTTTCATGCAAGTTACAATGCAAGCTCATGTA CTTC  
GGATGTTTCATCATGTTAGGTTTAATATGGAGCAGAGATTTGACGTGCTTGAGCATAGGCTTAAAGCTAT  
AAAAATCGGAGTTGACGATAAAAGTGGTGGTGGTGGTGGAGGAGGAGGGTGT TTAGGGGAAGCTGTG  
AAAAGAATGGAAGAAGATGAGAAATGGTTTGAGAATAGTTTTGTAAATTTAGGTGCTGGGATTGAATT  
GGGGAAGAGGAAAGTGAAGGAGATGCTGATGGGTGAACAGGATAGAGGTGTGTTTGAGATTTGTGGA  
ATTGGGGGTAGTGGCAAACTACCTGGCTAAAGAGATTTGTAAAGATGATCAAGTTAAAAGTAAGTAA  
TTAATCCCAGAAAAGTTTCTCATGTAGAGTACTTTAGCTTTTTGCGGGGTTGATTTCTCGAAAGTTACTC  
AACTAATAGTTATTATCTATCACTTTTCGTTCTTGATTCTGATGCAAAGAAAGTGACTTTATTAGATATTA  
CTATTACTTGAGTGGACATCCGTGAAATCAACTCATGTTTTGCGTTGCTGATGATCGAGTTATTAGAAGT  
TAATAATCACACAAAAGTTTCTCATTTCATTTTGTTTTACTCTTCTGTTGCGGATGAAACAGTGGATAAA  
AGTTGAAAAC TTTATTGGCTATTATCTCTATTTTATCAGTTGAATTCTAATAGAGATCAATTTTGCATGTAA  
AGGACTCATCAAAGTTTTGATTGGAATACAGTTTAAATTGGTCTTAAAAAC TTTTCTTTAAATAATGGT  
ATGGTGTCTAAAACCGCCATGTTGTTCCAGGTTATTTCAAGGACAAGATTTTCTTTTTCACTGTTTCTCAA  
TCTCAAACGTGGAGCAATTAAGGAAAATGATTTGGGAAAAGATATCAGGGTGCAATCTCCATGGTTAT  
GGACACGGGGAGATGTTACCCAGTGGAACCTACAGTACCAATGGAATACGAAATCTGCATCCCCAGTA  
CTCTTGATTCTTGATGATGTGTGGTCTGCATCTGTGCTAGAGCCACTAATTTTCAAGATCCCCGGCTGCAA  
GATCCTAGTTGTATCGCGTATCAAGTTTCTCCATCAATCATTGACTGTATTTATGATTTAGAGTTGTAA  
AGGAAGATGAAGCTATGCCCTTATTTTGCCATTTTGCATTTGGACACAATTCCTTTCCGCGTGGTTTCAGC  
CAAAGCTTGTCAAAGAGGTATTAGTGTATGTTTTTGGCAGCATATTAGTTTTTCTTTGCAAAAATTTCTT  
GTTGTA CTTGAGTTAAGCTAACTAAAGCTTCTTGACTTTTTAGATTGTGGATGAATGTGAAGGGCTTCC  
TTTGGCTCTTAAGGTCATTGGATCTTCATTAAAGGGAAAACCTGAGATGTTCTGGATAAGTGCAAAAAAC  
AGATTATCACGATGCCAACCTGTCTGCGAGTCTCATGAACTGCAGTTGCTTGAGCGAATGAAATTGAGT  
ATTGACTGTTTGCCTGAGAAGGTGAGAGAGTGTTTCTGGACTTGGGTGCTTTCCAGAAGACAAAAGG  
ATTCCTCTTGATGTTCTAATTAACATGTGGGTGGAGCTACATGATATTGATGAGGAGGAGGCTTTT CACA  
TTCTTGTTGAACTTT CAGACAAAATCTCCTAAATCTAGTCAAAGATGCACGGTAAGCGGTGGACTCAA  
TCTCCTCAAACAATCTTTTAATTTTGT TAGAAGGTGATTGTTTATGGAAAAATCAATATGTTGATAGTT  
TTCAATGTGGTCTTCATGTGGCAGAGCTGGAGACATGTATACAAGTTACTATGAGATATCGGTGTTTCAG

CATGATGTATTACGAGACCTAGCAATTCATATGAGCAACCGTGATGATATAAATCAGAGAAAGCGATTG  
GTTATGCCACGAAGAGACGTAACTTTCCAAGAGAATGGGAAAGAAATGTGGACAAACCTTTCCATGCA  
CGAGTTATCTCTGTGCATACAGGTATTTTAGATCCTTGTTACTGCTGATTGCTTAATAATGAAAAGTTTA  
TCATGTGATATAAACAGAAATATCTCTCTTTAATGCAGATGAAATGAGAGAAATGGACTGGTTCAGAAT  
GGATTGCCCCGAAAGCTGAAGTACTGATTCTCAATTTGCCTCATCTGAGTACTTCTTGCCTCCTTTCTGG  
AGAATATGCCAAAGCTAAGGGCATTGATAATCATAAACTATAGTGCTGGCAATGCAGTTCCTTCATAACAT  
GTCTGTATTCAAGTCAATTAACCAACTTGAGAAGCCTTTGGTTTGAGAAGATATCTGTCACTCACTTATCTG  
ACTCCACAAATCCTCTCAATAACTGCGGAAGATATCTCTAGTGCTTTGTGACATGAAAAACAGCTTAGA  
TGAGTCAGATGTGGACCTCCCTGGTTTGTCCACAGCTTTCTGAGTTCACAATGGATCATTGCATCAACT  
TCAATAAGCTGCCATCAAGTATTTGCCGGTTGCATAAGCTCAACAGCCTTAGTATCACTAATTGTGATAG  
TCTTTATGAACTCCATCTGATTTAGGTGAATTACAACTCTACAAGTTATAAGGATATATGCCTGCCAC  
ATCTGAAAAGGCTTCCCCGGGAATTGGTCATCTGGTAAAGCTGAAGTACCTTGACATTTACAATGTGT  
TGGTTTGAGATGTCTCCCTGAAGCAATTGGTTGCTGTAGAACTTGGAGAAGATTGATATGAGGGAGTG  
CCCTCAAATTGACAGTTTGCCAAGCGCTCTATCCTTTCTTGAATCATTACGTTGTGTTATTTGTGACGAAG  
AAGTTTTTTGTCAATGGAAAGATGTTGAGAAGGCTGTACCAGGTCTCTGTGTACAGGTTGCCGAGGAGT  
GCTATACTCTTGATTGGCTATCTCAGTAATCAAGTTTTCAATCCCTTATCTGGGTTTCTTTCGTGTAAT  
GTAATAAGGCTCAGTCAATTTTCCAGTTCTGTATTTTCCCCTTGCATGGGGTTCATTGTATCTCTTGAAA  
TAATATATAGCAATATGTAAATATGTAGATGGACTACATCTCAATAGCTGATCTTTCCTTTTCCTTAAAA  
CCATAATGCTGGAAGCAAAATTACCACAGGTAATCCAAGACTAAGGCGAGTTATCTGCTATAACATGT  
>PGSC0003DMG400008036 LRR-RLPs

ATGAATAGTACTATCAAATTTCTAATGTTTTCTTCAAGTGTCAACAGCACAACCACTAAAGGGACAGA  
ACCAATTGATTTTTGCAGATCAAAGGCTTGCTATAGTATACCCATTATACAAAAATTCAAGAATATCATC  
TCTGCTGATCCTCTAGGTATTACAAAACTTGGGTTGGTCCAAACATATGTAATTATACTGGTTTTTATTG  
TGAAAGTCTCCAGACAACAATTCAGCAATTGCTCTTGCTTCTATTGATTTCAATGGCTTTCAACTTAGCG  
CGTTGACACTTGATGGCTTCTTGATCAGCTTCTGATATAGCTATTTCCATGCTAATTCAAACAATTTG  
GTGGGACTCTGTCTCTAAAATCGCGAATCTTCTTATCTCTATGAACTTGATATTAGTAACAACCAATTT  
TTCGGTCCATTTCTAGTCCAATTTGGGCATGAATAGCCTAAATATATTGGATATAAGATTCAATCTTT  
CACTGGATCAGTCCCACCTCAATTGTTCACTAAAGATCAATTAGACGCGCTTTCATCAACAACAACAATT  
TCATGCAAATGCTTCTGATAACATCGTGACCAGCCATGTCACATATCTTACTTTAGCTAACAACAGATTT

TTCGGTCCTATCCCACATAGTATTTCCAAAATCTTGTCGAGTTTGTCTGAGGTTTTGCTGCTTAACAACCTT  
GTTAAGTGGATGTCTTCCTTACGAGATAGGATTCTTAAACGAAGCAATAGTCTTCGATGCTGGCAATAAT  
AGACTCACCGGTCCACTTCCGTTCTCATTAGGGTGTTTGGAAAATGTAGAAATGTTGAATTTTGCTAGAA  
ATCAGATGTATGGGATAGTGCCTGATGTGATTTGTGCCCTGGGGAATTTGGCAAATTTATCGTTGTCCGA  
TAACTATTTACAGGATTTGGGCCAATTTGCTTGAGATTGATAGAAAATGGAGTGCTTGATTTGAGGAAT  
AATTGTATTCCTGGTTTTCCATTTCAAAGATCAATAGCTGAATGTGTTGCATTTTTTGCTTACCCAAGGTA  
CTGTCCTCATATGGCTACATATACTTATATTCCTTGTTGGCTTTCAAATTTCAAACACCTACTCTGGATCT  
CCCTGAATTGGCTCCTTAGTAAGGGTAACACGGTGTACAAAGCATTATGCGTTAGCATGGTTCGGGAAA  
AGATCATTAGAAAATTCTGGTATTTGATCATAAACATACATGTCCCATTTTCGCGATCTTTTTTTGTTTTAA  
TTAAATTAAGCTTGTAATTTCCATTGAACAGAGTGTGATATCTCATAATAACTTGCGATCTCTGTTTATGG  
AGTATTGCTCAGTTGTAATTTACGTTACTTTTATGTTATGG

>PGSC0003DMG400008185 LRR-RLPs

TATATTTGGCTTTTTAAAAATATATAAATAAATGTGTGTAAGCAGTTTTGGCTTGCCACTTATGACCTAG  
TGTTTTGTTCCAATAGCTCCAACCTATCTGCAACAATGTTTGCAGTTTTTTGTCCCAACCTGGAAGACC  
TATACATCCATGGCCTTAAAAGCATAAGTGCTCTATGCTCTCACCAACTCCAACCTGACTACTTCACCAAA  
CTTCAAACATTGTTTGTATCATTGTGGAAAATTGAGAACTTGATGTCTCCATCAGTGGCCACAGGTCT  
TTTGAATCTCCGAATGCTATGGATAACAAGACTGTGAATCAATGGAAGAAGTGATCACAAAAGAGGAACA  
AGAAGGAGCAGGAATCATGACCTTATTTCCACTCTTAGAACAGCTGCATCTTATTCGTCTGCCTAAGTTG  
GGGCATTTCTTTCTGACAAACCATGCCCTGAATTTCCATATCTAAGAAATGTGGAAATTGATGACTGCC  
CTGAAATGAAGACGTTTGTTCACAGGGAATATCTGTGAGTATACCAATTCTCAAATATGATGATGAGG  
TGAAATTCGTAGATGATCTCAATAAATGTATACAGCAGGAGTTCAATAACAAGGTATGTCTTATCCACT  
AGCTATATAAGTAATTGCTACATGATATTCTAATCAGGCTCTACTCCTCTCTTTCCGTTTTAGATACTTATT  
TAAGTGCATCAACTTTCTTTACTTAATAATCTAGTCATCTCTCTCTTTTGCATTCTCTGTTTCCTGCAG  
GAACAAGAAGCTAGTGATGACTACGAAGCTAGTGATGACGACGAAGCTGAACCTAGTCATGCCAGAAG  
TTAGGAAGCTGGTAAGAAAACTCAATGAAATAATGCAAGTAAAACCTTGAACATCACCTGATACCTAT  
GCTCGTGATGGAGGTAATTAACAAGGAGAGGCAGATCTACATTATTGTAACCTATCGGTTTCATGTCAAC  
CTACTAGCTATTGGCTATAGATCTAGTATATGTATTAGTAATATCTAAAAAATAGTTGAT

>PGSC0003DMG400008394 LRR-RLPs

CTTCCTTTGAGTACTCTACAAACAACCTACCAAAAGAAGACTTACTTTGAGAAGACTTTGGTGCAGAGGAA

GAAGACTTTGTGAAGGAGCAAACACAACAATGGCCGATCCTGTAATTGGTGCTACTGTTCAAGTTTTGCT  
TGAAAAGTTGATTTCTCTCACTATCGAGGAGGTCAACAGCTCAAGGGATTTCAACAAAGATCTCGAAAT  
GTTGACACAAAATGTATCCTTAATCCAAGCTTTCATTCATGATGTTGAAACACCACAAGTTGAGAAACAA  
CAGTCTATCGAACAAATGGCTCAACAGGCTTGAGAGAGTTGCTGAAGATGCTGAAAATGTGTTTGATCGA  
TTCAGATATGAATCTCTCAAAAACAAAAGTGGTGAGGAGCCCATTGAAAAAGGTCAGTGGTTTCTTTTCTC  
ATACTGCTTTTAAGAGAAAAATGTCTCAAAAAATCAACAACATCAATAAAGAGTTGACGGCTATCAATAA  
GGTAGCCAAAGACCTCGGTCTACAATCACTCATGGTTCCTTTTCGGAAAATACTACCAATTGAGAAACA  
GATTCCTTAGTAGTTGCTTCTGATATTGTTGGTAGAGATTTGGATGTTGCTGAGATAAAGGAGAAGATTT  
TGAACATGAGAGAGGAGGATATTGTTCTGTCCACCATTCCCATAGTAGGTATGGGAGGTTTAGGGAAAA  
CAACTGTGGCTAAGAGGATTTACAATGATGAACACATCCAGCAAATCTTTGAAAAGAGAATTTGGTTGT  
GTCTACCTGAAATGTCTGAAACGAAGTGCTTCTTGAACAAATCCTCGAATCATTGATAGAGAGGAGAA  
TTGAGGTTGAAAGGAGAGATATAATAGTCAAGAAGCTACAAGATGAATTGAGAGGAAAAAATATTTG  
CTAGTCCTGGATGATTTGTGGTGTGTTGACTCTACATCATGGCATGAGTTCGTTGACACCTTGAGAGGAA  
TAAATACATCCAGAGGAAACTGCATTCTTGACTACTCGTATGAAGCGGGTGGCATCCACAGTAGCAA  
CAGATCTTCATATCTTGGGGAAGTTAACAGAAGATCATTGTTGGTCTATTTTCAAACAAAAGCATTGT  
TGATGGCAGGGTTCCAGAGGAATTAGCGAGCATGGGCAACAAGATTGTTAAAATGTGCCAAGGTCTAC  
CGTTGGCTGCAAGTGCGTTGGGAGGGCTCTTACACAACAAAGAAAAACATGAATGGCAAGCAATTCTTG  
ATGGCAGCCTCCTTGTGTCAGGTGAAGATGATAATGGAGAAAATAGCATAAAGAAAATCCTAAACTCA  
GCTATGATTATCTACCATCTCCACATCTGAAAAATGCTTTGCTTACTTTGCAATGTTTCCAAAAGATTAT  
ATGTTTGAAAAGGACCAACTAATCCAATCTGGATGGCAGAAGGGTTTCTTCGTCCAAGTCAAGAGATC  
CCTGTGATGGAAGACGTTGGGCACAGGTTTTTTCAAATCTTGTGTCAGAATTCCTTGCTACAAGATGTTG  
TGTTAGATGAACACAACACTATAACACACTATAAGATGCACGATCTTGTGCATGATTTGGCTGGAGATAT  
CTTAAAATCTAGACTATTTGATCCGAAGGGAGACAATGGAGAAAACTTTCTCAAGTTCGATACTTTGGA  
TGTGAGTCACCAACGGATCAAATAGATAAGATATATGAGCCAGAACGTTTGTGCACACTGTTTTGGAGA  
AGCAATTATACGTCTAAAGATATGCTGTTGAACTTTAAGTTCTTGAGAGTTTTAGATTTGTCCAGTTCAGG  
AATCAAGGAGTTGTCAGCCAAAATGGGGAAGCTGATATACTTGAGATATCTTGATCTCTCGAACACTGA  
GATCACAGCCTTGCCAACTCCATTTGCGAGCTCTATAATTTGCAAACATTTAGAGTCATCAACTGCTTTT  
CACTCCAGAACTTCCATATGAGATGAGAAATATGATAAGTTTGAGACACATATATTACACTTCTGTTGA  
CGAAACAAGTGGGCATTGGGGAGGATGGTGTCTTCACAATGAACATTTTCAGATTCCACTTAATATGGG

GCAATTGACTAGTCTTCAAACCCTCAAGTTTTTCAAGGTAGGTTTAGAGAAAGGTCGTCAAATAGAAGA  
ATTAGGTCATTTGAAAAACCTAAGAGGTGAATTGACAATCAATGGTCTCCAATTGGTCTGTGATAAAGA  
AGAGGCTCGAACAGCATATTTACACGATAAACCAATATCTGCAAGCTGGCATATTTATGGTCCCATGAT  
GAATCAGAAGGCTGTGAGATCAATGATGAGCATGTGTTGGATGGTCTTCAACCGCATCCTAACTTGAAA  
ACCTTAGCAGTAGTGGACTATTTAGGGACTAAATTCCTTCATGGTTCAGTGAAGAGTCTCTACCAAATT  
TGGTCAAGTTGAAATTAAGTGGTAGCAAAGGTGCAAAGAAATTCCATCCCTTGGCCAACTGAAATTCC  
TTCGGCATCTTGAGCTGATAGGATTCCATGAGTTGGAATGCATTGGACCTGCTTTAGATGGTGTGAGAT  
TAGAAATATTGGATCAAACAGCATTATCCAAGTGTCCCATCATTGAAAGAAGTATTGGAGGATATG  
CGTAGCCTTATTGAGTGGAAAGGGAGATGAAGTTGGAGTAAGAATGTCTCCAGGCTTGAGAAGTTGCG  
GATTACAGACTGTCCATTGTTAAAAAGTATTCCGAATCAATTTGAAATCCTCCGTCAATTAGAAATTAGA  
GGAGTTGACAGTGAATGCCATTGTTGAACTTGTGCAGCAACTTGACATCTCTCGTAAAGCTTAGTGTCT  
ATGATATGAAAGAGCTCACTTGTCTCCAGATGAGATACTACGTAACAACGTTTCTCTTCAACAGATAAC  
GATTTTCAACTGCGGAGAGTTTCGTGAATTGCCACAAAGCTTGTACAATCTCCATTCTCTTAAGAGATTA  
GACATTTACAACCTGCACCAATTTAGTTCTCTTCTGTTCCCAATGGAGACAACCTATTTGACTTCCCTCGA  
ATTCTTTTTCTTATAACAATTGTAATGGATTGATCAGTTTACCAATTGGAATGCTAGATCAATGCCGGTCTC  
TAGAGTTTTTGTGTGTCAGCTGCTGTAACAACCTTGGTTTCATTCCCTTTACATGTGTGGGAAATGCCTTCA  
TTTTCATTTTTGGATATAACAGAATGTCCCAAATTGATTAGTGTACCCAAAGTGGGCCTTACCATCTCAC  
CGGTTATTGAGATTGGGAATTGGTCCTTTCTCAGAGATGGTGGATTTTGATGCATTCCAATTGATTTTT  
AATGGCATTGAGCAGCTGTTGTCCCTTCGTGATCTGGAGGTGTACGGACGTGGGCACTGGGATTCTCTG  
CCCTATCAGATTATGCAACTATCTGACCTAAGAGAGATCACAATAGCTGATTTTGAATTGAGGCTCTTC  
CTCCTAGACTTGACAACCTTACTTCTTGAAGTTTACTCTAGTGAGGTGCAAACAGCTACAACATCTG  
AACTTCTCAGATGCCATGCCCAAATTACGGCTTCTGTGTATAAGTGATTGTCCATTGTTAGAAGCTCTGTC  
GGATGGGCTCGGCAACCTGTTTCTTGGGAAGAATTATTTTACATGACTGCGAAAACTAGAGCATCTA  
CCGTCCCAGATGCCATGCGACGCCTCACTAAATTATGGAACATGGGAATTAAGGCTGCCCAAAGTTA  
GAAGAAAGTTTACCAACTACTCCAGTGGTCCAAAATTTCCCATATTTCAAATATTGAATTAGGTGGGC  
GGAGAAGGACAACCGTAAGTCTCGGTTTCTTTTCACTTACTGAGTCGCTCGCATTTTTAATTAGAATATT  
ATTTCCACGAGTTCCAAAAAGAAGTTTGGTAAGTAATGTAATAATTTTTCTTGAATATTTTGACATA  
AAAAAAAAAAGTTAGATTAAATCAATTGCATCTGTTGCTATGCTGGATTCTGCTTGTCCACTTGAAGTGA  
ATTGCTGTTATTCTAAAAATTATGTTTCTTTTCTTATAGGTAGCTGGTTCAAAACGTCTCTGTGGTAAATC

AAGCCAAATCGTATGAGCAGCAGGCAATTACGTTAGGTAAATTTTCATTTATAATTTATAGGCACTTTGT  
AATCTACTTGTTTCTATCTTTCTTTTTGTTGGAAACCAATTTTCGGAGGTCTATGCTGATGAATACAACATT  
ACCTTCCTTAAAAAAGTTTAATCATGAAAATTTATGATTTCTGCTCATAGGTTACTAGGTACAAGGAC  
ATAGTAGAACGTCGTTGTGGTATATCTAGTCAAATCCATGGGCAGAATCATGTTAGGTATTTTTATTTA  
GTTGTTAGAGGAATGCTATAACAAGTTTGTAAGTTTCTTTTTTTACTTTCTTTTCTCTCATGAAATAAT  
TTAATGTTTAAACGGGACTTGTCGTGTTTCACAGAGGAACCACCACTGTTATTTTGTATGAAGAACAATCT  
TCAACTGTAGACTCATTATGGGACACTTTCATGAGTATTTTCGGGGAACACTACAGTCTACATATGAAACAT  
CAAAAACCTCAAAAGCGTATAGGGTGCTCAATGAGAAGCTACACGGGGTCTATTCTCCATGTAAGTATTG  
ATAACTCTCAAGGAACAATACCAAGTCTCATATATGGTAGAAATCTATATAAGTTTCTTAATAGACTCATA  
AAAGAATAATCTTTATGTCTTCTGCAGTTCTGGTTTTATTTTCATGCTTAAGACAGTACAACCTTTTATGAAT  
ATATGAAACACTTCTCGTTACTTTACCTCACAGGACAATTTCTCCGTTCAATAAACTTCCGCAAATGAA  
GGACTTCAACAAAGATAGTTGTCATGAATATTTTTGCAAAGGGTGACCCATTGGCTCTTAAAATGTCCTT  
AGCAGTATATGTTTCATCTTAAACAGGTTTTCTCTGTCTTTTTTAGTGGTTACTTGTAAATGATCCGCTTCT  
CCATTCTCCAAGGAGGAAACGTGTGCCAAAACCTAACTTTTTACCATTTCCCGTGTTTCAGATTCATGTTTG  
AAACTCCAGCATGGACCTTCGAAATGCTACTTGTGTTAGAGATGTGTTTGAGTGTTCATGATTGGCAAGG  
GAAATTGCATGTGGCGGAAATTGGAGTGGAAATACTATTTACTTGTATGACTAAGATTTGACAGCAGAG  
GCGCCTTTCTTTCACAGCATACTGCCTTTTGGTACAAATAGAGTTCATTTTTCCAACAAACATTTTGAAC  
TTTTATACTTAGCTGCTGCTTCATTGCCTAGTTGTTAGCTTCTGTAATGTACATCTGCTTTTTCTCTTGAAA  
TTTCTCTTGGCTTTTGTTCGCAAGTATAAACAACAAAAGACAGGGCCTACCATTTGCATTGTTAAATCCAA  
ACAATATGTATTCAAAAGTCACAAGCTACGTGTGTTATTCCAATTTTCGTACAGGACTGCATTTTTGTGTCT  
TTGTATAACATATCGCATTGCTCATTATTCTTTCAGATAGACCAGATTGCAC

>PGSC0003DMG400008450 LRR-RLPs

ATGCATGACTTTTGTATATAAAATCTAGAAAGGAAAAGGTGTTTGACTTCATAGGAGGTTCAAACGCTC  
CGTCTTCTTCTTCTGGTGTGATGGCACGAGGAATTACCATTTCGTTATGTTAAACACCTTCTCTCTGAAG  
GTGTATGATGGGATTCATGATTGTCTTTCCTACAACAGTACCTAAAACACTTGAGGCTTCTTAAAAGTTT  
GGATTTGAAGGGCCTAACATTGACAGATTCTTTGCTGGATGAAATTGGTATGCTCGTTCATTTGAAGTAC  
TTAATCATTGACAGCAAGGCAAAAGCTCTCCCTCCGTTATTTCAAACCTCTGCAATCTAGAACTCTATC  
GGTGTATAACATTGAGAGACCATGCATGATACTATCACCTGTTTTTGGAGTCTTGCAAAGCTACGAGAT  
GTGCGGATGATGGAATGTGCTCTCTTTGAACCAACTGTGTTAGATGAGGACTCAAGGTTAGAAAATTTG

AGAACATTACAGCATCTCTCCCTTCCCGGTTCCAGAAGACATGGAGGATATTTTCAAAGGTTTCCTAATC  
TTCAAATCCTTAGTGTCTCTATCATAGCAGAGAAGATTTGTTTTCCAAGATTGGATGTCCTTAACGAACTT  
GAACAACTCAATTTATCTGCTTCTTGGGATTCATTCCATGAATATACACACGACTTCCCTTTGAGCTTGAA  
GAAAATGAGGTTGCAAGGGCTCGCTCTGACATCCGATTCATTGTCAAGAATTGCTAGACTACCCAACCTT  
CAAAAATAAGTCTAAAAACGCAATCATCGATGGGGGGCCAGGAGAATGGAACATGGAAGATGTCAC  
CTTCAAGAATCTCAAATATCTAAAATTGGATAGTGTGGAATTTTCTGAATGGCAGGTTGATGCAGAGAA  
ATCATTCCCCTGCTCGAGATGTTAGATATAATTACATGTGAGAAGCTTATGGACATCCCAGATAGTTGT  
GGAGATATTGCGTCATTAGAGCTTATCAAAGTATGGTTTAGCCCTCAGCTTAAAGAGTCAATTCTTCAAT  
ATTAA

>PGSC0003DMG400008492 LRR-RLPs

CTTTTTCTTGTTACTTGCTTCATAAAATATAATGAAGCCCTCCTCCTCTATACTTTCCATTCTTTCTTTTT  
CTCTCTTGTTTTCTTTTCAACTCTCTTCATCTGAAAGATGCCATCCAATGACAAAAAGCCCTCCTAGAAT  
TCAAAAAAGGTCTAGGCAATCCTGAAGACTTGGGTAATTGGGATCCGAAAAGTATTGTTGTTACTGATT  
GGTACGGACCTACTATCAGATGCGATGAAAAACCAATCGTATTAACGTCATCGACTTCACCAAAATGG  
ATATGGCCGGATACCTCTCCCCGCCATAGGAGACCTTACATACCTTACAACATTCAGTATCCACAATGT  
ACGTAATCTCACCGGTCCAATTCCATCAACAATTGTTAAACTGACTAATCTCGAATTCTTCAGAATTAGTC  
AAACAAACATTTAGGACCTGTCCCTGAAGTTCTTAGTAAGTTGAAAAGCTTAACGTACATTAACCTTGTC  
CTATAATAAGCTTGTTGGAACCTATTCCACCTTCGCTATCTCAACTCCACACTTGGAGTTTTTAGGATTGG  
ATAGGAACAACTTAGTGGACCAATCCCGGAGTCTTTTAGAAAGTTAGCACCAATCTAACGTATCTTTA  
CCTTGGACATAACCAACTTACAGGGATTGTACCAACTTCATTTGCTGGCTGGAGTTTTGCGACAATTGAC  
TTGTCAAGGAACATGCTTGAAGGGGATATTTCATTTTTGTGGTAAAGATAAGACTACATTTGAAATGC  
TTTTGGATAGGAATAAGTTTGAATTCGACTTCTCAAAGTTGACGTTTGGGAAGAGATTATGGAGGTTGG  
ATTTAAATCATAACAAGATTTATGGGAGTATCCAAAAATAATAGCCAAGAATCCGTGGCAAATCTTGAA  
TGTGAGTTATAATAGACTTTGTGGCGAGATTCCAAAGGGTGAGTATATGAAGAAATTTGAGATATATGA  
GTATCTTCACAACAAATGCTTGTGTGGTGTCCATTGCCGCCCTGTAAATAATCATCACTAGTATCCTGTC  
TATGTATTTCAACTTGTTCTCTTTGAATGTTGATGAATAATTAAGCGACGAACTCAAGGCTTAAAAATGT  
ACTTTAATTAATTTATGAATGAATGTTATCCTTTTTTAGTAACTTCTCGATGGATGATTATA

>PGSC0003DMG400008596 LRR-RLPs

CTTTATTTAGGTAAAGAAGACTTTGGTACAGAGGAAGAACATTTTGTGAAGGAGCAAACACAATAATGG

CCGATCCTGTAATTGGTGCTACTGCTCAAGTTTTGCTTGACAAGTTGCTTTCTCCCACTATTGAGGAGGTC  
AAAAGTTTAAGGAACTGCAAGAAAAATCTCGAAATGCTGACAAAAATGTATCCTTGATCCAAGCTTTCA  
TTCATGATGCTGAAAGACGACAAGTCGAAGATCAGGCTGTGGAAAAATGGCTCAAGATGCTTGAGAGA  
GTTGCTGAAAATGCTGATAATGTGTTTGACGAATTCAGGTATGAATCTCTCAAAGACAAGTGAAGATT  
CGAAACAATCCAATGAAAAAGGTCAGTGATTTCTTTCTCATACAGCTTTTAAGAGCAAAATGTCTCAA  
AAATCAACAACATCAATGAAGAGTTGACGGCTATCAATAAGTTAGCCAAAGACCTTGGTCTCCAATCATT  
GATGGTTCCTCCTCGGCAATACTACTAATTCGAGAAACAGATTCTGTAGTGGTTGCTTTGGATGTTGTT  
GGTAGAGACAAAGATGTTGCTGAAATAAAGGAGAAGATATTGACCATGAGAGAGGATGTTGTTCTGTC  
AACCATTCCAATAGTGGGTATGGGAGGTTTAGGGAAAACAACACTGTCGCAAAGAGAATTTACAATGATGA  
ACACATCAAGCAAACCTTTGAAAAGAGAGTTTGGCTGTGTCTACCTGAAATGTCGGGAGACTAAGAGCTT  
TCTTGAAGTATCCTCGAATCATTGACAGAGAGGAAAGTTAAGGTCCAGAGCAGAGATATAATTGTCAT  
GAAGCTCCGAGATGAACTGGCAGGAAGGAAGTATTTGCTTGTCTGGATGATTTCTGGCGTGTTGACTC  
TACATTGTGGAATGAGTTTGTGGATACCTTGAGAGGAATAAATACTTCCCGGGGAAACTTCATTCTCGT  
ACTACTCGTATGGAACAGGTGGCGTCCACAGTAGCAGCAGTAGGTCCTCATAAGTTGGAAAAACTAGCA  
GAAGATCATTGTCGGTCCATTTTCAAACAAGAGCGTTTGTGATGGGGAAATTCCAGAGGAATTAGCA  
AGCATGGGCAACAGGATTGTTAAAATGTGTCAAGGTCTACCGTTGGCTGCAAGTGTATTGGGAGGCCTC  
TTACGCAGTAAGGAAAAACATGAATGGCAGGCAATTCTTGATGGAAACCCCTTGTTCAGGTGAAGAT  
GGTAATGGAGAAAATAGCATAAAGAAAATCCTAAAACACTCAGCTATGATTATCTACCATATCCACATCTGA  
AAAAATGCTTTGCTTACTTTGCAATGTTTCCAAAAGACCTTGAGTTTGAAAAGGACCAACTGATCCAAC  
CTGGATGGCAGAAGGCTTTCTTCATCCATGTCAAGAGACCACCGTGATGGAGGACATCGGGAACAAGTT  
CTTTCAACTCTTGTTGCGGAATTCCTTGCTGCAAGATGTTAAGCTAGATGAGCATAACAATATAACACAC  
TGTAAGATGCACGATCTTGTCATGATTTGGCTGGAGATATCTTAAAATCTAAACTAATTGATCCAAAGG  
GCGATGGTGGAGAAAATCTTTCTCATGCACGATACTTTGGATGGGACTCACCAAGTGATCAAATAGATA  
AGATAAATGAGCCAGGACGTTTGTACACACTGTTCTGGAGAAGCAATCATATATCGGAAGATATGCTGT  
TGAGCTTTAAGTTCTTGAGAGTTTTAAATTTGTCCAGTTCAGGAATCAAGGAGCTGCCAGCCAAAATCGG  
CAAGCTAATACTTGAGATATCTTGATCTCTCCAACACTAAGATCACAGCCTTGCCCAACTCCATTTGCA  
AGCTCTACAATTTGCAAACATTTAGAGTCAATGACTGCTATTCACTCAAGGAACTTCCATATGAGATGGG  
AAATATGATAAGTTTGAGACACATTTACTGCTATTCTCGATCTCAGTTGCCACTTAACATGGGACAATTG  
ACTTGTCTTCAGACCCTGCAGTATTTCAATGTGGGGTTAGAGAAAGGGCGTCAATAGGAGAATTAGGT



TGTTTGAAGAACCTTAGAGGTGAATTGACGATCAATGAGCTGGAATTGGTCTGTAGTATTGAAGAAGCT  
CGAACAGCATATTTACAAGAGAAATCGATTATCTACAAGCTGGCATATGTGTGGTTCCACGATGAACCA  
GAAGGCTGTGAAACCATTGTTGAGCATGTGTTGGATGGTCTTCAACCGCATACTAACTTGAAAACCTTAG  
AAGTCAAGAACTATTTAGGTACTAGATTTCTTCATGGTTCAGAGAAGAATCTCTACCAAATTTGGTCAA  
GTTGAAATTAAGTGGTTGCAAAAGATGCAAAGAAATTCATGGCTTGGCCAACTGAAATTGCTTCGGCA  
TCTTGAGCTATTAGGGTTACATAAGGTTGAATGCATCGGAACTACTTTTTATGGTATTGATGGTAACAAC  
ATTGGATCAAGCAGCAATGTCCAAGTGTCCCATCATTGACTGAACTAGTATTGAAGGATATGTCTAGCC  
TTATTGAGTGGAAAGGGAGATGAAATTGGAGTAAGAATGTTTCCTCTGCTTGAGAAGTTGAGGATTAGTA  
GCTGTCCATTGTTAAAAATTACTCCAAGTCAATTTGAAATCCTCCGTGAATTAAGAATTGAAAGAGTTGA  
CAGTCAAATGCCATTGTTGAACTTGTGCAGTAAATTGACATCTCTCGTAAAGCTTAGTGTTTATGATGTG  
AAAGAGCTCACTTGTTTTCCAGATGAGATGCTACGCAACAAGGTTTCTTCAACACCTATTGGTCTCAG  
ACTGTGGAGAGTTTCGTGAATTGCCACAAAGCTTATACAGTCTCCGTTCTCTTAAGAGCTTAAAGATTTA  
CCGCTGCACCAATTTCAAGTTCCTTCTGTTCCCAGTGGAGAGAATTATTTGACTTCCCTCCAAAGTTTTCA  
GTTATGGAACCTGTGATGGATTGACCAGTTTACCAAATGGGATGCTAGAGCATTGTCGGTCTCTGGAATC  
TTTGATGGTCTGCTACTGTAACAACCTTAGTTTCCTTCCCTATACGTGTGGGGGAAATGCCTTTACTTTTTG  
ATGTGTATCTATCAGAATGTCCCAAATTGATTAGTGTACCCGCAGGGGACCTTTACCGTCTCACTGGGTT  
ACGGCATTGGAATTTGGTCTTCTCAGAGATGGTGGATTTTGAGGCATTCCAATTGATTTTCAATGGC  
ATTCAGCAGCTGTTGTCCCTTCGTTTTTGTGTGTGGTAGGACATTTGCACTGGGATTCTCTGCCCTATCA  
GCTTATGCAACTCTCTGACCTAACAGAGATCCAAATATATGGATTCCGGAATCGAGGCTCTTCCCTATAAA  
TTTGACAACCTTGCTTCTTCTTGAAGATTAACGTTAGTGAGGTGCAAACGGCTACAACATCTGGACTTCT  
CAATTGCCATGCTCAAATTACGGCATCTCCAGATACAGGATTGTCCATTGTTAGAACTCTGTTGTATGG  
GCTTGGCAACCTTGTTTCTTGCAGGAGTTAGTTTTACAGAAATGCGAGAACTAGAGCATCTGCCATCC  
GGAGATGCCATGCAACGCCTCACCAAATTACGGTACCTGAAAATTGAAGGCTGCCCAAAGTTAGAAGAA  
AGTTGCACCAATCGGATTGGCTCAAACCTCCAGTGGTCCAACATTTCCCATATTCCAAAATTAAGTAG  
GTGAAAGCATAATTCAGGACTTAAGTAAGTCTCTGTTTCTTCTTTCAGTTTCTGAGTCGATTTTTTTGTTCTT  
TCTTTTCCACGAGTTACTCTCCTTCTTTTTAACAAACTTTTCATTCCCCAACTAATACATGTTATGGTACTG  
AAGAATTGCAGATTTTTTTATCACTCACTTGAACTAACTGTTCTTCTTCTTCTTATCGTCATCAAAG  
AGGAATATATACATTCCCGTCTTTAATAATGTAATATGTTCTTCTCATAGGTAAGTAACTAGATCAAATGTCA  
TGCTGGAACGTTGCTAGCTGTGGTATATCAAGTCAAATTTATGGTTGGTAATCAGGCTGGCTAAAATTT

TCATTTAGACTTGGTAGAGGAATGCTATAACAAATTTGTCGCTTCTTTTCACTGGTCATTATTGTACTGTT  
TAACTAGGTTGGCTGTGTTTTGTATGCATGCAATGTAAGCTTGGTTGCGTTTCTAGCACCATGAGGGACG  
TTCATCCATTTGGTTAAGGATTCTCTACTCTCATTGGACCAAACATCTCCATGTAAGCTTCTTCCCAGTTA  
TTAATCTCCTAGATCCCATAGTTTCTTTTGTTAATCGTGCAGCAAAAGAGTATCTTTAATCCTCAAATATT  
ATAATGCTCTTCGATATTGGGTATAGTGTGTTAGCATGTTGGACAGATACTAATAGTTGTACATATCTAT  
GTAATAGCTCTAAATATTTGTGTAATTAAGTGTGCAATTGCTTCCACATGTAGGAGATATCAGGGATAA  
ATGTAGCATATTTTTATAGATATTACAGATATTTAGGGGTGTAAGTGGCAACTTCTAATTTAATGGAAGA  
GCTCTTAATTTGAGAGCATTCAATTCAGCAAATTCGACTCTGGATAAAGACAATTTCTCTTTCTCTTGAGGA  
AAATGAAGTATTTGATTGACAAAACATTGGCTTATCATGGTTGACACAATCAGTTTCTTTTGCATAAGAG  
AAGGTGAAACATAGAGGGGGGAAAACGACCTTCTGCAAGACAATTTTATTATCGACTATCTGGTGAAT  
AGTATAGGTAACAAAGCCATTTATCATAAGCCTTAGATGCAAGACAGATTTCAATTTGGTAAAAAATGT  
GACTTCAGTTGATAGTAGAGGCTTTTCCAAATTTTGTGACGGTCTTCACTCTTCAATAGTATTTTCTTTAA  
TTTTCATGGGACTTATCGGAACATTGTTTACATTGGTGCCTTTGGGGACGGTGATTGCACAAGCTGATTA  
GGTCTTGTTTTCTCCTAAAATTTCTCTTTTTAGTGGTTTTTTTTTTTTTTTTGGTTGAAAACAGAGTAATATA  
TATGTTATGTAATATGCATCGTTACATTGTTACCAGCAAGTGGCAAAACAGGACACCTACTATTGGTGT  
CTGAGGAAGGGGCATACTATTACTAGTACTATTACATGAGTTAATTACAGAGGGCATACTATTACTAGTA  
CTATTACATGAGTTAATTACAGAGGGCATACTATTACTAGTACTATTACATGAGTTAATTACAGAGGGCA  
TACTATTACTAGTACTATTACATGAGTTAATTACAGAGGGCATACTATTACTAGTACTATTACATGAGTTA  
ATTACAGAGGGCATACTATTACTAGTACTATTACATGAGTTAATTACAGAGGGCATACTATTACTAGTAC  
TATTACATGAGTTAATTACAGAGGGCATACTATTACTAGTACTATTACATGAGTTAATTACAGAGGGCAT  
ACTATTACTAGTACTATTACATGAGTTAATTACAGAGGGCATACTATTACTAGTACTATTACATGAGTTAA  
TTACAGAGGGCATACTATTACTAGTACTATTACATGAGTTAATTACAGAGGGCATACTATTACTAGTACT  
ATTACATGAGTTAATTACAGAGGGCATACTATTACTAGTACTATTACATGAGTTAATTACAGAGGGCATA  
CTATTACTAGTACTATTACATGAGTTAATTACAGAGGGCATACTATTACTAGTACTATTACATGAGTTAAT  
TACAGAGGGCATACTATTACTAGTACTATTACATGAGTTGCTTGCAAAAGATATCTTAGATAGTCTAACA  
AATGGAGTTCCTTCTTTGTCTGCTTCTAGTTTGTGCTGGATACAAACACCGGAGGAACTTCCATGCACAAAA  
AAGAGTTGATTTGATCCATTTTAGCGCCTTCTTTGCTAGAGCGTCTTTTGTAGTGGTTACTTGTAATGACC  
CGCGTCTCCATTTCCAAGAAAGAACTGTGTGCCAAAACACTGACTTTTTTCCCCTTGTGTTTCAGATGGTTG  
AACAAACGGCATGGAAAAAAGACTATGAAGTTTCATAGTCATGATTGTCAAGGAAAATTGCATTTTCGTAA

ATTCATTTGCATTTGGCTGGAAGTGGAAATTGAGATACTATTCTGTATGTGGAAAATTCTGGACTAAGATC  
TGTCAGCTGAGGACTTTCGTGCATTGTGTACATGCTACACTTGCCTTTTCTTGTATATAGAGATTTTGTCT  
CCAGCAAACAGTTTTTTAATTATTTTTTTAACGTTGTGTGGGGTTAGGTTTGACCCCTACCACGTCTGTAA  
CATCCAAAAGTTGCAAAGCAGAAGGGGACATGGACCTAACTTCCAGCAAACAGTTTATATTCGCTTA  
ACTGTTGTATCATTGTCTAGTTGATAGCTTCTTAATGTATCTCTGTTTTCTTTTCGAAATTTATCTTGGCTT  
ATGTTAGTGCATACTATGATGGATTAATATAAAACATGTGTTCCAAATCAACATTTCC

>PGSC0003DMG400008925 LRR-RLPs

ATGGATCCTAATGAGGTAATGAGAAGGTTACCTAATCTTCGGAAAATTGAGATGCATATCAGTTGACTCG  
GAGGACTGCTGTCATTTTCCATCACTGGAGTGTGTGAGTCGACTTGAATCACTCAAGATATTACACTATG  
GTCAGTCATTTTCTTCTTGTAAAGTTCAACTTCCCCTCAAATCTCAAAGACTGACATTGCCAAAGTTTCAG  
CTACCATGGACTGAAATTTCAAGAATTGGTAGCTTACCACACCTTGAGGTTCTCAAACACTTGGCCCGAG  
CCTTTGAGGGTGTGCAATGGGACATGAAAGACGGAGAGTTCCTGAAACTAAGATTCTTGAAGTTAGACT  
CTTTGAACATTGAACAATGGAACATCTCATCTGATTGCTTACCTTCCCTTGAGCATCTTGTCTGCAAAGT  
TGTAAGAACTTAAGGAGTCCCTTCATGCTTAGGCGATGTTTCAACGCTACACAGTGTGAGCTACACT  
GGTGCAGCCGTTCTTCTGTGAACTCGATTATCTCAATTCAAGAAGATGAGGGGTTCAAGGTCCATGTATA  
CCCTCGAGAATTCGATTCCTGA

>PGSC0003DMG400009029 LRR-RLPs

GGTTATCCCTCGAGTAACAAGACAGTCGAATATAAAAACACTGTTCCACAAAACACACACACATTGTTT  
ACTTCACTTTTTTTCAGTTGAGATTTTCTTCACTTGCCTCTCTCCGGCGGCGCGTGAACACTCACACATTCTC  
CCTTGTGTTTTCCGGTGAGTTACAACAGACACTCACTCCAACGATAATCAGAAAAATCCAAAAAGGTT  
TTTTCTTTTCTTCTGATTTCTAGGGTTTTTGCCTTATGCTCTGTACGAGTCTACTTTTTTGGTCATGTGATT  
ACACAGATCTGTGCTGGATTTTAGTAATTTTTCTTGTAAATGTGCTTTCGTTTGTGGTTTTAGGTAGTTTT  
TTTTATGTTTATTATTTTGGGGTTTGGTAGAGTAGGTTGCAATTACTGGGAGGAGGACTACAACTTCA  
CTGTTAGGTATAAAGTTTTTATTTTTCTCGTGAGGTTTGTGTTTGTAGGGTAAAAGAGGGATTTTGT  
TTGTATTACAAGTTTCTGATGTTTTAGCGGCTCTGTAAATTGTATATATGCTGCTCTGCGCTGCTCATATT  
ATTCTTCGGTAATGTATTGTGGGGTATTTTTTTGTATCCAAGAAAGTTTTTATGTGTTATAGTGTGGTGA  
AATGGAATACATCTGTTGAGTATACCATTTTTGGTTTTGAGTGTTTTTTACATTGTTGGATATGAATGTGG  
TGCATTGCAAGGTGGTTTATAAAGAATTAGAAAATCAATCTCGTTTTCGATGATGGATGATTGTAGAA  
ACTTTGCCATTCTTTGGACACCTGCTTGGTGTGTTTGTGGTGAAACTATTGAGTTGTCAAACAATTATATCT

GATTTCTATATGAGGAAGAATTTGAGCTCTTCAAATTTGGTTTCGATATATGTTAGTTTTTCTTACGTGGA  
GTAGGTGTGCACGAACCTGTTCTTGCCTGGTACTTTGTTTTGGTTGTTATGTTCTTAACTGCCAGAGATG  
AGTCTTGTAGTGGTTATATTTCTTGAAAGATAATCACTTTTATAGAACTGAGACATGATTCACTATATTC  
CTTTGATTCTAGGTTTTCTTCCAATGGATGCCACAACAGCTAACTCTCAGCGCAGACCATTTTCAATAAA  
CTGTGGCCTCCAAGTGAGAACACAAGAAAAATGCTGGTGAAAGAATGACGAATAATCTTTCTAGTCCA  
ACCATTTTCACCCGCAAGTACCGCAGTCTATCCAAGGAAGAAGCTGCCAAAATGCTGAAGAAATTGAA  
GATGCAGCTTTTACCATTGCTAATCAACATTATGAGAAGGAGCCTGATGGTGATGGAAGTTCTGCTGTG  
CAACTTTATGCCAGGGAATGCAGCAAGCTTATCCTGGAAATTCTAAAGAAGATACCCAAATCAGAGGAC  
AAGGAAATTTCAATTTCTGAAGTGGTTCTACTGTTTCAGGAGACCTTTTTTGATATCTCAAAGGTA  
GGGCTTTTATCGAAGCGGAAGAGGCTCAAGAACTTTTAAAGCCATTAAGAGCCTGGAAATTTTACA  
GCAAATTTGTTTCAGCAATAGAAGCTTCGGTATAGATGCAGCACGTATTGCAGGCCCTATCTTGGCAGC  
CTTGAAGGATCAATTGAAGGAAGTTGACTTGTGAGATTTTGTGCCGGAAGAAATGAGGCAGAAGCACT  
TGATGTCATGAATATATTCTCAGAAGCTCTGGAAGGTTCTAACTTGAAGTTTCTGAATCTCTCTGATAATG  
CTCTGGGTGAGAAGGGAGTTAGGGCATTGGAAGCTCTTTCAGTCTCAAACCAACTTGAAGA  
TTTTGATGAATGATGGGATTTTACAGGAAGCTGCAAATGCTGTTAGCGAGCTAGTTCCTTCCACCGAGA  
AGCTTAAGGTTCTTCATTTTATAATAATATGACAGGTGATGAAGGGGCTGTTGCGATTGCGGAAATTGT  
GAAGCGTTCTCCTTTATTGGAAGATTTCAAGTGCTCTTCTACCAGGGTAGGCTCTGAAGGAGGGAGTGT  
CTTGTGTGAAGCACTTGGGATGTGCTCTCATTGGAAGAAGCTTGATTTGCGAGACAATATGTTTGGTCCA  
GAAGTTGGTCTTGTGTTGTGTAAGGCACTCAGCAAACATGAAAATCTTACGGAAATTTACCTGAGCTACC  
TTAATTTAGAGGATGAAGGAGCAATTGCAATAGCTAACGCTCTTAAAGATTAGCCCTTCACTTGCTGT  
CTTGGAGATGGCAGGTAATGATATAACTGCTGAAGCTGCTTTCAGCAATAGCTTCTTGTATAGCTGCAA  
GCAGCTTCTTGCCAAGTTAAGCTTGGGTGAGAATGAACTCAAGGATGAAGGTGCAATTCAGATTGCCAA  
GGCACTGGAAGGACACAGCCATCTGATTGAAGTTGATATGAGCAGCAATGCACTAAGGAGGGCTGGGG  
CTAGGGTGTGGCTCAAAGTGTGCTGCACAAAGATGAGTTTAAATACTAAATGTTAATGGGAATTTTAT  
CTCAGAAGAAGGCGTTGACGAGTTGAAAGAGATCTTCAAGAAATCTCCTGAAATGCTTGCATCCCTGGA  
AGATAATGACCCGGAAGGAGAAGACGAGGATGATGAGGAGGATGAGGAGAAAGAATCTGGAGATGA  
GGGCAAAGACGTTGAGGATGAACTAGAATCAAACCTCAAACCTGGACGTCAAGCAAGAGGCAAGTC  
TTGACACACCAGATAGCAATTAGAATCCAGTACTTGACGACTTCTGCATGTTGCAGTTTTAGTTTTACCAT  
TTTCTTTATGCTAAGCTGGCCATATTATGTTCTCCAGCAAGTGCTCTAACATATAGTTCCATCAGTAATTT

AAATTTGGTGAATTGAACTGTTGCCTTAATTGGTCAAGTTAGGTCTCTGGCTGAATTATGTAGGGTACG  
AGAGAGAGAACTGCTATTTATGTTGAACCTTCTTTTGTATGTAGACTTGATAATCTCCTCTTTTTTTCCTT  
TTCTTTTTTTTTATATTTCCATGATGCATTTGACTTGTTTTATT

>PGSC0003DMG400009230 LRR-RLPs

CTTGACTGGAAGCTTGCACACCAAAGACCATTTCTTCATTCTTCACGCGTATTCTCTCATGAAAACTCTATT  
TAGACTAATCCTCCCACCTTTGTCCTTTCATCATTTTTTACCATGGCTAAATCTACAATATTTTTTCTCCTTT  
TTCTTTCATTTTCAGTGTTACTTCACAATGTTACTGCATCAGATGATATTAGGTGTTTGCAAGGACTGAAG  
GACTCATTTAAGGATCCTAATGGAAATTTGAATTCTTGGAACTTCTCAAACACTCCATGGGGTTTATCTG  
CAAGTTCATTGGTGTGCGTTGCTGGAACGACCTCGAGAATCGGGTGCTCAGCCTCTCACTTCCAAACATG  
AATCTCAGTAGACAGCTCCCAGATGCCTTCAAATATTGCTCCTCTTTGACTTCTCTTGATCTCTCTGGTAAC  
AAGTTCTCCGGTCCCATTCCCTTCGGAGATTTGTAGCTGGACTCCTTTTTTAGTAAACCTCGACTTGCCAA  
CAACAGTTTCTCCGGCTCTATACCTGCTGAACTTGGAACTGCACCTACCTGAACAAGTTGATGCTCAAT  
AACAACTCTCTGGAAATATTCCACCAGAAATCTCTCGATTAACGAGGCTTAAGGTGCTCTCCGTGG  
CCAACAATAATCTTTCTGGTAAAATACCACATTTTTCAGGATTGTCTGATTTTGAATATGGAGGAAACAG  
ACATCTCTGCGGTGGACCATTAGCCAAATGTGGTTGAAGATGGCAGAAAGTTAGCCAAGTTTTGGCTAA  
TTGTATCTTTTATAGCCTATCTAGATTTCTGTTTCTGTCAATTCATAATTGTATTGTATGGTGAAAATGTC  
TACAATTCCATGCCTTTTAAGTTAACAAATGCAACACTGGCTTCTTCTGTGTCCATTCCACAAGTTATTGT  
ACACAACACAAAGGAACAGAAATGTTAATACTCGAACTATCATTGCCTTGCTCAAGACTGTTCTTCGCGT  
ACAGAACAATTTATCAACAGAATACTAATCTACCATTTTTTTTACCCACTATACTACATCTAGGTTCCCACC  
AAACCCAGAAATCTACAACTAGGCTGAAAAATTGAGTCATAGAAATGGCCGAGAATAATCAACAGATA  
TCAGACATCTCACAAAAGAATAAAAACAGAAAACACTCTCAAGCTGAAATTGATAAAGGGGAGATGAC  
CGGAAAATCCAAAATCTGGCACACCTATTTTTTTTTGGACGGAAATGAACAGCCATAGAGAAGTGCCTCC  
AACCAATCATTTAAGTTCTTTTGCCTACTTGAAATGATCCTGCCTGATTATTGCAACAACTCTGAATGC  
AACTGTCCTCTTTCTGCTTCCATATTTCTCCGTTGGCATGTATTAACCATGATATTTGAGGGGAAAGTTG  
TGCGTACAAATCTGCAAGTAATATATGATATTTAACTAATCAAAGACGTGCCCAAAGCAACAAATTTCT  
TGGTTGCAAGAACTGCAACAAACAAGAATATATACATTTAGAATGTCTAGACTATGATAAGTCTTCTATT  
AATGCTCTACAAAGAGAGTTATCAAGTATCACCTAAGTTTATCCACACCTATTACTACTTCATAACAACAA  
AGAGGGTTATCAAGTATCACCTAAAACCTTTTATCACAATAGTCAGTATGTGTAACCTTTTTGCATTGTTGC  
ACAGACTAGAATGATAAGGCACATGGATTTTTCTGATCAAGCTCAGTGAAATACCTGTACTACTAGGA

GGAGGGTCTGGATCTCTTGACTATGAAGAACCAATGTACCAGAGAGCACAGTTAAAAAGCCACAAAGC  
GCTGAAACTATGTTGCTAACACTCTGACCAGACCAATCCTGAGAGAAAGACATGACATTAGAAATGAAA  
ATGAGAGAAGGCCTCCTTGCATCCCGAACATAAACTTTGAGAATACCTTAAACATTATGGCACTGGCTAA  
AATTGTAAGTGATGTGAACATGGCATAATATATTGGAGAAACCACAGCAGTGTTAAATGTGTCCAATGC  
CTGCAAGAGTCAAATTCAGGCATTTGTCCAATTTACAATACAAGTCTAAGCCAAGATTCAATAACATGTA  
GTTTCTATAGTAATCCCTGTAAATATTAGCTCAAGCATTGAAACAAATGCCAATGAGTGTGAGTTCATAA  
GTTTTCCAATTACAATTGTACTTGTAAGAAATGGATCTTGGGTCTTACTCAACCTCAAAGATAGCTC  
AAGAGATCACCCATGTGGTGAGAATTGTTCAAGCCATATTAAGAGATCTCTTCATACACTACCTCACGC  
CCAAGAATGGAGATCTAGTGTATGGGCAATTTAATAAGAGGAGCGTTGAAAAATGCTCTTTTACTAATT  
GTTGGTTTTTAGCAGAGAAATTTGGAAAATAACAGAGCAAGACTGAGAGGAAAATGCTGCAATGCTAT  
CAAAGGGAACTTTTTATTAGCTTACTCTACATTTACGGGGAACCTGAAATAAAAAACAGTAAAAATAT  
GATCATTATCCTAGCCTGGAGTATCTTCATACAATCATATCTTGCCTTCACTACTATCCAGTTAATATGG  
CATACTTTACTTTTTAGTCAGTCACAAGTCACAACAAAATGACACATTTCTTATTTGGCAAATGTTAAT  
GACATTATCAACATTTTACCCATGCTGGGTACACTTATTTGGCAAAGGTCCACAAAAGTGATTCTTCT  
ATTTAAAAATTCATTTCTTTAAGGGTAGTTTTGGAACATTGCAAAGTCTTCTCATATTGCATAAATGTTG  
TGCCAAGTCAAATAATATCACATAAACGGGAGAACTAATTACTAGAAATTAAGGCTAGCTAGCTAAC  
AACTTTAACTAAGATTTATTCAAAAACAACACAGCTAAACAAAGTTACTGTAGTCCAAAAGCATAATTC  
TAAGGGGTCGTTTGGTTTGAATATGAGTTATGATGGGATAAGTTATGTTGGGATAAGTTATGTTGGGAT  
TAGTTATGATGGGATAAGTTGCTGCTGGGATTATTTCTTATTGAGTGTTTGGTTTGTATATTCAAATAAT  
ATATATTGATAAATTTAAGAACAAGTTGTTTGTACAAAATTACCCTTCACTTTATTTAACTTTTTAAA  
TATTTCTTTGTGAGCTTTAGTTATTCATTTTTTAAATAAACTTTTTATTTTATTTAACTTAAATATTTTTGTT  
TATGTATTCCCATGATAAGTACCATGTGTATTTAAAAAATAACTTTTTTTCTTATTTAGCTTAAAAATAGA  
ACTTCCCTCTAAGTTTATTAAGAGAAGAAAATTTATGAGAAATCAAATAAAATAAACATAAGAATTA  
GTCAAATAATTCATAAATAAAAATTATTTATATAGTATAATTTTTAATAGAAAATATGTATAATTA  
TCATAAAAATAAGGAGTAGTAAATATTATTATACATGGTATTAATAAAAGTGTAATATACATAAATGTA  
AAAAATGATGTATAAAAAGGATTTAAAGGGACATATTTGTCATTTACCTATTTTATCTCGGGATAAGTTA  
TTCCGGGATTACTATACCACCCATGGGGAGGGATAACTTATCCCGTACTAATTATTAATCCCGGGATAA  
GTTATCCCGGACTTGCCAACCAACAACATAATTTTTTTTTATCCCATCATTATTTCTTATCCCATCACTA  
TTATTTCTAATCCCTCACACCAAATGAGCCCTCTAATAGTACTCTCAGACTTCAAACATCACTGCATACCA

GTGTTTTCAAAAACGTTTTTGGGGCGAGTCTCAGGGCAGGGCGTACCAAAAACGCTCCGGAATGTAAAT  
CAAAGACGTAGATCCATAAGGCGTAAGTTCTAAAATTTGAGGCATAAGCCTCGAGCATAAAAACGTAAT  
TCCTGGGCGTAAAACGTAGGCCCGGGCGTTTTTAATTTTTTTTAAACCTTTTTTGCTTTAAATCATATATT  
TTATTATTGGTGAATGATATTTCTCAAATAGTAATTATTAATACTTTTTTTCTTCATTATTGATTATTAATA  
TTTATCTCAAATAAATATAATTTCTATATATTATAGGTTATTTATAAAAAAATTATTTGTAAAAATCATTGA  
AAGATTTACTTTTGCTTATTTTATTAGTAATAAACTATAAAATTGAATATACATGAGACTACGCCCCGTA  
GATTTATGGGACTTACGCCCCATAGATCCATGGGACTTACGCCCCGTGTCTCGGGGCTTACGCCTCGCCC  
CATACTGTATAAAGCGCCTCGCCTCACACCCCGCCTTTTAAAACACTGCTACATACTATAAGGAGAAGT  
AGAAAGTCTACCTTATTTAAGTAATTTAGTTGAGTAATTATACATGTAACAGAAACCATCACAAACACCC  
AAGTTTGAAAATTTGCAGCTTGGTTTGAACCCTCCAATGTAAGCTTTATAGCTATACCGATAGCTTTGATG  
CTCATAACCTACAACAGAGCAACAAACAACTTAAAATGACTGCTACATGCAATTTTTACCAATTGTA  
ACTGAGAAGGACTAGTTCCTATATTTTCTTACTTCTCATGAGGAATAATTTTATCATATTTTATTGGCAAC  
AGAAGCACTCTCTAAGTCAGTTCGGCAAAGAGAACTGCAATAGTAGCTCAATTAATACAAAAAATT  
AAGAGAGGAACCAATTCATAAACTGTTATTTATCGAGTTTTTTAAGCAAATACATGAGTATTATTCAA  
AGATAGTGAATTCGATTGATAAAGAAGTCATAAAATAACTCGACCTCGAACTAACAAATGACTAGATAAA  
AGCTTATTTCAACTAGCAACTTAGACTTATTTTAAATTTATGTAAAAGACAAAACTAATAAAATAAAGTA  
ATAGCACTGCAATCTTTTATTGAGTTACACACCTACTAGTCAAGGAAAAACAACAGCAACCCTGGATGCC  
TTATAAATTATAACAGATCAAAGTATAGTCACTTGTACAAGTATAGTGGCAGGAAAAGACATCTACTAGC  
ATGCAAACACGTTACAGCACCCCTAAAGCTCTGGAGTAATATTTCAAGTTCCATACATCCATTTATACCTAA  
ATGAGAAGTTTTCTTTTACTTCAAGTACAACTAGCAATGGATAAGGACCCAGGACCAGTTTGACTCTTCA  
CAACTTAAAAAATATGATCCATTTAGTGGTCAAATTATGCTATTCCAACACCAAGGAGAAAGATAGAATT  
TGGATAACGTTAAGTTTAAAAGATAAGGCGTCTTGCAAACGTCAATTTAGCTTCAAGGTTAACTCAGTC  
AGTTCAGAGCTACAACTAAAGCACGGTTGTGACACATGTTTCTCCCTTCCTTCCTTCGCTTTCTTAATTC  
TTGAGTAGAAGTACAGACTCTGTAGGGATATAGATCAATACAATAGAGGCACTAACCGTCAAGGACCCA  
AAGATGGAGCAAACACCAATATAGACCATAATATTTGTCCGACCATAGCGAGGCTCACAAATACAAGACT  
AGTACCAATGTTATTGCAACTGCTGATGCAGTGTACAAAAGAAAAGCTGCAAAAACAAGAGTGGAACAT  
CAAAAAAATGATATATCAGCAAGGCAAATAAGAATGATCTTCAAGGAAATACAGCACAGTACATTAGCA  
CACCTGGTTGTGTAGCTAATGCCCATATTTTATCCACTGAATTGAGATCATGTTACGAGGTGCATGAAG  
AACAAATGACAACGGAACCTACTATACATAAAAGACATCCTAATACTCCCAGTTTCTTCAATTTTTCTTCA

GTATGAAATGTGCTAGAACAGCACTGCAGCAAAGCGCCAAATTATATGGAAGAAAACCGAATAAGCCA  
TTGCCAGAAAATAATAAGGCCGAGTGGAAAATTTACCTCACAATTATACTTAAAGCTCCAAGCGGTGTC  
ACAAGAACTGCTGGCGCATAAATGTAAGCCACGAAATTTGCAAATCTCCAACAATCACTGCAAGGATT  
ATGGTAAACATTGCACTCTATATTAGAATAACAAATTCAGGAACATATTCTCTAACATTTAAGAAGCAATT  
CAAGACTTACTAGTTACCATCCCAATCCACCAAAGAGGCTGCCGTAGATAACCATATCCGCCCGAGCCTT  
CAGCAAGAAACAAGTATCTTATTGTCAAATAGACAGAGCAACAGAGTTCATATAATCAGCTTTTAAACTA  
AATTCTATTTAATGCTGCTACAGAAAAGCATCTTCTATATATAAACTTTACAAGATGTCCCAATATATCT  
ACTTTTAATGTGTAAAGTAGCTGATAAATTACAATGTCAAGGAAATTCATTCAGCTTATTACAGTGCAGA  
ATGATTTAAAAAATCCACTACACTGATCATTTTCAGTTCTTAAAGTCAAGATCCATTTATTATGTCTTGAG  
CTCATTTCTTCTCTGTAATACATGTATTAGTACTACCTAATACAGCAGTCTGTGTTTATTCGGAAATGATA  
GATCAAATAATTTGGAATTACCAACAACAATCATTTAGTGAAGCAGAAGCATGAGTGCATATATTTAAAT  
TGTTGGCCCATTTCTACAAGCGGTA ACTATCAAAGGTATTAAGTTTAAACAGGTGCTGCTGGAGTCGCTCT  
GATTGCTAAAACAATGTCATTAGTCCTAGATAACTGCCACCGAAATCTAGGCAGCTGACTGGTCAACATT  
CAGAAGAATATGAATTCCTTTGCAAATACTTCTCCAATATTATTCAAGGACTACTTACTTGCATGATAAGT  
GTGAAGTGTCAATTCCAATATAAGTAACTTGATATTCATTTCCAGAAATGTACACCCAATACTTCCCTT  
TCGGAGAGAAGTGCAAATTCATTCTTGAGTTCCAGAACAAGTTTTCTTTATTCCCAAACGGATAACTG  
CTTTGTAAGATGCAATATCACCTTTTATAAGCAGTCATTGTGTATTAGTAATACTCATTGTGACTCTACATT  
TGCTGGAAGTGTTACCCCATTTGCTCTTATTTTACAGTCGGGCACCTACAACATGGTGTACCAACAGAGCA  
TAACATAATCTTAACTGTACTTAAGCAGAAAACAATGAAGTAAGAATTTTCAGGTGTAAAACATGTGT  
TTCACCCGCAAAACTAAAATGGGGACAGCAGAAAAGCAGGTACCACCATACCAGTACAAAAGCAAACC  
CAACATTATCAGTCTGTTACCACTTGATATTTCAAAGTAAGAAGTAAAAGAACAATCTATTCATCAAGCAT  
AATCTCCAATTCATACATCTATAAACAGCATCTGATATATGGTAAATTGGTAATGCAGTAAAATGGTTA  
GAAATATCAATCTTCAATCGACTAATTTTGACTTGATCATGTAATAGTCGGTGTGAGCTTTATGAGTCCAC  
TATATTCATTCTACATATCTGGGCCATTTCAATTTCAATACTACAGGAATTTTATATTAAGAAAACTAG  
GGGTTTTCTAGAGTTAAGAGATTCTCAAATGTCACACTTCTTTTCTGTACACTAACATACAAGTTTTAA  
CCTTATTCCCAATTAGCTAGCGTCATCTACAATAAATCATTTACTTCAACTGTGATTCTTACCTAATTTGCC  
TTAGTTGAGAGATTGTAGGGGTTTTGTTGTCATTGTTAGGATCGAAATTACCAAGTGCATGAAGAAGC  
CAATAAAGCAAACATTGGACTATGATAGTATAACAAAGAGAAATATACCAAATACATAAAAAATTTAACAT  
GAAGAATTCACAAAGATAAAAAAAGAGTACAAACATATAAAGAGAATAACCTCACAAAATTCCTCGTA



AAGAAGTTTACTTTTGCCTAAACAAAATTCTCTTGAGACTACATTGTGCATGCTCTAAATTGAGAAGGA  
AATCCTCAATGAATAGAAATTCAAACATGTTCTTCCAAGAAAAGGATTAGCCAAATATGGAAGATTCAT  
ACTTTCTGATAAAATCTAGTTATCCTAAATGTTATATCCAAATATGATAAATAAATTAGGGCAAACACCT  
ACAACAACCTGCGTTTGTATAATTTAAGCAAGGTCAACCTTCTAACCTTAGCAAGAAGTAATGCATTG  
CAACACACACATATAAAGAACTGAGCATATTAACAACCTTAGCAAACTACAAGGTAGAAGAAAACAC  
ACAAACATCGGCAAACCTGAATGGGGACACAACCTAACCTCCATGAATCCACCACTAGAAGCATTGACAA  
AGTTCAAATCAACAAAAGCAATAGATTATTGACAATTAGACCTAAAACACTTTGCTATCAAGAAAAT  
GAATTACTACTGGCCCGAGTACCAGAGGGCGCCTGCCTTCTGAAGACCCTTCTTCTTGATAATGAAACTG  
GAACCAATAAAAGCGCTAGACGCCACAGCCAATCCAAAACCAAGTCAAATTAGCACTGTACATGATCCCA  
ATATTATATCTAAACTATTGGGCAACAATTTTGAATTTAATTCTCATCTGAACTTTCCCAAGAACAAAAC  
TTTCAACACCCAAAAGGTTCCCTGGATATACTCAACAAGACAACACTCAAGTAAGACTAAAATAGCAAG  
AAAAACGAAATGGGCAAGTTTGAATACTTAAAACCGCTGTAGCTTTACTCAATTACCCTATAATTGTAG  
AGCTGAGAATGAAAAACAGCAAGAAAAACGAAATGGGTATATGAGAAAATTGGCGAAAACAGGTTT  
GAAATGGTGAGCTAACAGTGCAAGCTCGTTATAGACAATAATGGAGAATAGTATTACAATAAGCATAAT  
TTTGTATGCTTTGATTCGTTGCTTTGGGTTGATTTGGCTATGGTATGTCTTCGACAATTGGGCATAACTA  
TGAATAAATC

>PGSC0003DMG400009324 LRR-RLPs

AGGAGACCTAGTAAAAAGAAAAGAAAAAACATGGCCGACGAAGTTCAGCCAGTCAACCAGAGGTAC  
GGAGAATTGTTGGTATATGCAGTTATCATGAAATATATAAAGTCCACACACTGCTCAGCTGAGCAAACC  
AGACACTTTGAATTGGTCAATATATCTTTACTGGATTCAATACATGGCGGAAGCTTTTCTTCAAGTTCTGC  
TAGAAAATCTCAATTCTTTCATAAGAGGGAACTTGTATTGCTTTTCGGTTTCGAAAAGGAATTTGAAAA  
GCTGTCCAGTGTGTTTTCCACAATTCAAGCTGTACTTCAAGATGCTCAAGAGAAGCAATTGAAGGACAA  
GGCAATTGAGAATTGGTTGCAGAACTAAATTCTGCTGCGTATGAAGTTGATGACATATTGGGCGAATG  
TAAAAATGAGGCAATAAGATTCGAGCAGTCTCTATTAGGGTTTTATCATCCAGGGATTATCAGTTTCCGT  
CACAAAATTGGGAAAAGGATGAAAGAGATAATGGAGAACTAGATGCAATTGCTGAGGAAAGAAGGA  
AGTTTCATTTCTTGAAAAATTACAGAGAGACAAGCTGCCGCTGCTACGCGTGAAACAGGTGTGAGTA  
CTGAGTAATAGTAGCTTAGTTTATATTCAATTTGTTACCACATCGTGTGTTCCACCGTGATCTCTACAGTAG  
GATGGCAATGGGGCGGGGCGGGTTGGAGGTGTGCAGGTGTGGGGCGCAATCCCAACTTTGAGTCTG  
CACAAGTAGGTACTTAAATTTGTATAGAGTTAAACAAGTACACACGCATCCTACTTGGTGTCTACATGG

CTCTTATGTGTATTATGTCATATAGGATGCATGTGTCTATTTGTTCAATTTTATACGAGTTTAAGTTCTACT  
TGTGCACACCCAAATGAAAGTTGGAGGGCGTAGATGTCAGTTGATACCAAGTTAAAAATTCATATTAAT  
GAATTATGCCTTTAAATTATGATTCAATTTTATATCAGTCTGTCCAAAAGATGTTCTAGTGAAAGTGTTAA  
ACTTAGCCTGGATCTGCTATTGGAAGTGTGAATTTTTGTGGCACTAAACAATGCAATGGGTCTGGATTCA  
TTTTTGCATTAACATTTGTTTAGACGATTTTCTTTATCGAATTTTACTGTCTAAAAAGGAAAAAGCAAAGA  
AATAAGACGTATACAGAGGCTGACTTCTTCATAGGATTTCTCATATAAAAAAAAAAACATTGATTTCTAGG  
ATATGGGTTATTTTAAATTACAAATTTGTGAGTTAAAACAGTTCTGTTGGGAAGGATTTAGATACACGTG  
GATAGTATCTAGAAGTTTTTTAAATAAAAAATTAGCAAATTATGTGGGCTGGGGCGGGTTGAAAACAGC  
AACTTTGCAAGGCAGGGCGGGTTGAAATCATTGCAAGTTTGTGTGGGTTTGCCTGCACCACCCCATCT  
GCCATTCCTGTCTAAATGTTTGTCTATATAATTCTTGCTGACTCATTCTAATGAGCTCAATTGTAAC  
AAATCTTTGTGTCCACACTACTTGGAACAGTTTTGTGTTAACTGAACCAAAGTCTACGGAAGGGACA  
AAGAGGAGGATGAGATAGTGAAAATCTTGATAAACAATGTTAATGTTGCCGAAGAACTCCAGTCTTCC  
CTATAATTGGTATGGGGGGACTAGGAAAGACGACACTTGCCCAAATGATCTTCAATGATGAGAGAGTG  
ACTAAGCATTTCATCCCAAATATGGGTTTGTGTCTCAGATGATTTTGATGAGAAGAGGTTAATTAAGA  
CAATTATAGGAAATATTGAAAGAAGTTCTCCTCGTGTGCGAGGACTTGGCTTCATTCAGAAGAAGCTCCA  
AGAGTTATTGAATGGAAAACGATACTTGCTTGTCTTAGATGATGTTTGGAAATGATGATCTAGAAAAGTG  
GGCCAAGTTAAGAGCAGTCTTAAATGTTGGAGCAAGAGGTGCTTCTATTCTAGCTACTACTCGTCTTGAA  
AAGTTGGATCAATTATGGGAACGTCGCAGCCATATCATTTGTCAAATTTGTCTCCACATGATAGTTTAC  
TGTTATTTATGCAACGCGCATTTGGGCAACAAAGAGAAGCAAATCCTAATCTAGTGGCCATTGGAAAGG  
AGATTGTGAAGAAATGCGGTGGTGTGCCTTTAGCGGCCAAGACTCTTGGTGGTCTTTTACGCTTCAAGA  
GAGAAGAGAGTGAATGGGAACATGTGAGAGATAATGAGATTTGGAGTCTGCCTCAAGATGAAAGTTCT  
ATTTTGCCTGCTCTAAGACTGAGTTATCATCACCTTCCAGTTGATTTGAGACAATGCTTTGCGTATTGTGC  
AGTATTCCCAAAGGACACCAAATGATAAAGGAAAATCTCATCACTCTCTGGATGGCCCATGGTTTTCTT  
TTATCAAAGGGAACTTGGAGCTAGAGTATGTGGGTAATGAAGTATGGAATGAATTATACTTGAGGTCT  
TTCTTCCAAGAGATTGAAGTTAAATCCGGTAATACTTATTTCAAGATACATGATCTCATCCATGATTTGGC  
TACATCTCTGTATTTGGCAAGCACATCAAGCAGCAATATCCGCGAAATAAATGTCAAAGATTATAAGCAT  
ATAATGTCCATTGGTTTCGCTGAAGTGGTGTCTTCTTACTCTCCTTCGCTCTTGAAAAAGTTTGTCTCGTTA  
AGGGTGCTTAATCTAAGTTACTCAAACTTGAGCAATTACCCTCTTCCATTGGAGATCTATTACATTTAAG  
ATACCTGGACCTGTCTCGCAATAACTCCGTAGTCTTCCAGAGAGGTTATGCAAGCTTCAAATCTTCAG

ACTCTTGATGTGCATAATTGCTACTCACTTAATTGTTTGCCAAAACAAACAAGTAAACTTAGTAGTCTGCG  
AAATCTTGTTCTTGATGGCTGTCCATTGACTTCTACTCCACCAAGGATAGGGTTGTTGACATGCCTTAAGA  
CTCTAGGTTTCTTTATTGTGGGAAGCAAGAAAGGTTATCAACTTGGTGAAGTAAAAACCTAAATCTCTG  
CGGCTCAATTTCAATCACACACCTTGAGAGAGTGAAGAACGATACGGATGCAGAAGCCAATTTATCTGC  
AAAAGCAAATCTGCAATCTTTAAGCATGAGTTGGGATAACGATGGACCAAACAGATATGAATCCGAAGA  
AGTTAAAGTGCTTGAAGCCCTCAAACCACACCCCAATCTGAAATATTTAGAGATCATTGCCTTCGGAGGA  
TTCCGTTTTCCAAGCTGGATAAATCACTCAGTTTTGGAGAAGGTCATCTCTATTAGAATTAAGTTGCA  
AAAAGTCTTGCTTACCACCCTTTGGGGAGCTGCCTGTCTAGAAAGTCTAGAGTTACAAAACGGGTC  
TGCGGAGGTGGAGTATGTTGAAGAGGATGATGTCCATTCTAGATTCTCCACAAGAAGAAGGTTTCCATC  
CCTGAAAAAATTCGTATATGGTTCTTTGTAATTTGAAAGGGTTGGTGAACAGGAAGGAGAAAAACAA  
ATTCATGCTCGAAGAGATGGCGATTTTACATTGCCCTCTGTTTGTTCATCCTTTCTTCTGTCAA  
GAAATTAGAAGTTCACGGCAACACAAAAGCAAGAGGTTTGAGCTCCATATCTAATCTTAGCACTCTTACT  
TCCCTCCGCATTGGTGCTAACTACAGAGCGACTTCACTCCAGAAGAGATGTTACAAAGTCTTACAAATC  
TCGAATACTTGAGTTTCTTTGACTTCAAGAATCTCAAAGAGCTGCCTACCAGCCTGACTAGTCTCAATGCT  
TTGAAGCGTCTCCAAATTGAAAGTTGTGACTCACTAGAGAGTCTCCCTGAACAAGGGCTGGAAGGTTTA  
ACTTCACTCACACAGTTATTCGTTAAATACTGTAAGATGCTAGAATGTTTACCCGAGGGATTGCAGCACC  
TAACAGCCCTCACAAATTTTGGAGTAACCGGTTGTCCAGAAGTGGAAAAGCGCTGTGATAAGGAAATAG  
GAGAAGACTGGCACAAAATTGCTCACATTCCTAATTTGAGTATATATTAGTGAGTTATTTGTAATTGTTTC  
TTGGGTTATTTTTTGTGAGTCTCTCACAGGTTACAATTCCTGCCATTGGATTATTATAGCAAAGTTTGACT  
GTATGAGGAAACATTTAAAAAAGAAAGGTAATCGTTAACATGACTTTTTTTTTACTGTTTAAT  
TTAATATAAAAGGATTGTACTAATTTTCTATTTGAAAAC

>PGSC0003DMG400009532 LRR-RLPs

ATGGATCGAATTTCCGAATTACCAGAGCCAATTTAGAGTACATCTTGTCTTTTCTTGTTTACAAAATGT  
TGCACAATTAAGTATGTTGTCCAAGACTTGGAAACAAGGTTTGCAATTCAATCTCCTATTTGAAATTTGATG  
GTGATTTTTTCTTTACGCCATCAAATACAAACCAAGCTGGTGGATGTTGTGCATCAAACCCTAGAAAA  
TCGTCGAAAGCTGAAGATTGCCGTACACAAGTGTGGCTACCATTAACGATTGGATCTCATGAGGTATA  
CAATTGTTGGATTGATACACTTGTAGTTTGTAAATATCAAAGAACTACATCTATCAATTAATCTCATCTTT  
ACAAATTGCCTGAGATGATCTTTAATGCAAAGCCCTAAATGTGCTGAGGCTGATTGGATTTAACATTAT  
TGAATTGCCTTGTAAGTATAAATTTGCCATCTCTGCGAGAGTTTTATCTTGACAGTGTAATTTTGGACG

ACAACCTTCTTCGAGCTATATGCACAACCTGTTCTAATTTAGTGGTTTTGTATTTGGTGGGCTGTCATGGA  
TTTAACAGTTTGCAAGTTGGTGAAAATTTACCTAAACTGAAAAAATTGAAATTGGAATATTCTTATCATCA  
AGTCCAATTCGTTGATATTAGTTCAACTAATCTTGAACAACCTACCATCTACGGCAATTGTGATTACCTAA  
AGGCAGTTGAAATAACTGCTTCTAAAGCCCTTAAGACTCTGTACCTCCAGCGTGTGCCGATAACCCAAAA  
AATTCCTTCTTGCCTTGAAATCTAGACAAGTGTGAGTTATTTTTTTGCCACACATTGAAGACTCTAAAGA  
TTGCAAGTTTCCTGCTCAAACAGCTGACGGTACATCAATGTCCTAACCTAATCGCTGTTGAATTAGACT  
CCTAATTTGATAAGGTTTTCTGACAATTGTCATTGCAACCCTGCAACTGAAAGCTTCAGCTTCAGC  
TTCATTGGAAGCAAAAATTTGCTTTGTCTCAGGAACCACTGACAGTGATGTCACAAAATTTCTTGGTAAC  
TTCAATCAGTCCATGGTTGTTGAATTAACATGCAAAAGTGACAAGGTAATAATCTTTTTAATTCCCACATA  
TTCTTTTAGTTGTTGTTATATATTATGGATTTCTCACAAGTTGTTTACTTTTGCTGATACAGGCACTAGTTA  
TACCAAAGACATGAGAGGAAGCTTGCTTCTCCCTTTACGGTACTAATCGTGTTTCATGTAAATATTCG  
AAGTCCATTGATAAACTGTTTCGATTGTCGACATTCTTGATAGTATGCTTTGGATTTCTCCTCAACTGGACA  
CCCTATCTTATTTCAAACCTGACTTAAAGATCCTAATGGTAAGACATTTATCTTTCAAAGGTAAGTACTGACTTT  
GTAAAAAACGTTTTTTTAGATGCAAGGTTTCTTGCAATCTTTTCCCTTTTAACATGCCTATTTCTTTCTTT  
CTTTAGCAGTATAAGTAATTAAGTCTGCAGTTACTTGAACATAACAAGTCAATTAAGTCTAGTATAAGGAT  
ACTGAGATTCTGAAATCTTTTCGCGTCCCCCAAAGCTGTTTATTTTAAAAAATTGCGAGAATATATGT  
GAAAATTTGGGTTAATAATTATTGGATTGTGCTTTGTCTCTGCGGCTAGTGGATAAATTTGAAGTTATA  
TGTAGCTGGTTAACTCAAAAAAATATGTTGTTAACAAACAAGACAACGAAATCAGGGTCATAAGATTGT  
ATTGAAAATTGCACTTCTAACAAAGCCGTGCATGCTACATTTGCAGCAATAACTCTACTAGAAAAGAGAC  
TGGTGTCTCTGATATTTGTTTTCATGACTGATTCTTTATGAAGACAGTTTTTATATTCATGCGTTTGTGTAT  
TGTCAACTATTGACTTTTTCTGGTTTTACAGTTTATATATGAAGATGCATTAGATGAAGATGAGAAGCC  
TTGTTGTACATCTCAACCTTGAAATGTTGGAGGCATAAGTTAAAGCAAGTCAAAATACAAAACATTACA  
TGTATGGAACAAAAACAGGAGTTGAGAACTACTTGTACGCAAACCCAGATATCCCGGAGATAATTGAG  
GTTCTGCCCAGTATTCATCGATCCCACAGTATTCATCCACAGATTCGTAATTGGATAA

>PGSC0003DMG400009755 LRR-RLPs

ATGGACAAACCAAGTTATAAAGGAGATGGATATTACCAAGACTCGGTAGTTGTTGTATCAAAGGGATTG  
AAGCTTGAAGTTGTGAGAATTTGTCTTTGTACACAGTTATAGATCTTTCAAACAACAAATTTGAAGGAC  
ATATTCCTGGTATTCTGGGAGATCTCATTGCGATTCGGGTACTGAATTTATCTCATAATGGATTGCAAGG  
TCCTATACCACCATCACTTGGAAGCTTATCTGTAGTGGAATCACTGGACCTTTGTTTAAACCATCTTTGCG

GAGAGATACCACAACAACCTTGCTTCTTACGTCTCTTGAATTCTTAAATCTCTCTCACAATTATCTCCAAG  
GATGCATCCCTCAAGGACCTCAATTCGTACCTTTGAGGGCAATTCATATGAAGGTAATGTGGATTACGT  
GGATTCCCATTTCAAAAGGTTGTGGCAATGATCCTGTGTCTGGAGACAAATTATACAGTATCTGCGCTAG  
CTGATCAAGAAAGGAATTCTGAATTTCTCAATGATTTTTGGAAAGCTGTTCTGATGGGCCATGGCAGTG  
GACTATGTATTGGATTATCCATAATATATTTTCATGGTCTCAACTGGAAGTATGAAATGGCTTGCAAGAAT  
CATTGAAGAACTGGAACACAAAATTATCATGCAAAGGAGAAAGAAGCGGCAAAGTCAAAGGAACTACA  
GAAGAAGAGATAATCATTCTAGACAAGTTACCAATAAAGAAGGATTTCGATTTTCAGAACTTCAGGTATTC  
AAGCTAAGATCTACTATCTTTATTAGTTTATTCTAACTACTAATATATTAGTTTACACGTTTTTTGTTAAT  
AACAACTAATTAATGCTCAATATGAAGCATATTCGTGTTTCTTCAACTCAAGAAGCTAAAGATTTG  
AAAAGCTTGGCAGTTGTTATAACAGTGGCTACTAAATTCAATCAGTGATCAACTCTCAAGTATTTGACTC  
ACTATCTATTTTTTCAGATGCCAAGAATAAGAAGATGTTGGCGTAATGGATTTGATTTTAGTTTCTTTTT  
AGTTTAATAAGTAAGCTTCTTCTTAACTTGAAAATGTCATATTATGAATTTTTGATGATATATAAAGTTT  
ATTTAAGTTTCTAATGTTATTCAATAAATGTTGTGTGATTGAATGAAATGTATACATTTCTCTGATCCCTA  
ACTTACAATTCAAAGAATCTAGGAGGGACTTAGTCATGAATAAATTTTTGAACAAGCTGAAGAATGTGT  
TATCTTGTCCCTATTTAGCTCGAGAAAGAAGTGAAGTCAGAGTGTGGGTGTCCCTGGATTGCTCACTGC  
TGCCTCAACGTGTGCTGAGGTTTTGCAGCAGTCTAAAGAGAGAGCGTTGAGAAGAGCTAAATTAGAGG  
AAGATATTTATCGTGTGATAGAGGAAAGAGCATTAAACAAGGAAGAATAACGAGTTCGTGACAAGTGAT  
TACATTTACTGGCCAAGGGAATTGCTTTAA

>PGSC0003DMG400009899 LRR-RLPs

ATTGTCTAATAAATTTCTCTTTGATTATTGAGCAAAATTTTGTACCAATGGAAGGTGTAATTTACTACT  
AGTCCTTCTTCTTGTAGCTAGTAGTACTATATTAGATGGATTGTTATTATGCAGAGCTATGAATTCAGACA  
TACTTTGTGATGAAAATGAAAAAATGCTCTTATCAAGTTCAGACAGGGTTTCAGGGATCCATCACAGTC  
AATGATCATGTCGTCTTGGATGGTCGAGGAAAATTGCTGCAACTGGAAGGTGTTGAATGTGACAACAC  
AACCGGATACGTGATCACTCTTGACCTGCACCAGCAATTCTTGCAAGGTGAGTTTGGACTTACTTGCTT  
GGCTTGTCTCATTTAAGACACTTAGACTTAAGCCAAAATGATTTCTTGAGGCCTTGTTTCTGATTTTCAT  
TTGCAAATTTAAGTACCTAGAGTATCTCAATTTGCACAAAACCAAGTTTAGGGGATCAATCCCTGAGTGT  
CTTGAAATCTGTCGCGGTTGCAGTTACTTGATCTTGGTGATGGTTTATCACTCCGGGTTGATAGTCTTG  
AATGGATTCAGCATCTTCCAATATGAGGATTTGACCTGAGTGGAGTTGACCTGAGCAATGCCAAAA  
ACTGGCTACATGACATCAATTTCTAAGGTCTCTCGTGGAATTACGTTTGTCTTCTTGTGAGCTTCCTAAA

TTGCTTCCTGTTTTGTAAATTCACATCCCTTCAGGTTCTTGACCTCTCGTTAAACTATCTGGATGTTCCA  
TTTCCTAGCTGGTTAGTCAATACAAGCTCTCAGAGTCTTGTTTATCTTAATCTCAAAGAAGTCTGCTGCA  
TGGTTTACTTCCAAATACCGCCTTTGGAAACATGTACTCACTTAGAGTCTTGATCTTTCTGACAACTCTAT  
CCGAGGAAAGCTTCCGTCTTTTGAGAACATGACTTCAGTACTTCTCTTGATATCTCAAGGAATTCTCTTG  
TAGGCAAATAACCGCCAACCCTGCCTTCAAAGTTGAAACATTTGGATCTTTCATCCAATAATCTGGAGGG  
TCCTTTAGCAAGAAGCATCGCACAACCTTAGGCAATTAGTTGTCCTCAATGTTGCTTGGAACCTTTCAATG  
ACTCAATTACTGAACATTTCTTGAATTTAGTGATTTGAGAATGTTAGACTTGTGCATCCAACCTCAATTATC  
CTCAATATAACTGCAACTTGATGCCTCCTTTTCAACTTGACATTATTGGCCTGATGTCTTGCCAACCTGG  
TACACAGTTTCCTCAGTGGCTTCATACACAAAAGGATTACTCATTTATCGATATCTCTCATGGTAGCATCT  
CAAATGAAGTGCCTGATTGGTTCTGGAGTCTCTCTGCAAAGGTACAGCACATGAACCTTTCTCTCAACTA  
TTTCAGAGGGGAAGTACCTCAAGTTACATCAAGACTTGATAGTCTTGAAAACTAGACCTGAGCCAAAA  
CAACTTTTCTGGTCCCTTACCTCATTTTTCGTCCAAGATGAAGATGTTGATTTTGTCCCGGAATTCTTTTAA  
TGGCGCCATTTCCCTGTATGTGAATCACTTGTGCATGAATAATTCTTATGTTTTAGACCTATCGTTCAA  
TAATCTATCAGGAACACTTTCAGACTGTTGGAGATATGGGAACAATCTGGCAGTATTAAGTTAGGCTAT  
AATAATCTGTCTGGTGAATACCTCATTCTTTTGGATATCTTGAAACTCTCAGGTATCTGCAACTGAAAA  
CAACAGGCTGTCCAAAAATCTGCCTTCATCACTGAAGAACCTACAAGGACTAAAAATTCTTGATCTTTCC  
GGAAATTGTTTATCTGGAAAGATACCATCTTTCTTAGGGGAGACTTCACAAAATCTATTGGTCTTTTGT  
AAGAAAGAACAAGTTCGATGGAAACATTCCCTACAGATTTGCCAGCTCAAAAACCTTGATTATTTTGGAC  
CTTAGTTCCAATTCTCTATCAGGCACCATTCCAAAGTGTGTTAAAAATTTCTAATGATGGCTGGGGTAG  
AGGAGCTCCCTCCTTGGTTTATGGTCCCTATGAAGAATACAGGAAGGATGTGGCGTTGATGCTAAAAG  
AGAGAGGCTATGATTATAGTTTTGCCTTATGGCGGTGATTGATCTATCAGATAACCATTTATCAGGGGA  
AATTCCTGAGGAAATCACCACACTTGTTCAATTGCAGGTATTGAATTTATCAAGGAATAATTTAACTGGA  
GCAATTCCTTGTAAGATTAGTAAAATGCAATCTTTGGAAGCTCTTGATGTTTCCTGGAATCGTCTGTCATC  
CTTCTTGCCTTCCAGCATAGTGGAGCTTTCAGGCTCGAGATCGCGAATTTTTCGTTCAATAGTTTGACAG  
GAAAAATCCAATAGGTGGTCAATTTTTAACCTTTGAAAATAGTTCTTATATTGGGAATCCAGATTTGTG  
GGCATGCCACTTTCCAAAAGCTGCTCGGGACATTTTCTTGAGGACATTACTCACTGTAACCTCTCCCAAGA  
AAAAAGACGTGCAGGCCATTCATCAGCATGAGGAAGACAATTGGCTTGATGAATCATCATTCTATATCA  
GCATGGTAATTGGTTTCATCACAAGTTTCTGGTTATTTTGGGCTACTCTATTAGTGAAAACATCTTGGAGA  
CATTCTATATGAGGTATCTTAATAAAATGGGCAACAATATTTATGTGTTTGTAGCCATAAGATTACCAA

ATAAGCATAAACCATCAAAGATGAAAGATTGAAGTTCTTTCAGGGATTGCTGAATAAGGTAATGAAGGT  
CTTATTTCTGGTGCAACTTTCTTTTGTGTTTTGTTTTCTAGGAGCTCTTCTGGTTTTGTTTTGTAAAATCT  
TCTAAGTACTATATTGTGTATGCCTAGTTGCATTGTTTCATCTCGTGGGATTGTAAGGATGTTGTTGT  
TGTAAGTACTAATTGTATTCTATGATATGTTTTGTGGATATCTAAGTAACTTGAGAATACTATTACTAATGT  
TTTT

>PGSC0003DMG400010183 LRR-RLPs

ATGTCATTGTCAATGACCATCTTGTATTTCAATTTGTGTTGTTTTGACCGAGTGAGTATAAAGGCGCTATAT  
TGCAGCTGCATTTCTCCTAAAAAGCAGTTGAGTTAAAATACAAGACAAAGCAAAGCAAAAATAGTTA  
GTCAACACTTACCTTGCATGCACCAGAGAGTCGTGACTTTTGAAATTCAATTTCAAGAACTGGATAGTTT  
TTAATGCATATTTTAAAGAAAAGCTTAGGTGGATAGAGAACCAAACCTCAGAATCAATGTGCTAACAAA  
ATATTTTATTGTTGATATATCATTGGCAGCTTATTTTATAATCGTGTGTCTTATACCACGTAGTGACTCTCC  
ATTACCAAAAACAACATTCATCTCTTGCTCCTTGACATTTTCCAGAATGGAAATTTTCTCAATGAGTTTTAA  
TTCCACACCTTACTGGCAACGCATGCTGTGTTTCTATTCTCATCTACTCTCAAATATGCTGCAGCAGCTA  
CTATATACTTGGAACGAAACTGACGAACTAGCCTTACTTGGATTCAAGTCCCAAATAACTGAGGATCCA  
TCAAGAGTTTTCGCCTCTTGGAACCAATCCGTTCAATTTATGTCAGTGGACTGGAGTAAAATGTGGCCTGA  
CACAGGAAAGGGTGAGTCTGGCAGGTACAATCTCAGATCATCTCGGAAATCTTTCTTGCTCAATTCTCT  
TGACCTGGCAGAAAATTCATTCCATGACGGAATTCCTCAAGAACTCAGCAGGCTGTCAAGGCATCAAAA  
CCTGAATTTGAGTTTTAACTATCTAACAGGGGAAATTCAGTTAATCTATCACATTGTGTTAACCTCAAGA  
GCCTTGCTGGACCACAACACTCTTGTGGGACTGATTCCTTACCAAGTTGGATCTTTAACAAAGTTAGT  
GAGATTGTATCTCAGAAATAACAACCTGACAGGAATCTTCCAGTGTCTATTGGAATCTTACATCTTTA  
GAAGAGTTGTATTTATCGTACAACAGTCTAGAGGGACAAGTGCCAGCTTCTTTAGCTCGATTGACCAAGT  
TGAGACTGCTTGGATTGTCAGTAAATAGCTTCTCCGGGGAGTTCCTCCTTCTTGTAACAATTTGTCATCC  
CTGGAATTAATAGCACTTTCCTTCAACCACTTTTCTGGTAATCTCAGATCTGATTTAGGCCACTACTTCCCT  
AATCTCAAAGACTTCACTTGGGGAAGTCAATTCCATGGCTCCATACCATCCTCTTTGGCCAATGCTTC  
AAAATTGCTACAGCTTGATTTCCCTGTAAACAAATTCAGTGGAAATATACTAAAGGGTTTTGATAACTTG  
CAGAATTTGTTGTGGCTCAATGTTGGGAGTAACCATCTTGGATACGGTAAGAATGATGACCTTGACTTTG  
TAAATTCTCTTACCAACTGCAGCAGTCTACAAATGCTCCATTTTGGAGACAACCAGTTTGTAGGTACATTA  
CCTCATTCAACAGTCAACCTTTCTAGTCAGTTACAACGCCTACTCTTCTCGGGAACAGAATTGGTGGAA  
GCATACCCAGAGAGATCTCAAACCTGGTGAATTTGAATCTACTCGACATGAGCAACAATAATCTTACAGG

TAGCATTCCAGATTCTATTGGAAGACTTGCAAACCTGGGAAGTCTTGACTTGC GTAACAACCTCTTGACA  
GGGGTAATCCCTTCTTCAATAGGCAACCTCACTGAACTCGTCTATCTTTATTTAGGATTTAACAGGTTAGA  
GGGTAACATACCTTTAAGGCTTTAA

>PGSC0003DMG400010325 LRR-RLPs

ATGGTGGAACAAGAAGCAGTGTACAATGTTCTTGAATCCATTAACCTGATGTCTCTTGGCGTTCCTTTT  
CCCTGATGATCTCTGTTCTTCTTCCCCACATGGGGTTATTTGTGATTACTTTGTTTCCACTACAAACTCATT  
TACTCCTCATGTAAGTGTGATTAGTCTTGGTTATGTTTCAGATTATGCTCCTAATCCACCTGTACTCCTAA  
TAGCACACTTAATGCTTCCCTTTTTACCCCTTTTTCTTATCTAAGAAAGATCTTTGTTTACAAATGTTTTACT  
GAAAATGAGGTTTCTTTGATTGACTTTGGATCTTTGCCTTCTTCTTTGGAGGAGGTGGTTTTCTGGAGA  
ATCCAGGTCTTGTGGTTCTTTAAGTGATAAAGTTGGAACTTGATGAGTTTGAGGAGGTGGTTTTGAG  
TGGGAGTGGTGGTTTATGGGGAAATCCCAAATGGAGTTGGTGGTTTGGTCAATTTAGAGCAGCTGACTTT  
ATCAAGAAACAAGATTAGTGGTGAAATCCAGTGGGGTTGATGACATTGAAGAACTCAAGATTCTTGA  
TTTGAGTCAAATGAGCTTGAAAGTAGTGTCTTGAATCTATAGGGAACCTTACTCAACTTTTGAACTT  
GACTTGAGTTACAACAAGCTTACTGGGAAAATCCCTCAAAGTTTGAAGGGTTTGAAGAGTTTGGAGTTT  
TTGGACTTCAGTTACAATAACTTTTCCAATTCTGGGGTCCATTGTTTTTGGCTGAGATGTCTAGTTTGAA  
GGAAGTCTACTTAAGTGGAACTATCTTGGAGGGGAAATCCAGAAATATGGGAGAATCTTGAGGGTA  
TTGTGGGGCTAGGATTATCAAAAACAGGACTAGTTGGGAACATTCCTGTTTCTATGGGGGTGTAATTGA  
AAAACATATGTTATTTGGGGCTTGATAATAACAAGCTGGAAGGGGCATTGCCTGAAGAGTTTGGGGCAT  
TGGAATATGTGAATGAGTTACATTTGGAGAACAATAATTTGAGTGGTAGACTTCCATTCTCTCCAAAATT  
TGTATCCAAAGTTGGAGAAAAGTTGAAGTTGGGAGGCAATCCTCAACTCTGTGTAGATGAAGGCTTGAG  
AATATCTAATGTTAGTGTAGCTTGAGGCTACTAAAATGTGCAACAATGCTATTAGTGCCAAATTTGTC  
CCATTCTCTGGGGCATCTTTAGTACTGGTGCCTGTTTCCCATGTTGTCTTTTTTCTTGGAAATTTGTTTCTC  
CTGTGCTAG

>PGSC0003DMG400010328 LRR-RLPs

TACAAACATTATCTTATGTAGAACCCATGGAGAAAAGACTGCGACTTTCCAACAAATTTGCTTTAAAAAA  
GGTGTTTTTCTCAACCCCATATCTCTTTTCTCCAGTCTCTTGTCAATCTTGTGGTTTGATCAATTTTTTGT  
TCTAGTGTCAAAGGAGGTCTGCATTGCACAAGAAGATCGTGTGAGTACCTGATGAAATTCTGG  
TATATATATTGTCTTTCTTTTCTGTTAAGGAAGCTGCAGATACAAGTCTCCTCTCAAGGCGTTGGCTAAAC  
TTATGGACATATATTGATCACCTTGATTTTGTGCTACAAAATACTTGGATCAAGTGTTCGTGCAACCCAA



GCTACAAAAGGGCATATGGACAAGTATCTGACATGGGTCAACTCTGCTTTGCAAAAGTTTAAAGGCCA  
GAGACTTGACCAATTCGTGTTTACTATGATTTAAGCAAATTTGCTCAGCACGACATTGACAAATGGCTT  
GAACTTGCCTTTTCTAAGAAAGTTCAAAGACTAGAGTTAGACTTATTAAGGTGTGGATCATTCACTCGTA  
ATTTTGATTCTGTTATACTTTTTCCGGAGCGGCTCCTTGGTCTTGGAGATTCTTCTTCATGCTCTAATAACC  
TCCAAATACTCTCACTTATCAACCAGAATTTCAAGTCTCTAAAAGTGCTTATATTGAAATCTGTAAATGTG  
ACGGGCCAAGTCTTGAGTCTTTCTACGCAATTGCCATTTCTGAAAGAATGCAAGTTCATGGATCAG  
GAACATTGAAAAATTTGGAAGTTGTTGGTCCGTCCCTCAAGTTGAGACACTTGGAGATATATAGTTGCTT  
CAATGTAAAATCACTTAAAATTTGTGATACAAATCTTATATCATTAAAGGACTTCAGCAGGAAAAGTATTA  
CTGCTTAAGAATGTCCCGATGCTGGTTGATGTAGAGATTTTGGGTATGCCATACACCCATTTATTGGATG  
ACATATCCTCTCGTCTTGTGCGTTCTCTCTCAGCTGGAGGTCCTTACAGTAGATGCTTGTATATCATTG  
GTTAGTGAACAAAGTTTGTGTCTATCTACTCTTGTTTTACTAGCCTAGCACTAACTGGTGCCTTATCTGTA  
GTTTGATTATCCGCACGAAGATTTGGAGCATTACAATTTTCTGAACTTACGAAGCTCAAGAAATTTGTTT  
TTATTACATTTGGAAATTCACTAAGAGTGTGAGGCCAGAGTCTCTTAGGTTGCACGTCTATAATAAGGGC  
TGCCCCACAATTGAAGGAATTTGAACTACAGGTAAGTATCATGCCTTTTCTCTTTGGTGTACAAAAGTCT  
GATTTATTCATATTAGCAATTCTGGTTCATGCAGTTATTGATGCTACTTCTTTAATAAACTTAGTTATTTAA  
GTCGTTGAGCTTGAGTTGAAACAATTGTGAAGAGCTAACTTGAATAAATGGTACTCTTGCATTTTAACT  
CATCTGACTGTGCCAATATAAAAGTCTGCCCTTACATAGGTGTCATTTTAGATAGGTAGTAGACAGCTC  
TGTCGTCCCTGAGCTTTGATTTATTATCTGTAACAAAGAGCTTAAAGTCTCATCATTTTCATCAAAGAGCTT  
AGAGCCTCATCATTCCCTCAGTTTCTGAATATTTTACTGAGTTACTGCACTTGTTTAGCGTAATGGAAT  
GACCTGAGTGTGGGATTGTGGTTTCAGTTGTGCGATTGTGTTGCTCCAAAATCTTAGGTTTCCACCTGTTT  
GTTGCCAGTATATTATATGATGGAATTGGGAAGTACTATACAGTGATTATTATGTGTTTAAATAAACTAC  
TTTTTTGAGAAAAGGTAACCTTGATTATAAACACAGGAATACTCATGACGTATTCCAGTAATACTTACAAT  
CAGAAATACAGAAGTGTTGCTGTTTTCTATAAACTCAAGAACTCTAAGATACTAGGGATATCATCATTT  
TCATGAGGATATTTTTTTTTTTTTTTTTGATAACCGAGAAATCCGTCAGTGACCCGCCCTTTGGACCAATC  
ATAGCCTTCTAACTCGGTGGATAATGGGCCCGCCCTCTACCCTTCTCCACTTAAATACGGGGCTTCAT  
GAGGATATTTATGTTTACACCAAAAACAAGAGCTAAACAATTCAGCTTCATCTTCTCCATAGAGCAGCTC  
TTGTTCTCAAACATCTTTGATTCCTTTCCAGCCAAATAGTCCACCAATGCAGGCTGGGACAATCTTCCA  
TCTCTCCCTGTGCCCTGACTTATTTCCATCCCGATTCCAACATGCCAAAGTTTCTTTATGTTTCTGGCAT  
AGACCAACTGATGCCCTTTTTATTGATGAAAATTTGCCGAAGTTTCAATGTCTCTTAAAGTGTA AAAAG

AGATGATTTATTGTCTCTGTCTCACACTCACAAAAAAACATCTGGAGCACAAATCGAGGCCCTTCTTCAT  
ACGGTTATCCTGTGTGAGAACAGCCTGTTTTGCTAAGAGCCAAGTAAAACATGCCACCTGAAGGGCAC  
CTTAACTTTCCAGATCATTTTCCATGGCCAGTAGCTTGATTGAGTGTGTGTCCTCTGTGAGTTTCTGTAAG  
CTGTTCCAACCTGAGAATCTCTCCTGTGTATCTGGAGCCCATAACAGTTTGTCTTCACTATTACTGAGTTCC  
TTGTATCGTTCCAGGATATTTAGAAAATTCAACCATTCTATTCACCTCCCATTCAITTAAGGTCTTCTGAAC  
CTTAAATTCCAACCCTGAGCATCTTTTATAAACCTACTTTCTTGTGATAATTATACTGGTTGGTTTCAAATG  
AGAACAACCAACTAAGAAAATTGAGAAGTAAGTTGTTGCCTAGCTAGGTAGATGGGTGAAGGAGGAAT  
TTAGTGGGGTAGAGGTTTCAGAGATGAGGGATTACAAAATGTTGTTAGAACCGAGGGGAACCTCCAAA  
TTCTAATAGTAGGATTCTGAAGGTGGCATCCTGAATCCCAATCAAATGACTCCAGGCTCAAAGAGTCAGA  
ATCGAGCCTGGATGGTATTGTAGAGGAGGCTTAGGGCTTCACATGGTATCTGATGTTCTCTCTTGAAT  
ATTTATTTTTTCAAAAAATCAAGTAACGATTATATAAGGGAAAAGAGAAAAAATACCCGAACCTGTATCG  
GATTTCTTGTTACACTTATTCTTTGAAGTTGTTCTATGAATTATTTTGTAGTAGAATAATACCATAGGAAG  
TGTTGATGTGGCTTTTACTTTGCACCTCCATATAGTGCATGAAAAGACAAATACAAGCTAAATGATAGAG  
GCTCTAGAGTCCAAAAGATATAATTTTTCTTCTACTTTTTAGGCCCTTTTCTAAATCTCGAGCGGTGATCC  
ACCACTTGTCACCAGGCCACCATCCATGCCCCCACCCTGTCTGAGCCAGGATTTTTTTTTGTAG  
TTGAGTAGATACACAAATTATGTTTTCTACTCATGAGTGGGTGCACGCACTTGGCTAAAGTTGTGTGC  
ATAATATTTTCAATAAAAAATCAAGCAATAAAAGTAAAAAAATTATCTAGGGTGTGTTTTGTATGGAGAA  
AAATGTTTATCTATTTTCATGATTGGTTTGTCAATATATTTTGTGAAATATTTTTCTAGGAAAACAAGCTC  
CTTAAAAATGAGGAAATTTACTTTCTAATGGAAGTAGAAAACATAAGTTCCAAAGCAATTAATCATAT  
TAGCATTTTATAACTATAAAAAACAATCATATAAATCACTATAGACATAGAGAAGTCAATAAAATAATTTT  
AGTTACTAGTTAAATTAATAAAAAACAATACATATCACAATAAAAGTAATAAAATAATAATTAATAA  
AAGAATTACCGCGAACATTATAAAAAAACTATTGATAATCTCAACCACAAAAAACTTGAAAGGAAA  
AACACGAGTACGGAGCCAGAAGGGCAAAAAAATTGACCAAAAATCCAAAAGGGTTTGAAATCAAAG  
GGCAACATTTAAACGGTAGAGGAGATGCTGTTTAAATTAGGGTAGCGCCTTACAAGGCGCAACTCCCTA  
TGCGCCTTACAAGGCGCAAGAAAACAGAGCCACCATCATTGTTATTTTTTCCATGTCAGTACTTACGGT  
GGTACTTTTTGCACTACAAAATAGTATAGGGTTCGTAGGGACATCACAAAGAATAAGTGTGTAACCTGGA  
AACTGAGATAAGTCCATAGGGTTTTATGCCTTTCCCACTTTGTTATTTAAAAAAGCACCAAGAGGGC  
TCCAACCTTACAAGTAGAAGATTCTGTTGTTCTGTCAACCTCCCAGTCATGCAATCTCCTTCTTAATCTAA  
TATTAAGATAGCCTTTCTCTGTATTCTTCAATCACATCTTTTATATGGATAGCTATGAGATGTAATTCTG

AATAAGTTATTAAGCTTCTTGATCCGGCGTACATGAACTTTATCTTCTTCTTGCAACTAAAAGCTTTCA  
CAAGATTAAGAATCAATTCCATAAGTTCTAATGTACTTTCAAAGTGTGACATCATCAGTTGTATTGATT  
AGTTTTGCTTTTGAACATCTCATATCGTTGCCATGCTCTATGTTTAAACAGCTTAATCCATAAATTGTTTTGC  
TCTACTGTGTTTTATCTCCACAACTAATTCGACAATAGACACTTTTTTTAATACCCAAAGTTTTTATCTAT  
GAACTACTCTTCTTAGAGAATATAGCTCTATTTTTATGCTCTTTGAATCAACTTGCCACATCTTCTCCTTG  
CATTATCGAACCGTCTTCGCACCTTAAAAATGATAGATACAGTTTCTTGCGGGTTGCCAATCTTCTCAAC  
CTTATGTATCACTCTCTGCCATATTATTGCACTTCTATATCTGGCATTAGAGACTTGCTCATGTATGTCTCT  
GCCTGGATTCTCAATTTAAATGCAGTCAAGTGCTGTCTCAAAGTGTAATAGTAGAGATCTGTGATGCATG  
ATCTTCCGCTCCTCAAGTCCAAATAGAAATAGGGTATAGTCTGCATATCGTGTACATGAAAAATTTCCAT  
ATTTTCATTTGTACAACCTTTCCCAACTTTTGACTCCTTTTATCCATACTATATTCATGGCATAATGCAGCAT  
CTTACTGAATGTTTCCATTGCTTAGGAAGAGAATGGGATAACGGGGTTCTCCTATTTAACTGCATATCCT  
AATTATATTTTTCCATTTGTTTGCAAACCGTGTTGATTCAAAGCTTCAGTAATATTGCCAGTTTACATGAT  
TGTTCCACCGGGTCAAATCTTTGCTTGATCCTGTGTTGTCCCTAGTCTGAGGTGATAACTGAGAATGAA  
TCATTCATCGGTGCTCTCATAGTAAAGAAGGCTTCGCTCAAGGAGTGATAGATTTGGACGGAGTCTTGG  
CTTTGATGCTAAGGAGACGAGATCCATCGATCTGAATAAGTCTAGTACACCTTTCTCAAGTCCAGCTAAC  
AAATAATTCTTGCTACTTTAATTCTATTTAAGGCTCCAAGAATTCATTTTCTAATAACACTGGATCTATAGT  
TTGTCTTCCCTTACAAATACATGCATTTTTTGACCTTGATATCTACTTGCCAATACTTGTTTCATCCTTGT  
TGTTAGGACCCACCGGTAGTAATCTCATCCTTTTACCTTGTTCTTAAGAACCAATGCTGTGAATATTGCA  
GTCCAGCCTCTTGAAAAATTTCTGTCTCATGAAAGAAGTGCAATGCACTGATAATGTCCCTTTCCAAAA  
AGTTCCTAGATTTCTGGTAAGAAGACATTATCTGCCATCTGGCCCTAAAGTTGTTATCACCCTAGACCA  
TCTCCATTACTTCTCCGAGAAAATTTCTTAGTAGCCAACACTCTTCCCGTGATAATAGCTCAAGGTCATTG  
TAACTGGAAGGCGCCATCATTGCTCGGTTTTACTAAATAACTTCTCATAGCATTACACTCATCTGATGACC  
TTTGGATTTGGTAGTTCGTCCATCTCTTACAAGTTAGTTTATATGGCTGTACTTTTTATTTGATTGATCAA  
TTTACAGTAAAACACTTAGTATTTTGTAGGGGTGTCAAAAATGAGCCACCTATAGGTAACCCGCCAAC  
CCGCCATAATTTAAGGGTTGGGCTTAAGATAATTTGAATTAGGTTAATCTCAACCCCATTTTAAGAG  
AATCCTCAATTGAGCCCAATTTAATTTCAATTTCAACCCATTTAAGACTCTTATTTGATTGATGTAA  
TGTATGTTCTTATATTGAAGGTATGAATTACTTTTGTATTTATTTTTTAGGATTTATCTATCCATTTGTAAC  
TTTTTTGTAATTTCTTAAGTTGAAATCTAAAATGTGGTTATAAACTTAAATAAACAATATATTTAAACT  
ATTGAGATTAAGCGGGTAAAGACCCAACCATTTTTAAGCTCATTTGAGCCCAACCCATTTGAGCCCAAAG

TAAACTTGGGCGGGTCAAGACTCAACCCAATTTCTATTTCAACCCATTTTAATATCTCCAATTTCAACCAA  
CCCGCCCATTTGACACCTCTAGTATCTTGTCTCATTATCTAACCAGAAACACCTCAATTGTTGTTTCCAGG  
ATGTTTTTTAGCATTGGTTATTTGTTCCAGTTCTACCAAGTGCTTCTTTTAGGCTTTTCGTTTTTCTATATCC  
GTTACCCTTTTCTGATCATACTTACCAATCCAGCAATCTGATTATGTATAATTTTTCGACATGCATTGTTG  
TTTGAACTCAAAGTCTGCCTTTTAAGTTCAGTTTCCTTTCTATTAACCATAATCAGATTGCCAACACTATCA  
TAAGATTGCTATTGCTGTTCCGCTAAATCAATGGATCCCTCTATAGCTTTTTTCATTTTCTCGAATTTGCAT  
TAAGATTCGCCTATTCCCAAGTCTGCACTCTGCTGGAATGGGTGTATGATTGGTTATCATCATATGCTTTG  
AAAACCTGAATATCACATTCCAAAGAAATTGTATACACAAATTTCTGTGTATTCCACCTCATAAGTTTACT  
GTACATGCTATTGTATTTATACAAAACCTAGGTCTAAATTCTGTACCAAATAAATGAATTAACAATGATT  
ATTTGTACACTTGGCACCTAATTATTGGACTACTTTGTAACAACTCTAACAGCCATTTTGCTCTTCATGTG  
CCTTCCTTGTGCCTAGGTTGAGAATCTTCTAGACCTTGTACAACCTGGTTAGGTTGAGAATCTTCTAGACCT  
TCTGATTAGGTTTCTAGAACTTTTGTTCTTTTTGGCACAAATCTTTTGTTCTTGAAAAGAAATGTTGGA  
GAAGGTTCAATTCGGTTAGCAAGTCCGGCATGCAGCTCGAATATGTTTATATGATAAGTCACTTATGTAT  
TCTTTTGTTTCTAATTTCTCCAAGTTAAGATTTTCTCAGAGAGAGTCTAGAACATGGATAATGAGTAGT  
GGTGATTGAATATTGTTGAATTAGTCAACTTGACTAGGAGGCATCTTACATGATAATGGGAAGTTTTTTCAT  
TCAGTCGATCAAGGAAGCCATATATCCCGAATCTTAAAATTTAGATCCACAACCGATTTTCGAGCAACTTA  
GTCTAAAATAAGTCGACCCAAACATGTTGAAAGAAGTTGCAATTCTCTCAGAAAATTGAGCACTCCACGT  
CTGTAATATTCTTGTCCATATTTCCCACTTTTCTTCTCCGTGTGGTAAATACTTTAGGGAATTTGTAGAA  
GAACAAAGTAGTAGGAGAAGTCAAATGACATGAGCGATTGATACAATCATGGTTCATCAGTGATTGGTA  
CATAGTTTTATGTTATACTGATTCCCCAAAGTTAATTCTTTTCATTTAACTTGTGTCCCAAGAAAAAGGCC  
TGTTCAAATTTTCTTTTATTAGCTTTACTGACTTATCTTATCATTATTTTTTATTTTAATTTAATTTGTGTT  
GTATATATTTACGGCAGGTGATGTCAATCCCCTTCGAGGCAAAGAAAGAGTGTAAGAAAGCAGCCATAA  
AATGCCCACTCCATCACCTCAAAGTGGTCAAATTTTCGGGGTTTTATACAGGCTTATTTCAACTTGAACCTC  
GTTAGGTACTTTTTGGAAAATGGTGTGCTTGTGAGAAAATCATTATTGATCCAGGTAATCCATTTTTTTA  
TCGTATCCCTCCGTGCCCTAGCGAAATCAAACACACGCAAGCTTCGAGAAATCTTGCTAAGCTCCAGCTT  
GAATGTGAAGTGCCTCCGGCTATTGAGTTGGTCATACTTTAATGAAAATAATAATGTTATTAGGGTTAAA  
TTTGTGATACATATCGGAGGTGAATTTTTATTTCTTAGTAGATGTTCTCATGCTTTGTTTCATTATTGAGT  
GATATTTTCACTTTTTGCGAGGTTTATATTGCTATATGAAATATGGGGGATTTTCAAATGAAAATGTCGC  
AGTTATTCCGCCA

>PGSC0003DMG400010447 LRR-RLPs

CAACTTGCACTTTCCAAGTCTAAAAAGCAGACATCACATTTAACATTTATAATTCAGAAGCCACCAAGA  
ATTTGTCATCCAAATGTATGTATATATTATGCCATTTTTGGCACATTCTTTCTTATAATTCACAAAAAT  
GAGAGGGCTGTACTACATAGTACTTGTCTGTTACTATAAAGCTTTGTTCTTGCAGTGGAATTTGCAA  
GAAAATGAGAAAACAGCTTTGCTAAGGTAAAGAAAGAAGCAAATGATCCCACAAATGTACTATCTTCT  
TGGGTTGATAAAGAAGATTGTTGCAACTGGGAAGGAGTTTTGTGCCACAATGTGACTGGTTCTGTCATT  
GAGCTATCAATTAACGGATGGGATTGGTCAGAACTTAAAGGCCTAAAGATTGATGATTTCCAGTGGTTG  
TCAAGTCTTGAAAATCTTGATAGTTTGGACATGTCTGGTGTGGATTTAAGTGAAGCAACAACTGGACT  
GAGGTGATTAGCATGCTTCCTTCTTTGGTTAATCTTCGTTTTTCGAATTGTAGCCTTCATTCAATACCTCT  
TTGTTTGATCATAACAGTTCTGTTCTTGAAAATCTTGATCTTTCTTTGAATAACTTTGGCTCTCCGATTCCC  
GGGTGGGTTTTAGTTTTGGTAGTCTTGTCTCTTGAATCACTGGAAGTAATTTCACTGGTTCATTTCC  
TGAAGGTCTTTTAACTTGACTTCTTTCACAACATTGAGAGCTTCTAGCAACTCCTTTGGTTCTGTTTTGCC  
TCAATGGTTATTTGATCTTAGTAATCTTGAATATCTTGATTTGAGTTTTAGTGGTCTTGAGGGTCCAATAC  
CAAATGGAGTTGGTGATTTTACCAAGCTTACATATCTTAGTCTTGCTTCCAATAATCTGAACTCCACTATC  
CCAAATGGCTCTATGGATGCAAGAATCTTGAAACACTTATCATGAAGGATAACAGTCTTGAGGGAACAG  
TTTCAGACTCGATTTCAAATCTGACATCTCTAACTAGTATCGATATGTCTGAAAATTTCTTTCTGGAAAG  
TTACCGAGTGTAATTGGAAAGCTATGGAAATTAGAAGATCTCGATCTCTCAGAAAATCGATTTGAAGGA  
GAAGTATATGAGGTTTTCAACTATGAATGATTTTCTCCAATAGGCTCAGGAAATTGTTCTTCTTTGAG  
GACCTAAGACTAAATGACAACAACTGATTGGAAATCTTCCAAAAGTTTTGGGCAGCTTCCAAATCTA  
CAATTCTGTTTCATGTCCAATAACAGGTTGGAAGGGGTGTTAACAGAAGAACATTTACCAACTTGACAA  
ATTTGAAGTTTTTCTCTGCATCTAAGAGTAATTTGACTTTAAGGGTGAGTTCAGATTGGATTCCATCATT  
CAAGCTAGTGACATAGTAATTGGCGGTTGGCGCTTAGGCCCTGACTTCCCTTTGTGGATCCAGACTCAAC  
AATCAATCATGAATTTGGACATATCAAATGCTGGTATAGTAGGTGAGGTTCCAACTTGGTTCTGGAACCT  
ATCGTCTCAAATTTGTTTCTCAACATGTCTCACAACCAGCTCATTGGTGAGATTCCAACCTTCTCAATTT  
TGATAGCTCCATGGGAAGTGGAGGTCCTTGTTGATATACTTGAGTTCCAACAACCTCAGTGGTTTACTC  
CCACATATTCCAACCATGGTAACAGAGTTAGACCTTTCAGATAACACTTTCTCGGAGGGTTTAAACAAGCT  
TCTTGTGTGATAACAAGAATGAATCTTACATGTTGGAGATTCTACACCTTGGGGGAAATCGTTTCTCCGA  
AGAAATTCCTGATTGTTGGATGAATTGGCCAGAGTTGAGAGTTGTCAACTTGGGAGAGAATAAGCTTAC  
CGGAGGAATCCCAAGATCCATTGGAGCTTTAAGCAATTTGAAATCTTTGGACTTGAAAAGAAACAACT

TTCTGGTCCATTGCCTTCATCCTTGAACAACACTGCACAAGATTGTGGAAAATAGACATGAATGAGAATGAG  
TTAGATGGAAATTTACCACCTTGGTTTGGTACACTTTCAAAGCTGATAGTCCTTAGTCTTCGGTCTAATAA  
ATTCGATGGTGAAGTAGCTCCAGAAGCTTTGCAAGCTCAATGAACTTCAAATCTTGGATCTTGCCAACAAC  
AATTTGTTTGGAGCTATACCTCGGTGTGTTAATAATTTACAGCAATGGTGAATGGGAGGAAGGAAATT  
AGAGATGGGGACGACGAGATGGATTATTCTTATTATGTTGGAGTTTTCAGGGAAAGTGCAAGAGTAGC  
AACTAAGGGCAACATGTATCAGTATGATACCATTTTGTATTGTTTACTAGCATGGATCTTTCTAACAATA  
ATCTTTCTGGAAACATTCCTATGAGTCTCACAAAGTCTTGTTGGATTGAGATCATTAAATTTCTCCACAAT  
CAGCTGACTAGTAGTATTCCCAGGGACATTGACAAGATGAAGGTATTAGAATCACTTGATATCTCGAAT  
AATCAACTCTCTGGTGAATAACCAAAAGTATTTGAGTTTTGCCTCTTTGAGCTACTTGAATGTATCTCA  
CAACAACCTATCAGGGCAGATTCCTGTGAGCACTCAACTTCAAAGCTTTAGCCCTTTTAGTTTTACTGGAA  
ATAAACTGTGTGGGCTTCCACTCGTGAAGCGTTGCAGTAAAATCCTGAGGTTGAAAATGAAGAAGAA  
GAAGATGATGATAATGAAGTGAATGGTTCTACGTTCCATGGCAATAGGATTTATTGTGGCTTTTTGG  
GGTGAAGTGCTCCTTTGCTTTTCATAAGACCATGGAGACATGCCTATTATGGGTTTTTAGATAGAAAAT  
GGAAATCATGGCACACATAATTTGTAAAGATAAGACATTAGGGAGATTTCTATTTATGTATACTGGATGA  
AATTTGTTTATATCTCATGAAAATCCATCACCATTCCGGCGTTCTTTGAATTAAGACATTTTTATATTTGTTG  
TCTCCATACAAATATGAGAAATTTGACAATTTTGATTTGGCAAGGTTTGAGTTATGGAATGAACAAAGGA  
AATTAACAGTTCCT

>PGSC0003DMG400010519 LRR-RLPs

TCAGTTCAAGTCTCGAGACATTTCAAATCAACATGTCTTGGATGACCGTCTGCAGCTAAACCATAACGA  
AAATCGTATGGTGCTCCAAACAGATTTTTTCCATTTCTATAGCCTACTTCTTCAAAGCCTTACAAGTGG  
CTCCATATATGCTGTAATTTTCTAAACATGTTAAAAGTAAGTTACTACAAGGAATTTCTGGATGAGTTAT  
TGGCTGAAACAAACTGAATTTCTGAATCATACGTTACTAGTATGGCGTTGTAAGATAACACCATACTGG  
CAACATATGACATTTTGATCAATCCAAGGCATATTTTTTTCTTTTTTTGTAATGGTATCAGGCTAACTTGT  
ATGTGCTTCAACTGGATAACAAGATTGTGCATTTTCAACACTAAGAATAATAAATAATCTAGAAGGTGAT  
AGACTAGAGGGGTTCTTGACATCATCTATCGGGAACCTAACAGAAGTGTCTCTCTGAATCTAGGCAGG  
AACAAAGTTTLAGAGGACCAGTGCCAGAGAGTATTACTTATTTAAGGAACTTACAAGTCTTCAACTTTCTG  
AGAATTTTTTCTCTAGTAGTCTTGTTAATGACATTGGTGTCTTACAAAACCTGAAATTCTTGATGTCGCG  
AATAATAAGCTATCTGGTTCAATCCCTTCATCGACTACATCACTTAGAAGTTTGACGCGATTAGACCTGTC  
TAACAATGAATTGACCGGGAAAATTCCTCAACTCAACGGTTTATGGAACTCCATTCATTTGACATTTCCA

ATAACCAAATTTAAGGGAATTTGCCACAACCTCCATCGAAGATCAAGACATTGTCACCTAAGCCACAACCTT  
GCTATCAGGACACATTACCACAGTGCATAAACTTAGACATCTAAGAACATTAGACCTTAGTGAAAACAG  
ATTTTCAGGAGGAATAAACAAAGGGATCTTCATGTTACTTGAATTAAGTCACGTAAGCATTTCAGTAAAC  
CGGTTACAGTGTGTTGAGGTGGTAGAATTCTCTGATAAAGAATCACAGCTTACACGTTAGACGTAAAT  
GCCAATCGTCTACATGGTCATTTGCCTGTGAACTTGGATACTTACCCAACTTAACAGAAATAAACCTTG  
GGCATAACCTGTTTTCGGGTGAGATTCCATCGGAATATTGGTCAAGACTCAGGTTTTTCATGGAGAAGTCT  
CAACTTGGAAATATAATAACCTGGAGGGATCGGTTCTCGAGAGCTCAACAGGACTTTAGAAGGGGTTCA  
GGGAAGTTTTGAACACAACCTGTCTCATTGTCCAAAGGGCTTTCAGCTATGTCATGGACAGAGGACAGC  
TTCAGAATGTCATGGAGGAGACCATAATTAGCTGAGAATGTTTTAAAAATTACATTGCATTTTTTTTTAATG  
TTTTCCAGTTTTCCAATATAGTTTATAAGTTGCATTTTTTTTTATGTTTTCGTAGTTTCCAATATAGTAGAA  
GTTCTTAAATTTGTCAGTATATTTATTTAGATACTTGAACATAACATGTTTCTATTAAGCACCTGACA  
TGATGAACTGTGTTAGAGTTTTGCCCTGAATGTATGATATTATCAGTTATAGCAAAGTATATTTGCATAAC  
AATATTGAACAAGAGTATCAAAATTGGTTAAGTATACGACATGAGCAAGAGTATCAAAATTAECTACT  
GAAGCAACATGTAAGCCAACGTTTTAAGTGCGAGCTGTTTTAAGTTCAACTATAAGTGAGCTTGTTTAC  
TTTGTGGTTCCAAGATTAGATAAATTCTCATAATTTATGGTGAAGCAAGGTTGCTGCAAAGAAAAGTGA  
TTCCTCTCAACTACCTTACTAACATAAAGTCATTCTTTATTTCTTAACTCCATGTCAACTCAAAATACA  
TCAAACAAATTTTAAACGGAGGAAGTACCATACTACTAGTAACTGGAAAAATCAAAACAAGCTATAATG  
AAAGTTGTTTTAATTGCTAAAGAAGCTCATGAAGACAATGACATTACAACCTATTTCTGTTGCCTAGTCTA  
ATAAAAACAATATTTGCCACCTAAAGATATATTTTAGCAGAATTGCATGTCTAAGAACTTAAGTACCTTTT  
TCAGGGGAAGATGCTGGGAAGAGTCCTTTACAAGCATCTGTATTCCACAAACATGAAATCAAAAGAGCA  
AGTCAGGCCCGAGACTACAAGCTGCTGTATTTCAAAGCATCTCAATGGATTAGAGAAAAACCTTGACCC  
ACGAGTGTTAAGCTAGTAATATTATAGCTATTGACAGAAGGCTTGAAAATTGTACTACTTATGTAATGAT  
ATGTGTAATTCATTGTTATTTCACTACTCGTTCATGAGTTTTTGAAGTTGAGAAAGAGATTCTGAAAGTAAC  
TAGTGAAGATTTGAGAATAGCAATTCACACATTTTTTAAAGAGCGGGAATTGTGTACAAAAATGTA  
CTATTTCTTCTAAAGTAACGTCTGCATTTTGAAGAAAATCTCACCTCCTATATGTGTCCGAGTGTTCTTT  
GCTGTCAAATGGGGGCATCCCGTACAGAACTCAAAGCATAGGACACCAAGGCTCTAAATGTCCCACT  
TGCATCATGCTCCCACTTTCCACTGCATGTTCAACAATTAACATATCAGAAAAAATGTAAAAACAGATTA  
ACAAAATGTTAAAAGCTAACTCTCATACACGCCCATGTGAAGGTAAAAAGCAATGTATAACATTCACAC  
ATAGTCCGCCTTCGATTAAAGGTATGCACTGACCACCAAAGTCTGCCGTTTTGAGTTCACCCTAAAAGC





TAAGTTAATTGAGCTTGACCTTAGTCATAACATGTTGAGTGATGAAATCCCAATGTGGATAGGGAATGTC  
TCAATGTCACCTTGAAAACTTAACCTAGGGTTTAATAGTTTTTCATGGGGATATACCTAAGAGCTTGTTGA  
ATTTGATGTCTTTGAAGTATCTTGACTTGTCTCACAATAGTTTGATGGGAAATGTGGGTGATTTTAACCAA  
GAATTGGTCTCACTTAATCTTGAGTCTAATTTGTTATCGGGTACTTTGCCTTGTTTATATTCGTCAAGGGA  
ATCACTTACACTTCTTAATTTAGCAAACAATTCGATTCTTGGAGGTATACCAACGTGTATCTCGAGTCTTG  
GGGTTTGACACAGCTCAACTTGTACGTAATGAATTACGATATGGTATCTCGCCTAGACTGGTTTTTTC  
AGAGAGGTTATGTTTGTGGACTTGAGTTATAATGAGCTATCAGGGAAGATTCCAAGTAGGATTGTTGA  
GGCATCGGACAAGTCTGGACTTCTACTTCTTGACCTGTCTCACAATCAGTTCTCTGGTAATATTCCTGTAA  
CGATAACAGAATTGAAGAGCTTGCAAGCATTGTTTCTGTCTTATAATCTTCTGTGGGCGAAATACCAGA  
AAGGATTGGTAATTTGACCTATCTACAGGTGATTGATCTCTCACATAACTTCCTCACTGGCTCGATTCCCT  
TGAACATCGTAGGATGTTTCCAACACTACTGGTGCTGATACTAACAGTAATAATCTTCTGGGGAAATTCA  
GCCAGTGCTTGATGCGTTGGATAGTCTTAAGATATTTGATATAGGAAACAACAAGATTTCTGGTGAGAT  
CCCCTGACATTGGCAGGCTGCAAGTCGTTGGAAGTTGTTGACTTGAGCTCTAACAACTCTCTCAGGGTCT  
CTAAATGATGCAATAACCAAATGGTCGAACCTCAAATTCCTCTCCCTTGCTCGGAACAAGTTCAGTGGAT  
CTCTGCCAAGTTGGTTGTTTACATTTTCAAGGCTATTCATACTCTGGATTTTTCTGGAAACAAGTTCCTCGGGA  
TATATAACCAGATGGTAACTTTAACACTAGTCCAAATTTCTACAACGGCGACATTAGGAAAACCATTCTG  
CAGTACCATCAATTTAGCTCGAAGCCTGGATATCAAATTTCACTCATTGCTGATGAAACTAGTTTGAG  
CTTCAACTATAACCTGACAACCACAATTGGAATTGATCTGTCTGACAATTTGCTTCATGGTGAAATTCAG  
AGGGTCTGTTTCGGATTACATGGTTTGGAGTACCTTAATTTGTCATACAATTTTCTTAATGGTCCAGTTCCA  
GGGAGTTTAGGGAAGTTGCAGAAGCTAAAAGCACTTGATTTATCACATAAATCTTTATCTGGCCACATCC  
CTGAAAACATTACTGTCCTCAGAAATTTGACAGTTTTAAATCTGTCTTATAAATTGTTTCTCTGGTGTATTTC  
CGACAAAGCGAGGTTATTGGAAATTTCTGGAGCATTGCTGGGAATCCAGACTTATGTATGGAATCAT  
CTGGTAATGTCTGTCAAAGAATTTGCCTGTAGAGCCAGGGAAGAAATTTGAAGAGGAAATGGAAGAG  
GGACCATTATCAGTTTGGATTTTCTGTATAAGTGCTTTAGTTAGCTTCTATGTTGGCATTGTTGTTTTATTT  
TGTTTCATCTCGAACAAGAAGCTGTATTCTGCAAACAAAAAGTTTAGCAGGTTGAAAGTGATAAGTGATC  
ACATTGTACAGCAACTTATGAATTGTATCATATAGCAAACTGCTTCAAGCATATCTGTTTACTAATCAG  
CCCTTCATTTTTTTTAACTAGTTAACAATGCTTCACGTTG

>PGSC0003DMG400010700 LRR-RLPs

ATGGGCATTGGAAAACCTGCATTGTTTCTGCTATGCGCGTTTCTCTGTCAACTTGTTTTCTCCTCATCTTTA

CCTCATTGTGCCTCAATGATCAAGCCCTTGCTCTTCTTCAATTCAAAAACACGTTTACTATAAATCTTGAT  
GCTTCTTATAGTGGTTATTATCCTAAAACAGTTAAATGGAATAAGAGCGCAGATTGTTGTTTCATGGGATG  
GAGTTAAGTGTGACGAGATGACAGGACAAGTGATTCAGCTTGATCTCAGTCGCAGCCAACCTTCGAGGC  
GAGTTTCATTCCAACAGTAGCCTCTTTAAACTCGTTCATTTACCTAAATTTGGTGAGCTTTCTAGTTTGAC  
TCATCTTGATTTGTCATATTCAACTTTTACAGGTATAATGCCAGCAGAAATATCTCATCTTTCTAAATTGCA  
CGTTCTTAGTATCGAGAGTGATCCATATGAGCTTAGATTCGAACCTCACAATTTTGAAGTGTCTCTTAAGA  
ACTTGACCCGATTAAGAGTGCTCCACCTTAGCTCTGTGAACATCTCTTCAACCATTCTCTTAAATTCTCTT  
CTTATTTAACAAATCTAGGACTTTTCAGACACGCAGATATACGGGATATTGCCGAAGGAGTTTTCCACCT  
TTCCAACCTTGAATCTCTTGATTTATCAGACAATCCCCAGCTCACTGTTAGGTTTCCACAACCAAATGGA  
ATAGCAGTGCATCACTTATGAAGTTATATCTCAGTGGTGTGAATGCTACTGGTACGATACCAGAATCATT  
TGGTCATCTAACTTCACTGCATAGATTGAGAATAGCTTCTTGTAACTCTCTCAGGGTCTATTCTAAACCTC  
TCTGGAATCTCACCAACATAGAGTTTTGGACCTTGGTTATAACCATCTTGAAGGACCAATTTCTGATTTT  
TTTAGATTTGGAAAGATCAGGTCGTTATCACTTAGAAATAACAACCTTTAATGGCCAACCTTGAGTTTTTATC  
CTTTAACAGATGGACGCAACTTGGATTATTAGATTGTTTCAGCCAATCCCTAACAGGTCCCATTCTTCTA  
ATGTAAGTGGTATGCAAAACCTATATCACTCTTCTTGTTCATCAAACCTCTTGAATGGGACTATACCTTCC  
TGGATATTCTCCCTCCCTTCAATAGGGATTTTAGACTTGAGTGATAACCATTTAAGTGAAAATATTCAGG  
AGTTCTATTCCGAATCATTGTATCGAGTTTCTCTAAAACAAAATCAGCTGCAAGGTCCTATTCCAAAGTCA  
CTCTTAGATCTGCAGGGCCTACAATTTCTTCTCCTTTCACGAAATAATCTCAGTGGACAGATTGCTTCAAC  
CATCTGCAATCTGACAAAACCTGTTAGTGCTAGATTGGGCAGCAATAATTTGGAGGGAACAATCCCCT  
ATGTTTGGGTGAGATGAGTGGACTTTGGATTTTGGATTTAAGCAACAATAGTCTTAGCGGGAAAATTA  
TACAACTTTTAGTATAGGAAACCAACTTATAGTCATTAAATTTGACGGGAATAAGCTAGAGGGGAAAGT  
TCCGCAATCTTTGATCAATTGCACATATTTGGAAGTTGTTGATTTAGGTAACAATGAGTTGAGTGACACA  
TTTCTAAATGGTTGGGAGCCCTACCTATTTGCAGATTTTGATTTGAGATCAAATAAGTTCTATGGCCC  
TATAAAAGATTCAAGGACTGATAACTTGTTTGTCAAATTCGAGTCATAGATCTCTCAGCCAATGGATTT  
AGTGGAGATTTACCAGTGAGTCCTTTTTTGAAGAATTTGAAGCCATGAAAATGATTGGATGAGAGCAGT  
GGAACCCGAGAGTATGTAGGAAATATATATTCTTATTATTACACGAATCTTTGACAGTGACAACAAAGG  
GACTGGATCTTGAACCTCCTCGAGTTTTGACTACAGACATGATTATGGATCTCTCAAGGAATAGATTTGA  
AGGTCATATCCAAGCATTATTGGAGATCTCGTTGGGCTTCGTACGTTAACTTATCTCATAATGTCTTGG  
AAGGTGATATACCAGCATCACTGCACCAGTTATCTGTACTTGAATCATTGGATCTCTCATCCAACAAAATC

AGTGGAGAAATTCCACAACAGCTTGCATCCCTCAAATCACTTGAAGTCTTAAATCTCTCTCACAATCATCT  
TGTTGGATGCATCCCGAAAGGAAACAATTTGATACGTTTGAGAACAGTTCATACCAAGGAAATGATGGG  
TTACGTGGATTTTCACTCTCAAAGGATTGTGGTGGTGTATGATGGGGTAGCACAAACGACGAATCCAGTT  
GAGCTAGATGAAGAAGGAGGAAGAGATTCATCAATGATCAGTTGGCAGGCGGTTCTCATGGGTTATGG  
TTGTGGACTTGTTATTGGACTGTCCATAATATACATAATGTTGTCAACTCAATATCCAGCATGGTTTTCGA  
GAATGGATGTAGAATTGGAACACAAAATTCTTACGAGAATGAAAAGGCATAAGAAAAGATATTAGTGT  
GTTACCTCCA

>PGSC0003DMG400010940 LRR-RLPs

ATGAACTCAGTGGTGAATGTGGAGAGGGCCATGGTATGTACCCGAACTCAGTCTTAAATCTCACGAAC  
AATAGCCTCACAGGTATGATCCCTCCTTCTGTTGGAAATGCCACAAAATGATGAGTTTCAGTTTGTCTG  
GGAATAGAGTCAGCGGCAACATTCCAAAGGAGGTCAGTAATCTGAGCCAGCTTGCATATTTGCCCTTGT  
TCGATAATCAATTAACAGGTTCCATTCCCGCAACACTGTTAATATCTCGTCGCTACTTGCTGTATCTCTGT  
CAATCAATAGCCTTTCTGGTCCTCTCATGCTAGATGAAGGGAATATTGTGTCCAATCTGTACTTTTTAAGT  
ATATCTTACAACCAAATATCTGGTTGCATTCCTTCCAACATATGCCAACTCACAGAGCTCAAAGTTTTGTC  
CATATCTTTCAACAATATAACTGGAGACATACCCAGAAATATTGGTTGTTTATCCAAGCTCGATGGGTTTT  
ATATTGGCCATAATCCAATAAAAGGGACTATTCCCCTTATTGGGAAATATTTCCACTCTGCATGATGTT  
TACTGTGAAACAATCTCATAGTGGGGGGAATTCTCCGGAATTAGGAAAGCTATCAAATTTGAGGCAA  
TTAACCTTTGACAATAATTCTAATCTTATTGGTCAAATTCCAAAGGCTATTTTCAACATATCTTCTTTGGAA  
GTGATTTCTTTCCATTACAACAACCTCTTGGGGAGAATTCCAACCACTACAGGTCTTCATCTTCCGAACCT  
TAAAGAACTTGACTTGGCAGTGAATCAGCTTGAAGGGGAAATTCCATTGTTTATAACAATGCTTCCAA  
GCTTGAATGCTGGAGCTAAATAATAACTTTCTGAAAGGAACTATTCTACTAATTTAAGAAATCTTCGT  
GAGCTGCGATATCTGCTCCTACATACTAATCAACTTACCAATGAACCAAGAGACTGTGAGTTGTTATTCTT  
CAATCTTTGGCGGACGGTAAGATGTTGCGATATTTACAAGTGGGTAACAATCCGTTGAATGGCATTCTG  
CCCAATTCTATTGGGAATCTTTGATCTACTATTCAAACATTGATATAGGAGATGCTCACATCAACGGCCC  
CATCCCCACAAGTATAGGCAACATGAGCGGTCTTACAGCCATAGACATTGAAGGAAACAACCTAACAGG  
GAGTATTCCTTCTGAGATTGGTAAGCTTAAACAACCTCAAGGTCTGTATCTATATAATAATAAATTGCAG  
GGACATATTCCAGAGGCCGTATGCCATTTATCTAATTTGGTACAACCTATTTCTGAATGGTAATGAGCTCTC  
TGGATTAATTCAGAATGCTTAGGAAATCTTAGCATGCTACAAAAGCTTTATTTGAATTCTAACAAATTTT  
CATCTAAATTTCCGTTGAGCCTTTGGAAGATGAGTGGTCTCCTCTATCTAAGAGTGTCACGAAATTCAATT

GAGGGAGAATTTCCATTAGATATTGGAGGACTGAAAGCCATTGTAGAACTACATCTTACCAGTAACCAC  
TTTTAGGAATGATACCAAGCACATTCGGGGAACCTCCAAAACCTGCAGTCTCTTGACCTATCGAACAATT  
CATTTTTTGGCCAAATTCCATTATCCTTTGCCAACTTGATAAGCTTAGAATACTTGGATTTGTCTTCAAATG  
CGTTGTCAGGTAATTCCTAAGTCTTTGGAAAACTCTCATACCTTAAAAGCATTAAATGTTTCATTTAAT  
GATTTAGAAGGTCAAATACCGAGTGGTGGTGTGTTGCAAATTCCACTTTGCAATCATTCTCAAGAACA  
AAGGTCTTTGTGGAATGCACATATTGGAGATTCCTGCTTGTGCTATCACTAATCCTGGAAAAACAATCAA  
GCTTAAAGAGGTTCTGCTAAAAATTGTTACTCCAGTGGTTACTTCATCCTTTCTGATATTCTTGTTTCGTTT  
AATTTGGATAATAAAACGACAGAAGAAAGGGAAGTCCAAAGATGTGGAGAAGGTACCGGAGATCGGG  
ACTCATCAATTAGTTTCTTATCACGAGATTCAACGAGCAACAAATAATTTTGGATGAATCCAATTTAATTGG  
TGAGGGAAGCTCCAGCTCTGTGTACAAAGGCACATTGTTTGGTGGAACTGCAGTGGCCATAAAGTTCT  
CGATTTGGAAATGAGCAGGTATGCAAAGGTTTAATACCGAATGCGAAGTGA

>PGSC0003DMG400010950 LRR-RLPs

CATTTTTCTATTAATATTTGCACTAATGGAGAAAGCCTTCACATTTTCCTCTTGACAATACTCTTGTTGCT  
TTCATATGTTATGACCCAAACCAACATACTACTGATCAATTAGCTCTTCTCTCTTTGAAATCCCAAATTA  
GTTTCAGACCTTTTCATTATTTGGATGAAAGTTGGTCTCCTGCTATTAATGTTTGTGAGTGGGTAGGAGTC  
ACTTGTGACTACCGTCACCAGAGAGTGAAGTCCTTGAATCTATCCAGAATGGCTCTTACCGACAGGACTC  
CTCGTGATTTTGGAAACCTCACATTTCTTGTTTCTTGTATTGCGAAGGAACAATTTCCATGGAAATTTG  
CCTCAAGAAATGGTACGCTTACGTCCGCTTAAATTTCTTAAGTTAAGTTTCAACAACCTTGAGAGGGGAAA  
TTCCTTCTTGTTTGGGTTTTTACACCAACTTCAAGTTCTAAATCTTGAAATAATAGTTTCACTGGTTCCA  
TTCCTCCGTCACTCTCAAATGCCTCAAGGTTGGAGACTTGTAGAAATATCTGCCAATTTACTTGAAGGAAA  
CATTCCGGAAGAGATTGGCAATCTTCAGAACCTGAAATCTTGTCCATAACAATAATAAGCTTACGGGT  
TCTATACCATTACAATTTCAATATTTCTAGTATCCAAGTCATTGCATTTACAAACAATAGCTTATCAGGA  
AATCTTCCAATGGTTTATGCAATGGTCTCCCGACTCAAAAAGCTTTATCTATCAACAAACAAACTTCA  
TGGTCATATGCCTACAAGCTTGTCAAATTGTTCACAACTTCAAATATTGTCTCTATCCGGAAATAATTTTG  
ATGGACCAATACATAGTGAAATTGGAAGAGTGAGTAACTTGCATATATTGTATCTCGGATCCAACCATTT  
CACAGGTATATATGTTTTATCTTTCTAGTTTCTGGACACGTGTGTGGTCATCTAAATTGACATAAATTGTT  
TCAAATTATCATTGTATTAATAAGATTTATAATTAATTACATGAATATCG

>PGSC0003DMG400010952 LRR-RLPs

TTCAAAGTCTCAAACCCACAGGTTACTAGTACTAATATTTGCACTAATGGAGAAAGCCTTCACTATTTTAT

TCTTAACAATACTCTTGTTGCCTCACTATGTTATGGCCCAAACCAACATTAACACTGATCAATTAGCTCTTC  
TCTCTTTTAAATCCCAAATTAGTTCGACCCCTTTCACCTTCTGAATGAAAGTTGGTCTCCTGCTATTTCTG  
TTTGCCGTTGGGTTGGAGTCATTTGTGGTTCTCGTCACCCGCGAGAGAAGACGTTGAAGCTTTCACACTT  
GGCTCTTACAGGCAGAATTCCCCGTGATTTTGAACCCTCACATTTCTTATTTCTCTTGACTTGGGAAGCA  
ACCATTTCCATGGAAATTTGCCTCAAGAAATGGCACATTTGCGTCGGCTAAAGTTTCTTGATTTAAGTTTA  
AACAGCTTCAGAGGGGAAATTCCTTCTTGGTTTGGGTTTTTACACCAACTTCAAGTTGTAAAGGAGTAAC  
AGTTATACTGGTTCATTCCCTCCGTCCTCTCGAACGCCTCAAGTTGGAGACTTTACAAATACCTGCCAA  
TTTACTTCAAGGAAACATCCCCGAAGAGATTGGCAATCTCCACAACCTGAATTGATTATCCATAGAAAAT  
AATCAGCTTACGGGTTCTATAACCATTACAATATTCAATATTTCTAGAATTGAAGTCATTTTCAATTTT  
AATAGCCTATCAGGAGATCTTCCAATGGTTTATGCAGTGATCTCCAATACTCAAAGAGCTTGATCTAT  
CAATAACAAGCTTCATGGGTCATATGCCTACAAGCTTGTCAAATTGTTCAAATTAGCAAAAACAAAGAG  
ACGTACCGGGTACAATATAACCAAATGTTGCTAAGGTTTTTGTGTATAAATAAATCACTCTCATCTTCAGG  
GAGCAGTTTTGAAAAACCAAAGTCACTTAGGTGGGTAACCATATCCTCATCCAACAAGACGTTACTAGG  
CTTTAGATCACAATGAATCACAGGTAAGAGCACCCATGATGGAAATATTCCAACGCACATGTAACATCT  
ATGATAATGCTTAGTCTCTGGCTGATATCTAGGAAGTAGTTGTGTGAATACAATACTTTTCAAGACTTC  
CATTAAGCATATACTCAAGCACTAAAGCCTTAAATCAAGGTTGGAGCAACTAGTGATGACTTTCACGAG  
ATTCCTATGGCGAAGGCTGCGCAAACTTCACATTCTGTATCAGAACTCTTGAATGTCGCTTCCAGTTGC  
AGATTGAACACTTTAGCTGCAATGGCAGTCCCCTTCAGAGAACCCCTTTGTAAACAGAGCCAAAACCTC  
CAGAACCAATCAGATTACTGATTCACTTAGCGAGAGTACTAATCTGATTGGTTCTGG

>PGSC0003DMG400010964 LRR-RLPs

AGGACAGAATCTATTAAGGCATAATGGTACCAATTGGCTCAGACCAACATATATGCAAGTGGAGCAAA  
GCTTTCAGAAACATGCCTTGTCTTAGGTTACTCATTGTCAAAGGGCAGGAGGTCTGGCATCATGACCTTA  
TTTGTGACCCTATTGAGTGTCTCCCAGTAACTTGAATGGCTTGATTGGTCATACTACAGTTTTGAATCT  
TTACCAGCATATTATGAACCAGGAAACCTTGTGGGCTCCACATGACTTTTAGTTCTCTTGTGAAGTTTT  
CAAGGAGCCAAAGGTATTATTTACTCCTTTAGAAACAAATCATATGTGAAAAAAGAATCATTGCTAAAG  
CTGAAGTTTCTATTCTCTCTTTATGAACAGGCATTTGATAAGTTGACAGTTCTCAATTTAAGTTTTTC  
TAGAAATTTAATCCGAACACCCAATTTTTCGGATATTCCAAACCTGCAGAGGATTATACTGAAAAGCTGT  
GTAAGCTTGGTAGAAGTTCATCCATCCATTGGCCATCTCAGAAAGGTTGTCTTTTTGAATATGGAATACT  
GCGAAAGTCTCAAATCTTTACCAAGCAGTATTCAAATGGAATCTCTTAAATCTTCAATCTCTCAGGTTGT

GAAAAGTTGGAGAAATTTCCAGAAATTCAGGGAAATATGGAATTACTATCAGAGCTCCTTTTGGCACAT  
ACTGCAATATGGGAACTTCCATCATCAGTTGGACTGCTCAGTGGCATCAGCTTGCTCGATTTGCATTCAT  
GTAAATACCTTGTAAGACTCCCAGCCAGTGTCTCTGAGATGAGAAAAGTAAAATTTTACTTTGAAAG  
GCTGCTCAAGACTTGCACACTTCCCTGAAAATCTAGGTGATCTAAACCAGTTGGAGGAGCTCTATGCTGG  
TAACTGCCATTTGGCAACTACCAGATTCTCTTGAAAATTAAGCAAATTAAGTCCTATCGTTAAGA  
AGAGGCCGGAAGGTAAAGTATCAAGCTGGTGGCAGTTTAATGCTACCCCCATTCTGGGAGTTTCATGGT  
TTGAGGGAATTGAAAAGCTTAGATCTCAGTGGATGCAATTTATCTGATAACCAAAGTCTGCTCTTATGA  
ACTTGCCTTCTTACTAGAACTGAATCTGAGCAGAAACAAGTTTATTTTATTACCTGATATCATCAGTCGA  
CTTTCTCAGCTTCGATATCTCAACATAACACAGTGTGAGGAACTTAAGGAACTTCCCAAAGTACCTCAGA  
GTATAGAGGAATTATATGCAGAAGATTTTTTGGCCAAGCAAAGTATCGCAAAGCTACAAATGTACCCGA  
GATTGAATTTGGTGTCAATCACAAATTACAGTTTTGATCAACAATCTTATAACAAGGGAGAGCAATGGTAG  
CTCAGTTTTGGATGAGATTCTCGGTTCAATTTCTTCACTCAACATGGATAATGTGGTCCAGTCCTCTCTCA  
ACTCCAATTACAGGGTGAATGTTCCATCGTCTTCTGAATGTGCAATTCCCACGTGGTTTAGGCACCAG  
AGTGTTAAGGAAAAGATGTTGCTTGAATTCCTATTAATTGGTATAATGATAAGTTCAAGGGCTTTGCTA  
TATGCTGTGCCACTCTCATGGGAGCAGGTGTGTTGAATCCTGATTCAGGGCTATCCAAGAAGTATGATTA  
TGCTTCGTCAAAGCTAAATTGATATGCAAAGATGATTTAGAAGACCTTAAAGTCTAGAGAAAGAATG  
TAAAGTGGGAACAGCATCTAGAACGTATGGCTTGTGTGTTTGTCTTGTCTACATACCATTGTATGCTTCA  
CTGCAGGTGTCCGGCACAGATGTTGAAAATATTAACCAGTATAGCCTATTTGAGGCATCTATCCATGGG  
CGCATTGTGAGACAGTGGGGAGTTCATATGATCTATGAGGATGAAAGTACATTTTTTGCAGGAAAATAT  
GGAAGTGTGGTTTACACCACTTAAGCTGAAGAGAGGCTAAATTAGCTGTATATGCTGGGATATTGAG  
GGAATTACCAAGAAACCGAGTTTAAGGTAAGTCAATGCCTATTATTATTGAAGTTTAATAAATTGAATTT  
TGAATACAGTTAGATTAACAATTTCAATTTCAATGTGGTTAAGTATTTGGTTAATAATGTTGGTAAAAATTA  
GGCAAAACTAATGATTTACTTAGCATTAAATGAATTAATAAGGCAAGTCAATAATTACGTTAAAATTATTA  
GTAAATGGCAGTTAACAGGTTTGAAAATATATGAGTCAATCTGATAGCTTAATAGTTATACCAATATAA  
TAGTTACATTTTTATTTTTTTTACCTGGATAGCTCTATATGAGGCATGTCTCACCCAAGACAACATAAAG  
AAAAGAAAAATATAGTTCCCAAACAGATGCTATATGTGCAAAAAAGAGGCTAAAACCCCCAGACACCTT  
CTTCTTATTGTGAGGTGGCCTCAGAATTATGGAGCATTTTTTTTGTCTCTCTGGCATCAATTGGACCACA  
CCCCTCACTGTTATGGATGCATATGAGAGTTGGAGTCTATGGAAAGTTGACAAAGCCATCAAGAAGATC  
TGGATTATGATACCTGCTTGTATTTTTTGGTGTATTTGGTTAGAGAGGAACAAGAGATGTTTTGATGGAG

AGTCAACTGCTTTAGGCATTTTGAAGACTAGGTGCATTGAAAATTTGTTTAGTTGGTCCAACCTGTATCCT  
GTTGTTAATGCAGAACAACCTTCAGGATTTTACTAACTCATTAGCTCTGGCTTAGATAGTTTGTATAGTTAG  
CCAGAGATTTTTTTTTGTAAGCTCAAATTCCATATCTTGTAATTTTGCATCTTCTTGATGTTGTTATTAATA  
CCACTCATCTTATAAAAAAAAAAATAGTTACATTTTAAATCACATTATTCTTGATGTTGTATATCCTCGATCA  
TTTTGTAGCAACCAATTCGAAATAAACTAGTTGATATACTGACCTTCAAGCGGGAACCTAATATTAGGG  
ATGGTTGTGTAACAAATCTTCAAATCTTAAGTGAATAGTACCTCTTCTTGTTAAATTTACTGTATAAT  
ATTACAATTAAGAATTAATTAGCAGTAAGTGTTTTAGAAAATAAAGACTGTATTAGGCACCACCAAAG  
GTTGTGATAGGGTGGTAAGTACCCTTTTATCCTAAATCACAGCTCTCGGATTTGAGCCCTGAGATTTGAT  
TGGAGGCACTTTACCCCTCAAATAGGATTTACCTGCACAAATTCATATTAGTCGGGCCAGAGGCAGT  
GTCATTTGTTGAGCTCAAAGAGGAGACGAACATTGAGCAACCCGTCATATATATTCTGTATGTATCAGG  
TGCATCCTTTTTCTTTTTATTATTCTTAATGTTTCTCCTTGTAATATTAGTTCTATGTTCTTTCCGATCCT  
TATATTGGGTTTGATTGCTCAATCAAGCTCTCCGGGTTTTTGAATTTAAAATGTCCAAGGAAAAAAAA  
AGTACTTCATCTGTTTCAATTTGTTTGTCTGATCAAGAGTGTACTTTATATCTTATTCTTAATCTGTGATT  
GTAGGATGGTCGGAGCAAAGTTGATGAGTGCACAAGTAGTGTGTATCTAGACAGATTTGTGAGCAG  
GGGAAGCACTTCTCTGTTAGTCATTGATCTGGCTAATCTGGATTCGTGCTGAATAGAGTTACTAAAGGG  
GTAAAGCGTTTTCTCCAAAAGTTCTCTTGCATTACAAGTCTCCAACCAAGATATCAGGAAAGCGCTA  
CCATATTAATGAGGAGATTTTAAAGATGATGAACTCTCCTCCTCTGCCACAATCGTCATCTCCTCCTCCTC  
CATCGTCACCACCATCACTTCGCCGGCTTTTCTCCGTCTTGTTGCTTCACTTTCTATCAAAAAATTA  
GTGTCTTTATTCATCTCCTCCAGACTATTTTTAGAATTTTTAGTGTCTTTATTGCTTGTAGCATCATATAT  
GGATTTTCTTATATCGTCTTAATTCTATCCAAAAT

>PGSC0003DMG400011045 LRR-RLPs

ATGGCCGATCTTGTAATTGGTGCTACTGTTAAAGTTGTGCTTGATAAACTGCTTTCTCTCACTATTGAGGA  
GGCCAAGAGTTTAAGGAACTGCAAGAAAAATCTAAGAATTCTGACAAAATATGTATCCATGATTCAAGC  
TCTCATTGATGCTGAAAGACGACAAGTTGATGATCAGGCTGTTGAACAATGGCTCAAGATGCTTGA  
GAGAGTTGCTGAAGATGCTGAAAACGTGTTGACGAATTCAGATATGAATATCTCAAAGCACAAATG  
GAACATCCGAACCAAATAATGGAAAAGGTCAGCAGCTTCTTTTCTCATACTGCTTTTAAAGTACAAAATG  
TCGCGAAAAATAACAACATCAATGAAGAGTTGAAGGCTATCAATCAGTTAGCCAATGACCTCGGTCTC  
AAACCACTGATGGTTCCTTCTCAGAAAATACTTCCAATTCGAGAAACAGATTCCTTAGTTGTTGCTTCGGA  
TGTTGTTGGTAGAGACAAAGATGTTGCTGAAATAAAAGAGAAGATTTTGAACATGAGAAAGGATGTTG

TTCTGTGCACCATTCCCATAGTGGGTATGGCGGGTTTAGGGAAAACAACCTGTGGCTAAGAGAATTTTCA  
ATGATGAACACATCAAGCAGCAGTTCGAAAAGAGAGTTTGGTTGTGCCTACCTGAAATGTCAGAAACTA  
AGAGCTTTCTTGAACAAATCCTTGAATCATTGACAGAGAGGAAAGTTGAGGTTCAAAGGAGAGATTTAA  
TAGTTAAGAAGCTACAAGATGAATTGGAAGGAAAAATGTATTTGCTTGCCTAGATGATATGTGGCGTG  
TTGACTCTATATCGTGGCATGAGTTCATGGACACCTTGAGAGGAATAAATACATCCAGAGGAAACTGCA  
TTCTTATGACTACTCGTATGAAGCAGGTGGCATCCATAGTAGCAGAAGATCTTCATATGTTGCCAAGATT  
AGCAAGAGATCATTGTTGGTCCATTTTCAAACAAAGAGCGTTTGTGATGGGGAAGTTCCGCAGGAAAT  
AATGAGCATGGAGAACAAGATAGTTGAAATGTGTCAAGGTCTACCATTGGCTGCAAGTGTGTTGGGAG  
GCCTCTTATGCAACAAGGAAAAACATGAATGGCGGGCAGTTCTTAATGGCAATCCCCTTGTTCGGGGG  
AAGATGATAACGGGGAAAATAGCATAAAGAAGATCCTAAACTCAGCTATGATTATCTACCATCTCCAC  
ATCTGAAAAGTGTTTTGCTTACTTTGCCATTTTCCAAAAGATTTTGAGTTTGAAAAGGACCAGCTTATC  
CAACTCTGGATGGCAGAAGTTTTCTCTGTCCATCTCAAGAGACCACTTTGATGGAAGACGTTGGGAAC  
AAGGCTTTTCAACTTTTGTGCAAATTCCTTGCTGCAAGATGTTAAGCTAGATGATCTGAACAATATAAC  
ACACTGTAAGATGCATGATCTTGTGCATGATTTGGCTGGAGATATTTTAAAGTCTAAACTATTTGATCAA  
AAGAGTATTGGAGGAGAAAATCTTTCTCAAGTCCGATACTTTGGATGGGACTCACCAAGTGATCAAATA  
GATAAGATAAACGAGTCAGGACGTTTGTGCACATTGTTCTGGAAAAGAATTATATCTGAAGAACTGTTG  
TTGAGCTTTCAGTTCTTGAGAGTTTTAAATTTGTCCAGGTCAGGCATCAAGGTATTGTCAGCCAAAATCG  
GCAAGCTAATACTTGAGATATCTTGATCTCTCCAGCACTGAGATCAAAGCATTGCCCAACTCCATTTGC  
AAGCTCTACAATTTGCAAACATTGAGAATCAATAGCTGTTTCTCACTTAGGAAGCTTCCAGAAGAAATGG  
CAAATATGATAAGTTTGAGACACATATATTGCATCTATCATTACCCAACATATCTTTATTTTTCGGGGTCGG  
AGATCAAGGTTTATAGGTAATTATCAGTTTTCAGATGCCACTTAATATGGGGCAATTGACTAGTCTTCAGA  
CGCTACAGTTTTTCTATGTAGGTTTAGCGAAAGGTCGTGCAATAGAAGAATTAGGTCATTTGAAAAACCT  
TAGAGGTGAATTGACAATCAAACATCTCCAATTAGTCGTAAATAAAGAAGAGGCTCGAACAGCATATTT  
ACAGGAGAAACCAAATATCTACAAGCTGACATATTTATGGACCCATGATGAATCAGAAGGCTGTGAGAT  
CAATGATGAGCATGTGTTGGATGGTCTTCAACCGCATCCGAACTTGAAAACCTTAGCAATAGTGGACTAT  
TTTGGGACTAAATTTCTTCATGGTTCAGTGAAGGATTGCTACCAAATTTGGTCAAGTTGAAATTAAGTG  
GCTGCAAAGGTGCAAAGAAATCCCATCACTTGGCCAACTGAAGTTCCTTCGGCATCTTGAACCTGATAG  
GATTCCTTGAATTGGAATGCATTGGATCTACATTTTATGGCGTTGATGTTAATGATAATGGATCAAGCAG  
CAATAATGGCAATATCCAAGTGTCCCATCACTGAAAGAACTAGTATTGCAGAATATGAATAGCCTTATT



GAGTGGAAGGGTGATGAAGTTGGAGTTAGAATGTTTTCTGCGCTTGAGAAGTTGAGGATCACAAAGTG  
TCCACTGTAAAAGGTACCCACGTCAATTGAAAATCCTCCGTGAATTAAGCATTGAAGGAGTTGACAGT  
GAAATGCCATTGTTGAACTTGTGTAGCAACTTGACATCTCTGGTAAAGCTTACTGTGAATGATGTGAAAG  
AGCTCACTTGTCTTCTGATGAGATGCTACGCAATAACCTTTCTTCAACAACCTATTGGTCACACACTGC  
AGAGAGTTTTCGTGAATTGCCCCAAAGCCTGTACGATCTCCATTCTTGTGAGAGCTTACAAATATTCTTCTG  
CCCCAATTCAGTTCTTCTTCTGTTCCAGTGTAGAGAATCGTTTACTTCCCTCCAAAGTCTTGATTTATC  
ACTGTGTTTTGGATTGACCAGTTTACCAAGTGAATGCTAGAGCATTGTCGGTCTCTACAGACTTTGAAG  
GTCAGCTGCTGTGACAACCTTAGTTTCTTGCCTTTACACGTATGGGAAATGCCTTCAATTCATATTTGGG  
TTTATCAAATTGTCCAAGTTGATTAGTGTACCCACAGGGGGCCTTACCACCTCACAGGGTTAAAGGTA  
TTGGAAATTGGTCCTTTCTCAGAGATGGTGGATTTTGAGGCATTCCAATTGATTTTTAATGGCATTCAACA  
GCTATCGTCCCTTCATACATTGGAGGTGTATGGATGGACGCGTTGGGATTCTCTGCCTTATCAGCTTATG  
CAACTCTCTGCCCTAACAAAGATCCATATACATGATTTTCGGAATTGAGGCTCTTCTCATAGACTTGACAA  
CCTTACTTCTCTTGTAAACATTACATCTAATGGGGTGCAAAAGGCTACAACATGTGGACTTCTCAGATGTC  
ATGCCCAAATTACGGTATCTGGAGATCCGTTATTGTCTATTGTTAGAAGGTCTGTCCGATGGGCTTGGCA  
ACCTGTTTTCTTTGAAAGAATTAAGTTTACGTAACCTGCGAAAACTACAACATCTGCCATCCAGATATGCC  
ATGCTGCGCCTCACTAAATTATGGAACTAATAATTAATGGCTGCCCGCAGTTAGAAGAAAGTTGCACC  
AATCGGAGTAGCCCAAACCTCCAGTGGTCCAACATTTCCCATATTCCAAAAATTGAAGTAGGCGGGAGG  
ATAATTCAGAACCTTACGTAAGTCTCTGTTTCTTTCACTTTTTGATCTGTAAAATTTTTAAATATTATTTTC  
CCCGAGTTCCAGAAAAGAAGTTATGCATGTAG

>PGSC0003DMG400011108 LRR-RLPs

ATGTTTCCAAAAGATTTTGAGTTTGAGAAGGACCAACTAATCCAACCTCTGGATGGCAGAAGGGTTTCTTC  
GTCCATGTCAAGAGACCACTGTGATGGAAGACGCCGGGAACAAGTTTTTCCAACCTTGTGCGAAATT  
CCTTGCTGCAAGATGTCAAGCTAGATGAGCACAACAATATAACACACTGTAAGATGCATGATCTTGTGC  
ATGATTTGGCCAGAGATATATTGAAATCTAAATTTTGGATCCAAAGAGAGTTGGAGGAGAAAATCTTTC  
TCAAGTCCGATACTTTGGATGGGACTACCAAGTGATCAAATAGAGAGGATAAATGAGCCAGGACGTTT  
GTGCACATTGTTCTGAAAAGAAATCTATCTGAAGATATGTTGTTGAGCTTTCAGTTCTTGAGAGTTTTA  
AATTTGTCCAGGTCAGACATCAAGGAGTTGTCAGCCTCAATCAGCAAGCTAATATACTTAAGATATCTTG  
ATCTCTCCTACAATAAGATCAGAGCCTTACCCAGCTCCATTTGCAAGCTCTACAATTTGCAAACCTTTTAGA  
GCCAATAACTGTTTTTCACTCAGGAAGCTTCCAGTAGAAATGGCAAATATGATAAGTTTGAGACACATAT

ATTGCAAGTATCATTACCAATCATGTACAGGTAAGGATCGGTTTCAGATGCCACTTAATATGGGGCAATT  
GACTAGTCTTCAGACGCTACAGTTTTTCTATGTAGGTTTAAAGAAAGGTCGTCGAATAGAAGAACTAGG  
TTGTTTGAAAAAACTTAGAGGTGAATTGACGATCGAACGTCTTCAATTAGTCGGAAATAAAGAAGAGGC  
TCGAACAACATATTTACAGGAGAAACCAAATATCTACAAGCTGGTGTATTCATGGTCCCCTGATGAATCA  
GAAGGCTGTGAGATCAATCATGAGCATGTGTTGGATGGTCTTCAACCACATCCGAACCTTGAAAACCTTA  
GCAGTTGTGGACTATTTAGGGACTAAATTTCTTCATGGTTCAGTGAAGAATTGCTACCAAATTTGGTCA  
TGTTGAAATTAAGTGGTTGCAAAGGTGCAAAGAAATTCCATCACTTGGCCAACCTGAAGTTCCTTCAGCA  
TCTTGAGCTGGTAGGATTCCTTGAATTGGAATGCATCGGACCTACATTTTATGGTGTGAGATAATTGAT  
AATGGATCAAGCAGCAATAATGGCAATATCCAAGCGTTCCTGTCATTGAAAGAACTAGTATTGAAGAAT  
ATGGCTAGCCTTATTGAGTGGAAGGGAGTTGAAGTTGGAGTAAGAATGTTTCCTAGGCTTGAGAAGTTG  
AGGATTAGTAACTGTCCCCTGTTAGAAAGTACTCCGAATCAATTTGAAATCCTATGTGAATTAGAGATTG  
TTGGAGTTGACAGTGAAATGCCATTGTTGAACTTGTGCAGCAACTTGACATCTCTTGTGAATCTTGTGT  
TAGTAACGTGAAAGAGCTCATTTTTCTCCCGATGAGATGCTACGCAACAATGTTTCTCTTCAACACCTAT  
TGGTCTCACTCTGCGGAGAGTTTCGTGAATTGCCACAAAGCTTATAACAATCTCCGTTCTCTTAAGAGCTTA  
GAAATTACCAGCTGCACCAATTTAGTTCTTTTCTGTTCCAGTGGAGAGAGCTATTTGACTTCCCTCCA  
AAGTCTTGAGTTATCCAATTGTAATGGATTGACCAGTTTACCAAGTGAATGCTAGAGCAATGCCGGTCT  
CTAGAGATTTTGACGGTCAGTACTGTAACAACCTGGTTTTCTTGCCTTACATGTGTGGGAAATGCCTTC  
ACTTTCGTATTTGTGTTTATCAGAATGTCCCAAATTGGTTAGTGTACCCGCAGGGGGACTTCACCACCTCA  
CTGGGTTACAGCATTGGAAATTGGTCTTTCTCAGAGACGGTGAATTTTGAGGCATTCCAATTGATTTT  
TAATGGCATTGAGCAGCTATCTTCCCTTCGTACATTGGAGGTATACGGACGTACGGATTGGGATTCTCTG  
CCCGATCAGCTTATGCAACTCTCTGCCCTAACGGAGATCGGAATAAATGATTTCCGAATCGAGGCTCTTC  
CTCATAGACTTGGCAACCTTACTTCTTGTAAACATTAGATCTGGTGAGATGCAAACGGCTACAACATGT  
GGACTTCTCAGATGCCATGCCAAAGTTACGGTATCTGGAGATCCGTGATTGTCCATTGTTAGAAGCTCTG  
TCGGATGGGCTCGGCAACCTGTTTTCTTGGAAAGAGATAAGTTTATGTAACGTGAAAAATGGAGCATC  
TGCCATCCAGAGATGCCATGCAACTCCTCACTAAATTATGGAACCTGCGAATTAGTGTCTGCCACAGTT  
AG

>PGSC0003DMG400011116 LRR-RLPs

ATGTTTCCTGGGCTTGAGAAGTTGACAATTACAGAGTGTTCACTGTTAAAAAGTGCTCCAACCTCAATTGG  
AAACCCTGCGTGAATTAGAAATTGAAAGAGTTGACAGTGAAATGCCATTGTTGAACTTGTGCAGCAACT

TAACATGTCTTGTGGATCTCGATGTCAGTGATGTGAAAGAGCTCACTTGTCTACCTGATGAGATGCTACG  
CAAGAACGTTTCTCTTCAACGCCTGTGGATCTCAGATTGCAGAAAGTTTTGTGAATTGCCACAGAGCTTG  
TACAATCTCCATTCCCTTGAGAGCTTACGAATATCCTTCTGCCCAATTTAGTTCTTTTCTGTTCCCAGT  
GGAGAGAATTATTTAACTTCCCTCCGAAGGCTTCACTTACTTTATTGTGATGGATTGACCAGTTTACCAA  
TGGAATGCTAGAACAAATGCCGGTCTCTAAAGATTTTGAGGGTCAGCAACTGTAAGAACTTGGTTTCCTC  
CCTTTACATGTGTGGGAAGTACCTTCACTTTCCATTTTGGATATGTCAAATTGTCCCAAATTGATTAGTCT  
ACCCACAGGAGGCCTTACCATCTCACTGGGTTATGGGATTTGAAAATTGGTCTTTTCTCAGAGATTGTG  
GATTTTGAGGCATTCCAATTGATTTTTAATGGCATTAGCCGCTATTGTCCCTCATAACGTTGTGGGTGTA  
CGGACATGGGCACTGGGATTCTTCCCTATCAGCTTATGCAACTCTTCCCTAATTGAGATCAGATTAA  
GTGATTTGGTATCGATGATCTTCCCTCATAGTCTTTGCAATCTTACTTCTCTTGAAACATTACATCTAGTGG  
GGTGCAAACGGCTACAACATGTGGACTTCAGAGATGCCATGCCCAAATTACATTATCTTGAGATCTGTG  
GTTGTCCATTGTTAGAAGCTCTGTCGGATGGGCTCAGCAACCCTGTTTGTGGAAATGTTAATTTTTTG  
GAACTGCGAAATACTGGAGCGTCTGCCATCCAGAGATGTCATGCGAAGCCTCACGAAATTACAGTTCTC  
GAAAATTAAGACTGCCACAGTTAGAAGAAAGTTGCACCAATTGGAGTAGCCCAAACCTCCAGTGGTC  
CAACATTTCCCATATTCCAAAAATTAAGTAGGTGGGAGGATATTCAGAACTTAA

>PGSC0003DMG400011209 LRR-RLPs

GCGACTACTAGGTGACCATCATACTATGCCTATAAATGACAAGAGATGTTCCCTTCTACTTCATTCACAAA  
CAAGCAAATATGAAGAACAATTCACTTCAACTTATCTTTCTCATATTGTTATCTCAACTTTTCTATTTCACTT  
GCATAAACCATCACTTTGTTTCTCTACTAACACCTCTTGCAATTGAAACAGAGAAAAATGCACCTTCTAAAC  
CTTAAAGAAAATCTCACAGATCCTTCCAGACAGGCTATCTTCTTGGATTGATCAACAAGATTGTTGCCAAT  
GGCTTGGTGTAAACATGTAACAACAAGACCGGACATGTCGTAAAGATTGATCTTAGGAACAAATACTCAA  
CAGAACATGAATTGAGAGGTGTGATTAATCCATCTTTACTTAAGTTACAACAATTGAGATACTTAGACTT  
AAGCATGAACAATTTGAAGGAATCAAAGTACCGGAATTCATCGGTGCGCTTAATGAACTAAGGTATCT  
CAATCTATCTGGTGCATCTTTTACTGGTTTAGTCTTTCATTCTTAAAAACCTCTCAAATTTGCAAGTTCT  
TGATTTAGGAGGCTTAGATCTTAGTAAAGATACTAATTCTTGGCTTCAAATAATCAATGATCATGTTCCCT  
CTCTGTTGGAGTTGCGTTTGCCTCGATGTCAACTTTTAAACATTCCTTCTTCTTTTCCATTACTAAATCTTAC  
TTCCCTTTTGGTACTTGATCTTTCCAACAATGCTTTTAGTTCATGTACATTCCCTCAATGGATATTTAACT  
TAGTAGCCTTGTGTATCTTGACTTAAGCTCCAACAATATGTGTAGTGAACCTGTTGATGAGTTTGGTAAG  
CTCACTTTCTTGAACATCTTGATCTGTCTTGAACACGGTATCAATGGGACACTCAAGAGGAGCTTGG

GGAAACTATGTAATTTGAAGAGTTTGATCCTGTCTTACAACAACATCAGTGGAGACATAATCGAGTTCAT  
CGATGCGTTATCTGAATGCCAAAGCAATAGCTTAGAGACATTGGAGTTGAGTTTCAATAAATTGACAGG  
AAATCTTCCTGATGCATTAGGCCAACTTGAGGAACTGAAACATCTTCAGCTGAGGTATAACTCACTGACA  
GGCACAATACCTGAAAGTATAGGGAACTTATCATCCTTGGAGACATTTTACCTCACATCTAACAAAATGA  
GTGGGAACATCACCACGAGTATCGGCCAGCTCATGTCGTTGGTCTCGTTGGATATCTCGGAGAATATGT  
GGGATGGTATTGTCACTGAAGCTCATTTGATGTATCTTCCAACCTTGCAAGAGTTTTAGTTGGGATGAA  
ACTTAGTAAAAATATTACCTTGGCATTGATATCAGCCCGAATTGGAATCCTTCATTCAGGCTGACATTCT  
TGACTATTCAGTCATGCCAATTAGGTCCTGAATTCCCACATTGGCTGAAGGATCAGAATGAGCTCACCAG  
CCTAATACTCAATACCGCGGGGATTTCTGATGCGGTACCTGATTGGTTTTGTAGAGTTGGATTTGAAGCTT  
GATAATCTAGACATGGCATAACAACACTTGACAGGGAAAGTTCCAAACAAATTCAAGTTCAACTTTCAAG  
CCAATGTGGATTTAAGCACTAATCGCTTTGAGGGACCTCTCCCACTATGGTCTTCTAATGTTACAACATTG  
TATCTGAGGGATAACTTGTTTTAGGACCTATTCTCTCAACATTTATGAAGCACTTCCAATATAGGAGA  
CTTGGACATCTCCAGGAACAATCTAAATGGCACAATTCCCTTATGCATAGGTGATATGAATCAGTTAACT  
ACGTTAGCCCTCGATAACAACCAACTTATCGGCCAAGTTCCTGATTTCTGGGGTAAGTTACCATATCTTTA  
CTGGATAGATATGTCAGAGAATCGCCTATCCGGACAAATTCCACACTCACTAGGCTCTCTTGCTAGTCTG  
ATGTTCTTAAGACTCTCAGGCAACAATCTCTCTGGAGAACTGCCTTTGAGTTTGAGAAATTGCACGAAAA  
TGATCAACATTGATCTTAGTAACAATCAGTTGTCAGGGCTAATCCCAGCTTGGTTAGGGGAAACAATGA  
GTTCACTGTTAATCCTTAGTGTAAGGAACAACAGGTTTTTCGGTCACATTCCTTTAAAAATCTGTAGCCTT  
TCAGGTCTTCACATACTAGACTTTTCAGGAAACAACACTTATCCGGTCTGTCCCCTCTGTTTTGGAACTT  
GGAAGGGTTCAAGGTTGAGCTAACTGATGTAGAAGCTAAACAATATCAAGGTACATTGAAGCTTGAGG  
CAAAAGGAAGAACAACACTTTCTTATGATAGAATCCTTTACCTAGTAAACAGTATCGACCTCTCGAGCAACAG  
TTTGTCTGGTGAATCCCGGAAGAGTTAACAACTTACACAACTTGGAACCTTGAACCTTGCTATGAAC  
CATTTGACAGGACATATACCAACAGATATCGGAAAGTTACGTTGGGTTGAAACGTTAGATCTTTCAATAA  
ATCAGTTATCAGGTAATATCCCACCAAGCTTAGCTACATTAGACTTTTTGAGTCATTTGAACTTGTCATAT  
AATAAGTTGACAGGAAGAATCCTACTAGTACTCAGTTTCAAACCAAGTTGATCCAACAATTTTTCAAG  
GAAATGTTGCACTTTGTGGTCTCCTTTGGAACAATGTGTTGGTGATAGGACTACGACGACGACAACATC  
ACAAAGTGGAGGAAATGATGAAGGGGAAACAGATGATGAAGATAAACTTGAGAAAGTATGGTTCTTTG  
CTGTTGTTGGTTTGGGATACATAGTTGGTTTTTGGGCATTTTTTGGCACTTTGATCTTCAAGAAAAGATG  
GAGAATTGCTTATTGCAGATTCATTGAGATGTGTATCTTGGAGTTCTATGAAATGTCTTGTAGTTTTGTG

AAAAAATGATAGGAGTCTAATAAGCTATGTTGCTCAGACTCTTCAAATTGTCGAGGGGTGCATGTGG  
GATCCTCCAAATATAGTATATTTGTGAAGGATACGACAATATTTTATAGAGAGTCCGAGCAACTTAGCTAA  
TAAGTGGAGCTATAGGAGTTTGTCTCTGCAATTCTGCTATATGCTATGTTTTAGTTTCAATATAGCACATA  
TTACTACTTTTTCTATATGTAAAATAATGCTACCTAAGTATTGGCACTTATAGAAATGCCAGTGTGTTGGG  
TAGAGTTACGACATGAGTGGTCAGTTGAACACTTTTACGTCGGTCAAATAATACTTCTTATATATGTAT  
ACATGTTCAACAAGACTATTGTAGTACATATAATTAGGAAGTTGTTAAATAGTATCTAAGACTATTCTTAT  
ACTTAATTTGCATGCATCTACTTGTATA

>PGSC0003DMG400011353 LRR-RLPs

ATAATAAAACCTTATCTTCTCTGTAGAACACTCACACACACTCTCTCTCTCTCTCTTCTCTCTCTAAAATACA  
GCAAATCTAAGCTCGTTAATGTCGATTCAGATCTGAGAGAAGAAGAAGAAGGAAGAAAAAGGACTACT  
GTAAATCTCTCTCTCACTGTGAAATTACACTTTTGCCCTTCCCCCTCCATTACCGTACAACAATGGCGTATG  
CATTCCCGGAGGAAGTACTAGAACACGTCTTCTCCTTCCCTACCACCGACAAGGACCGTAACGCAGTATC  
TCTAGTCTGCAAATCATGGTACGAGATCGAACGGTGGTGTAGGAAGAGAATATTCGTTGGAACTGCTA  
TGCCGTTAGCCCTAGGATCATGATCCGACGGTTTCCGGAAGTCAGATCTGTTGAGCTTAAAGGGAAGCC  
TCATTTTGCTGACTTTAATCTTGTACCGGAAGGTTGGGGAGCTTATGTTTATCCTTGGGTTTTGGCTATGT  
CTAGGTCTTATCCATGGCTTGAAGAAATTAAGCTTAAGAGGATGGTAATTACTGATGAGTCGTTGGAGT  
TGATTTCTAAGTCGTTTAAAGAACTTTAAAGTGTGGTTTTGTCTTCTTGTGATGGGTTTACTACTGATGGA  
CTCGCTGCTATTGCTGCTAACTGCAGGTGAAATTTTTGTCTTACTTGACATTTCTTCTGTTTTGCTCAC  
TTTAAAGTAGTTAGTGGTGAAGAGAAGTCTTAATCTGTAAAGTAATTAGATCTAATTTTGGGTATTAGTTT  
GGACAATGACTTGTATTGTTGTTAAATCTTAAGCTTTTGGATGAATGCAGTAAGCATTTTGGGGTTTTGT  
TATAATCCCTTGCTAAACACGAGAATGAAGAAGCACTTTTCTTGCAGCTGTTTGTCTGTTTATAGGATAT  
GTAATGTATTAGTGGAAACGAAGTATCTACTGTAGATGAATTCGTAGTGTGTGAACCTGAAGAACTGAC  
ATTTCTTCAAGTGATTATGGTATTATTGGATACGTCTTGCTGCTACATTGCATCAGTCTGGTTCATCTGAC  
TTAATACTTCAAAGATTAGAGCTTTTTGTTTGTCTTTTAGCTTCTTTTTTTGAGGTGAACTTCTGGGA  
ATTAATTTTTCGGATTTTGAATGAGCTAATGTCAATAATTTCTTGTACTTCTTCCCAGAATTCTAC  
ATTTGCATTCTATCTTACAGATCTCTAAGGCCTTATAACAGAAAATGCTAACTTGTGGGTTTTCTTAATT  
GTTATAGGATTTAATCAGTTGGACTTCTTTTAGCATTAAATTTCTTGTGGTATACACTGTGTAAACATGCC  
CTTTAGCTTTGCTTTGTTTTGAAGTTGTTGGAGATTTGAATGTTATCTTAATTATCTGGAGATTTCCATATG  
TTTGTCTTGGTTCTCTGGTGGGATTAATTTGTTTTATCAGGAGGGAGTTTTGTAATGGAGTATAGTTGT

AGTTCAATGTTGAAATGGTTAAGTGGGTTAGGAATATGAAATGGTGATTTATTGAAATCCAATAGGAA  
TATGATTCTAAATCTTTCTTATTTATCTTGTTTCATATCGTCTGTGATTTATTATCATTTGTTGTTTTCTGTTG  
AGTCTGTTGATTTGCTTCAATTTATCACAGAATAATTGTGTAGATGGGTATTGTCATCTAACTCCCGTTTT  
GCTGCAGGAATCTGAGAAAAGTACTGACTTGGGAGAGAGTGAAGTGGAGGACCTTAGTGGGCATTGGTTA  
AGCCATTTCCCTGATAACTGCACGTCACCTGTTTCACTTAACATTGCCTGTTTGGCTTCTGAGGTCAGTCT  
ATTAGCTTTGGAGCGCCTGGTACTCGCTCTCCTAATTTGAGAAGTCTTCGGATAAATCGTGCTGTGCCCC  
TTGAGAGGCTTCCAACTTGCTCCGCCGCACTTCCCAGTTGGTCGAATTTGGTACAGGTGTTTTCTCTGCT  
GATGTGCGGTCTGATTTTTTCTCGAACCTGACAGAAGCTTTTTCGAGCTGCAAGCAACTTAAATGCCTGT  
CTGGGTTTTGGGATGTTGTACCAGCTTACCTTCCAGCTTATATCCAGTGTGCTCAAGACTCACCTCCTTG  
AATTTGAGCTATGCTACATGTCAGAACCCTGAGCTTGGCAAGCTCATAAGTCAGTGTCAACAATTTGCAGC  
GTTTGTGGGTATGTTCTAAATGTTTTGAAGTCTTAATTGATGTTCTTGATACTGCAACTGCAAACATGTTT  
TTTTTCTTATAAAGAAGAAGAGGCAATGAGATTGTAACATCATACTTGCTGTGATGACATTTAGTATAT  
ATTCTTAGTGAAGAATAAGAAAAACCTAACTGCTACAGATCAACCAATCAACCACAACCTTAATCCCAAT  
TTAGTTGGTCTCAGCTTTATGGGTCTCTTAAACCATATTGCTATATTCAGGTCATTTTCGTTCCGATGCTA  
AATTATTTGTCTTTACGCAATAATTGCCAAGGATAGGAAAAAGTAGTTCATTCTGTAGATAAACTTCAC  
CTATGCTGGTTAGGAAAATTCCAGGCTACATATATTTGATATTATATTGCTAAGCAGCTCACTTTCCTTGG  
AAGTTGAAGCCAATTGTTACATGCTTCATATTGTGATCTGGACGAATGGGTTTCAGTTTTTAATACTTGTG  
CCTACCCAATGCACGTAAAAATTCATCTAAATGTGATGGTTCTATGCTGAAAAATGTATCTATTCTTCCCT  
AGTAGCTTCCCCAACTGGTTCTGTAATATAAACTCCAGTATCAAGTTAAGTGCTGAATTACTTTTCTTG  
TAATATATGTGACTGCAGGTGCTGGACTACATTGAAGATACTGGTCTTGAGGAACTTGTGCCAATTGTA  
AGGACCTTCAAGAGCTGAGGGTGTTCCTTCTGACCCATTTGCTGCAGAACCAATAACAACCTTGACGGA  
GCAAGGCCTTGTAGCTGTCTCAGATGGCTGCCAAAGCTCCAGTCTGTCTTATACTTCTGCCGCCAAATG  
ACTAATGCAGCTTTAGTTACTATTGCTAGGAATCGACCTAACATGATCCGTTTTCGCTTGTGTATCATTGA  
GCCTCGAACTCCTGATTATTTAACCTTGGTTCATTTGATGCTGGTTTTGGGGCCATAGTAGAGAACTGT  
AAGGAATTGCGGCGACTTTCACCTGCTGGCCTCCTTACCGATCGTGTCTTCAATACATTGGCGCCCATG  
CTAAAAAGTTGGAGATGCTTTCATAGCTTTTGGTGGTATAGCGATTTGGGACTCCACCATGTTCTCTC  
GGGTTGTGATAACCTTCGGAAGTTGGAGATCAGAGATTGTCCGTTTGGAGACAAGGCTTTTTGGCTAA  
TGCTGCAAAGCTCGAGACAATGCGATCCCTTTGGATGTCTTCTTGTTCAGTAAGTTTTGAAGCATGTAAG  
ATGCTAGCTCAGAAGATGCCTAGGCTTAATGTGGAAGTCATAGATGAGAGGGGTCTCCAGATACAAG

GCCAGAAAGCTGTCCTGTGGAGAACTTTACATATATCGAACTGTGGCTGGACGAAGATTTGACACACC  
TGGTTATGTTTGGACAATGGATGAAGATGCAGCTGTAAGGTTGACCTGAGCCATACATCAAATGGAAAA  
TTCCAGCAAGACTTCACATGGAAAGATGGGCAGGTATTAGCGCTATGTTTATCCTCCTGCATTTGTTTGT  
CACGCCTTATGTAGTTGCAGTGCCAGTTGAGGGTTGGAACCTTCACTGCTTTGAAGTAGAGACTCCCGAG  
CTCATACGCCATCAATTTTATTCTTGGCTGAGAGCTACTTTACAGCAGGTAGTTTTTAATAAAGAATTTGA  
ACTCTGAGTTTCTGTGTATCATCTAGAGTAACAATTATTCGTTTTCTTGGGTGGGATTTTGCTTGGGGGG  
TTTGGGGGGGCATATTTTGGCATGTATGTGTTATTTCCAGACTTTGCTTCATTATGTAGTTCCCTTTATTTA  
TTCTATTGACTTATTCTCTATGAAATGGAGTGTCT

>PGSC0003DMG400011513 LRR-RLPs

ATAAATAGCAAAACAAACACAAAATGAAAAGATAACTCCTCTTTCTTTCCAATAAGATTAGAACCTTAAA  
CTTCTCCGATGGCCAGCGACGACTCTCATCTGCAAACGACGTCGTTTCTGTCCACTGTATAAACGACAG  
TCTCGGCGACGACGAGCTTCGGGCCGTA CTGTGCGAGGCTCGGAGACGACAAAGACAAGGAAGTTTTCG  
GGCTGGTATGTAAGCGGTGGCTTCGTATTCAAAGTACTGAAAGGAAGAAGCTTTGTGCTCGGGCCGGG  
CCTCACATGCTCAGAAAAATCGCGGCCAGATTCACTCGATTACATGAGCTTGATCTATCTCAATCGGTTTC  
TAGATCTTTCTATCCTGGTGTACTGATTCTGATCTTTCAGTTATTGCTACTGCTTTCTTGTGTTACGGATT  
CTCAATCTTCAGAACTGTAAAGGTTTCGTTTTGTATTTTTAAAAAGTTTTATAGTTTGAAAGTTGTTGAAT  
TTGAATGTTCAATTGCTGAAGTGAACCTGAGCTACTGCAGGAGAGGCCAAATGCACCAGTGAGTAGTAGT  
ATGTGTAGTGATATTTACATTTAGTACTGATTTAAAATATTGAATTTGTCTTTGTGTGGGGTGGTGGAG  
CAGGGATTTTCACTTAAAGGGTTTGAATAACATAAAACATAATTTAACACGTATAACCGGTTTGGGTGA  
ACCCCTGGGCCCTTATTAGCTCCGCCCTGCCTGTGTGGGGTGGTAGGTGTATTGTTCCCAACTTGGACA  
TCAAGGAAATTTTGAAGTTTACTAAAATCTATTGTTTGAATGTTAAAGGTTTTGACCCGATATGGCGA  
AGACTGGCTCTTCTCTTTTCTATCTTGTAATAATGGTTTTTATGATAAAAAGGGCGTAATGGGGTTTAT  
GGAGGATTTTAGGTGAATTTATGGTTGGTTTTTTGAAGATTTGTAGGATTTTGTGTTTCTGTGTAAAGG  
TTATGTCTTTTTTGTATGTGGTTTTTTGAAGTGGTAGCAAAGGGAGGATAGTGTAGTTATATCATATGT  
ATTCCAATTTTCAAGAGAAAGTCTAACTTTGTTGCGAATCTAAGGCTCAGATGCTTCTTACTTAACTTG  
CGCGTTTTTCTGGTCCAAATTTACAGGCATAACAGACAATGGATTGGCAGCGATTGGATCAAGTCTCTCT  
TCTTTACAGTCCTTAGATGTATCCTACTGCAGAAAGATCACAGACAAGGGGCTTTCAGCTGTTGCTGAGG  
GGTGTGATGACTTGAGAACGTTGCATCTTGCTGGCTGTAGATTTGTCTCAGATTCATTAATGAAAGCTCT  
CTCCAAGAATTGTCATTATGTAGAAGAGCTAGGTTTGAAGGATGCACCAACATTACCAACTCAGGTCTC

TCTGTTTTGGTTGAAGGTTGCCGGAGGATAAAGTATTTGGACATTAACAAATGCAGCAATATTGGTGAT  
ATTGGGATAACTAGCGTGTCTGAAGCTTGTCATTGACACTTAGGACATTGAAGTTGTTGGATTGCTACA  
AAGTTGGTGATGACTCCATCTTATCCTTGGCCAACACTGCAAAAATCTTGAGACACTTGTTATTGGTGG  
TTGCCGTAACATATCAGATGAGCCTATGAAGTCACTGGCAGCTTCTTGTAAGTAATAGTCTGAGGAACTG  
AGGATGGATTGGTGTGTTGAATATACTGACTCTTCATTGGACTGCATCATTCCAAATGCAGAGAGCTTG  
AGGTTCTCGACATTGGCTGCTGTGAGGAGTTAACTGATGCTGCATTTCAACAATTAGGAAGTGAAAACA  
TTATGTTGGGGATGAAGATTTTGAAGGTCAGTAACTGTCCAAAGATAACTGTTGAAGGAATTAAGAAGC  
TTATGAAGTCATGTGAATATCTTGAATATCTAGACGTACGGTCTTGTCCTAATCACTAAAGCAGGGTG  
TGAGGAGGCTGGAATTCAGTTTCCTGAATCCTGCAAAATAAACTTCACTGGAAGCTTAGCAGAGCCAGA  
TGTGTTACTTTGAGCAGTACTTGATTTAGCAATGTCTTTGAAGGACTGAAGGGGATCATGCAGTGAAATT  
ATCACATTCTTGCCTAAGACCTAAAATATGACTTTGGAAGCTCCTGATGTCAGTCCCTTGTCCCATTAA  
TTTGCCTTTTGTAAAGCATCAAGTGTTTTGTTGTAGATTATTTCCCTGCTTTTCAGTTTTTTTTCCCTGCT  
TTTCAGTTATTTGATATCAAACCTCCTGTATATCATCCTTGTAAACTACTAGTAGGCACCATTGTTTCCTGTA  
GGTGTTCAGATTGTGAATGAAATGAGTCCATTGCTGCTAGCTTGAATGTGAACCTTATACCAACAATGA  
TGGTTTGATTGATTACATTTCTTGTACGAC

>PGSC0003DMG400011610 LRR-RLPs

ATGGTTAATAGTATATCCCAACAAATTGATCAAACAGCGAAGGTACCGACATATCTTGGTAAATCTGGA  
GAGAGAGATTACAATGATTCTATAACAATTTCAACAAAGGGAATGGAGTATGAACTGGATAGAATTTTG  
ACAATTCTCAAGACTATTGATCTTTCAAGTAACAAATTTGAAGGACATATCCAAAGTAATCTCGGAGATC  
TCATTGCGCTCCGGGTGTTAAATTTGTCTCATAATAGATTGCAAGGTAATATACCGTCATCACTTGAAG  
TTTATCTTTAGTTGAATCATTGGATCTTTCATTTAACAGCTTTCCGGAGAGATACCACAACAACCTGTTG  
CTCTTACATTTCTTTCATTCTTAAATCTCTCTCACAAATCATCTCCAAGGATGCATTCCTCAAGGACATCAAT  
TTGATACATTTCAAATAATTCATATGAAGGTAATGATGGATTACAAGGATTCCCTATTTGAAAGGTTG  
TGGAAGTAATTGGACACCGGAGACAAATAATAGGGATTATGAGTCAGATGATGAAGAAAGCAATTCTG  
AATTTCTAAATGATTTTTGGAAGCTGCTCTTATGGGATATGGAAGTGGGCTATGCATTGGATTATCCAT  
AATATATTTGATGATCTCAACTGGAAATCTGAAATGGCTTGCAAGAATCATTGAAGAGCTAGAACACAAA  
ATTATTATGCGACAGAGAAAGAAACAGCGAAGTCAAAGGCAAAACAAAAGAAGACATAATCGTGTCTA  
G

>PGSC0003DMG400011611 LRR-RLPs



ATGAATAATCTCTCTGGAACCTATCCCACCTGAAATTGGTAATCTCACTAATCTGTCTATATTGACTTGCA  
CACCAATCAGATTTTCAGGCACAATCCCATCACAAATCGGCTCACTATCCAAGCTCCAGAACATTTACATCT  
ATGACAACCTTTTAAATGGTTCCATTCTGCCTCATTGAGCAATTTGACCAACTTGTCTATTTTGTCTCTTT  
ATCAGAATAATCTTTCTGGCTCGATTCTACAGAAATAGGTTATTTAAGGTTTCTTACTTCTCTAGATTTG  
GGTACTAATTCTCTTAATGGTTCTATTCTACTTCATTGGGAAATTTGACCAACTTATCTAGTTTGTCTT  
AATGGGAATCACCTTTCTGGCTTTATTCCCGCTTTATTGGGAAATTTGACCAGCCTTTCTATTCTGTATCTT  
CAGGAGAATGACCTTTCTGGCTCCATTCTGAAGAAATAGGTTATTTAAGGTCTCTTAGTCAACTAGTTT  
GGCTAAGAATTCTCTAAGTAGTGCTATTCTGCCTCATTGGGAAATTTGACTAGCTTATCTGGTTTGTATC  
TTAATGAGAATCACCTTATTGGCTCTATTCCCCCTTCATTGGGAAATTTGACCAGTCTGTCTATTCTTTATC  
TTAATCAGAATAACCTTTCTGGATCCATTCTGAAGAAATAGGTTACTTAAGGTCTCTTAGTCAATTAGTT  
TTGGCTAAAAATTCTCTAAGTGGTGCTATTCTGCTTCATTGGGGAATTTGACCAGCTTGACCTCTATGTA  
TCTTCGTGAGAATCATCTTTCTAGCTCCATTCTAAAGAAATAGGTTACCTAAAGACTCTTAGTTATTTAG  
ATTTTTCTACTAATTTTCTAATGGTTCTATTCTGCTTCTTTGGGGAATTTGAACAACCTTGATCTTTTGT  
TCTTTATGCTAACAACTTTCTGGTTTCGATTCCAAGTGAGTTGGGGAATATAGGAAGACTAGTTACTATG  
TATTTAAATATTAATCAACTCATTGGTTCAATTCCGGATTCTTTGGCAACTTGAGAACTTGCAATGGAT  
GTATCTCCACAACAACAATCTCACTGAGAAAATTCCTTCATCTTTCTGCAATTTGATGAAATTGGAAGTGG  
TGTATTTGGGGAGAAACAACCTTTAGGGGAGAAATTCGCAATGTCTAGTTAATATCAGTGGACTCGAGG  
TATTGAAAATAGAAGATAATAATCTCAGTGAAGATATCCCTTCGTCTATTTGCAATCTAACATCACTAAG  
GATTTTAGATTTGGGTAGAAACAATTTGAAGGGAGCAATTCACAATGTCTTGGCAACATGGGTGGTCA  
TCTTGAGGTTTTGGATATCCACCAAAAACAATCTTTATGGGACTCTTCCAGAACTTTTAGCAATGGAAGT  
GTAATCAGAAGCTTAGACTTGCATGACAATGAATTAGAAGGAAAAATCCCCGATCTTTAGTCAATTGTA  
AAAACCTTGAAATTCTTGATTTAGGAGACAATCACTTCAACGACACATTTCCAATATGGTTTGAACTTT  
GCCAAATCTGAAAGTTTTAAGCTTGAGATCGAACAAATTGCATGGACCAATTAGAACTTTAAGTAATGG  
AAACATGTTTTCTGAGCTTCGAATCATAGATCTTTCTTATAATGCTTTCACAGGAAATTTGTGCGACTAGTC  
TATTTCAAAAATTGAAAGCCATGAGGACAATTGATCAAACAGCAAAGGTACCAACATATCTTGGTAAATC  
TGGAGAGAGAGATTACAATGATTCTGTAACAGTTTCAACGAAGGGAATGGAGTATGAACTGGATAGAA  
TTTTGACACTTTTCAAGACTATCGATCTTTCAAGTAACAAATTTGAAGGACATATTCCAAGTAGTTTGGGA  
GATCTCATTGCACTTAAGGTGCTAAATTTGTCTCATAACAGATTGCAAGGTAATATACCATCATCACTTGA  
AAGTTTATATTTAGTCGAATCATTGGATCTTTCATTCAACCAGCTTTCAGGAGAGATACCACAACAACCTTG

CTGCTCTTACATTTCTTTCATTCTTAAATCTCTCTCACAAATCATCTCCAAGGATGCATTCCTCAAGGACATC  
AATTTGATACATTTCAAATAAATTCATATGAAGGTAATGATGGATTACGAGGGTTCCAGTTTCAAAGG  
TTGTGGAAGTAATTGGATACCAGAGACAAATAATAGAGATTATGAGCCAGATGATGAAGAAAGCAATT  
CTGAATTTCTAAATGATTTTTGGAAAGCTGCTCTTATGGGATATGGAAGTGGGCTATGTATTGGAGTATC  
CATTATATATATCATGATCTCAACTGGAAATCTAAATGGCTTGCAAATATTTTTGAAAAGTTAGAAGAA  
AAAATTATTATGAGACAGATAAGGAAGAAGCGAAGTCAAAGGTAA

>PGSC0003DMG400011708 LRR-RLPs

GTGTTACATATGATTTTGTCTTTAAGTCAGTAAAGTTGGTTCTTTGTATATGTGGTTGGGAAAAATTTATG  
TAGGAGATATTTATCTCAAGTTCACATTTCTATTTTTTTGCGGGGCCATTGAATGGTAAGTGTGGATT  
GGAATCTCCCTAGTTTGATTTTCATCTTCTCTATCATTTGAAAAACTCAATATGGAGGATGAGACGGAAA  
CTGAAAAATCTCCGATTACTACCCGTGTGATACTTCTTTCCAAAAACAGTCTTATGGAATACGAGTAGA  
GATTGTTGTACATGGGATGGATTACAACCTTGATTACAGAACATTGGACACAATACTTCATAACTTCACAA  
AAACCTGTGAATTTCCAAAAACAGTCTTATGGAATGCGAGTAGAGATTGCTGTACACTTTCTCTCCCTG  
ATGTCAACATCTCATCTCCGATACCTATGAATTTGTCTTCTCCTTAAGGTACGTGGATCTTGAATATACT  
AATATACAAATTAGGTATTTGAATTTACCGGCCATATTTCTTTCACAATCTCTAAATTGAAGCAGCTCAC  
AAGTTTAGATCTTTCATCTAACTACTTTTCAGGTGAAATGCTCGACGTTTTCTAACCTCCAAGAGCTTA  
CATCTTTCTGACAACATGAATTATGCGGTTCTAAACCTTTGCATAATTCATTAACAAGCCACCTAGCTA  
CCACAAGTTCATTACAACAATCTAGAGTATCTTGATCTTAAATTTAACTTCTTTCAGGGTCCACTACCTTCA  
TCCATTTGTAACATGAGCTAGCTTGAATTTCTAGATTTATCACACAACAACCTTCAGTAACTCGATTACAAG  
TTGCTTGGGAAGTATGGCTAGTTAAGGGTGTGGACTTAAGAAGGAACAATTTAGAGGGAGTCTTCC  
ACCATTATGTGCGCAGAGCACTTCATTGAGTACCATTTTTTTGTTTGATTTTCTTGTTTTGTTTTAAATTT  
CTAGTTGTAGTTTGTATATGTTTGATAGCTACATAATTATGTGTGTGTTATTTTAGTATCAATGGTTATTCA  
AGTTATGTTAATCTGTTTCTGTTTCAAGTTGACAGAAGTTATCTACACAGCCATGCACTCATTAGCAGGCT  
CTTCAAAAATGTCAATGGGTATGTGTTGGATCTTCAAAGTAGTGCATTTTTAAGGAACTAACACAGATG  
CAACATCATTATATAGAAGAGTCCGAGCAACATAGCTCATTAGTACAGCAAAAAGCAAAAAGCAGTAAG  
CATATTGAGTTTGGTTCATGATTGAAATCACTTGATTCAATTGTTTCATCATTACTCTCATTATCGTAATC  
ACTCGTAATTGATGAATCACACTTAAAACGTATGATGATGCTTCACCTACATAAGGTAGAAAACTAAAA  
ATGTCTACTACTTTGGTTATTTCCATCTCTTCATGTTTGAAGTGTATCATATTTGTCCTTTTCCCCTGTAG  
TCTTTGTGGAATTTGGTTAAAGACTTTGGTGGAAATATTGATAAAAGTTTCCCTCGTTACCTTAATGTAAA

AAGTCTTATGGAAAATTATAGAATGTACCTAACAAAGTTTGAAAACAGCACAAGAGACAACACTACTTGGAA  
ATTTCTCTTAAAATTTCTCAACAGGTGGAATGATCTTCACCAAGTTATTCAAACATATTTGAGATAATTA  
AAAAATTATTTGAGATAAAGGAATTGAAATAGGTAGTTGAGTCAATAATAAGTTGCTTAATATTTAAAAA  
ATAGAAGTAGAGTGTCAAATGGGGCTACACGTGCAATGCGCGTGCTTCGAGACTTTCCCAAGTTGTGAA  
TTTTGATCTTTCTTGTAATGAATTCAGTGGATCACTTCCTGGAAAAGTTTTTGAAACTTCAAGGCAATG  
ATCAAATTAGATGGTGAAGACACAAGAGAGATCAAGTACATGAAACCATCTGAGAAGTCATTTTACATA  
ATGTATGAGGACTCGGTGAGATTGGTATCAAAGGCCAGGAAATCGAGCTAGAAAGAATCAACACAAT  
TATGACAGCCATAGATATCTCAAGCAACCATTTTGAAGGTGTCATTCCGAAAACACTAAAGAATCTCAAC  
GCTCTTTGGCTACTCAATTTATCCCGTAACAATCTCAAAGGTGATATTCCAATGGAATTAGGGCAATTGA  
ATACGCTTGAAGCTTTAGAACTCTCTTGGAAATTGGCTCACTGGAAAGATTCCACAGGAATTGACAAGAAT  
GAACTTTCTGGCATTCTTAAACCTCTCTCAAATCTTCTTATTGGACCAATTCCTCACGGTCAACAATTCAA  
CACATTTGAAATGACTCGTATGGTGGCAACCTTGATTTATGTGGTCTCCCTTTATCGAAGAAATGTGGA  
ACAAGTGATTCATCGCATGTTCTCAACCAATGGAATCCGAAGAAGATGAAGACGAGTCATATTTCTTAA  
GTGGATTTACTTGGGAATCCGTAGTCATAGGCTACAGTTTTGGACTAGTTGTTGGAAGTGTGATGTGGA  
GTCTCATGTTTAAATATCGTAAACCAAATGGTTTTGTAGAATTTTTTATGATGCAATCGTGCCTCACGAAAAT  
AGAAGGCCAAAGAAGAAAGCTCAGAGACAACGGACTTAATGTTGGAATAATCTCATCAACATGCATTTG  
ATATTTTGTCTTTTACTTTGTCTGAATTTTCTCATCTGTTATTTGCTTCGACTACTGAATTGAAGTTATAAA  
AGCAGTTTTCTTTGCTTGTGCAGCACTTTATTTT

>PGSC0003DMG400011864 LRR-RLPs

AAGCATTCTTCTTCTTCTTCTTCTTCTCCTCCTCACTTGGTTTATTCTCAACTAGGCCAGTGTTTTCTGTT  
AAACGGTTCCTTCTCAATTTTCCATCTTCTATATGTGATCAAATTCACAAATGGACTACAAATTAATCTCTCC  
ACCTGCAAATTTTCCCTAAACAATCCCACCATTACCAAGAATAACCAAATCTAAGCTGCAATTTAAGCAT  
AAAGCTACAATCTTTGTCCAAAATGATCCCTAAAAGTTCAATCTTGGGAACAATGAAGAAGCAAAAGCC  
AATTTAGGAACCCATTTCAACCCCTTTGATCTACTTTCTGAAGAAATCGTCTTTTCAGTTCTTGATTGTCT  
TAATGACAACCCATTGGACAAGAAATCATTTTCTTGTGTTGCAAATCTTTTATGCTATTGAGTCTCATCA  
TAGGAAAATCTTGAAACCCCTTAGGCCAGAACACTTGACAAAGGTTCTTAGCAGATACCCACAAGTTACC  
CATCTGGATCTTTCCCTTTGTCTAGAAATTACAGACGGTTCACTAACAGTTATAGCTAATTTCTGTAAGGA  
AATGTTGAGGTCAATCAATCTTTCTAGGTCTAAGTTTTTTACCCATGTGGGGTTGTCGAATTTGGTGATG  
AATTGTGGGAATTTGGTTGAGATTGATTTGTCAAATGCTACTGAGTTGAAGGATGTGGGTGCTGCTGCA

TTAGCTGAGGCAAAGAAGCTTGGAGAAGTTGTGGTTGGTGAGGTGTAAGTCTTAACTGATATTGGACTT  
GGGTGTATTGCTGTTGGCTGCAGGAAGCTCAGATTGCTTAGCCTGAGATGGTGTGGGGTGGTGGTAT  
CTGGTGTGGGGTTGATTGCAGTCAAGTGTAAAGGAGATTAGGAGTTTGGATCTTCTTACTTGCCGGTA  
ATGGAGCTTTTCTCCCTTATAAATTTGTTTTGATTATATTTTGGCTCTGTACTTTTGTGTTGGTTATGTT  
TCTGTTTCTGTTTTTCATGGTAAGTTAGTTTGTGTTGCTAAGTAGTTCATTTGAACATGTTTAGACAGTATG  
CTCGTCGATTGGTTGGTGTCTGTTTACTATGATTTTCAGGGTCAAATGATGTGTGTATTCATGTTGTGAA  
TCAATAATCGCTAGATAACCCTGAGGGTAGCTCGGCTGGTAAAGGCTGAGGGGCAAAGCCCTTGGT  
CGCCAGTTCGAGCCCCCTCAGGGCCACTGGGGGCATTACAAACCGCCCGTGTCTCCAGGGGGCCCGTGGA  
ACTCACCGGTGTTATCCACCTTGAACAGTGGGACCCGGAGGGTACAGCTAGTCGGGGAGTGGGTTGG  
TAAAGGCTGAGGAGCATGCTCTTTGGCGCCAGCTGTAACCCCGGAAACCACGGTTAAAAAAAATAAA  
AAAAATAAAAAATAATCGCTAGATGTGTTGTGTGATTCTTTTTGAGTACTGCTATTTGATTTCTCTTGC  
CATACTCTGCCAAGCTTGTGGCCAATTGATGGCTTATCAGATTATAGTCTTTCATGAATCCTTGCTTGTG  
TCATGAACCTCGGTTTATTGAATTGTGATGTATCATGAATGCTAAATATGCACTGTATGTTATAGAACAAA  
TGTAGCTTGGTGTATGATAATTTATGCGGCTTTGGGAGTGTTAACCAATGATTTAGAAGGTAATGTGCAG  
ATTAAGCTGGCCAAGAAAGTATCATTATAAATAAAATGCTAAGCCGTTTAGGAATTTCTCATTGATATCC  
TTAACGAAGTCTATGAGAATTGTGACATCCATGACGGAGGGCACACCAACAAGGGTGGGTCAAGACGA  
GTAATGGCAGGCTTTTAGCTTGGCAAGCTTCCGAAGAAGGGGTGCACATGACACCTTAAGGGAATTCAC  
ATCAGAATGGGAAAGAAGAACTTCGTGAGAATATTTTGCACAAGATTATTTTTCACTCTCTATCCTCCGT  
AAGGGAGGAAAATTTTCATGAGTTTGCATTGCTCAACAAGTGTGACATGTCTTAGGTTCAAACCTAGAC  
GATTTCTTCCCATCTGTATAAGCTTTAGTAGACAAAGTTACCTGGTACGTGTGCTGGTGGGAGGGAGCA  
GGTCATTGGTGGGTATGCACTAGCTTGGCCAGGCACCAACGTCATAAAAAGGAAAAAAGCTAGTGCTG  
ATGTGTCGTCAAACCTCAATGATGATTTTTTTTTAAATTTGAACGGAAAATGACATTTACAGAACATTA  
TATTTAATATTATTAACATTTGCTAAGATTCTTACATTGTCTTAGTTAAATTTATCCCGTGTATTGTGCTT  
CTCTACTTGGGAGATATACAAGTTCTGAAAAATGAGTCTGCTTATGCACTTTGCACATCTCTTGCCTTGG  
CATGCTTCTGACCTTGAGTTTGTGAAAAGAAAAGATATTGCAGAGTCCAGCTTTTGAATCCTAATGAAC  
ACTTCTGCTTACATTCCGATGCATCTTCAGATGAATAATTGAATGTTCTCTTATCATACTCATGCTGAAA  
TACTCTAAGTTAGTGGAGGTTTTATGCTATAGAACATCTATCCATATTCTCTCGATATCTGTGCACCACTC  
AAGGATAGCATGACCAAAAAAATTGTGTTTTAAAGCACCTTGGTGTCTTGTCTGATGTCCAGGTCTCAAT  
TACATTTTCATGACCATCACAACATGCTCCTTTTTTTCATCGTATAATATGGGAAAGTTCTTGTTCATGTGATT

CGAAGTCCTTTCTTGACTTATGAAGTTACCACGACTTGGATATGAGCTTAAATAGAGGGACATAGACAAT  
GAAAATTCATATAGCTGGCCCCAACTTGCTTGAGATTAAGGTGTGGTAGTAGTTGTTGGTGCTGTAGTTT  
CCCACTGCTTTGGTACAGAACTTAAATCCAGACGTACCAAGTTCCAGTGACTGACTGTATTTATGAAG  
TTGTTACATGTAATCTGTTTCTGTGTTCTGTTATTACATTCCATCTCTTTTTCTTTCTCCGTTTTTGTTTTGTT  
TTGTCTAGGGTTTTCTTTATCGATCATAACAATAATGTGTTGATCTTCTTATTAACAGATCACTAATGAATG  
CTTATCATCGATCTCGAACTGCAATATCTTGAAGATTTGGTTCTAGAAGGCTGTTATGGAATTGATGAT  
GACAGCCTTGCATCCCTTGAGCAAGGCTGCCAGTCACTGGAGGTATGTACTTTGGAAGACTCTGTTTAAAC  
AGACTTTGATTCTCATATTTGCCTGATTGCCTCTCCTTGAGATAAAATGAACAATAAAAAATGAAGCTAG  
TATTGATGTATGAAATTGCCAAAAGCTCCCAGGACGTAGCTCAATTGGCGAAGGTTGATAAACTTGTGA  
CCTAGGTCATTAGTTCGATCCCCATGTCAAGCGAATCTGATATTTAAGTGGTGAAGGGAGAAGTGAGCC  
CATCATCCCCGAGTTTCGAAGGCTGCGGTTGGTCCTAAGGGTTGGCTCCTAATGGATTTCTCGGTCATCA  
AAAAGAAATTGCCAAAATTTGTCAAATTGCCTAGCTTCAAGCACTACTTTTAGATGTACATATATATG  
ACTTTTTTTCCCTAATTGCCTAGTCAATAATTGGAGACCTACTGTGTGAATGCCACTATAAGTACTCTGAA  
ATAGTTAAAGAACAAGGTAACCTCAGATTTTTTTTTTTTGGATAACCGAGAAATCCGTCTGTGACCCGCCCTT  
TGGACCAATCACAGCCTTCTAAACTCAGTGGATAATGGGCCCGCCCCTCTACCCTTCTCCACTTAAATACT  
GGGCTTCACTTTGCATGGTGTGGGGCATGAACCTGGGACCTAAGCCACAAATCCTCTACCTTTTGCCACT  
TGAGCTAGGCCTTGGGGGCAAGGTAACCTCGGATTTTATGCACCCAGAATTCTACCTAATTGTCAGATGTC  
CCAAAGAAGTGGACTATTGTGCAAGTCAAGTGTTCCTTGCATGTATCATGCCTTTTGGTCCTTTTTTTCC  
TCTTAAATAACTTTTTCTTTAGAAGGTAATGACTAATGTCAGTGTATGTATGTTGGCTCTTTTCAGAA  
ACTTGATATGTCGAGCTGTCAGAATGTTAGTCATGTGGGTTTGTGTCATCTCTTACCAGCTGTGCTGGATGT  
CTGCGGCAACTTGATTGTCGTATGGTTCTCCCGTAAGGCTTAACAACTTGAGCATCTTTCAGTAGTAT  
GAGTTTTAATTTGATTGCTGATTTCAAATTAAGTATTTTCAAGGTTACACCTGCTGTCGCAGATAGCTTGC  
AGAAGCTTTCCAGGTTGCAGTGCGTCAAACCTAGATGGTTGCCAAGTTACATGTTCTGGACTGAAGGCTA  
TTGGAAATTGGTGTGTCTCACTTAAAGAACTGAGCTTAAAGTAAATGTGTGGGAGTGACAGATGAAGGTC  
TCTGCTCCCTCGTAACAAAGCACAAAGACTTAGGGAAAGCTTGACATTAAGTGTGTTGCCGAAAATTAAGT  
CGTATCAATTTCCCATATAACGAATTTCTTGTGCCTCCCTTACTTCTTCTTAGGATGGAGTCTTGTACTCTAGT  
CCCAAGAGAAGCTTTTGTCTAATTGGACAGCGTTGCCAGTACCTGAAGAGCTTGACCTTACAGACAAC  
GAAATTGATGATGAAGGTCACCCCTTACCTTAAAGGTCTCAGGCTTCTGTTGTAATTTTGAAGTTCCTC  
CTTTATATCTGACGGTGTCTACATATGCAGGCTTGAAGACCATTTCCAAGTGTGCCAGCCTTTCCAGCTT

AAAGCTAGGGATCTGTCTGAACATAACCGATCAGGGTCTTATCCACATTGGCATGTGCTGCTCAAATCTT  
AAGGAGCTTGACTTATATAGGTATGTATTTACAGTTCATGGGATATTATTTGAGATAGTGTAACATATAT  
ATCTTGTGCAGTTTTTTTTATATTCTTTCTTTTGTGATGGATTGGCTAAACTCACTTTTAACTATGGAG  
TACAAGAGATTGAGTGTGCTGATTACTGGGTGATTCTTCTTGACAGGTCTGCTGGAATTTCCGACTTGGG  
AATATTAGCAATCTCTCGCGTTGTATTGGCCTTGAAATGATCAATATTGCATATTGCAATCGTATTACTG  
ATGGCTCATTATATCTATATCAAAGTGTCAAAGTTGAATACACTTGAAAGTCGAGGTTGTCCTTGTGTC  
ACATCTTTAGGTCTTGACAGCTGTTGCTGTGGGATGTAAGCAGCTTACAACATTAGACATCAAAAATTGCC  
ACAACATTGATGATGCCGGAATGATTCCACTTGCTCACTTCTCGACAAACCTCAAACAGGTAACCACAGT  
TTCTCTTTGTCGACATTGACGAACTGGAGCATTGACATCTAATATGAGCTGGCCATCTGTCAATTACACA  
GATAAATTTATCCTTCACTTCAGTGACGGACGTGGGGCTGTTGTCTTTCCAGCATCAGCGGTCTACAG  
AACATGACAATCCTGCACCTCAAGGGTTTATCTCCTGGTGGGCTAGGAGCTGCACTGTTGGCTTGTGGC  
GGACTTACTAAAGTTAAGCTGCAGACATCATTTAAATCATTGCTACCACAACCTCTCCTTCAACATCTAGA  
ATCCCGGGGTTGTGTTTTTTCAGTGGAGAGAGAAACCATTTAGGTATCTTTCTCATATTTATCATTACCTA  
CTTTTTCTCTGAAAATATGTGAGGTACTTCTATGGTTGTCGAAATATGCCGTCGTATGAATCAATTAGAAT  
TACATATTTTAGCTTAACATGACATAGTTATTACTTGATCTAGAGGGTCAATGCAGTTTCAGAGGCTTTCT  
TGTTTGGCATTTAATTGAGACAATAAAATTACAGTTTTGATTATCTTTGTTGTAATAATGAAAATATCCTTT  
TTGCTTGCTCTAGTCATTAATTATCTTTCTTTTATTGGTTAAACACAGGCTGAAGTAGATCCAATATACTG  
GAAAATTCAGCTGGACAATTTAGACTGAAGATTTGAGCCATTTATGCGAGTTGTCCTAAGATGGATAGT  
CGCCCCAGAACCTCCGGAGTCTTACTTCATCTGTTAGCACTTCATCAGGCAAGGTGCATTGTTTCATGGC  
GACTGTTTTGCATGTTAAGTGTCTGCTACTTGTTGCTGTATCCTCTAAACACTCTGTAAATTTCAAAAAC  
CGGGAAAACTCAATGTCCATTCAGCATTGCCCCGGCGTGAAATCAATTTGTCAACAATGTTATGAGAT  
GGATTAACAGATCCAAATCATGTTTATTGTTTAGCAATCAATATCTGGGTTTGTGAATGCTTATTCCTCT  
TGACTAATGTGATTTGCGGTGAAGTTACTTCAAATTTACTCTCAATTAATAGTTATTTG

>PGSC0003DMG400011900 LRR-RLPs

TTTTAGGGGATTTGGAGAAAGAGCTATCATCTTACATCCATTTTAGAGAAGGAGCTATCATCCATTTTC  
AGAGATGTCGTGCACCATGAACATAAAAATTCCTAAAGATCTTACAGAGACGTACCATCAATTTGGCATATG  
AGGCTGAGGTTGCCATTGACTCTATTCTTGCTCAGAATAATGCTTTTTTGCATATTTTTGCTCACTTCCTA  
CAATTTTAAAAGAGATCAAGCAAATTAATGCAGAGGTGACTGAGATGTGGTCAACGGACATTCCTCTTA  
ATCCTCACTACGTGGCTGCTCCATTTAAACATCTGCCAGCTCGACATAGCAATCTTGTGACTGATGAGGA

GGTAGTGGGTTTTGAGAATAAAGCAGAAAACTAATTGCTTATCTGATTAGAGGTACAAATGAGCTAGA  
CGTCATCCCAATTGTAGGCATGGGGGACAAGGGAAAACGACAATAGCTAGAAAGTTGTACAATAATG  
ACATCATTGTTTCTCGCTTTGATGTTGAGCATGGTGCATCATTCTCAAACATATAGCCGAAGAGAGCT  
ATAAAAGAGATTTTCAGTCAAGTTACGGGCTCCAAGGACAAGGAAGATGAGGTAGGCAAACCTTGCTG  
ACAGGTTGAGGAAAAGCCTAATGGGAAAGAGATATCTCATTGTATTGGATGATATGTGGGATTGTATG  
GCATGGGATGACTTAAGGCTTTCTTTCCAGATGTTGGAATGAGAAGCAGAATAGTCGTAACAACTCGA  
CTTGAAGAAGTGGGTAAGCAAGTTAAGTACCATACTGATCCTTATTCTCTTCCATTCCACACAAGAAG  
AGAGTTGCCAATTGTTGCAGAAAAAGTGTTCAAAAGGAAGATTGCCCGCTGAACATAATATGTGA  
GTCAAGCAGTTGCAGAAAAATGCAAAGGACTCCCCCTAGTGGTTGTCTTGGTAGCTGGAATAATCAAAA  
AAAGGAAAATGGAAGAATCTTGGTGGAAATGAGGTGAAATATGCTTTATTTGACTATCTTGATAGTGAGT  
GCGAAGAATATAGTCTGGCGACTATGCAGTTGAGTTTTGATAACTTACCCGATTGTTTAAAGCCTTGCT  
TCTTTATATGGGGATGTTTTCGGAGGACGCAAGAATCCAGCATCTAAATTGATAAGTTTATGGATTGCT  
GAAGGATTCGTGGAGAACACTGAATCTGGGAGATTAATGGAAGAGGAAGCTGAAGGTTACTTGATGGA  
TCTCATTAGCAGTAACGTGGTAATTGTTTCAAAGAAAGTTATAATGGTAAAATCAAATGCTGCCAGGTT  
CATGATGTTGTGCATCACTTTTGCTTGGAGAAGGGTAGAGAAGAAAAGTTTATGCTTGCAGTGAAGGT  
CAATATATCCAGTCTCAACCCTTGATTGGAAGGGAAGTCGAGTGAGCTTCAGTTTCAGTGAAGAGCTT  
TCCAAGTTTGCATCTCTGGTTTCCAAAACACAGAAGCCTTCCACCAACACTTGAGGTCTCTGATAAGGA  
CAGATGGTGAAAATCTATTGATATGATTCCCTTCTGTCAGATTAGTGAATTGCGACTTCTTAAAGTCTTG  
GATTTGAGTTCTTATTATGTGGAGTTTTTGTGGTTAGCTACATTCAAACCACTTATTCATCTGAAGTACCT  
CGCAGTTCGGGCAGGTGATTTCTATTTTGATCCAGGATCACATCTGCCCCATATAGAACTTTAATTGTG  
AAGAATTCTCCTTATGTATGGTTACCAAGTGTCTTTTTGCAAATGGAAAATTAAGGCATGCTCATTTTGG  
TTGGGCTGTTTTGATAAGCAGGGACTCTTTGAAGGATCCTCTAAATTGGAAAATTTGAGGATATTAAG  
AAAATTGAGAAATTTCCAATTGATAGGGCGGATGTGTTATCAAGGAGGTGCCTAATCTTCAACAACCTC  
ATATCGAATTTGATGGACATTCTGCAGATTCTTTTTGTCTCACATTGGAGAATCTTACCCAGCTTCAAATA  
CTTCGTGTTTCTTTGAGCGGCACCACATCATTGTATCTGGGTTGCAATTGCCTTCAAATTTAAACAAGTT  
GGTACTTAAAGGAATTCATATAGAAAGTGTATTCCCTTCATTGCGGGACTACCAAGCCTGGAGTATCTC  
CAATTACAAGATGTGTGTTTTCTCAATCAGAAGAGTGGTGCCTTGGAGATATCACTTTCCATAAACTTA  
AGTTGTTGAAACTGGTGCAGTTAGGTATCTCAAGGTGGGATGCCTCGGAGGAATCATTTCCCTTGCTTG  
AAACACTTGTTATAAAAATGTGTGGTACCTAGAGGAGATCCCACTTAGCTTTGCTGATATTCCATCATT

GAAACAGATTA AATTGATTGGGTCCTGGAAAGAATCTCTGGAGGATT CAGCTGTGAGAATTAAGGAAG  
AAATCAAAGAGATTGAAGGATGTGATCGTATACACCTCGTCAAAGAACTGACAGATTGGGAGGCATATA  
GCAATTTGTCGCAGCTGTGCTTATACTGAAGTCTATTTTGTAGCTAGCCATTCTCTTATATTGTAACACT  
ACTACTGTTTGTATGTTTGTGTTTGGATTGATCAACTCTTTTTATGTATGGTTGGAGACAAATATATATCAG  
ATGATCTTTCAC

>PGSC0003DMG400013644 LRR-RLPs

TTCCACAGAACCGAACAAAGACACATTTTCTGTCTTAGATAACTCATCCTTTCTCTCCCTTCTTCTTCTTCT  
CTCTGTTCTCCACATTTACGTACACTTT CAGAAACATTGTTGATTTACTTTGGACAGAAAAGCCACTAAA  
TAGTGTGAGTCAATTTCTTTCCTTAAATAATTGTTTGGAGTTTTGTTTTAATGGGAAGGTTTTTTTTTTCATT  
CATTTTTATGAGTGTTTTTTCCGTGTTTTTGAAAACAGTTGTTTTACATATAGGAAAATACGGCGAAAAAT  
AAGCTTTACTTTGCATGCCTTCATGTGGGTAAAGGTTTGAATTTGCTGTCATCGTTGATTGGCGCTTTCTA  
GAAACTTGTAGAAACAAAAA ACTTAGCTGCGGTTTT CATTTTTCTTGATCTGCTGATTGTTTTAGATATAG  
CGGAATTCATCTTTGTTTTTGTCTTGAATAATACATACACAACGAGGAAAAGGGTAGTCTGAGTCTAAT  
TTTTGTGGCCGGAGTTGTATTTATGTTCAATTAATTTATCTGGGTGTTTCTTGTTTTCGAGAAATTTTCAG  
AGGATTATTGAAAATGGGGTCGTCAGGAATGTCGATTGATGAGATTGTGCAAGAAATTATGAGAATTCA  
TGGATCTCTACCGACAAGGCCATCGATTGATGAGGTTGAAGGAGCAAGAGGTTTAATTGGAAATCTGG  
AGAAAGAAGATCAGTTGAAAATAGAAGCTATCATGAGGCAAATAAAAAGGAAAGGTGTACCAGAAGA  
GCTGTTCAAATTTTGAAGAGATGCAGAGGAACGCTGTTCTTTTT CAGAGTAAAGAACAAAAGAGGGA  
GGCGTTGAAACTTTTAGATCTCGACAATTCACAGTGTGTTGACGATTTGATT CAGAGAGCTACGAAA  
TGTTTGCCTTCTAAATCTCACGATAATGACCCGTCTTCTTCTTTAATTGAACCGAATGATTTATCTTTGGCA  
AACCAAGTTTCTTCTCCGGCGGGCCTTAATTCTCCGACA ACTACA ACTGCGGCTGCTTCTTCGTGCGA  
GCTATTATAACTCAACAGAGCCTATTAAAGCGTCTGAACTGTATAGTAGAGATGACAGTTACTTGAATAA  
GGCAAAGCCACGTTTCTTGTTGGATGGAATTGGTGTGGGCTTCGATCTGGGGATGCTTTATCAGGGCC  
TAAGATTGTTGATTCCACCTTAAAGCCGGCGTCAATAAGTGGTATGTTACATCTATTTGCTGCACCGTATT  
TCTAGTGAATTTGATTATATAATTTGTTGTGTTGACTCAAAGTTCGAATTTTTTGTATCAAGAAGACTG  
TTTTTTGTTTGTAGGTCAAGATGGTGAGAAATTAAGTTTAATTAAGCTTGCTAGTATGATTGAAGTGTC  
ATCCAAAAAGGAAGTCGAGAACTTATCCTTCGGAATAAGTTGTCTGACCAAGTAGAATGGCTTCCAGA  
TTCTATAGGGAAGCTATCAAGTTT GATCACTTTGGATCTGTCTGAGAATCGAATTACGGTCCTACCCACC  
ACCATAGGGGGGCTTTTATCATTGCAAAGCTAGATTTGCACTCAAACAAAATTGTTGAACTGCCTGATT



GTATTGGAGATCTTCTTAACTTGGTCTATCTTGATCTCAGTGGAATAACTTGAAGTTGTTGCCCGCGAG  
TTTTGCTAGGTTAGCTCACCTTCAAGAACTTGATTTGAGCTCTAACATGCTATCAGTACTCCCTGAGACAA  
TTGGCTCCTTAGTAAGTCTTAAGAAATTGATTGTGGAACTAATGACCTTGAGGAACTTCCTCACACTATT  
GGTCAATGTACTTCGCTCAAAGAGCTTCGTGTGGACTATAATCATCTTAAAGCTCTTCCTGAAGCAGTGG  
GACGAATTGAGTCTTTGGAGATTCTGACTGCGCGGTACAATAACATTAGGCTGTTGCCTACAACATATGTC  
ATCCCTTACAAGTTTGAAAGAGCTGAATGTTAGTTTCAATGAAATCGAATCAGTGCCTGAGAGCTTGTGT  
TTTGCTACTTCACTGGTAAAGCTGAACATAAGCAACAATTTTGCAGACCTGAGATCACTACCAAGGTCCA  
TTGGTAACCTTGAGTTGCTTGAAGAATTGGACATGAGTAACAACCAGATACGCGTTCTCCAGATTGTT  
TAGGATGCTCTCAAGTTTGCGGGTCTTAAAACCGATGGAAATCCTTTGGAAGTGCCACCAGGAAACAT  
CGTTGAGAAGGGAGCACAGGTTTAAATTTGTTTCGTTTAACTATTATGCTTTCTGAATTAGTGTAGTATTT  
AATTATCTTAGCTCTTCTTGGATATATCAATCACTAATGTTTTATTTCTCAGGCTGTTGTACAATATAT  
GTCTGATCTGGTTGCCAATAGAGAGGTAAAGGCGCAACCCGTAAGAAGAAGAAGAAATCATGGACTC  
AAATATGCTGCTTTTCAAGTTCCAACAAACGTCAGCGCAATGGCAGTATGGACTATGTTAATGCCTGATG  
TGTTCCACACAAATTTGGTATGATTATATATTTCTCCTTCTTACCAAGTTAGTCATTATGGTACTGAACTTT  
CCATATTTCATAAACTTCGTGTTCACTCAAACACTACATCCCATAGACTATGGAGGGAGTTTTAAATATATAT  
TGTTAATAAATGGGAATGGTGCATTATACATGGTGTCTGATTAGTGTTAATTAGAATAATGAAAATGAAG  
GGTTGTAAGGGTAACGGCTCACATGATGTCTGTGTTATCCGTTGTAGGGAAATGAGCTGTGATTTGGCT  
GGACGAAAGCTGCAAAATTTAGTTGAATTCGAACATTTTTGCCAGCGAGATTCAATCAACTTTCTTGTT  
GTTCCAGATAAGCTCTAATCCACCACGTGGTTTTTTATTCTCATTTCATGTAATAATCTTTAATGCTCTTT  
CCTGTATTTTCTCGATTATGATGTAAAATATCAAATGAGATGTAAAATCTTATCTTATTTTTTTACTTTCA  
ATATATTCAATGAATTCCAGAATTTCTG

>PGSC0003DMG400013766 LRR-RLPs

ATGAAGAGTGCTACAATTAGCAATTTGCCCTGTAATGTCTTGGATAAAATCTTGGGAGCTTGCCTTTGA  
AAGATGCAGTGAAGACCAGTATCTTGTCAAAGGTTGGAGGTACAAATGGGTAACGCGTGCAGAACTT  
GATTTTCGTAGTGAGTTTTTCACATCTTTCAACGACAACCAAGAAGCCAAGAAAATCATTTACCAAGTCTT  
ACGACTGCATCAAGGACCAATACTAAAGTTTACTCTCCAACATCCTAATTTGATATGCTATCGTGATATTT  
ATAATTGGATGCTCTTCTTGTCAAAGAAAAACGTCCAGGAACTCACCTTCAAATATTCACAGGCAACAA  
ATATCATTTACCTTCTTATCTTTTACATTTTCAAGCACTAAGACATCTGGACCTTGATATGTGCTTCTTCCA  
CCCTCCACCTGATTTCAAAGGGTTTGCAAAGCTTATTAGTATTAATCTTCAACATGTCATTTTTGATCCAAC

AATATTTAGGAATCTCATAACCAAATGCCATTGCTTGAAAGTTTGATGTTGACTAGGTGCACCGCATT  
GACGTTCTTGAAATTGATGCCCTAATCTCAAATGCTTCGACTTTCTTGGAACATCGAAGTTTATTTGCTT  
CAAGAATGTCCCTATGCTTAAAACCGTTGCTGTATGTCTCAATCAAATTTTGATGGATACGTCAACTTTTT  
GTTCTAATCTTACAAAGTTCTTCCATTTTCATGCCTTCCCTGGAGGAACTTGAAGTGGCGTTTCATCATT  
GAGGTAATGTACATTTGTGATAATATTACTTATGATAGTTGGTACTTATTATAATCATATGATGTGTCTTC  
AACCAATTTTTTACATGCTTCTAGTACTTGAACATGGGAGGTATACCAGAGAATCCCCGGCTGCTCTA  
ACAATGTCAAATCCCTATGTATTTTCGGACATGTCTTTCAGAAGTGTGAGGAGTTTCTAGTGCAGTTT  
ACTTGATTACAAGCTGCCCTAAATTACAAGAACTTACAATTGAATGTGTAAGCACCTCCTACTTTCTCAT  
AAAATTATTGATATGGTTTCTTCATCTGAATCCGCCTAACTGTTACCAAATTTTTTGCAGGAAGCAGTAG  
GCATTGTGGTGGAACTGTTATAACAATTCTTACGAGCCAAAGCAATCTCATGTGGTGCTATGAAGCTGCT  
TAAAAGTGTGGAAATGCGTTATTTTATTGGTTTTGAGATGGAAATAGAATTTGTGAAGTTTATATTGGCA  
TCTGCACCAGTACTTAAGGAAATCTTCATTTGGAGTAGTGGGCAGTTTCATCGGGGTACACAGATGATG  
GATGAGATAAAACAATTCCATCGAGAATCACCCAATGTTAGATTCAAATTCGAAGAAATGTGA

>PGSC0003DMG400013898 LRR-RLPs

CCCCTTTGGCTTCAAGGCTTACAAGTCATCGTCCGCTAGTATATATATCTATGAGAACCCTTTTAATGTAA  
AAGCTCAAAAAAGTTGTATTATTGTTCTTGAAACCAAGTACTCTACCTATTAGACATGACAACCTTCTACA  
GTACCTCCTTTACATTCTACTTGTGCTTCTTCTTTTTCACTTCCATTACAATTACATCATCAGCAACAAC  
TGAAGCTGAAGCTCTTGTCAAATGGAAGATGAACTTATCTTCTGCTTCTTCTTGGATTTCATGGTCCATTT  
CGAATCTCGGAACTTGTGCAATTGGACATCTATTGTCTGCAATGCTGGTGGAAACAATTTCCGATATCAA  
TCTTTCTGATGCAGGCCTCTCAGGCACTCTTGATCAGCTTGACTTCACTTCATTTCCGAGTCTCACAAGTTT  
TTCTCTCAATGGCAACAACCTTAAGTGGATCGATACCATCAAATATTGGCAATGCTTCTATGCTCACTTTCT  
TGGACCTGAGCAACAATATCTTGGAGGGTGTACATACCAGAAGAGATTGAGAAGTTAACACAACCTTGAAT  
ATCTCAGTTTCTATAACAACAATATCATTGATGTTATTCCCTACCAAATAAGTAATCTTCAGAAGGTATGG  
CACTTGGATCTTGGATCAAATTTTTAGAACTCCTGATTGGTCCAAATTGAGGAATATGCCTATGTTGAC  
ATATTTGAGCTTTGGTTATAATGAACTAACATTAGAATCCCTGAATTTGTAAGTCCGTTGCCATAATCTGA  
CTTACCTCGATTTGTGATAAACCATTTGAATGGTTCAATACCAGAAACACTATTACCAAACCTTGGATAAG  
CTTGAACAACCTCAATCTTTCATCTAATTCATTTCAAGGTTTCATTGTCACCAAATTTTACCAAGTTGACCAAG  
TTAAAAGAACTTCAAGCTTGGTGTCAACATGTTTTCGGGCTTAATTCCTGATGAAATTTCTCTGATCAGCAG  
TCTTGAAGTTGTTGTACTTTTCAATAATTCATTCAGGAAAGATTCCATCTTCTATAGGTAGACTTAGAA

ATCTTCAACAACCTTGATCTTCGAAAGAATCGTTTGAGTTCAACCATTCTTCTGAGTTAGGTCTTTGACT  
AACCTCATTTTCTGGCTCTAGCAGAGAATATCCTGCAAGGACCATTGCCTATATCCTTGTCGCGGTGAC  
CAAGTTATCTGACTTGAACCTGTCTGATAATTTCTTTCTGGTGAGGTTCAATCATATCTCATTACCAATTG  
GACTGAGCTGACATCTTTGCAGCTTCAAACAATTCATTTTACGGAAAATTCCACCTGAAATCAGCCAG  
TTGAAAAACCTCGTATATCTTTACCTCTATAGTAACAATTTCACTGGTTCCATTCCCTATCAGATTGGTAA  
GTTGCAAACTTGCTGGATCTAGATGTCTCTGAGAACCAGCTTTCAGGCACAATACCTCCAACCATTGGA  
AACCTGACCAATCTAAGGACGTTGCAGCTTTTTTCGGAACAACATCAGTGGAACCATTCTTCTGAGATTG  
GCAAATTGACATCTTCAAACCCTTGACCTCAACACTAACCGGTTTAGTGGTGAGCTGCCCCGACAGCAT  
TTCTAACCTCGGCAGTCTGAAGCTTCTTGAGTTCCTTTCTTTAGTAACAACCAGTTTTTCAGGTGTGATCC  
CTTTGTCTATTTGCAATTCGACATCACTACAACTCTAGTTTTTCGCAAGAAACAATTTCAGGGGAGAGATT  
CCACAATGTTTGGGTAATATCAGTGGCCTCTCCATTTTGGATATGCGCTGCAACAATCTTTCTGGGATTCT  
TCCAACAAGTTTTGATATTGGATGTTCACTTAGAACCTTCAACTTTCATGGAAATGAACTACAAGGGAAA  
ATCCCTCGATCTTTAGCCAATTGTAAAGAGTTGCAAGTCTTGATTTAGGAGACAATCACCTCAATGATA  
CATTCCCCATGTGGTTGGGAACTCTATCAATGTTGCAGTTTTAAGTTTGAGATCGAATAAATTGCATGG  
ACCCATTAGAACTTCAAGGATTGAAACATGTTTCCTGGTCTTCGAATATTAGATCTCTCTCGCAATGCCT  
TCACAGGAACTTGCCGACAAGTCTATTTCAACATTTGAACGCCATGAAGACAATAATCAAACAAAGA  
ATGCACCAATTGAAGGAAGCCACTATTACCAAGACTCGGTAGTTGTTGTAATGAAGGGACGCATGTTTG  
AAGTTGTGAGAATCTTGTATTTATACACGAGTATGGATCTTTCAAGTAACAATTTGAAGGACTTATTCC  
AAGTATTATGGGAGATCTCATTGCACCTCGGGTGTGAAATTTGTCTAACAATGGGTTGCAAGGTCATATA  
CCGCCATCACTTGAAATTTAGCGGTAGTAGAATCATTTGACCTTTCATTCAACCACCTTTCAGGAGAGA  
TACCGGAACAACCTTGCTTCTATAACAAGTCTTGCAGTTTTAAATCTCTCTCTACAATCATCTTGAAGGATGC  
ATTCCTCAAGGACCTCAGTTTGCTACATTTCAGAACAGTTCATATGAAGGTAATGATGGATTACATGGAT  
TTCCAGTTTCAAAGGTTGTGGTAATGATCAGGTATCAGAGACAAATGATACCGTATCTGCACCAGACG  
AACAAAGAAAGCAATTCGGAGTTTCTGAATGATTTTTGGAAAGCTGCTCTTATGGGCTATGGAAGTGGAC  
TATGTATTGGATTATCCATAATATATTTTATGATCTCAACTCAAATCCAAAATGGCTAGCAAGAATCATG  
GAAGAGTTGGAACACAAAATTATTACGCGAAGTAGAAAGAAGCAACGAGGTAAAAGGCATTATAGAAG  
AAGAAAATAATCGCTTCTAGACAAGTTACCAACTGAGTAGGATTTGATTTCAGAATTTGGGTATTCAAG  
TTAAGGTCTATGCTGATTTTTAGTTTATAGTAGCTATATGTATTGATATATATACACTTTCGTTACAACAAC  
AGTTAATCGATACTTTATACTAGGTATATTTTTCTTTCCAATAATTT

>PGSC0003DMG400013955 LRR-RLPs

ATGAAGCAAGAACTCTTGAAGATGTTCACTACTGGTGATATGGTAGCTTTTATCGAAGAAATCAAAGAA  
GTAACCTCCTGAACATGCAGTGTTCAAAGTATGTATGCCGATGGTGACCTTCATGAAGAAAGCATTGAG  
GGACATGTATTGGAGATCGAAGTCTCTAGTCAATCATCTGTCATATCGAGGTCAGTAACTGGCTTAGATT  
GAACATTGGAAACAAATGGAGAAAATGATGACCAAATAGATGAAGAAGTTGATTTTGAAGTTTCAAAG  
ACAAATGATATGATTTTTGAAAGCTTTGAAGCTTCCAAAAATCTATCGAGGAGATCATAAGAGAATATG  
GCAATGGATCCTATGTTGGTGTGAGACTTCACAAGAAATTGATAGAGTTTCTCTGGATAATATAATTGT  
CGAGAAGTTAAGAGAAAGGGGGAGTTTGAGAACTCAACAAGGAGATAATTTACATGGATCAACTGTCCG  
GTGAAAAATCTTTATCATTGAAGAAGGAAGAGGAGTCCGGAAGAAAGTGCTAAGATTTTCACCAAGGC  
GTGGCTCAAAGCTTCGTTGAGCTCTCCATGACAAGTGTGGGGTAGTTTCCAAAAATCACTTTAAGGG  
GGAGTGTGAAAAATTAAGTTGATTTTTTGGAGGTACAAAAATATCTTAGATATTTAGTAAACTTTCT  
AGAATTTGTAGAGTAAATATCTTTGATATTTATACTTAAGAAATATCTAGATGTTCTAGATAAGTAGATA  
TTTGTAGTAAAGTATAGAAATATCTAGGTTCTTGTTACATAGTTAGAAGATAAGAATATCTAGATTTTTCT  
TGTAGAAGTATCTAGAAGCATCCCTATACAAGTATAAATAGGGGTGGCATTAGGCATTTGTAAAACAAT  
CTAATAACAACCCAAATAAAAGAGTGTCTTCCATAAACAAGTTCTCCTTTCTAGCTTCTCTTTAGTT  
GCATATCCAATCTTAGTTAACGATCTTGGGCTAGCAGAAGGTTTCCAATACTTTTCTCTGCTATTCTCT  
ACAATTCTATCATTGAGTCTCCGGCCCAATCGCATCAGTGTACATGTAAAAATTGTTGTCTGAGTTGCG  
AAGAATTCTAAGACCTGAAGTTGTTGTGGCTTTAAGATACCGTAGTAGTATCCTCTTAACCGCCTCCAG  
TGTTTCATGGTAGGTTTCATGCATAAACTGTGATAGTTTGTGACAGCAGGCCGTGTGAATGATAAATCCTG  
TAACTTACCAAGGGTGCGCCTGTAGAGTGTAGCATGAGCTAGCAGGCGGAGAACCATCAGCTGCCCGA  
GGTAGTTTACCGGAGCACATTGGAGTCAAGACTCCTTTACAATCTTGCATATCCAATTCAGACAAAATAT  
CATGAATGTATTTGGATTGAGAGAGAATAAGACCATGACCATCTGACACTTTTTTTAACTTCAACACCCA  
AAAAGTAGTCTAAGTAACCAAGATCCTTCAAAGAAAACCCACTTCTATTCCATTTTGTGAAACACAACCC  
AAGTAGTAGTGTAGTACTGTCAACTGGATAAATTCCTTTTCTTATTTTCTCATACTTAATAATCTGTTTTT  
ACATTAATCTTTTTGCTACTTATTTTCTCATCCATTAATCTGTTTTCGCATTTTGAATATATTATTTTTG  
GAATTAAGAAAAAATAAAAAAATAAAATAGATTTAAAAAAGTGAATCACACATGAC  
AATGTGTGTAGTAGCGTGTGTCACGTTTGATTTTCTCAAAGAAAACATTAATAATTTCTCCATTTTGTG  
CTAATTAGTGAACGTATGTTGTGTAACACAGCCTGTAAGGTTGATTTGAAAGATTGACTCCCATTGACT  
TTGCTCTTAACAATTATTCTTTCTATATTATGACTTTTATTTGTTCTGTGAAACACAACCCAAATTAGTGTCT

TTTTTTTTATTTTGCTATTTATTTTCCTCCTTTAATCTGTCTTTACATTAATCTGTTTTACATTTTGAAAT  
TAGTCCATACTTTTCAGCATTATTTGTTTTGGTGCTATATATATAGTGGAGTAACTTTGATCATTGGAA  
ATACCACAAACACAAATTAATTGCCTTGAAATATTCTATATCATATGGAGAAGCACATTTTCTTATTGATT  
CTTCTCTTTCTAATTCAATTTCTGTATCATTGCTTCCTCAAATGAGAGTGACCAACAAGCTCTATTAGCT  
TTCCAAAATCTTATTACAAGTCCTAATCATTTTTGGCCACTAATTGGACCAAAAATACTTCTTTTTGCTCT  
TGGTATGGTGTCACTTGTAGTCCAAAAAGGCAAAGGGTTGTGGCCTTGACTCTTCTAATTTGCAACTTC  
AAGGCACAATTTCCCGTCTTTGGCCAATTTGCTCTTCTCAGTGAGATCAATCTGGGAACAATAAATTC  
TGTGGTGGCATCCCTTATGGACTTGGCCACTTGCCTCGCTTGCAGTGATTGATATTCAAAAACAATCAGT  
TTAACGGAAGTATACCAACAAGTCTATTTCAAATCGGAGAGTTCAAATAATTTCAATTGGCTTTCAATGA  
ACTCAGTGGTGAAATGTGGAGAGGGGCCATGGTATGTACCCGAACTCAGAGTCTTAAATCTCGGGAAC  
AATAGCCTAACCGGTATAGTCCCTCCTTCTGTTGGAAATGCCACAAGAATGATGAACTTCAATTTGTCTG  
GGAATAGAGTCAGTGGCAACATTCAAAGGAGGTCCGTAATCTGAGCCAGCTTGCATTTCTGTCCTTGA  
TCGATAATCAATTAAGTGGTTCCATTCTACATCACTTTTTAATATCTCGTCACTTCTTGTCTATCTCTGA  
GAAATAATATCCTTTCTGGTCTCTTGTAAACGAAGGAAATATTGTTTCAAATCTGAACCTTTAAGT  
ATATCTTACAACCAATATCTGGTTGCATTCCTTCCAACATATGCCAACTCACAGAGCTCAAAGTTTTGTC  
CATATCTTTCAACAATATAGCTGGAGACATACCCAGAAATATTGGTTGTTTATCCAACTCGAGAAATTT  
ATATGGGTGATAATCCAATAAAAGGGACTATTCCCACTTCAATGGGAAATATTTCCACTCTGCATGATCTT  
TACTGTCAAAAACAATCGGATAGTGGGGGGAATTCCTCCGGAATTAGGGAAGCTATCAAATTTGAGGCAA  
TTAACCTTTGACAATAATTCTAATCTTATTGGTCAAATTCAGAGGCTATTTTCAACATATCTTCTTTGGAA  
GTGATTGGTTTTCACTTTAAACAACCTCTCCGGGAGAATTCCAACCACTACAGGTCTTCATCTTCCGAACCT  
TAAAGTACTTGAGTTGGGAGTCAATCAGCTGGAAGGGGAAATTCATTGTTTCATAGCAAATGCTTCCAA  
GCTTCAGAACTGGAGCTAAATAATAACTTTCTGACAGGAACTATTCCTAATAATTTGGGGAATCTTCGT  
GAGCTGCAAGCACTGCTCCTACATACCAATCAACTTACCAATGAACCAAGAGAACGTGAGTTGTTATTCT  
TCAATTCCTTTGGCGGACTGTAAGATGTTGCGATATCTACAAGTGGGTAAAATCCGTTGAATGGCATTCT  
GCCAATTCATTTGGGAATCTTTCATCTACTATTGAAAACATTTATATAGGATATGCACACATCAATGGCC  
TCATCCCCACAAATGTAGGCAACATGAGCGGTCTTACAGTCATAGACATTCAAGGAAACAACCTTGACAG  
GGAGTATTCCTTCTGAGATTGGTAAGCTTAAACAACCTCAAGGGCTGTATCTAGATAAAAATAAATTGCA  
GGGACATATTCCAGAGGCGGTATGCCATTTATCTAATTTGGTTAAACTATTTCTGAATGGTAATGAGCTC  
TCTGGATTAATTCCAGAATGCTTAGGAAATCTTAGCATGCTACAAAAGCTTTATTTGTATTCTAATAAATT

TTCATCAA AATTTCCATTGAGCCTTTGGAAGATGAGTAGTCTTCTCTATCTAAGTGTGTC ACTGAATTCAG  
TAGAGGGAGAAGTTCCATCAGATATTGGAGGAATGAAAGCCATTGTAGA ACTACATCTTTCCAGTAACC  
ACTTTTCAGGAATGATACCAAGCACATTCCGGGGA ACTCCAAAACCTGCAGTATCTTGACCTGT CGAACA  
ATTCATTTTTTTGGCAAAAATTCATTATCCTTTGCCA ACTTGATAAGCTTAGAATACTTGGATTTGTCTTCA  
AATGTGTTGTCAGG TACTATTCTAAGTCTTTGGAAAACTCTCATACTTAAAAGCATTAAATGTTTCCTT  
TAATGATTTAGAAGGTGAAATACCGAGTGGTGGTGTGTTTGCAAATTCCACTCTGCAATCATTCTTGGG  
AACAAAGGTCTATGTGGAATGCACATATTGGAGATTCTGCTTGTGCTATCACTAATCCTGGAAAACAAT  
CAAAGCTTAGGGAGGTTCTGCTAAAATTTGTTACTCCAGTGGTTATTGCATCCTTTCTGATATTCTTGTG  
GTTTCAATTTGGATAATGAAACGACAGAAGAAAGGAAAGTCCAAAGAGGTAGAGAAGGTACTGGAGAT  
CGGGACTCATCAATTAGTTTCTTATCACGAGATTCAACGAGCAACAATAATTTTGATGAATCCAATTTA  
ATTGGTGAGGGAAGCTCTGGCTCTGTGTACAAAGGCACATTGTTTGGTGGA ACTGCAGTGGCCATTAAG  
GTTCTGCATTTGGACAATGAGCAAGTATGCAAGAGATTTGATACCAAATGCAAAGTGACGAGAAATGTT  
AGACACAGAAATCTTGTTCCAGTGATTACTACATGTTCTAGTGACTATATAAGAGCCTTTGTTCTGCAATT  
TATGCCCAATGGAAGTCTTGAGAATTGGNNNNNNNNNNNNNNNNNNNNNNNNNNNNNNNNNNNNNNNNNN  
NNNNNNNNNNNNNNNNNNNNNNNNNNNNNNNNNNNNNNNNNNNNNNNNNNNNNNNNNNNNNNNNNN  
NNNNNNNNNNNNNNNNNNNNNNNNNNNNNNNNNNNNNNNNNNNNNNNNNNNNNNNNNNNNNNNNNN  
NNNNNNNNNNNNNNNNNNNNNNNNNNNNNNNNNNNNNNNNNNNNNNNNNNNNNNNNNNNNNNNNNN  
NNNNNNNNNNNNNNNNNNNNNNNNNNNNNNNNNNNNNNNNNNNNNNNNNNNNNNNNNNNNNNNNNN  
NNNNNNNNNNNNNNNNNNNNNNNNNNNNNNNNNNNNNNNNNNNNNNNNNNNNNNNNNNNNNNNNNN  
NNNNNGAGACATTGGGCACTCTTGATACATTGCACCAGGTATAATAAATCTTCTCTCTTTGATTTTCTC  
TTATCATAGTTAAGCATTCTAGAAGTAAAAAAGCAAGTCTTCATTTATGCAGAATTATTGTTGTATTTCAA  
TTGAGTAACTTTTCTCAATCCGTTTTTAAGAATATGGCTCAGAGGGAATAGTGTCCACTAGTGGTGATG  
TTTATAGCTATGGCATCATGTTGATGGAGGTTTTGACGAAAAGAAGGCCAACAGATGAAGAGATAGGC  
AATGAAAATCTTGACTTGAGGAAATGGATCATACAATCATTTCAGGGAGTATGATGGACGTTGTGGAT  
GTCAATCTTTTTTCTGAGGAAGAAGAAATCACTAGTAAAAGTGAAATGTGCATAGCGTCCATGATAGAA  
TTGGGTTTAGACTGCACAAAGGAAACGCCAGAATCAAGAGTGACCATGAAAGAAGTAGTTAAGAGGCT  
TAACAAAATCAACAACACATTTCTGGAAACATAG

>PGSC0003DMG400014463 LRR-RLPs

GCTAAAGATGGGGTAATGCAATTGTGCTCACTCTCGTCTTTTTCTGTCTTGAAGTTTCTTCATCCATATTA  
CCTCATCACTCTCACAACATCAAATTCAAACCATTTCCCTTCTAAAATTCAAGAAGTCCTTTACTATAGAT

CCCTCAGCCTCTTATTTTTGTCAAGACTTCGGTAAGAAGTTTTATCCAAAACGAGTTCATGGAACATGA  
GCAGAGATTGCTGCTCATGGGATGGAGTTGTATGCGATGACATGACTGGACATGTCATTGAGCTTGACC  
TCGGCTGCAGCGGTCTTGTTGGGACCATTGATTCCAATAGCAGCCTATTCCAACCTCTCATCTCCAAAG  
GCTTGATCTTTCTTTAAATAACTTCTCCAATTCTCACATCTCCCCTGAATTTGGCAGGTTTTCGAGCTTGAC  
ACATCTTGATCTTTCAGGCTCCTATTTTTCAGGTCAAATTCCTTTGAAATCTCTTATCTTTCCAAGTTACAC  
TCTTTTCGCTCTCCACAAATATTGGGTTTGTGGCCTCCCCTCATATTTTGGGCCATACAAAGACTCGC  
GGCCCATGATTTTAAATTGCTCCTCAGAATTTGACCCAATTAAGAGAAGTTGATTTTAGTTTCATAAACA  
TCTCTTCAACCATTCTCCGAATTTTTCTTCTCATTTCAAACTCTGAGTCTGGGATTAACAGGATTGTATG  
GGATAATACCTGAGCGTATTTTTCACCTCCCAACTTGAAAAACTTGACTTATCCAGCAGTTATGAGCTC  
AGTGGTTATTTTCAAAGACCAAATGGAACAACAACACATCTCTTAGGAAATTAGAAGTCAAGTGGCGTG  
AATTTTTCTGATAATATACCTGAGTCTCTTGGCTATCATCTAACTTCGCTGAATTATTTTTCTTTTCGCATT  
GCAAGCTTTGGGGCCCTATTCCTAAATCTTTTCCAATCTCACTCACATAGAGTATTTGTACCTTGATGGT  
AACTGTTGAATGGAACAATACCATTAGGGATGTTCTCCCTTCTATCACTAATTTATTTAGAATTGAGTCA  
TAACCACTTTTCTGGTCAGCTTGAGGATTTCAAGTCAAATTCATCTATATTGGTTTAAGCAATAATC  
AGCTGGAAGGCCATCTTCAAAGTCAATTCAAAACCTTGGAACCTGACAACTCTTGATCTTTCATCGAA  
TAATTTTAGTGGCAATGTGGATGTCAGCCTCTTTTCAAACCTCAAACAACCTTTCGTATCTTATTCTTTCATC  
GAATAATTTTAGTGGCAATGTGGATTTGAGCCTCTTTTCAAACCTCAAACAGCTTTCATATCTTATTCTTTC  
TTCCAATAATTTTATTGGAAATGTAGATGTCAGCCTTTTTTTCAGACCTCAAACAGCTTTCATATCTTAGTCT  
TTCACAAAATCATTCTCATTGACCAATGAAAACAAAGTTAAGGTTACTTTGCCAGGATCTCTTTATACGT  
TACAATTGGCTGCATGTGAAGTGAAAGAATTGGAGTTTCTAAAATCCACAAATCATCTTGTTTTCTTGGA  
TCTGTCAAATAATAAGCTTCAAGGAAGAATCCCAGATTGGGCATGGTCTAAATGGATGTTTTATTGCAA  
TATCTAGATCTATCCTACAACATGTTGACAAGTGTGATTCAATTCCTCTTCAATCACTAGATACTATTGAT  
TTACGGTCCAATTTGCTTCAAGGTTCACTACCTGTTCCACCAAATTCACAATATTCTTCTTAATATCCCAA  
AATAATCTCACTGGAGAAATTCCTGCATCTATTTGCAATTTGATGTCACTCCAAATTTTGGATTTGGCGAG  
AAACAATTGAGAAATTCACAATGTTTGGGAAATATGACTCCCCTCCGGGTTTTGGATATGCGCCACAAC  
AATCTTCTGGGAATATTCCACCAACTTTCAGTAATGAAAGTATATTGAGCAGCCTCAACTTGCATGGCA  
ATAATCTAGAGGGGAAAATTCCTCGATCTTTGGTCAGTTGCAAAGACTTGCAGCTTCTTGATTTAGGCAA  
TAATAACCTCAACGACACATTCCCTGTGTGGTTGGGAGCTCTCCAGATCTGCTCATTTTAAGCTTGAGAT  
CAAACAATTGCATGGACCAATCAGAACATCAAGTTGGAGTGAGAACATGTTTCCTAAGCTTCGAATCAT

AGATCTTTCCTACAATGCCTTCTCGGGAACTTACCTTCGAGTTTGTTTCAACATCTTAAAACCATGAGGA  
CAATTGATCCATCAAGGGAAGCAGCAAGACATGGTGGAAATACATATTACCAAGATTCTATTATAGTTG  
CAATCAAGGGATCTGAGCGTGAAATTGTCAGAATCTTGTATTTGTACACCGTTATCGATCTTTCAAGTAA  
TAAATTTAGAGGGCAAATTCCAAGTATTATGGGGCATCTCAATGCAGTTCACATATTGAATTTATCTCAT  
AATGCATTGCAAGGTGATATACCGACATTATTCGGAGATTTATCTTCACTTGAATCATTGGACTTGTCAG  
GAAACAACTTTTCGGGAGAGATACCACAACAACCTGGCTTTTCTTACTTCTTGCATTCTTAAATCTCTCC  
CACAATCATCTCCAAGGATGCATTCTCAAGGACCTCAGTTTTACACTTATGAGAACAATTCATATGAAG  
GCAATGATGGATTACGTGGATTTCTATTTCAAAGGCTGTGGCGATACTCATCGTCTCTAAAGAATCCA  
CGCCCTTTTTTTAGCGTTTAGGGCCGGGCGTCATGAAACAAGAATTCAGAATTTTCTAAGTGTTTCGTGT  
GTATCAATTCATGAATTTTTGGAAATATGACTGATCGAATATTTTTGCCCAAATATTTATTGAAATCATCT  
GTAATGACCTAGTGAAC

>PGSC0003DMG400014717 LRR-RLPs

ATGGTGAAAGTGTGTTGAAGATCGTGGGGGATGGGCTGGGGCTGAGAGATACAGAAGGTAATGGGATT  
TGGGGAGGGAGCAACAGAACGAAGTGAGAGAAAACTTTTTGAATTGATAATTTATCATTAAATTAATGA  
GTTTAAATTTAAGATAATTATTTAACATCATATATAAGAGATTTGTGTATCTAATTAATATTTAAAAAA  
TAAAAGTGATATTGTGCGTAATTTTTTAACTAGAGGTAAATTAAGTATATATGGCACTAAAGTATGTC  
TAACTAGGTAGTTTTTCCAATAATGAATTCATGAAAAATGCTTTTTTCTTTCTAGCTCCAATGGTGAAAC  
AAGGTTTGATCCTTTCTTTTCAGGAACAAGGTGGGTTAACATTGTATCACATCAAGATGTGCGATTCATTT  
TTTGCCCTCAATGAAACGGAGAAATTTTAAACCCGATTTTTGAGCCTTTCATCTTTCTTAATCAAGACCTA  
ACAACCGCCGAGGAGCACCTCAACATATGATTGTGCACAGTAACTGAGACTCCTATTGCACCTAAGGTC  
AACTTCAATTCACCAAACTAAAGTTTATCTTTGTGTAGTCATTGTAGACTCATACAAGTAGGGGAGGAG  
CCAACATGTCTTTAGGGGTTTCATCCGAACCCCTTCGAAAATTTACTATATATACATGGTTAAAATTATT  
TTTTAGATGTATATAATAGATGTGGAACCCCTTCGACTAGTTCGTATGTTTACTCCTTCGAATTTTGAACC  
CCCTTATTGAAAATCCTGGCTCTGCCACTGCGTACAAGGATATTGAGTAGATAGTTGATGTATCAGACTC  
GATACTTCAAAGAATGGAGGAGAAGACGATCTACGGCTGCAAGTGTGCATGAAGACAATATATGAAA  
TAACTTAGCAAACATTCTTTGAAACAAACAGTTCACAATTCATAGATCAGAAAAATAATTTCCAGCACG  
TCTAAAACAAGCAAAAATGGAAAAGAAAAACAAAACAGTTCCAAAGGTAGATAAAAAGTTCTTAAGCTT  
TGCAAACACACCATCCCTCTGCAATGTCCAACACAAACGAATCAGATCGATACATAACCATCACAACGG  
TAAAAAGATTATGCAATCACACCTTGATCTTTGCCAACACGAGCTTAAACCTGTCATAATCATTGAGTGA



GGCCGTCCTCTTCTGCACGATCGACTTCCTTCCTCAGGAAGTGGACTCCCACTTGGTCTTCACATATGCGA  
GGACATAAAGCAAATGAGAGTTAATCAAGTTCTTACGTAACCCTGTCGTTAGCCAAATGACTCAAATTAC  
CATTCTGGATGATGAAAACCGTTTTCTAATTAATAAATTCAAATTTGAATACTGCAATTCAGCCAACGT  
ACACGTATCTTGATCTCTAGCTCGGCCACTGTTCCAGTGATATGTATTTCTGAGGGGACTAATTAACAC  
ATAGTCTAGTCACTTTAGTATTTAGTATTGTAAGTCTAGTGCTACAAAGAGTTAAGTTTAGTAGTGACGAT  
TCATGAGATTAACCTCTAAATTTGTGATGACTGAAAATCAGAAAGTAACACAAGATGCTGTTCTATCTT  
ATGAAAAGATTAGAAAGGTGAAACTCTACTTCTTTTAAGCTTTGTATTCTAATTGATAGAATTTATTTT  
CTGTATGATAGTTTTGTTTTACTTGGAAAAAGTGGGAGTAGATGTGCAACACATGGATAAAGACAATAA  
AAAGACAAAAGCACACAACCCAAATTTGACTAAAGAATGACAACATTTTCTCTAATAAAAATTGAACAGA  
CAAAGTGTGAATAAGAGTTTAGAAAAAATGGGAGTAGATGTGTAACACATGGATAAAGACAATTA  
AGACAAAAGCACACAACCCAAATTTGACTAAAGAATGACAATAATTTGAGTGACTTTTCTCTTACAA  
AAACAAAGAAAGGTGACTTTCTGAGATAATTATCTATAGTTGAATGACCACGTGAGAAATCAACTCTTGA  
CGTCTACTACATATGAATTAGAGATAATGTAGTTTAGAAAATTATTAATTTAAGACTGAAAATTGTTGAA  
ACAAATATGTCTATATCATATGCTAAGGCAGAGTGGTCATGATCAATGTGTGATAACAAAACCTATTTTG  
CCACTTCGGTTAAGTCCTTGTCTGAATTAGTGTGGTCTTTAATTATAATTTACGTACAATATAAAAATCCC  
ATGAACCCGAAACAATAAACTCAAATATGATGATGGTTCCAGCAAATACTCTCTTCACTTCAGTGTCT  
CACTCTTTTATATCTCTTACAGTTACTTTTGCTTCGACTGAGGAAGCAACTGCCCTCTGAAATGGAAAG  
CAACTTTCAAGAACCAGAATAATTCCTTATTGGCTTCATGGACGCCAAGTTCTAATGCATGCAGGGACTG  
GTATGGAGTTAAATGCTTTAATGGTAGGGTAAACACGTTGAATATTACAAATACTAGTGTCAGTGCTACA  
CTCTATGCTTTTCCATTTTCTCTCTCCCTTTTCTTGAGAATCTTAATCTTAGCATGAACAATTTCTCTGGCA  
TCATTCCACCTGAGATTAGTAATCTCACTAATCTTGTCTATCTTGATTTGAACATCAATCAGATTTAGGA  
ACAATTCCACCACAAATCGGATCACTAACCAAGCTTCAGATCCTCCGTATATTTGACAACCATTTAAATGA  
CTCTATTCCTAAAGAAGTAGGTTACCTAAGGTCTCTTACTAAGCTATCTTTGGGTAGGAACCTTTCTTAGTG  
GTTCTATTCCCTGCTTCATTGAGGAATTTGAACAACCTTGTCCTTTTTGTTTCTTTATGAAAATCAACTTTTTG  
GGCCTCTATTCCCTAAGGAAATAGGTTACCTAAGGTCTCTTAGTGAAGTACTAGATTTAAGTAGTAACTCTCTA  
AATGGCTCTATTCCCTGCTTCATTGGGGAATTTGAACAACCTTGACTTATTTGTATCTTTCTGATAATCACATT  
TCGGGCTCTATTCCCTGAGGAAATAGGTTACCTAAGGTCTCATAGTGAAGTACTAGATTTAAGTTATAACTCTC  
TAAATGGTTCTATTCCCTGCTTCATTGGGCAATTTGAACAACCTTGTCCTTTTTGTCTCTTCGTGAAAATCAAC  
TTTCTGGCTCTATTCCCTCAAGAAATAGGTTACCTAAGGTCTCTTACTGATCTTCGTTTGAACAATAACTTTT

TTAATGGTTCAATTCCTCTTGAAATAAGTTACCTAAGGTCTCTTAGTTTCATAGATCTGAGTATTAECTCTC  
TTAATGGTTCTATTCTGCTTCATTGGGGAATTTGAGAAATGTGCAAAGAATGTTTCTTGATGAAAACAA  
TCTCACTGAGGAAATTCCTTTATCTATGTGCAATTTAAAATCACTTGATATTTTGTGTTTTGCGGAGAAACA  
ACTTGAAGGGAAAAGTTCCGCAATGTTTGGGTAATATTAGCGGCCTCCAGGTTATGACGATGTCACGTA  
ATAATCTTAATGGAGAGATCCCTTCATCTATTTCCAATTTAAAATCACTACAAATTCTAGATTTGGGAAGA  
AATAGTCTGGAGGGAGCAATTCCACAATGTTTTGGCAATATTAATACCCTACAGGTTTTTGATATGCAGA  
ACAACAAATTTTCTGGGACTCTTCCAACAAATTTTAGCATTGGAAGTTCATTATAAGTCTCAATTTGCAT  
GGCAATGAACTAGAGGGGGAAATCCCTCGATCTTTGGCCAATTGCAAAAAGTTGCAAGTCTTGATCTA  
GGAAATAATCATCTCAATGACACATTCCCATGTGGTTGGGAACTTTGTTAGAGCTGAGAGTTTTAAGAT  
TGACATCGAATAAATTGTATGGACCCATAAGATCTTCAGGGGCTGAAATCATGTTTCTGATCTTCGAAC  
CATAGATCTCTCTAACAATGCCTTCTCGAAAGACTTACCAACGAGTTTGTTC AACATTTGAAAGGCATG  
AGGACAATTGATCAAACAATGATGGTACCAAGTTATGAAGGAGATGGAAGTTACGAAGACTCGATAGT  
TGTTGCATCGAAGGGATTGAAGCTTGAAGTTTTGAGAATTTGTCTTTGTACACAGTTATCAATCTTTCAA  
ACAACAAATTTGAAGGACATATTCCTAGTGTCTAGGAGATCTCATTGCTCTTCGGGTGTTGAATATATCT  
CACAATAGATTGAAAGGCCATAGACCACCATCACTTGGACGTTTATCTGTAGTGG AATCATTGGACCTTT  
CATTTAACCGCCTTTCTGGGAGAGATACCACAACAACTTGCTTCTCTTACGTCTCTTGAATTCTTAAATCTCT  
CCCACAATTATCTCCAAGGATGCATCCCTCAAGGACCCCAATTTACATACCTTTGAGAATAGTTCATTTGAT  
GGTAATGATGGATTACGTGGATTCCCCGTTTCAAAGGTTGTGGCAATGATCCTGTGTCAGAGACAAAT  
TATACAGTATCTGCGCTAGCTGATCAAGAAAGCAATTCTGAATTTCTCAATGATTTTTGGAAAGCTGCTCT  
GATGGGCTATGGCAGTGGATTATGTATTGGATTATCCATAATGTATTTTCATGATCTTAACTAGAAATCCG  
AAATGGCTTGCTAGAATCATTGAAGAAATGGAACACAAAATTAACATGCGAAGGAGAAAGAAGCAGCG  
AGGTAA

>PGSC0003DMG400014718 LRR-RLPs

ATGATTCTCAATGATAACAATCTCATTGGGGAAATTCCTTCATTTGTGTGCAATTTGACATCACTGGAAGT  
GTTGTGTATGCCGAGAACCAATTTGAAGGGAAAAGTTCCGCAATGTTTGGGTAATATAAGTGGCCTCCA  
GGTCTAGTGATGTCACATAATAATCTCAGTGGAAAGATGCCTCCATCTATTTCCAATTTAACGTCACTAC  
AAATTCTAGATTTGGGCAGAAACAATCTGGAGGGAGCAATTCCACAATGTTTTGGCAATATTAGTAATCT  
CCAGGTTTTTGATATGCAGAATAACAACTTTCTGGGACTCTTCCAACAAATTTTAGCATTGGAAGTTCAC  
TTATAAGTCTCAACTTGCATGACAATGAACTAGAGGGGGAAATCCCTCGGTCTTTGGCCAATTGCAAAA

AGCTGCAAGTTCTTGATCTAGGAGATAATCATCTCATTGACACATTCCCCATGTGGTTGGGAACTTTGAC  
AGAGCTGAGAGTTCTAAGATTGACATCAAATAAACTGCAAGGACCTATAAGATCTTCAGGGGCTGAAAT  
CATGTTTCCTGATCTTCGAATCATAGATCTCTCTAACAATGCCTTTTCAAAGACTTACCAACGAGTCTGT  
TTCAACAATTGAAAGGCAGGAGGACTGTTGATCAAACAATGAAGACACCAAGTTATCTAGGAGGTAGAT  
ATAACTACCAAGACTCGGTAGTTGTTGTAACAAAGGGATTGAAGCTTGAAGTTGTGAGAATTTTGTCTTT  
TTACACAGTTATCGATCTTTCAAACAACAAATTTGAAGGACATATTCCTAGTGTTCTAGGAGATCTTATTG  
CGATTGCGGTAAGTGAATTTATCTCATAATGGATTGCAAGGCTATATATCACCATCACTTGGAAAGTTTATCT  
GTAAGTGAATCATTGGACCTTTCAATTAACCGTCTTTGCGGAGAGATACCACAACAACCTTGTCTCTTAC  
GTCTCTTGAATTTCTAAATCTCTCTCACAATTATCTCCAAGGATGCATCCCTCAAGGACCCCAATTTACATC  
CTTTGAGAACAGTTCATTTGATGGTAATGATGGATTACGTGGATTCCCCATTTCAAAGGTTGTGGCAAT  
AATCCTGTGTCAGAGACGAACTGTACAGTGTCTGCGCTAGAAGATCAAGAAAGAAATTTCTGAATTTTC  
AATGATTTTTGGAAAGCAGCTCTGATGGGCTATGGCAGTGGAAATATGTATTGGATTATCCATAATATATT  
TCTTGATCTCAACTGGAAATCTAAGATGGCTTGCAAGAATCATTGAAGAACTGGAACACAAAATTATCAT  
GCGAAGGAGAAAGAAACAGCGAGGTCAAAGAATTACAGAAGAAGAAATAATCGCTTCTAG

>PGSC0003DMG400014719 LRR-RLPs

ATGATGATGGTTTCTAGCAAACATTCTCTTCGCTTCAGTTTTTCACTCTTTTGTACCTCTTTACAGTACT  
TTGCTTCCACTGATGAAGCAACTGCCCTCTTGAATGGAAAGCAACTTTCAAGAACCAGAATAATTCCTT  
ATTGACTTCATGGATGCCAAGTTTTAATGCATGTGAGGACTGGTATGGAGTTATATGCTTTAATGGGAG  
GGTAAACACGTTGAATATTACAAATTCTAGTGTCACTTGGTACACTCTATGCTTTTCCGTTTTTCATCCCTCC  
TTTTCTTGAAAGTCTTGATCTTAGCATGAACAATTTCTCGGGAACCATTCCACCTGAGGTTGGTAATCTCA  
CTAATCTTGTCTATCTTGACTTGAACATTAATCAGATTTAGGAACAATCCCACCACAAATCGGTTCACTG  
GCCAAGCTTCAGATCCTCCGTATATTTGACAACCATTTAAATGGCTCTATTCTGAAGAAATAGGTTACCT  
AAGGTCTCTTACTAAGCTATCTTTGGGTAGGAACTTTCTTACTGGTTCTATTCTTACTTCAATGGGAAAT  
TGAACAACCTGTCTTTTTTGTCTTTATCAAATCAACTTTCTGGTTCTATTCTAAAGAAATAGGTTACT  
TGAGGTCTTACTAATCTATATTTGGGTAATAACTCTTAAATGGATCTATTCTGCTTCATCAGTGTGC  
AATCTGACATCACTGGAAGCGTTGTTTATGTGAGAAACAACCTTGACAGGAAAAGTTCCACAATGTTTG  
GGTAATATCATTGCGCTCAAGGTTATGACGATGTCACATAATAATCTCAGTGGAGAGATCCCTTCATCTA  
TTTCCAATTTAACATCACTACAAATTCTAGATTTGGGCAGAAACCATCTGGAGGGAGCAATTCACAATG  
TTTTAGCAATATTAGTAGCCTCCAGGCTCTTGATATGCAGAATAACAACTTTCTGGGACTCTTCCAACAA

ATTTAGCATTGGAAGTTCACCTATAAGTCTCAACTTTCATTGCAATGAACTCGAGGGGGAAATCCCTCG  
ATCATTGGCCAATTGCAAAAAGCTGCAAGTCTTGACCTAGGAGATAATCATCTCAATGACACATTCCCC  
ATGTGGTTGGGAACTTTGCCAGAGCTGAGAGTTTTAAGATTGACATCGAATAAATTGCATGGACCCATA  
AGATCTTCAGGTGCTGAAATCATGTTTCCTGATCTTCGAATCATAGATCTCTCTAACAATGCCTTCTCGAA  
AGACTTACCAACGAGTCTGTTTCAACATTTGAAAGGCATGAGGACAATTGATCAAACAATGAAGGTACC  
AAGTTATGAAGGACATGGAGATTACCAAGACTCGACAATTGTTGTAACAAGGGATTGAAGCTTGAAGT  
TGTGAAAATTTTGTGCGTTGTACACAGTTATCAATCTTTCAAACAACAAATTTGAAGGACATATTCCTTGTG  
TTCTGGGAGATCTCATTGCGATTCCGGTATTGAATATGTCTCATAATGGATTGAAAGGTCATATACCACT  
ATCACTTGGAATTTATCTGTAGTGGAATCCTTAGACCTTTCGTTCAACCAGCTTTCGGGAGAGATACCA  
CAACAACCTTGCTTCTCTTACGTCTCTTGAATTCTTAAATCTCTCCACAATTATCTCCAAGGATGCATCCCT  
CAAGGACCCCAATTCATACCTTTGAGAACAGTTCATTTGATGGTAATGATGGATTACGTGGATTCCCCG  
TTTCAAAGGTTGTGGCAATGATCCTGTGTCAGAGACAACTTTACAGGGTCTGTGCTAGAAGATCAAG  
AAAGAAATTCTGAATTGTTCAATGATTTTTGGAAAGCAGCTCTGATGGGCTATGGCAGTGGACTATGTAT  
TGGATTATCCATAATATATTTCTTGATATCAACTGGAAATATGAAATGGCTTGCAAGAATCATTGAAGAA  
CTGGAACACCAAATTAACACACGAAGGAGAAAGAAGCAGAGAGGTCAAAGGAATTACAGAAGAAGAA  
ATAATCGCATCTACACAAGTTACCAGTAA

>PGSC0003DMG400014736 LRR-RLPs

TTTTCACTTGCTAGTCTAAACATTACACACCATGAAAGTGTTAACAATAACACTATGGGTTCTCTTGTTT  
TTTATTTTAAAAATACCAAGTTTGTCAATTTGTGTAGGGATTTGTAGAGAAAACGAGCAACGAGCATTGG  
AGACCTTGAAGAAAGAAATACACGATCCATCGGATATTCCATCTTCTTGGATTGTCGGAAAAGATTGTTG  
TGAATGGGAAGGGTCTGTGTGCAACAATCTATCTCGTCATGTGATTGAACTACATCTAGGTTATGTAAC  
CGTCATGAAGAGATTGGGCGAGGTATGTTTTTGTAGGCTCGAGTTTACTTATCCAAGGATAAATAGC  
CTTGAGTGGCTGCCAAGTCTTTCGAGTCTTGAGAACCTACAGATGGTAAGTGTTGATCTTAGCAAAGTTA  
ATGAATGGCTACAGGTTATTAACATGCTTCCTTCTCTTGTGATCTTCGTTTATCCAGTTGTAGTCTTCATC  
ATATAACACCTCTACTTGATCATCACAATTTTTCTTCACTCAAATTTCTTGATCTTCTTCAATTACAAATT  
AAGCTCTTCTGTTCCGAAATGGGTTTTCAACCTCCCAAATCTCATTTTTCTTGACCTGAGTTACTGTAATTT  
TACTAGCCCATTTCTGATGGTCCAGTTAACTTGACTTCTCTCACAACTTCAAGGCTTCTGGAACTTTTT  
CAATTGTCGTTTACCAAATGGTTGTTTGATTTAATAATCTTGAACATCTTGAGCTTCTAGTAATATGCT  
TTCTGGAAAGTTACCAAATGTAATTGGAAAGTTAGGGAAATTAGAATACCTTGATCTCTCATATAATCAA

TTTGAGGGAGATATTCCTATAAGTGTAACACGTCTTGCAGGATTAAGATCATTTAATCTTTCCAAAATA  
ACCTAACTGGTAGGATTCCAAATGACATTGGTGACATGAAAGTCTTGAAAAGTCTTGATCTTTTCAGAAAA  
TCAACTTTATGGTCAAATCCCACAAAGCTTTTCGAGTTTGCCCACTTTGAGCTACTTGAATCTATCTGATA  
ACAATTTGTCAGGTATGATACCAGTGAGCACTCAACTTCAAAGCTTTGATTCCACGAGTTTTCAAGGAAA  
CAAACCTCTGCGGACTTCCACTCTTGGTGAAGTGCAGTTCGGATGGTAATATTCCAAATAACAAGCATGAA  
GATGATGAGAGTGACAAAGATGAAGTAGATTGGTTTTACATTTCAATGGCTATAGGATTTGCACTAAGC  
TTTTGGGGTGTGGTTTCATTGTTTTAAGAGGTCATGGAGACATGCTTATTTTCGTTTGTATGCTTAC  
ATTTCTCATGTTAGCAATCATGTTGTTTCATTGTATATTCAAATGAATGTTTCTTAAGATGTTCAAACAATG  
TTGTTTCTTTCATAGTTCCAATTTTCTTTTTCAATCACAGAGTTGTGAG

>PGSC0003DMG400014738 LRR-RLPs

ATGGTGACGGATAAAGGCAACAAGTACCAGTATGACACCATTTTGGTGTGTTTACAAGTACGGATATG  
TCTAGAAATAACCTTTCTGGGGATATTCCTGTAAGTTTAATAGGTCTTGCAGGATTAAGATCATTTGATTT  
TTCTAATAATAACCTAACTGGTAGGATTCCAAATAACATTGGTGAAATGAAAGTCTTGGAAATTTGTTGAT  
CTTTTCAGAAAATCAATTTTACGATCAAATCCCACAAAGCTTTTCAAGTTTATCCACTTTGAGCTTATTGAAT  
CTATCTGATAATAATTTGTCAGGTGTGATACCATTGAGCACTCAACTTCAAAGCTTTGATCCCACGAGTTT  
TCAAGGAAACAAACTCTGCGGACTTCCACTCTTGGTGAAGTGCAGTTTAGATGACAATATTCTGAATCAC  
GAATATGAAGATGATGAGAGTGATAAAGATGAAGTGGATTGGTTTTACATTTCAATGGCTATAGGATTT  
GCGCTAAGCTTTTGGGGTGTGGTTCACTGCTTTTCAAGAGATCATGGAGACATGCTTATTTTCATTT  
CCTAGATCGTAGCTGA

>PGSC0003DMG400014739 LRR-RLPs

GCTATAAATACATATTACTTGGCCTAGCGAAAAATATAAGCAAACACATACTTTACCCAAATACTTTTCAC  
TTGCAAGTCTAAACATTACACACCATGAAAGTGTTAGCAATAACACTATGGGTTCTCTTGTTTTTTATTT  
TGACAAATACCAAGTTTGTGGTTGTGTAGGGATTTGCAGAGAAAATGAGCAACAAGCGTTGGAGACCT  
TGAAGAAAGAAGTAGACGATCCCTCAAATATTCTCTCTTGGGTTGTGGAAAAGATTGTTGTGAATG  
GGAAGGGGTGCGTGTGCAACAATCTCACTCGTCATGTGATTGTGCTAAGCATTTATTTGATTGGTTTGGAG  
TCGAGATATCTAAGGATCAATAACCTAGAGTGGTTGACAAGTCTTTTCGAGTCTTGAGAAGTTGGAGATG  
GAAAGTGTGATCTTAGCAAAGCTAATAATTGGCCACAGGTTATTAACATGCTTCTTCTCTTGTGATCT  
TCGTTTATTCAATTGTAGTCTTCATCATATAGCACCTCTACTTGATCATCACAATATTTCTCACTCAAGTC  
TCTCGATCTTCTGAGAATCGCAACTTAAATTCTTTTGTCCCAAATGGGTTTTCTACCTCCCAATCTTGT

TTCTCTTGACCTGAGTGATTGTAATTTTATTGGCCCGTTACCTGACGGTCCAGTTAACTTGACTTCTCTCAC  
AACCTTCAAGGCTTCTGGAAACTCTTCAATTGTCGTTTACCCAAATGGTTGTTTGATTTGAATAATCTTG  
AACATCTTGACCTTTCTACTAGTGGCATTGAAGGTGTGATACAGAGTAAGAGCGGAAACATAACAAAAC  
TTAAACATCTTGATCTTTCTAGCAATAACCTCAACTACACTATACCAAATTGGCTCTATCAATGCAAAGAT  
CTAGAATCACTTCAACTTGGATTAATCGTCTTGAAGGAACAGTTTCAAGTCTGATTTCAAATTTGAGCTC  
AATAACTATTATTGACCTTTCTAATAATATGCTTTCTGGAAAGTTACCAAATGTAATTGGAAAGTTAGGG  
AAATTAGGATACCTTGAACTCTCAGGAAATCTGTTTGAGGGAGATATATATGAATTATTCAATGTTAGGA  
GTAATTTCTTTTCAAGTGCCATTGCGAAATACTTCTTCTTTATCTACTTTGAGACTAGGTTGGAATAAACTC  
ACAGGAGCTCTTCCGGAAAGTGTTGGCCAACTTTCAATGCTAGAAGACTTTTCCATCTATAACAATAGGT  
TGGAAGGCGTTGTAACGGAAAGTCATTTCTCTAAATTAACACATTTACAATACTTTTATGCATCTAGAAAT  
AATCTGACTTTAAAAGTGAGTCGGAATTGGATTCCGTCTTTTCAAGCCACAACAATGTTAATAGGCGGCT  
GGAATATAGGCCCTTCGTTTCCCATGTGGCTCCGAACTCAGAACCAGATAATGTATGTCGACATATCAGA  
TTGTGGAATACAAGGTGAGGTTCCAACCTGTTTCTGGAACCTGTCTTCTCAAATTCGATTACTCAATCTTT  
CTCATAACCACTTTGTTGGTGAGGTTCCAATCATCTCAACAGATGAGCAGAGTGGTTCTCCGCTAATGTA  
CTTGGCTTCCAACAATTTTAGTGGACCATTACCATTGATTTCAACCAATGTAAGAGAGCTAGATCTCTCAA  
GCAATTCTTTTTCAAAGGTTTATCTAACTTTTTGTGTGAAGCAAAGAATGGATCATACAAATTGAGAATC  
TTAAACCTCGGGGAAATGATTTATCAGAAGAAATCCTGATTGTTGGATGAATTGGCCGGAGTTGAAA  
GTTTTAATCTTGAGGGACAATAATTTGATTGGAAGCTTACCAAGATCTATGGAGGTTTTGAGTAATTTGC  
GATCATTAGACTTACGAAGAAATAGACTTAACGGTCCGTTTCTTCATCCTTGAAAACCTGCACAAAACCT  
GCATAAAATAGATTTAGCTGAGAATGAGTTTATTGGAAAATTACCATCTTGGTTGGGAATGAGGTTTCCA  
ACTTTGATAGTCCTTATCCTTCGGTCCAATAAATTCGATGGTGAATTGCCTCAAGAACTTTGTACCTCAA  
AGATCTTCAAATCTTAGACCTTGCAAACAATACATTTGTTGGAATCATACCGAGGTGTATTGGCAATTTG  
AGTTCGATGGTTAAAAAAAAAAGGAATTGGAAGATGATGAAGACTTAAATTACTCTTATTATATAGGA  
GTTCTGATAGAGAGTGCAATAGTGACGACTAAAGGCAACATGTACCAGTATGACACCATTTTGGCGTTG  
TTTACAAGTATGGATATGTCTAGCAATAATCTTTCTGGAGATATTCCTATAAGTGTAACACGTCTTGCA  
GATTAAGATCATTTAATCTTTCCAAAATAATCTGACTGGTAGGATTCCAAATGACATTGGTGTGTCATGAA  
AGTCTTGGAAATCTGTTGATCTTTCAGAAAATCAACTTTATGGTCAAATCCCGCAAAGTTTTTCGAGTTTGA  
CCACTTTGAGCTACTTGAATCTATCTGATAACAATTTGTCAGGTATGATACCATTGAGCACTCAACTTCAA  
AGCTTTGATCCCATGAATTTTCAAGGAAACAAACTCTGCGGACTTCCACTCTTGGTGAAGTGCAGTTCTGA

ATGGTAATATTCCAAATCACAAGTATGAAGATGGTGAGAGTGACAAAGATGAAGTGGATTGGTTTTACA  
TTTTCAATGGCTATAGGATTTGCACTAAGCTTTTGGGGTGTGGTTGTTGTTTCAAGAGATCATGG  
AGACATGCTTATTTTCGTTTTCTAGACCGTAGCTGGGAAATGTTACTTGCAAAGTTACCAATATGTTGAG  
AGATATGGTTTAGGATATTTCTATCTTCAAAGTTACTGTGCGTGCTTACATTTCTCATGTTAGAAATCAT  
TTTGTATTCAATATGTAGACTTTTATGTCTTAACAACCTCCTCAAATGAATGTTTCTTAAGATGTTCAAACA  
ATGGTGTTCCTTCATAGTTCCAATTTTC

>PGSC0003DMG400014740 LRR-RLPs

GGCCTAGTGAAAAATATAAGCAAACAATAACACACAAAAAATACTTTTCACTTGCAAGTCTAAAACA  
TTGCACACCATGAAAGTGTTAGCAATAACACTATGGGTCTCTTGTTTTTTATTTTGACAAATACCAAGTT  
TGTTGTTTGTGTAGGGATTTGCAGAGACAATGAGCAACAAGCGTTGGAGACCTGAAGAAAGAAGTAT  
ATGATCCCTCGAATCGTCTCGCTTCTTGGGTAGTCGGAAAAGATTGTTGTGAATGGGAAGGGGTCGTGT  
GCAACAATCTCACTCGTCATGTGATTGAGCTAAGCATTATAGTGATCAGATCGAGTCGAGATATCTAAG  
GATCAATAGCCTAGAGTGGTTGACAAGTCTTCGAGTCTTGAGAACCTAGAAATGTATAATGTGGATCTT  
AGCAAAGCTAATGAATGGCTACAAGTTATTAACATGCTTCCTTCTTGTATCTTCGTCTATACAAATG  
TAGTCTTTCAAGTCTTGAGCTCCGTTATGGTGGCATTGAAGGTGCGATACAGAGTAAGAGTGGAACAT  
AACAAAACCTTAACATCTTGATCTTTCTAGCAATAACCTTAACTCCACTATACCAAATTGGCTCTATCAAT  
GTAAAGATCTAGAATCACTTTTCTTGGATCAAATCGTCTTGAGGGAACAGTTTCAAGTCTGATTTCAA  
TTTGAGCTCAATAATTAGTATTGACCTTTTTGATAATATGCTTTCCGGAAAGTTACCAAATGTAATTGGAA  
AGTTAGGGAAATTAGGATCGCTTGAACCTCAGTAAATCAATTTGAGGGAGATATATCTGAATTATTCAA  
TTTTATGAGTAATTTCTTTCCATAGAATTTGGAAATAGTTCTTCTTTAACTGTGTTGAGTCTAGACAATA  
TAAACTCACAGGAGCTGTTCCGGAAAGTGTGGCCATCTTCAATGCTACAAGGCCCTTTGTTTCCCACG  
TGGCTCAGAACTCAAAAAAGATATTGAATGTCGACATATCAGATGGTGAATACAAGGTGAGGTTCCA  
ACTTGGTTTTGGAAATTGTCTCCTCAAATTCGATTACTCAATCTTCTCACAACCAATTTGTTGGTGAGGT  
TCCAATCATCTCGACAGATGAGCAAAGTGATTCTTGGCTATTAATGTACTTGGGTTCCAACAATTTTAGT  
GGACCAATACCATTGATTTCAACAAATGTAAGAGAGCTAGATCTCTCAAACAATTTTTCAAAGGTTT  
ATCTAACTTTTTGTGTGAAGCAAAGAATGGATCTTACAAATTGAGAATCTTAAACCTCGGGGGAAATGAT  
TTATCAGAAGAAATTCCTGATTGTTGGATGAATTGGCCGGAGTTGAAAGTTTTAATCTTGAGGGACAAT  
AATTTGATTGGAAGCTTACCAAGATCTATGGAGGTTTTGAGTAATTTGCGATCATTAGACTTACGAAGAA  
ATAGACTTAACGGTCCGTTTCTTCATCCTTGGAAAACCTCACAAAACCTGCATAAAATAGATTTAGCTGA

GAATGACTTTTTGGAAAATTACCATCTTGGTTGGGAATGAGGTTTCCAACCTTAATAGTTCTTATCCTTC  
GGTCCAATAAATTTGATGGTGAATTGCCTAAAGAACTATGTCACCTCAAAGATCTTCAGATCTTAGACCT  
TGCAAACAATACATTTGTTGGAATCATACCAAGGTGATTGGCAATTTGAGTGCGATGGTCAAAGTAAA  
AAAGAAAGTACTGGAAGATGATTTGAGTTAAATTATTCCTCTCGTTATGGAACCTTTGATAGAGAGTGCA  
ATGGTGATGACTAAAGGCAACATGTACCAGTATGATACAATTTTGGTGTTGTTTACAAGTTTGGATATGT  
CTAGCAATAATCTTTCTGGAGATATTCCTATAAGTGTAAACACGTCTTGCAGGATTAAGATCATTTAATCTT  
TCAAAAAATAATCTGATTGGTAGGATTCAAATGACATTGGTGATATGAAAGTCTTGGAAATCTGTTGATC  
TTTCAGAAAATCAACTTTATGGTCAAATCCCACAAAGCTTTTCAAGTTTGACCACTTTGGACTGCTTGAAT  
CTATCTGATAACAATTTGTCAGGTATGATACCATTGAGCACTCAACTTCAAAGCTTTGATCCCACGAGTTT  
TCAAGGAAGTAACTTTGCGGGCTCCCACTCTTGGTGAAGTGCAGTTCGAATGGTAATGTTCCAAATCAC  
GAATATGAAGATGAGGAGAGTGACAAAGATGAAGTGGATTGGTTTTACATTTCAATGGCTATAGGATTT  
GCACTAAGCTTTTGGGGTGTGTTGGTTTATTGCTTTTCAAGAGATCATGGAGATATGCTTATTTTCGTTT  
TCTAGACCATGGCTGGGAAATGTTGCTTGCAAAGTTACCAGTATGTTGAGAGATATGATTAAGGATATT  
GCTATCATCAAAGTTAGTTTGTGTGCTTACATTTCTCATGTTAGAAATCATGTTGTTTCATTTTGTATTCA  
AATATGTAGACTTTTATGTCTTAATAACTTCCTCAAATGAATGTTTC

>PGSC0003DMG400014753 LRR-RLPs

CAAACAACCTACCACACACAAAAAATACTTTTCACTTGCTAGTCTAAAACATTGCACACCATGAAAGTGTT  
AGCAATAACACTATGGGTTCTTGTGTTTTTATTTTGACAAATACCAAGTTTGTGTTTCTGTAGGGATTT  
GTAGAGAAAACGAGCAACGAGCGTTGGAGACCTTGAAGAAAGAAGTATATGATCCCTCGAATATTCTCT  
CCTCTTGGGTTGTCGGGAAAGATTGTTGTGAATGGGAAGGGGTCGTGTGCAACAATCTCACTCATCATG  
TGATTGATCTAAGCATTCTATTGATTGGCCTTATTCGAGATATCTAAGGATCAATAACCTAGAGTGTT  
GACAAGTCTTTGAGTCTTGAGAACCTAGAAATGGAGAGCGTTGATCTTAGCAAAGCTAATGAATGGCT  
ACAGGTTATTAACATGCTTCCTTCTTGTGATCTTCGTTTATAACAATTGTAGTCTTCATCATATAACACC  
TCTACTTGATCATAAAAAAATTTCTTCACTCAAATCTCTCGATCTTTCTGGGAATTACAACCTTTAATTCATC  
TGTTCCAAAATGGGTTTTCAACCTCCCAATCTGTTTCTTGTGACTGAGTGACTGTAATTTTACTGGCCC  
GTTTCCTGACGGTCCAGTTAACTTGACTTCTCTCACAACTTCATGGCTTCTAGAAACTCTTTCAACTGTCG  
TTTACCTAAATGGTTGTTTGAATAATCTGAACATGTTGTGCTCTATCGTAGTGGCATTGAAGGTG  
CGATACAGAGTAAGAGCGGAAACATAACAAACTTAAATATCTCGAAATTTCTTACAATAACCTCATCTC  
CACTATACCAAATTGGCTCTATGGATGCAAAGATCTAGAATCACTTGTCTTGGTGGAAATCATCTTGAG



GGAACAGTTTCAAGTCTGATTTCAAATTTGAGCTCAATAATTAATATTGACCTTTCTAATAATATGCTTTCT  
GGAAAGTTACCAAATGTAATTGGAAAGTTAGGGAAATTAGGATCGCTTGACTTCTCAGGAAATCTGTTT  
GAGGGAGATATATCTGAATTATTCAATGTTAGGAGTAATTTCTTTTCAGTGGGATTGCGAAATACTTCTT  
CTTTATATACTTTGAGACTAGGCTGGAATAAACTCACAGGAGCTCTCCGAAAAGTGTGGGCCAATTTTC  
AATGCTAGAATACATTTCCATCTCTAACAATAGGTTGGAAGGTGTTGTAACAGAAAGTCATTTCTCTAAA  
TTAACACATTTACAATCCTTCTCTGCATCTAGAAATAATCTGACTTTAAAAGTGAGTCGGACTTGGATTCC  
ACCTTTTCAAGCCTTTGAAATTGAAATAGGCAGCTGGAATATAGGCCTTTTCGTTTCCCATGTGGCTCCAA  
ACTCAGAACCAGATAATCTATGTGACATATCAGATTGTGGAATACAAGGTGAGGTTCCAACCTTGGTTCT  
GGAACCTTGTCTTCTCAAATTCGATTACTCAATCTTCTCATAACCACTTTGTTGGTGAGGTTCCATTCATCT  
CGACAGATAATGAGCAGAGTGATTATCCGCCATTAATAAACTTGTCTTCCAACAATTTTAGTGGACCAAT  
ACCATTGATTTCAACCAATGTAAGAGAGCTAGATCTCTCCAACAATCTTTTTCCAAGGTTTATCTAACT  
TTTTATGTGAAGCAAAGAATGGATCTTACAAATTGAGAATCTTAAACCTCGGGGGAAATGATTTATCAG  
AAGAGATTCCTGATTGTTGGATGAATTGGCCTGAGTTGAAAGTTTTAATCTTGAGGGACAATAATTTGAT  
TGGAAGCTTACCAAGATCTATGGAGGTTTTGAGTAATTTGCTATCATTAGACTTGCGAAGAAATAGACTT  
AACGGTCCGTTTCTTCATCCTTGGAAAACCTGCACAAAACCTGTATAAAATAGATTTAGCTGAGAATGAGT  
TTATCGGAAAATTACCATCTTGGTTGGGAATGAAGTTTCCAACCTTGATAGTCCTTATCCTTCGGTCCAAT  
AAATTCATGGTGAATTGCCTCAAGAACCTTTGTCACCTCAAAGATCTTCAGATTTTAGACCTTGCAAACA  
ATACATTTGTTGGAATCATACCAAGGTGTATTGGCAATTTGAGTGCGATGGTCAAAGTACTAGAAGATG  
ATTTGAGTTAAATTATTCCTCTTATTTTGGAACTTTGATAGAGAGTGCAATAGTGACGACTAAAGGAAA  
CATGTACCAGTATGACACAATTTTGGCGTTGTTTACAAGTATGGATATGTCTAGCAATAATCTTTCTGGA  
GATATTCCTATAAGTGTAACACGTCTTGCAGGATTAAGATCATTTAATCTTTCCAAAAATAACCTAACTGG  
TAAGATTCCAAATGACATTGGTGACATGAAAGTCTTGGAAATCTGTTGATCTTTCAGAAAATCAACTTTAT  
GGTCAAATCCCACAAAGCTTTTTCGAGTTTGACCACTTTGGGCTACTTGAATCTATCAGATAACAATTTGTC  
AGGTATGATACCATTGAGCACTCAACTTCAAAGCTTCAATTCCACGAGTTTTCAAGGAAACAACTCTGC  
GGAGTTCCACTCTTGGTGAACCTGCAGTTCAGATGACAATATTCCAAATCACGAATATGAAGTTGATGAG  
AGTGACAAAGATGAAGTGGATTGGTTTTACATTTCAATGTCTATTGGATTTCGACTAAGCTTTTGGGGTG  
TTTGTGGTTCATTGCTTTTCAAGAGATCATGGAGACATGCTTATTTTCGTTTTCTAGATCGTAGCTGGGAA  
ATGTTACTTCAAAGTTACCACTATGTTGAGAGATATGACTTAGGATATTTCTATCATCAAAGTTAGTGT  
GTCAGTGTGCTTACATTTCTCATGTTAGCAGTCATGTTGTTTCATTTTGTATTCAAATATGTAGACTTTTAT

GTTTTAATAACTTCCTCAAATGAATGTTTCTTAAGATGTTCAAACAATGTTGTTTCTTTC

>PGSC0003DMG400014829 LRR-RLPs

CAAATATCGAAATTTTCTAAACTACTTTGCACGAAAAACAAAGGGAGTAGAAAGAGGAGGAAGAAA  
TAGTATTCGTAGATTACATCTGAGCTTGACAACAAATTATGCAAGATTTTGAGTGAAACAACCAGACCTT  
TCATGGTGTTTCTTGTTGGCTGCTAAGAAAACAATGGCGTTTTACCTGAAAAATCAAATTCAGGTCAC  
CATTGAAAGGGCCACCATCTCCTAGCTGGAATGATTTGTTGCTCAAGAACAAGAAAGCACTCAATCATGT  
CCTTTTCACTATGCATCTTCAATCCAGGTCCAATAAGCAAACCCCATCTTCATCCCCTTCTCCACAACCTCG  
CAAATCCCTAGATTTCACTCTCCGTCACCTGTATCCGATCCAATTTCTCTTCTTCTGATCAAATACTTCTT  
TCTATTCTCTCTAAACTCCCTGATTCACAAAGAAATTGTAATTCTCTTGATCTAAACGCTGGCTCTATCTC  
CAAGGTCGTCTGGTACGGTCGATTAAGCTTCTGATTGGGATTTCTTGTTTCGGGTCCGGTGTATTATCG  
GTTCCCGAATCTTATCCATGTTGATTTGGTTAATGGGTCTCTGATTTACCGGGGAATGCGGGTGTTTTTT  
GCTCTAACCGGTTGCTTCTTCTCACGTGGATTGTAATGCTGATGCGAAAGATTGGTTTCTTAAGGAAAG  
ATTTGTGTTGCCTTCTGATGAGATTGATAAGGGGTTGAGAATACTAGCAAGTGGGTGTCCTAATTTGCGT  
CGATTATTGGTGGTAAATGCTAGTGAATTGGGATTGTTGGGGGTAGCTGAGGAATGTCCAACCTTTGCAA  
GTGTTGGAATTGCACAGATGTAATGATCAGGTTCTTCGTGGTATCGCGGCCTGTCAGAACTTGCAGATAT  
TGAGATTGATTGGAAATGTTGATGGGTTTTATAAATCTTCGGTACTGATATTGGATTGACTATTTTAGCT  
CAGGGGTGTAAGAGGTTGGTGAGGCTGGAGCTGAGTGGTTGTGAAGGGAGCTATGAAGGGATTAAGG  
CAATAGCACAATGTTGTCAAATGCTCGAAGAGTTGATTCTTCGTGATCATAGGATGGAGGGTGGTTGGT  
TGCTGCTCTTTCCTATTGTGAAAATTTGAACACCTTGAGGTTTATGTCTTGTAAGAGTATTGATCATTGT  
GGATGGTTTGATGAAGATGTAGGATCTTGCCCGACACTTGAAAGATTACATTTGAGAAATGCCAATTA  
AGAAATAAGGAGAGTTTGAGAACGTTGTTTCTACTATGTCAAGAAGTTAGAGAGGTTATTTTCCACAAC  
GTTGGGGACTGGATAATGAAATGTTCACTATCCACTGGTCTAAGGTATTGGTTATATTATTCTGTTCTC  
GTTTACTTTGCTTGCTGTTGCTGGAAAATTCGTGCTGGATTAGCATTTTGTTATGCATTTGACATACATG  
AACTTATTGTGTTTAGGTTTTATGACCTTGAAATGTAGTTCCTTATTTTGTAAAAATGACTTTTTAGTGT  
TGCTGTAACCCCATCCCCGCCCTCGTGTATAGTAGACGACCAAATGAAAGGATAGTTTGCTTGTAAAT  
AGTGCAATTTATTTTGGTCATAGTATACCTTTGATCTTATCTTCTGGTAAAAGGATAAGTGTGATAGAT  
TTCTTAGCTATTTGTGTTGGGGATAGATTGTTTTTTAAGGCCAGTTTGTAGATGCATTTGTAATCATGC  
ACCCTCTGGTGTTCAGTTATTAATGTTAAAATAGCCTTACCGTTTCTCAAAGAGTATACGCTTCCATCTT  
GCGTTAGAGAAAACACATAATGTTTCATGGCATGACAATTATGTTTCAATTCATTATTGATGCTTGATTTAT

CAATATCATGTGTGCTATCTTGGATTATAAAGGGTCCAGTTTTGAGTTTTATACACTGAACTTGCTTCAGT  
TCTGACTGGCAATTTGGCATCATATTTGTTTTGCATTCACTTGGAGCAGCAATAAAGTAACTGTCTCCGT  
GTGACCTATAGGTCAGTTCGAGCCGTGGAAGTAGCCACTAATGCTTGCATTAGGAGGGTAGGTTGT  
CTACATCACACCCCTTGTGTGAACAATGGATACTTTGTGCACCAGGCTGCCCTTTTTAGTTCAGTTGAATA  
AAGGGCCTGTAATTAATAAATAACATTATGTGAGGAATTTGGGTTTCACAGCTTCATTTTGGTGTTATTT  
TCAACAGGAGAGTGAAGTCTATTTGCCTAGAAAGCTGTTCAGTCTCACAACCTGAAGGCCTCGAATCTG  
CACTCCTTTCGTGGAAGGAGATCCAGAGCCTCAAGGTGATATCATGTGGCAATATAAAGGATAGTGAAA  
TCAGTCCAGCACTTTCTACCTTGTCTCCACGCTAAAAGATTTTCAGTGGAGACCAGACACAAAATCTCTT  
CTTTCAGCTGGTCTTGTGGGAACTGGCATGCGAAAAAGAGGCAGTAAATTATTCAAGAAGACGTGCGAC  
TGGAAGTCACTGCCTGGTGCATAGACTGGCTTCTCATCATGCATTAGACAATAAATTATTCAAGAAGA  
CATGCGACTGGAAGTCACTGCCTGGTGTATAGACTGGCTTCTCATCATGCATTAGACGACTCTACTAG  
ATTTTACCTCCTCATTTATGCATATGAGAACTCTAACACATGAAAGAGGTCAGTGGGACACTTTGCTCCAA  
TACTGTCAGCAATGAGGCCTTGATGTCATTATCCTGTATTTGTAGTCGCTTAAGTATGTAACGTAGGAAC  
TATAGGATCGAAGATCGGCACTTTCTCAGGGTAGAGATGGAGAAAGAGGCCTAAGTTAGTGTATAGAG  
CTCGATGCTGTAACCTCATGAGCATTAGCTAAAGCCATCTCGCTGTATCTTTGTCAAGCTTAATGGTATG  
TATTTCTGTATTGGAACCCCAAAAACCTCTAAAAGGGGTTTTCTTATCTACAATGTTATAAAGAATTTGG  
CACCTTTTATGCCATGACTACTGCCTTCCACAATTGTGTGAAAGCATATTTGATATGAACCATACCAGCAA  
GCATGTCATTTGTGGAGGAGACGAGAACCAGAATAATTTTCTACATCAATGGCATCTATGTC

>PGSC0003DMG400015121 LRR-RLPs

TGGAAATCAAACCATTTAATGTTTTGCATGATTGATGTGATACGTTTGCACCTTTCAGTGAACACTTGA  
GAAAAGTGATATCGTAAAGACTTGGGCAAATACCAATTGTTCCGGTCAACTCAACAACATAAGTATTGCTA  
TATAGTAATACATTTGAAAAGCAAATCAAGCTTAGAATCAATAGTAACAGCATGAAGAAGAACATTATCT  
TATTGATTCTTCTTTCTAATTCAATTTCTTTATCACTTTCTCCTCAAATAAGACTGACCAACAAGCTCT  
ACTAGCTTTCAAAATCTTATTACAAGTCCTAATCATTTTTTGGCCAATAATTGGACCAAAAATACTTCTTT  
TTGCTCTTGGTTTGGTGTCACTTGCCTCCAAAAGGCAAAGGGTTGTGGCTTTGGCTCTTCTAATTTGC  
AACTTCAAGGCACAATTCGGATCTTGGCCAATTTGTCCTTCTCAGTGTCTCAATCTCCAGAATAACAG  
CTTCCGCGGTGGCATCCCTTATGGACTTGGCCACATGCCTCGCTTGCAGATTATTGATGTTAAAAACAAT  
CAGCTCAACGGAAGTATACCAACAAGTCTATTTCAAACCGGAGAGTTCAAGTAATTTCAATTGGCTTTCA  
ATGAACTCAGTGGTGAATGTGGAGAGGGCCATGGTATGTACCCGAACTCAGAGTCTTAAATCTCAGGA

ATAATAGCCTCACCGGTATAATCCCTCCTTCTATTGGAAATGCCACAACATTGATGAACTTCAGTTTGTCT  
GGGAATAGAGTCAGCGGCAACATTCCAAAGGAGGTCGGTAATCTGAGCCAGCTTGCATTTTTTCTCTTG  
TCCGATAATCAACTAACAGGTTCCATTCCCGCAACACTGTTTAATATCTCGTCACTACTTGCCGTATCTGT  
GTTACACAATAGCCTTTCTGGTCCTCTGTTGCTAGATGAAGGCAATATTGTGTCAAATCTGTACTTTTTTA  
AGTATATCTCACAACCAAATTTCTGGTTGCATTCTTCCAACATATGCCAACTCACAGAGCTCAAAGTTTT  
GTCCATATCTTACAACAATATAACTGGAGACATACCCAGAAATATTGGTTGTTTATTCCAAACTCGAGG  
AGTTTTATATTGGTGATAACCTAATAAAAGGGACTATTCCCACTTCATTGGGAAATATTTCCACTCTGCAT  
AATCTTCACTGTGAAACAATCAGATAGTAGGGGGGATTCTCCGGAATTAGGGAAGCTATCAAATTTG  
AGGGAATTAAGCTTTGACAATAATTCTAATCTTATTGGTCAAATTCCAGAGGCTATTTTCAACATATCTTC  
TTTGGAAAGTGATTGGTTTCAGTTTCAATAACCTCTCCGGGAGAATTCCAACCACTACAGGTCTTCATCTTC  
CCAATCTGAAGGACTTTACTTGGGAGCAAATCAGTTCAAAGGGGAAATTCCATTGTTTATAACAAATGC  
TTCCAAGCTTCAGATACTGGAGCTAATAATAACTTTCTGACAGGAACTATTCCTAATAATTTGGGAAAT  
CTGCGTGAGCTGCGAGGACTGCTCCTATATAATAATCAACTTACCAATGAATTAAGAGAGCGTGAGTTG  
TTATTCTTCAATTCTTTGGCGGACTGTAGGATGTTGCAATATCTACAAGTGGGTTCCAATCCGTTAAATGG  
CGTTCTTCCCAATTCTATTGGAAATCTTTCATCTACTATTGAAAACTTTTATATAGTAGATGCACACATCAA  
TGGCCTCATCCCCAAAAGTATAGGCAACATGACTGGTCTTACATCCCTAAGCCTTGACGGAAACAACCTG  
ACAGGGAGTATTCTTCTGAGATTGGTAAGCTTAAACAACCTCCAAGGGCTGTATCTAGATAACAATAAAT  
TGAAGGGACATATTCCAGAGGCCGTATGCCATTTATCTAATTTGGTTCAATTATTTCTGAATGTTAATGA  
GCTCTCTGGATTAATTCAGAATGCATAGGAAATCTTAGCATGCTACAATATCTTTATTTGGGTTCTAATA  
AATTTTCATCAAATTTACGTTGAACCTTTGGAAGATGAGTGGTCTTCTCTATCTAGACGTATCACAGAAT  
TCAATGGAGGGAGAAGTTCCATCAGATATTGGAGCACTGAAAGCCATTGTAGAACTACATCTTCCAGT  
AACCCTTTTCAGGAATGATTCCAAGCACATTCGGGGAACTCCAAAACCTACAGTATCTTGACCTGTCGA  
ACAATTCATTTTTTGGCAAAAATTCATTATCCTTTGCCAACTTGATAAGCTTAGAATACTTGGATTTGTCTT  
CAAATGACTTGTGAGGTAATTCCTATGTCTTTGGAAAACTCTCCTACCTTAAAAGCATTAAATGTTTCA  
TTAATGATTTAGAAGGTGAAATACCGAGTGGTGGCGTGTGTTGCAAATTCCACTTTGCAATCATTTCTCG  
GGAACAAAGGTCTTTGTGGAATGCACATATTGGAGATTCTGCTTGTGCTATCACTAATCCTGGAAAACA  
ATCAAAGCTTAAGGAGGTTGTGCTAACAATTGTTACTCCAGTGGTTATTGCATCCTTTCTGATATTCTTGT  
TCGTTTCAATTTGGATAATGAAACGACAGAAGAAAGGGATGTCCAAAGATGTTGAAAAGGTATTGGAG  
ATCGGGACTCATCAATTAGTTTCTTATCACGAGATTCAACGAGCAACAATAATTTTTGATGAATCCAATT

TAATTGGTGAGGGAAGCTCTGGCTCTGTGTACAAAGGAACATTGTTTGGTGGAAGTGCAGTGGCCATTA  
AGGTTCTGGATTTGGAAAATGAGCAAGTATGCAAGAGGTTTGATACCGAATGTGAAGTGATGAGAAAT  
GTTAGACACAGAAATCTTGTTTCAGTGATTACTACATGTTCTAGTACTATATAAGAGCCTTTGTTCTGCA  
ATTTATGCCAATGGAAGTCTTGAGAATTGGCTGTACAAAGAAGATCGCCACTTGAACCTTCATCAAAGA  
GTCAGTGTAAATGCTTGATGCTGCTATGGCAGTCGAATATCTACACCATGGTCATAAACTCCTATAGTTCA  
TTGCGACCTGAAGCCAGCCAACGTTCTTTTGGATGAAGATATGGTGGCTCATGTTGGTGATTTTGGAAATC  
TCTAAAATTTTAGCTGTCAGCAAGTCTGTGGCACATACAGAGACATTGGGCACTCTGGATACATTGCAC  
CAGGTATAAAAAATCTACTCTCATTGATTTTCTTTTATCATAATTAAGCCTCACCAAGTTGTAGAAGTAAA  
AATAGAATTATTGTTGTGTTTCAACTGAGTAAATTTTCTTCATTCTTTTCTAAGAATATGGCTCGGAGGG  
AATAGTGTCTGCTAGTGGTGATGTTTATAGCTACGGCATCATGTTGATGGAGGTTTTGACCAAAGAAG  
GCCAACAGATGAAGAGATATGCAATGGAAATCTTGACTTGAGGAAATGGATTAACTATCATTTTCGGG  
GAGTATGATGGACGTTGTGGATGCCAATCTTTTTCTGAGGAAGAACAATCACTAGTAAAAGTGAAT  
CTGCATAGCCTCCATGATAGAATTGGGTTTAGACTGCACAAAGGAAACGCCGGAATCAAGAGTGACTAT  
GAAAGAAGTAGTGAAGAGGCTTAACAAAATCAAGAACGCATTTCTGAAACATAGAAGTCATGGTGTT  
CTTTGCTGAGCTGCAAATTAATATGATGCTGTTTGTCTTTAATAAAGTTGTTGTATAGTACTACTTGAA  
GTCTTTGAGTAGTTTTGGACCTATTTTACTCTATATATTTGTGATTATGTTTTGAATGCTTGAAAGAAACC  
AGAAATAAAGGTGTTTAGCTGCACTATTTTGTTTTTTGAATGTGAT

>PGSC0003DMG400015283 LRR-RLPs

ATGCACTCCAATACCAAACAACATTTACGAGAGGTATCGTCTTTTGCTTCTTGACATTTTCCAAAATGGA  
AGTTTTCACACGAGTTTTAATTTCCACACCTTTCTGGCTATCCGTGCTGTGTTTCTTGTTTCTATTGTC  
ATTTTCTCTCCAACATGCTGCATCAGCTGCTTTTCTTAGCAATGAAACTGATAATCTTGCCTTACTTGGATT  
CAAGTCCCAAATAACCGAGGATCCATCAAGAGTTTTCGTCTCTTGAATGATTCTGTTCAATTTCTGTCAGT  
GGACTGGAGTAAAATGTGGCCTGAGACACGTAAGAGTCATCCGTTTGAATCTCAAAGGGCTGAGGCTG  
GCAGGTACGATCTCAGATCATCTTGAAATCTCTTTTTCTCAATTCTTTGACCTTGCAGAAAATGCCTT  
CCATGAAAAAATTCCTCAACAACCTCAGCAGGCTGCCAAGGCTTCAATACTTGAATTTGAGTTTTAACTAT  
CTAACAGGAGAAATTCAGCTAATCTATCACATTGTGTTAAACTCAAGAGCCTTGTCTTAGACCACAACA  
CTCTAGTGGGAAAGATTCCTTACCAAGTTGGATCTTTAACGAAGTTAGTGAAGTGTACCTCAGAAATAA  
CAACCTGACAGGAATCATTCCAGGTTCTATTGAAATCTTACATCTTTAGAGAAGCTGCATTTATCGTAC  
AACAACTAGAAAGGAGAAGTGCCAGTTTCTTTAGCTCGATTAACCAAGTTGAGGATTCTTGGACTGTCA

GTAATAGCTTATCTGGGGAGTTCCTCCTCCGTTGTACAATTTGTCATCCCTGGAAC TAATATCACTTTC  
CCTTAACAAC TTTTCTGGTAATCTCAGATCTGAGTTAGGCAACTACTTCCCTAATCTCCAATACTTTACTT  
GGCGAACTGTCAATTCATTGGTTCATACCATCCTCCTTGGCCAATGCTTCAA AATTGCTAGAGCTTGATT  
TTCCTGTAAACAATTTCACTGGAAATATACCTAAGGGTTTTGGTAACTTGCGGAATTTGTTATGGCTCAAT  
GTTTGG AATAACCATCTTGGATATGGTAAGCATGATGACCTTGACTTTGTAAATTCTCTTACCAACTGCA  
GCAGTCTACAAATGCTCCATTTTGGAGGCAACCAGTTTGGAGGTACATTACCTCATTCAATAGGCAACCT  
TTCTAGTCAGTTACAACGCCTACTCTTCTCGAAAATAGAATTGGTGGAAACATACCAAGAGAGATCTCA  
AACCTGGTGAATTTGAATCTACTCGACATTGGTTC AACAATTTTATAGGTAGTATTCCAGATTCTATTGG  
AAGACTTACAACTTGGGAGCTCTCAACTTGGT TAAACAATCTCTTGACAGGGGTCATCCCTTTTTCAATA  
GGAAACCTCACTGAACTCGTCTATCTTTATTTGGGACTTAA CAGGTTAGAGGGTAACATACCTTCAACAT  
TGGGAAACTGTAACCAACTGCTAAAATTGGGATTTTCTGAAAACAACCTGACAGGAACTATAACCACAAC  
AACTTTTTGCTCTCTCATCCCTCACAGATATTTTTGCATCTAATAACTCTTTGACTGGTCCATTACCAGTGG  
ATATTGGTAACTGGAATCATCTTACTTATCTTGATTTTTCTTACAACAATCTTTCGGGTATGATTCCACAAA  
CTCTTGGAAAATGCTTGACCTTGGGGGAGATCTATATGAAGGGAAACTCCCTCCAAGGAACCATTCCCA  
ATTTAGAAGATTTGCCGGATCTCCAATCCTTGGATCTTTCCTAAACAACCTATCAGGGCCAATCCCTCAC  
TTCATTGCAAATCTTACTTCCCTACACTACTTGA ACTTATCTTTTAAACAATCTAGAGGGTGAGGTTCTGT  
ACCGGAATATTTTCAAATTTGAGTGCAGATGTATTAAGCGGAAACTCCAAGCTTTGTGGTGGGATTCAA  
GAGCTTCATTTACAACCTTGTATTTATCAAAAGACACGGAAGAAGCATGTGCTTGCCCTCAAGTTTATTTT  
GATAATTGTTTTGCTGCTTCATTTTCAATCCTGGCCTTGTTAGTAGTTTTCTTTGTAGGAGAAGAAATTT  
GAACAATCAACCAGCACCACAAGATAGGTCTAAATCTGCGCATTCTACCCCAATATTTTCGTATGAAGAG  
CTCCGCACTGCAACAGGTGGATTTTCTTCTGAAAATCTTATTGGCTCTGGCAGTTTTGGA ACTGTTTATAA  
GGGAACTTTTCCCTCTGATGGAACGGTCGTTGCTGTGAAGGTACTCAA ACTCCAGCATGAAGGTGCTTC  
AAAAAGCTTCTTAGCAGAATGCCAAGCATTGAGAAACATAAGGCACCGGAACCTTGTCAAGGTCATCAG  
TGTATGCTCAAGTTCTGATTTCAAGGGAAATGATTTTAAAGCTTTAGTCTTTCAGTTCATGCCAAAAGGG  
AACTTGGACGAATGGCTACATCCAGAAAAGGAGATGAATGAGAAGAGTAGCTTGACCACACTTCAGAG  
AATGAATATCATAATAGATGTGGCCTCTGCACTTCATTATCTTACCATGAGTGCCAAACACCCATGATTC  
ACTGTGATATAAAACCACAGAACATTCTTCTTGATGAAGATCTCACCGCTCATTTGGGTGATTTTGGTTTG  
GTGAGACTCGTTCCTGAATTCAGTAATGAATCGGATCTACATCAGTTTAGCTCACTTGGAGTTCTGGGAA  
CCATTGGCTATGCAGCTCCAGGTAATTTTTATATGTAAACAAAACTATGAATATACCATATGGTTTCTTG

TAACAATAGTGGTTTATTTATGAGATGATCAATTTGCTTGTTGCAGAATACGGCATGGGTAGTAAGGTCT  
CCGTTGTAGGAGATATGTACAGTTTTGGGATCCTAATATTGAAATATTTCACTGGAAGAAGACCCACAG  
ACACTTTGTTCCAAGCAAGTTCTACCCTCCACCACTTTGTAGAAACAGCATTGCCAGAGAAAGTTATGGA  
GATTCTAGACAAAACAGCTTTTCATGGTGAGATGAGTAAAGCAACCTGTGGCGAAGAATACTGGGGCA  
ATATCAAGAAAGAACAGATGGAATGCTTGGTTGGCATACTTGAGATCGGTGTTGCATGTTTCAGCTGAAT  
CCCCAAGAGACAGATTGACCATGACACAAGTTTACAGTAAGTTGACACTAATAAGAGAAAAATTCCTAC  
AAAGGGGAGATGGAGGGCACAGGCTACAAGTGAAAGCATTGGATTTAATCTAA

>PGSC0003DMG400015345 LRR-RLPs

TATTTCTAACAATAAGATTCGTGGCCAAATCCCAAACCTGGTTTAGCGGCATGAGGTGGGACAACCTTGTTG  
TACCTAAACCTTTTCGCATAATTCTTTAACAGGCCACCTACAACCTATTTCAATTTCCATAATCTAGAGTATCTT  
GATCTTAAATTTAACTTCCTTCAGGGTCCACTACCTTCATCCATTTGTAACATGAACAATCTTAAATTGCTA  
GATTTATCACGCAACAACCTCAGTAACTCGATTCCAAGTTGCTTGGGAAGCATGTCTAGTCTAACAGTGT  
TGGACTTAAGAAGGAACAATTTACAGGGAGTCTTCCCCATTATGTGTGCAGAACACTTCATTGAGAAC  
CATTGTCTTGAATGGCAATCAATTTGAAGGAACCTCCCTGTGTCGTTGCTCAACTGTAGTGGTTTAGAA  
GTTCTTGATATGGGAATAACGCTATAAATGACACATTTCTGCTTGGATAGGAACACTTGAACAACCTGC  
AGGTCTTAATATTAAGTCCAATGTGTTCCATGGACCAATTACTACTTGTGCACTACTACTTTGCTTTCCC  
AAGTTGCGAATTTTTGATCTTTTCGCGTAACGAATTCAGTGGCTCAATCCCTGCAAAGGTTTTTGGAAACTT  
CAAGGCAATGATTAAATTAGATGGTGAAGACACAGGACAGATCGAGTACATGGAACCATCTATGTTTCA  
CACATTATATGATGATTCCGTGAGTTTGGTGATCAAAGGCCAGGATATTGAGCTAGAAAGAATCAGCAA  
AATTATGACAACCATAGACCTCTCGAGCAACCATTTTGAAGGTGTCATTCCGAAAACACTAAAGGATCTC  
AGATCACTTTGGCTACTCAATTTATCCCATAACAATCTCATAGGTCATATTCCAATGGAATTGGGGCAATT  
GAATAAGCTTGAAGCGTTAGATCTCTCTTGAACCGGCTCACTGGAAAGATTCCGCAGGAATTGACAAG  
GCTAACATTTCTGGAAATGTTAAACCTTTCTCAGAATGTTCTCGTTGGACCAATTCCTCACGTTCTACAAT  
TCAACACATTTGAAAATGACTCGTATGGCGGTAACCTTGATCTATGTGGTCCTCCTTTATCAGAGCAATG  
TGGAACGAGTGATCTATCCCATGTTCTCAACCATTGGAGTCTGAAGACGAGTCATATTTTTTTAGTGGA  
TTTTACGTGGGAATCAGTAGTCATTGGCTACAGCTGTGGACTAGTTGTTGGAAGTGTGATGGAGCCTC  
ATGTTTAAATATCGTAAACCAAATGGTTTGTGCAATTTTTTGAAGGCATTTATCCCAAGAAAATGAGAA  
GGTCAATGAAGAGAGCTCAGAGACGACGGACTTAGTGGAAGATTGCAAGAG

>PGSC0003DMG400015347 LRR-RLPs

GTTGGTAATTAGTGAAAGCTTTTCTTCTCCTCTGTGATGATGCATCATGTTTGCTCTCCCACTGAAGCTTT  
TGCTTTGCTTCACTTCAAACAATCCTTTCAAATCTCTGACCAACCTACATGTTGGGATGATATCCCAAAA  
CAAAGTCTTGAATGAGAGTAGGGATTGCTGCAGTTGCTGCAGTTGCTGCAGTTGCTGCAGTTAACCGG  
TTATGTTATTGGATTGGACCTTAGTTGCAGTATGCTTACTGGAACCTTTCATCCCAATAGCAGCCTCTTCC  
AACTTCATCATCTCCGGACACTAAACCTTGCTCACAATGCCTTCTTTTCTCAATCCCACACAACATTGGCC  
GATTGACGAATTTGAGGCATCTCAACCTTTCTCATTATTCTTTGAAGGGGAAATCCAACAGAAATCTC  
ATACCTTTCCAATTTGGTTTCACTTGAACCTAATTGTTATGGATGTGAACCTTGATGAGAGAACATTTGAAA  
CAATCTTCAAACTTCACAAATCTGGAGGTAGTTTCTCTCTTTGGTGTCAACATCTCATCTCCGATACCTC  
TGAATATATCTTCATCCTCCTTAAAGTATGTAGATCTTGGATTTACTAATCTGCGAGGTGTTCTCACAGAG  
AGCTTTTTCTTCTGCCAAAATTGGAAATGCTCTATTTGAATTACAATGATCTTCTTAAAGGAGGTTTACC  
AAAGATCCACCCGAGCAACACTCTGTTGGAGTTGCATATTTCAATCACAGGAATCTCCGGTGAGCTGCCT  
GATTCAATTGGCACCTTCAGTTCTTGAATCGCTTGAACATGTATGGATGCCAATTATCTGGCCGCGTTCC  
TGATTCCATTGGCAATCTTACACAAATTAGGTATTTGGCTTTCAGTTATAATCATTTCACCCGGCCATATTCC  
TTCCACAATATCTAAATTGAAGCACCTCAGCTATCTAAAGCTTTCGTCCAACCTCTTTTCAGGTGAAATTC  
CCGACATTTTTTCTAACCTCCAAGAGCTACGTTCTTATATCTTCATAACAACAGTTTTCATTGGTTTCGTTTC  
CTTCTACAATTGTAAGCTTGACACATCTTCAACTTAGACTTGTCAGTAATCCCTATCTGGCCCACTG  
CCTAATAATTTTAGCATGCTTCAAAGCTAACCCAACCTGGATTTGTCGTACAACGCACTGAATGGGACCA  
TACCATCTTCGGTGTGTTAGCCTCCCTTGTACCTCAATTATGGCTCGATAATAATCGATTTAGTGGACTA  
CCCACTGAGCTCAAACAATCCAACATTAGAAAGCCTAGATTTAAGCCATAATCAACTCAGTGGTTCTT  
TTCCTCAATCACTTGTGAATCTCACAAGCCTTCTACCCTCGACCTTTCATCAAATAACATCACCATCGATG  
AGGGAATACAAATCACTTTTCTAGCCTACAAGATTTGTGGTTATCATCTTGTGAACTGAAGGATATTCC  
ACACTTCTTGACAAATGTAAAGAACTTCAGGTCTTGGATATTTCTAACAATAAGATTCGTGGCCAAATC  
CCAAACTGGTTTAGCGGCATGAGGTGGGACAACCTGTCCTACCTAACCTTTCGCATAACTCTTTAACAG  
GCCACCTACAACAATTTAATTTCCATAATCTAAGGTATCTTGATCTTAAATTTAACTCCCTTCAAGGTCCAA  
TACCTTCATCCATTTGTAACATGAACGATCTTCAATTTCTAGATTTATCACGCAACGACTTCAGTAACTCG  
ATTCCAAGTTGCTTGGGAAGCATGTCTAGTCTAACAGTGTGGACTTAAGAAGGAACAATTTCACTGGG  
AGTCTTCCATCGTTATGTGCGCAGAGCACTTCATTGAGTACCATTTACTTGAATGGTAATCAATTTGAAG  
GAACTCTCCCTATGTCGTTGCTCAACTGTAGTGATTTAGAAGTTCTTGATATGGGGAAATAACGCTATAAA  
TGACACATTTCCAGCTTGGCTAGGAACACTTCAACAAATGCAGGTCTTAATATTAAAGTCCAATCTGTTCC



ATGGACCAATTAGTACTTGTGACTACATTTTGCTTTCCCAAGTTGCGAATTTTTGATCTTTTCGCGTAAC  
AAATTCAGTGGCTCACTCCCTGCAAAAGTTTTTGAAACTTCAAGGCAATGATTAATTAGACGGTGAA  
GGTACAGGAGAGATCAAGTACATGGAACCATCTGAGATGTCATCTGATGATTCTGTGAGTTTGGTGATC  
AAAGGGCAGGATATTGAGCTAGAAAGAATCAGCACAATTATGACAACCATAGACCTCTCGTGTAACCAT  
TTTGAAGGTGTCATTCCGAAAACACTAAAGGATCTCAGCTCACTTTGGCTACTCAATTTATCCCATAACAA  
TTCATAGGTCATATTCCAATGGAATTGGGGCAATTGAATAAGCTTGAAGCGTTAGATCTCTCTTGGAAC  
CGGCTCACTGGAAAGATTCCGCAGGAATTGACAAGGCTAACATTTCTGGAAAAGTTAAACGTTTCTCAG  
AATGTTCTCTTCGGACCAATTCCTCTTGGTCCACAATTCAACACATTTGAAAATGACTCGTATGGCGGTAA  
CCTTGATCTATGTGGTCCTCCTTTATCAAAGCAATGTGGAACGAGTGATCCATCCCATGTTCTCAACCAT  
TGGAGTCTGAAGACGAGTCATATTTTTTTAGTGGATTTACGTGGGAATCAGTAGTCATAGGCTACAGTTG  
TGGACTAGTTGTTGGAAGTGTGTGGAGCCTCATGTTTAAATATCGTAAGCCAAAATGGTTTGTGCGAA  
TTTTTTGAAGGCATTTATCCCAAGAAAATGAGAAGGTCAATGAAGAGAGCTCAGAGACGACGGACTTAA  
>PGSC0003DMG400015348 LRR-RLPs

ATGTCGTTGCTCAACTGTAGTGGTTTAGAAGTTCTTGATATGGGGAATAACGCTATAAATGACACATTC  
CTGCTTGGATAGGAACACTTGAACAACACTGCAGGTCTTAATATTAAGTCTAATATGTTCCATGGACCAAT  
TAGTACTTGTGACTACGTTTTGCTTTCCGAAGTTGCGAATTTTTGATCTTTTCGCGTAACAAATTCAGTG  
GCTCACTCCCTGCAAAAGTTTTTGAAACTTCAAGGCAATGATTAATTAGATGGTGAAGACACAGGAC  
AGATCAAGTACATGAAAGCATTTGACACATCGTATGAGGATTCTGTGAGTTTGGTGATCAAAGGCCAGG  
AAATTGCGCTAGAAAGAATCAGCACAATTATGACAACCATAGACCTCTCGAGCAACTATTTTGAAGGTGT  
CATTCCGAAAACACTAAAGGATCTCAGCTCACTTTGGCTGCTCAATTTATCCCATAACAATCTCATAGGTC  
ATATTCCAATGGAATTGGGGCAATTGAATATGCTTGAAGCGTTAGATCTCTCTTGGAACCGGCTCACTGG  
AAAGATTCCGCAGGAATTGACAAGGCTAACATTTCTGGAAAAGTTAAACGTTTCTCAGAATGTTCTCTTC  
GGACCAATTCCTCTTGGTCCACAATTCAACACATTTGAAAATGACTCGTATGGCGGTAACCTTGATCTAT  
GTGGTCCTCCTTTATCAAAGCAATGTAGAACGAGTGATCCATCCCATGCTCCTCAACCATTGGAGTCTGA  
AGACGAGTCATATTTTTTTAGTGGATTTACGTGGGAATCAGTAGTCATAGGTTACAGCTGTGGACTAGTT  
GTTGGAAGTGTGTGGAGCCTCATGTTTAAATATCGTAAGCCAAAATGGTTTGTGGAATTTTTTTGAAG  
GCATTTATCCCAAGAAAATGAGAAGGTCAATGAAGAGAGCTCAGAGGCGACGGACTTAA  
>PGSC0003DMG400015349 LRR-RLPs

ATGGGAATTCTGTTTTCTTTTATCACTTGTCTGTTTTTTGTTGGTAATTAGTGAAAGCTTTTCTTCTCCT

CTGTGATGATGCATCATGTTTGCTCTCCCACTGAAGCTTTTGCTTTGCTTCACTTCAAACAATCTTTTCAA  
TCTCTAACCAACCTAGCTGTTGGGTTGAGATTAATCTGCCAGATATGACCTTTGTTGATATCCCAAAAACA  
AAGTCTTGGAATGAGAGTAGGGATTGCTGCAGTTGGGACGGGGTAACTTGTGACATGTTAACCGGTCA  
TGTTATCGGATTGGACCTTAGTTGCAGTCTGCTTAATGGAECTATTCATCCCAATAGCAGCCTCTTCCAAC  
TCCATCATCTCCAGACACTAAACCTTGCTCGCAATGACTTCTATTCTTCTCAATCCCACATAACATTGGCC  
GATTGACGAATTTGAGGCATCTCAACCTTTCTCAATCTTTCTTTGTAGGGGAAATTTCCAACAGAAATATCA  
TACCTTTCCAATTTGGTTTCACTTGAECTTAATTGTTATGAATGTGAACTTGATGAGAGAACATTTGAAAC  
AATTCTTCAAACCTTCAAAATCTGGAGGTAGTTTCTCTCTGTGGTGTCAACATCTCATCTTCAATACCTG  
TGAATATTTCTTCTTCTCCTTAAGGTACGTGGATCTTAGACATACTAATCTGCGAGGTTTTATCACAGAG  
AGCTTTTTCTTCTGCCAGGATTGGAAAGGCTCTATTTGAGTGACAATGATCTTCTCAAAGGAGTTTTACC  
AAAGATCCACCCGAGCAACACTCTGTTGGAGCTGGATATTTCAATCACAGGAATCTCCGGTGAGCTGCCT  
GATTCAATTGGCACCTTGAGTTCCTTGAATATCTTGAATTTTCTAATAATCATTTACCGGCTATATTCT  
TCCACAATCTCTAAATTGAAGCACCTCACATCCCTAGATCTCTCGTCCAACCTCCTTTTCAGGTGAAATCCC  
GATATTTTTCTAACCTCCAAGAGCTACGTTTTTATATCTTCATAACAACAGCTTCATCGGTTTCGTTTCT  
TCTACAATTGTAAGCTTGACACATCTTCAAGACTTAGACTTGTCGAGTAATTCCTATCTGGCCCACTGCC  
TAATAATGTGAGCATGCCTCAAGAGCTAACCAAACCTGGATCTGTCGTACAACCTCACTGAATGGTACCATA  
CCATCTTCGGTGTTTAGCCTCCCTTGTATCTTCAATGTCTCTCCAACATAATCAATTTAGTGGACTAGCC  
GATGAGTTCAAAACAACCTCAACATTAGATTACCTAGATTTAAGCCATAATCAACTCAGTGGTTCATTTCC  
TCAATCACTTGCAGTCTCACAACCTTTCTACCCTCACCTTTTCATCAAATAACATCACCTTCGATGAGG  
GAATACACATCACTTTTCTAGCCTACAAGATTTGCATTTATCGTCTTGTGAACTGAAGGATTTTCCACAC  
TTCTTGAGAAATGTAAAGACACTTACGGTCTTGGATATTTCTAACAATAAGATTCGTGGCCAAATCCCAA  
ACTGGTTTAGTAGCATAAGGTGGGACTACTTGTACTACCTAAATCTTTCGCATAATTCTTTAACAGGCCAC  
CTACAACAATTTCAATTTCCATAATCTAAGGTATCTTGATCTTAAATTTAACTCCCTTCAGGGTCCACTCTCT  
TCATCCATTTGTAACATGAGCGATCTTAAATTTCTAGATTTATCACTCAACAACCTCAGTAACTTGATTCCA  
AGTTGCTTGGGAAATCTTCAATTTCTAGATTTATCACGCAACGACTTCAGTAACTCGATTCCAAGTTGCTT  
GGGAAGCATGTCTAGTCTAACAGTGTGGACTTAAGAAGGAACAATTTACAGGGGAGTCTTCCCCCATT  
ATGTGCATAG

>PGSC0003DMG400015351 LRR-RLPs

ATGTTAACTGGTCATGTTATCGGATTGGACCTTAGTTGCAGTCTGCTTAATGGAECTATTCATCCCAATAG

CAGCCTCTCCAACCTCCATCATCTCCAGACACTAGACCTTGCTTACAATGACTTCTATTCTTCTCAATCCC  
GCATAACATTGGCCGATTGAGGAATTTGAGGCATCTCAACCTTTCTTATTCTTTCTCTGGAGGGGAAATC  
CCAACAGAAATATCATACCTTTCCAATTTGGTTTCACTTGACCTTTTATGTTATGGATGTGGTCTCCAACCT  
GATGAGAGAACATTTGAAACAATTCTTCAGAACTTCAGAAATCTGGAGGTACTATCTCTCTATGGTGTCA  
ACATCTCATCTCCGATACCTGTGAATATTTCTTCATCCTCCTTAAGGAACATGGATCTTGGACATACTAAT  
CTGCGAGGTGTTCTCCAGAGAGTCTTTTCTTTCTGCCAAAATTGGAAACGCTCTATTTGAGTGACAATG  
ATCTTCTCAAAGGAGTTTTACCAAAGATCCACCCGAGCAACACTCTGTTGATGTTGGATATTTCTACACA  
GGAATCTCTGGTGAGCTGCCTGATTGAGTTGGCACCTTCAGTTCCTTGAATCAATTGAACCTCCGAGGAT  
GTCAATTCTCTGGTTCATTCCCTGATTCCATTGGCAATCTTACACAAATTTGGCGTTTGGATTTCCGTAAT  
AATCATTTACCCGGCAATATTCCTTCCACAATCTCTCAATTGAAGCAGCTCACATGTCTATATCTTTGTC  
AACTCTTTTTGAGGTGAAATTCCCGACATTTTCTCTAACCTCCAAGAGCTAAGTTGTGTATATCTTCGTAA  
CAACAGCTTCATCGGTTTCGTTTCTTCTACAATTGTAAGCTTGCCACATCTTCTAGACTTAGACTTGTCGA  
GAAATCCCTATCTGGCCCACTGCCTAATAATTTTAGCATGCTTCAAACCTAAACGAACTGCATTTGTTG  
TACAACTCGCTAAATGGTACCATAACCATCTTCGGTGTTAGCCTCCCTTTACTAGTTGAGTTGCGGCTCGG  
TAATAATCGATTTAGTGGACTACCCAATGAGCTCAAACAAACCCAAAATTAGAACGCCTGGGTTTAAGC  
CATAATCAACTCAGTGGTTCCTTCTCAATCACTTGCGAATCTCACAAACCTTTCTACCCTTGACCTTTCA  
TCGAATAACATCACCGGTGATGCTGGAATAAATATCACCTTTCCTAGCCTAGAAATTTGTCAGTTATCATC  
TTGTGAACTGAAGGATTTTCCACACTTCTTGACAAATGCAAAGAACTTCATGTCTTGGATATTTCTAACA  
ATAAGATTCGTGGCCAAATCCCAAATGGTTTAGTAGCATAAGGTGGGACTACTTGTACTACCTAAATCT  
TTCGCATAATTCTTTAACAGGCCACCTACAACAATTTCAATTCATAATCTAAGGTATCTTGATCTTAAAT  
TAACTCCCTCAGGGTCCACTCTCTTCATCCATTTGTAACATGAGCGATCTTAAATTTCTAGATTTATCACT  
CAACAACTTCAGTAACTTGATTCCAAGTTGCTTGGGAAGCAAGGCTAAACTAAGAGTGTTGGACTTAAG  
AAGGAACAATTCATAGGGAGTCTTCCCCGTTATGTGCGAAGAGCACTTCATTGAGTACCATTGTCTTG  
AATGACAATCACTTTGAAGGAATTCTCCCTATGTCGTTGCTCAACTGTAGTGGTTTAGAAGTTCTTGATAT  
GGGGAATAATGCTATAAATGACACATTTCCAGCTTGGCTAGGAACACTTCAACAACTGCAGGTCTTAATA  
TTAAAGTCTAATATGTTCCATGGACCAATTAGTACTTGTGAGACTACATTTTGCTTTCCAAGTTGCGAAT  
TTTTGATCTTTCACGTAATGAATTCAGTGGCTCTCTCCCTGCAAAGTTTTTGGAACTTTAAGGCAATGA  
TTAAATTAGACGATGAAGTCTCAGGAGAGATCAAGTACATGAAAACATTCGGGACTGTATATTCCACAC  
CGTATGAGGATTCTGTGAGTTTGGTGATCAAAGGCCAGGATATTGAGCTAGAAAGAATCAGCACAATTA

TGACAACCGTAGACCTCTCGAGCAATCATTTTGAAGGTGTCATTCCTATAAACTAAAGGATCTCAGCTC  
ACTTTGGCTACTCAATTTATCCCATAACAATCTCATAGGTGATATTCCAATGGAATTGGGGCAATTGAAT  
ACGCTTGAAGCGTTAGATCTGTCTTGAATCGGCTCACTGAAAGATTCCACAGGAATTGACAAGAATG  
AATTTCTTTCTTCTTAAACCTCTCTCATAATCTTCTTATTGGACCAATTCCTCAAGGTCCACAGTTCAACA  
CATTTGAAGATGACTCGTATGGCGGTAACTTGATCTATGTGGTCCTCCTTTATCAAACCAATGTGGAAC  
GAGTGATCCATCAGATGCTTCTCAGCCAGTATTGGACTCTGAAGAAGATGAAAACAAGTCATATTTTTTT  
AGTGGATTTACGTGGGAATCAGTAGTCATAGGCTATAGCTGTGGACTAGTTGTTGGAAGTGTGTGTGG  
AGCCTCATGTTTAAATATCGTAAGCCAGAATGGTTTGTGATTTTTTTGAAGGCATTTATCCCAAGAAAAT  
GAGAAGGTCAATGAAGAGAGCTCAGAGACGACGGACTTAA

>PGSC0003DMG400015352 LRR-RLPs

ATGATGGAGACTGAAGAAAACATTGTAACCTGTTGGTGCTGGCATAGCTGGTCTTGCTACTTCTTTGGCCC  
TTCACAGGTAATAATTGCTATTCTAAAATACTTGTTCAATAATTACATCATCTACTTCCAAAAGTTTGATT  
AGAAGGGCATATGCATTTGAACGAGCATTATGCCCTCCACTTTTAGATGTGCATAAGTAGTAATACT  
TAGGATGCCAGGTAGATGCAGAACTGTCACGTAGGATGCCACATGGGATGGGTGTGTTTACTTAGCTTG  
TTCAACTTTTGAATAATTTAACAGTCTACTTGTACCGGCTCAAAGTTGGATGACATAGATGTGGAGCAAA  
GTTAGATGATATATTTATGTATTATGCCTCTCTAGAATATGATATTTATGATATAATAGCGCTATTAGTTG  
AGTGACGATTTGAGAAATAACTCGATGGAAGGCGTGTCTTGTATGTAATATGTAGGTTGGGGCTGCGG  
AGTGTGTGTTGGAATCAGCAGATTCGTTGCGAGCTACTGGATTTGCATTGGCATTGTGGACTAATGCCT  
GGAGAGCTTTGGATGCATTGGGCATTGGGGGCTCTCTTAGACAACGTTCTTATCAATTACTGGGTAAG  
CTTCTCTTTATTATTAGTTAGGATTTAGGATTAATAATTGAAGTTCAATTTTGAATTTTTATGAGATTTTG  
TGGTCATATGTGTTTTCCGGAGTTCTAGCTCTGGAAAAAAAAGTTACTGATTGTCCAAAATGCATTCGA  
GTTGATGTGCAGGTTTAAAAGTTTCTCAGCGGATTCAGGTGCACCTATCAAGGAGGTATCATTGTGGG  
GAATAACAGGTTAGCATTATACCAATTTTCATATTAGTTGGGGTCGGTTATATAAGTCCTTTTCATCTATTC  
GTGTTTATGTATGTTTCAATTTTGTCCAACACTAGATAATCTAGCATGTGAGACAAATTAGGAATTCTCTAA  
AATTAGAGGTTTTTTGAGTATCGCAATCTATAGAGATGTATAAATTTCTAACCATTTGATATAAAGACTCCT  
CACAAACGTTGAAGTAATGCAAACCTCCGATTTTACAACATCGATCTTCGTAGAGAACAATCACATTTG  
TTACGAAGGACTTAAGTATGAATAGCATATTCAGAGGATGCTACATACCCAATTTTTTGTATTGTTTACA  
AGTACAGAGTGACGTGATTTAATGTCCAAATCCCTATGATTTCAACAATGAAATTAAGTTCATTTTGAAT  
AACGTGGTTGAGTATGTCTTCTTCCGACTATTGGATGGACTGATCATTTCGTCAGCCAACATTTTTATTTT



GTAATGTTGGAATAATCTCATGAATATTTTTGTGGTCTATGTAAGAACATTGTTATTTTTAGCATTGCTT  
CGACTACTGATTTAGTTATTTCCATCTCATCATATTTGTCCTTTTTTCCCCTGTAGTCTTTGAGGAAATTG  
GCTTAAAGACTTGGAAGTTTTTAAACATCTATTTCTACTACAACACTACATGGATGTGAAAAGTCTTGTGG  
AAAATTATAGAATATGACTCACAGTTTGAAAAATTCCACACGGTATCAAAAATGTTACGTTTCGTCTAA  
GTAGATGTAGGAGTTAAATCATGTCTTTAATAATTGTTAATTTTTATTTTTCTCACTCCACTTAGTCAAGC  
AACAGTATCTCTCATTGGAATTTGTTACAATTCTGCAGCAAATGTTCTACCGTGTGTCTTACATAATGGG  
ACCAATTCACATTGACTTAGGTGACACACTGCAGAGATAGTCGATAACCTTGAAATGAAACAACATTTAG  
AGAAAACAAATATGGAATAATTGGTACTAGCCACTAGGGGTGTACATGATCGGGTTGATTTGAATGTTCC  
CAAATATCAAACCAAACACTATTTGTGTAAAATTTAAATTTATAAATCAAACCAAACACTAATAAAATTCAGAT  
TTTTGGGGTTTTTCAACCTCGGGTTGGTTCGCGTTTTTCACTTGTGACTTGTTAACTGGTCATGTTATCG  
GATTGGACCTTAGTTGCAGTTTGCTTTGGGTACTATTCATCCCAATAGCAGCATCTTCCAGCTCCATCAT  
CTCCGGACACTAAACCTTGCTTACATGACTTCTATTCTTCTTCAATCCACATAACATTGGCCGATTGACG  
AATTTGAGGCATCTCAACCTTTCTGGTCTTTCTTTGAAGGGGAAATCCCAACAGAAATATCATACTTTT  
CTATTTGGTTTCACTTGGACTTAATTGTTATGAATGTGAACTTGATGAGAGAACATTTGAAACAATTCAG  
AACTTCACAAATCTAGAGGTACTATCTCTCCATGGTGTCAACATCTCATCTTCAATACCTGTGCATATTTCT  
TCATCCTCCTTAAGGTACATGGATCTTGGACATACTAATCTGCGAGGTGTTCTCACAGAGAGCTTTTTCT  
TCTGCCAGGATTGGAAAGGCTCTATTTGAGTTCCAATGAACTTCTCAAAGGAGTTTTACCAAAGATCCAC  
CCGAGCAACACTCTGTTGGAGTTGGATATTTCTAACACAGGAATCTCCGGTGAGCTGCCTGATTCAGTTG  
GCACCTTGAGTTCCTTGAATATCTTGAACCTCAAAGGATGCCAATTCTCTGGTTCATTCTGATTCCATT  
GGCAATCTTACACAAATTAAGTATTTGGATTTGAGTAATAATCATTTACCAGCCATATTCCATCCACAAT  
CTCTCAGTTGAAGCAGCTCACATATCTACATCTTTTGTCCAACCTTTTTTTCAGGTGAAATTTCCCGACATCTT  
CTCTAACCTCCAAGAGCTAAGTTATTTATATCTTGGTAACAACAGCTTCATCGGTTTCGTTTCTTCTACAAT  
TGTAAGCTTGCCACATCTACAAGACTTAGACTTGTGAGTAATTCCCTATCTGGCCCACTGCCTAATAATG  
TGAGCATGCTTCAAAGCTAACCAAACCTGAATTTGTCCTACAACCTCAATGAATGGTACCATAACCATCTTCT  
GTGTTTAGCCTCCCTTTGCTAGGTCAGTTGTGGCTCGATAACAATAGATTTAGTGGATTACCCGATGAGC  
TCAAACAAACCCAAACATTAGCACGCCTGGATTTAAGCCATAATCAACTCAGTGGTCTTTTTCTTCAATCA  
CTTTTGAATCTCACAAACCTTTCTATCCTTGACCTTTTTCATCGAATAACATCACCGTCGATGAGGGAATACA  
AATCACTTTTCTAGCCTACAAGATTTGTGGTATCATCTTGTGAACTGAAGGATTTTCCACACTTCTTGA  
GAAATGTGAAGTCACTTTGGGTCTTGGATATTTCTAACAATAAGATTCGTGGCCAAATCCCAAACCTGGTT

TAGCGGCATGAGGTGGGACTACTTGTGGTACCTAACCTTTCGCATAATTCTTTAACAGGCCACCTACAA  
CAATTTCAATTCATAATCTATGGTATCTTGATCTTAATTTAACTCCCTTCAGGGTCCACTCTCTTCATCCAT  
TTGTAACATGATCAAGCTTGAATTTCTGGATTTATCACGCAACAACCTTCAGTATCTCGATTCCAAGCTGCT  
TGGGAAGCATGTCTAGTCTAAAAGTGTGGACTTAAGAAGGAGCAATTTCACTGGGAATCTTTCTCCATT  
ATGTGCGAAGAGCACTTCATTGAGTACCATTGTCTTGAATGACAATCACTTTGAAGGAACTCTCCCTGTG  
TCGTTGCTCAACTGTAGCGGTTTAGAAGTTCTTGATATGGGGAATAACGCTATAAATGACCTATTTCCAT  
CTTGGCTAGGAACACTTCAAGAAGTGCAGGTTCTAATATTAAGTCCAATGTGTTCCATGGACCAATTAG  
GACTTGTGAGACTACGTTTTGCTTTCCCAAGTTGAGAATTTTTGATCTCTCTCATAATGAATTCAGTGGCT  
CACTTCCTGCAAATTTTTTTGGAACTTCAAGGCAATGATTAATTAGAGGGTGAAGACACAGGACAGA  
TTGAGTACATGAAACCACACGAAAATACAATTTACACATCGTATGACGATTCTGTGAGTTTGGTGATCAA  
AGGCCAGGATGTTGTGCTAGAAAGAATCAGCACAATTATGACAACCATAGACCTCTCGAGCAACCATTT  
TGAAGGTGTCATTCAGCAAACACTAAAGGATCTCAGCTCACTTTGGCTTCTCAATTTATCCCATAACAATC  
TCACAGGTGATATCCAATGGAATTGGGGAAATTGAATACGCTTGAAGCGTTAGATCTCTCTTGGGAATA  
GGCTCACTGGAAAGATTCCGCAGGAATTGACAAGAATGAATTTTTCTGGCCTTCTTAAACCTCTCTCATAA  
TCTTCTTATTGGACCAATTCCTCAAGGTCCACAATTCAACACATTTGAAAATGACTCGTATGGCGGTAACC  
TTGATTTATGTGGTCCTCCTTTATCAAAGCAATGTGGAACGAGTGATCCATCACATGCTCCTCAACCATTG  
GACTCTGAAGAAGATGAAGACGAGTCATATTTTTAAGTGGATTTACTTGGGAATCAGTAGTCATAGGC  
TACAGTTTTGGACTAGTTGTTGGAAGTGTGTTGTGGAGCCTCATGTTTAAATATCGTAAGCCAGAATGGT  
TTGTGGAATTTTTGAAGGCATTTTCCCAAGAAAATGAGAAGGTCAAATAAGACAAGGCCGAGACGGC  
GGATTTAA

>PGSC0003DMG400015353 LRR-RLPs

ATGCGGAAATTGAATTTTGGAAATAATCATTTACCGGCTATAATCCTTCCACAATCTCTAAATTGAAGCA  
CCTCACATCCCTAGACCTTTCGTCCAACCTCTTTTCAGGTGAAATTCCCGATATTTTTCTAACCTCCAAGA  
GCTATGTTATTTATCTCTTTTTGACAACAGCTTCATCGGTTCTGTTTCTTCTACAATTGTAAGATTGACACA  
ACTTCAACACTTAGACTTGTGCGACAACCTCACTGAATGGTACCATACCATCTTCGGTCTTTAGCCTCCCTTT  
GCTATCTTCATTGTCGCTCCAACATAATCAATTTAGTGGACTAGCCGATGAGTTCAAACAAACCCAACA  
TTAGAACACCTAGATTTAAGCCATAATCAACTCAGTGGTCTTTTCTCAGTCACTTGCGAGTCTCACAAA  
CCTTTCTACCCTCATCCTTTCATCAAATAACATCACCGTCAATGAGGGAATACAAATCACTTTTCTAGCCT  
AGAAGTTTTACAGTTATCGTCTTGTGAACTGAAGGATTTTCCACACTTCTTGACAAATGTGAAGTCACTTA

GGATCTTGATATTTCTAACAATAAGGTTCTGGCCAAATCCCAAACCTGGTTTAGCGGCATGAGGTGGG  
ACAACCTGTGGTACCTAAACCTTTTCGCATAATTCTTTAACAGGCCACCTACAACCTATTTCAATTCATAATC  
TAGAGTATCTTGATCTTAAATTTAACTCCCTTCAAGGTCCAATACCTTCATCCATTTGTAACATGAACGAT  
CTTCAATTTCTACTTTTATCACACAACGACTTCAGTAACTCGATTCCAAGTTGCTTGGGAAGCATGTCTAG  
TCTAACAGTGTTGGACTTAAGAAGGAACAATTTCACTGGGAGTCTTCCATCGTTATGTGCGCAGAGCACT  
TCATTGAGTACCATTGTCTTGAATGGTAATCAATTTAAAGGAACTCTCCCTGTGTCGTTGCTCAACTGCAG  
TGGTTTAGAAGTTCTTGATTTGGGGAATAACGCTATAAATGACACATTTCTGCTTGGCTAGGAACACTT  
CAACAACCTGCAGGTCTTAATATTAAGTCCAATGTGTTCCATGGACCAATTAGTACTTGTGAGAGTAGGT  
TTTGCTTTCCCAAGTTGCGAATTTTTGATCTTTTCGCATAACAATTCAGTGGCTCTCTACCTGCAAAAAGTTT  
TTGGAACTTCAAGGCAATGATTAATTAGACGGTGAAGACACACGAGAGATCATGTACATGATGCCAT  
CTATAATGCCATTTTACTCATCATCATATGAGGATTCTGTGAGTTTGGTGATCAAAGGGCAGGATATTGA  
GCTAGAAAGAATCAGCACAATTATGACAACCATAGACCTCTCGTGTAAACATTTTGAAGGTGTCATTCCG  
AAAACACTAAAGGATCTCAGCTCACTTTGGCTACTCAATTTATCCCATAACAATCTCATAGGTCATATTCC  
AATGGAATTGGGGAAATTGAATAAGCTTGAAGCATTAGATCTCTTGGAAATCGGCTCACTGGAAAGAT  
TCCGCAGGAATTGACAAGGCTAACATTTCTGGAAAAGTTAAACCTTTCTCAGAATGTTCTCGTTGGACCA  
ATTCCTCACGTTCTACAATTCAACACATTTGTAAAATAG

>PGSC0003DMG400015449 LRR-RLPs

CTCATAACAACACTATATCTCCACAAAAAAGTGAAAAAATCAATCTTCATTTCTTATATGATGAACATT  
TCTTATCTTGAATAATTGTTATTGTGTTAATATATAGTTCTTTTGTATATCATCTTCCCTTAGGGGCAGCCT  
TGGGGGTTGGTTCTTCCGAGGCAGCTTGTTAGTCGAAAATCCCTTTGAAAAATGCAGGTGTATCGATG  
TTTTTTCAGTTTGTGCTGATCTCTGCTGTTCTGTTTTCTTCTTGTGCACTCTCTGATCATGAAGCATCA  
TTGCTTGCACGACGACAACCTCTCAACACTTCTTAAAAATGGTAATTTACCCGATAAATATGAATTCGAGG  
TGAATGTAGAATACACATTTCTAATTCTAGGCTTAGACGTGCTTATATTGCGTTAAAGGCATGGAAAGA  
AGCTATATATTCTGACCCTTCTGAATTCAGTCAATTGGAAAGGTCCAGATGTTTGTAACTATAAAGGC  
GTGTTCTGTTGCTGCTTGTAGATGATCCTAATGTCACTGTTGTTGCTGGGATTGATCTGAATCATGCAGA  
TATAGCAGGTTATTTTCTGTAGAATTAGGATTATTGACAGATGTAGCTTTGTTTCACTTAACTCCAATA  
GATTTTGTGGAATTGTTCTGAGAGTTTTTCGAAGCTTACGTTGATGCATGAGTTTGTGTTAGTAATAA  
TCGTCTTGTGGCCCTTTCCCTAAGGTTGTTTTGAACATGTCTAGTCTTAAGTACTTGGATTTAAGGTTTA  
ACAACCTTGGAGGGAGAGTTGCCTTACAGTTGTTTGACAAAGATCTTGATGCTTTGTTCTTGAATGATAA



TCGATTCGTGTCTACCATCCCTGAGACTCTTGGTAACTCTTCAGCTTCTGTGATTGTGTTTGCTAATAACA  
AGTTTCATGGTTGTATTCCCAGTAGCATTGGGAAGATGTTGAATTTGGATGAGATTGTGTTTATGAACAA  
TGATCTTGGTGGATGTTTGCCTGTTGAAGTCGGGTTGTTAAAGAATGTAACAATGTTTAATGCTGCTGGG  
AATTTGCTTTCTGGGATATTGCCAAAGACACTTGATGGTCTTTCACATGTTGAGGAATTGGATATTTACA  
TAATACCTTAACTGGGTTTGTCCGGAGAATCTATGTTTCATCGTTGAGTTTGAAGAAGTTTGTGTTTTCGT  
TTAATTACTTTAATGGAGAGGCTAAAGGTTGTGAAGCGCGAACAAGGAAAGATATGAGTTTTGATGATA  
GGAACAATTGTTTGCCTGGTAGAGCAAACAAAAGTCTCAAAAAGAATGTCAACCTATTGTGAGTAAGC  
CTATTGATTGTAGTAAGGCTAAATGTGGAGGGCCTTTAACAAAATCTCCTCCTAGTAAGAAAAATGAAG  
TGCCACCAAACCAACACCAACACCAGCACCAAACCTCGACCTACCCCTAAGTCACCACCCACCCCAAA  
GAAGGCTTCTCCTCCACCAACACAAGTCGTTTCATCGCCCCCTCTAGTACATTCTCCACCACCACCTGTTC  
ACTCCCCTCCACCACCTCTAGTACATTCTCCACCACCACGTGTCCATTCTCCTCCTGTTTCTCCTCCACCACT  
ACCCGTCCACTCCCCTCCATCACTACCTGTCAACTCCCCTCCACCACCTATAGTACATTCTCCACCACCAG  
TGTCCATTCTCCTCCCGTGTCTCCTCCACCACCACCTCTTGTCCAATCTCCACCGCCACTACATATCAACTC  
CCCTCCACTACCTATAGTACATGCTCCACCACCACATGTCCATTCTCCTCCTGTTTCTCCTCCACCACC  
TCATGTCCAATCTCCACCGCCACCTCTAGTACATTCTCCACCACCACCTGTCCACTCTCCTTCTCCACATGT  
TTCCTCTCCACCACCACCTATCCAATCTCCACCGCCACCTCCAGTACATTCTCCACCACCACCTGTCCACTC  
TCCACCTCCACCTATTTCTCCTCCACCGCCACCTGTCCATTCCCCTCCACCACCACCCGTCCACTCTCCTCCT  
CCACCTGTTTCTCCTCCACCACCACCTGTCTACTCCCCTCCACCACCACCCGTTCACTCTCCTCCTCCACCAC  
CACCCGTCCACTCTCCTCCTCCTGTTTCTCCCCACCACCACCTGTCCACTCTCCTCCACCTCCGGTACTCTC  
ACCACCACCACCTTTGGAACATGTTGTCCTCCACCAAATATTGGTTCAATTTACGCATCGCCACCGCCAC  
CAATCTTCCAAGGATATTAATTAAGCAATGAATGAAGCTTCGTCTCGTTTCCACCTTTTTAGTACGTATAA  
TATTTAGTACATGCAGAATTACATAATCATTTTTCTTAATGTAAGATTATTATCTAATATATGGTGATGTTT  
TTCTTTCTTTAACTGATACAATATAATCTTGGAAAAG

>PGSC0003DMG400015603 LRR-RLPs

CAGATCATCATCACTGCAACGCCGCGCTTTATCTCCTCTTCTGGAACTCTCCCTTCGTTCTCCTCACTGTCT  
AACTCACTCATTGAGTCTCTCCATGGGCTCATCTTCTACATTCTCTCTGTGCTCTCATCCAACGGTACTTTC  
CTCTACTCTATTAGCTCACTCGAACTTACAATTATGACTAAATTCTCACTTTTTTTCGTAATTTTTAGGTGA  
ATTTTGAATTTAATGGTAGAAAAGTCGGATACGGATTGCAGAAATCGTTGAGCAGTTCATCCAGTTATTG  
TTTGATTCATATTTGCGCGATTTGTATAAGTAGTAGAAGAAAATGCTTGCAATTGAGACGTGTAATTGTT

AGAGCTGCTTCGTCGTCTAGTACTGGTCCGAGACGTTTCGACGAATACTCGGAGAGTTTACAAGGAATCA  
CAAGCTCAAACGCCAGCATTGCCTGTTGACAGAATTGTTTCGTTTGTGTGCCGGCTGGTGCCTTTGTGG  
TTATCTCTTTTGGTATTGACATTTTGCCTATTTTCATCTCTTTTTCTACTGATAGGCTTATAGCTTTAATTTCT  
TATGCTGAATTGAGCTTTTGGAGGAGATTTTGCCTTTGAGTACATTCGGTTATCACTACTAGTGTGGAG  
CAATAAATAAAATAAGGAGTTAAAAATTACTTCTTCAATATATGTTACACCTTTTAACTCAGACACAGAA  
AAAGAAGACTTTTGAATTTATGGTCTAAAGTACTAGAGTACTTGATTATTGGTGCACCTATAAAGTTAAA  
TTGTTTCCAATTATAAAAAAAGTGACATCTTTTGGACAAATTAAAAAAGGAAGTGTGCCACATAAATTAG  
AACGGATTAAAAAGGGAAGTGTGCAATGTTTGCCTTCCATTATGTATCTGTAATGGTTTTAATTTTCTGTT  
TTTCTTGTATTGAAATTGTTTTTGCATCCTTTTGCCTTAGTTAAGCTCAATTGCAATGCACCTTATAACT  
GTGGCAAAAAATATGAAATTGCAAATGGTAAATTTGACATTCTTGCTCTTGTGTTTTTACAATGCCAAG  
TTAGTGGCAGGCAAGGCTTAGTATTTGGGAAAGGGTCTAACTTAAGTGGGTTTTCCAGTTTTGGCGGA  
TACTGGAAGAGGTCAGGAATCATGAGGTCTTGTGTGAAAATTCTCAACTTAATAGAAAAGTTTGAAGTT  
ATTGGAGTGCTTGGCAGTATGACAGAGACCTGATATTCACCATGAATGGAGAACTTAAGGCTCTTTAT  
ATGGAACCTTTTAAAGCTGTACATCCTGCAACGGATTACCCTCTTTTTGTTGAGTTATTCGTGACTAAGAAA  
ATGAGTTAACACGGTAATGTTTCAGCATTTTAGAGGCTTAGATTTAAAACCTTAGAAGTGCAAGGCACCTT  
ACAGCCAAACAGGATTGCCATTTTCATTTTGCAGCCTTTTGGATATCATTTTAGATGTTCTGCTGCCTGCAC  
TCGTATGAATGTATTTTGTGACATTTTACTGAGTGACACTGACCTGTTTTTTAGGTTCCCAATTGTTG  
CAATCATTGTAATCAATTTAATATGCTTTAATTATCTAATATAAATTAGCCATTGAAAATTATATTTCTCT  
TTAAGAGCCATTTTCTAACAGCTTTTGGAGATATAGGTTCTGCAACTTCACAAATTCATTCTCTGAACCA  
CTTTGGTTGTAAAGCGGCTTGTCAACACAACCATAAATCTGGTTTTTCATCTTTTAGTTGCCAAATATAGT  
TCTATGCTTAAGGGACACCGGACATGTAGTGTGTGGTAGTTTTTTTTTTTTAAAAAAAATTAGTGAGAA  
GATGATGACTTGTTCGCAACTTATGGCATCCTCATTTAACTATCTTTTAAAAATCAAGAGGATTACTAGG  
AGGAATGCTCTTGTCTTTTTAGTTGTTTTACTGGTGAAAGTTAATGGAATGTTATTAATATTGTGTAGAA  
ATATTCTTAATGATTATGTTATATTGATTAAGAGCTCGTTTGGATTGACTTCAAAAAAGTAACTTTTTAAA  
GTGTTGAAAGTTATTTTAGAAATAAGTAGTTATGTGTTTGGATAAAAGTGTGCAATTGAAATTTTTTTAT  
TGATGTGTCTGGCAAATAAGTGTGTTAAACACTTTTTTTTACCAAATGTCCTGAAATACCCTTAAACT  
GATAACATTATATAAAAAAAGGTTTTGAGATGAAGGTCTTCAATGAAGTTGAAGACCGTGCTCATCAA  
CATTCTAAATATATGTTGGATTTTCTCTATGTGAAGATTAGTGATTGAAAGCGAAGGAGGGTTTATTGGT  
AATAAATGCTTGAGGACACTTCAATGGCATCCTAATCAACAACGGAATATCCTAGAAAAGAATAGTTGTG

CTGGGGATAGAAATAGAATAGCACTTATATGGATGAGGTCATGAGCCTCCCTTCAGTAACTTACTTCAGT  
GTCGATCATCCTGTGAAATTTTCATGAAAAAAAAAGAGAAAATTGAAATGTTGAAGAGGAACAAGAAAA  
ATGTTGGTGAGAACGTTGGAGAAAAGTAGGGCCACAACAACAAAAGAAAGTTGAGGGAAAGAGGAGA  
TCTTAGAGTTTTATTTACAAGGGCAAATTTGGAATTATATACATGAATTGAGGGTACAAAAGTAATATC  
CTTGGTTTTAAGTTATTTTTATTTGCCAAACTCCTAGAAGTCAAAAAGTACTTAAGTCGATTCAAA  
CAGGCCCTAAGAATCCAAAAGATTAGGAAATAATCCTTATTATTGTAGGCTAAAAGTCTATTTAGGAGT  
CTTCTTGATGGTTGTAAGCATCAATTAAGAAGTTGTTATTCCCTTTTCAGATGTTATAGATCTTGCT  
AATGACTTAAGTAACTTCTGCCTATCAGTGCACGGCATTATGCTACTACTTTTGGGTGGACTTCTCTTTCC  
TTTTACGTTTTACTGATCACACTTCTTTTTCTTCTGGTGGCACTGCAATTCTTTTTACTTCTTAAGTTG  
ACTTTACCACCAATCCGAGCTATGTGGATGATGTCCAAGAGATTTAACTTAGCATATACCTTCCGGTGGT  
TGAATTATAGATTCCTTTACATGTGTCGAAAAACACTTTCTTTCATTATTCAATTACCAGTAACCTTTTAGA  
AGAAAAAATTTCAACGCTGCTTTTCTTTCCATGATCATTCACTACTAATTAGACGATTCAGGTGACTGT  
TCTTGTCTAATTACTTTCTAGTTATTTGACCATCTTGAATATGAAGGAGCATGCTTGACGTTAAGTGAA  
TCATTAATAATATTGTGTAAATTATTCATAATAATTATGTTTTATTAGTTAGGAGAGCGGGAATTAGTAA  
ACTTTCCTTCTTAATTTAGTTCAGAATTTCTATATGAGTAGCTCCTTGAATGTGGTTAAACCTTTTATTACA  
AGAGCTCATTCTCTCTCTTTTTTACAATGTCAAATTTCTAATAAACAGTTAATCAACCACTGGTATCGTT  
GCATCTAATTTATCTTAACATTCAAAGTTCTTACATTTCCATCTCCAAGATGTTGCTCCATACTACTATTC  
TATATGATGCGATTGAATTCCTTTTATTGCCAATTACCTCTACTAATAACTTCTGAGCTCTTTCTGCCCA  
AAAAATTGAGGAGCTACTTAACTTGCATCTGCAGAAAGAGTAAATGTCTTAGTTTTACCACAGTGTGCT  
CTGGTTCAGTCATTAAGTATGGGCCCTGGCCATTTCTATTGCTGCACCCTTCCAATGAACTCGTTGCAAG  
TTATATCCTTCCAACCTTTGCCTGGCATCCTTTCTCACGGAGGTTGAATCTTGTGAGAATGTGGCTGCTAG  
ACTGAAGATCTTCTTATGAATTGTGACTCGAAATAGAAATCTTAAGTAGAAGGAAGATTCTCTATAT  
CGTACTAATCTATGTGTTGAGTTGACAGTTTTGTGGAAGCTGGTGGAGAAAGTTCTTCTACCCAAACCAG  
CCAAGACTACATCAGAAGAAAGCAAGTCTACTCAGGGATTGAAGTGGTCCATTGCCGCTGGGACAAACT  
TGTTACCTGGTTTTGGTGCAAGATTGAAAGAGAATCCAAGCTGAGGCTTAATGACTTTGCTAAAGAGC  
TTAGATCTTTCAGCATTGTTGACATGTCAGGTAAAATTGCAGTCAGTTCTGGCTCAGCTGCTTCAGTATTA  
AAGTTGGTGGTCGTCTATGCTAAATGTTGTCATAATGAATATCTTCTTCTTTATACCTTTGATAAAAAAC  
CTTCTATCATTGTTAGTTTTAGAAAATGTGATCACGATGTTAAAATATTTGCCTTGACTTGTTAAATCTTG  
AGTCCACCTCTTTAGAAAAGTTCAACATATAAAGATCAAAGCTTTACCGTGATTTATGATTAATAAACATT

TTGTGCATACTGATATTGCCTGAAGGAACTTTCCAATCTTGTTTCATTTATAAGCTTCCCCACCAAGTG  
CGCGACACACCAAACCAAAGTTTTACTGCATCTTCCTTGATTGTGATTCTACATTCTTGCATACTGATT  
AAGGATTAATAATTGCAAGTCACAAGAGGTATTGGATTGAATGTTTTAGGCTTTGGCAGGTCGTAACTTT  
GGAGATGAGGGGCTCTTTTTCTAGCAGAGAGTTTAGCATATAATCAGGTAATGTCTTTTGCTCTCTCTA  
CCCCCTCCCTCTTCCTTATCTGTGTAGAGTATGTCATTATTTATCATGGTCCATCTTGTTAACCCAAGAG  
GATAAAGCCATAATCCTGTAATGTAGACAAGTAACAATACAATCCTGGCTTCTTTTTTCTGGAATAATGT  
TTTTGGGCAAGTTTGGTTCCTTACCAATGTACTGCATTTCTTTTCATGTGATTTCCAGACAGCCGAGG  
AAGTAAACTTTGCTGCTAATGGAATAACTGCAGATGGATTGAAGGCCTTTGATGGCATATTGCAATCAA  
ATATTGCTCTAAAGACTCTTAACCTATCTGGAAATGCTATTGGGGATGAAGGAGCCAAGGTAATGCACA  
GATGATATAGGTGAAAATCCAAAGCAGTGAGTTCTTGGAAACAGATGACTAATAAGCAGATCCTAACT  
TTCCCTTTCACCTACTTAACTGTTATACCAATTTAACACGTGTATTTATGGTCATGCTTTGTATTGTATTT  
TCATCTCCGCCTTGGCACTTCAGGAGCAATCACGTCTATTTGGTGTTAATTTATGTTTGCAGTGTCTATGT  
GATATACTGGCAAATAACTCTGGTATTCAAAGCTCCAGCTGAACAGCACTGGCTTAGGAGATGAGGTC  
TTGAACATGCCTTGAGCATTTAATTGAAATGCTGTTGCTAACTTGCATGGTATTTTCTGCTTTCTGGTAA  
ATTATTGCTTAAATTTGCTGCAATGGTTTGTCTGAATTTTGCAGGGAGCCAAAGCCATTGGTGAAATGC  
TGAAAAAAATCAACTTTGCGTGTTCTTGAACAAACAATAATCTGATTGACTATTCTGTATGTTATTAA  
GCAGAACTTGTAATTTGTATTTCTAGTTATTAATTATCTCAATTTCTGAAGGAAAACATGTTTGATTTGG  
ATATGGAAATAGGGATTTTCAGGTCTTGCTGGATCACTTCTTGAGAATAAACTTTACAATCCTTGCATCT  
GAAGTAAGCAAATTTATTCTGCTGTCTTTCTGCGCCATCCTCATTGTGCGTATGTCAAATGTAGCAGTT  
AATTATTTTATTTTTCTTATTGGTTTGGAGGGTGGGGGTGGGGGGAAAAGAAGTGGATTTTAATTTGTG  
AGGGAAAGCATATCAATTCTTATTTTCCCTTATATCTTTTAATTTATGTGCTTAAATTAAGTTCAGCGGC  
AATTATGGTGGTGCTTAGGGGCTGCAGCACTGGCTAAAGGCTTGGAGAGCAATAAGTCCTTGAGGGT  
ACATTTCTAATCAATTCCTCCTCCCACTGAGACCCTTCGCCTTTTGTCTTTTTTTTTGTTCTTGTAATTTGA  
CTTGGCAAATAATTGAGCTTTTTTTCAGCCTTGATATCTTGCTTCTGCGTCATTGGACTGTTTCTTAGTATT  
TAACTTCTGCACTCATGTTTCCCTTCTTTTTTTTTTGGGAAACAACCTCTCTACCTCCACAAGGTATGAGT  
AAGGTCTGGGTACACTCTCCCCACCCCAACCCCACTTGTGGGATCACACTGGGTATGTTGTTGTTGTTAC  
TCATGTTTCCATTTGATTGTATAGAAGAGCTCTTCTTTTCAAAGCTTCAATTTCTCTGTGACTGCTGACA  
CTGGGATTAAGTGTTAAATGCACTAATGTTATTAGATAAACTTCTTCAGGGGGTTTCTTAATGTTCCCTCAC  
CAACAATCCGAGGTTGAAGCTAGATCTGTTCCGCCAAAATGGAAATGGGCTACTGTTTACATATTACTA

TATATCATTAAACATACACCTGTATATTCAAAGGTGTTTGAAAAGATTCTTTATGTGCAGGAACTTTATATG  
CAGGGGAACTCTGTTGGTGATGAAGGAGTACGGGCATTAATCTCGGGCCTATCTTTGCGTAAAGGTTTG  
CTTATTGGATATAATTAACCATTCTCTCTAAACACATATTGGCGTTGTTTCCTGTGCATCTTTTTTGAAGG  
TCACCATCATATGTCTGCAGGGAACTTGCTTACTTGACCTTGCCAACAATTCAATTACTGCTAGAGGA  
GCATTTTCATGTTGCCGAATACGTCAAAAAAAGCAAAGCTTACTGTGGTTGAATCTCTATATGAATGACA  
TCAAAGATGAGGTAATTGAACCACTTAGAACTTTTACAGTTTTTTTCTTTGTAATGTAGAAGACTCTTC  
TCAGCCTTGTCTTCTCACTGCAATCAGTAGACTCTTGAACATTTTTATGGTTTTATTTTATGTAACAGA  
AGCAAAGAATGAGAAAGCTTGAGTTTTTGTCAAGTTGAAACCACTAAAATAAGATAGAAAAGATTTTTG  
GGTAAGAGGGTGAGGATTGATTGTGCGAGAAAAAACAAAAAGAATTTGATTGGTTAGAGCTGAAGGTGA  
TGGCTGAGTCGTTCTTGAAACCAATCATAAGTTCAGATCACATGGTTAGGAAATTTTATAATGGTACTTA  
CCATTAAAGAATATAATTTTAAGACTAGGTTTAATCACTTTGGGGATTCTTGCCAGAAGAAAATTAGAAG  
GGTTGCATGGTGTGGATGAACTGAGGTCTTTTTAAATTTTGTGAGCAGTTCAGAAAGATAAAACTCAA  
TAATCCCAAATCTGTAGGGGTAGCTTTATTTTTCCCTTCAAATACATATGCATATGGACAGACATATTAA  
CTATGTAAAAATGAATACTTTTATAGTCCTGCACAACCTTAAACGTTAATATTTCAACAGTGAGAAACCTAA  
CTGTGCTCCTCTTGGATTATAGTAGAACTGTCTGCATCCACCATAATTAAGTGTGTTTATTGGAATCAA  
AGGAAAGCTTTGTGGTCGAAGCAGAAAGATAAAAAATTGATGATTGGAGGAAATTGGTACGGATTGAG  
TAACAGAAGGTTAAATCTGTTGTGAAGAGTTCAAGGGATTTGGGCTGCAAAGAAGGATTTTTTTTCAGAA  
ATTTATGGGGGTGGGTTTGCATTCGACAGGGTAGTTGCTCAGAAGCACAATTAATTTCTGCTGGAGAA  
GAGCTCATGTGCTGGCAACATCAGATTGAAACATAAAGTCAAACCTTAAACCATATCCTTGGTAGATTAGA  
CCAAACTAGCTAATGTTGATTACCCATTCCGGAACTTAAGGCTATGGTTTACAATGACAGAGTACAGTG  
TCTACAAGCAACAAGTCTGCACAAGAAGTGGAAAGAAGTCTCTAAGTTAGCTCGCAAAAAAATTTACT  
GCCTTCATTTGTGTCAATAAACTTCACATGTAATCAGTAGCCTCAAGTTTCCCACTTCTTCAATTCAACCA  
GTTTCTTTTTGTTGGTATGCGATTTCTTGGTGTGAAGATTAAAGGCGAAGGCTTTTTGTTTTAAAGAG  
TACACAAATCACATGCTTTTCACTTGAGAACTACCGTTAATATTTGACGTCAAATTTGGGAAGGACCAA  
AGGTGTCCATTTTTTCAAAGACGAAGGATTTATTTTATCCACAGTTATATTTGAAGGACAAAGTGTAAC  
CTGTCCCATAAATAAGGGATCATTGAGTTTTTACATTGCAGATCCAGACTCGATCTCTTGATATGCATT  
GACTTTTCTTCTTTTTTTTTTCCCCATTTACATCAATATCCATCAGGGAGCTGAAAAGATTGCAGAAGCT  
TTGAAGGAGAATCGCTCGATAACTAACGTTGATCTTGTAAAGAGTTGTTTCTCTTTTCTATTTTATTCAAC  
ATTTCTTGTGTTTTCATGGAGGAGGTTGGGTTTCTTAATCTTATCAGAGCATAATTTTCTATTTGCTCTGA

TGGCTGGAATTCTGCGAATTTTACAGGGGGGCAACGACATACATGCTAAGGGTATTAGTGCCATAGCAG  
AAGTTCTGAAAGATAATTCTGTCATTACCTCTGTAAGTTTCATCAAATGTTAACTTTTACTGATTTATTGG  
ACAACTTAAATACATTATACTTCAAATTTCTCACGAACAGTTAGAAGTTGGTTACAACCCCATGGACCA  
GAGGGGGCAATGGCATTAGCAGAGGTAAGTTTCATGGAAAAGTAAAAGATCTCATGCTTGGGTG  
GTGTCAGGTAATGCATGGATTGTTTCATATATGCCTTCTTAACTATCTCTTTTAGCATGCTCACTTAATTT  
TGTTCCAGATCGGAGCCAAAGGTGCAGAATATTTGCCGATATGTTGAAGTACAATAGTACCATATCAAC  
TCTAGACTTGCAGCCAATGGACTTAGAGACGAGGTTTCATTCAAAGTTTATAGTTCTTCTATTGTGCCA  
CAATCTTTAATTTCCCTCAAAGTACATAACCATTTCTTTTTCAGGGTGCAATCTGCCTTGCTCGGAGTTTA  
AAAGTGGTCAATGAATCTTTGACGACACTCAATTTAGGGTTCATGAAATTAGAGTATGCAACTCTTTTC  
CAGTACAAGTACAACCACCTGTCTTGATAAAGGTATCATCTTGTATTAAGTTAGTTTCTGTTGCACACAGG  
ATGAAGGAGCTTTTGCTATCGCTCAAGCACTTAAGGCAAATGAAGATGTTAGACTCACATCTTTAAATCT  
TGCCAGTAACTTCTCACCAAATTAGGACAGGTAACATCAAATGATAATATTATTCTTTTATTTTAGCTGT  
TTTACGCGATTTTTAGTTCCCTTACAATATCCGGATGGATTCCAAATTTAGACAGCTCTCACAGATGCAAG  
AGACCATGTGTTTGAGATGACTGAGAAGGAGCTTGCTGTTATGTTCTAAAATACTACATTCCTTAGATCA  
GATATATTTTCTCCCTACTTGGGGCAAGGTAGATAAGTATTTTTTTTTCTATTCTGGGGGAATAGAATCG  
CAGCCTACCATGATATTCTTAAGAGTCCCACCTTAGTTCCCTTTTGACTGAAATCATTTTGAGCGGGGA  
ACAGTGGAAATTTGATATCGAGATACACACTGATATTATAAAAAATGTTCTTTTCTGAAACTTTTTTTTT  
TGCTGATAACGTTAGTGGCAAGTACATAGAGATTACTTCTATTCACCATTTTCTGATTCTCTCTGGTTT  
GAAACTCTTCTGAGTTGTTGTTCTTTCCCTATGGCCTTTAAGCTTATTTTGGTGTGACAGGACAG

>PGSC0003DMG400015672 LRR-RLPs

CTTCTTCTCTAAAAGCTAAAGGTTCTCAGTTTTGCTAAAATTTACACATTGCAGCAAAAAATTCTCT  
AATTTTCCAATCAACATGACTCAAGGTATGCAAATTCTCTTTTTGTTGTTTTTTTTGGATTATGAAAGTG  
GATTTGAGTCTATAGTTGAAGAAAAATAGCATTTTTCTCTCCAGTTATTTACTAACCTGAAGTGGAAATTT  
TACTATTCAGATATGAAATTTGAAGTTTTAGAATTTGATAAAGTAACTTAGATTCTCATTTTTATTGAGTT  
GTGTCTTTCAATTGATCCCAAAAAAGTTTAATTTTACTCCTATTATGTAGTGGGAAGAACAAGACACTAAA  
GAAAGAAAAAATATGCTTTGAGAATTAGGTTTCAAGGCTTAAGCCCTGAAGTGAAGGCTAAAAATGCAT  
ACTTTTCCGAAGAGGCGCCACTAAACAAATGACAATTGATATTTCACTTTGTAGTTAAAAAAAATCAATTT  
ATTTGATCATATATGTGGCATTCTGTGCTTATAATTATTAGTGTGTTGATTTTTTCTTCTGTTTCGCGTGT  
ATTAAGCCTATGCTTTATTTGCACGTTATGCTTAAAGCCGTTGTGCTTTTTGGTTTTGATAACACTTGTA

GAAGCACCTTTAGTGGTCGTTTGATAGAGTGTATAAAAATAATGTATAATAGGGTGTATTAGTAATACTT  
TTATTAGTTATGCTTGCATTAGTTAAACATAGAATATTTTTTATGCATTGTTTGGTTTGGTGTATTA  
AAGTAAGTATTGTATAAAAATGTGTATTTACAAAAGCATCCTCCACAATTATGGTGGAAAAGATGTAAAA  
GTGCTTTTGAGGGGTAATTGAGTCTTTAACCATACTAATGCATGTATTAAGTCCTTTGCATTACTAATACC  
TAGAAATTTATATACATGGCATAAAAAAATGTACCAAACAAGGTATTACTAATACACAAAGCTAATGCAA  
GCATTATTTTTGTTAATACTCTACCAAACGACCCCTTAGTTTGTTCATTTTGTGCACAATAGGATGTGA  
CTTAGTGGTCGATGAAGTATGAGGGAAATCGTGAGGTTAAGAAAATGCTTGGTAATTTCTATTTATCTGC  
CTAGGATTTGGTGGGCAGAGACTCAGAGTTACATGATTCATGTGTTGGTGGGAGGTACTACATATTTAG  
TGTAATATTCTATGTGCACGCAAGGTGGCTCGGACATCACTGTCGTTAAAGATAAGACACTACTAACTT  
AAGGGACTAATTTGATTTTTTTTTCTCCATATTCTTCTAACAGATGGAACAAGATGTGTCATTGAAGGGG  
ATAGTGAAGATAGAATCAGTGGTTTACCAAGAAATGTTATCGATCGTATCCTTGAGCTCATACCAGTTGA  
AGATGCAGCAAGAAGACTAGTATTTTGTCTCGAAACTGGAGATATATTTGGGCAACATTTCCAAATCTGGTG  
CTGGATGACCGCTTCCTTCATAATTTTATAGGAAAGCTCCAATTCAACTTCACAGAAGCGGTAGATTGTA  
TTCTGTTATTGCATATGGGGAACATTGTGAAGTTTGTCTTGACACTAGAGGAGTTTTTACTGCAAATTCT  
TCATATGCAATTATCGATAGATGGATTCTTTATGTCACCAGAAATGGAGTCAAGATGCTAACCCCTCACA  
TTTCAAATGATGATACCTATACTCTGCCTTCTTCTATTTTTATTTGTTCAACCTTGACATATTTGAAACTCTC  
CAACTGTGTCTTCAGACCACCCAATCCCTTTCTGGTTTTCAGAATCTTATTACCCTTCGTCTGGAAGGGT  
CAACCTTTGTGCCAGCCACATCATTTTGTGTTATCAAGGCTCCCCTTCTTGCCAGATTGGATTTGATCTTG  
TGTCGTGGTACGCAATACCTAAACATTGTTTACCAGGGCTGAAGTTCTTGACATTCAGGACAGTCACT  
CATATCTCGTGCTAGATTGCTTTATGAACTGCAAGAATATAAGACTGTAAAACTTGAATTTAACAGAGT  
GGTTGATGATCCAACAAATGATAAAATATCAACTTTGGAGAAGCTTCTTGTTAGCTCTCCTGCACTTGAG  
GTA CTCCGTTT TAGATTCATTCTTTGTTGAGGTAAGATATTGACTACTTGTCTCTTGATATCTTATAGTGA  
TGGCAATTTGATGATTCTAATTATTGTGTTTTCTCAAAGCGTGCACGCATTGTTCCGAATGGGCAACC  
TTCTACTCAACTGCTTGTGGCATCTATTTAGATGTAGACTTCAGCAAATGGGTGAGATTTCTAATG  
TTCTGCAGTTAATTAAGAGTTCCCCCAATTTGAGGAACTCCGTATTTGGTAAGAAAAGAAAATATATG  
CACGATCTGGTTCCTTTTTGCACTTCATAATTGTGAACATGAGAATCTAAAATAGCTTGGTATTTTCTTCAT  
ATACATATTAGGTCCATGCTACAAGTGACAATGCTGAAGCAATCTTGAAGTATCTTGATACGCCATCCTG  
CCTGGAACAACCACTCGACAAGCTAGAGCACATTTTCATCAACTTTTTTAAGAGATCAAAAAGTGAAGT  
CTTTTTGTAAAGCTATTGCTTTCTCGCACTCCATCTCTTTTAAAGATGTGCATTGACCAGGTTGCAGACAT

AGACGTTGATATTGCCTTAGAATTGATGCGTTTCGCCAGGGCTTCTCCGAGGGCAGAGCTATTCTATTCT  
CGGATAACTCTGTGATTTGAGTGTGGAAGGCAGACTGATGTTTATCCGTTGTCAATTAGTTTTGTAAA  
ACAAGGGATGAATTGGCAAATTTTGTA AAAAATGTGTGGTACCTTTGTGCATATGTTCTTCACTAGATGT  
TTTTGATGCTCAGCATGCGTCGATGTGTTTGATATGACTAGATGTCTTTTGCTATATTTCTTTGTATTCTAC  
TTCTGATTCAAGTTGCACTGGCTATTGAGAAATAGGGTGTCTGATGGTTTAGCATAAAGTGTTATTTTTTT  
CACACCATTGTGTATATTGCTTGTTAAG

>PGSC0003DMG400015687 LRR-RLPs

ATGGATGGAGATGTTGTTATTGTTGTTGGAAAGAAGAAAGGACTATGTTCCATTGATCATAAGTGTTAG  
TAACTATGACTATGTTCCAAAAGGACTGAAGTAGTTATACATATCAGCAAGAATGTTAAATTCAAAT  
TAATCTATTTGCCTCGCGAAAACCTTAACTGTTTAGCATGTCTGATTTTAAGTTTCTTCGTGATTTGTTTACA  
GGTTTCAAGAAACCTGGACAACCTAGAAATACTTGATTTGTCATTGAACTACTTGAACCGCAGCATCTTTA  
AGTCTCTTAGTCAACTTTTCATCTCTCAAGTCGTTGTACCTCGCGAAAACAACATTGAATCAGGTGCTAAC  
ATTTGGTTCATCTGTTTTCCCTTTGCACTATTAGTCTTCTCTTTTACAGAACTGTGCTAAAAATAATCC  
ATTTCTTCTAACATTTTCAGGTTCTGAGAGATTATCAGGGTTGGACAAGCTGGAAATCCTGGATTTGAGC  
TACAATGCACTAAATGATGAAAATGTTCTCTCTGTTCTAGGTAATTAACTTATAGTTTCTTTTGTA  
GAAA  
GCCGTTTTCTCAGTAGCTTCTACATAATTATTCTGAATTCCTCGACAGATCTAAATGTATCTAGAATG  
ACGTTGAAGAAGCTTGATATAAGGTACAACAGATTCGGAGTTTTATACCAAATGAAGGTATATATACA  
ATTACTGAAGTTTTTCTTCTTCAATTGATTTTATTCTACCTCTTGTACATCTTGCTATGTAAATATATCTT  
ATTGGTACCCAATCGAAATCACAAGCTTAAAAGAAGTCAAAAATCATTACAAATTCACAG  
GCTCCATTTGCATTTGATGAGATGTGTATAAAATATAAATACATAGACTTACATGGAAAGATGTTATTT  
AATAACTCTCTTTGTCAACATTTTGTTAAAATATGACATTCCACCATTTTAGGCGTCATTTGCAAGTCG  
CTATTGCCATTTAGTTCAAACATTTACAGTTTAAAGCATACTTTAATGTTTCTTTTGCATGTAAGAGTTG  
GGAGCTTTAAGAAATATCGAGTGGTTACCGTTGGATGGAAACACATTGGATGAGAACTTTCTCAGGAGT  
ACTGGTGAATGTCATCTTACAGTGTATCAGTAGCTAACTGCAACCTCAGTGGAGTCTACCTCTTCA  
AGGTAATTTAGACATACGTAAATAGAACAATGAATAGTCGAGAACAATGAATAATTTAGAACAAATCC  
ATGTTTCTAATATTTTCTGCATAACAACCTATATAAGAACAATGAATAACAATCATCTTCAATTTATAGGCTTG  
TGTGATCTAAAATATCTTGAAGAACTAAGTCTCCGCCTAACTACTTCATTGGAGAAGTCCCTGCATGTCT  
TGAAACTTAAACCTCTTCGGGTAATAGATCTCAGTCAAAATTTATTGAAATATTGCCTTATCTC  
CACTTCGAAGTCTTGTCCCTTGAATATCTTGTAGCAAACAACAAGTTTGAATACCAATTTCAATTCGA



GCCATTTGCTAACCATTCAAACTTAAGTTTGTCAATTGCTTTGTTATTCTAAAAGCTGGACTCCAAATTTCC  
AATTGGAAGCCTTGCTTTATCCAATTGCTCTCAAATGCCAAGTTTCCTTCAGTATCAACATCATTTACGG  
ATTCTTTGTCTCTCGAAATGTAACATTGGTGGAACTTCCCAAATTGGTTGTTAGAAAACAATCCCAGACT  
AGGAGAAGTTTATTTGGATGGAAATGCATTCAATGGATCTCTTGAATTTCTGTTCCCTCCTAATCTGAAA  
GCTTTTGATATCTCCAGCAACAAAATTCAAGGACAACCTCCTCCTAACATTGGGTCCATTTATCCGAACT  
CATGATATTCAAATGTCCAACAATATGCTTGAAGGCTTGTTCCTCAAGTTTTGGTGGCATGAAAGAC  
CTTCAATGCTTGGATTTGTCAGGCAATAAGCTAACAGGTGATCTACCTATTGGATTGGCTCGTAAAGGAT  
CCAAGTTAAATTTTCTGAGATTATCGAATAACATGTTGAAAGGGGAAATATTTCCAGTTTTGACTAACAT  
CAACAATTTTGCATATTTGTTCTTGGATGGAAATAACTTCTCAGGCCCAATTCCGCAGGCGTTATCCACTG  
CCTTATTATTTTCACTGGATTTAAGTTACAATAATTTGTCAGGAACTTACCAGTGTGGCTTGGTGACATA  
TCCTCCTTAGATTCCCTCGCACTGTCCGGAAACCATCTAAGAGGTCATATTCCGCCTGATTTTTGTAGACT  
TGAAGGACTTCAGGTGTTAGATCTCTCTGAAAACAACCTTGTGGCACGATTCCATCATGTTTTAGTGCTT  
TACGAGCCTTAAGACGTGTGTATTTGAGCAAAAACATGTTACAAGGGGAATTTAACGTGTTCTCGAATTC  
CCATCTACTAATGTTGGATCTTGGAGATAACAACCTCAGTGGTTCAATTCCAAATGGTTGGACGAACT  
TCTGAGTTAACTGCCTTACTCTTGAAGGAAATCGTCTTCAAGGCACCATTCTCCACAGTTATGTCATGC  
AAGTTACTTAAGAATGTTGGATCTTTCTCACAATAATATCTCAGGACCTATACCTCATTGCTTGGGAAACA  
TAATGCAGAATCCATGGGACACAGATGTATACTACAGTCCATCATTGGATATGGAGACTTCGAGATGTT  
TGGAGGAAATACCTTGATAGACGTAGATGACTCATTGAGACAACATCAACAATTTCAATTCCAAATAGT  
TTTGGCGCGTGGGTTGGAGTAGAGTTCACAACCAAATATAATACTTATTCATATGAAGGTAGCATTCTTA  
GTTACATGTTTGGTGTGATTTATCTTGCAACCAGTTAAGTGGTCAAATACCCAATGAACTCGGTAATCTT  
ACTGTCATTCATGCATTAACTTGTACATAACCACCTTACTGGAACAATACCATCAGAATTCTCAAATCT  
CCAGAATATTGAGAGTTTGGACATATCATAACAACCTTACTGGGAGGCTTCTACTCAACTTCTAAAG  
TTGACAGCTCTAGAAGTTTTAGCGTGGCACACAATAATTTAACAGGTATGACTCCACAGCGTACAGCGC  
AGTTTGCAACTTTTATGATGAAAGCAGTTATGAGGGAAATCCTGTTCTTTGTGGTCCCTCATTGCACATCAG  
TTGCACAGAGGCCAAAGAGATTCCAACATACCTTCTGCACCAGATTTCTCCGAAGATGATGCTTCTTTTT  
TAGATATGGAGTGGTTCTGTATTTCAATTTCTGTAGCATATGCAAATGTGGTGGTTGCAGTGGTTGTAGT  
ACTTTGCGTAAACCCCTCCTGGAGAAATGTCTGGTTTTATTATATCGAGTCTTTCATGTATTCATGTTACG  
ATTACTTTAATTCAAAAGTTCATGACTTTTATAATTATGTAACATTTCAATTTATGTAATGTATGTGTGAG  
TTGTTCTTGAATGTTGGTGCCTATCTAGTCCATTAATACTAGTGAATGTTGTGTTGATTTGCTTGTGCCT

TCTTTAAGCATTGGCCAGATTAATTAATTATTTTCGAAATATAAAAATGTGTCATATTTTTTAGAACAGAC  
GAATAGCCAAAATTCTTCAGTGCAATTAATGGTTTGAAAAATATGTATACTGCTCAATGAGCCATTTCTTC  
TATATGGTCCACTGAAATAAGTGCTAAAGACTTGGTAACTCCTAAAGTAGCTGAATTTTTTTGACATTA  
GCACACAAAAATTATACTAAAAAAAGAAAGAAGAAGAAAATGGCTAAGGAATTAATTTTTGTTGACT  
AGTTAAGCACATAATTATCAAAATTTACTCACCGTTTCAATTTGTTTGTCTTACTTTCTTTTTAGTCTGTT  
TCAAAACGAATGTCTCTTTCTTTTTGCAACTCTTTACATCAAATTTCCACGTGACATGTTAAGACCAC  
ATGATTCAAAAATCTTCTTTACTTTCTAAATTTCTGTGTCAAGTCAAAATCAGAAAAACAAATTGAAACGG  
AGGGAGTATATAGCAATAGAAGTGTTCATGAAACTCCATACAAGTGATACTAATGGGAAATGTTTC  
CTCATGAGTAAGTGTCTCAAGTCAAGTCAATGATGGTGCTAGTCAACTCAAATTGCAAGCAATGTTTTGA  
TGAAAATTAGAGAAAAATATAGAGATAGAAGAACAACAAGACATATTAAAGAGTAAATAAAGAAGTT  
GAAAGGGACATAACAAGAAAAGTAGTTGCACAAAATTCCACTCTAGTCTACATCAATTATTGCACTATTC  
CTAAGATGCCTGCTACCTCTCACCAGCACAGATAACGAACAAGCTTCTTTTTCTTATATATAGTTCGGAT  
ATATCTTATAGTGTTCACCTGTAGGTAAGAAGCAAAACATGGCTAATAGCAAGATAGTAGATTGG  
TGGTTGTTGATTTTGTTTCATGGCAAATGGATGGTTGTGTTGTTATTGTTGTTTGAATGAAGAAAAGACTG  
CTTTTTGCAACTCAAGGCAAACATAAACTACAGTACAGGCAACGATTACTTGTTCATCGTGGGGGGCTA  
ATGAAACCTCGGATTGTTGTCAATGGGAGGGAATTGTTTGAACAACACCACCAGAAGAGTCGTAGAAT  
TGTCATTATTGCTAAGCAAATTAGTCAAGAAGAACAACCTAAGAAATGTTACAGATAGAGATGATATGTT  
GAGGAACTGGCTTTTTAATGCATCTCTATTTTTCCCTTCAAAAATCTCAAAGCTTTGATCATACTGGAC  
ATTCATTAGCAGGCTGGGTGAAGAATGAAGGTATGTTCTCTCTATATACGCTCCATAATATAGAACGAA  
AGAGATTATACTACTCCCTCCGTTTTATATTATATGGCGATGTTTGACTAGGCTCAAAGAACCTTAAAA  
GCTTGTGGTTGTAAACATGTAATGATAATTCTATTGTGTTGTACTTTTTTTAAACGGACTAAAACAGAAA  
GAATGTCATATAAAATGAAACAGATAGAGTACTACATATCTGAAAAATGGTTCTAAAGATCCATTTCTAA  
ATACAAAAGGTGTCATTCTTTTTAAGCGGGATAAAACAGAAATGTTGAAGTTTGCTTTTAGTTACTGCA  
GTAACTTTTAGCAAAATAAGTTATTTAGTTTGAATAAATTTGAATTTTGAATTTTAGTTAGTTTGTATGT  
TGTTGAGATATTTAGGTTGTTTTAAATTTCAAATTACGCAGATTATGTGTTTTATGTTGGCTATTTAAG  
CCCCTCAATGCTTAATAAAATTATTGAAAGCTATTGAAAGTCATTTCAATCCATTGAGAGACATTTTCAAT  
CTTTTTGTGCTGCCCCATTTTTAAAAACACCAACAGTGGTATCAAGAGCTTCATTGATCTTAAGGGATCT  
GTGAAATCTTCAAAAAACTACCATATATATTTAACCCATAAGGGCTACCCATTTAACCCATCAGGGCTAC  
CCATTTAACCTACCTTTTCAACCGGTGCTTTTTTCAATGCACAGGCTTTTCTAAATCATTTTTAACCAA

ATAATGGTAAGCAGCAGTCTCTCTTTGAATTCCCCACAAATTTTCACAGACGAAAACATCAAATTTGGTC  
TGTGAGAATAAAACCATATTTTGAAACCTATGTGATATGTGAGGTTGTGATGGAAGAAAAACCTTACA  
ATCTCTCTCTGTGAAGTTCAGATTAAGTACTTTTCAAAAAACTTCTACACAAGACAATGTCATCACATG  
TGTTTTGAAGAACAAAATCATAAGAAGAAAAGAAAAGAAGAAATTTTGCAAGTTCAAAATAATAG  
AAAAAATCCAGCATCAACTACCAAAGCAAAAATTGAGGAGAAGCATTTTTTCAATTGAAGTAACTAA  
AGCAAAGGAGGAGTGTGAAGTTTGCTTTAGTTACTGCAATAACTTTTGGCAAATAAGTTATTTAGTT  
TGAATAAATTTGAATTTTGAATTTAGTTAGTTTGTGTTATGTTGTTGAGATATTTAGGTTGTTTTAAATTT  
CAAATTATGCAGATTATGTGTTTTATGCTGGTTATTTAAAGCCCCTCAATGCTTAATAAAAATTATTGAAAG  
CTATTGAAAGTCATTTCAATCCATTGAGAGACATTTTCAGTCTTTTTGTGCTGTCCCATTTTTAAAAACA  
CCAACAAGAAAGAATGTCACATAAAATGAAACGGAGGGAGTATGATCGCAATACAACTTGAATTACA  
GCTTCAAAGGTTTAACTATATACTGGTTAAGAATGTTAAGTTCATTGTACAATCTACTTGACTCTGTCA  
CATAATTTAGCATGTCCATTTAAGTTTCTTGTTAATTTGGTAACAGGTTTCGAGAACTGAGACGACTGA  
GGAACTAGAAAGACTTGACTTGTGCGGGGAATCAGTTCAATCGCAGCATCTTTCAGTCCCTTAGTCAGCT  
TTCATCTCTCAAGTCACTGAACCTCTCAAGTAACAACAAAATTGGATCAGGTTCTGAGAGATTGTCAGGG  
TTAGACAAGCTGGAAATCCTAGATTTGACCTATAACAATCTAGAGGATGAAAATGTTCTCTCTGCTCTAG  
GTAAGTAACTTATAAAAATGTTCTAAAAAAGCTCTTCTTTATCATCCATACCTTCTAACATTATTATT  
ATGAATCCTGGACAGAGTTGAATAAATCTAGAACGACATTGAAGAAGCTCGATATAAGGTACAACAGA  
TTCCAGAGTTTTATACCAAATGAAGGTACTTAAAGTTTCTTCTTTCAGTTGATTTTATTGTTAGAAAAACC  
ATAGATTACACGCGGAGATATTATTCTAGGTGTCTCAGTATCAGTGTCTTGGTTAAAAATATGCTGTTCC  
ACCATTTTAGGTGTCATTTGTTAGTTACTATTACTTCACACGTCTACGCTGCACTTTTGTAACACCTATGGC  
TACATGTTGATGATTCTTTTATGTTTCTTTGACGAAAGAGTTGGGAGCTTTAAGAAATATAGAGTACTT  
ATTGTTGGATGGAAACACATTGGATGAGAATTTCTCAGGAGCAGTACTGGTGTAAATGTCATCTCTTAAA  
GTATTATCAGTAGCTCAATGTAACCTCAATGGAACCTCTACCACTTCAAGGTAATTTTCAGACATAGCATCG  
ATCCTTTAAATTTTCGTCTTTCTAGATAGTGCTACGTAGGATTGATGTCACGTTAATCTTGTGTAAACGGG  
ACAAAATTTCAGAATTTTGGTTCCATAGTAGTCTATATTTTCTGCATAACAAAATAGAACATGTATAACAA  
TTATCTACTTGTTCAATTTTATAGGCTTGTGTGATCTAAAATATCTTGAAGAATAAGTCTCAGCAGCAACA  
GCTTCACTGGAAAACCTCCCTACATGTCTTGGAAAACCTTAGCGTTTCTTCGAGTAATTGATCTCACTCATAAT  
CAGTTTACTGGAAACATTGCTTTATCTCCACTTCAAGTCTCTTGTCCCTTGAATACCTCTTGATAGCAAAC  
AACAACTTTGAAGTACCAATTTCAATTCGAGTCATTTGCTAACCATTCAAAACTTAAAGTTTGTCAATTGCTGA

CTACAACCTCGGTAATTGTACAAACTACGTCTAAAAGTTGGATCCCGGAGTTTCAATTAGAAGCCTTATCT  
TTATTCAACTGCTCTCAAATGCCAAACTTTCTTCATTCTCAACATCACTTGAGACTTCTTCGTCTCTCGAAA  
TGCAACATTGGTGGAGACTTTCCAAATTGGTTATTAGAAAACAATCCTAAACTTGGAGAAGTTTACTTGG  
ATGGAAATGCATTCACTGGATCTCTCAATTGCCATTACTTCCTAATCTGAAAACCTTTCGATATCTCAAAC  
AACAAAGATTCGGGGGGAACCTTCTGCTAACATTGGGTCCATTTTCCCAAATCTCGTGATATCAACAATGT  
CCAACAATATGCTTGAAGGCTTGTGCTTCAAGTTTTGCTGACATGAAAAACCTTAAATGCTTGGATT  
GTCATAAATAAGTTAAAAGGAGAGCTACCGACAAGATTGGCTCGTAAAGGATCCAAGTTATATTTACT  
GAGATTGTGAATAACATGTTGAAAGGGGAAATATTTCCAGTTTCAGCCAACATCAACAATTTGGAATAC  
TTATACTTGGATGGGAACAACCTTCTCCGGCCCAATTCCACAGAAGTTATCCACTGCTCCTTACGTACATT  
GGACTTAAGTTACAACAACCTTGTGAGGTAACATACCGTCTGGCTTGGTAATATCTCCTCCTAACCTCCC  
TTGCATTGTCCAAAACCATCTAAATGGTCATATTCCACCTGATTTCTGTAGGCTTGAAGGACTTGAGGT  
GTTAGATATCTCTGAAAACAACCTTGTGGTGTGATTCCATCATGTTTTAGTAGTTTCTGGGACTTAAAC  
ATGTGTATTTGAGTAAAACAAGCTACAAGGGGAATTC AACATGTTCTCAAACCTCAGATTTAAGAGTGT  
GGATCTCGGAGATAACAACCTCAGTGGTCCATTCCAAAATGGTTGGGACGTTCTGGTATAACACCTTA  
CTTTTGAAGGAAATAATCTTCAAGGCACCTATCCACAGAATTGTGTCATGCTAGTGACTTAAGAATTA  
TGGATCTTCTCACAATAATCTCTCGGGACCTATCCTCGTTGCTTGGGAACATAATGCAACAAGAATAT  
GTCATAGAAGACAAATACAGTCCAGCATTGGATATTGAGGATTCCAGACGTTTGGAGGAGACGCTGCG  
ATAGAGGTAGAATTCTCGATCCAGTATTCATCGACAATCATGTTTCTAGATACCTATGTATGGGTTGGAG  
CAGAATTTATGACCAAACACATTACATATTCCTATGAAGGTAGCATGTTTTATTATATGTCGGGAATTGAT  
CTTTCTTGCAACCAGTTAAGTGGTCACATACCTAAGGAGCTCAGTAATCTTACTCAAATTCGTGCGTTGA  
ACTTGTACATAACCACATAACTGGAACAATACTATCAGCATTCTCGAAGCTTCTGAATATCGAGAGTTT  
GGACTTGTACATAACAACCTTACTGGGAATATCCCACTCAACTTCTAGATTTGACAACCTTAGCAGTG  
TTAGTGTGGCACACAATAATTTAACAGGTATGACTCCACAGCCTATTGCACAGTTTGGAACTTTAATG  
AAAGCAGTTATGAAGGAAATCCTTTTCTTTGTGGTCTCCACTGCTCATCAGTTGCTCGGAGCCTAAAGA  
GATACCGAAATCACCTCTGAACCAGAATGTTGTGAAGACGATACTGGTTTTCTAGATATAGAGTCATTC  
TATATTTCAATTTCTTGTGGCATTGCAAATGTGGTGTCTCGTAACGGTTGTAGTCTCTGGGTGAACCCCTA  
CTGGAGAAATGTTTGGTTTTATTATGTTGAGTATTACATGTATTCTTGCTATTACTTTTTTGTCTCCAAAAT  
GTAA

>PGSC0003DMG400015706 LRR-RLPs

ATGAAGAGTGCTAGGAGATCTGATGTAGATACACTTAGCAACAATTTGCCTCGTGATATTCTGGATGGA  
ATTCTGGGGCACTTGCCTTTGAAAGATGCAGTGAAGAGTAGTATCTTGTCGAAAGATTGGAGGTATAAA  
TGGGCCACACGTCAAGAGCTTGAGTTTGATTATCACTTTTTCGAGTTGTTTGCACATTTTCAAGAAGCTAA  
ACAATCATTATCAAGTACTCTTACTCCATAAAGGACCTATACTGAAGTTTAACTTGGAGGGTCTAATT  
TGATAAGATTTTCGTGATATTGATCATTGGATACTTTTCTTGTCAAAGAAAAATGTCGAGGAATCACTCTT  
CGTGTAAGATCAAACAACGATTATCATTACCTTCTCACCTTTTTACATTCCGGAAACTAAGGCTTTTGGAA  
AGTTCAAATTGCTTATCCACCCTCCACCGGATTTCAAAGGGTTTAAAGAAGCTTGTTAATCTTGGTCTTC  
ATTGTGTCACTTTTCTCCGACAGTATTAACAATCTTATCTCTCAATGCCCGTTTCTTGAAATATTGAAGT  
TGAATTGGTGCACAACTTCGACACCCTTGAAATTGATGCTGCTAATCTCAAATGCTTTGAATTTAGAGG  
AACGTCAAAGTCCATTTGCTTCAAAAATGCCCTATGCTTAAGGAAGTTACTATATGGCTCAATTCACAA  
GTTTCGACAGATCTATCAGCTCCTGTTTGTCTAATCTTATAAACTTCTTCTATTACATGCCTTGCCTAATG  
GAACTGGATATAAGTGGTGTTCATTAAAGGTAATAGTCGAGTGAAGTTAGCTACTTATCATAACTAAAT  
TATGTATTTGATTCGTATCTTGAACATAATTTTGGACATGCTTATAGGATTTAACAATGGGAGGTCTGTCAG  
GGAATTCTCCGACTGTTTTGAACAATGTCAAATCTCTCAGAATTCAGAGAATGTTATTCGAAAACAGTGA  
GGAGGTTTTAGGTGCTGTTTACTTGATTGCAAGCTGCCCCAAATTACAAGAGCTGACTATTGAATGTGTA  
CGTACTCTCTCCTCCCTAAGGTAATTTGATAATAATTTGCCTTTGTATCCGGCCTGACAACCTCCTGAATT  
TTTTTTTAGGAAATAATGAACGATGTTGTGGGACCTGTTGCAGTTGTACAATACTTACAAGACCATCAAA  
GCTTGTATGATTCTGTGAAGCTGCTTCGGAGAGTGCATATGAATACGTTTAGTGGTTTTGAGATAGAAAT  
GGAATTTGTGAGGCTTATATTAGCATCTGCACCTGCACTTGAGAAAATTTCTTTTGGAAATTTTTCATGTT  
TCCTTCATCAGCCGGGTAGACAACCTGATGGATAAGATGAAGCAATTTACCAAGCATCACCTAATGTTGA  
ATTCACATTTGAAGAAGTTGTTGCAGAAGATCGTAGACCAATTGAACCCCAAGAAGTCATGGAAGCACC  
ATATGACTTTGATTAG

>PGSC0003DMG400015707 LRR-RLPs

ATGAATATGAGGAGTGGAGGAAGCTCTGGTGCAGATAGGATTAGCAGTTTGCCTTGTGATCTTCTTCAG  
AAGATATTAGGATGCTTGTCTTTGGATGATGCCGTAAGGACAAGTGTGTTTGTCAACAAAATGGAGGTAC  
AAGTGGGTAGTACGTTCCGAACTAGTGTGTTGATTATAACATCAACAAAGAAGTCTCCTGAAAACAAGTA  
TTTATAAAGTCTATTGATGCATCAAGGAGAAGTACATAAATTTAGCCTCTTGTACCCTAGCTCCAACCTT  
TTTTCTGATATTGATAATTGGATTCTGTTTTTGTGCAACAAAATGTCCAGGAATTATCACTTGCATTTCTT  
ACATGTTTTCGCTCCCTTCTCACCTATTCAAATTTAGGATCTAAAGCACCTGGAACCTAATAGTTGTAA

ATTCCACCCTCCTCCCAACTTTAAAGGTTTTCGAAGTCTTGTTACCCTTAACTTTCAAGTTGTAACCTTTGA  
GCCCATGTCATTTCAAGTCTTCCTTTCAAGTAGCCATTACTTGAGCATGTATTAATGGTTTGCTGCAGTG  
AGTTTGATAGCTTCATTATTGAGGGCCCCAATCTAAAAATCTTTGAATTCAGCGGCAGAGCAAATTCCT  
TTGCTTTAGAAGAACCCTCTGCTTGAGGAAATTGTATTGGGCATGCCTTTAACATGTTGGAGGTAATC  
ATCATCATTGAAATATCTGTCTGATGCACTACTAGATTTTCCTCGTAATTTTAGCTAATTTGTGCGACTTT  
GTTTTAGTCCTTTACAGTACCAGAGCCTCAGTTAACACTAGACAACATCAAATTTTGAATTTCAAGAATT  
TGATCTTTACTATGGTTGACTGGGTTGCATACGTGCTTGACTTGATCAATCGATGCCCAACATAGAAAG  
GCTTCTAATTACGGTATGTCTCAGTTTTCATCTTTTGATTGTAAAGAGGTTGATTTTTAGCTTCTTCTATA  
ATTAATCTTCTTTTTCCCTTCTCAAGTCTGATGCTTTTGAAGCGTGTGCGTGTGTACACATCCCTTGCGATC  
AAAAGAAATGGCAATGACACATAGTGCAATGAAGCGGCTCAAAGCGTGGATATGACCCTCCTGTACTA  
GGTTAATAAAACTGAAACAGAATTCTTGAAGCATGTATTGGCATATGCAACTAACTTGAGAAAATATAC  
ATTGCGACTTCTGCAGATATCCGTCATAGGGGAATGAAAATGATGGAGGAGATGAAGCAATTCCTTGA  
GCATCACCTAATGTAGAATTTATCTATCATTGAGATTGATCTATCTTCGTAGCAATAACAATATTGTT  
TATCCGAGATTCTTATTTTCTTTTTAATTTCAATTGTTTGTGATCTCTCATAAAGGAAAATATTTAATT  
TTTGGATGGACGATGTTCTCAGAATTGAGTTTGTCAATGTAATAAAAAGGAACCTAAAGGTTTTTGTAT  
TTAGTTGAAATTATTGAATTATTAGTCATGTAAGGCTATGCATGCGTACTTGTTTAAATATGTATTCATGT  
AAATTTGAATATTGTCTTTATTCGAAATTCTCAAAGAATATTGAATACTTTGAAAGTTGATAACCAATT  
TGCTTAGTACTATTGGTTAGCTTTCCTAATCTCAGTTTTCAGAGGTGCCTACTAACTCTCATTAGTACTCG  
ACCACGAAGAGTACTAGGAGATCCAGTATCGATTCAATTAGCAACTTTCCCGCAATATTTTGGACGGAA  
TTCTAGGGTGATTGTTGTGTCTTATCAAAGATTGGAGGAATAAAGGGGTACACGTCAAGAGCTTGCG  
TTTGATTATCACTTTTTTCAAGTCGTTTGCACATGGTCAAGAAGCTAAGACAATCATTTACCAAATCTTATT  
ACTCCATAAAGGATCTATACTGAGGTTTAACTTAGAGGCTCTAACTTGATAAGATCTCCTAATATTGATT  
GTTGGATACTTTTCTTGTCAAAAGAAATGTCGTGGAATTCACCCTCCGTGTAAGCTTAGGCAACAAATT  
TCATTTACATTATTACTTTTTACATTCCAGCCACTAAGGCATTTGGAAGTTCAAATTTGCTTGGTCCACCCA  
TTTCTAAAATTTGACTCGGAACCTAAGACTCGAGCCTCGAGATCCAATCCCTTACCGAGGTGAGACTA  
GATACATGAACTCGAGACTCGGCAACCAAGTGTAGCTCTAGCAATCGAGACCCGGGAGCGACATCTGA  
GCGTCAATCCTGACTCAGGACCCGATCCAATCTTTAATCGAAACCAGATATTCAAGACTCGAGATTTGAG  
CCCTAAGGCACAATATGGGCTAGAATTAGATTAATATTGGGCTAAATTGAAGACAACCTTTAAAATTTGG  
GTTATATTTGATTGGACTAAAATCAGCCCAATATAAAATTATCTCATGCCCAAGTCCCAACCTCATAAAAT

TTTGGATGGATTGGACGGGTTATCAATTTTTGAGCCAGATTCTGCTAACCATTAAGCGAGGAGTTAAAAC  
ACCAAACATCACTCTGGCGAAAAATGAGACTAAAAAGTAGAGGGCAGCTTTCGATCTCTCTCCAGCGG  
ACTCTGCTATCGTTAAGCGTCCAAATTCAACTCTCTAAAGGTGAAATCCCAACATTGACACAAAGTTCGA  
AACTCGGTAGATAACCGATCTGGCCGTTTTCTGGTACGAATGCCAATTGATTTCTTCAACAGAATCTAG  
GTTGAAATTTCTAGCTTATTTGATTTTGATATTCTGTTGTATTTGAAAAGAAAGTAGCAAACAGTCTCGAT  
TAGGGATCAGGTGAAAAGTCATATGTAGTCATGTTTACAGAAATTGTGAATTTTCATTAGTTGGGTAGA  
GAATAGTACTCTGGCCCTAAGTTGAGATTTCTAGCTTGTTTCATTGACTATGCTCTTGATAGGAAATAA  
TTATACCCCTTAACAACAAACCAGCGCGCAACGACTGAAAAGCCGTTGTTGCTTTTGCTTGCAGACTCGA  
AAATCTCTCTTTCGCCTCTCTCCCTGTCTCAATTCTGATAGATTAGCTTCTTCCTTCGTACAAGCTACTATT  
TGTGAGTAACAAACTTTTTCTATAGCAGACCGGGTGAAAAGTCAAATGTAGTACTATCAAGCAGTTTG  
AAACAGGGGAAATATATTATCAAATGGTGAATTTCCCTTGTTATCTACCTGTTAACCTTTAGAATGTTAT  
ATTCCTTTGTGAAAAAAGTTGATCTCATGTTTCTATGTTTACCACTATATTTTGTCTAGTGGTAAGTGTG  
CCACCCAGTTGCGTGGATTAGACATACATCTTAAAGATTACGACTAATAGTCTTCGCAAACCCTTTGAA  
GTCAGGTGGAGGGTGAAGAAGCACATATCAAGTCCACATGTCTTAGTTGCTGGAATGTAAAAAGAT  
AGGTAAATGATATTTGTTGCCTGAGAATATTTGAAGGGTGAATTCCTAGACATTTTTTTTTGACAAGAAGA  
GCATCTAGTAATAAATATCAGGAAGACATGTCAAATTAGGACATTGAACTGTAAATTTTAGTATTGGTAC  
TTGATGTAGTCGTAGGACTTGGTAAATGATTGTCTTGGCTTCTTGGTTGTCGTTGAAAGATGTGAAAAAC  
TAACTACAAAATCAAGTTCTGCACGTGTTACCCATTTGTACCGCAAGTCTTTTGACAAGATACTGGTCTT  
CATTGTATCTTTCAAAGACAAGCTCCCTAGAATTTTATCCAGGACATTACACGGCAAATTGCTAATTGTA  
GCACTTTCATGGTTTAATACACACATTTGCACACAACCTCTAATAATTCAAATTTGAAATAAAGAAAATAT  
CCAAATTCTCATAATTACACATTTCAACAATGTATGCATAGTCTTTTATACTACTAGTTCACATTTTCGAT  
TGCATAGAAGTTTATCATTTTGCCAATATAGAAGGGAGAAAATAATTAATGATGAATGAGAGAGTACCT  
GAAAAATGTTGGTTGGAGACAATAATGGTGAAAGCATGAATTTAATCTAGCAGATTCAATAATGTGTGT  
ATATATACATAAAAAGGATATTTACCTCAATACACAATACATTTTTTTGGCGAGGGGGACTAGGAAGC  
TATTTCCATTTCTAGAAAAGATCTTGATAGATATCTATTCTTTGCAATTGGAAAACCTTCATTAGATCAATT  
AGCTCATTCTCATCTTTGGAATGTCAGCTATTTCCATTTCTGAAAAAGATTTTATAGAAATTTATACTTAA  
CATATGAGATATCTACTCTTGCAAATTTTTTTTACCCAAATCCACCCTGATTACTATCTAAATTATGAATAG  
ATCGGAAGAAAGCATAAATAGGCCCAAAAATCATTAGGAGTCCGCCCTACGACTTTTGTATAGTGG  
TAAGTGTGCTGCCCATGTTGCATGGATTAGACATATATCTCGGGTTTGGGTTTGAACCGATGAAACCTA

CTATTGAAGCCGAGAAGAATACACATCCAGATTATAGTCTTCTCAGCTTAAATAGTAGGTTTCATCAGTT  
GCAAACCACGATTTATGCCTAATCCACGCAACACAGGCAACACACTTACCACTAGACAAAAACCCTAGG  
GGCGGAACTCCCAAGGATTTTGGAGCCTATGTCTGCTTACTTCCAATTTGTTTATAAATTCTATAATAATCT  
GGGTGGATTTTGGTAAAAAAAAAATTGTTAAAGTAGATATCTCATATGTTAAGTATAGATTTCTGTAAA  
ATCTTTTTATAGAAATGGAAATAGTTGTCTGACGTTCCAAAGATAGAGAATGAGCTAATTGCTCTAATGT  
AGGTTTTGCCAATTGCAAGAATAGATTTCTACAAGATCTTTTTCTTGAAATGGATATAACTTCCTTGGCTC  
CCCTCGCCAAAAAAGTGTATGTGCATTTAGGTGAAATATCCTTATAGTTGTATATACATATACATTG  
TTAAATCTTCTAGATTAATTCATGAAAGCACCATTGTTGTCTCCAATCAACATTTTCCTCATACCCTCGCA  
TTCATCATTATTTTTCCCTCCGATAATGGCGAAATGATAAACCTCCATCAATTGAAAAAGTTGAACTAGCT  
AGTAGTTATATAAGACTATGCATACATTGTTAAAATGTGTATTTATGAGAATTTGGATATTTTCTTTATTC  
CAGATCTGAATTATTAGAGTTGTCTACAACTTGTGTATTAACCACGAAGAGTGCTACAATTTGCCCTG  
TAATGTCCTGGATAAAATTCTAAGGAGCTTGTCTTTGAAAGATGCAGTAAAGACTAGTATCTTGTCAAAA  
GACGGGAGGAACAAATGGGTAACATGTGCACAACCTTGATTTTCTTAGTGATTTTTCACTTCTTTCAACAA  
CAATAAAGTAGCCAAGACAGTCATTTACCAAGTCCTACGAATCCATCAAGGACCAATACTAAAGTGTACC  
GCTCCAAGATTATCCTGATATCCCCCTATTTGACGTGTTATCTTGATATTTATTACTGGATGCTCTTCTTGT  
CAAAGAAAAGTGTCTAGGACTTCGCTCTTCAAATATTCTCTGGCAACAAATATCATTACCTTCTTATCTTT  
TTACATTCCAGCAACTAAGACATCTGGAACCTTGATATGTGATTCTTCCACCCTCCACCTGATTTCAAAGGG  
TTAGCAAAGCCTATTAGTCTGAATCTTCAAAGTGTGAGTTTTGATCCAACAATATTAAGGTATCTCACATC  
CAAATGCCATTGCTTGAAGTTTGGAGTTGACTAGGTGCGCCGAATTTGATATTCTTGAAGTTGATGCC  
GCCAATCTCAAATGCTTCGACTTTCTTGGAACATCAGAGTCCATTTGCTTCAAGAATGCCCCGATACTTAG  
AAGCGTCATTGTGTGGCTCAACTCAAGTCACGAGTTTTGATGGATCCGTCACCTTTTTGTTCTAATCTTAC  
AAAGTTATTCCATTTACATGTCTTCCATGGAGGAACTGGAAGTGGTACATATCATAATCAAATGATGTATCTTT  
TACCGATTTTTGACTTGCTTCTAGTACTTGGCCATGGGAGGTATACCAGAGAATCTGCCGAGTGCTCTAA  
ACAATGTCAAATCTCTGTATTTGGATATGTCTTTCAGAAATATAATGTTGACGAGGTTTCAAGCACAG  
GTTACTTGATTACAAGCTGCCCTAAATTACAAGAACTTACCATTGAATGTGTAAGCACTCTCCTATTTTCT  
CATTGAACGTATTAATATGGTTTCTTCTCATCTGAACCTGCCTAACTGTTATCAAATATATTCTAGGGAGTAG  
TAGGCATTGCTGTGGAATCGATCTGTTATACAATTCTTACGAGCCAAATCAATCTCGTGTGGTGCTGTGA  
AGCTGTGCATTATTTATTGGTTTTGAGATGGAAATGGAATTTGTGAAATTGATATTGGCATCTACACCT



GCACTGAAGGAGATCTTTGATGGATGAGATGAAACAATTCCATTGAGAATCACCCAACGTTTTAGATTC  
AAATTTGAAGAAATATGTACAGGTCTGGAACCTGATTTGTACTTATTGAGGTAGATTTGTCTTCAATATC  
AGCTTTCCCTTCAACATCAATCGATGAAGTTAATTTCTTATATGATCATCAAGTAATTGAAATAATCTATC  
AGTGTCACTTTTTTAAATAAGAAAGTCATTGACTAT

>PGSC0003DMG400015824 LRR-RLPs

ATGGACTATGCAATTGTGCTCTTACTTGTTTTCTCTGTCATGAAGTATTTACTGTTTCTTCATCCAAATTA  
CCTCATCTCTTTCACAAACATCAAACCAGTTCACCTTCTAAAATTCAAGAACACACTTACTGTAGATACCTC  
AGCCTCTTATCTCTGTCAAGAGCCTTATCCAAAAACGAGTTCATGGAACATGAGCAGAGATTGTTGCTCA  
TGGGATGGTGTTCATATGCGATGAGATGACTGGCCATGTAATTGAACTGGACCTCAGCTGCAGCAATCTT  
GCTGGGACCATCGATTCCAATAGCAGCCTCTTCCAACCTCTCTCATCTCCAAAGGCTTGATCTTTCTCTGAA  
TAACTTCTCCAATTCTCACATCTCCCCTGAATTTGGCAAGTTTTCGAGCTTGACGCATCTTGATCTTTCTGA  
CTCCAATTTCTGTGGTCAAATTCCTTCTGAAATCTCTCATCTTTCCAAGTTGCAGTCTCTTCGTCTCTATGG  
TCGCCTACGACTCATAGCTCACGATTTTAAATTGCTCCTCAGAACTTGACTCAATTAATAGAGCTAGATC  
TACTTCCATAAACATCTCTTCCACCATTCTCTGAATTTTTCTTCTCATTAAACAACCTTTAGGCTGGGAG  
ATACAGCATTGTATGGGATAATACCTGAGACTATATTTACCTGCCAACTTGAAACACTTCACTTATG  
GGAAAATTTTCAGCTCAGTGGTTATTTTCCAAGACCAAATGGAACAGCAGCACATCTCTCCAGAAGTTA  
CAACTCAGTTTTGTGAATTTTCTCATAATTTGCCGAGTCTATTGGCTATCTAACTTCACTGCGTTATTTG  
TATCTTCAAATTTGCAACCTTAGAGGGCCTATTCTGAATCTCTTTCGAAGCTCACTTGCATAGAGGATTT  
GTACCTTCAATATAACTCCCTGAATGGAACAATACCATCAGGGATTTTCTCCCTTCCATCACTAAGTCGTT  
TAGTCTTGAGCAATAACCACTTTTCTGGTCAATTTGAGGATTTCAATTCGAATTCGAATTCCTAATCTTGA  
TTGATTTAAGCAATAATCAGTTGCAAGGCCATCTTCCCAACTCAATTCAAAACCTTGGAACCTAACAGAT  
CTTGATCTTTCTTCAATAATTTTTCATGTGGATGTCAGCCTCTTTTTCAGACCTCAAACAGCTTTTGTATCTT  
AGTCTTTCATACAATACTATTGATGAAAAGGAAGTTAATTCTACTTTGCCTGAGTCACTTGAAGTACTTACT  
ATTGGCCGCATGTGAAGTGAAAGAATTGGCGTTTCTAAGATCTGCAAACATCTTTCCAACTTGGATCTT  
TCAAATAATAAGCTTCAAGGAAGAATTCCTGATTGGGCATGGTCTAACTGGATGTCATTGACAACCTTAA  
ATATATCCCACAATATGCTGACGAGTGTGGATAACAATTCCTCTTCAGATTGTATATACTATTGATTTACGA  
TCCAATTTGCTTCAAGGTTCACTACCTGTTCCACCAAATTCACAACATTCTTCTTCATATCCTATAATTATC  
TCAGTGAAGAAATTCCTTCAGATATTTGCAATTTAACATCACTTGTAAATGCTAGATTTGGCAAGAAACAA  
TTTACGTGGAGAAATTCGCCATGTTTGGGAAAAATCACTGCCCTCCAAGTTTTGGATATGCGCCACAAC

AATCTTTCTGGGAACATTCCAACGACTTTCAGCAATGGAAGTTCCTGAGCAGCCTTAACTTGCATGGAA  
ATAAACTAGAAGGGAAAATTCCCAATCTTTGGCCAATTGCAAAAACCTTGCAGCTTCTTGATTTAGGCAA  
TAATAACCTCAACGGCACATTTCTGTGTGGTTGGGAGCTCTGCCAGATCTGCTAGTTTTAAGCTTGAGA  
TCAAACAAATTGCATGGACCCATCAGAACATCAAGGATTGTGAACATGTTTCCTGAGCTTCGAATCATAG  
ATCTCTCTTATAATGCCTTTTCGGGAAGCTTACCTTCGAGTTTGTTC AACATCTGAAAGCCATGAGGACA  
ATTGATCCATCAATGGGAGCACCAAGATATCATGGAGATACATATTATGAAGATTCTATTACAGTTGCAA  
CCAAGGGATTTTATCGTGAAATTGTGAGAATCTTGATTTGTACACAGTTATCGATCTTCAAGTAATAAA  
TTTAGGGGGCAAATTCCAAGTATCATGGGGGATCTCATTGCAGTTCACATAATGAATTTATCTCATAATG  
GATTGCAAGGTCATATACCGTCATCATTCCGAGATTTATCTTCAGTTGAATCATTGGACCTATCAGGAAA  
CCAGCTTTCAGGAGAGATACCACAACAACCTGGCTTCTTACGTATCTTTCATTCTTAAATCTCTCCACA  
ATCATCTCCAAGGATGCATCCCTCAAGGACCTCAATTCACACTTATGAGAGCAACTCATATGAAGGCAA  
TGATGGATTACGTGGATTTCTATTTCAAAAAGTTGTGGCGATGCTCGGGTATTAGATACAAATGATACC  
GTATCTGGACTAGATGATGAAGAAAGCAATTCTGACTTTCAGAGTGATTTTTGGAAAGGTA CTCTTATGG  
GCTATGGAAGTGGACTATGTATTGGATTATCCATAATATATTTTCATGATTTCAACTGGAAAACCGATTTG  
GCTTGCAAGAATCATCATAGAAATGGAGCACAAAATAATTATGGGAAGGAGAAAGAAGCAGCGAAGG  
CAAAGGAATTACAGAAGAAGAAACATTAATCACTTCTAG

>PGSC0003DMG400015853 LRR-RLPs

CAAAAATATAGATAGAAGACAGCACCCACACACAAACCTCATTGTTTTGTACCTCATCCTCCTTCTAC  
CTCTTTTTTCTCTTTTTTGCCTATTCAATAGGGTTTCAAATGATCTCTTGCTACCTGATTTTCTGATGCA  
ATCAGTTGTTCAAGCTCTTTAATTGTGTTTCTTTTGGTTGATCTGTCAATTTTTGCTCTCCATAGAGGGTT  
TTTTGGTCTGGACAGTGCAGATTCTACTTCCCCAGTGTTTTTCAACCATACTCATGTCTAAAGTCTTCAAT  
TTTAGTGGTATGATCTTCATCCTTGTCTGGGTTTTGCTTAAAAATTCAATCTTTATCTTAATTATTGTTTTT  
TCTCTAGTGTTTTAGATTTTAGGTTTTTCTTTTTGAGTTCATCTGTTATTAATTTTATGTAACCTTCTCTTG  
AGACTAGTGGGGTTTCTACATCTGGATCCTTGATTTTATCCTAAGTGTGATTTTACTTTGATCTATCTAGA  
TATGATACAATTGAATCTCTCTTGTTTTCTTTACTAGTGCAAAATTCCATATAAAATGTTAATGATATGCT  
AATCTAGGAAAAAATGGGCAATAATGACTGGAAAATTCATTGATGGATATTTATGTTGAAAATCAATT  
ATTTTTTCCCATGTTGACTGAAATATTTTTTTCATAGAACTCTTCAAACCTGATTAACCTGGCATATGGA  
GTATCTTGATTTCTGTGATATATGCTCTAAATCTGGATCTGATCAGACTTGTATGTGAAGTGGGTTTGGC  
CTTCTCAAGATTTGTTTGGTCTCAATTGTGATCTTTGGCTGATGTTCTTACCATATTCTGGATTTCAAGT

GATGATGCTTTTTACCATGGTGGGGCTGTGTACCCAAGTCCCAAGGAATCCAGTCTATTTCTGTCCCTTG  
GGAATCATGTGGATGTCTATTTTCTCCTTGCAAGAGGTCTCGTGTTGCGGTCCCTTTGTTTTCACTGAA  
AAGAAGCAGAAGTTGTCTTCCATTGATGTCCTACCTGATGAATGCCTTTTTGAGGTATTGAGGCGCCTTT  
CTGATGGCAAAGAGAGGAGTGCCTCTGCTTGCCTTTCCAAGCGCTGGCTTATGCTTTTAAGCAGCATCCA  
CGGGGATGAAACAGTCATCTCAGATCTCAATCCATCTTTGGAGACCGAGGAAAGATCTATCCAAACCGC  
CCTTGTTAAGCCCGTGGACTGTGTTAAGAAGGGTGAGGTATTGACTCTAATGGTGCAGAAGTTGCTGA  
TGCTGAATCTCAAGATATTGAAGGAGAGGGTCATCTTTCCAGGTGCCTTGATGGAAAGAAAGCAACAGA  
TGTCCGACTTGCTGCTATTGCTGTTGGAECTCAAGCCATGGAGGGTTAGGGAAGCTTTCTATTGCGGG  
AAGCAACCCAATCCGTGGTGTGACTGATACTGGCCTTAAGGCTATTGCTCGAGGTTGTCCTTCTTAGG  
GCTCTTTCTCTCTGGAATGTATCTTCTGTTAGTGACGAAGGTTTAATTGAGATTGCTCAGGGATGTCATCT  
CTTAGAGAAGCTTGATCTTTGCCAATGCCCTGCAATTACTGATATGTCTTTGATGGCTATCGCAAAGAATT  
GTCCTAATTTGACCTCTCTAACGATAGAATCTTGTTCAAAGATTGGAAATGAAACTCTTCAAGCTGTAGG  
TCGTTTTTGCCGAAGTTGAAGTTTGTGTCTCTCAAAAAGTGGCCACTCATTGGAGATCAAGGAATTGCA  
AGTCTCTTTTCATCTGCTGGTAATGTTTTGACAAAGGTGAAACTTTACGCATTGAACATCAGTGACATCTC  
CCTTGCTGTTATTGGACATTATGGCATTGCCGTGACTGACATAGTCCTTATTGGTCTTCAAACATAAATG  
AGAGAGGATTTTGGGTCATGGGTAATGGCCAAGGTTTGCAGAAGCTGAGGTCGCTTGCTATAACTGCTT  
GCCATGGAGTACTGATTTGGGACTTGAAGCTCTTGGTAAAGGTTGTCCAAACTTGAAGCTGTTCTGCCT  
GCGAAAATGTACAATCCTGTCAGATAATGGCTTGGTTGCTTTTGCCAAAGGTTCAAGTTCAGTTCAGTACTAGAGAAC  
CTCCAATTAGAAGAATGCCACAGGATCACCCAGGCTGGGTTTGTGGTGTCTTTTGTAGCTGTGGTAAG  
AAGTTAAAGGTTCTGTCCATGGTGAATTGCTTTGGTGTAAAGAGTTAGCCTGTGATTTCCATCTGTGC  
TACCTTGCAACTCACTGCAGTCTTTGTCTATTCGCAACTGCCCTGGAGTTGGTAATGCTACGCTGGCCATA  
GTGGGTAGGCTGTGCCCCAACTGACTCATTGGAGTTGAGTGGCCTTCTTGAAGTAACTGATGAGGGT  
CTTTCCCTCTTGTTTCAGAGCTGTGAAGCTGGTTTGGTCAAGGTGAATCTAAGCGGATGTGTTAATGTTA  
CAGACAGATCAGTTTCATTCATAACTGAGTTGCATGGGGGAAGTCTCGAGTCTCTTAATGTTGATGAGTG  
TCCATATGTTACTGATGCGACCTTGTTAGCAATTTCCAACAAGTGTGGTTGCTCAAGGAACTTGATATTT  
CAAAGTGTGGAATAACTGATTCAGGTATTGCATCTTTGGCCAGTACAGTGCAGTCTAATTTGCAGATCCT  
CTCATTGTCGGGTTGCTCTATGCTTTGCGACAAAAGTGTACCCTTTCTGCAGAAGTTGGGGCAGACACTT  
GTGGGCTTAAACATCCAGCACTGCAATGGGGTCAGTAGCAGGTGTGTTGATCTTCTTGGAACTTCT  
GGAGGTGTGATATCCTTTCTTAAGTGCACAGGGTTTAAGGATGAATGCAACTTACAAGTTGAGCTCCTTT

GAAGATGGAGCTTAGTAAGGAAGTTTAACTAGTCTTTCTTTGTTAGTGGTAGCATAAAGTTTTTGGTCC  
ATGATCTTGGGTCTTCTAATAGTCCAGTATCTCGGCTCCTTTTCCAGGGATGTGGTTGGTTCTCTTTTTT  
GCAGCTTCTTCACTAAAGCTGTTTATGGGAATTTTTTTTTCTGTTTTTCCAACCATACTTCCCTGAGATAC  
AAATGCTGAGTTTTTGGATTAAGAGATTCATGTCTGGTCTAGTCCTAGTACTTGTGTCACTAGTTTTTA  
GCTTCTACCCTTGCATTGATTACCAAATCTTGCAGCGGTAGAAGCTTTTCAATATTGTCTTAGTGTTTAT  
GTGTGTGCACTTGTAGTTTTACCGAGTCTTTCACGTTGTTGAACCTTTCAACTCGTGATGGTTGGGTTATG  
TTTGTGTGTTGTTCTTGTGGTTGCTTTTGGGCAGTTGTAGGTATAGATGCCTCTCTTTCATGGGCTTTTGG  
CCATGGCAGCAAGTTCCTTTTCTGCCATGACAACCCTCTGGGGTTGTTTTTCTTTTTACCAAGCCTTAGTT  
TTGCAGGCCTCTCTTGTCTTTAACTCCCAAATGTAACCTCGTTTTGTAAGTTGTGGAAATGTTAGTTTGTAC  
TTATGTCTTTTATTCAATAAAAAAAAAAGAAAAAAAAAGTTAGGTTGTAT

>PGSC0003DMG400015878 LRR-RLPs

ATGGGTGATTTCCAGAGGATTTTCAAGTTGAACTTGGAGATTGATCCAATTATGGATCGCAGAAGGT  
TTCATAAGGACGTCTTCTGGAAGTCATGAAAGCTTGGGAAGAAGTAGCTAAACATTATTTGGAGGATCTT  
ATCAGCAGGAAGTTGATAATGGCTAGAAAAAAAAAGATTCAATGGTGAGGTAAAAGTATGCGGAATACA  
TGATCTGCTGCGTGAGTTCTGTTTGATAGAAGCTGAAATGACAAAGTTTATGCATGTTGTGAGAACTCCA  
TTTTACCAGGACAAAAGCCTAATTTTCGTCGCTTCAGTATTGAAAAGTATATTGAAGATGCTTATAAGCT  
CTTACCCCCTGTAGCCAGATCTATGTACTGCTTTTCTAACTTGGATCTACCTTTTGAACCCCGTATTAAGCT  
TCTCCCTATATTGCCATCTACCGTCATGATCCTATAATACATGAATTTTTCTCTTGTTC AACCATCTCAG  
GGTATTGGCCATCTTTCCTGCCTGGTTTGAAGTCAATCTCAGAGCTTCTGAATTTGCAAAGTCTAATTTGTG  
ATGCTAATATAATGTATATAACTTTACCTCGGAAGATATGGATGATGAAGAAGTTGAGGTATATACGTTT  
AAGGGCAGCCAGTTATTTTCCAAGTCTAGAATAGATAAGAATCTTGTGACAGGGATGCCAAATCTAGA  
GGAAGTTTTTGGTCTTTGTTACTCTAGTTGTACAAATGAAGTTTTTTCTAGCATCCCCAATTTAAAGAGAT  
TGACCATTACGCACCTTAATGGTAGACAATGTTCCATATCATCTCTTGGATATGTCGAGCTTAAGAAA  
ACTTGAGGCATTCAAGCTTTCCTGGAGATATGTTTTTGCAAAGCCCATCAAAGATTTGTTTTTCCAAAAT  
CACTTAGAAGATTGTCTTTAGCTAGGTGTTATAAGTTTATTTGGGAGGAGATATCATCAACTTTTATCAA  
GTTGCCACATCTTGAAGAGCTCAAAGTAAATATTGTCGAGCCGATGATGATATATGGAGATTGAATGA  
CAAAGACATATTCAATCTCCAACAGATTTTACTGAGCGAGCTAAATCTTAAGCATTGGGAAGCTAGCAGT  
GATAACTCCCTAATCTAAAATGCCTTATTCTGAAGAATTGCGAGTTCCTACAAGAAATTCCAACAGATTT  
TGGGGAAATTTGTAAGTTTGAATCAATTGAATTACATGATTGCACCACTATTTCTGAGGATTCTGCCAGA

AATATCGAACAAAGAACAAGAGGATATGGGAAATAATATCCTTAAGGTCTACATTCGTAGCTGCCACAGT  
AAGTTTTAA

>PGSC0003DMG400015957 LRR-RLPs

ATGCTTGGAGTGCTACTGATGCCACCACTTTTAGGTGATTTGGTGAATTTGGAGCAATTGAATGTGGCAC  
ATTATATGCTTTCTAGAACAATTTCAAAAAGTATTTGTCAGCTTCCTAAGCTTCAGAATTTTACGTATCCTT  
ATAATTTCTTCACTGGTGAAGTCCGGTGTATTTGGGATTGCCGGAGTTTCATGATGAACGGAATTGTTT  
GCCAAAATACCGGTGCAACTGTCTCCGGGACAGTATAAGGCGTTTTTGTCTAAAAAATTCATTGTAGT  
GCTTTTAGGTGTCATAAATTTGTTCTATTTTGCCATCTCCATCACCTCTACCACCAGTCTATTCACCGCCA  
CCACCAACTCCATCTTCTCCTCCACCGCCACCACCACCATCTCCACCTCCTCCACCACCTGTTTATTCACCA  
CCACCGCCACCACCATCACCTCCACCACATGTTTATTCACCACCACCACCACCACCCCCACCATCTCCACCT  
CCTCCATCACCATTGCCGTATTGTGTACGCTCACCTCCACCTCACTTGCAGGCCTTCGACCACTCCCTTGC  
AGGCCTCCTCTTCTCCTCCTTACATTTTTTCTGTCATCTAATGAAACCCACAAATCTAATAGCTTCCTATG  
CTTTCTTTTCTATTTTTCTGTTGGTCTAAACTCGACGAAGCCCAATTCATCTGTCTTCGGCCTCTCCTT  
CTTGATCTACCAATCTAATCGCTTCCTAA

>PGSC0003DMG400016357 LRR-RLPs

GCTACTGCTTCTCTAAAACAAAATCAGCTGCAAGGTCTATTCCAAAGTCACTCCTAAACCAGCGTGATC  
TATATTCTCTTGTCTTTCGCACAATAATCTCAGTGGACAGATCGCTTCAACCATCTGCAATCTGACAAAA  
CTGTTAGTGCTAGATTTGGGCAGCAATAATTTGGAGGGAACAATCCCACTATGTTTGGGTGAGATGAGT  
GAACTTATGATTTTAGATTTAAGCAACAATAGTCTTAGAGGGACAATTAATACAACCTTTTAGTATAGGAA  
ACCAACTTATAGTCATTAAATTGACGGGAATAAGCTAGAGGGGAAAGTCCCACAATCATTGATCAATTG  
CACATATTTGGAAGTTCTTGATTTAGGTAACAATGAGTTGAATGACACATTTCTAAATGGTTGAGAGCC  
CTACCGAATCTGAAGATTCTAAGACTGAGATCAAATAAGTTCTTTGGCCCTATAAAAGATTCATCGACTT  
ACAAGTTTTGCTCAAATTCGAATCATAGATCTCTCATCCAATGGATTTAGTGGAAATTTACCAGTGAGCCT  
TTTTGAGAATTTTGAAGCTATGAAAATAAATGGTGAGAAAAGTGGAAACCCGAGAGTATGTAGCAGATAT  
GAATAACGTTTATTACGCAAATTCCTTTATAGTTACAACAAAGGGGCTGGATCTAGAACTACCTCGAGTT  
TTGACTACCAACATAATTATCGATCTCTCAAGGAATAGATTTGAAGGTCATATCCCAGGCATTATTGGAG  
ATCTCATTGGACTTCGTACTTTGAACCTATCTCATAATCGCTTGGAAAGTCCACATACCAGCATCACTGCAC  
CAGTTATCTGTGCTTGAATCATTGGATCTCTCATCCAACAAAATCAGCGGAGAAATCCACAACAACTTG  
CATCCCTCAAATCACTTGAAGTCTGAAATCTCTCTCACAATCATCTTGTTGGATGCATCCCCAAAGGAAAA

CAATTTGATACGTTTGAGAATAGTTCATACCAAGGAAATGATGGGTTACGTGGATTTCCTCAAGG  
ATTGTGGTGGTGATGATGGGGTAGCTCAAACGACGAATCCAGTTGAGCTAGATGAAGAAGGAGGGG  
AGATTCATCAATGATCAGTTGGCAGGCGTTTCTCATGGGTTATGGTTGTGGACTTGTATTGGACTGTCC  
ATAATATACATAATGTTGTCAACTCAATATCCAGCATGGTTTTCGAGGATGGATGTAAAATTGGAACACA  
AAATCTTACGAGAATGAGAAGGCACAAGAAAAGACATTAGTGTGTAACTCGAGGTATCAACTTAATC  
TCTATCCTTCAGAAGATCACATTTTATATATCCATAAATTTTCTACCTCCTTCATCTTTAAAGCTTTTAACTT  
TAATCTTCATTTTTGAAAATTGCAGGATTCAAGTCTACTGCATCGCTGGGATGTAAAAATAGAAGCTTTT  
ACTTTCATAGTTTGTATTCTGTGCAACTCAACAAAATTTGATTTCACTTATCTGTAGTATGTAGAAATAA  
ATTCAGCATTTTCAATTGTGAGGAAAAACAAGTTCATAAAATGCAAAGGGATCAAAGGGAAACACCA  
GTAGAGCAAAAAGTTTGAAATAACAGTAGAAAGCACATTCAAATTCCTAAAACAGTTCCAAATTCATCG  
ATATATAATAACGACGACCACAATAGAGTTGGTGTAGCAGTTGAAAAGTTTGAGAAACAACCTTGGATA  
CTAAGTTTTAAATCCTAGCAGAGATATCACATTTAGGAAGAAATCCAGCAGAAGTCTTAATTTGATGAG  
TCATGACTTCGTATCGACAATTTTACAACTAACTCTACTAACTAAAAGTGTGGGCTGGAACCTTGTGTA  
TTCCAGCATCTAACATTGTTCTTTCCACCTCTCTGCGCCAATATAAATCTTGAGAGTTGCACATAACGCC  
CAAATGATTCTGTTGCGACTCAAGCAATAGTTGTGCTACTTCATTTCCCACTTAATAGCTCCACCAAGT  
CTACAAGCACCCATCAGAGCCCCCAAGACAGTAGCATCAGCTTCAAAGGCATCTTCTTTATGAAGTCG  
TATGCTCCTGCAGTAGATCAACCTCACAACCATAACGTTTCATCTTAGCTGCAAGTCCAAATTCATGTGA  
CATTGCTTCAAACAATTAGAACCCGAAATCGACAAGCTTGGCACACAGACAAGCTGATAGAAGTCCAC  
GAAGGCAATCTCATTTGGTTGCAGCCCCTTTACTCTCATCTTTGTTGAGAATATAATGAAATAATAGCTT  
AAGCTTTTAGATGAGATGGTCACACACTTCAGCAACCTTGACATACATCGTTAATGCTAGGGAAGAAATC  
ATAGCATTCCATGTGCAAACCTGCTCCATCGCATCAAATACCTGTGTTACAGCAAATGGTTAAAAATACA  
TGCAAGGCCTCGTACTATAAAGAGCACGCAGTTTAAAATACATGCAAGGCCTGCTAACAAGCTTTCATTA  
AATGATAAGCACGAGCAAAAATTAAGACCATCGATTTGAGCGACAGAATCAAAGACCACCCGAAATA  
GGGACAATCCGTGCAAAAATTCTATCAATTTAGGACAGAAAATAAGACCTTTAAAATCACGAGAAGTG  
CAGATCCAAACCAATTTACAGGCGAATTGTTAACAGAGACATCAACTGCACAAAATTCTAAACGAAGAA  
ACAATTAATATAGTGTAAATATTGTTGGCTTCGGGCAAACATGCACAGTTTTCTTCAAATGTCTCCAATC  
ATATTGCAATCAGTTTCGCTACAGCACCCGCTGCTCTAGCCTAATATGAGTATCACTTCACTTTATACACA  
TCTTCTTTTCTTAGGAGACAAAATGCATGTGTTATTACAAGTATTGGGACTTTCATTTAAATCTTTCTTAA  
ATTGACTTGAGGATGTTATTTGACTTACAGTGCATGACTTGAGAAAGATTAATAGTCTTTACATATTG

TGTGACACATTGAATGTGAATGTGTAATTGACAACCTCTAAAAGTACTGACTGAAAATGACTAGGTGACCTTCC  
TGGAATTGATTATTTCAAAGCAAACCTTAAATGTGCTATATAGGATTTGTTATCTGACAATTTCCACCTGC  
ATCAAACAGTCCAGAAGTTGTTGTGGATTTTCTGTTTAAAGTACTCCTTCAATTATTATTTTGTGTCAAGG  
TTTATACACCAATTATTCATAGTGGTAGGAAGCTCAAAGGAAAGTGTAATAATATCCCAATAGATAGGG  
AATGGAACAAGCTTTAAAGGATTTTCGACTGGCATGAAGAGTTTGATTCTTAACTCTAACTCTAAGGTCT  
TGAATACCTAGAGTTAAGAAATTATGTTTCATAACATTCAAGAACTTGAATTATTCTGTGCTCATGGGAAC  
TAAATTAAGACATGGCATAACCTTCTTTTGCTTAAAAAAGTCGACACTACTTAAATAAAAGGACACTAA  
TTATCAACTTGGGACAGAAAGTAAGACCTTAAAATCACAAGAAGTGCAGATCCAAACCAATTAATAAGA  
CGAATTGTGAAAATAGACCTACATCAATTGCACAAAATTCTTAAAATGGTGTGATTTGCAGATTTTAAAC  
TTGAGATCAAATAAGCTGTATGGCCCTATAAATGATTCAAGGACTGAGAAGTTGTTTGCTAAAATTCTAG  
TAATAGATCTCTCATCCAATGGATTCAGTGGAGATTTACCTGTGAGCCTTTTTGAGAATTTTCAAGCCATG  
AAAATGATTGGTGAAGTGTGGAACCCAGAGTATGTAGCAGAAACATATTCTACTTTATACACAAATT  
CTTTGATAGTGACAACAAAGGGACTGGATCTTGAAGTCTCTCAAGTTTTGACTATGGACATAATTATCGA  
TCTCTCAAGGAATAGATTTGATAGTAAGTATTATTAGAGATGTAATTGGACTTCGTACGTTGAAGTCTCT  
CATAATAACTTGAAAGGTCATATACCAGCATCAATGCAACATTTATCTATACTTGAATCATTGGATCTCTC  
ATCCAACAAAATCGTCGGAGAAATTCCACAACAAGTGTATCCCTCACATCACTTGAAGTCTTAAATCTCT  
CTCACAATCATCTTGTTGGATGCATCCCCAAAGGAAAACAATTTGATACGTTTGAGAACAGTTCATACCA  
AGGGAATGAAGGACTACGTGGATTTCTCTCTCAAAGATTGTGGTGGTGTGATGATGGGGTACCACAAG  
CGACAAGTCAAGTTGAGCTAGATCAAGGAGGAGATTCACCAATGATCAATTGGCAGGAGGTTCTCATG  
GGTTACGGTTGTGGACTAGTTATTGTATTGTCCGTAATATACATAATGTTAACTCAAATCCAGTGTGATT  
TTCGAGGATGGTTGATCAATTGGAACACAGAATCATTACGAGAATGAAGAAACACAAAAAAGATATGT  
AACCTCTAGGTATTCAACTTGATCTTTTTTATTCAAAA

>PGSC0003DMG400016424 LRR-RLPs

GTTTTTTGAACATTTTAGTGCAACAATGGGCTACGTAACCGTATATTTTTATGCTATTTCCCTTCTCTG  
CCATCTTTCTTTCTCCTCATCCTTACCCCATTTGTGCCCAAAGATCAAGCTCTTGCTCTTACAATTCAAG  
CACATGTTTACTATAGATGCTTTTGATCGTTGTTTCGACATAACAGGCCAACCGTTATATCCAAAACTCT  
TTCGTGGAACAAGAGCACAGATTGTTGCTCTTGGGAAGGAGTTTATTGTGACGAGACGACAGGAAAAG  
TGATTGAGCTTAACCTCGCTTGCAGCAAAGTCAAGGCAAGTTTCACTCCAACAGTAGTGTCTTTCAACTC  
TCCAATCTCAAAGGCTTGATTTTTCTAATAATAATTTCTCTGGATCGTACATTTGCCTAAATTTGGTGA

GTTTTCTAGTTTGACGCAACTTGATTTGTCATATTCAGGTTTTACAGGTATAATACCAGCACAAATATCTC  
GTCTTTCTAAATTACAAGTTCTTCGTATCCAGAGTTATTCAGATGGTCTTAGATTCAAACCTCACAATTTG  
AACTGCTCCTTAAGAAGTTGACCCAATTAAGAGAGCTTGACTTTGACAATGTGAACATCTCTCCACCATT  
CCTCTGAATTTCTCTTCTTATTTGACAACCTCTACACCTTCGGAACACACAGTTCTACGGGGTATTGCCCGA  
AAGAGTTTTCCACCTTTCCAACCTTGGAACTCTTGATTTATCAGACAATCTCCAGCTCACTGTTAAGTTTCC  
CACAACCAATGGAATAGCAGTGCATCACTCATGGAGTTAGATCTCTATAGTGTGAATGCTACTGGTAG  
GATACCTGAATCATTGGTTCATCTAACTTCACTGCGTAGATTGAGAATAGTTTCTTGTAATCTCTCAGGCT  
CTATTCCTAAACTTCTATTGAATCTCACCAACATAGAGGAATTGTACCTTGGTTATAACCATCTTGAAGGA  
CCCATTTCTGATTTCTTAGATTTGGAAAGCTCAGGTTGTTATCACTTGCAAATAACATCTTTGACTTCAA  
TTCCTTCCAATGTAAGTGGTATGCAAAACGTACAATCACTCATATTGTCATCAAACCACTTGAATGGGAC  
TATACCTTCCTGGATATTCTCCCTCCCTTCACTTGACTTGTTAGACTTGAGTGATAACCATTTCAAGTGAA  
>PGSC0003DMG400016653 LRR-RLPs

ATGCTTACCCAGGATTTGACATCCAAATCGAAAATTGACCCTGAGCTGATTCAGAAGCTCGAGAGTTGGG  
TCTCCCATCAAAGTTGTGAGTTTGGTGGCGAATTGAGAATTATTAGTCGGATTCCAATTAGTATCGGGAA  
TCGATAACCGAAATTTGATTTAGGGTGGAAAGTTTAGGTGTGAGGTTGAAAAAGAGTTTTCGAAAATGT  
TTTCCTTATTATTTTTGGGGTAAGTCATTTTCCTTGATTTTGAAGAAATTAATTTATTTGGAAAACATTT  
AAGTCAACCAAACATGAAAAATTTGAAATCATTTTCCAGAAAATATTTTCCTTCGAACTAAACACAAAAC  
TGTGCTTTTATCTTCTTTTTTTTTCTCCCCCTTCAATCATAGTTTATATAGGTTGGTGATAAGAAAACATG  
ATGGGTATATTATGTATATAAGTTTCTATTTTGATCTTTGTCTGATGTTTTATATCTTCTGATTTTCAGAAA  
ATGGTGCTTTTTTCAAAGCTTCATATCTAAGTTCAAGATAATCATCTTTGCTTTTATCACATGGGCAAAT  
AGGAATGTAAATTTTTCTCCTAGGAAGAGGATTTGTGTCCTACCGCTTCTAAAAATTTTGAGCAGAGGA  
ATCATCCTCCATTGAAATCCTTCTTGATAAATGCCTCTTTGAGGTATTCAAACGTCTCCGAGTGGCCAA  
AAGAGAAGTGTATGTGCTTGTGTTTCCAAGCGCTGGCTTACACTTTTAAGCAGCATTACAAGGATGAG  
ATTGCAGAGTTTAATGGTATAGAAGGTGAGGGATCTCTTTAAGGTCCTTGTGGTAGGGAAGCCACA  
GATGTTAGACTTGCTGCTATTGCTGTTGGAATCGAAATCGTGGAGGTTTAGCAAAGCTATCTATTCGGG  
GAGACAATCCGTGTCGTGATGTGACAGATGCTGGTCTCAAGGCTATCGCTCGATGTTGCCCTACTCTGA  
GAGATCTTTCCTTGTGGAATGTGTCTTTTGTGGTGTGAAGGCTTATCTAAGATTGCTCATGAATGCCA  
TCTATTATAGAAGCTTGATATTTTCCAATGTCCAACAATTACCGACAATTCTTTGTTGGCCGTTGCAAAGA  
AATGTAATCACCTGACCTCCTTGATCATAGATTCTTGTTCAAAGATTGGGAATAAGTCTCCCAAAGTTGT



GGGTCAATACTGTCTGAACCTGAAGCTCGTCATACTAAAAAATTGTCCACTCATTGGGGATAAAGGAATT  
GAAGATCTCTTTTATTACGCCGGTACTGTTTTAACAGAAGTAGAGCTCCAGGCACTACACATTAGCGACA  
TTTCTCTAAAAATTATTTACATTATGGAAGTGTACTGACAAGTCTAGTTGTTGGTGAAGTTCGAAGAATA  
ATAGCGAGGGATTTTTGGGTCATGGGCATTGGTCAATGTCTGCATAAGCTGAAGGCCCTTTCAATAAGC  
TCTTCCAATGGAGTCAATGATTTGGGTCTTACGTTATCTGTAAAGCTTGCCCAAATTTAAAGTTGTTTTG  
TGTCGGAAAAAGTGCATCCTATCAGATAATGGATTGGTTGCTTGTGTCAAAGCTTCAGTCTCACTTCAG  
AACCTTCAGTTAGAGGAATGCCACTTGATTACCCAGGCTGGATTTTTTGGTATACTTCTGAACTGTGGTA  
AGAACTGAAGACTCTTTCCTTGGTGAAGTGTGGGTGTGATGGACTTAATTAATGTAGCTCCTTCGAA  
GGCTCTTTGTTGTAAGTCACTGGTATCATTGACTATTCACAAATGTCTTGGAGTAGGCAATGCTACCATTG  
TTGTAGTAGGTAGTCTATGTCACAACTAACTCATATAGAGCTGAGTGGGCTTCTTTGTATAACTGACGA  
GGGGCTCTTCCCTCTAGTTAATAACTGTGCAGCTAATTTGGTGGCGGTGAATCTAAGCGGGTGTGTCAA  
TATTACAGACAAAGCAGTTTCAGCCATAGTTAAATCAATGGGAGATCTCTGAAGTCTCTACTCGTAGAT  
GGTTGCAGACATGATACTGATGCAACATTAGTAAAAATTTGGAAGTCTTGCTGGATGCTTAATGTACTCG  
ATGTTTCCAAGTGTGGAATCACCGATTAGAGATTACAACCTTTGTCCAGTGCTATACAACCTTCATTTGCAG  
ATCCTCTCACTGTCTGGTTGCCCTTGGTGTGAGACAATAGCTTACCCCTCTTGCTCGATTTGGTTCAGAA  
CCTTCAGGGCTTGAACATACAGCAATGTCCCAACATCAGCTTTAGAAGTGTGATGCACTTGTAGAGATA  
AATCCAGGTTGTAATATACTTTTCTAA

>PGSC0003DMG400016808 LRR-RLPs

GAAGCTTTCATTTTTGAATTGGTACTTGTTTATTTCTTCTTCTCTATATAACTAATCTGTTTCATCAATTGA  
TCTCATCCATACTAGACTATTAATCGAATCTATGGCATCATCTTCTTCTTTTGCAGTAATTCACAGTAC  
TGTCCTCAACGGAAGTACGATGTCTTTCTAAGTTTTAGAGGAGAAGATACTCGAAAAAATTTTACGAGTC  
ACTTGTACCAAGATTTGGAAAATAAGGGAATATTCACCTTTCTAGATGATAAAAGGCTAGAGGATGGAG  
ATTCCATCTCAGAAGAAGTGTGAAAGCTATAGAAGAGTCTCAAGTTGCAGTAATCATTTTCTCAAAGAA  
TTATGCTACGTCAAGGTGGTGTGTTGAATGAACTAGTGAAGATAATGGAATGCAAGGAGAAAAAATTG  
GACACACAGTCATACCGGTCTTCTGTTATGTGGATCCATCACATGTTTCGATACCAAAGTGAGAGCTTTGC  
AGAAGCATTTGCCAAACACGAATCGAGGTACAAGGATGATGTTGAGGGGATGCAGAAGGTGCAAGGA  
TGGAGGAATGCCCTAGCTGCTGCCGCAAATCTAAAGGGATATGATATCCGTGACTGGTGAGTTGAAAAC  
ACATAAACTGAAAAGAAACCATATGTGTATTGCATTATGGGACAAACCTCAAAAAATGAGTCAAAACAG  
AATCTTAATTATAATTTTGCATATTTCCGAATTATATATTTATATCAGTAAGAAGGAAAAGTATTCTGATT

GATTTATGTTTATATAACTTATTCACGATTTATGTCTCAAATTGCTCTACTAATTTTTATTCTGATTCTTTA  
TCTGTATATATTAACAATATTCTTTTTTATATATAGGATTGAATCAGACTTCATTCAGCATATTGTTAGCC  
AAGTTTCGTCCAAATTATGCAAGACTTCAGTATCTTATTTGCGAAATGTTGTGGGAATAGATACTCATTTA  
GAAAAGTAAAATCCCTATTAGAAATGGAGATCAATGATGTTCCGATTGTTGGGATCTGGGGAATGGG  
TGGAGTTGGTAAAACGACAATAGCAAGGGCTATTTTTGATACAACTCAAATCGATTGATGGTGCTTGT  
TTCTTGCGGATATTAAGGAAAACAAGTGTGGAATGCATTCTTTGCAAAATATCCTTCTCTCAGAACTATT  
GAGGATACAAGGTAACCACGTGAATAATAAGAGGACGGAAAGCACATGATAGCTCATAGACTTCGGT  
CTAAGAAGGTTTTAGTTGTGCTTGATGACATAGATCACAATGACCATTTGGATAACCTAGCTGGAGATCT  
TGATTGTTTTGGCAAAGGCAGTAGGATTATTGCAACAACTAGAGATAGACATTTGATGGGAAAGAATG  
ATGTAGTATATAAAGTGACTGCACTACTTAAACATGATGCTATTAAATTGTTCCATCAATATGCTTTCAA  
GAAGAAGTTCCAGGTGAATCTTTTGAGAAGCTCTCGTTGGAGGTCATTGATCATGCTAAAGGCCTTCCTT  
TAGCACTGAAAGTGTGGGGTTCTTTCTTACATAAGAGGGACATAATTGAGTGGAGAAGTGCTATAGAGC  
AAATGAAAATTAATCCAAGTCAGAAATTGTTGAAAACTTAAATTAGCTACGATAGACTGGAGACCA  
TACAACAAGACATATTTCTAGATATAGCATGCTTCTTACGAGGGGAGGGAAAAAATACATCATGAAAA  
TTCTTGAGAGTTGTTATTCTGGAGCAAATATTGAATTGAGTGTCTAATTGACAAATCTCTTGTGTTTCATC  
GACGACTATGATATGATTCAGATGCATGACTTAATACGAGATATGGGTAAATATATAGTGAATATGCAA  
AAGGATCCAGGTGAACGTAGCAGACTATGGGACATGAAGGATTTGGAAGAAGTGTGTTGTCAACAATAC  
AGTAAGTAGACTAAACAACACAATAATATTCAATTTCTAGTTTTCATTTATCAAATTCATTTATGTTATGT  
TATCAAGCCACGAATTAGTCTAGTAGCAGCTTAATATGTTAATCTAACTTTTTATTCTTTGGATTAACCTG  
AAATTTGATCAATACTTCGTACAGAATAACTCAATTAATAATCTTTTTAGCTAATATTACCCAATTTAT  
TTTGAGTAACATTTTGTAATAAAAAATTCTCAAATGGAAAAATACAAGTAAGGAGGGGCAAAAAATAC  
AAGCTAATTGTACAAAGCATTCTCTTGAGCAACATATTTCTTGAGAAGGGCCTAACTAATATTGTACCCT  
ATTTTTTTTTAATGATTGCTTTTCAAGAACTTCAAGTGCAATTATAAATAATTCAAACATTCCAAAAAAA  
TTGCATGCAAGGAGTAAGAAAATAGAGATATTGATAAGCGTATTTTACATGACATCTGAAGTTATAATTT  
GTGGGTTGTGATCTTTTTATCAGGGGACAGTGGCAGTGGAAATAATCTGGAATATTTATTTCCAAACT  
ATGGTTAAGCAAAGAGGCAATGAAAAATATGAAAAGACTTAGGATATTACATATAACTGACTGTCACGG  
ATGGTTCCAACGGAACCTCGATACAGATTATAGCTCCGGGAGTGATTCCGGAAGACAATGTTTCCTATGA  
TTCCAATTGCCATGATGGTTTCATTGAGTACCTGCCCAACAACCTTGC GTTGGTTTACCTGGTATCGCTATC  
CTTGCAAGTCATTGCCAGAAAATTTAAACCGCAAAGACTTGTTTCATCTTCAACTCCAGGATAGTTTGTTG

CATGAATTATGGACTAAAAGAAAGGTACAATTTTATTTGAAATACTTTTTATTTTTGCAGAATAACAAAAC  
TCCCCTAAAATGTAGACATAAATTTGTGTTGTTTTATTATGGTCTTTGTCATCATTTGTCCTCCCCACGAG  
TCTCGGGTTTGAGATCCACACCGCCACATGGCATTATTGAAATAATATATTTTAGTCAACTGTCAAGTTTA  
AGGTGTTTTAGTTATTCTACCTTTTATTTATAGTACTAGCTAATGACAACACTTTTACATAGTTTATGAACA  
TGTATTTTCCATAAAAAAATAAAAAACAATTTCTAATTTCCCACAAAATATTTTGTTGACTCTCATAATCTAA  
AGCAGTAAATTAACAATTTCTTGTGTGTTTTGAATAGATACTTTTGCCGTCTCTACGAAGGCTAGATCT  
CCGGTCTCTAGAAGCTTGATGGCAACACCAGATTTACCCGGGATGCCAAATTTGGAGTATTTGGATTTG  
GGTGGATGCAAGAGTCTTAAAGAGGTTCCACCATTCTCTGGGATGTTCCAGAAAACCTCATCTCTTTAGAGT  
TGTATGGTTGTATAAACCTTGAGAGGTTTCCATGTGTAAACGTGGAATCTCTTGAAAACTATATATAAT  
GAGTTGCTGTAGTTTAGAGAAATTTCCAGAATTCCTTGGAAGACTGAAGTTGAAGTTAGACATTGGTGA  
GAGAGGAGGCTCCAAGATAAGTAGTGATTTGCCTACAGAGCTAGATTTGAGTAATTTCAAAAACCTTGT  
AGCTTTTCCAAGCAGCATTGGCATGTTGAAAAGCTTGGTGAAGTTATATCTATCGTATTGCTCTAAGTTT  
GAAAGCCTTTCAGAAGGGATAGGGGATTTAGAAAACCTTGAGGAGCTTCATGCCGACTATACTCTAATC  
TCACAACCTCCATCTTCCATTATCCGGCTGAACAACTTAAATCATTGAGTTTTGCAAAAAAAAAAACAG  
GAGGAGGTCTCGTAGATGGAGTGTTCTTTGTTTTCCCTCACGTGAATGAAGGGTTACACTCATTGGAAA  
AGCTAGATCTCCGTTACTGCAATTTAACAGATGGAGGACTTCCGGAAGACATTGGATGTTTATCCTCATT  
GAAAGAGTTGCATCTCCAGGGAAATAATTTGAGCATTTCCTCTAAGCATAGCCCAACTTGGTTCTCTT  
CGATCCTTGGACTTATCAGAGTGCAGGAGGCTTAAAAAGTTTCTAGGTGTTAATGTGGCTGAAGGGTTA  
CGCTCGTTGAAAATCTGAATCTCAGTTCCTGCAATTTAAAGAGGGGAGTACTTCCCGAAGACATTGGAT  
GCTTATCCTCTTTGAAAGAGTTGAATCTCCAGGGAAATAATTTGAGTATTTGCCTCGAAGCATAGCCCA  
ACTTGGTTCCCTTCGATCCTTGGATTTATCAGAGTGCAAGAGGCTTAAAGAGTTTCTAGGTGTTAATGTG  
GCTGAAGGGTTACGCTCGTTGAAAATCTGAATCTCAGTACTGCAATATAATAGATGGAGGACTTCCG  
GAAGACATTGGATGCTTATCCTCTTTGAAAGAGTTGAATCTCCAGGGAAATAATTTGAGCATTTCCTC  
GAAGCATAGCACAAGTTGGTGCTTCAAACCTTGCACTTATCAGATTGTCATATGGCTCTGAAAATTAT  
TCCTAATTTACCACAGAGGGTGATATTCACGCCATTGCCATATGGCTCTGAAAAGTACAATGATTTGATT  
CCTATTACGTTTGCCCGTGCCATGTTTCCAGAATATCTCTGATTCACATTCCTTGTCAATTTAGAATGTCTACC  
ATTAAGCATGCTGGGAATAAAATCCCTAGTTGGTTCCACCATCGGGGGACAGATAAAAGTGATCAGTC  
TATTTGCCTGAAAATTGGTACACATGTGATAACTTCTGGGATTTGTTGTATGTTATTATGACAGATTAGT  
TGAAACCACAGCTCACTTGATTCCCTTATGCAATCGGATGCCGTGGATGATCCAGAAGTTATCCGTAAGC

AATCATTCAAAGTGCTATAAATCTTATCTTGATGAACGATCTACTATTCATTTATTCTTTGTACCTCTTGCT  
GGCGTATGGGATACATCTAAGGCAAATGGAAAAACACCAAATGACTATGGATTTATTGGTGTAACCTTTT  
TCTGGACAAATTAAGAATTACGGATTTCAATTTGTTGTATAAAGATGAACTAGAGCATGAGGCGTTGTTAC  
AAATGAGGGGAGATAATGATGAACCAACAGAGCACTCCATTTGGACAAGGAGGAACAGATATGATGAT  
AGTGAACACCATAATGAAGCCAGTTGCTCGTCTTCTAAGAAACAAAGGTCTGGTACTACTGTTGATGTGC  
CAGTTAATCCAGAACTTTGCAGCTCTTCCGACAAGTCCTGGATTTTCGCTTAAATAAAGGTATATATAA  
CTCATGATTTGGTAGTGAAATTGTGTTCTCTCTCTCTTTTTATGTAATTCTCTCCTGTTAGCTACAAATTA  
AGTGTCTTCCATAACCAATACATTTTTATTTTCATTCTTAGTCACCAAATTAGTGCCAGAAAGTGCAGGC  
AACACTAACAGTCCAAGACTGGGAATCTAAGGGGTTAAGAAGGAACTTTGCATGTTGAATATGAAATGG  
TAAGTAATAAGAGATGTAATTGCATCTTTATTGATCCTCAAGTAAAGCAACCTTCTGGAAATGTGTGTTT  
GAGAATCCCCGAGCTATTTTAATTCTCCTTAAAGTTTTGAATTAATATTCGTTTCGATGGATATTTTGTCTCT  
GAATTAAGTTTCTAAGTTCCAAGACGAAATGAATATAGAAATGTGTATTAGAACGGATCAATTGGGGGA  
GTTAATTGAATGGATGGAGTAATTGATCCCTTGATCATGTCTTTCTGCAGATGCATACCCAACCGATATC  
GAGATTTCACTGTGTTATCACTTGAAGGTGTTATAAGTTCATAGAGAAAATGCAAAGTGTATTCCCAAA  
GGTAGGATCCATGACTTACTACTCGTTCAGTTTGATGCTCTTGCTAATTGTTATATTCGGGGAAATTGCTG  
CTTTAAAAACAAAACTTTATGTGGGATGCGTCAGTTTAAATACTTCTGCATCAAACATTTTCATGTGCGAA  
AGGTATTGATCATGCTCTAACTTTAGCTATACACTTTTGTAAGTATTGCTCTGTCAGATTGTTATATTAGC  
AGAAATCTCTTTTTAAATGTAATATCTCTTTTGTTATGGCAGGTAAGTTGGGAATAAGATGAAACAATC  
AAAGATGCAGTACAGCTTGAGACGGTGGGGGAAGCTGGAGTGAAGTTGAGGTTTCGTCTCCCTCGTGAT  
CTCTTTCAGTTCTCTTGAATTCTTTTGTAGGAAAATGTGAAATATTGTGGATTAGGAATACAAGATATTT  
TAGGCATAATACATATATTGGACCTTAACTTGGCTTCAAATTTTAACTTTGACCTCCAACCTTCAAAGTG  
CACAAATAGACACTTTAACTATCCAACCTTTAATAAATAAACACGCGTGTCTTACCTGGCAAAACGCGT  
GATGTGCACGCATTTTGC GCGAGTGAGAAGTAATTTTTGAGGCACACAACAGTAAAAAATGCTGAAAT  
GACAATTCTACCCTTAATTAATTTATTTTATTTTGGTTCTAAAATGGACGTGTAAAGTGTTAATTAGTT  
GGCAGCCATTGAGTGGCTCACTAATACACGTGGAAGCGTTTGCATTTTCATGCGCTTTGCTCCAAAAATCA  
CGTGTTTATTTATTAAGGTTGGATAGTTAAAGTGTCTGTTTGC GCACTATGAAAGTTGGAGGTCAAAG  
TTAAAATTTGAAGCCAAGTTTAAAGTCAAATATATGTATTATCCCTACTTTTTATCTTACTGTCTGCTCTCT  
AGCTTATTGACTTGTGATCTTTATGAAAGTAATAAGTAGCATCTGTATCTCGATTACTTATATAAGTGGTT  
TGTAACAAGTTTCACTCTTTTGGTTTTTGATTACTTCTGCAGTACAACTGGGACCATGGTACTTTTAGAA

CAACGCTGGTAACTCCGCCTGTGAAGGACACATGTTTCCTCTGTTTGTAACAGAACAACACTAGTAATTTGT  
TGTTTCAGAATATCTCATCATTGCGGCGTGACATTTCTGCTTCAGTCACTAAGAGTGTTTACCACAAGGG  
GGAATATTGCAAGTTGGTTCCACCATTCCGGGAATTGGTAGAATTAATTGTATCAGTCAATTTGCCTGATA  
ATCGGTACGTTAGTTAAACTTCTTGGGATGACCCAGGAACCTGCCTAATCTTACCATTGAGAATGTGAT  
ACAAAGTTCTCCAACCATTGAGATTTTCAAACAGAATTATCCGACCATTGAGAATGTGATACAGAATTAT  
CCGACCATTGAGAATTTGATATAGAATTTACTATTAATATTTTCTTTGGTACCTTTTGCTGTCTCCGCTCTA  
TAAACAAAGGTCACATGTGAATCTGCAGCCACAAGATTAGGCATAGTATGTAGAGCTGTTCTTAATCG  
ACTCCTCATTGATCCGATCTCCAAGGGAGAAAGTTAGAGGGAAAACGTCTGTATGGAGCTATGTTGCG  
CGGACTCTTCATTTTTGAAGGCGAACCCGTCTCGACGCGACACTGGTGCGGGTGCGGGTGCGGGGTGC  
GTGTCGGATTCCGGTCAATCCGATCCGGACACTTTGACCAGAGCCGAGAAAAAATTGGGAAAGGAGATC  
AGTTTCCGGCGACCTCTTAGAGAGGCGGCGGAGCTGTAAGAAGCTTAGAAAAAGTAAAAAGAAGAAG  
AAAGAGGAGTTTTTTCTTCATTGAAAAAGTAAAGAGAAGAAGAAGAGGAGGAGTTTTTTCTTGAAAA  
GTAAAAGTAAAGTCTTTTCAACTTTTCAACTTTTCAACTTTTCAACTTTTCTTGAAAAAGAGAACTAAAGG  
CTAAGGGTTTCTCTAGATAAGTGTGTC

>PGSC0003DMG400016882 LRR-RLPs

ACTCAGTTGGTAAAACAGGACGGGGAGTACTATGCTATGTAGTAGTGACACATCATTGCTTCCATTTT  
TTCCGGCGTAACAGATTTATCAAATTCATCAGCCTAAAACAAAGGTATTCTTCTTCTTCTATCTACTGA  
TTTAGCCCTAATTTGCTGTTTCAAGAAAATTGTAATTTTTTACTTGCTCCACTGTGTTGAAGTTCCATTT  
TAGGTTAATTTTGGTGTGATTTGAATCATTGATAGAGTCTATAAAACAAAGGGTGTGTTGTCGGTGATGTT  
TTTTGACTTCTTATTTGTGTTAATTTTCAATTTTCTAGGTTATTAGCCCTATAAAGTTTGTGTTTTTTGGGCTA  
TTGATGTGTTTTGTAAGACATTGTTGAAAATTTATATGATTCTAATGTTTTTTTTTTCAGAATTAATGATGG  
TTAATTAGAGGGTTATAGCTTCTAATGTATAACTTGTTTCGTGATCCACAACCATTGTTCTGCCATTGCTC  
TATGTGAAGTGATTTAGGTGAGTCATAAGCAGATGTCTAAGTGCTACTCTTTCTTTTCAATGACTAATTGC  
TACTGATTTAGTGTGAGTCGGAAGCTGCGAGTTGCTTCATTTGCCTTGATCTTGCTGATTTGTTGTCATA  
TTATTCTTGAATCCTGCTTCGGTTTTCAATTTTTTGGAGCTGGAGGTTTGTGCGAAAACAGCCTCTCTACCCT  
ACAAAGATAGGGGTAAGGTATGGTACATCTTACCTTCCAGATTGACTTGTGGTATTGCAGTGGGTAT  
GTTGTTGTTGTTGTTGTTATTTTACATAAATGTTGATAAATTGAGTGGCACAATGTAAGTGAAGTATTTTA  
GTGTCAAATCAAATGATCCATTTGAAGATTGTGCTTCAATTAGTAGAATAACAAGCACACACCTATTA  
CAACTGAATAAAGAAAATTTAAGGCGTTTTGTTTTTCTGAAGTTCTTTTGAATCTTGCGAAGAAAATTTT

CCAAAAATTGTGTTTCTTTGAATCTTCTGAAACACTTTTTAAAAAAAATATTTTTTATGAAGTGTTTTTA  
GGGTGCTCCCACTCACAGATCTTCAATAACCAACTATCCATAAACATTTAGTCTTTGCATGTTTTAAAAAG  
AAAGATTTTTTGAGAAAACCTTTCCAAGATCATCTCTAAACATGCAAGCCGAATAGCTCCTATAAATTC  
TGTAATGAAAACATTAACATAATTGATGAAATTAGTAATTAGAGCATCTCTTTTCAAACCAACATTTAAAGT  
GTTTGCATCTGTTGATGGATGAATTCAATATGCTAATGAATTCTAACTCAGCATTTTTGGAAGATACAGCT  
TTCGTGGTGAAGGAATAAGCAGTTCTTTTGGAAAATAGTAAGGAGCTATGGCTTGAATGTTTATGCGAA  
GCGAATGTGTACCTTCTGTTTACTCTATGGATGCTAAAAAATTCTGCTAGTTGCTAAACAGGATGAGGA  
CTATGGGAAATAACTTGTTTTGTTTATCCACTCATTTCTTCTACCACTGCTCTCTGTAAAGTGATTAG  
GTGCGCCACTTTATTATCCATGTTATAAGCATCTGTCTAGGTGCCCCATTATGTTTCTAGGATAAGTAGA  
AGTTCTTGCAATTGACTAGCTGCCACTGATTGATGGTAAATACTTACCCACATCGGGTGTTTATACTTAAA  
TAAACAGTTAACCTTTAGAATTAGCAAGTTAAAGTGAAAATGCATATCACTTAACCGTGTTTAAAGTGTTA  
CTAAGTGTATATGCAAGATATATGTGTATATTCATTGTCTTGGTGTAAAGCACCCATTCGGGTAAAGATTTT  
ACCTGATTTAGTGCCTCTCGGAAGCTTTTAATTGCGATTTATGTTAGGGATTATCCATAAATGTTGATCAA  
TTGAATGTCACAGTGGGATTTGAAGTACTTAAGTGTCAAATCAAATGATTCACTTGAAGACCGTGCCTT  
AATTAGTAGAAGAACAAGCATAACACACCTATTACAATAAATAAAGAAATATCTAAGGTGTTTGTGTG  
AAAGTTTCTTTGAGATCTTGAAGAAGTTTTCGAAAATATGTTTCTTTGGAGTCTTCAGAAAAGCTATTT  
CTTGAGCAAGTTATTTTAGGGTGTCTCCATTCACAAATCTTCAAACCAACTATCCAAACACATTTTCTG  
TTTGCATGGTTTTAAAGAAAGGATTATTCAGAAAATTTCTTTCAAAGTTATCCGTTCAACTCTTATAAAA  
CTCTGCGATGAATACATTAGCTAATTGTTGAAGTTTGTATTAGACCATCTTTTTCAAACCACATTTAAA  
GTGTTTGCTTCTGATGATGGGTGAGTTCAACATATTAACAAATCTTACACAACATTTTTAGACCATACGA  
GTTTGTGGTGAAGGAATGCACAGTTCTTATGGAAAATAATAAAGAGCACAGTTGAATGGATATGCAAA  
GTGGCGGTGTGTCTTCTGTTACTCTATGGATGCTAAAAAGTTTTTCTACTTGGTGGCATATTGTTACATTT  
GGCCCTTTTATATGAATCAGGTGGACCAGCAAAAATCCTCAAAAAGAGCCTTATTTGGACCTTTGAGGCA  
TGACATCTTTTACAATCTCATTACAAAAAATGAGTGTTATGGTAAGTCATGTGCTTCTTTCATAGTAACT  
GTGTAATGTGATAAATGAACCATTTTATTTGCTTCTTTCATTGTTTTCACTGATGTGTGCTTCTTTCGAC  
ATTTTTGACGATAATTAGTCCCCTAGTTTTCAATTTATGTGCTACAGTGCTTACAGAGTAAAGTACTGC  
ATTTACTTTTTAGTTAATTTACTATATTTTCTGGCCCAATTTTAGTGGTCAACATCAAACACTCGGCCTTG  
ATTGCATGATGACGTTGTACAATGGGAAAATAATTGCAATAGCTAAATGGTGTGTTGAAAGATCAGCC  
ATCCCTTAACTCTGTGTTTGTGGATGAAATCCTCTCTCAGAAGAGTTCGAATGGCCATTCCTGCCCTTGA

GCATAACCAAGTAAATGACTACTTAAATCGTAGACATTGCTCATAATTGGTCAAAAATTGGCCAGCATAT  
CTGTAECTATTCTCTTAACACAAATTATAGTAGCATCATTTAAAGAAAAACAGAACTCTGAGTGCTCTTAT  
CCTATGTCGTTCTTTGTCAGTAAACCACAGTGATAATTTCTCTCTCTTGGGTTGTCACATTGACATCTTTGC  
ATTTTTGTAAGCACTCTTGTATGCATGTATGTATGTTATAAACTAAAAATACACATTTTTCTCATTGGATG  
AATGTCTTCTTCTTTGTTACTATGCAGAAGCAACATATAACCATCCAACCTTCTTTGCAATGCAGAACTGA  
GGTGGACAATATCAGCAACTTACCAGCACAGATTGTTGACAAGATTCTGTCCCATTATCACTTAGGGAT  
GCTGTGAGGACAAGTGTCTTGTCAACTAAATGGAGAAACAAATGGGTTACTCTTCCAAACCTTGTATTTG  
ACAATCAATCTCTTTGATCTCATCCCAAGACCAAACCTTCATAAAAAATAAGATAGTAAACATTGTTGAT  
CATGTTCTCTTACTTCATTCTGGTCCCATACACAAGTTCAAGCTTTCTCATCGGGATCTTCAAGGGGTATG  
TGATATTGATAGATGGATTCTTTCTATCAAGGGGTGCTGTGAAGGAATTTATTCTGGAAATATGGAAA  
GGCCATCGCTACAACTCCATTCTTCTATATATCTTTGTCAAAGTTGAACCACTTGGAGCTTTTTAATTGT  
CTTCTAAAACCACCTCTCACATTCAGTGGTTTTAAAAGCTTGAAAAGTCTCGATCTTCAGCACATCACTAT  
GGAACAGGATGCATTTGAGCAACTCGTATCGAGATGCCATTTACTTGAGCGGCTTACACTGATGAATTTT  
GAGGGTTTCTCCGATCTTAAATCCATGCACCGAATCTTCTCTTCTTTGACGTTGGAGGCGTCTTTGAAGA  
CATCAATTCATGAACACATTCAATCTTGCCATCGTTTCTATTGGGCTATATGTAAATCCTGGATTTGACA  
AAAATCTTGCTCTAGGCAGTGCTGGAAATTTGGTCAAGTTTTTTGCTCATTGCTCGTCTTCAAAGGCTT  
GAAGTACAGAGCTTTTTCTTGAAGGTATTCTTCATACTTACCTTTTGTGCTATGATTGTAGATTTCCAGAG  
AGTTGATGGCAACTTCTCTTCCAAGCATTGTTTTCTGTAAAATTTAGCATAAAATGATGTTTGACAACC  
AAAAGTATGGAGCTGGATCTTTTACTTTGCGGTGTTTGCTGTCTAACATAATGCAATATCATTAGGGTC  
AAATCATTAAATACTACCATGTGAAAATGACTTGTGTCCTGCAGTGCAACTCATATTTTATTATGAATCTC  
CAACTTTCACTGCCATTAGTACTCGCGGGTCCTTATTTGAAACAATTGTAATCGCTCTTTGTTATCTACTA  
TTTCAAATACACCATCATCACATCTTGCCACTACTTTCTACCACTGTCATTGTCTTCATTTAAATTCCTG  
GAAAATTGTTAGGAATGGGTTTTCTATTGAAGAGATTCTCCCTGTTTTATGATATATCTTGTGCCAACC  
TAACAGAACCTTACTGTTCTTATTTTCTTAACTAAAATGTAAAATTTCTCTAATGGATGCCTTTGCCAAGTT  
TATCTCCCCGCATTATTTATTGGATGCTTGAAATGGAGAACTCTGTCAATCTTTGGAGAAAATGTATACT  
AATCATTGTTATGTCTGCAGTATCTGGCTGACAATAAAGTGCCAGGAAGACTACCTACGCCTTGTGACGA  
GCTAAGTTTTCTTTCAATACGCATAAATTTCAACCATTTGGATGAGTGTGGCAGCACTTTGCCTTCTCA  
GAAGTTCCCCTAACCTACAAGAGCTTGAGATGTTGGTGAGTTTCAAATATCACTTGAACCTCATTAGGAC  
CAATCATAAACTGGCTTCAACATACTTCACTGCATGGATAATATTCATGTACCCAACCTATTTTGCAGCAT

GTAAACTTTTCACAGCATCTGCCGAAGTGTCTTTAAGCTCTGTACATTCATGCCATTGTCATTTTGTAGGC  
ACGCACAGAAGAACAAGTACTTTGAGAACAGTTGCCAGTGTTATGGAAGAGGATTACCAGAATTGTAT  
GTTCAATCAATTGAGGCATGTTAAGATTGCTGGTATAACTGGGCTTAAACAAGAGCTAAATTTGTCAT  
TTTCTGCTTTCAAATTCACCTGTTCTTGAAAGAATGACAGTCAAGCCAGCTTCAGCTGACGGTGCATGGG  
AGATGCTAAAAGAGTTGCTTCGCTTCAGGAGAGCTTCTGTACAAGCTGAAATTGTTTACGTTGACCCTTA  
ATTTATAGCATATATAAGCTGGGGAGCCTGTGGTCTAGTAAGATCTAGGCGTATTTACTATATTAGTTTA  
GCATCTAGTGTAGAACTAAGCTAGACCGTCTGCTGAAATGGAAGCACCATGTGATCGGTAGCAGAAA  
GATGATTATAATACTGAACTTGTTGTTGTTGTTGTTGTTGTTGTTGTTGTTGTTGTTGTTGTTGTTGTT  
TTTCTGAACAATTCAACTAGTTGCGTAGTTGTTGTTGTTGTTGTTGTTGTTGTTGTTGTTGTTGTTGTT  
CGGTACAAGTATTCTAAAAAATGTGTTATTATTGTTGTTGTTGTTGTTGTTGTTGTTGTTGTTGTTGTT  
TGTTTTCTTACATCCTTATATCTGAATATGTGCCCTCAGAATGGATCCTAATGCCTTAAATGTTTG

>PGSC0003DMG400016899 LRR-RLPs

TTGCAATTGCAATTGCAATGCTGAGTGTATTAATATGTAGTGTAAAACGAGAGTAGCAATAAACCTCTC  
ATTGAAGAAGCACCAACTAAACCCACATCGTCTCTCATCAATGCTACAATCACATTTTGTGCAACCTTGCA  
AAAAACGAAACGCCTCTTGTGTTGACCAAAAATGGGGGGAATTTGCTTTGTGGTTTTGCTCCTTCAAATC  
ATAGTTACTGAAGTTGTTGGTGCTGGTGGTGGTGGTGGTGGTGGTGGTGGTGGTGGTGGTGGTGGTGGT  
TGGTTTGGTGGAGGGATCAACAGCCCAAGCCCAGGTGTTGTCCCAAGTCAAATTCGGCTTACACTGCT  
CTTCAAGCATGGAAATCTGCAATCACTGATGATCCAATGGGGATTTTGAAGAATTGGATGGGTCCAAT  
GTGTGTACTTACAGAGGAATTTTCTGCACAACTCTCAAGATTACATGGGCAACCCAACAGACCCAGTTG  
TTACAGGTATAGATCTCAATCATGCAAATCTTCAAGGCACTCTTGTTAAAGAAGTGTCTTACTTAACATAT  
ATTTCTCTCATTACCTCAATACCAACAGATTTTCAGGTATAATTCCACAAACATTCAGAGATCTGTCTTCA  
CTCATTGAATTAGACCTTAGTAACAACCATTTCTCTGGTCCATTCCCTACTACAGTACTATTCATCCCAAAT  
CTTCTTTATTTAGATCTCAGATTCAACAGTTTCACAGGGCCAATTCCTGAGGATCTGTTCAACAGAAAAT  
TGATGCTATTTTTCTAATAATAACCAGTTTGATGGTGAACCTCAGAGTTTAGGGAATTCCTGCTT  
CAGTGATTAATTTGCTAATAATAAGTTTAGTGGGAACATTCCTTTAGTTTAGGGTACATGGGTCCGAG  
AATTAAGGAGATTTTGTCTTAAACAACGACTTAAATGGTTGTATACCAGAAGGCGTGGGATTGTGGAC  
GGATTTGCAAGTTCTAGATGTGAGTTTCAATTCATAATGGGGCATTTCCTGATACCTTTCTTGTGTTGA  
GTGGCATTGAGGTTCTCAACTGGGACATAACAAGTTATCTGGAGATTTACCAGACTTGGTTTGTCTACT  
AAGAAACCTTGTGAATTTGACTCTTGCTTACAATTTCTTCTCTGAGTTGAGCCAGGATTGTGATAAACTTC



CTTTGAGAAATGTGGGTATTGATTTCTCATTGAACTGTATTCCAGGAAGACAAATGCAAAGGCCTCAACC  
TGAATGCTCTGTCATTCCAGGTGGAAGTCTCAATTGCCTTAGAGTACCTGCAGTAAAGCCTCTTGTTTGT  
GGATGAAAAAACTGCTACTGCCTGACTTAGTCGGACTCCAACGTGGGTACCGAACACCCGGTGGAAAAA  
AAAAAATCACTACTACTACTATTTTATTTATTTATGAGTGACAACAATTGAGCACTATCATCAATGTTTTTG  
TTGTAAACCTGGTTATCTTGGCCTAGCACACGCAAGTTATGACTTGTACCTTTCAAATTTATTTCTCTCCT  
TATTTCTTTATGTTGCATTATGAATTGTAAATACTAGTATTAATTAGGACACTTATATATGGGTTTCACCC  
ACCTCTAGTAATCATAATTCCTCATCAGTAGTCGGGGATTCTCA

>PGSC0003DMG400016982 LRR-RLPs

ATGGGAATGCCAAATTTGGAGTATTTGGATCTAGAGGAATGTATGAGTCTTGAAGAGGTTACCATTCT  
CTGAGATGTTCCAGAAAACTCATTGAGTTAAATTTGAATGAGTGTGGAAGCCTTAATAGGTTTCCATATG  
TTAATGTGGAATCTCTTGAATATCTTAATCTAAGTTCCTGCTATAGTTTAGAGAAATCTCCGGAATTCCTT  
GGAATAATGAAGCCGGAGTTAATGATTATGATGTCATTCTTTGGAATAATGGAACCTCCATCATCTATTA  
TTGAGCACCAAGCTGGTCCAACAAGCCTAGATTTAAGTGAATGAATAACCTGTAGCTCTTCCAAGCAG  
CATTTGTAGGATGAAAGGTTTGGTGAAGCTAATTGTGTGGGGTGCTCAAACTTGAAAGCTTGCCAGAA  
GAAAAAGGTGATTTAGAAAACCTGGAGGAGCTTGATGCCAGAGATACTCTAATCTCACGACCTCCGTCT  
TCCATAGTCCGATTGAACAAGCTTAAATTATTAACTTTTGAAAAAGAAAAACAGAAGACAAAGTGTACT  
TTGTGTTCCCTCAGGTGAATGAAGGGTTACCCTCATTGGTTGCTCTGAATCTCAGTGACTGCAATTTAATT  
GATGGAGGACTTCCGGAAGACATTGGATCCTTATCCTCTTTGAAACGTTGCATCTCAATGGAAATAATT  
TTGAGCGTTTGCCTCGAAGCATAGCCCAGCTTGGTGCTCTTCGATCCTTGGACTTATCAGATTGCAAGAG  
GCTTACACAGCTGCCAGAAGACATTGGATGCTTATCCTATTTAAAAAAGTTGAATCTCAGTGGAATAAT  
TTGAGTATTTGCCTCGTAGCATAGCCCAGCTTGGTGCTCTTGAATACTTGCACTTATCAGATTGCAAGA  
GGCTTACACAGCTGCCAGAATTTCCACATACAATAAATGCAGATTGGAGCAATTCTTCGATCTGTAATTC  
ATTGTTTCAGAATATCTCATTATTGCACCCTGACACCTCTGATTCACATTCCTTGTCACTTAGAGTGTTTAC  
AAGTAGGCCGAAGAATATCCCAAGTTGGTTCCACCTTCGGGGAACCTGGTACAAGTGTATTAGTCAATTT  
GCCTATGAATTGGTATGTAACAGATAACTTCTTGGGATTTGCTGTATGTTACTCTGGCGAATTAATGAC  
AATACAGCTCATTTGATTCCTTATGTGATGCTGGGATGTCGTTGATGACCCAAAAACTTGCTTTATCCAA  
CCATGCAGAATATCTTGATGATATTAATTTTTTGTGGTACCTCTTGGTGGCTTATGGGATGCATCTAAAG  
CAAATGGAAAAACACCAAATGACTGA

>PGSC0003DMG400016983 LRR-RLPs

ATGGCATCATCTTCTTCTGCGAGTAATTCACAATACTGTCCTCCATGGAAGTACGATGTCTTTCTAAGTTT  
CAGAGGAGATGATACCCGGAATAACTTTACAAGTCACTTGAACAAAGGTTTGGAAAATAGGGGAATAG  
CCACCTTTCTAGACGATGAAAGACTAGAGGATGGCGATTCCATCTCAGAAGAAGTTGTGCAAGCAATAG  
AAGAGTCTCAAGTTGCCGTAATCATTTTCTCAATGAATTATGCTAAGTCAAGTTGGTGCTTGAATGAAAT  
AGTGAAGATTATGGAATGCAAGGAGAAAGAAAACAGACAAACAGTTATTCCGATCTTCTATTATGTGGA  
TCCATCACATGTTGATACCAAAGTGAGAGCTTTGCGGAAGCATTGCCAAACATGAATCAAGGTATAA  
GGATGATGTTGAGGGGAAGCAGAAAGTGCAAGGGAGGAGAAATGCCCTAACAGCTGCCGCAAATCTA  
AAAGGACATGATATTCATGACCTGTGAGTTGGAAACAAATAATTGCTTTTGATGGAAAAAAAAAATAACA  
GTATGTTTCTATATATTATCCTGAACTATAATGTTTCCAATTTAATACGGTCTTGAACATAAAAAATTATGA  
AAATACTCTCTAATACTTGACTTCCTCACATTGTCAACAATCAATCTCTAATTTATGTAGGATTAATCAATA  
AATGAAAATTGATCAGATCGTCGACCACATCTCTCCAACTTTGCAAGAGTGCTCGTTTTTTGTCTTATT  
TGCAAGATGTTGTGGGAATAAATTCTCATTTAGAGGAACTAAAATCCCTACTTCAAATAGAAATCCATAA  
TGTTCTGATTGTAGAAATCTGGGGAACAGGGGGAATTGGTAAAACGATGATAGCAAAAACCATCGTTG  
ATACTCTATCTCATCAATTTCAAGCAGCTTGTTTTCTTGTGGATGCTAAAGAAAATGCAAGAAAGAATCA  
ACTACATTTCTTACAAAATACCCTTCTCTCTGAATTGTTAAGAAAAAAGATAATTACGTCAATAATAAGT  
ATGATGGGAAGTGCATGATTCCAAACAGACTTTCTTCAATGAAGTTGTTGATTGTGCTTGTGACATTGA  
TGAAAGAGATCATTGGAGTATTTAGCAGGTGGTGTGGTTGGTTGGTTAAAGGCAGCAGAGTTATTGT  
AACAACTAGAAACAGACAATTGATAGAGAAGGATGTTGCAATATATTAAGTGCCTACACTACCTGATGA  
TGATACTATGCAATTGTTCAATCAACATGCTTTCAAAAAGAAGTTCCAGATGAGTGTTTAAGAAGTTC  
TCGTTGGAGGTAGTAAATCACGCTAAAGGCCTTCTTTAGCTCTCAAGGTGTGGGGTTGTTTGCTGCATA  
AGAAAGGCCTAACTCAGTGGACAAGAACTGTAGACCAAATAAAGAAAAACTCTAATTCAGAAATTGTTG  
AAAACTCAAATAAGTTATGATGGGTTGGAGCCCGAAGAGCAAAGATATTTCTAGATATCGCATGTT  
TCTTCCATGGACATAAAAGAAAAGAAGTCATGCAAATTGTTGATAGCTGTGATTTTGGAGCTGAATACA  
GATTAGATGTTCTAATTGACAAATCCCTTGGATTCTCTCTAAATATGATAGAATTGAAATGCATGACTTG  
ATTGAAGATATGAGCAAATACATAGTGAATGCAAAAAGATTCCGAAAACCTTAGCAGAATATTGAAG  
GTTGAATATTTGGAAGATGTGATGATGGACAATATGGTAAGTAAGCTAAACAATGCAATAGTATTATA  
ATTCAAAGATATATATATATATACCTTGGAGTAAATTTTTATAAAATAAAATTAAGGAGGGCCAAAAC  
TAACCATACCAGTTCACTTGATCATTGATTAGTTTTTTTTTGAATTAATAACTAGCATTTTATTACCAAATA  
TCAGATCTGTACATAGTCTAGAAAAGCTGTGATGGTATGGCATTACACAGCTGCAAACCAAACAATA

GACATCAAAAACCTATGTGCTAGTGGTAAACTATAGCTAACTATGGGTAGAAATTAAGGCTATTTAGTCT  
TCTCGCAAGCTTCTTCTTGAGTGATACTCCGTAGAATATGTCCTGCACAGTTCTCCTAACCACCATTTTAG  
GTTCAACGTTTGGCCTGAAATATCTTCTGATTTCTCTCTATCCACACTTTGTATACTGCTGCAGCAAAT  
GTCATCCTTAATATAGTTGTTGTTGACCATTTCCATTGGCATAAGTGCATGCCAGTTAAGTTCATCTTT  
CCAATTCATGGCCACTCTATTGATGCCCTGCCTAGACCAGATTTCACTTGAGTAGTCACAGCTGAAGAAA  
AGGTGTTCAATAGTCTCATTCTCCTTGTTCATAACTCACATTGTTGTTTCATCAACTTCACCCCATTGTAGC  
AATCTGTCTTTTATATGTAGTCTTCTAAGGGTAGCCAATCTAAGGATAAAAATCCATTTTGGAGAACCTG  
GATTGTTGCAAATAATTTTTCTCCACTGTACTTTTTGGAACCTCACCCCTCATCAAGACATACATCTTCCTAA  
TGAATAACTATGAATGTTTGACAAATCACTAACTTGTAACCAATGTCCTGTAGGCATAACTTCACCTTC  
AAAATCTTTTGTGTTGGGTTGGATTCCCATATTGGCCTTCCTTTTATATAGTAACAATGCACCCATCTAAC  
CCATAATGTACCTTTTTTAGAGCACAGGTTCCAGAGCAATTTGCTAATGGCTGCTCTGTTCCACACTGTAA  
TATCAAGAATGTGTAGGCCACCAGCAGTTCTTGGTAACCACACCTTATCCCAGGCTTGCAAAGCCTTCTT  
TGTTACTTCTGTACCTCCCGTCCACAAGAACCTCTTACAAGTTGATTCTATAAGTTTGATCACCTTGGCGG  
GTAACACAAAAATTTGCGACCAATAAATATGGATAGAGAATAATACAGATTTAATTAGCTGCTCTCTGCC  
TGCGTAAGATAGAACTTTGTTGTCCAACATGTTATTCTTCTAGCATCTTGTCAATCAAGGGTTGGCATT  
GGGTGATTGATAGTCGTTTAGTACTTAGAGGCCCTAAGTATCTAAAAGGTATCTCACCTCTAGTAAATCC  
AAGAATATTCAAGATAGCTGTCTGATTTATGACATTCACCCCTCCAAAATATACAACATTTTTGTCTTTGTT  
TGCAATCAGACCAGAAGCATGAGAAAATTGTTGAAAATAATCAAACAACAGCTGTACAGACCTTATGTC  
ACCTTGCAAATAATAAAGTCATCAGCAAAATTGAATAAGTTTTACCTTTGAGCACCTGGGGTGAAA  
CTTAAATTCAGGACAGGTCATTAGGCTCTTCAATAATCGTGAGAAGTACTCCATTGCTAAAACAAGAGA  
AAGGGGGACATAGGGTCCCCTTGTCTCAATCCTCTCTTAGCATCAAAGGTACAGAAGGCCAGCCATTG  
ATACAGATTGAGTAAGACACAGTTTGAAGGCACTCCATTATCTAGTGTATGAATTTGTAGGGAAATTCA  
GATGTGTCATTACTTGCTTGACAAAGATCCATTCTAGTGAATCATATGCTTTTTGCATATCTACTTTAAGC  
ATACATCTAGGAGAGACCCCCTTCTCCATAGCCCTTAACCAGTTCATGACTTAAGATAATATTGACATG  
CAAATTTTATACAGACATTTGAAGTTATACTTTGTAGACTAATGAACCTTTTAAACAGGGAACCAAGACAA  
TGGAAGCAATCTGGGCGCATGGTGTTCAAAAATTATGCTTTAGCAAAGAAGCCATGGAAAACATGAAAA  
GGCTTAGATTATTATGCATCATGAGTTTTCGTACACATGATGACTCCATTGAGTACCTGCCAACAACTTG  
CGTTGGTTTGTCTGTCATCATTATCCTTGGGAGTCATTATTAGAAAATTTGAACCTAAGAAGATTGTTTG  
TCTTGATCTCCAAAAGAGTTCCTGCGTCAATTATGGACCGGAATAAAAGGTACAATTGTTGAATTCAAT

TTTCATTATTTTTCTTTTTGTCAAATACGTACATAGATAGACTCTCAAATTTTAAATAAATTTTGGTCTAAA  
GTTGTTGGGGTGGTCCAATTAGAGTCAAACTGAGGGACCAGTTTCGTTGGCTATTTGTATCGAGAATT  
TGAATTTGATGAAACGAATGAAAATTAGTTGTTGAGCTTATTAATTTTAAACAACATAAAAATACTTAGCTT  
AGTTGAAATAAAAAGATAATTTTATATAAATTGGGTTGGAGCAAATTTGATTCAATGAGAGTAAGATATTT  
TTTATTGGTCCACTAGCCAAATCTTAATTATCCTGGGCAGCATCCTAATTCTTCTGTGTTTTGAATAGCAG  
CATTTGCCGTCTCTGCGAAAGCTAGATCTTAGAGATTCAGAAAGGCTGATTCAAACACCAGATTTACGC  
TAATGACAAATTTGGAGTATTTGGATCTGCGTAACTGTAGTGATCTTGAAGAGGTTACCGTTCCTTGA  
GTGTTGCAGAAAACCTCATTGTGTTAAATTTGCAGAGGTGTATACGCCTAAATAAGTTTTCCATGTGTTAAC  
GTGGAATCTCTTGGATCTCTGCTTCTACTGCATTGCTCTAATTTAGAAAAATTTCCAGAAATCCTCGGAAG  
AATGAAGCCAGAGTTAGAGATCAAGATGAGCTGGTCTGGGCTAAGGGAAATACCATCATCTATTATTCA  
GCAATACGCATGTCACCTTGC GGAGTTAAGTTTGAGTGATATGAAAAACTTGTAGCACTTCCAAGCAG  
CATTTGTCAGTTGAAAGGTTTGGTGAAGCAGGATGTGTCATACTGCTCAAACCTTGAAAGCTTGCTAGA  
AGAGATTGGTTATTTAGAAAACTTGGGAGGGGCTTCATGCAAGCTTTACTCTAATCTCACGACCTCCGTC  
TTCCATCATCCGCTTGAACAAGCTTAA

>PGSC0003DMG400017062 LRR-RLPs

TGAGTTTGTAAACATATTCTTTGCTAACTACAATACTTCCAAATATCTAATAGTGAATTGAAGATATGGCT  
GAATCTCTCCTTCGAATTCTGTAAAGAGTCTGACTTCTTTTCATCCAAGGGGAAGTTGGATTGATTCTTGG  
TTTTAAGGACGAATTCGAAAAGCTTCAAAGAACGTTTACGATGATCCAAGCTGTGCTTGAAGATGCTCA  
GGAGAAGCAACTGAAGGACAAACCAATTGAAAACCTGGCTGCAGAATCTCAATGTTGCTGCATATGAAG  
CTGATGACATCTTGGATGAATGTAAAACCTGAGACAGCAAGACTCAAACAGACTAACTATTGGAGTTATC  
ATCTAAAGGCTACCGCTTCCGTTACAAGATTGGGAAAAAGATGAAAAACATTATGAAGAACTAGATG  
CAATTGCTGCGGATCGAATCAAGTTTCATTTGGAAATAAGGCCTATAGAGAGACAAGCTGCTAGACCTC  
AAACAGGTGCGTATCTTAAATATTCTCACACAAATTAGTATTACAATTACAACATAATTTATATTCATATTT  
GACAATTATCAAGTTCATGTATGTTTTTGGGCTGAGGGTAAGTTTCAAATATTTTTCTAATCTAAATGTT  
CGTTAAACAGATTGATTCCGATTCGTTTATTGGGTTCAAATCTATTACCTGTATGTGTTTAGTGAAGTTT  
TTAACATATATACATGCTGATATATATGGGCTCAGATAAATCCATAGCTTACTCATAGAATATCCCCCG  
AGTCTAAATGACAAACAAAGCTTCAGTTGTTTTAGACCTTATTACTAGTTTCTGGGTGCCTTGACGTTTG  
TTCCATACAACCTATTATAAAGTTGAGTTTATTATAACAATATTAATTTTACCAATTTATATTTTATTCATTA  
ATAAAATTCATAATAATTAATGGCCATTGAAAACAAATTAAGATAATATATATAGCCTCTAAAGATAT

GATCAATATATATACCGATATGATTTATCCTCAATAACTACATATATAAGTAGCTACTTAACAGAAACCAC  
ATCGATAAGAAAAGTATTACACCCTCTGTCCAATTTATGTGACATTTTTCGTTTTTCGAGAGTCAAATAA  
TTAAGTTTGACCGAAAATTTGCGCATGGGATCTTCAATTTTTTTGAAATGAAATTTATATATTTGTAAC  
TACGTAAAAAGTACTATAAGTCACAATAATTGATAATTCAAAATGTTTAAAAGATATATAAAAAATTCAC  
GATCAAAGATAGACTTGTTTGAATCTTGAATCTGAAAAGTGCCACATAAAATGGGACGAAGGGAGTAT  
AAAAATATTATAAAAGTACATTAAAAAACAAATACAAGTCATGAATGACTAATTTACAGCACAATAAAAA  
TAGAGACTTACAACATTTAGAATTTTCATGGAAGATTAATTAAGAAGTATAATAGATAGAGAATATAA  
AAAAAGGCATAATACATAAATATAAGTCATTTACATTTAGGTATTTCAACTTTGGGTATGTACATGTTG  
ACACTTAACTTGCATAAAGTTAAACAAATAGACGCACACGTCCTATGTGGCATCCTACATGGCAATTTG  
CATCCTACACGGTGTCTATGTGTATTATGTCATATAGGACTCATCTGTCTACTTGTCAACTTTATATAAG  
TTAAGTGTCTACTTATGCACATCAAAGTTGGATAAATGAGGCCAAGTTAAAAGACAAATTTATGTATTG  
TGCCAAAAAAGATAGATAAGAACAAATACAACATTCATATCTGTGTTACGACTTTAATTATAACAATAT  
AATGGTAAAAGAAACACATAATTAATACATAATTTTTTGAGCTCTTGACGATACCTTCTATAATCAATCAA  
AATTCAAAAGCCTTAATAATGATTCAAGCGCTTTGCTACTTTAACTGTACAATAAAGTGGAAAACCTTGG  
GTAGAGATTCTTTTCATGAAATAAATAAAAAAGATGATTTGTATTGATAAAAGTAGAGAAATATCAAAA  
GACATCTTAAAGTTTTAAATTAATATTTGAAAGTTATGAATATTAAGAGTAACAATTGAATAGGTAATT  
AGATATGAACTATGATAGTGAATATTTAAAACAAAGAAAGAAGAAGAAAAATAATAAATAAGTAATTA  
AAGAGAGTAAAACATTACGACAAATGATATTTAAATAAATAGTGTTATCATATTATTATGAGCAACTTTC  
ACATACAACAAACATAAAATTATATTTGTATGTTATAGCTATAGTTTGCATAATTGCGCTCCATATCAAAT  
TAAATATTTGCTATGGAGCTTTTGATTTGTATAATTCGCTAGATACATCCAATTTTATACAAATTATTTAGT  
TTTGTATAAATTCATTTATACATTGTAATTTGTATAATAAAATTTGTATTTGTATAACTATAAGTGTATAGG  
ATGAAAATATATGTATGTTTATTTGTATATACACGTTTCTCTCGCTTTATGTAAACACAAATACATTTTATA  
CATTTGTATACCGAATGGGTAATTGTATACCAAAAATGACTAATTGTATACCGAATCAAATGACAAAAAA  
ATGGGATGTTTGCTGCGTTACAAATAAAATAAACTATGGTTACAACATTTAATTTGAATTAATAAATTTGCT  
ATTTACATAAATTTTCTATTATTCATAGTGAACAAACAATAACTACATCATAATAAAGATTTCAAATA  
CAATTCATTGGCTTTTCTATACATGAAAGTAATAATTACTTTTATGAACTTTATAATATAAAATGCACATA  
AATTTTCATTAAGTTAAATACTACTACATTAATTAAGTTATTCAAATTAATTTAGAGAAGGGGAAAAGGT  
TTAGTTAAGTATTTAGATACATGTTTTCATGTACCAATAAATGCACATACTTTTATGGATTTTTTCATCTT  
TTAGTTATTTATTTTACACCTTGTCACCTGTATTATTTATCATAATATTAATAATATAGTAATATGATTATTA

TTAATATTTAATTAGTTAAATATTTTATAATATTTGGAATTAATGTAGGGTAAAATGCTACTCTTTATCTC  
TTTATTGTGCAAAAATCTTCTCTGGTTTTTGTACAGAGCTTGAATTTTGTAAACAATATTCTCATGTGAACA  
TACTTGTACCAGTTCTGTATTAAGTAAAAACAAGTTTATGGGAGGGGCAAAGAGGAAGATGAGATA  
GTGAAAATCTTGATAAACAATGCCAACAACTTTCAGTCTCCCAATACTTGGTTTGGGGGGACTAGGAA  
AGACCACTCTTGCCCAAGTGGTCTTCAATGATCCGAGAGTTACTGAGCATTTCATCCCAAAATATGGAT  
TTGTGTCTCGGATGATTTTGTGAGAAGAGGTTGATAAAGGCAATCGTAGAATCTATTGAAGGAAAGTC  
ACTCAGTGATATGGACTTGGATCCACTTCAAAGAAGCTTCAGAAGTTGCTGAATAGAGAAAGATACTT  
GCTTGTCTTAGATGATGTTTGAATGAAGATCAACAGAAGTGGGATAATTTAAGAGCTGTCTTGAAGGT  
TGGAGCAACTGGTGCTTCTATTCTAACCCTACTCGTCTTCAAAGGTTTGTTCATTATGCAAACCTTGC  
ACCCATATGAATTGTCAAATCTGTCTCAAGAAGATTGTTTGTGCTTGTTCACCAACGTGCATTTGAGCAC  
CTAGAAGAAATAAATCCTAACCTTGAGGCTATCGGAAAGGAGATTGTGAAAAAATGTGGTGGTGTCCCT  
CTAGCAGCCAAGACTCTCGGAAGTATTTTGCCTTCAAGAGAGAAGAAAGAGTATGGAAACATGTGAG  
AGATAGCGAGATTTGGAATTTGCCTCAAGATGAAAGTTCTATTCTGCCTGCCCTGAGACTGAGTTATCAT  
CATCTTCCACTTGATTTGAGACAATGCTTTGCATATTGTGCGGTGTTCCCAAAGGACACCAAAATGGAAA  
AGGAAAATCTAATCTCTCTTTGGATGGCACACGGTTTTCTTTCATCGAAAGGAACTTGGAGCTAGAGG  
ATGTGGGTAATGAAGTATGGAATGAATTATTTTAGGTCTTCTTCCAAGAGATTGAAGTTAAAGATGG  
TAAAACCTATTTCAAGATGCATGATCTCATCCATGATTTGGCTACATCTCTGTTTTCAGCAAGAGCATCAA  
ACAGCAATATCCGTGAAATAAATGTAAAAAATACTCAGATATAAAGTCTATTGGTTTTGCTGCAGTGGA  
GTCTTCTACTCTCATTTGCTGGTGGAGAAGTCTTGTCTCGTTGAGGGTTCTAATCTGCGTTACTTAGAAC  
TCAATCAGTTACCGTCTTCCATTGGAGATCTAGTACATTTAAGATACATGGACCTCTCTTACAATAGAGAA  
ATGTGTAGTCTTCAAAGCAGTTATGCAAGCTTCAAATCTGCAGACTCTTGATCTACAGTATTGCATCTC  
ACTTTGTTGTTTGCCAAAAGAAACAAGTAACTGTTAGTCTCCGAAATCTTTTACTTGATGGCTGTCCAT  
TGGATTGTATGCCACCAAGGATAGGATCTTTGACATGCCTTAAGACTCTAAGTCGCTTTGTTGTGGGATG  
GAAGAAAGGCGGTCAACTTGGGGAAGTAAAGCAATCTGTATGGCTCAATTGAAATCAGCCATCT  
TGAGAGAGTGAAGAATGATAAGGATGCAAAAGAAGCCAATTTATCTGCAAAAGAGAATCTGCGATCTTT  
AATCATAGATTGGGATTGGCTTGAACCACGTAGATATGAATCAGAAGAAGTTGAAGTGCTTGAAGCCCT  
CAAACCACACTCCAATCTGACTTCTTTAAAAATCAATGGCTTCAAAGGAATCCGTCTCCCATATTGGATGA  
ATCACTCAGTTTTGAAAAATGTTGTCTCTATTGAAATCAGCAGTTGCGCAAAGTCTCATGCTTACCACCC  
TTTGGTGAGCTGCCTTGTCTAGAAAAGTCTAAGGTTATGCTGGGGTCTGTGGATGTGGAGTATGTTGAT

GTTGATGTTGATTCTGGGAGGTTTCCATCCTTGAGGACACTTGTTATAGTGAACCTTAGTAATCTAAAAG  
GATTGCTAAAAAAGGAAGGAGAAGAGCAATTCTTTGTGCTTGAAGAGATGATAATTCTCTATTGCCCTA  
TGTTTGTATTCCGACCCTCCCTTCATTGAAAGTTTGTATGTCAGATGCCTCAAGTTTGAGGTCCACATCT  
AATCTTAGTGCTCTTACTTCCCTCAACATTAGCGGTA ACTATGAAGCTACTTCACTCCCAGAAGAGATGTT  
CAAAAGCCTTGCAAATCTCACATACTTGGAAATCTCTGTGTTCTACAATCTTAAAGAGCTGCCTAGCAGC  
CTGGCTAGTCTCAATGCTTTGAAGCGTCTGGATATTTATTATTGTGACACACTAGAGAGTCTCCCCGAGG  
AAGGGGTGAAAGGTTTAACTTCACTTACACAGTTATCTCTCCACTACTGCAAGATTCTAAAATGTTTACC  
GGAGGGATTGCAGCACCTAACAGCCCTCACAACTTTAACAATTACTGAATGTCCAATAGTGTTCAAGCG  
GTGTGAGAAGGGAATAGGAGAAGACTGGCACAAAATTGCTCACATTCCGTATCTGCATATTCGTA ACTA  
TTAGTATTTATAATTCTTTCTTTGTTTGTGAATCTTTTTGGTTTCTCCCATTGGATGTAATTGTTTGTAGGGT  
TGTTTGTGAGTCTCTCTCATTG

>PGSC0003DMG400017072 LRR-RLPs

TATGCCACCAAGGATAGCATCTTTGACATGCCTTAAGACTCTTGATCACTTTGCAGTGGGAAGGAAGAA  
AAGTCCTCAAATTAGTGAATTAAGAACTTGAATCTCTATGGCTCAATTGAAATCACGCATCTTGAGAGA  
GTGAAGAATGATATGGATGCAAAAGAAGCCAATTTATCTGCAAAAGAAAATCTGCATTCTTTAAGCATG  
ACTTGGGATGAAGATGAACGTCCACATAGATATGAATCAGAAGAAGTTGAAGTGCTTGAAGCCCTCAA  
CCACACTCCAATCTGACTTGTTAAGAATCAGTGGCTTCAGAGGAATCCGTCTCCCAGACTGGATGAATC  
ACTCAGTTTTGAAAATGTTGTCTCTATTGAAATCAGGGGTTGCAAAA ACTGCTCATGCTTACCACCCTTT  
GGTGAGCTGCCTGTCTAAAAAGTCTAGAGTTACAGAACGGTCTGCGGAATTGGAGTATGTTGATTCT  
GGATTCCCTACAAGAAGAAGGTTTCCATCTCTGAGAAA ACTTTTTATAGGCGAATTT CATAATCTGAAAG  
GATTGCTGAAAAGGAAGGAGAAGAGCAATTCCTATGCTTAAAGAGGTGGAGATTGATGAGTGCCCT  
GTGTTTGTATTCTACCTTTCTTCTGTCAAGAAATTGGAATTTGTGGGGGAGGCAGATGCAACAGGTT  
TCAGGTCCATATCTAATCTTAGGGCTTACTTCCCTCCACATTAGCTTTAACAAGAAGCTACTTCACTCC  
CAGAAGAGATGTTCAAAGCCTTGCAAATCTCAAACTTGAAAATCTTTCTTTAAGAATCTCAAAA  
GCTGCCTATCAGCCTGGCTAGTCTCAATGCTTTGAAGAGTCTGGAAATTAATATTGTGGCACACTAGAG  
GGTCTCCCCGAGGAAGGGGTGAAAGGTTTAACTTCACTCACACAGTTATCCATAACATACTGTGACATG  
CTACAATGTTTACCTGAAGGATTGCAGCACCTAACAGCCCTCACAAATTTATCAGTTAGGTATTGTCCAA  
CACTGGCCAAGCGATGTGAGAAGGGAATAGGAGAAGACTGGTACAAAATTGCTCACATTTCTGATGTG  
TTTCTTTATCAGTATTCCTAGTTAGATGTAATTTCTGATTTTCTTTTGGAAAGCAAATCAACTATTTGTAAC

ATCTATTTGTATTATACTTGAATTTTCT

>PGSC0003DMG400017081 LRR-RLPs

CAACAGTAATGCATTATTGATCACACTGTTATGTAAATAAATATGGAGTACAAGTTCAGCTAGATAGTT  
AGATATATGCAATGGAGTACCAACAATTGATAATAGCTTTCTGCTTCTATTCACTTTTTGTGCAACAATCT  
CAGCTTACATATGCTGGGAAACATCTCTGTCCCCCCCCATGAAGCTGTTTATTTGCTTCAACTTAAGCAAG  
GCCTCACAGTTGATCCAAATGCTTATCGCAATGGTTGTGACAGCGAGGCCGAAGCCAAGACTTTGTCCT  
GGAATGCTACAAGAGATTGTTGTGAATGGGGTGGTGTACTTGCAATGCATTTACAGGTCATGTCATAG  
GCCTCGATCTTTCTTCGAGCTGTCTTAGGGGAACCATCAATGCTAACAGCACCCCTCAAAAACTTGGTCA  
TCTCAAAGACTCAACCTTGCCTTCAACAAGTTGAGTGACTTTCCACTTGGAATAGCATTAGTGAACTC  
AGTAGTATGACGCATCTCAATCTTTCACATTCTGGAAATATGATATGGGAGATGCAGATCCCAGCAGTAT  
TATCAAACCTTGCTAAATTGGTTTCACTTGATCTCTCCTGGCATTTCCTGAATTCGAATTTGGTCTAACAA  
CCTTCAGAAGTTTGTTCACACTAAACCAATTTGGAGGTAAGTCTTGCTTGACAACGTGGACATTTTTGGG  
AACATAAGTGAGTTACCTAAGAACCTTTCTTCTCCCTTAGGTACTTAAGTCTTCGAGGCACCGGCATGTT  
TGGGAACATAAGCGAGTCTCAGATTTTTCATCTACCAAACCTTGCAAGTGTGAGATTGGGAGATAATCCT  
TTATTAACAGACACTTTGCCAAATTTCCATCGGAATTTAGTGGAAGTGTTTTAGAGTTGGACTTCTCTAA  
TACTGGTATTTTTGGGAAGGTACCTGGTTCAATTGCTAATCTCCATTCTTTGGCGTTTGAACCTCTTAA  
TTGCAATTTATCCGGCTCGATTCCAGAATCCCTTGGCGACCTCACTGCAATCAGAGAGTTGATACTTACA  
GGTAACAACCTTTACTGGTAATGTTCCCTCAACTATCTCAAATTAAGCAAACCTCGTATATTTAGATCTCTC  
TTCCAACCATTTTCGAGGCTCGATTCCAGAATCTATTGGCAACCTCACTGCAATCACAGAGCTGGCACTTT  
CAGATAACAGCTTCACAGGAAATGTTCCCTCAACTATCCGAAAGCTGAACAACTTAGCTACTTATCTCTC  
TCTTCCAATAATTTGAAGGCTCGATTCCAGACATCTTTGCCAACTTTTCAGAGCTATCATTTTTAGATTTT  
GACACTAACAGTTTCACTGGCCCCCTCCCTTTTTCGATTGCAACCTTGACACGCCTTGAAAGTTTATACTT  
GCAAAACAATTCATAACTGGACCACTTCCCTCTAATATAAGCGGATTTCAAGAGCTACAAATACTCGAT  
TTGTCGTTTAATTGTTTCACTGGCGCAACACCCCTTGGTTATTCCATCTTCCATCCTTGTTTTCTTTATATG  
TTCAACACAATCAATTAACCGGGAATTTGCCAAATGAGCTCATGAGTAATTATGTAGAATACTCTAACAT  
TGATCTTTCATACAACAAGCTGCAAGGTGAAATCCCGATTGGATGTTTTCTACAAGCATGGGTAGACTG  
GATCTCTCACATAACTTCCCTCACAGGCTTTGAAAAACAAGTATGGCCCTCAGGGTCCTTACAATACCTTAA  
TTTGGAGAACAATTTTCTTCAAGGGACTTTGCATCAATCCTTTTGTGACATGATTAACCTTGAATTCCTCA  
TTTTGGCTCAGAACAATTTCAAGTGGTTCAATCCAGACTGTTTGGGTAACCTCAATAGCTTCATTTCTATT



TTAGACTTACGAATGAACAATTTTCATGGAGAAATACCAAGATTCTTACCTACAGGGTTACAGTATCTTG  
GTTTATATGGCAATCAATTGAGGGGACAAGTCTCGGATCCTTGGTAACTGTACAAGCTTGGAAGCTCT  
TGATTTGGGGAACAACAAGTTAAATGACACGTTCCCATATGGCTGGAGAACTTCCAAACCTACAAGT  
TCTGATTCTTAAATCAAATCTCTTTCACGGTCCAATTGGTGATTTGGAGTCCGAGTTTCCATTTCTGAGT  
TACGGATCTTTGACCTTTCCTGCAATGGGTTCACTGGAACCTTGCCATCTAATTTTTTCAAAAATTTTAGA  
GGTATGATGGATTTGGATGAAGAAAATACAGAAATTAAGCTAGTAATAGGACTCACAGAGATTAC  
CTGTACCACGTTAGTTTGGTGATAAAAGGTAATGAGTATGATATGGGAATCACGTCAATTATGACGAGT  
GTTGATTTATCAAGCAACAGGTTTGAAGGAGATATTCCAAATCCATTGGAAATCTGAGCTCACTTGTGC  
TACTCAACCTGTCTCACAAACAGCTTCTTGGTTCGATTCTGCAGAATTTGCACAATTGCAGCAGCTCGAA  
TCATTAGATCTCTCAATGAACAGACTCATTGGAGAAATCCAGGTCTATTATCGAGTTTGACATTTCTTGA  
GGTCTTAAACCTTTCCTACAATCATCTGGCTGGGCGCATTCTATTGGGAAACAGTTCAATACATTTCCAA  
ATGATTCGTGTTGTGGAATCCTGATTTATGTGGATTTCCACTGTCAAAGAATGTGGAAACAATAACGA  
GTCACCACTTGAACATGATGATGATGATGATTCATATTTTATGAGTGGGTTTACATGGGAAGCAGTGGT  
AATAGGTTATGGTTGTGGTATGATATTTGGATTGTTGATAGGAGGCCTCATGTTTCTATTCGAAAAACCA  
AAATGGTATGTGAACTTTGCTGAAGATATTGCTCAACACATTGCTGCTAACAAAGCGAACAAAGGCAAAG  
AAGAGACGTGGTTTAAAGAATGAATTAGCAATATAGCAGGTATGCATCAAACAAAACCTTTATGTCAATTT  
TTTATTTTTTCTAAATATTCAGAAATTCAGAAAAGTCATTAAGTCCTTTAATACTCAATTTGTCACTGTAG  
AAAGGTTGCAGGAAAGTCGGACAAGTTTATCAGTGGATGCATCTGTTTCTTTACTTTATGACCATGGTTG  
CCAAATACATAATAAGTTACAGTTGATTTCTATAGTTTTGTGTCAAATAATAAGTTAGCTTTAGACACAGC  
AACCTCTTACTCTGTTTGGATGGTTG

>PGSC0003DMG400017087 LRR-RLPs

TTTTGTTTCAATTCCTCTCAATATTGACTTGATGGAAGCTTATACTGCTGTAATTTCTTCTTCAAACCTCT  
GATCAACCAAATATTTCACTACTCTTTCATGATCACAGTACTGAAATGCTCGATTCTCTTGTGACAGGGAT  
GGCAAATCTAGAGGAATTTACAATCTTTGTTACTCTAGTTGTACAAATGAAGTCTTTTCTAGCATCCCCA  
ATTTAAAGAGATTGACCATTACGCACCTTTTAGAGTAGGATACATTATTCGATGTCTTCTTGGATATG  
TCGAGCTTGACAAAACCTTGAGGCATTCAAGCTTTCCTGGAGATATAATTATGAAAATCCCATCAAAGAT  
TTGTTTTTCCGGAATCACTTAGAAGATTGTCTTTAACTAGGTGTTCTAAGTTTATTTGGGAAGAGATATCA  
TCAACTTTTATCATGTTGCCACATCTGAAGAGCTCAAACCTTAAACATTGTCTAGCCGATGATGATGTATG  
GAAATTGAGTGACAAAGACATATTCAAAGCTTGAAGTTGTTGTTACTGAGCGATGTAATCTTAAGTG

TTGGGAAGCTAGAAGTGATAACTTCCCTAATCTAAAACGCCTTGTTCTGAAGAAATGCAAGCACCTGCA  
AGAAATTCCAACAGATTTTGGGGAAATTTGTACTTTGGAATTGATTGAGTTACATGATTGCACCACTACT  
GCTGAGGCTTCTGTCTAGAAAGATCAAACAAGAACAAGACGACTTGGATAATAATATCCTTAAGGTCTAC  
ATCCATAACAGCTACAGTAAGTTATAATTCTCTCTTAAAAGTTCTTCGATTCTTCACATTATTTAAAACCTC  
ATTTTTATTAAATCATACTTCTTTGAAATTAAGATGATGACTTGTACTTTTTATCTTGCTTATGCAGCGGAT  
CAAAGAGATCATCTAATGCTATCTCCGAATTCAGAACCTTGAGTTCATATTTTTGTTTTAATATTCTGAT  
CGTTTGTTAATTTGATGTTTTAGGAATAAGTATATTTAATACATGTCTCGGCCAATTGTATTTTTGTATTTT  
GTAAACAGTAACTAATGATGTACTCGTGTAACATCTATTTGTTTTATGTGATAGTTCGAAATAATAAG  
GATGTTCAATCTATTATGCATTGCCTATGGAGTACACTTTGAATCTGTTTTCTCTGTTCATGTATAATACA  
TGTTTTTCGTTGATGGACGGTGCTTTATGTGATGGATATCGATAACATTTCTCATGGATGGTACTTGGTA  
GTAACAGTATGTAATGGTGGTCGGCAGTAATAGTTGCTGTCTG

>PGSC0003DMG400017283 LRR-RLPs

ATGCAGATGACCAGTATGAGGTTTCTCAAATCCGGAATGCATATGTTTGCCAGGGACCTGAATTTCTTC  
CTGATGAGTTGAGGTGGCTTGATTGGCATGGATATCCTTCCAAAAGTCTGCCTATTAGCTTTAAGGGAG  
ACCAACTTGTTAGTTTGAATTGAAAAAAGGCGCATCATACACTTTGGAAAACCTCAAAGGATCTAG  
GAAAACCTGAAGTACATGAACCTTAGCCATTCACAGAAGCTAATAAGGATGCCAGATTTTTTCAGTTATGCC  
TAATCTTGAGAGACTGGTTCTTGAAGAATGCACAAGTTTGGTAGAAATCAATTTTTCTATTGGAGATCTT  
GGAAAGCTAATCTTGCTGAATCTGAAGAACTGCAGAAATTTGAAGACCCTACCAAAGAGAATTCGATTG  
GAAAAGCTTGAATTTCTCGTTCTTTCAGGCTGCTCAAAGTTGAGAACATTCCCAGAAATAGAAGAGAAA  
ATGAATCGTTTAGCAGAAGTGTATTTGGGCGCGACTGCTTTGAGTGAACCTACCTGCATCAGTTGAGAACC  
TTTCAGGAGTTGGTGTATTAATATAAGTTACTGCAAGCATCTTGAGAGTCTACCTAGCAGTATTTCTAG  
GTTGAAATGTCTGAAAACATTTGATGTGTCCGGATGCTCAAACTTAAAAATTTACCAGATGATTTGGGA  
CTTTTAGTTGGTTTAGAGGAGCTCCACTGCACTCACACAGCCATCCAAACAATCCGTCTTCTATATCTCT  
TCTTAAAACCTTAAGCACTTATCTCTCCGTGGATGTAGTGCTTTGAGTTCACAAGTAAGTAGCTCAAGTC  
ATGGCCAGAAGTCTATGGGTGTAAATTTTCAGAAATTTGCCGGGTCTTTGTTTCATTGATCATGTTGGATCT  
TAGTGAATGCAACATTTTCAGATGGAGGCATTTAAGTAATCTTGGGTTCTTACCATCTTTGGAGGGATTG  
ATTCTCGATGGTAACAATTTTTCCAATAATCCGGCTGCAAGCATAAGTTGTCTCACTCGACTTAAAGCCCT  
TGCATTGGCTGGTTGTAGGAGGCTTGAGAGTTTACCGAACTTCTCCAGGTATAGAAAAGATATATGC  
TGATGAATGCACATCTTTGATGAGCATTGATCAGCTAACCAAATATCCAATGTTGCGTGGAGTTTCATTT

ACAAAATGTCATGAACTTGTA AAAAATAAATGGCATGCCTCTGTGGTTGATTCATTGTTGAAGCAGATGC  
TCAAGGTAAGTATGCTTCCAAGCCACA ACTCTACTATACCCACATGAAAATATAAATGAGCTTCTTTTTAT  
ATAACTGGAAGGGCTTTTGTATTTGTA CTCAATTAGCTAAGGTCGCATATGAATCTAGGTAAATAACAT  
TCTTTTCACGGTGCATGCAGAGACTATA CATGAATGGCACATCTAGTATGTATTTTCCTGGTGTGGAGAT  
TCCTGAGTGGTTTACATGCAAGAACTGGGGGACTAAATCAATCTCAGTGGCCCTGCCCAA AATTGGTTC  
ACACCCACATTCAGGGGGTTTACTGTTTGTGTTGTTTTTGACATGATGACTCCTTTCATTTTAGGGAAATT  
AATGTCGAATGATCCCTTCAGTTTTCGTACTGCCAAATGGCTAAAAAATTTCCAAGGACTTGTGATATGG  
TTAAGGTTCAAGCCATGATGGTTTGCAGCACAAATTTCCGACATGCATCGGCTTAATAGGAAGTGAA  
AAACCTGTTGGTTTAGGTAATACTTTCTAGCCCATGTACCACTTCCAAGTTCTTGGCCGTTCAAGGATGT  
TCTCGATAACAATCTTAATAACCTCATT CAGCTTGAGGTTGGTGTCTGTGATGATTTGCATAAGGATTTG  
GTGGTCAAAGGTTTGGGAGT GCGTCTTGTGTATGAGAATTGA

>PGSC0003DMG400017317 LRR-RLPs

ATGAATCAGGAAAGTTCATTGCTTCCATCCCCAGAAATTATTCGATGGAGTTACGATGTTTTCTTAAGTTT  
TAAAGGTGAAGATATACGCAAAACATTTGTTGACCATCTGTATCTTGCTCTGCAACAAAAGTGCATTAAT  
ACCTTCAAAGATGACGAGAACTAGAGAAAGGAAAGTTCATTTACCGGAACTCGAGAGTTCAATTGAA  
GAGTCAAGGATAGCTTTGATCATATTCTCTAAAACTATGCTAATTCAACATGGTGTTTAGATGAATTGA  
CAAAGATCATGGAGTGCAAGAATGTGAAAGGACAAATTGTTGTTCCGGTGTCTATGATGTAGATCCAT  
CAACAGTGAGGAAACAAAAACGATATTTGGAGAAGCATTTAGCAAACATGAAGCCCGGTTCCAGGAG  
GACAAGGTGCAAAAATGGAGGGCAGCACTGGAGGAAGCAGCTAATATTTCTGGCTGGGATTTGCCAAA  
TACTGCCAATGGGTAAGTATCTATCATGAAACCAA ACTCATCGTCATATGTTAATCTGAATACTTAGTTCA  
TTTTATTTTTGCATCGGAGGGCCTTTTCCCTTTTTCATTAAATAGAATTATCGTAGATTTCTGTTCATATTTT  
TTTAATAAAATCCAATAGACA ACTTGTATTTATATCATAATCAAGTTACAAGGGAATGGATATACCAAAC  
CTGCCAAACCAGATAAGGGAATTTATAGAGGGCGTCTCTCTGTTTACA ACTGATTCACATTTAATGTAGC  
AAATGTGGCTACGGTGAAGACACATTTGGGGAGTTGGCGAATTACCTCTGTGGGATGAGGGATATAT  
ATACAATAGGAAATAGTCCGTTAGGGTTCATGCTATGAAGTTGTCTTAGTTGCTTTCTAGGTAACTCTCA  
AAATAAGTAAAGATGACAAAAAAGAGTATAACCAA CTGATGTA CTCCGTCTTCTTCTGTCTAATCCTCAA  
GTTTGACATTCTAACTTGTTCATCCAGTATGTTTGTAACTTGTATCCAAAGTTGGTTAATGCTTCTCTAT  
AACGATGTCTCACTTCTCCTTGCTAAATTCTGCTGGATTCTCTTTACCCATACTTGTTACTACAATATTCAT  
TGAGCCCTGATTTCTTTTTGTATGCCTCATTGCATTCCAAAATAATTAATGGAAATAAATAGAATCACCAT

CAGTGTCTCAACAGCTTCTAGGAATTCGGAATTCATGGAAAAGATGGGCTTCACAGATCTTGTTAAAC  
CATTCTTCTGTACAATTTGTTGGGCATGGTTATAATAACACTTCATTTAATGTAATTGGGAAAGAGAGA  
ACTCCTGCTTAATTGAAATTTAGGCCAAATACACACAGTTGTCTAAGATATTACTTATCCTTTGAGGTATGC  
AGACATGAAGCTAGAGTCATAGAGAAAATTGCAGAAGATATAATGGCTAGATTGGGTAICTCAGAGACA  
TGCAAGCAATGCTAGAAATCTTGTTGGAATGGAGTTACACATGCACCAAGTATATAAAATGCTTGACGTT  
GGGTCTGGTGGAGTTTCGCTTCCTTGGGATACTGGGAATGAGTGGAGTGGGGAAGACAACCTCTTGCAAG  
AGTTATTTGTGATAACATTCGGAGTCAATTTCAAGGTGCATGTTTTCTTCACGAAGTCAGAGACCGTTCA  
GCAAAACAGGGACTAGAGCGCTTGCAAGAGATACTTCTTTCTGAGATCCTTGGTGTAATAAAACTAAGG  
ATCAATGATTCGTTTGAAGGAGCTAATATGCAAAACAAAGACTACGGTATAAAAAGGTTCTTCTTGTTT  
TGGATGATGTTGATCACATAGAACAGTTAGACGCATTAGCCGGGGAGCGTGAATGGTTTGGTGACGGA  
AGTAGAATCATCATAACAACCAAAGACAAACACTTGCTTGTTAAGTATGAGACTGAAAAGATATACAGA  
ATGGGAACTTTAGACAAATATGAAAGCTTACAACCTTTTTAAACAACATGCTTTCAAGAAAAACCACCTA  
CCAAAGAATTTGAGGATCTATCAGCTCAAGTGATAGAGCATACTGGTGGACTCCCCCTAGCCCTGAAAG  
TCCTTGGCAGTTTCTTGATGGAAGAGGTTTGGATGAATGGATAAGTGAAGTGGAGCGTTTGAACAAA  
TCCCACAAAATGAAATTTGAAGAACTCGAACCAAGTTTCACTCGTCTCAACAATATTGAGCAAAAGAT  
ATTCTTAGACATTGCATGCTTCTTTTCAGGGAAGAACAAGATTCAGTGACCAGAATACTTGAGAGTTTT  
CATTTTAGCCCTGTCATTGGGATAAAAAGTTCTCATGGAGAAATGTTTGATCACTATATTAAGGTCGCA  
TTATAATACACCAATTGATACAAGAAATGGGCTGGCACATTGTTTCGTCAAGAAGCTTCTTACAATCCAAG  
AATATGTAGTAGGTTGTGGAAGCGCGAAGATATTTGTCCTGTACTCGAACGAAATTTGGTACGTAGTTG  
TAACTTATGACTTCTTACATAATTTCTTTTCTCATCCACCTTAATACTCTTGCTTATTAGGCAACTGAC  
AAGATTGAAGGCATATCGCTGCACCTGACTAATGAAGAAGAAGTTAATTTTGGTGGCAAGGCCTTCATG  
CAGATGACCAGTATGAGGTTTCTCAAATTCGGGAATGCATATGTTTGCCAGGGACCTGAATTTCTTCTG  
ATGAGTTGAGGTGGCTTGATTGGCATGGATATCCTTCAAAAAGTCTGCCAAATAGCTTTAAGGGAGACC  
AACTTGTTAGTTTGAATTTGAAAAAAGCCGCATCATACACTTTGGAAAACCTCAAAGGATCTAGGAA  
AACTGAAGTACATGAACCTTAGCCATTCACAGAAGCTAATAAGGATGCCAGATTTTTTCAGTTATGCCTAA  
TCTTGAAAGGCTGGTTCTTGAAGAATGCACAAGTTTGGTAGAAATCAATTTTTCTATTGGAGATCTTGGA  
AAGCTAGTCTTGCTGAATCTGAAGAACTGCAGAAATTTGAAGACCATACCAAAGAGAATTCGCTTGGAA  
AAGCTTGAATTTCTCGTTCTTTCAGGCTGCTCAAAGTTAAGAACATTCCCGGAAATAGAAGAGAAAATG  
AATCGTTTAGCAGAACTGTATTTGGGCGCGACTGCTTTGAGTGAACCTACCTGCATCAGTTGAGAACTTTT

CAGGAGTTGGTGTAAATAAATCTAAGTTACTGCAAGCATCTTGAGAGTCTACCTAGCAGTATTTTTAGGTT  
GAAATGTCTGAAGACACTCGATGTGTCTGGATGCTCAAACTTAAAAATTTACCAGATGATTTGGGACTT  
TTAGTTGGTTTAGAGGAGCTCCACTGCACTCACACAGCCATCCAAACAATTCCATCCTCTATGTCTCTTCT  
TAAAAACCTTAAACATTTATATCTCCGTGGATGTAAGTCTTTGAGTTCACAAGTAAATAGCTCAAGTTGTG  
GCCAGAAGTCTATGGGTGTAAATTTTCAGAATTTGTCGGGTCTTTGTTTCATTGATCATGTTGGATCTTAGT  
GACTGCAAAATTTTCAGATGGAGGCATTTTAAGTAATCTTGGGTTCTTACCGTCTTTGGAGGGATTGATTC  
TCGATGGTAACAATTTTCCAATATTGCGGCTTCAAGCATAAGTCGTCTCACTCGACTTATAGCCCTTGCA  
TTGGCTGGTTGTAGGAGACTTGAGAGTTTACCGGAACTTCTCCAAGTATAAAAAAGATATATGCTGAT  
GAATGCACGTCTTTGATGAGCATTGATCAGCTAACCAAATATCCAATGTTGCATAGACTTTTCATTCACAA  
AATGTCATCAACTTGTAATAAATAAACAACACGCCTCCATGGTTGATTTCATTGTTGAAGCAGATGCACAA  
GGTAAGTACACTTCCAAGCCACAACCTCTACTATATCACATATGAATCTTGGCAAATAACATTCTTTTCACG  
GGGCATGCAGGGACTATACATGAATGGCTCATTAGTATGTGCTTCCCTGGTGTGGAGATTCCCGAGTG  
GTTTACATACAAGAACTCGGGGACTGAATCAATCTCAGTGGCCCTGCCAAAAATTGGTACACACCCACA  
TTCAGGGGGATAACTATTTGTGTTGTTTTGACATGATGACTCCTTTTCATTTACCGGAAATATAAGTCGGA  
TGATGCCTTCAGTATTCTTAATGTCAAATGCCTAAAAAATTCCAAGGACTTGTGATGGGGTTTAGGTTT  
ACAACCCATGACGGTTTTTTCACGCAGATTTGGCAAGTGTGTAGGCTCAATAGGAAGTGAAAAACCTGTT  
GGTTTAGATAATACTTACCTAGCCCATGTACCATTTTCATCAGTATCCGAAGTATGATGATAATTACATTTT  
TAATGACTTCATTCAGCTTGAGGTTTCGTGTGCGTCTGGTATCATTTCATCCGGATTTAGTGGTCAAAGGT  
TTGGGAGCGCGTCTTGTGTATGAGAATTGA

>PGSC0003DMG400017337 LRR-RLPs

ATGACTTCACTCCAGACACTTGACTTATCTGGGAATTCTTTCCTGGAGGGTCAGTTGCATGAGCAACTGG  
GAAATCTGTGCAACCTAAGAGAATTGGATCTTCTCTAAACAATTTACAGGCGATATAACCAAATTCAT  
CAATGGTCTTTCTAGGTGCAACGAAAGCAAGCTAGAGAGGCTGAATTTGGGATATAATGCTGGATTGG  
GTGGAACCTTCCAGATTCTATCGGATTCTTGAAAAATCTCAAGTATATTGAGTTATGGAAGAATTCATTT  
GTTGGTATGATCCCTGATTTCGATTGGAAATTTGTCATCATTGGAGTATTTGATCCTTGTATGGAACCAAAT  
GAGTGGACAAATTCAGTCACTTTAGGGAAACTTTCAAAGTTGGTTGTCCTAGACCTTTTTGAAAAATAAT  
TGGTGGGGTGTGATCACAGAAGCTCACTTCACAACTTGACTAGTTTGAAGGAGTTGTATATATCCTCAA  
ACTCATTACCTCCTAGTCCTCCTTTGGTTGCAAACGTTGACACTGAGTGGATTCTCCTTTTACTCTCCAGT  
ATCTCAAGTTCAGGTCATGTCGATTTGGTCTAAATTTCTATGTGGATCAGACATTTTACTGAATTGCAA

ACTTTAACGTTCAAGCGTGCTGGATTTTCAGATACTCCCTGATTGGTTGTGGGAAATGAACTGGGAAC  
TTGAAGAACTGGATTTTGGCTATAATCAACTTAGGGGCAGAGTGCCAACTACTCTAAAATTTAAGCCTGG  
TTCCACTGTCTATTTGATGTCTAACATTTTTGAGGGTCCAATTCCACCTTGGTCCTCAAATGTAGCCTCGA  
TAAGCCTGAGAAACAATTCATTTTCAGGACCTGTTCTTTTGATATTGGCTACAGATATCCAGATTTGACT  
GACTTGGATCTTTCTCAAACTCTCTCAATGGAACCATTCCCTGTCCATTAGCAAATCACCAGCTTGGT  
AACTTTGATTCTCTCGAACAATCATCTTACCGGAGAACTCCCTGATTTTTGGGACGAAGTGCCAATTTTGT  
ACACATTAGACCTTTCAAACAACAATTTTATTGGCCGCGTCCAAGCACCTTAAGTACCCTTAATCCCTC  
AGATTCTAATGCTGAGTAACAATCATCTTTCTGGGGAATTCCTCGTGGTTTTCCAAAATTTCTCTCAAT  
GATCACTCTTGATCTTGGGAACAACCAATTTTCAGGAGAAATTCCTCCTGGATAGGGGAAAAGATGCC  
AGTTTTGTTGGCCTTGAGCCTTCGATCGAACATGTTCAAAGGAGAGATTCCAAGGGAATTCTGCAATATG  
ACATCACTTCATTTTATAGATGTTGGTTCCAACAATCTCTCCGAAATATCCCGTCTTGTTTTGGGAATCT  
GAAGGGCATGACTTTGGATCCAGAATCTCAACGTTACGAAGGTCAATTGAACGTATTCTCCAAGGGGAG  
AGATCTCTTATACAAGGATAATCTTTATCTTGTGAATGGCATAATCCTTTCAGGCAACCATTTAACTGGTG  
AGATACCAGAAGAATTGACAAATCTTTCCAGGATGAATACCCTGAATTTGTCCATGAATCATTTGAGTGG  
AAAGATCCCTGAAGAAATTGAGAGGTTGAGACAATTGGAACTCTTGATCTCTCTAGGAATGAGATCCA  
TGGCACCATCCCAGCAGGCATGACAAGCTTAACATTACTGACTCATTGAATCTCTCGCACAATCACTTGT  
CAGGTAGAGTCCCACAGCTAACCAATTTAACACCTTCAATGACCCTTCGATATACACGGGCAATCCTGA  
TCTCTGTGGAGATCCATTGCAAAACAATGCAAGGATGAAACAGAAGAAGAACCTGATCTTCATCAGGA  
TCCTCCTTATCATTCTTCTCCTAGTGAATTTGGAGAAATGGGGTTCTTTGTCAGTATAGGAGTAGGATTTG  
TTGTGGGATTCTGGGGAGTATGCGCGATTCTAATAATAAAAAGTTCATGGAGGCATGCCTATTTTCAGTT  
TGTTGTTATTTGGGAGATAAGTTGTTTGTCAATTTTCATTCTGCCTTGGGCTAGTTGGAGGAGATCCAGA  
AGCTAG

>PGSC0003DMG400017666 LRR-RLPs

ATGTCTAAGCTCCCTATTTATAAAGAAAAAATAGGCTTGTTGATGTCATGGATGATGTCTTTGGAAGAT  
GCAAAATATTCAACATCTCAATGTGAATATATCAAATATGGTGGCTTCAAATCTTTGACAAATATTGCTA  
CCAAATTTCCACATTTGTGGCTTCAAATCTTTCACAAAAGAAAGATAAAATAACTTTCTTTCATCAAACA  
AAAAGCCACATTACAACCTATTATGATTTGTTCTAGCAAATCAACTGCTACTTGGGGAAAAATTGATCAT  
TGAACACACTTTTGTGTACATGACATTAACATCTCTCAATTTTCAGATGTGAAGTTGGCATCCAAGAAGTTC  
CAAAAGATTCTGCATTGGCCGGAAGATTAGAGGAAGTGATAATGTGGTATGTATTGTTCACTTTCACCT

CCCATTTTGCTATTTCTTTGGTCCCTCTTCTTCTTGTCCATTACTTTGTTTTCCGTTGGGAATTTCTTTTAA  
CTGGTATGGAGGTTCAACCATATCATACGCGTCGCCAATGTTTAAAGCCCTTTTGTGATGTCATTTAGTGT  
AGTGATGTATTACTTCATGCTGTGATTTTAAAGAATTGCTTATCTTTTACCCATGCCTAGGCTGACGCCTT  
ACTTTGTCTTTACTCTTTACGCATCATCTAGTGTCAACCTGAAAAAATTTATGCAGTTAAGGTCTTTGATTC  
TACCTTAATCATAAATGTATCCCTTGTACTTAGGAGGTCATACAATCAGTAAGATCAATGACTTGCTTTTG  
TTGAAGAATAACTATGATGATTGAACGTCTGCAATTCGTTTGTCTGCAGGTGGAGATATACCGCCGTTGT  
TACGAGAAACAACCTTTGGTTATCCAAGGTGCTGGAGTAGGAAATGATACCACAGCAGCAGGTGTCCTA  
GCTGATATCCTTGACATTC AAGATTTATTCCCTTGACTGAGTATTATACACTGAGATACAAACATTCAATC  
CTCAAAGGACGAAAAATTGACTCTTCTTGTCCCTCCTGCTTCCAGATTGGAGATTGAAATCAGGCTAAGA  
AATCTCACGCATTTTTTTGAAAAATTTCTCGATACACGAGAGTGCCTCGTCAGTTTACAGTAGATTATTAC  
GCAATTTCTCTCCTGCATAACGTTCAAATGGAACAGTTCAAACCTGAGTCATTTGCCTCAGTGCTGGACTA  
GTTTTTAGGATTTCCCTTCAGCTTATAATCAGTTTCCTTGTAAATGACCATTTTCTTTATAATCTGAAAAACA  
GCTGATATTTCTTTTTAATATTTCTTTAGAAAACCTTATGATAGAACACCACAAAATTCACCTTTTCGGTAT  
TTAATGTTCCCTTATGTTACGTGTTCTTCTATTTTTCCCTCTTTTCTTTTATTTTTGAAGTCAATCATCAATTG  
GGACATGGACCCAGATAATCAAATAGGCTATGATCCACATTCAGCAACTTGACCTATTCTTAGGACTAT  
TAACTATACAAAAACAAGGCAAGCGTTGTAATGAATAACCTACAGTTCCTCCAACACTATCTTCATTTAT  
CTTTATCCCCGGCAAAATTTAGAAAAGTAGAAAATGTAAAACAGAGAAAATGACAAGGAAGAAAGTGTG  
AAGATTTACCAAATGTAAATTCAAAATTC AAGAATGATTTCTTTTTTTATAAAGAACAAATTTGGAGTCC  
CCACCCCTCTCTTGCTTCAATTATTGAATTGCAAAAGTAATAAACAGTCAAGAAACCAGACTGACAGAC  
TCCATCATTTTTTTTTCTATGGCTGTGAGCTGCAGACTGTAGATAAAACATAGTTGTACCAATTACAAGAAA  
AAGAGACATAAATCATTCTTGATTACTCATCACTCTTAGCTCTTAGCATTCAACAGGTAAAATAAAGTTGT  
TAGTAATTGAAGTTTGAACATTTATCTTCTTAAAATCATTTTGTGTTTCCTTGTTTTGCTTGACATTTCA  
GAAATGGAGGTTGGCTTAGCAGTTGGTGGTGCATTTCTCTCTTCAGCTTTGAATGTTTTCTTTGATAGGC  
TTTCTCCTCATGGTGATCTGCTTAACATGTTTCGGAAGCATAAGGATCATGTTTCAGCTTTACACAAACTG  
GAGGACATTTTGCTTGGTCTTCAGATTGTGCTAAGTGATGCAGAGAATAAGCAAGCATCAAATCGACAC  
GTGAGCCAGTGGTTTAATAAGCTTCAGAGTGCTGTGGACGGCGCTGAAAACCTTGATAGAACAAGTCAAT  
TATGAAGCTTTGAGGGTTAAGGTGGAAGGCCATCATAAAAAAATGGGCGGCCTGGGTAAGACAACACT  
TGCTAAAGCCGTTTACAATGATGAGAAGGTGAAGGACCATTTTGGTTTGCAAGCTTGGTTTTGTGTTTCT  
GAGGCATATGATGCTTTCAGAATAACAAAAGGTTTACTTCAAGAAATTGGCTCATTTGACTTGAAGGCTG

ATGACAATCTTAATCAGCTAAAAGTCAAATTGAAGGAAAGCTTAAAGGGGAAGAAGTTTCTTATTGTTCT  
GGATGATGTGTGGAATGAAAAC TACAATGAGTGGGATGACTTGAGAAATGTTTTTGTACAAGGAGATA  
TAGGAAGTAAGATCATTGTGACGACACGTAAAGCGAGTGTTGCCTTGATGATGGGTAGTGAGGCAATC  
AACGTGGGGACTTTGTCTGATGAAGCCTCTTGGGATCTATACAAACGACATTCCTAGAAAACAGGGAT  
CCTAAAGAACATCCATAACTTGAAGAGATTGGAAAACAAATTGCAGACAAGTGCAAAGGGTTGCCTTA  
GCTCTAAAGGCACTTGCTGGTGTATGCTGCAAATCAGAGGTGGATGAGTGGAGAGACATTTAAGA  
AGTGAAATATGGGAGCTGCCAAGTTGTTGAATGGTATATTACCAGCGTTGATGTTGAGCTACAATGAT  
CTTCTGCACATTTGAAGCAATGTTTTGCTTATTGTGCAATATATCCCAAAGATTATCAATTTGCAAAGA  
CCAAGTTATTCACCTTTGGATTGCTAATGGTCTTGTACATCAGTTGCATTCTGGTAACCAATACTTTCTCG  
AGTTGAGATCAAGATCACTGTTGAAATGGCCTCAGAGTCTTCTGAAAGAGATGTAGAGGAATTCTTAA  
TGCATGACCTTATCAATGATTTGGCCCAAATTGCATCTTCAAATCTTTGTATAAGTTTGGAAAGAGAACAA  
AGGATCGCACATGTTGGAACAATGTTGGCACATGTCCTATTCAATAGGAAATGATGGTGACTTTGAGAA  
ATTGAAATCACTCTTTAAATCAGAGCAGCTGAGGACATTAGTTCCAATCAATATCCAGCTCTATTATTACA  
ACATTAAGCTAAGCAAGAGGGTGCTGCATAACATATTGCCAAGACTAACATCCTTAAGGGCATTATCATT  
GTCACACTATGAGATTGTTGAGTTGCCAAATGACTTGTTTATAAAATTAACCTCCTGAGATTTTTGGATA  
TTTTCTCGGACAAAGATTAAGGTTGCCAGATTCCATTTGTGTGTTGTATAACCTAGAGACACTTCTCCTG  
TCATCTTGTTGCTGATCTTGAGGAGCTACCGCTGCAGATGGAGAAGTTGATTAACCTGCGTCATCTTGAC  
ATAAGCAACACTTGTGCTTGAAGATGCCGCTACATCTGAGCAAGTTGAAAAGTCTCCATGTGCTAGTG  
GGAGCCAAGCTTCTGTAGGTGGTGGTGGTTGAGAATGAAAGATTTGGGTGAAGCACATAACTG  
TATGGATCTGTATCAGTTGTAGAGTTTCAAATGTAGTTGATAGAAGGGAACCTGTGAAGGCAAAGATG  
AGGGAGAAGAATCAATGTTGACAAGTTATCATTGGAGTGGAGTGAAAGTATTAGTGCTGACAATTCACA  
AACAGAAAGAGACATACTTGATGAGCTACGCCACATAAGAACATAAAAGAAGTCAAATCACTGGATA  
TAGAGGGACAACTTTCCAATTGGCTAGCTGATCCTTTGTTTCTTAAGCTAGTACTGTTGTCTATTAATA  
ACTGCAAGAACTGCTATTCTTGCCAGCACTAGGACAACCTCCCTGTTTAAACTCCTTTGATTAGAGG  
GATGCATGGAATAACAGAGGTAACGGAAGAATTCTATGGTAGTTTGCCTCCAAAAGCCTTTTAACTCT  
CTTGTGGAGCTTAGATTTGAAGATATGCCGGAGTGAAGCAATGGCACCTACTAGGAAGTGGAGAGTT  
TCCTACACTTGAGAACTTTTCATTAATAAATTGCCCTGAACTCAGTTTGGAGATACCCATCCAATTTCAA  
GTTTAAAAGTTTTGAAGTTATTGGTTGTCAAAGGTTGGAGTTCTTTTTGATGATGCTCAACTGTTTACC  
TCCCAACTTGAGGGAATGAAGGAGATTGAGGAATTAGATATTTGGGATTGTAACCTGTTACCTCCTTAC



CTTTTAGCATACTGCCACTACCTTGAAGACAATATGCATATCTGGTTGCCAGAAATTGAAATTGGATAC  
CCCAGTTGGTGAGATGAGTATGTTTCTCGAGGTTTTGAGAGTGCATGCATGTGATTATATAGATGATATA  
TCACCTGAGTTGCTCCCAAGAGCACGCAAATTGTGGGTACAGTATTGCCACAACCTTACTAGATTTTTGA  
TTCCTACTGCCACTGAAAGTCTCACTATTTGGAATTGTGAGAATGTTGAAAACTATCGGTGGCATGTAG  
GGGGACCCAGATGACGTCACTGAAAATTAAGTTATGCTATAAGCTGAAGCGTCTGCCAGAACATATGCA  
GGAACCTCTCCATTTCTTAAGAACTATATCTGTTTGATTGTCCAGAAATAGAGTCCTTTCTGAAGGAG  
GATTGCCCTTCAATTTACAACCTCTTTGTATCCGAAATTGCAAGAACTGGTGAATGGCCGAAAGGAGTG  
GTGTTTACAGAGACTCCCCTGTCTCACAGAGTTATCCATGGTACATGATGGCAGTGACGAAGAGATTGTT  
GATGCTGAGAGTTGGGAGTTGCCTTCTCTATTCAAAGCCTTAGCATAGAGAATCTGAAAACATTAAGC  
AGCCAACTTCTCAAAGCCTCACCTCTCTTCAATATATATGTATTCAGGGTAATTTACCTCAAATTCAGTC  
CATGCTGGAACAAGGCCAGTTTTCTCCTTTTCGCACCTCACTTCGCTTCAAAGTCTACAAATCAGGAATT  
TGCTAATCTCCAATCACTTCCCGAATCAGCACTGCCCTCCTCCCTCTCTCAGCTGGAGATCTCCCATTGCC  
CTAATCTCCAATCCCTTCCACTAAAAGGGATGCCCTCTTCCCTCTCTAAACTATCTATTTGCAACTGCCCAT  
TGCTCAAACCACTACTAGAATTTGACAAGGGGAATACTGGCCAGAAATTGCTCAAATCCCACCATAGT  
GATCGATTGGGAATCCCTGTGATGATTAACAATAAGTGTCTCACAAATGTAAGCTTTTCTTTTTCTC  
ATAAGCCTTCTATTTTTTTAACTTCTTTGCTTTTATGTTAATTCTTTTTCTTTATTACATTCTTGTTGCGCA  
GTATGGAGCGTCTATTGCCACTCTGAAACTGAGAAATCATCTTCAGATTAGAATGATTTTAATTTTAGATC  
TCAATAGCAATTAATGTTACATATCTTACTCGAATATTTTTATCACTTGAACCTTTCATCTCAATAGCAATTC  
ATGTATGCTTGTAATTTCCCTTTTCAGTCAGTTTLAGAGTGATGCACATGTCCACTATCGAATTCAAAACCTC  
TAATAGAATTCAAAGGTGTACCATACACAAGGTTTGGTTCCTATGTATCAAAAATACAAATGTTTGCCTC  
CCAATAAATTTAACACCTAAAACATCAGCAATATTCAGGTTTTTATTAATGATGCAGCCCATCATAGAG  
ATCGATTGGGAATACATGTGATGATTAAGAAATGGCTCTCCAACCTGATGTAAGTTATTCTTTTCCATC  
AGAAGCTTTTTATTTTGTTGATTCTTTTCTTTTAAAACCTTGTTGAGCAGTGTGGAATGTCTATTGTTCAA  
ATCATAAATGTTGATTGGGAGAACCATTAACGAGTGCTACTCCGATAGATGTAAGTTATTCTATTCCC  
TTGGTATTATTTGATTGTTTGTAAATCTCTTTGCTTGTGTTGTTAATCTTCTTGACCTTTACTTTGTTGCT  
GGATTTGGGTAATAGGCCCAAATGTGTACTTTGTTTTCGTATCAATAAAAGTCTAAATTTTCATCAAAAAA  
AAAATAAAAAAATCTTCTTAACCAGTGTGTACCATCTATTGCTTCTGTGAAGTCGACAAAATATCTTTAGA  
TCAGGATGAAATCTTATATTTGTAAAAGAAATCTAACATAGGTAGGAGTTGAGATAATTTGCTCAAGAA  
AATTGATTGCTTAATATATGTTAGGGTCTAAGAAATGCAACCTCACATTCTCAATCAGGTAGCCAAGACA

TTGATAAGAGTTGTATCAGCTTCAAATTTAAGAAAGTAAAAACGACTGCTTGCTCCATTATTTATGCCAT  
GTTATATAAAGTTATCTGTTGATCCAAAATTTTCATTTTTCTTGATCTTCTTCTATCTTTAGTTTTACATGTC  
TTCTGATTGAGTTATAATACATGCCTTGATTCTATAGAAGATGAGAAATTGTCAAATGCCTTTATGAAGT  
GCTTGCTAAGTTGATGTCGCCTAATTCACATTTCACTGAATTAATTTCTGACTCAAGTTTATGCATATGTTT  
GCTCTAACCTTGAAAAGGAAAAACGTCCAATGATATGGATATTTTTATTTTTTAAGAATACAAAGTCGCAA  
TAAAAAATTCATGGTATTAATTTTGATATGGATCACCGCTGAGAACTTTGCCTGAGGTATAAATTTATAT  
TTCCCTGTTTAGAAATGTTTCCCGTAGCTCCTAATTGTGATGCTTCATTTACACATTTTTAAAATTTTATCT  
TATAACAATAAAGTGTGTCAAAGTAAATTAGATGTTACAGACTTGGCTCTTCTTTGTTTAATTTACTT  
TCTTCAATTTGATCAGAAAATATTTCTCTAAAGGCATGTTGATTTTATTATTTTACACGATTTCTGTTTGTG  
TTACTTTTTCGATTTCTAATTTGTTTTATGAATGTTTTTACAGTTTAATTTTTGATGCTTCTCTGAAGTTTTCT  
GGGTGAGCATGGTTCTCTCCTTTGAACTATGAATGCATCTTAACAATAATTTAATTATTGAATGCATCTTA  
AGTGTATACCGCTAACGAAGATATTAACCCTGTTGAAGAGATTCCCTTGAATGGTAGAAAAATAAAG  
CAAATCAGTATACAGTGTAAATGATCGATTATGTTTCAAGCTACTTCTGGACTCTTCGACAACTAAAAT  
TAGTATAGATTGTTAATATTGATGTTGCTGATGCTAATAATCACTTGGCTATCATATGTCTCTGTTTCGAT  
GCTGGGGTGATTTTACTGTTATAGTGAGCCGAATATCCTTGTTTAAGTTCTGGTAGCGAAGAAGCTTTA  
GAAACAAGTGGAGCCTGGGAAGGGTAGAGTTTATGTAGGTAGACCTTACTCCTACCTAAGAAGGTAG  
AGAGGTCATTTTCAATAGACTGTTGGTTGTGGTTTCTCTGTTGCAACAAAACACTAAAAAAAACACTACCT  
TTCACATATATGTGCTTGAAGGATGCAGCCCGTGATTTTGTGCGACTCAGACTACTACCAATCCAAGCTA  
TTTTATGAATAAAATGTGATCAATTAACCAACCAATGTATGACCAATGATGTTTTTCTAGCTTTACCCAGC  
TGGCAAGGGAAAAATCAAAGGCAAGGTGGAAAACGGGCCACCACATCGAGAAATAGAAGTACTACTAATC  
CTAAATCAAAGGGTCAAGAACTCAATACCACAATGCTCTAACAACCTTGGAGCAGGGTCTTCTTCCAGCAC  
TATTAATGATATGAAAATAACGATCAAATAAAGATTAATTTGTCA

>PGSC0003DMG400017716 LRR-RLPs

ATGTGTATAGTAGATTTTCGTGCAGTTGTTTCAGTTGAACCTAAGCAACAACAAGTTTGACCAGAAAATTC  
CAAAGGAGATAGGGAGGATAACACAGCTTAATGTACTTGATTTGAGCTATAATCTTCTGGTTGTCGATAT  
ACCCCTCAGTTAGCTAATTTGAAGGTGTTGGTAAACTTAAATCTTCCCACAATGGCATATCTGGACTCA  
TTCCTAGAGAACTTGAACTTTGACTGGTTTGCAGGATGTGGTATTGTCATACAATGAGTTGGAAGGTCC  
AATCCCTAACAGTAAGGCTTTTATCAATGCCTCATTGGAGGGTAATAAAGGTCTTTGCGGCAATGTTGCA  
GGACTAGATCCCTGTCAAATGCCATCTTATGTGGTGAAGAAGCACTCAATGGCAAAGGGACGTATACTC

ATCCTCATCACTGTACTTCCTGCTATGGGAGCACTAATACTGCTATGTGTTTTTGTGTTGTGTTGTTTATG  
TGTGATAAAAGAAGGAGAGTTGGAGACGTTGAAAGATGGGATGATGGTTGGCTTTTCGATAACCATGTT  
AGATGGAAAGGCATTGTACAGGGACATCTTAAATGGCACAGAGGAATTTGATGCAAACTTTGCATCAG  
GCATGAAAGGCATGGAAGTGTTCACAAAATAGACCTTCCATCATTAGGGAATATAGCTGTGAAGAGACT  
TCATTCTTCATTTCAGAATACTCATCCCAAAGCTTTATGAATGAAGTAAGGGCATTGACTGGGATTAAG  
CACGGGAACATTGTGAACCTCTACGGCTATTGTTCTGAATGCACAAAACCTCGTTCTTGGTTTACGAGTATG  
TGGAGAGGGGAGTTTGTCTAGTATTTTGAGCAATGAAGTTGAGTCCAAGAAATTGGATTGGCTTAAAG  
GGTGAATATCATCAAGGGTGTGCTTTTGTTCATCTTACATGCACCGGGACTGTTACCACCGATTGTTT  
ATCGAGACATATCGAGCAATAATGTGTTGCTTGATTTTGAGTATGAACTTGTGTTGCAGACTTTGGAAT  
AGCAAAGATTCTCAAGCTAGACTCAACCAATCACACTGCGCTTGCAGGCACATAAGGCTATGTGGCACC  
TGGTAAGTTTTAAATAGTTCATGAACTACAGCCAAATACTCCACTGTTTTTATCTCATTTACACTTTTAAAT  
TGGTAATATTGTTCTGGAAATTGTATTGCTCAGAGCTTGCATATACAATGAAGGTTATGAAAATGCGTGA  
TGTGTTAAGAATTCATCACCAACTTAATTATTTACTTAAAATAAATCAAGAAAAATCTAGAATATGCCGG  
AGGTGTTGAGAATTGAAGGAAGATCTCTAGAATGAGTATTCTAGAGAGAATAGTCTAGAAATATTCTAG  
AAAAGGTAATTCTAGAAAAAGATAGCTAGGAATATTCTAGAATAGAGTAGTATGTATCTCTCTAGATTCT  
TCCATCACCTCTTATAAATAGAGGTGGTCCATTTGAGTTGTAAGCAACCAAGCAAGAAGCAACTAAGAA  
AGAAACCAAGTAAGAAAGTAAGCAAGGGAGCAAACAAGAGTGAGTAAGAAATAAGAGAGAGTTGCCT  
GTAAAAATTGTAAGACCGAAGCAAGTTCTTACTTTGCAATAATAAAATTCAAGTTGTGAGAAATCGACTG  
TGCCTGTCATCTCCACAACCAACAATATTCAACAAGTGGTATCAGAGCCTGGTGGATAAGAGCGAGGTA  
GTAECTCATAGAAGATCCACAAGCTATTATCGGAGGCTACAAGTTGCGAGACACTTATCAATGGCAGA  
TTTCGCAAGCACTCTCCGTTTCTTGAATATGTTGATCTTAGCGTGAATCAGCTCTCTGGTATCATCCCCT  
GCAATAGGAAACCTCACTAATCTTGTCTATCTTGACCTGTCGATCAACCAGATTACTGGTTCAATTCCAAT  
TACTTTAGGTGACTTAACTGAGCTCAAAAATTTGTACCTTCTTAACTGAGCTCAAAAATTTGTACCTTTATT  
CTAACCAACTTTCTGGTCTCATTCTAGTGATTTAGGGAATTTGAAAAATCTCAATGATATGGAACTATCC  
CATAATAATCTTACTAGTTCATTTCAACTACTTTAGGTAACTTAACTGAACTCAAAAATTTGTACATTCTT  
TCTAACCAACTTTCTGGTCTCATTCTAGAGAGTTGGGGACTATGAAAAACCTCGCAGAGCTGGATTTAA  
CCAGTAATCAACTTAGTGGTTCAATTCCAATAACTCTAGGATAACTTAACTAACTCAAAAATTTGTATCT  
TTATTCTAACCAACTTTCTGTTCTCATTCTCGAGAGTTGGGGAATTTGAAAAACCTCAATGATCTGGAAC  
TATGCAATAATCAGCTTAGTGGTTCAATTCCAATGACTTTAGGTTTCATAACTGAGCTCAAAAATTTTATAC

CTTTATTCTAACCAACTTTCTGGTCTCATTCTAGAGTTGGGGAATATAAGAAACCTCACAGAGCTAGATT  
TATCCAGGTTCAATTCCAATAACTCTAGGTGACTTAACTGAGCTCAAAATTTTGTACCTTTATTCTAAGTTC  
CAACCAAATTTCTGGTCCGATTCTAGAGAATTGGAGAGTTTGAAAAACCTCAATGATCTGGAGCTATG  
GAATAATCAACTTAGTGGTTCAATTCCAATGACTCTAGGTTACATAATTGAGCTCAAAATTTTGTACCTAT  
ATTCTAACAAACTTTCTGGTCTCATTCTAGAGAGTTGGGGAATATGAAAAACCTCACAGAGCTGGATTT  
AACCGGAAATCGACTTACTTGTTCAATTCCGATGTGGTAGTAAGCAACGTGCGACTTGTAGGACACGAT  
CTGTTGTGGATTTGTACATCCACCATTATTTGTAGGAATGAAGGTGCTCTTAGCTCGACATCATTGGTTCT  
GTTTCACTAGAACCCCTCGTTTTTGTGTCTTGGAATGTAAATAGTCCATGATGGAGCTCGAGTAGAAAG  
TATTAATTTATTTCTTGGGAATAACTGTAGGTGACTTAACTGAGCTCAAAATTTTTTACCTTTATTCTAAC  
AACTTTCTGGTCCCATTCTAGAGAGTTGGGGAATTTGAAAAACCTCAATGTTCTAAAACCTACAAGAAAA  
TCAACTTACTGGTCCAATTCCTGCTTCCTTTGGCAATTTGAGAACTTGCAATTCTGTATCTCCGCGAGAA  
CAAACCTTTCTGGTTCTATTCCAAAAGAACTTGCATATTTGGATAACTTGGTAGACCTGATAATAAGTGAA  
AATCAATTTTCAGGCCATTTGTCTAAGCATCTTTGCCAAGGTGGGAAACATGAGAACTTCACAATGAACA  
GTAACAAGCTGACAGGGCCAATACCAAGCAGCTTGAAAAAGTGCTCTAGTTTAAAATTTGTCCGCTTAA  
CAACAACAGTTTCACTGGGAATTTATCTGAAGCTTTTGGCATCCATCCAGAGCTGCAGTTCATTGATTTG  
AGCGACAAAGTTTTTACGGTGCCTTAGCAACAACCTGGGGGAAATGCGAAAATTTGATTGATCTGCGT  
GTAGCCAGAAATAACATTAGTGGTAGCATACCACCAGAGATTGGAAATGTCAAAGGGATTTTAGGACTT  
GATCTTTCATCGAATCATTGATTGGGCAGATTCCAAAGGAATTTGGAAAATTAAGATCTCTAGTTAATC  
TTTTTCTGCAAAACAACCGAATTTAGGTAATATACCTGAGGAACTTGGGTTACTAACAAAGTTAGAGTC  
CCTTGATCTATCAGACATCAGATTGAACGGGTCAATCCCGATGTGTATAGTAGATTTTCGTGCAGTTGTTT  
CAGTTGAACCTGAGCAACAAGTTTGGCCAGAAAATTCCAAAGGAGATAGGGAGGATAACACAGCTTAA  
TGTAATTGATTTGAGCTATAATCTTCTGGTTGGAGGTATACCCCTCAGTTAGCCAATTTGAAGGTGTTG  
GTAAACTTGAATCTTTCCACAATGGCCTATCTGGACGCATTCTAGAGAACTTGAAACTTTGACTGGTTT  
GCAGGATGTGGTATTGTCATACAATGAGTTGGAAGGTCCAATCCCTAATAATAAGGCTTTTATCAATGCC  
TCATTGGAGGGTAATAAAGGTCTTTGTGGCAATGTTGCAGGACTAGATCCCTGCGAAATGTCGTCTTCTG  
TGGTGA AAAATATACTCAATGGCAAAGGGACGTAAACTCATCCTCATCACTGTACTTCTGTTATGGGAGC  
ACTAATATTGCTCTGTGTTTTTGTGTTGTGTTGGTTCTGTGTGATAAAAGAAGGAGAGTTAGAGACGTT  
GAAAGACGGGATGATGGTTGGCTTTCGATAACCATGTTAGATGGAAAGACATTGTACAGGGACATCTTA  
AATGCCACAGAGGAATTTGATGCAAAATTTTGCATCAGGCATGGAGGGCATGGAAGTGTTTACACAATA

AACCTTCCATCATTAGGGAATATAGCTGTGAAGAGACTTCATTCTTCATTTCAGAATACTCATCCCAAAG  
CTTTATGAATGAAGTAAGGGCATTGACTGGGATTAAGCACGGGAACATTGTGAACCTCTACGGCTATTG  
TTCGAATGCACAAAACCTCGTTCTGTGTTTACGAGTATGTGGAGAGAGGGAGTTTGTCTAGTATTCTGAGC  
AATGAAGTTGTGTCCAAGAAATTGGATTGGCTTAAAAGGGTGAATATCATCAAGGGTGTGCTTTTTGCT  
TTGTCTTACATGCACTAGGACTGGTCACCACCGATTGTTCTCGAGACATATCGAGCAGTAATGTGTTGCT  
TGATTCTGAGTATGAACTTGTGTTGCATACTTTAGAATAGCAAAGATTCTCAAGCCAGACTCAACCAAT  
CACACTGCGCTTGCAGGCACATATGGCTATGTGGCACCTGGTAAGTTTTAA

>PGSC0003DMG400017718 LRR-RLPs

ATGAAATCACTTGAGATTTTAGCCTTACAGAATAACAATCTTTCTGGTCCAATTCCAATAACTCTAGGTGG  
TTTAACTCTGCTCAAAATTTTGTACCTTTATTCTAACCAACTTTCTGGTCCCATTCTCGTGAGTTGGGGAA  
TTTGAAAACCTCACTAATTTGGGTTTATCTGATAATCATCTTAGTGGTTCAATTCCAATTACTTTAGGTA  
ACTTAACTGAGCTCAAAATGTTGTACTTTTATTCTAACCAACTTTCTGGTCCCATTCTAGTGAATTGGGA  
AATTTGAAAACCTCACTGATATGGAAGTATCCATAATAAGCTTATTGGTTCAATTCCAATTACTTTAGG  
TGACTTAACTGAGCTCAATTTTTTGTACCTTCATTCTAATCATCTTTCTGGACTCATTCTAGAGAGTTCCG  
GAATTTGAAAACCTCAATGAACTGGAAGTATGAAAATCAACTTACTGGTCCAATTCCTGCAGAAATA  
GGGAAGATGAAGTCACTTGTGGAGTTGAGATTAACAAAAACAATCTTTCTGGTCCGATTCCAATGACT  
CTAGGTTACATAACCGAGCTCAAAATTTTGTACCTTTATTCTAACCAACTTTCTGGTTTCATTCTAGTCAG  
TTGGGGAATTTGAAAACCTCACAGAGCTGGATTTATCCGATAATCAGCTTAGTGGTTCGATTGCAATAA  
CTCTAGGTGACTTAACTGAGCTCAATTTTTTGTACCTTCATTCTAACCAACTTTCTGGTCTCATTCTAGAG  
AGTTGGGGAATTTGAAAACCTCAATGATTTGGAAGTACAAGAAAACCAACTTAGTGGTCCAATTCCTG  
CTTCCTTTGGCAATTTGAGAACTTGCAATTTTTGTATCTCCACACCAACAACTTTCTGGTCTATTCCAA  
AAGAAGTGCATTTTTGGATAACTTGGTTGAGCTGATAATAAATGAAAATCAGCTTTCAGGCCATTTGCC  
TGAGCATGTTTGCCAAGGTGGGAACTTGAGAAGTTCACGGTGAATAATAACAAGCTCACAGGGCCAAT  
ACCAAGCAGCTTAAGCAAGTGTCTCGAGTTTCAAAGGCTGCGTTCAATAATAACAGTTTTACTGGGAA  
TTTATCTGAAGCTTTTGGCATCCATCCACACCTTCATTTCAATTGATTGAGCGACAATGATTTTTATGGTG  
AACTCAGCAGCAACTGGGGGAAATGCGAAAATTTGATTGATCTGCGTGTAGCCAGAAATAACATTAGTG  
GTAGCATAACCACAGAGATTGGAAATGTCAAAGGGCTTTTAGGACTTGATCTTTCATCAAATCATTGAT  
TGGACAGATTCCAAAGGAATTTGGAAAATTAACCTCTCTAGTTAATCTTTTTTTACAAACCAACCAATTT  
CTGGCAATATACTGAGGAACTTGGGTCACTGACAAAGTTAGAGTCCCTCGATCTATCAGACAACAGAT

TGAATGGGTCAATACCGATGTGTATAGTAGATTCGTGCACTTGTTTCAGTTGAACCTGAGCAACAACAA  
GTTTGGCCAGAAAATCCTAAGGAGATAGGGAGGATAACTCAGCTCAATGTACTTGATTTAAGCTATAA  
TCTTCTGGTTGGAGATATACCCCTCAGTTAGACAATTTGAAGGTGTTGGTAAACTTAAATCTTTCCCACA  
ATGGCCTATCTGGGCGCATTCCCAGAGAACTTGATACTTTGACTGGTTTGCAGGATGTCATATTGTCATA  
CAATGAGTTGGAAGGTCCAATCCCTAATAATAAGGCTTTTATCAATGCCTCATTGGAGGGTAATAAAGG  
TCTTTGCGGCAATGTAGCAGGACTCCATCCCTGCGAAATGTCGTCTTCTGTGGTGAAGAGGCACTCAAG  
GCGAAGGGACGTAAACTCATCCTCTTCACTGTACTTCTGTTATGGGAGCACTAGTACTGCTCTGTGTTTT  
CATTGGTGTCTCTTTATGTGTAATAAAAGAAGGAAAGTTAGAGACGTTGAAAGAAGGGATGATGATG  
GTTGGCTTTCAATATCCATGTTAGATGGGAAGGCATTGTACAGGGACATCTTAAATGCCACAGAAGAGT  
TTGATGCAAAATTTTGCATCGGGCAAGGAGGACACGGAAGCGTTTACAAAGTAAGCCTTCTATCATTAG  
GGAATATAGCTGTGAAGAGACTTCATTCTTCATTTCAGAATACACATCCCAAAGCTTCATGAATGAAGT  
AAGGGCATTGACTGGGATTAACACCGGAACATTGTGAACCTCTACGGCTATTGTTGAAAGCACAACA  
CTTGCTCTTGGTTTATGAGTATGTGGAGAGGGGGAGTTTGTCTAGTATTTTGAGCAATGAAGTTGAGTC  
CAAGAAATTGGATTGGCTTAAAAGGGTGAATATCATCAAGGGTGTGCTTTTGCTTTATCTTACATGCAC  
CAAGATTGTTACCACCCATTGTTTCATCGAGACATAAGTAGCAGTAATGTTTTGCTTGATTCTGAGTATG  
AAGCTCGTGTTCAGACTTTGGACTAGCGAAGATTCTCAATCCAGACTCATCCAATTGCACTACACTTGC  
AGGCACATATGGCTATGTCGCACCTGGTAAGTTTTAAATAGTTCATGAACTATAGCCAAACACTCCATTG  
TTTTATCTCATTACACGTTTTAATTGTTAATATTGTTTTGAAAATTGTATTATTCAGAGCTTGCATATACT  
ATGAAGGTTACGCAAATGTGTGATGTGTATAGCTTTGGAGTATTATCATTGGAGATAGTCAAAGGAAAG  
CATCTTGGGGAATACATTACTGTGCTAGCAAATTCATCGACTATAGATCCTGAGCAGCTTAGCGATTTGC  
TGGATGAACGCCTTCATATCCTGAAGATAGAGTAAAAGATGTTTTGGTTTTTATCATCAATCTAGCATG  
CTCTTGTTTGCTTAAAACCTCAAATCAAGGCCAACAAATGCACTTCATCTCTCAGAAGTTATCCTCAATGG  
ATGCACGTCCACCTATTCATCAGAGAAACCCCATGTAAGGCGAGCAATATATAATCCTTGATATGTATG  
GAAATGTCGGTAGTGTGAAGTAAGTATTTCAATTGCTGGGACTAGTATTTTAGGGTTCTCATTTTGTTT  
ACTGTATTTAAGACCTTATATTACAGTCGCACATAGTTTCGTCTTGGAAAGTTTTTCATTGATTTCAAAGATT  
TTACCTGTATGTATAGAAGCTAGAAAATGACCCTTCTGCTCAAGCTTTTTTCCCAACTGAATAAATGGAG  
TTGTT

>PGSC0003DMG400017941 LRR-RLPs

CTGCAATCAAGGTCCCCTTTTTATTTATTGTTAGCTTTCGGCAAAGATTGTATCTTCCTAGTAGGAAATAA

TACAAACATTATCTTATGTAGAACCCATGGAGAAAAGACTGCGACTTTCCAACAAATTTTCTCTAAAAA  
GGTGTTTTCTCAACCTCAAATCTCTTTCTTCAGTCTCTTGTCATTCTGTGGTTTGATCAATTTTTTTTTT  
GTTTCTAGTGTCAAAGGAAGTCTGCATTGCACAAGAAGATCGTATCAGTCAGTTACCTGATGAAATTCT  
GGTATATATATTGTCTTTCTTTACTGTAAAGGAAGCTGCAGATACAAGTCTCCTCTCAAGGCGTTGGCTAA  
ACTTATGGACATATATTGATCACCTTGATTTTGATGCTACAAAATACTTGGATCAAGTGTTCGTGCAACCC  
AAGCTACAAAAGGGCATATGGACAAGTATCTGACATGGGTCAACTCTGCTTTGCAAAGTTTAAAGGC  
CAGAGACTTGACCAATTCGTGTTACTATGATTTAAGCAAATTTGCTCAGCACGACATTGACAAATGGC  
TTGAACTGCCTTTTCTAAGAAAGTTCAAAGACTAGAGTTAGACTTATTAAGGTGTGGATCATTCACTCG  
TAATTTTGATTCTGTTATACTTTTCCGGAGCGGCTCCTTGGTCTTGGAGATTCTTCTTCATGCTCTAATAA  
CCTCAAATACTCTCACTTATCAACCAGAATTTCAAGTCTCTAAAAGTGCTTATATTGAAATCTGTAAATG  
TGACGGGCCAAGTTCTTGAGTTCTTTCTACGCAATTGTCCATTTCTGAAAGAATGCAAGTTCATGGATC  
AGGAACATTGAAAATTTGGAAGTTGTTGGTCCGTCCTCAAGTTGAGACACTTGGAGATATATAGTTG  
CTTCAATGTAAAATCACTTAAAATTTGTGATACAAATCTTATATCATTAAAGACTTCAGCAGGAAAAGTAT  
TACTGCTTAAGAATGTCCCGATGCTGGTTGATGTAGAGATTTTGGGTATGCCATACACCCATTTATTGGA  
TGACATATCCTCTCGTCTCTTGTCGTTCTCTCTCAGCTGGAGGTCCTTACAGTAGATGCTTGTATATCAT  
TGGTTAGTGAACAAAGTTTGTGTCTATCTACTCTTGTTTTACTAGCCTAGCACTAACTGGTGCCTTATCTG  
TAGTTTGATTATCCGCACGAAGATTTGGAGCATTACAATTTTCTGAACTTACGAAGCTCAAGAAATTTG  
TTTTATTACATTTGGAAATTCACTAAGAGTGTGAGGCCAGAGTCTCTTAGGTTGCACGTCTATAATAAG  
GGCTGCCCCACAGTTGAAGGAATTTGAACTACAGGTAAGTATCATGCCTTTTCTCTTTGGCGTGCAAAA  
GTCTGATTTATTCATATTAGCAATTCTGGTTCATGCAGTTATTGATGCTACTTCTTTAATAAACTTAGTTAT  
TTAAGTCGTTGAGCTTGAAGTTGAAACAATTGTGAAGAGCTAACTTGAATAAATGGTACTCTTGCATTTT  
AACTCATCTGACTGTGCCAATATAAAAGTCTGCCCTTACATAGGTGTCATTTTAGATAGGTAGTAGACA  
GCTCTGTCGTCACTGAACTTTGATTTATTATCTGTAACAAAGAGCTTAAAGTCTCATCATTTTCATCAAAGA  
GCTTAGAGTCTCATCATTCCCTCCAGTTTCTTGAATATTTTACTGAATTACTGCGCTTGTGTTAGCGTAATGG  
AATGACCTCAGAGTGTTGGGATTGTGGTTTCAGTTGTCGATTGTGTTGCTCCAAAATCTTAGGTTTCCAC  
CTGTTTGTGCCAGTATATTATATGATGGAATTGGGAATACTATACAGTGATTATTCTGTGTTTAATAAAC  
CTACTTTTTTGAGAAAAGGTAACCTTGATTATAAACACAAGAATACTCGGGACGTATTCCAGTAATACTT  
ACAATCAGAAATACAAAAGTGTGCTGTTTTCTATGAACTCAAGAACTCTAAGATACTAGGGATATCCT  
CATTTTCATGAGGATATTCATGTTTACACCAAAAACAGAATAGAGCTAAACATTTAGCTTCATCTTCTCC

ATAGAGCAGCTCTTGTTCTCAAACATCTCTGATTCCCTTTCCAGCCAAATAGTCCACCAAATGCAGGCTG  
GGACAATCTTCCAACCTCCCTGTGCCTGTAAAACATGCCACCTGAAGGGCACCTTAACTTTCCAGATCA  
TTTTCCATGGCCAGTAGCTTGATTGAGTGTGTGCCTCTGTGAGTTTCTGTAAGCTGTTCCAACCTGAGAAT  
CTCCCCTGTGTATCTGGAGCCCATAACAGTTTGTCTTCACTGTTACTGAGTTCCTTGTATCGTTCTAGGAT  
ATTTAGAAATTCAACCATTCTATTCACCTCCCATTCAATTAAGGTCTTCTGAACCTTAAATTCCAACCCTG  
AGCATCTTTTATAAACCTACTTTCTTGTGCATAATTATACTGGTTGGTTTCAAATGAGAACAACCAACTAAG  
AAAATTGAGAAGTAAGTTGTTGCCTAGCTAGGTAGATGGGTGAAGGAGGAATGCACTGGGGTAGAGG  
TTTCAGAGATGAGGGATTACAAAATGTTGTTAGAACCGAGGGGAACTTCCAAATTCTAATAGTAGGATT  
CGAAGGTGGCATCCTGAATCCAATCAAATGACTCCAGGCTCAAAGAGTCAGAATCGAGCCTGGATGGT  
ATTGTAGAGGAGGCTTAGGGCTTCACATGGTATCTGATGTTCTCTCTCTTGAATATTTATTTTTTCAAAA  
TCAAGTAACGATTATATAAGGGAAAAGAGAAAAAAACCCGAACCTTGATCGGATTTCTTGTTACACTTA  
TTCTTTGAAGTTGTTCTATGAATTATTTTGTAGTAGAATAATACCATAGGAAGTGTGATGTGGCTTTTGC  
TTTGCACCTCCATATAGTGCATGAAAAGACAAATACAAGCTAAATGATATAGGCTCTAGACACTGTGTCC  
AAAAGATAGAATTTTTCTTACTTTTTAGGCCTTTTCTAAATCTTGAGCGGTGATCCGCCACTTGCCCC  
ACCAGGCCACCATCCATGCCCCCACCTCCGTGTCTGAGCCAGGAATTTTTTTTTGTAGCTGAGTAGATA  
CACAAATTATGTTTTCTACTCATGAGTGGGTTACGCACCTGGCTAAAGTTGTGTGCATAATTTTTTCA  
ATAAAAATCAAGCAATAAATGTAAAAAATTATCTAGGGTGTGTTTTGTATTGAGAAAAATGTTTATCTAT  
TTTCATGTTTTGTTGGTCAATATATTTTGTGAAATATTTTTCTAGGAAAACAAGCTCCTTAAAAATGAGG  
AAATTTACTTTCCTAATGGAAGTAGAAAACATAAGTTCCAAAGCAATTAATCATATTAGCATTTATAACT  
ATAAAAAACAAACAATCATATAAATCACTATAGACATAGAGAAGTCAATAAAAAATAATTTTAGTTACTAG  
TTAAATTAATAAAAAACAATACATATCACAATAAAAGTAATAAATAATAATTAATAAAAAGAATTAC  
TGCGAAATATTATAAAAAAACTATTGATAATCTCAACCAAAAAAAACTTGAAAGGAAAAATATGAGTA  
CGTAGCCAAAAGGGCAAAAAAATTGACCAAAAGTTCCAAAAGGGCAACAAAAATAAGTTTGAAACCAA  
AAGGGCAACATTTAAACGGTAGGGGAGACGCTGTTTAAATTAGGGTAGCAATGCGCAACTCCCTATGC  
GCCTTACAAGGCGCAAGCAAACAGAGCCACCATCATTGTTTATTTTTCCATGTCAATACTTACGGTGGT  
ACCTTTTGCCTACAAAATAGTTTGGGGTTCGTAGGGACACCACAAAGAATAAGTGTGTAACCTGGAAAA  
CCGAGACAAGTCCATAGGGTTTTATGCCTTTTCCCACTGTGTTATTTAAAAAAGCACCAAGAGGGCTCC  
AACCTTTACAAGTAGAAGATTCTGTGGTCTGTCAACCTCCAGTCATGCAATCTCCTTCTTAATCTAATA  
TTAAAAGATAGCCTTTCTCTGTATTCTTCAATCACATCTTTTTTATGGATAGCTATGAGATGTAATTCTGAA



TAAGTTATTAAGCTTCTTGATCCGGCCTACATGAACTTTATCTTCTTCTTGCAACTAAAAGCTTTCACAA  
GATTAAGAATCAATTCCATAAGTTCTAATGTACTTCCAAATTGTGACATCATCAGATGTATTGATTAGT  
TTTGCTTTTGAACATCTCATATCCTTGCCATGCTTTATGTTTAAACAGCTTAATCCATAAATTGTTTTGCTCTA  
CTGTGTTTTATCTCCACAACTAATTCTACAATAGACACTTTTTTTAATACCCAAAGTTTTTATCTATGAAC  
TACTCTTCTTAGAGAATATAGCTCTATTTATATGCTCTTTGAATCAACTTGCCACATATTTCTCCTTGCATT  
ATCGAACCGTCTTTGCACCTTAAAAAATGATAGATACAGTTTCTTGCGGGTTGCCAATCTTCTCCACCTTA  
TGTATCACTCTGCCATATTATTGCACTTCTATATCTGGCATTAGAGACTTGCTCATGTATGTCTCAGCC  
TGGATTCTCAATTTAAATGCAGTCAAGTACTGTCTCAAAGTGTAAATAGTAGAGATCTGTGATGCATGACC  
TTCCGCTCCTCAAGTCCAAATAGAAATAGGGTATAGTCTGCATATTGTGTACATGAGAAATTTCCATATTT  
TCATTTGTACAACCTTTCCCAACTTTTGACTCCTTTTATCCATACTATATTCATGGCATAATGCAGCATCTT  
ACTGAATGTTTCCATTGCTTAGGAAGAGAATGGGATAACGGGGTTCTCCTATTTAACTGCATATCCTAAT  
TATATTTTTCCATTTGTTTGCAAACCGTGTTGATTCAAAGCTTCAGTAATATTGCCAGTTTACATGATTGT  
TCCACCGGGTCAAATCTTTGCTTGATCCTGTGTTGTCCCTAGTCTGAGGTGATAACTTGAGAATGAATCA  
TTCATCGGTGCTCTCATAGTAAAGAAGGCTTCACTCAAGGAGTGACAGATTTGGACGGAGTCTTGGCTTT  
GATGCTAAGGAGACCAGTGTATCAAAGGCGAAAAGCACAAAAAAGCTCTAAGGTCTGTGGGGGCTTT  
AAGCGCAAAGCGCAAATAAAGCGTGGGCTTTAATGAAAAAAGGCACAACGGGAGAAAAAATACAAT  
GTATATGTTTAGTCCAAGACTAAAAATTATAAACATAAATGACAAATATATGACCAAAGAAGATGAAAA  
AAGATTATGATAAAATGAAATATCAATTGTTTAGTGTCACCTTCTTCATAAGAGGCTCATTGGCCAGGAAA  
AGTTTGTCTCAAACCTTGATGACGACACTGAAGCGCACATAAAGCGAGGCGAAGCGCTCAACACGTTT  
TGAGCCTCGCTTCAGGGTTTAAAGCGCACCTAAAGCGCGCATTTGATAACACTGAAGGAGACAAGATCCA  
TCGATCTGAATAAGTCTGGTACACCTTTCTCAAGTCCAGCTAACAAATAATTCTTGCTACTTTAATTCTATT  
TAAGTCTCCAAGAATTCATTTTCTAATAACACTAGATCTATAGTTTGTCTTCCCTTTACAAATACATGCAT  
TTTTTGACCTTGATATATACTTACCAATACTTGTTTCATCCTTGTTGTTAGGACTCCAGTAGTAATCTCATC  
CTTGACCTTGTTCTTAAGAACCAATGCTGTGAATATTGCAGTCCAGCCTCTTGTAAGAATTTCTGTCTCG  
TGAAAGAAGTGCAATGCACTGATAATGTCCCTTTCCAAAAGTTCTAGATTTCTGGTAAGAAGACATTA  
TCTACCCATCTGGCCCTAAAGTTGTTATCACCCTAGACCATCCTGAGAAAATTTCTTAGTAGCCAACACT  
CTTCCCGTGATAATAGCTCAAGGTCATTGTAGCTGGAAGGCGCCTTCATGCTCAGTTTTACTAAATAACTT  
GTCATAGCATTACACTCATCTGATGACCTTTGGATTTGGTAGTTCGTCCATCTCTTACAAGTTAGTTTATA  
TGGCTGTACTTTTTATTTGATTGATCAATTTACAGTAAAACACTTAGTATTTTGTAGGGGTGTCAAAAAT

GAGCCACCTATAGGTAACCCGCCAACCTGCCATAATTTAAGGGTTGGGCTTAAGATAATTTGAATT  
AAGTTCAATCTCAACCCCATTTAAGAGAATCCTCAATTGAGCCCAATTTAATTTCAATTTCAACCCATT  
TTAAGACTCTTTATTTGCATTGATGTAATGTATGTTCTTATATTGAAGGTATGAATTACTTTTGTATAT  
TTTTAGGATTTATCTATCCATTTGGAACCTCTTTTGTAAATTTCTTAAGTTGAAATCTAAAATGTGGTTAT  
AAAACCTAAATAACAATATATTTAAAATTATTGAGATTAAGTGGGTAAAGACCCAACCCATTTTAAAGCT  
CATTTGAGCCCAAAGTAACTTGGGCGGGTCAAGGCTCAACCCAATTTCTATTTCAACCCATTTTAAATATC  
TCCAATTTCAACCAACCCACCCATTTGACACCTCTAGTATGTTGTCTCATTCAATTAACCAGAAACACCTCA  
ATTGTTGTTTCCAAGATGTTTTTAGCATTGGTTATTTGTTCCAGTTCTTCTACTAAGTGGTTCTTTTAGGC  
TTTTCGTTTTTCTATATCCATCCACCCTTTTCTGATCATACTTACCAATCCAGCAATCTGATTATGTATAATT  
CTTCGACATGCATTGTTGTTGAACTCAAAGTCTGCCTTTAAGTTCAGTTTCCTTTCTATTAACCATAATC  
AGATTGCCTACACTATCATACGATTGCTATTGCTGTTCCGCTAAATCAATGAATCCCTCTATAGCTTTTTTC  
ATTTTCTCGAATTTGCATTAAGATTGCCCCATTTCCAAGTCTGCACTCTGCTGGAATGGATGTATGATTGG  
TAATCATCATATGCTTTGAAAACCTGAATATCACATTTCAAAGAAATTGTATACACAAATTTCTGTGTATT  
CCACCTCATAAGTTTACTGTACATGCTATTGTATTTATACAAAACCTAGGTCTAAATTCTGTACCAAATAA  
ATGAATTAACAATGATTATTTGTACACTTGGCACCTAATTATTGGACTACTTTGTAACAACTCTAACAG  
CCATTTTGCTCTTCATGTGCCTTCCTGTGCCTAGGTTGAGAATCTTCTAGACCTTGTAACACTGGTTAGG  
TTGAGAATCTTCTAGACCTTCTGATTAGGTTTCCTAGAACTTTTGTCTTTTTGGCATGTTATTTGGCACA  
AATCTTTTGGTTCTTGAAAAGAAATGTTGGAGAAGGTTCAATTCGGTTTGCAAGTCCGGCATGCAGCTCG  
AATATGTCTATATGATAAGTCACTTATGTTTCTTTGTTTCTTAATTTCTCCAAGTTAAGATTTTTCTCACA  
GGGAGTCTAGTCTAGATCATGGATAATGAGTAGTGGTGATTGAATATTGTTGAATTAGTCAACTTAACTA  
GGAGGCATCTTACATGATAATGGGAAGTTTTATTTCAGTCGATCAAGGAACCCATATCCCGAATCTTAAA  
ATTTAGATCCACAACCGATTCCGAGCAACTTAGTCTAAATTAAGTCGACCCAAACATGTTGAAAGAAGTT  
GCAATTCTCTCAGAAAATTGACTTTTCATTTGCACTCCACGTCTGTAATATTCTTGCCATATTCCCCACTT  
TCCTTCTCCGTGTGGTAATACTTTAGGGAATTTGTAGAAGAACAAGTAGTAGGAGAAGTCAAATGAC  
TTGAGCGATTGATAACAATCATGGTTCATCAGTGATTGTTACATAGTTTTATGTTATACTGATTCCCCAAAG  
TTTAATTTCTTTTCAATTAACCTGTGCTGTTCAAATTTTCTTTTATTAACCTTACTGACTCATCTTATTATT  
TTTTATTTAATTTAATTTGTGCTGTATATTTACGGCAGTTGATGTCAAGCCCCCTCAAGGCAAAGA  
AAGAGTGTAAGAAAGCAGCCATAAAATGCCCACTCCATCACCTCAAAGTGGTCAAATTTTCGGGGTTTT  
ATACAGGCTTATTTCAACTTGAACCTCGTTAGGTACTTTTTGGAAAATGTTGTTGCTCTTGAGAAAATCATT

ATTGATCCAGGTA CTCCATTTTTTATCGTACCCCTCCGTGCCCTAGCGAAATCAAACACACGCAA ACTTC  
AAGAAATCTTGCCAAGCTCCAGGTTGAACGTGAAGTGCCTCCGGCTATTGAGTTGGTCATACTTTAATGA  
AAATAATAATGTTATTAGGGTTAAATTTGTGATACATATCGGAGGTGAATTTTTATTCTTAGTAGATGTT  
CCTCATGCTTTGTTTCATAATTGGGTGATTTTCACTTTTTGTGAGGTTTATATTGCTATATGAAATATGGG  
GATTTTCAAATGAAAATGTCGCAGTTATTCCGCCA

>PGSC0003DMG400017966 LRR-RLPs

ATGGCTTTACAAGTTGTGAATTTGACCCTATTAAGAGTGCTTGATCTTAGTGGTGTAAGCATCTCTCCAC  
CATTCTCTTAATTTTTCTTCTCATTTTACAACGCTGGTGCTGGGCATT CAGAGTTGTATGGAGTAATAC  
CGGAGAGTATTTTTACCTGCCCAA ACTAAAAACTTGACTTATCCATCAATTATCATCTCAATGGTTAT  
TTCCCAAAGACCAAATGGAACAGCAGCGCATCTCTCACAGATTTAAATCTCCAAGGAGTGAATTTTTCTG  
GTTATTTGCCTGAGTCTCTTGGTTATCTAACATCACTGAATAATTTGTTTCTTATTTTCTGCAATATCTGGG  
GGCCTATTCTGAATCTCTTTCGAATCTCACTCTCATAGAGTATTTGTTCTTACAGGTA ACTTCTCAATG  
GAACAATACCATCATCGATATTCTCCCTTCTTCACTAACTGATTTAGAATTGAGTAATAACCATTTTTCTG  
GTCAGCTTGAGGATATCAAGTCCAATTCATCTATTGATCTAGGCAATAATCAGCTGCAAGGCCA  
TCTTCCCGAGTCAATTCAAAACCTTGTAACCTCACA ACTCTTGATCTTTCTTTCAATAATTTTAGTGGTAG  
TGTGGATGTCAGCTTCTTTCAGACCTCAAACATCTTTCATCTCTTGGTCTTTCATATAATAGCATCTCATT  
CACAAATGAAAACAGAGTTAATTTTACTTTGCCTGAGTCACTTCTGTACTTACGGTTGGCTGCCTGTGAA  
GTGAAAGAATTGGGGTTTCTAAGATCCGTAAGAAGCTTGAGGACTTAGATCTTTCTAATAATAAGCTTC  
AAGGAAGATTTCCAGATTGGGCATCGTCTAACTGGATGTTTTATTGAAA ACTCTTAATCTATCCCACAA  
CATGCTGACAAGTGTGGACTTAACTCCTTTTCAATCTTTACAAACAATTGATTTGCGATCCAATTCTCTTCA  
AGGGTCCCTATCTATGCCACCAAATTCCACAACATACTTCTTCATATCAGAAAATAATCTTAGTGGAGAA  
ATTCCTTCGTCTATTTGCAACTTGACATCATTAGTAATGCTTGATTTGGCGAGAAACA ACTTGAAGGGAG  
CAATTCTGCAATGTTTGGGTAATATCAGTAGCCTCCAGGTTCTGGATATGCACCACAACAGTCTTACAGG  
GACTCTTCAAACACTTTTAGATTTGGAAGTTCTCTGAGAAGCCTCAACTTGACGGCAATAAACTAGAG  
GGGAAAATTCCCAATCTTTGGCCAATTGCAAAGAGTTGCAAGTTCTTGATTTAGGAGATAATCACCTCA  
TTGATATATTCCCGATGTGGTTGGGAACTCTTCAAAGCTGCAAGTATTAAGCTTGAGATCCAATGAATT  
GCATGGGTCCATTAGAACTCCAACGATTGAAAACATATTTCTAATCTTTCGAATGTTAGATCTCTCTTCCA  
ATGCCTTCACCGAAA ACTTACCAACGGGTTTGTTC AACATTTGAAAGCCATGAGGACAATTGATCAAAC  
TATGAACGCACCACATTATGAAGGAACTGATGGATATTACCAAGACTCGGTAGCTGTCGTATCCAAGGG

ATTTGAGCGTGAAATTGGGAGAATCTTGTATTTGTACACCGTTATCAATCTTTCAAGTAATAAATTTGGA  
GGGCAGATTCCAAGTATCATGGGGGAACCTATTGCAGTTCACATATTGAATATATCTCATAATGGATTGG  
AAGGTCATATATCGTCATCACTTGGAAAGTTTATCTTTGGTTGAATCATTGGACCTGTCAAGTAACCATCTT  
GTAGGAAAGATACCAGAACAATTTGCTTTACTTACTTCTCTTGAAGTCTTCAATCTTTCCTACAATCATCTT  
GAAGGGTGCATTCCCTCAAGGAAATCAATTCAGACCTTTGAGAACAATTCATATGAAGGTAATGATGGA  
TTACGTGGATTCCCACTTTCAAAGGCTGTGGTAATGATTGAGTATCAGAGACAAATGATACCGTTTCTG  
AACTAAATGATGAAGAAAGCAATTCTGAATTTCTGAATGATTTTTGGAAAGGTGCTCTTATGGGCTATGG  
GAGTGGACTATGTATTGGATTGTCCATTATATATTTTCATGATTTCAACTGGAAAAGTATGATGGCTTGA  
AGAATCATTGTAGAGCGGGAGCACAAAATAATGATGGGAAGGAGAAAGAAGCAGGGGAAGGCAAAGG  
AATAACAGAAGAAGAAATAATCACTTCTAG

>PGSC0003DMG400017967 LRR-RLPs

AAGGTCTCTTACTGAACTAGATTTGAGTTCTAACTCTCTTAGTGGTTCTATTCTACTTCATTGGGGAATT  
TGAGCAGGTTGACCTATTTGCATCTTTATGAGAATCAGCTTTCTGGCTCTATTCCGGAAGAAATAGGAAA  
TCTTGTCAATCTTGTTCAAGTTTTCTTGATACAAACCAATTAACAGGTCATATACCAGAAGAAATAGGA  
AACTTGTCAATCTTGTTCAAGTTTATCTTGATGAAAATCAATAAACAGGTCATATTCCGGCAGAAATAG  
GGAAGATGAAGTCACTTCAGGAATTAATCTTATCACGTAACAATCTTTCTGATCTAATTCCAAAACTATA  
GGCGACTTAACAGAGCTCAAACCTTCTGTACCTTTATAGCAATCAACCCTTTGGCCCAATTCCTAGTGAGTT  
AGGGAACCTGAAAAACCTCAATACTCTGTTATTATCCAATAATGAACTCAGTGGTTCAATTCCGTCATCCT  
TTGGTAATTTGAGAACTTGCAAGTTCTGTCTCTCAATGACAACAATCTGATTGAGGAAATTCCTTCATCT  
ATTTGCAATTTGACATCACTGGCAACCCTGTATTTGTCAAGAAACAATTTGAAAGGAAATATTATGAAAT  
GCTTGGGTAATATCAGTGCCCTCCAGTATGTGATGATGTCACATAATAATCTCAGTGGAGAGCTCCATCC  
GTCTATTTGCAATTTAACATCGCTGCAAATTCTAGATTTGGGTAGAAACAATCTAAAGGGAGCAATTCCG  
CAATGTTTTGGCAACATGAGTGGTCATCTTGAGGTTCTGGATATGCAACACAACAATCTTTCTGGGACTC  
TTCCAATTGACTTTTAGAGCTGGAACACTTAGAAGCTTCAACTTGCATGGCAATAAACTAAAGGAAAAAA  
TTCCCAAATCTTTGGCCAATTGCAAAGAGATGCAAGTTCTTGATTTAGGAGATAATCATCTCAACGACAC  
ATTCCCGATGTGGTTGGGAACTCTCCTGAGTTGAGAATTTAAGCTTGAGATCGAACAAGTTGCATGGA  
CCCCTTAGAACCTTAGGAAGTGAAAATATGTTTCTTGAGCTTCAAATCTTAGATCTCTCTTGCAATGCTTT  
CTCTGAAAACCTTACCGACAAGATTGTTTCGACATCTGAAAGCCATGAGGACAACCTGATCAATCAATGAA  
GGCATTAAAGTTTTGAATTCATCCATATTACCTAGACTCGGTAGATGTCGTAACAAAGGGATTGGAGCTT

GAAGTTGTGAGAATCTTGTCTTTGTACAACGTTATCGATCTTTCAAACAACAAATTTGAAGGACAAATTC  
CTTGTGTTCTGGGAGATCTCATTGCACTCCGGGTTTTGAATCTGTCTCATAATAGATTTCAAGGTCATATA  
CCACCAACACTTGAAATTTATCTTTGGTTGAATCATTGGACCTTTCAATTTGCCAGCTCTCGGGAGAGAT  
ACCAGAACAAATTGCTTCTTACAGCTCTTGAATTTTTAAATCTTTCCCACAATAATCTTGAAGGATGCA  
TCCCTAGAGGACCTCAATTTGCCACATTCAGAACAATTCATACAAAGATAATGATGGATTACGTGGATT  
CCCCTTTGAAAGATTGTGGTAACTATGATGGGGTATTAGAGACAAATGATACCATAGCTGTGCTAGA  
CGATCAAGAAAGCAATTCTGGATTTCAAATGATTTTTGGAAAGCTGCTCTTATGGGCTATGGAAGTGG  
ACTATGTATTGGATTATCCATAGTATATTGCATGTTCTCAACTGGAAAGCCGAGATGGCTTGCAAGAACC  
ATTGAGAAGCTGGAACACAAAATTATTAATAAAGGAGAAAGAAGCAACGGTGTCAAAGGAATTATAG  
AAGATGAAGTAATCGCTTCTGGACAAGTTACCAACGGAGCAAGATTTGATTCAAGTTAATATCTATGCTG  
GTCTGTAAATTTATTGTGAGTATTTGGTATTCATACTAAGCATGTTTGTATTTTCATTAAGTAGAAGCTTTT  
AAAAAAGATTAGACTTTGTTGATGTTTTAAGCTAGTAAAAGTTTACTATGTATACCGTGCGACAGAGG  
AGTAATTATATGAATAAAATTATAAATCTTTACCGTAATTAGTTGAATCTGTTTTATTAAGAAAATATAAT  
TTGACTGGTTTTAAGAGTCGCCACTTAATTTTTAAGAAAAATCAAGAAAACACTATTGTTTTCAAAGAC

>PGSC0003DMG400017968 LRR-RLPs

ATGTTCTCCCTCCATCACTAAGTTATTTAAGATTGGGTTCTAATCAATTTTCTGGTCAGCTTGAGGATTTT  
AAGTCCAATACACTAGTCTGGATTCAGTTACAGGGCAATCGGCTGCAAGGCCATCTCCCAAGTCAATTC  
AAAACCTTGTGAACCTAAAATATCTTGATCTTTCTTTCAATAATTTTAGTGGTAGTGTGGATGTCAGCCTC  
TTTTCAGACCTCAAACAGCTTTTCGTATCTTAGTCTTTCATACAACAGTATCTCATTGACTAATGAAAAGGA  
AGTTAAATCCAGTTTGCCGGAGTCACTTGAGTACTTACGTTTGGCTGCGTGTGATGTGAAAGAATTGGA  
GTTTCTAAGATCCGCAAAGCAGCTTTCCGATCTGGATCTTTCAAATAATAAACTTCAAGGAAGAGTTCCT  
GATTGGGCATGGTCTACTTGGAAATTTTTCAGTGTCAACTCTCAATCTATCCCACAATATGTTGACAAGCAT  
GGATTCAATTCCTCTACAATCTGGATATATAATTGATTTGCGGTCCAATTTTCTTAAAGGATCACTACCTA  
TTCCAGGGAATTCACAGCATTCTTCTTCATATCAGAAAATAATCTTAGTGGGGAAATTCCTTCATCTATT  
TGCAATTTGAAATCAGTGCAACTTCTAGATTTGGCGAGAAACAACCTTGTGATGGGTGCAATTCACAATGTT  
TGGGTAATATCAGTGGCCTCCAGTTTTGGATATGCACCACAACAATCTTTCTGGGACTCTCTCAATGGC  
TTTTGGAATCGTAAGTGAGCTTAGAAGCCTCAACTTGCATGGAAATGAACTAGAGGGGAAAATCCCTCG  
ATCTTTGGCCAATTGTGAAGCGTTGCATGTTCTTGATTTAGGTGATAATCACCTAAACGACACATTCCCCA  
TGTGGTTGGGAACTCTGCCATATCTGCAAGTTTTAAGCCTGAGATCAAACAAGTTGCATGGATCTATTAG

AACTTCAAGGATAGAAAATGTAACAAACTCAATTCCAGCAGAAGCACTCTTATATATATTAATTACTGAA  
TACAAGTTACAAGATAGAATATGCACAACAAAGTAA

>PGSC0003DMG400017969 LRR-RLPs

AACTTTTTGAATTGCTTAAACAACATGGGGCTCTCAGTTGTGTTCTTAATTATCTTTCTTTATCAGCTTTCT  
TGTTCTTCATCCATATTTCTGTGTCCCAAACATCAAAGCATTTCCTTCTAAAATTCAAGGAAACATTTACT  
ATAAATCTCTATGCTTCTTAGATGTTATTTCCGCGGTCAGAAGCCTTATCCAAAACGAGTTCATGGAA  
CATGAGCAGAGATTGTTGTTTATGGGATGGAGTCATATGCGATGAGATGACTGGCCATGTCATTGAACT  
TGACCTCGGTTGCAGCCGTCTTGTTGGAAAGATTGATTCCAATAGCAGCCTATTCCAACCTCTCATCTCC  
AAAGACTCAACCTTTCTTGAATGAATTCCACGGTTCATATCTAGCCTAAATTTGGTAGGTTCTTGAGC  
TTGACACATCTTGATCTTTACAACCTCAATTTCTCAGGTCAAATTCCTTCTGAAATCTCTCATCTTTCCAAC  
TACACTCTCTTTGTCTCTATGGTACAGGTAGTCTACGACTTGTAGCTCACGATTTTAAATTGCTTCTTCAG  
AACTTGACTCAATTAAGAGAGCTTGATCTTACTTTCATAAACATCTCTTCCACCATTCCCTCTGAATTTTTCT  
TCTCATTTAAACAACCTCTGAATCTGGGATTTTCAGGATTGTATGGGATAATACCGGAGAGTATTTTTTCATC  
TTCCTAATCTGGAAACACTTGACTTAAGTTACAACATAAGCTCAATGGTTATTTTCCAAAACCAAATGG  
AACAGCAGTGCATCTCTCATATTGTTAGATCTCAGTCGCGTGAATTTTTCTGATAATTTGCCTAAGTCTAT  
TGGCTATCTAACTTCGGTGCATTCTTTGTCCCTTCAAATTGCAACCTTAGAGGGCCTATTCTTGAATCTCT  
TTCGAATCTCACCCGCATAGAGCATTGTACCTTCAAGATAACTCCCTGAATGGAACAATACCATCAGGG  
ATGTTCTCCCGGCTTCCATCACTAAGTCGTTTATACTTGAGTAATAACCACTTTTCTGGTGAGCTTGAGGA  
TTTCAAGTCCAATTCAGTAAAAATATTTTCTTAGGAGGCAATCAGCTGCAAGGTCAAATTACCAAGTCA  
ATTCAAACCTTGAGAACCTAAAAGTTCCTTCAATAATTTTAGTGGCAATGTGGATATCAGCTTGTTTTCA  
AACCTCAAACAACCTTTTGGGTCTTAGTCTTTCATATAATAAGATATCATTGATCAATGAGAACAAAGTTAA  
TTTTACATGGCCTGAATCTCTTAATACGTTAGAATTTGCTGCATGTGAAGTGAAAGAATTGGAGTTTCTA  
AGATCCGCAAACCAGCTTTTGGATTTGGATCTTTCAAATAATAAGATTCAAGGAAGAATTCCTGATTGGG  
CATGGTCTAACTGGATGTTTTATTGTAATCTATCCCACAATATGCTGACCAGTGTGTATTCA  
ATTCTCTTCAACATCATTTAACAATTGATTTGCGGTCAAATTTACTTCAAGGTTCACTACCTATTCCACCA  
AATTCCACAAGATACTTCTTAATATCCCAAATAATCTCACTGAAGAAATTCCTCCATCTATTTGCAATTTG  
ACATCACTGATAATGCTAGATTTGGCGAGAAACAACCTTGAAGGGAGAAATTCGCAATGTTTGGGTAAT  
ATTAGTGGCCTCGAGGTTCTGGATATGCACAACAAAAAATTTCTGGGAATATTCCAACAATTTTCAGCA  
ATGGAAGTTCACTGAGAAGCCTCAACTTGCATGGAAATAAACTAGAGGGGAAAATTCGCCGATCTTTGG

CCAATTGCGAAGACTTGCAGGTTCTTGCTTTAGGAGACAATCATCTCATTGACACATTCCCATGTGGTT  
GGGAACTCTTCCAAAGCTACAGGTTTTAAGCTTGAGATCAAATACATTGCATGGGTCCATTCAACCTCCA  
AGGATTGAAACTATTTTTCCCGAGCTTCAAATCATAGATCTCTTACAATGCCTTCTCCGGAACTTACC  
TACGAGTTTGTTC AACATCTGAAAGCCATGAGGACAATCGATTCATCAATGGAAGCACCAAGATATCGT  
GGAGATACATATTACCAAGATTCTATTACAGTTACAACCAAGGGATTTATGCGTGAAATTGTGAGAATCT  
TGTATTTGTACACCGTTATCGATCTTCAAGTAATAAATTTGGAGGGCAAATTCCAAGTATCATGGGAGA  
TCTCATTGCAGTTCACACATTGAATTTATCTCATAATGGATTGCAAGGTCATATTCCACAATCATTCCGGAG  
ATTTATCCTCAGTTGAATCATTGGATCTGTCAGGAAACCAGATTTCCGGGAGAGATACCACAACAAGTAGT  
TTCTCTTACATCGCTTTCATTCTTAAATCTCTCCACAATCATCTCCAAGGATGCATTCTCAAGGACCTCA  
ATTTCATACTTTTGAGAGCAATTCATATGAAAGCAATGATGGATTACGTGGATTTCTGTTTCAAAAAGTT  
GTGGCGATGCTCGTGTATTAGATACAAATGATACCGTATCTGAACTAGATGATGAAGAAAATGATTCTG  
AATTTCTGAGTGATTTTTGGAAAGCTGCTTATGGGCTATGGAAGTGGACTATGTATTGGATTATCCGT  
AATGTATTTTCATGATTTCAAGGGGAAACCCGAGATGGCTTGCAAGAATCATTGTAGAGATGGAACACAA  
AATAATGACGGGAAGGAGAAAGAATCAGCGAAGGAAAAAGAATTGCAGAAGAAGAAATATGTAACAT  
TTACTGTATGCATTTCTTGTTCAGTGAAGTGTATAATTTACAAATTTATGCAGTTTATTGCATCTTCTCA  
GCAACATCGCGTAATTTTTCCATTTATCATCAAGTGAACAAGGTAGGAACTCTTAAATCTTCTCATCAAT  
GCATTCTGCTGACACAACCTTTGACATCTCTGCTCTCCTGGAGCTAAAAACAGGTCATTGTCTGTTCTATG  
AAGGGAGACGGATATGTTTTCCGTAAACATTTAGTGACAATAAATTTTCTTTTCAAAAAACATATAGC  
GGTAATTGAGTTAATGTCATTGCATTCTAAATATCATAGAACTGGTCTCTTTTGGTTGTCGCTGACTTCA  
TTGACCATTAAACCGCACCTATAACTCTCATTATAGGCACAGTAGTGTGTGAACATGTACACTTCCATTCCG  
AAATTTCCACTACAAGACTTTGAAAAACAATACCAGTATTTAAGTTGTTACTAGA

>PGSC0003DMG400018045 LRR-RLPs

ATGTCTGAAGAGTACTTTAATTATTGGTGTATGAAGATTTTTTCCAAAAACAAAGTCTTGGAATGAGA  
GTAGGGATTGCTGCAGTTGGGATGGAGTCACTTGTGACTTATTAACGGTCATGTTATCGGGTTAGACC  
TACTTGTAGTCTGCTTCGTGGAAGTATTCATCCCAATAGCACCTCTTCCAATTCATCATCTCCACACAC  
TAAACCTTTATGGCAATGACTTCAATTATTCTTCAATCCACATAACATTGGCCGATTGAGGAATTTGAGG  
CATCTCAACCTTTCTAATTCTTTCTTTAGTGGGAAAATCCCAACAGAAATCTCATACCTTTCTAATTTGGTT  
TCACTTGATCTTTCTTCTTATTTTTATGGACTACAACCTTGATGAGAGAACATTTGAAGCAATGTTTCAAAA  
CTTCACAAATCTGGAGGTACTATCTCTCTTTCTTGTCAACATCTCATCTCCGATACCTGTGAATATTTCTTC







GGTGCTAGACTTAAGAAGGAACAATTTACAGGGAGTCTTCCCCATTATGTGCACACAACACTTCATTG  
AGTACCATTGTTCGTAAATGGTAATCGATTTGAAGGACATCTTCTGTGTTCGTTGCTCAATTGTAATGGTCT  
ACAAGCCCTTGATGTGGGGAACAATGCTATAAATGACACGTTTCCAGCTTGGCTCGAAACTCTTCAAGA  
GCTGCAGGTCCTTATATTAAGTCGAACAAGTTTCATGGACCTATAAGTACGTGTCAAATAAGTTTTGC  
TTTCCCAAGTTGCGAATTTTTGATCTTCTCGTAATGATTTTCAGTGGCTCACTTCTGCAAAAGTTTTTCGA  
AACTTCAAGGCAATGATTAATTAGATGACGAAGACACAAGAGGGATCACGTACATGGAATCTAAGTCG  
AATAATTTTTTTCATTACAGGCATCGTATGAGGATTCAGCGAGTTTGGTAATCAAAGGGCAGGATATTGAG  
CTACAAAGAATCAGCACAATAATGACAACCATAGATCTCTCAAGCAACCATTTTGAAGGTGTCATTCCGG  
AAACTAAAGGACCTCAGCTCACTTTGGCTACTCAATTTATCCATAACAATCTCATAGGTTATATTCCA  
ATGGAATTGGGACAATTGAATAAGCTTGAAGCTTTAGATCTCTCTTGAATCGGCTCACTGGAAAGATTC  
CGCAGGAATTGACAAGAATAAACTTTCTGGCAGTCTTAAACATCTCTCAAATCATCTCGTCGGACCAAT  
TCCTCAAGGTCCACAATTCAACACATTTGGAAATGACTCGTATGGCGGCAACCTTGATTTATGTGGTCTCT  
CCTTTATCAAACAATGTGGAACGAGTGATTCATCACATGTTCTCAACCAGAAGATGAAGGCGAGTCA  
TATTTTTTTAGTGGATTTACGTGGGAATCAGTAGTCATAGGCTATAGTTTTGGACTAGTTGTTGGAAGT  
TCATGTGGAGTCTCATGTTTAAATATCGTAAGCCAAAATGGTTTGTGGAATTTTTTATGTTGGTCTCT  
CACAAAAGAAGAAGGCCAAAGAAGAGAGCTCAGAGACGACGGTCTTAA

>PGSC0003DMG400018117 LRR-RLPs

TATAGTTATAGAGATATAAAAGAGAGGAGAAAAAAAGGGGAAAAAAATATCGAGATGCGATCTTAC  
CGTGTAATCGGTTATTCATGGATTAGTTCGTTCAGCCGGCCTGGCCTGCTTATAGTTGACGAAAAAGT  
TAGAGCTCACTGTTCTTCACAATTCAAAACCTCCCTTCCCAATTTCAATTTGATAATCTCCAGTAGCCATGG  
ATCCAAACCCTACCAATTTCCCAATTCTCTCTACGTCATGTCCAAGCTACCCAGTATGGGCCGTAGAACC  
ACCGCCACCGCCGATGAATTCGACATCGAAAAGCCCCAGAACCACCCTCAGCCTCCTCCAGAACCTCACT  
TCGACATCACCGAGCGTATGCCTCATCTCACTGACCCTAAGGTTGTCAACGCTATGCGATCAGCCGTTGC  
TGACGTGTCACAGACACGGTCAATGCTCAAACCCTGGGTGAGCGGCCTTTTACGAGCTTGTGATACT  
GCCAGGGTGAAGTTAGCTGAGATCGAGGCGGATATGTCCAAACGCTTGAGGAGATTGTCTTGTCTCCA  
CGTCCGCCAGAGATGGAGAGGCAGGATTGGAGATTGGACATGGAGGTTAAAGAGGACGAGTGTAGAA  
AGGCTATGGAGAAGGAGAAAGAGGAGTATAAGGCGTTGATAGCTTTGGATGAGTTGCACGAGGCGTA  
TGAGAAGATGTTGAAGGATGCGGAACAGAGGTTGGAGAAGATTTATGAGACTGCTGTTTCTGGTGGTG  
ATGTGGAATCAATTGGAGAGTCTTCTGGTGAGAAGAGTTCTGAGTTGAATGAGGAAGTGAATGAGGAA

GTGATCGGGATTTTGCAGGAGGCATTAGGGAAGAGTGTGGAAAGGGTTGATTTGTCCGGCAGGCAGCT  
GAGGATGCTGCCTGAAGCTTTTGGGAAGATTCACTCCTTAATTGTGCTTAATTTGTCCAACAACCAGCTT  
ACGGTATGCCCTAGTTCAGATAATCTTTCATGTTTCTTGTCTTCGACTCGTTTTACTTGATTTGAACTTGT  
GGTATGTATTAATTTTCAACTGCATGATGTCTTGTTGCATTTTCGTGCTACTTGATATACTGTAAATTGAAC  
TACTAATGATACTTTTACCCCTATACTGTTTGCACATCCATGTCAAATGCGTAGTTTGATATTTCAATTCAC  
GCGTGGAAGTAGCAGAAGTTTGATGGAGATCATATTGTAGAGCTATATAAAAGTGTGGTGTTCCTTTCT  
TTTTCCCTCCCTTGGGTTGAGGGTTAGTTTCAACCTATGATTGAACTGCCAAACTACAGGTCCTTTGGG  
TTAATCAAAAGTGTATATTTTCACTCAATGGCTTGTTGCGTGGTAAAAGTTTGATAACTTTTTTCTGGTT  
GCGGCCAGCATAATTTGAGGTACCACAAATTTACTGTCACGTGCTGGGACAAGTTGCGTTTAGAGGGTC  
TGAAGATGGAGTTTTGCACCATTCCCATGCTTTACTCGGAGCACTCATCTAAGTTATCTTATTTTATTTTT  
CACAATCAGAAGCTGTTATCAAACTCTGTTACATTGCTTACTGCTTCTTACTATTGTAACTGATCATCTT  
TTGGCTTTTTGAGATGCTTTTTCTTTTATGAAACAAGACTCAATCTTAAAAGAATGACACTATCACTACT  
GGGGAGTCAATACTTTTTCTTAGACGGGGATTTTTCAAATGCTTTTTAGATACTTTCAAAGTTAAGAAA  
TCAATATCCATATCCAAAAGAATCAAGTGCTGCACTGAGCTGGTTACTTTGAACCTCACCATGCTTGAAG  
TTGCAATTTGGTACCTTCACTACGATTTGATCATAGGACGGAACCCCAATGCATATGATTAAAGGGGCTA  
CTAGGTTTCTTTGACTGGTAAGGTGCAAGAACCTTCTGAACCTACTCTAATATCTGATTATGCTAAATGT  
TAATTGAGCACCGGTTCCCTCTTCTTGTCTTTATCTCTTCTAGGAGAAGAACATTTACTTGTGCGCATTATT  
TCTCATTCTGGTTCCACTTTGTTTCTTGAATTATAACATTGTTCTGCACTTTGCGCTCCTGATAGCTGTCTT  
CCAGGATCCAAAGTCTCCAAAATATAGTATTGACTTCCACATTCCAGTTTATCTGTCTGTTTTTGTCTT  
CTGCTGATTGATTGACCACTTCCAAAGTTAAATCTGATATTGATTAGTTTCATATATGGAAAAATGCTAAGT  
AGCTCGGACTCTTCACTTTTGGTGCCGCACCCGTGTCGACACGACATGGATGTGGGTGTGGGATCCGTG  
TCCAATTCGGTCAACGGATTTTGGTACTTTGACCAAATTGATGGGGAAAGTCTTGGGACAATTTAAT  
GATTTCTATAATCAATACAAAAGCTAAGGTGAAATTGAAGAAATGGAATACCTTTTATATAGAAATTTCT  
ATGTCACTCCTTTTCTTTAATCTCCTTCCAAGTTTTTCTCAAGTTCTCACATAATATCTCATAATTTAGGT  
TTTATAACTCTATTTTATAGATATTTAATTATTTTATAGCGAATCCCCGCATCCGTATCCATACTTGGATCC  
ATATCCCCGGCTCTTAAAAATTAGATCATGAAGGATCCAACCTCTAGATCTGCACTCGTATCGGACACCC  
GCACCCGAGTCCGAGCAACTTAGGAAAAATGTAAGTTAGTTACTACTACGAAAAGTACTAGAGGCTG  
CAGTTTTCATTGTAAGAATGTGATTAAAAGATACATTCAGAAATGTTAGTCTAAGATCAATCTGTTTGACT  
ATTCATTATTGGGAAGCGAAAAGGGATAGCTAATTTTATAGAGTTAGCAGTGAATGTGATTTTGTGAT

ATTTACTATTTGAATTGGCAGAAAATTCCAATACTATTACCTGAGCTACAGAATTTTCATAGCAAGTGTA  
AGCTCTAAAAAATTTGCTTTTCATCATAATATAGGTGTTAATCACTCAACTACTACTACATCTATAATTAG  
TAGGGGTCAGCTATATGGATCCTCATAAATACTTTCTCTTGACACTTGAAGCAATATGCTAACTACCTTA  
AAACCCAAATCTGAATGATGTCCATTGTGATGTGTGCGCCGACAATCCATTCTATTTAGAGAAGCAGTTGT  
CACTTGATCATTGAAGCTAGTCCCATTGCTAAAATCTATATATAGTTTAAACAACATCTGTATCCACTGGAC  
AGGTAACCTACCAATTTGTGTCTGATACTTCTCTGCCACTGCCTATTAATTGCATCATATCCCTCATTGAAT  
CCACTTCAAGAATTTCCATCTGACAATTGCATAATAGTTTCCACTGTAACATATATTTATCAAAAGTCC  
AACATTGTTCTTCGTGATAGTTGAATGAGAACAAAATCAAGCTGTTTGGCATTCAAATGTTTGTAATTTT  
CTGCTTCTTAATTTTTTGGGGAAAACAGGTGGTTCCTGATTCAATTGCGAGCTTGAAAACCTTGAGGAG  
CTGCACCTTTCTCAAATCTTTTGAATCACTGCCAGACTCCATTGGTCTGTTGTTTAGTTTGAAGATCTTA  
GATGTCTCTGGAAACAAGCTTGTCACTTTGCCAGATAGCATTGTCATTGCAGGTAATAGTGGTTCAGAA  
ATAAGCTATTTACCCGTTTTCCAGCCTGAATACACTATTTTGTACTCTTGTTAGTTCTCTCAGATACTCTT  
TGTTATGGTTGTGTTTGCAGGTCGTTAGTGGAATTTGATGCAGGCTTCAACAAGCTTTCTTATTTGCCAAC  
AAATATTGGCTATGAAGTGGTAAATGTAAAAAGGCTTTCACCTTCTTTTAAACAAGCTCCGTTCCCTACCCA  
CTTCCATTGGTGAGATGAAGTCCCTACGCCTTTTAGATATGCACTTTAATGAAGTACATGGGCTTCCACAT  
TCATTTGGGAACTTGACAAATCTTGAGATCCTCAACCTAAGCAACAATTTAGTGATCTCACTAAGCTTCC  
TGACACAATTGGTGACTTGATAAATCTTAAGGAACTTGATCTGAGTAACAATCAGATTCATGAAGTGCCT  
GATACAATTAGTCGGCTTGACAACCTCACTGTGCTTAAGTTGGATGAAAACCTCTTGTGATACCTCCAA  
AAGAAGTTGTAGTTGAAGGGGTTGAAGCTGTAAAGGCTTATATGATTAAGCGTCGGCTTGACATACTGT  
TGGCAGAAGAGCCAGAAATTATGCTTGAAGAGGTGGGGCAGACACCGACAGGCTTATTAAGTGAAGT  
ACCTCCTGGTTGAGTGGTACTGTTTCAAATGTTCTTGGAACTGTTGCAGGGTATTTGGGTGGTGGAGGG  
AAGTCAGATCCAGACCATTATCTCAACCAACAGTTATGACTTATGAGGCTAATGATTTCTTTCCTTTAAG  
CCTTTTCACTTCTGTCTGTTTCCGTTGAAAGAATATGGTTGATATGGACCAGCTACGCCTTTCCTTTCCTT  
TTAATTTTTCAGTTTGTGTTGAAGAGAATTGAAGGATGTTGGTGTGTTTGCAGTCTGAACATTTATATG  
TTACAATAATACAACTAGTGTGTTTTGCTCTCTAGCTTCTAAAATGTCTGTGTTGAATATTTTAAATCAGA  
CTTGACAAGGGATCAAGGCCCAATAGCAGAGGGAGCAAATATAATCTCTCGCGAGTTCCTGTTATGCAA  
GGTGTCTATTTGATGGAAGTTTTATATCAATTCTCTTTTCTGGCAAAGTAACAGGATTTAGGAATCAAA  
CTATACCTCTCTCAAATGTATGAGTAGTCGTTACGCC

>PGSC0003DMG400018163 LRR-RLPs

GTCAAGTTAGGACTGTAACTTTCCTCCTATCTCTCTTAGCAAATATATTAGCTTCATGCTACTCATAAG  
TTTCATTTTAAGTAAAAACCAGCCCCACAAATCTTTCATAAATTATGCATTTGTTAATTTAAGTTCCGAG  
GTTGTGTTCCATTACAAATATTGGCATGGGAAGTGTTCTTTTTCTTATCTGCTGTTTTCTTGACAGCAG  
TTAGTGTTGTTCTTGCTGTTTCTTCAGCAGATGGTTCATCTGATTCGTATCGCCTTTTGAGAATAAAGTCA  
GAACTTGTTGATCCAAATGGAGTTCTTGAAAAGTGGTCTGAAGGGACTAACATGTGTACCTGGAATGGA  
GTGGCATGTTGAGATGATAAATCTCATATTGTGAGGCTCAATCTTACTAGTTCAGGACTAGAAGGTCAA  
TATCTCAAGAATTCGCGCATCTCACTTCTTCGAGTGATTGATCTTTCGGACAATTTCTTAATGGAACA  
ATCTCTCCTGCATTAGGAGAGCTTCATAACTGGAGGAATTGCTTCTTTCTCTAATTTCTCACTGGTGA  
GATTCCTTCGGATATCGGTGTTTTGAGGAAGTTGCAAGTCTTAGAATTGGAGCCAACATGCTGACAGG  
ACAATTGATACCAGAAATTGGTAACTTTCTGAGTTGAGAGTGTTGGCTGTTGCTTATTGCCAATTCAGT  
GGAAAGATACCAAATGAGATTGGTAATTTGAAGCAGCTGATAAATCTTGACTTGCAGCAAAACAGTCTT  
AGTGGCCCCATACCAGATGCAATTGGCGGCTGCAAAAATCTTCAAATTTTGCAGCATCAAACAACAGG  
ATTGAGGGAAAGATTCTGCTTCAATTGGTCAGCTCAAATCACTCGAAATCTTGAACCTGGCAAACAACA  
GTTTTCTGGTTGATTCTGTTGAGCTGAGCCATCTTCCAATTTGAAGTACTTGAACCTGTTTGGCAAT  
GAATTGGAAGGAGAAATTCCTTTGAGCTTAACAAGTTGGTTCTGGTTGAAACATTGGATTTGTCAAACA  
ACAATTTTCAGGAACCATAAGGCTTCTCAACACTCAGCTGAAGAATCTTGAGACTTTATCACTCTCTGGT  
AACTTCTTAACAGGAAGCATCCCGAGTAACTTCTGTCTCCGTGATTCAAGCTTAAGCCTACTCATTCTGGC  
TGACAATAAGCTGTCTGGGAACCTCCCGTTGGAGTTATTGAACTGCACGTCCATACGACAACCTGGATCTC  
TCCGGTAACAGCTTTGGAGGAATGCTGCCACGAGGCCTCGACAGGCTAGAAAGTCTCACAGACCTCTTG  
CTCAACAATAACAGCTTTACTGGAACATACTCCTGAAATAGGAAACTTGACTAACTTGGAAAGATTTGT  
ACCTGTTTCATAACATGCTCTCTGGTGAATTCCAGTTGAAATAGGAAAGCTTCAAAGGCTGCGTGAAC  
ATACCTCTACGAAAACAGTTGTCAGGAAGTATTCCAAGAGAGTTGACAACTGCTCCAGCTTAACAAG  
CGTTGATTTCTTCGGTAACCAACTTTGAGGATCTATTCTGATAACATTGGGAGGCTTAAGAATCTTGTTA  
TTCTTCAGCTAAGGCAGAATGAGTTGTCAGGTCCGATTCCATCAAGCTTAGGCTACTGCAGGAAGCTTCA  
AAAAGTGGCTTTGGCTGATAACAACTTTGAGGATCATTGCCACCAACTTTTCGATTTCTCTCAGAGATG  
GACCTGATTACTCTTTACAACAATTCCTTTGAAGGTCCACTTCTGAATCTCTTTCCCTTCTGAAAAATATC  
AGCAAAATTAACCTTTCTCACAATAAGTTCAGTGGAAACATTTTCCCTTAGCTGGTTTAGATTCTCTGAC  
AGCTCTGACTTAACAAACAACAGTTTCTCTGGTCTATTCCCTCTGAGCTAGCTTTGTCAAAAAATCTAA  
CCCGTCTTCGCCTTGCTAATAATTTTTTCACTGGAGAACTCCCTTCTGAATTCGGACAACCTGAGGATCTC

AGGTTTCTTGATTTATCATTCAACAATTTGACCGGAAATCTAGCACCTTCCCTTGCTGGTCTTAAAAACCT  
TGGTCATTTTCTCCTTAGCTCTAACCAATTCTCGGGTGAAATCCCACATGGTTAGGAGGCATAGAAGAT  
CTTGGTGAACCTCGATCTTTCGTTCAACAACCTTCACTGGAACAGTTCCAACAGAAGCTTGGAAACTCTCCAA  
AGTTACTCAAACCTTCTCTAAGTTACAACAGATTATCAGGCCCCATACCACCAGAAGCTAGGCAATCTCACA  
AGTCTAAATGTCTTGAATCTTCGAAGAAACAATCTCTCTGGTTCCATCCCTTCAACTCTTCAAAAATGCCA  
AAAGCTCTATGAGCTAAGGCTCTCTGAAAACAACCTTAACAGGCTCAATCCCTTACGAACTTGGTTCTTTAT  
CCGAATTACAAGTAATACTAGACCTCAGCAAGAATCACATTTTCAGGTGAAATCCCATCATCACTTGGAAA  
CCTTGTAAGTTAGAAAAGATTGAATCTTTCATTCAATCAACTTCAAGGAAAAGTCCCACCATCACTTGGAA  
AGGTTATCAAGTTTACATAGACTCAATCTTTCATATAATCATCTTCAAGGCCAAATCCCTTCCACATTTTCA  
GGATTCCCCTAAGTTCTTTCATGGGAAACAATCATAACCTATGTGGCCCACCATTACTATCTTGTCTGA  
ACTAAAGGAACATGAGAGAATTTGGGAGCTGTCAAAGCAAGTGTGTAGGGATAACAGTGGCTATTG  
TGTTAACAGCAACAGTTATATGCATGGTTCTGCTTTATATCATGCTGAGGATTTGGTGCAATTGGAGAAA  
AGTTACAATTTCTGCTCAGAGAATGGTGGAATTGAGAGTAAAAGTAGACAAGGGGAAAATTGGGTAT  
ATGGAGAAGAGATCAAAAAGTGGACAATATTGGAATACAACATCATTAGTTTCATCTAAAGAGAAGCAAA  
TATCTAAAGGGACTTGCATGTTTAATCTTAGTGTAAGTTCATCAGATAGCACAGAAAAACCTTTAGTTTA  
AATTAAGAGGTGTTTTGTTTTGTTTTGTCTCTCTACTTTGTAAATTTCTTTGTGATGTGTTGAGATTAATTT  
GTTTATGTGGGGGTTTACATGTAAAGAACAATCACCTTATGAAAACCTCCCATCAATTCAAAGACGTACGC  
GTG

>PGSC0003DMG400018308 LRR-RLPs

GTTGTTAGACTTTTCAGATTTTTCATTTGATCTTTGTCTGTACTTTGATCAATATTCTGAAGATGAGTGTATC  
TAAAAAATTCATTCAACAGCTTATTCTGTTTGACATATTCATCGCGCTGTCAGTTACCTGTGGTGTGTGT  
TCAGCTCAGGAGTTGGTGATGGGAATATCAAGTGCCTTCAAACGGAATTAGAAGCTCTTCTCAGTTTCAA  
ACGGGAGTTGTTAGATGTCCGTGGACGTCTTCTTCGTGGGGAAATGAAGGATTTAATCAAGATTGTTG  
CACATGGAGAGGTGTCCAGTGTGACAATCAAACCAGTAATGTCATTAGACTCGATCTTCGTGGTCCTTCT  
GGCCTCAATGCATCCGTTGCCACTGAGCCATTGATAGGTAAGATAAGTCCTGCCTTACAAGTATTGATGC  
AATTAAGTATTTGGATCTTAGTTACAATCGAATTTTCAGGAGGTATACCGGACTTTCTTGGTTCTCTGAGT  
AAGTTGGAATACCTCAACTTATCTTGTGTTGGTGATGATTTTACGACAGTTCCTAATCTTGGCGATCTTTC  
TAGCTTAAACACCCTTGATTTGAGCTATAATGATTTCTATCTGTGAATAACCTTGAATGGATTTTCGCGTC  
TTTATCAATTGAGATACCTTGCTCTACGTTATGTTAATAATCTGAATAGTTGTGTATATACCTGGCTGTTT

AAGTTAAGCAATCTGACTCACCTTGATCTCTCTGGTAATACTTTATATGGTCAAATTCCTGATGCTTTTTG  
GAGTATGAAATCCTTAAAACACCTTGATCTGTCTCGGAATGCGCTTGGAGGTGGCTCCCTAGATGTCTT  
GGTAACAGTAGTAATTTGAAGTTATTGCGACTGTCTTCCAACAATCTAGACGGGCAGCTACCTGAGATA  
ATGAATAACTTGTCATGCGTGTACATTCTCTCGAGTACCTGAACTTAGAAGAGAATCACATTGGTGGTT  
CACTGACTGATGTTGTAGCTAAGTTTGCATCTTTGAGAGAGCTGAGGCTCGGACGTAATAAGTTGAATG  
AATCCATCCCGGGAGCTGTTGGAAAACTTTTAAGTATTGTTCTTTTGGATTTATCTTGGAACAGAATCAC  
GGGATCAGTCCCTGATCTTTTTCTGTTATCGTCGTTGAGGGAATTATATCTTCTCATAATCAGTTAACTG  
GTGTAACGGAGAGTATTGGATGTCTTTCCAACTTGAGAAGTTGTACCTTGACTTCAATCAGCTTGAAGG  
CACAATATCTGAAGCTCATTTGTTCAAGCTCTTGAATTACGTGAGCTGGACCTCTTTATAACTCAAC  
TACATATTCGAGTCAGTTCAGATTGGATCCCGCCTTTTCAGCTGGATCTCATTGTTTTACCCACTGCAAA  
TTGGGTCTCAATTCCAAACCTGGCTGCGGAATCAGAACAACATTTCCGAGCTTGATTTCTCAGCTTCTG  
GAATTCGGGTGACGTTCTAGTTGGTTCTGGGAGCAGTTGCCTGGATTGACCTTCTTAAACCTTTCTTAC  
AATGATATAGGAGGAAATGTACCATATCTCTCAAAGAAGATGACTGATCTTCTTTGCATAGATTTGGCTA  
CAAACAATTACCGGTCCAGTACCACGATTTCTACCAGTGTTATAACAGTTGATCTCTCCAACAACATG  
TTTTCCGGTACCATCTCCTTCATTTGTGACAATTTTGATTATTTGGGATATCTTGACCTCTCAGACAACAG  
GTTGTCCGGAGAGCTTCTCACTGCTGGACGCTTAGAAGTATCGTGCATCTTAACTTAGGGACTAATAAC  
TTCTTCGGGGAGATACCTGATTCGATAGGCTCATTGCAGACGATGGGAATGCTGCACCTTCAAAAACAT  
CATTTAACAGGAGAACTACCTCAGTCCCTGGCAAATTGCAAAAAGTTGAGGGTTATAGATGTTTCGGTCT  
AATAACTTGTCTGGTGAATTCCAGCATGGATTGGGAATAACATATCTGATATCATTATTGTTATCTTAA  
ATCCAACAGGTTTAGTGGAAGCATACTTCAACCATATGCCAGCTAAAAGAATTCAAATCTTGGACTTA  
TCTGAAAATAAGATATCCGGGATCATAACAAAATGTATCAACAACCTCACTGCAATGACGGAAGAAGAG  
AGCACAATGCACCAAATCAAGAGTTGGTATTTTCAGGTGATGATCAAGGTGATGTCAAATAAATGCC  
TCATACGATGAAACTGCAGTTTTGATGTGGAAGGGACGACAATTTGAATACAGCAGCATACTTGGTATG  
GTAAAGAGCATCGATCTTTCAAGCAACAACATGGTGGGAGAAATCCCGTTGAAATTACATCTCTTGTA  
GGTTTGCACGGTTTGAACCTGTGAGAAACAACCTTAAACCAGCAGCATCCCTCTGAGAATTGGTCAAATG  
AGGGAATAAATTTCTTGACTTAAGCACAAATGATCTTACAGGGGAAATTCCTGCTAGCCTTTACAGT  
TAAGTCACCTGGGAGTTTTGAACTTGTCTTACAACAACCTTGTCTGGTGAATCCCTTTAGGCGAACACTTA  
CTGACTTTCAACAACAGATCTTACATTGGAATCATGGACTTTGCGGCCGTCCACTAACAGAAGCTTGCT  
CTCTGGAGGAACTGCCTCCAGACTCAACGTTGAGTGATGAGGACGAGTTTATAACTCCAGAGTTTTATAT

TAGTATGGGAATCAGCTTTATTTCTTCATTTTTGGGAGTCTCAGCTCTGATGTTGAATAGAAGGTGGACT  
TATGGTCTACTCAGATACTAGGAAATCAATAATGTAACATCACACAGTTAAATGTAGGTTTACTTAAATA  
CCATGATAAGGAGCTATGTAATCTTGAGTTCTTGAACTTTGCACTTGCCTGAATTTTTATTCCATGTGCA  
TTGTACACCACACGAATCAGCTGATCCTCGGATATTTA

>PGSC0003DMG400018385 LRR-RLPs

GGCGATCTTTCTAGCTTAAACACCCTTGATTTGAGCTATAATGATTTCTATCTGTGAATAACCTTGAATG  
GATTCGCGTCTTTATCAATTGAGATACCTTGCTCTACGTTATGTTAATAAATCTGAATAGTTGTGTATAT  
ACCTGGCTGTTTAAGTTAAGCAATCTGACTCACCTTGATCTCTCTGGTAATACTTTATATGGTCAAATTCC  
TGATGCTTTTTGGAGTATTA AAAATCCTTAAACACCTTGATCTGTCTCGGAATGCGCTTGGAGGTGGCT  
TCCCTAGATGTCTTGGTAACAGTAGTAATTTGAAGTTATTGCTACTGTCTTCCAACAATCTAGACGGGCA  
GCTTCTGAGATAATGAATAACTTGTCATGCGTGTACATTCTCTCGAGTATCTGAACTTAGAAGAGAAT  
CACATTGGTGGTTCACTGACTGATATTGTAGCTAAGTTTGCATCTTTGAGAGAGCTGAGGCTTGGACGTA  
ATAAGTTGAATGAATCCATCCCGGGAGCTGTTGGAAAACCTACCAAGTCTTGTTCTTTTGGATTTATCTTG  
GAACAAAATCACGGGATCAGTGCCTGATCTTTTTCTGTTATCGTCGTTGAGGGAATTATATCTTTCTCATA  
ATCAGTTAACTGGTGTAAACGGAGAGTATTGGACGTCTTCCAACTTGAGAAGTTGTACCTTGACTTCAA  
TCAGCTTGAAGGCACAATAGCTGAAGCTCATTGTCCAAGCTCTTGAAATTACGTGAGCTGGACCTCTCT  
TATAACTCAACTACATATTCGAGTCAGTTCAGATTGGATCCCGCCTTTTCAGCTGGATCTCATTGTTT  
TACCCACTGCAAATTGGGTCTCAATCCCAAACCTGGCTGCGGAATCAGAACAACATTTCCGAGCTTGAA  
TTTTCAGCCTCTGGAATTTAGGTAACGTTCTAGTTGGTTCTGGGAACAGTTACCTGGATTGACCTTCTT  
AAACCTTTCTTACAATGATATAGGAGGAAATGTACCAGATCTCTCAAAGAAGATGACTGATCTTCTTTGC  
ATAGATTTGGCTACAAACAAATTCACCGGTCCAGTACCACGTTTTCTACCAGTGTATAACAGTTGATCT  
CTCCAACAACATGTTTTCCGGTACCATCTCCTTCATTTGTGACAATTTTGATTACTTGGGATATCTTGACCT  
CTCAGACAACAGATTGTCTGGAGAGCTTCTCACTGCTGGACGCTTAGAAGTATCGTGCATCTTAACTTA  
GGGACTAATAACTTCTTCGGGAGATACCTGATTCGATAGGCTCATTGCAGACGATGGGAATGCTGCAT  
CTTCAAACAACATTTTGACAGGAGA ACTACCTCAGTCCCTGGCAAATTGCAAGAAGTTAAGGGTTATAA  
ACGTTCACTAATAACTTGTCTGGTGAATTCAGAATGGATTGGGAGTAACATATCTGATATCATTAT  
TGTTATCTTAAATCCAACAGGTTTAGTGGAAGCATACTTCAACCATATGCCAGCTAAAAGAACTTCAA  
ATCTTGGACTTATCTGAAAATAAGATATCCGGGATCATACCAAATGTATCAACAACCTCACTGCAATGA  
CGGAAGAAGAGAGACAATGCACCAAATAAAGAGTTGGTATTTTCAGGTCGATGATCAAGGTGAAGTC



AAAGTAAATGCCTCATACGATGAGACTGCAGTTTTGATGTGGAAGGGACGACAATTTGAATACAGCAGC  
ATACTTGGTATGGTGAAGAGCATCGATCTTTCAAGCAACAACATGGTGGGAGAAATCCCGGTTGTAATT  
ACATCTCTTGTAGGTTTGCACGGTTTGAACCTGTCGAGCAACAACCTTAACCGGCAGCATCCCTCTGAGGA  
TTGGTGAAATGAGGGCACTAAATTTCTTGACTTAAGCATAAATGATCTTACAGGGGAAATTCAGCTA  
GCCTTTCACAGTTAAGTCACCTGGGAGTCTTGAACCTGTCATAACAACCTTGTCTGGTCTGAATACCTCTA  
GGCGAACACTCACTGACTTTCAACAACAGATCCTACATTGGAAATCATGGACTTTGCGGCTATCCACTAA  
CAGACACTTGCTCTCTGGAGGAACTGCCTCGAGATTCAACGTTGAGTGATGAGGATGAGTTATAACTC  
CAGAATTTTATGTTAGTATGGGAATCAGCTTTATTTCTGCATTTTTGGGAGTTTCAGCTCTGATCTTAAAT  
AGAAGGTGGACTTATGGTCCACTCAGGTACTAGGAAATCAATAATGTAACATCACACAGTTAAATGCAG  
CTTTACTTACATACCAATTTGTTAAGGGCACATAACAACCTTTTTT

>PGSC0003DMG400018574 LRR-RLPs

ATGCCGCTACATCTAAGCAAGTTGAAAAGCCTCCAAGTGCTAGTGGGAGCCAAGTTTCTTTTAGGTGGT  
CACGGTGGTTCGAGAATGGATGATTTGGGCGAAGCACAGAACTTGTATGGATCTCTATCGATTCTAGAG  
TTGCAAAATGTGGTTGATAGAAGGGAAGCTGCGAAAGCAAAGATGAGGGAGAAGAATCATGTTGAGA  
AGTTATCTCTGGAGTGGAGTGAAAGTAGTGCCGACAATTCACAACTGAAAGAGACATACTTGACGATC  
TACACCCACATACAAACATAAAGGAACTCCGAATCACCGGATATAGAGGGAAGAAATTTCCAAATTGGC  
TAGCTGATCCTTTGTTTCTTAAGCTAGTTAAATTGTCTCTTAGAACTGCAAGGACTGTGATACCTTGCCA  
GCACTAGGACAGCTTCCTTCTTTGAAAATCCTTTCATTAGAGGGATGCACCGAATAACAAAGGTGACA  
GAAGAATTCTATGGTAGTTCGTCATCCAAAAGTCTTTAACTCTCTTGAGGAGCTTGAATTTGCATATAT  
GTCGAAGTGGAAGCAATGGCACGTACTAGGTAATGGAGAGTTCCTTACACTTAAGAACCTTTCAATTAA  
AAATTGCCCTGAACTCAGTGTGGAGATACCCATCCAACCTTGAGGGAATGAAGCAGATTGAGCGATTATC  
TATTGTTGATTGTAACCTCTTACCTCTTTTCTTTTAGCATTCTGCTGAGTACCTTGAATACAATATACAT  
ATCTGGTTGCCAGAAATTGAAATTGAAGGCGCCAGTTGGTTATTGTAACATGCTTCTAGAGGATTTGAG  
AGTGGAAGAATGTGAATGTATAGATGATGTATCACCTGAGTTGCTCCCAAGAGCACGCAAATTGAGTGT  
AGAGAGTTGCCACAACCTTACTAGGTTTTTATTCTTACTGCCACCGAAAGTCTTTTATTTGGAATTGTA  
TGAATGTTGAAAAACTTTCCGGTGGCATGTGGGGGGACCCAAATGACGTCACTGAGTATTGCCAGTGTA  
GGAAGCTGAAGTGTCTGCCAGAACGTATGCAGGAACTCCTTCCATCTCTTAAGGAAATGTATCTGTTTAA  
TTGTCCAGAAGTAGAGTTTTTCTGAAGGAGGATTACCCTCCAATTTGCAAGTCCTTCAGATTGTCAATT  
GCAAGAACTAGTGATCGGAAGAAAGGAGTGGCATTACAGAGACTTCCTGTCTCATAGAGTTAGTGA

TCGAAGAGATTCTTGCTTGTGAGAATTGGGAGTTGCCTTCCTCTATTCAAAGACTAACCATAGACAGTCT  
GAAAACATTAAGCAGCCAACATCTCAAAGCCTCACCTCTCTCAATATCTACGTATTGCTAATTTACCTC  
AAATTCAGTCACTGCTGGAACCAGGGCGGCTTCCGTCATCTCTTTCTGAGCTACATTTATATAGACATCAT  
GAGCTCCATTCACTTGGTCTTTGCCACCTCACTTCGCTTCAAAGCTTACACATCGGGAATTGCCATAATCT  
CCAATCACTTTCTGAATCAGCACTGCCCTCCTCTCTCTAAGCTAACCATCTATGATTGCCCTAATCTCCA  
ATCACTTTCAAATCAGTACTCCCTCCTCCTCTCTGAGCTGGACATCTCCATTGCCCTAATCTCCAATC  
TCTTCTAGTAAAAGGGATGCCCTCTCCCTCTCTAAACTATCTATTTCTAACTGTCCATTGCTCACACCACT  
ACTAGAATTTGACAAGGGGAATACTGGCCAAATATTGCTCAAATCCCATCATTGATATCGATTTGAAA  
TTCCTGTGA

>PGSC0003DMG400018577 LRR-RLPs

TTTCAAATTGGCTAGCTGATGTTTCGTTTCTTAAGCTAGTAGAATTGTCTTTATAAACTGCAAGAACTG  
TTATTCCTTGCCAGCACTAGGACAGCTTCCTTGTTTGAAATTCCTTTCCATTAGAGGGATGTATGGAATAA  
CAGAGGTGACGGAAGAATTCTATGGCAGTTTGTCTCCAAAAGCCTTTTAAACGCTCTTGAGAAGCTTGT  
ATTTGAAGATATGCCGGAGTGGAAGCAATGGCATGTACTAGGAAATGGAGAGTTCCTTACACTTGAGA  
AGCTTTTAATTATAAATTGCCCTGAACTCAGTTTGGAAACACCCATCCAACCTTTCATGTTTAAAAAGGTTT  
GAAGTTGATGGTTGTCATAAGGTTGGAGATGCTCAAATGTTTAGATCCCAACTTGAGGGAATGAAGCAG  
ATTGTTGAATTAGATATTAGTGATTGTAACCTCTATTACCTCCTTTCTTTTAGCGTTCTTCTCATTACCTGA  
AGAGAATAGTTATATCTGGTTGCCAGAAATTGAAATTGGAGCAGCCAGTTGGTGAGATGAGTATGCTTC  
TCGAGGATTTGCTCACTGCAAGAATGTGATTGTATAGATGATATATCACCTGAGATGCTCCCAACAGCAGC  
CAGATTGTTTGTATGTAATTGCCAGAACCTTACTAGGCTTTTTATTCTACTGCCACTGAAAGTCTCTATAT  
TGCTTATTGTGTGAATCTTGAATACTTTTCGGTGGCATGTGGGAAGACCCAGATGATGTATTTCCAGAA  
CGTATGCAGGAACTCCTCCCATCTCTTAAGACACTGATTCTATCTAATTGTCCAGAAATAGAGTCCTTTCC  
TGAAGGAGGATTGCCCTTCAATTTACAAAACTTCATATCTACAATTGCAAGAACTGGTGAATGGCCG  
AAAGGAGTGGCATTACACAGACTTCCCTGTCTCAGAAAGTTAAGCATCTACCATGATGGCAGTGAAGA  
AGAGATTGTTGGTGGTGAAGAATTGGGAATTGCCTTCCTTTATTCAAAGACTTACCATATACAATCTCAA  
ACATTAAGGAGCCAAGATATCAGAAGCCTCACCTCTCTCAATATCTATGTATTGGTAAGTTATCTCAACT  
TCAGTCAATGCTAGAAGAAGGGCAGCTCACTTCACTTCAAAGTCTAGACATCAATAATTGCCCTAATCTC  
CAATCACTTTCCGAATCAGCACTGCCCTCCTCCTCTCTGAGCTGACCATCAATAATTGCCCTAAGCTCCA  
ATCCCTTCCAGTAAAAGGGATGCCCTCTCCCTCTCTAAACTATCAATTCGCGACTGTCCATTGCTCACAC

CATTAAGTAAATTTGACAAGGGGGAATACTGGCCAAATATTGCTCAAATCCCACCATAGTGATCGATGA  
GGATTCCATGTGATGATTA

>PGSC0003DMG400018694 LRR-RLPs

TAAGGAGTTGCCAAATGACTTGTTTATCAAATTAAGCTCCTCAGATTTTTGGACCTTTCTCTGACATATA  
TTGAAAAGTTGCCTGATTCTGTTTGTGGATTGTATAACTGGAGACACTTCTCCTGTCATCTTGTTATAAT  
CTTGAGGAGCTACCGCTGCAGATGGAGAAGTTGATTAAGTTGCATCACCTTGACATAAGCAACAGTTTTTC  
GCTTGAAGATGCCGCTACATCTAAGCAAGTTGAAAAGCCTCCAAGTGCTAGTGGGAGCCAAGTTTCTTC  
TAAGTGGTTGGAGGATGGAAGATTTGGGTGAAGTACATAACTGCACGGATCTCTATCAGTTGTAGAGT  
TGCAAATGTGTTGATAGTAGGGAAGCTGTGAAGGCAAAGATGAGGGAGAAAATCATGTTGACAA  
GTTATCTTTGGAGTGGGTTGGAAGTAGTAGTGCCGACAAGTCACAACTGAAAGAGACATACTTGATGA  
GCTACGCCACATAAAAACATAAAGAAGTCAAGATCACCGGATATAGAGGGACAACATTTCCAAATTG  
GCTAGCTGATCCTTTGTTTCTTAAGCTGGTGAATTGTCTCTTAGCAACTGCAAGGACTGTTATTCCTTGC  
CAGCACTAGGAGAACTCCCTTGTGTTGAAATTCCTTTGATTAGAGGGATGCATGGAATAACAGAGGTGA  
CGGAAGAATTCTATGGCAGTTTGCCTCCAAAAGCCTTTTAACTGTCTTGAGGACCTTGAATTTGAAGA  
TATTCCGGAGTGAAGCAATGGCACGTAAGGAAATGGAGAGTTCCCTACACTTGAGAAGCTTTTCAT  
TATAAATTGCCAGAACTCAGTTTGGAGACACCCATCCAACCTTCATGTTTAAAAGGTTTCATGTTGTTG  
GTTGTTCTAAGGTTGGAGTTGTTTTGATGATGCTCAACTGTTTATATCCCAACTTGAGGGAATGAAACA  
GATTGTTGAACTATTTATTAGTGATTGTAAGTCTGTTACCTCCTTTCTTTTAGCATACTGCCACTACCTT  
GAAGATAATATGCATATCTCGTTGCAAGAAATTGAAATTGGAGATGCCAGTTGGCGAGATGAGTTATTG  
TAACATGTTTCTCGATTATTTGAGCGTGGCAGAATGTGATTATATATCACCTGAGTTGTGCCAAAGAGCA  
CGCCAATTGAGAGTACAGGATTGCCACAACCTTACTAGTTTTTTGATTCTACTGCGACTGAACTCTCT  
ATATTCGGGGATGTGAGAATGTTGAAAACCTTTGGTGGCATGTGGGGGACCCAGATGACGTCCTG  
ATTATTGATGGCTGTAAGAAGCTGAAGTGGCTGCCAAAACGTATGCAGGAACTCCTTCCATCTCTTAAGC  
AACTGCAACTGATTGATTGTCCAGAAATAGAGTCCTTTCTCAAGGAGGATTGCCCTTCAATTTACAACG  
ACTTTGGATCAGAAATTCCAAGAACTGGTGAACAGACGAAAGGAGTGGTGTGTTGCAGAGACTCCCCTG  
TCTCAACTGTTAGAGATCTCTCATGATGGCAGTGACGAAGAGATTGTTGGTGGTGAAGAATTGGGAGTT  
GCCTTCTCTATTCAAAAACCTTACAATAACAATGTGAAAACATTAAGCAGCCAACATCTCAAAAGCCTC  
ACCTCTCTCAATATCTATGTATTGAGGGTAATTTCTCAAATTCAGTCAATGCTGGAAGAAGAGCTTCC  
CTCCTCTCTTTCTCACCTCACTTCGCTTCAAAGTCTACACATCGGGAATTTCCCTAATCTCCAATCACTTTCT

GAATCAGCACTGCCCTCCTCCCTCTCTCAGCTGACCATAGATGATTGCCCTAATCTCCAATCACTTTCCGA  
ATCAGCACTGCCCTCCTCCCTCTCTCAGCTGGAGATCTCCATTGTCCTAATCTCCAATCCCTTCCGGTAAA  
AGGGATGCCCTCTTCCCTCTCTCAACTAAGTATTTACAACCTGCCATTGCTCACACCGTTACTAGAATTTG  
ACAAGGGGGAATACTGGCTAAATATTGCTCAAATTTCCACCATAGTGATCGATGAGGAATCCCTGTGAT  
GATTAACGAATGGCTCTCCAACCTGATGTAAGTTATTCTTTTCCATCATAAGCTTTTTACTTTTGTACT  
TCACTTTGCATTTTGTAAATCCTTTTCTTTTTAAACCTTTTTGAGCAGTGTGGAATGTCTATTGCTCAA  
CCACGGCTGCCGACCAAAAACCTGCTCATATTTCCACCATAAATGTTTCATTGGGAGAACCTCTAATGATTC  
AACATGTGGTGCTCCAATAG

>PGSC0003DMG400018722 LRR-RLPs

AACCAATACTTTCTTGAGTTGAGATCAAGATCATTGTTGAAAGGGTCCCAGAGTCTGAATGGAAACCG  
GAGGGATTCTTAATGCATGACCTTGTCATGATTTGGCCAAATTGCATCTTCAAATCTTTGTATAAGGTT  
GGAAGAGAACAAGGATCGCACATGTTGGAACAATGTCGGCACATGTCCTATTCAATAGGAGAAGGTG  
GTGAGTTTGAGAAATTGAAATCACTCTTTAAATCAGAGCAGCTGAGGACATTACTTGCAATCAATATCCA  
GCTCTATGATTACAAAATTAAGCTAAGCAAGAGGGTGTGCATAACATATTGCCAAGACTAACATCCTTA  
AGGGCATTATCGTTGTCACGCTATGAGATTGTTGAGTTGCCAAATCACTTGTTTATTGAATTAAGCTCCT  
GAGATTTTTGGATATTTCTCGGACAAAGATTAAGGTTGCCAGATTCCATTTGTGGATTGTATAACTTA  
GTGACACTTCTCCTGTCATCTTGTGCTGATCTTGAGGAGCTACCGCTGCAGATGGAGATGTTGATCAACT  
TGCATCTTGACATAAGCAACATTTCTCTCTTGAAGATGCCACTATATCTGAGCAAGTTGAAAAGCCT  
CCAAGTGTAGTGGGAGCCAAGTTTCTTAGGTGGTTCGAGAATGGAAGATTTGGGTGAAGTACATAAC  
TTGTACGGATCTCTATCGTTGTAGAGTTGCAAAATGTGGTTGATAGTAGGGAAGCTGTGAAGGCAAAG  
ATGAGAGAGAAGATTCATGTTGGCAAGTTATCATTGGAGTGGAGTGAAAGTAGTAGTGTGCGACAATTC  
ACAACTGAAAGAGACATTCTTGATGAGCTACGCCACATAAAAACATAACAAGAAGTCCGAATCACCGG  
ATATAGAGGGGACAAAAATTTCAAATTTGGCTAGCTGATGTTTCGTTTCTTAAGCTAGTAGAATTGTCTC  
TTATAAACTGCAAGAACTGTTATTCTTGCCAGCACTAGGACAGCTTCTTGTTTGAATTCCTTTCCATT  
AGAGGGATGTATGGAATAACAGAGGTGACGGAAGAATTCTATGGCAGTTTGTCTCCAAAAGCCTTTT  
AACGCTCTTGAGAAGCTTGATTTGAAGATATGCCGGAGTGGAAAGCAATGGCATGTACTAGGAAATGG  
AGAGTTCCCTACACTTGAGAAGCTTTTAATTATAAATTGCCATGAACTCAGTTTGGAAACACCCATCCAA  
CTTTCATGTTTAAAAGGTTTGAAGTTGATGGTTGTCATAAGGTTGGAGATGCTCAAATGTTTAGATCCC  
AACTTGAGGGAATGAAGCAGATTGTTGAATTAGATATTAGTGATTGTAACCTCTATTACCTCCTTTCTTTT

AGCGTTCTCCCACTACCTTGAAGAGAATAGTTATATCTGGTTGCCAGAAATTGAAATTGGAGCAGCCAG  
TTGGTGAGATGAGTATGTTTCTCGAGGAATTGAACTGCAAGAATGTGATTGTATAGATGATATATCAC  
CTGAGATGCTCCCAACAGCACGCAGATTGTTTGTATGTAATTGCCAGAACCTTACTAGGCTTTTTATTCT  
ACTGCCACTGAAAGTCTCTATATTGCTTATTGTGTGAATCTTGAATACTTTCGGTGGCATGTGGGAAGA  
CCCAGATGATGTATTTTCCAGAACGTATGCAGGAACTCCTCCCATCTCTTAAGACACTGATTCTATCTAAT  
TGTCAGAAATAGAGTCCTTTCCTGAAGGAGGATTGCCCTCAATTTACAACAACCTCATATCTACAATTG  
CAAGAACTGGTGAATGGCCGAAAGGAATGGCATTACACAGACTTCCCTGTCTCAGAGAGTTAAGCAT  
CTACCATGATGGCAGTGACGAAGAGATTGTTGGTGGTGAGAATTGGGAATTGCCTTCTTTATTCAAAG  
ACTTACCATATACAATCTGAAAACATTAAGGAGCCAAGATATCAGAAGCCTCACCTCTCTTCAATATCTAT  
GTATTGGTAATTTATCTCAATTCAGTCAATGCTAGAAGAAGGGCAGCTCACTTCACTTCAAAGTCTAGA  
CATCAATAATTTCCCTAATCTCCAATCACTTTCGAATCAGCACTGCCCTCCTCCTCTCTGAGCTGACCAT  
CAATAATTGCCCTAAGCTCCAATCCCTTCCAGTAAAAGGGATGCCCTCTCCTCTCTAAACTATCAATTC  
GCGACTGTCCATTGCTCACACCATTACTAGAATTTGACAAGGGGGAATACTGGCCAAATATTGCTCAAAT  
TCCTACCATAACGATCGACGAGGATTCCATGTGATGATTAAGAAGAAATGACTCTCCAAGTATGTAAGT  
ATTCTTTTCCATCATAAGCTTTTTACTTTTATTTACATCACTTTGCATTTTTGTTAATTATTTTCTTTTTTAA  
ACCTTTTTGAGCAGTCTATTGCTCAAACCATGGCTACTGACCAAAAATTGCTCATATTTCCACCATAAATG  
TTCATTG

>PGSC0003DMG400018806 LRR-RLPs

CATAGGCAGACATATATAAGGCGAAAAGAAGTAGCTCCATTGTCTGTAGTATTATTTTTCCACAAATCT  
CCATTTGCCGATCTTTCAAAGCTCAATCCAGAAAAGCGTCACCACTGCCAGCCTTCGATCCTTCGAAA  
GATCCGATCAGATCTCTTTGTCTTTCTCTCACTGCACTTCTCATACTGTTTTCTTTCTCTACACACATAAC  
TTTTCTGCAACTCCATTCTCCGGTTTGTGCAAGATTCTGGAACAAGAATTTGTTAGATTCTGTGAACTAT  
GTAATTTGTGTGCTTTCTTGTGAAAAGGAGTCGTTTTGTGTAGTTTGTGTACAGTTAGGGTTTTTTTT  
TGGGAAAGTTTTAGATCGTGAGCTAGGGTTTCTGAAGATCAGAAATTGATAAAATTTGGGGTTTATTC  
TTTATTTTTCTTGGTGTGGTGTGAGTGAGTGATGAGGATTTGGTGTGTTTATGTTTTGGAGAAGAAGA  
AGATAGTAAGAAGGGCTACAAGAGTATGAGGGACCCGATTTTGGGGAATAACGGCGACGAATCTCCAG  
ATGAAAATTCGGCATTGACTGGAGGAATGTTTTGAAGGTGTCAATGTTGCAGCAGTGGTGAGTCCAC  
AAGCGGGCGCTGCGGGTATCTTGGTGTCCCAAGAATGAGGAGATTGATTTGATAGCAACTGGTTAT  
CCAGTGAAGTGGAGGTGAAGAATGAAAATTATAGTGGTGAGAAAATGTTGGATGTTAATTTGAATTTG

GGTTTGAGTGGAGAGGCTTCATCCTCAACAGTGCTGAAAGAGGATTCTGATCGTGATACCTGTAGTAAA  
AGGCCCAAAGTAACTCCTTTTCGCTGTAAGACCTGCTACTGCACCTTCATTTACAATATTTTTTTTCCAAT  
TAGTCAAATTTTATTGAATATTAGAGTGAAGTTGGCCATAGTAGAGAACTAATACAGAATTCATTTAAGC  
AACCCAAGCCTAATTACAAGGATCAGTTGATGTTATAGGGGCGGCTCACTAATTAATTAAGGACTCTCAA  
GAGTCCTGTAATTATTTCTCGTGTAGTACAGTTTTACATGTGGTCAAGAGTGTTACACTATTCAGTGT  
TTGGAGAAAGTACATTCTCACATAATTCTTTTAGAGAAAAGAACATAGTAATATTAACATGGAGTAGAAT  
TATTTCTAAAGCTAGTTATATTTGGAATTTCAAAGCTTAACCTAATATATAATGTTACTCTTTAATTTGAT  
ATAATCAAATTGTCTTTTGAGTTTTGAAGTAAGCCCTAAATGTAGGCCAACAACTCAAAAATGAAGACTG  
ATTGATTAATATTCTTGCAGGGATTGGGACAACCACTTGTGCTGGAAACCAGTTACCTATGTCCAATGA  
ACGAGGGCGGTGGAGATATGAGTTTATCAAACCTACTTGGTGCAACAGATGCTGAGGGGAAAGATTCT  
AAAATGGACTATTTAGATGTGCGGATGGATCTTACTGATGACTTGTTCATATGGTATTTACTAGTTGCC  
ACATCCGCTCCTTCTGAGTTGCTTAATCAATAAGTGTATGCTAAGTTTCTGATTAAGGGAATATATGCC  
TCATCTGTTGCCAGGTGTTCTCCTTTTTGGACCATATTGATCTTTGTCGAGCTGCAAGTGTGTTAGCCAG  
TGGAGAGCAGCTAGCTCTCACGAAGACTTTTGGCGGTATCTGAATTTTGAGAATAAACAGATATCCTCA  
AATCAATGTGAGTATCTTTTCCTCATATCCGTTCCCTCCACACTACTATGATCACTTCACATAAAATTCATG  
TTTCAATTAATTGCAACTTTTTGTTTCATGTATGATGTAGTTGAGGACATGTGTCGGCGATACCCAAATGCA  
ACAACAATCAACTTATATGGAACCTCCTAATATTCACCCACTAGCAATGAAAGCTGTTTCTTCTTAAGGTA  
ATACTTTTTTTTATGTTGTTGTCACTACTCTAGGAATGAATCACTATAAGTGACTAATTTGATACATTTTAT  
TGTTGCCAGGAATCTTGAGACTCTGTCATTGGGCAGAGGTCAATTGGGGGAAACATTTTTTCAAGCCTTA  
ACAGATTGCCATGTGTTGAGGAGTTTGACCATTAATGATGCCACTCTTGAAATGGCATTCAAGAGATA  
CCAATTTCTCATGATAGCTTGCCTTCTGCAGCTAGTGAAGTGTGCTGTGCTTCGAGTTTCTATCAGGTT  
GTATAATATTAGTCAACAATGTTAATTTGTTAAAGTAGTTAGCGTCCAATTGTGCTTAATTGTTGGTATTC  
TTACAGATGTCCACAACCTGAAACGTTGTCACTTAAGCGCAGTAGCATGCCACATGCGGTGCTTAATTGC  
CCTCTTTTACATGACCTTGATATTGCTTCATGTCAAACTTTCCGACGCTGCTATTCGTTCCGGCTGCTACA  
GCATGCCCTCTTTTAGAGTCTTTGGATATGTCAAATTGTTTCATGTGTCAGTGATGAAACACTGCGTGATAT  
AGCTCAAACCTGTGGAAATCTTCGAGTTTTGGATGCTTCATACTGCCCAAACATTTCTTCTTGAGGTATGTT  
CATTAAAATTACCTAGTACCTGAAATTGACATAGTTGGCTTATACTAACACTTGTTACTTGTTGAAGTCTG  
TGAGGCTGGTTATGCTGACTGTTCTCAAGCTTCATAGTTGTGAGGGCATAACATCAGCTTCCATGGCTGC  
CATAGCCCATAGCTATATGTTAGAGGTTTGAGTCTTTCCTCACCTTTTCATACTGGTAGCCATGCTGTAA

TCAGGAGTCCTTAAATCTCATATTGAACAGTGAATTTTACTTTTTTTCAGGTTCTGGAGCTTGATAATTGC  
AGTTTATTGACATCAGTGCCTTGGATCTTCCTCGCCTTCAGAGCATCAGACTAGTACATTGTCGCAAGTA  
TGATACAGGCTTTATAGTTTCCATATCCAGTCTCAAGGGAACCTTTTCCATCCCTTGATTGCCGTCACCTC  
TTTGTGCAGTAACCTACTGTTTATATTGAAACAGGTTTATTGACCTTAACTTGCATTGTGGAATGTTATCA  
TCAATTACTGTTTCTAATTGCCATTGCTTCATCGAATCAATATAACTTCAAGTGCACCTCAAAGTAAGTTT  
ATTCCTAGATGTTATATATTGTCACCTTATTTTATTGACTAGAATTATTCTATTTCATTGGATAATAGTTCTC  
TCCTTTATTATTCCACAGAAATTAGTTTTGCAGAAGCAGGAAAGCTTGACAACAATTGCATTACAGTGC  
CGAATTTGCTAGAAGTAGACCTTACTGAGTGTGAATCGCTCACCAATTCTATTTGTGAAGTTTTCAGTGA  
TGGTGGTGGCTGTCCTGTGCTTAAATCCTTAGTTCTAGATAACTGTGAGGTTGGCAATTTTAGTTCCTCGT  
TGTTAACTTGTGCATTCTTGGTTGTTAACTAGAGGATGTGTTGCTGAACATGATTTTTCTAAATCTAATTA  
CGATATATATGATCTCTTCTTAGTTTTGCTTGTCAACGGAAGGTGGTTCCTTAAATCTTGGCAGTTGAT  
CTGTGCAGAGTACATTTTTCTAAGAGCTTGTTTTTGTCCTCACGTATGTCAATGTGGTTGTGGACCTAT  
GATCATAGTGCCATTTTTGCTTTTCTGTAAACACATACTGTGATTCTTTTTTATGCATGTTTCCAAGTAAAT  
AAATCTAGTACTGAATTCTGACAATCAATGATCAGGTATTTTAAATGAGTAATCATGAAAGATGATGAAAT  
GAAAAAGTATGATCCAAGTGTACTGACTGTTGTGTCATCTGGTTGTGCTTTCTTGTGTTGCCGTAAGCCTG  
GGAAGCTGTGCTACTGGGTGCACTAAGGGCTTGTGTTGATATGAGGGATAAGAGATTACTGATCCCAGG  
ATTTGTTTTAGGATGAGTTTATCCCATGTTTGGTTGGGATAAAATCGCGGGATAACTTATCCCGGGATTG  
TAGTGTCAATTCTTATCCACATTGAGGGTGGGATAACAATTCCTGGATAACTTGTGCGAGAATCTCCTTC  
AATAACTCAGACAAGTTAAAAAATATTAATAATTGTTCAAGAGGTGAAGCGGGAAAGATGAAAAGTTCTA  
ATTCCTTTGTTTTGGCATTAAAGGATAGTGATTATGTATTCTAGATTTACCAGTAGTATTTATGTTATACTC  
ACATTTCCAAATTAACCTGAAGTATATTTATCTTGTCAAATATAACTATTAGGGTAAACGTCTTTCTTGG  
TATCATAAGCTCTAAGTTTCTTCAACATTTTGATTAGATACATGGGAGTTCTTAAGGGGACGGTTTAAG  
GCTTTAAGCTGAAGTAGAACATGAGAACTATTGCCAGATGGGAGAAGAAAATAGTTCACCTTTTTTTTC  
CTGATTCAATGCTAGAGCTGAAGTCGCGCCATTTCAAAAAAATGTCAAATCGGAATTTTCTTTTGAAG  
CTTGATGAAAATATGTACTCCTCTCCAATCAAGATTCCCTTTTATTGATTTGGTGATCAAGAAAGTAAGG  
CTGAATTAGGTTTGGGTTTACATTTTGTGAGAGATGTACAAAATAATGAACTAAATTTGTCAATATTGTG  
GTAGACTATTGAAGAAATTCACAACAAATCAAGTATTATATTTTCGGTTACCCATTCTCCCTCCCCCGTGCC  
CCCTCCCCCTCCTGGGAAAGGGGGGGAGGGACCGGGTGAGAGAAAGAGTAATATATTCAAGTTGCGA  
CCTCCCGGGGAAAAGGGGGCTGAGAGAGGGGAAAGGTTTCCACTGTTTTAGAATGGGTCCTGATTAGCA

TTCACCTTCTGTGTTCTCTTTCTGCCAGATCTGTTTTAGGCTAACACCTATTCAGAAAAGTTTTTTTTTTTT  
TAATATTGGAAGTGATATATTTCTGCCTATTCAACTTGAAAGATCCGGCTGTATCTATGTAACATTTGTAT  
TGTTGTTATGGTCTAAATCTAATTACGGTCTTTTCTTTTTTTCAGAGCTTGACACTTGTGGCTTTCTGCAGC  
ACTTCTTTGGTTTCTCTTTCACTTGGTGGTTGCCGTGCTTAATTTCTCTTGCACTTAGTTGCCGATATCTT  
GAACAAGTCTCTTTAGATGGTTGTGATCATCTTGAAGTAGCATCATTTTGCCCAGTAAGTGATCATCGGG  
TCCTTCCTCTTTTCTTTACCTCATCTCTGGGTTTGAGACTGGAGTTGTATGTTACCTGCTGATTTTATGAT  
TGTTAATTTGTTACACATGCATTTTTTCTTTATTTATACCCAAATGGTTGATAAAGGTGTTCTCTTATTCC  
AGGTTGGTCTTAGGTCACCTAATCTTGGTATATGCCCAAATGAATATGCTCCATATTGAAGCTCCACA  
AATGGCTTCACTTGAGCTGAAGGGCTGTGGTGTGCTATCTGAAGCATCTATTAATTGCCCCCTGTTAACC  
TCTTTTGATGCTTCATTCTGCAGGTTGCTTACTTTCTCTCGCTTGTCACACGTGCATATTTGTTTTAGTTCTG  
TCACATCTCATTAAATTTCTTTCCATATATGCAGCCAACTCAAGGATGATTGTTTATCTGCCACGACTTCGTC  
GTGCCCCCTCATCGAGTCATTAGTATTAATGTCATGTCCATCTGTTGGCTGTGATGGACTCCTCTCTTTGC  
AGTCCCTCCCAAACCTTGACCTACCTTGATCTATCCTATACGTTTTTGGTTACCTTGCAACCTGTTTATGAAT  
CATGCTTGACAGTTAAAGGTAACCTTCTATCGCCTAAGCATATTATCACTTTCTCCATTACAGTGGGAAGCTA  
GATGAACTTGATTTAACATGCTCTATTTTGTGGAAAAAGTATGCCTATTTATCCAGTCTGGACTTGCACTC  
TTCTAGATATATGGGCCACTTTCTATCTTTTTTCTATGGGTATCAAAGGGATGGGTTGGCTTAAGTTTG  
TGCTGGTCAAAATACCTAACTACAAAATTTACTCATGTAAAGATGGGATGAACACAGGGTCATAAGCCAT  
TTACTTTAATCTCTCCTTTTCTTTTTCTGTTCTCCTTTTTTCCCACTTGACAGTAAAAGCTAAAACACCAGGA  
TGCATGTAACAATTTGTGAATCAGTTCTGACTGATTGAAAGCTTACTTCAGTAGAACTGTGATTCTATTTT  
GACTATTACAAATTTAATAATCATTGTTTGTGGCCATATTTTTGGGGAACTAGAAGTGCTTTTTTTTTCTT  
CAGTTTTTTGGCAGTTAAGGTGTTTGACCATTCTTCTTGAAAAGAAATGTGATCTTTAGTACCATAAGCT  
GTTTCTCTGTTGTGGCGAAGAAGTCAAATTTGAAGTTTTTCATTAAGAAGAACCAAAGTTTAATTTTTCA  
ATACAAAATACCATTATAATTTTCTTACCAAGTTATACCACAGTTCTGACAAGTGACAACCTGTATTAATTT  
AAAGAGGGAAGCCCGGTGCATTAAGCTTGCGCTATGCGCTGGGTCTGGAGAAGGGCCGGATCACTAGG  
GTCTATTATACGTAGCCTTACCCAGCATTTCTGTGAGAGGTTGTTTCCCATTCACATGGCAACAACGTAAT  
CGGTTATGCCAAGGCTCCCCTTCGACAACCTATATTGATTTATTATTGAAAAAGCATTTCTGTTTTCAAAGT  
GAATCATCAGCTCTGTACAAAGAATAAGAAGTAAATTAAGCCAATGCATTAGATCAAGTGTAAGTGATA  
ACACAGATTTAAAGTAACATCAGTAGAATAGAAAGCTGACAATCATGGATACCAGAAAGAGCTAGGAA  
ACAGCTAAAAGCAAGCTTAGGCTTTAGCTTTTACCTGCTCTGGAGGATCTGGAGCAACAGAAACTGTAA



AGAGCAATAAGAAAACCTTGTAAGAGGTTCCATTTTGCATTGAAAAGAACTCTAGTCGAGGGCAAGGGA  
AAGAGAGTCAACAAAGTATAGAATAAGATTGTAGATTGTTGGACTTCTAAAATCTACAATTATATTAGCT  
GTTGATGGAGTAGGATATTCTAATGCCATTCCAGGACTGATGATGTTGTCTCTGTTCTCAAATAGTTCTG  
TGCCACTTGGTTGGGTTGTTTATAAATGCACTTGTTAAATATTACGAAACTGTAGACTAGAATTGCCACCT  
TAACTCTTTCATTATTGGCCCTCCTTTTTAGACCCTTGAAGATGGCCGGCCTGGAATTGTGGAGATCCAGT  
TACTTTAGGCATTCTGTCATTCATTTTTATTTTGGAGCGTAACATCTGAATATTTCTACTTTCCAACAGATG  
CTATAATTTTTGTCCATATCCAATGTTTGCCATTGTCTTGTGCCCAATTTGTTTCAGTGCAAGGGAATGAG  
TTCCTTGTATGCAGAATTTCTAGTGCTATATCTGAAATTTTCTGATGAGACTCTAGTTTAGTAACACAAGT  
GTGTTTCTCTTCTCACTGCACTAGGCACATCCTTATTGCGTTTGGGATAAAAACTTTTTGGATCTGCATGA  
TACATTGATGGGCTTTTTTGGCTTACTGCCCCACCACCCCAACCCCTCCTTTTTTTTTTAACCCCTCTCTAA  
GCTTATATATATATGTTATGTTGTAGGTCCTAAAGTTGCAAGCATGCAAGTATCTCACTGATACATCTTTG  
GAACCCCTCTATAAAGAAAATGCTCTCCAGCCCTTGTGAGTTGGATTTGTCGTATGGGACCTTATGCC  
AATCAGCCATTGAGGAATTGCTTGCTTGCTGCACACATTTGAGTCATGTCAGCTTGAATGGATGTATTAA  
TATGCATGATTTAAATTGGGGATTTACTGGAGATCAACTGTCGCATATACCCAGTGTTAGTATACCTCAT  
GGATCTTCCCTGGGAGAACAGCAGTTGCCAAATGAACAACCAAAGCGTTTGTAGAGAACCTTAACTGT  
GTAGGCTGCCCAAATATAAAAAAGGTGTTTATTCCTATGGCACAAGGTTTCCTTTTGTATCATTAAACCT  
TTCCTGTCTGCGAATTTGAAGGAGGTTGATATAGCTTGTTACAACCTTGTCGTTCTCAATTTGAGGTATT  
TTCTTTAGCAATATGATTTTCGTAGGTTAATGTTGTATCAATGGCTTTATTTTCATGATCATAGTTGTTACTT  
AATTATGTTCTCTTGTTTCAGCAATTGCTGTTTCATTGGAATCATTGCAACTGGAATGTCCAAGATTAAGTAG  
CCTCTTTCCTCAGGTATTCTTGCATCTTCAATTTGGCATTTCCTTGTGCTGGCTTTTTAATTGTTGTAGTGGTA  
GCTTTGCTGCAAAAGTGTTCTTTCTAGTTGGTCTTTATCATTTTGTGCTTTTTTTCCCTGTTGAGGT  
AGTAATAGTTTTTTACCTTAGCATGAAGGATATGCAAACCTGTACAACCATTACAATGTCAGTCCCCTTCC  
TACCTTGTAGGGACTTTATGAGTTATATCAATGATTCAACTTCATTTACAATTTCCTTTTTACACCAAAGAC  
TCATCCATTTAGGATAGGAGGATCCTCGTTGGTCTATTTTACAAAACATTCTCGTCTGCCTCTGGTTCAGT  
AGGTTGGTATGGAGAATATGCATACCCCTAAGCTTGATATTCTGTAGAGAGAACTTGAGCTCCTAATCAA  
GTCGCTAATGGGATTGTATTGTAAGATCTAATAGCTAGCTGCATATTGTCTTAGGAGTACTCAAATTAAC  
ACAGTGGTCTACTAAAATAACAAGTAATCCTAATACTCTTCATGGTCTTCTAGGAATTCATGTGGATAG  
ATAATAAACATTTTTCAAATTTGGAAGTGTTAGAAGTCCTTAGGGATGGCATGTAGTTTGGGGGCATCGT  
GCCTATATTTCTTGGAGCATGATGTACTTGTGTTAAAATTAAGTAAATGAGAATTTGAACTCTCAACTGAT

GCTTATTTGCTTGAATATTGGAAGTCAAGTGAGAAGTGAAGTCTTAGTTTTTTTTTTCTTTAGAAGTTTT  
GCTTCTCTGAGCTGTATTTCCGTTGTTGCTTCTATCATTACACGCCTCGGACTTACCTCAAAGACATGCC  
ACTTTCTAGTGTAGAGCTCGTGAAATCGATTGCCTTTCTTTCCATCATGTCTTGTTAAAACTACTTTGAT  
GAACTCCCTTGAAAAATCGTTGGCACACCCGGAAGGTGCTTGTGCAATTGAAATTCTTCTGACACAATTG  
TGATGTGGAGTTATTCTGTACTCTTGCTTTTGTGTCCTACAGTCCTGCAACATTGATGAGGAAGCTGTTG  
AAGCTGCCGTATCACGATGTACGATGCTTGAGACGCTTGACGTTGTTTTGTCCCAAGGTCAGGAGTAC  
TTTTGATGTTAAGAATATGCCCTGTATTGATTTTTGTGTATCATTTTATTGATACAAACAAGGGCTTTTTG  
TGAATTTGCTGATAATCCTTTTTTCCACTTAAACAGATTTGTCCACTGAACATGACGAGGTTGCGGGTTGC  
ATGTCCCAGTTTGAAACGCATCTTCAGCAGCCTAGTCCCATCATGAGGCCAAAATGAAATATTTGATATGT  
TTGTGTAGGCTGGCTAGGGACATAATTTGACTACAGAGGTTTCATTTTTATGTATAGTTAGCTATTTAT  
GTTGCTGTGATTGGTGAAACGTACAGCGAGCTTCATACATGTAACACCTTAATGTTTTGGTGTGGCTTT  
CACATTTTATGATTTGGTTAGCGCACTTAATGCAACTTTATTCAGATCTCATGGATGAAGAAAATAAACT  
GGAGCCTTGTAAGGGAAATATTAGTTAATAGTGGCCTGCTTGCCCTTTTCAGTTAATGGGAAAAACGC  
AGGTTGCCAGGCTCAAGTGTGTAATTTTTGGTTGCCCTAAAAATAAGGTTACAAAATATAGCCCCAAA  
ATAGAGTAGTCAGTCGGCTCATGTCTTTGGGAT

>PGSC0003DMG400018861 LRR-RLPs

ATGAGCATTCTCTCGAAAACATGGCTACAAGCGTGGTCGACTCTTCCCAACTTGAATTCTTTGTTAATTG  
TTGGCGAGGCTGGGAAGCGCATATAAATATAGTGGACACAACCATGGAGAGATATGGGAAGGGGAAA  
ATTCCTATACAAAAGTTTGAATTATCAGAGATTTTTGCTGATTCTCCCAACTCTTCCCTCTGATTGATAAG  
TGGCTTCTCATTGCACTTCAGAATGGTGTAACAACCTGTACTTCACTTTACAGCATACCCGGCACCTAT  
TTAACAATCTTGACAGCAAATCTTTAAGAGAATTGGTTCTGCACAATTGTAAGTCTTATGCCTGTTTCAT  
TATCTAGTGGGGTTGTGAGTTGCAATTCTCTGAGAAAGATTTCTCTATCTTATGTAACATTAGATGAAAA  
CATGCTTCAGACTCTACTTAATAGATGTCCCTTATTGTCTCTTTCATACTTGAGTATTGTTGCGGGTTTGAC  
TACGAAACTTATAAAGATCAAGTCGGATTCCCTGAAGGTCTTGAAGATTCATCAATATTGCGGGATATG  
GGAGATTAATGCTCCAGATTTAGTATCACTTGACTATGCAGGGAATGAAATTCCTGAACTCAACATTGTA  
AGAGAGTCAAGTCAATTGGAGAACTCAAAAATAATTCTTCATTGCATCTCCAGATTAATAACGACATGGT  
TTTGTAAGTTGAGGAAGTTTCTATCAAATTCATCCTCTTGGTCTGAAGTTAACCTTTGTTTATTCAAATGC  
GATGAGATCAACATGACAGATTTGCAAATGGATCTGAAGGAGAGAAAGAGAAGACAAATATGA

>PGSC0003DMG400018865 LRR-RLPs

AGCTAAATATGGGCTATGCAGTTGTGCTCTCTTGTCTTTCTCTGTCATGAAGTATTTACTGTTTCTTCAT  
CCATACTACCTCATCTCTCTCATAAACATCAAATCATTCCCTTCTAAAATTCAAGCAGTCGCTTACTATAA  
ATACCTCAGCCTCTTATTATTGTGAGAATCCTTATCCAAAACGAGTTCATGGAACATGAGCAGAGATTG  
CTGCTCATGGGATGGAGTCGTATGCGATAACATGACTGGAAATGTCATTGAGCTTAACCTCAGTTGCAG  
CGGGATTGTAGGAAAGATTGATTCCAATAGCAGCCTCTCCAACCTCTCATCTCCAAACGCTTGATCTCT  
CTTATAATCACTTCTCTAAATCTCACATCTCACCTGAATTCGGTAGATTCTCAAACCTTGACATATTTTGATC  
TTTCTGGGCAGATTTCTCAGGTCAAATTCCTTCTGAAATCTCTCATCTTTCCAAGTTACACTCTCTCAGTC  
TCTACAGTTCTATTGGTCTACGACTCGCAGCCCATGATTTTAAATTGCTCCTTCAGAATTTGACTCAATTA  
AGAGAGCTTGATCTTAGTAACATAAACATCTCTTCCACCATTCTCTGAATTTTTCTTCTCATTGACAAC  
CTGAGCCTGATAGATACAGGATTGTATGGGATAATACCTGAGAGTATATTTACCTACCCAACCTGGAA  
ACACTGTACTTAGGTTTCAGTGATCTCCGTGGTTATTTTCAAAGACCAAATGGAACAGCAGTGCATCTC  
TCGTAGAGTTAGATCTCCTTGGAGTGAATTTTTCTGATAGTTTTCTGAGTCTACTGGCTATCTAACTTCG  
GTGCGTTCTTTGTCTCTTCAAAGTTGCAACCTTAGAGGGCCTATTCTGAATCTATTTCTAATCTCATTCTG  
ATAGATTATTTGCACCTTCAAGATAACTCCCTGAATGGAACAATACCATCAGGGGTGTTCTCCCTTCCATC  
ACTAAGATATTTACTCTTGGGTAAGAACCACTTTTCTGGTCATCTTGACGATCTCAAGTCCAATTCACTAA  
TCTGGATTAATTTAGGTGACAACCAATTGCAAGGCTATCTTCCAAGTCAATTCAAAACCTTGTGAACCTC  
ACAAGTCTTTATCTTTCTTCAATAATTTTAGTGGTCTGTGGATGTCAGCCTCTTTTCAAACCTGAAAAG  
GCTTTCGGATCTTACTCTTTCAAATAATAAGGTCTCATTGACCAATGAGAACAGAGTTACTTTGCCTGAAT  
CTCTTCAAATGTTATAATTAACCGCATGTGAAGTGAAAGAATTGGAGTTTCTAAGATCTGCAAAGCAGCT  
CGAGGTGTTGGATCTTTCAAATAATAAGATTCAAGGAAGAATTCCAGATTGGGCATGGTCTAACTGGAT  
GTTTTCATTGAAAAGTCTTAATATATCCACAATATGCTGACGAGTGTGGATTCAATTCCTCTTCAGACTG  
TATATACTATTGATTTACGGTCCAATTTGCTTCAAGGTTCACTACCTATGCCACCAAATTCACAAGATAC  
TTCTTCATCTCCCAAATAATCTCACTAAAGAAATTCCTTCATCTATTTGCAATTTGACATCACTGGTAATG  
CTAGATTTGGCAAGAAACAACCTTGACGGGAGAAATTCCGCAATGTTTGGGTAATATTAGTGGTCTCAAG  
GTTCTTGATATGCAGCACAACAGGCTTATTGGTACTCTTCCAACAATTTTTCAGCATTAAATGGAAGTTCAC  
GAAAAGCCTCAACTGCATAGCAATAAATTAGAGGGGAGAATTCCTCGATCATTGGCCAATTGCAAAGA  
GTTGCAGCTTCTTGATTTAGGTGATAATCATCTCACTGACACATTCCCGATGTGGTTGGGAACTCTTCCAA  
AGCTAAAAGTTTTAAGCTTGAGATCAAATACATTGCATGGGTCCATTCAACCTCCAAGGATTGAAACTAT  
TTTTCCGAGCTTCAAATCTTGATCTCTTACAATGCCTTCTCGGGAACTTACCTTCGAATCTGTTTCA

ACATCTAAAAGCTATGAGGACAAATGATCCATCAACGGAAGCACCAAGATATCCTGGAAGTACATATTA  
CGAAGATTTCGATTACAGTTACAACCAAGGGATTTGTGCGTGAAATTGTGAGAATCTTGTATCCTAGAAG  
TACATATTACGAAGATTTCGATTACAGTTACAACCAAGGGATTTGTACGTGAAATTGTGAGAATCTTGTAT  
CTGTACACTGTTATCGATTTTTCAAGTAATAAATTTGAAGGGCAAATCCAAGTATCATGGGGGATCTCA  
TTGCAGTTCACACATTAAATTTATCTCGTAATGGATTAAGGTCATATACCACCATCATTAGGAGATTTA  
TCTTCAGTTGAATCATTGGATCTATCAGGAAACCAGCTTACGGGAGAGATACCAGAACAACCTGGCTTCTC  
TTACGTCTCTTTCATTCTTAAATCTCTCTCACAAATCATCTCCAAGGATGCATCCCTCAAGGATCTCAATTC  
ACACTTTTGAGAGCAATTCATATGAAGGGAATGATGGATTACGTGGATTTCTGTTTCAAAAATTGTGGA  
GATGCTGGGGTGTAGATAAAAATGATACCGTATCTGGACAAGATGATGAAGAAAGTGATTCTGAATTT  
CAGAGTGATTTTTGGAAAGCTGCTTTTTTGGGCTATGGAAGGGGACTATGTATTGGATTATCCATAATAT  
ATTTTCATGATTTCAACTGGAAACCCAAAATGGCTTGCAAGAATCATTGTAGAGCTGGAGCACAAAATAAT  
AATGGGAAGGAGAAAGAAGCAGCGAAGGCAAAGGAACTATAGAAGAAGATAGTCAGATGAAGTTGG  
GGTGGAACTGACGTTATCAAAGATGCATCTGCTGTGAAAATGATAACATTTTGTAAACTTGGAAATTGATT  
TATAATTTAATTATTTTCTAATGAGATCTGGTGGGTTAGTGTGGTATGATCGTATCCGATTTATGATTTG  
ATATGAAGGC

>PGSC0003DMG400018866 LRR-RLPs

ATGGCTGACATATTGCCGGAATGTCTCGTTCAAAAATACTCAGTTTTCTCCTAGTTATAATCAAGCATC  
CAAGATGAGTATTCTCTCCAAAACATGGCTGCAAGCATGGTCGACTCTTCCCAACTTGAAATCTTTTTAT  
TTTGTGGGAAGGCTGGGAAAGCCGTACAAAGATAGTGGACACAATCATGGAGAGATATGGGAAGGG  
GAAAATCCTATAGAAAAGTTGAATTATCAGAGATTTTTGTTGATTCTCTCCAACTTTTCCCTATGGTTG  
ATAAGTGGCTTCTGATTGCACTTCAGAATAGTGTAAGAAGACTGTACTCCACTTTAAATCATAACCGGC  
GCCTATTTTAAACAATCTTGGCAGCCAAATCTTTAAGAGAATTGGTTCTGCACGATTGACTCTTATGCCTG  
TTTCATTATCTTGTGGGGTTGTGAATCCAATCTTTGAGAAAGCTTTCTCTATCTAATGTAACATTAGAC  
GAAAACATGCTTCAGACTCTACTTAATAGCTGTCCCTTGATTGTCTTTTCATCGTTGAGAATTGTTCCGGG  
ACTGAATGTTCTTAAGATCAAAGCGGATTCACTGAAGGTCTTGAAGATTATACAATATTGCAATATATGT  
AACATTGATGCTCCAAATTTGGTATCCCTGACTATAAAGGGTATGAAATCCTGAACTTAACATTGCAA  
GAGAATCAAAAATCATTCTTCATTGTCTCCTCAGTTTAAATACGGCATGGTTTTGTAAGTTGAGGAAGTTT  
CTATCAAATCCGTCCTCTTGGTCTGAAGTTAGCCTTTGTATATTAATGAGATGAGATCAACATGACAG  
ATTTGCAAATGGACCACATAGTTCTAGTGGAGGGGTGGACGTTTTAAATCTCAATATGCTACTGATGG

ATGAAATTATAGAGTGCCCAACTTTTGTGGATGCTTTGCTATGGAGTTGTCATCCTGAGAGACTCAACTT  
AATCTCAATTGATATTGAAACAGTTACACGTTTAATTGATCGGTTAATGTATATGAAGAATTCGAGTCATT  
CTACATATTGTCATGGTTGGAATAATCAATTAAGAAATAAAAGCTTTTGATGGAAAAAATCAGTTGCT  
GCAACTAGGAAGTGAGGAGCTTGCAAAAAGGATTACGGAGGGGGAGAAACCTTATTTTATATTAGATT  
GGTGATGGAGTTAAGTTGTCTCTGTTTCGAATTGAATTCTAAAGTTTATTACTTCATTTGTTTTCCACATCT  
AGCTTTAAATTCTTGCAGTTCCGAAAATATGTTTCACTGTTTTCCATCTTCTGAGTTTGAGGGATTTTTCAT  
TTCTCAATTATCCTACTAACAGCACAACCTTATATACCAGTTTTTAAATCAGAAAGAGGGACTCTGTACTTT  
CCTTTCAATACCATATATAGAAAAACAATCCCCCTCCCTACATGTGCATTAACTTCATACTGCCTGCTGCT  
GGTTGATACCAAAATGAAATAAGAGTTTCCCATAAAATGGCTATTCATCTCTTACTTGGTGATGCATAAC  
CATAGCACCTACGAATTCTGAAAAAGTTCCAAGTTAGTTGAAGAAGCCATGATGAACAAAAATGTAAC  
ATAATGAAAGATAAAGGAAAATCAACATTAAGACTGGATAGTATCTTACTTTAACTCCTATTATAATTCC  
CATACTTCCTTTTTTTCCATATCATGTTTCACTTTAAAGGTTGTGGTGCCTCAGCCACTTATAATCTTCAT  
AACTTGATTCATCATTGGAGTAATTGTACGAGTATTACTTAAAATTTAAAATACAATGTTATATTCAAGG  
AAAATTTATGTGTCTGCCTTCATACATATGTACTTCTCCATGTTATACTCATAATCTAACTGCATCTTTAA  
AACTATTCGTGTGAACATAACACATCCCTATATACAAGAAAACGTTAAGCTAGGAAAAGCAGTACGGC  
CAAGTTAATTACATGAACAATTTTACAATATAAAATTGATGAAGAAGCAACCAATCACTTCCCAGTATCA  
CATCACATGTGAATAGGGGTCTCAAATGGATGGTTTGGATGATGAAACTAGTCGGGTCCAAATGAGCCG  
ACTCAATGACTCGCCCAAGAGCTACTTAGGCCAAAATGGATTGGGCTGAAATGAACTAAAAACGAATC  
ATATTTCAACCCACTCAATTTACTAAGTTTTAATTTGCTTTATATAGAAACCATGACCCTCTCTTGCTC  
AAACAGATAGTCATCTTGACATTAGCGAGCTAATATGTCAGGGTCTCAAGGATGTAGCTCTAATTCTCG  
ATAATGTGTTGGATTGATTGTTATCCATGGACAGTCCATGTGATTGTTAAGAGTAAACAACCTAACACAG  
ATCGTACATGTGTATCTCACAGTCTTGGTGAACAATTTGATTCAGTACGACTTCATTCGAGAGAATGA

>PGSC0003DMG400018867 LRR-RLPs

ATGGCTGACTTATTGCCAGAATGTCTCATTCAAAAATACTCGGTTTGCTTAGTCATAAAGAAGCAATCA  
AGATGAGCATTCTCTCGAAAACATGGCTGCAAGCGTGGTTAACTCTTCCCAAGTTGGTATTCACTGTTCT  
TTGTTGGGAAGGCTGGGAAGGCACTACAAAGATAGTGGACACAATCATGGAGAGATATGAGAAGGGG  
AAAATTCCTATACAAAAGTTTGAATTATCACTGTTTTTGTGATTCTCCCGAACTTTTCCATCTGGTTGAT  
AAGTGGCTTCTCATTGCACTTCAGAATGGTGTAAGAAGTGTACTTCACTTTACATCATACCGGGTGC  
CTATTTTAAACAATCTTGGCAGCAAAAATCATTAAAGTGAATTGGTTCTGCACGAATGTATACTTATGCCTGTT

TCATTATCTAGTGGGGTTGTGAATTACAATTCTTTGAGAAAGATTTCTCTATCTAATGTAACATTAGACGA  
AAACATGCTTCAGACTCTACTTAATAGCTGTCCCTTGATTGTCTCTTTCATCCTTGAGAATTGTTGCGGGA  
TGAAAGTTCTAAAGATCAAGTCGGATTCCCTAAAGGTCTTGAAGATTATACAATATTACAAGATATGTGA  
CATTGATGCTCCAAATTTGGTATCCCTTGACTATACAGGGAGTGAAATTCCTGAACTTAACATTGCAAGA  
GAGTCAAGCCAATTGAAGAACTCAAAAATCATTCTTCATTGTCTCCCCAGTTTCTCCAGTTTAATTAATAC  
GGCATGGTTTTGTAAAGTTGAGGAAGTTTCTATCAAATCCGTCCTCTTGTCTGAAGTTAGCCTTTGTTTAT  
TCGAATGCGATGAGATCAACATGACAGATTTGCAAATGGACCACATAGGTTCTACTGGATGGGTGGACG  
TTTTAAATCTCAATATGCTACTGATGAATCAAATTATAGAGTGCCCAACTTTTGTGGATGCGTTGCTATGG  
AGTTGTCATCCTAGGAGACTCAACTAATCTCATTTGATATTGAAACAGTTACACGTTTAATTGATTGTTT  
AATGTATATGAAGCATTGAGTCATTCTACATATTCTTATGGTTGGAATAATCAATTAAGAAATAAAA  
GCTTTTGATGGAAAAATCAGTTGCTGCAACTCGGAAGTGAGGAGCTTGCAAAAAGGATTACGGAGGG  
GGAGCAACCTTATTTTCATATTAGATTGGTGA

>PGSC0003DMG400018900 LRR-RLPs

ATGCAACAAACTTTGATACTTGGAAGTTTGCAGGTTTCTTGTCCCAACTTGAAATGGCTATATATCGGTG  
GGGCTAACACATAAGTGATCTCTGCTCTCACCAACTTCCAAGTACTACTTGAGCAAAGTTGAAATATT  
GGAAGTACATGATTGCGGAAAATTGAGAACTTGATGTCTCCATCAGTGGCTAAAGGTCTTTTGAATCTC  
CGGGAAGTAGAGATTGAAAAGTCCAATCAATGGAAGAAGTGATCACAAAAGGAGAAGGAGCCATGG  
CCTTATATCCCCTGTTGAAAGAGCTGAAGCTTATAGGGCTGCCAAAGCTGGGGCATTCTTTATGACGGA  
GTGTACTCTTGAAATTCATTCTCAAGGTAGTGTTAATATATGACTGCCCTGAAATGAAGACGTTTGTCC  
AGGGAATATCTGTGAGTCTTGAAAGTGATGATGAGGTGAAAGTAATGTTCAATTCTAAGGTTTGTCTT  
ATAACTAATTACTGCTCTCTTTTCACTTTAACTAGTAAATAGTAGTAATAGTTATTTCTGTTCCACTTCCTG  
TTACCTTGACGTAAGATGATATATGGTTCAATTTTTTATTTATACTTGAAGCTATATTCAATTTCCATCCAT  
TCAACATTTGCAGGTTTTTTGTCCCAACTTGGAAGAGCTACGTATCTCGATGGCTCAAAGCATAAGTGAT  
CTATGCTCTTACCAACTTCCAAGTCTTATTTTCAGCAAAGTGTAGCATTAAAAGTAGATAATTGCAGTAA  
ATTGAGAACTTGATGTCTCAATCAGTGGCTATAGGTCTTCGGAATCTCCGGAGACTAAAGATTGAAGA  
CTGCCATTCAATGGAAGAAGTGATCAGAGAAGAGGAACAACAAGGAGAAGGAATCATGACCTTATTTT  
CTCTATTGGAACAACTGAAGCATAAAGGACTGCCTACTTTGAGGCATTTCTTTCTGACGGAGCATGCTCT  
TCAAATTCATTTCTTAAAAAAGTAAAGATATATGGCTGCCCTGAAATGAAGACATTTGTCCAACAGAGA  
TTTGTGAGTACACCAAGTCTCGAAAGTGTAATTTGTGATGAGGAGATGAAAGTAGATGATCTCAATAAA

GCCATGTTTAATTCTAAGGTTTGTCTTGTGCCTCTAGTTGTATAACTAATTACTATATATATTTGTGTCATA  
CGTTAATACACCCCTGGTTTACTGCTATCTTTCCATTTTAACTAGCAAATAATGATAGTAATATTAATCTTT  
TCACATAGCTATAGCAAATAAAAGTTTTTTTTATCACCCCTCCTCCTCCAGCCCCCTTTTACAAAAAAGA  
AATAAAGAAATTCAGAAAACTTAATCTTAATTAATAGAAAGCAAAGATATATCGATCATCAGATGA  
GAAATAAAAAAACGAACTAATTGACTAGAGGATTTTAAAGGAGGGTAGTGGACAAGGTCTTTGTGA  
AAGCTAACTAGTCACATGTTTCATGCAATAATAATAATCCATTTTAAAGTAAATGCTTTAATTTGTTAGGCA  
GTGCCAACGTGCACTTTGAATAGGGTTTAGACGCATTTTTTCTAAAAGAAATTTTCCAAAGATGATTCA  
ATAATTCACATTTTTTTCTTCCTTTAAGACCTAACATACCCAAAAATCAATCCTAAAAAGGCTAATAATA  
AAGCAAATAATTGGCAATCAATAATGGAATCCAAAGACTTATATATTAGAGACCAGGCAAAACAGAATA  
TAATCCTCTATTATCTTATGGATCTAATATTATATATAACATCAAATTTAATTTGTCACCTTTCTAAGGTTGA  
TCAGATAAGACTTAACTATTATTTGTGGTTTTGTTACTAACTTTAATTACCATCCATTTGGAATTTTTCTTT  
AAAAAAAAGAGAGCCAACAAGAGAATATTAAGGAATTTTTTTTTATTTTTTGTACTTGACCTATTTTAAA  
TGAGTTGAGTACCCAACGCCTTTAAAATGGGTAAATCTGAATAGGAACCCATATAAATTATCCATTTTGT  
CACCCCTAGGCGAAATTGCAATATTGTAACCCAAGGGTTCACGTGAACCCAATAGCTTTTGCCTAGAGAC  
TTAATTTGTATTATTAATATGTAGAGATACCTTGATTATGAACGTGATTGTTATTGGATATTAACCTGAG  
GTCTTTGGAGATATCTATACATTTCAAATTTTGAATGTGCATCTCATCCTAAATACTTTATATTTTGCGCCT  
CAATAGGATTAATAAGGTAAGACATATCCCCTTGCTTGTACTTTTTCATTTTGAATTTTGTTTTTATTACAT  
ATACTAGTTTCTGGACACTTGCACGTGTGTTCCATAAAAATGTTAATTGATCCATTAGAACGATAAGAGT  
TCTATGAAAACATGCTTGCAATGAGTAATAATGAAGCAATTACAAATAAACTTGAAAAGTGTGACAAG  
AAACACCACACAAGTGATGTAATTTAATGTTTGAATTAATTCCTTTCAAACAACCAACTGTAAATTTTTA  
ACTTTGTTTAGTAGTTAACAACTTTCAATAAAGTCACAAATGGCTAACTTGAACCAAATAAGAATACAG  
ACTTACGACAGTAAGAAATTCATAGAAATTTACATTAAGAAGTCTAATTGAGAGAAGACACGAAAGAA  
TAAACAATGAAGGAAAAAATACAACATGCACTTCTTAAGACTTTAATCATAAAAATATAGATGAAAAA  
AAAGAAATACAAAATAATTACTTAATTTTTGAGCTCTTGTGACATCTTCCCTCTTAACCAATCAATATTC  
AAGAGCCTTCTTCATCAAGTCAAACATAAATGAATCAAAAATAGTACAACAATAATGTAAGCACTTCAC  
TACTTTAACACATAATAACATAAATGTGCCATTTAATTTGAATCAACTGGTATCTATGCCCTCCAACATT  
GGGTATTCACAAGTAGACAATTAATAATTTGAATGAAGTTGAACTAGTAGACACACACATCTTGTGTGG  
CATAATACACGTAGGATGTCACATAGTATGTAAATTGTTGCGTAGGAAGCCACATAGGACGTGTGTGTT  
TACTTGTTCAGTTTAAAGTGTCTACTTGTGCACACCTAAAATTGGAGGGCATAGATGCCAATTGAATCCG

AGTTAAATGACATATTTATGTATTATACCCCTACTTTAACTATAGAATGAAATGATAAGCTTGGGGAGGGG  
TATCATGAAACAAAAAATGAACTTATATAGATAAAAAATGGAAGAATACCAAAAAGAAGTCTTAAAGTTT  
TAAATTAATAGTAAGAATGAGAGTTATGGATACTAAGATTAGCAATATAAAAAGAAGGCATAATATAT  
ACATAAATATGCCCCTTAACTTGGCCTTAACTCACATTTATACCCCTCAAATTTAGGTGTGCATAAGAAAA  
CACTTAACTTGTATAAAGTTTAAACAAATAGACGCACACGTCATACATGACATCCTACATGTCATTTTTAT  
CCTACGTGGTGTCTACGTGTATTGTGCCATGTAGGACTCGTGTGTTTACTTGTTCTACTTTATACAAGTT  
TAAGTGTCTACTTTTGCATATCCAAAGTTTGAGGACATAAATGTAAAATGAGGCAAGTTAAAGGGCACA  
TTTATGTATTATGCCTATATAATATGTGCATTTATTATCTCATGTCATTTTATATTCTATGTTGTTTTACAAG  
AATGCTTTTCAAATACTTGTTTTTATTGAGTAATTTGACCTTAGATGTTTAAAGCACTTTTGGCTTCTCAGT  
GTTGGGTGTTAATATGCAACAACTTTGATACTTGAAGTTTGCAGGTTTCTTGTCCTCACTTGGAAAGG  
TTATGTATCGATGGGGCTAACAACATGAGTGCTCTATTCTCTACCAACTTCCAACCTTACTTGAGCAA  
ACTTGAAATATTGGAAGTACATAATTGCGGAAAATTGAGAACTTGATGTCTCCATCAGTGGCTAAAGG  
TCTTTTGAATCTCGAGGAACTAGAGATAGAAAATTGCCAATCAATGGAAGAATTGATCACAAAAGGAGA  
AGGAGTCATGACCTTATTTCCCCTGTTGAAAGAGCTGAAGCTTACAGGGCTGCCAAAGCTGGGGCATT  
CTTTCTGACGGAGTGTACTCTTGAATTCATTTCTCAAGGTAGTCATATATGACTGCCCTGAAATGAAGA  
CGTTTGTCCAGCAGGGAATATCTGTGAGTCTTGAAGTGATGATGAGGTGAAAGTAATGTTCAATTCTA  
AGGTTTGTCTTTATAACTAATTACTGCTCTCTTTCCGTTTTAACTAGTGAATAGTAGTAATAGTTATTTCTG  
TTCCACTTCTGTTACCTTGACGTAAGATGATATATGGTTCATTTTTTGCTATATTTAATTTTCATCCCTCAA  
CATTTGCAGTTTTTTGTCCCAACTTGAACAACATATATCTCGGGGGCTAACAACATAAATGCTCTATT  
CTTTACCAACTTCCAACCTGCCTACTTCAGCAACTTGAATTATTACAAGTATCTTGTTGTGAAAATTTGA  
GAACTTGATGTCTCAATCAGTGGCCAGCGGTCTTCTGAACTCCGGGAGCTAATGATTCAACACTGCCA  
ATCAATTGAAAATGTGATCACAGAAGAGGAACAACAAGGAGAAGGAATCATGACCTTATTTCCCCTGTT  
GGGAAAGCTGCAGCTTCGGTATCTGCCTAAGCTGGGGTATTTCTTTCTGACGGAGCATGCTCTTAAATTT  
CCATTTCTTAAAGAAGTGAAGATATATAGTTGCCCTGAAATGAAGACGTTTGTCTAG

>PGSC0003DMG400018901 LRR-RLPs

ATGTCTCCATCAGTGGCTAAAGGTCTTTTGAATCTCCGGGAACTAGATATTGAAACTGCCAATCAATGG  
AAGAAGTGATCACAGAAGGAGAAGGAGTCATGACCTTGTTTCCCCTGTTGGAAAAGCTGAACCTTACAG  
AACTGCCTAAGCTGGGGCATTCTTTCTGACGGAGAATGCTCTTAAATTTCCATTTCTTAAAAAAGTGGA  
GATATATGACTGCCCTAAAATGAAGACGTTTGTCCAACATGGAATATCTGTGAGTCTTGAAGTGATGAT



GAGGTGAACGTAATGTTCAATTCTAAGGTTTGTCTTTATAACTAATTACTGCTCTCTTCCGTTTTAACTA  
GTAAATAGTACTATAGTTATTTCTGTTCTACTTCCTGTTACCTTGACGTGAGATGATATATGGTTCATTTTT  
TTATTTTTAATTGAAACTATATTCAGTTTTAATCCCTTCAACATTTGCAGGTTTTTTGTCCCAATTTGGAAA  
AGCTACATATCTCAATGGCTCAAAGCATAAGTGATCTATGTTCTTATCAACTTCCAACCTTATTTTCAGC  
AAACTTGTCGCATTAAGTAGATAATTGCAGTAAATTGAGAACTTCAATCAGTGGCTAGAGGTCTTCT  
GAATCTCCGGAGCCTAGAGATTAAAGACTGCCATTCAATGGAAAAAGTGATCAGAGAAGAGGAACAAC  
AAGGAGAAGGAATCATGACCTTATTTCCCCTGTTGGAAGAGCTGAAGCTTCAGACACTGCCTAAGCTGG  
GGCATTCTTTCTGACGGAGAATGCTCTTAAATTCTCCAACATGGAATATCTGTGA

>PGSC0003DMG400018994 LRR-RLPs

ATTTCTTGAAGAAGACGAGCTGGGTTTCAAATTTTCGTAAGTATTGATTAATAATTTCTTTATGAGCTTTGT  
TCTAAGTGCTTAGAGAGTATTGATTCACCTTCATTATCAACAAAGTTTTTTGATGGAGAAGAAGAAAACA  
CAAAGATTTGGCTAAACATGTTGTAGTAGTTGTGTACTTGATTTCCGGGTAACAAGTTTCAGTTAAAG  
TGACCTAATTATGTAAGCTCTTTTTAAAAGTTAAAAGAGTGCTTTAGGTGAAAAATAAACATTGATG  
GAGGTATTCCAGAAAATCATTTCATGGAGGATACTTAACTGTACTATGCATGCTCAATCACATCAATAATT  
TTATGATATGTAACAGAGGCGAAAATTTTCATGAGATTTTAGGATAAAAATTGTTTAGCTTTAATTTCAAT  
CATGAATACTTCATGATAGTTGAAAAATCATTCTGTTTTATTACGACATTTTGAGATAATAACTATTAGT  
TGAGTGAACATATTGAGAAATCAAAGTCGTGATTGTCTCTAGGTTCTCCAACCTAAGGTATGCAGGGG  
ACCTCAATTAACGCTAATTTTTGCCTTCCATTTTCGGCTACTTAATTAGCACTATTATTCCACAGGACTTGA  
CTTGACCTTCAAATATTTGTCCTCATTTCATTACGCAAACCTACAAGTTACTTGTAAGACAGTAGTGAAG  
CTGAATCATAAGGAGAAATATATGGTCCTCTGTTATGGGTTGTCTTTCTATATAAACAGGCCCAAATAAC  
TAATGCTAGTAATATACAGTGCTTTAACTATAACCATCTCTATTAGTATACGATCAACTAAAATGGCATG  
TTGGAAAATTTAGTTGCTCTACTTGTTTTATTTCTTCTTTCTTTCTCTACCTGTTTCAGTCAAAGCCATA  
AAAGCTGTATCTTTACCTCTCACAACAATACCGAAGCCAAAGTGAGATGTGTTAAAAGTGAGAGGAAT  
GCTCTATTAAGATTCAAACAAGGTTTCACTGATCCCTCTGACCGACTGGCTTCTTGGGTTGGCAAAGAAT  
GCTGCATCTGGAAAGGCATTTATTGTGACGCTCGTTATAATGTCATCAGGCTTGATCTCAATGACAGAAC  
AAACAATTGCTATTGGAAGAAAGTGGGATACATGATTCCAGGCAATTCAACATGCTTGGGTGGCAACAT  
AAGTTTTGATTTACTCGATTTGCATCACTTGGAGTATTTAGACCTAGGTGGTAATGACTTCCAAGGACTTA  
CCACTCCCAATTTCTTGTCTTCTCTAAAGAAATTACAGTATCTTGACCTTTCTTTTTCATCTCTTATTGGTGT  
TCCTCCTTCACTTGGAAATCTATCAAATTTGCAGTATCTAAGCTTCCGTGCGTGTTCTATCCTTACGATAA

TGTTGAAAGAAGTTGGGTCAAAGATTTGAATTGGGTTCCGGTCTGTCTTCTTTGAAGTATCTTGATCTTT  
CTTATGTGAACCTTTCTTCGGCAACACATTGGCTTGATTCTATTAATAAGCTGCCATCCTTAGTGACTCTC  
AGTTTGCAAACCTGTAGTCTTCACTATCTTCCTTATTCCTTCCCAACCTGGAATATGACTTCTCTTTCTTATC  
TCTCCCTTTCACAGAATAAGTTTGTTAACTCTGAGTTGCCTAAATGGTTGTCTAATGCCACCACCATTGAG  
ACACTTTATATGGTATACAGCAACATCCAAGGCCAATATCAAATGTTGAATGGGGTAAACTCTGTAATT  
TGCAGAAGTTGTATCTAGAGCAGAACAACTTAATGGAGACCTAAGTCGAGTGGTGAAGGATTGTCC  
AACTGCAGCAACCCTACGATAGAGGAATTATCTCTAGGCGAAAATGTGTTGACAGGGGAATTGTCAAAT  
TCATTAGGACATCTGAAGAACTTAAGGATTCTTAGTATTTCTTTAATATGATCTCTCAGCTTTCACGGTT  
GGAAATTTTGTACTTGGGAGAGAATCAACTGAAGGGAGCCTTGCCTGAGAGTATTTTTAATTTTTAGAA  
TTAACTGAGTTGCGGCTGACAACAATGCTTTGGAAGGCAATCTTTCACAAAATCACTTTGAAAACTCC  
ATCAACTGGAAGTTTTATCCCTATCTTGTGGAAGAAGTTTTTCAGTCAACTTGAGCAATGAATGGGTTCC  
TCCATTTAGCCTCTATGGTATCGAGCTCAGAAGTTGCAGTTTGGGTCCCAAGTTTCCAACATGGCTAAAG  
ATTCAAAGCAACTTCAGTGGGTCACTCTCACCAATGGCTCCATTTCAGAACCTATACCTCCTTGGCTTTG  
GATGATGTGCTCACAATTTCACTGGCTCGATCTATCAGATAATCAAATTGGTGAAGTCTACTGAGGATA  
GTAAATTTCCATCAACATACCAAATCTGGACGGTGGGTTTCTATTTTAGTTACTATTATGGTGTGCTCGT  
GGACTTGAGTTCCAATCACTTCCATGGTTCGTTACCTCTTTGGCCAACTGTGACACATTTGAATCTTGCGA  
ACAACCTGGTTTTTCAGGATACATACCCTTAAACATTGGTCATGTGATGACAAAACCTCAAGTGTTAGATCT  
TTCTGGAAATGCTTTTATAGGAACTATACCATATTCCATAACAAGAGTCAAGCAGCTATTGAGATTGGAC  
CTTTCAGACAATCATTTGTCTGGGAAGATTCTGATTGGTGGTATGATTTGCAACAACCTCAAGTCATAG  
ATTTGTCAGGGAATAATCTTTCAGGTAATTCCTCCTTCAGTTTGTTCACTTTTCACTTTTTTGGTTGA  
GATTATGCCGCAATAACCTTTCTGGAGGGCTTCCAAAATCATTGAGGAATTGCAATAGCTTGCTTGCCCT  
TGATATTGGAGAGAACAATACTACTGGCACCATACCGGAGTGGTTCGGAGAAAGTCTCTTATCTCTGCA  
AAAGCTCAGAATGACAGGTAACATGATTCATGGACGCATTCCACCACAACCTATGCCAACTTTCTAACCTC  
CAAATTCTCCATCTTTCACATAACAATCTGACAGGTTCTATCCCTTCTTGCCTGGGAACCTTGAGAGGTCT  
CAAGTTGATGAAATTTACAAGTGGTTTCCCAACTACCTTTATTTAGTTATGTTTTTACACCCAAGATGG  
AATTGGTTGAGAAAGGAACAAAGCAGACTTACACTTTTACCTTAGATCAAGTGAATCTTATTGATCTTTC  
CTGCAACAATCTTCAGGGTGAAATCCCGAAAGAGATAACAGCTCTGTCAGCCTTGAGCACTCTGAATTTA  
TCTGGGAACCAATTATCAGGAAGAATTCCAGAGGACATAGGGAGCATGCAACAATTGGAGACACTAGA  
CCTTTCATCTAACCATCTCTCAGGTCCTATCCATTAAGCATGGCATCCATCACTTCATTGAGTTATCTTAA

CTTGTCACATAACAACCTTCATGGCCCTATCCCATCAACAAACCAATTTGGAACCTTTACTGATCCTTCGT  
GTTTCGAAGGTAATCCAGAACTCTGTGGGAAACCATTGACCACCAATTGCTCCTTACCCAGGAAAAGAG  
AAATAGAAGAAGAAGATGATGATGAAATAAGGCTTTGTTTTTTGTGAGCGCGGGAGTGGGATTCGTT  
GCCATGTTTTTGGTGACATTTATAAGCTTGACGATAAAGAAGTCGTGGGGATACTGCTGCTTCCATTTCA  
TGGAGGAAGTTGGAGAAAGAATTATCAGGTGCTGTATGGGTTTCATGAATAGGATTTTCAGCGTCACAA  
GGAACATAATTTCCATTGCATTACTGTTCTTTCTGTTTTGATACTGTTGCAGTGAAAATATGGCAATCTTTG  
AAATTATGTTTCGTCC

>PGSC0003DMG400019071 LRR-RLPs

ACATATTGCTTGGCCTAGTGAAAAATATACGCAAACAACCTACCACACACAAAAAATACTTTTCACTTGCT  
AGTCTAAAACATTGCACACCATGAAAGTGTTAGCAATAACACTATGGGTTCTCTTGTTTTTATTTTGACA  
AATACCAAGTTTGTGTTTGTATAGGGATTTGCAGAGACAATGAGCAACGAGCGTTGGAGATCTTGAAG  
AAAGAAGTCTATGATCCCTCGGAAATTCTCTCTTCTTGGGTTGTCGGAAAAGATTGTTGTGAATGGGAA  
GGGGTCGTGTGCAACAATCTCACTCGTCATGTGATTGATCTAAGCATTCTATTGATAGGTTTGATTGCA  
GATATCTAAGGATCAATAACCTAGAGTGGTTGACAAGTCTTTCGAGTCTTGAGAACCTGGAGATAGAAA  
GTGTTGATCTTAGCAAAGCTAATGAATTGCTACAGGTTATTAACATGCTTCCTTCTCTTGTGATCTTCGT  
TTATACAACCTGTAGTCTTCATCATATAACACCTCTACTTGATCATAAAAAAATTCTTCACTCAAATCTCTC  
AATCTTTCTGGGAATTACAACCTTAATTCATCTGTCCCTAAATGGGTTTTCAACCTCCCAATCTTGTTTCT  
CTTGACCTGAGTGGCTGTAATTTTACTGGCCCTTTTCTGACGGTCCAGTTAATTTGACTTCTCTCACAAC  
CTTCAAGGCTTCTAGAACTCTTCAACTGTCGTCTACCAAATGGTTGTTTGATTTGAATAATCTTGAAC  
ATCTTGCTCTATCGTAGTGGCATTGAAGGTGCGATACAGAGTAAGAGCGGAAACATAACAAAACCTTA  
AATATCTTGATCTTTCTTTCAATAACATCAACTCCACTATACCAAATTGGCTCTATGGATGCAAAGATCTA  
GAATCACTTTTCTTGGATCAAATCGTCTTGAGGGAACAGTTTCAAGTCTGATTTCAAATTTGAGCTCAAT  
AATTAATATTTACCTTTTTGATAATATGCTTTCGGAAAGTTACCGAATGTAATTGGAAAGTTAGGGAAA  
TAGGAGTAATTTCTTTTCAGTGGGATTGCGAAATACTTCTTCTTTATCTAGTTTGAGACTAGACAATAATA  
AACTCACAGGTGCTTTCGAAAAGTGTTGGCCAGCTTTCAATAGAACATTTTTCCATCTTTAATAATAGG  
TAGGAAGGTGTTGTAACAGAAAGTCATTTCTCTAAATTAACACTTTTACAAACCTTCTATGCATCTAGAAA  
TAATCTGACTTTAAAAGTGAGTCGGACTTGGATTCCACCTTTTCAAGCCACAGACATTGTATTACGCGGC  
TTGAATATAGGTCCTTCGTTTCCCATGTGGCTCCAAACTCAGAACCAGATAATGTATGTCGACATATCAG  
ATTGTGGAATACAAGGTGAGGTTCCAACCTGGTTTTGGAACCTCTCTTCTCAAATTCGATTACTCAATCTT

TCTCACAAACCAATTTGTTGGTGAGGTTTCAATCATTTTCGATAGATGTGCAGAGTGGTTCTTCGCTAATGTA  
CTTGGCTTCCAACAATTTTAGTGGACCAATACCATTGATTTCAACCAGTGTAAGTGAAGCTAGATATCTCAA  
ACAATTCTTTTTCCAAAGGTTTATCTAACTTTTTGTGTGAACCAAAGAATGGATCTGACAAATTGAAAATC  
TTAAACCTCGGGGAAATGATTTATCAGAAGAAATTCCTGATTGTTGGATGAATTGGCCGGAGTTGAAA  
GTTTTAATCTTGAGGGACAACAATTTGATTGGAAGCTTACCAAGATCTATGGCGATTTTAAGTAATTTGC  
AATCCTTAGACTTACGAAGAAATAGACTTAACGGTCTGTTTCCTTCATCCTTGGAAACTGCACAAAAC  
GCATAAATAGATTTAACTGAGAATGAGTTTATTGGAAAATTACCACCTTGGTTGGGAATGAGGTTTCCA  
ACCTTGATAGTCCTTATCCTTCGGTCCAATAGATTCGATGGTGAATTGCCTCAAGAACTTTGTCACCTCAA  
AGATCTTTAAACCTTAGACCTTGCAAACAATACATTTGTTGGAATCATACCAAGGTGTATTGGCAATTTCA  
GTGCAATGGTCAAAGGAAAAAAGAAAGTGGGAGACGATTATGAGTTAAATTATTCCTTTTATAATGGAA  
CTTTGATAGAGAGTGCCTGGTCTCTCACGGAACCCATACCCAATCAGTTAGTGTACCAGATCGTGGTA  
CCCATTCCAAGTTAGTGTGTTGGATCGTGACACCCGTTCCAATTTTATGTCGGTACGTGACATCCGTTCC  
CAATTAGTGTGTCGAAACGCGACATCCGCTCCATTCAACATACCACAATCACAATCACAATGTATATTCTC  
ATATTCATAAATTAAGAGGTGATTTATGGCATATAGTTATTTGCTCATACTCATTTACGATTAGTGTGAT  
CAATAATGCAACATTCA

>PGSC0003DMG400019072 LRR-RLPs

ATGAAAGTGTTAACAATAACACTATGGGTTCTTGTTTTTTATTTTGACAAATACCAAGTTTGTGTTTG  
TGTAGGGATTTGCAGAGAAAATGAGCAACGAGCGTTGGAGATCTTGAAGAAAGAAGTATATGATCCCT  
CGAATATTCTCTTCTTGGGTTGTCGAAAGATTGTTGTGAATGGGAAGGGGTGGTGTGCAACAATC  
TCACTCGTCATGTGATTGAGCTAAGCATTTATGTTGATATGTTTGATTGAGATATCTAAGGATCAATAAC  
CTAGAGTGGTTAACAAGTCTTTGAGTCTTGAGAACCTGGAGATAGAAAGTGTGATCTTAGCAAAGCT  
AATGAATGGCTACAGGTTATTAACATGCTTCCTTCTTGTTTATCTTCATTTATACAATTGTAGTCTTCAT  
CATATAACACCTCTACTTGATCATAAAAAAATTTCTTCACTCAAATCTCTCGATCTTTCTGGGAATTACAAC  
TTAAATCTTCTGTTCCGAAATGGGTTTTCAACCTCCCAATCTTGTCTTCTTGACCTGAGTGGCTGTAAT  
TTTACTGGCCCGTTTCTGATGGTCCAGTTAACTTGACTTCTTTCACAACCTTCGAGGCTTCTGGAAATCG  
TTTCAACTGTCGTTTACCTAAATGGTTGTTGATTTGAATAATCTTGAACATGTTGTGCTCTATGGTAGTG  
GCATTGAAGGTGCGATACAGAGTAAGAGCGGAAACATAACAAAACCTTAAATATCTTGATCTTTCTTCAA  
TAACCTCAACTCCACTATACCAAATTGGCTCTATGGATGCAAAGATCTAGAATCACTTTTCTTGGTGGAA  
ATCATCTTGAGGGAACAGTTTCAAGTCTGATTTCAAATTTGAGCTCAATAACTATTATTGACCTTTCTGGT

AATATGCTTTCTGGAAAGTTACCGAATGTAATTGGAAAGTTAGGGAAATTAGAACAACCTTGATCTCACA  
GGAAATCAATTTGAGGGAGATATATCTGAATTATTCAATGTTAAGAGTAATTTCTTTTCAGTGGGATTGG  
GAAATACTTCTTTAACATTTTTGAGACTAGATGATAATAAACTCACAGGAGCTCTCCGGAAAGTGTTGG  
CCAACCTTCAATGCTAGAAAGTCTTTTCCATCTCTAACAATAGGTTGGAAGGTGTTGTAACAGAAAGTCAT  
TTCTCTAAATTAACACATTTACAAACCTTCTATGCATCTAGAAATAATCTGACTTTAAAAGTGAGTCGGAA  
TTGGATTCCACCTTTTCAAGTCATAGATATTGAAATAGGCGGCTGGAATATAGGCCCGTTGTTTCCAATG  
TGGCTCCGAACTCAAAGCAGATAGCAAATGTTGACATATCAGATGGTGAATACAAGGTGAGGTTCCA  
ACTTGGTTTTGGAAATTGTCTTCTCAAATTGAATTTCTCAATATTTCTCACAACCAATTTGTTGGTGAGGTT  
CCAATCATCTCGACACCTTCGTGGACGGATGGACATGGAGGTCCTTGGACAATGTGCTTTGGTTCCAACA  
ATTTTAGTGGACCATTGCCCTTGATTTCAACCATTGTAAGTACTGAGCTAGATCTCTCAAACAATTCTTTTTCCA  
AAGGTTTATCGAATTTTTGTGTGAAGCAAAGAATGGATCTTACAAATTGGAGATCTTAAATCTCGGGG  
GAAATGATTTATCAGAAGAAATTCCTGATTGTTGGATGAATTGGCCAGAGTTGAAAGTTTTAATCTTGAG  
GGACAATAATTTGATTGGAAGCTTACCAAGATCTATCGAGGTTTTGAGTAATTTGTTATGCTTAGACTTC  
CGAAGAAATAGACTTAACGGTCCGTTTCTTCATCCTTGGAAAAGTCTCAAAGTGCATAAAATAGATT  
TAGCTGAGAATGAGTTTTTTGGAAAATTACCATCTTGGTTGGGAATGAGGTTTACAACCTTGATAGTTCT  
TATCCTTCGGTCCAATAAATTCGATGGTGAATTGCCTAAAGAACTATGTCACCTCAAAGATCTTCAGATCT  
TAGACCTTGCAAACAATACATTTGTTGGAATCATACCAAGGTGTATTGGCAATTTAGTGCAATGATCAA  
AGGAAAAAGAAAGTACTGGAAGATGATTTTGAGTTAAATTATCCTTTTATTATGGAACCTTTGATAGAG  
AGTGCAATGGTGACAATAAAGGCAATATGTACCAGTATGACACAATTTTGGCGTTGTTTACAAGTATG  
GATATGTCTAGCAATAATCTTTCTGGAGATATTCTATAAGTCTAACACGTCTTGCAGGATTAAGATCATT  
TAATCTTTCCAAAATAACCTAACTGGAAGGATTCCAAATGACATTGGTGACATGAAAGTCTTGGAACT  
GTTGATCTTTCAGAAAACCAACTTTACGGTCAAATCCACAAAGTTTTTCGAGTTTGTCTACTTTGAGCTA  
CTTGAATCTATCTGATAACAATTTGTCAGGTATGATACCATTGAGTACTCAACTTCAAAGCTTTGATCCCA  
CGAGTTTTCAAGGAAACAAGCTCTGTGGGCTCCCGCTTGGTGAAGTGCAGTTTCAAGATGGCAATATTCC  
AAATCACAAGTATGAAGATGATGAGAGTGACAAAGATGAAGTGGATTGGTTTTACATTTCAATGGCTAT  
TGGATTCGACTAAGCTTTTGGGGTGTGTTGTTGTTTCAAGAGATCATGGAGACATGCTTAT  
TTTCGTTTTCTAGACCGTAGCTGGGAAATGTTGCTTGCAAAGTTACCAGTATGTTGA

>PGSC0003DMG400019900 LRR-RLPs

GAGAATTTAGCCGCCATTTGGCAGAAAAGTCTTTGGCATCTGCAGATTTTCATGAAATATAAAATTCCCAC

ACTGCTCAAGTGCTCAAAGTATCAAGTCTTAGCATCTGCAGAGTGGTGCTTCATATAGAATTCTATAAAT  
GGTGGACGCTTTCCTTCAAGTTCTTCTAGAAAATCTGGCTTCTTTCATCGGAGATAAAATTTGTATTGCTTT  
TCGGTTTTGAAAAGGAATTTGTAAAGCTGTGAGTGTGTTTTCCACAATTCAGTTGTGCTTCAAGATGC  
TCAGGATAAGCAATTGAAGGACAAGGCAATTGAGAATTGGTTGCAGAACTCAATTCTGTAGCCTATGA  
AGTTGATGACATATTGGGCGAATGTAAAAATGAGGCAACAAAATTCAAGCAATCTCGATTTGGGTTTTA  
TCATCCAGGGATTATAAATTTCCGTCATAAAATTGTCAAAAAGATGAAAGATATAATGGAGAACTAGA  
TGCAATTGCTGAGGAAAGAAGCAAGTTTCATCTCCTTGAAAATATTATAGAGAGACAAGCCACCTCCAC  
GCGTGAAACAGGTGTCACTACTAATTAATAGCGTAATTTAGATTCAATTTGTTAACACATCGTGGGTTAA  
CCGTGATCTCTGGCAATGGGGCGGGAGCCGTTCTTAAAAAATATTTTTTTTTAACGTGAGCTTTGCATT  
TATTTAAGGTATAATATATAAACATGCTCTTAACTTGATATCTGCTAGCATTGTGTCTCTAATTTTGA  
TTTGCACAGTTGAACAAAGTACACACACGTCCTATATGACAATTTGCATCCTACTTGGCTCCTATGTGTAT  
TATGTTATGATGGCCGCAAGTGTACTTGTTCATTTTATACAAGTTTAAGTATCTATTTATGCACATCCA  
AAGTAGGAGGTATTGATGTTAGTTGAGACCAAGTAAAAGACATATTTATGAATTATACCTTCAAATAT  
GATGCAATTATATATCAGTCTGTCCAAAAGATTGTTTTAGTCAAACCTAGTCTGGATCTGCTATTGGAAGT  
GTGAATTTTTGTGGCACTAAACAATGCTAGGGGTCTGGATTCATTTTGCATTAACATTTGTCTAGATGATT  
TTCTGTATCGAATTTACGGTCTAAAAAAGAAATTTCAAATTTGTGAGTTATGAATCTTAAGTCTAAATT  
GTAAAACAATTGTTATGGAAATAGGAGGAAACAGTTCTGTTGGGAAGGATTTTCGATACAAATGGATTGT  
ATCTAGCATTTTATTTAATAAAGGGTAAATGGCCAAATATTCCCCTAACTATTTCGGAAAGGTCTAGATA  
TACCCTCTGTTAAAGTTTGGCTCACTCATGCCTTCGCCGTCTAACTTTTGGTCTAAATATGCCCTTATGG  
GCGTTAGTTGGCCTGCTGGACATATCCAACCTCATTTTTCATTTCTTTAAATGCCAAATAGAATTGCCATGT  
CATATTGACTTTACCACATGACATTTATATGAAAATTGAAATGGAATTGCCATGTCATTTTTGGCGTTAAT  
TTTATATTTTTTCATAATTTTGATTAATCAATACTCATTTTCGGGATTTATCGAAAAAATAAATTTTAAA  
AAAATTGTTGAAAATTTGTTGAATTTAAGGTTACAATATTTATTTGTGAATTTTTGACATTAATTTTATATT  
TTTTTTCATATTTTTCTATTTTTTATTAATCAATTAATAATTTTCGGGATCTACCGAAAAAATAAATTTAA  
CAAATTTGTTGAAAACGGGTCGGGTAGTTTCTTTAAAAGGGGGGGTTGATTTTATGGGTCCGATTAGG  
TGTTTATGGGTTTCGAATTTTATAGGGGTATAATTGATCCCTTTCCATTTTCATAGAAATGTCATGCGGTAA  
AGTCAAATGACATGACAATTCATGTGGCATTAAAGAAATGAAAATGAGCTGGATATGTCCAGCAG  
GCCAACTAACGCCATAAGGGCATATTTAGACCAAAGTTGGATGGCGAGGGCATGAGTGAGCCAACC  
TTTAAACGGAAGGTATATCTAGAACTTTACGAATAGTTTAGGGGCATTTTTGACCCTTACCCTTAAATAA

AACATAGCAAATTATGCGTGTTGAGGTGGAACAAGTTGAAAACAACAACTTTGCAAGGTGGCTGGTTG  
AAATCTTTGCGGGTTTGTGTGTGTTTGCCTGCACCACCCATCTGCCATCCCTGTCTACCTGATTGTTTT  
GTCTCTTTAGTTTGCAAAGTGTTCTATATTTCTTGCTGACTCATTCTACTGAGCTCAATTGTAACAAATCT  
TTTATGTCCACACTACTTGAACAGGTTTTGTTTTAACTGAACCAAAGTGTATGGAAGGGACAAAGAG  
GAGGATGAGATAGTGAAAATCCTGATAAACAATGTTAATGTTGTCCAAGAACTTTCGATTTTTCTATAA  
TTGGTATGGGGGACTAGGAAAGACAACACTAGCCCAAATGATCTTCAATGATGAGAGAGTGACTAAGC  
ATTTCAATCCCAAATATGGGTTTGTGTCTCAGATGATTTTGATGAGAAAAGGTTGATTAAGACAATTAT  
AGGAAGTATTGAAAGAAGTTCTCCTGATGTCGAGGACTTGGCTACATTCCAGAAGAAGGTTCCAGGAGTT  
ATTGAATGGAAAAAGATACTTGCTTGTCTTAGATGATGTTTGAATGATGATCTAGAAAAGTGGGCTAA  
GTTAAGAGCAGTCTTAAAGGTTGGATCAAGAGGTGCTTCCATTCTAGCTACTACTCGTCTTGAAAAGGTT  
GGATCAATTATGGGAACGTCGCAATCATATCATTTATCAAATTTGTCTCCACATGATGGTTTACTGTTGTT  
TATGCAACGTGCATTTGGGCAACAAGAGAAGCAAATCCTAATCTAGTGGCCATTGGAAAGGAGATTGT  
GAAGAAATGTGGTGGTGTACCTTTAGTAGCTAAAACCTTGGTGGTCTTTTACACTTCAAGAGAGAAGA  
AAGTGAATGGGAACATGTGAGAGACAATGAGATTTGGAGTCTGCCACAAGATGAAAGTTCTATTTTGCC  
TGCTTTGAGACTTAGTTGTCATCACCTTCCACTTGATTTGAGACAATGATTTGCATATTGTGTAGTATTCC  
CAAAGGACACCAAATGATAAAGGAAAATCTCATCACTCTCTGGATGGCACATGGTTTTCTTTTATCAAA  
AGGAACTTGGAGTTAGAGGATGTGGGTAATGAAGTATGGAGCGAATTATACTTGAGGTCTTTCTTCCA  
AGAGATTGAAGTAAAATCCGGTAAAACGTATTTCAAGATGCATGATCTCATTGATGATTTGGCTACATCT  
CTGTTTTAGAAAAGCGTATCAAGCAGCAATATCCGTGAAACAATGTAAAAGTTACACACATATGATGT  
CCATTAGTTTCGCTGAAGTGGTGTCTTCTACTCTCCTTCGCTCTTGAAAAAGTTTGTCTCATTAAAGGGTG  
CTTAATCTAAGTTACTCAAACTTGAGCAATTACCCTCTTCCATTGGAAATCTATTACATTTAAGATACCT  
GGACCTGTCTCGCAATAACTTTGCTAGTCTTCCAGAGAGGTTACGCAAGCTTCAAATCTGCAGACTCTT  
GATCTACATAATTGCTACTCACTTTATTGTTTGCCAAAACAACAAGTAACTTGGTAGTCTCCGAAATCT  
TGTAATTGATGGTTGTCCATTGACTTCTACTCCACCAAGGATAGGATTGTTGACATGCCTTAAGACTCTAG  
GTTGCTTTATTGTGGGAAGCAAGAAGGGTTATCAACCTGGTGAACATAAAAAATCTAAATCTCTATGGCCC  
AATTTCAATCACACATCTTGAGAGAGTGAAGAATGATAAGGATGCAAAGAAGCCAATTTATCTACAAA  
AGCAAATCTGCATTCTTTAACCATGAGTTGGGACATCGACGGGCCACATAGTTATGAATCAGAAGAAGT  
TAAAGTGCTTGAAGCCCTCAAACCACACCCCAATCTGAAAAATTTAGAAATCATTGCCTTTGGAGGATTC  
CGTTTTCCAAGCTGGATAAATCGTTCAGTTTTGGAGAAGGTCTTCTATTAGAATTACAAGCTGCAAAA

ACTGCTTGTGTTTGCCACCCTTTGGGGAGCTGCCTTGTTTAGAAAAGTCTAGAGTTACAATACGGGTATGC  
GGAGGTTGAGTATGTTGAGGAGGAGGATGCTCATTCTAGATCCCCACAAGAAGAAGATTTCCATCCCT  
GAAAAGACTTTGTATTTGGTTCTTTCATAATTTGAAAGGATTGGTGAAAGAGGAAGGAGAAGAGAAATT  
CCCCATGCTTGAAGAGATGGAGATTCTATATTGCCCTATGTTTGTTTTTCCAACCCTTTCATCTTTCAAGAA  
ATTAGAAGTTCATGGCAGCAGAAATGCAACAGGTTTGAGCACCATATCTAATCTTAGCAGTCTTACTTCC  
CTCCGCCTTGGTGCTAACAACCAAGTGACTTCACTCCCAGAAGAGATGTTCAAAGCCTTACAAATCTCA  
AATACTTGACTATCTTACTACAAGAATCTCAAAGAGCTGCCTACCAGCCTGGCTAGTCTCAATGCTTTA  
CAGAGTTTGACAATTGACTATTGTGAAGCCCTAGAGAGTCTTCTGAGGAAGGGGTGAAAGGTTTAACT  
TCACTCACAGAGTTATTTGTTGAACAATGTAAGATGCTAAAATGTTTACCTGAGGGATTGCAGCACCTAA  
CAACCCTCACAAATTTAGGAGTTACTGGTTGTCCAGAAGTGGGAACGCGCTGTGATACAAAAATAGGAG  
AAGACTGGCACAAAATTGCTCACATTCCAAATCTGGATATTCGTTAGTCTTATTGTATTTGTATTACTT  
ATATAATGTGAAATCTATTTTCTGTACTTG

>PGSC0003DMG400019970 LRR-RLPs

GTAGATGTTGCATCTTGTGCTTGCTCTGGCAATTCCTTCACCAGATGCGTTTTCTGAGCATGGAGGAAA  
GCTGGACTCTTTTACGCGATAAGGTTTTTGGGAATGGTGGTTACCCTCCGGAATTGGAGAAAATTGGGA  
GGTACATTGGCCATCAGTGTCAAGGGTTGCCACTTGCAAGTTGTTGCAATTGGTGGACTACTTTCCAAGAT  
GAGCAAGGAAACAAGTCTTGGGAGAATGTTGCAGAAAAGGTAGGATCACTTATGACCAGCGACACTA  
TGGATTGCTTGAACATACTTTGTTGAGCTACAACCACTTGCCTCAGTACTTGAAAACATGCTTCCTTTAT  
ATGGGAGTTTTTGCAGAACTCGTGAGATCCAGTCTGGAAGTTAATAAAATTATGGATTGCTGAGGGC  
TTCGTCAAGAGAGTTAATCATAAAAATCTAGAAGATGTGGCAGAGGAAAATTTGAGGGAGTTGGTTGA  
TAGAAGTTTGGTTTTGGTGGGAAGCATACTTCCCTAGGAAAAATCAAGACTTGTAAGATGCATGATCT  
CGTTCGAGATATGTGTTTGAGAGAAGTCCAATATGAGAATTTTATACACTTCAAACGAGGTATGACTAT  
GATGATCTTCTAGAAAACATTAGTTGTCTACGTCGTGTAGCTGATTTCCATAAGTATACACACAGTGGAC  
TTTCTAAACTTATGCCACTCACACGTTCTGTTTTCTTCAAATATCCATACTTTTTTTGTTACCTCTCACAGTC  
GAGCTTTAGATTACTGAGGATATTAGATGTTTGCTTTACATGTTTTTCTCCTGTAGTCAAGTCCGTATCAG  
AACTTGTTCAATTTGAGGTATATTGCTTGTCCGTCCTTCAATGGTCTTGTGCAATCACTATGCAAGCTACGG  
AATATACAGAACTTAGTTATTCATGATTCACATCCATTTGGTTCAAGTATGAGAACCAGTCCCTACCATG  
GGAAGTTGTGAATATGCCTCAACTAAAACATATCCATACAAAAAAGTTGAGTCTTTTCATATCCCCACCTA  
CATCAGTATTAATTTCTGAGAGGGAGAATCACTTACAAACGTTAACCGGATTGATGCCCTCATCTTGTA



CGATGAGGTGTTTCTACGAATTCCAAATTTGAAGAAGTTGGGAATTTTAATTGTTGATGAATCAGACACT  
ATTCAGAAGTGTTATTGTCTTGATAATCTTGACATTTAACTCAGCTTGAGAAGCTCAAAGTTGAGGTCA  
GCGAGAGTTATCTGCTAATTTTTATGCGGATTAGCGAAGGTTGGGTGGACATTCCACATTGTGACAATTT  
CCCACCAAACCTTAAGAAGTTAACATTGTGCAGAACGCACCTACAATGGGAAGACATGAACATTCTCAG  
TAAGTTACCTAATCTTGAGGTGCTCAAACCTAACATCATGCCTTTCACGGACTAATTTGGAAACTAAGC  
CATGAAGACGAAGATGGATTCTTGAAGCTAAAGTTTTACTCTTGAGCGCATGAGTCTGAAGCAATGGGA  
AGCAACAAGTTATCATTTTCCAAGCCTTGAGCACTTAGTCCTAACAAATTGCCGGTACTTGGAAAAAATT  
CCTTTCGACTTTCGCGGAGATTACAGACTACAGCTGATTGAACTACACGAATGTAAGCGTTCTGTTCTGT  
TTCAGCAGAGCAAATACAAGAGGAGCAACAAAGCTTGGGAAATGATGACCTCGTTATTCATGCGAACTC  
TATACGTGAGTAAACATTAATCAAAAAGGTATACATTTCTTAAAAGCATAAAGATTTTTGATTAGTTAGA  
TTCCTTCGAAAATCTGAAAATGATTTTTATATTCATCATTTTCACTTATTTATACTATAAAAGGTGCTAATT  
ACAATTGGTTTGTGCATTGCAGACGTAACGACTAGCTGATGGAGAGTACCATAAGGTATATATACTCAA  
GCAATTTGCAGAAGTTCATGATATTTCTGTCTGTGATTTTGACTTGTTTAGGACTGAGACGTAGTTTA  
GTGAATCTGATATCTATATACATTCATCAGAAAGAATGCATCACCTTGGAAATGTGTGTATAGTTGAATA  
ACTTCTCTTTTTATTGAAATTGATTCTATAAATCAGTTCTCCTCAACAAAACCTTTCGTCCATACCAAAC  
>PGSC0003DMG400020178 LRR-RLPs

AAGAAAGTGACCGTAGAACTATCTATCTATCTGCTACTCAATTCATCCATCTTCTTCTCTCTCTAA  
ACCATTAATTTCTTATACCAAATTTGTTTCAGCCATTACCAAAAAGCTTTTGCTTCTTGTGAAGCTACTT  
TTTTTTGCCTTTCGTTTTGGTTCCATTAAGACCCCATTTGATGACCTGTTGCTTCTCACGGAAAAGAAA  
ACCAAAAAGTTCCATTTTTTTTACCTTATATAAGCCTGCACTGCCTTTTCTATCATTCTTCTTTCAGCTAT  
ACGGTAATTATGATACCATTCTTTGTATTCTTTTTTCTTCTTCTGCAGAATAGTTTCGCCATTTTAGACCCA  
ATTGATTTCTTAGCTTTACAAGCGATTGAAAAGGCTTGGATGATTTGCCCGTTCCAACATTTTGCTTC  
CTGGGATTTCACTTCTGAGCCGTGTAACCTCGCCGGAGTTTACTGCGATGGAGATAAAGTGATCGCCTTG  
AATCTCGGTGATCCCAGAGCTGGATCACCGGGTTTGACCGGAACTTGGATCCTTCTATTGGGAAACTCT  
CTGCTCTTGCTGAGTTCACGGTGGTTCCGGGTCGGATAACCGGTGCCTTGCCGGAAAGTTTTTCTCAGTT  
GAAGAGCCTGAGATTTCTAGGAGTTAGCCGGAACCTTCTCTCCGGTGATATTCCGGCGTCATTAGGCCTG  
CTCCGGGAGCTACAACTCTTGATCTTAGTTTCAATCAGCTGACCGGGAGTATCCCTTGGGCTATTGGAG  
CTCTTCCGGCATTGTCCAACATTATACTCTGTCACAACCATTTGTCCGGTTCGATCCCACCATTTCGTATCCC  
AAAGATTGACCCGTTTAGACCTTAAGCACAACCTCACTTTCAGGTACCCTTTTGCCTAATTCACCTCCTTCAT

CGCTTCAATACTTGTCAATTGTCATGGAACCGTTAACCGGTCCAGTAGATTATCTGTTGAGTCGGCTGAA  
CCAGTTGAATTACCTCGATCTTAGCTTGAACCGGTTCAACGGCTGCATTCCGGGAATCTTATCACTTTCC  
CACTCACAATCTTCAGCTACAAAGGAATCTATTTTCGGGTCCGGTTTTACCCATTTAGAGGTGACAATT  
CCGACGGTGGACATTAGCTTTAACAGGTTTTTCGGGGAGATATCTCCATTGTTGTGTAATGTGGAGAATT  
TGTATCTGAACAATAACCGGTTACGGGTCAGGTGCCGGCGGTGTTGGTGGACCGGTTATTATCTGCCG  
GAATACAAGTTTTATATTTACAGCATAATTTCTGACGGGGATTGAGATAAATCCGAGGGTGGAAATTCC  
GGTGAAGCAGTTCAATTGTGTTGCAGTATAATTGCATGATTCCGCCGTTGAGACGGCTTGCCGTTGAAA  
GCCGGGAAGCAGAAGAGTAGGCCTACAAATCAGTGTGTGGAGTGAAGGGGCAAAGAGTGAAAAAA  
CAAACAATAATAATATACTACTATTATGGCTTAATTTTTCTAGATTCTTTCATTGATTAATCCATTTCA  
TCCTTCTGATTATGATGGACTAAGTAATACTAGTAAAAAGAGTAAATGTGCATAATAAGGAGAGAA  
AAATAGAGTAAAAGGGTGTACGAGTCATGGCCATCCATCCTATTGTTTTCTTTGTATTAAGCCAAAAC  
AATTTTGGCATTCTTTTTGTAATTAGGTATGACTATAATAATATATTCAATTACTTGGATTACGGATCT  
CAAGTTGAA

>PGSC0003DMG400020330 LRR-RLPs

ATGAGAACTCTACACTTTCTCCGTCTTTCTTGATTCTTTGTTTCAAATCTTATCAGGAAATGATATTTCT  
TTGTTTCTCTAAATGTCTTGATGATCAAAGTCATTGTTGCTGCAATTGAAAGACAGCCTCCAATATGAT  
TCTAGTTTGTCAACCAAGTTGGCGGTTGGAACGACAACAAGTGAATGTTGTAATTGGGATGGGGTG  
AAATGTGATCTCTATGGTCATGTGATTGCCTTGGAACTAGATAATGAGTTGATTTCTAGTGGAGTTGAGA  
ATTCAAGTGCTCTTTAAGTTTTGAGTATCTTGAGAAGCTAAATTTGGCTTACAACAGGTTTGACGTTGGT  
ATACCAGTTGGTATATACAATTTAGTCAACTTGAAGTACCTGAATTTATCAAATGCTGGTTTTTTTCGGGCA  
AATTCCTATGACGTTATCAAGATTAACCAGGCTAGTTACTCTTGATCTCTCAACTCTTCCATCCACTTAA  
AATTTGAGAGTCTTGATTTTATTGAGAACTTAACAGAACTTAGAGAGCTTTACCTTGATGGTGTGACCTT  
TCAGCTCAGAGGAACGAGTGGTGTGAGTCTTTATCGTCATATTTGCCTAACTTGATGGTCTTGAGCTTGC  
GTGGTTGTGAGTTTTAGGCCCTATTGATGATCACTTTCCAACCTTCAATTTCTTTCAGTCATCTATCTAG  
ACCAGAACAATCTACCACAGTTCCTCAATATTTGCCAAATCTCCAACCTTGACTAGCTTGCCCTCAGCT  
CTTGTAATCTACATGGAGCATTTCTGAAACAATCTTTTCGAGTACAATCTCTAGAGATGTTGGATTTGTCA  
AACATAAGATGCTTAGTGTGAGAATCCCAAATTTCTAAAACGGATCTTTGAGGACGATATCACTAA  
GCAACACCAAATTTCTGGTTTATTACCAGAGTCCATTTCCAACCTTCAAGACTTGTCCAAGTTAGAGCTC  
TCCAATTGCAATATCAGTGGACCAATACCATCCACAATGGAAAACCTTACAAATCTTGTTTACTTAGGTTT

CTCCTTGAACAACCTTCACTGGTTCTATCCCATATTTCCAACGGTCCAAGAACTCACCTACTTAGACGTGT  
CGTATAATAGTCTAACTGGTCTCCTCTCTCCAGCTCATTTTGAAGGACTCTCAGAGCTTGTGTACATGAAT  
TTAGGCAACAACCTTACTCAACGGGATCCTTCTGCATATATCTTTGAGCTACCCTCGTTGCAGAAGCTTTT  
TCTTTGCAGCAATGAATTTGTTGGCCAACTCAACGAATTCGCAATGCATCCTTCTCTACTGAAAATAC  
TTGATGTGAGCAATAACCATCTGAATGGATCAATTCCCAAGTCCATATTTGGAATTGAGAGGCTTAAGGT  
CCTCTCACTTTCTTCCAACCTTGTTTAGTGAGACATTACCATTTGAGATGATTGGGATGCTCAGTTACCTTA  
CTAACTTAGATCTTTCATACAATAACTTGACAATTGATACAAGTAGCAGCAATTCAACAACATTCACTTTT  
CCACATTTGAGAATATTGAACTAGCTTCTTGTCGGTTGCAAGTGTTTCTCGTCTTAAACTCCTTTCAGA  
AATTAGGATCTTAGACCTTTAATTCATGGGCCAATACCAAATTGGATTTGGGAAATTGGTTATGGATTTT  
CCTCTCAACTGAATCTTTCCTGCAATCTGCTGGAGTACATGAAGCAGCCTTATAATATCCCGACAATCTT  
ACGATGTTGGACTTGCACTCCAACAGGCTAAAGGGTGACCTTCCAATGCCTCCTTCTTCTTCTATGT  
GGACTACTCGAGCAATAGTTTCAGCAATTCCATCCCCTAGATATTGGTGATTCTCTTGTTAATGCACGC  
GTTTTCTCAGTTGGAAATAATAGCCTCACTGGAAGAATTCCTGAATCCATATGCAATGCCCTCTTCCCTCA  
AGTTCTTACTTTCTCTCAAATGCATTGAGTGGAACAATACCAATGTGTCTACTGGAAAATAGTGCAACT  
CTTGGGGTGCTAGATCTAGGGAACAATAGACTGAAAGGTGTTATACCAGATTCATTTCCAATCGGCTGT  
GCTCTAAGATCTTACACCTCAATGAGAATACCTTACAGGGGAAGCTCCCAAGGTCCTGGTGAAGTGT  
GACTTCTGGAGGTCCTAAATGTCGGAATAACAACTTTTTGATAGTTCCCTTTTATGTTGAAGAATTC  
ATCCAGGCTTAGAGTCCTAGTATTGCGCTCCAACGGATTTTATGGAAATTTTTCAGTGTCATAGCTGGCAA  
AATCTCCAGATCATAGATATAGCCTCCAACAATTTTACTGGTGAATTGATTGCAGAATGCTTATGGAATT  
GGAAAGGAATGATGGTTGGAGATGATTACATTGATTGAGGAATTAATCGCATTCATTTTGGATACTGTC  
AGGAAACAGTGACACTAACCATCAAAGGAATGGAAATGAAGCTTGTGAAAATCTTTAGAGCCTACACAT  
CTATTGATTTCTTCAAACAATTTTATGGAGTGATCCCAGATATTGTCGGAAATCTTAGCGCCCTCTAT  
GTTCTCAACCTGTCACACAATGCTCTTGAGGGTCAAATTCCAAAATCAATTGGGAAGCTAAAAATGCTTG  
AATCACTAGACCTGTCCTGGAACAAGCTATCTGGAGAAATCCCTGCAGAACTTGCATATCTTACATTCTT  
ATCATATTGCTTGGAAAAATCCCATCGAGTAATCAGTTTCAAACATTCTCTGCAGATTCCTTTGAAGGAA  
ACAAAGGCCTATGTGGATTACCTCTTGAAGATCGCAGAAACAATGACTCTGAGCTGCCGCCAACTCAGC  
CTCTACCAGACTCAGATGATGATTGGAAGTTCATTTTTTTGGCTTCCAGGATACATAG

>PGSC0003DMG400020520 LRR-RLPs

GGCAACTCCAATCACAAAAACCCCATCACCTGCATGTACAAAATTCATAGAAGAAATCACAAGAATTTAC

AAATCACTCCCACCAAGACCATCCATTTTAGAAATTGAAGCTTCAATTTCTGTAATAAAATCAGTAGAAAC  
AGAAGAAAAAATAGAACTTGATGAAATTTCCAAGAAAGTAGTGGAGATAGAAGAAAATGTTCCAGCTG  
AGCTTTTCTCTGTGTTACAACAAGTGAGAAAAGCTATGGTTTTGTTCAAAGCAAAGAACAGAGGAAAG  
AGGCTGTTCCAGTTAATTGAACTTGATAAGACTTATCAAGATTTTGATGTGTTGATTCAGGAAGCTACAGA  
GTTGATTTCTGGAGATACCCAAATGGGAAAAATCAATTCCTTTGAGGACCCAATTGGTGAAATTGGAAA  
AAAAGATGAGAATTTGATGAAGGGTTTGGTTACAAGTTGTGAATTGATTACTGTTTCTTCTCAGGTTTG  
GGTATTTGCTTCTCCTTTTTGCTTTTTTGTGTCCAAGATTTCAACTTTTTGCTTGCTTGTGAGTTGTGGAG  
GTAGTGTGTTGTCTTTCTATCTGTCCATACTAATAGTTGTAGTATTGCTTATGTTACTATTTGTTGTTCTT  
GTACTTCGATTATTTTATTATTTGTTGTAGCTAATGTTCCAGAATGCTTTGTTATGCTTTCACTTCCGTTTAT  
TCTTTTTGTGTGTCATCCAAGATTTCAACTTTTTGCTTGCTTGTGAGTTGTGGAGGTTGTGGAGAGCAT  
GGATTAGGCTAGAGGTTAGTAGGTACTAGTAGTCCTAGGATTGCTTATCTGGTTTCTTGTCTTCTGTTA  
CTATGTGTTGTTGTAGTATATAGTTTGATTATCGCATTATTTTATTGGAAATCTTAGAATAAAAAATGTAT  
CCAAACACAACCTCAAAAATCGTTCAAGTTTCTAACTTCAAAATCTATGGCAAACGCTAGCTTAGATTG  
ATGGAAAAACATCATTATAATTTCTCCTTTTGGTCTTTCTTGGAACTTGAGCTCTAGTTTGCAAGATTCTT  
TTTCTTTTTAGTGATGGCGCTAGCTTGCTACGTATGTTGACTAATCTACTAGGTTTCCAGTTATAGGTCA  
GTATGTGTGGCAGTGGCGGAGCTATTGATAACCCTTTGTTGGGATTGGGGCGTAGTTGTTGTTGGCCG  
TCAATGTTTAGATTGATGGAAAACATCATTAGAGTTTTTCTTTCGGGTGTCTCTCTTGGAACTTAAATCG  
TAGTTAGCATTATTCTTTTTCTTTTTAGTGATGGCGCTAGCTTGCTATGTACGTCAACTAATCTACTAGGT  
TTCCAGCATTGTTCCAGTATGTGTGGCAGTGGCAAAGCTATTGATATCCCTTCATCGGAAAATTATAATG  
TGCAAATAGGTCAATTTCTTTTTATGTATAAATACTATATATGTTGTTTGGGACCGAGACATAGTTGTTG  
TTGTTGTATATACTATATGTTTAATCCTGTAGCCTTCTTCGTGTGTTACTCTTTTCTATTTTAAATCCTCTTA  
GTAAAAGTCTTGGCTCGTTACTGATATGGCATTCAACTATACTATGTCTTAATTGTTGTGTAATTGCCTTT  
AGGGATCAAGCACAAAGAGAAGTACAGTTTAATGAAAGTAGCTGCCCTAATTGAAAATGCTGCCAAAAC  
TCGAGCAAGAGTTGTGATCTTCACAACAAGTTAATGGACAAGATTGAATGGCTTCCGTTGTCACTTGG  
GAAATTGGTGAATGTCCTGAGCTAAACGTTGCCGATAACCAAATTATGGCTCTTCCAACACTACAATTGGT  
AGCCTTAATGCCTTAACGAAGCTCGATCTTCACTCCAACCAAATTATAAACCTTCTGATTCAATTTGGTGA  
GCTAATCAATTTGACTGATCTCGACCTTCACGCGAACAGGTTGAAATCGCTGCCAGCTTCTTTCAGGAAC  
TTAGTAAATCTGATTGATCTTGATTTGGGTTTGAATAGGTTGCTCATTGCTGATTTGCTTGGGAACTT  
AACCTCCTTGAAGAGACTAAACGTGGAAACAATCAGCTCGAGGAACTTCTTACACAGTAGGATTTTG

TTCTTCCCTTGTAGAACTGAGATTGGATTTAATCAGCTTAAAGCTCTCCCCGAGGCAATGGGAATGCTC  
GAACACTTGGAGATTCTTACACTGCACATCAACAGAGTTAAAGGATTACCAACGACAATGGGGAATCTT  
TCTCACCTCAGGGAACCTTGATGTTAGCTTCAACGAAGTTGAGAACATACCCGAAACATTCTGTTTTGCTG  
TCAGCTTGGAAAAGCTTAATCTTGCAAACAACCTTGCAGACTTAAAACTTTACCAAGATCAATCGGGAA  
CCTTGAGAATCTTGAAGAGCTTGATATTAGCAACAGTCAAATAAGAACGTTGCCCGACTCCTTCAGGCTC  
TTGTCAAAGTTGAAAACCTTTTCGAGCTGATGAGACTCCACTAGAAGTACCACCAAGGCAAATTATAAAGC  
TAGGGGCTCAGGTGATTTTTATGCTTACTGTGTTTCTGTCAATCAATCTTTAACTTTATGGTAATTTTTA  
GAGTTGATAGTTAAAAACATACTTGAACATATCGCCTTTCCCGAGTTTACACCCTACACTATCAACTCTT  
CCCTTTTCGTACATGAACTATCAATATCTATGTATTAAGCACACCTCAACTATTACATAGGAAAAGGAAA  
AAAAACAGACGGCTGAGCCGTTGAAGTGTGTTTTAATACATATATGGTGATAGTTCAAGTAGGAAAAGG  
GAAAAGGGAACATCTGATAGTTGAGGTGTGAACTCGTAAAAACAATTGTTTGACCATTATCTCTAG  
ATTTTCTAACTAGTTTCGTTTTCTTTTTTTCTTGCCATCAGGTTGTTGTAGAGTACATGGCTGAATTCGT  
CGCTAAGAACGAGCTTCAATTGCAGCGGCCAAAGAGAAGGAGAGCTTTCTTTTCTCTGAGTTGCCTATTT  
CCTAACACCGAGAGGAAGAGGCGGATCTAGAGCATGTACTGTGGGTTGAACCGAACCTAATGCTCGCG  
GATCGAACTATTTGTACATCCTGCAAAAAACATTTGAAAACATATACATATTATAGGATCTCACTCATTCT  
GAATCCACTGACTCTAGATCCTGGATTCACCTTAGTGAGAGGTGTCGGATACCTTCAGAATCCATCAAAG  
CAATTATATATATATATATATATATATATGAAAAGTTACTCCAAAC

>PGSC0003DMG400020546 LRR-RLPs

TTTACATTTACCAAGGAATGATAAATAATTTTCGTCAAAGGAATAATTGTTGTTTGAATTCAGAGATCG  
GCGGCGAGTAAAGAGAAATGGAGAAAGAGGGAAAAAGTGACGCCGATAACCGGAGTACAATCACAGT  
GAATGTTAAATTCAGTGGTCGATCGATACCGGTGGAAATCTCCGACGAGTCCACTGTCAAACACCTCAA  
GTCTCTCCTTCAACCACTCACAAATGTCCTCTCTCGCGGCCAAAAACTCATCTTCAAAGGTATTTTTTTCTTT  
CAATTCTAACCTATCAGCATTATTTTCGTATACAATCGGAGCTCCAAAGAACTGAATATCAATGAATTTGAT  
AGTTGACATAATTTTTTTCATGAATAGGGAAAGTTTTGGTGGATGAAATAACATTGAAGTCATCGGAGG  
TTGGAAATGGTGCGAAGATCATGCTTATGGCTTCCAGGGCTTACATCAAGGGGTAATTCTTTATTTTCC  
TTTACATTATACTCTATTGAGTATAACTATTTGGGATTAGTACCTATATGTGTTACTATACTTAGTTTGTTT  
ATGGATTTGTACATAACTAGAAAATGGAGAGAGCCTCTAGTATTGATAAGCTTCTCAGTTGTGTTAAAG  
GATAACATATTGATTACTAGAATGAATTAAGGCTACGCGGAGTAGAATGTATATTTAGATATAGGAGAC  
TACAACTGATTTGGATTGAGGTGTAATTGATTGAGCCGTGCTTGTGACTTTCGAATTTTTGTAAAATTGA



ATCATTTTGTGCATGTACATATTATGTATCCAGTATGAGAGTATACTATGGTCAAATGGTAAATTCATCTT  
AGCCAAGTAGTAGGACCAAGTTTGATTCCCTTCTATCGCCCAAGAGTTATTTATCTACTTGTGTTAAATCGT  
AAATAGCATTATGTACATCCTGAAACTACGTTTCGCAGCCGATTCTTTTTGCTTTTTCTCCTCTTGAAGATA  
TTGCTCTCATTACATATTGGAACCTGATAGGTCTTGCCTGATGAAGTGTGACCTGCGGACCTTCCGCTA  
GAGTCCTGGATCTCAGCCACAACGCCATACAGCATCTTCCAGCCGCAATTAATAGCTTGAGTTCTCTCA  
GGTCAGTAGAGCTGACTTCTTTATATTTCTTTGAAATTGCGATTTATTCACTTGTTTGAGGCAGAAATTTA  
TTTTGGTATTGTTTCTGCTTCCAGAAATTGATCCTCAATGGGAATGAAATTATGGATAATTCCTTAAGCT  
GGGAAGAGCTAGCTTCTCTAAAGAGTCTTATGGTTATCTCACTGAACCAAACCAGTAAGCCCCCTTCA  
TCAGCATATTACTCTCCAAGCTGAATGAGATTCACCAATATATTGCATCGTCTCTATTTAATTGAAGTAGA  
AAAGTATTCTTTTCTGCACCATTAAATGATGGCTACACCAAACATGTATATACATTTGAGTGTGAGGGAC  
AATAATTGCAATGTCATAGTTCTCATTTATTGTTTTCATAAAATTAAAATATGAAAACCTGAAGTATATCAA  
TGAGTAATATAAGTTGTTGAATTTCTAGTATTCAAATGTTAAGTTGCATCATTGGAATGTTAGTCATTCCA  
AGTTTTCTTTGACATACAGCTTGAAACTAAATTGTAATACTCACTCACAGTTTTCTGTCTTATATACTTGT  
TTTCTTGCATTTTATGAGTATATATTTATTTAAAGTTACTTTTCTCAGAATAGTCGAATACTTACGAAAACAT  
AATTGAAAATTTGTCATTTGTCATGGTCTCTCAGATGTTTGAATAGGTTGGCTTTTACATATCAGTTTATA  
GTTTATGTGAACTAGTGATTGGGTATTGGCAATTTCTATGTTAACTCAATTTGTTCTCACAAAAATATTAT  
AAAGCTTTTAATCGGTTCTTTTGTACTCAGTTTTAACTTGTAAGTGCCAAATTGGTTATCAGACAACCCA  
TTTGCTAAAGTATAAAAACCGTTCCAATGTATAAGATTCACATATAACTTAAGACAGTTGGACGATGGAT  
ATAAGCCCAAATACTGCTTTTGGCAGAGGGGAGAGACCAATCTTCATGCTTGTAGTGTTTGGTGGATT  
GTAAATTGTACCAAGGCAAGTCTAATCATAAAACAACATTATTTATTGACTGACCCTCTCAAACATGCAT  
GAAAACCTGAAAATAAAGCTGTCTATCTTTCACTCACAAAATACATGGTATTAATTTTTTGGTCAGTGACAT  
TCAGATGTCGTTTTGTGTTACAATTTTATTTTCTGATACATCTTACTCTGTTTACCAACCTCAATCATTTATC  
ATATGCCATTATTTTCGTATAAAGGTTTCTTGTATGATTGTATCAAGTAGTCTTCTTTGGTATGCAGCATAG  
CAACGCTGCCTCCTGAGGTCGGCACTTTGACCGGTCTGAGACAACCTTCATATTGCACATAACGAGTTAAC  
AGGTCTCCCATCTGAGATAGGTCTGCTGACCAGCCTTGAGGTTCTGAAAGTTAACAACAACAGGTAATTT  
GAAGTACTGAAACAAAAAAGATATTTCAATGATATGGAATCAGCGTGAAATTGTATGTCCAAACGCTG  
ATTCTATCTCACAATTCATATCGTGATATGGTATCGCATGGCCAAACGCCTACTTAGTGTTTTACGTTAT  
TGTTCCCTCTCCTCTTTTCTGGAGGTCATGGATGTTTCGGAGTATGTTGATTTTCTTTTTATCTTTATTTT  
TCTTTGAAGTGATAAGGACCTAAGTTAGGTTTGTAAAGCTTAACCTTTTAATTGCAGGATACGCTCTATTCC

GGAAAGTATAGGGGGTTGTGTTTCTCTTATTGAGGTAAAAAAGGGCATATTTTCCTCTACCCACTTGTCT  
TCTCTTCTATTTCACTAAGTGAATCATGAAATCCAAAATATAGGCTGAAACCTGCAATAAGTTCCAGTGT  
TTATTGTTTCTTGTGATGTTATTACCTATATACAGATAACGTGATTCTATATGGTGTAGGTTGATCTTTCAT  
CTAATCTTTTGGTAGAGCTGCCAGAAACAATTAGCAAATAAGGACTTAAAGGTCTGTCTTCATCTATA  
CATTATTCGTTTTCTTTTTGAAGTCATTCTTCAAATAACCACTTCAGTTTACAGCTTTTTATATGCAATATA  
AAAAAAAATCTGTTTTTTTTTATAAATGCCGTACAGAAAAGAACTTGCAAACGTTTTACGAGATTAG  
CTATATATGCTCAAGTACTGGTTGTTAGACATTGGTAAAGAATGTAACATAGTTTTCTAAGATAGAGCAT  
AGCCTGGATGGACATTTATATATCAGCTCTAGAATATTCAGCTATGACATTTTAAACCAAATAAGGAT  
TACTGCCATAATCTGCTGGACCGACACCATTTGCTTGGATAAAAGCACAGCACATGATAGGTAAAATTT  
AATCATGGTTAAGTGAAAACTTGGTTTTATCAATTGGCGCTAGTAAGTTTATACTGCACATTATAGGGG  
GATGTCACGAGTTTAAATGTTGCCACAGAAATATTCAAGTGGAGAAGGATAGATGGTAGCCCATTATCA  
CATAGTGTCAAATACTGTGTGCCAACCACTCACAGGGATCTCTCAGTTATCAAAGGGAAAAAATGTTGTT  
TTCTTTGCAAGGCACGACACAAATTTCTTAAGTCAACAATGTTTTCTGAAACATCTAGCATCATGTGATGG  
CCTCTTTTACCTGACAGTATGCTTTTGCCCAATTATTTGTGTGGTTCATGTCCGATTACTGGTGCAGGCA  
CTTTATCTTGGGAACAATGGGCTCAAATCCCTTCTAGCAGCATTTTTAAACAGTGCTGTCAACTCTCTAC  
ACTAGATCTCCATGGAATACTGAAATACTATAGATGTTATCTGCCAGGTAGTAAATCATTACTACTATAA  
AGTAATAACAGTAACATGCCCTATCTAGTTTGCCTCTTACGATTTTCAAACGATCACAGATTGAAGGATG  
GGAGAATTTTGATGAGAGAAGACGCTCGAAGCATCAGAAACAATACTGGACTTCAGAGTGAGCAGCTCTG  
GCAAATTTGACGAAGGAGCTGATCAAAGCTGATAAGGCCTGATACAAATACTCGGTAATACTCGGTTTAT  
ATACATCCTGACATACATTTGCATAGTGATCCCTAGCAAATACTTACAGAAGAATATTGTAGTACCTGTAA  
GATACATCAAGAAATTATAATGAGCATACTTGCTCCTCTGTGCACTCCCTAAAGATGATTAATTTTCTGA  
AGGCTTACTATAAAGCTTTCTGCATCTTCTCAAATTGTTACATATATAGTTGAATGAAAATCCCTTTTAA  
GGATACATATTACAAATTGCTGAACCCCTA

>PGSC0003DMG400020641 LRR-RLPs

TACTCCTATAAACTTATTTAAATTTAGGTGATGGGTTTTATCACACAAAACTCCGAAGACAAACCTCCC  
CATCATCCAAACCGCACCAATAAGATGTGTGACATATCACTAAATTTGCATCACATCCAAACAAGGTGTT  
ATAAATCCGATGCTGATGTGAGTGATTAACAATAGTTCCAATTTCTTATCTTCGCCTCTCTCAGGTACGG  
CCTTCGGATTTTGATTTTTTTTTTCTAAGTCTGGAAACACCTTATCTTCCGAATTTGATAAATTTGGTGG  
ATTTTTTTGTGAGATTTTGATGAAATTGTAGTTTTATAGAACCAGATTTGTTAGCTGTAGCATGTCTAC





AAAAGACAAGATATTCATGTATGGTATGCTCAATGCTGTATAATGTCAACTAATATGCAGTTTTTCTTATT  
CTTTGCAGTGTTGGTTTGTGTGGCTAACCTCTCAAGTTAACATCCTCCAATCATTCTCTTTTGGTATTGGT  
ACCAAAGACGGTAAGTATAGTTAAAACTGACCATTGGGAACATTGACATTTTACTCTGGTTGATAAGTAA  
ACTATCTTCCTAGTTCCTACTTCTTAGGGGACTTCATAGTTCAAAAACCAGATTTCTTTGCCATAACTCAGT  
GATCTCATAGGTCATGCGTTTGAAGACTTGCTCTTTCTTTTTCGAGTCGCTACCTCTTCTAAGACTCTAG  
CATGTCTTTTAATAAAATTATTGGGAAGTCCTAATAAAAAAAGTTTATTGTGAACTATAGAGCTTCAC  
ACCTTGCTGGAGTGTTAACTTGGTAGAAATGGATAATCCATCAGATGATTTCTCTGGATATATCATGCA  
GCTTCCTGACGATTGTTACTCTTTATTTTCCAACACCTTGACTGTGGATCTGACCGTGAATCATTGGTTT  
AACCTGTCGTCGCTGGCTTCAAATTCAAAATCTAAATAGAAGATCTTTACAGTTCCAATGCTCTTTCACTA  
TGCTTAATTTTTTCATCGTTATCTCAAATAACACCCGAATCAGTACATTACACTTATATAGGCTTCTGAACC  
GTTTCCAGAACCTAGAATCATTGTCCCTGTCCGGATGCACCGAGCTTCCAGATTCGGGTTTGTCTTTGTTA  
CCACGTCATGGATCGAAACTGCAAAGTCTTCATCTAGACTGCTGTTTTGGGATAACTGATAGTGGTCTTT  
CCTGCGTGGCATCTGGCTGTTCTTTGTTGGTAATACTAAGTCTTTACCGGTGTAATGTTACAGATTATGG  
GTTAGAGGCCTTATCTAATTCTTGCCTAGCTTTAGAAGATCTGAATCTCTCGTATTGCTCTCGAATCTCTG  
ATTATGGCGTAAGAGCTATTTACAAAACCTGCCGTGCTTTAGAGCAATCAGGATATCCTACTGTAGAAA  
TCTAACTGGTGCTGGCTTTCAAGGATGTTCTCAAACCTGACTCATTGGAAAGCCGATTACTGTAGGCTT  
GAACCTAATGGAATACGGAGTATCCTAAGTGGAGGTGGTATTGAATACTTGAGTGTGTCTAACTTGACC  
TGGTGCACTCGTGTGAATGGTCTGGTAGTTATTAGCGTCGGATTTGCTGCAAAGTTAAGAGTGTGAAT  
TTCCGTTCCAGCAGAACGATTGGCGATGATTGTATCATGACAATAGCAAAGGGTTGCCATCGCTTCAG  
GAATGGAACCTAGCAATATGTCATGAGGTCAAGATAGCAGGTTGGGAATCTATTGCATCACATTGTCAT  
AACTTGAAAACACTACATGTGAATCGGTGTAGAAATCTTTGTGACCGTGGACTGCAGGCATTGAGAAAC  
GGATGCAAACGTCTCTCAATTCTTTACATCACCAGAAGTTCTCAGATCAGTGGTGTAGCGTTGGAAATTT  
TTAAACTTGTTAGAGGTAATGTAGAGGTCAAAGAAGAAGAAGTAATGTGTATTTGCCCTCATGGAGCCT  
TCAGGTTTTAATAGGTGGCAATAATCTTCAGTTCCTAAGCTGTCAGGTCTCAGCAGACATTCTGATTTTAC  
AGACTCGTGAGGAGAACTATCATCCCAGTCAATCCAATTCGGATTCCCTGGAACCTGACGTGTTACTCAC  
CCGTCCACCACTGGAACATTGTTTCTGTCCAACCTTGATGGAAATGCACGACAGTTGTGCCCCACTGCA  
CACTAGTATCAAGCTGCGTATAATTTCTTGTAAATGTTTTCTTCCCATAAGAAAAAAGTGATTCTAATAAA  
TGCATGTACATACAATGAAACAGTTGCTTGGTGCAAATTGCTGAACCCACACTCAGAGGTATAGCTCTTC  
ATGTGGCATGTAGGCCACAATGCAGAACAATTGTTTGATGCATGATAAATGGAAGGATTGGTATATAAG

AATAGTAGGGAA

>PGSC0003DMG400020729 LRR-RLPs

ATGAACGGTCTTGAGGAGATTGCCAACACTTGTAAGGAACTTCAAGAGCTTAGGGTGTTCCTTCTGATC  
CATTTGCTCCAGGACCTAATGTATCCTTGACAGAGCAAGGCCTTGAGCTGTCTCAATGGGCTGCCTTAA  
GCTTCAGTCAGTTTTATACTTCTGCCGCCAAATGACAAATGACGCCTTAGTACTATTGCAAGGAACCGT  
CCTAACATGATCCGATTCGTTTGTGTATTATCGAGCCTCGAACTCCTGATTACTTAACCCTTGAACCACTT  
GATGCTGGTTTTGGGGCCATTGTGCAACACTGCAAGGAATTGCGGCGACTTCTCTTTCTGGCCTCCTTA  
CAGATCGTGTGTTGAGTACATCGGGGTCCATGTTAAGAAGTTAGAGATGATTTCTTAGCTTTTGCAGG  
GGATAGCGATCTAGGCCTCCACTATATTCTCTCTGGTTGTGAGAGCCTCCGTAAGTTGGAGATTAGAGAC  
TGCCCTTTTGGCGATGAGGCTCTGTTGGCTAATGCTGCAAAGCTGGAGACAATGCGATCCCTTTGGATG  
TCTAATTGTTCAAGTAAGTTTTGAAGCATGTAAGCTGTTAGCCCAGAAGTTGCCAGGGCTTAATGTTGAAG  
TTATAGATGAGAGGGGTCATCCGGATACGAGACCAGAAAGTTGCCCTGTTGAGAACTTTACATATACA  
GGACAGTGTGAGGAAGGAGGTTTGACACTCCTGGTTTTGTTGGAATATTGATGAAGATGCAGCATTGA  
CTCCATATAGCAACGGGAATTGCTCTCTGGTTTTCTTCTTAG

>PGSC0003DMG400020918 LRR-RLPs

TATAATTGGCCACGGCGATGACCAGTTCCTTCTTACTTCTTCTCCTACATATTAATAATCGTCCCCATTTT  
TCTCTCTCAAAGCTCCATTAGAATCAGCTAGCAGCGCCGCCCTAACATCCCTATTTTTTACGGCAGCGTCT  
ACAATCCGGCAGACCATTACGACAACGTTTACTAGTTTCCTTCATTCCAAATGGGCCAATCTTCTCAGC  
TCACGGCTTCTCCCCACCGATTCCAATTATCCCCACCACCGTTGTTCCGGCACCGGCCATTCCCAATCGG  
AATTTTTCTACCCTACACTTTCCGAAGAAGACGATTTCCCCATTTACAACCCTGTGAAAACCGAGATTAC  
ACTGATGGTCTTCTGACGAATGTTTAGCCCTAATTTTCCAGTCCTTGAGCTCCGGTGATCGGAAAAGAT  
CTTCCCTTGTCTGCCGGAGATGGCTTCTGGTTGAAGGGGTTAGCCGTCACCGGCTTTCTCTCAACGCAAA  
AGCTGAAATCATTCCGGATATACCCACCATCTTCTCTCGTTTCGATTCCGTCACCAAACCTCGCTCTCCGAT  
GTGACCGAAGATCGGTTAGCATCAACGATGAAGCTTTGATCCTCATCTCCCACCGATGCGTTAACCTAAC  
GCGCCTAAAGCTTCGTGGTTGCCGAGATATCACCGATTTGGGAATGGCTTGTTTGGCAAAGAATTGTGA  
GAAATTGAAGAAATTCTTGTGGGTCTTGTATGTTTGGAGCTGAAGGTATGAATGCTTTGCTTATTAAC  
AGCATTTCACTCGAAGAACTCTCTGTAAACGTTTACGGTGTATGAATCATACTGTATCTGTTGAACCGAT  
TAGCATTGGATCTAATGCTGCTTGTTCGCTTAAATCTATATGTTTGAAGAGCTTTATAATGGACAATGTT  
TTGGACCTTTGATCATGGGATCGAAGAATTTGAAGACGTTGAAATTGTTGCGATGTTTGGGTGATTGGG

ATAGAGTCTTGGAGACGATTGCAAGTAGGGAGAATCATTTAGTTGAGATTCATTTAGAGAGGGTTCAAG  
TGAGTGACATTGGACTCAGGGCGATATCCAAGTTTTCGGACTTGGAGATTCTTCATTTGGTGAAAGCTCC  
TGAATGTACAGATGCTGGAGTTGTTGATGTGGCTAGACATTGTAAGTTGTTGAGGAAGGTTACATTGA  
TGGATGGAGGACGAATCGAATAGGTGATGTTGGTTTGGGTGCCATCGGCGAATATAGTGTAACCTCA  
AGGAATTGGTAATTATGGGTTTGAATCCTACGGTGACTAGTTTATTAGCCATTGCTTCTAATTGTCAAAA  
GTTAGAAAGATTAGCACTTTGTGGTAGTGAGAGTATTGGGGATGCTGAAGTAACTTGATTGCTACAAA  
ATGTATGGCTTTGAAGAAGCTTTGTATTAAGGGATGTGAGGTAACAGATGAAGGGATTGTGTCTTTGCG  
GTGGGGATGTCCTAATTTGGTGAAAATTAAGGTTAAGAAGTGCAAGAACGTAACCTGGTGAAGTTGCAG  
ATTTGTTGAGATCAAGAAGGGGATCTTTGACGGTGAATCTTGATGTTGGGGAAGTTGATGTGGAGGTT  
GTGGATGGTAGCGCTAGTGATGGTGGAGCATTAGAAGAAGGCATAGAGTTTCCGCCGATTGCAAGAAC  
TGTTCCCATCCTTGGTGCTGGTGGTGTGCTTGTGATATTGATACCCCATCGACCGGTAATTTTGGTCGATCAT  
CATCATCTACTTCAAGGATTGGCTTTCTTGGAGGAAGGGGCTTCGTTGCTTGCACCTTCCGTAGGTGGTC  
AAATGGTAACGCCAATGAGAACTTATGAAAATTGTGAACACAAGTTAGAACAGAGAAAACACTCTGTTC  
AACTTCATTTTAAATTGAATCAATAGAAAAGTGTGGATGTGCGACTTATCTCTCCTTCGTTTGTGTGTTTG  
ATAATTGCTTTTTGAAAATTTGATATGTAACCATAGATGCATTTAGAATCTTAGAAGTCACTTCTTGGATG  
ATGAAATCTATCCCTGCTCTATTGACAATTGCATTATAGAGTGCTGTCTTGAACCATGTATACTGTTGCTT  
CTGGTATGTGAATCAAATAGATATTGTTCCATCGTCTAAATGTCATCAAGGACAGTGATCATTATGCATG  
TTCATTGTCATTTTGCTTCAAGAATGGAGTAATACATGTGCAAGCACCTTCTATATTACCAGGAATGCAC  
ATATTACTTCGACTGCTAGACCCTCCTCTTCCCTCTTTTTTATTTTTCCGAGAAAAGATCGATCTCCAAGAT  
TC

>PGSC0003DMG400021051 LRR-RLPs

ATTTTGGAAAATGGTTTGGTCAAGGTCTATGCTATGTGCTATATAAACCTCATAAAAATTATTGAATAGA  
GACACAAAGCAAGAATTGAAGAAATTAGTAATTTTATATATTTTTGAGGCACGAAAATGGGCATTGG  
AAAACCTGCATTGTTTCTGCTATACGCGTTTCTCTGTCAACTTGTTTTCTCCTCATCCTTACCTCATTGTGC  
CCCAATGATCAAGCCATTGCTCTTCTTCAATTCAGCCAAACGTTTACTATAAATCTTGGTACTTCTTCTAGT  
GGATCCGATTCTAAAACCTTACATGGAACAAGAGCACAGATTGTTGCTCTTGGGATGGAGTTTATTGTG  
ATGAGACGACGGGACAAGTGACGGAGCTTAACCTCGCTGACTGCGAACTTCAAGGCAAGTTTCACTCCA  
ACAGTAGCCTCTTTCAACTCTCCAATCTCAAAGGCTTGATTTGTCTAATAATGATTTCTCTGGATCGCTC  
ATTTACCTAAATTTGGTGAACCTTCTAGTTTGTGACGCATCTTGATTTGTGCAATTCAGGATTTTCTGGTCTA

ATTCCAACAGAAATCTCTCGTCTTTCTAAATTACAAGTTCTTAGTATCCAGAGTAGTCTATTAAGTTTTAA  
ACCTAACAAATTTTGAAGTCTCCTTAAGAACTTGACCCAATTAAGAGAGGTTGAATTTTACGATGTGAAC  
ATCTCTTCCACCATTCTCTTAATTTCTCTTCTTATTTAACTACTTTGTTCTTCAGAACACACAGTTATACG  
GGTACTGCCTGAAAGAGTTTTCCACCTTTCCAACCTAAAATCTCTTGATTTATTAGACAATCCCCAGCTC  
ACTGTTAGGTTTCCACAACCAATGGAATAGCAGCGCATCACTCATGGAGTTAAATCTCTATAGTGTGA  
ATGCTACTGGCAGGATACCTGAATCATTGGTCATCTAACTTCACTAGATAGATTGACAATAGCTTCTTGT  
AATCTGTCAGGGTCTATTCTAAACCTCTATGGAATCTACCAACATATATCATTTGGACCTTGTTATAA  
CCATCTTGAAGGACCAATTTCCGATTTCTTTAGATTTGGAAAGCTTACAGAGTTATATCTTGGAAATAACA  
ACTTTGATGGCCAACCTGAGTTCTTATTCTTTAATGGATGGGGGCAACTTGAACAGCTAGATTTTTTCATTC  
AATCCCTAACAGGTCCAATTCCTTCTAATTTAAGTGGTCTGCAAACCTTCAAGTTCTCTTCTTGTCA  
AACCATTGAATGGGACTATACCTTCATCGGTATTCTCCCTCCCTTCACTAACTAATTTAGGCTTGAGTGA  
TAACCATTTAAGTGGAAAAATTCAGGAGTTCGAGTCCCAAACATTGTCTGAAGTTGATTTAAAACAAAAT  
CAGTTGCAAGGTCCTATTCCAAAGTCACTCCTAGACCAGATGTCCTTACAACATCTTCTCCTTTCGTACAA  
TAATCTAAGTGGAAAGATTGCTTCAATCATCTGCAATGTGAACATGCTACAAGTCTAGATTTAGGCAGC  
AATAATTTGGAGGGAGCAATCCCACAATGTTTGGGTGAGATAAGTAGACTTGTGATTTTGGATTTAAGC  
ACAATAGTCTTAGCGGGACAATTAATACAAATTTTAGTATTGGAAACCAACTCAAGGTCATTAATTTGC  
ATGGGAATAAGCTAGAGGGGAAAATCCCACGATCTTTGATCAATTGCACGTATTTGGAAGTTCTTGATTT  
AGGTAACAATGAGTTGCATGATACATTTCCAAAATGGTTAGGAACTCTATCGAATTTAAAGATTTTAAGC  
TTGAGATCAAATATGTTGCATGGTCCCCTCAAAGTTTCAAAGAACCAAACTTGTTTGACCGACTTCAA  
TTATAGATGCCTCATCCAATGGATTTAGTGGGAGCTTACCAGCAAGTCTTTTTGAGAATTTCCAAGCCAT  
GAGGATAATTGATCAGAACGTGACAACCTCCAGGGTATTTAGGAGATGTAGAGTTAATTTATGTGTCTCA  
TCTGAGAACCCAGTGTATGTAGGTGATCTTTTTCTGTTTATAAGTATGTGAGTGAACCTTACAACAAAG  
GGACGAAATCTTGAATCGGTTGAGTCTTTCCAAAAACATATTTATTGATCTTTCTAACAAACAGATTTGA  
AGGTCAGATACCAAGCATTATTGGAGATCTCATTGGACTTCGTACTTTGAACTTATCTCATAATGTCTTGG  
AAGGTCATATACCAGTGTCAATTGCAAATTTATTGGTACTTGAATCATTGGATCTCTCATCCAACAAAATC  
AGCGGAGAAATCCACAACAGCTTGTATCCCTCACATTTCTTGCAGTCTTAAATCTTTCTCACAATCATCTT  
GTTGGATGCATCCCCAGAGGAAAACAATTTGATACGTTTGGGAATAGTTCATACCAAGGGAATGATGCG  
TTACGTGGATTGCCACTCTCAAAGATTGTGGGGGTGATGAAGGGGTACCACAAGCAACAACCTCCAATT  
GGGCTAGATCAAGAAGAAGAAGAAGGAGATTCAGCAATTATAAGTTGGAAGGCAGTTCTCATGGG

TTATGGTTGTGGACTTGTTATTGGACTGTCCATAATATACATAATGTTGTCAACTCAATATCCAGCATGGT  
TTTCGAGGATGGATATAAAATTGGAACACATAATTATTACAAGAATGAAAAAGCACAAAAGATATTAGT  
TTGTTACCTCCAGGTATTCAATTTGATCTTTAATTATCAATGAATTTGCTCACCTCCTTCATCCTTAAACTC  
TAACTTTGAATTCTTTTTTAAAAAAATAATTGCAGGATTCAAGTCTAATATGTTGTTGGTGATGCAAAT  
AAAAGCTTTTAGTTTACTAGTTTGTGATGTATTTGAAGTGTACATTTCCCTATGTATAAAAGCATTAAATTT  
CGTTTATCAATATTTTGTGAGCGTAATTATTAGTTAGGTAATTGGATTGACTGCAA

>PGSC0003DMG400021067 LRR-RLPs

GTTTGAAGCTAAAAATGGGGTATGCAGTTATTATTCTCTTAATTGTGTTTCTCTGTCATGAAGTTTCTTCA  
ATATCCATATTACCTCACAAACATCAAACCATTTTGCTTCTAAAATTCAAGAACACCCTTACTATAGATCC  
GTCAGCGTTTTATCCAAAAACGAGTTCATGGAACATGAGCAGAGATTGTTGCTCATGGGATGGAATCAT  
ATGCGATGACATCACTGGCCATGTCATTGAACTTGACCTCAGCCGCAGCGGACTGGATGGCACCATTGA  
TTCCAATAGCAGCTTATTCCAACCTCTCATCTCCAAAGGCTCGATCTTTCTATGAATTAATTCTCCAATTC  
TCATATCTCCCCTGAATTCAGCAAGTTTTCGAGCTTGACGCATCTTGATCTTTCTGACTCCTATTTCTCAGG  
TCAAATTCCTTCTGAAATCTCTCATCTTTCCAAGTTACAGTCTCTTCGTATCTCCACAACCTTTTTACTTTTAT  
GGTAGTAAGAAGCTAAGACTCACAACCCATGATTTTAAATCGCTTCTTCAGAACTTGACCCAATTAAGAG  
AGCTTGATCTTAGTCAAGTAAACATCTCTCCACCATTCTCTGAATTTTTCTTCTCATTTAACAACCTCTGA  
GTCTGACATATACAGGATTGTATGGGATAATACCTGAGAGTATATTTACCTGCCAACCTGGAAACACT  
TACTTAGGGATCAATCATGAGCTCAATGGTTATTTTCCAAAACCAAATGGAACAGCAGTGCATCTCTC  
ATACAGTTAGATCTCAGTGGCATGAACTTTCTGATAATTTGCCTGAGTCTCTTGGCTATCATCTAACTTC  
ACTGCGTTCTTTGGACCTTGCATATTGCAACCTTAGAGGGCCTATTCTGAATCTTTTTCAAATCTCACCC  
GCATTGAGTATTTGGACCTTTCATATAACTCCCTGAATGGAACAATACCACCAGGGATGTTATCCCTTCCA  
TCACTAAATACAATAGTCTTGAGTAATAATCACTTATCTGGTCCGCTTGAAGATTTCAAGTCGAATTCAT  
AATCTCGATAGATTTAGAGAGCAATCAGCTGCAGGGTCATCTTCCCCTCAATCCAAAACCTTGTGAAC  
CTAACATCGCTTGGTCTTTCCTTCAATAATTTTAGTGGTTTTGTGGATGTCAGCCTTTTTCAAACCTTAAA  
CAGCTTGGGGAACCTTAGTCTTTCATATAATAATATCTCACTGACCAATGACAACAAAGTTAATGTTACTTT  
GCCCGAATCTCTTTATTTGTTAGAATTGGCCGCATGTGAAGTGAAAGAATTGGAGTTTCTAAGATCCGCA  
AACCAGCTTTTCGATTTGGATCTTTCAAATAATAAGATTCAAGGAAGAATTCCTGATTGGGCATGGTCTA  
ACTGGATGTTTTATTGCGAGATCTTAATATATCCACAATATGCTAACGAGTATGGATTCAATTCCTCTT  
CAACATCATTTAACAATTGATTTGCGGTCAAATTTACTTCAAGGTTCACTACCTATTCCACCAAATTCAC

AAGATACTTCTTCATATCCCATAATAATCTCACTGGAGAAATTCCTTCATCTATTTGCAACTTGACATCACT  
GATAATGCTGGATTTGGCGACAAACAATTTGCGTTGGAGAAATTCCTGCAGTGTTTCGGAAATATCACTTC  
CCTCCAGGTTTTGGATATGCGCCACAACAATCTTTCTGGGAATATTCCAACAACCTTCAGCAATGGAAGT  
TCACTGAGCAGCCTCAACTTGCATGGCAACAACTAGAGGGGAAAATCCCACAATCCTTGACCAATTGC  
AAACAACCTGAAGTTCTTGATTTAGGAGACAATCACCTCAACGACACATTCCCAGTGTGGTTGGGGATT  
TACCAAAGCTGAAAGTTCTAAGCTTGCATTCAACAATTGCATGGTCCCATCAGAACATCAAGGATTGA  
GAACATGTTTCCAGAGCTCCGAATCATAGATCTCTTGAATGCCTTCTCAGGAACTTACCTTCAAGTT  
TGTTTCAACATTTGAAAGCCATGAGGACAATTCATCAAACGATGAACACACCAAGTTATGAAGGAAGTC  
GATATTAC

>PGSC0003DMG400021279 LRR-RLPs

TGATTCTTTTCTCACTCAAGATCATGTCCCCACTCTCCCCACCCATCGTATCAGTCACATCTCTAAGCCTA  
CCCCCCCCCTCCACCACCACTAAACCCTCCAATAGTTCTTGCATAAAAATTGATTCTTTTCTTAAAT  
ATCAAATAGAACTCCAACAATTGATCAGAACTTTTACAACAAATACAATGTATCCATTCAAACCTTTTT  
ATTTCTCTACTACTCATGTTTTTCTATCTACCACCCACCTTCTATCTCCTCAACCAATGTAGCAAACATC  
AACAACTCACACAACCAACATGAATCCTCATGAACTAGAACTCTTTACAAGATCATGGAATCAATTT  
CCAGTGACCAAAAATTGGAGAAAATCATATCCAATCCATGCCAACAAAGTTCATCTTGGCTTGAATTGA  
GTGCAAAAAAACACCAACAACATTTACCATGTCACTAGGCTTGATTTTGGGACACATCCAATCCCCT  
TGCAAGAAAACAGCAACATTCCTTCACTCATTTTCCAACCTCCAAATCTTGAATCTCTCTTTATCCAA  
TGCTTCACACACACAAAAACAACATCTCCATTCAAGAAAACAGAATTCTCCAACAACCTTAGTATAAGAT  
CAAATCCATCATTAAATTGGCACAATCCCACCTCAAATTTATCACTTAAATCACTTCAAATCCTCACATTGT  
CACAAAACAATCTTCTTGGACAAATCCCACCACAAATCTTCACACTCAACTCACTTATTCATCTTGATTTAA  
GCTACAACAACCTCACAGGTCAAATCCCAAACCAATTGGCAATCTCATCAATCTTATAGGCTTAGACTTT  
AGCTACAATTCATTAACAAATCCAATCCCATCCACAATTGGCCTTCTCAAATCTCTTCAAAAACCTGACTTA  
AGCTCAAACCTCATTAAACAGGCAAAATCCCTCCAACAATAGAAAAGTTACAATCTTTAAACTTCTTAGCACT  
TAGTAACAACAAGTTAAGTGGCAATTTCCCAAATGGGATACATAAACTTCAAGAACTTCAATATTTTCTC  
ATGGATGACAATCCAATGATGTTTATAACATTGCCTGATGAATTGAGTCAATTACATAAACTTCAAGAAT  
TGAGCCTTTCAAGTTCAGGTTACTCAGGGGAAATACCATCAAGTTACTCACAACCTCGTGAACCTTAACTAC  
GTTGTCTTTACAAAACAATCGATTAACAGGTGAGATACCGGTGGAATTTTCAAGATTATCACATATGTAT  
CACTTGAATTTGAGTAGAAATTTGTTAGATGGTGTGTCATTCAATTCAAGTTTTTTGAAAAGACTTG

GAAGGAATTTGGACTTAAGTGGAATCCAGGGCTATGTTTGATGAATCAACATGAAGGGGTTTATGTTG  
GAGTTAATGTGTGTGGGAGTAGTAGTAATACTATAACTATGCCATTGAAGAAGAATAGATCATGTGAAG  
CTTCATGTGGAGTTGTTAGATCATTGTTTCTTGTTTGTGTTTTGTGTTTTTTAGAAATTGTTGTTTTGTGTTT  
AGGAGTTTTTAGGCTTTTGGTTGTAT

>PGSC0003DMG400021415 LRR-RLPs

AAATGGCAGGCTCTTAATAAGAGGGGTGCATTTGGCGGCAACAAAATGAACCAATTTGGGGAGGTCTC  
AATTCTCATCTCAAATTAATTTGGGTTCTAGGGTTTCAAATTCGATTATTCACCATTGTGCGACGAAACAC  
GATGGGTAACTTCTGTTGAGAGGCGATTATTTGTTCTTCTGGTACGACTCCGTTTATTCTTTACCCAT  
ATCATTTTTATGTAAATAAATATCACTGTACTAGTATCTAGGCTTCTGCTACTTTTAAGTTTGAGTTAACTC  
TTAGTTGACAGATTTGTGATCAATTCAGTCTTAGGGCATTCCATAGAGAAGAAAAATAGAATGGGTCAG  
TTAGATGTCCTGAAAACTTAAAAAGAGCTCAAATTTAGAGTAGTTGATTTGTAAAACCGAGATGCG  
AATCTAGTATTTTCGAGAACATAGCGCACCACTAAAAAAATGAATTAAGTGGTAATTGATGGATTCCTAG  
TACTCTAGGTAAATAACTCAACGTGAACCATTTAGGCTTCCCGTAGCATGGGTGTCATCCGATAATATTA  
TACCAATTTTAAAAATATATATACATACCACGGGTTACGGGCCCATTTTAAGGCTATAAATTTGCCACT  
GGTCAAACCAATATAGATAGATAAATGATAAATGCACAGAGTAGGTACATGAGTAGTTTAGTATATAGG  
TCTCTCATTCTTGTAGTGAACCTTTGAAAGGTTAATATGTGCTATTTTTTCAGAGCAGGAATCAAGGAGTG  
TCAGACTTTCGGCTAAGATCAAAAAGTTATTAATATGTGCTCTTTTCTCAGCGCAGGTACAGTAGTTGTTTA  
GCATATAGGTCTCTCATTCTTGCAATGAACCTGGAAAGGAAATGTAGTGTGACAACCATGGGCGATCAA  
GACCAATCCCCTGGCAGTTCTGGTGATGATGGACATTCTAAAGGCCAGATTCTTGA AACCTACCTCAGG  
AAAAAGTGAACATTGAGACGGAATGTGAAGAACTGGCATTGATTGGATCAGTGAGCTACCTGACGCT  
CTTATTGTACAAATCTTTCTCAAATGCCATACAGGATGCCTTCAAACATCTATTCTCTCTAAACGTTGG  
CAATACCCCTGGACTTCTATAGACAACCTTATTTTTGATAACAGGAATACCAATTGGTCCGATAGAGAGA  
ATGTGATTAATAAGTTCATTTCTTACAGACAATGTACTACCTCTCCTTTGCTGCTCTAAAATTA AAAAG  
TTCTGTCTATATTTCCGATTTTGCCTTGTTGCTTCTTATAGTTCCAAAATTGACAAGTGGCTTGAAATTGCT  
TTAAAGAAAAAAGTGGAGGATCTTGACCTGGAAATATGGTATTATGATCAAAACCCCTATGTCTTGCCAC  
AAGTTCTCTGCAACAACCTCATCCATTGTAAAGTTTAATTGCGAGTTTTGCAGAATACCAGAAGAATGTGT  
ACTAAATTGGACATCCCTGAAGAGTTTGACACTAACCTATTTGTTTCTTCGGGATGAACATGTTGAACAA  
ATAGTAACAAATTGTCCTCAGTTGGAATCGTTGAAGCTATGTGAGTTTTGTGGTTTTTCATCGCTTACATAT  
AACTTCTCCAAAATGTAGGAGTCTGCAATTGATTGATCAAGCCCATCCTGATGGAGATTGGGGTCCATTT



GGAGGTGATTGTTCCCTTCGAAATAGTTGCCCATATATTCAACATTTAAAGATTTTCGGGGCATTITGATA  
ACGTGGAAATTAGACTTGGGGACCTTTCATCTTTAGTCCACGCTGATCTTACTTTCTCTGTTGATGTTGTA  
TTTGACAAAACCGTGGCACTTCTCTTGGCAAGTGTACGTTGTGCTAATGAGCTAATGATCCCATGCTGGT  
TTATCGAGGTCAGTTTTAGCCCAAAAAATCTCCAGTCTTTTTTTATGCTGAATATGAATATAAAATGTGC  
CTGCATTTAAAGTCAAATTATAATTAAGATAGACTGAACAAAGTCAGAATACCAAGGGGGAAAAAAGA  
CTGACACAGTAATAAAAAGAAAAGGATCAATCTAGACAGCTCTGAATCTGCAGAAGAACTTAAACAAT  
ATAGAGAAAATTGAGAGCACGATGATGCAGGTGTAAACTTGTCTCTGTAAGATGTATTGCTCTACAGT  
AAAACAGACATAAAAAGGTAAAATTGAAATAAGATAGAGCGTCTCCCTAATCTTGGAGCTGGATACCAA  
GGAAACACTTCTCTAGGCTAAAAGGCAAGTAATGGTAATAATCACTACATTAAGTAAAGCATAGAGTGA  
CTAGTTGAAGAACATTCTTTGAATAAGGAGCTTTTTAGATGAGCCAAATGCACCCAAACAAATCAATAGC  
CAAATGGCCACTCGTTATTAGGATTGAGTGAGTGAGAAGGAGAAGGGCCACTTGCATATATAGGTACTC  
TTTTGGTGCATAAATGAGTAATCACTCGTCGTTGGTGTCAAATCCTCTGTTGTCATTGGCATAGGCCCCCA  
CACTACTCAAATAAGTCCCTGATTTGCTTCGACTGAAAAGGTGGTTCATATCCTCTATGTGCCTCTCACAT  
TATGAGCACCTACTACAGATGTTGACCCTCTTCTTTGGAAGTTCTCCTGGGTTAAACAAGCTCCTTAAGGC  
ACCAGCCAGGTAAAGCAAAGCTCTTTAAGCATCCTACTTCCAGGGGAGCTTTGCTTTTCAAATGCATTT  
CATAAGCAAAAATGTGCTACTGCCAGAAGATCTCCTAGATAGAGAATAATAGTCTTTGATCTTGACGTTA  
CCTACTGTGTTTGCTTTCCACAAAAGAGATTCAGCTCTAGAAGATAAAGGGGGGCAGCTATGCAGCTTA  
TTTGAAGTGAGGACACGGTTAAATTCACAATCATTTTTGCTGCACCAGAGACCAAAAACACAGGCCTG  
TTCAGACCACATTTCTGAATTGTAGCATCTTGTGTTTGTGCAATACTGTAAATATATGGATACTGTATCTT  
CGGTGGTGTGTTGGACTAGCCAAACATCCTCCCAGAACTTGTCTCCTTCCATTTCCAACCTGAAGAGGTG  
ATGGCAAAAATAATTTTAGTGGACTCTAATATGCCTCCATATACCATAGGGACTGTTGCTGAACCTGTT  
TAGTTATCCAAGGGATCAGGCATGCATTTTTACCATAACGACACCTCAAAGTGCCTTCTCTTTACCA  
CATCTTCATAACTACTTCTGCAGTGAGCTGTTGCTCTGCATCTTCAATTTCTCTACTCTTAAATTCTCCCTG  
CCTTCAAATTTGTGGTACTGATTCCCATCTTACCAAGTTGAAGGTTCTGTGTTCTTTCTCTTGCATAAG  
CAATTCCTATGTAGTTTGTGTTTGTCCAACCTTTTTGTCACTGAAAACATGCAGTGGAGCAAACAGATAGGG  
TATATTGGATATTATTCTGAACTTAAAACAGCTTTGGTTGGATGTTATCATCACACAGTAGCTTTGTAAC  
GAATTCCTTGTTAACTATGTTTGTGTTTCTAATATATTATAGAAGCTATTGGGAAGTTCTGATGCTAGAAAA  
AGATCAAATTAAGACCATAGTTTCAAACATTCTTTGTCGGGTGAAGGGGTGTGAAGGGTGAACCTTTA  
ACCCATGAGTTTGGGATGTTTTTAAGCCCTATAAAAATTTGATATTGTGATACTTAATGTACTTACCTTCTA

CTCTGCTTCTCTCTCCCATTTAGATGATTTATGTGTCGGTGTTAGAAAAGAAGAAAGATGTTCCATTGCTG  
ATGCTGAAGTGCAAACAGTTGACGATAAATTCTTGGATTTCAAGAAATGCCATTCTCGGCATAGGTGTT  
TCTTAAAGTCAACTCCTTATCTGGAGAATTTGACGATACTTCATGAAGAGGTATGTTTTCAATTGATTCTT  
GCTTTGAGATACCTTTTATATTCTTTTTCACTCTTTAATTTTTCCCTTGTGTTTGTTCATTATCCTTTACAT  
TTTCAGTATCACATTTTGAGGCATAATATAGCCTTGGATGTCAAGCTGTTTTATGTATAGCGCCATTTATT  
ACTGAAATTGTTGCCCATCAGACCTACATTTTCTAATTTCTAAATATATGCGACCATAGTGTACTGCACT  
GAAGACTCTTCTTCTTTTACAATGAGTTATTAGCTTCTTGCTTTTGTGGCATAAAATATTACATTCAAT  
CGTCTATTGATCTCCTACGACATCAATGGGAAGTCTCAACATTTTAGTACTTTCCACTAAATTAATCA  
GTGGTCTATCTCAATATTATACACCTTCTGACTAAAAAGTATTTTCATCTGTTTGTCTATTGTTGACTAC  
TATGTTGCTTATATCTCGCTTCAGATTCTTTTGTGTTGTTTCAGCAATTTTCAGTACCATAAAATCCATTCTA  
AAATCCAAACATTTACTTAAGTATCTTCTAGCTGTTACACTTACACTTAACCTGATTTGTGGTTCTTCTGTA  
TCCGTAGGGAGATTTCTTTGTCTGGGATGAAGACTTGAAGATGAAGAGTTTGATTGGTCAGGAGACAA  
TTCCCTCTCCTTGCATGAAAACATATTCAAAGGCTCCTTACAGAATTTGAAGCATGTGGAAGTTACTTCAA  
ACTGTTGTAGTTGTCAACACAAAGCTGACGCAACAGAGCGCCTTTCAGAATTTTTGAAGTCTTTGCTTGA  
GCATGCAAAAAATCTTGAGAACTGGTAATAGCGCCATGGCACAATGGATGCAATATCTCTTCAGCCAA  
TATCTCAAAGTGTTAAGAAGTCTGCTAGCTTTTCCAGGAGCTTCTAATATTGCAGTTGTTTCTTAGGAT  
CGGTCTCCGGTGTGACTTTTTCAGGGGAGTAGAACTTTTATATTGACCTTGTGTTTCTAATATTTTGT  
CAACTACTTTTGGAACTCTTATATTTTTGTATGTCAGTGTAAAAAATGTTGACCATCAAGTTATTGTGTA  
ACTGAAAGAGGAGATGTAATCTGCTATAATTGATTAATACTACTGTGGTAGTATTCAAAGTTGTTTTGCA  
TTATCAATGTATAATATGCCG

>PGSC0003DMG400021962 LRR-RLPs

CCCAGTCCATATATTATGCCTTCTTTTCAAACCCTTACTTTGCTTGAGGAAACAATTCGAAATTAGATCC  
AATTCCAATGACCGGAGTTGGAGAAACCCTAGAGGACCGTATCAGTTCGTTGCCGGATGAACTTCTGAT  
CAAAATTCTGTCTTGTTCGGCGACAAAGGATGCATACACAACATGTATTCTCTCTAAAAGGTGGCTTTAT  
CTCTGGACTTCCATTCGTAACCTCAGTTTTGCTAATACAAATTACCGAGAAAATTTACATCTTTTGTAAAC  
TATATATTATCTCGTTCTGTTTCTCCCAAATACAAAATTCGAACTCGACTACAGTTATTGCGATGTTGA  
AAGCCGCTGGCAAATCACCGAATGGCTTAATTTTGTGCTACTAGAAAAGTGGAACATCTTCTACTCTGG  
TCTACTGATTTAATCACTTCCCCTTTCCATTGCCTCAATCTTCTGCGAATGTTTCGTCATTGATAACATTA  
GCAATAGTTGTGGGTCGTTTTAACTTTGATGACACAGTCATAGCCTGGAAGTCTTTAAAGAGCCTAAAAT

TGGGGAATTTTATTATAGATGATTACAAAATTGCAAAAATATTGTCAGGCTGTCCTGCATTGGAAGATAT  
GGAATTACATGATTTAGTTGTGCTTAATGGTCCTCATCGCTTGGAATTTATGTCTTCAAAGTTAAAGACAC  
TGAAGCTGAATGGTCAATGGTTGATTAATGATGGAAGTCTTCGTTGTGTGGAAATTTTTTCCCGTACAT  
TCAGCATTTAGAAAATTCAGGAGGTCTTTATGATCTCAAGTGTATTCTCGTAGATGTGTCTGCTGTGGTTA  
CTGCGAAGCTTACTTTCAACATTATGTGTATCAAAGACATCAACTATGATTATGGTCTACATGTTGATCCT  
GAGGAAGACAGTTGTAGTGGCTATCATCAATTCTTAGGTCGCTCGCCCACTGTTACCTTCTAATGTTCCA  
TAATGTAAAGGAGTTAACCATTGGAAGTTGGTTCACAGAGGTCTGTTTTTATCTCAGAGTACTTTTCCTTG  
GACAGTTGAGAATTAACCTTTGTACAAATTTCAAACTCAACTGGATGAGTTACAGAACTTGTGGCTT  
TTTTGTGTTTTTTTGTCAACTTTCGAATGTCGGGTATTTTTTTTGTGCATATCTGCAATACATGTATCTGAAA  
TCACGGATTCTTCTGTGTCGATTGTTGCTTAAAGTGTTTAGATGATTAGGTTCACTACTTGAAGATAATAG  
AAAAAAGTGGATATCAGGCTCTTCCTTGGGTGCGGTATATTACCATGGCTGGTGAATATGAGTTGAGAC  
TTGCATAAAACACACCGAGATGATGATCCAATCCAATAAGTTTTGCTTGAGGGCTTGAGGCTCATATA  
ACTCATCCAATGCTTTGAGCTCCTTGCAGGAGATGAACTGGTTTAGCTCATAGATTTGAAGCAAATTGT  
TTTGTGTCGAATTTTTGTTATTATTGATTTGACTTTATTTCTTGTATGTTACCCACATTTTCTTGTATAA  
AGATGTCTGCTGATTACTTTCGTGTTGCATATACTGTTAAAGAAATTCAATAGATTTGTCACATAACTTAT  
GTTGCCATGGAGTACTTTCCTTTTGTACTTATTGCTTCTCCATTCTTATATTACTAGTTTCATTGGGATTA  
TTGCAACAGGTTCTGTGCATGTTGCTGTTCAAAGGGACTGTACTTCCAGAAATGAAATGCAAATATCTGA  
CGCTGGAGTTGCATGTGAAGAGGTTTAATTTGTATGGAGTAGCTGGTCTTCTGCGAGCATCAAGTCATG  
TAGAGAGACTCAACATAAATATATACAGAGGCACTAGACATAGAGGGACGCGACATAGATTTATCAA  
CAAAATCTGTAACCTCCTCTCTTCTTTAAATCCATTCATTTTATGAGTTTAATCACCCCTCCTTAGAATTTT  
TCTTTTGTACGACAAAGCTTAACATTAGTTGGTTGGTGTGTTGCTTCTTTGAGGCAAATGAGGTCTG  
AAACGGAAAGGGTTTGGTGCCATCCACTCTTGGCTTGGGTTACGTAGGCCATGAATCTTTAAGATAGGA  
ACAATCATCATAATCTGTTTAAAAAGTACCAATAAGATTTGTTGGTTCTGAAATCATTTTTTCCCACTTTT  
GTGCAATATCCATGAGGCTAACTTGAATTTAGTCCTGATTAATTTCTTCTTCTCCAGCTTGAAGATACCCA  
CTGCCACTTTGAGTTATCAGATTTGGTCAAAGGAGATGATATTGATTTGCAAAATTGGATTTTATTTGGG  
TTTCCCAACCTCAAGAATGTTAAGATTATCAACTTCCCGGAGAGCGGTGCTTTAAGGATCATTTCAAAC  
AGGGCTTTGACAAGCTTTTGAACCTTTCAGAATTTCTGTTAAACAATGCAACAGTTTTGGAGAAGTTCGT  
GCTATCAAAGGGAATAATGTGCAAGATATGTTCAACCAACTGTGTGTCCACATTTTTATCTCAATTGGCT  
GAGAAATTGTTTTGTTGCCAAGATCCTCTACAAATTGTGTGATTATCTACTAGTAGTGAGCTTGTGATG

ATTAGACTGCAAGTAGTTTTCTATCTTAGGATACACGAGATGTTGCCTTATATTGAGTTTTTGGTGAATAC  
TCATACAATCATGACACTTTAACTTGTCTATGCAACTAATTACTTATCTTGTGGCATAACCAATGTTATGAT  
GTCTTAGTTTCTCATTCTTGAAGCTTTCAGTTCTGATGAATCATTATATTCAAATCATATAAGAATGTATG  
GTTAGATCTCTTTGTTTGATTCATCTGAAATATCCATTCTTCAGGCAAATTTAGATGACGATAAGGGGTT  
TCGAGAAATAGTTTCTGTTTTACCTTTGTTGCAATAG

>PGSC0003DMG400021996 LRR-RLPs

CCCCCTCTCACAAGTCTTCAAACCCACCTACCCCCAATTCAACCCACCCACCCCATCTCCTCTTCTTCAG  
CTCCACACACTCCCTCTCTAGTCTCCACAGATCTGAACTTTCATTACTCAAGATTTAAAGATTCTTGAAAT  
TCTTGAAAAAATGTCAACTTTAGCACCCCATTTCCGTACAGTAATGGTGAACCTCACTTCCCTTAGAAGT  
TCTTGAACACATCTTCTCCGACATAACTTTAGATAAGGACAGGAACTCAATATCCTTGGTTTGTAATCTT  
GGTATGAAGCTGAGAGGTGTTGTAGGAAAAGTGTGTTTATTGGGAACTGTTATGCTGTTAGCCCTTCAA  
TCTTGATTAGACGTTTCCAGATCTCAGATCTGTAACGATTAAAGGGAAGCCACATTTTGCTGATTCGAT  
CTTGTAACCTGAAGGTTGGGGTGCATATTTCTATCCATGGGCTGTTTCAATGGCGAAATCTTATCCATTTCT  
TGAGGAAATTAGGCTTAAGAGAATGGTTGTTTGTGATGAGTCATTGGAGCTGATTCGAAGTCGTTCAA  
GAATTTTAGAGTCTTGGTTTTACAGTCTTGTGAAGGATTTACTACTGATGGACTTGCTGCCATTGCTGCTA  
ACTGCAGGTTTATCTAGCATTTTTTAGCTGTTTTTTTTTGGTAGATGACCCTTTTCTGAGTGATGGTGAA  
AAAAGTCTTAATCTTTACATCTGGGGTAACTGTGCTTGTGTTGTAAGTGAAGGGGTTGAGGAAAGTTTTAA  
TCTTTGCATCTGGGGTTGACTGTATTTGTTTGTAACTGAGGGTGGTTGAGGAAATGGTATGTTTTTTTTA  
GAGCATTGTTGTCTGAGTACTCTAGTTGTTAATGGTGAAAAGAAGTCTTAACCTTTGCATCTGGGGTTAA  
CTATACTTGTGTTGTAAGTGAAGGGGCTGAGGAAAGGTTTTAATCTTTGCATCTGGGGTTAACTGTATTTGTT  
GGTATTGTGGGGTTGAAGAAATAGTATGTTTTGTAGAGTATTGTTGTCTGAGTACTTTATTTGTTAATGG  
TGAAAAGAAGTCTTACTCTTTGCATCTGGGGTTAGCTGTTCTTGTGTTGTAAGTGAAGGGGTTGAGGGAAG  
TTTTAATCTTTGCATCTGGGGTTAACTGTATTTGTAATTGAGGGGCTGAGGAGATGGTATGATTTGTAGA  
GCATGTTGTCTGAGTACTTTAGTTGTTAATGGTGAAAAGAAGTCTTAATATTTGCACCTGGGGTTAACTG  
TACTCGTTTGTGATTGCGGGGTTGAGGACATGGTATGTTTTGTAGAACATTGTTGTCTGAGTACTTTAGT  
CCTTGTTGGTGAAAAAGTCTTAATCTTTGCATCTGGGGTTTACTGTACTTGTGTTGTAATTTAGGGGTTGA  
TGAAAGTTTTAATCTTTGCATCTGGGGTTAAGTATTTGTTTGTAAATTGAGGGGTTGAGAAATTTAGACTT  
AAGAGAATGGTTTTTTTTGTCATGAGTCATTGAAGCTGATCTCAAAGTCATTTAAGAATTTGAAGTCTTG  
GTTTTACAGTCTTGTGAAGGACTTACTACCTATGGACTTGCTGCCATTGCTGCTAACTGCAGGTTTATCTG

GCACTTTTGTAGCTGTGTTTTCTTTGTAAATTACCCTTTCTGGTAATAGTGAAAAAGCTTTGACCTTTGC  
ATCTGGGGTTAGCTGTACTTGTGTTGAACTGGGGTGAGGAAAGTTTTAATCTTGCATCTGGGGTTGACT  
GTATTTGTTTGTAAAGTGTTGGGGTTGAGGAAATGGTATGTTTTTTGTAGAGCATTGCTGTCTGAGTACTT  
TAGTTGTTAATGGTGAAAAGAAGTCTTAATCTTGCATCTGGGGTTAACTGTACTTGTGTTGATTTGAGG  
GGTTGAGGAAAGTTGTAATCTTGCATCTGGGGTTAATAACTGTATTTGCTTGTAATTTAGGGGTGGAG  
GAAATAGTAGTTTTGTAGAGCATTGTTGTTGAGTACTTTAGTCTTACTGGTGAAAAAGAGTTCAAAT  
CTTGCATCTGTGGGGTAACTGTTTCGAGGAAATACTAGAAGGTTTTGTTGAGCACTGTTGTCTGAGTAC  
TTCAGCCCTTACCGGTGACTTCATTCAATTAGTTTTAATCTGGGGTTAACTGATTTGAGGAAATAGTAGG  
TTTTGTGGAACATTGTTGTCCGAGTACTTTAGCCCTTACTGATTAGGATAACTTTAATCTATGCATCTGA  
GAGTACTGTTTTGTTGTAATTGATGCATTGGGGAAGCAGTGGGTTTTGTGGAGCATTGTTGTCCGAGT  
ACGTTAGTGTTACTGGTGAGAAAAGTTCTAATCTTGCATCTGGGGTTGAATGTTTCTGTTTGTAAATTGA  
GGTTTTGTGGAAGCAGTAGGTTTTGTGAAGCATTCTCGTCTGAGTACTTTAGCCCTTGAGATATTCCTCC  
CACATTGTGTGAACAATCTCTTCTCGTCGAGCATGCGTTTCCCGATCAGCTGACCTAGAAGATGAAGCAA  
CATTGTTGATGTCTGTCTCTGGTTGGTCGCTAATATAAAAAGTTGGGGTTGTTATAACCAAAAAATTAGGG  
TAAAATTTGAAAATAAACTATAATTCCAACATTTGAAAGCGAGTTGGAAAACATATTATAAGTTGTTTTCC  
AAATTTGATTTACAACCTCAAGTCGGCTTTGAACTTTTCATGACCAAACACTGGTTTTCAAATAAAGTGAA  
ACATTATTCCGGAAAAAAGTAAATAATAATTATGGCCAAATGGGTCCTTAGTTACGTCTTTCAGTTCATTC  
CTTTGTTTTGCTTGATTGCTTGGTATTTACGGTAGTTGGTGAAAGAGTAGCAAGAATGCCCTAGCGAA  
GAAATGCCTTAGTACTTTGATCCGCTTACTGGGCAAAGAAGCAAGAGCATATACTTGTATGACTTGGCTT  
CAACAAACAAAAGGGACGTAAGAGGGCACAATTTCTGCCACCTTTAGAACTAAACAGGAACTGAATCT  
AATTAACTTTTCTTTGATATGTGCATTTTATTAGCAATGGTGCACGGAAAGTGTAACACTACTGGTTCAA  
TATTATAAGTAGTTCAATGAATTTGAATTATTGAAAGGGTTGAACATCTTGTAAACATGGTTATCAAATAA  
ATGTTGCATTTTTATCTCTTCTTATGGATTTATGACAATTCCTCTTATATTTGGACCTCTTTTGCTGCTAT  
TCTTGTGTTAGCGCTGGGAATAAAAACCTATAGAAGCAATGTAACCTCGTGATTTGCTGCAGGAACCTGAGA  
GAACTGGACCTAGGAGAAAGTGAAGTAGAAGACCTGAGTGGCCATTGGCTTAGTCATTTTCTGATAGC  
TGCACATCACTTGTGTCACCTAACATTGCTTGTGTTGGCTTCTGAGGTCAGCTTCTCAGCTTTGGAGCGTCT  
AGTTGCTCGTTCTCCTCATTGAGGACTCTTCGGCTCAATCGTGCTGTTTCCATTGAGAACTTCCAAAGC  
TACTTCGTCATGCTTCGAAGTTGGTTGAATTTGGTACAGGATCCTACTCTGCTGACATGCAGGCTGATGT  
TTCTGAAGTTTTTGTAAATGTATCTCAAGCTTTTTCAGGCTGTAATCAACTCAAAGGCTTGAGTGGGTTTT

GGGATGCTGTGCCAGCCTACTTTCCAACATTTATCCAGTCCACTCCAACTCACCTCTTTGAATTTAAGC  
TATGCTACCATTCAAATACCTGATCTTGGCAAGCTCATTGGCAACTGTCTCAATTTGCAACGGTTGTGGG  
TAGGTTCTAGCTTGTGTTTTACTTTTGTATACTTATTGCGTGTTTTCAATAGTCATGGCTCGATACATAAAC  
TTTTTTTTTTTTGAGAAGGGATATATGAATGTGTTTGTGATAAAATAGATAAATTGATTGTTAGTTGTAA  
ACACAGAAGTTTCCAAGAGAAGAACAATAATCCTAACTTATTAATTGTCTTGCTGATTCTGATTACTGCCA  
GGGATATATAAACAGCGTAATAAACTTCAGTGTATACTGAGATAACATAGCTAAACAATTAATGTCGAG  
TAAACTCATTGAATAGTTTGTGGTCTGCCATATGAAGAATAACTTAATGTTGAAGCTTAGTGTTGCACG  
AATCCTACACTTTGACAATTCATGTTTATCTTTCCGAGTTAGATGCTTCCATTAGTTTTTAAGCTCTTCTTG  
TCCATTGGCTCTGTTGCATAATTGGTTATCCCGCTTATGCTTAAGGCACTTAGAATGGATGTGATTGCAAT  
TTGCAGGTGCTAGATTACATTGAAGATAGCGGTCTTGAGGAGATTGCCAACACTTGTAAGGAACTTCAA  
GAGCTTAGGGTGTTCCTTCTGATCCATTTGCTCCAGGACCGAATGTATCCTTGACAGAGCAAGGCCTTG  
TAGCTGTCTCGATGGGCTGCCCTAAGCTTCAGTCAGTTTTATACTTCTGCCGCCAAATGACAAATGAGGC  
CTTAGTTATTATTGCAAGGAATCGTCCTAACATGATCCGATTTGTTTTGTGTATTATTGAGCCTCGAACTC  
CTGATTACGTGACCCTGAACCACTTGATGCTGGTTTTGGGGCCATTGTGCAACACTGCAAGGAATTGCG  
GCGACTTTCTCTTTCTGGCCTTCTTACAGATCGTGTGTTTGTGAGTACATCGGGGTCCATGCTAAGAAGTTA  
GAGATGCTTTCCTTAGCTTTTGCGGGGGATAGCGATCTAGGCCTCCACTATGTTCTCTCTGGTTGTGAGA  
GCCTTCGTAAGTTGGAGATTAGAGACTGCCCTTTGGCGATGAGGCTCTGTTGGCTAATGCTGCAAAGC  
TGGAGACAATGCGATCCCTTTGGATGTCTAATTGTTGAGTAAGTTTTGAAGCATGTAAGCTGCTAGCCCA  
GAAGTTGCCAGGGCTTAATGTTGAAGTTATAGACGAGAGGGGTCATCCGGATACGAGACCAGAAAGCT  
GCCCTGTTGAGAACTTTATATATACAGGACAGTGTGAGGAAGGAGGTTTCGACACTCCTGGTTTTGTTG  
GATTATTGATGAAGATGCAGCATTGACTCAATATAGCAACGGGAATTGCTCTCTGGCTTCTTCTTAGGAA  
GACTTCAGGTATAAGTTCTATGTTAATCTTTCACCCGCGTTTACTTGCTTGAGCCTTGTGTAGTTGCAGTG  
CTGGTTATGGTGGGAGTGAAGCTCGTGTTCATCGATTTGATCCTTTGTTGAGTGACTTGGCAGCAATTA  
ATTACAAATAATGAGAGTTTAACTGTCGTTGTTGTGCTATATCAGCAAGGACAACACTATTGTATTTTTGGT  
TGGGAGGGGGCATGTTCAACTGTTTATCCTATTTTGTATCATTATGTATCAGTTTAACTTTCTCTAGTGAC  
TTTTTCTTCTGGTGAATGGTGCTATCATGTACTTCTCTGGTCATGTATTGTTGTAATTCTCTTTGAAGATT  
AATGCGAACCTTTCATTCATTATGAGTGCTGGAAATCCCATTTGTTG

>PGSC0003DMG400022067 LRR-RLPs

ATGGCCTCATTGCTTAAATTGAAGCATGAACTTACATTTGATTCTTCTATACCAAAGAAAATAGTTAGGT

GGAATAGAAACATAGATTGCTGCTTGTGGTCGGGTGTAAGTTGTGACGAAGAAGGTCATGTGCTTGTGC  
TGGAGTTGGACAACGAAGCCATTTCTGGCGGAGTTGACAACCAAGCAGTCTCTTCGATCTTCAACATCT  
TGAGAAGCTCAATCTGGCTTATAACGACCTACGTTCTCTTCCAATACCAACAGATATTTATAAGCTTTTAA  
ACTTGACGTACCTGAATTTGTCACAAGCTGGTTTCGAAGGGCAGATTCCAGTGGAAATTGTCAAGATTGA  
CGAAGTTAGTAGTTCTTGACATTTCTACTTATAATGACATTGTAGGTTTTCTTACTCTTTATTAAGTCTAG  
AGAGCCCTGATTTGGGGACACTCGTTGGAAGTCTAGCAAATCTTAGAGAACTTTACCTTGATGGTGTGA  
ATGTTTCATTGAAGGGGAGTGAGTGGTGCTCGGCGTTATCTTCATCTCTACCTCAATTGAGAGTTTTGTC  
AATGAGATACTGTGAAATTTCAAGCCCAATTGATCCTGTCTGGTAAATCTTCCTTTCTTTTCAGTTATTC  
GTCTCGATATGAATAACTTGTCCACTATGGTTCCAGATTTTTTGGCAGATTTTACGAAATTGACAACCTTA  
AGTGTTAGATGGTGCAATTTGTTTGGTTCATTTCCAGTAAAATCTTTCAGGTACCAACTCTACAACAAC  
TGATCTGTTAGGCAACGTAAACCTTACCGGCACCTTACCTGAATTTCCACAGAAAAATGCATTAAGGGAG  
TTGAGTCTTAGGGAGACGAGTTTCACCGTTTTGCTTCAAATTC AATTGCTAACCTTCGAAGTTTGATTAC  
ACTAGACTTATATGATTGCAATTTAGAGGACCTATTCCGTCAACAATGGGAAATTTAACGAACCTAGTT  
TCATTAGACTTGTCAAACAACAACCTTTACTGGCTCAATCCCGCTGTTCCATGAGGCTAACAAAGCTCAATTA  
CATTGACATTTCTAATAACAACGGTCAACTTTCTTCTGCTCAAACCTCAATTAGCCGTTCTCCTTTCCCTCCC  
CTCATTGCAGTACCTTTATCTTTATAATAGTCATTTAAGTGGAGAAATCCATGAATTTCAAATGCATCCT  
CCTCTGTTCTGGAAACACTTTATTTGAGCAATAACCATCTAAATGGATTGATCCCCCGGTCTATCTTTAAA  
CTCAATAGGCTTTCACAACTCTCACTTTCTTCCAACCTCCTTCAGTGGGACCATTAATATCGAAGCGGTAAA  
TGGACTTCCTAGGCTAACCACCCTTGACCTTTAGACAACAAAATTGAAGGGAAAATACCAATTGGGTT  
TGGACAGTTGCAAACTGAATCTTTCTACAATCTCTTTGAGTCACTGGAAAAACCTTATTATATATCTAC  
TACTTCTATTGTCATTGACTTGAGTTTCAACAGGATCAAGGGCAATCCACCGTTTCTACCAGATCGCTTTG  
CAAACCTGGAAAAGTAGTATTACTTACTTTTCAATTGCCAATAATGAATTTACGGGATCAATATCCTCTTCC  
ATATGCAGTCTAGATCAGCTTCAATTCCTTGATATGTTGAATAACTCCATAAGCGGAAAAATACCTCCCT  
GTCTAATCCAATGCTGGCTATGAGTCTCGTAGTGTTGAATATAGGGAGAAACAATCTAAGTGGCATTG  
TTCCTGATACATTTCCGCTGAATTGCAGTTTGGAACTTTAGATCTCAGTAGGAATATGTTAGAAGGAAA  
AGTTCCAAGCTCCTTGCAAAGATGTGAACCTTTGCAAGTTTTGAACATTGGAAACAACAAGATCAAAGAT  
ACATTCCCGTGCATGTTGAAGAAATTATACAGTTTTCATGTCCTAGTCATAAGGTGCAACAAGTTCTACG  
GGAATCTCCAGTGTCTGTTGCTAATCAAACCTTGGTCAAGGCTTCAAATTGTGGATCTTGCTTACAATAAT  
TTCAGTGGTGTCTGCTACCGCATTACTTCTCCAGCTGGGAAGGCATGATGCAGGGCAACAATCCATACC

CATGGGAGCAGTACTTAAGTGCTGATAATCTGTATCAAGACAAGGTGACTTTAACTATCAAAGGTTTAAAC  
AGTGGAATATGTGAAAATTCTTGTGGTTTTAACTTCCATTGATTTCTTTGCAACAACCTTTCAAGGGGAG  
ATACCGGAGACATTGGGAGATCTCAAATCACTAATCCATCTTAACTTCTCGCACAATGCTTTGACCGGAA  
GAATACCAAATGCCCTTGAAATTTGACTCAGCTTGAATCCTTAGATTTCTCAGTTAACCATTTACGTGGG  
AGGATTCCAGACGAGCTCGTGAGTCTCACATTTCTTGCTTTCTTGAACCTATCTTTTAACTAATCACTATCTGG  
TAGGATTCCAAGTGGTAACCAACTTCAGACGTTCTCAGCGAATTCCTTTGAAGGGAACACAGGGTTGTG  
CGATTTACCTTTAAAGAAAACGTGCAGTGAAACCAAAGTGAATGGATCATACAATTACTTAGCAGCCAT  
TCTGAACATGAAATTGAAGGGAAATATATAAGTTTTTCCTTGGGATCTTCTGTTGGCTTTGGCATCATAAT  
CTGGCTGCTTTTGCATAGTCAAAGATGCAATGAGCTCCTTGATAGACTTCTTTTCAAGATGTTGGATCGA  
CACAAAAAAGGCGCATGAATAAAAATCTTTGAAGGTGGTCAAGTATAGCTTTGATGTTTGATCTTTTAC  
ATTCTGTTTAAAGGAGTTCATAATACTATTGTTCACTTTGTTTTTCCTTTGTTTTCTGTATGGTAAAGAGTG  
GTGTTTGAATTTTAAATGCAAGGAATAATTTTTCATGATGATCTGTTTATCATTTTTCACTATTTGGCTCTTT  
TACTTTTATACAAACAATACTGCTAGATCCTTATTTCTCCTCTATTATTTTCAATCGTTTTTCCAACATCA  
ATACTCAAACATCAAATAAAGATATGCTACTCCTAGGTCAGTTGAACAAGTTCATTGTCTTGGAGATC  
CTTGAGATACTGATTAGATATATTGTTAGGTTGCCTGTTCAATTTTATCGGATTTACATGCCTAAAAATCT  
GCTATTTACACCACAAAAGATATGCTACTCCTAGCTGCAATGTTCTGAAAAATATTGTTATATTAATCCC  
TGGATAACTCCTATCTATGGGAGGCAATTAACATCATAATTATACAAATATATATAGCTATTACATAGATA  
AAGTAAAGCTATTCTAATCTGTCCATCATGTTAACAAAGATTGGTCTTATTTTCTGCAAATTTTAAAGATG  
ACTATATATTAGTGATCTCTATTCGTTTTCGGTGATTTTTTAGTTAGTCTTTGTGTTAAGAAAATTTTTACC  
TGATGCTAATCGCGAGATGAAATTTATGCAATTCTGACTAATGAAGCCATTAATATTTGTCACCTTCAGA  
CAACCATCATAGATTAAGTTTTGTTCTTTAGACGGAGTCCTGATGAACTGGTAAACAATAAACATATAGG  
TCTAAGGAAGTGTTGGCAGGGTTAAACACATTTAAATATTTGTTCTTTTGGTTGTAACCCCTCACCTAGCT  
TACTCTTATCGTTGGGGTCACTCAATAATCATACTCTACTTATATATCTAGGCGCGTCTAAAACCAAAT  
GTCAAAGTTTCCATCTTATTGATTTGAGAAACAACAAGCATTGCAAGGCATCACTTATGCTCTTGTA  
AAGTTGAATGTGTCATTGTCAATTACAAGCTTAAGTTGTGTAATTTATACCTTATGTTAATGATATTAGG  
TTTACTTGCATATGCACAACCAAGTCAACATAAACTACAAAGCGAAATTATACCAAATTGGAATTAGT  
CTAGTCGTTTCATGTGTAAGAAAAGACAGAAACATCACTTTGTTTAGATTTTAAACATCTGATGTA  
AGACCTCATTAGACAAAACAATGAAGCTGTCTTGACTTTTCAAAAAAATTCTTGTCTTTGCGAGTGCCG  
GCCAAGATTATTTTGTATATATATATAGAAATTCATCATCATTTTCAATACTTCACTTCATAATATTGCCTCAC



TATGAAAATATCACTCCTGCTACAACCTTTCTTACATTACTGTGCTAGTGGTGTTTCTGATTAGTTCTAATAT  
TTCTCCAGTGTATGGCCAATGTTTGGGCGATGAAAAGGCATTGTTGCTTAAACTCAAGAAAAGCCTCACT  
TTCGATTCTTCTAAATCAACCAAACCTGGGTAGATGGGATCTAAACACAGACTGTTGCCTGTGGCCAGGTG  
TAAGTTGTGATCAAGAAGGTCATGTGCTTGTCTGGATCTGGACGACGAAGTAATCACTAGTGGAGTTC  
CAGAATTTATAGCAAATTTTACAAAATTGACTACCTTGAGTCTCCGGAACCTGCAAGTTGCGTGGTTCATTT  
CCTAGTAAAATCATTACAGGTACAAACTCTTACAGGAGCTTTATTTATCATTTAATGTAAACCTTACTGGCAC  
TTTACCTGAATTTTACAAAAGAGTGCATTAAGGGAAGTAGTGCTTAGTTACACGGGATTACCCGGTTCC  
CTTTCAGATTCAATTGCTAACCTTCAGAATTTGACCCGGCTTGATTTAGCAGGTTGCAATTTAGTGGAG  
ATATTCCATCAAAAATGGGAAATCTCACAGACCTGGTTCATCTAGACTTGTCAATTCAACAGTTTTACTGGC  
TCGATCCCATTCTTTCACAAGGCAAAGAAGCTCAATTACATTGACCTTTCTAATAACAATGGTCCATTTTC  
TTCCACTCAAACCTCAATTAGCAGTTCTCCTTTCCCTCCCGTCCCTGCAGTTTCTTAGTGTTCAGAACAGTCG  
TTTAAGTGGAGTAATCCATGAATTTTCAAATGCATCCTCTTCTGTTCTTGATACTTGATTTGAGTAATA  
ATCATCTGAATGGATCCATTCCGCGGTCTATCTTTCAACTCAAAGTCTTTCAGAACTAGTACTTTCTTCCA  
ACTCGTTCAATGGGACCATTAATCTTGAAGCGATTAGCCGACTTCCTAGGCTAAACATCCTCGACCTTTCT  
TACAACAACCTTGAGAGTTGTAAGTAATTCAACCTCATTCCCTCTCCGGCTGGGATGCACTCCCTGAGGT  
TGGCTTCATGCCAGTTGCAAAGTTTCTGATCTCAAAAACCTATCATTCTTATTAGAATTAGACCTTTTCG  
AACAACAAAATTAGAGGGGGAATACCAAATTGGGTTTGGAAAGTTACAAATCTGAATCTTTCTCACAAT  
CTCCTGGAGTCTCTAGAAAAACCTTACTATATGTTTACCAGTCCCTCTTTCCATTGATTTGAGTAGCAACAG  
GATCAAGGGCAATCCACCCTTTCTACCACCTGACAGGGATGATACATATTACCGTACAAGTCGGGGAGG  
TAGTGTTACTTTTCATATCACTTGCCAATAATGAATTTACGGGATCAATACCCTCTTTCATATACAATCTAG  
ATCATCTTAAATTTCTTGATATGTCAAACAACACCTTTAACAACAAAATACCTTCATGTCTATTCCAAAAG  
GCTGACCCTTTTGTAGTACTGAATCTTGGGAGAAACAACTAAGTGGCACTATTCCAGACACATTTCCAC  
TAAATTGTAGTTTGGAACTTTAGACCTCAGCAGCAATATCTTAGAAGGAAAAGTTCCAAGATCCCTGCT  
AAGATGTGAACCTTTGGAGGTTTTGAACATTGGAAACAACAAGATTGAAGATACATTCCCATGCATGTT  
AAATTATTTTCCAATTTGCATGTACTAGTCTTGAGGTGGAACAAGTTCCATGGGAATCTCCAGTGTCTTA  
TTGCGAATCAAACCTGGTCAAGTATTCAAATTATTGATCTTGCTTACAATAATTTAGCGGTGCTATGCTA  
CCACAATACTTCTCAAACCTGAAAGGCATGATGCAAAGCAGAAATATAGACCCGGGGGAGCATTATTTG  
CATGTTGATAGTCTGTATCAAGACAAGGTGACTTTAACTATTAAGGTCTAACATTGGAATATGTGAAAA  
TTCTTGATGTTTTAACATCCATTGATTTCTTGTCAATAACTTTCAAGGGGAGATACCTGAGACATTGGGA

GATCTCAAATCACTTATCCATGTTAACTTCTCACACAATGCTTTGACTGGAAGAATACCAAAGGCTCTTG  
AAAGTTGACTCAGCTTGAATCCTTAGATTTCTCAGTTAACCATTTAAGCGGGAGAATTCCAGACGAGCTC  
GTGAGTCTCACATTTCTTGCTTTCTTGAACCTATCTTTAATCAACTTTCTGGTAGGATTCCAAGTGGCAA  
CCAATTTAGACATTCTCAGCAGATTCTTTGAAGGGAACATTGGGTTGTGCAACTTTCTTTAAATACAA  
CGTGCAGTGAAACCAAAGTGAATGGATCGTCACAACCTAACCAACCATTCTGAACATGAAATTGATGGGA  
AATATATAAGTTTTCTTGGGATCTTCTATGGCTTTTGGTATCGTAACCTGGCTTCTTTGCATAGCCAA  
AGATACAATGAGCTCGTTGATGGACTTCTTTAAGAATTTGGGTCAGCCCAAAGGAGGAGAAAGAAT  
AAAAACCAAAGGAGGTCAAGAAAAATAAGGCTATAG

>PGSC0003DMG400022068 LRR-RLPs

ATGAAAATATCACTCCTGCTACAGCTTTCTTTCATCACCATGCTGGTGGTGCTTTTTTTGATTAATTCTCCA  
GTGTATGGTCATTGTTTGGGCGATCAAAGGCGTTGTTGCTTAACTCAAGAATGGTCTTACATTCGATT  
CTTCTAGGTCAACCAAAGTGGTCAGATGGAATCAAACACTGACTGTTGCCAGTGGCCAGGTGTAAGTT  
GTGATCAGAAAGGTCATGTGCTTGTGTTTGGAACTGGACAATGAAGCAATCTTCAGCGGACTTGAGAATC  
CAACCAGTCTATTCGATCTTCAGTATCTTGAGAAGCTGAATTTGGCTTATAATCATTTAACTCTATTCAA  
ATAGCAACAGAAGTTTATAAGCTCACAACTTAACATACCTGAATTTGTCATTTGCTGGTTTTGGTGGGA  
AGATTCCAATGGAATTGTCAAGATTGACGAAGTTAACGTTTCTTGACCTTTCTAATGTCGCATTAAAGCTT  
GAGAGCGGAGATCTGAAGACACTGGTTGGAAACCTGGCAAATCTTAGAGAACTTTATCTTGATGAAGTG  
CACATATCATGGAAGGGGATTGAGTGGTGTCAACCTTATCTTCATCTCTGCCTCAGTTAAGAGTGTTAA  
GCATGACAAATTGTGGCATTTCAGCCCTTTGATCCATCCTCTTAAATCTTCATTTCTTTTCAGTCATTC  
GTCTCGATGGCAATAACTTGCCAGTATAGTTCCTGAATTTCTAGCAAATTTTACAAAATTGACAACCCTT  
AGTCTCAGTAACTGCAACTTGAGAGGTGAATTTCCGAATAGATCTTTAGGTACCAACTCTACAGGAGCT  
TGATTTATATGGCAATGAAAACTCACTGGCACTTTACCTGACTTTTACAGAATGGTTCATTAAGGGAG  
TTAGGGCTTGGCAGCACAAATTTACAGGTTTACTTCCGGATTCAATTGCTAACCTCACAACTTAACCG  
AGATTGACTTAAGTTCATGCAATTTCTTTGGACCTATCTCATCAAAAATGGAAAATCTAAGAGATTTAG  
TTTATTTAGACTTTACATCCAATAGCTTTACTGGCTCAATCCCTCTCTTTTACATAAGGCAAAGAAGCTCAATT  
ACATTGACCTTTCTACATAACAATCTAACAGGTCCACTTTCTTCTACTCATTTTGGAGGTCTTTTCAGAGCTTG  
AATATCTATACTTGGAAAGACAATTCTATCGGTGGGACCTTCCGACAGTTGTGTTTTCCATTCCATCATTG  
CAGGTGCTTGAACCTCAGAATAATCACTTCAGTGGAGAAGTCCATGAATTTGCTAACGCGTCCTCCTCTT  
TTTTGTATGAACTTGACTTGAGCAATAACTATCTAAATGGATCAATCCCCGGTCTATCTTTAACTCAAT

AGGCTTTCACAACCTCTCACTTTCTTCCAACCTCCTTCAGTGGGACCATTAATATCGAAGCGATAAAGGGAC  
TTCCTAGGCTAAAAACACTTGACCTTTCTTACAACAATTTGAGAATTGATGTACAGGGTAATAATTCAACC  
TCATTTCCCTTTCCCAAATGAGTGAACCTGAACTTGGCATCATGCCAGTTGCAAAAGTTCCCGGATCTCAA  
AAACCAGTCACTCATGATTGCATTAGACCTTTCATACAACAATATTTTCAGGACAAGTACCCAGCTGGATT  
TGGAGTAATAGTTTAAGTTATCTTAATCTTTCTTGCAATTTCTCGAGGCTTTGGAAGAACCTTACGACAC  
ATCTTCAGAATTATGGAGTGTCAATTGACTTGCATAACAACAGGATCCACGGCAATATAACCCATTGTACCT  
ACTTCTCTTATCTACCTTTCAATTGCCAATAATAAACTTACAGGATCAATACCCTCTTCCATATGCAATCTA  
TATCAGCTTCAATTTCTTGATATGTCAAACAATTCCATAAACAGCAAACCTACCTCCATGTCTATTTCAAAT  
GTTTGACTATCTCTCAGTGCTGAATCTAGGGAGAAACAGACTAAGTGGCATTATTCTTGATACATTTTTGT  
CAAACCTGCAGTTTGAAAACCTTAGACCTCAGCAACAATAACTTAGAAGGAAAAGTACCAAGATCCCTGC  
AAAGATGTGCATTTCTGGAGGTTTTGGACATTGGAAACAACAAGATTAGAGATACATTCCCATGTATGTT  
GAAAACATTACCCAGTTTGCACATCCTAGTCCTAAGGTGCAACAAGTTTTATGGAGATCTCCAGTGTCTG  
ATAGCTAATCAAACATGGTTCGAAGCTTCAAATTATAGATATTGCTTCCAACAATTTTCAGGGGAGCACTGC  
TACCACATTACTTCTCGAACTTGAAGGCATGATGAAGAGCAGAAATCCAGAGCCACGACTACACTACTT  
GGAAGTTGAATTCATCAACTATGGCCTCTACTATCGAAATAGAGTGACTTTAACTCTCAAAGGTCAGGAG  
ATGGAGATTGAGAATATTCTTGAAGTTTTTACATCCATCGATTTCTCCAGCAACAACCTTTGAAGGAGAGA  
TACCAGAGGTATTGGGAGATCTCAAATTGCTTTACCTTCTTAACTTTTTCGCACAATGCTTTGACAGGAAG  
AATACCAAAGGCCCTCGGAAAGTTGAGTCAGCTTGGATCCTTAGATCTTTCGGTAAACCAGTTAAGTGG  
GAGAATTCCAGACGAGCTCGCGAGTCTCACATTCCTTCTTGAACCTATCTTTAATCAACTTTCCG  
GTAGGATTCCAAGAGGCAACCAACTGCAGACATTCTCAGCAGAATCCTTTGAAGGGAGCACAGGGCTG  
TGTGATTTTCCGCTGAAGAACTGTGCAGTGACACCAAATGCATGGATCGTCACAACCAAGAAGCCAT  
TCTGACGATGAAACAGTTGATGGGAAATATATAAGTTTTGCATTGGGATCTTCATTGTGTTTTGGCATCG  
TTACCTGGCTGCTTTTGCATAGCACAAGATACAATGGGCTCGTTGACAGACTTCTTTTCAGAATATTTGGT  
GAGCACAAAAGGCGGGCAGAAATAGAAACAGAAGGAGGTCAAGGTAA

>PGSC0003DMG400022404 LRR-RLPs

CTTGAGAGTTTCTTTGGCTCTTCTGGTGCACCAAAGAGTCCACATTTTTCCATTCTCAAGACTGAGGTA  
TGCAATAAAAATAAGAAAAAAAAGCCAACAGCTTTTTCAATTCTTGTTCAATTCCAGTTTGTTTTTTCTCT  
TACAACCTCACGCTTTTCTCCCTGTTTTTCTTGTAATTGTTCTGAAGTTTTACTGATTCTTTTCTTTTTCTT  
TTGTTTTTTTTCTGTGTGTTAAATTGTTATAAGCATGGTTTTTCTGGGTCATTTTTTTTTATCTGCTTTTTTCAG

TAGCATTTCAGAAATTTCTCAGCCTTTTCTCTCTTTAGAGTTTTAGAGTTTAGACCCATATCTCTTGCTCTG  
TTTTCTTGAAGCTCTAAAATGGAGTGTAGTACAACCTGATTGCAGATGATGTTGTCTTTTTGAAATTCAGGT  
GACTCAAGATGGTTTTTTGTTTGTACAAATCTTGAAAGCTAGTATTTTTTTTTATAACCAGAAGAGTT  
GTTGACTGTTGAAAATTTTGTGAGCATGTCGAAAAATAGGATAAAGATTTGAACTTTTCAGTTGTTTTGAT  
TTCAATTCAGTTTTCTTGAGATGGAAATGAATCCGAGCTTGAAAAAACCGAGGGAATCTGTAGATTTATC  
GAACTCATCGGAGTTAACTCAGTCAGCATTCCCAGATGAGGTGTTGGAGAAGGTGTTGTCTCTTGTTCA  
GTCTCATAAAGATAGAAATTCAGCTTCACTGGTGTGCAAGGATTGGTATAATGCAGAGCGTTGGACAAG  
GACTAAGCTGTTTATTGGGAATTGCTATTCAGTTACTCCTGAGATTGTAGCAAGAAGATTCCCAAAGATT  
AAGAGTGTTACCCTTAAAGGGAAACCAAGATTTTCTGACTTTAATTTGGTACCAGAGAATTGGGGTGCT  
GATATTCAGGCTTGGCTTGATGTTTTTGCCAAAGTTTACCCTTTCTTGAGGAGTTGAGATTGAAAAGAA  
TGGCTGTTAGTGATGAGAGTTTGGAGTTTTTGGCAAATCATTCTTGATTAAAGGCTCTCTCATTGTTG  
AGTTGTGATGGTTTTAGCACTGATGGGATCAGTAGCGTTGCTGCTCACTGCAAGTAAGATGATCTTTTCA  
CTTGTGTTAACTTTTGTGTTATTTTTAATATCAGTTAATGTTTCAGATATGGGTGTTGTTTTGATTGGAT  
AAAAAATCTATCTTTTTTTCAAGAAATAGTTTTATTTGATTGTAAGTGGTATATCTAGCATCTGACTTCAA  
GATCTTAGTTTTCTGTTATGGTGGATTTAGAATTTTCAAGGCAGATTGAGGAAAAACAGTACTGTTTA  
CAAGGTGGTCCATGCTAATTATTGTAGTAATGGAGGACAAAACAGTAGACCCATGTGTCTGGATGTGGA  
ATGGTTAAGAACTTGTATTTTTCATTTGAAGTGGCCATGTGGGTGAAGAAATAAAAAAGTGACATGTT  
CTGGGCTGGGGACATGTTAGGCTGTTTATCTTGTTATCACCCACTTGTCTTACCACACATTA AAAAGAAA  
GAAGAAAAAAGTATAAGTGGAAATTGAAATGGTTCCACTTTATGAATCTTTTTCTGTTCTTTTTTATGT  
TACTTTTCATGATGTGACATTGACCTGTTAATGAGCATTAAATTAAGGGAATTTCTTGATGTCATTGTTAGGC  
ATAAATAACTCTTCTTATTGGTCAAGAAAGAGTTTCTACATTAACTTGGATTGTGTAACAAATATTTGATC  
TCTGAACCTTTAATGTCTATTAGACCTGTTTCGATGTATGGAGCTTCAACTAGTATATCACTATGTATATG  
TTGTCAAATTGTCGTCTAGTTTTGTAGCACCCTAGGTTATTATGGTTCATGAGGCTTTTCAGGTTGATTGT  
TGCTTTGGCAAATAAGGAATACCATCACAAGGTGTCTAGGTTCGCATGCCAAGATTTTGCTTGTGTAGTT  
TTAAACGTAGAAGTTGGCATCTTTGCAATTTAAGTAACGATAATCTGAACCAAAAAGAATGTAAGAATG  
TGGGATCTTTGGTTGTTCTGGTCCGCAATCGTTCCAAAGAAATGTAGTTTGAAGGATGGCTCTAATGTCA  
TATCCACAATTCAACATACTACAGAAGCTGGACTTGTATATAACAAATGTCTTCATGTACTATCTAAATGA  
TGCATACAAGGAGGTTCTATTTATGTTATGATAACAAGATTTGTTTGGAGTAATATTCCAAGGTATAGAA  
AAGCAAAACATGCTTTTCTTCATAGGCAGCAGAAATGTCAGTTTGTGTTTGTGGCTCTTAATTGATGCTTAT

CAGCATGAAACCAAGTTATCTTAATTGCTATACCAATCTAAATGTTGGTTTCCTTCACAGGAATTTGACAG  
AGCTGGACATTCAGGAGAATGGCATGGATGATATTTGTGGTAGTTGGCTAAGTTGTTTTCCGGATGACT  
TTACATCACTGGAGGTGCTTAACTTTGCCTGTATGAACACTGAGATCAGTAAAGATGCTTTAGAGAGACT  
TGTCGGTAGATGCAAATCACTGAGGGTTCTGAAGGTTAACAAGAACGTCACCTTGCCTCAGTTGCAACG  
CCTGCTCGTCCGAGCTCCTCAGCTGATGGAGCTGGGTACAGGATGCTTTCTCCAGATCAACTCACAAGT  
CGGCAGTATGCAGAACTTGAAAGTGCATTCAGCAACTGCAAACATCTGCACTCTCTTTTCAGGTTTTTGGG  
AAGCAAATCGTCGATATTTACCATCTCTTTATGCAGCCTGTGCTAGGCTGACTTTCTCAACTTGAGCTAT  
GAAGCCATTAGGAGTGGTGAATTTTCGAAGCTTCTTGCTCATTGCCAAATTTAAGGCGCCTTTGGGTAA  
GAATGTACCTCAGGATTTAACATTTACGTGATAAATCCTTTCATGATGAGGTCTTAGGTATTGATCTCCTG  
ACATTTGACATTTTGTGCGAGGAACTGAAAGTTACCACTAATTCGTCTTTTAAGTTTGAAGTCTATGGT  
TGTTTTCTCTAGGGATAAGTATTCAAGAGATGCTAATCACCTTTTTTTTCATATCATGGTAATCCATTTTC  
TACTTTCAAGATCTTCATGCCTAATCTTTCTGTTATAGGTCCTAGACACTGTCAAAGATAAGGGGTTAGA  
GGCTGTTGGAACCAGCTGCCATTGCTTGAAGAACTGCGAGTCTTTCCTGCTGACCCTTTTGAAGAGGAT  
ATGGACCATGGAGTGACGGAGTCAGGCTTTGTGGCTGTGCTGCTGGTTGTCCTAAGCTTCAATATGTTT  
TCTATTTCTGCCGACAAATGACTAATGCTGCTGTTGCAACAATAGTGCGTAAGTGCCTAATTTTACCCAT  
TTTCGTCTCTGCATAATGAATCCTGGCCAGCCAGATTACTTGACAAATGAACCCATGGATGAGGCATTTG  
GTGCAGTGGTCAAACCTTGTA AAAAGCTCCAGAGGCTTTCTGTTTCTGGACTGTTGACTGACCTGACCTT  
TGAGTATATTGGTAAGTATGCCAAAACCTTGAGACACTTTCAGTGGCTTTTGCTGGCAGCAGTGACTG  
GGGTATGCAGTGTGTGCTCGACGGCTGTTCTAAGCTGAGGAAGCTGGAGATAAGGGATTCTCCATTTGG  
AAATGCAGCACTTCTTTCTGGAATGGGGAAGTATGAATCAATGCGGTGTCTTTGGATGTCAGCTTGCAG  
GGTCACCATGAATGGTTGTAGAATACTTGACAAGAGAGGCCTAGGTTGAATGTCGAGGTAATCAAAG  
ATGAGCACAGCGATGATTATGCTGATAAATTATACGTCTATCGCTCTGTAGCAGGGCCACGAAAGGATG  
CCCCACCTTTTGTTGTAACCTCTAGCACAAAGAAACAGGAACTTTGGTAAGCTCCTCCCTTGCTCTCCT  
CTGTCCTATGCTTGCTAAAATAACGTGGAGTGGAAAGATGATATGCTGATAATGCTAAGTTTTATTTTA  
TCTGTAGGTGTGCACTGGGATACCCTTCTATTTTCAGCTAGTTTTATCTGCTACATGCATGATGTTTGTA  
GGTGAACGAGAGAAAGTAAGTAAATGAATACCTCTCCTTATGCTGCATTTACTATGTTTTACTTGGAGAA  
GCTTGAAATTTTCAAGGAAGATCAACAAAAGGGATGTTTGTGCGCGCTTACTGAACTAATGCATTATG  
AGAAAGAAACCATGCGAAGATTCTTTACAGTTAGTGAGACCAAATGATCATCACTCGTGGAGAAGCAG  
GAACTGGAACGAATGATCACATGACGGAGTTGATTATGTCTGAGAAAACCTATCAGCAGATGAAGAGTCC

TGAATCTCACAAGAACAAGCAAGATGAAGAACGCTGGTTTGTTGATTGCGGGAGTTTTTTCTTTTTCTTTT  
TCAAAACAATAAGTAGCATAAACATAAAGAAAGAAAAATGAAAGGAGTCTCATGTAACCTGAATGATG  
GTGATTAGGTTTCACAGACATAAGTTATTTGGCCAACTGGAAATGCAAAGAAAAAAGAAACCATGG  
TATTCTTTTTTTAAAATGTGCATGATTGCTGTGCTTCATCAAATAATTTAGTGTGACATTTACTATGTTG  
>PGSC0003DMG400022452 LRR-RLPs

CAAAGTCTTTGTGATGGTTTGAAACTGTATATAAATGATAGCTTGTCTTTCCATAGTCACATTTGGTATTA  
GACATAGAAGATAAATTAAGACAGAGAGATGGAGAGAATAATATTGTCTCTTATAATTCTATTTGTGTA  
TGCAGTTGAAGTGGTTTCATTTTCATTTGGTAATCCACTTTGCTCTTCCCATGATTCCATTGCACTTTTACA  
GTTTAAGCATTCACTTAATTTGACAGACGATGGTTATTGTGAATCTTCTTATCCTAAGATGACGTCGTGGA  
ATATGAGTAGTATGGATTGTTGTAGGTGGGATGGAGTTACCTGCAATCTCTTAACTGGCCATGTCATTGG  
TTTGGACCTCAGTTGTAGCAGACTTGGAGGAACTCTACATCCCAATAGTAGCCTTTTCCAGCTTCGTCATC  
TTCAAACACTCAATCTTTCCCTTAATGGCTTTTGGGGTTCTCAATTTCCACAGGAGATTAGTCAGTTGGTC  
AGCTTAACACATCTCAACCTCTCTTATTGTTGGTTCAAAGGAAGGATTCCATTAGAAATCTCACACTTGT  
CAGTTTAGTATCCCTTGATCTCTCTAATAATTTGATGTCAAGTTCAGTCAGGAAGGATTCAATATGCTCT  
TTCAAACCTTAACCAAGTTAGAGATACTTTCTCTTTATAAGGTAAACATCTCATCCAGCATACCCATGAAT  
CTATTATTCTCTTCTTCTTTGAGATATCTTGATCTTGCAAGCACTAAGTTGCAAGGAGACTTGCCAAAAG  
CATTTTCTCCTATCCAATCTGGAAACTCTCAGATTGCCAGGAAATTATCTAACTGTTTCTTACCCAAGTA  
CTTTAACTGGAGCAGCAGTACTCATTCACTAAGGGAGTTAGATCTCTCTTTTAATAATGTTTATGGAGGG  
ATACCCAATTCCTCGGAACTACTACTCTCAAAGCCTTAAAGATTCTACAACCTTCTGGGTGCAACCTTGC  
CGGACCATTTCCAGAATTCATCGGGAACCTTTCACAAATCACCCAACCTACATCTTTCAGACAACCTATTTGG  
AGGGTGAAATTCCTGATTTTTTTTTCCAACCTTGCAAAGCTTACATCCTTATCACTGGAGAACAACAACCTC  
ACTGGCCGGTCCCATCTTCTTGTGAATTTGACAAAGCTTGAAGATTTGAGTTTGAGAAACAATTCAT  
CAGTGGTACACTTCCTCCTTTTACTGCTAGCAGGCTTCAAATCTAATTTACCTTGATTTGTCTGAAAACCTC  
ACTCAACGGATCAATCCCGTCTTGGATGACTAGTCTTCTTCAATTGGTACAGTTATTGCTGGGGAGGAAT  
CGTTTCAGTGAACCACTTCCCGAGTTTAAGACCAATTCTCTAGAAGAGCTTTATTTGTCTCATAATCAATT  
CTCTGGTCCCATACCTCAATCGCTTGGAGATCTTCTGAACCTAACTGCTGTCTATCTTGAACAAAATAAGT  
TGAGTGGGGAGATTGGAGCAGATATGTTTTCAAGTATGACAAACCTTCAATATCTTGATCTTTCTCATAG  
TGGTTTATCATGGAGTAGCAATATCAACACCACTTTTCCCCTTCTTCTTCTTACGTTTAGGCTCTTGTGCG  
TGTGAAAGATTTCCAGATTTCTTATTGAACTCTAAGGAATTATGGGTTTTGGATCTCTCGGAGAATGAA

ATTCATGGTCAGTTCCTAAATGGTTTGGGGGTTTGAGTGCATTGCAATTCCTTAATGTCTCTCACAACCTT  
CCTTACAAGCTTAGACCATCTACCATGGGAGACAATAAGGGTACTTGATCTTCAATCAAATTCCTCAGA  
GGACCTTTGCCATTTCCCATTTGCACCATAACTGAACTTTATCTTATAAATCTGTCTTACAATAATTTGAGT  
GCTGAAATTCCAATTGCTTGTTTACTTCTTCCTTGCTCAAGGTCTTAGACTTACGAGCAAATAACTTCCAT  
GGACCCATCCCAAACAATTCCCAAAGAATAGTGCCTAGTTCATATTAGTTTGAGCAAAAATCAATTGG  
AAGTTCTATCCCAACATCCCTAGTCAACTGTACATCCTTAAAAGTCCTTGATTTGGGAAACAATAAAATC  
CAATCTACATTTCCACCTGGCTGGAAACATTGCAAGAGTTAGAGGCTCTCATACTGAAATCTAATAGAT  
TTTACGGACCCATTGGTGGTTACCAAACGAAATCACCATTTCCAAATTTGAGGATCTTTGATCTCTCAGAC  
AATTCATTTACTGGCTCTTTACCTACAAAGGTAATAAAAAGTTTCAAAGCTATGATAAACATGGATTCACA  
CAAATCAGGATTGGAGTATCTTGAGGAACTTTATATTTCAAAGTCCTAACACTTGGTATGGGGTTTAT  
CATAAAGATCACTATGCGGAATCGATGATATTAGTGATGAAAAATCAAGAGATTGAATTCAACAAGATG  
TTGAAGATTTTCAACAACATCGATTTGTCAAGGAACAAGTTTGAAGGAGAAATCCCTAAATTCATTGGGA  
ACTTGAATTCACCTTCTGCTGCTGAATTTATCTCATAACAACCTCACAGGACACATTCCTATTGAAATGAAG  
AACATGAGCACTCTTGAAGCTCTGGACCTTTCAATTAACCAGCTTACCGGCAAAAATTCAGTGGAATTGG  
CGAGTCTCACATTTCTGGCGGTCTAAATCTGTACACAACCATCTTGTTGGACCTATTCTCAGAGTAAT  
CAGTTCAATACGTTTTCAAATGATTCCTATTTAGGAACTCTGAATTATGTGGATTTCCACTGTCAAATGA  
ATGTGGGAAGCATAAGAGTGCATCAGTACCGGTTGAACAAGAAGAAGATGAGCCAAGTTTTCTTAGCG  
AAATGACTTGGCAATCTGTCCTAATCGGGTATGGTTGTGGCTTGACATTTGGATTTGGCATAGTGTATCT  
CATATACCGCTTTGAAAGGCCAAGATGGTTCATAGACTCTTTTGAACTATCATTAAATGAAATGATATAC  
ATACTACAGAGGGGACATAAAAGGCGCAGGAGGAATTTTACAGAAGAAAACACTGAAAATCTATGCA  
GCAAGGGAGAGATCAGAGAGCCACTACAGTGTCTGTTTGGGAATGCAGATTATCATTATCATCATGTTA  
ATAACTATCTATTAAGTATTTATCTCACTTTTGGCAAAAACACATATACTGTATAATCAACTTATTGATGAG  
AATTCAAAATTGAATAAGTGCAGA

>PGSC0003DMG400022599 LRR-RLPs

ATGGCTTCTCAACTTCTTTGTTTTCTTGATTGCTAACTCTCACAACCTATTTGTAAGTAAATCTTGTCAT  
CCAAATGATTTAAAAGGTCTTCAAGATTTCAAGTCTGGAATTCATTAGACTTCTGGTAGACTAAGTA  
AATGGATTGGCCGAATTGTTGTAATGGGAAGGTATTTTTGTAGTAATGTAATAAAAAGAGTTGTAA  
GTATAAGCCTACCAGGTCTCTATACTCAGATGATGCACCAATTCAATCTGCTATGGAAGGGGAATTGTC  
ACCTTCAATCACACTCATCAACTATCTTGAAGTTATCAATATAGGTGATCTTCTTGGTATAACGGGGAAA

ATCCCCTCATCGATTGGTTTACATCTACCAAATCTCAGAAAACACTCACTTTGTTAGAAACAGGTTTACTGG  
TGCATTACCAGAAAGCATTGTATGTTGTCTAAACTGGAAGAATTGTATCTCCAAGAAAATGGTTTTTCG  
GGTTTTATTCCCTGGTGTATAGGAGGTGTCAAGAATCTAAGAAGAATGGATGTACATTCTAATAAACTTT  
CTGGTGAATTCTGAGTCTATAACAAAGTTGAAAAATTAGAAAGTTTGTGTCTTGAAGAGAATTTCTT  
GACAGGGGATATAACCAGAAAACATTGGTAATTTGCAAGAATTGAAAGAGGTTGATTTGTCTAATAACTC  
GTTAACGGGGATAATCCCTCGTTCTATTTCTAGACTAAAGTTTATGTCAGTTCTTTACCTGAATCCAATC  
AGCTCGAGGGGGACATACCGTTGCCTTCAAACCTGGGAAATTGTCTTCTCTGAGCTTTGTAAGACTGCA  
GAACAATCAGCTTAGTGGAACGATACCTTCATCTATTGGCTACTTGACCTCCCTTCAGAGAGTTTCACTTG  
CAAACAATCAGCTAAAGGTTCTATTCCTTCGAGTATAGGTAATTTGAAGTTATTGGAAATGTTATATCT  
CAGTTGCAACCAATTATCTGGTCAGTTGCCAAGATCAATAGGCGGGATTTCTGAGCTTATTTACCTGAGT  
ATATCTCATAACATGATTGAAGGACCGCTGCCTCGTGAAATTTCTCCCTTCAAATCTTCAATCGCTGGA  
TCTTTCATTCAACCGTTTGAATATGTCAACCATTCCCAAGTGGCTCATGCAGTTGCCATCACTATCGCAAA  
TTTACTTGGCAGGATGTGAAATTCATGGTCAAATTCCAGATTACATACCCAAGTCATTGCTGGAAGTAGA  
CTTGTGAGCTAACCATCTTTCAGGAAGGATACCAGCTTGGATTGGCAGCTTTTCGCAGATATATTCTTTAA  
ACCTTTCTAAGAACAAGTTTGTGTCTGAGATTCCTTCAACTGTCACAAATCTCGACATTCTGGGAGTGTTA  
GACCTTCACTCAAACAAGCTAGACGGCAGTGTGAATGCAGTTTTCCAGATAAAGAGCAGGTTTGCAGAA  
GGATCATTGACATATCTTGATCTGTCTGATAACAATTTCTCAAGTGGTGTGCAACAGATTGGCATGGGAG  
GACAACAACATATCCAACACTTAAATTTATCGCATAACTTTCTCAAAGGTAGATTACCAACCTCCGTAGG  
AACATTGAAAACACTACAGACTTTGGATCTCAGTTACAATGGATTAGGAGCTAACCTGCCAACATCACTG  
GCCAACGTGACCGTTTTGGAGAGACTGATGCTGCACAAAAATCAATTCAGTGGCAGAATCCCTGAGGAG  
TTTTTGAAGCTGAATAAACTGAAAGAATTGAACCTTTCAGATAATCTTCTTGAAGGAAAAATACCTTATG  
GGAAGCCATTTCTTGATTTTCCGCAGAGCTCATTCTCTGGAAACAGAGGTTTATGCGGGAAACCCCTTCT  
TCCCTGTAAATCTTGA

>PGSC0003DMG400022785 LRR-RLPs

ATGGCGGCGTATGCTGCTGTGAATTCACCTTTGCATACGCTGGATAATCTATCTCAAACCTCATAATCACA  
TTCTCTTCTTTACAAAAAAGCAAACCTGAAGTCCTCAGTGACAAGTACACCTTCTTAAAACCTTTCTTG  
AGGATTTACTAATATTTTCCATGAAGATGTAAAGATGAAGCATCTCGAAAGGATAATCCAAGAAGCTG  
CTAATGGAGTGGAAGATACTATTGACTCACATGTATATGATAGCTCTGCCTTAGTACAAAGCAAGCGAG  
TACGAAGAAAGGCTTATACGATCTTTCATCAAACCTTGGAAATATGCAATTGAGGAAATTGGTTTGATACA





CACTCACACGTTCTCTTTTCTTGAAATATCCATACTCTGTTTGTTCCCTCTCACAGTCAAGCTTTAGATTAC  
TTAGGATATTAGATGTTTGCTTTACATCTCGTTTGTACCGTAGTATGTCCATAACAGAACTTGTTCAATTTG  
AGGTATCTTGCTTGTCCATCCTTCAATGGTCTTGTGCAATCACTATGCAAGCTACGGAATATACAGAACTT  
AGTTATTCAGGATTTACGTTTCATCTGGTTTACGTAGGAGAAACCCAGTTCCTACCATGGGAAGTTGTGAAT  
ATGCCTAAACTAAGACATATCCATACAAAAAAGTTTAGTCTTTTCATACCCCCTACATCACTAATTGCTGA  
GAGGGAGAATCATTTACAAACGTTAACCGGATTGATGCCCTCATCTTGTAAATGAAGAGGTGTTTCTAAG  
AATTCCAAATTTGAAGAAGTTGGGAATTTAATTGTTGATGATTCAGACACTATTCAGAAGTGTTATTGC  
CTTGATAATCTTGACATTTAACTCAGCTTGAGAAGCTCAAAGTTGAGGTCAGAGAGAGTTGGCTAATTT  
TTAGGCCGACTATCAAAGTTGGGTGGACATTCCACATTGTGACAATTTCCCACCAAACCTTAAGAAGTT  
AACATTGTGCACAACACACCTAGAATGGGAAGACATGAACATTCTTAGTAAGTTACCTAACCTTGAGGT  
GCTCAAACCTTAAAGATCATGCCTTTCGCGGACATATTTGGAACTAAGCGATGAAGACGCAGATGGATT  
CTTGAAGCTAAAGTTTTTACTTCTTGAGCACATGCATCTGGAGCAATGGGAAGCAACAAGTTATCATTTTC  
CCAAGCCTTGAGCACTTAGTCTAACACATTGCCATTCGTTGGAGCAAATTCCTTTCGACTTTGCGGAGA  
TTCAGACACTACAGCTGATTGAACTACACAATTGTATGCGTTCTGTTCTTGTTCAGCAGAGCAAATACA  
AGAGGAGCAACAAAGCTTTGGAAATGATGACCTCATTATTCGTGTGAACTCTATCTATACTAGAGTAAAC  
ATTAATAAAAAAGGTATACACTTTTTTTAAAAGCATAAAAAATTTGATTAGCTAGATTCCTTCGAAATCT  
GAAAATGATTTTTATATTCATCATTTTCACTTATTTATACTATAAAAGGTGCTAATTACAA

>PGSC0003DMG400022977 LRR-RLPs

CTTGAACATCTTAATCTTGCTAATAACTTTAAGATTAAGGTGGGGTCCCAGTTCCTTCGAGAATTTGA  
CCTGTTTACGTCATCTGGACATGTCTAATACTTAGACAGACCAATGGCTTCCTGAGTTGTTTCTCAGGTTA  
TCAGGCAGTAGGAAATCACTTGAGGTTTTGGGGTTGAACGACAACCTCATTGTTTGGTTCAATTGTTAATA  
TGACAAGATTTTCATCCTTGAAGAAATTATACCTGCAGAAGAATGTGCTGAATGGTTCTTTCATGGAAAG  
TGCGGGACAAGTTTCTACCCTCGAGTATCTGGATTTGTCTGATAACCAAATGAGAGGGGCATTACCAA  
TTAACATTGTTTCCATCATTGAGAGAGTTGCATCTTGGCTCAATCAATTTTCAAGGGAGGATAACCACAA  
GGTATCAGACAACCTTTACAGCTTAGAATTTGGATGTCTCGTCCAATAGACTGGAAGGATTACCAGAAA  
GTATGGGGCAACTATCTAATCTGGAAAGTTTTGATGCCTCTTACAATGTCCTGAAGGGTACAATTACTGA  
GTCCACCTTTCAAACCTCTCCAGTTTAGTGGATTTGGACTTGTCATTCAACTCATTGGCTCTGAAGACGA  
GCTTCGATTAGCTTCCTCCTTTCAGCTACAAGTTATAAGCCTGCCGTCTTGCAATTTGGGACCTTCTTCC  
TAAAATGGCTTCAAATCAACATAACTATACTGTTCTTGATATCTCTCTTGCAAGTATTTAGACACGCTT

CCAAGTTGGTTCTCTGGCATTCTCCCGATCTAAAGATTTTGAATCTCTCAAACAACCAAATCAGTGGAA  
GAGTGGAAAGAGTGTCTAACTTAATAGAGAATACATATGGTTACAAGGTTATAGATTTAAGCTCTAACAA  
CTTTTCAGGGCCTTTGCCAATAGTCCCTACCAATGTCCAAATATTTTACCTGCATAAAAATCAGTTTTTTG  
GATCCATCTCTGCAATTTGTCAAAGTAAAACATCCCCACTTCTCTCGACTTGGCACACAACCAATTCTCA  
GGAGAACTTCCAGATTGTTGGATGAACATGACAAGTCTAGCTGTTCTTAATCTAGCTTATAACAATTTCTC  
TGGAGAAATTCACATTCATTGGGTTCCCTTGACAAATTTGAAGGCGTTATACATACGCCAAAACAGTTTT  
AGTGGAAATGTTGCCTTCTTTTTCACAATGTCAGCAGTTGCAAATCTTGGATCTTGGAGGGAATACGTTGA  
CAGGAAGTGTCCCGCATGGATAGGGACTGATCTACTCAATTCGCGCATTCTAAGCATGCGGTTCAACA  
GATTGCATGGCAGCATAACCGTCCATAATCTGTCAGCTTCAATTTCTTTCAGATACTGGACCTTTTAACAAAT  
GGATTATCAGGGAAAATTCACATTGCTTCAACAATTTTACCTTATTGTATCAAGATAATAATTCTGGTAA  
GCCAATGGAATTTATAGTTCAAGGTTTCTATCGTAAATTTCTCGTCGTTACTTGTATATTGGTGACCTAT  
TGGTTCAATGGAAAATCAGGAGGCTGAGTACAAAATCCTTTATTATATCTGAAGACTATTGATCTTTC  
AAGTAATGAATTGGTTGGAGGTGTTCTGAAGAAATAGCTGAGATGAGAGGATTGAAATCTTTGAATCT  
ATCAAGAAATGATCTGAATGGAAGTGTGTTGAAAGAATAGGTCAAATGAAGATGTTGGAGTCTCTTGA  
CATGTCAAGAAACCAGCTTTCTGGTGTGATCCCCAGGGTCTTGCGAATTTGACTTTTCTTAGTGTGTTG  
GACTTGTGCAACAACCACTTATCCGGGAGAATTCCATCAAGCACTCAACTGCAAAGTTTTGATAGATCAT  
CCTACAGTGATAATGTTCAACTCTGTGGTCTCCTCTTCAAGAGTGTCCCGGATATGCTCCTCCTAGCCCT  
CTTATCGATTATGGTAGCAACAACAATCCATAAGAACATGATGACGATGAAGAGGAGTTCCCATCGCTG  
GAGTTTTATATATCAATGGTGCTAGGCTTTTTTGTTCATTTTGGGGAATTTTGGGCTGTTTAATTGTCAA  
TAGTTCCTGGAGGAATGCCTACTTCACATTCTTAACGGACACGACAAGTTGGCTCAATATGATATGAAGA  
GTCTGGTTTGAAGACTCAAGAAAAACAGAGGAGGGCCTGATAAATGTCAAGTTTCTGTGTACTTGT  
TACTTTTTAAGAGTTAGCTTGTTTTCTTGTCTTCTTCTACCTGATAGTTGCTTTCCTCTTGTGTGATTC  
TATCTG

>PGSC0003DMG400022978 LRR-RLPs

ATGTTAAGAGTGGATCATGCAAACATTTTGTGCATAACAAAGGAGAGGGAAGCTCTTCTCGAGTTCAA  
CGAGGTCTCATAGACGAACATAATATGCTTTCTTCATGGAAAAATGAGGAATGTTGTTCTTGGAGTGGT  
GTGAAATGCAGTAACAGAACAGGCCATATAACAAGTGTGAATCTTCGTGGTAACTTCGACACGTCTTGG  
ACAGGTAATATTAGTCCATCATTGGTTAAGTTGCAGTATTTGAAGTACTTGGACCTTAGTTTCAATAATTT  
TGGTGGACAAATACCAAATTTATCGGCTACTTCGAAAGACTAGAGTACCTAAATCTCTCATTTAGTTAC

AATCCTTTCACTGGTCTTATTCTCTTCAGTTCCAAATCTAACACACTTAAAGACTCTTGATCTTGGTCAA  
AATTCTTTAACAGTGAAAAGCCTTGAGTGGCTTTCTAATCTAGTGTATTTGGAGTACTTAGATCTTCATTT  
TTCCAATGTGCAAGTGAAAACTGGTTACAAGAGATGATTAAGCTTCCTAATTTGAGGGAATTGCATTTA  
TCAGCCTGTCAACTCCCTGTAATCATTCTTCATCACTTGTATCAGCCAATATTTCTCGTCTCATCTTTTCG  
ATCCTTGACATCTCCTATAATAGATATTCGTCCCCTGCAATAAATAGTTGGTTATTTAACTTCACTAGTCTT  
ACTAGCCTAGATCTTTTCGGGTAACGACTTAGGCCAAATGTCTAGTGGCTTTGGGTAAGTCTTTGG  
AACATGTTAAGCTATTTGGAAGTGGTATTCAAGGTGGGATACCAAGGTCTTTTGGGAGTTTAAGTCGTTT  
ACGCTCTATTGATGCAGATTCCAATAACTTGTTAAGTCAACCATTTTCTGAGTTGCTTGATAACTTAGCTG  
GGAGTAATCAATCGCTTGAATATCTGTCTGTTTGGGGAAATGCACTCACTGGTTCATTGATTAATCTTAC  
TAGATTTTCATCCTTGAGGGAGTTGAGGCTACGAGAGAATTCGCTGAATGGCATTTCATGATAGCTTT  
AGACAAATCTCCTGTCTTGAGTATCTTGATTTGTCTAATAACCAAATGACAGGGTCATTACCAGACTTGG  
AATTCTTTCCATCACTGAGAGAGTTGAAATTACGGTCCAATCACTTTTATGGAATGATACCACAAGGTTT  
AGGGAAACTTTCCGAGCTTAAAATCTTGGATGTGTCTTTCAACATATTGCAAGGCTTACCAGATAGTTTG  
GGGCAACTTTTCCAAGCTGAAAATCTTGGATGTGTCTTTCAATAGACTGAAAGGCTTACCGGAAAGTTTA  
GGGCAACTTTTTCGACCTTGAAAGTTTTGATGCTCCTTATAATTTGTTAGAAAGGTACAGTCTCTGAATCCCA  
TCTTTCCAACCTTTGCAAATTGAAAAGCTTAACTTGTCTTCCAACCTCCTTGACTTGGAAATGTTAGCGTTG  
ATTGGATTCCGTGTTTTCAACTACAAGTTATCAGTCTTTTCGTCTTGTAAATCTTGGACCAAATTTCCAAAAT  
GGCTTCAAACCTCAAATGACTACTCAATTCTGGATCTATCTCTTAATAGTCTCTCAGACACAATGCCTAGT  
TGGTTCTCAAAGTTGCCTCCCATGTTAACATACTTGAATCTCTTACAACCAAATCATCGGAAAGATACA  
AGATTTATCAGCCAATAATATCGGTTCCATTGTTATAGATCTTGGTTATAACAATTTTTCAGGACCCCTTAC  
CAACATTTCTCAATTGGTTAGTGCATTGCGTATTGACAACAATCAGATTTCTGGATCACTTAACTCCATA  
TGCAAAATTCGTTTCAGCTGTAACACTTGACTTGTCCGATAATCTCTTGTCCGGAGAGATTCTGATTGTTG  
GACCCTCATGTCTGTTCCAATGGTCCCTTAACTTAGCCAATAACCATATATCTGGAAGCATTCCGTACTCTC  
TGTGTTCTTCGACATCCTTGAGCTCTCTATACGTGCGTAACAACAATTTAAGCGGACAGTTTCCAGCCTCT  
TTGAAGAATTGCCAAGGTTTGAAGTCTTGGATTTGGGAAGAAATACATTTAGTGGAAAAATCCCAGAA  
TGGATAGGGACTGAGTTAGCTTATTTGGGGATTCTGAGCCTTCGATTCAACGAATTCTCTGGGAGCATT  
CTTTAAGTATATGTCAGCTTCAATCTATTAGATACTGGACCTTTCTGGCAACCATTTATCAGGAAGAATT  
CCGAAATGCTTCAGCAATTTAGCACAATGCAACTTTTGAAGATGGTTCAAGTGTGAGCTATGACTTCG  
ATCCTTACACCCCTCGAGTAGGTACATTGTACCATGGCAATGCACTAGTCCAATGGAAAAACAAAGAGTC

AGAGTATCGTAACATCTTGTGGCTTCTGAAAACCATCGATCTTTCTAGCAACGATCTAGTCGGTGACATC  
CCTAAAGATTTTAGCAAATGAATGCATTGCTGTCATTGAACCTATCAAGGAACAATTTGACTGGAAATA  
TCGTTGAAGGAATTGGTTAATGAAGATGTTAGAGTCTCTTGACTTGTGCGAGGAACCATCTCTCGGGGA  
AGATCCCAGTAGGGCTTGCTAACCTGACATTTCTTAGCGTGTGGATTTGTCAAACAACAATTGTCAGG  
GAGAATACCATCGAGCACTCAATTGCAAGGCTTCGACTCCTCAACCTATGGTGGGAATGTTGAGCTATGT  
GGCCCTCCTCTCCAGAGTGTCTTCATTTGCTCCTCAAATCTTCATGTTGGTCAAGACAGTAATTTCCA  
AGAAAATGATGATGATGATGAGTTTCCATCAAAGAGTTTTATATATCGATGGCGTTAGGGTTCATTGTT  
GCATTTGGGGGGGTGTTAGGATCTTTGTTCTCAACAGTTCATGGAGGAATGCCTATATTAAGTGGCTCC  
ATCTTTAGCTCAAGGCCTGATTTATGTTATATGTAAATATCCTATGAATGGCTTGTAATCAAGAGAACTC  
TTTTATATCTGATATTATAACTTTTTTTTAAATTCT

>PGSC0003DMG400022988 LRR-RLPs

AGCAAAAAAAAAATGGATACCAAAGAACACTACAAACCAATTCATTTCTTTTGATTTGTCTATCAATGTT  
GATCATGCATCAAAGCTTAGCTTTTGGATCAACGTTAAGAGTGGATCATGCAAACATTTTGTGCATAACA  
AAGGAGAGGGGAAGCTCTTCTCGAGTTCAAACGAGGTCTCATAGACGAACATAATATGCTTTCTTCATGG  
AAAAATGAGGAATGTTGTTCTTGGAGTGGTGTGAAATGCAGTAACAGAACAGGCCATATACTAGTCCTG  
AATCTTCGTGGTAACTCCGACATGTCTTTGACAGGTAATATTAGTTCATCATTGGTTAAGTTGCAGTATTT  
GAAGTACTTGGACCTTAGTTTCAATGATTTTGGTGGACAAATCCAAAATTTATCGGTTACTTCGAAAGA  
CTAGAGTACCTAAATCTCTCATTTAGTTACAATCATTTCACTGGTCTTATTCCTCTTCAGTTCCAAAATCTA  
ACAAACTTAAAGACTCTTGATCTTGGTCAAATTCATTAACAGTGAAAAGCCTTGAGTGGCTTTCTAATTT  
AGTGTATTTGGAGTACGTAGATCTTCATTTTTCCAATGTGCAAGCGAAAACTGGTTACAAGAGATGATT  
AAGCTTCCTAATTTGAGGGAATTGCATTTATCAGCCTGTCAACTCCCTGTAATCATTCCCTTCATCACTTGTA  
TCAGTCAATATTTCTCGTCTCATCTTTGATCCTTGACATCTCCAATAATAGATATTCGTCCCCTGCAATA  
AATAGTTGGTTATTTAACTTCACTAGTCTTACTAGCCTAGATCTTTCGGGTAACGACTTAGGCCAAATGTC  
TAGTGGCTTTGGTACTTGAAGTCTTTGGAACATCTTAAGCTATTTGGTAATAGTATTCAAGGAGGGATA  
CCAAGTCTTTAAGGAATTTAAGTCGTTTACGCTCTTGTGATGTTAGTAACAATTACTTATTAAGTCAACC  
GTTTTCTGAATTGCTTGATATCTTATCAGGGAGTAATAGATCACTTGAATTTTTGTCCTTTGAGGAAAATG  
CACTCACTGGCTCATTGATTAATATACTAGATTTTCATCCTTGAAGGAATTGAGGCTACAAGAAAATC  
GCTGAATGGCATTTCATGAAAGCTTTAGACAAATCTCCAGTCTTGAGTATCTTGATTTGTCTTATAACC  
AAATGACAGGGTCAATACCAGACTTGGCATTCTTCCATCATTAGAGAGTTGCACTTACAGTCCAATCA

CTTTTATGGAATGATACCACAAGGATTAGGGAAACTTTCCGAGCTTAAAATCTTGGATGTGTCTTTCAAT  
AGATTGCAAGGCTTACCGGATAGTTTGGGGCAACTTTCCAACTGAAAATATTGGATGTGTCTTTCAATA  
GACTGAAAGGCTTACCGGAAAGTTTAGGGCAACTTTTCGACCTTGAAAGTTTTGATGCTTCTAATAATTT  
GTTAGAAGGTACAATCTCTGAATCCCATCTTTCCAACCTTTGCAACTTGAAGAGTTTAGAATTGTCTTCCA  
ACTCGTTGACTTGGAACGTTAGTGTGATTGGATTCCATGTTTTCAACTACAAGTTATCAGTCTTTCGTCT  
TGTAATCTTGGACCATACTTTCCAAAATGGCTTCAAACCTCAAATGACTACGCATTTCTTGATATCTCTCT  
AATAGTATCTCAGACACAATGCCTAGTTGGTTTACAAAGTTGCCTCCCATGTTATATTTTTTGAATCTCTCT  
TACAACCAAATCAGCGGAAAGATACAAGATTTATCAGCCAATAATATCGGTTCCATTGTTATAGATCTTG  
GTTATAACAATTTTTTCAGGACCCTTACCAACATTTCTTATTTGGTTAGTGAATTGCGTGTTGACAACAAT  
AAGTTTTCTGGATCACTTAACTCCATATGTAAAATTCGTTACCTGTAACACTTGACTTGTCCGATAATCTC  
TTGTCCGGAGAGATTCTGATTGTTGGGCTCTCATGTATACTCTAATGGTCCTTAACTTAGCCAATAACCA  
TATATCTGGAAGCATTCCGTATTCTCTGTGTTCTTCGACATCCTTGGGCTCTCTATACGTGCGTAACAACA  
ATTTAAGTGGACAGTTTCTGCCTCTTTGAAGAATTGCCAAAGTTTGAAGTCTTGGATTTGGGAAGAAA  
TATATTGAGTGGAAATATCCAGAATGGATAGGGACTAAGCTGTCTGGTTTGGGCATTCTGAGCCTACG  
ATTC AACGAATTTTCTGGTAGCATTCTCCAAGTATATGCCAGCTTCAATCTATTAGATTCTGGATCTTTC  
TGGCAACCGTTTATCAGGAAGAATTCCGGAATGCTTCAGCAATTTACCACAATGCAACTTTTGCAAGAT  
GGCTCAAGTATGAGCTATGACTTCGATCCTTACTTCCCTCATAAAGGTACATTGTACCATGGCAATGCATT  
AGTCCAATGGAAAAAAAAGAGTCAGAGTACCGTAACATCTTGTGGCTTCTGAAAACCATCGATCTTCT  
AGCAACGAACTAGTCGGTGACATCCCAAATGATTTTAGCAGAATGAATGCATTGCTGTCATTGAACCTAT  
CAAGGAACAATTTGACAGGAAATATCATTGAAGGAATTGGTTTAAATGAAGATGTTGGAGGTTCTTGACT  
TGTCGGGGAATCATATCTCGGGGAAGATCCAGTTGGACTGGCTAACTTGACATTTCTTAGTGTGTTGG  
ATTTGTCGAAAAACAATTGTCAGGGAGAATACCATCGAGCACTCAATTGCAAGGCTTTGATCCTTCAAC  
CTATGGTGGGAATATTCAGCTATGTGGACCTCCTCTTCCAGTATGTCCTACATTTTCTCCTCCAAATCCTCA  
TGTTGGCTTTGACAGTACTCGTCAAGAAAATGATGATGATGATGAGTTTCCTTCTAAAGAGTTTTATGTA  
TCGATGGCATTGGGCTTCATTGTCGCATTTTGGGGAATTTGGGCTCTTTGTACTTCAATGATTCATGGA  
GGAATGCCTACTTCAAGTGGTAAATGGATGTCAGAATTGGCGCTTCATCTTACTCAGCAGTCTGCTTT  
GCAAGGTTGAAGGCCAAAACCTGAGGGCCTGATGACTAAATTTATATTCTAATCATGAAAAAATGCATCTA  
TTTTGTATGTCATTTGTCTATAGGTG

>PGSC0003DMG400022989 LRR-RLPs

ATGACTCATCTTTGTTTCTTCGGAAAATATCTACAGGTTGTGCTTCTTGATGACATAGATCATGGTGATCA  
TTTGGAGTACTTAGCAGGTGATGTTGGTTGGTTTGGTAATGGCAGCAGAATTGTTGTAACAACTAGAAA  
TAGACATTTGATAGAGAAGGATAATCCAATATATGAAGTGTCTACACTGCCTAATGAAGAAGCTGTTCA  
ATTATTCAATCAACATGCTTTCAGAAAAGAAATCCAAATGAATGTTTTATGAAGTTCTCATTGGAGGTA  
GTAAATCATGCTAAAGGCCTTCCTTAGCCCTCAAGGTGTGGGGTTCCTTGTGCATAATAAAGGCCTAA  
CTCAGTGGACAAGCACTGTAGACCAAATAAAGAAAAATTCTAGTTTAGAAATTGTTAAAAAGCTCAAAG  
TAAGTTATGATGGGTTAGAGCTTGAAGAGCAAACAATATTTTAGATATAGCATGTCTTTTACGAGGAAA  
AGAAAAAAACTAGTCATGCAAATCCTTGAGAGCTGTGATTTTGGAGCTGAATGCGGATTGGATGTCT  
AGTTGACAAATCTCTTGTGTTTCATCTCCAAATATAATGTGATTGAAATGCATGACTTGATTCAAGATATG  
GGTAGATATGTGGTAAAAATGCAAAGGATTCGGGAGAACAAGCAGACTCTGGGATGTTGAAGATTT  
CGAAGATGTGATGGTCAACAATACAGTAAGTAGGCTAAACAATGCTATAATATTCAGTTTTTAGTCTCCA  
TCTTCTATTTTTATTTAAAAGATGAAAATTGTTGGTACCCTATCAATTACAACCTCGTTCTCTTACAACAT  
GAAAACTTTTCGATTGGACTTTAAGAAGACTAGTTGAAAATTGTATTACTAGAAATTAGAAATATAGAAT  
TAATTGCATAAAGTATTTCTCTTAGCGACATTTTTCTTAACTAATATTGTACCTTAATTTTTATTTAATGGTC  
TCTTCAAATGCAATAATAAATAATACAAAACATAACGAAATTTGGCATTGCAAACAGTTAGAAAGTAGTC  
ATATTGGCATGCAAATTTTATACAGATATTTGAAGTTATACTTTGTAACTAATGAACCTTTTAAACAGGGG  
ACCAAGGCAATGGAAGCAATCTGGACACATGGTGTTCAAAAATTATGCTTTAGCAAAAAAGCCATGAAA  
AACATGAAAAGGCTTAGATTATTATCCATCATTAGTTTTAGTACACATGATGACTCCATTGAGTACCTGCC  
CAACAACCTGCGTTGGTTTGTCTGTCATAGTTATCCTTGGGAGTCATTATTAGAAAATTTGAACCTAAGA  
AGCTTGTGTCTTTATCTCCAGAGGAGTCCCTGCGTCAATTATGGACCGGAATAAAGGTACAATTGTT  
GAATTCATTTTCATTATTTTTCTTTTTGTCAAATACGTACATAGATAGACTCTCAAATTTTAAATAAATTT  
GGTCTAAAGTTGTTGGGGTGGTCCAATTAGAGTCAAACCTGAGGGACCAGTTTCGTTGGCTATTTTGTAT  
CAAGAATTCGAATTTGATGAAATAGTTGTTGAGCTTTTTAATTTTAGCATAAAAATACTTAGTTTAGTTGA  
CATAAAGGATAATTTTATATAAATTGGGTTAGAGCAAATTTGATTCAATGACTATGAGAGTAAGATATTT  
TTTATTGGTCTACTAGCCAAATCAAATATCCTGGGCAGCATCCTAATTCTCATTCTTCTGTGTTTTGAA  
TAGCAGCATTGCGTCTCTGCGAAAGCTAGATCTTAGAGATTCAGAAAGGCTGATTCAAACACCAGATT  
TCACGCTAATGACAAATTTGGAGTATTTGGATCTGCGTAACTGTAGTGATCTTGAAGAGGTTACCGTTC  
CTTGGAGTGTTGCAGAAAACCTATTGTGTTAAATTTGCAGAGGTGTAAACGCCTAAATAAGTTTCCATGT  
GTTAACGTGGAATCCCTTGGATCTCTGATTCTACTACATTGCTCTAATTTGAAAAATTTCCAGAAATCTT

TGGAAGAATGAAGCCAGAGTTAGAGATCAAGATGAGCTGGTCTGGGCTAAGGGAAATACCATCATCTA  
TTATTCAGCAATACGCATGTCATCTTACAGAGTTAAGTTTGAGTGATATGAAAAAATTGTAGCACTTCC  
AAGCAGCATTGTGTCAGTTGAAAGGTTTGGTGAAGCAGGATGTGTCATACTGCTCAAACTTGAAAGCTT  
GCTAGAAGAGATTGGTTATTTAGAAAACTGGGAGGGGCTTCATGCAAGCTTACTCTAATCTCACGACC  
TCCGTCTTCATCATCCGCTTGAACAAGCTTAA

>PGSC0003DMG400022990 LRR-RLPs

ATTCACAACAACAAAAAATGTATACCAAAGAACACTACAAACCAATTAATTTGCTTCTAATCTGTCTATC  
GATACTGATCATGCATCAAAGCTTTGCTTTTGGATTAATGTCAAGAGGGAATAATACGAAAATTTTGTGC  
ATAACAAAGGAGAGGGAAGCTCTTCTCGAGTTCAAACGAAGTCTCATAGATGAATATAATCTGCTTTCTT  
CATGGGGAAATGAAGAAAATAATGAGGAATGTTGTTCTTGGAGGGGTGTGGAATGCAGTAATATAACT  
GGCCATATACTCGTCCTTAATCTTCGTATAGGTACAATTGAATCCAATCCTGATGGTCCTGATAAGGATCT  
CATATTGACAGGCAACATCACTTCTTCATTGGTTAAGTTGCAGTATTTGAAGTACTTAGACCTTAGTTCCA  
ATAATTTTGGTGGCGACGGACCAATACCCAAATTTATTGGATATTTCAAAGATTAGAGTACTTAAATCT  
CACATCTAGATACAGAGTTTTTACTGGTCTAGTTCCTCTCCAGCTCCAAAATCTTACCTCCATAAGGACAC  
TTGATCTTCGAGGCAATTATTTAACGGTCAATAGCCTTGAGTGGATTTCTCATCTAGTGCATTTGGAGTAC  
TTAGATCTAAGTTTATCCAATGTGCAAGCGAAAACTGGTTGCAAGAGATAAGTAAGCTCCCAAATTTGA  
GGGAATTGCATTTGTTTGGTTGTCAACTCCCCAAAATCATTCTTCATCACTTATCTTAGCTAATATTTCTT  
CATCTCGTCTTCCATCCTCGACATCTCCTCTAATAGATATTCGTCCCCTGCAATAAATAGTTGGTTATTTA  
ACTTCACTAGTCTTACTAGCCTAGATCTTTCGAGCAACGACTTAGGCCAAATGTCTAGTGGCTTTGGGTA  
CTTGAAGTTTTTGGAACATGTTAAGCTATTTGGAAGTGGTATTCAAGGTGGGATACCAAGGTCTTTTGGG  
AGTTTAAGTCGTTTACGCTCTATTGATGCAGATTCCAATAACTTGTTAAGTCAACCGTTTTCTGAGTTGCT  
TGATATCTTAGCTGGGAGTAATCAATCGCTTGAGTATTTGTCGTTTGAGGGAAATGCATTCACTGGTTCA  
TTGATTAATCTTACTAGATTTTCATCCTTGAGGGAATTGAGGCTACGAGAAAACTCTCTGAACGGCATTTT  
CCATGAAAGCTTTAGAAAAATCTCCAATCTTGAGTATCTTGATTTGTCTAATAACCAAATGACAGGGTCA  
TTACCAGACTTGGCATTCTTCCATCATTGAGAGAGTTGCACTTACAGTCCAATCACTTTTATGGAATGAT  
ACCACAAGGTTTAGGGAACTTTCCGAGCTTAAAATCTTGGATGTGTCTTTCAATAAATTGCAAGGCTTA  
CCGATAGTTTGGGGCACTTTCCAAGCTGAAAATATTGGATGTGTCTTTCAATAGACTGAAAGGCTTAT  
CGGAAAGTTTAGGGCACTTTTCGACCTTGAAAGTTTTGATGCTTCTAATAATTTATTAGAAGGTACAAT  
CTCTGAATCCCATCTTCCAACCTTTGCAACTTGAAGAGTTTAAAATTGTCTTCCAACCTCGTTGACTTGGGA



ATGTTAGTGTTGATTGGATTCCATGTTTTCAACTCCAAGATATCAGTCTTTCGTCTTGTAATCTTGGGCCT  
CTTTTTCCGAAATGGCTTCAAACCTCAAATAGCTACTCATTCTTAATATCTCTCTTGCTAGTATCTCAGAC  
ACAATGCCTATTTGGTTTACAAAGTTGCCTCCCATGTTATACTTTTTGAATCTCTCTTACAACCAAATCAGC  
GGGAAGATACAAGATTTATCAGCCAATAATATCGGTTCCATTGTTATAGATCTTGGTTATAACAATTTTTC  
AGGACCCTTACCAACATTTCTCATTGGTTAGTGAATTGCGTGTTGACAACAATAAGTTTTCTGGATCAC  
TAACTCCATATGTAAAATTCATTGCGCTGTAACACTTGACTTGTCCGATATTCTTGTCCGGAGAGATT  
CCTGATTGTTGGACCCTCATGTCTGTTCCAACGGTCTTAATGTAGCCAATAACCGTATATCTGGAAGCAT  
TCCATACTCTTTGTGTTCTTCAACATCCTTGAACCTCTATACGTGCGTAACAACAATTAAGTGGACAGT  
TTCCTGCCTCTTTGAAGAATTGCCAAGGTTTGAAAGTCTTGGATTTGGGAAGAAATAGATTGAGTGGAA  
AAATCCCAGAATGGATAGGGACTAAGTTGGCTGGTTTGGGCATTCTGAGCCTACGATTCAACGAATTTT  
CTGGTAGCATTCTCCAAGTATATGCCAGCTTCAATCTATTGAGATACTGGACCTTTCTGGCAACCATTTA  
TCCGGAAGAATCCAAAATGCTTCAGCAATTTACCACAATGCAACTTTTGCAAGATGGTTCAAGTGTGA  
GCTATGACTTCAATCCACTTGCCGGTAGAGGAATTTAGTGTACAAAGGCAATGCATTTGTTCAATGGAA  
AAACAAGGAATCAGAATACCGTAACACCTTGTGGCTTCTGAAAACCATTGATCTTTCTAGCAACGAACTA  
GTTGGTGACATCCCTAAAGATTTTAGCAGAATGAACGCATTGCTGTCATTGAACATATCAAGAAACAATT  
TGACAGGAAGTATCATTGAAGGAATTGGTTAATGAAGATGTTGGAGGCTCTTGACTTGTCCGGGAATC  
ATCTCTCGGGGAAGATCCCAGTAGGACTGGCTAACTTGACATTTCTTAGTGTGTTGGATTTGTCAAAAAA  
CAACTTGTGAGGGAGAATACCATCGAGCACTCAATTGCAAAGCTTTGATCCTTCAACCTATGGTGGGAAT  
ATTCAGCTATGTGGACCTCTCTTCCAGCATGTCCTACATTTTCTCCTCAAATCCTCATGTTGGCTTTGAC  
AGTACTCGTCAAGAAAATGATGATGATGATGAGTTTCTTCTAAAGAGTTTTATGTATCGATGGCATTGG  
GCTTCATTGTGCGATTTTGGGGAATTTGGGCTCTTTGTAATTCAATGATTCATGGAGGAATGCATACTTC  
AAGTGGTTAAATGCCTGCTTTGCAAGGTTGAAGGCAAACTGAGGGCCTGATGACTAAATTTATATTCT  
ATTCATG

>PGSC0003DMG400023018 LRR-RLPs

ATGATCTTGCGTAACCTGAAAGCATTAGTTCCTAATCCTGAACTGGATTCAAGGTGCTCTTTACTACAGTTT  
CTCGTACTTTCTGATTAAGAAGAACTAGGTAACAAAGAGATACACACAAAATCCATTTCTACTTGTGAGTTC  
AATGAGGGAGAGTATGTATAAGTTGGAGTGTGCAGAGTCACAAAATCTAAAACATGCCAAGTAAATCC  
AAAAATATTGTGATTATACTTTCTATTAATACTAAGTAAAAGAAATTAAGAGAGAGAGCAGTGATAAA  
TGACAAATGGAAGAAATGAAAATGAATGAAGAGAAACGTAAGACTTTGACGATTTGGGCACTTAAAAG

AGTAAAACGCGGTATAATTAATGTGAAACTCCAAGAGCTCTTTTGGTCGTCCACAAGACCTAAAGCTGTA  
GACCAAATCAGTCAATTGCCGGATGCTCTTCTCCTTTGCTCTCTTATATCGACTGATCAAACACTCGTAAC  
AACCGCTCTCTCAAAAAGGTGGCACTATCTCTGGAATTGACTTGATACCTTTTGTTTTAGTACTTTTAATT  
ACCATGAGCATTATGTATCCTATGTTCAATTATGTATTAGGTTATTCTATTTCTTCCAAAATTA AAAAATCCA  
ACTTGATAGCCTTGAGCCGGATGCACACAGGTGGAAAATATGAAACTCCGGTTAGTTTCTGAAGAAGAG  
GTTTGTGCATTGTCTTTATGTTTATGCACTTGTTTCATCGTTTATAACACTAATTTTGGGATTTTGATGCTAA  
TGTGTCCATAGCATGAAAGTCTCTAAAACATAAAATTGAAGTGGATAGTGTTATCCAATGACCATATTG  
TGAACTTATTGTTGGGTTGTCCTGCATTAGAACTATGAAATTATCTTGTTTTAAAGGTTTTAGTCGCATG  
GAAATTAGGTCTTCAAATTAAGAGACTGAATTTGATATCATACAATGAAGATGAAGAAATTGATCATT  
CCTTGGAATTGTTGCCCATATCTTCATCATTGTTGGGAATTTTCAGGAAGTTTTTCATGGTCTCAAGTGTAGG  
CTTGTAGGCATATCCTCCATGGTTAATACTAATTAAGCTTACGTTTCGACATTACATATATCAAAGACATGT  
AACATGCGGTATAATATTGGATGTCTTTGATGGATGTAATATCGAACATAAGCTTAGTATTAACACATA  
TGATATGGCTACAAGCCTACACTTACAAAATGATGACTTCCTGAAATCTCTGAATAATGAATGTACTGT  
AGGAGACAACAATTTCCACAAAATGATCAATTTCTTCATCATCATTATATGATATCAAATTCCTCTTCAATT  
TCGAAGACCTAATTTGAAGCGACTAAAATCCTTAAAACAGAATGATTCCATAGTTTCTAATGGAGAACA  
ACCCAACAATAAATTCGCAATATGGTCCTTAGATATTACCATCCACTTCAATTTTATACTATACGGAGATT  
TTCAAATTATATCCACATGCACATCAAAATCTCAAATTAGTATTTTCAAGCGAATGTGTATAAACATTCC  
TGCAATGCACAAATCTCTTTTTGAAACTGACTTGAGTTTCACATTTTCTTTGATCAAAGTTGTAAGTTG  
AATTTTTTTAATTTGGGAGAGAAAACAAAATTACCTAAGCCATAATCAACCCAGGATACATATCCTTTGTG  
ATAATTAAGTTACTAAAAGAGAAGATATCAAGTAAATTTCAAAGATAAAGCTACCTGTTTGAGAGAGC  
ACTTGTTACGGTTTTCTGATTTTCGTTAGAATAATAGAGAGACTGTGAAGAAAAAGAGCTTCAGGCAACT  
AACTGATCGGTCTACTGTTGTTGTTTCTTCTGTCTTTTCGCCGGAATCCATGGTTGGTTTTTGGTTACAGCT  
ATTGTTTCTTCTATTTTCTCAGCTGGAATCCATGGTTTGTGTTGGTCTACAACCTGTTGTTTCTTTTATCTTC  
TCGCCGGAATCCAAATGTTGTTTGGCGGAATCCGGCAACTGATTGGTCGATCCAGCAACTGACCGGTGCG  
ATCCGACAACCTGATTGGTCGATCTACATCTGTTGTTTGGCGGAATCCAGAAATGCTTAGAAGGTATCACC  
CCCCCTTCCGTTTCAGTTTTAACTTAGGCACAAAATGAGCAAATTGAGTAATATATTGGCATAAATTTG  
>PGSC0003DMG400023198 LRR-RLPs  
GCTAATAATACATCAACCTACCATTTCTAGCAACAACAGGCAACAGCTGTGGAGATTTTTTTTTTTGTATA  
AATAAATTGTAACCCCTTCGATGTATTTATGGTTGGATTTTCCATCAAACCAAAAACCTCTCCATTTTCTCTC

TCACACAACCTCTTCTTATAGCTCCAGTTTCTTGTTAAAGAAAAAATGTCAGTGAATAGTATAACTGAG  
TTCTGTTCTGAATCCTAAGTGGGGTTTGCTTTTCTCATCTTTTTTTTTATGCTGCCCTGTTCCATCATAAA  
CACTCGTTTTTCACTGTATAAAACACGAAAAACAAGTAAAGTTTTGTTTCTTAACTACTATTATTTTGATT  
GATTTGATTTGATTGGATTAACATTTGTATTCTTGTCATATTGATTGGCGCTTCTAGAAAGTTGTAAAGA  
GGAAGAACTCAATTATGGCTTTCTCAATATTTTCGTTTTTTTTATCTAGGACTCTTGAAACTAAACCCC  
AAAAAAGTGATTCTGAATCTGGATACTGTGGGTGGTTTCTGTGTGTAGCTGTGTGTGTGTGTGTGTGTG  
TTTTTTTTTTGACGAAATTGAGAGTGAAATGGGATCCTCTGCAATGTCTGTTGACGAGATTGTGGAAGAG  
ATGATGAGGCTTAACAAATCTCTACCAATAAGGCCAGGGATAGATGAAGTGAAGCAGCAAAAGTTTTA  
ATTATGAATATGGAGAAGGAGGAACAAATGAAGTTAGAGACAATTGCGCGGCAAAACAAAAGAAAAG  
ATGTACCAGAAGAGGTATTCAAATATTGCAAGAGATGCAGAGGAATTTAGTTTATTTTCAGAGTAAAG  
AACAGAAGAGAGAGGCATTAAAATTGTTAGATCTCGAAAATGTTCAATTACCTGTTTCGATGAATTGATTCA  
AAGAGCTTCGAAATGCTTGTTCATCTAATCCTCAAGCTAATAATACTTCTTCAGCTTCTTCAAGGAATTCCA  
GCAATTTGTCTTTGGCGAATTCATCTTCTTCAACGGTAGCAGTTTCAATTCTCCGGCAACTACTACGACT  
ATGTCTTCGTCGAGCTTTTATAGTGAGAAAGAGCCTGTTAAAGTGTCTGAACTTGTACAAGAGACGACA  
GTTACTTGAAGAAGCCGACAACCTGCGTTTCAAATGGATGGAATCGGTGTTGGGCTTCGATCTGGGAACG  
CTTCTTCTGCTCCCCAGATTGTCGATACCACTTTGAAGCGTAGTACTGGTAAGTTTAATCTATTTCTGTA  
ACATATTGCTTGTGACCAATGTGTTTTTTTATACTTTGTTAGCTTAATTGGATAAAATTTGTTTCCTATAAT  
ATGAAAATTATTAGTTTAATGGAGAAGCCATTTATCTGTAGGTCAAATGGTGAAAAAATGAGCTTGAT  
AAAGCTTGCTAGTTTGATAGAAGTTTCAGCCAAAAAAGGAACCAAGGAGCTAATTCTTCGAAGAAAAC  
GTCAGACCAATTAGAATGGATTCCAGATTCCTTGGGAAGCTATCAAATTTGGTGACTTTGGATTTGTCT  
GAGAATCGAATTGCTGTGCTGCCAACTACCAGCGGGGGTCTTTCATCGTTGCAAAAACCTAGATTTGCAT  
GGAAATAGAATTGTTGAACTTCTGATTCAATAGGAGATCTGCTTAACTTGGTCTATCTTGATCTAAATG  
GCAATAACCTGAAGACGTTGCCTTTGACTTTAGCGAGGTAACTCACCTTGAGGAAGTCGATCTAAGCTC  
TAACATGCTATCTGTACTCCCCGAGGCAGTGGGATCCCTTGTGAGTCTCAAAAAACCTGATCGTTGAGACT  
AATGACCTAGAGGAACTTCTCACACTATTGGTCAATGTACTTCGCTGAAAGAGCTCCGTGCTGACTATA  
ACCGTCTTAAAGCTCTTCTGAAGCCTTGGGGCGAATGGGTTCTTTGGAGATTCTATCCGTGCGGTACAA  
TAACATCAGGCAATTGCCTACAACCTATGGCATCCTTAAACAAGTTTGAAAGAGCTCAATGTTAGTTTCAAT  
GAGCTTGAGTCAGTGCCTGAGAGCTTGTGCTTTGCCACTACACTCGTAAAACCTGAACATTAGCAACAAC  
TTGCGGACCTGCAATCACTCCCTAGATCCATAGGAAACCTTGAAGTGTGAGGAGCTGGATATGAGTA





ATGAAGCCGGAGTTAGATATTACGATGTCAGACTTTGAGATAAGGGAAGTCCATTATCTATCATT  
TCCAACCTCATCTTAGAGAGCGAAGTTTGAGTTTCATGAAAAACCTTGTATCTATCCCAAGTAGCATTGT  
AAGTTGAAAGGTTTGGTGAAGCTAGATGTGTCTGCTCAAAAATTGAAAGTTTGCCAGAAGAGATA  
GGATATTTAGAAAAGTTGGAGTTACTTGATGCCAGCTATACTCTAATCTCACAACCTCCATCTTCCATTAT  
CCGGCTGAACAAGCTTAAATCATTGAGCTTTGCAAATATAATACAAGAGGAGGGGTGTTCTTTGTTTT  
CGAATGAAGGGTTACGTTTATTGGAAGATCTGCATCTCAGGACTGCAATTTAATTGATGGAAGACTTCC  
AAAAGACATTGGATCCTTATCCTCTTTGAAAAAGTTAAATCTCAGTGGAAATAATTTTGAGCATTGTCTC  
AAATTCGATCCTTGGACTTATCTGAGTGCTGGAGGATAAAAAGAGTTTCTAGGAGTTAATGTGGCTGAAG  
GATTATGCTCTTTGGAAGATCTGGATCTCAGTTTTTGCGGTATAATAGATGGAGGACTTCTAGAAGGCAT  
TGGATATTTATCCTCGTTGAAAGTGTTGAATCTCAAGGGAAATAATTTTGAGCATTGCTCGAAGCATA  
GCCCAACTTGGTTCTTTCGATCCTTGGACTTATCAAAGTGCAGGAGGCTTAAAGAGTTTCTAGGTGTTA  
GCATGGCTGAAGGGTTATGCTCATTGGAAGAACTGGATCTCAGTACTGCAATTTAATAGATGGAGGAC  
TTCCAGAAGACATTGGATGCTTATCCTCGTTGAAAGTGTTGAATCTCAAGGGAAATAATTTTGAGCATT  
GCCTCGAAGCATAGCCCAACTTGGTTCTTTCGATCCTTGGACTTATCAAAGTGCAGGAGGCTTAAAGAG  
TTTCTAGGTGTTAGCATGGCTGAAGGGTTATGCTCATTGGAAGAACTGGATCTCAGTACTGCAATTTAA  
TAGATGGAGGACTTCCAGAAGACATTGGATGCTTATCCTCGTTGAAAGTGTTGAATCTCAGTGGAAATA  
ATTTTGAGTATTTGCCTCAAAGCATAGCCAGCTTGGTACTCTTCAAGTATTGGACTTATCACATTGCAAG  
AAGCTTACACAGCTGCCAGAATTTTACATCAATTAGATAACAATAGAAGCAGATTGGAGCAATGATTCAT  
TTTGTAATTCGTTATTTGAGAATCTCATCATTGCAGCATGACATCTCTGTTTCAGATTCCTTGTCTACTAA  
CAGTGTGTTGAGTTGGCCATGGGATATCCCACGTTGGTCCATTATCAGGGAATGGTTCAAGTGTATTA  
G

>PGSC0003DMG400023396 LRR-RLPs

ATGTGGTTAAAGAAAGATTTTATTATATTTTCTGCTCTATTTTACCATTTTTCGATCATTATAGCTGTCAT  
GAAACAGAAAGAGCAGCTCTGTTAAGCTTCAAATCCTTGCTGACTGATCCTTCTAACCGTTATCTTCAT  
GGCAAGACAGAAATTGTTGCAATTGGAAGGAATCAAGTGCTCGAGTTCAGGTCATGTTGTAGTTGTCA  
ACCTTCGGAATCCTAATCCCGTTGAAGTCATGATCAATATCAATAAGGAAGTTGTTACAAATCTAAAAA  
CACGTCCGATTTTTCTTTAAAGGTAATATCTCCATTGCTCTTACTCTTGACCATATGCGACATCTCGA  
CCTGAGTTTCAACAATTCATGTAATCAAAGTTACCTGTTGAGATATCGAACTTAAACAAGTTGACTTATC  
TCAATCTGTCGAATGCCATGTTTCAAGATTTTCATCACCATGCAATTCACAAACCTTACATATCTAAGGTCT

CTTGATCTTTCGTGTGCTAATTTAGTACCTGATTTTTCTTCTGTTTCTGTTAGCTTGACATTTCCACTGAAG  
TTGGAGTTTGGCTCATTGTTATCTTTTATAAGCTACGGTTATTTATCTAGTCCAAATCTTAGGTGGTTACA  
AGGACTCCGACGTCTCAGATATCTAGTATTGACTGGTGTGATCTATCAAAGGCGTCCGAATCATTTCAT  
TGGGCTAAACCAATATCAAGCCTCTCAAATCTCATGTCACTTCATTTGTCCAGCTGCAACATTTCAGGAAG  
AATTCTGATAGGGCAATTACTTAACCTTACTAATCTTGCTACTCTAGATATGAGTTCTAACGTTCTAACAT  
CCTCGATACCTGATCTTCTATCGAACCTCAGTACCCTCTCGATTCTTGATTTTAGTAGCAATGATTTAGAT  
GGTCATATCTCTTACATTCCTCAACTCAAAGAACTTTCTGTTTCTGGCAATCCTGCTATGACCATAGATCTT  
GTTTCAATGTTTTCTGCTCCATGGCCACAGTTGACATTTCTTGACATAAGCTTCGTTTCATGTAGCTGGAAT  
GATTCCTCCTTCTTTAAGCAACTCAACTTCATTGTCCTTTTTCCGAGCTGATGGATGCTCGATTCAAGGGT  
CGATACCTTCTTCTGTACAAACTTAAGAAATTAAGTGTACTGATGCTGAATGACAACGATATCACAGG  
CCAACTCCTGTATCCATGTCCAGTTTAGTAAGCCTTCAATACTTATCTATGTCTCAGAACAGATTAGAAG  
GTCACATACCATTTTCGATCTGTCAAATCGCCTCCCTCAAGTACCTGAATTTAGAATGGAACGATCTAACA  
GGACATCTTCCGTTGTGCATACTTCAGCTTCTAAGCTTTCATCTCTTTATATTAGAGGAATAGACTGAA  
TGGTAATATGCCATTGTCTTTGTTCCGAAAGTCTAGATTAGATGAAATTAGTTTAGGAACTAGTGGATTG  
TCATTGGAAATCAATGATCAAGATCAACTCTTCGTGCAAACGTTCCAGCCCAAGATTTTGGATTTACATC  
TTGCAACATGAGAGGAGAAATCCCGGATTTCTTTTCGAATTTTACAAGCCTCGTGGTTTTGAATTCGCTA  
ACAACAGTCTATCGGGCGCCATACCACACTGGTTGTTCAATCTCCCTCCCTCTATACTATCTTTGCCTA  
TGAATAACTTCAGGGGAATAATACCTCCAATGATTCAGCTGAAATCTTCTCATTTCCCAACAATAGTAAAT  
TTAGCCAGAAACAACTTCAAGGTCCTCTCCCTTCTCAGCTCGAGAATGTTAACGTCATCGATCTGCACT  
TAACAATTTTCGTAGGCTTGATTCCATCACGGATAGGAGAAGTTCCTCGGTATCAGGTCCATATCTTTATCC  
GGAAACACAATTCATGGTCTAATACCTGAATCATTTTGCCAAGCGACTAACATTCTCCAGGTTCTTGATCT  
CTCTAATAATAGCTTGTGAGGCACCATTGACGTAATTTGGGAAACTGCAAGTCTCTCATTTACCTTAATC  
TTGGACAAAACAAGCTCACTGGAAGTGTCCAAAAGAACTTGAACGCGTTACAAGTCTTCGTTACCTTGA  
CCTGAATGGAAATCAGCTAGAAGGATCTTTTCCAAAATGATTGAAAACCTTCAAGATTTGGAGATTCTG  
AACTTGGCAGGCAATAGATTTGAAGGACCGATACCAAAGTTCATCGGTGAGCTACACAGCCTCCGTATA  
CTCGTTCTTTCATCGAACATTTTCAATGAATCTATCCCAGAAGGGCTAATGAAGTTGGAAAATCTACAAT  
ATATCGGTTTGTCCAGGAACAATCTGTCCGGTCCCATTCTGAGAATCTCGATGGCTTGAAAATGATGAC  
GAAAAGGAAAAATGAGGCAACCATCTTAGGTTATGTTTACTCCCTCAAGTTCACTGGTGCACAGCTAGA  
AATAGTCACCAAAGGACAGATACATTGGCTTGAACAGTGTATTCTACAACACTGGATTTCGACGTCTCG

AGCAATGCTCTTACTGGTAAAATCCCTGAAAAAATTGGCCTTTTAAGTGAATCCCATTCTGAATCTCTC  
ACATAACAATCTTTTTGGACTGATCCCAAAGACTATCGGCGATATGATTTCACTCGAGTCGTTGGATCTTA  
GCTACAACCATTTAGAGGTGAAATTCAGTGACATTGGCATTGTTAGATTTTCTCCAACATCTCAGCAT  
GTCCTACAACAATTTGAGCGGACGGGTTCCAAGGAATCCACATTTGACACTTTGTATCAAGACGGAGC  
AGCATATATCGGAAACAAATACCTATGTGGTACTCCTGATGGGATGAACTGCAGTAACAATGGTCCCTCT  
ATCATCACTGAAACTACAGAGAACGAATACGATCAAGAAAATGTCCTGTTTGTCTAGTTATATTTTTTG  
GCTATGTAACAGGCATTTCTGGATTGTTTTGCTCTTATATTTGATGAAGGACAATTGGAGGAACAAATA  
CTGGAGGGCAATAGACAGAATTGTGTTAAAAATAGTAAAATAG

>PGSC0003DMG400023498 LRR-RLPs

ATGTATTCAAAGTTACCAGTTGAGATATCAAACCTAACAAAGTTGACTTATCTCAATCTGTCAAATGCTAT  
GTTTCAAGATACCATCACTACACAATTCTCAAATCTTACATCTCTAAGGTATCTTGATCTTTCGTGTGCTAA  
TTAGTACTCGATTTATCTACTGTTACTATTAGCTTGACATTACCACCAAAGTTGGATTTTGGCTCATTGTT  
ATCTTTTATAAGCTATGGTTATTTGTCTAGTCCAAATCTAAGGTGGTTAGAAGGACTTCGACGTCTAAGA  
TATCTAGTATTGACAGGTGTTGATCTATCAAAGGCCTCGGAATCATTTTCATTGGGCTAAACCAATATCAA  
GTCTTTCAAATCTCATGTCACTTGAATTGTCTAGCTGCAACATTTAGGAAGAATTCCAATAGAGCAATTG  
ATTAACCTTACTAGTCTTTCTACTCTAGATATGCGTTCTAATGTTCTAACATCCACGATACCTGATATGATA  
TCGAATCTCACAACCCTCTCAGCTCTTAATTTTCATGGCAACGATTTAGATGGTCATATCCCTTACCTTCCT  
CAACTCGAAAGACTTTCTGTTTCTAGCAATCCTGCTATGACCATAGATCTTGTTTCAATGTTTTAGCCCC  
ATGGCCAAAGTTGACATTTCTTGACATAAGCTTCACTCGGGTAGGTGGACCGATTCTCCTTCTTTAAGC  
AACTCAACTTTATTATCCTATTTCCAAGCTGATGGATGCTCGATCCAAGGGTCGATACCTTCTTCCATTAC  
AAAACCTCAGAAATTAAGTACATTGATGCTCAATAACAATGATATCACAGGTCAACTTCTGTTTCCATGT  
CCAGTTTAGTAAGCCTTCAATACTTATCTTTGATCCAGAATAGCTTACAAGGGTATATTCCAAATTCGATT  
TGCAAGTCCCCTCCCTGGAGTACCTGAATTTAGAATGGAACGATCTAACAGGACGTCTTCCCTCGTGCA  
TACTTCAGCTTCTAAGCTTTTCAATTTTATGTTTCAAGATGAATAACCTTAATGGTAATATGCCACTGTCAT  
TGCTCCAGAAGTCTAGATTGGACTTTATCAGTTTCGGAGTTAGTGGATTGTCCGTGGAACCTCGATGATCA  
AGATCAATCCTTTGTGCAAACCTTTCCAGCCATAATTTTGAATTTACATCTTGCAACATGAGAGGAGAA  
ATCCCGGAGTTCTTTTCAAATCTAACGAGTCTCGAAATTTGATTTTGGCTAACAAACAGTCTATCAGGAGC  
CATACCATACTGGTTGTTCAATCTCCATCCCTCTCTGTACTAGATTTGTCAATGAATAACTTCAAGGGAG  
TTATACCTCCAATGATTCAGATGAAATCTTCTCGTTTTCCAACGCTAGTAAATTTAGCCAGAAACAAACTT



GAAGGTCCTATTCCCTACTCAGCTCGAGAATGTTAATGTCATCGATTTGTCATTTAACAATTTTCGTAGGCTC  
AATTCCAACACAGATAGGGGAAGTTCATGGTATCAGGTCCATATCATTATCAGGAAACAAAATCCATGG  
TCCAATACCTGGATCATTGTTGCCAAGCGACTAACGTTCTCCAGGTTCTTGATCTCACTAATAACAGCTTGT  
CAGGCACCATTGACGTAATTTGGGGAAGTGC AAATCTCTCATTACCTTGGTCTTGGAAAAACAAGCT  
CAGTGGAAGTGTCCGAAAGAAGTGAATGCGTTACAAGCCTTCGTTACCTTGGCCTGAATGGAAATGA  
GTTTGAAGGTTCTTTTCCAACAGTGATTGAAAAGTTAAAGATTTGGAGATTCTGAACTTGGCAGGTAAT  
AGATTTGAAGGAAGGATACCAAAGTTCATCGGTGAGCTACACAGCCTCCGTATACTCATGCTTGCATCA  
AACTCTTTCAATGAGTCTATACCGGAAGGGGTAATGAAGTTGGAAAATCTACAATATATTGGTTTATCCA  
GGAACAATCTGTCCGGTCCCATTCCCGAGAATCTTGATGGCTTGGAAAATGATGATGAAAACACAAAATC  
AAACAACCATCTTAGGCTATTTTTACTCCCTCAAGTTCCTGGTGCTCAGCTAGAAAATTGTCACCAAAGG  
ACAGATACATTGGCTTGAACAGTGTATTCTACAACACTGGATTGACGTCTCAAGCAATGCTCTTACT  
GGTAAAATCCCTGAGAAAATTGGCCTTTTAAGTGGAAATACCATTCTGAATCTCTCACATAATAATCTAA  
CCGGGGTGATCCCAACGACTATTGGCGAAATGATTTCCCTCGAGTCGTTGGATCTCAGCTATAACCAATT  
AACAGGTGAAATCCAGTAACATTGGCACCTTGGATTTTCTTGCATATCTTAACTTGTCTTATAACAATT  
TGAGCGGACGGATTCCAAGAAATCCACATTTTGACACTTTATATCAAGACGGAACAGCATATATCGGAA  
ACAAATACCTATGTGGTACTCCTGATGGGATGAACTGCAGTAACAATGGTCCCTCTATCATCACTGAAAC  
TACAGAGAACGGATACGATCAAGAAAATGTCCTGTTTGTGTTTAGTTATATTCTCGGGATTTGTAACAGGA  
GTTGCTGGTGTATTTCTGCTGTTACATTTGATAGATGAGAATTGGAGGAACAGGTATTGGAGTGCAGTA  
GACAGAATTGTGTTGAAAATAGTGAAGTGTAAACTATGA

>PGSC0003DMG400023549 LRR-RLPs

ATGGAGAAGCACATCTTCTTATTGATTCTTCTCTTTCTAATTCAATTTTCTATATCACTTGCTTCTCTAATG  
AGACTGACCAACAAGCTCTGTTAGCTTTCCAAAATCTTATTACAAGTCCTAATCATTGTTTGGCCAATAAT  
TGGACCAAAAATACTTCTTTTTGCTCTTGGTATGGTGTCACTTGCACACCAAAAAGCCAAAGGGTTGTGG  
CCTTGGATCTTCTAATTTGCAACTTCAAGGCACAATTTCCCATCTTTGGCCAATTTGTCCTTCTCGGTG  
TTCTCAATCTCCAGAACAACAGCTTCCGTGGTGGCATCCCTTATGGACTTGGCCACATGCCTCGCTTGGC  
AGTTATTGATGTTAAAAATAATCAGCTCAATGGAAGTATACCAACAAGTCTATTTCAAACCGGAGAGTT  
CAAGTAATTTCAATGGCTTTCAATGAACTCAGTGGTGAATGTGGAGAGGGCCATGGTATGTACCCAAA  
CTCAGAGTCTTAAATCTCAGGAACAATAGCCTCACAGGTATAATCCCTCCTTCTGTTGGAAATGCCACAA  
AATTGTTGAACATCAATTTGTCTGGGAATAGAATCAATGGTAACATTCCAATGGAGATCAGTAATCTTAG

CCAACCTTGCATTTTTGTTCTTGTTAGATAATCAATTAACAGGTTCCATTCTCCAACACTGTTAATATCTC  
GTCGCTACTTGGCATATCTCTGTCATTCAATGGCCTTTCTGGTCCTCTCTTGCTAGATGAAGGAAATATTG  
TGTCAAATCTGAAGCATTAAAGTATGTCTTTCAACCAAATTTCTGGTTGCATTCTTCCAACATATGCCAA  
CTCACAGAGCTCAAACCTTTGTCCATATCTTTCAACAATATAACTGGACACATACCTAGAAATATTGGTTG  
TTTATCCAAACTCGAAAGGTTTTATATTGGTGAAAATCCAATAGAAGGGACTATTCCCACTTCATTGGGA  
AATATTTCTACTCTGCAATATCTTGATTGTGTCGACAATTGGATGAAGGGCAAATTCCTCAAGAATTAG  
>PGSC0003DMG400023551 LRR-RLPs

ATGAAGAAGAACATTCTTATTGATTCTTCTCTTTCTAATTCAAATTTCTGTATCATTTGCTTCCTCAAAT  
GAGACTGATCAACAAGCTCTACTAGCTTTCCAAAATCTTATTATTACAAGTCATAATCATTTTTTGGCCAA  
TAATTGGACCAAAAATACTTCTTTTTGTTCTTGGTATGGTGTCACTTGCACTGAAAAAAGGCAAAGGGTT  
GTGGCCTTGGCTCTTCTAGTTTGCAACTTCAAGTCACAATTTCCCATCTTTGGCCAATTTGTCCTTCCTC  
AGTGTCTCAATCTCCAGAACAACAGCTTCCGCGGTGGCATCCCTTATGGCATTGGCCACATGCCTCGCT  
TGCGAGTCATTGATGTTAAAAACAATCAGCTCAACGGAAGTATACCAACAAGTCTATTTCAAGTTTTCAA  
CACCGGAGAATTCAAGTAATTTTATTGGCTTTCAATCAACTCAGTGGTGAAACGTTGAGAGGGCCATGG  
TATGTACCTGAACTCAGAGTCTTAAATCTCAGGAACAATAGCCTCACCAGTATAATCCCTCCTTCTGTTGG  
AAATGCCACAAAATTGATGAACTTCGATTTGTCTGGGAATAGAGTCAGTGGCAACATTCCAAAGGAGGT  
CGGTAATCTGAGCCAGCTTACAGACTTGATTTGTACAACAATCAATTAACAGGTTTCATTCCCGCAACAT  
TGTTTAATATTTTATCACTTCTTGCCTATCTCTTGGAAATCAATAGCCTTTCCGGTCTCTCTTGTGTTGATG  
AAGGAAATATTGTCTCAAATCTCAACTTTTTAAGTACATATCACAACCAAATTTCTGGTTGCATTCTTCC  
AACATATGCCAACTCACAGAGCTCAATTTTTGTCAATATCTATCAACAACATAACTGGAGATATAACTAG  
AAATATTGGTTGTTTATCCAAACTCGAAAGGTTTTATATTGGTGAAAATCCAATGGAAGGGACTGTTCCC  
ACTTCATTGGGAAATATTTCTACTCTGCAATATCTTGATTGTGTCGACAATTGGTTGAAGGGGAAAATTC  
CTCAAGAATTAGGGAAGCTATCAAATTTGGGGGAATTAAGCATTGCCAATAATTCTAATCTTATTGGTCA  
AATTCCAGAGGCTATGTTCAACATAACCTCTCGGGGAGAATTCCAACCACTACAGGTCATCATCTTCCGA  
ACCTTGAAGAACTTTACTTGGGAGACAATCAGCTTGAAGGGGAAATTCATTGTTTCATAA

>PGSC0003DMG400023599 LRR-RLPs

CCACTCCTTACATATCCATTTCTTAATCTTCCAACTTTTCTTGTTTCATCATTTTTGAGTATTAATTTGATGG  
CAGCTTATAGTGCTGTAATTTCTTCTTCAAACCTTGTGTTGATCAATGAAATATTCGAGAACTCTTTCATG  
ATCACACTGCCAAAACGCTCGATTCTTTCATGCTACTGCTCAATATTTTCAACATGTCCTTGAAAATATTA

AGCAAGAATAGAAGATTTGACCATGAAAAGATCAAATCTTTGGAGGAAAAATAAGAGTTGCTGTTAGT  
TATGCAGAAGATGTTGTTGAGATGAAAATTTCTCAAATCATCAAAGGCTCAAGCTGGACATTTGGAATTT  
TACAACACCATGATTTGATACCACTTGTGAAAAAATGGATACAACAAGAAACAAGTGATGGACATTCT  
TTCTCATGATGCTGATCAAGTTCTGGAATTATCCGGCGATTCTTGATTGCCACTTCTTCTACAAGTTATC  
CAATGATGAAAGATGATATTGTTTACGGACTTGATGATGACTTGGAGATCATAATTAATAGGTTGAAAG  
GATGAGTACGGGATCTAGACGTTGTCACAATATCAGGCATGGGTGGCATTGGTAAAACAACACTAGCTA  
AAACAGCTTATGATCATCTTACAATCAGGTATCATTTTGACATTCTTGCTTGGGTTACAATATCTCAAGAA  
TTTAGCCATAGAAGTGTATTGTTAGAAGCTTTACATTGCATCTCAAAGTCAACAGTTAGTTTTCACACAAA  
AGATTATGATAAGATGGATGACAATGAGTTAGCTGACCTGGTGCAAAGAACCTAAAGGGTCTGAAGAT  
ACCTTATTGTTGTTGACGATATTTGGAGTACAGATGTTTGGGATAGTATAATAGGAATATTTCTAATTAC  
AACAATGGAAATCGAATCTTATTGACTACTAGGAAAAACGAGGTAGCAATGTATGCAAATACTTGTAGC  
CCTCATGAGATGAAGCTTTTGAGTTTAGAAAACGGTTGGAGGTTACTTTGTGATAAGGTGTTTGGACCA  
AACCATGATCATCCTCCTGAGTTAGAAGGAATTGGAAAGGAAATAGTAGAAAAATGCCAAGGACTACCC  
TTGACAATCTCAGTGATTGCGGGACATCTCTCTAAAGTGGCCAGGACATTAGAAAAGTTGGAAGGATGTC  
GCCCAAACCTTAAGTGAATAAATTGCCAGTCAGTCAGATAAATACTTAGGAGTGCTCGGTTTGAGTTACC  
ACCACTTGCCTAGTCGCCTTAAACCTTGCTTTCTTTCTATGAGTAGTTTCCCAGAGGATTTTCAGGTTGAT  
ACTCGGAGACTGATCCAATTATGGATCGCAGAAGGTTTTTGTAAAGGATTTCCAAAAAATGGTAAAAGTT  
TGGAGGAAGTGGCAATTGATTATTTGGAGGACCTTATTAGCAGGAACCTTGATACAAGCTAGAAAAAGG  
GGATTCAATGGTGATATAAAAGCATGTGGAATACATGATATACTGCGTGAGTTCTGTTTGATAGAAGCT  
GAAATGACAAAGCATATGCATGTTGAGAGAACTTACCCTACTCTTCCAACACAAAAGCATAATGTTTCGTC  
GCTTCAGTTTTCAGACCAAATCTTGTTGAGTTGAGGATTTTTATAAGTTATTGACCCCTGTTGCCAGATCT  
ATCTATTTATATTCTCTATGGAATCTACCTCTTGATCCCCGTATTAAGATTTTCTGGAGAATTCCCAGCTAC  
CGCTGTGATCCTAATATAATACCTGAATTTTTCTCTCGTTTCAACCTTCTCAGGGTATTGGTCATTTTCAAT  
AAAGTTTTAATGCTCTCATCATTTCCAGTTGTGATTACAAAGTTGTTTCATTTGAGATATCTCCAAGTTCCA  
TTTCACCAGAATATTCCTGAATCAATCTCAGAGCTTCAAGAAATTTGCAAACCTAATTTGTAGTGGTTATTC  
TCTCGAGTCTGTAAGTTTACCTGTGGAGATATGGACGATGCAGTACTTGAGGTATATACATCTACGGGC  
AGCCACTTCTTACCAGCCCTAGAAGAGAAAGTATTCTAAATAAGCATCTTGTGACAAGGATGCCAAAT  
CTAGAGGAATTTTCTGGTCTTTCTTGCAACCAGTTGTACAAATGAAGTCTTTTCTGGCATTCCCGATCTAAG  
GAGATTGATCATTCAAGCACCTTTATTCTTTGATGACTCTTTACCCAATGGACTCATGGATATGTCCATCT

TGAGAAAACTCGAAACATTCAAGTGTTACTGGCAACATAGTTGGATCTCGTGTAACCTCCATCAAGAG  
TTTTGTTTTTCCAACATCACTTAAGAGGTTGACTTTAACTAGGTGTTATCTTTTTCTTGGGAAGACATATC  
ATCAACTCTCATCATGTTGCCAAATCTTGAAGAGTTCAAACCTAAAGATTCTAAAGCTACAGATGATATAT  
GGAGATTGAGTGATGAAGATAAGTTCAAAGCTTGAAGTTGTTGTTACTAGATGTCCTAAATCTTAAGC  
ATTGGGAATCTAGTAGTGATAACTTCCCAAATCTAAAACGCCTTGTCTGAAGAATTGCACCGACCTGCA  
AGAAATTCCAGGAGATTTCTGGGGAAATTGGTACTTTGGAATCAATTGAGTTACATGATTGCAGCACTAC  
CACTGAGGATTCTGCAAGAGAGATTGTACAAGAACAAGAGGACATGGGAAATAATATTCTTAAGGTCTA  
CATCCATAATAATTGCAGTAAGTTTTAAATCTCTCCAAAAGTTCTTCGATTCTCTAATCTTTGTTAAATAT  
TACTTCCTTGAAATTAAGATGATGACTTGTACTTTTTATCTTGCATATGCAGGGGAATGAAGCTTATTTTA  
AGGCACCATCTAATGTCATCTTCAAATACAAAACCTTTTAGTTCATACTTCGAAAAGTAAAATCTTTTCGT  
TGTTTCTATGTTCTGATCATTAAATTTGGTTAAATTCATGTTTTAGGAATAAACATGTTTAATTCAATTTAC  
CTTCAGCCTGAGAGGTATGTTCTGTATCATATGACGGAGTGTTCAGCAACGGAGAGTTAAGGTCTTGA  
GCAATCCTTAACTCTTAACTAGCTCAATGTCCATTTCTTATCATGTATCAGAGCCAAACTCTTCTTAAATC  
ATTGTTTACCTGATGATTTGGGCCCATCTTATATTATCCACACTCCAGATGTCCAATCCTAGGCATGCCG  
AGGTGTTGAGTCCACACCAT

>PGSC0003DMG400023613 LRR-RLPs

ATGCTTCTCTTTCTAATTCAATTTTCTGTATCATTTTCTCCTCAAATGAGACTGATCAACAAGCTCTACTA  
GCTTTCCAAAATCTTGTTACAAGTCCCACTCATTTTTTGGCCAATAATTGGATAAAAAAACTACTTTTTG  
CCCTTGGTTTGGTGTCACTTGCAGTCCAAAAGGCCAAAGGGTGTGGCCTTGTCTCTTCTAATTTGCAA  
CTTCAAGGCACAATTTCCCATCGTTGGCTAATTTATCCTTCCTTAGTGTCTCAATCTCAAGAACAACAA  
CTTCCAAGGTGGCATCCCTTATGGACTTGGCCACTTGCCTCGCTTGCAGATCATTGATATTCAAACAATC  
ATCTCAACGGAAGTATACCATCAAGTCTATTTCAACACCAAGGAGTTCAAGCAATTTTGTGGCTTTCAAT  
GAACTCAGTGGTGAATGTGGAGAGGGCCATGGTATGTACCCAAACTGAGTGTCTTAAATCTCAGGAAC  
AATAGTCTCACGGGTATAATCCCTCCTTATGTTGGGAATGCCACAAAATTGATGAACTTCGATTTGTCTG  
GGAATAGAATCAATGGTAACATTCCAACAGAGATCGGTTATCTTAGCCAACCTTACAGAGTTGTATTTGTA  
CAACAATCAATTAACAGGTTTCATTCCCGCAACATTGTTAATATTTTCGTCACTTCTTGTCTATCTCTGG  
AATCAATAGCCTTTCCGGTCTCTCTTGTCTTATGAAGGAAATATTGTCTCAAATCTCAAATTTTTAAGTAT  
ATATGAGAACCAAATTTCTGGTTGCATTCCTTCCAACATATGCCAACTCACAGAGCTCAAATTTGTGACC  
ATATCTTTCAACAACATAACTGGAGACATACCCAGGAATATTGGTTGTTTATTCAAACCTAGAGGAGTTTT

ATATTGGCAATAATCCGATAAATGGGACTATCCCATTTCATTGGGAAATATTTCCACTCTGCGTAATCTT  
TACTGTGGAAACAATCGCATAGTGGGGAAAATTCCTTCGAAATTAGGGAAGCTATCAAATTTGATGCAA  
TTAGGCTTTGACCAAATTATTATCTTATTGGTCAAATTCCAGAGGCTATTTCAACATATCTTCTTTGGAA  
ATAATTGATTTAGTTTCAACAATCTCTGGGGGAGAATTCCAACCACTATAGGTCTTCATCTTCCAAACAT  
TAAGGATCTTATCTTGGGAGGTAATCAGTTGGAAGGGGAAATTCCATTGTACATAACAAATGCTTCCAA  
ACTTGAGATACTGGAGCTAAGTAAGAACTTCCTCACAAGAACTATTCTACTAATTTGGGAAATCTTCGT  
GAACTGCGATCACTACTCCTAGATAATAATCAACTTACCAATGAACCACGAGGGCATGAGTTGCGATTCT  
TAAATTCCTTGGCGGACGGTAGGATGTTGCGATATCTATCAGTGAGTTCCAATCCGTTGAATAACGTTCT  
GCCAATTTTATTGGGAATCTTTCATCTACTTTTCAAATCTTTCATATAGAAGATGCACACATCAATGGGC  
TCATCCCCACAAGTATAGGCAACATGAGTGGACTTACAACCCTAATTTTGGACGAAAACAACCTTGACAGG  
AAATATTCCTCCTGAGTTTGGTATGGTTAAACAACCTCAAGGGCTGTATCTAGATAACAATCAATTGAAC  
GGACATATTCCAGAGGCGGTATGTCATTTATCTAATTTGGATCTATTAATTCTGGAAGGTAATGAGCTCA  
CTGGAGTGATCCCAGAATGTATAGGAAATCTTAGCATGCTACAACATCTTTATTTGGGTTCTAATAAATTT  
TCATCAACGTTTCCATTGAATCTTTGGAAAATGAGTGGTCTTCTCTCTAAGTGTGTCACGAAATTCAAT  
TGAGGGAGAAGTTCCATTAGATATTGGAGGACTGAAAGCCATTGTAGCTCTAGATCTTCCAGTAACCA  
CTTTTCAGGAATGATACCAACTAGATTGGGGGAACTCCAAAACGTGCAGTATTTGACTTATCGAACAAT  
TCATTTTTTGGCCAAATTCATTATCCTTTGCCAACTTGATAAGCTTAGAATGA

>PGSC0003DMG400023641 LRR-RLPs

TGCATAGCAACATCATGGAGAAGCACATTTTCTTATTGATTCTTCTCTTTCTAATTCAATTTTCTATATCAA  
TTGCTTTCTCAAATGAGACTGACCAACAAGCTCTACTAGCTTTCCAAAATCTTATTACAACCTCCCAATCATT  
TTTTGGCCAATAATTGGACCAAGACCGCTCTTTTTGTTCTTGGTTCGGTGTACGTGCAGTTCAAAAAG  
GCAAAGGGTTGTAGCCTTGACTCTTCTAATTTGCAACTTCAAGGCACAATTTCCCGTCTTTGGCTAATT  
TGTCTTTCTCAGTGTTCTCAATCTCGAGAATAACTCATTCTATGGTGGCATCCCTTATGGACTTGGCCAC  
TTGCCTCGCTTGCAAGTGATTGATTTTCAAACAATGAGCTCCAAGGAAGTATACCAACAAGTCTATTTT  
AACACCCGAGAGTTCAAATCATTTTATTGGCCTTCAATAAACTCGGTGGTGAATGTGGAAGGGCCAT  
GGTATGTACCTGAACTTAGAGTCTTAAATCTCAGGAACAATAGCCTCACAGGTATAATCCCTCCTTCTGTT  
GGAAATGCCACAAAGTTGATGAACTTTAGCTTGTCTTATAATAGAATCAACGGCAACATTCCTAAGGAG  
ATCGGTAATCTGAGCCAACCTTGCAGTTTTGTCCTTGGTTGATAATCAAGTAACAGGTTCCATTCTACATC  
ACTTTTTAATATCTCGTCATTACGTTCCCTAACTCTGGGAAGGAATAGCCTTTCTGGTCTCTCTTGGCTTGA

TGAAGGAATATTTTTATCAAATTTGGAGCGTTTAAGTTAACTCGCAACCAAATTTCTGGTCGCATTCCCTT  
CTAACATCTGCCAACTCATAACAGCTTAAAATACTGTCAATATCTTCCAACAACATAACTGGAGAAATACCC  
AAAATTATTGGTTGTTTATCGAAGCTCGAGGAGTTTTATATTGGTAATAATCCAATAACAGGGACTATTC  
CCACTTCATTGGGAAATATTTCCACTCTGCGAAATCTTTACTGTGAAACCAATAGCTTGGAGGGGCAAT  
TCCACCAGAATTGGGGAAGCTATCAAATTTGATAGAATTAGATTTTGAAGAAGTTTATAATCTTATAGGT  
CAGATTCCGGAGGCTATTTTTAATATAACTTCTTTGGAATACATTGCGTAACTTCGAACAAACTCTCAGG  
GAGAATTCCAACCTCTACTGGTCTTCATCTCCGAACCTCTTAGAACTTCATTTGTCTGGCAATGAGCTAG  
AAGGGGAAATTCCTCCGCATATCACAAATGCTTCCAAGCTTGAAAGGTTGGGGCTAGCAACCAACTTCTT  
CAGTGGAAGTATTCCAACCTAATTTGGGAAACCTTCGTGATCTGCGACTTCTTTTCTACATGATAATCAAC  
TTACCAGTGAACATGAGTTGCCATTCTTCCAATCTTTGGCAGACTGTAGGATGTTGCAATATCTAGATGT  
GGGTTACAATCCGTTGAATAGTGTCTGCCCAATTCAATAGGTAATCTTTCATCTACTATTGAATTCTTTG  
AAATGAGCAATGCTCACATCAATGGACTCATCCCCACAAGTATAGGCAACATGAGCGGTTTTATAACCTT  
ATTCTTTCAAGATAACAGCTTTATGGGAAATATTCTCCTGAGTTTGGTAAGCTTAAACAACCTCAAGGG  
ATGTATCTAAATAACAATAAATTGCAGGGACATATTCCAGAGGCGGTATGCAATTTATCTCATTGGGAC  
GATTAAATCTGGAAGGTAATAAGCTCTTTGGGTTAATTCCAGCATGTATAGGAAATCTTAGCATGCTACA  
ACATCTTTATTTGGGTTCTAATAAATTTTCATCAAATTTCCGTTGAGTCTTTGGAAAATGAGTGGTCTTC  
TCTTTCTAAACGTGTCACAAAATTCTATAGAGGGAGAAGTCCATCAGATATTGGAGAACTGAAAGCCAT  
TGTAAAACTAGATCTTTCAGGTAACCATTTCTCAGGCATGATACCAAGCAGATTGGGGGAACTCCAAAA  
CCTGCAGTCCCTTGACCTATCAAACAATTCATTTACAGGCTCAATTCCATTATCCTTTGCCAACTTGATAA  
GCTTGAATTCTTGAATTTGTCTTTAAATGCCTTGTGAGGACTATTCTAAGTCATTAGAAAACTCACC  
CTTAAAAGCATTAAATGTTTCATTTAATGAATTAGAAGGTGAAATACCCAATGGTGGTGTGTTTGTAAATT  
CTACTTTGCAATCATTCTCGGAAACAAAGGTCTATGTGGAATGCGCAAATTGGAGGTTCTGCTTGCCC  
TATCAGTAGTCATGGAAAACAATCAAAGTCTAAGGAGCTTGTGCTGAAAATTGTTATTCCAGTGGTTGTT  
TCATCCTTTCTGATACTCTTGTTGGTGTGAGCTTGGATAATGAAACGAAAGAAGAAAGGAAAGTCCAGA  
GATGTTGAAAAGGTTCCGGAGATAAGGACATATCAATTGATTTCTTATCATGAGATTCAACGAGCAACA  
AATAATTTTGTGAATCAAATTTAATTGGTGTGGGAGGTTCTGGCTCTGTATACAAAGGCACATTATCTA  
GTGGAATTTTGGTGGCTATAAAGGTTCTGGATTTGCAAAGTGAGGAAGTATGCAAAGGTTTGATACCG  
AATGCGAAGTGATGAGAAATATCAGGCACAGAAATCTTGTTCCGGTGATTACTACTTGTCTAGTGACTA  
TATAAGAGCCTTTGTTCTGCAATATATGCCCAACAGTAGTCTTGATAATTGGTTGTACAGAGAAGATCAC

CACTTGAACCTTCTTCAAAGAGTCACCATAATGCTTGATGTGGCTATGGCAATTGAATATCTGCATCATG  
GTCATGATACTCCGATTGTTCAATTGCGACCTAAAGCCAGCCAACGTTCTTTTGGATGAAGCTATGGTGGC  
TCATGTTGGTGATTTTGGCATCTCTAAAATTTAGCTACAAGCAAATTCATGGCACATACCGAGACATTA  
GGCACTCTTGGATATATTGCACCAGGTATAATAGTCTCTTTCTATCTCACTTATATTGACTGTTTCTTTCT  
ATTTTCACAAATCATAATTTAGCCCTTCCAAAATCTAGAACTCAATAAAAGCAAGTGTCTGTTAGTACATA  
ATTATTCATGTTATATTTCAATTGAGTAATTTTTTTTATTTCAATTCATTCTTTTCTAAGAATATGGCTTGG  
TGAATAGTGTCCACTAGTGGTGATGTTTATAGTTACGGCATCATGTTGATGGAGGTTTTGTCAAAAAG  
AAGACCAACCGATGAGGAGATATGCAATGAAAATCTTGACTTGAGGAAATTGATAACACAGGCATTTTCG  
GGGACTATGATGGACGTTGTGGATGCCAATCTTTTCTAAGAAAGAACAGATCACTTCCAAAAGTGA  
AATGTGCATAGCCTCCATGATAGAATTGGCTTTAGACTGCACAAATGAAAAGCCAGAATTAAGGATAAC  
CATGAAAGAAGTAGTCAAGCGGCTTGACAAAATGAAGAACACATTTCTGAACACATAGAAGTTAGCATC  
TCTTCCGGCGGTGTTCTTTCTCTGCTACAATTTAACATGTTGCTCTTGAATCATATATCAT

>PGSC0003DMG400023863 LRR-RLPs

ATGGGAAATACAGGATTTTACGGGATAATACCTGAGAGTATTTTTCACCTTCCTAATCTGGAAACACTTG  
TCTTACAAAACAATAATCAGCTCAGTGGTTATTTTCCGAAGACTAAATGGAACAGCAGTGCATCTCTCAT  
AGAGTTAGATCTCAGTGGCGTGAATTTTTCTGACAACCTGCCTGAGTCTATTGGCTATCTAACTTCGGTG  
CATTCTTTGTCTCTTAAATATTGCAATCTTAGAGGGCCTATTCCTGAATCTCTTTTGAATCTCACTCGCATA  
GAGGATTTGGACCTTCAATATAACTCCCTGAATGGAACAATACCATCAGGGATGTTCTCTCTTCCGTAC  
TAAGTCGTTTAGTCTTGAGTAATAACCACTTTTCTGGTCAGTTTGAGGATTTCAATTCCAATTCATAATCT  
GGATTGATTTAAGTAATAATCAGCTGCAAGGCCATCTTCCCAAGTCGATTCAAACCATGTGAACCTAAC  
AGGCCTTATTCTTTCTTTCAATAATTTAGTGGCCATGTGGATGTCAGCTTCTTGCTGACATCAAACAAC  
TTTATTATCTTGATCTTTCATATAATCGTATCTCGTTGACCAATGAGAACAACATAATGTTACTTTGCCAG  
GATCTCTTATGAGCTTACAATTGGCCGCATGTGAAGTGAAAGAATTGGAGTTTCTAAGATCCGCTAAGCT  
TCTTTGGCAGTTGGATCTTTCAAATAATAAGATTCAAGGAAGAATCCCTGATTGGGCATGGACTAACTGG  
ATGTTCTTATTGCAACGTCTTAATTTATCCACAACATGCTGGAAAGTGTGACTCAATTCACCTTCTGTTT  
ATAGAAGCTATTGATTTGCGGTCCAATTTGCTTCAAGGTTCACTACCTATTCCACCAATTTCCACAAGATT  
CTTCTTCATATCCCATAATAATCTCACTGAAGAAATTCCTTCAGATATTTGCAATTTGACATCACTGGTAAT  
GCTTGATTTGGCAAGAAACAACCTGAAGGGAGCAATTCGCAATGTTTGGGTAATATCAGTGGCCTCGA  
GGTTCTGGATATGCACCACAACCGTCTTTCAGGGACTCTTCCAACAACCTTTTAGAATTGGAAGTGCACCTC

AAAAGCTTCAACTTTTCATGGCAATAAGCTGGAGGGGAAAATCCCACAATCCTTGACCAATTGCAAGCAA  
CTCGATGTTCTTGATTTAGGAGACAATCACCTCAACGACACATTCCCCATGTGGTTGGTAACTCTGCCAA  
AGCTGAAAGTTCTAAGTTTGAGATCCAATAAATTGCATGGGTCCATTAGAACTCTAACGACTGAAAACAT  
GTTTCCTCAGCTTAGAATATTAGATCTCTCCTCCAATGCCTTCTCAAAAAGCTTACCAACGAGTTTGTTTCA  
ACATTTGAAAGCCATGAGTACAGTTGATCAAACGATGAATGCACCAAGTGATGAAGGGGATCGATATTA  
CCAAGACTCGGTAGCTCTTGTAACAAAGGGATTGGAGCTTGAAGTTGTGAGAATCTTGTTTTGTACACC  
ACTATTGATCTTTCAACAACAAATTTGAAGGATTTATTCCAAGTATTATGGGAGATCTCATTGCACTTCG  
TGTGCTGAATTTATCTCATAATGGATTACAAGGTCATATACCGTCATCACTTGGAAAGTTTATCTTCAGTTG  
AATCATTGGATCTGTCAAGTAACCATCTTGTAGGAGAGATACCAGCACGATTTGCTTCTGTTACATCTCTT  
GAAGTATTAATCTCTCCTACAATCATCTCGAAGGGTGCATTCTCAAGGACCTCAATTCGATACATTTGA  
GAACAATTCATATGAAGGTAATGATAGATTACGTGGATTCCCACCTTTCAAAAAGTTGTGGTAATGATGGT  
AATGATTCCGGAGACAAATGATACCACATCTAGACTAGATGATGAAGAAAGCGACTCTGAATTTCTGAAT  
GATTTTTGGAAAGCTGCTCTTATGGGGTATGGAAGTGGACTATGTATTGGATTATCCATAATATATTTCA  
TGTTCTCAACTGGAAATCCAAGATGGCTTGCAAGAATAATTGTAGAACTGGAACACAAAATAATGATGG  
GAAGGAGAAAGAAGCAGCAAAGGCAAAGGAGTTACAGAAGAAGAAATAATAGCTTAACTTGA

>PGSC0003DMG400023864 LRR-RLPs

ATGATGATGGTTTCTAGCAAAACATTCTCTTCACTTCAGCTTTTCACTCTATTCTACCTCTTTACGGTTGCA  
TTTGCTTCCACTGAGGAAACAACCTGCCCTCTTAAAATGGAAAGCAACTTTCAAGAACCAGAACAACTCCT  
TATTCGCTTCATGGACACCAAGTTCTAACTCATGCAGGGATTGGTATGGAGTTATATGCTTTAACGGTAG  
AGTAAACATGTTGAATATTACAAATACTAGTGTCACTTGGTACACTCGATGATTTTCCATTTTCATCTCTCCC  
TTTTCTTGAGTATCTTGATCTTAGCATGAACTATTTCTCTGACACCATTCCACCTGACATTGGTAAACTCAC  
TAATCTTATTTGTCTTGATTTGTCAAGTAATCAGATTTTCAAGTACAGTACCACCACAAATCGGCTCACTAG  
CCAAGCTTCAAAGCCTCCATATGTTTGACAACCATTTAAATGGTTTTATTCTGAAGAAATAGGTCATCTA  
AAGTTTCTTACTGAGCTAGATTTGAGTACCTAAGGTCTTACTGAGATAGATTTGAGTTCTAACACTCTT  
GATGGTTCTATTCCAACCTCATTGGGAAATTTGAACAGCTTGCTCGTTTGAATCTTTATAAAAATAACCT  
TTCTGGCTCCATTCTGCAGAAATAGGTTACCTAAGGTCTTACTGAGATAGATTTGAGTTCTAACACTC  
TTGATGGTTCTATTCCAACCTCATTGGGAAATTTGACCAGCTTGTCCTTTTGTATCTTTATGATAATCACC  
TTTCTGGCCCTATTCTGAAGAAATAGGTTACCTAAGGTTTCTTACTGATCTACGTTTGAACGATAACATT  
CTAATGGTTCTATTCTGCTTCACTGGGGAATTTGAACAACCTTACTATTCTACGTCTTGATGATAATCA



CCTTTCTGGCCCTATTCCTGAAGAAATAGGTTACCTAAGGTCTCTTACTGATCTGCGGTTGTACACTAACT  
CTCTTAATGGTTCTATTCCTGCTTCATTGGGGAATTTGAACAACCTTGACTATTCTGCGTCTTGATGATAAT  
CACCTATTTGGCTTTATTCCTGAAGAAATAGGCTACCTAAGGTCTCTTACTCATCTAGATTTGTGTTCTAA  
CACTCTTGATGGTTCTATTCCAACCTTCATTGGGGAATTTGACCAACTTGTCTGTCTTGTATCTTGATGGTA  
ATCACCTTTCTGGCCCTATCCCTGAAGAAATAGGTTATCTAAGGTTTCTTACTGATCTACAGTTGTACAAT  
AACTCTCTTAATGGTTCTATTCCTGCTTCATTGGGGAATTTGAGAACTTGCAAGTTCTGTCTCTCCAACA  
AAACAATCTGATAGAGGAAATTCCTTCATCTATTTGCAATTTATCATTGCTGACAATCCTGTATTTGTGCGA  
GAAACAACCTTGAAAGGAAAAAATCTGCAATGCATGGGTAATATCAGTGCCCTCCAGTATGTGATAATGT  
CAGATAATAATCTCAGTGGAGAGCTCCATCCGTCTATTTGCAATTTAACATCACTGCAAATTCTAGATTTG  
GGTAGAAACAATCTAAAGGGAGAAATTCGCAATGTTTTGGCAACATGAGTGGTCATCTTGAGGTTCTG  
GATATGCAACACAACAATCTTTCTGGAACCTATTCCAACAATCCTGTATTTGTGCGAGAAACAACCTTGAAAG  
GAAAAAATCTGCAATGCATGGGTAATATCAGTGCCCTCCAGTATGTGATAATGTCAGATAATAATCTCAG  
TGGAGAGCTCCATCCGTCTATTTGCAATTTAACATCACTGCAAATTCTAGATTTGGGTAGAAACAATCTA  
AAGGGAGAAATTCGCAATGTTTTGGCAACATGAGTGGTCATCTTGAGGTTCTGGATATGCAACACAAC  
AATCTTTCTGGAACCTTTCCAACAACCTTTTAGGGCTGGAACACTTAGAAGCTTCAACTTGCATGGCAATA  
AACTTAAGGGGGAAATTCCTCAATCTTTGGTCAATTGCAAAGAGATGCAAGTTTTTGATTTAGGAGATA  
ATCACCTCAACGACACATTCCCGATGTGGTTGGGAACTCTTCCTAAGTTGAGAATTTTAAGCTTGAGATC  
GAATAAGTTGCATGGACCGATTAGAACCTTAGGAAGTGAAAACATTTTTAATGAGCTTCGAATGTTGGA  
TATCTCTTCCAATGCCTTACGGAAAACCTACCGATGAGTCTGTTACAACATTTAAAAGCCATGAGGACA  
ATTGATCAAACGATGAATGCACCAAGTGATGAAGGAGGTGAATATTACCAAGACTCGGTAGCTGTCGTA  
ACAAAGGGATTGGAGCTTGAAGTTGTGAGAATCTTGTTTTGTACACCACTATCGATTTTTTCAGACAATA  
AGTTTGAAGGACATATTCCAAGTATTATGGGAGATCTCATTGCACTTCGCATGCTTAATTTATCTCATAAT  
GGATTGCAAGGTCATATAACCGCCATCACTTGGAAAGATTAACCTTTGGTTGAATCACTGGACCTGTCAAGTA  
ACCACCTGTAGGAGAGATACCAGCACAATTTGCTTCTCTAACTTCTCTTGAGTCTTAAATCTCTCCTAC  
AATCATCTCGAAGGGTGCATTCCTCAAGGAAATCAATTTCATACTTTGACAACAATTCATATGTAGGTA  
ATGATGGATTACGTGGATTCCCACATTTGAAAGGCTGTGGTACTGAAGGTAATGATTCAGAATCAGAGA  
AAACTGATACCGGATCTGAGCTTGATGAAGAAAGCAACTCTGAATTTCTGAATGATTTTTGGAAAGCTG  
CTCTTATGGGGTATGGAAGTGGACTCTGTATTGGATTATCCATTATATATCTCATGATTTCAACTGGAAA  
ACCGATATGGCTTGCAAGAATCATTGTGGAGCTGGAGCATAAAATTATGATGGGAAGAAGAAAGAAGC

AGCGAAAGCAAAGGAGTTACAGAAGAAGCAAATAA

>PGSC0003DMG400023867 LRR-RLPs

ATGTTCTCTCTCCGTCCTAAGTCGTTTAGTCTTGAGTAATAACCACTTTTCTGGTCAGTTTGAGGATTTCA  
AATTCCAATTCCTAATCTGGATTGATTTAAGTAATAATCAGCTGCAAGGCCATCTTCCCAAGTCGATTCA  
AAACCATGTGAACCTAACAGGCCTTATTCTTTCTTTCAATAATTTTAGTGGCCATGTGGATGTCAGCTTCC  
TTGCTGACATCAAACAACCTTTATTATCTTGATCTTTCATATAATCGTATCTCGTTGACCAATGAGAACAAA  
CATAATGTTACTTTGCCAGGATCTCTTATGAGCTTACAATTGGCCGCATGTGAAGTGAAAGAATTGGAGT  
TTCTAAGATCCGCTAAGCTTCTTTGGCAGTTGGATCTTCAAATAATAAGATTCAAGGAAGAATCCCTGA  
TTGGGCATGGACTAACTGGATGTTCTTATTGCAACGTCTTAATTTATCCCACAACATGCTGGAAAGTGTT  
GACTCAATTCCTTCTGTTTATAGAAGCTATTGATTTGCGGTCCAATTTGCTTCAAGGTTCACTACCTATT  
CCACCAATTTCCACAAGATTCTTCTTCATATCCATAATAATCTCACTGAAGAAATTCCTTCAGATATTTGC  
AATTTGACATCACTGGTAATGCTTGATTTGGCAAGAAACAACCTTGAAGGGAGCAATTCGGCAATGTTTG  
GGTAATATCAGTAGCCTCGAGGTTCTGGATATGCACCACAACAGTCTTTCAGGGACTCTTCCAACAACCT  
CTAGAATTGGAAGTGCCTCAAAGCTTCAACTTTCATGGGAATAAGCTGGAGGGGAAAATCCCACAAT  
CCTTGACCAATTGCAAGCAACTCGATGTTCTTGATTTAGGAGACAATCACCTCAACGACACATTCCCCGT  
GTGGTTGGGGACTCTGCCAAAGCTGAAAGTTCTTAGTTTGAGATCCAATAAATTGCATGGGTCCATTGG  
AACTCTAACGACTGAAAACATGTTTCCTCAGCTTAGAATATTAGATCTCTCCTCCAATGCCTTCACAAAAA  
GCTTACCAACGAGTTTGTTCACATTTGAAAGCCATGAGGACAGTTGATCAAACGATGAATGCACCAA  
GTGATGAAGGGAATCGATATTACCAAGACTCGGTAGCTCTCGTAACAAAGGGATTGGAGCTTGAAGTT  
GTGAGAATCTTGTCTGTACACTACTGTTGATCTTCAAACAACAAATTTGAAGGATATATTCCAAGTAT  
TATGGGAGATCTCATTGCACTTCGTGTGCTGAATTTATCTCATAATGGATTACAAGGTCATATACCGTCAT  
CACTTGGAAGTTTATCTTCAGTTGAAGCATTGGACCTGTCAGGTAACCATCTTGTAGGAGAGATACCAGC  
ACGATTTGCTTCTTACATCTCTTGAAGTCTTAAATCTCTCCTACAATCATCTCGAAGGGTGCATTCTCA  
AGGACCTCAATTCTATACATTTGAGAACAATTCATATGAAGGTAATGATAGATTACGTGGATTCCCCTT  
TCAAAGGGTGTGGTAATGATGGTAATGATTCAGAGACAAATGATACCACATCTGGACTAGACGATGAA  
GAAAATGACTCTGAATTTCTGAATGATTTTTGGAAATCTGCCTTTATGGGGTATGGAAGTGGACTATGTA  
TTGGATTATCAATAATATATTTTCATGTTCTCAACTGGAAATCTGAGATGGCTTGCAAGAATCATTGTAGA  
ACTGGAACACAAAATAATGATGGGAAGGAAAAAGAAGCAGCAAAGGCAAAGGAGTTACAGAAGAAGA  
AATAATAGCTTAACTTGA

>PGSC0003DMG400023868 LRR-RLPs

ATGACTGGCTGTGTGATTGAACTTAATCTCAGTTGCAGTGGTCTTGTAGGAAAGATTGATTCCAATAGCA  
GCCTCTTTCAACTCTCACATCTTCAAAGGCTCGACCTTTCTTCTAATAACTTCTCTAATTCTCACATCTCGCC  
TGAATTTGGAAGGTTCTCGACCTTGACACTTCTTGATCTTTCTGACTCCTATTTCTCAGGTCATATTCCTTC  
TGAAATCTCTCATCTTTGTCAATTACAGTCTCTTAGCCTCTCCCCATCATTTGAAACTATTCTAAGACTCAC  
CGCCCATGATTTGAAATTGCTCCTTCAGAATTTGACTCAATTAAGTGAGCTTGATCTTACTTCCATAAATA  
TCTCTTCCACCATTCTCAAATTTTTCTTCTCATTTGACAACACTATGAGGATGGGAAATACAGGATTGTAC  
GGGATAATACCTGAGAGTATTTTTACCTTCCCAATCTGGAAACACTTGTCTTACAAAACAATAATCAGCT  
CAGTGGTTATTTTTCAAAGACTAAATGGAACAGCAGTGCATGA

>PGSC0003DMG400023869 LRR-RLPs

TGCAATGCTTGGGTAATATCAGTGCCCTCCAGTATATGATGATGTCACATAATAATCTCAATGGAGAGCT  
CCCTTCGTCTATTTGCAATTTAACATCACTACAAATTCTAGATTTAGGTAGAAACAATCTAAAGGGAGCG  
ATTCCACAATGTTTTGGCAACATGAGTGGTCATCTTGAGGTTCTGGATATGCAACACAACAATCTTTCTG  
GAACTCTTCCAACGACTTTTAGAGCTGGAACATTTAGAAGCTTCAACTTGCATGGCAATAAAATAAAGG  
GGAAAATTCCCAATCTTTGGCCAATTGTAAAGAGATGCAAGTTCTTGATTTAGGAGATAATCACCTCAA  
CGACACATTCCCGATGTGGTTGGGAACTCTTCTAAGTTAAGAGTTTTAAGCCTGAGATCGAATAAGTTG  
CATGGACCGATCAGAAATTTAAGAAGTGAAAACATTTTTCTTGAGCTTCGAATGTTGGATATCTCTTCCA  
ATGCCTTCACGGAAAACCTTACCGATCAGTCTGTTTCAACATTTAAAAGGAATGAGGACAATTGATCAAAC  
GATGAATGCACCAAGTGATGAAGGAGATGAATATTACCAAGACTCAGTAGCTGTCGTAACAAAGGGAT  
TGGAGCGTGAAGTTGTGAGAATCTTGTTTTGTACTACAATCGATTTTTCAAACAATAAATTTGAAGG  
ACATATTCCAAGTATTATGGGAGATCTCATTGCACTTCGCATGCTAAATTTATCTCATAATGGACTGGAA  
GATCATATACCGCCATCACTTGAAGATTATCTTCAAGTTGAATCATTGGACCTGTCAGCTAACCACCTTGT  
AGGAGAGATACCAGCACAATTTGCTTCTTACTTCTTGCAGTCTTAAATCTCTCCTACAATCATCTCG  
AAGGGTGCATTCCTCAAGGAAATCAATTTACATACCTTTGAGAACAATTCATATATAGGTAATGATGGATT  
ACGTGGATTTCCACTTTCAAAGGCTGTGTTAGTGATGATAATGATTCAGAATCAGAGAAAAATGATAC  
CAGATCTGAGCTTGATGAAGAAAGCAACTCTGAATTTCTGAATGATTTTTGGAAAGCTGCTCTTATGGGC  
TATGGAAGTGGCCTCTGTATTGGATTATCCATTATATATATCATGATCTCAACTGGAAAACCGATATGGC  
TTGCAAGAATTATTGTGGAGCTGGAGCATAAAATTATGATGGGAAGAAGAAGAAGCAGCGAAAGCAA  
AGGAGTTACAGAAGAAGCAAATAATCGCATGTAGAAGAGTTAAAAAT

>PGSC0003DMG400024033 LRR-RLPs

CATCCTCTTCTTCTCCTCTTCCAGATCTGAACAACAATGTCGTCGTCATTCCCTGAACAAGTGTTGAAGC  
ACCTCTTCTCCTTGTTAACCTCACACAAGGACCGTAACAGTATATCCTTAGTCTCTAAGTCGTGGTACGAG  
CTCGAGAGGCGCTCTAGGAGGAGTGTCTTCATCGGCAACTGCTACGCCGTTAGCCCTGAGATTATGATC  
ACACGCTTCCCTCAACTCACATCCATCTATCTCAAAGGAAAGCCCCATTTTGCTGACTTTAATCTCGTTCCT  
GACGGATGGGGTGCCTATCTTCAACCTTGGATTGCTGCAATGTCTCCCTCTTATCCTTGGCTTGAGGAAA  
TTAGACTCAAGCGAATGGTTGCTACTGATGACTCCTTGGACTTGATTTCCACCTCATTTACCATTTCAG  
GTCTTGGTCTTGTTGTCTTGTGAAGGCTTACTACCGATGGACTTGCTGCCATTGCCGCTAACTGCAGGT  
CCCTTTTATTGCCTTACTTATTTAATTGCTGCTCATAACATAATGGGCATCTCCATACACTTACAGAAAGAA  
TTGAAATTGTTATTTGCACTTGCAGAAATCTCACTGAACTAGACTTGGGAGAAAGTGAAGTGGAGGACC  
TAAGTAGTGATTGGCTCAGTCATTTTCCTGATGGTTGTACGTCACTGGTGTCACTTAACATTTCTTGTTTG  
GGTTCTGAGATCAGCTTATCACATCTGGAGAGTCTCATTGCACGTTCTCCTAATTTGAAGACACTTCGGCT  
CAGTCAAGCTGTCCCCCTTGAGAACTTCCACACATATTGTCTTGTGCTTCCCAATTGGTTGAATTTGGTA  
CAGGTGCATACTTCTGAGGTACAGTTACAGTCTGATGTTTTCTCAAACCTCCAAGAAGCTTTTTTCAGGC  
TGCAAGATACTTGAAGGCTTGTCTGGATTTTGGGATGTCATGCCAGCTTACCTTCCAGCTGTATATCCAG  
TTTGCTCCAGACTCACCTCATTGAATTTAAGCTATGCTACTATTCAAACCTCATCTTAACAAGCTCATAA  
GTCTGTGTCATAATTTGCAGAGATTGTGGGTATGTTCCAGTGCTTTGCTTTACTTTACTTTACTTTACTTGC  
CTATGTTTTTCAGTCACAACATTCTGATAACTTAAGAGCATGATATCTTGCCTTGAAGGCAAGGGATTGTTT  
ATAAGAGAAGCACACAAAATTTTACCTGTTTATCGTCTTGTAATTCTGTTGACGGCAAGGATATCTAGG  
ATAAAAATCATGATATGCAGATACTTCCACTCATAAGATTGGCTAAAATAATTCACCTTTACCTTAAGTT  
GAAGTTATAGACCTGTACATGAAGTAGGATCTAGAAGATACATTCTTTGGTTGTATAATTCTCATACGCA  
ATGGTCATATGACATATTTATCAATCTTAATGCTGAAGACTTTTTTACGAAACAGGTAACCTTAACTTTTAT  
GCTGAAGACTTTTTTATCTGTTCTCTTTTCTGTGACATTCAAAGAATTTCTGCTAATGGTTCTTTAATCT  
TTCTTGCTACAAGCTTGAATAGTTGCTTAGTGTTAAGACATTTCACTTTGAATAAATGTGACTACAGGT  
ACTAGACTACATTGAAGATACCGGTCTCCAGGCGCTTGCCGGTACCTGTAAAGACCTGCAAGAACCTTAG  
GGTGTTCCTTCTAATCCCTTTGATCCAGAACCAAATGTTTCCCTGACAGAGCAGGGACTTGTAGCTGTTT  
CAGATGGCTGTCCTAAGCTCCAAACAGTTTTATACTTCTGCCGCCAAATGAGAAATGCCGCTTTGATTAC  
TATTGCTAGAAACAGTCCTAACATGGTTTGTTCGCTTGTGTATTTTGGAACCTCGAACTCCTGATTACT  
TGACTCTGAACCGCTTGATGCTGGTTTTGGGGCAATTGTAGAACAATGCAAAGAGTTGCGGCGACTTT

CTCTTTCTGGCCTTCTTACTGACCGTGTGTTTGAGTACATTGGGACCCATGCTAAAAAGTTAGAGATGCTT  
TCCGTCGCCTTTGCTGGGGATAGTGATATGGGCCTCCACCATGTACTCTCTGGATGTGAGAGCCTCAGAA  
AACTAGAGATCAGAGACTGCCCTTTAGTGACGACGCTCTTTTGGCTAATGCTGCAAACTGGAGACAA  
TGAGATCCCTTTGGATGTCTTCTTGTTCAGTAAGTTTTGGAGCCTGTAAGCTGCTAAGTCAGAAGATGCC  
TAGGCTTAATATTGAAGTTATAGATGAGATGGGTCTCTGGACACGCAGCCAAGAAGCTGCCCTGTTGA  
TAACTTTACATATAACCGAACAGTGGCTGGACCAAGTTTTGACCTGCCTGGTTTTGTTCCGGATAATGAAA  
GAAGATGCTGCACATTAGCAATGGAAATTCACCCTCATGCTATTAATCCTCCTTTTTGTAGCAGGTTAAG  
CCATAAAGTGCTATGTCGAAGACCTCACATGCCATCAACTATTACCTCTTGCTAAGCTAATTTACTGCAT  
CAGCTTATAAAGAGTTAAACTCTTGTGAGGTTTGGAAATGACAGACCCAAGTTCTATACTTATATTAGTA  
TCCTAATCCCAGTAACCGACCCCTATGTGTTGTTATGTATCATTGGGAATAAGAATTACTACTTTGTATTT  
TGTTTTAGGGGGAAGGGGGTATGTTCAACAATGTACATGCTAGCGATTTGAAGACTTTGTGCATCGTTA  
TGCAGCTAATTTCAATTATCTTTTCTATTGACTTGTTTTCTGATGAGATTATGCCATCGTGTACTCATAAGT  
CAATAAAATTCATTGCATCCATGTACTAAGAATCTCTTCAGGAATTTTTTTTTGTCAAATTTGAACTCATA  
ATCAAGTGATGAGTTCAATGGAAGGATTAATTCTGAATTCACCTTTACAAGACAATGAGAATTCAGACT  
TTAAATACTAGTGACCTACCATAGAAGAGCATCACTGGTACTCCTATCTAAGAAAGCAAATGATGGAAG  
TTCAAATGTGCACGAACGACTAAAGAGAGAGGCTTAATGAAAATATTAATTGGACAAGAACAGTTTTAT  
TCTTTAACTTTTACATCCATACACACTTGTGTCTTTTGCAACTGCTTCTTTGATGTTACTGCTCGCTCATAT  
TCTTATACTTTTGATCCTTGAAGTGTTTCCAAAATATGTTCTATTCTGTACTTCATGACTGGTTGGCCTGAT  
TTGGTTTTCTTGAACATTTTCTCCCTTAGTTCTTTCCCTCGAGATTCAGCTCTCTGCCTTTCTTCTTCCCTGG  
TAGAATAGTGGCCTCTGTCTCCATCTTGCCTTGTATCCTCCTCGCGTTTTCTCTCATATATTTCTCTTAG  
GCTTCTAGCACTATTCTTCTTATTTCTTCTCCCTTCTTCATCCT

>PGSC0003DMG400024206 LRR-RLPs

TTTCACTCAAATCTATTTTATTTTATTCACCCGTTAATTTCTTCAAGAACATCAAACCTAATCGACAATTT  
CAATTGTAAATCGAAGAACTGCTAAAGATTTCTTCGATTTTATAGTGTTTTGAGTCATCTTACCAGTGT  
TAATCGTTAATCAAGGTTTTACTGTCATATTGGGAGAAATTTGATGGTTATAATTGAGTTCATCATTTGG  
TGGAAGAAAATCGGCGGTTACTAGGGTTTTGGTGAAGCATTTATTGTGTCGTCATCTCCATTTCTAAAAGG  
TCAGCCACACATCTCATTATTTCTATTTTTCATACGATTTAGCCTAGGATTTTTTTGTCTTAAATATTTTGT  
AAGTTTGCAATATTTTCATCCATATTGATGATTCCCCTTAGAGTTGTATGTATTTGTAGTGGTTGAGGGT  
CAACTGTGATTGAAAAAATTAATTTGTTAACATCGCGTTTTGATATATTAATTTGTTGAAACAAGATAAA

TCTGCCTCGATACATTGCTCAACATTCCGATATATCATGTCTAGATACATCTTTGTTGATATAAAACACAC  
ACGTCCCAGATACATTGCGTAAGCGTGATGTATCCGAGAATAAGAGAGAGTGGGAATTCTTGTAATTTTA  
TAACTGATAGAAAATTTAAAGAATATGGTAAAATAAATTTTGTATTTAAGTAATTTTTTCAATTTTTTTA  
TATTAATACGGTAGAAAATAATTTTTGGTACTTTTTTTATTACAATGTATCGTCTATATTTACCTTTAAT  
AGCTAAAATCACCCATTACTCTTCTCCCTTCTCTAGCCAACCTCGCGTCGCCGGAGATGACTTCTCCAAG  
GATGCTTATGTTTTAGTTGGTTCACATATACAAAGATCTGGCCAATATATTTCACTTTGCGCGCTAAGTTT  
TGGTATTTCCCCTTATGAAATATTAGCAAAGTAACTCGATGCCACGTTCCAGATCTGATCAGAAAATCTC  
CATTTACGTTCCAGATATTACTCTAATATGACTTCAATAAAATTCTAGTAAATAAGAGATAATTGTGGAGA  
AAATCTAAAACGAAAATGTTTTGCGCGCAACTGAATTGTACAAGGTACCCCAAACATCTTCTCCTCCTC  
TATACTTTAGACTTGTATTGTTGTTTCATGGTCTTCTATATTGTAGTGAAGTTTGTGGAGGGGATGCCCTTT  
GAAAGAATTTCTCACTTCCTTCTACTTCGTTTGGTTTGAATTCAAAATTATGATGGGATAAATTATGTTTA  
GATTATTTTTTATTGAGTGTTTGTGTTTGTATTAAAATAATAGGCTTTCATAAATTTAAGAACAATT  
TATTTGTTTACAAAAGTAACTTCATGAATGTGAAAAGTATGTATAAAAAAGGTTTAAAAGGATATTTT  
TGTCATTTACTTATTTTATCCCGGAATAAGTTATCTCGGGATTACTATATCATTCAAGGGATGAATGGGAT  
AACTTATCCTGGTACTAATTATTAATCTCAGAATAAGTATACCGGACATGCCAACCAAACAACAAATTAA  
GTGACACTACAATTTAATCCCACGACTATTTTATGTAATCCTTCACACCAAACGGCCATTTAAACATGTAG  
GACTGCCCTAACGGCTGTCGCAAATTGAAGTATTGTATTGGTCTTACTTGAGTTGCGTGACATTATTGAT  
ACAACATAAACATTTGCTTTACTTGGATGATCGACCACGTAAGCTATTCACCCATTTCACTTTTTTTGGAGT  
GACTCAGTGGTTTGGGCTTGAGACTTTTCATGTTGGAGGTCTCAAGTTTGAAACCCTTTGCCAGCGAAATC  
AAGGGGTTTGCCTAGTGC GGATTAATCTTTTCTATGTGGTTTGC GAGATATTGCATAGAAGCAGGGGTT  
TTACCCTATGTGCACCCAAAGAGTAGCGGTTAAGGGTTTATCTTGTTATATATATATAAAAAAAAAAAGGT  
ATTGAGCCATTTCTAACAGTAACAAAGGATAATTCTTATAAATTTTACTACTCAATGTCATTGTTAGGTAG  
ATAATATTGTGATTGCTTCTTCAAGAGTTTTGATTTATGTACTTAGTCCCTTCTATCATAATTATGAACTCT  
ACTAGGTGAAGTACTATTGACTCTTTTATCTGCATATATCAGCAATATTCTTATTTTTTTGGTATCAATAATG  
TCACTCAAGTAACACCAAACCACTAACATACAAAAAAATTAATAAAATTAATAAAGAGACACATTTTGT  
TGGACTCTATTCTTTCTTTTCAATTATAATTACAGTTGTTGTTGATTCTTCATTTCCAAAACAAAATGATTC  
AAGTAGGACCCCTACTGTTTTTGAAGTCTAGTAGTATGCTTTTGGTGACCAAGAAAGCCATTGACATATT  
TTACAATAATTCTTATGACAAGTGAAGTAGAGCTTTATGAACTTCTTAATTCACCAAACATTCATCTTT  
CATTTTGTTCATTTCTTCTTATTACCACACCTACACACAATAAGTGTTTTTTTTCCGGAGTTACAATT

GAATCCATGTCATCATCTTCCTCTTTTGGCGAGTAATTCACAACACTATCCTCGATGGAAGTATGATGTCTT  
TCTGAGTTTTAGAGGTGAAGATACTCGAAAAACATTTATGAGTCACTTGTACGAAGGTTTGAAAAACAG  
GGGAATATTCACCTTCAAGATGATAAACGACTAGAGCATGGCGATTTCGATCTCAGAAGAACTCTTGAA  
AGCTATTGAAGACTCTCAAGTTGCCATACTCATTTTCTCAAAGAATTATGCTACATCGAGGTGGTGCTTG  
AATGAACTAGTGAAGATCATGGAATGCAAGAAGGATGAAAATGGAAAAACAGTCATACCAATCTTCTGT  
GATGTGGATCCTTCAGATGTTTCGGAACCGAGGAAGATCTTTCGAGAAGCCTTTCGCAAAACACGAATCG  
AATTATAAGGATGATGTTGAGGGGATGCAGATGGTGAACGGATGGAAGATTGCCTTAAGTGTGCCGC  
AAATCTAAAAGGATATGATGTCTGTGATGGGTGAGTAAAAACACATAATTACTTTTAATGAAAAAGA  
AAACGAATAATTTCTATTCAAATTTGGATGCTTTTGTGAATCCTAGATATATTCTACTATAGAGCAAAGAA  
TCTATACCTCCAAAAGGTGAATTAATTAACAGAATCAACACTTAATTAATTTGTCATATTTACCAAATTA  
AAAGGTGGAAATTAGATCAACATATTTTTGAGCTAAGAATACTGAATGCACTGTCTTATTTTCATTGATTAT  
CATTTAGACATAAGAAATGTATTTATATTTTTTTCCGGTAAAGAGAATGATGGTAGATTATATATGTTTAT  
ATCAGTAAGAAAGCATAGTCCTATCAATTTAATTAGAGAGAACACCTAAAAATCCTCCTAAACAATTCGA  
GTTTTGCAACTTTCATACTTTACTAATAGAGTAATCGTATTTATTTTCCACTATCAATCTTTTTATTTATGTA  
GGATAGAATCAGAGAATATTCAGAAAATTGTCGACCACATCTCTTCCAGATTATGCAAGAGTGCTTATTC  
TTTATCGTCTTTGCAAGATGTTGTGGGAATAGATGCTCATTTAGAGAACTAAAATCCCAACTTCAGATA  
GAAATCAATGATGTTCCGATTGTAGGGATCTGGGGAATAGGTGGAGTCGATAAAACAACAATAGCAAA  
ATCCATCCTTGATACTCTATCTTATCAATTTGAAGCTGCTTGTTTTCTTGCAGATGTTAAAGAAAATGCAA  
AAAATAATCAACTGCATACCTTACAAAATGCCCTTCTCTCTGAACTTTAAGAAAAAAGATGATTACGTC  
AATAATAAATATGATGGGAAGTGCATGATTCCGAGCAGACTTTGCTCTAAGAAGGTGCTGATTGTGCTT  
GATGACATAGATCATAGTGATCACTTGGAGTATTTAGCGGGTAATCTTGGCTGGTTTGGTAATGGCAGT  
AGAGTTATTGTAACAACTAGAAATAGACATTTGATAGAGAAGGATGATGCAATATATGAAGTGCCTACA  
CTACCTGATCATGAAGCTATGCTATTGTTCAATCAACATGCTTTCAAAAAAGAAGTCCAGATGAGCATT  
TTAAAAAGTTCTCGTTGGAGGTAGAAAATCATGCTAAAGGCCTTCCGTTAGCCCTCAAGGTGTGGGGTT  
CTTTGTTGCATAAGAAAGGCCTAACTCAGTGGAGAAGAAGTGTAAACCAAATAAAGAAAAACTTGTAGT  
TCAGAAATTGTTAAAAAGCTCAAATAAGTTATGACGGGTTGGAGTCTGAAGAGCAAAAGATATTTCTA  
GATATGGCATGTTTCTTCCGAGGAATTGAAAAAGAAAGTCATAAAAATCCTTGAGAGCTGTGATTTTGG  
AGCTGAATACGGATTGGATGTCCTGATTGACAAATCACTCGTGTTTCATCTCTAAATATGGTACGATTCAA  
ATGCATGACTTGATACAAGATATGGGTAAATATATTGTGAAAATGCAAAAGGATCTGGGTGAATGTAGC

AGACTATGGGATGCCGAAGATTTTGAAGAAGTGATGGTCAACAATATGGTATGTAGCTAAACAATGCAA  
TAATATTCAATTTCTTGTTTATATATTCCAAAAAACATATAGGTTTCGATTCCAATCATTATTTCTCTTGCT  
TCCCATTCTCATATGTGAGTCATTTTAATAGTTTTTGTGGAAGATGCAAAGTAATAATTATTGTCTAACAC  
AACTAATTCATCAAGGAGCCAGTTTGATTAATGTTGCCTAATTCATTTTCTTAAGTTATTAAGCTATGAAG  
TAGTCTAGTATCACTTAAACTGTTTAATCCAATTTCATTTTTGGATAACATGAAATTTGTATGACATTTTA  
TACATAATAAGTTATTTTACAGGGTACCAAGGTAATCGAAGCAATCTGGTTTAGTTATTGTCAACAATTA  
TGCTTTAGCAAAGAGGCCATGAATAATATGAAAATGCTTAGGATATTGTACATATGTTGGGACAAGAAA  
TGGTTCCAAGATCGCTTACTTCCCATGATGGCTCTGTTGAGTACCTGCCCAATAACTTGC GTTGGGTTTT  
CTGGAATTACTATCCTTGGGAGTCATTGCCAGAAAATTTTGAACCCAAAAGACTTGTTTCATCTTGAACTTT  
TTCAAAGTGAACACTACATTATTTATGGAAGGGAACAAAGGTACAATAGTTAAATTCTTGTTTATTTTAATTA  
TTCTCATATCTATTAGAGTGAATGGTGACAAATGCAAGAAGTGTCTAGTTTTTGC GACTTTCATATCTAAA  
CTATCAGGTGTGCGAGTTTCTACCTGAACAATCACCAAACGTTTATCAAAAAACATCCTAATTCAAATG  
GCGTACTCACTTTTTGTGTAAGGGAGTAAATTAAACACAATGGTCATTTGATACATAGATAGCCAGTA  
GCCAAATCTAAATCACGAGCAGCACCTAATTCTCATGCTTTTTGTGTTTTGATTAGCAGCATTGTCTTCT  
CTAAGGACGCTAGATCTCAGCTGCTCTAGAAGCCTAATGCGAACACCAGATTTACG GGGGATGCCAAAT  
ATGGAGTATTTGCTTCTGTGGAAGTGTAGTAATCTTAAAGAGGTTACCATTCCCTGGGATGCTGTAGAA  
AAATCATTGGTTAAATTTGAGTGATTGTGAAAGCCTTAATACGTTTCCATGTGTTAACGTGGAATCTAA  
GGGTTCTCTAGTTTLAGAGAAATTTCCAGAAATCCTTGG AAGCATGAAGCCGGACTTAAAGGTTAAGA  
TGAGAAACTCCGGGATTAAGGAATTACCATCATCTATAATTCAGCACCAAGCTCGTCATACAGTGCTACA  
TTTGAGTGACATGAATAAATTACTTGTAGCTCTTCCAAGAAATATTTGTAAGTTGAAAGGTTTGGTGAAG  
CTAACTGCTCAAACTTAAAAGCTTTCCAGAAGAGATAGGTGATCTAGAAAACATGGTGGAGCTTGATA  
CCACATTCATCTAATTTACAACCTCCGTCTTCCATCGTCCGTTTGAACAAGCTTAATATCTTGAATTTTC  
AGAAACAAAAATCAGAAGTAGGCCTCAATGATGGAGTGTCTTTGTGTTCCCTCAGGTGAATGAAGGGT  
TACTACTATTGGAATATTTGGATCTCAGTTACTGCAATTTAATAGACGGAGGACTTCCGAAAGACATTGG  
ATGCTTATCCTCTTTGAAAGAGTTGTATCTCAGTGGAATAATTTT GAGCACTTGCCTCGAAGCATAGCC  
CAACTGGAGCTCTTCAATCCTTGGACGTATCAGATTGCAAGAGGCTTACACATCTGCCAGA ACTTCCAC  
CAAAATTAGATACAATTGGAGCAATGATTCAATCTGTAATTCGTTGTTTCAGAATATCTCATCATTGCAGC  
ATCACATCGCTGCTTCAGATTCCTTGTCACTACGAGTGTTTACCACCAAGGGGAAGAATATCCCAAGTTG  
GTTCCACCATCGAGGAACTGGTAGAAGCGTATCAGTCAGTTTGCCTGAAAATTGGTATGTACGTACGTG



ATAGCTTCTTGGGATTTGCTGTATGTTACTCTGGCAGCTTAATTGACACCAAAGCATACTTGATCCCCTCA  
TGTAATCGGATGTCATGTATGACACAGAACTTCCGCATCCAGCTATTCAAAATGTGTTCTAGAACCTA  
TGATTCATTTTTCTTGGTACCTCTTGCTGGCTTATGGGATACATATAAAGCAAATGGAAAAACACCAAAT  
GACTATGGGATTATTAGCTTATTTTTGAAGAAATGAAGGAGTTTGGATTCGTTTGTGTATAAAGATG  
AGCCTGGGCTTGTGGCCTTGAATCGATATGATAATAGTGAACGCCATGACTTCGTGACTAATGAAGCCA  
GCTGTTCTCTTCAGAACTTTGCAGCTCTTCCCACAAGTCCAGGATTTTAGCTTAAATATAGGTATTCT  
ATGACATCTTGGCACTTTCATCATATCTTAGTGCTCCATTTGTATTCATTTACTATGCAAGCCATTATTCTG  
CTTTTTAAAAACCAAGTATCAGATATTGTCTTTGTTGTATGGTTTTCATGTGCGAAAGATGTATGGTGTTA  
AGATTGTAATTCAAGTATTAATTATATTTGTTCCCCTGATCATGTCATCCTGCTGATGAAGATTCATTTGTA  
CTTCTTCTCATTAAAGTCCAGAGAAGAAAAGGCAAATGTTTGTAGTCCCAAAGTAGCCGCTGATCCATGG  
CTACAAAACCTACTAATAGTTCCATTTTGTATGCTCTTAAATTGTTACATTTGGAGGTATCCCTGTCTTAAC  
TTTTAAAAATAAAAATATCTCTCTTGTATGGTAGGGATCGGAGTTGGACGTGGAGGAGGCTGGAGTAC  
AAGGCGAAGTTCGTGAAGGTGGAAAATGAGTAACAAAGTTTTTGTGTCAATTTGCCTCTTACATCAGAT  
AATAGCAGAAGTCTACATTATTATACCAAATGTTACTTACAAGTCCTTTCCTCTGAAAACCTGTTTGCCT  
AATTCATGGTTAGATGTGATGTGATCGTTTCAAATTAGGAATGTGCTATCGTTTTTATCTGCTGCTACTTT  
TTGTAGAAATTGATCTTGATAAGGTAATACTAACATCTATATCTTGATTACTTATTATAAGTGGTTCCAAT  
CTTTTGGATTTGGATTATTTTTGCAATGCATAATGTAGATACATTATTTGAGAACAAAATTACATATGGTA  
CTTCCCCTGTTTGTAGCTAGATTCTTGTGGTGAGAAAGAGATTCGCGAAAGAACTTTGGGTGGGATCTCT  
CATCTTTGTAGAGGTGACGGGACAGCTCTTTTAGACCTGAATACCTAGTTTTCATTTTGAATATCCCACCT  
TATCTCGCATACCAAATGACCCATAGTATTTTGAAGTCAACTCGTCTGCTTTAGGTGACGAAGAAAGCCA  
TTATTAAGATATCTTACAATTTCAAAGATATCTTAAGTAGAAGGCCATCTAATCACTTTCCATTTGTCCCA  
AGAAAAATAGGACCCATAGTGCTGCTTTAATGCTTTTGGTGGGTCAGCTACCCATATAATTGATGTGGG  
ACTTGTCTCATTTCGTATCATCATTTTTATTTCTTACTTATCACAACCCCATCTATCCACACGGTTTTTCTTCT  
CTCAAATTTCCACGAATTAATAATCCATGACATCATCTTCTTATAATTATGCGAGTAATTCATTGTA  
CGGATCTGGATGGAAGTATGATGTCTTTCTAAGTTTGAAGGTGAAGATACTTGGAGAACATTTACAGG  
TCATTTGTATCAACAATTGAAAAACAAGGGAACATTATTAACCTTTCAAGATGATATGCCGCTAGAGGAT  
GGTGATTCCATCCCAGAAGAACTCTGAAAACATCAAGAGTCTCAATTTATCCTCGTCGTTTTCTCAA  
GAGTTATGCTACATCAAGATGGTGCTTGGATGTACTAGAGAAGATCATGGAATCCAAGGATGAATACG  
GACAAAACGTGCATACCGATATTCTATGATGTGGATCCATCAGAAATTCGAAAGCAAAGGGAGAGCTTTG

CTGAAGCATTGACAAATACGAATCAAATTATAAGGATGATGTTGAGGGAATGCAGAAGGTGCAAAGA  
TGGAGGACTGCCCTAACTGAAGCAGCCAATCTCAGAGGATATGATATCCGCCAATGGTGAGCCAAAAA  
AAAAAATATGCAATAATTTATTATGTGTACTCTATACGGTAGAAATACTTAATTTATCATCAATCTTCTTC  
TTATTTTTCTTTTTGTAGGACTCGATCAAACGTATTTCAGCATATTGTTGATCAAATTTTCATCCAAATTATG  
CAAGACTTAAATTCCACCATTTTTGGTAAGAAATGTTATGAAAAACATGAAATTGGGGAATATTTGTAT  
TGTCGCATGACGAATAAAAGTGATAGTTCTGTCCTTGTATATGTTTGAGCTTATAATCCAAGTCCAATTG  
AAAAAGAAGGATAATTTAGTTCTGCTTCAGCAATTTTTGATGAGCAATTTCACTTTTCTCAATACAAACATA  
TAAGCTGCTTTGTTGGGTATTTAAACCACATAAATAATGAACATTATCCTCGGGTTTGATGTCATAGAT  
TAAGCCTGGATCACCTGTTCTTAACGGATTGACATGTCCTGCACCAGTGGCGAACAAGTCACTCTTTTCA  
TCAAGATCAGCAGTCGTCATGATTGCTGATTTGATAGCAGCTGGAGACCAGTCAGGGTTTGTACATTTTA  
CTAATGTTGCAATTCAGATACATGAGGGCAAGACATTGACGTGCCAGACGCGATGTTAAAAGTAGACT  
TAGTTGGCCAAGCAGCAAGAATATTAAC

>PGSC0003DMG400024263 LRR-RLPs

AGATGTTATCTATAATTATATTTGAAGTGATGGATTTTAAACCTAGCACTGAAAATATGTTATCTCGTCCT  
GGTTAAAGTATAAAAAAGACATACATTTGCTAGCTAAAGATTACGAGTGTTATCATGTCAACAGTAAATA  
TTTGATCATCTTTGTCTGGTTGTTACGTATGAGGATGTGAGATAATCACGCGGAGAATCAGCATCATTTT  
CTGTTGTAACCTGGATAAAGAGAACTATAAATGCAATCCCTCAAATAGCAGGTATTGTTGAAGAGTTTGC  
AATGTTTTAAAAGAATTTCAAGTGGACAAAGAATGCGCTTTCAGGATTGAAGCTTCCTCACTTTATGCCT  
GTAGCTTATTTGTACATTATGACAGACTGTGTCTACTATAGTTTTATTACAAAAGAGTATCACTGCAGGG  
ATCTACGATCATTTGTCACCATTTAGTCATGATGGTTGAAATCATCGGAGGTCATTAAGCCAATGGTTTTT  
CATCTTAAAGTGTCCAGATTTAACTCTTTGATTGTGATGCTAAGTTGTGTAATTAATCCCTAAAGAAGGA  
TGGAATAAGGGTGAGAAGAAATTTAAATGATTGGGTGTTAACTGCACTAACTGATCTTCTTTTGTTC  
TGCAGGGTCATCAAGGTAACACGGATGAAAGAGATAGAGTATGGTGGATTCTAGCAGTGATGGTGAA  
TTATCTGTGAGTTTGTA AAAAGACTATTCATATGGAAGGTGAAATTGTTGGAGAATAGCTAGAAAAACA  
AATCTAGGACACTAAGGTGGCCTGTTTCACGTGGTTAGCATCCCGTCGATCTGTTTAAACAATAAGGATT  
CGATTACTGGTATTTCTTAGTTCATTTCCATCTAATCAATTGGAAGTTCCTCTGTTTTATCTGTTCAATT  
TTCTGAAATTTCCATGTAGAGATTTGAATATTTGGTTGAAGCCTGATTGTATTCCCTTTTGTAAAGGACTT  
GGACATTTTCTTTCTTTAAGTTGTTAAGGTAAGCTGTAGAAATTTGAGTGTTATGTTCTGAAATTAGTCG  
ACTGATGCCGTTGTTTTCCCTGTAACAAAAAGGGTTCTCTGAATAACAGGGACTTAAAACATTTTTCTCT

CCTTTTCTGTTGGTTCAATCCAGATCAGCCTATTTGGTGTTAATTGGTTTAATTTCAACAACATTCTTGGTT  
TTATCCCCACCCCCACCTTAATCTTACATTTGATTTTGTAGGTTAATCTTTTTAAACCTTTTGTTAAAA  
CTAGTTTTATGCGTTTCAGGTTGCTACTGTATTACTGGATTGATGATAGAGAAGTTTGATCCAGATGGAT  
AATTTACCAGCTGAATTGCTTCTGGAGATTTTGGGACGGATTAAGAAGAACTACTGATAGGAACTCTGTAT  
CCCTAACTTGCAAACGCTTCCACAAATTGGATAATGGACTGAGAATATCGATGCGCGTAGGGTGTGGTT  
TACATCCTGTCTGTGATGCATTAAGTCTCTATGCAACAGATTCCATAACTTGGAGAAAGTGGAATTAT  
TACTCTGGTTGGATGTCTAAGTTAGGGAATCAGTTGGATGATAACGGTCTTCTCATCCTTTACGTTGTT  
GCCCTTGCTCAAGGACCTCACATTAAGTTATTGTACTTTTCATAACGGATGCTGGTCTTAGTTACTTGGCT  
TCTTGTTGCAAACCTTACATCCTTGAAGTTGAACTTTGCTCCAGAACTACTGGTTGTGGCATCTTGTCTCTT  
GTTGTGGGCTGCAAAGCCCTCAGTGTGCTTCACCTGATTAGATGTCTTAGTGTGAGTAGTATGGAGTGG  
CTAGAATATCTCGGAAAACATGAAATGCTTGAAGATCTCTGCATCAAGAATTGTAGGGTGATTGGAGAA  
GGTGAATTTGATTAAGCTTGGACCTACTTGGAGAAAATTGAAGAGACTGCAATTTGAGGTTGATGCCAAC  
TACAGATATATGAAGCTTTATGACCGTTTAGCAGTTGACCGATGGCAAAGCAATCGATCCCATGTGAG  
AACATGCTTGAACCTTTGTTTAGTGAAGTGTGTTATCAGCCCCGGGAGAGGGCTTGCATGCGTAATAGGG  
AAGTGCAAGAATTTGGAAAAGATTCAGTTAGACATGTGTGTTGGGGTTAGGGACTGTGACATAGTATGT  
TTGGCCAGAAATCAAGCAACCTTCGATCAATCTCTCTCCGAGTTCCATCAGACTTCTCCCTTCTCTGCT  
ACAAAACAATCCATTGCGGTTAACAGATGAAAGTCTAAAGGCAGTGGCTCAGAACTGCTCTCTGCTTGA  
TACGGTTAGGTTGTCTTTCTCTGATGGAGAGTTCCCTTCATTTTCTTCTTTACCTTAAACGGAATACTTAT  
GTTAATACAAATGTGTCCAATAAGAGAACTTGCTCTTGACCATGTGTATTCTTTTGACGATATTGGAATG  
CAAGCTCTTCGTTGAGCACAACATCTCCAAATCTTGGAACTTGTAAAGGTGCCAAGAAATCACTGATGACG  
GAATGCAGCTTGCTAGCCAAATCCTCAATTATGTACATTACGGTTGAGGAAGTGTGTTGGGAGTGACCG  
ATGATGGATTAACCTCTCGTGGGGTCTTACAAGTTAGACTTGTGGTTGTAGAGGATTGTCCACAGAT  
ATCAGAAAGGGGTGTTCAAGGAGCTGCAAAGTCGGTCACCTTCAAGCAAGACTTGTGATGGATGTACTA  
AGCTTTCCATTTTACAAGTATTTTCCAGATGTTGTACAGGTTAGGTTGTTCCGTCTATACGACTTTTTGT  
ACAGTCATTCTGTTTTTTTTCATAACAATTCTGTAATCTGCAACACAGAACTCCCTATGTCCACATGCATGTT  
GCATAATAAAGGTTAATTTGAGTGCGTGTTCCTATGCTTCGGCTACCATATTATTTGTTGTTGCTTTGTTT  
TTTC

>PGSC0003DMG400024406 LRR-RLPs

TAAACTCAAATATGATGATGGTTTCTAGCAAACATTCTCTTCCCTTCAGTTTTTCACTCTTTTGTACCTC

TTTACAGTTACTTTTTGCTTCCACTGATGAAGCAACTGCCCTCTTGAAATGGAAAGCAACTTTCAAGAACCA  
GAATAATTTTGTATTGGCTTCATGGACGCCAAGTTTTAATGCATGCACGGACTGGTATGGAGTTATATGC  
TTAATGGGAGGGTAAACACGTTGAATATTACAGATTCTAGTGTTCATTGGTACACTCTATGCTTTCCGTTT  
TCATCCCTCCCTTTTCTTGAAAATCTTGATCTTAGCATGAACAATTTCTCGGGCACCATTCCACCTGAGATT  
GGTAATCTCACTAATCTCGTCTTTCTTAACTTGAAAATCAATCAGTTTTTCAGGAACAATCCCACAACAAT  
CGGTTCACTAGCCAAGCTTCAGATCCTCCGTATATTTGACAACCATTTAAATGGCTCTATTCTGAAGAAA  
TAGGTTACGTAAGGTCTCTTACTAAGCTATCTTTGGGTAGGAACCTTCTTAATGGTTCTATTCTGCCTCA  
TTGGGGAATTTGAACAACCTTGTCTTTCTGTTGCTTTATCAAAATCAACTTTCTGGCTCAATTCCTCGAGA  
AATAGGTTACCTAAGGTCTCTTACTGACCTAAAATTGGGTAATAACTCTCTTAATGGCTCTATTCTGCTT  
CATTTGGCAATTTGAGAAATCTGAAAATGATTCTCAATGATAACAATCTCATTGGGGAAATTCCTTC  
ATCTATATGCAATTTGACATCACTTGAAATGTTTTATATGCCTAGAAACAACCTGAAGGGAAAAGTTCCG  
CAATGTTTGGGTAATATAAGTGGCCTCCAGGTTCTAGTGATGTCACATAATAATCTTAGTGGAGGGATG  
CCTCCATCTATTTCCAATTTAACATCACTACAAATTCTAGAATTGGGCAGAAACAATCTGGAGGGAGCAA  
TTCCACAATGTTTTGGCAATATTAGTAGCCTCCAGGTTTTTGATATGCAGAATAACAACTTTCTGGGACT  
CTTCCAACAAATTTTAGCATTGGAAGTTCCTTATGAGTCTCAACTTGCATGGCAATGAACTCGAGGGAG  
AAATCCCTCGATCTTTGGCCAATTGCAAAAAGTTGCAAGTTCTTGATCTAGGAGATAATCATCTCAATGA  
CACATACCCCATGTGGTTGGGAACTTTGCCAGAGCTAAGAGTTTTAAGGTTGACGTGAATAAAAAGTT  
ATAA

>PGSC0003DMG400024437 LRR-RLPs

GAGAGAACATTTGAAACAATGCTTCAAACCTTCAGTAATCTAGAGGTACTTTCTCTCTTTTCATGTCAACAT  
CTCATCTCCGATACCTGTGAATATTTCTTCTCCTTAAGGTACCTGGATCTTAGTTATACTAATCTGCGAG  
GTGTTCTCATAGAGAGCTTTTTCTTCCGTCAAACAGCTTGAAACGCTCAAATTGAGTGATAATGATCTT  
CTCAAAGGAGTTTTTCAAAGATCCACCAAAGCAACACTTTGTTAATGGAGTTGGATATTTTCATCCACAG  
GCATCTCTGGTGAGCTGCCTCATTCAATTGGCACCTTTAGTTCCTTGAATATCTCTAACCTCCAAGAGCTA  
CGTTCCATATATCTTTACCATAACAACCTTCATCGGTCCATTTCCCGCTTCAATTTTAACTTGACACATCTT  
GAATTCTTAGACATGTCGACTAATCCCTATCTGGCCCACTGCCTAGCAAGGAACCAAGCTGGATTTGTC  
ATACAACTCACTGAATGGTACCATACCATCTTGGCCTGTTAGCCTACCTTTGCTATCTTCAGTGTGCTC  
CAACTAGCCGATGAAGTGATCAAAACAAACCAACATTAGAAGAACTGAATTTAAACAATAATCAACTC  
AGTGGTTCTTTTCTCAATCACTTGTGAATCTCACAAACCTTTTTACCCTTAATATTTTCATCAAATAACATC

ACCATTGATGAGGGAATGAATATCACCTTTCCTAGACTATCATCTTTATTCTTATCATCTTGTGAACTGAA  
GGATTTTCCACACTAGTTGAGAAATTTAAAGACACTTGTGTACTTGGATAATTCTAACAAATAAGATTTGT  
GGTCAAATCCCTAACTGGTTTAGCGGCATGAGGTGGGACTCGTTGCTGTTCTAAACCTTCTCATAATT  
CATTAACAGGCCACCTACCACAATTGCATTTCCATAATCTAGGGTATCTTGATCTGAAATTTAACTCCCTT  
CAGGGTCCACTACCTTCATCCATTTGTAACATGAGCTCGCTTGAATTTCTTGATTTATCACGCAACAACCTT  
CAGTGAICTCAGTTTCACATTGCTTGAAGCATGGCTAGTCTAACGGTGCTAGAACTTAAGAAGGAACAA  
TTCACAGGGAGTCTTCCCCATTATGTGCACACAGCACTTCGTTGAGCACCATTGTCATAAATGGTAAAT  
CAATTTGAAGGACCTGTACCTGTGTCGTTGCTCAAGTGTAGTGGTCTAGAAGTACTTGATGTGGGGAAC  
AATGCTATAAATGACAAGTTTCTTCTTGGCTTGGAACTCTGAATACCTGTAGGTCCTTATATTAAGTC  
GAACAAGTTCCATGGACCTATAAGTACGTGTCTGACTAAGTTTTGCTTCCCAAGTTGCGAATTTTTGATC  
TTTCTCATAATGATTTAGTGGCTCACTTCTGCAAAAGTTTTTGAAACTTCAAGGCAATGATCAAATTA  
GATGGTGAAGACACAGGAAATATCATGTACATGGAATCTCTGTGCAATTCGCCATTTGTACATCCTATG  
AGGATTCAGTGAGTTTGGAAATCAAAGGGCACGATATTGAGCTACAAAGAATAAGCACAATTATGACAA  
CCATAGATCTCTCAAGCAATCATTTTGAAGGTGTGATTCCGAAAACACTAAAGGATCTCAGCTCACTTTG  
GCTACTCAATTTATCCCGTAACAATCTCAGAGGTGATATTCCAATGAAACTAGGACAATTGAGTATGCTT  
GAAGCTTTAGATCTCTTGGAAATCGGCTCACTGGAAAGATTCCACAGGAATTGACAAGAATGAACTTTT  
TGGCCTTCTTAAACCTCTCTCAAATCATCTCGTCGGACCAATTCCTCAAGGTCGACCATTCAACACATTT  
GAAAATGACTCATATGGTGGCTACCTTGATTTATGTGGTCTTCTTTAACAAAGAAATGTGGAACGAGTG  
ATTCATCGCATGTTCTCAACAATTGGAGTCCGAAGAAGAAGGTGAGTCATATTTTTTTAGTGGATTTAC  
TTGGGAATCAGTAATCATAGGCTACAGTTTTGGACTAGTTGTTGGAACCTTCATGTGGAGTCTCATGTTT  
AAATATCGTAAGCCAAAATGGTTTGTGGAATTTTTGATGGACTCATGCCTCACAAAAGAGGAAGGCAA  
AAGAAGAGAGCTCAGAGATGAAGGACTTAATGGAAGATTGAGAGGGCTAAATTGTCTTTGTTTGGTTTT  
GTGGACTAATTAGTGAACGTCTGTTTTTGTCTTTTTTAATTTCTATTTGTT

>PGSC0003DMG400024438 LRR-RLPs

ATGGAGTTGGATATTTCAATTCACAGGCATCTCTGGTGAGCTGCCTCATTTAATTGGCAACTTGAAATCCTT  
GAATATCTTGGACCTCGGAGGATGTCAATTCTCTGGTTCCATTCCCGATTCCATTGGCAACCTAACACAA  
ATTACAGAGTTGATTTTATCTTATAATCATTTCACTGGCCACATTCCTGATTCCATAGGCAACCTAACACA  
AATTACGGAGTTGGTTTTATCTTATAATCATTTCACTGGCCATATTCCTTCTACAATCTCTAAATTGAAGCA  
CCTCACAAGTTTACAACCTTCTGACAACCTTTTTCAGGTGAAATTCCTGATGTTTTCTTAACCTCCAAGA

GCTACGTACTTTACCACTTTCTTATAACGGCTTCATCGGTTTCGTTTCCCGCTTCAATTTTAAGTTTGACACA  
TCTTGAATACTTAGGATTGTCGAGTAATCCCTATCTGGCCACTGCCTAGCAACCAAAGCATGCTTCAA  
AAGCTAACTTCTGTGGATTTGTCATACTCACTGAATGGTACCATACCATCTTGGGTGTTTAGCCTACC  
TTTGCTATCTTCAGTGTGCTCCAACATAACCAATTCAGAGGACTAGCCGATGAAGTGATCAAAACAAAC  
CCAACATTAAGAGAACTGCATTTAAGCAATAATCAACTCAGTGGTTCCTTTCTCAATCACTTGTGAATCT  
CACAAACCTTGAAACCCTTGAAATTCATCAAATAACATCACCATTGATGAGGGAATGAATATCACCTTTC  
TTAGCCTATCATCTTTATTCTTATCATCTTGTGAACTAAAGGATTTTCCACACTTCTTGAGAAATGTAAAGA  
CACTTGTCTACTTGGATATTTCTAACAATAAGATTTGTGGTCAAATCCCTAACTGGTTTAGCGGCATGAG  
GTGGGACTCGTTGCAGTTCCTAAACCTTTCTCATAATTCATTAACAGGCAACCTACCACAATTCGTTACT  
ATAACCTACAGTTTCTTGATCTGAGATTTAACTTCCTCAGGGTCCACTACCTTCATCCATTTGTAACATGA  
GGAACTTATCTTATTAGATTTATCACACACTACTTCAGTGGCTCAGTTCACATTGCTTGGGAAGCATG  
GCTTTACTAACGGTGCTGGACTTAAGAAGGAACAATTCACAGGGAGTCTTCCCCATTATGTGCACACA  
GCACTTCGTTGAGTACCATTGTCATAAATGGTAATCGATTTGAAGGACCTGTTCTGTGTCATTGCTCAAC  
TGTGATAGTCTAGAAGTCTTTGATTTGGGGAACAATGCTATAAATGACACGTTTCCATCTTGGCTCGGAA  
TTCTTGAATACCTGCAGGTCCTTATATTAAGTCAACAAGTTCCATGGACCTATAACTACGTGTCAGACT  
AAGTTTTGCTTCCCAAGTTGCGAATTTTTGATCTTCTCGTAATGATTCAGTGGCTCACTTCTGCAAAA  
ATTTTTGGAACTTCAAGGCAATGATTAATTAGATGGTGAAGACACAGAATTTAGTGGCCTAGTTTCTG  
CAAAAGGGATCACGTACATGGCACCATATATAGCGAGCGAGTTATCTGGTAGGTCGTATGAGGATTCAG  
TGAGTTTGGTAATCAAAGGGCAGGCTATTGAGCTAGAAAGAATCAGCACAAATTATGACAACCATAGACA  
CTACAACAATGTGATATATTGCTACGAAATAATTAGCTACAATATAAAATTTGCTACTAATTGTTCAATTT  
TTCGTGACGAAAGTTATATTTTGTATTTAAATACATGAGGAACATACTTTTAGTGACGAAACACAAATAT  
TTGTAGCTAAGTTTTGTCCACTATAATTTCCCTCCAAAAGATAAGTTGGCGCCATTTATTGAGTACTATTA  
GCTATAAATCTAAATTTATCAGTGACACATTATTTTGTCACTAAATGAAGTAGTACCCAATATATGACAAA  
TCATTTTTTATCCTAAAATTAATTAATTTTGGACATAAAATAGTTTCGTCACAAAAATTATGTTGATACAA  
TAGTGACGAATTATAAATCGTAGTTAATCATTGAAGAATTTAACCATAAAATTTATGTTTTAATTGTGACC  
TTATTTTTTGTCACTAATAATTTGAACAATTAGTGACAATTTTATCATTGTCTCTATTTAACCTACAATTTAG  
CCAAAATAATTTTTGTCACAAAAAAATAGAATTTTCAATTGACTACAACCTTAATTTGTTAGTTGATGAAT  
AGTGTAATTATTGGCTACGAAAAATATAGGAAAACTGCATATCTAAGCAAACATAGCTAGTATATCTAC  
TCAACTAACCTATAGTTTTGAAAAGGAAAACTAACTTATTAGATATACATCCATACCGCATATACTTATT

CTTCCAATACTTTCAAATAATTAGATATCTTACCACTAATTAAGAGTTTCCTACCATCTTTTGAGAAAGATA  
TATACACCTATATATAGCGTTTCATCTACCAGATACACTAGAATAATAGTGAGTGAATCGAGCGAGATTG  
GAAGGGAGATACTCATGTATCCCAGATAATTAGGAGAGTGACAAGTGAGATGGGAGGGAGACAAGCG  
GGATTGTTTTATGTATCCAAGATATATGTGAATCCACTTGGATACGGTGTATTTAGAACAAATTACACCA  
AATTGACCCAATGTATCCCAAGATCCATGTATATGGAAATATCTGGACGCACCAAAATCTTATAAGATTC  
GTAATATTATAAACTAGAGTGTATCTAAGTAATTAGCTCATAAACTAGTGAATTTATGTAAGTTTTCCAT  
TAAATGACTAATATGTGAAGGTTCTAAATTTCAATTAATTCCGGTAAGAAATCACAATCTCATCTTATAA  
TGAATGATTGAAATGTGTGAACTATTAAGAAAATGGTTAGTGTAGTTTATCCTATAAGAACCCCCCGAT  
CCAATGATAGTAACATATCTGACTTATCATCAAGATATTATTCAACAATGTTCTTCAGAAATATTCGCCAC  
CTGATTCAAGAGATCGAATCAAAATTTTCTCTTTTGTTATTTCAATCTTTGATTTTATTAATTGTTTCGTTT  
ATCCATTAATTTATTATTTCACTTCTTCGATTACATATTCAGGATTTTGGATAATATTAGTAACTTAGTTTG  
TTGGTTATTTGAACTTTTACCTTGTTTGTGATAATTTGATTCTCCATCTCATAATCCCTTTCTTACCCCATC  
TTGAAGAAAAAAATTCAAAATTTTTATATCATTTGAATTAATTATGTTACTTTAAATCTCTTTCAATTA  
TTCATCTGATTCTCCGAATAAATAAATTTTACGCTAAACATTAATGTCACACCTAAGATTTTGAGGGACGA  
GATTGATACTCATTATCTTAACTTGGTTCATATTCGTTTTACCACACTCCAATTATTTTTCTGATTGCGCG  
AGTCTCACACACCTGAACTTATTTAATATTATCATTAATAAATTATTCAATTTCAAATATAAAAATTTGTGG  
ACACTTATAATTAATATATACAATTATTTAAATATTAAGTCCATTCATGTAGAAAATTTTCTCAATGTGC  
TTCACATTTTGACCAAATAAAATTTATGAGGTAAGAAGTGTGAAATAATTCATAATACAAAAAACA  
GATAAAAATATAGTTTTAATATTCAATTGAAATTCATTAAGTGAAGAAATTATAACTTTGAGAATATATT  
TTATACGAAATTATTAGAGGGAAAAGAAAATAACAAATTTTACTTTCAATTAATTTTTCCCTCCACTTTCA  
ATGTGTAAATTTCCCTCACACCATTTCCCATTTTCCATCCAGTAAACCACGCATAACGGCACAAGGAACT  
GCCCACTAACTTTCTTTTCATTTTATTTTTTTTAAAATAATCAAAATTTGCCCACTCTCTTTAACTATCCAAG  
TCCAATCAAATGCAATACATTTTTTCATAAAAAAAGAGACTCCTCTGCATTTTCTCTCAATCTTCTTTTTTC  
TATCTATTTTTAAAATGATGTCCATCCAACATTTACCATGCTCTATAAGAAACAAAATTTTTCTTTGGTTA  
GCATAAGGAACCATTATTCACGAAGTTATTATTCAACTCCTTACAAGGATTATCTTAATGGAAGA  
GATATTATCTTGGTAAGGAGATAAGTGTTTATAAATTGTGATAATCGAATAGTTAATGATTTTGTATAAA  
ATTAATAATTTTTAATTCTATTATTTGTTTCACTAATTAATGTTAATTTTAGAATTATATTTTGTTTAAAT  
TATGATTTCAAAAAGTATATACTAAATTATTTTTTTTACACACAGGTCCATAAAGGTGCAAAAATGACTC  
AATGAGTGAAGATTTTAGATAAAAGAGCACGAATAGACGAGGAACTACATACTTTTATCTTTTTTAAAT

TTATCATTGTTCCCGTACCTCATCTAGGTCTTTTTTTGAGTGATTTCCCTTGATTTACTCAATGAATTTGTA  
CTCAAATGTTATCCCTGAATAATTAGAAATGTAATTAATCTATATAGTTTTCGTATGGATTTTTGGTATTATGTT  
CCTCTTTTTTTTTTTTTGATTTATTTATTTACAAAAGCTATGTACTTTTAAAAATTGAAGTATACATGTAATT  
AATGGCAAACAGTTTAACTACATATTTAAATAATACTATTATAAAACATTAAATACATTCAATTTGTTATA  
AATAATTTTATCCTTGGATATTTATATAATTTTAAAAATCATATTTTGGTCGCAATTCAAAATGGTATTCTT  
TATCTATAAAATGTAAATCATATTAATAATGTTTTAGTTGTCACAAATTAATTTTATTCAGTGATAAAACTA  
ATTTATTCCAAAATAGCCTTCATATTGATAGCATAATTATATTTTTAGCAAAAATTAACCTTAAATGTATCT  
AATTGAGACAACATAGAGAAACAATTTATTCGTCAGTAATACCATATAGAGAGACAAATTATTCATCACT  
AATACCATAAAGAGAGACAAACTATTCGTCATTAATATCGTATTTAGTATATCACAACTAATTTTCAGCCA  
CAAAATTAATATCTTTTAGTGACGTAATAACACTCTTTTAACTACAAATTATGCATAGCTTTAAAGACAAT  
TTATATCGTCACTAATTAATTTATAATTAGGGACAAATAAAATTTGTCAGTATTAACATATTTTTAGTG  
ACGATATGAGTTTCTAGCTACAAAATTTACGTTTTTTAAGACGATCAAATTCGTCATAAATGCTACATAT  
TTGGAGACAAATTTATTTTTGTAGTTAATAGAATCTTTCTAGCGACAAAACACTAAATTGTCTTTGTAAA  
CTTTTAGTGACCCACATTTAGAGACGAAGACTGACGAAATTTTTTCGTCATAAAAAATTTTTGTGACGA  
AATATTATCTTTAAGTGACAAAATAATTTGTCACTGATAATCAAACCTTCTTGAGTGAGATCTCTCAAGTA  
ACCATTTTGAAGGTGTGATTCCAAAACACTAAAGGATCTCAGCTCACTTTGGCTACTCAATTTATCTCAT  
AACAATCTCATAGGTGCTATTCCAATGGAATTGGGGCAATTGAATACGATTGAAGCTTTAGATCTCTCTT  
GGAATCGGCTCACTGGAAAGATTCCGCAGGAATTGACAAGGATGAACTTTTTGGCAGTTTTTAACCTCTC  
TCAAATCATCTCATCGGACCAATTCCTCATGGTCTACAATCAACACATTTGAAAATGATTCTTATGGTG  
GCAACCTTGATTTATGTGGTCTCCTTTATCAAACAATGTGGTACGAGTGATTCATCACATGTTCTCTCAA  
CCATTGGAGTCTGAAGAAGATGAAGGCGAGTCATATTTTTAGTGGATTTACGTGGGAATCAGTAG

>PGSC0003DMG400024768 LRR-RLPs

GATCACTTATCAATGAAAATGCATCTCCAGCACCATTCCAATTATCTTCCAATATCAACAATCCTTTCTTT  
CTCTCTCTCACACACACTACTTGTCTTCTTTAACCTATGTCACACCTGTCGTCATAGCACCTCGGAATTT  
CCGATACCCACCTGAAAACATCGCCGGAGAATTAGGCATCTACCATGATCATCTTTGTCTGCATGACCC  
GGTTTGGTCTTTCTTGTACTCTTTCTTTTTCCACCCTTCAACCCCTTCTCAACGCTCGTCTCCTCTCTCTTT  
GTCCCGACATAATACAGTTACAACCCTTTCTTTCTTGTAGTTTTTGGTGGGAAGAAGAAGATCCGAAC  
AGAAAGTATTGACTAGTTGAGTTTTTTTTTTGTTTTTTTACAGAGTATTCAAGATTTGTATGTCAGCGTATT  
GAATGTTAAACGGATTCAAATGGGCTTAAAGGAGTAGTTAGAATTCATTTAATTTACCCAAGAAACTTG



GAATTGAGGTTTAGTACAAGTAGTTTTGTTGTTGTTGTTTCTTATAGTTTTCATGGATTCTGCTCTGTTTG  
TTCTTAACGAGGATCTTCTTATCAGAATTCCTTCATTACCCATGATTCCGACCGCAAAGCTTCCGTT  
TGGTTTGTAAGCATTCCCTCCGGGTTGACTCTTCCACCGTACCCATCTCCGGATCCTTCGTCCTGAGTTC  
ATTACAACCCTTTCTCCAAATCCCACGTATTTACTCCCTTGACCTTCCGTTTGCCCCAAATTAATGAC  
GGAGCTGTTTCCATGCTGGTGGGTTATGGGTTGCCGGATTGGAGTAGGAGGTTGAGGAGGTTGGTGCT  
GAGTCGAACCACTGGGTTGAAATCAGCCGGGTTAGAGATTCTTATGAAGTCTTGCCTGTTTTGGAGTCT  
ATTGACGTGTCTTACTGCTGGGGTTTTGGTGATAGGGAAGCTGCGGCTTATCTTTGGTGGGTCTTTAA  
GGGATGTAAAGCTCGACAGGTGTTGGGTCTTACTGATGTTGGTTGGCAAAGTAGCAATTGGGTGTC  
AATGCCTAGAGAACTTAGCTTGATGTGGTGTATTGAAATTAAGTCTTGGGATTGATTTTCTGTCCAA  
GAAATGTACACAACTGAAGCAGCTTGACATTTTCATATTTAAAGGTTTGTATCTTACTATCCTTCTTTTG  
ATCGTAGCATATAAGGTATCTGTGTTTGTGAAAATGTGGATTGGTGTGTTTCAGGTTACTAGTGTGTC  
ACTGCATTCTATAAGCAGTATGGAGAAGTTGGAGCTTTTGGCTATGGTTGGGTGCGGCATTGTGGACGA  
TGAAGGACTACATTATCTTGAAAAGGGTGTCTTCGCTTCAGGTGATTAACACGTTTGTCAAATTATTG  
TGATCAATTGTAGAAAAATATGAGATCATAGCTGCTTTTTGGAGTTTTGTTCTCCTCTCTTAAGGTGGCCT  
TTACCATGTTGCTATCTGGTTTTTGCCGATTTAAGACTGAAAATAAACCTTGTATGCAAACACAATTGCT  
TCATAAATAAGCACATGTAGTTTCATTTCTTATAGCTTGTGGAATTATATTTATTTATCATAGAGTGAAG  
ATGGGCTTAAATTTGTTTTGTTAACTTATACTCTCTCAGTTCCAATTTATATGACATAGTTCAACTCGGGA  
CCGAGTTAAAGAAGAAAATGGAACTTCTAACTTGTGGTCTTAATCATGCCATAATATTTGTATTGCTA  
TAAAAATTTGGAACCTGTTATCATAAACATGCCATAACATCTATGTGGCTATAAAAGCTTCTTGTGAGT  
GTAGAATGAGAAGTTTTACGTTAAAGTTAGTTCAATTGGCAAAGGTTGAGGGACTTGTGTCTTTGGTCA  
CAGATCCCGAATGTCAAAGGCTGTGGTTGGCCAAAGGATTGGCTCCATATGGATTTCTCAGTCACTAA  
AAAAATTATATCCAAATATAGATATGTGCCATTCTTTTTGGAATAGACACATACGAAAGTATTGTCACATA  
AAAGGAATAGAGTGAATGACTCGTTTCAGGTGTCATGGTTGGAATTTGAGACAGTTAGTGCATATGACA  
TTTTCTGATGACCAAATTATGCAGTAAGCACATGAATCTGGAATACAGGAAATACTTAATGGAAAATAT  
GATTTATGGCTGGTGATATTTCTGGTATTCTGACTGTAGGCGAACAAGGCATCACTTGATGCTGCATG  
ATCTAGTTCTGATCCTTCTTATCTATCTATCTATTTGTACTTTTTATGAATCCCACTTTTCAGCTTTTCTAGT  
GATCTTTAAGCATACCAGCTGCATTCGTATTTCTTCTTCTTCAAGTTATATTTATAGTGGAAAACAATTT  
CTATCCATGAATATCTGAAATTAGTATTCTAAAGCTCAAGCTTTAGCATTTTATGTGGCGTACATAAGTTT  
CTTGGGTTGCCATAACTATTCAGAACTTGTATGTTTACAGGCACTGGATGTATCAAGGTGTGACAGACT

AAGCTCATCTGCCTTAGCTTTCTTGATTAATGGACATCCTTCAATGCTACAAGTCTACGCTAGTCACTGTT  
TCCATGTGAGTAAATTTGTTGTTAGAACCTACATTTTGAATAATTCCTTGGGGAGTTTTTGATGTTGGTTC  
TGCAATTTAGATTGAGAATCTTGATGCACCAGGAGTTTCTACTAAAGTCATCCAAGGGCTGAAGGACCT  
AAAGAATCTGAAAAGCTCATACTTGATGGAGCACCGTTTTCTGAATCATTCTTCAAGATCATTAAATTC  
AATTGCAAATATTTGGTCGAAATAGGGCTTGGAAAATGCAAAGGAGTGAAGTACTGACAAGGGCATTCTCCA  
GCTGGTATCAGGGGGTGTTAATTTAAATATCTTGAATCTCACATGCTGTAGCGAACTTACCGATAATGCA  
ATATCAGCTATAACAGATTCTTGCCGGAGTGTGTTGTGCCTCAAGTTGGAGTGTGCAACTTACTCACAG  
AGAAGAGCCTATATCACCTGGGATTACATTGTTCTTACTTGAGGAGCTTGATCTTACTGATTGTTTTGGA  
GTCAATGACACTGGTGAGGCTCAAGCCATTGTTCTTTTGTGTTTTATTAACGTATTTATTCTGTCACCATTCA  
GATAAAGGTAAATTTCCATTTATTCTGAAGGACCCAGAGCAAGAAATCTGATTTTCCCTCGTCTCATCTG  
GATTCTATTTCCATTTTTATATTCTTCAAGTTTTGGGCTTTTGTGAGTTGGCTTCCCATTTCTCAAGAGCAAGA  
CATCTAATTTTCTTCTTTAATGACATGTGAAGCTTTGTGCATTATGTCTCAAAGCTCCTCGTGTCAAGTC  
TTCGATGATATGGTTACTCCAAAACCTTGTGCAGTTGGTGACATACCTTTAAATTAAGCATTTCAGCTAG  
GAATTCAGCTATGCTTTAGGTCTGCGCTAATATGTGTTGCATCTCATCTTCTGAGGACTTTATTACCT  
GTCTAAATGTACAAAGCTTATATGCCTAAAGTTGGGATTATGTACTAACATTACTGACAAGGGACTGTAC  
TGTGTGGCTAGAAATTGCAGCGAGATTCGTGAACTTGATCTATACCGGTAAAGTGATTGCCCCATCTGAC  
TTATCCTGTGAATTTGAAAATGTCTTCTTATATTGTATCTTGAACCATTTCAGGTGCCAAGGAATTGG  
TGATGATGGACTCTATGCTTTATCAAGTGGTTGCAAAGAATGCAGAAGTTAAATTTGTCTTATTGCAGT  
GAGGTTACTGATAGAGGAATTGAGTGTCTCGGCCATCTACCAGAGCTCTGACCTCGAGATGCGGAGT  
CTTTTGAATGTCACAGGCACTGGTTAACAGCACTTGCTACGGGATGCAAGAGACTTGCTGAATTGGAT  
GTGAAAGACTGTACTAGCATTGATGATTGAGTTTTATGGCGCTTGCTTATTACTCTAGGAATTTGCAAC  
AGGTATAATTTCTCAATCTTGAACCTTCTCTACTTCTTGTAAATGTATGATGCTGTTAAATCTGCTTGGC  
ATGTACTTTCTGCATTACCAGTTGATTGTAATGGTTAAATAACTATACACCTTTGATCAGTTTTTATCATT  
TCTCGAAATCCTGAGAACAGTAATTGAGTTGTAATCCTTTTTCAAATTTTGTTCGATACAACATAACTCT  
CTTCTTTGGTCCACAATTACATTTATATAAGTGCCAGGAATTTATTTTTGTAGAAGTTATCAGCAACTCT  
GTAACCTGATTTAGTTGCTACAAGAGTCCGTGCTCCTTTTATGTTATCAGCTCACTTTTGTGAGAGTCTAAC  
AAAATTTCCGTGATAAATTAGGTTTTAAATACTTCAACAGATTTTTGGCCTCAAGTCTTTCATAAACTG  
AATCAGTTTTTATAAAAAGACTGTTTGTGGGATCAAGCAGTCCTGGTTTTCTTTTTGTTCAAAGTTCAA  
ATAGCATAGTAATCTTGGCGGTGCATAATGGTTCAAGTTTCACTAGTAGATTTTCTAGATTACTCTTTTTG

TATAATTTTCTGGACCCATGATAAGATATGTTAGAATTATGTTTCTCGCAACTATATCCACTTTGTTGCCTT  
TGGACTTAGTAGGCCATTCATCAGGATTGAGAATTATCATTTCACTATATGCACCACACTGAAAGGACTC  
TGAATGTTGCATTAACCCTAATCAACTGGTCAATTCTTGTTTGAATGCTTAAAAAGTTCAGAATACCCCT  
ACTTTTTGGATATCAATCACAGTTTTTGCAAAATTATCGACAACGTTTTGACTGATCAAACCTTGATATTGA  
GTTTACCAACTCAAATAATCGACATATACACTTACTCCATTTCCCCTTTAAGGTTTATTAGCGTCAGATAT  
GTCAGGTCACCTAATATTCTTACCAGCAACAGTGTGTACTGTGTATGAACAGGTAGTGATCGTACTTGAA  
CTTTTGAGTTGATTTTTTTTTCTGCATACTCATGAGGTGTCAAATTGAGACCATCTGAGGATTAECTATAT  
TTTTCAATATCAATTAAGGACAAAAGGAATCACATGGAATGAAGTTGTCTCGAAAGACCTACAGTTTT  
TTTGGAACCTATGCAGACTTAGCTATAGATAGAGCAAAATGGAAGAAAAACATCCATAATAGGTGATAT  
TACTAGTTGGGAACAGGTTTTACCATTTTAGTCTTGTTAGTAGGTTGACTTTGAACCTAGTGCTTTTCTG  
GAGTATTTTGATCTTACCATAAATTTATATGTCAGTCAAATATAGAGAACTTTCAATATTAGTGTTACTA  
TTATTTATATATTTAACTCATTTTCAAAAAAATATTATTTGGTATGATGATGACATGAGTTGAGTTAAAT  
GGAGAAACATGGTCAGTGAGGATTCTTATAACCAACCCCACTTGTTTGAATTGAGGCATAGTTGTTG  
ATGTTGTTGTAAATAAAAGGACAAGTTTCAACCATGACGTCTGTTTTAACACCTTTCTCACAGGCATCTGT  
ATGATGGTTACTACACTTTTCAATCAGATCATCAGTTAGAATCATGTCACTGTTTCTTGACAAAGCTGTG  
GCATAATTATTTTTTTAAAATTTTGATTCCACACTCGACTTGAAAGTTGTAACATGCTTGTTGAATTTA  
TAATTGTTGTCTGTTCAAGAATCAGATGTACTTGACAGTGCATTTGTTTAGTAGATCTCTGAAATGAGCAT  
TCATCAGATCTATTGATTGCCTTGCTATTGCTCTATGCTTTTACGGTTTAAATGAACAATCTCTTATGAGTTT  
AACTGGGTTATATACTTGTTAAGTTGGTCAAGTTGACTGAGTTCAAATGAAGGTCATAACTCATAATC  
ATTAAGTGAATACAAACATTTTGCCGTATAAAAAAAAAAATACAGACATTTTCATGTCAATTTCACTAAGT  
TCTACTAGCCGGAATTGACTCAGTTTGTGCAAGTATGGTTAAATTCATTTGTGAGTAGATGCATGTAGCT  
GTTGTTGGCACCCCTTGATGCTTGCTATGCATTGAGACTTGTTTATGTTATGCATGCAGTAGTATAAGCAG  
CAGATTTTCTTAGATTTTTGTTGTTATTCCTCATGTATTCTAAATAAAGTACATTTTGTGCGATTCATG  
CCATTCTTGTCCTTGAATACCTAAATGGGAATAGAGAGGCTTATGAATTTGTCTACAACCTGCTGAAAT  
AAGTCTTTGATGGCAGATTAATCTGAGTCATTGTGCAATCTCGGATGTGGGCCTGTGCATGGTGATGGG  
GAACTTGACACGGTTGCAGGATGCCAAGCTCGTAAACCTTTACAACGTGTCAACCAATGGCTTTGAGGT  
TGCTCTTCGGGCTTCCCGTGTTCCGGCTGAAAAAAGTTAAGTTGATTGCCTCCCTGAGACTACATCTTACG  
CCGGACGTAGTTAAGACATTGAAGGCAAGAGGTTGCAGGATTAGGTGGGATTAAGGTACAATATCC  
CAACAGTACATGCCAATGTGTGTTACCATAACCCCCCACTTACATGAATGGGGTACTACCAATACATTTG

AGCTGTTGAACCTAAAACCTTCTCCCATTACATCAGTAAGCAGAAATTTCCATCATGTTGTTTTGTAAAGT  
CCACCGAAGAGATTTTGC GCGACTCTTCACTTGTGTGGACTCATTGTATAAACTTCTTATGTACCTTTGCA  
GTCTGGAGATCAACTATATGAATGATAAAACATCATATCAGAGGATCTCTAAAGTTAATGGCAGAGAAT  
ATCTTCTTATTAATCCCTTTGCCATTTTGC GCGCTGCTTCTTGAGTTGAGGGTCTTTGCGAAACAATCTTTCT  
ACCACCCAAAATAGGAGTACAATCTGCATGTATATTACCCTCCATACCCCACTTGTGGAATTACACTAGG  
TATGTTGTTGTCTGGTTATTG

>PGSC0003DMG400024857 LRR-RLPs

GTTACTTTCCCTCCCAATGAAACAAAACCTCCCTTTTCCCCTAGAAATACTGATCAATACATACACTACTAT  
ACATTCAAGTCTATCTCTTTTTTTTCTACTCACCTCTCTGTATTTTTGTTTGAAACAGCAACAAGAAGATA  
CCCTTTTTGGGCTTTTCTTCTTTGTTTTGTGTATATATAGAGGTAGGAGTTTGTGGGGGTGTA AAAAGAT  
TACAACCTTGAGTAGTGCCAAATGTTAGGGGTAGAAGATTTGAGCTTGACAAGCTGTTTGTGAACAAT  
AGTAGCAGAGGTGGGGTTTGTAAAATGGGGGGTGGGGTGATGATGATGGGAGAGTGAAGGATATAC  
CTATGGAGTTGTTGTTGAGGATTGCTTCACTTGTGGATGATCGGACGGTGATTGTGGCTTCTGGTGTGTTG  
TAGTGGATGGAGAGATGCAATTTCTTGGGGACTCACTCGTCTTTCCCTTTCTTGGTATGACTGACTTTTTCT  
TGTTTCTTGATTTTGATAAAAATTTAAGGTTTATTTTGATTGTGTGGTTTTGCTTGATGTGATTGATGAAG  
GGTAGTTCTTGTTCTTCATTTGTTTGATTGTAAATGGTCAGGGGAGTCAAGTCAGCAAAGACTGAATTT  
TTGTGTTCTAGAATAGTTGAAGGAAATAGGAAAAATCTACAAGTTTTTATGTGTTGGACTATTTTGGTCC  
TATTTACCTTGATTAATCTATTTGAGATGTCATGTATGATTGATCAACTGGAGGAACACACATGAGGTTTT  
CATTGTTTACTTTCTTGAGGAAGGGTTTGTAAATGTTGTTGAATAAAGCTTTGAGTTTGAAGCTAAGG  
TAGATGTTAAAAGGGGAATCATAGTAGCTCAGTGGATTGACTACCTGAACTTTTTTATCTCGTTGGTGAG  
GGTATGAGTCCCCACCTTGTAACCCCTTCTCCTTACCCTACCCCGTTTTGTTCTTTTGGAAAAGGTTAG  
ATTTTTATGTTAAAAGGGGTTGACTGAAGATTTTTTCCAATTTGGATTTGTGAGTGCCAAGACTTGGAT  
GAGCAAAGCTAAGTTGAAAAGCTTGCCTTGCCTGGCATCAAGGGATTTGGGGGAAATGAGGAGATTA  
GAGAGATTAGGATAGTGATTCAACAGCCTTAATCCCATAGGTCTTATCACATGTGTTTGTATCTGAGATG  
CCCTAAATATGAAATATGGTCATAGCATAATGGTTATTGTTCTGCTTTGTGGCTAAATTTTACCCTTTTTTC  
TATGTGCTTCATCCTGGACATCTGGAAGTTAATATCTATGTTTTAGTGCTCAGAAGCATTGGACCTGAGA  
AGATATAACTTGCATATGATTGTGCATTTGCCTTATTTTATATTTTTCTTTACTTTTTGAGGACTTATTCA  
CATGTTGGTTCTTGCTTGCATTTTCTGGATTTGTAGTGTGGTTTTTACCCTCTCCTGCTATTAGAATTTG  
ATTGATTTCCCTATCTTGCTGGTATTAGTAATCTGAGAGTTGATATTCTATGGAATTGAGTACATAGATA

TTTGTGAGTTATCTTCCCTTGTTGATTTGTGGTGTATATCGGTTTCTAAGCTTTTTGTCCCCTCAGGTG  
CAAGAGGAATATGAACAATTTAGTGCTGACACTTGCCCCAAGTTCACGAAGCTGCAGGTTCTAACTCTT  
AGACAAGATTTACCACAACCTTGAGGATGTTGGTGTGCGAGACAATTGCCAATCACTGTCATGAATTGCAA  
GACCTTGATCTTAGCAAGAGTTTTAAGCTAACTGATCGTTCCTTTATGCTTTAGCTCACGGCTGTCCAAA  
CCTCACAAAGCTGAATATCAGTGGGTGTTCTGCTTTCAGTGATAGCGCTGTTGCATACCTAGCTGAGCAT  
TGCCGAAACCTAAGAGTCTTAAACCTTTGTGGTGTGTTAAAGCTGCAACTGATAAGGCATTGAAGGTAT  
ATGTCTTGTCTCTCAAATGACCTGTAGGAGTACTAAACCGTTGTTTCTTCGAACTTATATGACTCATATT  
ACTCCTTGCAGGCTATTGGTTACTACTGTAACCGACTGCAGACTGTAAATCTTGGTTGGTGTGATAAAGT  
TGGTGATGAAGGTGTAATGAGTTTGGCTTATGGGTGTCCTGATCTCAGAGCCCTCGATCTGTGTGGCTG  
TGTCTTATAACAGGTAAAACATGTATCTGGTTAGGTTTTGTATTTAATGTCTTCCCTTAGCAGTGGTATG  
TTTACTACCAAAGAGTCTTAAACTGACTCGGATTTGCCATGCTTATTAGGGCATAAGTTGTATTCTAGA  
AATTTTATGCAAAAAAATCTTACCAAAGAAGACGAACTTATTTATTCCTATTAGTAACTAACTAGAAG  
GAGATATTCATGCAAGATATTTTCTTAGGAAATGAAAAGTGGAAACATGATTTTGATGTATACGAGGG  
ATATGAAGGACCTTACTTTAGATTTTATATCAAATAAACTCCTATGGCTATTTGTGGTGTCTGAAATGAAT  
GATGAAATGCATATTAGACGGTAGAACTGAGCTTTTTTTCTTTGGGGGAGTGTCCAAATTTATGAAGTCT  
GCCTCAGCCGACTGATTATTAGATGTCTCCTATATTTCTCTGTGTGGATGCTTTTGTTATGAAATTTTATG  
ATCATTGCTCTCGACCTGTTAGAGCAATGGCTACAAGATAGCAGTGTCTAAGTAGTTTAGAGGTCTGTG  
TTTCTCTCGTTGGCTTGTGCGAGTGTACTCACACCTATGTTCTACTGCCTACTTCTTGATGGGCTATTAGTG  
TTTCTTTTTCTACTGAAGTTTGAGATAAAGTTGCTGATGTCTCCAAGTTCATTTTTCTGGTTTAGT  
CATCCATTTAACATAGCTATTATCTAATGCCTGCAGATGAGACTGTGATTGCTTTGGCAAACAATTGCACT  
CACTTGAGATCCCTCGGCCTATACTTCTGTGAGTACATCACAGATAGGGCAATGTAAGTCTCTAGCTCAGA  
GTCGGGTCAAGAACAAGCACGAGATGTGGGCATCTATGAAGAAGCACAGGTACGAGGACGAAGGGCT  
TATGAATCTAAACATCAGCCAATGCACTGCTCTCACACCTCCCGCCGTTCAAGCAGTATGCGAAGCATT  
CCTGCTCTGCACACATGCCCTGAGCGACATTCCCTCATCATTAGCGGATGCCTGAACTAACATCAGTGC  
ACTGCGCCTGCTCTGTCCAAGCTCACCGTGCAGTGTCTCCATCCAGCTCACTGAGTGTCTATGGAGG  
AGAAGTTGCCAAGTTTTTTTTTTTTGAGAATGGTAAAGAGAAAAGTTGCCAAGTTTCGAAGCCGTCATAG  
AGGGAGAGAAGAAAAATAGGGTGAGAAGGTTGAAACGCCCTGTACATATTTGTTTGTGAAAAACTA  
TGCTGGACAATCTAGGCTGTTAAGCCAAACAGGTTCTGTTTGTAAATCTGTTGGACTGAGAACTTGT  
GGTTTATGTCAAACTCTTAAAGACTCCTTTCATGTGTTTTGACTATTTGGTGAAAGACATTTAATTCCT



TTTGTTTAGCTGTACTTGGTCCGCTTCAACTTTTCTCATTTCATCTTTTTTAGTTTTGAATTTGTGGTCTTGA  
ATACATTGTGCAGATATACATCTCACTTCCCAATTTTGATGAGCTTTTGTTAGATTTTGTCTGTACAAGAT  
TTGTTATAGCAATAACCTTGTTTCATGTTGGTTCTTGGATGATAAAAGTGTATCTTGCAAAGCAAATTCTCC  
CTCAACATGCATGCATACTTGTCT

>PGSC0003DMG400025295 LRR-RLPs

GTGATGAATAACAAGAAAAACCCAATCTTCTCTTTTTCAATTTTTTATCATAAACTATACATACATAC  
ACCTTTTGTCTTCCAAAGTCAAGATTATTTTTTTTCAAACCCCACTTACCAAATGCATTTTCTGAT  
GTTGGTTTTCAAGATTTTGTTCATTTTCATCTTTTCATCTGTTCTCACTAGCCCAACAACCCCAAATTTG  
TGTTGAAACTGACAGACTTGCTCTTCTTGGCTTCAAAGATAAGATTTTAAAGGATACTACTGATTTTCTGT  
CTTCATGGACAGGTAAAGATTGTTGTGGAGGAGGTTGGGAAGGTGTAGAATGTGATGTTTCAACAGGG  
AGAGTGAATAGATTGGTGTACAAACACCTTCTGAGAGAGACACTAGTGTTCATGAAGGGTACTTTG  
TCATCATCTCTTGGTGATTTGGTTTTCTTGGAGACATTGATTATAAGTGAATGAAACATATTGCTGGTG  
CTATACCGGAAAGTTTTCAAACCTTCAAGATTGAAGCAATTGATCTTGGATGGTAATTCATAAAGG  
AGATATACCCTCTGGTTTATCTCATTTGGAATCACTTCAAACACTTTCACTTAGTGGTAATCATTTGACAG  
GACATGTACCTTCTGTATTAGGAAATTTCAAGAATCTGCAGCAGCTGAGTTTAAACAGACAATTTGCTAAC  
TGGGGTTATCCAATTGGTTTCAAGAATCTTATTAAGTGCAGTCCTTGGATCTGAGCCACAATTCATAT  
CCGGGGTTGTTCCGAATTTTCTTGGACAGCTTCAAATTTGACATATATTGATCTTTCAAGTAATGAATTG  
TCAGGGGAGGTTCTGTTTCCTTGTGTAGTTTGCTCAAGCTGTCGTTTTTATCGATGGATCATAATCGAAT  
AACAGGGAGAATCCAACCTCAAATTGGGAAGATGAAAGCACTTACTTCATTGTCATTGAGTTCTAACAA  
GTTGACAGGTCAAATCCCTGAGTCTATTGCAGGATTACCAAATCTTTGGAACCTTAGTTTGTCTAGAAAT  
GAACTTTTAGATCCTTTGCCTATTGCTTTCTCTAAAGGCCTTCTTCACTTTTATCAATAGATTTGTCTTATA  
ACAAGTTCAATCTTGGAAATAGTACCTGAATGGATTAGGACTAGAGAGCTTTCTGATGTTAATTTAGCAGG  
CTGTAAGCTTCGTGGGACGCTTCTGAATTTCACTAGGCCTGATTCATTGAACTCTATTGACTTGTCCGATA  
ACGCCTTCACAGGTGGGATATCGAGTTTCTTTGCAAGAATGTCAAGCTTGCAAAGGGGAAGATATCAA  
ACAACCAGTTGAAATCTGATGTTGCTGTGATCAAACCTGCTGATGGGATTTTCATCTCTTGGATCTTCATTCA  
AACCAGCTATTCGGGTCTCTTTGAGGATGTTAAGCAACAAGACTAGCAAATCTTGGAAAGCAATCGAC  
GTCTCAAACAACCAACTCTCTGGGAGCATCCCAGAGTTCGTCAGTGGCTTAAACCTGAAAGTTCTCAACA  
TAGGAAACAACAAGATTGCAGGTCAAATCCAACCTTCAATATCGAATCTTGATAAGCTTGAGAGGTTTCG  
ATATATCAAGAAACCAGATTACTGGTACAATCCAGTAAGTCTAGGATCACTAGTGAAGTTACAATGGTT

AGACTTATCGATCAACAGACTTTCAGGGAAAATACCAGATAGCTTGTTGGGGATTGAAGCATTGAAACA  
TGCAAACCTTCAGAGCCAACAGATTATGTGGTGAATACCACAAGGCAGACCATTCAATATCTTCCCTGGA  
GCTGCCTATGCCACAATTTATGCTTGTGTGGCAAGCCTTTGCCGCCTTGTAAGGGAACGAAACAAGATA  
AGTTGGGCCAGTAACTGCTGACTCCATTTATAGGAATTTATGTTTGTTAACAACAAACAGTTTACTTTTC  
TTTTCTTTTTTTGAATTCTAGTACTACTTGTACAACCTCTATCATCTCACATTGTTAGTCAGTGTTTACTTCA  
CATAAATTCAATATGAA

>PGSC0003DMG400025383 LRR-RLPs

TGTTTATCAAATTAAGCACCTAAGGTTTTTGGACCTCTCCTGGACAGCTATAAAAAAGTTGCCAGATTC  
AATTTGTGTAAGTGTACAACCTAGAGACACTTCTCTTGTACATTGTAGTAATCTTTATAAGCTACCTCTGCT  
TATGGAAAAATTGATCAACTTGCCTCACCTTGACATTAGCGAAGCTCATTTGAGGAGACCCCTACATCTG  
AACAAGTTGAAAAGTCTCCATGTGCTAGTGGGAGCCAAGTTTCTTCTAAGTGGTCGCAGTGGTTCCAGA  
ATGGAAGATTTGGGTGAACTACATAACTTGTATGGATCTCTATCAATTCTAGAGTTGCAAAATGTGATTG  
ATAGAAGGGAATCTATGAAGGCAAATATGAGGGAAAAGAAACACGTTGAAAGGTTATCTTTGGAGTGG  
AGCGGAAGTTTTGCTGACAATTCACAACTGAAAGAGACATACTTGATGAGCTACAACCAAATACAAAC  
ATAAAAGTACTCCAAATTACCGGATATAGAGGGACAAAATTTCCAAATTGGCTAGCTGATAATTCATTT  
ATAAGCTAATAGAAGTGTCTCTTAGCTACTGCAAGGACTGTGATTCCTTGCCAGCACTAGGACAACCTCC  
TTGTTTAAAATTCCTTACCATTAGAGGGATGCATCAAATAACAGAGGTGACTGAAGAGTTCTATGGTAGT  
TTGTCCTCTAAAAGCCATTTAACTCCCTTGAGAAGCTTGACTTTGCAGAAATGCCGGATTGGAAGCAGT  
GGCATGTACTGGGGAAGGGAATTCCCTATACTCGAGGAACTTTGATTAAAGATTGCCCAAAGTTTA  
TAGGAAAATTGCCTGAAAATCTTTCTTCTGACAGGATTGAGAATTTGAACTGCCCTGAACTCAGTTT  
GGAGACACCTATCCGACTTTCAAATTTAAAAGAGTTAAAAGTTGTTGGTTGTCCTAAGGTTGGAGTTCTT  
TTGAGGATGCTCAACTGTTTACATCTCAACTTGAAGGAATGAAACAGATTGTTGAATTAGTAATTAAGT  
ATTGTAAGTCTCTTACCTCCTTACCAATTAGCATTCTGCCGAGTACCTTGAAGAGAATAAGAATATCTGGT  
TGTGGGAAACTAAATTTGGAGGCGTCCATGAATGCTATGTTTCTCGAGGAACTGTCTTTAAAAGGATGT  
GATTCACCTCAGTTTGTCCCAAGAGCACCTATTTGAATGTAAGTAGTTGCCACAACCTTAATAGGCTTTT  
GGTTCCTATTGCCACTGAAAGACTCAGTATTAGAGGTTGTGATAATCTTGAGATACTTTTCAAGTGGCATGT  
GGGACTCAGATGACATCATTGCATATTCACGACTGCAAGATTTTGAAGTCGTTGCCAGAGCATATGCAG  
GAACTCCTTCCATCTCTTAAGGAACTGCAACTATGGCGTTGTCCAGAAATAGATTCTTTTCTGAAGGAG  
GATTGCCCTTCAATTTACAAGTCTTTGGATCAACAAGTGAAGAACTGGTGAATGGCCAAAAGGAGT





CACCAAATGAATTGATTCATATTTTTGCCTTTTTGATATGAAAGGGATACAATCAATTGCAGTTGATAGG  
AATGAGAAGAAATTTATTGTGATCGGAGATATGGATGCTGATGAAGTTCGATTAGTTGTGGGGAAACTG  
ATGCTGTAA

>PGSC0003DMG400025563 LRR-RLPs

ATGGACAAAACCTCAGCAGAGTTACCAACAGAAATCCTTCATCAAATACTCTCTCTCTCCCAACTAAAAC  
TGCTGCTCGAACTGCATTGTTGTCCAAATCATGGCTTAAAGCATGCTCTACGAAACCCCATCTCTGTTTCG  
ATATATCTGATCCCGTAGAATATCGAGCTCATGAATTCCTGAGAATTGTAGATAATACTTTGGAAAGGTA  
TCACCGCGATAATAATCTACCTATTTTCATCTTTTGAGCTTTGCATCTCCTTTTATGATCACATTTATTGTGA  
TGGTCTAGTTGATAAATGGTTAGATATTATAACAGATAAAAGAGCTTCAAAGATTTCACTTTTTGTGAAA  
AGCAAAGCTAAAGAATATTGTGAAAGATATAATTTGTTTGTTCATAACATATTTAAGATGAAATTCATAC  
AACATTTGGAGTTAAATCATTGCCAAATATTACTGGCGAAACAAAATGCACTCTTTTATGATGATAAAAT  
TAAGTGTGATAACCTGAAAAACATAACCTTGTGTTATGTTACTATTTCTCAATTAACACTTCAAAGCCTGA  
TTTCATGTTACCCTCAGATTGAGAAGGTATCAATACAATACTGTATCGGGTTCAATAGCATTTCGTGTTTCA  
AAAACCTTCCTAAACTTTTGTGATTTAGTATCTTTTACTGCCCAATTGTGGAAGTTGAAATTGTTGATGC  
ACCAAAACTGCTATCTTTCGAATATGTGAACAAAGGTGATTCCGCGCCTTATTTATCTAGTGATAATCTTC  
ACATATGTTTGCGAACAATAGAGATTGGTACTTGTCAAATCTCAAAGGGTAGAATTTGTGAAGGTCA  
CAGTTGAGTATTGGGATCTCTTCAAGATTATACAAAAATTACACTCTGTGAAAGAGTTGATTTTACACTA  
CTGTAGGTACTIONGAGAAAAATAAAAATCTCAAGTTCAACCCTCGAGGTTTGTAGCATAGTTCAGTGTGAT  
TTAGTAGAAGAAGCCATTTTTGATACGCCAAATTACTCTCCTTAGCCTTCTCCGATCAAGATAGACTACC  
TTCTTTATCTTTTGAAGGGCTCCGAGCCAATGCAGAGTTTCCATAAGGATTGACATTTTATGGGACGTT  
CAGCACCTCATGAACTTACGGAGATTTCTAGTTGAGTTGGGTGATCAAGTTGTAGATTTGACGTTGTCTA  
CATTCTCTAAAAGTTTGATCATACCAAGAGGAATTTATCATCTTCCCACACTGAAGTTGAGCATTGGAA  
TTATCTTATAGTGATATTACAACCGCGACATATTCATCTTATAACTATGATGTCATCTTCGCAATTTGTTTG  
CCCAAGATTTTAACGTTACAGTGTGACAAGAACTAAGAAAGTTTCTACGTCAACAATGGTTGAAGAAG  
AGAGAAAACAGATTTATCAAATGTACTTGGAAAAAGTATCTCATAAATGCTGAGATAGAGTACAAGAAA  
AGGAACGGAGAGGATTGGATGACCCTTGATAGGAAGATATTGGTAGCTGATCCGCATATTATTGAAGA  
GATCTATACAATCCGCTTCAAGCAAATTCAAAGAAATGAAAAAATAAGTATTCGTATATTCCAAGGTAC  
GTAACAATTTGTTATGCACAATGTATGGATTATGATATCAATACTTTTCATCTTTCCATTTCCAAACAAT  
TAACTTCGCTTGTATTCTGCAGATGTATTCCGAGATGGATAGTTCATTGATTGGAGTGATCGCGATAT

GTGATAGCTCGTTCTTCTTGGCTTCTATTTACATAGTCTGCAATACCAAACAGCGTAATGCAAATCTTTGC  
TCGGATTTGAATTGAATTAGGAAATGTTGTTTGATTGAATTAGGATTTGAATTTTATGCTTCTACGTGGTA  
GAATATTGATATTAAGTGGGTTGTGAATTTTATGTTTTATATACGTATTTCTCGTATCTTATTCATGTTAAA  
TAAATAAGCAGAAAGATGTAATGTTAAGTAATACTTTATTTTTATACTATATATATTATGATTAGTCCATT  
TTCTTCACTTTCTTGTCTGAGCAAACTCCATATGCTCTTCCATGGATAGAATTTACAGTTACCAAATAAA  
ATCCTTCACCAAATACTATCTTCTCCCTACTAAACTGCTGCTCGAACCGCGGTGTTGTCGAAGCAATG  
GCTTAAAGCATGCTATACAACTCCAATCTCTGTTTTGACGAATCTGATTTTGGCGAAGAACAACAGAAT  
AATGGTAGGTTTGTAGACTTTTCATGGTGAATTCTCGAGGTTAGTAGATTATACTTTGGAAAGATATCGC  
CGTGAAAATCTACCTATTTGGGTTTTAAGCTTCACATCTCTTTTTCCGATCAAATACTGATTGTGAAGGTCT  
AGTCGATAAATGGTTAGAAATTATAGCAGAGAGAAGGGCTTCACAGGTTGCACTTTTGGTGAAAAGCG  
AATTTGGAGTTTATTCGAAAAGATATAGTTTGTAGCTGATTCCATATTTGCGATAGGATCGTTGCAGGA  
GTTGGAGATAAATTGCTGCAGAATACTGAAGCAAAAAGCATTACTTTCCGAAGATAAAATTAAGTGTAG  
TAACCTAAAAAATCTAACCTTGTGCTATGTTACTGTTACTGAATCAGCACTTGATAGTCTAATTTTCATGTT  
GCTCTCAGATCCAGAAGATATCATTCCAACACTGTTTGGGGTTCAATTGCATTTGTGTTACGAAAAATCTT  
CCTAATCTTTTGTCTCTTCATATCTTAAAGTGCCCAATTATGGAAGTTCATATTGGTGATGCACCAAATACT  
GCTATCTTTCGAATATGTGAACAAAGGTGATTCCGAGCGTTTATATCGTCATAATCATGACATATGTTTGC  
GGACGTTAGAGATTGGTTCTTGTATAATCTCAGAAGGGTAGAATTTGTGAAAGCTGAGATTGATGATG  
TGGTTCTTTTCGAGCTTATACCAAATACTACACTTCATCAAGGAGTTGATCTTACACTACTGTAAGTACTTG  
AAGAACATAAGAATCTCAAGTGCAACACTCGAGGTTTGTAGCATAGAAAGTTGTGTGTGCTTAGTGCAA  
GCCACTTTTGATGTGCCAAGTTACTCTTCTTAGTCGTCAAGCCAATGCAGGATTTTGGTGAACGTATAA  
CACTACCTTGTATCTTTTGAAGTGCTTCAAGCCAATGCAGAATTTACATAAAGTATGGCGATCTACCA  
TCTGATGCCGAGCATATCATTGACTTACGGAGATCTCTGGTTGAGTTGAATGATAAAGTTGCAGACTTGA  
CATTGGTTAGTATCAGTAAAGGGTTGAGAGCAACAAGTGGAGTTGATCATTTTCCCTCAACTGAAGTTG  
AGAATTTGATATTAACCTATTGTGACTGGTCAATTACGACATATTCATCTTACTTAAATGACGTCTTCTGG  
ATTTGTTGGCCAAGAATTTAACTGTACATTGTGGCAACAAATTTAGAAAGTTCGTATGTCAACAATTGT  
TGAAGAAATGCTGGTGGAGGAGACCTTCTAAATGTTCTTGGAAAGAATATTTACATAAATGCTCAGATAG  
ATTGCATGAAACGGGGAGGAGACGACTGGATGACTCTTGATTGGAAAATGTTGGCATCTAACCTCGTA  
TTATTGAAGAAATCCGTATAATTCGCTTCAACCATACTCAAAGAAAAGAGATAAAGAAAGAATCATATAT  
TCTAAGGTAACGTTTCGTTATGTAAAATTGTTCTATGAATTACAATATTATTTGTGCCATCCCCTTTCCCTT

TCTTAACAATTAACAGAGTATATTATTTGTGCAGATGCATTCCGAAATGAATAGCTCATCAATCGGAGTG  
ATCCATATGGCTTGGGATTATTTTGAGTTGTTTTCTTTCATTTTGGTTGTAGACTTGCTTTGAGGTTAGCT  
GTTTATGTCCATTTAAGCTTATTTTCATTTTCTCCATTGGACCTCCAATGTTATGCTGTTGGTATGGTCTCG  
AATTGATTGGATTTGATATTTTTGTGCGACTTACAACAAAAAGTACTACTTAGATAGTTCTTTATATCTGTC  
AAAGTCTTGGTGCGCAGATTTACCTGTTAACAAATACGTGATAGAAATGCGAGCTCTCTGAAACACCATC  
ATAAGTCGATACTTGCATAAACAATTATCATTTTTTCATATACATTACTGCAGGATTAATGCTAACCAATC  
CACTCAGTGCTGCAGAACAGGAATTTGAGAACTATACTACTCCATCTGTTTCAATTTGTTTGCCTGATTTT  
GACTCGACACAAAGTTTAAGAACGTAAAGAAGATTTTTAAATCTTATGATTTTAAACTAAATATATGTAG  
AATATTCCAAAATGTCATTTAATTTTGTGGTATTAACATTTCCCGTGAAAAATGCATTTTTAACTTCCTGA  
AGAGTGTA AAAATGTCAGTTCTATTTTTCTGAGGTTTAGCTAATAAAAACTTTAATCTAATTGGTCTGCC  
GTGTAGTGTAACAAATTCTTCCAATTATATGGGTCGTTGTTGAGAACAAGTTATCCCAAGATTAATT  
AAATAGTGGGATAAATAATTACAGAACAGCCTAATACCTCCAACAAACACAGAATAAAAGTCGTGCAT  
TTTATCCTGGTTATACACCTCACA ACTCTCAACAAGCTCTGCTACTGCCATGGATAGAATTTAGATTTAC  
CAACTGAAATCCTTCACCAAATACTCTCTCTCTCCCATTA AAACTGCTGCTCGAACTGCCGTGTTGTCG  
AAGCCATGGCTATACAAATCCCTATCTCTGTTTTGATCAATATGATTCTAAACCACCTGCGGCTGCATAAC  
GGTATGTT CATAGACTTTCATAATCAATTCGTGACGATTGTAGACAATACTTTGGAGAGATATCGCCGTG  
AAAATCTACCGATTTAGTTTTAACCTTCGCATCTATTTTTCCGATCAA ACTGATTGTGACGGTCTAATCG  
ATAAATGGTTAGCTATCATAGCACAGAAAAGTGTTTTACAGTTTTCACTTTTGGTGAATTGCAGATCTGA  
AAATTATTTTAAAAAATATAGTTTTGTTAGCTGATTCCATATTTGCGATAGAATCGTTGCAGCAGTTGAAG  
ATGAATCACTGCAGAATACTGAAACAAAAAGCACTACTTTCCGAAGATAAAAATTAAGTGCAGTAACCTA  
AAAAACTAACTTTGTGCTCTGTTACTGTTACTGAATCAGCACTTGATAGTCTAATTTCTGTTGCTCTCA  
GATCGTGACGATATCATTCAATACTGTATAGGGTTCATTTTCTCTACTTTACAATCGATATACATAGTT  
GGATAAACATACCAGACTACCTGTTTATCTTTGAAAGTCCTTCAAGCAAATGCAGGATTTCTATATATT  
ATGGTGATCTATGGGATGAAGAGAAGTACATTGACTTACGGAGATCTCTAATTGAATTGCGTGATCAAG  
TTGTAGAGTTGAGATTGTTTTGTATCTATATAGGCTTGAGAGGAGCTAGTGGAATTGATCATATTCCGAT  
ACCTGAAGTTGTGAATTTGATACTTACTCCTTACTATTCAACTACTTACTTTGATATCATCTTCTCGATTTG  
TTGGCCCAAGAGTTTAACATTTAGGAAGGTGACAAAAGATTTAGAAAGTATCTACGACAACAATTGTT  
GAAGAAGAGACAATGGAGTTTTACGAGATGTACTTGGAAAGGAGTATATGATGAATGCTTAGATAGAGT  
ACAAGAAAAGGACACAAGACGATTGGATTACTCTTGATAGGAAAATAGTGGCAGCCGACACTCGTATTA

TTGAAGAGATGAATACAATCCGCCTTACACTGTACAATGTATGAATTATGATATTGATCACGTCTTCCAG  
TTTCATCCCCTTCCCTTTCCTAACAATTAATGGAGTTTGTTATTTCTGCTGATGCCGTCCGAGATGGATA  
CCTCATCATGGAGGGATCGATAACTCATTTCAGCTATCTTCTTGCTTATCTTTCTTATTTCTTTAA  
TTTACCCAATAATTTGATGGAGTTTGAGTATTAGGGTAGAAGGTCAGTAGGTAGCTCATAGCTGAGTGT  
TGTCTCACTTTGTGTGTGAGAGAGACACGGGCGGACTACCTTGATATTTTATTGTTTTAGTTTATTTAAT  
CCTGTATTGGATACATTCCTTTGAGTCGAGGGTCTATGGAAACATCTTCTCTACCCACAAAGGTATCGT  
GAACTTAGTTGTATACATATTTAGTGGATCTCTACTACAAGTACATGGTTTGAACCTTTGAACATACTA  
CTGATCTCAGCTGAACCTGTATGTAACCTGCTAGCTCCGACACTGTAAGAACCCTGTAGACATCAAATGT  
CTTGACTGATTCTTTCACCTTGTATCTTGGTTTCTAGATATTCGAAAGATAGCAATTTTGGTGCATCAACAA  
CATGAACTTCCTCAACTCGGAAACATAAGACATTAA

>PGSC0003DMG400025769 LRR-RLPs

TGAAATTCTGCAAATTGATTAAGTCAACACCCCAACATTCAATCAAATATAGCATTCTCCA  
CCATCACCCAGCCAGCCAAAAGGGAAACCTTTTTTCAAAGTTACATTAAGAAATTTGTGTGAAAGAG  
CTGACCATCAACTACAAAGGTGAGATATCAACCAAAAAAAAAAAGGAAAAAACGAGCTGCAGTTACT  
TAGGTGCTCAAAGTAACTAGATTAGAGTACAATACTAGGAGACAAGCATAATAGAGATTCTAAATCA  
ATAGCAAAGAGAACTTCTAGAGTATGCACTGGCTCCATTGAAATGCTTGTGGATTACTAATCAAATGA  
CCATGCCACTATTTCAATGCCAATCATATAAACCTTACTTCATCTGCCACAGACACTTCCACTAACAAAG  
GTCATCGAGAACCATTCAAAAAATAAGAAAAACACTAGTAAGTTCAGCCTTCTTTAAACTCTGCTTTG  
CAAGGCAATCAAACCTCATCCCAACGATGTTGGATGATGCAATCTACAGGTCAACCTACAAATCAATAA  
AACAGATTTTCAGAAAATTTTGAGAATGAAGTTTCAGTCATGAACACAGAATAATGCAGCTAAGCTATCTG  
CTTTAATCTTACTCTACTTTCAAGGGGAAACAAAATTGAAATGGAAGAAAAACAGTTGTGCAATCAAGA  
AAAGGAGCAAAGGGGACATATTCCTCTCATAGTTAGCAGAAGATCGAAGGTGAGGGTGAAGCAAAA  
AGACCTGTACTTCTACAAGCTGCCTTTGGATGTTGAGTGAAGGAATATTTCAAGAACTTAATTCTCTATCT  
GGTTCATGTAAATCATAGCTCTAAGCTAAAATCAGGACACGAGCTAAGGATCTCACTCCAAAAGTCATTA  
ACAAGCTAATTGCCGTTTCAGTTTCAAACCCACAGGTATCCCTTTGAATCCAAACCCAGAACTTATAT  
CAGCAATTATGAAGTAATCTAAAGATTCAAAAAATCCCAAATTAGTGTATCCGGTTAAATCTATTCTGA  
CCAACCTGTTTAACTTTTGAAGTAAATTAAGAGAGTGAGCACACTGTAAGGGATTAACGGAAGCTTTTAT  
AAGCACAAGGCTTATTTAGAAAATAATCACAATTATAGAAGGAATAATTATGTATAACTAATTCTTGGC  
ATTAAGAAAAATAAATTATATCAAAGTAAAAGCACTTTTCACCTTTAAGTCTCCTTTATTTCCATTTGTTT

TAAGAAAAAATTACTTTGCATTCCAAGAACCTTTTTAGTTTGTCTAGACCTATCGCAGAAAACCTCTAGTA  
TTAGGGAAGTAGTAATTTGTCTTAACAGATGAACAATTGAAAATTGGATCCAAATGGCATAGAATGGAT  
ATTGATGATTCTACTACCTAAAAAACTAGTTTAGGAATGAGGTGCAGTAACAGTATAGTGGTTGTTGC  
ATGGTTATATCTATTCTATCCGTAAGTAAGTGGCCTATTTTATTTTTTGCTAATAAACAAGGTGATCTTTG  
ACTATACCATCAGTGTATGAAGTCAGTAAACAAGAGAAAGGAACTCATAAATTTGCTAGATTTTCTAAAA  
TAAAGTAATTAATTTGATGGGAAAAAAACAAAAAACTCATAAGGTAACCTTTGAAAAGAAGGTAGCA  
TGGGAAAGGAGAAAATGGAGTGGGGGGAAAAGTCAATAGGAGGTGGACTATAATTACACCTCTCTTTT  
TTGCTAACGTCCGCTACCAAAAACACAGATTCCCTCACTCCCTTATTTTTCTAAAAATTAACAAAATATG  
AATACCTAACTTTTGAGTCAGGAATTATCGAAAACGATCTTTCTATTTTATAAAGATAAAGATAAAATCTA  
TGTATTTTTTATTCTTCTTCAATTTCACTTATAAAATTATATTAATATTATAATTCTGTATAAATCTATAAT  
AGAGGCTCATTGATGGTTTTAAATTTCTAGGTTTAAATTTAAAGATTAGGCATTGAATTCATTACATTATT  
AGAATTCTGGTTTGATAATATAGATAATTTTTTAAGTGATCAGTATAATTTAACTTGTTGTGAAAGGTT  
ATTTGCTAGAGTTTTTTGAAACCTCAGATAATCCGCAGCCGTTACAACCTCTGCCGAAGTCTTCGCTCTT  
CGAGTGAGCACTTTGTGCGCATTGGGTAAACCCCCCGCAGGTTACTAATTTTACTTAATAATCGTTAAA  
ACTGACCTGATAGAGAAAAAAAGTTTAAACAATATCAGTACAAATAAGTTATATTTAGAACAAAATGAG  
GACAGAAACAAAGTACTTCAATATTAGCCATTCACTTTGTTTTCTATACTTACTCAAGTACCCTTTTACTA  
CTACTACTATATATCAATATCAGATTATCAATATTATCATCTATGTAGCAGAGTGAACCAGAACACTATTC  
TTTTTTTTGCCCAATACTTCTACATCCCTTGCTGCCTTTTTGGTCACCAAAGCAACTTCTCTAGTAGTTGG  
TTTACCTTTTCTCTTTCTTCTTATGTATATAGGAGTATTATGCTGTAATCATGAATAATCAGTTCAAGAAA  
TGATGACAAACTCAGATCAGTACTATTCTTTCTGGTCATTTGGGGTCTTTTTCTTTCTTTCTTTGTGTCCTC  
ATTTGGTCTCAACATAGATGGAACCTCTTGTGTTGCTTTCAAATACTCTGTTCTTGAAGACCCTTTATCATT  
TCTTGATAATTGGGACTATAATGATGCAACCCCATGTTTATGGACTGGTGTAACCTGTGCACCAGACATG  
TTTAGAGTCATTAGTTTAGTACTCCCAAATTCTAAGCTTATTGGTTCTATTCTAGAAGAATTAGGATTTATT  
CAACATCTTCATACTATTGATCTTTCAAATAATTTCTTGAATGGAACGCTACCTGTTTCACTTCTCAATGCT  
TCTGAACTTCAAGTTCTTTCACTGTCAAACAATGCTATTTCTGGTGAGCTTACTGAGTCTATTGGAGGGTT  
GAAGAGCTTAAAGGTTCTAAATCTTTCTGTCAATGCATTTGTAGGAAATCTCCACAAAAGCTAAGTTTTT  
TGCAGAATATAAAAGTTGTTTCTTTGAGTAAAAACCTATTTTCTGGTGGATTTGAGTTTGTGAGGTGTTG  
GATCTTTCTTCAACTTGTGGAATGGAGCATTGCCTGATAATTTGATGGGGATAGTTTGAATACTTGAA  
CTTTTCTTCAAACAAGTTATCTGGTTTAGTGTACCACAATTTGCAAAGAAAATACCAGCAAATGCTGCA

ATTGATCTTTCTTTCAACAGCCTTACAGGTGAAATCCCAGAGTCAATAGACTTATCAAACCAGAAAACAG  
AGTTTTTGCAGGAAATACAGATCTTTGTGGAAAACCACTCAAGAACTCTGTACAATCCCTTCAACGCC  
TTCATCTCCACCTAATATAACCACTAATCCTCCAGCAATTGCAGCCATTCCAAAGTAAATTAECTCAACCC  
CACTTCCTGAACAAAAAACTGTTGTTGGCAAAGTGTGATCTAACATAAGTTTGTACCAACTGATTGCCTC  
TTCATCACATTATAGAATGAACATGTGATAATTAGAGACTTACAAATAAAACATGGAGATATACTTGACA  
TTTTAGCAAATAACCCCTCTTCAGGAAATACCAGAGAAGTTGGATGAGTAGATCTGGAAAGCTATTTTTG  
CCCTTTCCCTATGTTTCCAAATTTCTCCCAAATTAAGCATCTAGAGTACAATATGTTGTTGCTTAAAA  
ATCTGTCTACAATGGACAGAGGACTATCAACGTGCCATAAAAGGGAAAGGTCTTTAACGAGGGCAATC  
ATACATTGGTGATCAGGGTATAGCTGCATTATTAAGTCTTCAGGAACCTCACGATCCAATTATTCTTCT  
ACTTAAACAAGAAAAAAAAGGAAAATTCATCCCAAACAAGTCAAGCAGCAATAAAATAACTCTTGTT  
AGTGCCCCTTGTATTAGGATATCAAGAACTTATAGCAGAACAATGTATTTGCTTACAGATCAAAGGGC  
ATGACATAAAGGATTCAGAGCAGAAGAACATAAAGTATTTGATAAGCAAATGTTTAATTCTATATTCAT  
TTCACAAGTTAACAGAACCCAGACATCCTGTGAAGATATGCATAGGACAGAAAGAGAAAACACTGCATGTA  
TATCTTTATATCTGAGAGAAAGAGAAAGTAAGAGAAAGGGATGAGGCAAGACATTACAGTTTACTGAG  
TCTTCTTTTCTTATTTGAAGACCTTGAAATCTTTCTCAGTACATTATCATCAATTTTCTTGTACTGTGTCTG  
AATGACCTTTTGTGCTATAATAAGCTTGCATCAATTTGATTTTGATACTTGTGCTACAGCAGAGGCACAG  
ACAAACTAAAAGAATTCTGTAGGAAAGATACACAATTCAGTCAACTATAAATCCCCAACACAATTTA  
TATCACCTGAAAAGAACCCGACTCACCCATGTAGATGAAAGTGAGGAGGTTGAAGAACTACCAACATA  
AGATATCAGCCACAAGACAAGAGAAACCTGATAAACCAATCCATATTAATAAGATGTAAATGTGAAGAA  
AATATGGCGCCAATAGCGTGACAAACATGATGCCTGAAATGGAAGGGGTCCTATAAGAACAGACCTTA  
ACAAAAAGTTTTAAATCCCAACATAGCAATATCATGGGCAATCATCAGGACATGATTGATCCAAACAC  
GCATCATGTCAGCAGCCTTTACGACAGATTCCTCGTGAACCTCCAAATCAGGGATAGGAGGTAAAGGCC  
TGGAATTGTACAGACATAATTGATTCAGTTTTCCACAAAAAGTCTTACTACAGCATAATCATTAAAGGAT  
CTCAATTGCTCAACACAATCAGAACCATAATTGAAATGCACGCCCCAGTAGAAAAGGCAGAGAAATGCA  
ACAGCCAGAGGCAGATCTACTTCAGGTGCACCCCTGCCTCAGTGCCAAATTAGCCTGACAGTAGGCTTC  
AATTTTCAAAAATAAGACAAAATCAATGATCCACCAATCTTATTCAGAGAGCAACCAGAAATTATCTC  
GAAAAAGTTGGATAGCGTGACATGCACTTATTACATTACCTGTTAAGAAGTGAGGCAGATTTAGCCCA  
GAAGAAGAGAATCACAACACTAGAAGCAACATAACATTGGCAACAAAGGAAAGGACATTATATCCAGCTC  
GCTCAAACAAAATCCAAAGCGCAGTGGAAGTACTAGCAGAGTAACACTAGCACACCATCTCCTCCACA

ACAGCACATCCGCCACTGCAATTCAAATTTAACCGCCTCAACAAAACATTTCTATCGAATAGTATTATTT  
TCCTAGAGAAGCCGAAGTTGATTATCATCGTGATCAAGTGTTACTTCAAATCCATAGTGAATTGATGCG  
TTAATTGATAATTGCAATAAGGTCAATATCAAATCTGAATTTCTGTAAATGCATGAATTGGGCTATGGAT  
GCAAATATAGAGAAAGACAAGAATATACAGAAGGCAAAACGCAGACGTAGGATGAGGAAGAAACCTG  
AGCCACCACCAAGAGCATGATGTACAAAAGACTGACGATTATCTCCCATGGCGATTAGGGTTTCTGCCT  
AGTCTGCAACCGAAGAAGGAGGGCAGTGATGAAATCGCAGGGAGGGCGACGACGGTAATTTTTGGTA  
AATCAGTTCAACTTCAAATATGCCAGGCGCACTAATGGATTAACAATACTTAACATAATAAATCTGAAG  
GACGAGGAAATAAAATACTCCCGATCAGAAAGAAAGACGTTATGCTAAAGGTAAAAGGTAAAGTCTC

>PGSC0003DMG400025848 LRR-RLPs

ATGGATTTGGGTTGTTTTGATATGGGTTGTATTGAAAAGAAGCCGGCGAACGACAATTTTTCTAATTCAG  
AGAACAGTCCCACCGCCGCTCCAGAGTCGGAAGGTACCCATTACCCATTCTTTTTGATATCTGAGGA  
AGAAACTCTGTTTAGTTTTGAATTTATTTCTTGATTTTGCTTATGTTTCTGGTTGGGGTTCTTTTGATT  
TGGGGTTTTCCAAAACCTTGTTGTAATTAGGAAGAAAGATTTAATTTGATCCCCAATGTTAATCTTGA  
TTGTTATCTATTGTTAGCTTAAAGATTTTGTGAGTGGATGTAACGGTAATGACCAAATAAACTTCATTA  
TCATTGAGTATGAGTGTAAAGAAGTCGGTGGCTAATTAGGCTTTATGAAAAATGTAAGTTTCTCTAGA  
GTGTTATTTGCATTAGGGGTGTGGTTTGGTATGTAAGTAAGAGAATATTATCCCAAGAGCATTTTTATGT  
TATCTAGCAAACGATATGGAGGTGAGTAGGGATGAGGAGTAGGGGGTTCAGGGGTGGCGGGATTGG  
GATGATCAAGGGGGGGTGAGGGTTGGGTGGGGAGGAGATGATAAACTTGGAATTTCACTTGTACAAA  
ACATTTTGATCAACCAAACATTTCTCCATACCAAACACACCCTAGATCTTCGCTTAAAAAGGTGTATATT  
TCTATTGTTTTTTCATGTTCTTGTGTTTTCTAGGATTGCACAACAAGGAAATGAAGAAGGTTGACAATCAGAT  
TTTGTTACTTTTAAGCAAATTCACATAAATGTTCACTTTGATTGGTGTGTTGTCAAAGTTTGGTAGTTGTC  
TTGTTTTCAATTAGTGCTGAACAAGGCAATCAAAGTTGAATCTAGTTGCTTTGAAGTATTATTTAATTGGT  
GTTTTCCAATTTTGGGTTTTTCAATTTGTTGTTTTGGAATAGTGCAGACTAAGGCAACGAAAGAAAGTGGC  
CAGTCAAGTTTAGTTTTCTTTAAACAAATCTGGATCACAAATTAGAAAGCCTCCTCATCGCAAAACTTCGCC  
TCTGAATTGGTGTGTTTTCAATTTGAGTTGTCTGTTTTCAATTAGTGCTGAACAAGGCAATCAAAGTTGA  
ATCTAGTTGCTTTGAAGTATTATTTAATTGGTGTGTTTTCAATTTTGGGTTTTTCAATTTGTTGTTTTGGAATA  
GTGCAGACTAAGGCAACGAAAGAAAGTGGCCAGTCAAGTTTAGTTTCTTTAAACAAATCTGGATCACAA  
ATTAGAAAGCCTCCTCATCGCAAAACTTCGCCTCTGAATTGGTTCCTCGCAAGAAAGTGGATTCCTACTT  
GAAGAGGAAAATAAAAATGCTCCAGGTATATTTATATGCTTGAGCATTCTTTTTTTATTGTCAATAAATA



GTGGAAGAAGTACTGATAGTGTTTTGGCCTGTTGTGAAATCTCAGGAAGTGGATGGTATGAACTCCAC  
TCTTGATGAGACTCTGGGGGATGCAATCCCCACTATTGTAGAGTTTTGAGAGAATAAATTGCAGTAAG  
AGAAGCTGCTCAAAGAGTTGTGAAAGCTCGGAAGGCTGCACTTGTTGAAGCATCATGGTGCCGAATTCT  
TCAAGCCTCAAGGTGAGCAATTTAACATTCATTTATCTGTATTTGTTGTTACATGCATTAGATCCGGTATT  
TGTCTGGAGTTGTTTTTTCTGCTTAGAAATTCATACAGGAATTCATTTGCTAATTATGTGATATTGGATA  
CATTAAATTTAGAGATAGTTAGTTACAGTTCAATGTCTTTTGGTGATCTAATTTACAAAATAGCTAGAAA  
ATGTATAGGCTTGGTATATCTTAGTATAAATATACATATAATACTCACAGCTGAGAACATGCTTTTATA  
TATAGGAAGTTATGGAGGTGGAGAAATAGGGTAGAAGGTACTAGGTAGTCGAGTGTTGTTGTGCTGTA  
GTATGATTTAGGTATCGTTAGTTTCTCTAATGTATATTAATTTAATAGCTGTTGCTACACTTGTTTTGTACA  
TTGTTATCTTGTTGTCTCTTTTTCTTACTTTCTTGCCTCAATTACATTTGTTTTGAGTCGAGAGTCTTATTGG  
AAACAACCTGAAGGTGGAGAGGTAAAGGTCTGCATACATTCTACTCTCCCCAAACCCCACTTATGGGTTT  
ATACTGGGTATGTTGTTGTATACACATCATATATGCGTAATCAGTGTTATATGTTTTGTACTAGCGCCCGT  
AATTAATTTGCGCCGACATGCAAGAAATGGAAAAATAGCCAATATTAGCTTGTTTATGACAGAGACATT  
GTTGATTGATTGAATAGAGATTTGGTCATATGTTAGTCTAGAACTTACCTTTTCTGTATCTGCCATACAGG  
ATTGATTGTAAAGAAGCAGAACAATTGCTGGTAAAGGCAGAAAAATATTCTGCAGATGCTTTTGAAGCA  
GCAACAACCTATTGGAGTAATCTTGTATGACATTCCTGATTGCTCACAGAAGCATTACAAAATAGAAAAGT  
CACCAGCAAAGGAGGAGGACCCACCACTCATACTGTTAGAACATCTTTTGAAACTGCATTTGAGGTAG  
ATAAACAAGTAGCAAGTGCAGTTAAGGCTGCCCTTCTTAAGCTTGCTAATTGCCCTTCTATGAACAAAGA  
TGAAGTTAAGGAACTGCTGCACAGAATAAGCCAGAACCCTGAAACAGATGATAATCAACAAGAAGTGT  
CTGAGTTCTCTCAGAATGCGAATCAGATACTGCTCCGAAGCCACAGAGTTAGAAAAAGAAAAGGAAA  
GGAAGTATAAAAAGAAGCAGGCGTATGAAAAGTTTAATATGCCAAATCTTGTGGAAATGATGCTGGAA  
AGGCTTAGATGTTTGCAAGAAGATGAACTTGCATCTCTTGCTACTATAGTTGCAACGTGTGGGTTGAACG  
CTGCTCTAGCTGAAGCGGAAAACAACAAAGTGCATGTTTCAGGGTCTGCTGCTGATGACAGATCAGAAT  
TATCTGTAGGAGACGGAACAGTTAAGGGCACTGAGGAACTTCCAAGCCTGGATAAGTTTCTAGTTAAGC  
GGTTAACAAGACTTGAAAGGGAGGTATTAGAAGCCAAAATGCTAGAAGTGAAGCTAGGGAAAGAAG  
TGAACAAAGTCAAATGAATCTTATCATAAAGTGATTCATTGAGATACCATACAAATTCAAGCCATGAT  
CTGGCAAGTATTCTTAAGAAACCATCTTTTTCAAATTTGAGAAGGAAATTGAAGAGGGCAAGAACAAC  
TCCGAACTTTGGTAAGAACTAAGTGTAAGCTTCAGATAATTCATCTGAGGTTTCAAGCCTGGACAAGT  
TTTTGGTGAAGCGATTAATGAGATTTGAAAGGGAGGTTTTAGAAGCCAAAATGCCAGGAGTGAAGCT

GGGGAAAAATGTGAAAAACACGAGATAAGTCTAGTGATAAAGTGGTTCACGCAGACTACCCTACAGA  
TACAAGCAATGATCTGGCAAGTATTCTCAAGAAGCCTTCTTCAAATTTGAGAAGGAAATTGAAGAGGC  
CAAGAACAACCTCCGAGACGTTGTTAAAAACAAGTGTAGAGCTTCAAATAGCAATGTGCATTCATTTGA  
GGTTCCTGACTTAGGCAGTGTGTTGGTTAAGCACTCTTCAAAGCTTGAGAAAGATATTGAAGAGGCTAA  
GAGGAAGAATGAAAACTTAGTGAAATAGAGGGCAAGAATTCGAATAGATTGGGTACTGTGACAATTG  
GTCGAAGAAAGAAACATGAAATGGATGTTCTAGTTTAGAAGATTATCTGGTGAAACATATGACCAAAC  
TTGAAAAGGAAATTCAGAAGCAAAAAATAGGGAAAACTGCTGACCCTAATGCCAATGTGTCTGAG  
ACTACCTCATTGGTAGGAAAAGAAAATGTTGACCACAATGTAAATCTTGTAATGGAGAACAACCATCA  
AAGCCAGCAGACACATTATCATTGAGGTTGAAAACAAAGAAGATGTGGATAGTCTGGACAAGATTCTA  
GTAAAGCCAGTTCATCGTCTGCAAAGACTTAAAATGCAAGAATCATTAAACAAGAAGAGACTATCGTGCA  
CAGAGGACTCCAAGAAAGATTGAAGCTAATAGTGCCACTGATAGCGAAGGTTTGGACAAGATTTTAGT  
GAAGCATGTTTCAAAGCTTGAAAAAGAGAGAATGTCTTTTCATGCAAAGGAAGACAATTTGCTGAATGT  
AAAGAAAAGGGACACCATTGGTAAACAGTTGCAGAACAATGAAGGCAGTTTGGATCAGATTTTGGTGA  
AACACAAGTCGAGACTTGAGAGAGAAAAGATGGCTGCTATTCAGCCAGAGGATGATAATGATCAGGTA  
AGACATTCAATTACTCGGAAAGCTATAAGGGAGAGGGAGTTGCAAGAAGCTTGGGGAGGCTTAAGTCT  
TGGGAECTCTATGCGTCTCGTATGTCTAGACTTCAGAGAGACAAGGCAAGCGCATTAACTTCATTCTTA  
AGCCATTTTATATTGTTGTTCCTTTTCTACTTCTCACGACTTTTCTTTGTTTTCCCTGTAGGCTGCCTGGC  
TTAAAGCTGAAGAAGAGGAGAGGAAGGGAACCGTGAAATTATGAGAACTATTAGATTCAAATATCAT  
AAATTCCTTGTGTTTTCCCTCCCATGCTTCCGTTGGTCAACTTCATAACAACCAACTAACTTTTGAATAC  
TTCTTCACTACTCATATAGTGATCTCGTGTGAGATGGATCTTTTTTGGTTCTTTTTTGGAGTAAATAGAAT  
TAGAATGCTATTTTTTTTCAATTTTCAAATGTGTAAGTGAAGGTTGCAATGTAAAGAAGAGTGCTGCAAT  
TTGTACATATTGCTTGTCTATATTCCTTCTGTGTATATGAGTGAGCAACTAAATGTATCTGCAATATTAGA  
AAGAACTACATATTGTACAAATTAATATATAAATTAACAAAGTACTTGAAGTAATGTAAGGATAAG  
ATGAGAGAAAATAGCGAAGATAATTTGGCCATATTTTACCCAAGACATCCAAAATATATCATTCAATTA  
ATACATTGTTGTTATTTACTAAAAATGAAGTAAATCTAAAATCATGTAGATGAAATTATCTCAAGTGACTT  
ATAGCAATCTCTTGAAATCAAACCTGGATTTATCCAAGAAAATATATTCAAATTACATGATAAAGCCGTTA  
AATCCAAAAAACAATCCACACCCCCTCCAACCCCCAATTTTGTCTTAATATAAAATTAATG  
CTTACATAAATTCGAATGTAATTATTGAGAGTATAGTGAAATGGTTGAGATGACATTCAATCAACAAAGT  
TGGATTTGAGTTCACATAAATACTTAAAAATTAGGAAATTAATACTTAACCCCTTTTAATTTTGTGGTTT

GGCATTGGTAGACAATTATTTTCAGTTGAGAGTTGAGACAGGACGAAAGTCCTTATGGAAAATCTCACA  
GTGATAGTGTGAACAACAGAAGTACTGAGCAGTGAACACTGGTCTCATTACTCACTTTAATAGTAATAACT  
GTACAAAGTACTCAACAGTTGTACAAACACTCAACACTCAACAGTATTTTACAGCTTCCAAATTTGACTTG  
ACCTCTCTCTCTCTCTCTCTCTCTCTCTCTCTCTCTTATATAAACTCCTATTGGTTAAACACTACTACATGTA  
CTTTCTTCTTTGGCCTAAAATTTCTTGACTCATCACTTCCATTGTTTCTCCATTTTCTCAATGGCTTCTCCTTC  
CTACTTTTTCTTCTTCTTCCAAATCATTCTTTGTATTCCCCTGCCTTCTCCACAAATTCTGAAGGTAATTCC  
TGCTAATTCAAGTTTCCCATGTTTTCTTAGGGTTAAAGATTTTCTGCTTTGTTTTTTCTTCTTTTAGTTCA  
TGGGGTTTGTAGTTAAAATCTTGAAATGAAATATTTGTATAAAAGAAAGAAAAAGGTGTACCCTCTTA  
CTCAATTTTTTTTTTTGATTTGCAGGGACTGCTTTGCATTCTTTGAGAACCAAACTTTCTGACCCAAAAAA  
TGTTCTACAAAGCTGGGACCCTACACTTGTAATCCTTGACATGGTTTCATGTTACCTGTGACTCAGATA  
ATAATGTTATTCGCCTGTAAGAGAGTCTTGATTTTTCTTTTTCTTCTTGATTTGAATGTAGCCTTAATTTTT  
TTTGAATTTGCAGGGATTTGGGCAATTCTAATATTTCTGGAACCTTAGGACCAGAGCTTGGTGAACCTCA  
AGAATCTACAGTACCTGTATATTTCTTTGTTTATCTCTTTTCTTGACTTTTGTCTTGTCTCAGTTTAGTA  
TCTCTTGTGGCTGTACTGAAACCGTGGATAAAGTAACGGAAACATAATAGAAAAAGGGCGTTTTTTA  
GACAAAGAAATAACTATGTATCACATGATTAATGTTGTTTCTGTGATTAACAGTTCAATCTTTTGTGTGT  
TTCTTTGCTTGCAAGTCTATCTATCTGTCTTTAAGATGATGGACAACTTTATCTATCCTGAATTGCAGGG  
AACTTTATAGTAATAACATAGAAGGGGAAATCCCAAAGGAATTTGGTGATTTGGAAAATCTTATTAGCAT  
GGACCTATATGGCAATAGATTTGAAGGCAACATTCCCAAATCTTTGCTAAATTGAAGTCTCTTAGATTTT  
TGTAAGTATTCTCATTGAATAATTCATCAGTATGACATTTTTAGTAGATATTTGATGTGATGTTATAAAGA  
TTGAATCTTTTTCATGCTATGACTACAGACGGTTAAATGACAACAACTAACTGGTTCGATTCCAAGGGA  
ACTTACGACACTCCCCAACCTTAAAGTATTGTAAGTTCTCAAATTCATATCTGCTGTTATTACCTTCGTATT  
TACACCATGAAACAGAAAAGGACAATCAAACAATATGGTGTGATTTCTGCTTGAGTGTATTTGTTTATT  
GCATTGCTGCAGTGTGTTTCTAACAACAATCTTTGTGGAACAATCCCTGCTGATGGACCCTTTGGAAGC  
TTTCTATGGAAGGGTAATCATTTTTTCTTCTTTCTTGAAAATATGCTTACATTTTCACTGATCCCCTTAACT  
ATCCCTGATATGGTACTGGTTCATTACTGCCAATTTTATTGGTGAAGATTGTTTTGAGCTTCATTCTGTTA  
AGCTGTGTTACTGGGGGAGAAAGAAATCTATTGAATGACTGGTTCATCATGCTAAAAATGTGCTTTAA  
GGTTCATAGACACAGGTTCTGAGCTTAATCCACCAACCCATTGCAAAAAATTAECTTATGGTAAGTCATT  
AGTTAGTAGTTGGTGGCTTTGGGTGATAGCTAGTGATTAATGCTTGTGTTGCAAGTGCAATTACTATA  
TGCCCTCAAATTGTTATCGGATGCTGATGTTTCATACGACTCTAGTATGAGTCTTAGAAACCATTTCATTGAC

CTTGTGTTATTGAATTCGGATGACACATACAAGTTACAACCCCAAATGTTTCGAGTTCATCAGATCTCTCAT  
TCTTGGACTAGGATATGTCATATTTATAGGTAAGCTGTGATATTTGAGCTAGAACCAGTATCACAAACAT  
CAAACCCAAAGGAGCTGTCCTGACTCGTGAGTTACGCATATGTTGGGACCTTTACTATATAGTGCAATT  
CAATGGTAGATTCAGATTTTTCTCCTCAATGTTGTGTATTGTTATTAGTTCTACTTGTAGTAAATGAG  
CAATCAATGCAACTCTTGATGACATTCCTTTGTTTCAGTTTTGCACACAACAGACTCAATGGACCTGAAC  
TGAAAGGACTAGTGCCATATGACTTTGGATGCAAAGAAGTTGAAGTATAGTTTGACAACAGCCTTCACA  
AGGTTGCTATTATATCTTTATGTATTGTATATGTAGTTTGACAGTGTTACTGAAATTAATAATCTCAAGTC  
GAATGCACTTCATGAGACATAAGGTTCTTTAAATTCACACTAAAGCTCACCTTCACTGATAACTTGGCA  
GCAGAAAATGTATTGTCTTGCTGAATTTGAAATTAAGTGCTTGATGGTTTTGGAGTGAAATTTCTTCTTC  
AAGAACAATCTATTTTTATGTTGGTGTATCAAATTGATGTGCTTCCTAAT

>PGSC0003DMG400025864 LRR-RLPs

ATGATGACAAACTCAGATCAGTACTATTCTTTCTGGTCATTTGGGGTCTTTTTCTTTCTTTCTTTGTGTCCT  
TCATTTGGTCTCAACATAGATGGAACCTCTTGTGCTTTCAAATACTCTGTTCTTGAAGACCCTTTATCA  
TTTCTTGATAATTGGGACTATAATGATGCAACCCCATGTTTATGGACTGGTGTAACTTGTGCACCAGACA  
TGTTTAGAGTCATTAGTTTAGTACTCCCAAATTCTAAGCTTATTGGTTCTATTCTAGAAGAATTAGGATTT  
ATTCAACATCTTCATACTATTGATCTTTCAAATAATTTCTTGAATGGAACGCTACCTGTTTCACTTCTCAAT  
GCTTCTGAACTTCAAGTTCTTCACTGTCAAACAATGCTATTTCTGGTGAGCTTACTGAGTCTATTGGAGG  
GTTGAAGAGCTTAAAGGTTCTAAATCTTTCTGTCAATGCATTTGTAGGAAATCTCCACAAAAGCTAAGT  
TTTTGCAGAATATAAAAGTTGTTTCTTTGAGTAAAACCTATTTTCTGGTGGATTTAGTTTTGTTGAGGT  
GTTGGATCTTTCTTCAACTTGTGAATGGAGCATTGCCTGATAATTTTGTGGGGATAGTTTGAAATACT  
TGAACTTTTCTTCAAACAAGTTATCTGGTTTAGTGTACCACAATTTGCAAAGAAAATACCAGCAAATGCT  
GCAATTGATCTTTCTTTCAACAGCCTTACAGGTGAAATCCCAGAGTCAATAGACTTATCAAACCAGAAAA  
CAGAGTTTTTTGCAGGAAATACAGATCTTTGTGGAAAACCACTCAAGAACTCTGTACAATCCCTTCAAC  
GCCTTCATCTCCACCTAATATAACCACTAATCCTCCAGCAATTGCAGCCATTCCAAAGTAA

>PGSC0003DMG400025867 LRR-RLPs

CATCAAAGGCCCCACACTGTGCCTAAACCACCAGAACCCTCCATTACAAAACCAAATTTTTTTGATCAA  
TTTGTAGTCATTTTTCAAACATGTCAAATCAAGAACCTCTGTTTTCTTCTTTCTTTCTTTTCACTTCA  
TCAGTCCAATCAATTCCTCCTTCTCAGACATAATTGCTCTTCAAGCTTTTAAAGCCGCCATTAAACCTTCC  
TCTATTCTTCATATTCTGTTTAGGTAAGTTTCACTACAGACCCTTGCTCTGTTCTCGTGTTACC

CATTTCACTTGTGGCCTTTCTTG TAGCTCTGGAAATAGAGTAACTGAACTTACTCTTGATCCTGCTGGTTA  
TACAGGGACTCTTTCTCCGTTAATTTCTAAACTCACTCAACTTGTTACTCTTGATCTTCAGAACAACAATTT  
CTATGGCCCAATTCCTTCTTCTGTCTTCTTTACCAAATCTCAAGAACCTGGTTCTTCGACTCAATTCATTT  
TCTGGGTCAGTCCCACCTTCCCTCACTTCTTTAAAATCTCTGCTTTCTTTGATATTTCTCATAATTTGATTT  
CTGGGTTACCAAATTCGATGAATGAGCTAACCAGCTTAAGAAGACTTGATCTTAGTTACAATAAGCTAAC  
TGGGTCACTCCCAAATACCCCAAATCTACTAGAACTTGCAGCGAAGGCTAATTCGTTATCTGGGTCT  
CTTTTAAAATCGTCGTTTTATGGGTTAAATCAACTGGAAGTTGTGGAGCTTAGTGAAAATTCGTTATTTG  
GAACTATTGAAACTGGTTCTTTCAGTTACCTTCGTTACAACAAATCGACATGGCGAACAACAGCTTTAC  
ACTCGTCAAGATTCCAAAGGTTGTTGATTTGAACAGCGACCTTGTCGCCGTCGATTTGGGTTTCAACAAA  
ATCGAAGGGTATTTACCGGTAAATTTTCGCGATTTTCCCTCGATTGTCGTCGTTGTCATTAAGGTATAACAA  
GTTCCGGGGACCGATTCCGTTGCAGTATAGCAAAAAGGCGACGTTGAAAAGGCTGTATCTTGACGGTAA  
TTTCTTGAATGGGTCACCGCCGGCGGGATTTTTCGGCCGGGAAACTTCAGTTACCGGCAGTTTAGGAGA  
TAATTGTTTACAAAATGTCCGATTTCTTCGCAACTTTGCTTGAAATCACAGAAATCTACGTCGATTTGTC  
AGCAAGCTTATGGTGGGAAACCAAAGTCTTAGTTGTGTCAGTCAATGTTTCTGAGATTTTTTTTCATCTTG  
GTTTTCATATTGTAATTGTAGGAGTATTATATTATTTCTTTAGATAAGAAAATAACCCAATATAATATTTG  
CTCATCTGAATTATGCCCCCTTTGTATAGAGAATAGTACTATATTCATACTAGAAAATTACGG

>PGSC0003DMG400025921 LRR-RLPs

CTCCTACGCACTTGACTTTTTTATCCACTCTATAAAGAAAGCAAACAAAAATTCCAAATTCCTAACCTTTTT  
CCTCCCTTTCTTCCCACAGTCTCCGCCGTTCAATCTGCACACCTTTTTTATTGTCACACTCTGCGATTCTTCT  
TTATCCCAACTTGAAGAAAACCTAACAACCTTTTTCTTCAAGGAAAAAAGTTTCAGTTTTTGTAGTCATTC  
TGCAGAATTTTCTTGAACAAAATGAAGTTGAAGAAACCTCATCTGGGTTTTGTGTGTTTCTTGATATTATT  
GTCGTTTGTGTCTCTGTATACTCTCAGGGTAGTGCAGCAACAGATGCTGCAGTGATGCAAGAGTTGAA  
GAAGGGAATCAGCCCACCGAGTTCACTCAACTGGGACGATCCAGACCCCTGTAAATGGGGTAAAGTTAC  
GTGTAATAAGATGGTCGTGTAAGTACTAGGATTCAAGTAGGGAATCAAGGGCTAAAAGTTCTCTACCACC  
AAACATGAATAACCTGACGGAAGTGCAGGTGTTTGAAGTTCAACACAATGCACTTACTGGGGCGATTCC  
GACTTTTGCTGGGATGAACTCGTTGCAGAGCATTCTTCTTAACAACAATGGGTTCACTTCAATTCCTAGC  
GACTTTTTTGTAGGGTATGACTAATTTACAAAATGTTAACTTGGATTCCAATTCCTTTTCGCCATGGTCTGT  
ACCAGAGAGTTTGAAGATGCCACTTCTTCAAAGTTTCTCTGCTAATTCTGCTAATATTACTGGTAAAA  
TCCCTGATTTCTTGGTGGAGATACCTTTGTTAGTTTAAACAGATTTGCATCTGGCCTTTAATAATTTTGTAG

GGTCCCCTGCCCTCGAATTTTTCGGGTCTTCTATCCAAACGTTGTGGTTAAATGGTCTCCATAGTAAGTT  
GAATGGTTCAATAGATGTGGTACAGAACATGACCTCATTAAACCAACTCTGGTTTTAGGCAATAAGTTT  
ACAGGCCCTTTGCCTGATTTTTCGGGCTTGACTCAGTTGAGAGAGTGCAATTTGAGAGACAATAGCTTCA  
CTGGTCCAGTGCCAGACTCATTGGTTAATCTTCCTTCATTAAAGATGGTTAATTTGACAAACAACTTTTT  
CAAGGGCCTACGCCAAACTTTCCATCTTCAGTGCTAGTGGATATGTTGGATAATACCAATAGTTTTTGTTT  
GTCACAGCCGGGTCCTTGTGACTCACAAGTTAATACGCTGTTGGGTGTGGCTAAGGCTGTGGGGTATCC  
CACGGGGTTTGTGAGAATTGGAAGGGGAATGATCCTTGTTGCTTGGATTGGTATTACCTGTGATGG  
TGGGAACATTACAGTGCTGAATTTTCAGAAAATGGGACTTACTGGGACAATCTCTCCCAACTACTCGTCC  
ATTACATCATTACAGAAGTTGATCCTAGCAAACAATTTTCTTACAGGAACTATTCCAAATGAGCTCGCATT  
GCTGCCAAACCTAAAGGAATTCGATGTTTCTAACAAATCAACTTTACGGAAAAATCCCACCATTTAAGAGC  
AATGTATTGGTTAAATATGATGGCAATGTCAATATTGGGAAAGATAGTCCACCTCCAGTTGCACCTCCG  
GGAGTACTCCTAGTTCACCCGATGGGGGTGGAGGTGGACAAACTCATGGGAATGGTAATAAAAAATCT  
TCAACTGGAGTTGTTGTGGGCTCAGTGATAGGTGGTGTGTTGTGGTGCGGTTGCAGTTGCTGGATTATTT  
GTGTTTTGTCTTTACAGGACTAAGCGCATGCAGTCCGGTAGAGTTCAGAGTCCACACGCAGTGGTTATTC  
ATCCTCATCATTACAGGATCTGACCAAGATGCTGTTAAGATCACAGTTGCTGGTTCAAGTGTCAATGGAGG  
GACAACGGAAACGTACAGTTGTGGAAGCAGTGCACCTGGGGACTTGCACATTGTTGAGGCTGGTAACA  
TGGTGATTTCCATCCAAGTTTTGAGGAATGTCACGAACAACCTTCAGCGAGGAGAATATATTGGGGAGAG  
GTGGATTTGGAAGTGTGTTACAAGGGGAGTTACATGATGGAAGTAAAATTGCTGTTAAGAGGATGGAA  
TCTGGAGTTATGAGCGAGAAGGGATTGGATGAGTTCACGTCTGAGATTGCGGTGCTTACTAAGGTCGGC  
CACAGGCATTTGGTGGCACTGCTAGGATATTGCTTGGATGGAAATGAGAGGTTACTTGTATATGAATAT  
ATGCCACAAGGGACAGTCAGCAGGTATCTTTTCAACTGGAAGGAAGAAGGGATAAATCCCCTCGAATG  
GACAAGGAGGCTAATCATTGCACTGGATGTTGCAAGGGGTGTTGAATATCTTCATGGTTTAGCTCAACA  
GAGCTTCATTCATAGAGATCTGAAGCCATCTAACATTCTTTTGGGAGATGATATGAGGGCTAAAGTTGCA  
GATTTTGGACTTGTTGCTTCTGCTCCTGAGGGAAAACTTCATTGGTTACTAGGTTGGCTGGAACTTTTG  
GCTATCTTGCAACCAGAGTATGCAGGTAACTTCATCATGTGACCTGTTTAATTTCTTATATTTTTGCATAT  
ATTTGCTTACATAAATGGACGTATGTTAGTGTATATAAGGCCAATAATATTAGATTAATAGGCTTAACAG  
GTGACAGTGGAAAGTAGGAACTGCTTCTCTTGTGTTAGTTGTTTGGGTCTGCATCTACAGACCATCAGG  
GAAGCCTATTCTAGCTGGATCTTTTGGAACGTTGAAATCACGGATGTTTTGAATGGGTCTCAACTTTGAA  
TCACTCCCTAAAATTCAGTACCTAGTTATTTGTTTAGCTGGATTTTGCCTTTAAATAGTGTGACACTTTT

TTTGGATTTTGTAAGCTCTTTGATTTAGCTAGGTTCTTGTACTGGAGCTAACTCTCTTGTACACTTTTGCT  
AATATCATCACCTGATACAGTGGAAGTAAAACCAATAGAGAGTTGGGAACACTACCTTTATCAAAAAA  
ATGAATAAATTCCTATAGAGAGTTAGAGAAGTTTCTATGGTAGGATTGCAGTAGATGAACTTTTGCTGTA  
CCTTATATCTTCGAATGGTGGAGTGCAAGTCTGAGAACATAAAAAATAAGCAATATGCCTCTAATCAAGG  
CAAATTTAAATACTTCTGAGAAATGCTTGACTTTTTGCTTGACAGTCAAACTTAAATCTACTTCTTCAGT  
AAGATGTGGGAATTCCTGGTAACCTTTCTTATTTCCACATGTTAGTTATGTTACCGCCATTTAGGTGTT  
GTGCTCGTGTTGAATGATGACTTTTTCGTATTACGGGAAAACACTTGCCCTTTGATTTTGTATTTCTTCC  
TCGATGATAAAGCTGTGTTGCTATTGTTCAATTCCTTTAGGCTCAGATCAAGTGTAGTTTATCTCCTTAG  
GCATTGATCGGGTTCTTTCATTTGGTTTTCTGTTTACATTTTATTCTCCCTATCCAACCTGAATTC AATTTAA  
TAGCTCTCATCTTGAATTGCATCATTAGTATGAAAGAACTGTTAACACTTGACTATTTTATTTAATTGGA  
CAGTTACGGGCCGAGTAACCACAAAGATTGATGTGTTTAGCTTTGGTGTAATTTTATGATGGAGCTAATTAC  
TGGAAGAAGAGCTCTGGATGAATCTCAGCCCGAGGAAAGCATGCATCTGGTCCCATGGTCCGCAGAAT  
GCATATAAATAAGGAGACATTCGGTAAGGCCATTGACCACACAATCGATCTTGATGAAGAACTCTGGC  
CAGTGT CAGCACAGTTGCTGAGTTGGCTGGTCACTGCTGTGCTAGGGAACCCCATCAGAGACCAGACAT  
GGGTCATGCTGTCAACGTGCTTTCCTCCCTGGCTGAGCTCTGAAACCAGCAGAAGTAGACGAGGATGA  
AATATATGGAATCGATTATGACATGACGCTACCTCAAGCAGTTAAGAAGTGGCAGGCTCTCGAGGGAAT  
GAGTGGCATTGACGGCTCTTCTTCATACATTGGCAGCAGTGAAAATACACAAACAAGTATAACCCACTCG  
GCCATCTGGATTTGCCGATTCATTTACGTCAGTGGATGGACGATAATTTGATTGTCCAACCTATACTGGTG  
GGGCTTTGGCCTATTGTATTGCCCTTAGAGGGTTGGTTTGTTCATTCCTTGCTCATCCCTTATATCTAT  
CTTTGCCTTCTTTTTCTCCCTGTCTTGGTTCTTCCAGGTTTGTTAAGATCCTAGTGTGACAATATGGAGTTG  
CTTTCATCTGATTCTTCTTGAACTTTTACTACCCTGCCTGTGCCTTCTTCTAGGAGTTGTCCAATATGCAA  
ATATTATGAGGCAATGTCTGATTTATATTAATTAGTTTGGATTCATTCATATTTTCTGATCTGATTTGAAA  
GTCTTTTCTAGGGTGTCTAGATTATAAGTCATCAAGATTCTAATATGGGAATATCAACACTTTGCCTTGCA  
GATATAGATTCTTGTAACTTTTTGTAATGAAATATGTTATCTTAATGGCTGAGAGAAATGATGATATG  
GATCAATGCTTTGTGGCCACGTTGGGCTACAAAACAAAATAGAGTGGGGCTGCAGATTTTGTGTCAT  
GATTTAAGTCAACCACATCCATTA AAAATGCTGTGGAAGAGACGTGGAAGAATTATTACTTGTTAATTA  
GTGTCATGTGATATAAATAAATAAATAAATAAATAAATAAATAAATAAATAAATAAATAAATAAATAAATAA  
AATGGATATTATTACCCTTTTTCCATTTGTCTATTTGTAATGAAACACTGAATCTCCTGTCAGATCAGCCTT  
GTCGAGGTAAAAATTCCATGTGCTGTACCAAATTGCCAAGTGCAAGACCATAGATCTAGTTGAGCAGA

ATAGAGAATTAACATTCAAGCCTTTTTTTAATAATTC

>PGSC0003DMG400025922 LRR-RLPs

ATGAATTTGAAAAACCCCATTTGAGTTTTGTGTGTTTGTGATACTCTTGCCAATGTTGTCTCTGTATA  
CTCTCAGCCTCAGGGCAGTGCTGCTACAGATGCTGCAGTGATGCAAGAATTGAAGAAACAAATAATAAA  
TCCGAATTCACTTAACTGGAACGATCCAGATCCCTGTAAATGGGATAAAGTTCAATGTACTAAGGATGGT  
CGCGTAATTAGGATTCAAGTTGGGGATCAAGGCCTAAAAGTTCTCTCCCATCAAACATTAATACCCCTTA  
CTGAATTGCAAGTTTTTGAAGTTCAAAGAAATGCATTCACTGGTCCGCTCCCGAGTTTTTCTGGATTGAA  
CTCATTGCAGAGCATTCTTCTTAATGGCAATGGGTTCACTTCAATTCCTAATGACTTTTTTCAAGGTATGA  
CTAATTTGCAAAGTGTTTACTTGGATTCCAATCCCTTTTCGTCATGGACTGTACCAGAAAGTCTGAAAAGT  
GCTACTGCTCTTCAAATTTTCTCAGCTTATTATGCTAATATTACTGGTAAAATCCCTGATTTCTTTGGTGGGA  
AATACTTTTTCTAGTTTAACTTTGCATTTGTCGTTTAAATAATTTGGAGGGTCCTTTGCCCTCGAGTTTT  
GCGGGTTCTTCTATCCAATCGTTGTGGTTAAATGGTATTAAGGTAAGTTGAATGGCTCAATAGATGTGA  
TACAGAACATGACCAGAGTAACCCAACCTGGTTTTTCAGGTAATGAGTTTACAGGCCCTTTGCCTGATTT  
TTCGGGCTTAACTCAGTTGCAAGATTGTAATTTGAGAGATAATAGATTCACTGGTCCAGTGCCAGACTCT  
TTGGTTAATCTTCTTCTGTTAAAAGTGGTTAATTTGACAAACAACATTTTGAAGGGCCTACGCCACAATT  
TCCATCTTCAGTGCTAGTGGATATGTTGGATAATACCAATAGTTTTTGTGTTGTCACAGCCTGGTCCTTGTG  
ACTCACGGGTTAGTACACTGTTGGATGTGGTTAAGGATGTAGGGTATCCACGGAGTTTCGCTGAGAATT  
GGACGGGGAATGATCCTTGTGTTGCGTTGGCTGGGCATAACTTGTGATGGTGAAAACATTACAGTACTGA  
ATTTTGAGAAAAGTGGACTTACTGGGACAATCTCTCCCAACTGTGCGTCCATTACGTCAATACAGAGGTT  
GATCCTAGCAGACAATTCTTACAGGAACTATTCCAAATGAGCTCACATTACTGCCAAACTTAACGGAA  
TTGGATGTTTCTAACAATCACTTTACGGAAAAATCCCACAATTTAAGAGCAGTGTAGTGGTTAAAACCTG  
AAGGCAACGTCAATATTGGGAAAGATAAGCCACCTACATCTGCACCTGGAAACACGTTCAAACAAATGT  
AG

>PGSC0003DMG400025926 LRR-RLPs

CCATTTTGCTTTGAAGAATATATTACAATAAGCAGCCTTGGGCCTTACCCACAGGTGGACTTACAAACAT  
GGTGGCCTTGGGTTGCTTTCTTTTTCTTGTATCTTCTGTTCTTTTTCTCCATCATATTTTGCATTATCT  
GATATTGAAGCTGCTTCTATTGCCCGTCGCCAACTTTTAGGTAACAATGGCGAGCTTCAAATACATACG  
AGTCTGAAATGACCATTAACATGAAATTCGAAAATGCCAGGTTGAAGAAAGCTTATGTTGCTCTTCAGG  
CATGGAAGAAAGCTATTTACTCTGATCCAACAACTTCACAGCTAATTGGGAGGGTAATAATGTATGTG



CCTATAATGGTGTCTTTTGTGACAATGCTCTTGATGATCCCAACATCTCTGTTGTTGCTGGGATTGATCTT  
AACCATGCAGACATAGCTGGACATCTCCCTGTGGAGCTTGGCCTCTTGGCTGATGTGAGTCTCATCCACA  
TTAATTCTAACAGATTTTGTGGAATCATTCCCAAGAGCATTAAAAATCTTACGCTTTTGGATGAGATTGAT  
TTCAGCAACAATCGTTTCGTGGGGCCATTCCCTGATGTTGTTCTTGAGTTGCCTAAACTCAACTATCTTGA  
TCTTAGGTTCAACAACCTTTGAAGGTCAAGTGCCTTCCGCGCTATTTGAGAAGAATCTTGATGCAATATTG  
ATCAACAATAACCGATTCCATTCCACCATCCCTGAAAGCTTGGGCAATTCCAATGCTTCCGTGGTGGTATT  
GGCAAATAACAAGTTCTATGGTTGCATCCCGAGCAGTATTGGTAAAATGGGCAACTCATTAGATGAGCT  
TGTATTCACCAACAATGAGCTCTCTGGTTGTTTGCCTGAAGAGATTACTAAGCTCACGAGCCTAACACTG  
TTCGATATTAGTGGAAATAAGTTTGTGGATCGTTACCTCAGGATTTGAAATCGATGCAGAAAGTGGAA  
ATCTTTGACATTGCATCGAACAAGTTCATGGGAAATGTTCCAAAGAACCTTTGCACGTTGCCTAGTTTGA  
CGAATTCACATTCTCTAAGAACTACTTTGAGAGCATGGATGAAACATGTACGCCATCACAGACGAAACA  
AGTTAAGATAGATGGTAATGAGAATTGTTTGGGGGGGAGATCAGAGCAGAGGACGGAGAAAGAGTGT  
TTCCAGTAGTGAGCAAGCCTGTTGATTGCAGTAAAGGTCATTGCGGAGTTTCAAGGGAAGGGCAGAG  
TCCAAAAGATCCACCTAAAACCTGACTCCTTCAAACCAGCAACACCAACCACTCCAAAACCAAAGCCA  
TCTCCACCACCACCAGTAGCCTCACCTCCTCCACCACCACCAGTGGCCTCACCTTCACCTCCCATCCACTCA  
CCACCACCTCCAGTCCATTACCACCACCACCACCGGTAGCATCACCTCCACCTCCAGTCCACTCACCACC  
ACCACCACCAGTAGTATCACCTCCACCTCCAGTCCACTCACCACCACCACCACCAGTAGTATCACCTCCAC  
CTCCAGTCCACTCACCACCACCACCACCAGTAGTATCACCTCCACCTCCAGTCCACTCACCACCACCACCA  
CCACCTCCAGTCCACTCATCACCACCACCGGTAGCATCACCTCCACCTCCAGTCCACTCACCACCACCACC  
GGTCCACTCACCACCACCACCAGTTCAATCACCTCCACCTCCTGTCCACTCACCACCACCACCGGTTGCCT  
CACCTCCACCTCCCGTCCACTCACCACCACCACCGGTAGCATCACCTCCACCACCAGTCCACTCACCACCA  
CCACCTGTTGCCTCACCTCCACCTCCAGTCCACTCACCACCACCACCGGTAGCCTCACCTCCACCACCAGT  
CGCCTCACCACCACCACCTGTAGCTTCACCTCCACCTGCTCCAGTATTCTCTCTCCACCACCAGTCCACTC  
ACCACCACCACCACCAGCTCCGGTAATGTCTCCACCTCCACCCACTTTTGGAGGATGTCGCTCTTCCCCAA  
CATTGGGCTCGCTATACGCCTCACCACCACCACCAATTTTCCAAGGTTATTAAGAAGTTCGCCATTAGGA  
CTACTTAAAACAATGTGTACCAATCAATCTGTAAACACATATCAATTGAAAAAAAAACGTTTACATTATCA  
ATTGTACTGAAAAATTGGAAATTTGCTATTAGATGGTGCTGATTGAATAAATCATTCTGCAGTTTCAA  
CATATTTAGTATTTAAATCCTATCAATTATCTTCATT

>PGSC0003DMG400025939 LRR-RLPs

ACTAAGTAACAAAAAAATTCCAATTCCATGAAGATCTTTTATTCCCTCATTATTTTTTCAATTCTCAACAA  
TATTAATTGCCAATTACTACCACCTTTACCAGCACCAATTTAACCTTCATAGACCAAAGTCTAGCTCTAA  
TATTCCAATAATACAAAATTTCAAGAACACAATTACTCTTGATCCTTTTGGTGTACAAAACTTGGACA  
GGCCCTGATATTTGCAATTATAAAGGCTTTTATTGTGATAATCCACCTAATAATTCCTCAGCAATTTCTCT  
GCTTCTATAGATTTCAATGGATTTCAACTTAGTGACCTACATTAGATGGTTTCATTGATCAACTCCCGGA  
CTTAGCCATATTTGCTAACACCAACAACCTTTTCAGGCATAATTTCTTCGAAAATTTCAAATCTTCCATA  
TCTTTACGAACTTGATCTTAGTAACAACCAATTCATCGGTACATTTCCCATGTCAATTCTCAATATCAAGA  
CTCTAACTTTCTGGATATTGTTACAATCTCCTAACAGGAATAATCCACCTCAAATTTTCGTACAATATC  
TTGATGCATTTTTTCTTAACAATAACAATTTTATTCAAAAACTTCCAGACAACATTGGATCCACCCCTGCTT  
ATTATTTAACCTTAGCCAACAACAATTCGTTGGTCCAATCCCACGTAGCATTGGACAAGCTCCGAATTT  
GTTGGAAATTTTATTCTTGAACAACCTTGCTCACTGGTTGCATTCTTATGAATTAGGCCTTTTGAAAAAG  
CAATTGTGATCGACGTTGGATTTAACACATTAACCTGGTCCATTACCACGTTTATTAGGGTGTGGAAAG  
TGTGGAACAATTGAATTTTGGTGAATTTGTTATATGGACAAGTTCCAGAAGTGATATGTTCACTAAAA  
AATTTAGTGAATTTTACTTTGTCATATAACTATTTTACAAAAGTAGGGCCACTATGTAGGGAATTGATCG  
ATAATGGAGTTCTTAATGTTGAAAAAATTGTATAAATGGTCTTCCTAATCAGAGATCAATATTGGAGTG  
TGTATTATTTAGGATGCAAATTAATTGTGTCCATTACAGAAGAGCTTGAGGATCATACTTGTAAATTT  
CTAATTTTAGTCCCATAGACCACTTAGACCAGAAAGACATTTGATTTCACTCTGCTTTGTCAAAACAT  
ACAAAATTGTATTAATGAAACCTTTGTTTTAGTGTCTTCTTGATTTTTCTTTCTTTTTTTCTATGTTTTCTAC  
CTGGTGTCCG

>PGSC0003DMG400026064 LRR-RLPs

GGTTGTCAGAAATTAGAAAAATTTCCAGAAATTCGGGGGAATATGGAATCGCTATCAGAGCTCCTTCTG  
GCACGTAAGCAATTTGGGAATTGCCCTCATCAATAGGACAGCTCAGTGGTATCAGCTTGCTTGATTTGC  
GATCATGTGAATACCTTGTAAAGACTCCCAGCCAGTGTCTCTGAGATGAGAAAAGTGAATTTTATTCT  
GAAAGGCTGCTCAAGACTTGCAATTTTACCTGAAAATCTAGGTGATCTAAACGAGTTGGAGGAGCTCTA  
CGCTGGCAACATTGCCATTTGGCAACTGCCAGATTCTATTGGAAAGTTAAGCAAACCTCAAGATCCTATCA  
TTAAGAAAGGGCGAAGGTAAGCATCAATCTGCTCGCAGTTTGATATTACCCTGGGAGTTTCATGCTTTG  
AGGGAATTGAAAAGCTTAGATCTCAGTGGATGTAATTTATGTGATAGCCAAGCTGCTGCTCTAATGAGC  
TTAACTTCTTTATTGGAAGTGAACCTGAGCAGAAATAAGTTTATTTATTTCCCTGATGTCTTCAGCCGACT  
TTCTCACCTTCGATATCTCAATATAGCCCACTGTCAGGAACTTAAGGAACTTCCTCAGAATATAGAGGAA

TTATATGTAGAAGATTTTTGGCAAAGAAAGTATTGCAAAGCTATGGATGTACCCAAGGTTGAATTTG  
GTATCATTACCAATTATAGTTTTGATCAACAATCTTATACAGAGGAGAGCATTGGTAGCTCAATTCAG  
ATGAGATTCTCAGTTTGTCTATCAAACAATATGGATGATGTGATCCTCCCCACTCTTAACTCTGATCAT  
AGGGTAACCTGCTCCATTGTCTTCTGAACGTGCAATCCCACATGGTTTATACATCGGAGTGTTGAGG  
AAAAGATCTTGTTCAAACTGCCATTAATTGGTATAATGATAAGTTCAAGGGCTTGTATATGCTGTGT  
GACTCTCATGGGAGCAGGTGTCTGCAGTCCTAATTCAAGGCTATCTGGGAAGTATGATTATGCTTTTATC  
AATGCTAAATTGATATGCAATGATCATTGAAAGACCTTAAAGTGATAGAGAAAGAATGTAAAGTGGGC  
ACAGCATCTAGAACATATGGCTGGTGTGTTGCTTCGCCTACATACCATTGTATTCTTCACTGCAGGTTGG  
AGACATTAACCAAGTATAGCCTATTTGAGGCATCTATCAATGGGTGCATTGTGAGACAGTGGGGAGTTCA  
TTTGATCTATCAGGATGAATGAATATCTTTGAAGCGCAGACTCAGATAGATTGCTTCAAGTACACCTACG  
CTGAAAAAAGATTAATTATGCTGGGATATTAAGGGGATTACCAAGAAATAGATTAAGGTAACCTCGAA  
ATACCTCTTCTTTGTTACTAGAGTTTCATAATTTGAATATGGTTAGATTAACAAGTTTAAACTATAAGTTC  
GATTAGAAAAATATAAAAAGCAATCAGATAACTTAACTTAAATTAGATAAAACTGGTTGGCATCAAG  
CCAAGCCAATGTCCCCAGCATAAAGTTCTATTTTCTGAAAAATTACATAAATGAATCTCTTTTATTTA  
ATAATTATTACCACTTTTAAATAAACTTTTATTTTATTACTATTTTTGTCAACTTTTAAACAATACTTAAACAA  
TTCTTGAACAATTTTGTTCCTTTTATATATAATTAAGAATTTTCACTTAGCAAAAAGTGTTGTACCTGAT  
TGGAACATCACTCATTCCCTCTTTCCTTTCTGCTCTTCTCTGTTTTATTTTAGGGTTTCGCCGT  
TCTTCTTCTTTCAGTTTTCAACACAGAATTCTAATGGAAGAAGGTAAACGAAAATCGCCTAGAAGAAGTC  
CGCGGATACTTAATGATGTTGATACTTTGAATAAAAATTTTTATAGAAGGTGTCGGATGAGGGGTCAA  
TTTCAGCTACTACTGCTACCGACAAAGTTAAGGACGATCCCAATTTTAAATTTGGGAATTTACAAGTATC  
GAGTAAGCAGAACAAGGAGGAGAGAAATGCATGTTCAATTGTAAAGGTAAAAAAGAGTTAAAGAGG  
TGAACAATGTGAAAAAATAAAAAAATGGCGTTGATTTTGCATCTACATCGAAGAAAATTGCAGACAAC  
GATGACAATTTTGGAGATTTACCTCCTCAATTTAGTCAAAAAAATGAAAAATAAAGTTGTTTCAGAGAA  
GAAGCCAGTGAAGGATGCAAAAACACTGAACTGATTGCCAAAATGTCATTCTACCGGAGAGTAGAG  
ATTCGGTATGTGAATTTATGTGACTTATTTTTCTTTTTAGTCAGTTCCAAAAGATGACACATTTTTAGATT  
AAGTAACAATTTAACTATAAAATGTCTATTTTATCCTTAATGAAATGATTTAAAG

>PGSC0003DMG400026160 LRR-RLPs

ATGGAAACAAGATCCGTTAAGAAAAAAGGCTTCTTGATGAAATCTACGCAAGTTTTTCATGTGGTGAA  
GACCGCATCAGTGATCTTCTGATGCGGTCAATCACCAAATCTTTTCTTCTTCCAATCAAATCCATCGCT

AAACTTAGCGTACTTTCTAAGCGATGGAAGCACATGTGGCACACTTTCCAGATCTCGATTTTACAACAA  
TCAATGTCCCATCAACATCAACATCACCATCAAGTTATAATAACTTAATCTCAAAGTCAGCTCAAACGTT  
TACAAAAAACTCCATGCAAATTGTAAGTACTAGTGTGGAGGTGCTGATTTTCATAGATCAAGTGTATCTTTTC  
GCGAAAAAAATTCAGGGATCAGGGTCCTCCGTTTTTCGTGCAAATTTGAGTTTTTCACATCTAAACGCCCT  
GATTCGTGGCGCTGTTAAGCACAATGTACAAGAACTTGACGTTGAAGTAGCCACTAATGATTATTTCAAT  
TTCCCAAGAAGTGCTATAAATAGTGAAGTCTTTAAGAGTTTTTAATTAAGTCAAATATCCAGGATTTA  
GGTTACCTCCTTCATCAATTATGAAAAATGGGTTCAAATTTGTTACATTGTCCCTTTTCGTGTCTTATTA  
TGTACGAACAACCTTCGTTACATGATTTATTCACGGAGACATCTTTCCCGTTGCTTAAGAAATTGAGTCTT  
GATGGTTGTACGGGGTAACTTACTTACATGTAAGTTGTCGTGTAAGTACTAGAGAATTTAATTCTTGAAAATT  
GTTTTCAATTGGAGAATTTAGATATAATGTGTTTCGAAATTGGAGAAATTGAGTGTCAACAGCTGCTTCGA  
TTCGTATTCTAGTGGTACTGAGGTTAAGATTGTTGGTCCGAGGCTAAAAAGTATTGTTTGGTTCGAATAAT  
ACTATAACGGATCAAAGTTGTTTGGAGAATTTAACTTGTGTTGATTGAGGCTTTTGTGGGTTTTTTGTGCT  
TCTTGAGGATCTTGGTGAATGAAGCTTCGAAGTGTCAATGATTTCTGTCTGGCCTCTCTCATTACATT  
CATTAGTTCTTGAAAATCAAAGTGTGAGGTATATTTTTGATTCATTTACCAAGTTCTATGTTTTATTTGAT  
GTGTGACATTTGATTTTGGCCTCTTCTATTGATCTATGTGTTATATTTAATTCTGTCTGATAACTTGGTGT  
TGTCAACTTTCCACCAGTATAGGTATTGAGTTACTCGGCCATCAAGACTAAAGCTATTAAGATTTGAGT  
TTTGATTTTTCATTTTTTTTTAGTTCAGTTCATTGACCACTAGACATTCTCTGTAAATATATATATTGATTA  
TTGGACCAAGTTGTTGTTGTTACATTTACATTAGGCCTCGTTTTGCTCTCTACCATGATTTGAATTTTGATC  
TTCCATGACCTCCTTATTTTGTAGCCATAATCCAATAAATATTTATTGATTATTCGACCAAATTGTTGTTG  
TTACATTTACATTAGGACACATTTTTCTCTCTACCATGATTTGAATTTTGATCTCCTCGATATTTTATTAGCC  
ATTTATCCTATAAATATTTATTGATTATTGGACCAAATTATTGTTACATTTACGTTATGCCTCGTTTTGCTTT  
CTATCATGATTTGAATTCTGATCTCTCATGATTTTCCATTATTATATCATTGTAGACTTCAAATGATTT  
CTATTTTTTGTGTCAGATTCTATCGAAGAATAATCACTTGGCAGGAATTTCTCTGCGTCCTTTTAGTAAAC  
TAAGATCGTTAGAGTTGCACACAGGGTTCCACAAACACAACATTCCAGGATTAGCAAATCTGTTTAGGA  
GTTCTCCAGCAAACAATACTAATTCTCAAGATTACAAATGAACACAACATCCAAAGAAGGGTAAGAA  
TTTTTCATTAGCAAATATCCATCTTAATTATGAATATTAATTGTTATACGATACAAGTAACGAGGTACA  
TAAACCTATAAATCACACGAAGAAAATTATCTCAATAAATATATATGATCTAATGCAATTTATAACCTAC  
ATTGTTAAGAACATAAAACACACTTTTAGAAATAGTAGAAGTTTTTTTCCAATCACGAATCAATAGAAAA  
TTTTTGTCCACCTCATTTTCACCAAATACTCACTGGAAAAATGTATGACAGAAAAAAGATTCTCATT

GAAATACTTGAATAAACACTGAATATTTTTATTTTTTCATCGATTCAATCAAATTATGACAAATTA  
GTTTCATCGATAGTGTGAAAAATTATGACTCCATTTGTGTATATAAGTTAACTTATTTCTCTTGGACTG  
ATTGATTAAGTAAATGTGTGTCAAATTCTTAGATTGGAGATCACTAGTGTGCTCGAACTATAGGTT  
AAATTTACCGATAGTGTTAAAAATCTTACACTGTCAATATATATTTCTCATTACATTGATGTTTCTTAG  
CCTCATGACACATTTTTCTTGTCTTTAAATTTTCAGAAATGGAATAGGGACCTATGGCAATTGTCAA  
TGGTGAAGAAAGATTTTGGGAGTCACAAAGTAATGCTATGAATCTTTCCTTCAACATCTTAAAGTAGT  
AAGATTCATGGATTCTCAGAGTGTGAAAGTGATGTTAGTTTAGTGAAGTTTTTGTGAAGCATGGAAA  
GTATTGCAAGAAATGTTCTTGTGTGTAGCTGAGCTTTCCAAATCAAGAGACTCACTTCATAGAGAAAA  
TCAAATCACAATAATGGGGTTTTCCAAAGCATCTTGTAAATGCTAAGATTGTGTTCAAGTAA

>PGSC0003DMG400026231 LRR-RLPs

TTCCTCAAATTTTCAGTACCAACTCTTTTTTAATTCAAACATGGGCTACATGCAACTCTCAGCTCTGCTCT  
TAATTGTTTTCTCTGTCAAATTGCTTTTTCTTCATCTTTGTGCCCTAAAGATCAAAGCATTTCCCTTTTAA  
TTCAAGAAATCGCTTACTATTGATCCCTCATATGATATTTGTCATTACAATTTTTCAAATTGAGTTCATG  
GAATACGAGCAGTGATTGCTGCTTATGGGATGGAGTAACATGCGATGAGATGAGTGTCCATGTTATTGA  
GCTTGACGTCAGTTGCAGTCAACTTGTTGGAGTGATTGATTCCAATAGTAGCTTATTCCAACCTCTCTCATC  
TGAAAAAGCTCATTCTTTCTATGAATGACTTCTCTTCTCACACATTTACCTGCATTTGGAAGGTTTTCAA  
GGTTGACCCATCTTCATCTTTCTGACTCGCATTTCTCAGGTCAAATTCCTTCTGAAATCTTTTCTGTCAA  
ATCTCACTCGCATAGAGTCCTTATACCTTAGAGGTAACCTCCCTGAATGGTACAATACCATCCGGTATGTT  
TCCCTTCATCACTAATTGAATTAGACTTGAGTAATAACCATTTTTCTGGTCATCTTGAGGATTTCAAGTCC  
AATTCATAAGATCTATTGATTTAAACAATAATCAGCTGCAAGGTCGTCTTCCAAGTCAATTCAAACCT  
TGTGAACCTAACGTGGCTTGATCTTTCATCAAATAATTTAGTGGCAATGTGGATGTCAGCTTATTTTCAA  
ACATCAAATCTTCAGGGTCTTGATCTTTCATATAATCGTTTCTCATTAAACCAATGAGAACAGGGTTAAT  
TTACTTTGCCAGAATCTTTTTAGTTTGGCATTGGCCGCATGTGAAGTAAAAGAATTGGAGTTTCTAAG  
ACCAGTAAAGAAGCTTTGGGACTTGAATCTTTCGAATAATAAGATTCAGGGAAGAATTCCAGATTGGGC  
ATGGCCTATTTGGCTTAACTTGACCGTCTTAACTTGTCACACAATATGTTGACAGATATGAACTCAACAA  
ATATAAACTCAATTTCTTATCCCTCTCTATATATTGATTTGCGGTCCAATTTTCTTCAAGGGTCACTTC  
CTATTCTACCAAATTCACACAATACTTGTTTCATGTCAAACAATAATCTTAGTGAGGAAATTCCTTCATCT  
GTTTGCAATTTGAGATCACTAAAAGTCCTAGATTTGGCAAAAAACAATTTGATGGGAGAGATACCACAG  
TGCTTGGGTAATGTCAGTAGTAGCCTCGAGGTTTTTGATATGCATCAGAACAATCTGTCTGGGACAATTC

CAACAACTTTTGGCATTGGAAGTTTACAAGTTAGGAGCCTCAACTGTCATGACAATAAGCTACAGGGGA  
AACTCCCACGATCTTTAGCCAATTGCAAGGAGTTGCAAGTTCTTGATCTAGGAAATAATCACCTCAACGA  
CACATTCCCATGTGGTTGGGGACTCTACCAAAGCTGCAAGTTTTAAGTTTGAGATCAAACAGATTGCAT  
GGTCCCATCGGAACATCAAGGATGAGGAACTTGTTTCCTGAGCTTCGAATCTTAGATGTCGCTTACAATG  
CCTTAACAGAAACCTTGCCAACAAGTTTGTTTCAACATTTGAAAGCCATGAGGACAATTAATCGAACAAT  
GAAGGGACCGGTATACCTTGGAACGAGTACTACCGAGATTCTGTAACAATTGTATCCAAGGGAATGAT  
GCTTGAACCTGTTAGAATTTGACGATTTACACAGCTATCGATCTTTCAAGTAATAAATTCAGAGGACCA  
ATTCCAAGTGTATGGGAGATTTCAATTGCACTTCACGTGTTAAACTTATCTCATAATGGATTGCAAGGTC  
AAATACCTCCATCACTCGGAGATTTATCTTCAGTTGAATCATTGGACCTATCGGGAAATCAACTTTCTGGG  
AGAGATACCACAACAACCTGGTTTCTCTTACGTCTCTTGC GTTCTTAAATCTCTCCACAATCATCTCCATG  
GATGCATCCCTCAAGGACCTCAAGTTCACACTTTTGAGAACAGTTCATTTGCAGGCAATGACGGATTACG  
TGGATTACCAATTTGAAAGGCTGTGGTAATGATGGTGTAAATAGACACAAATTACACAACATCCTCTCCA  
GATGAAGAAAGCAATTCCGAATTTCTGGATGATTTTTGGAAAGCTGCTCTTATGGGCTACGGAAGTGG  
CTATGTATTGGATTATCCATAATATATTTTATAATCTCAACTGGAAACCCGAAATGGCTTGCAAAAATCAT  
TTTAAAGTTGGAGCATAAACTTATGATGAGATGGAAAAAGATACAGCGAAGGCGAAGGAATGACAGAA  
GAAATGATCGCTTCTAAGATAAGTTAAGGTATTCAAGTTAAACTCTGCACTAACTTCTAATTTTTATAC  
TTTCGTTATAAGAATTACTAATCAATATGCTCTCTATCCTAAGCATATTTGATTTTGAAATGGTTATGCGTT  
TGTTGATGTCTCAAGCTTGATATTCATTTTTCAATTTCAAGTTCATATCTTAAACTTGAAAGGTGTAGCATG  
TATGCAACAAAAGGACGAAAGAGAAGTAAACAATTATGAACATACATAGACCCATTACGCCAAATACAA  
CAAATGCTGTTACAACACCATTATAAACTCTGCCACAAAATCCAACAAACCAACATCACATGACTTACAC  
TCCCAACACAGAAGAATAAGAGAAAAAGACAAAGTAGAATTGAAAAAGGTACAAGTTGCATGCAACA  
AGCAGCAGCATTTTCTCCTTGAACAACTTTGATGATGTTAAAGACTCTTCAAGTAGTAGTCTTAACT  
GTTGCTGGGCTTGATGTCCCAATTGCTCTGCTTTCTCCTTAATATCATGGGCCGCATGGGCTAGTCTATCT  
CTTGCATAATCTAGCTTATCCGCCCAATTGGATGCTTCCCAGTGGTGTACCTGCAACCATAACACACCG  
ATTCCGAATTTAAATTTGAAGGTACATTCATACCACTACCTGCAACCATAACACCGATTCCGAATTTAAAT  
TTGAAGGTACATTCATTCGAACGTGGGTGATCTTGAACTTTTGACCTCCAACCTCATAGGGAGGATCAAA  
GATTCAAAATGGTCAGTGTAAATTTTCTATAATTTATGTGCCACTGTCTGATCAATGTATCACATAATTTT  
TTTTGAATAATTTACCATTTTGCCCTTTAGACAAGCTTTAGTTAGAGCTATAGAAATGTTATGGCACCG  
CTTAAAATTACAAAGCTCCGAAAAATCAAATCTTAAATCCCGTATCAAATCAAACATAGAAATTAAGT

ACTCC

>PGSC0003DMG400026748 LRR-RLPs

ATGACTTCTAGTGGGCAAAAATGTGTTACAAATGAGAGTCGATGGGCGAATATGGTAGAAGAAGAGGA  
GGAGCATGTCACACCTCATAGTAAATTGATCCCCGGAGCACCAACCTTTGTGCCTAAGGGTAGTAGCATT  
GCCTATGTTTCATCTCCATTACATTGGGGGCGACAATTGATTTTAGCAGGTTCTAATGTTCAAAAAGTTTA  
TGTCAGTGACAAGGAGCTTATTGATGCATTGTGGGGTTCTAATGTTGAAAGGTTGGTTTCTTTACAAGT  
TACACCTATTAACACTAACAAACAAGTGAAGTTGATGGTAGTCAGTTTGCTAACCTACAAGATGAGGAA  
AGTGATGAAGAGGATTGGTTGGATCAATGTTTTGAGAATGTAGCTAGGGATGCAGATATTTCTCCTAGG  
CAACAACGCAATACACTACAAAAAGGGGCTAATTCGCAGGAGTAAAATTACGAATAGTGGGGGTTT  
AGAACCCCCACAATTTGTCGTTACAGGGGTTTCCACAACCCCCATAGTTAGGTTTGTCACAATTAAGTTG  
CAGCAGTTTTTAAGCAACCCCCACAATCGACAATTAGCGGGGTTCTAACTTCTGTAATTTATTTCCAGGA  
AATAATTTTATTCCATTTTGTGGGGGTTTTATAACCCTCCACAAATAAATTTAGTATGTTGGGGCTATAA  
CCTCCGCAACACTTTTGTGGAATTTTTATATTCATTTTCGTAGAGGTAATAATGTATATAAAATTAAGCT  
ACAATAAATTAATAAAATATTTTCATGGAATAAAAAACACAAAGATCTAACTAAATCATGAAGTTAACAT  
AAATTAGTGTTAAAGTTCATCAATTTACAATAGACTTTCTTTAAATCAAAAAGAACATAAAAAACAAAAA  
ATTGATACGGTGTGTCTCTATGTACACAATGTCTACTCAACTCAACTTCTCTAAAAATATAATACGTAA  
ATCTGGCTTTTAGAAGAACAATTCAATTCCTTCCAAGTATTTATTGATCTTTTAGACATTATTTTTTCGAAC  
TGAACCTTGACTTTGGCACTCCTGCAACAATAGTGTATGTGAAGGACATTAGTTGTGCAACAATAGAGA  
GAAATGCAAAAAGGCATAGAGGAAAATAGCACATTTGACTGTAGCACAAAGAGACTCAATGTCTACGAT  
AGGCAGGATCGATTCTGTCAAGTATTAGCTCAGTGCTATACCAGTAGTCAGTGACGGAATCAAGATTTTC  
ATCAGCCTTTGTGCCTAAGGGTAGTAGCATTGCCTATGTTTCATCTCCATTACATCGGGGGTGACAATTG  
ATTTTAGCAGGTTCTAATGTTCAAAAAGTATATGTCAGTGACAAGGAGCTTATTGATGCATTGGGGGGG  
TTCTGATGTTGAAAGGTTGGTTTCTTTACACCTATTAACACTAACAAACAAGTGGTGGTAGT  
AGTACTTTCTCCCCAAATCAGTTTGCTAACCTACAAGATGAGGAAAGTGATGAAGAGGATTGGTTGGAT  
CAATGTTTTAAGAATGTAGCTAGGGATGCAGATATTTCTCCTAGGCAACAACAATATATAACAAAAAG  
AAGCATGGAGGAAAGAATAAATGGAATGACAAGGTGCCTGAGGAGGTTGTTTCAACACCTACCGATG  
CGACTGGCAAAACAGAATCATATGACAGTGTCAACATATTCAACAAGATCCAATAATTCCAAGAAGAAG  
TGATGAAATATCAAGTGTGTTGGATAGATTTGAAGAAGACAAGAACAAAATACTTCAGGTTACTTTAG  
ATGGGCAATCAATCTTTTCATTCATGCATCTTTAAAAGGAATGTTTCAGGTCGATAACTCAACATTCTTCT

TGGTTGTTATATTTTTGCACTATTTAAGCATCCTCGTTTGTAAATATCATCATAGAGTGAATTACAACTCTG  
TAAATTTACCAATACCTAGTTCTCTCTAGCTCATATTTCTTCATGCTTGTTAGTTAGTAGAGGTTTGTTA  
CCGCATTAGGATTGGTAAGGTAAGACCTAGCCCCCTTGCTTGACTTATCCCTATTGAGATTTTTATTTTC  
TAATAAAAGGCCGCTAGACACTTTGTCTAGTGGTAAATTTGCCAAAACAAATAAATCCTTGAAAGCATTG  
ACTTATTAGAATGGCAACATAAAGCACATGTGTATTGGTGTGGTCGATGGGAGATGACAAATATCTTCG  
TGGAATTAGTGGAGATGTTTGAAAGTTGGCTTGAATACCGTTATAACAATACATAAATGTACCATTTAAT  
TGGCATTATGTCCTCCAACATTGGGTGTGAACAAGTAAACACTTAACTTGTGTAAAGTTGAACAAGTA  
CATACTGTATACATCTTATGTGGCGTTCTATGTAGCAATTTACATCCTACGTGGCATCTTACGTGTATT  
ATACCACATAGGACACGTGTGTCTACTTGTTC AACGTTATAAAAAGTTTATGTGTATACTTGTGCACACCCA  
AAGTTGAAGGTTGTAGATGCCAGCTGAGGCCAAGTTAAAGAACACATTTATGTATTATCCCTAAAAAAA  
GTGTGATTACGTGTTCCGATAAAAAGTATTGAAATTTATAATAAAGATTTATGTATTTGGTAAGATGTTGT  
ATTGGTAAGTTGTTCTTTTATTAATAAATACTAATCTAAAATAATCTTGATTTGTCTTTTTTTAGAAAGTGTA  
AATCTAAATGTAACCTTGTAAGAAAAAGAGGAACACTATATATCTTAGTGAAGAGGAAGTTACGAGAC  
TTATATTGGAAAAAGTATTTTTGAGAATTTAAAAAAAATAAAGGACAAAATAGTAAGAGACCGGGTCAA  
ATCAAGAGTGTTCATAACCCAAAAATTAATAAGTTCGGAATAATCAACTTATGACTTTTGATTGGTCTTA  
GTGGTTTATAAGTACTTTGAATGTTTACTAATTAATACGAACGTAAGATAAAAATTGTTTATAAGTTAGTT  
TAACGAGCCTACAAGCTTAGTCAAATACCTTCTAAATATCTCATTTAATTTTGTACTTTTTATCTCTCAAGT  
GAGAAGCGATAATGATCAAGAACTCACAAGTGTTTTTTTTTTTTTTGTAAGATTCATACATAAATTATCAA  
GTGTTTGTGTTTTCTATCTGAATTATCACTATTTATAATTACTCTTCTTTCTTTAAAGGGAAAAGACCCAA  
CTATGCCATTGAACTTTGAGAAAAAAAACCTCATAATCTATTCCATCCGTTTAGAAAATTAGTTTATCTATG  
ACATTTTCATTTGAGAAAATGTTTCATCCATATCATTGTTAGTTAATTAATAAATAGTTTAAATTTGCTTAGT  
TATAACAACGTTTACTAGCTAGCTATTCATGTCTGAAATTAATACACAATTTGTTTTACAATTTAAAAACA  
ACGTAACATAACTTGTATAAGTTAGGAGGGAATTTGTACATAATGTTATCTCAAATGGACTGTCAATGC  
TTATAGAAAATATAATAACAAAAGGATAATGACAATTGAGAAAAAGGTAATTAAGAAATGATGCATAAA  
TCAGAGGTCAAATATATGATAAATAATAATAATAATGAGATATAACTATATTAGGAAACAAATTTAG  
CAGAGGCCTTTTTCCACTGTAGGTCCACTTTTCATCACACAATTCTAGAGAATATGAAAGCAAGAGTATT  
TACAAAGAATTACGCACACAATAAATAAAGCAAACTTGGTTTACTTGCCATGTCTTAATTGGCTGATTA  
GAGGAATTTTTTTGCCACCATATTTGACCATTCTGATTGAGATGTGAAATACTTGATTGAATGGAAAAAT  
CTCCTAAAAAGAGATCTTATTGCTTTTCAAAGTCTCAAACCACAGGTTACTAGTACTAATATTTGCACTA



ATGGAGAAAGCCTTCACATTTTTCTCTTAACAATACTCTTGTTGCCTCACTATGTTATGGCCCAAACCAA  
CATTACAAGTCAATTAGCTCTTCTCTTTTTAAATCCCAAATTAGTTCGACCCCTTCACTTCTTGAAT  
GAAAGTTGGTCTCCTGCTATTTCTGTTTGCCGTTGGGTTGGAGTCATTTGTGGTTCTCGTCACCAGCGAG  
TGAAGTCGTTGAAGCTTCCAACTTTGCTCTTACAGGAAGAATCCCCGTGATTTTGGAAATCTCACATTT  
CTTGTTTCTCTTGACTTGGGAAACAACCATTCCACGGAAATTTGCCTCAAGAAATGGCACATTTGCGTC  
GGCTTAAGTTTCTTGATTTAAGTTTAAACAGCTTCAGAGGGGAAATTCCTTCTTGGTTTGGGTTTTTACAC  
CAACTTCAAGTTGTAACCTTAGGAGTAACAGTTTTACTGGTTCATTCTCCGTCCTCTCGAATGCCTC  
AAGGTTGGAGATTTTAGAAATATCTACCAATTTACTTGAAGGAAACATCCCGGAAGAGATTGGCAATCT  
TCACAACCTGAAATCGTTGTCCATAGAACAAAATCAGCTTACGGGTTCTATACCATTACATTATTCAATA  
TTTCTAGAATTGAAGTCATTGCATTTTCATATAATAGCCTATCAGGAGATCTCCCAATGGTTTATGCAAT  
GATCTCCCAATACTCAAAGAGCTTTTATCTATCCAGAAACAAGCTTGATGGTCATATGCCTACAAGCTTGT  
CAAATTGTTACGACTTCAAATATTGTCTCTATCTGGAAATTAATTTTATGATGGACCAATACATAATGAAAT  
TGAAAATTGACTAACTTGCAGAAATTGTATCTCGGATACAACCATTTACAGGTATATATGTTTTATCTT  
ATGAATGCTACTACTATATATTGAATCTAATTACCTCACATCTTTCTTTATTACACATTGAATGCAGGTATA  
GTTCCAGAAGAAATTGGAAATCTTGTTAATTTGGTGGACTTAAGCGTGGAGAATAACCAGATTACCGGA  
TCTATCCCAATCTCCATATTCAATATCTCATCGCTGCAATCATTGTTACTGTGGGGCAACAATCTTAGTGG  
ATTCTTACCACGGGAGATTGGCAACTTAACCAAGATGCAATTCTTAAATCTCAAGGAAAATAGGTTTACT  
GGTACGTATTCAAAGTTATAGCGATCTGTATTGAGCTAGCTAGACTCATTCTTTCTTACGTGTTGACAG  
GTGAAATACCCAAAGATATAAGAAATCTCGTTGAGTTGGAGGAATTTGATGTTGGGTTTAAAGTTTTA  
GTGGTTCACTTCCAATGGAGATCTTCAACATATCACAACCTGAGAACAATTCAACTTTCAGACAACAATCT  
ATCAGGAACTCTACCACCAACATAGGTTCTACCTTACCCAACATTGAAATACTTTATCTGCATACCTTAA  
CCAATCTTGTTGGGACTATTCCTCATTCTATCTCCAATTGTTCAAAGCTTACTGATCTAGAGCTTTCACAAA  
ACAACTCAGTGGCTTAATACCCAATTCTCTTGGATATTTGACTCATCTAACTTCTAACTTGTGGGGA  
AACAAATTAACCAGTGATTCATTTTTAAGCTTCTTGACTTCTTAACCAATTGCAGAAATTTAACATTCTAT  
CTTCAACCCTCTAAATGGCATGCTTCCGGTCTCCGTAGGGAATTTCTCCAATCTCTTGTAAGTTTTAT  
GCCGCTGCTTGCAAGATTAACGGTCAGATTCCAAATGAAGTTGGCAACTTAAGCAGCTTATTAGACCTTG  
ATCATTCTAATAATAACTTCATTGGATCAATTCCTACCTCAACTCGTAACTTGAGAAACCTTCAGCGCCTG  
TACTTGAACAACAACAAGCTTACGGGATTTATTGGAGATAATTTATGTAAATTGCAGCATTGGGGTGCTA  
TTTACTTGGGACAAAATCAACTTTCAGGATCTCTTCTAATTGTTTAGGGAACGTCACTTCCCTTAGAGAG

ATACATATGTATTCCAATAAATTGAGTTCCAATATACCAACAAGCTTAGGAAATCTCAAAAATCTAATGG  
TTCTTAACTTGTTCATCAAACAACATGGTTGGTTCTTTACCTCCGGAAATTGGAAATCTAAAAGCTGTGATA  
CAGATGGATCTGTGGTTCTTTACCTCCGGAAATTGGAAATCTAAAGGCTGTGAATTATATGGATCTGTCA  
ATGAATCAATTTTTGCGACACAACAAGTTGCAAGGATCTATACCTGACTCAATGAGAAACATGGTAGG  
CTTGGAATCCTAGACCTTTCTCATAATAATATAACAGGAATCATTCCCATGTCTTTGGAGAACTTCAAT  
ACCTCAAGTATTTCAATGTTTCTGACAACAAATTGTATGGTGAATACCCTCGGGGGGTCCTTTCAAGAA  
CCTCTCGAGTCAGTTTTTCATCGACAATGAAGCATTGTGTGGTTCTTCAAGATTTAGTGTCCCGGATGCC  
CCACTTCATCAAAGCACAGATCAAATAGGAAACAAATGTTTGTCTATTTCTTATGCTGGGAATTGCACTT  
GTATTTGTTCTATTGCCTTTGTGTTCTGATGGATTAGGTATAGAAGAGGTAAAAGAGTTCCTCAACGAG  
CTGATTCATTGTCTATCGCAACAACGGAAAGAATTTCACTACTGAACTACTCCAAGCAACTGATTCACTT  
AGCGAGAGTACTAATCTGATTGGTTCTGGAAGTTTTGGCTCTGTTTACAAAGGCGTTCTCAGGAGTGGG  
ACTGCCATTGCAGTTAAAGTGTTCATCTGCAACTGGAAGCGGCATTCAAGAGTTTAGTGCTCGAGTATA  
TGCCTAATGGAAGTCTTGACAAGTATTTGTATTCGCACAACACTTCTAGACATCAGGCAGAGACTAAG  
CATTATGATAGATGTAGCATGCACGTTAGAATATCTCCATCATGGGTGCTCGTTACCCGTGATTCACTGT  
GATCTGAAGCCTAGTAACGTCTTGCTGGACGAGGATGTGGTTGCCACCTAAGCGACTTTGGTATTTCAA  
AACTGCTTGGTGAAGATGAGAGTGATTTATACACAAAACCTTAGCAACATTTGGTTATATTGCACCGG  
GTGCGTCTCTTTGTTTTGCTAATTTGAACATTGATTTTTCGTCTTTTTTTTTTTTCCAATCAAGAAAGTATA  
TTGCCTATTTAAATTAATTGTTTCCCTGTAGAGTATGGAATGGATGGACTGGTGTCAATAAAATGTGATG  
TCTATTGTTACGGGATTATGTTGCTGGAACATTTACTAGGAGAAAGCCTAGTGATTTTGAGGGAGATCT  
TAGCTTGAAGCAATGGGTGAGTTATTCCTCCCGAGGCAGTAATGGACGTTGTAGATGCCAATTTGAT  
AACAGTACCAATGGATAATTGCTTACAGAAGGAGCTAGATGTTGTGGCATCAATCATGAAAGTGGCATT  
AGATTGTTGTGCTGAATCTCCGGCAAGAAGGACAAACATGAAAGATGTTGTAGGGATGCTACAGAAGA  
TCAAGATTCAACTTCTTACATGTTGA

>PGSC0003DMG400026750 LRR-RLPs

GTCTCTTTTTCACTATCTTCTGTACACAACAGACTTCAATACACCTCTGCTCTGTAATTGCAACCATTTTCC  
ATCTTTCTTCAACCAAAAACAACAACATGGCCTCTTCTTCTCCAGATCCATTTTTCTCCTCATATTTCTCA  
CTTTTTCTCACCATTTCACTTCAAACACTCTTTCTTCTTCTCCCATCACCCCTTTCTTCTCCATCTCCA  
AAACCCTCTCCTATTTCAACTCCACGAACTCATTATCTTCTTCTTCTGACCCAAATCAGCTCAAAGCT  
CTACAATCACTCAACATCCCAACAGGCAAAACCCCATGTTCCCATCTCACAATACTACCACTATTTGTGA

TTCTTCAACCCCATTTAGTCACATTGTGTCATTAACCTTCATTAACTGCTCAGATGATGTTGCATTATCACT  
TACTGCTTTGAAATCATTGTCTACAGTGAAGGATTTGGGGTTTTACAATTGCCCATTTACCTATTAGGT  
TACCTTCTCAGCTTGCTTTGAATCTGAAATCTTTTACTTGTGTTAGTAGTTTGAAGAAATTAACTGGGGTT  
TGGCTTAGCAAATTGGTGAATGTTACTGATTTAACTGTTTCTCATGTTTCGATTGTTGCTAGTGGTCCATC  
TATAATCATGAATAGTATAAAGAATTTGCACAGTGTACGATTTGGAATGCTAATCTTACTGGTTATTTGC  
CTAACATTGGCATTGGAATCTTAGTTATGTTGATTTGTCTGGGAATAAACTGAAAGGGAGAATACCCAG  
CTCGTAACTGAGCTGGAGAATCTGTTTACCTCAATTTGTCTTCGAATTCACTTAATGGAACGATCCCCG  
CTTCGTTTGGTGAATTTGTCTTCATTGCAAAATGTGTCTTTGTCTTCGAATTCGTTGTCTGGATCTGTTCCGG  
ATTCGTTTGTGCTATTCCGAGATTAGTTCATCTTGATTTGGGGTCTAACCAACTCAATGGGACTATTCTT  
AAGTTCATTTCTGATATGAAGGGATTGAAGTATTTGAATCTTGAGAGGAATAACTTTTCATGGGGTTTTGC  
CTTTAATGCTTCGTTTATAAAGAAATTGGCTGTGTTGAAGGTGGGAGGAAATTCGAATCTTTGTTATAA  
TCATTGACATTGTCTTCTAAAGTGAAGCTTGGGATTGCTCCTTGTGATAAACATGGGTTGCCTGTATCAC  
CTCCAGCATCGAAGGATATAAGTTCGGATGATACCGATGATTCTGATGATTATGCTGATGATGAGAGTC  
AGCACCAGGAACATAGTCATGGACCAAGTAAGGTTGTTCTTGGTATTTCCATTGCACTTTCTCGATTGT  
ATTCATAATTATTTTCTTGATTCTGTTGGCTAAATGTTGTAAATGAGCATAAAAATGAAATCTTGGTTCGT  
TTAGTTTAGGAAAATTTCTTAATTGGGTTATGAAATTTGTTAGTTAATTATACATTTGTATCTTGTTAGAA  
GTAGAAGAGGTGGCTACTTTATTTGGTGTGATTCTTTTGAACAAGTTAAATTGCTGGAGGAAGTAGGCG  
GCTAAATTGATCGTTTAAAGTGTATGATGGGAGAGATTGCCTATCAATGAAATTTTCTTTATGTTGATTT  
TCGATTGACGGATTGAGGTACATGGTTTTGATTTCTGATATATGGTGATATCTTAATTGCTTACGACATT  
TTGTTGTTGGATTGAGCATTGCTTCATTCATTTGTTGATTGACAATTTGAAACATTCCTTTATTTTCATG  
TGTTGGTTACGAGTCATGACAATGGATGAGATAATCTATGTCGTGTGGATCCTTCATTTGTCTTGATGTA  
CCCCGTGTCCAGTGGGAATGTGGCAAGGGTTAGGATACTTTGCTGGAAAAGGTTGACATACCCATATCT  
GGTGCTTCAAAGAAACTGTACAGAACACATACCCGTAAAAGAGTCCAAGCAACATAATGACAATATGA  
AGTATCTACCAAATTAGCTCCAATAGTCTATTGTCTCAGTTTGAAGTCAAGATCACCGTTTTCGTTCTT  
ACTTGTATGATTTTTCGTAGTAAGTCTTTTGTCTTTCTTTGTGCTCTACCGGACTTTCCAGTATTCCTCGTAT  
GTCCTGTGATGCCAGTGTTTTTATGAGATCTAACATAATGCTGTGAAAACAGTATTCATTGTGGACACA  
AAAGTTCATTATCTGGCACTTCATTTCAATTTGACAGAAGAAGCTCAACTAGTCCTCTCCTTAGTTGTGTTG  
CTCGGATTCTCATAATATGTTTGGGTATGTGTTGGATCCTCAAAGCTATGCATTTTTGGAGGATCTGAC  
ACGGGTGGGGCAACACTTTTGGAGGATTCGAGTAACAAAGCTCCTTAGTCCCCACTATGGTACCTGATC

ACCACAAAGGATTACTAGGGGGTGCTGCCACTATGGTTTTTCCTTTCATTGTTAAATGCTTATTGTGATAA  
TAGACCGGAGAATTCATATAGTCGATTCTAACTTGCTTGGGACAGAGGCACGAGTTATTTTTTAATGTC  
GTTTTAGTTATAACGTCTATTGTTTTGGCC

>PGSC0003DMG400026840 LRR-RLPs

CAAAAATTCATGAAAAATCATATACGTTTAAGGGAAGCCGGTATTTACCAAGTCCTAGAATAGATAACA  
ATCTTGTGACAGGGATGGCAAATCTAGAGGAATTTACAATCTTTGTTACTCTAGTTGTACAAATGAAGT  
CTTTTCTAGCATCCCCAATTTAAAGAGATTGACCATTACGCACCTTTTAGAGTAGGATACATTATTCGAT  
GTCTTCTCTTGATATGTCGAGCTTGACAAACTTGAGGCATTCAAGCTTCTGGAGATATAATTATGA  
AAATCCCATCAAAGATTTGTTTTCCGGAATCACTTAGAAGATTGTCTTAACTAGGTGTTCTAAGTTTA  
TTTGGGAAGAGATATCATCAACTTTTATCATGTTGCCACATCTTGAAGAGCTCAAACCTAAATATTGTCGA  
GCCGAAGATGATGTATGGAGATTGACTGACAAAGACATATTCAGAAGCTTGAAGTTGTTGTTACTGAGC  
GAGCTAAATCTTAAGGGTTGGGAAGCAAGCAGCGATAACTCCCTAATCTAAAACGCCTTGTTCTGAAG  
AAATGCAAGGACCTGCAAGAAATCCAACAGATTTCCGGGAAATTTGTACTTTGGAATCAATTGAGTTA  
CATGATTGCAGCACTACTTCTGAGGAATCTGCCAGAAATATCGAACAAGAACAAGAGGACATGGGAAAT  
AATATCCTTAAGGTCTACATCCATAACAGCGACAGTAAGTTTAATTCTCTCTGTAAAGTTCTTCGATTCTT  
CACATTATTTAAACCTCGTTTTTATTAATCATACTTCTTTGAAATTAAGATGATGACTTGTACTTTTTAT  
CTTGCATATGCAGGTAATTGAAGCTTATTTTGAGGGATCATCTAATGCTATCTTCCGAATTCAGAACCTTG  
TACTTCATATTTTTGTTTTTATATTCTGATGGCTTGTTAATTTTCATGTTTTAGGAATAAGCATGTTTAATTCA  
TGTATCGGCCAATTGTGTTTTTTATTTATTTGTAAACGGTAACTAGTGATTTATTTCTGAGATAACATG  
TTCTAAGTTGCTGCCAGTGGTTATTACGGCAGCAAAGGACAGGTTGGTTTTGCTTTTCAATTCTTGTTAA  
AGTCATTATATGCATCAGTTCCTAGATCTGATGGTCCAATTTCAATTTCTTCTCCAGAGTGCCCAACGTCAA  
ATTTAATGTTGCAAAGGTGTTGCAGTCCCTTATCCCTGTTGTTGACCAATCAGTGAGAACTCTCATCTACC  
TTCTTTTCTTGGATTGGTTACTTGGTTTAGTTGAAATAACGATTGAGCTTACTTACGTTGTTGTTTGTGAA  
GAAAGTTTACACTTGCATATCCTCGCTATACCTTAATGTCGACTTTCTAGTTTAGTAGAGCTAGCTGAGGA  
CCCTGATGTCGATGTCCGTTTTTATGCAAGTCAAGCACTTCAGCCAATTGATGATGTCATGATGTTAAGCT  
AGAGATACTTATCTGTATTTCTGTTGGGGTTCCTACCAGAAATCTGTTGTCAAATCCTCTCTGGACGTC  
TGGGATTATGCCGTCACACCAGGAAACAGTAAAGAGAAGGCAGAAAGTGAAATATATCTGTCTGAGAT  
TTGGGGGTCGTATTAATACTAATATATATTTTAGGATGTCAAATATGAAATGCTTCTACAGTAAGCTCA  
AGTATTTACATGTAAATTGGCTGTTTAGACTAACTAATTAGTATCTTCGAATGAATGGTTTTTCTTATTAG

ATTCTTTCTAGTTACTAAAGGCTGTTATATTTGGTGCTTTGTATAGTAGACCATTTAGTTGGGTCATGGCC  
ATTCTGTTGTATGATCATAGTCCAGTGTAGATGAGTTGAAGGTTCTTATTGAAATTTGATTTCAATACT  
AGTAGTTTTTGAGAAGATTCTTATCATTGTGCATTTTAATAAAGAAGGCATAATACAT

>PGSC0003DMG400027407 LRR-RLPs

ATGGATATTGGCTTAGCTGTTGGTGGTGCATTTCTCTCTTCAGCTTTGAATGTTCTCTTTGATAGGCTTGC  
TCCTAACGGTGAGCTGATGAAGATGTTTCAGAGGGACAAGCATGATGTTTCGGCTTTTAAAGAAGCTGAG  
GATGACTTTGCTTGCTCTTCAGGCTGTGCTAAGTGATGCAGAGAACAAGCAGACATCAAATCCATATGT  
GAGTCAGTGGCTTAGTGAGCTTCGAGATGCTGTGGATGGTGCTGAAAACATAATAGAAGAAGTCAACT  
ATGAAGCTCTGAGACTTAAGGTGGAAGGTCAGCATCAAAATCTCGCAGAAACAATCAACAAGCAAGTA  
ATTAGCATAAAGGAGAAGTTGGAAGACACCATTGAAACATTGGAGGAGTTGCAAAAGCAAATTGGTTT  
CCTTGATCTAACAAAGTATCTTGATTCAGGTAACAAGAAAAAGGACATTTTCAACTTCTGTGGTTGAT  
GAATCTGATATCTTTGGTAGGCAGAATGAAATAGAGGAATTGATTGACCGTTTATTGTCAGAGGATGCA  
AATGGAAAAAATCTTACTGTAGTTCCTATTGTAGGAATGGGGGGTGTGGCAAGACAACACTTGCTAAA  
GCTGTTTATAATGATGAGAAAGTGAAAAACCATTTTAATTTGAAAGCTTGGTTTTGTGTATCTGAACCAT  
ATGACGCTCTCAGAATAACAAAAGGATTACTTCAAGAAATTGGCTCATTTGACTCGAAGGCTGAAAGCA  
ATCTTAATCAGCTACAGGTCAAATTGAAGGAAATCCTAAAGGGAAAAAGGTTTCTTATTGTCCTAGATGA  
TATGTGGAATGATAACTATAATGAATGGGATGACTTGAGAAATCTTTTTGTAAAAGGAGATGTAGGAAG  
TAAGATCATTGTGACAACACGTAAAGAAAGTGTTGCCTTGGTGATGGGTAAGGAGCAAATTAGCATGG  
GAATTTTGTCTAGTGAAGTTTCTGGTCTTTATTTAAAAGACATGCATTTGAATACATGGATCCTGAAGAA  
CAACGAGAACTTAAAAAGGTTCGAAAAACAAATTGTAGCTAGGTGCAAAGGACTGCCTTTAGCTCTGAAG  
ACGATCGCTGGCATGTTACGCTCCAATCAGAGGTTGAAGGGTGGAAACGTATTTTGAGAAGTGAAAT  
GTGGGAGCTGCCAGACAATGACATATTACCAGCGTTGATGTTGAGCTACAATAATCTTCCCGCACATTTA  
AAGCAATGTTTTTCTTATTGTGCAATCTTTCCCAAAGATTATCCATTTTCGAAAGAACAAGTCATTCAACT  
GTGGATTGCTAATGGTCTATTAAGGGGTTGCAAAAAGATGAAACAATTGAAGACTTAGGCAAACCTATA  
CTTTCTCGAGTTGAGATCAAGATCACTTTTGAAGGGTCCAGGAGTCTTCTAAAAGGAATGAAGAGGA  
ATTCTTAATGCATGACCTTATCAATGATCTGGCCCAAGTTGCATCTTCAAACCTTTGTATCAGGTTGGAAG  
ATAACGAAGAATCTCATATGTTGGAAAAATGTCGACACCTGTCCTATTCATTGGGAGATGGTGTCTTTGA  
GAAGTTGAAACCACTCTACAAATCAAAGCAGCTGAGGACATTGCTTCCAATCAATATCCAGCGTGGGTA  
CTCATTTCTTTAAGCAAGAGGGTGTGTATAACATATTGCCAAGACTAACATCCTTAAGGGCTTTATCAT

TGTCTCATTATCGGATTAAGGAGTTGCCGAATGACTTGTTTATCACATTA AAAACTCCTAAGAATTTTGGAC  
CTTTCTCAAACGGCGATAAGAAAGTTACCAGATTCCATATGTGCATTGTATAACTTGGAGATACTTCTCT  
GTCTTCTTGATATATCTTGAGGAATTACCGCCGCATATGGAAAAGTTGATCAGCTTGCCTCACCTTGAC  
ACTACTGGCACTTCTCTCTTGAAGATGCCACTACATCCAAGCAAGTTGAAAACTCCATGTGCTAGTAG  
GATTTAAGTTTATTCTAGGTGGCTGCAATGATTTGAGAATGGTAGATTTAGGTGAACTACGCAATTTGCA  
TGGATCTATATCAGTTCTAGAGTTGCAAATGTGGTTGATAGAAGGGAAGCTCTGAACGCAAACATGAT  
GAAAAAGGAACATGTTGAGATGTTGTCGTTGGAGTGGAGTGAGAGTATTGCTGACAGTTCACAACTG  
AAGGAGACGTACTCAATAAACTACAACCAATACAAACATAAAGGAACTGGAATCGCTGGATATAGA  
GGGACAAAATTTCCGAATTGGATGGCTGATCATTCTTTCTTAAGCTGGTGGGAGTGTCTCTTAGCAATT  
GCAACA ACTGTGCTTCCTTGCCAGCACTAGGACA ACTTCCTTCTTTGAAATTCCTTACCGTTAGAGGGAT  
GCATCGAATAACAGAAGTGAGTGAAGAGTTCTACGGTACGTTGCCTCCAAAAAGCCATTTAACTCTCT  
GAGAAGCTTGAGTTTGCAGAGATGCCGGAGTGGAAGCAGTGGCATGTACTGGGGAAGGGAGAGTTCC  
CTGCACTTCATAACTTTTTAATTGAAGATTGCCCAAGCTGATTGGGAAGTTGCCTGAAAACTTTGCTCT  
CTGAGAGGATTGAGAATTTCAAATGTCCTGAACTCAGTCCGGAGACACCTATCCA ACTTTCAAATTTGA  
AAGAGTTTAAAGTTGTTGCTTCTCCTAAAGTTGGAGTTCTTTTTGATGATGCTCAACTGTTTACATCTCAA  
CTTCAGGGAATGAAACAGATTGTTGAATTATGTATTCATGATTGCTACTCTTTACCTTCTTACCGATTAG  
CATTCTTCCGAGTACCTTGAAGAAAATAGAGATATATCATTGCAGGAACTGAAATTGGAGGCGTCAAT  
GATTTCTAGAGGAGATTGTAACATGTTTCTGGAGAATTTGGTAATATATGGATGTGATTCTATAGATGAT  
ATATCACCAGAGTTGGTCCCAAGATCACACTATTTGAGTGTAACAGTTGCCCAACCTTACTAGGCTTTT  
GATTCCTACTGAGACTGAAAACTCTATATTTGGCATTGTAAGAATCTTGAAATACTTTCACTGGCATCT  
GGA ACTCAGACGATGTTGCGTAATTTGAGTATTCGTGACTGTGAGAAGCTGAAGTGGCTGCCAGAATGT  
ATGCAGGAACTCATTCCATCTCTTAAGGAACTAGAACTATGGTTTTGTACAGAAATAGTGCCTTTCCTG  
AAGGAGGATTGCCCTTCAATTTACAAGTCCTTCGGATCCACTATTGTAAGAACTGGTGAATGCGCGAA  
AGGAGTGGCATTACAGAGACTCCCCTGTCTCAGAGAGTTAACCATCTTACATGATGGCAGTGACCTTAA  
CCATCTTACATGATGGCAGTGACCTTGCTGGTGAAA ACTGGGAGTTGCCTTGCTCTATTGCAAGGCTTAC  
CATATCCAATCTGAAAACATTAAGCAGCCA ACTTTTCAAAGTCTTACCTCCCTTGAATATTTATCTACTG  
GTA ACTCACTTCAAATTCAGTCACTGCTGGAAGAAGGGCTTCCACCTCTCTTTCTCATCTAACTTTATTTG  
GCAATCATGAGCTCCATTCCCTACCGATTGAAGGTCTACGACA ACTCACTTCACTTCGGGATCTATTCATT  
TCTTCATGTGATCAACTCCAATCTATTCCAGAATCAGCACTGCCCTCCTCCCTCTCTGAGCTGACCATCCA

GAATTGCCATAAACTCCAATACCTTCCGGTAAAAGGGATGCCCACTTCAATCTCTACACTATCTATTTACG  
ACTGTCCATTGCTCAAACCACTCCTTGAATTTGACAAAGGAGAATACTGGCCAAAAATTGCTCATATTTCC  
ACCATAAATATTGATGGGGAATACCAATAA

>PGSC0003DMG400027410 LRR-RLPs

ATGCGTCAATAATAGAGGTGACTGAAGAATTCTATGGTAGTTTGTCTTCCAAAAAGCCATTTAACTCTC  
TTGAGAAGCTTGAATTTGCAGAGATGCCAGAGTGGAAGCGGTGGCATGTACTAGGGAATGGAGAGTTC  
CCTGCACTTAAGATCCTTTCAGTTGAAGATTGCCCAAGTTGATTGAGAAGTTCCCCGAAAACTTTTCTC  
TCTGACAGGATTGAGAATTTCAAATGCCATGAACTCAGCTTGAGACACCTATCCAACCTTCAACTTTA  
AAAATATTTGAAGTTATTAGTTCTCGTAAGGTTGGAGTTCTTTTTGATGACACTGAACTGTTTACATCCCA  
ACTTCAGGAAATGAAACATATTGTTGAATTGTTTTTACTGATTGTAACCTCGCTTACCTCCTTACCTATTAG  
CATTCTGCCAAGTACCTTGAAGAGAATACACATATATCAGTGCGAGAACTGAAATTGGAGACGCCAGT  
TGGTGAGATGATTACTAATAACATGTTTCTCGAGGAGTTGAAACTGGATGGATGTGATTCCATAGATGA  
TATATCACCTGAGTTGGTCCCAAGAGTAGGCACCTTGTAGTTGGGCGTTGCCACAGCCTTACTAGACTT  
TTGATTCTACTGAGACTAAAAGCCTCACTATTTGGTCTTGTGAGAATCTTGAAATACTTTCAGTAGCATG  
TGGGGCTCGGATGACGTCGTTGCGTTTTTTGAATATTGAAAAGCTGAAGTGGCTGCCTGA  
ATGCATGCAGGAACTCCTTCCATCTCTTAATACGCTGGAACCTTTAATTGTCCAGAAATGATGTCCTTTC  
CTGAAGGAGGATTGCCCTCAATTTACAAGTCCTTTAATCTGGAATTGCAAGAACTGGTGAATGGCCG  
AAAGAATTGGCGTTTACAGAGGCTCCCCTGTCTTAGAGAGTTAAGGATCGAACACGATGGCAGTGATGA  
TGAGATTCTTCTGGTGAGAATTGGGAGTTGCCTTGCTCTATTCAACGTCTTACATATCTAATCTGAAAA  
CTTTAAGCAGCCAAGTTCTCAAAGCCTCACCTCTCTTGCATATCTAGATACTTATTATTTACCTCAAATTC  
AGTCACTGCTGGAAGAAGGGCTTCCCTCATCTCTTATGAGCTACGTTTAGATGACCATCATGAGCTTCA  
TTCCTACCGACCGAAGGTTTTCGACACCTCACTTCGCTTCGACGTCTAGAGATCAGGCACTGCAATCAA  
CTCCAATCTCTTTCAGAATCAACTCTGCCCTCCTCCCTCTCTGAGCTGACCATCGGGTATTGCCCTAATCTC  
CAGTCCCTTCCAGTAAAAGGGATGCCCTTCCCTCTCTAACTACATATTTACAACCTGCCCGTTGCTCAA  
ACCACTACTAGAATGTGACAAGGGGGAGTACTGGCAAAAAATTGCTCATATCTCCACCATAGAGATCGA  
TTGGAAATACTTGTA

>PGSC0003DMG400027469 LRR-RLPs

GGATACTCTAAACAAAAAAAATCCATTTCCATAATGTGCAACTGCAACATTATTCTTTACTTAGTACTAC  
CATTTTTCTACTACTTTCCAGCTTTTCTCTAGATTGTTTGTGATGTCGATAAAAGATTGTTGGAAGACCCTT

TTAATTTCTTGAATACTACGTGGAAGTTCGATAAACAGACAGAAGGTTTCATATGCAGATTTGCAGGAAT  
ACAATGCTGGCATGATGATGAGAGCAGAGTTTTATCCATTAGTCTTTTCAGACATGAGACTAAAAGGTGA  
GTTTCCGCGAGGCATAAAAAATTGCACTTCTATAACTTCTCTAGATCTTTCAAGCAACGAGATATATGGA  
ACCATCCCTTCGGATATATCAAATTAATTGAATTTATTATAATGGTTGATCTCTCAAGCAACCTATTGTC  
AGGCGCGATCCCAAGTAACATTGCAAATTGCTCTTTTCTTAATTCCGTCAGATTAGACAGCAATAAACTA  
GACGGTCCGATCCCAGCTGAAATTGGCTCGTTAAATCGACTCAAGAACTTTAATGTTGCCAACAACATGT  
TGACAGGGCCAGTGCGAAGGTTTATCAATGCCACTTTTCCACCTGAAAGTTATGCAAATAATGCAGGAC  
TTTGTGGTAGTCTCTGAAAGCATGTGTTACAAAACGCATCGGGTTCCATCATATTCTGTTAAGTACTGTA  
TTGAACCGTCGTGTACAGTTTGCTTGTGGTTTTGTGACTGGTTGGTCACTTTTTACTGTACTTGGTATATA  
TCTTTTTTCTTAGGTTTACCTGGTGTAAGAAGATGCTTCTATTCATCAACAAGAGAACAAGGTAATG  
GTGATTGATGGAAATGAATCGCTCAACGAGAAGAAGTAAACAACGATCCAAAGGTAAACATTACGCTT  
TGAAAAATATTTAGAATCTATGGCCAAACGCCTCCTTAAAGTTATCATTTTACTCTTAGTCACAAGTTTTT  
ATAGGCATACAAGTGTTATGGGATGTTTAAGACTACAAGTTTAAAAAAATTCTTCTTTTGTCTTAAAATT  
TTTGTCCAATCAAACCTATGTCAGATATATTGAGACGAAAGGGTACTACTTAATCAAACCTATTGCTAAAT  
ATGGTAGCTATGTTCTCTCCTCAGATTTTAAAGATGGAGAAGATTGTTACAAGAATGAGTTTTCTGGAA  
CTATCAAAAGTGACTTTGAATTTAGCCAAGACAATGAAATCGGGAACGGAATGCTAGGGAAAGTGAC  
AAAGCACTGGTCCCAAATGGATGGACAGTTGCCATAAAGAGGTTCCATGTATCAGAGGATTTGGAGGA  
AGAGTTTGTTCGAGATCACAACCTAGGTAGTCTGAGGCATCCGAATTTGGTGCCTTTAATCGGCTTT  
TGTTCTGAGAGGGACGAGCGAATTCTGGTTTACAAATACATGCCTAATGGAACTTACATGAGTGGTTG  
CATTCAACCGACGACAAGGCAAGACTCTTGACTTTAATCTAAGGGTAAAATTGTTTTAGGTGTCGCAA  
AAGCCCTGACTTGGCTTCATGATGGTGGAAATTTCCATGTTGTGCATAGTAACATAAGCACACAATGTAT  
CTTGCTCAATGAAAATTTGATCCTAAGTTATCCAATTTTTGGGAGGCAACACTTGCAAAAACAAATGAC  
ATAGATTCAAACCTGAGTCTATTTCCAATAGTCGAGTGTTTAGACTTTACAACATATAAAAAAGATGTTTA  
TCGATTTGGGGTTGTGCTTCTCGAGCTTTTAAACGAGGAAAAAATCTTACATATTGAGTTGCTCGAGTCTA  
AATTTGTCGAGCAGCTTTTTGCCAGTCTCTTGATGTGGATAAACTACTGTTAGGCCAAGGATTTGATA  
ATATGGTAATGCAACTACTTGAACCTGCAAGTGATTGCATGAAATTTATTCCGGATCAAAGGCCAACGAT  
GCAACAAGTGTATCAGACTGTTGCTGCGATTGCTCGAGTCCATGACCAAACAGAGGACTCTGAAATACA  
ATTGCACGTGGACTAGAAGCAGGGGCGGAGCCACCAAAGGGACGTGTAGCTTTGGCTCAAACCA

>PGSC0003DMG400027470 LRR-RLPs



ATGGGACTAAAAGGTGAGTTTCCACGAGGCATAGAAAATTGCACTTCTATAACTTCTCTAGATCTTTCAA  
GCAACGAGCTATATGGTACCATCCCTTCGGATATATCAAAATTAATCAGATTTACTATAACCCTTGATCTC  
TCAAGCAACCAATTTTCAGGCGCGATCCCAAGTGACATTGCAAATTGCTCTTTTCTTAATCCCTCAGATT  
AGACAACAATAAACTACAAGGTCCAATCCCACCAGAAATTGCCCTTTTAGGTCGACTCAAGAACTTTAAT  
GTTGCCAACAACATGTTGGTAGGGCCAGTGCCAAGGTTTATTAATTCAACTTTTCCAGCTGAAAGCTATG  
CAAATAATCCAGGACTTTGTGGTCCTCCTCTGGAATTATGTGGTACAAAACACGTCGGGTTTCATGTTAAG  
TACTGTATTGAACCGTCGTGTACAGTTTGCGTGTGGTTTTGTGACTGGTTGGTCACTTTTTACTGTACTTG  
GTATATATCTTTTTTCTTTGGTTTACCTGGCGTAAAGAAGATGCTTCTATTCATCAACAAGAGAACAAG  
GTAATGGTGATTGATGGAAATGAATCGCCTCGAGGAGAAGAAGTAAACAACGATCCAAAGGTAAACAT  
TACGCTTGCTTTCAACCGTCTTTTTTCCCAATAA

>PGSC0003DMG400027966 LRR-RLPs

ATGGTTCCCAAAATATTTTATTCCTGATGTTTTCACTCTTCACTGTTACTTTTGCTTCCGTTGAGGAA  
GCAACTGCTCTCCTCAAATGGAACGCTAATGTCCTAAGCCAAAATAATTCCTTACTGGCTTCATGGACAC  
TAAGTACTGATGCATGCAGGGGTTGGTATGGAGTTATATGTTTTAATGGTCGGGTAACAAGATCAATAT  
TACAAATGCTGGTGTGTTGGTACACTCCATGATTTTCCATTTTCATCTCTCTTGTTCCTGAATATGTTGA  
TCTTAGCATGAACCAGTTCTCTGGTATCATACTCTGGTCCAATTCCAATAACTCTTGGTGACTTAACTGAG  
CTTAATGTTTTGTACCTTTATTCAAACCAACTTTCTGGTCCCATTCTGCAGAAATAGGAAAGATGAAGTC  
ACTCGAGTATTTATCCTTATGGAGTAATAATCTTTCTGGTCCAATTCCAATAACTCTGGGTGACTTAACTA  
AGCTCAATATTTTGTACCTTTATTCAAACCAACTTTCTGGTCCCCTTCTGCAGAAATAGGAAAGATGAAG  
TCACTCGAGTATTTATCCTTATGGAGTAATAATCTTTCTGGTCCAATTCCAATAACTCTTGGTGACTTAACT  
GAGCTTAATGTTTTGTACCTTTATTCAAACCAACTTTCTGGTCCCATTCTTGCAGAAATAGGAAAGATGAA  
GTCACTCAAGTATTTATCCTTATGGGGTAATAAACTTTCTGGTCCAATTCCAGTAACTCTTGGTGACTTAA  
CTGAGCTCAAACCTTTTGTACCTTTATTCAAACCAACTTTCTGGTCCCATTCTAGCGAGTTGGGGAATTTG  
AAAAACCTCAATAATCTGCAGCTATGTGATAATCAGCTCAGCGGTTCAATTCCAAGTACTTTGGGTGACT  
TAACTAAGCTCAATATTTTGTACCTTTATTCAAACCAACTTTCTGGTCCCCTTCTGCAGAAATAGGAAAG  
ATGAAGTCACTTGAGTATTTATCCTTATGGAGTAATAATCTTTCCGGTCCAATTCTAGTGAGTTGGGAA  
ATTTGAAAACCTCACTAGATTGGATTTATCCTATAATCAGCTTACTGGTCTTGTTCCTGTTTCCTTTGGCA  
ATTTGAGAACTTGCAGACACTAAATCTCGCTGCGAACGAACCTTTCCGGTCTATTCCAAAAGAATTTGC  
ATATTTGGATAACTTGGTTTTGTTATCAATGAGTTTCAATCACTTTTCAGGCCATTTGCCAGAGTGGCTTT

GCAAAGATGGGAAACTTGAGATTTTCGTTGTGAATGGTAACAAGTTTACAGGGCCAATCCCAAGAAGCT  
TGAGCAAGTGCTCGAGTTTCAAAGGGTTTCGTTCAATAACAACAGCTTTACTGGGGATTTATCTGAAAC  
TTTTGGTATCTATCCAGAGCTTCTGTTTCATTGATTTGAGCGACAACGATTTTCATGGTGAACCTCAGCAGTA  
ACTGGGGAAAATGCAAAAATTTAATTGATCTGCGTGTAGCCAGAAATAACATTAGTGGTAGCATACCAC  
CAGAGATTGGAAATGTCAAAGGGCTTTTAGGACTTGATCTTTCATCGAATCATTTGATTGGGCAGATTCC  
AAAGGAATTTGGAAAATTAACCTTCTCTGGTTAAGCTTTCTGTGCAGAACAACAATATCTCTGGATATATA  
CCGGAGGAACTTGGGTCACTGACAAAGTTAGAGTCCCTCGATCTATCGTACAACAGATTGAATGGATCA  
ATCCCGAAGTGTATAGGAGATTTTCATGCACTTGTTTCAGTTGAACCTGAGCAACAAGATTTTCGTGCACT  
TGTTTCAGTTGAACCTGAGCAACAAGTTTGGCCAGAATATTCCAAAGGATATAGGAAGGATAACTCAGC  
TTAATGTACTTGATTTGAGCTATAATCTTCTGGTTGGAGGTATACCCCCTCAGTTAGCCAATTTGAAGGTC  
TTGGTAAACTTAAATCTTCCACAATGGCCTATCTGGACGCATTCTAAAGAACTTGAAAGTTCATCTGG  
TTTACATGATGTTGTTTAGTCATACAATGAGTTGGAAGGTCCAATCCCTAATAATAAAGCTTTTATCAATG  
CCTCATTGGAGGGTAATAAAGGTCTTTCGCGAAATGTAGCAGGACTCCAGCCCTGTGAAAGGCCGTCTT  
CTATGGTGAAGAAGCACTCAATGGCGAAGGGACGTAAACTCATCCTCATCACTGTATTTCTGTTATGGG  
AGCACTAGTACTGCTCTGCGTTTTTCATTGGTGTTCGTTTTATGTGTAATAAAAAGAAGGAGAGTTAGAGAC  
GTTGAAAGAAGGGATGGTGATGGTTGGCTTTTCGATATCCATGTTAGATGGGAAGGCATTGTACAGAG  
ACATCTTAAACGCCACAGAAGAGTTTGATGCAAAATTTGCATCGGGCAAGGAGGTCACGGAAGTGTTT  
ACAAGGTGAACCTTCCATCATTAGGGAATATAGCTGTGAAAAGACTTCATTCTTCATTTCAGAATACTCA  
TCCCAAAGCTTCATCAATGAAGTAAGGGCATTGACTGGGATTAAGCATCGAAACATTGTGAACCTCTA  
CGGCTATTGTTTCGAAAGCACAACTCGTTCTTGGTTTACGAGTATGTGGAGAGGGGGAGTTTGTCTAG  
TATTTTGAGCAATGAAGTTGAGTCCAAGAAATTGGATTGGCTTAAAGGGTGAATATCATCAAGGGTGT  
AGCCTTTGCTTTATCTTACATGCACAGAGACTGTTTCATCACCGATTGTTTCATCGAGACATATCAAGCAGTA  
ATGTGTTGCTTGATTCTGAGTATGAAGCTCGTATTGCAGACTTTGGAATAGCAAAGATTCTCAAGCCGGA  
CTCATCCAATTGCACTGCGTTTGCAGGCACATATGGTTATGTCGCACCTGGTAAGTTTTAAATAGTTTATG  
AACTATATCCAAACACTATCTCATTTACATGTTTAAATTCTTAATATTGTTCTGGAAATTGTGTTGTTTCTGAG  
GCTTGATATACAATGAAGGTTACGCAAATGTGTGATGTGTATAGCTTTGGAGTATTATCCTTGGAGATA  
GTCAAAGGAAAGCATCTTGGAGATTACATTTCTGTGCTAGCAAATTCATCGACTATAGATCCTGAGCAGC  
TTAGCGATTTGCTGGATGAACGCCTTCCATATCCTGATGATAGAGTAAAGATGTTTTGGTTTTTATCATC  
AATCTAGCATGCTCTTGTGTTGCTTGAACCTCCAAAATCAAGGCCAACAATGCCCTTCATCTCTCATAAGTT

ATCATCAATGGATGCACGCCTACCTATTCATCAGAAAACCCCATATAAGGCAAGCTATATAATCCCTAA  
CATATATGGAGATGAATAACCTTTGTCGCTGAGTGGTTGTGAAGTAAGTACTGTTTCAATTGCTTGGACT  
AGTGGTGGTCATTTGGTTTACTCTATTAATATGTATATTGTAAGAGGTAATTATTTAATCTTCTGCTTCTT  
GGCCTTGAGTAAATATCAAGAATTC

>PGSC0003DMG400027968 LRR-RLPs

ATGAACCAGCTCTCTGGTATTATACCCCCTGAAATAGGAAACCTCACTAATCTTGTCTATCTTGACTTGTC  
GTCTAATCAGTTTTAGGCAAATCCCATCACAGATTGGCTCACTGTCAAAGGTTGAGAACCTCTTCATCT  
TTAATAACCATTTAAATGGTTTCATTCCTGTTGAAATAGGGAGCATGAAATCACTTGAGATTTTAGCCTTA  
CAGAATAACAATCTTTCTGGTCCAATTCCAATAACTCTAGGTGACTTAGGTGAGCTCAAAGTCTGCACC  
TTTATTCTAACCAACTTTCTGGACCCATTCCTAGTGAGTTGGGGAATCTGAAAAACCTCACTAATATGAAA  
CTATCCCAAATAAGCTTAGTGGTTCAATTCCAATTTCTTTAGGCGACTTAACTGAACTCAAACCTTTTGTA  
CCTTCATTATAGTGAGTTGGGGAATTTGAAAAACCTCAATGATCTGGAECTATGCAATAATCACTTAGT  
GGTTCAATTCCAATTACTCTGGGTTACTTAACTGAGCTCAAATTTTGTATCTTCATTCTAACCAACTTTCT  
GGTTTCATTCTAGTGAGTTGGGGAATTTGAAAAACCTCAATGATCTGGAECTATGCAATAATCACTTA  
GTGGTTCAATTCCAATTACTCTGGGTTACTTAACTGAGCTCAAATTTTGTATCTTCATTCTAACCAACTTT  
CTGGTTTCATTCTAGTGAGTTGGGGAATTTGAAAAACCTCAATGATCTGGAECTATGCAATAATCAACT  
TAGTGGTTCAATTCCAATTACTCTGGGTTACTTAACTGAGCTCAAATTTTGTACCTTTATTCTAACCAACT  
TTCTGGTCTCATTCTAGTCAGTTGGGGAATTTGAAAAACCTCACAGAGCTGGATTTATCCGAGAATCAG  
CTTAGTGGTTCAATTGCAATTACTCTAGGTGACTTAACTGATCTCAATTTTTTGTACCTTCATTCTAACCA  
CTTTCTGGTCTCATTCTAGAGAATTGGGAAATTTGAAAAACCTCACTGATATGAACTATCCCAAATA  
AGCTTAGTGGTTCAATTTCAATTTCTTTAGGTGACTTAACTGAACTCAAACCTTTTGTACCTTCATTCTAATC  
AACTTTCTGGTTTCATTCCGAGTGAATTGGGAAATTTGAAAAACCTCAATGATTTGCAGCTATCCATAAT  
AAGCTTAGTGGTTCAATTCCAATTACTTTAGGTGACTTAACTGAGCTCAAATTTTGTATCTTCATTCTAA  
CCAACCTTTCTGGTTTCATTCTAGTGAGTTGGGGAATTTGAAAAACCTCAATGATCTGGAECTATGCAAT  
AATCAACTTAGTGGTTCAATTCCAATTACTCTGGGTTACTTAACTGAGCTCAAATTTTGTATCTTCATTCT  
AACCAACTTTCTGGTTTCATTCTAGTGAGTTGGGGAATTTGAAAAACCTCAATGATCTGGAECTATGCA  
ATAATCAACTTAGTGGTTCAATTCCAATTACTCTGGGTTACTTAACTGAGCTCAAATTTTGTACCTTTATT  
CTAACCAACTTTCTGGTCTCATTCTAGTCAGTTGGGGAATTTGAAAAACCTCAATGATCTGGGACTATG  
CAATAATCAACTTAGTGGTTCAATTCCAATTACTCTGGGTTACTTAACTGAGCTCAAATTTTGTACCTTT

ATTCTAATCAACTTTCTGGTCTCATTCCCTAGTGAAATAGGGAAGATGAAGTCACTTGAGGTTTTAGCCTTA  
CAGAGTAACAATCTTCCGGTCCAATCCAATAACTCTAGGTGACTTAACTGAGCTTGAAAGTCTGCACC  
TTTATTCTAATCAACTTACTGGTCCAATTCCTGCTTCCTTTGGCAATTTGAGAAAGTTACAATTTTTGTATC  
TCCGTGCCAACAACTTTCTGGTTCTATTCCAAAAGAACTTGCATATTTGGATAACTTGGTAGAGCTGGT  
ACTGAGTGAAAATCAACTTACTGATCCAATTCCTGCTTCCTTTGGCAATTTGAGAAAGTTACAATTTTTGT  
ATCTCCGTGCCAACAACTTTCTGGTTCTATTCCAAAAGAACTTGCATATTTGGATAACTTAGTAGAGCTG  
ATACTAAGTGAAAATCAGTTTTAGGCCATTTGCCTGAGCATCTTTGCCAAGATGGGAACTTGAGA  
TCACGGTGGCCAGTAACAAGTTAACAGGACCAATACCAAGAAGCTTGAGCAAGTGCTCCAGTTTTAAAT  
GGGTCCGCTTTAACAAACAACAGTTTCACTGGGGATTTATCTGAAAATTTTGGTATCTATCCAGAGCTTCT  
GTTCAATTGATTTGAGCGACAATGATTTTCATGGTGAACCTCAGCAGTAACTGGGGAAAATGCAAAAATTT  
AATTGATCTGCGTGTAGCCAGAAATAACATTAGTGGTAGCATACCACCAGAGATTGGAAATGTCAAAGG  
ACTTCTAGGACTTGATCTTTCATCGAATCATTTAATTGGGCAGATTCCAAAGGAATTTGGAAAATTAACC  
GCTCTAGTTAATCTTTTTCTGCAAAACAACCGAATTTCTGGCAATATACCTGAGGATTTTGAGTCACTAAC  
AAAGTTAGAGACCCTAGATCTGTCAAACAATAGATTGAATGGGTCAATCCCGATGTGTATAGTAGATTTT  
GTGCACTTGTTTCAGTTGAACCTGAGCAACAACAAGTTTGGCCAGAATATTCCAAAGGATATAGGAAGG  
ATAACTCAGCTTAATGTACTTGATTTGAGCTATAATCTTCTGGTTGGAGATATAACCCCTCAGTTAGCCAA  
TTTGAAGGTGTTGGTAACTTAAATTCCAAAGGAGATAGGGAGGATAACACAGCTTAATGTACTTGATT  
TGAGCTATAATCTTCTGGTTGGAGGTATACCCCTCAGTTAGCCAATTTGAAGGTGTTGGTAACTTAAA  
TCTTTCCACAATGGCCTATCTGGGCGCATTCTCAAGA  
ACTTGAAAGTTTACTGGTTTGCAGGACGTC  
GTATTGTCATAACAATGAGTTGGAAGGTCCAATCCCTAATAATAAGGCTTTTATCAATGCCTCATTGGAGG  
GTAATAAAGGTCTTTGCGGAAATGTAGCAGGACTCCAGCCTTGTAAGGCGTCTTCTATGGTGAAGA  
AGCACTCAATGGCGAAGGCATGTAACTCACCTCATCACTGTACTTCTGTTATGGGAGCACTGGTACT  
GCTCTGTGTTTTATTGGTGTCTCTTTATGTGTAATAAAAGGAGGAGAGTTAAAGAAGTTGAAAGAAG  
GGATGGTGATGGTTGGCTTTCGATATCCATGTTAGATGGGAAGGAATTGTACAGGGACATCTTAAACGC  
CACAGAAGAGTTTGATGCAAAATTTGCATTGGGCGAGGAGGTCACGGAAGTGTTTACAAGGTAAACCT  
TCATCATTAGGGAATATTGCTGTGAAGAGACTTCATTCTTCATTTCAGAATACACATCCCAAAGCTTCAT  
CAATGAAGTAAGGGCATTGACTGGGATTAACACCGAAACATTGTGAACCTCTACGGCTATTGTTCAA  
ACGAATACACATCCCAAAGCTTCATCAATGAAATAAGGGCATTGACTGGGATTAAGCACCGAAACATT  
GTGAACCTCTATGGCTATTGTTGAAAGCACAACTTCACTCTTGGTTTACGAGTATGCGGAGAGGGGG

AGTTTGTCTAGTACTTTGAGTGATGAAGTTGAGTCCAAGAAATTGGATTGGCTTAAAAGGGTGAATATC  
ATCAAGGGTGTGCTTTTGTCTTATCTTACATGCACCAGGATTGTTACCACCCATTGTTTCATCGAGACAT  
AAGTAGCTGTAATGTTTTGCTTGATTCTGAGTATGAAGCTCGTGTTGCAGACTTTGGACTAGCGAAGATT  
CTCAATCCAGACTCATCCAATTGCACTACACTTGCAGGCACATATGGCTATGTCGCACCTGGTAAGTTTTA  
AATAGTTCCTGAACTATAGCCAAACTCCATTGTTTTTATCTCATTACACGTTTTAATTGTTAATATTGC  
TTTGAAAATTGTATTATTCAGAGCTTGCATATACTATGAAGGTTACGCAAATGTGTGATGTGTATAGCTTT  
GGAGTATTATCATTGGAGATAGTCAAAGGAAAGCATCTTGGGGAATACATTACTGTGCTAGCAAATTCA  
TTGACTATAGATCCTGAGCAGCTTAGCGATTTGCTGGATGAACGCCTTCCATATCCTGAAGATAGAGTAA  
AAGATGTTTTGGTTTTATCATCAAGCTAG

>PGSC0003DMG400028001 LRR-RLPs

GCAAAAGAAGATTTGTGCAAAAACCTTTGGTGTAGAGGAAGAAGAGGACTTTGTGTGAATTAAGGAGAA  
AAAACAACAATGGCCGACCCTGTAATTGGTGCTACTGTTTCAGGTTGTGCTTGAGAAGCTACTTTCTCTCA  
CAATTGAGGAGGCCAGAAGTTTAAGGAACTGCAAGAAAAATCTCAGAATGCTGTCAAGATATGTAACCA  
TGATCCAAGCTTTCATTCATGATGCTGAAAGACGACAAGTCGAAGATAAGGCTGTGGAAGAATGGCTCA  
AGATGCTTGAGAGAATTGCTGAAGATGCTGAAAATGTGTTTGACAAATTCACATATGAATCTATCAAAG  
CGAAAGTGATGAACAACCGAGCCAACTAATGGAAAAGGTCAGTCAATTCTTTTCTCATACTGCTTTCAA  
GTACAAAATGTCTCGAAAAATCAATAAGATCAATGAAGAGTTGAGGGATATCAATCAGTTAGCTAACAA  
CCTCGTTTTCCAATCACTGACGGTTCCTTCTCGGAAAATACTACTAATCCGAGAAACAGATTCTGCACTA  
GTTCTTCAGATGTTGTTGGTAGAGACAAAGATGTTGCTGTAATAAAGGAGAAGATTTTGAACATGAGA  
AAGGATGCTGTTCTGTGCACCATTCCCATAGTCGGTATGGGGGGTTTAGGGAAAACACTCTGGCTAAG  
AGGATTTTCAATGACCAACACATCGAGAAACACTTTGAAAAGAGAATTTGGTTGTGTCTACCTGAAATGT  
CTGAAATTAAGAGCTTCTTGAAGTATCCTCGAATCATTGACAGAGAGGAAAGTTGAGGTCCAGAGCA  
GAGATATAATAGTCAAGAAGCTCCGAGATGCATTGGGAGAAAAACAGTATTTGCTTGTCTGGATGATT  
TGTGGCGTGTTGACTCTACTTCGTGGCACGAGTTCCTGGACACCTTGAGGGGAATAAATACATCCAGAG  
GAACTGCATTCTCGTGACTACTCGTTCGAAGCAAGTGGCATCCATAGTAGCAGCAGATCTTCATAAGTT  
GGGGAAATTAACAGATGATCATTGTTGGTCCATTTTCAAACAACGAGCATTGTTGATGGGGAAAGTTCC  
GGAGGAAATACTGAGTGTGGAGAACAAGATTGTTGAAATGTGTCAAGGTCTACCTTTGGCTGCTAGTGT  
GTTGGGAGGCCTCTTTTGTAAACAAGGAAAAACATGAATGGCAGGCAATTCTTGATGGCAGCTCCCTTGT  
TGCATCTGAAGATAGCATTAAAGAATATCCTAAAACACTCAGTTATGATTATCTACCATCTCCACATCTGAAGA

AATGGTTTAGTTACTTTGCAATGTTTCCAAAAGATTTTGAGTTTGAAAAGGACCAACTAATCCAACCTCTG  
GATGGCAGAAGGGTTTCTTCGTCTATGTCAAGAGACCACTGTGATGGAAGACGTCGGGAACAAGTTTTT  
CCAACCTCTTGTTACAATATTCCTTGCTGCAGGATGTTAAGCTAGATGAGTACAACAATATAACACACTGT  
AAGATGCATGATCTTGTGCATGATTTGGCAGGAGATATTTTTAAGTCTAAACTATTTGATCAAAAAGAGTG  
TCGGAGGAGAAAAGTCTTTCTCAAGTTCGATACTTTGGATGGGAATCACCAAGTGATCAAATAGATAAGA  
TATATGAGCCAGGACGTTTGTGCACATTGTTCTGGAAAAGCAATATATCTGATGATATGCTATTGAGCTT  
TCAGTTCTTGAGAGTTTTAAATTTGTCCAGGTCAGGCATCAAGGAGTTGTCAGCCTCAATCGTCAAGCTA  
ATATACTTGAGATATCTTGATCTCTCCAATACTGAGATGAAAAACCTTCCCAACTCCATATGCAAGCTCTA  
CAATTTGCAAACCTTTGAGATTCTATAGCTGCTGGTGTCCACTCGGGAAACTTCCAGAAGAAATGGCAAAT  
ATGATAAGTTTGAGACACATATGTTGCTACCATTGTTTCGAATCAGATTCTCAGATGCCACTTAATATGG  
GGCAATTGACTAGTCTTCAGACGCTACAGTTTTTCTATGTAGGTTTAAAGAAAGGTCATCGAATAGAAGA  
ACTGGGTTGTTTGAAAATCTTAGAGGTGAATTGACGATCGAACGTCTACAATTAGTCGGAAATAAAGA  
AGAGGCTCGAACAACATATTTACAGGAGAAACCAATATCTACAAACTGGTGTATTCTGGTCCCATGA  
TGAATCAGAAGGCTGTGAGATCAATCATGAGCATGTGTTGGATGGTCTTCAACCACATCTGAACTTGAA  
AACCTTAGAAGTTGTGGACTATTTAGGGACTAAATTTGCTTCATGGTTTCAAGTGAATAAATGCTACCAAAT  
TTGGTCATGTTGAGATTAAGTGGTTGCAAAGGTGCAAAGAAATCCATCACTTGGCCAACTGAAATTCC  
TTCGGCATCTTGAGCTGGTAGGATTCCATGAGTTGGAATGCATTGGACCTGCTTTATATGGTGTGACAT  
TAGCAATATTGGATCAAGCAGCATTATCCAAGTGTTCCTGTCATTGAAAACACTAGTATTGGAGGATATG  
CGTAGCCTTATTGAGTGGAAGGGAGATGAAGTTGGAGTAAGAATGTTTCCTAGGCTTGAGAAGTTGAG  
GATTAGGAACTGTCCATTGTTAAAAGGTAATCCGAATCAATTTGAAATCCTCCGTGAATTAGTAATTGTC  
AGAGTTGACAGTGAAATGCCATTGTTGAACTTGTGCAGCAACTTGCATCTCTCATAGAGCTTGAAGTCT  
ATGATATGAAAGAGCTCACTTGTGTTGCCAGATGAGATGCTACGCAACAATGTTTCTCTTCAACACATATC  
GGTTTCCGACTGCAGAGAGTTTCATGAATTGCCACAAAGCTTGTACAATCTCCATTCTCTTAAGCTCTTAA  
CGATTGATAACTGCACGAATTTAGTTCTTTTCTGTTCCGAGTGAAGAGAATTATTTGACTTCCCTCCAA  
GATCTTCGGTTATTGGATTGTGATGGATTGAGCAGTTTACCAAGTGGAAATGCTAGAGCATTGTGCGGTCTC  
TGAAACTTTGAGTGTGAGCCGCTGTGACAATTTAGTTTTCATTCCCTTTACATGTGGGGGAAATGCCTTC  
ACTTTCCTATTTGTATATATCACAAATGTCCCAAATTGATTAGTTTACCCTCAGGGGGTATTACCATCTCAC  
TGAGTTAAGTGAAGTGGAAATTGGTCCCTTCTCAGAGATGGTGGATTTGAGGCATTCCAATTGATTTTT  
AATGGCATTGAGCAGCTGCTGTCCCTTCGTACATTGTGGGTGTATGGACATGGTCACTGGGATTCTCTGC

CCTATCAGTTTATGCAACTCTCTGACTTAACAAAGATTCAAATATATGGATTCCGGAATCGAGGCTCTTCCT  
CATAGATTTTGCAACCTTACTTCTCTTGGAACGTTAAGGTTAGTGAGGTGCAAACGGCTACAGAACCTGG  
ACTTCTCATATGTCATGCCCAAATTACAATATCTGTGTGTAGAGGAATGTCCATTGTTAGAAGCTCTGTCTG  
GATGGGCTTGGCAACCTTGTTTTTTTTGGGACATTTACATTTAGTAAACTGTGAGAACTAGAGCATTGTC  
CATCGAGAGATGCCATGCAACGCCTCACCAAATTATGGAACCTGGGAATTAAGGCTGCCCAAAGTTAG  
AAGAAAGTTGCACCAATCGGAGTGGCCCAAACCTCCAGTGGTCCAACATTTCCCATATTCAAAAAATTGA  
AGTTGGTGGAAAGACAATTCAGGACTTGCCTAAGTCTCTGTTTCTTTCAATTTCCGAGTCGCATTTTTTA  
ATTATTATTTCCACGAGTTAGTCTTCTCCATTCTCCAAACATTTTTCTATTCCACTTGAAACAAATTTATGA  
ATATCTATATTACTTTTAAGATATGGTTTACTCATGAATATTTATGTATTTTTACTCATAGGTTATTAGCTC  
GAAGGTCACACTAGAACGTTGTTGTGGCATTTTAAGTCAAATCCATGGGCAGCAATTACACTAGGTGA  
AATTCCATTTAGAATTCTGTAACAATTTGTCAAGTTTTCTTTGCACTCCTTTTTTTTTTTTTCTTTTCTCATG  
ACACAATTTTATTGTTTAAACAGGGTTAGTTATGTTGATAGAGAGGAACCAACACGTTTGTGTTTGTGAA  
GAACAGAATCTTCAGCCGTAGACTCTTACATGAGCATTGGTAAAGACTACTGACTACATAATCTCTCAA  
CATTTACTCTTCATAACATGGATATATACCAACAACATTAAGTAAAAATAATTTAGTACACAGTCGCTCA  
TTTGCCCTAGTGAAACTATTCTTTTATGTATGGGTGTCTTTGATAATATATAACCTTTTTTCTACGAGTTGA  
TGAAAATAAAAAGACTAACAAGTAGTTTTGGGTAAATAATGAATGAGTAGTTCAACCAACCAACAAGTA  
CCATGTTCTAGACTTCCCCTTTGGATGTTCACTTGAAATCTATTTTTCTTCTTTTCTATACAATAGAAGC  
GTAAACTCAATATCAGGTCAGGTAAGTCTTTGGTCAGGTAGTAAAGGGTATCCGTGGACCGAGCCATTGAAT  
TCTGTTTCACTAATTGATAAGATGAAGTTAGGAGGTTGCTGTGCTACTAAAAGTACTTTTTTACCGTCT  
CCTATGTTTCAGATTCTTGAATGAAACAATGGCATGAAACTTGTGAGATGGTATACTGAAGCAGACTTC  
TCTTAGATGTGTTTAAAGTGTGCTGATTAGCCAGGGAAATTACATTAGGCGGAAACTGGAGAGGAGATAC  
TATTTACTTGTATGACTAAGATTTGACAGCAGAGGCCTTTCTTGACAGTGTTTCATGCCTTTTTGTACAAA  
GAGTTTTTTGTTTCCAGCAAACATTTTGAACCTAATACTTAGCTGCTGCATCATTGCCTAGTTCATATACAT  
CTTCT

>PGSC0003DMG400028072 LRR-RLPs

ATGGACAACCTATTGTAAGGACCTTACCTTGAAGAACTTAATTAGGGAATTCCTTATGTGCAAGAACCAG  
ATGTATCCTTGACGGAGAGAGGCCTTGTGCTTTCTCAGCTGGCTCCACTCGGTTCTATTCTTTTGCCGCC  
ATGGTTGTGATTGCAAGGAACTGTTCTAAGTTGATCCAATTTGTTTTGTTTACTCAAGCCTCCAACCTC  
TGATTACCTAACCCCTGAAAAGCTCAATGCTGGTTATGAGGCCATCATCCATCACTGCAAGGGATTACGG









AGATTAATCACAAATACAAGAACGTCTCAAATATCTCAATTAAGTTGGGATCAGCAATATGAATTCTAAC  
TAATAACCATGTCGCTATATTTTTATACCTCTGACAGAACTAGACGACTCCAAGAACACATAGGACCTA  
AAGTAAAACATTTTAACTCCTAGAACAAATAAATTAGTGATCAGACATTTGGTTTTTTTTTTTTTTTCA  
ATTTGCTTAGCCTATTTTGATTTGGCCAGAGGTGCTCTGAATCTCAAGAGACTATGGATAACAGATTGCC  
AATAAATGGAAGAAGTGATCAGAAAAGGAGAAGGAATCGTGACCGTATTTCCCCTGTTGGAAAAGCTG  
GAGCTTCGCAAGCTGCCTAA

>PGSC0003DMG400028112 LRR-RLPs

GTAGAAAAGATCCCTAAAACACTCACCACCTGTTGTCATTCCCAAATCCAACCTTTTTACTCCTACTTTC  
CTCTTCATTTCTTCTTCTTCTTCTCCAAAAAATCCCTAGAAAATTCTCCATCAAATTCTAAGCAAACCC  
ATCAATTTTCTTTGCTTCTGAGTATTATTAACCATGGCAGCTGTGTTCAAACCCAGAGTTCGCTCTTGA  
AGTTATGGGGTTTGTGGCAGTTGTTCTTGTGTAGCTGTGGCTGTGAAGGGGAATTCAGAAGGGGAT  
GCTTTGTACGCCCTCCGCCGGAGCTTATCCGACCCGGGTAACGTGCTTCAGAGCTGGGATCCGAATCTTG  
TTAACCTTGTACCTGGTTTCATGTCACCTGCAACGGAGATAATCAAGTTACTCGTGTGAAGTCTTCAA  
GTTTCCTTCTTTTTGTGTTTTTGTAGTTAAATACTTGTGGGTGTGCTGATAGTTATCGGAAATTGGTCG  
ATTTGTATGTTTGTGTTTGTGTTATGTATGTGTTACTCACAGGTATATATATGGTCTAAACCTAAAGCGGA  
GGATTTGATTGAATCTGCTATGTGAGGCTGGATTTATATGACAGGAAAAAAGAAAAATTGCTGAGTTGT  
GGAAGGAAATGGGTGTAGAGTAGAATTTAGCTAGAGGATTCATATAGCCATTTGTTGTTGTTGTTG  
GTTAGTTGTGTTGATATTCATTCTGGGCTCATATAGATGGTAAAAAGTTAAGCTTTCACTTGACTTGCTTG  
CTACAAGTCTTTGTTTGGAGATTAGTAGCAAAGTGATTCCTGTTTCCAGGGTGAAGAGCATGTCTGTAT  
TACTTTTGTGTTGACTTACTCAAAGTTCCTGTCGTGATGTGTACTGATGATCTATGTGCTAAATATGGAGGT  
GTGTGGTTCATTAATGATCTTTGTCGTTGTTATGTTTTGATCTCACGTGGTTTCACCCTTGTGTCTGTAT  
TACTTTTGTAACTTACTCGAAGTTCCTGTCGTGATGTGTATCGATGAGACAATGATCTATGTGTTAAAGA  
TGGAGAAGTGTGATTCATTAATGATCTTTGTCATTGTTATGTTTCTAATCGCACGTGGTTGCATCTTTTAT  
AACTTTTAGGAGATTTTGTCTGATTTAAAGTGTGGCAAAGCCTTGACTTTAAAATTAGTTGGTGGTGA  
CCAAGATGAAGAGGGCGTGTGCATTACTTTTGTAACTTACTCGAAGTTCCTGTCGTGATGTGTATCG  
ATGATCTATGTGCTAAAGATAGAGACGTGTGATTCATTAATGATCTTTGTCCTTGTATGTTTCTGATCTC  
ACGTGGTTGCACCTTAAAGTCTGTATTACTTTTACTTACTCGAAGCTCCTGTCGTGATGTGTATCAATGA  
TCTATGTGCTAAAGATGGAGACGTGTGATTCATTAATGATCTTTGTCCTTGTATGTTTCTGATCTTACGT  
GGCTGCACCTTTATGTCCGTTTTAAAGCATGGCAAAGCGCCAAAGTCTTGTACGTCAAATTAGTTGGTG

GTGACAATGTTTGTGTACGGCTTTTTTGTAAATGTTGGAGCAAGCATGGTCATTTGCTAATGTTTTTTTTT  
TTTATAAAATCAAATTATCATTTCCTGACAAAAAATTGGATGTTTGTGACAGTTTGTGTGCTTAGAGTT  
CCATTTCTGTATCTTATATGATCTTGGAACACCTGATGACTGATGTTACTGGGTGGATTTTTATGTTGAT  
TGATTGATAGTTGATACATAACAGATGATTTGTGAAATTTGAATGAGTCACAACTTATTTATTGAAATG  
CAAGAAATCTTGCTATTAGTGTTACCAAAGCAAAAAAAGCTCTATGATCTGTTGGGGGTTTAAGTACA  
AAACGCAAATAAAGTGTGGACATTAATGAAAAAGGCGCAAAGGGAGAAAAAATTTAGAAATATGTA  
TGTTCAAGGCTAAGACTAATAATTATAAGCATGAATGAAAAATCTATGAACAAAGAAATCGAAAAAGAAT  
TACAATAAATATCAATTGTTTAGTATCACCTCTTAGAAGAGGCTCATTGACAAGGAAAAGTATGCCTTA  
TAACTTTGATGACGATACTGAACCATACATTAAGAGAGGCGAAGCGCTCAACACCTTTTGAGTTTCACTT  
CAGGACTTAAGCGCACTTTAAGCGCACCTTTGACAACACTCCTTGCTATATCTTCGCAACTGTGTCTCACA  
TATTTAAAAACATGAGGTACTTGGCCGGACATTCCACGTGTACGAAGAATCACATCAATGTCCAAACCG  
GAAATTGTTATATACTTGCATCTATCCTGAAAGGAACAGTAACTATAACCAACAAACATGTTTTTCTGAAA  
CGAACTTGTTCGCCTAAGAATAAATTCATGTTTCTGATATGAACTTATTCTCTACTGATTCATACATAA  
ACTGCCCCCTGATGAATTCTCCAAAAAGTGGTGCAACTCAGAAAAGATAATGACAAGTCTGAAATATC  
TCTGGGTTTTAATGTTTCTCCAGGGACCTTGGCAACTCAAAGTTATCTGGTCATTTGGTACCTGAGCTTG  
GAAAGCTTGAACATCTACAGTATCTGTGAGTAATTATTTGAAATCTTGAATTGACTTGCCATTTCTAGTCA  
ATAACTCTTTTTGTTTATAAGGAGTCATATCCATGAGGTAATTGTTTGTGCTTCAGGGAGCTTTACAAAA  
ATAATATTCAGGGAACCATCCCTAAAGAGCTCGGTAACCTGAAGAGCCTTATTAGTCTGGATCTGTACAA  
CAACAATATTCGGGGACAATTCCTACTTCACTTGGAAAGCTGAAAAACCTGTTTTCTTGTAAGTTCTCC  
TTTGTGATGTTTCCCAATTTGGTTCCAGTCATGTGTACGTTTTACATATGAGGGGGAAGAAAAATAAAGC  
AAATATTCTGTTACTTGCCTACTCACAGAGTTCCCTTTCTTCTTTGACCTTAATATTCACTTACTGCT  
TGTAGTGAATGGGTTAAAGCACATTCTCTTATGTTGATTGAAAGTTTCTTATCTGATCTATCAGGCGTCT  
AAATGATAACAAGCTAACCGGACCAATCCCAAGAGAACTTACTAGCGTTTCTAGCGTGAAAGTCGTGTA  
AGTATAATTTCTTTGCTTGTGTTATTATTGTTAATTCTTCTGCGAAATAGATTTTAAATTATGCACTCTTTCT  
TCCAGGGATGTCTCGAATAATGATTTGTGTGGAACAATCCCACTTCTGGTCCATTTGAGCATATTCCTCT  
GAACAAGTAAGATTTCTTGTATATCCTTCAAGTATTGTTGTCAGAGTTGAACTGTAGGAGTATTATGCA  
ATGGTGCAAAGAGTAATCATGTCTCTGTATGCTTTATTCTATCGTTCACCTTTAAAAAAGACTACCAATC  
AAAAAAGGTATTCCTTTTAAAAAATATATTTTCTTGATTTGCCCTTATCTAAGTTAAATTTGGGCTTCATA  
ATAGGCAAATTATACCGGAAGCAATGACTTCCAACCTTTGTTTTGAAAGAAGAAAATTATTTGGAAAAGA

TTTGAATTTCTGCAATGACTTCTAAATTTTGCTTTGAAATAAGACAACACTATTTGGGAAGGACTTGGATATG  
TGACCTTTTATTTTCAGACTACACGTCATTGATTAGTTGAGAAGCCTTAAATAACACCTTAAAGAGAGTGA  
TATACTAACACAATGAGTTCTAGATTTCCGGTTATTTCAATTAGAATTGTGGGTGGCATTAAATTCAAGCT  
ATACACGAGATACCATTGTCTCCATTTACTTCAAACCGAAAGGAAGCCCAACTGTATTTTTATTTTGTTC  
TCTGGATATGCTAATTATATGTGCAACGCAAATCAATTAAGACGCGTCATGGTTACCTTTTCACTTTTTGT  
TTATTCCTTTAGCTCCTTAATTCCCTTGTTTTGACATGTATTTATATTAGATTTTGTGTTATTTGGGAAAG  
GGTGTGTGTTAAGTAAAAAAAAGAAGTAGAATATATAAAAATAAAGCCAGACAAGCAGATAAATAC  
ATCCAGTATATGTCTCAGAAAGCAATTGTGCTTTCGAATATAGTCAAAGAGCCTTCGTGTTCTGGTGGT  
ATCCATGTGTCATATGTGGGTCTTACCTGCTTAGCTTTTGCCTATGACCAAGAAATTCACCTGGGGCTA  
ACTATTAGGACCAACCGCCTCTTACCATTCTCCACGTAAGTACCAGATTTAGTTTGCATGGTTCTGAGAT  
TGAGCTTTTGACACAAGTCCATCAACCTTTGCCACTTGAACCAAGTCCCGGGGGCTTGTGCTATGTATAG  
TCTTACACCATGTCATTCTTCTTGATTTCTCAACTCTGCGGTCATCTCTACTGATTCCTTTAAGAAGATAC  
AGTATCCTAGTTGGATGTTTCTAATGAGTTTCTGAACTTCTAATTTGCAGTTTCGAGCACAATCCTCGAC  
TTGAAGGTCCGGAGTTGTTGGGACTCGCTACCTACGACACCAACTGCTCTTAGAAGCTTGATGAATAGCT  
TCAGAAGAAGCACCCTTTTGTGGAAGTTTAACAAATTCCCCTCCCCTGAACCTTGTTTATTGTTGTA  
ACTTACAGTGTGTCCAAAGTTGTA  
ACTTAAAGCAAAAGGTATGGTGTATGTAGGTTATTACTAAGTTAAGGAAT  
GTGTGTAACAATCTCTATACTGCTACCAACTGTTGATGTATTTTCAATTTCAAAGTCTAGTGAATGGT  
TCAGTGGGGTTAGAAATGCCTATTTTTACTTCTGTTACACTGCTATAAAT

>PGSC0003DMG400028156 LRR-RLPs

GTTCCCTTGAACTTTGACAAAAGGGTTTTCCCTGAGAAAATATGAATCAAATTTTCGCAGTTACCGGCGGC  
AACTAATATGGATCGAATTTGCGCGGCGGCACGTAATTTGGATCGAATTTTCGCAGTTACCGGCGGGAAT  
GTTAGAGCACATCTTGTCTTTCCTTCTTTTGAAGAAGCTGCACGAATGAGTGGAGTATCAACGACTTGG  
AAAAATGCATACAGTTCACTCCCCTGTTAAATTTTGAAGAGGTATTTTTTAGACAAGCCAATAGAAAAAC  
TTGTGAATGCTGTGGATCCAATTCTA  
ACTTATCGGAAAAATCAAAGGTTTCTGTAGAAAAGTTTTCGCT  
ACGCATAAATCAACAATGGAGTAGTCTGTTTTCTAATTGGATTGATACACTCGTAGATTGTAAGATCAA  
GAGTTAAACCTAGTTTTAAGATCAACCAGAACTGGATACACGAAATTGCCTGAGGCAATTTTTAATGCCA  
AAGCACTAAAAGTGTGAAATTGAGTGAATTTCAATTTGAATTGCCATCTAATAGTACTATTATGTTTTCA  
TCATCTTTGCGAGAGTTACACCTTCAATCTGTATATTTGACGAGGAGTTTATGCAAGCTTTATGCACAAG  
TTGTATCAATTTAGAGGTTTTCATGGTGCGGGGCTTGAAGGGGTTACTAGATTTCAA  
ACTAGTTTACCT

AAATTGAAAAAGCTACAGGTGACAGCGTATTATTCTAAATTACGATTTGTTGATATTAGATCACCTAATA  
TTGAAGATCTTGACGTCTATGGCTCCAACCTCTGCTCCGACTACTTTAAGAGTGAGAGTGATCTAAATGT  
AGTTATTACTAACTGTTGCAAAGCCCTTAAGAGTTTGCAGCTCAATGGCCTCAATGGTGTGGCCATG  
ACCCAAAATGGTTTGACGAAATTTTACCTGCCTTCAGAATATAGAGAAGTTGGATTTAGGTGATTGCA  
ACATGTTAAAGACTGTGAAAATCTCAGGCGTCTTCTCAAACAGCTGAGAGTATATCGTTGTGATAATGT  
GATTACTATTGAATTAGACACTCCTAATTTGATAGAGTTCTCGTATGATTGTTCTTCATTGCCGAATTTGA  
AACTAAAAGCTTCAGCTTCATTGGAAGCCAATATCAAATTCGACTCAGAAGGAGGAGAAACCCCTAACA  
GTGATTGGTACTCTAAGCTCGTGAAATTTCTTGATAACTTCAATCATTCCATGGCTCTTGAATTAACATGC  
AAAAGTGAAAAGGTATGTCCCAGAAATCTTTAACTAGCTAGTTAATACTATATTGTTATGGATTTCTCAA  
AAGTTGCTTCTTTTTGCTAATACAGGGGCTAGTTATACCAAAGACGTGAGAGAACACTTGTTTCCTCCC  
CTTTATGGAATAATCACGTGAAAGTACACATTCATAATCCATTGATAAGTTATTCAGTTGTAGATATTCT  
TGATGGTATTTTCTGGCTTCTCCTCAATTGGACACCCTATCTTATTCCAAATTCGACTTGAACACCCTTGA  
GGTAAATACTTTTATCTTTCAAAGGCACCGACTCCCTTAGTGGGATTTCACTAGGTATGTTGTTGTTGATG  
ATGATGATGATTGAAAATTATGCTTCGTAATCACTCAAACCTGAACTTCTGTTGATCTGTTCCAGCACGCA  
TATACACTGTTGCTATCGAGCATTAAATTAACCCTCTCTAATATTGATTTTCATGATTATTCTTCATGAAGACA  
GTTTTTATCTTATTCTTCTTCAATAGTTACTGAGTTTTCTGGTTTTACAGTTTTCATATGAAGATGCATTA  
GGTGAAGATGAGAAGTTTTGTTGTACATCTCAACCTTGAATTGTTGGAGGCATAAGTTAAAGCAAGTC  
AGAATACACAACCTTTAAACATAAGGAAGAAAAACAGAAGTTGAAAACTATTTTTCCACAAACACAGAT  
ATCTTGGAGATAATTGAGGTTCCCCGGCACACATTGACCTAGAATCCCCTGGGAACAAGTACATACCTA  
AATGTCCATGTCCAATTGTTCCCTCAGATTAATTTGTAGAATTACATGCTTGGTTTGTATAGGGGATTTA  
ATATCTAGTTCTGGCATTAGCTGGCTTAGGTTTTTCCCCCTTCCAGCAGAGCAATAAGCTAGGTTTTG  
TTTTAGGAAGATTTTATGTTAGACATTAACTCTTATCTCATAGCATGAAGAATTGTTTACTTCATTTGG  
AAGCTTCTTATATTTTCGGCGAACAGTGCCTTCTCAAACCTTAAAATGCTGTTCTTCTACTTTTTGTGGTGT  
TTACTTTTTTTGATATTGAAGCTCTCAGAGCAAACCAATTTTAGAGGTTGTTTCCG

>PGSC0003DMG400028212 LRR-RLPs

ATGAAGTATGGTCTCTCTTCACTGTCAATTTGTTCTAGTGTTTATTAAGTGTACATCTTGCAGGTATGTAT  
TCAAGATTCAGATTTTTTTTTTTTTCATAAAAGACTACAAATATTTCTACTAATACTATACTCTTGAGGAAAA  
TGTAATAATTTTTTTTTGTCTTTTTGGCAATTGTTAGAAGAAGAATATTTGGTGAAGTTTGTTTTTGAAGTT  
ATCTTTTAATAAAAGAAGAAGAACATTTGGTGTTTTAATTACTTCAATTTGAAGGTCTTCAATTTCTTTTTT

TAAACAGGTA CTTCTCAAGATTCTTGTTACTTTTGTTCTATTGGTTAAACTTTGTTTGGTCATAGATT  
TTGAAGTTGTGTTCGAACATGTATTTAGTTGAAGTTGTGTTAAATTTAGTTATTTGGAAAATTTGATCA  
AATTTCAATTGCCAACAGATATTTGAAGACAAATTTTCGAAATCTGATCCAAAATCTATGGCTAAACGCT  
AGCTAAATGTCTGCATTAATACTTCATGAAGCTTTCTTTTTCTTCTAATTGTGCTGCTTACTTCATTATG  
TGAAAAGATAAGAGGATGTTGATATATTGCAATATGTGTCCTGTATTTTCAAGATTTTCATCTTTTCTTGG  
ATTGGATTTGGTGGTGGTGGGGTGGTGGTGGAGTTGGGAGTAGGGAGTGGGGAGTTGGGGGGTGG  
GGGGNNNNNNNNNNNNNNNNNNNNNNNNNNNNNNNNNNNNNNNNNNNNNNNNNNNNNNNNNNNNNNNN  
NNNNNNNNNNNNNNNNNNNNNNNNNNNNNNNNNNNNNNNNNNNNNNNNNNNNNNNNNNNNNNNNNN  
NNNNCTTCTTGCTTTTATACTCCTTCGTTTCAATCTGTCTTGCTTTCCTTTTGTCTGTATAGAAAAATG  
TTTCTTACCTTTTGGCAACTCTTCAGTTTCAACTTACACACGACAAGTTAAACCATGAGATTAACGC  
ATTTTGGTACATTCTACATATCCTTAGCTTAGTTAAAGACCAAAGATTCAAAGTCGTTCTTACTTTCTT  
GAATCCGTGTAAAGTCAAACAGACAAGCAAATTGAAACAGAGGAAAGTACATTTTCTTGAATTGTT  
GTTATTCTAATAACTATGGATACAGAGTTTGATGTTTGCTTACTGAAATTCATTCAGCTGAAGTAGTGA

AGAAGTGGCAACTAGAGTGTTTACAAGAAAGCTCAAAAAAGTGTAATTTCTCAGTTCCTTTTAGTCCTT  
TTTTGGTGATGGAAAAACATTTAGGACTTAAACTCTTCTAGTTTTGCTTGTTTTATTGCTCTCAATTAGC  
ATCTCAGAGCAACTACAATCTTCTTACAAGCAAATATTTTATCGAGAATTCGAAATCTTCTGAACTATCC  
AAATGTTTTGAGTAATTGGAACAATGACACTGATTTCTGTAACACTGAGCCAAGTTCATCTGTTACTGTTA  
TCTGTTATGAGGATAACATAACACAGCTTCATATAATAGGGAGCAAAGGGGCTCCTCAATTACATAATTT  
CTCGATCGATTCGTTTTGCTACTACACTTGTTGAGCTTCCAAGTTTGAAAGTTCTAAGATTAGTTTCTCTTG  
GTTTATATGGACCATTGCCTAGTAACTTTCAAGACTTTTCATCATTAGAGATACTTGACCTTAGTTCAAT  
TTCTTTCATAGTAACATAACCTCGAGAAATTCATCGTTAACGAGCCTCCAGAGTTTAATACTAGATGGAA  
ATAAGTTCACTGGAAGACTTCCAAATGGACTTGGTTCACTTGTTGTTTTGGCAGTTTTGAGTGTAAGAA  
CAATCTTTAGATGGACATTTACCTGATATGCTCGGAAGTTTGCATAATCTTCGTGTACTTTCACTTTCGA  
GGAATAATTTTACTGGTGATGTGCCTGATCTTAGTGGTGTGAAAACCTTCAAGTTCTAGACTTGGAAGA  
TAATTCCTTGGACCGAAATTTCCACAAGTTAGCAGCAAATCCAAAGCATTGTGTTGAGGAACAATAAG  
TTCACTGCAGGAATTCGGAGAAAGTTCAATCTTACCATCAGCTTGAACATATGGACATTTCTTCAAACA  
GATTTATGGGGCCATTTCTCCGTCTTTGCTGTCCTTGCCATCGATCACTTATCTTAACGTTGCAGGAAAT  
AAGTTAACGGGAATGCTTTTTGATGATAATCAATGCAATGCCGGATTAGATTTTGTGGATCTATCGACTA  
ACCTGTTGAGTGGAAGATTGCCTAGTTGCCTTCTGACTGGTCCTAAGGACAGGATCGTGCGTTACTCTAA  
CAATTGTTTAGCAACTGGAGGCGGAACTCAACATCCATTTTCTTCTGTCGGAATGAGGCGTTGGCTGTT  
GGTATCTTACCTCATCATATAACATATAACCAGGTTCAAAAGTGTTCTTGCTTTGATCATTGTGGTAG  
CATCATTGGTGGAGTCGTGCTAGTTTGC GCGACTATTATAGTAGTAAGAAAATTTCTTGCAAAGATAGCT  
ACACCGAGAAAAACAACAAGATCAATAGTAGAAAATGCAGCATCTACATATAACATCAAAGTTATTCCT  
GATGCAAGTAAGATTCCTCTCTTTCCGTCTTAGCTTTGAAGTTTGAAGCATAGTACAATAATTTTGGC  
TTACCTGTGCACGAAATACACAATAGGAAGGCGAAAAAGCCTAACATACGAAGTTTCTTCTATTCTT  
AATTACTACTAATTTTCCATCTTGTGTGTTTCTTCTCCGTTTACAAGACTATGTTACTCGAACAATGAAGCT  
GGGATCACTTAGTCTTCATCTTATCGGACCTTTTCATCCGAAGAGCTTAAGGTGGCAACAAACAACCTT  
GATGCAGCAACTTTTATAGGCAACAGTTCTGATGATCAGGTGCATTTCAAGAATCACTATGTACCTTACT  
TTTCTTCTTAACGTCATAATTGAGATCCTTAAACGTTTCGTTTAAAGAACATTTTATGGTATTATCATCCTTC  
ATTGTTTTGACACCACAAATGAGTCAGAACCTTGCAGCCTATCAAACATAGTCAGTTGCCTTAGAATTCTT  
AATCTATACCTTATCCCATTGAAGGTGTTTTAGAAGATCTTCTATCATGTTACTAGTCGTTCATTTTCTTAG  
ACGAGTGGATATCAAACAGGTATGGTATGATAATACTTCTTCGTGAGATCCATCTAGAGTTCATTAGTC



CATAGAAAACAAATGTTGATACATACACTTATGTGATACTCACGTCTGAGCGAATGTAACAACACTAAAAGA  
GTAAACTGCATATATTATATGACAGAATTAGTGAGTATGGAGGTTAACTTACTGTTTTTTTTGGATTGAGC  
TGTACAGAGGTCAGCTGAAAGATGGTTCATACATAACCATAAGATGCCTGCAAACGAAACGAAAAAATA  
GCAGTCAAAATTTTATGTATCATATAGAATTGATGTCAAAACTCAGACATAATCATCTGGTCAGTACTCTT  
GGACTGCTTCAAGTGTTACTTGGATGATTGATTGTTAGCAGGATATTTCTGGTCTTTGAGTATGTAT  
CAAATGGTACCCTAAGAAGCTGGATCTCTGGTAATTATTCAACAAGCATTTATACTTATCGATCCCAAGA  
TTGCAGTACAACAGTAATGTGTTATCCGATTCTGCAGATAAACATGCTAGAGGAAGACTAACGTGGACA  
CAACGTATAGCTGCTGCAATCGGAGTAGCAAGGGGAATGCAGTTTTTGCATACTGGAAATGTACCTGGT  
GTGTTTTCAAATAACATAAAGATAACAGATATCTTGTGGATCAGAACTTTGTAGCCAAAATTTGCAGCT  
ATAATTTGCCTATTCTGGATGAGTATGTAAAGGAGCAGAAGAGTACAAGGTATGCCTAACTGTTCCGAA  
TTCTAAGTTGCTCGGACTCTCCAAAAATATTGCCACACATGTCGGATCCTTCAAAAAATGCACTTCTTTTAA  
GGATCCAACATGCTCCCAATGACATGATTGTTAATATATTAGTTAATCATGTGTACTATGAAGATCAAAT  
ATTATGCTAATCTCTCTATGGTAGTAGACATAATTAATAATATATTAGGTACAAAAAAGTTGTATTAGT  
TTCTTACTTCTACTAATCCACAGGGCTAATTATGAAGAAAAATTTGTTGTATATGATTTTGGAGTAATATT  
ATTGGAGATAATTAGTGGGAAGCAGATAAATACCAAGAATGAAGTGAGAGTTATACAAAATCAGGTAT  
GATTTAACTCTTTTTTCACTCTTCACAACAACACTATGTCCAAGTCAAATGTAAGTTAGGATCAGCTATATG  
AATTCTGACCGACTCTTTTACTCTTCATATTTTCTGCAGTTACAAGAGAGCATAATGTCTAATGCAATGTC  
AAGAAAGAATATGGTTGATCCAGCAATTAGAAATTCGTGCTCGGATGAATCATTGAAGACGATGATAGA  
GATATGTTGCAGGTGTTTGGAAACAAGATACAGAAGATATGCCCTCAGTTGAAGATGTAATATGGAATTT  
GCAGTTTGCTGCTCAAGTTGAGGATTCATGGAGAAAAGACTCTTCAAGTAGTGATGCCTCTCCAATTTCA  
CATCTCTACAGCTTCAAACCCAACCTTGTGCGCAATAGCAATAGCAATAACAATAGCAATGGCACGTCTG  
TGTGACAAGCTATTTCTAACGTGGATAACTAATCTCGATACTATTATTCCATCCTGTGACAAGAATAACTA  
AACTAACAATTTATGTAATAATTTTCTTTGCATAGCTTATACAAAAAAGTAAGTTTTTCATACAATCTTTTC  
CTAACAAGCAGATGCCATAGCATTTCCTTGTGTATATACCAACCCAACCTTAATAGTACCTAGATATTAC  
AAGAGCAACATATAGTGCAGAAACCTATAATAGACATGGATGATAAAAAACAAAAACAAAAGAATGCA  
AAGAGGGACTAGTTAATGGAAAAGGGAAGCATTACAAATCGATTTTTTGTAGACAGTAGAAACAGAATATC  
TATTCGTTTGCAGGAGGAGTTTCCATTTTCTGAACTTGAGGGGCTGTCACTGCCACTAAGCTAAGATCAG  
ATGAGTTTGAATCTCCAGATCTTTCATGGATCTCTCGGTAATCCTGGCATATGGCACATAAGTGGCAGAA  
AAAGTGTGTGGCGAAGTCTCCACATGGAGCTTCTGTCATATATATCAGGACACACAAAATTGTTAAATG

CAGAAATACTGATGTAAGCAGTTTGCATCTTTCTATTTCAGGCATGGAACCATAGTATTTTCGTAGAACAGA  
AAAGGGGGGCGGGAGCTAATGGGAAGAGAGGAAGGTGAAGAATTCAGGGTAACTGGTTATAGATGCT  
GCAGACTCATCTGATAATAAACTCAAACCTAAGATTTCTAACTCGGACAACCTCTCAATGTAAACCAAAC  
AGAAAAGGAAAGTACAGTCAGTTCTCTTTCTACATGGAGTCCTGATTTTCCTGATTTTCAAGTTGTTGATA  
GTTTATCGAACTGAAGTCCACCACTACTAATTCAAATGAAGTATAATCATCTCTGCCGTGGAGTCGATTA  
CACACTGTAACCTTTAATCTTTTGTAGCTTCTACGGATAACATCCAATTCAAAGAATGTATGTGGAATT  
TTAAGACATTTCTGATTAATTTTTCTTTCTAATGAAAAG

>PGSC0003DMG400028312 LRR-RLPs

ATGATTTCTGGTGATAAACAAAAGTACATGGACATAATCAACTTAAGTTTACCTAATCATTTGACGAATG  
GCTTTCTTTACTTTGGAAAACATTTTGAGGATGAGATTTTGGTTTCGAGAGTTGATTCAGCTTTGGATCGC  
GGAAGAATTTGCAGTAGAAGATGTAGCAAAGGACTATGTGAAGGAATTAATAGATAGTAATCTTGTAAT  
GGTTGTTGGAAGGAATTTCTTTGGTGAGGTGAAAGCAATTGGTATGCATGATCTGTTGCCGTGAGTTCTG  
CTTGACTCGAGGTAATATCTCATTTGAACCATCGATCACAACTTTGTTACTTCCAGACTCTTTAACTGG  
TTCTTACTATTTTATTTTCTTCTTTTGGTATTTTGTCTTTGTCAGATCAAGTAATTCAACAGCTGCTGAA  
CACGAACGTGGCATTTCACCTGATTTCCGTTAAAATTATAAAGAAGCTGAATATTTGTATCCCCATTCTGC  
TATCTCCCGAATACCCTATTCTGTTGACGATATACTTGACCAGAACAACCTTCTCATATTTGACTGCAAAA  
GTTTGTGTTTCAAACCCAGAATCACATCACTGAGAGTGTTGGATTTGGTGTGTGTACATCGAGCAATGC  
ACCTTATATTCAATTCTTGGTTAATTTAAGATACTTGTCCATGAAGGGGAATTTTGAGGAAGATCCATCAT  
GGTTATCCAACCTCAAGTACTTAAAACATTGATACTCAGAGAATCGCGCAGATTAGATCTATCTTATGC  
AATATGGGGTATGGTGAGCTTAAAACATTTGGAAGTGACTGGTAAACCAGCTGTCATCAGGTGCCATGT  
CCCAGAGTTCATGATGAACCGTCGTTTAAACAAAATTACAATGTCTTTCTTTTGTACACTTACCTGAAGGCG  
AAGAGTTCATGTCAAAGTACCCAATTTAGTAAAGATGAGGTGTTTGGTTGATGAGGCTGAGCCACAAG  
GTGATCAGACAATATGCATTAGGCTTCCAGGTTTAGACTCTTTGAATCACTTAAATTTAAGGTCTATTTTC  
TAAAACATGGTGCAAAGCGACTTGAGATCAACTTTCCTAGGAACCTCAAGAAGTTGACCTTGTATCATT  
TCGATTACAACCTATAGGAAGATTAGAAAACCTGGAGGTGCTCAAGTTGGAGTCCAATGCTTTTCGAGGGA  
GATCAGCAATGGGATGTCGATAATGAGGAGTTCCAAAACCTCAAGTTCTTGATGTTCTACAACATGAAT  
ATTCCACAATGGAACCTTTCTGATATGTTCTTTCTAACCTTCAACATTTGATATTCAGAAATAGTCGACTT  
AAAACAATTCCTCGCGACTTTGAAAACCTTACTTTTGCAGCAGATGATTGAGGTGTCTTGGTGTAATGCA  
GCCGAGATGCCTTAAACACTGCTGAAGAGATTAAGAAAACCTCAAACCTGATATGGGAAATCATGAATTTA

AGCTCATAATCAAATCTAGAGAGGATGATGATCATGAAGAAGATGAAGATGATCATGAGGATGCACAT  
CAAAAGAAGCTCTTTTCTTGA

>PGSC0003DMG400028575 LRR-RLPs

TAGTATTTAAAATAGGCAAAAAAATTGATCTGTTAGCCAAAAAATAAATACAAACGAATCCTGTTGTT  
TATTTGCGAGGATTTTGCTATTTTATACGTTTCAGATCTGCAGAAATTTGGAGTTTCTTTTTCTGTTGACA  
GTCCAAATGAGAAGTGAAATGTTTTCCCATCTTTTCTTGATCCTATTACTCTCCATCTGCTGTAAAATGAG  
TGATGTAGTGGCAGCTAATTCCAGTAAATGTCTTGAGGATCAGAAGAAGTTACTGCTGCAGCTGAGAAA  
TAAGCTTACTTATGATTCTGAAATATCTACCAAGCTAGTGAAGTGGAACCAGCGGATTGACTGCTGTCAA  
TGGGAGGGTGTCACTTGCAACGGTGAAGGCCAAGTTATTGGTCTTGACCTTAGTGCTGAATCATTCTCG  
GGCAGTATCACTCCGTTAGCTGATCTTAAGTTTCTCTCTATTGTCCATCTTGATGGGAACAATTTATCTGC  
ACCAATTCCAGAGTTCTTTGCGGAATTCACCAATTTAACTGTCTTGAGTCTGAGTTCCTGCAACTTGATAG  
GAGAGGCACCTCAGAAAATATTCCAGGTACCAACTCTGCAAACAATTGACTTATCAGTAAATAGGATGC  
TTGGGGGTTCTTTACCTGAATTTCTTCAAAGGATCTCTACAAAACCTGGATCTTAGTTATACGAAATTT  
TCAGGAAGTTTACCTGAGTCCATAGGGAACCTTAGGAAGTTGTCGCGTGTTGAACTTAGAGCTTGTAAAT  
TTACAGGTCCAATTCCATCTTCTATGGAAAATCTAACCCAGCTTGTTCTTCTGGATTTCAATTTGAATAGCT  
TCACGGGTTCAATTCATCTTTAAGCTGTCCAAAATCTCACTGATATATACTCTGCTAGAAAATCGTTTG  
ATAGGAATATCATCAGACTGGGAAGGCTTTGAGAATCTTGAGTATCTTGACTTGAGTAGCAATTCATTT  
CTGGGATCATTCCAGAATCATTGTTTTACCTACCCTCACTTTCAGCTTTAGTTCTGTCCAACAACAAGTTTT  
CTGGCCAAATAACTGAATTACAAAATGTGATTTCTCCACTTAAAAGTCTTGAGTTGAGTTCCAACAAATT  
GGAAGGGCCAATACCTGAGTTTTTATTTGAGCTGCATGATCTTTATGGTCTGTCACTTTCATTCAACAAGT  
TTAACGGTACTGTGCAGTTGAAGAAGTACACAAAGATCAATAAACTTGTAGATCTTGATCTGTCCCACAA  
CAGTTTATCAGTTGACACCAATATAAGTGAATCGGACCTTGCCTTGCTACCCCAGCTAAATAGTTTCATGT  
TAGCGTCATGCAATCTGCAGAATATTTCTTCCTCAAGAACCAATCAAAGTTGTCGATGTTAGATCTCTCA  
AACACCAGCTTACTGGTGAATACCAAAGTGGTTGGTGGAAATCAATGATGGACTTCTCCGTTTTCTGA  
ATCTTTCTTTCAATCAATTTACGCGTCTTCAAGAACCATATACAATTGGCTTTCTCATGAATTTCTTGATC  
TGCATTCAAATCTGCTCACTGGGGTTATTCCATTACCACCACGTGCAGCTGCTTATATTGACTTCTCAGAC  
AATAACTTTTCATCTTTCCACCTGACTTTGGCAATTATCTAGTAACTGCTCGGTTCTCTCAATTGCAAAC  
AACAAAGTTATCGGTAGTATCCCTTCTTCGATATGCAACTCCAGCTATCTTGAAGTACTTGAGTTATCAAA  
CAACAGTTTGAATGGCATAATACCACCATGTTTAGCAGAAAAGAGCAGCACACTGAAAGTACTGAACCT

GGGAAAGAACAATCTCATAGGAGATATACCTGAAAAGTTTTCTTATAATTGTGAGTTGCAGAGCCTTGA  
CCTCAGTCAGAATCACTTAACAGGTCTGCTTCTCGTTCTTTGTCCAAGTGCACAAAGTTAAAGGTAATAA  
ATATTGGAAACAACAAGATCAAGGATACTTTCCCTGCTGGTTGAGGAACATGTCAGATCTTCGTGTACT  
TGTATTACGCTTCAATGGTTTCCATGGGAACATTGATTGCTCACGTGTGAATTCCAAGTGGACTGCACTTC  
AAATCATGGACCTAGCTTCCAACAATTTAGGGGGTGTCTTCCCCGAGGTTCACTTCTGGAGCTAAAAGC  
AATGATGGCTGACCCATCTTTAACACATTCACGCTCTGATATCTTGCATTTTGAGTCTTCTATTAGGCCAA  
TATATTATCAGGACAGAGTCACTCTTTCTTAAAGGACAAGATGTTACACAGACAAAGATCTTTATCTTC  
TTCACCTCCATTGACTTTTCAAGTAACAATTTGTGGGGAACATACCAGAGATAGTTGGAGATCTCAGAT  
CACTTAATCTTCTCAATATTTACACAACAATCTCACGGGTCAAATACCTCCAGCAATTGGAAATTTGAAG  
CAATTGGAATCACTGGACCTCTCATTCAACAAGTTAGGTGGCAATATCCCAGAAAAGCTTGCTAGCCTCA  
CATTTCTTTCCTTCTTAAATTTATCATCTAATGAATTGGTCGGAATGATTCCACGAGGCAACCAAATTC  
ACATTTGGAGAAAGTTCTTTTGAAGGAAACAAGGGGCTATGTGGGTTTCCGCTGAACAGAACTTGCAAG  
AATAATTCAGCAGATGCACCTTCTGAACCAGAAGTTGAAGAGGAAGAATTCATTTCAATGACGGAGATT  
TATGTAAGTGCTATGTTGGGATTTATTGTTGGTATTGGGATCATCTTCTACCCTTCTGTTCTCAAAAAG  
ATGGAACCAGTCGTACAACAGAATAATTAACAGATTAATTTAAGGATATTTACAGCAGCAAATCAAGA  
AAAGAAAAGTAGTAGCAGTAGTGTAGCATCTTGGAAAAGGCAGCAGGGAAATCAAGAGGCAGACATT  
AATTTACAGGATGTAACACTTCCTTGCAGCATGCTGCTCACTATTAGTACTTCTAATTGTTTCCACTATG  
AGTTATCTGTGTTTGTACCTTTCATGATTCATTTAGTTGCTTCTTATTACATAGAAGAACAACAAGCAA  
TCTTGCATTCTGTTTTAGGTAACGGTCAGTGAATAGCCATAACTAAAC

>PGSC0003DMG400028576 LRR-RLPs

AAAATAGGCAAAAATGGATCTGTTAGCCCAAAAATAATTATTCAAACAATCCTGCTGTTTATTTGC  
GAGGATTTTGCTATTTTATACGTTTCAGATCTGAAGAACTTGGAACCTTTTTCTGTTGAGAGTCCAAA  
TGAGAAGTGAAATGTTTTCCAGCTTTTCTTGATCCTTCTACTCTCCATCTGCTGTAAAACGAGTGATGTA  
GTGGCAGCTAATTCCAGTAAATGTCTTGAGGATCAGAAGATGTTGCTGCTGCAGCTGAGAAATAAGCTT  
ACTTATGATTATGAAATATCTACCAAGCTAGTGAAGTGGAGCCAGATGATTGACTGCTGTCAATGGGAG  
GGTGTCACTTGCAACGGTGAAGGCCAAGTTATTGGTCTTGACCTTAGTGCTGAATCATTCTCGGGCAGC  
ATCAATCCGTTAGCTAATCTCAAGTATCTCTGTTATCCGTCTTGATGGGAACAATTTATCTGCACCATT  
CCAGAGTTCTTCGCGGAATTCACCAATCTAACTGTCTTGAGTCTAAGTTCCTGCAACTTGATAGGAGAAG  
CACCTCAGAAGATATTCCAGGTACCAACTCTACAGACAATTGACTTATCAGTAAACGATATGCTTGGGGG

TTCTTTACCTGAATTCCTTCAAAGGATCTTTACAATCACTGGTGCTTACTGCTACAAAATTTTCAGGAAT  
TTTACCCGAGTCCATAGGGAACCTTAGGAAGTTGTCGCGTGTTGAACTTAGAGCTTGTAAATTTTATAGGT  
TCAATTCCATCTTCTATGGAAAATCTAACCCAGCTTGTTCTTCTGGATTCGAGTTGAATAGCTTCACGAG  
TTCATTTCCATCTTTTAAGCTGTCCACAAATCTCACTCGTATATACTCTGCTGGAAATAGATTGACAGGTA  
TATCATCCGACTGGCAAGGCCTTGAGAATCTTGAGTATCTTGACTTGAGTAACAATTCAATTTCTGGTCTC  
ATTCCAGCATCATTGTTTTACCTACCCTCACTTTAGATTCTGTCCAACAACAAGTTTTCTGGCCAA  
ATAACTGAATTACAAAATGTGATTTCTCCACTAACAAGTCTTGACTTGAGTTCCAACAAATTGGAAGGGC  
CAATACCTGAGTTTTTATTTGACCTGCATGATCTTTACGGTCTTTCACTTTCAATCAACAAGTTTAAACGGTA  
CTGTACAGTTGAAGAAGTTCACAAACATCAATAAACTTGTAGATCTTGATCTGTCCACAACAGTATATC  
AGTTGACACAAATATAAGTGAGTCGGACCTTGCCCTGCTACCCAGCTGAACAGTTTCATGTTAGCGTCA  
TGCAATCTGCAGAATATTTCTTCTCAAGAACCAATCAAAGTTGTCGATGTTAGATCTCTCAAACAGCCA  
ACTTACGGGTGAAATACCAAACCTGGCTGGTGGAAATCAATGATGGACTTCTCCGTTTTCTGAATCTTTCT  
TTCAATCAATTCACACATCTTCAAGAACCTTATACATTTGGCTTCTGAATTTCTTGATCTGCATTCAAT  
CTGCTCACTGGGGTTATTCCAGTACCACCACGTGCAGCTGCTTATATTGACTTCTCCAACAATAACTTTTC  
TACTTTTCCACCTGACTTTGGCAATTATCTAGTAACTGCTCGGTTCTCTCAATTGCAAACAACAAAGTTA  
TCGGTAGTATCCCTTCTCGATATGCAACTCCAGCTATCTTGAAGTACTTGAGTTGTCTAACAACAGTTTG  
AATGGCATAGTACCACCATGTTTAGCAGAAAAGAGCAGCACACTGAAAGTATTGAACCTGGGAAAGAA  
CAATCTCATAGGAAATATACCTGAAAAGTTTTCTTATAATTGTGAATTACAGAGCCTTGACCTCAGTCAG  
AATCACTAACAGGTGTGCTTCTCGTTCTTTGTCCAACCTGCACAAAGTTAAAGGTATTAATATTGGAA  
ACAACAAGATCAAGGATACTTTCCCTGCTGGTTGAGGAACATGTCAGATCTTCGTGTACTTGTATTACG  
CTTCAATGGTTTCCATGGGAACATTGATTGCTCACGAGTGAGTTCCAACCTGGACCGCTCTTCAAATCATG  
GACCTAGCTTCCAACAATTTAGGGGGTGTCTTCCACGAGGTTCACTTGGAGCTAAAAGGAATGATG  
GCGGACCCATCTTTAACACATTCACGGTCTGATATCTTGCATTTTGAGTCTCAATCTGTTAGGTCAGTATA  
CTATCAGGACAGAGTCACTCTTTCTTAAAGGACAAGATGCTACACAGACAAAGATCTTTCTTCTTCA  
CCTCCATTGACTTTTCAAGCAACAATTTGTGGGGAACATACCAGAGATAGTTGGAGATCTCAGATCACT  
TAATCTTCTCAATATTTACACAACAATCTCACGGGTCAAATCCCTCCATCAATTGGAAAATTGAAGCAAT  
TGGAATCACTGGACCTCTCATTCAACAATTAGGTGGCAATATCCAGAAAATCTTGCTAGCCTCACATT  
TCTTTCCCTCATAAATTTATCATATAATGAATTGGTTGGAATGATTCCACGAGGCAACCAAATTCAAACAT  
TTGGAGAAAGTTCTTTTGAAGGAAACAAGGGGCTATGTGGGTTACCGCTGAACAGAAGTTGCAAGAAT

AATTCAGCAGATGCACCTTCAGAGCCAGAAGTTGAAGAGGACGAATTCATTTCAAGGACGGAGATTTAT  
GTAAGTGCTATATTGGGATTTGTTGTAGGTGTTGGGATCATCTTTCTACCACTTCTGTTCTCAAAAAGATG  
GAACCAGTTGTACAACAGAACAATTGACAGATTAATTGTAAGGATATTTCAAGCAGCAAATCAAGAAAG  
GAGAACTAGTAGCTGTAGTGTAGCATCTTGAAAAAGGCAGTAGGGAAAGCAAGAGGCAGATATTAAT  
TTCACAGGATGTAACACTTCCTTGCAGCATGCTGCTCACTATTAGCACTTCTAATTGTTTCCACTATGAGT  
TATCGGTGTTTGTACCTTTTCATGATTCATTTTAGTGGTTTCTTATTAGATAGAAGAACAATGCAATC  
TTGCATTCTGTTTGTAGGCAACGGTCAGTGAATAGCCATAACAAACCTGATAACAACCTCTCTTTTTTTA  
AGAAACAGAAGCCAGCTTGGCATTTCCTAAGTACAAAATAGTTTATAACAAGTCTCCCTTATTCTTCGAA  
GTCAAGAGTCGTTCTGCGAAGACAAAATACTTCTCAAGTTCCTTACTGAAGTCTTTATCGACATCCTGCT  
CTTCAGCCACTTCTTGTGGGAGAACTTA

>PGSC0003DMG400028591 LRR-RLPs

GAGAAGAGAATTAGAGGAGAGAGATATGGAGAGAATAATATTGTCTTATAAATCTTTTTGTGTATGC  
AGTTGAAGTGGTATGTTTTTCATTTGGTGATCCACTTTGCTCTTCTCATGATTCCCTTGCACTTTTACAGTT  
TAAGCATTCACTTAACGCGACAGGTGACCATCAATATGATTGCCCAAATTATTTTTATGCTAAGACGACG  
TCTTGAATACGAGTAGTATGGATTGTTGTAGGTGGGATGGAGTAATCTGTGATAGCTTCACTGGTCAT  
GTCATTGGTTTGGACTTGAGTTGCAGCAGACTTGAAGGAACTATACATCCTAATAGTAGCCTTTTCCAGC  
TTCGTATCTTCAAACACTCGATCTTTCCTCTAATAACTTTTCAGGTTCTCAATTTCCACAGGGGATTGGTC  
AGTTGGTCAGCTTAACGCATCTCAATCTTCTTACTGTTGGTTCAAAGGGAGGATTCCATTAGGCATGTC  
ACACTTGTCCAATTTGGTTCCCTTGATCTATCTGATAACTATTATCCCTTTGTACACTTAAGTCAGGACGT  
ATTCAATATGCTCTTTCAAAACCTAACCAAGTTAGAGTTACTTTCTCTTCTCATCTAAACATCTCATCCAG  
CATACCCATGAATCTATCATTCTTCTTCTTGTAGATATCTAAATCTTGACAACACTTACTTGCAAGGAG  
ACTTGCCAAAAACATTTTCCTCCTGCCAATCTGGAACTCTCAGACTCTCAGGAAATTATCTAACTGTT  
TCTTTACCCGAGTTCAACTGGAGCAGTAGTACTCATTCACTAAGGGAGTTAGATCTCTCTTTTAATAATGT  
TTCTGGAGGGATACTCAATCACTCGGAACTACTACTCTCAAAGCCTTAAAGATTCTACGACTTTCTGGGT  
GCAACTTTGCCGACCATTTCCAGAATTCATTGGGAACCTTTACAGATCACCCAAGTACTGATCTTTTCAGC  
AACTATTTGGATGGCAAATTCAGACGTTTTTCCAACCTTGCAAATGCTTACATCCTTGTCACTGAAGAA  
CAACAACCTCACTGGCCCTTTCCATCCTCTTGTGAATTTGACAAACCTTCAAGTTTTAAGGTTGAGAA  
ACAATCACTCAGTGGTACCCTTCCCGAGTTAAGACTAATTCAATAGAAATACTTGATTTGTCTCGTAAT  
CAATTCTCTGGTCCCATACCTCGATCGCTTAGACATCTTCTCAACCTAACTGTTGTCTTCTTGGACAAAAT

AAGTTGAGTGGCGAGATTGGAGCAGAAATGTTTTCAAGCATGACAAACCTTCAATATCTTGATCTTTCTA  
ATAGTGGTTTATCATGGAGTGGCAATATCAACACCACTTTTCCACTTCTTTATTATTTAGGTTTAGGATCT  
TGTCGTGTGAAAGATTTCCAGATTTTCATATTCAACTCTAAGAAGTTATGGATTTTGGATCTCTCGGAGA  
ATGAAATTCACGGGCAGTTTCCAAAATGGTTTGGGAGTTTCGGTGATTTGGTAAACCTTAACCTCTCTCA  
CAACTACCTTACAAGCTTAGACCATCTACCTTGGGCGACAATGATGATACTTGATCTTCAATCAAATTCAC  
TCACAGGACCTTTGCCATCCCCATTTGCACATCAACTTCACTTTATATAATAAATTTGTCTTACAATAATT  
TGAGTGCCGAAATCCCAATTGCTTGTTTACTTTTTCTAGGCTCGTGGTCTTAGACTTACGAGCTAATAAC  
TTCCATGGACCCATCCCAAACAAATCCCAAAGAATAGTGGACTAGTTCATATTAGTTTGAGCAAAAATC  
AATTGGAAGGTTCCATCCCAACATCCCTAGTCAACTGTACATCCTTAAAAGTCCTTGATTTGGGAAACAA  
TAAAATCCAATCTACATTTCCACCCTGGCTGGAAACATTGCAAGAGTTAGAGGCTCTCATACTGAAATCT  
AATAGATTTTACGGACCCATCGTTGCTTTTAAAACAAAATCGCCATTTCCAAATATGAGGATCTTTGACCT  
CTCCGACAATTCATTTAGCGGCTCTTTACCTATGGAGGTTCTAAAAGTTTTCAAAGCTATGATGTACATG  
GATGCACACAAATCAGGATTGGAGTACTATGTCGAGGAAACTATAAATTTGGTATTAGTTCATATGAC  
GTTTTGTATCGTGGATTGTATGTGGAATCGATGATATTGGTGATGAAAAATCAAGAGACTAAATTC AAC  
AAGATATTGAAGATTTTACAACAATTGATTTGTCAAGGAACAAGTTTGAAGGAGAAATCCCTAAATTCA  
TTGGGAATTTGAACTCACTTCTGCTGCTGAATTTATCCCACAACAACCTCACAGGACAAATTCCTGTGCGAA  
ATGAGGAACATGAGCACTCTTGAAGCTTTGGACCTTTCAATTAACCATCTAACCGGCAAAAATCCAGTGG  
AGTTGGCAAGTCTCACATTTCTCGCGGTCCTAAATCTGTCATAACAACCATCTTGTTGGACCTATTCCTCAG  
AGTAATCAGTTCAATACGTTTCAAATGATTCCTATTTTGGAACTCTGATTTGTGTGGATTACCACTGTC  
AAATGAATGTGGGCATCATAAGAGTTCATCAGTACCAGTTGAACAGGAAGAAGATGAACCAAGTTTTCT  
TAGCGAAATGACTTGGCAGTCTGTGCTAATTGGTTATGGCAGTGGCCTGACTTTTGGTTTTGGCATAGCG  
TATCTCATATACCTCTTTGAAAGGCCAAGATGGTTCATAGACTCTTTTGAACCTATCACTCATGAAATGAT  
ATACATAGTACAGAGGGCACGTAAAAGGCGCAGGAGGAATTTTACAGAAGAAGACACTGAAAATCTG  
TGAGGTAATAATTAATTCATTATTTTCTTGCTGCATAATCAAGTATACTTTTTATTAGCAATACGTAAGGT  
CATGTAAACTACAACATAATCCATTGATATTAATGGGAATTGGAACTTTGTTTTTGTACAAGCTCTAGT  
CCCAAAGAGTTTCTTAGATATTCAATACTTTCAAACCTTTTTTTTTAAAAAAAATAAAAAATCAAGGAAGT  
GCACATAATATCCTAATGTAAACTCATTGTTTATCATTGCTATTTCAGATGACAATCAGAAAGTATGAAGC  
AAGAGAGAGGTCCGAGTATGCCACTAGAGCATGGGCTTGGGAAAATAGTGATTTTATAATTTTAAAATA  
ATGCAGATTGTTGTTTTTAGTATACTAGTTTTTGGACACGCGGTTGTGCGTGTGTCCAATGCAATATTTT

ATGAATTTGTTAGGATGATTAATAATTCAACGAAAATATGTGTGTAATGAGT

>PGSC0003DMG400028627 LRR-RLPs

GTCATTGCCATAAATATTTATATTATGTCACTTATAAAACACCCCTACAAATACAACCAAGTTTGTCACCTC  
ATTCATAGTCCAAAATGGCCTTTTTCTCTCAATACAAATAACACTACTACTATCTTTTTCTTCTTTCTCT  
AGGATTGTCATTACCGTTATAATGTCGGATTCCGGTGCACCTTCAGCTCTAGTTGATGCTCCACAACT  
GTTTCTCGATGAATAATAATCGTGCACGAACCGATCCTCGTGAGCAAGAAGCCGTTACGACATTATG  
AGGGCTACGGGGAACGATTGGGCCACCGATATCCCTGATGTTTGTCTGGTTCGATGGCATGGTATTGAG  
TGCATGCCGGATAATGACAATGTGTACCATGTTGTGTCACTTTCCTTCGGCGCATTGTCTGATGACACAG  
CATTTCTACGTGTTACTCAAGTCATTGTTTCATTTACCTTCAGTTAGGAACTTCCACACCTTCGGACTT  
TATTCTTCTATCGTTGCTTTAGTAACAATCCTCAGCCCATTCCAGGATTTCTAGCCCAATTAGGGCCCACTT  
TGCAAACACTAGTTTTAAGGGAAAATGGGTTACAGGGACCATTCTAATGAATTGGGTAACCTAACTC  
ATTTGAGAGTTCTAGATCTTCACAAAACAATCTTAATGGTTCAATACCGATCTCTCTGGGCCGGATCATC  
GGTTTGAAGTCATTAGATTTGAGTGACAACAACTAACCGGTTCAATTCCAAGTTTAACTTCCCTCAGTT  
AAATATCTTGGACCTTAACCAAAAATCACCTTACGGGTTCAATTCCATCCACACTCATGAGCTGTCATTGCG  
TTATAAAGCTAGACCTGAGCCGTAATCACCTCTCTGGTTCAATACCTGACTCGATCCACAACCTTAAACAAC  
CTCATCCTTTTGGATTTAAGCTACAATAGTCTAACAAGCCCATTCCAAACGTTACTCAAGAAATTGAATTC  
TCTACAAACCTTAGTCTCAATGGAAATCCAATGGACTCAGCTACTCTATCGGATAACGTCTTCGATGGTT  
TCAACAACCTAATGATTTTAGGATTATCAAACATGAACCTTCAAGTCCAATACCAAATTCACTAGGCCTA  
TTACCTATGCTACGAGTCCTTCATCTCGATGGGAACAAGTTAAATGGTTTCGATCCCATCGAGTTTTGGTA  
ATTTAAATAACATAAGTGAGCTTAGGCTAAATAATAACATGTTGAGTGGTCCTATTCCATTTAAAAGAGA  
CATGGTTTGGAGAATGAGAAGGAAAATGAAGCTTTCAAATAATGAAGGGCTTTGTTACAATAAAGAAA  
ATGGGCTTGGAGATGATTTAGAGACATTGTTGGATTCAGGGATTGGACATTGTGGGGACTCTAAACAG  
AGCCAATAAAAACAGTACAACACATTTCAACACTCAACAGAGCAAGTTTTGTAAGATCAAATAGCTACAA  
ATTATTATCATCTCTTGGATGCTTGCTTTGGTCAGCTTTAGTTTTTGTGTAGTTTGTGTTGTGAGTGTT  
TAGAGATTTTGGTACAGTTTTTTTTCTCCTTTCTGTTTTAAATGTAAC

>PGSC0003DMG400028630 LRR-RLPs

ATACAACACATTTAAAATCTTCAATTAGTACAAAATACATTAATAGTAAAAGCAGATCACTCTGGTTCT  
GCTCTCCGCCGTCGCCGGCAGTCTTCGTTGAGGTTTGATCGGTTCTCTTCTTTTTATTTTCATATAGAAGA  
ACAAATAAACCAAATCAAACCTAAAATTTGAGCTATTATTTATCACCGGGTTTTTTTTTTTAGGGGAACT



GAAATTCTTCATGAAACCCTAAATTAAGAAATGAATGGGTTTTTGATTGTATGGTAGAGATGGAATTTGC  
AACTAGAATAAGAAAATCTCATGCTTATATTATTCATGTACAAAGAGCTTGTGATTTGATCTGTATGTAAT  
TGTTGTTTGGTAGAGATGGACTTTGCAACTAGAATATAAAATGAATTCTATTTTTATTTTTTTACGATCTG  
GTGTTTGGGCCAGCTTATGCACAACTCAACTAATTGTAAGTGGATATGTGCTGCTCCCACCAACAACATG  
TATTAGGTAACTTTTGTACCAAGACTTGGATCGTTGGAAAGAAAGACAGACCTAGTGTTTTTGGATTT  
GAAAATCATTTTCTAAAGAGCAAAATGTTTCTTAAGTTTTGAAGTGTGTTTGTGTTAGTTGAAGCAAGTAAT  
TTCTCTACAATGAAAGGCTTACAGAGTGCCTGAAAGAGAAGATGTTTTCTATTTGTAATGAGCCTAT  
TATAAGAGACATTGTCATATTATATTTGATTATGATTTTATTAGTAGAATTCTTCGCGCTGTCTTCCTTATG  
TTAGTTTTGATTTATATATTTTTTTGTTCTATCAAGTGTGTTTTATGAGTTACCTATATATTACTACATAGTGTG  
ATTTGATGTTATCGGTTTGTCCAATTCGTTGAATTTTTTAAATTTCAAGCTTCAAAGCTTGAATGTCCTT  
GACCAAATTCATGGCGCCGCTAGCTCAGGTTGTTGCGTGGTTCAGGTTGTGTGTGACAATTTCAAGT  
CGAGGTCCTGATGCCGTAGCTCCTTTCTGCTCTTTTGGAGAACAATAATGTTTTTTTTTTGGTAAACCGT  
GAAGAATTACCATTGACAGCCAAAATTTACACCTATAGAGCACTTTAGGTAGAGGAGCCATCTTCCAG  
GAAGGGTACCCTTCTCTAAAGCCTCAAACAAGACAAATCTAGTTACAAAATTTCTGAACCAAATATC  
TACATTTACTTGCTTCTACTATCCTTCAGGTAATCCACTCTTCCACTATCTCTTTCTTTATCTGTGTGAT  
TGTAATCTATGTATTTTTTTTTGAAACTGGTAACTATATTTTTAAATTACACCATAACAGTGCAAAAGA  
CATTACAAAATCCCAACCAAGCTTAGGCTACTGCTTCAACAAGGATCCTATCATATCAACTAGTGATTTCAGC  
CTCCTCAGCATAGCTTTCTTTACACCAAAAATAAAACAATAATATACAATTCATCTTGATTTTCTCCACAAA  
ATTATATTTGTCTTCAAAGCGCTATAGTTCCTCTCCTTCAAATGGTCCACCATATGCAAGCAGGGACAT  
GTTTCCACCATTTTTCTGACTAACTGCCCCATCATTCTGGTTCACATTTCAAGCAATCAACACTTGTG  
CTGGCATTGACCATCTGAGCCCTACCATATTCAAGAATAGTTGCCATAATTGTCCAGTGACGGGACAATG  
AATGAATAGATGACTATTATTTTCCCAGCAGCTCCACACAAAAGCATCTAGAACACAGTTGGAATCCC  
CTTCTTTGAAGTTTATCATGTGTGAGACAAGCATTCTTGCTACTAGCCAAGAAAAGCATAACCACCTAAA  
AGGAGCCTTCATCTTCAAATGGATCTCCATGGCCACTGATTAATTGACTGTCTGTGCCTAATCAAAATCT  
TATAAGCTGAGTTTACAGAATAAGTTACTTTTTTTTTTTTTGAAATAGGTAACTTTAGTTTACAGAATAAG  
TTCTTTACTAGTGGGCTTCCATATAAGTGAATCTTCAGTGTCTTTGAGCCCTTGAATGATTCCAAGGTC  
TTGAAAATTCACAACCTTTTCAAACCTCCAATCATGCAGTAGTCTTCTAAAAGTAATATTCCATCCATG  
TACTCCTTTGCTGATTCCAGGCTAATGTTTGGCATAGTGGCAATGCTAAAGAATTCAGGGAAGAGTTCC  
TTAGAGGTCCATGTCCAAGCTAGTTATCACACCAAAAAGGATTTTCTACCATTGCCACTCTTAGGCT

AATTTTTCCAGCCATCAAAGACTAGATGGATCTGATTGCTTCCAGACTCCTACACCATGGGGGCTCACA  
ACCGCCTTGAACACCACTGGTCTTCTTGACCATACTTGTGCATGAATGACATTTCTCCATAAAGCATATGT  
TTCAAGATTATACCTACATAACCACTTCATTAGCAAACCTTTGGTTGTGAGCATTAGGTTCCCTGATGCCAA  
GGCCACCATCTCTTCTGGATTTGATAAGAACATCCCAATTAACCAGGTGGAGTGCTCTTTTTTCGTTGTTG  
CCTTGCCATATGAAATTCCTTCTGATCTTGTCAATTCTATTCTAACCTTGCTAGGTAAAGGAAAAAGAGA  
CATAACATAAGTAGGAAGGGCATCCAAAACACTATTGACTAGTATAACCCTACCACCTAGAGATAAGTA  
TTGTCCCTTCCATATTGCAAGCCTTTTTACACCTTTCTATGACACCACTCCAAATCTGCAAGGCTTTACT  
TTTAGCACCCAAAGTTAACCCCAAATAGGTAGTAGGTAGGGAACCCACCACACATCCAGAATACCTGC  
AAGTGCTTGAATATTGCCCACTTTATTAACCGGGAATAAACTGCTCTTATGCCAGTTGACATGAAGTCCG  
GAAACTGCCTCAAAAATCATGAGAATAGCTCTCAGATGTAATCTATGTATTTAGTATTGTCCCTCTGAATA  
GTTTCCAATTTCTTGCTCTCCAAGTGGATAGATTCTGGCTCCCATATAGCTGTAGCTATTTCTTCTTATA  
TTGCTTCCAGTGTCTTCTTTTATCCATTTTAGGCATTAGCACTTCCGTTTTTTGTATTTAATACACGACCA  
AGTCTCCAGTGCTTCTTCACTTTTGTGTCCAGGTATATTCTGCAAATAAATGTA CTGAGTCTCCAATTT  
GCTTCTCCACATAGGCAACACTTGTGCATCTTCTATTGGCATTGTCAGTCTGATCATCTCTCTTTTCGTTAG  
CAGTTTTTCTGATTTGCTAGCCATAAAATAAACCTGTGTCTAGGCAGCATGAGTGAGTTCCATATCAAG  
TCTGCTACAGGTAGTTTCAACTGCCTACCCAGTAATTGGTTGTA ACTACA ACTCACATTATATGCTCCATT  
GGTCAATAGACAGTAGGTTCCATTAGTATAACCACATTCCCATGGTTAGTTTAATGGAGTTGAGCTTCTC  
CAATACCAGCTGCTATCCTTAGAGGGTGTATGTGTCCAAAAATCTTGCTCGTCTTTCATATATAGTCCATG  
CACCCATCTTATCCATGGTGTATCTGCCTTGCTAGCAATCTGCCATATCAACTTACCAACTGATGCAATAT  
TCCATAACTTGCATCTCTTGATGTTCACTCCACCATTCTTCTTTGGCACACAAATCTTCTCCCACGATACAA  
GGACTACCTTCTTGTCTCCTTATTTCTCATAGATAATCCCTACATTTTATATCAACCTCTTTCAAAT  
ACTTTGAGGCAAGATGAAAACATTGCTCCAAAAGTTATAGAGCGAGAAGAGTGCAGCATTATGACCTG  
CAATCTGCCTGCACATGACAATGTTTTGAATATGCACCAGTAATCCTGTTGGTTATCTTGTGATCAGTT  
GATGGCAATCTATCTTTGTCCATTTCTTTGATGATAATGGCAAGCCCAAATATCTGATAGGAAGATCACC  
TAGTGAAATCCTGTCAGCTGCAATATTTTTCTTCCATAACATCATCCACCCAGCTACAAATATATTAG  
ACTTGTCCAGATTTGCCACAAGGCCTGTCACCCTACTGAAATGGTTCAACACCTCTATCATCCTTCTTATA  
GACTTAAGATCCCCTTTGCAAATAGCATCAAGTCATCTGCAAAAATCAGATGGTTTAGCTTGGTGCTAT  
GACACATTGGGTGAAACTTAAAGTCTGGTAGTTCTCCTACCTTCTGTAGTGCTCTAGATAGATACTCCAT  
GACCAACACAAATAGCAATGGTGACATTGGATCCCCCTGCCTCAATCCTCTCTTCCCTTTAAAATATCCAT

AATTTTCGCCATTTACCTTGATGGAAAATTTTGTGAAGTCACACAGTTCATCACTGGTCTGGTGAAGCC  
GTGAAGGTTTCTGGAAAACCATATCCATGAAGTGCCTCCTCAATAAACTCCCAAGATACCATATCATATG  
CTTCCGAGAACAAAAATGTTGTTGTACAGGTTCTGGGGGTTTCAAGTAATATATTGAAGAACTTTCCATT  
TAGGGTCCATTTTCATTCTTTTTTTTTTTGTTTCTTACTCATTTTCTTTTGTAAATTTTTGGTGCAATTTGGC  
TTCGATTCCAAAAGTTTTAACATTTTCTATCATGGCCCCTTATGTTTTGGCTTCATAATAAGAGACAATTTT  
TTGACTCTTTTCGGGATACCATTGTATTTCTTAACTGTTTTGGGAGCTTAATTGAACAAAATAAAAAGACA  
TCTACTATCATAATGTTCTCCTCTTTTCTGTCACTGACAGATCAAGACGCCTCTTTGCACAAATTCTACAC  
TATTGCTAGTAAGGTGGAAAAAAATCAAATCAGAAAAAGAAAATCAAGCATGAATCAAGGCACTTTCT  
CTTCCCCTTAATTTGTCTGATTCTTTCTGGATTACAACTTGAAGGCTTATTGAGATTTATCAACTTTTCTC  
TAACAGATAAAGGAAAAATTTAACCCCTAATAAGATCATTTAAATTCTTCTCACAGATAGAGTAAGCAT  
TGCGGTTGAGGGGGACATAGAAGATAGAATTAGTGTCTACCAAGAAATGTTATTGATTGTATCCTTGA  
GTTCTTGCCTGTTAAGAAGCTGCAAAAACCTGTACATTGTCCAAAAGCTGGAGATACATTTGGAGCGA  
GCTTCCAAAATGGTGCTGGATTACGAGTTTTGTGATGAGTTAATAGACGAGTCTGAATCCAAATTCAG  
AGAAGTAGTAGATGGGATTATGTTGCTGCATATGGGCAAGATTGTGAAGTTTGATCTTGACGTTAGAGT  
AGAAGATTTAGCTTCATATACAGCTATTGATAGATGGGTTCTTTATGTCACCAGAAACAGTGTCAAGAAG  
CTACACCTTAGAATTTCTAATATTGGTGATCGTACCTATACACTGCCTCCTTGTATATTTCACTGTTCAACC  
CTGACACAGTTGAACTTGCTAGATGTTCTTTAAACCACCTGGTTCTTTTCGTGGCTTTCCCAATCTTGT  
AACCCCTCGGTTGGCATCAGTAACCTTTTCAGAGCATTGTGTTATCAAGGCCCTCTTCTTGCTAATTTGA  
CCTTGAACCTGTTGTGATGGTATGCAATACCTAAACATTGTTTCACCAGTGTGAAGTCCTTGTATGTTTGT  
TACCCTCACTCCTATATCGCACTAAATTGCTTCATGAACTGCAAGAATTTGAGAGATTTAGGACTTGTGTT  
TTCCAAAGTGGTTGATAATCCAAATCATGATCATAGATCAACGTTGGTGAAATTTCTGGTAGCTTGCCT  
GCACTTGAGGTA CTCTGTTGGATTCACTTTTCATTGACGTAAGACATGAACTTGTTTTTTCATTTGAATA  
TCTCCTATAGTGATTTTATTCAAGTGAGATTGTAATCATTGTATTTGCTCCAAAGCTTTTGAGTGCAGACG  
TAGTTCTATCAAGTGGTCTCCTTTTATGCTCAACTGCTTGC GGAAGCTGTCCCTCTCTGTTGACTTTGGC  
AAATTGGGTCATATTTCTTGC GTTCTACAATTAATCGAGTGTTCGCCCAATTTGAATGAACTTGAGATTAC  
GGTAAGAAATGTTAAATATATCTGGTGGTCTTTTTTTTTGCTCTTCATATATTTGAAGTTGAAGATAATGG  
TGTTTGTATACCATTAGGTCAATGGTACCGATGATAATATTGAAGCATTGTGAAATGTCTGAAGATG  
GCTGACTGCTTGCAGCTACCACTCAACAAGCTAGAGTATGTGAGTTTCTATGGTTTTGCAAGTCCAATCT  
GTGTAGAGGCTTTTGTATGCTATTCATTATTCAGGCACGATCTTTGCTAAGGATCTTCATTGAACAACCG

CTAGGAACTAAATCCAGTAAAGATTTGAGTGGTTTACCCAGAGCTTCTCCTAAGGCTGAGCTAGTTATAA  
GTTAAATCGATACATTATCTATTTGTTGTCGATAAGTTTATCTAATATGTCACAAATGTTGAACCAGTTTTC  
TTCCATATTTACTGTTGGGAAAGTATGACTGATATCTGAATCTTCATCTTTTGACAGTTGAGCTTATTTTG  
GTCTCTATATCTACATGAGGCCAACTAGTAAGATTAATTTGTGAATGTTGTTGTTGGGTTTGATATCCTAC  
TAGTTTTTGAGGATAAAAACATAAAATAAAATATACTA

>PGSC0003DMG400029168 LRR-RLPs

ATCATCAATAGAGAAGAAAAAGAAGTTGAGCATTGTCAAATCCGGTGAAGGAGCAATGGCGGCAGA  
AACTATTTGGAACAGAGAAACAGTGCCAAAAGTGATGAAAATAGTGAGCACGAGGCTTCAACAAAGAG  
ACCTCATCACTCTTCTACTTGCCAGCCCTTCGATTCACCGTACTCTCCTTTCTCACCCCTCCCTCTGGCTGG  
TTAGTTCATTTCCCACTCGATACGACTTGCTTAGTGCGGTTTACATTTACTGTGTGTGGCCTGCTATTTAT  
TGCACAACTGGGTACCTTTTCCTTTTTTTTTTTTTACTTGTTTTAATTTTTGGTGTCTCTTATAGGTTCTTG  
ATTTTCATGAGATGAGTAATGCTGGTGATCGCCTGTCTCAGCTCTTCTTTGGTTTGTTTCCTTTCTTTTC  
CTGTATTTTATTGGGTATTTGTTAAGCTGATGGATTTTTCTGAGTAATCAGTTTTGGTTCCAGGAAAAATG  
TAAGAAGGAAAAGTTAATTGCTTTAGTTTGTCTTTGGGAATCTGGGAGAATAATGTGAATGGAGAAAG  
ACTGGAATTTGGAGGCTCAAAGATAAACTAGTCATATTTGCTTTTAAGTGTGGTGTGAATGAAATT  
GTTTTACAGAAAATGATTTCTAGAAAATGTTATCTTGAAAATAAGTTGGTTCGAAGAGCATTATAT  
GTTATCTAGCAAAACAACATGGAGGCGGTATTGGATGTGGAGTGAGGGTTCAAGGGTGGTAGGGGGT  
GGGATGGTCAAGGGTTGGGGGATTGGGTGGGTGGAGAGGAGAAAATAAAATTGGGAGACTTCTGTCTG  
GGAAGTCATTTGCCTCATTTTTAAGGAATTTGTTTTCTACTCCCAAGGGAAGTCATTTGCCTCGTTTTTA  
AGAAACTTGTTTTCCCTACTTCCATCAGGGAAGTCATTGCCTCATTTTTAAGAACTTGTTTTCCCTACTTC  
CATTAGGGAAGTCATTGCCTCATTTTTAAGGAAGTGTTCCTCAAGATGTTTTCCAACATTTTGACCAA  
CCAACATAGGTAAATTGAAAAACAGTTTTTGGATGTTTTCTCCATTGCAAACACACCCTATGTAGATAT  
CGCATATTGTATATTTCTTTGGTTGCTGCTATTTTTTTATTTTTTTTTGGGTTGTTTTCTCAACCAATAGA  
AGGTCTAGTAGTACTACCTTGTCTAAAATTACTACTAGAGAGAAGACCAATATTTAAGTTGGACATAAA  
CCATGTATTAACAGGATAAGAAGTGGATTACTTGGTCTCAACACCTTCATCTTAAATACTCACCACCTGGC  
CAGACTAAATTTTTTGATAGATAACCGCTAAGACAGGCTTCATTGGCTTCTTTGTTTGTTTTGTTTTTGT  
CAAGCAACAGGAACACTAGTAAGGAAGTGGCCCTTGTGCTAGCCTCCTCCATATTAAGTATAACCA  
CTAGGCCACACTTCTTTGGATCTTGTGCTTTTCTATTGTGTAGGTGATGAAAAGAAGCAGTATAGAAGAA  
TGAGTTTCTTAACTTAGGGATGCAGGTTGTTGTCTTATGATTTCTTCTTGCAGCCGAGATATCGCAATG

TGAAGCATATCAACCTTGAGTTTGCGCAGGATATTGAAGACAAGCAACTGGAAAATGTTAAAAGCAAGG  
TGGGATTTAGAAAATTGGGAAGTCACAGAAATTAGAATGTTTCAGATTATTTTTTTAAAAAATCTGTGG  
AGGCTGCCTTTGTTTGATAAGCACCTCTGGCTTATTTTTGTGACTTAGTATCAAATCTACTTGGAGCCAT  
TTTATAATCCTCAGAAACGTTAGAAGTGATTTTTTCCTTGTTGTGTCAACAACCTGGGGTGACCTGTATATA  
GGGGTGTCAAAAAATGAGGAACTATTCATATCTTACCATCTAATGAAGATAAAGAAAAGTTTGCTAATT  
CTTGTAATTTGAGGTAACAAATTACTTTTAATGTGTCCTGCATGGTACTATTTTTGTACAGAAATTTGAT  
GTTCCCGTGGTGTAAAAAATATGCAGTGTGGGGATTCCCTTTTAGATTTAGAGATTCTAAATCTAAATGG  
CTGTCAAAGGATCTCTGACAAGGGAATCGAAGTAGTGACAAATACTTGTCTAACTGAAGGTTTTTTCC  
ATTTATTGGAATGTAAGGTATCGCAAGCTTCATCTAATGCTCTTTCCCAATTATTATATAGCTGTTGCATG  
ACCGAATAAATGTAACCTTTGTACCTGCAATTTTTGGATAAATGTTTAGGGTAACAGATGTTGGCATTAC  
TCATCTGGTGAAGAATTGCAGATTTGTGGTAGATTTGAACTTAAGTGGATGCAAGGTACATGAACCTCT  
AATGTTCTATACGCATGTTTCAGTGATTACTTGATGAGCTTGTCTTACATCAACCTCCAAATGCACCATTC  
ATATATATGAGACCATGGTGATTCAAGCTGTAAAGGAGAAACGAGATAGGCCTAAAATCTAATGGAAA  
GAAGTTGTGTTGAAAGGCCTACATTCTCCTTGAACCTCATGCAGACTTAGCAAAAAATAGGGTACAACGG  
AAGGAAAAAGATCCATTTAGTGGTACCAATTAGTTGGGCTTAAGGCTTAGTCGTGGTAGTGCGCTCATC  
AGATATTCGCTAGGAGTCTTTTTGTTTTGTCTGATATTTGTATGATAGAGAAAACATAGAGGACTTCTACT  
GATAGAGACCTAACTTTTTATGTTTGATTGAGACCAGTCTAAGTGGAGCGACATGGATAGCAATGATT  
CATATAGTTGATCCCAACTAGGCCAGGTTTGAGACATAGTATATTGCTATTGTTGTTGTATAAATAGACTT  
TATCATCCTTCATAAATTATTATTCTTGTCTACAGTTTTTCAACATTCATATAGATGTCAGGAGAAAAGAG  
ACCCTGTATAACAAGCAGTATCCAAAAAAGTGAAGAACCTAAACCGGAAATTTTTCTCTAACAAAAGCCAC  
CAATCATCTACACAAGTAGGGGTATGGTGGATCTACAAAAAGAACTAAGAACACGAGGCTATTCTCTC  
GAGTATGCAGTGTCAATTCTCGGCGGTTTCAGATGTCCACTCTCTATCAAAGAACCCACATAGTGGCTGAA  
GAAGCAACATCCCACGCTAAGAGTCCTCTCTCCTTTATCTAAAAGCCTAACTGTAAAACACTTCTTCAC  
TCTGCTTTGCATAACCCATTGTAATAAAAATTAGTTCAGGACCGTTCACCACGAAACCGTAGCCACATGA  
CAACGCAGAAGGATGTGATATGTCTTCTCCTGAAAGTTGCCGTCAAGGGAAATGCAGACTTCCAGTAGA  
CGTCCTTCTGGTCGATTGTTGGAGTTTGTTTTTAGAACAAATGATTCTGGACAAAGGTTCTGATATTCTGC  
ATTGTACAGTTTGTGGTCAAACCTAGCAGATGTTGTGAGTTTTAGGGTGTGAAAGAAAGGAGAGGAA  
GAGAACATTTACGGGCAAAAAATATTCTTCATACAAAGCCAACCGGGAACCTTTTTTCAAACCTCGCTCA  
ACACAAAAGAAAAGACGAAAGACGAGAATCCGCCCTTTTACCAAGTGTACCAGATAGATGATGATAAA

GGGACAACAATCGTTGCCTTGCACAAGACGATGCCCTTTCACCTCAAGGCGTCGGCTCTGAAATGATGG  
AAGATTGAATCATTCTTCTATTACAAGTAGTGATGGCCGGCTTTCATTTTTCCGGTAGGCCATGAC  
TAAATTCAAGATTTCTCTGTTTATTCTAAAATATGGAGAAGACACGATAATTGCTTCTTCTTTGTTGAGA  
TCCGCCCCCAGCCTTTTCTTCTTTCAGGTCCCTCCCCTCGTATTCATTTTAAATCCCATGCCTCCAAC  
TCTTTTTCATTTTTCACAGTACTTCTAGTTTTTGGCATGTCAGCACTTAACTTAAGCTTATATGGTGTGG  
TCTTCAAGTTCTTTCATTATTTATTTGGAAAATTTGAATGTTTATCAATTGGGATTGAATAAGAGTGGCAG  
AGCGCTATTTTCAATGGAGAATTGAACGAGGAAACTACATGGAACAACCATTAGGTTTCGTTGTTAAAG  
ACCAAGAAAAGAAAGTTTATAATTTAAAAAGATCAATTGCTGGCCTAAAGCAATCTTCAAGGTAGTGGT  
ACCTAAAATTTATAAGGAGGTGATTTCAATTTGATTTACCATGATCGATGAAAACCATTGCATCTATGTG  
GAAAAGTCCAATGGAAAGTTTGTAAATCTTCTTTTTATTTAGATGATATTTTATTGGTTGGAAATAATTT  
GGAGTATGTGAAAAGTGTCAAGTCATGGTTTTCAAAGTCATTTGATATGAAAGATATGAGTGACACAGA  
CTATATATTGGGTGTTAAGATCCAGAGAAATTGTTCCAAGAAATTTTTGAGTTTATCTCAAAAACATAA  
ATAAAGAAAATATTGAACGCTTTCGAATGAATAGTTGCAAATCCATGAATACTCCTGTAGCAAGAGGTG  
AACTTTAAACCTTGAAATGTGTTCAAAGACTGAAAAGAAATGGAAGACATGTCTCGAGTTCCATATTC  
TAGTGCTGTCTGGGAGTCTGATGTATGCTATGATGTGTACTCGTGTACTCGCTCACTCGCTCAGACATTTG  
TTATGCTGTAGGTCTGGTTAGCAAGTATTAATCCAATCCTGGAAGAGATCACTTGAAAGCAATAAAAAG  
AATATTTTGATACTTGAAGGGAAGTGCAGATTATCACTATGCTATAGTAGATCTAATTAATTCATAAGA  
GGTTATACAAATGTTGATTGGGCTGGTGATCGGTGTGATAGAAAATCAACCTCCGGTTATGCTTTCTTAC  
TTATTGATAGTGCTATTTTCATGGAAAAGTAAGAAACAACTTGCACAACCTTTCAACTATGGAATTTGA  
ATTCGTAGCTTGTGCATCTGCAGTACAAGAAGCTGTTTGGTTAAAGAGATTCTTTGAGCATTGGATATT  
GCAAAGAATTCCAAGGGACCTATGATTTTATATTGTGACAGTCAGGCGGCTATCACATATAGAAGGATC  
CTAAGTATCACAGCAAGACCAAACACATTGATATCAAGTATAACTTTGTGAGAGACATAGTAGCAAGTG  
GAGAAATAAATTTACAATACATTCCTACACGTAAAATGATAACTAATCCTAATATCTAGAGACTTGTGTTGA  
GAAACATGTTAATGCTCTAGGTTTGGTAGGATATGATAATTTTTGTATTGTAAAATAACTTGATTGTTA  
TATTGTTCTCATCAATATATGACTATTTTGAATTTATATTCATATTTTCATATGCATGTAATAATGTTTTAGA  
AATGAAGAGTGTGGACAAGTCGCGAGATTGGCTCTAACATGAACAATCGCCTTACGTTGGAGAA  
CGTGAAGAGATGATTTCCGCTACCATGTTATGACTTTTTTTTTATAAGCCAACTAAGTCTCTCTAAGAAGA  
TGATATTGATGATCATTAAATGAGAAACCGGGTTAAACATCTAGAGGTGTTTAGACCAAGGTTTGTACGA  
TGTTGGATAATCGAAAGAATGAGACACATGCACCAGTATAAGGTGAAAACATCATAGCACGGTTGCAAC

TCAAGTATTTAAAGAACCTACTTTATCTGTTGATAATATCATTTGATTAGAGCTCCGTGCATCTAAGACTT  
GATACTTGTGCAACATAAGATGCACTCAAAGCTTTGTCTCCCTAATTCCAATATGATGCACAACATGCA  
CTTCATTGACTAGAATTGCAATATGTCCTGTTTACCTTATTGCAACTTTAATAGGAGCCTCACCATGAGAT  
ACATCAAGCTAGTCGAATATGCTCTTCAGATATACATGCCAAATATGCTGAGGTGTCGTTTGTGACGTTT  
CACTCAAATGTTTCAAATTCTTCCTTCGCTTTTCTTTTCTTTCTTTCTTTCTTTCAACTGATAAGTATACT  
ATCCAATTCGTATTTCCGCTTTTCAGCAGTTTAAAGTTGGCACTATGTACATAAGTTGCACTTGCTTCTCATT  
ATGCAAATCCTCTTAGCTTCATTTGATCCATACTCGTTCTGCTGAAGATTTTTCTCATTGTATTGATTTTT  
ATGCAGAATATTACAGACAAAAGTTTGCATCTGGTTGCTGACAATTATCAAGAATTGGAATCGTTGAACA  
TCACTAGGTTGGATATTTTCTCTCAGTCTGCATGAGATTAGTTAAAGGAAGAGTTGTTTTCAAATGTTCTG  
GATAACGCATAGCATCTCTTGGACATAAGGATGCCCTTTCTTGGCTGAGGCCTTTGTCTGTTGTAGGGGT  
GATGATAATATAAGCCCCCTTTCTAAGAAGGATACTTATAATCGAGTATCTTGAGAGTATTTCTAATT  
GTTTGGTCTTTATAACCTTTTTGAGAGGGACCAAATATGATTATGTTTTCTTGATTGTAAGTATTTGTTTG  
ATGTGACTAGGTGCATCAAGATGACGGATTCTGGTTTGCAGCGGATATTGCTGAACTGCTCTTCTCTACA  
GACTTTGAACCTTTATGCCCTTTCCACGTAACCGCTTGTTCATTTTATAATATATCTGTCAAAGATATGT  
TCCATTTCAATTCATATCGTGTGAATGCACCTTTCTACCACTCAATGGTATACTACAAAATGCATATGTTG  
GAGTTTCTACTCAGACAATCTGCTTCCTTTCTTTCTTGCAGTTTAAACAGATGAAGCTTATAAGATGATATC  
TCGTCTGCCTCATCTTAGATTTCTGGATCTCTGTGGTGTCTCAGGTATAGTCTTCAGCATTTTCTTGGACTG  
CTTTTCATAGGTTATGCTATTGCTTGGTGAATACCGAACTGTCTAAGTGATATTGCTATTAACCCAGT  
TGTCCTCAGAATCTGACAGATGATGGGCTTTCTTGTATAGCGATGTGCAAAAACCTGGTGTCTCTCAAT  
TTGACATGGTATGTATCCTAAATATATTTCAATTTTATTGGGAGCAAAGGAGATACAATTGTATGTTATT  
GAACTGATATATATTCACATTTACAGGTGTGTACAAGTCAGTGATGTTGGGGTCATAGCAATAGCTCAA  
GGCTGCAGGTCTCTTGAATTATTAAGGTGAGTGTGGACCTAGAATTATCACTAAAATAGGAAGACCAAAA  
ATGACCTATGCTGCATTACTTCAGCACCTCCACAAAGTCGACAAATATTCTATCTTGTGAACTAACTAGAT  
AGAGATATACTGTTTTTGAATACTCCAATGTTTGTGTAGTCATTGGGCCTCCGGCTTAAGCAATTATAAA  
ATATAAAGTATAACCACTTCTATTGACTGCAGATTTATTTGCAATTTTTTTTTTTTCAATTAAGCGAGCTC  
AGGGCTCATTTATTCAACACCAAAAATATTTACATTGGCCCAACGAGCCCAAAAGTGAAAAAGAAGCAA  
ATGGAAAAGATCACCTGGCCGTCAAATAAGACCAACCAAGTTGTCTTAAAATGTCCTACTCTGTAATTA  
TTGTTCAATTTGCTGCCTCTGCACGCTGATCCTTCTTGTCTTAATCCTCAATGTTGGCATGCCTATTTTATCC  
ATGTTTATTATTCTTGCAGTCAACTGTTAGTTGATTAATAATTGTTCCACTGAATCCCTCCTGCTGCATG





AATCAATTCCTAATGAACTAATGAAAGCCATAGAAGAGTCTAGATTTGCTATTGTAATATTTTCCGAAAG  
CTATGCATCATCAAGATGGTGTGGGAGGAGCTTGCACATATTATAAAGTGTGCGAAATGAATTAGATCA  
GATAGTGATTCCAATTTTTATGATGTTAGTCCATCTGATGTAAGCCATCAAACTCACCATTCGCTGAGT  
CGTTTTCAAATACAAAGATGATGAGTTGGAGAAGGTTCAAAGATGGAGAGAAGCTTGTAAGGAAGCT  
GGGAAAATATCAGGTTACCATTTACAAGAATGCAAGTAAGATTTCTTTCTTTTGCACCATATCCTTTTTTC  
GTAAATACTTTGATTTTCTGTCATATTCCCTTCCCTTTTTTCGTAAATGCTTTGGTTTGCTGCACCTTATGTTG  
AGGGTCTTTTGGAAACAACCTCTCTACCTCCCCGAGGTAGGGGTAAGGTGTGCGTACACTCTAACCTCCC  
CAGATAGCCCTTGTTGGGATTACACTGGATATGTTGTTGTTGTTGTGAAAGAATCATTAGAAGTAATAAAA  
TAAGATATAAATCATAAAAGAGAGCACACACTTGGGTGCTAAATGTAAAGAACTCTATAATCTTATTTGA  
TCTCTAAGTAGTTGTTCAATTCATTGTCGTTTAGGGATGAGGCAAATTGCATCAAGAAGGTTGTTGATCA  
CATATTACCAAACATTATTTCAACCGTTTCGGAAAGCTTAGTGGGTACTCAAATTGAAAAGTAATCTCA  
TTATTACATATGAAATCTGATGATGTTTACTTCGTTGGATTATGGGGAATGAGTGGTATTGGTAAGACAG  
AAATCGCGAGTGTTATATATGAGAGATACCGTCATCAATTTGAAGCTTATTGTTTTCTTGGTGATGTTGG  
AGAAATGTACCGGAAAAAGGGACTTAGATGGCTACAGAAAACCTTATCTGCAAACCTATTTGGAAAAAA  
GATGATTGTAAGTAGTGAGCATGATGGAACCACAATTATAAAGAATGGGCTTCGGTGGAAAGAAAGTTTT  
ACTCGTTCTTGACAACATAGACCATCTAAGTCAACTAGAGCTTATAGTTGGAGGGACAGAGTGGTTTTGG  
CAGGGGTAGTAGAATTTTGATTACCACGAGAGACAAACACCTGATAGTCAGTCATGTGAAGGAGGATA  
AAGTATACGAAGTCTTACTATTATCTGAGAACGAAGCTCTTGAAGTGTGTTTTGCATGCATGCTTTCAAAG  
AAAATCTCCGGAGAGAGATTTAAGGTACTTTCAAATGAAGTAGTGAAGTATGCTGATGGACTCCCTTTA  
GCTCTTAAAGTTTTGGGTTCTTCTTTTATGGACGAAACAAAGAGCAATGTAGAGATATAATTGATAGAT  
TGAAAAGAATCCCTAATGATGACATTCTAGGAAAACCTAAGATTGGTCTAGATGGGTTGAATAACGATG  
AGATGAGAACATTCCTTGATATAGCATGCTTGTACAATCATGAATATAGCTATTACGTTGAACGAATACT  
TAAGAGTTGTGGTATTCACCTGATAGGAATAAGCTACCTCATCGAAAAATCTCTTATGCATCAGATAT  
CACTCGTTTGAGATGCATAGTTTGATAAGTCAAACGGGTCAAATGTGTGCGAGGGAAGAATATGCAAAC  
AGCAGAGTATGGCTTATTGAGGAAGTTCATGACCTTTTTGCTGGAAAGTTGGTAAGAAATATTTTATCAA  
AAAAATTGATAATTTAAGAAGCTCTTAGTATTTTGTGACTTCGTTATGTTGAGTTTTTTTGGACAAATAGAT  
ATATGTTTCTTTCCTTACAGAAAACAAAAAAGGTTGAAAGCCTACGGATCCCAAATGGTTACCGGTTTGA  
TGATGATCATATCAATTATAACAAGGTATTCAAGAGAATGCAATGCTTACAGGTGTTGATACTTCATCGT  
AGAACTATTTGCTCGGAAAGCACTGTCACCTGTTTGCCTTCTAACCTGCGGTGGATTGAATGGCCGAAC

ATCCTTCAAGTTCATTGCCAGAGGGGTTTGAACCATCACAACCTCGTTGGGCTTTGTTTACGTGGAAGTTG  
GCTTGTGAACTTTGGCCAATACCAAAGGTATAGTGATTTCTTCTCTCCAAAACAATAGCTCCAGTTTAT  
CACGCGCTATGGTTCAAATGCTATACCAAATAAATGCTTTTGTATAAGCAATTTACATCATGTAACAGAA  
ATAGAATAGCATATTTCTATTAGGAGTACTACTTGAGCTAACTGGTAATTCGCAGGTACGTTATGTTTTA  
ATATTTTGTATTTTTATGAAAACAGAACTGTGCAACTGAAGTATTTGAATCTAAGCGAGAGCCTTGG  
GCTAACGAAGACCCCTAATTTTGGTGATATGCCAACTTGGAGACACTAAGTTTACGGAGGTGTGAGAA  
TTTGGAAAGTGGTTCATCCCTATCTTGGACATTGCAAAATGCTTACTTATTTGAGTTTGACGGGTTGTGTCA  
AACTTAAGAAGCTTCCAAAATTTGTCTGCATGGAATCTCTCGAGATTCTTCTCCTTGATGAATGCACGAG  
CTTAAAAAGATTTCCAAAATCTGTGGAGATATGCGGGCCTTATCAATACTGTATGTAGAATCCCCCTGG  
ATAAGAAGCTTACCCCCGTCTCTCAGCGGCCTTAGTCGTTTGAACTGAAAGGTTGTGAAGTTCTTGAAA  
GTATTCAGACTCTATTCTAAATCTTGAAAGACTTCACATTTAGGTTGCAATAAACTTACAACCTTGCCA  
AACAGCCTCTTTGAATCACAACAATGGATATTTCTTATATATACCGATGTTCTGGATTGGTAGAGCTCCC  
CGTATCTCTTGGAGTTCAAAAGAACTTGGTTTTTATCCGTAGAAGAATGTGAGAACTTAACGAAGCTT  
CCAAGCTCTATTAGATGGAATCCCTTACAGAGCTCAAGATATCTAATTGCCAAAATTAACACTTCC  
AGAAATAATCGGAGATATGCATTGCTTGAAAAGTTTGACTCTGGAGTCTACTGGGATTAGAGAACTGCC  
TTTGTCCATTGGGAATCTGAGTGGCCTCGAATATCTCAATCTGAAAGGTTGTGAAGATCTTGTAAGTCTA  
TCAAACAGCCTCTGTAAGTTGAAGAATCTTCAACGGCTTATTCTTCGTGGCTGCAAAAAGCTTCCAGGAA  
ACGTTGGTGATCTGCAAGAGTTTGAAGACTTGAAGAGCCTCGGAGATCTAGTAAATAAGTGTCTTAAG  
CTGCGTATCTTGTCAATATCATGGCGTGGTCATGAGAAATCCGAATGCCAACTGTCTCAAGTGAACAA  
GTTAATGTGTTGAAGTTGCTACGACATTTTCTCCAGACATGCATCCAGGTTTTTTAGCTATCCATACACAT  
ATGAATGTTGAATATTCTCGTCAAATTGATTTGACTAATAGTAGTTTCTATTGCAGTGTGACTTCCGCCA  
AAGGATTTCTTTTCTCATTGTTTTCTGAAGTCAGAATCCAGAGTTGTTTCGATTATCAGTTCATAAATCA  
AAAAGTGATCTCAATTGATCTGAAACCATCTTGGTATACCGATAAGTTCATGGGGTTTTCACTGTGTTATT  
GTCCTGACTTGAAGCAAATGTGAGTTTAATAGCTACGTTGGTCTGAAAATCGGACCCTGAAAGAAAAC  
ATTCCTTGAAGTATGTCATCCGTGAATATTGTCCTAAGCTTCTTCTTCCATGACTTTCATCTACATACCAT  
TTGAAACATTGTGGCGCGCATTGACAATAAAGAAGGGAAGAACCCAAATGATTATTACCTTTTGAAGG  
TATCTTCATTTTACAGGGAACTATGTTGGGGAATTCGATTGGAGTATGAGAATAAAGTTGGGAGATCGA  
TCAAGAAGGATTTACGAGTTATGTAAAGTCTTCTGGTAAAGCAAAAGTGTACTGAAAATAAGTTTTT  
ATACGAATTTCCCAAATGATTCGTAGGTGGGAAAACCTTTGTTTCCAAGTAGTGTGTGCAACAATTTTT

CGACTATCTCTGTTTCATGTTGAATATACATTTAGTTCCTTAGTGTAAGTGTAACATCATGGTTTCAAGGGG  
AATGTTGTAATATATTTTGATTGACATTTGAGTTTCTTGTAATAATACATTATGTATTTG

>PGSC0003DMG400029555 LRR-RLPs

ATGATAACTTCGTCTTACGGTCAAGAGTCTGAACCAACTCTCCTCTTTAAATTCAAATCTTCGCTCGAAAA  
CGCCACGTCATCATCATCACTCGGAACTGGAATTCATCGGTGCCGCTTTCACCCGGCAACAATTCAAAT  
TGGAACGGATTGCTTTGCTTCAACGGAAAATTCTACGGTCTCCGTCTCGAATCGATGGGATTATCGGGG  
AATCTTGACGTCGATACGCTTCTCAGTTGACTAATTTGCTTACTATAAGTATTATGAATAATAATTCGA  
AGGTCCGTTTCCGAACGTGAAGAAAATCGGAGGTGATTGAGAGGTGTGTTTTGTGCAATAATCGATT  
TTCCGGTGAGTTGCCGGACGATGCTTTCGCCGGGATGAAGTCGATAAGGAGAATTTAATGGCGAATAA  
TGAGTTTACAGGGAAGATTCCGACGTCGTTATTGGGAATTCCGAAGCTTGTTGAGCTGCAGATACAAAA  
TAACAAATTCAATGGAACAATACCGGCGTTTAGTCAGAAGGATTTTCAAATAAATGCTGCAAATAATAG  
ACTTGAAGGTCCAATACCATCTCAGCTTAGCAGCCAAAGTGCAAGCTCGTTTGCAGGTTAG

>PGSC0003DMG400029556 LRR-RLPs

ATGATAACTTCATCTTACGGCCAAGAGTCTGAACCAACTCTACTCTTTAAATTCAAATCTTCGCTCGAAAA  
CGCCACGTCATCATCATCACTCGGAACTGGAATTCATCGGTGCCGCTTTCACCCGGCAACAATTCAAAT  
TGGAACGGATTGCTTTGCTTCAACGGAAAATTCTACGGTCTCCGTCTCGAATCGATGGGATTATCGGGG  
AATCTCGATGTCGATACGCTTCTCAGTTGACTAATTTACTTACTATAAGTATTATGAATAATAATTCGA  
AGGTCCGTTTCCGAACGTGAAGAAAATCGGAGGACGATTGAGAGGTTTGTGTTTTGTCAAATAATCGATT  
TTCCGGTGAGTTGCCGGACGATGCTTTCGCCGGGATGAAGTCGATAAGGAGAATTTAATGGCGAATAA  
TGAGTTTACAGGGAAGATTCCGACGTCGTTATTGGGAATTCCGAAGCTTGTTGAGCTGCAGATACAAAA  
TAACAAATTCAATGGAACAATACCGGCGTTTAGTCAGAAGGATTTTCAAATAAATGCTGCAAATAATAG  
ACTTGAAGGTCCAATACCATCTCAGCTTAGCAGCCAAAGTGCAAGCTCGTTTGCAGGTTAGAGTTTATCT  
TAAGGAAAGTTATACTCGTTTTAATTCGGTGGTTTCGTTGTGATTTGAAATAAAATTTAAGAAAGTAAAA  
GAAAATTTTGAATCTAGAAATTTTTTTGAATTGTGATTTTGAATTAATACTCTCTGTCACGATTTATGTGAT  
ATTTTTCGTTTATAGAGAGTCAAACCGTTAAGTTTGACCGGGTTCAAATGAAATTTTATATTATAAAAA  
ACTACGTAAAAATTAATAAGTCACAATAATTGACAATTCAAAATATTTAAAAAATATATGAAAAATTTA  
CGATCAAAGATAGATTTGTTTAAATCTCAAATTTGAACAATGCCAATAAATTGAGATAAAGGAAGTAAT  
ATGTCAAGTATACCAAATATCGTATAATCTTATGATTTAATTAACGAAAAGTTAAAATTTAAAGGTTTA  
AAAAAATAAAAAATATATAGTACATGTTTTTAAACAACTAAAAAACAAAAACAAAACGGAAACGAGAAA

GTAAATATTTAACTGACTACTCACTATAGTAGGCTCTTACTTTATTTCTTCCGATTACTATTTTGGGCTTTA  
TATAATTAACCTATCATTGTTGGTGAATTTTAGGTGTTAAAAACTTACACTAAGTTTTATGTATCG  
ATGTACATTATCAGATCACTTATTAGTAGCAATACGAGTAAATCTCTTAATAAATATTAATAATTAATAAT  
TCGGTAAAAATGGTAATAGTACTATTTAAAAAATGATACTAGCATTATTTTTGAGTTTAAGTTATGC  
ACACTCTCAATATAAGATTGATATAATTTGTTTTAATAACTCTTTGTTAAGAAGTCAATTAATAAAGATA  
GCGTTAAATATTGAAAGACTTGATCAATTCGAATTGGAATGGTAGAAAGTGATGAAGCAAATTTTACT  
ATCATGTTAACTTTATTATTATTACAAAAAGAAGTTTACTAGAAATCGCTTTCAAAATAATTACTGAATA  
ACTTACGCCTATTAATATGCATACTAAAATTTATATGTTTTGAATATGAATATACATATGAATATTA  
TTGATTATTACATAACTAAAATTTAAAAATAAAAAATTGAGTGATAGATTTTTGTTTCAAATTTA  
AAATTACTAAATATAAACTTTTAAACTACTGTATATTAATTAATTAATACATATTAATAAATTTTTTA  
AATTATATGTAGTGCCGTTGGTGGGATGATGGCTAACAAATGATAATTGTAATGTTGATCGGAAATGGT  
GTTGGCTAATTGTAGTGATTAATGGTGGTAAGTTCATAGATGAGGCTGATAGCTGTGATGAATGATAGT  
GATAGCTAATAATGATAGTTGACAATATATAGTGGTAACTGATGATAATAATTATCGATAGTGATTGATG  
ATACATGTGTCTTGATTATCAATGGGGAGAATCGAGAGACCTAACTCGTCCGAACTATTAATAACGTA  
TCGTGCAATTAGACATTATAGAAATGAAGATAGCATGTCAATTAGAGTGATCTTATATAAGATCCCAAGA  
GATTGATATTACTACTACGTGGGCGCACGTCCTAATTAGATGAAGTTAATTATTGATACCCTCTTGATCCC  
TTTAGCCATATCAAATATAATTATTATTATAATAATGATCATTATACTGCAATCTATTATATTATAATC  
TTTTAAATAGACGTACGTGGCAATTTTGTATCCCCTACACTTCTGCACTTCTGTCTTTCCAAATTCAGGA  
AAAAAAGTTAAAAAGTTTTATATATCATAAATCATAGTACTAATATATAGTAAGTGTTAAAGAACTTA  
TTGAAAATACTGTATACGTCATTGATTTTTGAGCATATAATTTGTGTACATTATATATATATAGTCAGTG  
AATTAGAACTTATTAATAATTCTGTGTACGCCACTGATCTTGAGCATATAATTCTTTATACACTACTGAT  
CTTGAACATATAATAATTTAATTTTTGTGAATGAAACAGGAAATTTGGAGATATGTGGTAAGCCAATG  
GCAGCATGTGCAACATCAAAGAAGAAAAAGAAAATCCCAATAGTGGCCATAATCCTTGCATCTATTGGA  
GGATTAATCATATTAGCCATTATATTATTTGCTCTCTTCTGTCTATAAACAAAGGAAAAACCAACTCA  
ATATGAAAAATCATCAGTAAAAATCTCAACAAAAACCCCTCAGTACTGAGAGAAGAAAAGTACACAAA  
AAGTCATCATGACAAGGCTAGTAAATTGTACTTTGTAAGAAGGGATAGAGAAAAGTTTGATTTAGAAGA  
TCTTCTTAGAGCACCAGCTGAAGTTTTGGGAAGTGAAGTTTTGGTTCTTCTTATAAAGCTGATCTTCTA  
TTGGAAAACCAATTGTTGTGAGGAGATTTAGGCAAATGAGTAATATGGGCAAAGAAGATTTTCATGAAC  
ATATGAGAAGCCTTGGCAAGTTGTCACATCCTAATGTTCTTCTTGTGGCTTCTATTATAGGAGGGA

AGAAAAGCTTTTGGTACTGATTTTGTGATAATGGAAGCTTGGCAAGTCATTTACATGGTAAGTACTTT  
CACAGCATTTAAAACTTACTCAGAACTACTTTTTAATAGTGCTCAATTCTCAAGAAACATCTAATAAATA  
AGTATAATTTAGTAACATATGTCTTGTAGTATTGTTATTTTTTCATAATAGGTCTGAAATGAGCTAAATCAA  
CAATTATTTGGAACAGTGAGGGTAAACTTAAAGTGATAGTAATACATGTCACTTAATTATAGTTAGGTG  
GTAGATATGTGTATAAAAATACATGGTATATATTTATTAATTTAACATAAACATTGAATGCAAATAAATTT  
TAACCACTCAAGTCAAGCATGATATCTGTCACAATTTGTATGAAGCAATGAGATTATTTAAAGTATTTAA  
TTATAAAAAAGTTTCAACTTTTTAAACAGATTAAGATGCTTTACAATAATTATAGATAGTTGTACATAAA  
AATTGAGTTAGCTAGTTATCTCAAAATGAAGGCAATAGTGTAATAATTGTTTGTATTGCCAATGTATTTAA  
ATTAATTCCTATTGAATTTAACTTATATATATTGATCATATAAAGAAATGTTACACTATTTTTATATTTTAA  
CATATATAGTAATTTTTTTAGAAAGATTTATTAGTGTAAAAACATTGAAGAAGTTCCACCTTGGTCAATTAT  
GAGATGAATGGTCTCTTTATATATAGATTGAGTAATTATTATCTACTTAAATTAGTTTTTGAGGTTGAATT  
ATACTTAAGATCCATAACATGACATCAAAGCAAGACTCATCTCAAATCTCATTACGATATTGGGCCTCAC  
CCATGCTCCAGATATATATCCAGCCCGCCTCTTGAAGTAGTTTTTGAGGTTGACTTTGCAATTCTCTTCATA  
TGAACATAATTTGGTATTTGTTGATCAGGCAAAGAAGTCCTAACCAACCAAGTCTTGATTGGCCAAGTC  
GTTTGAAAATCATAAAAGGAGTTACAAGGGGATTGGCTTATCTTTACAAGGAACTTCCAACACTGACACT  
CCCACATGGACATCTTAAATCCTCAAATGTTCTTCTAGACCACAAATTTGAGCCACTTGTAGCAGACTATG  
CTCTTGCCAGTAATCAACAAAGACCATGCCAAACAGTTCATGGTGGCTTACAAATCACCAGAGTACAT  
GCAAATGAACGTCTCACAAGAAAACTGATGTATGGAGCCTTGGCATCCTCATCCTTGAGCTACTAACC  
GGCAGGTAATAATACTTCATCCCATCCTTTATTTATTATCTGAAAGACAGTCTGGTGCATAAAGTATCTG  
ACATTCACATCCTTTATTTATTATCTGAAAGACAGTCTGGTGCATAAAGTATGTGACATTCACCTAGAGAC  
AGTAAAAGTACTAGTAATACTTTCTCCATCGCAAATTTTGTGCTTTTTTACTTTACAAGTCCTTTAAAA  
AGTAGTATTAATTACAATTTTTTTAGTACTTTAACCTTATATATCAAAGTTATACATCTTAGTATGCAATTA  
TCAAGATCATTTTGTGCATATACCAACACAAATTACTTCATTTTGTGATTTTATTTAGTGACAAGGAACCAA  
ATATTTACATTTTAGGCTCACAAATTTTGTGACTTACTTGTGAAATAAAAAGAAACCTCATATCACTAA  
TGTTAGTTGTGCACGACTTTTTTGTGCTTCATTCGGGTTAAGATGTGGCTAAAGTCTCTCTGAGGGTA  
GGAATGTTTACTGGATAGGTAATTTAAGAAAAAGGAAGACTTTTAAAGTATACATGACATTTATATTATT  
ACTATAAAAGCATGTTATTAATATTAAGCTTAATTAACACAGGTTTCCAGCTAATTATCTAAAGCAAGG  
CAAAGGTGCAAATGCAGACTTAGCAATGTGGGTGAATTCAGTAGTAAGAGAAGAATGGACAGGTGAG  
GTTTTTGATAAAGACATGAACACAACAAAACATAATTGTGAAGGTGAAATGCTTAAGCTATTGAAAATT

GGAATGTCTTGTTGTGAAATGGATGTTGGAAAGAGATGTGATTTAATGGAAGCTTTACACAAAATTGAA  
GAATTGAAAGAAAATGATGAAGAAGATTATTCTTCTAATTCTTATAATAATTATGCAAGTGATCAAGGAG  
AAATGTATTCTTCTAAAGCCATCACTGATGATGATTTCTCCTTTTCTAAGAATGCTTAG

>PGSC0003DMG400029572 LRR-RLPs

CAAGTTCCTAGCTAGTTAGATATATTCAATGGAGTACCAAAAATTGCTAATAGCTTTCTGCTTCTATTAC  
ATTTTATACTTTTTGTCCATCAATCTCAGCTTACATATGCTGGGCAACATCTCTGTGCCCGCGATGAAGCT  
TTTTATTTGCTTCAATTCAGCAAGGCCTCACAGTTGATCTTAGTGGTTATGACTGTGACTATGAGGCCCG  
AGCTAAGACTTTGTCTTGAATGTTACAGGAGATTGTTGTCAATGGGATGGTGTACTTGTCTATGGATT  
ACTGGTCACGTTATAGGACTCGATCTTTCTTGCAGCTTTCTTAACGGAACCATTAATACTAACAGCAGCCT  
CACAAACTTAGTCATCTGCAAAGACTCAACCTTGCTTTCAACAAGTTGAGTAACTTTCCACTTGGGGAT  
AGCATTAGTGAACCTCGAAAGTTTGACATATCTCAATCTTTCGCATTACAGTACATATGATAGGGGAGAAGC  
AGATACCACAAGTATTATCCAACCTGTCTAAATTGGTTTCACTTGACCTCTCCTCGTATTACACTGAACTC  
AAAGTTGATCGAAAACCTTCAGAAGTTTGCTTCAAGACTTGACCAATTTGGAGGTACTGTTGCTTGACA  
ACACGGATGCACCATTTGAGTTACCTAAGAATCTTCTTCTCCCTTAGGTACTTAAGTCTTGAAGGAACC  
GGCATGTTTGGGAACATAAGTGAGTTTCAGATATTTCAATTAACAACTTGCAAGTGCTGAGATTGGGAC  
AGAATCCTTTACTAACAGGCACTTTGCCAAATTTAATCGGAGTTCCAATGGAAGAAGTGTCTTAGAGTT  
GGACTTTTTTCCACTGGTATTTCTGGGAAGGTACCCGATTCAATTGGTAATCTCCATTCTCTTTGGTATTT  
GAACCTCCAGAATTGTCATTTATCCGGCTCGATTCCAGAATCCATTGGCAATCTCACTGCAATCAGAGAG  
TTGATACTTTCAGAAAACGACTTCACTGGTAATGTTCCCTCAACTGTCTCAAAGTTAAACAACTCGTTCCG  
TTTAGATCTCTCTTCAAACCTATTTTCGAGGCTCAATTCTAGAATACATTGACAATCTCACTGCAATCACAC  
AGTTGACAATTCCAGATAACAGCTTCACTGGAAATGTTCCCTCAACTATCGGAAAGTTGAACAACTTAA  
CTACTTATCTCTCTTCCAATTATTTGAAGGCTCGATTCCAGACATCTTTGCCAACTTTTCAGAGCTATC  
TGCTTTAGTTTTTGACACTAACAATTTCACTGGTTCATTTCCCTGTTCAATTGCAACCTTGACTAGCCTTGT  
GAATTTAGAGTTGCAAACAATTTACTAACTGGTTCCTTCCCTCTAATATAAGCGGATTTCAACAACACTAC  
AAGCACTTGATTTGTCCTTCAATTATTTCACTGGCACAACACCCCTTCGTTATTCTTCTTCCAAGATTGG  
TTTCTTTACATGTTCAACGCAATCAATTAACCGGGAAATTGCCAAATGTGCTCAAGAGGAGTTATCTAGG  
ATACGTAATAACCGTAGCATTGATCTTTCATACAACAAGCTGCAAGGTGAAATCCCAATGCGATGTTA  
TCTATGAGCATGGGTAAGCTGGATCTCTCATAACTTCTCACAGGCTTTGAAAAACAAGAATGGCACT  
CAGAGTACTTACAATACCTTAATTTGGAGAACAATTTCTTCAAGGGCCTTTGCATCTATCCTTTTGTGAC

ATGTATAGTCTTGAATTCCTCATTCTTTAGCTCGGAACAATTTTCAGTGGTTCAATCCCGGGATGTTTGGGTAA  
CTCCAGTATCTCCATTTCTGCTTTAGACTTGCGAATGAACAATTTGCATGGAGAGATACCAAGATTCTTAT  
CTACAGGGTTACAATATCTTGGTTTATATGGCAATCAATTGGGGGGACAAGTCCCGCGATCCTTGGTTAA  
CTGTACAAGCTTGAAGCTCTTGATTGGGGAACAACAAGATAAATGACACGTTTCCGATATGGCTGCA  
GAAACTACCAAACCTACAAGTTCTGATTCTGAAATCGAATCTCTTTCACGGTCCAATTGGTGATTGGAG  
TCCGAGTTTCCATTTCTGAGTTACGAATCTTTGATCTTTCCTTCAATGGGTTCACTGGAACCTTGCATCT  
AATTTTTTCAAAGTTTTAGAGGTATGATGGATGTGGATGAAGAAAAACAGGAATTACTCGCTCCTAC  
AAAGGGTCGACCAGGCCTTGTACAAGCATAAATCGATGTGGAAGAGATTACCTTACCCTTTAGTTTGG  
TGATAAAAGGTAATGAGTTTGTATGAGAATCACGTCAATTATGACGAGTGTTGATATATCAAGCAACA  
GGGTTGAAGGATATATTCCAAATTCATTGGAAATCTGAGCTCACTTGTGTTACTCAACCTGTCTCACAA  
CAGCTCCCGTGGTCATATTCCTGCAGAATTTGCAAAGTTGCAACAGCTCGAAGCATTAGATCTCTCATGG  
AACAACTCATTGGAGATATTCCTGATCCATTGTCAAGTTTGACATTTCTTGAGGTCTTAAACCTTTCCTA  
CAATCATCTGGCTGGACGCATTCCTCTTGGGAAACAGTTCAATACATTTCCAAATGATTTCGTATTGTGGA  
AATCCTGATTTATGTGGATTTCCACTATCAAAGGAATGTGGAAACAGTAATGACTCACCCTTAAACACG  
ATGATGATGATGATTCATTTTTTGCAGTGGGTTACATGGCAAGCTGTGGTAATAGGTTATGGTTGTG  
GTATGATATTTGGATTGTTGATGGGAGGTCTCATGTTCTACTGGAAAAACCAAATGGTTTGTGAACTT  
TGCTGAAGATATTGCTCAACAAATTGCTGCTAAGAAGCGAACAAGGCAAAGAAGAGACGCCAAAGAC  
ATGGTTTAAGAATGAACTAGCAATATACCAGGTATGCATTAACCTTTAGTTTTGAATCAGGAACAACA  
CTACAGAGGTTGTTGGATAACTATATGTCAACTGTTTTTATTTTTTCTAAATATTCAAACCTTAACTGTCT  
TCTGCAGAGGTTGCTGGAGAGTTGGACAAGTTTATTAGCAAGTTAGTGCTGATGTTCTGGCAAATAGCA  
ATGGATGCATCTGTTTGTCACTTTATGTGCCAAATACGTATGTAAATGTTACAGTTGATTTCTGTTTGT  
TGGTTCTTACATGTTGTTTTGTAACGTATTGTATTATATTGTATTGTATTGTTAGTACAACAATATG  
AATCCTGTATTATCTACTAGATGAGTCAAGCCCGTGCTTAGCACGAGCTCAACATTAAGGTGATTGAAAT  
CTCTTTTCT

>PGSC0003DMG400029597 LRR-RLPs

ATGTCTGTCCCTTCGGGGACATCCGATAAAATTGGAACGATACAGAGAAGATTAGCATGGCCCCCTGCGC  
AAGGATGACACGCACAAATCGAGAAATGGTCCAAATTTTTTCTTAAACAAACCCCCGTCATTTTACTAG  
TTTTTCTCCTTTTTCAGAGCTACATTTTTTTAGTTACATTTTTGCTATTCTTATAAAAGGTTATTGTTACTA  
GAAATTAGAGTAAGTAAAAGCAATATTTGATAAGTAAAACCTAAATTTGCTTGATCAGCTAGAAATTCAC

AACATAAAGTGATTATACAATACAACATCATTTTGCCTTGATCTACCTAAGTTATATGGCCTATGGGGTTC  
AATCTTTTAAGATTTTTAGTATCGAAACGAGAAGGCAAGCTTGTTGGCTTCACATTCTTAAACAAGTGTCT  
CAAATTTATTAGTTTTGTTGATCTTGATCTTGTTTGGTGGATATGATGATGTATCATTGCTTTAATTAGTAA  
AGGAGCCATTTTTAGATTATGTTCAAATTTATAAAATCTATACGTATATGAATTTAAAAAAAATAATATT  
ATATATAATATAACTTTTCGTCAAGAGATTTCAAATTAACCCTCGCTACTCTCTAAATCCGTCTCTGGATG  
GTGATGTTTAGTCATGAAGCTAAGCTCATTGACTGCAATAGTGGTTGATTTTATCACATGGATTTAC  
AAAGAAGTACAAGCCCCATATAGTGTGTCAGATCCATTTAACATATTGTATTGTCACATAATTATGATTT  
AAATAATTAATAATAGAAACCAGAAGTAATTTAATCTTGATTTTTTTTAGAAATATAAATTTATATAATA  
ATTATTACTCCCTCCGTCCAAATTTATGTGACTTACTTTCTTTTTTGTGAGTCCAAAAAAAAGACACAT  
TTCTATATTAAGTAATAATTTAACTATAAAATATTTATTTTACCCTTAATGAAATGATTTACCGCCACACAA  
ATTTCTAACCTTCATTTTGGATCACAAGTTTTAAAAATCTTCTTTCTTTCTTAAATTTCTGTGTCAAGTCAA  
TTACCTCACATAAAATGGAACAGATGAGTACTGACAACTAAAATGAAAAATAAAATACCACATGAATTA  
CTGTCATATGACATGTGCACTACTACTCTTTTGGAAATGTAGATTTCAAATATTATCTGTAGAATCATTTA  
TTAGGTATTAAAAAATTTATTGCAACATTACATGTGCCATTTAATATGATATACAGAGAAGTGTGGTGT  
AGCACTATAAATAGAGCTGAAATCAAGCCATTTGATTCACATCTACTTCTACAAGTAAATCAAACTCTTT  
GGAAAAAATAACGTTTGAGGAATTTCTTTGATACCAATATGGGGTGTAGCTTGTGCAAGATGGCAACC  
TTTCTAGTATTAACTTTGAATATTGCTCGGCTTCGAAGATGGACTAAACATCAATATCCCCATACTTGAAA  
GCGTTACACAGTTTCAAAGTTTGTCTAATGTTGATGTACAGTTCATCTTCGGCGCCAAGCGATATTATTGA  
AAGTTAATAGTAGAAAGGTTGTCGTCTGCACAATTAATGAACCCTTGATTAAGAAAAAAATTTGTACT  
TTTGTTGTTGGATATGTAACCGTATATATCATTATATTAAGTTTTGGGTAATATTATTTCACTACATTTACG  
AATGTGATTTACATAACCAAGTGTTTTGAAGGCGTGGGATGATAAAAAACAACAGGTCCACTCCCTTTT  
TGAAGTGAAACATCAATTAATATAAAATATTAATTTGTATATACATGAATTATGAATAACCAAAAACTT  
ATAGCAATAACATATTAGGCAAATAATTTATTTTTTATTAATTATTATCATGCAACTAAAAGTGGGAA  
AAAAAATAAGCAAAAAAATGCAAGAACAGCTTTACACTTATGAAATTGCAGATTTGTTTTGAGAAAA  
AATTTGGACATTTCTCAATTTGTGCGTGTCTCCTTGCAGGGGCCATGCTAATCTTCTCTGTATCGTT  
CCAATTTTATCGGATGTCCCCGAAGGGACAAATATATATCTTAATGTTTCGCAATATAAATCCCCAAACA  
AATTTTCTGCAGACGATGAGGGAGAATTAGCTTGCTAGTTTTTGTGTTTTCCCTGGCACGGGCCTGGGCT  
TCTTTTTTGTGTTTTAGTTGGATCTGAACAAAGCCATTTTTGTGCCTGGATTAAGTGAATGGGCCGG  
CCTTTTTTGTTCCTCTTCTTTATAGAGAAATTTTCATAAATAGTGTATTAGCGTTCGTTTTTGTAAAATGT



GATGGTTTTTTAAGGGAAAATTGTATAAAATAGCAAATTAATAATTCAAATTAATGGTATAATCACAG  
TTTGATTTAATTGTAACCCGTAGCAAACAATTGTCATTGCCTCTCTCCCTGAATTTCTCGCTCACCCTCT  
CCTGATCTCACTCGGCAGTCTCTCCCTCGCCTCTCTCACTTTATACAAACACAAATGTATACAATGTGTTTG  
TGCTTGATAAAGCGAGAGAAAATATATATATACATATATTTTCGTTACCTCTCTCCTAGAGAATCTCG  
CTCGCCACTCTCACTCGCCTCTCTCACTTTTTATACAAACACAAATGTATAAATTGCGTTTGTGTTTGTATA  
AAGCGAGAGAAAATTGTATATACAAATACATATATTTTCGTCCTATACACTTATAATTATACAAATGCAG  
ATCTTCCCCTGTCCAGTTTTCTTTGTCTTTCTCTTTCTCGCTTTATACAAACACATATTATACAATTGAT  
TCGTATATGTATACCGAAATATACATATTAATAGTCATATCAAACATAAAGTTTGATATGAAGCGTAATTA  
TACAACTATAGTTATAACATACTAATATGATTTTTATATTTGCTAAACCCAAAATTTACTTTTTTTGAAAC  
TAAGCAAATACATTCTATTTACATATATCTAAAAAAATCTAATCCTAATTGAAATCCACGAATACAATG  
TCTCATTGTGCTTCTCTATTTTATTTTATGTCACACTTTTTTTAATTTGTCTCCGAGAATAATGTTACTTC  
GTGATAACTATAAATAATTTAACTTTTTAAAATTCTTTTTACTTTTAGTGAAATGATTTACAACCACACA  
AATATCTCGAAATTTTTTAGATCACAAATTTCAAACACAAATATCTTATTTGCAAATATAGTGTTGTTT  
TTCGAAACGTAGCAAATACATTGTATCTACATACATAAATAAATAATTTAATCCAAATTGAAATCCCCG  
AATACAATGTCTCATTATGCTCCTCAGAACAAGTTATTTTCAAGAAAATAGGGGTTCCGAACGGGAGAA  
GAATAAGATAGACTTTCCTTTTATTAGTTTGTGACCGAATGACTCTATAAAATTAGGTCGATACTTCCAC  
ATATCACGAATAAGGTAAGTGACTTCTCTATTTTTTTGATACCCTTTTCTTTTAGCCCGTTTAAAAAAA  
GTTACTTTAATATAATTAGAAATTAGAAATAATTTAGTTTTAAAATTCTCCTTTTACAACCACACAAATATT  
TTATTTTAGATCACTAAAATAATTATCCTACAATACTTCTATTTATCATCTAGCAGATTTTCGTGCCCTTGT  
ATTGAACGTTTTTTCGTGCATTAAGGGAGGAGATAAACACCAAACGTGAAACGTCGCCAACTTCCATTAA  
AACCGGCAGTTTTGATCTCTCTCCGGTGGACTCTTCATCTAAAGGTAACTCTATAGTTTCAATCAACTTCT  
CGTTTTATGTTACATCTCTTTCAGTTTCTACTTCAATTACAAACCCTTTAAACCCTTCTACTTTTGGGGGA  
ATTTGTGTAGCAATAGGAACTCTCCTGTTTCTGCTTACAATGGATTTGTGATTAATTCATATTGAAATTGG  
TCATATTTGTTGTCATTCTTCTAATTTGCCCTATTTAGAAAATCACTTTACTTACTTACTTACTTACTTACTT  
TTCTCATCACTATTTTGGAGAAATTTAAACGGAGGAACACTGGCTAATGAGAGGAAGAAAGTCCTTATATA  
AAATTTAGTTAGTTAGATGGACTTTTTTTTTTTTTTTGGTTTCCCACCCGTGTCTGGAGCTCGACTAAATCT  
GGATCGTGCCTGCAGGACCCATTTAGGGGTGACGGTCTCAACAGGATTTTCATCGTCTGGTTAACGGT  
GAAGCAGTCCTACACTGCACCATAACCCATGTTGGTTAGATGGACTTAATTTTTGGGTGACTGTTGGGCT  
TCTTTTTTTTTGTAGACACTAACAATGTTCTCTCAACTTGAAGTTTGTGGTCCTCCAACAATCTTCCAATT

TCTTATAACCATTACGAAAATTGTTGAAAAATTGTATGTAGATGAAAAACATTGAATTATTAGTCATATGC  
AAAGGCTATGCATACGTTGTTGAAATATGTATTTTTGTATATTTGCATGTGTTATCTTGATGTTGAAATTC  
TGTTGAGAATATTGATTACTTTGAAAGTCGAAAAGTGCATTTGCTTGATACTATTGGTTAACTTCCCTGA  
TCTTAACTTTCAGAAGTGTATGCAACTTGTAAGTATTCGATCATGAGGACTGCTACGAGATCTAGTGTAG  
ATACAATTAGTGATTTGCCTTGTAACGTTCTGGATGGAATATTAGGGTGCTTGCCTCTGAAAGATGCAGT  
GAAGACTAGTATCTTGTCAAGAGACTGGAGGTATAAATGGGTTACACGTCAAGAGCTTGAGTTTGATTA  
TCAATTTTTTGTGACGTATGCATGTAATCAAGCTACGGCAATCATTTACCAAGTCCTATTACTCCATAAAG  
GACCAATACTTAAGTTTAGTCTTGGGGCTCTAACTTGACAATATATCCTGATATTGATCACTGGATACTT  
TTCTTGTCAAAGAAAAATGTTCAAGAATTCACCCTTTGCGGAAACAGCTTAAACAACAGATATCATTTAC  
CTTCTCACTTTTTCACGTTCCATCACCTAAGGCATCTGAAAGTTGATCGATGCTCGTTCCATCCTCCACCCG  
GTTTCAAAGGGTTTGAGAAGCTTATTAATCTTGACCTTCATTTGCCACTTTTGATCCAGCAATACTTGGG  
AATCTTATTTTCAGATGCCATTGCTTGAAAGATTGACGTTGAGATGGTGCACAAATTTTGACACCCTTG  
AAATTGATGCACCTAATCTCAAATGCTTTGACTTTAGAGGAAATTCAAAGTCCATTTGCTTCAAGAACGC  
CCCTATGCTCGAGAAACTTATTGTGCATCTCAATTCACGAGTTTCGATGGTTGCATCTCCTGTTTGTCCA  
ATATTACAAAGTTCTTCTGTCACATGCCATGCCTAATGCAACTGGATATAAGTGGTCATTTATTGGAGGT  
AAAGGACATTTGTGATATAATTAGTTATAGTCTAGTGAAGTTTGATGCTTATCTACATAACTAAATGATG  
CATCTGCGTTATATCTTTAACTAATTTTTGATATTTTCTAGTACTTAACAATGGGAGGTCTGCCGGAGAA  
TCATCTGACTGCTCTGAACAATGTCAAATCTTTCAGTGTTCCGGGCAATGTTCTTTCAGAAGCATTAAACATG  
TTTCGGGTGTTATTTACTTGATTACAAGCTTCCCAAATTACAAAATTTGACTATTGAATGTGTAATCACT  
CTTTCCTATTTCTGATTAAGGTCATTTTATACAGTGTTTCGTCATCTGACCACTTTCTGATAATCTTTTAGG  
GAATGAAAAGTGAAGCTGTGGAACCTGTTGTACAATACTTACAAAACCAATCAAGCTTGTGTGGTGCTG  
TGAAGCTGCTTCAAAAAGTACATATGAGTATGTTTAGTGGTCGTGAGGTGGAAATGGAATTTCTGAGGC  
TTATATTAGTGTCTGCTCCTGTACTTGAGGAAATTTCCGCTTGAATTATGAACATCTCCTTTGTCTGTCTG  
GGTAGAGAAATTATGGATAATATGAAACAATACCAACGAGCATCACCAATGTAAATTCATAGTTGAT  
GAAATTGTGGTAGAAGATGCTTTACTATGAGTTGAGCATCACACACCTTGAATGTGGTTTGGATTGGG  
GCTCGGGTGGTACATCTGAGGACCAGATGAGGAGCAGGTTCTAGGGCGAGTGGCGGAAGTTGAACCTC  
AACTTTGGATTCAAGTTGTATACTACATCAGTACTCAGTAGTGTAGATAACATTTATATTATAGTGAGCTA  
TTAGTATTAATATATACTCCATCCGCCTCAAATATTTGTCGTTCTTAATAGAAGTAAGTATTTGTTATG  
TTACTATGTCATAAAAGTTGTGTGTTTCCACCTTATGCATTCATTTGACTTCTAGCTGGTTAATAGACA

CAACATCAGCTCAAACAGATCAATTGAAAAGTTGCCCTCTGAATCCTGAAGTACATGGCAAGTTTACCAC  
CTGATTGTGGCAACATCAGAAATGAAGCAAGCAAGTGAAAGACAAAACACTACATCTTAGGCACTCTTGAT  
AACTACATCTTCTTCATAGTTTACTGCATCCCCGCCTCTAAGATCTGCTGCTGTTTCTTCAAAGTAATCGTC  
CCGAGCATTATTAGATATCATCAAGCAAACCAACCAGAAAAGCGCAGAATCAAGAGACAAGAAGGCAC  
CGCCACCAAGAAGACCAGTCTTGGCAGTTGGACACCCCGTTTGCAAGTTGTGGTGGTGTATGTTCCGCA  
TGCTATGAAGTTGCTCACTGATGATAGGCCACAACAACAGCACTGCTGCTAAACCAGTTGTACCCCTTTA  
TTTTACCAGCAG

>PGSC0003DMG400030072 LRR-RLPs

TGATAAACTCAGCAATTGCCAGACAAGCATATGTTGATGAAACACACAGGTGAAAGCTGCTAACTGTGG  
CTTCTACATTCAGAGAAATACACCCCTATCTGTCCTGGATTTCCGGGTAAAATCTTACTGCCTCCGGCTTTC  
GATCTCTCTGAGACTCTCAGTACTGGTAAACATCTTGTATAATCTTTGATTATTTGCTCTCAAATTGTA  
CTTTGTTGAATAATCAACTTATCATCAACCCATCAGGTTAGGTTTTCTTTGGGATTTAACCGACTAATTCA  
CTAATACCATAAGTTGTCCAAATCATCTTGTGTTTTGACGCCTCTGGAATTTGAACCTTAGATATCGTGAT  
TTTCAACCCATCAACTAGCCAGAAATGGTGTGGTAATATCACCGGAAGATTAATTCGTGATTCTTTTTTTA  
ACCGGAGAAATCACTTGGTGGATAATGGATTCATGATTCTCCACTTAAATATTAGGTTAGGGTTCCGAACC  
TATTGCATGTAAGAACTAGGGATGGATATTGGTAAAAGGACTGCAAGTAACTAATTAGGACATGCTACA  
AAAGAATTGGATTGGTAATATTTGGTTATATAACGTTTAAACGAAGTCAATCAGAAAACAATTTAAACATT  
TGTTTTCCACATGTATTAATTGTTAATGACATGGATGAGCCTTTTTTCAAACATAAATGTCATAGATGATC  
CTTTTCTCAAAGCTAGATGGTATATTTGAGCCTTTTTCCCTTTATTTAAAATATATAAATGGGCAAGTTA  
GGCATACTTCAAGAGCTTAAAGTAAGATGAGAGGAGGAAACATTACTTTGTGAATCTTAATCTCACACTA  
CTTCGGTGCCCTGGATGTTCTCTCTTTGACATGCTCCTGTTTTTATGTCTTAAGGAGTTATAACTCATTGTG  
GTTGCTCTTCTGAGTCTCTTTTATCTACTAAAACCCATCATTGGATAGAGTATATAATTACACTATTGTCT  
TCAATCTATGTTCTTTCCCGTGCTCAATCATGTATCATTCTCTAATGACGTTGAACCACTAGTTATTTTCTA  
TACATTACTGAAATGTATTTGGATATTGCCTTCATCCCTGATTTTAATTTTCAGAATTGCTGACAAACTTGT  
TTTGTTAGACCATGAGGAATGCTTGGACATCTGATGTAGATACAATTAGCAATTTGCCTTGTAATGTTCTC  
GATGGAATACTTGGGTGCTTGCCTTGGAAAGATGCAGTGAAGACCAGTATCTTGTCAAAGACTGGAG  
GTACAAATGGGTAACACGTCAAGAACTTGATTTTAAACGATGAGTTTTTCAAGTCTTTCAAACAAGATGAA  
GAAGCCAAGAGAATCATTTACCAAGTCCTATTAGTCCATCAAGGACCAATACTGAAGTTTAGACTCTGTA  
GGATTACGAGTTGTCCTGATATTGATCATTGGATGCACTTCTTGTCAAAGAAAAATGTCCAGGAATTCAC

CCTTCATGTAAGCTTAGGAAACAAATATCATTACCTCATCATCTCTTTACATTCCAGCAACTAAGGTTTT  
GGAACCTCAAGATTGCTTGTTCCACCCTCCACTCGGTTTCAAAGGGTTTGAGAAGCTTATTAATCTCGATC  
TTGTGCGTGTCACCTTTGATCCATCAATATTTACTAATCTCATCTCTAAAAGCCCGTTGCTTGAACGATTG  
AGGTTGCGTTGCTGCACAAACCTTGACATCCTTGAAATTGATGCCGCTAATCTCAAATTCTATGAGTTTAT  
TGGAAAAACAAAATCCATTTCTTCAGGAACGCTCCTATGCTTGAAAAAGTTACTGTGGCGATCCTTGGA  
CGGCGACTTTTGACTGATACATCTCCTGTTTGCTCTAATTTCCCAAAGTTCTTCTATTACATGCCTTCACTG  
CTGGAACCTGGAATATGCGGTACAATATTAGAGGTAAGGTACATTTGTGATATTACTATCATAACTAAAT  
GATGAATCTGATTGGTGTAAAAAGTAATTTTAACTTTCTTGTAGTACTTGATCAAGGGAGGTTTACCAG  
AGAGTCCCCCAACTGCTCTGAACAATATCAAATCTCTCACTATTTCTGTCATGTCTTTAAGAAACGCCAG  
GTGGTTTCAAGTGCAGTTTACTTGATTTCAAGCTGTCCTAAATTACAAGATCTTACACTTGAATTTGTAAG  
CACTCTCTGGTTTTTTTTTTCATTAAGGGGATTGAATATGGTTTCTTATTCATCTGAACTCGCCTAACTAAC  
CGTCTCTCAAATATTCTTTAGTACCAAGTGTGGGCGGGGATATTGTTGAAGCTGTTGTACAGTTGCTAC  
GAGCCAATCATCCTCAAGCGGTGTTGTGAAGCTTCAAAGGTCCAAGTGAACATGTTTACTGGTCTTGA  
GATGGAATGGAGTTTATGAAGTTTATATTGGCATCTGCACCTGTACTTGAGGAGATCTTCATTTGGAAT  
TGTACGCGTTGCCTTTTTTCGTTCTGTAAACAAATGATCGATGAGATGAAAGAATTCCGCAGAGCATCAC  
CCAATGTTGAATTCACATTTGAAGAAATCGATATGGAAGGTGGATATGAACATGAAGAAGTCATGGAAG  
TGCCATGATTTTGCTAACATATTTGTTTTGTAGCGCTTAGTTTGCCTGTTATGCCCTGTCTTGTCTGTCTA  
ATATTATGCAGTATGTATATATGTGCTTGGCTAAGTAAGTTTTAACAGTTTGATGAACTATGACTCTACTT  
GTAATGGTCACTGTATTACCATGTTATTTTTATTTTGGCCCCCGTGTATACAATTATGCATATTTAATCTT  
TAATTAACCTAAATGTGTAGTTTTGTCTATAAACTGAATAAATGGGGTAACCTTTTGTCTAAATAAGGA  
GTAATAAAAAAACGTTTTCAAAGTGGATACATGAACTTGGAGGTTTCAATAGGGATAATCGGATCAGT  
TTGCTAACATCAAGGACAATTTGTCCTATTTTAATAGTTCAAGGGTATTTTTGGGACCAAATAAACG  
AAGGATATCTTTGTTTCATTTCAATAGTTCAGGATTCTTTTTGGCCATTGTTTTTTTTTTTTTTGATTTT  
ATGATAATTTGTTTAGCACTTAACTTCAGTATACACATAAAGTTAAAGGCATAATACATCAATATAACCT  
TTAACTTGATCTCATTTTATGTTTATGCCCTCAAACCTTTGGGTGTAACCTTGATAAAAATTGAACAAATAGA  
CACACACGTCTATGTGACATCCTACGTGATGTCTACATGTATTATGACACATAAACTCATGTCATGAT  
TCAACTATAATAAACTGAATTGCTGATGATTCAGCCCAATTGCACACAAAGGAAAATGGTTTAAACATTCG  
TGATTTGTCTTATATATGCCTTTCTCAATTGACGCACCCAACGTTATCTTTTATCTTAAGTATACCCCTAA  
ACTATTTAAAAGTTCGTTTCTATTGAATAAATATTTCTTTTGAAGTACACGTTCTTTTTGAAGAAACACTT

CAATTCTTTATCAAAAAATTAAGAATGTGAAACCTTCTTGTTATATTGTTTGATCTTAAACATGTAATAGA  
AGTGCTTTTCATACATTTTGGCATAAGGTTATATTTATATTTGAAAAATGTTATAAAATACTACATACATGT  
TAGAATATTTAGTTTCGGTTCGGATTTTTTTTGGATTTCTTTTATAAATTAAGGGCCATTCCAATTGTTCA  
GGATGGTTACACACTTAAATAAAAATTTCACTATTTTATTGAAAAATGATATAAATCGATTTCGGTACGGTT  
AGGTTCAATCGGTTTCAGTCAGTTTTTTCATATTCTTTTGACACCCTACATGAGTTATAAACTCAAATGCCTA  
ATTAACACTAGATAGAATTAGTCCGTGCAAGCACGGGCCTAGGGGTGTGCAAAAATTGAACCGAAAAA  
ATGTTATTGGTTTATTGTTATTGGGTTAACAGTTATTTAATGGTTTTATAAAAAAATTATTGGGTTATTG  
GTTTCGATATTGATTTTTTAATATTAGGTTATTGGATTAACCGATAACCCATTAATAATATAATAATTTACTA  
TTTTAATTTTTAATCACAGATAAATATCAAACAAAAAATATTAATAATCACTGTATTAGACTATAACTAT  
AACCTACACAGTTAACTACTTAATTCTACTCTATGCATTTACCCTTTAGGTTTTAGCATTACTTTAGTC  
TTTAGGTTTACAATGTCAAACCTAAAGAACTAAAAACAACGTTGGGCTAGCGTTTGCAACGACAACGG  
CGACAAGGATTAGGCAACGACTAGGGTGGTGAATTGCGAGTATTTTGTCTATAGTACTTTTACTACTAA  
TCATAATTTTTGTATTCACTGAGTAATTTGATTTCTCTTTTTTATTTTCGTGTCAAATTGTTGGACAAGTTA  
TATATTTGTTTTGAAAGCATTCTTACTAGTTAAATCGAAATCGAACCGTTAAAGACCAAAAATCGATGA  
CAAATATATATATCTTATTATTTTGGTTGTCGGTTTAGCATAATTAAAAAATCAAAAATTAATAAATCGAA  
TCGATAATACTTAAACTGAACCGAATCGACCGATACATACACCCTACACGGGCCAACTTGCACGGGCC  
AACACATGTTGTTCTAGCGAAATTCGTTTCAACAGATGTAATGACATTCTATTGTAGTGAAATTTGTTTCA  
AAAGACACAATAAATGAAATAAAAAGGGAAAATATGTAAAAAAATTCCTGAATTTGGTGAATAACTT  
ACTTTAATACTTAAATTATACGGGCGTTTAAATACGCCCTAACATCTTTGAAGTGATTTTAATTTCCACCC  
TGAGACTATAACCACTCTCACCCGCTACATCATAGCCACGTAAGCGCCACATCATAACCATGTAGGCA  
CCATGTCATTAATTTTTATTTCTTTTTACTTATTTCACTATTTTTCTTAAACACTTTTCTTTCTTCTTCTTGT  
TGTTACCATTATTTCAACCTTCCATACTTTCTTTCTTCTTCACTATTCAACAATTTTTAAGTCACTTTA  
AAGAAGAAAATTTCACTAATATTCACATTATCTTCTTTGAATCCTTCCAACGAATTTACCCACTTGGAGAAT  
GAATTTTTTTGAAAGCCAATATTTTTTTGACAACTCAAATAAGAAATGAAGATTGCATAAGAAAGTTAGT  
CCAAAAAATATAAATTTTATGAGAAGTGTTTGAATGGATCTAGAAATTAATGAGGTTCACTCAAAATTT  
AAGAAAGTTTACATTTGCCAAATCAACACCAATAATATAGAGTGAAATCGACGTCAATAAAATGACATTG  
GTGTTGAATTTTACGAATTAATAAAAGACTAGTGAAATGAAATAGTGGATAGAGGTGGGGATGAAGA  
TGGAGGAGGAGATGTTTCAATGGAGAAAGATGTGTATTGAGGAAAACAACAAAATGAAAAGAAAAA  
AAAATTAAAAAAATTAAGAGAGGACCCACTAATTTCAATTTACCTCTTATTAAGAAAATTTACATATTTTA

AAGATTTAATATATATAAAAAGCTATTTAAATAATTTGTTATATATAGGCCAATAAAAAAGGCCATGTGT  
AGGGCTTTAAAAATTCAGCTTTTTTTCTATGTTTTACGCACTTTAGGAGAGTGCACTCACTCTCTGTCT  
ACATCATCCCTTAGGGGGTGTTTTAATCACTTCAAAGATGTTTATGGGGTATTTAAACACCCGTGTAGTTT  
AAGTACTAAAGTAAATTTTCGTGCCAAGTTCAGGGTGGGTTTTATGTATTTTCCCAAATAAAAATGATA  
AGTTAAAGAGTTTTTCATAAAACATGGGCCATAATCTTGATTAATTTCTTCACATAAACTGCAAGCATTGT  
TTATCCTATCAGATTTATAAAATTTGTAAACAAAACGATAATGAAAAAAAAATAAGAAGATTTTTCTAAA  
TTTGAAAGAATTGCAAACCTCAAATTTATGAGATCAAACCTGAGAAAGAGCGTGTGAAACAAAAAAAT  
ATTACTAGAAAAATAAGAGAAAAGAAAAGGCATCTAATATGAGTAGAGGTGTGCACTATTTGGATTA  
AACCGAAAAATCAAACCAAATCAAACCGAATTCTAATTTGGATTGGTTTTTTGGATTTTTGGTTTTGGTTTT  
GGATTTATAAGTTACTTTGTTTGGTTTTTTTTGGTTTTGGTTTCGGATTTAAAAAATGAAAACCGAAAAAA  
ACCGAATTATATATATATATATATATAAATAGATTAATAATTACACATATAATATTTAGGTTTACTATGT  
AGGCCGTAGGGTACTAATAATTCAGTATTGTTGTAATATTTAGGCCATATCAAATTAAGTCCATCCTATT  
TCACTAAATTTTAGGCATTAGGTTTTACATTATAACTATAAATATCACATATTACTTGCACTTTCATGACAA  
AAAAATTAGCAGAACTAGAATTAGTACTTTTCCTTATATGATTTTTTTTTTTTTTAAGCATGCAAATATAAC  
TTTGATTATGTTATTAATTAGTTATGAAATAAGTTATAACCGAATAGCCAAACCGAAAAAACCAAACCG  
AAAAGAGAAAAATCGAACCGAACCAATTTTTTTTTGGTTTCGAATTGGGTTATACTTTTTCAAACCGAAAA  
CCGAATAACACAAAATCGAACCGAAAAACCGAATGCACACCCCTAAATATGAGGACTGAGGTGGCTATA  
GTCAATAAAGCCACGTAGTTAAATGTATTGGCAATTGAAGGAAAAACACACGTAATATTAAGAAGCTTA  
GAACTTAAATGACAAATATACCCACAATTTGAAATTTAATGACAAAAACAAACATTAGGGTTATTTTTG  
TACAAATGAGAAAATATAAATGAATTTCAACCTCTCTGTCCTGCATTTCCGGTAAAATTTACTGTCTCCGG  
CATTGATCTCTCTGAGACTCTCACTACTGGTAAGTAAGCATCTTCTATAATCTTTGATTATTTGCTCACAA  
ATTTTAGTTATTTGTTGAATAATCAAACCTCATTATGAACCCATCAAGCTAGGTTTTTTTTTTGTTTTTTTTTA  
TCGATAATCATAACTGACTAATTCACCAGTACCATGGGTTGTCCAAATCATCTTGTGTTTTGACGCCGCTG  
GAATTTGAATCTTATATGTCGTGATTTTCAACCCACTTTATTGAAATGGTGTGGTAATATCACCAGAAGAT  
TAATTCCTGAACCGGAGAAATCACGAGTACTTGGTGGATAATGGACTCCGTTCAAGTTCGCGAATTTGAT  
CCGATTTAGCAAAAATGAAATTTACTTAGAGGTCAACTGTGAGTTCTCTATGCTATGTCTGTTTTATCTAC  
TAAACTGCATCATTGGATAGAGTATATAATTACTATCTTGGGAAGTTATAACTATGGGACTTATTTG  
TGAAGTGTGAGTTCAATTGGAAAGAAAAGTAAAGTGACCGCTTTTAAATCAAGCTCAAATATTGAGGAA  
CCTTGGCTAATGCGAGGAGGAAAATCCATATATAAGTTTTCAATAGATTAGATGGGCGGAATATCCTGA

AGAGTAATGAAACCTTTGTAGGAGCTTTATTGATACTAGTTGTGTTTTATTTTCGCTGTCATCCCATGTTTA  
TTGAAGGGGATTCAACTAAATACCATTTTGCCAAAAGATTGTATTGTGTATGTAGGTTAAATATTATTTTA  
TGTGTACATATATACTTGTGAATCCTCTGCATACAAGAGAACATTTTTTTGAATCCCTTGATGAAAATCT  
TGCTTTTACCACTGGTCTTCAAATAATTATTTCTTTCTATGATATTGATAAATGATAAAATTTGATGCAGT  
TGCAGACGTTGAACCACTAGTTATTTTCAATACATTACTGAAATGTATTTGGATATTGCCTTTATCGCTGA  
TTTTAATTTTCAGAGTTGTTGACAACTTGTTTGGTTAGACCATGAGGAATGCTTCGACATCTGGTGTAG  
ATACAATTAGCAATTTGCCTTGTAATGTTCTCGATGGAATACTTGGGTGCTTGCCTTGGAAAGATGCAGT  
GAAGACCAGTATCTTGTCAAAAGACTGGAGGTACAAATGGGTAACACGTCAAGAACTTGATTTTAATGA  
TGAGTTTTTCAAGTCTTTCAAACAAGATGAAGAAGCCAAGAGAATCATTTACCAAGTCCTATTAGTCCAT  
AAAGGACCAATACTGAAGTTTAGACTCTGTAGGATTACGAGTTGTACTIONGATATTGATCATTGGATGCACT  
TCTTATCGAAGAAAAATGTTTCAAGGAATTCACCTTCATGTAAGCTTAGGAAACAAATATCATTACCTCAT  
CATCCTTTTACATTCCAGCAACTAAGGTTTTTGGAACTTCAAGATTGCTTGTCCACCCTCCACTCGGTTTC  
AAAGGGTTTGAGAAGCTTATTAATCTCGATCTTATGGATGTCACTTTTGATCCATCAATATTAACAAATCT  
CATCTCTAAAAGCCCGTTGCTTGAACGGTTGCGGTTGCGTTCATCACAAGNNNNNNNNNNNNNNNNNN  
NNNNNNNNNNNNNNNGCTAATCTCAAATCTTTGAGTTTATTGGAAAAACAAATCCATTTCTTCAAGA  
ACGCACCTATGCTTGAAAAGTTACCGTGGGTTTCTTGGACGACGACTTTTGACTGATACATCTCCTGTT  
TGCTCTAATTTCCCAAAGTTCTTCCATTACATGCCTTCACTACTAGAACTGGATATATGCGGTACAACATT  
AGAGGTAATGTACATTTGTGATATTACTATCATAACTAAATGATGAATCTGATTGGTGTCTTAAAGTAAT  
TTTTGACTTTCTTGTAGTACTTGATCAAGGGAGGTTTACCAGAGAGTCCCCCACTGCTCTGAACAATATC  
AAATCTCTCATTATATCGTCCATGTCTCTAATAAACGCCGAGGTGGTTTCAAGTGCCATTTACTTGATTAC  
AAGCTGTCCTAAATTACAAGATCTTACAATTGACTTTGTAAGCACTCTCTAATTTTTTTTTCATTAAGGTGAT  
TGAATATGGTTTCTTATTATCATCTGAACTCGCCTAATTAACCGTTCCTCAAAAATCTTTAGTACCCTGTGG  
GGGATATTGTTGAACCTGTTGTACAGTTGCTACGAGCCCAATCATCCTCATATGGTGTGTTGTAAGCTTCA  
AAGAGTTTCGAGTGAACATGTTTACTGGTCTCGAGATGGAAATGGAGTTTATGAAGTTTATATTGGCATCT  
GCACTTGTACTTGAGGAGATCTTCATTTGGAATTGTACGTGTTTCTTTTTTCGTTTCATGTAAACAAATGAT  
CGATGAGATGAAAGAATTCCGCAGAGCATCACCCAATGTTGAATTCACATTTGAAGAAATCGGTATGGA  
AGGTGGATCATATGAACGTGAAGAAGTCATGGAAGTGCCATGATTTTGCCAACATATTAGTTTGCCTGTT  
ATGCCCTGTCTGTCTAATATTATGCAGTATGTATATATTTGCTTGCCTAAGTAAGTTTTAACAGTTTCATG  
AACTATGAGTCTGCTTGAATGGTCACTGTATTATTATGTTATTCCCATTTTGGCCCCTGTGTTATACAATT

ATG

>PGSC0003DMG400030149 LRR-RLPs

AAAAAACTACTATAATTCTGCCCTATATAGTTCCTATATAAACATTCATTCCGTTAGGTAGCAAATTAG  
ATTGCCAGAAAAGAAAATAGAGTAATAATGGGGATGGGGAACATTAAGCTTTTGTTGTTAGCGTTTTT  
CTAATAGTAATTGTGGCGAATGGTTGTTGGGAGGAAGAGAGAAATGCTCTCTTGGAGCTGCAGGCAAA  
CATAATGAGTTCTAATGGCGAATTGTTGGTTGATTGGGAAGGTTATAATGCCAATGGATTTATAGATTGT  
TGTTTTGGGAAAGTGAAAATGCAGCTTAGAAACAGGTCGAGTGATCAAACCTCAGTCTCGGAAGTGAA  
AGGTTTGGATCAGGGGATGATTGGAGATTTAATGCCTCTCTATTTCTCCATTCAAGTCCCTCCAATTTCT  
TTTATTGTCTAACAGAAATATTATAGGGTGGACAAAAAATGAAGGTATGACTTGTGAATACGTACGGAA  
ACTATATATTACTATATACTAACATGTTATTTTGTTATCCGATCCAGGGTTCAGTAAACTAAGTCAGCTTC  
CTAACCTGATAGAAGTCGATTTGCAATTCAATCCGATCCATCCTAAAGTTTTACTATCATCTTTATGTTG  
ATTTTCATCTCTTGAGGTTCTAAAACCTGGTGCAGATGCTGATACCTCATTGAGCATACCGACGACATATA  
TAGCAGTATATCCTCCAACATAAACTCTACATATGAAATTGTGGCCATTTTTGCAATATAACTTAGTAT  
AGTTGTAATTTTTGGATGAAGGGATGAGTAAGAAATGTGGAGGGCTAACCAATTTAAGACAACCTCTGGT  
TCGAAGGCTATGGAATCAGTGACATCAATACCCTTTTTGCATTGGGTAAGCTCTCTTACCATAAGAGAA  
AAAGCAATTAACAAAATAACACTAAGCCTAAGTACAGTTTTTTTTTCATAAATCAAATGCAGGTGGTGGT  
GCAAATAGTGGACTGAGGAATTTAGAGAACTCAATTTGAATTATAAATACTTCAATTCTACCATCTTTTC  
ATCACTGAAGGTTTTTCCATCTCTCAAGCAGTTGGAACCTGTGCGACAATAAAATAAATGGAAATATCAAA  
ATGAATGGTTTGTTACGCATATTTGCTCCACTAAGATATTAATGATGCATCTAATATCTCAATTTTATTT  
CTTCGCATATCAAATTATAGTTTGATTTTTATTTTTATTTATCTGTCTAGACATAATTGCTTTGAGCAACT  
TGAAACATCTGGATCTCAGGGGAAACAATATAGAGAGATTTGTGACTACCAAAGGTACACAAATCAATG  
CAGTTGCTCTAATATTGAATGTTTTATTTAACCTTAAGAACAAAATGCAAATTTGATCAGATAAAGATTA  
ATAATGAAATGTGGACTAGGATTACACATCTTACAACTTATGAATAAGATCAATCTATTCAATCTTATG  
TAAAACATATATGATTTATTTAACAGGTAACAAAAGAATAAGTTCTCTATGGAAATTACTATTGGGAAG  
TCCTTGTTAGGATATACTATTAACCATGCGTTTTGATATAGTATTATTGAACAATTGTTTATTCATTTA  
TTCAATTCAATAAAGTGTTACATTAATAGATCAATTTTCATATATGTGTCCTTAACTTATATAGTAGATG  
ATTTAGTGATAGAGTTTAAAGCTTATACACAGAAGATTAATCATCGGTTCTTATAAGTTAAAAGTTATA  
GTTCATAATCGTAGATGGAAATTTGGACAAAACCATCAGAAAGATTGTAGCACGAGATTAATGTAAT  
CTATCTTGATTATGAGAATGGTATAGTTCTAACTTCTCGTGCTAGTGCATTTTGTATGTATTGAACGGGAC



CAAGCAGAGATAGATGTTTTAGACTGACTGATAAAAACATATTCTCTAAACTGTAAATGTACTIONTATATTC  
TTAATCTTGATATAACGATTATGATCTGTATATATTAATTATTGTTTTGATTTATTAAGGTTGAGATTCTG  
AGATGGGTCAATATGCCTGGTAGATTGGATGATAATAATATATATTGGTGAATAATTAGTTAGTTGAT  
GGAATCCATGTCTCAGTATAGAGATTGATGATACACCTTTTTATGAGAACTTATAAGTTTTCATGTGTAA  
ACCCGGCCGGTAGATTTATGAATCTGGCACATGAAATAAGTTAAGTGTGCTCTAAAGGAAATTAATCAT  
TGAATTAATTCGTCAGTAATTTAATTTATTGATTAGTATCTGGAATCTTAACATGGGGAATTACATAAGT  
GTTTAATGGTGAATTTGAAATATAAATAGAGGAGTGCAATTACGAATTTTTAGTGAATGATTTGTAAT  
TTATTATGGTAAGAATAATTCAAATTAATTATTTGGAATTTTCCATAATAGGAAGCCTCAGTAATAAAT  
TCTGTGGTCCCTCCAGTGCCCAATTTAACTAGAACTCAGAATCCTATTTTCTAGTAGAAGAAGGAAAAGT  
AACGTGTATATTTTCTCCAAGAAAGAAACGTGAGTTTTGGGGTTTTCTTGAAGAATAAGGATTTATACT  
TTCTTCTCCTTTTTTGGACTGGGAAGACATCTCTATAAGTAGGGATTCTTCTAACCTAGAAAGACAATTCA  
GTATTCTATACGATACTTGCCACCCAAGTATTGAGAGAGTTCAATTGTTAATTGGGATCACTGTAGAAG  
ACTGTAGAGCTGGAGTTGGATTTGCTTCAAGATATCTGCACACGCTTCAAGAGGTAATCCTGAGTTAATT  
TTCAGCATACTTGTATGTGATACGTATTTGTGATTGTTGTCTATACTCATGCAAGATGTATGATTCTGGA  
ATGCTTCCGCTGTGTATGCTATTTTCTAACAAT

>PGSC0003DMG400030159 LRR-RLPs

GGGGATATGGGGAACATTAAGCTTTTGTGTTGGTGTTTTTTATGATGGTAATTATGGTGAATGGTTATT  
GGGAGGAAGAGAGAAATGCTCTCTTGGAGCTCCAGGCAAACATAATGAATTCGAATGGTGAATTGTTG  
GTTGATTGGGCAGGATATAATGCGAATGGTTTTATAAATTGTTGTTTTTGGGAAAAGTTAAATGCAGCT  
TAGCAACAAGTCGAGTGATTGAACTCGATCTTGCAGCAAGGCTTGGATCAGGGGATGATTGGAGATTTA  
ATGCCTCTCTTTTTCTTCCATTCAAGTCCCTCAAACCTCTTTTATTGTCTAACAGAAATATTAATATGACCTG  
AACTCATTCGAATAATACAAATTTAATTATCAATTTAGATAAACAACCTTTATGTATTAGCTAATACCTAA  
AACTATTTAAATAATTTTTTCCATGCTTTGATTCACAAATAAGTCTATTAATAATAATAAAGAAATTG  
AATACGAACTTGTGTGATAAAATAGGAGCAAGAACGTCATTGCCGGATACTCGACATAGAGACCAAAC  
CCAAGTTTCAACCCATAAATCTTCAAAAAATATATTTTGTGTTGTTGGATATTGCTTTTCTTTTTGCGT  
GAGTCTTGGCG

>PGSC0003DMG400030239 LRR-RLPs

ATGGAGATTGGCTTAGCAGTTGGTGGTGCATTTCTCTTTCAGCTTTGAATGTTCTCTTTAATAGGCTTGC  
TCCTAAGGGTGAGCTGTTCAAGGTGTTTCGGAAGCATAATTAATAATAATGTAATTAGTAGTGGACTGAA

CATTTTAAGAGAACTAAAATATAAATAAACATAAAAATTAGGCAAATAAGTTCAACCTGTAATGTAGTC  
ATAAATAAAAATTATATTTATAAAATGCAATTTTTTAATAGAAAAATATAATATCATAAAAACAATGAATA  
ATTAAGGTTGTGAATATTATCATAAATATTGTTAAAAATTATTTAATATACATGAATGTAAAGTGGTGTA  
TAAAGAGAGTTTAAGGGAGGTATTTTTGATATTTACATACTTTATCCAGGATAAGTTATCGTTGGATTA  
CTATTCCACCTCAGGGAGGGATAAATTATCCCAAGACTAACTATTATCTTGGGATAAGTTATTCCAGTCTT  
TGCAACCAACAACGAATTAAGGGCACTCAAAAATTGTTTCGGGATTAATTCCTTTTATCCATCACACC  
AAATGACCCCGTATTCTTAAAAATTATGCCATGCATATTATTTGACTATGACAAACCAATAAATCAGCAG  
AACTAATCCTTTCATAATTTATCTCAGTATAACTTATCACATGATAACTAATCCTAACATAACTTGTCTTCA  
AATCAAATGATCCCTAAAGGGCACTAAAAATAATCCTCAATTAAGTATTTTATCCATCACAGCAAACG  
ACCCCTTCTTATCCTCTCTTGCTTCAATTATTCAAGGCATTGAGAGAGTAATGAATAGTCTTTGTCATCTT  
GTTGGCTGAAAAGTCATACTTTCGGAAAAGAGAAAAAGGGACAATAGTTAATAGTAGCAGACATAGT  
TGTACCAGTTACAAGTAAACCACTAGCAAGAGAGAGAGAGAGAGAAATCAGTGATCATTATAGTTGC  
AAATTACTCTTATCATTCAACAGGTAAAATAAAGCTCTTAGCAAAGAACAGTAATCTTCTCAAATTCT  
TATAATCATTTTGTGGTTTCCTGTTTTGCTTTCAGATTTCAGAAATGGAGATTGGCTTAGCAGTTGGTG  
GTGCAATTCTCTTTCAGCTTTGAACGTTCTCTTTGACAGGCTTGCTCCTAACGGTGATCTGCTGAAGATG  
TTAAGAGGGACAAGTGTGATGTTTCGGCTCTTAAAGAAGCTGAGGATGACTTTGCTTGGTCTTCAGGCT  
GTGTTAAGTGATGCAGAGAATAAGCAAACATCAAATCCATACGTGAGCCAGTGGCTTAATGAGCTTCGA  
GATGCTGTGGACAGTGCTGAGAACTTAATTGAAGAAGTCAATTATGAAGTTTTGAGACTAAAGGTAGAA  
GGTCAGTGTCAAATCTTGGAGAAACAAGCAACCCACAGGTAAGTCACCTCAGCTTGTCTTGGAGTGAT  
GAATTTTTCTTAACATAAAGGATAAGTTGGAAGAAAATATTGAAACATTGGAGGAGTTGCAAAAAGCAA  
ATTGGTTGTCTTGACCTGAAATCGTGTCTTGATTTCGGGTAAACAAGAACTAGAAGACCTTCAACTTCTG  
TGGTTGATGAATCTGATATCTTTGGTAGGCAGAGTGAAACAGAGGAATTGGTGGGCCGTTTATTATCTG  
TTGATGCAAATGGTAGAAGTTTACTGTAATCCCTGTTGTTGGAATGGGGGGCGTGGGCAAGACAACA  
CTTGCTAAAGCTGTTTACAATGATGAGAAGGTGAACGACCATTTTGATTTGAAAGCTTGGTTTTGTGTGT  
CTGAACAATATGATGCTTTCAGAATAGCAAAGGATTGCTTCAAGAGATTGGCTTACAGGTTGATGATA  
ATATAAATCAGATTCAGATCAAATTGAAGGAGAGCTTAAAGCGTAAAAAGTTTCTTATTGTTCTAGATGA  
TGTTTGAATGACCAATATAATGAGTGGGATGACTTGAGACATCTTTTTGTGCAAGGAGATCTCGGAAG  
TAAGATCATTGTGACAACACGTAAGGAGAGTGTTGCCTTGATGATGGGTGGTGGGGCAATGAATGTGG  
GGATTCTGTCTAATGAAGTCTCTTGGGCTTTATTCAAACGACATTCATTAGAAAACAGGGATCCTGAGGA

ACATCTAGAACTTGAAGAGATTGGAAAGAAAATTGCAGAGAAATGCAAAGGATTGCCTTTAGCTATAAA  
GACCCTTGCTGGGATGTTACGCTCAAATCAACAATTGAAGAGCGGAAACGCATTTTGAGAAGTGAAAT  
ATGGGAGCTTCCAGACAATGGAATCTTACCAGCATTGATGTTAAGCTACAATGAGCTTCCCCACATTTG  
AAGCGATGCTTTTCCTATTGCGCAATATTTTCAAAGATTATCAATTTTACAGAGAACAAATCATTCAACT  
GTGGATTGCTAATGGTCTAGTTCAGAAGTTGCAAAAAGATGAAACGGTTGAAGAAGTGGCAACTAGT  
ACATTCTCGAGTTGAGATCAAGATCATTGTTAGACAGGGTCCCTGATTCTCAAATGGATGGTGAGAAATT  
CTTTATGCATGACCTTGTCATGATCTTGCCCAAATTGCATCTTCAAACACTGTACCAGGTTGGAAGAC  
ATCGAAGGATCTCATATGTTGGAACGAACTCGACACTTGTATATATCACGGGTGATAGTAACCTTTTGT  
CATTTTCAGGAGGAGATGGTGATTTTGGTAAATTGAAAACCCTCCACAAATTGGAGCAATTAAGGACAT  
TGCTCCGATAAATTTCCAGCACCATTGGTGTTGAGTTAATCTAAGCAAGAGGGTGCTGCATAACATACT  
TCCAAGACTAACATTCTTAAGGGCATTGTCATTTTCTGGTTATTACATCAAGGATGTACCGAATGACTTAT  
TTATCAAATTAACCTCCTAAGATTTTTGGACCTTCTTGGACACATATAAACAGTTACCAGATTCAATT  
TGTGTGTTGTACAACCTAGAGACACTTATCGTGTCTGTTGTTTTGATCTTGAGGAGTTACCGCTGCAGA  
TGGGAAATTTGATCAACTTGCATTACCTTGACATTAGGCACTGTTCTCGTTGAAGATGCCGCTACATCC  
TAGCAAGTTGAAAAGCCTCCAGGTGCTATTAGGAGTTACATGTCTTCCAAGTGGTTTGAAACTCAAAGAT  
TTGGGTGAACAATGCAACTTGTATGGATCTCTATCAATTGTAGAGTTGCGAAATGTGGTTGATAGAAGG  
GAAGCTCTGAAGGCAAACATGAGGGAAAAGGAACATATTAAGAGGTTATCATTGTCGTGGGGTATAAG  
TATTGCTGAGAATTCACAACTGAAAGAGACATACTCGATGAACTACAACCAACACAAACATACAAGA  
CCTGGAATCTCTGGATATAGAGGGACAAAATTTGAACTGGCTGGCTGATTATTCCTATCTTAAGCTG  
GAGACGTTGTCTCTTAGCCACTGCAACAACCTGTGATTCCTGCCAGCACTAGGACAACCTCCATCTTTGA  
AAGTCCTCACCATTGGGTATATAGATCGAATAACAGAGGTGACCGAAGAATTCTATGGTAGCCCATCTTC  
AATAAAGCCATTTAACTCTCTGGAATTGCTTGGATTTAATCGGATGAACGGGTGGAAGCAATGGCATGT  
ACTAGGAAGAGGAGAGTTCCCTGCACTTCAGAACCTTTCAATTGAAGGCTGTCCCAAGTTGATGGGGAA  
GTTGCCTGGAAATCTTTGTTCTTTGACCGGATTGTCAATTTAGATTGTCCGAAATTCATTTTGGAGACAC  
CTATCCAACCTTCAAATCTAAAAGGTTTAAAGTTGCTGGTTCTTTAAAGGTTGGAGTTCTTTTTGATCAT  
GCTGAGCTATTTGCATCCCAACTTCAAGGAATGATGCAGCTAGAGTCATTAATTATCAGTTGGTGTACG  
GTCTTACCTCCTTGCATATTAGCAGTCTGTCGAAAACCTTGAAGAAAATAAAAATAGATTATTGTCAGAA  
ATTGAAATTGGAGCCGTCAGCTAGTGAGATGTTTCTCGAGAGACTGGAACCTAAGTGGATGTAATTCTAT  
AAATGATATATCACCTGAGTTGGTCCCAAGAGCACACTATTTGAGTGTAATAGGTGCCATAGCCTCACT

AGGCTTTTGATTCTACTGGGACTGAAGATCTCCGTATTTCTGAATGTGAAAGTCTTGAAATACTTTTGGT  
GGCATCCAGGACTCCAACGTTGTTGCGAAAAATGAAAATTCACCGCTGTGAGAAGCTGAAGTCGCTGCC  
AGAACATATGCAAAAACCTTCTTCCATCTCTTAGTCATCTCTTCTGCAATCTTGTCCAGAAATAAAGTCCTT  
CCCTGAAGGAGGGTTGCCCTTCAGTCTAGAATTCCTTGAGATCGAATTTTTCGATAAACTGGAGAATGA  
TCGAAAGGAGTGGCATTACAGAGACTCCCTTGTCTCAGAAAACCTCACATCCTCCATGATGGTTCTGAT  
GAAGGGATTCATTGGGAGTTGCCTTGCTCTATTCGAAAGCTGTTGGTTAGATTTATGACAGCTAGGATTA  
GAGCAGTTCACAAGATAATTATTCTAGAATCAGTTAGAAGGTTAGAAAGTTGTTAGAGTTAGTTAGCAC  
AGTAACTTTCTTTATATAGACATAGCATTGTAAAGATATTTTAAGATGCTTTCAGCTTAATGAGAATTA  
GTTCTCTTTCTTCTATAATTCTCTCTGTATCTTCTTACTTCTGATCCTTTTTGCATCTTCTAGATGGTGATTA  
CTCCATAAGTTTACATGGTATCAGAGCCTGAGTGTTGAGCAGGAGTTCATCATCAATTTGTGGTTTTAT  
CAACTGTAGTTGTTTCATCTTTGTAGTGATTTTTTGTGATTTGCTTATTACTGTTCTTTTAGAGCTTCGAT  
CTATAATCCATGGCGATTGATGAGTCCAATGATGCAGCAGTTGTCCCACCTCATTCAATCGAGATTGATC  
ATTATCATCCCCTGTATCTGCATCCATCAGATACCTCAGGAAGCTCTTTGGTTTCAATTCAGCTCACTGGT  
CCTGAAAACCTATGCCATCTGGAGTAGATCTATGCGCCTTGCTTACTGGGAAAAAGTAAGCTTGGTTTTG  
TTGATGGGAAGCATAACCAGAGACACATGTCCTTCTTCTTTCATGATCTATGGGAAAAGTGTAATGCCAT  
TGTTCTCTCATGGATCATCAATTCAATCAGGAAAGAGCTCTTGAGCAGTGTGATTTATGCATCAAAAGTT  
TGGAGTGACCTAAATGAAAGGTTGATAAGGTTGATGGATCTCGAATTCATTTTCTGCACAAGGAGATT  
CACTCTATGTCACAAGGTACACTCACTGTTTCCAATTACTTCTCTAGATTGCGTGAATACTGGGATGAATT  
CGATGCCATAATGCCCTGCCAGGCTGTAAGTCCCTGAATCTAGGAATTACATGCAACATTTTGATTAT  
CAACGTTTACTTCAGTTTCTCACTGGTCTAAATGAGTCATATGCCCCAGTAGGAGTCAAATTCATTATGAT  
GACTCCTACTCCCTCTATCAATCAAGCTTATTCTATGGTGATCTCAGAGGAGAGCCAAAGGTCTCTTGG  
AAATCAGTCCAAAACCTTGATATTAATGAAGGAGCTGTTTTCTATACAAGCAAAGGAAATTTTAAGCCTA  
ATCTCGGAGGAGGAGGAGTCCAATTTAGGCCAACTTCTAGTCAAGGTCATACTGGGAACACTAGGTCTG  
GTTACTATACAAGTTCTAACTCTGGGTGAGGCAATTCAGGCAATGCCTCAAGCTCTGGCTCTAAAAACAG  
AAAAAATAGTCATCTACAGTGTGATTACTGTCACTACACTGGTCATACTAGCGATCGATGCTACCAGCTG  
CATGGATATCCTCCAGATTTTAGACTAAACTCAAAGAAGAAGTTTAACTCACACTCAGCT

>PGSC0003DMG400030240 LRR-RLPs

ATGTTGTCTCTTAGCCACTGCAACAACCTGTGATTCCTTGCCAGCACTAGGACAACCTCCTTCTTTGAAATC  
CCTCACCATTGAGTATATGGATCGAATAACAGAGGTGACCGAAGAATTCTATGGTAGCCCATCTTCAATA

AAGCCATTTAACTCTCTGGAATGGCTTGAATTTAATTGGATGAACGGGTGGAAGCAATGGCACGTA  
GGAAGTGGAGAGTTCCTGCACTTCAGATCCTTTCAATTAACAAGTGTCCCAAGTTGATGGGGAAATTGC  
CTGGAAATCTTTGTTCTTTGACAGGATTGACAATTTCAAATTGTCCGGAATTTATTTGGAGACACCTATC  
CAACTTTCAAGTCTAAAATGGTTTAAAGTTTTCGGTTCTTTAAAGGTTGGGGTTCTTTTGGATCACGCTGA  
GCTATTTGCATCCCAACTTCAAGGAATGACGCAGCTAGAGTCATTAATTATCAGAAGTTGCACTCTCTTA  
CCTCCTTTTCAATTAGCAGTCTGCCGAAAACCTTGAAGAAAATAGAGATATCTGATTGTGATCAATTGAA  
ATTGGAGCCGTCAGCTAGTGAGATGTTTCTCAAGAGTCTGGTACTAACTGAATGTAATTCTATGAATGAG  
ATATCACCTGAGCTGGTCCCAAGAGCACACTATTTGAGTGTAATAGGTGCCACAGCCTTACTAGGCTTT  
TGATTCCTACTGGGACTGAAGATCTCCATATTTCTGGATGTGAAAATCTTGAAATGCTTTTGGTGGCATC  
CAGGACTCCAACGTTGCGAAATTTGCATATTCACAGCTGCAAGAAGCTGAAGTCGCTGCCAAAACATAT  
GCAGGAACTTCTCCATCTCTTAATTATCTCAACCTGTATGATTGTCCAGAAATAAAGTCCTTCCCTGAAG  
GAGGCTTGCCTTTGAGTCTAGAAGTCCTTCAGATCTGGAATTGTGAGAACTGGAGAATGATCGAAAGG  
AGTGGCATTACAGAGACTCCCTTGCCTCAGAGAACTTAAAATCTTCCATCATTCTACTGACGAAGAGAT  
TGATTGGGAGTTGCCTTGCTCAATTAATCGCTTTGCATATCCAATATGAAAACATTAAGCAGCCAACTT  
CTCAAAGCCTCACCTCTCTGAATCTCTATCCATTGCTAATTTACCTCAAATCCAGTCACTGATCGAAGA  
AGGGCTTCCCTTGCTCTTTCTTCACTAAAATTAAGACACCATGATGAGCTCCATTCACTGTCAACTGAAG  
GTCTTCAGGGCCTCACTTCTTTAGGCGTCTAGAGATTAGCTCCTGCGTTCAACTCCAATCTTCCAGAA  
TCAGCGCTTCCCTCCTCCTCTAAGCTGACCATCCATTCTTGTCTAACTCCAACACCTTCCAGAAAAA  
GGGATGCCCTCTGCCCTCTTAACTATCTATTACACACTGCCATTGCTCAGTCCATGTCTAGAATTTAT  
GAAGGGGGAATACTGGCCAAATATTGCTCATATTTCCACTATAGAGATCAATGGGGAATGCCTGTGA

>PGSC0003DMG400030496 LRR-RLPs

GTTACAAGAAAAAGAAAGCAAGGAAACACAAAACCTCTAGAGAGAAAAAATGGCTTATGCTTGTATTTCC  
TCACTTATGCAGACTGCAGCAACTCTTGAATCTAAATCATCTTTGATTTGTGAAAGTCCCATACAACA  
AAAACATGTTGAATCTTCTTATCAAAGTCTATGTGCTTCAAGTTTTTCTTGAGGATACCACAAATGAAG  
CCAATGATATTGAAAATCTCAAGATTTTAGAAAAAAGATCAAAGATGTAGTCTACAAAGCAGAAGATA  
GAGTTGATTCATGCTTAACAAACATGATTCTAGCTGATAATGAAGACGACCGAGGAAAAGCTTGTAAT  
TCTTCAATGAAGAATTACAACAAGTTGAAACAGAATTTGATTCTCTCAGGAAAGAGGTGATGGTGATCG  
AGTTCAACAAGCGTGAAGCAAATCAACGGAGTTAGCAGCAGCAACAACCTTCTTCTCATCAATCGAGG  
AAACGACTTATGTTGGTATGAAAAAGACTACAAAGCCATACTGAATTGCCTCAATGCCCAAACAAAAGA

GCTAATAGTCATATCACTTGTTGGTATGGGCGGTATAGGTAAGACAACCTTGCTAGAAAAGTTTTGAT  
AATTCAACCATTTCGTGATCGATTTGAGAAACATGCATGGGTCACCATATCTGAACAATATAATAAGAGAC  
AAATGCTTCTTGAAGTTGCTTCTTCGATTAGTGGAGTCAACAATCAAGAAATGAGCAATGATGAATTGAT  
GGTTATTGTGTATAGGAGTCTCAAGGGTAGGAGATTTCTAATCGTCATAGATGATCTTTGGAGTACCGAT  
GCTTGGGACCAAATGCGAAGAATATTTCAAATGATAACAATAAAAGCCGAATTATATTAACCACTCGTC  
TCAAACATGTTGCTGATTATGCAAGTCCCCTGAATTTCCCTCATGATGTGTCTTTTCTAAGTTTTAAAG  
ATAGTTGGAACTATTTACCAAAGGCTATTTCAAAAAGATCGTTGTCTCCACAACACTACGAAAATAGG  
GAAGCATATCATAACAATGTCAAGGATTACCTCTCTCGATTATTGTCATTGCTGGACTTCTTGGCAAG  
ATAGGTGTGACATGATAATTGGAAGAAAATTGAGGAAAATTTGAAGTCATTTTCATGGTTTCGGTTTTAGA  
ACAATGTCAAGCAATTCTTTCTTTGAGCTACAATTACTTGCCCCATACTTGAAGGCGTGCTTTCTCTATAT  
TGGAGTTTTCTGAAGATATGGAGATTCGTGTATCGAAGATGATGAGCTCATGGATAGCTGAGCAATT  
CATAAAGGCAACAAGCGATAAAAGGTTAGAAGTTGTGGCAGAGGAGTATGTGCAAGAGTTAATGGATA  
GGAGTCTAATTTTGGGTAAAACCTCGAAAGCCTAATGGAAGATTCAAACTTGCAAAATTCATGATCTTCT  
TAGGCAGTTGTGCATAAGAGAAGCTCAAATTTCAAATGTTGTGCATTTCCCTTACAGTGATCATGTTTCT  
ACTTACTCAGATGACATAAATGATCGTAGGCGTGTGATGATTCCTTTTCTGATTGAGGATTATTTTTGCGA  
TCATCCAAGTCAAATGAGTGGTAAGATTACAACCCGCAGCTTGATCTTTATGGGAGCTGGTAGATCTTAT  
CTAGTACCTGAAATAAATCACTGGCCTGATAGTATTTCAAGATTTCAAGCTACTTAAGGTGTTGGATGCAC  
GTGAAATTGGCTACGATTTCTCTCATATTATACCTCAACTTGTTTCATTTGAGGTATGTTGATGCAAGAATT  
CAGGATCCTTCTTCACTAGCCAAGTTGTGCAATCTACAGACCATAATTATTTATTCAAGGATAAATATTGT  
GCAGCTCCCGGTGGAGATTTGGACAATGTCAGAGATAAAACATGTGATTATTGAACAAATGGATATGCC  
TAATCCTCTTAGTATTGAAGAGCAACAACCTTTGTTTCTGAATAACTTGCAAACACTTGCTCTCGATTCT  
CGCCTTTTTTGGCAGAAATCCTAAAGAGAACACCCAATGTAGATAAGCTGAAGATTAGAGCTGCTAATA  
CACATAATGAGTGGTCTGATTTTGTGATTGTCTCATTAACTACAGAGGCTGGAAAAGCTAAGTATAAC  
AGCAACAGAAGACAACAGTCCGCGCATTCTGTCTAGTGCTTTTTGCGCGCCTAATCTAAAGCATTGAGA  
TTAGCTGAACTTCATTGCCTTGGGAAGATATGGCTGTGCTGGCTAATTTACCAATCTTGAGGTGCTCA  
AAGCAGATCATGCATTCACGGGAACAGATTGGGATCTAAATGAAGATGTTGTGTTTCAAAAATAAAAT  
ATCTACGAATTAAGAGGGCAGATGATCTGGAATGTGGGAAGCAGCTAGTGATAGTTTCCCGATGCTTG  
AGCAACTAGTCCTTCAGCATCTCGAAGAACTAGAGGATATTCCACAAAGTTTTGGAGAAATAATGACT  
AAAATTAGTCCAAGTGAATATTGCAGTCTACAGTCGATGATAGTGCAAGGAATATTCTAGAAGATCA

ACAAAGCTGGGGAAATTATGAGCTTCAAATTATAATTGTACCATCTTTACAATACATGTAATGTTTTCTGT  
TTTTTTTCATTTCTTGTTTTCACCTATTTGTGAACTCTTATCTATCTATCTATACTATTCTAAAGGTAAGAAG  
TCCCATAGTTGAAAG

>PGSC0003DMG400030497 LRR-RLPs

GAAAAGTAGCAAGTAGTAATTGATTTTATTTATGTGCTTCATTATTCATGCTTTCATATACTTTTGACTAAC  
AAAACCTAGAGAGAGAAAATGGCCTATGCTTGATTTTCTCACTTATGCAAACCTCTGCAGCAACTCCTGC  
AAGCTAAATCACCTTTGATTTGTGAAAGTTCTATAACAACATGTTGAATCTTCTTATCAAAGTCTATGT  
TCTCTTCAGGTTTTTCTAGAGGATACCACAAATGAAGCCAATGATATTGAAAATCTCAAGATTTTAGAGA  
AAAAGATCAAAGATGTAGTCTACAAAGCAGAAGATAGAGTTGATTCATGCTTAACAAGCATACTTCTAG  
CAGATAATGAAGACGACCGAGAAAAAGCTTGTAATTCTTCAATGAAGAATTACAACAAGTTGAAACAG  
AATTTGATTCTCTCAGGAAAGAGGTGATGGTGATCGAGTGCAACAAGCGTGGAAGCAAATCAACGGAG  
TTAGCAGCAACAACCTTCTTCTCATCAATCGAGGAAACGACTTATGTTGGTATGAAAAAAGACTACAAAG  
CCATACTGAATTGCCTCAATGCCCAAGCAAAGAGCTAATAGTCATATCACTTGTTGGTATGGGCGGTAT  
AGGTAAGACAACCTCTTGCTAGAAAAGTTTTTGGTAACTCAACTATTCGTGATCGATTTGAGAAACATGCA  
TGGGTCACCATATCTGAACAATATAATAAGAGACAAATGCTTCTTGAAGTTGCTTCTTCAATTAGTGGAG  
TCAACAATCAAGAAATGAGCAATGATGAATTGATGGTTATTGTGTATAGGAGTCTCAAGGGTAGGAGAT  
TTCTAATTGTCATAGATGATCTTTGGAGTACTGATGCTTGGGACCAAATGCGAAGAATATTTCAAATAA  
TAACAATAAAAGCCGAATTATACTAACCCTCGTCTCAAACATGTTGCTGATTATGCAAGCTCCCCTGATT  
TTCCTCCTCATGATGTGTCTTTTCTAAGTTTTAAAGATAGTTGGAACTATTTACCAAAGACTATTCAA  
AAAGATCGTTGTCCTCCACAACCTACGAAAAATAGGTAAGCATATCATAACAACATGTCAAGGATTACCTC  
TCTCGATTATTGTCATTGCTGGACTTCTTGGCAAGATAGGTGTGACATATGATAATTGGAAGAAAATTGA  
GGAAAATTTGAACTCATTTTCATGGTTCGGTTTTAGAACAGTGTCAAGCAATTCTTTCTTTGAGCTACGATT  
ACTTGCCCCATACTTGAAGGCGTGCTTCTCTATATTGGAGGTTTTCTGAAGATATGGAGATTCGTGT  
ATCGAAGATGATGAGCTCATGGATAGCTGAGCAATTCATAAAGGCAACAAGCGATAAAAGGTTAGAAG  
TTGTGGCAGAGGAGTATGTGCAAGAGTTGATGGATAGGAGTCTAATTTTGGGTAAACACGAAAGCCT  
AATGGAAGATTCAAACCTTGCAAATCCATGATCTTCTTAGGCAGTTGTGCATAAGAGAAGCTCAAAGT  
GAAAATGTTGTGCATTTTCTTACAGTGATCTTGTTCCTGCTTACTCAGATGACATAAATGATCGTAGGC  
GTGTGATGATTCCTTTTCTCATTGAGGATTATTTTTGCAATCATCCAAGTCAAATGAGTGGTAAGATTACA  
ACCCGCAGCTTGATCTTTATGGGAGCTGGTAAATCTTATCTAGTACCTGAAATAAATCACTGGCCTGATA

GTATTTCAAGCTACTTAAGGTGTTGGATGCACGTGAAATTGGCTACGATTTCTCACATATAAT  
ACCTCAACTGTACATTTGAGGTATATTGATGCAAGAATTGAGAATCCTTCTTCACTAGCCAAATTGTTCA  
ATCTACAAACCATAATTGTCTATTCAAGGAGAAATGTGCAGCTCCCCGCGGAGATTTGGACAATGTCACA  
GATAAAACACCTCGATATTGAACAAATGGATATGCCTAATCCCCTTAGTATTGGAGATCAACAGCCTGAA  
TTTTGTACCTGAATAACTTGCAAACACTTGCTCTTGATTCTCGCCTTTTTTGGCAGAAATCCTAGAGAG  
AACACCCAATGTAGAAAAGCTAAAGATTAGAGCTGCTAATACACATAATGAGTGGTCTGATTTTGTGAT  
TGCTCATTAACTACAGAGGCTGGAAAAGCTAAGTATAACAGCAACAGAAGACAACAGTCCGCGCATT  
CTGTCTAGTGCTTTTTGTGCGCCTAATCTAAAACATTTGAGATTAGCTTATACTTCATTGCCTGGGAAGA  
AATGGATGTGCTTGCTAATTTACCCAATCTTGAGGTGCTCAAAGCAGATAGTGCATTCAATGGAACAGAT  
TGGACGCTAAATGAAGATGTTGTGTTTCAAAAACATACTACGAATTTGGAGCGCAGATGATCTG  
GAAAGATGGGAAGCAACTAGTGATAATTTTCCAATGCTTGAGAACTAGTCCCTCAGCATCTCGAAGAA  
CTAGAGGAGATTCCACAAAGTGTTGGAGAAATAATGACATTAAAATTAGTCCAAGTGGAAAATTGCAAT  
CCTGCAGTCGACACAAGTGCAAGGAATATTCTACAAGAGCAGCAAGGCTGGGGAAATTGTGAGCTTCA  
AATTGAAATTGTACCTTCATTACAATACGATCTTTGATTATTTCCAATTCTTAGTTAATAAATTCATATGAT  
GTTTTCTTTTTCTTGTTTTCCCC

>PGSC0003DMG400030561 LRR-RLPs

TGAAGATCTTAAAAGCTAAAACCCCTCAAGAAAACAGAACAATAGCACTATACTCAAATAAAAAAAAT  
GAACTACCATCCCTTTTTGATTCTGCTACTTCTTGTTTTTGTCACCAATCTTGAAGTTGGTTTTCACTAAA  
CTCATCATTCCAATACAACCTGTTCTGAAAATGACCAAAAAGCTCTGATTGAATTCAAGAATGGCCTAATC  
GATAACTCGAATCGTTTGTTCATCATGGACAGGACAAAATTGTTGCAAATGGGATGGAGTTTTTTGTGAT  
GAGAAAACAGGAAATGTTGTCAAATTGATTTGCATTACAAGAATTATCTTCTAGATGGTGAATATCCAC  
AAAGGGTGTAGATAATCACACTAAAACCTTCTGGGAGGTGAGTTAAGTCCTTCTTTGGTTAAATTGAA  
ACATTTGAGGTACTTAGACTTGAGTCACAACACTTTTCAAGTATCCAAATTCCACCTTTTTTTGGATTGTT  
AATGAACTTGAGATTTCTTAATCTTCTGTGCTGGTTTTGGTGGATATATCCCAAAAATCTTGGGAATT  
TGTCGAAATTAGAACATCTTTATCTTGGTGGATGTTATGGCTACGTTATCGGACCAGGAAATGATCTCAG  
AGTTGATAGTTTGGATTGGATATCTAAGTTTTCTTCTTGGAAAAGTTTTGATCTTCTCAATTGGTTATTGA  
AGATACTAAAGATCTTTGGAATTCAATTAACATGTTGCCTTCATTGCTTTCATTGAACTTAGAAGGTTGTA  
ATCTCAACATTTTGCCTTCTTTACACAAGTTAATTTACATCTCTTAGTTCACTCAATATCCGTGATAACG  
CGATTGGAATGAGCTTTGAGAATTCCTCCATCATCCCTCCATGGTTTTCTAATCTTACAAGGCTTATGAAT



CTTGATCTTGGTCAAAACAAGTTTGATGATCCAATAATGTTCTTGAGAAGCTTAGTTCACCTAAGAGTATT  
AGATGTTTCTAATAATGGATTTGGCGATTTCGTTGTTGAGTTCATTGAGTAAGTTGAACAACCTGGTTTATT  
TGGATTTGCTAGGGAATGACATCCACTTCTCTAGTCTCCATTTACTTGGAAATCTGACTTCACTTTCTGTA  
CTTAAGTTGAGATATAACGTGTTAAAAGGGCTGATCCCGGAGGGTTTAAACGAGCATTCTGTGCGATTG  
AGTGTGCTTGATTTGTCAGACAATGAAATCAGTGGACTGCTTCCAACCTTTATAAGAGATCCATCGAGCT  
GTCTCGATAATCGTTTGAAGGAGCTATACTTAGGAAATACAAAATTCAGTGACTTCTTTCTGAAGGATT  
GACAATGCACAAGAATCTTGAAGTTATTGACAGTACTAATAGCTTATTATATGGTGAAATCCATATTCA  
ATAAGCAAGCTGTCAAATTTGAGGTTTCTAAGGATATCAAACAACAAGTTGAATGGGAGCATTCTTCG  
AGTATTGGACAGTTATCGAATCTTGAAGAGCTAGATATCTCTGAGAACTTATTCACCAGTATAGTTTCTG  
AACTCCACTTTGTAAAATAAGCAAATTGATGAAATTGCACTTGTCTAAAAACGAAAACCTGGTTTTGAA  
TGTGAGTTCCAATTGGTATCCAACCTTCCAAGTCAAAGAGATTGGAATGGCATCAGTAAAAGTAGGGCC  
TAATTTTCTCAATGGCTACAAAACCTGTCAATTCTTGATACTCTTATTATGTCTGATGCTAATATTACTGA  
TATGATCCCGAATTGGTTGAGCAATATAACATTGTTTCATGACAACCTCTGGATCTCTCTGTTAACACATTAG  
TCGGTGGTATAAGCGTGTGTTGTGTGATGCTCAACTTTTGAATCAATTGATCTTTCCAAGAATCTGTTATCC  
GGACGAATCCCTTCATGTTTGGAGTAACTTGGAAAGAGTTGAGATCATTAAATCTGGCTGACAATAGTCTTG  
AAGGTGAAATCCCAAGTTCTTTAGGTGATTTGACACTAAGGTTTTTGCATTTGCAAAGAACAACCTTACA  
AGGTAAAATCCCTTTGTCTTTTCAAATTTGACATGGTTAGAAAGACTTGACTTAGGAGAAAACAAGTTG  
AAGGATGTTTTTCTACATGGATTGGCGAAAAGCTACAGAGTTTGGAACTCTTGAGGCTAAATTCAAATC  
AATTTTACGGTGTATCCCATTAGAACTATGTCAAATCTCATCTCTATGTTGGTTAAATCTTGCTGGTAAT  
AACTTGATGGAACCTATTCCGAGTTGTTTTGGAACTTTTCGTGTGGTAGTATTAGTGGACCTGGTGAAG  
TATTTGGACAAAGAGTTGAAAGTTTTATGAAAGGAATACCACTTGAGTATGTTGGTGAACAAATTTTGT  
ACTTAGAATTTTGGATCTTTCTGAAAATAAATCTGTTGGAGGTATCCCCAAGGAGTTAACAAAATTTGGTA  
TACTTGCAATACTTGAATTTGTCTAGAAATAGTCTTAATGGGAGCATACCAAAAAAGATAGGTGATTTGA  
AGCAATTGGAGTCACTTGATTTGTCACATAACAACTTTCTGGTTCAATTCCTCAAAGTTTAGCTTCTTTG  
AATTATTTGAGCTACATGAACCTGTCATATAACGATTTTTCGGGTCCAATTCCTACTGGAAATCAGCTCCA  
ATCTTTGGATGATCAATCATTTTATGTTGGTAATCCTAGACTTTGTGGAATATTGATCAAGAAAAGTTGCA  
ATGGCAATGGAACATCAAATGTAAATGAACAACTCCTCAAGGTGGTGATCATGATCAAGATGTTGATG  
AACATAAGTGGTTTTATGCTGGAATTGCACCTGGTTTTTGTGTTGGCTTCTTGGGTGTCCTCTTCATTTG  
TACAAGACAAGGAATCGTGGCCTGGTGCAGGTTTTCCAATGCTTGGCTCGACGTCTATGACAAGTCATG

TATGTA CTCTATGAGAGGTTGTCTGGTTGACAGTTGACACACAAGTTATGCAGAGATTAGAGTGT CAG  
AATTGTAATGCAGAACATTATAATGTAAAGATTGTAACATATATATTATTTTTTTTCGGACATTAGGTTCA  
TTGTA CTAAAAACATAAATATTTTTCTGTAATGGCAAGCTTGTGCATGAATGTACACGTGGCTCTCATCG  
AGTTGCTGATCATGATCTCTCTAGACTCGAGAAGAGACTCATCATGACCTGAGATTTTGGATTTGTCACG  
ATCCAAA

>PGSC0003DMG400030790 LRR-RLPs

CGCTGATTGATCTATCGCTCCTGTCAACA ACTGACGGGCAAGTTCTACCGACCCGACTCACCTGATACC  
ACATCTATATCTTCACTCATCGAATTTCTCATTTCTCTCTTTTACGTATCTGAAATCGAGATTCAGCTGCG  
AATTGTGTATTTATAAGGTCATATAGATCCAGAAGAAGTAGACAAATTC AATGAGAGGGCGTGATTGGA  
TCAATCAAATCCTGCCGGATGAGCTGATTCTCGATATTTCCGGCATCTGGAATCAAATCAAGCCGTGA  
CGCTTGTGCACTTGTCTGCAAGCGTTGGCTCCGTCTCGAGCGCCTCAGTCGTCTCACTTTACGAATTGGT  
GCCTCTGGCTGCCCCGACGTGTTTATTA AACTGCTCGCTCGCCGCTTCGTCAATGTCCGAAATGTGTTTGT  
CGACGAGAGACTATCCATATCTCTCCCGTTCCACTTGTAAGCCTTGAATTCATATGCGACGATTT CAT  
ATATTTATTGATTAGCTTGTATGCAACGTCTATATTTGAGTGTCTAGGTCTCAAATTTAAGATTGGGATA  
TCTATTGCATTCCAATTGGGAATATTTTGGTCAGAATTCTAATTTTGCACCTAATGATTTGGAATGATTGT  
TTTTTTTTTGCCTAACAAAGTTATTCGTTTCTGTTGCTCTTGTGTATATCTTTTCGAGATATAACTGGTGAA  
AGACTATGTATTTGTCAATTGAGGATAGGAACTCTAAAATCTAGATCAGGACTTCAAAGTTTACCATCGA  
ATTAGGAATTGGTGATCATGATGTTTCATGTTAACCTCAATTTTTCACCTGAAATAAATCAGATTGACAT  
TTATCTTAGTTAAATCTACTACAATAGTCATCCATCTCGTGAGGTGATTAGTGAAGCCGTTTAGGGAGAG  
GAAGAAGGACTCACATATAGTGTTCA TTGACCTAGAAAAAGGGATATGACAAAGTCTCAAGGGAGGTTT  
TATAGAGATGCTTGGAGGCTAGAGGTGTACCGATGGCATACTAGGGAGATTACAAATATGTGCGAT  
GGAGCCAAGACCCATGTGAGGACTTAGAGCACTTTTCAGTTGTGTTGGAATTGCATCAGGGATCAACTT  
TTAGTCTGTTTCTGTTTGGCTTGTGATGGATGAATTGACATGTCATATCCAAGGTGAGGTGCCATGGT  
CTAAGTTATCTGTAGAGGTTTGGAGAAGAACCCTAGAGACTAAAGGGTTCAGGTTAAGCATGACCGACA  
CTCAATACTTAATGATACTGTTAGAATAGGAATAGGTTTATACAATCCAATTAGAATAGGAATAGGAATA  
GTAAATAGTATCCTATTTGGTAAATGATTGTATTCTAGTGTCTATAAATAGGGTCTCAATATAATAATGTA  
AATGACAACAATGCAATAATATTCTTTTTCAATATTTCTCACATGGTATCAGATCCTCTAAGATCTTAGTA  
GAAAATCAATGAGCTTCCGCTGCCAGCGGGTGGCACCCATATATGCCGCCGTCTGACCAATGATTATG  
TTAGCAAAAAGTTGGTCACCGTGTATCTTTCTGGTGACTATTTTCTCATATCTAATTTGTGTAGCATCGTGC

CATCATTCCGGTGACTACTTTCTTATATTTAATTTGTGTAGCACTGTGCCATCATTCCAGTGACTACTTTTT  
CATATATAATTTGTGTAGCACTGTGACATCCTTTCCGGTGACTACCTTTTTTGCATATCTGTTTTGTGTAGC  
ACCGTGCATCTCTCCCGGACTACTTTTCATATTTAATTTGTGTAGTACCATGGATTTTTTTCCGAACTATTT  
TCTCAGAGTTGCATAGCATCATGTGTCTTTTCAGTGACTCCTCAGATTTGATTTGCATAGTTCCATTCGTCT  
TTTTCGATGACTCCTCAAATCTAATTTGCGTAGGGTTGTGCCATCATTCCAACCCTATTCGTATAATTTTTCT  
TTTTCAGTAGGGTCGTGCCATCATTTGACCCTACCCCTATTATTTCTTTTTCTATGGGATCGTTCATC  
AATTCGAACTATCCTATCCATATAATTTTATTTTTAAATTGTGACCTCTTTCAGTCATCAAATCTAATACT  
GCGGCGTATGAGCATTTCGCGCCAATTTTTCTGTGACTTTCTTGTTAATATTGACTCGTCTATTGATTC  
CAACATGATCGATACATTTTATACTAGATTTTGAGCACTTCCAACGACCGTTGCATTGTGAAGAAGTCTAT  
ATGGAGCAACTACCTGATTATGTTGCTCAAGGAGAGTTTAGTAGTCTTGTATGTCGATTGTGTTAGTCAC  
TCTATGGTCTGAAACAGTCTTTGCAAGTTTGGTTTGGGAAGTTCAAACAGAATGGGAATAGGTTTATACA  
ATCCTATTAGAATGGGAATAGGTTTATACAATCCTATTAGAATGGGAATAGGTTTATACAATCCTATTAG  
AATGGGAATAGGTTTATACAATCCTATTAGAATGGGAATAGGTTTATACAATCCTATTAGAATGGGAAT  
AGGTTTATACAATCCTATTAGAATGGGAATAGGTTTATACAATCCTATTAGAATGGGAATAGGTTTATAC  
AATCCTATTAGAATGGGAATAGGTTTATACAATCCTATTAGAATAGGAATAGGAATAGAAATAGAAATA  
GGAATAGTAAATAGTATCCTACTTGGTAAAGGATTGTATTCTAGTGTCTATAAATAGGGTCTCAATGTAA  
TAATGTAAACGACAACAATTCAATAATATTCTTTTTCAATATTTCTCATACAATCTCGTATGCGAAAGAAC  
AAAAGAAACCCTATAATCTAAGAACAAGGAAGTAAATGATAGAAAGCTAGACACAAGAATGGAACGAA  
TAGGCAACAATGACTATATTAAGTCAAACCTCCTATTAAGAATACCAAACAAGCACCTAAACTATAGA  
GACACCCTCAAGAGGAATGATCCTCAAGAAAGCAATCCCATCAACATTTTCTAGCACCCGAACAAAAAA  
AAGTTTCACATTTAGTGGTAATATAAGTGACTCCAGTATTTGTTAGGTTTACAAGCGAATTTCTCTGCCT  
TCTGTTTGTGAGACTTGGGTTATGCTTTTTTCAAGTTTGTGATGCCAAAACAGTATTTTCTAAAGGTTTGA  
GTGTTATATTATTTGTTAGGCTCACAGGTGAATTTCTGAGCTTGTACCGGGAAGCTACATTCATCTTGAA  
AGTTTTAAATTTATTGTTTCTTTGTATACCCGTTGCAGGGAAGAAGGCGTGGCACTGATCATTCCGTGA  
TTTCAGCTCTCAAGATCCATTCCTGGCTGAAACAAATGGCTCGGAAGACAATGAAACAGAATCTTACTG  
TTTGTGAGATGCTGGGTTGGCTGCTGTTGCTGCTGGCTTTCAGTAAGCTTGAAAAGCTGAGCTTAATATGG  
TGCTCCAATGTGACACATGTGGGGCTGAGGTCTATAGCTGAAAAGTGTATATTTTTGAAGTCTTTGGATT  
TACAGGTAAATATCTAGTCATTTAAACTTTGGTTTCCTCATGGTTATTTTATTGATCTGTTTCTAGCTGTT  
TTGGAATTGAACTATATGATGTGCATGTTATCTAAGGTCTGAGAAGCTTTAGTTTCTGTACCTCTTAAAG

GGCTGTTATGTTGGAGATCAAGGTCTAGCAGCTGTTGGGGAGTTCTCTAAGCAACTTGAAGATTTGAAT  
TTGAGGTTCTGTGAAGGCCTAACTGATGCAGGCTTGATTAATTTGGTAGATGGTTCTGGGAAGACGTTG  
AAATCTATTAGTTTGGCTGCCTGTGCAAAGTAACTGACACCTCCTTGAAGCTGTGGGATCTCATTGTA  
GATCTTTGGAGTCCTTGTCACTAGACTCAGAGTGTATCCATGATAAAGGTGTACTTGCTGTTGCCAAGG  
ATGCCCTCAGTTGAAGGTTCTGAAGCTACAATGCGTCAATGTTACAGATGGTGTCTCCAAGGCGTTGG  
CACTTGCTGTTTGTGCTGGAGTTGTTGGCTCTTACAGTTTCCAAATATTTACGGACAAGTTAGTTGTTT  
ATTCTGGTTGTCTTCCCTATTTGGATTTATTTGTTTTGACTTACCAGCAGCATGATCGTAACTTCTATATT  
CATGTAAGCTTTTGTAAATGTACATCTACATTTAGACATGAATACAATTCCTCTTAACCAATAGCTTTTCCA  
GTGTTCAAGATTACGCAATCTAAATACCAAATCTTTAAATTTCAACTCCATCTTTGCTAAAAAAATAATT  
CCTGAATATAGAGAACAGATAGTAACTTGATTCAAAGTGTGTGTTGCTGTCTGTCTTTTTATGGCAATAG  
TTGCAAGCAAAAATTTAACAAGCATGTGCTGGGATGATTGGTTTTACAATCTGACCTATATCTTTATG  
CATATTTTTTCAGGAGTCTGTATGCTATTGGTAAAGGGTGCAAACGGTTGAAGTCTTTACCTTGAATGA  
TTGTACTTTCTTAAGTGACAAAGGCTTGGAAAGCAGTTGCAGTTGGTTGCACTGGGCTCACGTATCTTGAG  
GTTAATGGCTGCCACAATATAGGGACATATGGACTGGAATCTATTGCAAGATCTTGCACGTACACTTTTC  
TCCTCGTGCTTTATTTGAATTTCTTTCAATCTTTGTGTTGAATTTAGTTATTGAAGGCCAAAAGACCTA  
GTGCTTACTTTCCCTTTCTCCTTGTCTCTGAATTCAAGATAGATTCTTGTAAGTCTTATATTTTTAAG  
GTCGTATGCATGAGTGGTGGTGCATTTGAGGAGAGTATTTAGCATGAGAAGCACTTATGTGAGTATCTA  
GTAAATGTTTAGAATTACATTTAGAGGTTTCAAAAAAAATAAGCATTAAAAGAAGCAGCTCAAAATTG  
GTGCTTATAGAACTACTTTTGCACCTAAGATTTTAGGCGCCATGTTAAAGGAAAATATGCTATTCTATCAA  
ATAAAAATGCTTGCTTGAGTTTAAATTTGTATAAATTAACAGAAAAAATGCTTCATAGAACAATTATAGC  
AGATTATGGAGGGAGTGCTTATATTAGATTTTAAACGTGATTTTCTTTGAACGCATTCTCTAGAAAAGTTT  
TGTAATCCCAAGTTGGACCAAATTGAGTTCTCTGTTATTCCAAAGCTCATGCGACAATCATGTTATTCTAT  
TTCTGTCAGTATTACCTCATGAAACAAAATGCTATACTTTTCCAAACTCCAGGGGATGGTTTCATCCATGT  
TTACAGCCAGATTTCTGAATCTACTGAGTTAGATAATTAATGCGGAATGCATATAAGTTCCACCACTTTCA  
AAGAGGCTTACAGTAGGATGTAGGCTGATCTAGTATTAGAATTTGATAGATAGAAGCGTGAAACTACCT  
TTTAATATAGGATAATATGTTGAATCAGAATGGTAAATTGCAGTTCTCTTATGTTTTATTTGATTGCAGA  
TTTTAATTTTCATCATATATACTTCTTTGAAAATGATGTTATTTCTTTTCATGAAGATGTGGGCAGTAAATTT  
ATGTTTGTGTTTCATAGATGATTGGCTGTAATTTTATTGCTTTAATGAAATCCTGTCTTTTTTTCATTGTTTA  
GTGTCCTCCAATTTCTTTTCATCTCTTTTTCTTTAAAAATGAAGACTGAAAACCTAATCTATTAGGACTAGCA

AACTGTTGAATGGTAGTTGATTGGTTTCACTGATAGATTGATTACTGCTATTTATGTTATGCTTGGCTCAT  
CTTATTAATAATACTTATGAAATTCATGAATTTTATCCATTGCTTGACCTGATAGTTTGTACCCCTCTAAAA  
TTCTGTCCTGGTCCTATCTTGAGTCTTGTCTTCTTTTTCTAAGAAGTCAAAGGTCCTAATTTGAGTTTT  
GGCTTCATAATGTAGGCATCTGTCTGAGTTGGCCTTGCTGTATTGTCAAAGAATTGGTAATTTGCGATTG  
TCCGAGATTGGCAAAGGATGCAAGTCTTGCAAGCTTACATTTGGTAGATTGTGCAAGTATTGGGGAC  
GAAGCCATATGTTCTATAGCCAGAGGATGCTGCAACCTCAAAGGCTCCACATCCGTGATGTTATGAG  
GTGCTTTAATAATTTGTCACCCTCATTACTTGGGGATTTCTCTCTTGTCTCTAGTGATGTCAAAGTTACAG  
GATATCTTACATGCGGAGTGTGTCATATTACTGGAGGCCTATGCATTTTTTTTATCAGTAAAGATTCAAA  
GATATCATTAAATTACCAGCACCGAGATGGTGCTGCACATGTACGCTAGGGATCCAGAAACATCAGCAGA  
ACTTTTCTAATACATCAGCTGACAAAAGCAAGAGCATTCTCCAGTTCTAGTGTTTTACTATGTACACAAA  
TCAGATACTCTCTATACCTGAAGGCACTGAATTAATCTAAGAGACTAACCTCATCTGATATGAATCATTCT  
CCAAACATAAAACCTCATCCAACATGAATCCAACCTTACAACAATACGAGAGTAAAGACAAATAGTTGTA  
TTTGATTTTGCTAACAGATTCTGCTTTATTCGTGAAGCACCTTAAGTTCCTTTCCTTCCATGTTGCCCATC  
TAGTGACGCTGGTACTGTAGTTCGTACGCTTTTCTGTTTCTTATTGATGCCTCTTCCATTCCACTGAGTG  
GAAGCTCCCTGGTAGTTCTTGGCATTCTCCACATAAGCTTAGAGATGTGCAGGAACATTACTATAGTTGT  
GAGAGTAATATGCAATGTAGAAAAATGTGACAGTTGTCTTCCATCTATTTCTTACAAAGTTAGCACTTGC  
TGCACAAGTTTATCTTCTTTTTTAACTAGCCTCATATGCTGCCACGTGAGTCAATCTTCTTAAACATTTG  
AAATCTGCTTCCAAGGCCATCTCAGGTTATGTTCACTTCTGCCCCTTAAAGTCCCTTAAATTGAACACATCA  
CTGTTATGTGCCTTCTGTAGACTATATTACCATAGCATTCAAGAGACCTGAGTAGCCATGGGAGGCC  
TAACAGCACTCCTTGTTCCTTTTTTCACTTCTTCCGATCTATTGTTAGTGAAATCTGATTTGTGCTGTTTC  
CTTTGCACTTTATGCCAAAACCTCAATTGTTTTACTTGATAATACTGCTCTTTTCACTTCTGATTTGAAGGTT  
GGAAATAAGGGAATTATAGCTGTTGGCGAGAACTGTAAATTTCTTACAGACCTTAGCCTCCGATTCTGCG  
ATAGGTACATGATTTTCTTTTCTCAACTAATATTGCCTTCTATTTTTTTTTGTTTCTCAATCATCAAGTCTC  
GGCTGATAAAATTGTCAGACAGTCTTTCCTTGCTTGCATTACTTCTTGTATTGTCCTTAAATTTATACT  
TGAATGCTCTTTGAGATGAACGTTTATCTTTGCGTCTCTTTTCTTTTTGATATGGGAATTGTTGTGCTCCT  
TGTGGCGCCAGATTTTTGATATGGGAATTGTTGTGCTCCTTGTGGCACCTCTGGTGCTGCAAGAGGTCGC  
TTGTCCATTTGAAGATGAAGATTGCCTAGGCACAATTTTCTCTGCTTCTTAAACTTCTAGCCCATAG  
TCTGACGGAAAATGTTCTACACTGCGAGATCAACAAAAAATTGTGTCTAGATGGTTATTTGCTTTAGTAA  
CTTCTCCTTACGCGTATTGTTGATTGCTTATATTTTGCATAGCATATACTTTGAACTGCTTCTTTATCAA

GCTTGCTACTTAACTACCGTATTACTGGTAATTTGGCTCTAATAAGTCTTAGCCTCTATTTGATTACCAGA  
GTAGGGGATGAAGCACTTGTGGCTATTGGTGAAGGTTGCTCTCTGCATCATTTAAATGTCAGTGGCTGC  
CACCAAATTGGGGATGCTGGAATAATTGCCATAGCAAGAGGATGCCCTGAACTCAGTTACTTGGATGTG  
AGTGTACTCCAGGTGTGTCCACTTATACTTGCTCTTTTTATAGTGGGATACACATTGTATATGATGCATAG  
ACGGTATGAATATGCTTAACATACCAAGGTTATTGGATAATTACATTAAGGTGATTACGTAACAACATTA  
AGTTATATTAGAACTACTTAGTGTAGGTAGAGCTTAAAATGGTTGCTTCCTCCTGAATCCACCGGTTAAC  
AAGTGCATTAGGAACCCCATATTATAAAGTCCCATATGCAACACACACACACACGTATTGCTCCCATATA  
CAAGATGTTTGATAGACCAAAAAATTGACTTTTTATCTCTATTCCGCACTGAATACTAGCGCATCAATTT  
TTGACAGGATTTGGGCGATATGGCCATGGTGGAGCTAGGTGAAGGATGTCCCTTGCTGAGGGATATTG  
TGTTGTCTCACTGTCGTCAAATAACAGATGTAGGTTAAGTTATATTGCTAATAGGTGTACCTTGTTGGA  
AACTAGCCACATGGTCTATTGCCCTGGTATCACCGCTGCTGGAGTAGCCACGGTGATTACGAGCTGCAC  
AAATATAAAGAAAGTTCTTGTAGAGAAGTGGAAAGTGAGTCCAAGAACCAAAAGGAGAGCAGGATCCA  
TCATCTCCTATCTCTGTGTTGATCTGTAGATCTCTGTACACGTGTTAGTGTAATCTATTCCCTTGCAGCCTCC  
AATCGAAAGCAGCAAGGGTAAACAGACTATCGTTGTGGATAGCCAGTTTAGAAAGAGGGGTGTGCGTA  
GCTTGTGTTGCACTTTTCTTTTATCTGCTATGTTCTTTTCACTGTTTTGTTTTTGTCCAAATCTCACAGTAAT  
TTACTAGTAGATCGACTTCATTTTAGAAGGTGGGTGGGGTGTCTTGTAACCCTCCCGATGTGTAGGAATA  
TGCTCGTTGATTGTCTTTATTGGGGAAAGATAGCAAATAGCCAGTTCTTTTACCATCAGTTGAAACTTTAG  
CCAGCATTTCAGAATTATTCAAAGTAACTGCTTTTTAAGGCGGAAATAAAATTTGGACAAAAACTC

>PGSC0003DMG400030856 LRR-RLPs

CTGAAACTTTCTTCAAGTTGTGCTAGACAATCTTACTTCTTTCTCAAAGGGGAACTTGTATTGCTTTTTG  
GTTTTCAAATGAGTTCCAAAAGCTTTCAAGCATCTTTTCTACAATCCAATCCGTCCTTGAAGATGCTCAG  
GAGAAGCAATTCAACGACAAGCCACTTGAAAATTGGTTGCAAAAACCTCAACGCTGCTACATATGAAGTC  
GATGACATCTTGGATGAATATAAACTAAGGCCACACGATTCTCCAGTCTGCATATGGCCGTTATCATC  
CTAAGTTATCCCTTTCCGTCACAAAGTCGGGAAAAGGATGGACCAAGTGATGCAAAGACTAAATGCAA  
TTGCTGAGGAAAGAAAGAATTTTCAATTTGCACGAAAATATTATAGAGAGACAATCTGTTGACGGGAAA  
CAGGTAATCATCTTAAATTAGTATTACGACAGCTTAGTTTACATTCATATTTTTGGCAATTATCAAATTTG  
GAGAAGGGTCAAATATACTCATGTACTATTGTAATAGTTTAAATATACCTCTCTTATTATACTTTGGCAC  
AAATTTGTCAAACCTAGCAAGTAGCAAGTTTTAAATACCCGATTTCTTTAGAAATCCACCCGTTTAACTCA  
TCCACTACCCATTCCCTTTGCTTTTTGCTTTGAATTGTTTTCTTTACCTCTAACTTAGAAAACGCGATCTGT







CGCGCCGGGAAGTCCCACAGCGCTCCCTAACAAAAGCGACCTCGGTACCCAAGGGGCTCCCACACATGT  
TACATTCCTGCCATTGGATGTAATATTGTGATTTTCTGTCCAAATAGTAAGAAAAGACAAGTTTTCTGTTAT  
ATCACTTTGATCACCTTCAAAGTGGGAATTCCATTTCTAACTTGATCAAACTGTCGTGCACCATGTAGC  
TTGCATTACACTCGATGTTTATATTAAT

>PGSC0003DMG400030928 LRR-RLPs

ACAATACTTGTTCTTTTTTTCTTCTCTACTTTCAACTTTCCTTCTTTTTTTCCCTACTTAGATAGGGTTTT  
TGTTGAAATCTTGAACCTTTTCATGTGTAATGCAAATCTTGGTTGAAGATAAAATTTGGGGTTTGTGTTCT  
TTGGTGCAAAGTTTTTTTTTTTTAATTCCTTGGGGGGTTTGTGTTGAAGTGAAGCAACAACCATGTCT  
ACTCTTGTTAATTACAGTGGTGAGTTTTCTTGGTTTGTTCATGTATTGGATTATGGGTTTTGAGTTTTA  
AGGAAATTGGCATTGGGTGATTTAGTTTTCATAGAATAGATTCATTTTAGTGCTTCATGAATCTATTAA  
GGGTTGTTGATTGTTGATATGAATATGAAGGGTGTAGGAGTAACAAGAAGAAAAAATTGTTGCTTGG  
GAATTTAGTAGCTCCATTTAGTTGGTTGGTTGGTTATCTGAACCTTCACCTTGTAATCCTTGCCCCATTT  
CCCCAATTTGAAAAAGATTA AAAAGTTGTTGCTTTGGCTTTGAAGATGTTAATCTTGCTCCTATTTAAA  
AAAAAATTATGCTTTAGTAAGTTTTTGTGTGTGTATTGTTTAGATTGATGTTAAAGATTGGCACTTTTTGA  
TAAAAGGTGTGAATAAGAAACATTTTTCTGGTCTTTGTAGCTAAGAATTTATTTGTTGTTCAACTTTTGAT  
CTGATTTGGTAGATCTCAGTTTTAAGTTTTTATGTAATGAGTTCTCTGACTTGAAATGAAGTTAAATATA  
AGATTTTTGTAAGAAAGGGCATGAAATTATAATCTTGGGAATTTTAGTATGTTGATTTGGTGGAAAAGAT  
AGTTGATGAAGTTCTTGATGTTTGATCTTCAGGTGATAATGAGTTCTATAGTGGAGGATCACTTTGTTCA  
GCTGATTTGGGTCTTATGTTGGCTCTTGGTCATGCTGATATTTACTGTCCTGTTAGTAAGAGGGCACGCA  
TTAGTGGCCCGTTTGTGTTGAAGAGAGGACAAAGAATCCATCCATTGAAGTACTTCCCAACGAATGCCT  
ATTTGAGATCTTCAGAAGATTGGAAGGAGGCCGTGAAAGGAGTGCAGCAGCTTGC GTTTCTAAGCGTT  
GGCTTATGCTCTTGAGTAATATGAGGAGCTCTGATATTCGCCATACTAATCTTTCAGCTGCTAATGGGGC  
TTCAGATGATACAAAAATGGCCTCAGCTGATGAAGATCTTGAAGTGGAGTGTGACGGATATCTTACTAG  
GTGTTTAGAAGGGAAGAAAGCTACAGACATTAGGCTCTCAGCTATGGCAGTTGGAACCTTAGCCGTGG  
GGGTCTTGAAAGCTCTCAGTTCGGGGGAGCAACCCCGTTCGGGGTATTACTAATGTTGGTCTATCAGC  
AATCGCCACGGTTGTCCGTCTCTTAGAGTTCTTTCATTGTGGGATGTTTCAGGATGTTGGAGATGAAGGT  
CTTATGGAGATTGCAAGAGGATGTCATTCATTAGAAAAGCTAGACTTAACTAAATGCCCTCAATTTCCA  
ACAAAGGTCTGGTTGCAATAGCAGAGAATTGCCCAAGTTTGACTTCTTTGACGATCGAATCTTGTA AAAA  
TATTGAAATGAGGGACTGCAAGCTATTGGAAGATGTTGTACCAAATTAGAGTCTCTTACTATTAAGA

CTGCCCTCTGTAGGTGATCAGGCAGTTGTTAGCCTTCTGTCGTCAGGCAATACAAGGTTGAAGAAAGT  
GAAACTTCATTCTCTAAACATTACGGATTTCTCCCTCGCTGTCATTGGTCACTATGGCAAGGCGATTATCG  
ATCTTAATCTGTGTAAACTTGGTCACGTAAGTCCGAGGGGGTTTTGGGTTATGGGTGCTGCTCAGGGTTT  
GCAATCTCTGGCTTCTTTGACTGTCACCTTCGTGCATTGGACTGACGAATCCGAGTCTTGAAGCAGTGGGA  
AAGGGCTGCACAAATATTAAGCATGTGCCTTCGCGAGTGTGAACGTGTTACTGATAGTGGACTTGTT  
GCATTTGCTCAAGCTGCTGGATCTCTCGAGTATCTCTTGTGGAAGAGTGCGACAAGATCACCCAAACAG  
GCATCCTAAATGCTGTTTCAATCTGCAGCAAGTTGAAGTCACTTTCCCTGGTGAAGTGTTCTGGGAGTCAG  
GGATTTGCCTCCACAAGCTTCCTTGTGCTCCCTGTGATTCTCTCCGATCGTTGTCCATCCGAAGCTGTG  
CAGGATTCGGTAGCAGAAGCTTAGCTATGGTGGGGAAGCTATGTCCCAGCTTCATCATTGGATCTCA  
GTGGGCTTACTAGAATAACAGATGCTGGGCTTCTCCCACTTTTGGAGAGCTCCAAGGCAGGACTCGTCA  
AGGTTAATCTTACTCACTGCCTGAACGTGACCGATGAAGTGGTGTCTCATTAGCTAGGCTACACGGTGA  
GACTTTGGAATTGCTGAATCTTGATGGATGCAGGAGGGTTACCGATGCAAGCTTGGTGGCAATTGCTGA  
TAATTGTCTATTACTTAACGATCTTGATGTTTCAAAGTGTTCAATAACTGATTCCGGGTTTAGCTGCTTTATC  
CCAAGGAGTGCAATTGAATTTGCAGGTTCTTCACTCTCAGGTTGCTCCATGGTAACAAACAAGAGCTTT  
TCGTCTCTTAGAACATTGGGTGAGAGCTTAATTGGTTTAAATCTCCAGCACTGCAATGCCATTGGTAGCA  
GCAGAATCGAGGCTCTTGTTGAGGACTTGTGGAGGTGTGATATCCTCTCCTAAAAGCCTACTGGAGCAC  
AAGGCTATGCATCATCAAAGGTGTTTGAACACGAGTCGTAGCTATTTGGTTCATTAATCTTGGTGGGA  
TAGAAGTAAACATGATTGTGGTTTTTGGCTAACTAATGGCCTTGTGATGCTCCAGTGGCTTGGTTGTTTT  
CCAGGAGGCTATGACAAACAACCTTTTCCATCCATTTTTGCAGGCTTCATCTACTTAAAGCTTGTCCA  
CATCGTTCAAACCTCCGGTGTACACGGAGGCTGCCTTTACACAACCATGGTATCCTGAGAATACAGTTA  
CCTAAGTCCTGGTGCTAAAGTTTTCACTAGTGTGCTCCTTGTCCCGTCTTCGGGGATGAACTAATAATG  
CTTCTCTTAAACTATATAGATATCATGCATTTGCCTTGATAGTACTACTGCAGAATCAGACAGTTTTTTC  
TTAGTTCTAGTATGTAAGTTTTCGTATTAAGAAGTCGTCCTCGTTGTTACTATAAGTGTTTTACTTATCATC  
TTAGTCGTCTGTAGTTGGAATCGAACGATTTCTGTAGCATGGTGTCTGATAATCTGGGGCTTGGTCATGG  
CAACTAGTCCATCTAGGTTGTTTTCTAGTGTCCAAGTTCTAGTTTTTGATAGGATTGTAAAAAGTCCTCG  
ATTGTACAGGTTCTTGTCTTTCAGATTTGTACTTTGCAACTACTTTGTTATGTGTAATAAACTCTGTTTAG  
TTTGTCTAAATTGTGC

>PGSC0003DMG400031283 LRR-RLPs

ATGCGCCGACTATTCATTTTATTGCCATTTGATCCTCTTCTTCAAGGCTTCGCATACTGGAACAAAGGGA

GAAGTTAGTCCCTTCGGCGATTGCGCAAATGTGTTTGGCAATGCTCAGGCTTCAGGTTCTTCGTTTTCTTT  
GGCCATTTTGTTCCTTTTGGCCTAAGTGTCTATGCTTCCACTAAAACCTCAAATCCCTGAAATTTAAGCAT  
TTTCATCAGATATTGAGATAAAATAAATATTTGAGGACACAATTTTTATTAATAAATATCTAAATGAGT  
CCAATTTGAGGACTCATCAATCAACAATAGTCTTAGTGGGACAGTTAATACAACCTTTTAGTATTGCAAAC  
CAACTTCAAATCATTAAACATGGACGGTAATAAGCTAGAGGGGAAAGTCCCACCATCTTTGCAAATATTTG  
GGACAACCTTGATTTAGGTAATAATGAGTTGAATGACACATTCCCAAATGGTTGGGAGCAATACCTGCT  
TTGCGGATTTTAAGTTTGGAGATCAAATAAGTTGCATGGTCCTATAGAAGTTTCAAGGACTTCAAACCTTTT  
TTCTCAACTGCGAATTATGGATCTCTCATCCAACGGATTTAGTGGGAAGTTACCGGCAAGTCTTTTTGAT  
AGTTTTCAAGCCATGAAGATAATTAATGAGAACATTACAACCTCATATCAGGGAGTTCAATATGATACTT  
TGACAATTACAACAAAGGGATTGGATCTTCAATTTGTCAAAGTTTTTGATCAAGCAAACATAGTTATCGA  
TCTCTTAACAATAGATTTGAAGGTTATATTCCACGTACTATTGGAGATATCATTGGGCTTCGTACGTTGA  
ATTTGTCTCATAATAACTTGAAAGGTTATATACCAACATCACTGCACCAATTATCTGTAGTTGAGTCATTG  
GATGTCTCATTTAATAAAATCAGCGAAGAAATCCACAACAACCTCGCATCCCTCACATTTCTCCAGTCTT  
AAATCTCTCTCACAAACATCTTGTTGGATGCATTTCCAAAGGAAAACAATTTGATACGTTTGAGAACAAAT  
TCATACAAAGAGAATGATGGACTATGTGGATTTCCACTCTCAAAAAAATGTGGTGGTGATGATGGGGTA  
CCACAAGCGGCAACTCAATTTGGTGTGATCAAGAAGAAGAAGGAGATTCATCAATTGTCAATTGGCAG  
GCAGTTCTTATGGGCTATGGTTGTGGATTAGTCATTGCACTATCTGTAATATACATGCATAATGTTGGCA  
ACACGATATCCATCATGGTTTTCGAGGTTGTTTGA

>PGSC0003DMG400031284 LRR-RLPs

AATAAAGCCCTAAATGAGTTCAATTTGAGGACTCATCAACCAACAATAGTTTTAGTGGGACAGTTAATAC  
AACTTTTAGTATTGGAAACCAACTCCAAATCATTAAACATGGATGGGAATAAGCTTGAGGGGAAAGTCCC  
ACCATCTTTGCAAATATTTGGGATAGCTTGATTTAGGTAATAATGAGTTGAATGACACATTCCCAAATG  
GTTGGGAGCACTACCTGATTTGCGGATTTTAAGTTTGACATCAAATAAGTTGCATGGTCCCATAGAAGTT  
TCAAGGACTGAAAACCTTTTTTCTCAACTGCGAATTATGGATCTCTCATCCAACGGATTTAGTGGGAAGT  
TACCGGCAAGTCTTTTTGATAGTTTTATGCCATGAAGATAATTAATGAAAACATTACAACCTCATATCTG  
GGAGTTCAATATGATACTTTGACAATTACAACAAAGGGATTGGATCTTCAATTTTTAAAGTTTTTGTATCA  
AGCAAACATAGTTATCGATCTCTTAACAATAGATTTGAAGGTTATATTCCACGTACTATTGGAGATCTCA  
TTGGGCTTCGTACGTTGAATTTGTCTCATAATAACTTGAAAGGTCATATACCAACATCACTGCACCAATTA  
TCTGTAGTTGAGTCATTGGATGTCTCATTTAATAAAATCAGCGGAGAAATCCACAACAACCTCGCATCCC

TCACATTTCTTGCAGTCTTAAATCTCTCTCACAAACATCTTGTTGGATGCATTCCCAAAGGAAAACAATTT  
GATACGTTTGAGAACAATTCATACAAAGAGAATGATGGACTATGTGGATTTCCACTCTCAAAGAATGT  
GGTGGTGATGATGGGGTACCACACGCGGCAACTCAATTTGGTCTTGATCAAGAAGAGGAAGGAGATTC  
ATCAATTGTCAATTGGCAGGCAGTTCTTATGGGCCATGGTTGTGGATTAGTCATTGTACTGTCTGTAATA  
TACATGCATATTGTTGGCAACAGGATATCCATCATGGTTTTCGAGGTTGTTTGAAGAATTGGAACACAAA  
ATTATTACGAG

>PGSC0003DMG400031320 LRR-RLPs

ATGGAATCTCTTGAAAGCTTCAACCTCTCAGGTTGTCAGAAATTAGAAAAATTTCCAGAAATTCGAGGGA  
ATATGGAATCGCTATCAGAGGTCCTTCTGGCACGTA CTGCAATTTGTGAATTGCCCTCATCAATAGGACA  
GCTCAGTGGTATCAGCTTGCTTGATTTGCAATCATGTGAAAACCTTGAAAGACTCCCAGCCAGTGTCTGT  
GAGATGAGAAAACCTGAAAATTTTGATTCTGAAAGGCTGCTCAAGACTTGCAATTTTCTGAAAATCTAG  
GTGATCTAAACCAGTTGGAGGAGCTCTATGCTGGCAACACTGCCATTTTGCAACTACCAGATTCTGTTGG  
AACTTAAGCAAACCTCAAGATCCTATCATTAAGAAATGGGCGGAAGGTTAAGCATCAATATGCTCGCAG  
TTTGATATTACCCAGTCTGTTTCATGCTTTGAGGCAACTGAAAAGCTTAGATCTCAGTGGATGTAATTTAT  
GTGATGACCAAGCTTCTGCTCTTAAGAACTTGACTTCTTTATTAATGGAAGTGAACCTGAGCAGAAATAA  
GTTTATTTATTTGCCTGATGTCTTCAGCCGACTTTCTCACCTTCGATATCTCAATATAGCCCCTGTCAGGA  
ACTTCCCCTACTTCTCGGAATATAGAGGAATTATATGTAGAAGATTTTTTGGAAAAAGAAAGTATTGCA  
AAGCTACTGATGTACCCAAGGTTGAAATTGCTCTCATTACCAATTATAGTTTTGATCAACAATCTTATAC  
AGAGGAGAGCAATGATAGCTCAATTCGGATGAGATTCTCAGTCTGTTTCTATCTAACAATATGGATGAT  
GTGATCCTTCCCTCTCTTAACCTCTGATCATAGGGTAACTTGTCCATTGTCTTTCCTGAACGTGCAATCCC  
AAATGGTTTATGCATCAGAGTGCTGAGAAAAAGATCTCGTTCAAACCTGCCATTAATTGGTATAATGATA  
AGTTCAAGGACTTTGCTATATGTTGCGTGACTCGCATGGGGGCAGGTGTTTGCAGTCTTGATTCATGGCT  
ATCTGGGAAGTATGACTATGCTTTCATCAATGCCAAATTGATATGCAATGATCATTGAAAGACCTTAAA  
GTGCTAGAGAAAGAATGTAAAGTGGGCCAGCATCTAGAACTTATGGCCAGTGTGTTTGCTTTCGCTAC  
ATACCGTTGTATGCTTCACTGCAGGTGTCTGGCACTGATGTTGGAGACATTAACCAGTACAGCCTATTTG  
AGGCATCTATCTGTGGGTGCATTGTGAAATAG

>PGSC0003DMG400031446 LRR-RLPs

ATGCCTTCTAAAGACTTACCAACGAGTCTGTTTCAACATTTGAAAGGCATGAGGACTATTGATCAAATAA  
TGAAGTCACCAAGTTATAAAGGAGGTGGAGTAACTACCAAGACTCGGTAGTCATTGTAACAAAGGGAT

TGAAGCTTGAAGTTGTGAAAAATTTGCCTTTGTACACAGTTATTGATCTTTCAAACAACAAATTTGAAGG  
ACATATTACTAGTGTCTAGGAGATCTTATTGCGATTCGGGTAATTTATCTCATAATGAGTTGCAA  
GGTCATATAACCACCATCACTTGGGAAGCTTATCTGTAGTAGAATCATTGGACCTTTCATTTAACCATCTTTC  
GGGAGAGATACCACAACAACCTTGCTTCTTACGGCTCTTGAATTCTTAAATCTTTCCCACAATTATCTCC  
AAGGATGCATCCCTCAAGGACCTCAATTTGACCTTTGAGAGCAATTCATATGAAGGTAATGATGGATT  
ACGTGGATTCCCCATTTCAAAGGTTGTGGCAATGATCCTGTGTGGAGACAAATTTTACAGTATCTGCG  
CTAGCTGATCAAGAAAGGAATTCTGAATTTCTCAATGATTTTTGGAAAGCTGTTCTGATGGGCTATGGCA  
GTGGACTATGTATTGGATTATCCATAATATATTTTCATGATCTCAACTGGAAATATGAAATGGCTTGCAAG  
AATCATTGAAGAACTGGAACACAAAATTATCATGCGAAAGAGAAAAAGCGGCAAGGTCAAAGGAATT  
ACAGAAGAAGAGATAATCAATCTAGGCAAGTTATCAATAAAGATGGATTTGATTTCAGAACTTCAGGTA  
TTCAAGCTAAGATCTACGCTCATCTTTTTTAG

>PGSC0003DMG400031451 LRR-RLPs

CAACTTTCTGGCTCTATTCTGAAGAAATAGGTTACCTAAGGTCTCTTACTAAGCTCTCTTTGGGTAGCAA  
CTTTCTTACTGGTTCTATTCTGCTTCATTGGGGAATTTGAGCAACTTGTCTGATTTGTATCTTTATAGTAA  
TCACCTTTCTGGCTCTATTCTGAAGAAATAGGTTACCTAAGGTCTCTTACTATGCTATCTTTGGTAATA  
ACTCTCTTAATGGATCTATTCTGCTTCATTTGGGGTGTGCTAGAACAACTTGCCAGATTGTATCTTCAT  
AATAATCAGCTTTCTGGCTCTATTCTGAAGAAATAGGTTACCTAAGGTCTCTTACTATCCTATCTTTGGG  
TAGGAACTTTCTTACTGGTTCCATTCCAGCTTCATTGGGGAATTTGAGCAACTTGTCTGATTTGTATCTTT  
ATAGTAATCACCTTTCTGGCTCTATTCTGAAGAAATAGGTTACCTAAGGTCTCTTACTATGCTATCTTT  
GGGTAATAACTCTCTTAATGGCTCTATTCTGCTTCATTGGGGTGTCTGAACAACTTGCCAGATTGTATC  
TTCATAATAATCAGCTTTCTGGCTCTATTCTGAAGAAATAGGTTACTTGAGTTCTCTTACTTATCTATATT  
TGGGTAATAACTCTCTTAATGGATCTATTCTGCTTCATTTGGCAATTTGAGAAATCTGAAAATCTATGATT  
CTCAATGATAACAATCTCATTGGGGAATTCCTTCATTTGTGTGCAATTTGACATCACTGGAAGTGTGT  
GTATGCCGAGAACCAATTTGAAGGGAAAAGTTCCGCAATGTTTGGGTAATATCGGCAGCCTCCAGGTTT  
TGATAATGTCACATAATAATCTCAGTGGAGAGATCCCTTCATCTATTTCAAATTTAACATCACTAAAAATT  
CTAGATTTGGGCAGAAACAATCTGGAGGGAGCAATTCACAATGTTTTGGCAATATTAGAAGCCTCCAGGTT  
GCTCTTGATATGCAGAATCTAGAGGGAGCAATTCACAATGTTTTGGCAATATTAGAAGCCTCCAGGTTT  
TTGATATGCAGAATAACAACTTTCTGGGACTCTCCAACAAATTTTAGCATTGGAAGTTCACCTATAAGT  
CTCAACTGCCTGGCAATGAATTAGAGGGGAGAATCCCTCGGTGTTGTCCAATTGCAAAAAGTTGCAA

GTTATTGATCTGGGAGATAATCACCTCAATGACACATTTCCCATGTGGTTGGGAGCTTTGACAGAGCTGA  
GAGTTTTAAGATTGACATCGAATAAATTGCATGGACCCATAAGATCTTCAGGGGCTGAAATCATGTTCC  
TGATCTTCGAATCATGGATCTCTTTACAATGCCTTCTCGAAAGACTTACCGACGAGTCTGTTTCAACATT  
TAAAAGGCATGAGGACTATTGATCAAACAATGAAGGCACCAAGTTATAGAGGACATGGAGTATACTTCC  
AAGACTCTGTAGTTGTTGTAACAAAGGGATTGAAGCTTGAAGTTGTGAAAATTTGTCTTTGTACACAAT  
TATTGACCTTTCAAACAATAAATTTGAAGGATGTATTCCTAGTGTTCTAGGAGATCTCATAGCTCTTCGGG  
TATTGAATATGTCTCATAATGGACTGAAAGGTCATATACCACCATCACTTGGAAATTTATCTGTAGTGGA  
ATCATTGGACCTTTCAATTAACCGCCTTTCAGGAGAGATACCACAACAACCTGCTTCTCTTACGTCTCTTG  
AATTCTTAAATCTCTCTCACAATTATCTCCAAGGATGCATCCCTCAAGGACCTCAATTTACATACCTTCGAG  
AGCAATTCATATGAAGGTAATGATGGATTACGTGGATTCCCTGTTTCAAAGGTTGTGGCAATGATCCTG  
TGTCTGCGCTAGAAGATCAAGAAAGAAATTCTGAATTTTTCAATGATTTTTGGAAAGCAGCTCTGATGGG  
CTATGGCAGTGGAATATGTATTGGATTATCCATAATATATTTCTTGATCTCAACTGGAAATCTAAGATGG  
CTTGCAAGAATCATTGAAGAACTGGAACACAAAATTATCATGCGAAGGAGAAAGAAGCAGCGAGGTCA  
AGGGAATTACAGAAGAAGAAATAATCGCTTCTAGACAAGTTACCAATACAGAAGGAT

>PGSC0003DMG400031478 LRR-RLPs

ATGCCAAATTTGGAGTATTTGTATCTACAGGGATGTACGAGTCTTGAAGAAGTTCATCATTCCCTCAAGT  
ATTGCAAAAACTCATTGAGTTAAATTTGTCTTTTTGTTCAAACTTGAGAGGTTTCCATATGTTAATGTG  
GAATCTCTTGAATCTTTGAATCTAACTACTGCTCTAGTTTAGAGAAATTTCCAGAAATCCTTGGAAGGAT  
GAAGCAGCGAACTGCCAGAGAGATTATGACGTCAGGCTCTTGATAAGGGAAGTGCATTATCTTTGGA  
AGGTTTGGTGAAGCTAGATGTGTCTTGGTGCTCAAACTTGAAAGCTTGCCAGAAGAGATAGGTGATTT  
AGAAACTTGAGTATCTTGATGCCAGTTATACTCTAATCTCACGACCTCCGTCTTCCATCGTCCGGTTGA  
ACAAGCTTAAAAGTTTGAGTTTTGGACAACATAGATCAGAAGATGGAGTGTACTTTGTGTTCCCTCTGGT  
GAATAAAGGGTACTCTCATTGGAATATCTGGATCTCAGTTACTGCAATTTAAAAGATGGAGGACTTCCA  
GAAGACATTGGATCCTTATCCTCTTTGAAAAGTTGTATCTGGGAAATAATTTGAGCATTTCCTCGTA  
GCATATCCAACTTGGTGCTCTTGAATACTTAACTTATCAGATTGCAAGAGACTTACACAGCTGCCAGA  
AGACATTGGATGTTTATCCTCTTTGAAAGAGTTGCATCTCAAGGGAATAATTTGAGCATTTCCTCAA  
AGCATATCCGAACTTGGTGCTCTTGAATACTTAACTTATCAGGTTGCAAGAGGCTTACACAGCTGCCAG  
AAGACATTGGATCCTTATCCTCTTTGAAAGAGTTGTATCTCCAGGGAATAATTTGAGCATTTCCTCA  
AAGCATATCCAACTTGGCGCTCTTCAATACTTGGACTTGTGAGATTGCAAGAGGCTTACACAGCTGCCA

GAAGACATTGGATCCTTATCCTCTTTGGAAGAGTTGTATCTCCAGGGAAATAATTTTGAGCATTTCCTC  
AAAGCATATCCGAACCTGGTGCTCTTCAATGGTTGGAATTATCAGATTGCAAGAGACTTACACAGCTGCC  
AGAAGACATTGGATCCTTATCCTCTTTGGAAGAGTTGTATCTCCAGGGAAATAATTTTGAGCATTTCCT  
CAAAGCATATCCAACTGGTGCTCTTCAATACTTGGACTTGTGAGATTGCGAGAGGCTTACACAGCTGC  
CAGAATTTCCACAGCAATTACATAAATATATGCAGATTGGAGCAATGATTTGATCTGTAATTCGTTGTTT  
CAGAATATCTCATCATTGCAGCATGACATCTCTGTTTCAGAATATCTTCACTAAGAGTGTTTAGGAGTTG  
GGTGGAGGATGACATCCCAAGTTGGTTCAACTATCAGGGAATGGGCACAAGTGATCAGTCAATCTGCC  
TGAGAATTGGTATGTAAGTGATAACTTCTTGGGATTTGCTGTATGTTACTATGGCGATTATTATAGTGAT  
TGCATCACAGCTCATTTGATTCCCTTATGTGATGATGGGATGTCGTCGATGACCCAAGAATTTGCCTTATC  
CAACAATCCAAACGAAAATGAATATATTCATTTTTGTTGGTATCTCTCGATGGCTTATGGGATGCATCTA  
ATGCAAATGAAAAACACCAAATGACTATGGGTGCATTGAGTTTGATGATTTTGGAGAAAATATGCAA  
TTGGAGTTCGTTTGTGGTATAAAAATGAATCTGAGGTTTGCATTGGGATAAGGAAGAGCAGAGATGAA  
GAAGAGGCCACTTGCTCCTTCTAAGAAACAAAGGCAACTCTTCCAGAAGATTCGGATTATAG

>PGSC0003DMG400032130 LRR-RLPs

TGAAGATTTAAGCTTGAGATCAAATAAGTTGCATGGTCCCATCAAATCTTCAGGCAATAAAAACTTGTT  
TGCGCAGCTTCAAATTATGGATCTATCATCCAATGGATTTAGTGGGAATTTACCAGAAAATATTTTGGG  
AACTTGCAAGCCATGAAGAAAATTGATGAGAGTACAAGAACCCCGAAGTATGTTTCTGATCAATATGCT  
GGTTATTATGATTATTTGACGACAATTACAACAAGGGACATGATTATAATTATGTTTCGGATTTTGGCTTC  
CAACATGATTATCGATCTCTCAACAACAGATTTGAAGGTCACATTCCAAGCATTGTTGGAGATCTCATT  
GGACTTCGTACCTTGAACCTTATCTCATAATGTCTTGGAAAGGTCATATACCAGCATCATTGCAAAAATTTATC  
TGTAATCAAATCATTGGATTTCTCATCTAACAAAATCAGCGGAGGAATTCCACCACAACCTTGCATCCCTCA  
CATTTCTTGAAGTCTTAAATCTATCTCACAATCATCTTGTGGATGCATCCCCAAAGGAAAACAATTTGAT  
ACGTTTGAGAACAGTTCATACCAAGGAAATGATGGATTACGAGGATTGCCACCCTCAAGAGATTGTGGT  
CGTGATGATAGGGTACCACAAGAGACAATTCCAGTTGAGCTTGGTCAAGAAGAAGAAGAAGATTACC  
AATGATCAGTTGGCAGGCAGTTCTCATGGGTTACGGTTGTGGACTTGTTATTGGACTGTCTATAATATAC  
ATAATGTTGTCAACTCAATATCCGGCATGGTTTCCGGGGATGGTTGTAAAATTGGAACACAGAATTA  
CGAGAATGAAAAGCACAAGAAAAGATATTAGTGTGTAGCTACCTCCAGGTATTCAACTTGATCTTTATC  
CTTCAAAGATTAATTTTATATATATCGATGTATTTCTACCTACTTCATCATCAAAGCTCTTAACTTTAA  
TTCTTTACTTTTTAAAATTGCAGGATTTAAGTCTACAGAGTTGCTGAAGATGCAGATAAAAGCCTTTTAT

CTTTCATAGTTTGTGATGTTTTTCATAAAGTTTTTGTAAATCCTATGAATAAAGACACAACCTTTTATT

>PGSC0003DMG400032286 LRR-RLPs

GGTGTTAAAAAAAAGATCAAATTTCCACACTTCTTGAGAAATGTAAAGACACTTGTGTACTTGGATATT  
TCTACCAATAATATTTGTGGTCAAATCCCTAACTGGTTTAGCGGAATGAGGTGGGACTCGTTGCAGTTCC  
TAAACCTTTCTCATAATTTATTAACAGGCCACCTACCACAATTCCATTATTATAGTCTAGAGTATCTTGATC  
TGAAATTTAACTCCCTTCAGGGTCCACTACCTTCATCCATTTGTAACATGAGCTCGCTTGAATTTCTTGATT  
TATCACGCAACAACCTTCAGTGACTIONCAGTTTCACATTGCTTGGGAAGCATGGCTAATCTAACGGTGCTAGA  
CTTAAGAAGGAACAATTTACAGGGAGTCTTCCCCATTATGTGCATAGAGCACTTCATTGAGTACCATT  
GTCATAAATGGTAATCAATTTGAAGGACCTGTACCTGTGTCGTTGCTCAAGTGTGGTGGTCTAGAAGTAC  
TTGATGTGGGGAACAATGCTATAAATGACACGTTTCCAGCTTGGCTCGGAACTCTTCAAGAGCTACAGG  
TCCTTATATTAAAGTCGAACAAGTTCCATGGACCTATAAGTACGTGTCAGACTAAGTTTTGCTTTCCCAAG  
TTGTCGAATTTTTGTATCTTTCTCGTAATGATTTTCAGTGGCTCACTTCCTGCAAAAGTTTTTGGAACTTCA  
AGGCAATGATTAAATTAGAGGGTGAAGACACGGAAGAGATCAAGTACATGGAGTTGATTTTGTCAATTTG  
ACACATCGTATGAGGATTCAGTGACTIONTGGTGTATCAAAGGGAGGGATATTGAGCTAGAAAGAATCAGC  
ACAATTATGACAACCATTGATCTCTCAAGCAACCATTTTGAAGGTGTCATTCCGAAAACACTAAAGGATC  
TCAGCTCACTTTGGCTACTCAATTTATCCATAACAATCTCAGAGGTCATATACCAATGGAATTGGGGCA  
ATTGATACGCTTGAAGCTTTAGATCTCTCCTGGAATCTGCTCACTGGAAAGATTCCACAGGAATTGACAA  
GATTGAACTTTCTGGCCTTCTTAAACGTCTCTCAAATCATCTCGTTGGACCAATTCCTCAAGTTGACAA  
TTCAACACATTTGAAAATGACTCATATGGTGGCAACCTTGATTTATGTGGTGTTCCTTTAACAAAGAAAT  
GTGGAACGAGTGATTCATCGCATGTTCTCAACAATTGGAGTCCAAAGAAGAAGGCGAGTCATATTTTT  
TTAGTGGATTTACTTGGGAATCAGTAGCCATAGGCTACAGCTGTGGACTAGTTGTTGGAAGTGTGATGT  
GGAGTCTCATGTTTAAAGTATCGTAAGCCAAAATGGTTTGTGAAATTTTTTATGATGGACTCATGCCTCACA  
AAGAAGAAGGCCAAAGAAGAGAGCTCAGAGATGACGGACTTAATGGAAGATTGAGAGGGCCAATTGG  
TGAACCTTTCTGGTTCTGTTTTTATCTATTAGAAACATAATTATATGTGTGGTATAATTCAAGTTAAGTTAC  
TCTGCTTGTGTGGAAAATATTATTGAATTTCTTACAAGGATAAGGCATTTCACTTTCTAGTTCTGAGTGT  
TTAAAAGCAAATTGAACAAAATTTCAACTCTTTTTAAGTAAATATCGGTGATCTGTGCGGTAGCACAAA  
GTTTCTGGCAGTCTTAAACCTCTGTCAATCTTCTTGGTGGACAGATTCTCAAGGTCTACAATTGATCA  
ACACATTTGAAAATGACTCATATGGTGGCAACCTTGATTTATGTGGTCTCCTTTATCAAAGCAATGTGG  
ATCGAGTGATCCATCACATGTTCTCAACCATTAGAGTACGAAGAAGAACATGCAATAGGGCTAGGTTA



ATTTGGGATCCGGATTGAGTAGTGGCATGGAAACGACTCCATCAAAAAGGGTAGTGCAATGTGATTCA  
GGAATTATGCATATTGGAGAAAATGTTTGCCTCTCCTCTTCTTAGAGTCTAAGCTTCT

>PGSC0003DMG400032572 LRR-RLPs

TGAAGATGGCTGATGCCTTTCTGTCATTTGCAGTTCAAAAATTGGGTGATTTCCATACAACAAGTTTCC  
CTGCGTAAAAATCTGAGAAAGGAAATTGAGTGGCTGAGAAATGAGCTACTCTTCATACAGTCTTTCCTCA  
AAGATGCAGAACTAAAGCAATGTGTAGATCATAGAGTTCAACAATGGGTGTTTGAATCAATTCTGTTG  
CGAATGATGCTGTCGCAATACTCGAGACTTACAGCTTTGAGGTTGATAAAGGTGATGACCATGAATTTG  
CTAGTCGTCTCAAGGCTTGCCTTGCATATGTAGGAAAGAGAAGAAATTCTACAATGTCGCCGAGGAGA  
TTCAATCACTCAAGCAGCGAATCATAGATATCTCTCGCAAGCGAGAGACTTATGGGATTACAAATATCAA  
TAGTAATGCTGGAGAAGGGCCAAGTAATCAGGTTAGAACATTGAGGAGAACTACCTCATATGTGGATG  
ACCAGGATTACATTTTTGTTGGACTTCAGGATGTTGTACAAACATTGCTAGCTCAACTTCTCAAAGCAGA  
GCCTCGTCAAGCGTCCTCTCCATTTATGGCATGGGCGGATTAGGCAAGACCACTCTTGCAAGAAACCTC  
TACACCAGTCCTAATAATAATCTCAAGCTCCCTACACGCGCTTGATATGTGTTTCTCAAGAGTACAACAT  
AATGGATCTTCTTAAGACTATCATAAAATCCATCCAAGGTCGCACCAAGGGAACCTTAGGATTGTTAGAA  
ACTATGACAGAAGGAGATCTAGAAGTTCACCTTCGTGATCTATTGAAAGAACACAAATACCTTGTGGTG  
GTTGATGATGTATGGCAGAGAGAAGCATGGGAAAGTTTAAAAGAGCATTCCCGGATAGCAAGAATGG  
CAGCAGAGTTATTATTACCACGCGCAAAGTGGATGTCGCTGAAAGAGCAGACGACAGAGGTTTTGGCC  
ATGAACTTCGTTTCTAAGCCAAGAAGAAAGTTGGGATCTTTTTGTAGGAACTACTTGATGTTGAGC  
AATGGTTCAGCAATGGAAAGTCTAGCTAAGGATATGGTGGAAAAGTGTAGAGGCTTACCTCTTGAAT  
TGTTGTATTGAGTGGACTACTTTCGCATAGAGGGGGGGTGGACAAATGGCAAGAAGTGAAGATCAAC  
TTTGAAGAACATTATTGAAGATAAATTTATTGAAATCTCCTGCATTCTATCCTTAAGCTACAATGATTTT  
GTCAACTGTGCTCAAGCAGTGTTTTCTGTACTTTGGTATTTTTCCAGAAGATCAAGAGGTCGATGCTGAA  
AAGATAATACTGTTGTGGATGGCCGAGGGTTTCATACCAAATGGAGAAGAAAGAATGGAGGATGTGGC  
TGAAGGCTTCTTGAATGAGCTGATAAGACGAAGCTTGTTCAAGTGGCTAATACGTTTTGGGAAAAGT  
TACTGAATGTAGGGTTCATGATTTACTCCGTGATCTTGCCATACAAAAGGCATCCGACACAAACCTCTTT  
GACATTTATCATCCAAGAAAGCACTCCAATCCTCTTCATGTATCAGACTTGCCTTTCATGGTCAAGGAG  
AAATGTATCACTTACTTGATCTTTCTAATTTGAAGTTGAGGTCAATTATGTTCTTCAATCAGGATTTTCGTA  
ATGTGTTCCAACATATAGATGTGTTTCGACATATATATGTGTTGTACTIONTGCATATTAAGGCTGTGGTGCT  
ATACCTGATGCCATAGGAAGTTTGTACCACCTTAAGTTCTTAAGCTTGAGAGCTAACCGTGATCTTCCATC

TTCCATTGGCAACCTCAAGAATCTACAGACACTTGTGTCAATGAGGGGGGATACTACTCCTGCAAACCTA  
CCCCGCGAGACAGCTAACCTGATAAATCTAAGACATTTAGTTGTTTGGTATTCAAACCTCTGGCACATA  
TAAGCAAACCTCACTAGTCTTCAAGTTCTTGAAAGAGTTTGTGTGATCAATGGAAAGATGTTGATCCTGT  
TGATTTAGTCAATCTTCGAGAATTAAGCATGTTTCATACTAGCAAACTTACTCCCTAAACAACATTAGCA  
GCTTGAAAAACCTTAGCACTCTCAAATTGATTTGTGGAGAACTGAATCATTCCCATCTCTTGAATTTGTT  
AATTGTTGTGAAAAGCTCCAGAAATTGAGGTTAGAAGGGAGAATAGGGAAACTGCCTCTGTTTCCAAAT  
TCCATCACAATGATGCTTCTTGAGAACTCAAACCTGACGGAAGATCCGATGCCTATTTTGGGAATGTTGC  
CAAACCTAAGGAATCTCCATTTGGTTGGAGCTTATGAAGGAAAAGAAATAATGTGCAGTGATAACAGCT  
TCAGTCAACTAGAGTTCCTTCATCTTTATGATCTTTCAAAGCTAGAAAGATGGGATTTAGGCACAAGTGC  
AATGCCTCTGATTAAGGTCTTGGTATCCATGACTGTCCAAATTTAAAGGAGATTCCAGAGAGAATGAA  
AGACGTGGAGCTGTTGAAGAGGAATTATATGTGGTGAAGCTTTTCAAGCATATATATATATATATATA  
TGATGTCTTCATAATCGTAGAGGTATTGATGGGGGCATGGCATTCTGCCAAGCACATTGGTTATTAATT  
GAGTGGTTTTAGTGTTCATTTCTTTATTGTTTTAAGCTTTGTAATTGGTTTGAACATAATTGGTCTAC  
TGTATGTTCTCTTGCTTATCCACATTTAAGACGATGCTTTATTTATATGTTAAAAAATGATATTA AAA

>PGSC0003DMG400032785 LRR-RLPs

CCCCTGTATAGTTCCTATATAAACATTCGGTTAGGTAGCTAGCAAATCAGATTGCCAGAAAAGAAAGTA  
GAGTAATAGTGGGCCGGGATAATGGGGAACATTAAGTTTTTGCTGTTAGCGTTTTTTCTAATAGCAATTG  
TGGCCAATGGTTGTTTGGATGAAGAGAGAAATGCTCTCTTGGATCTGCAAGCAAACATAATGAGTTCGA  
ATGGCGAATTGTTGTTGATTGGGCAGGTTACAATGAGACTGATCTTATAGATTGTTGTTCTGGAATAG  
GGTAAAATGTAACCTAACACAGGTGAGTGATCGAACTCAATCTCGCAACAAGGTTTGGATCAGGGGA  
TGGTTGGAGATTTAATGCCTCTCTCTTTCTTCCATTCAAGTCACTACAACCTCTTTTATTGTCTTACAGAAA  
TATTATTGGGTGGACAAAAAATGAAGGTCTGATCGATCTTGTATGGAGTGTGTGTGTATATATATTATAA  
CTAACATGTTTTTTGGTCTGATTTTTTAATCCAGGATTCAGTAAACTAAAACAGCTTCCCAACCTGAAAGA  
AGTCGATTTGCAATATAATCCAATCCATCCTAAAGTTTTACTATCATCTTTATGTTGGATTTTCTCTTGA  
GGTTCTAAAACCTTGGTGTACATGTTGGTACCTCTTTCAGCATACCGACGGCATATAATACCAGTATATTTT  
CTTACATATGCATATACCTGTAGCTATTTTTGGACGGTATATTTTTACTTAGTATAGTTGTAATTTTTGGAT  
GAAGGCATGAGTAAGAAATGTCCGGGGCTAAGCAATTTAAGAGAACTCTGGTTTGAAGGTTATGAAAT  
CAATGACATCAATATCCTTTCTGCATTGGGTAAGCTCTCTTTTACACAACAAATACATGTACAAAGTAACT  
CGGAGATTTACAAAATAATACGTTTTTTTTTCCATAAATCAAATGCAGGTGCAAATCTGGACTGAGGA

ATTTAGAGAAGCTCATTTTGAATGATAATAACTTCAATTCCACCATCTTTTCATCACTCAAGATTTTTCCGT  
CTCTCAAGCATCTCAATCTCGCCTCAAATGAAATAACTGGAAATATCAAATGAATGGTTTGTTACGCCC  
TCTTCCCATCCAAGTCTTCCCTGCTAACAAATTTTGCTCCACTAAGATATCAATGATGCATCTAAGTATCTC  
GATTTTATATTATTTCGCATATCAAATCACAGTTTGATTTATTTATTTTTGGTGTGCTTACTATTTATTTTTGA  
TTAACTGTGTAGATATAATTGCTTTGAGCAACTTGAAATATCTAAATCTCTGGAATAACAATATAAAGA  
GCTTTAGGACTACCAAAGGTACACAAATCAAGGCAGTTGCTCTAATGTTGAATGATTTATTTTTAACCTTA  
AGACATACAAAATGCAAATTTTATCAGATAGAGATTAATGATGAAATGTGGACTAGGATTACACATTTTT  
ACTAACATATGTAATAAGATCAATAAAAAACATATATGATTTATTTAACAGGTAAAAAAGAATAAGTTC  
TCTGCGGAATTTACTATTGGGAAGTCGTAACTCCAACCTCCAACCTCGAGCAGCGTCTTACAATCTCTAAAA  
TTATTCTCATCCCTTAAGTCACTTTCTTATAAAGATAGTGATCTCACTGCTCCCACCATAATTTACGGTAAG  
TTCAAATCAAATTTTATTTAACTTACTTCTATTGTGACTTTTTCTTTGAAATATGAAAATTTTGTTATTTT  
TTTTTGTGACTCTATCATATAATAAGCATTAAAGAAATCTGAGCACGGTGGAGTACTTATATTTGGGGAA  
ATCTTCTTTAAATGAGAATTTCTCGCAAATATTGGACAAATGACTTCTCTTAAAGTGTTGAGTATGCCTT  
CTGGTTACAATAATGGCAACCTCCCTAATCAAGGTAACCTATTTCTCTTCTTTTTCTTAATGCTTGCATTT  
TCATTAATATAGGTGTGTTTCAAGTATGGGGAAAACATGTTTTCTGGAAAACATTTATACTAGAAAAA  
AATTCTTATAAAATGATACTATAATATAATTTTTCTTTAGAACACATCCATAGTCCATAGCTATAATATA  
ATATACAAATTTTTTTTAGCTAAATATCTCTGAATCTTTTTTATAAAAATATATAGGTTGGTGTGAACTCA  
AATACATTGAAGAGCTGGATTTCTTAGACAATAATTTTGTGGGAACACTGCCTTCGTGTCTTGAAACTT  
GACATCCCTTCGATGGTTGTGTTTGGCTGGGAATTACTTCAGCGGAAATACAACCTCACATTCTATTTGG  
AGGAGATTCACATCACTTGAGTACTTGGATATTGCATATAACCAATTTGATGTTTCTCTGTCATTGAGGCA  
CTTTTCCAACCATACAAAATTGATCTACTTGGATGTTGGTTATAATACAATAATTACAGATACCGAATTCC  
AAAATTGGATCCCAAATTTCCAGTTGGAGTTTTTTGCTATCGAGGGATGTATGAACCTTCAAAAATTGCC  
TTCTTTCTTCACTACCAATATGACTTGAGGATTCTGTTATAGATGGAAATCAATTGCAAGGAACTTTC  
CAACATGGTTGTTAGAAAATAACACCAGACTTGCAGGGATTTATAGTAGAGATAATGCTTTTCGATGGAC  
CATTCAAGTTGCCATCGAGTTGTACCTCCATCTAGAGATGATTGATGTGTCTAATAACAACTAAATGG  
ACGTATTCCAGAAAATATGAGTTTAGCCTTCCCAAAGCTTACTAGTTTGAACCTGTCACAAAATTATCTTG  
AAGGTCCTATACCTTCCAAGATTTGTGGCGTTCATGTATTTATCTAGACCTATCTCACAATTTCTGTCTG  
GGGGAGTACCTAGTGATGTGGCAATTGGTTCTCCAGCATTAGGTTACCTTCGATTGTCACACAACAAGTT  
AAAAGGGCAAATTTTTCCGAAGTATGTCAAACAAGGATGTTATCCTTTTTGTAATTGAATGGAATAAC

TTTGAGGGGCCACTACCTAGCAACATGTTTATCACATCCCTTTTTGTA CTGGACGCTAACAAACAATAGTTT  
CTCTGGGAAGATTCCGAGATGCATTAGGGATAATACAAGATTGTTACA ACTTGATTTGTCCAAGAATCAT  
CTCGAAGGTTTCGATTCCAGTTGAGATTTGCAATTTAAAGCGCATT CAGGTTTTATCTTTATCTGAAAACAG  
TCTTTCAGGATTAATTCCTTCTTGATGAGTTCTTTATCTCTTCAACACATCCATCTAGAGAGAAACCAATT  
GGGTGGTACACTAGAACATGTACTATTCAACTTCTCTTCTCTGATAACTTTGGATCTTCGCAACAACAATT  
TTAGAGGAAATATCCCACACACCATAGGCTCGCTTAATACTCTAAACTACCTTCTCCTTAGCACTAACCAA  
TTGGAAGGGCAGATTCCAAATCAGATTTGTATGCTGAATAAGTTATCTATTGTGGATTTATCTTTCAATAA  
GCTTTATGGTCCACTCCTTCCTGTTTGGGTTACTTAACACAAGCCGAAAATGATGTAGAGATAAGTAGT  
ACTAAGTATGCTACGACTTCTACGTATTCATGGTTAAATTTTTTGC ACTGGATACGTTTCGAAAAGGCACTA  
CCACGATAGTCATGGAATTCTAAGTGACATATCTTTGATGGATGTGGAAACTCAGGTCCAGTTTTCAACG  
AAAAGAAACTCATACACTTATAAGGGAAGCATTCTAAAATATATGT CCGGTATTGATCTCTCAAGTAACA  
GATTA ACTGGTGAAATTCCCGTTGAGCTAGGGAACATGAGCAATTTACCTGCATTGAATCTATCGCACAA  
CCATCTCATCGGAAGAATACCATATACCTTCTCCAATCTACAGGAAATTGAGAGTTTAGACCTTTCCTACA  
ATAGATTGAATGGGAGCATTCTGTTGGTCTACTTGAGCTGAATTCTT TGGCAGTATTCAGTGTTGCATA  
CAACA ACTTATCTGGTGCAGTTCCTGATTTTAAAGCTCAATTTGCAACTTTTGACAAAAGCAGCTACGAG  
GGAAATCCTTTTCTTTGCGGTTATCCATTAGACAACAAGTGTGGCATGAGTCCTAAATTGTCAAATACCTC  
CAAGATTAATGGAGATGAGGAATCATCAGAATTGGAAGACATTAAGT GTTTTTACATTGGCTTAGTTGT  
GTCTTATGGAGCGATCTTGTTGGGATTAGCTGCAGCGCTCTGCTTCAATCGTCATTGGAAAAGAGCATG  
GTTTAGGATGATAGAGTCATTGATGTTCTATTGTA ACTATTTTGTGTTGGACAACATTGTTACACCCATCA  
AGAGTAGATGGTACAGGAATGTTGGTTAGGAATTGTTGTATGTCTATTCACTATTATTTTATTGTGATTCT  
CTTTTATCAATATAAAAATCCATTTGGAGCTGTTACAATTT CATATGTTAGTAATATCCCAATGGTCTATTT  
TTGTATATTCATGAGATGCTTCATTGGTG

>PGSC0003DMG400032828 LRR-RLPs

TGCATTA CTAGTCATTAACAAAAATGGCTTCATTTTCTTTCCCAT TACCACTACTGCCTTTGTTATCTTGC  
TTCTAAGTCTTACCTCCAATGTGTTCAACA ACTCAGCAGCCAAACACAGCCATTCTCCTCCGTTAAGGGC  
ATAAAAAACCCAAGGCTGCAAAAAGCCTACATTGCTCTCCAAGCTTG GAAACGTGTTATCTACTCTGATC  
CTAACAACTTCACCTCTACTTGGGTTGGCCCTTCAGTCTGCAACTAC ACTGGCATATATTGCGCGCCATTC  
CCTAATAACACCAA ACTCCAAGTTGTTGCTGGCATTGATCTGAACCATGCTGATATAGCCGTTTCCTACC  
TGAGGAACTCGGTCTTCTCAATGACTTAGCGTTGCTGCACCTAAACAGCAATCGCTTCTGTGGAATCCTC

CCACTCTCTTTATCCAACCTCACTCTCTTGCATGAGCTTGATCTCAGTAACAACAGATTCGTAGGACCTTTT  
CCTAACGTTGCTCTCTCTGCCTTCCTGAAATATCTTGATCTTCGCTACAATGAGTTTGAAGGGCCATT  
GCCTCCTCCACTCTTTAGCAAAGATCTCGATGCTATTTTCGTTAACAATAACCGTTTAACTAACGTGATCC  
CTTCAAATTTAGGATCAAGCTCTGCTTCTGTTGTGGTTTTTGTAAATACTACTTTGGAGGATGCTTACCA  
CCTAGCATAGCCAACCTTTCGAAACACCTTAGAAGAATTGCTCCTTACTAATACTAGCTTATCAGGGTGTTT  
GCCTCCTGAAGTGGGATTTTTATACAAGTTAAAAGTTCTTGATGTGAGCAACAACAAGTTAGCAGGGAC  
AATACCTTATACTATTGCTGGTTTAGCTCACTTGGAGCTACTAAATTTAGCACACAACATGTTTAGTGAA  
CTGTACCAGAGGGAATATGTGTATTACCTAAGCTCTCAAACCTCACATTCTTATAACTATTTCTGTGAG  
GAGCAAGGTATTTGCAGCAACTTGACATCAAAGGGCATAGTGTACGATGATCGTCGAAATTGTTTGCCA  
GAGAAGCCTCTTCAGAGAAGCAAGAAGGAATGTGATGCTGTGGATGAGCATCCCATTGACTGTTTAGCA  
TTTCATTGTGGCACTTGATACTGTTTTTCATGTGTTGGTTCTACTGAAAATGTGACAAATTAGTACTAGCTT  
GAGTTTTCTTGAACTTTTTTTTCAAATTTAGTAGCCAATGTGAAAAAGAATAAAGTCAATAGCAACTCT  
GTAAATATGGTGTGTGATTAAGCTTTTCTTATGTTGGTAATTTAACTTTGATGCTGCTATTATGTGTTGTC  
CCAAAACATGATTCTCATTCTTGAAAAATCTAATCAAGTTCCTACCTACATAGTGAATTCTTCTGTAATTC  
CATATTTTTCTTGTACTGTATATTTCAATTTAGA

>PGSC0003DMG400033131 LRR-RLPs

GTCATTTTTTAAATTTCTATGACCATCAATTTAGGGCAACCCTTTGGAGCAATTGATCTCTGTTTGCCACA  
ATCAACAACGGAAGGTGAGATTTTTTTAAATCTTTTTTCGCTTATAAAATCATGTAATTAATCAAATAT  
GTAATACTACTTCAAGTTGGTTTGTAATTGTAGTACAACAAAATTCAAATCATTTGAACTTGGTTAT  
GGTGTTTTTCTTCTCTAAATTATGAAATGATATTGTTTTCATTTCTTTTATTAAGGTGAAAGAGCAATTAA  
CTCAATCCATGGAAGTTGTTGAGACTTGTGCTAAAGGAACTCTTCTTCTGGAGAGCCTTCAAACAAACC  
TGGTATTACATCAATCTATGATGATGATGAAGTTGTCGGCTTTGAGAAAGAAGCAGAAATTATAATGAT  
GAAATTGATACGAGGAACAAAGGAGCGGGATCTTATCTCCATCTATGGAATGGCAGGACTTGGTAAAA  
CAACTTTGGCAAGAAAGGTATACAACAATCCCTATATTGTTAATCACTTTGATGTTAAAGCATGGTGTGC  
TTTGTGCAAGTATATAATAGGACGACGTTATTGATTGAGATTTCAAACAAGCTACAAATGATGAGATC  
GAAATCAAAGAAGAGGATGATGTAGCTGACATGTTGCGCAGGGTTCTAATAGGCAAGAGATACCTCAT  
CGTATTAGATGATATTTGGGATGTGAGGCATGGGAAGATTTGGGAACATGTTTCCCTCAAGGTAAATA  
TGGAAGCAGAGTAATGGTTACAACAAGAATTGAACAAGTGGCTAAGTATCTTCAGCACCATAGTGATCC  
TTATTCTTAGCTTTCTAACATCCGAACAGAGTTGGAAATTATTGGAGAAGAAGGTATTTCAAGGAGAG

AGTTGTCCCCTGAATCTACTTGAAGCAGGGTTACAAGTTGCCAACATTGCAAGGGATTGCCTCTTGTTG  
TTGTCTGGTTGATGGGTTTATTGCGAAAATGAAAAGGGAAACGTCCTTGTGGCTCGAGGTTGCAAATA  
ACTTAAGTTCTCTTGCTTTGGGGGAGCAGAGTATGAAGGTAATACAATCAAGTTATGACCATTTAGAAG  
ACCATTTAAAGCCTTGCCTTCTCTACATGGGATTGTTTCCAGAGGACCATAAGATTCCAGTGCACGATCT  
GCTGAAGTTGTGGATGGCTGAAGAGTTTGTATTGAATGCCGAAACAGAGAACATGGAGGAAGCATGTC  
GAGTTTGCTTGAGTGATTTGCTTAACAGAAGCCTAGTAATGGTCTCTGGAACGAGAGTTAATCGTGATG  
TAGTGTACTGCTCACTTCACGATGTAGTGCGTGAGTTCTGCTTGAGAAAACACAGAAGACAATTATAT  
ACAGGTTGCAGTGCCATACAATCCGTATCAACATTTGCATTCCACGGAATCACGGTTATGCATTTATATTC  
ATGATGATCTTGTTAAACAATTAGATTATTCTGAATACCAGTTGGATAAGATTCCAATGCTCTATTTCAAG  
GAAACAAATTTCTTGGAGTTCATTGCTCATCCAAAACCAATACATGGAATAACCAATATTCAAATCCATT  
AGATTTAGTTGTTAAATTCAGATTTGTTCCGGCATTGTATTTGATGGATGTGGAATTGCCAAATTCATGG  
GCTACTGTACTGCAATCGCTAACTCAGTTGAGGTACCTAGCACTTTATGTCAAACAATTTCAATTGAAGT  
GGATATCACACCTACACCATCTCCAAACTCTGCACCTCAAACAAGGAAGAGGATATGGCTAAGGGCTT  
CTACTTTATGGGAAATGACAAAGATAAGGCATGTGAATATAAATAGGTCTTCCGTGGTATGGGATTTCA  
ATGACGAAGGAAGTTGTGATGAACTTCAACAATATGCTAGAGAACATGAAGACTTTTCACTTGCA  
ATATATGCTTGGATAATATGAATCCAGGGTTTTTGTGGAGGTTTCAAATCTTGAAGAACTCGGCCTCAA  
AATGAAATATGTACCTGAGTTTCTTTGTTCCCATACCGGAAGTTTATACTTGCCTTCACTTCTTTCTCT  
GGAGTTAAGTTCCTTGAATTTCTGGGATTCAGTTGGATGGAAGAGCAATTTTGTCTTCCCTCAAATCTT  
AGGCATCTGTACTTTGCTGGCTGTTTCTTGAGGGAAGGAATGGTTCAAACATAGCAAGATTGCGGAAG  
CTTGAGAGTCTCACATTAGAAGAGGGAGTTCCTTGCAGGATATCTGAGAGTGAGAGCCTCTATTGCTGG  
GACATTACAAATGTTGAGTTCCCTGCACTCAAATACTTACACTTCCGTTGGCATATAGACGAATGGA  
AAGCATCAGAGGAATCCTTTCCGTTCTTGAGGAGCTATCTATAGAGGCTACTGGTCAAATTTCAAGGA  
GATCCCTCCTTGCTTTGCGGATATTTCAACACTGCGACTTATTAGACTGGCTTACTGCAGCCATTCATTG  
GTGTTTCAGCCATGAATATCAAAGGGACAGAGAAGAAAACACAGGATGTGACAGTCTCAAAGTTTTAG  
GTGTAATAAATAAATAATGATTTAAAAGCAATTCAAAGCTGTGAATCCCAGCTCTATTTCACTTCTT  
AATTCTAC

>PGSC0003DMG400033132 LRR-RLPs

GAAGAACCTCTGTTTTTAGTAGCAAAGATAGTTGTTTGAAGCTACAAATTTATGCAAAGGAAAGAAAAG  
GGGTTGATGGATGTAGCATGCTTGTGGAAATCATGAATGCATTCTGAATAATAATGGTGAAGGGAAATA

GAGAAATTGTTTCATATGTTTCATCTGAAATGAAGGGAACCTTGTATATCCATGTTGAGCTCATCTCTGG  
CTTCTCTGGACACTAGGTAATTGCTGAATATATTGTTGAATCAAGTGAGGTTATTACAAATAAGTCTGCA  
GTGCGATAGGCTATCAATTACACTTGTTTCCTCAAATAAGACTTTTTTTTTCTTTCTGTGTGGCATTACTTC  
ATTTTATATTTTTGTTTTGATTTTTCTCTAGAGTATGAATATTGTTAAAAGTTCGTTTTCTTTTATGAAAA  
GGTGACAGGGCAATAAACTTCAAGGCAGTTGGATTGTGAAAGACACCAAACCAATTGACATGGATGTT  
GTTGAGACTTGTGAAAAGGAACCTATTGATTCCGGGGAGTCCATCCAACGTAGTTTTCCATCAATTG  
ATGAAGAAATTGTGGGCTTTGAAAAGATGCAGAAAGTATAATGCAGAAATTGACACGAGGAACAAAG  
AAGCTGGACGTTATATCAATCTTTGGAATGCCGGGACTCGGCAAAACAACCTTTGGCCAGGAAAAGTGTAC  
AACATTCCCTCTATTGTTAATCACTTTGATGTTAAAGTATGGTGTCTGTTTCTCAAGAATATGATAGGAG  
AACGTTGTTGGGTGAGATCCTTAAACAAACAACACGTAAGAGCGAATTCATTGAGGCTGATGACAGACC  
TGAAATATTGTGCAGGAGTCTGATAGGCAGGAGATACCTCATTGTATTAGATGATATATGGGATGTCAA  
GGCATGGGAAGATTTGATTTATGTTTCCCTAAGGGTGAAAATGGAAGCAGGGTAATGGTAACAACCTC  
GAATTGAACAAGTGCTAAGCATCTTCAGCACCATAGTAATCCTTATCCTCTTAGATTTCTAACACGGGA  
TGAGAGTTGGGAATTATTGCTGAAAAAAGTATTTGAGGAGAGACTTGTCCACCGAGTCTGTTGGGAGC  
AACGCTACAAGTTGCCAACATTGTAAGGGATTACCTCTTGCCATTGTCCTAGTTGCTGGCCGATTATT  
GGGGAAAAGGATAGGGAAGCGTCCAGGTTGTGGCTGGAGGTTGCAAATGATTTAAGTTCTTATGTTTTA  
GGAGAGCAGAGCATGAAGGTGATACAGTCAAGTTATGACCATTTAGAAGGTCACTTAAAGTCTTGCCTT  
CTTTACATGGCATTGTTTCCGGAAGACCATGAGATTCTAGTATCTAATTTGTTGAAGTTGTAGATGGCTG  
AAGAGTTTGTACTGAATGTGCACACAGAGAATATGGAGGAAGCATCTAGAATTTGCTTGAATGATCTGC  
TTAACAAAAGCTTAGTTATGGTCTCTAAGAGGAGTGCTAATGGTGACACAAAATACTGCATACTTCATGA  
TGTAGTGCGTGAGTTCTGCTTGAGAAAACCTCACACAAGACAAGTATATGCAGCTCGCAGTGCCATACAA  
TCCATATCAACATTTGCATTCCATGGAATCACGGTTATGGATTTATATTCATGATGATCTTGTTGAACAAT  
TAGATCATTCTGAATATCAATTGGATATAATTCCAATGCTTGAGTCCACCAACAAAACATACTGTTTTGGT  
AAATGTCCTATGTCGTCTTTGGAGTTCATTGCTCATCAAAGTTCAACACATGGAACCTATCAAATCCTTT  
ACCTTTACTTGAAAACCTAAGACTTGTTCCGGGTGTTGCATTTTCCGCTTGCAAAGCTTCCAAGTTCTTGGC  
CTAGTGCAGTACAATCTCTAACTCACTTGAGGTACCTTGAGATTTATGTCCAAGAATTTGATTTCAAGTG  
GATATCTCACCTGCTCGATCTTCAAACCTTAGTGGTTTGTTCATCTAATTCTCTAAGGACCTCGCTTGCA  
CTATCTGGAAAATGACGAAGCTAAGGCACTTAGATATATACAACCTTGCTTTGATATGGGACGACAATG  
ATCGGGCAACTTTTGAAGAATCTTCTACAACCTATGCTAGAGAACTTGAAGACATTCCGCGCTCATGTTAT

ACGCGTGGATGATAGGACCCCGAGGTTTTGGAGGAGGTTTCTGAATATTGAAGAACTCAGATGCTTCCA  
CATTATCGATTTACCTAGTTGTTCTTTGTTTCCCGCAGTGGAAGTTCATACTCGGCTTCAATCTCTTTATCT  
GGTCATAAACCCCTCAGGGATTCTGGGATTCAGTTGGTTGGGAGAGCAACTTTGTCTTCCCTTCAAATCTT  
AAGGAATTGTGCATTGGCGGCTGTTTCATAACAGAAGAAATGGTTTTAAATATTGCACGATTGAAGAAG  
CTTGAGAGTCTGACATTAGAGGGAGGATTTTCATTGGGAGGAAATAGAGTACCATTGTTGGGACGTCAC  
AAATGTGAAGTTCCTGCACTCAAATACTTGGCATTACACTTTATGAGGATGGAAGAATGGAAAGCTTC  
AGAGGAATCCTTTCCCGTGCTTGAGAAGTTAGTTATAAGAGAATGTCACTACTTCAAGGAGATCCCTACT  
AGCTTTGCCGATATTCCAACACTGCGACTTATTGAACTGTTTGAGTGCCTGATTCACTTGTGGTTTCAGC  
TGTGAACATCAAAAATGAAATAGAAGAAAACACTGGATGTGATAGTCTCCGGGTAAGAAAGTTGTATG  
GAGACGGATCTCTAAAGAAAAAGAAAAGGATGCCACGGGGTTTTTAATAAAGAGAAGAGAAAAGGA  
TTTTTCCAATTGAAGTGATGTATTGATAAGGGAT

>PGSC0003DMG400033152 LRR-RLPs

GTGATATACGCTTGGATAATATGAATGCAAGGTTGTGGTGGAGGTTTCCGAATCTTGAAGAACTCGGCC  
TCAACGTTAAAGTTGTACCTGAGTTTCCGTTGTTTCCCATAGCGGAAGTTCATAGTCACCTTCATTTTCTT  
ACTCTGGAGTTCTCTTTAACAGAATTATTTGATTCAGTTGGATGGGAGAGGTATTGTGTGTTCCCTTCAA  
ATCTTAGGCATTTGGACCTTGCCACCTGTTTCTTGACGGAAGAAATGGTTTTAACATTGCAAGACTGAA  
GAAGCTTGAGAGTCTTCAATTATCTATGGGATTTGCTTCTATGAGATATTGTTGGGATGTGACAGATGTG  
GAGTTTGCTGCACTCAAATACTTGGGATTATTCTTTATGCAGATAGAAGAATGGAAAGCTTCAGAGGAA  
TCGTTTCTGTGCTTGAGAAGCTAGTTATAAGTGGATGGCCCGGTTTCAAGGAGATCAAGGAGATCCCC  
CCAAGCTTTGCGGATATTCTAACCCCTAAGACGTATTGAACTGTTTGACTGCATGGAGTCTTTAGGGGTTT  
CAGCTATGAATATCAAAGAGAGATTGAAGAAAACACAGGATGTGACAGTCTCCAAGTTGTTATAGAAA  
AGTAAATAAAT

>PGSC0003DMG400033153 LRR-RLPs

GTGGGCTTTGAGAAAGATGCAGAAATTATAATGAAGAAATTGATACGAGGAACTAAGGAGCGGGATCT  
TATCTCCATCTTTGGAATGCCCGGACTCGGTAAACAACCTTTGACAAGAAAGGTGTACAACAATCCCTAT  
ATTGTTGATCACTTTGATGTAAAGCATGGTGTGCTGTGTCAACAAGCATATAATAGAAGGACGTTATTGG  
TTGAGATTTTCAAACAAGCTACAAATGATAAGATCAAATCAAAGAGGACGATGATGTAGCTGACATGT  
TGCGCAAGGTTCTAATAGGCAAGAGATACCTTATCGTATTAGATGACATTTGGGATGTCAAGGCATGGG  
AAGATTTGGGAATATGTTTCCCTCAAGGTGAATGTGGAAGCAGAGTAATGGTCACAACACGAATTGAAG



AAGTGACTIONAAGCATCTTCCGCACCACAGTGATCCTTATTCTCTTAGCTTTCTAACGTCCGAAGAGAGTTG  
GGAATTATTGGAGAAGAAGGTATTTGAGGAGAGAGTTGTCCCCGGATCTACTGGAAGCAGGGTTAC  
AAGTTGCCCTACACTGTAAGGGATTGCCTCTTGTGGTTGTCTTGATTGCTGGAATTATAGCAAAAAGGGA  
AAGGGAGGCGTCCTTGTGGCTCGAGGGTGCAGAAGACTTGAGTTCCTTGCTTTAGGAGAGCAGAGTA  
TGAAGGTGATAACAATCAAGTTATGACCATTTAGAAGATCACTTAAAGCCTTGCCTTCTTTACATGGCATT  
GTTTCCAGAAGACCATAAGATCCCAGTGGACCATCTGCTGAAGTTGTGGATGGCTGAAGAGTTTGTATT  
GAATGCCGGAACAGAGAACATGGAGAAAGCATGTGAGTCTGCATGACTGATTTGCTTAACAGAAGCC  
TAATAATGGTCTCCGGAATGAGATTTTATCGTGATGTACAATACTGCTCACTTCATGATGTAGTGCCTGA  
GTTCTGCTTGAGAAAACCTCACAGAAGACAAGTATATGCAGCTCGCAGTGCCATTCAATCCGTATCAACAT  
TTGCATTCCACGGAATCACGATTGTGCATTTATATTCATGATGATCTTGTTAAACAATTAGATCATTCCAA  
CTACCAGCTGGATAAGATTCCAATGCTCGATTTCAAGGAAACAAATTCTTTGGAGTTCATTGCTCATCCA  
AAACTCAATACGTGGAATAACCAATATTCAAATCCTTTCGATTTACTTGTTAAATTAAGATTTGTTCCGGC  
ATTGGATTTGATGGATGTGGAATTATCAGATTCATGGGCTACTGCAATTCAATCGCTAACTGAGTTAAGA  
TACCTTGCACCTTGTGTCAAACAATTTGAATTGAAGTGGATATCACACATACACAATCTCCAAACTCTTCA  
GGTCAAGTCAAGTGAGAAGTTACGCCTAAGGGCAGCTACTTTATCAGAAATGACGAGCCTAAGGCATGT  
GAAAATAGACTGTTTTTTCATGGTATGGGAAAACAATGAGCAAGAAAGTTCTTCAACCACTATGCTAGA  
GAACATGAAGAGTTTTGGCACTTGCATATACGCTTGGATAATATGAATGCAAGGTTCTGGTGGAGGTT  
TCCGAATCTTGAAGAACTCGGCCTCAGCGTTAAAGATGTACCTGAGTTTCTTTGTTTCCCATAGCGGAA  
GTTCATAGTCACCTTCATTTTCTTCTCTGGAATTCTCTTTGATGGAATTATTTAATTCAGTTGGATGGGAG  
AGATATTTTGTGTTCCCTTCAAATCTTAGGCATTTGGACCTTGCCGGCTGTTTTTGGACGGAAGAAATGGT  
TTTAAACATTGCAAGATTGAAGAAGCTTGAGAGTCTCAAATTAATTGTGGGATTACCTTTTGGGAGATCA  
GAGAGCTATTGCTGGGATGTGACAGATGTGGAGTTTGTGCACTCAATACTGGGATTATTCTTTATGC  
AGATAGAAGAATGGAAAGCTTCAGAGGAATCCTTTCCTGTGCTTGAGAAGCTAGTTATAAGTGGATGTT  
CCGATTTCAAGGAGATCCCCCAAGCTTTCAGATATTCCAACACTAAGACGTATTGAACTGACTAACTG  
CATCGACTCTTTAGGGGTTTTAGCTATGAATATCAGAAGAGAAATTGAAGAAAACACAGGATGTGACAG  
TCTCCAAGTTGTTATAGAAAAGTAAATTAATGTATTTAAAAGCACTTCATTGCTGCTCTATTTCCAATTCTT  
AATTCTACTTCTATATTGTCGCATTGTTATCTGTTTTTTAGGCATAATACATAAACATACCCTTTAACTTGA  
TCTGAGCTGACAACCTATGTCCTTCGACTTTGGTGCACACAAGTAAACACGTATAAATTGAACAAGTAAAC  
ACACACGTTTTATGTGACATAATACATGTAGGACACAATTGATAGATAGACGAATGGAAAGCTTCAGAG

GAATCCTTCCGGTGCTTGAGAAGCTATCTATACAAGCTACTGAGGAGATCCCTTCTAGCTTTGCAGATA  
TTCCAACACCCTGACTTATTGAACTGTCCAAATGCA

>PGSC0003DMG400033154 LRR-RLPs

AGGTTGCAAATGATTTAAGTTCTTATGTTTTAGGAGAGCAGAGCATGAAGGTGATACATTCAAGTTATG  
ACCATTTAGAAGGTCACTTAAAGTCTTGCCTTCTTTACATGGCATTGTTTCCGGAAGACCATGAGATTCTA  
GTATCTAATTTGTTGAAGTTGTAGATGGCTGAAGAGTTTGTACTGAATGTCGACACAGAGAATATGGAG  
GAAGCATCTAGAATTTGCTTGAATGATCTGTTTAAACAAAAGCTTAGTTATGGTCTCTAAGAAGAGTGCTA  
ATGGTGACACAAAATACTGCATACTTCATGATGTAGTGCGTGAGTTCTGCTTGAGAAAACCTCACACAAG  
ACAAGTATATGCAGCTCGCAGTGCCATACAATCCATATCAACATTTGCATTCCATGGAATCACGGTTATG  
GATTTATATTCATGATGATCTTGTGAAACAATTAGATCATTCTGAATATCAATTGGATAAGATTCCAATGC  
TTGAGTCCACCAACAAAACATACTGTTTTGGTAAATGTCCTATGTCGTCTTTGGAGTTCATTGCTCATCCA  
AAGTTCAACACATGGAACCTATCAAATCCTTTACCTTTACTTGTA AAACTAAGACTTGTTCCGGGTGTTGCA  
TTTTCCGCTTGCAAAGCTTCCAAGTTCTTGGCCTAGTGCAGTACAATCTCTAACTCACTTGAGGTACCTTG  
AGATTTATGTCCAAGAATTTGATTTCAAGTGGATATCTCACCTGCTCGATCTTCAAACCTCTAGTGGTTTGT  
TCATCTAATTCTCTAAGGACCTCGCTTGCAGCTATCTGGAAAATGACGAAGCTAAGGCACTTAGATATAT  
ACAACCTGTCTTTGATATGGGACGACAATGATCGGGCAACTTTTGAAGAATCTTCTACAACCTATGCTAGA  
GAACTTGAAGACATTCCGCGCTCATGTTATACGCGTGGATGATAGGACCCCGAGGTTTTGGAGGAGGTT  
TCTGAATATTGAAGAACTCAGATGCTTCCACATTATCGATTTACCTAGTTGTTCTTTGTTTCCCTCAGTGG  
AAGTTCATACTCGGCTTCAATCTCTTAATCTGGTCATAAACCCCTCAGGGATTCTGGGATTCAGTTGGTTG  
GGAGAGCAATTTTGTCTTCCCTTCAAATCCTAAGGAATTGTGCATTGGCGGCTGTTTCATAACAGAAGAA  
ATGTTTTTAAATATTGCAAGATTGAAGAAGCTTGAGAGTCTGACATTAGAGGGAGGATTTTCATTGGGAG  
GAAATAGATTACCATTGTTGGGACGTCACAAATGTGACGTTCCCTGCACTCAAATACTTGGCATTACACT  
TTATGAGGATGGAAGAATGGAAAGCTTCAAGAGGAATCCTTTCCCGTGCTTGAGAAGTTAGTTATAAGAG  
AATGTCTCTACTTCAAGGAGATCCCTACTAGCTTTGCCGATATTCCAACACTGCGACTTATTGAACTGTTT  
GAGTGCCTGATTCACTTGTGGTTTCAGCTGTGAACATCAAAAATGAAATAGAAGAAAACACTGGATGT  
GATAGTCTCCGGGTAAGAAAGTTGTATGGAGACGGATCTCTAAAGAAAAAAGAAAAGGATGCCACGGG  
GTTTTTAATAAAGAGAAGAGAAAAGGATTTTTCCAATTGAAGTGATGTATTGATAAGGGAT

>PGSC0003DMG400033334 LRR-RLPs

CATCAATTGATCTCATCCGATCCATACACTTTACTTTTTCTTTTCAGACAATTAATTGAATCTATGGCATCT

TCTTCTTCTGCGAGTAAGTCACAGAACTGTCCTCCATACAAGTACAATGTCTTTCTAAGTTTTAGAGGGCGC  
AGATACCCGGAGAAATTTTATGAGTCACTTGTACCAAGGTTTGGAAAACAGGGGAATATTTACCTTTCTA  
GATGATAAAACGCTAGAGGATGGTGATTCCATCTCAGAAGAACTCATGAAAGCGATAAAAGAGTCTCAT  
CTTGCCGTAATCATTTTCTCAAAGAATTATGCTACGTCAAGTTGGTGCTTGAATGAACTAGTGAAGATTA  
TGGAATGCAAGGAGAAAGAAAATGGACACATGACAGTTATACCGGTCTTCTGTAATGTGGATGCATCAC  
ATGTTGATACCAAAGTGAGAGCTTTGCAGAAGCATTGCCAAACATGAATCGAGGTATAAGGATGAT  
GTTGAGGGAAATGCAGAAGGTGCAACGATGGAGAAGTGCCTAACTGCTGCCGCAAATCTAAAAGGACA  
TGAATCCCTAACAGGTCAGTTAAAAACACATAAATTTAAATTGATGGAATAAGTTATGAAGACTAGCTA  
CACATAGTTATATTAGCATTAGTTTATTCTTCTTTTTTTTGCAGTGGTGAGTCAGATGCAGACTGTATTAA  
GCGTATTGTTGATCAAATTCGTCTAAGTGCAATACTTCAGTATCTTATTTGCAAGAAGTTGTGGGTATA  
GATACTCAATTAAGAAAGTAGAATCCCTACTAAAGATGGAAATCAATGATGTTCCGGATTGTGTGGATC  
TGGGGTATGGGAGGCATTGGTAAAACGACATTAGCAAAGACAATTTTTTATAAGCTCTCGTCCCAATTTG  
AAATCAATGATGTTTGTTCCTTGAGAATATCAAAGAAAAAAAACACAAAATGCACTCTCTACAAAATAT  
CCTTCTCTCTAAACTGTTAAGGGAAAAAGATAACTGCGTGAAAGATAAGGAGGAAGGGAGGAATTTGC  
TGGCTACGAGACTTAAGTGTAAGAAGGTTTTAATTGTGCTTGTGACATAGATCACGGAGACCAGATGG  
AATACCTAGCAAATGATCTCGGTTGTTTTGACAAGGGTAGCAGGATTATTGCAACCACTAGAGACCAGC  
GTTTGATAGGGGAAAATCACGTAGTATATGAAATGGAAACACTACTTGACCGTGATGCTATTAACTGT  
TCGAACTATATGCTTTCAAAAAAAAAGTTCCAAATGAGTGTTTTAAAGATCTAACGTTGGAGATAGTAAG  
TCTTGCTAAAGGCCATCCTTTAGCCCTGAAAGTATGGGGTTCTTCATTACACCGGATGGATATAACTGAA  
TGAAAAGTGCCATGGTCCGAATAAAGAAAAACTCTAATGTAGAAATTACTAAGAACCTCAAATAAGT  
TATGATGGGTTGGAGCGGAAGAACAACAATATTTCTAGATATAGCATGTTTCTTCCGAGGAATTGAA  
AAAGAAGAAGTCATGCAAGTTCTTGAGAGTTGTTATTTTGGACCAAATTTGGATTGCGTGTTCTAGTTA  
ATAAATCTCTCGTGTCTATCTCTGAATATGATACGATTGAAATGCATGACTTAATACAAGATATGGGTAA  
ATATATAGTGCAAAGGCGAAAGCATCCGGAAAAACATAGTAGATTATGGAATGTTGAACATTTCAATGA  
AGTGGTGGACAACAATATGGTAAGTAGGCTAAACAATGCAATAATATTCAATTTTACTTTTCATATTCGA  
AAGACATATAGAATATATAGTCAATTTCAATTTATTTATTCATCTTTATTTATATTCTAGCGCGTATGTCATT  
TTAGTCATTTACTTTAAGGGAAAAAAAACCTGATATACCCCTTAACTTTGTCATTTGGAGCTGATAAA  
CCCCTCTTTATGACAGTGACTCACATATACCCTTACCGTTATACAAACGGCTCACATGTACCCTACGTTA  
CAAATGAGCTCACATATATCCTTCATTTAACGAGAGTGAAAAATTAGTTTTAAATTTATATATTTAACTT

TTATTTTTTAAAAATAATAATTTAGGGGTATATATGATCCTTCTAGCAAAATTCAAGGTATATTTTAATCT  
TTTTCATACATAAATTATTTTTGACTTCTTTGATTATCATTGTTTGAGTTTCTTATTCTTGTTTTATTTTT  
TCTTTCATTCTTAATGTAAAGAAAAAATTAAACTATTTTTGTGGCTATATTATAATTTAAACTATTA  
TTTCAGCTATACTGTAATTTAGATTTTGTATTTGGAAAACAAAATTGGGTCATCTATAATAAATTTTACAA  
GAATATTAGTGAAACATAAATAAATTTGACCATGAAAATAATAAATCGAAGTCACTGAAACAATAAAAG  
GTAAAAAATGTATGTATGAGGATGATTATGTATACCCATATGAGATTATTTTTGTAAAAACAAAATA  
ATGAAAAAATTAATTAATAATTTTCTACTTCCGTTAGAGAAAAAGGGTATATGTGAGTCATTTAT  
ATAACAATAGGGGTACATATTAGCCACTTTCATAGCGAATGATATATCAACTCTAAATGACAAAAGTTGAG  
GGGTATATCAGACCCTTTTCTTTACTTTATTAATGATAGAAGCAAAAATAACAGTAGTTGCCAAAGGTA  
GCTAATTCGTCAAGTATCCATTTTTAGTTAACGTTGCCTAATTCGTTTATGTTATGGTTAGTGGATTTTGC  
ACGGCATCTGAAGTTATAATTTGTCTCATGATCTTGTTACTAGGGGACCATGCCAGTGAAAGCAATCTGG  
TTTACATATTGTCAACAACAAAGCTTTAATAAAGAGGCAATGAAAAATATGACAAGGCTTAGGATATTAT  
GCATACGTGGGGACAAATATGATTTATTCTTTTCATCTGACTCCAATAGCCATGATGGCTCCACTGATGG  
CTCCATTGAGTACCTTTCCAACAACCTTGC GTTGGTTTGTCTGGCATGAATATCCTTGGAAAGTTATTGCCAA  
GAAATTTGAACCCAAAAAGCTTGTTTCATCTTGAGCTCCGATGGAGTTCATTGCATTATTTATGGAATGA  
AACAAAGGTACCATTCTATTTAAGATACTTCCTATTTTATCTTGTCTAGAAATTATGATTCTTGTGATTAAT  
TAAGGGAAAAAACATAAATTATCCATGAACCTGTGCCGAAAAATCAGTTACATGCTCAAATTATTATGG  
CGACCTATTACACACCTAATCTTATTCAAAGTGATATTAATACCCCCTTCCGAAGACAATCTCAGTTTTGT  
GTAAAAAAGTGTTGTACACGCATTTTACACATAAATAATATTGTTTTAAATTTTTAAACATTTTTCTTG  
ATATTTTCTTTAACTTTTGCAAAAAATTA AAAATGTGGGCATCTTCTTCTCTCACCATACATATCTTTTT  
AAAATCTATTTCTTCTTCTTCTCCATTGTTTCATAAATTGAAGGGAAAAATAAAAATTTGAAGAGAAAATA  
GGAGTCAGTAAGTCGATTATGAAGTATAGAGATGTTGGCTCCGGTGATAGGCGATGGGCAACACCATT  
ATGGTCGATGGAACAAATAAAATTTTCAGATCTGTAAAATCTTTAAAAATCTTGATAAGTATGTATGTA  
AATCAAACATTTTCATTAGTATTTTTGTGGTAATTGATTAATCAAATATGCTATTGATGATATGAGACAT  
AAAAATAACATTGTGGTGGTTGTTGGTAGTTCTCCGACGAAAATAGAGAAGACAAGATTGAGAAATCA  
TTTTCTTCGGTGAGCTTTTGAAAAATTTAGACAATATAATCATGAATTTTATGCATAAATGGCATAGAATT  
TTCAATAGAAATCATTATTTTTCTCATGAATCTTTTTCGGTGATCTTCTCCGGTGAATCCTCCGGCGAGTC  
CGAATGGAAAAATCTTGAAAATTATTAACTTTTCGATGAAAATCATCATCTTCTCCACCCTTTCTATTTTT  
AAGAGTCTTCTGTATGGCTAGAGTGTTGGATGTGCTTCCATTAAACAATCAATAGCTACAAATGCTCCT

TAAGAAGAAGAACAATTCAAACAAGAAAAATGTAAAAGCTTTAAAGAAATTGGGGCCACCAATAAA  
AAGATTAAGAAAGAAAGAAATTGAAATAATTAATATATTAAGTTATAATACATAATTATATAATGACC  
TATAAATAGTGCCATGTGTTGAAATTCGTCATTTAACATATAATTTTTCTTCTCACGCACCTTAAGGA  
AGGTGACGACACTTTCTTGCCATGTCACATTCTAAGGGGGTATATCACTTTGAACAAGATTAGGTGTGT  
AATAGGTCGTCACAATAGTTTGAGCGTGTAAGTACTGACTTTTCGACACAAGCTTAGGGGGGAATTTATAAA  
CTCAAATAATGTATTTTACATTATTTGGGTTGTACGTTCTCATATTATAATCTCTATGAATTGCATTC  
CAACCTTTGCATCTCATGAAGAAACAAAAGAAATATGTTGGCACAACCTTTTCTCATCGGCCATTGTTTTC  
TATTTTTATTACACTCACGCGCCTAAAAAGGTATTTCACACTCTTTTCTACATCAACGTCTAGGGGGGTA  
AATGAGAATAGATAATCAAGTATATATAGCGGAAATTTAAATGTGCACTAAATAAACATGCTAAGATT  
AAGGTCTTCTTTTAGATATTTTACCTTTATTTATTATAACATGATTTTTATTTAGTTTCTGAGCATGTAATT  
TCCATATAAAGTAAAATAACAATTTCTCATTTCAAATGTTGAGTTATAATAAACATGTGGTTTACTAC  
TTTTCATCATTCTTTCTGTGTTTTGAATAGCTGGAGAAATTTCTTTCTCTACGAAGGATAGATCTAAGAGA  
CTCCAAAAGCCTGAAGAGAACACCTGATTTCAAGGGGATGCCAAATTTGGAGTATTTGAATCTAGCGTG  
TTGTACGAGTCTTGAAGAGGTTTCATCCTCCCTCAAGTATTGCAAAAACTCATCCGGTTAGATTTGTTTG  
ACTGTAGAAGCCTTGAGAGGTTTCCATATGTTAATGTGGAATCTCTTGATTTTTTTATTCTAGATTACTGC  
AGAAGTTTAAAGAAATTTCCAGAAATCCTCGGAATAATGAAGACGGAGTTAGAGATTAGTATGTCATGC  
TCTGGGATAAGGGAACTGCCATTATCTAACTTTGACCTCCAACCTCATCTTACAAAGCTAGATTTGAGTG  
GCATGGAATACCTTGTATCTCTTCCAAGCATCATTTGTAAGTTGAAAGGTTTGGTGAAGCTAGATTTGTC  
GAGGTGCTCAAACCTTAAAGCTTGCCAGAAGACATTGGATCCTTATCCTCTTTGAAAAAGCTGGATCTC  
AGTTACTGCAATATAATAGATGGAGGACTCCGGAAGACATTGGATCCTTATCCTCTTTGCAACGCTTGA  
ATCTCAGTGGAAATAATTTTGAAGCATTGCTCAAGCATATCCGAACCTTGGTGCTCTTCGATCCTTGAAC  
TTATCAGATTGCAATAGGCTTACACAGCTGCCAGAATTTCCACAGAATTTAAATACAATATTTGCAAATT  
GGAGCAATGATTGGATCTGTAATTCGCTGTTTCAGAACATCTCATCATTGCAACATGACATCTGTTCTTCA  
CATTCTTGTACTAAGAGTGCTTGTGAGTTGGTGGTGGATATCCCAAGTTGGTTCAACTATAAGGGA  
ACGGACACAAAGGTATCAGTCAATCTGCCTGAGAATTGGTATGTAAGTGATAACTTCTTGGGATTTGCT  
GTATGTTACTATGGCGATTATTATATTGATTGCATCACAGCTCATTTGATTCCCTTATGTGATGATGGGAT  
GTCGTGATGACCCAAGAATTTTCTTATCCAACAATCAAATATTCTGATGTATGGAATATTAATTTTT  
TCTTGATACCTCTTGGTGGCTTATGGGATGCATCTAATGCAAATGGAAAAACACCAAATGACTATGGGT  
GCATTAGTTTAATTTTTGGAAAAGAGAAGAAATTTGGATTCGTTTGTGTATAAAGATGAAGCTGAGCT

TCACAATGCGAAAAGGAGGAGCAGAAATGAACATCATGAAGAAGAGGCAAGTTGCTCCTCTTCTAAGA  
AACAAAGGCCACTCTTTCCCACAAGCTCGGGATTATAGATTAAGTAAATACCTCACAGATTTGT  
GTTCTCTGTTTATATATAAATTATTTCTTCTCATTCTTTCCCCTATTGGCAATCAGCAGTGAGTTTGATTCTC  
CTCTTAACAACCTTTTTATTTTTATTTTTGGTAACCAATGTAAAATATTACCATTACCACAAAAACGCAAT  
ACAAATAAAGAGCATCCATTTCTGATATCAGAACTAGGTCTCCAACAAACAAGAAAATAACTACAAA  
GTAAGCGATGCGTAAAATGTTTACATTTTTTTGCTTT

>PGSC0003DMG400033563 LRR-RLPs

GTCCGTAATTACGGGCCTTAAATATCTAGTTACGTATAACCAAAGGAGTAACAAAGGGCTGTTCGCCT  
ATGCCGTGCGAGCCCCAAATCGAAAATCCCTAAAACCTAGAGTTCCACCGTCGTCAGTGTTTCTCTGTCTC  
AATTGCCGGCAACCGGCGCCTTCTTCTCCGTGAATTTCTCAGTCAGCATGACTCAAGGTATACGATTCTCT  
CTTTTCGTCTTCTTCTTTTTGGATTATAAATTTTATGCCTAAGATTATTGATCTTCTTTTAGGTAAAAGAGC  
TGCTGTTGAAGTTGAAAGAGAAGTAGAAGATATAATCACTGCTCTGCCAGTAAATGTTGTGCGATCGTATT  
CTTAAGTTGTTGCCGGTTCACGACGCAGCAAAAATACTAGTATTTTGTCTAGAAAATGGAGAGGTATATGG  
GCTTCACATCCATATCTGGTACTGAATAGCTTATTTTGCAAAGGCTAATAACAAAATCTGAATCTTTTT  
TAGAGAAACAGTAGATATGATTCTTACAACATATTGGCGACATTGTGGAGTTTGATCTCGATGTTTCA  
GGAGTACGATTGTCTTCATTTATAGATATTGATAGATGGATGCTTTTTGTAAGTAAATGGTGTCAAGA  
AACTAACACTTAAGATGTCAAAGACTATAAATACTACTTATAAAGTGCCTTCTTATATATTCAATTGTCGA  
ACATTGGAACATTTGACACTTTTCAACTGTATCTTCAAACCACCAAATCCCTTTCTTGGATTCAACAATCTT  
ATAACCCTCTGTCTACGAAGAATAACGTTTGTACCAGCTACGGAGTTTTGTGTTATCAATGCACCCATTCT  
TATCAATTTGACCTTGATAAGGTGTAAGTGTACTCAATACTTCAACATTGTTGTCTCAAGTAGGTTGAAGT  
GCTTGTCTAATTGTGGGGTTCACGGCAATCTTGATCTTAATCGCTTTGCGAACTGCAAAGAATTGACAAA  
TTTAGTGCTTTTGGATGATAGTCCAATACACAGTGATGAAATATCAACTTATGAAAAGCTTATCTTTAGCT  
TGTCTGCACTTGAGAACTTACTTTAGGTCCAATTGCTCTTGAGGTAAGAATCTAACATGTTTTACCTGGT  
ATGGGTTATGTTCCAAATTGTTCTTATTGTTTTTGTCTCAAAGCTTTTGTAGTACAGGTGTAGTTACAAAGG  
GAATTCCTTTTACTCAACTACTTGTGGCATCTACAGTTAATTGTAGACTTGAGCCAAATAGGCCAGACT  
TCTTACGCTCTGGAGTTAATTAAGAGTTTTCCCAACTTGAGCAAACCTCAGATTTGGGTAAGAATAACTG  
GTAAGTGCATATATGTCGCTCTATTTTTACTTCATATGTTATAAACATGAGAACTAAAACATGTATTGCCT  
TGTATCATTAAATTAGGTCTATGCTGCTTGTGACAAGGATGAAACGGTTATGAAATATCTGGACAAA

>PGSC0003DMG400033632 LRR-RLPs

TTTGAACTCTTTCATTCAAACATGGACTACAAGCAACTCTCAGTTGTGCTCTTACTTGTCTTTCTCCGTCAC  
AAACTTGTTTTCTTCTTCCATATTACCTCATTGTGTCCCAAACATCAAAGTACCACCCTTCTAAAATC  
AAGCAGACGTTTACGATAGATACATTTGATATGTGTGGACTTATGCTTGGCCAGGAGTCTTATCCAAAGA  
CGATCTCATGGAECTTAAGCAGAGATTGTTGTTTATGGGATGGAGTGAAGTGTGACGAGATGAGTGGT  
CATGTCATTGAACTTGACCTCGGTTGCAGCCTGCTTGTGGGGTGATTGATTCCAATAGCAGCCTATTCC  
AACTCTCATCTCCAAAGACTCAACCTTTCTATGAATAACTTTGATGGTTCTCAAATCTCACCTAAATTTG  
GCAGGTTTTCAAGCATGACACATCTTGATCTTTCCCGGTCATATTTCTCAGGTCAAATTCCTTCTGAAATC  
TCTCATCTTTCCAAGTTACACTCTTCTTCTCTCCACACTTTATCTCAATAAGCTAAGACTCGCAAGTCAT  
GATTTTAAACCACTCCTTCGGAATTTGACCCAATTAAGAGAGCTTAATCTTAGATCCGTAAACATCTCTTC  
CACCATTCTCCGATTTTTTCTTCTCATTTAACTTTGAGGTTGGGATGGACAGGATTGTATGGGATAA  
TACCCGAGAGTATTTTCCACTTGCCCAACTTGCAAAGACTTGACTTACATCACAATGATCAGCTCAGTGG  
TTATTTTCAAAGACCAAATGGAATAGTAGCGCATCTCTCATAGAGTTAGATCTTACTGACGTGAATTTTT  
CTGATACTTTACCCGAGTCTCTTGGCTATCTAACTCGTTGCAGTCTTTGTCTCTTCAAATTTGCAACCTTA  
GAGGGCCTATTCCCGAATCTCTTTCAAATCTCACCCACATAGAGTCTTTGTACCTTGGAGTTAACTCCCTG  
AATGGAACAATTCGTCATGGATATTCTCCCTTCCATCACTAAGTTTAATATACTTGAGTAATAACCAATT  
TTCTGGTCAGCTTGAGGATTTCAAGTCCAATTCCTGTCTGGATTTACTTACAAGACAATCAGCTGCAA  
GGCCATCTTCCCACGTCAATTCAAACCTCGTGAACCTAACAACCTTGATCTTTCATCGAATAATTTTAG  
TGGTAGTGTGGATGTTAGCTTCTTTTGAAGCTCAAGTATCTTTTAGATCTTGGTCTTTCATATAATCGTA  
TCACATTGATCAATGAGAATAAAGTTAAATCTACTTTGCCTGAATCTCTTGAGAAGTTAGGATTGGCCGC  
GTGTGAAGTGAAAGAATTGGAGTTTCTAAGATCCGCGAAGAATCTCAAGGAGTTGGATCTTTCAAATAA  
TAAGATTCAAGGAAGGATTCCTGATTGGGCATGGTCTAATTGGGAATTTTCAGTGTCAACTCTTAATTTA  
TCTACAATATGTTGACAAGCATGGACTCAATTCCTTCTATCTCTAGATACTATTGATTTGCGTTCCAAT  
TTTCTTGAAGGGTCACTACCTATTCCAGCTAATTCCACGAGATACTTCTTCATATCGGAAAATAATCTTAG  
TGGGGAATTCCTTCGTCTCTTTGCAATTTGATGTCACTAAAATGCTCGTTTTGGGAAAAAATAACTTG  
AGGGGAACAATCCACAATGTGTTGGGTAACATGAGTTACGATCTTGAGGTTTTGGATATGCACCACAA  
CAATCTTTCGGGGACTCTTCCAACGACTTTTAGCATTGAAAGTTCACTCAGAAGCCTCAACTTGCATGGT  
AATAAACTACAGGGGAAAATCCCCGATCTTTGGTTAATTGCAAAGGTTGCAAGTTCTTGATTTAGGA  
GAAAATCACCTCAACGACACATTCCAATGTGGTTGGGGACTTTGCCTGAGCTTCAAGTTTTAAGCTTGC  
GATCCAACAAATTACATGGGTGATTCAACCTTCAAGGTTTGAAAATATGTTTCCCAGCTCCGGATAAT

AGATCTCTTACAATGCCTTCTCAGGAACTTACCTACGAGTCTATTTCAACATCTGAAAGCCATGAGG  
ACGATTGATCCATTGACAAAGTCACCAAGTAATGAAAGAGATGGATATTACCAAGACTCGGTCGTTGTA  
GTAACAAAGGGATTGGAAGTTGAAGTTGTGAGAATCTTGTTTTGTACACTACTATCGATCTTTCTAGCA  
ACAAATTTGAAGGACATATCCCTAGTGTTCTAGGAGATCTCATTGCACTTCGGGTGATGAATTTGTCTCA  
TAATAGATTGCAAGGTCATATTCCATCATCACTTGGAATTTATCAGTAGTTGAATCATTGGACCTTTTCA  
TCAACCAACTTTCAGGAGAGATACCAGAACAACCTCGCTTCTTACATATCTCGAATCTTAAGGCTCTCC  
CACAATCATCTTGTAGGATGCATTCTATAGGACGTCAATTTGCTACATTCAGAACAATTCATATGATGG  
TAATGATGGATTGCGTGGATTCCCTGTTTCAGAAGATTGTGGAAGTCGCGAGATGCCAAAGAGAAACAA  
CACAACACAAGTGTTGAATCAAGAAAGCAACTCCACATTTCTAAGTGAATTTAGGAAGACAATTCATTATG  
GGATATGGGAGTGGACTTATCATTGGACTCTTCATAGCATATTTTCATGCTTTTCGAGTCGAAATCCAATT  
GGCTTTCTAGGATCACTGAAGAACTAGAATACAGAATCGCTATGAGAAGGCGAAAAAAGAAGCAGCAG  
CAAGGCCGTCAAAGGCAGCACTAAGAATCCAGTTGGTGAATGCCCCATTGGAGATGCAATATGATGCT  
TGTTTTGGTATGGTGGATTATGAATTTCAATGTATTTCATTGTAGTTTTTTTTTACATTGCACGAATTCAGA  
TTAGTCAGGTCTCTAATGTGAATATCAGAACTAAATGAAAAACCAAAAAAATCATGTCTCCTTCTAAA  
TATCATGTCTAATAAGGTCTATCAACAACCTCAATATCTTAT

>PGSC0003DMG400033670 LRR-RLPs

CTTGATTAAATGTGTTGTGTTTCATATTACTGTGGACCCATAACAATAATTCATGAAAACCTTTTCATATTT  
GTTGCCTGTATAACAATAATGGTCCCAAATATCATCAATTTTATCTGTCCACACCCTTCTTATCTTTCTTCTC  
AAATTTCAACAAATCAATCAATCGGATCCATGGCACCATCTTCTTCTTGTAAAGCAATTCACAGTACTGT  
CCTCGATGGAAGTACGATGTCTTTCTGAGTTTTAGTGGTGAAGATACTCGTAAAACATTTACAGGTCACT  
TGACGAAGGTTTGAAAAACAGGGGAATATTCACCTTTCAAGATGATAAAAGGCTAGAGCATGGTGATT  
CGATTACAGAAGAACTCTTGAAAGCTATCGAAGAGTCTCAAGTTGCCCTGTAGTTTTTTTCAGAGAATTA  
TGCTACATCGAGGTGGTGCTTGAATGAACTAGTGAAAATTATGGAATGCAAGAAGGAAGAAAATAGAC  
AAATAGTCATACCGATATTCTATAATGTGGATCCAGCACATGTTTCGTCACCAAAGAGAGAGCTTTGCAA  
AGCATTGCCAAACATGAATCGAAGTATAAGGATGATGTCGAGGGAATGGAGAAGGTGCAAAGTTGGA  
GGATTGCCTTAACTGCTGCCGAGATCTAGAAGGATATGACATCCGCCAAGGGTGAGTTAAAAAAAAG  
TGAGTTTAGACGTTAGAAATGCTTATTTAAGTCCTTTATTTTTTTATGAAAAAATGTTTATAGACACTTT  
TTTTTAAATTTAATATATAATCACTTTATTTTCAATTTTAGCACTTCAACTCAAACATCTGAATGGTGCTT  
ATTTATTAACCAGCTCCCCACATGAAAAGTATTTCTCAGCACTAATAGTATGAAATACTTATAATACAT



TACTTTATTATGCTTATCCACAATTAATGTTCTTATTTATGTAGGGTTGAATCAGAGAACATTCAACAAAT  
TGTTAACCAAATTTTCGTCCAAATTATGCAAGACTTCAGTAGCTTATTTGCAAATATTGTGGGAATAGAT  
ACTCACTTAGAGGAAGTAAAATGCCAACTAAAGCTTGGAATCAATGATGTTCGAATTGTGGGGATCTGG  
GGCATGGGGGGAATTGGTAAAACGACAGTAGCAAGGGCAATTTTTGACACACTCTCGTGTCAATTTGCA  
GATGCTAGTTTTATTGCGGATATTAAAGAAAACAAATGTGGAATGCATTCTTTGCAAATATCCTTCTCTC  
AGAACTATTAAGGAAAAAAGATAATTATGTGAATAATAAGGAGGACGGAAGCACATGATAGCTCGTA  
GACTTCGTTTTAAGAAGGTTTTAGTTGTGCTTGATGACATAGATCACAGAGACCATTTGGATTACCTAGT  
AGGAAATCTTGATTGGTATGGTATGGGAGTAGAATTATTGTAACAACTAGAGATAAGCATTGATTGA  
GACGAATGATGTAGTATATGAAATGACTACACTAGCGGACCATCAAGCTATTAATTTGTTCAATCAATAT  
GCTTTCATCAAAGAAGAAGTTCCAAACAAATGTTTTGAGAAGCTCTCAATGGAGGTTGTACATCATGCTA  
GAGGCCTTCCTTAGCCTTGAAAGTGTGGGGTTCTTTATTACATAAGAGGGACATAACCGAGTGGAGAA  
GTGCTATCGAGGAAATGAAAAATAACTGTAATTCAGAAATTGTTGAAAAGCTTAGAATTAGCTATGATA  
GATTGAATATCATACAACAAGATATATTTCTGGATATATCATGCTTCTTTGAGGGAAAGATAAAGATTA  
TACCATGCAAATCTTGAGAGCTGTTATTCTGGAGCAAATATCGGATTGCGTATCTTAATGGACAAATCT  
CTTGTTTCATCTCTATAAATAACTATTGAAATGCATGACTTAATACAAGAGATGGGTAAATACGTGG  
TGAAAATGCAAAAAAATCGGGAGAACCTAGCAGAATATGGCACACTGAAGATTTCAAAGAAGTTATG  
GCCAACAAGACAGTAAGTAGGTTAAACAGCGCAACATTATTCAATTTCCAGTTTTCATATATTGAAATAA  
ATTTGTCTTATGTTATTAAGCCATTATTTAGTCTAGTAGCCATTTAGTATGCTTATCAAGCTTTCAAATCAT  
TGAATTAACCTGAAATTTGTATGATATTGTCATTTTACAAGATGACAGTTATTAGTACTTTTTTCATTTTACA  
AGATAACTTGAAGTGCGGCACTTTTTGTGAGATTCTTATCTGAACTATCATGTGTTTATCGCCTTATATATA  
GCCTTATGCAAATAGTGATATCGGTAAGTTTATTGTACACAACATTTGAAGTTATGATTTGTTAATTTATG  
ATCTTTTTACTAGGGAACCATGACAATAGAAGCAATTTGGTTTACTTGCTTTGAACAAATATGCTTTAATA  
AAGAGGCGATGAAAAATATGAAAAGGCTTAGGATATTATGCATAGCTGATGGTAGGCTAAACCGTTTCT  
CTTCGCCCCATTCTCCATTGATTCGAAATACATTCTCAACGGCTCCATTGAGTTTCTGTCCAACAACCTTGC  
AATGGGTTTACTGGGAGCAATATCCTTGGGTGTCATTGCCAGACAATTTTAAACCCCAAAGGCTTGTTCA  
TCTCTATCTCGGGTGGAGTTTGTTCATGATTTATGGACAAAAAGAAAGGTACCGCTTTATTTGAGATAC  
TTTCTATTTGGTTTGTCTTGAATTATAATGTTTGTGATTAATGAAATTAAGATATTAGTTTCATAAACAC  
CTTTATTTAGTTTCTGAACATTTATATAAATGAAAATTAACAATTTCTTTCTATGTTCTGATAGGAGCTTT  
TGCCGTGTCTACGATGGCTAGATCTCAGCTTCTCTGATAGGCTGATGCAAACACCAAATTTACGGGGAT

GCCAAATTTGGAGTGTTTGAATCTGAAGAGATGTAGGAGTCTTAAAAAGGTGCATCCTTCACTGGGAAA  
TTGCAAAAAACTCAATAAGTTAAGTTTGTATCGTTGTAAAAGCCTTGAGAGGTTTCCATGTGTTAATGTG  
GAGTCTCTTGAACATCTGGATCTAGAGGGCTGCTTAAAATTAGATAAATTTCCAAATTTCTTTGGGAGAA  
TGAAGTTGGAGTTAGAGATTAAGGTAGAAGGCACTGGTATAAGGGAACTGCCCTCATCTATTCAGTATC  
TAACTCATATTACCAAGAAACATTTGCTAGGCATGAAAAACCTTGAAGCTCCTTTTACGGAGCTAGATTT  
GGCGGGCATGAAAAACTTATAGCTCTCCGAGCAGCATTGGCATGTTGAAAGGTTTGGTGAAGCTAGA  
TGTGTCATGGTGCTTAAAACCTTGAAGCTTGCCAGAAGAGATAGGTGATTTAGAGAAGCTTGGTGAATCT  
TGATGCGAGCTGCACTAGAAATTTCAAACCTCCATCTTCCATCGTCCGCTTGAACAACTTAAATTCTTGA  
ATTTTGCAGGACAATGTTTAGAAGATGGAGTGTACTTTGTGTTCCCTCAGGTGAATGAAGGGTTACGCTC  
ATTGGAAATTCTGAATCTCAGTTCATGCAATTTAATAGATGGAGGACTTCCAGAAGACATTGGATGCTTA  
TCGTCTTTGAAAAAGTTGGATCTCAGTAAAAACAATTTGAGCATTGCTCGAAGCATAGCCCAACTTG  
GTGCTCTTGAAGCCTTGTACTTATCATATTGCAAGAGGCTTACTCAGTTGCCAGAATTTCCGGAGCAGTT  
AGATAAAATAGATGCATATTGGAGCAATGATTCAATCTGTAATTCGTTGTTTCAGAATATCTCATCATTGC  
AGCAGCATGACATCTCTGCTTCAGATTCCTTGTCAATTAAGAGCGTTCATTAGTTGGGAGGAGAATATCCC  
TAGTTGGTTCCACCATCGAGGATTTGATAAAAGCGTATCAGTCAATTTGCCTGAAAACCTGGTACGTTTCGT  
GATAACTTCTTGGGATTTGCTGTATGTTACAGTGGTGAATTAATTGACATGACAGCTCAGTTGATTTCTT  
ATGTGATGATGGGACCTCGGGTATCACCCGGAAGCTTGCCTTATCCAACCATTGAGATTGGAATTCTAAA  
ATTTATTTTTCTTGGTACCTTTTGTGCTGCTTATGGGATACATGTAAGGCAAATGGGAAAACACCAAATG  
ACTATGGGCTTATTACATTATGTTTCTCTGGAGAAATGAACAAGTATGGATTACGTTTGTGTATAAAGA  
TGATCCTGAGCTTGACGCGAATTGCTCCTCTTCTACGAAACATTCTTATATTCTTGGGAGAGTGGTTAGTC  
TCTTCAGCTGCATTAATTGATCTCTGTTTTAATAATTTAATTACTTAAGCTCTTCTCATATATGGTTAGCA  
CTGTTTTTGATTGCTTGTATCAACGTGTTGTCGATGATAAAGAAATTAGTGGGTACTTTTTCTCTCCAG  
CTTCGTCTGTTGTAGCACATATTTGTTTGTGGATCTTCTAATACAGTTCAAACAAAATTTTCACAATACTG  
TCCTCGATGAAAGTACAATCTCTTCTTAAGTTTTAGAGATGAAGATACTCATAACAATTACGGGCTAC  
TTGTATGAACTTTTTACAAGGAGGGGAATAATCACCTTTAGAGATTATAAAAGGCTAGAGCATGATGAT  
TTGATCCCAGAAGAACTCTTGAAGCTATTGAGACTCTCAAGTTGCCCTTGTCATTTTCTCAAAGAATTAT  
GCCACATTGAAGTGGTGCTTGTATGAACTAGTGAACACATGGAATGCCAAAAGGACGAAAATGGACAA  
ATAGTCTTACCAGTCTTCTATGATGTTGATGCAACAGATGTTGAAACCAAAGGGGAGCTTTGCAGAAG  
CATTTGCCAAAAAAATTGTGGTGATGGCCTGATAGGATGCACGCAGAAGGTGCAAGTATGGAGGACTT

CCCTAACTGCTGCCACAAATCAGAAAGGATATGTATTGTGAGTTAGACGAAAGGAATAATTTTTAAGAC  
AATCTACACATTATTATATATTAATTTATCAAACAAAGATTCTCTACCTCAAAAATGAGTCAAACAGAATC  
TTAAATAACTTAATTTTCTGAAAATAGTCTGAT

>PGSC0003DMG400034634 LRR-RLPs

ATGAGTTTAGTAGTGGAAGGTTGTGAAAACTTGAAAGGCTTCCCACTAAGTTTCAGTTTGAGTCTCTTG  
AAATTCTAAATTTTTCTGGATGTCCGAGTTTGATAAAAGTTCCAGAAGTTCAGCAAATGTGAATCGCTT  
ATCAGAATTCAAGAAGACATACTTTCGTGTATCTACATCATCATTTGAACATGGCAATTCTCTGAGCTATA  
TAGATATGTGTGACTGCATTACATTGAAACTCTCCCTACCAGCATTGCGAGGTTGAAGAATTTGAAGTT  
CCTTTACCTCATTAGTGTTCAAAACCTTAAACCTTGCCGAAAATATTGGTGATCTGGAAAACATTGAG  
GGGCTTGATGCAACTGGACAGCAATCTGGCACACCCCAAATTCCTTCATAA

>PGSC0003DMG400034987 LRR-RLPs

ATGGATAGAATTTACAGTTACCACCAGAAATCTTCACCAAATACTCTCTCTTCTCCAAACTAAAACCTGC  
TGCTCAAACCGCCGTGCTGTCCAAACTATGGCTTAAAGCATGCTATACCAATCCCCATCTTAATTTTGATC  
AATTTGATTTCTACACTTCTTCTGATGAATCTGATTTTCGACACTTCTGATGATGAATCTGATGACGAAGCT  
GAAATTGAACCACGGCATAGCGATAGTTTCTACGAATCTCATGTTGAATTCTCAAGGATGGTAGACAGT  
ATTTTGAAAGATATCGCCGTGAAAATCTACCGATTTACAGATTTAACCTTCGTATCTCTTTTTCCGATCA  
AACTGATTGTGAAGGTCTAGTCGATAAATGGTTAGATATTATAACAGAGACAAGGGCTTCACAGGTAAC  
ACTTTTGGTGGAAAGCAAACCGAAGATTATCCGAAAGATATACTCTGTTAGCTGATTCTATCTTCGCA  
ATAGAATCGTTGCAGCAGTTGGAGCTAAATCACTGCAAATACTGAAAAGGAGAACACTACTTTCCGAA  
GATGAAATTAGGTGCATTACCTAAAAAATCTCACATTGCAATTTGTTACTGTTTCTGAATCAACACTCAA  
CACTCTAATTTGATGTTGCCCTCGGATTGAGACGATATCACTTCAATACTGTATCGGGTTCAATTGCATTC  
GTGTTACAAAAGTCTTCATAACCTTTTGTCTCTTAGTATCTTGTCTGTCAAATTGAGGAAGTTCATATT  
TCGATGCACCAAATGTGTCTGTTTCCGAGTTCTAGTTCAAGGCAGGGCAGGACGGGACTCACGGG  
GGTTGGGGGGAGCCTTCCCCAGGGAAAGCCTAATAAGACTCATTCTAATACTTGAGTTCAAGCTCCTA  
CTTCGAAGTAAGCCTATGGGTTGTTTTCGAAGCTTAGTAGCTAAAGCGTACTTGCCTGTTAAAGGGGGTA  
CGCGGATTTGGGCTACTAAGTGAACCGACCATTTCAACTTGCCATTTGCACTCTCCTAGGGTGCATCG  
TAGGAAGCTCTATTAGCGAATGCAATTCCTCGCCGATAAGACTGATCATGCCCTGCTGCTTGGCTTGG  
ATCAAACCTAGCCTATCATGCCCTTTCTTCTTCTATATGGACCCATATTCCTATGTTCTTCCAATGTTTACT  
GTATTACTGGGATTCCTATTTACTGAACCATATCAAAGAAGCTACTTTCTTCTGGCTTTTATACCCAGGT

ATAAAGGGATAGACAGTCTAAGAGAGTGCCAAGAAAGAACACATACCTATCACTTTTGGAAAGGTTTGGAA  
ACCCTCGATTTCATCCGACTCAAGGAGAAAAAGAGAACAAGATGGGGGGGCTTGCCTCCTCGTTCCCTTT  
TAAACGAGTGGGAAGCTTATTCACCTAATAAAATATGTCTGCGTGTGTTGAATATTGGTACTTGTCCGGCA  
GAGGCGAATCTAGGATTTTTTCGAACATGGGTGCACCAAGTAGAATGTATTGAAGTGAGAATTGATCCTT  
CATCCTCAAGGTCAAAAGCTCAACATTTAACCATGTGGACCATTTAGACTTCTTGTAGTACGGGTGCAAG  
AATAAATATTATACAAAATCTTAAAAATATACATATAAAATATCTAGTTTTACGAAAAGACCACGGGTG  
CGGATGCCCTTTTTTTTTGGCTCTAGATTCGCCACTGCTTGTGCGGAATCTGAGAAGAGTAGAGTTTGTGGA  
AGCTGGAATTGATGATATGTTTCTCTTCGAGCTTATACCAAACACTACATTCATCAAGGAGTTGATGTTAC  
AGTTTTGTGAGTACTTGAAAGAAATAAATATCTCAAGTTCAACACTCGAGGTTTGTAGTATAGTTAAGTG  
TGATTTATTAGTACAAGCCATTTTTGATACGCCAAGTTACTCTCCTTAGCCTTCTCCAAACAATGTAAACT  
ACCCTGTTTATCTTTCATAAGTGCTTCAAGCCAATGCAGAATTTCCATAAAGTATGACACTATAATGGATA  
CCGAGCAGTTGATGAACTTACGGAGATCTCTAGTTGAGTTGCGTGATCAGGTTGTAGATTTGACATTGCC  
TAGTATTGATAAGGATTTGAGATTAGCAAGTAAAATTGATCATCTTCTCCTCCGCCTGAAGTTGAGAATTTA  
TCATCTTATTGTCCGAATTCAGCTTATTCATCTTACTTTGATCTCATCTTCTCAATTTGTTGGCCCAAGAGT  
TGGATAATACAGTACTGTGACGAAGATTTTGGAGAGTATCTACGTAAACTGTTGTTGAAGGAGAAGGA  
GAGACGATGGAGATTTATCGAATGTACTTGGAAAGAGTATCTCATGAATGCTGAGATAGAGTACAAGA  
AAAGGACACGAAACGATTGGATGACTCTTGATAGGAAAATGTTGGCAGCTGACTCTCGTATTTTTGATG  
AGATTAATACAATGTGCTTCAAGCAAACCTCAAAGAAGAGAGAAGCATAAATATTCTTGCATTTCCAGGTA  
A

>PGSC0003DMG400035141 LRR-RLPs

ATGTCTTTGGCCAATTTGTCCTTCTCAGTGTTCTCAATCTCGAGAACAACAACCTCCGCGGTGGCATCCC  
TTATGAACTTGGCTACTTGCCTCGCTTGCAGTGATTGATATTCAAACAATCAGCTCAACGGAAGTATA  
CCAACAAGTCTATTTCAACACCAAGGAGTTCAAGTAATTTCAATGGCTTTCAATGAACTCGGTGGTGAAA  
TGTGAAAGGCCTATGGTATGTACCCGAACTCAGAGTCTGGATCTCACCAACAATAACCTCACGGGTA  
TGATCCCTCCTTCTGTTGGAAATGCCACAAAATGATGAACTTCAAGTTTGTCTGGGAATAGAGTCAGCGG  
CAACATTCAAAGGAGGTCGGTAATCTGAGCCAGCTTGCATTTTTGTACTTGTTCGATAATCAATTAACA  
GGTCCATTCGCAACACTGTTTAATATGTCGTCACTATTTGTCCTATCTCTGGGAAATAATATCCTTTCT  
GGTCTCTCTTGGTAGATGAAGGGAACATTGTCTCAAATATGAACGTTGTAAGTATATCTCTCAATCAAA  
TTTCTGGTTGCATTCCTTCAACATGTGCCAACTCACAGACCTCAAACTTTTGTCCATATCATTCAACAACA

TAACTGGAGACATACCCAGAAATATTGATTGTTTATCCAACTCAAGATGTTTCTTGTTGGAGATAATCC  
AATAAAAGGGACTATTCCCACTTCATTGGGAAATATTTCCACTCTGCAATATCTTTATTGTGAAAACAATC  
GCATAGTTGGGCAAATTTCTCCAGAATTAGGGAAGCTATCAAATTTGAGGGAATTATTCTTTGACAATAA  
TTATAATCTTATTGGTCAAATTCGTAAGGCTATTTTCAACATATCTTCTTTGGAAGTTATTGATTTAGTTT  
CAACAACCTCTCGAGCAGAATTCCAACCACTACAGGTCTTCATCTTCCAAACATTAAGCAACTTATCTTGG  
GAGACAATCAGCTGGAAGGAGAAATTCCATTGTTTATTACAATGCTTCCAAGCTTAGAATTCTTGGATT  
TGCTTTAAATGTATTGTCAGGTAATTCCTAAGTCTTTGGAAAACTCTACTACCTTAAAGCATTAAAT  
GTTTCATTTAATGATTTAGAAGGTGAAATACCGAGTGGTGGAGTGTTTGCAAATTCCTACTCTGCAATCAT  
TTCTTCGGAACAAAGGTCTTTGCGGAATACACATATTGGAGATTCCTGATTGTGCTATCAATAATCCTGG  
AAAACAATCAAAGCTTAAGGAGGTTCTACTAAAATTGTTACTCCAGTGGTTATTGCATCCTTTTTGATAT  
TCTTGTTGGTTTTAATTTGGATTAATTGAACTAACAGAAGAAAGGAAAGTCCAAAGTATGTTGAACAG  
GTACTGGAGATCGGGACTCGTCATTTAGTTTCTTATCACGAGATTCAACGAGCAACAAATAATTTTGATG  
AATCCAATTTAATTGGTGAGGGAAGCTCTGGCTCTGTGTACAAAGGCACATTATCTAGTGGAAGTGCAG  
TGGCCATTAAGTTCTAGATTTGGAAAATGAGAAAGTATGCAAGAGGTTTGATACCGAATGTGAAGTGA  
TGAGAAATGTTAGACACAGAAATCTTGTTCCAGTGATTACTACATGTTCTAATGACTATATAAGAGCCTT  
TGTTCTGCGATATACACCCAATGGGAGTCTTTGA

>PGSC0003DMG400035333 LRR-RLPs

ATGGCTAAATCTACAATATTTTTCTCCTTTTTCTTTCATTTTCAGTGTTACTTCACAATGTTACTGCATCAG  
ATGATATTAGGTGTTTGAAGGACTGAAGGACTCATTTAAGGATCCTAATGGAAATTTGAATTCTTGGAA  
CTTCTCAAACACTCCATGGGGTTTATCTGCAAGTTCATTGGTGTGCGTTGCTGGAACGACCTCGAGAAT  
CGGGTGCTCAGCCTCTCACTTCAAACATGAATCTCAGTAGACAGCTCCAGATGCCTTCAAATATTGCT  
CCTCTTTGACTTCTCTTGATCTCTCTGGTAACAAGTTCTCCGGTCCCATTCTTCGGAGATTTGTAGCTGG  
ACTCCTTTTTTAGTAAACCTCGACTTGTCCAACAACAGTTTCTCCGGCTCTATACCTGCTGAACTTGGAAA  
CTGCACCTACCTGAACAAGTTGATGCTCAATAACAACAACACTCTCTGGAAATATTCCACCAGAAATCTCTC  
GATTAACGAGGCTTAAGGTGCTCTCCGTGGCCAACAATAATCTTTCTGGTAAAATACCACCATTTTCAGG  
ATTGTCTGATTTTGAATATGGAGGAAACAGACATCTCTGCGGTGGACCATTAGCCAAATGTGGTTGA

>PGSC0003DMG400035513 LRR-RLPs

ATGAGTGTTAACCTTCTAGGGTTTTGTCAAAAAATTTCACTGAATCAAATCTCTAAGCACAAAGAGAAGT  
ACAGTTTAGTGAAAGTAGGTTCCCTAATTAATAATGTTGCCAAAAGTAAAGAAAATGTTGATCTTCACAA

GTTAATACACAAGATTGAATGGCTTCCATTGTCACCTTGAATTTGGTGAATGTCACCTGCGCTAAACATT  
GCCGATAACCAAATTATGGCTCTTCTAACTACCATTGGTAGCCTTAATGCCTTAACGAAGCTCAATACTCA  
CTCCAACCAAATTATAAACCTTCTGATTCAATTTGGTAAGGTAATCAATTTGACCGATCTTGACCTTTACG  
CGAACAGGTTGAAATCGATGCCAGCTACTTTCAGGAACTTAATAAATCTGATTGATCTTGATTCAAGTTC  
AAACGAGTTTGCTCATTTTTCTGATTTCTTGGGAACTTAACCTCCTTGAAGTGA

>PGSC0003DMG400035893 LRR-RLPs

ATGGATTCTGCAGGATTCTCTATGAAGCTGTGGCCCCCAAGTTAAGTACCAGGCTAATGCTCGTGGAG  
AGAATGACCAAGAATCTTATTACTCCATCCATCCTATCCAGGAAATATGGTCTTTTGGAGTAAAGAAGAAG  
CTGAAGAGGATGCCAAACAAATAGAAGCTCTGGCTTTTATTCTGCCAATCAACATTTTACAAGGAGC  
CTGATGGCGATGGAAGTTCTGCTGTGCAACTTTATGCTAAGGAATCTAGTAAGCTCATGTTAGAAGTTAT  
TAAAAGAGGCCCTCAGACTAAGGAATCTGCAGAAGGTATTGTATCTGAGAAGGTTAAAGCATCTGATGA  
AACTACTATTTTTGATATATCCAAAGGTAGACGGGATTTTATAAGTGCAGAAGAGGCGTCTGAGTTATTG  
AAACCATTAAGTGAACCAGGGAATAATTATAAAAGGATATGTTTCAGCAATAGAAGCTTTGGCGTGGAT  
GCTGCTAAAATTGCAGGACCTATTTTGCCTCTCTTAAAGATCAATTGACAGAAGTTGACCTTTTCACTT  
CGTAGCAGGTAGACCAGAGGAAGAAGCCCTGGAAGTCATGGAAATCTTTTCTTCTGCTTTGGACGCCTG  
TGACCTGAGGTACCTCGATCTTTCTAACAATGCTTTAGGTGAAAAAGGAATAAGGGCATTGGGGCACT  
TTTAAAGTCACAGAAGAAGCTTGAAGAAGCTCTATTTAATGAATGACGGCATTTCAGAGGAAGCAGCACA  
AGCAGTTTTCGAGCTAATCCCTTCAACTGATAAACTTCGTATCCTTCATTTTACAATAACATGACAGGG  
GATGAGGGTGCACCTTGCTATTTCTAAACTTGTGAAGCATTCTCCTGCATTGGAGGATTTCCGGTGCTCAT  
CTACAAGGGTAGGATCTGAAGGTGGGGTTGCTCTTTCACAAGCACTTGGAGAATGTAGGAATTTAAAGA  
AGGTTGATTTGCGTGACAACATGTTTGGTGTGGAAGCTGGAATTGCCTTGAGCAAAGTACTATCAATCTT  
TTCCGGCTTAACTGAAATTTACTTAAGTTATCTGAATTTGGAGGATGAGGGGTCCATAGCTCTTGCTAAT  
GTCCTCAAGGAATCTGCTCCATCCCTGAGGTTTTGGAGATGGATGGAAATGACATCACAGCTAAAGCT  
GCTCCTGCTCTGGCAGCCTGTATTGCTGCAAAACAATTTCTTACCACGTTGAAGTTGGGAGAGAATGAAT  
TGAAAGATGAGGGTGCTATCTTAATTGCAAAGGCATTGGAGGATGGTCACGGTCAATTAAGTGAAGTG  
GATATGAGTACCAATGCAATAAGAAGAGCTGGTGCAGGTTGCTTGGCACAAGCTGTAGTGAACAAATC  
TGGGTTTAAAGGTGCTGAACATCAATGGCAACTTCATATCTGATGAAGGAATTGATGAGGTAAAAGATAT  
TTTTAAGAATTCATTCATGTGCTTGGACCTTTGGATGACAATGATCCTGAAGGAGAAGATTATGACGAA  
GAGGCTGATGAAGGAGGCGATAATGAGAATGATTTGGAGATCAGGCTCAAGGATCTCGATATCAAGCA

GGAAGAATAA

>PGSC0003DMG400035934 LRR-RLPs

ATGTTACATATAACCATTACAATTTTCAATATTTCTCGAATCAAAGTTGTTTCATTTGCAATCAATATCTTA  
TCAGGAAATCTTACAATGATTTATGCAATGGTCTCCCAATACTCAAAGGCTTTATCTATCACGAAACAA  
GCTTCATGGTCATATGCCTATAAGCTTGTCAAATTGTTCAAACCTTCAAATATTGTCTCTATCCGAAAATT  
ATTTTGATGGACGAATACATAGTGAAATTGGAAGATTGAGTAACTTGCAGACATTGAATCTCGGATATA  
ACCATTTACAGGTATATATGTTTTATCTTATGAATACTAGTACTATTGTATCTAATAACCTCATATCTTTTT  
ATTACACATTAATGCAGGGATAATTCCACAAGAAATTGGATATCTTGTTAATTTGGTGGAGTTAACAAT  
GGAGAAAACCAGATTACCGGCTCTATCCCGATCTCCATATTCAATATCTCCTCGTTGCGTTTTGTTTCAC  
TATGGAGGAACAATCTCAAGGAATCCTTACCACGGGAGATTGGCAACTTAACCAAGATGCAAGTTTTAT  
ATCTTAACGAAAATAGGTTTGCTGGTACGTATTCAAAGTGATAGCAATTTGTATTGAACTAGCTAGTTAG  
TAAACTCAAATCTTTCTTCATGTATTGACAGGTGAAATACCCAAGAGATAAGAAATCTCGTTGAGTTGG  
AGAACTTGGTCTTCACTTTAATAGTTTTAGTGGTTCACTTGATATGGAGATGTTCAATATATCAGGGAT  
GAGATCAATTGATCTTTCAGCCAACAATCTATCAGGGACCATCCAACCAACATAGGTTCTATCTTACCCA  
ACATTGAAGAGCTTTATCTGGATCGCTTAACCAATCTCGTTGGGACTATTCCTTATTCTATCTCCAATTGTT  
CAAAGCTTACTATTCTAGAGCTTTCATACAACAACTCACAGGATTGATTCCCAATTCTATTGGATATTTG  
ACTCATCTACAGTTCCTAACTTGGCGGAAAACAATTTAACCAGTGATTCATTTTTAAGCTTCCTCACTTC  
CTTAACCAATTGCAGAAATTTTAACATCTCTTTATCTATCTTTCAACCCTCTAAATGGCATGCTTTCCCGGG  
TCTCCGTAGGGAACCTTCTCCATATCTCTTGTAATTTTCATGCCACTGCTTGCAAGATCAACGGCCAGATT  
CCAAATGA

>PGSC0003DMG400036109 LRR-RLPs

ATGAGCCCATGTACTAGAAGCAAGTCAGCTAGAGATCTGAGCAACTCTATTATTTCTGAATCACCGATTG  
TTGCACTACATAGAATACTAGAACTTATGCCCATCAAATATGCTGCAAGATCTAGCATCTTATCAAACCTT  
TGGAGACAGTTATGGTCTACACAACCTAATCTTGTTGTCGATCCACTGTTTTTTCAGTATGTATCTAATAC  
TAAGGATTCTGCTGCAAGTGTAATTCATAAAATTCTCTTGAACATACTGGAGATATTCTGGGATTCCAT  
CTCATCTCCGAGGCAGACACTTTAACACAGTCCGATGTGAATCAATTCATCATCTTTGCCTCGAATCATGG  
TATCCAAAAGCTCACTCTAAAATGGCCAACGATGAAAAATATGTGTTGCCTGATAGCATATTTACTTGT  
GCAACGTTGACACATTTGAATCTCTCAAGGTGTATCTTTATGCTTCCGGATGGTACCCAATTTCCCAATCT  
TATTACCCTTCAGTTAGAACATTCTAAAATTGCCGGTCATCGAGGATTAGAAAACAATCTTAATTTGCCA

GTTCTCGAGACTATGGAGTTGAGATTTTGTGTTGATGTTGATTCTGTTTATTTGGTTTCTCCAAAACCTTGA  
GAACTTGTCTATCATTAGCAGCTATAACAATTACATTTTCGGTGTTTTAGTGTGAACCCAATCTTACTATCAT  
TAAGCACCTCTGCTTGAATGGAACCTCCCTAGAGGTAAGAAAATAACGTTACTTTGTTTTTCATTCGTAGA  
TGCTCTTACTAACACTCCATAACTTCATTTCTTTGTCATTGGTTGTTTCAGAACTTTGCTTGGCGTATGTG  
GAAGACAAGCTTTTTCAACCACTAAAATTGCAAAGCCTGAAAATTTGCGACTTTAAGATTTTCAGTTGAAA  
GTATTGCTTGTGCAGTTTGCCTACTTAGGAGTTCTCCTAACCTTTCTGAAATTGAAATAGACGAGGTTGTA  
AAGGTA AACATATCATGCCTAATAAGGACATTTTTATGTATATACATCTTTGTATATTTATTTGAAATCTT  
AAGA ACTTTTCATATTGCCGTCAAGATTTATTGTTACACTTTGTATAATTCTGGTAATGTAGGTTGACTATC  
ATGAGACTTTTTCTTTAGGTTGATGAGACATTGAATCAGAGAACGGAGCTGTTATCTTACTTATCAATGG  
AAAAAGACCGTGTGAATGAAGCTCTGAGATTGATTCAAACAGTGAGGTTTCGGAACTCAAGGGATCA  
AGTACTGAAATGTACTTAATAAGAGTGATGTTTTCTCATTCTCCAAAACCTTGAGAGGATTATCATTGAAC  
AGTGCGAGAAATCAGGACATGTCACAACTATAGGGAAAATTTGAGGGAAGCTGCTAAGCTGCATTACTC  
GAGCATCACCCAAAGCAATAGTTGTCAAGTATTTACAATGTGATTTCCAGTGGCGTGTTATGACTTTTTT  
GTTTAG

>PGSC0003DMG400036410 LRR-RLPs

ATGGGAAAAACAATTGAGACTCAAATCACAAGGAAATAATGTTTGAATTCGCCCAAAGAGTTAGGCG  
GAAATTGCAGAAGCGAGGCGAAGAGTTGATTAGCGGAGTCGAAAATGGGGTTATAAGGTACGGTTG  
CACAATAGGACACCTTCAATTGATATATTGTCAGAATGTCTCATTATAAAATACTCTGTTGTCTTTGTTTT  
AAAGAAGCAACACGGATGAGCATTCTTTCCAAACATGGTTGCAAGCCTGGTGAATCTTCCAACTTG  
GATTTACAGTTGATTATTCTAAATGCAACGATATGAAAATAGTGGATGATATCCTGGGGAGATATAGG  
GACGGAAAATCCCTATAGAAAAGTTTGAATTATTAGATGATTGTTTGATAATGTTTCTAACTCTTTTGA  
AGTTTTAGATTTCCCTATGATTGATAAGTGGCTTGGCATTGTACTAACAAATGGTGTAAGACCTTACC  
ATATCATCATACCCCTTGTTTATTTTCGCAATCTTGGCGGTAAAATCTGTGAGAAAATTGGTTTTGAAATA  
TTGTATTCTTTTGCCTGTTTTGTTATCTAGCGTTGTTGTGAATTGCAATCTTTGAGAAAACCTTCTCTATCT  
TATGTAAGATTAGTAGACGAAAACATGCTTCAGACTCTACTTAATAGCTGTCTGTTGATTGAATCTTTCAC  
CTTTGAGTGTGCAATGGCTTGGAAACAATGAATCCTCAAAGATTAAGTCGGTTTCCCTGAAGTTCTTG  
AAGATTCAGCATTGTGGGGGAATATGGGAGATTGATGCTCCAACTTGGTATCACTTAAGTACACCTGG  
GAAGACATTCCTCAAATTAATAATTGTGAGAGAGTCAAGACAACCTGAAGTACTCAAGAATCATTCTTGAAT  
GCTTAGACAGTGACAATGTAAATGCTGCATGGTTTTGTAAGTTGAGGAAGTTTCTATCAAATTCGATCTC



TTGGTCTGACTTTTGGATTGATTCTTACGAATGCAAGAACATCAACATTCAAATTTGCAACTGGACCAT  
AAAGATTCTAAGCCCCATGTGGACGCTTTAAATGTCACCATTATATGGAAGGACGGGGAGAGCCCAACG  
TTTGTGGATGCTTTGGTATGGAGTTGTCAGCCTAGGAGACTCAACGTGTATTCAACAAGAGAAAATATT  
ACATTTTTTCATTGATCATTGATGTATATGAAGAATTCGAGTCAGTCTACTTCTCATGAAAGCATGCCTCA  
ACTTAGTCAATTAAGACGTAAAAGCCTACAAATTTGATCCTAGATACTATAAGGAGGAGAGTTGGCA  
TCCTGTGGAACACAAAAGTGGGGAGCTGGCAACAACGAACTTTGAAAAGTGGGAATGGTGTATTTTTT  
ATTAGATTGGTGA

>PGSC0003DMG400036835 LRR-RLPs

ATGGGGCTCAAGTCGTTATCACTAGGAAATAACAACCTTTGACGGCCAACCTTGAGTTCTTATCCTTTAACA  
GATGGACGCAACTTGTTGAGCTAGATTTTTTCATTCAATTCCTAACAGGTTCAATTAATTCTAATGTAAGT  
GGTATGCAAAACCTACATTCCTCTTCTGTCATCAAACCTTTGAATGGGACTATAACCATCATGGATATT  
CTCCCTCCCTTCACTAAGTTATTTAGACTTGAGTGATAACCATTTGAGTGGAAACATTGGGCTAGATCAA  
GAAGATGGGTTACATGGATTGCCACTCTCAAAGATTGTGGCGGTGATGAAGGGGTACCACAAGCAAC  
AACTACATATGGGCTAGATCAAGAAGAAGAAGAAGGAGATTCAACAATTATAAATTGGTAG

>PGSC0003DMG400036994 LRR-RLPs

ATGGAAAATATTGAAAACTTCCACTAATTGTATTATATGTTTTCTCTTTCAACTGGTTTCTCTTCATGT  
TTGCCTCATTTGTGTCCCAAATATCAAGCTCTTGCTCTTCTAGAATTCAAGAAGACGTTTGTATCAACCC  
TTTTGCTTCTACTTTTGAGGAATGTGAAGGTCTTTCTCTAAGACACTGTCATGGAATACAAGCACGGATT  
GTTGCTCGTGGGATGGAGTTCATTGTGATGAGACGACAAGCAAAGTGATTGAGCTTGACCTCAGATGTA  
GCCAATTCAAGGCAAGTTCCTTTCCAACAGTAGCATCTTCCAACCTCTGCTCTCAAAGGCTCGATTTA  
TCTATGAATGATTTCTCTGACTCAAACATTTACCTAATTTCCGGTGGGTTTTCTAGCTTGACATATCTTGAT  
CTATCCTATTCGACGTTACAGGTCAAATACCTTCTGAAATTTCTAATCTTTCTAAACTACGTTCTCTTCGT  
ATCTATGGTTACTCAACTGGTTTAACTTGGACCGCACAACTTGGACAGCTTCTTAAGAACTTGACCC  
AATTAAGAGAGCTTGAGCTTTCCAATATGGGCATCTCTTCAACCATTCCTTCAAATTTCTTATTATTTAA  
TAACTTTGCGTCTTCCAGGCACACAATTATATGGGATATTACCTGAAAGAGTTTTCCACCTTCCAACTTG  
AGATTGCTTGATTTATCAAGGAATTCTCAACTTTGAGTCAGCTTTCCAATAACCAATGGAATAGCAGTG  
CATCTCTGAAGGATTTATCCCTAAATGGTGTGAATTTTACAAACGTACCTGAACCCATGAGTAACTTTTTT  
GGACCTGTTGACTATTCAATGAAAATTGGACACAACCTGGAATCACTAAATCTTCAATCCAATTTCTAAC  
AGGTCCAATTCCTTCTGATGTTAGTGGATTTCAAAGCCTACAGCTACTCTCGATGTCATCAAACAGTTTGA

ATGGAATGATACCATCCTGGATATCCTCACTTCCGTCCTGAAATATTTAGACTTGAGCAATAACAGCTTC  
AGTGGCCAACTTGAGGAGTTCAAATCCAAAGAACTGTTTTGGATAGATCTAAAAAAAATTACTTGCAA  
AGTCCCATTCCAACTCACTCCTAAACCAGGAGAACTTGATATTTCTTAGCCTATCATTAAACAATTCAG  
TGACAATCTAAATTTTAGCATGTTTTCAAACCTTGAGTGGACTAGGCACACTTAATCTTTCATATAATAGTT  
TCTCATGGGATGATAAGGATCAAGTCAAGTCTAATTTGCTCAACTCTCTTTATGACTTGGATTTGCGCTCC  
AATTTGCTGCAAGGGTCACTACTTATTCCACCAAGTTCTATAGAGAACTTCTACATATCACATAATAAGCT  
TAGCGGATATATCCCTTCGACTATTTGCCAACTAGAATTTCTGAGAGTTCTAGATTTGGCAAGTAATAGT  
TTGAAGGGAGCAATCCACCTGTTTTGGTAACATGAGCGCAATTGAGGTTTTAGATTTGCGCCACAATA  
ATCTTAGTGGGACAATTCAACTAACTTTAGTGTTGAAATCCACTCAGAAGCTTTAATTTGCGTGGAAA  
TAAGTTAGAGGGGGAAATCCACATTCTTTGATCAATAGCAAGCGACTGGAAGTTCTTGATTTAGGAAA  
CAATGAGTTGAATGACACATTCCCAATGTGGTTGGGAACTCTACCAAACCTGATGGTTTTGATTTAAGA  
TCAAATAAATTGCATGGACCCATCAGAACATCAAAGACTAAGAGATTGTTTCCTCAACTTCGAATTATAG  
ACATATCATCCAATGGATTTTATGGGGATTTACCAACACATCTTTTGGAGAATTTCAAGCCATGAAGAA  
AGCTGATGAAAACATGAAAACCCCAATGTATATTGGAGATTACTATTACAAAGATTCCATAACAATTTCA  
TCAAAGGAATGAGCATGGAACCTGTTAGAATTTTTCTATGTACACAGCCATTGATCTTTCAAGCAATA  
GATTTGAAGGTTACATTCCAAGTGTATAGGAAATCTCACTTCACTAGTTCTTTTGAACCTATCTCATAAT  
AGTTTGAAGGCCATATACCAACATCACTTGGAAAGTGATCAGCGCTTCAATCGTTGGATCTCTCATTTA  
ACAACTTGGTGGAGAGATACCAGTGCAACTTGCATCTCTGACATTTCTTGGATTCTTAAGTGTCTCTCAC  
AATCATCTTGTGGATGCATCCCTAGTGGAACACAGTTTGCTACGTTTGAAGTGGTTCATTTGAAGGGA  
ATGATGAATTGCGAGGCTTTCCAATTTCAAAGATTGTGGTGGAAAGTGGTCATGGTCATGTACCACAAT  
CAATGACTCCATCCACTAGATGATCAAGAAGAAGATTCTGGCTTTGAGATAAGTTGGGAAGCGGTTTC  
TGATGGGCTACGTTGTGGACTCATTATTGGAATATCCATAATATATATTATGTCATCAACTCTCAAACCG  
ATACAGCTTTTCAGGATGATTGCAGAATGGGAACACAAAGTTATAACCATGAGAAAGAAAAAGAAAGT  
AGCCAGACAAGTCAGGTATTCAACTCTAACTCTACACTAA

>PGSC0003DMG400037069 LRR-RLPs

ATGAATAATCGTGGTACAGAAGTGATCGTTGATGAAAATGAGATAGACAAAATCTCTGATTTGCCCAGG  
GATATCCTCGATGAAATATTCAAGGATATGTCATTTCAAGAATTGGTAAAACATGTGTTTTGTCCAAGA  
AGTGGGTACATTTTTGGACTATGCATCCAATACTAATTCTAGATTGGGAGTTCTTTGAAGAGAAAAGTGG  
TACTATAGGATTGATTGAAAATGGTTTTAGTAATATGATTGACAACATTCTCTTGCAGCATGTTGGATCCC

TAGTCAAATTTTTCTTGATTTGTCAACTATTGATTGTAATGATAGGGACCTTGACCATTGGTTGTTATGT  
GTAACAAGTAAACGCGTCAAAGAACTTACCTTAAAAAATCACAAACGCAAACGTTATACGTTGCGTTTTT  
GTGTATTTGATTGTCCAACCTCTCACATATCTAGATGTCACAAATTCATAGTTAAACCACCTTCTCCCAA  
GCATTAGTCCCAAATCTCCTTGAATTGACCTTAAAGTTCATCAAATTTACCCGGACAAAGCAAATTATGT  
CTTGAATACCCCACTTACTTTACTCTTTAACGTTTCATTGCTTGCAATGGCGTTCATTTCTCACCATATTTGC  
TCCTAGGATCCAGTTCTTGACTGTTTCATGATAGTCATGACATTCACGCAAGTTTTTTTGATAACTTGTCAA  
ATGCTAGGGAGTTGTTTCATGGTATTAGATGTCTGTGAAGAATCAAAAAGTTATGAGCAAGAGAGGTTCA  
TTACATGGTCGCGTCTTCTTTATTTGTGCTCTAACCTAACAAAGGCTTGTTTTGAGTAATTCTTGCATTAG  
GTGATTATAATATGATCAAGACATATTTAAATATTCTTTATTATAATATTCTCAATAAGTGTTACTATGCTT  
ATCATATATACTTAACCATTAATGCATTTTGCCTTTTTTTTTCTTTTACCAAGCATTGGGTGCAGAGATCA  
TTCCGAAAAGGTTTCAATCCAAACCCTACCATTTGGAGCATGTAACATTGTGTGTGAGATTTATGGATCT  
AAACCAAGTCTCTGGTGTCTTTCTTGATTTCGAAGTTCTCCCAACTTACACTCACTGGAGATAGATGTAA  
TGTTTTCTCGCTTTCAATAATTTAAAATTGAGTTTAAATTTATATATACACTGATTGTAGGTAACCGTTACAT  
GTTGTAGTAGGTAATATATCTTATTTTTAATATTACAAGTTTAACTTGTTACCAGTAGATAGTTTTCGGT  
GAGTTAAGTACTCTACATTTTTAGAGTTTAACTATATATGTACCGACAACGTAATGAATTTATACACTA  
TCAATATTAGGTTATAAAAATTTAAAATATCTACAAGTAATTTTTATGGTTATGGAATTTGTAAAAAT  
ACTAACCTTTTTTTTTGGTCTTTTTGCACCATATGAATTTTTATAGGTTGTCAATACCTTGAGTGAAGGAA  
ACATAGATGAAGTTACACATTATTTGGAAGATCCAAATTGTGTTGACAAACAATTTGAGAAGCTTGAATT  
TGTGGAGCTAAGAGAGTTTGAGGGGACACAATTTGAACTCCTTTCTTAAAGCTCATATTGGCATATTCC  
CCTTCACTTTCAAGGATGATTGTTGAACCTTCTGATGAACTTGATGTAGCTGAGGTATTGAATTTGTATGA  
AGAATTGAGCATGTCCTTAAAAGCATCACCAAGAGCAAAGTCATCGTAGCACCTCATGGTCAAGATGT  
GTAA

>PGSC0003DMG400037098 LRR-RLPs

CTAAGCTTTGTCTCTTATCTTTGCCAAGAGTTCTTCAGCCCTTTTCAGCGCATCTGTTGGTTCTTCTTCTC  
GATCTGTTGAGCTTCGTGCATATCTTCACTAGTCTCACTCCGCATCGAGGAGTTTGATTTCGTATATTGAT  
TTAGATTTGAAAGAAGAGTCTGTTTTACCTCCTCTAGGTAATTCAAAATCATTTGATTTTGCTCTTCTTCAT  
CATGATTGGAAATCCTTCGAGCTATATGCTTAATCGAAGCTGAGTCATCAGTCATAATTCCTTTATTAGAA  
ATTGATTTATATTCTTTAATAGTCGTTGCAATTTGGTCCAACAGTTCTTGCCATAGATTGACTTAGTTTGT  
GGATCCTTTTTATTAGTTTATCCCAAAGTTATTATAATATGTGCGATATAAGCAGGGGATCTGTTCTTT

AGTAAAATCCACCTCTGGAATCCACTTGTGAATCCATGGAATGGAAAATTCTATAAAGAAACATATATGT  
TCTATTTGTTGTAATAAGAGACATGATCTTGATGATATAATCTGTTAAGATCTGGGGAAATCTTTACCCA  
TTCTTTATATAATTTAAGAAATGGTTCGGGAAATATTTTTACTGTTGGCCCGTGGTATGACCACCAATTCA  
AAAACCAATTTGGTATAGGACTAGCAAATATCTTTGCACATACTTTTATGAACCAAGTATGTTTGTGCCTC  
TCGTTGTTATAACAAAGGACTTTATCAAATGCTTGGATATAATCCCAATATGTGAAACTTATCTTAACATT  
GTTAAGGCTAACCTGTCTTTCTGTCATTAAGGAAATACCCCAATCTTCAATGTGAATGATTTGTTTAATAA  
TCATTTTGGAGAAGTTATAAACATTCTCACTGGTATTGTATCCAGAGAAGTGTGAAATTCAACACCTGT  
ACTTATCAGTAAAGTCTCATAGTACTTTTGAGTTTTGTATGACTCACCTGGGAAGTATAGGCCATTGAGC  
AAGTACCTTTGGAATATCTTCCAAGGTTCTTCTCTCTCTGTATATCAGAATTTTCCAAGAGAAATATCATT  
TCTCTTTTCTCTACCTTTTCATAGGTTTTCATATCATCAATAGTATCTTCTTTGGCTAATGAAGCAAAAAGTA  
TTACTTTGCTTTTGGTTTATAAATCTTGTAATCGAGCGTATAACAGATCACTTTCTGGGATATCTTCCAG  
ATGTATTGATGAAGAGGTTTTCTTGTGTATTTGAATTTAGTTAACTAAACTCATTCTCTCTTTGTAA  
GATGGGAGTGCTAGATGAAGAAGATCCGTATGACGATCTTGATGAGACTATTGAGGATGATCTTCTCT  
ACCTCTGCCTCTACCCTTAGTTATCCAAGGGTGTTCATTCTGCAAATGAAACAATAAGTTTTAGACCCAA  
TATGCGTCATAATAAGTGTTTCTTCTGCTGTTTGGAAATAGATCTATCAACATTCCATCTATAATTTTC  
CAGCAAATATGTTCTTTAAATCTCTGTTAAAAGGAATAACCTTTAGAATAGTAATCAGTCTTTTTTCTAT  
AAAAAACATAGAGATAGGAATATTATGATCTTCTCTGAAAACTACTATACTCACTCATTCTGAATGTAT  
TCTCTTGATAAGAAGTCTGGGAGGGAGTTATCACTTCTTTCTTATAAAGGATTTCAAATCAAAGGGG  
CTAATTGTGCTTGCCACCTTGCAAACATAAGTTTTGAAGCATCGTGTTTAAAGTCTTTGTCAAACAAATAT  
TTGACTGACTGAGCATCGGTTTTTATTAATAAATCTTAATTGTAAAGATCATCCTAAAATTTTAAACACA  
TTTAACGATAGTTAACATTTTCGTGAGCTACCGTAGCATATTTTCGCTGAGCATCGCTCCATTTTCTGAAT  
GAAATCGAATAAGATATTCGTGTTTATCATGCGGGTTAATTTGTTTTATAATCCTCCATAACCCATGTTG  
GACGCATCTGTCTCTACTATTTTAGGCCACGCAGGATTGGCGAGAGTTAAACAAGGTAAAGACTTAACT  
CTTTCTTTGATAGTTTTAACCAGATTTGTAAGACTATCAGTCCATGGTTTTTTATGCTCCTTTATTAGTCTTT  
CGTATAACGGAGCTAGGTCACGGGACAGATTTTTGTAAAAAGGGGAGATGTAATTTAACTTCCCAAAA  
ATCGTTGTAAGTACTGAGTTCTATCAGTAATTATATCTGGAAATTTTGATGCGAATTCGATAGATCGCTGAAT  
AGGAGTAATTTTTCCCTGGCAAATGAGATGACCCAAAAACCTGACATCAGTTTGGAAAGAGACTCATCTTA  
GGTTTAGATATTACCAAACCATTTTGAATAACTATTTTCTTGAAAATGCCTAAATGTTTGATATGCATTTT  
AAGAGTTTTTGAATAGACTAGAATATCATCAATATAGACTATAATGAAATCCAAATAAGGATTGAAACTA

TCATTCATAATCTTTTGA AATTCAGAGGGTGCATTTTTCAAACCAAATGGCATTACATTCCATTTCGTATTG  
TCCAAAGGGGACATTA AAGCAGTTTTATATGAATGCTCTTTAAATACTTGAATCTGCCAATATCCTGATT  
TTAAATCAAATTTTGA A AATATATTGGCGTCATATAATCTTGATAGAAGATCCCTCTTATTTGGAATAGGA  
TACCTGATCCATTTTAA AATTTTGTTTAACGGTTTATAATTTATAACTAACCTGGGAACACCACGTTCTTTC  
TCTGCTGCATTATTA A AATTA AAGGCAGTACAAGACCAAGGTGATTTGGAAGGTTTTATCAAACCTTTT  
GTAACAGATTATCAATCTCCTTTTTGCAGAATTCAACTAGTTCAGAATTCATTTGGCAAGGAAGGGATTT  
CGTAGGAATATTTTCTTCAGAGAAATCATCTTCATATGGAAGAGTAACGATGTGCTTTTTTCGATTCCAG  
AAAGCACTAGGATGATCAACACAAATATCAATGGCCATTTGTTCCAGAGATTATTTTAATCTTCTACTGTAC  
TTTAGTAGTCTTCAAAGTATCAAAAATATTCATACTAAAGATTTCAAGTTGTAGATAATTAATATGCTTTT  
GTTTCATTTCAATCAAAGCATTAAATATCACGAGAAACAGGTTCCAGTGATAAAAGTATAATTAATATCATG  
ATCCTTATAAGTAGCTGAAAACCTTTAGCATTATATTGGTAAAAGGATAAATAGAATTTATAAAAGGA  
GTTCTTAAAATGATAGGAGGGTATAACTGATTTTTTACCAAGAAAAGAAGTGAGGAAACTATTTTAATT  
GATAATTATTTTTCTATATCTAATATTGCCATGATTGACAGTGGAGCTGATGTAAGTTGCATTCAAGAAG  
GACTAGTTCCTACTAAACATTTTGA AAAAACTACTCATATGGTGAAATCTGCATCTGGACATGCTTTAGAT  
ATAAAGTATAAATTATCTAACACTCGTATTTGCCAAAATAATAATAATAATAATAATAATAATAATAAGA  
GAGGTGATAGCGCTTAAGTGTGAGCACCACAAAATCAGAATATTTAAATAATTA A AATTTTAAAAA  
AATAATTTTAAATCAGTTTTAGAGAATAGGAAGTAACTGTGAATATGTATTTATTATTA A ACAAAGCT  
CTACAAAGTAACGTATGTGGTCCTTTTTTGTGGAAAGGTATTTTTAAATTTAATTATCTTTCCGCAACCTC  
CTCATTTAAAGAAAATCAAATAATAATAATAATAATAATAATAACAACAATGATAGCGCTTAAGTG  
TCAGCACCACAAAATCAGAATATTTAAATAATTA A AATTTTAAAAAATAATTTTAAATCAGTTTTA  
GAGAATAGGAAGTAACTGTGAATATGTATTTATTATTA A ACAAAGCTCTACAAAGCACTAATAATAAT  
AATAATAATATTAATAATATTAATAATAATAATAATGTACTGGTTATTTGTTCTTGTTTAGCTAAGATGGA  
GATACTTAACTTGACACAAAATCAGTTCTATGGAGAATTGCCTGAACTCGTGTGCAATTTGTGGTTGAGT  
TGCAATTACTTTATTCAAGTTAATTCAGAAAAGGTTGTTGATGTGAGAATGAAGTGCCCTTGTCTCAT  
GAATCAATTGGACGTCAACAACCTTACTGCTTTGAAACCACATTCCTTGTAATAGTATCAGAGATTATA  
GCAGAATGGCTCACTAATGCATCTATGTTTTTGATACCAATTGTTAAGTTTTACTACTTATCTTAATTCATC  
TATTTTTAAGTTTAAATAAATCATATGCAAACATCGAAAGAAGGATGCATCAAAGGAGTCAATTAACATC  
ACAATTGGTATGCATTTGTAGTAGTGTCAAATGGAATGATTTAACTCAAATTGACAACTTGAAATACAC  
AAGTTAGAGGGTGTTCGATTGACTTAAAGTTGATCAAACCTACTTTTAACTCAGTTTTTTACTTCTCTA

AATGTTTCACAAATATAAAAATAAATTGGGAAATATTTGTCAAGGTTAAAAATAAGTTAATGAATAAA  
ATAAATCAAAAACCAAATATATCTCCCCTACTTTTTATTCTTTGACTTAAAAGTCATTTATGATTGACTT  
TTATTTTTGACTTAAAACACTCTCTCCCCACCTATTAAGAAATCAATAATTGACATAGTGAGTTTACTAT  
TTTACCCCTATTAATTATGAAGTACATGAATTAAAAACCTAATATTTTCAAAAAGTTCTACCTTTTTCAAAA  
TAATTAATTGAGGGTATATAATAGGTAAAAAAATTGTCCTTTCTGACTTGTCAAAATGGAAGAGTAAT  
TAGGGACAACATAAAAAGAAATTCTAAAATTGTATAAAAAAATGGTATAAACAGTATACCAATTACAA  
ATAAATTTTATGTAGTTTCTTTTACCAGAAAGCTTAAATTTTAAAAAAAGTTCATACCAAAAATCTATTCC  
AATTTCAAACCTTATATTATGTAATCTCAAAAAAAAAAAGTTCATCAAAAAAATCAAAATCAAATTCTATT  
ATACACAACAAAATCTGAAAATTTACTTTCCAACATCATTGTTCTTAATATTTTTTTTTTACGTTTGAGTAG  
TATAACAATACAAATAAAAAATCGCAAAGAACACTAACCTGAAGGATCACATCTATCACCACGCTTTATT  
AATATTGATAAGAAGTCATCCATTACAACAAAATGAAGATTATTGAATAGAAACGAATTGGAAGTAGTT  
GTGAGTGACGACAAATTACAAAAAAATTAAGATTATTCTATATAATATGATTATACTTGTGCAACCAAA  
TAGTACATTGGTAATTACACTATGATTATATTGTGGCAAACAAACAAGTTAATGTAATTACTAGGTTGTG  
TAATTACTAGGCTTGTAATTACCGTTGACACCAATTTAGACCATCCACATTATAGATTAATGATCGAGCT  
TCTTTAATTTTTCAAATGATTTAAAGTAATTAGTTTTATGAAATTCAAGTTACTTTTATATAATTTTTTACA  
TTTGGAAATTTAAATTATATTTGGAAATCATCTCAAAGATTTTAAATTATAAGTTAAATATTTTATTAAATT  
AGTTTAGTTTAAATTATGGTTATAATTTTGTGCAATTAGTTTATTATATTTTATTTTGTTAAGGTTAAGAT  
GGTCGTTATTTAATTTGTTGTATTAAGTTCAAGTGTAAAATTCAGGAAACGGAGTCAATTTGACTAAATT  
GTTAATTTATATGGCTATTCCTTAATTACAAATCTCTTGCCTCACCTCCAACCCATGAAAAGACCAAAATT  
GGGCCAGCCCAATTCCTGTAAAACCCAGCCCAACGTTCACAATACCTACAGCAAGCAGCAGGATAATAC  
ACAATTCCAAATTGGGCCGACCCCAATTCGTGTAAATCCCAGCCACATTCAACTCCAACCTTCACAACGTC  
TATAATCGATAATTC AACGTTACAGCGTCTGCTACACTTCCAACAGTGTAAACGTTCAATGGCGTG  
AATACAACAACGGCAGCGTGAGACACCAAGAACAGTCGCGTCGTCTTCTCCTTCACCTCGGTAGCAGG  
TGTCTCGTACGCTTAGAGCCGTCCACCTCCAT

>PGSC0003DMG400037551 LRR-RLPs

ATGATGATGGCTACCAAAATATTTCTCTACTTCATTTTTTCACTCTCTTATATTTCTTCACAATTACTTTTG  
CTTCTATTGAGGAAGCAACTTCTCTCCTAAAATGGAAATCATCTTTGCATTATAAGAATGATTCATTATTG  
ACTTCATGGACACAAAATTCTAGTGAATGCAGGGATTGGAATGGAGTTAAATGTTCTAATGGAAGGGTA  
AACAGTTTGGATATTACAAATGCAAGTGTATAGGCACACTCTATGATTTTCCATTTTCTGACTCTCATTTTT

CTTGAATATGTTAATCTTAGTATAAATCATTCTCTGGAATCATTCCACTTGAAATTGGTAAACTCACTAAT  
CTTGCCGTCTTGATTTGTCCAACAATTATATTTTCAGGCACCATCCCACCACAAATCGACTCACTAGCCAA  
GCTTGAAACCTTCCACATCTCTAAGAACCAGTTAAATGGTTTCGATTCCAAGAGAAATAGGTTACCTAAGG  
TCTCTTACTCGGCTAGCTTTAAACAATAACTTTCTTGAAGGTTCTATCCCTACTTCATTAGGGAATTTGAAC  
AACTTGACCTATTTGTGTCTTTATGGAAATCGCCTTTCTGGCTCCATTCTGTAGAAATAGGGAAACTCGT  
CAATCTTATTGAACTTATCTTGATTCAAATCAGTTAGCAGGTCATATTCCTCCAGAAATAGGTAACCTTGA  
TCAATGTAAGAGTGTCTCTGCTTTCTCCAACGGAATTTCTGGTCCCATTCTGTAGAAATAGCAAAGAT  
GCAAACACTTGAGGAATTGGACCTATCAGTCAACTCGCTAGAAGGAGAGATACCAGAACAACCTCGTTTC  
TCTTTCAAATCTTGAAATATTGAATCTCTCCTACAATCTTCTCACAGGATGCATACCTCAAGGACGTCAAT  
TTGATACCTTTGAGGAAAGTTCGTATGCATTCCAAGGTAATATTGGATTACGTGGACTCCCAGTTACAAG  
ACGTTGCCATAATAATGGGGTAGAAGAAGGAAACGATACATCGTCATTGCTAGATCAAGAAATCAATTC  
TCAATTTCTCATTGAATGGAAGGCGATTCTTTTGGGCTATGGATGTGGACTATGTATTGGATTTTCCATTG  
GATATTTTCATGATTTCTACTGGAAAACCAAATGGCTTTCAAGATTCATTGAAGAATATGAACACACAAT  
TACTACGCGAAGGAGAAAAAAGCAACGAGATCAAAGGGACAACAAAAGAAGAAATAATCGCTTCTAA  
>PGSC0003DMG400037653 LRR-RLPs

ATGTCGACGAACGGAGTCCGTGAAGTTGAAAAACCCTAGATCGTATCAGTAAGTTGCCGGACGCAGTT  
CTCATACAAATTCTCTCTTTCTGCCGACGAAAGATGCCGTTCGCATCATGTGTTCTCTCAAAAAGGTGGC  
GTTATCTCTGTAATTCAATTGATAATTTCCATTTTCGATGGTTGTAGCTACTACAACAATGTAGAAAATTTTC  
GTATTTCTAGTGGATCATGTTTTATCTCATTGTAATTTTCCAAAATCAAAAATTTCCAACCTATTTTACCT  
TATAACTCTGAGTGGAACTTTGATTTGAGTATCAGCCGATGGATGAATTTTGTCTGTGGAAAGAAAAGTG  
GAAGATGTTGTATTGTGTTTATGTGATGACAATTTCACTTTTGAATTGCCTATATCTATTTGTACTTGTCC  
TCATTGATTACATTGGATTGGAGCTGTTGTGCGATTGATAAAGAATCGGTTATACAGTGGAAAGTCGTTG  
AAGAGCCTAAAGTTGAACTATGTTTTATAGATAATGACGATCTCGCGAAGATTTTGTGAGTTGTCTCTG  
CTTTGGAAACTCTGGAGTTGTCTTTATTTGAAGGTTTTCGCCGTCTAGAAATCACTTCTTGAATTTAAAG  
AGACTATCATTAGGAAGCTACTGGTGGTTTTATGGCAGAGCTGATGAACCTTTGGAAATTATTGCCCGT  
ATCTTCAGCATTGGAATTTTCAAGGAGACCTTGAATATCTCAAGTGTAAGCTAGTAAATGTCTCCTCTTTG  
GTTACTGCTACACTTACTTTTAAACATTACATGTATAACTGAGATCGAGGGGTTTGTGACGAAGATGGTT  
GTAGTGATTATCATCAAGGTTTTAGAAATCTCGTTCTGGATTATCTTCAAAAATAAGTTATGCAACTGA  
GCTAACAATTGGACGCTGGTTTGCAGAGGTTTGTTCATGTCAAAGACCTTATTCTCTATTTAAGTTCA

AGTGAACATTGCGGAATGTAACTTGTGAAAGAGAAGAGCCTTCAGAATCTAATAAAATTATGAACTTC  
TGTATACACGAAAATTTTAGTGAGAATATTTTTGATCGACTAACTGAATTTTTATCCATATAAATTGAT  
CTTCTCTTCGCCTTTTGTGGTCTTCCTATCTACTATTTGAAGTTTGGATATTTTTAGAACTAGATTTTCTG  
CATTGCTATTCATTAAGTGGTTAGATGGTTAGATTAACAATTATAAAGTACATAAATTTGTCATAGCACT  
ATTTTTTGTGGATTATTTTTCTCTATCCTTCACTAATTTCTTTGAAATTATTTACCAGGTCGTGTTCATG  
TTGCGACTCGAAGGTGTGTCGCTACCAAATTGAGATGCAAGTGTCTAACTTTAGAGATGTACGTGACA  
AAGAATAATTTGTATGGAGCAGCTAGCCTTTTGCAGAACTCGCCTCTTTTGGAGACTCAACATACCCT  
TGAGAGCTAGAGCTGTAATTTCTCGCAATTTATTCTTTGCTTTAAATCTTTGATTTTTTAAGTTTTAAGAA  
CTCCCCAGCCCCAACCTCACCAGTTCAAATATTTTCTTAAGGAGGATGGAAATATTAATTTAATTAACACT  
AAGAATTTTTTTTGTCACTGTAGTTGCTTTCTATCTGGTAAATGTACTTAGAAAGCAATGGTGACAACTA  
AGCCTTGTTACTTTTCATCTACTGCTTGAGCATATCTGGTAGGGATAAGATATTGTAATCAATTGCTGAG  
AACTGTTCCAAGTTTGTGGATTCTGAAAATTATTCTATATTAGACTATTGCAAATGCACTTCCTTTTTGT  
GTTACATGGTATATTCCCATTCTGTTGTGGATCTCCATTTGATTCTGATTATATTATCTACTACAGTTTAA  
TGATTTCCGCTGCCAAGTTGAGCTACGTTATTTGGACAAAGGACGTCATATAATCTTGAGAGTTGGATT  
TCAAACACTGTGTTTCCAATCTCAAGAATGTTACGTTTGATGCCTGCATATATGAATGTAGAAAAAAGT  
GGTTTGGAGGGGGCAATGATAAGCTTTTCGAACTTTCAGTATTTCTACTAAAGAATGCAACGGCTTTGAA  
GAAGTTTGTCAATTGTATCAAAGAGGAGAATCTGCAGGGAATGTTGAGAGAGCTGTGTGTCCCAATATTT  
ATCAGGATTGGCTAAGAAATTGTTAGACAGCCCAAGATCATCTAAGAAGCTTTTGATTATTTACCAAGAG  
TCTGCTTTGGATTGACTAGAGTAGAAGTTTTGTTTTGGCATACTAGAAATGTCACTGTATATTGTAGCTTT  
TGATTTACTGCAGATGCAAATTATTAAGTGGTGGCATTCTAGTCGTTGCATATATGTGTTTGTAAATTTCT  
TGCAAACTGTGAGATCGGCAAACCTACAAGACATGTTTATTTACTCAGACATAAGTTGGTATTTTTGTC  
TTTTAACTTCATCAAACCTCTGGCTTGAGGAACTCTCCTGCAACATTATTTCAATGTTATGTAGCCAAGAA  
GAGATGTCAGCTGTAGATGATGTTTACTTCATTTTCCCTCTGTTTTCTATCAGCTTATTCTGTCTTATTTTC  
TTTGATTTGAAGGCAACCTTCACAGGGCACCTAGGAATGATAACGAGGCAGGGCTGGTCTGTCTCTGTTG  
TGTGTGGTGCGGGTTGAAGCAATTTTTTAAAATCATAAGCGGGGTGGGGTGGTATGTGCCTCGTGG  
GTTAGACGAATGTAAGTTTAAGACTCGTTTCTTTGATCGTTTACTGTCTGTGGTTGTATTCAATGGAGA  
AATACGGTGAGTGAGTACTCATATAGCTAATTTAACTTATTTGAACTTTGGCAAATATCCAGACTTCG  
GCCTTATTTATTTTATTAAGATTAATCTTTTCTCAAAGCATATTTAAGTGCCTATGGTAAAATATCTACTT  
TGATTGCTCTTCTTTCTTACTTTATTTGACTAAAGTTGTGGACATCTTGTTGATCTTCTTAACTCTATTT



TCAAACTAAAACTAGCATTGAAAATGGAGAATACAAAATATTAATTGATTGATTGATAGTTGAAAA  
AAATGAGTAAGAAGGAAGTTGCTCTCAAAAAAGAAATTAAGCCCGAGTTTGAGAGAGAAATAAATG  
CAGTCTGAATAGAACTCTTTCATAGATCAGATGTATTCAGACTATTAAAAGATACTCTAAAAAAAACAA  
CTATATATTGGACTTAGGTTTAAATGCAAATAATCAGGTCTACAGGCTTAAATAGGTTTAGTAACCGTT  
CTTCTCAATTTTGAGCCATAACTCAGATCAAAACAATGGATTCCCGCAGTAATTGCCCGGCGTCAAAGAA  
ACAAAAGAAGAGTATCGCCGGAGTTGAAGAAACCGTCGACAGAGTCAATGATTTACAAAAGAAGAGTG  
TCGCCGGAGTCGAAGAAACCGTCGACCGAATCAGTGATTTGCCAGACTCTTCTTATTAGATTCTCTCT  
CTTTTGCCAACAAAGGATGCCTTACAACCTCTATTCTCTCGAAAAGGTGGCAGTATCTCTGGACTTCAAT  
TGATAACTTCATTTTTAATTGTAGCAATTATGGAGAAAATTCGTACCCTTTGTTGATTATGTATTAGCTCA  
TTCCGATTCGCCAAAATTAATAAATTTGAACTCGACTACACGAACGAGTTTGTGTACGACTACCAATCT  
CAAATCAGTCAATGGCTTAGTTTTGCTGTAAAAGAAAAGTGGAACATGTTGTACTCTGGTCCACTGATT  
TAATGGCGGACGAATGCACAATGACTCAATCTTCTGTGCATGTTTCGTGTTGATATCATTAGTTTTGGG  
TCCAATTAAGTTTGATGTTGATGTGGTCATAGCCTGGAAGTCTTAACGAGCATAAAGTTGGGGAATTTG  
TTTTAGACAATGACACAATTGCAAACCTATTGTCAGGATGTCCTGCATTGGAACTATGGAATTATAG  
ATTTAGTTTTGATTAAGGGTCCTTGTGCGCATGGAAATTCGTCTTCAAATTAAGACATTGAAGCTGAA  
AGGTCATTGGAAAGTAGGTCTTCAATTTTATCGTCGATTTTTGGAAATATATGCCCATATCTTCAGCATT  
TGGAATTTTCAGGAGATCTTTATGATCTCAGGTGTATACTTTTTGATGTGTCCTCCGTTGTTACTGCTAAG  
CTTACCTTCAACGTTAGGTGTATCAAAGACATCCTAGATGATCATTGTCAGGAATTTGATCCTCATGAAG  
ACAGTTGTAGTTACTATCATCTTCTCAAGATCCTCATCCACTTATCTTCTAGCGTCCGTAATGCAA  
ACGAGTTAACAATTGGAGCTTTGTTTCGAGAGGTTTGTCTATCTCAGAGTCCTGTTCTCTGTTTGTAT  
TAGCAGACAGTTGTTTCTATCACAGAGGTCTGTTTGTCAAATACTGGATTATTTGCAGAACTTGTGG  
CCTTTTTGTGCTTTTTAGTCAACTTTCTGATGTTTGATATTTCTTGTGCATATTGGCAAAGAAATATCTGAA  
AACCAGGATTCTTGTGCGTCATGTTGCTTAAAGTGTTAGATGATTTGATTTGTCACATAACTTTTCTTGC  
TGTGGAGTACTTCCTTTTTGTTGTTATTGTTTTCTCATTCTTTATATTATTAGTTTAATTGGAATTGTTGCA  
CCAGGTTCTGTGTATGTTGCAGTTCCAAGGGATTCCGCTTCCAGAATTGAAATGCAAATATCTGACTCTA  
GAGTTGCATGAGGAGAAGTTTAGTTTGTATGGAGTTGCTGGCCTTCTGCGAGCATCACCTCATGTAGAG  
ACACTCAACATAGATATATCAACGGTGGCACTCGACACAGATATATCAACAGATCATGTAACCTTCTGGA  
ACTTCTCTCTTTTTACATCCATTCATTTTATGAAGTTTAA

>PGSC0003DMG400037662 LRR-RLPs

ATGTTAACCGGTCATGTTATCGGATTGGACCTTAGTTGCAGTCTGCTTTTGGGTACTIONTTCATCCCAATAG  
CAGCCTCTTCCAACCTCCATCATCTCCGGACACTAAACCTTGCTTACAATAACTTCTATTCTTCTTCAATCCC  
GCATAACATTGGCCGATTGAGGAATTTGAGGTATCTCAACCTTTCTCAATCTTTCTTTGAAGGGGAAATC  
CCAACAGAAATATCATACCTTTCCAATTTGGTTTCACTTGAACTTTTTTGTTACGGATGTGAACTTGATGA  
GAGAACATTTGAAACAATTCTTCACAACCTCACAAATCTGGAGGTAGTTTCTCTCCTTGGTGTCAACATCT  
CATCTTCAATACCTGTGAATATTTCTTCATCCTCCTTACGGTACGTGGATCTTGGACATACTAATCTGCGA  
GGTGTATCACAGAGAGCTTTTTCTTCTGCCAGAATTGGAAAATCTCAAATTGAATGGAAATGATCTTC  
TCAAAGGAGTTTTACCAAAGATCCACCCGAGCAACACTCTGTTGGAGTTGGATATTTCTACACAGGAAT  
CTCCGGTGAGCTGCCTGATTCAATTGGCACCTTGAGTTCATTGAATCTCTTGAACATGTATAGATGCCAA  
TTCTCTGGTTCCATTCTGAATCCATTGGCAATCTTACACAAATGCGGAAATTGAATTTTGGAAATAATCA  
TTTACCGGCCATATTCCTTCCACAATCTCTAAATTGAAGCACCTCACATTTCTAGGTCTTTCGTCCAACCTC  
CTTTTCAGGTGAAGTTCCCGACATTTTTCTAACCTCCAAGAGCTACGTACTTTATATCTTCGTAACAACA  
GCTTCGTTGGTTCGTTTCTTCTACAATTGTAAGCTTGACACATCTTCAAGACTTAGAATTGTCGAGTAAT  
TCCCTATCTGGCCAACTGCCTATTAATGTGAGCATGCTTCAAAGCTAACCATATTGGATCTGTCTGTACAA  
CTCACTGAATGGTACCATACCATCTTCGGTGTGGCCTCCCTTTGCTATCTTCATTATTGCTCCAACATAA  
TCAATTTAGTGGACTAGATGATGAGCTCAAAACAAACCCAACATTAGCACACCTGGGTTTAAGCCATAAT  
CAACTCAGTGGTCTTTGCTTCAATCACTTTTGAATCTCACAAACCTTTCTATGCTTGACCTTTCATCAAGT  
AACATCACCGTTCATGTGGGAAAACAAATCACTTTTCTGGCCTAGAAGTTTTGCGGTTATCATCTTGTG  
AACTAAAGGATTTTCCACACTTCTTGAGAAATGTGAAGACACTTTGGCTCTTGGATATTTCTAACAATAA  
GATTCGTGGCCAAATCCCAAAACTGGTTTAG

>PGSC0003DMG400037968 LRR-RLPs

ATGGCTGACCTATTGCCTGAATGTCTCATTATAAAATACTTTCTTACCTTAGTTAACAGAAGCAACTCG  
ATTGAGTATTCTCTCGAAAACATGGTTGCAAGCATGTTGACTCTTCCAATTTGGAATTCACAGTTAAGT  
ATCGCAACAATATGAAAATAGTGGATAATATCATGGAGAGATATCGGGATGAAAAATCCCTATTGAAA  
AGTTTGAATTATCAGACTTTAGTTATTTGCGTTTAGTTTTCCCTATGTTTGATAAATGGCTTGACATTGCAC  
TTCAGAACAGTGTAACATATTGTCTTTGGTGTTCCTAGCCATACATCGTACCCCTTGCCTATTTTCAA  
ATCTTTGCATCAAATCTTTAAGAGAATTGGTTCTAAGTGGTAGTAATTTGAAGCATGTTTCATTATCTAG  
TGGTGTGGTGAAGTGAATTCGTTGAGAAAGCTTACTCTATCTGACGTAGTTTTAGATGAAAACATGCTT  
CAGACTCTACTTAGTAGTTGTCCGTTTATTGTCAGTTTCATCTTTGATAATTGTTACGGGTTGAAAAAGAT

TGAGCTACTGAATAATCTCCAAAAGATCAAGTCGGTTTTAATTTGGAAAGGTGGAAACCAGCTCGTTAA  
AATTCAAGCACCAACTCTTGAACACTTGTCTTATGTTACTCAACCGGAAACATCTCCTAAGTTGGATATTG  
TTGATGCTCCAAATTTGGTGTCACTTGTGTATAAGGGAAATCTAGTGCCTACGATTTTCGTGGATGCTAA  
ATTGCCATGGAGTTGTCATCCTAGGAGACTCCTCCTCGAGTCAAATGGTACAACGATTGCATATGTCATG  
GATCGTTTAATGTACATGAAGAGTTCAAATCAACTAAAAGAAGTAAAAGTCTATAGATTTGATTGGGGA  
GAAGTGAGATGGCATTTTGTGGAACCTCGGAAGGGAAAAGGAGGCAATAAGGTACTATACCGAGAGGA  
ATAGATTTTCGTTTTTTATTAGATTGGTGA

>PGSC0003DMG400038495 LRR-RLPs

ATGTGGGATGAAAGCAGTATTGACTGTTGCCAGTGGCCAGGTGTAAGTTGTGATGAGGAAGGTCATGT  
GCTTGTCTGGAGTTGGACAGCGAAGCCATTTCTGGCGGAATTGAGAAGTCAAGCAGTCTCTCCATCTT  
CGATATCTTGAGAAGCTCAATCTGGCTTATAATGGCCTATACCTGTTCCAATACCAAGAGAAATTTATA  
AGCTGGCAAACCTTGATGTACCTGAATTTGTCACATAGTTTTAACGGGCAGATTCCTATGGAATTGTCAAG  
ATTGATCAAGTTAGAGATTCTTGACTTTCTGGAGGGGATTTAAAGCTTGAGAGGCCAGATCTGAAAAC  
ACTGGTAGGGAATCTTGCAAATCTTAGAGAACTTTACCTTGATAGAGTGAATATTTTCATTGAAGGGGAG  
TGAGTGGTGCTCGGCGTTATCTTCATCTCTGCCTCAATTGAGAGTCTTGTCATGAGAGACTGTAAAATT  
TCAGGCCCTCTTGATCCTGTCCTTTTAAATCTTCGTTTTCTTCCGTCATTCGTCTTGATTATAACTACTTGT  
CCACTATGGTTCCAGATTTTACAAAATTGACAATCCTAAGCGTCAGATGGTGCTACTTGTTTGGTCCATTT  
CCCAGTAAAATCTTTCAGGTACCAACTCTACAGCAACTTGATTTATCTGGCAATGAAAACCTTACTGGCAT  
TTTACCTGAATTTCCACATAAAAAGTGCATTAAGGGAGGTAGTGCTTAGCTACACAGGATTCACCGGTTCCG  
CTTCCAGATTCAATTGCTAACCTTCGGAACCTTGACCCAGCTTGATTTAGGAAGTTGCAATTTTCAGTGGAG  
AAATTCATCAAAAATGGGAAATCTCACAGAAGTTCATCTAGATTTGTCATTCAACAGTTTTACTGGC  
TCTATCCCCTCTTTCATAAGGCAAAGAAGCTCAACCACATTGACCTTTCTAATAACAATGGTCCACTATC  
TTCAGCTCAAACCTCAATTAGCAGTTCTTCTTCCCTGCCATCATTGCAGTACCTTAGTGTTCAGAACAGTC  
AATTAAGTGGAGAAATCCATGAATTTCTAATGCATCCTCCTCTGTTCTGGAAATGCTTGATTTGAGCAAT  
AACCATCTAAGTGGATCGATCCCCGGTCTATCTTTAAACTCAATAGGCTTTCAAACCTTCTCCTTTTCTCC  
AACTCCTTCAGTGGAAACCATTGTTATCGAAGCGGTAAAGGGACTTCCTAGGCTTACCACCCTTGACCTTT  
CAAACAACAAAATTGAAGGGGAAATACCAAGTTGGGTTTGGACAGTTGGAAATCTGAATCTTCTCACA  
ATCTTTTAGAGTCTCTAGAAAACACACAATTTGTATACTACTTCTATTGTCATTGATTTGAGTTCCAATA  
AGATCAAGGGAGATATACCCATTCTACCTACTTCTCTTACCTACTTTTCAATTGCCAATAATGAATTTACG

GGATCAATACACTCTTCCATATACAGTCTAGATACGCTTCAAATTCTTGATATGTCAAATAACAAATTAAG  
TGGCATTATTCCTGACATATTTCCACTGAATTGGAATTTGAAAACCTTTAAACCTCAGCAGTAATATATTAG  
AAGGAAAAGTTCCAAGCTCTCTGGAAAAATGCTCATTCTGGAGGTTTTAGACATTGGAAACAACAAGA  
TAAGAGATATGTTTCCATGCATGTTGAATAAATTAGCCAATTTGCGTGTCTAGTCATAAGATCAAACAA  
GTTTTACGGGAATCTCCAGTGTCTTAGAGCTGAACAAACCTGGCCAATGATTCATATTATAGATATTGCT  
TCAAACAATTTTACGAGGAGATACCTGAGACATTGGGAAATCTCATATACTAATCCATCTCAACTTCTC  
ACACAATGCTTTGACTGGAAGAATACCAAATGCCATTGGAAAGCTGACTCTGCTTGAATCTTTAGATTTG  
TCAGTTAACCAGTTAAGTGGGAGAATTCCAGACGAGATTGCGAGTTTCACATTCTTTCTTTCTTGAACCT  
ATCTTTTAATCAACTTTCTGGTAGGATTCCAAGTGGCAACCAACTTCAGACATTCTCAGCAGATTCTTTG  
AAGGGAACATTGGGCTGTGCGATTTTCTTTAAAGAAAACGTGCAGTGACACCAAAGAGACTGAACGT  
GAAATTGATGGGAAATATATAAGTTTTGCCTGGGATCTTCTGTGCGTTTTGGCATCATAACCTGGCTGA  
TTTTGCATAGCCGAAAATATAATGAGCTCGTTGATATACTTCTTTTCAGAATTTTGGGTCAGCACCAAAG  
GAGTGGCAGGAATAAAAACCAGAGAAGGTCAAGGTAA

>PGSC0003DMG400038990 LRR-RLPs

ATGTGGTTGGGAACTCTTCTAAGTTGAGAGTTTTAAGCTTGAGATCGAATAAGTTGCATGGACCGATTA  
GAACTTTAGGAAGTGAAAACATTTTTAATGAGCTTCGAATGTTGGATATCTCTTCCAATGCCTTCACGGA  
AAACTTACCGATGAGTCTGTTTCAACATTTAAAAGCCATGAGGGCAATTGATCAAACGATAAATGCAGC  
AAGTGAGGAAGGAGATGAATATTACCAAGACACGGTAACTCTTGTAACGAAGGGATTGGAGCTTGAAG  
TTGTGAAAATCCTTTTTTTGTACACCACTATTGATCTTTCAAACAATAAATTTGAAGGACATATTCCAAGT  
ATTATGGGAGATCTCATTGCACTCCGTGTGCTGAATTTATCTCATAATGGATTGGAAGGTCATATACCCT  
CATCAGTTGGAAGTTTATCTTTGGTTGAATCATTGGACCTGTCAAGTAACCATCTTGTAGGAGAGATACC  
AGCACAATTTGCTTCTTACATCTCTTGAAGTCATCAATCTTCTACAATCATCTTGAAGGGTGCATTCC  
TCAAGGAACTCAACTTCAGACCTTTGAGAGCAATGCATATGAAGGTAATGATGGATTACGTGGATTACC  
TGTTTTCAAAGGCTGTGGTAGTTATGATAATGATTCAGAATCAGAGAAAATTGATACCGGATCTGAGCT  
AGATAAAGAAAGTGACTTTGAATTTCTGAATGATTTTTGGAAAGCTGCTCTTATGGGGTATGGAAGTGG  
AGTATGTATTGGATTATCGATAATATATTTTCATGTTCTCAACTGGAAATCCGAGATGGCTTGCAAGAATC  
ATTGTAGAACTGGAACACAAAATAATGATGGGAAGGAGAAAGAAGCGGCAAAGGAAAAGGCAAAGGC  
AATACAGAAGGCAAAGGCAAAGCCGGACTTAA

>PGSC0003DMG400039004 LRR-RLPs

ATGCTTTTATCACGTGGTCAAATTGGAATGTAAATTTTCCTTCTATGGAGAGGATTTGTGCCACTACCGC  
TTCTCAAATTTTGGAGCAGAGGAAATATCCTTCCATTGAAATTTCTTCTGATGAATGCCTCTTTGAGGTAT  
TCAAACGTCTTCCCAGTGGCCAAGAGAGAAGTGTCTATGCTTGTGTTTCCAAGCGATGGCTTATGCTTTT  
AAGCAACATTCACAAGGATGAGATTGCAGAATATAATGGTATAGAAGGTGAGGGATATCTTGTGAGGT  
CCCTTTTTGGCAAGGAAGCCACATATGTCAGACTTGCTGCTATTGCCATTGGAAGTCAAATCATGGAGG  
CTTAGCAAAGTTATCCATTCAGGGAAACAATCCTTGTCTTAGTGTGACTGATGCTGGTCTTGTGGCTATT  
GCTCGAGGTTGCCCTACTCTCAGAGATCTTTCCTTGTGGAATGTGTCTTTTGTGGTGATAAAGGTTTATC  
TGAAATAGCTCATGGGTGCCATCTATTAGAGAAGCTTGATCTTTCAAATGCCCAATAATTACTGACAAG  
TCTTTGTTGGACATTGCGAAGAAGTGTCCCGATATGACCTCTTTAACAATAGATTCTTGTTCAAACATAGG  
GAATGAGTCGCTCAAAGCTGTGGGTCAATACTGTCCGAACCTGTCCGAACCTGAAGATTTTCGTATTAAA  
GAATTCTCCACTCATTGGGGATCATGGATTAGCAGTTCTATTTTATTTAGCTGGTAAAGTTTTAACAGAA  
GTAAGACTCCAAGGCCTATGCATCAGATTTCTGTCTCTAGGTATACTTTTTAACTATTGTACAAAAGTACA  
GACTCTTTCCTTGGTGAGCTGTATTGATGTGGAAGACTATCCATTAACCTTGGTGGCTTCTTGTGTAAGT  
CACTAGTATCTTTGGCAATTCACAATTGCCTAGAGTAGGCAATACTACAATTGATGTAGTAGGTGGACT  
GTGTCGCAAAGTACTCATATAGATCAGAGTGGGCTTCTTAGAATTACCGACGAGGGGCTCATCCCTCTT  
GTTCAAATTTGTGCAGCTAATTTGGTGGCGGTGAATTTAAGCAGGTGTGTCAATATTACAGACATATCA  
GTTTCAACCATAGTTAAGCTGAATGGGGGATCTCTGAAGTCTCTGCTCGTAGATGGTTGCAGACATGTTA  
CTGATGCAACATTAGTAGAAATTTGAAGTCTTGCCGGATGCTTAATGTACTAGATGTTTCCAAGAGTGG  
AATCACCGATTCAGGGAGTAAACTTTGGCCAATGCTACACAACCTTACCTGCAGATCCTCTCACTGTCT  
GGTTGCCCTTTTGTGTCGGACAATAGCTTACCCTTCTTGTCTGATTTGGTTCAAACCTTCAGGGCTTGAA  
CATAACATTGTCTCGAAATAAGCTCTAGAAGTGTGATGCACTTGTAGAGATAAATCCAATTTGTGAT  
ATCCTTTCCTAA

>PGSC0003DMG400039455 LRR-RLPs

ATGGATTCCGGCGAAAACATAGAAGAAACAACAACAGCTGTAGACCGAATCAATCAGTTGTGGACGA  
TCTTCTCCTTACATTCTCTCTTATGCCGACCGAAGCCGCACTTGTGACAAGTGTCTCTCAAAAAGGT  
GGCGCTATCTTTGAAATCACTTGATAGTTTCTCTTTTAGTACATTTGGAACTATGAGTGGTATGTATCC  
TATGTTGATTATGTATTAGGTCATTCCGTTTCTCCAAAATTAAGTTTCAACTCGATAGTAATGAGCC  
GGATGCATACAAGTCGGACATGGATCGATGGCTTAGTTTTGCTATTGAAAAGAAAGTGGAAAATTTGAA  
AATCCAGTCAGTCTCTGAAGAAGAGGTTTATGCATTGCCGGAATGTTTATACACCTGTTTCGTCGTTGATA

ACACTAGTTTTGGGATTCTGTTCTTTTGATGCTAATGTGGCTGTAGCATGGAAGTCTCTAAAGAGCATAA  
AATTGAAGTGGATGGTGTATCTAATGACCATATTGTGAACTTACTGTCGGGATGTCCTGTATTGGAAAC  
TATGGAATTATCTCGTTTTAAGGGTTTTAGTCGTTTGGAAATTAGGTCTTCAAATTGAAGAGACTAAAT  
TTGATAGCATACAATGATGATGAACTTGATCATTCTTGAAATTGTTGCCCTATCTTCAGCATTGGGA  
GATTTGTGAAATCTTTATGGTTTCAAGGTAGGCTGTAGACGTATCCTCCTGGTTAATGCTAAGCTTA  
CGTTGAGATTACATGTATCAAAGACATCCAATATTTGCTTGATGAAGAAATTGATGATGACGAAGATA  
GTTGTCGTGGCTATCATCAAGTTTTATGATTCTCGTGTGGGATTATCTTCAAAGCTGAGTAGTGCAAG  
CAAGATAACAGTTGGAACATGGTTCATAGAGGTTTGTTTAAACTCAAAGTCTTTATTTCTCTCATTGA  
TTATTAGCAGACAGTTGCAGATAAACATTATAACAATGGAGATTTGTATACACAATCCATTAAGCAACTG  
GATTAATTGTAAAAAATTGTGGAGAAGGGTAGAGTGGTGGGCTTGTCTCCACTGACTTTCAAACCAT  
GGCCTCTGACCCTCGCGATTCTTGATTAAGAAGTACTGAGTTAGAGAATTTGTGGACCTTTATGCAA  
TCCGTTTGCCAATTTGTGAAGTCGGGTATTTCTTTATCATATTGCCAAAGTTATATCTAGACACCAGGA  
TTTTCGTACATTGATGTTGCTTAAAGTGTTAGATGGTTATTTGTCCACAACACTGTATCTGTTGTGGAGT  
ACTTTCTATTTGTTGTTTTTTGTTGCTTTCTCCGATTTTTTCATTGGTACTGCACCAGGTCCTGTGCATGTTG  
CAGTTCAAAGGGGTGCGAATTCCAGAATTGAAATGCAAGTATTTGACGCTGGAGTTGCATAAGAAAGA  
GTTAAGTGTGTTTGGAGCAGCTGGCCTTTTGCAGCATCACCTCATGTTGAGTGTCTCAACATAGACATA  
AGAGCTATGCATGTAACCTTTCTGTTGCTTTGTATCTTCTTTTACATAATTTTATGAAGCTTTGCCTTTTTG  
CCTTTGTACATCATTTTACACCATAGAAAGAGTTAAGTGTGTTAGGAGTTTCCCTCTTCTAAGGCCACCA  
CGGCCAACCTCTCACTGGGGCATTGTCACATCTCCTCTACAGTTGCACGAACCATCTCAACACAAATATAT  
CCTTAAGTGCATTAAGAGACTTTGCTTATGTCACCGTATAGCTTCGTGATTGCTTTCTTGTGAAAAATGT  
GTTATCAATTTTGGCTACCTACATCATGAGTCTCTTTATGAAAAGAATAGCCATTATGATCATTTCAGG  
TATCATTAAATTTGTTGGCTCTGAAATTTATTTTACCCGACATTTCTACTTCAAAGTTTTCTTTGCAACT  
TTTTGCAATTTCCATTAGGCTGACATGATTTGTCCCTGATCGTATTCTGTTTCCAGCCTGATGCTACCTT  
CTGCTGCTTTGGGTACAAGATTTGGTCAAAGAAAATAATATCAATTTGCAGAGATGGATTTCAATCTTT  
GTGCTTCCCAACCTCAAGAATGTTAAGATTGCCATCTCCTCCCGGATATGCTTGA

>PGSC0003DMG400039627 LRR-RLPs

ATGTATCTTAATAATAATCAGCTTTGTGGCTCTATTCATGAAGAAATAGGTTACTTGAGTTCTTACTTA  
TCTATATTTGGGTAATAGCTTTCTAATGGATCTATTCCTGCTTCATTTGGCAATTTGAGAAATCTGCAA  
CTCTGGTTCTCAATGATAACAATCTCATTGGGGAAATTCCTTCATTTGTGTGCAATTTGACATCACTGGAA

GTGTTGCATATGCCGAGAAACAATTTGAAGGGAAATATTCCGCAATGTTTGGGTAATATCAGCGGCCTC  
CAGGTTTTGATGATGTCACATAATAATCTCAGTGGTGAGATCCCTTCATCTATTTCCAATTTAACATCACT  
ACAAATTCTAGATTTGGGCAGAAACAATCTGGAGGGAGAGGGAGCAATTCCACAATGTTTTGGCAATAT  
TAGTAGCCTCCAGGTTTTTGATATGCAGAATAACAACTTTCTGGGAGCCTTCCAACAAATTTTAGCATT  
GGAAGTTCACTTAGAAGTCTCAACTTGCATGGCAATGAACTAGAGGGGAAAATCCCCAATCTTTAGCC  
AGTTGCAAAGAGTTGCAAGTCTTGATTTAGGAGATAATCAGCTCAATGACACATTTCCCATGTGGTTGG  
GAACTTTGCTAGAGCTGAGAGTTTTAAGGTTGACATTGAATAAATTGCATGGACCTATAAGATCTTTATG  
GGCTGAAATCATGTTTCCTGATATTCGAATCATATATCTCTCTAGCAATGCCTTTTCGAAAGACTTACCAA  
CGAGTCTGTTTCAACATTTGAAAGGCATGACCACTATTGATCAAACAATGAAGGCACCAAGTTCTAAAG  
GAAATCAAGTATACTACCAAGACTCGGTAGTTGTTGTAACAAAGGGATTGAAGCTTGAAGTTGTGAAAA  
TTTTGTCTTTGTACACAGTTATTGATCTTTCAAACAATAAATTTGAAGGACATATTCCTAGTGTCTAGGA  
GATCTCATTGCTCTTCAGGTATTGAATATGTCTCATAATGTTTTGAAAGGTCATATACCACCAGAACTTG  
GAAGTTTGTCTTTAGTGGAATCATTGGACCTTTCAATTAACCATATTTTGGGAGAGATACCACAACA  
GCTTCTCTTACATATCTTGAATTCTTAAATCTCTCACACAAGTATCTCCAAGGATGCATCCCTCAAGGGCC  
TCAATTTCTTACCTTTGAGAGCAATTCATATGAAGGTAATGATGGATTACGTGGATTCCCCGTTTCAAAA  
GGTTGTGGCAATGATCCTGTGTCAGAGACAAATTATACAGAGTCTGCGCTAGACGATCAAGTTCTGAAT  
TTTTAATGATTTTTGGAAAGCAGCTCTGATGGGCTATGGCAGTGGGCTGTGTATTGGATTATCCATAAT  
GTATTTCTTGATCTCAACTGGAAATCTAAGATGGCTTGCAAGAATCATTGAAGAACTGGAACACAAAATT  
ATCATGCGAAGGAGAAAGAAGCAGCGAGGTCAAAGAATTACAGAAGAAGAAATAATCGCTTCTAGAC  
AAGTTACCAATAAAGAAGGATTTTTTTCAGGTATTCAAGCTAAGTTTTACACTAATCTTTTTTAGTTTATTCT  
AACAACTAATATATTAGGTTTTATGCTTTTTTGTATAAACAATACTTATTAACGCTTGATACGAATTG  
CTAGTAATCAGTTGGAAACTGTGATAACAGAGGCCAAAAATTTATAGTTGTGTGACTCACTTTCTTATTTT  
TTAAGCTATTTAGATGCCAAGAATAAGAAGACATTGGCGTAATGGATTTGGTTCTTCCTATGTTGCAGC  
TTATGATGTTGGATTTGATTTTTAGTTTTATAAGCTTTTCTTCAGTTGGGAAAATGTAATATTATGAATTTT  
GATGATATACAATAAATGTTGTGTGTATTTAATGATGTGTATGCATTTCTCGGATCAATAATACTCACCTC  
AAAGAATCTTAGAGAGCTGAATGAATGGAGGAAGATATTTAGCGCACGATAGAAGAGAGAGAATATCT  
CACACCCCAAAGCTAGTTATTATGGTGGGAGAGACCAAGTTTTAATTTTTTGTGATAAGGTTAATGTGGA  
AACAGTGAGGTAGCATACAATACACCCTTGTGGTCCGGCCCTTCGCTTAGCCTTTTATTATACAAACAGG  
CTTACTCAAAGTAAACTGTTTTTTTCAATTTGCATTCATCAATGATATTCCTTGTGCTCGTAGCACTTTGAAA

CTTTCATTTGCCAATTGCAATAATGTTATTTTGAACATTTGTCTGTTCTATTTACAGATACAGGGGGGTA  
TACTAGATAGATCAAAGTTGGATAATCTATATGAAGCAGCACTGGCAAGACAGAATCTTGTAATGAC  
CCTAAAAACAGGGAAGTTTCATATAATCTATTCGAGGTAGCTGATAATTAACAGGATGCACTTAATAGT  
TCAACCAACTCTGGAACAAATGCTGCACAAAATGGCTCATTACCATGACTATGGTGTACTCATGCAACAA  
CAGGTTGCCAATATGACTCAATCACAACAACCGTTACAACACGAAGACCTTGATGATGCAGACAGCAAA  
TGGCTATGTGCCTCTGCAACATCAAAGTCTTCTATGACTCAACATAATGAAGGAGAGATTCAAGAACA  
GGAAGCACAAAATTAAGAAAATATAGCTAATGTGCCTCAACTACAATTCATGTTTGTGTTAGC  
AGTAAATGTAATCAGGTTATCCATCAAATCAAGATGTTGCTCTCTGTTCCATTTCTAAAGAGCAATTCT  
CCATCAATGGAAAAATATTCCTTACCAGGTTGAGAGATTCATGCCTAAGATTAATATCAAATGTCTTGAA  
AATGATTGGATATGGTCCACTACTTTAGAGATAAGAATAGAAAACCAAACATGTCTGTATCATACTAA  
AAGTGGTCATGACCAATGTGTGATAACAGAACTATTATGGTCACTTTGACTAAGTCCTTTGCTGAATTAA  
ATGTGTAECTCAAAACAACTCAAATTTTACTTGAGAATGGCCACATTTTCTCTAATAGCAATCAAATTT  
GCAAATTTGAAGAAAACGCATTTACATTCCTATTCTTTTTGGGACCACAGATATGTGTTAATTACTATT  
TGCGAAAACAATCATATGAAGATTACTCCCTCTATCTCAATTTATAATGCATAGTCTGGATTTTCAAGAGC  
CAAATAGTTTAATTTTACCAAAAATTCAGGCATGAAGTCTTTAAAAAATTTAAAATAAAATTCATATATT  
TTGAAACTACAGAAAAGTATTATAAGTCACAATAATTTATCCGCAAACCATCTTCGGAGTGATCGCGTT  
TGAAGTGAAAGAATTGGAGTTTTTAATATCCAGAAACCATCCTCGGAGGTTGAGATATCTTAATCTATCT  
CTAATAAAAAAACTATTAATATCTAGTTTTCTTGAAGGTCATTACCTATTCCGACAAATTCCACAAGATAC  
TTCTTGAAGGTCATTTACCTATTCCGACAAATTCACAAGATACTTCATCATATCAAAAAATAATCTCATT  
ATGAAATCTTTTTATTTGGAAAATCGATTTGAGAGTCATTGAAATTTAATTTATCAAATATTCGAGCATG  
AAAAATTTGGAECTCTGGAGGTCTCATAAAAATAAAATACCCTTTGCAACACGACTTTATTTGGCATATT  
CAAAAATCACCTAATTTTTACACATTTAATTAACAGGCCACCACTTACTATAAAATTACATTAECTCCTCGA  
AACCCATAAGTCTCAGTTGTTTGTGAATAATTTGTGTTTCAAATTGAGACGACAATAGTTCAAGTAGGGA  
AAATAAATAACTTATTATTCGAAAGCACAAACACGCAAAAAAAGTGACATTCAAATTAATTTTGACCATT  
ATCTCTTAATTTTCTTGCTCTTCATTAATTTGGCTATTCATTTTTCAAAGCTCCACATCATCAGACATCAA  
TATCTAGCAGGTCCATAAAAATAAAACACCCTTCTCAACACGGCAAAGAAAGATTGAAAAATGACAAC  
ATTTACTCAAAGACAAAAACAAAACATGTGAGAGAAGACATTACGAATCATCGTAACGTCTAAGACTGA  
GAATTGTTGGATATGGTCCATTACGTAGAGATGAGAATTAAGAACCAGACATGTCTGTATCATACTA  
AGGGTGGTCACAAATCAATTTGTGATAACAAAATTTTTGGCCACTTTGATTAAGTCCTTGGCTGAATT





ACAATTGAAAGGCATGAGGACTGTTGATCAAACAATGAAGACACCAAGTTATCTAGGAGGTAGATATAA  
CTACCAAGACTTGGTAGTTGTTGTAACGAAGGGATTGAAGCTTGAAGTTGTGAAAATTTGTCTTTGTAC  
ACAGTTATCGATCTTTCAAACAACAAATTTGAAGGACATATACCTAGTGTTCTAGGAGATCTTATTGCGA  
TTCGGGTACTTAATTTATCTCATAATGGGTTGCAAGGCTATATATCACCATCACTTGGGAAGTTTATCTGTA  
CTGGAATCATTGGACCTTTCATTTAACCGCCTTTCGGGAGAGATACCACAACAACCTTGCTTCTTACGTC  
TCTTGAATTCTTAAATCTCTCCACAATTATCTCCAAGGATGCATCCCTCAAGGACCCCAATTTACATACCTT  
TGAGAACAGTTCATTTGATGGTAATGATGGATTACGTGGATTCCCCATTTCAAAGGTTGTGGCAATGAT  
CCTGTGTCGGAGACAACTATACAGCTGCGCTAGAAGATCAAGAAAGAAATTCTGAATTTTTCAATGATT  
TTTGAAAGCAGCTCTGATGGGCTATGGCAGTGGGCTATGTATTGGCTTATCCATAATATATTTCTTGAT  
CTCAACTGAAAATCTAAGATGGCTTGAAGAATCATTGAAGAAGCTGGAACACAAAATTATCATGCGAAG  
GAGAAAGAAGCAGCGAGGTCAAAGAATTACAGAAGAAGAAATAATCGCTTCTAG

>PGSC0003DMG400039637 LRR-RLPs

ATGGGCAAAGAAATAATCCAAGAGGCTTCTTACTTGGTCTTTACTGCTCCTAGAGACAGCTTTTG  
GATTAACCTCAAGAGAAGTTAGCAAGACCCTTGTATAGAAAAGGGGAGAGATGCCCTTCTTGAGTTTA  
AAAGAGGCCTTAACGACGATTTTGGTCGTTTATCTACCTGGGGTGATAAAAAAGAATGCTACAAATGGA  
ATGGTATTGAATGTGACAAAAGAACAGGTCATGTTATTGTTCTTGATCTCCACAGTGAGGTTACTTGTCC  
AGGCCATGCTTGTGTTTGCTCCAATATTGACAGGTAACTTAGTCCTTGTCTACTTGAGTTAGAGTATTTGA  
ATTTCTTAGACCTCAGTGTAATGGATTTGAAAATAGTGAGATACCAAGATTCATAAGCTCCCTTAAGAG  
ACTAGAGTACCTGAACCTTTCATCTTCTGATTTTTCTAGTGAAATCCAGCATAGTTCCAGAATCTAACTC  
TTTGAGAATTCTTGATCTCGGAAACAATAAACTTATAGTAAAGGACCTTGTGTGGCTTCTCATCTCTCCT  
CTCTAGAGTTCTTGCGTCTTGGTGGTAACTACTTCCAAGCAAGCAATTGGTTTTGAGAGATAACTAAGGT  
CCCTTATTGAAAGAATTGGACTTGAGTGTTTGTGGACTCTCTAAATTCGTTCTGTCTCCAGCTGATCTAG  
CCAATTCATCTTTGATCTCTCTTTCTATTCTTCATTTATGTTGTAATGACTTTTCTACTTCATCTGTATATAAC  
TGGTTATTCAATTTTAGCACAAAGCCTAACTAGCATAGACCTTCTCATAATCAACTCATTTCGTCAAATTGA  
TGATCGCTTTGGGAGCTTGATGTATCTTGAACATCTTAATCTTGCTAATAACTTTGAAGTTAAAGATGGG  
GTTCCAAGTTCTTTTGGGAGCTTGATGTATCTTGAACATCTTAATCTGGACATGTCTAACACTCAAACATA  
CCAATGGCTTCTGAGTTGTTTCTCAGGTTTTCAAGCAGTAGGAAATCACTTGAGGTTTTGGGATTGAAC  
GACAACCTCGTTGTTTGGTTCAATTTCAAACAACCTTATGAGGACCTCTGTAATGAGTTGTGGTAA

>PGSC0003DMG400040306 LRR-RLPs

ATGGCTGATTTATTGCCTCAATGTCTTATTCATAAAATACTGTGTCTGCATAGTTTTAAGAGAGCAGCCCA  
GTTGAGTATTCTTTCTAAAACATGGCTGCAAGCGTGGTTGACTATTCCCAACTTGAGTTATTCACCTGGTT  
ATCTCGAGCACAATATGAAAAAGTAATGGATAATATCATGGAGAGATATCGAGATGGAAAAATCCCTA  
TTGAAAAGTTAGATTTATCATACTCTGTTTATTCTAATGAAGTTTTCCCTCTGTTTAAACAAGTGGCTTGATA  
TTGCACTTCAGAATGGTGTAAAAGATCTTGTCTTTGAGTTCCTAGCCACCTTACGTCATACCCATTGCCT  
ATGCTAACAATCTTGGCAACAAAATCTTAAAGAGAATTAGTATTAACAGGTTGTGATTTGACTGTGTTTC  
ATTATCTAGTGGTGTGGTGAATTGCTATTCGTTGAGAAAGCTTCTCTAACTCAGGTAGGTTTAGGTGAC  
AACACGCTTCAGATTCTACTTAATAGTTGTCCCTTTATTGACAGCTTAATTTTAGATTATTGTTCTTGGTTG  
AAAAAGATTGAGCTACTGAATAATCTTCCAAGATCAAGTCGGTTTTTATTGCGAAATCTGGCACACAGC  
TTGTTAAAATTCAAGCACCATCTCTTGAACATTTATCTTATTTTACTGGTGGGGAAGAGTTTGCTATGTTT  
GATATTGATGCTCCAAATTTGGTGTCAATTGGAGTATAAGGGATTTAAATTTCTGCAACTTTTATGGATG  
CTAATTTGCAATGGAGTTGTTATCCTACGAGATTCGTCCTTGATTCAACTAGCGAAACAATTGCAAGTTTC  
ATGGACGTTTTAATGCATATGATGAGCTCGAGTCATTCTACTTCTCATGGAAGCAACAAGCCTTTGCATC  
GTCAATTAAGAAGTTAAAGCCGATAAATATGATTGGGAAAACCAGAGATGGCATTGTGATCCTGTGG  
AACTTGGAAGTGAAAGGATGGCAATAAGGGACCTTAAGGATAAGTTTTGCTTTTTATTATATTGGTCATG  
CAATTAA

>PGSC0003DMG400040620 LRR-RLPs

ATGAGATATGGTGACTTTGAGAAATTGACACCACTCTACAAATTGGAGCAGCTGAGGACATTGCTTCCG  
ACATGTATTGATCTCGATAATTGTTACCCTCTAAGCAAGAGGGTGCAACATAACATACTTCCAAGTCTAA  
GATCCTTGAGGATACTGTCATTGTCTCATTACCAGATTGTTGAGTTGTCAAATGACTTGTTTATCGAATTA  
AAGCTCCTCAGATTTTTGGACCTTTCTCAGACGGATATAAAAAAGTTGCCAGACTCCATTTGTGTGTTGTA  
TAACTTAGAGACACTTCTCCTGTTACATTGTAGTATTCTTGAGGATTTACCGCTGCAGATGGAAAAGCTA  
ATCAACTTACATCATTTTACATAAGCAACACTTATCGGTTGAAGATGCCGCTACATCTGAGCAAGTTGA  
AAAGCCTCCAAGTGCTAGTGGGAGTCAAGTTTCTTAGGTGGTGGTGGTTCGAGAATGGAAGATT  
TGGGTGAAGTACATAACTTGTATGGATCTCTATCAATTCTAGAGTTGCAAAATGTGGTTGATAGAAGGG  
AAGATCGGAAGGCAAAGATGAGGTGAAAGGAACATGTTGATAAATTATCTATTGTTGATTGTAACCTCTC  
TTACCTCCTTACCTTTTAGCATTCTGCCAAGTACCTTGAAGACAGTACGGATATCTCGTTGCCAGAAATTG  
AAATTAGAGCAGCCAGTTTGTGATTCTATAGATGATATATCACCTGAGTTGCTCCGGAGAGCACGCAAA  
TTGAGGGTACTACATTGCCCAACCTTACTAGCTTTTTGATTCTACTGCCACTGAAAGTCTCCATATTTG

GAATTGTGAGAATCTTGAAATAACTTCGGTGGCATGTTCTGGGGACACAGATGGCGTATTTGTGTATTTTC  
AACTGTAAGAAGCTGAAGTGGCTGCCAGAACGTATGCAGCAACTCCTTCCATCTCTTAAAACATTGAATC  
TGTGGCATTGTCCAGAAATACTGTCATTTCTGAAGGAGAATTGCCCTTCAATTTACAAGTACTTGAGAT  
CTGTAATTGCACGAACTAGTGAACGGTCGAAAGGTGTGGTGTTTACAGAACTCCCCTGTCTCAGAGA  
GTTAGTGATCGCACATGATGGCAGTGATGAAGAAATGGAGCATTCCGGAGTTGCCTTCTCTATTCAAAG  
ACTTACCATACGCAATCTGAAAACATTAAGCAGCCAAGTTTTCGAAAGCCTCACCTCTCTGAATATCTAT  
ATATGGCTGATTTACCTCAAATTCAGTCAATGCTGGAACAAGGGCGGCTTCCCTCATCTCTTTATGAGCT  
ACATTTATCTCGCCATCATGTGCTCCGATCACTTCTGAATCAGCACTGTCTCTCCCTCTCTGAGCTGAT  
CATCGAGGATTGCCTAATTCTCCAATTCCTTCCGGTAAAAGAGATGCCCTTCCCTATCTAAGCTGACCA  
TCAGGGATTGCCCTTATCTCAAATCCCTTCCGGTAAAAGGGATGCCCCCTTCCCTCTCTGAACTATATGTT  
CCCGACTTCCCATTGCTCAAACCACTACTAGAATTTGACAAGGGGGAATATTGGCCAGAAATCGCTCATA  
TCTCGAACATAGAGATCGATTGGTAA

>PGSC0003DMG400040927 LRR-RLPs

ATGCCCAAATTTACATCAATTCTTGTTTTTGGTGATTCAACAGTTGACACTGGAAATAACAATTATATATT  
TACTTTATTCAAAGGCAATCATATACCTTATGGAAAAGACTATTTTAACCATGTATCAACAGGTAGATTTT  
CAAATGGAAAAATTGTGCCAGACATATTGGCAAATTTATTAATAAAAAAATATGGTGTGCCACCATA  
TTTAAATCCAAATTTATTGGAAAATGATTATAGAAGTGGAGTTTCTTTTGGATCAGCTGGATCAGGATAT  
GATGATTTAACAAGTTTAATTTCAAGTGTAATTTCAATGAGAAAACAATTAGAACATTTTAAAGAGTATT  
TGAAGAAATTGAAAGATTTTTTTGGAGAAAAAAGAAAAAAGAATTGTGAAAGGTGCTTTGGTTATGG  
TTAGTTCAGGGAGTAATGATTTTATATTTAATTTCTATGATGTTCCAACAAGAAGGCTTGAGTTTAGTTG  
GAGGAGTATCAAGATTTTCTTCTAGACAAGGTGCAATGTTTTGTCAAGGTAAATTCTCTATCACATCTATA  
TTTCTTTTAAATGTTATAGATGGGCAGTCTCGGAATAATTGTAAAGCTATCTCTATATAGTAAATTAATTA  
CAAGTTAAGTCATGAAATCAGTCGTTGATACTTGCATCATGATACGCTGTATATATTATATGTTCTTGGG  
GTGTGACTTTTAGTTGGATCCTGTATAAATGTGAAAAAATTGTGCATCAGGCTGCAATATTTTATGACT  
ATGTTATTCGAGTTAGATTGTTATAGCGTGTAATACCGTTAGTGATATTACTTTCATATCAAGATTTCT  
ACGACTTTAAAAGATATCACTAGTGTCTAAGACTTGCACACTTTATACATTCAATATCTTTTTCCGTATTTA  
ATTTTTCTAGGGTGTTACTGTACTTGTGTATATTTGATTATTTTCATCATATACTTATTTCTTGCCACCAATA  
CAAATGCCATAATAACTTTATTTAGGAAACTTAAATTTTTAGACCGACAAAAGAAATCACATGAATAG  
CATTGACATAACAACCCTATCGTCTTATCACTCCTTTCTGTAATTTTTTTGTGAATACTTTACACCATTACATC

ACATATATATTATAGCAGATAACTTATCTTATTTTCTAGACTATATATCTTACTTTTTTTATGATAGTCAAA  
CTTTATATAATTTTTGTATCTTATTTTATTAGGAACTTTATGAACTTGGATGTCGTAATATTATAGTGAGTG  
GGCTACCTCCAATTGGTTGTCTTCCAATTCAAATGACAACAAAATCTCCACTCCATAGAACTTGCATTGAA  
AAAGAAAATTCAGATTCTCAATCTTATAATAAAAACTTGAAGAATTATTGCCACATTTACAAGCACAAC  
TTCAAGGAAGCAAATACTTTATTCTGATATATACACTCCTTTATCACATCTCGTCAATAATCCACATCAAT  
ATGGTAAGCTTTAAATTATGTTGTTCAAGTCTTCAAATATATTACTGAATACGTATTAATTTCTTTATAAA  
TCATATTTTCTTTAGAAAATTTAGTACAAATATAATATTATTTTGGAGAGTAAGAGAGATTATATTCTGT  
GCATTTTTCATATTATGATTGACTTGATTCTTGTCTTAATTAGAAAAATTTTGTGTGAGTACATCATCAATC  
TAGTTTATATTATCTTTGATTTATGTTATCAATCTAGTTAATGTTATTTTTTTTATAAAAAAAATTGGTACA  
ATGATTCTTTTCAAATACATAGTTTTGTCTTAAATACCAAACAAACAATCCATTTTGACAAATGTGGGAAC  
TATCATATTACAATTTCAACCAGTGCTCATTTCATGAAAATAATGTTTCAGATCAATTTACACACATTTTAT  
CTATTTTCATTGAGTATTATTTATTATTTTATTAATATATTAGGTTTTTTTACTCATTAGTAGAGTGGCAACA  
CAAAGTGAGTTGTGGTTAGTTGAATATTTTTTGTCAAATCATACTCATGACTATTACCATAGTTAATAT  
TAAGAGTGAAACAAAAAAAATCTCTTAATATACTTTAGTGAACAAGTAAACCTGAAAATATATTTTTT  
ATTATAATGAACAAATAAAAGTAAATGATAAAAGTACTTTACAAACCTCCCCAAAATCACCTTTTTTGTCT  
TCTTATTAATCTAAATTAATGTCTTTTTATTTTTATTTTATCTTTATTTTTACATAATTATGACAGGATT  
GAAGAAACAAAAGAGGTTGTTGTGGAAGTGGATTATTAGAAACAGGACCCTTGTGTACAAAAAATC  
TCAAGTGTGTTACATACTTCACAATATGTTTTCTTTGATAGTATTCATCCAACCTGAATCAGCTTATTACCA  
AATTTCTGAATATTTTATGAAGGAGCTTCTCCCAAATCTCAACCATTGACAACCTTTTAATTTATTACATT  
CAAATAAAATTTGTAAAAAAAATTAGGTGTTATTTGGCTTCTGGTTAAGAAGGGAGTTATTCATGTATT  
AAATTAATGTAGGTAAATATCATATGTGGTAACTTTCTAGTTTCTTTGTATAAAAAATTCAGCATATCAAC  
TATGATATGTGGTTTGTCATTTTATAATGAGAGAAGTAATCTTGACGCAAATATTAATTTTCGTCCCTGAAT  
TATTAGAGTATCATTTATCTACGCTTTTTAAGCTTGTTTTCTTTTCAAGGATTTTATGATAGTTTGTTTACT  
TAAAAAGAAAATGTAAATGTGTAACACATGGATAAAATAAGAAGAGATAAAAAAGAAAAACATAAC  
AACCTAAATTTAACTTGAGAATGACAATTTTCTTTGATAAAATATGAACAGACAAATTAGAATAGTTTGA  
AAAAATGGCACACCATGGCATGTTATAGTTAAAATTGGCAATAAATAACCCACTTACAATTTTTTAGCAA  
AAAAAGATTTCTTAAAATCTATTTGTCATTTATTAGCCATGTTCTCTTTTACTCGTTGTTTTTTTTCTTTGAA  
AACATTTTTTTTTCTAACCTTTTCAAGAAACGTTTTTTCTTTTATTCTTTATTTTAAAAAGTAAAT  
TATTTTTTAATCATTTCTTCATCTCTTCTTATTTTAAACAGTTCTTTGGTAATAACAACCTTTTTTCAACTTT

TTTTTTTTACTTTTTGTTTATCTCTTTAAGATTTTTTTCATACATGCATATATTCTTTTTTTTTGCCTAAATTT  
TCTCCTTCGCATCTACATTCAACCTGTGTATGATGATATTAATCATTTTTTTCATTGTTCTTGACTATATTTA  
ATCTATCATATATATTTAGAAAATAAAAAATTCATTATTTTATTGTTCCCTATTTTCTCTCTTCTTATTTATTTT  
GTCAACTGTTTTAAAGCAAATTCCTCTTTTTTCTTTCTAAAATTCTTTCTTACGATAGTTTCCCTTTTCTTT  
ACTCCTAAATTTTTCTTCTATTTCTTAATTTCTCTTTCTCCACGTATTTCAAACCTCAAATAAAAAAGTGA  
AAGGACCACGAAGAAGAAAGGGGAAGATAATGTATACCCCATTTCAATGAATTATTTGAGACATTCATA  
TAAGATGTGTACATATTAACCTTTTAATTTGATAGACTATATATATCAAAGTGTATACATTTCCAGAATA  
TAATTTAATGGTGTACATATATGAGTGTATACATATTTGAACTATATAAATTACTCCCTCTGTCCCAATT  
TATGTGACACATTTTGCTTTTCGAGAGTCAAACAGTTTAAGTTTGACCGAGATTTTGCTCATGAAATTTTC  
AAATTTTTTAAAATAAATTTATATATTTGTAAACTACATAAAAAGTACTATAAGTCTCAATAATTGATAATT  
CAAATATTTAAAAGATAGGAAAAATTTACGATCAAAGATACACTTGTTTGAATCTCGTAATCCGAAATG  
TGTCACATAAATTGGGACAGAGGGAGTACAATTTAGTGGCGTATACATACCAGAAGTGTATACATTTCT  
GAATTGTACAAAATACAAAGTAATGATGTATATATATTAGAACTACACAAATACAACCTTAAAGATGGATA  
CATATCAGAATTATACAAATATAATTTAATGATGTATACATGTCAGAATTGTACAAATATAATCTAGTGAT  
GTAACATATCAGAATTGTACAAATTTCAAATTAACAGTGTATACATATGAATATGTTTCATATTATTATCT  
ACCATTTTTCTTTTACATTTCAATGAGATTAACAAAGTGTATGTCATTTTGTGTTGTATTGTAAGAGAGAG  
AAATACGAACAAAATATTTTTTTATGAAAAAGAATATGTGACTATTCAATACACGTTAATAAAGGGATAA  
AAATATTTTCATTCTGTAATGTAACCGCATTCTTTTCAATTGATTAATTAATTAATGTTGTTTGACAAAAA  
AAATTATTTCTTAAAAGAGGGCGCATTTTTTATTAGTGGCTAAGTAGTGCCGATTAATTGAGGCCTTTT  
AGTTGCTAATTATTTTTGGCTACTTAGTGCCAATACTATGTGCGGATTGTACCTTTGTGTCAATTCCTAC  
AAAATATATAGATGTGGAACACATGAATAAAAATAATTTTTTTAAAAGTCTAATCCATCGATGACCCCT  
TAAAGTTGGCACTAAGTTTCATTTAGACACCTTAACTAAGTTTTGTTTCAATTTAGACACCTTATGTAGGAT  
TTCCTGTGTCATTTTGACACTTTTTTAACAATCAGCCAAAAATTTAAAGTGTATATAATACTCGCCGA  
TGACGTGTTAAAATGACGAATTAACAAGACACGTGTCATATATTTTAAAAAATAATTCTCAACTAATG  
ACTTTTAAAGTAGAAAGAAAAATGACCATTGACTTGATGATATGTGGCATTTTAAACTCAAATAATAATTA  
TTTTTAAAAAAGAAATTCACCACTTCTAATTTTCAAGAACTCATCCTCGTCTTCTTACCCCAACCAACCC  
ATGCATCTTCTCCACCCACCCAGATCGTCCTCTTAACCCCAACCCCAACCTCAACCTTTTTTCCACTC  
CTATCGTCTTTTCAAGAAACACTTTCAAAGAATTTAATTACATCAAATAATAATTTACAATAGCACAA  
TTTTTCTCTTCTTACTTCTAAAAGCATCAGTTATAACTAACAATGGAAGAATTATTATTTTTGCATTTCTC

GTATGTGTAGAAGATTCAAATACGTGAACAAGAAATAAAGTAATTATTTTCGTGGCGCTGAAATTTAATT  
GTCGGATCTAAAAAACAGAATGAGAAGATGATGTGGTTGTGGTGATTTTTAGATCTGAAAAATTAAA  
AATTACTTCGATTGTAATAAGATTAATAGCAATGATGCATCGGTGGTGGGTTGATGGTGTGCAGTGGAT  
GAGATAATAATCACAAAGAAAGAGGGAAGAAGATGAACTGTTTTTTTTTAAATAAATTTTTGGCCTGAA  
AAAAAGCCCTTTCACACGCTGACTTTGATGTTAGCGAAAAATGTCAAATGATACAATAGGACTCTACAT  
GAGGTGTTTAAATAAACATCGCTCATTAAAGAAATCTAAATGAACTTTATGCTAATTTTAGGAGATCA  
TCGATATATTAAGCCTTAAAAAAAAGACAAAAATATAACAATCCAAAATTGACTTGAGAATGACAATTTT  
CTCTAATAAAATACAAACAAACAAAAAATGGTTGAAGCGTGAATTAAGCGAGCAGCCGAATTTGCAC  
TTAAAGAGGGGCACCGCAACATATAGAGAAAACACGTTTCTTCGGGAAAAATAATTTTCTAGTCCTTTAA  
AAAAATTATGACACTTTTACGAGAGATTTTTATTTTTTTATCGAATCGATGTTTTATTAATAAAAAATTA  
TTAATATAAGAGATCTTCATTTATTAATTTTTATCGAATACATGTTTTATTAATAAAAAAATTGTTCAATA  
TAAGAGACCTTCGATTTACATAGAAGAGATAAAAAATGTCATTTTCTTCTATTCAAATTGTCCAGATCTTA  
TTTCTCAACTTCTCTTTGGTCTTTAATGATAAATAATGTACAATATTATATTTTTATTTTTAAAAAATCAATC  
CCTCTTTTATTCTATCGTCACACTGTGGTCCTCATGAAAAGACTTAAATGGTATACTAGCACCATGTGTTT  
TGTAGCTTTCTTTTGAATTTTATGGCAAGACTAGTCAATACAAACAACAAAATTTCCATTCCGTGAATCC  
AAAAATTGTTGTTGAACTAGCACGTATCGAAATCGAGACTTTTGGTTAAAGATAAAGGAGTACAGTAGC  
GGAACCAAAATTTTTATTAAGGCTATCAAGAATAGAACACACAACCTCAAACAACTTTTGAAACCCCTTA  
ATCACTACACTAAACCTTCAATTTATGTCAAGATGTGTCAATACTTGTATATATATTCATTAAATCAAATTT  
TGACTTATACATACAATGTAATTTCCGACGAAGGGGGTGTGCGTTGACACCCCTTGTCTAGGGTAGCT  
CCGCTCCCGAAGAATTACTTACCACTCCACCACAACCCTTTCTTTTGTGTTCTTTATATTGGGAAGTAAAG  
TGCTCCCTAACAAAGGCGATTTTCGTATTGAAGTCGAGACCTTTGGTTAAGGATAAATGAATACTTACCAC  
TCCACCAACCATTTCTTTTTATGTTACCACAACCCTTTCTTTTTTGTTCACCATAACCCTTTCATTTCTGTT  
CTTTATATTGGGAGGTAAAATGCTCCCTAACAAAGACAATTCTGTATCGAAGTCGAGACTTTGGTTAAGA  
ACGAAAAAGTACTTACCACTCCACCACAACCCTTTCTTTTCTGTTTATTATATTGGGAGGTAAAACACTCC  
CTAACAAAGGTGATTCCGTATCGAAGCCGAGACCTTTAGTTAAGGACGAAGGAGTACTTACCACTCGAC  
ACAACCCTTTCTTTTCTGTTCTTTATATATACATCTTAGATATGAATGATTTTTTATCCCTCTTTCATTTAAA  
AGCTCATAAAAAATTGATTGTTATTGAAACCAAAATACTACATTAGACATGACAACCTTCTCATTGTACATTC  
ATTTACATTCTTCTACTTCTTTTTTCACTTCCATTCAAAGTAATCACATCATCAGCAAAAACCTGAAGCTGAG  
GCTCTTATCAAATGGAAGAGTACTAACTTATCTTCTACTTCTTATTGGATTTCATGGTCCATTTCCAATCTC

GAAAACCTTGTAATTGGACATTCATTGCCTGCAATGCTGATGGAACAATTCGGAGATCAATCTTTCTA  
ATGCAACACTCTCAGGCTCTCTTGATCACCTTGACTTCACTTCATTTCCGAATCTCACGAGTTTCATTCTCA  
ATGGCAACAACCTTTAGTGGATCGATACCATCGAATATTGGCAATGCCTCTAGTCTTGAAGTTGTTGACT  
TCTCAACAATTCATTTCAAGGGAAGATTCCATCTTCAATAGGCAAACCTTAGAAATCTTCAAACACTTGATC  
TTCGAAAGAATCGTTTGAACCTCAACCATTCCCTTCTGAGTTAGGCCTTTGTACAAACCTCATTATCTTGGCT  
CTAGCAGAGAATGCTCTGCAAGGAACATTGCCTATATCTTTGCCTCTTTGATCAAGTTATCCCAGTTGGC  
GTTGTCCGATAATTTTCTTCTGGTGAGGTCTCATCAGATCTCATTTTACCAATTGGACTGAGTTGATAGC  
TTTGCACTTCAAACATTTACATTACTGATTTAGGAGATAATCACTTCAACGACACATTCCTAGTGTGGT  
TGGGAAATCTGTCAGAGCTGAAAGTTTTAAGCTTGAGATCAAACAAATTCATGGACTCATTAGAACGT  
CAAGGATTGAGAACATGTTTCCCGAGCTTCGAATCATAGATCTATCTTATAATGCCTTCTCGGGAAACTT  
ACCTACGAGTATGTTTCAACATCTAAAAGCCATGATGAGAGTTGATCAAACAATGAAGGCACCAATATAT  
CTTGGAGTGACAGTTATTGCCATGATTCTATGACAGTTGCAACCAAGGACGAGAGCTTGAACCTTGTTA  
GAATTTTGACAACCTACACCACCATTGATCTTCAAGTAACAGATTTGTAGGGAATATTCCAAGTATTATG  
GGAGAACTCATTGCACTTCGGGTGTTGAATTTGTCTCATAATCAATTGCAAGATCATATACCACCATCACT  
TGGAAATTTATATGTACTTGAATCATTGGACCTTTGTTTTAACCATCTTTCAGGAGAGATACCACAACAAC  
TTGCTTCACTTACGTCTCTTGAATTCTTAAATCTCTCCTATAATTATCTCCAAGTATGCATTCTCAAGGAC  
CACAATTCTCTACATTCCAGAACAACCTCATATGAAGGTAATGTTGGATTACATGGATTCCCAATTTAGAT  
GGTTGTGGCAATGATCGTGTATCTGAAACAAATTACACCGTATCTTCTCTAGAAGATCAAGAAAGCAACT  
CTGAATTTCCCAATGACTTTTGGAAAGCTGCTCTGATGGGCTATGGCAGTGGACTATGTATCGGAATGTC  
CATAATATATTTTATGATCTCCACGGGAAATCCAAGATGGCTAGCAAGAATCATCGAAAACTGGAACA  
CAAATTTATCATGCAAATGAGAAAGAAGCAACAAGGTCAAAGGAATTACAGAATAAGAAATAATCGTTT  
CTAG

>PGSC0003DMG400041062 LRR-RLPs

ATGGCAGCTCCAACATGTTTTCTATTTCTTTTATGGTTTTGCTAAGCTTAGCAATATGCTCTGCCAGCCT  
ATTGATGTTCACTAAGCCTATGGAAGTTGATCATCATCACAACCACAAAGCTCACACTTTGAGTAATA  
TCGACGTCCAAGGCTTTGGAGGAGGAGGCAGTGATGGCGGATCAGGCATTGTTCTGGTGGATTTGGC  
ATTGGTGGTGGCGGAGGTGGATTTGGTGTGGTGTGGTGTGGCGTTGGCGTTGGTGGTGGTGGGG  
GTGGATTTGGCATTGGCATTGGTGGAGGTGTCCCTGGCTACAATGACCCTGGTTTTGGTTTCCCTATCTA  
TATACCTGGCTTTGATTTCCAGTCTATTCCCTGATTGTGGTTATGTGTGTCTTGCTAATAATCCTAGAG



GAGAAATCACTGAATTCAAATCTCAGGATTATCACACTTCACCAAACCATACAGATGCAGGCCAGGGC  
CAAACATGCGCGGAGACAAAGATTTTAACCATGAACTTCTTCTAAACTTTGTTTCTACAATGCAGGACAA  
ACAAGAGAACAACATGAACGTCTACACTATGGAGGACACGGTGGAGATGTAGGCCTCCGAGTAGGGG  
GAGCTAGACGTTTAGGATTTGGTCGTGGTACTGATACCTCTGATCAGTATGCTAATGAGGACCCTGGTT  
GGAGTATTGAGGGCTGTGGTTATGTATGTCCAGGCAACAGTCCTAGTGGAGGAATCACTGAATTCCATA  
TATCAGGAATATCACATTTTAGTGAACCTTACAGATGTAGCCCAGATATGTGTGACACTGAAGAATGTG  
GTGAATTTCTTCTACGCTTTGTTTCTCCAATGCATAACAAACACGAGAACAACATGGTCATCAGTCAGA  
GAAGCAAGACAACATGAGAACCAACATGGTCATCAGTCAGAGCAGCAAGAGAAAGAAATCACAAACG  
ATATCCCCGACCCACCCACACCCCAATCCTGA

>PGSC0003DMG400041336 LRR-RLPs

ATGAAGGAAATTGACGATTCCGACGATGTTATCGATGTATTCGAGGTCGGAGAGTTTGATTATTCTTCTA  
ATATTCCTGATGAGTGTGTTAGCTTGCATTTTCCATTTCTGAGCTCAGGTGACCGGAAAAGTTCTTCCCTC  
GTCTGCCGCGTTGGCTCCGTGTTGAAGGCCAGAATCGTCACCGTCTCTCGCTTAATGCACAATCGGAAC  
TTGTGCTGTGGTTCCCTGTGATTTTTCTAGGTTTGATTTCGGTAACGAACTCGCTTTGAAATGTGACCGT  
AGATCTGCGAGTATTGGGGACGAGGCGTTGGTGCTTATATCTTTAAGGTGCCGGAACCTAACTCGTTTG  
AAGCTCCGGTCATGCCGGGAGCTTACTGATACTGGAATGGAATCTTTTGCGAAGAATTGTAAGGGTTTG  
AAGAAGCTATCTTGTGGATCTTGTGCTTTTGGAGCTAAAGGGATGAACGCCGTGTTGAATAACTGCTCG  
GCTCTGGAAGAGTTGTCCGTGAAACGGCTGCGTGGTATCACAGATGGGGCTGCAGCTGAGCCCATTGG  
TCCTGGTGTGACAGGGGTTCTCTGAGAGTTATTTGCCTTAAGGAACTCTACAATGGTCAGTGTGTTTGA  
CCGTTGATTATTGGATCGAAGAGTTTGCAGGACGCTGAAGCTTTTCCGTTGTTCTGGAGATTGGGATAAG  
ATTCTGGAAGTGATTGCTGAACAAGTCAGTGAACCTTGTGAAATTCATCTTGAGAGGCTTCAGGTCAGT  
GATACTGGTCTTGCTGCTATATCTAAATGTTCCATTCTTCAAATCTGCACCTTGTGAAAACGCCTGAATG  
CACTAATAATGGTCTAAAGACTGTTGCTGAAAACGTAAAGCTTCTAAGGAAGCTCCACATTGATGGGTG  
GAAGACTAACAGGATAAGTGATGATGGGTTAATTGCTGTGGCAAACATTGCCCTAATTTACAAGAATT  
GGTTTTAATAGGTGTGAATCCAACATGTGCTAGTTTGGAGAAGTTGGCTACGAATTGCTGAATTTGGA  
GAGATTAGCTCTGTGTGGAAGTGAACTGTTGGGGATCCAGAACTATCGTGCATAGCGGCGAAATGTAT  
TGCATTAAGAAAACCTTTGTATAAAGAGTTGCCAGTATCCGATCAGGGTATGGAAGCGCTTGCTAGTGG  
ATGCCCAAATTTGGTAAAAGTAAAGGTTAAGAAATGTAGATTGGTGACTTCTGGAAGTGCAGATTGGTT  
GCGGACAACACTAGGGGTTCTGTTGCTGTGAACTTGGATACACCTGAACCTGAAAATCCTGATGCAAGTGC

CAGTGATGGAGGTGTGGCTGAAGTTGGCAATGAAATTAGACAGGTGGCTGGCCAAGTAAGAGGTGTA  
AGTATTGCATCAAGCAGTACTGGGAGGTCAAATTCCTTTAAGGCCAGGCTAGGACTTACAACAGGAAGG  
AATCTGGTGGCTTGCACATTCAGAAGGTGGTCGAGCTTTGGTGGGAGTTCCAGTTCAGAAATAATTAG  
AAAAAAGGAGTTGACTGAGATCAATCTTATGCTCAAACATTCTGCTATTGAAGTTATTTGACTTTTATTA  
CATTTATATATTCTTGAATTTGCATGCTAGTTAATGCAACTACAGATTCAGCCTCCATGGTTGGACCTTGT  
TCGTGAGTTTCCCTTCTTTTTGTTTTGCTTATGTACAATCCCAGTGATGCTATTTTTGGGCTTGGTATGCT  
CCTTCAACGTGGAGTCTTATCACTTCTCCTGGGAGAGGACTCTACATGCTATCTTCTGAAAAAGAAAGA  
AAGGAGAAGGTTATAATCCAAGAAGTTGGTGATTTTGAATGTGTTTACCAGTTTATGTTTTGCTAAGTT  
TTTCTGTATATATTTACTCCGTACGAAAGATTCAATATCGTTAACACATTCTTCTTGACTCATTAGGCGTTT  
GAATGGAGAACTGAGAAGAACCGAAGAACTAGAAGTGTGCATAAATCATACTATTGCTTTCTCTTATA  
CACTAGGATATGCACATTAAGCTAATAGAAAAGTCAAAATTTTGATTCTATGTTCTAATCGTCCGTACCTTT  
CTCAAACACAAAAAAGTCCAGATTCTGATTCATACCGTTGCCTTTCTCAAACAGAAAAAAGTCCAGATT  
TTGATTCACTCCCATGTTATTAATTACAGGATAGCATCATGGAAAGTCAAATTGATTTTGAGTTCAAAGA  
AGATGTTTCCAGCTAATTAGGGGAATCCACATTTCTCCTCGAGTTCGATTAGGGGCCCTACCCTCCATT  
CTCTCAAGTACCTCTCCGCTTGCTTTGGGATCAACTTCACTAACTTCTCTTATAAAAAATTTATGATACCT  
TTCTAAAAAATAACCTCTCATAAAGGTTCAATTAGTCTTACAACCTGTTTGTCCACGGCTTTTACCAATTA  
AACTTTGTACATTTTTATATTAATCAGGTGTGTTTGGGACGTGCCCTTATCAGGAATCATTCTTGTATTTT  
TTGGTGAATGTGGGGGGAAGTTAGCAATAGTGTGATTCACCTGGTAAATGAAGAACATTGGTGAAAAG  
TCAGGCTTGAATAGTCAAAGCTGCACCCCTAATTGAAACAGGAAGTGTTCAGGCCTTGATATGCTACA  
GTAAATGTTTAAATGCCATATAAGTCTAACTGTCTGAATCTTTCTATATCATTCTCTCAATGTGCTTATCTG  
ATTTGGTTATCTAAAAAATAAGTGCTTATTTGACTTGTATGACATTTAGGAAACATGTTGAGAACTA  
GAGCATGGATTTGTTTATGCTGAGAGCTAGAGTATAAATTGACTCTCTATTAGATCAAGAGATTGTTGAA  
GTCAAGGTATCGACCTCTAGATGTTAGGTTAATAAATAGTTACACCAAACCTTTGTTTATTGGTGTTTAGAT  
GTGGATGTA CTCTCTAGAAAGTTCTGCACTTCGCCATAAGACACAACAACAGAGTTGTAAGTTAAAACCTC  
TGGGTTTGGGGCCACAAATTAGTATTTGTGTGATACCATGTTGACTTAATTGTTTCTGTTCTATTTAAGAA  
ACTTTTGTGACTTCTTGTAAATCAGAATATAATTATGTCAAGCTTTGTCTTTCTAGTGTGGAGTTTTGAATA  
GGAATGGAGATCAAGGATGGTTATTGTAGTTATTTTTCGTACCAGTTCCTCTTGCCTTGTCTTGAAGGC  
CAAACCTTAGTCATACTCCCCTTGAGGCCATTGCCTGCAGTATTTAGCTACATCGAATAAATAAATCAGC  
TAACTTTATCAGAAAAAGATGACTGATCCTCATTTTAATAGGGTAAACACAACCTTTATTTTTGCTCTTCTG

CATGACTCTGAGGTCTGAACTGCATGCCTGATTTATTGGTTTCATGACCAGCTTATGTCCTTTAGTTGGTT  
TTGTATTAAGTCCTTCAGTTTACTTATGCTTTGCGTCACTTTTACTGAATATTTTCTTTGAAAATCATATGA  
AGGCAATTGAAAAACCTTTGGAAAGTTGCATTGTCAGTGGTGAGTTGAATATTGTGTTTGGAGAATTGT  
ATTCTTAGAGAGTAGGTATAACTATCAATACAAAGTTGCTCATTTAATTAGATGACGCCTGATGTTTGTG  
AACTGTATCTTGCTGTTTTCTTCATGCTTTGGTTAGTAGCATGTATTGAATTGTTATCTTAAATTGTACGGT  
GTAATTTTGGATTCTTTACCATAGACAGGCTATAGCAGTAATATTTGCTTCTTTGAGAATGAATCATCAAA  
TTTTGTTATCATCTTTTGTGGTGAGTTGGTCTAACAAGTAAATCCTAGTTCATCATTCTATATGGATCCA  
GTGGACCGAACAGCCATGTCCTTTAGTTGATTTATGAGTAACACACAGTTAGAACTTCAGTTATGCTGCA  
TGAAGTGGTTATTGTATACACAGTCAGGGTTGTGGCAACTACTATAGAATTATCCTTTTCAGTTACTGAAA  
CATAACAATTACATATGTTTCTCTTTTCTGAATGATGGGGTTCTGTAGATTTTGTTCACCACCAAATCCCA  
AACAATGGCACTGGCTATACCTGTGAGTTGCCATGATTGATGTTTTATGACTTGGAAAACCTCACTCTTA  
TCAGACACTGGGTTTAATTTTTGATTTGGTAGTAAAACACTGACTTTGCTCATTTCCGGTGTGTTGTTTTG  
GAAGGATTCTTTTGCTTCCTTTCTGTCTTGCTTGATGTAGTGATAATATTGTCGTTTTGGGAATTTTCTGT  
CTTGACCGGTGATCAAAATTTCTTCAGTAGTTGTCGATCTTTTTTGTGGTAATCTTGTTTTCTGGCTATG  
CATACTTCATCTGGTAAGTGGTGTATGGTGATTGGTTTGTAAAGCTTTTGCTTGCTTGATTGGTTATGTTT  
AAAGATGTCTCGATTCAAGCTTTGAAACTGACAAAAGCTATGCTTCCGCGACGTCTGCAGGTTGTTTTG  
GCTTCATGTGATGGTACTGATGAGTGCTTGCTTTGTTGTCAAACCTTCCGTGTACACTGAAATATTGT  
CAATCAAATTATGTGATTAGTATTGGATCTGTTGACAATATTTTTGCCTTAAACTGCATCCATTGAGTGT  
ATCAATCTAAAATGTAACGCTAGAAGCTCATAGAACTTAACGAGTCTGAACCAAGGGGTACAGTTCGTC  
TTGCTGATCTGTAAGAATGCTTGTTCTAATCCCGCACCTATATGATGTAGTACAATGAAGTGGTAAAAAT  
CATAGAACTAAAGTTCCATTTTGGTAGAGATGAATAATACTAGACGTCTTCTTTTCAAATATCTAACTT  
CGAGAGGATAGAGTCCCCTGATACCTAAGGTATTCAGTAAAATAGTTGAGTTGGCATGAATACCACGGT  
AACTATAATATTCGATATTTAAAACCACTCTGAACAATCAACGTTTTATAACCTTCATATATGTAAACTGT  
GTGTGTCATTACTCCTTAACAACACTATCTCTATTACATTGATTAGTAGCACTTTTTCGATCGATTCAAC  
CTTAGAAGAATCCCTGTTACACAAATTTGATAATCATACTCATTTCTCTATGATTTAGGTAGATTGTTCTT  
CTGCTGATTTTGTGCGCTGGGTTCCAACATCACCTGGACAAATAGATAAAATTTGGTTGCGGTGAATAT  
CTTCAACATTTGGTTCTTTTAGGCATTTTCAGAAAACAGGTTCTATGCACAGAGAGGGATCGAGAATGAA  
GAAGGAGGTTTGTCTTGTTTGCAGCTCGACTTGTAGAATTCCTCATTCAATCAGCTCAAGACCTTCAA  
GTTTCTCCGATCGTCAAATACTCAGCACTGTCACTTTTACCGATCGATTCTACCCAGCTCTTACCGGAGA

AGGAACTAAGGATGCTAAGAGCTGGCTCTTACAGCCTCTGAGAGAAAGCAATTTGCAGCTATTTGCGCT  
TGTTGCAATATGGATCTCAAGCAAATACACGATTCTCCTTCCCAAGTGTGAAATCCTTCAAGTCTCTGG  
CTGACATCACCATTAAGAGCAGCATTTTACAACAAAGGATTTTCTGGAAGCTGAGCTAGTGTTAATGCA  
GGTATTGAAATTTGAGATCGGCATGTTAAGCATCCCCTTCCGATTCTTCTGAAGATCTACTTACTAAGTTCA  
GTGAAGTTGCTAGAGTTGGAAAGCAATTAAGCTTGGAAAGCTTGCATGGATATCATGGACCTGATATATG  
AAAAGGGGGAGATTTTCATCTTTCAATTGTTCTTCTCATCATCTAGCCGCATCGATTGTTGTTGCTGCATAT  
GCAATCACAGTTCATTGCAAAGAGTGAATCCCCATTCTTGTATGGGTTAAGTTTGTCACTTCGTGCA  
GAGAGGAGGATATTGTAGACACTGTCAAAAATATTCTAATGCATGTGTTTGAAGCTTGA

>PGSC0003DMG400041679 LRR-RLPs

ATGAATAAGAACGGTGGAGAAAGCTCTGGTGGAGATAGGATTAGCAGTTTGCCTCGTGATCTTCTTCAG  
AAGATATTAGGATGCTTGCCTTTACATGATGCCGTAAGGACAAGTGTTTTGTCAACAAAATGGAGGTAC  
AAGTGGGTAGTACGTTCCGAACTAGTGTGTTGATTATAACATCTACAAAGAAATCCTCCTGAAAACAAGTA  
TTTATAAAGTCCTATTGATGCATCAAGGAGAAGTACGCAAATTTAGCCTCTTGGTCCCTAGCTCCAACCTT  
TTTTCTGATATTGATACCTGGATTCTGTTTTTGTCAAGCAAAAATGTCCAGGAATTATCACTTGCATTTCTT  
ACATGCTGTGCGCTCCCTTCTCACCTATTCAAATTCAGGATCTAAAGCACCTGGAACCTAATAGTTGTGA  
ATTCAACCCTCCTCCCAACTTTAAAGGTTTTCGAAGTCTTGTTACCCTTAACTTTCAATTTGTAACCTTCGA  
GCCCATGTCATTTCAAGTCCTCCTTTCAAGTAGCCATTACTTGAGCATGTATCGATGGTTTGCTGTAGTG  
AGTTTGATAGCTTCATTATTGAGGCCCCCAATCTAAAAATCTTCAAATTCAGCAGCACAGCAAATCCCTT  
TGCTTTAGAAGAATCCCTCTGCTTGAGGAAATTGTATTGGGCATGCCTTTTAAACATGTCAGAGGTAATCA  
CTATCATTGAGATGTTTGTGTTGATGCACTACTGGATTTTCCTCGTAATTTTAGCTAATTTTTTACACTTTG  
TTTTAGTCCTTTACGGTACCAGAGCCTCAGTTAACACTACACAACATCAAATTTTGAATTTCAAGAATTT  
GATCTTTTCTGAGGTTGAGTGGGTTGCATATGTTCTTGACTTGATCAACCGCTGCCCAACATAGAAAGG  
CTCCTAATTACGGTATGTCTCATTTTTTCATCTTTTGATTGTAAATATGTTGATTTTTAGCTTCTTTGATCTTA  
TAATTAATCTTCTTTTCCCTTCTCAAGTCGTATGCCTACACATCGTGTGCATGTGAGTGTACACATCCCTT  
GCGATCCCAAGAAATGACAATGACCATAGTGCAATGAAGCGGCTCAAAGTGTGGATATGACCCTCAT  
GTGGGTTAATAAAACTGAAATGGAATTCTTGAACCATGTATTGGCATATGCAACTGCACTTGAGAAAAT  
ATACATTGCAACTTCGGCAGAAATCCGTCATAGGGGAATGAAAATGATGGAGGAGATGAAGCGATTCC  
CTCGAGCATCACCTAATGTAGAATTTATATATCATTTCATGA

>PGSC0003DMG400042176 LRR-RLPs

ATGGATCTCGGTTACAATAATTTCAAGCGGAGAGATTCCAATGTGGTTCGGTTTCAATTCTGGTTTTATTTCAAGTTAGAACTCTGAGTGTGAGAAACAATCTCCTTCAAGGCGGTATCCCCAAGGAGATTGGGAACCTGAGAATCTTAAGGACTTGATTTTATTCGAAAATCAACTTACTGGCTCTATTCCACTCTCCATTTTCAACATTCCTCCTTGGAACTTTTAGGTCTCTCAGGTAATCAATTAACAGGGAGTCTTCTGTAGATATATGTGCGCGTCTTGGGAAGAATAAAGAGAATATCATTAGTTTCAAACCATTTGAGTGGTTACATTCCATCAGGTTTGTCTAACTGCACAGAATTGTCCGAATTGTCATTGGCATAACAATAACTTCAGTGGAAACATTCCACCAGAAATTATCAACTTGGAGAGGCTTGAGCTCTTAAGCCTTGGGGGAAACAACCTTGCAAGGTATTTATTAAGGGTGTGCTAACTGTTACGTCAATAATGGGCAAGTAAAAATGCATGGAGAGGGTACTTCTCTCAATTTGAATAACATTTAATATTTTAGCGCGCTCATAATAATTGACCATGCCCTAGCCTATTCTATTAACAACAATAACTCTCTCCATCCCATTTGGCCAAATGCATAAAAAACACCCTTGTCCGTTTTAACTCTCAAAAATAATTTGCAGGCACAATTCCAGCAAAGATTGGTAATTTACGAAAGTTGCAGCAATTAATTTGGAGAACAATCACATTGTGGTTCAATACCGCGCACTATCTCCAATTATCATCACTATGGTGGCTTAATTTGAATACCAACAGTTTATCAGGTAATTTTCAAGCAATGTAGGTTTGTGGTTATCCAGATCACTATTACTCCTCCATCATGCGTAGAATTTGGCTGATTAATTTTTGATATATGAACGAATGCAATCAAGCATAATCTTCTGAAAGTTGGAACAAGATTTAAAGAAATAGCATTGATCTGGATGTTTTTCTCTGTATTATGTGGCAGGTGTTATACCAAGAGAGATTGGGAATCTTCAGAAATTGAAGGTACTTTATTTGCAATTTAATCGATTAAGTGTACCAATTTGGGTGCAACAGCCACGTAA

>PGSC0003DMG400042190 LRR-RLPs

ATGGAAGTACCTACAAGTCTATTTCAACACCGAAGAGTTCAAGTTATTTCAATTGGCTTTCAATAAACTCATGGTGAAATGTGGAAAGGGCCATGATATGTACCTGAACTCAGAGTCTTGGATCTCACCAACAATAGCTCACGGGTATGCGGTATGATCCCTCCTTTTGTGGAAATGCCACAAACATGATCAACTTCAGTTTGTGGAAATAGAGTTAGCGGCAACATTCCAAAGGAGATCAGTAATCTGAGCCAACCTAGAAGACTTGCCTTGA GTGATAATCAATTAACAAGTTCCATTCCCACGACACAGTTTAATATCTCGTCACTACTTGCCTTACATCTGCTAAACAATAGCCTTTCTGGTCCTCTCTTGCAAGATGAAGGAAATATTGTGTCCAATTTAGAGGTATTACGTATATCTCACAACCAAATTTCTGGTTGCATTCTTCCAACATTTGTCGGATACTCACAAGCTCAAAATGTTGTCTTTATCTTTCAACAACATAACTGGAGAAATACCTAGAAATATTGGTTGTCTAGCCAAGCTTGAGGTGTTGTCTATTGGACGTAATGCAATGAGTGGGACTATTCATGCTTCATTGGGCAATATTTCCACTCTGGA AAATCTTGGTTGTTCTCACTCTCGCATAGTGGGGCATTCCATCCAACACTACAGGTCTTCATCTTTGAACTTAA

>PGSC0003DMG400042486 LRR-RLPs

ATGGCAAAAAGAGAAGACAGAACATCAGAATTGCCTGTGCATATTATTCATCACATCTTATGCCGCACCA  
ACCTCGAAGTGAAAGAGGGCGGCAGCAACTTATATGTTGTCCAAGAGATGGTACTATTGCTGGACTTCAA  
GACCTAATTTGATACTCCATCAATTTCAAGGCAACACATATATGCCCTGGAAAAGTTTGTCAAGTTGGT  
TGATCAATCCCTACGATTCCATGTTGAACACAACCTTACATCTAGAGAAATTA AAACTTACATATAGTGATC  
GAGATTTGGATTCTAAAGTGGATCATTGGATTGAACTGGGGGTAAACTTAACGTCACCGTGCTGGTGA  
TTTACCCTTCCTTTTTAAGTAAATCATAACAGCTTACCTAATGTTATTTATGATGCTAAAAAGCTGAAAACAT  
TGTGGTTAAGTAGGTGCAAGTTTGAATTTGATATTAGCACCCTCACATAAGATTTTGTGCTTGAGGA  
TCTTTATTTGTATTATGTTTCATATTTCTGATGCTCAATTGCAAAGAGTTATCGATAGATGCCCATTCATCAA  
GACTCTAGATCTAGTCTCTTGCCAGGGAATAAGCAAATTGCATGTTTTTGGCCTAGTTTATCTCAAGAATT  
TGACAGTAGTATTGTGCAAACTTAATAGAGTGATAGTCCAGGTCCAAAATCTTCAATTCCTTAGATATGT  
AGAAGTTCCTGATCATCCTTGCGAAATTGCTATTTTGGATGGTTACAATACTTTACAAACACTCAAGCTCA  
CTGGTGCCAGTATCACAGACCAACAGTTTCGAGATGTTCCCAAACATTTCAGAATTGGATCTAACATTAT  
GCTTTAA

>PGSC0003DMG400042529 LRR-RLPs

ATGGGGACTGCTGACATGTTGCCTGTATGCCTCATTGCAAAAATACTCTGTTATCTTAGTTATCGAGAAG  
CATCCCGGATGAGAATTCTCTCCAAAACATGGCTACTAGCCTGGTTGGATCTCCCAACTTGGAATTCTC  
GGGAAAAGCATAGCAATAGTGGATAATATCATGGAGAGATATAGGGACGGAAATATTCCTATTGACA  
AGTTTGAATTTGACAACTCTAAAAGCCTGATCGTATTTCTGCTCTGATTGATAAATGGCTCGGCATTGCT  
CTTCAAATGGTGTAAGACATCTAGTGTATAGAGATGTTACACATTCAAAAATATACCCCTTTCCTATTTT  
TAAATTCCTGGAAGCAAATTTTTTAGGAGAACTAGTCTGATGGGTTGTGATCTGATGCATGTTTCATTAT  
CTAGTACTAGTAATGTGGTGATCTGTCGTTCTTTGAGAAAGCTTCTCTATCTCGTGTACGCTTAGATAAG  
AACATGCTTCAGACTATACTCTCTAGTTGTCCCTTCATTGTTGATCTAATCATCAGGAATTGTACTCGGCT  
GAAAATGTTGAGCTCCGGAATCTTCTAAGATCAAGTCACTTGCCATTGATATTGACCATCCCATTA  
ATCGAAGCACCAACTCTTGAACACTTGATTATTCTAGTTTTTGTGTTGAATAAATTGAATATTGATAAATA  
TAAGAATCTGAAATCTTAGAGATATCATGTACGAAGATATCTGATATATATCTCAACCGCCTTATCTTCA  
GACCTTACTGCCTCGAGAAATTGGTATTAGCTAACATTTCTTAGGAAGGTTTAAACGTTTGCAGGAGTCG  
ATCCCTAAAGGTCTTAAAGATTCATAATTGCAAGAAAATCGGAGCAATTTATGCTCCAAATTTGGTTTTG  
CTGGAGTATAAAGGACATGATATTCCTCAGCTTAAATTTGCACAAGAATCAAGACAATTGAAGCAGTCA

CAAATGATTCTTTATCCCTTGTTCAATGTAGACGCGGCATGGTTTTGTCAGTTGAGGCAATCTCTATCAGA  
TTCGATCTCTTGGTCTCAAGTACCATTTATTTTACAAATACGAGGAGATCAACATGAATGATTTGCAGC  
TGCAGTGTAGAGATGCTATCCCCAAAGTGGACGTTTTAGATGTAAATTTTTTAAGGCCTACTGGAGAGT  
GCTCGACGTTTGTGGATGCCTTGCTGTGGAGTTGTCGTCCAAGGAACTCAACCTACAATCAACAAGTG  
AAATGTTTACATGTTTCATGGGTGCTTTGATGCATATGAAGAGTTGAGACGCACTCTTCTCATGAAAT  
GGTTGTTTGTGATGCATATGAAGAATTGGAGACGCGCTCTTTTTCATGAAAGGCATGGTCAATTAAGA  
GGTAAAGTCTACAAATTTGATCAGAGAAATCAGAGTTGGCATCCTGTAGAACACAAAAGAGGAGAGC  
TCTCAATAAGGACTGTTAGCACGTTGGAGAAATATTTCTTTTTATTAGATTGGTGA

>PGSC0003DMG400042787 LRR-RLPs

ATGACAAATAACACCTTAGTACTATTGCAAGGAACCGTCCTAACATGATCCAAATTCGTTTGTGTATTAC  
TGAGCCTCAAACCTCATGATTACCTAACCTTGAACCACTTGATGCTGGTTTTGGGGACATTGTACAACAC  
TGCAAGGAATTACGGCGACTTTCTTTCCGGACTCCTTACAGATCGTGCGTTTGAGTACATCGGGGTCC  
TTGCTAAGAAGTTAGAGATGCTTTCCTTAGCTTTTGTGGGGGATATCAATCTAGGCCTCTACTATGTTCTC  
TCTGGTTGTGAGAGCCTCCGTAAGTTGGAGATTAGAGACTGCCCTTTGGTGATAAGGCTCTGTTGGCT  
AATGCTGCAAAGCTGGAGACAATGCGATCCCTTTGGATGTCTAATTGTTTCAGTAATATTTGCATTA  
AATATCTGCATCATAATGGTGCCACACCATTGCACTCTCTTTAG

>PGSC0003DMG400042991 LRR-RLPs

ATGGATAGAATTTACAGTTATCAACTGAAATCCTTCACCAAATACTCTCTCTCTCCCAACTAAA  
ACTGCTCAAACCGCGGTGTTGTGCAAGCAATTGCTTAAAGCATGCTATACAACTCCAATCTCTGTTTTGAC  
GAATCTGATTTTGGCGAAGAACAACAGAATAATGGTAGGTTTGTAGACTTTTCATGGTGAATTCTCGAGG  
TTAGTAGATTATACTTTGGAAAGATATCGCCGTGAAAATCTACCTATTTCCGGTTTTAAGCTT  
CACATCTCTTTTCCGATCAAACCTGATTGTGAAGGTGTAGTTGATAAATGGTTAGAAATTATAGCAGAGAGAAGGGC  
TTCACAGGTTGCACTTTTGGTGAAAAGTGAATCTGGAGTTTATTCGAAAAGATATAGTTTGTAGCTGAT  
TCCATATTCGAGATAGAATCGTTGCAGGTGTTGGAGATAAATTGCTGCAGAATATTGAAGCAAAAAGCA  
TACTTTCCGAAGATAAAATTAAGTGCAGTAACCTAAAAAATCTAACTTTGTGCTATGTTACTGTTAGTGA  
ATCAGCACTTGATAGTCTAATTTTCGTGTTGCTCTCAGATCCAGAAGATATCATTCCAACACTGTTTGGGGT  
TCAATTGCATTCGTGTTTCGAAAAATCTTCTAATCTTTTGTCTCTTCATATCTTAAAGTGCCCAATTATGG  
AAGTTCATATTGGTGATGCACCAAACTGCTATCTTTCGAATATGTGAACAAAGTTGATTCCGAGCGTTT  
ATCTCGTCATGATCTTGACATATGTTTTCGGACGTTAGAGATTGGTACTTGTTATAATCTCAGAAGGGTA

GAATTTGTGAAAGCTGAGATTGATGATGTGGTTCTTTTCGAGCTTATACCAAACTACACTTTATCAAGG  
AGTTGATCTTACACTACTGTAAGTACTTGAAGAAAATAAAAATCTCAAGTTCAACTCGAGGTTTGTAG  
CATAGAAAGTTGTGTGTGCTTAGTGCAAGCCACTTTTGATGTACCCAAGTTACTCTTCTTAGTCGTCAAGC  
CAATGCAGGATTTTGGTGAACGTATAAACTACCTTGTTTATCTTTGAAAGTGCTTCAAGCCAATGCAG  
AATTTCCATAAAGTATGGCAATCTACCATCTGATCCCGAGCATATCATTGACTTACGGAAATCTCTGGTTG  
AGTTGAATGATAAAGATGTAGACTTGACATTGGATAGTATCGGTAAAGGGTTGAGAGCAACAAGTGA  
ATTAATCATTTTCCCTCAACTAAAGTTGAGAATTTGACATTAACTTATTGTGACTGA

>PGSC0003DMG400043061 LRR-RLPs

ATGGGTATTTGGAGCAACCTACTTGTGCTCCTTGTTATTTTCCCTTTTTGTACACCAGATCCAAACGATGA  
GATGTGCTTGACCCATCTCAGTCAATCTTACAAGACCCTTGAAGAATCTTCAAACTGGACTAAA  
CCTTCGCTAAACCTTGTGATGGGTTTACTTCATATCTACAAGGGGCAACTTGTAACAATGGCCGCATCTA  
CAAATTGTCCCTTTCGAATCTCTCGCTTAAAGGTACCATTTCTCCTTATCTCTCTAATTGCACCAATCTCCA  
AGCTCTTGACCTCTCCTCCAACGCAATCTCCGGCCCAATACCTCTGGAACCTCCAGTTCCTAGTCAATCTGG  
CTGTTCTCAATCTCTCAGCTAATCAACTTTAGGCCCCAATTCTGAACAGCTCGCCATTTGCGCTTACCTCA  
ACGTCATCGATCTTCATGATAATCAGCTTAATGGGCTTATCCCGCAGCAACTGGGCCTCCTTGACGGCT  
ATCAGTTTTCGACGTATCGAACAATAGATTATCGGGTCCGATACCAGCGTCACTGGGTAACCGGAGCGG  
AAATTTTCTCGATTCAATGCCAGTTCGTTTGATGGGAATAAGGATCTTACGGGTACCCATTGCCACCC  
AAAAAGAGTAATGGGTTATCGGTTTTGGCAATTGTAGGGATCGGATTAGGAAGTGGGTTCTTGAGTTTG  
GTGATAAGTTTTACTGCTGTTTGCATATGGTTGAGAGTTACTGAGCAAAAATTGGATGCTGAAGAAGGA  
AAAATCAGTCATCTCATGCCTGATTATTGA

>PGSC0003DMG400043237 LRR-RLPs

ATGTTTGAAGAGAGGCTAGAGATGATAGAATATCAGAATTGCCTGTGCATATCATTATCACAGCTTAT  
GCTACTGCACTAACTCAACTTGAAAGAGGCGGCGAGAAGTTGTATCTTGTCCAAGAGATGGTACTATT  
GTTGGATTTCAAGACCTCATCTGATATTCGATCAATTTGAAGGGAACAAATATATGCCCCAGAAAAGTA  
TGCAAGTTGGTTGATCAATCCCTGCGATCCCATGTGCAACAAAACCTTACGTCTTGAACTATTAATCCTTG  
GATATCGTGATGAAGAATTGGATTCTCACTTAGATACTTGGATTGAATTGGCGGTTAACTTAACGTCAC  
ACTATTGGGGATTTCCCTTCCCCTTTGATATCGTTACCTGATGCTATTTATGCTGCTAAAAAGTTGACGG  
TATTGTGGTTATGCAGGTGCAAGTTTGAATTTGATATTAGCACTACTTGCATAAGATTTTGTGTTCTCGG  
GATCTTTCTTTGTATGATGTCCATATTTAGATGACCAATTGCAAAGACTTATCGAAAGATCCCCGTATAT



CAGGAATCTAATGCTACAGAATTGCCAGGGTATAAGCAAATTACATGTTTTTGGCCTAGTCTATCTCGAG  
GATTTGGCTGCACAATATAGCAAATTCGATAGTGTGATAGTCCAAGCCCCAAATCTTCGATGCTTTACAT  
ATGCAGAACATGAGGACAATTTTCTCCTCGTGAAATTGCTATTTTGGATGGTTACAATACTTTACAAACA  
CTCAAGCTCACTGGTGCCAACATCACGGACCAACAGTTTCGAGATTTATCCTATAAGTTCCCAAACATTTT  
AGAATTGAATCTCACAGAATGTTATAAGCTGAAAAATATAGAGATTCAGAGTGAAAACTAAAGATATT  
CACCTTATTAAGTTGAAGAGTCTGGAAAAAGTCACGGTTCAAGCTCCAAATTTATTGGAATTTGATTTT  
GTGGGTGATAAAATGCCCTTCTCATTATGGATCCTTCTCCCTGGAAAGAGCCCAACTCGTTTTCTCCTC  
GCTGAGCACAACTTGTTGGGTTTAGCAAGGTGTGAATGGGAAATAAAAAGAGAAAATGGAAAGTGGA  
AGAACCAATGA

>PGSC0003DMG400043334 LRR-RLPs

ATGGATGAGGTAGCTAGTAAAGGAAGGAAGTCTACCACTATCGGTGACTTACAAGATGGCATATTACAT  
ACAATACTAGAGTTTATGCCCATCCAAGACGCTGCAAGAACTAGCGTCTTATCGAAGAAATGGATACCTA  
TATGGTCCACACAGCCACATCTTGTGTTTGATCCCCTGTTTTTTCAGTATGTATCTAATATTGGTGCTTCTG  
CTGCAACCGTAATTTATAAGATTCTAATGCAACACACAGGAAATATTATGGGGTTTTCATCTTATCTCGAG  
TACGTGCAAACCTTGACAGTCAGTTGTGGATCAATTCATCATTTTTGTCTCGAAGCATGGTATCCAAAAG  
CTCACTCTTGATATGGCAAATGAAGAAAATTACATGTTGCCTAATAGAATATTTACTTGTGCAACATTGA  
CACATTTGAAGCTCTCAAGGTGTTTCTTTAAGCTTCCGGATGGTACCCAATTTCCATTCTTGTTAGCCTTC  
AGTTAGAACATTCTAAAATTGCCGGTCATCTAGGATCAGAAGACGATCTTAATCTGCCAATGCTTGAGAC  
TTTGGAGTTGAGATTTTGTATTGGCGTTGATTCTGTAAATTTGGTTTCTCCCAAACCTTGACAATATGTCTA  
TCGTTAGCAGCTATACAGTTACATTTTACTGTGAACCCAATCTTTGCAATCATTA

>PGSC0003DMG400043603 LRR-RLPs

ATGAAAACCTTGCAAATTCACGATCTTCTTCGCCAACTGTGCCTAAGTAAAGCTCATACTGAAAATGTTA  
TGCATGTCATGAATGGGAATGATCTCGAAGCCATAGATAATCAACGTCGAATGATCCTTCTGTCTGAAGT  
TGAAGAGAAGTATGATTATGGTCCGCGAAATAGCAGTGGTATTGTCCGTACCTTTATTTCAATGGGTGTA  
GTAGCTTTACCAAAGAGATGTGTTCCATTGTTTCAGAATTCAAGTTGCTTAAGGTGTTGGACGTATTAT  
CAGTACTCTGGTACGATTTCTCTAGTGAATACCTGAGCTTGTACATTTGAGATATGTTTCTGCAAGAATT  
GAGGAAGCTCCTTCACTAGCCAAATTGAGAAGTCTACAGACCATAATTCTTCGAAGATATTTCTCTGGCA  
GTGTCAGACCAATAACGTTGGAGCTGCAGCCGTTAGATATCTGGAGAATGTCAGAGATAAGACATATG  
GATATTGATTGGCCACTATATATATCAAACCTTGTTGAAGCAGAACAACTTTATTTCTGAATAACTTGCA

AACACTTTATCTCTATAATTCTCCTTGTGTTGCGGAAATCATAAGAAGAACTCCCAATCTAAAAAAGCTAA  
AGATTTTATATAGATCTAAGCTTCCTGATTCTCTGAGTATTTTACAGGATCTGGAGACACTACACATAAAA  
GAACAAGAAAACATTGATCCGATGATTATCTCTAGAGATATTTCTCTCCTAATCTCAAGAAGTTGAAATT  
ATTTGTAATCGTATAACCATGGGAAGTTGTGAATTTGCTGGCTAATTTAACCAATCTTGAGGTGCTCAAT  
GGGAATCGTGCATTCGTTGGAACAGATTGGAAAGTAGATGAAGATGTTGTATTTACAAAATTAATAAT  
CTACGACTGTATGTGTGCTTTGATCTGGAAAGGTGGGAATTAGCAGCTGGTAGTGATAATTTTCCGATG  
CTTGAGCAACTGAACTGTATGTATTGCCTAACTGGAGGAGATTCCCGAGAGTATTGGAGAAATAATG  
ACACTAAAATCAATCCGAATAGTTGATTGCAGCTCTGGTGTTAATACAAGTGCAAGGAAAATTCAAGAA  
GAGCAAGAAAGCTTGGGAATTATGAGCTTCAATTTGAAATTGTTTTGGTATGTAA

>PGSC0003DMG400043752 LRR-RLPs

ATGCAACGGGCGGAACCGTTGCCATTGACTATCTATTGCAACAGTTGTATAACCGTTGCCAGAAAAAGT  
GTTGCCATATGTTCAATTTCTAGTAGTGGAAGTTTTGAAGAATGTTCAACAAGTATGCTAGAGAACATGA  
AGACTTTTCACACTTGCCATATATTGTTTGATAAAATGAATCCAAGGTTCTGGTGGAGGTTTTCCGAATCTT  
GAAGAACTCAGTCTCCGCGTTGATTATGTACCTCATGAGTTTTCTTTGTTCCCATACCGGAAGTTCATAC  
TCACCTTCATACTCTTTCTGTGAATTTATCTGTCATGAATTTCCGGCAATCAGTTGGATGGGAGAGGAATT  
ATGTCTTCCCCTCTAATCTTAGGCAGCTGCACCTTGCTAGCTATTTCTTGACGGAAGAAATGGTTTTAAGC  
ATTGCTAGATTGAAGAAGCTTGAGATTCTCACATTAAGGGGGGAGTTCGTTTGATGATATTTCAAAGCT  
TTTGCTGGGACGTCACAAATTTGGAGTTCCTGCACTCAAATACTTGGCATTACTCGGTATGCAGATGGA  
CGAATGGAAAGCATCAGAGGAATCCTTTCCTGTGCTTGAGGAGCTATCTATAGTAGATGGTTATACATTC  
AAGGAGATCCCTCCTAGCTTTGTGGATATTCCAACACTGCGATTTATCAAAGTCTGATTGCGCCAAGT  
CTCTTAGGGTTTTAGCTTTGAATATCAAAAAAGAAATAGAAGAAAACACCGGATGTGACCGTCTCCAAG  
TTGTTACAATATAG

>PGSC0003DMG400044242 LRR-RLPs

ATGAGGATGTTTCTTTTGTGTTACCTCTTGTCTTCTTTTGTGAGTGCAGTAGAAACACAAGGTATCAGTGT  
TGTTGATTTATCTGCTCTGCGTGAAATCAAAAACAGCCTCACCGACATACTTCTCTTCTCAAATGCCTT  
TTTTACCAGCTGGGACTTCACTGCTCCCGACCCGTGCTCGTCTTTTGTGGAATTAATGCTCTCTGTTTCA  
TCCTAAACGTGTTACTACACTCACACTTGGCACTGGCCTCTCTGATTCACCTGGCCTTGCCGGGATATTAT  
CTCCGGCTATCTCTAACCTCTCCGAGCTAACTCAACTGTTCTTTTCACTGGGATTGTAAGTGGTCCCATCC  
CTGACCAAATCGGAACACTCAAAAAACTCAGCGTCATCTCTCTCACGAACAATCGCCTAACTGGATCCAT

ACCTACTTCCATTTTCACACTCCCAATCTCCATACTCTCGATTTGAGTCACAATCAACTCACTGGTACAAT  
CCCTGGTTTCGATTTCCAGTTATCTTCGCTGAAGGTAGTAGTTCTGGGATCCAACAAAATCTCCGGCGAG  
ATTCCAATTCTGCCGACGGAATTACTTCACTTGGATTTGAGTAACAATGAGCTATCGGGAATGTTGCCGA  
GGAAAAGCAGAATGCCGTTAACGCTCCGTTATCTGTCAGTATCAGGAAATCGGTTGTGGGGACCACTGA  
GCGTCCTCGAATCACTCTCAGAGTTAGTGTACCTCGACTTAAGCATGAACCGTTTCAGTGGGACCATCCC  
TTCATCACTCTTCCGATCCACGTTGTCATCAATGTACCTCCAACGGAACAATTTAACCGGAAGGGTCCCAC  
AACCACCGCTATCCTCCCCTGCCGCCACCGTATACGGCCCTGGATCCACCGTGGATCTAAGTCACAACCTC  
ACTCACTGGGGAACCTACAAATACTCTCGCCGGAGTAGAAACACTCTTCCTTAACAACAATCGGTTACC  
GGAGCAGTACCGAAGGATTACGTGGAGAGTGTTTACAGTGGAAACACGAGAACTCTGTATTTGCAACA  
TAATTACATTGCAGAGTTTCCGGTGAAAGAAGGATTACCATTGCCGGATTCAGTAGCATTGTGTTTATCG  
TACAATTGCATGGTTCCACCGGTGCCGGTGGGGTTCATGGCTTGCCGGCTAGCGCCGGCGGACAGATA  
TCTAGACCAGTGAACCAGTGCTCTGCTTTTAATACTTCCATGGCATAA

>PGSC0003DMG400044365 LRR-RLPs

ATGGAAAACCTCACCTCTGAAAAAAGCGAAGATTGAGATAGAATGTGAAGATATTGACAGCATTGATAG  
GATCAGTCAACTACCTGAAGCTCTTATTGTTCAAATTCTATCTCGATTGTCCATAACAAATGCGTTCAGAA  
CAACTATTCTCTCTAAATATTGGCAATACTTCTGGACTTGTATCGACAACATTGTTTATGAAGAGGATTAT  
AGTCGTTCAAATAGCTCGACAATGCACAAATTCATTTCTTAACGGATAATGTACTACCTCTGCTTAGCTG  
CTCTACCATTA AAAAGTTCAGTCTAAACTTTGTGTTT CAGATATGATGATGGTGTGTCTTATTTTCCAAAA  
TTGACAAGTGGCTTGAATTTGCTGTGAATAAGAAAGTGGAGGATCTACGCTTGAATATACGTTATACTGT  
TGATCCGACTGAGCATGACCAACCCTATAACTTGCCAATAGTTCTCTCTAATAGTTCATCGATTCTAAAC  
TTAACTGTGAGAATTGCAGAATATTAGAAGATTGTGTGCTAAATTGGACATCTCTGAGGAGTTTAACT  
GAAAAATTTGTTTCTACGGGATGAACACATTAACAAATAATGTCAAATTGTCCTCAATTGGAATCTTTG  
AAGCTACAAGAATTTTGTGGATTTAATCGTTTGCACATGACTTCTCCAAAATGTAGGCGGCTGCATTTGA  
TCCATCATGGTCATCCTTGTGGGGATTGGTACTCATTGGAAGGTGATATATGTTGCTTTGAAATTGTTGCT  
CCACATGTTGAACATTTAACGATTTCTGGGGTTTTTAATCATACAAAAATTAAGCTCGGAGACTTGCATC  
TTTGAAACATGCCAATCTTGATCTCGTCTGTGATGAATTTAATGAAATGGATGAACACATAGTGAAGGAT  
CTTTTGGTAAGCGTTCGTTGTGCTAATGAGCTAATACTCTCATCCTGGTTTATCAAGGTCAGTTATCAGTC  
CCAAATGTCTAAAGTCTTTTTATGTTGATTGTGAATAGAGCTCCTATTTTATATTCTGCCTCATTCTTCTAT  
TTAGGTAATTTCCAATTTGATGTTAGAAGAAGAAGATGTCTCTTTACCGTTGCTGGAATGCAGATGGTTG

ACAATAAGTTCTTGATTTTCAAACCTTCGTTCCCTCTACTAGACAACCTCTTAAGGTCGACTCATAAATT  
GGAAAATTTGATGATATTTCTGATACGCCGGTATGTTTTCAATTCACGATACTTTATATCAAATGTATAT  
TGATCCCCTACAGCCTCAACAACCTCAATTCATTAAGCTTACCCTAACCTGATTTGT  
CCTTGTTCTGTATTTGTAGTACCATCCTTTTTTTGAGGATGAAGAGATAGATTTGTTGGAAGACAAGTAC  
CTCTCCTTTGAAGAAAACATATTCAAAGTTTCCTTACAGAATTTGAAGAATGTCAAGGTTATGCCATTTTG  
TAGTCGTACGGGTAGATCTGACGAAACAGAGCTCGATCAATTCCTGAAGTTTTACTTGAGCATGCAATA  
AATCTGGAGAAATTGGTTATAGTGCCAGAGCATAAGGAATGCAACAATTGTTCTACTAATACCTCATAACC  
TGATGAAGTATTTGTTAGCTTTTCCAACAACCTTCTATTCGTGCAGTTATTTCTTAGGAAAAGTTAGTCAG  
AATGTTTTCTATAGTGATGTTTGA

>PGSC0003DMG400044406 LRR-RLPs

ATGCTTTTAAGCAGCATTTCGCAATGATGAGATTGCAGAATCTAATGGTATAGAAGGTGAGGGATATCTT  
GTCAGGTCCGTTTTTGGTAGGGAAACCACAGATTTTCAAGAGTTACTGCTATTGCCGTTGGACCTACAAATG  
GTGGAGGCTTAGCAAAGCTATCCATTCGGGGAAACAATCATTGTTGTGGTGTGACTGATATTGGTCTTG  
AGGCTATTGCTCGAGGTTGCCCTACTCTCAGAGATCTTACCTTGTTGGAATGTGTCTTTTGTGGTGATAA  
AGGCTTATCTGAAATATCTCTTGGGTATCATCTGTTAGAGAAGCTTGATCTTTTCCAATGCCCAACAATTA  
CGGACAAGTCTTTGTTGGACATTGTAAAGAATTGTCGTGCTGTGACCACTTAAACAATAGATTCTTGTTT  
AAACATTGGAAATGATTCCCTTAAAGCTGTGGGTCAATACTGTCTGAACCTGAAGATTGTCGTATTA  
ATTTGTCCACTCATTAGGGATCATGGAATAGCAGTTCTATTTTATTTAGCTAGTAATGTTTTAACAGAAGT  
AAGGCTCCAGGGACTATGCCTCAGCGACCTCTCTCTAGGTATACTTTTTAATTGTTGTACGAAACTAGAG  
ACACTTTCCTTGGTGAGTTTCATTGGTGTGGAAGACTATCCATTAATTTGGTGGCTCCTTGTGCAAATCA  
CTTGATCTTTGGCTATTCGCAATTGTCCTGGCGTAG

>PGSC0003DMG400044447 LRR-RLPs

ATGGACAAAACCTCAGCAGAGTTACCAACAGAAATCCTTCATCAAATACTCTCTCTCTCCCAACTAAAAC  
TGCTGCTCGAACTGCATTGTTGTCAAATCATGGCTTAAAGCATGCTCTACGAAACCCATCTCTGTTTCG  
ATATATCTGATCCCGTAGAATATCGAGCTCATGAATTCCTGAGAATTGTAGATAATACTTTGGAAAGGTA  
TCACCGCGATAATAATCTACCTATTTTCTCTTTTGGAGCTTTGCATCTCCTTTTATGATCACATTTATTGTGA  
TGGTCTAGTTGATAAATGGTTAGATATTATAACAGATAAAAGAGCTTCAAAGATTTCACTTTTTGTGAAA  
AGCAAAGCTAAAGAATATTGTGAAAGATATAATTTGTTTGTTCATAACATATTTAAGATGAAATTCATAC  
AACATTTGGAGTTAAATCATTGCCAAATATTACTAGCGAAACGAAAAGCACTCTTTTATGATGATAAAAT

TAAGTGTGATAACCTGAAAAACATAACCTTGTGTTATGTTACTATCTCTCAATTAGCACTTGAAAGCCTGA  
TTTCATGTTGCCCTCAGATTGAGAAGGTATCAATACAATACTGTGTCGGGTTCAATAGCATTCTGTTTCA  
AAAACCTCTTCTAACTTGTGTGTTTTAGTATCTTTTGCTGCCCAATTGTGGAAGTTGAAATTGTTGATGC  
ACCAAACTGCTATCTTTCGAATATGTGAACAAAGGTGATTCCACGCCTTATTTATCTAGTGATAATCTTC  
ACATATGTTTGCGAACAATAGAGATTGGTACTTGTCAAAATCTCAGAAGAGTAGAATTTGTGAAGGTCA  
CAGTTGAGTATTGGGATCTCTTCAAGATTATACAAAACTACACTCTGTGAAAGAGTTGATTTTACACTA  
CTGTAGGTACTTAAGAAAAATAAAAATCTCAAGTTCAACACTCGAGGTTTGTAGCATAGTTCAGTGTGAT  
TTAGTAGAGGAAGCCATTTTTGATACGCCAAATTACTCTCCTTAGCCTTCTCCGATCAAGATAGACTACC  
TTCTTTATCTTTTGAAAGGGCTCCAAGCCAATGCAGAGTTTCCATAAAGATTGACATTTTATGGGACGTT  
AGCACCTCATGAACTTACGGAGATTTCTAGTTGAGTTGTGTGATCAAGTTGTAGATTTGACGTTGTCTAC  
ATTCTCTAAAAGTTTGATCATACCAAGAGGAATTTATCATCTTCCCACACTTGAAGTTGAGCATTGGAAT  
TATCTTATAGTGATATTACAACCGCGACATATTCATCTTATAACTATGATGTCATCTTCGCAATTTGTTTGC  
CCAAGATTTTAACGTTACAGTGTGACAAGAACTAAGAAAGTTTCTACGTCAACAATGGTTGAAGAAGA  
GAGAAAACAGATTTATCAAATGTACTTGGAAAAAGTATCTCATAAATGCTGAGATAGAGTACAAGAAAA  
GGAACGGAGACGATTGGATGACTCTTGATAGGAAGATATTGGTAGCTGACCCGCATATTATTGAAGAG  
GTCTATACAATCCGCTTCAAGCAAATCAAAGAAATGAAAAAATAAGTATTCGTATATTCCAAGGTACG  
TAACAATTTGTTATGCACAATGTATGAATTATGATATCAATACTTTTCATCTCTTTCCATTTCCAAACAGTT  
AA

>PGSC0003DMG400044512 LRR-RLPs

ATGCCTGTTTCGTTTTCTAGAGATGTGACGAATTACAATTCTTTGAGAAAGCTTTCTCTAACCCATGTCAA  
ATTAGATGAAAACATGCTACAACTCTACTTAATTGTTGTCCCTCGATTGTCAATTTTCATCTTTGATTATTG  
TTGGGGGTTCAAAAACATTGAGTTGTTAAATCTTCAAAGATCAAGTCAGTTTCCATTAAGGCAAGAGA  
ACAAAACGAACTTGTTAAATCCAAGCACCAACTCTTGAACACTTGGCTTATGACGGTTATTTGTCGGGA  
AAATTGGATATTGTTGAATGTCAGAATCTAAAATCTTTAGATATATCATATGTGAGAATATCTGATGAAT  
TTCTGCAGAACCTTATTTCTGGATCTCAATCCCTGAAGGACTTGAAGATTGCAAATTTGTGGGGATATAGA  
GGAGATTGATTTTTCGAATTTGGAGTCACTTGAAGTATATGGGATATAAAAATTCCTAGACTAAAAATTACA  
AGAGAATTGAAGCACTTGAAAATCAATCTTCAGTGCTTGGCAGTTTAA

>PGSC0003DMG400044624 LRR-RLPs

ATGAGTGAGGTAGCTAGAAATGCGAGGAAGTCTACCACTATCGGTGACTTACCAAATCGCATACTACAT

ACAATACTAGAGTTTATGCCAATCCAAGATGCTGGAAGAACTAGCGTCTTATCGAAGAAATGGATGCAT  
ATATGGTCCACACTGCCACACCTTGTGTTTGGTCCCCTGTCTTTAAGTATGTATCAAATATTGGTGCTTC  
TGCTGCAACCATTATTCATAAGATTCTAATGCAACACACTGGAAATAATATGGGATTTTCATCTTATCTCGA  
GTACGTGCAAACACTAGCACAGTCAGATGTGGATCAATGCATCATATTTGTCTCGAAGCATGGTATACAAA  
AGCTCACTCTCGATATGGCAAATGATGAAAATTACATGTTGCCTAATAGAATATTTACTTGTGCAACATT  
GACACATTTGAAGCTCTCAAGGTGTATCTTTAAGCTTCCGGATGATACCAAATTTCCCAATCTTATTAGCC  
TTCAGTTAGAACATTCTGAAATTGTCAATCATCAAGGATCAGCACTCTATCTTTCAAAGCTTGAGACTTTG  
GAGTTGACATTTTGTGTTGATGTTGATTCTGTTAATATGGTTTCTCCAAAACCTGTGAACTTGTCTATCCTT  
AGCAGCTATACGGTAACATTTGAGTGTTTAATGTGAACCCAATACTTGAGAGGATTAAGCACCTATGCT  
TCGATGGTTCATCCCTAAAGGTGAGAAAATGACTGACTTGCTTTCTTTCTTATTTGAAATATGAAGTACTA  
ACTATTTACTCTAATAATGTTTTTGTGCTGCCTCTCAGAACTTAGGGTCGGTTCCTGTTCCAGATATGCTTGA  
TGTATCACTAAACTTGCAAAGCCTGAGAATTTGTGACTTCAAGATTTCTGTTAAACGTATTTCTTGTGCAC  
TTTGCTATTAAGGAATTCACCTAACCTTGTGAACTTGGCATAGATGAAGTTGTGAAGGTTAGACATAC  
CTTGACTCGTGTTAAGACTACAACACATTGATATGTGGATTAGGTGGAATGTCATGGGTTTGAACCTTGT  
GCCGCTGGCCCTCTTGAATTTCTTGTTTATAAAATGTGTATGTGTATATATAAGCTTCACTAATTTTTGAA  
AGATTGACTACATTGTACAATATGATATTTTCTCAGGTTGATGAGACAATACGTCACACAGATGAACTG  
CTTGATTACTTGTCTGAGGCAGTAAATGAAGTGATTGAAGCACTGAGGATGATTCGGACAGTGAGGTTA  
ACGAAATTCAAAGGAACAACACTACTGAAATGTACTTGATAAAAGTCATGCTTGCTCATTCTCCAGAACTTG  
AGAGGGTGATTATTGAGAAAAGAAATGCCACATACATTCCACATTTGAAGGAACTCTTAAGCTACCATC  
GAGCATCACCAAATGCAGAAATCAAGTACACTTAG

>PGSC0003DMG400044936 LRR-RLPs

ATGGCCTCCACTTTTTGCAATTTGCATAGCTACACCAATAGTAGTAGTACTGCATTATTATTACCAGA  
TGATATCCTTCACAAAATCCTCTGTTCTCTTAATCTCAGAAACAGAGCAATTGCTTCCCAGGTTTGTA  
CTTGGCATGACATTGTATCATTGTGTAACATTAACGATAACATTATCAACGACAACGTATTACAAGCACA  
AGTTTCTAACCGCACATTCTGTGCATACTGCTGCTCTCGAATTGTCCATCGAATCTGCTATCACAGCCTCT  
ATCCTATAGTTGTCAAGTTTGTCTCCGACAACATCAATTTGAGGAATTATATTTGATTGCTACTGTTACC  
TCATTAGCATTGTCCCCGCAATTTTCAATCAAGAGTATTGTTAACCGTTTTATGTTTAAAAAACTGCAA  
ATTTGAGGATGAAGCATTGATGATATTCAAGAGATGAATCTATTGAAAGAGATTTATTTTGTTCGGTT  
CAAATCTCTCCAACAAATTTGTA AAACTTATCAACAATTGTCCTTCTATTGCTGATTTAACCTTGATCAAT

TGCTACAACGAACTTGGCGTATTTCCAATCTTATTGCCTGATTTGAATCAACTTAAAAAGGTTTCATTTGAG  
TGGTAATGGAATTGGGCCAATTGAAATAAAAGCTCAAATTTACGAGAGTTTCACTTGTTAAGATCATT  
GCAGTGAAACTTGATTTAAGTGCTTGTACTAAGCTACATGTTCTGAAAATCGATTGTGAGTACATTCCTA  
TCGGATTTCTGAAGATATTTCTCAGCATTCCCCTGTCTTAAATCGTTGTTTCTTCGTTTCGTGCAAAGGA  
TTGAAAATTTTCAAACCTTCGAGTCCTGAATTGGAGAATTTGACGTTAAGTAACATGATTGATTTGAATG  
ATGCTGTCATTGTTACTCCCAATTTACGTTTCGTTCAAGATAGTAGATATGAAACAAGTCCCAAACCTCGTGT  
CCAATCGTTGGTTTCGAGTCTCATGGAAGTCGAGATTGGATTTAAGTACGTTACCTCGATCAGTAGGTTGG  
TTTGGTACTTGAGAGCTTTGGGAGAAAATTTGGGTGATAATTTGACCTTTTCTCTAACAACTGATGCAGC  
AACTGAATCAAACCTGATGCAGCAACTGAATCAAAGGTATTGA

>PGSC0003DMG400045303 LRR-RLPs

ATGAATAATCATTGTACAAAAGTGATCGTTGATGAAAATGAGATAGACAAGATCTTTGATTTACCCATGG  
ATATCCTCGATGAAATAGTCAAGGATATGTCATTTCAAGAATTAGTAAAAACATGTGTTTTGTCCAAGAA  
GTGGGTACATTTTTGGACTATGCATCCAATACTAGTTCTAGATTGGGAGTTCTTTGAAGAGAAAAGTGGT  
ACTATAGGATTGATTGAAAATGGTTTTAGTAAAATGATTGACAACATTCTCTTGCATCATGTTGGATCCCT  
AGTCAAATTTTTCTTGATTTGTCAACTATTGATTGTAATGATAGGGACCTTGACCATTGGTTGTTATGTG  
AAACAAGTAAATGCGTCAAAGAACTTACCCTAAAAAATCACAAACGCAAACGTTATACATTGGCTTTTTG  
TGTATTTGATTGTCCAACCTCTCACATATCTAGATGTCACAAATTCATAGTTAAACCACCTTCTCCCAAAGC  
ATTATTCCCAAATCTCCTTGAATTGACCTTGAAGTTCATCAAATTTTGCCAGACAAAGCAAATTATGTCT  
TGAATACCCATTACTTTACTCTTTAACGTTTCATTGCTTGCAATGGCGTTCATTTCTCACCATATCTGCTC  
CTAGGATCCAGTTCTTGACTGTTTCATGATAGTCATGACATTTACGCAATTTTTTTTTGATAACTTGCAAAT  
GCTAGGGAGTTGTTTCATGGTATTAGATGTATGTGAAGAATCAAAAAGTTATGAGCAAGAGAGGTTCAAT  
ACATGGTCGCGTCTTCTTTATTTGTGCTCTAACCTAACAAAGGCTTCTTTTGAGTAATTCTTGCATTCAGGT  
GATTATAATATGATCAAGACATATTGAAATATTCTTTATTATAATATTCTCAATAAGTTTTACTATGCTTAT  
CATATATACTTAACCATTAATGTATTTTTCTTTTTGTTTTCTTTACTAAGCATTGTTGGTGCAGAGATCA  
TTCTGTAAAGGTTTCAATCCAAACCTACCATTTAGAGCATGTAACATTGTGTGTGACATTTATGGATCTA  
AACCAATTCTCTGGTGTCTTTCCTTGATTGGAAGTTCTCCCAACTTACACTCACTGGAGATAGATGTAAT  
GTTTTCTCACTTTCAATAATTTAAAATTGAGTTTAAAGTTATATAAACACTGATTGTAGGTAACCGTTACAT  
GTTGTAGTAGGTAATATATCTTATTTTTAATATTACAAGTTTAACTTGTTACCAGTAGATACTTTAATATA  
TCAGGTTATAAAAATTAATAAATATCTACAAGTAATATTTTATGGTTATGGAATTTTTAAAAATACTAAC

CTTTTTTTTTGGTCTTTTTGCATCATATGAATTTTTATAGGTTGTCAATACCTTGAGTGAAGAAAACATAG  
ATGAAGTTACACATTATTTGGAAGATCCAAATTGTGTTGACAAACGATTTGAGAAGCTTGAATTTGTGGA  
GCTAAGAGAGTTTGAGGGGACACAATTTGAACTCCTTTTCTTAAAGCTCATATTGGCATATTCCCCTTCAC  
TTTCAAGGATGATTGTTGAACCTTCTGATGAACTTGATGTAGCTGAGGTATTGAATTTGTATGAAGAATT  
GAGGATGTCCTTAAAAGCATTACTAAGAGCAAAGTCATCATAGCACCTCATGGTCAAGATGTGTAA  
>PGSC0003DMG400045368 LRR-RLPs

ATGGTGGATTTTGAGGCGTTCCAATTAATTTTTAATGGTATTCAGCAGTTGTTGTCCCTTCATACATTGGA  
GGTGTGGAGACACTTGCCTGCGACTCTCTGCCCTATCATCATATGCAACTTTCTGACCGAACAGAGATC  
GAAATAGATGGATTCAGAATCGAGGCTCTTCTCATAGATTTGGCAATCTTACTTCTTCTTGAAGATTAA  
CGCTAGTGAGGTGCAAACAGCTACAACATCTGGACTTCTTAGATGCCAGCCCTAAATTACGGTATGCGG  
AGATCTGTGACTGCCCATGGTTAGAAGCTCTGTCCGATGGGCTCGGCAACCTTGTTTCATTAGAACAGTT  
AAGATTGTGGAAGTGCGAAAACTAGAGAATGTGCCATCTAGAGATGCCATGTGA  
>PGSC0003DMG400045411 LRR-RLPs

ATGAGCAACCAAGACCAATTCTCTAGCAACTCAGAAAGTCTGCTTATTGAAAACCTCACCTCAAGAAAAAG  
AAAAGATTGAGACAGAATGTGAAGATATTTATAGGATCAGTCAATTACCTGACGCTCTTATTGTTCAAT  
TCTATCTCGATTGTCCATAACATATGAGTTCAGAACAATTTCTCTCTAAACATTGGCAATACTTCTGGA  
CTTGTGTCGACAACATTATTTATGAAGAAGAGTATGGTCGTTTCAGATAACTTGATAGTGCACAAAATCAT  
TTCCTTAACGGATAATGTAACCTCTCCTTAGCTGTTCTAGCATTAAAAAGTTGAATCTAACTTTGTGTT  
CATATATGATGATGGTCTGTCTTATTTTCCAAAATTGACAAGTGGCTTGAATTTGCTATGAAAAAGAAA  
GTGGAGGATTTACGCATGAATATACGGTATACTGTTGATCCGACGGAGCATGACCAACCTTATAGCTTA  
CCAGAAGTTCTCTGTAGTAGTTCATCGATTCTAAACTCAACTGCGAGAAATGCAGAATATTAGAAGATT  
GTATACTAAATTGGACATCTATGAAGAGTTTAAACGCTGGAAGATTTGTTTCTTTTGGATGAACACATTAA  
AAAAATAATGTTAAATTGTCCTCAATTGGAATCTTTGAAGCTACATGACATTTTGTGGTTTTAA  
>PGSC0003DMG400045777 LRR-RLPs

ATGAGGTGGGACTTCTTGAGGCACCTAAACCTTTACATAATTCATTAACAGGCCACCTACCACAATTC  
ATTATTATAGTCTAGAGTCTCTTGATCTTAAATTTAACTTCTTGAGGAGCCACTACCTTCATCGATTTGTA  
ACATGAGCAATCTTAGCCTTCTCACAGACGATATTCCAATGGAAGTGGGACAGTTGAATACGCTTGAAG  
CATTAGATCTCTTGTAACTGCTCACAGGAAAGATTCTGCAAGAATTGACAAGGCTAACCTTTCTGGA  
AATGTTTAACTCTCTCAGAATCTTCTTGTGGACCAATTCCTCAAGGTCCACAACCTCAACACATTTGAAA



ATGACTCATATGGTGGAACCTTGATTTATGCAGTCCTCCTTTAACAAAACAATGTGGAAAGAGTGATCC  
ATCTCATGCTCCTCAACCATTGTAG

>PGSC0003DMG400046138 LRR-RLPs

ATGACATACACCTCTACCTTAGATCAAGTAAATCTTATTGATCTTTCTTTCAACAATCTTCACGGTGTAATC  
CCGAATGAGATTACAGGTCTGTCAGCCTTGGGCACTCTGAATTTATCTTGAACCAATTATCAGGAAGAA  
TTCCAGAGGACATAGGGAGCATGCAGCAATTGGAGACACTAGACCTTTTCATCTAACCATCTCTCTGGTTC  
TATCCCATTGAGCATGACTTCAATCACTACACTAAGCTATCTTAACTTGTTCATATAACAACCTTGGTTGCC  
CTATCCCATCGAAAAACCAATTTGGAACCTTCACTAATCCTTCAAGTTTTGAAGGTAATCCAGAACTCTGT  
GGGAAACCATTGATTACAGATTGCTCTCCACCAAGAAAAAGAGATCACAAGAAAATTGAAGAAGAAGA  
AGATGATGAAAGGTTGTGGTTTTTAATGAGTGCAGGAGTAGGTATGTCATAA

>PGSC0003DMG400046485 LRR-RLPs

ATGAGCAACAAAGAACAATTCTCTGGCAGTTGTGGTGATAATGGAACTCCGAAAGTCTTCTTATTGAA  
AACTCACCTCTGAAAAAGCGAAGATTGAGATAGAATGTGAAGATATTGACAACATTGATAGGATCAGT  
CAACTACTTGAAGCTCTTATTGTTCAAATTCTATCTCGATTGTCCATAACTGATGCGTTCAGAACAACAT  
TCTCTCTAAATATTGGCAATACTTCTGGACTTGTATCGACAACATTGTTTATGAAGAGGATTATGGGGTTT  
CATATAGCTCGACAGTGCACAAATTCATTTCTTAACGGATAATGTACTACCTCTCCTTAGCTGCTCTACC  
ATTA AAAAGTTCAGTCTAAAATTTGTGTT CAGATATGATGATGGTGTGTCTTATTTTTCCAAAATTGACAA  
GTGGCTTGAATTTGCCGTGAATAAGAAAGTGGAGGATCTACGCTTGAATATACGTTATACTGTGGATCC  
GACTGAGCATGACCAATCCTATAGTTTGCCAGAAGTTCTCTGTAATAGTTCATCGATTCTAAAACCTCAACT  
GCGAGAATTGCAGAATATTAGAAGATTGTGTACTAAATTGGACATCTCTGAAGAGTTTAAACGCTGGAAA  
ATTTGTTTCTACAGGATGAACACTTTGGACAAATAAAGTCAAATTGTCCTCAATTAGAATCTTTGAAGCTA  
CATGAATTTTGTGGTTTTAATCGTTTGCACATGACTTCTCCAATATGTAGGCGACTACATTTGATCCATCA  
TGGTCATCCTCGTGGGGATTGGCACTCATTGGAAGGTGATATATGTTGCTTTGAAATTGTTGCTCCACAT  
GTTGAACATTTAACAATTTCTGGGGTTTTCAATCATACAAAAATTAAGCTCGGGGACTTGTCATCTTTGAA  
ACATGCCAATCTTGATCTCGTCTGTGATGAATTTAATGAAATGGATGAACACATAGTGAAAGATCTTTTG  
GTAAGCGTTCGTTGTGCTAATGAGCTAATACTCTCATTCTGGTTTATCAAGGTCAGTTATCAGTCACAAAT  
GTGTTTAGTCTTTTTATGTTGATTGTGAATAGAGCTCATGTTTTATATTCTGCCTCATTCTTCTGTTCAGGT  
AATTTCCAATTTGATGTTGAAAGAGGCAGATGTCTCCTTACCGTTGTTGGAATGCAGATGGTTGACAATA  
AGTTCTTGATTTCAAACTTTCTGTTCCCTACTAGACAACCTCTTCAGGTCGACTCATAATTTGGAAAA

TTTGATGATATTTTCTGATACGCCGGTATGTTTTCAATTCACGATATCTTTATATCAAATGTATATTGATCC  
CCTACAGCCTCAACAACCTCAATTTCACTACTACAGTTGTTAAGCTTACCACCTAATCTGATTTGTCCTTGA  
ACGGTATTTGTAGTACCATCCTTTTTTTGAGGACGAAGAGATAGATTTGTTGGAAGACAAGTACCTCTCC  
TTTGAAGAAACCATATTCAAAGTTTCCTTACAGAATTTGAAGAATGTCAAGGCTATGCCGTTTTGTAGTC  
GTACGCGTAGATCTGACGAAACAGAGCTCGATCAATTCTTGAAGTTCTTACTTGAGCATGCAATAAATTT  
GGAGAAACTGGTTATAATGCCAGAGCATAAGGAATGGAGCAGTTGTGCTACTAATACCTCATACTGAT  
GAAGTATTTGTTAGCTTTTCCAACAACCTTCTATTAGTGCAGTTATTTCTTAGGAAAAGTTAGTTAG

>PGSC0003DMG400046550 LRR-RLPs

ATGCAGCAACTTCTTCCATCTCTTAAAACACTGAATCTGTGGAATTGTCCAGAAATAGTGTCATTTCTGA  
AAGAGAATTGCCCTTCAATTTACAAGTACTTGAGATCTGTAATTGCACGAAACTGGTGAACGGTCGAAA  
GGTGTGGCATTACCCTGTCCCAGAGAGTTAGTGATCGCACATGATGGCAGTGACGAAGAGATAGAAC  
ATTGGGAGTTCCCTTGCTCTATTGAAGACTTACCATACGCAATCTGAAAACATTAAGCAGCCAAGTTCT  
CCAAAGCCTCACCTCTTGAATATCTATATATGGCTGATTTACCTCAAATTCAGTCAATGCTGGAACAAG  
GGTGGCTTCCATCATCTCTTTATGAGCTACATTTATCTCACCATTATGAGCTCCGATCACTTCTGAATCA  
GCACTACCCTCCTCCCTCTCTGAGCTGATCATCGAGGATTGCCCGAATTTCCATTCCCTTCCAGTAAAAGG  
GATGCGCTCTTCCCTATCTAAGCTGACCATCAGAGATTGCCCTAATCTCAAATTCCTTCCAGTAAAAGGG  
ATGCCCTCTTCCCTCTCTGAACTATATATTTCTGACTGCCATTGCTCAAACCTCTACTAGAATTTGACAAG  
GGGAAATATTGGCCAGAAATTGCTCATATCTCGAACATAGAGATCGATTGGGAATCCCTTTAA

>PGSC0003DMG400047124 LRR-RLPs

ATGATTCTCTTACAACATATTGGAGATATTGTGAAGTTTGATCTTGATGTTTCAGGAGTACAATTGTGTTT  
ATATGCAGATATCGATAGATGGATGCTTTATGTCACGAGATATGGTGTCAAGGAATTAACCTTAACATG  
TCAAAGAATATTAGTAGTACTTATAAAGTGCCTTCTTATATATTCGATTGTCGAACCCTGACACAATTGAA  
ACTCTTCAAATGCATCTTCAAATTACCAAATCTTTTCTGGGTTTCAAACCTTACCATCCTTCAGTTGAA  
AGAAGTAACCTTCGCGCCTGCAATAGAGTTTTATGCTATCAAACGCCACTTCTGTGCAATTAACCTTG  
ACACATTGTGAGGGCACTCAATATCTTAACATTGAGTTCTCATCAGGATTGAAGTACTTGTCTGTTCTGTG  
AGAGTCACTATAATCTTGACCTAAATAGCAATTACTTTAGGAACATCAAAAAATTGACATACTTATACCTT  
GTGTTTGATAATCCAATACGTGTTGATGAAAGATTAACCTTTGGAAAAGCTTCTTTTTAGTTGCGCTACACT  
TGAGACACTTACTTTGGGTTTTTATGTAAGTACTGAGGTAAGAAGCTAACATGTTGTTTTACTTAGATATCTAC  
GTTATCCTTCTGTTTGTATAATTTTTCGTTAAAGCTTTTGAATGCAGGTAGAGTCCCAAAGGGGCTTCATT

ATACGCTCAACTGCTTGTGGCATCTACAGTTAGGTGTAACTTCAACAAATTGGGTCAGACTTGTTACAC  
TCTCGAGTTGATTAAGTTTCCCAATTTGAGTAACTTGAGATTTGGGTACGAAATAGCAAATATATA  
TGTATGATCTTGTTTCGTTTTTGCCTTGGCATACTTAAGTATGAGAACTAAAATGACGTTGTATTCTTTA  
GGACAATGCTTTCGGTGACCCTGATGAAGCAGTTATGAAATATCTAGACGCACCATCATGTTTGGACCA  
AACACTCAACAAGCTTGAAGATGTTCCATCCATATTTTAGGCGATCCAAAGTTGTACTATCTTTCATAA  
AGTTATTGTTTGCTCATGCTCCATCTTGTCAAGGATGAGCATTAAAGCCGAAAAACGCTTCTAGTTCCAAA  
GAAGAATTGAATGTTGCTACAGAGTTGATGCGTTTCCCAGAGTATCTCCTAAGGCAAAGCTATTCTATC  
ATCCAACAGTTGGATTAAGGCCGAATGA

>PGSC0003DMG401000105 LRR-RLPs

CTTCTTCAACTTCTAAAGAATTTTCTGCGGAACTATACATACAGCTTCTGTATATATAGATTCGTGAGT  
TCAACAACCCTAAAAATGGTGAAGTTGTAGAGAGAGAGAAAAGTGAGCTACAGCTTGGCGATGTTGGAG  
AGGTGGTGCAGAAATCGAGGTAAAGATTCCCGTCTTGTAACTTTAACCCGGACCCGATTCCCAACATTG  
ACTGTGCGAGAAATGCCTACGTCACCTGAAGAAAACCCTAACCTAAGGTTATGTCGGCGGGCGGCGGC  
GAAGAAACGGCGGTTCGAGCTTGTTCGGATATATGGAATAACAAGGATACTCAGGCGTTGAAGCAATTGG  
TGCTTCAAATGCGAGCTCAATCGTTTTCTAATTCCACTACTCCACCGTCTGAGCCCGAATCTGATATTCAA  
TCCCTAACCTAGATGACCCGGAGCCGACCCGTTTTAGTTCTGGACCAGATTATACCGCCGTACTTTCTG  
ATAAGTTGCTGTTAAGTGTGCTTTCGAAGCTTCCGGAACAGCAACATACTTCTAATTCATTAGTTTGTAAAG  
CGTTGGTGTAAAGTTTAGTGGGAAGTTGGTTAGGTCTATTAAGCTGTTAGATTGGGAATTTTTAGAATCTG  
GGAGGCTTAGTTATAGATTTCCGGGTTTAATTGACATTGACCTAGTCCGAGCATGTGTGAAATCCCGGA  
GGAATTCGGGAATTGTGATGAGTCATAGGCTCGTTTCGGTGCATTTGGATTCGAACTCTATTCATGGAG  
GGTTTGTGGGAAAGAGGGCTTTTTGGCACAAGAGGTGGTTGATGGAGGGGTTAAGTTTTAGTTGAG  
GGTTGTGCTAATTTAAGAAGAATACTATTGATGAATGCGAGTGTAGAGGGGCTGGGTTATTTGGGTGAA  
AAGTGTGAACTTTACAGGAGTTGGAATTGCATTTCTCTGATGACTTTGCATTGAAGGGGTTATTTGGCT  
GTAGGAATTTGCAGATACTGAAATTGGTTGGTTGTATTGATGGACTATATAATTCCATGGTTTCAGATAT  
AGGGTTGACCATTTTAGCTCAAGGTGTCCGCGTTTACTGAAGCTTGAGCTGGTTCGGATGTGAGGGAAG  
TTATGATGGGATCAAAGCAATTGGGCAGTGCTGTCAGATGCTTGAGGAATTGATACTTTGTGATCATAG  
GATGGATGGTGGGTGGTTGTCTGCTTTGTCATTTTGCAGCAACTTGAAAACCTTGAAGCTTCAGTGTTGT  
AAGTTCTAGATTCAAGTCTGGCCCTGATGAACACTTGGGTTCTTGTCTACTCTCGAGGAGCTACATTT  
ACATCAGTGTCAATTACGGGATAAGCAAGGTGTGAGAGCATTGTTTCTGGTTTGTGGGACTGTCCGAGA

GCTCGTCTTTGGGGACTGTTGGGGATTAGACAACACTATATTTGCTGCTGCAAGTGTTTGTCGGTACGAA  
CACATATTTATTCTATTTATGTATTGTATATGCATTTCTAACTTTAACAGATGGGTCATCTGATAAATTTGA  
AATTGATGTATGAAATTGTTAATGAGTGCATGTAGAAATGGAAAACCTTGCTGAATGGATAAGGAAATTT  
TCATCTTTAACAAATTGAATGACCAACTTTTTGGCGAGAATTTATCTGTTTGCAAACATAGAAGATAGGT  
GCATATTTTTAAAAGGATTTGTACCCAAGCTTCAGAAGAGACTTCCATAGTCCTTTGCTTATTTAAATTTCT  
GTGTTATTAATCTCTCAGAGAAAAAGGAGGTAACATAACAATGTTGCGATGAGATAAATTACAACAACAA  
CAAACCAACGTAATATCACAAATGGGATCAGGGAGGGTAGAGTGTACGCATACCTTATCCCTACCTTG  
AGAAGGTAGAGAGGCTGCTTCTGGTAGACCCTGGTGGGGTCTGAGAGGTAGATAAATTATCATCATT  
AATGCACAAAGTGTTCCAAAATCAGTTTGACACCTAAAATTTCTTTCTATAATATCTAATATTAATAATTT  
GGCTGCTTTTCTTTAAAGAAAAAACCAACTGCAGTCAAATTCGTCTTTTATGGCTAATTTGATGCAGTGC  
ATTTCTTTTTTCAACAGAAGATTGCATCTAGCTCGTCCATGAACTCTATAAGTAGAAAACATAATAATTGT  
GCTGACACTTCCAAGATTAATGGGAACTTTTTCTTTTAGGAGCTTGAGAAATCTCTCTTTGGAAGGAT  
GCTCGTTGCTCACGACGGAAGGATTAGATTCGGTAGTTCAGTCATGGAAAGAGCTTGAAAGGCTTAAG  
GTAGTCTCATGTAACAATATAAAGGATAGTGAATAACACCAGAACTAGCAACTTTATTTTCTGTTCTCA  
AAGAGCTAAAGTGGAGGCCAGATTCTCGATCTTTTCTATCATCAGGTCTTGAAGGGACTGGTATTGGCC  
AGAAAGGTGGTAGATCGTTGCGGAGGAAGTAGAGTGTGAACTGGTAAAGATGTCAATGTAAATGCAGT  
TCACCATGAAGGTGAAAGTCTGTCCTCACTCACTCCAGACAGTCCAGAAAATATTGGGCAGAGTGTTGTT  
GCCTCTAGTGTTGGCACTGATATTGCATCTGCGATTGAAAGTATTCAACCAGAAAAAGAAGCTTCTGGTA  
CTTCTGAGCCAATTGTTGTGGAAGCGAGCTCCGGTGTGAAAGAAAGCAATGTTGCAGAACCCAGTAATA  
ATTTAAGACCTATAACAGTTCCTCAGGAAGATGCAGTCTCAAAGGATTCAGACTTGAAAAACCTTTGAT  
TTCCAAGAATTTAGTTCAGCTGCAGAACTGGAGGTATGCATAATCTCTGATATAGTATAGTTGATTTCTT  
TGCTTAGTATATGTGTGTTGTTCAATACATATCATTAAAGCCTTTCTCTGCTTGCTGTAACAATTTGTTCTC  
AACTGGTTGTAAATCAAATTGAAAATTACAGTGCTCAACTTTTCTGTTTGGCTAATTCTACAACCTTGTTAT  
AACCCCAACCCCGCCCAACCCCTGCGCGTGCCCTTTCTGTTTTGGATAGCTCAAAGTTGCCAATGAC  
CGTGCAATTCGGTGATTGTTACTTGTTTACATGGCCTTTTCTGTGAGGTCAATATCAGTTTATAAATAATT  
TTTTTGGGGGGTGTGGCCCTAGTGGCTAAGTAAGAGAGTCCCAACACTTCTATATCCTGCTGGCTGCAC  
TCCAGATAAACTTAACTGTTGACATTGAAATCCTTGAGAGGGTTAATAAACACCCATCTGTCATGGCCC  
ATACTTTGTTTTAAATCATCTTTTAGCTAATGTCCGAGTTTAAATTTGTTATTTTCTTCTGTTACTTTGCATAG  
CTGATGCACTGCTGCTTTTCTAATTTGTGTTTTTAGTGTTGCCTTCAGTGATATTGCTTCAGTGACTAGTAA

AACTCCTTTATGGCTTCAATGGGATGTAAACAAAGTTGCTGGAAAATGATTCTTGGGAGAATTGCAGTAA  
AAAAAGAAAAAAAAAGAAAGCAGGGAAGTCATTTTCTAGTATTGTTTGAAAGAAATTGGAGTTTAAATGA  
GAAGTGGAAACAAGACCCTTTTTTCCCCTTACATTTGCAGGACTTTGGTGGAAATTTTTCTGGGTGAAGT  
TTTTAAGTGCATTTCCATCAACTTTATTTTTTACTAAATGCATCAAAAAGTGTGAATAATTAACCTTTCTGA  
TACTTGGGTTTCCTTTCCACACAATCAAATGGTACCTATGTGTCCTTGCTGCGAGTAAACCATGTTTTAGG  
GGGAAAAGGATGTGTGTCTTCTGTTTATTGGTCTTCCCTTCTTGTTGGAAGTGTGGCCTTCGGGCATTGC  
TTGGTTCATCTGCCACTGCTAAGTTTGTACTCTTCGTACAGATAACAGTATGGAAGTTTGACATGAATAC  
TTAATATATGTGCTATATTAATTGGGACTATATACTACTATGATTTTGGCGTTGATATTGTTGTCTGGT  
CTCTATGTTTTCTCGTCACCAGTAAGCTTTTGTACTGTTTATTGGTGAATGCAGTAGTGTGTCACCAA  
TAATTCCTAACTGTATGTACTTTGATTTGGTTGTGTTAGGTCCTTGCCATGGAGAGGTTAAAGTTAGAAC  
TTCAAGTGCCTGGGTTGAAGTGTGGATGCACTCTGCCAAGAGCGTGCATCCAGGCTTTTCTTGCTCAAA  
ACCACACCTTTGGAGATGCTTCCAAAGAAGTTGCTTGCTAAGAAGTAATTTTGTGCTCGTTTGTGTTGCTA  
TTGTAGCTAGTTGTAATCGTAACCTCATTTTTTAAGTGTGAGCTTATTCTCTATTTGACTTGGTACCCGTTT  
GGATTGGCTTATTTTAGGTGCTTTTAAGCCAAAATAGCTTTTAAGCAGTTTTGAAGTATTTGGGCAAAGT  
TAAAAGTGCTTATAAGCACTTATTTTCAAGTCAAAAATAACAAAATAAGCCAAAAGTCACAAGTTAGAA  
ATCCTAGCTTATGGCTTTTGGCTTTTAAGTCATAAGCCAATCCAAACAGGCCCTAACTTATGTAGATATGC  
GTATGTATTTTTCAATAAATTTCAACTACTTACAAGGACAAACAGCAGTAATTCCT

>PGSC0003DMG401000299 LRR-RLPs

ATGGAGAAGTTATACCTTTTGGTTTTAACCTTCATAACAGTTTGGTTGAGTTCAGTCAGGGGATTTACAA  
ACATAGAAACAGATGAATCTGCTCTTATTGCCTTTAGAGCATATATAACTTCAGACCATGATCATATCTTG  
TCCAAAACACTGGACGCCATCCAGTAACAGATCCTCTATCTGTTACTGGATCGGCGTCTTTTGTAGTGGAG  
ACAACGAAAATCAAAGAGTGACATCTTTAAATGTCTCAGGATTCAGACTTTCAGGCACAATTGCTCCTGA  
TTTAGGAACTTGACATTTCTAATATCATTAGACATCAGTAACAACAACCTTCAGTGGCTTGATGCCTAATA  
AGTTAGGTAATCTACAACGATTACAAGAGATAAACGTAGGATTCAACAATTTAAGCGGAGACATTCCAA  
GCTGTTTTGGAACTTGCCACAGCTCGAGAGCATTTTTATGAACGATAGCACGTTTGTAGTGGTCTATTCC  
ACCGTTTTAGGCAACAACACAAAGCTGAAGAGATTGGTACTGTCATAACAATTTGTTACATGGAAACAT  
ACCTCAAGAGATAGGAAACCTTTCCATGCTGATAATAGTTGACTTTAAGTATAATGTGCTTACAGGATCT  
ATACCATCTGAATTATTCAACATCTCATCGTTGCAAAGCATCGATCTCACTGGTAATAGTCTAACAGGTG  
GACTAGCACCGGATATCTGCAGTAATCATCGTTTTGTTGAGCTTCAAGGAATATTTTTATCCGCGAATCA

GCTTCATGGACTGATCCCATCGACGTTTCATCTTTGCAAGGAACTCCAGGATTTATCCTTGTCTACAATC  
AATTTAGTGGAAAAATCCAGTTGAAATTGGATATATAACCAAGCTCAAGATATTATATCTGGGGATAAA  
CAATTCATAGGTATCATATTATTTATTCAAGTTATATAGTAGTCAGCACTCTTATAATATTGCTAGTGT  
AGTTAGTGATTAGAAGAGAAGTCAAGTTCTATAATTTTTACATAGAAAGATGACTGTTGGAATTGCATGT  
TCAAAGAATTATGTTTCTCCGAATAGCTGTGTTTTAACAGATATCTAAGTAGGGGCAGAGCCAGGAAGG  
GCCAACTATATATAGCAATGTTGGAACCTTTGGCTTCTTCATGTGTTTACTTCTTCATATTTGAACCCCC  
TTAGTGAAAATAGGATCGGGGTTTAAATTCCTAATGAAAGAGATTTTCAGTCAAACCATCAGTTTTCTG  
TTTCTACAAGTTTATCTTCCCAACATAAATGTATAGCAACTTCAACTTATCGAGGATATGACCTTATATA  
GGAGGTTGTGGAGTACATGGATTAGAGTAGAAGGTTAGTAGGTAGGAGTGCATTGTCTTGATGTCAGT  
CCATACTAGTAGTCGTAGTATTACAACATCGTAATAGTATTTTGTGTAGTACTGTTCTGTTACTATATG  
ATGTTTTTTGACTTCCGTTACTTCTTTTTCTGGACTACTGCTGTCTGCTTTGGACTTTTTTTCTTGAGTTG  
AGAGTATATCGGAAACAACCTATCTACCTCTGAGGTAGGAGTAAGGTCTGCGTATACTCTACCTTCCCTA  
GACCCTACTTTGTGGAACACTACTGGTGCTGTTGTTGTATATGTATAGCAACTAAATAAGTGTTAAGTGA  
GTTTAAATCAACAAGAAATTTCTACTTACTACCAATCGATCGAGGTGTTTTGCTATCTATATTTATCTA  
GTTTTGACAATCTTTTTGCAGGTGGAATTCCTGAAAATTTAGGCAATCTTACATATTTGGAGATGCTAAG  
CCTAAGAGGTGGTTCACTAACAGGTCAAATTCACACACTCTATTCAACATGTCCAGCTTAAAGCAACTC  
GATCTTTTGAACAACAGCTTGTCCGAAACCTACCATCCATGAGCAGTCAATGTAATGTTCCCTCACATAA  
CTGGTGAAATCCCAGCAAACACATTCAGATGCAAACGCCTTCAAGTCATACAATTAGCAGACAATATGCT  
TACAGGCAGCATTCTAAAGATATTCGGAACTTTACTTTCCTCAGAATCTATATTTAGCAGACAACAAC  
TCACAGGTACGCAACGCCAAATTGTTATTGCCCTGTAGTTTCTATTTATAGATATCAAAGTCCTAACTTT  
ACCACATTAGATATTTCTACCTCATACTTTAACGACACCATGTAGCTTGTCTCAATGCACGTGTAATTAC  
ATACATGGTATCAGTTATAGTATATATTACATTCCTAATTCATTTGATACTTTGTCAGGGAGATTACCAGC  
TGATATAGGTAGCATAAATCTGAAGGTACTTAATGTCGATGGAAATCACTTGTGAGGTGTCATTCCATCT  
GAAGTATTCAACATATCGACGTTGCAGATTCTAGACTTAAGCAGGAACCGGCTCACAGGAACTCTCCCT  
CAGGCTTGGGCCATCAGTTTCAAATCTGCAAGAGCTTTATTTAGGTGAGAATGAGCTTACAGGATCAAT  
CCCAAGCTCTATCTCAAATGCTTCATCACTGGCTCGATACCCGACCTTGTAATTTAAGACTTTTGAAGAG  
GCTATTTCTAGAAGAGAATAACCTTACAGGGGAACTTCAAAGGAGAATTTAAATTCCTGTCCTATTTA  
ACTAATTGTAGACATTTGGAAAAGATAGAAGTGTCTTTAAATCAGTTAAATGGTGTCTTCCAACCTTCATT  
AGGGAATCTCTCTGCTAGCCTTCAAATTTTCTCAGCATTGGAAGCAAATCAAGGGGACTATACCTGTC

GGAGTTGGAACTTGACAAGCTTGACCGGTATGTACTTGGATAGCAATGAGTTGACTGGAGTTATCCCA  
AATACAATTGGAAAGTTAAAAAATCTCGAACGTATATATCTGGAATACAATAGACTGGAAGGGTATATC  
CCAAGTATATTTGCCAGTTAAGTAAGCTGGGGGATATCTACATTAGTCACAACATGATCCGTGGAGCC  
ATACCAGCATGTTTTGGTGAACCTCAAATCACTACAGAGAGTTTTCTTGGATTCAAACAATTTGACATCTAC  
CATTCCATTGAACTTTTGGAACCTGAATGACCTTGTAGGTTTGAACCTTATCCACAACTCTTCAAAGGCT  
ATTTACCATCAGAGATCTCTAATCTGAAGGTTGCAACAGACGTGGACTTATCATGGAATCAATTTTCAGG  
AGATATCCCCAGCATAATAGGCAGGGCGCAATCAATAGTTTACCTTTCTTTGGCACATAATAGATTGCAA  
GGTACTATTCTGAATCTTTGAGTAACTTGATAAGCTTAGAGACATTAGATTTGTCGTCCAACAACCTGTC  
CGGAATGATTCCAAAGTCTCTCGAGGCATTGAGGTATCTCCGACACTTCAATGTCTCTGTGAATGAATTG  
GAAGGAGAAATTCCATCAGGTGGATGTTTTTCAAATTTCAAGTCTGAATCTTTTAGGCAAAAATCCTGAGC  
TATGTGGAGTAGCTCGGCTGCATGTTCTGCCCTGCCGGACAAAACATTCCAAGTCAAAAAGTGTTCATC  
TTTGATTAATATGTTGTTCCCCCTCTTGTCAACAATTCTCATGGTACTGTTGTAATTATATTGATAAG  
AAAACGGAACCAATACGTAAAGATGAAAATGGAGGAATCACAGCTTGCTGCAATTCTTTCACCTAATGC  
ATACTTGAGAAATGTTTCATATCTTGAACCTGTACGAGCAACAATCTTTTCTGAATCCAATCTACTAG

>PGSC0003DMG401001040 LRR-RLPs

AAAAAATAAACAAAAAATACCAATAAGGTCCATCCACGTGTAGGAGGAAGGATTTGCCACGTGCCAAT  
ACACGATTTGGGGGTCAGGTGATGAGCACGTGCTTCCCATCATTGCAACTGAAAGGACTATTCACTTTTT  
ACACACACCAGTGAAACAAAGAGTCGGGATTGTCGTGCTCAGTACTTCTCCGATGACCAAATTTACCG  
GTAACGGAGGTTACCGGTCGCCGTGGTTCCATATTTATTGTCTACTTTTGCTACCAAAGCTTCAGTCTCC  
GAGTTCGCTTTCTCAAATGGCCACTATCGTCTCTAGTGAGCTCCTTTTCACTTCTCTTTTAGTGTATCGTA  
ACCTCTTTCGGTTTCCGTTTTGTGGTTATGGCTTCTGATGTTTATGATGTATCAAACGTAGTAAATATTTAT  
CTTTGGCATTGTCACCTTATTCGATTTTTTTGGGTGTAAGTCTCTTAACTATTATTATCCCTAGTTTTC  
ATTCGACACTTTTTTATTTGGTTCTCTTTGTGTACATCTAGCATCAGTCGTATTATCACTGTTCTCGTAGTT  
TTTTGTTATTATCTATTGTTTCTAGTGCTAAGGTTATTGCATTATTTTGTGTAGCTACTATTTAATGTTTTG  
CATATTATCTGTCATCTTCTTACTTTGGTTATTTCTTTCAAATGGCTTTGTTATGCGCTACTTGAGCGA  
GGGTTTTTCAGAAACAATGCGCGGGTCTTTCGGAATACTTGCTATGTTGTTGTTGGTATAACATC  
TAATCTTTTGTGGCTAAGATGACTACTGATTCAAAAAAAGTTCCTAGGACACCGGGCTTAGTTAGTTG  
TATTGTGTAGTCGAATCACATATTAATGATTCCCAAATTTGCGATGATCCACATGGGAAAGACTCTACC  
CGTTGACTAGAAATGGACATTTGGCCTAACTCCAAAATCTAGCTTATAATGCGAGGATTGTTCAAGAAAA

AAATAATCATTCCCTCGATCATGTGGATTGACTCTAACACCAACACATACTCAAGTCCGAACTGTGGAGC  
ATGGATAACATGGCATAGGATCGCAACAATAGGTAAATTAAGAGCAGTGCTGGGTCTAGCTCTGGTATC  
ATGTAAAGAAAATGAACTTTAGGTCTAACTCAACCCTATAATTTTGTTCATTAGTAGACAACAACCCATTT  
TCTAGATCATTGTGGGACTCTAATGGAGCTCTTAATGGTAAATACTAGCAAGTACAAGTTGCACCACTTT  
TATAGAAGCTAATTAATGATATTTACACTCTGCTTGGATGTTACATATTGTTTCTATTATCGTACTGTATTA  
TTTTAATAAGTACAACGTTTGGATGGATTGTGTCATTTTTCGTCGTTATATAATGCCACACATCAATAATT  
TGAAGGATAAACCTACAAGAAAATGAGTACGAGGAAGAACTACTATAAAAAGTTAAGGTAAAGGAT  
AAACAAGATTATTAATAATAAGTAAAGACAAAATGAGAAGAAAACATAAGGTAATGATGTGATCACAC  
CAAATCGGTCATTGCACTAAATGGGGCATTTCGCCGTTACCTAACGATGGATTTAACAATACGATACGAT  
AAACTTAATCAAAAACAAACCTTATATTTAACTAATAGTACAATAATACAATGGATAACAACCATCCAA  
ACAAGGAGTGAGGGCTTGAACCTTCAGGAAAGCTTTAAAAGATGTAAAACCTGGATATAACATGAAAG  
CATAATTGAGCTAAAATAAACTGCATTGAATTGGATTGACAAAAAAGGATAATAAGAGTTGTGGATGTG  
TTGTGTTGGATGTCTCATTACCTACTGTAAAAGTGTGCGATCATTTTATATATATTGTAGATTTAGAAAAGG  
AAATTTAGCTACCCTGACCATCTTTTTCATTTTCTTCGAGACTTCCTCCTTGAGTTTTGTATAAGTGGATCA  
TGCCACATATTATGGGGATGGTTGATACTTATCGTATAAGTAACTGGTTTGTTCCTTGTCCTCACTCCT  
TGGGAAGTTAGTTTCTAACTAGATCCTTGCCTATAAGTTTCTTGGACTTGGTCAAACACAATAACTTTT  
TCCATGGTAGCTTGGACCTTGATTGATTCTACGACGTAGCTACCTGAGCTTAGTTAGCTAAAGGTATGAT  
CACAGTCATGCTAATCTAATTGATTCAGACCCGTTTTAAGCTTAACTTGTGCGTTGTGAAGACTCAAAATCA  
TTATCTAGTTGATAGGCTGACGTAAGGTGTAGAGGTGTTGTTTTCACTCAGTTGAACTGGCCTTTGTCT  
CATTGTTTGGGCTGACTTGCCCCTCGGCTCAGCTACACTGGCCTTTGTCTCAACTGAAGTCTTGGATCGA  
ATAAACTACCCCTAAGCTCTGTGCAACAATGACCAAGTGGGTTTAATTTAATGTCGGTATTATCACATAT  
AAATGATGTTGTTTCTTCTTCTGTTTGGGGTCTTGGGGAAGAGGGTCAATTTAGTTGAAGGGCATGAT  
TCATTCGTGAGGCTTCTAATGCATTAGGCTGATAATGGATATGTCTCATTCTAGGATTTGGATGGTTTTA  
CGAAGTTTTAAATACTTTGATTGTCGCGCTTAGTAATTTATTGATGGTGTACAGATCCTAGTCTTCTTTA  
GTTTGATTTCCACACGTTAACTAACGAGAATCTTATGCTTCAACTTGCATTTGTGTTTGGCCATTTACTGCT  
AAGTTCCACCTACTAACTGCTTTTTTCCCTTCCCAGGGAGTAGGTGGCACACAATTAACAGCTTCAAACG  
GCATACTGCTTTGGAAGTGCATAACCCCGAAGGCGGAGAAGATAAGATCAGCAATTTGCATGATTCCAT  
TCTTCTTACATTCTTTCATATCTTCTACCAGAGATGTTGTGGGCACATGTATACTTTCAACAAGGTGGA  
AGAATCTTGGACTTGTGTTGAAAACATTGACTTTGATGACTCATTCTCTACTCAAGTAGGGTTTTTGGT



TATCCGATGAAGGTCAGTCTTTCATGCACTTTGTTCCACAGATTTCTTCAACTTCGAGAAGAATCAGACAT  
AAAAAAGTTTCGCCTTTCCTGCCGTGTTTGCTTCAGTGCCTCTCATGTTTGTTTCATGGCTTTCAACTGTTAT  
TAGGCATAATGTTCAAGATCTTGATCTCTGTCTTTTTGTAGAAGAACCTTTTATGTTGCCTCAATGTGTTTT  
CAGTAGCAAGACACTTACTTCTCTAAAACCTGAAATGAATTGTGTTCTTGAACCTACTACTAGTACTTGT  
TTCTTTTCTTAAGACCTTGACCTATGTCTTGTCACATTCGGGATGATAGCTCAACCCAGAGGCTGTTA  
TCTAGCTGCCCTATGCTTCGGGAGTTGGCTATATTAGATTGTGAATGGATGAACTTGAAGCAAGTTGCAA  
TTTCAATCTCTTCATTAAAGAGTTTGATAATCGATGATTTGCCTTTCTTTGGCTCCACTGATGATCTAAATG  
GCTGCAAAATCAAGATTGATGCAGCAAGTCTTACTTTTCTTAAGTACAGTGGTTATCTCTCAAATGAGAT  
ATGTTTGTATAATCTATCTTCTCAGTCAATGCATCAATTCACATCCCCATTCTGTATGAGAAGAGAAATC  
AAATTGCTTTTCGTGCTGTTAAGCTCTTTAGAGGGCTACACAAGATTAGTGCTGCCAGAATATCTAACAG  
GGCTATTGAGGTAATTACAAACCAGATGGAAATTAGCTACAGAACATCACAGTCTAGAATGTTGAATGT  
CTAAATATGCAGTACTGATGTTTTTCTTTTTTCTTTCTGTGATCCCATCTTGTTGCTTGGCAAAGTCTCT  
CTTCATCGCAGATATAGAGAAAGACCAACTTCCAATATTTATAACTTGACGCATTTGGAGTTGAGTATG  
GAACTGAAAATCATTCCATTGGACCATTGAAGGAACTGCTCCAATGTCTGCCAAAGTTGCAATCGCTTC  
ATTTTTCTGAGGTAGATAGATACCTTTGGCATTGTGGACTTGTTTATAAAAAAATTTCAATTCACATGAGT  
TCTTTAATATTTTTCATACCATTGAGGGACTTGACCCCTGCATGCACCTTTGTGAAGATGACTGGAACCTG  
AGATCTGTGCCACCCTGTTTCTTGTCTAGTCTCAAGACAGTGAAATACAGCAATTTTCATGGTAATGATAC  
AGAGATTTCTTTTTTAAGAAATTTGCTGGAAATTGCAATAGTTTTGGAGAAGCTGAACATAGTTTGTTCA  
AAGAGACCTTTTGGGGATCTAAAGAAGCAAAGGAAGTTGAAGATCAACTGCGGAGTGGGCACGGAG  
GATCAGTGTCTTGTGCTATCAAGTTTATGTAAAACCTAAAAGAGCTTTGACATGTGAGTTCCTTTTCCATC  
AAGAAGCTTGTTAGTTTTCTTGTCTTTTTCTTTCTATGCAGAACTGTGGCATTGTTTTTTTTTCTTCTGC  
TTTGGTTCATAATTCGATTTACTAGCTAAATATCTGAATCAGACTTCTCAGTGCAGTAATGAGTTTAAAAG  
CCCAGATTCTACCCCTTAAGATATGAACTTGAGTTTTACTAAGAAAGCATGATGAGTTTCTCGTCATTTTC  
AGAAGGTCCGTCTTCGGTGGATTATACATGAGTTACTTTCAAGCTACTAGGAGCTAGTTATAAGTCGGG  
AATACAAAAGAGGAAGGGTTATGAATGTTTCAGAATAACATAGAAGTACATCTATCCAGGAATGAATT  
TTAGCTTAGTAGCTAGTGCTTGAAAATCACATTTTGCACATATGCTGTCCAGGTCAAATAAGATCTCTC  
GTCTATTTCTATTCTTGTGTATCTATGGTTCACCGAATGAAAATATGTCTCTTTATGGTATAAAAAGATTT  
GCACGTGCCTGCACCAAAGCTCACCGTGTTAATAAAGCTAATGTTTACTGGACAATTATATTCAGACC  
CGATTGTTACATCTTTCAGCAACTTAACTGAACTTCTGCACATGAGACTAATGTATCAAATTAGATAACCA

TTAAAAATAGATGGTGGGTAATCTCTTAATGAATATCCGGTTTGTCTAGTTAGGAGTTAGGATTCACATT  
CACAGAGTTTCTTATTTTAAAAGGCAGTGTTGCTAAGAAATCCTGAACTAGATCCTCTTTGGACTTTTAC  
GACTGGAAACATCAAAGAATTCTTCTTTCCCTCAAGGAGTTGAGGCCAGAGTAAGTGCAATATGCATCATT  
AATTATTATAATTACTGTTACATATTAATCAAAATAGTCTCGTTCTTTTATAATGATGATAATATTTTGTGT  
ATATGTGGTCACCAGATGAAAATATGTCTCTTTATATAGTAGAAAAAGATTTGCATGTGCTTGCACCAAA  
AGCTGATCATGTTAATAGAGTTGAGGTTTACTGGAAAATTATATCCAGACCCGTTTGTTCATCTTTCCG  
GCAACTTAACTGATATTCTGCACATGAGACTGTGAAATTAGATTACCATTATAAATTGATAAATGGGAAT  
CACTTAATGAAATCTGGTTTCTCTAGTTAGGATGTACATTCACCGAATTTTTATTCTAAAGAGCTCAGTGT  
CGTGATGAAATTGTTGAACTAGAACCTCTTCGGACCTTTACGAGTGGAAACATCACAAGGAGTTTAAAG  
CACGAGTAACTGCAATATGCAAATCTGCTTTTGGTGCCTGTGCAAATTTGTTTTTCCAGTCTTTCAGCTA  
GCCAAGAAGCCGTCAATTTAACTATACATATATATCATTATACTTGGACTTTGAAGAATTTTCATGTTGCAC  
TTACACTTCTTGATGCAGCAAGTAACTTCACCTAATTCGATATCAAACCTCATGTCTTGCCTGCAAGATTA  
GTGTGATTTTCTTTTCATCTTTTCATGTGTCAAAGTATTCTGTTCGCTTAAAAATGAAATCAGTTGACAAT  
TTTTTATCTCTAATAGCTTCTACTTTTAGACACTAGGTAGTGCTGTAGTATTGCATTTTACTAGCCATTGAC  
TGTTAAAAAGCATTAAAGATGGTGTGTAACCTAATACTGACATTTTTATGCTTATTACCTTCTTATTGTAT  
GTGTATGTAATGCAGTCTCCAACAAGCAGATATTTTGAAGCATTAGCTGTGGATCCGGCGCTACAATTT  
TTGGTCCGTTTACAAGTGCAACACCATGCTTTAGTACACTTCTTGGATCAGTTATTTTTGGTAATGAATT  
CTGCAGATTCATGTAAATCAGTTGAACTTCTTTTTGCATTTAGGTCACAAGTCTTTCTGAAGTATTGGAA  
TCTGACTCTAGTGGAACAGGTAACAGTTAACTTAGCAATGGACCCTTTACCCCTTTTTTGTCAATTTATTTT  
GTGGGGGATAGGCATAGATGCTTGGTAGATGATTTTGTGATTGTTTTTAATTCAAAGGAATCAAGCAT  
TGTAATCTACTATATGTGATATAGCTGACTCAAGTCATATGAAACAACAAGGACAGGGAAAATATTTTA  
TAACAAGTTTGGGTTTTTTTTTGGGAAAGAAAGTTACACATGCATTGATCAAGTTCCAATGTCTGTTATTT  
TGTGTGTTTTACATGTCAAAGTTTTATGCATTATGTCTTGTTTTACAATTGGAGAAATTGAGTTTTATCTTC  
TTCTTTTTTTCATACTCTGCTGATAAGTCCTTTATGTAGGCAGTCAGAAAAATTAGAAGTAGAACTATCAG  
AGGGTTTTAACTCTCTTGATAACCATCTCTCGACTTTAGTTTTCATAAGTGGACTTTGAAGAACGTAGAAT  
GTATGCAATTTTTATGCTTATTTTTACAGAGTAAAGAGTAAAGAGACTGTTTTCGATAGATTTTCTTCGTA  
TCAAAGGAGGAAAAGCATAAAGAAATGGAAAAGAATAATTGCTCCAAAAGCATTCTTTTCCATCTT  
GACTTATAAATGTTGTTGTGGAGGGTTGTTATTATACCCTTTGGATAAAAGTGTCTTTTTATTCCAATAAA  
AAGCCACTTATAAGACTTGGTTCTGTCCCATAGAGAAAAACCAAACAAGGGGCAGAGAACAACACTGCAA

AAAATTCTCAGATATGCACATTTATTAATGACACAGCATTAAAATAATCTAACAAGAATATGCCAATTC  
AGAGAACTTTTTTAAAAATAATAATAATGTAGGTCAAAGTGTAGCACTTGATATTCTAATAAATTTATGTT  
TCTTTATGTCCTTATCAAACAGCAATTACAATGCACTGAATCCAGTACTGCTTTTTTTTTTTTTATTATGCTC  
ATTATAAAAAGAATAAGACTATTTAATTGATACATTAGACTAATAATTCTAATAATAATAATAATAATA  
TGTGTAATGATGCAATCTCTTTACTAAATTTACTCAACTAAACACATGGTGTGCCCTCACTCTTCAAGAA  
TTGAACTTGTGGGTAAGTTTTGACAGTGAGGGGTTATCTTTGTCAAAGGCCCACTTAGAGCAGTACTA  
AATATAAATTCAAAAAAGATACTTATTTGGACATCGTTATTTAATTTATGTGTTTGAATTATATATGGTT  
GAAGTTCAGATGTTTAGTCTTGACGACTTCATAACTAAGTGTACTTTTTTTAAGTGGTGTATGTGCGTA  
ATGATATTTACTTGTTTGTGATAAAAGGTACGTTAACATCTTCATGAGAATAAAAAATAAAAAAGCTCTG  
AGGATTGGGGCAAACGGCTAGTGATAGACTGCTCGAATTGTTTCCTCAGGGCAAACGACTAGTGGACA  
ACTGTTGAGTTGTTTTGAGGTGAAAGTGAGTCATCGTTTATCGATCAGGGGATGAACGAGTGTTCATC  
AGGTCCTCGACGGCTGATTCTGAGGTTAAAGTGAGTCGTTATTTATCAATCAAGGGATGA

>PGSC0003DMG401001828 LRR-RLPs

ATGGAGTACCAAAAATTGCTAATAGCTTTCTGCTTCTATTCACTTTTTGTCCAACAATCTCAACTTACATAT  
GCTGGGAAACATCTCTGTCCCCGCGATGAAGCTTTTTGTTTGCTTCAATTAAGCAAGGACTCACAATTG  
GTCGAAATGTTTCATCACTATTGTGACGAAGACACCCATGCCAAGACTTTTTCTGGAATGTTACAGGAGA  
TTGCTGTGAATGGGATGGTGTACTTGCAATGGATTTACGGGTCATGTCATAGGACTTGATCTTTCTTCG  
AGTTGTCTTAGTGGAACCATCCATGCTAACAATAGCCTCACAAAACCTTGTTTCATCTCCAAAGACTCAGCCT  
TGCTTCAACTACTTGGATGACTTTCCACTTGGAATAGTATAAGTGAGCTCAATAGTTTGACGCATCTCA  
ATCTTTGCGATTCTGGATTTCTGAAAGGGAAGATGATTCCACCAGGATTATCCAAGTTGTCTAAGTTGAT  
TTCACTTGACCTCACCTGGAATTTTCATCCAAGTTGGCCAAACAACCTTGAGAAGTTTTCTGCACAACCTAA  
CCAACCTAGAGGACTGTTGTTTCGCAATGTGCACGCACCATTTGAGTTACCTAATAATTTCTTCTTCCC  
TTAGGAAACTAAGTCTTGAGGGCACCGACATGTTTGGGAACATAACTGATTCTCAGCTTTTTCATCTACC  
AAACTTGCAAGTCCTGAGATTGGGTTGAATCCTTTAATAACAGGCACTTTGCCGAATTTAATTGGAGT  
TTCAGTGGAAGTATTTAGAGTTGGACTTTTCCATACTGGTATTTTTGGGAAGGTACCTGATTCAATTG  
GTAATCTCCATTCTCTTTGTTTGTATTTAGATCTCTCTTCCAACAGTTTATCTGGCTCGATTCCAGAATCC  
ATCGGCAACCTCACTGCAATCACTGAGTTAACGCTTTCAAGTAACAGCTTCACTGGTAATGTTCTCTCAAC  
TATCTCAAATTAACAACACTTGTTCAATTTAGATCTCTCAAACAACCATTTTCAAGGCTCATTTCCAGAATC  
CATTGGCAACCTCACAAATATCATAAAGTTAACGCTTCAATGTAACAACCTTCACTGGTACTGTTCCCTCAA

CTATCTCAAATTAATAAACTCTATGAATTAGATCTCTCTTCCAACAATTTCTAGGCTCGATTCCAGAAT  
CCATTGGTAACCTCACTGCAATTACAAAGTTGACACTTTTAGGTAACAACCTCACTGGTACTGTTCCCTCA  
ACTATCTCAAATTAATCAAACCTCTATGATTTAGATCTCTCTTCCAATCACTTTGAGGTTGATTCCAGAA  
TCCATTGACAACCTCACTGCAATCACAGAGTTGAGACTTACAGATAACAGCTTCACCGGAAACGTTCCCT  
CAACTATCGGAAAGCTGAACAACTTAGCTTCATATCTCTCTTCCAATAATATTGAAGGCTCGATTCCA  
GACATCTTTGGCAACTTTTCAGTGGTAGGTTAAATTTTCAAAGTAACAATTTCACTGGCCCATTCCC  
AGATTCAATTGCAACCTTGACTCACCTTACACTCTTAGAGTTGCAAAACAATTTACTAAGTCCACTTC  
CCTCTAATATAAGTGGACTTCAAGAGCTACAACAACCTTGATTTGTCCTTCAATTACTTCACTGGCGCAACA  
CCCCCTTGGTTATTCCATCTTCCATCCTTGTTTTCTTATATGTTCAACACAATCAATTAAGTGGGAAATTG  
CAAATAAGCTCAAGGGAAGTTCCTCAAATACTTTAGTATTGATCTTTCGCACAACAATCTGCATGGCA  
AAATCCCTGATTGGATGTTATCATCCTTAAGCAAGGGTAGCCTGGATATCTCTCATAACTTCCTCACAGG  
CTTTGAAAACAAGTATGGCGTACAATGTATTTGTGGTCGCTTAATTTGGAAAACAATTTTCTTCAAGGG  
CCTTTGCATCAATCCATTTGTGACTTGTATAACCTTCAGGTCCTCATTTTGGCTCAGAACAATTTCAAGGG  
TTCAATCCCAGGATGTTTGGGCAACTCCAGTAGACGCATTTCTGAGTTACGGATCTTTGACCTTTCCTGCA  
ATGGGTTCACTGGAACCTTTGTCATCTAATCTTTTCAAATAATTCAGAGGTATGATGAATGTTGATGAAGA  
AAAAACAGGAATTACTCGAAAAGTACAAGGCATCACACAGATTACCTTTACCATGTAAGTTTGGTTATA  
AAAGGCAATGAGTTTGATATGAGAATCACATCAATTATGACGAGTGTGATTTATCAAGCAACAGGTTTC  
GAAGGAGATATTCAAATTCATTGGAAATCTTAGCTCACTTGTGTTACTCAACCTGTCCCACAACAACCTT  
CCGTGGTCTATTCTGCAGAAGTTGCAAAGTTGCATGAGTTGGAAGCATTAGACCTATCATGGAACAG  
ACTTGTGGTGAAATCCAGGTCATTGTGCGAGTTTACATTTCTTGGAGTCTTAAACCTTTCATACAATC  
ATCTGGCTGGGCGCATTCTATTGGGAAACAGTTCAATACATTTCAAATGATTCGTATTGTGGAAATCC  
TGATTTATGTGGATTTCCACTGTCAAAGAATGTGGAAACAATAATGAATCACCCTTGAACACGATGAT  
GATGATGATTCATTTTTTATGAGCGGATTCACATGGGATGCTGTTGTAATAGGTTATGGTTGTGGTATGA  
TATTTGGATTGTTGATAGGAGGCCTCATGTTTCTACTGGAAAACCAAATGGTATGTGAACTTTGCTGA  
AGATATTGCTCAACAAATTGCTGCTAAGAAGCGAACAAGCCAAAAGAAGAGATGTCAAAGAAGAATGA  
ATTAG

>PGSC0003DMG401001979 LRR-RLPs

GGACAATGTCAGAGATTAGATACCTGGATATTAGATTGCCACTATATATATCAAATCCTCTTGAAGCAGA  
ACAGCCTTTGTTTCTCAATAACTTGCACACACTTTTTCTCTATTACTCTCCTTTTGGTTCGGAAATCATAAG

AAGAACCCCAATCTAAAAAGCTAAAGATTCAGATAGATCTGAGCATCCTGACTGGCCTCCTATTATG  
AATTCTCTCAGTCTTCTAGAGGGGCTGGAGACACTACATATAGCAACAGAACAAACCATTACTGGCCGG  
ATGATTTTCTCCGGATGTAATCTCCCGCCTAATCTCAAGCAACTGAAGTTATCAGGTA CTCTATAACCATG  
GGAAGATATGAATTTGCTGGCTAATTTACCCAATCTTGAGGTGCTCAAAGGGTCTCATGCATTCACTGGA  
ACAGTTTGAAACTAAATGAAGATGTTGTGTTTAGCAAATTAATAATCTACGACTGTATGCCTGTGGAG  
ATCTGCAAAGGTGGGAAGCTGGTAGTGATAATTTCCCGATGCTTGAGCAACTACTACTGCGTGAATTGG  
ATGAACTGGAGAAGATTCGGAGAGTATTGGGGAAATAATGACACTAAAATTGATCCAAATAGATGATT  
GCAGCTCTTTTGTAGAGACTAGTGCGACAGAAATTCAAGAAGAGCAAGAAAGAGTAGGAAATTATGAG  
CTTCAAGTTCGAATTAAGGTATGTTAAAATTCCATCTTTGATTATTAGCCAATTCTTAATTAACATGTTT  
TTGTGGTCTTTCTATTTTCTTTCAATTTTGTGTCACCTGCTAAAAAGGCTGTGTAGATTAGTGTAACCTTG  
TTGAATACACCAAATTTAGCTGCAATAGCCTTAGAGATTGGCAGGGAAAGCATCGCGAAGAATTGTATT  
GGAGAGTATAATTA ACTATAACCAAGAGACTCTCTTGGAACAGAATATAAGTATAAATATTATGATTTTTT  
TTCTTTCAACTTGCATGGCCATAATTCTTCTATGTCCTTGCAGGACAAAGCTCGAGCGTCCTCTTCAGG  
TAGACTCATTACTTGACAAAACCTTCTCTCCCGCACTATCCTTTTGTGCCGAAATGATGAGAAGAACT  
TCCAATCTAAAAGAGCTAAAGATTTTACATAAATCTAAGCATCCTGACTGGCCTGATATTCTCGATTCTCT  
CCGTCTTTTAGAGAACTGGAGACACTAGACCTAGGAGCAGAACAAACCATCAATGACCAGATCATGAT  
TTTCTCGGGGGATATTTTCTCCTAGTCTCAAGGAATTGAAATTAGCACGTACTTTTATAACCATGGGAAG  
CTATGAATTTGCTGACTAATTTACCCAATCTTGAGGCGTTTATGGGGGTTGATGCATTGATGGAACAGA  
CTGGACTAAATGAAGATATTGATTTCCCAAATTAATAATCTACGAATTTTGTTCGGATGTCTGGCA  
AGGTGGGAAGCAGGTAGTAATAATTTCTGATGCTTGAGCAACTATACTGGATGGCTTGTATGAACTG  
GAGCAGATTCCCGAGAGCATTGGAGATATAATGACACTAGAATTGATCAAAATAGACCGTTGTGGCTCT  
GGTGTGGAGACTAGTGCAAAGAAAATTCAACAAGAGCAACAAAGCCAGGGAAATTATGAGCTTCAAGT  
TCAAATTATTAGGTATGTTAAAGTTCCATCTTTGATATTAATCCAATTCTCATTAAATATGTTTGTGTGGTCT  
TTTTTGTGTTTTGTTTTCACCTGCTAAAAAGGCTTGTAACCTTGGAACTATGATAAATATCAAAGAACA

>PGSC0003DMG401002428 LRR-RLPs

AATTTCCATATAAAGTAAAATAAACAATTTCTAATTTGACACGTTGAGTCATAATCTAAAAAATGTAGTTT  
ACTACTTTACTCATATTTTCATCATTCTTTCTTAATGTTTTGAATAGCAGCAATTGTCGTCTCTACGGAGGCT  
AGATCTAAGTCACTCCGGAAGCCTGAAGAGAACACCCGATTTCAAGGGGGATGCCAAATTTGGAGTATTT  
GAATCTAGAGAAATGTACGAGTCTCGAAGAGATTCACGATTCCCTGGAGTATTGTGGAAAACCTCATCCG

ACTAAATTTGTGTGACTGTAGAAGCCTTGAGAGGTTTCCAGTTAATATGGAATCTCTTGAATCTCTGAAT  
CTAAATTACTGCAGAAGTTTGTAGAGAAATTTCCAGAATTCCTTGAATAATGAAGACGAAGTTAGAGATT  
AAGATATCACACTCTGGGATAAGGGAACTGCCATTATCTATCTTTGATCTCCAACCTCATCGTACAGAAC  
TAGATTTGTGTGAGATGAAAAACCTTGATCTCTTCCAAGCAGCATTGTAAGTTGAAAGGTTTGGTGAA  
GCTAGATGTGTCGTTCTGCTCAAACTTGAAAGTTTCCAGAAGAGATAGGTGATTTAGAAAACCTTGGT  
GGAGCTTCATGCCACCTATACTCTAATCTCACGACCTCCGTCTTCCATCGTTGCTTGAACAATCTTGCATT  
CTTGAGTTTTGGACAACCTATATCTGAAGATGGAGTATTCTTTGATTCCCTCAGGTGAATGAAGGGCTG  
CGCTCTTTGGAAATTCTGGAAATCACTAACTGCAATCTAATAATTCCGGAAGACATTGGATCCTTACCCTC  
TTTGGAAAGTGTTGAATCTCAGGGGAAATAATTTTGTAGCATTTCCTCAAAGCATATCCCAGCTTGGTGCT  
CTTCAAACCTTGGACTTAACAGATTGTAAGAGGCTTACACAGCTGCCAGAATTTCCACAGCAATTACATA  
CAATAAATGCAGATTGGAGCAATGATTCAATCTGTAATTCGTTGTTTCAGAATATCTCAGTATTGCAGCA  
TGACATCTTTGTTTCAGATTCCTTGTCACTAAGAGTTTTTACGAGTTGGCCGGAGAATATCCCAAGTTGGT  
TTTACTATCAGGGAATGGGTTCCAGTGTATCAGTCAATCTGCCTAAGAATTGGTATGTATCGGATAAGTT  
CTTGGGATTGGCTGTATGTTACTCTGGCAAATTTATTGATGACATCACATCTCATTGGATTCCCTTATGTG  
ATGATGGGATGTCGTCGTTGTTGATGACCCAAAACCTTGCCTTGTCCAATTATTCAGAAGATTTTGTAGGA  
AGATAGTATTAATTTTTTGTGTTGTTGTTGTTGTTGTTGTTGTTGTTGTTGTTGTTGTTGTTGTTGTTGTT  
CCAAATGACTATGACATTATTAGTTTTAGTTTTTGGAGAAGAGAAGGAACATGGAGTTCGTTTGTGTTGTTGTT  
AAGATGAAGCTGAGCTTCACATTGGGATAAAGAAGAGCAGATATGAAGAAGAGGCCAGTTGCTCCTCT  
TCTAAGAAACAAAGGCCATTCTTGCAGCTCTTTCCTACAAGCCCGGATTATAGATTAATATAGCTAGG  
TATATAACTCATGAAATTGTGTTCTCTGTTTATATATAAATTATTTCTTCTTATTCTTTTCCCTATTGGCAAT  
GGGTGAT

>PGSC0003DMG401002869 LRR-RLPs

ATGAGTTCATGGAACATGAGCGGAGATTGTTGCTTATGGGATGGAGTCATATGCGATGAGATGACTGG  
CCATGTCATTGAGCTTGACCTCAGCTGCAGCAAACCTGTTGGGACCATTGACTCCAATAGCAGCCTTTTC  
CAACTCTCTCATCTCAAAGGCTCAACCTTTCTTGAATGACTTCTACGGTTCTCATATCTCCCCTGAATTT  
GGCAGGTTCTCGAGTTTACACATCTTGATCTTTTTCAGCTCCAATTTCTCAGGTCAAATTCCTTCTGAAAT  
CTCTCATCTTTCAAAGTTACACTCTCTTCGTCTCAATGGATTTGGTCGTCTAAGAATCGTATCTCACGATT  
TAAATTGCTTCTTCAAACCTTACTCAATTAAGAGAGCTTGATCTTACTTTTCGTAACATCTCTTCCACCAT  
TCCTTTGAATTTTTCTTCTCATTTAACAACCTCTGAGGATGGGATTTACAAAATTGTACGGGATAATACCTG

AGAGTATATTTCACTTACCCAACCTGGAAACACTTGATTTAAGTTACAGCTATCCACTAAGTGGTTATTTT  
CCAAAAACCAAATGGAACAGTAGTGCATCTCTCATAGAGTTAGATCTTAGTGGCGTGAATTTTTCTGATA  
ATTTGCCTGAGTCTCTTGGATATCTAACATCGGTGCGTTCTATTTCTCTTAGAAAATTGTAATCTTAGAGGG  
CCTATTCCTGAATCTCTTTGAATCTCACACAAATAGAGGATTTGGACCTTTGGACTAACTTCTTGAATGG  
AACAAATACCGTCATGGATGTTCTCCCGCTTCCATCATTAAAGTCGTTTAACTTGAGTAATAACCACTTTT  
CTGGTCAGCTTGAGGATTTCAAGTCCAATTCACTAGAAGAGATTGATTTAAGTGATAATCAGCTTCAAGG  
CAATCTTCCCAACTCAATTCAAAACCTTGTGAACCTAAAAAAAATTTTCTTTCCTTCAATAATTTTAATGG  
AAATGTGGATATTAGCTTATTTTCAAACCTCAAACAACCTTTTGGTTCTTAGTCTTTCATATAATAATATATC  
ATTGATCAATGAGAACAAAGTCAAATCTACTTTGCCCGAATCACTTGAGAAGTTAGGATTGGCCAAATGT  
GATGTGAAAGAAGTGGAGTTTCTAAGATCCGCAAAGAATCTTGGGGAGTTGGATCTTTCAGTAATAAAA  
CTTCAAGGAAGAATTCCTGATTGGGCATGGTCTAACTGGATGTTTTATTGACAAATCTTAATATATCCCA  
CAATATGCTGACGAGTGTGATTTGATTCTTTCAGACTGTACATACTATTGATTTACGGTCCAATTTTC  
TTCAAGGTTCACTACCTATTCCACCAAATTCACAAAATACTTCTTCATATCTGATAATAATCTCACTGGA  
GAAATTTCTTCATCTATTTGCAATTTGACATCATTGGTAATGCTAGATTTGGCAAGAAACAATTTGGGGG  
GAGGAATTCCGCAATGTTTGGGTAATATTAGTGGCCTCAAGGTTCTGGATATGAGAAACAACAAGCTTT  
CTGGGACTCTTCCAACAATTTTCAGCAATGGAAGTTCACTGAGAAGCTTCGACTTGCATGGCAATAAACT  
AGAGGGGGAAATTCCTCGATCTTTGGCCAATTGCAAAGAGTTGCAGGTTCTTGATTTAGGAAATAATCA  
TTTCATTGACACATTCCAATGTGGTTGGGAACTCTTCAAAGCTAAAAGTTTTAAGTTTGAGATCTAATA  
AATTGCATGGGTCCATTCAACCTCCAAGGATTGAAACTATTTTTCCAGAGCTTCGAATCATAGATCTCTCT  
TACAATGCTTTCTCGGGAAACTTACCTTCGAGTCTATTTCAACATCTGAAAGCTATGACGAAACCTGATCC  
ATCAATGGAAAGAGTAATATATCTGGAAGACACATATTATGAAGATTCTATTACAGTTGCAACCAAGGG  
ATTTGATCGTGAAATTGTGAGAATCTTGCATTTGTACACCGTTATCGATTTTTCAAGTAATAAATTTGGAG  
GGCAAATTC AAGTATCATGGGGGATCTCATTGCAGTTCACATATTGAATTTATCACATAATGAATTGCG  
AGGTCATATAACCACCATCATTAGGAGATTTATCTTTAGTTGAATCATTGGACCTATCAGGAAACCAGCTTT  
CGGGAGAGATAACCACAACAACTGGTTTCTCTTACGTCTCTTTTATTCTTAAATCTCTCCACAATCATCTCC  
AAGGATGCATCCCTCAAGGACCTCAATTTCACACTTTT GAGAACAATTCATATGAAGGCAATGATGGTTT  
ACGTGGATTTCTGTTTCAAAAAGTTGTGGTGATGCTCGGGTATTAGATACAAATGATACTGTATCTGCA  
CTAGACGATGAAGAAAGCAATTCTGAATTTCTGAGTGATTTTTGGAAAGCTGCTCTTATGGGCTATGGA  
AGTGGACTATGTATTGGATTATCCATAATATATTTT CATGATTTCAACTGGAAACCCAAAATGGCTTGCAA

GAATCATTGTAGAGTTGGAGCACAAAATAATGATGGGAAGGAGAAAGAAGCATTGA

>PGSC0003DMG401002888 LRR-RLPs

GCTATTTGTTGAATACAAACAAACAAATGGGATGTTTCCTTTCTTTCTTCATTTCTCTGTTTTGTGTTGC  
TAATAAGTGGATGTTTTCTTCATCCATTGATCATCATCTTTGCTCTCCCACTGAAGCTTCTGCTTTGCTTC  
AGTTTAAGCAACCCTTTGAGATTACATCCGAGTACTCTTGTCAATTCGAGGACAAGCTTCTTTCCCGAAA  
ACAAAGTCTTGAATGAGAGTAGGGATTGTTGTAAGTGGGACGGAGTCACTTGTGACATGTTAAACGGT  
CATGTTATTGGGTTGGACCTTAGTTGCAGTCTGCTAAAAGGAACTATTCATCCGAAAAGCAGCCTCTTCC  
AACTTCTTTATCTTCAAACACTAAACCTTGCTTACAATAACTTTTCAACTTCTTCAATCCACATAACATTG  
GCCGATTGACAAATTTGAGGAATCTCAACCTTTCTTATTCTTACTTTGATGGGAAAATCCCAACAGAAATC  
TCATTGCTTTCCAATTTAGTTTCACTTGATCTTTCTCCTCCTTATAAGTATGGATTACAACCTTGATCAGAGA  
ACATTTGAGGCAATGCTTCACAACCTTGACAAATCTGGAGGTACTATCTCTCTCTTTTGTCAACATCTCATC  
TCCGATACCTGTGAATATTTCTCCTCCTTAAGGTACATGGATCTTGAATATACTAATCTGCGAGGTGTTCC  
TCACAGAGAACTTTTTCTTATGCCAAACTGGAAAGGCTTAAATTGGGTTTCAATGCTCTTCTCAAAGGA  
GTTTTACCAAAGATCCACCCGAGCAGTACTCTGTTGGAGTTGGATATTTCATAACAGGAATCTCCGGTG  
AGCTGCCTGATTCAATTGGCACCTTGAGTTCTTTGAATATCTTGTACTTCCGTGGATGTGAATTTTCTGGT  
CACATTCCTGATTCCATTGGCAATCTTACACAAATTCGGGAGTTGATTTTATCTGATAATCGTTTCACTGG  
CCACATTCCTCCACAATCTCTAAATTGAAGCACCTCACACATTTAGTTCTTGAGTCCAATTCCTTTTCAGG  
TGAAATTCCAGATGTTTTCTTAACCTCCAAGAGCTACGTTATTTACATCTTTATAGTAACAGCTTCATTG  
GTTTCGTTTCTTCTACAATTTAAACTTGATACATCTTCAATACTTAGACTTGTCGAGTAATTCCTATCTG  
GCTCACTGCCAGCAATGCAAGCATGTTTCAAAGCTAACCGAGCTGGATTTGTCATACAACTCACTGAA  
TGGTACCATAACCATCTTGGGTGCTTAGCCTCCCTTTGCTAACATCACTGTCGCTCCAAAATAATCAATTTA  
GTGGACTAGCCGATGAGCTCAAAAATAACCCAACATTAGAATACCTGTTTTTAAGCAATAATCAACTCAG  
TAGTTCTTTTCTCAATCTCTTGCGAATCTCACAAACCTTTTTACCCTTGACATTCATCAAATAACATCAC  
GGGTGATGCGGGAATAAATATCACCTTTCCTAGCCTAGAAAAAGTGTCTTATCATCTTGTGAATTGAGG  
GATTTTCCACACTTCTTGAGAAATGTAAACACACTTCAGGTCTTGGATATTTCTAACAATAAGATTCGTGG  
TCAAATCCCTAACTGGTTTAGCAGCATGAGGTGGAACCTGTTGCAGTTCTTAAACCTTTCTCATAATTCAT  
TAACAGGCCATCTACCACAATTTCAATTATTATAGTCTAAAGTATCTTGATCTTAAATTTAACTTCTTCGGG  
GGTCACTACCTTTATCCATTTGTAACATGAATAGCCTTAGCCTTCTGGATTTATCACACAACAACCTCAGT  
GGCTCTGTTCCACATTGCTTCGGCAGCATGGTTGAGCTATCTGTGTTAGACTTTAGAAGAAATAACTTCA



CAGGGAGTCTTCCACCATTTTGTGCACAGACCGATTCAATTGAAAACCATCGTCTTGAATGGTAATCTATT  
GAAAGGACCTGTCCCTGTGTCGTTGCTCAACTGTGTTGGTTTAGAAGTTCTTGATTTGGGGAATAACGCT  
ATAAATGACATATTTCCAGCTTGGCTAGGAACACTTCAAGAACTGCAGGTCCTAATATTAAGTTCAATC  
TGTTCCATGGACCTATAAGTACTTGTGCACTGAGTTTTGCTATCCCAAATTGCGAATTTTTGATCTTTCTC  
GTAATGAATTCAGTGGATCACTTCTGCAAAAGCTTTTGGAACTTCAAGGCAATGATCAAATTAGATGG  
TGAAGATAACAAGAGAGATCAAGTACATGGAACCATATGAGAATTTCTTTACACATCGTATGAGAATTC  
AGTGAGGTTGGTAATCAAAGGGCACGATACTGAGCTAGAAAGAATCAGCACAATTATGACAACCATAG  
ATCTCTCAAGCAACCATTTTGAAGGTGTCATTCCGAAAACACTAAAGGATCTCAGCTCACTTTGGCTACTC  
AATTTATCCCATAACAATCTCATAGGTCATATTCCAATGGAATTGGGGCAATTGAATATGCTTGAAGCAT  
TAGATCTCTCCTGGAATCGGCTCACTGGAAAGATACCACAGGGATTGACAAGAATGAACTTTTTAACAG  
TCTTAAACCTCTCTCAAATCATCTCGTTGGACCAATTCCTCACGGTCCACAATTCAACACATTTGAAAAT  
GGTTCGTATGGTGGCAACCTTGATTTATGTGGTCCTCTATCAAAGCAATGCGGAACGAGTGATTCAT  
CACATGTTCTCAACCATTGGAGTCCGAAGAAGATGAAGACGAGTCATATTTTTTAGTGGATTTACGTG  
GGAATCAGTAGTCTTAGGCTACAGTTTTGGACTCGTTGCTGGAACGGTTGTGTGGAGCCTCATTTTTAAA  
TATCGTAAACCAAATGGTTTGTGCAATTTTTGAAGGCATTTTTCCCAAGAAAATGAGAAGGTCAAAGA  
AGAGAAGGCCAAGACAAAGGACATAATGGAAGATTGAACTTTTCTATTACTGTTTTGTTTTTAATTTA  
TGTTTGCTGTTTGTATATGTTTGATAACAACCTAATTGTTATGTGTTATTTTAGCATCAATGGTTATTCAAG  
TAAAGCATTTTTTATGCTTAATCCCAAACATACTAGATGGACACCTTCTGTACATTTACTCAAGCAGCTC  
GAAACATCTTGACCTTTTATGATTGTATAGATTCCACGAAAAAATTGCACAAAAAATTTATTGCATTGCTC  
CAACTGGTTTCACTTGATTAAGTGTTCCCTCTTGTCACATCTCATCCATGGACCACTAATTGGTTCAAT  
GACTTCAAATTATACACTCTATTATCAACTTAAAGCAGCACAACACATCTTGACCTATTATGATCGTATA  
GATTCCATGAAAAAATTGCACTAAAAATTTATTGCATTCATACAACCTCGACACATCATGTCATTTGACTTA  
GTCAATCAATAGTTTCTCTTTTTGAACATTCTTGTTGGGAAAACCTAGAAAAATATGGCTGATAAGTTGGAA  
GTCAACCAAAGAGATGTTGATGGGACAATAATAGCAGAGAGTTCAATTAGCTGTAAACAACCTCAAACAA  
AAAATATCGCTCTATTTACATAGTATAATTTTTCAACGAGCAGGATTTAGGTGAACCCCTTGACCTCTAT  
GTCTCCATCCCTAATCAGAGTGTGGAGAAAGTCAGCCCTTAACTATATATATATACCGTGGATTATGAT  
TGATTTTGTAAAGAACATTTTGTATCTGCTAAAAATAACAATGGGACGTCTAGTTTTCTTTTATTCAATTC  
TCTGTTTTGTCTTCTAAGTCAAAGCTTTTCTTCATCCTTTGTGCAGCATCTTGCTCTCCAGTGAAGCTT  
TATCTTTGCTTCAGTTCAAGCAACACTTTCAAATGTCCGACAAGTACTCTAAACATTATAGTACTTCTCTCC

CAAAAGCATCGTCTTGGAATGAGAGTACGGATTGCTGCACTTGGGGATGGATCACTTGTGACATGTTAA  
CTGGTTATGTAATTGGCCTAGACCTTAGTAATGCAAATCTTAGCGGAACTATTCATCCTAACAGCAGCCT  
CTTCAACTTCATCGTCTTCAGACGCTAAACCTTGCTTACAATAACTTATCTGGTCTCATTCCCTGATTCCAT  
TGGCAACTTCACACAAATCAGAGAGTTGGATTTTGGTTCCAATCATTTCACTGGCCATATTCCTTCAACAA  
TCTCAAATTGAAACATCTCACACGTCTAGATCTTTCGTTTAACTCACTTGGAGGTAAAATTCCCGATGTT  
TTCTCTAACCTCCGAGAGCTAGTTACATTGTATCTTCTTATAACAGCTTCATCGGTCCATTTCCCTCTTCG  
ATTTTAACTTGACACGTCTTGAAACTTAGACTTGTCTAGTAATTCCTTGTCTGGTCCATTGCCAAACAA  
TGTCAGCATGCTTCTAAAGCTAGTTGACCTGGATTTTCTCACAACCTTGCTAAATGGAACAATACCATCTT  
GGGTGTTTAGCCTCCCTTCTTATATATGTTGGAGCTCCATCATAATCTATTCAATGGACTATCCGATGAG  
CTCAAAGTGAATCGAGCAGTAGGGCGTTTGGATTTGAGTTATAATCAACTCAATAGTCCTGTTCTTCGAT  
CACTTCAAAGCTCACAAACCTTGTAACCTTGACCTTTCATCAAACAACATCACCGTTGATGGGGGGAC  
ACACATCACTTTTCTAGACTAGAAATTTTGC GGTTATCATCTTGTGAACTGAAGGATTTTCCACAGTTTC  
TAAGAAATTTAAAGACTTCAGGTCATAAATCTTCTAACAACAAGATTCGTGGTCAAATCCCTAACTG  
GTTTAGCGGGATGAGGTGGGACTCGTTGTTTACCTAAACCTTTCATATAATCACTCAATGGTCACATA  
GATCTATCTCATTCTATAGTCTAGTGTCTCTTGATCTTAAATTTAACTTCCTTCAGGGTCCACTACCTGCA  
TCCATTTGTAACATGAGCATCATTAGCCTTCTGGATTTATCACACAACACTTTCAGTAACTCGATTCCAAG  
TTGCTTGGGTAACATGACTCAGCTAACGGTGTGGACTTAAGAAGGAACAATTTCACTGGAAGTCTTCCA  
CCGTTATGTAGTCAACACACTTCATCGACTACCAGTATTCTGAATGGTTATGGTAATCAATTGACGACCAT  
TATCTTGAATGGTAATCATTTTGAAGGACATGTCCCTGTGTCACTCACTGTGTTGGTTTAGAAGTTC  
TTGATATCGGGAACAACGCTGTAAATGACTCATTTCCAGCTTGGCTAGGAACTCTTCAAGAGCTGCAAGT  
CCTTATATTAAGTCGAACAAGTTCATGGACCTATAAGTACTAGGCTGAAGTTTGGGTTTCCCAGGTTG  
CGGATTTTAGATCTCTCATAATGAGTTCAGTGGCTCACTGCCTGCAGAAGTTTTTCAAACCTTCAAAG  
GAATGATCAAATAGATGACAGTGACAAAGGTGAGATCGAATATATGAAAACATCAGACTCATTTTTTG  
TTATGTACGATGATTCAGTGAGGTTGGTGATCAAAGGAAACGATATGGAGCTAGAAAGAATCACTACAA  
TTATGACAGCCATAGATATCTCAAGCAATCATTTTGAAGTGTGATTCCGAAAACACTAAAGGATCTCAG  
CTCACTTTGGCTACTCAATTTATCTCATAACAATCTCAGAGGAGATATTCCTATGGAACCTAGGAGGATTG  
AATATGCTTGAAGCGTTAGATCTCTTGGAAATCACTCACTGGAAAGATTCCGCAACAATTGACAAGGC  
TAACCTTTCTGGCATTCTTAAACCTCTCTCAAATCACCTAGCTGGACGCATTCCTCAAGGTTACAGTTC  
AACACATTTGAAAATGACTCGTATGGTGGCAACCTAGATTTATGTGGTCCCTTTTATCAAAGCAATGTG



ACTCAATTATTGTAACGACTTAAACTAATCATAAATTCACCTGTAATTCACATATTTAACCCCTCTTTTGTA  
TTTCTAAAAGCCCATTAAGTTTTGGCATCTATATTTGGGTCATTCACCATGAAGTTAAGGATTCAAAAAAT  
TTCTTTCCATATGACATTCATATTTAAACAAATTTAAATTATATATACCAACAATATGAAGTCTACAATCAG  
TATAATTTAACGTGTTGTAGTTAGCATGTTGTTTACCTTGATTTGCATGTTATTAATTTCACTTATAATGAA  
GAGTCATCTATAGTTACTTTTAGACGAGTTGATAGTAAGAAAATTTCTTTAAAGCTCTAGCATTCAATTTT  
TCGAGAAACAAAAATAGAACAACGGAGAAAAGCCTAAAATACATTCGAACTATTGGAAACAAAGGG  
TACATGTCACTCTCTCAGACCCCACTTGTGGGATTACACTAGGTATGTTACGTTGTTACTCTGTTTCACTT  
ACAAAACACTGTTGTTAAGACGTATATTGAATACCTAAAGAATAAGGCGCAAACATTTTAAAAAAATTGA  
TGTTTCATCCATTAATTATTATTTTTTAAGAAAAAGATATGACGTTAATTTTTAAAATGAAAAAGTGAAAT  
GAAGAACATAAATAAAAAATGAAGAAATCATAAATTTAGTATTTTGTGTTTAAATTGTATATAAAACAGAG  
TTGAAGGATTAAAATGGAACAAGACTAAGTTAGAATGTCAAATGAAAAATGGGGGCAAGTTAGATGA  
GTTGTGTATGTTTTAATTGAATTTTATGCCATGTCATGGTGTGTGAAATACATACGTCCACTTTGTTGAT  
TCTTTGGAAAGAAGTACCTAAATGAAACATAAAAATTTGGAGTTGAAGGGTTAAAATGGAACAAGGTTG  
AGTTGGAGTGTCAAATGAAATTTAGGAACAAGTTAAATATCTACATATATGTTTGGCCGAAGTATTAT  
TTTGTGAAGTCTTCTTCATGCTCTAAAAGTCTTATGGAACACTACAAAATATGTGTAACAAGTTGTTAGA  
AGTGACTTTAATTTGAGTCTTCTGGAAATTGACTTAACACTTGGGACAATTTTTTTTGTAAACCACAAATT  
ATTACCCCATTTTATTTGTCTGGATGTGTTTCTTTTCTTTGTTAATTTATACCTCATAGTCTCATGCATAGA  
CAAGTAAACAACGTTACTTTATCAAATAGTGTTTAGTTAACTGTTTACTTTATTTAATATGGAGGTCGTTG  
TAATAATTAAGAAATAAAATAGTGTTTAGATAATTATAACATTTCTTTGTTATGACAATCATCATGAACCA  
TATTATTATTTTTACCTTTTTTATTCTATTACTATTTTTATTTATTCATTATTGAATATTCTAAAGCCTACCA  
AACGGTAAAACCTTTTGCATTATGCAAATAAATTGTTGGGTGTTAAAAAAAAGATCTAATTTGTTTTT  
GGTGTATTCTTTGAATTACAAGCACTGCAACAAACACTACAACAAAAACAACCTTTTAGCGGCAATAAATA  
TATACATTAATAAAGAGTGTTAAAGATTTTACCGGTATTAGTTAAGTGTCAATTAGATCCAATGTCGCAAA  
AAGCTTTAGGGACATATGCAAAGAGTGTTAATTGCCGTTAAAATACATATTTAGCGGCAATTAACCTTA  
ATTAATTGCCGTTATAAATCATTTTTGATGTAGCGAAATCAATACCATTTTCATAATATTATATCAACTTAT  
CAAATTCAGCGCAATTATTTCAATACCATTGTATAATCTTCTTAATGTTTTGAGTAAGATTTGATTATTTTA  
ACTTAATATTATATTTTTTATTGAAAATTTTTGTTGTTTGTATTCTTACTTCATAAAGGTCTTCGTATATCC  
TATCTTCTTGAACTTTACTTGTGGATTACGTTATAGGTATTCAATTTATGTATGACAACTGAACTAGT  
ATATATATATGTGGATAATGCTGATTGATTTGTAAGAAGAGAACAACATCCTGTTATTTGCTGAAAACA





TGTTTTGCTTTCCCAAGTTGCGAATTTTCGATCTTTCTAGTAATGAATTCAGTGGCTCACTTCCAGCAAAA  
TTTTTTAGAACTTCAAGGCAATGATCAAATTAGATGGCGAAGAAACAGGAGAGATCAAGTACATGAAA  
CCATCTGAGAAGTCATACATGTCGTATGAGGATTCAGTGAGTTTGGTAATCAAAGGGCAGGATATTGAG  
CTACAAAGAATCAGCACAATTACGACAACCATAGATCTCTCAAGCAACCATTTTGAAGGTGTCATTCCGG  
AAACTAAAGGATCTCAGCTCACTTTGGCTACTCAATTTATCCATAACAATCTCATAGGTCATATTCCA  
ATGGAATTGGGGCAATTGAATACACTTGAAGCTTTAGATCTCTCCTGGAATCGGCTCACTGGAAAGATTC  
CACAAGAATTGACAAGAATGAACCTTTCTGGCGTTCTTGAACGTCTCTCAAATCATCTCGTCGGACCAAT  
TCCTCACGGTCTACAATTCAACACATTTGAAAATGACTCGTATGGCGGCAACCTTGATTTATGTGGTCTC  
CTTTATCAAACAATGTGGAACGAGTGATTCATCACATGTTCTCAACCATTGGAGTCTGAACAAGATGA  
AAGCGAGTCATATTTTTTTAGTGGATTTACGTGGGAATCAGTAGTCATAGGCTACAGCTGTGGACTAGTT  
GTTGGAACCATCATGTGGAGCCTCATGTTCAAATATCGTAAGCCAAAATGGTTTGTGGAATTTTTTGATG  
GACTCATGCCTCACGAAAGAACAAGGCCGAAGAAGAGAGCTCAGAGACTACGGACTTAA

>PGSC0003DMG401002917 LRR-RLPs

GAGTTTCAGGATGAGCATTGGTTTAGGTCCTTACACATAAACTTTGCTGGTTGATTAGGACGCCTACCG  
ATGATGATAAGAGTCCCTTGAGAAGAATTCGATCAATTTTCCTGTTTGTGCTGCACCTTCTTTCAGTAACAAT  
TCCAATTTAGAGCTTGGTCATTTGAATTTAATCAGAGTCTTGACTTGAGTTCAATGTTCTTCTCAAGCTT  
TCCCCTGCAGATACTTAGTCTCTTTTTGTTGAGGTACCTATCCTTTTCGACTCGTAATCTTTTGGCATAACC  
TGGAGGACTTTGCAGATACTGAATCTACAAACATTCATCGTTTCGAGGGCCAGTTATCTCATTTATTAAG  
TTCCCGGAATAATTTGGGAAACAACAATTAAGGCACCTGAAACTCAGGAATTTTTATTTGCCAGATC  
CTCCAAGTTCATCCATTGATGGAGAGAGGAACTTGTTTTGGCCAAACATACAGTCTGTTTCGGGCTTGAT  
TCCTTATTGTTGACTAAGAAGATCCTTTCAAGGTTTCAAACATTAAGAAATTATGTATTCGGGGGCAC  
GTGTATGACTATGGAGTGCACGAAGAAGTTATGGACCTCCGTCATCTTGTTGATCTGCATCAGCTAGAA  
ACATTGAGTGTTAAAGTTGATCGTTATCAGGTAAGTCACGGGAGTTCAAGATTCCATAAATCGCCTGTTT  
TACATTTTCCAATAAAGTTGAAGAAGTTAAACTGGTCCGAACTTGTCTATCATGGGAGGAGTTGAACA  
TCATAGGGCAATGGCCTAACCTTGAGGTGTTGAAGCTGAAACCAAATGCTTGTCATGGCCTAGAATGGC  
GTCCAATTGAAGGAAGATTTCCACAGTTGAAGTTTTTGCTAATTGAAGGTACAAATCTGAAATGTTGGAA  
AGCCACAAATGATCATTCCCTGCTCTTGAGCATCTAGTGATCAGACATTGCTTTCATTTGGAGGAGATC  
CCTATTGAGTTTGCAGATATTTACTCGCTACAATAATCGAGTTACAGAACTGTAGTGCAAAACTCGTGG  
CTTCTGCTGGACGAATTCAAGAGGAGCAAGAATCCCTAGGAAGCAAAGCTGTGGATGTTTCGTTCTACA

ACGATCCAGGTTAGTACAATAATTGCCTTTGAAACTTAAATTTTTTTTTGAAGTTATATATTAAGAGTTGA  
TGGTCAAAAACGCACCTAAAGTATCCCCATTTTTCGAGTTTCATATATGAACTATCAGATATGTGAGTTTC  
CTCCCTGAACTATCAGTTGTTCCATTTTCTATCTGAAACATCCCCATCATTGAGGTAGGAAAAGGAAAGC  
ACATGAGAACTTCGTGAGAGCTTGCAACGAGTAGCAAAGGACATTGACCGTGTTCAAGAAGAGTCGC  
AAAAGATTCAACAACATAAAGGTAGCCAAGCATCAACGTTGTCCTTGTTACGAGATACAAGTAGCTCAG  
AAATATTACCTAATCTGGATGTTTCGAACAATATGGTGGGACGTGACAAGGAAAAGAAAAGGATGCTTG  
AAGAACTCAGAGGAGGCTCTAAAGATGAACTAAAAGTCATCCCAATTGTTGGGATGGGTGGCATTGGT  
AAGACAACCTTTAGCAAAAACAAGTCTTCAACCATCCTTCGATTAAGTCTCGTTTTGATGTTCTGCTGGGC  
TACTATATCTAAAGAATACAATGTGAAAGAAATCCTGCTAAGTCTTCTACAGTCAATAATCAATATCGAT  
GACAAAGTCTACAGCAGAGATGAGGATGAGCTAGCAGACCTACTACAGAAAAAATTGAAATGTAGGAG  
GTATCTTATTGTCATAGATGACATATGGAGCAATAAAGCATGGGATGACACAAAACAATGTTTTCCAATT  
GATAATAATGGAAGTCGAATATTGTTGACTACCCGTCATACTGAGGTAGCTATTAATGCTAGCTCAAGTA  
ATCTTCTTTTAAAGATGAATCTCATGAATTCAGATGAGAGTTGGAACCTTTTTAAGAGCAAGGCGTTTGC  
AAATGAAAGCTCCCGCCTGAACTACAGACCATAGGTGAGAAAATTGCAAGCAAATGTCAAGGGTTACC  
ACTAACGATTGTCGTGGTTGCTGGTCTTCTCTCAAATCAAAGAGAACAAAAGAAGAATGGGAGAATGT  
TGCTGAGAATATTAAGTCGTTTGTAACGAAAGATCCTGATGAACAATGTCTACGTGTGCTCGGATTGAGT  
TACAACACTTGCCTAATGACTTAAAAGCATGCCTTCTGTATTTTGAATATTTCCAGAAGACAGTGAAT  
TTCAGTGAAGAGATTGGTGAGATTATGGATTGCTGAGGGTTCTTGAAGCTGGAGGGTGACTTGGAAG  
AAGAGGCTAAAAACCGTTTGCAGGATCTCGTGGATAGATGTCTAGTTTTAGTTAGCAAAGAAGTGCAG  
ATGGAAGAAAAATCAAGACATGTAGGATTCATGATCTGGTCCATGAGTTATGCTTGAGAGAAGCACAAA  
GCCAAAACCTTTTTGTTTATCAGAAATGATAAACAGGATCCGTTCCCTCGTGTGGGATGTCAATGGATTAG  
CATACAGAAAAGTCAACAACTGATGTTGAGTTTCAGGATGAGCATTGGTTTAGGTCCCTTACACATAAA  
CTTTGCTGGTTGATTAGGACGCCTACCGATGATGATAAGAGTCCCTTGAGAAGAATTCGATCAATTTTCC  
TGTTTGCTGCACCTTCTTTCAGTAACAATTCCAATTTAGAGCTTGGTCATTTGAATTAATCAGAGTCTTG  
GACTTGAGTTCAATGTTCTTCTCAAGCTTTCCCTGCAGATACTTAGTCTCTTTTTGTTGAGGTACCTATCC  
TTTTCGACTCGTAATCTTTTTGGCATACTGGAGGACTTTGCAGATTACTGAATCTACAAACATTCATCGT  
TCGAGGGCCAGTTATCTCATTTATTAAGTTCCCGGAACTAATTTGGGAAACAACACAATTAAGGCACCTG  
AAACTCAGGAATTTTTATTTGCCAGATCCTCCAAGTTCATCCATTGATGGAGAGAGGAACTTGTTTTGGC  
CAAACATACAGTCTGTTTCGGGCTTGATTCTTATTGTTGCACTAAGAAGATCCTTTCAAGGTTTCAAAC



ATTAAGAAATTATGTATTCGGGGGCACGTGTATGACTATGGAGTGCACGAAGAAGTTATGGACCTCCGT  
CATCTTGTTGATCTGCATCAGCTAGAAACATTGAGTGTTAAAGTTGATCGTTATCAGGTAAGTCACGGGA  
GTTCAAGATTCCATAAATCGCCTGTTTTACATTTTCCAATAAAGTTGAAGAAGTTAAACTGGTCGGAAC  
TTGTCTATCATGGGAGGAGTTGAACATCATAGGGCAATGGCCTAACCTTGAGGTGTTGAAGCTGAAACC  
AAATGCTTGTGCATGGCCTAGAATGGCGTCCAATTGAAGGAAGATTTCCACAGTTGAAGTTTTTGCTAATT  
GAAGGTACAAATCTGAAATGTTGGAAAGCCACAAATGATCATTTCCCTGCTCTTGAGCATCTAGTGATCA  
GACATTGCTTTCATTTGGAGGAGATCCCTATTGAGTTTGCTGATATTTACTCGCTACAATAATCGAGTTA  
CAGAACTGTACTGCGAAACTCGTGGCTTCTACTGTGCTTATTCAAGAAGAGCAAGAATCCCTAGGAAGC  
AAAGCTGTGGACGTTTCGTTCTTACAACGATCCAGGTTAGTACAATAATTTCTTTGAAACTTAAACAATT  
TTGAAGTTATATATTAAGAGTTGATGGTCAAAAATGCAGCTAAAGTATCCCGATTTTTCGAGTTTCATA  
TATGAACTATCAGATATGCGAGTTTCCTCCCTGAACTATCAGTTGTTCCATTTTCCTATCTGAAACATCCCC  
ATCACTCAGGTAGGAAAAGGAAATAACTGATAGTTGAGGTGTGTTTTGATAAATAGTTGATGATAGTTC  
GGGTAAGAACTCACACACCTGATAGTTCAGATATAAAATTCGAAAACCAGATATTTAAGGTGTGTTTT  
TGACCTTCCGTCTATACTAAACATGAACCAAATCGATTCAACTTTGCGTATATCAAATGTATAGTTGAC  
CCTTTATGTTCTTTTTGCTACAGCTGAATGTGAACTAAATGGAAGTGATTCTGATTCAGACTGATGTTTAC  
CTGAGGATTGAAGACTTTCAGACTTGATTTGTTAATCATTGCTTATCTTATTCCATAATTGGAGTTTATCT  
GAATGAACATTGGGGCTATTGCAGACCAACATTAAGTGTGCTAAGGCATTATCAGTGAGATATGAGAT  
CGAGGAGAAGTAGTCGAGATATACACAAGTTGATCCCCATTTCAATTTGTTTTTCTACTCTACTTTTTTT  
GTTAGTCTCAAAAAGAATGTCTATTTCTTTTTTTGGCAACTTCTATTTAACTTTCCATATGACTGATG  
ATATATTTAAGACTACAAG

>PGSC0003DMG401004423 LRR-RLPs

ACAATGGCCTACCAAAGTGGTCCTTTATTCAAATTATTGTGTATGCATTATTGTTTTCTTTTAGTGGCG  
GCTCCTCAAGACATCTGCAACAATGGCCTACCAAAGTGGTCCTTTATTCAAATTATTGTGTATGCATTAT  
TGTTTTCTTTTAGTGGCGGCTCCTCAAGACATCTGCAACAATGGCCTACCAAAGTGGTCCTTTATTCAA  
ATTATTGTGTATGCATTATTGTTTTCTTTTAGTGGCGGCTCCTCAAGACATCTGCAACAATGGCCTACCA  
AAAGTGGTCCTTTATTCAAATTATTGTGTATGCATTATTGTTTTCTTTTAGTGGCGGCTCCTCAAGACATC  
TGCAACAATGGCCTACCAAAGTGGTCCTTTATTCAAATTATTGTGTATGCATTATTGTTTTCTTTTAGTG  
GCGGCTCCTCAAGACATCTGCAACAATGGCCTACCAAAGTGGTCCTTTATTCAAATTATTGTGTATGCA  
TTATTGTTTTCTTTTAGTGGCGGCTCCTCAAGACATCTGCAACAATGGCCTACCAAAGTGGTCCTTTAT

TCAAATTATTGTGTATGCATTATTGTTTTCTTTTAGTGGCGGCTCCTCAAGACATCTGCAACAATGGCCT  
ACCAAAAGTGGTCCTTTATTCAAATTATTGTGTATGCATTATTGTTTTCTTTAGTGGCGGCTCCTCAAG  
ACATCTGCAACAATGGCCTACCAAAAGTGGTCCTTTATTCAAATTATTGTGTATGCATTATTGTTTTCTTT  
TAGTGGTCCGCAAAGCAAAGAAGGCTTTTTGAGAAGAAGACTTTGTGCAAGAACTTTCACAACAATG  
TCTGACCCTGTAATTGGTGCCACTGTTCAAGTTTTGCTTCAGAAGCTGCTTCTCTCACTATTGAGGAACT  
CAGTAGCTCAAGCGACTGCAAGAAAGATCTGGAAATGCTTACACAAAATGTATCCTTGATCCAAGCTTTC  
ATTCATGATGCCGAAAGACGACAAGTTGACGATCAGGCTGTGAACTATGGCTCAAGAGGCTTGAGAA  
AGCTGCTGAAAATGCTGAAAATGTGTTGACGAATTCAGGTATGAATCTATCAAAAGACAAGTGAAGAT  
CCATAAGAACCCAATGTTAAAGGTCAGTGATTTCAATTTCTCATACTTTAAGAGCAAATGTCTCGA  
AAAATCAACACCATCAACGAAGAGTTGAGGGATATCAATAAGTTATCCAATACCTCGGTCTCCAATCAC  
TCATGGTTCCTCCTCGGCAAATACTACCAATTCGTGAAACAGATTCGCTAGTAGTTGCTTTGGATGTTGTT  
GGTAGAGACAATGATGTTGCAGAAATAAAGAGGATGATGTTGAACATCAGAGATGATGTTGTTCTGTG  
CACCATTCCCATAGTGGGTATGGGGGTTTAGGGAAAACAACACTATGGCTAAGAGTATTTTCAACGATGA  
AAAGATCGAGAAATACTTTGAAAAGAGAGTTTGTTGTGTCTACCTGAAATGTTAGAAACGAAGAGCTT  
TCTTCAACTAATCCTCGAATCATTGACAAAGAGGAAAGTTGAGGTCCAAAGCAGAGACATAATAGTCAA  
GATGCTACAAGATGAACTGGCAGGAAGAAAGTATTTGCTTGTCTGGATGATTTGTGGAATGTTAACTC  
TACATTGTGGGTAGAGTTTGTAGATACTTTGCGAGGAATGAATACATCCCGAGGAACTTCATTCTCGTG  
ACTACTCGTATGGAACAGGTGGCGTCCACAGTAGCAACAGTAGGTCCTCATAGGTTGGAAAAATTAGCA  
AAAGATCATTGTTGGTCCATTTTCAAACAAAGAGCATTGTTGATGAGCAAGTTCCAGAGGAAATAGTG  
ATCATGGAGAACAGGATTGTTGAAATGTGTCAAGGTCTACCATTGGCGGCAAGTGTGTTGGGAGGCCTC  
TTACGCAACAAGGAAAAACATGAATGGCAAGCAATTCTTGATGAAACCCCTTGTTACAGGTGAAGAT  
GATAACGAAGAAAATAGCGTTAAGAAAATCCTAAAACCTCAGCTATGATTATCTACCATCTCCACATCTAA  
AAAAATGCTTTGCTTACTTTGCAATGTTTCCAAAAGATTTTGAGTTTGACAAGGACCAACTAATCCAACCTC  
TGGATGGCAGAAGGCTTTCTTCATCCATGTCAAGAGACCACCGTAATGGAAGACATTGGGAACAAGTTC  
TTTCAACTCTGTTGCGAAATTCCTTGCTGCAAAATGTTAAGTTAGATGAGCACAACAATATAACACACTA  
TAAGATGCACGATCTTGTGCATGATTTGGCTGGAGATATCTTAAAATCTAAACTATCTGATCCGAAGGGC  
GATGGTCCAGAAGATCTTTCTCAAGTGCGATACTTTGGATGGGACTCACCAAGTGATCAAATAGTTAATA  
TAAATGAGCCAGGCCGTTTGTGCACACTGTTTTGGAGAATCAATATATCGGAAGATATGCTGTTGAGCTT  
TAAGTTCTTGAGAGTTTTAAATTTGTCTGTTCAAGGAATCAAGGAGTTGTCAGCCAAAATTGGGAAGCTA

ATACACTTGAGATATCTTGATCTCTCGAACACTAAGATCATAGCCTTGCCCAACTCCATTTGCGAGCTCTA  
TAATTTGCAAACATTTAGAGTTGATCGTTGCTATCCACTTCCATATGAGATGGGAAATATGATAAGTTTG  
AGACACATATATTGCCATTCTCGGTCTCAGAGTCAGATGCCACTTAACATGGGACAATTGACTTGTCTTC  
AGACCCTACAATATTTCAATGTGGGTTTAGAGAAAGGTCGTCGAATAGAAGAATTAGGTCGTTTGAAGA  
ACCTTAGAGGTGAATTGAGGATCAATCATCTCCAATTGGTCCGTAGTAGAGAAGAAGCTCGAACAAACAT  
ATTTACAAGAGAAATCGAATATTTACAAGCTGTCATATGTGTGGTTCCGTGATGAACCAGAAGGCTGTG  
AAACCATTGATGAGCATGTGTTGGATGGTCTTCAACCGCATCTAACTTGAAAACCTTACTGGTTGAGGA  
CTATTTGGGCACTAGATTTCTTCATGGTTCAGTGAAGAGTCGCTACCAAATTTGGTCAAGTTGACATTA  
AGTGGTTGCAAAGGTGCAAAGAAATTCCATCGCTTGGCCAACTGAAGTTCCTTCAGCATCTTAAGCTG  
ATAGGACTCCCTGAATTGGAATTCATCGGACCTACATTTTGTGGTGTGAGGTTAATGATAATGGATCAT  
GCAGCAAAATCCAAGTGTCCCGTCACTGAAAGTACTTCTATTGGAGAATATGCATAGCCTTACTGAGTG  
GAAGGGAGTGGAATTGATACCAACAACAAGTGGGGTAAGAATGTTTCCTGGGCTTGAGAAGTTGAGGA  
TTAGTAACTGTCCAGTGTTAAAAAGTACTCCGAATCAATTTGAAATCCTACGTGAATTAGAGATTGTCGA  
AGTTGACAGTGAAATGCCATTGTTGAACTTGTGCAGCAACTGACATCTCTTGAATGCTTAGTGTGTAT  
GATGTGAAAGAGCTCACTTGTTTTCCAGATGAGATTCTACGTAACAACGTTTCTCTTCAACACCTATCAGT  
CGCAGACTGCAGAGAGTTTCATGAATTGCCACAGAGCTTGTATAATCTCCATTTTCTTAAGAGCTTAAGG  
ATTAACCTCTGCACCAATTTAGTTCTTTCTGTTCCCACTGGAGAGAATTATTTGACTTCCCTCCAAAGT  
CTTCAGTTAATCTCTTGTGATGGATTGACCAGTTTACCAAGGGGGATGCTAGAGCATTGTCCGGTCTTTGG  
AATCTTTGAAGGTCTTCAACTGTAACAACCTTAGTTTCTTCCCTTTACATGTCGGGGAAAAACCTTCACTT  
TCATATTTGAATATATCAAAATGTCCCAAATTGATTAGTGTACCCGCTGGTGGCCTTCGTCTCACTGGGTT  
ACAGCATTGGAATAGGTCCTTTCTCAGAAATGGTGGATTTGAGGCATTCCAATTGATATTTGATGGC  
ATTCAGTCTCTTCATACATTGGAGGTGTGGGGACACTTGCACTGGGATTCTCTGCCCTATCAGCTTATGC  
AACTCTCTGACCTTATAGAGATCAAAATATATGGATTTGGAATCAAGGCTCTTCTCATAGATTTGGCAA  
CCTTACTTCTCTTGAAGATTAATGCTAATGGGGTGCAAACGGCTACAACATCTGGACTTCTCAGATGCC  
ATGCCCAAATTACGTTATCTGTGCATAAATGATTGTCCATTGTTAGAAGCTATATCGGATGGGCTCGGTA  
ACCTTGTTTCTTTGCAAGAGTTATTTTTACAGAAATGCGAGAACTAGAGCATCTGCCATCTAGAGATGC  
CATGCGACGCCTCACCAAATTATGGAACCTGGAATTAAGGCTGCCCAAAGTTAGAAGAAAGTTGCAC  
AAATTGGAGTGGCTCAAACCTCCAATGGTCCAACATTTCCCATATTCTAAAAATTGAAGTAGGTGGAAGC  
ATAATTCAGGACTTGCGTAAGTTTCTGTTTCTTTTTGTTTCTGAGTTGCATTTTTAATTATTATTTCCAC

GAGTTATTCTCCTCCATTCTCCATTATAGTTTTCCAAACATTTTTTTGTTCCACTTGAAACAAATTTATGAAT  
ATCTATTTTTACCTTTATGATATGGATTAATCATGAATATTTATGTGTGCTTTTTCTCATTGGTTATTAGTTT  
AAAGGTCATGCTAGAACGTTGCTGTGGCATTCAAGTCAAATCCATCCACGGCAATTACATTAGGTAAA  
ATTGCAGTTAGAATGTTGTAACAATTTTTCTTTGCACTCCTTTTTTCCCATGACACAATTTACTGTTTAA  
CATGAATGGTTATGTACGACAAAGGAACCACCACATTTGTTTTGTTGAAGAATAGAATCTTCAGCCGTAG  
ACTGTTTCATGAGCATTGGTAAAGACTATATAATCTCTCAACATTAAGTTGAAGCTAGAAGGTTATTGT  
AATACAAAGACAAAATATATGTCCATTACTAACTACACCTTATTTCTATGCCAGCCAAGACTTAAAAGCTA  
TGAGGAAGTATAAGGCATGCCAAGAACAATTTATCAATTTTACTTTTCAGCTCCTTTTTCTCGTTAAAA  
TACTGAACTTTTAAACAGGTATTATCTTTTCTTTTCTTTTCTTTTCTTTTCTTTTCTTTTCTTTTCTTTT  
CTTCATTATATAATATGATTCTGGTAAAGGAAATTGTTCTTTCTTTGAGGAAAGTGAAGTATTTGATTG  
GCATAACATTGGGTTGTCATGATTGGTGTACACATGATTCTTAGATGCAAGACAGATTTTATTTGGATT  
CCATTGATAGTAGATGCTTCTCAAATTATGTTTCAAGTTTTCAACATGATTTTAACTTTTCAAGGTAAGT  
GGAAGTTTGTGGACATTGGTGCCGCGTTGGAGACTCTTCTTGCACAAAGCAAGAAAATTCAAGGTAAGT  
CAGTTTTTGTTCATAAGAGATTACAAATGGTGTACAGATCAATTGTAACGAGTTGCTTCTCCATTTTCGCA  
AGGATCAGACAAAATGTGTGCCAAAAGTACTTTTTACCATTTCTTATGCTTAAGATTATTGGTTGAAAC  
AACGACATGCATGGACCTTGTGAGATGGTAGGCTGGAGCAGACTTCTCTTAGATGTGTTCAAGTGTCTT  
GATTGGCAAGTAAAATTGCATTTGGCGGAAACTGGAGTGGAGATATTATGTAAGTGTACTTGTATGACTAAGATT  
TGATAGCAGAGGCCTTTAATTTCTTGCAGGACAGAGTACATGCCTTTTTCGTACTAATAGAGTTCTTTTGT  
TCCAGCAAACATTTTGAACCTAATACTTATCTGCTGCATCCTTGCCTAGTTGATAGCTTCTTTAATGTAGCT  
CTGCTTTTCTGCTTGAATTTATCTATGGAAATTGCACCATTTCAATCCATCTTATTATTGGTTTTATAAA  
ATGGATAAGTATTGTTGGACATTCCAGAATAGTATAGTGTATAAGTAAAGATAGACGAAAGCTACTCCA  
ATGTTGGACCATCATTAATTCCTTCTACCGACACATCTAAATAACTTTAAATAACCAACACAAATACACC  
ACATGTACCTAAGTTAACACATAAAGTGGGAGCCTCACACTCCTTTTTCTTCTCACACCTCATCTCTAAAA  
CTACATGCTCACCTTCTTTACTACTGGTA

>PGSC0003DMG401004726 LRR-RLPs

ATGGGGTCTGGCCAATTCTCATTCTGTTCTTTCTGTTTCTGTCAGCTTTCTTTTTCTTCATCCATACCTC  
ATTTGTGCCGTAAAGATCAAAGCTACGCTCTTCTAGAATTCAAGAGAACACTTATCGTAGATCCCTCATT  
AGTTACGAGTAGTTCCTACTCTTATACGAGTTCATGGAATATGAGCAGAGATTGTTGCTCATGGGATGG  
AGTCGTATGCAATGAGATGACTGGCCATGTCATTGAACTTGATCTCAGTTGCAACAGTCTTGTAGGAAA

GGTTGATTCCAATAGCAGCCTCTTCCAACCTCTCATCTTCAAAGGCTCGACCTTTCTTCTAATAACTTCTC  
TAATTCTAACATCTCGCCTGAATTTGGCAGGTTCTCGAGCTTGACATATCTTGATCTTTCTGACTCCTATTT  
CTCAGGTCAAATCCTTCTGAAATCTCTCACCTTTCCAAGTTACAATCTCTTTATTTCTCAGGAGAAATGCT  
TAAATTTGGACCTCACGATTTTCAAATGCTCCTTCAGAATTTGACTCAATTAAGAGAGCTTCATCTTACTT  
CCATAAACATCTCTTCCACTATTCCTCTGAATTTTTCTTCTCATTTAACAACTCTGAGGCTGGGAAATACAG  
GATTGCACGGGTTAATACCCGAGAGTATTTTTCACCTTCCAATCTGGAAACACTTGTCTTACAAAATAAT  
GATCAGCTAAGTGGTTATTTTCAAAGACGAAATGGATCAGCAGTGCATCTCTCGTAGAGTTAGATCTCA  
GTGGCGTGAATTTTTCTTGAATTTGCCTGAGTCTATCGGTTATCTAACCTCACTGCATTCTTTGTCTCTTA  
AAAATTGCAACCTTCGAGGGCCTATTCCTGAATCTCTTTGAATCTCACACACATATTGGATTTGGACCTT  
TCAGATAACTCCCTAAATGGAACAATACCATCAGGGATGTTCTCTCTCCGTCACTAAGTCGTTTAGTCTT  
GAGTAATAACCACCTTTATGGTCAGTTTGAGGATTTCAATCCAATTCAGTAATCTGGATTGATTTAAGCA  
ATAATCAGCTGCAAGGTCATCTTCCAAGTCGATTCAAACCTTGTGAACCTAACAGGCCTTGTCTTTCT  
TTCAATAATTTAATGGTAGTGTGGATGTCAGCTTCTTTGCTGACCTCAAGCAACTTTATTATCTTGATCTT  
TCATATAATTGTATCTCATTGACCAATGAGAACAAACATAATGTTACTTTGCCAGGATCTCTTATGAGCTT  
ACGATTGGCTGCATGTGAAGTGAAAGAATTGGAGTTTCTAAGATCCGCAAAGCTTCTTTGGCATTGGA  
TCTTTCAAATAATAAGATTGAAGGAAGAATCCCAGATTGGGCATGGTCTAACTGGATTATTTCAATTGAAG  
AGTCTTAATATATCCCACAACATGCTGGCAAGTGTTGATTCAATTCCTCTTCAATCTGCAAATGCCATTGA  
TTTGCGGTCCAATTTTCTTCAAGGTTCACTACCTATTCCACCAATTTCCACAAGATTCTTCTTCATATCCCAT  
AATAATCTCAGTGGGGAGATCCCTTCGTCTATTTGCAATTTGACGTCACTGGTAATGCTAGATTTGGCAG  
GAAACAACCTTGAAGGGAGCAATTCCGCAATGTTTGAGTAATATCAGTGGCCTCGAAGTTCTGGATATGC  
ACCACAACAGTCTTTCAAGGACTCTTCCAACGACTTTTAGAATTGGAAGTGCCCTCAAAGCTTCAACTTT  
CATGGCAATAAGCTGGAGGGGAAAATCCCACAATCCTTGATCAACTGCAAACACTCGAAGTTCTTGATT  
TAGGAGACAATCATCTCAACGACACATTCCCCGTGTGGTTGGGAACTCTGCCAAAGCTGAAAGTTCTAA  
GCTTGAGATCCAATATATTGCATGGACCCATTAGA ACTCTAACAACTGAAAACATGTTTCCTCAGCTTCA  
AATATTAGATCTCTCCTCCAATGCTTTCACAAAAACATAACCACGGGTTTGTTC AACATTTGAAAGCCA  
TGAGGACAATTCATAATGATGAACACACCAAGTGATGAAGGAAGTCGATATTACCAAGACTCGATAG  
CTGTCGTATCCAAGGATATGAGCGTGAAATTGTGAGAATCTTGTTTTTGTACATCACTATCGATCTTTCA  
AACAAACAATTCGAAGGACATCTTCCAAGTATTATGGGAGATCTTATTGCACTCCGTGTGCTGAATATAT  
CTCATAATGGATTGGAAGGTCATATGCCCCATCACTTGGAAAGATTATGTTTCAGTTGAATCATTGGACCT



>PGSC0003DMG401006653 LRR-RLPs

TTCAAGAATTTACCTGTTGGAAGAACCCACCAGAAGAAAACCTCAAAAAACAGACTAAAAATCCCAAC  
TTTGAGTTTTTCTTCAACAATTATAAGTTTCAGTGAAAATCTCAAGATGTAATTTTTTTCAAGAATTCATC  
TTTTAGGAAAACCCATAAGAAGAAAACCTCAAAAAACAGATTCAAATCTCACCTTTTTTTAGATCTTTT  
CAACATTTTTCAGTTTATTAGCTTACAAAAATCACTGAACAAGGAAGAAGGGATTCAAGAAAAAGTGGA  
ATAAAAATGTCATTTGTTTTAGGGGTTGTGTTTGAATAGCATTGGACTTGCTATAATAGTTGCTTTTGT  
GAAATCTGAAAATGCTAGATCCAACAACGTAAGTCTGTTAGTCAACTAAAGTCTTTGTTTTTTTTGG  
ATCTTTATTTTTTCCATTTCTGGGTTTTTTTTTGTATTTATGTTGTTTTTTGGTTGAATTGTAAAGGCTA  
GTGGAATTGCTGCATTTGCTAGAATGACAGTGGAAGATTCAAGAAAAATCTTTACACCAGAACAATACC  
CTTCTTGGGTTGTTTTCTCAAATCAACAAAAGGTGAAGTCGTTAACTTTTCTTAAAGATGTATTTGGTAG  
GACGCAGAGGCGGAGTCAGAATTTTTAGTTTATATGGGTTCTAGACCACTGTTCTTTTTGTTTTGTTGGG  
TTTCTGAAAGCTATGTTGCTCGGACTCTCAGAAAATGTTGTTTGTACCCATTCTGGATTCTCTAAAGTTGC  
ACTAGTTTGGAGTATACGACACTAACCATCAACCGTAACCATTTTTGAAGAGTCCGAACAACATTGACTG  
AAAAGACTATTTTTACATCTTATAACATTAATATAGGGTTAAACCAAAGCTACTGGATTTTGATGTACTTG  
TAGCTAAAGCAATGTCATTTATCATAAATCTGTAAACTGACTTATTTTCTAGAAAATGTTTTTCGTAATGG  
ATTTTTTTTTCTGGGAAAAGACATTTAATCGGATAGTGTTTGGTGAAAATATTTGAGTAGTAAAGATTGA  
TAATAATGTTTATATGTTGAGATAATTGTTTGTCTTTTTGGTGGAATAATGTTTTCGCAAAACATATGTT  
CTAGCAGCCAAAATCAGAAAAAAGAGATTACAAACACACCGTTGATGTCCTTATCTGTTTTTGGAGCACA  
TAGTGACCATATAAGATCATTGAGATTAAATTCATGCATTATGGTTCAAATTGTGGTCTTTGGTTGCAAG  
ACTGTCCCTTATGGACTTTGTTAATTTCTATCTAGAATACATCTTGTGATTTAGTTTGTGAGGGCAAA  
AAATGACCTTTTGAATTTTTCAATTTTGTCTTACAGTTGGCATGGCCAGATGTTGTGATTTAGTCAACTA  
AAGTTTTTGTTTTTCTTACTTCAATTTTTTGGATTTTGTAGTTTTTCCATTTTTGGGGTTTTCTGTATTTAT  
GTTGTTTTTTGGTTGAATTGTTAAGGCTAGTGAATTGCTGCATTTGCTAGAAGGACAGTGGAAGATTC  
AAGAAAAATCTTCACACCAGAACAATAACCTTCTTGGGTTGTTTTCTCAAATCAGCAAAGATGAAGTC  
TTAACTTTTTCTTAGGATGTATTTGGTAGGACGTAGTGGCTGAGTCAGAATTTTTAGTTTATATGGGTTCT  
TAGACCATTGGTTCTTTTTGCTTGTGGGTTTCTGAAAATTATGTTGTTCCGACTCTCAAAAAATGTTG  
TTTGTACCCGTGTCGGATTCTCTAAAGTTGCACTAGTTTGGAGTATACGCCAGTAACCCATCACCCATCAC  
CATTTTTGAAGAGTCCGAGCAACATTGACTGAAAAGACTATTTATACATCTTAACATTAATATAGGGTTA  
AACCAAAGCTACTGGATTTTCCGTAAGTGTAGCTAAAGCAATGTCATTTATCATAAATCTGTAAAATGA

CTTATTTTCTGGAAAATGTTTTTCGTGATGGATTTTTTCTGGGAAAAGACATTTATTGTAGATTGAATCA  
GCAAATTGGATAGTGTGTTTGGTGAAAAATATGTGAGTAGTAAAGATTGATAATAATGTCTATATGTTGA  
GATAATTGTTGTTCCTTTTGATGGAAAATAAGATTTTACCAAACACACTGTTGATGTCCTTACTGTTTT  
GAGCACATAGTGACCATATAAGATCATTGAGATTA AATTAGTGCATTATGGTTCAAATTGTGGTCTTTGG  
TTGCAAGACTGTCCCTTATGGACTTTGTTAATTTCTATCTAGAATACATCTTGTGATTTAGTTTGTTGAG  
GGCAAAAAATGACCTTTTGAATTTTTCAATTTTGTCTTACAGTTGGCATGGCTTAATTCTCATCTTGAATA  
GATCTGGCCATATGTGGATGAGGTTAGGGGTTCAATGTCTATACATAGTTTAGTTTTCCACTCTATTGCG  
ATTCTGCAATTTTTCAATTTCCCTTTTTTTTTGGTTCTAATTTATGATTGTTGAACTTCTTTGTTGCTAATTG  
AGTCGGTATGGGTATATATGGTAATTCAGGCAGCATCAGA AACTAGTAAAGTCAAGTGTGGAGCCAGTTT  
TGGAACAATATAGGCCTGTGATTTTGGCGTCGTTAAAATTTCAAAGTTCACTCTTGATACAGTTGCTCCA  
CAATTCACAGGTTAGTAGATTATGGCTGGTGTAACTGCCTCAAAGCTCTTGTATATTGTACTACCTAAA  
AGTTTTAGGAGTCACTTATACATATGAACAACTTATCAGTCCTCTAGGTCTTTATGGCATGCTTATGTCT  
GGAGTAGCGTAACATTTCCCTGCACGGACACCACCACCATCAAAAAAAAAAACGGCATAACATTTTCTT  
GCCATTTATAGCCTCTTGAGATGTCAAATGTGACAAATAATTTGAGACAGGCAAGGGTATAAAAAGATA  
TTCAAACCTCAAAGAGCAATCCTATCATCTCGTGTGAGTTAATCCTTAATAAAAAGAACTGCTTGTGAGG  
ATGAATCTCACTACATTTAACAATGCTTGATCTCATGTATATGCCACTGCAGGGATTTCTATTATTGAAG  
ATGGAAGTGAGGGTATTACTATGGAATTAGAGATGCAATGGGATGGTACCATAACCATCTTGGGTGTTTA  
GCCTACCTTTGCTATCTTCAGTGTGCTCCAACATAACCGATTGAGAGGTCTAGCTGATGAAGTGATCAA  
AACCGCTCCAACATAACCGATTCGGAGGACTAGCCGATGAAGTGATCAAAACAAACCCAACATTA AAAC  
AACTGCATTTAAGCAATAATCAACTCAGTGGTTCTTTTCTCAATCACTTGTGAATCTCACAAACCTTAAA  
ACCCTTGGACTTTTCATCAAATAACATCACCATTGATGAGGGAATGAATATCACCTTTCTTAGCCCATCATC  
TTTATTCTTATCATCTTGTCAACTGAAGGATTTTCCACACTTCTTGAGAAATGTAAAGACACTTGTGTA  
GGATATTTCTAACAATATGATTCGTGGTCAAATTTCTGACTGGTTTAGCGGCATGAGGTGGGACA  
ACTTG  
TGGTACCTAAATATTTACATAATCTTTTGACAGGTTACCTACCACAATTGCATTTCCATAATCTAGGGTA  
TCTTGATCTGAAATTTAACTCCCTTCTGGGTCCTACTACCCTCATCCATTTGTAACATGAGTTCGCTTATCTT  
ATTAGATTTATCACGCAACA AACTTCAGTAACTACAGTTTCGTATGAGGATTCATTGAGTTTGGTAATCAA  
AGGGCAGGATATTGAGCTACAAAGAATCAACACAATTATGACAACCATAGATCTCTCAAGCAATCATTTT  
GAAGGTGTGATTCCGAAAACACTAAAGGATCTCAGCTCACTTTGGCTACTCAATTTATCCATAACAATC  
TCATAGGTCATATTTCCAATGGA AACTAGGGCAATTGAATACGCTTGAAGCTTTAGATCTCTCTTGGAAATTG



GCTCACTGGAAATATTCTGCAGGAACTGACAAGAATGAACTTTCTGGCCTTCTTAAACGTCTCTCAAAT  
CATCTTGTTCGGACCAATTCCTCACGGTCTACAGTTCAACACATTCGAAAATTATTCGTATGGCGGAAACC  
TTGATTTATGTGGTCTTCCTTTATCAAAGCAATGTGGAACGAGTGATTCATCACATGTTCTCAACCATTG  
GAGTCCGCAGAAGAAGGCGAGTCATATTTTTTAGTGGATTTCTTGGGAATTAGTAGTAATAGGCTAC  
AGTTTTGGACTTGTTCGTTGGAAGTGTTCATGTGGAGCCTCATGTTTAAATATCGTAAGTCAAAGTGGTTTG  
TGGAATTTTTGATGGACTCATGCCTCACAAAAGAAGAAGGCCAAAAGAAGAGAGCTCAGAGACGAAGG  
ACTTAATGGAAGCTTGAGAGGGCTAAATTGTCTTTGTTGATTTTGTGGACTAGTGAAGTGTCTGTTTT  
GTCTTTTTTAATTTCTATTTGTTGTTTGTATATGTTAGAAACATAATTATATGTGTGTTATTGTAGTATTC  
AATTTATGTTAGTTTGTCTGTTTCAAATTGACAGAAGTGATCTACACAGCAACTCTAGCTATGTTACTT  
AGATTTTTCAAAAATGTCAACGGGTACGTGTTGGATTCTTCAAAGTTGTGTATTTATTAAGGAACCAAC  
ATGAGCAGTGGCGGATCCAGGATTTTCATTAAGGGTTTCGAAAAAAGAGAGCAGTGCTTAAGATTTG  
AGTTTTGAACCCCTCAACCACTAACTAACCTCTAATCTTATATTCAGGAGGTTCAAATCAATATATAAA  
CATAAAAATTCTTTAAAATACCTTAAATATACAACATAATTTTTTGCCGAGGGAGTTGGTCCACCCCTGAA  
CATGGGTGCGACATCATCATATTTTAGGAGAGTCCGAGCAACATAGCTCATTAAACAACAAAATTGGA  
TAAAGCAGTGCAGTAAGCATATAGAGTTTGGTTCATGATTGAAATTAGTTGATATTAGAAAGTTTATATT  
TGTGAAAATTGATGTAGAAGAATGCTCAAACTACAGAAGTGGCTAATAATTTTGTGGTACTTCATCTTT  
CTAGTCATAAAACATCCTTAAAATGTTCTCTAACTCAGTTTCAACTTCTGCAATTTTTATTTTGGTAGATTT  
TTACATATATTTATACTTCATGACGAGTGTTATGTCTCACGTGATCCAACAATAATTCATACTGCTTGATT  
ATGAATGAGGAAATTTTTTGTGTTTGGGAAAATGCTCTCTGGAATCGGCTCACTGGAAAGATTCCAAG  
GGAAGTACAAAGACTAAAATCCTGGCAGTCTAAAACCTGTCTGAATGTTCTTTTTAGACCGATTGCA  
TGCTCCTCGTCCATTGGAGTCCGAAGAAGAAGAAGAAGAAGAGAGTCGTATTTTGTAGTTGTGGATTA  
ATTGTTGTAAGTGTTCATGTGGCACCTCATGTTTAAAGATGGTAAGCTGAACATGTGATCCTTCAATACAA  
TTAGTCTCTCAGTTTTTTTTGCTTGAGTATCATTTTTTTTATCTTCTTAATTTGATCACTATACTTTATCTTG  
AGTCGAGGGTCTACAGAAACAACATCTCCACTACTTTGGTTATTTTCCATCTCTTCATATTTGAACTGTAT  
CATATAGATGGAATTTCCCTCATTAATGTTTAAAATCTTTTGGAAAACAGCACAAAGAGACAATA  
ATCGGAAATTTCTCTACAGGTGGAAGGATCTTCACCAAGTATTTCAGAACATACTAATTAAGCAGGAAAA  
CACAGATCAAACAAAATTTTGTATAAAATCCACAAGGAGGAAATGAAGGACTTAAATCATGTCTTTAAT  
TATTGTTCAATTTTTTCTCACTTGACTTAGTCAAGCAATAGTTTCTACCATTTGAAATTTCTAAGAAGTTC  
TGCAGAAATTTTTCTACATAATGGGACCAATTTACATTATCTTGCGTAACACACTGCAGAGATAGTTAA

TGACTTTGAAATGAACACAACATCAAGAGAAAAATAGGACATAGAGAGTATTATTTTGTTAAGTCTTCTC  
CGTCCTCTAAAAAGTCTTGTGGAACACTACAAAATATGAGTATCAAGTTGTTAGAAGTGAGTAGTACTCA  
TCTTGTAATTCAATTGTTTCATCAGTCCCGATTTCATCATAATCTTTTTTTTCTCTAGTCTTTGTGGAAATTG  
GCTTAAAGTCTTACAAGTCATCGTCCGCTAGTTACAATACTGTATCACTTTTTTCTTAGTTGGAATGGAA  
TATTGATGGATTTTCCCTTATTTACTTAATGTGAAAATTATTGTGTACCTAACAAGTTTGAAAATAGCAGA  
AGAGACAATAATCACTCACTCGGATTGACTTTTCTGATTGTATAGATTCATGGAAAAATTGCACCAA  
AATTTATTTAATCCTCAATTGACTTGGTCATGCAACAGTTTCTCTTTGAAAAGTATTGTGGAAAACAGAAG  
AGATGTTGATGGAAAGTTGGACAAGGTTGACATAAAACAGGAGTTCAAATAACTATAAAATATGTATGG  
ATTTTGAAAAACAGAACATTCTGTAATATGCTGTAAACAAAAAGTAATTCCCGTGACCAGTTCAGTTCA  
AGGTTGGTCACGGGAGGGTTGAATAAAAATCACTTGAAAGTTGTTAAGGGGGTATTTAAATGTTTCATGT  
AGTTTAAGTCTAAAGTAAATTTGGCTATCAAGTTTGAGGGTGATTTTAGGATTTTTCTCAAAGTTAGC  
AGTCAAATTGAAAAAGTGTTCAAATTGGGAAAATATGTAAAATTGTTATTTTCCATCTCTTCTATTTG  
AACTGTATCATATAGATGGAATTTCCCTCATTAATTAATGTGAAAAGTCTTCAGCACAAGAGACAATA  
ATCGGAAATTTCTCATAAAATTTCTCTGCAGGTGGAATGATCTTCACCAAGTTATTCAAACATACTAAGC  
AAGCAGGAAATGAAGGACTTAAATCATGTCTTTAATTATTGTTTCAGTTTTTTCTCACTTGACTTAGTCAA  
GCAATAGTTTCTACCATTTGAAATTTCTAAGAAGTTCTGCAGAAATTTTTCTACATAATAGGACCAATTT  
CACATCATCTTGTGTAACACACACTATAGAGATAGTTAATGACTTCGAAATGAACACAACATCTAGAGAA  
AATGAGGACATATGGAGTATTATTTTGTTAAGTCTTCTCCGTCTCTAACAAGTCTTGTGGAACACTACAA  
AATATGAGTAACAAGTTGTTAGAAGTGACTAGTACTCATTTTTGATTCAATTGTTTCATCAGTCCCGATTCA  
TCATAATCTTTCCCCCTCTAGTCTTTGAGGAAATTATCTTAAAGGCTTACAAGTCATCGTCTGCTAGTT  
ACAGTACCGTATCCCTTTTTTCTTAGGTGGAATGGAATATTGATGGATTGTCCCTTATTAATTAATGTG  
AAAATTATTGTGTACCTAACAAGTTTGAAAATAGCAGAAGAGACAATACTCACTGACTCGGAATATTG  
ACCTTTTATGATTGTATAAATTCATGGAAAAATTGCATAAAAAATTATTGCATTCTTTGTGGAAATTGTC  
TTATTAAGACTTTGGCTTCAAAGAACAAAATAAAATTCACACGGTATTATTGTTTTGTTGTTACATACT  
CTTAAGTTGATGTCTTTAATTATTCTTCATTTTTTTTCTCACTTCATGACTTAGTCAAGCAATAGTTTCTCT  
CATTGGAAATTTTTCACTTATGCAGAAATATTTTCTACTGTGAGTGTTACGTAACCTTGACCAATTTCA  
CATCATCTTGCGTAAACACACACCGTAGAGATAGTCGATCGATGATCTCGAAATGAACAACAACATCTAG  
GGAAAATGATGTGTACCAAGTCGTTAGAAGTGACTAGTACTCATTTCATGGACCATATGTGACTGAAAAT  
TGACTTTACACTTGGGACAACATTTTTTGCAACCACAAATTATTACCCATTTATTTAATTATCTATGTGTT

TCTTTTCTTCGTTAATTTATACCTCAATAGTCCCATGCATAGACAAGTCAACAACGTTACTTTATGAAATA  
TTGTTTAGTTAATTGTTTACTTTATTTAATGTGGAGGTTGTTGTAATAATTAAGAAATGGAATAGTGTTTA  
GTTACTTATAGCATCCTTTCTACATGGCTACTTATTTTATTGACTTATTTATATCTTGGCAATTATCATGA  
ATTTTGATAATGCATGTTTTTCATTGAACACGGGTGCAACTTAGAAAGTAGTATATATATGTGTGGATAAT  
ACTGATTGATTTGTAAGAAGAACACATCCATCCTGTTATTTGCTGAAAACAAACAAACAAAAAATGGTCA  
TGAGTCTGTTTTCTTCATTCATTTCTGTATTTTGTGTTGCTAATAAGTATGTTTTCTTCTTCCTTTGATC  
ATCATCTTTGCTCTCCACCGAAGCTTCTGCTTTGCTTCAGTTAAGCAATCTTTTGGAGTTGATTACAACT  
ACTCCAAATGTTTTACTTCTTTCCAAAAAGAAAGTCTTGGAATGAGAGTAGGGATTGCTGCAGTTGGGA  
TGGAGTCACTTGTGACTTATTAACGGTCATGTTATCGGGTTAGACCTTAGTTGTAGTCTGCTTAGTGGA  
AGTATTCATCCCAATAGCACCTCTTCCAACCTTCATCATCTCCAGGCACTAAACCTTGCTTACAATCACTTC  
AGCTATTCTTCAATCCCACATAACATTGGCCGATTGACAAATTTGGTTTCGCTTGATCTTTCTTCTGATTTT  
TATGGACTACAACCTTGATGAGAGAACATTTGAAACAATGCTTCAAACTTGACAAATCTGGAAGTACTAT  
CTCTCTTTCTTGCAACATCTCATCTCCGATGCCTGTGAATATTTCTTCTCTTTAAGGTACCTGGATCTTC  
GTTATACTAATCTGCGAGGTGTTCTAACAGAGAGCTTTTTCTTCTGCCAAACAGCTTGGAAACGCTCAA  
ACTGAGTGGGAATGATCTTCTCAAAGGAGTTTTTCCAAAGATCCACCGGAGCAACACTCTGTTAATGGA  
GTTGGATATTTCATACACAGGCATCTCTGGTGAGCTGCCTCATTCAATTGGCACCTTTAGTTCATTGAAAT  
ACTTAAACCTCCAAGGATGCCAATTCTCTGGTTCATTCTAATTCCATTGACAACCTAACCCAAATTACG  
GAGTTGATTTTATCTTATAATCATTTCACTGGACATATTCTTCCACAATCTCTAAATTGAAGTACCTCACA  
AATTTACATCTTTCTGACAACCTTTTTCCAGGTGAAATTCCTGATGTTTTTTCTAATCTCAAAGAGCTACGT  
TATTTAGATCTTTTAATAACAGCTTCATCGGTCCATTTCTGCTTCAATTTTAAGTTTGACACATCTTGAA  
TACTTAGGATTGTCGAGTAATTCCCTATCTGGCCCACTGCCTAGCAAAGCAAGCATGCTTCAAAGCTAT  
CCGAACTGCATTTGTCTTACAACCTCGCTGAATGGTACCATACCATCTTGGGTGTTTAACTCCCTTTGCTA  
TCTTCGTCGTGGCTCAATCATAATCAATTTAGTGGACTAGCCGATGAGATCAAACAAACCCAACATTAG  
AATTCCTGTATTTAATAATAATCAACTCAGCGGTTCTTTTCTCAATCACTTGTGAATCTCACAACCTTT  
CTACCTTGACCTTTTCATCAAATAACATCACTATTGATGAGGGAATGAATATCACCTTTCTAGCCTTGAA  
ATTTTGCAGTTATCATCTTGTGAACTGAAGGATTTTCCACACTTGTGAGAAATGTAAAGACACTTCAGG  
TCTTGGATATTTCTAACAATAAGATTTGTGGTCAAATCCCTAACTGGTTTAGCGGCATGAGGATGGGACT  
CGTTGCAGCTATTAACCTTTCTCATAA

>PGSC0003DMG401010943 LRR-RLPs

ATGGCCGATCCTGTATTTGCTGCTACTGTAAAGTTTTGCTTGACAACTGCTTTCTCTCACTATCAAGGA  
GATCAACAGTTCAAGGGATTGCAACGAAGATCTGGAAATGTTACACAAAATGTATCCTTAATCCAAGCT  
TTCCTTCATGATGTTGAAACACCACAAGTTGAGAAACAACAGTCTGTGCAACAATGGCTCAGGAGGCTT  
GAGAGAGTTGCTGAAAATGCTGAAAATGTGTTTGATCGATTCAAATATGAATCTCTCAAAACAAAAGTG  
ATGAACATCCGAAATAGCCCAATGAAAAAGGTCAGTGGTTTTCTTACTCATACTGCTTTTAAGAGCAAAA  
TGTCTCGAAAATCAACAGCATCAATAAAGAGTTGACCGCTATTAACAGTGTAGCCAAAGACCTCGGTCT  
CCACTCACTCATAGTTCCTTCTCGAAAATATTTCCGATTGAGAAACAGATTCCTTAGTAGTTGCTCCAG  
ATGTTGTTGGTAGAGATTTGGATGTTGCTGAGATTAAGGAGAAAATTTGAAGATGAGAGAGGAGGAT  
GTTGTTATGTGCACTATTCCCATAGTGGGTATGGGGGGTTAGGGAAAACAACTTTGGCTAAGAGGATT  
TACAATGATGAACACATCAAGCAAATCTTTGAAAAGAGAATTTGGTTGTGTCTACCTGAAATGTCTGAAA  
CAAAGAGCTTTCTTGAACAAATCCTCGAATCATTGACAGAGAGGAAAACCTGAGGTCCAAAGGAGAGAT  
ATAATAGTCAAGAAGCTACAAGATGAATTGGGAGGAAAAAACTATTTACTAGTCCTGGATGATTTGTGG  
TGTGTTGACTCTACATCGTGGCATGAGTTCGTCGACACCTTGAGAGGAATAAATACATCCATAGGAAAAC  
GCATTCTTGTGACTACTCGTATGAAGCGGGTGGCATCCACTGTAGCAACAGATCTTCATATCTTGGGAAA  
GTTAACAGAAGATCATTGTTGGTCTATTTTCAAACAAAAGCATTGTTGATGGCAGGGCTCCAGAAGA  
ATTAGCGAGCATGGACAACAAGATTGTTAAAATGTGCCAAGGCGCAACAAGATTGTTAAAATGTGTCA  
TGGTCTACCGTTGGCTGCAAGTGTGTTGGGAGGCCTATTACACAACAAGGAAAAACATGAATGGCAAG  
CAATTCTTGATGGCAACCCCATGTTGCAGGTGAAGATGATAATGGAGAAAATAGCATAAAGAAAATCC  
TAAAACCTCAGCTATGATTATCTACCATCTCCACATCTAAAAAAGTGCTTTGCTTACTTTGCAATGTTTCCAA  
AAGATTCCAAAAGATCTTATGTTTAAAAGGCCCAACTAATCCAACCTCTAGATGGCAGAAGGCTTTCTTC  
ATCCATGTCAAGAGACCACCGTGATGGAAGACATCGGGAACAACCTTCTTTCTACTCTTGTGAGAAATC  
CTTGCTACAAGATGTTGTGTTAGATGAGCATAACAATATAAAATACTGTAAGATGCACGATCTTGTGCAT  
GATTTGGCTGGAGATATCTTCAAATCTAAACTATTTGATCAGAAGGGCAATGATGGAGAAAAACTTTCTC  
AAGTGCGATACTTTGGGTGGGACTCACCAAGTGATCAAATAGATAAGATAAATGAGCCAGGACGGTTG  
TGCACGCTGTTCTGGAGAAACAATTATATATCGGAAGATATGCTGTTGAGCTTTAAGTTCTTGAGAGTTT  
TAAATTTGTCTAGATCAGGAATCAAGGAGTTGTCAGCCTTAATCGGGAAGCTAATACTTGAGATATCT  
AGATATCTCGAGCACTGAGATCACAACCTTGCCCCACTCCATTTGCAAGCTCTATAATTTGCAAACCTTTA  
GAGTCAATTGTTGCTATCACTCAAGGAGTTTCCATATGAGATGGGAAATATGATAAGTTTGAGACACAT  
ATATTTTTATTCTTCGTCTCAGACGCCACTTAACTTGGGACAATTGACTTGTCTTCAGACCCTACAGTATTT

CAATGTGGGTTTGGAGAAAGGCCATCGAATAGAAGAATTAGGTTGTTTGAATAACCTTAGAGGTGAATT  
GTGTATCAATGAGCTGGAATTGGTCCATAGTAGAGAAGAAGCTCTAACAGCATATTTACAAGAGAAATC  
AAATATTTACAAGCTGACATATTTATGGTCCCATCAGGAATCAGAAGGATGTGAGATTAATGCTAAGCAT  
GTGTTGGATGGTCTTCAACCACATCCTAACTTGAAAACATTTGAAGTGGTGAGATATTTGGGTACTAGAT  
TTCCTTCATGGTTCAATGAACAGTCGCTACCAAATTTGGTCAAGTTGAAATTAAGTAATTGCAGAAGTTG  
CAAAGAAATTCATCTCTTGGCCAACTGAAATTCCTTCGGCATCTTGAAGTGGTAGGGTTCCATAAGCTG  
GAATGCATCGGAACTACATTTTATGGTATTGAGGTTAACAATATGGGATCAAGTAGCAATAATGCCATTA  
TCCAAGTGTCCCATCATTAAAAGAAGTAGTATTGGAGAATATGCGTAGCCTTACTGAGTGGAAAGGGAG  
TGAATCGATACCAACAACAAGTGGGGTAAGAATGTTTCCTGGGCTTGAGAAGTTGAGGATTAGCTACT  
GTCCATTGTTAAAAAGTACTCCGAAGCTATTTGAAATCCTACGTGAATTGAGCATTAAAGTAGTTGACAG  
TGAAATGCCACTATTGAATTTGTGCAGCAACTTGACATCTCTTGTAAGCTTAGTGTCTCTTTTGTGGAAG  
AGTCACTTGTTTTCCAGATGAGATGCTACGCAACAACGTTTCTCTTCAACACTTATCGGTCTCAAAGTGC  
AGAGAGTTTTCGTGAATTGCCACAGAGCTTGTACAATCTGCATTCTCTTAAGAGCTTAATCATTGAGTGT  
GCACCAATTTGAGTTCCTTTCCTGTTCCAGTGGAGAGAATTATTTGACTTCCCTACAAAATCTTCAGCTA  
TGGAGTTGTGGTGGATTGGCCAGTTTACCAAGTGAATGCTAGAGAAATGCCGGTCTCTACAGAATTTG  
AGGGTCAACTATTGTAACAAGTATTGTTTCCTTCCCTTACATGCGGGGGACATGCCTTCACTTTCCTATTT  
GTCTATAGCACACTGTCCCAAATTGGATAGTGTACCCACAGGGGGCCTTACCATCTCACCAGGTTAAGG  
GAATTGGAATTTGGTCCCGTCTCAGATATGGTGGATTTTGAAGCATTCCAATTGACTTTTAATGGCATT  
AGCAGCTGTTGTCCCTTCGACTCTGCTTGTGTTCCGACATTTGCACTGGGATTCTCTGCCCTATCAGCTT  
ATGCAACTCTCTGCCCTAACTCATATACATATATGTGATTTCCGGAATCGAGGCTCTTCCCTCATAGACTTGA  
CAATCTTACTTCTTGAAGTATTACGTTTGTGAGGTGCAAACGGCTGCAACATGTGGACTTCTCAGAT  
GCCATGCCCAAATTACAGTATCTAACCATCTGTGGTTGTCCATTGTTAGAAGCTCTGTCGGATGGGCTTG  
GCAACCTTGTTACTTTGCAACAGTTAAGATTAGAGAACTGCGAAAAACTGGAGCATCTGCCATCCAGAG  
AGGCCATGCGACGCCTCACTAAATTATGGTACCTAAAAATTAAGGGTGCCCAAAGTTAGAAGAAAGTT  
GCAACAATCGGAGTGGCCCAAACCCAGTGGTCCAACATTTCCCATATCCAAAAGTTAAAGTAGGTG  
GAAGCATAATTCAGGACTTGCGTAAGTCTCATTTTTAATTTTTATTTTCTACGAGTTCTAGAAAAGAAGTT  
CTGTATGAATATATCTCAAATTATCAAACGTTTCGTTTGTGTTTGCACGTTTATCCTTCAATAAAGAGTTA  
TCACTTAATCCTAGAATGTAGTACTCTTCACTACATAGTATAATGGAAGTTATTAAGTGGTATGTACTCTT  
CATTACATAGTATAATGGAAGTTCTTAAGTGGTATGGTTCCTGAATAAGGTAATTGTTCACTCTTCAAG

TATAGACAAGTATTTTACTGGCATAACATTTGCTTGTCATATCTGGTATATTACAGTTTCTTTTTCGTAAG  
AGGAGGTGAACTGTAGAGAGGAAAAAGCTGACCTAATTTGACTTCTATTCAATTTGCATCAGTGGTGCT  
TTTGGAGACTCTGATTGTATGTCGTTTGAGATTTTAAGGTAAGTTTTTGTCCATAAAAAGTTTGCAAATG  
GTGGATTTTAGATCAATACTTTGTTTTCTCTATGAATGGTTTTCTTTCCCCCTAAATGCCGTTTTTAAA  
TCATCCTACTTACCTTTATCTCGTATACTGTTCTTAGTTAATTGAAACTCTCAAGGAACAACACCAAGTCT  
CATATATAGTAGAGGTCTATATAACTTTCTTAATAGTCACACTTCTCGTACTTGAACAAAAAGGAAATTT  
CAAAGGACTGCTATGTCTTGAACCTTACAGCAAAGAGTGCCCCATTGACTCTAAAATTTCAAAGACAA  
CTAGGTTTGTACAAAGCAATTTGTGTTCTTGTATGCAAGTTTTAGAGTTCAATAAGAATGTGAACTTAC  
ATTGATTATTTGCTGGTAATTGTTGTTTGGCATGTGGTTGAACTCTGGATACAGTCCTTCCTGTCTTGTGG  
ATATCAATAAATCTTCAAGATTTGTTTCTCAAATTCTCACCGATGGAGTGGCTGCAGCCTCCAGTTCCAT  
CATGTCCCATTTGGGATATATTGCACAGAGACGTGATGGCATTGAAATGCTTATACCATTCTTGCTGACA  
CTACAGTAAGTGATTGCCTCACATCTCAGTTAGATTGACAATCATTAGCCACAAAGGGAAGAAAAGAGT  
AAAAGGAGTATCATAGATGTCACCAAAGACGAATGTACAAATAACTCCAAGGATCCCCTGTCCTTAGG  
TCCTGAAAGAGACACCGATCATATATGAAAGTTACATTCGAGTGGCTTTGAAGCTTGTGTCTTTACTTAT  
GTCTAGTATATATGTAATTTATCTGATGTATCATTGCCTAGTTGATATATAGCTTCTCTCATCTAGCTCTGT  
TTTGAATTTATCTTGGCATTTCATTATTTTAAGTGCAAATACTATGATGGTTCAAATCTAGAGCTTGTG  
TTCAAATCGACAAGGCATGCAATGTCCTCTTTTGATATATCAACTGTTTGTGCAAATTCATGTGCTGTG  
TCTTGGTACTGAAGCACAACCTCCTCACTAGATAATGCATTTGGTGAGCTTACTATTAAGCATTATATAAC  
TACTGGAAACAGGAGTACTTACCATTTCGGAGTTAAACAGTATGTACCATTTTATTGTAAAGATAGGTTAT  
GCAATGGCTCTAACCAA

>PGSC0003DMG401014048 LRR-RLPs

GAAAACTTTTCGGTGGCACTTCCATCTGCGATGACATCATTGAGTATAGGCTACTGTGAGAAGCTGAAG  
TGGCTTCCAGATCATATGCAGGAACTCCTTCCATCTCTTAATGGACTGCATCTTTCTAATTGTCCAGAGAT  
AGAGTCCTTTCTCAAGGAGGATTGCCCTTCAATTTACAACAACCTTGAGATCATTAAATTGCAAGAACTG  
GTGAATGGCCGAAAGGAGTGGTGTTTACAGGGACTCCCTCGTCTCAGAGAGTTAGAATTAGTGATCTAT  
CATGACGGCAGTGACGAAGAGATGGAACATTGGGAGTTACCTTTCTCTATTTCGAAGACTTGAGGTATCC  
AATCTGAAAACAATAAGCAGCCAAGATCTCAAAGCCTCACCTCTCTTGAATTTCTATATATTGCTTATTT  
ACCTCATATCCAGTCACTTCTGGAAGAATGGCGGCTTCCCTCCTCTCTTTCTGAGCTATATTTATATGGCC  
ATCATGAGCTCAATTCCTAGGCCTTTGTTACCTCACTTCGCTTCTACGTCTACGCATCGGCAATTGCTGT

AATCTCTAGTCACTTTCCGAATCAGCACTGCCCTCCTCCCTCTCTCATTGACCATCAAGTATTGCCATAAT  
CTCCGATCACTTTCCAAATCAGCACTGCCCTCCGCCCTCTCTGAGCTGACCATTAAGTGTTGCCGTAATCT  
CCAATCACTTTCTGAATCAGCACTGCCCTTCTCCCTCTCTAAGCTGACCATCAAGGATTGCCCTAAGCTCC  
AATCACTTTCTGAATCAGCACTGCCCTCCTCCCTCTCTGAGCTGACCATCAGAAATTGCCCTAATCTCCAA  
TCCCTTCCAGTAAAAGGGGTGCCCTTCTCCCTCTCTGAACTATGGATTTTCCGCTGCCCACTGCTCAGCCC  
ACTACTAGAATTTCAGAAGGGGGAATACTGGCCAAATATTGCTCAAATTCCTTCATATTTGTCGATGGG  
AAACACCTGTAATGTTTAAAACGAATGGTGCTCTGACAAATGTAAGTTATTCTTTTCCCTCGGAAGCTTTT  
TACTTTTGCTTACTTCACTTTGCTTTTCTGTTAATTCTTTTCTTTTAAAATCTTGTTGAGCAGTGTGGAGT  
GTCTATTGCTCAAACCACGGCTAGTGACCAAAAATTGCTCATATTTCCACCATATATGGGAGAACCTGAA  
ATAATTTAAATGAGTGGTGCTCCTACAGATATATAAGTTATACTATTTCTTCGTATCTTTTGATTATTAGT  
TACTTCTATTTGCTTGCCTGTTAAATCTTTTGGACCAGTGTTGTAGCATCTATTACCTCTGTGAAGTCGAG  
GAAATATCTTTAGATCAGGAAAAAACTCCTTATATTTGCATTGAAACATTGTAAGAAATCTAATATAA  
GCAGGAATTGAGATAATTTGCTCCAGAGTTGTACCAGGATGTTTATCGCACAAAAGCAATTCATATATA  
CTTGACAAATCTCACTTTCATGACCTATGTTCTCTCTCAAATCTTGCACTGGAAGTTTATTTGCCAT  
CATGAAAGTTGTTCCACATTTTTCTGTCTTTCTACAGAGATAAAGGGTCCAAGAAATCCAACCTCATTGT  
CATCTCTTCTACATAGATGGCCCAAGAAATGCAACCTCACTTTCTCAATTAGGTAGCCAAGACCTTCACAA  
GAGTTACATCAAGCTTGAAATTTAAAGAAATTGAAAACGACTTTGAATGCCTACTTTTATTATTTACTCCA  
TGTTGTACCATATTGATATCAAATTTGATGCTACTGCATTTTACATCAGTTTTTTTTGGTATTCAAATCCAG  
AATATTACATCCATTTTTTGGTTTTGATATTCAGAGAACTTTGGAGATTATGAAGTTTCTTTCAAGTTATGT  
CCATTACTCAACCTCGAGTGACACCTCACAGCTAGCGGAAAGTCAAGGAAGTATATCCTAGTCGGGATG  
ACTTCAAGGTTAGATAACAAAATAATGATTTACTCGTGTTTTAGTTACCAAGATGCGTATTTTTAAGTAAT  
AGTTTGCCTCTCATAAATCAGCGAAATAGATTTCTTCATTGGCACTCTCATCAGTCATCAGCCAGCGAA  
ACAAAGAAACCGTCGGTTTCAAATTTCAATGACACCCAAGTTTAAAAAAAAGACATCAACAGAGGAGA  
AGAATTCAACCCACACCCATTTCAACCCAAGTTTTCTGCTTTACCTGATGCGAAGAAGTTTATGGGTGA  
GAAAGGTCAAAGGTATATATATTTTTTCTTCTCTTTTCTCACTGCAGCACTTATATTGGTTTTTCCCTGC  
TTTACATCACAATGCTGTGCGGAGTATATCAGTTTTCTACTGTTATTCAGATACTTAAAGTGGGAAATTGCT  
TCTGATTTGAGGTTTAAAATTTATCTTTATTGTAATTATTTGATTTTTTAACTTCAAATCTAAACGTGAA  
TTTTTACAACAACAATACACCCAATCTATGCCTGAATTTTTTCTGTTCCAATTGTTTTGCTACTACAGTATT  
TGTGTCCAGCCTAATTGGTATTGTTCATTTTGTGAAACATCCTATAATTATTTGGAGAGATAATATCTTAG

TTGATCACTCAACTATAAATTTTTTCTCAAAAAATCACTCAACTTTGATTAECTATGGAAGTTTTACTTAC  
CAAGTCAATCAATCTATTTAATTGATTTTTTTCATTATAATTTGCTAATATGAAATTTTTATTTAAAATCAAA  
ATTTAAAATTTTTAAGAAATAAAAAGACATCTATTCAATCCATTTAATGATCCGACTAAAAATATTTAAA  
AGGTAATTACTATGTTAGTTTTAGTTTTTTAATATATTTATAATGTAAAGCTCTATTTCATTTTTTGAAAG  
CTGCAGTAGAAAATGTTTTGATGTGAAGTGCAAACACTTGGAGTTTTCAATTTGCCAAATGAGACTCGTTT  
AATATAAGTTTTCTTAATTAAGTATTCATATTTATGTATTTTTTAAATATGCAGTAAAATCAGGTGTTCTTT  
TAGTTCTCACTTAGATTGAGGTTGAAAATAATGAATTTGATTGGAGAAATGGTGAACATATTGATTAT  
TCATTTGCAATAAAAGAAAAGATACTTGAAGGTTTCTTTTTGTTAGATTTTTTCGTGGAATTTGCTTATGT  
TGGTTTTTTGGAGTTGTTTTTTTTGCTCAACTGTAAATACCATTAACAAACAAGGGCCGATACACCTATA  
GAGCACCTAAAATCTATGTTGCTCGGAATCTTCAAAAATGCCATCGGGTCCGTGTCCGATTCCGCCAAAA  
GTAGTGTATTTTTGAAGAATCCGAGACGGGTGCGGCATCAAAAGTGAAGAGTCCGCGCAACTAAGCCT  
AAAATCCATAGCTACCTTCTAGGAAAGGTTCTATGCCTTTAGGCCTCCAACCTTGACAAGAGAACTAGTT  
ACGTGGAAATATGTTGAATCAGCCTATAACTTCTATGAGCTTTCTTGGATCCTCTAAACAATGCTATTCTC  
TCTGTAAATTCTGTTTTTATCTGTGCAGTTACTATCTCACTATTGACAGTTGTGTTTCTATACAACTTCTAG  
TTCTTGCCATCCAAGTGCAGTAAACTATGGCACTCCAAATTGCTGCAATACTTATTTATAGAATTGCCT  
CTAATGCTTCCGCTTGATCCTTTCTAGGACTTGTCTCACCTCACCTCACCTGGGTAAACTTGCATACCACCC  
CATGATAAAATTTAGCTTTAACTTGTCCCAACCAAGTGAATGGGCGAAGAGATGCAGTTGTCTCCATC  
ACTTGGCTGCGGCACAAACAACATGTCTCATTATCAACAGGAATGTTCAAATGTAGCATCCGGTCTTTGG  
TAAGTCGCCTGCCTTGTACTGCTAACCACGTTATCATTCTATGCCTTGGCTGTGCTACAGAAGTCCAGATA  
AGATCAGCTATCCGTAGCCTGTTCAAGTTCACCTAGCATTGCAATGTAAGTGGCAGAAATTGAATATTGGC  
CAGAGTGGGTCAAAGTATACCTCCCTTGTACTTACCCGTTCTCATATTGTTCTTTATTGCATTTAGTTTTT  
TCTAATAACAAGTTGTAGTCTAGAGGCGGGGTATGTTCCACATGGAAACATCATTCTCATATATAGAGC  
CCATGGACCCATTTTACTAAAAGTATTATCTTGTCTCTGATAACTGCCAGAGAAGTTTGCCAACTGATG  
CAACATTCCAGTTGCTACATCCCTTTACATTCAGCCCTCCGAACTTTTTTGGACAACAAATTTTCTCCAAGC  
TACAAGTAGCACTTCTCTTCTCTTCACTTCCCCAAATGTAGTTCTTACAAATCTTGTCAACCTCCAT  
GAGGATACTCTTGGGAAGGATGAACACTGACCACCAGAACTGTGTATAGAAAACAATACGGCAGTCA  
CAACTTGAATTCTAGCATCATAAGATAGAAGTTTGGAAATATCTAGTGTAGTTTATTAGTGTATCTTCATC  
ATCAGCTGTTGGCAATCCACTCTTGTCCACTTCTTGGATGACAATGGAAGCCCAAGATATCTGATTGGAA  
GCTGTCCCAAAGTGAAACCAGTTATTTCTAACAATTGTCCTTGAGTCCGTCATCAATTCCAGGTACAAA



GAGGTTAGATTTTTCTACATTTGCCACCAAACCTGTAACCTCACTAAAATGAGTTAAAGCTTCCATCACTC  
TAGTCACAGAGCCGGCATCACCTCTACAGAGGATCATTAGATCATCTGCAAAGATCAAATGAGTCAACTT  
GAGGTGTTTACACATTGAATGAAAGTTAAAATTAGGCACGTCGCCCATGCACTTGAGCACTCTCGACAG  
ATACTCCATTACTAGAACAACAAGAGAGGGGACATTGGATCCCCTTGTCTTAAACCTCTCTTGCCAGCA  
AAAATCCCATGTCCCTCTCCATTGACTTTGATGGTAAAATACGGTGAAGAGACACATGTAATCACCAATG  
GTATAGAACTTTTAGGAAACCTATATCCTGTCAGTGCTCCACAGATTTCCCAGTTTACCACGTCGTAGGCT  
TTCCTTAGGTCTATTTTCATCAAGCATCTTGGTGTGATTTTCTCCCATAGTGTACATCAAGTCGTGACAT  
ATCATGATATTGTGTATCATAGACCTTCTTGGACAAAAGCGGATTGGTTTCTACCACTCTAGTGCTCTA  
ATAGCACCTCTCAATCTAGCTCACAAGACTTCGGAAATACATTTGTAAATTACATTGCAACACGAAATAG  
GCCTAAGTTGATTGGCAGATTCAGGAGCTGTGACTTTTGAATCAGAGCAATGTCTGTGGTATTTAACTG  
CCTTAACAATTTTCCATTCTAAAGAATTCAAGGATTGCATCCGTAATGTCTGTCCCTACAATATCCCAAG  
CTGACTTAAAGAATCACTCCCATAACCATAGGATCCGGGGCTTTTATTAGTGTCTATTTGAAACATGGC  
AGTCTTGATATTTTTAGGAGTATAAGCTTGCAAAAGCTCAACTTGTTGATCCACAGTAAGACAATGTCCA  
TTCTTCAAAAATTTCCATAGGCTCGCATCCTTTGACTGCACTTCTCCCCAGTAACTCTATGTAATAGTCT  
ACAAACAGCTTGACTATTACTTCTGGATCAGTCTTCCAATCCCAGAGTCATCCTTAAGTTGAGTTGTTGC  
TTGTTGTAGGCTTCGATATTTTATGACAGAGAAGAATATTTGGTGTATCGTCTCCAAGTTTTATCCATG  
TAGCTTTGCTCCTCTGTTGAAGATAAATTTATACCTTGTAGGAGGTCTGTCTGAATTTTTGGTATTTTTCT  
TCTCATCTTCCTGATAATCAACATTCATAGGATCCTGCTGTAATAGTTGTTGAGCCTTCAACATAGCTTCC  
CTATCCTCTTGACATTCAGAAACAATATTCCTGAAGTCCCGATTATTAAGCTCCTTAAATCCATATTTTCATG  
ATCTTTAGCTTTCTAACTACTTTTAGCAGCTTACAACCTTCTACTTAAGTGCCCATGCTTCTCTCACTTTCT  
CCTTAAATCTGGGCTGAGTCACTCATACTACAAAATTGAAATGACTTCTGTTCTATGAGTCTGCATTA  
GTTAGTGTCACTTTAATTGGGCAATGATCATTATTTCTTTTTCAGGAAGGTACTTTACTACACTGGAACGCA  
GTGTGCCTAGCCATACATTGTTAATAAAGACCCTATAAATTTTTTAAAAAATCTTCTGATTATCACTTTTA  
TCATTCCAAGTTTATCTTTGACCCTGGTAAGACATTTCTATGAAACCACATGTTGCAATACAATTCTGAAA  
AATCTTCTATTTCTGACCACACCACAGGGTAGCCCCAATCCTGTCTTCAGTTGTTAGTACTGAGTTGAAA  
TCGCCTAGGATCATCCAAGGTAATTGACAAACATAAGAGATTCCCATAACTCTTTTCTGCCTTCTTTGTA  
TTATAGGCATAAGCCATTGTCATGATAAATGAATGTTGCAGAGGAACACTTCTCTCTTCAAGTAATCA  
ACTGAGATGTTGATTCTTTTAGTGTAAGTGTATAATAATCCGGCCTCCAAGTTATCCAAATCCTACCATTG  
TAATGAGAAGCAAGATTGGTAATGAATGGTCAGCCACCAAACATCTTCTAAGCTATCAAATCGACCTTCC

CTACTTTTATTTTTGTTTCCAGTAACCCTACTAGCCCAATTTTTTCATTATTACAAAATAGTTTCACCTCCTT  
CTGCTTATTAGGGCCATTGAGCCCTCTCACATTCCGACAAAGACAACACTATACATTCCCAATATTGGGATTA  
GGATGGCCTCCCCTGTTTCTTCACTGTTACTGGTAGCCTTCTTATTCTTACCCTCTTTGTTTCAGTACCTGA  
AAAGTGTCTTTACTCTCTACATGTAGTTGTTGCTTAGCTTGAGACTTCAGTGTTTTTGGAGGTGTGACCGA  
GACAGTGGTTGCACCCTGCTTCTAAGACTCGTCTGATCTGCCGACTTGTGTGGATCCAACACAATTGTT  
GGAGGTGAGTTAGTTTGGAGTTGTTGAGCAAAAAACCATTAGAATGGTAGAGAGCTATTCAGATATAAT  
TGTTTTGAGACACTTTCAAAGTGGTATTCTAACAAAGAAGCAATCATACTAGTGACATGTTCAACTTCAA  
CCCACATGATTAAGCAGTTTTTCCACTAATAAGGACATGTGAAATCGATTAGTAAGTTTAGATATTGTT  
GAAAATATCGTTTTTCATTGTTTCGAAAGTTGTTTAAACATACGATTGGCTTTTGTTGATCTAAATTTTTATTT  
TCTGCTTATCCTCTTCTATCTGTTGTTTTACACATCTTCTGATTGAGTTAATAATACATGCTTTGCTTCCATA  
GAAAATGAGAAATTGCAAATTCCTTTATGAAATGTTTGCTAAGTTTCTGTACCTAATTCAGATTCCACT  
GGATTAATTTTTGACCCAAGATTATGCATATGTTTGGTCTACCGTTGAAAAGGAAAAACCTCGAATGATA  
CCGGTATTTTTTAAGAATACAAAGTTGCGATAAAGACTGAAATTTTGATGGCATTAAATTCGATATGGA  
TCACCGTTGAGAACTTTTTCTGAGGTATTATGTCCATTTTCCCTGTTTAGAATTGTTTTCTGTAGCTCCTA  
ATTGTGATGCTTCATTTACACATTTTAAAATTTTTATCTCATAACAGGGAGAAATTCTACCTGAGTCAATT  
ACAGACTAGCAACTAATTGTTGTGCATTATATAATTGCATATTTCTTGGATGGCAGGTAATGGATTGGTT  
TCTCATATTGCTTATTGATTATGATCTTATCACGTTTTAATTCACATCTCAATTGCGAAAACATCATATGT  
AGCTTGTGCAACCATGTTTAATTGAACTTTTTAGTTCTTGTAAGCATCAAAGATCCCATGTCTAGAATGA  
AACTTTTCTTAACAGTAGAAGTAGAATGAAGATCTGATGTCACTACAGAAAATATTTTTAAATGAATCTA  
TGAAGGATACATATTTAATTGTGCCACAACATGATGATGATAACTAAGGTTTGTCAATTGGTTGTTAAAT  
TGAATATAAGGTGAGTTTTCTATTGAAACATATAGATTTCTTACAAATATTTATGTAGGCTGGGGATATT  
CTTGAAAGCATAAGAAGAAAGAATATGCATCAATCATCCATGGGAATGTATACTTACGAGGAGACAATG  
GTCATCACCACATCTATTTGTTAGGACATAAAAAGAACATGTCTAAGGTATGGAAAGTCTTGCAAGATTC  
TGTTACATCAATATGAACAGAACTTTTCTTTCAGAACTTCTCCTCCTTACTTTCCTAACTGGCCGGTGATAT  
AACTATTGCAATTTAACAGTCCGTTAAATCGGAAAAGATTTTACTGTTAGTACTTTTCTTCTTATTATTT  
TTTACTCTTGCTCTTCTTCAAACATGTTCTCAGGTGAGGGTCTATCGAAAACAACCTATTTGCCTCTTCA  
AGGGTAGTGGTAAAGTCTGCATACACCTACCCTCCTCATACCCACCTATGGTACTATACTGGATATGTT  
GTAGTTGTTAGTACTAGCTAGTATGTTGTATTTTACTTCTTAGAATTGACAGCATAACAAAGAAAGAGTC  
ATCTCTTATTAATTCTAGTTTTAGCTGATGGATATAAGCTGTTCAAATATGATGTGCTTACTACGCTTA

GTTGCATTTAATGTCCAGATAACTTGACAGTTAATTTTGTGGAGTTCTCCTTTGCTTGTCTATTAGGTTGA  
TTTGGTCGTTGATCGATTGTTATTTTAGGAGTTTTTCGATCTTTTCTATGTTCTTAAACTTCAGTCAACTAA  
AATCATGAATGGTCAGCTATATATATAGATGTGTGTGGTCTGTAATTGTAATATGGGGATTGGCTAAGA  
GTTCTAAAATTTCTTTTTGATTACTTTTCAGTAAGAAGGCTGTGATTTCCAAGTCAGCCGTCTACTAGTTCC  
TTGAGATGAAGCATGACTTATTGTAACACACAGGTACATGAGCTAAAAGTTGTTTAATGTAACACACAA  
GAGACATATCAGGATTTCTGGAGCAATATGTTAGCCTCGCGAACCTACAACCTATGGATTTTGATAAATA  
ACAATTAACCAATATTATGTCTACAGAATCAATGAGAACAGATCACAAATAAGGAAGGAAGCACAAGA  
GATTGAATTCATCCAAAGGAGAAATTCAAGGACAATTGATTTACTCTCTGTAATCAAGCGACGTAATCA  
AATCAACAAAACCAGCATCAATGGAAGACAACCTCAGAGAATCTTCAAGACCAAGATTGATAGGCCAAAAT  
CAAATCAGAGAATCTTCAAACCAAGCTACTGGACAAAGTTTCACAAATCAAGGAATCTGGAAAGGAAG  
GCAAATCTTGTCAAGAAGAAAGAAGATCATGAACATAGATGATATGGACTTGATCACAATCTACCCTAA  
ATCAGACTCAATCAAGGAATTCACTACAAATCCTTGATTGAATGAAATACCCATGGGTTTTCTTAAAAG  
AGCAAAGAGCTAGATTATACAAACCAGCCTTAGGATTAGAGGAAGTCCACGCACTTCACTTAAACTATT  
GTGCTATCTTTCTTTCATCTTTCATAAAACATTTGTACTCTCTGTGTATGAAATTATGATTTTGGATTTGCT  
GGATGACTTGTTTATCAAATTAAACTCCTAAAGATTTATGGAACCTTCTTGGACAGATAAAAAGGTTG  
>PGSC0003DMG401014605 LRR-RLPs

TATAGTATATTGCTTTTTTCTATATATCTTCTAAAACCTTGGTTGATCACTTTGCAGAAGAAAATGAAAAT  
CAATAGGTTTCTACAATTCATTATTGCATTTTCAATGTTTCATAGGACTTGAAACAAGTTGGGGTAAAACAT  
TATGCATTGAGAAGGAAAGACAAGCTCTGTCCAGTTTAAGCAAGGTGTTATAGATGAGTACGATATCC  
TCTCATCGTGGGGGAGAGAAGAAGAGAAACAAGAATGTTGTCGTTGGAACGGTGTAAAGTGTAGCAAC  
AAAACAGGTCATGTCGTGATGGTTGATATTCATAACACCACAACCTTTTCTAGATGTGGATCAACACT  
TGAAAGGTAATATTACTCCTTCATTGCTTGAATTGCAGCATTGAACTACTTGGACCTTAGTAACAATGAT  
TTTGGTACAAGTCGAATACCGGATTTCAATTGGTTCATTTCCAAGACTAGAATACCTTAAACTTCAAGGTG  
CTAACTTATCTGGTGAAATCCTTACTCATTTAGTAACCTTACACATTTGAAGATTCTCGATTTATCTTCGA  
ATCAAATTACAGGATTGTTTCAAACCTAACAATGTTTTAGCTTTAAGAGAGTTGTATTTGAGCAATAAC  
AAATTCAAAGGGAGGTTACCTCAAAGTATTGAACAGCTTTCAAACCTCGAGATATTGAGAATCAATTCAA  
ATTCTTTTGAAGGTCCAATCACAGAATCACATCTTTCAAATCTTTCCAACCTTAAAAGAGTTGGACTTGTCTG  
TATAACTCATTCTCTCTCAGTTGAGGCCTGATTGGATTCTCCTTTTCGAGTTACAAGTTATAGGACTCTC  
GCATTGTGAAATGGGGCATCGTTTCCCTCAATGGCTACGAACTCAGAAGACGTATTCATATCTTGATATC

TCTTTTGTGGTATATCAGATATAGCTCCTAACTGGTTTTGGGATCTTTCTCCTGAAATGATTGATGTA  
CAACATTTCTAATAACAAAATAAGCGGAGAAGTTCCTGATTTGTCTTCCAAGTTTCTAGAACTAAGTAT  
CAAATAATGGATTTTAGTTTGAATAACTTATCAGGTTTGTAGTCCCATCATTCTCATCAGACTTGAAACATT  
GAACCTTTGAAAAACAAGTTTGTGGATCAATATCTTTCTTGTGCAAAATAGCCAATCCATTGTTCCGTA  
CCATTGACCTCTCGCATAACATGCTTTTCAAGGAGAACTCCCACTGATTGTTTCATGAATTTGGAAGAACTA  
GCCGTTCTTAATTTAGCTAACAACAAGCTATACGGTAAAATTCTAGCTCTATTGGATATTTGATGGATAT  
TCAATCTCTACAGTTGCGTAACAACAACCTTTACTGGTCATCTCCAACCTCTTTGAACAACCTGTGCTCTATT  
GGAAATCCTGGATGTTGGTGGAAATAATTTAATTGGAGAAATCCGTCATGGATTGGCTCAGATTTAAC  
ATTTTTGATCGTCTTGAGTTTGTAGAGCCAATAAATTCGATGGAAATATACCTTCGAATTTGTGTCATCTGA  
ATAAAATCCGTATTTTGGATCTTTCTCATAACATCTTATCAGGAGAAATCCCGCATTGTCTCAAAAAATC  
ACATCATTGCTTCAGAGTAATAGTTCAACCTCAAGCATTCTTTTTGATTTGGGTGAACAAAACGGAAATG  
GTTTTATTCTTTTGTGAAGAATGCATTAGTTCAATGGAAAAATAGTGAATTTGTGTACAATAAAACACT  
CGGATTGTTGAAGATCATCGATTTTTCAAGTAACAATTAGTCGGAAGAGTTCCTGATGAAATCACTCAA  
TTAGATGGACTACTTTCACTAAATCTTTCAAGAAACAACCTAACAGGACACATCGTACAAGGAATTGGGA  
CGATGGAAATGTTAGAGTCTCTTGATCTGTCTCGAAATCAGTTAACAGGACGAATTCCGACAAGTCTTGC  
TCGATTAAATTTCTAAGTGTTTTACTTATCGAGTAACAATTTGTCAGGGGAAATTCCTTCGAGCACTC  
AATTGCAAAGTTTTAATCCTTCGTCATATGCAGGAAACAATGAACTTTGTGGTCCCACTCGAAAAATG  
CACTGTTTCATGATGATCATAAAGCAGAACCAACAATGTTGATGAAGACGATGATATGTTATTGTCGTTT  
GGGTTTTATGCATCTGTATGTAGTGGATTGTTGGATTTGGGGAGTGATTTTACTTTAGTCTTCAA  
TAAATCATGTAGAGATGCTTACTTTTCTGTTTCAACGTCGCGAATTGGATCTTTGTCACAACAATTA  
TGTGTCTACGCAGATTGAAGATGCTCTGGAGCTAGTTAGCAAACAACAAGCTGCATAATGTCATAAGTA  
AGTTTTACAAGTCTAGCTTCTTTCATAAAAAGAATTACATGTTTGTAGTCACCAATGGTGGTATATAGTAT  
GTGATGTTTCTCATGTATAATAATAAAATGTTACTATTAATGAAAATGTTTTGGGAGCAAATACATCTT

>PGSC0003DMG401015009 LRR-RLPs

ATGGGCGTATGGGCGAGTACTGCCGATGTTGACGTTGTCAGGGTTCTCTGCGATTTGGTGAGATCTTCC  
GAGTTTGCTGGGATTTTCGCGTGAGGAAGAAGCACGCGCAGGGGGTTCGGGTCAGTTTGGTATTGCT  
GTTGTTGATGGAACGTTGGATTGTTGTTTGGGTATGCTGTATGTATTGTGTGGAATGGATTGTTTGGT  
ATTGAGTTGGTGGGCTGGGAATTGAGGTATTGGGCTGCTGAAAAGAGGTAACAAAATGTCCAAAATT  
GGTCTCAAATGGGTTGGATTTGTAGTTAATAAAAGGGTCATAGGGTTACAGACTCAACCAACTTAAGT

TGAGAAGTTAGCCAAATTGAGTTAATTAGCAAATTCGACTAAAACCTTAAATAGGACAAATTAATTTAAT  
TAATTAATGAGTTTCTTATCTTTAACGAACTAAAATAATTAATTTAATTATAAGCTAATAACTTAAAAATAT  
AACTATAACTTAAAGTAAAATAATAAAATATTTAACTAAAATGTAAAATCTTTTGTGATGATTTTCAAACA  
TTTATATAATAATGTGATTGTAAAAATACATATTTATTATTTAAAATGACAAAATTACTTTTAAAAATAA  
CTTGGAAGTATTTTGAATTTCTGAAACTCATTAATTCAAAATTATAACCATCACTAATAAAAATATAAAAT  
CTTTTCGAGACGATTTTGAATATTTATGAAATACATTAATTATATAAAATATATATATATATATATATA  
TATATATAAATTTAAAAATTATAAAAAAAAATGACGAACTATTTAAGATAACTTGCAAATATATTTAT  
TTTATTTTCTTGAAATTTTATAAAAATAAATTTTTTAAATTATTTGAAAATTGGAGAAGCTCAATGATTAA  
TTTATATTGTGGAAGGTCAAATTTGAGTGTCAACAGTCTATATTAATAGTCAGGATTAGTATAGTGGGCA  
GTGTTGTATTTGCTTAGGCTCAGTTAAGTAATAGGTGATTACTIONTAGTGTGGAGATTAGCAGGTTAATC  
TCAAGTTGTAAATTGTGTTTTACTCTTTGCTTGTGAAGATTAATGAAAGCAGTTTAAAAATCCCTGTGAG  
ACAGGTCGTAGTTTTACTCCCTTGAGCAAGAAAGTTCCACGTAAAGTTGTGTGTACAATCTGTACTTTCA  
ATATTTATTTACGTTCAAGTATTTATCTGCTTTTGTGATTGTAATCGTGCTAAGGACCTGATCCTATCGTAG  
CTGAGTGGACGCATATATTCCAACATTAATATTAGTAAAATTTACACATAAACTTTGTACTGTCTCAGTA  
ACAAAAGGTCAAACGACATGATATTTTCTAATCTTATCTTAGACTGTGGAGACTTCCATTGACTTGGTTTT  
GGACCATACAATATATATGATCCATATGTTTTTGTCTTTATAAAGTTGGTCAATGTGAGATGATATTGCAA  
TAAAAGTTTGTGGGAATGTTTAATATCTTCTCAAATCAATTAGTCAAACACAACTGATACTCTTTATCTT  
ACTTTTTAAACAAAAACAGAACTTGAATGAGATAATCAAAGCATTAGGCTTGGAAAAAGTTAAGGG  
TAAGACTTCATACACTTGTGAGATTACTTCATAATACATTTGAAAAACAAAGGTATTAATCTGTTTCCAAG  
TGCATAGTAATATCATGAAGAAGAACATTGTCTTCTGATTCTTCTCTTTCTAATTCAACTTTCTGTATCAT  
TTACTTCCTCAAATGAGACTGACCTACAAGCTCTATTAGCTTCCGAAATCTTGTTACAAGTCCCACTCATT  
TTTTGGCCAATAATTGGACCAAAAATACCTCTTTTGTCTTGGTTTGGTGTCACTTGCCTCCAAAAAGCC  
AAAGGGTTGTGGCCTTGGCTCTTCTAATTTGCAACTCAAGGCACAATTTCCCGTCTTTGGCCAATTTG  
TCCTTCCTCAGTGTTCTCAATCTCCAGAACAACAGCTTCCGTGGTGGCATCCCTTTTGGACTTGGCCAAT  
GCCTCGCTTGCAGTGATTGATGTTAAAAACAATCAACTCAACGGAAGTATACCAATAAGTCTATTTCAA  
AACCGGAGAGTTCAAGTAATTTGTTGGCTTTCAATGAACTCAGTGGTAAAATGTGGAAAGGGCCATGG  
TATGTACCCGAACTCAGTTTTGGATCTCACCAACAATAGCCTCACGGGTATGATCCCTCCTTCTGTTGGAA  
ATGCCACAAAATGATGAACTTCATTTTGTCTGGGAATAGAGTCAGCGGAAACATTCCAAGGAGATCG  
GTAATCTGAGCCAACCTGCAGACTTGTCTTGTGGATAATCAATTAACAGGTTCCATTCCCAGTACTG

TTAATATCTCGTCGCTACTTGGCGTATCTCTGTCATTCAATAGCCTTTCTGGTCCTCTCTTGCTAGATGAA  
GGGAATATTGTGTGCGAATCTGTACTTTTTAAGTATATCTGACAACCAAATTTCTGGTTGCATTCCTCCAG  
CATATGCCAACTCATAGAGCTCAAAGTTTTGTCCATATCTTCAACAATATAACTGGAGACATACCCAGA  
AATATTGGTTGTTTATCCAAGCTCGAGACTTTCTTGATTGGCGACAATCCAATAAAAAGGACTATTCCCC  
ATTCTATTGGGAATCTTTCATCATTAAAGGAGCTTATCAAAGAATCACTGTACTGCTTGATGCAGCTATGG  
CAGTTGAATATCTACATCATGGTCATGCCACTCCAATAGTTCATTGTGACCTAAAGCCAGCCAACATTCTT  
TTGGATGAAGATATGGTGGCTCATGTTGGTGATTTTGAATCTCTAAAATTTTATCGATAAGCAAGTCCA  
TGGCTTATACCGAGACAATATTGGGCACTCTGGAACATTGCACCAGGTATAAAAAATCTACTCTCTTTG  
ATTTTCTTTATCATAATTAAGCCTCTCCAAATTCTAAAAGTAAAAAGAGCAAGTCTTTATTTATGCAAAA  
TTATTGTTGTATTTCAATTGAATAATTTTTTTTCAAACCTTTTCTAAGAATATGGGTTCGGAGGGAATAGTG  
TCTGCTAGTGGTGATGTTTATAGTTACGGCATCATATTGATGGAGGTTTTGACAAGAAGAAGGCCAACA  
GATGAAGAGATATGCAATGAAAATCTTGACTTGAGGAAATGGATCACACAATCATTTTCAGGGAGTATG  
ATGGACGTTGTGGATGCCAATCTTTTTTCCGAGGAAGAACAGATCACTTCAAAAAGTGAAATCTGCATTG  
CGTCCATGATAGAATTGGGTTTAGATTGCACAATGGAAATGCCAGGATCAAGAATAAGCATGAAAGAA  
GTAGTGAAGAGGCTTAACAAAATCAACAACACATTTCTGGAAACATAGAAGTGATCAGCATCTGTTCCGG  
ATGGTGTCTTTTCTGAGCTGCAAGTTAATATGATGTTTCTTTAGTAAAGTCGTCGTATAGTACTTACTAC  
TTGGAGTCATGTATTGTTTGAATTTCAATTTGAGTGATTTGAACCTATTTTACTTTATCTATTTGTAATTAT  
GTTTTGAATGCTTGAAAGAAACCAGAATGAAATTAATAAAGGTGTTTAGCTGCA

>PGSC0003DMG401015877 LRR-RLPs

AAAATTATTTTTGTTGTAATTCCTCTCCATATTGACTTGATGGCAGCTTATACTGCTGTAATTTCTCTTCTC  
AAACTGTTGATCAACCAAATATTGCAGAACTCTTTCATGATCACAGTGCTGAAATGCTCGATTCTCTTCGT  
GCTACAGCTGAATATTTTCAAGATGTTCTTGAAAACACTAGCGATGAGAAAATCAAATCTTTGGAGGAA  
GATATTAGAGTTGTTGTTAGTGAGGCAGAGGATGTTGTTGAAATGAAGATTTCTGAAATCATCAAAGAA  
GAAAGCTGGACATTTGGAATTTTACAACACCAGGATATGCTACCAGTTGTTGAAAAAATGGATACGACA  
AAGAAGCAAGTGATGGAGATTCTTCTCATGATGCTGATCAAATCTTGAATTAACCGCGGATTCCTTGA  
TTGACGCTTCTTCTATGAGTGATCCAATGCTGTCAGATCACTTGAAAGATGATATTGTGCAGGGACTTGA  
TGGTGACTTGGAGAAAATAGATAAGAGATTGAGAGGACCAACGTCGTATCTAGACATTGTCACCATATC  
AGGTATGGGTGGCATTGGCAAAAACAACACTCGCTAAAAAAGCTTATGATCATCTTCCAATCAGGTGTCA  
CTTTGACATTTTTGTTTGGGTTACAATATCTCAAGAATTTGATATAGAAATGTATTGTTAGAAGCTTTAC

ATTGCATTTCAAAGCAAAGAGTTAATGTGAACACAAAAGATTATGTTAAGATGAATGCTAGTGAGTTAG  
CTGATCTGGTGCAAAGAGTCTAAAGGGTCCAAGATACCTTGTTGTCGTTGATGATATTTGGAGTAGGG  
ATGTTTGGGATAGCATATCACAAATATTTCTAATCGCAACAATGGGAGTCGAGTCTTATTGACTACTAG  
GGAAACTGATGTAGCAATATATGCAACTACTAGTAGCCCTCATAAGATGGACCTCTTGAATTTAGATAAC  
AGTTGGAAGTTACTTCGTGTTAAGGTGTTTGGACTAGAACACGATCATCCTGCTGAGTTGGAAGAAATT  
GGAAAAACAATAGCAGGAAAATGCCAAGGACTTCCCTTAATAATTTAGTGATTGCAGGGCCTCTCTCT  
AAAACGGTGCCCAAGACATTAGAAAGTTGGAAGTATGTTGCCAAAACATTAAGTGAAATCATTGCTAGT  
CATCCAAATAAATGCTTAGGAGTGCTCGGTTTGGAGTTACCATCAGTTGCCTAATCGACTCAAACCGTGCT  
TTCTTTCTATGGGTGATTTCCAGAGGATTTTCAAGTTGATACTCGGAGATTGTTCCAATTATGGATCGCA  
GAAGGCTTCATAAGGGCGTCTGCTGGAAGTCGTGAAAGTTTGGAGGAAGTGGCTGAACATTATTTGGA  
GGATCTTATCAACAGGAACTTGATAATGGCTAGAAAAAAGAGATTCAATGGTGAGGTAAAAGCATGCG  
GAATACATGATCTGCTGCGTGAGTTCTGTTTGATAGAAGCTGAAATGACAAAGTTTATGCATGTTGTGA  
GAACTCCATTTTACCAGCACAAAAGCCTAATTTTCGTGCTTCAGTATTCAAAAGCGTATTGAGGATGC  
TTATAAGCTCTTACCCCCTGTAGCCAGATCTATCTACTGCTTTACTTACTTGGATCTACCTTATGAACCCCG  
TATTAAGATTCTCCCTAGATTGCCCATCTACCGTCATGATCCTATAATACATGGATTTTTCTTGTTC  
CCATCTCAGGGTATTGGCCATCTTTCCTCCTCGTTCAGCACATTTCCACTTGTGATTATGAAGTTATTTCA  
TTTGAGATATCTCCAATTTGATGTTTTGACAACAATATTCTGAATCAATCTCAGAGCTTCTGAATTTGC  
AAACTCTAATTTGTGAGGGTTTTCTTTAGAGATAACTTTACCTAGGAAGATATGGATGTTGAAGA  
GAGGTATATACGTATAGGGGGAGCCACTTATTTACCAAGTCCTAGAATAGATAAGAATCTTGTGACAGG  
GATGCCAAGTCTGAGGAACTTTACGGTATTTGTTACTCTAGTTGTACAAATGAAGTCATTTCTAGCACTC  
CCAATCTAAAGAGATTGATCATTTCGTGTACATTGGAGCATACTAAAGAATTTCCGGATCGTCCCTTGG  
TATGTCCAGCTTGACAAAACTTGAGACATTCAAGCTTTACTGGGAAGGTTATTTGGAAGACCCCATCAA  
GATATTTGTTTTCCAAAATCAATTAGAAGAGTGTCTTTAACTAGGTGTGAAAAGTTTATTTGGGAAGAG  
ATATCATCAACTTTTATCATGTTGCCACATCTTGAAGAGCTCAAACCTAAATGTTGTCGAGCCAAAGATG  
ATGTATGGAGATTGAGTGACAAAGACATATTCAGAAGCTTGAAGTTGTTGTTACTGAGCGAGCTAAATC  
TTAAGGGTTGGGAAGCAAGCAGCGATAACTTCCCTAATCTTAAACGCCTTGTCTGAAGAAATGCAAGG  
ACCTGCAAAAAATTTCCAACAGATTTTCGTGGAAATTTGTACTTTGGAATCGATTGAGTTACATGATTGCAC  
CACTACTGCTGAGGATTCTGTCAGAAATATCGAACAAGAACGAGAGGACATGGGATATAATATCGTTAA  
GGTCTACATCCATAACAGCCACAGTAAGTTATAATTCTCTCTGAAAAGTTCTTCGATTCTTCACATCATT

AAAACCTCATTTTTATTAAATCATACTCTTTGAAATTAAGATGATGACTTGTTCTTTTTATCTTGCATATG  
CAGGGAATTGAAGCTTATTTTGAGGGATCATCTAATGCTATCTTCCCAATTCAGAACCTTGTAGTTCATAT  
TTTTGTTTATATATTCTGATCATTGTTAATTCATGTTTTAGGAATAAGCATGTTAATACATGTCTCGGC  
CAATTGTTTTTTTTATTTTATTTTGTAACGGTAACTATTGATGTACTGTAAGATCTATTTTG

>PGSC0003DMG401015894 LRR-RLPs

GTTAAGAACAAAATGGTAATTCAACTTTGAGGTTATGAGCTTCCCCTTATAATAATATGTCTATCATGCT  
AACAAATTGGTCTATTTTTCTGCATATTCTTAAAGATGACTATGTATTAGTGATCTCTATTCATTTTCAGTAG  
ATTAGTCTATAACGGTCATTTCTTAGAGAGTAACTACAAGATCCACCCTATGGAGCCTCCCTCAGATAA  
CACGCCGACTTCATCTGGGGAAGGAAAACCAACTTATGCTATAACACTATACTTTAGGTTGATTTGCACA  
ATATAAACTATTCAAGTCAACAGAAACTATCCCACACGCAAGAGAATCAACTTTAATTTTTAATTTTCT  
TATGTGAAATTATTGACTTGGTCACTGATCATGACACTCCTTAAATTCCTACATATATTAGTGCATCAACT  
CTTATTCCACATGCAACAACACTCAAGTCAACAGAAACTGCAGAAAGAAACCAATTGTTGTAGAATA  
ATTAAGACACCTCAATCACCAAGACCTGGTTGACCACAATGACATTTTTGGATCAAATTAACGAA  
GGGTATTGTTTTCAATTCACATAATTTAAAGACCCTTTTCTGTATACTTAAGTACTATTTAAAGACAACCT  
ATTTTGCAGTTTCATTAGTATAATCACTATGAAAATATTACTCCTCCTCAGGTTTCTTTTCATCACTATCCTT  
GTGGTGTCTCTAATTATACTTCTGGCCAATGTTTGGAGGATCAAAAAGCCTTGTTGATTAATTAAGA  
ATAACCTCACGTTGACTCTTCTGTGTCCACCAAAGTCAAGTCAAGTCAAGTCAAGTCAAGTCAAGTCAAGT  
CCAGTGGCCAGGTGTAAGTTGTGATGAGGAAGGTCATGTGCTTGTCTGGAGTTGGACAGCGAAGCCA  
TTTCTGGCGGAATTGAGAAGTCAAGCAGTCTCTCCATCTTCGATATCTTGAGAAGCTCAATCTGGCTTAT  
AATGGCCTATACCCTGTTCCAATACCAAGAGAAATTTATAAGCTGGCAAACCTTGATGTACCTGAATTTGT  
CACATAGTTTTAACGGGCAGATTCCTATGGAATTGTCAAGATTGATCAAGTTAGAGATTCTTGACCTTTCT  
GGAGGGGATTTAAAGCTTGAGAGGCCAGATCTGAAAACACTGGTAGGGAATCTTGCAAATCTTAGAGA  
ACTTTACCTTGATAGAGTGAATATTTCAATTGAAGGGGAGTGAGTGGTGCTCGGCCTTATCTTCATCTCTG  
CCTCAATTGAGAGTCTTGTCAATGAGAGACTGTAAAATTTAGGCCCTCTTGATCCTGTCTTTTAAATCT  
TCGTTTTCTTTCCGTCATTCGTCTTGATTATAACTACTTGTCCACTATGGTTCCAGATTTTACAAAATTGAC  
AATCCTAAGCGTCAGATGGTGCTACTTGTGGTCCATTTCCAGTAAAATCTTTAGGTACCAACTCTAC  
AGCAAATGATTTATCTGGCAATGAAAACCTTACTGGCATTTTACCTGAATTTCCACATAAAAGTGCATTA  
AGGGAGGTAGTGCTTAGCTACACAGGATTCACCGGTTCCGTTCCAGATTCAATTGCTAACCTTCGGAAC  
TGACCCAGCTTGATTTAGGAAGTTGCAATTTAGTGGAGAAATTCATCAAAAATGGGAAATCTCACAG



AACTAGTTCATCTAGATTTGTCATTCAACAGTTTTACTGGCTCTATCCCCTCTTTCATAAGGCAAAGAAG  
CTCAACCACATTGACCTTTCTAATAACAATGGTCCACTATCTTCAGCTCAAACCTCAATTAGCAGTTCTTCTT  
TCCCTGCCATCATTGCAGTACCTTAGTGTTTCAGAACAGTCAATTAAGTGGAGAAATCCATGAATTTCTTA  
ATGCATCCTCCTCTGTTCTGGAAATGCTTGATTTGAGCAATAACCATCTAAGTGGATCGATCCCCGGTCT  
ATCTTTAAACTCAATAGGCTTTCAAACCTCTCCTTTTCTCCAACCTCCTTCAGTGGAACCATTTGTTATCGAA  
GCGGTAAGGGACTTCCTAGGCTTACCACCCTTGACCTTTCAAACAACAAAATTGAAGGGGAAATACCA  
AGTTGGGTTTGGACAGTTGGAAATCTGAATCTTTCTACAATCTTTTAGAGTCTCTAGAAAAACCACACA  
ATTTGTATACTACTTCTATTGTCATTGATTTGAGTTCCAATAAGATCAAGGGAGATATACCCATTCTACCT  
ACTTCTCTTACCTACTTTTCAATTGCCAATAATGAATTTACGGGATCAATACACTCTTCCATATACAGTCTA  
GATACGCTTCAAATTCTTGATATGTCAAATAACAAATTAAGTGGCATTATTCCTGACATATTTCCACTGAA  
TTGGAATTTGAAAACCTTAAACCTCAGCAGTAATATATTAGAAGGAAAAGTTCCAAGCTCTCTGGAAAAA  
TGCTCATTCTGGAGGTTTTAGACATTGGAAACAACAAGATAAGAGATATGTTTCCATGCATGTTGAATA  
AATTAGCCAATTTGCGTGTCTAGTCATAAGATCAAACAAGTTTTACGGGAATCTCCAGTGTCTTAGAGC  
TGAACAAACCTGGCCAATGATTCATATTATAGATATTGCTTCAAACAATTTTACGAGGAGATACCTGAG  
ACATTGGGAAATCTCATATTACTAATCCATCTCAACTTCTCACACAATGCTTTGACTGGAAGAATACCAAA  
TGCCATTGGAAAGCTGACTCTGCTTGAATCTTTAGATTTGTCAGTTAACCAGTTAAGTGGGAGAATTCCA  
GACGAGATTGCGAGTTTACATTCCTTTCTTCTTGAACCTATCTTTAATCAACTTTCTGGTAGGATTCCA  
AGTGGCAACCAACTTCAGACATTCTCAGCAGATTCTTTGAAGGGAACATTGGGCTGTGCGATTTTCCTT  
TAAAGAAAACGTGCAGTGACACCAAAGAGACTGAACGTGAAATTGATGGGAAATATATAAGTTTTGCCT  
TGGGATCTTCTGTGCGTTTTGGCATCATAACCTGGCTGATTTTGCATAGCCGAAAATATAATGAGCTCGT  
TGATATACTTCTTTTCAGAATTTTGGGTCAGCACCAAAGGAGTGGCAGGAATAAAAACCAGAGAAGGTC  
AAGGTAAGTTGAGGTTTGTGTAGAACAAAAGGCTAATAATATTGTTGATATATGACTATAAGCTTTTAA  
GTTCAATGTTTTACATTTTGTCTATAAGCGTGTGGTAATTAGTGTTCCGATATGTATTTTAGTTTGGTTTT  
CTAAGACAACCTGTTTAGAAAGAACAGTGAATATATAACACTAGTTGAATATTTTTCTGTTCAATAAATTA  
GTGGCAAAGCAACCAGGATTGAAAGCACAGGGTATACATGAATTAGTAGCTCCTCTAATCAAATCACT  
GAGAATTTCTGTTATTTTACGACTATTCAGGTATGCGGTATCAGGTTGATACTGCAGATTTTTAGGTTTCC  
ACAACAGATTAGCCTATCTTGTTATCATATTTTGGGTCAGGTCATTCTAGATGTGATGATTGAGAATTTG  
GGAGACAAAAGGAATGATACTAGGCTAAGGGAATATGAATAATAGAAATTCCAGGACATCTTGCACT  
CACCTCTGCACTCACCTCACAACTCGACACGATCTCTAGAAATTCCAGTAATTTCCATATGCACATTAT

AAGATGTACAAATCTAATCCTGTAAAGTTTTAAACAATAGATGTATGACCTTATAACATGTTATAAATCAA  
ATGTCAATACTGTAGTTGTTTGTGGTGGAGAAGTTGGGCCTTGCCAACCATGTCTTTCTGGATCATATTT  
CTCTCCATCACCCCAAAGGGCATAGGCTTCTTACCATGAACCGCGTCATCTCCAATCTTTAGCTGCTCAT  
CCGACATCCTTAGTGGAATGAACAACCTTATTGCAAGTAGGATTAACGTCGTTGCAACTATGTTCCAACC  
AATGATGAAGAGAGCTGCAACTATTTGCTTAAGGAAAAGAATTCCACCACCTCCACCATAAAATGCACCC  
TTTGTGTTGGTGACTIONGGAAGAACAATATTACAGAGAGATGGTTCTGCCAGAAGACCAGTTAATAAACCC  
CCTAGAAGTCCTGCCACAGCATGTGTGTGAAACACAGCAAGTGTATCATCCACCTGTTATTATACAACAA  
GCAAGTCAGTTACAATCTAAGTCTAAAATGGGCATTGGGGCCGTTGGGATTGGATATGAAAAATCAATT  
TTTAGATTGGATTATTTTTTAAGTTCGGGTTTGGATTAATCGGTTTGAGACACACAATGGAAATTAACAA  
CCTCGGTTACCTAATAGTTTGTACTTAAAATGTACTATAACTTTTTGCAGTTAACAAAGATTGAGGTCA  
TCCTGTCACACATGATGTGTAACCTCATATTGGACTTAGTACTATAATGGGTAGTGTCTGATAGACTAA  
TCTATTGAAACTTTGAAAATTCGACATACTAGCTAGCATTGGGCACACATGTTTCGGATATCCAATTTAAA  
AATGAAATCCAAAGTGAAATAATCCAAACCAATATCCAAAAGTTTCGGATTTTCGGGTTGACCCAACT  
ATGCCACCCTTAGCCTAAAATATAACTAGAGATAACCATCCATAATAAGTTGAATTAACAACACTAAAAA  
AATAAGGCAGTTAACTTGTACAAGAATTTACACATATTGACACTTGACAGTGTAATATTTTTTACCCCG  
TAGTATATAAGAGATAAATCCTACTATCTCTCTAACATTGGCAAACACAATTTTCAAATGACTAGTCAA  
TACAAATTGTTAATCTCCACAAATACTTTTTCGAAAAACACTTTTGATAAAAAATTTTTGCAAAATAACA  
GATTTTAAAAGGTTGACCAAACGTGCAATAAGTCACCGATGTGGGAGTCAACATTAACTATACATTTTG  
CTTGTGTACCTAACAAAAACAAAAATAAAAAGGGCAAGTTGTTGAAATTTTTTAGTGCTTACCTACTTTT  
CTCCTTCATTTGAGTAAAGACATTATAAGAGCCGTAGGGACAAGGGGAAGGTTGGATAGTTATAGCAAC  
TTATTTTACATACACACTATATTCAATTTCAACAATCATATATAAAGACAATTACCAAATACTCTATAGA  
ACAAGTAATATTCTTTACAAAAAAAAGAAAAGATGGAAGATTATTAAGTAAATACAATTATCGTACCT  
GCTGTAGAAAAGTGGACTTTTTGTGGAGTATCATCATGGAATACCATGGAATGCTTCCAGCAAGAATTC  
CCATTAATGACTGCTGCCAAGCTTGCACCACTCCTACATCAATAATTTAATTTTAGTATTACTCATTTTCGA  
TGACAAGTCGGCCTTCTCATTACGAGTCAGTTAAAATCACAAGACATGTAGAACTCTCACCACCACTCA  
TTTTAAAAGGAATGCTTGATATTTTGTACTTTTGTCTTACATGTCACAAATTTTTTCTATAATATCTTAA  
ATTACGTGTTCAATCTAATAGTTGTACATAAAATTGGACTTCTCCATACAGAAAAACAACCAATAAGAG  
AGCACAATATTCTTTATTTTTCTTGAAATATTTTCAAGTAACCTCACATTGTTGACAGAATTTGACTCCTAA  
GTTTTCTAATGTAGATGTTTTACATGTAATCAACAGCAATAAATCTTTACTAAATGGACAATAAAAGAG

GGATCAATTATATTTTGAACCTTAGCTAATAGGAGCAATAAATAAGAGAACCAATTGCAAGTTTATTTCT  
TGTGGGATTTAAGCTATACAACAAAGTAAAACATAAATCATAATATTAGTATAATTTGACATATTCTATCT  
AGTTAGTTTCTGTTTTATTAGGTTACCAATTAATATTTATAATCGAAATGTACTTGTAAGTATCATAGTGT  
AACTATTTTTCAACTGTCAGTATATAGAACTTAACTACCTGCTCCAGGAGTTACACAAGCTAGGCCGGT  
CATCATTCCCTGAACCGCTCCGATAACGGATGGCTTGCCAAAGTAAAAACATCTAGAGTTGTCCAAACC  
AGAAGACTTGTAGCTGCTGAAATATTAGTGTAAAACAGCCAAAGGAGCAGCTACATTTGCAGCATT  
GGTGCTCCTCATTGAAACCTGACCAACCCATCCAAAGTAACCCTGCTCCTGCAAGCATCAACAACACAT  
TGTTTGGTGGAAACCTTCCCTATCACTCTCAATCTTGCCCAACCTGCCATCAACATATCCAATCAACTC  
AATTAACATACACAAAAAATCGAGTTGAACAGAATCCACTACTTTCAGTTTGAATCATGTAATATCCGA  
TAGTGCTATGTGATCTAAAGGCTAGACTAAATCACTAAAAGTTGAAACGACATCAAAATTTTGATCACCT  
AATTTCAAATTGTAATGAGTTTAGCTGTAAAACCTAAAGGTTGAACACGTCAATTTTAAATCCTGAATTC  
ACCTCTAAATCATACTCGCTCCAAATAAACTAATTTGACTTTAAATTGCTCGGATCCAACACATAGCTGTC  
GACATTTTTGAAGAGTCTAAACGACATAGCTTTAAATTTTGGATCAAACCTTATCATAACAGAGTAAAACA  
GAGTCGAATGAATGAACGAAAAGGGAGAATTAGTTGGTTGTAATACCCAATAAGCAGCGGTGAATCCA  
GAAATTCAGCAGAAAGATGAATAACATAGCCACCAGAATAATCAATGACACCCCAATGATAAAGAAAT  
CCACCTCCCCAAAGGCTAAAAGCTCCAACAGTATAACAAAAAATAAGCCAAAGAGGAACAAAAGCCATC  
CAAGCTTTGATATTCATACGAGCAAGAACAGAACCAGCCAACAAAATCATGGTAATAGCTGCAAAAAGTG  
AAATGAAAATAGACATGTGCAGCCATAGGATAAAAAGGTTTCATGCATAGGAGATTCTATAGTCGTTCCA  
TCGCTATAATAATGCGTTGTCTCTGGCATTCTTGCTCGTCTGTTAAGTATTTTTGGCCTAAAGCAGGGGC  
CCCTTTGCCAAAAGGGCAAAGCTTATCGCCAAAGGCGATACGATAGCCTACTAATACCCAACATATG  
AGTACAGCTGCGAAAGCGTAAAGAGCCATGAAAGCAGAGTTAACTGCCATTTTTTTCTTGACAATGCTG  
GCGTAAAGGATGACAAGGCCTGGCATACTCTGCAGACCAACGAGGGTCGCTGCAGTCATTTGCCAGGC  
GTTGTCGCCTTTGTTTAGCCATGGTGGAAGTCTGCTGTTGATATGCTCCTGCTGGTATGGAC  
ATGGCTAATTATTTTTAGAGCTTCTTGAAATTTATTTGATGAGATATATTATATGCTCTGTTTTGTTAA  
ATGGAGCTTGTTTCAGTT

>PGSC0003DMG401015976 LRR-RLPs

ATGCAATTCTTAATTCTTAAGGAAAATAGGTTTACTGGTACGTATTCAAAGTTATAGCGATCTGTATTGA  
GCTAGTTAACTCATTCTTTCTTACGTGTTGACAGGTGAAATACCCAAGATATAAGAAATCTCGTTGA  
GTTGGTGGAAATTTGATGTTGGTTTAAATAGTTTTAGTGGTTCACTTCCAATGGAGATCTTCAACATATCA

CGACTGAGAACAATTCAACTTTCAGCCAACAATCTATCAGGAACTATACTACCAAACATAGGTTCTACCTT  
ACCCAACATTGAAATACTTTATCTGCATACCTTAACCAATCTTGTTGGGACTATTCCTCATTCTATCTCAA  
TTGTTCAAAGCTTACTCATCTAGAGCTTTCACAAAACAACTCAGTGGCTTAATACCCAATTCTCTGGAT  
ATTTGACTCATCTAACTTCCTAACTTGTGGGGAAACAATTTAACCAGTGATTCATTTTTAAGCTTCCTC  
ACTTCCTTAACCAATTGCAGAAGATTAACAACCTTTTCTCTATCTTTCAACCCTCTAAATGGCATGCTCCG  
GTCTCCGTAGGGAATTTCTCAAATCTCTGTAAAGTTTTATGCCGCTGCTTGCAAGATTAATGGTCAGAT  
TCCAAATGAAGTTGGCAACTTAAGCAGCGTATTAGACCTTGATCTTTCTAATAATAACTTGATTGGATCA  
ATTCTACCTCAACTCGTAACTTGAGAAACCTTCAGCGCCTGTACTTGAACAACAACAAGCTTACGGGAT  
TTATTGGAGATAATTTATGTAAATTGCAGCATTTGGGTGCTATTTACTTGGGACAAAATCAACTTTCAGG  
ATCTCTTCCTAATTGTTTAGGGAACGTCACCTCCCTTAGAGAGATACATATGTATTCCAATAAATTGAGTT  
CCAATATACCAATAAGCTTACGAAATCTTAAAAATCTAATGCCTCTTAACTTGTCATCAAACAACATGGTT  
GGTTCTTTACCTCCGGAAATTGGAAATCTAAAGGCTGTGAATTATATGGATCTGTCAATGAATCAATTTT  
CAAATGGAATTCCTAGGGAAATTGGAGGATTGCAAATCTGGTGCATCTTTCTTTGAGACACAACAAGT  
TGCAAGGATCTATACCTGACTTAGTGAGCAACATGGTTGGTTTGGAAATTCCTAGACATTTCTCATAATAA  
TATATCAGGAACCATTCCATGTCTATGGAGAACTTCAATACCTCAAGTATTTCAATGTTTCTGACAACA  
AATTGTATGGTGAAATACCCTTGGGGGGTCTTTCAAGAACCTCTCGAGTAAGTTTTTCATCGACAATG  
AAGCATTGTGTGGTTCTTCAAGATTTAGTGTCCCGCGATGCCCCACTTCATCAAAGCATAGATCAAATAG  
GAAACAAATGTTTGCTCTATTTCTTATGCTGGGAATTGCACCTTGATTTGTTCTATTGCCTTTGTGTTCTG  
ATGGATAAGGTATAGAAGAGGTAAGAGAGTTCCTCAACGACCTGATTCATTGTCTATCGCAACAACAGA  
AAGAATTTCATACTATGAACTGCTCCAAGCAACTGATACGCTTGGCGAGAGTAATCTGATTGGTTCTGGA  
AGTTTTGGCTCTGTCTACAAAGGCGTTCTCAGAAGTGGAAGTCCATTGCAGTTAAAGTGTTCATCTGC  
AACTGGAAGCGGCATTCAAGAGTTTCGATATAGAATGTGAAGTTTTGCGTAGCTTCGCCATAGAAATCT  
CGTGAAAGTCATCACTAGTTGTTCCAACCTTGATTTTAAGGCTTTAGTGCTCGAGTATATGCCTAATGGA  
AGTCTTGACAAGTGTGTTGATTTCGCACAACCTTCTAGACATCAGGCAGAGACTAAGCATTATGATAG  
ATGTTGCATGTGCTTTGGAATATCTTCATCATGGATGCTCCTCTCCGGTGATTCACTGTGACCTGAAGCCT  
AGTAACGTCTTGCTGGATGAGGATATGGTTGCCACCTAAGCGACTTTGGCATTTCAAAACCTACTTGGTG  
AAGATGAGAGTGATTTATACCTAAAACGTTAGCAACGTTTGGTTATATTGCACCGGGTACGTCTCTTTG  
TTTTTGCTAATTTGAACATTGATTTTTTCATTTTTTTTTCTAATTCAAGAAAGTATATTGCATATTTAAATTA  
TTCTCTGACTGTAGAGTATGGACTGGATGGACTGGTGTCAATAAAATGTGATGTCTATAGTTACGGGAT

CATGTTGCTGGAAACGTTTACTAGGAGAAAGCCTACTGAGTTTGAGGGAGATCTTAGCTTGAAGCAATG  
GGTGAGTTATCACTCCCCGAGGCAGTAATGGACGTTGTAGATGCCAATTTGGTAACAATACCAATGGAT  
AATCGCTTACAGAAGGAGCTAGATTTAGCACTTGATTTGTGCATGATTCAGTTTTAGAAAATTCTAGATG  
GTTGCAATAAATATCACTATTTCAATTTGATTACCGGCAAATCTTGAAACAGAATGAGTTCAGTGCTTCTAT  
CCTTTGTTTTGTGCTTTTTACTGATGCAGAGGATGAGTGA

>PGSC0003DMG401016557 LRR-RLPs

ATGTCTTCTACCATGTTTGTAATGGCCGCCGATACTCTTTCTGATTCCGATCAAATATTTTCCAAGTTACCA  
GAAGACATCATCGAGAAAATCCTGTCTTATGTAACATGAAACAGAGACCAATAGTTTCTTATTCCA  
AAAAATGGCAACAAATAATAAAATCATTCAACGACGATCTCAATTTAGTCCACAAATATTCTGCAAAGAT  
AGCTTGTGGATACTGCGGCTCCTCTCAATTGGACCGTCATGCGTCCTGTTTATGCTCCGACACTGATCTCT  
ACCATGTCGATCCATTTATTAACCTTGTGTCAGACAACATCAGTTTCAAAGAGCTGTATTTATTCATACCA  
CCTACTTTTAGGTATTGTGCGTCTCCTGGAATTTTAGATTCCAAATTTTAAACCATCCTCCATATAAAAGG  
AAATTGCAACATGAATATTATTCGAAAATTTAATGTAATGCCTTCATTGAAAGAGTTGTATTTTCACTCTG  
TTTGCAATTTTTCGCACGCCTTCTCCAATTTTATACCCAAGTGTCTCTCCTTGTCTGTTAACTTTGATAAA  
TTGTGACAACCTTAATGAATTAACAGTCCCCATCTCAATTATCTCGAAAAGCTTCATGTCACTACTCGCA  
AAAAAATTACAAAATTGAAGTAAAAGCTCAAATCTCCTCGAGTTTCACTTGTGTTGTCCAGCCTTACC  
AAACTTGATCTGTCTGCTTCTACTAACTACAACCTCCTCCATATAGATTCTACAAATGTTCTGACTCATT  
CCTCATGAAATTTGCTCAACATTCCCATCTCTAAAATCCTTATGTCTTATATTATGTAGAGGATTGAAAAA  
AATCAAATTTGTGAGTCCTCTATTGGAGAGTTTGACATTGAATAACATCATTGACTTGGACGAAGCATT  
ATAGCTACTCCTAATTTACAATTGTTCAACGTAATATATAGCTTTAAATTCAAACCCCGTGTCCCATAGT  
GGGATCAAGGCAAATGGAAGTTGAGATGGGTGCTCGTGCAACCAATAACTTGCTTGAGTTGAGAACTTT  
TGCTGAAAATTTGGGTGAAAATATCACGTTGTCCTTGGAACTGACACAACCTGGAGCAAAGGTATGTAC  
TTACATCTTAGTATTTTTCAATTCGATTTCTTTTATGTTTGACAAGTCATTTTGTGTTGAATATTATTTT  
CATTGTCTATGAAGGGAGTAACATTTAGCCAGGAAACCTTGGACCACTTTGTATCAAGTGCATAAATTT  
GGTAATACAATCTTCATTTAAACCAAGATATGAATCTTTTCTGCTGAATTTTTTGGTACTTCCATCCGCA  
GACCTTGGTAGTGACAGTGAATTCAGATGCCCGCAAACATGACTTTTTACAGGTATTCTACAATATTATA  
ATGACTTCATTTTCACTTAATAATTTCCCATCTTCACTTATGTTATGAATTTGTAGGTCCTAATGAATGAG  
CTGGAATGCTGGAACAGAGACGGCACTAAACGTTACAAACGTAGTGAGTACATTTTTGGTACAGTGCA  
TTGAAACGCTTTACAGTCCTTGGATCAACTGCATTTGCAAGACAAGAAAAGGAAACCCGGTGTGATAGG

TCCACGCTATGTGCTGGGTCAGGGGAAGGGTCGAACCAGAAGGGGCTATCAGTAGACTTACCCAACAT  
TTCTTCAATTACAAAACAAGAAAGGGGAAGCCCCGAAATGGTAAGCGCCCGCTCTGTGCAGGATCTGAGGA  
AGGACGGGAACAACAATGCATATTGTTTCATAGCCTTACCTAACCTTTCTACAATAACAAGAGAAGGCGCT  
CATCAAATTAAGTTGCAGTTTGAGTGGTAA

>PGSC0003DMG401016933 LRR-RLPs

CTTTATTACACTAGCCAGTGAAGAATTAATTGATCAGATATGGAATTCTTATCTATTTTTGTGAAAATGAT  
CACAGATTGCTTGATCCAGCCAGTTGCGCGAGGGATTGGGTATTTCTATTACTACAAGAGCAACATCACA  
TCTCTGGATGAAGAATCTCAGAAGCTGGAGAATATCAGACACGGCGTGGAGGAAAGAGCAGAGGCTGC  
CCGGAGAACTTACAAGTCATTTACCCAATGTTGAGGCTTGGTTAACTAGTGTTGATATCACTACTGCA  
GATGTGGCAGCTGTGATGCAACGAGGTAGAATTGAGGTTGAAAGATATGGTTGGTGTCCAACTTGAA  
ATCACGTTACTCGCTGAGCAAGAGAGCCAAGAGAATTACCCTGGAGATGATTGAACTTCGAAATGAAGG  
TAACAAGCATGATGTTTTCTGCTATCCTGTCGTAGAAATTGAAGCTATTTCTAGTAACAGTACTGAAGAA  
TTTGACTCCAGAAAATTGCAAGAGGAAGAGGTCATGGCAGCTTTGAGAGATGATGGGGTCAATATGAT  
TGGGATATGTGGTATGGGTGGTGTGGTAAGACAACACTGGCTGAGAAAATAAGAGCAAGGGCGAAA  
CAAGAAAGTTGTTTGATGATGTTGTCATGGTAACTGTCAGTCAACAACCAGACTTCAAAGAATTCAG  
GGTGAGATCGCAAGAGAAGTCGGGCTGACATTAGAAGGGGATAATTTGTGGAGTCGTGGAGATCGGC  
TGC GTTCAAGGTAAAGGATCAGAACAGCCGCGTCTTATAACTGGATGATGTTTGGGAGGCTCTTC  
ATGATCTAGAGAACTTGGAATCCAAGGGGTAGCAACCACAACCATCGGTGCAAAGTGACATTGACTA  
CGCGTCTGAGAGATGTTTGTGAAGCTATGGAAGCTCAGAAGATCATGGAAGTTGGAACCTTACCTGAAA  
ATGAAGCATGGATTCTTTTTAGGCAGAAAGCCAGTAATTTAGTTGACAATCCTTCTCTCCTTGACATAGC  
AAAAGATGTTGCCAAAGAATGCAAGGGGTTGCCACTTGCAATTATCACAGTTGCAGGAGCACTAAAGCA  
TAAAACCAAGCCTTCATGGGAGGATGCCCTTAAACAATTACGTGATGCAAAAACAAGAAATATCCCTGG  
AGTGCACACAAAGGTGTATAAAATTCTGAGGCTAAGCTATGATCACTTGGAAAGTGATGAAGCCAGGTA  
CCTCTTTTTGCTTTGTTCTTTGTTTCGAGGAAGATAGTGATATTTGGACTGAAGAATTAAGGTATGTAA  
TGAGGCTTGACATCTTTTCGAAATCGAAAATTTAGAACATGCAAGAAATAGAGTGTGTCTTCTGTTAGA  
AACACTGAAAGGTTGCTTCTTGTATCCCAAGGTCGGACAAAATTATGTCAAATGCATGATGTGGTC  
CGTGATGTGGCTATATATATTGCGTCTGAAGGAGAGCATATCTTTATGGTAAGTCATAATGTGAACTCAA  
AAGAGTTCCAAGAAGAATTTCTTATGAGCATTTTCAGTCACATGTCAATTGTTGCAAATAAATTTGATGA  
GCTTCCTAGACCAATCGTTTGCCAAAACCTGAAGCTTCTAATGTTAAACTCTGTTTTGAAAAGCCATTCA

AATTACAGGACGATTTTTTGGATGGCATGAGTAACTCAATGTTTTAAGCATGAGGGGAGACAGATATA  
AGGAGTCCATTTGGCCTCTTCCAGGATCCATTAGAGGTTGTCAAGTCTGAGGACGCTGTGTCTGAGTA  
AATTAAGGTTGGATGACATATCCGTTATTGGGGAAGTTGTCACCTTAGAAATTCTCAGCATCAAAGATTC  
TCAGTTAGAGGAGTTGCCAGTGGAGATAGGAAAATTAACCAATCTAATTATCTTAGAGCTGCAGAATTA  
TAAGCAAGTAGAACTTGAAAGGATTTACCAGGTGTCTTATCAAGACTAGTACGATTGGAGGAATTACA  
TATGGTGGGAGTAGAACATTTTAGTTACTCCACCTTAAGAGAGCTGGAATCCTTATCGAGATTGACTGCA  
CTGACATTAAGTAAATGTTCCGGAGATGTGATCTACAATAACTTGGGCCCTTCCCGAGTTGACACGGT  
ACGCTCTTACATTGGGTAGAGCTTACAGAACGACTTCAACCATAGATGATTATGACAAGAATATTTCTTT  
AGAGGTCACTGAGACCACCCATTGGGTGATTGGATCTGCCACAAGCTTAGGAAGAGTGAAGTTGTACA  
TTCAACTGGAGAGGGCTCCAAGAATGTGCTGACAGAGTTGCAGCTGGATGAATTTAGAATGTGAAATA  
TCTTCTCTGGATGATTGTGATTCATTGACACATTTATTAAGATCCACTGTCAGAATAATATTCCATTCCC  
TGAAGTAAAGACTTGAGGTAAGCCGTTGTCGTGGTCTACAGTATGTTTTTGTGTGCCCTTGGCTGGA  
GGGAGTTGGACAGTAGTTTGCCTAATGATGAGGAAGAGGAGATCTCTCGGAGGACTCGTGAAGTAAT  
CAAGTCCCAATTTATATGAATTGGACCTTCATTCTTGAATGCCTCACTCACTTTTGCAGTGACAGTG  
TTGAGGGCATTGAGTTCCCTCGGTTACGGGAAATGAGCTTCTTTGAGTTACCAGAGTTTCAAATTTCTT  
GCCTACAACCAACAACTCAATCACTCACTCAAATCCTCTTTTTGATGAAAAGGTCTTCTTCTACTGCTCTAT  
GTGACCTATCATTTCACAAAAAATGATAACTAATTTATAAATTTACAGGTTTCTTGTCTCAGTCTG  
GAAGAGCTATCTATCGATGGAGCTAATAGCATAAGTGCTCTATGCTCTCACCAACTTCCAACAACCTACT  
TCAGCAAAGTTGAATCATTGTATGTATCAAATTGTGGAAAATTGAGAAACATGATGTCTCCATCAGTGGC  
TAGAGGTGTTTTCAATCTCCGAATACTAAAGATAGATGGTTGTCAATCGATGGAAGAAGTGATCACAGA  
AGAGGAACAACAAGGAGAAGAAATCATGACTAATGAGCCCTTATTTCCCTGTTGCAAGAATTGAGGCT  
TCAAAGTTTGCCATGGCTTGGGCATTTCTTTGTGACGAAGCATGCTCTTGAATTTCCATTTCTCAGAGAAG  
TGACTATTCATGACTGCCGTGAAATGGAGACGTTTGTCCAACAAGGATTTGTGAGTCTCGAAAGGGTGA  
ACAATGACGATGAGGTGAACAATAAAGTGATGTTCAATTCTAAGTTTGTCTTGTGCCTCTAGTTGTATA  
ACTAAGTCTTCTGAGAAAGTGCATTGCACGTTGATCTCTATTTTTTACTTAAAGTTTGTATTACAAAAT  
AATGAATCGAAAAAGTTATATCACTTTAAAATATATTTGTGGTTACCAAACAAGGAAGTTGATCCATT  
ATAGAAATAACTTTGAATTGATTTCAATTCATGTTTAAATTTTTTATAGAGTGAAATGGACACTATGTGAC  
AAAATATTATGCTAGATATCTGCTTTATATAAGCACTTGATTCACCCTAACATGCCAACAACAATATGTTT  
CCATTCAGTTGTACAACAATAGCATATTTAATTAATTCATTGACTATCTACTTATATCAATATCGATCATAA

TAGACAAGACACTTGATATATTTATATTTAATAAAGTTTGTGTTGAGTTATAAAATAGAACAAAACACTATTC  
ATCTTCTGCTTCATAATGTGAAAGTTATTGGAACCTACCAATTAATACCTCTTTAGTTTATGACAAGCATGT  
TAAAATCATATTCAATTCTAATTAATATTTAGTAATCCTAAAATTAGTAGTATATTTATCTTTTACAAATA  
TTTTTCATATATCAACATTCACAAAAATAGGTGAATTTAATTAATAATGGGATCTAAAATAATATAGT  
AATGTCAAGTGAATTCTCCACTAGGAATGTACATAATAACATTTTCTTTCCTTATAGCACCTCATGTACAT  
GTAGTTATATTGCTTTCCTCTTGAAATGAGATATCAAGTTATTCTCCACTTTGTTGTTGCGACTCTCCAAAA  
TTGTTGCCGCACCCGTGTTGGATTCTCCAAAATGCACTACTTTTGGAGTATCCAACATGTATCCATCGACA  
TTTTTGAAGAGATCGAGTAACATAGATTCTTCATACCTGTCTATTACATTGTATTAGAGCCTGAGCTAGC  
TCTCGCTCCACGTTCCAGTTGGGCCTGGATGTGAAGGGGATGTTAGAGTCCCACGTTGGTTGGAAAATG  
GAATGGTGGTCTGCATATGTGTACTTGGTCAATCCTCCCCTCTTGAGCTAGCTTTTGGGGTTGATTTAGG  
TCATATCTTTACAATTTTCATATCAAACCTCTCCAATACTGTCTTTACTGCCTTTCTTCATCCCTTCAATCGTA  
CGTTTGCAGGTTTCTTTTCCCAGCCTGGAAGAGCTATATATCAATGGCGCTAACAGCATAAGTGATCTAT  
GCTCTTACCAACTTCCAACCTGCCACTTCAGCAAACCTGAAATATTGAATGTAAAGGAGTGTGCTAAATT  
GAGAACTTGATGTCTCCATCAGTGGCCAGAGGTGTTTTGAATCTCCGAATACTAGAGATAAATGACTG  
CCAATCAATGGAAGAAGCGATCACAGAAGAGGAACAAGAAGAAGAAGAAATCATTACTAATGAGCCCT  
TATTTCCCCTGTTGGAAGAGCTGAAGCTTCAAAGGCTACCAAAGCTGAGGCATTTCTTTCTCGCCAAGCG  
TGCTCTTGAATTTCCATTTCTCAGAGTAGTGTGTATTGACTGCCCTGAAATGAAGACTTTTGTCCAAC  
AGGGATCAGTGAGTACCCCAAGTCTCGAAAGTGTAACAATGATGATGAGGTGAAAGTAGTTGATCTC  
AATAAAGTGATGTTCAATTCTAAGGTTTGTCTCGTGCCGCTACTATATAGCTAATTACTATTCTTTCCAT  
TTTAACTAGTTAATAGTAATAGTAATCTTTGGATAGTTATTTCTGTTCCGGTTCATTTTTTATTTTGTACTTTA  
AGCTATTTTGAATTTTTCATCCCTTACATAAAATACAAGTTGTCCTTCATCATTGTCAGGTTTCTGTCCCAG  
CCTGGAAGAGCTAGAACTCGACAGGGCTGAAAGCATAAGTGCTCTATGCTCTCACAACTTCCAACCTGC  
CTACCTTAGCAAACCTTGCAAATTGTATGTATCGAATTGTGCTAAATTGAGAAATTTGATGTCTCCGTCA  
GTGGCCAGAGGTGCTTTGAATCTCCGAATACTAGAGATAAAAGACTGCCAATCAATGGAAGAAGTGATC  
ACAGAAGAGGAACAACAAGGAGAAGAAATGACTAACGAGTTTTTATTTTCACTGTTGGAAGATCTGGA  
GCTTAAAGGGCTGCCTAAGCTGGGGAATTTCTTTCTGACGAAACATGCTCTTGAATTTCCATTTCTAAGA  
GTAGTGAGGATTCATGACTGCCCTGAAATGATGACGTTTGTCCAACAGGGATCTTTGAGTACACCGTGT  
CTCAAAGGGTGAACAATGACAATGAGGTGAAAGTAGATGATCTCAATAGAGCGATGTTCAATTCTAAG  
GTTTGTCTTGTGCCGCTAGCAGTATTATTGATTACTATATATATTTGTGTCATGCATTAATAAACCCCTGG



TATACTGCTCTCTTAGCGTTTTAACAAACAAATAGTAGTAGTAATCTTCAGATAGTTATTTGTCACCTGAT  
ATCTATCTATGTTGACGGAGGTAACAAACATAGGTGAATCTACAGTATTGTAATCCAAGGGTTCAGATG  
AACCTAATAGCTTTTGCGCAGAGACTTTTTATCTGTATTAGTTATATCTAGAGATTCCTTGATTGTGAATG  
CGATTATTATTGTATATTATTAACCTTGATGACATTGGAGATACCTATAAATTTCAAATTCTGAATCTACTTC  
TCATTCTAAATTCTTCTTTCATTATATGTAACAGCTAATATGTTGATTTATTTTCTCATGTTATCTTGCATTC  
TATGTCATTCTACTTCATCCCTTCAACGTTTCGCAGGTTTCTTGTACAGCCTTGAAGATCTAACTATCCATT  
GGGCTAACAGCATAACTGTTCTATGCTCTTACCAACTTCCAAGTGCCTACTTCAGCAAATTGTAATATTG  
GCAGTAAGGAATTGTGGAAAATTGAGAACTTGATGTCTCCATCAGTGGCCAGAGGTGTTTTGAATCTC  
CGAATACTAAATATAGCAGGCTGCCAATCAATGGAAGAAGTGATCACACTAGAAGAACAACAAGGAAA  
AACAAATTATGACTAATGAGCCCGTATTTCCCGATTGGAAGAGCTGCAGCTTGAAGGCTACCTAAGCT  
GAGGCATTTCTTCTGACGGAGCATGCTCTTAAATTTCCATTTCTTAGAGAAGTGAAGATTGATGACTGC  
CCTGAAATGAAGACGTTTGTACAACAGGAAATCTCTGTGAGTACACCGATTCTCAAATGGGTGAACCGT  
GATGATGAGGTTAAAGTAGATGATTTGAATAAATGGACACAACAGAAGTTCAATTCTAAGGTTTGTCTT  
GTTCTTCTAGTTGTATAACTAATTAACTCTAGCGCTCTCTTCCGTCTTAACTAGTACTCGACTACTTAATA  
GTGATAACAATATTAAGATTGTTATTTATGTTTGTCACTTGAAGCAACTTTCTTTTACTTGCCAAGTAAAT  
GTTTTATTTACTGAGCTAGTCATCTCTTCTCTGCTCGATCCCGGGAACAAAAGGCAGGACAAGGCACT  
ACCGATGGCTACCAATCTGAAGCTAAAGATGGCGATGAATCTAAAGCTACTGATGGGGAAAAATCTAAA  
GCAAGTGATGGTGATGAATCTGAAGCTAGTGATGACGATGAATCTGAAGCTACCTATGGCGATGAATCT  
GAAGCTGCTGATGAAGACGGATCTGAAGCTACTGAGTCTCGAAAGGGTGAACCAGCTTGATTTTGGGG  
TGATGGCAATGAAGCCAAACCAAGTCATAGCAGAAGCTAGTGATGTCTATGAATCCGAAGCTAGCTAGG  
AAGGTAATAAGTATTCGATGAAATGGTTGAAGTTAGCTCGAATATCACCTGATACCAATAGCGATGTTT  
GTTGATATTATGAATGAAAAGGTGAAGCTTGAAGAAGTCTAGAGTAGCAGCCTATTACATTTTTTTTCAA  
GCCCTTTGATATCTTATTAATCAAGCGTGATAGAGGTAACAAGAGAAAGGGTGGGATCTATATTATA  
ATTCATGCAACAGTTTTTGAAGAGACAATTCGTATTTGTATCAGTAATTTCTTTAGTTAGAAATCTTTG  
ATGTGCGGAGGGTTTTAAACATTCCACATTAATTGAGGAACTTTTCGGTTTTGATTTGATTCAA

>PGSC0003DMG401018044 LRR-RLPs

TTTCATCAAATAACATCACCATTGATGAGGGAATGAATATCACCTTTCTTAGCCTATCATCTTTATTCTTAT  
CATCTTGTGAACTGAAGGATTTTCCACACTTCTTGAGAAATGTAAAGACACTTGTGTACTTGGATATTTCT  
AACAAATATGATTCGTGGTCAAATTCCTGACTGGTTTAGTGGCATGAGGTGGGACAACCTTGTGGTACCTA

AATATTTACATAATCTTTTGACAGGTTACCTACCACAACCTGCATTTCCATAATCTAGGGTATCTTGATCT  
GAAATTTAACTCCCTTCTGGGTCCACTACCTTTATCCATTTGTAACATGAGCTCGCTTATCTTATTAGATTT  
ATCACGCAACAACCTTCAGTAACTACAGTTTCGTATGAGGATTCATTGAGTTTGGTAATCAAAGGGCAGG  
ATATTGAGCTACAAAGAATCAACACAATTATGACAACCATAGATCTCTCAAGCAACCATTTTGAAGGTGT  
CATTCCGAAAACACTAAAGGATCTCAGCTCACTTTGGCTACTCAATTTATCCCATAACAATCTCATAGGTC  
ATATTCCAATGGAACCTAGGGCAATTGAATACGCTTGAAGCTTTAGATCTCTCTTGGAAATTGGCTCACTGG  
AAATATTCTGCAGGAACTGACAAGAATGAACTTTCTGGCCTTCTTAAACGTCTCTCAAATCATCTTGTCG  
GACCAATTCCTCACGGTCTACAGTTCAACACATTGAAAATGATTCGTATGGCGGAAACCTTGATTTATG  
TGGTCTTCCTTTATCAAAGCAATGTGGAACGAGTGATTCATCACATGTTCTCAACCATTGGAGTCCGCA  
GAAGAAGGCAAGTCATATTTTTTTAGTAGTAATAGGCTACAGTTTTGGACTTGTCATTGGAACCTGTCATG  
TGGAGCCTCATGTTTAAATATCGTAAGTCAAAGTGGTTTGTGGAAATTTTTGATGGACTCATGCCTCACA  
AAAGAAGAAGGCCAAAGAAGAGAGCTCAGAGACGAAGGACTTAATGGAAGATTGAGAGGGCTAAATT  
GTCTTTGTTTGATTTGTGGACTAATAAGTAACTGTTCTGTTTTTGTCTTCTTTTTTTAATTTTCTATTTG  
TTGTTTGTATATGTTAGAAACATAATTATATGTGTGTT

>PGSC0003DMG401018576 LRR-RLPs

GTTTGCAAATTACTCTTAACATTCAACAAGTAACTAAAGCTCTTATAAACTGAGACTATTTGAAGATATA  
TCTTCTTAAAGAATCATATTGTGTTTCCTTGTTTTGCTTTCAGATTTTCAAGAAATGGAGATTGGCTTAGCA  
GTTGGTGGTGCATTTCTCTTTCAGCTTTGAATGTTCTTTGATAGGCTTGCTCCTCACGGTGATCTTCTC  
AACATGTTTCAGAAGCATAACAGATGATGTTTCAGCTCTTTGAGAAGCTGGGGGACATTCTGCTTGGTCTTC  
AAATTGTGCTAAGTGATGCAGAGAATAAGCAAGCATCAAATCAATTTGTGAGCCAGTGGTTAAATAAGC  
TTCAGACTGCTGTGGACGGTGCTGAAAACCTGATAGAACAAGTCAATTATGAAGCTTTGAGACTTAAAG  
TGGAAGGTCAGCTTCAAATCTTGCAGAAACAAGCAACCAGCAAGTAAGTGACCTTAACCTGTCCTTGA  
GTGATGATTTCTTTCTTAACATAAATAAGAAGTTGGAAGACACTATTAATAAATTGGAGGGGTTGGAAA  
AGCAAATTGGTCGCCTTGGCTTAAAGGAGCATTTTGTTCGACTAAACAAGAACTAGAACACCTTCAAC  
TTCTTTGGTTGATGATGCTGGTATCTTTGGAAGGCAGAATGAAATAGAGAATTTGATTGGCTGTTTATTG  
TCTAAGGATACAAAAGGAAAAAATCTGGCTGTAGTTCCTATTGTTGGAATGGGTGGCCTGGGTAAGACG  
ACACTTGCTAAAGAGGTTTACAATGATGAGAGAGTGACAGAAACATTTTGGTCTGAAAGCTTGGTTTTGT  
GTTTCTGAGGCATATGATGCTTTCAGAATAACAAAAGGGCTACTTCAAGAAATTGGGTCAACTGACTTG  
AAGGTTGATGACAATCTTAATCAGCTACAAGTCAAATTGAAGGAAAGCTTAAAGGGAAAGAAGTTTCTT

ATTGTTCTGGATGATGTGTGGAATGACAAC TACAATAAATGGGATGAATTGAGAAATATTTTGTACAA  
GGAGATATAGGAAGTAAGATCATTGTGACGACACGTAAAGAGAGTGTTGCCTTGATGATGGGAAATGA  
GCAGATTAGCATGGACAATTTGTCTATTGAAGCCTCTGGTCTTTATTTAAAAGACATGCATTTGAAAAC  
ATGGATCCTATGGGACATCCGGAACCTGAAGAGGTCGGTAAACAAATTGCAGATAAGTGCAAAGGACT  
GCCTTTAGCTCTGAAGACGCTGGCTGGCATGTTACGCTCCAAATCAGAGGTTGAAGGGTGGAAACGTAT  
TCTGAGAAGTGAAATATGGGAGCTGCAAGACAAGGACATATTACCAGCGTTGATGTTGAGCTACAATG  
ATCTTCCC GCACATTTAAAACGATGCTTTTCTTTAGTGCAATATTTCTAAAGATTATCCATTTAGGAAA  
GAACAAGTTATTCATCTGTGGATTGCTAATGGTCTCGTACCAAAGGACGATGGGATAATTGAAGATTTA  
GGCAACCAATACTTTCAGGAGTTGAGATCAAGATCATTATTTGAAAGGGTCCCAAATCCTTCTGAAGGG  
AACATAGAGAATTTATTCTTAATGCATGATCTTGTCAATGATTTAGCCCAAATTGCATCTTCAAACCTTG  
TATCAGGTTGGAAGAGAAGCAAGGATCTCATATGTTGGAAAAAAGTCGGCACTTATCTTATTCCATGGG  
AAAAGATGGTGACTTTGAGAAATTGACACCCCTCTACAAATTGGAGCAGTTGAGGACATTGCTCCGAC  
ATGTATTGGTCTCAATTATTTTTACCCTCTAAGCAAGAGGGTGCAGCATAACATACTGCCAAGACTAAGA  
TCCTTAAGGGCATTATCATTGT CAGGTTATGAGATTAAGGAGTTGCCAAATGACTTGTTTATCAAATTA  
AGCTCCTCAGATTTTTGGACCTTCTCAGACATGGATTAGAAAGTTGCCTGATTCCATTTGTGTATTGTAT  
AACTTAGAGGTACTTCTCCTGTCATCTTGTGCTTATCTTGAGGAGCTACCGCTGCAGATGGAGAAGTTGA  
TTAACTTGCGTCATCTTGACATAAGCAACACTTGGCGCTTGAAGACGCCCTACATCTGAGCAAGTTGAA  
AAGCCTCCAAGTGCTAATGGGAGCCAAGTTTTTTCTTGGTGGTTTGAGAATGGAAGATTTGGGTGAAGC  
ACAGAACTTGTATGGATCTTTATCTGTTGTAGAGTTGCAAATGTGGTTGATAGTAGGGAAGCTGTGAA  
GGCAAAGATGAGGGAGAAGAATCATGTTGACAAGTTATCTTTGGAGTGGAATGGAAGTAGTAGCGCCG  
ACAATTCACAAACAGAAAGAGACATACTTGATGAGCTACGCCCGCATAAAAACATAAAAGGAGTCGAA  
ATCACTGGATATAGAGGGACAACATTTCCAAATTGGTTAGCTGATCCTTTGTTTCTTAAGCTGGTGAAT  
TGTCTCTTAGCTACTGCACGGACTGTTATTCCTTGCCAGCACTAGGACAACCTCCCTTCTTTGAAATATCTTT  
ACATTGGAGGGATGCATGGAATAACAGAGGTGACAGAAGAATTCTATGGCAGTTTGCCTCCAAAAG  
CCTTTTAACTGTCTTGAGAAGCTTGAATTTGAATATATGCTGGAGTGGAAGCAATGGCACGTATTAGGA  
AATGGAGAGTTCCTACACTTGAGAACCTTTCAATTAATATTGCCCTGAACTCAGTTTGGAGACACCCA  
TCCAACCTTCAAGTTTAAAAGGTTTGAAGTTAGTGGTTGTCCAAAGGTTTTTGTATGATGCTCAACTGTTT  
AGATCCCAA CTGAGGGAATGAAGCAGTTTGAAGAATTAGATATTAGGGATTGTA ACTCTGTTACCTCCT  
TACCTTTTAGCATACTGCCCACTACCTTGAAGAGAATATACATAGATGGTTGCCAGAAATTGAAATTGGA

TCCGCCAGTTGGTGAGATGAGTATGTTTCTGGAGGATTTGAAACTGCATGAATGTGATTGTATAGATGA  
TATATCACACTTACGAGCACGCTCTTTGTCTGTATATAAGTGCCACAACCTTACTAGGATTTTGATTCTTA  
CTGTGACTGAAAGACTCCAGATTTGGGTATTTGAGAATGTTGAAAACTATCGGTGGCATGTGGGGGG  
ACCCAGATGACGTCACTGGATATTGGGTACTGTTCAAAGCTGAAGTGGCTGCCAGAACGTATGCAGGAA  
CTCCTTCCATCTCTTAAGGTACTGCAACTGAGTAATTGTCCAGAAATAGAGTCCTTTCTGAAGGAGGAT  
TGCCCTTCAATTTACAATTCCTTGAGATCAGCGAGTGCAAGAACTGGTGAATGGCCGAAAGGAGTGGC  
ATTTACAGAGACTTCCCTGTCTCAGAGAGTTATGGATCTATCATGATGGCAGTGACGAAGAGATTCTTGG  
TGCTGAGAACTGGGAGTTGCCTTCTCTATTCAAACACTTAACATAAGGAATCTGAAAACATTAAGCAGC  
AACCATCTCAAAGCCTCACCTCTCTTCAACATCTTTGTATTGAGGGTAATTTACATCAAATTCAGTCAAT  
GCTGGAACAAGGCCAGCTTTCGCACCTCACTTCCCTTCAAAGTTTAGGAATCGGGAATTTCCCTAATCTC  
CAATCACTTCTGAATCGGCACTGCCCTCCTCCTCTCTCAGCTGATCATTAAATGAGTGCTCTAAGCTCCA  
ATCCCTTCCAGTGAAAGGGATGCCATCTTCTTCTCTAAACTATATATTTACAACGTCCATTGCTCACACC  
ACTACTAGAATTTGACAAGGGGGAATACTGGCCAGAAATTGCTCATATCCCCACTATACAGATCGATCG  
GGAATACCTTTAATGGTTAAAACAAATGGTGCTCTCACAAATGTAAGTTTTTCTTTTTCTTCAGAAGCATT  
CTATTTTTGTTTTCTTCCCTTTGCTTTTTGTCAATTCTTTACTTTTTGAAATCTTGTTGAGCAGTGTGGT  
AAGTCTATTGCTCAAATCATATATGTTTATTGGGAAAACCTGTAATGATTAACGAGTGCTGCTCTGAT  
AGATGTAAGTTATTCTATTTCTTAATATATTTTGATTGTTTGTTAATTCTTTTTGACAAGTGTGTACCATC  
TATTGCTTCTTTGAAGTCGACGAAATATCTTTAGATCAGGATGAAATCTTTATATTTGTAAAAGAAATCTA  
GTATAGGTAGGAATTGAGATAATTTGCTCAAGAAAATTGATTGCTTAATATATGTTAGGGTCTAAGAAAT  
GCAACCTCACTCTTCTCAATCAGGTAGCCAAGACCTGATAAGAGTTACATCAAGCTTCAAATTTCAAGA  
AAGTGTAACGACTTTGAATGCCTGCTGCCATTTTTATGCCATGTTGTACCACATTGGTTTCAAGTTTGA  
TGCGACTGCATTATTACATCAGTTTTTTTTTTTTCATATTCAAAGATCCAGAATATTACATCAGTTTTTTGG  
TTTTGATATGCAGAGAACTTCTAGGATCATGAAGTTTCTCCAAATTATGTCCATTACTCAACCTTGAGTG  
ACACCTCAGAGCTAGTGAAAGTCAAAGAAGTATATACTGCTCGTGATGAATTCAAGGTTAGATAACAAA  
ATAATGATTTACTGGTGTTTCAGTTACCAAGATACTTATTTGTAGTAATAGTTTGCCTCTCATAAATCA  
GCAAATAGATTTCTTCAATTGGCACCTCATCAGTCATCTGTCTGCGAAACAGAGAAATCAACGGTTTC  
AAAATTCTCTAGAACCCATTTTCATGAGCTTCAAGCCTTCAATTCTGATGACACAAAAGACATCAACAGA  
GTAGAAGAATTCAACCAAGTTTTCAATTCCTGCTTACCTGATGGGAAAGGTACAAATATTTTTTTCTTC  
TCCCTTTCTTACTGCGGCGCTAAATTGGTTTTGCCCACTTTGTATCACAATGGTGTGGAGTATATCGGT

TTTCTACTGGTATTTCAGATACTTAAAATGGAAAATTGCTTTTGAAAATATCGTTTTTCATTGTTCTGAATGTT  
GTTTAAATCATCTGCTGATCCAAAATTTTTATTTTTCTTGATCTTCTTCTATCTTTAGTTTTACATGTCTTCT  
GATTGAGTTATAATACATGTCTTGATTCTATAGAAGATGAGAAAATTGTCAAATGCCTTTATGAAGTGTTT  
GCTAAGTTGATGTCGCCTAATTCACATTTCACTGAATTAATTTTTCTGACCCAAGTTTATGCATATGTTTGCT  
CTAACGTTGAAAAGGAAAAACGACCAATGATATGTTAAGAATTCATCACCAACTTAATTCTTTACTTAAG  
ATAAATCAAGAAAAATCTAGAATATTCCGGAGGTGTAGAGAATTGAAGAAAGATCTCTAGAATGAGTAT  
TCTAGAAAAGAATAGTCTAGAAAATGTTCTAGAAAAGAATAGTTCTAGAAAAAGATAGTTAGGAATATTCTA  
GAATAGAGTAGTATGTATCTCTCTAGATTCTTCCATCACCACTATAAATAGAGGTGGTCCATTTGAGTT  
GTAAGCAACCAATCAAGAAAGAAAGCAAGAAACAAAGTAAGAGAGAAAACAAGAGTGAGTGCTAAGT  
CAAGAGTGTTGCTGAAGCAAGCAACAAGTGTGATCAAGATTGTAAGACCGAAGCGGGTCCTTACTTTGA  
TATAATAAAATTCAAGTTGTGAGAAATCGATTGTGCCGTCGTCTCCAAACCAATAATATTCAACATGAT  
ATGAATATTTTTCTTTTTTAAGAATACAAAGTCGTGATAAGATAGAAAATTTTCGATGGTATTAATTTTCGAC  
ATGGATCACCGTTAAGTACTTTGCTTGAGGTATAAATTTCTTTTTCCCTGTTTAGAAATGTTTCCTGTAGC  
TCCTAATTGTGATGCTTCTTCATTTACACATTTTTAAAATTTTCATCTTATAACAGCTATAAAGTGTGTCCGA  
GTCAATTAATATTACAGACTTGGCTCTTCTTTGTTTAATTCATTTCTTCAATTCGACCAGAAATATTCTT  
CTAAAGGCATGTCAATTTTATTATTTTACACGATTTCTGTTTGTGTTACTTTTTCGATTTCTAATTTGTTTTA  
TGAATGTTTTTACAGTTTCATTTTCGATGCTTCCAAGTTTCAGCAGTCCTGATTCCTAAAGTTTTCCGGGT  
GAGCATAGTTGTGAGTTGCAAGTTTTGCAATTCATTTCTGTATTATGAATCATTGATGGACTATGATGA  
AATTTACTTTTCTTCGTAGAAAAAATATCAAAGAATTATACTACTATACTAATCAGGTTTGTTAATATTGA  
TGCTGCTGA

>PGSC0003DMG401019148 LRR-RLPs

GAGAGAAATTTGACTCTGGTAAAGAAGGAAGAAGTCGACTGAGCCTAGAACTAGAAGCAAACCCAAC  
AATGGCAGATCCAGTAATTGGTGCTACAGTTCAAGTTGTGCTTGAGAAACTGCTTTCTCTCACTATTGAG  
AAAGTCAGTAGCTCAAGGGACTGCAACAAACATCTCAGAATGCTCACACAAAATGTATCTATCATTCAAG  
CTTTCATTAATGATGCTGAAAGACGACAAGTTGACGATCACGCTGTGGAAAAATGGGTGAAAATGCTTG  
AGATAGTTGCTGAAAATGCTGAAAATGTTTTGACGAATTCACATATGAATCTCTCAAACACAAGTGAT  
GCAGATCCGAAATAGCCCAATGAGAAAGGTCAGTGATTTCAATTTCTCATAACAGCTTTTAAGAGTAAAATG  
TCTCGAAAAATCAAAAACATCAATGAAGAGTTGAGGGTTATCAATCAGTTAGCCAAAGACCTCGGTCTC  
CAATCACTAATAGTTTCGTCTCAGCAAATACTACCGTTTCGAGAAACAGATTCCTTAGTAGTTGCTTCGGA

TGTCGTTGGTAGAGACAACGATGTTGCTGAAATAAAGGAGAAGATGTTGAACATGAGAGACGAAGTTG  
TTCTGTGCACCATTCCCGTAGTGGGGATGGGAGGTTTAGGGAAAACACTACTGTAGCTAAGAGAATTTTCA  
ATGATGAAGAGATCGAAAAACATTTTGAGAAGAGAGTGTGGTTGTGTCTACCTGAAATGTCAGAGACTA  
AGAGCTTTCTTGAACAGATCCTCCAATCATTGACAGAGAGGAACTTGAGGTCCAGACCAGGGATATAA  
TAGTCAAGAACTCCGAGATGAACTAGGTGGAAAACGGTATTTGCTTGTCTTAGATGATTTGTGGCGTG  
TTGACCTCCGGTATGGGATGAGTTTGTGGATAGCTTGAGAGGAGTAAACACTTCTAGAGGAAATTGCA  
TTCTCGTGACTACTCGCATGAAACAAGTGGCATCCACTGTAGCGGTAGATGTTTCGTGTGTTGGGAAAGT  
TAACAGAAGATCATTGTTGGTCCATTTTCAAACAAGAGCTTTTGTGATGGGGAGGTTCCAGAAGAAA  
TGGTGAGCATGGAAAGCAGGATTGTTGAAATATGTCAAGGTCTACCGTTGGCTGCAAGTGTGTTGGGA  
GGCCTTTTACGCAACAAGGAAAGACATGAATGGCAGGCAATTCTTGATGGCAACCCCTTATTGCGGGT  
GAAAATGATAATGGGGAAAATAGCTTAAGGAAAATCCTAAAACCTTAGCTATGATTATTTACCATTTCCAC  
ATCTGAAAAAATGCTTTCCTACTTTGCAATGTTTCCAAAAGATTTTGTGTTTGGAAAGGACCAACTAATC  
CAACTCTGGATGGCGGAAGGATTTCTTCGTCCATGTCAAGAGACTCCTGTGATGGAAGACGTTGGGAAC  
AAGTATTTTCAACTTTTGTGCAATATTCCTTGCTGCAAGATGTTGAGCTAGATGAGCACAACAATATAA  
GATACTGTAAGATGCATGATCTTGTGCATGATTTGGCTGGAGATATTTTAAAATCTAAACTATTTGATCA  
AAAGAGTATTGGAGGAGAAAATCTTTCTCAAGCCCGATACTTTGGATGGGACTCACCAAGTGATCAAAT  
TGATATGATAAATGAGCCAGGACGTATATGCACATTGTTCTCGAGAAACAATATATCCAAAGATGTTCTA  
TTGAGCTTTCAGTTCTTGAGAGTTCTAAATTTTTCCAGGTCAGGCATCAAGGGTTGACAGCCTCAATTG  
GCAAATAATACTTGAGATATCTTGATCTCTCCAATACTAATATCAAAGCCTTGCCTAACTCCATTTGC  
AAGCTCTACAATTTGCAAACATTTAGGGTAAGTAACTGCTTTTTACTAGAGGAGCTTCCAGATGAAATGG  
CGAATATGATAAGTTTGAGACACATATATTACAGCAATGATTTTCAGATCAGACTCTAGAAAATGGTGTTT  
CGGCAATCAGAATTTTCAGATGCCACTTAAGATAGGACAATTGACTTGTCTTCAAACACTACAGTTTTTC  
AAGGTAGGTTTCAGAGAAAGGTCGTGCAATAGAAGAATTAGGTTGTTTGAAGAACCTTAGAGGTGAATT  
GATGATTAGAGATCTTCAATTGGTCTGTAATAGAGAAGAAGCTGTAAAAGCATGTCTATGGGAGAAACC  
AAATATCTCCAAGTTGGCATATTTATGGTCCCATGATGAATCAGAAGACTATGAGGTCAATGATGAGTAT  
GTTTTGGATGGTCTTCAACCGCATACTAACTTGAAAAATTTAGTGGTAGTGAACATTTGGGGACTAGAT  
TTCCGTCATGGTTCAGTGAAGAATTGTTACCAAATTTGGTCGAGTTGAAATTAAGTGGTTGCAGAAAGT  
GCAAGGAAATTCATCGCTTGGCCAACTTAACTACTTCGGCATCTTGAGCTGATAGGATTCATGAGTT  
GGAATGTATTGGACCTACATTTTATGGTGTGGAAGTTGACAATAATGGATCAAGCAATAATAACACCAAT

ATCCAAGTGTCCCGTTACTCAAAGAACTAGTATTGTGGAATATGCCTAGACTTACTGAGTGGAAGGAA  
GTGCAGTTGTTATCAACAGGAAATGATGGTAGCGACAGAGTTGGAGTAAGAATGTTTCCTGGGCTGGA  
GAAGTTGAGGATTATTAAGTGTCCACTGTTAAAAAGTATACCGAATCAATTTGAAATGCTGCGTGAATTA  
AGCATCGATGGGAATCAGATAATTGAATTTGGAATTGAGGTTCTTCTCTTGAACATTAATGCTAGTGAG  
CTGCAAATGGCTACCCATCTGGACTTTTAGATGCCATGCCCAAATTACATTATCTGAAGATCAAGGACT  
GTCGATTGCTAGGATTAAGCTATGTTGGATGGGCCCGTGAACCTTGTTCCTTAATTTGCAACAGTTATTT  
TCATCGAAGTGTGGAAAAGTACTAGAGCATCTGCCATCCAGATATTCCATGTGATGCCTCACCAAATTGCGGT  
ACCTGGGAATTAAGGCTGTGCTCAGTTAGAATTAAGTTCTATCAATAATAGGAGTGGCCGAAACTCCC  
AGTGGTCCAACATTTCTCATATTTTAGTTATTAACGTTGGGTTTCATGAAAATTCAGGACTTGTGTTAGCCT  
CTATTTCTCCTTTTAGTTTTCCAAGCTTTTCATTCCCCAAACGAATACATCTTACTATAGTACTGAAGAAGT  
TGAGGATTAGTAGATGTCCACTGTTAAAAAGTACTCCAAATCAATTTGAAATCCTGCATGAAGTAGCGAT  
TGAAAGAGTTAACAGTGAAATGCCGTTGTTGAACTTGTGCAGCAACTTGACATCTCTCGTAGATCTTATT  
GTGGATGATGTGAAAGAGCTCACTTGTTCCTCAGATGAGATGCTACGTAACAATGTTTCTCTTGAACATC  
TACTGGTCTTAAATTGCCGAGAGTTTCGCGAATTGCCACAAAGTTTATACAATCTCCGTTCTCTTAAGAGC  
TTAAGGATTGAGCGCTGCAACAATTTAGTTCCCTTTCCTGTTCCAGTGGAGAGAATCATTTTACTTCGCT  
CCAAAGTCTTGAGTTGTCCAATTGTGATGCCTTAACCAGTTTACCAAGTGAATGCTAGAGCGTTGTCGG  
TCTTTGGAATCTTTGAAGGTCAACAAATGTAACAACCTTAGTTTCCTTCCCTTTACATGTGTGGGAAATGCC  
TTCCTCTCATATTTGAATATATCAAATGCCTCAAATTGGATAGTGTACCTGCACAGGGTCTTCACCGTC  
TCACTGGATTACAGGAATTGTGCATTGGACCTTCTCAGAGACGGTGGATTTTGAGGCATTCCAATTGAT  
ATTTAATGGCATTACAGCGGCTATCGTCCCTTCTAAATTAGAGGTGTATGGGAATAGGCAATGGGATTCT  
CTGCCCTATCAGGTTATGCAACTTTCTTCCCTAACAGAAATCGGAATAAATGATTTTGAATCAAACTCT  
TCCTGATAGATTTGGAATCTTACTTCTCTTGAACATTAGAGCTAGTGAGGTGCAGACGACTATTCAGG  
ACTTAAGTAAGTCTCTACTTCAGAAATGAGAAAATTTACTTGTTTTTTGAAGTTATTTTTATGCACAGACT  
GACCAGATAGGAATAAGTAATTCAACTGGTGTCTCAACAATGACTCGAATGCATTGCAACGGTTGCTCT  
AAAGTTTATTTCTTTTGCAGATTAAGTTTTACTACAAGTGAAGAGGTCATCCCCATTCCGGCCTTGTTT  
GGGTACTGAACAACCTTTTCCGGGAACTATAGTCTACATATGAAACATCAAACACTCAACGTGTCTAGG  
GTGCTCGATGAGAATCTACACAGGTCTATCCTCTGTCTTTGCATGGCCATGTTTGCCTTTTTATTCTCCATT  
TAAGTTTTTGTACTAGATAAAGTTCCTTGACCACATGTAAAAATTTCTGTCATTTTTCCCTTGTATATGT  
GACATTTGCTACTAACTATGAACTCTTTGAACAATAAAATCCACATATTGAATCTTGC

>PGSC0003DMG401019681 LRR-RLPs

GAGTACTCCAAAAATGGCAGCTCTGTTTCAAACCAATTTTCTCTCTCTAAAATCCTCTCTTTATCTCTCTT  
CATCTCCATCTTCTTCTTCCACCATATCTCATTCCGACGATTTCTCAGCTCTTTTAGCCTTCAAATCCCGAGCT  
GATACGTGGAATTTTCTCACTTCATGGTCTAGAAATGCCCCCTGTTCTTCATGGATAGGTGTAAAATGTCA  
TCCAATTACTCGTAGAGTCGTAAAAATTGACTCAATCACTTAAATCTCACCGGATCAATTCATCCATTGA  
TTCATCTTACACAAATTCGGCATCTAAGTTTACACCACAATTCTCTCAGTTTCGATTCCGAATTTTCGATTTTT  
GGCCTAATCTCAAACACGTTTACCTCTCTAACAACAAGTTTCCGGTGAATTTCCGCCAGGAATTTACCTT  
TTGAAGCGACTCAGGCGACTTGATTTGTCATTTAATGAGTTTTCCGGTGAGATTCGGTGGAAGGAGTTG  
AATCAATTGCCGCATTTGATGACTCTGCGTCTCGAGTTAATTCTCTTAGCGGATCACTTGGTGCTGATGA  
AAAAAAACTGTTGCTTCAGTTAAGGAATTCAATGTTTCTGGGAATAACTTTTCTGGGAAAATCCCAAAT  
TGGTTATCAAATTTCCAGTGGCAGCTTTTGCAGGTAAAGTGCGGGAAACGAGCAGATTGGATCAAATT  
TGAACGGATCAAACGGATAAAGTTCATAAATAACCATTTTTTAGTTCGTGTAATTGAGAATTAACCATG  
GTCATAGAATATTGTCGTAGAGTTTCACTTGTGAAATTTGAAACGTTACCACAATGACTATTTTCTCAATT  
ACAAGATTGAAAAATGGCTAGGTGAAACAGGTCTTGATTAACCGTTCAAATTTGTCGGGTCAAAT  
GAGTGAAATAGTGAGGAATTTGCACAATTGGCCTTAAAAGGTCACTATTTAGATTTTATCCCCCTATGC  
TAGTGAGCTAAAATTTGCATTCAACTTCTTCTGAATGCGGATTTTAGCTGACTAAGCTAACGATTACAAA  
ATTTAAAAGAAACGATGATAATTCTATGTTGAAATAACGTTTACTAGCTACTTTTTCGGTTTTGTCTTTGAA  
AATAAACTACTTTTCATGAAGTTTTCGAATTCACAGCTAATGTATTTTTCTTATAGGAAACGTTTCGTCTTTGT  
GGATATCCATTACGAACTATTTGCCCGAGCGAAACAGTGGATAGTAATCCAACAGTGATGAATACTCCT  
AATTCACAATTCAACTTTCTTAATCAAAGAAAGAAGATTTGAGTGAAAACATGTTCTTATTGATAGTCA  
CACTTGATGCAATTGGCGTTATGATGACGGTTTTGGTAATAACATGGTGTTGTTATTACAGAAAGAAGA  
ATCAAGAGAGTGAAATTGACAGATTGAGAAAGACGAATAGGAAGTATAATAATCAGGACACGAGTAGT  
TCAAGTCTGTATCATTCAATTTGAATATGGTATCAAGAAAACAAGTGATCAGTTTGCAACAATGGTTTGTTT  
TGAAGGATGTAAAGTTTTCAATAAAGTTGATGATTTGTTGAAGGCCTCAGCTGAAATGTTGGGAAAAGG  
GAGTGTTGGAACAAGTTATAAAGTGGCTATTTTGGATAATGGAGATGTTGTTGTGGTTAAAAGAGTAAT  
TGAAAAGTTGAAGAAAATGAAAGATGTTGATGGATTTTTGAGATTAATTGGAAATTTGAGACATACAAA  
TGTTGTGCCACTTAGAGCTTATTATTCATCAAAGAGGAATTGCTTCTTGTCTATGATTTTCTTCCCAATG  
GTAGTCTACACAATCTTACATGGTAATTTTTCAATCCTTTCCTTCTCAATTCAAAACGGAAATTTATAG  
TCTGTTTGGTCAAACCTTCAAACCTCTGTTTATTTTAAAAGTGTTTTTTGTTAGAAAAAGTATTTTGTGCTT



TGAAATACACTTTTGCAATATTAGAGCAACAATTTATGCTTGATCAAGTCCTCGATAATCTAAAGTTGAG  
CCACTGAGTATGTTGTTCTTGTGTAATCTCTGCTTGATTAAGCTTTCAAAAAGTGCTTCCGGGGAAAACC  
TGCTTTTTTTCAGCTTCTCTTACTACTCAAAAACACTTATGTATTTCTAAAAGTTTGGCGAAACACCTCAAC  
TCTCTAAATTAAGCACTTTTTAAAACAATAAACACTTTTTAACTTCCCAAAAACCTTGATAAACAGATTATT  
AATTAGGAATAAAATGGAAGGGTTATTAAGAGTTCATATTGTTGATCCCCATTCATATGAGATTGAAATA  
TAATTGACTTACAAATTAECTTATATGCATTATTATAAGTAACTAACGTTTATACTATCAGGCATCAGCGT  
ATTAATTAACATGTTATGATAAGTTGTCTGATAACAAGTTACTTATCATAATCAGTTACTTGTAGTTAT  
CTTTTAGGTGATCTGATAGTATAAAAGCTCCACAGGTAATCGTGGACCGGGAAGAACACCATTGGATTG  
GACAACAAGACTAAAATATGCATTAGGAGCAGCAAAGGACTTAGTTTTTTACATAGCTACAACAAAAC  
CAAGATTTGCCATGGGAATTTACATCATCAAACATACTAATTGATCACAATGGCAATGCTTGTATCTCTG  
ATATATGTCTCCACTTGCTCTTACAAATGCCAATTTTCATCAAACAATGGATACAAAGCACCAGAATTATCA  
ACACAAAACAATGTAAACACAAACCAAAATCCAAGAAAATTTTCTCAAAGAGTGATGTGTATAGCTTTG  
GAGTGGTTTTACTAGAGATTTTACTGACTGGGAAAATTGCAACAAGTGAAAGGGGAAACAAGTTTGGCAAAA  
TGGATACAAAGTGTGTAACAAGAATGGACTTGGGATGTGTTTGATTTTGAAGTTGCAAGGTATAAA  
GAAAGGGAAAGATGAAATGGTTGCACTTTTAAAAGTGGCTATGGCTTGTGTTTGGTTTCATCTCCAAAAGAT  
AGGCCAAAGATGATTGTAGTGGAGGAAATGATCGAAGACATCGCAAAAAAGAGAACAATAGAGGG  
ACAGGTCCATTATCCATCGAATTTTAAAAGTGTATGTTTACTTATCCTTAGAAAATTTATCGATCATCAAAA  
GAGGAGAATAGAGTTCTTTATACTACTAATTGTTCTCCTTCTACTCACAATTTGAATTTGATTCTTGTAAT  
CAATTAGCTATGATGATTTTTTTTTGTTTTCAATTTTTACCTAGAAATAATTTGGTACAATTACTATATCAT  
TCTTACTTCTTTAATTCTTGTTTTTTTTTG

>PGSC0003DMG401020789 LRR-RLPs

CTATGGGACATCCGGAACCTGAAGAGGTGGGAAAACAAATTGCAGCCAAGTGCGAAGGACTGCCCTTA  
GCTCTGAAGACGCTTGCTGGCATGTTATGCTCCAAATCAGAGGTTGAGGGGTGGAAACGTATTTTGAGA  
AGTGAAAAAGGGAGCTGCCACACAATGACATATTACCAGCGTTGATGTTGAGCTACAATGATCTTCT  
GCACATTTAAAGCGATGTTTTTCTATTGTGCAATATTTCTAAAAGATTATCCATTTAGTAAAGAACAAGT  
TATTCATCTCTGGATTGCAAATGGTCTTATACTGCAGGAAGATAAAAATCATTCAAGATTTAGGCAACCAA  
TACTTTCTCGAGTTGAGATCAAGATCATTATCGAAAGGGTCCCAAATCCTTCTCAAGGGAACATAGAGA  
AATTCTTAATGCATGACCTTGTCAATGATTTAGCCCAAATTGCATCTTCAAATTTTGTATCAGATTGGAA  
GAGAGCCAAGGATCTCATATGTTGGAAAAAGGTCGACACTTATCATATTCAATGGAAAGTATCGACTTT

GAGAAATTGACACCCCTCTACAAATTGGAGCATCTGAGGACATTGCTTCCAATCAATTTCCAACATGGTG  
CTCCACTTAGCAAAAGGGTGCTGCATAACATATTGCCAAGACTAACATCCTTAAGGGCATTATCGTTGTC  
AAATTATGGGACTGTGGAGTTGCCGGATGCCTTGTTTATCAAATTAAGCTCCTCAGATTTTTGGACCTTT  
CTCAGACAGCGATTAAAAGGTTGCCGGATTCCATTTGTGCATTGTATAATTTGGAGACACTTCTCCTGTC  
ACATTGTGATCATCTTGAGGAGCTACCATTGCAGATGGAAAAGTTGATCAACTTGCATCATCTTGACATA  
AGTAACACTTCTTTCTTGAGATGCCACTACATCTGAGCAAGTTGAAGAGCCTCCGTGTGCTAGTGGGA  
GCCAAGTTTCTTCTAGGTGGATCAAGCATGGAAGATTTGGGTGAACTGCATAACTTGTATGGATCTCTAT  
CAATTCTAGAGTTGCAAATGTGGTTGATAGAAAGGATGCTGTGAAGGCAAAGATGAGGGAGAAGAAT  
CATGTTGATAAGTTATCTTTGAAGTGGAGTGAAAGTAGTGCCGACAATTCACAACTGAAAGAGACATA  
CTTGATGAGCTACGCCACACACAAACATAAAACAACCTCCAAATCACCGGATATAGAGGGACAAAATTT  
CCAAATTGGCTAGCTGATCATTGTTTCTTAAGCTAGTTGAATTGTCTCTTAGCAAATGCAGGGACTGTG  
ATTCCTTGCCAGCACTAGGACAACCTCCTTCTTTGAAATTCCTTTCCATTAGAGAGATGCATCAAATAACA  
AAGGTCACGAAAGAATTCTATGGCAGTTCATCCTCCAAAAGCCTTTTTACTCTCTTGAGAAGCTTTAATT  
TGCAAATATGCCAGAGTGGAGGCAATGGCATGTACTAGGAAATGGAGAGTTCCTACACTTGAGAACCT  
TTCAATTATAAATTTCCCTGAACTCAGTCTGGAGACACCCATCCAACCTTTCAAAGTTTCAAGTTATTGGTT  
CTCCTAAGGTTGGAGTTCTTGAGGGAATGAAGCAGATTGTTGAATTATCTATTATTGGTTGCAATTCTCT  
TACCTCCTGCCTTTTAGCATACTGCCAGTACCTTGAAGAGAATACGGATATCTCGTTGCCAGAAATTG  
AAATTGGAGGTGCCAGTTGATTATTATAACATGTTTGTTGAGGATTTGAGACTTGAAGAATGTGATTGTA  
TAGATGATATATCACCCGAGTTGCTCCAAGAGCACGCAAATTGAATGTATCTAATTGCCACAATCTTAC  
TAGGTTTTTGATTCTACTTCCACTGAAAGTTTCTATATTGGTAATTGTAAGAATCTGAAAAACTTTCGG  
TGGCACTTCCATCTGCGATGACGTCATTGAGTATTGGCTACTGTGAGAAGCTGAAGTGGCTTCCAGATCA  
TATGCAAGAACTCCTTCCATCTCTTAAGGGACTGCATCTTCTAATTGCCAGAGATAGAGTCCTTTCTC  
AAGGAGGATTGCCCTTCAATTTACAGCAACTTGAGATCATTAAATTGCAAGAACTGGTGAATGGCCGAA  
AGGAGTGGTGTTTACAGAGACTCCCTCGTCTAAGAGAGTTAGAATTAGTGATCTATCATGACGGCAGTG  
ACGAAGAGATGGAACATTGGGAGTTACCATGCTCTATTGCAAGACTTGAGGTATCCAATCTGAAAACAT  
TAAGCAGCCAGGATCTCAAAGCCTCACCTCTCTAAATTTCTATATATTGCTTATTTACCTCAAATCCAGT  
CACTTCTGGAAGAATGGCGGCTTCCCATCTCTTTCTGAGCTATATTTATATGGTCATCATGAGCTCAAT  
TCACTAGGCCTTTGTTACCTCACTTCGCTTCTACGTCTACGCATCAGCAATTGCTGTAATCTCCAGTCACT  
TCCGAATCAGCACTGCCCTCCTCCTCTCTCATTGACCATCAAGTATTGCCATAACCTCCGATCACTTTCT

GAATCAGCACTGCCCTCCGCCCTCTCTGAGCTGACCATTAAGTGTTGCTGTAATCTCCAATCACTTTCTGA  
ATCAGCACTGCCCTCCTCCCTCTCTAAGCTGACCATCAAGGATTGCCCTAATCTCCAATCACTTTCTGAAT  
CAGCACTGCCCTCCTCCCTCTCTGAGCTGACCATCAGAAATTGCCCTAATCTCCAATCCCTTCCAGTAAAA  
GGGGTGCCCTCTCCCTCTCTGAACTATGGATTTTCCGCTGCCCACTGCTCAGCCCACTACTAGAATTTCA  
GAAGGGGGAATACTGGCCAAATATTGCTCAAATCCCTTCATATTTGTCGATGGGAAACACATGTAATGT  
TTAAACGGATGGTGCTCTGACAAATGTAAGTTATTCTTTTCCCTCAGAAGCTTTTTTCTTTTGCTTACTTC  
ACTTTGCTGTTCTGTTAATTCTTTTCTTTTAAAATGTTGTTGAGCAGTGTGGAGTGTCTATTGCTCAAAC  
CACGGCTACTGACCAAATTTCTCATATTTCCACCATATATGTTGATTGGGAGAACCTGAAATATTTAAAA  
TGGGTGGTGCTCCTACAGATATGTAAGTTATACTATTCCTTAGTATCTTTTGATTTTTGGTTACTTCTATTT  
TCTTGCCTGTAAATCTTTTGGACCAGTGTGTAGCATCTATTACCTCTGTGAAGTCGTGGAAATATCTTTA  
GATCAGGAAAAAACTCCTTATATTTGCATTGAAACATTGTAAAAGAAATCTAATATAGGCAGGAATTGA  
GATAATTTGCTCCAGAGTTGTCACCAGGATGTTTATCGCCTTTGGAGATTCATCACAAAAGCAATTCATA  
TATTCTTGACAAATCTCACTCTTCATGACCTATGTTCTCTCTCAAATCTTGCAGACTGGAAGTTTATTTG  
CCATCATGAAAGTTGTTCCACATTTTTCGTCTCTTCTACAGAGATAAAGGGTCCAAGAAATCCAACCTCAT  
TTGTCATCTCTTCTACATAGATGGCCCAAGAAATGCAACCTCACTTTCTCAATTAGGTAGCCAAGACCTTC  
ACAAGAGTTGCATCAAGCTTGAAATTTAAAGAAATTGAAAACGACTTTGAATGCCTACTTTCATTATGTA  
CGCCATGTTACACCATATTGATATCAAATTGGGAAAAGGGCCTGATATACCCCTCAACTTTGTCATTTGG  
AGCTGATATGCCCTTCGTTATGAAAGTGGCTCATATATACCCTTACCGTTATACAAACGGCTCACATATAC  
CCCTACCGTTACAAATGAGCTCACATATACCCTTCACTTAACGGAAGTGAAAAAATTAGTTTTAAATTTAT  
ATTTTTACTTTTAATTTTCTTAAAAATTATTTAGGGGTATATATGATTCTTCTAGCAAAGTTCAAAGTATA  
TTTTAATCTTTTTCATACATAAATTATTTTTGACTTCTTTGATTATAATTATTTGAGTTTCTTATTTTTATTT  
ATTTTTTCTTTCATTCCCTTAGTGTAATAAATAAATTTAACCATCAAATAATAAATCTAAATTAGTCATT  
GAAACAAAAAAAAGTAAAAAATTATGTTTGAGGAGGATTAATATACTCATATGGGATTATATTTTT  
TTTAAATAAAAAATAAAAAATAAACTAAAATTAATTTTTTTCATATCCGTTAGAGGAAAAGGGTATAT  
GTGAGCCATTTGTATATAAGTAGGGGTATATATGAGCCACTTTCATAACGAGGGGTATATCAGCTCTAA  
ATGACAAAGTTGAGGGGTATATCAGACCCTTTTCCCTATCAAATTTGATGCGACTGCATTTTACATCAGTT  
TTTTTTTTGTTTTGGTATTCAAATCCAGAATATTACATCCATTTTTTGGTTTTAATATTCAGAGAACTTTG  
GAGATTATGAAGTTTCTTCAAGTAATGTCCATTACTCAACCTCGAGTGACACCTCACAGCTAGCGGAAA  
GTCAAGGAAGTATATCCTAGTCGGGATGACTTCAAGGTTAGATAACAAAATAATGATTCACTTGTGTTTT

AGTTACCAAGATGCTTATTTTATAGTAATAGTTTGCCTCTCATAAATCAGCGAAACATATTTCCCTCATT  
GGCACTCTCATCAGTCATCAGCCAGTAAAATAAAGAAACTGATGGTTTCAAACCTCCAATCACATCCAAG  
ATAAAAAAAGACATCAACAGAGTAGAAGAATTCAACCCACACCCATTTCAACCCAAGTTTTCGATTCTT  
GCTTTACCTGATGAGAAGAAGTTTATGGGTGAGAAAGGTCCAAAGGTATATATCTCTTTCTCACTGTAGC  
GGTATATTGGTTCTTCCCTGCTTGCATCACAATGATGTGCGGAGTGTATCAGTTTTCTACTGTTATTCAG  
ATACTTAAAGTGGGAATTTGCTTCTGATTTGAGCTTTAAATTTATCTTTATTGTAGTTATTTTGTAAATTTT  
CCTTCAAACCTAAACGTGATTTTTTACAACAACAATACACCCAATCTATACCTGAATTTTTTCTGTTCCAA  
TTGTTTTGCTACTACAGTATTTGTGTCCAGCCTAATTGGTATTGTTCAATTTTGTGAAACATCCTATAATTAT  
TTGAAGAGATAATATCTTAGTTGATCACTCAACTATGAATTTTTTCTCATAAATCACTCAACTTTGATTT  
TAAACACATAGGTCCTCAACTACGATTTTTCTCTCAGGAAGTGACCCAACCTTTGATTTTTAACCACAAAA  
TCACTCAACTATGGAAGTATTACTTACAAAGTCAATCAATCTATTTAATTGATTTTTTCAATTATAATTTGCT  
AATATGAAATTTTTATTTAAAATCAAATTTTTAAGAAAGAAAAAGACATCTATTCAAACCTTTCTAATGAT  
CTGACTAAAAATATTTAAAAGGTAATTACTATGTTAGTTTTAGTTTTTTAATCTATTTATAATGTAAAGCT  
CTATTTCAATTTGTTGAAAGTTGCAGTAGAAAATGTTTTGATGTGAACTGCAAACACTTGAGTTTTTCATTTG  
CCAAATGAGACTTGTTAATATAAGTTTTCTGAATTAAGTATTCACATTTATGTATTTTTTAAATATGCAGT  
AAAATCAAGTTGTTCTTTTAGTTCTCACTTTAGATTGAGGTGGAAAATAATGAATTTGATTGGAGAAATA  
GTGAAACATCTTGATTATTCATTTGCAATAAAAGAAAAGATACTGAAGGTTTCTTTTTGTTAGATTTTTG  
TGTGGAATTTGCTTATGTTGTTTTTTGGAGTTTTTTTTATTTTTTGGTAAACTGGTAATACCATTAACAAA  
CAAAGGGCCGATACACCTATAGAGCACCTAAAATCCATAGCTACCTTCCAGGGAAGGTTCTATGTCTTTT  
AAGCCTCCAACCTTGACAAGAAAAGTACATGAAAAAATGCTGAATCAGCCTATAACTTCTACGAGCT  
TTCTTGGATCCTCTAAACAATGCTAGTCTCTCTGTAAATTCTGTTTTTATCTGCCATCTCACTATTAACAGT  
GGTGTCTCTATACAACCTTCTAGTTCCTTGCCATCCAAGTGTGGTAAACTATGGCACTCCAAATTGCTGCAA  
ATACTTCCTTATAAAATTGCCTCTAATTTTTCTGCTTGATCATTCTAGGACTTGTCTCACCTCACCTGGGT  
AAACTTGCATACCACCCCATGATAAAATTTAGCTTTTCAATTTGTCCCAACCAAGTGAATGGGCGAAGAG  
ATGCAGTTGAGTCTCCATCACTTGGCTGCGGCACAACAACATATCTCATTATCAACATGAATGTTCAA  
TGTAGTATCCGCTCCTTGGTAAGTCACCTGCCTTGTACTGCTAACCACGTTATCATTCTATGTCTTGGCTG  
TGCTACAGATGTCCAGATAAGATCAGCTATCCGTAGCCTGTTCAAGTTCACCTAGCATTGCATTGTAAGT  
GCAGAAATTGAATTTTGGCAAGAGTGGGTCAAAGTATACCTCCCTGTACTTACCCGTTCCCTCATATTGTT  
CTTCAGTGCATTTAGTTTTTTCCAATACAAGTTGTAGTCTAGAGGCGGGGTATGCTCCACATGGAAACA

TCATTCCTCATATAGAGCCCATGGACCCATTTCACTAAAAGTATTATCTTGTTTCTCTGATAACTGCCAGA  
GAGGTTTGCCAAGTGATGCAACATTCCAGTTGCTACATCCCTTTACATTCAGCCCTCCGAACATTTTTGGA  
CAAGAAATTTTCTCCAAGCCACAAGTAGCACTTTCTCTTCTCTTCACTACTCCCCAAATGTAGT

>PGSC0003DMG401021043 LRR-RLPs

TTGAGCGGTTTCAGTTGAATATTCACGCTTAATGATTTCAGTTTATTGGTTAATGGTTATCGAATTTTAAATC  
GTTAACCAAGGGCCGGCTCTGCCTATAAACTCCACCTAATAATAATTGAGAGATATTGTGGAATAATTGAG  
TTTGTAATTATAACAACCTCATCAAGTCAAGCTTTGTGCTTCTTACAGTCAGCTGTCCATATTACATCGATC  
TTACTTTATAGATTTATTGCTTACTCACAACAATTCCACCAATCTACACTCCCTCCACATATATGGCTGAAG  
CTTTCTTCAAGTTCTGTTAGACAATCTGACTTGTTCATCCAAGGGGAACTTGGATTGATTCTTGGTTTT  
AAGGATGAGTTCGAAAAGCTTCAAAGCACGTTTACTACAATCCAAGCTGTGCTAGAAGATGCTCAGAAG  
AAGCAATTGAAGGACAAGGCAATAGAAAATTGGTTGCAGAACTCAATTCTGCTGCATATGAAGCTGAT  
GACATCTTGGACGAATGTAAAAGTGAAGGACCAATTAGACACAAGAAGAATAAATATGGGTGTTATGAT  
CCAAACATCACTTTCCGTCACAAGATTGGGAAAAGGATGAAAACATTATGGAGAACTAGATGATATT  
GCAGCGGAACGAATTAAGTTTCATTTGGGAAAACATTATGGAGAACTAGATGCAATTGCAGCGGAAC  
GAATTAAGTTTCATTTGGATGAAAGGACTATAGAGAGACAAGTTGCTACACGCCAAACAGGTGCTCATC  
TTTAAATGATTTTCTAGTAATACAACAGCTTTATATCATCAAATTCATGTGTGTTTTTGGGATTTTGTCTAA  
TCTAAATGTTTCGTCTCAAGTCTAAATAGGATTTATTAATTGGGTTCAAATCTATTATCTAAATCTGTTCA  
GTGAAGTTTTAAACATATATAGCCTCAGATAAATCCATAGCTTACTCATAGGATTAGGATATGCCCCAA  
GTCTAAATGACAGGATAAAGCCAGATTTGTTTTAGATCTTATAAATTAACAATGATAATAATGTGAATTC  
AAAAAAGTGCATTTTTTAATTTGAAATATGTCTGCTGCTTCTCAAGCTTCTCTTTATTGTGCAAAATCTT  
GGACCAGTTTTTGTTTAATGAACCACAAGTTTATGGAAGAGACAAAGAAAAGGATGAGATAGTGAA  
AATCCTAATAACAATGTTAGCGATGCCCAAACACTTCCGGTCTCCCAATACTTGGTATGGGGGGACTA  
GGAAAGACGACACTTGCCCAAATGGTCTTCAATGATCAGAGAGTAATTGAGCATTTCATCCCAAATAT  
GGATTTGTGTCTCGGAAGATTTAATGAGAAGAGGTTGATAAGGAAATTGTAGAATCTATTGAAGGAAG  
GCCACTACTTGGTGACATGCACTTGGCTCCACTTCAAAGAAGCTTCAAGGAGTTGTTGAATGGAAAAAC  
ATACTTGATTGTCTTAGATGATGTTTGAATGAAGATCAACAAAAGTGGGCTAATTTAAGAGCAGTCTTG  
AAGGTTGGAGCAAGTGGTGCATCTATTCTAACCCTACTCGTCTTGAAAAGGTTGGATCAATTATGGGA  
ACTTTGCAACCATATGAATTGTCAAATTTGTCTCAAGAAGATTGTTGGTTGTTGTTCAACGTGCATT  
TGGGCACCAAGAAGAAATAAATCATAATCTTGTGGCTATCGGAAAGGAGATTGTGAAAAATGTGGTGG

TGTGCCTCTAGCAGCAAAACTCTTGGAGGTATTTTGCCTTCAAGAGAGAAGAAAGACAGTGGGAAC  
ATGTGAGAGATAGTGAGATTTGGAAATTGCCTCAAGATGAAAGTTCTGTTCTGCCTGCCCTGAGACTTA  
GTTACCATCATCTTCCACTTGATTTGAGACAATGCTTTGCATATTGTGCAGTATTCCCAAAGGACACCGAA  
ATAGAAAAGGAAAATCTAATCTCTCTCTGGATGGCACAGGGTTTTCTTTTATCGAAAGGAACTTGGAG  
CTAGAGGATGTAGGTAATGAAGTATGGAATGAATTATACTTAAGGTCTTTCTTCCAAGAGATTGAAGTT  
ATATATGGTCGAACTTATTTCAAGATGCATGATCTCATTGATTTGGCAACATCTCTGTTTTCGGCAAG  
CGCATCAAGCAACAATATCCGTGAAATAAGTGTAAAAGGTCACCCACATATGATGTCAATTGGTTTTCGCA  
AAAGTGGTGTCTTCTACTCTCGTTCTCACTTGCAAAGTTTGTCTCGTTGAGGGTGCTTAATCTAAGTTA  
CATAGA ACTTAAGCATTACCGTCTTCCATTGGAGACCTAGTACATTTAAGATACCTAACTTGTCTGGCA  
ATCTTAGAATTCGTAGTCTTCCAAAGCAGTTATGCAAGCTTCAAATCTGCAGACTCTTGATCTACATAGA  
TGCTACTCTTTTCTGTTTGCCAAAAGAAACAAGTAACTTGGTAGTCTCCGAAATCTTCTACTTAATGA  
TTGCTATGGATTGACTTGTATGCCACCAAGGATAGCATCTTTGACATGCCTTAAGACTCTTGGTTGCTTTG  
CAGTGGGAAGGAAGAAAAGTTGTGCAATTGGTGAATTACGAAACCTGAATCTCTATGGCTCAATTTCAA  
TCACGCATCTTGAGAGAGTGAAGAATGATATGGATGCAAAAAGAAGCCAATTTATCTGCAAAAAGAAAATC  
TGCATTCTTTAAGCATGACTTGGGATGGCGATGAACGTCCACATAGATATGAATCAGAAGAAGTTGAAG  
TGCTTGAAGCCCTCAAACCACACTCCAATCTGACAATTTTAAAATCAGTGGCTTCAAAGGAATCCGTCT  
CCCAGAGTGGATGAATCACTCAGTTTTGAAAAATGTTGTCTCTATTGAAATCATGTATTGCAGTAACTGC  
TCATGCTTACCACCCTTTGGTGAGCTGCCTTGTCTAAAAGTCTAGAGTTACAGAACGGGTCTGCGGAAG  
TGGAGTATGTTGATTCTGGATTCCCTACAAGAAGAAGGTTCCATCGCTGAGAAACTTATTATAGGTGA  
ATTTATAATCTGAAAGGATTGGTGA AAAAGGAAGGAGAAGAGCAATTCCTGTCTTGAAGAGATGG  
AGATTCAGTGGTGCCCTGTGTTTGTATTCCGACCTTTCTTCTGTCAAGAAATTGGTAGCTTATGGGGA  
CAAGTCAGATGCAATAGGTTTCAGTTCCATATCTAATCTCAGGGCTTACTTCCCTCCGAATTAGGGATA  
ACAAAGAACTACTTCACTCCCAGAAGAGATGTTCAAAGCCTTGCAAATCTCAAATACTTGAAAATCTC  
TTTCTTTAAGAATCTCAAAGAGCTGCCTACCAGCTTGGCTAGTCTTAATGCTTTGAAGCATCTGGATATTA  
TTTGGTGTGACGCACTCGAGAGTCTCTCCGAGGAAGGGGTGAAAGGTTTAACTTCACTCACACAGTTAT  
CCATAACAAAGTGTGAAATGCTACAATGTTTACCGGAGGGATTGCAGCACCTAACAGCCCTCACAAATTT  
ATCAGTTAGGGATTGTCCAACACTGGCCAAGCGATGTGAGAAGGGAATAGGACAAGACTGCTACAAAA  
TTGCTCACATTCCTGATGTGTTTATTTATCCTTGTCTTATTCTAATTAGATGTAGTTTTCTGATTTTCTTT  
GGAAGCAAATCAACTATTTGTAAGATCTATTTGTATTATACTTGATTTTTTCTTGGGTCTGTAACAATAAA

TATTTGAATTTTTTCATATTAAGATTCAG

>PGSC0003DMG401021049 LRR-RLPs

ATGTTTACAATAGTTCCTAATGTTTCTGATTATTGTATCGGCATAAGAGGCCAATGGATTTCAGTCATATCC  
AAAACTCTTTCATGGAACAAGAGCACAGATTGTTGCTCTTGGGATGGAGTTCATTGTGATGAGATGAC  
AGGACAAGTGATTGAGCTCAACCTCACTTGCAGCAAACCTCAAGGCAAGTTTCATTTCAATAGTAGCCTC  
TTTCAACTCTCCAATCTCAAAGGCTTGATTTGTCTTATAATGATTTTTCTGGGTCGCTCATTTACCTAAA  
TTTGGTGAGTTTTCTAGTGTGACGCATCTTGATTTTCTTCTTACAAGTTTTACTGGTCTAATCCCAGGAGA  
AATCTCTCACCTTTCTAAATTACGGGTTCTTCGTATCCGGAGTGATTATGGGGTTAGATTTGGACCTAACA  
ATTTTGAATTGTTCTGAAAACTTGACCCAATTAAGAGAGCTCGACCTTAACTTTGTGAACATCTCTTCC  
ACGTTTCCTCTAAATTTCTTCTTATTTAACAACTCTATGGCTTCATACACACAGTTACGTGGGATATTG  
CCAAAAGAGTTTTCCACCTTCCAACTTAGAATCTCTGGATTTAACAAACAATCCCCAGCTCACAGTTAG  
ATTTCCACGACCAAATGGAATACCAGTGCATCACTCATGGAGTTATATTTGAGTGGTGTGAATTTCACT  
GGTAAGATACCTGAATTATTTAGTCATCTAACTTATTGGTTGACTTAGTGATGAGTTCTTCCAATCTCTC  
GGGGCCCATTTCTAATCCTTTATGGAATCTCACCAACATAGAGGTTTTGGACCTTCATAATAATCATCTTG  
AAGGACCAATTTCTCCGTTCTTGAGATTTGGAAAGCTCAGGGAGTTCTCGCTTAGAAATAACAACCTTTGA  
TCTCCAACCTGAGTACTTACCCTTAAACAGAAGCTGGACACAACCTGAAATGTTAGACTTTTTCGTCCAATT  
ACCTAACTGGTCCAATTCCATCGGGCGTTAGTGGACTGCAAAACCTACAATCACTCAGCTTGTCAATCAA  
CCACTTAAACGGGACTATAACCATCCTGGATATTCTCCCTCCCTTCACTATTTGATTTAGACTTGAGTGACA  
ACCATTTTCAGTGGAAAGATTCAGGAGTTCAAATCCCAAACATTGTTTTCCATTTCTGTAAAACAAAATCA  
GCTGGAAGGTCCTATTCCAAAGTCATTCTAAAACCAGCAGGGACTATACTATCTTATTCTTTCTCAAAT  
AATCTCAGTGGACATATTGATTCAGCCATCTGCAATCTGAATTTGGGTGTGCTAAATTTGGGAAGTTGTA  
ATTTGGACGGAACAATACCACAATGTTTGGGTGAGATGAGTGAACCTTTGGGTTTTGGATTTAAACAACA  
ACAGTCTTAGTGGGACAATTAATAACAACCTTTAGTATTGGGAACCAACTCAGAGTCATTAATGGATG  
GGAATAAGCTAGAGGGGAAAGTCCCACGATCTTTGATCAATTGCAAATATTTGGAAATCTTTGATTTAG  
GTAACAATGAGTTGAATGACACATTTCCAAAATGGTTGGGAGCCCTACCTGATTTGCAGATTTTAAACAT  
GAGATCAAATAAACTGCATGGCCCTATAAATGATTCAAGGACTGAGAACCTGTTTGCTAAAATTCTAGTA  
ATAGATCTCTCATCCAATGGATTCAGTGGAGATTTACCTGTGAGCCTTTTTGAGAATTTTCAAGCCATGA  
AAATGATTGGTGAGAATAGTGAACCCCAAGATATGTAGCAGAAACATATTCTACTTTATACACAAATTC  
TTTGATAGTGACAACAAAGGAACTGGATCTTGAACCTTCTCAAGTTTTGACTACGGACATAATTATTGAT

CTCTCAATGAATAGATTTGAAGGTTCTATCCCAAGTATTATTGGAGATCTAATTGGACTTCGTACGTTGA  
ACTTGTCTCATAATAACTTGAAAGGTCATATACCAGCATCAATGCAACATTTATCTGTACTTGAATCATTG  
GATCTCTCATCCAACAAAATCGGCGGAGAAATCCACAACAACTTGCATCCCTCACATCACTTGAAGTCC  
TAAATCTCCCTACAATCATCTTGTGGATGCATTCCGAAAGGAAAACAATTTGATACGTTTGAGAATAG  
TTCATACCAAGGGAATGATGGGTTACGTGGATTGCCACTCTCAAAGATTGTGGCAGTGATGAAGGGGT  
ACCACAAGCAACAACTCCATTTGGGCTAGATCAAGAAGAAGGAGATTCATCAATGATAAGTTGGCAGGC  
GGTTCTCATGGGTTACGGTTGTGGACTTGTTATTGGACTGTCCGTAATATATATTATGTTGTCAACTCGAT  
ATCCAGTGTGGTTTTCGAGGATGGATGTAGATTTGGAACACAAAATTCTTACGAGAATGAAGAAATACA  
AAAAAGGATATGTAACCTCCAGGTATTA ACTTGATCTTTTTCTTCAAAGATTAATTTTTATATAGCAAT  
GAATTTTCTATTTCTTCATCCTTGAAGATCTTGACTTTTAGTCTTCTTTTTTAAAATTGCAGGATTCAAG  
CCTAA

>PGSC0003DMG401022197 LRR-RLPs

TGATAATATAAGATTGTTCAATAACAAAAAATGAATTTGAACTTGTCACCTTCTGTAGTTATTTTT  
CTTTGCTTTGCTTCTCCTTCAGTCTCAGTAAGATGCAATCCAAAAGACAAAAAGTCCTTTTACAGATAAA  
GGAAGATTTGGGCAATCCTTACCATTTAGCTTCATGGGATCCAAACACAGATTGCTGTTACTGGTACGTC  
GTAAAATGTGACCGGAAAACCAATCGGATAAATGCTCTCACTGTCTTCCAAGCCAATATCTCCGGTCAAA  
TTCCGGCAGCCGTCGGAGACCTTCCGTATCTTGAAACATTGCAATTCCATCATATACCAATCTCACCGG  
AACCAATTCAACCTGCAATTGCTAAGCTCACAAATCTCAAATGTTAAGGCTCAGCTTCACTAATCTTACAG  
GTCCAATCCCTGAATTCCTTAGTCAGCTAAAGAATTTGACATTGCTCGAGTTGAATTACAATCAATTAACC  
GGAACAATCCCTTCTCCCTCTCTCAGCTTCCGAATTTGTTAGCGATTTACTTAGATCGTAACAAACTCAC  
CGGAACAATACCGGAATCGTTTGGGAGATTTAAAGGACCAAACATAACCAGATCTGTACCTTTCACATAAC  
AGCTTGACCGGAAAAGTGCCGACTTCTTTAGGTGATTTGAATTTTTCCAGGCTTGATTTCTCCAGGAATA  
AGCTTGAAGGAGATGTTTCGTTTTTGTGGGAAGAATAAGACGAGTCAGATAATTGATTTATCGAGGA  
ATTCATTGGAGTTTGATATTTGAAATCGGAGTTTGCTGAGAGCTTGATATCATTGGATTTGAATCATAA  
TCGAATTTTCGGTAGCTTACCACAAGGATTGAAAGATGTACCGTTACAGTTTTTCAATGTGAGTTATAAT  
AGACTTTGTGGACAGATTCCACAAGGTGGAACGTTGCAGAGCTTTGATGTTTACTCTTATTTGCATAACA  
AATGCCTCTGTGGCTCTCCCTTGCCGACTGTAAGTAGATATGGAGTTTCGAGGATTTGGATAGCCGAAT  
GTTGTGGGAGAGGCATGAAGCCTCTCCTATATATTTCTAATCATATTTAGGAATCACATTTTTTCTGTCTG  
TATTTGTATATGTTGCTTAATTAGCTTTGTATCTTTCTAATCTGTCCGTTGAGAGTCTATTGAATATAGTCT



TTCAATCAATAAAAGTAGGGATAAAATATGTCCTCTCAGATTCCACTAATGAAATTGCACGGATTATGT  
TGTTGATCAATATTCTTATCCTTGATTCATGTGTTATCTTTTCGTTTGTCAAGTTGCTTTTCGGGATGAAAT  
ATGTCCTCTCCAGATTCCACAGA

>PGSC0003DMG401023640 LRR-RLPs

TAATAATTAGGGAATCTCAATAACTTGTGTTAGAATAATATGATTGTATGACATAGGAACTGTAGCCAAT  
TAGAGGAGACAAAAGATTCTGGTGGAAAAATAATATTCTACACCAAGGATTGCTATATAATGGTGTAAAC  
TTTGGCAACAAAACATATAAAACATATGGAGGAGCACATTTTCTTATTGATTTTTCTTTTTCTCTGCTTT  
TGTATCAGCTGCACCCTCAAATGAGACAGACCAAGAAGCTCTACTAGCTTTTCAAATCTTATTACAAGT  
CCCAATCATTTTTTGGCCAATAATTGGACCAAGAATGCGTCTTTTTGCTCTTGGTTCGGTGTACGTGCAG  
TTCAAAAAGGCAACGGGTTGTAGCCTTGAATCTTCTAATTTACAACCTCAAGGCACAATTTCTCCTTCTT  
TGGCCAATTTGTCCTTTCTCAGAGAGCTCAATCTCGAGAACAACCTATTCCATGGGGGCATCCCTTATGG  
GCTTGGCCACTTGCCTCGCTTGCCTGTGATTGATGTTAAAAACAATCAGCTCAACGGAAGTATACCAACA  
AGTCTATTTCAAACCGTAGAGTTCAAGTAATTTCAATGGCTTTCAATGAACTCAGTGGTGAATGTGGA  
GAGGGCCATGGTATGTACCTGAACTCAGAGTCTTAAATCTCAGGAATAATAGCCTCACAGGTATAATTCC  
TCCTGCTATTGGAAATGCCACAAAGTTGCTGAACTTTAGTTTGTCTGTTAATAGAATCAGCGGCAACATT  
CCTAAGGAGATCGTTAATCTGAGCCAGCTTGCAGTTTTGTCCTTGACTGATAATCAATTAACAGGTCCCA  
TTCCTGAAGCATTGTTTAATATCTCGTCACTACTTTCTGTATCTCTGGGAAAGAACAGCCTATCTGGTCT  
CTCTTGGTTGAAAAGGAAATATTTTATCACATCTGGAGAGGTTAAGTTTAACTCACAATCAAATTTCTG  
GTCGAATTCCTTCAACATCTGCCAACTCATACAACCTAAAATATTGTCCATATCTTCAACAACATAACT  
GGAGAAATACCCAAAAATATTGATTGTTTAAACGAAGCTCGAGGAGTTTTATATTGGTAATAATCCAATAG  
ATGGGACTATTCCCACTTCATTGGGAAATATTTCCACTCTGCGAAATCTTACTGCGGAAGCAATAGCTT  
GGAGGGGCCAATTCCTCCAGAACTGGGTAAGCTATCAAATTTGATAGAATTCGATTTTGAAGAAAATTA  
TAATCTTATAGGTCAGATTCCAGAGGCTATTTTTAATATATCTTCTTTGAAACACATTGCGTTAACTTTGA  
ACAACTCTCGGGGAGAATTCCAACCTCTACTGGTCTTCATCTTCAAACCTCTTAGAACTTCACTTGACT  
GGCAATGAGCTTGAAGGGGAAATTCCTCCGCATATCACAAATGCCTCCAAGCTTGAAAATTTGGGGTTA  
GCACACAACCTTCTCAGTGGCACTATTCCAACCTCATTGGGGAAGTCTTCTGATCTGCGATTTCTTTCT  
ACATGATAATCAACTTACCAGTGAACATGAGTTGCCGTTCTTGAATCTTTGGCAGACTGTAGGATGTTG  
CAATATCTAGATGTGGGTTACAATCCATTGAATAGCATTCTGCCAAATTCATAGGGAATCTTTCATCTAC  
TATTGAATTCCTTGAATAAGCGATGCTCACATCAATGGCCTCATCCCCACAAGTATAGGCAACATGAGT

GGTCTTACAACCTTAGTCTTTCAAGATAACAACCTTTACTGGAAATATTCCTCCTGAGTTTGGTAAGCTTAA  
ACAACCTCCAAGGGCTGTATCTAAATAACAATAAATTGAAGGGACATGTTCCCTGAGGCAGTATGAAATTT  
ATCTAATTTGGGTGCGATTATATCTGCAAGGCAATGAGCTCTTTGGTTAATTCCAGCATGTATAGGAAAT  
CTTAGCATGCTACAACATCTTTATTTAGATTCTAATAAATTTTCATCAAAAATTTCCGTTGAGTCTTTGGAAA  
ATGAGTGGTCTTCTCTTTCTAAGTGTGTCACAAAATTCTATAGAGGGAGAAGTTCATCAGATATTGGAG  
AACTGAAGGCAATTGTAGAACTAGATATTTCTGGTAATCACTTTTCAGGAATGATACCAAGAAATTTGGG  
TGACCTCCAAAACCTGCAGTCTCTTGGCCCTGTCAAACAATTCATTTCTGGCCAAATTCATTATCCTTTGC  
CAACCTAATAAGCTTGCAATTCTTGGATTTGTCTTTAATGCGTTGTCAGGTACTATTCTAAGTCTTTGG  
AAAACTCCCCCTTAAAAACATCAATGTTTCATTTAATGAATTAGAAGGTGAAATACCCAGTGGTGGTGT  
GTTTTCAAATTCCTCTGCAATCATTCTTGGGAACAGAGGTCTATGTGGAGCGCACATATTGGAGATT  
CCTGCTTGTGTTGCAACTCACTAA

>PGSC0003DMG401023866 LRR-RLPs

ATGCACCACAACAATCTTTCTGGGACTCTCTCAACGGCTTTTGGAAATCATAAGTGAGGTTAGAAGCCTCA  
ACTTGCATGGAAATGAACTAGAGGGGAAAATCCCTCGATCTTTGGCCAATTGTGAAGCGTTGCATGTTC  
TTGATTTAGGTGATAATCACCTAACGACACATTCCCATGTGGTTGGGAACTCTGCCATATCTGCAAGT  
TTAAGCCTAAGATCAAACAAGTTGCATGGATCTATTAGAAGTTCAAGGATAGAAAACATGTTTCCCCAG  
CTTCGCATCATCGATCTCTTACAATGCCTTCTCGGGAAACTTACCTACAAGTCTGTTTCAACATCTGAA  
AGCCATGAGGACAATTGACCAATCATTGAAGGCACCAAGATCATCTTACATAGAATCGTATTACCAAGAT  
TCTATTACAATTGCAACCAAGGGAATGGATCATGAAATTGTGAGAATCTTGTATTTGTACTGCTCTTG  
ATCTTTCAAGTAATAAATTTAGAGGAAAAATTCCAAGTATTATTGGGGATCTCATTGCACTTCATGTGTTG  
AGTTTATCTCATAATGGATTGCAAGGTCGGATACCATCATCACTCGGAAATTTATCTTCACTTGAATCATT  
GGATCTATCGGTTAACCAACTTTCCGGTAAGATACCACAACAACCTGGCTTCTTACATCTCTTGCATTCT  
TAAATCTCTCCACAATCATCTACAAGGATGCATCCCTCAAGGACCTCAGTTTCATACATTGAGAATAAT  
TCATATGAAGGTAATGATGGATTACGTGGATTCCCTATTTCAAAGGTTGTGCCCATGATCAGGTGTCAG  
AGACAACTATACCGAATCTGCTCTAGATCACGATCAAGAAAGCAATTCAGAATTTCTCAATGATTTTTG  
GAAAGCTGCTCTGATGGGATACAGAAGTGGACTATGTATTGGATTATCCATAATATATATCATGATTTCA  
ATTGAAATCTGAAATGGTTTGAAGAATCATTGAAGAGATGGAACAAAGGATCATTACGCGGAGGAG  
AAAGAAGCAGCGAGGTCAAAGGCATTACAAAAGAAGAAATAATCGCTTCTAGACAATTGTTACCAATCA  
AGAAGGATTTGATTTCAGAACTTTAGGTATTGATCAAGCTAAGCTCTATAATAATCTTTTTAGTTTATTTT

AACTACTAATATATTAGCTTTCGTATTTATTCGTTGTAACAACATCTGATCGATGCTCTATGCAAAGCATA  
TTGAAAATGAGCTGAAGATTTTGAATAGGATTAGCCTTAGTTATATATATTGTTAATGGATGGTTAAACA  
TGTGTTTGTAGTGAAAATTAAGTAATTGATGTGTTACAAATTAACAAGAAAATATTACTAATTA AAC  
CTGAATTCTCTTCAATATTAATCATGGCCCTATTAATGTGGATATCAAAAACCAAATGAGAAATCATGAA  
AAAAGCCACGTGTTTCATTGTTCTAAATTCGTGTCCATTGAGTCTGTTAACTAAAAGGGTCAATATTTT  
GTTAGATGGCGAGGGTATATATGCAACAGTTTTTTAACAATGGTATATCGTCTCTAAATCGTAAAGTTGA  
GGGTTACTATATATGCCCTTTTCTTTGAGAAGAAAAAACAATGACACACTGATATTTGACTTAGTCG  
TGTCTAATTTTTGAAAATGACACTTCTCTACTTTTTTTTTGTCTGCTTAATTATTCTTTCTTTGAAATTTCCA  
TTGCAAGACTTATGCATCGACTTTCCCTCTTTGTTGCTATGAGTTTACTATACGTCAAGGTGGAACCTTGA  
ATTAGTTACACTTTGGAATAAAATTATTGGGAAAATGCATAAGTACCCCTCAGCCTTTGTCCAAAATCCC  
AGAGACACACCTAACTTTTATTAAGGTCCTATTACCTCCCAAACCTATTTTATATATAACTTTCTACCCCT  
TTTCGGCCTACGTGGCACTATCTTGTGCGCCAGCGCGTGTGACAAAATTTTCAAGGATAGTGCCACGT  
AGGCCGAAAAGGGTAGAAAATTATATATAAAATAATTCGGGGGGGGGGGTAATAGGACCTTAGTAA  
ATGTTAGGTGTCTCAGAGATTTTGGGCATAGACTAGGGGATACTTATGCATTTTCCCTAAAATTATTAGC  
AGTGACTAAATCAAGTTTATTAATGAGTTGAAACCATGTTTCGAAATATGTGAATTTTAATTTGAAAATAT  
AGGCTATCGATATCTAAAATTTAATGAAAATAGATGTATTAAGTTCATATTATTAGCAGTGAGGAACAG  
TAAATTTGACATTTTGTAAACTTGGAATTGATGATGATTTGAAATGAAGGCAGCAGTCCTTGCTTGAGTT  
TCCCCACTTTCCTCTTTCTTTTGATAATAAAATTCGTAAGTAATTTATTTTCATATGAAAATTCAAAGCGAA  
AGTAATTTGTGCGTTAAGTAGCTTTCGTTTGAAATTTCCACAACAAGACTCACTGCAATTA CTGGAAATT  
CAAAAACTGCATTAATACTTTTAGGTGCAAGAAAAAAGATATTTAGAGGGACACTTGGTGCAAAAACT  
TGGTGTTATTCCCCCTTTAATAGGCCTTACGCGGCGAAAATGCAAACCCTAATGTGAATATAAAAAACC  
GAATGAAAAGCAAAAAAAAAAAAAATAATAACAAAAAGTCACGTCTCATTCTAAATATCAGGTCCTTA  
ATACTCCCTCTATCCCATTTTATATGATGTACTTTGATTTGGCACAACTTTAAGAAAAATGGAAAGACTC  
TATTATGTTCCGAAAATACCCTTATTAATAAGTCTAAATTGTTAAATAAAAAAATACTACATCTGACAT  
TGAATAGAAAAGTTTATGACTTTTCTCTCTTATAAGTTAATGTCACATCAATCATTAAATGTAAATCCAA  
AAGAGTCAAATATATTTATTTCTCTCTTTTTTCTACTGCATTCTCCATTCCCTCTCCCTTAGTCTTTCAAT  
GAAGAAGATATATTCCAAAATGATTGATTTTTTGTGATTGCAGGTAAAAGTAGTTTTTTTTTTCATAATTTT  
AATTGTAGTTTCAAAAAATTGATAACATAAAAAAACGTGGGAAAAGATCAAAATTTTCAGTTTCTAGC  
GCCAATTTTTTTGCCAATTTTAAAATACTAGCTAATGGACTCCATATATAAGTAGAGATACTTTATCTTT

AATTTTCAGTTCTTCCTTTTACATTTTTTCCAATTAGTGATCTTAAAATGAGTGTTGAATTTTCAGAAGAC  
CCAATTACCATAAAAAGGCGATTGAATCTGAACGAGCGTCGAGCAATTGCAAAGTGGCTTTTGAAAGAA  
AGTAAGAATGGAAAACCTAAACATGGTTCTGTAAAGGAAGCACGTATTATGTTCAACACATCAAGAAGT  
ACCATTGATCGTATTTGGAGACAAGCTAGATTATGTGTTGCTAATGGTGACATGGTAAATGTTTCTACTA  
ATCTTGCAGGCAGAGTTGAGAGAAAACGCATACAAGTTGATATCAACTTATTCAACGAAATCCACTATG  
TCGTGCAACAAATATTTGATCTCTTTCTTTTGAATAAATATGGCAAATCAACAATTTTTCGACGTGTGA  
AAGAAGGTGCAATTAGGCCACACACCAACGCCATCAAACCGCACTTGACCGAAGAAAACAAAAAAGCG  
AGACTTCGATTTTGCCTCTCAATGATTGATCAGAGTAACTCAAATCCCATGTTTATAGACATGTTTAATT  
ATGTCCATATCGATGAAAAATGATTTTACTTATCGAAAAATTTTGAAAGGTATTATCTTCTCCCGAAGAA  
GAAGAGTCTAATCCGTATCGTTCTTGCAAAAGTAAAACTTTTATCACAAAAGTTATGTTTATGGCAGTTG  
TTGCACGTCCTAGATTTGACGCTAATGGAGTTGAGTTATTTTTGGGAAAAATAGGAATTTTCCATTTGTA  
GTTAAGGAACCAGCCAAACGGAATAGCAAAAATCGAACACAGGAACTATTGAAACAAAACCAATTTTA  
TCGGTGACTAAAGATATCACAAGAGCTGTTTGATAGAGAAAGTTCTTCCAGCCATTTCGATCAAATGGC  
CAGCTTCAACGTCAAGGTCACCCATTTTCATCCAACAAGATAATGCAAGACCACATATTGGTGTTAATGA  
TTTGAATTCATGGGCGCCGCTCAACGGGATGGATTTGATATTAAGTTATGCTTTCAACCCCTAATAGT  
CTTGATCTTAATGTTTTGGACCTTGGATTTTTAGAGCAATTCAATCTTCAATATCAAATGCTCCTTCA  
AATGTTGATGCATTAGTGGAGGTTGTTGAAAAATCCTTCAATGAAATGAAAGTAGAACGACTCAATCAT  
GTATTTTTGACTTTGCAATGCTGTATGAATGAGGTGATGAAAGATAGCGGTGGCAATAACTACAAAGTG  
CCTCATATGAACAAAGAAAGACTCGAAAGAGAAAATGATCTCCACTTCAAGTTCGTTGCTATGTTGATG  
TTGTTAATCAAGCTTTAACTCTACTTCAACAGTGATGGGATTACAAGTATTAACAACACTGTGTTTTGT  
ACATTTTGATGTTTATATTAGAACTTTGCAAATTTAATTTAATTTTTGGATAGTTTAAATGTTTATGTTAAA  
TCATGCAAAGTGTAATTTACTTTTGAATGGTTTAAAGTTTTTGTGGGACATTGTAAATTTAACATGTTG  
AAATAAAATTTTCATTTTGGTAAATGTAAGAAAATTTACTTTTTGAAGTTTATATTTGAAAATTTTCATTT  
TATTTTTATTGTAATCTGAACTAAAGAAAAAAGAAGAAATATTCATCAAATATTTTTTAAGTGAGGACA  
ACTTTTGATTGTACATTCTTTAATTTTTAAAAATAAAAATAAAATTACATTAACGTACTTCACAATTCTATC  
ATTAGTGTAAGAAAGAAAGAATATGAAGTGGTGAAGAAAGAAAGGTTATGACAAAGTATTGAA  
AAAAATGTTTAAAGTACTGTTGACTGTCAGAAAAAGAGAAAAGTATTTGTACTTTACTGCATTTCAATAA  
CTTTTTCTTTAAATTTAAAGAGTGCAACTATTGAAATGATGAGTTTCAAGAAGGGTAAAATAGGGATAAT  
GTCGTAAATATTTACCAAATAAGGAAATGTGTCAATCTTTTTGGGACTGACCAAAAAGGAAAGTGAGTC

ATATAAATTGGGACAGGGGGAGTAATAATTATCACGTCTCATTGGAAAATGTTGTTTCTCTACTTTTTTG  
GATACTTAAATATGCTTCTTTGAAATTTCCACAGCAAACTTGTGCATTGACTTGAGAATAACAAACATT  
AATTTCCCAGTTTCTTTTCAAATTTACAATTGGTGAAGGTGGAATTTGAAATAATTACAGCGTGGAGTA  
GCTTTCATTGAAATTTCCACGACAAGACTTGTTCAAGGACTTTTAAACAATAATTTTTTTAAGTTCCACA  
AGTAGAATTCCACTCATTGTGTCTCCACACACTTCATTGTCACTCCACTCTCACCTTCTATAGTATTTGTC  
TTGATTATACACAAATGATTTAATGTAACACATTTTGTATGTGCCAAACACAAGAAAATAAGTAAGAA  
ATTCACTTATTTTCTAGAAAATATATTTTTTCTACCGAACACACCTTGAATTGGGGGAATCTCAGTTG  
ACATTTGGTTGACTATCTTTTATTAATTAAGAAAAAAAAAATAAGAAACACAATAACACAACTTGACTT  
GTGTTGAACAATATAAAATCCTATGAACCCTCCACAATTAGTTCATTGAAACCCAAAATAATAAACTCAA  
AATATGATGATGGTTCCCAAAAAAATATTCTCTTACTTCAGTTTTTACTCTTTTATCTCTCTTTACAGTTA  
CTTTTGCTTCCACTGGGGAAACAACCTCCCTCCTGAAATGGAAAGCAACTTTCAAGAACCAGAATAACTC  
CTTATTGGCTTCATGGAGACCAAGCTCTAACGCATGCCGGGACTGGTATGGAGTTATATGCTTTAACGGT  
AGGATAAACAGGTTGAATATTGCAAATTCTAGTATCATTGGTACCCTCTATGCTTTTCTGTTTTCATCTCTC  
CCTTTCCTTGAATATGTTGATCTTAGCATGAACAATATCTCCGGAACCATTCACCTGAGCTTGGTAATCT  
CACTAATCTTGTCTATCTTGACTTGTCCATCAATCAGATTTCAGGCACAATCCCACCACAAATCGGCTCAC  
TATCCAAGCTTGAGACCCTCCACATCTTTGATAACCATTTAAATGGTTCCATTCTAAAGAAATAGGTTAC  
CTAAGGTCTCTTACTGAACTAGATTTGAGTTCTAACTCTCTTAGTGGTTCTATTCTACTTCATTGGGGAA  
TTTGAGCAGGTTGACCTATTTGCATCTTTATGAGAATCAGCTTTCTGGCTCTATTCCGGAAGAAATAGGA  
AATCTTGCAATCTTGTTGAGTTTTTCTTGATACAAACCAATTAACAGGTCATATTCTGCAGAAATAGG  
AAAACCTGTCAATCTTGTTGAAGTTTATCTTCATGAAAATCAATTAACAGGTCATATTCCGGCAGAAATA  
GGGAAGATGAAGTCACTTCAGGAATTAATCTTATCACGTAACAATCTTTCTGATCTAATTCCAAAACTA  
TAGGCGACTTAACAGAGCTCAAACCTTCTGTACCTTTATAGCAATCAACCCTTTGGCCCAATTCCTAGTGA  
GTTAGGGAACCTGAAAAACCTCAATACTCTGTTATTATCCAATAATGAACTCAGTGGTTCAATTCCGTCAT  
CCTTTGGTAATTTGAGAACTTGCAAGTTCTGTCTCTCAATGACAACAATCTGATTGAGGAAATTCCTTCA  
TCTATTTGCAATTTGACATCACTGGCAACCCTGTATTTGTCAAGAAACAACCTTGAAAGGAAATATTATGA  
AATGCTTGGGTAATATCAGTGCCTCCAGTATGTGATGATGTCACATAATAATCTCAGTGGAGAGCTCCA  
TCCGTCTATTTGCAATTTAACATCGCTGCAAATTCTAGATTTGGGTAGAAACAATCTAAAGGGAGCAATT  
CCGCAATGTTTTGGCAACATGAGTGGTCATCTTGAGGTTCTGGATATGCAACACAACAATCTTTCTGGGA  
CTCTTCCAATTGACTTTTAG

>PGSC0003DMG401023870 LRR-RLPs

ATGCTAGATTTGGCGAGAAACAACCTTGAAGGGAGCATTCTGCAATGTTTGGGTAATATCAGTAGCCTC  
CAGGTTCTGGATATGCACCACAACAGTCTTACAGGGACTATTCCAACAACCTTTAGATTTGGAAGTTCTTT  
GAGAAGCCTCAACTTGCACGGCAATAAACTAGAGGGGAAAATTCCCAATCTTTGGCCAATTGCAAAGA  
GTTGCATGTTCTTGATTTAGGAGATAATCATCTCATTGATATATTCCCGATGTGGTTGGGAACCTTTCAA  
AGCTGCAAGTTTTAAGCTTGAGATCCAATGAATTGCATGGGTCCATTAGAACTCCAACGATTGAAAACAT  
ATTTCTAATCTTCGAATGTTAGATCTCTCTTCCAATGCCTTACCGAAAACCTTACCAACGGGTTTGTTC  
ACATTTGAAAGCCATGAGGACAATTGATCAAATATGAACGCACCACATTATGAAGGAAATATTACCAA  
GACTCGGTAGCTGTCGTATCTAAGGGATTTGAGCGTGAAATTGTGAGAATCTTGTATTTGTACACCGTTC  
TCGATCTTTCAAGTAATAAATTTGGAGGGCAGATTCCATGTATCATGGGGGAACTCATTGCAGTTCACAT  
ATTGAATATATCACATAATGGATTGGAAGGTCATATACCGTCATCACTTGGAAAGTTTATCTTTGGTTGAA  
TCATTGGACCTGTCAAGTAACCATCTTGTAGGAAATATACCAGCACAATTTGCTTCTTACATCTCTTGA  
AGTTTTCAACCTACAATCATCTCGAAGGGTGCATTCTCAAGGAAATCAATTTGAGACCTTTGAGAACAA  
TTCATATGAAAGTAATGATGGATTACGTGGATTCCCACCTTTCAAAGGCTGTGGTGATGATTGAGTATCA  
GAGACAAATGATACCGTTTCTGGACTAGACGATGAAGAAAGCAATTCTGAATTTCTGAATGATTTTTGG  
AAAGGTGCTCTTATGGGCTACGGGAGTGGACTATGTATTGGACTATCCAAAATATATTTTCATGATTTCAA  
CTGAAAACCAATGTGTCTTGCAAGAATCATTGTAGAGCTGGAGCACAAAATAATGATGGGAAGGAGA  
AAGAAGCAGCGAAGGCAAAGGAATTACAGAAAAAGAAATAATCAGTTATGATGTCACAGTGGCGAGAT  
TGATAATGAACTATTTTATTCGGAATGGCAAGTAAGTGGTTGCAATAAGCAACTGATAATATCGTTCAGG  
ACTGTTTTATCTTTAAATACGTATGTGGGATGAGTTGATCGTTTCTTACCTATTCTTGTGTTGTTTCTG  
CACTTGTGTTGTGATGGTTTTCTTTGAGAGTAATGGCTTCGTAATCTGTATTACCTATTGAGTACACTGTA  
CTGAACTTCTGGAATGTGTTTCTTAAGTTGCATTTCTTGTGTAAGTGCAGAAAGGGATTTGCTGCTTACG  
CCATATGCCAGACGTCCGCTAGCCGAGGTTTGTACTAGACGTACATAAATCACATACGACGTCAGGTAA  
AAGTGACATTTTGAGAAAAAAAATCAAGATACCCATTCTTAAAAATGACATTATTACTATTTGAGGG  
GTATAGGAATAGTTTAGGGGAAAAATCACCTTTTTACCTAAGCTCTGCCCTGGTTTCAGTGATTTG  
GTATTTTCAGGGGAATAACTCATAGTTTAATGGTTTTATTGTTACAAAAACAGTTACAAAGAGCAAGTTT  
GATAAATAGCTCGTATTGTTATGAAGAGTTAATTTAGAAATGACCATCGGTGAAATTATCCTCAAATTT  
TGTGATGAAGGTAATGAGAAAGTAACACAACACACAATTCTATTTAATAACAAAACAAAAAGATG  
ATTCTCTATCCTTTTTAAGTTTGTTCCTTTTTAGGGAATTTATTTTCTGTATGATAGATGTGTAACACAT

GGATTAGAATTACATATGAACAGACAGAAATGGTTTAAGTGTGAATGAGAGAAAGAGCAGCCAACAAC  
ATTTGGAGAAAACACGTTTCCGTTTGGTCTTCAATGATAAATTCATACAATATAAAATCCTATAGACCCT  
CCACAATAAGTTCATTGAAAACCCAAAATAATAAACTCAAATATGATGATGATTCCAAGCAAATATTC  
TCTCTACTTCAGTTTTTCACTCTTTTATATCTCCTTACAGTTACTTTTGCTTCCATCGAAGAAGCAACTGCCC  
TCTTGAAATGGAAAACAACCTTTAAGAACCGGGATAATTTCTTATTGGCTTCATGGAAGCCAAGTTCTAA  
TGCATGCAGGGACTGGTACGGAGTTATATGCTTTAACGGTAAGGTAAACAAGTTGAATATTAGAAATAC  
TAGTGTCAATTGGTACACTTGATGATTTTCCATTTTCATCTCTCCCTTTTCTTGAGTATCTTGATCTTAGCAT  
GAACCATTTCTCTGGCACCATTCCACCTGAAATTGGTAAACTCACTAATCTTATCTATCTTGATTTGTCGA  
GTAATCAGATTTCAAGGCACAGTACCACCGCAAATCGGCTCACTAGCCAAGCTTCAGATCCTCCATATCAT  
TGAAAACCATTTAAATAGTTTTATTCTGAAGAAATAGGTCATCTAAAGTCTCTTACTGAGCTAGATTTGA  
GTTCTAACGCACTTAATGGTTCTATTCCAACCTCATTGGGAAATTTGAACAGCTTGTCTCGTTTGAATCTT  
TATAAAAATAACCTTTCTGGCTCCATTCTGCAGAAATAGGTTACCTAAGGTTTCTTACCGATCTACGTTT  
GAACGATAACATTCTTAATGGTTCTATTCTGCTTCATTGGGGAATTTGAACAACCTTACTATTCTGCATC  
TTCATGATAATCACCTTTCTGGCCCTATCCCTGCAGAAATAGGTTACCTAAGGTCTCTTGTTGGGTTAAGT  
TTGAAGAATAACTCTCTTGATGGTTCTATTCTGCTTCATTGGGGAATTTGAACAACCTTGTCTGGTCTTGTA  
TCTTAATGGTAATCACCTTTCTGGCCCTATTCTGAAGAAATAGGTCATCTAAAGTCTCTTACTGAGCTAG  
ATTTGAGTTCTAACGCACTTAATGGTTCTATTCCAACCTCATTGGGAAATTTGAACAGCTTGTCTCGTTTG  
AATCTTTATAAAAATAACCTTTCTGGCTCCATTCTGCAGAAATAGGTTACCTAAGGTCTCTTGTTGGGTT  
AAGTTTGAAGAATAACTCTCTTGATGGTTCTATTCTGCTTCATTGGGGAATTTGAACAACCTTGTCTGGTCT  
TGTATCTTAATGGTAATCACCTTTCTGGCCCTATTCTGAAGAAATAGGTTATCTAAGGTTTCTTTTCTGA  
ACTACAATTGTACGATAACTCTCTTAATGGTTCTATTCTGCTTCATTGGGGAATTTGAACAACCTTGTCTGG  
TCTTGATCTTAATGGTAATCACCTTTCTGGCCCTATCCCTGCAGAAATAGGTTACCTAAGGTCTCTTGTT  
GGGTTAAGTTTGAAGAATAACTCTCTTGATGGTTCTATTCTGCTTCATTGGGGAATTTGAACAACCTGA  
CTATTCTGCATCTTCATGATAATCACCTTTCTGGCCCTATCCCTGCAGAAATAGGTTACCTAAGGTCTCTT  
GTTGGGTTAAGTTTGAAGAATAACTCTCTTGATGGTTCTATTCTGCTTCATTGGGGAATTTGAACAACCT  
GTCGGTCTTGATCTTAATGGTAATCACCTTTCTGGCCCTATTCTGAAGAAATAGGTCATCTAAAGTCTC  
TACTGAGCTAGATTTGAGTTCTAACGCACTTAATGGTTCTATTCCAACCTCATTGGGGAATTTGAACAGC  
TTGTCTCGTTTGAATCTTTATAAAAATAACCTTTCTGGCTCCATTCTGCAGAAATAGGTTACCTAAGGTC  
TCTTGTTGGGTTAAGTTTGAAGAATAACTCTCTTGATGGTTCTATTCTGCTTCATTGGGGAATTTGAACA

ACTTGTCGGTCTTGTATCTTAATGGTAATCACCTTTCTGGCCCTATCCCTGAAGAAATAGGTTATCTAAGG  
TTTCTTTCTGAACTACAATTGTACGATAACTCTCTTAATGGTTCTATTCTGCTTCATTGGGGAATTTGAAC  
AACTTGACTATTCTGCATCTTCATGATAATCACCTTTCTGGCCCTATCCCTGAAGAAATAGGTTATCTAAG  
GTTTCTTTCTGAACTACAATTGTACGATAACTCTCTTAATGGTTCTATTCTGCTTCATTGGGGAATTTGAA  
CAACTTGTCGGTCTTGTATCTTAATGGTAATCACCTTTCTGGCCCTATCCCTGAAGAAATAGGTTATCTAA  
GTTTCTTACTGATCTACAGTTGTACAATAACTCTCTTAATGGTTCTATTCTGCTTCATTGGGGAATTTG  
AGAACTTGATGTTCTGTCTCTCCATGAAAACAATCTGATTGAGGAAATTCCTCATCTATTTGCAATTT  
AACATCACTGGTAGTCCTGTATTTGTCGAGAAACAATGAAAGGAAAAAATCTGCAATGCTTGGGTAA  
TATCAGTGCCCTCCAGTATGTGATAATGTCACATAATAGTCTCAGTGGAGAGCTCCATCCGTCTATTTGC  
AATTTAACATCACTGCAAATTCTAGATTTGGGTAGAAAACAATCTAACCGGAGAAATCCGCAATGTTTGT  
TGTGCCGTAATTTTCTATTTTCTAG

>PGSC0003DMG401024548 LRR-RLPs

AAAAAATCGAAACAGAATCGAGACCCCGCTTCATATCAAACGCGCATTTCCTGTCAAAAGTCGTCGGGA  
TTTCTTTTCTCTCTCAGTCCACGGTCGTCGACGTCAACGCCTTTGGTGTTCCTTCGGGGATATCCAATCT  
ACAAAAAAGGTCTCCGACGCTTTTTCTTCTCTAAACAGATTGAAGACCTTTTTCTATCTTATTTATCGAACCC  
AACCTCTTCGATAACTCCGAGAAGTTAGAGAAAAATCCATCATTTTTAATCATCGATAATGGGGTGCAGC  
AGCAGCAAGGCCGCTGATGCTGGCACAATTTGCGGATGGCGGTCTACTGGAATCGTTGCTTTACGCGAC  
TCCAAATTGAAGTATTTCCCTTTATTCTTCGTGTTTCTGCAATATCTTAACAAGTTTAATTTGACATCTAA  
ATTTTTTAATTGCAATCTACAATGTTTATCCCATGATACTTTTTCCATGATCAATTATGTGTGACCTTTC  
GTTTCACTAATTCTGATTTTCATTGTATTCTCATGTTTATTTGATTAGCATTCCAAAAATGTTCTCTTAAATA  
ACATTTTCTATTTAGATCAAATTCATTGAACTATTCAAATTTAACTATGAAGTGATGAGTTTTCTATAA  
GACTAATTCTTAAGTAACTGTTAGTCATACATTCTCCGAGCTGAGGGTCTATTTGAACATTGCTAGGCAT  
GGTAGAGCTTGACACGGAGCTTGGACTCTATAGGCAGGAGTTTGTAGTTTATACACCAAGAGATGCTCT  
AAGTTAACCAGGATAGTGAAATATAATCAAGCATCTTATAGAGGAGATTTTCCCATGCAAATCTTTTGGT  
TGTTTCTGTTTGATTCTCGAGGTCATTAAGTGAACAAATACATTTTGTGGGAAGTAGAGGTGGGATG  
GTAATTAATACTCCCTCCAGCCCCATTGAAACAAATCATTGTCCGAGGATTTACTTTTGCTTGTTTGT  
GTTTTGATGGATGAACTATGATGAAATGCTAAAACAGTTAAATAAGGCAACATATTTAGTCCATTGAAA  
AGGCCACATATTTGTGATTTCTGACTAGCCTTTTTTTGAACAGACATTTCTGATGAAGTTTTTGACCTG  
GAAAGATCTGTACGTACCCTCGACTTAACACACAATAAAATGGGTATTGTTCTCCAGCTTCTTGAGCTCCT



AATCTGTCTTCTTATCATTTCAGAGTATAAAAACAAATTCTATTAGAAGATTGTTTTGTATACTTATCTTA  
TTTTTTTTAAAAAGGTTGTTTTCTGGAAGCTAATTCTCACTCTTCTGTTGTGACAGTTGAAATTCCTATGG  
AGATCAACAACTAACCAACTTACAACGTCTTGTAAGTACTGCATCCTACTCTTCTCTTTTTGTCTGAT  
GTTTGTTAATGTATCAGGGCCTCATTAAATTAGAAAAATATGTATTCTATTTGGAAAGAAACTATACTG  
TTATTGGCGTCAAATCATATTATAAATGCTAGCTGTTGAGAAGATATCAAACCTCATATACTCGCAGCCAA  
AATGCATATAAAGCTAATGAAAATGATTTAGGGAGCAGAAATGGAGCAAACAAGTATAGCGTTATTTGT  
TGTTGTTTATAGGATAAAATTTACTAGGGTAGAAAAAGTTTCTACAGAAGACAATGTCAATAGGATAG  
AAGAAACACAATTCTTCATTCTGTCATAAAGACTTCGATAAGTGGGATACCATTAATACTAATGTTGAGC  
AAATACAACGGAAAAATGATCCTCCCTGAAAAGAAAACAACCTTAATATGAGCTCTTGTAAGGGCACAG  
AGAAGAAGAGAGCAATATACCTGAAAATGTAATTGTAGGAACTGGAATAGGCAACATTATACTATATAG  
TTATCTGTTTTTATTCTTGATTGGGACCTAAGGAGGGTAGATTAACCTTTAAATGTAGCAAGACACGGAA  
AACATGTTTGTGAAGGGGAAGAAACTCTGGTGATTACTTGATTAGCCACTCCTAAATCTTGACCCAT  
AAATTTTGAAATATAAAGCATAGAAAATAGCTGTTATAAACGAGGGAGAACCACACCCTAAAAGCTAAC  
TATTAGGTTGGGAGAGCCCAAGGCTATAAATACCCACATCAGAACTTTGTAGTACCGATGTAGGACTTT  
GCAATGGACCATAATAATAACTCTTCTACTTGTCTGTTACTTTTTCTCGTTGAATAATTCTTTGTAGTTTT  
CTAAGGACTTTTATCAGAGAATTTTTCTTGTTTATTACTCATAATGATATCATTAGTTTTTTACTGTATTAA  
TGGTGAACATATTTCTTAAGTTTATAATCTAATACTAAGAGCAAAAACTTGTATCTCTAATTATCTGTAT  
TCAGATTTTAGCCGATAACATTATTGAGCGCCTTCCCATGAATCTGGGATTGCTCCAGTCTTTGAAAGTG  
GCAACATTTGATGGGAATCGAATCACAACCTTGCCTGATGAATGTAAGTCTATATATGTTAGATCACTCA  
TGTTAAGTGGATTCTTTTTCTTATATGAGCCAGGCTCTCTGTTCTAACTACAAAAAACTTCTGTATTCA  
GTGGGGCAGTTGGTGAACTTGAGCGTCTGTCTGTCTCAGCAAACCTGTTGACCAGCTTGCCTGACACA  
ATTGGGAGCTTGC GGAGTGTGAGTGATTGATTACACTCTATATGTTACCTGCTTCTCTGTTCTATTTAAT  
GTGCCTATAAAGATTTTACTCCTACATAGTTTTATTTTTCGTTAAAATATTTTTACTGTAAAGGTGTTTAGC  
TAACAAAAGAATTATTTAGTTTTGATCTTGCCAATGCCTTTGATTGGAGAATTATTCTGTAATAGGAAAG  
AAACCCCAATCAATTTATCAAGTTGTGCTATTAAGCCACCTTATTGTGATATTTATTTAGTTGTCACACCTC  
TTGCTTCATGTTTTAATTTGTTTCTATTATCTTTTTGTCGTCCTGTTAAACAGATAAAAATACTGTATAG  
ACTTGCATTATAAGTTATTATTCAATTTCTTGTTGTTGTGTTTTGGGGTTCTGAATCAAGTTCAATGGTTC  
TGTTGATTTTGAACTGTTTTACATTTGCACATGTTATTATAAAAAGATTATCAGCTACTTGTGAGTTCTA  
GTATTCACGGTGATGCTGTTGAAGGAAGCTAGTACTGCTTAGACAGGCATCTTAGCAGTTCCTTTTCACT

GATAAGTTTTGAGCAGACGAATTGATAATATCTTTTGGCGATGCAGTTGGTTTTGTTGAATGTTTCAAAC  
AACAAAGTTAAAGTTTCTCCTGAATCAATTGGAAGTTGCTGCTCATTGGAAGAACTGCAAGCAAATGGTA  
CCTTCATTCTTAGCTCATGATTCTTGTGATTCTTTCTGTCTCTCCTTTTCTTTGGTCTCCTGGGTGTCGTAG  
CTTTGTATGCATATCAAATTGAACATTAGCAACTCTTACATGTGAGATGACTAGTCTTTGTGGAATACATT  
TTTGAGTTGATATACTGTATCATTTTTCTACTTTTCTCCGATCCACTGTTGGTACTTTTACTGACTTTAATGC  
CGTTATTGAAGTGATGAGCTTTGTTTCTCCTAAGGCTCATGATTGGAAGTTTCTGTTACAGATAACTCCAT  
TGAAGAGCTTCTGGTTCAGTTTGCAATCTCATTAGCTAAAATCACTCTGTTTGAACAATAATAATTTCA  
ATCAGGTAATTTCCAACTTCCCTCGCTGTCTCTAATTTCTGTCTCTGTCTCTCTCTCTCTCACACATACA  
CAGAGTCATGTACATATGTAAAGGCATGCTTAGCATTAGTAGATCTAAAGTTGTACGGTCTGTCTCACAT  
AATGTAACAAAAAGCAATATTTACTTTGTTAGACTGATATTTTCTTCCAACACTCTCACTCTCTCTCTCT  
CTCACACACACACTCACTCTCTCTCTCTCACACACACACTCACTCTCTCTCTCTCTCACACACACACTCAC  
TCTCTCTCTCTCTCACACACACACTCACTCTCTCTCTCTCTCACACACACACTCACTCTCTCTCTCTCACA  
CACACACTCACTCTCTCTCTCTCACACACACACTCACTCTCTCTCTCTCTCACACACACACTCACTCTCTC  
TCTCTCTCACACACACACTCACTCTCTCTCTCTCTCACACACACACTCACTCTCTCTCTCTCTCACACACA  
CTCACTCTCTCTCTCTCTCTCTCACACACACACACACAAGGCTATTCAACAGACTCGTGTATAAATATGTTA  
TATAACTCTTCATCAACCATAAAACATGCACAAAAAGGCGTTTCTTAAATTAACATCCTCATGTCTTGA  
ACTTGATATGAAATAGACATTGTGTCAAATATAGATATTTGCAAAGTAATCCACATATGAGGTCATCTGC  
TTACACTTCTAGGTAGTTTCTTGTCTTTAATGTGTTATTCCTGGAGTTCACCCTTCTCCTAGCTTATCTGCTT  
ATTTTACAGCCATATTTTAGCTATTGATTTGTTGGTTCTCATTTTTACAGATGCCTTCAAATTTATTAAGAG  
AATGCAAGGGCTTGCAGAACATAGCCCTACATGGCAATCCCATCACTATGGACCAATTTCAACAAGTAA  
GTCACTATTGTGCTCACCTCTGTGCATCCTGAAAAAGTCACTTATGCAGATCTCCGACTGACCTTTTTCCA  
TTCAGATGGAAGGATTTCAAGAATTTGAAACCAGGCGTAAAATGAAGTTCGACAAACAAATTGATTCAA  
ATGTGATAATTAGTTCTAAAGGGCTTGATGAGGGTGTGATCTGTGATACCAATACTGCTGTAATTTTTG  
TAAGCCTTTCCACTCTGTCTTATTAATCTTGTTTTATATCCTTACTTCTTATTTGGGTTTTTTTTAAAAAGG  
AAACTTCTCCATAATACAGTTTTATGCAATAACCCCATTTGCAAAAAGAGGTGGCATCAACTTGTAATT  
TTTGTAATATCTAAATTCACCTACTTCATTGTTGTCAAATGCTCATGGCATTGCTTCATATGCATGTTGGC  
GTTGATCTTGCCTCCCTACCAATTACCATATTGCCTCTGCTATCATATATGCCTCAATCAATGTTTGTATGA  
CAGTTATAGGCTTATGCTCATGTCTCTGGTTGATAGGCATGTTGGCATTGATAAGCTTCCCTACCATATTG  
CTCCTACTATCATTTACGCCCAACCAATGCTTGTATAACAGTATAGAGTTACATAGCTGCCAGTGAAGG

TATCCATTGTGGAAAACATGCTCAATCTAAAAAAGGTGCACCATAATTGTTATAAACAGTGCCTTCG  
CAACAGGATTCTGTTGTCTGGCAAGTTTCTGAGTCTGATAGATATATCTACCAGTTCATTTGATTGCCAAA  
ATTAGTTTCAACAGAGTACGATGAAATGCCAGATTAGGTGATGCATTTTGATTAAGTCTGGTCAATTTT  
GTTTGTTCAGTTGGGGTGGAAATGTAAGGCATTGAAATTGTTTGACTTCAATGAACAGTTATAGCTGCT  
GACTGCGAAGAATTTGCTCAGGCCTTTCTACAGTTCTTCATGGAATTGTTAACTTCGACAACTGGGCAA  
TGCATCTATGATGTGTTAGAATAATTGTACATGGTCTGTATATCAAGTGTCCAATCACTTGTTTCTTTTTC  
TTTTGTAAAAGCTATGTATATATTTACTTAAACTGGTTATATGTGCAACCTTTTGTAAACATAAAATTATC  
AGTCCTTATAACATGCACATAAGTATCTACAGAACTCCATTGTTATTTTCAGAAATGCGATTTAAGCTTTT  
CCAGACTCTACATTGTCT

>PGSC0003DMG401024846 LRR-RLPs

AAAGTTTCAGAGGTATGATGGATGTGGATGAAGGAAAAACAGGAATTACTCTAGCTATTAATAGGACTC  
ACAGAGATTACCTTTACCATGTTAGTTTGGTGATAAAAGTCAATGAGTTTGATATGAGAATCACGTCAAT  
TATGACGAGTGTTGATTTATCAAGCAACAGGTTTGAAGGAGATATTCCAAATTCATTGGAAGTCTGAG  
CTCACTTGTTACTCAACCTGTCTCGCAACAACCTCCGTGGTCATATTCTGCAGAAATTGCAAAGTTGC  
TGCAGCTCGAAGCATTAGATCTCTCGTGGAACAGACTCATTGGAGAAGTTCTGGTCAATTGTGCGAGTTT  
GACATTTCTTGAGGTCTTAAACCTTTCATAACAATCATCTGGCTGGGCGCATTCTATTGGGAAACAGTTCA  
ATACATTTCCAGATGATTCATATTGTGGAAATCTTGATTTATGTGGATTTCCACTATCAAAGAAATGTGGA  
AACATAATAGGCCAGATGAGTCAACACTTGAACAAGATGATGAAGATTCATTTTTTGCAGCGGGTTC  
ACATGGGAAGCTGTGGTAATAGGTTATGGTATGATATTTGGATTGTTGATGGGAGGCCTCATGTTCTTA  
CTGGAAAAACAAAATGGTTTGTCAACTTTGCTGAAGATATTTCTCAACAAATTGCTGCTAAGAAGCGAA  
GAAATCAAAGAAGAGACGTCAAGGGCGTGGTCTAAGAATGAATTAGCAATATACCAGGTATGCATCA  
AACTTTTTGTTTTGTATCAGGAACAACACTATTTTTGTAGCTGTTTATTGTATAACTATATGTCAATTGTT  
TATTTTTCTAAATATTCAAAAACCTCAGAAAAGTCATTAAGTCCTTTAATTTTCAATTTGTCTCTGCAGAA  
AGTTGCTGGAGAGTTGGACACGTTTATTAGCAAGTTAGTGTGATGTTCTGGCAAATATCAATGGAT  
GCATCTGTTTTTCACTTTATGTACATGGTTGTCAAATACATATGTTACAGTTGATTTCTGTAGTTTCGTGGC  
TTCAGAGATAGCAACCTCTATACTCTTGTATGATGGTTGTGTCCTAATGTATCGTATTATTTTATATTGAT  
GATTTTCTTTAAATTG

>PGSC0003DMG401025507 LRR-RLPs

TATGATGATGGTTTCTAGCAAAACATTCTCTTCGCTTCAGTTTTTCACTCTTTTCTACATCTTTACAGTTGC

ATTTGCTTCCACTGAGGAAGCAATTGCCCTCTTGAAATGGAAAGCAACTTTCAAGAACCAGAATAATTCC  
GTACTGGCTTCATGGACTCCAAGTCTGACGCATGCGAGGACTGGTATGGAGTTGTATGCTTTAATGGA  
AGGGTAAACACGTTGAATATTATAAATGCTAGTGTGAGTGTACACTGTATGCTTTCCGTATTCATCTCTC  
CCTTTTCTTGAGACTCTTAATCTTAGCATGAACTATTTCTCTGGTACCATTCCACCTGAGATTGGGGATCT  
CACTAATCTTGTCTATCTTGACTTGAACCTCGATCAGATTTAGGAACAATCCCACCACAAATCGGTTAC  
TAGCCAAGCTTCAGATCCTCCGTATATTTGACAACCATTTAAATGGCTCTATTCCTGAAGAAATAGGTTAC  
CTAAGGTCTCTTACTAAGCTATCTTTGGGTATGAACTTTCTTACTGGTTCCATTCCAGCGTCATTGGGGAA  
TTTGAGCAACTTGTCTTTTTTGTATCTTTATGATAATCACTTTTCTAGCTCTATTCCTCGAGAAATAGGTTA  
CCTAAGGTCTCTTACTGACCTACATTTGGGTAATAACTCTCTTACTGGTTCCATTCCAGCTTCATTGGGGA  
ATTTGAGCAACTTGTCTATTTTGGTTCTTTTTTATAATCACTTTTCTGGCACTATTCCTGAAGAAATAGGTA  
ACCTAAGGTCTCTTACTGTGCTAGCTTTGGGTAGAACTTTCTTAGTGGTTCTATTCCTGCTTCATTGGGG  
AATTTGAACAACCTTGTCTTCTATGTTTCTTAATGATAACAACCTGAAGGGAAAAGTCCGCAATGTTTGG  
GTAATATCGGTGGCCTCCAGGTTTTGTCGATGTCATCTAATAGTTTTAGTGGAGAGGTCCCTTCATCTATT  
TCCAATTTAACATCACTACAAATACTTGATTTGGGCAGAAACAATCTGGAGGGAGCAATTCCACAATGTT  
TTGGCAATATTATTAGTGGCCTCCAGGTTTTTGATATGCAGAATAACAACTTTCTGGGACTCTTCCAACA  
AATTTTAGCATTGGAAGTTCCTTAAAAGTCTCAACTGCATGGCAATGAACTAGAGGGGAGAATCCCTC  
GGTCGTTATCCAATTGCAAAAAGTTGCAAGTCTTGATCTGGGAGATAATCACCTCAATGACACATTTTC  
CCATGTGGTTGGGAGCTTTGACAGAGCTAAGAGTTTTAAGATTGACATCGAATAA

>PGSC0003DMG401026432 LRR-RLPs

ATGAATACTCAAGGAGAATCATCTTCTTCCAACCTCTCTTATGATGTGTTTCTCAGTTTCAGAGGTGA  
AGATACCAGAAACAACCTTACCGGTCATCTTTATTTAGATTATGTCAAGTCGGAGTTAATACTTTTCATAG  
ATGATGAGGAATTGAGAAAGGGAGACGTCATTTCAATTGAACTTGAGAAAGCAATTGAACAATCTAGG  
GTTGCCATTGTTGTTTTCTCCAAAATTATGCTTCCTCTAGTTGGTGTCTTGATGAACTTGTCAAAATTCTC  
GATTGCAGAGAGAGGTTAAATCAGCTAGTTTTGCCTATTTTCTATGATGTTGATCCTTCTCAAGTACGAA  
GACAACTGGATCCTTTGGCGAAGCTTTGGCAAACACAAGGAACGATCAATTGGAAGTGAAGAATG  
GAAAAGTGGAAGCTGCACTTACTGAAGCAGCAAATTTATCTGGATGGGATTTGAGAAATGTTGCTGAT  
GGGTAACACTTCTTAATCACTTTAGAATTTGAATTTAAGCATTTCCTAAGCTTATAAGTTGGTTAGT  
TTTGAACATTGCAAACTTTTTATATTTCTTAATCTCCGTGCCAAATCAGACTGCATCACATAAATTGG  
AACGAGGGAGTAATAGTAATTGATAATCTCCATTCTCTACCCTCGATTTCCCTGTTATCTGTTGGCTATGG

ATTTTGTTTTGTTTCATCATATATTTTCAAATATCAAAGTTTTGTTTTTACTGTTTTTGCTAAAAAACTGTA  
GGCATGAATCAAATTTATTGAAAGTATTATAAAACAAGTTCTGCAAGAAGTCAACCAGACACCTCTAGA  
TGTTGCTCATTATCCAATTGGATTAGATTCTCCTATCAAAGATATATTGTTGTTAATGCAAAGTGGATGTG  
AGCATGAAGTTCGAATGGTTGGTATATGTGGCGTTGGTGAATTGGAAAACAACTCTAGCAAAAGCC  
ATCTACAATAGAATATTTCTACAGTTTGGTGGTAGTTGCTTCCTTTCAGATGTTAGATCAAAGCTGAAG  
AATTGGGTCTAATCAAGCTTCAAGAGAACTACTTCATCAAATCCTCAAACCTAAGGAATTTGAAGTTGA  
TAGTGTGCTGAAGGTGTTAATCTCATCAAAGCAAGACTTGGGTCCCAAAGGTTCTAATTGTTCTTGAT  
GATGTGGATCATAGAAGCCAATTAGAATCCTTAACAAGAGAAAGAAATTGGTTTGGTTCTGGTAGTGTT  
ATAATTATTACAACCCGAGACGAGCATTGCTTTATGGTCTTACAACAAATGAGATATACCGGGCCAAAC  
TTTTAAATGGCAACGAAGCACAACAACTTTTTCTTGTCATGCTTTAACAGTCTTCTCCACCACATGAAT  
ATGTTGAGCTGGCCCAAACATAATTAATATTCAGGTGGGCTACCATTAGCTCTTGACATTGGGGTC  
ACATTTACAAGGGAGATCCGTTGAAGAATGGAGATACGAGTTCGAAAACTAAGAACAATTCCTCATT  
TGATATTCAAAAGATTCTCAAATAAGCTTTGATGGACTTGATGACAATACTCAGAATGTTTTCTTGATA  
TTGCGTGCGCCTTCCATGGATGTGATGAGGATGAAGTTACCAAAACATTAACGCCTGTGGTTTGATTG  
TGAAAGTGCAATTGTAACCTAGTCAAAGACACCTGCTCCAAAGGGATCGGCGTCGTTTGGTGATGCA  
TGATCTAGTGCAGGATGTGGGAAGAGAAATCGTTCGCATGGAATCACCTCGAGACAGTGGAAAACGGA  
GTAGATTGGTCAACCCTCAAGAAGTCCTTGATGTCCTACAAGGAAATAAAGTCAGTAAATTTCAATTATCT  
TTATCTTGTTATACTTCTTCTTCTTTTTTTCATATTGATATACATTTGCTTATAATTTATGCATTTGTGCT  
TAAATCTTCTCCCGTTAGTAAGTATCTTTAGATGTTTGAACCATTCTGTACTTGAAATGAACATTTACTGA  
AGTCTAAACAAACTATCAAAGACAAAATTATCAAATAAACATCCTTTAGTTGGATATAATGTGTAATTTTT  
TTTTATTGGTACATAATTTATTCTATTTGTTTGACCTTCAATTTGTATAAAGCATTCTCTTCTTAATTTAT  
CATACTTAACATGGTCTTATAGTACTTTTCTTTTACTAACTGTAGGGTTCTAAAAATGTAGAAATATTG  
GTGGTAGAACGACAGGCATTAAGGGTGTGAAGCTGAACACCAAAGCATTTCAGAAAATGATAAATC  
TTAGGGTGCTTAAAAATCGACGACTTACATATTAGTGGAGATTTTGAGCTATTGTCCAAGGAGCTCAGA  
TGGCTGTCTTGAAAGGATGTCCTTAAAATGTGTACCATCAAATTTCCATCTGAGAACTTGATTTCT  
GAATATGAAAGGGAGCAATATCCTAGAATTTGGTTTGAATTTGCAGTTTCGTTACTCAATTTTGCAAATT  
TATGTGTAATGTTTAAAGGGAAAGAAAATCTTAATTGAAACAATATTTTGTACTTTTAGTATTGTAGAAA  
TTTGAATGCTGGATCTCTCTGATTGCAAGCGCCTCAGAAAACTCAAACCTCAACGGTTCACGAAGT  
CTCGAGACTTTGTTGCTTGAGAATTGCTTCAAGTCTGAAGGAGATCCATCCATCAATAGGAAATTTGGAC

AGACTAACTGATCTTCAATTGAATGGTTGCAAAAAATATTACGGATCTTCCGAGCAGCATATGCCAGCTA  
AAATCCCTTAAAACCTTGTACATTAATGACTGCTCGTCTTTACAAACACTGCCAGTTAACATTGGAGCTAT  
GCAAAGCCTAAGATATCTTAATGCACGTGAAACAGGTATAAAACAATTGCCTGGATCTGTTGAAATGCT  
ACGAAATCTTGTAGAATTGGAAATGGGAGGCCAATACTTAAAGGCCAAAAGGAGTTTTTCTCAAAGAAG  
AGTACGCCCCATAGTGTCTTGTCAAATTTATTTTGAATCTACGCCTTTCATATTGTGGTTTCTCGGAGG  
CTGATGTTCTAGGGATATTGGGAGTTTATCCAATTATATTTTTAGATTTGAGCGGCAACAGTTTCCTC  
TATCTACCCTTTGATTTTTCCAAGTTACCATTGTTGACGTCCTTATATTTGAATGATTGTGAGAACCCTCAA  
ACACTCCCGTCAATATCAAATTTAGAGCACCTTGCAATTGTTGAACTTAGGAATTGCCAAAACTGGTCA  
AGATTACAGGGTCGGACTACCTCCCTTCAATAGAGAAGGTGGACATGATTAATTGTAICTCGTCTGCAGA  
ATCCATTCAATGAAGGCTTCTTTAGTGCCCATGCTCTATCAATCCGTCTAGAAAACATCAACGGTATAAG  
GTTAGTCCCTCTCCCTCTCTGATCTCTCCCTCGTATCACATTAATAATTAATGATCTAATTGTGTCTTAATTT  
GTCTGATGAAGATGTCATTACAAATTAATCTCGAAAGCAATGAGATTCCAGATTGGTGCAGCAATAAAG  
TAACAGCTCCATCTATCTGTTTGACTATGCCACAGTACATAATAATAAGTTCTTGGGAATGGTTCTCTGG  
TTTGTGGCCACTTTGGCAATGTATCCTCTATCTTCAAAGCTTCATTGTTACTGTTGCCCATGTAGAGTCT  
TCAACTTTTTGGTGGAGTTCGCATTTTAATATACCTGACAGTCAGGGAGAAATATCACGTGTATATTA  
CTCTTACTCAAACAATAGACCTTTAATGGCCTGAAGATCAAAGGCGGGGAACAGATAACAGTAGAGGA  
TCGCACTGGCGGAGCCGTTGTAAAGAAGATAGGAGTACGTCTATTATATGTAGATCAACATGGTAATGT  
TACTTCTTTCCCGGCAGTTGTGGATCATTCTTATACTCCCTCTACCCACAAAGACTTTCAGCATGGTATAT  
CAACTCAAACAACAACAACACATCCAGTGAAATCCCACAAGTGAGGTCCGTATTAGTGGATATCAACGA  
GCAAAGTTCTGAGAATGTGTTATGTACCATGGAAAATGTGTTCCATAGAAGTAGGCCATGGACCTGGAT  
CTACCAAATGATAACAATGCCTCTAAAATGTCTTTTTGGAAAATGTTTCTCCGGAGAATAAGTAGGTTTCT  
TACTTATTTTCTTGTGATCGTTATGTAAGAAAAACGTTTGTTTCATAAAGTATTTGTATATA

>PGSC0003DMG401026447 LRR-RLPs

AAAATTTATGCATGTATTTCATTTTACCTTGAAAATTATCTCACTGTGTCTAATATGACACCGACTGCATA  
ATCAGATAATCTCCAATGCAGTGGTCATATGCCGCCTGAATATGCAATACAAGAAATATTTTTTCAATAG  
TCTACGCACCAAAAAAAAAAAAAAAAAACCACCAACGCTATAAAAATTGACTGAACATTTTCGAGCTGTAAG  
CAGAAAAGTTGTTTGATTTATCTTTTCTGCTCGCATATAAAATAATTATCTCTGGAATGGCAACTGTGGA  
GTGAGGGGAAGACAGTCACGTTTTTATAGATCCAAAGTTGAGTAACATATGATCAAAGAGTAAGTTATAAG  
AGGTATAAATATTGGTCTCTTGTGTGTTGAGGATTTTATTTAATGATAGAATGATTTTTAAAAATAAAAA

TCACAAGTTGAGTGATTTTATTGATATAAAAGAAAGTTCAATGACTTTTCTATATAATTTCTAATAGTTCA  
GTGATCTTTAAGCTATTAACCCTGATGGAGTATGAAAGTGAAACCCTTAAAAGAGGATATACAACGGC  
ACCAAGAAATCAAACGAAGGAAGCAATATGGCAAAAAGAGAAGACAGAATATCAGAATTGCCTGTGC  
ATATTATTCATCAAATCTTATGCCGCACTGACCTCGGCGTTGAAGAGGCGGCGAGAAGTTGTATGTTGTC  
CAAGACATGGTACTATTGCTGGACTTCAAGACCTAATTTGATATTCTATCAATTTGATATGACCCTTGAAA  
ACTATGTCAAGTTGGTTGATCAATCTCTGCGATTCCATGTCTGAACAAAACCTTACATCTTGAACAATTCATC  
CTTAGATATCGTGATCCAGAAGTGGATTTTACGTGGATACTTGGATTGAATTGGCGGTTAAACTCAACG  
TCACAGAGCTGGGAATTCACCGTTTGGGTTAACATCATATAACTTACCTGATGTTATTTATGATGCTAAA  
AAGCTGACAACATTGCAGTTAAGCAGGTGCAATTTTGAATTTGACAAAAGATTTTCTTGGCTCGAGTCTC  
TTTCTTTGAATCATGTCCATATTTAGATGCCCAATTGCAAAGAGTTATCAACAGATGCCCATCTGTCAGG  
ACTCTAAGGTTACAGTGTGTGAGGGTATAAGCAAATGTCATATTTTTGGCTTAGTACATCTCAAGTATTT  
CGATGCTAGTTATTGCAAACCTCCATAGTGTGATAGTCCAAGCTCCATATCTTCAATGCTTTAGATATACAG  
AACCTACTGAACAGGGCAATCTTCATCCTTGCGAAATTGCTATTTTGGATGGTTACAGTACTTTACAAAC  
ACTGGAGCTCACTGGTCCACCATCACAGACCAACAGTTTCGAGATGTATCCTATAAGTCCCAAATATT  
TCAGAATTGAATCTAAGATTATGCTATAACCTGAAAAATATAGAGATTCAGAGTGAAAAACTCAAGAAA  
TTCACCTATTTGAGTTGAAGAGTCTGGAAAAACTCACGATTCAAGCTCCAAATTTATTGGAATTTGATTT  
TCATGGTAGTAAAATGCCCGTCACATATATGGATACTTCTTCCCTAGAAAGTGCCCGACTGATATTAATA  
ATATTTTGTCCAGGTAGTTTACATTATTTTTGTGCTTAATTTATGCATTACTTGTTGAATTTGGTTTAAA  
CTATGGGATTGACTAAATTCTTGCAGACCAAAAGCATCCTTATTTATGAAAATCTAAGAGAAATTGTTAT  
TCCACCAAGTCACAAAGTCGAGATATTCATTGCATCCATGCTGAGTGTGAATCGATCATTGGAATAATA  
ATGTTCCGGAAGTCCCTATATCATATCCATACTTCCATGTACAGATAGCAAAGCACTACAGGTAAAACGTC  
CCTTGTGCTTGTATAATTTGAGAAGAAAATTTGTTGTTAAATGTTGATTGCTCGTCTCATAAGCATTATTA  
TTGTATAATATATCTTATGTTTCTGCTTAAATGCAGGCGATGTCTACACTAAAAGGGTGTACACAAAAGC  
AAAATTGTGGTAAAGAATGTCCATTCAATACCAAGTGGCATCGTAACTTAAAAGATGTTATCAGTTGTAC  
TGGGACACCTGAGGAGGGAATGGCCGCTCCATGTGGTATCTCTGGTTGAAATCTACATCTGTAATTGA  
CCAAGTGAATAATTTATGTTAAAATGGAAATAACAAGCTTAGACCAAAGAGTCTTGGCGAATTCAGCA  
TATAGAGTTAATTAGTGTGTATGATTTATTACATAATTTAGCATTTTTTGGCTGTGTAAGACCTCCAACCT  
TGATTACACATTTATACTTGCAATGAAATAGATTTTGCAGCAGTCTATCTTTAGTATCGATGGTTATGAATG  
TGTAGATGAATTGGAAAATATAATATTCTGGGCTGCAAAGATAGAGGTATTCGGAGTTGTATAAGCTTG

TAGACAGATAGACGCACGCCTTCCTTGTATGTAGAAATCAGGAAATTGAACATAACTTGAAAAATGGAA  
AGTAACACTCTGTTATGAACTCATGCAAATAACCTTAATAATGAAGCAGATGGATTGTGATCTGTAAACA  
ACAATAACTCATCTGAAGAGGACGGCTCCACACTAGCATGTCGTTTTCGTTTTCCATTAAGATTTTGCA  
>PGSC0003DMG401026747 LRR-RLPs

ATTTCCATGGAAATTTGCCTCAAGAAATGGTACGCTTACGTCGGCTTAAGTTTCTTAAGTTAAGTTTAAAC  
AAATTCAGAGGGGAAATTCCTTCTTGGTTTGGGTTTTTAGAACAACTTCAAGTTTTAAATCTTCAAAGAA  
ATAGTTTCACTGGTTTCATTCCCCGTCCTCTCGAATGCCTCAAGTTGGAGACTTTAGTAATATCTGAC  
AATTTACTTGAAGGAAACATCCCGGAAGAGATTGGCAATCTTACAACCTGAAATTGTTGTCCATACAAT  
ATAATATGCTTACGGGTTCTATACCATTCAAAATTTTCAATATTTCTAGTATCCAAGTCATTGCATTTACAA  
ACAATAGCTTATCAGGAAATCTTCCAATGGTTTATGCAATGGTCTCCCGATACTCAAAAACTTTATCTA  
TCTGGAAACAACTTCATGGTCATATGCCTACAAGCTTGTCAAATTGTTACAATTGCAAATTTTGTCTCT  
ATTTGAAAATGATTTTGATGGACCAATACATAGTGAATTGGAAGATTGAGTAACTTGCAGATATTGTAT  
CTCGGATCCAACCATTTACAGGTATATATGTTTTATCTTTCTAGTTTCTGGACACGTGTGTTTCATCTAAAT  
TGATATAAATTGTTTCAAATTATCATTGTATTAATAAGATTTATAATTAATTACATGAATATCGTTCATT  
TTCAAACAAAAAATAGTTCAAATAATTGGAATATACTCTTGGATACCAATAACAAATTAATAATGACAA  
CAAAGTATCTTCTCAAATAAAATAAAAAATGATAATTTAGTATTTTAAATACTATAATTATAAAC  
ACAAATTAATATATGTATATTCTTATCTCATATGTATGGGCTAACAGATGTTATTGGCATACTCCTATTAA  
AATCTGCAGCGTATATAAACTTCTCAAATAAAGGTCACCTTTTTCTCATAGTACATGAACTTCACATG  
TTGTCCAAAAAAATTACAATATAATTTAAAGTGCAATTACAACAAATAGCAAAGAAATAGATATAAT  
TATTGTATTACACAAATCTAAAAAAGTTGTCTAGATGATAGTATCGACAAATCAATCGAAGTAGATAACA  
TCCTATTATAATTTACAATATGTAAGGCCAAAAAAATATCTTTTTCATAAATAAAGAATGAGAATTAGC  
CAAATTGTTACTACATATTCTGTCTAAATGATGAACTAACTTTACCATCTTGTAATAAATTGGATGGAT  
AGTTGCCATTTACCTTCGAGTAATTTGACTGTCATATGAAATTTAGTTTTTCAACTTCCTTTATCCATTTGA  
GGAAAAGGAGTGGTATTTATACTATTTTATAGTAGTTCAATTGGAGAAGTCTAAATTGGTTAGACTAATT  
TTAAATGTCCTATATTCATTTACAATGAATGTTGTGTGCATTGAATTTTCATCTCTTAGAATTTTCATGCTT  
TGACAAAAACGTAAAAATGTTTTGAGTAAAGTACGTGTTAGGGTTTTGCCCTGATTTTCTTACCTTATTTG  
AAGTTAGTTTTTCTAAAAGAAAAGACAAAACATTACCAAAAATGTATTTACTTTTCATGAAAGGAAATA  
TATTTTCTTCCATATTTGGTTTATTCTTTCCTTAGAGGAAAAGTTTGGAGATCTATAAATTGAAGATCCCT  
ATTTCCATAACGCAACTCAATAGCATCCACAATGTAGACGTTTAAGAGTTTATGTTTATGGGGAGATTTAT





>PGSC0003DMG401027811 LRR-RLPs

GAACTATTTGGTTAATAAAGCATTCTTGTGAGCTAATATGGCAATGTTTCATGTATGTTTACAGGATTTTC  
ATTTCTCTTTTGCTGATTTTGGTCCATTGTGAGGTGACTGTTGAACAGGTTACACACGGCCCTCTACGCAA  
AATCTGTACATTTACTAGGCGTGATAAACTATAGCAGAAACACCTCCTCTTGCCAGAGAAGATGGTAA  
GATTGAGATTGTCATACTCTTTAAGGCTACTTGGCCATTGTTTACGTTCTACGCAAGTTTAACTTGTCGAC  
GTGCTTCCTGAAAACCTATGTTTTGTCAAACCTCTTATAAATGTCAACAGGTAGGTGTGTGTCGGATTCTC  
CAAAAGTAGTGTACTTTTAGAGACTTCGACATGTGTGCTTCATAAAAATGAAGAGTTTGCGCAACTTAGC  
TGAAATCATGGTATTTGTCCACCAAAGATATTGTTGCTGTCAAAGTCATAGTAATCCATTGTTGTCTGAA  
TTCACAGTTGAAGTATTTTAACTTGCCTTGTTATATTTTTGAATTATCTTTCCATTTTGTACTGTTTTATT  
GACTTCTTGTTGAGACTATATTAAGATGCTTGGATCCATAGTTTTTAAATTCTGAAGTGTTAAATAAGCAA  
ACATCTCCTTCTCTGCTACTTTATTTCTCTGTTTTTCGTTAAATTCTTTTTATTTGTCTGCAGACATGGATT  
TGTTGACTGTCTTGTGGATTATGTGACATATATGGTTTTTATGTCTTCGTCTAAAAAATTATCGCTTGCT  
TTGTTTATGGTAAAGATAACATAAATAACTTTTTATGCATCGGCTATTACTGTTGAAATGAAAGCTGAATA  
ACCTTTACGGGCTATGCATATAGTATTTGTTTTCGAAATATTCATGACATCACAGGTTATCCATTTAATTT  
TTCCCCCAATATTTCTGTGTGTGGATGCCAGAGGATGTCATCACTGAGCTGCTTCGGTGTAAATTCAAG  
AGTATTACCGCCAAGGTGTTTGATAACTGGAAGTAATTCCAAAGTTATTTGCAATTGTACTGTTGAGAAT  
CATAAAATATGTGCGAGTGGTGGAGATGTATGCTTCTAATCCAAGTTATTTACTATTATTATTGTTTTATTT  
TTTGATTCATCGACTGTTCTTCTTGTAAATTGATTTTCTGAGTAATACGTTATTTGGAAATAATACAGGTCC  
TTTGATAGAATAAGCTGGAGATATTGATCGGATTACATTCGCCTATTTTTCTAATTATAATTTGCACTGAT  
ATAATTAGTGATCCATTATGCCATCATTTTTTGGGAGTTAATTTGGGGATTTGTTTCATAGGGAGCAATAT  
ATGCTTGTGCTCTTCGGCACTTTGCCTTCCTAATATTCTTCATGCAGTGTTTCATGCTACTTTTGTTTAATA  
ACCGTAGTGTGAGGGCCAGCTTGCCTGCACCTAGACTAATTTCTATATATGTCTCTTTACATTTCTATATA  
TGTTGATTAATAAAGTCCGTTGACTAAAAGGTTTTCCATGAAGCAGGAATATTCATCTTTGCCTACTCGA  
CCAAAATGAATTCAAATAATTTCACTATAATTATAGCAACATCTGCACAATTTCACTACTAAAATGTAAA  
GCAACTTAAGAGACATTTAAGTTAGTACTTTTCATGCCAAATATGTGCTAATCATCCTGTTTTATGTTCA  
TTATTACTGTTTGAAGTTGTGGTCTCAAGGGAGTTAAAATTTGTAGTATTTGTTTTTAACTATGCAACTTC  
TAGTTTCTGATTGATGTCTTTGCAACATAATGAACTGCAGAGATTTCTCCGATAGACGAATAGAAGGTGG  
GATCCCTCAGAACATTGGAACCTTAAATATTTGACTACTCTGTAAGGATACCTAAACAATATATTCTTTT  
TGTATTGTGCTTTTGAAGGGGATCCTTGGGGTAACTAGTAAAGTTGTTGCCATGTGACTAGAAGATCAC

ACGTCCAAGCCATGGAAACAGTCTCTTGCAGAAATGCAAGGGAAGGCTGCGTACAGCTAGACCCTTGTG  
GTCTCCCCCTTCCCCTGGAGCTTTAGTGCATCGAACTACCCTTTTCTTAAATACTATGACCGGTAGGCATT  
TATATTTTGAGGCAGGAGTGGGAAAAATGGAATGCATGCCCAAGAGATATGCATAAGTCGGAAAGCA  
TTACAAAAAATAGTGCAATGTTCTTAAAGATGTTAATCACCTAGTGTTGCATATCAAAAACGACACTAG  
ATTTAAACACATCATTACTTGAATAATAGCAGGGGAGCTCACGGCTAAAATCTTAACGTCTTAAGCACTC  
ATATTTGAAAGTGATCTTATCTCTTGGGGCTTGCATTCCACCTTTTCCAGGTATACTAGTATAAATTA  
AATAAGAGGTTATCAAACCTCAAAAAAATCTCAATATTATAAAGTCTAAAACCTAACTACTTCATATCCA  
AGATTCGATAATGTGCTATCCTTTATGAATCTATCTACTTTGGTTGATCACAGTAATTTGGATAGAAACAA  
GTTGAATGGACCAATTCCTGAATCATTTAAAGAGCTGACGCGACTAACGCATATGTGAGTAGTTTCATAA  
CTTCGGCTGCAAACCTTTTCATTATATTCTCCATCCTTCACTGTGTCCATTAGAAATTTACTCATCTATTTTG  
AAGTCTTTCATTACTATGCATACGATGAAGCCAATTAAGGAATTCTTTTTCTTAAATTACCTCTAATGCTTA  
TAATGTTTTATCTGACAGTTCTCTCTGTGATAATTCATTAACGGAACCATTCCACTTCCCTTGGTGAGAT  
GAAGTCTTTACAAAAAATGTAAGTCATCAGCTTACCTAATTATGTCCTTATGTTGGTGTTTGTACCTATTT  
GGGTATGTAAGCTTTAAGAACCATTAGATTATTGGCGTTCCAATAACGAAAATTGTGAGTGAAGAATAT  
TTATAATCTAATGGTGACAATTCTATTAGCCCTAATTTGATGTTAACATCACGCTTAGATGGTTTTTCCC  
TCGTTTAAGTGTATCCAGATTATATACATGTCTGGTGACCTACATGATTAATAATTAGCAATAGCTACGTAT  
AAAAGTTTGTTTTAAAGCAAAGGTTGAGGAAATAATGTTGTTGTGATGGTGAATATTGGAAAAAAGA  
GATTTGTAGTGATGGCGGATATCGTGGAATGAAAACCTAAGAACTATTTGGAATAGTAGTTTTACGCG  
TACTCAATAGACTAGTACTTAGGAACTAAGGGGGCTTCAATCACGACAATGAGCGCCTTAACTCTGCA  
TTCTTACATGTCAACTGATGCAGAGTTAACATGGATCCGGCATTTTAAAATTGGATTTTGAACCAATGAA  
GACGGCTCAACTAGAAAATTCCTCAGAATTCTATCTTGGGATCGTATTTAATCATTACAATCTAACCTTG  
GTTGATATTACAGATCTTTGTGCAAAAACCTTCTCAATGAAACAATTCCTCCAAATTTGAAGTCTCTCAA  
TCTTTAGAATATTTGTAAGTCTAAAGCTGCATCTTATATTGTCTTTTATATTGCGAAATAAATTACTAT  
CTAGTCATCTTAGTTCATAATATATTTATTTTCTTCTTGTCTTTCAGAGATTTGAGCTATAATTTATTATCA  
GGGAACATACCTGAGCTGGGAGGAATTGGGACCCTCACCGAATTGTAAACGCCTTGATAAGATCCATAC  
TTGTACTTCCCAATTAGTTTGGCTTAACTTTAATTCCCATCTATTTTCTTCCAAATTAGGAACCTGGCGG  
ATAATCAACTCTCGGGTGAACCTCCCGGACAGTCTACAAGTTTTGTGAATCTTGAGGAGTTGTAAGTATA  
TTTTTGTTAGTTACTTTTGGGTGCATGTACCTAACGAAACAGGGATACTTATTATTAAGTTGTAATGATT  
TCAGGCAGTTGCAGAACAATGAATTTGTTGGTGCCTTGCCGTCGAGCTTCATAGTTTGGTGAACCTGAA

AACTTTGTAAGTATCAACTCTTATCTTTCCACTACTAAGAAAATCATTATTTCCATTGAAAAATGTTC  
GGTGGCTACTCCCACAGATATTTTGATTGAAACAATGAGAAAAGAATAATACTAGTGTTTTCATATGGAA  
AAATTAGGAAGTTTTACTAATTGTAACGAGAATTTGTTCCCATCATGAGCTGGTTAGGTTGAAATGG  
GGTGGGAAATCATGTTTTATAACACAAATTTCTATTAAGCCTCTGTTTTTTAGTAGTGTTCAATCTCATT  
GCATAGAATTGGAACACGAAGAGAGAGAGAGATTAAGTTTTAAATCAATTGTTTATCTTCTTTCTTTGTA  
GCGATGTGCGAGGGAACAACCTCAATGGAACAATCCCAGATATTTTCAGAGGGTGGGAAAAGCTGCTT  
ATCATGTAAAACCTACTAAGTAACTGTACACTTTTATACTATCTATGCATGTGTTTAGCAAGACTACTGAT  
TTATTTTTCTGCACATGTTGAGAAGGAATCTGATGGGGAATAATTTTTCTGCACCATTCCCTCCACTTT  
CTCAGAGCTGAAGAATCTACAACAACCTGTAAAATCCTATAGCTTTTCCGATATACGCATCCTTGAAAGGA  
GTTCTCCCAAACCTTTGAATTATTATGGATTATGTAATATCTACTTTCAGGTATATCAGTGACTCAGTTGGA  
GAACAGTACTCATTTCCAAAGTTATCCACAATAAAATCTTTGACAACCTTTGTGAGTCCCGTGGCACCCAA  
AACTTTCATGCTTATTGGAATAATAGTTTTTTCTTTTGCTTTTCTCCTAAAATAGAATTCTATTTTCCAATTT  
TCTGTTTATCTAGGACATTGAGGAATTGCTCACTAAAACCGGAATCCCTGATTGGATATGGAAAATACC  
TCAACTAGAGTATCTGTAAGAAAGCTTCTGCATGCAGTAACTATCTCCATATTCGTTTACTTCACAAAGAA  
AAGGATGTGCTTTTTGATAGGGGAAAGTCGATGCTTCAAATGTTCTCCTCTTTGACTGCTTTTTTCAAATG  
AACTATTATATTATGAGGTTTATGAGAAAATAAGTTGTTTGTTGATAAAAGAGTTCGTCAGGCTAAGC  
TCTTAAAGTGTGCTATCTTTGTCTTGCTCTTCCGTTTAAACATCATAACAGTAAAGTGCCTGGAACAAAGT  
GGAAAACTACTTGATTGCGTGTAACCTGTCACTAAATAGGCGATTACATGTTTCCTTAACAAATATAT  
AAAGTAATACTACTTTCTTTTCTCCTGATGCAGGGACTTGAGTTTCAATAATTTGTCTGGTGAATTCCAG  
AACTGGTCCCAAATCACTGAAATTTATGTAAGTGATCTTGCTTCTCTAACTAATCATTAAATATACGTGA  
TCTTATTTTTGTAATGAATTGTGGATATAAAATTCATCACTGCAAGAAAAGCTTTTATACCTCTTTCTTTT  
GGCTATATCTTTCTTCTATGCATTTCTGTTGAAGCTAGTAATAGTTTATACATCTCAAACTCAAGTTTTT  
TTTTCGATAACAGCTGATATGGATTTCTGTTACTATTTGTTGTTTCTTGTACATTGACTATTGCATTGTTTT  
GTTGTAGCTTCCATTCTGTTATTTGTTATTATCTATAGTTTTTGTACTTGTATTACTTCTTTTTCTCGACTTCT  
TCCGACTTTCTTTTCTTGAGTCGAGGGTCTATTGGAAAAATCACTCTACCTCTAAGGTAGGAGTAAGG  
TTTGTGTATACTCTACCCTTCCGGACCCCACTTTGTGGGACTATACCGGGTATGCTGTTGTTGTTGTATA  
ACAGCTGAGGCGGATCTATAGATGGAAAGCTTTTGAAGTGAACATTGGTTTCATACTAATTGCAACGTA  
ACTTACGGTACTTGTGTATTAGATTGTGTGATTCTGGTGTGTTTGAATATCAGAAATTGTGTGATAGCTC  
GCATTTGATGAATACTTGAGCTCTGTGATGTCGAAAAATTGATCTTTTATCACATTTTTTTCTTTCTGTCTT

GTTTTAAGTGT CATAATCCAATGCATTGTTTCCAGATTTCTAAGAAAAATAAACTCACTGGGACAATTCC  
AGCTTGGGTCAAGGATTATCCATACGTGTAAGTACCTTTTGCATTAATATATTACTTTTTTGGTTGTAATT  
AGTCGAGGTGGGGAAAAGCTGGCTTGCACACCACGGTTATCAAAAAATAAAAGAATGGCAAACACTT  
CATGTTTTGCAGAGTGACTTTTATTCTTAGTACTGTCCAAACCACAACACGTGACGCTGAAAGATCACTG  
GAATCATAGCTGTAGTCAATGGAACAACGAAGATTCAAATGATTTCTACTTATAATAACATATCTAACT  
TTTCTACTCAAGGCCTCTCAACCTGTAAATTGGGATGCAAACATGTTTCTTAGTCATAGACACAATCTT  
CACTTTTCAAACAATTTGCAATCGCCAACCTCATTGTTTCATGTCTCGCACATTAGTTGATGGAACGGGTTG  
TTGTTGCCTCATATGGTTTTAGACAGTCCTCATCTCATGAGCTAGCTTTTGGGATGAGTTCATCATTAGG  
CCCATTTTTGTTTTGGTCATTATCTCTTTCCATTAACTACCATATATTCTTAGGCCAATTATTTCTTTTTCT  
GTGTTCTTGTTTTACTCTTCTATCCACTTGGATATAATTGTTGTTGGGGAACAATGAAAAATCACAC  
TAATAGTAGTTGATTTAACATGATTTTTGCCTCGGCTTTCTTTTTCATTAAATGTCTACAACATATTATGC  
CACTCACTCGTCCAAGTTGAAGTGCAGGGATCTTTCTGAAAACCATTTCAACTTGAGCCAAATAAAAAAG  
ACAAATCCTAACTTGTAAGTGTGATTTTACATATCTAGAAAAATCTTATTTATGTGCTTCTGAGTAGCT  
TTTCTATTCCCGAATCCAATTATATTTCCCTTACCAGGAATCTGTTTCGCG

>PGSC0003DMG401028427 LRR-RLPs

ATGGCTCATTCTTCTCTCCTTGACCCTTCTCCTCTTTCTCCTCTCCACAAAATCATCATCTCAATCCACTA  
ATCTTGACCCAAACCAACTCAAAGCTCTCAGATCACTAAATGTACCAACAGGAAAAGACCCCTGTTCTCC  
CCTTCACAATTCCACCATTTGTGACTCTTCAACTCCCTTTCACCATCTCATCTCCCTCAAACCTATAAACTGT  
TCAAATGATGTTACATTATCCCAAACATCTCTCAAACCTCTCTCCACTCTCCAAGACTTACAATTCATCAAC  
TGCCCTGTTTCTCCTATTCAATTTCCCTTCTGAACTTTCTCCAATCTCCAATCCTTCACTTGCATCAACTCCC  
TCAAGAACTCACAAGCCTTTGGCTAATTCAATTGTGCAATGTGACAAGTTTAAACAGTGTACATGTTCC  
TGTTTCTGCTAGTGGCCCTTCTATAATCTTGAACAGTATCAAGAACTTGCAGAGTGTACAAATATCTCATG  
CAAATCTCAAAGGGGTTCTTCTACAAAATGGCATATGAATCTTACTTATGTTGATTTATCTGGGAATCAA  
CTAAAAGGGAAAATACCAAGTTCTTTAACTGAACTTGA AAAATCTTTTGCATTTGAATCTTTCTTCAAATTC  
ACTCAATGGGACTATACCAAATTCATTTGGTAACTTACTTTCTTTAAAAAATGTGTCATTAGCTTCAAATG  
CTCTGTCTGGAAGTATTCCGAAATCGATTGCTGCAATCCCTGGATTAGTCCATCTTGATCTTGGATCAAAC  
CAATTGAATGGAAGTGTCCAAAGTTCATTTAGATATGAAGGGATTGAAATACTTGAATCTTGAAGAA  
ACAATTTGAAGGGGTTTTGCCATTCAATGCTTCTTTTCATCAAGAACTAGTTGTGTTCAAAGTGGGAGA  
AAATTCAAATCTTTGCTACAATCATTCCACATTGTCTTCAAACCTGAACTTGGCATTGCCCTTGTGATA

AACATGGATTGCCACTGTCTCCGCCGCCTCCTAAGGAAGATTCAGTGATGATACTGCCGAGGATGATG  
GTCCACCACCTAAACATGAACATGGACCAAGCAGGGTTGTTTTGGTGTGGCTATTGGACTTTCATCCAT  
TGTGTTTTTGATTATTTTATTGGTTTTATTGTCCAAATGTTGTAATGATCATGACTGTAAATTGTGACAA  
ATTCTTGGTCCAGTTAGAAATTTGAGTTTTGAAAGCATGAATCATTACACTATTGAAAGTATGCATATGT  
TCATGATTTAGTGTTTCTTGAAATTGATTCACAAACAAAAGTATGAACTTTGTACGTCTTATTATTAATCTA  
GCTCAAATTGGACTCAAATATTTAAATGAGCAAGCTTGCGTATACGTTTGAECTTATGTTTATATAAATTT  
ATATATATTCTGTGAGAGTATTTTATATACTATATAGTCTAGTCAATCTTTATAAGATCTATTTCTGTTTT  
TTATACTTAGTGATATTTGATACTCGATGAATGATGATATGAGCTATGAGCTATAATTAAGATGTAATC  
ATGGTTTCTCTGTTTAGCATGAGTAATAAATAATGAAAAGATCAAATCTGTCAGCTTACTATGTTTCATGG  
TTGGTTTTTTTTATTCCAATCTTGGTACAAAGGGAACATGCCCTTTTCAGATTATTTTAAATTTGACAAAACA  
TAATGTCTCTTAACTTCACAAAGGGTCAAGAAAAGTTAAGACGACTTGGGACTCATATTTGAACTGAG  
AAGAAGGATAAAATGCTCCAATCTTTTTATTTCAATCATGTTACATATTTTTTACATAGAAATTTGTTTTC  
ATCAAGATCTGACCATGTCCTTTTAGTACAAAATTTGATTATACATGTTGATAAAAGGATTCGTTTACTTT  
GCTTGTTTTTTCATTTTCTTTTACAAATGAACATTCAGAAAGGGTGACTGTAATAATTGGTGAAGAAACA  
AACAAAATCAAGTGGAGTGGTAAGTGCTCCTTCATCTTTAATCAAAGATTCAGGTTCAAGTACCTTGA  
TATGAATGTCAATTTTGTCTGGGAGCGTTTATCCTAATATGGCATTTCCTGACGTGAATTCAAATTTAATC  
GAGCTCCATCATGACGCTCCAATATAAATACCGAACAACAGAATTATTTTTTTTAAAAAAAAAATCCTTTT  
CTCATCCAAAACCACATTCTACTTGCAAATAGCACGTGTGATAAGTGACGATGAGACACAAAATGTGTA  
CATGGCTTTTGTGGTCAGCCTGCATACACATCTACTATTTTTTGTGGTGTTGAATGAATGTGTTTACTAA  
AAATAAAGAGTCTACGGTATATGTAATCTTCATTAAGAATCGAAAAAATAGTTTTCTAAGAAAATATGGG  
TGCAACAGCAACTGCAGTTTTCTTTCAAATTCTATATCTCAATTTCCCTCCTTCTCTGCTTTATGTAAACC  
AACTTGGGGATCCGAATACCAAAGGTACTTTTTTTTTAATTATGAAAATCTTCATGGAATGAGTTGATT  
AAGTTGTGTTCTTATGAATTCTTGAAATTAATTTGGAATTTAATTGGGAAGTTGCTTCGAAAATCTGG  
GTTTTATTACTATTGGAATTGCAAGCAAGAATTGTTACCCAATTTACTTCAACTTACCTGTGTTATGA  
ACATTGATCTAGGTTAGAATGTAGCAGTACGAATTAAGTAGTAGATGTGTGTTTAGCTCTCTGTAAACCT  
TTGCCTCACAGTATAGCAAGGCGCAAATAATTAGTCGAGGTATGTGCAAGCTGAACCGAAAATAACC  
CACAAATAGTCCATGCAATTGATGGATAAAAAATGTGGAATTTGAGTGTTCTTGATTTTAAATCAAGAAGG  
GTTAAGTAGATGAGAAGAAGAGCCTCAATATGCCTATTGTAGCTAGATCTGCTTTTCGATTTAACTTTGT  
GGATGTTTTTCTGTTATCTGTAGAGGATCTTGGTATATTTGTATAATCACCATGACTTGGTAGTTGTAGAA



AAGACAGAACCCAAAAGGTAGTGATTTCTTTCAGTTTTACCCAAGCCTGTTTCCAGTCGTCCCACCTTTTCC  
CAAAATTCTATCCCAGTGCAAATGATGATACTCAGTTAGCTAATATCTCTTTTTCTTTTTAAGGTAATAAG  
GATGACAAGGGTTTGACTCATCAAAAAGATAAAAAAGAACCGGAAACAGACTATCCACCAACAGCAGA  
TCCAAGATCAACACGCCTACGGTCAAGCTTTGTGAAAAGATCGCCTCTACAATCCCCATTTAACTCCAAA  
GAAAAAGTTGAGCTCAAGGTGGAGACATCACTGGAGAATCATGTTGAAAGTGAAGCAGTCAAAATTGA  
AGAAATGAACTTCCTCAGCTTAAAGAACTTGCAAATCTAGAGGACTTAAGGGTTATTCGAAACTGAA  
GAAAAGTGAACACTGGAATTGCTCATCAGTTGTTGAGACAATGCAAAGATGATCAAGTTGTCCATCCA  
ATGCTTTACATACTTGACGGTTAACTGCAGGACTCGTCTTTTTTTCGTATCTGCTTTCTTTCATGGAGAAA  
CAAGATGAAAGGGCAGAGTACTGTGGGAGTTTTAACACATTCATTTGTTTGGTTTGTAAACATGTGTT  
GTCTTTAAAGTCTAATTGCATTTATGATCAATTTCTCAAGTTGCTTACCTTCTCCTTCTCCTTCCCCAAC  
AATTTGCTTGCTTTAATGGTTGAAAGAGGGGTTATTATTCCTCCAATCTGCTAGTTGTTTTTCTTATATAA  
ATCTGATGTGATCTTTTAGCCTGGTGTGGGAAGATCCTCACTTGCAATAACAAGTTGG

>PGSC0003DMG401030236 LRR-RLPs

CAGATTTCAAAAATGGAGATTGGCTTAGCAGTTGGTGGTGCATTTCTCTCTCAGCTTTGAATGTTCTCTT  
TGATAGGCTTGCTCCTAACGGTGATCTGCTCAACATGTTTCGGAAACATAAGGATTATGTTTCAGCTCTTA  
AAGAAGCTTAAAATGACTTTGCGTGGTCTTCAGGCCGTGTTAAGTGATGCAGAGAATAAGCAAGCATCA  
AATCCATCTGTGAGCGACTGGCTTAATGAGCTTCGAGATGCTGTGACTCTGCTGAGAACTTAGTTGAA  
GAAGTCAATTATGAATCTTTGAGGCTTAAGGTGGAAGGCCAGCATCAAAATCTTGAGAAACAAGCAAC  
CAGCAAGTAAGTCACCTCAGCTTGCTCCTTGAGTGATGAATTTTTCTTAACATAAAGGATAAGTTGGAAG  
AAAATATTGAAACATTGGAGGAGTTGCAAAGCAAATTGGTTGGCTTGACCTGAAATCGTGTCTTGATT  
CGGGTAAGCAAGATACTAGAAGACCTTCAACTTCTGTGGTTGATGAATCTGATATCTTTGGTAGGCAGA  
GTGAAATAAAGGATTTGATTGACCGTTTATTGTCTGAAGATGCAAGTGGAGGAAACCTGACTGTAGTTC  
CTATTGTTGGAATGGGCGGGAAGTTTACTGTAATCCCTGTTGTTGGAATGGGGGGCGTGGGCAAGAC  
AACACTTGCTAAAGCTGTTTACAATGATGAGAAGGTGAACGACCATTTTGATTTGAAAGCTTGGTTTTGT  
GTGTCTGAACAATATGATGCTTTCAGGATAGCAAAGGATTGCTTCAAGAGATTGTAAGACAGGTTGAT  
GATAATATAAATCAGATTCAGATCAAATTGAAGGAGAGCTTAAAAGGCAAAAAGTTTCTTATTGTTCTAG  
ATGATGTTTGGAAATGACAACACGTAAGGAGAGTGTTCCTTGATGATGGGTGGTGGGGCAATGAAT  
GTGGGAATTCTGTCTAATGAAGTCTCTTGGGCTTATTCAAACGACATTCATTAGAAAACAGGGATCCTG



AGGAACATCTAGAACTTGAAGAGATTGGAAAGAAAATTGCAGAGAAATGCAAAGGATTGCCTTTAGCT  
ATAAAGACCCTTGCTGGGATGTTACGCTCAAAATCAACGATTGAAGAGTGGAAACGCATTTTGAGAAGT  
GAAATATGGGAGCTTCCAGACAATGGAATCTTACCAGCATTGATGTTGAGCTACAATGAGCTTCCCCAC  
ATTTGAAGCGATGCTTTTCCTATTGCGCAATATTTCCAAAAGATTATCAATTTTACAGAGAACAAATCATT  
CAACTGTGGATCGCTAATGGTCTAGTACAGAAGTTGCAAAAAGATGAAACGGTTGAAGAACTAGGCAA  
CCAGTACATTCTCGAGTTGAGATCAAGATCATTGTTAGACAGGGTCCCTGATTCTTTTGCATGGAAGAGA  
GGGGTAAGGCAGGACTTGGACATATATTCTGAAATGGATGGTGAGAAATTCGTTATGCATGACCTTGTC  
AACGATCTTGCCCAAATTGCATCTTCAAACATTGTACCAGGTTAGAAGACATCGAAGGATCTCATATGT  
TGGAACGAACTCGACACTTGTCTGATTCCACGGGTGATGGTAACTTTTCGCCATTTACAATAGGAGATGG  
TGATTTTGGTAAATTGAAAACCCTCTACAAATTGGAGCAGTTAAGGACATTGCTTCCGATAAATTTCCGG  
CTCCATTCGTTTTAGTTAATCTAAGCAAGAGGGTGCTGCATAACATACTTCCAAGACTAACATTCTTAAG  
GGCATTGTCATTTTCTCGTTATGACATCAAGGAGGTACCAAATGACTTATTTATCAAATTAACCTCTAA  
GATTTTGGACCTTTCTTGGACAGAGATAAAACAGTTACCAGATTTAATTTGTGTGTTGTACAACCTAGA  
GACACTTATCGTGTCTTGTGATTATCTTGAGGAGTTACCGCTGCAGATGGGAAATTTGATCAACTTG  
CGTTACCTTGACATTAGGCGCTGTTCTCAGTTGAAATTGCCGCTACATCCTAGTAAGTTGAAAAGCCTTC  
AGGTGCTATTAGGAGTTAAATGTCTTCAAAGTGGTTTGAAACTCAAAGATTTGGGTGAACTACACAACCT  
GTATGGATCTCTATCAATTGTAGAGTTGCAAAATGTGGTTGATAGAAGGGAAGCTTTGAAGTCAAACAT  
GAGGGAAAAGGAACATATTGAGAGGTTATCATTGTCGTGGGGTAAAAGTATTGCTGACAATTCACAAA  
CTGAAAGAGACATATTCGATGAACTACAACCAACACAAACATAAAAGAAGTGGAAATCTCTGGATATA  
GAGGGACAAAATTTCCAAACTGGCTGGCTGATCTTTCTTTCTTAAGCTAGTGATGTTGTCTCTTAGCCAC  
TGCAACAACCTGTGATTCTTGCCAGCACTAGGACAACCTCCTTCTTTGAAATCCCTCACCATTGAGTATAT  
GGATCGAATAACAGAGGTGACCGAAGAATTCTATGGTAGCCCATCTTCAATAAAGCCATTTAACTCTCTG  
GAATGGCTTGAATTTAATTGGATGAACGGGTGGAAGCAATGGCACGTAAGGAAAGTGGAGAGTTCCC  
TGCACTTCAGATCCTTTCAATTAACAACCTGTCCAAGTTGATGGGGAAATTGCCTGGAAATCTTTGTTCTT  
TGACAGGATTGACAATTTCAAATTGTCCGGAATTTATTTTGGAGACACCTATCCAACCTTCAAGTCTAAAA  
TGGTTTAAAGTTTTCGGTTCTTTAAAGGTTGGGGTTCTTTTGTATCACGCTGAGCTATTTGCATCCCACT  
TCAAGGAATGACGCAGCTAGAGTCATTAATTATCAGAAGTTGTCACTCTCTTACCTCTTTCATATTAGCA  
GTCTGCCGAAAACCTTGAAGAAAATAGAGATATCTGATTGTGATCAATTGAAATTGGAGCCGTCAGCTA  
GTGAGATGTTTCTCAAGAGTCTGGTACTAACTGAATGTAATTCTATGAATGAGATATCACCTGAGCTGGT

CCCAAGAGCACACTATTTGAGTGTAATAGGTGCCACAGCCTTACTAGGCTTTTGATTCTACTGGGACT  
GAAGATCTCCATATTTCTGGATGTGAAAATCTTGAAATGCTTTTGGTGGCATCCAGGACTCCAACGTTGC  
GAAATTTGCATATTCACAGCTGCAAGAAGCTGAAGTCGCTGCCAAAACATATGCAGGAACTTCTCCATC  
TCTTAATTATCTCAACCTGTATGATTGTCCAGAAATAAAGTCCTTCCCTGAAGGAGGCTTGCCTTTCAGTC  
TAGAAGTCCTTCAGATCTGGAATTGTGAGAACTGGAGAATGATCGAAAGGAGTGGCATTACAGAGA  
CTCCCTTGCCTCAGAGAACTTAAAATCTTCCATCATTCTACTGACGAAGAGATTGATTGGGAGTTGCCTT  
GCTCAATTAATCACTTGTCAATACAATATGAAAACATTAAGCAGCCAACCTTCTCAAAGCCTCACCTCT  
CTTGAATCTCTATCCACTGATAATTTACCTCAAATCCAGTCACTGATCGAAGAAGGGCTTCCCTTGTCTCT  
TTCTTCACTAACATTACAATACCATCATGAGCTCCATTCACTGTCAACTGAAGGTCTTCGGGGCCTCACTT  
CTCTTAGGCATCTACAGATTAGATCCTGCAGTCAACTCCAATCTCTTCCGGAATCAGCGCTTCCCTCCTCC  
CTCTCTGAGCTGACCATCACAATTTGCCTGAACTTCAACATCTTCCAGTAAAAGGGATGCCCTCTACCCT  
CTCTAAACTATCGATTTCACTGCCCATTGCTCAATCCACGTTTAGAATTTATGAAGGGGGAATACTGG  
CCAAATATTGCTCATATTTCCACTATAGAGATCAATGGGGAATACCTGTGATGATCAAAACAAATGGTAC  
TCTGACAGATGTAAGAACTCTTTTTATCTCAGTAGCTTTTTATTGTTCACTTCTCTTTGCTTGTGTTGTTG  
AGTTTTTTCCTTTGTTATATTGAAATCTTCCAGAGGTTGAAATCAATCTTTAAAAGAACAAGTTGGACTT  
TAAGCAACTTTATTGATAACCATGATCATTTTCATGTTCTATGAAATTATTTTTTATCAGATCTGATATT  
TCAAATCCTGAATGAATTCTATTGTAACGGTTTGTTCAATTATGATAATTTATTTAATATTATGTTGACAT  
TAGATATTATTGTACGAAAATGCTTTGTTTGGGACCTAAAGCCGGTGATTTCTTCATACTTAAAGCTTTGA  
ACATCTAGATTATATGTATTGGAAGCACATATATATAAAACAATGGTTGTTGCATGACCTACCAATAAAA  
ATAAATTTATTCATGTAAAAATCTAAGTTGCAAATAAAAACATTTTAATTTTCGTATTATATTCATGCTTTA  
GATAAGTTATTTTATTGTTTTATGTATAATTATTATTTAAAAAATTTCCCTTGTTATCATATTAATATC  
ATATTTTTTCTGTTGTTTTAACACGTCATGAGATCAAAGAGAATTATTAAGAAATTGCAATCGAAGTT  
TGTAATTGAAGATGTTTTGATCTAATATATATACTCAACAGTTAACGCAATATACCGCTAGGAGTGTA  
AATCACATATAGCCAACCGTTTGATGCAATATTAATTAATTTGTTTAGCTTTGGTTGCATGTTATATTATT  
GTTGGTTTGGCAATTTTCATTTAAAGAAAATTATTAGCTTGTAGACTTCACAATTTATAATGTGTTTTAG  
TTTCTATTTGAGGAATCAATTATTGAATAGGCAGTGAGAAAATCGCCTTTCGTGATTCAAGTAGTAAGCT  
CGGGTTCATGATTGAGAAAGGAATTTTTCAAGTGTAATTTGAAATTTTCTACTATTCTTAACATCTCATT  
TAAAGATTTTTTAAATTATTTATTTGATTAATATAGTTCTTACAAAATATAACACGATAATCATGTTTC  
AATTTAACGTCTATCAGTAATTCAATACAACTTTATAAAATAGAAATATAATTAATAAATAAATAAATAA

TAACAGTTTCTTAAAATTCATCCTTTTAACTATAATTCTCCAAATTAAGAAATCCTCACACCATTAACAAAA  
TGCTACACCTTATATGTAGCTTTCCAATCTTTTCAGTTACCAATGTGGAGCTTTGTTTCGCATGCCTATTAGC  
AGTCTGTCAACTTCGAGGCCTCATGTTGCTTCGATATCTAGCTATCTGGGACTGCCATTATCTCCATTTTG  
AATTGCTCATTTTTCCACCATAATTATTGATAGGGATACCAGTAATGATTTAGAGAAATGGTGCTCTGAT  
ATATGTAATTATAATTCTTTCTTTTTTCATTATTCATTTATTTTTATCAACTTCTCCTTGCTTGTTAGTTAATT  
CTTTTCCTTTGTTAAATCTTTAAGCAGCGCAAAGCGTCTATTAATGAACTAGTAATCTTGTCAGCAGGATG  
TTTATCGTCTTGTATTTTCATCTCATTGCAATTCATGAATCTTGTTAATTATATATATCACTCTTCATCTT  
ACTTAAAATATTAACACTATTTACAGTATCTCTTTTCTTAATGTAATATCAATGAGCTAGTAATCTTTTAA  
GATTATTGTTTCTTGTATTTTAACTATGTTCTCCCTCAAATCTCTCAGTCTGGGAAAATTTTTGCCATCA  
TGAAAAGTTGTTTCGGCATTGTTCCCATTTCTTGTGTCTTCCACAGGGATAAGGGGTCCAGGTTTTCTCC  
AACATATCACAATAAGTTGTGGACGGAGGAAGTGGTTTAGAGTAATGCACATGCTAACTTTTGAATAGG  
CAAATATTTAGCTCAACTGTGATCGGTCAACAGAATGTAGGTGCAGAAAGGTACTTTCTTTTTCGCTGG  
AATTTGACTACTACTTTTTCTTTTATCTGACTGAGAAGTGAAATATTGAGCAAACCTTTGTACAAGGAGT  
TTCTCCTATAGCACGTGAAGATCATTCTATTCTCTTCTTCTGTGTCAGCAGCTCAACAAAGTACAAGGTT  
CGATTGATCAGTTTCTCTGCCAAGATACGATGTCATTTCCATCGAGACAGCTGAAGTTTGCCACCAGA  
ACCAATGCTAGAATTCCTCCATCTACCGAAAGAATGGTAGGCATTTCAATCTCAGAAAAATAGGATATT  
TTTGTGTATTAACCTCTGATTGTTGTTGTTCACTGCTACAGCTGCTCTTCAAATGAGAACTTTAATTG  
CTCAAATGCCATTTTATCATTGTTGTTTCGAGTAATTTAACTGTTGTGGTCTTTATCAGGTAACATTTG  
GATCGTGAGAGTTCTTCTAGTTGTATGTCTAAGATGTGCTCCTCAAACCTCAAAGAATGACTGCTTAAA  
ACGGTTGGCTTGAAATGCTGAACCTGCATTTAGACCAGCAGTGCTACAAGGTCAAGTTGGTATGTCCAG  
ATGGTGTGTCACGTGTTTGGTAATACTTCCATCCTCAACATTGCTCTGTTGTGTGAGAGTTTGTAGCAT  
CAGATGGAATTTTATTTTGTATGTTGTATATGATCTTAGTTGAGTTGAAGCAGCAAATATTGCTATGTTGT  
CCTTGAGAATGTTTCAGGATTGAGATTACAAGTGAAGTTAGTTTAGTATAATTACGAAAGACAAAGTTGG  
ACCACTTTATAGTGACGGACATCTTTTTGGCTGCTATAATGAATGATTGCTATTGTTACACACCTTAATAA  
TATTTGACGTTTAGATCTTATTTGGTGGTTATTGATAAAAGAAATATGCAAGAAGTCATTTCTCTTGACT  
TTTTATGTTATAGAAGAAAACAAAATACTTAACAGGGTAAAGACATAAAATCCGTCTGAACTTGTCTGA  
AAAGTCGAATATATTGTGGCAACCTATGAATTTTTCTAGAGCAAAGAGGGTGCCTTTCTGCTTGGGCTA  
TCTTTTCATAGTATTTGATTTTCATCAAATAAAGAGAAAATTATAAAAGGAATACTTTTAAAACACATTAAT  
TTCAAGAAAAAAAAAACCCAACTCAAAGTAAACAATTAGTAGGAAGTTTCTGGTCATTTTTTAAAGCTAA

TGCTAGTTGATTGAAGAGACCAATCGTATGAAGGTCGTTGAATTAATTAATAGGAGATTAGTGTAATC  
ATTGAATTAATCAAATGACTTTTTAAAAATAAATTTAAGTGTGAAAACAAGACAATGTAGTGTTAG  
ATTTAACTTCAAAAAGGCATCTTCTATGAAAAATTATTTAAAAACAGTTTGTATAACCACTACTTAT  
AATTTACTCATTACCTTTATATAATGGTGGTGTCCACCAATAATTTATTATTATTGTATGGAATTTGATAA  
TCAAGCCAAAAGTTACAAGTTTGATTCAATTAATAACAAGTTCTGTTATTTTTAGTTTTTTAATATAT  
ATGCCTCAAAGTGAAGAAGGACACAGCTAAGAGAGAAAAGTCATTCTCCAAAATTGGTATAACAATTGC  
AAATTAATTAGCAGACAGTCAGTATATTGTTTGCATATTGCTCTAGCATTCAACAGGTAAATTAATCTAT  
TACTAGTAGAAATATTAACCATTTTGTGATTCTTTGTTTTGTTTTTCAGGTTTCAGAAATGGAGATTGGC  
TTAGCAGTTGGTGGTGGCATTCTCTCTTCAGCTTTGAATGTTCTCTTTGATAGGCTTGCTCC

>PGSC0003DMG402000299 LRR-RLPs

CTTGGGTGCAAATGAAGGATACTATTAATGCCTCTCATCTTCTTACAACCAAAGTTAACATTCCATAATTG  
AGAATACATCAAATCCACATATGGAGAAGTTATACCTTTTGGTTTTAACCTTCATAACAGTTTGGTTGA  
GTTTCAGTCAGGGGATTTACAAACATAGAAACAGATGAATCTGCTCTTATTGCCTTTAGAGCATATATAAC  
TTCAGACCATGATCATATCTTGTCCAAAACTGGACGCCATCCAGTAACAGATCCTCTATCTGTTACTGGA  
TCGGCGTCTTTTGTAGTGGAGACAACGAAAATCAAAGAGTGACATCTTTAAATGTCTCAGGATTCAGACT  
TTCAGGCACAATTGCTCCTGATTTAGGAACTTGACATTTCTAATATCATTAGACATCAGTAACAACA  
TCAGTGGCTTGATGCCTAATAAGTTAGGTAATCTACAACGATTACAAGAGATAAACGTAGGATTCAACA  
ATTTAAGCGGAGACATTCCAAGCTGGTTTGGAACTTGCCACAGCTCGAGAGCATTTTTATGAACGATA  
GCACGTTTAGTGGTCTATTCCACCGTTTTAGGCAACAACACAAAGCTGAAGAGATTGGTACTGTCATA  
CAATTTGTTACATGGAAACATACCTCAAGAGATAGGAAACCTTTCCATGCTGATAATAGTTGACTTTAAG  
TATAATGTGCTTACAGGATCTATACCATCTGAATTATTCAACATCTCATCGTTGCAAAGCATCGATCTCAC  
TGGTAATAGTCTAACAGGTGGACTAGCACCGGATATCTGCAGTAATCATCGTTTTGTTGAGCTTCAAGGA  
ATATTTTTATCCGCGAATCAGCTTCATGGACTGATCCCATCGACGTTTCATCTTTGCAAGGAACTCCAGGA  
TTTATCCTTGTCTACAATCAATTTAGTGGAAAAATCCCAGTTGAAATTGGATATATAACCAAGCTCAAG  
ATATTATATCTGGGGATAACAATTTTCATAGGTATCATATTATTTATTCAAGTTATATAGTAGTCAGCA  
CTCTTATAATATTGCTAGTGTAGTTAGTGATTAGAAGAGAAGTCAAGTTCTATAATTTTTACATAGAAAG  
ATGACTGTTGGAATTGCATGTTCAAAGAATTATGTTTCTCCGAATAGCTGTGTTTTAACAGATATCTAAGT  
AGGGGCAGAGCCAGGAAGGGCCAACTATATATAGCAATGTTGGAACCTTTGGCTTCTTCATGTGTTTA  
CTTCTTCATATTTTGAACCCCTTAGTGAAAATAGGATCGGGGTTTTAAATTCCTTAATGAAAGAGATTCA

GTCAAACCATCAGTTTTCTGTTTCTCACAAGTTTATCTTCCCAACATAAATGTATAGCAACTTCAACTTAT  
CGAGGATATGACCTTATATAGGAGGTTGTGGAGTACATGGATTAGAGTAGAAGGTTAGTAGGTTAGGAG  
TGCATTGTCTTGATGTCAGTCCATACTAGTAGTCGTAGTATTACAACATATCGTAATAGTATTTTGTGTAG  
TACTGTTCTGTTACTATATGATGTTTTTGTACTTCCGTTACTTCTTTTTCTGGACTACTGCTGTCTGCTTTG  
GACTTTTTTTTTCTTGAGTTGAGAGTATATCGGAAACAACCTATCTACCTCTGAGGTAGGAGTAAGGTCTG  
CGTATACTCTACCTTCCCTAGACCCTACTTTGTGGAACACTACTGGTGCTGTTGTTGTATATGTATAGCAA  
CTAAATAAGTGTTAAGTGAGTTAAATCAACAAGAAATTTCTACTTACTACCAATCGATCGAGGTGTT  
TTGCTATCTATATTTATCTAGTTTTGACAATCTTTTTGCAGGTGGAATTCCTGAAAATTTAGGCAATCTTAC  
ATATTTGGAGATGCTAAGCCTAAGAGGTGGTTCACTAACAGGTCAAATTCACACACTCTATTCAACATG  
TCCAGCTTAAAGCAACTCGATCTTTTGAACAACAGCTTGCCGGAAACCTACCATCCATGAGCAGTCAAT  
GTAATGTTCCCTCACATAACTGGTGAAATCCCAGCAAACACATTCAGATGCAAACGCCTTCAAGTCATACA  
ATTAGCAGACAATATGCTTACAGGCAGCATTCTAAAGATATTCGGAACTTTACTTTCCTTCAGAATCTAT  
ATTTAGCAGACAACAACCTTACAGGTACGCAACGCCAAATGTTATTGCCCTTGATGTTTCTATTTATAGA  
TATCAAAGTCCTAACTTTACCACATTAGATATTTCTACCTCATACTTTAACGACACCATGTAGCTTGTCTCA  
ATGCACGTGTAAATTACATACATGGTATCAGTTATAGTATATATTACATTCCTAATTCATTTGATACTTTGT  
CAGGGAGATTACCAGCTGATATAGGTAGCATAAATCTGAAGGTACTTAATGTCGATGGAAATCACTTGT  
CAGGTGTCATTCCATCTGAAGTATTCAACATATCGACGTTGCAGATTCTAGACTTAAGCAGGAACCGGCT  
CACAGGAACTCTTCCCTCAGGCTTGGGCCATCAGTTTCCAAATCTGCAAGAGCTTTATTTAGGTGAGAAT  
GAGCTTACAGGATCAATCCCAAGCTCTATCTCAAATGCTTCATCACTGGCTCGATACCCGACCTTGGTAA  
TTTAAGACTTTTGAAGAGGCTATTTCTAGAAGAGAATAACCTTACAGGGGAAACTTCCAAAGGAGAATT  
AAAATTCCTGTCCTATTTAACTAATTGTAGACATTTGGAAAAGATAGAAGTGTCTTTAAATCAGTTAAAT  
GGTGTCTTCCAACCTCATTAGGGAATCTCTCTGCTAGCCTTCAAATTTTCTCAGCATTGGAAGCAAAAT  
CAAGGGGACTATACCTGTCGGAGTTGGAAACTTGACAAGCTTGACCGGTATGTACTTGGATAGCAATGA  
GTTGACTGGAGTTATCCCAAATACAATTGGAAAGTTAAAAATCTCGAACGTATATATCTGGAATACAAT  
AGACTGGAAGGTATATCCCAACTGATATTTGCCAGTTAAGTAAGCTGGGGGATATCTACATTAGTCAC  
AACATGATCCGTGGAGCCATACCAGCATGTTTTGGTGAACCTCAAATCACTACAGAGAGTTTTCTTGGATT  
CAAACAATTTGACATCTACCATTCCATTGAACTTTTGGAACTGAATGACCTTGTAGGTTTGAACCTTATCC  
ACAACTCTTCAAAGGCTATTTACCATCAGAGATCTCTAATCTGAAGGTTGCAACAGACGTGGACTTAT  
CATGGAATCAATTTTCAGGAGATATCCCAGCATAATAGGCAGGGCGCAATCAATAGTTTACCTTTCTTT

GGCACATAATAGATTGCAAGGTAATTCCTGAATCTTTGAGTAACTTGATAAGCTTAGAGACATTAGAT  
TTGTCGTCCAACAACCTGTCCGGAATGATTCCAAAGTCTCTCGAGGCATTGAGGTATCTCCGACACTTCA  
ATGTCTCTGTGAATGAATTGGAAGGAGAAATCCATCAGGTGGATGTTTTCAAATTCAGTGCTGAATC  
TTTTAGGCAAATCCTGAGCTATGTGGAGTAGCTCGGCTGCATGTTCTGCCCTGCCGGACAAAACATTCC  
AAGTCAAAAAGTGTTCATCTTTGATTAAATATGTTGTTCCCCCTCTTGTCAACAATTCTCATGGTGACT  
GTTGTAATTATATTGATAAGAAAACGGAACCAATACGTAAAGATGAAAATGGAGGAATCACAGCTTGCT  
GCAATCTTTCACCTAATGCATACTTGAGAAATGTTTCATATCTTGAACCTGTACGAGCAACAAATCTTT  
TCTGAATCCAATCTACTAGAAAAGGGAAGTTACGGTTCAGTTTATCGAGGGGAACTCAACGATGGAACA  
GATGTAGCTGTAAAAGTTTTAACTCATTGACAGAAGAAGCAACCAAGAGTTTCTATGCTGAATGTAAG  
ATATTGAGCAATATCCGTCACCGAAACCTTACAAAAATCCTTAGTTGTTGTAGTACCACAGACTTCAAAG  
CTCTTGATTAGATTACATGCCAAATGGTAATCTTGAGAGGTGGTTACATTCCAAGATTATTGTTTAAGT  
ATGCTTCAGAGATTGAACATAGCAATAGATATTGCTTCAGCTTTAGAATATCTTCATTGTGGTCTAACAAC  
TCCTATTGTACTGTGACCTGAAGCCTAACAATATCTTATTAGATGAAGATATGACTGCACATCTTTGCG  
ATTCGGGATCGCAAAAATTTTTGAGCAAGACATGCATATGGCTCAAACCAAGACACTAGCCACCATTG  
GTTATATGGCACCAGGTGAACTAAATCCAAATCCTTCTTATTCTGCTTTCTTTAGTAGTAAATCATTTTTT  
GGGTATTTTGAACATACTAACTATCAAAAATCATTATAAGCTACATTGCTTGAATCTGTCAGGAGCAA  
GAACTCCATTTTATTGATCACTTATCCCATATTACCAAATCCTTTTCATGTCTATGACCTTTATTACCAG  
AAAATCTACACGTTTATCCACTTTCTTCATTCATCTCTTAAAGTTTTTCCGAAAACAGCATCTCCGGTTTGG  
ATCTTCACACTACCATTAGTATATAGCTTAATTTTTCTTGCACAAGGAGGACCAAGCAATTAGTTTGACTT  
GTTTGGATATAGAGGTTTTGCATAGGGAAATACTTGAACAATTTCCATAGTGAATTTAAATGTGTTTAG  
ATATACATTTCTTTCTAGTTATCCCTCTATTATAATTTGTTTCGTCTTATTTTCTTTGAGTCCGTCTCATAAA  
AACCACAAAACATGTTAAGACCACAAGATTAAGATATTTGATACATTCTAAGGTTTTCTTCACTTTCT  
TAATTGAAATCCGTGTCAAGTCAAACCAAGACAAACAAATTGAAACAGAGGGAGTGAATATAAACTAG  
ATCTTATGCTATATATTTTTCTTAAATTGTAATGTCATTGCAGAGTATGGAACCTCATGGGATAGTTTCAAC  
AAGTGGAGATATCTACAGCTATGGCATTATATTGTTGGAAATGTTTACAGGAAAAAAACCAACTGATGA  
TATATTCGGGGAAACAATGAACTGAAATGTTTCGTGGGCGAAAGCTTATGTAGAAAATCTTTAATGGA  
AGTTCTGGATTCTGATTTGATTAGAGATGTTGAACAGTTCTCTGAAGTAGTACAACAGTTTGTGTCATCT  
ATCTTTTGTGGGATTGGAATGTCTGAAAGATTGTCCTGAAGACAGAATGAGCATTAGTAATATTGTGG  
ATAGCCTTAGAAAAGCTAAAATTGAATATTTAGCAATTAGAGGAAAGGCAGAAAAGGTGGTGTAATTT

TCTGATTGTGAAAAATGTTGTAAACATTTTGTTTTGTTTTGTATTAGTGGTTACAATGGGAGTTCTTTTCA  
AATCTGTTTCTGAAAATACTTTTTCTTGAGCCGAACAACGGTTGAAAATAGTCTCTCTACCTCCCACAAGA  
TATAGTGGAAAGGTTTGTGTATTTGATTTCTTTTTGGACCACATAAGAATTTGTGCTCCGATTGAATATTC  
CTTTTTCTCGATGCTCTATTGGAAAGGTTTGTGTATTTGATTTCTTGGACCATGTAAGAATTCATCGTCC  
GATTGAATATATTTT

>PGSC0003DMG402002888 LRR-RLPs

ATGTCCGACAAGTACTCTAAACATTATAGTACTTCTCTCCCAAAGCATCGTCTTGGAAATGAGAGTACGG  
ATTGCTGCACTTGGGGATGGATCACTTGTGACATGTTAACTGGTTATGTAATTGGCCTAGACCTTAGTAA  
TGCAAATCTTAGCGGAACTATTCATCCTAACAGCAGCCTCTTCAACTTCATCGTCTTCAGACGCTAAACC  
TTGCTTACAATAACTTATCTGGTCTCATTCTGATTCCATTGGCAACTTCACACAAATCAGAGAGTTGGAT  
TTTGGTTCCAATCATTTCACTGGCCATATTCTTCAACAATCTCAAAATTGAAACATCTCACACGTCTAGAT  
CTTTGTTTTAACTCACTTGGAGGTAAAATTCCCGATGTTTTCTCTAACCTCCGAGAGCTAGTTACATTGTA  
TCTTTCTTATAACAGCTTCATCGGTCCATTTCCCTCTTCGATTTTAACTTGACACGTCTTGAAAACCTAGA  
CTTGCTAGTAATTCCTGTCTGGTCCATTGCCAAACAATGTCAGCATGCTTCTAAAGCTAGTTGACCTGG  
ATTTTTCTCACAACCTTGCTAAATGGAACAATACCATCTTGGGTGTTTAGCCTCCCTTCTTATATATGTTGG  
AGCTCCATCATAATCTATTCAATGGACTATCCGATGAGCTCAAAGTGAATCGAGCAGTAGGGCGTTTGG  
ATTTGAGTTATAATCAACTCAATAGTCCTGTTCTTCGATCACTTCAAAGCTCACAACCTTGTAACCTT  
GACCTTTCATCAAACAACATCACCGTTGATGGGGGGACACACATCACTTTTTCTAGACTAGAAATTTTGC  
GGTTATCATCTTGTGAACTGAAGGATTTTCCACAGTTTCTAAGAAATTTAAAGACACTTCAGGTCATAAA  
TCTTTCTAACAACAAGATTCGTGGTCAAATCCCTAACTGGTTTAGCGGGATGAGGTGGGACTCGTTGTTT  
CACCTAAACCTTTCATATAATCACTCAATGGTCACATAGATCTATCTCATTCTATAGTCTAGTGTCTCTT  
GATCTTAAATTTAACTTCTTCAGGGTCCACTACCTGCATCCATTTGTAACATGAGCATCATTAGCCTTCT  
GGATTTATCACACAACACTTTCAGTAACTCGATTCCAAGTTGCTTGGGTAACATGACTCAGCTAACGGTG  
TTGGACTTAAGAAGGAACAATTTCACTGGAAGTCTTCCACCGTTATGTAGTCAACACACTTCATCGACTA  
CCAGTATTCTGAATGGTTATGGTAATCAATTGACGACCATTATCTTGAATGGTAATCATTTTGAAGGACA  
TGTCCCTGTGTCATTACTCAACTGTGTTGGTTTAGAAGTTCTTGATATCGGGAACAACGCTGTAAATGAC  
TCATTTCCAGCTTGGCTAGGAACTCTTCAAGAGCTGCAAGTCCTTATATTAAGTCGAACAAGTTCCATG  
GACCTATAAGTACTAGGCTGAAGTTTGGGTTTCCAGGTTGCGGATTTTAGATCTCTCTCATAATGAGTT  
CAGTGGCTCACTGCCTGCAGAAGTTTTTCAAACCTCAAAGGAATGATCAAATAGATGACAGTGACAA

AGGTGAGATCGAATATATGAAAACATCAGACTCATTTTTTGTATGTACGATGATTCAGTGAGGTTGGTG  
ATCAAAGGAAACGATATGGAGCTAGAAAGAATCACTACAATTATGACAGCCATAGATATCTCAAGCAAT  
CATTTTGAAAGTGTGATTCCGAAAACACTAAAGGATCTCAGCTCACTTTGGCTACTCAATTTATCTCATAA  
CAATCTCAGAGGAGATATTCCTATGGAAGTAGGAGGATTGAATATGCTTGAAGCGTTAGATCTCTCTTG  
GAATCAACTCACTGGAAAGATTCCGCAACAATTGACAAGGCTAACCTTTCTGGCATTCTTAAACCTCTCTC  
AAAATCACCTAGCTGGACGCATTCCCTCAAGGTTACAGTTCAACACATTTGAAAATGACTCGTATGGTGG  
CAACCTAGATTTATGTGGTCTCTTTATCAAAGCAATGTGGAACGGGTGATCCATTGCATATTTCCCAA  
CCATTAGAGGAAAAAGAAGAGGACGAGACATATTTTTTTAGTGGATTTACGTGGGAATCAGTAGTCATA  
GGCTACAGTTTTGGATTAGTTGTTGGAAGTGTGATGTGGAGCCTCATGTTTAAAGCTGGTAAGCCAAAAT  
GGTTTGTAGAATTTTTCGAAGGCATTATTTCCCAACAAAAAGAAGGCCAAATAAGAGAGCTCAAAGAA  
GACGGACTTAA

>PGSC0003DMG402004423 LRR-RLPs

GATGCCTGATAAAATAAGAGGATTGGGTTTACAAATCAATATAAAGTAGGAGGGTCTTTTCGTCATTTCA  
CTTTTATTGTGTACTATGAATTATTGTCTTCCTTTTAGTGGTCCACAAACAAGACTTGTGCAAAAACTTTTA  
TAAGACTTTGGTGAAGAGGAACAAGACTTTGTGCAAGAAGTTTGGTGCTACAATTCAAGTTTTGAGCAA  
AACACAACAATGGCCGATCCTGTAATTGGTGCTACTGTTCAAGTTTTGCTTGAAAACTGCTTTTTCTTAC  
TATTGAGGAACTCAGTAGCTCAAGGGACTGCAAGAAAGATCTGGAAATGCTTACACAAAATGCATCCTT  
GATCCAAGCTTTCATTCATGATGCTGAAAGACGACAAGTTGACGATCAGGCTGTGAAACTATGGCTCAA  
GATGCTTGAGAGAGCTGCTGAAAATGCTGAAAATGTGTTTGACGAATTCAGATATGAATCTATCAAAG  
ACAAGTGAAGATCCAAAAGAACCCAATGAAAAAGGTCAGTGATTTCAATTTCTCATACAACTTTTAAGAGC  
AAAATGTCACGAAAATCAACAACATCAATGAAGAGTTGAGGGCTATCAATAAGTTAGCCAAACACCTC  
GGTCTCCAATCACTCATGGTTCCTCCTCGGCATATACTACCAATTCGAGAAACAGATTCTGTAGTAGTTGC  
TTCGGAGGTTGTTGGTAGAGACAACGATGTTGCAGAATAAAGAGGAAGATGTTGAACATCAGAGAGGA  
TGTTGTTCTGTGCACCATTCATAGCTGGTATGGGGGGTTTAGGGAAAACAACACTATGGCTAAGAGAAT  
TTTCAACGATGAACAGATCGAGAAACACTTTGAAAAGAGAGTTTGGTTGTGCCTGCCTGAAATGTCAGA  
AACGAAGAGCTTTCTTCAACTAATCCTCGAATCCCTGACAAAGAGGAAAGTTGAGGTCCAAAGCAGAGA  
CATAATAGTCAAGACGCTACAAGATGAACTGGCAGGAAGAAAGTATTTACTTGTCTGGATGATTTATG  
GCGTGTTGACTCTACATTGTGGGTAGAGTTTGTGACACCTTGCAGGAATAAATACATCCCGAGGAAA  
CTTCATTCTTGTGACTACTCGTATGGAACAGGTGGCATCCACAGTAGCAGCAGTAGGTCCTCATAGGTTG



GAAAAATTAGCAGAAGCTCATTGTTGGTCCATTTTCAAACAAAGAGCGTTTGTGATGGGGAAATTCCA  
GAGGAAATAGTGTGCATGGAGAACAGGATTGTGGAAATGTGTCAAGGTCTACCGTTGGCTGCAAGTGT  
GTTGGGAGGCCTCTTACGCAACAAGGAAAAACATGAATGGCAGGCAATTCTTGATGGAAACCCCTTGT  
TGCAGGTGAAGATGATAACGGAGAAAATAGCATAAGGAAAATACTAAAACCTCAGCTATGATTATCTACC  
ATCTCCACATCTGAAAAAATGCTTTGCTTACTTTGCAATGTTTCCAAAAGATTTTCGAGTTTGAAAAGGACC  
AAATAATCCAACCTCTGGATGGCAGAAGGCTTCTTCATCCATGTCAAGAGACCACCGTAATGGAAGACAT  
CGGGAATAAGTTCTTCAACTCTTGTTGCGAAATTCCTTGCTGCAAGATGTTAAGTTAGATAAGCACAAAC  
AATATAACACACTGTAAGATGCACGATCTTGTCATGATTTGGCTGGGGATATCTTAAAATATAAACTAT  
TTGATCCAAAGGACAATGGTGGAGAAAATCTTTCTCAAGTGCGATACTTTGGATGGGACTCACCAAGTG  
ATCAAATAGATAAGATAACTGAGCCAGGACGTTTGTGCACTCTGTTTTGGAGAAGCATTATATATCGGA  
AGATATGTTGTTGAGCTTCAAGTTCTTGAGAGTTTTAAATTTGTCCAGTTCAGGAATCAAAGAGTTGTCA  
GCCAAAATTGGGAAGTGTATACACTTGAGATATCTTGATCTCTCGAACACTGAGATCAGAGCCTTGCCCA  
ACTCCATTTGCGAGCTCTATAATTTGCAAACATTTAGAGTCAATGGTTGCTATTTACTCCATGAACTTCCA  
TTTGAGATGGGGAATATGATAAGTTTGAGACACATATATTGCCATTCTTGGTATCAGATGCCGCTTAACA  
TGGGACAATTGACTTGTCTTCAGACCCTACGATATTTAATGTGGGTTTGGAGAAAGGTCGCCGAATAG  
AAGAATTAGGTTGTTGAAGAAGCTTAGAGGTAAATTGAGGATCAATGATCTCCATTTGGTCCGTAGTA  
GAGAAGAAGCTCGAACAGCATATTTACAAGAGAAATCGAATATTTACAAGCTGTCATATGGGTGGTTAC  
GTGATGAACCAGAAGGTTGTGAAACCATTGATGAGCATGTGTTGGATGGTCTTCAACCGCATCCTAACT  
TGAAATCTTACTGGTGAAGGACTATTTGGGTACTAGATTTCTTCATGGTTCAGTGAAGAGTCCCTACC  
AAATTTGGTCAAGTTAAAATTAAGTGAATGCAATAGGTGCAAAGAAATTCATCGCTTGCCAACTGAA  
GTTCTTCGGCATCTTGAGCTGATAGGATTCCTGAATTGGAATTCATCGGGCCTACATTTTATGGTGT  
GAGGTTAATGATAATGGATCATGCAGCAAATCCAAGTGTCCCGTCATTGAAAGA ACTTATATTGGAG  
GATATGTGTAGCCTTATTGAGTGGAAAGGGAGTGAATTGATACCAACAACAAGTGGGGTAAGAATGTT  
TCCTAAGCTTGAGAAGTTGAGGATTGCGAACTGTCAATTGTTAAAAGTACTCCGATTCAATTTGAAATC  
CTAAGTGAATTAGTGATTGTGCAAGTTGACAGTGAAATGCCATTGTTGAACTTGTGCAGCAACTTGACAT  
CTCTCGTAAAGCTTAGTGTCTATGGTGTGAAAAAGCTCACTTGTTTTCCAGATGAGATGCTACGCAACAA  
CGTTTCTCTTCAACACCTATCGGTTGAAAAATGCGGAGAGTTTCATGAATTGCCAAAGAGCTTGTACAAT  
CTCCATTCTCTTAAGAGATTATGGATTAGAAGCTGCCCAATTTAGTTCCTTCTGTTCTTAGTGGAGA  
GAATTATTTGACTTCCCTCAAAGTCTTGAGTTACAGAATTGTGATGGATTGACCAATTTACCAAGTGGGA

ATGCTAGAGCATTGTCGGTCTCTGGAATCCTTGAGTGTCTACAAATGTAACGACTTGGTTTCCTTCCCTTT  
ACATGTGGGGGAAATGCATTCACTTTTCATATTTGGGTCTATCACACTGTCCAAGTTGATTTGTGTACCCA  
CAAGCGGCCTTCACCGTCTCACTGGGTTACGTCATTTGGAAATTGGTCCTTTCTCAGATATGGTGGATTTT  
GAGGCATTCCAATTGATATTTAATGGCATTACAGCAGCTGTCGTCCTTCGTACATTGGGGGTGTGGGGA  
CACTTGCCTGGGATTCACTGCCCTATCAGCTTACGCAACTCTCTAATCTAACAGATATAAAAATGTATG  
GATTCGGAATCGAGGCTCTTCCCTCATAGATTTGCCAACCTTACTTCTTTGAAAGATTAACACTAGTGGG  
GTGCAAACGGCTACAACATATGGACTTCTCAGATGCCATGCCCAAATTACGATATTTGGGGATAAATGA  
TTGTCCATTGTTAGAAGATCTATCGGATGGACTCAGCAACCTTGTTTCTTTGCAAAAGTTAGTTTTACAGA  
AATGCGAGAACTAGAGCATCTTCCATCTAGTGATGCCATGCGACGCCTCACCAAATTAGGATATCTGAT  
GATCCATGATTGGCCATTGTTAGAAGCTCTGTGCAATGGGCTTGGTGACCTTGTTTCTTTGCAAGAGTTA  
TTTTTACAGAATTGCGAGAATCTAAAGCATATGCCATCCAGAGATGCCATGCGACGCCTCACCAAATTAC  
GGAACCTGGAAATTAAGGCTGCCCAAAGTTAGAAGAAAGTTGCACAAATCGGAGTGGCCCAAACCTCC  
CAATGGTCCAACATTTCCCATATTCCAATAATTAAGTAGGTGGAAGCAGAATTCAGGACTTGGCGTAA  
GTCTCTGTTTCTTTTTCAGTTTCTAAGTCACACTTGTAATTATTATTTTCCAAGAGTTACTCTCCTCCATTCC  
CATTTTATAGTTTTCCAGACAAATTTATGAATATCTATCTTACTTTTAAGATATGGTTTAATCATGAATATT  
TATGTGTGTTTTTCTCATTGGTTATTAGTTTCTAGGTCATGCTAGAAGGTTGCTGAGGCATTTCAAGTAA  
AAATCCATCGGCGCCAATTACATTAGGTAAACTTTCAATTAGAATGTTGTAACAAGTTTTTCTTTGCACTC  
CTTTTTTCTCATGACACAATTTTACTGTTTAAACAGGTTGGTTATTACGACAGAGGAACCACTTTGCACT  
CCGTTGTTTTGTTGAAGACTACATAATCTCTCAACATTTTACTCTTCATAACGGGGATACCAACAACCTATT  
AAGTAATAATAATTGATTTACAGTCGCTCATTTGCCCAAGTGAAACTATTTTTTAATGTACAGGTATGTT  
TTGATAAAATATCTGCTCAGGTACTTTGGTCAAGGTAGTAAGGGGTATCCGTGGATCGAGCCATCAAAT  
TCTGTTTCATGAGATGAAGCTAGAAGGTTATTGTTATACAAAGACAAAATGTATGTCCACTACTAACTGCA  
CCTTAAGACTTAAAAGCTATGCGGGGAAGTATGAGGTATGCCCAAGAACAATTTTCATCAATTTTACTTTT  
CAGCTCCTTTTTCTCATTAAAATACTGAAATATTTAACAGGTATTATCGTTCAACAATATAGTGTCTCTCT  
AATCCTCAAATCGTATTATACACTTTTATTATATGGTATGATAAAAGAAAAGTCATATGATTCTGGTAAAG  
GAAATTGTTCTTTCTTTTGAAGAAAGTGAAGTATTTGAATATTGGCATAACATGATTGGTATACACAGA  
ATTCTTAGATGCATGACAGATTTCAATTTGGATTCCGTTGATTGATGCTTCACCAAATTATGTTACAGTC  
TTCAACATTATTATATTTTGGAGGGACACACTAGAACGTAGTGGACATTGGTGCCGCGTTGGAGACTCT  
GGTTGCACAAAGCTAGAAAATTTAAGGTAAGTCAGTTTTTGTTCATAAAAGATTGCAAATGGTGCTTTAG



AGACTAAGCTTTGCTTTCCCAACTTGCAAATTTTTATCTTTCTCGTAATGATTTTCAGTGGCTCACTTCCTG  
CAAAAGTTTTTGAAACTTCAAGGCAATGATCAAATTAGATGACGAAGACACAAGAGAGATCAAGTACA  
TGGAATCTAAGTCAAATTTGTCATTTGACACATCTTATGAGGATTCAGTGAGTTTGGTAATCAAAGGGCA  
CGATATTGAGCTACAAAGAATCAGCACAATTACGACAACCATAGATCTCTCAAGCAACCATTTTGAAGGT  
GTCATTCCGGAAACTAAAGGATCTCAGCGCACTTTGGCTACTCAATTTATCCCACAACAATCTCATAG  
GTCATATTCCAATGGAATTGGGGCAATTGAATACACTTGAAGCTTTAGATCTCTCCTGGAATCGGCTCAC  
TGAAAGATTCCGCAGGAATTGACAAGAATAAACTTTCTAGCAGTCTTAAACCTCTCCCAAATCATCTC  
GTCGGACCAATTCCTCAAGGTCCACAATTCAACACATTTGGATATGACTCATATGGTGCCAACCTTGATT  
TATGTGGTCTTCTTTATCAAAGCAATGTGAAACAAGTGATTCATCACATGTTCTCAACAAGAAGATGA  
AGGCGAGTCATATTTTTTAGTGGATTTACGTGGGAATCAGTAGTCATAGGCTACAGTTGTGGTCTAGTT  
GTTGGAACTTTTCATGTGGAGTCTCATGTTTAA

>PGSC0003DMG402009306 LRR-RLPs

GTGCTTGAAGAGATGACAATTAATCGTGCTCTATGTTTGTTATTCCGACCCTCCCTTCATTGAAAGTTTA  
TGCGACAGATGCCTCAAGTTTGAGGTCCACATCTAATCTTAGTGCTCTTACTTCCCTCAACATAAGCCATA  
ACTATGAAGCTACTTCACTCCCAGAAGAGATGTTCAAAAACCTTGCAAATCTCAAATACTTGAAAATCTCT  
TACTTTAAGAATCTCAAAGAGCTGCCTACCAGCCTGGCTAGTCTCAATGCTTTGAAGCATCTGGATATTT  
ATTTCTGTGACGCACTAGAGAGTCTCCAGAGGAAGGGGTGAAAGGTTTAACTTCACTCACCGAGTTAT  
TTGTTACATCCTGTAAGATGCTAAAATGTTTACCGGAGGGATTGCAGCACCTAACAGCCCTCACAACTTT  
AACAATTAGGAGATGTCCAACACTGGCCAAGCGGTGTGAGGAGGGAATAGGAGAAGACTGGCACAAA  
ATTGCACACATTCCGTATCTGCATATTCGTGACTATTAGTATTTATAATTCTTTCTTTGTTTGTGAATCTTTT  
TGGTTCCTCCATTAGATGTAATTGTTTGTAGGGTTGTTTGTGAGTCTCTCTCATTG

>PGSC0003DMG402009338 LRR-RLPs

GCAACTTTAATTTTTTGGATCATGTTGCTAACTACTTGTACGCTTTTCAGGAATCTGTAACTTAGGAACC  
TGCAGGTGTTAAATCTTCAGGATAACCTTATAACAAGGTGGACTTGATCCATGCCTTGGTGGAATGACTTC  
CTTGGTTTCTTTAGATCTTTCTTTCAATCATTTTGGGGGACTTTCTTCTTACATATTCAGCAACCTGACTTT  
GCTCGAGACCCTTCGTCTTTTCAAGATAACAGGTTTGTGACTTCTCTTGTGTTGCATCATTTGCTAACCTCT  
CCAATCTGAAGCTATTGATCTTACAAATAATGAGTTTGAAGTTGACACTGAACTCCATCTTGGGTTTCA  
TCTTTTCAACTTTTGTCCCTTGACCTACGAAATACTAGACTAAACCAGAACTATGGCCATGTAATTCCAAC  
GTTTATCTCCAAACAACACAAGTTGAAGTCCCTGTCTTTGTCTATAATGCCCTTCAAGGAAGCGTCCGT

CCTGGTTGTTGTATAATAATACTTCTTATGTTGTCTTTGAGAAGCAACCATTTGTATGGTGGAATTCCT  
GCGTCTTCTCAGATTCAAGCATCAAGTCTTCTGATGCTTGATGTATCAGATAATTGCTTAGGCAGTACACT  
TCGACTAACGTGCTCGAATCATTTCAGACTTATTCTATCTTAACCTGTCAAATAACACCCTCGAAGGCA  
CCCTTCCTTCATCTTTTGACAATCTGCTAAAGTTAGAGGTTCTGGACCTTTCTCACAACCTCCTACAGGGA  
AAACTCCTCCAGCTTTAAGACAGAATCACACTTCATTGGCACATTTAGTTCTTTCAAACAACAACCTTTCA  
CGGGGAGGTTATGCCCGATTTTCAAATATGTCAAATCTTGCATACTTGCATCTTCAAATGATGGATTT  
ATTGGAGTCTCCCTGCTGCTATGTTAACCTCCTGTTCTGAAGGTCATGGACATTAGTGGGAATAATTT  
ATCAGGGAATGTTCCAGATTATTTTCTCTCTTTCCACATCTAGCCATACTTATCTTGGCAAGAAACCAGT  
TTCATGGGATTATTCCAGTGTCTTTATGCCAGATGCAAAAGCTTCATATTTGGACATGTCAGCAAATTTA  
CTCTCTGGGGTTTTACCTTCTTGCCTCGGTAACATAACCGCGTGGATGAAAGAATCTCAAGTTCTACTCCT  
AGCCTTCATGTGGTTGTCTCCTTCATATACTAACTACAGGGTCAAAGTTCCTTTAACAACCAAGGGGAAT  
GCACTCTTATGAAGGTATTCTCTTTCTCAAATGACTATACTTGATCTATCTATGAACCATTTCAACCAGT  
GAAATTCATCACAACCTAGGACAACCTAGTAGCTCTCCGTTCAATAACCTCTCACACAACGTCTTTCTGG  
CCATATTCCAGAATCGTTCATCAACTTAAAGAACTGGAGAGTTTGGATCTTTCTTCTAACCATCTAATTG  
GAAAAATCCCTCCTCAGATGACTCAACTTGATTCACTTTCAACTTTAAATTTGGCTTTCAATCATCTATCAG  
GAAGAATCCCGTTTGAAAACAAATTTGTCACCTTTGAAGCATCTAGTTATAGAGGTAACAAGGAACTCTG  
TGGACCACCTCTGGAAAATGATTGTGTGTTCTCGAGCCCGCCTCAGCAGCATGAAGAAGAAGAAGACG  
AGAAGCAAGGAATTGGTGAGAGTGACTTCTTTTTCTTCTCATGCATAGCTGTTGCTTATGTTTTGGGATTT  
TGGAGTGTCAATTGCTCCTCTTCTTCTTAGTAGGAACTGGCGCACGACATATTATGCTAAGGTTGATAGCT  
GCATTGAACTGTGCAAGGAGAACTTCATCTGTCCTAATTCTCCATGAAAATTTTTATGCTACTTTTGTTA  
TTTTAAGAGTCGTTTGATAGGATGTATAAGAATAGTTCTGAATAAAAGTGTGTTAGTAGTAATGCTGGTA  
TTAGCTACGTTGATGCTATTTCTTATCCACTATTTAATATGTGGCATATTTCTACTTTCAACTTGTTTTGAT  
GAAACATGTTGAATAGTTGCAGATAGGGGTGTTTCATGGTTTGGATAAAAACCGATTCAAACCGAAAAAT  
CAAACCAACCGATTTAATTT

>PGSC0003DMG402010943 LRR-RLPs

CTGTTGGCCCTTCGTGATCTGGTGGTGTTCGGACGTTTGCCTGGGATTCTCTACCCTACCAAATTACG  
GAACCTGGAAATTAACGCTGCCCAAAGTTGGAAGAAAGTTGCACCAATCGGAGTAGCCCAAACCTCCCA  
GTAAGTGGTCCAACCAACATTTCCCATATTCAAAAATTGAAGTAGGTGGAAGTTACTCTCCTCCATTCTCC  
TTTTATAGTTTTCAAACATTTTTCTATTCCACTTGAACAAATTTATGAATATCTATATTACTTTTAAGATA

TGGTTTAATCATGAATATTTATGTATTTTTTTCTCATTGGTTATTAGTTCCAAGGTCATACTAGAACATTG  
TTGAGGCATTTCAAGTGCAAAATCCATGGGCGCAATTACGTCAGGTGAACTTTCAATTAGAATTCTTTT  
ACCAAGTTTGCACAAAGCTGGAAAATCCAAGGAATTCATGATCTTCAGATGTAGCTGCACTTTTCATGGAA  
GGGATATTGATATTTTTGTGAGGTTCTAAACGTCACAAAATTATTAGCATAATACATAATCATGACCC  
TTAACTTGTCTTTACCGAACAACTATTACCTCTAACTTTAAGTGTGAACAAGTAGACATTTAACTTGTAT  
AAAATTGAACAAGTAGACACATGTGTCCTACAAGTCATAATACACGTAGGACAAAAAGTTGTCATGTAG  
GGTGTGAGGTGGGATGAATGTGTCTATTTGTTCAATTTTATTCAAGTTTAAAGTGCATACTTGTGCAAACA  
CAAAGTTAGTTAAGGTCATAGCTGACAATCGACGCCAAGTTATGGGTAATGTTTATGTATTATACCAAAA  
ATATTCTCTGGTTTTGGCTGATGAAGTCGAGTAAGACAGGAACTCCTTAGAGTCTTAAGAGGTGCAAAC  
GGCTACAACATCTGGACTTCTCAGATGTCATGCCCAAATTATGGTATGTGGAGATCTGTGATTGTCCATT  
GTTAGAAGCTCTGTCGGATGGGATTGGCAACCTTGTTCCTTGCAACAGTTAAGGTTACAGAGCTGCAA  
AAAAGTAGAGTATCTGCCATCCAGAGATGCCATACGACGCCTCACCAAATTACGGAACCTGGAAATTGA  
AGGCTGCCCAAAGTTAGAAGAAAGTTGCAACAATCGGAGTGGCCCAAAGTCCCAGTGGTCCAACATTTT  
CCATATTCCTAAAGTTAAAGTTGGTGGAAGCATAATTCAGGACTTGCCTAAGTCTCTGTTTCTCTTTCCGT  
GTCTGAGTCGCATTTTTAATTATTATTTCTATCAGTTCTAGAAAGAAGTTCTGTATATAATTTAATACTAT  
CTCCTGCAATTATTTGACGTTAAAAAATGCAAAATTATTAGTCAATTGCATCTTATCTATGCTATGCTTT  
CAGCACTCTGCTAGTCCACTTGAATCAAATTGGTGTCTTCTTATAATTCTTCAAGTAATGTATATCTATAT  
CACTTTTAAGATATGATTTATTCATGAAAATTTATGTTTTTTTTCCCCTTAAAGTTACTAGTTCCAAGGTC  
ATACTTGAACATCACTGTGGTAAATCAAGTCAAAATCCATGAATGGCAGGCAATTACGTTAGGTCAATTT  
TCATTTAGACTTGTTAGAGGAATGCGTTTTTTTTGCACTACTTTTTCTCTTTTACTGTTTAAATAGGGTTGG  
TTATGTTCCACCACCACATTTGTTTGGTTGAAGAACAGAATCTTCGGCCGTAGACATTACGGGACACTTT  
CATGAATATTTAGTAACGATAACATAATCTGTCAACATTTTACTCTTCATAATGGGGAATACCAACAATTA  
TTAAGTGAAACTATTTGTTTGTTTTTAAACATGTGCTACAAAAGTTTTAAAGTGATGTCTCTCTATACTT  
TTATCAAGCATAGGAAGTCGACTATTCCAAATTCGTGCTGTGTAGGGCCCAATTCGAGGTAAAGCACTCT  
CCACCAAGGATTTTTCAATACCCAAGGCTCCAACCCGAGACATCTGGTTAAAAGAGGAACATCCCATCAA  
GCACCTCATATTTAAGTATTCTGCTAAAGAATGCATCAAATGATGAATATATCCTCTTTTGATACTTCAA  
CTGCTTATGCAAATTATGTAGTGTTCAACTAAACGTAGTTTCCCGTTTTCTTTGATGCAGCTGTTGGCCCT  
TCGTGATCTGGTGGTGTTCGGACGTTTGCACTGGGATTCTCTACCCTACCAAATTACGGAACCTGGAAA  
TTAAACGCTGCCCAAAGTTGGAAGAAAGTTGCACCAATCGGAGTAGCCCAAAGTCCCAGTACTGGTCCA

ACCAACATTTCCCATATTCCAAAAATTGAAGTAGGTGGAAGTACTCTCCTCCAGCCTTCTCCTTTTATAG  
TTTTCCAAACATTTTTCTATTCCACTTGAAACAAATTTATGAATATCTATATTACTTTTAAGATATGGTTTA  
ATCATGAATATTTATGTATTTTTTTTCTCATTGGTTATTAGTTCCAAGGTCATACTAGAACATTGTTGAGGC  
ATTTCAAGTGCAAAATCCATGGGCGGCAATTACGTCAGGTGAACTTTCAATTAGAATTCTTTTACCAAGT  
TTGCACAAAGCTGGAAAATCCAAGGAATTCATGATCTTCAGATGTAGCTGCACTTTTCATGGAAGGGGAT  
ATTGATATTTTTGTGAGGTTCTAAACGTCACAAAAATTATTGGCATAATACGTAACCATGACCCTTAACTT  
GTCTTCAGCAGACAACTATGACCTCTAACTTTAAATGTGAACAAGTAGACACTTAACTTGTATAAAATT  
GAACAAGTAGACACATGTGTCCTACAAGTCATAATACACGTAGGACAAAAAGTTGTCATGTAGGGTGTG  
AGGTGGGATGAATGTGTCTATTTGTTCAATTTTATTCAAGTTTAAGTGCATACTTGTGCAAACACAAAGT  
TAGTTAAGGTCATAGCTGACAATCGACGCCAAGTTATGGGTAATGTTTATGTATTATACCAAAAATATTC  
TCTGGTTTTGGCTGATGAAGTCGAGTAAGACAGGAACTCCTTAGCTACCACTTTCCTTTTTTCACTTCTAGA  
GTTTCTTTAACCTTTGATTTTCTTTAATTTTTGCTCTTTTCTTTTGCTTGTGTTTACTGATTGGACCGGAT  
CGTTATGAC

>PGSC0003DMG402011117 LRR-RLPs

ATGGACACCTTGAGAGGAATCAATACATCCAGAGGAACTGCATTCTTGTGACTACTCGTATGAAGCAG  
GTGGCATCCATAGTAGCAGAAGATCTTCATATGTTGAGAAGAATAGCTAGAGATCACTGCTGGTCCATT  
TTCAAGCAAAGAGCATTGTTGATGGGGAAGTTCTGGAGGAAGTACTAACTGTGGAGAACAAGATTGTT  
GAAATGTGTCAAGGTCTACCGTTGGCAGCAAGTGTGTTGGGAGGCCTTATGCAACAAGGATAAACAT  
GACTGGCAGGAAATCTTGATGGCAACCCCTTGTTCAGGGGAAGATGATCTTCGGGAAAATAGCATA  
AAGAAGATCCTAAAATAAGCTATGATTATCTACCATCTCCACATCTGAAGAAATGTTTTGGTTACTTTGC  
AATGTTTCCAAAAGATTTTATGTTTGAAAAGGACCAACTAATCCAACCTCTGGATGGCAGAAGGGTTTCTT  
TGTTCAAGTCAAGAGATCCCTGTGATGGAAGATGTAGGGAACAAGTTTTTTCACTTTTGTGAAATATT  
CCTTGCTGCAAGATGTTGAGCTAGATGAGCACAACAATATAACGCACTGTAAGATGCATGATCTTGGGC  
ATGATTTGGCTGGAGATACATTTAAAATCTAACTATTTGATACGAAAAGTGTGGAGGAGAAAATATTT  
CTCAAGTCCGATACTTTGGATGGGAATCACCAAGTGACCAATAGAAAAGATATATGAGCCAGGACGTT  
TGTGCACATTGTTCTGGAAAAGCAATATATCTGATGATATGCTATTGAGCTTTCAGTTCTTGAGAGTTTTA  
AATTTGTCTGGATCAGGCATTCAGGAGTTGTCAGCCAAAATCAGCAAGCTAATACTTGAGATATCTTG  
ATCTCTCCAACACTGAGATCGAAGACCTTCCAACCTCATTGCAAGCTCTACAATTTGCAAACATTTAGA  
GTCAGTGGCTGTTCTTCACTGAGGAAGCTTCCAGAAGAAATGGCAACTATGATAAGTTTGAGACACATA

TATTGCAACTATCATTACCAATCAGAAATTCATGATCAGTTTCAGATGCCACTTAATATGGGGCAATTGA  
CCAGTCTTCAGACGCTACAGTTTTTTTACATAGTTTTAGATAAAGGTCGTCGAATAGAAGAATTAGGTCTG  
TTTGGAAAACCTTAGAGGTACATTGACGATTGACCGTCTCCAATTAGTCGGAAATAAAGAAGAGGCTCG  
AACAGCATGTCTACAGGAGAAACCCAATATCTACAAGCTGGCATATTTATGGTCCCATGATGAATCAGA  
AGGCCATGAGATCAATGATGAGCATGTGTTGGATGGTCTTCAACCGCATCCTAACTGAAAACCTTATCA  
GTAGTGGACTATTTAGGGACTAAATTTCTTCATGGTTCAGTGAAGAGTTGCTACCAAATTTGGTCAAGT  
TGAAACTAAGTGGTTGCAAAAGGTGCAAAGAAATTCATCCCTTGGCCAACTGAAATTCCTTCGGCATCT  
TGAGCTGGTAGGATTCCATGAGTTGGAATGCATTGGACCTGCTTTATATGGTGTGAGATTCGCGATATT  
GGATCAAGCAGCATTATCCAAGTGTCCCGTCATTGAAAGAACTAGTATTGAAGGATATGCGTAGTCTTA  
TTGAGTGGAAGGGAGATGAAGTTGGAGTAAGAATGTTTCCTAGGCTTGAGAAGTTGACGATTTCAAGG  
TGTCGACTGTTAAAAAGTACTCCAAGTCAATTTGAAATCCTGCGTGAATTAGCAATTCATAGTGTGACA  
GTGAAAAGCCATTGTTGAACTTGTGCAGCAACTTGACATCTCTCGTAGAGCTTAGTGTCTATTTTGTGAA  
GGAGCTCACTTGTCTTCCCATGAGATGCTCCACAACAACGTTTCTCTTCAACACCTATGTATCTCAGACT  
GCGGAGAGTTTTCGTGAATTGCCACAAAGCTTGTACAATCTCCATTTTTTAAAGAGCTTAATGATTGACAG  
CTGCCCCAATTTAGTTCCTTTTCTGTTCCAGTGGAGAGGATTATTTGACTTCCCTCCAAAGTCTTCAGTT  
ATGGAATTGTGATGAATTGACCAGTTTACCAAGTGAATGCTAGAGCATTGTCTGTCTCTAGAATCTTTG  
ATGGTCAAGCACTGTAACAACCTTAGTTTCCTTGCCTTTACATGTGTGGGAAATGCCTTCACTTTTCATATT  
GGGTTTATTAGAATGTACCAAATTGACTAGCGTAGCCGAGGAGACTTCACCGTCTCACCGGGTTACG  
GAAATTACATATTGGTCTTTCTCAGAGATGGTGGATTTTGGAGCATTCCAATTGATTTTTAATGGCATT  
GGAAGCTGTTGTCCCTTACATATTGGGGGTGTCGGGACACTTGCCTGGGATTCTCTGCCCTATCAGCT  
GATGCAACTCTCTTCCCTAATAGAGATCCATATATCTGATTTTGAATCGAGGCTCTTCCCTCATAGATTTG  
ACAACCTTACTTCTTGAACATTAACGCTAAAGAGGTGCAAACGGCTGCGATATGTGGACTTCTCAGA  
TGCCATGCCCAAATTACAATATATGAGGATACAAGATTGTCCATTGTTAGAAGCTCTGTCCGATGGGCTC  
GACCATCTTGTTCCTTGGAAAGAGTTAAGTTTATCTAACTGCAAAAACTAGAGCATCTTCCATCCAGAG  
ATGTCATGCGACGCCTACCAAATTATGGAACCTGCAAATTTATGCCTGCCCAAAGTTAGAAGAAAGTTG  
TAGCAATCTGAGTGGCCCAAACCTCCAGTGGTCCAACATTTCCCATATTCCAAATATTGAATTAGGCAGA  
AGGATAATTCAGGATAGACGTAAGTGTCTGTTTCTCTTCACTTTATGAGTAGATTTTTTAAATGTTATTT  
TCCGCGAGTTCCAGAAATAAAGCTTTGTATGTAATTTAATTTTTTCTGCAATTTTTTGACATTA  
AATGCAAAAATTATCAATCAATTGCATCTGTGCCTATGCTTCTGCATTCTGCTTGTCCACTTTAATCGAAC



TGTTCTTCTTCTAATTCTTCAAGTATGGTATATCTTGATATGATTTAATCATGAACTTATGTTTTATTTCC  
CTCTAGGTTACTAGTTCCAAGGTCATGCTAGAACGTCAATGTGGTAAATCAAGCCAAATCCCATGAGCG  
GCAGGCAACTACGTTAGGTAAATTTTCATTAGAATTTATAGGCACTTTGTAATCTACCTGTTTTATCTTT  
GTTTTGTTGGGAACCAATTTTCAGAGGTCTATGCTGATGAATACAACATTACCTTCTTAAAAGAAAGTT  
TAATCATGAAAATTTATGATTCTTCTCATAGGTTACTAGGTACAAGGTCATGGTAAATCGTCGTTGTGGT  
ATATCAAGACAAAATCCATGGGCAGAATCATGTAAAGTATTTTGGAACCACTTTTATTTTGTATATAT  
GAAGAACAAAATCTTCAGCTCTAGACTCATTATGGAACACTTTCATGAGTATTTGGATACTGAACAACCT  
TTTTGGGCAACTGAAGTCTACATATGAAACATAAAAAAATTCAAAGTGTATAGGGTGCTCAATGAGAAG  
CTACACAGGTCTATCCTCTGTCTTTGCATGGCCGTGTGTGCATCCTAATTGCATCAATCAACTATCCATGA  
AATCGTGTACCTGTTTGAATGTAAGCTGTTTGGAAAGAGACTACATTAGTTTCAGTTAATTTGGTGTCTT  
TCCATATAATTCTTCTTTCTTTTCTTTTCCCTTTTCCCTTTTCCCTTTTCCCTTTTCCCTTTTCCCTTTT  
ATACGGGTGGCAAATTTAATCCTTGAGAAGGACACAAATGATTTGACCAGTTTGATGCGTATCCATCCAT  
TAGGCTGAAGTTTCTCTACTTTGCTTATTGAACCAAGATTTCCATGTAAGGTATGCCTATGACACCGAA  
ATAACAACTTTTCCACAGCATAAGTTTCTATGTTTGTATCATAATATCGCATAAGTTATGAAGTAAACGTA  
ACACCTCGGATTTTCGTGCCCATGAATATTCAGTATGTAGCATAGAAAACCAGATTGAAATTTAAGTTCCA  
GGTCCCACGGAATGGTTCATGAGTTGTGAACCAGGCTTGTGGAACCACTAGCTCGTGGAAATCCATCCT  
AGTCCTCTAGGTTTGTACACCCCCGAGCTTAGACCTTGGGCGGAACCGGCACTCGGTATCATTATAGGCC  
CGAGGGCGTACCCATAACATGACATTAGATATGAGCATAACATCTAGACATGAGCGGAAACATTAGTATA  
AACACATTTGAAGAGACAAGTCTTGTAAGAAACACTTGGCATAAATGTAAATCATAGTACTAAAATC  
ACTGACAAAGGACACGAAGGTCCAAAATGAAGCATAACTAACTGTCTATATATCTATGAAACATCTAGA  
TATAACTGAGTAATGTCAAATGGGAGGTGCCATTGAATTCTGTTTCATGAGTTGCAGCTCAAATAAATTC  
TCACTGATTGTTTTATGGATTCAACTAGGAGGTTGCTGTTGTACAAAAACAAATTGCATGTGCCACCTC  
ACTCTCGTGCTAGCCAAGTATTAACCTTGGGTGCAAGTATGCTCAAGAACTATTGTAGCAGTATCCGCTG  
CGAAGGACCTAGGACTTGAATGGATTGACCAGTTGGAGGGACATCTGTCCATTAGGTTGAAGGATTCTC  
TATTCTGCTTATTGAACCAACCTTTCCATGTAAGCTTCTTCTAAAATTGTTAGTCTCCTACATTCCTGTTTT  
TTTCTTATTGTTTTATTGCTCACTTACTTCTATAAAGTTAGTCTGATGCAATATATCTCAAATTATTCAA  
TGTTTTGTTTGTGTTTGCACGAGTATCCTTCAATAAAGAGTTTATCACTTAATCCCCGAATGTAGTATTCTC  
ATTACAAAGTATAATGGAAGTTATTAAGTGGTATGGTTCTTGAATAAGATAACTGATCATTCTCTCAAG  
TACAGAGAAGTAATAGCTTGCATAACAGGTCTATTACAGTTTTATCTTGCGTAAGAGGAGGTGGACCA

TTACACGGAAAGCCACTAACGTAGGCTTTGATGCAAGACAGAGTTCCTTTTGAACCGAAATGTGACTTCT  
ACTGATAGTAGAAGCTTCTCCAGTTTTTGTGGCCGTCTTCAACAGTATTTCTGTTAATTTTCAAGGGT  
CAGATTGGAACATTTTCGCTTCAGTGATGACTGTGGTTGCACGAAGCTTGAAAGTTCAAGGTAAGTTAGT  
TTTTGTCCATAAAAGATAGCAAATGGTGTCAATACTTTTTTCTCTGGAATGGTTTTCTTTTTCTCTAAATG  
CTGTTTTTAAATCATCTCACTTATCTATATCTCGTTTACTTTTTCTTAGTATATTGAAAACCTCTCAAGGAACTA  
TTCCATGTCCATATATGGTAGAAATGTGTAAAACTTTCTTAATAGGCTCATAAAAGAATAACTTTTTCTGC  
AACGCTGGTTTTATTTTCATGCTTTAGACAGTAGAACTTTTATGAATATATGACACACTTGTCAATTGCTTTT  
ACTTCACAGGACAATTTCTCCGTTCAATAACTTTTCGTCATTGAAGGACTTCAACAGAGATAGTTGTCATG  
AATCATTTAGCAAAGAATGCCCCATTGGCTCTTAAAATGTCCTTAGCAACATCTGTTTCATCTTAACAGGTC  
TTGCTTTCTCCTTTTTTTAGTGGTCACTTGTAAATGATCTGCTTCTCCATTTTCCCAAGGAGGAAACGTGTGC  
CAAAACAGACTTTTTAACATTTCTGGATGATTTTCAGATTCATGTTTGAAACACCAGCATGGACCTCGTCG  
AAATGCTACTTATGTAATTTAGACTCTCAGGAAGTTTGCTTCAAATAGTTATTACTATATAAACATTACC  
CTTTGTTTTACTTATTTACTATTTCTTAATATTTAAGTATTTTAGACGAAGAAAAGTTCATATAACTTGTA  
ATAATGTCAGTTGAAGTTTGTATTAATTTAATTTTTATTATTTATTTAATAGCTAATTTTATGAGATAAATA  
TTTTATTATTGCAAATATTTATTTATATTTGGGTAAGTATTTGTATTTAAATGAAAGTATTATTTATGCCA  
CAAATGTATTATCAGGTTAGCGAGATCTTCTAACTTCAAATGTATTATTTTAAAATGTTTCGAGTTTTTTT  
TTTTTAAAAAACTCACACAGATGTGAAAATATGTGAATATATAAAATATAGTTGATCTCTTCACAAGT  
TCAAATGACATCTAAAGAATTTAACGTAGAATACACATGCAAAGCACATCTGGTTAGATGACAACAAAA  
ATACAAAACAAATATCGTCTATAAGGTAATATTAGTGAGATAAGACTAATTACATAATTGAACCTCATCA  
AATTGAAATAAATCTATGCATAATTGCATTTAACTAATAAAAAGTTTTTCATTGATCATCTTCATAAATTTGC  
GTGAAGAAAAGATATATATGACGATCCACATTGAACATTCACAAAAGAATCTGCAATATTATTTTTTACT  
AAGCTTATTATTCAAATCTTAATTTGCTTAAATACGCAATACTATTTACTATAACACATATTTTTGAAATTG  
GTAATCACGTGCAATGCATGTGTCAGAAAACACTAGTATATATATAACATGAGGAAGCAATAGTTATTCATA  
GCATGAAAAAATGTATCAAATAAGATAATTAATACTGTAAAGATGCATGATCTTGTGCATGATTTGGCT  
GGAGATATTTTAAAGTCTAAACTATTTGATCAAAGAGTGTAGGAGGAGAAAATCTTTCTCAAGTCCGA  
TACTTTGGATGGGACTACCAAGTGATAAAAATAGATAAGATAAACGAGCATGGACGTTTGTGCACATTT  
TTCTGTAAAAGAAATATATCTGAAGATATGCTGTTGAGCTTTTCAGTTCTTGAGAGTTATAAATTTGTCCAG  
GTCAGGCATTGAGGTGTTGTCAGCCAAAATCGGCAAGCTAATACTTGAGATATCTTGATCTCTCCAGT  
ACTGAGATCAAAGACTTGCCCAACTCCGTTTGAAGCTCTACAATTTGCAAACATTTAGAGTCAATGGCT

GTTCTTCACTGAGGAAGCTTCCGGAAGAAATGGCAAATATGAAAAGTTTGAGACACATATATTACCAAT  
CAGAAATTGATTATCAGTTTCAGATGCCACTTAATATGGGGAAATTGATCAGTCTTCAGACGCTACAATT  
TTTCTACGTAGGTGTAGAGAAAGGTCGTCAAATAGAAGAATTAGGTCGTTTGAAAAACCTTAGAGGTGA  
ATTAACAATCAAATGTCTACAATTAGTCGGCAATAAAGAAGAGGCTCAAACAGCATATTTACAGGAGAA  
ACCAAATATCTACAAGCTGGTGTATTTATGGTCCCATGATGAATCAGAAGGCTGTGAGATCAATGATGA  
GCATGTGTTGTATGGTCTTCAACCACATCCTAACTTGAAAACCTTAGTAGTGGAGAACTATTGGGGGACT  
ATATTTCTTCATGGTTCAGTGAAGAATTGCTGCCAAATTTGGTCATGTTGAAATTAAGTGGTTGCAAGA  
GGTGCAAAGATATTCCATCGCTTGGTCAACTGAAGTTCCTTAGGCATCTTGAGATGATTGGATTCAATGA  
ATTGGAATGCATTGGACCTACATTTTATGGTGTGATAATGGATCAAGCAGCAATAATGGCAATATCCAA  
GTGTTCCCGTCATTGAAAGAACTAGTATTGAAGGATATGCATAGGCTTATAGAGTGGAAGGGAGATGA  
AGTTGGAGTAAGACTGTTTCCTGGGCTTGAGAGGTTGACGATTACAGAGTGCCACTGTTAAAAAGTGC  
TCCAACTCAATTGGAAACCCTGCATGAATTAGAAATTGAAAGAGTTGACAGTGAAATGCCATTGTTGAA  
CTTGTGCAGCAACTTAACATGTCTTGTGGATCTTTCTGTCAGTGACGTGAAAGAGCTCACTTGTCTACCTG  
ATGAGATGCTACGCAACAATGCTTCTCTTCAACGCCTATGTATCTCAGCCTGCAGAGAGTTTCATGAATT  
ACCACAGAGCTTGTACAATCTCCATTCCCTTAAGAGCTTAGGAATAGCCTTGTGCCCAATTTCAAGTTCTT  
TTCCGGTCCCAGTGGAGAGAATTATTTATCTTCCCTCCAAAGGCTTCAGTTACTTTATTGTGATGGATTG  
ACCAGTTTACCAAATGGAATGCTAGAACAATGTCGGTCTCTAAAGATTTTGAGGGTCAGCAACTGTAAG  
AACTTGGTTTCCTTCCCTTACATGTATGGGAAATGCCTTCACTTTCCATTTTGGATATGTCAGATTGTCCC  
AAATTGATTAGTCTACCCACAGGAGGCCTTACCCTTCACTGGGTTACGGCATTGAAAATTGGTCCTT  
TCTCAGAGATGGTGGATTTTGAGGCATTCCAATTGTTTTTAATGGCATTACAGCAGCTGTTGTTCTTCGT  
ACATTGAGGGTGTACGGACATGGGCACTGGGATTCTCTGCCCTATCAGCTTATGCAACTCTCTTCTCTAA  
TTGAGCTCGAATTAAGTGATTTCAAGTATCGAGGATCTTCTCATAGTCTTTGCAATCTTACTTCTCTGAA  
ACATTACATCTAGAGGGGTGCAAACGGCTACAACATGTGGACTTCAGAGGTGCCATGCCCAAATTACAT  
TATCTTGAGATCTATTGTTGTCCATTGTTAGAATCTCTGTCCGATGGACTCAGCAACCTTGTTTGGTGGAA  
AACGTTAATTTTTTGGAACTGCGAAATACTAGAGCGTCTGCCATCCAGAGATGTCATGCAAAGCCTCAGC  
AAATTACAGTACCTGGAATTAAGACTGCCACAGTTAGAAGAAAGTTGCACCAATTGGAGTAGCCCA  
AACTCCCAGTGGTCCAACATTTCCCATATTCCAAAAATTAAAGTAGGCTGGAGGATAATCCAGGATAGAC  
GTAAGTCTCTGTTTCTTTCACTTTCTGAGTCCATTTTTTAAATATTATTTTCTACGAGTTCCAGAAAAA  
AGCTTTGTATGTGATTTTTTTTTTCTGCAACATTTTGACGTTAAAAAATGCAAAATTAACAATCAAGTGC

ATCTGTGCTATGCTTTCAACATTCTGCGTGCTCACTTGAACCGAATTGTTCTTCTTAATTCTTCAAGTAT  
GGTATATCTTGCTATGCTTTAATCATGTAATTTATGTTTTTTTTTCTTATAGGTTACTAG

>PGSC0003DMG402012062 LRR-RLPs

GGAGCTTATGCCGTGTCTACGATGGCTAGATCTGAGCTTCTCTAGAAGACTGATGCAAACACCAAATTC  
ACGGGGATGCCAAATTTGGAGTGTTTGAATCTGGAGAAATGTAGTAGTCTTAAAGAGGTTCACTCTTCC  
CTGGGTGATTGCAAAAACTCATTAAGTTAAATTTGTATCGTTGTGAAAGCCTTGAGAGTTTTCCATGTG  
TTAATGTGAAGTCTTGAACATCTGAATCTAGAGGGTTGCCAAAGTTTGGAGATATTTCCAGAAATCAT  
TGGAAGAATGAAGTCGGAGTTAGAGATAAAGGTGAAAGGCATTGGGATAAATGAAATACCATCATCTA  
TTATTCAGCACCAAGCTCATCTTACAAAGTTAGATTTGTCAGTCATGGAAAAAATTGTAGCTCTTCCAAGT  
AGCATTGGCATGTTGAAAGGATTGGTGAAGCTAGATGTGTCGTGGTGCCCAAACTTATAAACTTGCCC  
AAAGAGATAGGTGATTTAGAAACTTGGAGGAGCTTGATGCCAGCTGCACTCGAATTTACAGCCTCCC  
TCTTCCATCGTACGGTTAAACAAGCTTAAATCCTTGAGTTTTTCAGGACAATGTTTAGAAGATGGAGTGT  
ACTTTGTGTTCCCTCAGGTGAATGAAGGGTTACGCTCATTGGAAATTCTGAATCTCAGTTTCTGCAATTA  
ATAGATGGAGGACTTCCGGAAGACATTGGATGCTTATCGTCTTTGAAAGAGTTGCATCTCAATGGAAAT  
AATTTTTGTGCATTTGCCTGAAAGCATAGCCAACCTGGTGATCTTGAAACCTTGACTTATCAAATTGCAA  
GAGGCTTCCACAGCTACCAGAATTTCAAAGCAATTGCATACAATATCTGCAGATTGGAGCAATGATTTG  
ATCTGTAATTCGTTGTTTCAGAATATCTCATGTGCTTCAGATTCCTTGCTACTAAGAGCGCTTATGAGTTG  
GGGGATCAACATCCCAGGTTGGTTCCACCATCAGGGAAGTAGTACAAGTGATCAGTAAATTTGCCTAA  
AAATTGGTACGTACGTGATAACTTCTGGGATTGCTGTATGTTACTCTGGAAAATTGATTGACATGACA  
GCTCACTTGATTCCCTTATGTGATGATGGGATGTCGGGTATCACCCAGAACTTGCCTTATCCAACCATTC  
AGAATGTAATCCTGAGATTTCATTTTTGTGATACCTCTTCTGACTTATGGGATACATCTAAGGAAAATG  
GGAGAACACCAAATGACTATGGGCTTTTTACGTTATGTTTCTATGGTGAATGAAACATTATGGATTACG  
TTTGTGTATAAAGTTGATCCTGAGCTTGACGCGAATTGCTCCTCTTCTAAGAAACATTCTAATATTCTTG  
GGAGAGTCGTCAGTTTCTTACAGCTGCAAACCAAGGAATTTAGATTAATAAATATAGGTAATATTCTAAT  
ATTTGTG

>PGSC0003DMG402015682 LRR-RLPs

AGCATTTTCAGTATCTACGGACGCTAGATCTCAGCCGCTCTAGAGACCTGGCGCAAACACCAGATTTAC  
GGAGATGTCAAATTTGGAGTATTTGGATTTGGGCAATTGTATTAATCTTGAAGAGGTTACCATTCCCTG  
GGATGTGCGCACAACCACTCAAGAGGTTGAATTTGATATATTGTAGACTCCTCGAGAGGTTTCCATGTGTTA

ACGTGGAATCTCTTGAATATCTGGATCTAAAGTTCTGCTCTCGTTTAGAGAAATTTCCAGAAATCCGTGG  
AAGAACGAAGCAGAAGCTTAGAGATTAAGATGTGGGACTCTGAGAAAAGGGAAGCTTCCATCATATATTGT  
TCAGTGCCTAACTCTAAGACATTTGGATAATCTTGTAGCTCTTCCAAGCAGCATTGGCATGTTGGAAGGT  
TTGGTTATTCTTGTATGTGTCGAATTGCTATAAACTTGAAAGCTTGCCAGAAGATCTAGGCGATTTAGTAA  
ACTTGGAGAAGGTTGACGCATCAGGTACTCTAATTTCACTACCTCCGTCTTCCATCGTCTGCTTGAACAA  
GCTTACATTCATGAGTTTTGCGAAACAAAGATATAACGTAAGTCTCGAAGGGGGAGTGACTTTGAGTT  
CCCTCAAGTGAATGAAGGGTTACTACTCATTGGAAGATCTGGATCTCTGTTACTGCAATTTAAAAGATGGA  
GGACTTCCGGAAGACATTGGATCCTTATACTCTTTGGAACACTTGAATCTCCAGGGAAATAATTTTGATC  
ATTTACCTCAAAGCATAGCCCAACTTGGTGCTCTTCGATCCTTGAAGTTATCAAATTGCAAGAGGCTTACA  
CAGCTGCCAGACTTCATGGGGATGCCAACTTGATGACGCTGAATCTCAGTATAATTAACATTGAGCGTT  
TGCTCGAAGCATAGAACAACCTTAGTGCTCTTCGATCCTTGGACTTGTCATATTGTGAGAGGCTTAAAGA  
GTTGCCAATCTTCATGGGAATGCAAACTTGGAGACTTTGAATTTGTCAAATTGTATAAATCTTGAAGAG  
GTTTCATCGTTCCCTGGGACTTCTCAAAAAGCTCTGTACATTAATAATGACTAATTGTAAACAGCTTAAAGA  
GGTTCCAGCTCTGTGCATTGATTCTCTTGATTATCTGTGTCTACGGGATTGCTCTAGTTTLAGAAAAAAT  
CCAGAAATCCTCGGAAACATGAAAGCTGAGTTAGAGATTCACATGCTCGACAGTGTAATAAGGGATCTA  
GGTTTTAGAGGTTTTGAAAACCTTGCAACACTTCCGAGCAGCATTGTGTAAGTTGAAAAGTTTGGTCAGCC  
TAAATGTGTCGGATTGCTCTAAGCTTAAAAGCTTCCAGAAGAAATAGGAGATTTAGAAAACCTTGGAAA  
ATCTTGATGCTAGAGGTAATCTAATTTACAACCTCCATCTTCCATTGTCCAGTTGAAGAAGCTTAAATTT  
TTGAGTTTTGCAAAACAAAATTCTGGAGGAGGTCTCGTAGATGGAGTGTACTTTAGTTCCCTGTGGTGT  
CTGATGGATTACGCTTGTGGAGATTCTGAATCTCAGTTACTGCAATCTAATAGATGGAAGTCTTCCGGA  
AGACATTGGATCCTTATCCTCTCTGAACGAGTTATATCTCTCTGGAAATAATTTGAGCATAAACTTGGCG  
ACTTTGAATCTGTCAAATTGTATGAATCTTGAAGAGGTTTCATCATTCCCTGGAATGTCTCGAAAATCTCTG  
TACATTAAGTTGACTAATTGTAAAAGGCTCAAAAGGTTTCCAGTTCTGTGCATTAATTCCCTTGAATATC  
TGAATTTAGAGGGGTGCTCTAGTTTLAGAAATGTTTCCAGAAATCCTCGGAAGCATGGATTTGAAGTTAA  
AGAGTGGGTTAAAGTGCCTAGACTTGAGAGGTTTLAGAAAACCTTGTAACTTCCGAGCAGTATTTGTA  
AGTTGAAAAATTTGGTGGAGCTAAATGTGTCGGCATGCTCAAACTTGAATCTTACAAAAGAGATAG  
GGGATTTAGAGAACTTGGAGTGGCTTGTATGCCGAAAATACTCTAATTTGCAACCTCCACCTTCCATTGT  
CTGTTTGAACAAGCTTTATTTTTGTCAGTTGCTAAACAAAAATCAGAAGTAGGCCTCGAAGATGGAGTG  
TGCTTTGATTTCCCTGCGGTGTCTGATGGATTACGCTTGTGGAGATTCTGAATCTCAGTTACTGCAATCT

AATAGACGGAGGTCTTCCGGAGGACATTGGATTCTTATCCTCTCTGAATGAGTTATATCTCTCTGGAAT  
AATTTTGAGCATTTGCCTCAAAGCATAGCCCAACTTGGTGCTCTTTGGTCTTTGGACCTATCAGATTGCAA  
GAGGCTTAAAGAGTTGCCAGGTTTCGAAGGGATGAAAACTTGGCGACTTTGAATCTGTCAAATTGTAT  
AAATCTTGAAGAGGTTTCATCATTCCCTGGGACGTCTCAAAAAGCTCTGTACATTAAAGTTGACTAATTGT  
AAATGGCTCAAGAGGTTTCCAGTTCTGTGCATCGATTCCCTTGAATATCTGAATCTAGAGGGGTGCTCTA  
GTTTAGAAAATTTTCCAGAAATTCTCGGAAGCATGAAAGTGAAGTCGGATATTGACATGTTAGACAGTG  
TGATGAGGGATCTAAATTCCATGTATATCTCACTTCCACGTTCCCTTGTCTCAGTATATCGTTTCCTTGCCG  
AATGCCATCTCTGGTTCAGATCCCTTGTCACAAAGAGTGTACCATTGTGCACGGTGGGAATAAGATCC  
CAAGTTGGTTCCACTATCAGGGAATGGATGAAAATGTATCGATCAATTTGCCTGAAAATTGGAATGTGT  
CGGATAACTTCTTGGGATTTGTTGTATGTTACTCTGGCAACTTAGTCGACACCACAGTTGACTTGATTCCC  
TTATGTGATGATGGGATGACCCAGAACTAGAATTATCCTTCCCTTCAAATTATGATACAGAATTATCCG  
ACGATTCAGAATGTGATACTGAACCTACGATTCATTTTTCTTGGTATCTCTTGCTGTCTTATGGGAAACA  
TCTAAGGCAAATGGAAAAACACCTAATGACTATGGGCTTATTACATTATTGTTCTCCGGAGAAACGAAG  
GAGTTTGGATTCCGTTTGTGTATAAAGATGAACCAACAGAACATTGCATTGGGACACCATGATGAAGC  
CAATTGCTCCTCGTCTAAGAAACAAAGCTCTTATTTCTAATATTCATTGGAGCTGTCTTTGAGAATCTGCA  
GCAACAACCAGTCTCTTTCAGAACTTTGCAGCTCTCTCCCCAAGCCAGAAATTTGTCTTAAATATAGG  
TAATATAC

>PGSC0003DMG402015894 LRR-RLPs

GTTAAGAACAAAATGGTAATCAACTTTGAGGTTATGAGCTTCCCCTTATAATAATATGTCTATCATGCT  
AACAAATTGGTCTATTTTTCTGCATATTCTTAAAGATGACTATGTATTAGTGATCTCTATTCATTTAGTAG  
ATTAGTCTATAACGGTCATTTCTTAGAGAGTAACTACAAGATCCACCCTATGGAGCCTCCCTCAGATAA  
CACGCCGACTTCATCTGGGGAAGGAAAACCAACTTATGCTATAACACTATACTTTAGGTTGATTTGCACA  
ATATAAACTATTCAAGTCAACAGAAAATATCCCACACGCAAGAGAATCAACTTTAATTTTTAATTTTCT  
TATGTGAAATTATTGACTTGGTCACTGATCATGACACTCCTTAAATTCCTACATATATTAGTGATCAACT  
CTTATTCCACATGCAACAACACTCAAGTCAACAGAAAATGCAGAAAGAAACCAATTGTTGTAGAATA  
ATTAAGACACCTCAATCACCCAAGACCTGGTTGACCACAATGACATTTTTGGATCAAATTTAATTAACGAA  
GGGTATTGTTTTCAATTTACATAATTTAAAGACCCTTTCTGTATACTTAAGTACTATTTAAAGACAACCT  
ATTTTGCAGTTTCATTAGTATAATCACTATGAAAATATTACTCCTCCTCAGGTTTCTTTCATCACTATCCTT  
GTGGTGTCTCTAATTATACTTCTGGCCAATGTTTGGAGGATCAAAAAGCCTTGTGATTAATTAAGA

ATAACCTCACGTTGACTCTTCTGTGTCCACCAAAGTATGTCATGTGGGATGAAAGCAGTATTGACTGTTG  
CCAGTGGCCAGGTGTAAGTTGTGATGAGGAAGGTCATGTGCTTGTCTGGAGTTGGACAGCGAAGCCA  
TTTCTGGCGGAATTGAGAAGTCAAGCAGTCTCTCCATCTTCGATATCTTGAGAAGCTCAATCTGGCTTAT  
AATGGCCTATAACCCTGTTCCAATACCAAGAGAAATTTATAAGCTGGCAAACCTTGATGTACCTGAATTTGT  
CACATAGTTTTAACGGGCAGATTCCTATGGAATTGTCAAGATTGATCAAGTTAGAGATTCTTGACCTTTCT  
GGAGGGGATTTAAAGCTTGAGAGGCCAGATCTGAAAACACTGGTAGGGAATCTTGCAAATCTTAGAGA  
ACTTTACCTTGATAGAGTGAATATTTCAATTGAAGGGGAGTGAGTGGTGCTCGGCATTATCTTCATCTCTG  
CCTCAATTGAGAGTCTTGTCATGAGAGACTGTAAAATTTAGGCCCTCTTGATCCTGTCTTTTAAATCT  
TCGTTTTCTTTCCGTCATTCGTCTTGATTATAACTACTTGTCCACTATGGTTCCAGATTTTACAAAATTGAC  
AATCCTAAGCGTCAGATGGTGCTACTTGTGGTCCATTTCCAGTAAAATCTTTAGGTACCAACTCTAC  
AGCAAATTGATTTATCTGGCAATGAAAACCTTACTGGCATTTTACCTGAATTTCCACATAAAAAGTGCATTA  
AGGGAGGTAGTGCTTAGCTACACAGGATTCACCGGTTGCTTCCAGATTCAATTGCTAACCTTCGGAAC  
TGACCCAGCTTGATTTAGGAAGTTGCAATTTAGTGGAGAAATTCATCAAAAATGGGAAATCTCACAG  
AACTAGTTCATCTAGATTTGTCATTCAACAGTTTTACTGGCTCTATCCCACTCTTTATAAGGCCAAAGAAG  
CTCAACCACATTGACCTTTCTAATAACAATGGTCCACTATCTTCAGCTCAAACCTCAATTAGCAGTTCTTCT  
TCCCTGCCATCATTGCAGTACCTTAGTGTTGAGAACAGTCAATTAAGTGGAGAAATCCATGAATTTCTA  
ATGCATCCTCCTCTGTTCTGGAAATGCTTGATTTGAGCAATAACCATCTAAGTGGATCGATCCCCGGTCT  
ATCTTTAAACTCAATAGGCTTTCAAACCTCTTCTTTCTCCAACCTCCTTCAGTGGAAACCATTGTTATCGAA  
GCGGTAAAGGGACTTCCTAGGCTTACCACCCTTGACCTTTCAAACAACAAAATTGAAGGGGAAATACCA  
AGTTGGGTTTGGACAGTTGGAAATCTGAATCTTTCTCACAATCTTTAGAGTCTCTAGAAAAACACACA  
ATTTGTATACTACTTCTATTGTCATTGATTTGAGTTCCAATAAGATCAAGGGAGATATACCCATTCTACCT  
ACTTCTTACCTACTTTTCAATTGCCAATAATGAATTTACGGGATCAATACACTCTTCATATACAGTCTA  
GATACGCTTCAAATCTTGATATGTCAAATAACAAATTAAGTGGCATTATTCCTGACATATTTCCACTGAA  
TTGGAATTTGAAAACCTTAAACCTCAGCAGTAATATATTAGAAGGAAAAGTTCCAAGCTCTCTGGAAAAA  
TGCTCATTCTGGAGGTTTTAGACATTGGAAACAACAAGATAAGAGATATGTTTCCATGCATGTTGAATA  
AATTAGCCAATTTGCGTGTCTAGTCATAAGATCAAACAAGTTTTACGGGAATCTCCAGTGTCTTAGAGC  
TGAACAAACCTGGCCAATGATTCATATTATAGATATTGCTTCAAACAATTTTACGAGGAGATACCTGAG  
ACATTGGGAAATCTCATATTACTAATCCATCTCAACTTCTCACACAATGCTTTGACTGGAAGAATACCAA  
TGCCATTGGAAAGCTGACTCTGCTTGAATCTTTAGATTTGTCAGTTAACCAGTTAAGTGGGAGAATTCCA

GACGAGATTGCGAGTTTCACATTCCTTTCTTTCTTGAACCTATCTTTAATCAACTTTCTGGTAGGATTCCA  
AGTGGCAACCAACTTCAGACATTCTCAGCAGATTCTTTGAAGGGAACATTGGGCTGTGCGATTTTCCTT  
TAAAGAAAACGTGCAGTGACACCAAAGAGACTGAACGTGAAATTGATGGGAAATATATAAGTTTTGCCT  
TGGGATCTTCTGTGCGTTTTGGCATCATAACCTGGCTGATTTTGCATAGCCGAAAATATAATGAGCTCGT  
TGATATACTTCTTTTCAGAATTTTGGGTCAGCACCAAAGGAGTGGCAGGAATAAAAACCAGAGAAGGTC  
AAGGTAAGTTGAGGTTTGTGTAGAACAAAAGGCTAATAATATTGTTGATATATGACTATAAGCTTTTAA  
GTTCAATGTTTTACATTTTGTCTATAAGCGTGTGGTAATTAGTGTTCCGGATATGTATTTTAGTTGGTTTT  
CTAAGACAACCTGTTTAGAAAGAACAGTGAATATATAACACTAGTTGAATATTTTTCTGTTCAATAAATTAA  
GTGGCAAAGCAACCAGGATTGAAAGCACAGGGTATACATGAATTAGTAGCTCCTCTAATCAAATCACT  
GAGAATTTCTGTTATTTTACGACTATTCAGGTATGCGGTATCAGGTTGATACTGCAGATTTTLAGGTTTCC  
ACAACAGATTAGCCTATCTTGTTATCATATTTTGGGTCAGGTCATTCTAGATGTGATGATTGAGAATTTG  
GGAGACAAAAAGGAATGATACTAGGCTAAGGGAATATGAATAATAGAAATTCCAGGACATCTTGCACT  
CACCTCTTGCACTCACCTCACAAACTCGACACGATCTCTAGAAATTCCAGTAATTTCCATATGCACATTAT  
AAGATGTACAAATCTAATCCTGTAAAGTTTTAAACAATAGATGTATGACCTTATAACATGTTATAAATCAA  
ATGTCAATACTGTAGTTGTTTGTGGTGGAGAAGTTGGGCCTTGCCAACCATGTCTTTCTGGATCATATTT  
CTCTCCATCACCCAAAGGGCATAGGCTTCTTACCATGAACCGCGTCATCTCCAATCTTTAGCTGCTCAT  
CCGACATCCTTAGTGGAATGAACAACCTTATTGCAAGTAGGATTAACGTCGTTGCAACTATGTTCCAACC  
AATGATGAAGAGAGCTGCAACTATTTGCTTAAGGAAAAGAATTCCACCACCTCCACCATAAAATGCACCC  
TTTGTGTTGGTGACTIONGGAAGAACAATATTACAGAGAGATGGTTCTGCCAGAAGACCAGTTAATAAACC  
CCTAGAAGTCCTGCCACAGCATGTGTGTGAAACACAGCAAGTGTATCATCCACCTGTTATTATAACAACAA  
GCAAGTCAGTTACAATCTAAGTCTAAAATGGGCATTGGGGCCGTTGGGATTGGATATGAAAAATCAATT  
TTTAGATTGGATTATTTTTTAAGTTCGGGTTTGGATTAATCGTTTTGAGACACACAATGGAAATTAACAA  
CCTCGGTTACCTAATAGTTTGTACTTAAAATGTACTATAACTTTTTGCAGTTAACAAAGATTGAGGTCA  
TCCTGTCACACATGATGTGTAACCTCATATTGGACTTAGTACTATAATGGGTAGTGTGTCGTAGAGTACTAA  
TCTATTGAACTTTGAAAATTCGACATACTAGCTAGCATTGGGCAC

>PGSC0003DMG402016933 LRR-RLPs

CTTGTCTCAGTCTGGAAGAGCTATCTATCGATGGAGCTAATAGCATAAGTGCTCTATGCTCTCACCAACT  
TCCAACAACCTACTTCAGCAAACCTTGAATCATTGTATGTATCAAATTGTGGAAAATTGAGAAACATGATG  
TCTCCATCAGTGGCTAGAGGTGTTTTCAATCTCCGAATACTAAAGATAGATGGTTGTCAATCGATGGAAG



AAGTGATCACAGAAGAGGAACAACAAGGAGAAGAAATCATGACTAATGAGCCCTTATTTCCCCTGTTGC  
AAGAATTGAGGCTTCAAAGTTTGCCATGGCTTGGGCATTTCTTTGTGACGAAGCATGCTCTTGAATTTCC  
ATTTCTCAGAGAAGTGACTATTCATGACTGCCGTGAAATGGAGACGTTTGTCCAACAAGGATTTGTGAG  
TCTCGAAAGGGTGAACAATGACGATGAGGTGAACAATAAAGTGATGTTCAATTCTAAGGTTTGTCTTGT  
GCCTCTAGTTGTATAACTAAGTTTCTGAGAAAGTGATTGCACGTTGATCTCTATTTTTACTTAAAG  
TTTGTATTACAAAATAATGAATCGAAAAAGTTATATCACTTTAAAATATATTTGTGGTTACCAAACAAAG  
GAAGTTGATCCATTATAGAAATAACTTTGAATTGATTCATTCATGTTTAATTTTTTTTATAGAGTGAAAT  
GGACACTATGTGACAAAATATTATGCTAGATATCTGCTTTATATAAGCACTTGATTCACCCTAACATGCCA  
ACAACAATATGTTTCCATTCAGTTGTACAACAATAGCATATTTAATTAATTCATTGACTATCTACTTATATC  
AATATCGATCATAATAGACAAGACACTTGATATATTTATATTTAATAAAGTTTGTGTTGAGTTATAAAATA  
GAACAAAATTCATCTTCTGCTTCATAATGTGAAAGTTATTGGAACCTACCAATTAATACCTCTTTAGTT  
TATGACAAGCATGTTAAAATCATATTCAATTCTAATTAATATTTAGTAATCCTAAAATTAGTAGTATATT  
TATCTTTTACAAATATTTTTCATATATCAACATTCACAAAAAATAGGTGAATTTAATTAATAAATGGGAT  
CTAAAATAATATAGTAATGTCAAGTGAATTCTCCACTAGGAATGTACATAATAACATTTTCTTTCCTTATA  
GCACCTCATGTACATGTAGTTATATTGCTTTCCTCTTGAAATGAGATATCAAGTTATTCTCCACTTTGTTGT  
TCGGACTCTCCAAAATTGTTGCCGCACCCGTGTTGGATTCTCCAAAATGCACTACTTTTGGAGTATCCAAC  
ATGTATCCATCGACATTTTTGAAGAGATCGAGTAACATAGATTCTTCATACCTTGTCTATTACATTGTATT  
AGAGCCTGAGCTAGCTCTCGCTCCACGTTCCAGTTGGGCCTGGATGTGAAGGGGATGTTAGAGTCCCAC  
GTTGGTTGGAAAATGGAATGGTGGTCTGCATATGTGTACTTGGTCAATCCTCCCCTCTTGAGCTAGCTTT  
TGGGGTTGATTTAGGTCATATCTTTACAATTTTCATATCAAACCTCTCCAATACTGTCTTTACTGCCTTTCTT  
CATCCCTTCAATCGTACGTTTGCAGGTTTCTTTTCCCAGCCTGGAAGAGCTATATATCAATGGCGCTAACA  
GCATAAGTGATCTATGCTCTTACCAACTTCCAAGTCCCACTTCAGCAAACCTGAAATATTGAATGTAAA  
GGAGTGTGCTAAATTGAGAACTTGATGTCTCCATCAGTGGCCAGAGGTGTTTTGAATCTCCGAATACTA  
GAGATAAATGACTGCCAATCAATGGAAGAAGCGATCACAGAAGAGGAACAAGAAGAAGAAGAAATCA  
TTACTAATGAGCCCTTATTTCCCCTGTTGGAAGAGCTGAAGCTTCAAAGGCTACCAAAGCTGAGGCATTT  
CTTTCTCGCCAAGCGTGCTCTTGAATTTCCATTTCTCAGAGTAGTGTGTATTTCATGACTGCCCTGAAATGA  
AGACTTTTGTCCAACAGGGATCAGTGAGTACCCCAAGTCTCGAAAGTGTAACAATGATGATGAGGTGA  
AAGTAGTTGATCTCAATAAAGTGATGTTCAATTCTAAGGTTTGTCTCGTGCCGCTACTATATAGCTAATTA  
CTATTCTCTTCCATTTTAACTAGTTAATAGTAATAGTAATCTTTGGATAGTTATTTCTGTTCCGGTTCATTTT

TTATTTTGTACTTTAAGCTATTTTGAATTTTCATCCCTTACATAAAATACAAGTTGTCCTTCATCATTGCA  
GGTTTCTTGTCCCAGCCTGGAAGAGCTAGAAGCTCGACAGGGCTGAAAGCATAAGTGCTCTATGCTCTCA  
CAAAGTCCAACTGCCTACCTTAGCAAAGTTCGAAAATTGTATGTATCGAATTGTGCTAAATTGAGAAATT  
TGATGTCTCCGTCAGTGGCCAGAGGTGCTTTGAATCTCCGAATACTAGAGATAAAAGACTGCCAATCAA  
TGGAAGAAGTGATCACAGAAGAGGAACAACAAGGAGAAGAAATGACTAACGAGTTTTTATTTCCACTG  
TTGGAAGATCTGGAGCTTAAAGGGCTGCCTAAGCTGGGGAATTTCTTCTGACGAAACATGCTCTTGAA  
TTCCATTTCTAAGAGTAGTGAGGATTCATGACTGCCCTGAAATGATGACGTTTGTCCAACAGGGATCTT  
TGAGTACACCGTGTCTCAAAGGGTGAACAATGACAATGAGGTGAAAGTAGATGATCTCAATAGAGCG  
ATGTTCAATTCTAAGGTTTGTCTTGTGCCGCTAGCAGTATTATTGATTACTATATATATTTGTGTCATGCAT  
TAATAAACCCCTGGTATACTGCTCTCTTAGCGTTTTAACAAACAATAGTAGTAGTAATCTTCAGATAGTT  
ATTTGTCACCTGATATCTATCTATGTTGACGGAGGTAACAAACATAGGTGAATCTACAGTATTGTAATCC  
AAGGGTTCAGATGAACCTAATAGCTTTTGCAGAGACTTTTTATCTGTATTAGTTATATCTAGAGATTCC  
TTGATTGTGAATGCGATTATTATTGTATATTATTAAGTGTGACATTGGAGATACCTATAAATTTCAAT  
TCTGAATCTACTTCTCATTCTAAATCTTCTTTTATTATATGTAACAGCTAATATGTTGATTTATTTTCTCAT  
GTTATCTTGCATTCTATGTCATTCTACTTCATCCCTTCAACGTTTCGAGGTTTCTTGTACAGCCTTGAAGA  
TCTAACTATCCATTGGGCTAACAGCATAACTGTTCTATGCTCTTACCAACTTCCAACTGCCTACTTCAGCA  
AACTTGTAATATTGGCAGTAAGGAATTGTGGAAAATTGAGAACTTGATGTCTCCATCAGTGGCCAGAG  
GTGTTTTGAATCTCCGAATACTAAATATAGCAGGCTGCCAATCAATGGAAGAAGTGATCACACTAGAAG  
ACAACAAGGAAAAACAATTGACTAATGAGCCCGTATTTCCCCGATTGGAAGAGCTGCAGCTTGAA  
GGCTACCTAAGCTGAGGCATTTCTTCTGACGGAGCATGCTCTTAAATTTCCATTTCTTAGAGAAGTGAA  
GATTGATGACTGCCCTGAAATGAAGACGTTTGTACAACAGGAAATCTCTGTGAGTACACCGATTCTCAA  
ATGGGTGAACCGTGATGATGAGGTAAAGTAGATGATTTGAATAAATGGACACAACAGAAGTTCAATTC  
TAAGGTTTGTCTTGTCTTCTAGTTGTATAACTAATTAAGTCTAGCGCTCTCTTCCGCTTAACTAGTACT  
CGACTACTTAATAGTGATAACAATATTAAGATTGTTATTTATGTTTGTCACTTGAAGCAACTTTCTTTTACT  
TGCCAAGTAAATGTTTTATTTACTGAGCTAGTCATCTCTCTCTGCTCGATCCCGGGAACAAAAGGCA  
GGACAAGGCACTACCGATGGCTACCAATCTGAAGCTAAAGATGGCGATGAATCTAAAGCTACTGATGG  
GGAAAAATCTAAAGCAAGTGATGGTGAATCTGAAGCTAGTGATGACGATGAATCTGAAGCTACCTA  
TGCGGATGAATCTGAAGCTGCTGATGAAGACGGATCTGAAGCTACTGAGTCTCGAAAGGGTGAACCAG  
CTTGATTTTGGGGTGATGGCAATGAAGCCAAACCAAGTCATAGCAGAAGCTAGTGATGTCTATGAATCC

GAAGCTAGCTAGGAAGGTAATAAGTATTCGATGAAATGGTTGAAGTTAGCTCGAATATCACCTGATACC  
AATAGCGATGTTTGTGATATTATGAATGAAAAGGTGAAGCTTGAAGAAGTCTAGAGTAGCAGCCTATT  
ACATTTTTTTTCAAGCCCCTTTGATATCTTATTAATCAAGCGTGATAGAGGTAACAAGAGAAAGGGGTGG  
GATCTATATTATAATTCATGCAACAGTTTTTGCAAGAGACAATTCGTATTTGTATCAGTAATTTCTTTAGTT  
AGAAATTCTTTGATGTGCGGAGGGTTTTAAACATTCCACATTAATTGAGGAACTTTTCGGTTTGATTTGA  
TTCAA

>PGSC0003DMG402016979 LRR-RLPs

GTTTTCTTTTCAGACAATTAATTGAATCTATGGCATCATCTTCTTCTTATGCGAGTAATTCACAGTACTGT  
CCTCGATGGAAGTACGATGTCTTTCTAAGTTTTAGAGGTGAAGATACCCGGAGAAATTTACGAGTCACT  
TGTACCAAGGTTTGGACAATAGAGGAATATTCACCTTTCTAGATGATAAAAGGCTAGAGGAGGGCGATT  
CCATCTCAGAAGAAGTCTGTGAAAGCAATAGAAGAGTCTCAAGTTGCCATAATCGTTTTCTCAAAGAATTA  
TGCTACGTCAGGGTGGTGCTTGAATGAACTGGTGAAGATTATGGAATGCAAGGAGAAAGAAAATGGAC  
AAACAGTCATACCGGTCTTTTGTATGTGGATCCATCACATGTTGACACCAAAGTGAGAGCTTTGCAGA  
AGCATTGTCAAACACGAATCGAGGTATAAGGATGATGTTGAGGGGATGCAGAAGGTGCAAGGATGG  
AGGAATGCCCTAACAGCTGCCGCAGATCTTAAAGGATATGATATCCGTGACGGGTGAGTTAAAACACAT  
ATTTGCTTTTTATGAAAAGGAAATGGGATAATTTCCAGTCAAATTAGGATGCTTTTGTGAAACCTAGAC  
ATATTCTACTATAGAACAAGAATCTATACCTCCAATATGAGTTAATTTAGTTGGAGAGAATACATAATAA  
TCCTTCTAAACTATTCAAGTTTTGCAACTTTCATAATTCAACTATAGAGTGTTCTATTACCCTGAACTACA  
ATGTTTCTATTGATTAATGGTATGAGATACTCACAAATACTTCGACTTTCTCACATTTCCGCTATCAAT  
CTTCTATTTATATAGGATCGAAGCAGAGTATATTCAGCAGATCGTCGATCACATCTCTTCAAATTATGT  
AAGAGGGCTTATTCTTTATCTTCGTTGCAAGGTGTTGTGGGAATAAATGCTCATTTTGGGAACTAGAAT  
CCCTACTTCAGATAGAAATCAATGATGTTCCGATTGTAGGGATCTGGGGAATAGGCGGAGTTGGTAAAA  
CGACTATAGCAAAAGCCATCTTTGATACTCTATCTTATCAATTTAAAGCTTCTTGTTTTCTTGCGAATGTCA  
AAGAAAATGCAAATTATAATCAACTGCATTCTTTACAAAATACCCTTCTCTGAACTGTTAAGAAAAAAA  
GATGATTACGTCAATAATAAGTATGATGGAAAGTACATGATTCAGAGTAGACTTTGTTCTAAGAAGGTG  
CTAATTGTTCTTGATGACATAGATCATGGTGATCATTTGGAGTACTTAGCAGGTGATGTTGGTTGGTTTG  
GTAATGGCAGCAGAATTGTTGTAACAAGTAAAGTAAAGTAAAGTAAAGTAAAGTAAAGTAAAGTAAAGTAAAG  
AAGTGTCTACTGCCTAATGAAGAAGCTGTTCAATTATTCAATCAACATGCTTTTCAGAAAAGAAATTC  
AGATGAACGTTTTATGAAGTTCTCATTGGAGGTAGTAAATCATGCTAAAGGCCTTCTTTAGCCCTCAAG

GTGTGGGGTTCTTTGTTGCATAAGAAAGACCTAACTCAGTGGAGAAGAACTATAGACCAAATAAAGAAA  
AACCTAATTCAGAAATTGTTGAAAACTCAAATAAGTTATGATGGGTGGAACGTGAAGAAAAAGAG  
ATATTTCTAGATATCGCATGTTTCTCCGTGGATTTGAAAGAAAAGAAGTCATGCAGATCCTTGAGAGCT  
GTGATTTTGGAGCTGAATGCGGATTGGATGTCCTAGTTGACAAATCTCTTGTTTCATCTCCAAATATAA  
TGTGATTGAAATGCATGACTTGATTCAAGATATGGGTAGATATGTGGTAAAAATGCAAAGGATTCCGGG  
AGAACAAGCAGACTCTGGGATGTTGAAGATTTGAAGATGTGATGGTCAACAATACAGTAAGTAGGC  
TAAACAATGCTATAATTCAGTTTTAGTCTCCATCTTCTATTTTTTATTTAAAAGATGAAAATTGTTGGT  
ACCCTATCAATTACAACCTCGTTCTTACAACATGAAAACTTTTCGATTGGACTTTAAAGAACTAGTTG  
AAAATTGTATTACTAGAAATTAGAAATATAGAATTAATTGCATAAAGTATTTCTCTTTAGCGACATTTTTC  
TTAACTAATATTGTACCTTAATTTTTATTTAATGGTCTCTTCAAATGCAATAATAAATAATACAAAACATAAC  
GAAATTTGGCATTGCAAACAGTTAGAAAGTAGTCATATTGGCATGCAAATTTTATACAGATATTTGAAGT  
TATACTTTGTAACTAATGAACCTTTAACAGGGGACCAAGGCAATGGAAGCAATCTGGACACATGGTG  
TTCAAAAATTATGCTTTAGCAAAAAAGCCATGAAAACATGAAAAGGCTTAGATTATTATCCATCATTAG  
TTTTAGTACACATGATGACTCCATTGAGTACCTGCCCAACAACCTGCGTTGGTTTGTCTGT CATAGTTATC  
CTTGGGAGTCATTATTAGAAAATTTGAACCTAAGAAGCTTGTTTGTCTTATCTCCAGAGGAGTCCCTG  
CGTCAATTATGGACCGGAATAAAGGTACAATTGTTGAATTCAATTTTCATTATTTTTCTTTTTGTCAAATAC  
GTACATAGATAGACTCTCAAATTTAAATAAGTTTTGGTCTAAAATTGTTGGGGTGGTCCAATTAGAGTC  
AAAAGTGAAGGACCAAGTTTCGTTGGCTATTTTGTATCAAGAATTCGAATTTGATGAAATAGTTGTTGAGC  
TTTTAATTTTAGCATAAAAATACTTAGTTTAGTTGACATAAAGGATAATTTTATATAAATTGGGTTAGAG  
CAAATTTGATTCAATGACTATGAGAGTAAGATATTTTTATTGGTCTACTAGCCAAATCAAATTTATCCTG  
GGCAGCATCCTAATTCTCATTCTTTCTGTGTTTTGAATAGCAGCATTGCGCTTTTGCAGAAAGCTAGATC  
TTAGAGATTCCGAAAGGCTGATTCAAACACCAGATTTACGCAAATGATAAATTTGGAGTATTTGGATCT  
GCGTAACTGTAGTGATCTTGAAGAGGTTACCGTTCCTTGGAGTGTTGCAGAAAACCTATTGTGTTAAAT  
TTGCAGAGGTGTAAACGCCTAAATAAGTTTCCATGTGTTAACGTGGAATCCCTTGGATCTCTGATTCTAC  
TACATTGCTCTAATTTGGAAAAATTTCCAGAAATCTTTGGAAGAATGAAGCCAGAGTTAGAGATCAAGAT  
GAGCTGGTCTGGGCTAAGGGAAATACCATCATCTATTATTAGCAATACGCATGTCATCTTACAGAGTTA  
AGTTTGAGTGATATGAAAAACTTGTAGCACTTCCAAGCAGCATTGTCAGTTGAAAGGTTTGGTGAAG  
CTGGATGTGTCATACTGCTCAAACCTTGAAGCTTGCCAGAAGAGATTGGTTATTTAGAAAACCTGGAG  
GAGCTTCATGCTAGCTTTACTCTAATCTCACGACCTCCGTCTTCCATCATCCGCTTGAACAAGCTTAAAT

CTTGAGTTTTAGATTAGACTTGAAACCTAACTCCTTTGCCACAAAAGAATCAAAATATAGAGTTTCCTTTG  
TGTTCCCTAGGGTGAATGAAGGGTTACGGTTGTTGGAAATTCTGGATCTCAGCTACTGCAATCTAACAG  
ATGGAGGACTTCCAGAAGACATTGGATGTTTATCCTTTTTGAAAAAGTTGAATCTCAGGGGAAATAATTT  
TGAGCGTTTGCCTCAAAGCATAGCCCAACTTGGTTCCCTTCGATCCTTGGACTTATCACAGTGCATGAGT  
CTTAAAGAGTTTGTAGGTGTTAACATGGCTGAAGGGTTATGGTCGTTGGAAATTCTGGATCTCAGCTACT  
GCAATCTAATAGATGGAGGACTTCTGGAAGCCATTGGATGTTTATCCTCTTTAAAAGAGTTGAAGCTCAA  
TAGAAATAATTTTGAGCGTTTGCCTCAAAGCATAGCCCAACTAGGTTCTCTTCGATTGTTGGACTTATCAG  
AGTGCATGAGGCTTAAAGAGTTTCTAGGTGTTAAGATGGCTGAAGGGTTACGGTCGTTGGAAATTCTGA  
ATCTCAGCTACTGCAATCTAATAGATGGAGGACTTCTGGAAGACATTGGATATTTATCCTCGTTGAAATT  
CTTGATCTCATTAGAAATAATTTGAGTGTTTGCCTCAAAGCATAGCCCAACTAGGTTCTCTCAATTCTT  
GGACTTATCATATTGCAAGAGGCTCAAAGAGTTGCCAGGTTTCACGGGGAGTGCAATAACTTGGATACT  
TTGGATCTCAGTTTCTGCGATCTAACAGATGTAGGACTTCTGGAAGACATTGGATCCTTATCCTCTTTGAA  
ACACTTGAAACTCAAGGGAAATAATTTGAGTATTTGCCTCATAGCATAGCCCAACTTGGTGCTCTTCAA  
ACCTTGGACTTATCAGATTGCAAGAGACTTAGACAGCTGCCAGGTTTCACAGGGATGCAATACTTGGAT  
ACTTTGGATCTCAGTTTCTGCAATCTAACAGATGGAGGGCTCCGGAAGACATTGGATGCTTATCCTTTTT  
GAAAAAGTTGAATCTCAGGGGAAATAATTTGAGCGTTTGCCTGAAAGCATAGCCCAACTTGGTGCTCT  
TCGAATCTTGGACTTAATAGATTGCAAGAGGCTTACACAGCTGCCAGGATTTCCACAGCAATTAGATACA  
ATACGTGCAGATTGGAGTAATGATTGGATCTGTAATTCATTGTTCCAGAATTTCTCAGCATTGCAGCATG  
ACATCTCTGCTCAGATTCATTGTCACTAAGAGTGTTACCCTCACAGGGAATATACCAATACCAAGATG  
GTTCCACCATCGGGAAGGTGGTAGAAGTATATCAGTCAAATTGCCTGAAAATTGGTATGTAAGTGACAA  
CTTCTTGGGATTTGCTGTATGTTACTCTGGCAAATTAATTGACGCAATAGCTCATTTGATTTGTTATGATG  
AGAGGCCAGTGACGCGTATCACCCAGAACTTGCCTTGTCCAATCATTAGTAGAAGTTCAGGAATCTCC  
TATTCATTTTTTCTTGGTACCTCTTACTGGCTTGTGGATAAATCTAAGGCAAATGGAAAAACACCAAATG  
ACTATGGGCGCATCAGGATATTTTCCACTGGAGAAATGAAGGAGTTTGGACTTCGTTTATTGTATAAAG  
ATAAACCTAAGATTGAGGCGAGTTGCTCATCTTCTCAGAAACAATGATGAACTAACAGCCATGATGATA  
GTGAACACCAAGATGAAGCTAGACTATCCGTTTTAAATGAGAATGATCATAACACCAGAAGCAACTTTTT  
TTTTCTTCAAATTTTATAAGAATAATTTTGTACAGAGCCACATTTTGTGTTTGTGGATGGTGAAATG  
GAGGTTTATTTTTCATGCTCAATCATT

>PGSC0003DMG402016981 LRR-RLPs

ATGGCATCATCATCTTCTTCTGCGAGTAATTCACAGTATTGTCCTCCATGGAAGTACGATGTCTTTCTAAG  
TTTCAGAGGAGATGATACCCGGAATAACTTTACAAGTCACTTGAACAAAGGTTTGGAAAATAGGGGAAT  
AGCCACCTTTCTAGACGATGAAAGACTAGAGGATGGCGATTCCATCTCAGAAGAACTCATGCAAGCGAT  
AGAAGAGTCTCAAGTTGCCAGAATCGTTTTCTCAAAGAATTATGCTAAGTCAAGTTGGTGCTTGAATGAA  
ATAGTGAAGATTATGGAATGCAAGGAGAAAGAAAATAGACAAACAGTTATACCGATCTTCTATTATGTG  
AATCCATCACATGTTGATACCAAAGTGAGAGCTTTCAGAAAGCTTTTGCCAAACACGAATCGAGGTAT  
AAGGATGATGTTGAGGGGATGCAGAAGGTTCAAGGATGGAGGAATGCCCTAACTGCTGCTGCAGATCT  
AAAAGGACATGATATTCATGACGGGTGAGTTGAAACAAATAATTGCTTTTGATGAAAAAAAAATAACA  
ATATGTTTCTATATATTATCCTGAACTATAATGTTTCCTATTTAATACGCTCTTGAACAATAAAATTATGAA  
ATTACTTTCTAATACTTGACTTCCTCACATTGTCAACAATCAATCTTTAATTTATGTAGGATTAATCAATCA  
AAGAAAATTGATCAGATCGTCGACCACATCTGTTCCAACTTTGCAAGAGTGCTCGTTTTTTTTCTGATTT  
GCAAGATGTTGTGGGAATAAATTCTCATTTAGAGGATCTAAAATCCCTACTTCAAATAGAAATCAATAAT  
GTTCCGATTGTAGGAATCTGGGGAACAGGTGGAATCGGTAAAACAACAATAGCAAATGCCATCTTTGAT  
ACTCTATCCAATCAATTTGAAGCAGCTTGTTTTCTTGCGAATGTTAAAGAAAATGCAAAAAAGAATCAAC  
TGCATTCTTTACAAAATACCCTTCTGTCTGTACTATTAAGAAAAAAGATGATTACGTTAGTAATGGTTAT  
GATGGGAAGCGCATGATTAAGAGCAGACTTTCTTCTATGAAGGTGTTGATTGTGCTTGATGACATAGAT  
CATGGTGATCATTTGGAGTATTTAGCAGGTGATGTTGATTGGTTTGGTAATGGTAGCAAAGTTGTTGTA  
ACAAC TAGAAACAGAAAATTGATAGAGAATAATGATGCAATATATAAAGTGCCTACACTACCTGATGAT  
GAAGCTATGAAATTGTTCAATCAACATGCTTTCAAAAAGAAGTTCCAGATGAGTGTTTTAAGAAGTTCT  
CATTGGAGGTAGTAAATCAGGCTAAAGGGCTTCCTTTAGCCCTCAAGGTGTGGGGTTCCTTGCTGCATA  
AGAAAGGCATAGATAAGTGGAAAAGAATTGTAGACCAAATAAAGAAAAACTCTAATTCAGAAATTTTTG  
AAAACTCAAATAAGTTATGATGGATTGGAGCCCGAAGAGCAAACGATATTTCTAGATATCGCATGTT  
TCTTCCGAGGAGATGAAAGAAAAGAAGTCATGCAAATTGTTGAGAGCTATGATTCTAGAGTTGAATACA  
TATTGGATGTCCTAATTGACAAATCCTTTGTGTTTCATCTCTAAATATGATAGAATTGAAATGCATGACTTG  
ATTGAAGATATGGGCAAATACATAGTAAAATGAAAAAGATTCCGGAAAACCTAGCAGAATATGGAA  
TGCTGAAGATTTGGAAGATGTGATGACTGACAATATGGTAAGTAAGCTAAACAATGCAATAGTATTCAC  
ATTTCAAAGATATATATACTCTGTTTCCTCTAGCTTCATATACTGACGCACAAGTCATTTAAGTTGTTTCA  
AATCCACACTACCTAGTTTGTATCTCATGTTAATAAGTTATGAATAACCACTTAATATATTTAATCCTAT  
ATCACTCTTTGGATTAACCTGAAAGTTATACAATATTTAATTTGTTCACTAATTTAATCAATAATTTTTT

AAAAGCTAATATCACCATTTATTTACCCCAAGTAATTTTTATTAGTAAAAATTCAGAAATGAAAAATAAA  
ATTTAGGAGGGCCAAAACTTAATTACCTTACTAATCACTTGATCATTATTAATTTATTTTCATTTATAA  
GATTACAGTTATTGACACTATTTTACAGTTACCATTTTTGTTTTATGAGAGCATGGAAAACTTTTAACTTTTG  
TCTAATAAACTTCTCCAAAAGGCCAAAAATGTATCAGTAAAAATAAAATTAGCTACGCAAAGCATTCTC  
TTAACTAATATTGTACCTTAAATTTTATTTGATGGTGCTGGCTCTTCAAGTACAATGACAAAAATTAGGGG  
TAGAGTAAGAAAACAATGATATTGATATGTGGATTGTACATGATAAGTTGATTCATGATCTTTTTATAGG  
GGACAAGGGCAATGGAAGCAATCTGGTTAGTTATTCTGAAAACTATGCTTTAGCAAAGAGGGCAATGA  
AAAATATGCAAAGGCTTAGGATATTAAGCATATTTCTAAAGACGGATCTTATAGGACACCCTACTTCAT  
TAAAACCGACTCCAATTGCCCTGATGGCTCCATTGAGTACCTGCCCAACAACCTTGCCTTGGTTTGCCTGG  
TTTGATTATCCTTGAAGTTATTGCCAGAAAATTTAATTCCAGAAGGCTTGTTTCATCTTGATCTCCGATG  
GAGTTCATTGCATTATTTATGGAATGAAACAAAGGTACCATTCTATTTAGATACTTCTATTTTTAATTGT  
CCTAGAATTATATATGATTCTTGCGTTTAAATAAAATATGTTATTTATTCCATACTCAAATAATGTATT  
TCATCATTCTTTCTGTGTTTTGAATAGCTGCCGCAATTTCTTCTCTACAAAGGATAGATCTATGTGGCTCT  
AAAAGTCTGAAGAGAACAGCAGATTTTGAGGGGATGCCAAATTTGGAGTATTTGGATCTTTGTGGATGT  
TCGAGTCTTGAAGAAGTTCATCCTTCCCTCAAGCATTGCAAAAACTTATCCAGTTAAATCTGTCTGATTG  
TACAAAACCTGAGAGGTTTCCATATGTTAATGTGGAATCTCTGACTCTAGAATACTGCTCTAGTTTAGAG  
AAATTTCCAGAAATCCTTGAATAAGGGAACTGCCATTATCTTTGAATGGCATGGAAAACCTTGTATCTC  
TTCCAAGCAGCATTGTGTAAGTCGAAAGGTTTGGTGAAACTATCTGTGTCGAATTGCTCAAACCTTGAAGG  
CTTGCCAGAAGAGATAGGTGATTTGGAAAACCTTAGAGTATCTTAATGCCGACTGTACTCTAATCTCACAA  
CCTCCGTCTTGATCGTCCGTTGAACAAGCTTAAAAGTTTGAGTTTTGGACAACATAGATCAGAAGATG  
GAGTGTACTTTGTGTTCCCTCTGGTGAATAAAGGGTTACTCTCATTGGAATATCTGGATCTCAGTTACTG  
CAATTTAAAAGATGGAGGACTTCCAGAAGACATTGGATCCTTATCCTCTTTGAAAGAGTTGAATCTCAGT  
GGAAATAATTTGAGCATTTCCTCAAAGCATATCTGAACTTGGTGCTCTTCGATGCTTGATCTTATCAGA  
TTGCGAGAAGCTTACACAGCTGCCAGAATTTCCACAGCAATTAGATACAATATATGCAGATTGGAGCAA  
CGATTGGATCTGTAATTCGTTGTTTTCAGATTATGTCATCATTGCAGCATGACATCTGTTCTTCACATTCCT  
GTCACTAAGAGTGTGTTGAGTTGGGTGGTGGATATCCCAAGTTGGTTCAAGTATCAGGGAAATGGGCAC  
AAGTGTATCAGTCAATTTGCCTAAGAATTGGTATGTAAGTGATAACTTCTTGGGATTTGCTGTATGTTATT  
TTGGCAAACCTAATTGATTGCATCACAGCTCATTGATTCCCTTATCATGTGATGATGGGATGTCGTCAATG  
ACCCACGAATTTGCCTTATCCAACAATTCACAATATTCTGATGAATGGAATATGAAATTTTTGTTGGTACC

TCTTGGTGGCTTATGGGATGCATCTAATGCAAATGAAAAACACCAAATGACTATGGGTGCATTAAGTT  
AGATTTTATTGGAGAAAGAGATGATGATTTTGGAAAAGAAAAGAAAATTGGAGTTCGTTTGTGTATAA  
AAATGAATCTGAGCTTTGCATTGGGATAATGAAGAGCAGATATGAAGAAGAGGCCACTTGCTCCTCTCC  
TAAGAAACTCTTGCAGCTCTTCCACAAGCCCGGGATTATAG

>PGSC0003DMG402019148 LRR-RLPs

ATGCCGTTGTTGAACTTGTGCAGCAACTTGACATCTCTCGTAGATCTTATTGTGGATGATGTGAAAGAGC  
TCACTTGTTTTCCAGATGAGATGCTACGTAACAATGTTTCTTGAACATCTACTGGTCTTAAATTGCCGA  
GAGTTTCGCGAATTGCCACAAAGTTTATAACAATCTCCGTTCTCTTAAGAGCTTAAGGATTGAGCGCTGCA  
ACAATTCAGTTCCTTCTGTTCCAGTGGAGAGAATCATTTACTTCGCTCCAAAGTCTTGAGTTGTCC  
AATTGTGATGCCTTAACCAGTTTACCAAGTGAAATGCTAGAGCGTTGTCGGTCTTGGAACTTTGAAGG  
TCAACAAATGTAACAACCTTAGTTTCTTCCCTTACATGTGTGGGAAATGCCTTCACTCTCATATTTGAAT  
ATATCAAATGCCTCAAATTGGATAGTGTACCTGCACAGGGTCTTACCGTCTCACTGGATTACAGGAAT  
TGTGCATTGGACCTTCTCAGAGACGGTGGATTTGAGGCATTCCAATTGATATTTAATGGCATTACAGCG  
GCTATCGTCCCTTCTAAATTAGAGGTGTATGGGAATAGGCAATGGGATTCTCTGCCCTATCAGGTTATG  
CAACTTCTTCCCTAACAGAAATCGGAATAAATGATTTTGGAACTCAAACCTCTTCTGATAGATTTGGAA  
ATCTTACTTCTTGAACATTAGAGCTAGTGAGGTGCAGACGACTATTCAGGACTTAA

>PGSC0003DMG402019681 LRR-RLPs

GAGTACTCCAAAATGGCAGCTCTGTTTCAAACCAATTTTCTCTCTAAAATCCTCTCTTTATCTCTCTT  
CATCTCCATCTTCTTCTCACCATATCTCATTCCGACGATTTCTCAGCTCTTTTAGCCTCAAATCCCGAGCT  
GATACGTGGAATTTTCTCACTTCATGGTCTAGAAATGCCCCCTGTTCTTCATGGATAGGTGTA AAAATGTCA  
TCCAATTACTCGTAGAGTCGTAAAAATTGTA CTCAATCACTTAAATCTCACCGGATCAATTCATCCATTGA  
TTCATCTTACACAAATTCGGCATCTAAGTTTACACCACAATTCTCTCAGTTCGATTCCGAATTTGATTTTT  
GGCCTAATCTCAAACACGTTTACCTCTCTAACAACAAGTTTTCCGGTGAATTTCCGCCAGGAATTTACCTT  
TTGAAGCGACTCAGGCGACTTGATTTGTCATTTAATGAGTTTTCCGGTGAGATTCCGGTGAAGGAGTTG  
AATCAATTGCCGCATTTGATGACTCTGCGTCTCGAGTTAATTCTTCTTAGCGGATCACTTGGTGCTGATGA  
AAAAAAACTGTTGCTTCAAGTTAAGGAATCAATGTTTCTGGGAATAACTTTTCTGGGAAAATCCCAAAT  
TGGTTATCAAATTTCCAGTGGCAGCTTTTGCAGGTAAAGTGCGGGAAACGAGCAGATTGGATCAAAT  
TGAACGGATCAAACGGATAAAGTTCATAAATAACCATTTTTTAGTTCGTGTAATTGAGAATTAACCATG  
GTCATAGAATATTGTCGTAGAGTTTCACTTGTGAAATTTGAAACGTTACCACAATGACTATTTTCTCAATT



ACAAGATTGAAAAATGGCTAGGTGCGAAACAGGTCTTGATTAACCGTTCAAATTTGTCGGGTCAAAT  
GAGTGAAATAGTGAGGAATTTGCACAATTGGCCTTAAAAGGTCACTATTTAGATTTTATCCCCCTATGC  
TAGTGAGCTAAAATTTGCATTCAACTTCTTCTGAATGCGGATTTTAGCTGACTAAGCTAACGATTACAAA  
ATTTAAAAGAAA

>PGSC0003DMG402021049 LRR-RLPs

ATGGGCAATGGAAATCTTGCAATTGTTTCTGCTATACGCGTTTCTTTGTCAACTTGCTTTCTTTCGTCCTTA  
TCTCATTTGTGCCCAAAGATCAATCTCATGCTCTTCTACAATTCAAGCACATGCTTACAATAAGTCCTAA  
TGCTCCTGATTATCGTTTCGACATAACAGACCACTTGATTGATTCAGTCATATCCAAAACTCTTTTCGTGGAACA  
AGAGCACAGATTGTTGCTCTTGGGATGGAGTTCATTGTGACGAGATGACAGGACAAGTGATTGAGCTTA  
ACCTCCCTTTCAGCAAACCTCAAGGCAGGTTTCATTCCAATAGTAGCCTCTTTCAACTCTCCAATCTCAA  
AGGCTTGATTTATCTTATAATAATTTCTCTGGGTCGTACATTTACCTAAATTTGGTGAGCTTTCTAGTTTG  
ATGCATCTTGATTTGTTAGATTTTAGTTTTACAGGTCTAATCCCTGAAGAAATATCTCGTCTTTCAAAATTA  
CAAGTCTTCGTATCAATAGTGATCTATATGGTCTTAGATTCGGACCTCACAATTTTGAAGTCTCCTTAA  
GAACTTGACCCAATTAAGAGTGCTCGACCTTAGCTATGTAGACATCTCTCCGCTATTCTCTAAATTTCT  
CTTCTTATTTAACTACTCTACAACCTTGGAAATACACAGTTATATGGGATATTGCCAGAAGAGTTTTCCAC  
CTTTCAACTTGAAATCTCTTTATTTAGAAGACAATCCCCAGCTCACTGTTAAGTTTCCACAACCAAATG  
GAATAGCAGTGCATCACTTATGGAGTTAGATCTCTATCGTGTGAATTTTATTGGCAAGATACCTGAATCA  
TTTAGTCATCTAACTTCACTGCGTAGATTGACAATAGCTTCTTGTAACTCTCTCAGGCTCTATTCTAAACCT  
CTATGGAATCTCACCAACATAGAGAAGTTGGACCTTGGTTATAACCATCTTGAAGGACCAATTTCCGATT  
TCTTTAGATTTGGAAAGCTGTGGTGGTTATCACTTGCAAATAACAACCTTTGATGGCCAGCTTGAGTTTTTA  
TCCTTTAACAGAAGCTGGACGCAACTTAAACGGCTAGATTTTTTCATCCAATTCCTAACAGGTCCAATTCC  
TTCTAATGTAAGTGGTTTGCAAACCTAGGATCACTCAGCTTGTCATTAAACCACTTGAATGGGAATATA  
CCATCATGGATATTCTCCCTCCATTACTTGAATTGTTAGACTTGAGTGATAACCATTTCAATGGAAACAT  
TCCGGACTTCAAGTCAAATGGTTGTTTCTTGTATTCTAAAACAAAATAAGCTGCAAGGTCCTATTCCAA  
AGTCACTCTAAACCAGCAGCGCTTACAGTTTCTTGTCTATCACAATAATCTCAGTGGACAGATCGC  
TTCAACAGTCTGCAATCTGAAAACACTACAAGTGCTAGATTTGGGCAGCAATAATTTGGAGGGAACAAT  
CCCACTATGTTTGGGTGAGATGAGTGAACCTTGGGCTTTAGATTTAAGCAACAATAGTCTTAGCGGGAC  
AATTAATACTAATTTTAGTATTGAAACCACTTAGAGTCATCAAATTTGATGGGAATAAGTTAGAGGG  
GAAAGTCCCGCAATCTTTGATCAATTGCAAAAATTTGGAAGTCTTGATTTAGGTAACAATGAGTTGAGT

GACACATTCCTAAATGGTTGGGAGCCCTACCTTATTTGCAGATTTTAAACTTGAGATCAAATAAGTTCTA  
TGGCCCTATAAAAGATTCAAGGACTGACAACTGTTTGCTCAAATTCTAGTCATAGATCTCTCATTCAATG  
TATTTAGTGGAGATTTACCAGTGAGACTTTTTGAGAGTTTTGAAGCCATGAAAATAATTAGTGAGAGCA  
GTGGAACCCGAGAGTATGTAGGAGCTGTATATTCTCCTTATTACACTAATTCCATGATAGTGACAACAAA  
GGGACGGGATCTTGAAGTTCTCAAGTTTTGACTACAGACCTAATTATTGATCTCTCAAGTAATAGATTT  
GAAGGTCATATCCCAAGCATTATTGGAGATCTCATTGGGCTTCGCATGTTGAACTTATCACATAATCACTT  
GGAAGGTATTATACCAGCATCACTGCACCAGTTATCTGTACTTGAATCATTGGATCTCTCATCCAACAAA  
ATCAGCGGAGAAATTCCACAACAACCTGCATCCCTCACATCACTTGAAGTCTTAAATCTCTCTCACAATCA  
TCTTGTTGGACGCATCCCCAAAGGAAACAATTTGATACGTTTGAGAACAGTTCATACCAAGGGGAATGGT  
GGGTTACGTGGATTTCCACTCTCAAAGATTGTGGCGGTGATGATGGGGTACCACAACCGGAAGAAGA  
GGGAGATTCAACAATGA

>PGSC0003DMG402023866 LRR-RLPs

ATGCAAGTTCTTGATTTAGGAGATAATCATCTCAACGACACATTCCCGATGTGGTTGGGAACTCTTCCTG  
AGTTGAGAATTTTAAGCTTGAGATCGAACAAGTTGCATGGACCCCTTAGAACCTTAGGAAGTGAAAATA  
TGTTTCTTGAGCTTCAAATCTTAGATCTCTCTTGCAATGCTTTCTCTGAAAACCTTACCGACAAGATTGTTTC  
GACATCTGAAAGCCATGAGGACAACCTGATCAATCAATGAAGGCATTAAGTTTTGAATTCATCCATATTA  
CCTAGACTCGGTAGATGTCGTAACAAAGGGATTGGAGCTTGAAGTTGTGAGAATCTTGTCTTTGTACAA  
CGTTATCGATCTTTCAAACAACAATTTGAAGGACAAATTCCTTGTGTTCTGGGAGATCTCATTGCACTCC  
GGGTTTTGAATCTGTCTCATAATAGATTTCAAGGTCATATACCACCAACACTTGGAAATTTATCTTTGGTT  
GAATCGTTGGACCTTTCATTTGCCAGCTCTCGGGAGAGATACCAGAACAATTGCTTCTCTTACAGCTC  
TTGAATTTTTAAATCTTTCCACAATAATCTTGAAGGATGCATCCCTAGAGGACCTCAATTTGCCACATTT  
CAGAACAATTCATACAAAGATAATGATGGATTACGTGGATTCCCACTTTGAAAGATTGTGGTAACTATG  
ATGGGGTATTAGAGACAAATGATACCATAGCTGTGCTAGACGATCAAGAAAGCAATTCTGGATTTCCAA  
ATGATTTTTGGAAAGCTGCTTTATGGGCTATGGAAGTGGACTATGTATTGGATTATCCATAGTATATTG  
CATGTTCTCAACTGGAAAGTCGAGATGGCTTGCAAGAACCATTGAGAAGCTGGAACACAAAATTATTA  
ACTAAGGAGAAAGAAGCAACGGTGTCAAAGGAATTATAGAAGATGA

>PGSC0003DMG402025507 LRR-RLPs

GAACAATCCCACCACAAATCGGTTCACTAGCCAAGCTTCAGATCCTCCGTATATTTGACAACCATTTAAAT  
GGCTCTATTCTGAAGAAATAGGTTACCTAAGGTCTCTTACTAAGCTATCTTTGGGTATGAACTTTCTTAC

TGGTTCATTCCAGCGTCATTGGGGAATTTGAGCAACTTGTCTTTTTGTATCTTTATGATAATCACTTTTC  
TAGCTCTATTCTCGAGAAATAGGTTACCTAAGGTCTCTTACTGACCTACATTTGGGTAATAACTCTCTTA  
CTGGTTCATTCCAGCTTCATTGGGGAATTTGAGCAACTTGTCTATTTTGGTCTTTTTTATAATCACTTTT  
CTGGCACTATTCTGAAGAAATAGGTAACCTAAGGTCTCTTACTGTGCTAGCTTTGGGTAGAACTTTCT  
TAGTGGTTCTATTCTGCTTCATTGGGGAATTTGAACAACCTTGTCTTCTATGTTTCTTAATGATAACAACCT  
GAAGGGAAAAGTTCCGCAATGTTTGGGTAATATCGGTGGCCTCCAGGTTTTGTCGATGTCATCTAATAG  
TTTCAGTGGAGAGGTCCCTTCATCTATTTCCAATTTAACATCACTACAAATACTTGATTTGGGCAGAAACA  
ATCTGGAGGGAGCAATCCACAATGTTTTGGCAATATTATTAGTGGCCTCCAGGTTTTGATATGCAGAA  
TAACAACTTTCTGGGACTCTTCCAACAAATTTAGCATTGGAAGTTCACTTAAAAGTCTCAACTTGCATG  
GCAATGAACTAGAGGGGAGAATCCCTCGGTCGTTATCCAATTGCAAAAAGTTGCAAGTTCTTGATCTGG  
GAGATAATCACCTCAATGACACATTTCCCATGTGGTTGGGAGCTTTGACAGAGCTAAGAGTTTTAAGAT  
TGACATCGAATAAATTGCATGGACCCATAAGATCTTCAGGGACTGAAATCATGTTTCTGATCTTCGAAT  
CATAGATCTCTAACAATGCCTTCTACAAAAGACTTACCAACGAGTCTGTTTCAACATTTGAAAGGCAT  
GAGGACAATTGATCAAACAATGAAGTTACCAAGCTATGAAGGAAATGGAGATTACCAAGACTCAGTGG  
TAGTTGGATCAAAGGGATTGAAGCTAGAAGTTGTGAGAATTTTGTCTTTGTACACAGTTATAGATCTTTC  
AAACAACAAATTCCAAGGACATATTCCTGGTGTCTGGGAGATCTCATTGCGATTCGGGTAAGTGAATTA  
TCTCATAATCGATTGCAAGGTCCTATACCACCATCACTTGGAAAGTTTATCTATAGTGGAAATCGTTGGACCT  
TTCGTTTAACCAGCTTTTCGGGAGAGATAACCACAACAACCTTGTCTCTAACGTCTCTTGAATTCTTAAATC  
TCTCCACAATTATCTCCAAGGATGCATCCACAAGGACCTCAATTCCGTACCTTTGAGAGCAATTCATAT  
GAAGGTAATGATGGATTACGTGGATTCCCTGTTTCAAAGGTTGTGGCAATGATCCTGTGTATGAGACA  
AACTATACAGTGTCTGCGCTAGAAGATCAAGAAAGAAATTCTGAATTTTTCAATGATTTTTGGAAAGCAG  
CTCTGATGGGCTATGGCAGTGGACTATGTATTGGATTATCCATAATATATTTCTTGATCTCGACTGGAAA  
TCTAAGATGGCTTGCAAGAATCATTGAAGAACTGGAACACAAAATTGTCATGCGAAGGAGAAAGAAGC  
AGCGAGGTCAAAGAATTACAGAAGAAAAATAATCGCTTCTAGACAAGTTACCAGTAAGAAGAATTTG  
ATTCAGAACTTC

>PGSC0003DMG402026432 LRR-RLPs

ATGCAAAGCCTAAGATATCTTAATGCACGTGAAACAGGTATAAAACAATTGCCTGGATCTGTTGAAATG  
CTACGAAATCTTGTAGAATTGGAAATGGGAGGCCAATACTTAAAGGCCAAAAGGAGTTTTTCTCAAAGA  
AGAGTACGCCCCATAGTGTCTTGTCAAATTTATTTTGAATCTACGCCTTTCATATTGTGGTTTCTCGGA

GGCTGATGTTCCCTAGGGATATTGGGAGTTTATCCAACCTTATATTTTTTAGATTTGAGCGGCAACAGTTTC  
CTCTATCTACCCTTGATTTTTCCAAGTTACCATTGTTGACGTCCTTATATTTGAATGATTGTGAGAACCTT  
CAAACACTCCCGTCAATATCAAATTTAGAGCACCTTGCAATTGTTGAACTTAGGAATTGCCAAAACTGG  
TCAAGATTACAGGGTCGGACTACCTCCCTTCAATAGAGAAGGTGGACATGATTAATTGTAICTCGTCTGCA  
GAATCCATTCAATGAAGGCTTCTTTAGTGCCCATGCTCTATCAATTCCGTCTAGAAAACATCAACGGTATA  
AGGTTAGTCCCTCTCCCTCTCTGATCTCTCCCTCGTATCACATTAATAATTAATGATCTAATTGTGTCTTAA  
TTTGTCTGATGAAGATGTCATTACAAATTAATCTCGAAAGCAATGAGATTCCAGATTGGTGCAGCAATAA  
AGTAACAGCTCCATCTATCTGTTTGACTATGCCACAGTACATAATAATAAGTTCTTGGGAATGGTTCTCT  
GGTTTGGTTGCCACTTTGGCAATGTATCCTCCTATCTTCAAAGCTTCATTGTTACTGTTGCCCATGTAGAG  
TCTTCAACTTTTTGGTGGAGTTCGCATTTTAATATACCTGACAGTCAGGGAGAAATATCACGTGTATATTA  
CTTCTTACTCAAACAATAGACCTTTTAATGGCCTGAAGATCAAAGGCGGGGAACAGATAACAGTAGA  
GGATCGCACTGGCGGAGCCGTTGTAAAGAAGATAGGAGTACGCTATTATATGTAGATCAACATGGTAA  
TGTTACTTCTTTCCCGGCAGTTGTGGATCATTCTTATACTCCCTCCTACCCACAAAGACTTTCAGCATGGTA  
TATCAACTCAAACAACAACACATCCAGTCAAATCCACAAGTGAGGTCCGTATTAGTGGATATCAAC  
GAGCAAAGTTCTGAGAATGTGTTATGTACCATGGAAAATGTGTTCCATAGAAGTAGGCCATGGACCTGG  
ATCTACCAAATGATAACAATGCCTCTAAAATGTCTTTTTGGAAAATGTTTCTCCGGAGAATAAGTAGGTT  
TCTTACTTATTTTTCTTGTGATCGTTATGTAAGAAAAACGTTTGTTTCATAAAGTATTTGTATATAACACCTAA  
GACACTACTATCAATCTGTAATATTCAAATTCTCATCCAACACTACAAGCTGATTTCGCTAAAAAGTATTTTT  
CATTTAGATTTTTTTTTCATCCGTCAGATGCTAACCACTCGAACTTCGATCCTAGTTTTGTCATCCAATTA  
AAATTCGCAAGCGTAACTAATTAAGGTGTACATATAGACATCTCAACTAACAGCTAAACACTCCAAC  
CACCTTAATGTGTCTCGTGGACACCCTATACTGACGTGACACACAAGCTTAAAGTACAAAGAGGAAAA  
CTTTGAACTAAACAAAAGTATATTGTACAATTAATCTATTCAATTAGTACAATTAAGTTAGAAACAA  
ATGGTATTATCATGATTTTGAGGAATATACAAATATTATATTTCCCATACAGTCATACACCATTTTACAGT  
ATTTTGTACATAAATATTATGATAATTCAATCCATAGAAAAATGGGACGCCTGGAAGATTAAGAACTGC  
ACAAATAAATTACATTTTCTTTTTTTCCACAGTAAGGATAGAGCACAAAATCAATATTTGGTTGGCATT  
CTGATAATATTTAATTCTATTCCCTTTTTTCTTTTCAAATACTATAAAGAAAGTGAAGTTGGAGCAGAA  
GATATGGTTTGTATTCCCTTGCTTTTCTTTGTTCCAAATACTATGACTGCTACTGGCATTTCGATTTTATA  
TTTATAGGTTCTCAATTTTATAAAAAGCATTTACTGGTCCGATCGGGTCCGGATATTATTTTTACACATA  
ACAAACAAATTTATTATCATAAATACAAAGTTCAATTTGGATCAAATACTGATTTGATTATTATAGAGA

GGTTAGTGTGAACTCAATAGATTTTATTCATATTATTTATATGTACTAAGAAAATCATTAAAGTAATTAATA  
TAATTTGATTATGAACTCAATTATTATCATTATAAATTTATTTATTTTTATAAGAATTCATAAATTTTAAG  
TTCTGAATTCACCTCTATATCAGTATGATAGGTATAGGATTAAGACCAATGGTTCAGTAAGAGTGATCCA  
ATTAGTTTTATTAGTTGTTTACTTGTTAATAGTTGCAATAGACTAGTAGTTAGTTTTATTACGACAAAGTT  
TCCTAGTTTTTACTATTAATACAAAGTGTTTTAATTTCTTTTAAAAAATTATCGTTATAATTTATGCGATACT  
ACTTGATTAGGTAAAAAAGAAAAAAGTTTAATCCAACCTTGTGAATTGAGAACAAATCGATGTTTTCAA  
TTCCATTATTAAGATTATGACATCAAGCTTAACATCATCATAATTATGTGGAGAGATGAACTTTTGAGT  
TTTCAAGGAAGAAAGAATCTTACTTTTTATCATTCAAGTCTTTAACAAATTAAGATGAGACAAAAGGTA  
AAGAATCATTAAAAAAAAGTCCCAATTAACAAAATTTAATGAAGAATAATTGTACAAAATAAATTAAG  
AATATATAGCATTAGTTAAGTTACCAAGAAAAAACCATAGCATGTGCATGGTATATTATATAGATAGCTA  
CTCATTCTTCCATATATTAGTCATCAAATATGAATACTCAATTTGTTGTAGGGGAATCATCAACTACTTCTT  
CCAACCTTCTTATGACGTGTTTCTGAGTTTCAGAGGTGAAGATACTCGAAAAACCTTCACAGGTCATCTT  
TATTCCAGATTATGTCAAGTTGGAATTAATACCTTCATAGATGATGAGGAATTAAGAAAAGGCAAGGTG  
ATTTCAAAGAAGCTTGAGAAAGCAATTGAAGAGTCTAGAGTTTCCATTGTTGTTTTCTCGAAAAATTATG  
CTTCGTCTAGTTGGTGTCTTGATGAACTTGTTAAAATTCTCGAATGCAAAGACAAGTTAAAGAAAATAGT  
TTTGCCTATTTTCTATGATGTTTCATCCTTCTCATGTACGCAAGCAAACCGGATACTTTGGTGAAGTTTTAG  
CTATGCTTAAGGAGCGATCATTGAGGTTGAGAGAATGAAAAAATGGACGGATTCACTTACTGAATTAG  
CGCAAATTTATCTGGATGGGATTTGCGAAATGTTGTTGACGGGTAATATTTATAAACTGGTCAAACCTGAC  
TTATCAGTCAAAGTCATAAGTTGGTTATCAATTTTTTTTTCCACACATCAAAGTTGTTTTTTTTATTCTA  
ACTTTTGTTTTTGCTAATATGCAGACATGAATCAAATTTATTGAAAGTATTGTAAAACAAGTTCTACTAG  
AGGTAAACCAGACACCTCTAGATATTGCTTGGCATCCTGTTGGAGTAGATTCTCGTGTGCAAGATATAGA  
GTTGTTACTCCAAAAGGATGTGTAGATGAAGTTCGCATGGTTGGTATATATGGCGTAGGTGGAATAGG  
AAAAACAACCTCTGGCTAAAGCTATCTACAATCAAATATTTGACACTTTGATATTAGTTGCTTCCTTTAG  
ATGTTAGATCAGAAGCTGAAGCATTTGGTTTAGTCAAGTTACAAGAAAACTACTAAATCAAATTCTCAA  
AACTAAGGACGTCAAAGTTACCAGTGTGCTGAAGGCATCAATCTAATCAAAGCAAGACTTGGGTCAA  
GAAGTTCTAATTATTCTTGATGACGTGGATTATATGAGCCAATTAGAATCCTTAACAAGAGAAAGAAG  
TTGGTTTGGTTCTGGTAGTTAATAATTATTACAACCCGAGACAAGCATTGCTATCTCGGATTAGAGAA  
AACGAGAGATACAAGGCAAACATTTAAATCAAGATGAAGCTCAACAACCTTTTTCTTGTCATGCTTTTA  
GTAGTCCTTCTCCGCCACAAGAATATGTTGAGGTTGCACAAAGCATAATCAAATATTCAGGTGGGCTACC

GTTAGCTCTTGTGACATTGGGGTCACATTTACAAGGGAGATCCGTAGAAGAATGGAGATACGAGTTCAA  
AAAATAAGAGCAATTCCTCATTGTGATATTCAAAGATCCTCAAGATAAGCTTTGACGGACTTGATTGT  
GAGGGAGATCCGTTAAAGAATGGAGATACGAGTTCAAAAACTAA

>PGSC0003DMG402027402 LRR-RLPs

TTGAATTCCAGACGGGCAGACTCCATAATTTTTGCTACTCTATTTTTCTGTGGCTGTGAGCTGCAGACT  
GTAGATAAAACATAGTTATAACCAATTACAAGCAAAGAGAGGGAGAAAGATCATTCTTGATTACATATC  
ACTCTTAGTTCTTAGCATTCAACAGGTAATAAAGTTGTTAGTAATTGAAATTTGAACATTTATCTTCTT  
AAAATCATTTTGTGTTCTTGTGTTTGTGCTTGCAGATTCAGAAATGGAGATTGGGTTAGCAGTTGGTGGTG  
CATTTCTCTCTTCAGCTTTGAATGTTCTCTTTGATAGGCTTGCTCCTCACGGTGATCTTCTCAACATGTTTC  
GGAAGCATAAGGATCATGTTTCAAGCTTACACAAGCTGGAGGACATTTTGCTTGGTCTTCAGATTGTGCT  
AAGTGATGCAGAGAATAAGCAAGCATCAAATCGACACGTGAGCCAGTGGTTCAATAAGCTTCAAAATGC  
TGTGGACGGCGCTGAAAACCTTGATAGAAGAAGTCAATTATGAAGCTTTGAGGCTTAAGGTGGAAGGCC  
AGCATCAAATCTTGCAGAAACAAGCAACAACAAGTAAGTGACCTCAACCTGTGCTTGACTGATGAAT  
TTTTCTTAACACAAAGGAGAAGTTGGAAGAAACCATTGAAACATTGGAGGTGTTGGAAAAGCAAATCG  
GTCGCCTTGGCTTAAAGGAGCATTTTGGTTTCTGACTAAACAAGAACTAGAACACCTTCAACTTCTTTGGT  
TGATGATTCTGATATCTTTGGAAGGATGAATGATATAAAGGATTTGATTGACCGGTTATTATCTGAAGAT  
GCAAGTGGAAGAAGCTGACTGTAGTTCCTATTGTTGGAATGGGCGGCCTGGGTAAGACAACACTTGCT  
AAAGCGGTTTACAATGATGAGAGAGTGCAGAAACATTTTGTGTTTGAAGCTTGGTTTTGTGTTTCTGAGG  
CATATGATGCTTTCAGAATAACAAAAGGGTTACTTCAAGAAATTGGCTCAACTGACTTGAAGGTTGATG  
ACAATCTTAACCAGCTACAAGTCAAATTAAGGAAAGATTAAGGGAAAGAAGTTTCTTCTTGTGTTCTGGA  
CGATGTGTGGAATGACAACACTACAACGCGTGGGATGACTTGAGAAATGTTTTGTACAAGGAGATATAG  
GAAGTAAGATCATTGTGACGACACGTAAAGAGAGTGTGCTTGATAATGGGAAATGAGCAAATTAGC  
ATGGACAATTTGTCTACTGAAGCCTCTTGGTCTTTATTTAAAAGACATGCATTTGAAAACATGGATCCTAT  
GGGACATCCGGAACCTTGAAGAGGTGCGAAAACAATTGCAGCTAAGTGCAAAGGACTGCCCTTAGCTC  
TGAAGACGCTCGCTGGCATGTTACGCTCCAAATCAGAGGTTGAAGAGTGGAAACGTATTTTGAAGAGTG  
AAATATGGGAGCTGCCACACAATGACGTATTACCAGCGTTGATGTTGAGCTACAATGATCTTCTGCACA  
TTTAAAGCGATTTTTTCTATTTTGAATATTTCTAAAGATTATCCATTTGGGAAAGAACAAGTCATTCA  
TCTGTGGATTGCCAATGGTCTCGTACCTCAGGAAGATGAAATAATTGAAGATTCAGGCAACCAATACTTT  
CTCGAGTTGAGGTCAAGATCATTATTCGAAAGGGTCCCAATCCTTCTGAAGGGAACATAGAGAATTTA

TTCTTAATGCATGACCTTGTCAATGATTTAGCCCAAATTGCATCTTCAAACCTTTGTATCAGGTTGGAAGA  
GAGCAAAGGATCTCATATGTTGGACAAAAGTCGGCACTTATCTTATTCAATGGGATATGATGGTGAGTT  
TGAGAAATTGACACCCCTCTACAAATTGGAGCAGCTGAGGACATTGCTTCCGACATGTATTAGTGCAAT  
AATTGTTATCACCTCTAAGCAAGAGGGTGCAGCTTAACATACTGCCTAGACTAAGATCCTTGAGGGTAC  
TATCATTGTCTCATTACAAGAATAAGGAGTTGCCAAATGACTTGTTTATCAAATTAAGCTCCTCAGATTT  
TTGGATGTTTCTCAGACAGAGATTAAGGTTGCCAGATTCCATTTGTGTGTTGTATAACTTAGAGACAC  
TTCTTCTGTCATCTTGTGAAGATCTTAAGGAGCTACCGCTGCAGATGGAGAAGTTGATTAAGTTGCGTCA  
TCTTGACATAAGCAACACTTGGCGCTTGAAGACGCCCTACATCTGAGCAAGTTGAAAAGCCTCCAAGT  
GTTAGTGGGAGCCAAGTTTCTTCTAAGTGGTTGGAGAATGGAAGATTTGGGTGAAGCACGGATCTGTAT  
CAGTTGTAGAGTTGCAAATGTGGTTGATGGTAGGGAAGCTGTGAAGGCAAAGATGAGGGAGAAGAA  
TCATGTTGACAAGTTATCATTGGAGTGGAGTGAAAGTAGTAGTGCCGACAATTCAAAAAGTAAAGAGA  
CATTCTTGATGAGCTACGCCACATAAAAACATAAAAGAAGTCAAATCACTGGATATAGAGGGACAAT  
ATTTCCGAATTGGCTAGCTGATCCTTTGTTCTTAAGCTAGGACAGTTGTCTATTGATAACTGCAAGAACTG  
TTTTTCTTGCCAGCACTAGGACAGCTTCTTGTGTTGAAAATCCTTTCCATTAGAGGGATGCATGGAATAA  
CAGAGGTGACAGAAGAATTCTATGGTTGTTTGTGTCGCCAAAAGCCTTTTAACTGTCTTGAGAACCTTGT  
ATTTGAAGATATGGCGGAGTGAAGCAATGGCACGTACTAGGAAGTGGAGAGTTCCCTATACTTGAGC  
AGCTTAAAATTAATAATTGCCCTGAACTCAGTTTGGAGACACCCATCCAACCTTTCATGTTTAAAAGGTTT  
AAAGTTGTTGGTTCATCTAAGGTTGGAGTTGTTTTCGATGATGCTCAACTGTTTAGATCCCAACTTGAGG  
GAATGAGGCAGATTGAGGAATTGTATATTAGGGATTGTAAGTCTGTTACCTCCTTTCTTTTAGCATACT  
GCCCACTACCTTGAAGACAATAAGGATATCTCGTTGCAAGAAATTGAAATTGGAGGTGCCAGTTGGTGA  
GATGAGTTATTGTAACATGTTTATTGAGGATTTGACACTGAAAGAATGTGATTGTATAGATGATATATCA  
CCTGAGTTTCTCCAACAGCACGCACGTTGAATGTATCTAATTGCCACAACCTTACTAGGTTTTTATTCC  
TACTGCCACTGAAAGTCTCCATATTTGGAATTGTGAGAATGTTGAAATACTTTCCGGTGGCATGTGGGGA  
GACCCAGATGACGTCACTGAGTATTCAGGGCTGTAGGAAGCTGAAGTGGCTGCCAGAACGTATGCAGG  
AACTCCTTCCATCTCTTAAGGAACTGTATCTGTATAATTGTCCAGAAATGGAGTCTTTTCTGAAGGAGG  
ATTACCCTTCAATTTACAATTCCTTGTGATCAGCGCGTGCAAGAACTGGTGAACGGCCGAAAGGAGTG  
GCATTTACAGAGACTCCCCTGTCTCACACAGTTAAGCATCTACCATGATGGCAGTGACGAAGAGATTGTT  
GATGGTGAGAATTGGGAGTTGCCTTCTTATTCAAACACTTACAATAAACAATGTGAAAACATTAAGCA  
GCCAACATCTCAAAGCCTCACCTCTCTTCTGAGCTAGAATTATATGACCATCATGAGCTCCATTCATA

GGTCTTTGGCACCTCACTTCGCTTCAAAGTCTAGAAATCAGGAATTTCCCTAATCTCCAATCACTTCCTGA  
ATCAGCACTGCCCTCCTCCCTCTCTCAGCTGATCATCATGCATTGCCCTAATCTCCAATCCCTCCAGTAAA  
AGGGATGCCCTCTCCCTCTCTGACCTATCTATTTCCAACTGCCATTGCTCAAACCACTACTAAAATTTGA  
CAAGGGGGAATACTGGCCAAATATTGTTCAATTTCCACCATAAAGATCGATGGGGAATGCATGTGATA  
ATTTAAATGGATGGCTCTTCAACTGATGTAAGCTATTCTTTCCCTTGGAAGCTTTTTATTTCCGTCTACTT  
CACTTT

>PGSC0003DMG402028427 LRR-RLPs

CTGGAAATTTAAACTGAGGTATTGATTTTTGATGCAGCTTGTTCAATTTGGCAGAGATTGCATATGGGCT  
TTCCTTGAGTACAAATCGTAGGGATTTTCATTGTTCAACTCTCTCCACCATAAGAGCTGATGGGATCAGG  
CGACGGAAGTCTTCAAAGATGCTACACCAGGGAAAACATCCAAAGGAAGTGAGCTCAATATACAGCC  
ATCCCCTGACAGTAAATCGCCAAATTCATTAACCAGGAAGAGATCATTTCTCTTTTCAAGAGAATACAA  
TCTTCAATTTCAAAGGTGATTCTACAAGTTCCAAGAAAAGAAGTACCAAGTCTTCTGAAGAGAAGCCCCG  
CTATTGATTCGGTCTTGGAATCCTTCGTCATTCAAAGACAGAACCAAAGGTAGTGATTTCTTTCAGTTT  
TACCCAAGCCTGTTTCCAGTCGTCCCACCTTTTCCCAAATTCTATCCCAGTGCAAATGATGATACTCAGT  
TAGCTAATATCTCTTTTTCTTTTTAAGGTAATAAGGATGACAAGGGTTTGACTCATCAAAAAGATAAAAA  
AGAACCGGAAACAGACTATCCACCAACAGCAGATCCAAGATCAACACGCCTACGGTCAAGCTTTGTGAA  
AAGATCGCCTCTACAATCCCCATTTAACTCCAAAGAAAAAGTTGAGCTCAAGGTGGAGACATCACTGGA  
GAATCATGTTGAAAGTGAAGCAGTCAAATTGAAGAAATGAACTTCTCAGCTTAAAGAACTTGCAAA  
ATCTAGAGGACTTAAGGGTTATTCGAAACTGAAGAAAAGTGAACTACTGGAATTGCTCATCAGTTGTTG  
AGACAATGCAAAGATGATCAAGTTGTCCATCCAATGCTTTACATACTTGACGGTTAACTGCAGGACTCGT  
CTTTTTTTCGTATCTGCTTTCTTTCATGGAGAAACAAGATGAAAGGGCAGAGTACTGTGGGAGTTTTAAC  
ACATTCATTTGTTTGTGGTTTGTAAACATGTGTTGTCTTTAAAGTCTAATTGCATTTATGATCAATTTCTCA  
AGTTGCTTACCTTCTCCTCTTCTCCTTCCCCAACAAATTTGCTTGCTTTAATGGTTGAAAGAGGGGTTATTA  
TTCTCCAATCTGCTAGTTGTTTTTTCTTATATAAATCTGATGTGATCTTTTAGCCTGGTGTGGAAGATCC  
TCACTTGCAATAACAAGTTGG

>PGSC0003DMG402030236 LRR-RLPs

TAGGAAGTGAATATGGGAGCTGCCACGTCATTCAAATGGAATCTTACCAGCATTGATGTTGAGCTACA  
ATGATCTTCGTCCACATTTAAAGCAATGTTTTGCTTTTTGTGCAATATATCCAAAAGATCATCTGTTTAGC  
AAAGAACAAGTTATTCACCTGTGGATTGCTAATGGTCTTGTACAGCAGTTGCATTCAGCTAACCAATACT



TTCTCGAGTTGAGATCGAGATCATTGTTTGAAAAGGTCCGAGAGTCTTCTGAATGGAATCCGGGGAATT  
CTTAATGCATGACCTTGCAATGATTTGGCCAAATTGCATCTTCAAATCTGTGTATCAGGTTGGAAGAG  
AACCAAGGATCTCATATGTTGGAACAAACTCGACACTTGCATATTCAATGGGTGATGGTGATTTTGGTA  
AACTGAAAACCCTCAACAAATTGGAGCAATTGAGGACATTGCTTCCCATCAATATCCAGCTGCGTTGGTG  
CCATCTTAGCAAGAGGGTGCTGCATGACATATTGCCAAGACTAACATCTTTGAGGGCACTATCATTGTCT  
CATTATAAGAATGAGGAGTTGCCAAATGACTTGTTTATTAATTAAGCACCTAAGGTTTTTGGACTTTTC  
TTGGACAAATATAAAAAAGTTGCCAGATTCAATTTGTGTACTGTACAACCTAGAGACACTTCTCTTGT  
ATTGTAGTTATCTTAAGGAGCTACCTCTGCATATGGAAAAATTGATCAACTTGCGTACCTTGACATTAG  
CGAAGCTTATTTGACGACACCCCTACATCTAAGCAAGTTGAAAAGTCTCCATGTGCTAGTGGGAGCCAA  
GTTTCTTCTAAGTGGTCGTAGTGGTTCGAGAATGGAAGATTTGGGTGAACTGCATAACTTGTATGGATCT  
CTATCAATTCTTGGGTTGCAACATGTGGTAGATAGAAGGGAATCTCTGAAGGCAAACATGAGGGAAAA  
GAAACATGTTGAAAGGTTATCTTTGGAGTGGAGTGGAAAGTATGCTGACAATTCACGAACTGAAAGAG  
ACATACTTGATGAGCTACAACCAAATACAAACATAAAAGAACTCCGAATAACTGGCTATAGAGGAACAA  
AATTTCAAATTGGCTAGGTGATCCTTCATTTACATAAGCTAATAGACTTGTCTCTTAGCAACGGCAAAGA  
CTGTTATTCCTTGCCAGCGCTAGGACAGCTTCCTTGTTTAAAATTCCTTACCATTAGAGGGATGCATCAA  
TAACAGAGGTGACTGAAGAGTTCTATGGTAGTTCATCCTCCACAAAGCCATTTAATTCTTGTAGCAGCT  
TGAATTCGCAGAGATGCTGGAGTGGAAAGCAGTGGGGTGTACTGGGGAAGGGAGAGTTCCTGTACTTG  
AGGAACTTTGATTGATGGTTGCCAAAGTTGATTGGGAAGTTGCCTGAAAATCTTTCTTCTGAGAAG  
ATTGAGGATATCAAATGCCCTGAACTCAGTTTGGAGACACCTATCCAACCTTCAAATTTGAAAGAATTT  
GAAGTTGCTAATTCTCCTAAGGTTGGAGTTGTTTTGATGATGCTCAATTGTTTACGTCTCAACTTGAGG  
GAATGAAACAGATTGTTAAATTAGATATTACTGATTGTAAGTCTCTTGCCTCCTTACCTATTAGCATTCTG  
CCGAGTACCTTGAAGAGAATAAGAATCTCTGGTTGTAGGGAACCTGAAATTGGAGGCGCCGATCAATGCT  
ATTTGTCTGAAGGAATTGTCTCTAGTAGGATGTGATTCACCCGAGTTTCTCCCGAGAGCACGCTCTTTGA  
GTGTAAGAAGTTGCAACAACCTTACTAGGTTTTTATTCTACTGCCACTGAAACAGTCAGTATTAGAGA  
TTGTGATAATCTTGAATACTTTCAGTGGCATGTGGGACTCAGATGACATCATTGCATATTTACAACCTGC  
GAGAAGCTGAATTCGCTGCCAGAACATATGCAACAACCTCCTCCATCTCTTAAGGAACTGAAACTGGTTA  
ATTGTTCAACAATAGAGTCTTTCTGTAGGAGGATTGCCCTTCAATTTACAACAACCTTTGGATCTCCTGT  
TGTAAGAACTGGTGAATGGCCGAAAAGAGTGGCATTACAGAGACTCCCCTGTCTCAGAGATTTAACT  
ATCCACCATGATGGTAGCGACGAAGTGGTTCTTGCTGGTGAAAAATGGGAGTTGCCTTGCTCTATTCGA

AGGCTTAGCATATGGAATCTGAAAACATTAAGCAGCCAACCTTCTCAAAGCCTCACCTCTCTTGAGTACC  
TATTTGCTAATAATTTACCTCAAATGCAGTCATTGCTGGAAGAAGGGCTTCCTTCCTCTCTTTCTGAGCTA  
AAATTATTTGCAATCATGATCTTCATTCACTACCGACCGAAGGTCTTCAGCGTCTCACGTGGCTTCGACA  
TCTAGAGATTCGGGATTGCCATAGTCTCCAATCTCTTCCCGAATCAGGGATGCCCTCTTCCCTCTCTAAGT  
TGACCATCCAACATTGCTCTAATCTCCAATCTCTTCCCGAATCGGGGTGCCCTCCTCCCTCTCTGAGCTG  
CGCATTTGGAATTGCTCTAATGTCCAATCTCTTCCCGAATCGGGGATGCCCCCTTCTATCTCTAATCTATAT  
ATTTCAAATGCCATTGCTCAAACCACTCCTAGAATTTAAACAAGGGGGATTACTGGCCAAAAATTGCTC  
ATATTCCCACCATATTTATTGATTTGGAATCCCAGTAATGATTAATAAAAAAATGGTGCTCTGATA

>PGSC0003DMG403000927 LRR-RLPs

TCTAAAATTTCCATTTCTCAAGAAAGTGTATATTTTTCACTGCCCTGAAATGAAGCTGTTTGTCCAACATG  
GAATATCTGTGAGCACACCGAGTTTCGAAAGTTTGAACAATGATGATGAGGTGAAAGTCGATGATCTCA  
ATAAAGCAATGTTCAATTCTAAGTTTGTCTTGTGCCGCTAGATGTATAAATATTACCTTACACTCCTTTTT  
TTGGTCGGAACATTACCTTACTTGAGGACTAAAGATCATTACTTAGGCAATGCCTATTTTTTCTACTATTA  
CTAGTGTTAGAGTTATTTTAATTTTCTTTTTGGGCACAATACATAAATGTATCCTTTAACTGACTCTATAC  
AAGATGGGAGATAGTTGAGACCCTGGGTTTCAGCAATGGAGTCCTCCCTATCAAATATTTGGGAGTACC  
ATTGAGCACTAAAAGGGTATCTATAGTACAATGTCAACCCATCTTGGATAAGATGCTAGGTAGAAGAAA  
GAGCTGGACCAAATTCCTCCTTTCAATTTGTGCTGTTCCATGGTCACTTTGGTAATGAAATCAAGTTTAGTT  
ACCAAAAAAAAAAACTTGGCCTCATTTCACATTTATGCCCTCCAACCTTTGGATGTACACAAATAGACAC  
ATGAGTCATACGTGACACGATATATGTAGGACACCACGTAGGACACAAATTTCTATGTAGAATGTCAGG  
TAGGACGCGTGTGTCTATTTGTTAACTTTATACAAGTTTAAAGTGTCTACTTTTGCACACCCAAAGTTGAA  
GGACATAAAGTGAGCTAAGGTCATATTTTTGTATTATGCCTTTTTGTGTGTGACTGAGATACTAAAAAC  
TTTTTAAAAATATGAAACGAGACAAATACACTTTTATTTTATATATTTCACTAGTGAAGGATCTAATCCTT  
TTGAATCAATAAAGCAATGTTCTATTGTGGGTCATCGATCCACATGATATTAATCAACTGTTTTTAGGG  
GGATAGTTCATAGATGTAGCTTGTCTTGGGATTCTCAAGTGTAGTCTTGGTCTCTTGGCCTGGTGCATC  
CCACCTTAAGAATGCAAAAAAAAAAAAAAGAAGAAGAAAAGGTTCTACTAAATTAACAACACTACTATA  
AAGGAGGAGTTTTTGTATACAATATGTATTTTCCAATTCAAGTAGAATATTCATTTATTAGTTTCTGCAT  
GATTAGAAATAGAAAGGTCCAACCTCATGACTAAATAGATAATAACTGATTTATAAATTTGTGTATTTG  
CAGGTTTCTTGTCCCAACCTGGAATATCTATATATCTATGATGCTAACAGCATAAGTGCTCTATGCTCTCA  
CCAACCTCCAACCTGCCTACTTCAGCAAACCTGAAACATTGTATATATTGAATTGTGGAAAATTGAGAAAC

TTGATGTCTCCATCAGTAGCCAGAGGTGCTCGGAATCTACGAATACTAGATATTAAGACTGTGATTCAA  
TGGAAGAAATGATCACAAAAGAGGAACAAAAAGGAGAAGGAATCATGACCTTATTTCCCCTGTTGAAA  
CATCTGACGCTTCAAAGGCTGCCAAAGCTTGTGCATTTCTTTCTGAAGGAGTGTACTCTTGAAATCCAAT  
TCTCAGGTATGTGTTGATTGATGACTGCCCTGAAATGAAGACGTTTGTCAAACAGGGAATATTTGTGAGT  
ACACCGAGTCTCGCAAGTGTGAACAATGATGATGAGGTGAAAGTAGATGATCTGAATAAATGAACACA  
ACAGAGGTTCAATTCTAAGGTTTGTCTTGTGCCGTTAGCTGTATAACTAATTAECTTGTGCTTTCTATT  
GCATACTAATAGTAATAACCATATTCAGATATTTATCTATGTTTGTCACTAGAAACAACCTTCTTTTACCT  
GCTCCCAAATATATTCAATAAGAAACTAAAGCATCAGCATAGTCATTTATCTTTCAAGTACATGTTGTAC  
ATACTAAGCTAGTCATCTCTTCTCTGCTCCCAGGAACAAAGCACTGGTGATGGCAACGAAGTCGGACC  
TAGTTATGACAAGCTAGTGATGTCTATGAATCCAAAGCTAGCTAGGAAGGTAAAAAGTATTTGATGAAA  
CAGTCCGAGTTAGCTCGAACATCGCCTGATACCTATAGTGCTGTTTATTGATTTTTGAAAGAAGGGGCAG  
AGCTTGAAGAAATAGCGTGCGCCTAGACTAGTAGCCTATTACATTTTGTGAGGCCCTTTGATATCTTATT  
AATCAAGCACTAGCACCCCTGTAGCGTAAGATGCTTGTGATGGAGGTAACAAGCAGAGGGCGGATCTAC  
ATTATAATTGCCAGTAAAATACACTAATAAAGTAAAAGTTGTTTACATTGCCAGTGTATACAAGTTAAATT  
CTTAATTGAAATTCCACTCAGAC

>PGSC0003DMG403003025 LRR-RLPs

ATGTCTCCATCTGTGGCCAAAGGTGTCCTTAATCTCCGAATACTAAAGATAGGATATTGTGAGTCAATGG  
AAGAAGTGATCACGGAAGAGGAACAACATGGAGAAGAAGTCATGCCCTTATTTCCCCTATTAGAAAAGC  
TGGAGCTTTGCAGGCTGCCTAAGTTAGGGCATTCTTTTTGACGAAGCATGCTCTTAAATTTCTATTTCTC  
AGAGTTGTTGAGATCTCAAAGTGCCTGAAATGGAGACATTTGTCCAACAGGGATCTGTGAGTATACCG  
AGTCTTGAAAGTGTGAACAATGATGATGAGGTGAAAAGAGTTGATCTCAACAAAGCGATGTTCAATTCT  
AAGGTTTGTCTTGTGCCGCTAGTTGTACAACAAATTACTATATATATATTTGTGGACCTATGTTGATGGG  
GGTAACAAATATAGGCAAACTAAAATATTGTAECTCAAGGGTTCACGTGAACCCAATTGATTTTGCCCA  
GAGACTTTAATTTACATTAGTAATATCTAGAGATTCTTAATTATGAACATGATTGTTATTGGATATTA  
CTGAGGTCATCAGAGCTATCTATAAATTAATACTGTGAATCTGCATCTCATTCAAATTTCTTTATTTT  
CGCTTCAATAGGAATAATAAGATAAGGCATAGCCATTTACTTGTACTTTTTCTTTGAGTTTCGCTTTTAT  
ATTATTTTTTAAAAAATACCCTAAAATACGTCTTTCATTATATTTAGCACGTAATGTGTGGATTTATTT  
CTCATGCCATCTAATATTCTATGTCATTTTAAATCTTCTTTCATTATATTTAGCACGTAATATGTGGATTTAT  
TTTCTCATGTCATCTAATATTCTATGTCATTTTAAAAGATTTAAAAGAATGCTGTTTTGGAGATGATTTTAA

AAATACTTCTTTTATTTGAGTAATTTGGCTTAGATGATTTCTAAAAATAATGGTCTTTTTATGGGAAGTTT  
CCAAAAAATGAGCAGTTAAACTATAATCATTATTTATAATACTTTTAATCAAACATCTATTTATTAAT  
TTGTCTTCGTCATATTTAAATTAACAACCTTATCACCTAGTGTTTAAACAATTTTGGCTTCTCAACGTAACA  
CCTAATGTTTTCTCCTGGTGTGAATTGGGTTATGATTGAGCCCAATAACTCCTACTGTAAGTACTGACTAACT  
GCAACAAAATACAATTAAGTTTGATACTTCATCCCTTCAACGTTTGCAGATTTCTTGTCCCAACCTAGAAA  
AACTATATATCAATGGGGCTAACAGCATAACTGCTCTATGCTCTCACCAACTTCCAACGCTACTTTAGC  
AACTTGAAGTATTGTACATATGGAATTGTGGAAAATTGAGAACTTGATGTCTCCATCAGTGGCCAGA  
GGTGTCTGAATCTCCGAATACTAGATATAAGAGATGTCTGTCAATGGAGGAAGTGATCACAAAAGAGG  
AACACAAGGAGAAAGAATCTTGACCTTATTTCCCTGTTGGAAAAGCTGGAGCTTTACAGGGTTCCTA  
AGCTGGCACATTTCTTTCTGACGGAATGTGCTCTTGAAATTCATGTCTTGAGGAAGTGCGGATTCATGA  
TTGCCCTGAAATGAAGACGCTTATCAAACAAGAAACATCTGTGAGTACACCGTGTCTCAAAGTGTA  
CAATGATTATAGGGTGAAAGTGGGTGATCTGAATATATGGACACAACAATGATTCAATTCTAAGGTTTG  
TCTTGTGCCTCTTCTCTATAACTAATTAACTCTAGTTCTCTCTTTCCATCTTAACCTAATAGTAATTGTAAT  
ATTCAGATAGTTGTTTGTAGTTGTACTTACTAAGCTAGTCATCTCTCTTTTTTTCCATTCTCTGCTTCTTTCA  
GGAACCGCTATATCCTAAATAAAGTGATACAAAAGATATTCAATTCTAAGGTTTGTCTTGTGCCGCTTAA  
TAACTACTATATTTGTC

>PGSC0003DMG403010943 LRR-RLPs

ATGCGTAGCCTTATTGAGTGGAAGGGAGATGAAGTTGGAGAAAGAATGTTTCTAAGCTTGAGAAGTT  
GACGATTAGGAAGTGTCCATTGTTAAAAAGTACTCCGAATCAATTTGAAATCCTCCGTGAATTAGTAATT  
GTCAGAGTTGACAGTGAAATGCCATTGTTGAACTTGTGCAGCAACTGACATCTCTCATAGGGCTTGAA  
GTCTATGATATGAAAGAGCTCACTTGTGGCCAGATGAGATGCTACGCAACAACATTTCTCTTCAAACC  
TAATGGTCTCAGGCTGTGGAGAGTTTCGTGAATTGCCACAAAGCGTGTACAATCTCCATTCTCTTAAGCA  
CTTAACGATTGGTAACTGCACGAATTTAGTTCTTTTCTGTTCCGAGTGAAGAGAATTATTTGACTTCCC  
TCCAAGATCTTCGGTTATTGGATTGTGATGGATTGAGCAGTTTACCAAGTGAATGCTAGAGCATTGTGC  
GTCTCTGGAAACTTTGAGTGTGAGCTGCTGTGACAATTTAGTTTTCATTCCCTTTACATGTGGGGGAAATG  
CCTTCACTTTCTATTTGTATATATCACAATGTCCCAAATTGATTAGTTTACCCTCAGGGGGTATTACCAT  
CTCACTGAGTTAAGTGAAGTGGAAATTGGTCTTTCTCAGAGATGGTGGATTTTGGAGCATTCCAATTGA  
TTTTAATGGCATTGAGCAGCTGCTGTCCCTTCGTACATTGTGGGTGTATGGACATGGTCACTGGGATTC  
TCTGCCCTATCAGTTTATGCAACTCTCTGACTTAACAAAGATCCAAATATATGGATTCGGAATCGAGGCT

CTTCCTCATAGATTTTGCAACCTTACTTCTCTTGGAACGTTAAGGCTAGTGAGGTGCAAACGGCTACAGA  
ACCTGGACTTCTCATATGTCATGCCCAAATTACAATATCTGTGTGTAGAGGAATGTCCATTGTTAGAAGC  
TCTGTGCGATGGGCTTGGCAACCTGTTTTTTTTGGAACAGTTACATTTAGTAAACTGTGAGAACTAGAG  
CATTTGCCATCCAGAGATGCCATGCAACGCCTCACCAAATTATGGAACCTGGGAATTAAGGCTGCCCA  
AAGTTAGAAGAAAGTTGCACCAATCGGAGTGGTCCAAACTCCCAGTGGTCCAACATTTCCCATATTCAA  
AAATTAAGTTGGTGGGAAGCACAAATTCAGGACTTGCCTAAGTCTCTATTTCTTTCAATTTCCGAGTCGC  
ATTTTTTAATTATTATTTCCACGAGTTAGTCTTCTCCATTCTCCAAACATTTTTCTATTCCACTGAAACAA  
ATTTATGAATATCTATATTACTTTTAAGATATGGTTAATCATGAATATTTATGTATTTTTACTCATAGGT  
TATTAGCTCGAAGGTCACACTAGAACGTTGTTGTGGCATTTTAAGCCAAAATCCATGGGCAGCAATAAC  
ATTAGGTGAAATTCCATTTAGAATTCTGTAACAATTTGTCAAGTTTTCTTTGCACTCCTTTTTTTTTCTTC  
TCATGACACAATTTTATTGTTTAACGGGGTTAGTTATGTTTCGATAGAGAGGAACCAACACGTTTGTTTTG  
TTGAAGAACAGAATCTTCAGCCGTAGACTCTTACATGAGCATTGGTAAAGACTACTGACTACATAATCT  
CTCAACATTTACTCTTCATAACATGGATATATACCAACAACATTAAGTAAAAATAATTTAGTACACAGTC  
GCTCATTGCCCCTAGTGAAACTATTCTTTTATGTATGGGTGTCTTCGATAATATATAACCTTTTTCTACGA  
GTTGATGAAAATAAAAAGACTAACAAGTAGTTTTGGGTAAATAATGAATGAGTAGTTCAACCAACCAAC  
AAGTACCATGTTCTAGACTTCCCCTTTGGATGTTCACTTGAAATCTATTTTTCTTCTTTCTATACAATAG  
AAGCGTAAACTCAATATCAGGTCAGGTACTTTGGTCAGGTAGTAAAGGGTATCCGTGGACCGAGCCATT  
GAATTCTGTTTCATGAECTATTCATAAGATGAAGTTAGGAGGTTGCTGTGCTACTAAAAGTACTTTTTAC  
CGTCTCCTATGTTTCAGATTCTTGAATGAAACAATGGCATGAAACTGTGCGAGATGGTATACTGAAGCAG  
ACTTCTCTTAGATGTGTTTAAGTGTGCGTATTAGCCAGGGAAATTACATTAGGCAGAAACTGGAGAGGA  
GATATTATTTACTTGTATGACTAAGATTTGACAGCAGAGGCCTTTCTTGACAGTGTTTCATGCCTTTTTGT  
ACAAAGAGTTTATTGTTCCAGCAAACATTTGAACTTACTACTTAGCTGCTGCATCATTGCC

>PGSC0003DMG403015682 LRR-RLPs

GTATCTACGGACGCTAGATCTCAGCCGCTCTAGAGACCTGGCGCAAACACCAGATTTACGGAGATGTC  
AAATTTGGAGAATTTGGATTTGGGCAATTGTATTAATCTTGAAGAGGTTACCAATCCCTGGGATGTCGC  
ACAAAAGTCAAGAGGTTGAATTTGATATATTGTAGACGCCTCAAGTGGTTTCCATATGTTAACGTGGAAT  
CTCTTGAATATCTGGATCTAAAGTTCTGCTCCCGTTTGGAGAAATTTCCAGAGATCTGCGGAAGACCGAG  
GCCGAACTTAAATATTAAGATGTGTGACTCTGAGATAAGGGAAGTCCATCATATATTGTTTCAGTGCCTA  
ACTCTGAGACATTTGGATAATCTTGAAGCTCTTCCGAGAAGCATTGGCATGTTGACAGGCTTGGTTACTC

TAGATGTGTCGAATTGCTATAAACTTGAAAGCTTGCCAGAAGATCTAGGAGATTTAGTAAACTTGGAGA  
AGCTTGATGCCACAGGGACTCTAATTTACGACCTCCGTCTTCCATCTCCGCTTGAACAAGCTTACATTC  
ATGAGTTTTGCGAAACAAGATATAACATAAGCCTCAAAGAGGGAGTGTACTTTGAGTTCCCTCAAGTG  
AATGAAGGGTTACTACTATTGGAAGATCTGGATCTCTGTTACTGCAATTTAAAAGATGGAGGACTCCG  
GAAGACATTGGATCCTTATACTCTTTGGAACACTTGAATCTCCAGGGAAATAATTTTGATCATTACCTCA  
AAGCATAGCCCAACTTGGTGCTCTTCGATCCTTGAECTATCAAATTGCAAGAGGCTTACACAGCTGCCA  
GACTTCATGGGGATGCCAACTTGATGACGCTGAATCTCAGTATAATTAACATTGAGCGTTTGCCTCGAA  
GCATAGAACAACCTTAGTGCTCTTCGATCCTTGGACTTGTCAATTGTGAGAGGCTTAAAGAGTTGCCAAT  
CTTCATGGGAATGCAAACTTGGAGACTTTGAATTTGTCAAATTGTATAAATCTTGAAGAGGTTTCATCGT  
TCCCTGGGACTTCTCAAAAAGCTCTGTACATTAATAAATGACTAATTGTAACAGCTTAAAGAGGTTTCCAG  
CTCTGTGCATTGATTCTCTTGATTATCTGTGTCTACGGGATTGCTCTAGTTTAGAAAAATCCAGAAATC  
CTCGGAAACATGAAAGCTGAGTTAGAGATTCACATGCTCGACAGTGAATAAGGGATCTAGGTTTTAGA  
GGTTTTGAAAACCTTGCAACACTTCCGAGCAGCATTTGTAAGTTGAAAAGTTTGGTCAGCCTAAATGTGT  
CGGATTGCTCTAAGCTTAAAAGCTTCCAGAAGAAATAGGAGATTTAGAAAACCTTGGAAAATCTTGATG  
CTAGAGGTACTCTAATTTACAACCTCCATCTTCCATTGTCCAGTTGAAGAAGCTTAAATTTTTGAGTTTT  
GCAAAACAAAATTCTGGAGGAGGTCTCGTAGATGGAGTGTACTTTAGTTTCCCTGTGGTGTCTGATGGA  
TTACGCTTGTTGGAGAATCTGAATCTCAGTTACTGCAATGTAATAGATGTAGGTCTTCCGGAAGACATTG  
GATTCTTATCCTCTCTGAATGAGTTATATCTCTCTGGAATAATTTGAGCATTTCCTCAAAGCATAGCC  
CAACTTGGTGCTCTTCGGTCTTTGGACCTATCAGATTGCAAGAGGCTTAAAGAGTTGCCAGTTTTCGAAG  
GGATGCAAACTTGGCGACTTTGAATCTGTCAAATTGTATGAATCTTGAAGAGGTTTCATCATTCCCTGAA  
ATGTCTTGAAAATCTCTGTACATTAAGTTGACTAATTGTAAGGCTCAAGAGGTTTCCAGTTCTGTGC  
ATTAATCCCTTGAATATCTGAATCTAGAGGGGTGCTCTAGTTTAGAAATGTTTCCAGAAATCCTCGGAA  
GCATGGATTTGAAGTTAAAGAGTGGGTTAAAGTGCCTAGACTTGAGAGGTTTAGAAAACCTTGTAAACAC  
TTCCGAGCAGTATTTGTAAGTTGAAAATTTGGTGGAGCTAAATGTGTCCGCATGCTCAAACTTGAAA  
GCTTACCAGAAGAGATAGGTGATTTAGAGAACTTGGAGTGGCTTGATGCCAAAAATACTCTAATTTTGC  
AACCTCCGCCTTCCATTGTTTGTGTTGAACAAGCTTCATTTCTTCCGTTCCGCAAAACAAAATCAGAAGTA  
GGCCTCAAAGCTGGAGTGTTCTTTGTTTTCCCTGCGGTGTCTGATGGATTACGCTTGTTGGAGAATCTGA  
ATCTCAGTTACTGCAATGTAATAGATGTAGGTCTTCCGGAAGACATTGGATTCTTATCCTCTCTGAACGA  
GTTATATCTCTCTGGAATAATTTGAGCATTTCCTCGAAGCATAGCCCAACTTGGTGCTCTTCGGTCTT

TGGACCTATCAGATTGCAAGAGGCTTAAAGAGTTGCCAGGTTTCGAAGGGATGCAAAACTTGGCGACTT  
TGAATCTGTCAAATTGTATAATTCTTGAAGAGGTTTCATCATTCCCTGGGACGTCTCAAAAAGCTCTGTAC  
ATTAAGTTGACTAATTGTAAAAAGCTCAAGAGGCTTCCAGTTCTGTGCATCGATTCCCTTGAATATCTG  
AATCTAGAGGGGTGCTCTAGTTTAGAAAATTTCCGGAAATCCTTGGAGCATGAATGTGAAGTCGGAT  
ATTCACATGTTAGATAGTGTGATGAGGGATCTAAATTCATGTATATCTCACTTCCACGTTCCCTGTCTCA  
GGATATCGTTTCCTTGCCGAATGACATCTCTGCTTCAGATTCCCTGTACAAAGAGTGTTACCATTGTGC  
ATGATGAGAATAAGATCCCAAGTTGGTTCACCATCAAGGAAAGGATGAAAGTGTATCGATCAATTTGC  
CTGAAAATTGGTATGTATTGGATAACTTCTTGGGATTAGTTGTATGTTACTCTGGCAACCTAGTTGACAC  
CACAGTTGACTTGATTCCCTTATGTGATGATGGGATGACCAGAACTAGAATTATCCTTCCCTTCCAAATTA  
TGATACAGAATTATCCGACGATTCAGAATGTGATACTGAACCTACGATTCATTTTTCTTGGTATCTCTTG  
CTGGCTTATGGGAAACATCTAAGGCAAATGGAAAAACACCAAATGACTATGGGCTTATTACATTATCGTT  
CTCCGGAGAAACGAAGGAGTTTGGATTCCGTTTGTGTATAAAGATGAACCAACAGAACATTGCATTGG  
GACACCATGATGAAGCCAATTGTTCTCTCTAAGAAACAAAGCTCTTATTTATAATATTCATTGGAGGA  
GCTGTCTTTGAGAATCTGCAGCAACAACAGTCTCTCAGAAACTTTCAGCTCTCTCCCCCAAGCCCA  
GAATTTGGCTTAAATATAGGTAATATACCTCATGATTTGTTTTCCCTAGTTGGTAGTGAAATTCTGTTC  
AACTCTCTTTTTATGTAATTCTCTCCTATTAGCTACAAAGTCTTCTTCCAATTCTGTTAATAACTTTTTATT  
TCTTTTCTTTTTTTTTCTTTATTCTTTCCCGTACTGACAGGAGCTCATCAATGGTGATGTATGTATCAACA  
GTGAGTTTTGTTGATTGATTCTCCATCTTGTGTTAAGCCATGATTAACCATGGTGAGTTAAAGGATGTGA  
ACAAGTTTTTTTTCGATACTCAAATCAGATCTTGGAAATCATTCAATCTTCATAAATTCTTACCTTAAAATG  
TGCTCACAAGTGAATAGAATAATCCTGCATTTTATCCTGGTATTTTTATCACTTATCCCTCATACCAAATAA  
CCCTAAGGTCATTTGGTTGGGAACAAGTTATCCTGGTTATAATTATCCTGGGATAAGCTATTCTACTATG  
TATATGGAATAACTTATCCCATCAATATAGTATAAAATTATAAATAGTGGGATAAATAATTCAAACACTA  
CCTAATACCTCCAACCAAACACATGATAAAATTATCCTGCATTTATCCCGAGAATATTATACCTTATACCTC  
ACACCGAACGACTCCATAGAGTATTGGAAACAAATTTCTCTTAAGTTCTATATTATACTCAATTTTGTTTTT  
CGACTTGTTCAATTTGTGGTTCTTTTTACGATTCAATTGGCTCTAAAGTGATTTTCTGAAATCAAGTATTTT  
TGTTTCTTTAATTAGTTCACGCACCTTTTTCAGTGAGAATGAAGGACTAGGATTTATCCTTAGAATCAATT  
ATCATATTCATTTGAAGTATCACTTCAGATGAATACTTCAATTGCTATTTCCATTGTTCAAATTGGGTGAT  
CCGCAATCGGAGTCTTTGATAAGGATGTATATCTAAACCTCTTTGGTTTGTGTGTGATGTTTGAGCATC  
AATCCCCAACATTTGGAAAAAATGGAATAGTTCTCAACTAATCTGTAGATGCTTATATATCATATTA





TTCTAGCATCCCCAATTTAAAGAGATTGACCATTACGCACCTTTTAGAGTAGGATACATTATTCGATGTC  
TTCTCTTGGATATGTCGAGCTTGACAAAACCTTGAGGCATTCAAGCTTTCCTGGAGATATAATTATGAAAA  
TCCCATCAAAGATTTGTTTTCCGGAATCACTTAGAAGATTGTCTTTAACTAGGTGTTTTAAGTTTATTT  
GGGAAGAGATATCATCAACTTTTATCATGTTGCCACATCTTGAAGAGCTCAAACCTAAACATTGTCTAGC  
CGATGATGATGTATGGAAATTGAGTGACAAAGACATATTCAAAGCTTGAAGTTGTTGTTACTGAGCGA  
TGTAATCTTAAGTGTGGGAAGCTAGAAGTGATAACTCCCTAATCTAAAACGCCTTGTCTGAAGAAA  
TGCAAGGACCTGAAAAAATTCCAACAAATTTGGGGAAATTTATTCTTTGGAATTGATTGAGTTACATG  
ATTGCACCACTACTGCTAAGGCTTCTGTCAGAAAGATCAAACAAGAACAAGACGACTTGGATAATAATA  
TCCTTAAGGTCTACATCCATAACAGCTACAGTAAGTTATAATTCTCTCTTAAAAGTTCTTCGATTCTTCACA  
TTATTTAAAACCTCATTTTTATTAATCATACTTCTTTGAAATTAAGATGATGACTTCTACTTCTTATCTTTC  
TTATGCAGCGAATTGA

>PGSC0003DMG403018696 LRR-RLPs

ATGCAGGAACTCTTCCATCTCTTAAGATACTGTATCTGATTAATTGTCCAGAAATAGAGTCCTTTCCTGA  
AGGAGGATTGCCCTTCAATTTACAAGTCCTTCTATCAGCAAGTGCAAGAACTGGTGAACGGCCGAAA  
GGAGTGGCGACTCCCCTGTCTCAGAGAATTAAGCATCTACCATGATGGCAGTGACGAAGAGATTGAACA  
TTGGGAGTTGCCTTCTCTATTCACTTGGTATAGACAATCTGAAAACATTAAGCAGCCAACATCTCA  
AAAGCCTCACCTCTTCAATATCTATCTATTCAAGGTAATTTACCTCAAATTCAGTCAATGCTGGAACAA  
TGCCAGTTTTCTCCTTTTCGCGCCTCACTTCGCTTCAAACCTCTACAAATCGTGAATTTCCCTAATCTCAA  
TTAATTTCCGAATCAGCACTGCCCTCCTCCTCTCTCAGCTGGAGATCTACCATTGCCCTAATCTCCAATCT  
CTTCCAGTAAAAGGGATGCCCTCTCCTTCTCTAAACTATATATTCACAGCTGTCCATTGCTCACACCACT  
ACTAGAAGTTAAACAAGGGGGAATACTGGCCAGAAATTGCTCATATCCCCACCATACAGATCAATGATGA  
ATGCCTTTAA

>PGSC0003DMG404010943 LRR-RLPs

GAGAAATCGAATATCTACAAGCTGGCATATGTGTGGTTCCATGACGAACCAGAAGGAAGTGAGACCAA  
TGATGAGTATGTCTTGGATGGTCTTCAACCTCATCCTAACTTGAAAACCTTAGCAGTAGTGGACTATTTA  
GGGACTAAATTTCTTCATGGTTCTGTGAAAATTTGCTACCAAATTTGGTCAAGTTGAAATTAAGTGGTT  
GCAAAGATGCAAAGAAATTCATCACTTGGTCGACTGAAATTGCTTCGGCATCTTGAGCTGTTAGGATT  
CCAGGAGGTGAAAGCATCGGGCCTAGATTTTATGGTATTGACGGTAACAATAAGGGATCAAGCAGCA  
ATATCCAAGTGTCCCGTCACTGAAAACTAATATTGGAGGATATGTCTAGTCTTATTGAGTGGAAGGG

AGATGAAATTGGGGTAAGATTGTTTCCAGAGCTTGAGAAGTTGAGCATTAGTAACTGTCCATTGTAA  
AAGTACTCCAAGTCAATTTGAAATCCTCCATAAATTAAGTATTGAAGGAGTTGACAGTGAAATGCCATTG  
TTGAACTTGTGCAGCAACTTGACATCTCTCGTAAAGCTTAGTATCTATGGTGTGAAAGAGCTCACTTGTT  
GCCAGATGAGATGCTTCGCAACAACGTTTCTCTTCAAACCTAACGGTCTCAGGCTGCAGAGAGTTTCGT  
AACTTGCCACAAAGCTTGTACAATCTCCATTCTCTCAGGAGCTTACAAATACACTTCTGCCCAATTTAG  
TTCTTTTCTATTCCCAGTGGAGAGAATTATTTGACTTCTCTCAAACCTTGTAGTTATGGGATTGTGATG  
GATTGGCCAGTTTACCAAGTGAATGCTAGAGCATTGTGCGTCTCTGGGATTTTTGATGGTCAGCTGCT  
GTAACAATTTAGTTTCTTGCCTTACATGTGTGGGAAATGCCTTCACTTTTTTATTTGGGTTTATCAGATT  
GTCCCAAATTCATTAGTATACCCGCAGGGGGCCTTACCGTCTCACCAGGTTAAGGGTATTGGAAATTG  
GTCCTTTCCAGAGATAGTGGATTTTGAAGCATTCCAATTGATTTTTAATGGCATTGAGCAGCTGCTGTCC  
CTTCGTAATCTGGCGGTGACCGGACTTGGGCACTGGAATTCTGTGCCGTATCAGTTTATGCAACTCTCTT  
CCCTAATACATATCCATATATGTGATTTTGGAAATCGAGGCTTCTCTCATAGGCTTGACAACCTTATTTCT  
CTTGAAACATTACATCTAGTGAGGTGCAAACAGCTACAACATCTGGACTTCTCAGATGCCATGCCAAAT  
TACGGTTTGTGGACATCCGCGATTGTCCATTGTTAGAAGCTCTGTCCGATGGGCTCGGCAACCTTGTTTC  
TTTGAAGAATTATATTTACATGACTGCGAAAACTAGAGCATCTGCCATCCCGAAATGCCATGCGACAC  
CTCACGAAATTACAGAGCCTGAAAATTAAGGCTGCCCAAAGTTAGAAGAAAGTTTACCAACTACTCCC  
AGTGGTCCAAAATTTCCATATTTCAAATATTGAATTAGGTGGGCGGAGAAGGACAACCGTAAGTCTCG  
GTTTCTCTTTCACTTACTGAGTCGCTCGCATTTTTAATTAGAATATTATTTTCCACGAGTTCCAAAAAGAA  
GTTTGGTAAGTAATGTAATAATTTTTCTTGAAATTATTTTACATAAAAAAAAAAAGTTAGATTAATCA  
ATTGCATCTGTTGCTATGCTGGATTCTGCTTGTCCACTTGAACCTGAATTGCTGTTATTCTAAAAATTATGTT  
TCTTTTCTTATAGGTAGCTGGTTCAAACGTCTCTGTGGTAAATCAAGCCAAATCGTATGAGCAGCAGG  
CAATTACGTTAGGTAAATTTTCAATTTATAATTTATAGGCACTTTGTAATCTACTTGTTTCTATCTTTCTTTT  
GTTGGAACCAATTTTCGGAGGTCTATGCTGATGAATACAACATTACCTTCTTAAAAAAGTTTACTG  
GAATTCTGTGCCGTATCAGTTTATGCAACTCTTCCCTAATACATATCCATATATGTGATTTTCGGAATCG  
AGGCTCTTCTCATAGGCTTGACAACCTTATTTCTTGAACATTACATCTAGTGAGGTGCAAACGGCTA  
CAACATCTGGACTTCTCAGATGCCATGCCCAAATTACGGTTTGTGGACATCCGCGATTGTCCATTGTTAG  
AAGCTCTGTCCGATGGGCTCGGCAACCTTGTTTCTTTGGAAGAATTATATTTACATGACTGCGAAAACT  
AGAGCATCTGCCATCCCGAAATGCCATGCGACACCTCACGAAATTACAGAGCCTGAAAATTAAGGCTG  
CCCAAAGTTAGAAGAAAGTTTACCAACTACTCCCAGTGGTCCAAAATTTCCATATTTCAAATATTGAAT

TAGGTGGGCGGAGAAGGACAACCGTAAGTCTCGGTTTCTCTTCACTTACTGAGTCGCTCGCATTTTTAA  
TTAGAATATTATTTCCACGAGTTCCAAAAAGAAGTTGGTAAGTAATGTAATAATTTTTCTTGAAATTA  
TTTTGACATAAAAAAAAAAAGTTAGATTAATCAATTGCATCTGTTGCTATGCTGGATTCTGCTTGCCA  
CTTGAAGTGAATTGCTGTTATTCTAAAAATTATGTTTCTTTTCTTATAGGTAGCTGGTTCAAACGTCTCT  
GTGGTAAATCAAGCCAAATCGTATGAGCAGCAGGCAATTACGTTAGGTAAATTTCA

>PGSC0003DMG400002526 LysM RLKs

TTTTCCCTTTTTGGTTGATTTGCAGTCTCACAGAGTAATTGTTATTAGTAGTAATAAGTTTCACTAAAAG  
ACCTTGTTTTACGCCATTACAGGACAATAACCCCCACCCCCAAACCCACAAAATGTTCTGTTCTTGGT  
TCTCTGCTATTCCCATCTCCCTTTCTTTCTTTGAGATTCAACTCTTTGCAAATTTTTTTCATGTTTTTCTTTA  
AGTTTCCATGACCCGTTTCACTAAATCTATCAAAGATTCAATCTTTAATACAATGGATCATATACAATCAA  
CATTTCTTGCAATAATTTGTCTGTCAGCAATTTTCAAGATTATCCCTCTTTGTTTCATCATACTCTACTCCATC  
AAACTGTACGGACACTGGTCGCTTGTGCACTTCTTCTGGCTTTTAAACCCAGCTCAGAACAGACCCTCC  
CAGTGATTCAAAGCATGTTTGATGTGTTACCTAATGACATAACTGTTGAAGGAAATGGTAAAGGTTATGT  
CTTTATCAGAAAGAACTGTTCTTGTGCTTATGGAATGAGAAAGTACTTGACAAACACTACATATACTGTC  
AGAAAGAACAATGGATCTGTGTATAATATGGTTGTTGATGCCTATGATGGGTTGGCTATTTTTCCAATA  
ATTTTACAAGGGAGGGGAAGAAAGGGGCAGTGGTTTCACTGAAGCTCATATGTGGATGCTCAAGTGGG  
CTGTGGAATTACCTCATGAGTTATGTGATGACAGATGATGATACTGTTGGGTCTTTGTCCAGTAGGTTTG  
GGTTAGTATGGATAATATTGAGAATGTTAATGGAATTGCCAATCCTGATAATTTACAGCAGGATCTTT  
ATACTATGTGCCATTAAATTCAGGTATGAGTTTCTTTCCCCTCTTATGATTTCTGATTTGTGTTTTTCCAT  
TTCCAAATGTGTATCAGTATTTGATTTAGGATGATTTAGGAGCTGTTTGATTAATCAAATTGTGTTAGTT  
GTAGTAAGTGTGATTAATGTTGGAATTTTTAGCTGCTGAGGAAGATTAGTCAGTTTTTTCTTTCTTTTT  
TGTTTGTGTGAGTGAGGGGATGAACCTTTGTTCTAGAGGGGCACACAATCCTCTCTCATTGTCTATGGC  
GGTTAAGATACCAACTAATCCCTTGTTTTCAATTTCTTTGTCTAGTTTTGACTTGACACGAGTTTAATAA  
AGCAAGTAAGACTTTTGAATCTTGGGGTCACAACTAAAGATATGTATAATGTACCAAATGTCTTTTAA  
TGTTGTGGTCTTAAAGATCATGTGGAAAGTGGGAATTGAAGAGTTGCCAGAAAGAGAAAGAGACATTT  
TTTTTAAACGAATAATAAAGGAAAATAAGGCAAAAAAATTGAAACAGAGGGAGTATGTGATTACTGTGG  
TTGGGAGAGGATCATGACTACCTAATGCTTTGTATCCAATAGTGAACATGAGAACAATGTTTCGAAAACA  
TCTAAAAATCTCTACACTTTTTGCACTAAATAGTGAAAAGTTGATTGAAGTGGATGTAATGGGAATTAGC  
TTGGCACCTTGGGGGATGGCCAAAATCAAGTGCCTTCGATCAGTTAGAGAGTTGGATTGCATGTATGA



ATCAAGTCATTTGCTTATATGTATTAATAATATGCGTGTGATCTAAAATCCATCAAAGCAAATCATATGCCA  
CACCTGTTATAGACTTATTGAACTCCTGCTAGAGAGGGGATGGGAAGTTAGGAAAAGCAAAGGAGTT  
TGGTTCTATAATCATTATGTAAAAATATCCTTGAATGGAGTTTCAGATGGCTACATAAACTAAACTAA  
AACTAGGTTATTCTATAATACTTCTGAAAATGACAGGCATGGTACTGATCAAGTTATCATAGTCAAATAG  
AAGCAAATCAGCCAAGATGTCAAATAAGCTCTCAAATTAATAATACTTCTTTTACCCATCTTAAGGTAT  
ACATGTCATAAGCAAACCTGTTATGCGAAGGTTACACATCAGGAACATCCCACTAAATTTCAAGTTGTGCC  
CTTGAACCTTGAGTTTCACGAGAATGGATGTCTAAACAGTAAACATGATGTAGTTATAGCCGTCCTATGTT  
GCTTAGACTCTCCAAAATGTTGCCGCACCCGTGTTGAATCCTCAAAAAACAACTACTTTTGAAGGATGT  
GACACGCACCTGTGACATTAATGAAGAGTCCGAACAAGATAATTAGCCGGGATTAGTTGAAATTGCCA  
AGCCTATGCTGGCCTTAGTCCTTTACTCGCTTCTAATGGCGTGCCACAATGTTAAAAGGAGTATTTGAAA  
ATGTTTCATAGAACCTTTTCTCCTGTGCTCATAATGGGGGAAAATGTAGTTTCACTATCATGCAGGATTTCT  
CAATATAATAATTGACTATTCTTTTTTTTTTTTTTAAAAAAAACAAAACAAAACCTGACTATTTTGGGCTT  
CCTTGACGTTATAGTACTGATGTCTTTGACATGGAAAAACCTCTTGTTTTCGCCTATGAAGACATTCTAT  
CTTCTACCGATGGATTTTCTGACTCCAATCTTCTTGGTCATGGAACCTATGGTTCTGTCTATTACGCCATCC  
TCCGCAACCAGGTTACTTCTCTCAACTTTACCTATATTGATAGATTTCTGTTAACATGGCGTATTAACCTG  
CTTATGTCTTTGGAACGTTAACCTTTGAGGAAGTTGCAATCAAAGAATGACTGCTACTAAAACAAAAGA  
ATTTACTGCTGAGATGAAAGTTCTATGTAAAGTTCATCATTGAAATTTGGTAATGAATACTGAATTTGCT  
GCAGTATCCTGAGTTTTTATTTTTGGAGCTTGAGGATAGTGCTACATCAATTCAAAGTTTTGACTCCTGTC  
TTGGTATTATTTGTCAAGGTAGAATTGATCGGCTATGCAGTCAGTAATGATGAATTATTCCTCGTTTATG  
AATATGCCCAGAAGGGTCTCTTAAGAGCCACTTGAATGATCCTCAGAACAAGGTACACATCTTGAAG  
ATAATCATTAAAGCTCAGAATTTTTGTGTAGTGTATATATACATTTTTTCCAGTTGTTGATATGGAAATGAC  
CTGTCACTGCTGTATTTTGGTGAAAAACTAGATGATCTGACCTCTTATTTTGGGTAGGCCACACACCACT  
CTCTTGGATCATGAGGGTCCAAATTGCACTTGATGCTGCTAGAGGCTTGAATACATTCACGAGCACACC  
AAGCCGCATTATGTGCATCGAGATATAAAGACAAGTAACATCCTGCTTGATGATTCTTTTAGAGCAAAG  
GTTGTAGCTATTTTGGTGCTGAATTTTTCTCCTTTGTGGCTGCCATTTTCAAACCCAAATTCTCATTGCC  
ATGTTTGCAACAGATTTGAGATTTTGGTTTGTCAAACTTATGGGGATAACTAATGATGCAGAAGCCTCT  
GCAACACGAGTTGTTGGAACCTATGGCTATGTAGCTCCAGAGTAAGCAACTTAACCAACAATAAGCAAG  
AACACAACTGAAACATCTCTGATTTTGTGTTTCCCTTGTCTTGCAGGTAATTGAGGGATGGCCTG  
GCAACTAAAAAGACTGATGTGTATGCATTTGGTGTTGTTCTATTTGAGATGCTGACAGGGAAAGAGGCC

GTCACCCGGACTGAAGGCAATGTGATGAAAACGCAGAAAGACGCTCCTTAGTGTCCATTGTAAGTCTT  
ATTGCTCACAACTGTTCAAATTGAAGGCATGCTTCCTAATGGATTCTATTTGCCTGTGTTGCCACTTCT  
ATCTGTTATGTGATTAATAAAGATGAAAACATCGATTTTATCATACAATTGAGTAAGATCAAATTCATGA  
AAGCTCTGAAAAATGTTTTGCATTCATCAGACTTGGTCAATGTATGACTAGATTCCATTGCCTATCTGGC  
ATCTTTATCAAATTGTGAAGTTTACTGTTCTCAGGTTTAGGATTAGTTCATCAACTTCCTAAATGCTTTACT  
TCAAAAAAAATTGAAATTCCTTGCCTATTGTTATGTACCTACAGTGTGTGCTGTGGCTATGTATAGGT  
ATACTTATGCATAACATATATATATATATATATATATATATATATTTACTTATATGCACACTATGAATCAATTC  
TTAGCAGTGCTTAATGCTACATAATTGCAGATGCTGGCAGCTCTGAGGAACTCACCAGACTCCACTAGTA  
TGACAAGCTTGAAGGACCAGCTGGATCCCAGTTTGATGGATTTGTACCCTTCTGACTGCGTTTTCAAGGT  
AAGTTGCAGCTTAACAATTATGTTTGCCAACTTTGAATCAGTTCAAGTTGTGCCTCATCTATAATAACGTG  
CATAGAATTGGTAGGGCCACTGACTACCTCAGCTGGTTTAGTTAAAATAATAGACAGAAGAGATAGTTT  
AAGATTGGAAGTTCATATATAGTTATTATCAGCTGAGTGACATAGGTGGCTGATTTTCTAATGAAATTC  
ACGACTTATTTCACTTGTCCACCATCATTGATGTGTTTACTTTGGTAGGTGGCTATGCTGGCTAAGCAAT  
GTGCAGATGATGATCCAATATTGAGACCGGACATGAAGCATGTGGTGATCACACTTTCACAGATAATGT  
TATCCTCTGTGGAGTGGGAAGCAACTCTTGCTGGGAACAGTCAAGTGTTCAAGTGGCATTGTGCAGGGAA  
GATAGGTCCATATGCTAGGTGTTGCCTTGCATCCTCATATATAATGTACATAGTACTCTTGTATTTTTGAA  
GCCAATCTTCTCATTACCAGTCCAGTCACTTTTTCTACATTCTTTATAATGTTATCTTTTTTATGCAC  
CGAGTAATCTCCATATAGCGAATTTTTCTCTTTTTCTTTTTCTTTTTGGGATACTGAGAGTTCAAG  
C

>PGSC0003DMG400006086 LysM RLKs

ACAAACACACATCTCTCCTCCAACAAAAAACAAGCAAAAAAATGATAACAAAAACAATATTTGGTTT  
TTCACCTTCTTCTTCTTATCATTCAATTCATATTCAACCAAAACATATGTTATGCACAAGATCCACCAAGCATAAC  
AGGATATACTTGTAATCCCAACCAATTCAATCCATGTCAAACCTTATGTGTTATACAGAGCTAGAGGACCA  
GAGTTTCTTGATTTAGCCACAATAGGTGATCTTTTTTTCAGTAAGTAGGGTAATGATTGCAAACCCAAGTA  
ATATTTCCAACCAAAACACAACCTTGTTAATGATCAATCCCTTTTTATCCCCATCACATGTTCTTGCAATA  
ACATCAACACAACCTTTTGGTAGCATATCTTATGCTGGCTTAAACTACAATTTCAAAGAAGGTGACACTAT  
GTATGAAATGTCAATATCCAAATACCAAAATCTTACTACTTATCAATCTGTTGAGGCTGTTAATCCCACAG  
TTGTAGCAACCAACATTGATGTAGGCCAGACCATAAAATTCCTAATTTTTGCAAGTGTCCAAACACGAC  
ACAAAATCAACCAAGACTACTCATAAGTTATGTTTTTCAACCTAATGATAACATTTCTTCTATCGCATCAA

GATTCGGGATAACCCCAATCCATAACACAAATTAATGGAAATAATACCAAGATTCTTGATACCCTTTTC  
ATCCCTCTTTCTAATCTACCTAATCTTACACAGCCAGCATCTTCAAACACCCACCCCCACCCCCAGCACCA  
GCACCAGTAATTCAAGAAAATGACAGAAAAGAGACTGTCATAGGGTTAGCAATTGGTTTAGGGGTTTGT  
GGGTTGCTGTTGATTTTGATTCTTGGTTTGTTTTACAAGGAGAAAACAGTAAAGAAAAGAAAAGTATGGT  
GATGTAGAAAAGGCCAAAAAAGTTTGTATCTTGGATCAAAAAAGAAGTCTTTTGTGATAAAGATGTTGAA  
GTGAATTTGTTGGCTGATTTATCAGAGTGTTTGGATAAGTATAAAATGTATAAAATGGTACAACCTTTGGG  
AAGCAACAAATGGATTTGATGAAGGGTGTGGATTCAAGGGTCTGTGTTTAAAGGAACAATTGATGAAG  
AAGTGTGGCAATCAAAAAAATGAAATGGAATGCCCGCGAAGAAGTCAAAATCCTGCAAAAGGTAAAA  
AAAAAACGTTACGTAAAATTCTGCATATATACGTATCCACTGCAGAATTGCTTTTGTGTACTACTAGTAA  
AAATCATTATTAAGGATAACATGAACACTTTAAAGTTAAATTGTTACTGGATAGAATATATGTCATTCT  
TTTACCTTTTTTTGTTTGTGTAGGTGAACCATGGGAATTTGGTGAAGCTAGAGGGTTTTTGCATAGACC  
CTAAGAAGCAAATTGCTACTTAGTCTATGAGTATGTTGAAAATGGTTCACTACATTCTTGGCTTACGG  
TGAAAAACCTGAAAAATTGAGCTGGAAAACAAGACTAAGGATTGCCACTGATGTTGCAAATGGTCTCTT  
ATACATTCATGAACATAACAAGGCCAAGAGTTGTCCACAAAGACATCAAGAGTAGCAACATTCTCCTAGA  
CTCCAACATGAGAGCCAAAGTTGCCAATTTTGGTCTAGCTAAATCAGGGTGAATGCTATAACAATGCAC  
ATTGTAGGTACTCAGGGGTACATCTCCCCTGAGTACCTCACTGATGGGGTTGTATCCACTAAAATGGATG  
TTTTCTCATTGGGGTTGTGTTGCTCGAGCTTGTGTCAGGGAAGGAGGCTATCGATGATGAAGGGAAAG  
TCTTGTGGGCAAAAATTAGCGATTTTTCTGAAGGGAGTGAAGAGAGGAAGGTGAGGAAATTGCAAGAA  
TGGATGGATGAAAGTCTATTGAGGGAAGAATTAACAATGGAAAGTGTGTAATGTGATGACTGTGGC  
TATTTTCATGTTGAATAAAGATCCTTCAAGAAGGCCAGGGATGATTGAAATTGTGTATGCCTTATCTAAA  
AGTATTGATCTATTTTCTGATGTTTCAAGAGGAAGGACCATCTCCAAGGCAAGTCACAGCAAGATAGACTA  
CATAATAGTACTTGCATATTATGTAAAGTTGTTTTGAAGTGGAGTAGCATTTTGTGTTTTGAGGTTTGTAC  
TTTACTTTAAAGTTTGCTTCTATATAAGTGTAAATATACTCCTATATTATCTTTTCTAGTAGTAGTGGTAAA  
TCCAATTTGAATAAGAGCATGTTTAAAGTTGTTCTAGTGGAAATATATATTAGTACCACATAAGACACTT  
GTAATGAATTTATCTTTATGTTATGTTGCTTGGATTCTTCAAAAA

>PGSC0003DMG400006087 LysM RLKs

CACACACATCTCTCCTTCAACCAAACCAAGAAAATGATAACAAGACCAATATTTGTTTTTCACTTCTCTT  
ATTCTTATCATTATTTCAACCAAACATAATATGTTATGCACAAGAGCCACCAAGCATCACAGGATATA  
CTTGTAATCCTAACCAATTCAATCCATGTCAAACCTTATGTGTTATACAGAGCTAGAGGACCAGACTTTCTT

GATTTAGCCTCAATTGGTGATCTTTTTTCAGTAAGTAGACTAATGATAGCAAACCCTAGTAATATTTCCAA  
CCCAAACACAACCTCTTGTTAATGATCAACCCCTTTTTATCCCCATCACATGTTCTTGTAACAACATCAACAC  
AACATATGGTAGCATATCTTATGCTGGCTTTAACTACACTTTCAAATCAGGTGACACTATGTATGGTATAT  
CAACATCTAAATACCAAATCTTACTACTTATCAATCTGTTGAGGCTGTTAATCCCACAGTTGTAGCAACC  
AACATTGATGTAGGCCAGACCATAAAATTCCTAATTTTTTCAAGTGTCCAAACACGACACAAAATCAAC  
CAAGACTACTCATAAGTTATGTTTTTCAACCTAATGATAACATTTCTTCTGTGCGCTCAAGATTCAGGGTA  
ACCCACAATCTATAACACAAATTAATGGAAATAACACCAAGATTCTTGATACCCTTTTTCATCCCTCTTTCT  
AATCTACCTAATCTTACACAGCCAGCATCTTCAAACACCCCAACCCCAACCCCAAGCACCAGCACCAGTAAT  
TCAAGAAAATGACAGAAAAGAGACTGTCATAGGGTTAGCAATTGGTTTAGGGGTTTGTGGGTTGCTGTT  
GATTTTGATTCTTGGTTTGTTTTACAAGGAGAAAACAGTAAAGAAAGAAAAGTATGGTGATGTAGAAAG  
GCAAAAAGTTTGTATCTTGGATCAAAAAGAAGTCTTTTGTGATAAAGATGTTGAAGTGAATTTGTTG  
GCTGATTTATCAGAGTGTGGATAAGTATAAAATGTATAAAATGGTACAACCTTTGGGAAGCAACAAAT  
GGATTTGATGAAGGGTGTGGATTCAAGGGTCTGTGTTTAAAGGAACAATTGATGAAGAAGTGTGGCA  
ATCAAAAATGAAATGGAATGCCCGGAAGAACTCAAATCCTGCAAAGGTAAAAAACAACGTT  
ACGTAAAATTCTGCATATATACGTATCCACTGCAGAATTGCTTTTGTGTACTACTAGTAAAAATCATTTTA  
TTAAGGATAACATGAACACTTTAAAGTTAAATTGTTACTGGATAGAATATATGTCATTCTTTTACCTTTT  
TTGTTTGTGTAGGTGAACCATGGGAATTTGGTGAAGCTAGAGGGTTTTTGCATAGACCCTAAAGAAGCA  
AATTGCTACTTAGTCTATGAGTATGTTGAAAATGGTTCACTACATTCTTGGCTTACGGTGAAAAACCTG  
AAAAATTGAGCTGGAAAACAAGACTAAGGATTGCCACTGATGTTGCAAATGGTCTCTTATACATTCATGA  
ACATACAAGGCCAAGAGTTGTCCACAAAGACATCAAGAGTAGCAACATTCTCCTAGACTCCAACATGAG  
AGCCAAAGTTGCCAATTTTGGTCTAGCTAAATCAGGGTGCAATGCTATAACAATGCACATTGTAGGTACT  
CAGGGGTACATCTCCCCTGAGTACCTCACTGATGGGGTTGTATCCACTAAAATGGATGTTTTCTCATTG  
GGGTTGTGTTGCTCGAGCTTGTGTCAGGGAAGGAGGCTATCGATGATGAAGGGAAAGTCTTGTGGGCA  
AAAATTAGCGATTTTTCTGAAGGGAGTGAAGAGAGGAAGGTGAGGAAATTGCAAGAATGGATGGATG  
AAAGTCTATTGAGGGAAGAATTAACAATGGAAAGTGTGTAATGTGATGACTGTGGCTATTTTCATGTT  
TGAATAAAGATCCTTCAAGAAGGCCAGGGATGATTGAAATTGTGTATGCCTTATCTAAAAGTATTGATCT  
ATTTTCTGATGTTTTCAGAGGAAGGACCATCTCCAAGGCAAGTCACAGCAAGATAGACTACATAATAGTA  
CTTGCATATTATGTAAAGTTGTTTTGAAGTGGAGTAGCATTTTGTGTTTTGAGGTTTGTACTTTACTTTAA  
AGTTTGCTTCTATATAAGTGAATATTACTCCTATATTATCTTTTCTAGTAGTAGTGGTAAATCCAATTTG



AATAAGAGCATGTTAAGGTTGTTCTAGTGGAATATATATTAGTACCACATAAGACACTTGTAATGAATT  
TATCTTTATGTTATGTTGCTTGGATTCTTCAAAAA

>PGSC0003DMG400006088 LysM RLKs

CACACACATCTCTCCTTCAACCAAAACCAAGAAAATGATAACAAGACCAATATTTGTTTTTCACTTCTCTT  
ATTCTTATCATTTCATATTCAACCAAAACATAATATGTTATGCACAAGAGCCACCAAGCATCACAGGATATA  
CTTGTAATCCTAACCAATTCAATCCATGTCAAACCTTATGTGTTATACAGAGCTAGAGGACCAGACTTTCTT  
GATTTAGCCTCAATTGGTGATCTTTTTTCAGTAAGTAGACTAATGATAGCAAACCCTAGTAATATTTCCAA  
CCCAAACACAACCTCTTGTTAATGATCAACCCCTTTTTATCCCCATCACATGTTCTTGTAACAACATCAACAC  
AACATATGGTAGCATATCTTATGCTGGCTTTAACTACACTTTCAAATCAGGTGACACTATGTATGGTATAT  
CAACATCTAAATACCAAAATCTTACTACTTATCAATCTGTTGAGGCTGTTAATCCCACAGTTGTAGCAACC  
AACATTGATGTAGGCCAGACCATAAAATTCCTAATTTTTTGCAAGTGTCCAAACACGACACAAAATCAAC  
CAAGACTACTCATAAGTTATGTTTTTCAACCTAATGATAACATTTCTTCTGTGCGCTCAAGATTCAGGGTA  
ACCCACAATCTATAACACAAATTAATGGAAATAACACCAAGATTCTTGATACCCTTTTCATCCCTCTTTCT  
AATCTACCTAATCTTACACAGCCAGCATCTTCAAACACCCCAACCCCAACCCCAAGCACCAGCACCAGTAAT  
TCAAGAAAATGACAGAAAAGAGACTGTCATAGGGTTAGCAATTGGTTTAGGGGTTTGTGGGTTGCTGTT  
GATTTTGATTCTTGGTTTGTGTTTACAAGGAGAAAACAGTAAAGAAAGAAAAGTATGGTGATGTAGAAAG  
GCAAAAAAGTTTGTATCTTGGATCAAAAAAGAAGTCTTTTGTGATAAAGATGTTGAAGTGAATTTGTTG  
GCTGATTTATCAGAGTGTGTTGGATAAGTATAAAATGTATAAAATGGTACAACCTTTGGGAAGCAACAAAT  
GGATTTGATGAAGGGTGTGTTGATTCAAGGGTCTGTGTTTAAAGGAACAATTGATGAAGAAGTGTGTTGCA  
ATCAAAAAAATGAAATGGAATGCCCGCGAAGAAGTCAAAATCCTGCAAAGGTAAAAAAGGTTAAAAAAGGTT  
ACGTAATAATTCTGCATATATACGTATCCACTGCAGAATTGCTTTTGTGTACTACTAGTAAAAATCATTTTA  
TTCACCCCTGCAACCCCTGCACCAGTAAATCAAGAAAATGACAGAAAAGGAACTGTTATAGGGTTAGC  
AATTGGTTTAGGGGTTTGTGGGGTTTTGTTGATTTTGGTTCTTGGTTTGTGTTTATAGAGAGAAAACAGTG  
AAGAAAGAAGGGTATAGTGATGTAGAAAGACAAAAAGTTTGTATGCTGGATCAAAAAAGGGGCTTTT  
TGTTGATAAAGATGTTGAAGTGAATTTGTTGGCTGATGTATCTGAGTGTGTTGGATAAGTATAAAATGTAT  
AAAATGGAACAAATTTGGGAAGCAACAGATGGATTTGATGAAGGGTGTGTTGATACAAGGATCTGTGTA  
TAAAGGAACAATTGATGGTGAAGTGTGTTGCAATCAAGAAAATGAAGTGAATGCTCGTGAAGAACTCA  
AAATACTGCAAAGGTAACATTTTTACTCAATTTTCTATACTTTTGGTATCTTTTCAAGAATTACTTTTGTG  
TATTGATATTGAGAAAATGATAAACATGGACCGACCTGGGTTGAAGTAGAGTAGTAAGTACTTCATTTTT

ATCAGAGTTTTCGAATTTGAGTCATCGGAATGCGAAATTGTCTTTGTTAAGGAGCAATTTACTCTTCATA  
GGGAATTTTTCTATATATTTGGTATGTTATCGAGAATTGTTTTTGTGTACTAATTGATGTTGAGAAAATG  
ATAAAATGGTCTAGTAATTAGAGGTTTTGAATTTGAGTCTTTAAGTATAGAGTTATTTTGGTTAGGAAGC  
GTAGAGTTATTTTGGTTAGGAAGCGTGTATTCTGACATGAATTCAAATTTAATCGAACTTTATAATGGA  
TATCGAACGCCGAGTAAAAAGGGGAAAAAAACATGGTCCATATGTGTGGAGGGTTGATTCATAAAGTC  
TTAAGTATGTACTATTTGATAGTTTTCCATCTTTAAGTTTGTCAAAAATTAGTATCTTTAATTTTTCATAAA  
ATATTTATTGAATTTATCTGTTAGATTTGATGGGATTATGGGGGGGGGGGGGGGGGGGGGGGAAGG  
GGGGGATTCANNNNNNNNNNNNNNNNNNNNNNNNNNNNNNNNNNNNNNNNNNNNNNNNNNNNNNNNN  
NNNNNNNNNNNNNNNNNNNNNNNNNNNNNNNNNNNNNNNNNNNNNNNNNNNNNNNNNNNNNNNN  
NNNNNNNNNNNNNNNNNNNNNNNNNNNNNNNNNNNNNNNNNNNNNNNNNNNNNNNNNNNNNNNN  
NNNNNNNNNNNNNNNNNNNNNNNNNNNNNNNNNNNNNNNNNNNNNNNNNNNNNNNNNNNNNNNN  
NNNNNNNNNNNNNNNNNNNNNNNNNNNNNNNNNNNNNNNNNNNNNNNNNNNNNNNNNNNGTGGGGGGGGGG  
GGGGGGGGGGGGGGGGGGGGGGGGGGGGAAAGGAAATGAGGGAATTCATAATTAGAGGTACTATTTTGTAG  
ATTGATTGGTTTTGATTTGTTTCTATAATTTGGTGTAGATTTTTTATTTTTTTAAGATATGAAGTGTCTGT  
ATGCAATGTTTTCTGTTGTATATTTAGATTTGAAAAGATTTTTTTAGTGTTTATGATTAATATTTATTAT  
TTTTGTCAAATTAATAAACATAAATTATTAAGTAGTTGACGAAGATTAATAATGTTAACTTTTGATAAAC  
TTAAAGAATCAAATTCAAACCTGTTGATTACATATTTAAGGAGCTATTTTGAACCTGTTCAAGTGTCTCC  
CACCTTAGAGGCTATTTTTGTCATTTTCTCAATTGATATTTTAGTAATGTTAAAATTCCAAGTGCAGAATTGT  
TTTTCTCCAATGGATCAGATTAAGTATTTAATAAAAATATATGTTTAAATAATTTAACTATTAGGTCTA  
GTGACCTGTCGTATTCTTGAGACATTAGTAGTACTTTATTTAAATATTTAAGTGGACCATTATGCCATTG  
GGATTTGATAATTTATAATTTAAGCTAATCAACATCATTTAATACTCAATTTATTTGTCCTCTGATGTCTAT  
CTTTTCATTAATACTCCTCTTTTTGTTCTCAATTATCACTTTTTGTTTTCTTTTTATTTTTGTCCCTAAG  
GAGACCCTCGAGCGTGTATCAAAAATAATTTTTTATATATTATTTTTTCATAACTTGTTTATAAAGATTT  
TACTAGATATATTGTTGTTGTGATAAGAATTGAGATATTAATAAACAAGATGTCTAGAAACAATTCT  
TTTTCTTTTTTTGCCATAGAAAAGAGCATCTTTATTAATAATTTATTTTATCAAGACAAAGTTCAAATAA  
ATTTCTTCCTAAATGAAATTTCTTTGTCTATGACTTTCTCCCAAAAAGCGTCATGCTTTTAGCTTGGTTT  
GGCTGTACTACTTTGACTAGATTTATTAGTTGTCCTATTAATAAAGAAAACGTCATCAAGTCTATTTTG  
CAACCGTACTATAATTAGCGCTTCGCTACGAATAAATCAATAACTTTTTTTAATCATGTATTATATAGTA  
TTTTATTCAATTTCAAATAATTATTATTAAATTATCTATTGGAAATAGTATTTCTACCTCTAAGATAATGG

TAAGGTTTACGTATATTTTACTCTCTTCAGATCGTACTTTATGGGATTACATGAGTATGTCGTTGTAATAT  
TGTCCCAAATTAATTATGTCTACTTAATAATTTCCCCTTTTGTTTTGTGTAGGTGAACCATGGGAATTTG  
GTGAAGCTAGAAGGTTTTTGCATAGACCCTAAAGAAGCAAATTGCTTCTTAGTCTATGAGTATGTTGAAA  
ATGGTTCACTACATTCATGGATTCATGGTGAAAAACCTGAAAAATTGAGTTGGAAAAACAAGACTAAGAA  
TTGCAACTGATGTTGCAAATGGTCTTTTATACATTCATGAACATACAAGGCCAAGAGTTGTCCACAAAGA  
CATCAAAACTAGCAACATTCTCCTAGACACCAACATGAGAGCCAAAGTTGCCAATTTTGGTCTAGCTAAA  
TCAGGTTGCAATGCCATAACAATGCACATTGTAGGTACTCAGGGGTACATCTCCCCTGAGTACCTAACCG  
ATGGCATTGTATCCACTAAGATGGATGTTTTCTCATTGGAGTTGTGTTGCTCGAGCTAGTGTCCAGGGAA  
GGAGGCTATTGATGATGAAGGGAAAGTCTTGTGGGCAAAAATTAGCGATTTTTCGGAAGGGAGTGAAG  
AGAGGAAGGTGAGGAAATTGCAAGAATGGATGGATGATAGTCTTTTGAGGGAAGAGTTAACAATGGA  
GAGTGTGGAATGTGATGTCTGTGGCTATTTCTGTTTGAATAAAGATCCATCAAGAAGGCCAGGGAT  
GATTGAAATTGTGTATGCATTGTCTAAAAGTATTGATCTATTTACTGATGTCTCAGAGGAAGGACTATCT  
CCAAGGCAAGTCACAGCAAGATAGGGGACATATATCTATTTAGCATATTATGTAAAAGTAGTTTTGAAG  
TGAGTAGTATTATTGTGTTTTGAGGTTTTTACTTTACTTTAAAGTTTGCTTCTATATATGTGTAATATTACT  
CCTATATTATCTTTTCTAGTAGTTGTGGAAAATCCAATTTCAAATAAGAGGATGTTTAAGGTTGGTCAAGT  
GGAATATATATTATGTTGTAATGAGTGTTTTATGTTATGTTGCTCGGATTCTTTAAAATTGTATTACTT

>PGSC0003DMG400015422 LysM RLKs

GTTTCGAGCAAAAGTAGCATGCTTCCAAGAAGATCTCCTTATACATGTAACGCTGTTTGAAAATAATCAAA  
AGTAAGTATCATTGTGGAATTTACAACGTATGTTGTTGTATCAATCGAGTCGTGGAATTATGACAATAA  
ACCAATATTGCTCCAAGTAAAATATTGCTTTCACCATTTGAGACACACATAGTAGATGAAACGTCTACTA  
AATCAAATTTCTAAACTCATTCTTCTTATGTCTGTTACTTGAGCTGATGGTCTTTTCGGAAACATCATATTT  
ATCTCCACAAGGTAGGAGTAAGATTTGTGTTGTGTATATTCCACCCTTCCCATATCCTACTTGTGGGAATA  
CTCCGGGTATGTTGTTGTTGTTTTATTCTCTTGATGCCCTTGAATGGAAACATAAGAATAATAACAATT  
CTTGATAATACAATGACACATTTACATAGTCTAGTCAGTCAAAAATTATTGTCACATCTACATTGATTTCTT  
TAATAAAAATCCACTTGACTTTGTAGTCTTCTGATAGGATGACACATTCCTTAAACAAAATTTTCTGGATCA  
AATTAAGTTCGAATGAGACATAATATATACAAAATTTAATAATGTTTAAACGCGTTTATACTTACATTATAC  
ATAATCCAACAAAATATATTCACAAGACCAATTCCTCCATGTTTCATATACTTAATCAAGAAAACAACAGCT  
ATGAATTGGTTTCTGAATATTCTCTGCATACTAACTTTCTAATTTTCATGTACCAAAGCTCAACAAGAATA  
CTCAGGTAATTCAGTATTGAACTGCAAAAACGAATACGAAACGAATTACTCTTGAATGGAAGAAATTCC

ACTTGTCAAGCATTCTCATATTCAAGGCTAGGGATCCTTACAATTCAGTACCTGGAATTGCTGCTCAT  
GTCTTCAAACATGTCTGAGATTACTCGTATCAACAATGTCACGAGGCTTACAGTGTTTCGCGCCAGAAAAG  
GAGGTTATAATTCCAGTGGACTGCTCTTGTTGAGTTTCGTATTATCAAAGCCAAAACCATGTAATATATAT  
CACCTCTTATTGAAACATACTTTGTGATAGCAAATAATTTACCAAGGATTATCAACCTGTAATGCATTA  
GTACGTTCGAAATGAATATGATGAGTTCAGTTAAGACCTGGTCTTGAGTTGCAAGTTCCTCTCAGGTGTG  
CCTGTCCAACAGCAAAACAAGTTGCAAAAGGCTCAAAGTATTTGATGACTTATTCAATTGACGTTGGCGA  
TGACATCCTTAAAGTTGGCAAAAGATTTAATGTTAGTGTAACGAACATAGTTGAATCAAATGGATTCTTG  
GATGAAAATTCTGTTCTGTATCCTTTTACAACCATTCTAATCCCTGCCTTCTGAACCATCAAATTTAGAT  
ACCAGAAATGAGAATTATAGAAAACCTGTTAGGTCCTTTTACCTCCACCGGTAGCTAATGCTTCAAAGG  
GAAAATCAAAGAGAAATCTTACATAGGTAGTGGAGTTGCAACAGGCTTTGTTCTGTTACTGCTTGTGGT  
TTCTTGGGTCGTCCTTCTTGCTTTGTTAAAAAAGGGATAGAAAATTTCCAAGGAGGTCTTCAAGTCAT  
GAAGATATCCTCGTGGAGATCGCGAACATAGATCATGTCCCTAAAGTTTTCAAGTTCAAAGAATTGAAG  
CATGCTACGCGAAACTTTGACTCCAAGAACCGGATAAAGGGATCTGTATACTGGGGAGGGTTTAAAGG  
GGAAATCTTAGCAGTCAAAATAGCAATCATGGATGTATCTAGAGAAGTGAACATGCTGCATAAGATCAA  
TCACTTCAATCTAATAAAGCTTTGTGGCTATTGTGAACATAAAGGTTGCTTCTTTCTGTCTTTGAATACAT  
GAAAATGGCTCTCTCAGGGAATGGCTGACCAGAACCAAGTCTCGAGATACCATAAGCTGGAAAAAAA  
GGATTCAGATTGCGTTGGATGTAGCTAATGGACTTCATTATCTTCACAGCTTTACCAAACCAGGCTACAT  
CCACAAGAACATCAACAGTAGAAACATTCTCCTCGACAGCAACATACGAGCAAAGATTGCAAACCTCAG  
TCTTGCTAAAGAAACGGATAAATCAGGCACGAGTTGGGAGCTTGTTGGGACAACAGGATACATGGCGC  
CTGAGTACGTTGAGAGAGGGTTCAGTGACTTCAAAGATGGACATTTATGCCTTTGGAGTTGTAAGTGTGG  
AATTAGTACCCGAAAAGATGCTGTAATTGTAGAGGAAAGTGGAGAAATTCTGCTTTCTGCTGCAGTAG  
CTGCAATAATGGAAGGAGAAAATGCAGAAATTGAACTGGATGGATTCATCAAAGCAGATATGAGGGAA  
GATGATGATTTGAAATAGCATTTCGGTAGCCAACCTAAGCTTAAGATGCTTGACTCGAGAACCAACA  
AATCGTCCAAGCATGGAAGAGCTAGTATCATGTCTACTGAAGATTCAAGTTAATGTACATAAGGCAGAA  
CAAACCAGTCAGAATTAAGAATATGGACATAGGAGGGGTTAAACTAACTCCAGCCTTGTTTTTTTTTGC  
ATTTGTTCTAGAGCCTAGACTAAGGCTGTATGTTTTAAGATTGAGACGTCTAAATTCTGAATACGAACCT  
GTATATTAAGTTCTATTGGCCGTTGAATGAGCCCTCGACCACCATGTGGTAGCCAATATTGAACTACTGA  
CACTGATCTTGAGTATACTCTTCAAACATCAACTTTATCATCGATGCCATGACGTTCTCGATGCCTCGT  
TCAGTGTGTACATCAACATTTGCTCCCTTCCAATACATTGTTCAAAAATGTATCAAAGTACATTAATAC

GTGTA AATA CAAAGCTAAACATTGACATAATGCAATCAGGATAATCAAAGAAAATGGCAAAAACAGA  
AAACTGAAAAGGACCCTTTGAATCCAGATTTTCAGTCTGCCCCAGACAACAACCTTAATTTTCATCTAATAC  
TTTCTCAAATTATACAGTCATAGAATTCTTCATAGCTAAAATTAATAATAGACCTAAACAAAAGCTTACAA  
GAAACGGGTAAACAATTGCTTTGTGTACACTTTTGACAAACATCCAAGTTATAATATTTAATTATGGTGTG  
TACCATTTTCTTAAACGACACAAATTCATTGTCTGACCTAAACAACCGTGCAAACAATGCTTAACGATGC  
ATCATCTAGTCTTATATTTTTGGAACGATCTTTTTCTAATATTCATCAAATGGTAAAAATATCCAAAACAAC  
TTAAACAACAACAATCAGATGTAGATTTCTAAAGAAGTTAACACATACTAACCAAAACAGTTTTCTGTTT  
CATTTTATGGTCTTGAATTAATGTATCAGAATCTTACATGGAGAAAAACATTGGCCCAATTCTGCTAACC  
AGTGAGGCTCCACAGCTGTCACACACTGCATGTACTCCTTTGTCGTCAAGATTGCCTCATGATAAACCAC  
GTAATCGGGAGTGTAACCCAATCCATAGAGAGCACTTGTGGGATGCAGGTTACAAGGCATTCTATTCT  
GCAATTAACATATTTCCCAATCCCCTTCAGCATAGCTGCATTATGAAAGTATGCGGAACAGATTGTTTTCC  
GCACAACATCCAATCAGAACCGCAGTATGTGAGTGGAATTTTGAGTGTCTTGAGGATGTCCAGCAATT  
GGGATCTTATCTCCCTAGCCTTGTACAGACCTTTGACCTGTAAAAAATGGTCATTACACCAGTCTCCTCTG  
TATTCATTAGCTTTCCATTGCTGGTAAACATTAAGCAATGTAAGGTGATCAGATTCTGGCACAAAAA  
TTTCCCTAGCAGCATCACTTTCCGCTTCCCTATCCTTAGGTGCGAAAGAAA  
ACTGAAGGCACTGAAAGCAT  
AGAAACAATTGTCAGAACCTCATTTAAGCATTCTAGTTTTTCCCCATCAGGAGCAATTTGGCAAGGGCA  
GGGTCCAATGGGAACTTCACCATTTTTTCGTCCAAGGTCCATTAAATCCCAACATCGTTCAGTGCACCTA  
GTAACCACA  
ACTGATACATGGAGTTAAGAATGTTATCTTGAGGAGGTGGATCCATAAAATCAA  
AATCCA  
ACAAGTTTTGAATTTGAGAGACTTGAGCAGCAATACCACATTCCAAGATTTGTCTGTTGAATCTCTGG  
CACAGGGCTTTGCAGCATTTTCATTCTCATAAGCATTCTCTGTATAAAGTCTGTAACAAGTCCCTGGGCA  
GTTCTACCAGCTCGACCAGCACGTTGGTCTGCAGAAGCTCGACTAATGGGGAACACTTGTAAGCATCC  
ATACC  
CATA CGGGGATTGTACACCTTCATTTAACATAGCCTGTATCAATGACATAGAAAATTCATCAAT  
GGTCAAGGACGTCTCAGCGATATTAGTAGCAACAATGCATTTGCGAGCCCCATCTTCAGCATTCTGGAA  
AATTTTTGCTTGCAGATCAGCAGGCAGTTGAGAGTATATAGGAAGAATTAACAGCTTGGGTA  
CTGGTTG  
CTTTGTTGATGAGATAAGTTGTTCCATCCTCTCTGAAAGTGCATAACAGGTTGCTTCGATCTCATCCTGAC  
CAGTCAAGAAGATGAGTATATCACCAGGGGCACCAGCAATATGGATAGTCATGGCTTGCTTA  
ACTGCAG  
CTTCGACATAGTCTTCACATGGGGTTTTACTATAACATATTTGAACTCGAAAAGTCCCTCCAGGTATGTGA  
AATATTGGTACGCCCCAAAGAAGTTTGAGA  
ACTTCTCGCCATTGAGAGTGGCAGAAGTGACAATAAGC  
TTAA  
AATCACGTGCGCTAGCCACA  
ACTTTCTTGAGAATGCCAAAAGGACATCAGTGTCAAGTGATCTCT

CATGGGCTTCATCCATTAATAATAACTATATTTCTCAAGATCGGGATCCTTAAGAGTTTCCCTTAAGAGC  
ACACCATCGGTCATGTACTTGATAACAGTACTTGGCCAGTGGCATCTTCAAACGAATAGCATATCCAA  
CTTATCCCCGAGCTCAGTTTCCATTTCTCACTAACTCTTTGGCAACACTCATCGCTGCCACACGTCTAG  
GTTGGGTGCAACCTATGATCCCATTAAGTATAACCATATTCATACAGGTAAGTACTGAGTTAGCTGTGTTGT  
TTCCAGAACCAGTTTCTCCAATAATAACCACCACCTGATTTTCACTAACCACCTGCAATAACTCATCTCGC  
ACAGAGAATATGGGCAAATTCTGTGCTTGCTGTGAAATTGTTTTCGATTTTGTAAAATCACTGACAGCTA  
AGTGCTGCGAGAATCTGGCTTTTCCCTTAAAATCAACCGCACCATCTCACCCACTACAACAGTATCTGCA  
TCAATCTCATCAACACTCTTCTCCACACCAAGAATATCTCCGAGTTTCGACCCAGCTAGCTCCCAAATCT  
TTGCCGAGACTTATCCCTCTTTGTTTTCGTGTATCTCCCGAACAAGAGCTGACCCTTTTCGTGAAATTA  
GTGCCATATCGGACATTGCATCCTTAATTGGCAATATCGGCTCAGTTTGCTCAGTGAAAATAACTCTCCC  
ATCCAAAATGGAGGCAGCTTTATATCATGAACATGAAGAATCACCTCCGTTCTCTTCATCATCATCAA  
ACTCCGTTTGCACCTTGTTACCTCTAACAGCTCCAGATCTCAAAGCTGACGATTCTCCAGTTTTTGCCA  
AGGATTTTTTTCTAGTTCGTGAATAATCATTTGTACTACCTATTTTCAGAGATACAATTTCTTTTAGCACTA  
AAATTGTAATTTTTTGCAGGATACTTAGAAGTTGAAGATCTTACCGATGCCCTAATTGGAATTGGAGAAG  
GAGCCACAATGTCCCACGGAGAAGAAGCAGCAACAGCATATGAATGTTCTTCGCTACTGGTTCTCTTTCT  
CCTTCTCACTCCATGGATTTGCTTCTTCTATCCCTCTCCGCCATATATGTTTGTGTTGAATTTGAAGGAAGA  
TGGAATATTGCTTCTCACTATTTGGTGTAGTTTTCAAATTAG

>PGSC0003DMG400016433 LysM RLKs

AAAATTCTTTGTCTCCCACTTAAAGTAATGCATAAATCAAAGCTAAAACCTTTTTGTTTCTTGACTAGAC  
CATGTAAAAATGCTAAAAAGTCAAAAATTGAAGCTGTCAAGTGTCAACTAACACAACCATAATTACATC  
CATTGGCATCTTTCATTCAAGATTCTAAAAGAGTTCAAAAATCTCAAGCCATTTCTCAACTAGTACAGAGT  
TGAAAATCAGATGATTTTTCAAGAAAATAGAAGCTTTGAGTTAGTTTTAGGCCTTTTAGTGTTAAACATT  
TGTGGGTGGGGGCTAAATCCCAGTGTAGTGATGATTGTGATGCATTAGCTTCATTTTATGTATGGAATG  
GTGCAAATCTCACTTTCATATCTAATACTTTTTCAACCACCATCAAGCATATTCTTAGTTATAATCCTCAGA  
TAACCAATCCAGATATTATTCAATTCCAAGCAGAGTTAATGTTCCCTTCTCATGTAGCTGTGTTGATGGG  
AAATTCATGGGCCATCAGTTTGATGTGCAGGTCAAGACTAGTACTACTTATCCGAGAATTGCTCGTCTTT  
ATTGTTCAAACCTTACAACAGTTGAAAAGTTGCAGGAGTCTAACAGTTATGATCCTAACAATGTTCTGT  
AAATGCAATAGTAAAGGTTACTGTCAACTGCTCATGTGGGAATAGTCATGTGTCAAAGATTATGGACT  
ATTTATAACTTATCCTCTTCGCCCTGGTGAGAATTTGGTTACAGTAGCCAATGATTTTAATCTACCACAGA

AGTTGTTGGAAGACTATAATCCTGAAGCAAATTCAGCAGGGGTAGTGGTCTGGTTTTTCATTCTGGAA  
AAGGTAATTGATCTCTTACCAAGGGTCTGTACTCGTATTCTTTGCATATTTTAAGTACACAATTAGTTG  
AATTCGGATGAGTTTGCACACTACAATCATAGTGAATTTTCGGATGATTTGACTTGTATGACAAATAGGT  
CGGAAGCTCGGGATTGTCACCTGAATATCTGTTACTATATGCCAAAATGTTGGATGATGTCATAGTTTTT  
TCTTTTAAATCTCTATTTCTGAAATGTATTGCAGATCAAATGGAACCTTATCCACCATTAAGGACTTCTAC  
AAGGTATTCTCCAACCCCAATGAGCTCCTAATCATTTCTTGAATGCTATAATATTGGTAGCTAATTGTTGT  
TTCTTGCTTTTACAGCTCAAAGGTTGTCCTTACTGCTACAGTGGCATCTTTATCAACTTATCAAGTCTA  
AGGTATCAAATAGGTCTGAATGTGATTGTAATCTACTAAAACTATGTTATTGACAGGATTCTCAGGTG  
GAGCAATAACTGGCATATCAGTTGCAGCAGTTCTTGTGGTTGCCCTTTAGCGGTTTGCATATACATTAC  
CTTTTATAGAGGCAGGAAAACGGAGGAAAATCTTAACTTGGAACCTTACAAACACAGTAGTAATAAGCA  
TGTTCTGGTAATTTTATTGTTTTGAATCTACTGATGTATGCTTAATTACCTGTCAAACCTCTATGGTGGAA  
ATTCCTGTTTGTGTTTCTCATTCTCTAGCCTTAGGCATGAGGAATCATCATCATCATCATAATGACT  
TGTTAAAGATATTACTCTATTTTCAATTTGTTAATTAGATATAAGCTTCCTGCAATCGATCCTGATTAATGA  
TAAAATTATGTCAACTGTTCTGTGGAAGCAATGTTTTGGTTCATCCTTAGAATAAACCTTGTAGTTTCTTT  
AAATGACTCAGGTCAAGCAAATTTTGAGAATTCTTCAGAAGGGGGATCTCTTAATAAGGGTGCTTCTCCA  
GAGATCCCGAGGATTGCTGTGGATAAATCAGTAGAATTTTCTATGATGAACTTGCTAATGCCAGTGAC  
AACTTCAGCACAGCCTACAAGATTGGCCAAGGTGGTTTTGCATCTGTTTACTATGGAGAGTTAAGAGGC  
GAGGTTTCGTTACATTATTCTTGTAGATTGAAATGATTAGCAATTATCCGGATACTCAGATTGATCAGCA  
GTCTAGTTCTAGCTGCTTATTATGTCACTGTTGCACCATTACATAATTGTCTAGACTCAGCATGCATTTCT  
TTTTCCATAGTCAAATTAATCATGCTGCTAATCTCCTTTGTCTCAATAAAAATGCAGAAAGCTGCTATCAA  
GAAGATGGATATGCAAGCAACAAAAGAGTTCCTTGCTGAATTGAAGGTTTTGACACATGTTCACTT  
GAACTTGGTAAATTCATTAATCATACTGATATACTATCTTTTCTTACTTGATTATAACCTCTCTGCCACCTG  
CTCTGAGTCTATGGGGAAAAAATCAACATCATGGACTCATGGTTGGTTGAACTTGCTAACTTCGGTGATC  
TTTGAACCTATTTGTAATGCAATTTACAGAAGTGGTCTGAGCCCCTTAGCTTGATAATGTGATACTTTTCA  
TAGTGAAAGTCAGGATTGGTGATTTAGTTCTGCCATACTTGAGATTTAGCAGATGATGAATCCATTTACC  
TGATATGTCATAGAGAATATGAGGTAATATTTACATGTTGAAACCTTTGCAGGTACGTTTGATAGGATA  
TTGCATTGAAGGATCCTTGTTCTTAGTATATGAATACATTGAAAATGGGAACCTAAGCCAACATTTGCGC  
GGTTTTGGTTAGTTTGTCTTCTCATTGCACGAAAAATTCATGTCTAACCAAATTTTCAAATCTCTCATAG  
TTCCATATCCATTTTGTACTCTTCAGTTCAGGTAAGGTACCATTGCCATGGTCCACCAGGGTGAAAATTG

CTCTGGATGCAGCTAGAGGCCTAGAGTACATCCACGAACACACTGTTCCCTGTTTACATCCATCGCGACAT  
TAAACAGCCAACATTTTGATCGACAAAACTTTCGTGCAAAGGTATGAGAGTTCCGAAACTAGAACTAT  
GAAAACAAAAACCATGTGTACTAATTCATTTGAAGATTTTGCCTTGCAGGTTGCTGACTTTGGACTCACA  
AACTGATAGAACTGAAGGTGGTTCGATGAACACTCGTCTCGTTGGTACTTTTGGTTACATGGCCCCAG  
AGTAAGAATTTATTTGCCTATGGTAGTAGTACTTATTCTATATCTCTAAACAAGATCAAATTATCAATTCC  
TACTTGCCTTTGTGCAGGTATGGTCAATTTGGTGATGTTTCACCAAAAATTGATGTATATGCATTTGGGG  
TTGTGCTTTATGAATTAATATCTGCTAAACAAGCTATTATCAGAAATAGTGAAATTGCTACTGAATCAAA  
GGGGCTTATTGGATTGGTAACTTTGAATCATTTCTTCACTCACCAAATTTAACCTCAAACCCTAAAAGA  
GTCAAACCTTAACTTTTAATTGGCAATATTTTTTGCAGTTTGAGGATGTGCTTAATGAGGTTGATCCTAGAG  
AAGGGATATGCAAATTGGTAGATCCAAAACCTGGTGATGATTATCCCCTGGATTCAGTGTGGAATGTAA  
GAAAACAATATATTTTTACAAGTGATTAATGTTAACGCGATTATATAACTAACCTCAGCTAGTTTGAAA  
TTTATACGTA CTACTCAGTGAATTGATTGATTAACGTGATTCATATAGGTGGCTCTTCTTGCCAAGGCCTGCAC  
ACAGGAGAATCCACAATTGAGACCAAGTATGAGGTCAATAGTAGTAGCTTTAATGACAATATCATCCAC  
AAGTGCAGATTGGAACCTTGGTGAATTTTATGAGAACCAGGGCCTAGCCCATCTCATTTCAGGAAGGTA  
ATAAATCCAATTGGAGTTATATTCTGTTACTCACAATCAGGAAATTAGAAGCAGAAGTTTACAGAAGTA  
ACACTAGTACATTTGTTTACATCAACCATATGATACAGTACTATAAGTACTTTGCCATATTTAAAAA  
AAAGGAACCCTGTATGGCTGTATATCGCTCCTTTGAGTAGGCACCTGTCTGTAATATTAATAAATCATGC  
TCAACGCTAATAGTATGTTTATATCCCCTGGAAGAAGTGTATTAAGAG

>PGSC0003DMG400038314 LysM RLKs

ATGAATTGGTTTCTGAATATTCTCTGCATACTAACTTTCTAATTTTCATGTACCAAAGCTCAACAAGAATA  
CTCAGGTAATTCAGTATTGAACTGCAAAAACGAATACGAAACGAATTA CTCTTGCAATGGAAGAAATTCC  
ACTTGTCAAGCATTCTCATATTCAAGGCTAGGGATCCTTACAATTCAGTACCTGGAATTGCTGCTCAT  
GTCTTCAAACATGTCTGAGATTACTCGTATCAACAATGTCACGAGGCTTACAGTGTTTCGCGCCAGAAAAG  
GAGGTTATAATTCCAGTGGACTGCTCTTGTTGAGTTTCGTATTATCAAAGCCAAAACCATGTA CTATATAT  
CACCTCTTATTGAAACATACTTTGTGATAGCAAATAATATTTACCAAGGATTATCAACCTGTAATGCATTA  
GTACGTGCAAAATGAATATGATGAGTTCAGTTTAAAGACCTGGTCTTGAGTTGCAAGTTCCTCTCAGGTGTG  
CCTGTCCAACAGCAAACAAGTTGCAAAAAGGCTCAAAGTATTTGATGACTTATTCAATTGACGTTGGCGA  
TGACATCCTTAAAGTTGGCAAAAAGATTTAATGTTAGTGTAACGAACATAGTTGAATCAAATGGATTCTTG  
GATGAAAATTCTGTTCTGTATCCTTTTACAACCATTCTAATTCCTGCCTTCTGAACCATCAAATTTAGAT



ACCAGAAATGAGAATTATAGAAAACCTGTTAGGTCCTTTTCACCTCCACCGGTAGCTAATGCTTCAAAGG  
GAAAATCAAAGAGAAAATCTTACATAGGTAGTGGAGTTGCAACAGGCTTTGTTCTGTTACTGCTTGTGGT  
TTCTTGGGTCGTCCTTCTTGCTTTGTTAAAAAAGGGATAGAAAATTTCCAAGGAGGTCTTCAAGTCAT  
GAAGATATCCTCGTGGAGATCGCGAACATAGATCATGTCCCTAAAGTTTTCAAGTTCAAAGAATTGAAG  
CATGCTACGCGAAACTTTGACTCCAAGAACCGGATAAAGGGATCTGTATACTGGGGAGGGTTTAAAGG  
GGAAATCTTAGCAGTCAAATAGCAATCATGGATGTATCTAGAGAAGTGAACATGCTGCATAAGATCAA  
TCACTTCAATCTAATAAAGCTTTGTGGCTATTGTGAACATAAAGGTTGCTTCTTTCTGTCTTTGAATACAT  
GAAAATGGCTCTCTCAGGGAATGGCTGACCAGAACCAAGTCTCGAGATACCATAAGCTGGAAAAAAA  
GGATTCAGATTGCGTTGGATGTAGCTAATGGACTTCATTATCTTCACAGCTTTACCAAACCAGGCTACAT  
CCACAAGAACATCAACAGTAGAAACATTCTCCTCGACAGCAACATACGAGCAAAGATTGCAAACCTCAG  
TCTTGCTAAAGAAACGGATAAATCAGGCACGAGTTGGGAGCTTGTTGGGACAACAGGATACATGGCGC  
CTGAGTACGTTGAGAGAGGGTCAGTGACTTCAAAGATGGACATTTATGCCTTTGGAGTTGTAAGTGTGG  
AATTAGTCACCGGAAAAGATGCTGTAATTGTAGAGGAAAGTGGAGAAAATTCTGCTTTCTGCTGCAGTAG  
CTGCAATAATGGAAGGAGAAAATGCAGAAAATTGAACTGGATGGATTCATCAAAGCAGATATGAGGGAA  
GATGATGATTTGAAATAGCATTTCGGTAGCCAACCTAAGCTTAAGATGCTTGACTCGAGAACCAACA  
AATCGTCCAAGCATGGAAGAGCTAGTATCATGTCTACTGAAGATTCAAGTTAATGTACATAAGGCAGAA  
CAAACCAGTCAGAATTAA

>PGSC0003DMG400038918 LysM RLKs

ATGAGTTGTAAAGGAACCAATGAAACAGGAACTACTGCTTCTTTCTCTATTCTTGAATGGTGAAAAGT  
TCTCCTGTCGATCATTCTGATTTTTAGATCAGATTCTACTTATAATTCTGTTTCTTCCATCTCAAACTCCT  
ATCTTTGAACCCTGATGATATTGTCCACATCAACAATATCTCAAGGTCTAAAATATTGGATCAGAATCAA  
GAAGTTATAGTTCCAGTAAATTGTTTCATGTTTCAGGTCAGTACTATCAGGCTGACACCTTTATGTTATACC  
AAGCAAATTTGATACCTATTTTCGCATTGCAACCACCACGTATCAGGGGTTATCTACTTGCAGTGCTCTTA  
TGCATGAAAATGTCTACAATGCACTCGATCTGTTTCCAGGTCTAAATTTACGGGTACCACTCAGATGTGC  
CTGTCTACAAGGGATCAGTCAAGAAATGGTGTGAAATATCTGGTGACTCATTTGGTTACATCGGGGGA  
CAACGTTTCTAGCATTAGCGCGCAGTTCAGTGTGAGTAGTCAAAGTACAGCATATGCAAATGGATTATCT  
GAAAATTCAGTTATTTATCCTTGCAACAATACTGATTCCCTGCCAAAAGAACCTTTAAGCTCCCAAAC  
AAGGACTATTAAGACTGCACACACTGAAATATTTTACCCTTCTAGGCACAAAATAACATACCGCAGTCTT  
TTCATTGGGGTAGGAACTGGTGTATCCCTTGCAGTCCTCTGTTTTATCTTGTTTCATTGTCTTAAATATAA

GAAGGAAAACAAAAGAGGTGAAATACTTGGGAATCGAAGACAAGGGAAACAACTAGGAATTTGCCA  
GAACATCTCCTGGAAAGTATTGTTGGTGAAGGTCAAATGATTAAGTGTATGAATTCGAAGAACTGGTG  
GCTGCAACTGAAAACCTCAGCTCGCGAAAAAAATTTGGTAATTGTGTTTATAAAGGGGTCTTCGAGGA  
AAACTGATGGCCATCAAGGAGACGCGGACAGACATATCAAAGGAGGTAAATTCCTTGCAAAGATCAA  
CCATTTCAATTTAATTAGCCTCACTGGTGTCTGTAAGCATCACCAACTATCCTATCTTGTTTTGAGTTCAT  
GGAAAATGGATCTTTAAATGAATGGCTTTTCAAGGATGATAACCCCGAGGCTCAGAGCTGGAAGTGCAG  
AATGCGTATTGCCTTAGATATCGCTGATGGTCTAGATTATATTCATAACTTCACAGCTCCAGCTTATGTGC  
ACAATAACATTAGTAGTAACAGTATCTTACTTAACAGACATCTAAGGGCCAAGATTTCAAATTTAGCCT  
GGCGCGGTCAGCAAACAATGAGGGAAAGGAAAGTTCATCTATGAAGTTCGTCAAGGGAAACAATGGCT  
ACTTGGCACCAGAGTACATTGAAACTGGCCAGGTTACTCCCAAGGTAGATATCTATGCATTTGGAATCGT  
TTTGTTGGAGATTATTACAGGAAAAGGGGCTGCTTTTGAGCAGGATGGAAAAGAAGTACTCTTGTGAGA  
GACAGTGCTTGAAAGTATGGATAAAGAATCTAAAATTCAGAAGTCCAAGGCTACAAATTAA  
GCACCCGCTTGGTTACATAATTCAACAAACTGATCTCGTTCTTCGATTGGTGAATTATCTGCAGCATGCT  
TGACGAGGGAACCTGAAAGAAGACCAAGTCAACTGAAATAATATCTACCTAATCAAAATCCAGACAG  
ATATACAAAACCTAG

>PGSC0003DMG400047346 LysM RLKs

ATGAATTATTCTCATCTCATCTTTGTTTTACCATCATTCTTGCTTATTCCTCCTCTGTTTCAATTCTTGACA  
ACAGCCTTACTTTGGAACAGGAACAAATGACTGCAACACCCAAGATACCTCCACTTCTGCTTTTGGGTAT  
TTATGCAATGGCGTTAACCGTACTTGCCAATCTTATTTGACCTTCAGATCTCAACCCCTTTCAACACCGT  
GCCCTCAATCTCATCTCTATTGGGTGCTAACCTTCACAGCTCTCTCAGCTCAATTCAGTTTCTCAAAATGC  
TACCTTTAACACCAACCAAATGGTTCTTGTTCTGTCACTTGTTCTTGTTTCAGGTCAGTTTTATCAATCAAA  
TGCATCTTATGTTATCAGAAGGGATGATACTTTCTTGAATGTTGCAATTAATACCTTACAAGGATTGTCAA  
CTTGTCATGCTATCAACGCGGAGAACAGTGAACAAGCTAATAATCTGGTTGTTGGTTCAAGAATTAATGT  
TCCTCTGCGATGTGCTTGTCTACGCAAAACCAAATAATAATGGTACAAATTATCTCCTTACTTATTTGA  
TTGCTTCTGGGGAATTTGTTTCCTCATTAGTGATAAATTTGGGGTGGATTTTAGGGCAACTCTTGCTGCT  
AATAGTATAACCAGAAGATGCTCCTACTGTCTTTCAAATACTACTCTATTAGTTCCTTTATCGACCCACCT  
TTGAGTTCCAAGTTGCTGGACCATCTCCACCACCGCCTCCTGCGACAACATCAACACCACCACCTGCTGT  
CCCTGTATCGGAGAGTAGCTCGAAGAAAACCTGGATATATGTTGTGGTTGGTGTGTTGGAGGACTTGT  
TGCTTTGTGATTCTGGGGGTTGTTGTTTTCTTTTTGTTTTTCAGGAAAAGGAAAAGAAAGCTGATCCA

CAGTTTGTCTGAAAGCTTTGAAGCTGTTGAGAAACCATCGAATAAGAAAGTTGAAGAAGAATCAGAG  
GAGTTTTTGAAAGTTTATCCAGCATAGCTCAATCTGTTAAGGTTTACAAGTTTGAAGAGGTTAAAGCAG  
CTACAGAAAATTTAGTCCTACATGTCTGATAAAGGGGTCTGTTTATCGGGGCACGATCAATGGCGATTT  
TGCTGCTATAAAGAAAATGAGTGGTGATGTATCAAAGGAAATTAATTTGTTGAGCAAATCAATCATTTT  
AATCTCATTAGTCTATCGGGAATTTGTTTTCATGATGGTCACTGGTATCTTGTATATGAATATGCTGCCAA  
TGGACCATTAAGTGATTGGATATGTCACCATAATGGTAATCAGAAGTCACTAAGTTGGGCTCAAAGAGT  
ACAAATTTCTTTGATGTGGCCACAGGGCTTAACTATCTTCATAGCTACACATCCCCTCCTCATGTTCACA  
AGGATTTAAACGGTGATAATGTTCTTCTGATGGTGATTTAAGAGCCAAGATTGCTAACTTTGGTCTAGC  
AAGGTCAGCGGATGGACAAGAAGGTGAGTTTGCGTTGACAAGGCATATAGTTGGGACCCAAGGTTACA  
TGGCACCTGAGTATTTGGAGAATGGGCTAGTCTCTCAAAGCTGGATGTCTATGCATTAGGAGTTCTGTT  
GCTGGAGATTCTCACTGGGAAAGAAGTTTCTGCTTTATATGAAGGCTCAAATACAACTTGTCTGAGGT  
GTTGATCCCGGTGCTTCATGATGAGGATGCAAAGGAGAATTTGAGCAACTTCATCGACCCTTCTCTGCAA  
GGGAAGTACCCTGCAGAACTTGCCTTTGCCATGGTCAGATTGATCGATAACTGCATAATGAAAGATCCTT  
CGCATCGCCCTAGTACGGATGAGATTGTGCAATCTGTTTCAAGAATTATGACAGCCACACACTCATGGG  
AAATGTCATTTAGCAGTTCAGTGTA

>PGSC0003DMG401000674 LysM RLKs

ATGTTGAACTTATCCCTTTTCTTTATACTAATTTACTTATCCTCTGTTCCATTACCAGTTAACTCTCAATGCA  
ACAGAGGTTGCGATTTAGCATTAGCTTCATTCTACGTATGGCGAGGAATAGATCTCACTTACATCGCAAA  
TTTATTCAATATCGAACTAGACAAGAAATCATGGATTACAACACCAGAGACACCATCCCAAATCTAAAC  
AGTGAATCGCCGGAACAAGAATTAACATACCTTTTCGCTGTGATTGCTTGGAGGACGGCGATTTTTTAG  
GGCATGATTTTCAATATGAGGTTAATTCAGGGGATACGTATGGTGGAATTGTGTTGAATTACTCTAATTT  
GTCGAGTGTTGATTTGTTGAGGAGGTTAATAGTAGATACCCGGAGAATAATATCCGACTGGTGCGAA  
TTTGAGTGTTGTAGTGAATTGTTCTTGTGGAGATAGAGATGTTTCTGAAGATTTTGGGGTTTTTGTAAACG  
TATCCTTTGAGATCGGAGGAGAAGTTGACGTATGTGACGACGACGAATGTGAGTGCTGAGTTAATA  
CGAAGGTATAATCCAGATATGGATGCTAAATTCAGTGCTGGAGAAGGGATCATCTATATCCGGGAAGA  
GGTTGGTGTTGATGCTCTTTAGTTATGTGTTTGCTTTATTTCTGCATATAATACATAAGCGTGTTTTTTAA  
CTTTGCTTAGCTACTGTTTATATTCTTATTAATTTGAAAGTGCGTAATTAACATATAAATTTGTATGAAAT  
TGAATAAGTAAATATACTAATTCTACATGATATAATATGCATCATAACGAACTTATCATTTTATTAGATA  
TAGATTATTCGCATTGCTGAGGGCTATGGTCAAATATAGATGCTAAACAAGACTTTAGAGACCTATAGTA

GGTGCTATTGTTGTGATAGTCAACAAGATTAGATGTGTTTTCAAAGGCGGGACAAGGCGTAGCAAAAAC  
CCACCGAGGCATTGTGGGGGTGGGAATGAATGGTGA

>PGSC0003DMG402000674 LysM RLKs

TTTTATTGTTTTACCAAAGTATTA AAAAATCTGAACAATAATCATTATTACTAATTTTCAATCC  
AACTTTATCAATAACCCACTCAGTCAACGCTTCCTCCAAAACCCAGCTCAAATTTCCAGAAAAATACGTT  
CTTGATCAATTTCTTCATAACCCATTTATAAATTTCCAGAAAAATACGTTCTTGTATCAATTTATAATT  
ACCCATTTCCAGAAATCCAGAAAAATACGTTCTTGAATCAATTTCCACATACCCATTTCCAGAAATTTCA  
TTCTTTCTTCATGAAACAATGTTTGAATCCCGGCCAAGAAGTGTGTTGAGCTTAGGGGTTTTCGTTATACT  
AGTTTACTTATCCTCTGTTCCATTACCAGTTAACTCCCAATGTAATAGAGGCTGCGATTTAGCTTTAGCTTC  
ATTCTATGTCTGGCGAGGTTCAAATCTCACTTTAATCTCAGAGATGTTCTCCACCAGTATACCAGATATCG  
TTTCTTACAACAACAGGGGCAACATCCCTAATCAAGATAGTGTAATCGCCGGGACAAGGATTAACATAC  
CTTTCCGTTGTGATTGCTTGAACGACGGGGAGGTATTGGGCCATGCTTTCCCGTACAGGATTA AACCG  
GTGATACTTATGATCTTGTGGCGAAGAACTACTCTGATTTGACGACTGCACAGTGGATGATGAAGTTTAA  
TAGTTATCCTGAGAATGATATCCCGAATACTGGGAATTTAAGTGTGTAGTGAATTGTTCTTGTGGGAAT  
GGTGATGTTTTCGAAGGATTTTGGGTTGTTTGTGACGTACCCTGTGCGGGCGGAGGATAACTTGACGTCA  
GTGGCTTCAGCAGCCAATGTGAGTGAAGATATAATCCGACGGTATAATCCTGCGGCCGAGTCCATACTA  
GATATAGGGCAAGGAATCATCTATATAACGGGAAGAGGTTGGTGTTTCGTGATCTTTATGTGTTTGTTTA  
TTTCTGATAGGAGTTTTATGTCTTGCTTTATAACTTTATGGGGTTCGTTTGGTAGCTGGTTAGAGTTGTGC  
AAATATAAGTAATGTAGAAATTAGTTATGGGTGAATCTATATATTATTTATGCAGATATTAGTTATGTA  
GGGATTAGTTATACGAATCTATCAAACGTCGTATAAATTATACAAAATTAATACATAAATAACTTGTTTC  
TTATCTAGCTACCAAACGACCCCTAAGGTTTAGTCCTAGTACTTCTTTTTCGGTTTCATGTTTTAGTCTCATG  
GGAAAAGGGAGAAAATGCTCTCTTTTTTAATGATAAGGGAACCCCAACCACTCGTATGCAATAGCTCA  
CAAACCGCACAAGAGAGCAAACCTGCACTAGGCAAGTCCCGTGTGACGAGCTCGGCCTGGAAGGCCAAC  
CCCTGCTGTCACAGGCAAGGAGGCAAATGCATTTTTAAGGAAGGAAGTAGGCACTTTGTCAAAAAAAG  
AAGTTAGGAAGGAAGTAGGAATTAATTTAGGAAGCAACATGTTTTGTTTAAAGGTAACATTGGATTGAA  
GTTTATTGTTTACTATAAACTGGAGTTTGTAGTTTGAATGGATAGAATCAATGAGGATTGAATCATCAAG  
GATGGGTTTTGATGTGTCTAAATGCGCAATGGGAACCTGAAGCAGTGATACAGCACTAATCATGGAGCA  
TTAATGCAAAATTTGTTGATGATACCTGTTTTCTTCTCTTTTTTGGCGTGATGCACAGTGTAGTGCTG  
GACCAATTGAACTTTAGCATTGTCATCTGTCTTTGTTCTAAAGTTGTTTCGTACATTGGACTAAAGGGGTTT

GAAGTACATGATTAACCTAGTAGTGCTGAACTGCTCATATCGGGAAAATGTGACAATTTTCAAGCATAA  
TAATCTTGTGTGAAATTCCTATGATTTACATAATGCTTTTGATTAGCTAAATTCTAGCTATACCAACTGAG  
TTTATCGCTGGGTTCCGTAATGGCAACACAAGGGGCAAGCAGTATTCACAAAAAGAAGAAGCACAACCTG  
AGTGACTGTTCTCTGTTGCTTGGCTTCTTTGAGCTCTTCAATCTGCATCCTGGATCATTCTTCAAACCTGCC  
GACCTGCCTCGATTCCGGTCTTGAAAAACATTTTTATATATACCACATGGAATGCAAATGTGAAGATTG  
AGAGATACATTTACCCTCAAAGAGAATTAGATGAAATAAATGTAGAATAATCTTATCAAAAAAGAATGA  
TCTTTAATTTTGTTAGTGATGGTAAAATATCTAGAGGTATACCCTTTTGAATCACAAACAAGCCCTTTCA  
AGTATTTTTCAATATCACTCTGTTTTCTGAAGATCAAACAGTAAGTACTGAACAAGAAGGATCAGAGTTA  
TGCTTTTGAGGATCTTTGCCGTCCATAATGGCTCTCAACAGCTTCAGAATGAAAGCTATCTTCTTATAGGT  
TGAAAAAGGAAAAAGATATAAGGGCTTGCAGATTCTATTTATTCTTGGTTCTTATTTTGGTACTTTGGA  
TGAGCAGGAGTGTAGTGCGGGCATGTTGCTTGTAGTCTCTCCTAGAGCAAACCTCAAATGATATACAA  
CAAATGCCAAGATATTGTTGTGTTTTAAATAGAATGCGTTTATCGAACTAAAACCTGACTCAAATCT  
GTGTCTTGTACAAATGCATTTCTGCTAAGACTGATATGCTCGTGTATCTTTCTGTTTCTCATCATCTTAA  
TGTGCTGGGAAGAAGTCATAGCTTGATGGTTAACAAATGTCCTAAAAGAGCTTGCTTCTGACTTTGATAT  
TCTCTACACCATATTTTATTTGATCTTCCCTCTTAATCCATTCCAATTCCTTGATCTGTTTCATATAATGCT  
AAATTTCTCGGTACCAGAAGTTCAAATTAAGAGACTGATACACTTCAAATTACTTTTAGCTTTGATACA  
ACATCTTTTTGACAAATCCTTTTAATCACGTGCTTTACTTATTAATGAATTAATATCTTTTACAGCTGACCA  
GCTACCATATATGATGCCTTTGATGTTTTCTTTTTCAATATCTGCATAGTCTAAGTTTGCCAACTAAAATT  
GGAGAGCAGTAACACATTTAGTACAAATACTTTGTCTGTTTTAGTGATTGTGCCTACTACGGTTCTTAATG  
TATAACAGTATTTGAACCATCATTTCTTTTATTATGCAGATAGAAATGGGAACCTTTCCGCCGCTGCCAAC  
AAGGTAACCTAATAAGTTGATGTAAATCTGACTGTCTTGTCTCTATTGATCTTCCATTAACCTAGCAC  
ATTGCTGACATTTATCATTTGTATTGTTTCTCCCTCTGATTTGCAGCACAGATGGTTTGGATCTTTCTCGT  
CTTCAGTGTGGCTTATTTGTTATCCGTTTTTCCAGACCATTATGATGATAAAGGAAGTCCTTTATGCTATC  
TACACTACTATCGTTGCATATTTCTAATAATTAGGTTTGTCTGGTGGCGCTAAAGCTGGGATATCTATA  
GGAGCAATAGGAGTAGTCTTGCTGTTGGCGGGTTTGGTTTATGTAGGATGTTATAGGAACAAAACACAA  
AAGGTTTCGCTGCTCAGATCCGAAGACCACCTCCATCAGTATGGTCATGGTAGGTGTTGATCCCTGTTCT  
TTAGTTCTTAATTTCTTATAAGTTATAACATTCATTTATTTGACGTACAACATTTCTTAAGGTGCTTATACT  
GGATCACTTTAAGGCTGAAAATGCAATTTAAAGTAGCTGATTTCTTTGTTGGAATTGAATATTTCTTTAG



GGGGGGTTCGCAACTAAAGCAATATCAATTCAATGAACTAGTTCAAATAAATTACGTAAGCCAAGT  
GATTGCATTAGCTTGGTAGTCTTGCTGCTTGAGACATCTATCCTAATAAAGCATAAATCAAGTAGTGG  
CTGCCACTTTAATGTTTGTATGATCCTTGAAACCTATACTTGGAGTACCTTAGTTGTTACAATCTGCCATT  
CATTTACAACCTGAATAAATTGCTTTAAATGCACCTAGAGTGCTCTGAAGAGAATTAAGGCCTCGAAGGG  
AATGGGTGCTGCAAACCTACGCTAAAGCTAAAAGAACAAGGTTGGAAAAGTAAAATCTTAGATACAACT  
TATAGTTGTAAAGTTATCAAGTGATGAGTGAGGTCTTGTTTTGATGCGGGTAATGACACACTTCAGGAA  
GGGTATGTGACCACTGTGAGATGATTAATCCACTTTCTTGATTTGATATCCTGAAGAAAGTGCAATAG  
TTGCTGCAAACCTAAGAGATTCCAGGGGATTCGTTACACTTGTTATTGAGGTTTGTAGTTTGGACAGGGTCT  
TCAACATTCTTAAACGGGAGGGCCATTGAACTCAAACATGGTGTAATTCTTCTTTTTCTTACACTAGA  
CTGATTGTTTCATTGATATCGAGTGCAGGTGCGCTTGATAGGCTATTGTGTTGAAGGTTCCCTCTTCCTTG  
TATATGAATACGTTGAGAATGGCCACATAGGCCAACATCTACGTGGTGCAGGTATCTTTGATGTGAATTA  
AATCACATTTCATAACTAACAAATCTTTCAGTAATAGTTAGTTCCTTAAAGAACTTTTACTCAATCTGGTCAA  
TTTATCTCCAGGAAGGGACCCATTGCCATGGTCTAAGAGGGTTCAAATTGCTCTAGATTCAGCTAGAGGT  
CTTGAGTACATACATGAACATACCGTACCAGTTTACATCCATCGTGATATTAACAGCAAATATTCTGAT  
AGACAAAACTTCCATGCAAAGGTTTGTCAAGGGGCACCTCTTTTGTGTTTGTCTATTGTGGGAGGCTGT  
TTTGTAAATCGTGTTAATCGTCTGATTTAGGTTGCAGATTTTGGTTTAAACGAACTGACTGAAGTTGGAAG  
CTCATCTTTGCAAACACGACTTGTGGGTACATTTGGATAACATGCCTCCAGAGTAAGTGTTTTCCATTTTG  
AATTGAAACCTTAAGAGTAGTAATAGAGATGTTCTCACCTATTTTTTTCTTTGAAGAAGAGAATCCATT  
ATTATTATTCTGAGAGTTGTTCCATAATTATGTCGGTGTATCCGTTTTTTGTTAAATGACCGGTGATCAGT  
GCACGGTCAGTCAGGAAAAGGGTAGTTCTAATTATAAACCAAGGTTTTCTCAATGCCTTGCTCAAAGCTT  
AAGTTGTTGCTTTCTGATTAACATTTCTTTTGTGAGTGCCTCATGTGACAGATTAGCACATTGCTTTTCTAC  
AGGTATGCTCAGTATGGTGATGTCTCTCTAAAGTTGATGTTTATGCTTTTGGTGTTGTCCTATATGAACT  
AATTCAGCCAAGGAAGCGATTGTCAAGCCAAATGGTTCTGTAACCTGAATCAAAGGGTCTTGTTGCTTTG  
GTAAATTTCTTTACATATTTCTTCGAAAGGACTATATGTTTGTCTTTCATTCCTTTTACTAGTTTCTCTCC  
TTCATTTGATAGGCAATTTATATTTATATAACACTCTGATGCTAGTTTTTCGTAGTATTGATCCCTCTTTT  
GCCTTTGTTTATCATAGTTTGAAGAAGTACTTAATCAGCCAGAACCTGATGAAGATCTTCGCCAACTGAT  
TGACCCAAGACTCGGAGACGACTATCCCCTTGATTCAGTCCGGAAGGTAATAAGATTTTAAATGAACTTG  
CATTGGTAGTAGCTAAAACAGTTGTTTCTTTTCTTACAAAAGTCCATTTCTTCACTAATCACAGA  
TGGCACAGCTTGCCAAAGCTTGCAACCATGAAAATCCTCTAATAAGACCAAGTATGAGATCAATAGTTGT

TGCGTTGATGACACTCTCTTCGTCGACAGAAGATTGGGATGTTGGATCTTTCTATGGAAATCAAGGTATG  
ATAAACCTCATGTCTGGAAGGTAGTAAACCAAATTACGCTCCCACACGCAATTAACATTTTCATTTCAGAT  
CCATGCTGTTTAAGCATTGGATATGTGTACTACTTGTGCATTTTTACTTGTATAGTACTTGCTTGAATAGT  
GTAAGAAAAGCATAGAAAGATGTATTTCAATTTGTAACATTTAGCACATACTTTGTGAGTTAGAAATGGAA  
CATTTCTCATGAGGAAATACATGTTTTCTTTGTTGTCTGCTGTCTGCTGATGTGACGAGCAGTGTTTATT  
ATCAGAAGCCGAGCCAGGATTTTTAGTTTATGAATTCTTGTCTACAATTCATTTTACATATTGGTTTTGGA  
TATATTATTTGACTGAATAAATTAATAAATTTATTTACAATTATATGGTTCCGGAGTGACAATTACTATGT  
CTG

>PGSC0003DMG400003659 Other RLKs with TM

CAAGACCTAGCTTAGAACGAGGAAGCATCGATGAAATAATAGATGCTAATCTCTTAATGGAGGAATGCA  
ACATGGAAATGATGCTGAAGATGGGACAACCTAGGACTGAAATGTGTGGTCAAAGTCCCCAAAGAAAGG  
CCTACCATGACTCAAGTGTGGCAAGAAGTGGAGACTGCCTTCTTTCTGCAGAAAATATCATAGATAAAC  
AACCTTCAAATGGTTCCTTCAAATTGTCAAACCGATCACTCGTAAGGGGAAGCCATAGAATGAAACAAC  
TGATTATTCTCAAAGCTCAGTTAGCATAGACGGCATTAGATTGCAGAAATTTTACATGGACATAGATGGC  
CTATCCTTTGGGAGTGCAAAGTTGAGATGCTTAGATACCTATAGTATAAGCTTTGAAGATGACTCATTG  
AACTGACAGGAACTTCCGAGGAAACAAGCACAAAGTGGAAACAAGAGCATAGGCTTAACATATAATAT  
CAGTTAAAGTTTGATTAATGTAAGTCGGCAAAGAACATATTTTAGGTTCTCTCTATTGGGAGTTTCTCCAT  
TCTCAAGCCTCAAACCCGAGACCTTTGGTTAAAAGGTTTATAAAAACGGTACCTACCTTCTTTGTATTTGG  
C

>PGSC0003DMG400003660 Other RLKs with TM

CTTATCTACGCCTTCCACCACAGAATTCGGCCCCACCAAATGGATAGCTTGTAACCTAACGAAATCCACATT  
AGATACTGTCGTTCCCGTTTCCGTTAATCCTAAATGCCGCCGTGTCTCTGCCTTCCCGCCACTCTCCCTCTC  
CCTTCCCAAACCTTCTCTCTCTCCACGCGCCGCGGCTTCCCACTACTAAAACCGCCGTATGCTTCTCAAAT  
ATATCCGTTGACTCAACCTCTCAGCCTAATACCACCGGGGTCATTGTCATCGGCGGCGGTTTAGCTGGCT  
TAGCAGCTGCCATTGCGCTTCAAGCCGACAACATCCCATTTCTCCTTCTCGAATCTTCTGATGCCGTCGGC  
GGCCGTGTTTCGCTCTGATGTAGTTGACGGATATACCCTTGATCGTGGTTTCCAGATTTTCATTACTGGTTA  
CCCTGAAGCCCGAAAAATCCTTGATTATGACTCTTTAGACCTCAGAAAATTCTATTCGGGGGCGCAGGTT  
TACTATGGTGGTCGTTTCCACACCGTTGCTGATCCTCTCCGGCATTTCGCCGATGCTCTGCAATCTTTAAC  
CAACCAATTGGTTCAGTTGTGGATAAATTACTTATCGGATTGACTAGATTGAAAGTTTTGACGCAAGGA



GATGATGAAATATTGAGTGCTGAAGAAGTTCCTACGATCGATTTATTGAAGAAGATCGGGTTTTCTGAT  
GCAATATTGGAAAGGTTCTTTGACCGTTTTTGGTGAATTTCTTCGATAGAGAGCTTGAAACAACAT  
CGCGGCTGTTTAATTCATCTTCAAATGCCTAGCTCTTGGTGACAACACACTTCCGGCGAAGGGCATTGC  
CGCCATTCCGGAACAATTGGCGGCAAAATTGCCGTCGAATTCAATATTGTTCAATACACGAGTTGTTTCC  
ATTGATTCAGGATCGGATTCCAGCACAAAAATAAGAGTGACATTACAAAATGGAGAAATGTTGGAAAGT  
GAATTTGGGGTAATATTGGCAGTTGAAGAGCCTGAAGCTGTCAAGTTATTGGCGGGAGAAAAACCGG  
TGAGGTTCCGGCAACCGGTTCCGGAGCACAGTATGTTTGTATTTTTAGCTGACCAAGGCAAAGTTCCGGT  
GCAGGATCCGGTCTTCTTCTTAACGGGTCGGGTAAAGGAATTGTCAATAACATGTTCTTCGCGACCAAT  
GTGGCTCCCTCTTATGCTCCGGTAGGGAAGGCACTGGTTTCTGCCACGCTTGTTGGGGATTTATGGTGAC  
GTGGCAGATGAGGATTTGGTGGATCAGGTCGTGAAGGAGCTATCGGGTTGGTTGGGGAGTCGGTAGT  
TGGGTCATGGAGTTACTTGAGGATGTACAGGATTGGGTTTGCCCAACCGAACCAATGCCACCCACTAA  
CTTGAAGAAGAACCCGATAATAAAACCGGGCTTGACATTTGTGGAGATTATGTGACTAGTGCTACTTTT  
GATGGAGCTTTAGTTTCTGGGAAAATAGCAGCAGAACTTTGCTACAAGATAGAGCTCTATTTAATGTAT  
AGCTTAATTTTGGTTGAGTTTTTTTCCAGTTGTGTAAGTAAAGTTTTGAGTGTCTTGATTAATTTGT  
ATATGGATTCATAAACGTTCCGAGATCATTTTGATGCAATAATTGTAATCAAGAAAGAAGACAATATGG  
TATGACTTGTCTGTTGTTCC

>PGSC0003DMG400006667 Other RLKs with TM

CTTTCACCTACACTGCTCTTATTTTGAAGAAGATGTAGTTTTGAAGCATTTAATGCTCACTTTTCTCTCTCTA  
TTTCTCCTATGCTGTCTTCCACCACTTCATTCTTGAGGGCACCGATAACTTTGACACAAAAGGGGCTAAAA  
AAAATGTCATTATGTTCTCTTTTTTGTGTTTCTTGAAGTAAATATGCAGCTTCTTGGCTACAAATTTTGT  
TAATTGTATTGATAACGAGGGTATTATAATTATTTGGGAGGAAGGAAAGTTGTGAATTTTATCTCATCT  
ACCCACCCATGGTATGTTTGAAGTATTTTTTTTTTTCGTGTGTTTCATAAATTAAGTCAGCTACTATGGAG  
AAGGAGGAGTGGTATTTTGGTTCTATAAAAAAGGATAAAGGTGAAAGAAAGCACTGACTTTCTGTTTGT  
GTACTTTGTTAATTTTTAATTTGTGTAATGGACGTGTTAATAAGTGGTGTGTGGTGATGTGGAAATGT  
AGATACTTTGTAAGAGCTTTTATGCTTCTGTAGTATTTTCAAAGTATCAGGGTTTGGATCAATGTCTTC  
AATTGCTATTTTATATGGTGAATATGGTTCTGTTTTTGTGGGTTGAAGTCAGATGGATCTCATTTGGTCA  
GCTGCTATGGCTCTACTTCTTCTATAATATATTCAACTCCAGCTCATTTCCCTTTTATTGGTCTTACTGCTG  
GAAATGGCTTTGTATGTGGACTTTTGTGGATTCTTACCAGCCTTATTGTTGGGGGAAAAGTAATTTTGT  
ACAAATGGGAGTGCCTCAGCCTATGATCAAAGGGTCTCAATACTTGAAATATCTGCAGGTGAAAATCA

TTTGTGTGGACTAAGGCAACCTTTAATGGGGAAGCATAGGAACACTTCACTTGTTGATTGCTGGGGTTAT  
AACATGACCACAAATAATGAGTTTGAAGGTCAGATCCACTCTATTTAGCTGGTTCTGAGTTTAATTGTG  
CTTTGTTTTCTGTCAATAAAAGTGTTTTATGTTGGGGGATGAAACTAGTAGCCAGGTTATTACCCTAGC  
ACCAAAAGATTTGAGATTTATTAAGATTGCAGCTGGGGGATATCATGTTTGTGGGATCCTAGAAGGGGT  
GAATTCTCAAGTGTATTGCTGGGGAAGGAGCATGAACCTTGAAGAAGAATTCTCTGTTGCTCAACTCAA  
TGTTGAATTGGCAGCCCCTAGTGATCCAATTATATCTGTTGTTGGTGGTAAGTTTCATGCTTGTGGGATT  
AGGAGCTATGACCGTCATGTCGTTTGTGTTGTTACAGAGTTGAGAAAAGCACACCCTCCTAGTGGA  
GTTAGGCTTTATGAGATAGCAGCTGGTACTACTTCACTTGTTGTTATCCTTGCAGAAATTTCACTTTTGCC  
TGTTTGTGGGGGTTTGGTTTTCCCTCATCGCTACCACTCGCTGTTTCTCCTGGAGTCTGCAAGCCTAGAC  
CCTGTGCATCTGGCTTCTATGAGTTTAAACAACGGAAGTGCAACTTGCAAGTCTCCTGATTCTCGCATTGCT  
CTTCCCTGCACCAATGGCTGCCCTGCTGAAATGTATCAACAGGTTCAATGCACTTCATCTACGGACAGTC  
AGTGACGTATAATTGTTCAAGTTGTACCTCTGTTGACTGCCTAACAGCTGTTCTACTGCTATTTCTGGG  
AAGAAGAACGCTAAATTTTGGTCACTCCAGTTACCAGTAATTGTTGCTGAGGTTGCATTTGCAGTATTCT  
TGGTGAGTGTGTATCTCTAACTTCGATCGTATATGTTTCGCTACAAATTAAGGAACTGTAGATGTTCAAG  
GAAAGGTCCTAGTCCTAGGAAGAATGGTACTTTCCCAAAGGAAATTGCTAAAGATAGGGCTGATTTGGA  
TGATCTTAAAATAAGGAGAGCTCAGATGTTTACTTATGAAGATCTTGAGAGAGCAACTGAGGGATTCAA  
AGAAGAATCACAAGTTGGAAAGGGTAGCTTTTCGTGTGTTTTCAAGGGCGTTTTGAAGGACGGTACTGT  
GGTTGCTGTCAAGAGGGCTATAATGTCATCTGACATGAAGAAGAATTCAAAGGAGTTCCACAATGAGCT  
AGACTTGCTGTCCAGGTTGAATCATGCTCATTGCTCAATTTGCTAGGTTATTGTGAAGAAGGTGGAGAG  
AGACTTCTAGTTTATGAGTACATGGCTAATGGCTCGTTGCATGAACATCTACACGGGAAAAAGAAGGAG  
CAATTGGATTGGATAAGAAGGGTAACCATTGCAGTCCAAGCTGCTCGGGGAATCGAATATTTGCATGGT  
TATGCATGTCCACCTGTGATTCACAGAGACATCAAGTCCTCAAACATCCTTATAGATGAAGAACACAATG  
CTCGAGTAGCTGATTTTGGGCTTTCCTTGCTTGGACCTGCTAATAGCAGTTCCCATTAGCTGAGTTACCA  
GCAGGGGACTTGGGTACCTTGATCCCGAGTACTACAGACTACATTATCTTACAACCAAATCTGATGTCT  
ATAGCTTTGGTGTGTTTTGCTTTTGGAAATTCTCAGTGGTCGGAAAGCTATTGACATGCAATACGATGAAGG  
GAACATAGTGGAATGGGCAGTCCCATAATCAAAGCTGGTGAATAGAGGCAATACTGGATCCAGTTTT  
GAAATCACCTTCTGATGCTGAAGCTCTTAGAAGAATCGCTAATATAGCCAGCAAATGCGTGAGGATGAG  
AGGGAAAGAGAGGCCGTCAATGGATAAAGTAACAACAGCTTTGGAGAGAGCACTTGCTCAATTGATGG  
GTAGTCCAAGCAATGACCAGCCTATCTTGCCAACAGAGGTTGTTCTAGGAAGCAGCAGAATGCACAAGA

AGTCCTCATCAAATCGATCAACATCAGAAACAACAGATGTTGCAGAAACTGAGGATCAGAGGTATGTCG  
AATTCAGAGCTCCTTCGTGGATTACATTCCCAAGTGTAGCATCATCTCAGAGAAGAAAGTCTTCAGTATC  
GGACGCAGATGTTGAAGCAAAGAATTTAGAAAGTAGGAACTGTGAAATGAACTGATGGATTGAGAA  
GTTTGAAGAAGAAATTGGACCAGCTTCTCCTCATGAACATTTGTTCTTGAAACACAACCTTCTAATTAAC  
ATAACACTAAAAAGGAAATGCTCTGCAGGTTGATGCTTAATTATTTTGTAGTGAAGAAATGTATACAA  
GTAAAAGGTAAATGTTGTGAATTCTTGATAAATGTGATCAAGAATCCCACTCAACCATTGGCGATGAG  
CTTAGCTAGATGTTTGATCCTGTAATTGTAAGTTCAATCTTCTTCTTTTTATGCATTCAATTCTGAGC  
ATTTG

>PGSC0003DMG400007389 Other RLKs with TM

TTGAAAGTCAATATATCTAGTTTTTATTTAGAAAATTTTTGTTACAACCTCTGTTCTTCTCAACCTTTGA  
GAACTTATAAATCTTTCATTATTCTCGAGTGTGCACATTTTCTTGATTTGTTATCTTCTCCGCGATATGGA  
GGAGAGACAATTGTTGTTTGAGAAGTATGAAATTGGGACATTATTAGGCAAAGGAACTTTTGCGAAAGT  
GTACTATGGTAAGGAACTCGAAACAGGGGAAAGTGTAGCCATTAAGTGATAAAAAAAGATCAAGTTC  
AGAAAGAAGGAATGATGGAGCAAATCACAAGAGAAATCTCTGTGATGGGCCTTGTCGTCATCCCAATA  
TTGTTGAACTCAAAGAAGTCATGGCTACGAAATCTAAAATCTTCTTTATAATGGAGTATGTTAAAGGGGG  
TGAGCTTTTCGCCAAATTAGTATCCAAAGGCAAATTTAAAGAAGATACAGCAAGAAAGTACTTTCAACAA  
TTGATAAGTGCTGTTGATTACTGTCATAGTCGAGGTGTTTATCATCGCGATTTGAAGCCTGAGAACCTAC  
TCCTTGATGAGAATGAGGACTTGAAGATATCTGATTTTGGGTTATCGGCTTTCCTGATGAGCAGTTGAG  
TAGAAATGATGGTTTGCTTCATACACAGTGTGGGACACCAGCATATGTTGCTCCTGAGGTTTTAAGGAG  
GAAAGGTTATGATGGTGCAAAGCTGATATTTGGTCATGTGGTGTAATTTGTATGTGCTTCTAGCTGGT  
TACCTTCCATTTCAAGATGAGAATGTGATGAACATGTACAAGAAGATTTTCAAGGCGTATTTGAGTTCC  
CTCCTTGTTTTCAATGGATTGAGGCGTTTGATATCTAACTTTTAATGGCTGATCCGGACAGGAGGAT  
CACTATTCAAGGTATCATGAGGGTTCCATGGTATAGGAAGGATTTGCGGATGCCACGGGCGTTTTCAAT  
CCAAGATTTTCAAAGTTAGAAAAGGAACAAGAAAATGATCATGTTGAAGAAGGAATGAGCAGCAAAC  
AAGGAGGGATGATTAGGAAATCCCCTTCATCCCCTGCATTTTTCAATGCATTGAGTTGATTTTCATCGAT  
GTCTTCTGGTTTCGACTTGTCTAGCTTGTGAGATCAAAGGGAAGGCATCATCCATGTTCACTTCAAGG  
AGCACTGCCCCGGATGTCATCCGTAAAATGGAGAAAATGGCTAAAGTTATGAGGTATAAGGTTTATAG  
GGTAAAACCATTCAAGTTGAAGATGCAATGCCCCGAGGAAGGACGAAAAGGGCGGTTGTTGGTCACCG  
CTGAGGTGTTTAAGGTGGCCCCGGAAGTCACCGTGGTCGAGCTCTCAAGTCCTCCGGCGACACGTTGG

AGTATAACAAGTTTTGTGAAGAGGAAGTTAGGCCTGCATTGAAGGACATTGTTTGGACATGGCAAGGG  
ACTGGTACTGGAAATGCTGATATTGATAACAAACAGGACTTGGAGCAATAAAAATTTGGTACATGTGCA  
TTTTCTCCCTCTTCTTTTGTGTTTGTGTTTCGCTCCCCCTGATCGGCTGATAGAAATAAATCAACGATCGG  
AGATATTCGTGTTACTTTGTCAATATTGATTTGTACATAAATTGTGTGTTATACTGACCACTTTGGGATTT  
GTATTGTTTGTATGTTGTGATTCACTTAATTTCTCTAGTCATTCAAGCACAATTAATCCAAGCTTGATAGG  
GGATCTTGTTCAAAGGATATATTTACCTCCCGGCTCCCTTATCTATTTGTAAGTTGCAAGTTGATGTT  
GCAACATGGACATTTTGTTCAGA

>PGSC0003DMG400007899 Other RLKs with TM

GAAACCTAAAGAAGCTAAGCCGTCTTTGAGTTTTACAAACCCTAGAGAGAGAAAACCTAAATCCAGTTTT  
TGGTTCCGATTTCCGGAATGCAGAGAGATGAGAGGCAAATCCCTTTTTCTAGTTTGATTTTAGGAGGCT  
TTAAGCCCCAAATTTCACTCGCTGGAGGAGGCCGGAATTGCCATCGGAATTGTCACCGGAAACACGTTG  
AAGACGGGTGAACTCACTCACCCAACACCCTTTCCACCTCAGTTATAAACCCATTTGTTTTTTCTTAACA  
AAAATATATACCCTTTTTGAATTCGTTTCGTCGGCGGCCGGAGTTCCACCGGAAACACGTCGGAGACG  
AGTGAACCTACCCCCACCCCCCTTTCACTTCCATTTAAACCCATCAAATTTTTTTTTCAAAAATCGAACAC  
CCTTTTCGATCTTGCTTCAGAAAAGTTCCCCGAACCAGTGTTTTATAATGGGGCCAGAAGAAAAATGTGC  
TGTTTTGTATGGTAAATATGAGCTCGGACGAGTTTTGGGTCAAGGTTCTTTTGCTAAAGTTTACCATGCT  
CGTAACGTGGTAACAGGGGAGAATATAGCAATGAAAGTTGTTGGAAAAGAGAAGGTGATAAAAGTAG  
GAATGATGGAGCAAATCAAACGAGAAATCTCCGTCATGAAAATGGTGAACATCAAACATTGTCGAGC  
TTCATGAAGTTATGGCAAGCAAACGAAGATTTACTTCGCCATGGAGTACGTTAAAGGTGGCGAATTGT  
TCGAAAAAGTAGCTAAAGGTAAGCTTAGAGAAGACAATGCTCGAGGCTATTTCCAGCAGTTGATTTCTG  
CAATTGATTTTTGTCATAGCCGTGGTGTATCACAGGGATTTAAAGCCTGAGAATTTGTTGTTAGATGA  
AGAAGGTAATCTTAAGGTAACCGATTTCCGGCTTAGTGCTTTTACTGATCATTTAAGACAAGATGGTTTA  
TTGCATACAACCTTGTTGTTACTCCTGCTTATGTTGCCCTGAAGTACTTGGTAATCATGGATATGATGGTG  
CAACATCAGATATTTGGTCATGTGGAGTAATCTTTATGTGCTTTTACTGTTTACCATTTCAAGAT  
GATAATATTATGGCTATGTATAAGAAAATTCACAAGGGTGATTTTAAAGTGCCACCTTGGATGTCATCTG  
ATGCAAAAAGTTGATAGTAAAGATGTTGGATCCGAATCCGAGAACTCGGATTACTGCTTCAAAGATTA  
TGGAGTCTAATTGGTTCAAGAAGACTGTGCCAAGGACTATGAGGAGTAAGGAGGAGGAAGAGTTTGCT  
CATGTGGGAGATGAAGATTGGGTAGGAAAGGTGAAAAGATTGAGTCTTTGAATGCTTTTCATATCATT  
TCTTTGTCGGAGGGGTTTGATTTGTCTCCGTTGTTTGGGAAAAGAAGAAGAAGGAGAAGGAACAGTT

GAGATTTGCAACAACAAAGCCAGCTAGCAGTGTGATTTGGAAGCTCGAGGAAGTGGCTAAAACGTCGA  
AATTCAGCTTAAAGAGGAGTGATTCTAGTGTTAGATTGCAGGGGAAAGAGAGTGGGAGGAAAGGGAA  
GTTGGGAATTTCTGCTGATATATTTGCTGTGACACCTTCATTTCTGGTTGTGGAGGTGAGGAAAGCTTGT  
GGTGACACATTGGAATATAATCAGTTCTGCAGCAAAGAGCTTAGGCCAGCACTCAAGGACATTGTTTGG  
AAATCAGCACCTGAGAATCCAACAATTGCTTGAGTTAATAAAAGCTACTATTAGATTCATGTGTTAGAGA  
ACTTGAATTTGTTTAGTTTTGTTCTTTTTGTTATTGCTTAGATGTGTTCTTGAAATTGAGACTTAATCTCTG  
AAGTATGTCTCTTGAATTCATGTGTTGAGAGATGGAATTTGTTAATTTTTGTTCTTGTCTTGTGTTTA  
GATGTGTTCTTGAATTTGAGACGGAGTCTCTTGAATTCGTGGTTGAGTGATTGAATCGTTTAGTTTTGTT  
CTTGTCTTGTGTTAAATGTATTCTTGAATTTGAGACTGAATCTCTTGAATTCGTGTTTGTGAGTGATTGAA  
TCGTTTAGTTTTGTTCTTGTCTTGTGTTAAATGTATTCTTGAATTTGAGACTGAATCTCTTGAATTCGTG  
TTTGAGTGATTG

>PGSC0003DMG400010503 Other RLKs with TM

CTGCTACCTCACCAGGTTTGGGGAGTAATAAACTTGGTATTAGAGAAGCTCGCGTCATAGGAGTCTATA  
AGCCGTGTCAGTCGAGATGACCATCTTTTTCTCTTGCACCTATTTCTCATCATCATAGTATTGTTGGCTAT  
GGATGGTGAAGGAGCATATAATTGCAGTGTCTCCAGGTGTGGAAGACATGGCCCTAGAATTCATTTTCC  
CTTCAGGCTTCACCACCAGCCAGAATATTGTGGCTATCCAGGCTTTGAGTTATCTTGTGACCTCAAAAAC  
CGAACCATACTCATACTCCCAATTCACCTACACTAATTGTTGAAGAAATTGATTATATGTCTCAGCAGAT  
TAGGCTTTCTGATCCTGAACGTTGTCTCATTCTCAAGCTATTGCACCTAATTTATCAGAATCTCCTTTCTC  
CTTCACTGTTGCCGAGCCTTATCTTACACTAGAAAACATTTCAATTTTCAATGTTCTGGTATGCCAGCAT  
ATTATCGGAACTACTATTAGATTGTGCCTCTGACAAAACACTATTTGCTGTTTCTACTCTTTATATTAC  
TCCCCATACAACCTTGCATAAAGATTCATGAAATTCATCATACGGTATGACGACTTACAGTGTGATAAG  
ACTCAGTTGGCTTAATACAACTGTAGCTACTGTGAAGGTCTTGAAGGATTGTGGCTTCAAGAACTAT  
ACTAAACAACCTGACTACTCAGTGTTCGACCGACCATTCACTACAAAAGGTATTGACAAACCTATCTTTAA  
TGCCATGATCATGTACTTCTCTATTCCATAACAAAAAATTGATTTAATTCTGACAGGCGGCGGAAAGAAA  
CCACTGATTGCAGGTATGTACTCTTGTGAGTTTTGGTATTAATTTT

>PGSC0003DMG400010504 Other RLKs with TM

TTCTTTTGGGAATTATTATGATGGCATTCTATGAGTGTTATAGCTCAAGCAAATTTGAAAGAGAGAATCA  
AGCCAGAGTTGAAAAGTTTTTGGAAAGACTATAGAGATCGCAGACCGACTAGATATACTTATGCAGATAT  
TAAAAAGATAACAAATCAGTTTCAGGAAATATTGGGAGAGGGAGCTTACGGGATCGTTTATAAAGGAA

CACTTTCGAATGAAATTCACGTTGCTGTAAAAATTCTCAATGATTCTGAAGGAAATGGGGAAGAATTTAT  
TAATGAAGTTGCAGCAATGGGGAAAATCCATCATGTCAACGTGGTTCGCCTAGTTGGCTTCTGTGCTGAT  
GGAGTTAGAAGAGCTCTAGTGTTTGAATACTTGCCAAATCAGTCACTTGACAAGCTCATTTTTCCGACAA  
GTTTCAAAGATAATATCACCCTTACTTGGAAGAAGCTTCATGATATTGCTATGGGAATAGCAAAGGGCT  
AGAGTATCTTCATCAAGGATGTGACCAACAAATCCTTCATTTGATATCAAGCCTCAAAAATATTCTGTTA  
GACCATAACTTGAACCCAAAGATCTCTGATTTTGGTCTTGCCAAGTTATGCTCTAAAGAGAAAAGTGTTA  
TCTCTATGACTGAAGCTAGAGGAACCATGGGTTATATTGCACCAGAAGTGTTGTCAAGCAATTTCCGAA  
CAGCGTCTCATAAATCTGATGTTTAAAGCTTTGGAATGCTGCTTCTTGAAATGGTTGGAGGGAGGAAGA  
ATTTTGATGCAAAGGCGGATACTAGCCAAATGAACTTTCCCGAGTGGATTCATGAGCGGCTGAATCAAG  
GAGAAGAGTTGAAAATCAGGATTGAGGAAGATGATGATGTTATAATTGTAAGGAAATTGGCTGTTATA  
GGAGTTTGGTGCATCCAATGGAATGCGATAGATCGGCCATCCATCAAAGTTGTAACCTCAAATGCTAGAA  
GGAGATGAAAGGTCAAATCCATATGCCAAAGAGTTATGCAAACCTCAAATAGAAATATTAGCATTGCA  
TCCTGAATATGCCATGAAGTCATTGACATGAGGTCTACACTACACCCGACTTTCAAATCGGATGGTGATA  
ATTCAGTCATGGTTGCATATGTGTGTCCCTTAAATGAATCAGAAGAAACATTGGAAGCATAACTCCTGTT  
GAGACAATTAGTGATTTCCACAAAGACTGGAGAATTTAAGGCCAAATGGACAGCTGAAGAGAGTGATTG  
GTAATGTTAACTTAACAAAACCAGGCATTGATTTTATAGAAGAATCAAACCAGAAAGGGGAAGTGTA  
CCGAAATCGAATTCTGAGGAAGAGAGCAAATAACTTGTTCTTATACCAGGATCTACAAGGCGGATAG  
TGGAGTTATCGTAATTGATGGCTTGAACATAGTAGTTCAGTGATTCATTCCAATCACGTGGCAGTATTGT  
GATTATGGCGCGATCTCCTTCACAGCTCAATTCATAATTTTAAAGGCCACAGTGCTTTGGATCACTTTTCA  
ATCGAAAGGGAAAATTGATGTTATGAATATCCCCACAACCTAAAAGGGACACACTGATTTCTTTGTTCTGC  
TAATGGGGTTTCTCTTTAAAGTTCTAGTCATCTTTCTTATGTTGGAGTTGGAATATCTAATGGGCGCGAA  
ATTGTTCTCACCGTGCAGGAACTTTCAATTGCATCATAAATCGACAAATGCCTTCTTCGTAACCTAATCA  
TTAGAAATACAACCTATGCATGGAAATAGAACGATTCTTGGCACAATGCTAAGCCCTGTGTACAACCATCA  
CAAATAAGCAAGAAAAGTTTGTGAATGGTTAAATTAATAAATTCAACCACCAACGTCTGCTCCATTTCGA  
CATTAGAATGATTTCTAGTAATAAATTTGAAAGACGAAAG

>PGSC0003DMG400013928 Other RLKs with TM

TTTCATCTCACCATTTCTATGGCCATTCTTGTTCAAAAACTCACTTTTTATTTTCTTTAATTTTCATTTTTTC  
CCTTTCTTTCCAACCATTTCTTCACTTTCCACTATTGCCATTTCCAAAACCTCTAATCAAACATTAGTTTGT  
GCATTGATTTCTCTTCTCATATCCCCAAGAATCATCTCTCAATTGTACTAGTTTCCCTCAGGGTATTCAA

ATCCCTTTAAACCTTCTGTTTCCTTTACTGGAATTGTGGGTGGAAATGGTTCCTTTGTGGGTAAACCTC  
TTCTTCTAATTCAATCATGGTGTGTTGGAGGTTTTCAATAATGGGACTGATTTGAATTATAGAAGGGTT  
TATATTGGCCCATTGCTTACAAATCTTGATTCTGGAAATTCCCATGTTTGTGGAATTGTTAATGGAACCAA  
TAGGCTTCAGTGTTGGCAGTGGCATGGATTGAGTTTGTCAAATAACAGTTCGATAACTTCAAATCTTGCT  
GTTGGAGAAGATTTTGTGGTTGTTGCCATCGGGTCAAATTCAATGTCTAGGAAGCTTTAGAAATG  
TTATTGATGCTGTTCTTCAGGGAATTACAGTGAAATTGCAGCTGGTTCTCAATATGCTTGTGCCATCTCC  
ATGAATGGTAGTTTGGCTTGTGGGGAAATATGGTAGTAGAAAAGCCTGTTGACCAATTCAAGTCTCTT  
GCTTTAGGTGATACTAGGGGTTGTGGTTTGTGGGTTAATGGGAAAGTGGTTTGTGGGGTAAAATGG  
TTTTAGTCTCCCTTCAACTTTGAGTGAGATATCTTTTGAACATTAGAAGCAAACAAGATATTTTTTGTG  
GCATTGTGACCTCAAATTATTCATTGTTCTGTTGGGGAAATGAGATTTTCAATTCAAATCCAGTAGTCTTT  
GAAGAAGCTGTTCCAGGACCATGTACCACTTCATGTCCTTGTGCACCTTTAGGTAAGTATGCTAAGTTTT  
GTGGTCAAGAACTAATGATATGTGAACATTGTGTTTGGCCAGGATTTGGTCAGAATCCCCAATTGTTAA  
CGGGTCAGGTCCTTCGCCACCGCCATTATCCCCACAGCCAACGCCAACGCCAATGCCAATGCCAACGCCA  
TCTCAGTGGAAATACGAGAAATGTGGCATTCTCGTGGTAGGTTGTGTTGGATCCTTAATGATGTTGAGT  
GTTGTTGTTATAATGTTTCTCAAGTATTGCAAGATTAGAGGATGCAGAGTACACGACTCTGGCCGCCTTG  
ATGAGGTCTGGGACACCTCCACAGCAAGGCAGCCAGGCATCTCAAGTTCAAGATCAATTAGGTCCTCAGC  
CATCAATCTTGAAAAAAGACCAAGTATATTCCATAGCATGGGAAATGGGGTCACTTAGAAGAATTTT  
CCTTGCAAGTGTTACTTCAAGTGACGAATAACTTCTCCGAAGAGCACAAAATCGGGACAGGAAGCTTTG  
GTTCTGTTTATCATGCTACATTAGATGATGGTGCAGGAGTAGCCATAAAAAGGGCAGAAGCTTCAGCCT  
CATCTTCCTATGCTGGTGGTTCAAAGTATAGACAAGAGGACAAAGACAGTGCATTCTCAATGAGCTAG  
ACTTCTTGTACGACTCAATCACAAGAACCTCGTTACACTATTTGGCTATTGTGAAGACAACAACGAACG  
CGTCTTGGTTTTTCGAGTACATGAACAATGGCACTCTCCATGACCATCTCCACAAGCTTGAGACCTCGTCA  
CTAATATCATGGACTGCTAGGATCAAGGTAGCATTGGACGCAGCCCGTGGGATCGAGTACCTCCACGAG  
TACGCAGTCCCAGCTGTCATCCACCGAGACATCAAGTCATCCAACATATTGCTCGACACCAATGGGAACG  
CCAAGGTGTCTGATTTTCGACTGTCCCTAATGGGACCACAAGAGGACGAATCACACCTTTCTTTGCGTGC  
AGCGGGGACGGTGGGTTACATGGACCCTGAGTACTACAGATTGCAACAATTGACAACAAAGAGTGATG  
TGTATAGTTTTGGAGTAATGATGCTAGAGTTGTTGTCAGGTTACAAGGCAATTCACAAGAATGAGAACG  
GTGTACCAAGGAATGTGGTTGATTTTGTGCGTCCATACATAGTGCAAGATGAGATTCATAGAGTGTTGG  
ATGGTAGAGTACCACCACCAACACCATTTGAGATAGAGGCAGTGTTCATATGTAGGTTATCTTGCAGCTG

ATTGTA CTACATTAGAAGGTAGAGATCGACCAACAATGACTGAAATTGTAAATAACCTTGAAAGAGCCT  
TGCAAGCATGTTTGACA ACTCCAAATTTCTCTCGATCCAACACCGATTCCACATAATCATATCATTAC  
TTGGCTTTGGATTGTGTATATTGTAATTACAACATTTTTCTTATTTGTATTTAATCATTTTCTCAA ACTTTAC  
ACACCATTTCTTTCCTAAA

>PGSC0003DMG400013989 Other RLKs with TM

TTCAGTGTGAACTTTGTTCTTAGTTACTCTTTATGATTCATTCAGGTAAACATAGACATTGGGTTGTTAC  
AAGTTAAAGTATCCTCTTCAGTATTCTCTAGTTCATTA AAAGGACCAAGGGAATGCTGAAAGATGTGCTT  
AAGAGCTAGTAAGTCTTTCTTTGAAATTGAAGCACTATTGGAGCTATCCAATAAACTTGATGAGATTGCA  
CCATTATTTCCAACGTCGTCACGTTCACTCATCAAATGCCAAACCCGACTAGATTCTTTCACGGTCAAAT  
TGTATCGTATCACCATCTTAGTGAAGATGGTTGAGTTGTTCACTTATTGATAAATATTGTGTTGAAAATAG  
CTAGTTTGATTACTCGGGGTTTGTGAAGTTGAGATGGAGAGTAAGGGGAGTAGTATACTAATGGAAA  
GGTATGAGTTAGGGAGATTGTTAGGACAAGTACTTTTGCTAAGGTCCATCATGCGAGAGACGTCAAG  
ACTAGCATGAATGTGGCTATTAAGATCATCGATAAGGAGAAGATTGTAAAAGTTGGGATGATTGATCAA  
ATCAAATGCGAGATTTTCAGCAATGAAATTGGTTAGGCATTCTAATATTGTGCAGCTCTATGAGGTGATG  
GCCAGCAAAAAGAAGATTTATTGTGTAATGGAATATGTCAAAGGAGGCGAGTTGTATAACAAAGTGTCT  
AAAGGGAGGTTAAAGGAAGATGTTGCAAGGAAGTTATTTTCAGCAATTGATTAATGCTATTGATTTCTGT  
CATAGTAGAGGTGTTTATCACCGAGACCTAAAACCGGAGAATCTATTGCTTGATGAAAATGGGAATCTA  
AAGATTTTCAGATTTTGGATTGAGTGCTCTTGCAGAATCTAAATGCCAAGACGGCTTACTGCATACTAAAT  
GTGGGACACCAGCTTATGTTGCACCAGAAGTGATAAACAGGAGAGGCTATGACGGTGCTAAAGCTGAT  
ATTTGGTCATGTGGGGTGATATTATATGTCCTTTTGGCTGGATATCTTCCTTTCCAGGATTCAAATTTTAT  
GGAGATGTACAGAAAGATCGGTAAGGCTGAGTTCAAAGCCCTAACTGGTTCCCTCTGATGCTCACAG  
GCTGATATCGAAAATATTAATCCAAATCCTAGCACAAGAATGTCCATTTCTAAGATAATGGAGAATTCT  
TGGTTCAAGAAAGGGTTGCAGCTGAAACCTATAAATGCTGATACTGAATTGAAGCCTGAAGAGGCAGC  
GATTGATGATGCAGGTTTTGGTATCGGTGAGAGTACCGACTCAATAACAGAAGCAAAGCCAGAACTGG  
TCAAGCCTGCACACTTGAATGCTTTTGATATAATATCTTTCTCAACAGGTGTTGACTTGCTGGCTTGTTT  
GAAGAAAGAGATAAAAAGAGAGGGAAGTTATATTTACATCAAAGCAACCGGCGAAAACAATCATCTCAA  
GCTAGAGGATGTAGCTAGGCGTTTGACGTTGAAGGTGATGAAAAGGATGGAGGACTATTGAAGTTGG  
AAGGATCTAAAGAAGGAAGAAAAGGGGTGTTGTCTATTGATGCAGAAATCTTTGAGGTA ACTCCAAATT  
TTCATTTGTTGAGATGAAGAAATCGAATGGAGATACGATAGAGTACAAGAAGACAATGATAAAGGAT



GTAAGACCAGCATTGGAAGACATTGTATGGACTTGGCAAGGTGACGAGCCGCGGCCTCAGCAACTAGC  
AGAGGAAGAAATTTTGCAGACTTATCAGGGGTACTCATTTGACACTAATTCACCTCAGAAGAATGCATA  
ATAGAGAGAGAAGTATAAATCTGATGTAACCTGATCTTTTTCCATTTTCTGTGCTATTAATGATGTATTTA  
TATTTGAATAATAGAATATTAAGTCCACTCTAATTTCTTTTATGTTCT

>PGSC0003DMG400015977 Other RLKs with TM

CATAATTTTTCTCCATTCCATTGGATTCAATTTTTCCAACACAAACACACCTCCTCTAACCTGGCTAAT  
TTCCCCCTATGATTAGCCAGGGGAAATCACCAGGCGAATACACGATGATTCACCCATAATTTCAATTTCTT  
CGTGCACTTGGATGCATCATCTATCCTCTTGCAGGATGATGAGCATGAAGAGCGCGAAAACAGAGAAAA  
AAGGGACAATTTGATGCATAAGTATGAGATTGGTAAATTGTTAGGCCAAGGTACATTTGCCAAAGTTT  
ATCATGCAAGGAACCTAAAAACAGGACAACTGTAGCTGTTAAGGTAATTGACAAAGAAAAAGTCCTGA  
AAGTTGGCCTAATTGACCAAATCAAACGTGAAATTTCTGTTATGAGATTAATTAGACATTCAAATGTTGT  
TGAACCTTATGAAGTAATGGCTAGCAAAGCAAAAATTTATTTTGCAATGGAATATGTTAGAGGTGGTGA  
ATTATTCAATAAGGTTGCTAAAGGGAGGCTTAGGGAATCAGCAGCGCGAAAGTACTTTCAACAATTAAT  
CGCGTCTGTTGATTTCTGTCATAGTCGAGGGGTATATCATAGGGACTTGAAACCTGAAAACATACCTCTC  
GATGAAACTGGAAACCTAAAGGTTTCTGATTTTGGGTTGAGTGCCCTTTTCGATACGAAAAGACAAAAT  
GGACTCCTCCACACGACGTGTGGAACCTCCAGCATATGTTGCGCCAGAGGTCATAAATAAGAGAGGATAT  
GATGGCGAAAAGGCGGATATTTGGTCATGTGGGGTGATTTTGTGTTGATTGTTATCTTCCATTTTCATGAC  
ACAAATTTAATGGAAATGTATAAGAAAATTAGTAAAGGGATATTTAAATGCCCTGAATATTTTCCATATG  
AAGTGAAAAACTACTTTCAAGAATTCTTGATCCAAATCCATTTTCAAGAATCACATTAGCTAAGCTAATG  
GACAATAATTGGTTCAAGAAAGGATTCAAACAAATTGATAAACCCTAGTTTTGGATCAAGAACATGAC  
GATGATTCACCTCGTAGTGTTTTGATATTGTGGATGATTTGGATGCAGAGTGTTCTTGAAGACACAAAG  
AACAGAGTTCATCAACAATAATGAAGCTTACTTGGTTGAGTGCTTTCGATATCATTCTCTTTCTCCTGGT  
TTTGATCTCTCTAGCTTGTTGAGAAAAGATAAGAGTCATAGGTCGGATGCTAGATTCACGACACAAAAGT  
CTGCATCCACTATTGTCTCGAGGCTAGAGGAAGTAGCTTCAATGGGTAGTTTTAAGGTACGTATGACCCA  
TACATAGTATAATATCGGTGAAAGATGTTTCATCTGACCACCTTGAGCCTATATGTGACTTTGCCTGTAG  
GTTTCATCTCATCTAAAAGTTAATCTGATCACCTTTAGCTTATGACCATCTTAGCTAAAAGTTTAGTATTAT  
AGAATGAACAACTTTATTTACTTTATTATGTCTTCAACAGGTGAAGAAAAAAGACGGGACGGTGAAAA  
TGCAAGGAAGCAAAGAAGGGAGAAAAGGGCAATTAGCAATTGATGCAGAGATATTTGAGATTACTCCA  
GCTTTCCATGTTGTACAAGTGACAAAAAATCAGGAGATACTGCAGAATACAGCCTTCATTAAGATAT

AGTTTGGACATGGCTGGGCAATGAGCAACAACAAGTGGAAAATCAAGAAATCAAGACTTAAGAGGTAA  
AGATATGAAAACAAAAACAAGTTGTGGGGGTAAAGTTTCTCTGTGAGACCTACAGGTCACGATTTTGA  
GTTGTGGATTGAGTCATTGATGTTTACGTGGAGGTAGTTTGCCTGCATTACGATTTACAACCCTTGGATG  
AGAGCCTTCTCCATATCTCGTGCATCGAGCTATTTCTGTTTTTTTTAAATCATGTAGGCATTATAATCATAG  
CATTTTTTGTGATTGCTCTTTTTGTTTGTGCTTGATGTTATATGCCCTCTTGGTGTTCATGTAAAACA  
TTACTATATTAATTGCCTATTTCTATTCATATAGATAATTCCTCTTAACAATTTACAAAAAGATCATTCTGC  
TTCAAGATTTTCAAGAGGATCGATTTAGTTTTAGTCATTCAATTTACTTGTCTACCATTTTGCATTAAGAG  
GAAACAGTGACATTTATTGCAACCAAGTAGCATTCTGAAAACAGAATCATGCACAAATCAAGTGCTAA  
AGCAAAACAGAAAAAGTGATCGATTTGAAACAAGAGATTCTGAGAAAATGCTCAGCATGCAAGAAGTT  
GAATCTTGATCTTCTGTAGCATCCCTACAACATCTTTCATGTTTGCCTTCTTGCCGGAGATTCAGCACAG  
CAATCTAATGCAACTTTCATGATTGATGCAACAACATCAAGCTTCTTCTGTAAGTGATTATCCAATGGTGT  
TACCAAGTTGGCATCTACAACATCCACTACTGCCTCTGGGAGTGAATAACTCACCCATTGCTTCAAGTTAA  
GATCTCCCTCAAATCACTAGGCTTCTCCTGGTAAATGTTTCCAGCAACATAATCCCGTAACTATAGACA  
TCACATTTTATTGACACCAATCCATCCAGTCCATACTCT

>PGSC0003DMG400016365 Other RLKs with TM

TCTCCCTCTCTCTCTGTGAATGTGTAAAGTCTCCAATTGGGATATAATGGAATAGCAAAGAACACAGC  
AGCCCTATTTGGACCATCAAAGAAGAGAGTTGAGTTTTGAACTCAAAACAAAGCAAAAACAAACAAAAC  
AAGAAAATACCCTTTTTGTTTCTCTACCTCAAGCTTCCTTTTTTTTTTCTCTCCTTGTGGTTCAAAGGTTT  
GATTTTTTTCTTGTTTTTCCATTCATTCATCACTTTTGTCAAGTACCCTTTTCTTGTCTTGTCCATTTGTAC  
TTTTGTGGTGTCTTTGATTTTGAAGCTTGATACAGAGAGAAATGAACAATCTTGATGTAAAAAATTGT  
GTAGTTTCACCAAATATGTGAAAAGTCTTTTTCTCCTTTTTTGTGTTCTTTTTGAGTTTTAAGAAGATGGG  
TGTGTTGCAACTTGGTGTGATCTTTTTGTTTCTTGGGATTTGCTTACAAGCTCAATCTCAAATCCCCAGA  
ACTTGATATGTAATCCAAAAGATTTTAAAGCTCTGGAGGATTTTGTGAAGAGTTTAGAGACAGTTCTTGA  
TTTCTGGGATTTGGGGAATTCTACAAATTGTTGTAATTTGGTAGGTGTTACTTGTGATTCTGGGAGGGTG  
GTGAAGTTGGAGCTTGGGAAAAGAAGGTTAAATGGGAACTTTCTGAATCTTAGGTAATTTGGATGAG  
CTAAGAACCCTTAATTTATCTCACAATTTCTTAAAGGACCTGTTCTTTTACACTGTTGCATTTGTCTAAA  
TTGGAAGTATTAGACTTGAGCAATAATGATTTCTTTGGATTGTTTCTTAGTAGCATGAACTTGCCTTTGCT  
TCATGTTTTCAATATATCTGATAATTCCTTTGAAGGACCAGTTCCTATGGGCATCTGTGAAAATTCAACTA  
GAGTTTCTGTTATTAAGATGGGGGTTAATTATTTAATGGTAGTCTCCAGTAGGAATTGGGAATTGTGG

TTCATTAGAGCTTTTTGCCTAGGCTCTAACCTTCTTTCTGGTAGTTTGCCTGATGATCTGTTAAGCTACC  
AAGATTGACTGTATTGTCTCTACAAGAGAATCGATTCTCGGGACAGGTTAGCAGTCAGATTGGTAATCT  
GTCTAGTTTGGTTCATTTGGATATTTGTTCAAATGGATTTTCAGGAAACATTCCAGATGTGTTTGATAGAT  
TAGGGAATTTAACATATTTGTCAGCTCATTCAAATAGGTTCTTTGGTAATATACCAACTTCATTGGCAAAT  
TCTGGGACTGTTAGTTCTCTTAGTTTGAGAAATAATTCTTTAGGGGGTATCATAGAGCTTAATTGTTTCAG  
CAATGGTTAGTCTTGTTTCGCTTGATCTGGCTACGAACGGGTCCCGTGGGTTAGTTCCTGAATATCTTCCT  
GACTGTGCAAGGTTGCAAATCAATCTGGCTAGAACTCTTTCCTGGACAACACTGCCGAAAGTTTCA  
AGAATTTTCATAGCCTTTCATCCCTTTCAGTCTCAAACAACAGTATGCATAATATTGATGCTGCTCTCAGA  
ATTTTACAGCATTGCAAGAACTTGTCTACGCTGGTCCTTACTCTGAATTTTCGGGATGAGGAGTTGCCTA  
CTGATCCTAGCCTGCAGTTTAGTGAGCTGAAAGCTCTCATTATTGCCAATTGCAGGCTCACTGGAGTTGT  
TCCTCAGTGGTTGAGAAGTAGCTCAAACTGCAACTGTTGGACTTGTCTGGAATCGTTTGACGGGAAC  
ACTTCCACCTTGGATTGGAGATTTCCAGTTTCTATTCTATCTGGATTTTCCAACAACACTCGTTTACCGGGG  
AGATTTCCAAAAGAAATTACCGGATTGAAGAGCCTAATCTCTGGCCCTGTCTCAATGAATGAGCCATCACC  
AGACTTCCCTTTTTCTTGAAAAGAAATGCAAGTGTAGAGGGTTGCAGTATAATCAGATTTTTAGCTTCC  
CTCCAACACTGGAACACTAGGTAACAACCTTCTCACTGGAGCAATTTTGCCGGAATTTGGGAATCTGAAAAG  
GTTACATGTTTTGGATCTAAAATGGAACAACCTTATCTGGGACAATACCAAGTAGCTTGTCTGGTATGGCG  
AGCGTAGAGAATTTGGATCTATCCCACAACAATCTGATTGGCAACATACCCTCCTCTTTAGTCCAATGCA  
GCTTTATGTCAAAGTTCAGTGTGCTTATAACAAGCTCTCAGGGGAAATTCCTACTGGAGGTCAGTTCCC  
AACATTTCCAACATCAAGCTTCGAGGGGAAACCAAGGACTCTGCGGTGAACATGGTAACCCCTGTGAAA  
TGGCAGCCAAGTTCCTCGTGAAGTTCGTTGCCAAAGGAAAGAGGGCGCAAAGGAACTGTCATTGGCATGG  
GTATTGGTATTGGTCTTGGAACGATTTTTCTTCTTGTCTCATGTAAGTATTGTTATACGGGCAAGCAGT  
CGAAAAGTAGTTGATCAGGAAAAGGAGTTGGATGCTTCTAACAGGGAACTGGAGGACTTAGGCTCAAG  
TCTGGTGATATTTTTCCATAACAAGGAGAACAATAAGAGATGTGTCTTGATGACCTTTTGAAATGTACA  
GACAACCTTGTATCAGTCAAATATTGTTGGATGTGGGGGCTTCGGCTTGGTCTACAAGGCCATTCTTCGTG  
ATGGTAGGAAAGTTGCCATCAAGCGGCTTTCAGGTGACTACGGGCAGATGGAACGAGAATTTCCAAGCT  
GAAGTTGAATCGCTTTCAGAGCGCAGCATCAAATCTTGTTTCATCTCCAAGGATATTGCAAGCACAGAA  
CTGACCGGCTTCTAATTTATTCTACATGGAGAATGGAAGCTTGGATTATTGGCTGCACGAGAAAGTTGA  
CGGACCTGCTTTATTGGACTGGGATCTGAGGCTTCAGATTGCTCAAGGGGCTGCAAGAGGACTTGCATA  
CTTGACCTAGCGTGCGATCCTCATATCTTGACCGAGATATAAAGTCTAGTAACATTCTTCTTGACGAAA

ATTCGAAGCTCACTTAGCTGATTCGGTCTTGCAAGGATTATTCGGCCCTACGACACTCATGTGACCACT  
GATGTTGTCGGAACATTAGGCTATATACCTCCTGAATATGGTCAAGCTTCCGTAGCTACCTATAAAGGGG  
ACGTGTATAGCTTTGGTGTGGTCTTTTGGAGCTTCTAACATGCAAAAGACCGATGGATCCGTGCAAGCC  
TAGAGCAAGCAGAGATTTAATCTCTTGGGTGATCCAAATGAAGAAACAGAAGAGGGAAACTGAAGTCT  
TTGATCCTCTGATATATGACAAGCAGCACGCGAAAGAAATGTTATTGGTCCTTGAAATTGCTTGCCTTTG  
TTTGCATGAATCTCCTAAAATAAGGCCTTCTTCGCAGCAGTTAGTTACTTGGCTCGACAACATAAACACA  
CCACCTGATGTTTCATGTGTTTTAGAGGAAACTTGTGTCGATAACTTATATTTTCAGCGGATGTCCTGCA  
CATATAGCAGTGTATTCTGGTGAAATGGTTGTATCTTATCCCTATTTGTATCTTCTGGAATTGAAGAAT  
ATATACTATGTTTCTTCTCAAACATGTACAAATAACATTGTGAATTTTGGATGTGACTTTATCTTACCTAAT  
AATAGATGAACATCAGTTTATTCCTTCTT

>PGSC0003DMG400017836 Other RLKs with TM

AGAGTGTTTGCCTTTTTAGTTAAAAGCTTTAATAGTTTAATTGCTCACTCACATGCTACCTGAAACGCCTG  
TGTATAGCATGTTAATCTCACAACACACCTTCTTATGCTCCCTTACACTCCATTTTTGGGCGTGTCTGC  
CTCTTCATTGCTTCTTCTCAATTTTCCTTTTTTTCTTTGTTATTGCTTCAACTTATCTAATTTTATCTCTCTT  
TTTTGGTACATATTTTCTACTTTTATGTTGTGAGGTTTATGGGATGGGTGGAGTGAAGCTGCAACTTGTTT  
GTTTGGTGTGGAATTATGTGCCTTTGCTTCTCTAAGGGATCTGCAGGTAAATTCTTCTTTTCTACTT  
CTTCAACTACCTAATTATTTATTTATTTATGAGTTTTGTGCTCAGTAAGTTTAGTATTGGTAATTTTGTGTT  
CTGAATTTTGGTCCCAGATTTGATAATTTTGTAGCACTCAAATCAGATTGATTCATCTGGTGTGTGTGTGT  
GTGAGGGAATGAGACTATTACATTCTGAATTTTGTACTCGTGTTTTTATGCCAACTGAAATTTGTGCC  
TTGAGTTCTCTAGCTTGGTTTTGTTTTAGCAATTTAACTGTTTCATTGATCACTGATTTTCCCTTTAGAGTC  
CCTACTTATTTTATTCTAATTAAGCTTCTTACCGGTTGGTTGCAAATTGATGCTGCAATGACTATATTAAT  
CCGCCATGGGATAATTAGCCTGGTTTTATTTCAATGACGTGCCATCTTGTGGGATGTATTGCCTTGTCTG  
ATTTATTTGCAAATAAGTTACACAGACATGTAATGTAAGACCATGGTAAAAAATGATAAACTGTTTCATGT  
TCATCATCCCCTCCGTATACGCTTTATGATTGTAATTAATCTAAGTATGTTGAAAAGGAGGGAAATGATTT  
TGCTAATGTCTTTTTATCTGTGTTTCGAGCTGTCATTTCCACTTAAGTTTTTTGTGAAATGGAGAATCTTTTC  
AAATGAAGAAGTGCATATCTAACCTAATATAATTTTTTTGGAATTCATTTTAGGCGTCAGTTTATCGCCCT  
CTCCGTCAGCATCCTCTGCAGTTCTCTCTGTTGAAGAGGGAATACCCTCTTTTGTCTCTCATGGGAATGCA  
TCCACAAGTAATGCACCTGCTCCTGCATTTGAGTTAAATGGTCAGACCGTGATTCTTGGCTTCCAAATCTA  
TTAACCAAATTTGATGCTTTATGTTATTCATCTTATGTTTTTTTTTTAACTCAGTAACATCTCCTCCTGCAA

ATGTCTTTCCACCACTGATGTCCCCCCTGTCCCTCCACCGAGAGAAGTTCTTACACCGTCTCTGCAACCA  
AGTGCTCCATAATATTGCCACCACCTAGTTCAGCTCCACCCGCAATCAATTCAGCCCCACCACAAATTGT  
TTCTCTACCATCTCCTCCTCCTCCAATAGTGTGGAATGATCCCGCTCCAGTTCTGCCTCCGAGTGCTCCTAA  
GAGAGAGCATCGACATACTGAACAGCCTGTTGTTGTTCCAGAAGCTCCAGGTATGTGGCTGACTGTAGT  
CATAATGTTGAAATGACTTGATTTCTCTTTAAGTTGATAGTTTTTTGGAGAGCAGCACCAGTCTCGTCAC  
CTGGAAGGAAATCTACTGAAGATGCACCAACTAAAGCTCCACCGCTACCTGGAECTATGCCACCCAGTG  
AGAGCAAGTCTCCAGAGGGTCTCTCCCTCAATTGCCCGGGTAATAATTGGCTGACGATAATTTTGGT  
TTTGACACAGTATCTTAAGATAGAAAATGATTATCACATTATTTTGTGTTTGTCTGTTATTTAACTCAGTCCTG  
AATGCGCCTGCTCCAAGGGGAAAGCCGCGAAATTCAGTCCCACCTCCCAAGAAATCCAGAAATTTCA  
CCATCCATTCCACCAGGTATCCTTGTCTTTTTCTAAAAGAAATTGTGACATTCATGTTAGAATGAAGTTC  
AGAGTAAATAAGATCTGATCACGGATGCCATTAATTTGTACATTATTTTGTCTCAGTCCTGAATGCACCT  
TCTCCAAGGGGAAAGCCACAAAATCCTCTGCCACCCACCCAATCATTCCAGAAGTTTCACCATCTATTCC  
ACCAGGTATTCACACTATATTTATCTAGTGCTCCCTCCGTTTCGTTTTATACGGTGGTGTGTTTTATTGGGCA  
CAGAGGTTAAAAAGAAAGAAAGAAAGACTTCCAATGCATACCAAAGGTAGCCTTAGAATTTGTCTTCTT  
AAACATATGATGATATTTTTATGGCTATAGGAGCATGTCATGAAAGGCTAAAATGGAAGTTTTAAGTT  
AAAGAGTTTCTTAATATAAAAAGGTGTCATTCTTTTTAGAACAGACTAAGAAAGAAAGATTGTCATATAA  
AAACGGCACAAAGGAAGTATGTGATACTTCGTAAGAAAAAATAAAGTGTAATTAGATGTGATCATG  
AATGCATGAATTTTTACATTATAGAGCTTCTCTCATTGCATTCAGTCCTTAATGCGCCTTCTCCAAGGGA  
AAAGCCGCAAAATCCACTGCCCGCCGCGCAACCAATCCAAAAGTTTCACCATCTATTCCACCAGGTATA  
CTTCTCCGTGTATTTAGTGAGTGATATTTCTGCAAATAAATTGTTTGTAACAAGATCTGATCATCTATG  
CATTGAATTTGCAGCGACAGTTGCACCACCTCCGAGGAGGTTGCCTAACAATTCACCACCCAGCCATCCA  
AGACATCCTCTAAAACCTCCATCCGTTTCACCAGGTAACAGTGCTTGCTAGTGTTGCTCATGTACATGTAC  
TTAATATTTCAACCAATATTTTTGGCTTGATGCAATCTACACATATTCTTGCAATTGTACCTCAAGTA  
GTCACCTCCTCAAGTAAAAACCAAATCAATAGAATCTTAAGTACTAGAGGCTTGCTTGCTTCCAAATTGTTAA  
TGATTGCCAATGTAGAACTAGCTTAAGAAAAATGAACTGATGCCTACTGAATGTGTTCCGAAGTTGAAAT  
AGTCAGTGCTCCTCTTTTTGGATTGTCCTTACCTCAGAAAGATATAAGAATGTGTTTTATTTGTTTTCCC  
ATTTTTCTGTTAAATAGCTACTTGGTTTTCAAAGTGGCATTGTTAGCATATTTAATTTGAGTCAGTGTTAT  
TACTGTAGTTAAGCACGATATATCCCCTGTATCAACTCCGTGGCCAAGCATCAACCGTAAAAGAGCAATT  
GGTCCAATGTTGCACCTACTAAGGGAATGAACCATCAGCATCCAGCAAAAGGTATATCAATATTTTTCT

GCTATCATTCTTTTCATCAGCAGCACGAGGAATGGCCAATTATGTCACCGAAGGATTTCTTCTCCTCTTG  
TCGCTCATACTGAACACAAAGCCATGGGGTGCTCTACTAATGCTCCTCCTCATAAATCCCTAATTCTCCC  
CCTGTGGAAGGATTATATCCTCCCTTATCTGCACCTTCAATCTCATTTCAGAGGGATCACTACCTAAAAGA  
TAATATGACAGAAATCACTCCGTCATCCTATGAAGTTTATCCTCCTGTTTCAACTGAACTAGGTTCTGTAT  
CTTACTTGAGAAATGTCAGTTGATATCCTCATTCTGATATACGACACTAACCAGAATTCAGTCAATATTTA  
ATGAAGGTCCATTGATTTCTCCATCTCCTTCGTTTCACTCAAATCATATCCAAGACTAACCTTAGGCAC  
CACTCTCATTACCGTTAACTGCAGGTTTGTGGTCATTCTAGTCATCCTCAGTTGACCATCCGTTTGCCTCT  
CTGAAAGAAAAATGAATAGCGAAAAGAAAAAAGTGATTCTGATAACTCCTACTTTACAGGATTGTCAG  
TACCACCGATGCTTGCGCCTTTAACTTCTCCAGAAAGTCATGATTCTCCTGCAATATCACCGTCTCCAAGT  
GCTTCATCTAGACCAACAAAAAGTAAGAGTATGGCATATGTTCCCTTTTCATGCAATCCATAGTCAAGGC  
ATTAACCTTATATTTTATTTTCATTCTATGCATAGTTAATGCTTATCTCTATATCATCTTTGTCATTGCAAG  
AGCCATTTCTTTCCCCTAAAATGTCTCCCTCTGGGTCTTACCAAGGCATCCAAAGTTACCGCATCCATTTCC  
AAGCACTACCACCTCCACCTCCTAATGAAGGTATGTTTTATCTGCCTCTGATTTCTCCTCTAAATGATATA  
GATTTTACATCCACAAGTTGCCAGTTTTTGCCCCATTGACTATTCTAAACATGACGTTGATGTTGCAGATT  
GCGCTTCATTGGCTTGTGCGGAGCCTTTCACAAATGGTCCACCCAAAGCACCTTGTGTTTGTGTCTTGCC  
CATGCGAATTGGACTACGCCTTAGTGTAGCACTCTACACATTCTCCCTTTGGTTTCAGAGTTAGCTACAG  
AAGTTTCTGTTGGGGTATTTATGGATCCAAGTCAAGTTCGTATAATGGGAGCAAATTCAGCCAGCCAGT  
ATCCAGAAAAGACCATTGTCCTTATTGATTTGGTACCCCTTGGAGAAAAATTTGATAACACTACAGCATT  
TGTGACATCACAAAGATTCTGGCACAACAAGTTGTTATAAAATCACTTTTTGGTGATTATGATGTATTAT  
ATGTGCAATATCCAGGTATAGAATCATTCTAATGCCATTGTGTCATCTTGATGCCACATGCTATGTCCCG  
AGTAACTAAATAGAATTGTTATATGTACAGGTCTTCCCTCCTCTCCACCTTCAGCAGCTTCAGACATTGAT  
ACCGTAGGTAGCCAACCATATCCTGGTGATAATAACGGAAGGACCATACAGCCCCTTGGAGTTGATGTG  
AAGGGGCAACAGCACAAAAGTGGGCCGAATCGGAGTGTATAGCAGTAATTGTGTTGTCAGCCTCTGT  
CGCAGTTATTTTATGTTGTGCCGTTGCATGGGTTTTGCTTTTCAGACATAGAGATCACGGATATCAGTTA  
GAACCAACTCCACCAACTACATTACCATCCCTTGCAAAGTCATCAGGTGAAATCCTTCTCTTGACATGTAA  
ATGATCTACTGCCATGTGGTTTGCCTAGTGTTTCGTATTCTCTGTGTTAGTTTTCTTCTTTTCATGCTGAAAA  
GACATTCAAACAGTAACTTCAGAAGCCTAGCCTTTCATTATCGCCATGCCTTTGTAGCATGCCAGGTAA  
ATACTATGTTAGGGGAAAGTAAATCATATTGGAGTTTTGAATATTCTATATGTTGCTCAACTCGGTTACTT  
TTACTACTTATCCTGAGCATACAATGGAATGAAATGTCCAAAATTATGAAATGGAATATAGGAAAAGTTA

TCTGGTTAGTCGCATAATGTTAATATGGTGAGTCATCCAATATCTTTTACTGGAATATCTTGAAGTATCA  
ACTCTTAATGGGTGCATTACAGGAACCTTTAACTTCACAAATTTATTAATATGCATCTAAAATGTGTACAA  
ATATGTGATTCTTACGAGTCTTGTGTAATAAAGACTTAATAGAATTATTCCTGATCTTTATGCATGGTGT  
ACGAATTGCAGCCTCCATGATTGGGAGTAGGCCGAACCTCCTACATTATCCTTTAGTTCAAGCTTTGCT  
GCTTATACTGGTTCAGCTAGAACATTTTCTCAAAGGAAATTGATAGAGCAACTGACAGCTTCAATGAAG  
CAAGAGTACTAGGTGAAGGGGGATTTGGTCGTGTTTATAGTGGTGTGCTTGATGATGGGATGAAAGTG  
GCAGTAAAAGTCTCAAGAGAGATGACCAACAGGGTGGTCGTGAATTTTTGGCTGAAGTAGAGATGCT  
TAGCCGCCTCCATCATAGGAACTTGGTCAAGTTGATAGGTATATGTCTTGAGGAGCGCAGTCGCTGTTTA  
CTTTATGAGCTCATCCCAAATGGCAGCGTGAATCTCACCTTCATGGTAATATTCAATTTGGATCACTCGT  
AACTTTTTTGGTTGAAGTCATGTGTATTTAGATTTACAGACTGGCTAAAAAACCGTCTTTCAGGTGTTGACA  
AGGAAAGTTCTCCACTTGATTGGAATGCCGAATGAAAATAGCACTTGGTGTGCCCCGAGGCCTGGCCT  
ATTTACATGAAGATTCCAGTCCCCGTGCATACACAGGGATTTTAAGTCTAGTAATATCTTACTGGAACAT  
GATTTACCCCCGAAAGTGTCTGATTTTGGTTGGCTAGAGCTGCATTAGATGAAGGAGAAAGACACATA  
TCCACTCGAGTCATGGGAACTTTTGGGTAAAATATTCATCTGACTTAATATTTGTATTTTCATTAGGCCAT  
CCTTCATCCCGTTTATGACTGACGAAGTCCCAAACCCCTTAAGCAGATCAGCTGCTTCATGCTGGTCTGCT  
TTCCTGGAGTATAATTTTTTTTCTTTTGAATGCCTTATTTATTTTACTCGAAAGGTGTTATTACATAGTG  
GACGGATTGTCCTCAATCAATTGAAACTGACTATGCATATCAAACCCATTCTCTTAACATTTTATTCTTCT  
GTTGTACACTTCTGACTTTGTTATTTTACCAGGTACGTAGCTCCAGAATATGCTATGACAGGGCATCTACT  
TGTGAAGAGTGATGTTTACAGCTATGGTGTGTCCTTCTTGAGCTGCTAACTGGAAAAAGCCAGTGGA  
TATGTCTCAGCCACCAGGTCAAGAGAATTTAGTGGCTTGGGCACGGCCACTCCTAACGAGTGAAGAAGG  
TCTGGAGTTGATTGTGGACCGTAATTTGGGGCCTGATTTCCCTTTCGATGACATTGTAAAAGTAGCTGCT  
ATTGCGTCAATGTGTGTTCAACCAGAGGTATCACACAGACCTTTCATGGGTGAGGTTGTCCAGGCCTTAA  
AGCTGGTATGTAACGAATGTGGACAGACAAAAGACGTAGTGTCTCGAAGTTGTAGCCAAGATAATCTGT  
CTATTGACATGGATACTAGGATTAGTACAACCTCAAGCCAAGTCTGAACCCTATACAACCTCAATCCCC  
AGTTTCTAACTCTGACAGTGAGCTGGATGTTGAGAGGGGACTTTCAATGTCAGATTTACTGAGTCCGTTA  
GCAAGATACGGAAGGCAAGAATCTGATTCATTTAGGAGGTATTCTAGCTCAGGTCCTCTGAGAAAAGGA  
AAAACCAGGAGGCTATGGCAGAAAATGAGAAGATTATCTGGAGGTAGTTTGGAGCGAGCACGGCGTGAT  
GTTTGGGTTACGGCCTGGATCCCACTAATTGAAGTTTCCATCTTTGATTTTGATAAATGTTTCTGCAAAAT  
GTCTATTTTCGCCATCCATGCTGGATATACTAGATTGAGCATGGAATTGTACAGCACCTTCTTTATCAAGA

CATAGAATGAGGAAGCAAACACCAACATACTCAAATTGTCCTGAATGCTATCGCGTAATCCATGAGTAT  
GATAAACCCCTCCGCCAAAAGCTGGGAAGAAGTGTGCGCAACAAGATATCTGAATAGGGATTTTCATCTTA  
TGTAAGAAGATTGTATTTATTGTAACATGCTAATTGTTTCATAAAAGGAATCATAGTTCTTTGTCTTCTGGT  
ATTGAGTTTGAACCTTGGAGGCAAACGAGTGATCTGCTGCTAAGATCTCATCCTTTGAACTTTCCTCTTTC  
ACAATGCCATTTTCATTAAAAATCAGCATGGGTTTACTAGGCTTCACCCCATCCTTCAACTTATCATAACT  
CTTCTTATCACACACAACATTTTTGGGTTTATTACCCACACCTTCAAGTACTTTTCCACTTCTAGTAACAA  
ATGGCAATCATTCTATGGATTAAGAAAAGTGTCTTCTATCTTTCATCCAATGATTCATTTGAGATGACAA  
GTGATTCATTTGTGCCTCAAGATGCTTGATTAATGCTGAATGGGAACCAAATAATGAGGGATATGTTA  
GGTATGAAACTCATATTCTCAATAGTCTAAGTATGAAACTCAAAAA

>PGSC0003DMG400019721 Other RLKs with TM

ATGCAAGTAAGAGTTTTAGAAATGTCCATCTTACTTTTCTTGTTATTTTCCCATTGCTTAGCTTAGGACAC  
AGACTAGAGGCGGGTTGTGAGGATTCTTCGTGCAAGAATGATGGTCTCATTCATTCATTTCCATTGAGAC  
TCAGTCATCAACCAAAACATTGTGGCAATCCTGGCTTTGAACTACTGTAACTAAAAAGACACCATC  
CTTGAGCTTCTCGTCTGTTCACTTAGTTGTTGAAGAAATTGATTATGTCTCACAGAAAATTAACCTTTAC  
GATCCTGACGAATGCATAGCAGCCAAGCTACCAAAACTGAATTTGTCACAATCTAATTTGAGAAATGCTG  
ACGATCCCACAGTCTTATTCAATTGTTTTGCACCATTGGCATACTATTATGATATTCATTTTGTCTTGTG  
TTGGTTCTTCTGGTTACAAAGTTTATGCTGTTTCGTACGACTCAATTATTGTAGGTGTAATTTTAGGTACAG  
CGCTTGTTCATTATTGTCTTCTCACTTTATCAGCTATATTTGACAAGTAGAAATGGAAGAGAGAGTGG  
AGTTAGACTTGAAAAGTTTTGGATGACTACAAGGCCATCAGACCAACACGATATTCATATGCTGATATT  
AAGAAGATAACAGATGATTTTAATGAAAAGTTAGGAGAAGGGAGTTATGGAAGTGTATACAAAGGCAG  
ACTTTCCAGTGAAATCTATGTTGCAGTAAAAGTCTACGCGATTCCAAGGGTAAAGGGGAAGAATTTAT  
CAATGAAATTGGTACAATTGGGAGAATCCACCATGTTAACGTGGTCCGCTTAGTTGGGTTTTGTGCTGAT  
GAATTCAGACGAGCTCTGATCTACGAATACCTACCAAATGATTCATTGAAAGGTTTTATTTTACCAGTGA  
GCTCAAGCCCGGGTAGTGTCTCACTCATCAGCTGGAACAAGCTTCAACATATTGCTCTGGGTAAGTCAAG  
AGGGATTGAGTATCTTACCAGGGATGTGATCAGCAAATCCTACATTTGATATCAAACCACAAAACATC  
CTTTTAGACCACAACCTTGAATCCCAAAATATGTGATTTTGGCCTAGCCAAACTGTGTTATAAAGAAAAA  
GTGTGGTCACTATGACAGCTGCTAGGGGAACCATTTGGTTACATTGCACCAGAAGTGTATCAAGAACT  
TTGGTAAAGTTTCTCATAAGTCTGATATTTATAGCTTTGGGATTCTTGTGTTAGAAATGGTTGGTGGGAG  
GATAAAGATGGATTCTAAGACGAATAATCACAGCAAAGTGAATTCTTTGGAATGGATATATGGATATTT



GGAGAAAGGGGAAGAATTAAGATTCGGATAGAGGAAGAAGGAGATGGTACAATTGTGAGAAAGTTA  
GCTATTGTTGAACTTTGGTGCATACTGTGGCATCCAATTGATAGGCCTTCAATAAAAAGAAGTTACTCAGA  
TGCTGGAAGGAGATGGGAGCCATCTCAACTTGACCCAAATCCTTTTATGGCTAATAATACGCCTAAGTT  
AAACGCAAGTCCTCTCAGTTAG

>PGSC0003DMG400020016 Other RLKs with TM

GAAAAAATCAAACATTAATGAAAGAGAACTCCACACTGAGAGTAATCACATATCTAGAGCTTCAATT  
GATAAAAACAAATTAGCTGCTGCCTCACCAGGTTTGGGGAGTAATAAACTTGGTATTAGAGAAGGCCGT  
GTCATAGGGAGTCCACAAGCCGTGTCAGTCGAGATGACCATCTTTTTCTTGCACCTATTTCTCATCAT  
CATAGTATTGTTGGCTATGGTTGGTGAAGGAGCATATAATTGCAGTGTCTCCAGGTGTGGAAGACATGG  
CCCTATAATTCATTTCCCTTCAGGCTTCACCACCAGCCAGAATATTGTGGCTATCCAGGCTTTGAGTTAT  
CTTGTGACCTCAAAAACCGAACCATACTCATACTTCCCAATTCACCTTACACTAATTGTTGAAGAAATTGAT  
TATATGTCTCAGCAGATTAGGCTTTCTGATCCTGAACGTTGTCTCATTCTCAAGCTATTGCACCTTAATTTA  
TCAGAATCTCCTTTCTCCTTCACTGTTGATGACCCTTTTTATACACCACATGACATTTTCAGTCTTCAATTGTT  
CTGGTATGCCAGCATATTATCGGAACCTATATCCATATTGTGCCTCTGACAAAGCAATATTTGCTGTTTAC  
TATTCTTTGGATTCACTCCCCCTGCAACTTGCAAAAAGATTCATGAAATTCCGTCATTTCTCTACGATACA  
ATTTACAGTTCGATAAGACTCAGTTGGGGTAATCCAACTGTAGCTATTGTGAAGGTCTTGAAAAGGATT  
GTGGCTTCAAGAACTATACTAAACAAGTACTACTCAGTGTTCGATCGACCGTTCACAACAAAAGGTAT  
TAACTCATTAAAAAATTTACCTTTGTTTGATGCCATGATCATGTAATCTCTATTCCATAACAAAAAATTG  
ATTTAATTCTGACAGGCGGCGGAAAGAAACCACTGATTGCAGGTATGTAATCTTGTGAGTTTTGGTATTA  
TTTTTTCTCCCTTACATACTTTTGATTGCCTTCTGATAATTTGTGAGATCATATGTTCCAGGTGGAGTTATA  
GGTCTCGTTCTTTTGGGAATTATTATGATGGCATTCTATGAGTGTACAGCTCAAGCAAATTGAAAGAG  
AGAATCAAGCCAGAGTTGAAAAGTTCTTGAAGACTATAGAGATCGCAGACCGACAAGATATACTTATG  
CAGATATTAAGATAACAAATCAGTTTCAGGAAATATTGGGAGAGGGAGCTTACGGGATCGTTTATA  
AAGGAACACTTTTGAATGAAATTCATGTTGCTGTAAAAATTCTCAATGATTCTGAAGGAAATGGGGAAG  
AATTTATTAATGAAGTTGCAGCAATGGGGAAAATCCATCATGTTAACGTGGTTTCGCCTAGTTGGCTTTTG  
TGCTGATGGAGTTAGAAGAGCTCTAGTGTGTTGAATACTTGCCAAATCAGTCACTTGACAAGCTCATTTTT  
CCTTCAAGTTTCAAAGATAATATCACCTTACTTGAAGAAGCTTCATGATATTGCTATGGGAATAGCAA  
AAGGGTTAGAGTATCTTCATCAAGGATGTGACCAACAAATCCTTCATTTTCGATATCAAGCCTCAAATAT  
TCTGTTAGACCATAACTTGAACCCAAAGATCTCTGATTTTGGTCTTGCCAAGTTATGCTCTAAAGAGAAA

AGTGTTGTCACTATGACTGAAGCTAGAGGAACCATGGGTTATATTGCACCAGAAGTGTTGTCAAGCAAT  
TTCGAAAAGCGTCTCATAAATCTGATGTCTATAGCTTTGGAATGATGCTACTTGAAATGGTTGGAGGG  
AGGAAGAATTTTGATGCAAAAGCGGATACTAGCCAAATGAACTTTCCCGAGTGGATTCATCAGCGGCTG  
AATCAAGGAGAAGAGTTGAAAATCAGGATTGAGGAAGATGATGATGTTATAATTGTAAGGAAATTGGC  
TGTTATAGGACTTTGGTGCATCCAATGGAATGCGACAGATCGGCCATCCATCAAAATTGTAECTCAAATG  
CTAGAAGGAGATGTGAGCAACCTAACTGTTCTTCTCCTTTTACAACAAGAAACACCACCCATGTAGGTC  
CTTCTACGCAAGAGTTGACGGTAATATCAGAACTAGAATGAATGGAAGCCTTAATTATGGATAAACTCCT  
GCATCTAAAGTTGTAATGTCAAGAGTCAGTACAAGTGGTGAAGCTTGATGTTAGTATTTTCATTAGATAT  
GTGTTAAGTCATTATGTTTAGCTGCTACTTTGCAACTCTTTTCCGTGTCCAAAATATTTATTGTCAATCTG  
TCATGATTCTAATATCAACACTCTCACAAAAGTTATTACATATGCAACACCCTCTAGTATAATATAATACA  
ATGTTTGATTGCCG

>PGSC0003DMG400021622 Other RLKs with TM

ATGGAGTTACTGAAGGCCCTACGAAATTCTTGTCTGGAAAGGGATGTTATTCCCAGTTGGTTTGATA  
CAAAGGCTACTCCATGCAATTGGACCGGCATAAAGTGTGAAGGTGAACGTGTCATCCAGATTGACTTTC  
CATGTACAGGATCACCGCTAAATGTACCATTTCTGGAATATTGGAAAATTTAGGTCCCTCAAGCACCT  
GAACCTCAGCCATTGCGCCTTCACTGGTACTATACCTACAGATGTTTGGAGTCTGGAGAATATGGAGAC  
ACTAGACTTGACTGACAACAGGTTAACTGGCGAGCTGCCTCCAACCTATATCTAACCTAAGAAACCTGAGA  
TATCTTGTACTCGACGATAATGGTTTCTCAGGCAGTTTACCATTAACAATTTGTGAGCTAAAGGAGCTCA  
GGGAACTATCAGTTCATGCAAACCTTTTTACTGGCAATCTTCTGGTGAGATTGGAAACATGGAGAAGTT  
GCAGTCTCTTGATTTGAGTTCAAATTTCTTCTCTGGTAATCTACCTTCCAGCCTAGGTAATTTGATGGAGC  
TTCTATTTGTTGATGCCAGTCAAACAACCTTGACTGGATTGATATTTCCAGAAATTGGAAAACCTAGGGAT  
GCTTAGAATTCTCTCTCTCATCCAACATGTTGTCTGGACCTATACCTGCAACAATTGGCCATCTGAAGC  
AGCTGGAGGTACTTGATCTCCAAAACCTGCAAATCACTGGAAGTATTCTGAAGAGATTTCTGAATTGAG  
TAATTTGAATTACTTGAATGTAGCACAGAATGAATTTGATGGAGAGCTTCCCTCAAGCATTGGAAAGCTA  
GAAAATTTGCTTTACCTTATTGCTTCAAATGCCGGATTGTCTGGAACAATCCCTTCAGAGTTAGGGAACT  
GCAAAGGCTCAAATCAATAAATTTGTCCTTTAACTCATTTTCAGGGGCATTACCTGATGAACTTTCTGG  
GTTGGATTCACTTAAATCACTTGTGCTTGATTCAAACCGCTTATCAGGCCCCCTGCCTATGTGGATTTCCA  
ACTGGACGCAAGTAGAGTCTATAATGGTGTCAAAGAATTTCTAACTGGACCTCTCCACCACTGTATCT  
CCCTTTGCTATCTGTTCTTGATGTCAGTGCTAACAGTCTATCTGGTGAGTTGTCTTCAGAGATATGTGGTG

CCAAATCATTGAGCGTGCTGGTGTGTCGGATAACAACCTCACTGGTGACATCCAAAGTACTTTACGAA  
TTGTTCAAGCCTCACAGACTTGGTGTGCTGGAAACAATCTCTCAGGTAAACTGCCTTCTTATCTAGGG  
GAGCTTCAGCTCATTACTCTTGAGCTATCGAAAAACCAGTTCTCTGGGATGGTACCATATCAACTATGGG  
AGTCAAAAACATTAATGGGGATCTCACTCGGCAACAATATGCTTGAAGGTCCAATTCCAGCGACTATTGC  
AAAACCTTCAACCCTCCAGAGATTGCAACTTGATAATAATCAGTTTGAAGGAAGCATACCGCGTACCATT  
GGTAACTTGAAGAACCTGACCAATCTCTCTTTCATGGTAACAAGTAACTGGAGGTATTCCATTGGAGC  
TTTTTGAATGTACGAAGTTGGTATCTCTTGATCTTGGTGCAAACAGTCTTTCAGGTGAAATTCCAAGATCA  
ATAGCTAAGCTGAAATTGCTAGACAATTTGGTTCTGTCTAACAATCAGTTTTCTGGCCCTATACCTGAGG  
AAATTTGTTCTGGGTTCAGAAATATGCCTTACCAGACTCTGAGTTCACCCAGCACTATGGCATGCTCGAT  
TTGTCCAACAATGAACTAGCTGGGTCCATCCCACACTCAATTAAGGATTGCATAGTTGTGACAGAACTAC  
TTCTACAGGGAAATAAGCTCACAGGAAGCATTCTCCTGAAATTTCTCAGCTCGGTAATTTAACAATGCT  
AGATCTATCTTCAATTCCTTGACAGGTCCAGTGTTTCTCAGTTGTTTCCAATGTCAAGCCTCCAAGGTC  
TCATACTTCTCATAACCAGATAAGTGGATCTATTCTGATAATCTCGACTCTATGATGCCAAGTTTAGTC  
AAGCTAGACCTTCAAATAACTGGTTGAGTGGCTCATTGCCGCCTTCTGCATTTAGGCTCAAAAGTTTGA  
CTTACCTGGACATCAGCATGAATTCCTTCTCAGGCTCGCTGTCTTTAACATTGGAAGCTCCAGCTCTTTG  
TTGGTCTTAAATGCTAGCAACAACCAACTCTCTGGTGCTCTTGATGATTCTCTCTAATCTCACATCCTTG  
TCCAAGCTAGATCTCCATAACAACCAATCACAGACAACCTGCCACCATCACTTTCAGCTCTTGCTTCCCT  
GATATATCTTGACTTATCCAGCAACAGTTTTCAAAGTCCTTTCCTTGAGTATTTGTGACATTGAAGGCC  
TTGTTTTTCCAATTTCTCTGGCAACAATTCATTGACCTAGCCCCTGATGTGTGCACTAAGGCTAGGAAA  
TGCATACCAAGTGAGCCTGTTTTACCTCCCAGGGAAAACCTATCCATCTGCACCAGTTCTAAGCCATGCAT  
CTGTCTTGGGCATTGCCTTGGGTGCATCGATCCTTCTCTTGTTGGTGCTAATTGTAGTTCTCAGATGGAG  
AATGCTGAGACAAGAAGCTGTACTTGTTGACAGAGGTAAAGGTAAGCAAGGAAAGAAAACCTGACCCCA  
CATCTACTGATGAGCTTTTGATTAAGAAGCCAAAGGAGCATCTGAGTATCAACATTGCAACCTTTGAGCA  
GTCTTTGTTACGGATCAACCCTACAGCTATTCTCTCAGCCACTGAGAACTTCAGCAAGAGCTACATCATTG  
GTGATGGTGGCTTTGGTACTGTATACAAAGCCAAACTGCCTGAAGGCCAGACCATTGCTGTCAAGAGGC  
TGAACGGAGGCCACATGCATGGTGTATCGCGAGTTCTTTGCTGAAATGGAAACAATTGGGAAAGTAAAG  
CATGAAAATCTGGTGCCATTGCTTGGTTATTGTGTCTTTGCAGATGAGAGGTTCTTGATATATGAATACA  
TGGAGAATGGAAGCCTTGATTTCTGGTTGAGAAACCAAGCAGATGCAGTAGAAGCACTTGACTGGCCA  
ACTCGTTTCAAGATTTGTCTAGGGTCAGCTGTCCGACTTTCCTTCTACACCATGGTTTTGTTCCACACAT

CATCCACAGAGACATCAAGTCAAGCAACATACTCCTAGACAAGAACTTTGAACCACGAGTCTCTGACTTT  
GGGCTGGCTCGAATAATTAGTGCTTGTGAGAGCCATGTTAGCACAAATCCTTGCTGGTACATTCGGGTAC  
ATACCTCCCGAGTATGGACAAACCATGACGGCCACAACCAAGGGTGACATCTACAGCTTTGGAGTGGTG  
ATGTTGGAAGTGGTAACAGGAAGGGCACCAACAGGACAGGCCGATGTTGAAGGAGGCAATCTTGTTGG  
CTGGGTGAGATGGATGGTTTCAAATGGCAGGGAGATTGAAACGTTGGATCCATTTATTTCTGGTTCAGG  
ATTATTGAAGGATCAAATGCTGCGCGTTCTTGCCATTGCAAGGTTATGCACCAGCGATGAGCCATGGAA  
GCGACCATCAATGCTCGAAGTGGTGAACTGTTGAAGGAGGCCAAGAACAATGGTGCTTGTGGAGTGT  
GA

>PGSC0003DMG400025784 Other RLKs with TM

GAGCTAATGTTGTCGAGACATGGAAAAATAGAAGGAAAATGTTAAAAAGTGGGGACTGTGGGGGGT  
CTATAAAGGTCTTGAGTCAGTCAAAGCGGCAGTGGCTGCTCCTCCTAGGACTCTGCTCAGTTTCAATT  
GTTTCTAATTTTTCTAAAATAAGCTAAGGCAATTTACCACTCTTCAATCATATCTGCATCTGTTCTATAT  
TGGTATTGAGGTTCTGCCATGACATTGTACGGACAAGCCATCTTTCTGGGTTTCTTGATCTTTCTTGAAT  
GCACCTTTTATCAACAACAAGTCTGCTTCAGGTATTACATCTTTTGTGCCTTCAATTACATCTTGTTTTGG  
GAGCTTCCATTTTGTGTTCAACAGTTTTGAGTTATATTCTATCTTGAGTTTGAGGTAAAGGAGAAAAA  
GATGACATTTTTAAAATTGTAATTTGGGCTTATTTATGAGTGTTTGATGATAGAAGTTATAGTGAGCTTG  
AAAAGCTGAAGCTGCTTTTATTTTCTTGAAAATCTTATGGGTGTTTGTCTTGTACTTGGTTTTGATGTGTTT  
GGGGTTCATGAGAATTTAAGAGGGAAGTGAAGAAGAAAGGTATTTATGGAAATGTGATTAATGTGCC  
TGCGTGACTATAAAGACCTGCCAATTTTCAAGTACAATGTGCTTTTTGTTTTGTTGGAATTTGAAATGT  
GTATGAAAGCTTGCCAATGTCAGTGGTGAAGCTCATACTAATCCAATTTATGTTTGCTTGTAAAGTTTCATA  
ACATTCAAATTCATAACGACAGCTATTCATAGTTTCAATTTAATATTGCTATAAGCATTACTTCATTTAACG  
ATGGTGTTACTGCACGATGTATTGATGTTTCTTTTGGAGTTTCCGCTATAACAATAACAGTGTAATAATTT  
ATATTTATCAGTGCAATTGATGGAAAGTACAATCAAATTTGCTCCTGTCTGAAGTCTAATGGTCCAAGTTTT  
CATCTGTAGTCTAGGTGTACAAGATCAATGTCCGTACAATTCGCTGTTAATTCTTAAAATTGGAGATATTC  
AGGTTGATACCCCTCCCAACACCCACACGTAATAGCTTTGAGCTCTTGCTTTCCACAAAAGTGGAGCTT  
ATACAAAATACAGGTACTTTTAAACATGTTGCATCTAAGTAGTTCTTCAAAGTCTTTTTATCTGTATATTACT  
GCTAATATCATTGCTGTTGTAATCTATAAGTTGGTTGCTTCCCTTTTATTTTTCTCGGTGTGTGTGGTGT  
GGTGGGGTTCATTTAGGGAGTGTATTGTAAGGAAGTAGAACTGGTGTAGTGCAGAAACATTTCTCAA  
TGAATTGAGATCTGAACAATGACTATCTATTTTTCTTCTACACATGCAGTGTGCCCTTAGACATGACTG

GATCCA ACTATACTCTGACTGCCTCAATCTGCTCCAACAAAGAAGAAAGAGGAAAGTGTTGCCGCTACAT  
TAATGCCTTGGTTGCAATTTCTGTTGCTCGATATGCAAATGCAACAAGCAACCTGGGGGTTAATGCTGAC  
ACATCACAGATTTGCCTAGACAAAATAGCAGAAATTTTCCAATTCATGGAGTCAACAGAAACGCAACA  
GTGTTGTGTGGGTTTGGAAACAAAATTCCTGTCAACTATGATTGCCAAGGTCGAACAACTGTA ACTCAG  
ATGATTCAATCTCCACAATTTTCAAGTGTTACTAAAACCTGCCAAGTCCCTCTCTCGGGGGAAAGTGAAT  
GCAGAAAATGCCTCAATGCTGGCATCTTGTATCTCCGCAATCTAGTTGGTACAGCTAATAATATGACATT  
TAGTACTTGTAGAGATGCAACTTTTGTGCTCTTGCAAGCCAAGTTGACAATGCATCAGCTATTGATCTT  
GCTCGCTGTTTCTTTGGGGTTATAGGCCTTATTATACCTCCAGGTACGTCTAACAGGGTAGTGGTGGGA  
TTCATTATCACGGAAGCTTAGATAGAACAGTTACAGGAATTGTACCGAATGCTTTATGCATTGGAATATT  
GTTACCAACATTGAATCCTTTTCTGAAATTCTGATGAGTTGCTTTCAGTTTTCCATATTCTTTATAAGGTA  
TTCCATT CAGGTCTAAGTGTGAGCTACATAAAAATTGCACAACCATTCTGTGCCGAGCCTATTCTATAACTA  
TCAAATATAGGATAAAGAACAAAAGAAAGAAAAGGAGAAAGCAGAAAAAGAAACCTACTTCTATTT  
GTTTTCTTTGTTCTGTCATAAGCCCTGAAGTAATTTCTTCTACACA ACTGTATTCCAGTGTCTTTTATAC  
CTTAATCATTAACTTGCCCGGAATTAGTCATAAAATCCTTAAATCTTCTATTCTAGACTCGAACATTTTCA  
GCTTCTTTCCAGCAACATCCTCCATTGTGTCATATTAGCCTCACCTTACACTCGGAGCAA ACTGCTGTTAT  
GACCCTCATTGCAACTTTTTCTGGTCCCGTGTCTTTCTCTGGTATGTTTACTAATGGTAATTTCTTAGGC  
AGGGAGTTGGTGTGTTTTGTTTTGTACTTCTGCACATAAAAAATATTTCCATGGATCATTTTAGTGATGTAAT  
GCACTTTCAGCCATATGAAAAGTTCTGACTTCCATTGTACGTCTAACC ACTTTCAGGACCATCTCCATCAC  
AACTTTCACCAGAGGTCTCTCAAACCCTCTGTTGCTGCAAGTCCCGCTCAACTTTCCTTGAATACACCT  
GTGAAGGAAAATCACCATCCTTACCATCTTACATTAGTACCAGTTATTGGCATAGTAGTTACAGTCATGG  
CTGTCCTGATGCTGTTTATCTTAATTGTTCTGATTTGGAGGAAAAGCAAAGAGTTGGAAGATTCTGATGC  
AACTGATAAGATATCTTCAAATCCTTACACATCCACCAAAAAGATTCCAGGAAGGTAATTTATGGTTCT  
TTTAGACTATTTGTGTACTAATCGAAGACGACATTGCAAGATCTGTTCA TTTATTCTCTAGGGTTCTTATC  
CTGTTTACTTATTATTATGCAAAATGCACACAGGTACAGCTTCTATATTTACGAAATACAGCTATAAGGG  
GACAAAGAAAGCAACCAACA ACTTTCAGCACA ACTATTGGACAGGGAGGATTTGGCACAGTATACAAAG  
CTGAATTTAAGGATGGTTCCGTGGTAGCAGTGAAAAGAATGAACAGAGTTTCTGAGCAGGCTGAGGAT  
GAGTTTTGCAGAGAAATAGAACTGCTTGCTCGACTGCATCATCGTCATCTTGTGCTCTAAGGGGCTTTT  
GCACTGAAAGGCATGAGAGGTTTGGGAATCATACTTGCAAATTTCTCTGTTCA TTTTTTTCTACCTCGTCTC  
TTTGTCCAGCTTTCAATGTAAGGTGACCTATTAGCTAGTTCACGTATTAATATCTTCTTTTCGATACTGAAC

ATTTATCATGGAGCAGGTTTCTCATGTATGAGTATATGCCAGGTGGAAGCTTAAAGGATCAGCTTCACA  
GTATGCTCTTAATCTTCGAGTCTTATTTGCTGATTTAATTTAAACAAAAAATTAGCCTTAAACATCAGTAA  
CTGGTCTGTTATTTGTTGTTGGCAAATACATAGTGCATCTTTGACTACTGTTCCATCTTAAAGTAGTTGTT  
GATTTGCTTGATTGTTCCCTCTAAATATATGTGAAGATCCAGGTACAACCTCCCCTCAGCTGGCGTACTAGA  
ATTCAAATAGCTATTGATGTTGCAAACGCTCTGGTACAATTTTTTATTTTACTCTGTCCAATTGTTATAATT  
TTATAAGCTGCTTAACATTCAGTGCCTTATTTCTTGTTACCTCCATGTAGGAATATCTTCATTTCTATTGT  
GATCCTCCACTGTGCCATAGGGACATCAAATCAAGCAATATATTATTGGATGAAAACCTTAGTTGCAAAG  
GTAACCTACATTAATTCAAGAGTGAACCTAGTTTCTTTTTACTACAAGGACGAACGTCAAATCTTTCTTTT  
GTTCTTGCCACTGAATTGGTAAAAAATTAACCTCTAAAATATTCCCTACTGCTTTATAAGATCTGTTGGCA  
GAGCAGATTATTCTTTTAACTCTTGTAATATGATAGGTTGCAGATTTTGGCCTTGACATGCTTCAAAGGA  
TGGTTCTATTTGCTTTGAACCAGTAAACACAGAGATCAAGGGAACCTCCAGGTTGGGGAAAAGTCTACTT  
ATTTGAGTAAAATTCAAGCATCATTACCTTGATGATGTAGAGGGAACCTTGCTTTGTTATTTAGGTT  
ATATGGATCCCGAGTATGTCATCACCCAAGAGCTTACGGAGAAAAGTGATGTATATAGTTATGGAGTAG  
TATTACTGGAATTAATCACAGGGAGACGGGCAATTCAAGATAACAAAAATTTGATAGAGTGGGCCGAA  
ATGTTTCATGACATCAGAATCTAAGATAACTGAGCTTGTGATCCTAACATTGGAGATTCTTATGACTTTG  
ATCAACTTCAGACCCCTTTAGCAATTGTTAGATGGTGTACTCAGAAAGAAGGACGGGCTCGTCCTTCAAT  
CAAGCAGGTCCTTAGGCTTTTGTATGAGTGTGCAGACCCAATGCACAGTGGCTTTGTTGAATCCATGGAC  
GATGAAGACTACGATGAGATTGAAGGAAAGGGGAAGAACAAGTAGGTCTAGGCTGCACAAAGGTGAGG  
GAATATTTACAGTGGTGTGATGGAAGATGTCTAGCTTCGTCGTCAGTACATCGAGGTCCTATTGTAGCA  
GGAGCTTTCTAATTGAAACCAGCCCTCCCAGTCTCCAATGTACCAGTTATTTGAGACCATTGCTT  
TACTGTGAACTTTTTTTTTTTTTTATATCTGAGGAATTCCCGTGGGCCAGCTGATGCATGGTTCAAACCT  
CGGTGGGTAATGGACCCACCCCTCCACCCCTTTGACTGTAACTATCTCTTGAGCAGATTTTAACTGTAAA  
GCCATTACATATCAGAGTTTAAAGGTTACTGACTTCACCATCCTGACATTGATAAGTAGCGTGCACACGA  
TCCAGAGGCTGTATTCCATAGGTCCATGAAGTTTGCTTCATTTCCACCAAACAACCTTTTCTTGCAAAGA  
AGCCTGTGGCTATAAGAGTTGTATTCTTTTCTCCATGAATTTTTTTGGAGAGGTAGTAACTAACAACCT  
TTAGTTTTCCCGTTCTCTTTGGTTTGGTTTGTGTTTAAACATTCTTTAGTACTTTCCAGGGCTGTTATTT  
TTGTAAGTTATTGGATTGTGAATTTGACTTGTGCTCTCTTTACCTGTATGTTTCCAACATTAGAAGAACCT  
GCTGCTTTTGCCTAATCTGGAA

>PGSC0003DMG400026743 Other RLKs with TM

TTTTCTCCATTCCATTGGATTTTATTTCTCCCAACACAAAAACACATCCTCTAATCCGAGCTAATTTTCCCC  
AATGATTAGCCAGGGGAAATCACTAGGCGAATACATGATGATTCGCCATAATTTCAATTTCTTCACGCG  
CTTGAATGCATCATCTATCCTCTTGCAGGATGATGAGCATGAAGAGAGCGAAAACGGAGAAAAAAGGG  
ACAATTTTGATGCATAAATATGAGATTGGTAAATTGTTAGGCCAAGGTACATTTGCCAAAGTCTATCATG  
CAAGGAACCTAAAAACAGGACAAATTGAGCTGTTAAGGTAATTGACAAAGAAAAAGTCATGAAAGTTG  
GCTTAATTGACCAAATCAAACGTGAATTTCTGTTATGAGATTAATTAGGCATCCAAATGTTGTTGAACTTT  
ATGAAGTAATGGCTAGCAAAACAAAAATTTATTTTGCAATGGAATATGTTAGAGGTGGTGAATTATTCA  
ATAAGGTTGCTAAAGGGAGGCTTAGGGAATCAGCAGCGCAAAAATACTTTCAACAATTAATTGTGTCTG  
TTGATTTCCATCATAGTCGAGGGGTATATCATAGGGACTTGAAGCCCGAAAATATACTCCTTGATGAAAC  
TGAAACCTAAAGGTTTCTGATTTTGGGTTGAGTACTTTTTCGATACGAAAAGACAAGATGGCCTCCTC  
CACACGACGTGTGAACTCCAGCATATGTCGCGCCAGAGGTCATAAATAAGAGAGGATATGATGGCGA  
AAAGGCGGATATTTGGTCATGTGGGATGATTTTGTGTTGATTGTTAGCTGGTTATCTTCCATTTTCATGACA  
CAAATTTAATGAAATGTATAAGAAAATTAGTAAAGGGATATTTAAATGCCCTGAATATTTTCCTTATGA  
AGTGAAAAAACTACTTTCAAGAATTCTTGATCCAAATCCGTTTTCAAGAATTACATTAGCTAAGCTAATG  
GACAATAATTGGTTCAAGAAAGGATTCAAACAAATTGATAAATCACTAATTTTGGATCAAGAACACGAC  
GATGATTCACCTCGTAGTGTATTTGATATTGTGGATGATTCGGATGCAGAGTGTTCTTCAGGACACAAAG  
AACAGAATTCATCAGCAATAATGAAGCCTACTTTTTTGAATGCTTTTCGATATCATTCTCTTTCTCCTGGTT  
TTGATCTCTCTAGCTTGTTTCGAGAAAGATAAGAGTCATAGGTTGGATGCTAGATTCACAACACAGAAGTC  
CACGCCACTATTGTCTCGAGGCTAGAGGAAGTAGCTTCAATGGAGAGTTTTAAGGTACGTATGATAGT  
ATAATATCGGTGAAAGATGTTTCATCTGACCACCCTTGAGCCTATATGTGACTTTGCCTGTAGGTTTCATCTC  
ATCTAAAAGTTTAATCTGATCACCTTTAGCTTATGACCATCTTAGCTAAAAGTTTAGTATTATAGAATGAA  
CAAACCTTATTTACTTTATTATGTCTTCAACAGGTGAAGAAAAAAGACGGGACGGTGAAAATGCAAGGA  
AGCAAAGAAGGGAGAAAAAGGGCAATTAGCAATTCATGCAGAGATATTTGGGATTACTCCAGCTTTCCA  
TGTTGTACAAGTGACAAAAAATCAGGAGATACTGCAGAATACAGCCTTCATTAAGATATAGTTTGG  
ACATGGCTGGGCAATGAGCAACAACAAGTGGAATCAAGAAATCAACACTTGAGAGGTAAAGATATG  
AAAAAAAAAAAAACAAGTTGTGGGGTAAAGTTGCCTCTGTGGGACCTATAGGTCATGATTTTCGAGTTG  
TGGATTCAGTCATTGATGTTTACGTGGAGGTAGTTTGCCTGCATTACGATTTACAACCCTTGGATGAGAG  
CCTTCTCCATATCTCATGCATCGAGTTGTTTCTGTTTTTTTTAAATCATAGAGGCATTATGAATTTCTGTTTT  
TTTTAAATCATGTAGGCATTATAATCATAGCATTTTTTGTCATTGCTTTTTTGTGTTGTCTTGATGTTAT

ATGTCCTCTTGGTGTTTCCCATGTAAAACATTTACTATATTACTTGCCT

>PGSC0003DMG400027124 Other RLKs with TM

CTTAGCTACTGTTACACATATACAGTATAATCCACCATTGCTCCAACCTTTTAGCTTACATCATAGCCTTT  
TTCCTTCTACAAATGACAGAAAATTTCTGATGACATTACCCATCTCCGGCGCCGGCGCCGTCATCGTTGCC  
GCCGTTATCTCACTGATAACTTCTGTTTTACTACCATTTTCTCATGCCCTCGGTAGTTCGCCACCACTTTG  
GCCGTTGCTTACGGCGCCAACATCACTATCTGCGGCATAGTAGCTTCTCAACCAATCCAAAGAATCCAAT  
GCTGGTCAGAAAATCAATTAGCACCCATCCCATATCTCCTAACGCCTCCTTAACTCCATCGCCGGCGG  
AGTTAACGGCTTCACCGGCGTTGAAACCGGTGGGTTTTCCCTTCTTCTGGAECTAAGTTTTCAACCCA  
AAAGACTTTTCTTCAGTTACTCAACTTTGTTAACAAGTGTACAATGGGAGATACTCAAATTTGCGGCTTA  
ACAAACGGTACCCAAAATGTTAAATGTTGGAGAGATGACTCGAATTTGGCGAAACAACCAAATGGGTGCG  
TCACAATTCATGTCAATTTTCTGTTGCGGGATTTTCTTGTGGAATTTTAAAAGTTCAAATAGGGTTAT  
ATGCTGGGGAAACAATAGGGATATTGCTTCAGCTATTCAATCTGGTTTTGTAATATTACAGTAGTGAAT  
ATATTTGCCGGTGGAAAACATGCTTGTGGGATGAATTCTACAGGTTTTTTAATCTGCAAAGGAGATAATG  
AAAATGGTCAATTAGATATTCCATCTAATTTGCTTATGAGTATAACGGATTAGCTTTAGGGGTTAATCAT  
ACTTGTGGAATTTCTAGAATGAATTATACAGTTGTTTGTGGGGTGGGAATGGTGAATTTTCGATGAATT  
TAACGAAAGGTCTTTCATTTGAATCAATTGTTGCTGGTTAGATTTTACTTGTGGATTAACAAGTGGGAA  
TTTTTCTGTTATCTGTTGGGGACCTGGTTGGAGTAGTAATATGTATCCTTCAGGTACTGAGCTTCCTTTAC  
CAATGATTCTCCAGGTCCATGTGTTTCAAGATGTATGTGATTGTGGTGTATATCCTCAATCGAAAACGTT  
GTGTTCTGGGAATGGTAATATTTGTAGGCCTTGTGATTTTTCGGTTGGAGTAGCTCCACCACCATCACCA  
CCGGTGTATTATGGTGCCATCGTCGCCATCTAAGGGGTTGAGAAAGGGATTGTTAGCTTTTGTGATTG  
TTGGATCAGTTGGGGCTATTGCAGGGATTTGACTGTTGTTTATTGTTTATGGACTGGTGTGTTTGG  
GAAGAAGAAAATTCATAATTCTGTTCAACCTACTATTAGTACTAATAATGTTGCTCAACAATGTTATAGTA  
GTGGTCAAGTTTCAAGATCATCTACTCTTAGGCGCCAAGGGTTCGAGGTTAATGAGGCGTCAGAGGAGT  
GGAECTTCATCTATACATGGTGATAGGGCAGAGGAGTTTCAGTTTTTCGGAGCTTGTGTCAGCTACGGAC  
AATTTCTTTAAAGAATAAGATTGGTGCTGGCAGCTTTGGGGTGTGTTACAAGGGAAAATTAGCTGATG  
GCCGTGAGGTTGCAATTAAGCGTGGTGAATGAGTCCGAAGATGAAGAAGTTCTTGGAGAAAGAGAG  
GGCTTTTGAATCAGAGTTGACGTTCTTGTCCCGACTACACCACAAACACTTGGTTAGATTGGTTGGTTATT  
GTGAAGAAATGGATGAAAGACTCTTGGTTTATGAGTTCATGAAGAATGGGGCGCTTTATGATCATTAC  
ACGATAAGAACAACGTGGAGAAGAGTAGTAGTGAATTCTTGGAAAATGAGGATCAAGATTGCA



TTAGATGCTGCTCGTGGCATCGAATACCTTCACAATTATGCAGTTCACCTATAATTCACCGGGACATCA  
AGTCATCCAACATCTTGATCGATGCAAATTGGATCGCAAGAGTGTGAGATTTTGGATTATCCTTAATGTG  
GCCGGAGACTGATGCCAGATTCAGTCAGCCAATGAGGGCAGCAGGCACAGTTGGGTATATCGATCCAG  
AGTACTATGGCCTAAATGTCTTGACAGCAAAGAGTGATGTCTATGGACTTGGGGTGTATTGTTAGAACT  
TTTGACCGGAAAAAGAGCCTTATTCAAACACTAGTGAAAACGGGGACATGCCAATGAGTGTGTCGACTT  
TGCAGTACCAGCAATTATGGTTGGAGAATTGAACAAGATTTTGGATCCCAGAGTTGGGCTGCCCGAGTT  
GAGGGAAGCTGAGGGAGTAGAATTGGTGGCATATACTGCAATGCATTGTGTTTCATTTGGAAGGAAAAC  
ATAGACCTACAATGACTGATATTGTTTCTAATTTAGAGAGAGCTTTGGCTGCATGTGATGTTAGCCATGA  
CAGCATCTCTAGTAGTCCAGACTCCATTAATCAGATTGACATTCCACGCATATGTCCGCGAAAGACTCC  
TACCAGTATCACTAGACGATAAGTTTTGGTGGTTAGAATAGTACGATTCGTGTAACAATTGTTGTTAGTG  
TAAACTGTAAATTATCGATAGCTGGAATGAAATCTTTTTCTCCTAGAAGGATAACAATCTTCACTATGTT  
GTGTTTAGCATCTTCTTGATAGGACTAATTGACTTGTGTCATTGTTCTTTTGTGTGTTTTTTTTTTGTAAA  
GGTGCTTAATGCACAAAAGTCCAATTGTTGAAATGACAATCAAGAGTAATAGCAGCAAGCCACAAGGC  
AAGTTG

>PGSC0003DMG400028073 Other RLKs with TM

CGGCTTCACCGCCGTTGCTCCGGTGGATTTTCTCTCCTTTTCTGGAACACGAGTTTCGTCCCCAAACGAC  
TGTATTTTCACTCAAACTTGTAAACAACCGTTACAATGGGTGGCGACAAAATTTGTGGCATAACCAA  
CAGTACAAAAAATGTTACCTGCTGGAGAGGCGATTTGAGTGAACAGCCAAATGGGTCATCACAATTTAT  
ATCAATCTCATCTGGGTCTGAATTTTCTGCGGAGTTTTGGAAAGTTCAAACAGGGTGTCTGTTGGGGA  
AATAGTGATATCGCTTCAACTATCCAATCTGAGTTCGTAATGAAACGATGATGAATATATATGCCGGCG  
GAAGGCACGCTTGTGGGGTGAACGCTACCGATTTTAAATTTGCAGAGGTGATAACACAAACGGTCAGC  
TTGATGTTCTTCTAATTTGTCTTACGAGTATTTGGATTAGCTTTGGGGATTAATCATACTTGTGGAATT  
CGTAGGGTGAATCGCACGGTAGTTTGTGGGGCGGAAATGGTGTATTTTCAAGTAATGTAACAGAAGG  
ATATTTTTTTGAATCAGTTTCACTGCTGGGTTAGATTTTACGTGTGGATTAACCACAAACAATTTTTTCACTGG  
TGTGTTGGGGGCCAGGTTGGACTAGTAAGATGGTTCCTCAAGGGGCAGCCCTTCTTTACCGATGATTC  
TTCCAGGTCCGTGTGTACGAAGTAATTGTAGTTGTGGTATATATCCGCAGTCTCAAAGTCTCTGTTTTGG  
CAATGGTAATATTTGTAGGCCTTGTGATTTCTCAATTTTAGCACCACCTACTTCACTACTACCACCACCAG  
CACCGCCACCATTGGCACCTTCTTCGCCTTCTAAAAGGCTAAGTAGAGGTTTATTAGCTTTTGTATTGTT  
GGATCAGTGGGCACTTTGGCAGGGATTTGCAGTATAATTTATTTTCTTTGGGCTGGTGGTTGTTTTGGAA

AGAAGAAAGTACATAATTCAGTTCAACCTACTATTACTGCTACTTCTAATGGTGGGCAATTATCCAGTAG  
TGGTCCTATTTCAAGATCATCAACTCTTAGGCGTCAAGGGTCGCGGTTGATGAGGCGTCAAAGGAGTGG  
AACTTCTTCTAAACACGCAGACAGGGCAGAGGAATTTCTGTTTACAGACCTTGCTGCAGCTACTAACAAT  
TTTTCTCTAGAGAACAAGATTGGTGCTGGTAGTTTTGGGGTGGTTTACAAGGGCAAACCTACCGGATGGT  
CGTGAGGTTGCCATCAAACGTGGAGAAACAGGTACAAGAACAAGAAATTTTCAGGAGAAAGAAATTGC  
ATTTGACTCAGAATTAGCTTTCTGTCTCGGCTACATCACAACATTTAGTTAGACTTGTTGGTTATTGCG  
AAGAAAGGGATGAAAGGCTTTTGGTTTACGAGTACATGAAGAATGGAGCACTTTTTGATCATTACATG  
ATAAGAACAATGTGGAGAAGAGCAGTAGTATAATTAATTCTTGAAAATGAGGATCAAGATTGCTTTAG  
ACGCTGCACGAGGCATTGAATACCTTACAATTATGCAGTTCCGCCTATAATTCATAGGGACATCAAGTC  
ATCCAACATCTTGATTGATGCAAACCTGGATTGCAAGAGTGTCTGATTTTGGATTATCGTTAATGGGGCCA  
GAGAGTAATCGCGATTACAGCAGCATGCCAATGAAGGCTGCTGGGACAGTTGGGTACATTGATCCCGA  
GTACTATGGTCTAAATGTGTTGACAGCAAAGAGCGATGTATATGGACTTGGAGTGGTATTGCTAGA  
TTTTGACAGGAAAGAGAGCGATATTCAAGAGCGAAGAGAACGGAGGTGCACCAATGAGTGTGGTGGAC  
TATGGAGTACCAGCAATTATGGCTGGAGAATTGAACAAGATTTTGGATAAGAGAGTAGGGACAGCAGA  
GGCAAGTGAAGAAGTAGAAGCAGTGAATTGGTGGCGTATACTGCAATGCATTGTGTACATTTGGAAG  
GGAGAGACAGACCAACCATATCTGATATTGTTTCTAATTTAGAGAGAGCTTTGGCTGCATTTGATGATAG  
CCATGGCAGCATCTCTAGTGGTCCAATTTCTTTGTTTCTGATTGATAATTCACCTCTCTATTCTTTGTTT  
ATGGCTAATTA  
AAAAAGTGTGATTATTTTGTAAATAGTGTAAGAGTAGATTCTTCATTCTAACATCATGTC  
TAAGGAAATCTGTAAGCTGCCAATTGCTGAAAAAGTTGTACAAGAAATCTTTCTCCACAAGATTGCT  
ACTGTTGCTAACCGAAGGAATCAAGGGCGTAGCTATAGCCACCCTATCGGAATATTAGGTTGTATATA  
TATATATATCAAATTTTACATTTAAATGATATATATTTAAAGTTGGACACC

>PGSC0003DMG400028561 Other RLKs with TM

ATGCCATCCAATGATATCCTTGACTGGAATACTGAAATCACAAGCACGTTTATTCTAACCGAATCCAGAG  
TTAACGTTCCCTTTGTTGTGATTGCCTTAATAATGGTGAGTTTTTGGGACATGTATTTTCTATATTGTTA  
GTGCCAATGACACTTATGATCTCATCGCCACAAGGCTCTATTCAAGTTTACGAATAAAGAGTTGTTGAT  
GAGGGATAATAGTTATCCGGAAAACAATATACCCGTTTATGTGACCTTGAACGTGACTGTGAATTGCTCC  
TGTGGGAATAAAGATGTGTCAAAGGATTATGGATTGTTTATCACGTATCCGATGAGGCCAGGGGAAAAT  
TTGAGTTATATCGCGTTGGTACTAATACTAGCTCAAGGCTGATAGAAATGTACAATCCAATGGTGAATT  
TCAGTGCTGGCAGTGGGTTGTTGTACATTCCAGGCAAAGGTTAGTTCAGATTAAAGAAAAGAAGAAGA

GTATTTGGTAGATTAGCTTTTTCTTTTATATAATATTGGACTGAGACGGACTTACATGAAGTAACATGGTC  
TGTGAAGATTCATATAGCATGAATCGCAATGCAAACAGACTCTGCTGAAGTAAAATTTAGGCAAGCATA  
GAAAATCCTGTTTTAATGATTTGTGTCTTTTGTACAATGTTGCTGTTGTTGTGATGGATATTATATTTGAT  
TGTAATCCAATTTTATCTATGTATATACTTGTTTTATGCAGATAAACTGGGGAATTATCCACCTATACCA  
ACCAGGTACAATTTTCAGATTTGAAGTAGTTATACATTGAGCACCTTATCTTAAGACATGCTTGCATATTC  
TTAACTTATTTGGTCATCCATGTTTCCCCTGGCTTGCAGAAAAGGTGGACTACCCTTTCTTCTCTTTATT  
TTGTGTTGATTCTCCATTATTGCTTCTTGCTCCCAAATCAAGTTGTTGATGGAAGTGTGTACAATGTAA  
GCATATTGATTATTCTGTATGAGTGTCTCATCAGGCTCATCAGGTAAAACAATAGCTGCATTAGCAGTAG  
CTGCACTAGCCGAGTTTTCGTTATTGGTAGGCATCATTTATGTGGGAATTTATAGAAAGAAGGAACAAA  
AGGTTGCAGCAAACATCCCAGCATCTTCTGGTCAATACCATCCACCTAGTCCTGGTAATTGTAAATCTTCC  
TTTTCTTTTTCTACTTCTTTGCTCTTCCCAAATTTGAGTTCAAATCTCCTTCTGAATGAAGCCTCCAGTTG  
AAAATGTCTATCATGGATGTTAAATTAAGCATTTTTGCGATTACCAGCAAAAATTCCTTCAACCCTGTCCT  
TTAGGATAGCCAATATTCTAATTCATTATCAAATTTCAACTTCATGGAGGTATCTAATGCTAGATTTATTA  
CTCCAATGTGCTTGCAATATGTTTGATCCGTGTGAAGAACCACTAGAACTTGCTTAGTTTATTACTCCAA  
ACATATTCTAATAAATGTGGCCTAAGGCACTGACCTTGTTGATGGTGCTTCAGCAGGTCTTTCGGGCATA  
CATGTGGACAAATCAGTAGAGTTTTCATATGAAGAACTTGCTAAGTCGACTGATAACTTTAGCATTTCGA  
ATAAGATTGGAGAAGGTGGCTTTGGAAGTGTATTATGCGGAGCTGAGAGGCAAGGTCTGCAGTTCAT  
GTTTTGTCTCCCATGATGCAAAGTTTTGTTTATCTATTGTTAGAAATATATTGCAAATCAGTAAGGAG  
AACACAATTCGATCATTCTTGCACTTGATTAAGTAAGATGTCTGAGTAGTCTCAACTAAAATAAACTGAA  
AAAGCTGTTAAAACAGTGTTATTAAGGGTAGCAATGTCTCTGCTAATTCTACATTTAAAACACTACAGAAAG  
CAGCAATAAAGCGAATGAATCGGGAAGGAAGAACAGAATTTCTTGCTGAACTTATAATTTTGACGCGTG  
TTCATCACCTGAACTTGGTATGATCAATATCTTCTGTCACCTGTTTTATTTGCTTATAATTTTATTTTATT  
TTTTGTTTTGTCAAGTATAATAAGTATTGAATGCCAGATATTGGAAGTTTAAGCAATATCTTTTAGAACT  
TCATTAGCATTCCCGTGCCTGGAATTCACATGTTTTGCTTATTTAGTTGATTGCTTTGAAGGAAATGTAAA  
GAGAGGGAAAAGAAATTGATTTTCTCACTCATAGCATGTCGTTTTACTAATTTTCACCCCTTTTATTTTAA  
CATTCTACTCCATATACATTGAGTTCGTAAAGCTGCAAGTTTAGTTTATAGTATGAGGGTATTGATAGATC  
CTGTAGGAGTTTATTTTCAATTTACAAAGGGAACCGTATTTGAAAATATGTCCATGAAGAGAGCGCATGC  
CTAAGAATGTGAAGGATGTTTGCACCTTAAATTACAAGTATCGAAATGCATGTATATCATTTTATTGATCT  
GGTGCGGAACTCAAATGTGATTGTATTATGCTTAATTTGTTTTCTCATTTGACTATTTTCATCTGATGCTGA

ATTGCATGCAGGTGTCCTTGATAGGGTATTGTGTTGAGAGGTCCCTCTTCCTTGTATATGAATTCATTGA  
GAATGGTAATCTAAGCCAACATCTTCGTGGTACGAGAACTCTACTAGCTATAGCAATATGATGGAATAG  
TTCATTCTTTATGGTTTTCTTCTTATTTGTATTTGTGATGTTTATATGCTTACAGATTAATTGTTTGGTAAAT  
CTATTTACAGGGAAAGACGTATTGACATGGTCAACAAGGGTGCAAATTGCAATGGATTACAGCCAGAGGT  
CTTGAGTATATACACGAGCACACCATCCCCTTTTACATCCATCGTGATGTAAATCAGCAAATATTCTGAT  
AAACGAGAACTTTCATGCAAAGGTATCTTTAACGTCCTCTATTAATTCTCTGTGTTTCAACAACCTTCTCTA  
GTCTTGTAACCTGGTTAATCACTCACAGATTGGAGATTTTGGCTTATCAAACTTGTTGAAAGTGGAATC  
CAACTCTGAATACACGTTTTATGGGTACATTTGGATACATGCCACCAGAGTAAGTTTTTTTTTTTTCACTG  
TATAAAGCGCGTCTAAAAGTATGTGTAGCTTCAGCTGTTCAAACCTTTTTACTTGAATAGAGAATCTGGC  
AATTAATACAAAATAGTAACAAATGCTAAAATTTGCAGGTATGGTCATTCAGGAGTTATCTCTCGTAAAG  
TAGATGTCTACGCTTTTGGTGTGTCCTTATGAATTGATTCGTCCAAGGACGCAGTAGTCAAGGAAGA  
TGGTGTGATGAAGCAAGAAGCCTTGTGCTTTGGTAACTTTTTCTCAAATTTCTTCATTGAATGTTATT  
CATTGGCATTGAGATGACGTTGACATAAACTTTACTCCTCTGCATTTAAAATCTGACACTTTTAGTTTGAA  
CCAGACGATGAGCTAATCGTGATTGTTCTGTGGTAATTGTAGTTTGTGATGAAGCTTATAGTCATTCAAATC  
AAATTGAAGCCATTTCCAGATTGATAGACCCTAACTCCACGATGACTACCCCCTCGATTACAGTCTACAA  
GGTCCAATTATATCTCTTTAATTATTGCACTAGCTAGTTACCCCCTTTTCTTCTCTGCTTCCACTTGAAGC  
AACACATGGTTTGTCTATTGCAGATGGCACAGCTTGCTAAAGCTTGTACGGAGAAGAATCCTGAAATGA  
GACCGACTATGAAATCAGTAGTGGTTGCTCTTATGGTGCTCTCATGA

>PGSC0003DMG400031486 Other RLKs with TM

ATTAGCTGCTGCCTCACCAGGTTTGGGGAGTAATAAACTTGGTATTAGAGAAGACCGTGTCATAGGGAG  
TGTACAAGCCGTGTCAGTCGAGATGACCATCTTTTTCCGCTTGCACCTACTTCTCATCACCATGGTATTGT  
TGGCTATGGTTGGTGTGATGGAGCATATGATTGCAGTGAGCCCAGGTGTGGAAGTGATGGCCATAGCATT  
CATTTTCCCTTCAGGCTTCGCCACCAGCCAGAATATTGTGGCTATCCAGGCTTTGAGTTATCTTGTGACCT  
CAAAACCGAACCATACTCATACTTCCCAATTCACCTTACCTAATTGTTTCGAGAAATTGATTATATGTCTCA  
ACAGATTAGTCTTTCTGATCCTGAACGTTGTCTCATTCTTAATATATTGCACCTAATTTATCAGCATCTCC  
TTTCTCCTTCACTGTTGACGAGCGTTATCTTACACTAGATAACATTTCAATTTTCAAATGTTCTGGTATGCC  
AGCATATTATCGGAACCTATATCCAGATTGTGCCTCTGACAAATCAATATTTGCTGTTTCTACTCTTTAG  
ATTTACTCCCCAGGCAACTTGCAAAAAGATTCATGAAATTCATCATTCTCTACGATACAATTTACAGT  
AGTTTGATAAGACTCAGTTGGCTTAATCCAACTGTAGCTACTGTGAAGGTCTTGAAAAGGATTGTGGCT

TCAAGAACTATACTAAACAACACTGACTACTCAGTGTTCGATCGACCATTTACTACAAAAGGTATTGACAA  
ACTTTTCTTTAATGCCATTATCATGTACTTCTCTTTCCATAACAAAAAATTGTGTTAATTCTGGCAGGCA  
CAGTAAAGGAACCACTGATTGCAGGTGGAGTTATAGGTCTCATTCTTTGGGAATAATTATTATGGCACT  
TTATGAGTGTTATAGCTCAAGCAAAATTGAAAGAGAGAATCAAGTCAGAGTTGAAAAGTTTTTGGGAAGA  
CTATAGAGCTCACAGACCGACTAGATATACTTATGCAGATATTA AAAAGATAACAAATCAGTTTCAGGAA  
ATATTGGGAGAGGGAGCTTACGGGATCGTTTATAAAGGAACACTTTCGAATGAAATTCATGTTGCTGTA  
AAAATTCTCAATGATTCTGAAGGAAATGGGGAAGAATTTATTAATGAAGTTGCAGCAATGGGGAAAATC  
CATCATGTCAACGTGGTTCGCCTAGTTGGCTTTTGTGCTGATGGAGTTAGAAGAGCTCTAGTGTGTTGAAT  
ACTTGCCAAATCAGTCACTTGACAAGCTCATTTTTCCGACAAGTTTCAAAGATAATATCACCCTTACTTGG  
AAGAAGCTTCATGATATTGCTATGGGAATAGCAAAAGGACTAGAGTATCTTCATCAAGGATGTGACCAA  
CAAATCCTTCATTTGATATCAAGCCTCAAATATTCTGTTAGACCATAACTTGAACCCAAAGATCTCTGA  
TTTTGGTCTTGCCAAGTTATGCTCTAAAGAGAAAAGTGTGTCACTATGACTGAAGCTAGAGGAACCATG  
GGTTATATTGCACCAGAAGTGTGTCAGCAATTTCCGAAAAGCGTCTCATAAATCTGATGTCTATAGCT  
TTGGAATGATGCTACTTGAATGGTTGGAGGGAGGAAGAATTTTGATGCAAAGCGGATACTAGCCAA  
ATGAACTTTCCCGAGTGGATTCATCAGCGGCTGAATCAAGGAGAAGAGTTGAAAATCAGGATTGAGGA  
AGATGATGATGTTATAATTGTAAGGAAATTGGCTGTTATAGGACTTTGGTGCATCCAATGGAATGCGAC  
AGATCGGCCATCCATCAAATGTA ACTCAAATGCTAGAAGGAGATGTGAGCAACCTAACTGTTCTTCT  
CCTTTTACAACAAGAAACACCACCCATGTAGGTCCTTCTACGCAAGAGTTGACGGTAATCTCAGAACTAG  
AATGAATGGAAGCCTTAATTACAGATCAACTCCTTCATCTAAAGTTGTAATGTCAGAGTCAATACAAGTG  
GAAGTCTGAATTTTGGTATTTTCATTAGATATGTGTTAAGTCATTATGTTTTGCTGCTACTTTACAGCTCT  
TTCCGTGTCCAAAATATTTATTGTCAATCTGTCATGATTCTAATATCAACACTCACAAAAGTTATTACATA  
TGCAACACCAT

>PGSC0003DMG401002542 Other RLKs with TM

ATATTTTGCAAGTTGGCTAAAGGTCATCAAACGACGTCGTTTCATTCAACATTTTCCTTTTCTGCATCTC  
TTCACTGTTCCACGTTTCTCCGTTATGTCTTGAACCTGTTTGTCTTGGTGCTCTTCAACTGTCCACTCTAG  
TTCTTCACGCCACTCGAAAAGACCTAGAGAATCTCAAGATCTTGGTTTCAA ACTGCTGAAAAACATTAGT  
CTTAAAGAAAAAAGTGATCTCCGGTAATGTCTACTGGGCCCCCGGAGTGCCGTTGGGTCCGCCGTTGC  
CGTTTCTCCGGCGGATAATGCAACTACTCCAACATCTCCGGTGAACCCAAGTACTACTCCTCCGTCTCCA  
GATGTTGCTAGTCAGCCTTCTTCAGCGACCTTGGTAAATCCGCCGCCCTCATCGATTAATGGAAGCTCTC

CAACGAGTGCTCCGTCGAAGGGGTCGGCGAATAATACTACTTTAGTAGCACTTGGAGTTGGAATTGGGA  
TTGGAGGAGCACTTGTGCTTATATGCGTGTGCATTTTTGCCCTTTGGTATAAGAGGAGAAAAAGGCGTC  
TTGGGTAAATGGTTTTGGTCATGATCCATCTTCACAAGGTCCTAAAGGTGAAATCTTTGTGACTATTTCT  
TCTTATATTGGATTTGGTGACCATTTGGGCTCCGTTTATTTTTTTTCTTTTATTGCAATTTAATTAGTTG  
AGTTGGTGTTCAAAACAAATTTAATGAAGTATTCTGCATTCTCACTGTTTCTTAATTCTACTTATCATTTA  
TTGGGGTCATTTGGGTAGGAAGTCATATTGAATAATTTAATTCTAGTCTGATTGTAAGCAAGTATTTTTTT  
AATGATTTGTATGCTGAATTGAATATAAATTTGGACTTTAGTTGTTGGCACCTTTGAGTATTTTTCCCTA  
GTGTCTATTTAAAACAGAGATTTTGTTCATATGATTTTAAAATTTGAATTTGTTGTCGTACTTATAAAA  
CATTATGTTGCTATGCACCTCACTCATATGATATTGTCATGTTCTTCGGTGGATCAGTGACCCCAATGGAG  
CTCCTTGTTTTATTACTTATTACAGTTAGTGTTTTAGTTTTTCAGCCATGTCCTTGGTTATGGTTAGTGATA  
ATGAGATCTTTTGAATTCTGTCCTTGTATCCAAGGAAGTATCAATTAAGTGAAGTAGCTTTGTGTTTTTT  
TTGTTGAGTTGATGACTATTAAGAATAGAATGAAGATTCAAGCGTCAGTCCATCAAATTTCTGACTCTTTT  
GGGAAAATTAGTAGTAGTGGTGGTGAGGGGGATATTTTGTGTTCCAATGGCCTCAGAAGAAGCATTTA  
AGATTTAAAATTATTGCATTTCACTATACCATATTATTTTGTGTTAAATAGTACTCTTTAATGAATTAGT  
ATATCCAGAAGTAACAGTGTGGAGGTAAGTAATTGAAGCTAAAAAACTAAAAGTGCTAAATTGCTTGGT  
GGCGTTGTTCCCTTATTTGCAGTATCAATTGCAGTTGAAACTGATGTACTTCCTTTGGGGATTGTTTGTG  
ATAATTGCCTTTTCTTGGGGGAGGAGGAGCCACATTAATTTTTGTTAAAAATCCATGATATATATGTAT  
ATATACACACACACATACATATATATATATAAATACACACACACACACATATATATATAATACACAAACA  
CACACGCACACACATAAATATATAAATACACAAACACACACACACACACACATATATATATATATATATA  
TTTATGTGTATTATATATAAATACAGATATATACATATACACACACACACACACACACATATATATATAT  
ATATATAATACACATATATACACACACAGAGATATTATGACCTACTACTGGTATTATTATTATTAGATCAT  
CATTATAAACATCATCATTTACGTAATATGGTTTGTCTGCTTGTTCATGCTCAGATAATTTGTTTGGTG  
GTCAACATCATCACTGGCAACAAAATGCTCCTCCCTCAGCAGAAAACATGGTGAGGATTCCAATAAATCC  
CTCCCTCCACCATCCATTACATCAGTTTCACAAGTATCTGCAGCAGATGGATGTACTCCTCCACTGCCAC  
CTTCCACTGGCAGTAACTTCACTACTGACAAACCTTTTCAACAAACAAATCCTGATTCCAACCTTGAGTTTC  
TCGAGAACTACATTCACCTATCAAGAATTAGCATTTGCTACCGATAATTTCTCTGTGCGCAACCTCCTGG  
TCAAGGTGGTTTTGGATATGTATAACAAGGAGTATTCCGTGATGGGAAGGAGGTTGCAATTAAGCAACT  
AAAAGCTGGAAGTGGGCAGGGGGAGCGTGAATTTCAAGCAGAGGTGGAGATTATTAGTCACGTTTCATC  
ACAAGCATCTTGTTTCATTGGTTGGACACTGCATTTCAAGGGGTGCAACGGTTGTTAGTTTATGAATTTGT

CCCAAACAAAACCTTGGAGTTCCACTTGCATGGTAAGTTCTCAGAATATCTAGATAGTTTGTCTTCTGCAA  
TTTAGCATAGACTGCTGTCAATTGCCATACTTGCTTTTATTAGAGGTTCTTTGTAATCATTTAATGGTGCA  
GAAGTTGTCCTCACCATATGATCTAAATTTAAGCTTAATTAGAAGCACCAATTATTTAGTGTGGTTCAAA  
GAGAGGGATTAAAGGTTAAGGGGCTTGGGTGTTTCATATTCCTGATTTTCTTGTCTTATTCAGTATTCA  
AAGATTTTCTTGCTTTTATTTAGTATTTTAACTTTTTTCTGAAGCAGAAGAGTTGTGTACCACACGATCT  
AAATTGAACTTACAAAAAGGACAACCTTCTCGCAGATGTTTCAGGTGTTACAAATGACCAAATTTTGATGT  
GTGTAAAAGAGCACTAATCATTTAGTCTTGTTCAAAGAGAGGGAGTTGAAGGGTAAGGGGTACATGCT  
CTTTCTCCATTTTCAATGAGGTTGTGTTCCCTCTTTTTAGATTACCAGGGAGATACATTGATTTCTTGCC  
TTACGGGAAATTTTGTGCGGTGCACTTCTTGTTGCCCTTTTACCCAAACCATGTTTTCTAAAGGAGAAAG  
AGAAGAATGGAAAAAAGTTGTTTTTAAATGTTTCATCAAATTGACATGTGAGTTGAAGAAGAAATTGGCA  
TATTCACACTAACAGTCCAGTCCCAAGCTACAACAAACAAGTCTAACTTTGTGATACCAATTCCTTTGAG  
TTTTAGCCTTTTGTAAATCTATTTGTTATTTTTAGAATAAGACTTGTGAAGTATATATTTCCAAGTCAGTC  
TGTTTCTTTCTTCCCAAATCCTTGTTTTCTCTATTATGTTTTGGACACAGTTCCTGGAGAGGTATCTCTC  
ATTGTTGAACTTAATTGGCATTGATCTTTTTAGGTATCCCTAGAAAAGTCGGAGAGAACTGCGATTTTT  
TTGTTCTTTTCAAGTGTTAGTTCTAAGTAACTAGTAATCTTGATGCATTATTATACCTTGGTTGTCTATCT  
TGCCATGGCTGTCGCCAAGAGTTGAATGTTTTCTTATCACGAATGGTTGAATATGTTATTTTTACCTTT  
TTAATATTCCGATATTGATACTTCTTTACCTGTTATTATAATACAAATAAAAAGGAGATATAACTGCAGG  
CAAGGAGCATCCCCACTAAGCTGGGAACTAGGATGAGAGTTACTTTATGCTCTGCGAGAGGATTGGC  
ATATCTGCACGAAGAATGTATGTTTCATGAGTTGCAGAATTCTACTAATTAATATCACCTTTCTGTTTTAG  
TTGGCAGAATTCATGATTTTGCATTTGAATATGTTGAAATTCGTCTGTCTTGGCAGGTCATCCCAAGATCA  
TACATCGCGATATCAAGGCCTCCAATATTCTTCTTGATGACAATTTTGATGCAAAGGTGAAATGGACAAT  
TCTGCATCTCTGTGTGTATAGTGTGTGCATCAATCTGCAGTTGTTTTTTAGCGTTTCTGGTAAAGCATGC  
CCTTTTCATTTTCCACCATCACCTACTTTAGAAAGCAAGAGCTTATTCATGTGGAGAATGACCGGGCTAC  
TTATAAGAGACACCCCTACAATAATAGAAGATACAATTTTGAGGTTTGTGACGATTATTCCTTTTCTAAC  
TGCATGAATGCCAAGGCAACTGTGCCCTTAAATCCTTAATGCAATTTTATCCTGCCAGGGGGCAATCAA  
GGCTGAGCTTTTTCTCTCCTTCGTTTACCTTGGAACTTCGATTGACAACAGTGAATAAGTCAATAACTGC  
CAAAGTTACCAAGTTAAAAAAGTCAAATAACTGCCACCAAGCTCTGTTATTACAGTAAGATGAT  
ATTATTAATGATAGACTGATGGACATCATATGTGAGTTGACAGCTTCAAAAATCTGGCATTGTTCTCTT  
TTTTTTTTTTCGAAGGTAACGATTTATATTATAAACCAGTACTTATGTAGTACTGAAAGCCATATGGTTC

TCTTTTGAACCTCAACGTTTTAATTGGGTGCATTATTAAGTAAGAATTACGGCATTGACACAAAA  
GTTGGTGGGACCTGATATGAAGTGAAAGTATCTGACTATCTTCTATGGATTTGTTTTCTCAATCTAAAG  
TAAGAAACAGAAACAAGCGTGCTTGCTTTTTTTCCTTCAAATATTTTCTTTGGACTTATATTCTCTGAATT  
TATTTTAGTAAGTTGTAATGATTTTCAAAAACCCAGGCCATCAAATATGATCTGAATTCGTTACTGCTG  
TGGTTAGTGCTGACTGAATGAACACGCTTTTTTTTTCTTTTACATATAAGTTGATTGCTAGATGCATTTG  
TTATATGTGATCCAGGTTGCTGATTTTGGGCTTGCGAGGTTGAATTATGACTCTGATACTCACGTCTCCAC  
ACGAGTAATGGGAACTTTTGGGTAATACTTTTTATCATCTATTAAGACGTTTCTGTTTCCATCCTCAT  
GCAGTATTATTCTGCAGTTGCTATTGCACATTGAATCAAGATTTAATCCCTATACATTTACGGTTTATGTTT  
ATCTTTGAGCTCTCCATATCTTTTCTTCACTAACTTCTTACCTTTTGCAGGTACTTAGCTCCTGAGTATGCT  
CTTACTGGGAAGCTGACTGAAAAGTCTGATGTCTTCTTTTTGGAGTCATGCTTTTGGAGATTATACTG  
GTAGACGGCCAATTGATAAAGCTCAACACTACCTTGACGATAACATTGTTGATTGGGTAAGTTTTTCTG  
TAAGTGGTGCAATAATCTGGGACAACACTAGATGTGGTTCAGATTTTCATGTGCATGTGCGTAGCATTATTA  
TCATATCCCAATACTCATGAATAAGGAGAGGAAGTTAATACACTATGTGGTTTCCAAGTTGTGAGTTTA  
TGCATTCTTCTTCTATTATTTGTATGTAATTGCTAAGCTTCTGAGATGATCTAGAGCATCCATCTTCTTCT  
ATTTCCCACTCCCCCTCCCCCAGTTAAATATAAAAGCAAATAACATATCCCCGAAAAAACTAACACT  
TCTCTCATGAAATTAGGCGAGGCCTTTGCTTACCCAGGCTCTGGATGATGGCAACTTTGATACTCTGGCT  
GATCCAAGATTGGACAAGAATTATGACTTGACTGAAATGACCAGAATGGTCACGTGTGCTGCTGTGTGT  
GTGCGCCATCTAGCACGTCGCAGGCCTCGTATGAGTCAGGTACCTTCTACTTGTGAAAGCTCTATTTTAT  
ACATACACTGTAGCTGCATTATTACCTTTAGATTTGCATGTGGAAAGGAACTGTCTGAACTTAGAAAGTA  
AGGTTAAATTCCTCGTGTCAAAGGTTGTAATGATTTATTTGAGTCTTTTTGCTTCTTTTCTGCCCGAA  
ATAGTTATTAGTTGTACCCCTCTGACACCTAACTGGTGTCTGATACCTGTCGCCTAAAGAACATTTTTTG  
TCCTATTAAATGTTTACTCACCAGTTCCTACTACGTGTTCCAGGTGCCAATATTTGTTTCTTGCACAATTA  
GCATCTCAAATGTAGATTACTTATTACAAGGAGTTTATAGCGCATATTTGTAGTTTTACCTTCTTTTTTTC  
CCTAGTCTAGGTCCTTTAGGAATATTCCTCAAATTCCCAAACCTTGTTCTTTATAAATTCTCGGGACAAC  
ACTGTGTCACATTGTGTTCTTTATGGGTACTAACAATTACAGCAAGTCTACAAGAGATTTCTGAGAATG  
TCTCCTTGAGTTTCAGATGTAAAATAAGAAAGCAATGTTTCATTTCTCGTGAAACTACTTGGAAGAAA  
GCAAATACCCCTTTTAGTAGCATACTCACCTTTAACTGTCCTTACAAATGGAATAGAACAACCTTGTTG  
AGTGCTGCTTCATCTTGCCTTAGCTCAGCAGAAGCTGGACTATACAATTGAAAATTTGAAATAACTTGGA  
TCTATAATCACCTTCTCAACCCCTAGATGGTTACACTATATTTGAGGATTTAGGAAGCATCTGAAATATA



CCAATTCTTCTTGTTACTTTGTTTTTGGAGATCTCAAGTTGGAACTTAGTCTCCCTCTCTAATCTCTCTT  
TTCTTCTTGAATGGCTTTTGCCTTTTAAATTCATGCTTACCACTTTTTATTTTTTCCCAGAATTCTATTAC  
TGTCAAAGAAGACTTGTCTTGGCTTAATATTCAGTGTTGGAACCTTTCTTATGCAGATTGTCAGAGCTTGA  
GAAGGAAATTTGCCGTTGGATGAGTTAAATGATGGACTTAGACCTGGACATAGTGGTATACATGAATCT  
TATGGGAGCTCGGATTTGATGCTGTTGAGTACAAAGAAGACCTTAAGAAATTTAGAAAGATGGCACTG  
GAAAGCCAGACACATAATTCTAGTGAATGCAGCGGGCCTACCAGCGAATTTGGCCCCATCCTTCCGGT  
TCAAGTAGTGAAGGCCTAAGAACAACCTCAAGGTACACGCTCTAGTATTGAAGGTCATCGAGAAATTAGA  
ATAGACTAGAAGGCAGTTAGGAAGCAGAAAAGAGTGATTGTTTGAATGAAAGGGAGCAATGTAATGA  
ACTCTTCTCAGAAATTGTTGGATTTGGTAGTGTGTTTAGAGAATTGTTAAATTTGGCATACTTTTCATATG  
CCACTCATCTTTGTAATTATCAATTGATCTAGGTGCTGTTGCAGATTTTGTAGTGTCCCATATCTAGTTCC  
TCAAAGTTACATGTAAAGAAAGGATTATCAAAAACATTGTATGAAAGCCATGAAGTTGGCTGTATTTTT  
TTTATCCTTGAAACTGGTTAATACTTACCCACACCGCGTGGACGTGTCATGTTTAATATGTGTGTGTGAA  
GATACGTG

>PGSC0003DMG400017293 RLK with ANK repeat

TCTGACTCATAGTATCCACCTTTGCTTCTCACTCGTTCCTTATTATTGATTGTTTTAGATAGATTGTTTCGAG  
AACCTTCTCGACTTCTTCGATTACTCGAACCATAATTGCGTAAACAGTTGAAGTTTTTCACTATGGAGTCA  
AAGTCGCAGTCAAGGTTTCCGCTGGGCAGACAATCATCTCTGGCGCCGGAGAAAGACGGCGTTTCCGAC  
GACTCAGTTACCGCCGGCCATGGAGTCGATGAAGGTATTGATTCCGTTTTGAGGTTAATGTACATGACT  
AATGACGGTGATTTGGAAGGTATGGAGGAACTTTTGGACTCCGGTACCAGTGTGAACTACAAGGATATC  
GATGGACGGACTGCGTTGCATATTGCCGCTTGCCAGGGTTACGCTGATGTTGTTGATTTTCTGCTTAAAA  
ATGGCGCTCATGTGGATGCCATGGATCGCTGGGGCAGTACGGTATACTTCATTATTAATCTGTATTTAGA  
TATCACTAACTTGTAGTATATACGTTTAAAAGCTGGTCAAACCAGCAGCTCAAAGCAGTTTTTGGCTAA  
TGTTATTTTGGGAATACTTCCATGCCCTTTCATCAATCCTGATTGATAAGTGATTACCAGCATTTCGCT  
CCAGTCTAGTATTCAACTTTTCAAACCGTCTTAGTCATTTGGAAATTCCTATCAGGAATTACAGTTTTTTTT  
TTTTTTATAACTGAGAAATGTATGGGACCCACCTTTGGACCAATCACCAGGAATTACAGCTTTTTTGCTT  
ATATTTAACTCAGGTAATGCCTATTTTTGCATATCTAGGGTGTGTTGGAGCTAGGGAAAATGTGGGATTG  
GGTGCAATGGCATTGTCTACCTTGTTAAATATTCGTTTGGATAGATTGTGCTCGTTTTGTGAGCTTTTAAG  
AAGTGCTTCTAAGCAAATAAGCCAATGTGAAGGTTAATATGGCTTACATGTTATCTTAATAACAGTAAC  
AGGAAAGTATTAATTGATGAAAAATTAGTTTGATACATCACATTAATTTATTTGAACTCTTGAAAG

CTGTATTGGAAAGAGATGTTCTAATAACTTGGTTTCCAAATGAGAAGAGTGTTTTACAAATTTAGACAAA  
GGAGTACGTCTGTTTCTGGAGAAGATTTATGAATTCTTAATAGTGTTAATCATTAGTATAGTGATGCTTT  
GTGAACTGAGTTAGACTCCAAGTTGCACACTGATGTCTACAGAGTGGAACATATGTGTGGCTATCTTGA  
GGTCTATTTTTGGCTACTCACAGTAGTGTAGTGCAGTGACAAAGTATGATTAATAGCCTCTTGCAGATG  
CAATATATTACAAGAATAATGATGTGGTCAAGCTTTTGGAAGTACATGGAGTAAACCTGCGGTATGTG  
TCGACAACTAGATTGTCCGATCTAAATGCACTATGGTAATATGGCATAACCATTTACCTTATCTGTTTTAC  
TTTTACTTTAGGTGGCTCCCATGCATGTAGAAAATGCTCGTGAAATTCCAGAGTATGAAATTGATCCAA  
GAGAACTTGATTTTAGTAATAGTGTCAACATAACAAAAGTAACAACCTTTTTCTCTTTGACTTGATAATTAT  
GCTTATTTGATCATTGCTCACTTTACCCTTTTGTTATTTGTGTTGTGTTATTGCATTAGATGTCCGCTGATTT  
TTGCTGTTTTTTCAGAACGGAATGCTTGCCTTTGGTAACAAGTATACTGGCATGTTTTTCAAGTTTATTGC  
CAAGCTCTGTTTCCCCTTTAGTTATCTTAGTTGATCAACCTGCCACAATTATACAGCAGATACTGTTGTTTA  
GGTTTCATTATTTAACCATTCCAAATGTTATTCATCCATCGCAACATGTATGACCTAATTTGACTAGCTG  
GGGCATTCAGATGAGAAGGTTTAAAATGATAGTTTGGAAATTTGAAGACGTGGGATAGCTAGAAGCAA  
GACGCTAATTCAACATTAAGATAACATAAAGTGAAAATTTAAAATATATTACCTTAGCTTTTTGAAGAGGG  
AAAGTATTTGTGAGATAGGCTACAGGTAAGTAGATCAAGAATTTGAGGTTGAACGAAGTATCTGCTGTT  
ATTATTGTATTTGTTTCTAGAACTGTTTGTTTTAATCCTACCTGTTATTTCTAATTTCTGTCTGTTGCTAT  
GTATCTGGGATAAAAAGCAGATGAACTTTCAACACTGCAATATATTTTCATATCATATCTTTAATGATTGTA  
GGGTACGTATTGTGTTGCTCTGTGGCGTGGAAGTGGTGAAGAACTTGGTGAAGAATTGTT  
CACCGACGAAGATAAAGTGTGGGTTGGTCATAGACTATCTATGATGTTGGAATTAGAACATTCCTCATT  
GACAGTTCATAAAAAGTACTAAAGACTCTTTTCTTTGTTTTCTAACTGTTTTTTCAGCAAGGCATTTGGGGA  
TGAGCTTGCCTTACTACAGAAGATACGCCACCCAAATGTAGTCCAGTTTCTTGGTGCTGTGACACAGAGT  
AGCCCAATGATGATCATCACAGAGTATCTGCCTAAGGTACTTTTCATTTAAAAGAACAATTCACCACTTCC  
TGGAGTTATCTCCAGAAAGTCAAATCAAGAACGACCATGCATCAAATAGTATAATTGATGGTTAAGT  
ATCAACAAAGTACTAAATACAAGGGTGTAAACGACTTAACAAATCATGCATATTATTTATCATTAAAGC  
CATGGTTCTGTTTTGTTTGTGATCAAAGGAAATAATCTCCATTATTTATGTCAACTAAATTCATTAAAGTC  
GTTGAGAAAGCCTTTGAAGTCCCTGCTGATTTAAAATATACCATTGATTCTGTTCTGTATTTCAGGGAGAT  
CTTCGTGCATTCTGAAACGGAAAGGTGCATTAAGCCAATAACGGCTGTGAAATTTGCACTGGACATT  
GCAAGGTCAGTTTACTGGCTGATGTCCTGAATTTCCACTTGAGAATCTTATTAGTATTACATGCATGCTGT  
TCACCAGGTGCTTGAATTTGCCTAAGGTGTCTGTTGATAAATGGCCATTAATACAGGAACACCAACTACA

GTCTCTCCGTTCTATGTATAATTTAGAATTGTTACATTCATTTTGTATCTCTTCATGCATTTGTGTTTTTC  
ACAAATGTTGATCTCAACAGTACAGTGCTGGCCATTGGGGTTCATTATGATTATAAATCTTCATTAGAA  
AGCAAAGTAGTGGCACAGCTTCTGATCAGTTGCAGAAGAAGCTGTGTACATAAATATGTTGAGAAATC  
TGAATTTGTCTTTCTTATAGTTGCGTCTATGTGTCTCATATAGTCATATTTGTATACATTTTGCAGAGGAAT  
AAACTACTTGCATGAGCATAAACCTGAAGCAATAATTCATCGAGACCTGGAGCCCAGTATGTTATTATA  
GTCTTCCTGACTGTTTCCCAGTGGCCAGTCACGTGCTTTGTTTGTCTTTAGTGGCTGAACTAAGTCTGAC  
AAATGTATGATAAACTTTTAATTTCTGAGTGAAATGACAGAAACATATTACGGGATGATTCTGGACTTCT  
GAAAGTTGCAGATTTTGGACTTAGTAAGCTGATGAAATTTACCAAAACTGTCAAGGAAGATAGACCATT  
GGCGCGTCAAGAGGATTCATGTGAGTATATCCCAGCATTTTATGCTGTTGAAGAAATATATTCACACTAA  
TGATTTGTTACTGCTACTTTGTTGTCACTTTTTTGTTACTCTTATATTTTGTTCCTTTTTTCTTTATGTAAAGC  
GTATATGAACAATGGCTTTAGGGTCAAATGTCTCATGGTTCTACTTTTCCTTTTAATTTTGTATGAAACACA  
TTTTCACCTCCGGTTTCCTCTCTAAGATTCAGCATATGGTCCTTGAATCTTTTATTTGAAACTGAAAGTGT  
TATATGGTCCTTGAATCTTTTGCCAGTAAATACTAAACTGTTTCATGTTTAGACACTTCAATAGCTGTGCTA  
GTGAATGAAACTCTAGGATTTGGGATAGAAGGAGTATATTGATTTTGTGTTTGTTCATCAAAAAGAATTATT  
CTCTTGACATTTGGCAATAGAATTTGAAGAGGAGAATTACAAAGTTATTTTAGAAAAAGGTATGCATA  
AGTACTGGTTGCCTCAAATTTAGTTGATAAACTCCTATTTAATCATTGTAGAACTATGGGTCTTTCTAT  
GCATGTTTTTAACAAGGCAATTGGTGTGATATAAAATTCTAATGTTTTAGTTTATGAGAATAACAAGTTG  
AATTGACCTCTTGATTTACAGGGAGATATGTTGCTCCAGAAGTTCTTAAGCATGAGGAGTATGATACCAA  
GGTGGATGTTTTCTCATTTGCTTTGATATTGCAAGAGGTAAGCTCTTCTAATCTTAATACTTTCTCTCAT  
GCATACACTACTGAAAAAGGCTCTCCAGTTGTGCCCTGTCTGGAAGAAAAAATGTTAGTTTGTTCGTGG  
GCAGCTGGCTATCACTTCTTGCTTCATAGATATTTTTCAGTTTTTTACTTTATGTAAGTGAAGTTTGTGTT  
AATGTGTGCTAATGGGCATGATATCAGACTGATGGCCACCAACAGGTTAATATGTATGCATTCTAGATCT  
CATCTCATGGAGGAAAAAGGCAACGGGGTCCCATATTTTGCAGTCAATGTTAGTTGTGTCTAAAAAG  
ATTGTATTGCCATCTACTGTCTCCTATTCTTATTTCTTGCAAATTTATGCTTATTCTACCTTATTAATCACTT  
GGAACACCTGGACTGTTCCAGCATGTTTGTAATCCCTTAATATTTAAGAGGGCCGTCGGGTAATTTAGA  
CATGTATACGCCTTGATATGCTTTCCGTTCCACAGATGATTGAAGGCTGTCCACCATTTTCCATGAAGCAG  
GAAATTGAGGTGGCCAAAGCATATGTTGCAAATGAACGCCCTCCCTTTAGAGCTTCACAAAAGTTGTAT  
GCTCATGGATTGAGAGAGTAAGTCCCTGTGTTTCTTTCAATTTCTTCAATTGTATTTAAAGTGATTATTT  
CAACAGGTTAATTGAGGACTGCTGGGAGGAGCAACCATCAAAAAGACCGACTTTTTCAGCGAATAATTAT

CAGGTTGGAAGAAATCAACCGTATTCTTTTGCATAGAAGACGTTGGAAGGTATGAACCTCTCTCACCCAA  
TCCCCTTCAGTTCAGTATTTCCAAAGTTCGGTCATGTATAGTAAATCAAGCTTCGGTACAGTAAATTCTGG  
TTCAGAAGGTGGAGTTGGCGTGGCTGTATAAATCTCAGAAAATAGCCAAGTCCAAATTCAGCCCAAAT  
TAAGATTGAGATTCTTTTGCATCCAAAAGCATGAAAAATTTAAAGACTAGATCTGAAACTCGATTACT  
AGGATGTAGGCAACTAACTTTGACAATTGCTCCTCAATTGTTTGCCTGAAGCATGAGAAATTGCTCTTGA  
GTTGTTTTCTGAAGCATAGAATTCGTTCAATATAAGGAGTTTACCCACTCCTCTTGTATACTTTTAGA  
CGAAGTGTAGCATTAAAAAGGAGAAAGGAGGTAATAAAGAGCACTCCTTCAATACTGAGTTATAAC  
ATGTCCTTATTGGCAGTACTGGTGAAGTATGCTCTTGTCAAAGGCTGATAAAGTTAGATACTTCGCTA  
TTAGGTAGTACCGGTTACTGAATTACCACACCGAGTACAAAAATTCTGAAATTTACTCCCTGAATACCGT  
ACCGGTTACTGAATACCGGATTCTGGCTCAGCTCGGTAATTCGGCTTCCGGTGATTTATTCCACCATTA  
GTGGGGGTTATGTTTCTGTTTAATCAATGACCTCTTATAGCTGCACCAAAGCAAAGAACAGAAAAATAA  
AAGAAAGAGAAGCTTGGAGGAAAGAATACTCGCAAATGTCTTCGGTTTTTTATTAATTTATAGTTACATTA  
TGGGAGTAATTTTGGGAACAAAAGTGAGGAAAATTCCTGTTTACCATTCAATCCATAGTCTCTCTAGGA  
AATTGATTATCAATACTTACCCTCACCTGTTCAATCTCACTGTCATGTTTATTATTGGACAAATGAGGAAT  
GTTGTTACTGTTTATACTGTCTTAATATATATGACAAAGGATAGTCTCGTGCCTTCCATAGTCTCTCTAGG  
AAATTGGAATTATTAATAACGTGTCCCCTTATCTGTTCAATCTCACTGTCATGTTTATTATTGGAACAAATG  
AGGAATGTTGTTACTGTTTATACTGTCTTAAATAATATATGAACAAAAGGATAGTCTCGTGCCTTCCATA  
GTCTCTCTAGGAAATTGAATATTAATACGTGCCCTTATCTGTTCAATCTCACTGTCATGTTTATTATTGGAA  
CAAATGAGGAATGTTGTTACTGTTTGTACTGTCTTAAATTGTATATGAACAAAAGGATAGTCTCGTGCGC  
TAAGCTCTTGTTACTTATGGGTCCAAGGAAGGGCTGGACCATATTGAGTATATGTACATAATCTTACTAC  
TTTGCAATTCATTACTCCAAACTCCCCTTTATTAATTATCTTTGAATATACAAAATATATTTTGACTTCAA  
TCAGTCCCAATGTAGTCAACTTGGGTTTCTTACAAGTTTTTGTACATAGTGTGAGCTTCATGACCACTT  
TCTCAGCCTCTGATTGTGTTACTTGCAGGCATGCGCACTTAATATTTTTCAGAACTGAAGGCCATCTTGA  
AGTTTGATCATTGAATCAAAGAGTCGCTCATCTCGCCCAACCGTCTGATGAGATGTGCTTGCCTTGA  
GCTACATTTTTGATCGATTAATCTTTATGTGCGTGCTTCCAATTTTTTATTTTATTTTCTTTTCTTTCTT  
TTGGGCGACTATGGTTTGGAGAGAGGGTGACGCCATGACGGTATGGCTTCCATTGCTGTTGTACTGGAA  
GTTTGATGAATGACACTATTCATCTAATGTAGCTATCGCAAATGTACAAATTTTAGCAAACACTTTTT  
TCTCTATAATAAAAAATTTCTTATCTTTTTCAGAGTAGTTAATTATGATGGAACCTTAGTTTTTATTTGGTTAT  
ATATATATGCGGCAATTGCATCAAAACACAATTAGAAATGCCAACAAAGAGAATAGTCTAGTCCAATCTA

TTTTCTTTTTGGATGACAAGGAAACCAACAGCCTTTTACAAAACCCATCTTTACATAGTTGTGATACTT  
AATGTGTTCTAGGATTCAAGTGACAATCTAAAAACATGAACATTGCATCTTATAAAGTTTACTAGTAAA  
GCAGCATAAAAGGAATTCTCACATTTATTTGAAAGTGTCAATCACTTAGTTTCATCTTCAATGCTAGAAA  
CATCCATTCTAGCAGATGCTTGCTTTGCCACTTAACAATCTTCTCAGCTTCTCTATTAATCTTCTCTTGCTC  
CTCCATAGCTTTCTTCATCAACTTCTTGTATTTTTCGACGAAAATATACTCATGTCCGATAAAAACTCATC  
ATCCTTCCCCCATTTAGCCCCATACTCACATTCCTATTCTTTCCCCTTTTTATTAACCCCTTCTTAGGT  
GAACACCAAAAACATCCAGTTTTCGCTGGTGGAGACAAACAATCCTTCGAAGAATCCGATGGAGATGAT  
ATTGGCCCAGATGAAGATGTTTTCCCTTTTTCCATTTGTGATTTTCGAGAAAACATCATTTTCAATCGA  
CGTTGATTTCTGTCTGTTTTCAACAACTCATCTTCCAAATTAACCTTAGAATCTTTCTCCTCAACTGGGCT  
TCCTTCAATTTTCTCATTTTCATCATCGATTTTCTCCGTTTTAGGGGTGTTTGGGAACCTCCGAGGAACCGA  
AACTCCTGGAATTTCTTGCACCGTAGAGGGTTTTGGAGTTGCCGGAGCAGCAGGAAGGGATTTGAGTT  
TGCGAAAACGAGTTTCGAGCTGAGTGGGGAGTACAGAGTCGGTAAAACCAGAACAAATTAATGGCAGCA  
ACTTGTTCAAGAACAGATTGATCCATTGCTTGTGACAGAAGCTCTTCTACAGCTTTTTTATTGTCGCTATC  
GGAAAGAAAAGAGAAATCCGCCATGAATGAAGTCTCTAAAATACCAAAAACAGAGAATTTAAGTTGATT  
TTTCGGAGTGTAATTCTCCAAAATTAGGGTGCGGTTGAGGTAATTTGGGAGTTACATCAATGGAGCTTTC  
CTCTCAGGCTCTCACTGCTAAAACGGCTAATTCATGTTTTTGGAACGTTGTATTTCCAGTCAAAAAGTGTG  
GGAGATGGGACCCATCATATTATTTTATTT

>PGSC0003DMG400020370 RLK with ANK repeat

GGCGGGTGTATATGTTTTTCAAGATTTGGGATTTCTGAGTTTTTCAATCATGTGTTAATTTCTGGGGAT  
TTCTAATTTGTATTGAGATATACATATCTGCTACAGTAGAATTGAATTGGTCAAATATTCTCTATCAAATG  
TATAAGTCTATCCTATCTGTGGTGTAAACAATAGATTTTTGTTGCTGGAGATAAGTGTGAAATGGAGC  
AGTTAAAGAGAGGAATATCAAGGCAATTCTCAACAGAGCTGTTTAGGAAGAGTGGAAAATTCAGTTTCA  
AGAGGCAGAGTTCATTGGATCCAAGGAGGAACAATTTGAGGTTTCAAGTTTTGGGAGGCAGTCATCGCTT  
GACCCGCTTCAAAGGAGCCCTTCGATTGAAAATGCTGGGAGAACTGTGCCAGAGAATCTTGATTCGACG  
ATGCAGCTGTTATTCATGGCGTGTAAAGGGGATGTGAAGGGAGTTCAGGACTTGTGGATGAAGGTAT  
TGATGTGAATAACATCGATTTGGATGGAAGGACTGCTTTCATATTGCTGCCTGTGAAGGCCATGTGGA  
AGTTGCCAAGCTATTGTTAAGTAGGAAGGCTAATATGAATCCCGTGATCGGTGGGGTAGCACGGTATA  
AATCTTATTATTTGATTCCTTTGGTAATTATTTGAAAGCAGCATCTTTTTCTTTTGTCTTTGGTAACAT  
GTTGTAGGATGTGTGAATGAAACTGTTGTTTTGAATTTCAAACCTGTAGTTTCTTGAATAGCGCAGGCAA

GGCAGGTATGGAGTGGTTGACTGAGTTGTTTGATGTAGTTTTTAAGAAGGTGAAATTGCCTGAACAATA  
AGGAGGACTACAATACTTGC GTTGTACAAGAATAAGGACGGCATCTAAAAATGCAACAATTATAGGGGT  
ATCAAGGTGTTGAGACACTAAGTTTGGGAGAGGGTGGTGGAAATGTGGGTGAGGACAAGTTCAAATTT  
TTGCCATGTCACTCAACTACAGAAGCCATTCACCTCAGAAGAAGAGTGGTGGAGTAGTATAGGGAGATG  
AAAAACATATGACAAAGTCTCGAGGGAGGTCTTATAGAGATGCTAGGAGGATACAACTTTACTTGTGAC  
TTACACTAGCATGATCAAGGACATGTATGATGGAGCCAAGATCAGGGCAAGGCTGGTGGGAGGAGACT  
TGCAACACTTACTAGTTATGATGGGGTTCATCAGGGATTAATTCTTAGCTCGTTTTTATTTTCCTTGGTG  
TTAAATGAATTGACACGGCAAATCCAAGGTGAGGTGTCATGGTGTATGTTTTTGCAGATGACATAGTTCT  
GATTGACGAGACTCGTAAAGGAGTTAGCAGTAAGCTGGACGTGTGGATACAGACCTTGGGAGTCTAAA  
GGATTTAGGCTGAGCAGAACCAAAACAAAATATTTGGAGTGCAAGTTTAGTGACGTAGCACATGAGGC  
TAGTGCGAAAGTAAGTTTGATACAAATGCAGTCCCAAAGAGAGTTTCAAGTATCTTGTGTCTATTAACC  
AAGGAGATGGAGAGATTGACGATGATGCCACACACCGTATTGGTGTGGGTGGGTGAAATGGAGGATT  
GCATCAGGAGTCTTGTGTTATAAGAAGATGCCACCAAACTTAAAGAAAACTCTACAGTGTAGTGGTT  
GGACCTACTATATCGTATGAGGCGGATTGTTGGCCAGTGAAAAATCTCACTTTCAGAAAATGAATGAG  
GATGCTACGATGGAAATATGGTCAGACTAGGAGTGATAGGATTAGAAATGGAGATATACAGGACAAGT  
GGGAGTGATCTCGGTGGAGGACAAGATTTGGAAAGCAAGATTGAGATGATTTGGGCATATGAAGAAG  
AGATGCACGGATGCTCCAGTACGTAGTTGTGAGGGTTGACTATGGATGGTTTCAGCAGAGCTTGACGT  
AGGCCAAAGAAGTATTGGAAAGAGGTGATTAGACATGATATGACGCAGTTTCAGCTTATCAGGGACAT  
GCCGTTAAATAGGAGGTTGTGGAGGAGATGGATTAGGGTGGAAAGTTAGTAGGTAGTAGAGCATTGTC  
TCGCTTATCTTTCCTTGCCAATTGTCATAGTATTACTCAGGGAGTTTCTTGTCCCTTGATGTCTGTTACTGC  
CTGTTGTTTTTGCATTTCAATTATCGTATTATTTGTTGTAGTTACCTTCTTTTTTCAGCATGCCTTGGACA  
TGCTCTCTATAATAATTTTTCATGACTTCTTACTCTTGTTAATTCTTTTTTCTTGAGCCGAGGGTCTATCGA  
AAATAATATTTCTACCTCCTAAGGTAGGGGTAAAGATGTGCATACACTTTACTCTTCTAGACCCCACTTGT  
GGGATTACACTGGGTATGTTGTTGTTGTAAGATCTCTACCTCCCAAAGTAGGGGTATAATATTTCTACCT  
CCTAAGGTAGGGGTAAAGATGTGCATACACTTTACTCTTCTAGACCCCACTTGTGGGATTACACTGGGTA  
TGTTGTTGTTGTAAGATCTCTACCTCCCAAAGTAGGGGTATAATATTTCTACCTCCTAAGGTAGGGGTAA  
GATGTGCATACACTTTACTCTTCTAGACCCCACTTGTGGGATTACACTGGGTATGTTGTTGTTGTAAGAT  
CTCTACCTCCCAAAGTAGGGGTATAATATTTCTACCTCCTAAGGTAGGGGTAAAGATGTGCATACACTTTA  
CTCTTCTAGACCCCACTTGTGGGATTACACTGGGTATGTTGTTGTTGTAAGATCTCTACCTCCCAAAGTA

GGGGTATAATATTTCTACCTCCTAAGGTAGGGGTAAGATGTGCATACACTTTACTCTTCCTAGACCCAC  
TTGTGGGATTACACTGGGTATGTTGTTGTTGTAAGATCTCTACCTCCCAAAGTAGGGGTATAAAAATAAC  
ATTTGATGATAGCTCAAGCATGAAACTCAAAAAATCGGAATACTTTATGTGTGTATTTGACCCTCAACTCT  
AGTAGAAAATAAGCAGATAGGTTGGCCTCCCAAGTTAAAACCTGAGAACTTTGTTGCATGAACTT  
GTTACTTATGAATAGGGTTAGAGAAAGAACAGATCACAATATAAAACGAGAAAGAACTCTATAAATGG  
GAATAAGTCAATCTTGTAACCTAGCGAGAAAGAACTCGGTAAAAATGAGGAAGCATTGTTTTGCTTTCTT  
CTTCCTCCTTTCTTCATCATATCCAAATACTTTACAGTTGGATGCTCTTCTTTGAGAAAATATTTACATCCT  
GCTTGTTATTCTTATGATGAACAAGATTTTGTACGCGCATTTCCTTCTCATGTACAATCAGATTTAGATCCT  
TGAATGTGCAAAATGCTATCATAAACTACGGACAAGAAACCAACCACAAAAGTAATTAATGAGTCTGGC  
TTTAGTAGTAATGAATATCTAAATGTAAATCTTGATGTTGTATGCTCTCCGAACTCATTAGCTTAAGTAAC  
TATGGTGCTTCCTTTCTTTTTCTCTCCCTAAATGCACTATTTTCTTTGTCTATTCCTTCTATATTCACAGAA  
ATGGCCAATAAAGAAAAGAAAAGAAATTGCTGTTGTTTTAGTTAATTTTTGAATTAATGTAATTCATC  
AAAAAATTTAATTGAAATATAATGATAATTAGAGATTAAGGCCCTAACTGTATTTTCAGCAGAAAATGT  
TTAAAGCTTTTTCCCTTATCTTCAAACCTTGACTGCTATAAGAGGCTGTGACAGGCGGCAGCTGATGCCA  
AACACTATGGTAATGCTGAAATTTACGAAATGTTGAAGGCCCGTGGAGCCAAAGTCCCGGTAAGTAGGT  
AGAAAGTCCTAATTAGCCTGAGGTTCTTATGTTCTGACACTCATAGATGTATATGTTATGTTGGTAGAA  
AGTCAGAAAGACGCCAATGGCTGTAGCAAATCTACGAGAAGTTCCAGAATATGAACTTAACCCTCTGGA  
GCTTCAAATCCGCAAAAGTGATGGAATCTCAAAGGCAAGTGTTCTATGTTTTGTTACTCAGCACTGTGAT  
GTTTCAATTATGATTGAGTGATGAAAGCACAAATCGGCCTTAAATTGAAATACTTACCTCCGCTTAAACCA  
TTGTATTTCTTTCTTAGCTTCCTGAATGAAGCCTGAGACACCAGGCCCACTTTCATTTTCATGTGATGCTTTT  
GGGTGCCTAACTTTTTGAATTTATCCCAAGAATTTGTCTATAATTTTCTTTTTAACTTTTGACAGGGTTC  
ATATCAAGTTGCCAAATGGAATGGAACGAAAGTTTCGGTAAAAATACTTGACAAGGATAGCTATAAAGA  
TCCTGAAAGCATGTATGTTTTAGCTGCTCTGCGACTCTCATTTACATGTGATGCTTATTGGCTTTTGTAG  
ATACTCTGTATTTTTCTTGTGTCTGTATCATGAGGGGCTCGTATCAAAATGTTTATTGGATTATGCAA  
TCTACAAGGCAAAGCCCTTCTGGCAATTTAATATGGACTTGTTATTTGGATCCTCTAACCTGGTTAAAGT  
CTGTTTGAATGTGGCCTTCCTTGGTTTACTTAAGCAGATGATTAATAATTTTTTCTCTTAACAAGTGTGT  
GCGAAATATATGGGTCCATAAATTAGACTTTGGATTTAATATCTAACTTTGCGTTGTTTCCACGATTGCAT  
GCAGAAACGCTTTCAAACATGAATTAACCTTTGCTAGAAAAAGTGCGGCATCCAAATATAGTTCAGTTTGT  
TGGAGCAGTTACACAAAATATACCGATGATGATAGTCTCAGAGTATCATCCAAGGGTAGGCTCTGTCAA

TCTTTCCACACTGCCTGTCACACAGCAATGTAGCTTGTTACCTTTTTATCAATTCAACTTATGTTAATATT  
CCTTATTATAATGGACACTCAACATTGGTTAAAAATTTAGCTAGCGTTGGCAATAGATTCAACTTCTTTGT  
TGTAGAGATCTTGATGCTTATGGATTTTGTATGTCGTTGGTCTCAATTCTTACCTTAGCCTTGCAATTATG  
AAATTTGGCATTAAATGCTTTGCAATTTTTTCAGGGTGATCTAGGTAGCTATCTTCAGAAAAAGGGACGTA  
TATCTCCTTCTAAGGCGCTTAAATATGCTCTTGATGTTGCTAGGCAAGTCGTTCTTTGTCATAAAAAGTGAA  
ATGATCTCTCATGCTTGAATCTGTCCTTCGCCAATTCCTCTACTCTTTGGTGACTTGTGATTGTTTCAGTTA  
CTTCTTTTATCTAAACATATCTATGTTGTATCATGTTGGTTGATTTTCAGGGGTATGAACTACCTTCACGA  
ATGCAAACCAGACCCAATTATACATTGTAATCTAAATCCAAAGTAAGACAACACTATATGCTTTAGTTCTCTA  
ATGATGTTAACTGATCATTGACTGTACTCATTGGGATTTCTAGTGTTTTTAATATTCGGAATTTGGTA  
AGGTGCCAGAAATATTTTGCTTGACAATGGAGATCACCTGAAAGTTGCCGGATTTGGTCTGATTAAATTG  
TCAAAAATTTACCTGACAAAGCAAAGTTGGTGCAGCCGGAGGGTTTTGATCGTTCAAGTAAGTTTTTCA  
AACTTTGAGTAATAAACACTAAATCATAATATTTCTACTCTGAAAGAAATCAATTCTCATGTGGTACTAA  
TTTTTGATAGATCAGAAGCTTCTGGTATGTTACCAGTTTCAAAAACAAAAAAAACCTTCTGGTGATGAG  
TTTGCCAATTGCATGAAAGGATTCACCTTTATGTGTTTATGTTTATTACGTTACTCATTTTCTTTTCACTTGT  
AGGTCCCTATGTGGCACCTGAGATTTATAAAGATGAAATATTTGACCGGAATGCGGACATATATTCATTT  
GGCATTTTACTCTATGAGGTATGATTTCTTTTTGTCAGATACTTCATTTAATGCTGTAGCTTAATTCAAAA  
TAGTGTAGACTTCTTGATTTCCCATTTCCGGTGCAATACTTTTCTAGAAACTGGTAAATTTGTATTCCCTCAG  
CATTGAGGACATGCTGGACACCATCAAAAAGTGTTAAAAAACAAATAGAAAAAAAATACTTACCGAGA  
TCTTAATAAATCTACAGAATGATCTATATCCTCTAAATCTACTTCTTTACACCAAATAGAAAGATACTAT  
ACAATTCATTTAACTTTCTGAATGGAATTGGATATATCTTCAAACACCTCCCATTTCTCTCTCTCAAAC  
TGTCCAACCTCCACCAGATGCATTGTCGTATGATCCTCCACCACTTCATTTAACTTTTGCTACCTCCTTTTT  
CATCCAACGGCTAAGCAAATCTGTAGTATGCTTAGGCATAGTCCACCTTGTCTTTGTTATGTTGAGAAAT  
AGAGACCAAAGTTGTGCTGTAAAGGTGCAGTGTA AAAACAGATGACTATTTGTTTCATCTGTCTCATTGG  
TTGGAGCTGGACTCTTCATAAGTTTCTCCATATTTTTGGTTGCCCTCTGTAGTATACCCTTCCTTCATTC  
TATAAACCTTTTAATAGAGAATTGCGCATCAATACTTTATGATACTTGGATGATCTTATCTTCTTAATATG  
CAATTCTGCTCCTCCATTTATCCTGTTTATCGGCCTATCAGCATTCTAGAAGCGTGAATGATTTATGGCTCTT  
TTCTTTCTGCTCTATGCAATTTATTTTACTTTGTTGGGCTCAGATGCTGGAGGGAACACCACCTTTTAATA  
CCAAGTCTCCTGAAGAGGCTACCAGATTGATGTGCTTAGAAGGCCAAAGACCAGCATTCAAATCGAAAT  
CCAAATATCCTCCAGAGCTTAGAGAGTATGTTTGTATCATTCTTGCGGGTATAATCATGTTGTGCAGTT



CATATGCGCTTATGTATTAGCTACATATTTTGTCTAGTTTAGCATGATGTTCTATTCTTTACTGCCAGCCATT  
GAAGTGCATCATGAATTCTTTTTGAAATGCCTCAGAGATGATTTCCATTCTGCTTCTTTGGTTTTCTTTCTT  
AATAATACATGTATGCTTTCAATTTCTTCAGCTATAGGCTTTTTCTTGGCTTGGTGATTTAGTACAACTCT  
AGCCATGTGAAACCCAACCTTGCATGTTGTTAAGCTCATGTTATTTCTACAATTTCTAGTACCCTTTTTTTT  
TTTTTTTTGATAACCGAGAAATCTGTCTATGACCCGCCCTTTGGACCAATCACAGCCTTCTAAACTCGGT  
GGGATAATGGGCCCGCCCCTTACCCCTTCTCCACTTAAATACCGGGCTTCGCTTTGCGTGGTGTGGGGC  
TTGAACCTGCGACCTAAGCCACAATCCTCCACCTTTTGCCACTTGAGCTAGGCCTTGGGGGCATTTCTAG  
TACCCTTTTTTTTTTTTTGATAACCGAGAAATCTGTCTATGACCCGCCCTTTGGACCAATCACAGCCTTCT  
AAACTCGGTGGATAATGGGCCCGCCCCTTACCCCTTCTCCACTTAAATACCGGGCTTCGCTTTGCGTGGT  
GTGGGGCTTGAACCTGCGACCTAAGCCACAATCCTCCACCTTTTGCCACTTGAGCTAGGCCTTGGGGGC  
ATTTCTAGTACCCTTTTTGTCTAGATCCTTCTAGACCTTGAGCATTTAATGCTCGTCTTTTGATGTCCATCTC  
TAAAGGCAGCCTGGTGCATAAAGCATCTCGTGTAGCAGGGTCTGGGAAGGGCGGCCGCACCCGCAC  
CCAAGGGTGTGACGTAGACAAGCTACCTAAATGCAAGCATTAGTGGCTGCTTCCACGGCTCGAATCCA  
TGATCTACAGGCCACACAGAGACTTTGTTGTGTGCATGACCTCATTTATGCTCAACTTAAGAGTTCTGTA  
ATAAGCTTTTGATAATTGATATTCGGTAATTGGAGTATACTCCAGATGAGTGTACCACCTCCAGGCCCT  
CAGGCAGGACTAGATGGCTCTCCTAGTGCACCATTACCTTATTAGGTTTGCATTCAATATCAATACTTGTG  
TTCCCTCTTGACTTCTGCTCAATGTATTGTATTTCTAGGTTGATTGAAGAATGTTGGGATCCAGAAGCTTT  
TGTACGGCCAACATTTTCTGAGGTCATTGTGCGGATGAATAAAATATTTGCTAACTCCTCGAAACAAGGA  
TGGTTGAAAGATACTTTTAACTTCTTGGAATGATTCTACTGCACTATTCATCGTCTATTTTAGAAATTC  
AACATTTGTTTATTTATTATGAATAAGAGCCTTGAACCTAAGGGGAAAAATTGTCTTCTCCTTAGCACAA  
TCAACTACGTTTGATGGGCCAGTAAACATATTTTACAAGATTGTTTGCCATTGCTGGGATCATTGCAA  
GATGAATTTATAAGTTTATCAAGTTGGTCTATGTCTGCTAATGCAACAGATCTTTGGTGCAGGTTGTAAG  
TGTGCATGAAAGTGTCAAGAACATGGACAATAATTGGAGTCAACGGAGTTTATCAGCGGAAGATTCTTG  
TGGAGCTTTCCATTTATGATAAACCTAATAGGCCAACTTGATTTACAAGATTCTTGAAAGCTTTATATT  
GTTGTTAACCAATAAAAGGCAGATTTGCTGGGTGAATAAGATGGGATTACAATTAATGTCGGCTTTA  
TAGTAAGTTTGAACCTCACTATATGTCATGTGAAGTGTGTTTATTAGATCCATAGTATTTGAACCTAAATGT  
ATTTTGTTTTACAAGGGGGAAAAACAAAAGGGTTATATAAGAAAGGACTGGA

>PGSC0003DMG400025222 RLK with ANK repeat

GATGTTTGTACCTGAAAAAATTTCAAGTTCAAATCCATTCCTCTTCTCCATTGTAACGCACTTCTATCTAT

CGCTCTGAGAATTTCAATTCTCAATTATCGATTACAGTTTCAGTTCTTTTCGCAACAAAATTATCAAAATATA  
TCTCTCAGCATTCTTCTAATTGTGATGAAATTATTCTAGTTTTGATTCTGAAAGTTTATCTGTGTTAAAGT  
TGATTTTTTGGATGAACGATAAAATGGATATGAAAAAGCGATTAACACGAGGAATATCTAGGCAATTTTCA  
ACAGGTTCAATTGAGAATGAGTGGAAAATTCAGTTTCAAAGGCAAATTCATGGATCCAAGGAATAAC  
AATATGCGGTTTAGTTTTGGTAGGCAATCGTCTCTCGATCCGATACGTAGGTGTCCGTCGTTTGAGAATG  
AGACGATTGCTGTACCGGATAATTTGGATTTCGACGATGCAGCTGTTGTTTATGGCGTGTAAGGTGATG  
TGAATGGAGTGAAGGATTTGTTGGATGAAGATGTTGATGTTAATAGTATTGATTAGATGGAAGGACTG  
CTTTCATATTGCTGCTTGTGAAGGACATGTAGAGGTTTCTAAGCTTTTGTGAGTAGGAAGGCTAATAT  
TGATGCTCGTGATCGATGGGGAAGCACGGTAAATTTTTATTTTTTTGCAATTTTTGGCTCATAAAGTT  
GTATATGTATGAGATATTGTGTTTGGTATGATGAAAAGCGTTATTGAATCTTACCTGAATTACGTAAAA  
TGTTTTGTGAAAATAGAGCTTTGCCGTAGCAGGTAAAGTTAATTTTCATGTGACTAGGAGGTCATGGCTTC  
GAGCTGTGAAAACAATCTATTGTAGAAATTCATGTGACTAGGAGGTCAGGGGTTTCGAACTGTGAAAACA  
ACCTATTGTAGAAATGTAGGGGAAATCCTTGAGATATCTTATTATGAGAATATTTTCTTATTGTTTCGTTTG  
CTATTATTCTCTTTGATATGTGAATAAATGAAATCAAGTAAATGTGGTGAGATTGTAATTCTAATTTTACA  
GAGGGAAAATAGGCCAGGTGGGAGCTGGAACAAAGTTTCAATTCTGAAGAACTTTAGCTAAGTTTTT  
GGATAGACTGTGAAAATATTGTGAGTGAAGTGTTTTATATGGAAAAGAATTCTGCTACGAATTTCTTCT  
GTAATTTGTGAAAAATCATGCAAAGGACTACAGAAAGAAGAAAATATTAGTGACAGAAGATGAGAAAG  
AGCTTATGTAGGTCTCATAGAATAAAAAAATTGTTCAAATGGCTTCGGCGAGTTTTACTTCCCATAGTATT  
TATGAGGGCCCAAGTGCATCCTTGAACCTTCTTATTATTATGGCAGGCAGCAGCTGACGCGAAATACTAT  
GGAAATAATGAAGTTTATAATATCTTAAAGGCCCGGGGGCCAAAGTCCCGGTAAGTGGGAAGATAAT  
TTTCTAATTAAGTGAGATTTATGATTTATGGGGCTGAGTATTTGTCACATTGTTAGAACTCAGAAACA  
CACCAATGACTGTTGCAAATCCTCGAGAAGTTCCAGAATATGAACTAAATCCACTGGAGCTTCAAATCCG  
AAAAAGGGATGGAATTTGAAAGGTAAGGCCTTTCTTTGATTTCAAATAAGCATTGTTGATGTTTCAATTT  
TGAGAAATGATGAAAGCATTAAAATGGCACCAGCATAAGCAAATTCAAAAGTTATAATGGTTATCTCTT  
TGATTTTAACTAGGAAAATACACTTTGAAGAACCTATATTCAAATGTCATCAACTATAATTCACTTGG  
AAAAAAGTTAAGATCAACAAAATCATCATTACCTCATAGGAGGCCTAACCTCAAATTTCTAACTTCTGC  
AACTTTTGAACGTTTTATTCCCTTCTTTCTTCTGAAGAAAGCCATGAGACATCTGCACTGACTTGCCCTC  
TCCTCATGCAATTTGTGCTTGATTTTGCATTGTTAATTTTTCAATCTTCTTAACTTTGCTGAAACTCC  
TTTGCCTTTCAACAGGGTTCGTATCAAGTTGCTAAATGGAATGGGACAAAAGTTTCTGTCAAGATACTTG

ACAAGGATAGTTATGCAGACCCTGAAATTATGTATGTTGTCAACTTATTTTCTGCTAATCTCCTGATTAC  
TACCATAATGCACATTTCTATTATTGATTTGGAAATAAGCTTACCAAAGGGATATGCATATTTTGGACTTC  
AGCTAGTTACCATGTTGTCTGATTCTCTGTGACTAGCAAAGCTTTGGCATGATACATTAATTTGGATATTA  
AATTAGTTGTGCAGCTTTGGCGGATGATTTATGCAGCTTCGGTTGGCTTGTGCATATGTTGAAACCATTAT  
TTTCTATTTTTCTTCACTTCCACTTGGGCATATTTTCATGTATCCCTTGTAGACTTGTTTGCTTGTATGTAGT  
GATGCCCAGGCTGTTTATACAAATTTGAGGCTCATTGTTTGGATGAATCAGGCTGAGAAAAGTAGGAA  
AAGTTTTCTAGTGTTAGTCAACAATAATTTCCAACGAAAGAAATCAGGACATATTGGAGTGCTTTCAT  
GTTTGATTAACAGGATGTCCCACTAAGTTGTGTTCTGTTATATTACAGTCTTGTGAGCAGCTCGATCACA  
TCATTATGTGTGCTTACATACTAACCCTTTGTTTACAGATTGTAGATAGTTCTTGTGTTTTTACGCA  
AGGTAGATTGTGAACATGGTATTGAGATGGCTCTAATAGGTGCCTTAATCAAGTTCTCATTAGAAAACCA  
AATCCCTGAAGCAGCTGGAAATACATTTGTCAAAAATATTGAAGTGTATATCCTTCTGATCATCAGGTCA  
CACTGCTTCATGTGAATAGCAACTCAACAGTCTATTTACATGAATCTGATCCTTTGAGCATTAAAATTA  
GATAGAAAGATGAAAATATGCATCTCAAAGGAAATTCAGCCTTCTAGGTAAAATTACTCTTTATATTCA  
CATGTTTCCAAGATATTGGCAGATTGAGTTGACGATGATCTGGATCTTTGATTTGTAGTAATATGGAATA  
AGTTGAGGATCACACTTCGTCATTCTGGAGTCCTTTTTGTTAGGCACTTTTCAAGTTTCATACAAACATTT  
CTCTAAAACCAACATTTTTTAAACAATTGTACAAGCTTCTTTGTAATTTTCTAATCCCTAGTTAAGGAGACT  
GGGATTCTCTACCTCAGTTTGTAGCATAATACATAATAAGTTGATCCTCTCATCTGTTATTTGTGATAGC  
CACCTTATGCAGTTTACCTCGTTTCATGCTAACCTTTCTCTGAAATTCAACTTAGGATGCATAAAGCCCA  
GCTTCTTTTTCAGGGTTTCATTGTAAGAAAAACTGGTAGCTCTATCCTTTTTCTGGTGACTTTCTAAATCAAG  
AAAAACTTATAATCTGCACTCTTGTGTGATCGCCACAAATTTTCACTCAGACATTGAAGTGATTCCGGGG  
AGATGCTTTATTTCCAAGTGTCTTGATTCATGAAAGGACAGAACTTTAGTTTTACTTCAACGTCATCAGAT  
CTTTTAAATTATCTTCTGAAAGTGTATCTTGGTCAAATGATAGATCCAGTTTTTGTATTATGGTCTTTTA  
GTTTCTCATTTGAACAAATCATTTTCAAGTTGTTATTTAGGATTGTCAAATCTTATTGTTTGGTTAACTGTT  
TTTATTCTTGATGTTAAGGTCACCTAATTCCATTTCTTCCATGCAGAAATGCTTTTAAAGCATGAATTAAC  
TTTGTGAAAGAGTACGGCATCCTAATGTGGTTCAATTTGTTGGAGCTGTTACACAAAATATACCAATG  
ATGATAGTAATAGAGTATCATCCGAGGGTAAGATCTCTAAATTTCTCTATCTCACACTGCTCCCCACAAA  
ATCCTTTCTTCACTCTATCCACCTACATTGTGAATATTGTTTATTATTATGCATACATTAATATTGAGAAAT  
AATCAATCAGCTCTTACATCAAATGTGCATTCAATTTTGTGCTGTGATTTCTCTCCTGGTATATTTTCATTC  
TTATTGATTTTATGTGCTGTACTTCTGTTCTTGGCTTAGTTTTCCAATGGGTACTTCATTCATGTATTGTT

GATTTTCAGGGTGACCTTGGTAGCTATCTTCAGAAGAAGGGACGTCTATCTCCTTCTAAGGTTCTAAGAT  
TTGCTCTGGATATTGCCAGGCAAGTCTGGTCCCTTTCCTATGTACTGAAAAATAATTCTGTTAGTACATC  
TGAGATATTTTATTTTTATGCTGATAAGATGTTCTAATTTTCGTTGGTTGCATCCTGTTTCCATCATATGATC  
TTATTTTCAGGGGAATGAATTATCTTCATGAATGTAAACCGGACCCAATCATCCATTGTCTTTTAATGCCA  
AAGTAAGAAAATAAATGCTTTATGATTCTCATATTTTAAATGACAATTTTCAGTGTACTCATGTCACGTA  
TCTACTTCTTTTAATGTTTGTAAATTTTGTAAAGGTGCCAGAAATATTTTGCAGGACAATGGTGGTCTATTG  
AAAGTTGCGGGATTTGGTTTGATTAGATTGTCAAACATTTACCTGACAAAGCAAAGTCGCTGCAACCTC  
AAGCCATTGACCGTGCAAGTAAATACTTTAATTTGAGCACATATAGTTAAATTTAAATACTCCTTATAAAA  
GGCAGAAAAAGAGCCTTCTAGTTTGATACTAGTGTCCACTTTAAAAACTTCAGGGGATGGACTTAAATG  
TATTCTAATTTTCATCACAGGAGGAATTGTAATACTACAATAACTGCACTATCTTTCTTGTTACTTGTAGGTAC  
CTATATAGCACCTGAGATTTATAAAGATGAAATATTCGATAGAAGCGTGGATGTATATGCTTTTGGAGTT  
TTACTTTATGAGGTACAGATTCAGTTTCAGATAATTTAACTTATGGCTGCCTTTTGTGTTACTACATAATTC  
TTTTAGCTAACTAGAACATCCGCGTTATGAAGTAGAATTTAACATTCTTCTTATCTTATGTGTTTTTGT  
ATTTTTTAAAAGAAGATCTAGTCAATTTACTCTGTCAAATACAAAGTATTGTAGATTCCTTCTTTTTTCCC  
CACTTTGCTGGATCATTTTCATGATATGAATGATCTTGCTGTGCATATGCTAACTCTTTTTTTTTCTTTTTAA  
TCTTTTGGGGCATTTCCTGAATCAGTCTTCTCAAATGTTCTTGAGCTCTTATCTTGTTCAATTTTGGCTA  
ACTTTGTTGGGTTTAGATGATGGAGGGATCACCACTTTTCATCCCAAGTCACCTGAAGAGGCTGCTAGA  
TTGATGTGCAAAGAGGGTAAAAGACCATCATTCAAGTCAAATCTAAGTATCCGCCGGACCTTAGAGAG  
TAAGCCCTGCTATTCATTTTATTTTCATTAATTGGATGCAATCTAGTCTTTTGCCGTTTCGTATGCAGTTATA  
AAGTAGAAACATGCTACTAAATATAGCAGATGTTCCATGTCATACTCCTAATCATTCAAATGGATATGAC  
TTCTTTTGTGAAAAGATTGCAAAAAAGGATTGTTGTTTGTCTGTTTCGCTTTACAGAAGTAATGTGTGATT  
TCTTTGGCTTCTGCTATTTGGCTGCTTAGTCCAGCATTGTGTTGTCGTTTTACTTTAACTTGCATTCTTCG  
ATTCGATGTTCTTTTCTACCAGAGATCTTGGGCATTAATAAGTGGACAATGATATATTCTCATGTGTCCA  
TCCATCTGATGATAAATATTCAACTGTACAGTGTGCATTAACCTATTTTAGATTTCTTATATTTTACTGAT  
CTTAAAGAATATAACAAACCAATTTTGCACAGTCATGCCGCTCCCCCACCATCATCTGGCAAGGCTCT  
GTCTCTCTAATATTCTTTTGTGATCTTATTGCTTAAGTATAAGTTCAGCGGCGATTTTCATGGTCGTTGAC  
AAAATTTGCTGAATGTCTAGGTTGATTGAAGAATGTTGGAATCCCGATTCTTTTATACGGCCAACATTTTC  
GGAGATCATTGTGCGCATGAATAAAATTGTTGCAAACACTGTTCAAACACGGATGGTTGAAAGATACTCT  
AAAGCTTCCCTGGTAATGCTTCCACTATACTATTTTGCATATTTTGGATCCTTTTTCAGTTGTTTTCGATA

TTCAAAGGTCCTTGGACCAAGAAGAAAAGATTCAGCACAGTAGATAACTTCTACAAGAACTAAAATAGC  
TTCTATACAACGTTTCAAGCATTAGAATTTTTACATTATATTTAATCTCATTTAATTGTAACAACATATCC  
ATGTGCAAAGCATAACTAACTTTAGTGGCGATAACTGAGCTCTATAACAAGTTTGTGAAGCTGTAGATCA  
AAGTAGCTTTTAACTTTCAAGATACCTGACAACATAAAGTTTGTGGTATTGAAATGTGTGATAATCT  
CATCTAAAAGTTTAAAGCTATTAGAGAAAGCACACTTATATTTCTTAATTATGTCTCCAACACGGCCCCCA  
AGGCCTAGCTCAAGTGGTAGAAGGTGGAGGATTTGTGGCTTAGGTCGAAGGTTCAATCCCAACACCAT  
GCAAAGTGAAGCCTGGTATTTAAGTGGAGAAGGGTAGAGGGGCGGGCCATTATCCACCGAGTTTAGA  
AGGCTGTGATTGGTCCAAAGGGGGAGGGTCACAGACGGATTTCTCGGTTATCAAAGAAAAAAATTTA  
TGTCTCCAACACGCCCAGTCATGTTCTATCCTAATTCTTCTTCATGGGGCAAGTTTGTAGAATTTTTTTTTG  
TAATAATGGATGACGGTAAAACCTCGAACCAAGACCTTGCTGCTCTTGATACTGTGCTGAAAGCTAGCT  
TCAAATACTCCCAAAGAGTTCAACAAGATATACCATGTTGAAAGCTCTAAGCTGTAAGTAAAGAATAAC  
TTAGGTCCATGTGGAAGATTCAGCAATAGTTGTATGGAAGAAATCTAGTTAACTAGAGAGAGTATATAC  
TCCGCTTGACGAGACAATAAAAGTAGATTACAGGATTTGTTTCTCATAGGGACCATACCTTAGATGA  
ATTTCTTGATGCAGGTTATAGAGTGAAGCAAACACTACATTGACCATGGACAAAGCTTAAGATCTGGAGAA  
GAATATTGACACAAGATTCTTGACTATTCGATATAATTATGTGGATGTGTGGCAGATTATGATATCAT  
ACTAAGCCTTATGCTGTCTTTGCAAGAATCGTCGTCATCGTGTGTTGGACCAAATAAAGGAAGAAAG  
AAGGGTGTGAGTGATTGGGATGAGAATTGAACTTCATGCACTGTGCTTCTCTAGTTTTGAGTAAAGCT  
AGAACTAGAGAAGTTCCTTTGTTGTCTGTTTATAGGCTTTCCTAGAAACAACCTTGATCTTGTTGTATAA  
GGAAAAGAGGAAGAATAATACTTTTTATTTTTCTGTTTGATATGTTGACAAACTATCGAGAATTCATTC  
TGCAACTATTGTATAAATGCATCCCTTATCGCCTTTTCTGTTAACCATCCGTAGTAACGAACCTTGCA

>PGSC0003DMG400028346 RLK with ANK repeat

GAGGAAGAGAGAGACTCAAACTAACTGTGTACACACATTCAAAGAAACGGAACACACGAGTCAAT  
TGATCCATTATCAATCCAAATGAGTACAAGTGAAGGGAGCTCCGGCTCATCGGCTGCCGCCGCGTCGA  
AGTACCGGTGGTATCAACGGAGAAGAAGAAGGAAAAGTCAAGAGTGAGCAAGACATCGCAAATACTG  
TGGCACGCTCATCATAACGATGCCGCTGCCGTACGGAAGCTACTAGAAGAAGATCGGACGCTTGTTCAA  
GCTAGAGATTACGATAATCGAACTCCACTCCACGTTGCAGCGTTACATGGCTGGATCGATGTTGCAAAG  
TGCTTGATTGACTATGGCGCCGATGTCAACGCTCAGGATCGTTGGAGAAACACGGTAAAAAATTGCAT  
TTTCTTATTTCCAGTAAATCTTCATACAGTATAGGTTATGTGCCTAAGCTTGTTAGGTGTGTCTGTATATG  
AAACTGATAACTGGTAGTAGCATGGTAATTTGCTTACCTTATCCTGATTTTGGAGCAAATTTGTGATAGC

TGTTGATCTCTTAAATCTTACTGAAGTTACCTCTTGTCTTGTTATGAAATGAAAACATTAGGCATCAGAAA  
TTGGAATTTTAGTCTTCAGCTATTAAGTGATGTCTTGATCAATCAGGAGTCAAAAAGTGTGCGGGATG  
TTACCACTTACCAGTGAAATTCATGTGGCATAGGTTGATTAAGTGTGATAAAAAAATTAAGTGGATTTT  
AGATTATTGAAAATACGAGTTTGCACATTTCTCTGGTTTTGCATATTTTCGTCCATGTTTTTAATGTGCCTG  
TTGTGACACTGACTTTTCTATGCCATCCTTGATTCTTGAGTGAATTTCACTAATCTGCTGCTTTGATCTAAG  
TTTTCAATTGTTTGTGACAGCCTCTAGCCGATGCAGAAGGCGCTAAGAAATCTGCCATGATTGAATTGTT  
AAAGACATATGGCGGGCTATCTTATGTGAGTTACATTCCTTTTCCTTTTGATATATCTTATATATCATAACA  
GTCGTTTGCCATTTGCAAAAGCTTGTATTTATCAACATTTAATGCATCAACTTGTCTTAGTTAAAAGGTA  
TATTAGCTAGCATATTTATCAGGCTTCTAGCTCTGTTTCTGTACAGCCATCCAGGTCTTGATGAGCTAGCA  
AAGCTGTTTATTAATAATTAGTGAATGAAATGTCCACATCGGTAAACGAATGGAATTCTGGGCTCCTT  
ATTAAGCTAGCATATTTATTAGGCTTCTAGATTGATGGCATGATTAGGAGATCATTACCTGAGTTG  
GGCAAAAATCTTTTACTTTTAGCAAATAACTGATTGGAGCTATCGCCTTAATAATGAGCCAAGAGCTAAT  
GGTTGCTGGTACTATAACAAGAAAATAATCTAACAGCGTTGGAAGCAGGATGTTCAATTCAATTCTTCCC  
AAGTCACTGAACAAGTGTTCATTATGTCATGTTGTGCCACTTCAAGATTTTCTTACATAATTATTGAG  
AATTACTTGATTTTCTGAATATGCGAACGGTGTCTTTGATTTCTTAGGATTGGTCTTTAAGAGCCTTTA  
ATGTTTTAATATATGCTATAGGGACAAAATGGAAGCCATTTTGAACCAAGGCCTGTCGCCCCACCTCTAC  
CAAAGAAGTGTGATTGGGAGATTGATCCTACTGAGCTGGACTTCTCAAATTCTGCAATCATTGGAAAGG  
TATGTTTTGCTATACTAGAAGTGCTGTTATTTAGCTTGTGGAGGTTAATTAAGTTTGTTTAAGCTACCC  
TGTCAGTATCTTTTCAAATGAATTGGCAACTGTAGTATACAAAGATAGCTACTCGTGTACCATTTTTTGT  
GTTTTTTCAATAAAATCTTTCAATCCGTGTTGTATTAGTGCATGACTGGAAGTCTTTTGTGAAGAGGTTTC  
TCCCAAATATAAGCAATTGAAGCGAATTTATGATGATTAAGCTAACACTTGTCTATGAGGTGTTGATGA  
ATGAAAAATCTCAACTAATCTAATTTTTAAAATTTAAAATGTGTGGATAGTTGTAGAGGAGTGAATCTG  
TTTAGTACTGTGTTTAAACATTTTATTTCAATCCAAAATAGAAAGTGTCTCATAATCAGGAAAGCTGCACAA  
TTATTGTGCTTGGAGCTGTCGTTCTTTGGTGTTTTTGATTGACGCTTCCCTTTGGTATTTTTATTTTTGTCT  
ATAGTTAATGACTGAGATAATTCTATTTCTTATTATGCGGTTACTATAATCCTAAACCTACTTACAAGA  
AAGAAGAGGGACAGTCTCTGGTAACTGGCTGTCCATTTTGCTTCAACCCATTTATCTTTTTAACTATTTAG  
TTTTGATACTGTTGTGCTTGATTCAAATTGCTTAATCTACTTTTCATCATTGATAAAAAAATTGCCAGCGAG  
GTTGCCATTTATGTATCTAATATGGAAGCTGATATTGATAGGGGTCTTTTGGTGAGATCTTAAAAGCTTG  
CTGGCGTGGAACACCTGTAGCTGTTAAACGCATCCTCCCAAACCTTTCAGATGATCGATTGGTGATGTAA

GCTCTATTGTGGGGTTAGCACTACAATATCCTGTATATATGATTCTGATATGTTCTGCTGTCTGCTGCTGT  
TGCAAGTTTCACAGTTTTCTTTTTGGGTGGGTAGGTGTGAAGAGTGAGGTTAAGGAGGACAGGAGTCT  
AGCTTTGGTCTCCTCTGTTATATATTGACTTTTAAAGTATTCCACATCATTGACCAAACTATAACAAAGA  
AGATGCTGCTTTTGCAAGCATGTCACATCCTCTAATTATCAATAAATCATATTCTATTTGTTAAGAATCTTT  
ACTCTGCTAATATTGTACGAGGACCTGGAATTTAAGTGGATCAAGAAGCTTCACATGTTACCCAAGGCTG  
TCAGCATTCTCAATTCACAATTGTCTCTTTAAGCTTGATGCAGATTTATATAATTATAAAAGTATGCTGTTA  
GTTAGACCCTGCTGCAGTAATTAATTTTTGATATTTTAAATATGATACTGATCTCTCTTTTTTTTTGGGATA  
ACTGAGAAATTTGTCTGTGACCCGCCCTTTGGAATATGATACTGATCTGCCTAATTTAATCCTCTCATGC  
AGTCAAGATTTCAAGCATGAGGTAATTTGCTGGTGAAGCTCCGTCATCCAAATATAGTGAATTTCTTG  
GAGCTGTTACTGAGAAAAACCCTTAATGTTAATAACTGAATACTTGAGAGGGGTATGTGGTTTTATTTT  
TTCTCTATATTTTGATTGAACATTGAATTATTTCTCTTTATCTTATGATGTACCTGTGCTGATTTGGTGCAT  
ATATATGTTGTAGGGCGATCTGCATCAGCACCTCAAGGAAAAGGTGCTCTTACACCATCTACAGCAATC  
AATTTTGCTATGGATATAGCAAGGTAGTATGAATAATTGTTAGCATTTCACTTTCATTTTCTTGAAAA  
CTCAAATTCTCTTGATTTGCTGATTCTTGAAACTCTGTAAGCTATGTTTTGAGTTGCCTATTTACACC  
GACTGATGTTTTAAGCATCATTGATGGACTAAATGTGCTCAGCCTGTTGCTGTTTACTTTCTGTCCAAAA  
CTCATCTTCTCACAGTAGCTGGTCTGTTGAATTAGCTGTAGGGAAAATACAAAAAATGTGCATCCAGAA  
GATGGTCTGCATAACGTGAACAAGTTACTATAACTCTCGGTAGATCTTTCTGATGTGGCATAGTTTCTGT  
CGTTTTTGCTCAGCATACCATTTTATGAGATACTGTAGTTATCTGACAATTTACCCAACATTCCAATGCCT  
AGTTTTACATTTTAAAATTGCATTGCGTAGTTACTTATGCAATGTTTAAATGTTTTGTGGGCAGAGGCAT  
GACTTATCTTACAATGAGCCAAATGTTATAATCCACAGAGATCTAAAGCCCAGGTCTGTTTTTCTCTCTT  
CATGGCTCTGCTATTGTTATGATTCAATTAACTTAATGCGGAATGTATCAATGTTTCTAGGAATGTTCTT  
CTAGTCAATTCGAATGCAGACCATTTGAAAGTTGGAGATTTTGGATTAAGCAAATAATCAGGGTTCAGA  
ACTCCCATGATGTTTATAAAATGACTGGGGAGACAGGGAGCTGTAAGTGACAATGCCATAATTCTCCCT  
CAATTGATTAACATATTCTTTCAAATGTAATTATTTGTTTGTGATATCTTTTTCTGTAATAAAACAATAGAC  
CGCTATATGGCACCTGAAGTTTTCAAGCACCGGAAGTATGACAAGAAGGTTGATGTTTTCTTTTCGCCA  
TGATCTTATATGAGGTAATTCTGACTTCTAGGCTCTGCCTATTAGGATTGGGAATAACATGACATGAAAC  
AAATAATGCATCAATGAATTTTCTATTGGTGCAGATGCTAGAGGGTGATCCACCATTATCCCCTATGAA  
CCATATGAAGCAGCCAAGTATGTGGCAGAAGGACACAGGCCTATGTTTCAGGGCAAAGGTTTTACCCCA  
GAATTGAAAGAGTAAGTCCAAACTGGATCTTGATGCTCCCTTTTTTTTAAAGCATCATACAGTATAACAATAT

CTTTAGCTATGTATGGTGTGGGTTTTCAACATGGACAAATGTGGCACAGTTAGAAGATGAGCTATGAAA  
GCATTTTTAGGTACTACAGCTTGGAAAAGATTTCAGGAAGGGGTATCTGGGATTTCCAAAAGTGAGATTA  
CTTGCTGTGAAGTCCCTTTTCAGTGAGCTGTAGCCTGTAGGCATCCTAATTGCAGAAAAAATTGAAACA  
TGATATATGCTTTTTTTTCTTCTCTTGCAACCTTAGGTTTTATATATGCACTGCGAAGTTTATTTCTTTTGA  
CTATTAGCCAACGCAAGAAGATGGTGGGCAGTGTGTTTGTGTTTATGCTTTTCTAAAGACAAATCAATTTTT  
GCAGGTTGGTAGAGGAATGTTGGGCACCAGATATGAACAAGAGACCCTCATTTTTGGATATTCTAAAAA  
GACTTGAAAAAATTAAGATGCTCTACCCTCGGAGCATCATTGGCACCTTTTCACTTCATGACATCAAATT  
CCAGAGCTGACCAGATATTTGTTGAATTCTCCCATCAAACGCACACTATTTGAAATTGATATGTTTGTGCGA  
TTGTGCATAGGATCAACTGGCAAAGGTCTGCAAAAAGTGTGCTGTACCAATTCTTTATGCCCCATTCAA  
CATTCCAGCTATGCTTGTGTAGATTTTATCAAGATATTTCCACAAAATATCAAGTAGAACTGTGTGTCGA  
GAGATTTGTAACAAATTTCTTACATTTGCTTCTTTTTAAAATGTGATTCCCAGTGGTATTGAAGTGGCAA  
CTGTATTTTTAACCTTTATTATTCGTTTGTGTTTATGATAAATGCAATTCTCGCTTTTTATTTAAAAGGTTACA  
GACATTTCCGGTCTAAA

>PGSC0003DMG400028443 RLK with ANK repeat

CTTTTAAATAGCCCCATTGATAGCTAAGTCTCATTTTTTTTTGAAGTAGGTTATCTTTGAACTGTCTTGTT  
CAACTGTAAATTTTCCAAAAAAGAAGAAGAAAAATCTATTCTTTTCAAGTTTATTCACCTCTGATCC  
TAAATTTGGTTGAAATAATAAGTTTCAAGAATACCCTTTTGCCATCTTTGGATTCTTGAAAAGCTTTAGTG  
TGAAGCATTAAAGTTTTGCTGACACCCTTTTGAGATTTTATATTCTTGAAAAGCTTTGATCTTTTTTGTGTTG  
TTTTGTGCTTCTGAAGCTGTATGTTCTTTGTTACTACTTTTTAAGTCAAATTTACGTTTTAGTAGTTTTTTTA  
GGTAGAGTGGCTGCAGATCTTAAAAGGGGTTCAAGTAAATTAGTTGTTGGAATCTTGATCTTGAAATGG  
AACCAGTAAGATTCTTGTTGGGTAAGCAATCGTCCCTTGACCAGAAAAGGTGATTGCGGCAGTGGAGA  
TTGAGAGTGAAGATGGGGAGGAAGGGGATGTTATAGATATTGATCCAAGAATCAGGTTGATGTATTCA  
GCTAATGAGGGTGATATAGAGGGGATTAAGGAGCTTTTGGATTTGGGCACTGATGTGAACTTTGAGA  
CGACGATGAGAGGACTGCCCTACATGTTGCTGCTTGCCAAGGTTACAGTGATGTTGTGCAGCTGTTGGT  
TGATAATGGGGCTGAAATTGATTCCGAAGATCGCTGGGGAAGCACGGTATATCTCATGAACTAGTTTTT  
ATTATCATATAGTTTTTGTCTCCCATATGATTGGTAAATTGGTATAAGTTAGATAAGGCTTGATTATGATT  
ATGATTATGATTTTATATTGCTAGTATCTTCACTTTTGGGTAGTTAGTTGGTATTGGAGAAAAAGGTATA  
GACCCTTGCACTCTGTTTTTATTTATATATGTTAATCTTAATCAAATCCGAACCTTGATTCAGTTGGGTTAAT  
GAGTTCATTTGTTAAAAGTGTCTAAGAGGATTCTGTGGGACAAAATTCTAAATGGCATTATATGAATG



GTTATAAATATGGTACTTTATAACCATCGTTCTTGTTCTAGTATCAAGGTCGTTTTAAGTGTAAGCAGAAA  
ATCTATCAGGTAATAATCTCTGTAATTTCAAGGAGACCTGAGCATTGCAGCTCCCAGTTGTTTTACTTCCA  
ACCCCTCTTTGCATTGAGGGAAGAGTAAGAAATGACAATAACATTGTCATGCATTACCAAGCATTATTGA  
CACAATGTTACCTTCTAAAACCTATGAAGTATCCTGCTTTTCCTATTGATCAACATGTTCTGAGCAATCTGA  
TCTTTGCTGAGCAGCCTTTAGGAGATGCAATACATTATAAAAATCATCATGTGATCAAGCTACTAGAGGA  
ACATGGTGCCAAGCCTCTGTAAAGTTTTATTTCTGTTCTATTTTACTCATCAAGTGATTAAAAACTGTA  
AGAAAGCAAACCTTTGTTCCGTTGCACAAAAGATTGCTTGGCTTTATTGCTGTCTAAATTTGTTTTGGA  
AAAATAAAATTCTCATCCAGATGGCTCCCATGCATGTCAACAATTCACGTGAAGTCCAGAATATGAGAT  
TGATGCTAAAGAACTTGATTTACGAACAGCATTGAATTGGCCAAGGTAATTTTCATATATAAAATGTGAA  
CATTTACATAAACTTGATTGGTAATTAGCTATTTTCAGTGGGCTAGGTGTGCTGATTTTACTTTCAAAGTA  
CTTCCTTTTAACTATTATCTTGGGAGGTTATAGTGAAAAGTTGACACAACCTAAATTGAGTGGGATGCTC  
GGTTGGTAAGGATAAGTTGATCTTCTTTGGTGTCTGTCATAAGAAGTCCTTATATTAGGGTGGTATGT  
TTGGGAAAAGCTGGGAAATATTCACCTGCTCCTTTTCCTATTCCGCTAATATATTGCTCCAATCTACAAAC  
TTTTGCTTCTGTATCTTCTGATGATTCCTGAACCTATTATAGGGAACCTTTCATATTGCCTCATGGCGTGG  
AATACAAGTTGCTGTGAAAAAGTTTGGAGATGATGAGATTGCTGATGAGGATAAAGTGTGAGTATAAG  
AAGATACCAATACTGATTCTGTGGAATCTTCTAATAAAAACAGAAAAACCATAAGAGCTTTTTCTTCAC  
ATTGTTTAGCTCTCCTCATATCTCACTTATTTATTATATATTCTTAATTTATGGATATTTGCAGGACGGCAT  
TCAGAGACGAGCTTGCACTTCTCCAGAAGATTAGACATCCAAATGTCGTCCAATTTCTTGGTGCTGTAAC  
ACAAAGTAGCCCGATGATGATAGTGACAGAATACTTACCAAAGGTAGTCCCAAATTTACTCTCTTGT  
TTCTTTATCTAAAATAGTTGTGGTGTGTATGGTTATATTTCAACAATTTCCGGTAGGCCGTGAAGGTTTTA  
GTTATTCTACACATTTGTCTTAGTTGATTCCTTCTCTATTTAGTTCTTTTCTAGCAAAAGCAACACCCTGA  
TACTAAATGTCCTTTTCATGGCTATATATTTCCAGGGTGATCTCCATGCATATTTGAAGAATGAAGAACCT  
CTTAGACCAACAAAAGCTATCAGATTTGCAATAGACATCGCAAGGTCTCGAGCCACTCTACCCTATTAG  
CTAATGTTATAAACTCACTACGTAATAACAAGACCAACACTTGTATAAATGTCTGGAACCCGGGGA  
TTGTGGAGTAACATTTAAGTCCACACAACCTTGCATATCTCTTGGAAATTCTAAAATTAGCATCTGTGGGA  
GGCAGCAGAGCAAGTAATCACTCAGCTGTTGACTATACTTCTGAGAATATTTATTGCTTAATTCATCTAAT  
AGTTTGTATGAATCTTTTAGTTAACATCTATTGTGTTTCTTAAAGATCCCATCTGGTGTGTTGCATATCCAC  
TGGTAATATTAATAGAAAGAAGAAAAGAAAATAGAAGATCATACTTGTTAATGGACATGCCACTTTTTCC  
TCAATCGCGTGGTTATCTGCTGACCTAGTATTGTAATGTCCTGCATATCACTTTAAGCTGACCCTAGGAAT

ATCAAATAGGATGCATTTAGTAAAGAAAAAGGAGAAAACCATATAGAGATGATGCAACACTAGTTGCTT  
TTCCGTCAGTCAATACTGGAAGTTAATAAACATCATTTGATATTACTCTTTACTTCCCACCTTGTTTGACC  
TGCTTCCAAGCTAAAATTTATGCCCTGTAGTACCCTGTATTATTTCAAATACAATGTGATATCTTTATACCC  
ATTTCAAGTCTTCCTACTATTTAATATTATCATAAATAATTGGAATCATTCTCTTGAGCTCTGAGATAGTCA  
ACACAGCTCAAACAAATTGGATTGGAGCATTAAACGATCTCTCAAAGTTATTTTTAATTCTATCAAAT  
TTTCATTTCAAATTTCACTTGAATTTCCACAGCTGCTTGGCATGTGAGACATTTGATTATATTTATTTCT  
TCGAATCAGCTCGTGCTTGTTAATTAATAATAATCTATCAAACATACTGTTCCACATTCATATGAAGTTG  
AAGCCTTATATGACTCATGTTAGCCTGAAGCATAATGTGCATAAGTAGAATTTAACCCTCTTGTTTTT  
ATATTGTTGCAGAGGACTGAACTATCTACATGAAATTAACCTGAAGCGATTATTCATCGTGACCTAGAG  
CCTTCGTAAGTTCTCTCTTTTGTAGGTTTCCTTTGATTCCATTTGTGTAAGCAAATCCCATCCAAGTT  
TGGTTGACAAGCCTCAATCTTTGAAGTTCCCCTCTTTCAAATGAGTTTCTTCATCCTATTGTTTTAATAT  
TTAACGTGACATAACAGAAATATTTGAGGGATGATACGGGACACCTGAAAGTTGCTGATTTTGGAGT  
CAGCAAGCTATTGAAAGTTACCAACAGGGTCAAAGAAGATAAGCCTCTGACATGTGATAACACATCTTG  
TGAGTACTCCTTTCTTTTAGGTATCACAACGTTTCTTTCCAATGGAGAACCATGCTGACATTTGACACAG  
ACTCGACAGTATTTGTGACACTGTTGTTGCTGCTTGTGGATGTAAAATTCCTGCCAGTCTAATTTTAAA  
AAAATTGTTGAGCATTGCATGGTGCCACAATTGCTTCTACTGATCCATTTCTGTTGATTAATAATTGGAAA  
TCTCTTAACCTGTTTCCTTTTGCCTTGTGTTTTGTTGGAAATAAATAGGCCGATATGTAGCTCCAGAGGT  
TTTCAAAAATGAGGAATACGATACCAAAGTTGATGTCTTTTCTTTGCTTTAATTTTGAAGAGGTAAAA  
ATATATATGTTTCATATATTCTTTTACGATTAATACTATTTTCTGAATGGAGTTACATTATTGAAATAACAT  
GTGGGAGAAGAGGTTTATAGTTGATGGTCACTATGGGGTCTCTTTTGTGAAGAGTTGCCGTAGGTTTTG  
CATGTAATCTGATAAATGAAGATCCTATCTTTTCTCCGCACAAGTCCACGAAAGTGAAATAAATCCTTG  
CACATCATTGAGTTGCCACATATCTAGTCCTTTTCTGACTTTGAACTTGATTTCTTCATACCCACAAATAT  
GTATGTATCTATCTGCTTTATGGTTGTGACACTCAGATGATTGATCTAGCTACATGACTTCGAACTTGTAG  
AATCCTTAATATAGTTTCTTTATAACATGCCTTTTCATGCAATACAATCAAGAGAGGATTTGTTGTGATGCA  
ATAACAAGCAATATCTTAGTTTTCTTTTATAAAACAATCTCTTTATATGCATGGCATTATGCAGTTTGT  
GTTATTTGTAGACAGTGTTAACTTTCTGCCGAGGGAAGTACAGCAGAGTGGTTGCCTTGTGCAGTGG  
GACTGCAAGTTTTATTTTCTACCATCTAGATAAATCAGTACTGCAATACATATTGATTATACTATACTAGT  
GTTGATCTGCTCTATGATGCTAGAAATCAGCTAAAATCTAATTGTGCTTTATGAACTTCATAAGTCAA  
GGATGTGCATATTTTCTATTTTGTTCACATATGGGTTGGGATTTTGATAATTGTGCTGTCGTGTAATTT

AGATGATTGAAGGCTGCCCCCTTCAAAGCAAAGAATGAAAATGAAGTACCTAAACACTATGCTGCTA  
AGGAGCGCCCTCCTTTAAAGCTCCAGCAAAGGTTTATGCCCATGGACTGAGGGAGTAAGTTCTCTATCA  
ATTTATTTGTGGAACCTCCATAGTCTAATACTTGTGCAATGCATTGGAACTCTGTTCTCATTGAAATTTAA  
GAAAATGATGACGATTAAGATATCAAGTAAAATTCAAGAACATTTGTTTATGACTGGTCTAAGTTTAAGT  
ACTGTCTACATTTTTCTAACTATCACAATTTACATGTGTGAAAAGAGTAAGAATAACTAGGAAAGTACAC  
TTCGTGGACATGCTTCTTTATTTAACCATACATATGCATACGGAAGAAAGAACAAGAAATTAACGGAG  
ATAGGTAGAGACGAAAAGTAAAATGGGAGAAAGAGATGGATATATGTGGGGTTTATATCAGCAGGGTT  
CTGCCCGAAGGACCAAACCTTACTTCTTGACAAGTTTGGTATATTGTTTTCCCTTTGTTGGCAGATGTTA  
TAGTCGTATTGCACTTATCCCACCAATACGGCATCAAAGCCCCTCCTGGCTCATCCTTAGACACTCTAAG  
ATCCTTTCTCGAACCTGCTCCCACTCTGAATCAATCTATTTCTTATTCTAAGGGCCTCAAAGACAGCATAT  
AGAAAACAGAGCTTGACCTATGAGATTGCCTTGTATTCCAATTGGTCGCATACCCAGACAGAACTAA  
GCTTCCATCCCGACCCATTTAACAAGCTACGACAAGTAACAAGTGTAGAACAATTACTTCTTTAAGGAC  
CATTAAAGGAAAGTGTATGTTAAATGACACCTACCTATGTGCCCTGTGTTCTGACAAATAAGTTATAGACC  
TTCATTTGTTAAAATTTCTTTTTTTAAGTGCCCATGGCAGCATTTTATGTGATAATAAGAAAAGTTATTGC  
AGCTAAGTTCCGTTTATCGAAGTTCTAGAGTTCCATAACCATCCTTTCCCTGTGTGCAACTTTATAGAGGA  
TCTATAAATCATGATAGGCATTCCCATGCAATTTATGCAGTTTAGGTTTAAAATAACAAAAGGAAGTC  
GATCCAGAAGTCAATTTGTAACCTCTTTGATTCTACTTATTCTACAGTTGTCTAGGTTTATAATTGTGGTTC  
TATATTTGATACTTTTTGAGATATTCAATAATGAACTGGTTTACTGTGAATCAACTTTTTTTCCCCACAGTA  
TAGGTTTTAACTTTTTATGGTTACAAAATCATCACCGCATTGTTGTTATTACTGCTGATTTAATCAGAGTT  
GATTTTGGTTTTCCAGGCTGATTGAAGAGTGTGGAATGAGAATCCGTCCATGCGTCCAACCTTTCAAGAA  
AATAATCCCAAGGCTCGAGGCCATTTACAACAAATTTGGCCACAAAAGGCGTTGGAAGGTAAACCTTTC  
GGTCATTTAGCTCCTTTCCACCATCTCTATGCACTTATAAATAGTGTGTGGTGCATCTGTATTTTGAACCTC  
TCATAATGGAGATCAATGAGTTCAAACATTTTTCCAAGCCTAGTCAAGTAGAAATGTATTACCTAAATCA  
CTTGAGCATCTGTGATTGCATAAGTAGTTCTTATACATCCCATTACCTTTCCACGCTTCAACAAGTGCAT  
AGCAACTAGCAAATAATACATAATTGCATAAACTTGACAGAAAAAGAAAAAAGAAAACATGCTCATGT  
TCTGATTGATAAGAGTCTCTCTCTGCTTTTCTGCTGATTTTCATACCTAGTACTAGAGGACAAGCCAGTGT  
TTCCGAAAATGTTCTGTTTCTTTTTCTTCTTTCCCTTCATACTTGTCTCATTGACATAGTCAAAGGTGGTCTA  
CAATTTTGTCCAAGGCTTAACGATGCCCCGAGTCTCAGCGATGGCCTGTATTGTGTTTTAGGAGATATAGT  
TTTGTGCTACTTCAATGCTCCTATATATATGATCATTCTGAGTTAAGCATAGATCTCTCATTTTCATCTTGT

ATATGTTTCCCTATGCAGGTTAGACCATTGAAATGTTTCCAGAATTTTCGAGGCCATGTGGAAGAAAGAA  
AACTCAAGTTCAAGTAGGAATGGATCATCGCGGTCAAACAGCAGTATCTAGCAAATTGTGGATATTTCCCT  
TTGTTCAAGTGTGCATATGTTCCCTCACAGATTTCTGCCAAAGATTTTCAGTAGTAGGAAGTTGTATCACTT  
TTTCTAGCTTTAAATCTCTAGATGTCCAAAACAAATGGTCATCCTTTTTTTTTCTTTGCCTCTTTCTATTGAG  
ATCTATATTGTTTATGTACATTACAGTAGATAAAATATTCATGGTGCAAATGCTATGTTTTCTTCTCTCTTT  
GCTTTGTGGAAGCATCCAATTAAGTACTGAGACAAAAGAGAAA

>PGSC0003DMG401030595 RLK with ANK repeat

CGCAAATATACAAGAAACGTCGAAGAATAATACAAGAACTAAGCTAACTTCGTTAAAACCCAAAACCCC  
TTTCTTGGACTGAATCGCCCATCCATGGCGACAAGAAACGTTTATCTTTATGTTAATTTTCATCAGGCAGT  
TTTGAAGTTCCAATTGTTGAGATATGGAGATCAGTACAATATTGATGCGGCATAAAGATTCTTCATCTGG  
GCATTTTGACATGCAGATGATAGGCACTTTCTTGAGTTTCGCATCAAGGGGTGACAGAGTTGGTCTCAAT  
CAGATGTTGAGGCAGGGAATTTACCCAATGTGCAGGACTATGACAAAAGAACTGCTCTACATCTTGCT  
GCTAGTGAAGGACACGCCTCTATTGTTGAACTTCTTTGGCTTACAAGGCTGATGTTAATCTCAAAGATA  
GGTGGCACCGGACTGTAATCCCCTTTTCATATACTATTACCCTTCTCTGCTCGTCTTTCTTCATACTGCATA  
CAACCCCATTCATTTATGTTACACATGGTTGTTACATATTGTTTTATAATGTATCATATTATACATGTTAT  
GTAGTTACACCGTTACATTATGTTAGATATAAGCAATTTGAAGGAAAAACAACAAGAAAAGTAGG  
GTTACGGAGTAGAGCTATCATAAAAAGGTAAGGTATGGTAAAATATGAAATATTATTATTAGGTAATAA  
CAAAGATAAAGTGAGAAAAAATAATAAGGTAACAATGTGATTACACCAAATTAGTTGTTACAAAAAAT  
GGAAAATTTTGTGTTGCATAACGACGGATTTAACGATACTATGCAATAAATTTTAGTAAAAATCAAC  
ACTGACAGTGCAATATCGTGATGGTAGTTACCATTTTTATCAATTATTAATTGATGCTTATTTTATAGATT  
AACTTGTAATTACCTTAGAAGTGACCTGATTGTATACATATGTTTTAACTTAACTCTCTGCTTTTTAATGC  
ATTCCTATGATGAGGAATTAACCATCATTATTTTCTTTCAATTGGTTGTTAAGCCCTTAACAGATGCAAA  
GTTGTACGGGCACCGTGACATATGCAGGATCCTTGAGGTCTGTGGTGGCAAGGATTCCAACAGTGATCA  
TCCTTTGGTAAGTGTTTCATCGTTAACAGTGATCATCCTTTGAAATTTGATGTTATGTATTTCTTATATGGA  
ACAAATCTTAATAATTTTCATTTACTTAGTGTGAGCATCAAGTTCTTACCGTCCAATAAGAGTTGTATATA  
TCATATCATGTCATTCAGGTGCTTAAGATATTGACAATAGCTTCATTAACAATAAACTCCATCTTATG  
AATTCTGCACCTGAAAACATACTTGAGACATACATGGTAGACTTAACTTTGGTAGAGTGTAGCTTTAGCT  
TAAATGTTGTTTACACAGACTGCTTGTCAAAGTGAAGTCTGGTTGAACTTCACGAATGGAACTTCTATC  
TTTGACATTGCAGTTTTAGTCACCTTTGTTGACAATTTATGGAAAAATATGAAGTCTTCCTTTATAAAGCT

AAGTCAAATTGCACTTTCTATCTTACAAAATAAGCATAATACTCATTTTTGGTCCTATGTCATTGCTTTGG  
GATATAGCTAGCTTTCACCTGTTGCTTGTGAACAAAGCAACCAATCAATTACTTACATAAACTTCTCAA  
GCCTTCATCCCTCCGAGAGCCATAACAATTCTTTCTGCATTACCTTGTAAGATCACTCCATTCTGGCAATGT  
GAATTTGGGGGATGATATGAAGAAGGGCTAAGGTAGCAGAATTAAGAATGTAAGTACTGAGCCCTGTCAG  
TTTCACTGTTGAAGGACTAACTGCTTATTTCCAGAGAGTAGATGAATAGAGGACCCCAACATTGGG  
GGATATACTTGAAGTACTTCAAATACAAGGACACAAGCACCTGTTAAGTCAAAAACCATAAGTTTTCA  
CTCATAAAAGTTCCAAGCCTATTAGTGCAGAATTTACTCATGACTGTGGTTCCGTTTACTCCTTTGTTGTT  
TTTGCTAATCAATCTGAGTAAGAAAACGTCCGTTGATATGACAAGTTGAATTTTATGACATGCAGACTGT  
TCGGCGTGAAGAGGATTCAATTGACGTGAATATTGACATATCTGAACTGAACTTGCAGCATTCTTCAATA  
ATTGAGCAGGTATTAATATGGAAATCCAAAGGTTGGGATGTCATGGTGCTGAGTATATTCTAGGGCTTC  
CTAGGGCTGTTTCTTTCTTTTACTTAGCGTTTAACTTTCTAGGAACTCAGTCCTTTGTTATTTTACAGGGC  
TTATTTGGGGAGTCTGAAAAGGTCAAATGGCGTGGAACATGGGTGGTAAAACCGTAATCAAAGGCA  
TTCAATTTATATGTCATTATTACTATAATTATTTAAAAAGGCTTTCTGGATTAATTCTTTCTTTAACTT  
TTTCCAATATACTTGATGCAGGGTGTTTTCTGCTAAGGTTAATACTTTACTGAGGGAACTTCGACATCCAA  
ATATTTTACAGTTTCTTGGATCAATTGTGCATGGTGATGAAATGATCTTGATCACAGAGTATTTGCCGAA  
AGTATGTTGTTTCTTCCCTCAATAATATTGGCAGAAACAGTTCAGATTTTTTTGTAGGACGGCACTCAAT  
AATCATTTTGTGAGACATGATGCAGAAATAAATGCATTTTGTAGCCTTCACTATGCTGTACTATTAATAGA  
TATTTTTTGCCAAAGTACTATCACCTAATATTCTGGGTGCTAATTGTTATGGAAGTATGCCTATTAAATT  
TTAACATTGATCTTCAAAAAATTTCTCCAAGATCTTTCAGTGATTGCTAAAATGGTTAAGGATAGTCCCT  
GAATATGATATACTTCTTATTATGTTTTCCCATATATTTAGGGAACTTGCAAGATATTTGAGAAAGCG  
TCTTGACCCCCCACTGCATTGCGCTATGCACTTGACATAGCTAGGTACAACATTCCACTTATTTCTGTTT  
AGGTTGATTTCATTTTATTATGTGAAGAACAATTACATTAGTGCTCACATTGAACACAGGGGAATGAAT  
TACCTCCATCGGCACAAGCCCTTGCCTATTGTTACAATAACTTGCATCTGAAGTATGTCTATTCGTTTATC  
CTTATTAATAACATCTCACTGCAATTTTTTATGTATTTATTATCTTCTATACTTGGGAATTGTAGTTGAGT  
CTGCTTTCAAAAATAGGATCAGGGAAAATAACTGACCTCTAGTTAAGTCTTTCTGTTTGCTGAGTTATT  
ATGATTATTCTAGTATCTGTATCTTGGTGTTAATCACTAATAGATAGTTGTTAGATAAAAACCGAGTGCTT  
CTTTCTTTCAGTTTGTCTGTCTATGATTTTCTGCAATGGATTCTAGAGAGTTCTTTTGTGTTGTAACAGTAT  
TGCAAGCTGCAGGTCATTTACATCTTTCGTTATGTGCCTTGCTAATCTGACTTGAGATTTCTATCCTCTT  
AAATGTTCAACTATCTTATTACTTCATAACTCAGAGCATTGGGTATGTTACGTTTTATTGCCAGAATATT

CATTATCGAAGACATGAAAATGCCTTTTATCTTAACTGATTCCAATTATCAATAGGACTCTTGAGTCAACA  
TGCAATTGGATGTCTAGGTTTCAACTAACATATTGGTCATTTGAATGAATGGTGCAAGTATGCATTTGTT  
CAATATTTTTTTAGTATGTTGATGCAGAGATGTCAAAGTGTGGTGGCGTATAAATGCATTTTAACCCACT  
TTACCATGCTATTTCTATCTGTGTGACTTCTGACATGCCAGCAAAGCAATATATGATGAAATGGACACTA  
ATTTGTTTAGTTTATGAAGCAAATTCTAAAATAATGTAGTTAAGCTATATAGCATATGTCCTCCCGAACAA  
TTAGCTGTCATCTTCACTGAAGTCTTTTCTTAATTTGGTCCAGGAAGTGTACTAGATGAATGTGGGCAC  
TTAAAGATTGGTGAATATTGGGTTCAAATATTGGATAATCAAATATATGCAAATCAGGACTGTTGTATGA  
AGACCTTTTGGTTCTTGCTTATTTGTTTGTTCATTTATTTTGGGTCACATACTGCAGCTTATAATCAGTCTC  
TTTCTTTTACAGGTCAATCAAACAACGGATGTAACCTAATCAGCCATCTGTGTCATGACATTAGCAAAGA  
TATTTATTCATTTGGCCTCATCTTTTACCAGGTAGATTCAAGGAGTTCTCCTATCATATATGCAATCAGCAT  
ATTGCAATAATCCTCCCCTTTTCTTACTGCTTTTTGTTGGAGATTCAAGGAGTTCTCCAAGTATTGAGCATA  
AACTGATCCAAGTGGATTAAGTGGAGTTGTTGGACCTTCTTAAACTAATAACAAAATTACATAAA  
ATGTTGATAGATTGATAAATTAACAATGATCTGTTATTTTAGCTTACCTTTGGAATCCACTCAGTTT  
GCTATTAGCACTAATGCTGCTACTTAATTCAGGCGATCTTTCATGATCTTTTACTAGTTTGATGAGCATCC  
TATAGAGTGCTAACTTGAAAAGCTACAAGAAAATTGAATATTATCTTATTAAGAACTGGATGATCGTGAC  
CTTTTTTATGTGTCATGAAAAGGGTAACTGGATTCAACTTAAATTACATATTCTGAAGAAGGACTAGCTG  
GATGCACCCAATACCTAGGATTAGACAAAGTTGAATTTATTTTTTGGTCGGGTAATCAAGAGGATGAGT  
TCAGATCCTCTCAATTCCAACTTTGGCATTAAAGTCTTTAGTTGAGTGCCAAATTTGTTTCCCGTTAGAT  
GGAAGTTCTTTCCCACAGTGAAAAGCTCAAACCCATAGAAAATAGTGACAAAATGAGCATGATCTAAA  
GTTGTTGAGGCATAAACTCAACATGATGTAGTCCATGTAGTAGTCAGTTGTACTGGTAGAACTTTTTCTT  
TGGTTCATTGCCAGTGAAAAGTTGTTGTGTTATTAGAGTAAGTCATCTTTCTGTTTACTTATTCTTACTTGA  
CTTACTATTATCACATGAGTTTCCATTAAGATTCAGTACTAACACTGGAAATGCTGCAGATGCTGGAAG  
GAAGACAAATAACTGACAGGAGTTTTGAGACCATGCATATCAAGTCTGTAGATTTGGAGAAAAAGCTTT  
ATACAGGTGATACCCGAGTAGAATTCTTCAGTAAGTCAATCACTCAATCTTGAAGCTTTAATTTAACTTC  
TCCAAGACATGTCTTATTACCCAAGTATATTCTTCACTAAACCAGCTTCTAAGTAATTCATACATAG  
ACATCATGATCCATGTTGATAAGAGGTTTAGTGATACTAGACTATCTGGTTAGAGCAACTCAGTATACGT  
TTAAATGATCATACTATCAGAAATACAGGCTACTAAGAACTCGAACATACATTGTAGCTCAAATTATGAA  
TTTAGATCCCAATCAACAAGTCAAAGGACCAAAATCCCATACCCGTAAGCTTCAGTTATTGGCTCTGCCT  
ATGTTGATAACATACTGTTATTTTGTTCAGGTTAATAGAGGACTGCACGAGTACAGTTACTTCTACAAGG

CCATCATTGCTACAGTGATAGAAATCCTAGAAGAAGTCTCTTTACTATCAAGAAAAACAGGTTGCCCGC  
CGTGTAATAAAAGCAAAGCCCCAAGTAAATGAATTTAATTTGCTAGTGATGGATATACTTTGATACACC  
ATAAATTTGAAAAAGTCAGTGAAGAACTCATTCTGGTTCATGAATATGAGTTTGATAAAATTTCCCAAGTT  
GACTTTCATGTATTTGACTTTGTGTTACTATAATGTATATAGGAAATTTTACTTGCTC

>PGSC0003DMG400002045 RLK with antifungi domain(GNK)

ATGTCTAGTTTGAATATCCCAATATACCTTGTGCTTTTCTTGATCAGCCAAAGTATTAGCACACATTAGC  
TCTTGATGACTATTACTGCCAGACACACTACTTATAACAATATAACAAACACCTTTACAATTCCA  
ACCTCAATTTGCTACTATCAAATCTTTCTTCTGCCTCTAGAGAACATCTTTTTTACAATTTCTCCATCGATG  
GCACCGATAATTTGAAACAATTTACGGTCTTTTCATGTGTCGAGGTGATATGTTAAGTGTAATTGTCA  
AGATTTTGTAACAAGAGCTGTTAAAGATATAATCTTGTTATGCCCCGGTAGCAAACGGCTGTATTATGG  
TGGGATGATTGCATGCTACGTTACTCGAATCAATCAATATTTCCCGATCCAACTATGGATCCACAATTA  
ACAATCCATCTACACCTTTTGTATATATAACACTATTCCAATTACCAATAATGAACATGAACAAAGAAGG  
TTCAAACAGATTCTAGGGAGAATTATGAATAACGTAACGGCACAGGCTGCCAGTGATGATCGATCGGTA  
GACAAGAAAATTGCAATTAGGGAAGCTAAGTTCAGTGCTAACACAACAATTTATGCCTTAGCTCAATGC  
ATTCCTCATATGTCTTCTAAAGATTGCCTAAATTGCTTTGAAAATGCCATCGAAGTTTTAACAGGTGTTG  
TGATGGTTATAGAGGTGCTAGAGTTCAATTTCTAGTTGTTTTATGAGGCATGAAGGTACCCTTCTAC  
AATAATGCTAAGCCACCTGCTTTGTCCATAATCAAGGTACATTTTACTGCTCTCTGTTCTATTTTATAT  
GAATTAGTCTAATTTGACACATAGTTTAAGAAATATTTTTTTTTAAAAAACTTGTGGGCTAAAATAAGT  
GATAAATGTTTGTCTAACTATAAATTATTTGTTAAAGGTAATAAGACATTTTAAAGTTAAATTGTTTT  
AATATGAAAATGTCTCTTTATTCATTTTTTTGGGAATTGACTAAAAAGAAAAGTGAGTCATGTAAAGACA  
TGAGGAGTAATATTTTGACCAATACAGTACTGACTTTAATTTGTTGTAGATTTGTGTCACCATTAGTTTAC  
GATAAGTTTTTACCTTTACCCCTCCCCACCACCCGGCCACACACACACAAATATGTAAGCATGCTATCTT  
TTCTTTTAATTTAATTGGATAAATGACGAAATGAAAAGTATTTTGAGTGTGTTCTTATCTTAACTCTTAAAT  
TAAATTAATATAATATTTATATTTGGTATAAGTCGACATTGTGCTATTATGGGTTTGTGTCCCATTGATA  
TTGACCCAAAAAAAAGATTTACCTAAAGAAGGTATACGTAACATTCTATTAATTAATAATAATATTCT  
TCATCTATATTTCAACCATATGTCTCTTTTATATCAACAAATGAAATTCAGATGAATCCGTATTTATTATCT  
GACGCCCGATAATAATATGATGGTTGGAAATATCACATCCAAAATTAATAGAAAGCATTAAATAGAATG  
AATTCAAATTCTGAATTGCGTAGTCGAAAACCCTTCGTCAAATATCGAAAATTTTTTTCATATGTATAT  
ACTAAATTTTAAACATCATTAAACGAATTTTCTTACTTCGCCAGGGCATGACGGAAATCCAGAAAAAGAAG

TACTAATTATTTGTGTAGTGGTTGCCATTGTAATTCTTTTGTCTACTATCAACTGGAGTCTTTCATTTGC  
TACTAAGGAGAAGAAGGATGAAAAGAAATAATAAACTCTTAAGGAGATGAATGGTAATTAATTAAT  
CCCAATTATTTAATACAATTCAAGTCCATTGATTTCTTAATTGACTAACTTTTTTTTAATTAATTATATACAT  
GTGTTGCAGTTGATCTTAGTGAGATTTAACTGCTGAATCATTGCAATATGACTTTAGTACAATTGAAGCT  
GCCACTAACTTCTTTTCTATGGAAAACAAAATTGGCGTTGGTGGATTTGGTGATGTGTATAAGGTAACAT  
GTTTCATATTAGACCATATAATATTTTTTTAGATATAAGTTATATATACTGACAATGTAAAAATTTTTTACAC  
GATCATCAGGGGGAACCTTGATAATGGACAAGAGATAGCTGTAAAGAGGCTATCAAGAAGGTCAAGTCA  
AGGTGTTGAAGAATTTAAGAATGAAGTTGTACTTGTGCTAAGCTTCAACATAGAAATTTAGTAAGACTC  
TTAGTTTTTTGCTTGGAAGGAGAAGAAAAATACTCATCTACGAGTTCGTGTCCAACAAAAGCCTCGACT  
ATTTCTTATTTGGTACGCTTGTTTATACGTCTCACTTTTCTTTTAATTAGATTGTTATATAGAGCATTCTC  
TAATTTCAATGTCTCGCGTGATATGATTAAGATACGAAGAAACAAGCAACGTTGGATTGGTCAGTACGT  
GACAAGATTATTAAGGAATAGTACGAGGATTAGTTTATCTCCATGAAGATTCTCGTCCTCGAATCATAC  
ATCGTGATCTCAAAGCAAGTAATTTTTGTTAGACAAAGATATGAACCCTAAAATTTTCAAGTTTTGGCAT  
GGCTAGAATATTTGGAGTTGACCAAATTGAAGGAAGCACTAACATAATTGTTGGAACATAGTAAGTGTT  
GGTTTTTCTAAATAAAAACTTTTTTTTGTGAATCGATTGTTATAGTATAGAAAAATGTTAATTATTGTG  
ATTTATTGTTCTTTTGTAGCGGCTATATGTCCCCGGAGTATGCAATGCATGGTCAATTCTCAGTGAAATC  
AGATGTTTTTAGTTTTGGTGTGCTTCTTTTGGAGATAATAAGTGGAAAAAAGAAATAATAAAGAAGA  
TAAATTTGATGACCTTCTTATCCATGTAAGTGCAAGTTAATTTAATTAACAATATACAATATAGTTATCCT  
AATTAATTAGCATGATTATAATTAATTATGTTGATATTTATAGGCATGGAGGTTGTGGAAAGATGGTAGA  
GCAATGGAAATTGTTGATCCAACCTTATTGGTGACTCAAATTCATGTCGAAAATCATGAGATGTATAC  
ATATTGGATTGTTATGTGTTCAAATTGATTTGGATGGAAGACCTACAACACTTTTGATATCTCATATTCTC  
GATACTAATTCTGCTATTCTACCAGAGCCAAATCAACCAGCGTCTTTTAAGGATTATTCTAGATTAAGAAA  
TATCGATCAACTCACAAGTAATTCATTCTGTCATCTAGTTTTGAGGAATTAATTACGGAAATCTACCCAA  
GATAG

>PGSC0003DMG400006912 RLK with antifungi domain(GNK)

CAAAAAACATAAATTTTCCCCAAAATATGAAAACACAACAGAAACCCAGAAAATAAGAAGAAAAAATG  
AAAAAAGGAAGATGATCACCTATTATTTCTAATGGCCAATGTCATCGTCATCGTTTTGTGTTAATCTTTT  
CGATTCTCCGGCTGCTATTGCGAATCCTCGAACAGAGCTCGTTTATAAATTCTGCGGTGTGGAGCAAGC  
TGATAATGTTTCAGAATTCAACCAAATTATGCAAACGCAATTGTAGCTATGGAACCCGAGATAAAATCC



AACAAATTCTCAATTTACGGAGAAGGATTAGCTCCGAATCGAATTTTCGTTTTGGCTCAATGTATGGATG  
ATCTATCTAAAGAAGATTGTCAGATTTGTTTTCTGCCATTAAACCCAATTGCCTGGTTGTTTTCCCATA  
TCAGCGGTTCGAGTTTTCTTGATGGGTGTTTCATGAGATTCGAGAATTATAGCTTTTTTTATGAATCCTCT  
TCTCCCATGACGTTAAAGTAATTTCTCTTTACCCTTTTTCTTTTTCTTGCTATTTTTTTTTTATTAAATTT  
TATATTTGGGGATTTATGTTAAAAAACAACAAGAATTGTTATATCCTATGTTGCTCGGATTCTTCAAAT  
TGTTGTAGCACCCGTGTCGGATCTCCGAATGTACTACTTTTGGAGTGTACATGCACCGTCAACATTTT  
TAAAGACTCTGAGCAACATAGGCAGATTCTCTCATGTTAAATGTGATTTTCCTATTTGCACGCTATGATTT  
TCCGATGAAGGGGATAATTGAACCGGTTTGGCATCATGTAGCTCCGTACTTGATTAGAAATGTGTTACCA  
TCTCATCTGATAGTTTAAGCCATTAGGACAAGGTATAGGGTATAGTTTTAGTTAGTTAATTATATATTCAA  
CAAGATCCCTAACATGATGGCCTAATTCTTTTTTCATGAGCAAAACACGTGGAAATTCTTTTAGAGAATG  
GGTGACGGTGTGTGTGTCTGTTTGATACCATACATGTTAGAAGTGTGTGACCCCTCATCTAAAAATTAAG  
CTATTAGGGAAGGTTCACTTTATTTAAGTAATCACTGCCTTCATTTCAATTTGTTTGGCCTATTTTGACTGT  
GAGGATAAGAAAATAAAGAAAACTTTTGAATCTTGTCAAATATACCAATATGTTTTTTAATTTGTGGCC  
TTAAATATGTCATGAGTTGGAAACAAAGAGTTGCTGGAAAGGGAAAGAATCATTCTTTTCGAAACGTAC  
TAAAAGGAAAGTAGGCCAAACAAATTAACAGAGGAAGTACATGTTTAACAAATTTGACAATGGCTA  
GCTTGTTTTTGGTCTCATGGTTATCTTTTTTGGTTAAATTTGAATAAAGAGATGCAGTGATGCAGTGAAC  
TTGAAGAATGATCAATTTAGGGATGTCGCTACCAAAGTCGTCAAGGATGTGGTAACCATGGCCCCAGTT  
CACGGTGGCTATGCAGAAGGACGAAGGAAAACATATGGTTTATCAGTTTATGGCATGGCTATCTGCTGG  
AATACTTTGGACGAAAAGCATGTTCTGATTGCCTTTCAAATGCAAGCACAGCTGTTCTTGATTGTTTGGC  
ATCCATTGAGGCACGCTCCCTTAGCGTTGGCTGCTATTTTCGTTACTCAGAATTTGAATCTAGCAATGGCT  
CGAATTTCTTAATTCTAAAGGTCAGCTCTACATCTCATGCTTGCCTTGAGAAATTTTATGGGACTTTAA  
TCATCTGTGTATAATATCTTAAGACAATAGGCGTATTTTATCTTGTTTTAGCATCTTAAGTATTATTTTCC  
AGGTTACTATATTATACCCGCTTTAAGTAGTTAACTCTAGTTATCTGTTTCGTTTTAAGTAAGTTAACCAA  
TAGTGAAAATAAGTATACCCTTTTAGTGACAAAAGGGAAACTCACTTAAGAAGGAATTCATTTTGCAG  
GAGCTATTTTCATGTACCTTGATTTATTCTTGTTGCTGTTGGTGTATGCATAATAGCTATTCTGGTTGGAT  
ATATTGTGGGCACAACCTCCATGAAAAACGAGTGAAACACCAGACGAAACATAATGGTGATTCTTCGG  
ATCTTGAGTCATCTGTTATGAAAAGGAGCCTGCATTTCAAATATTCTACACTAGAGAAATCCACAGACAA  
CTTCAGTGAAGAACGCAAGATTGGCCAAGGTGGATTTGGTGAAGTCTTTAAAGTATAAAAGCATACTAC  
TTCGTTTTCTTTCTTTCTTTCTTTTCGTTTTCTCACCCCTGTTTTGCTTCTCTGCTTTGACAATGTTAGTTCTGC

TAAATAAGTCTAGAATATTTCTGAAGTAGGGGACTTTGCCAGATGGTAGAGAAATTGCTATCAAACGGA  
TGTTTTTAACTACCAAATTCGGAATGAAGAGATATCCAATGAGATAGACATTATTGGACAAGCCCAACA  
CCAGCATTAGTTTCGTTTTCTTGGCTGTTGTTTCACTGCCGATGACAGCTTTCTTGTATATGAGTATCTAG  
AAAATAAAAGCCTTGATCTAATCTTATTTGGTACGTATTTTATTCTTAAGATCTTTAATTCTTCTCCTCCTT  
CCCGAAAAGTCATTTGTAAGTAGAAATACTATCGTACTTAGTTGATTTTCTTGACTGTATGCATGGAAGA  
AAGATCCAAAGAAGAAGAAGAATTGGATTGGAAGAAAAGGCTCAAATAGTCGAAGGGACAGCTGA  
AGGTTTAGAATACCTCACAATGATTGCCAAGTTCGAATCATTACAGAGACATCAAACCTAGTAATATC  
TTACTAGACTCGAAATATCGTCCCAAATTCAGATTTTGGTCTTGCCAGGTTAGTGCATTTACTTTAGGT  
TCATTGCCTTCAAAAAGTCGAGCCTTCTTAGTCGTGTTCAAGAGTTATGTCACCAGGAAACATGGAGAAC  
TACAAGTGTCTATTTTCATTTTTATTAAGACGAGCTTAAATGGAGCAACATGGACAATGATAATTCATATA  
TCTGACTTCGACTTGCTTGGAAATTGAGATGTAATTGTTATTTGTTATGTTATTGGTCTTTCCAGAGTTAAC  
ATCAGGGAAAAAGGAAGTGCACCTCTTGTCAATTGCAGGCACATTGTATGTAATGAAGCACTTAAATTTG  
GATTAACCTCTTACCACTCTTCATTTTGTCTAGCCCGTGCTAATCCCTATACCTGCAGCGGATACATGGC  
TCCGGAGTACCTTGCTCAAGGACAATTAACAGATAAAGTGGATGTTTATAGCTTTGGAGTTCTTATGCTG  
GAAATAGTAAGTGGACGGGAGTTCAACAAAATTCAGCCGATGACACTCTAGACACCCTTGTAACCATT  
GTAATTTCCCCTCAACACTCAGCTTTTTCGAATTTACTTCTAGATGTAGTTACACAATCAGGTCATTTTATA  
TTTTCTATTTTTGACAGAATTTGTGTGTTTGATATTAGCTTATTAATTTAACGTGCAGGCTTGGAAACATTTT  
AAGGAGAAAAGGGCATATCGGATAATAGATCCGAGTATGGAGATAGAAGATGTGAATGAAGTAGTAA  
GGGTGGTTCAAATTGCGTGCTATGTACTCAAGAGTCACCTATTATGCGTCCAGATATGTCAACAATCAT  
TAACTACTTACACAAGAAAATAGAAAGTGCCTGTTCCCTCAAAGCCTCCTTTTATTGATGATTCAATTT  
ATGGCTCCGAACAACATGGCTCTATTCATCAGCATCATCCCTCTGCATCATCAGTTGATTCTTGCAGATAT  
TATGACACACACCAAGATAATGGCTCTTTTCATCGTTATCGTCATCATCCCTCTGCATCCATTGATTCTTAT  
TATGACACGGAAAGTGTTTTAGGATGACAATGGTGCTCTCTTTATGGCCTCTGCAAAGACAGAGCTAGC  
CATTCTATTTACAAGGAAAATGACGAATTCTACAGAGCTCGAATCAGATAATTTTGGAGATTATTATGA  
AGCTATCCGCCTGTAAAACGAGTGTATCCATTTCCAGCTTCGCGCTATAGTGCAGTGCTTTGATCAAG  
ACCGGTTAAATCCCGGAATACTGCAAAGGCTGCTGGAAAGACCAGATAAGTAGATAATTAAGTTATGTA  
TATTGACTGTGTTAAGTTTTTTTTATATCTTTATAATAGAAATTTTACCTATAATACAAGTGACCTTAATGTT  
ATTTAACCTACAATGATAGAATTTTG

>PGSC0003DMG400013468 RLK with antifungi domain(GNK)

CTGTAATGGGGGTTCTTGGTTAAACCTTCAAATTCCTTAATTTTTTAGGATTCTTCTGTTCAAGCACTATTT  
TTTACAAATACCCTTTTGCTAATTTTGGATTCTTGAAAAGTTCTAGGAATTACTATAACAACTTATTGTTG  
TTAGGGTGGTGTAAATTTTGTACATTTTCTTGAAATGGAACCGAATTCACCTGTGAGATTCAAATTAGGT  
AAGCAATCTTCATTAGCACCAGAGAGGGAGGGGCGAAGAAGTATTAGGAGGTGAAGATGATGGATTTGT  
TATTGATATTGATCCAAGGGTTAGGTTGATGTATTCGGCGAATGAGGGTGATATAGAAGGGATAAAGG  
AGATTTTGAATCAGGGACTGATGTTAATTTTAGGGATATTGATGAGAGGACTGCACTTCATGTTGCTGC  
TTGTCATGGTTCAAGTGATGTTGTGAAGTTGTTGCTTGATAATGGGGCTGAAGTTGATCCGAAAGATCG  
GTGGGGGAGTACGGTATGATGATCAATCCCATTATGGTTTTGTTGATGTTGATTGTTAATATGATTTTCT  
GTTTTGTTTGTGTTGTTGGTACAGTTAGTTCTTGTACCTAGCTTGTGAAATTTTGAAGGGGTTGTT  
TTTTGGGTATGTAGCTGGTTAGTGAGAACAGTTTGCATTGTTACTTGGTATCTAGCTTATGAAATTTTAA  
AAAAGGGGGTTCTTTTTTGGGTATGTAGCTGGTTATTGAGAGTAGTTTGGTATTGTTGGTACACTTTTG  
AAATGAAAAGAAAAAAAAGTTCCTTTTGGGGCATGTAGCTGGTTATTGAGAGCTATGTTGCTCAGAC  
TCTTTAAAAGGCGACGAGGGCGTGCCTGATTCTCCAAAAGTAGTGCATAGTTGAGGAATAAGACATG  
GGTGTGGCATCAATTTGGAGAGTCCGAGTAAGGTGTAGTTACTTCTTGGTATCTAGCTTATGAAACACA  
AAAAGAGTTTCTTTTTTGGGTATGTAGCTGGTTATTAGTGTAGTTTACTGTGTTTGGTACAGTTACTTCT  
TGGTTCATCTAGCTAATGAAATTAACAAAAAAGATTCTTTTTCTGGTTATAGAGGGTAGTTTCTATTG  
TGGTATGGTACTTCTTGGTATCTAGCTTATGAAATAAAAAAAGGAAAAAGGTTCTTTTTGATATGTAG  
CTGGTATTCGGAGTAGTTTGTGTTGTTGGTACAGTTACTTCTTGTGTTTAGCCTATGAAATGCAAAAA  
GTTGCTCAATTGACAGATATTTCTTCTTTAGCCCATCTTACTTTTGTAGTTATTATTTAGTGTCTGGGTC  
AGTCTGTGGACACACTACTAATCTGCCGGTATTTGCTAGCTTCTACTAGCATATGTACGGTAAGGTTAA  
CTCTGCCTAGCCATCTTTAGGTGGATAGAAGGAATTTATCTGGTGTTCCTCTAGTGGGATTTGAACCTT  
AATCCCAGGATTATCACTCTAGCACTTCAATCTTTAGGCCACCATTGGGGCCTTACTATGATATGATGAA  
AACCCCATTTGGTTTGTGATGTTTGATTATCACTATGATCTTCTGTTCGGTTTGTGTCATTGGTACAGTTA  
CTTCTTGGTATCTAGCTTATGAAATTAGAAAAAAGGTTTTTTTTCTGGGGGTTATTGCGAGTAGTATTGCT  
CAAATTGATAGCTATTTCCCTCCCTTAGCCCATCTTACTTACCTTTACTGTTGTTATTTGAAGTTTGGG  
TCAGTTTGTGGACACACTACTTATTCACCTGGTTTTTGTATGTCCTACCAGCAAATTGGGAAAGGGTAA  
CACTGTCTAACAGATTATAAGGAAGGAGAGAAACCAGAGAACTTTTAAGGAAAAGAATGCACAATAGA  
AACGATTAAGTGGAAAGTAATTACCACTTTAGGCTTTTGGTATATAGAAAAGAATATAGAAGAGGAAAT  
TCAACTTGTGGATCTCATAGGAGCTCTGTAACCTTTAGGAGGTGGCTAGCATAGCCCTTAATGCCAAGGA

ACACAAAGCTACCAGTTTCAAATTAATAAAAAACACTGCCTTGCAATCTTTAGGCAGATAGAAATAATTCA  
CGATTCGGGTTCCGGACCTTAGTCCCAGGATTGTCAGTCTAGCTCTTCAATGTTTAGGCCACTCTTGGGG  
CATTACTATGGTTATTCTGAGATCTGAGATGGCGCATCATGGCGAAGAATAAATATCAAACAGAGCAAT  
GGTTGGCGGATAACTATCCCATGTCACGTGCATATTGTAGAATCGCATGTTTTGTGTGCTTTAAGATATT  
TCTTTTGATAGACTCATTGGCTTTAAGATGTTTTATGTTTTACAAAGTTACATGCTGTGTGACCTTTGTTG  
AGATGAGGACATATGCATGAAGATTTAACAGTTGTTCTTCATCTAATCTGATTAACAGATACTATAATTT  
GTTTTTATTGTCGTTCTCCTTGCTCCCCTTCACAAATATGGACAATTTGATTTCTTAAAGTATTAAGGACAC  
TTTTAGATGGATTCAATCTGAAAATTTTGAGTGTCTGTTTTTCTTATTAGTTTACATTTTTGGGAACAA  
TCTAATCTTGCTTGAACAGCCCCTGGCAGATGGAATACATTATAAAAATCATGCAGTGATCAAGCTACTA  
GAGAAACATGGTGCCAAGCCTCCAGTAAGTTTGCATTCCATTCAAGCTCTACTGATCAGGGAAAAACCTT  
TTATTTTATATTGTGATAAGAGTTGCTTGGTTTGATGATTGTCTAAATTAATTTTATCCAGATGGCTCCC  
ATGCATGTTAAGACTTGCCGTGAAGTTCCAGAATACGAGATTGATGCTAAAGAACTTGATTTCACTAATA  
GCATTGAGTTGAGCAAGGTAATATATTTTGTGTTTTCACTCTTGTGTCCTGCGGATGCGTGCTATTTTCGG  
TTGATTCTCTACCCCCCCCCCTTTTTTTTTTTTTTTTTTTTTCTCCCCCCCCCCCCCTTTTTTTTTTTTTT  
TTTTCTCCCCCCCCCCCCCTTTTTTTTTTTTTTTTTTTTTCTCCCCCCCCCCCCCTTTTTTTTTTTTTT  
TTTTTTCTCCCCCCCCCCCCCTTTTTTTTTTTTTTTTTTTTTCTCCCCCCCCCCCCCTTTTTTTTTTTTTT  
TTTTCTCCCCCCCCCCCCCTTTTTTTTTTTTTTTTTTTTTCTCCCCCCCCCCCCCTTTTTTTTTTTTTT  
TCTCCCCCCCCCCCCCTTTTTTTTTTTTTTTTTTTTTCTCCCCCCCCCCCCCTTTTTTTTTTTTTTTTCT  
TCCCCCCCCCCCCCTTTTTTTTTTTTTTTTTTTTTCTCCCCCCCCCCCCCTTTTTTTTTTTTTTTTCT  
TCCCCCCCCCCCCCTTTTTTTTTTTTTTTTTTTTTCTCCCCCCCCCCCCCTTTTTTTTTTTTTTTTCTC  
CCCCCCCCCCCCCTTTTTTTTTTTTTTTTTTTTTCTCCCCCCCCCCCCCTTTTTTTTTTTTTTTTCTCCC  
CCCCCCCCCCCCCTTTTTTTTTTTTTTTTTTTTTCTCCCCCCCCCCCCCTTTTTTTTTTTTCTATGGAGTTC  
TACTACTAAAATTCATTTTTTATTCTGCCATCATTGTTAGTATCATTCTCCAACCTGAGACTCTGTAGTCTGT  
ACTGGCTTTTCTTTTTCTAGTCTTATCTATTTGATTTTACTGTTGTCATATTTCTATGTCTGTTATCTTG  
GATGATTCTAGTGACAAAGGGTTTACTTAATGTAACCTCGATGATCACCTTAGAGTTTGAATTAGTAAGAT  
TGTAATATTGGAATGGAAGCAGCATTGCATGAGGCAAGTATGAGTAGATAACGGATGTTCAATGGAGG  
AAAACCTGAGGCTAGCCTCATCTGATCACATCTTAGATTGATCTGTGGCATATTGCTCAGCTGCATAGGAT  
TGCTTATCTTCTTTTGGAACCTGGCTAACTATTTGTTGATTAGTGTGTACAATCTGATGCTTACAAGA  
ATTGTGAGATGACTCATCTAATTGTTTACTGAAGTGGCCTAGTATATCTTCTTCTCCAATATAGAATATTT

TTCTCTACTACTCTGCTGATAGGAGGTATGAGAGGTTGACTATGGATGGTTTCAGGAGAAGTAGAGGTA  
GGCCGAAGAAGTATTGGAGAGAGGTGATTAGACATGACATGACATGACATGACACAGTCAGCATACTG  
CGGACATGGCCTTAGATAGGAGGTTGTGGAGGACACAGATTAGAGTGGGAGGTTAGTAGGTAGTAGA  
GTGTTGTCTCAATTATCTTTCCATACTTGTAGTCGTTGTCTTACTTAAGGAGTTTTTTGTCCTTTGATGTCG  
TTTTATTACACTTCGATTATTGTATTATTTGTTATAGTTGTGTTTTTTTCAGAATGCTTTGACATGCTTTCT  
ATGGTATTTTTCCATGACTTCTCAATTTTTCCCCCTTCATTGAGCCGGGGATCTATCTGAAACAACCTCTCT  
ACCTTTCAAGGTAGGGGTAAGGCTGCGTACATTCTACCCTCCCCAAACCCCACTCGTGAGATTATACTGG  
GTATGCTTTTGTGTTGTTCTCCTTTGCTGATCCCAAAGATATTGTAGGGAACCTTCCATATTGCCTCATG  
GCGTGGAATACAAGTTGCTGTAAAAAGTTTGGGGAGGATGTGATTGCTGATGAGGATAAAGTGTGAG  
TAACTTAAAAGTGATAGTGCTTCTATTTTTTTACTTACAAGGGGAAAACCCGTAGTTGCTACTTCACATTG  
TTAGCTAGCATCTCTCATTTATTTTTGTGGATATTTACATTCCCTAATATTAGAGCTTCTGCAGGAGCGC  
ATTTAGAGATGAGCTTGCGTTGCTCCAGAAGATGAGACATCCTAATGTGGTGCAATTTCTCGGTGCTGTA  
ACACAAAGTAGTCCTATGATGATAGTGACGGAGTACTTACCAAAGGTCTTACTTATTAACCTTAAACGGT  
TTGCATAATTATATTTGACAACATTTTTATACTGTTTTCTCCCTTATACTAGTTCTATCCATTTTTTTCAGT  
TTACATTCTCTTTTCTTCTTTTTGACAATATGTTTGAACTTTTTCCAACAAACCTATCACTTTGAAATGACTT  
TTCCATGCCGTATGTTTCCAGGGTGATCTCCGTGAATATTTGAATAGAAAAGGAGCGCTTAAACCAACTA  
AAGCTCTCAGATTTGCAATGGACATCGCGAGGTTACATCCACTCTGTGCCACTGACCAATATCATTAAAC  
TCTTTATAAATTGCAAGATTAATGGTTTGTAGATTTTTCTAAAAAAAACAATTTTTTTTCATTATGCATTACTT  
ATAAACTTTGAGTTAATGTTCAAAAATACACTTAAAAGTATTCGTTTTTTTTGAGTTTACCACCTGCACTA  
TGCGAGTTTCTACCTAACTATCACCAACTATTTTTCAAATTCAGCTCCTCGATCTGTTGTTCCCTTTT  
CCAACCTGAAATATAACCATCGTTCAGGTAAGAAAAGAGAACAATTGATGTTGAATTGTGTTTTGATGAA  
TAGTTCTGGTAGAAAACCTCGTACACTTGATAGATCCGGTATGAAAGTCGAAAAACTGGAATACTTTAGG  
TGTGTTTTTACTGTTCACTCTAAAGCTTTTTGTGGATGTAAAATCTCAATGTCTTGTAGTCCTTTGATTGG  
AGCATTACTGCTGGGTATAAAAATTCTCATATATAATATTTGGTTTTAGGGGAATGAACTATCTCCATGA  
ACATAAAGAAGCAATTATTCATCGTGATCTTGAGCCTTCGTAAGTTTCACTTCCGTCAGGTTACCTGAATT  
ACATTTTGTCTATACTAACGCCTAGCCAAGTTTTCGAGTAGCATCAATGCTTTTCATATTGTGATTTGAGAC  
TCTTCATGTAATAATAGTTCACTTTTTTTGGAGTAAGATAACAGAAATATTTTGTGGATGATACTGGACA  
TCTGAAAGTTGCTGACTTTGGAGTAAGCAAGCTACTGAAAGTTACTAAAAGGGTCAAAGAAGATAAGCC  
TTTGACATACGAAGACAGTTATCGTGAGTACTTCTTCTTTTAGATATTCAATAGTCCTCTATTCTTCTCCA

TTGGAAAAGATATGGTAGCTTGTTACTGTGGAAAATAATATATGCGTGAGTGTTTTCAAGTTTACTTGAT  
AGCTCCAAAAAAGCTTTCTTTATTTGATATGTTGTGATTTGATCCTGTTTATTGATATTGAGAACCGAT  
ATTTGGATTTCTTCTAATATTTTCATCATCTTTTTTCTAAAAAAAACTTTTCAATTCTTGCAACAAATA  
GGCCGATTTGTAGCTCCAGAGGTTTTAGGAATGAGGAATATGATACCAAAGTTGATATCTTTTCATTTG  
CCTTGATTTTACAAGAGGTAATAATTTGTCTTATCAGATTCATGTTTAACTTTGAGGAAGAACAGTTTGT  
TTGCACTCTGTGGACCATATCTTTATTTTATGTTTAAAGAGTGTGTGAATGCAAGGAGCATTGTGTTCCGT  
GTTCTTAAAAGTGAAAGCACAAAACCTAGAAAGTGAACATATACTTTTTTAAAATGAAATCGAAATGAGTG  
CTCAATCTGTAGAAAATCAGAGATTGTGTATAACATATATGTATTTAATACTAATGGCATCAAATTACAA  
ATAAATTACTGACTTAAGAATTCAATATATAATGATACCATATTATTCTTGCAATTCTGCTTCAGAAACAT  
TTCTTTTGATCTGAGGGTCAATCGGAACAACCTCTATACCTCGCAAAGGTAGGGTAGGGGTAAGGTCCA  
CATACATCCTACCCTCTCCAGTCCCCACTTGTAGGATTACACTGGATATGTTGTAGATCAAATTTAACATG  
ATATAAATATGTTTCAGTAAGGTCACAGAAATATACAGTGATTATCGTTTACTTGAATATTGATCTGATCT  
ATTTATGTTGTATATCTGCGTAAGTTTGAAAGTAACTCCGGTTTGATAAAATTTAGTGAGTCAAACATGT  
GCGTCTTTTGCAGTTTCTCTTTGCAGAAACAGGCGATATATTTATCTTTGTGTTGTGCTGTATTTTAGATG  
ATTGAAGGCTATCCCCCTTCCATGCGAAGGAAGAAAACGATGTACCTAAGTTGTATGCTGCTAAAGAG  
CGCCCTCCTTTAAAGCCCCGGCAAAGTTTTATGCCCATGGACTGAAAGAGTAAGTTCTATATTTTCATCA  
GTTGCTACTATAAGTCACGATATTTTATTTTAGTATAATAAACCATGCTATTCTAGGGTAAATATCGATTG  
TTATAATCTGAGAATATGAAAACCTCATGTCAATTAGGTGTGAGAGGAGAACCATGAAGTCTCAGGTTTA  
AATTCTAGTGGAGACGATAAACACTAGGTGATTTCTTCCAATTCTAATTAGTTACCTGGTACTTGCAACA  
GTGACATAGTAAACGTACTTAAAAAGAACACAAAAAACTAATAAGAACTGAACAGACCTACAATTATA  
AAATCAAACCTATTCAGAATTGGCGTTCCTTTCTTCCGTATAGGTGGCGGCCTCTTTCCACCTCTCTGTTG  
CACATAAACTCCTACACATCTACGTATCATGATCCCCCTTTCTGTAGGTTGTTTTGTGTAAGGAAAGCA  
TCCTAGTCGACATGCTACACGAAAAAAGAGGGCCTTAGACTTTCAAAGCTGTTTCTATATCCAATTGGT  
AAAGCTAGTGGAGGTAGAAGGCCATATACGGGTTAAGCCGAGCCCAATAGCTTTTGCTCAAACAATGTA  
TCTTGTTAAGAGATTCATTAATATGTATACATATGAAATTTAGAACCCCAATGCATATGAAGTCGTCGTT  
CTAAAATTTACAATCCATAAAGTTGAAATCCTGGCTCTACGTTAGTTGGTTTCAATCTTGATTCTACTTATA  
CATAGATTAGTAGGGTTATAACTGATCAACTGGTGTCTTTACTTAGATGGTAGCATTTAAACAACTGGG  
ATCTTGAAAATGTCCTTATTGTCTTCTTTTTCTGTATATAAATTTACCATCTCATGGTCATCAATTTGCT  
GCTGTCTCCAATATGTTACTCTCTACGTTTCAATTTGTTGTCTTACTTTCTTTTTAGTTTGTGTTGAAGAG

GATGTCTCTTTCCTTTTTAGGCAACTCTTTAATTTCAATTTCCACATGGCATGTTTAAGACCACGAGATTAA  
AGGATGTTTTGGTACATTTTACATATTTTGTTAAGACCACAAGATTCAAAAAGTCTTCTTTACTTTCTTAA  
ACTCCGTGCCAAGTCAAATTAGATAATTAATTGAAACGGAAGGAGTAATATTAGGGGTGCTTTTGGT  
GTTGAGATTGATTGAAGAGTGTTGGAACGACAAGCCAACCGAGCGGCCAAGTTTCAAGCAAATTATCCC  
AAGGCTTGAGTTCATCTATAAAAAGTCTGACCACAACAAGCGCTGGAAGGTAAAATATCCATTAGTGGT  
TCTTGCACTTCAAATTATCGTATTGTTTTGATGTAGTTTCTGTTCTTTTTTAGTATGTTTTGTTATGCTTTC  
TTAGCATTTTGTCTTGCTTCTTCTCTCCATTTTTTTTTCCGAAGTCTTTTATTTGAGCCGAGGGTCTA  
TTAGATACAATCTCTCTATCTCCCAAAGTGAGTAGGGGTAAGGTTTGCATACAGACTACTCTCCCCTGAC  
CCCCTTGTGGGATATCAACGGGTATGTTGTTATTGTTGTTGTTGATTGGTGTATGTTGTTGATCTTT  
TCACATTTTGGTCATCAATGAATCAAATTTACCATTTGTTTCATCGAATAGAGACATATTAGCTCTAA  
ATCACTCGAATTTTCATGCTTTTGTGAAATATTGACTTCTAGTGAAAAACAATATCCTGGCTCTGATTTGA  
TAAGTAGCTCATCTGAGATACTATTAGTGGACGAGTTAGTTATAATTAGCTCAGATGTAAGTCTTTGTTT  
AGTGTGGTTACTTGACTCAATAATGTCCCAAACAAGTTGGGGTCTGACTATATGAATCTGAGCTAATCAC  
CACATTCCATTTAATTTTCATCTCAGTCCAACATTATTACACAAAACCTTAATCTCGCCACGACCACTGCA  
GTTTAGCATAACATATTATTAGTAGATACCTAAGTGCCTTTTTTACCATGAATACTTTGCTACATGCA  
GGTAATTAGACCATTGAACTGCTTTCAGCATTTAGAGGCAATGTGGAAGAAAGATAGTTCAGGTTTAAAG  
TAGTCGGAATCGTTCATCTCGGTCTACGCGCCACATCTAAGTAAATTTCTGGATAAAGTTTTTCTACTTCT  
CCACATTGTCTGCAAAAATATTAGTTGCTTTTAGTACATAGTCTGTTGGATTATTTTCTAGTTTCAA

>PGSC0003DMG400013524 RLK with antifungi domain(GNK)

CTCCTTTTTTTTTTTCTTTCTTCTTTGTCACTGTCCTCTGTTCTTTAGCAGAGTTCCTAAAGCATCTGCAATA  
TAATTTTCTACAGCCATCTTGCTCAACAAATCTATTTTTCGCGATCCAAAGGTAAGATTTTTGAGTTTTAA  
GTGTCTTTTGTCTTCACTTTTTTCTGTTATGTGTTTTTCCAAAGAACTGCTCAAATTGAGAATTCTCTGTA  
TTCAGTTCAACTCTGAGGATTTTGTAAATTTTGTGCAATTACTATATCTTAATTTCTTCTAATATGATTAA  
GATATATGAAAGATGATTTTTTGAAGATGGGGAGTAAAGTTCTGAAAATTGGTCAATTGGGGGTATTTT  
AGTCTTTTTAATTATTATTGTTACTTATTATATTATCTAGCTTGAGCCAAGCTGTGATTGAGGTGGGGTCT  
TACTTTTTACATACTCCATGAAAATCAATGTTAGTTGGTTTTTTTTGGTATAATCATCAATGCTGACCTCTCT  
TTTGTGTTGATAGTATCACAATTCTCAACTTTCTCTCCTATTTTATACTACTATATACTTTTCAAATTGATG  
AGTTTAACTTTTATATATTGAAAGTTAGATTATTAATAAGTGGCATTAAAGTAACATGGAAAAAAAAAA  
TCATTTTTTGGAAAGGGGGGAATTATATTGTTCAACATTCTGATTTAGAGTTGATATAATTTTTGTTAAAA

AAATGTCATATATACTCTTGTCGTCTAACAAATAGAGCATTATTTACCCTTGTTAACAACTTATATTTA  
CTGAATTAATAAAAAAAAAAGTAATCCTAAAATTGGTCTTTTAATTTCTAAAATGTTATGCGACTTTAAAAAA  
TTACCTCACTCATTTTTTTACCTCTCCAATCCAATAAAAAATGAGTGAAATTATTTTTTAAGGCTCGTGA  
TATCTTTTTAAATTAATAAACCAATTTTAGATTATTTTTTTAATTAATAAATATGAGTTTGTTAATGAAAA  
GAATAAATATGCTATATTTATTAGATGACGAAGATATATATATGCCACTTTTTTAACAAGGATATATCAGC  
TATATTACAAAGTTAAATTATGCCCTTTTTTCTAATATTTTTTACATTTTCAGTGTGTACAAATCAATCTTA  
GTCTAATATAGGATGCTGCAGTAGTTTCAACATTCACCATGAATATTTCTGGTTCCCTTTTTTGACTTTGT  
TGACAACATTTTGGTTATGAAATTGAAGCTGCCTCATCATTTCTTCATTTTTTCCATATTATACAATAGTTC  
AAAAGTCTTTTAAATACAATGATTTGATGTTCTTATATTTGATTGATTTCTCTTATTAGATCTTGCAGTCG  
CGCAATGGAGAAAGCAGTGACATTAGTTGCATTTAGGCTATTTGTCGTTCTGTGCGATTTTACTTCTACCAA  
ATGTATCAGAGGCAGAACCAAGATCTCAGATGATCCAGATCATATGTAGTACGCAACCTGAGCATAATA  
CAACAGCTTTTGTCCCGAATTTTGTGGCCACAATGGAAAAATAAGTGATCAAATGAGAACTCAAGGCTA  
TGGAATTGCACTCACCGGGAGTGGACCGGATGCTAACTATGGACTAGCACAATGTTATGGTGATCTTTC  
TTTACTTGACTGTGTCCTATGCTATGCTGAAGCTCGCACTGTCCTTCTCAATGTTTTCTTTCAATGGAG  
GTCGAATTTATCTAGATGGATGCTTTATGCGAGCTGAGAATTACACGTTTGATCACCAGTATTTAGGACC  
TGAGGACAGACATGTTTGTGAAAATAGAACCAGAAAGGATTCTTTGTTCCAACAAACAGCTAGGCGGGC  
TGTTTCAGCAGGCGGTAGCTAGTGCACCAACAATAATGGCTATTCCCGTGCTGAATTGGCAGTGCCTGG  
GGCAATGAACGAGACAGCTTATGTCCTAGCTGATTGCTGGAAAACACTGAGTGCTAACTCGTGCCGAGC  
TTGTTTGGAAAATGCATCTGCCTCCATGATGGGGTGCTTGCCATGGTCAGAAGGACGAGCGTTGTATAC  
TGGATGCTTCTGAGGTAATCAGATGTTAATTTTCTTAATGCTATTGCTAGCAGTGAAGACTCATCGCCA  
AATGGTAATCTTTACTTTGTCTTCTTCTTTTTCTTCAAGTCAATCACCGAACTGTTATCTAGACCATGT  
AGCTGATATATTGACGGATTTTCAGTGGTAGTGATTGTAATTGCTGTTGTTAGTGCTGTGGTCGTCTTCG  
TACTGGGAGCTATTATCGCCTTTTATATGTGGAAGAACAACAATAACAGAAGAAGAGAAAAGGTAAAA  
CATTTTGGTGATATTTTCAGCTAAGGCTTTAGCTTTGAATGTCTCTTAAAGCAACTAAGGAGTTTGAGATTT  
TCAGGTTCCAATGATGTGGAGAAGTTAGTGAAGACCCTTAACGACAGCAGCCTGAACTTCAAGTATTCA  
ACTCTTGAGAAAGCCACTGCATCTTTGATGAGGCAAACAAGCTCGGGCAAGGTGGATTTGGCACAGTT  
TATAAGGTAGTGAGCTGAAAATGCTTAGCTCGTTAACATCTTTCATGTTTTAGTTTTATTACATAATCAC  
ATCAGAGTAAGTCTATAATATTCTTATTATATTGTAGGGAGTTCTACAAGACGGGAGAGAGATAGCCGT  
CAAAAGGCTGTTCTTCAACAACAACACAGAGCTGCAGATTTTTACAACGAAGTCAATATTATTAGCAGT



GTTGAGCACAAAAATTTAGTAAGGTTATTAGGATGCAGCTGTTCCGGACCTGAAAGCCTTCTTGTGTATG  
AGTTCCTCCCGAACCAGAGTCTTGATCGGTTTATCTTTGGTGAGTAGAAGACTTTGTGACTTTGGCACAC  
TCGATTCTTAGTGGCATGAAATTAATAGAATTCACCTTGTATGTTGAAATTGGCAGACTCTACCAAAGGC  
AAAACATTGAATTGGGAGAAAAGATTTGACATCATTATAGGGACTGCAGAAGGTTTGGTGTACCTCCAC  
GAAAACAATAGAACGAGGATTATTCATAGAGATATAAAAGCCAGCAATATCCTGTTGGATTGAGGCTC  
AGAGCAAAAATTGCTGATTTCTGGGTTGGCCAGATCTTCCAAGAAGACAAGAGTCACATAAGCACCGCT  
ATAGCTGGGACTTTGTTAGTGATTCTTTACTTTCACCATTTAAATCGTAGCTCAAACTTATGTTGCTAA  
ACATTAACAGCCAGCAGTGTAATTAGTTATCTCATCATATGGTTAATTTTCCATTATTTTCTTGCAGAGG  
TTATATGGCACCAGAATACTTAGCTCATGGCCAATTAAGTAAAAGGCAGATGTTTACAGCTTTGGTGT  
CTTTTATTGGAGATTGTTACCGGAAGACAGAATAACAGAAGCAAAAACACTGAATACTCTGACAGTTTA  
ATTTCCATTGTAAGTTGTGAACCAATCTTCTAGTTACTTGAATCTATAACAATTGCAGACAAGAATGTTTT  
GCTCATTGATTTAACTACTGTCGTGGATGAAACAGACGTGGCAGCATTTTCAGCATGCGAGAGTAGAGG  
AACTGTTTGATCCAAATCTAATGCTGCACAACACTATCACACAAGCAATGTAAAAAAGGAGTTCTAAGAGT  
GGTACATGTAGGACTTTTTGTGCACACAAGAGATTCCGGGATTAAGACCGTCTATGTCTAAGGCATTGCA  
GATGCTAGTAAAGAAAGAAGAAGAGTTACCTGCACCAACTAATCCTCCCTTGTAGATGAGAAAACCAT  
GGAGCTTCATGACCCTTGGGATACCCCATCTTATCCCATGGAGATGATTCAGCTTCAATTGCAAACATT  
CTCACAGCTCATTCTACCCAGATGATGTGTCAGTGGCCTCAAACACTGAGACATGATATAAATCTGCTAGA  
GAACGGATCTCGTGAATCTCAAGTATCTTCTTGCCTCATGTTCTTTTTTTGAATACTCTAGGAGCAGATGT  
TTGTTAGCAACAGGTTGCTTTGTCATTGTAATGGTGATGTGCTTGCACAAATCTTGCGGGAAGTTTATCA  
TTGTAAGTAGATACACATTATATCTTGTCAATTTGTAATGGTGAAGTAAGATATTGTTGGACATACTATCG  
GTAAGATTGTAGTACAAGATTAATATAGTTTATCTTGATTATGAGAATGGTTTGCTTCCAACAGTGTA  
AATGATCGCTTGGTCATTGATGTTTTGTATTTCTGTTATACAAATTGGTTACTGTAAAC

>PGSC0003DMG400015170 RLK with antifungi domain(GNK)

AAAATAAAAATATTAGCATTGTATATTATTCAATATATTCCACATTTTATTAACATGTATTATTATTTGTA  
AATAATATATATTAATAATTTACTACAAGTTTAATATAATAGTTAATAATTCATGTATTGTAATCTCTACAT  
AACTAATATCCACATAGCTAATACCCGCATAATTAACCCTGCATAACTAAACCCTGCATAATTAATACCT  
GCATAACTAAACCCTGTATAACTAATACCTGCATAACTCTAACCAGTAACCAAACGGCCCCCTTATTGCTTC  
TATCCCCAGTACTGTTACTTTCCGTCTCGACTCCTTAGACCAATTCTTCTTGAAGTTAATGTTTTGTGGGA  
AAAAAACTTCATCAAAATTGTTTTTTCATGATCAGACTGTTGACTTCGTGCTCCTTGTAGTTTTGAGCAGA

TTCATCTTCTGCTCCATCATTTAGATTACTTTAGACATAATTCAGCAGCAACTTATTTTAGTCAAGAATGGC  
GTTGGTTATAGTTTTGTGTTTGTGCAGTATCCAAACAATTCTGATTTTGTGCTCCATTCACTGCTTGTGG  
GCGTCAAAGCACAGATGCAGCCCTCATACTACACTTGTTCAATGATCAATAATTATACAGAAGGAAGCAT  
ATTCCAATCAAATCTTAACCAATTGCTGTACAGTCCATTAACAATAATGGTAACAATTCCATCTATACAA  
AAGCCAGAGAAGGAGAAGACCCTGATAAAGTTTATGGAGTATTCTCTGTAGAGGAGACGTTGTACCTA  
ATGACTGCAAAAACACTGCATTGACGTGGCAAGAGAGCGGATCCAACGTGAATGTCCGCTCAAGAAGCAG  
GCAATTATATGGTTTGATGAGTGATTGGTCCGCTATTCTAATGTATCTTTCGTGTCCATGTTAGACACCTC  
GATTTCTAAGATCCTGTATAGCGTAGAAAATGTTTCACAGCCAGAACAATTTATGGGGAATTTGAGTGCA  
ATGTTTGATAATCTTACCGCTCAAGCTACTACAATCAATCTCAATCTGAAATATGCTGACAATTCTGATGT  
AATTAACCTCGTTTGATGGCAAATTGCATGCATCAGTGCAGTGTCTACCTGATTTGTCAGCTGTAAATTGT  
GTCACTTGCCTGAAAACACTGCTTTTTCTGGAATCCGTAACCTCTCTGTCTATTGCCAAGGTACCACGTGG  
AGTCAGAATACTACTTCTAGCTGCAATTTAAGGTATGAGCTATATCCATTCTCTATGCCAGTGTACCGC  
CATCGACCAGACAGGGGAATGAAGACGAAGGTATGAGTTCATTACATTAAGCCAAATTTCCAGGAA  
ATCTATTTGAAGGCACTTTTCTCACTATTTTTCACATTAAGCTTTTAATCATAATCATATACTACATGG  
TGTCATGGTCAATATCGAATGTCGTTTAAATTTTGATGCACACCCTCAAAGAAAATCATTTACTAATAGG  
AGTTATGGCTGAATGATCATTGTGCATGTATCAATTATCATTCTCCAACCTGTAGAGAAGATAGTCACG  
CACACTTAAACACTTCACGAAGTAACGGTCTAATTCAGCTTTTAATTGACCAACTATTTTTTTTTGCAGGC  
AAAAACTTCAAAGACAAAGCTTATAAGTATCATTATAGGTGTTATACTAGCAATTTTAGCTGTTGTACT  
GGCAGGTACTTGCTTTTACCTTGTA AAAAGAAGAAGACGAATAGAGAAGGGTAATTTTTCTTTTGGTATT  
ATGCATTGAAAAGAAAATAATTGTAGTTTCAGCTAACCAATCAAAGTTGGATCTTTACAGGGGAGGAAT  
GAAAAGAGTCGAGAAATTCAATTGCTTGACATGATAGGAGAAACGCTTGATGCGAATGATGATTTTGGC  
TCAGAAAAGCAGGGGAGATCCAGAGAATTTCCAGTAGTAAACTAGACCTCATTGAGCTGCTACACAA  
AAATTTTCTGAAGAAAACAAGCTTGGAGAAGGTGGATTTGGTCCAGTGTACAAGGTAACGATTCCTATC  
ATTTGTCATAACCAATTACCTAGGAAGTCCTTAAATCTTAGTCTAGAGACTAGTGAATCTAAGTTGCTAG  
AGGGGGTCAATTTTTCATGATTTTTGGGTTATTTAGTGTGTGTATAACATTCCAGGGTACTCTAGCCAAT  
GGCATAGCAATTGCAATCAAGAGGCTCTCTAGAACGTCCGGTCAGGGACTGAAAGAGTTCAAGAATGA  
AGTTGTCTTAATTGCCAGATTACAACACAGAAATCTCGTGAGGCTCTGGGTTGCTGTTTAGAGGGAAAT  
GAGGCACTGCTTATCTATGAGTTCATGCCAACAAAATCCTGGACTTCTTCTTTTTGGTTTGACGTTTAC  
TTATTTGGCATATTAGTATATGCCACAAAAGAAGCAATTAATCACTAACTTCAAACCTTTCTTTTTCTAGATT

CAAGAGAAAATGAAATTCTGGAATGGAGACAACGTGTCCACATTATTAAGGAATAGCAAAGGGTATTT  
TGTATCTACACGAGGATTCTCGACTAAGAATCATTATAGGGACCTAAAAGCTAGCAATATTTACTGGA  
CAAAGATATGAACCCCAAGATATCTGACTTTGGAATGGCAAAGATGTTTAGCGGAAATCAACGAGAAGC  
CAATACAAATAGAGTTATTGGAACCTAGTAAGATGATGCAACAATGCAAAAATCTGTTGGTACTATTTAA  
AACAAACATTATAGTGTAAGATTGATGCTAAGGACCATTTTTACTTCTGCCATTTTTACAGTGGATATATG  
GCCCCTGAGTATGCTATGGAGGGACTTTTTCTACTAAATCAGATGTTTTCAGCTTTGGTGTCTGTTGCT  
TGAGATAGTAAGTGAAGGAAGAACAATAGCTATGTTCCGAATATGGTCAGAGTCTCCTAATTTTGT  
AAGTATACTTCTTCTCCATTTTTATTTTTGCTTATGTCAATTTCAACTTGCATGAAGCATCTAAAACATCT  
TGAAAATTCAGGCGTGAAGTTGTGGTGTGAAGAGCATGGATTAGAGCTAATGGACCCTTGCTTATCAC  
AGTCTTGTGTGACAACTGAGATAACAAAATGCATCCATATCGGACTACTCTGCGTTCAACAAGATCCAGC  
AGATAGACCTACCATGTCCTCTGTGGTTTTATGCTGGAAAACGACACTAAAACATTTCCACAACCATCA  
CAACCTGCATTTTCTATTGGGAGACTTGCCGTGAGATCAGCTGAGCCTCGATCTAATGATCAGTTATGTT  
CCGTTAACGAGGTCACTTTATCAATTCTATCACCCCGATGACCATTAATATAGGGTCCATCAAGGATCTGT  
CTCCTCTCCATTTTCCCAAGTTTCTACTTCGATTGGTGCACATGACATATGTTGAATTAATGACTACGATT  
TAATTGACCAAATAAATCCCTA

>PGSC0003DMG400015171 RLK with antifungi domain(GNK)

GTTTCGAGCAGATTCATCTTCTCCTATTACTTTAGACATAATTCAACAGCAAGTTACTATAGTCAAGA  
ATGGCGTCGGTTTTGGTTTTGTGTTTGTGCAGTACCCAAACATTAATTCTGATTTTGTGTTCCATTCACTA  
CTGCTTGTGGGTGTCAAAGCACAGATGCAGGTGAATCCCTTATACTACGATTGTTCAATGCCCAATAATT  
ATTCAGAAAGAAGCAAATCCAATCAAATCTTAACCGATTGCTGTACAGATCACTGTACAATAATGGTAG  
CGATTTTCTATACAAAAGCCAGTGAAGGAGAAGACCCTGACAAAGTTTATGGACTATTCCTCTGTAGA  
GGAGACGTTGTACCTAAAGACTGCAAAAACACTGCATAGACGTGGCAAGAGAGCGGATTCAACGTGAATG  
TCCGCTCAAGAAACAGGCAATTATATGGTTTGTGAGTGTGTTGGTCCGTTATTCTAATGTATCTTTTCGCGT  
CCATGTTAGACACCTCGGTTTCTAGGATCCTGTATAACACACAAAATGTTTCACGGCCAGAACAATTTAT  
GGGTAATTTGAGTGCAATGTTTGATAATGTTATCACTCAAGCTATTACCGTCAATCTCAATCTGAAATATG  
CTGACAATTCTGATGAAATTAACGATTTTCAAAGATTGTATGGCATGGTGCAGTGTCTACCGGATTTGTC  
AGCTGTAGATTGTGTCACCTGCCTGAAAACACTGCTTTTTCTCAAATGAGTATAACACTCTTTGACACCAAAA  
TACCAACAGGAGTTAGAGTTCTTCATGCAAGCTGCAATTTAAGGTACGAGCTATATCAACTCCTCACCAG  
TTTACCGCCATTGACCATCCAGGGAAACGAAGACCAAGGTATGGGATCTTCTATAAGTTAATTACATGCT

TTAATTTTACTCTGAAGCCAAATTTCCAGAAATCTATATGGAGGTACTGTTTCTCACATTAACAACTAATCA  
CTTCAAATGTATATTAAGCTTTTTAATCATAATCATATACTGCATGGTCCATATCAAATGTTTGTCTGTTT  
AAGGTTTTGGCGCACACCCTCAAAGAAAATCATCTACTAATAGAGTTATGGCTGAATGATTAGTGTGCAT  
GTATCAAATATAATTTCTCCAACCTTATAGTTAAGATAGTCATGCATACTTTACACATCACGAAGTAACAG  
TTGAATTCAGCTTTTAATTGATCAACTACTTTTTTTTCAGGCAAAAATACTTCAAAGACGAAGCTTATTAGT  
ATCATTATAGGTGTTACTAGCAATTTTAGCTGTTGTAAGTGGCAGGAACCTTGCTTTTACCTTCTAAAAG  
AAGAAGACGAATAGAGAAAGGTAAATTTTCTTTGGCATTGTTGGATTGAAAAGAAAATAGTTATAGTTT  
CAGCTAACCAATCAAAGTTGAATCTTTACAGAGAGGAATGAAAAGAGTCAAGAACCTTCAATTGCTTGA  
CATAATAGGAGAAACATTTGATGAGAATGATGATTTTGGCTCAGAAAAGAAGGGGAGATCCAGAGAGT  
TTCCAGTTGTAAAACCTAGACCTCATTGAGCGGCTACACAAAATTTTTCTGAAGAAAACAAGCTTGGAGA  
AGGTGGATTTGGTCTGTGTACAAGGTAATAATCCTATCATTATAATGACCTAGGTAGTCTCAAGTC  
TTAGTCTAGTGAATCTAGTTGCTAGAGGGGGTCAGTTTTTCCGTGAAATTTTGGGTTATTTAATGTTGTG  
TATAACATTACAGGGTACTACTACCATATGGCATAACAATTGCAATCAAAGGCTGTCCAGAACGTCCGGT  
CAGGGACTGAAAGAGTTCAAGAATGAAGTTGTCTTAATTGCCAGATTACAACACAGAAATCTCGTGAGG  
CTCTTGGGTTGCTGTTTAGAGGGAATCGAAGCACTGCTTATCTATGAGTTCATGCCCAACAAAAGCCTGG  
ACTTCTTCTTTTTGGTTTGTCTCGACTAATTTGGCATATTAGTATATACCACAAAGAGGCAATTAATTTA  
CTAACTTCATACTTCTTTTTCTAGAATCAAGAGAAAACAAGATTCTGGATTGGAGACAACGTCTCCACAT  
TATTAAGGAATAGCAAAGGGCATTCTGTATCTACACGAGGATTCTCGACTAAGAATCATTATAGGGA  
CCTAAAAGCTAGCAATGTTTTACTGGACAAAGATATGAACCCCAAGATATCTGACTTTGGAATGGCAA  
GATGTTTAAACGGAAATCAACGAGAAGCCAATACAAATAGAGTTGTTGGAACCTAGTAAGTTGATGCAA  
AATGCAAAAATCTGTTGGTACTATTTAAAACAACATTGTAAGTGTGTAAGATTGATGCTAAGAACCATTTTTTA  
CTTTGCCATTTTTACAGTGGATATATGGCTCCTGAGTATGCTATGGAGGGACTTTTTTCTACTAAATCAG  
ATGTGTTTCAAGCTTCGGTGTCTGTTGCTTGAAGTAAAGTGAAGGAAGAACAATAGCTATGTTTCTGA  
ATATGGTCAGAGTCTCCTTAATTTTGAAGTATACTTCTTCTCCATTTTTATTTTTGCTTATGTCAATCTCAA  
CTTGATAAAGCATCCTAAAACCTATCTTGAATAATAGGCGTGGAAATTGTGGCGTGAAGGGCATGGAT  
TAGAGCTAATGGACCCTTGTATCGCAGTCTTGTGTGACAACCTGAGATAACAGAATGCATCCATATCGG  
ACTACTCTGCGTTCAACAAGATCCAGCAGATAGACCTACCATGTCCTCAGTAGTGTATGCTGGAAAAT  
GACACTAAAACACTTCCACAGCCATCACAACCTGCATTTTCTATTGGGAGACTTGCCGTGAGATCAGCTG  
AGCCTCAATCTAATGATCAGTTGTGTTCCGTTAACGAGGTCACTTTATCAATTCTATCACCCCGATGACCA

TTAATATAGGGTCGTCAAGGATCCGACTCCTCTCCATTTTCCCAAGTTCCTCCTTCGAGTGGTGACACAT  
GACATATGTTGAATTTAATGGTTACCATTTAATTGACCAAAGTAAATCCCTAACCATTTGTTGAGATATCAA  
GTAATGACTGCATATCAATTTAGTTCCAAACATTGTTATAATCCCACAATCTTAATTCTTCTGTCCATAAATATA  
GTAAAAAATATACATCTTCTACGCAAGATCTATATCCTTATTCTGCTACCTTGTGCGATAACTGGACCG  
TTAACTATCTTGATAACCAATTAATCGTATTTTAGCAATTTTATAACAGTTTAGCATGTCTATACCCTCAA  
ACTGAAACCAATGATAAACATCCGTAAGTCTTAATTATATGGAACACATAGTATCAATGTCAAG  
TCTTCTATAACTCAAAAAGTTCATTTGGGAATTTTACAAACACATAGTATACAACCTTGTCAATTAGCAT  
AATAATAAACATACAGATAACAAGTATTTGATCTAAATATATGAAAAAGAACCTGGCGATGATAGTTAG  
TTTAAATCCAGCCAAAAGAAGCTCGGCGTCTTGTTGTCTTTGTTTTCTCCTTCTTCTTGTGTTCTTTCTG  
TTGATTTTCAGAAAATCAATTTTCTATAGTAAAAATATGAGGGGGTTATCACTTATCTCAGCATGTTTT  
AAAACATAATTTTGAAAATTATTCATTCTCCTCTTAAATTAAGCTCCTACTTGCTATGATTTTCACTATA  
AT

>PGSC0003DMG400016409 RLK with antifungi domain(GNK)

ATGAGAAGTACTAGAGGATATGGAGTAGCAGTTACCGGCACTGGACTAGATACTAACTATGCACTTGCCCAA  
TGCTATAGTAATCTTTCTTTAGTCGACTGCGTCTTATGCTTCTCTGCAGCGGAACTCTCCTGCCCAATG  
CTACCCTTATAACGGACGAAGAATTTATCTTGATGGATGCTTTTTTCGAGTGGACAATTACATGTTCTATG  
ACCAGTATTTAGGTCCAGAAGACAGGCATGTATGCGGAAACAGGACGACAAAGGGTACATTGTTCCAA  
CAGAATGCTAGGCGAGCCGTGCAGCAAGCAGTTGCAAATGCACCGAGTAATGATGGTTATGCACGTGC  
CGAAGTGTGAGTACCCAGTCTTCCAACGAGACAGCTTATGTTCTCGCTGATTGTTGGAAGACACTAAGC  
GCGAATTCCTGTGCAGCGTGTGTTGCAAATGCATCTGCATCTATGTTGGGATGCTTACCTTGGTCAGAAG  
GTAGAGCCCTTTACTGACTGGATGCTTCATGAGGTATTCTGATACAAATTTTCTCAATGATACTTCTACCAGT  
GGAGGCTCGTCATCAAGGGGTACGTTTTGCTCTTTTTTCGTCCTGGTTTACCGGTTATTTATGAACTAATT  
TTTACTTTCAAATCACCATAATGCAGGAAAAGTTGTAGTCATTGTCATAGTTGTTGTAATTAGTTCCGTTG  
TCGTTTTGGGAGCAGCTGCTTTGTTGGTTTTGGTGTGTTGGGAGAACAAACAATCCAGAAGAAGAGAA  
AAGGTAAATGCTTTTGTGCCAAAATATCAATGATGTACATATTGTTGAGTATATATCTTGCGATTGTCAC  
TCAACTGTACCGAGACAACCTTTCAAGAATTAAGTGTGAGGCGTTGTGGCCTACTCATGTTTTTCTCGGAA  
ATTTGAACTTGTAGGTGCAAATGATGTTGAGAAATTGGTGAAGATCCTTCATCAAAACAGCTTAAACTT  
CAAGTATTCGACACTTGACTATCCTTGA

>PGSC0003DMG400018101 RLK with antifungi domain(GNK)

GCCATTTATATTATTATCTCAACTCAACTCTCGAACAAAATCGAATCGAAAATCATTGACATTACTTTCAA  
TTTTCCCAAACGGGGTAGTCCCGTATTTTCTTCTCTCTCCTCTGCGAAAAAATTAATTTTTCACAACA  
CATTTATGCATTCTCATGTGTGTTGCATAAAATAAAAAGAGAAAGGAAGAAGAAGGAAAGGTGG  
AGAAAATTGAAAATAAGTCCACTTTTAGATATTTTTCCATAACCTATTTCAATCCTTTACAAATATGTTTTA  
TTTGTTACAGAAATACCAAATTGTTCAATTGTACAAATGGAAAATAGCTTAGGATCAATCTTTGTCCTGTTT  
AAAAAAAACGAAGAAAATTGAATTCTTATTACTATAATTTAATGCCTTATGCACCAAGATACCTTGAA  
CATGTTACGTTTCATCTCTTTAATTATCTTCATATTTATGATTTCTCCGTCTCTTTGTGATCCTAGAACTTCTG  
TTGCTAATGTTTCTTGCAAGCCTCGAGCAAATGTGGCGAATAATGTTGATTTAATACCAAATTTACACA  
AGTTATGGGAGACTCTCCATGATTTTATTATGGAAAATAAGTCTGCAACATATGAAATGAATACGAATGCA  
CCTGATATTTATGGAATGGCGAAATGCCATAATGATCTTTCTCAGGATGATTGCAAGCTATGTTTTGAAG  
AAGCTAAAATTAAGCTAACAAAATGTATTCTGCTCCTGGTGGCTCTGTTTATCTAGACGGTTGCTTTCTC  
AGATATGAAGATTATAATTTTTTCGACGAGAGTATACTGAAGAATTCATCTATTTATGTTTGTGGTGCTCC  
CACGGATATAACGAATGATCAGTACATGAAGAGGGATTTGCTGCAAGAGTTGATCGTGCAATTGCGAA  
TGTTACAAGCATGTCGATAGTGAATGGTGGATTTGGGGCAACGATTGTGAAAAGTGGATTGCTTGCTAT  
TTATGCATTAGGACAATGTTGGGATTATTTGCAACCAGAAATATGCACTATGTGTTTGAATAATGCTGGA  
GATATGCTAAGGAAATGTTTGCCTGCTGCAGAGGGAAAAGCTATGAATGCTGGTTGCTATTTGAGATAC  
TCTTCTAATAAATTCTTCGATGATGGAGCACTAGTCCCTCGCTGATAAAGGTAACGCCAAAGAATTTCTTG  
TTAATTAGTCTCTGGACGTCCCTGATACACTAAGCTCCCACTATGCACGGGTTTGGAGAAGGGACGGAG  
GGTCTATTCTGTAATGTGTCTAGTCTTACCTGCATTTCTGCAAGAGCTAGGTCGTCTCCATGGCTTGCTA  
TTTCTAGCAAAGGAAATATTTGTTACTTGTATAAATATTTTTAGCTAACATTTGGTCTGGTGTTCATTTT  
TTTTTCAGGACCAACAAAGTGAAGAATGTATGGATAATTGCAGCGATTGTATTATCGTCTATCTTGGGA  
GTATTTGCTATTTTAGGAGCTTTTTTAGGCTATAGAAGATATTCTCAGGATAAAGGAGGTATACTTTCAA  
ATCTTGAATTTCATAAATCAGTTTCTGTTTGTTCATGTTCTGATGGATCTTCTGCTTATCGCGATATGTATA  
TATATAGGTACAAATAGGATTCATAAGATTCCACTGGCTCTTGAGACGTCGAAACTAAATTTCAAGTATG  
AAATGCTAGAACAAAGCAACAGGGGTTTTGATCCTTTAAACAAGTTAGGCCAAGGTGGATCTGGTTCAG  
TATATAAAGGGATTCTTCTGATGGCAAAAAAATTGCTGTGAAAAGATTATTGTACAATACGCGTCAATG  
GGCAGAGGAGTTCTTCAATGAGGTCAATTTGATCAGTGGTATTCAGCACAAAAATGTTGTGAAACTCTT  
GGGATGTAGCATAGAAGGACCAGAGAGTCTTCTGGTTTTCGATCATGTATCTAACAGGAACCTTGATCA  
ATTGCTTTTCGGTAACTATTCTTCAAGTTTAATCTAACTAGTAGTAGTATTTTACTATACTTAAATATTTTA

GAGACAGGTTCAATAATTTGATTGATTTTTCTTGAAGATAAGAACAAACGTCAATTTTTAAGCTGGAAGG  
AGCGATTTGATATTATATTGGGAATAGCAGAAGGGATAACACATCTTCATGAAGGAAGCAAAGCAAAG  
ATCATCCATAGAGATATTA AAAACAGTAATATTCTAGTTGATGATGAACTCGTCCCAAAAATTGCTGATT  
TTGGACTTGCTCGACGTTTTGCTCCCATAAAACACTCATGTCAGCACCGGAGTTGCAGGAACGTTGTAAGT  
TATCAATGTTTGA AATTGGTTTTCTCCAAGAATACTTGTAGTCTATAATATGATTA ACTCTGTTGTAGGG  
GATATCTAGCTCCTGAATATCTTCTTCAAGGATGTTTAAACAGAGAAAGCAGATGTTTATTCATTTGGAGT  
GGTGGCCATAGAGGTTGCGTGTTGTATAAAGAGCAACGCTTTTGTGAGTGATAACGGATCAGTTCTACA  
ATCTGTAAGTCTCAA AACCATCCTTATTCAGTAACA ACTTAAAGCTTTTAGACGATCAGTTGGTCATATAGT  
TTGTGCTTTTTTAACTCTTGTAAATATATAGGTGTGGAGAAATTACAAGTTGAATAAGATTACGGAGTCAA  
TTGACAGTAGGCTGATGAGTGACTTTCAAGAAGAGGAGGCATCGCGTGTGCTTCAGCTAGGACTATTGT  
GCACACAAACTAGAAGATTTTCGCGACCATCTATGTCTCAAGTGGTAACAATCCTAAGAAACGAAGAAA  
TTGAAATTCCAACGCCAATGCAACCTCCATTCCAGAACTCAAGTTTACTAGCTCCTCCAGATACAAGCAG  
TTCATCCATAACTAAAGATAGTTTCTGCTCAGAATGGTATTCCACAGATGGAATTTCTATTCATTCTTCTG  
AGTTTGCTAGCATTCTAGCTCTCAATCAGGTGATTTTTCGACGTGTGAAAACAGTAGACTTTTTGAAAATT  
GCTTGAGGATTTTGGTTGCTTGCCATTAGGTCTCTGAACCAAAGATCAAAGGATTTGGA ACTGACCCTAT  
TTGCACATATGTAAAATTAATAGCAGAGTCATGACTTGTAATCACGGCAGCATTGCTTTCGTTGGTGT  
AACTGTA ACTATAACAATTCAAGAGGATGAAATAGATTGAATCGATAGAGCTGTTTATGGAAAATGTTAC  
ATTGCCAGTACTGGAAAATGTTATACAGTTTTCT

>PGSC0003DMG400023814 RLK with antifungi domain(GNK)

AAAAC TTT CATAAGATT CAGACACAGATAATGAACCTAATATTTTGACTCTGCCAGTGGCACA AACCTT  
CAACTACAAGACTCCACAGATAGATCATCAATCATCAAAAACACTTTTTGGGCACATAATTTGGTGAACC  
ATAAAGAAAACCCATTA AAAATGGTTTCTTGAATTA AAAAATCTCATTTTTTTCTCTTTCTCTCTAAAG  
AAGTTAGGGATGAAGGGT GATTTGTGGATTGTGTGTTTGTGTTCTGTCTATTTTCTTGGGTAGTTTCAA  
TTTCATCAGCTCAA AAGAGCACCAACTTTTCTGCAACTTGTCTTTAGATTTTGGGTATGTTCTGAGAGCC  
CCATGGTCTAGTTCTAACTGCAAAGTTCTAAATTCATATCCTCAGCTTTCCAATGGTTCTGCTATTTCCACA  
TCAAGCAAAGGCCAGTGCTGCCAGAACCTTTTGTCCCTCTTTGGTGTGCTATGGCACAACACCTTAAAG  
AAACTTCTTTTTCCAGCTACCCAATTTGGAACTTCTGCTTCTTGCATCCAGGAATCCAATCTAAGCTTA  
ATTCTTTGTCCTTGCCTTCAAATCTTACCTTTTCTGTTTTGACCCTATTCAGTTTGTCAATACCCATACAT  
TTGTGCCTCAATTCAAACCATCCAAGATTGGGATAAAAAGCTGGGGAATTCAACTGTTTTGAATTCTGGT

TGTAGGTCTGATCTTGAGGATTTAACTGCCTGTGACGGTTGTGTAGCTGCTGGCTTTAGAGTTCAGCAAC  
AGTTGATTGCAATTGATGGTAATGCATCTCATTCCACTGATTGTTTTACTTCACTATTTTGTATGCTGCTG  
GTATTGTCAATGAGTTTGGTCCTGAAAGTACTGGTGCCATGTCATGTATTTTTAGTATTGATTTGAAAAA  
GTATGGTTCATCAAGCAAACGACATTTAGCGCTAATATTTGGGTTGGCTGGAGCTGGTATGGCAGTATT  
ATGCATGTCTTTAGTGTGGGATTGTATATCTGGTGGAAACAAAAGGTGGAGGAAAAATGATGATGTGG  
AAATGGAAAGTACGGTGTCTAGGCGAAGAATGAGGCCTAATACTTCTGTTTGGTTCAAATTTCAAGGAGC  
TTGAAAGGGCAACAGATAGTTTTCCCAAAGAATTTTATAGGGAGAGGTGGATTTGGAGTAGTTTATA  
AAGGAACTTTAGCAGATGGGACTAATGTTGCTGTCAAAAAGATTATAGAATCTGATTTTCAAGGAAATG  
ATGAGTTTTGCAATGAGGTTGACATTATTAGTAACTTGAAGCATCGTAATCTTGTATCACTTAGGGGGTG  
TTGTGTGACTGATGAAAATCGGATTGAAAGTGGGGAGAGTGAAAGATTCCTTGTCTATGATTACATGCC  
CAATGGGAATCTTGAGGATCATTATTTGCTGTAAATCAAGGTGGAATACTGAAGCAACCGTTGACTTG  
GCCTCAGAGAAAAACATAATTTGGATGTGGCAAAGGACTAGCTTATCTGCATTATGGGGTAAAGCC  
AGCAATTTATCACAGGGACATTAAAGCTACTAATATCCTATTAGATGAAGATATGAGAGCAAGAGTTGC  
TGACTTTGGGTTGGTTAAGCAAAGTAGAGAAGGACAGTCTCATCTTACCACCAGAGTGGCAGGAACACA  
TGGCTACTTAGCTCCTGAATATGCTCTCTATGGGCAATTGACTGAGAAGAGCGATGTTTATAGCTTTGGG  
GTTGTTGTTTTGGAAATAATGTGTGGAAGGAAGGTCCTTGATTTCTTTCAGGATCACCTCGTGCTTTTCT  
GATCACAGATTGGGCTTGGTCGAAGGTAAAGGCTGGAAAGATAAATGAAGTTTTGGATACCATCCTAGT  
AAAGACTGAGGATTCAGTAAGTGCAAATCCAAGGGCTATAATGGTGAGATTTCTCCTTGTGGAATATT  
GTGTGCTCACGTGATGGTGGCCTTGAGGCCAATAATTGGATGCACTGAAAATGTTAGAAGGAGATAT  
TGAGGTTCTGAAATTCCAGACAGACCAGCACCTTGGACAACCTTCATTTTATAATGCTAGTGGTAAC  
ACATTCAGCATATCACCAGCCTTGAGTTGCTTGC GACTGCCTGCTGGAGACATGCTCAGGTGACAATATG  
AGGTTTTCTCATATTACATCCTTTTCTTGCTTATTGAGATTAGGAGAAAGCTAATGAAATTTCTGCTAGAG  
TTGAACCTGGGATCCGAGTGCCTTGGGATTTTTTGTGATAAAATAATATTAGCTCGGAGAGTTCTGTTGT  
TTTCAATTTCTGTCAATAGGGACATACTTAGAAATCCTAAGTGTAGAATAAAAACAGAAACACCATCTA  
CTTGCCGTCCAGCTAAACAAACCAAGAGGACATGGATTCCAATTAGATTGTCAATTCCTTGGAAAGACCG  
AGAGTTTCTTTGGCAGATGTAAGAGTTTCTTCTTTCTTTTATTCTTTCCGACAGCCTAGAACTTTTGACAAT  
CTTTGTTTAGGCAAACCTGCAGATTTTGTGTTTCTTTCGTTTCTCAATAGGTTAATCAGATCTTGTAATAAT  
TAGTAATAGCTGATACTCCTCTGTAATATATCTAGCTTGCTTCATTCAAGGCCATGGTTGCCTGTGATGTA  
TGTTGCAGTCTGTAAATTCATATATCTATATTATTTATGTTTCAAAGTTCTCGAGACAATATTTCC



>PGSC0003DMG400041974 RLK with antifungi domain(GNK)

ATGCCTCCGATGTATGTTGCATAGCTCTCTTCATTGCCTTCTTTCTGATTCCATTTGTGAATTCAGTGTCC  
TTTCAAATATCTCGATTTGGACCGGACGTGACTGACATACTCTATGAAGGAGATGCAGTCGCGTCTGTAG  
GAGAGATCGAGTTTAAACAAAGCGAACTATCTATGTCGCGTTGCTCATGCCATCTATAGAGAGAAAGTTC  
CACTTTGGGATCCTGATCATGACTCCACAAAGCTAGCTGATTTCTCCACACGTTTTTCGTTCACTATAGAT  
ACTCAAATCGTTCCTCATATGGTCATGGTATCGCGTTTTTCCTAGCTCCAGTTGGTTTTCGAATCCACCT  
AACTCAGATGGTGGTTTTCTGGACTGTTCAATACAAGCACTAGTGATTCAGCTCAAAGCCAAATTGTTT  
CTGTTGAGTTTGACTCATTTCACGTCGAATGGGATCCTCCATTGAGCACGTTGGTATCAATAACAAT  
TCAATTGCTTCATCTGTGACAACTCCTTGAATGTTAGTTTACATAGTGGTGATCCTATTGAGACATGGAT  
TACTTACAATGCTACAACAATAATCTTAGTGTCATTTGGAECTATGGAACAGGCCCGAATTCGAGCATG  
TTTTACATAATAAACCTCAGAGATGTTCTGCCTCCATGGGTCACAATCGGATTCTCTGCTGCAACAGGAC  
AAAATGTCGAGAGACATACTTGAATCATGGGAATTCAGCTCGAGTCTTGATATAACAGAGTTAGGTG  
GAAATGACCGTGAAAAGATTGGACTGATTGCAGGGCTAACAACTTAGGTGGGATTTTGTGTTGTGAGCG  
CGATTTTGGCTTTGGTAGTTTTGAGAAAATGTAGACGAAAGGTGAAGGGAAATCCAGAGACAATAAGC  
TTAACATCATTCAATGATGATCTTGAAAAGGGGGCAGGGCCAAGAAAGTTTTCGTATAAAGAGTTAGAT  
ACTTCAACTAATCATTCTCAGAGGAACGAAAATTAGGCGAAGGGGGATTTGGAGAAGTTTACAAAGG  
GTACCTTATCGATCTTGACATAGCGGTTGCTGTAAAGAAGATCTCGAGAGGGTCTAAGCAGGGGAAAA  
AGGAATACATAACCGAGGTGAAGGTTATTAGTCGATTAAGGCATAGAAATCTTGTGCAACTAATCGGTT  
GGTGTGATGATCAAGGTGAGTTCTTACTTGTGTTACGAATTCATGCCAAATGGTAGCTTAGATTTTCATTTG  
TTTGGTAAGAAGAATCCTCTTAGTTGGACTATGAGGTACAAGATTTCACTTGGTTTAGCATCCGCGTTGC  
TCTATCTACACGAAGAATGGGAACAATGTGTGATCCACAGAGACATAAAATCGAGCAACATAATGCTAG  
ATTCAAGTTTTAATGTCAAGCTTGGTGATTTTGGCCTAGCTAGACTAATGGACCATGAATTAGGTCCTCA  
GACTACAGGGCTAGCCGGAACCTTAGGTTATTTGGCTCCGGAATACATAAAAAACAGGACGAGCAAGCA  
AAGAGTCGGATGTATACAGCTTCGGAATAGTTGCATTAGAAATTGCAACAGGAAGAAAATCAGTTGATC  
CAGGGACAGGGAAATGTGATGCAGGATTAGTAGAGTATGTTTGGGATTTTTATGAAAAAGGGAACTT  
CTTTCTGTTGTTGATGAGAAATTAACATGGATTTTGAACAAGAACAAGTAGAACGATTGATGATTATCG  
CGTTGTGGTGTGCTCATCCAGAGAGCAATCTAAGGCCATCGATAAAACAAGCAATTCATGTTCTGAATTT  
CGAGGCATCGTTGCCTAATCTTCCAATGAAGATGCCTGTTCTGTGTACTATTACCTAGACCATGTGGC  
GAACCAACAGTTAGCTCGGGGGAGCCTACGATGACTTACACAAGCATCGATGTGGGTCGATAA

>PGSC0003DMG402000515 RLK with antifungi domain(GNK)

GGGACACATAAAAAGAGAACGTAGCAGACAATGGTTGGCTGTAAAGTCCGAATCATTTTTGAACAACAC  
TAGTAAAAAATATCATTTATTCTTCTCTCAGCCTCTAACGAAAGCTTCTTCTTCTTCCCATTTCTAACTA  
CCATATTTCTGTTTTCTTGTTAATCCATCAAAAACGAAGTTTAGAACTAATCTCATAGAGCAAGACGAAA  
GAGAAGCAGAAGTAGGATTCATTCGGCTTCTCCATTAGTCATTTCAAGTGAACTTTGTTTCGTATGCAGTA  
GCAGCTTGCTCATATCGTGCTAGAAAATTGAGATGAATTTATCCCGCTCAAATTTTCCACTTTTAAATTGG  
ACAGTATTTTTGTTGCTGAATTTTGCTTTAATTTGTGAAGCCGATCCTCGAATTTTCAAGATCTGGACTAGT  
ATGCGGCACGAACAGGACAACACCGGCGATCATTCCTCCCAATTTGTTAACTAATGGAAGTTGTTTCA  
CAACGCGTGACGGATAACAATTGGGGAAATCATTATGTAAATTCAACAAATATTTCAATTTATGCATTAG  
CAAATTGTTATCAGGATCTACCACATCAGGATTGTCTTCTATGCTACGCAGCTAGTCGAACTCGACTCCCT  
CGTTGTCTTCTGGTAAATCCGGTCGAATATATCTCGACGGATGTTTTCTCCGGTACGATCAATACAATTT  
TTTCAACGAAACTACTGATTCAGCTAAAGATACAGTGAAGTGTAGCAGCTCAATTGCAGTTGCTACTGGA  
CAGGAATTGGCCACGTTAAACGCATCAGCTGGAAATTTGATTGATGAATTGACGAAGACAGCGGTGGC  
GAACGGCGGTTACGCGGCGGCGAATTTGAACGGAGTTTATGGATTGGCGCAGTGTGGAAAAGTGTGA  
GTACAAGTGGTTGTAAAAAATGTTTGGACAAAGCAAGTAGAGATATCAAAGGTGTTTTCCGAATAGAG  
ATGCTAGAGCTTTGATTGCTGGCTGTTATTTGAGATATTCTACTCAAATTTTCTCAATGATCCATCCGGG  
AACAGTAGCGGTGGTAAGTATTTCTCCATTTTTATGCTCAAAGTGAATTATTGTCCTATGTTATTCTACT  
TCATGTATTTTTCCATTTCAATTTAAGTTTTTTTTTGGTGTAAGTGAAGTTTTAAGGTATATATCGATTTA  
GAAAATCAGGATAGAATAACTATTTCTTCATTTCTACTCTTGCTATTAATAATGCCAGAAGTGAGTAATA  
ATACTAACTTTTCAATTAAGTAATAATTTAGTAAATTATTATTTTTTACATAATATTTTTATAATTAATTACT  
AAAACCTTAAACAACATTGAAACGAGGAGGGTATAGTATTTCTTCGACCAGTTTTCAATGGCATGTCAAG  
GTGAATTTGATTTGCAAACATTTTCCCGGCTTCACTTTCTTTTCTATTTTAGCTGATCAACCTCAGAAGTTT  
ATTTTGAATTTAAAGTTGATGAGTTTAATTTTTAAAGGTTTTTAAAAAATGAACATATTGTTTCTTTTTTAA  
ATTATCAATATAAAGATTAAGCTTTTTAATTATTTTTTTTGTAAATTTTCGCACAAAAAATGTATATTCCATG  
TCAAAAATAAATGTGGCTGCATCCACCTCTGGTCAAATTTTCTATTGATTTTTTTGGTGGGTGGAGTGG  
GGAAGGGGGGGCGGTACTTTGCTTTTTATTTGACGGCAAAAATTAAGTACGATTCAACGTTAAAATACC  
ATAATTTTTCTAAATTTTCGCCAACTTTCTTGACCTACAAGTAAAATTTTCAAGGAAATGGTCCCTACTCT  
CTATGGTCATTTTCAAATATGAATAGAAGGAAGATGACTTCTTTTCATAAATCTTACTCCCTCTGTGAAAG  
TTTCACAAAGAGTATCCTAGTTTAACTTGACACGGAGTTTAAAGAAAATAAATAAGACTTTTGAATTTTGT

GTTCTAAATTAAGTTATGTCAAATGTACAAAATTGTCCTTTAATCTTATGATCTTAAACATGCCACGTGG  
AAAGTTGAAAGTAAAATGTTACCAAAAAAGAAAAGGGCCATTTTTTTTTGAAACAGACTAAAAAGGAA  
AGGAGACCAATCTTTTTGAAACGGAGAGAGTATTTCTTATTTTGAGATTTTATATTTGTAAAAAGAAAA  
TCTTTTACGAAAGAAACACAATATTTAAATTAATTTATAAAAGAATACAAAATTAATTGACTTTTGTGCA  
CCTGTTTTGACTTTATCTTCTGCATTTTTGTAATGAAAATGCTGTTATTTTCAGGGGTTAGCAAAGGGGTG  
ATAGTAGCTATCGTTCCTGGAGTGACAGCTTTCACCATGCTTGCTCTCAGCTGCGTACACAGCTCGTAA  
AAGATCATTAAAGCGAAAACGAGGTATTGAACAAAATAAAATAGTTTCGTAAGTACTGTACTGTTGCTGTTAC  
TAACGTTCAATGACTATATATTACTACTACGTAAGCTTAGAAGTATAATAATTTTTTTGGTTGCATTGTTG  
CAGCACGCATTAATCTTGGCAAAAATATCGAATTCATACAACAAGTCGAGCTTGAATTTTAAATATGAAAA  
TCTTGAGAAGGCAACAACTACTTTGATCCTTCAACAAAAGTAGGTCAAGGAGGAAATGGTTCTGTATA  
CAAAGGAACTCTGCCTAATGGAAATGTTATTGCAGTTAAGAGACTATTTTTCAATACAAGACAATGGGTT  
GATGACTTCTTCAATGAGGTTAATCTCATCCATGGAATTGAACACAAAATCTTGTCAAGTTGTTGGGTT  
GCAGCATTGAAGGCCCGAGAGCCTGCTCGTATACGAGTTTGTGACCAATAAGAGTCTAGATCAATACC  
TCTTTGGTAATTATCTTTCTTTCTTGTCCATACATAAAAAGGGAAAGTTAAGGAATCCAAGTGTCAAAGG  
GTAAAACCCAATGTGACAAAAACGTGAGGCCCAAAGTTTGGGGCAGAGTGGAAAATAGCTTGACAGT  
TGAACCTGGATTTTGACACAGCATTGTTCCACCTATACATTTCTAAGTTGTGACAGTTGCAGACTTCTAA  
TTGAGTTGTTGAATTTTTTTTTGTAGATAAGGACAAGGTAAAGATCCTAAGTTGGGAAGAACGTTTCCGTA  
TTATAGTTGGAACAGCACAAAGGCATTGATTTCTTCATGGAGGTTTCAGAGATCAGAATCATCCATAGGG  
ACATCAAGAGCTCCAATGTACTTCTTGATGAAAATCTTGAAGCAAAAATTGCTGATTTTGGACTTGCTCG  
GTGTTTTGGAGCTGACAAAACCTCATCTTAGCACTGGAATTGCTGGAACATTGTAAGTCAACAATTCACAA  
ATACTTATCAATACAGTTCACAAACACTTGTCCGTTTCTTAACTTAATCTGTGATTTTCGGTGTACAGAG  
GATATATGGCTCCTGAATACCTCGTAAAAGGTCAGCTAACAGAGAAGGCTGATGTCTATAGCTATGGGG  
TGCTTGTTCTTGAATCGTTAGTGGCAGAAAAAGTATTGCCTTTCAGAGGACTCTGGCTCTCTACTACA  
AACAGTAAGAATGCTATAAATTTCTTTTATCATGGTCATTATATGAATATCATTGAACTTTTGTAGTAAA  
GTAAAAAAAACCTATTTTTATCATATACTTAACTCAGTATATTGTCATTTTGGTTTCAGGTGTGGAAGCT  
GTACACAACAAATCAGGTAAGTGAAGCATTAGATCCTCTATTGAAAGGCGATTTTCCGCCAGAAGAGGC  
ATCAAAGGTACTAAAAGTGGGGTTGTTGTGCACTCAAGCTTCTGTGCTTTAAGACCATCAATGAGTGA  
AGTTGTCCAAATGCTAACGTGTGAGGGCTATCAAATTCAGAACCATGCCAACCACCTTCTTAAATTCG  
AACTTATTAGTTGGCGGTTTCAGTCAAATCCAGTATAAGAAGTTTAGTATCAAGTGCCTCTATAAACTTG

ATGAATCATCATCTTATGCCACCACCACTGGGTCCTCAAGTATGCAAAGCTCATCAACTGGACCACACAA  
AAGTGATGAATTCCTTTTAAAAGAGTCTGAAAATAGGAAATAATTGCAAAGACAAATATAGAAATGGAA  
ATTTTGAGAGATTTTTTATCAGTACATTTTTGTACAGTAATAGAATTGCTGTAGTTGTGCATTTTTATGAT  
TTTTTTTTGCATTTTTGGTGAGTGATGATACAAGAAAGTGTAGGGGTGGCAATTCAGCCCATATAAGT  
GAAATGAAACCATTTTGCCCATATTAATTAATGGATCACTCATTTTC

>PGSC0003DMG400000810 RLK with malectin domain

AAAAAATATTTGCAATAGATACTCGACTCGAAACAATATGCTTCTCTCTCCAAGTCCCAAAAAGTCAA  
GAAAATCAAAGCATCAATCTTGGCTTAACTTCTCTTCTCACAGCAATACCAGTCTTCTTCATCTCCTTCA  
TACATACTCTCTCCTACACTACCCGCCAATCTCGCACCCCTACCGGCCTACCCACCCCAACCACCATGC  
AATCACCATAGCTTTTTCGTATGTACAAAGAACCAACAATATCTCTCTTCCCTATTACACCATGACTCCT  
TTCCCTTCTTCTTCATCATCGTCTTCTTTGCCTTCTCCCTTTCTCCCTTCTCCTTCTTCTTCACTATCCT  
TACAGTAAGCAACTTCAAATTCTTATTACATTCTTCATTTTTTCAGTTTTCAGTTTTCATCAACTGTTATT  
GACTAACTAGCTGTTTTGCTCTGTTTTACAGATTATTCTTGCATATTGATTGTGGGAGTCTCTCAAATTC  
AACTGATATCTTCAATACTGCATGGGTTCCGACCGGTATTTACCGGCGGAGCAATTTCCGTTGTATCG  
GAACCTCTTCACTATCAGCACTCACAGGAGAAAACCTTCGTTATTTCCCATTTTCATCTGGAAAGAAGA  
ACTGTTATGTGATCCCAATTTGTCTTCCGGCAGGTACCAGCTCCGGACGTTTACGGTGTATGATAATTA  
CGACGGAAAGTCGCACTCGCCGTCGTTTGATGTTTCCGTTGAGGGTAATGTTGTCTTTCATGGAGGTCA  
CCTTGGCATGAAACTATCTCACGCGACGGCGCGTATTCCGATCTGTTTTTACAGTTTCTGATAATGAAGC  
TAATGTTTGTGTTTTACAGTATTGCCACTGACTACCGGTTATTGCTTCTTGAATTACCAAATTGATCC  
AGCTTCTTATCTAGTCAATGACACTTCAATTTGGTGAATTATGGTAGATTTTCTAGCGGGTCGGATCAAT  
GGGACCCGGTTTTAGCAACGATACTGATCGGTTCCGGCCGGTCATGGCAATCGGATGCCGATTTCCGGT  
CTAAGGTTGCGGGGAAAACCCGGAGCAACTGTTAAAGCTATTTCTGCTATTAATAATGTGATAAATG  
TAGATAGAGCACCAAATTATTTTCTTTGAAATTGTACCAATCTGCAGTACTGTAATTGGTGAAGGGGG  
TGAATTTTTGGAATATCAGTTACCGGTAGACGCGAAATTGGATTACTTGTGTTGGTTTTCATTTTGCTGAA  
ATTGATGTTAGTGTGAATAAGGCAGGTAAAAGGGTGTGAGATTGTAGTGAATGGTGAGAATGTGAG  
TAGAGTGGATATTTACAAGGAAGTTGGGAGTTTTGCAGCTTATGATTTCAAATATGTTGTTAAGAATTTG  
AGTAGTGCTGAGTTGAGTGTGAGGTTTGTGCCTATTGTGGGTGCTCCTGTGATTTGTGGGCTGGAGAAT  
TATGCTATTATCCAGCTGATCTCAAGACTCTCCCGCACAAGGTATAGCGAGATTTCAATTTATTTAAGA  
ACTCGTTGAACTTGCCTGTATTTGGTAATTGACTCAGCTGTTTATACCTGTGTTTGTAGTTGTTGCTATGA

AAGCATTGAAGGAATCGCTTAAAGTTCCGGATAGAATGGGATGGAATGGTGACCCCTGTGCTCCTACTA  
CTTGGGATGCTTGGGAAGGTGTTACTTGTCTGTTCCACTACGAATGGATCGCTTGTGATCTCCCAAATGTA  
TGTGATTTCTTTCTGTCTTGTGTATGTGGATAACAATTAGGTAAATGTTGAGTGGAGAACATGTGAGCT  
ATTAGCTAGTGTCTAGCCTGCTTTTGATGTTTGGATATCTTGATTGAGGTCATTACTTTACTCTTAGTTTG  
GTCCATTTGTAATTTGATAAGGGGTGTGTACTAACATGTGGTGATAAGCACGTCATAAGTGCATAAT  
AACAAATGTATAAAGTGGCTGTTTGTGTTAAGAACATTGGGACGAGCTAGAAAATAATGTAGAAGATTG  
AGAAACGAATCATATCTTACTTCTAGTTGCAATACCGAATTCCAGAGCATGATTAGAAGTGTAAAGGAGTT  
GTTTGGAGCAGCTATTGCCTGAGTAAATCACCTATATCTCTGTTCTGAACAATGAAACATAGAATGAAAA  
ATGCACAACCTTGCTGCACGAGTACCTGGGTCAAAAAGGTGTATGCTTTGCAGTTCTTTTGGTTATGACTT  
GTGACTAAATACTGTGGTGCTGTACGGTCTTACCACAAAAAGACGTTTATAAACATCTGTCGGAATTATG  
CTTAAAACTCAATTCCAAGAAAGTTATCTTTGAAATTCATGGCGATGCTGAGGCATTTGGGTTGGGGT  
GTCAATTCATCTTACTGAAGCCATGTAAAGAAGTGTCTGGAATTAATGCACATTTAGATCTATTAGTA  
CACGAGCTCTTAGAAGCCACTGTAGTAACTGGACCATTAAAGACTAAAGTGTGAAATTTCCATTGCTCCA  
GCCTCTCTAAGACAGCATTCTCTTTTATATCCTACCGATCTGACTTCTAACTTGACAAATGATGTAATCTT  
TAATTTCAATTTGTGTGTCAAAGAAGGAAAGAACAGATCCTTTTTCTTAAACAAATATCCCTAGACTTTCT  
GTTGTTAATTCTAGTGATATCTAATGCTGCACGTGTATATCCTTCTTGATTCTTTTAGTTCTTATCTTTAG  
AGATCTTGAAGCCAAGGCTTAAAGGGATATATCAGTGACCAAATTGGGCTCTTGTCTAATTTGGTAAG  
CTTGTAAGTACCTCTTAAACAATTTTCTCTTAGATACTGGAATTTACACGTTAATCCTCCTGCATAATATC  
TGAATCTACTCACTTGGTAGTCCTTCAAATGATTAAGAGGTGTTCAACAAAAAATGGTTACAGTATGA  
AAATATACTAGTATTTGCATATACTCATTATGGTGCACTGATGAATAATTCTCTTGATTGGATCATTTAAG  
TTGCACCAATTTCTTTTATGCACTTCTACTGTTTGTCAATCCTGCTAATTTGGCCTTCGCAAATAGTTATTC  
TACCTTCTTACTTTTTTGCATTGCAGGAACCTAAGTTCTAATTCTTTGGGAGGTTCTCTACCGTGGGGA  
TTGGGTCAGAAGTCTCTTGTGAAACTGTAAGTCCAGACATCAGCACTGTGTTATTGGTCATTTCTTTTTT  
ACTTGAAATTGTCTTCTGTTTTGCGTCTTAGAACTATGAGTTTTATCAAGTCCACATACATAAATTGTTGA  
GCGTTATTGGAGTCTGAATATTGATCCTGCCAGATTTTTCCGATCCACTCAGTTGCTACTAGCATAACAA  
CTTACCTCTAGTAAATTCCTTTTATTCTAGGGCCTTTTTTTTTAAAGATATTATGTCTTATTGAAGTGCTTTT  
TGCTCAAATTTTCTAAAACCTCTCCTAATTATTGATATTCTTGTTAATTAATAGGCGTAGAACCAAGTGC  
ATAACTACTCTGTAGTTTAGGGCGGCACTTTACCATCTTTCTCTTTTTTATGGGCTAACCCCTTTTGTCAA  
ACTGTTTTGCCGTCATGTTATTGGAACTTGAAGCTTGAATTCATCATTTGAAGATCTTTTGTGCAGGG

ATTTATCAAATAACAAGTTTACTGGACCCCTACCAGATAGTCTAGCTTCTTCACCCTTGCAGATTGTGTAA  
GCTCCATTCTTGTCTCAATAATCTTTTCATGGATTTGTCGTTGCATAATCACTCTTTGTGAGGTACCAGT  
TGCTTATTTTCATGATTGTTGTAGAAAGCAGGATAAGTATTTGGGTTATAAATCACTTGGATTCTTTTCAGTC  
AAAAGAAATTTATCTCGTTCTAGCTAATTTCTGCTTAGTTCTAACAGTTACACTGTAATTTGCTCAGGTTTT  
TGAATGGTAATGCACTAGAAGGCCAAGTGCCCGAGGAACTTCTTCCATTGGGGTCCATGGTGGAGCTA  
TTGAGTATGTCATTCTCTATTTTCTGTCTAAAGTTTTTCTTCAGTACATTATGGTCTTCCTTTAGTAGATTT  
TAATTTATGAATATGTGCTTCAACTATAAAAAACAAGACTGATTCGGTGAAGAGTGCCTCTGCTACTCAT  
GTTATTAGTGTATGAATGAATTGTGATGCTTCCCTATGTAAAAAACTAGTTTAAGTTGTTAGAAATAATG  
GTTTATATTGGAGTTTGCCTTTGTTTCATGGATAATAAATGTAACCTTCGCTGGGTCTTCTAGACTCTAAG  
CATCTTTAACCTGTTTCGTAAAAGCCTTTGGGATAAGTATCTTACAGAAATTAATGCAATCATGTGATAAT  
GCAACTTTATAACAACCATATTATACTGAACTGGACCGCCTCTGTGCCACAAGCTATTTTCATAGCTGAA  
ATTGTGCACACATAGTGCATCAACCACTAAGCATATATGCCAATGCTGTAACCTTTGGCACACTAACACT  
TGTTAAGTCGAACCCATGATGCCTTACTCACAGTAGAGCAGTACTACATGGCTACAACACTACTAGCAAATC  
ACATATCCGGTGATGAATCACAATAATCAAAATAATTGTAAGCTATCCCGTTAATGCTCAATCTGAATA  
CCAATGCATCAAACTGGTTTCATGCAAGTAAGTGATGTATCATACACAATGTATAGATCTAATAAACT  
CAACAGATTTCAAATTTCAATTTGCAAACATGGCTGCCTGAAACCTCTTCTTTTTTATGACGGTGGTGCTT  
GTGTTACCTCAGCCACTGGATACCTGCTACCTCCCATCAACACAAGTACCACGTAACCTCTGCGTCCCCAC  
TAAGGCTTAGGCAAGGGCTGCCTAAAACCTCTTTTCAAAGCTTTATACAATTTCACTATCGTTCAACATGC  
CGTTTATCAAAGCGAGTACTTCAGGGTAAGGTCTTCACTTATGTCCAATTTAAGCTAAGTAGCACTGC  
TACAGTGTCCAGACTCAACCAAAGATTGCCAAGACATACAAAGAATGATTCAGCGGTGTTAAATACATC  
CTAACAATTCATATCCAACTTGAACCTTTGGTCAAATTCAAAGTCAATCTTCCGATTTAACATTGGTCAA  
CATTATCAAACAATGGATCCAACCCAACTTGAGAGTTCTCAATTTAGTGTTTTTGGACCAAATCCATG  
CATTTCTATGGTTGAACCTTAGTTCTGTGAAGGTAGAACTTGATGTACTATGACTATATTAATCCAATCA  
ATCCTATTAATAAATCACCTCATAACAGTGCTAGTTTTACAATTCAACTCATACCCATCAATAATCATATA  
AATGACATCTCTAATTAATAGAAATATGAAGATATCCATTCCTCAATTTTTTAGCTAAAGCTTGGTTTT  
CTCCTCTTCTTCTCCCCGTCTCCCTCTTCCAATTACTTTTTCTCTGACGTTTGATAGCTTCTATAAAGCTAC  
ATTGCTTTGTGTTAATTCATCAATTGTACAACCTCAACCTACTTATAGCCCTTCTTTGTTTTAGGCTAAAT  
GACAAAAATATTCTTTATTTTGGGTTATTATATTCTCCCTACTTAAATAACATTTGAGGGACACCAACTTT  
GGTGGTCATTTGGACAAGTAATTGCCTGTGACAGAGTTCAGAGTTTGCTTATGATAACAATTATTAGTCT

AGTATGCAGATGGTGCTTTTTGAGGCTTTATATGGACGACAATGTCATTCTCCAGATAGTTGGTTCAAAC  
CCTGGGAGAGTTTTAGAATCCAGATTTGGTTCAGCATGCTTTAGTTAGGTGAAAGGGACCCTAGAGCGC  
TTAGAACAACCTCAAATAGATATATTAGTGTATAAAACCGATAGAACTTAACAGATTCCTGAATCCCCT  
TTGCAAACCAGGTATGTGCTCGTCCTCACATATAGGTTATTGGTAGGATAGGATGGCTAATGTTTCGTCAT  
ATTTTGTATGTTCTGAATGAAATAACTTGGTTTTTGGAACTATTAATTTAAATGATAGTGTATTCCAT  
GTATTCATAAGTCATCATTATCTCTGAGGATTCATACAGTCGACTGCAACTTGTCTAGGACTGAAGCTTA  
GTAATAGTAGTTGTTGTTACCTGACTTTTAAGAATCCGGACTGCAAAAATCAAAGCTAAGCTGAGGGG  
TTCTCTTATTAGCAAATGAAATATGCCTCAAGGTGTGTGAATGCTTATAGACTTAATTTTTCTGAATAGAA  
TTAATATTTAATAACCTATAAATATTATTAAAAAAATAGAAGTAAAGAAAACTAGAGAAAGCAGAAA  
AATATTACTTAGAAAGATGGAAGACTTCTTGTTTGGAACTTCAAAGGATTGAGAGGAGGTTTAGAGATG  
GCCGGTATGGCCATTTTTTCGTAATTAGGGCTTTTCGGTGCATGTTTTGCCTTTAATATAATGAATGAGAA  
ATCACGGGCTTAAGATGACTAAATGAAGTCATTTAATAGCAGATGGTGCCTTCTAGGGTGGGTGGAAGA  
AGCTTGTGTACCTGCTTTTGATTCAACTCCTTTGCCTCTAAACTCGTAGAAAATGTAAAACACGAAAA  
AAGTAACAGGTTACTGTTATCTTTGAGGTCTTCTTGAAAAGGTCTACAATATAGTAAAATAATTGTCATG  
GTGGTGTCCCCAGTGCTTTCTGTTCTGTTAATAAAAGAAATGTAGTAGATATTGGTGAATTTTGTAGAGG  
TTTACATTTTGTACTTCCTTCATGTACTAGTCTTTTCACTGATTTCTAACTGAAAGCTTTTTTTGCTTCCAC  
AGCCTCTTTGGTAATAAAGGGTTGTGCGGCGGACCTACTTTGCCTGATTGTCCGTTATTCTGGAGTAAAA  
ATGGTCTCTCTACTGCTGGTAAAGTTGCAATTGGATTATCATGTGTAGTGTATTTTTCGTTGGTATTGTTG  
GTGGCGTACATTTGCTACAAGAGAAGGCAGAATGATTATGACTTTGGTCTGCCACACGAGATGACGTGT  
AAGTGGTTTCTGGGAGATTACAACATGTTATCTTTCCATAACATTCTTTTTTTGAGATCAAAGATAACATT  
ATTCTCCTCCATCATGTCTATAAAAAATTGTGTTCAACAACATGTTTAACAAGATTTTCAAACAAAAAACC  
GGTGTGGCTAACATTTGCAAACAGTTTTATATTCCTTCATCTGTGCAACTCATACAACCTGAATTCTACTTT  
CTTGTGGAATATCTTAGATATGATTTTTCTTCATTGCTATATCATAGTCATAGATTGTCCATAATATACTCG  
TCTTATATGTCCATATATTGTTCCCCTGTTATGGCACCATTTGTCCCCCATATTCAATTCTTTATCTGCCTAA  
CTGATTTTGGAAAGATTCAAACCAGACCAGTAGGCTAACTATACCGTGGTAATATTTGTTCTGGTTTATG  
ACCGATAATAGAGCTTTAAGTTGGTTTTGTGATGTATGAAATATGAACTTATGCGAATCATCATATTCTTA  
GAGAAGTGCACATTATCAACTTTGTACCTGTTGCTAAAATCTTGGTATAGCAAGTTCACAATCATCTATAT  
TTTTGTCTGGTGCCTGTTCTGAAATTAGCTGGATGTTTGAATTTACTTTCTTAACACAAAATTATCTGTTTCT  
ATTGGGTATGCTGGATGATAGGTACCTTACTTCGGATTCTCCAAAATTGTTGTTGCACTATATCGGATCCT

CAAAAAATGCTCTATTTTGGAGGATCTGACATGCCCCCGTTGAAATTTTGGAAAGAGTCTGAGCATCATAG  
TTTTCTATTTGTAGCTTGAATTTTCAGTTGCATTGTTGTTTATTCTGATTGTGAACTAATCTCTACACTTCCG  
AAATTTGTCTTTACAGCATTAGCTGCAAAGAGGAATAGGTACCAACGACAAAAATCGCTGATGACTCTA  
GAAATGGAGAGCCAACATGCCAAAGGATTTATACCAACATACAATGCAACATGACATAATTTTGATGAA  
GTTCAACTTGCCAAATAGAGACAGATAGAAGTGGTGAGGTAAACAAATTATGTCCCTAAAGGGGTATGT  
AGAATTTAGATTTGTTTTTGTAGAGTTCAATGTATGCCAATTTGTTTCATGAAAATCCACCAAACAGATTAG  
GCAAATGCCTCCATTGTATCATACCCAATTTTGGGCATTTGACAAACACATGCTATATATGATTTGTGACT  
CATAAACTTGTAAATGCACATAGATATAGTCAACTTTTGTGTTGTTGATTCCATAATTCACATTATTGTGTAC  
TCATAATGACATTACAATCTCTCGTTTATCGGTCATCGATTAATTACCATTTCCCCTGAATCAGTTCTTC

>PGSC0003DMG400001368 RLK with malectin domain

CCACAGATAAAAGAAGATGAAATGCCTTGAGAGTCAACACTCAAGTCTTGCCAATGGTTGTGTATAATT  
ATTCCTTGGAACAATAATATCTCCTTACACAAACGCCCATGGCAACCATTACTCTACTTTTCTTTCTCTTA  
TTACAACCTATAACGGCCACTATTTCTACCACGCCGCCACCGTATAACGCCACTGTCTTTGTCTTGCTTAA  
CTGTGGCGCACAATCAGCCACCACCGATGATACTGACCGTTCGATGGGATACTGATACTCACTTTCCAAAT  
TTCTTACCTTCCAACCTTACAAGCATATCCACAACAGCCACAGCTTCTGAACAAGATCCTTCGGTCAATAG  
AGTTCCTTATACAACTGGTGCTCGTATTATGAGATCTCAATTCACCTACACTTTCCGTGTTACCCCTGGCA  
CAATATTCCTCCGTCTCTATTTCTACCCTGCCAATTATTCGGCTTCGACAAAGCTGAATCTTTTTTCTCCG  
TCACAGCTAATCATTTAACCTTTTGGAGTAACTTCAGTGCTTTCTCACAGTCTCCGCAAGTAGTAGAAAA  
CAAGTTCAAAAAGAATATGTCATCAATGTTGATGAAACTCAGATACTCAAATTAACCTTTTCTCCTTACC  
AAATTCCTATGCTTTTGTAAATGGGATTGAGATACTTTCTATGCCAACTGATCTTTACATCCATGGAGACG  
TAAAATTGGCTGGGAATACTAATCCATATAACATCAATAACAGCACTGCTCTTGAACTTTGTACAGGCT  
GAACGTGGGAGGATATTTTGTGGTAGCACAGAGGATACAGGGATGTATCGTGTATGGGATTCAGATG  
ATGCATTTGTTGTTGGATATGGCTATCAAACCTCCTATTTTGTATGATGCCAGCATCACTTACACTCCTAAA  
ACCCCGGCTTATACTGCGCCAACCATAGTTTACACAACCTCTAGGACTATGGCCAATTACAGCCCGGGAC  
TGGATTGGGAATTTCTCTAAACTCTGGCTTCTATTATCTTTTTCAGGCTCCATTTTGTGAGATTCAGCCG  
GAAGTTAAAGAAATAAACGATAGAAGTTTTTCCATTTCTATCGGAAACCAAACAGCAGAGCGAGAGGCT  
GATGTAATACAATGGAGTGAAGGCTGGAGAATCCCTGTGTACAAAGACTATGTGGTTAATGTTAGAAAC  
CAAGATGGTGAGCAAAACGTGACCCTTGCTTTGAGTCCTAACCCAAATTCTGCGTATCAAAATGCTATCT  
TAAATGGCTTAGAAATTTTCAAGTTGAACGACTCAAATGGAAACCTCTCCGTGCCGAATCCTGAATTTTT



CTTTCCGAATAATTCACCACCAAACAATAATAAGAGATCATCATCACACATCATTGCTGTTATCACTG  
CAGTGGCTGTTATTAGCGGAATTGCTCTGCTTTCAATTCTCTGTTTCTTAATTTCCGGCGGTGGAAAAGA  
GGAAAAGAACTTCATACAAGCGTTACAAAGTCATCATGGATCCCTTTGTCAATTACATCGAACTCAACCC  
AAAGAACCGGCGGTTTCAGGCTCATCAGCGCTACCATCCGATCTGTGCCGACACTTTTTACTAGAAGAGA  
TAAAAACAGCAACATGCAATTTTGATGAAAAATTTGTGATTGGCTATGGAGGTTTTGGTAATGTATACAA  
AGGGTACATAGACAACGGCGCAACCATAGTTGCAGTCAAGAGATTGAATCCTTCATCAAAGCAAGGAGT  
CCGCGAGTTCGAAACAGAGATTCACATGTTGTCAAAGCTAAGGCATGTGCATCTGGTGTCTTAATTGGT  
TATTGTGATGATAACAGTGAGATGATCTTGGTTTATGATTACATGTCTCATGGAECTTTCGTGATCACTT  
GTACAAAAGTATAATGCTCCACTTCCATGGAAGAAACGCCTTGAGATTTGCATTGGCGCAGCAAAAGG  
ATTGCATTATCTCCATACAGGTATACGGTCACTTAATTCTATACTTCTATTTACTCTGGTACCATATTAAG  
TATGTATTGAGTAAATTAAGTGATTTACTGGTAAAAAAGATAAAGATTAATTATTTAATATAATAAGTT  
ATTATTATCTATAGTAGATATGATCGTTAAATTTAATTTACAGGTAAAAGGATATCATTATTCATCGAG  
ATGTGAAGTCAACCAACATTTTATTGGATGATAAATGGGTTGCTAAGGTTTCAGATTTGGGTTATCCAA  
AATTGGTCCACTTAGTGGATCAGGAAAAACCCATGTTAGCACTGTTGTGAAAGGAAGCTTTGGATATCT  
AGATCCTGAATACTATAAGCGACAACAATTGACAGAAAAATCTGATGTGTATTCTTTGGGGTGGTGCTA  
TTTGAAGTGTTGTGCGCTAGACCAGCATTAAATCCTAACATGCCGAAAGGGCAAGTGAATTTGGCTGATT  
GGGCTTGTAGGAGCTGTAAAAAAGGAAATCTTCAACAAATAATTGATCCGAATTTGGAAGGACAAATTG  
CGCCAGAGTGCTTAAACAAGTTTGCAGAAGCAGCATATAATTGCTTGAAGGATCAAGGAGTCCAAAGGC  
CATCAATGAATGACGTTGTCTGGAATTTGGAATTTATATTAAGCTTCAAGATGCAGCTGATAATAGAGG  
TCACAAAATGGAATTGAACAGTTATCCGACTAGCCCGTCTTTCCCCTTGATTATGAATGGTCATGGTCAT  
ACCAATATATCTACAGATGAAGGATTCGAGGCATTTTCAGGTTACATGAAGTTGGAGGAAAATACACA  
AGCAGTGCTACATCCATGACCAGTAATAGTGATGACAAATTGAAGAGTGACACTATTTTCTCAGAGATT  
TGAATCCATCGGGTCGATGAGATTGTTACAACACTAGTATGATAAATTACATATTAGTTCTTCTCTGTTTTCT  
TTTTCTTTGTTGAATTTATGTCCTTGTTATATATGTAGATGAATTGAAGCCATTATTCAGAAGTATATAA  
GCTATAAAATAGTTTCACTATATTTTGTGGGTGAACTTT

>PGSC0003DMG400001369 RLK with malectin domain

GTCAGTTTTTAATACAGAAAAATCGAAATAACAGAATGACTTGATCATTGAAGAAGTAGATATCTGTACA  
CCAAATAACAGAGAAATTTATAACAACGCCATGTTATTCATTGCTCTGATTTCTCTCTCCTATTACATCT  
AATGACAGTCACTATGACTCTCACGCCACAGTACGATTACAATGCCACAGACCATCTTTTGTGAATTGT

GTCGCAGTATTGAAAGACCCAAAGTTAGCAGTCCCCGTTGAAGATTCGATGGCCGTCAATGGTATACA  
GATGCCACTACCCAAATTTCCAACCTTCCAACCTTTTCAAGAATATCCACAACAGCCACAGCTTTTGAACA  
AGACCCTTCGGTCAATAGAGTTCCTTATATGACTGGCACCCGTATTATGCTATCTCAATCACTACACTTT  
CCGTGTTTCCCCTGGAGCCAAATTCCTCCGTCTCTATTTTTACCCCGCCGATTACTCTGGCTTCGATAAATC  
AGAATCTTTTTTTTCAGTCACTGCTAATCATTTTACCCTCTTGAGTAACTTCAGCGCTTTCTATACAGTCGC  
TGCAAGTACCAATTCTAGTAAAGCTGTTTCGAAAAGAATTTGTCATTAATGTTAATGAATTCAGATACTC  
AATATAACCTTTTCTCCCTCGCCAAACTCTTATGCTTTTGTTAATGGGATTGAGATAGTTTCCATGCCACCC  
AATCTTTACATCGGTGGAGATAATCGCATCAAATTGGTGGGCCAGAATGATCCTTATTCCATCTATAACG  
ACACTGCTCTTGAAACTTTGTACAGGCTGAACGTCGGAGGACATTCAATTGCTAGCACGGAGGATACAG  
GGATGTATCGTGTATATGAGGAATTTGTTGTTGTATATGGCTTTCAAACCTCTAAATTTGATGTCAACATC  
ACTTACACTACTGAAACCCCGCCTTAAGGAAGTTTGCAGAATTGGTTTGCAGAATTTGTTGTTGTATATG  
TGTTAAAGAATGACAAAAGTCCCACATCGGTGGTTAATGAGATGGGTGGACTCCTTATAAGGCTTGGGC  
AATCCTTCTCCTTTTGTAGTTAGCTTTTGGGGTGTGAGTTAGGCCTAAGAACTAATTTAACAATATGATTTA  
CGTAACCTCTAGGACCATGGCCAATAACAGCCAGAGCCTGGATTGGATATTCCCTCTAGATTCTGGTTTC  
TATTATCTTTTTCAGGCTCCATTTTTGTCAGAATCAGCCGGAAGTTAAGGAAGTTTGCAGAATTGGACAAA  
GAATCATCCAAATTCCAAAGAAAATAACCCAAAACCTTTCTTTCAAGCAAACCGACTATTGCTCCAGTG  
GAACATAACAGATTATTATGAAAATGAAAGGCAGCATTTCATGGCCTACAAGAAAAAGATATACACCCCC  
AATTAACAACCTTTTCTCTGCCATTTCTATTTCTCTGTGATTTTTCTTGGGTACATATATGGTCCCCTTCTTT  
AGTGCAATAATCCTAATAGTAATTTCACTTACATTCTTCGATGAAGTCAACTCTTGCCTCACTGAGTTTTA  
CTCCATTTATTTGGTGCACCTTATAATAAGTTACTTTTGTACAAAAACAAAATTATGTCGGTTTTTAATACA  
GAAAATTAGAAATGACTTGATCTTCGAACAGCTACTGTATATATCTGCACAACAAATATCAGTATAGCAC  
GTACATAGTTTTTCAAGACAGCGCCATGGCAACCATTACTTTACTTTTCTTTCTTTCTTACAACCTCATAAC  
GGCCACTATTTCTACCACGCCGCTACCGTATAACGCCACTGTTTATGTCTTGCTTAACTGTGGCGCACAAT  
CAGCCACCACCGATGAAACTGACCGTCGATGGGATACTGATACTCACTTCCCAAATTTCTTACCTTCCGA  
CTTTTCAAACATATCCACAACCTGCCACAGCTTCTGAACAAGATCCTTCGGTCAATAGAGTTCCTTATACGA  
CTGGTGCTCGTATCATGAAATCTCGATTCACTTACACTTTCCGTGTTTCCCCTGGCGCCAAATTCCTCCGT  
CTCTATTTTTTACCCCGCCAATTAATCTGCTTCAACAAAGCTGAATCTTTTTTCTCCGTACAGCTAATCAT  
TTAACCTCTTGAGAACTTCAGCGCTCTCGCTGCAGTTACCGATTCTAGTAAAGCTCTTCGAAAAGAATT  
TGTCATTAATGTTGATGAAACTCAGATTCTTGATGTGACCTTTTCTCCCTCGCCAAACTCTTATGCTTTTGT

TAATGGGATTGAGATACTTTCCATGCCTACCAATCTCTACATCCATGGAAACCATCGCATTAAATTGGTG  
GGCCAGAATGATTTTTTTTACATCAATAACAGCACTGCTCTTGAACTTTGTACAGGCTGAACGTGGGAG  
GCAATTTAGTTGGTAGCACAGAGGATACAGGGATGTATCGTGTATGGGATTCAGATGATGCATTTGTTG  
TTGGATATGGCTATCAAACCTCTCATTTTTGATGTCAACATCACTTACACTTCTGAAACCCCGCCTTATTCTG  
CGCCGAGGATAGTTTACACAACCTCTAGGACTATGTCCAATCACAGCCAGAGCCTGGATTGGGAATTCC  
CTCTAAACTCTGGTTTCTATTATCTTTTCAGGCTCCATTTTTGTGAGATTCAGCCGGAAGTTCTGGAAGTG  
AACGACAGGGTTTTTGGACATATACATTGGAAACCAAATGGCAGAGCGAGCAGCGGATGTAGTTGAATG  
GAGTGGCGGCTGGAGATTCCCGGTTTACAGAGACTACGTGGTGAATGTGACTAACCCAGACGACCGAC  
GAAACAAACAAAGTATTACGCTTCAATTGAGTCCTAACATGGAAACAAAAGCTGTGTATGCTGATGCTA  
CCTTAGGATCAGCATATTCAAATGCTATCTTAAATGGCTTAGAAAATTTCAAATTGGGTGATGCAATTGG  
GAGTCTGGCCGCGTCAAATCATGAATTGCCGTCAGAAGCTCCGATCGCTTCATTAGCTTTTCCTAACAAAC  
AAGAAGAAAAGAATATCATGGCATATCATTGTTGCTATCATCACAGGTGTGACTAGCGGTATTGCTTTTT  
TCTCGATTCTGGGTTTCTTAATTTCCCGACGACGAAATGGGGGAAAAGATTCTGGTACAAGTGTTACCAA  
GTCATCATCACCACCATCCGATCTGTGCCGACACTTTTTAATAGCAGAGATAAAAAACGCTACCGACAAT  
TTTGATGAAAAATTTGTGATTGGATATGGAGGCTTTGGTAATGTTTATAAAGGGTACCTTGACAATGGTA  
CAACCACAGTTGCAGTCAAGAGATCGAATCCTTCATCAAAGCAAGGGATTCGCGAGTTCCAAACAGAGA  
TTGAGATGTTATCATCAAAGCTAAGGCATCGACATCTAGTGTCTTAATTGGTTATTGTGATGATAAGAA  
TGAGATGATCTTGGTTTATGATTACATGGCTAATGGTACCCTCCGTGATCACTTGTACAATACTGACAAT  
GCTCCTCTCCATGGAAGAAACGCCTTGACATTTGCATTGGTGCAGCTAAAGGATTATGTTACCTTCATTC  
AGGTAAGTAATCAATAAATTGATAAACATGTCATGATCTAACTTGCACTATATTTGTTTGGTTAAAAAAA  
GTATTGGGTCAGAATAGGTCAAATAACGATCAATGTCAAGTTAAACAGCATGACTCAACCTCCCAATTTG  
GTTTTGTATGTTCTATTTGCATTTTGACATGTTTTGATTCAATAGATTGATAGGTCATTTGAGTTTAATC  
CATTAAATGTGTCAAGCCAACAGGCAATTTACAATTAAGATCATTTAAATTTGAGTGAATTGCTTAAAAGT  
GAGTTCATTTTGTGTATAGGTACCAAACATATGATCATTTCATCGAGATGTCAAGTCAACTAACATCCTAT  
TGGACGATAAATGGGTCGCCAAGGTGTCCGATTTTGGATTGTCCAAAGTAGGTTCAAGTAGGTTGGGACA  
GATATTACCCATGTTAGCACTGCAGTCAAAGGAAGTTTTGGGTATGTAGATCCTGAATACTACAAGCGC  
CAACGATTGACAGTAAAATCAGATGTTTATTCTTTTGGGGTGGTTCTATTTGAAGTGTATGCGCTAGAC  
CGGCAATAAATCCAAACTTGCCAAGTGGGCAAGTGAATTTGGCTGAGTGGGCTAGTAGGAGTTGTAAA  
AAGAGAGAACTTGAAGAAATTATTGATCCTAACTTGAAAGGACAAATAGCCCCAGAATGCTTAAGCAAG

TTTGCAGAATTGGCATATCATTGTTTGAGAAAAGAAGGGGTTCAAAGGCCATCAATGGGTGATGTTGTA  
AAAACCTTAGAATCTGCATTACAGGTTCAAGAGGGTGAAGATCATGAGGTGGAAGGATCCTCTTTCCG  
TTGATTATTAATGGTGATGCTATGAATGAAGATGAGATATTCTCAGATTTAAGTGAAGTTGAAAGAAAA  
TTGACAAGCAATGGTATATCCATGTCGGTCAGTAGGAGTGCCAAAGTGAACAATGTTGCCCTTTCTCTG  
AGATTATCACTCCATTGGGTCGATGAAATTGTTATGATCATAGTTCGATACACTGAAATTACATGTATTTT  
AATTTGTTTTTCAGCTTCTTTTTGCAATTTAATGGGTACATACATGGCCCCTATTTATAACCCCATTGTTT  
GACGACGTCAACTCTTTTATGGAATGTCTTATAAAAAATATTTCTTAAATCACTTGTA

>PGSC0003DMG400001732 RLK with malectin domain

TTTAAAATCCTTGATATTATGCTCAACTTTTTAGCTAAGTGTCTTTTTGATGTTCCCATCTCCATAGTAGT  
TCTTGTTTTTTTTGTTTTTTAGCAAAGAACAAGATTTGGAGTAATGGGTACTGGAGTTTTCATCTTCTTT  
GTTTGGTTTGCTGTTTTCTTCTCATTAAATGGCAGCCAAGCACAGCCAGGTAATAACCCTTTTTTTTTGCT  
TATTTGTTTGTGGGGTTCTAGATTTAGTTGTTCTCGTTCATGGGTTTCTGTTGTTATGTGTTGTACTACTT  
TTTTTAAAGAAAATTTGTGTGATTTCTTGAATAGCTTGTCTTGATGTTTCATAGTGTATTTCTCTGTGCA  
AGATTTGATTTTAAAGAGTATCTTTAATCTTAGTGAAGGGTGTGGCAGAATGGTAAAGTTTCTTTCACA  
CTTAATCAGAGATGAAGTTGTCTTTGTTAGGGAGCGCTAAGACCCCAATAGTGAGCTTTCTATTGCGCGA  
ATTCGGAGTAGTTAGGGAGTTGGTTCTTGACGCTGGACTCTTGAGGCTAAAAAAGAAGAAGGAAAGA  
AGTACGTGCATGACATATGTGTTTGTGTGGTGGGAGTGGATGAGGTTGTGTCTACTGCTTTTGATGGTG  
CTCTTTGAACAAAAATTCCTATTTGATTGGTAGTTAATTTACTTGAAATGGAAAATGGAGAAAACAAT  
ATAGAAGAATAGGTGAAATTAATGTTTTGTTGTCTCATTCTATGTGTTACATACTTTATGGGATGTAT  
CTATAGTTGAATGCATATTCATGGGATGTATGTATTGTGGTTTCATTCTTGAAAATCTGATGGACCATGTT  
ACCATTTTATATCTTTGACTCGGTATCATACTTGTGGAAAGGGAACTCTGATTTAGAACAGACTCCGAGC  
AGAAAAAGTTTCGACCTTTTGGAGGATAAATTTAGACTATGTCGAATAGCTTAATCCAATCCTTGAAGG  
CTGGCTTGCCTCAATTGGTGTCCAACGGACAATGGAGTCATGCCTATGCAGCCTAATAATATGATAAAG  
ATCTGGCATTGATTGAGATTTGACTCAACTTGCTATAAATGAGAGAAACATTTCTGATCCCTTTATGCAG  
ATTGTTACAAGTAAAACACTAGAAATAAGCATAAGCCTGGAACCACTTACATCAAGTGGCCATTCAATTA  
TTCAAGTTAAATTCTCAATGCAGCTGTCAGCCTGTCCTTGTCAATTTCCATTGCACAAATTAATTTCTGC  
CAGATGCCATAGGTAATTTTACTTGTGAGAGCTGATAGAAAGAGTTATTAATTTGCATGAATAAACCA  
CATTAGTCATAAAGCTTTTGTGGCAATCATAAGAAGTGTGATAATCTCAAGCAGAGAACTGATGATGT  
ACTCAGAATTTTCTGTGAGTTAGTGATTTGAGGGTGTAACTAAAACAATAGCATCTAACAGAAAAGTGT

ATGCAATCGCTTAAGTTTCTGCGAAGCTAGAGAGATTAATAGGAGGTTGGTCAAAAAAGTATTGGGGA  
GAGGTGCTTAGATAGGACATGACACATCCTCAACTTACCGAAGACATGACCTTAGATAGGAGGATGTAA  
AAAGTTAGTAGATAGTGGAGTATTGTTTCTTTATTAGTTGCTATGTTTTCTTCAATGTCGTTTTTCTTTTT  
ATACCTACTTTGATTTGTTGAACTCGAGCCGAGGGTCTCCAGAAACAACCTTCTCTATCTCTGCGAGGTA  
GGAATAGGTCGGCATATACTCTACCCCCCCCCAAATCCACTTGTGGGATTTCAATTGTGTATGTTGTTGAT  
GTTAAGAGAGATTGATAAGACATGAAATAAAATTTCTGGGTGTTGCTAAAGGAGAAAGCAGTTCTCATT  
CTTTAATGAAGCTTTACCAATGGGTGTGAAAGTTGGTGGATATTTCAATTCTTTATGCACTGCTGATAAAAT  
TTAAACTGTCAAACAGGTTTTGTAAGTTTAGATTGTGGAGGCAAAGACAACCTTACAGATGAACTTGGT  
CTTAAATGGACTCCTGATACTCAAATGATTAGCGGAAATATAGCCAATATCTCTGTAGCAAATGAGACGA  
GGACACAGTATATGGCCTTGAGATACTTTCCAGCCGATAACAGGAAGTATTGCTATACACTTGATGTGAT  
TCCCCGAAACAGGTACCTTGTAAGAGCAACTTTTCTATATGGAACTTTGATAAGGACAATGTTTACCCA  
AAGTTTGATATCTCACTTGGGACAACCTCATTGGGCTACAATAGTTATATCTGATGCTAATACAATGGAGT  
ACCAAGAGGTAATATTTCTAGCCAAGGAACCTTCCGTAAGTGTCTGTTTATCCAATGCAACCACTGGGCT  
GCCCTTCATTTCTACACTTGAGCTCCGACATTTTAATGGTTCAATATATATGACTGAATTTGAGAATGATT  
TTTTCATGAGCGTCTCTGCTAGGATTAATTTTGGCGCAGCGAGTGATGATCCTGTCAGGTATGTTTCAGT  
TCTTCTGTTACTGTGGCAGCTTCCAAATCTATGTTCTTGCACGTTCTTGTATATTTTTAGAATATGATAGCC  
ATTGACATTTTTGAACTGAAACAAGCAGGCTTAGGCTCTGTCCCTAGCATGGTTTTCTTCTGACTTACTGT  
TTTTGTTGATTTCCGAAATTTTAATCTTCCCTAATGTCCTTATTCTCCTAGGTACCCTGATGACCCATTC  
GATAGAATATGGGCGTCTGACACCATAAAAAAGCCAATTACCTTGTGATGTGGCTGCTGGTACTGAA  
AGAGTTTCAACCAAAATGCCAATTGATGTGAATACCTTAAATGGTGAGATGCCTCCTCAGAAAGCAATG  
CAGACTGCTGTAGTAGGAAGAAATGGCTCGTTAACTTATCGTCTGAATCTCGATGGTTTCCCTGGTTTTG  
GCTGGGCATTTACTTATTTTGTGAAATTGAGGATTTGAAACCTGGTGATAGTAGGAAATCCGGTTGGT  
TCTCCCTGGAGCTCCTGATATCAGCAAGCTTGTGTTAATATCCAAGAGAATGCCATGGGAAATATCGT  
TTATATGAGCCCGGCTACTTCAACTTGTCTTGCCTTTGTGTTATCTTTTCGTTTCGGAAAGACATCCGAT  
TCCACCATGGGGCCTCTCTTGAATGCTATGGAAGTAAACAGATATGTTAAGAGAACTGATGGCTCTTAG  
ACGGTAAAACCATGCCTTTTTCTTTAACATTATTATAATGTGGTTCGTTGAAATGATTATCTGCAGTTTATT  
TCATTAGAAAGATTTTTTCTGTTGTAATGAGCATCTTTGTTTCGTTAGTTTCAAATAGTAAAGGCATGTCC  
CTTACTCTTTGCATGTGTTTTCAGGACCAGTTATTTCTAGTTTAGTCTCGCACTACTCTTCTGCCAATTTGAC  
AAACGAAGGTGGTGACCCATGCTTACCAGTCCCATGGTCTGGATCCGTTGTGACTCAGATATCAGACC

AAGAGTAACATCAATGTATAGTTCATCACTTTAGCTTCTTAATGCGTAGTTTCATGTGTTCCACTTTCTGC  
ACTTCAGTTATGGAAGAATTAAGATTACTTTCTAGTTTTCTCTTTATATTGTTCTCGCAACCTGAAGCAAT  
GGGCTATAATTCACAACCTGTCACCTTTGGCAGTAAATTGTCTGGGAAAAATTTGACTGGAAATATTCCGT  
CGGAGTTGACAAAATTGAGCGGCTTAGTTGAGCTGTAAGTCATAATATCGTTCTGTTAAATGTTCCATGC  
ATATGCTGCGGTTCCCTTCTCCTATTCTGCTGCTGTATAATCAATATGCACCCATGTTCTAATGCAGCT  
GGCTGGATGGGAATTCAGTACTGGTTCAATACCCGATTTTAGCGGATGTCCCAACTTACAGATAATGTA  
AGTTGAGCTGCGTTTTTCAATTCAACTTTTTTAGATATTCTCTTAAAACACATTAAGTGGTAAATCTAATCA  
TTATGTTTCTTGACAGACATCTTGAGAACAATCAGTTGAGTGGACAGCTTCCTTCCACCTTAGAAGACCTAT  
CAAATTTGAAAGAACTGTAAGCAGCAGAATTATTTATTGACTAAATGTACAATTACTTGTAGAATTTACT  
CAAGCATGTTAGGCTGTAGATGCTATTCAACTATGAGTTCATGCATATGGATGAGAAGCTTAACTCTCAT  
ATTAAGCTTCTGCTCATCAGAATAAGAATCTAGCATAACCCTGGTTGAGCTGCAGATCATGATCACGTCC  
TTGGAACTTTTTTGGCTCCACTTGCGTCCCTTTCTTATTTTAGCTTGCAGTCGTATGTACTGCCTCTAGT  
AAAGTTCTTCTCTTTCTTAATGAAAATGATGATTGCAGGTACGTGCAGAACAACATGCTAACTGGAAG  
TGTGCCTTCTGGTCTTCGTGATAACGGTGTGATTTTGAAGTGGGTATCATTTCTGTGCTAAGTGTGTTGTT  
CTGAGGCCTTGATCTTGTCATGCATTTATACTGTACTGCCATGGAAACTGTTGAGTTTACTTTTTTAGTG  
CTAGAGAAACTAAATTCTTAAATGTTGGATTGAGGCGGGTCTAAGGAGCGTGATATGGATAGTGAGGA  
TTCATACTGACCCCAACTAGCTTGTGGTTAAGGTGTACTTGTGTTGTTGATGCCTAAACCTTTTCATTC  
AGCTACCAAGGTATATCTATAGGGAGCTCATGGTAGAGACTCAATACTCCTTTCTTTATGAAAGCAGATG  
ATCTTAACATAAGTTGGCTTGTAAGATACTCATATGTTAAATCCTCCGCGCTTGGTTGTGGTTCTTATTT  
CAGTTACTTAATGGTTCTTACTGCGCATTCAAAGTGTCTTCAGTTTCTACTAAGCTTGACTCATTACTTTAC  
ATTTTATATGTCGAAATTACAAATCTTAAAGTTTCTCTGATAATCTTGCTGCATTTCTAAATTGTTTGTCTTG  
TCTGTTTCTTACTAAATCTGCTAAAATATTCCGTATTCTCCTCAGTTATACTGGAAACTTTAATCTTCACG  
AAGGGGAAACCAGTCGCAGCCGTAAGAAAATCATTATTGGATCATCAGTTGGGGCTCCGCTCTTCTTCT  
TGCTACTATTGCCTCTTGCATACTACTGCAAAAAGGGAAAAAAGCTCTCCTAAGCAAGGTCTGGTGCAA  
TACTTAATTTTGTCAATTTTATTATAAATAAATTTTTTTGGTGGGACACACATTATCTTTCTGCTTCTGTTTT  
AGGCCACCTCGAAATGAATTTACCTCCTCAAAGGTTTGTCTTCTTGGGAGATGCTGCAACAGAAGCA  
GCACACTACTTTACATTAGCTGAACTTGAAGAAGCGACCAAGAAGCTTTGAAAGAAAGGTTGGATCAGGG  
GGATTTGGAGTTGTATACTATGGGAAATTGAAGGACGGGAAGGAAATTGCTGTCAAACCTTCTTACAAAT  
AATTCCTTTCAGGGGAAGCGAGAGTTCTCAAATGAGGTAATAGGTGGATGCTCCTATTATATTCTAGA

AGCTTGTCATGATGCATAAGCATGGTCTTAAATGTCGGGACTGATGCTGTGGCTAAAAACCGATTATTTA  
TTAGTATAACTTTGTGAGGAAGATCAAGATATAAGAGGCTTCACCATTACACTTCAATGTTTTTAGATTAT  
CGAGGAATCCATTGTTTTACTTTTTGGAACCTCGGGGATAATGGGCCACCCCTCTACCTCAATTAECTAA  
ATACCAAACCTTGGTGCAACAACCAGGTTTTGAAGTCATGACATGCACCTACCACACTCCTGCTCTGTACT  
ACCTCTGATGTCGAATCAAAGCCCCGGAGGCTGCCTTGACACTCACATTATTTTTGCTTTTCAAGTCTGCA  
TAGCATCTCAGTATTGAAAATGAAAGCTGCGTAATATAAAGGATTAATTTCTTCATTAAAAAAAAAAAGAT  
TTATTTTAACGCTAGAGGACACTTTCTCAGTGGTACTTTTTCACACTCATCAAATGTATATTCCATAGAAG  
GTCACGGGCTATAAAACCTCTAGACCAGCAATGGACTAGAACTTAATTATGTTGTTACACAGTGTGCAA  
CTTTCCCTCTACATTGTGCAATTTTTGATCTGATGAAAATTAGTACAACCATATCCAGTTTATATGTGTCA  
AAATTACAATTTTTGGCGCAGGTCGCTCTGCTTTCAAGAATTCATCACAGAAACCTTGTACAGTTTCTAGG  
ATTTTGTGAGGAAGATGGAAAGAGTATCCTTGTGTACGAATTCATGCATAATGGAACCTTAAAGAACA  
CCTCTATGGTAAGTTCATCTCGTACATTGATTACAGAAAGTTCTAATCTGAATCATGCTCAATGTGTAAAA  
TCATTGGCAGGTCCTCAATTACCTGATCGAAGTATTAECTGGATCAGGCGCCTTGAGATTGCTGAAGATT  
CTGCAAAGGTTTGTAAAGAAAGGAAGAAGTTTTTTGGATTAGACAAGAAGGATCTTTCTATATTTACTGT  
GTTACTATTTGATTGTTTCAGGAATTGAATATCTTCACACGGGATGTGTCCCATCCATCATCCACAGAGA  
TGTGAAAACCTAGCAATATTCTGCTTGACAAGAATACGAGAGCAAAGGTTTCAGATTTTGGTCTCTCCAAA  
CTTGCAAGTAGATGGAGCTTCTCATGTGTCAAGCATAGTACGTGGAACCTGTAGGATATCTGGATCCCGAG  
TATGCATTCTTCTCTGGAACCTTTGAGTTTTTTATTCACTGTACAAGGCCAAGCGTTGACTGCATTTTTATTC  
CACAACCTGTTGCTATGTGTACTCTTAATTTGTTGGAAGGATCATATATTTTCTTTGTCTCTTGAACCCCTA  
TTAGCAAGAACAACAAAGTTTTTCTATGAATCTTAATGATGCAAATCAAGCTAGTATTCTAACTTGAATT  
ATATACCTGAGTTTCAAAGCCATGGGAAAAAAGCAAATCCTGGCTACATGAATAGTTTTCCCATAGCACA  
AGCTAATCTTTTAGCAGTTTTGCTTCACCAATTA AAAAGATTCTGCATAAATGACTCGTCCACAACCTGCGA  
CATTTCAATTTGGAAAGTGTCTCGGTAGCAATATGATTTATTTATTTGATTCTCAATGCTAGATCATATCCAT  
GGTGGTGTAAAGATATTCACCTGACTGATCTTCAGTGAAACTGGAGAGCTCTGTGTATTTAATTTGTTTTAT  
TGGCCTTGACATCACCTAATCCTCCTCTTTGAGTCTTCCATGCAACAACGACAACCTACGCACCATTGCC  
AGCTAATTGATTTAGCTATGTCAGTCCTCTATAACAATTCTGCTCGGTTGTTCCCGTCTCATTCTACTAGAA  
AGAATTA AAAAATTTACGAAAAAATGGAGATTCTAGGGCTTCTCTAACCAGACTTTACTTCAATTATGTT  
ATGTTCTCTTCGTCAATATATATGAACTTCTTTCTAGTACTGCCATGTTCCAATATATGCGACTCCATTTG  
ACAGAGCACGGAGTTTAAGAAACAAGGAAAGTGAACTTGTGGTCTTAAACAAGCCATAGACATTTGT

GTGGCAATAAATCTTCTCATAAGGGTAAAATATAAATTTTAAAGCTAAATTGTTCTAAATATAAAAAGTGT  
CATTCTTTTTGAGACAAAGTAAAAGGAAAGTATGCTACATAAGTTAAGGACAGAGAGTAATAATAATT  
AAAACAACAAAGGACTTGTGCATAATCTCCTTTACATGAGTGTGACAGTTGATACATCACCTTCTCTTT  
AAAACCTAGTGCCCTTCTCTATAATCTCATTGGATTGTTAAACTAGCTGTTATGTTCTTTCTGCAAGA  
ACTATGTTGAACGCTCAGAAATTTTACCTGAAGTTCGGTGTCTAATGCTCCTAAGTTGTCTTTTCTAATA  
AGTTATACGTTCTTCAGGACTTTTGGATTGACTCTTTTAATTTAATGTCTATACAGATATTACATTTCCAG  
CAGTTGACGGACAAAAGTGACGTTTACAGTTTTGGTGTCAATCTCTTGGAGTTAATATCTGGCCAAGAAG  
CAATATCTAATGAAAATTTTGGTCTCAATTGCCGTAATATAGTCCAGTGGGTAAGATTATTTTTTATCAT  
ATGCACTATCTTTGATAATAATTTGCTACCGAATTTCCACCTTACTACTTTCTCCATTTAAAAGAAGTTGAT  
ATCTTCTTGCTTCTGATATAGTCCTATATTATACTCATTAGGTGTCCCAACGACCCAACCTTATACATT  
CATAATGTCTTTAGCTTCTTCTAACAATTTAGTGGGAACATCTGAAAAAATTATATTGACTCCTGCATAAT  
CCCATTGTGGGGAAGGATTTTATCTATTGAACCATGCTATAAAGTTCGGTGCCGTCTTAGACATTTGCTG  
GACGGATTTTAAAACCTTCTACTTCTAATCATCCAGGCGAACTACACATTGAAAGTGGGGACATTCAGG  
GCATTATTGACCCCGCTTACACAATGACTATGACATCCAATCAATTTGGAAGATAGCTGAGAAAGCTTT  
GATGTGTGTCCAACCTCATGGAAACATGAGACCATCGATATCAGAAGTTATCAAAGAAATCCAGGATGC  
AATTGCAATCGAAAGAGGCGCAGAAGCAGTAAAGGAAGGTAGTTCAGATGACATATCCAGGCATTCGA  
TGCATTCTCCCTACACGCGGGTTCAATGGACCTAGGTGCAAGTGACCATTACTTGTCCATTGATGAATC  
TATCACAAGACCAGCAGCTCGATAAGGTTTTTGTTCATATGACTGTAGAATTTTGTTCATATAATAGACCA  
TTAAGTTGTGTTATTTCCAATTCATTTTGCCATCATTTTACATATTTCTCAAGGTCTAGGATTACACAATTG  
TTGTTATTGACACCTTTTGTGGAACATAACCTTCTTTTGTGCTGTGCTGTGTAAAGGCAAGTTTTTTAGC  
ACATTTTTAGTTTCACATTTTTGGCTTGAACCAAGAGAAAAAAGTGTAAAGCAATCTTTACTTCTATTGC  
CCTTTTGATAGAAATTTAACCATATGAGTGGCTACAGACTTTGCTGAGG

>PGSC0003DMG400002602 RLK with malectin domain

ATGATGAAAGACTTGATTTTTATCTTTCTAATTCTCTTGCACCTGAAGCTAACGCCCAAATTGATGAATC  
AGGTATATAATTTGCTCTTCAACACATTTTTATTTTTGTTCAATCCTTGTATGATTCTTAATTGAATGA  
TATACTTCTAATATTCTCTCAGGATTCGTAAGCATAGACTGTGGAATTCCTCAAGGTACCGACTACACCG  
ATATAGCTACTGGACTACAATATGTATCCGATTCAGGCTTCATCGATACGGGTAGTAATGCTTTTATCTCG  
AGTGAGTTCCAGGCCGATGGCCTGGAACAACAGTTGTACACCCTCACAAGTTTTCTGAAGGAAAACGA  
AATTGCTACACCATAAGAATTCACAAGGAAAAGGAAAAAAGTACTTGATCAGGGCTAGATTTTTGTAC



GGAAACTATGATGGAAAGAATCAACTACTGATCAATTTTGATCTTCATCTTGGAGTTGACTTTTGGGACA  
CGATTCATATAGTCAACGCCTCAACTTCGATATATAGAGAGATCATACACATTCTCTCATCGGATTTTGTG  
CACGTTTGTCTAGTAAATACAGGTCGAGGAACACCATTTATATCCGCACTTGAATTGAGACTCTTGA  
CAACCATGTATGTA  
ACTGAATCCGGGTC  
ACTACAACTGTCACGCGGCTTGATCTTGGCTCAACATCCAC  
TCAATTTGCACGGTAATCATTGAAAATTGTATTAATTCAGAATAGTTGATGTTTTACAAAAAACAT  
GAAACGTTTGTATATAGAGATTTGACTGTA  
CTATTTCGTGGTGATTTAGGTACAAAGATGACATGTAT  
GATCGTTTATGGTTGCCATATAACGAGGTGGCAAACACGGTACAATTGAGTACATCTTAAACCATTGATG  
GCGGTCCGGTGAATAACA  
ACTTTTTTCGACCACCGCCAAAGGTGCTGAGCACGGCAATAGCAGCCGATA  
ACGACACTAGTGGAATATCATATTCGTGGGAACCTGCAAATTCAACAGATGAGAATTACATCTACCTGCA  
CTTTGCGGAGATTGAAGCCAACCATGTGAATAGACAATTCGACATATATTTAGATGGAGAATTGTTTCAG  
ACAGCATATGCTCCTCCTATTTGTCCTCAAACACAATTTATTCAGGAGTGCCTATTACGCCAAGAAATAC  
GCACCAAATTACCCTCAATAAAACGGGAAATTCGATCCGTCAACCCACCATCAATGCCATAGAGATTTAT  
AAAGTGGTCAAACAAATCATAACCACTCAAACGAATGACCTAGATGGTAATTAAGTTTCTCTTCATTTAT  
TTTTGTGATTATATATATCACCTGAATTGGTCGAATCTTTTTTTGATCCACTGTTTTCTAAAATCATTTTAT  
TTTGA  
AAAGTAGAAATAGTTTGTCTTTCACCACAGAAATTTAAAAACACTTTTCGAGCAACAATTAGTGT  
TTGATCAA  
ACTTTTTAAAAAGTGTTTTAAACTTCTGAAAAACAGTTTCTGTTGCTCTCTAAAATGACTTATT  
TTCTCCCAA  
AAGCTTGACCAAACACTCACTTTTTAAAATTACTACTATTTTTGACTCCCAA  
AAACTTGGTC  
AAACAAGCTATAATTTGGACTATGCCAAAGTTTGGATGATTTGAAAGGGTTATATATCGATGGATCACT  
AACATTTATTTTGTATTAGTCGAGGCTATTATGAATGTCAAATCGACGTATGAGGTTAAGAAGA  
ACTG  
GCAAGGAGATCCATGCGGCCCTAAAGCTGATATTTGGAATGGTGTCACTTGCAATTTGATGGGCAGCT  
CCCCACA  
ATTATATCCTTGATTTTCTTATACTCTCAAATTTCTTCATTATAAACATGTTTCTTCTAATTT  
GTTTTGGAGAATGAACTAACTTATAGTTAATTTGTTGAGTAGAACTTATCTTCAAGTGAATTACAAGG  
GACATTATCGCCTTTTATTACAAGTCTCACAAATCTAGAAACGTTGTAAGTATATAAA  
ACTCACTATAAG  
CTTTATCACTTGTACCAA  
ACTAGAAAATGAAGAGCCTTTTCAGAGAAATGAGTACAAATATAATGTTTTT  
TTAAAA  
AAAAAATAAAAAAAATTGTACATGTTGTACCTGTTGTTTCACAAATTTAGTGAGTTAATAACTT  
TGATGGTCACTCAACTATCAACTTTTTTACAGAAAGTTACTCAACTTTTATTCTTAACTCAA  
AAGTCACTT  
AACTATGGCTTATTTGTACAGAAAGTCACTCAACATATTTAATTATTTTTTCACTAAAATTTT  
GACATGA  
AATTTATTTTAA  
CCAAAATTTAAGAACCAAATATATATCCATCTAATGACCCGACCCGCTAAAAATAT  
TATATTGAAAATTTTATTTTACCATTAATCCCTAAATCATTCTCTGTTTCCTTCTTTCTCCGGAGCGTTCT

TCTTTTCTTTTCTTTTCTTTTAAATTTCTCAATTTCAAAGAGCAAAGCAGGACATCTTGCAATCCTCTTA  
TAATGTATAGCAATTTAAAAAGTTTTGCCGTCTTAGAAATTTCCATTGAAATCGTAACCTAAGAGATTGT  
TGTAATTTTTATTGTTTTGAAGTTGGGAAAACAATAATTTGATCCTTAGGGATAACAGAGGGGTTATGG  
AAACTACAAAAATAAAAAACAGAGAGGTTGATATATTATTGATATGTGAAGAAAAGGTTGAAGAAG  
AAGAACGCTTAGGAGAAAGAAGGAGACAAGAGAGAATGATTTAGGGAATTAATGGTGAAATATAATTT  
TCAATATAATATTTTTAGCGGGTCGGGTTAAATTGGGCAGGTGATTAATGAATATATATTTGGTTCTTA  
AAATTTTGCTTAAAGTAAAATTCCATGTCAGAAATTTTAGTGAAAAATAATTAATATATTGAGTGA  
CTTTTGTGCAAAAAGCTTAGTTGAGTGACTTTTAAGTTGAAAATGAAAGTTGAGTGACTTTTTATGAA  
AATAGTTAATAGTTGAGTGACCATCAAAGTTATTAECTCAAATTTAGTAGACCCAAATCATAACGTTTTTG  
GGTGGAACAAATTTGAATCCTTCAATTTGTGAAACAAAAGAAGTCTCGATAATAAAATAAATAAAAT  
TTCGGTTATTAGTATTTTTATGAGATTCTTTGTTTCTGTTGAAGGAECTTGTCAAACAATCAGCTGACGG  
GAGAGGTGCCTGCCAATCTCTCACGACTAGCCTTCTTACAAGAGCTGTAATTTACTCATTTAGTCTCAATT  
TATGCTGCACAGTTGCAATTAATATGATTTTTATGACATTATTGTTGTGTTTCTGTTGAAGGGACTTGTC  
AACAAATCAGCTGACGGAAAGGTCCTGCCAATCTCGCACAACTACCCTTCTAAAAAGCTGTAATTTA  
CTCACTCATGACCTCTAAGTTTACAATTACTACCTCTGTATCAATTTATGCGGCAAATTCCAAATATGATT  
TTAAAAATTTTAAGTTGTTAATTATTTTCATCTATAGTAATTTTATGTTCAATTCACTATCAAAGTTTGA  
ATTTTGAATTGTGTCACATGAATTAGAACATAAGGGGTATTTATTTAATTAGAACACAGAGTAATTTGGT  
TATCTTTGTGACAGATACTTGAAAGGAAACAGTTTCTCCGAAAAAATTCCTGAAGAATTGCTGGCAAAT  
CAAAAATGAATCACTCGATTTGAGGTTTCGTTCCACTCTCAGAATCCATGAATTAATTTATGAGTATACA  
AAAAACATCTAAGATTGATTTAGAAAATTATCTCCCCTATGATCGATATTAATTTCTCATATAATTGGTCA  
CATGTTAAATTGTGTCATCAACTCATCTAAAATTAAGTCTGATGGTATATTGAATTGTTATCAAGTCGTT  
AGATATTGAAGACACACTCATATTTATTTTTTTGTGATACAGGTATGACGAATTCGTCCTCCAAAAGGTA  
GTAATAATCTTAGTCCTGGTGCCTAGCAGCAATTGTTGCATCCGTGGTGGTCTTGGGCATCTTGGCTTT  
ACTACTACTTCTTTGGTTTATAATTCGAAGGAAGAAAAACAAAAAGGTGAGCAAATCATAAGATCGAT  
CGATGAATTGCCAGATGATTTGTCATTGAAGAAATTAATTTCTGTAACAGGGAAGATCACTGGGACAGA  
AAGAACAGTACAGAGTCCAAACATTGCATTGGAGTTGAAAAACCGACAGTTCACATACTCGCAGGTTTT  
GCACATGACAAATAACTTCCAGAGAGTCCTTGAAAAGGAGGTTTTGGGACAGTTTATCTTGGCTCTGT  
CGATAACCGTGACGTGGCTGTTAAGATGCTGTCCCATCTTCAGTTCAAGGGTTCAAGGAATTCGGGGCT  
GAGGTAAACTGAAGAAGTATGTTTTAGTACATAAGACATTATATGAATTTGACTATACATAAATTTGACT

TGACAGGCTAGTCTACTGATGAGCATAACATAAGAAGCTTGATTTCTATAGTTGGGTATTGTGTTGAAG  
GCACCCACATTGGTATTATATACGAATACATGGCCAATCGAAGCTTAGACATGCAACTATCAGGTACCTG  
ATTTATAGTCAAATAAATGTTCTTTAGATCACACATTTACAAGTCTTTAATCGTTGCGTGCGATAGAAA  
TCCAAATGCTTTAACATGGGAGGAAAGACTTCATATAGCATTGGATGCGGCACAAGGTATATATATACA  
CCACTAGATGAAAATAATTTAGTCGAGTTTTAGAATGATTAATTATATATTTGACGTGTTTCTTTAATTT  
TAACTGAAAAATAATGAAGGATTGGAGTATCTACATCATGGTTGCCAGCCACCAATAATACACAGAGA  
TATCAAGTCTAGTAATATTCTATTAGATGATAAATTCGAAGCAAACTTGCTGATTTTGGTTTGTCAAGGA  
CTTTACCAACTGGAGAGGGAAGTCATGTTACCACCATAATCGCGGGTAGTCCAGGCTATCTTGACCCTG  
AGTAAGTGCTCTCTCATTTTATTATTAGTCTGTCTCAAAAAGAAAACGACTATGTATATCTAATTTTTACTC  
TCGAATTGACCTGCAGTTACTACAGGACAAATAAGCTAACGGAGAAAAGTGATGTATACAGTTTTGGTG  
TGGTTCTTTTGGAAATAATAACAGGACGGCATTACTAGGAAAACATGACAAGATTTATGTAATAACGT  
GGGTCAATGGTATGATTAATGATAACGGAGATGTTTCAAAAATAATCGATCCAAGATTAGGAGGAGAA  
GTTGATGTGAATTCAGCAAAGAGAATTGTGGCATTGGCAATGGCTTGTGTTTCTCTTGAACCAACAAATA  
GACCAGCTATATCTGTCGTTGTGACGATAATAAAGCAATGTTAAGGCAGATGATTGATAATTATGACTC  
GAATTGA

>PGSC0003DMG400003406 RLK with malectin domain

ATCTTTTTAAGGTTTGGGGAAAAATTATCAAAGGGTCTAAAAATGAAAACAAAACATAAGTTAACACCCC  
TACCCTTTACCCTTACCCTTACCCTTACCCTTACCCTTACCCTTACCCTTACCCTTACCCTTACCCTTACCCTT  
TTTTCTATCACAAATACATTTGTCATTGCTCAAGATGATGCTGCACCTGCAAAATCATTTCTGTATTAC  
TCCAGAAGATAATTTCTCATTGATTGTGGTGCAACTTCATCGATTACCCTTCCGGGGAATAAAGTTTTTC  
AACCTGATCAAAATGCCGCAAAATATCTTTCTTATAGTGGTAAAGATGTACAAGCCTGTGCTTCTGAGAA  
AATCAACGTTCTTCAACGTTATATGTAAACGCCAAAGTCTTCACAACTGAAGCTATTTACACGTTTCATG  
CCAGTACTTCAGGGTTGCATTGGATCAGACTACATTTCTTTCCATTTAGATACGAAGAATATGATCTTAAA  
ACAGCTAAATTTCTGTTAAAACGGATAGTTTAGTCCTTCTACGTGATTTCCAACTGGGAAAGATGAGG  
CTGTTGTCAAGGAGTTTGTGTTAATGTTACCTCAGAGCGTTTTGCTATTAAATTCGAGCCAGCTCAAGG  
ATCTGTGGCATTGTTAATGCTATTGAGTTTGTACTGTACCTGCGAAAATGCTTGATTATTCTGTTCTG  
TTTTATTTCCCGTGTACAGAGATTTGATCTTTCTAAAATAATTTCCAGACAATGTATAGGCTTAATGTC  
GGTGGTCTGCTTTGGATTCAACGAACGATACTGTTGGAAGAAATTGGATGTCTGATAATCAATTTCGAA  
ACAATGCTACAGGTGCAGAGGTATCAACACAAGCCTCTGCTATTAATTATTTGAAATCATCAGGAGGCTC

TCCGTTGATCGCGCCACCAACAGTGTATAGTTCTGCTGTAAAGATGGCGGATTCAGAACTACAATTGCT  
AATTTAACATATCATGGACTATGGATATTGATACTATATATCCTCATTGATTGCTTACATTTCTGCGAT  
ATTATTAGCAAAGCTCTTAATGAACTCTATTTCAATGTGTATATCAATGACAAGATGGCTATTTCCGGGCT  
AGATTTGTCATTATTGACAAATCATTGTCTACGGCTTTTTACAAAGATTTTGTGGATTCTCCATGG  
TGTCTAACCCCTCGTTGTACGTGTTTCTCCTGTGAATGATGCTCAAGGTTTAGAAATGCGATTCTAAAT  
GGCCTTGAGGTGTTTCGAATGAATAACTCTGTTGGTAGCTTAGATGGAGAATATGGTGTGATGGACAA  
AAACAAAGTGGTCCAAGCAAACAGTGGCTTATGTTGGATTGCGGATGATGTTTGGAGCGTTTGTGGGG  
TTGGGTGCAATGGCGGTAAATGGCAGAAGAGACCTCAAGATTGGCAAAGAGGAATAGTTTTTCGGC  
TTGGTTACTTCCCGTTCATGCTGGTGATTCAACATTTATGTCATCATCTTCGCGAAGCAAGAGCCAATTCT  
TCTCATCAAAAAACATGGGATTAGGTCAGTACTTTAGTTTTGCTGAATTGTCAGACGCCACGAGGAACTG  
GGAACCTAGTGAAATAATTGGCGTTGGTGGCTTTGAAATGTATACTATGGAGAACTTGATGATGGTAC  
AAAAGTTGCTGTCAAGAGAGGAAATCCACAATCAGAACAAGGTATAAATGAATTCCAGACTGAAATTC  
AATGTTATCTAAGTTAAGGCATCGACATTTAGTGTGCTTGATTGGGTATTGTGATGAAAGTGCTGAGATG  
ATATTGGTTTATGAGTTTATGCAAAATGGTCCATTGAGAGATCATCTCTATGGAAAGAACATGCCGCCTT  
TGCTTTGGAAGCAACGATTAGATATCTGTATTGGTGCTGCTCGCGGGCTTCATTACCTCCACACTGGTGC  
ATCTACTGGGATCATACATAGAGATGTCAAACCACCAACATTTTGCTTGATGAGAATTTTGTGCGAAAG  
ATGGCTGATTTTGGGCTATCTAAAGATGGACCGACAACAGAACAGACTCATGTGAGCACGGCTGTGAA  
GGGAAGTTTTGGCTACTTAGATCCTGAATACTTTAGGAAGCAACAGTTGACAGACAAATCTGATGTCTAC  
TCATTTGGGGTTGACTTCTGAAGCCTTATGCGCTCGTCTGCTATTAATCCATCATTACCAAGAGAGCA  
AGTGAATTTGGCAGAATGGGCAATGCAGTGGAAAAGAAAAGGATTATTGGACAAGATTATTGATCCAA  
CACTTGTAGGACATATTGATCCAGAGTCAATGAAGAAATTCGCGGAAGCAACAGAGAAGTGTGGCTG  
AATATGGTGTGACAGACCTACTATGGGTGATGTTTTATGGAATTTGGAGTACGCGTTGCAGATGCAAG  
AAGCCTCGTTACAAGGAAAGACAGATGATATCGATAACAAAGCAATTGTTGCACCAATTTCTCCTTCTAC  
AATTGCCCATGCTAATGTCACAACTGATAACAAACATATTTCTTACCAGAACAACATAAAAATCCTACTG  
AAGTTCAAGCCATTGATGACAAGTCAGGGGCTTTTGTCAATTTGAGCCTATCAATGGACGATAAAACG  
AACACTCAGCTTGTCTATAGACAAATCAAGAATCTACAATTAAGGTTATGAAATACATGTGTATGTAT  
ATGTATGTAGTAAAATTCAGCTTTTTATGGATGCCATTTTGTGAAAAATGTAATTCAGAACAATGTAAT  
GTTTCACATAATACTACTTTACTATATTG

>PGSC0003DMG400007299 RLK with malectin domain

CTTCATTGTAGGTTGTTTCCCAGCATCCTATAGTTGATTAGCTAAACACTTGTTTCATGGATGCCAAGAAA  
TGACCTGGTCTTTGTACCAAAGCAAAGAAACCTCCAACCTCCTCTTTGTATTGCGTAGGCGTACAGG  
ATTGTTTATTGTCCTGTACGCCTTTTTTTCTTTGTTTGTAAACCATGTTAACAAAATTATCCCACATTTTGT  
TACTAGTGATCTTATGTTACATCTCTTCTATTCTCGCTCGCTTCATGCTGCATTAACAATGATCAAAACT  
CATTGTTCTTAGCATGTGGTTCTCAAAATGGTGGAGTTGATGAAGATATGATAAAATGGGAATCAGACA  
CGAAGTATCTCGTGTCTGGTGATAAATCAGTCATGACACAACCTGAATCCCCTGACCCTTTGGCTCCATCT  
GTTGTACCATATACAAATGCAAGAGTTTTTCAATCAGAATCTTCATATAATCTTCTGTTACAAACCAAC  
AGCACATGTTATGCTTAGGCTTCGTTTCAACCAACGCCTTATCCTAATTTCAATATTTCAAAATCATTAT  
GACTGTTTCTGCTGGTAAAGTAACATTGTTAAATAATTTAGCGCGTATATAACTGCAGAAGCCTTGTC  
CAGAGTAGCATTACCAAAGAGTACTTATTGTCTCCTGTGGGTTCTCCAACCTTTGGAGATCAAGATTAAGC  
CTTTTGGTGATTCATCATTGCATTCATCAATGGAATTGAAATGATCACCGCGCCAGATATATTTTATGGT  
CCGGATCCTCTGATGGTTGGATTCAGTACAAGTATTCAAAATCTATTACTCAGCAAAGTATATCTGTAA  
AGGAAAACAATATGGAGTTAGCATATAGGCTCAATGTTGGTGGACAATACATTTCTCCGAAAAATGATT  
CAGGTGGGTTAATGAGAAGTTGGTATGAAGATACTCCCTACTTATATGGTGCTTCAATAGGCATTA  
GAGGAGCAACAGGACAATTCAATACGATAACATGCCACCATACGTTGCACCACTTGCTATCTACAAGAG  
CTGTAGATCGATGGGTTATGATTCAAACCTCAACAAGAACTATAACCTCACTTGGGTTTTCAATGTTGAT  
CCCAATTTTATATATCTTGTGAGGCTTCACTGGTGTGATTTAGCATCGATGCCACGAAATACAACCTCCAT  
GGTCTTTAATGTATATATTAATGGACAAATTGCAGAAACAGAAGTTGATTTAGTTGCAATGAAAAGTGG  
AAAAAAGGAAGTTGCAATCGTAAAGATTATGTGACTCGTGTTGATGATAAAGAAGGAGGTCAGCTTT  
GGGTAGCAGTGCATCCATTAGTGCATGCATTAGGAGTTGGAAGTGAGATAGCTAATGCTATTGTTAAATG  
GAATAGAGATATTTAAGATTGGCGGTGGAGATACGAGCTTGGCTGGAAGGAATCCTACAATGTCAGAT  
TTAATGCAAAAATATCAGGAAGAACATAGTAAAGAAGCTCCGGGGGCATTCTCTAATCAGGACAAATCA  
CATAGTAAACTGTTATAATCAGTGGTGTGCTGGTGGAGTTGCTGCTGCATTTGGTCTAGCTGCTGTTT  
TGGTCTTTGTTGCTTTGAAGAGGAAAAAAGATCCCCGGGAGCTGAACCAGGCATAACTAGTTGGCTGC  
CGATTCATGGGAACTCTCATTCTTCTGGTAGCAGCAAGTCAGCTTCTCGAAGAAGTGCTGGTAGCACAG  
CCATTTTCATCAGATGCTGCTTCTAACTGCCGATATTTTTCACTAGCTGAGATCAAACAGGCCACTAAAAAC  
TTCGACGAATCATATGTCATTGGAGTTGGTGGATTTGGAAAAGTGACAAAGGAGTTATCGATGGTGAC  
ACTGTTATAATCAGTGGTGTGCTGGTGGAGTTGCTGCTGCTTTTGGTCTAGCTGCTGTTTTAGTCTTTGT  
TGCTTTGAAGAGGAAAAGAAGATCCCTAGGAGGTGAATCAGGCACGACTAGTTGGCTACCGATTTATG

GCAACTCTCATTCTTCTCTAGCAAATCAGCTTCCGGAAGAAGTGGTAGTGGTAGCACCAACCATTTTCATC  
AGATGCTGCTAGTAACTGTGATACTTTTCACTTGCTGAGATCAAACAAGCTACTAAAACTTTGACGAA  
TCATATGTCATTGGAGTTGGTGGATTTGGAAAAGTGTACAAAGGAGTTATCGATGGTGACACGAAAGTT  
GCAATCAAAGATCAAACCCATCTTCAACAAGGGGTTAACGAATTTCAAACCTGAAATCGAGTTGCTTT  
CAATGCTAAGGCATCGACATTTAGTGTCCCTAATCGGATTTTGTGAAGAGAATAATGAAATGGTGCTTGT  
CTATGACCACATGGCATATGGAACATTAAGGGAACATCTTTATAAAGGTAACAAAACCTATACTATCTTGG  
AAGCAAAGGTTGGACATTTGTATTGGAGCAGCCAGAGGACTTCATTACCTTCATACAGGATATAAATAC  
ACCATTATTCATAGGGATGTGAAAAGTACAAACATTTTGTAAATGACAAGTGGGTTGCTAAGGTTTCAG  
ATTTTGGACTTTGAAAACAGGTCCAAACATGAACCAAGGACATGTTTCAACAGTCGTAAAGGGTAGCT  
TTGGTTATTTGGATCCCGAATACTTCAGAAGACAACAATTGACTGAAAAATCAGATGTATACTCATTGG  
GGTTGTCCTGTTTGAAGTATTGTGTGCAAGGCCAGCGCTTAATCCAACCCGTTCAAAGAACAAGTTAGT  
CTTGCAGATTGGGCATTAGCTTGTCAAAGGAAAGGGAATTTAGAAGATATAATTGATCCACATTTGAAA  
GGAAAAATCAATCCTGCATGCTTAAAAATTTTGCAGAAACAGCAGAGAAATGCTTAGCTGATAACGGT  
GTAGATCGTCCATCCATGGGCGATGTATTATGGAATCTTGAACATGCCTTGCAATTAGAAGATAATCCAG  
ATGGGGTCTTATCAACTTCCGAGGCAACGAAAGATGTGGATCATGACAATGCTGATCAACACAGTTTGA  
TAGCAATGCATAGAAGCACTTTGAGCCTTGAAAGTGATAATGGTGCTGATAATAATAACAAAAATG  
ATGTCTTTTACAGACTGTGAGTCCAACAGGAAGGTAATAGCTTAACATAGGTTGTTCTTTCTTATCATT  
TGTTATGATGAGAGTAAGAATTTGTACAAATATTATACATACTCCTTATAGACTATATAAGGAATATTATA  
GCAGGTTATTGAATAATGCTGCTATAGTGTATCTTTCGAGATATCACAAACAAATTTTGTATTGTTTGTATG  
ATTTTAGACAAAGCCATTTTTGTAACCTCTTTCATTCCAATTTATGTGACACTATTTTCTTACTGGGATTGA  
ATCCCCATGTG

>PGSC0003DMG400007307 RLK with malectin domain

TTGATTAAGCTAAAACCCTTTCAACAATGGATGCCTAGAAGGCAAGAAATGATCTCGTCTTCGCCATAAA  
TCAAACACAAAAGATCAATCTCTCATTTTTATTGTTTCATAGGCGTACAGAAAACATTGCTTTCCTGTACG  
CCTTTTTTCTTTTTTGTAAACACCATGTTAACAAAAAATCGTATTTTGTACTATTTCATATGCCTTTCTTCA  
TTTTCGCGATCATTACATGCTGCAATAGGTGATCATACCTCATTTTTTCATAGCATGTGGTTCTGAAAATGG  
TGGAACAGATGAAGATGCTAGAAAATGGGAATCGGACGCGAAGTATCTCATATCAGGTGATAAATCAG  
TCATGACACAACCTCAATCCCCTGACCCTTCTGTTCCATCTGTTGTACCATATGTAAATGCAAGATTTTTTC  
AATCAGAATCTTCATATAATCTTCTGTTACAAATAGATCAGCTCATATTTTGTCTTAGGCTTCATTTCTACC

CGACTTCTTATCCTAATTTCAACGTTTCCAATTCATACATCTCTCTTTCTGCTGGTAAAGTTACGTTGTTGA  
ATAATTTTCAGCGCGTATATAACTGCACAAGCATGGTCACAAAATTACATTATTAAGAATACATTTTGTAT  
CCTGTGGATTCTCCAACTTTGGAGATCAAATTAGTCCTGTTGGTAACTCATCACTTGCATTCATCAATGG  
AATTGAAATGATCACCTCACCTGATTTGTTTTACGGCCCTGATCCTGTGATGGCTGGGTTTAGTACTGAT  
GAAGAACCGAATTCTTCTGGGGACGGAGATGTTGTTTCTCAGCAAATATATCTATAAGGGAAAATAAT  
ATGGAGCTGATGTTTAGGGTCAATGTTGGTGGACAATTTATCCTCCGAAAATGATTCAGGCGGGTTA  
ATGAGGAGTTGGTATGAAGATACTCCCTATGTATATGGAGGTTGAGGTGTTGGTATTGCTATGAGCACC  
AATGTGACAATTCGTTATGCTGACTTACCATCATATGTTGCACCTCTTGCTGTGTACGATAGTTGTAGATC  
GATGGGTTTTGAGTCGAATATCAACATGAATTATAACCTTACTTGGGTTTTAGTGTGATGCAAACTTTT  
CCTACCTTGTGAGGTTTCACTGGTGTGATTTCAATTGTCGATTCCACTAAGGTCAATTCGTTAGTCTTTAAT  
GTATATATAAACGGACAAATCGCAGAAAGTGGAGTCGATTTAGTTGCAATGCAACATGGGGAAAAGGC  
AATTCCTTTAGTGAAAGACTATGTGACTCATGTTGAAGATAAAGAAGGAGATGATCTGCTTTGGATAGC  
AGTGCATCCATCAGGAGATAATGCTGATTTAGCTAATGCTATTGTAATGGACTAGAGATATTTAAGATC  
AACGGTGGACACACGAGCTTGGCAGGTCAGAATCCTGCAATGTCAGATTTAATGATGAAGTATCAGGA  
AGAACATAGTAAAGAAGAAGCTCCGCGGGGATTCACTGATCAGGACAAATCACATAGTCATACTGTTAT  
AATCAGTGGTGCTGCTGGTGGAGTTGCTGCTGCTTTTGGTCTAGCTGCTGTTTTAGTCTTTGTTGCTTTGA  
AGAGGAAAAGAAGATCCCTAGGAGGTGAATCAGGCACGACTAGTTGGCTACCGATTTATGGCAACTCT  
CATTCTTCTCTAGCAAATCAGCTTCCGGAAGAAGTGGTAGTGGTAGCACAACCATTTTCATCAGATGCTG  
CTAGTAACTGTCGATACTTTTCACTTGTGAGATCAAACAAGCTACTAAAACTTTGACGAATCATATGTC  
ATTGGAGTTGGTGGATTTGGAAAGGTATACAAAGGAGTTATCGATGGTGACACAAAAGTTGCAATCAA  
AAGATCAAATCCATCTTCAGAACAAGGTGCAATGAATTCCAGACTGAAATCGAGATGCTCTCAAAGCTA  
AGGCATCGACATTTAGTGTCTTGATCGGATTTTGTGAAGAGAATAATGAAATGGTCCTTGTTTATGACC  
ACATGGCACATGGAACATTAAGGGAACATCTTTATAAAGGTAACAAAACATACTATCTTGGAAAGCAA  
GGTTGGAGATTTGTATTGGATCAGCCAGAGGACTTCATTACCTTCACACAGGAGCTAAATACACTATTAT  
ACATAGAGATGTGAAAAGTACAAACATTTTGTAAACGACAAATGGGTTGCTAAGGTTTCAGATTTTGG  
ACTTTCAAAAACAGGTCCAAACATGAACCAAGGACATGTCTCAACAGTCGTAAAGGGTAGCTTCGGGTA  
CTTAGATCCTGAATACTTCAGAAGACAACAATTGACTGAAAAATCAGATGTGTACTCATACGGTGTTGTC  
CTGTTTGAAGTACTGTGTGCAAGGCCAGCACTTAACTCAAATCTCCGAAAGAACAAGTTAGTCTTGCAG  
ATTGGGCATTAGCTTGTCAAAGGAAAGGGAAATTTAGAAGATATTATTGATCCACATTTGAAAGGCAAGA

TCAATCCTGAATGCTTGAAAAAATTTGCAGAAACAGCTGAGAAATGCTTAGCTGATAATGGTATAAATC  
GTCCATCCATGGGTGATGTGCTATGGAATCTTGAATATGCCCTCAGCTACAAGAAAATCCAGATGGAG  
TTTTATCAACTCCGAGGCAATGAAACAGGTTGATCATGACAATGCTGATCAACACAGTTTGATAGCTAT  
GCATAGAAGCACTTTGAGCCTTGAAAGTGAAAATGAAAATGAAAATGAAAATGCTGATGGTAATACAG  
ATGATGTCTTTTCACAAATTGTGAATCCAACAGGAAGGTAATAGCAAATATACACATATATATAAGTAGT  
TGTTTCTTATGAATGGTTATGATAAGTATACAAAAGTACATTTCACTATATATATTATGTATTAAGTATA  
TATATATAAGGAGTATAGCTGGCGCGCGGTTGATTCCTTTGTGTCACATTTATGTATTTG

>PGSC0003DMG400009689 RLK with malectin domain

AAAGAAACATCCTTTGCCTCTCTTTCTTTCTTTCTTTGTTCTTTCTTTCTAAAAAGATACTCTTTACTACCC  
CTTCCCAAATAAAAATAAAAATAAAAAGCTTGTGATTTGGCTTCTATTCACCCATTCCAAATCTGGGC  
AATCTCATTCTTGGAGCATATTTAATCAAAAAGGTTCAATCTTTTTCTTCTCAGCTGTAGTTATAATTGAA  
ATTTTTCCAATTCTTGGATTGTTGGGGTTTTGAAATGTTGTCATTACATAGTTTTTTGTTTGTATTGTTGT  
TGGGGTTTTCTGTGTTTGTCTGGATTTGATCCTTCTGATGAGTACTTAATAGACTGTGGATCTTCAAAA  
GATACTAATTTTGGTAATAGGGTTTTTGTGTCTGATAAATCTGGTTCGAAGTTTCTGTCAGTTTCTCAAGA  
TATATTAGCTGATAGTACAAGGTCTAGTGATTCACCCCTTATCAAACCGCTAGAGTTTTTACCCAACTT  
CTAGTTATAAATCCCTATTACTAAAGTTGGAAGGCATTGGATCCGTCTTCATTTTTCCCATTTGTGTACC  
AATCTTATGATATGAGTTCAGCAACTTTCTCTGTTTCACTCAACAAAATGTTCTTCTTGAAATTTTAGTC  
CTAAAAAAGATGTATCTGTAAAGGAGTTTTCTGTAAACGTAACGACGGGTGATCTTGTTATCACTTTTTCC  
CCTTTGAGTGATTCATTTGCTTATATAAATGCTTTGGAAGTTGTCTCTGTACCTGATAGTCTTATAACTAAT  
GATGCCTCGACGTTTGGTCCATCTGGGGTGTTAGTGGTATGTATGCACAAGCACTTGAAACCGTTGCTA  
GAGTAAATATGGGTGGACCAGCTGTATCGTCTGAAAACGATACATTATGGAGGAGTTGGGTGCCTGATC  
GGGGTACTTGACACAGCCGATTTTGCAAAGTCCTTGTCGAAGATTGGATCTGTAAAGTATTTAGTGG  
GTGGAGCAACATCAGATATAGCACCACCGAGTGTATGGTACTTGTACTAAGATGAATGTGGATGCTG  
CTGGTAATGATGCTAGTGCTAATTTAATGTGACGTGGGTGTTCAATGTGGATGTTGGTTTCCAGTATTT  
CGTTCGATTACATTTGTGTGATATTGTGAGTACAGCTGCTAATCAGCTGTTGTTAATATCTATGTTGATT  
CGTCGAATATAGCTTCTGATTTTGATCTGAGTTCTAAAGTTCAGAGCAGATTGGCTACTGCGTATTACAT  
GGATTTTGTGACACCACAAGCTAATAGCAACAACATTAGCTTTAGTATTGGCCCATCTTCAAAGAGTGCT  
TTTCCAGATGCCTTTCTAAATGGAGTGGAAGTCTGAAGTTGAATAACTCTCAAGGCAGCCTTGCTGATG  
TTTCTCTGTTCTCCTCCTCGAGCTCGGGCTCGAAAAGAATATCGGAGTCATCGTGGGCGCGATTGT



AGGTGTGACACTTGTGTTGCTCGTGGTTGGTTTTCTGTTTTGTATGTGCAGAAGAAGAAAGCAGGAACA  
ACTCGGCCTGTGCGAAAACATGGATTCCCTTTGTCTATTGGTGGTGGTGGCTTGTCTCATACTATGGGAAGC  
AAATACTCGAACGGGACGACCTTAAGTGCCGCTTCTAACTTGAGTTATCGCATTCCCTTTGCAGCCATGC  
TAGCAGCAACCAAAAAGTTTGATGAGAGTTTGGTCATTGGGATAGGTGGCTTTGGTAAGGTATTCAAGG  
GCGTTTTAAACGATGGCACGAACGTAGCTATTAAGAGGGGTAATCATAGCTCCCAACAAGGTCTTAGAG  
AGTTCCAAACTGAAATAGAGATGCTCTCTCAGTCCGTCATCGTCATCTTGTTTCATTGATTGGATATTGT  
GATGAAAAGAATGAGATGATTCTCGTGTACGAGTACATGGAAAATGGGACCCTCAAGAGCCATCTGTAT  
GGTTCGGATATGCCTAGTATGAGCTGGAAACAGAGGCTGGAGATATGCATTGGGGCAGCCAGAGGTCT  
ACACTACCTTCATACTAGCTACGCCAAAGCAGTTATACATCGTGATGTCAAATCAGCAAACATATTGCTT  
GATGAGAATATGATGGCAAAGTAGCTGATTTTGGACTTTCTAAGGCTGGACCTGAGCTCGATCAAAC  
CATGTTAGCACGGCAGTCAAAGGGAGCTTCGGGTACCTAGATCCTGAATATTTTCAGGAGGCAGCAAAC  
ACCGAAAAAAGTGATGTTTACTCTTTTGGTGTGTTCTGTTTGAAGTTCTTTGTGCTAGGCCTGTAATCGA  
TCCGTCTCTTCCAAGGGAGATGGTTAATTTAGCTGAATGGGCGATGAAGTGGCAGAAGAAGGGACAAC  
TAGAGCAAATCATAGATCCCAATCTTGCTGGAAAAATAAGACCGGATTCCCTAAGAAAGTTCGGTGAAA  
CAGCAGAGAAATGCTTGGCTGATTTTGGCGTGGACAGACCTTCAATGGGCGACGTGCTGTGGAACCTCG  
AGTATGCACTTCAACTACAAGAGGCAGTTATTCAAGTCGATCCTGACGAGAACAGTAGCAATCTCATCG  
GAGAACTCTCTCCTCAGGTAACGATTTTCAGTCACGTGATGCCACTACTTCAGCAATGCAATTCGAAGG  
GTCGAATCTAGATGATCTATCTGGAGTTTCCATGAGTAAAGTTTTCTCACAATTGGTTAAGTCTGAAGGA  
AGATAAATTTGGTGAAAGATTGTATACAATTGACTCTTTTTTTCTTAGCTCCTCTTTTAATTCCACTTTTT  
TGTTCAATTAATCATGTGAAGATTGACTTTATTTTTTTAAACTATAGTTTTACATGTACTACAATATAAAAA  
TTATTCCAGCA

>PGSC0003DMG400010120 RLK with malectin domain

ATTTTTTTTACTTTTACCCCAATTCCTTTTACTTTGAATATTCCTCCGTCTTCTCCCTTCAACGAAACTCAA  
ATGGTCAGCAATGGAAATCAACACGACGGCGGGAAATAGGCACAACAGCGGTGGAGTTCGGCACA  
GCGACGGCGGAGTTCAGAACATCAGTGCTATTGAGAAGAAAGACGAATCAAAGCCGTCAACGTCTCTTC  
ACAAGCTCACCGTCAGTAGTTTGTATTCATATTAGCAAATTCATCATCGCCGATTGCCTCATATTCAATCA  
GATTGAATTCGAACTGTACGACCATGCCGTTTGGTGACTACTAATATCCATTTTATTCAATTGTTGGGCCT  
TGATGGGTGTATGTTCTAGAGTTCTATCTTTTATGTTGTTTGAATTGATGCATGTGTTTCTATATCACATA  
GTCTGATCTTGTGTCCAATAAAATTGGTGCAGAATTGCAGATAGCAACCAAATTAGCTGTTGTGGAGTTC

GATTTTTGATCTCCTATTTGAAGGTAAACAACCTAACTTAGTAGTTAATTGAACTGTATTTATTCATATA  
AAACTCAAATTTTCAATTACTAGGCCAATTCTTTTCGTGATCTCTGCTGCCGAAGTCAGGCTAGTGAATCA  
ATAGAGTGTACTTTTACAGTTTATGCAGTGAACCTGAGACTTCGCGCACTTATGCAAATCTGATATTCA  
AGTTCCTAATGTACCTACATTTTATCACTCTTATTTCTTCTAGAAATTCGATGAACATTAACATAGGTATTG  
GTCTGCTCCAGCTCATTGTCACACTGTACAACCTGTATTTCATACAATGAGCAATTGTGAATAGAGGATAT  
ATGCAGTGAACCTGAGACTTCGCGCACTTATGCAAATCTGATATTCAAGTTCCTAATGTACCTACATTTT  
ATCACTTCTTATTTCTTCTAGTAAATTCGATGAACATTAACATAGGTATTGGTCTGCTCCAGCTCATTGCA  
CACTGTACAACCTGTATTTCATACAATGAGCAATTGTAGAATAGAGGATATATATTCGCAGAAGGACTAA  
GTATCACTTTGCTTGTAATCTTCTACATTTCTGTACGTTCTATTGATGTTACTTTGGGTGCTAACTTAGAA  
GACCAAATACTGGGCATGAGTAACCTGTATGTATCTCATATTGTTATGGCTTGACTTGTTGCAATTCCT  
AGTTC AATCTCGTTATGTGTCAATTGTTAATGTAATACCATTTTGTGTGGGTTCAATAAATCAATTAAC  
TTTATGTTGGTTGTCAATCCATTGGACCCCTTCTTAGCCAAGCTATTTTCTGTTATTCTTTAGTGTAAT  
GTCTTATTTCTTTATCAATCAAAGGGCTCTTAATAGAAGTCAAGTATGTTAAACGAGTGATTCTGTTTAT  
TGCAAGAATTGGATTATAGAGGATCCTAATGTAGGAATAATGTAATTTTATTGTTTCACTAGGTAAAGTG  
CTTTAAGAGATCAAGATGGAGGGGGTGTAATGCTAATGTCTTGATGGAGTATGTTGAATTCAGATT  
TTTTCGAGTCAAGGCAAGTGAACTAACTAAAACAAATTTTTCGAGTCAGGGCAAGTGAACTAACTAA  
AACTACTTGTCTCTTTATACATAGGTAGTTCTTTGATTGAAGGAATGAAGAGCAGACATGAGGATACAT  
CACCATGATGAAGAACTTCCTTCAGGTTCAATTCGTAGCTACTTAGTGATCTTCAAATGTGTCAATTCAGA  
GCTCAATCTTAATATTCTCCTATACTATGTTAATTATATCATCACAAGTTGTTGTATCCGAGTTTGGATGAT  
AGTGGGTGAGGTTGTATCTAAAATGAAAGAAACATTTCTGATCCTTATGTGCAGATTGTTACAAGTAAA  
ACACTAGAAAGTGTGATAATCTCAAGAAGAGAATTATTGTTGTATACAGAAAGTTAGTGTGTTGAGATCT  
CGTTTCAGCTTCAGTCAACAAATATCGATCTAGATTTTAGGTAGATGGTTGAGAATGATGTTGACTGC  
CTTTGCATTTAAAATGCACCTTTTTGGTGCAACTTAAACAAGAACATCTAACAGAAAAATGTTTTGCTAT  
AGCTTAAGTTTCTGCGAAGCTAGAGAGATTAATAAGACATGAAATAAAAATTTTGGGTGTTGCTAAAGG  
AGAAAGCAGTTCCCATTTAATGAGGTTTTATCAATGTGTATGAAAGTTGGTGGATATACATTCATTCT  
TTATGCACTGCTGATAAATCTTAACTGTCAAACAGGTTTTGTCAGTTTAGATTGTGGAGGCAAAGACAA  
TTTCACAGATGAACTTGGTCTTGAATGGACTCCTGATACTCAAATGATTAGCGGAGTTATAGTCAATCTC  
TCTGTAGCAAATGAGACGAGGACACAATATATGGCCTTGAGATACTTTCCAGCCGATAACAGGAAGTAT  
TGCTATACACTTGATGTGATTCCCCAACAGGTACCTTGTAAAGAGCAACTTTTCTATATGGAACTTTGAT

AACGACAATGTTTACCCATATCTCAGTTGGGGCAACTCATTGGGCTACAATAGTTATACCTGATGCTAAT  
ACAATGGAGTACCAAGAGGTAATATATCTAGCCAAGGAACCTCCGTAAGTGTCTGTTTATCTAATGCAA  
CCACTGCATTTTCCTTCATTTCTAGTTTCTACGCTTGAGCTCTGACAATTAATGGTTCAATATATATTACT  
GAATTTGAGAATGATTTTTTCATGAGCGTCTCTGCAAGGATAAATTTGGCACAGAGAGTGATGATCCTG  
TCAGGTATGTTTCAGTTCTTCAGTTATTATGGCAGCTTCCAAATCTATGTTCTTGCACATTCTGTATACTT  
TTAGAATGTGATAGCTATTGACATTTTTGAATTGAAACAAACAGGCTTAGGCACTGTCCCTAGCATGCTC  
TTCTTCTCGCTTATTGTTTTTTTTCGATTTCCAAAATTTAATCTTCCCTTAATGTCCTTATTCTCCTAGGTAC  
CCTGATGACCCATTGATAGAAATATGGACGTTATTGGGTACAGGCTCGGTTTTCTCAAGCTCCGCCCTG  
ATTACAAGGTGGTACTTGAACCCTCATCAATAATATGAAAGTTCAGATAGTTAATTAATAACTAAACCGTTAA  
AAATTGACTCGTGATTTGAAGTTTGAACAGTTTTGACCAACCCCCAGAGTACATTGAATGATTTTGGTGC  
GTGCTACTCACCATTCCACAACTTACGCAACTACCTTTCTAGGGGAATTCGGATTATTGGAACACTCACT  
ATGAACTACAAAACAAAATAATTTGTTAACGTTTTATGTTCTGATATTATGAAAAATATATAAACGTTAA  
ATTTGATTTTTGTGGCTTAATATTATTTATTGCTATAGATTATATTTTTTAATTATG

>PGSC0003DMG400010577 RLK with malectin domain

TTTTATTGTAGGCAAACCTATTCTCTCAACTGTTTGTATAGCAACTGAACATGTTTCTCTCTCAGCTA  
TTCATTCTCTTATTGTGTATTCAAACAATCATCATATCTGTTGCCACTAACATTCATGAAGAAAACATTGCC  
ATATCATGTGGTGCCTCTGGCAATCCCCTGCACCAGATGGACGATTATGGATTGGAGATTCAACTTTCA  
CTTCTCATTCTACACTTAACTGGAAAATCTATTAATTCAAGAGTACCTTGCCAAGTTGCCTTGTTGGAT  
CCAGTTCCTTATAAGTCTGCTCGAACGTCTCGCCATCAGTTTACCTACAAATTTTCAGTGAAACCAGGACA  
CAAGTTCCTACGCCTGCACTTCAAACCAGCTTCATACAAAGGTTTCATCAAGTCCAAACCCATTTTTACTG  
TCAAACTGATCAGCATAACCCTGCTCAGTGACTTCATACCTACCCTTGCTGCAGGCATCAACTATTTCAA  
AAGGAATTTTGCATCAATGTAAAAGAAAGTGAAACATTAAGCATAACATTCATACCATCTCGAAAATCAG  
GCTTTTCAGAAGACACTTATGCTTTTGTTAATGCAATCGAGATTGTTCCATACCGTCTGGTCTGTATTT  
ACACCAGATGGCGATCAGGGAGTCCCTGTTGTTGGACGAAATTCAGATTCTACATTGACAATAGCACA  
GCACTGGAGACAATTCAGCGAATAAATGTTGGCGGAACTCTATTTTCATCCTTGGAAGATGCAACCATG  
TTTCGGGACTGGGAAGATGACACTAATTACCTGATTCAAGTTGGTGCCTTTTCGATCAACAGAGCCGTTG  
ATATCAGATATGCATCCTCAGCAACTCACATTGCACCAAAGAAGTTTACCAAACGGCCAGGTCAATGG  
GTGCTCACTGCCATTCGAATTTCTGTAATCTCACATGGAACATTCCACTTGATTTGGGATTCAGATACCT  
GTTAGGCTTCACTTTTGTGAAATTGAACCTACAATGATAAATGAAGGCCAAAGGAATTTCACTATTGTCA

TAAACAATCAGAATGCTGAAGATGATGCTGATGTGATCAAATGGAGTGGGGGGCATGGAATTTCTGTAT  
ACAGGGACTATGTTGCCATTATGGAGGGTGATAGAAGGGAAGGGAAGCGTAACCTTACTATAGTTTTG  
CAGCCAACTTTGCTTCAATCGGTAAACATGCTAATGCCATCTTAAATGGGCTAGAAGTCTTCAAGATAA  
GCAACCCTGACAACAATCTTGGTAGTGTGAGCCCAGTGCATCCTGTTACAAGTTCAACACCAGAAAAATC  
AGAGGAACTGTGCTGTTCTATACAAAGAATCAAATTGCAACTGCACTGACATTTATAGTCACTTTGATT  
AACGTTGCTGTTTATTACATTAGGCATAATGCAGAAATAAAGTCTGGCAAGACGTATAATGGAATATCTT  
CAGGAGAGCATCAGTGTCGTCATTTTCACTGGATGAGATGGAAAGATCAACGAACAATTTTGATCCTC  
AGCTTGTCATTGGTAGCGGTGGATATGGTACAGTATACAAAGGGGATATTGATGGTGGAGAGACCACT  
GTAGCAGTTAAGCGATCGAAACCAGGATCTAGCCAGGGGGAGAAAGAGTTTTGGACGGAAATCAATAT  
GTTATCTACGCACCGCCATGAGAACCTTCTCTCCCTCATTGGTTACTGCATTGAAGGTCATGAGATGTTAT  
TAGTTTATGATTATATGCCTCGAGGATCACTTGCTGACAACCTGTACAAAATGGACAGAAATAGCTCATC  
TCTCTTTGGGAACGGAGACTCAAGATTGCTATAGGTGCTGCACGTGGACTGGATTTCTTCATACATCT  
CAAAATAGGGTGATACATCGTGATATCAAAAGCTCAAACATTCTATTGGATGAAAAGTGGGAAAGTAAG  
ATCTCAGATTTTGGGTTGTCCAAAATGGGGCCTGGAAATGAATCAGCTACTCATGTTAGTACACAAGTCA  
AAGGCACATTTGGGTACCTCGATCCTGAGTACTTCTGACTAATAGATTGACATGGAAAAGTATGATGATA  
TGCTTTTGGAGTAGTACTATTTGAATTGCTCTCAGGAAGACCTGCAGTCGATATGAGCCTGCCTGAGGAA  
CAACATGGACTTGTAGCATGGGCCAAACAATGCATCAAGGAAGGAGAAATTAATAAGCTTATTGATCAG  
AATCTGTTGGGGTCCATCTCATCAACTTGTCTAAAGGCGTTTATAGGAATTTCTGCTAAATGCTTCGATG  
GTCGTCCGCAAGAACGGCCTGCGATGTCTGAAGTGGTGAAGCCTGGAATTAGCATTAGTATTTTCTCAGA  
AGAACGAAGGTGAAGGTATCATTTTCAATTTGAGGACACATCAACGTCATCTCAGTTACAGATTGAAGGAG  
AGAGGGCATCCATTAAGAGGATTGTAATGGCGGTGATACAACAGAAAGGAGTGCCATCTCAAGGGAA  
AAGGTAAAATCTGAGGATAAAAGTCCCTACACTGCTTCACCAAGATGGTGGGATGTTTCGTAGCCATTTT  
AGAAAAGCACCACCAAAGCCAGTGAATCTTGTTTATCCAGATAGCCAAATATCACAGCACCCAAATTTAA  
GGATATTTTCTTCTGAACTCAAGGCCGCCACCAGAAAATTTAGCAATGACACGGTGTGGGAGAAG  
GTGGTTTTGGTAAAGTTTACAAGGGTTACCTTGCTGAGTCTTTTCTTCCAAGAGTGGCCGGACAGTAAT  
TGCGGTTAAGCAATTGAGTTCTGAAAGCTTTCAAGGGTGGCAGGTGATTCTCTGTGCTAAATATGTGA  
ACTTCTAGTTTAAAGTTTTCTAATTGAAGCTATTTCTAGTTTATGCCTGGCATTAGCTGCAATTACTCTCTT  
TTTATTGTCTGTCTGAGAGAAATATAGATTTACGTAGAAGCACTTGACATTGATTTATTACTTAGTAGTAA  
CACATTCTAGGTAAATGTTGGTTATATATCTCTTGCGAATTTCAATTTCAATTTGTTAATTATGCAGTCTGAG

GTGAGCATTCTTGGAAGACTTTCTCATCCTAACCTCATCAAACCTCTGGGTTACTGCCAGGAAGATAAAG  
AACTACTGCTTGTCTATGAGTTTATGCCAAAGGGCAGCTTGAACAACCATCTTTTTGGAAGTAAGAGATT  
ATCTATACGTTCCATCAATAATATATAACATATTGTAGATCAAAGCAGCAAGGAATGTGCCTAGCTACTT  
CATGCTCCACCTAAACATATTTGTTATCTTTGTTTGCTTAGGGCGCTCTGTTGCTTTGTCACCTCCATGGAA  
TGTAAGGGTTCAAATTATGATTGGCGCAGCTCGAGGCTTGGCATTCTACATGCATCAGAAAAGCAAGT  
CATTTACAGAGACTTCAAAGCCTCAAATTTATTACTTGATGGCGTATGTTCTCTTACTTCTCCCTAGGAAT  
ATACCTTTATTAGCGCAAGTAATAAAGGTATCACAGGCCCTTTTCTTACTGGGCCCTTTTGGTTTACAC  
ACACTGTTTTGCCTAAAGTTTTGGAGCTATTTATCACAGAGAGACAACACCTGACGTATAACAGTGAAAA  
CATTAGAGAAAGGTTGTTATTAATAACTGTTCCATGACATTCTTTATTTCTTTAATGTTTCAGTCTTACA  
ATGCGAAGATAGCAGATTTTGGCTTGGCAAACAAGGTATTTGGGCTAGTCAATCACATGTGACAACAC  
AGGTACTTGGAACGTACGGTTATGCTGCTCCCGAGTATATTGCAACAGGTAAACTTGGAGTCTGTTGGG  
CTTCTGCACTTGGAATTCTACTTCTTGAAGCACATGCATCTTGTGCTTACAAGTTTAAACATATAGTC  
AAGTGTATTATTTGTTTTCTACAGGACACTTGTACGTGAAGAGCGATGTCTATGCTTTTGGTGTCTTTTAA  
GTGGAATGCTAACAGGTTTACGAGTAATAGACTTAAACCGCCCAAGCAACCAGCATAATCTAATTGAC  
TGGATTAAGCCTCATTATCTGACAAAAGGAAGTTGAAGGACAGAATCGATTCACGGCTGGGAGGAAA  
ATATCCATCCAGAGCTGCAGTACAAATAGCACAACCTGGCACTATCATGTCTTGGAATGAACCTAAAAGC  
AGACCATCGATGAAGGAAATAGTGGAGAAACTAGAACAGATTGAAGTTACCAATGAAAGATCCAAGGA  
CCATGCTTCTCCTTCTAATCCAAGGAACCGGGCCTATCCACTCCTTAGAAGAGCAGAGTGAATATGATAC  
TACTTTTAAACAATATGAAGAAGCTACAATATTGTTAAAATTTCAACTGTGAGTACTGTCACCTTAGGCGA  
GATCGTGCCAGTTGGACGATCCGCCCTTTGGTTAGGCGATCAACAGTGTGGGTGGAGTTTACAGTTCA  
TTCCATGTTTTTGGCCTTTCTTTCAAGTATTCATTCTTGCCCTTAGCCTACATAGCTGCAAATCAT  
GAAAATATCATTAGAATATAACATAATTAGGCATTGATGACACTAATTGCTGAACTAAGTAGGTCACAAA  
TAAGTGTAATCTACCACTCATCAATGACATCCTCCATGGTTGAAACTCATTCTTTGTCTAGAAAATCCA  
AATCTTGGCAGAATTGTTTATTGGAGCATATTTGTGTCCCCATTTCTTCTATATTACTATAGCTCCTGTGG  
ATCCTGGAAAGGTTTCATGACTGCTATAAATCAGTAATGATGCCTTCTATGTAGTTATATTAGTCTCTCAA  
AAGAATTCTGAGAGTTAACAGACATAATATTCTAGAATATGATTTTTTTTTCAATCATTGATCAATGGATC  
GGGTCTTATCTTACTGCTCCTTGTCTAACCTGAAGAGAGATCACAGATTTGCCTTTTCTGATCCTACTCT  
TCAGGTTATGTATGTGTCTAGGGTACAAAGTCCCCATCTTTGTTGATTTGATGAATATTCTCCTCCACACT  
ATCATCCTTCTCCACATCCTTTCTCATTGTATATGTTTCTCTGTTGCTACTACATTGTTTTTGTGGTATCTC

CTCTTGAAGTTTTGTTCTTCCGTGTCCTTCGGATATAGCTGTGGGTGTTCAACATAACATTCCTCCTAGTT  
ATGTCTCTAAATTATACATGTTTCACAATATTTGGGACATTGTCAACTTGATTGAGATACACTTCTCAACTA  
TCTCTCCATTTTGTGTTTCATCCTATGTTGATGCGCATTGGAAACTCGCCCACCAGATCTACTTCAACTTC  
CAATCTTGCATAGCTTGGTCTGTTCTGATTCTTGATGGTCATATTATCCTGTATGTAATGAATTATAAATC  
ATTGTTGCTAGAGAAAACATTGTTTCCTTCCAAAAAAATTTTTGGTGGAAGTGATGGAAAAGAAAT

>PGSC0003DMG400010746 RLK with malectin domain

CATGACTCAAATTCCTTCCCAAAGCAAAGTGAAAAAGTTGAAGATGAAAGATGAAGTTGAATTCATCT  
ACCTTTGGCAAAAAGCAAATTTCAAATATTCAAAGAAAAACAACATAGGAATGTGAGTGAACATTA  
CACAAAACACCTCAATGACAAAAAGTTAAAGGTAAACCAACAAAAGATCAATTAAGATCCACTTTTA  
GAGAGTCTTGAACCTCACTAAATATTATACTACAAATTTATCAAACAAAACACAACCTTATCTTCTTCTT  
CTTCTTTCATCTTCCATGGGTTTTGTTTTACAATCCTTTGTTGACTTCTTTGCTTCACTCCAGCAATTGTG  
GTCAAGTAACAGGTATGTGTTCTTACATCTTACCCTTACTATACCACATAATCTTGAAATAAAAAATC  
AATCTTGGCTTCAAATAACCTGAATTTCAATAGAATTGAAATTTTTTTTTGCCACATAGAGACATTTTCTA  
CTTGATTTTCATTAGGTCAAGATAGAGGGTTTTTTATTTATATATATAGATAGTGAACCTCTAGTGTCTT  
TCTTTTGGTATAATATTAGTGGGAGCTAGATGAGCTTAAATGACTAGACAGAGTTGCTCGGATGAAAA  
CACCTCACCTCTAATCCTTAGTGGTTGTTGGTAGCTGATTTGAAAATGAGTTATGCAGGTGTTAAATCT  
TGCATAAGTACTACCATGTCATGTATAAAATTATCATGATGTTTGATTTGTAATTTAGAAATCCGCATAAC  
TAATACATGTATAAGCTACGAGGGAATTTATCTATAATTTAAGAATTATAGAAGGTAGAATAAGTCAGA  
CAGGCATAACTAAATCGTGCATAAAACAATACATACATAGGTTTCCTCATAACTAATTTATGTATTATTAA  
TACCTGCATAACTCTAATCAGCTACCAATCGACCACTAAGGTTGTGGGTTTCGAGTCACCAAAGGGAGCA  
AAAAAGGGTGGGAGCTCCTAGGAAGGGGTAAAAAGAAAAGAGATGAGCTTAAACGGAATGTTATGG  
TCAGTGAGGATTCATGTAGCTGATAGCCAATCCAACCTCGCTTGGGATTGAGGCATAGTTACAAGTAACTT  
GATTTTTATTAGGACAAGATAAATGAGTGGCAATCTTGTTTCATGAACTAAAGGTTTAAATATGCAGAGTT  
TGTAAGTATAGACTGTGGAAGTGCAAGCAATTATACGGACACGAGTACAGGATTAGCATGGACTTCAG  
ATGCTGGAATGATGGGGCAAGGAAAACCAGTTGTGGTAGTGAATGCAATGTAACTCACAACAATAT  
CAAAGGCGCAGAGACTTCCAGCAGACAGCAACAATACTGTTATACTTTAAAAACCAAGGAGAGAAG  
GCGATATCTTGTCCGAGCAACATTTCTATATGGAAGTCCTGCAGCAGAGGCAACATACCCCAAATTTGAG  
CTCTACTTGGATGCAACTAAATGGGGAACATAACCATTTCAGAATCTTCAAGGATATATGTGAACGAAA  
TGATCATAAGAGCACCTTCAAACCTATCGACGTGTGCTTGTGTTGTGCAACAACAGAGTCCCCCTTCAT

ATCTACTCTTGAGCTGAGACCTCTAAACTTGTC AATGTATGCCACAGACTATGAAGATAACTTTTATTTAA  
AAGTGGCAGCAAGAGTAGATTTTGGAGCTCAAAGCAAGGAACCTATAAGGTATAGTAAATTTTGAGAAT  
ATGCTTTAGTCATACTTGTACGTTCTCTTTGGATCCTACGTTTTTTAAGAGTCTTTTAGTCCTGTTAGTAAT  
TTATATGCCAATAGAAAATATAGTGAACCTTATAGAATCTTTTTTTTAAAATTGTAATATTGGTCTAATATG  
CACTTAAATGGAGCGACAATGATCAGTGAGGATTCATATAGCGTAACTTGCTTGGGAATGAGGTATAGT  
TGTTGCTGTTTGTGAGGTGATACAAAAGCAGATAAACTATATGTTTTGACTTTTTTCAGCTCTCACAAGATC  
ATGACATGAATAGATCTGTCTCACAGGTATCCTGATGATCCCTATGACCGTATATGGGATTCGGATCTTA  
AAAAAAGGCCAAATTTTCTAGTAGATGTGGCTGCAGGCACAGAAAGAATCAACACAACAAAGTACATA  
GATACAAACACTAGAGAATACCCGCCCGTTAAAGTAATGCAGACTGCAGTAGTTGGGACTAAAGGAAT  
GCTCAGCTATAGGCTGAATCTTGATGACTTTCCAGCGAATGCACGAGCTTTTGCATACTTTGCTGAGATT  
GAAGATTTGGGGATGAATGAGACCAGGAAGTTTAAAATGGAGCACCCCTTACGTTCCGGACTACAGCAA  
TGCTGTGGTGAATATAGCAGAGAATGCAAATGGAAGTTATACTTTGTATGAACCTAGCTACATGAACAT  
AACATTGGATTTTATACTGTCAATTCTCCTTTGTGAAGACTCCTGACTCAACTCGAGGTCCACTACTAAGTG  
CAATGGAAATATGTAGATACGTGCAAATTGCTCCAAAGACCGATGAACAAGATGGTACAATGACCATTC  
CATGTTTAGTCTAGTTATTTCTCTCTATCCATATATGGTAATTGTTCTACTTCTACGCATATTTTTACCAAAA  
ATAGCTAATTTATTTAAAGCTTCTACTTGGAAAGTGAGTACTCTCAACGCCTCCGCTCTATGTCATTGGGA  
AGTGATTGCCAGATGAAGACGGTGATCCTTGTGTACCTACACAATGGGAATGGGTGACTTGCAGCACA  
ACTAGTCCACCAAGAATCACAAAATGTGAGTTATATTGCTACTATATGATATATGGATATAATGCTAGT  
CACAGGAAGAAAACAAAAGGACATTATTTGCAACTACTACTACCCACTGTCCTGCTATAACCTGACAGTC  
AGCTACAGATAAGAGATGATAAACTTTAACACAGCATTAGACAGAAATGGAACTCAGATCAGTGCTT  
AAAGTATAGTCTTTCCAGTCAATTTTATATTTTACTTTAATTTTCATCAGAACACTGTCAGGAAAGAATGT  
TACGGGTGAAATTCCTCGCGAGCTACAACATATGGAAGGACTGACAGAATTGTAAGTCTGCTTATAAAA  
CAAGTCAAATTTAATCTTACTATTTAGTTCTCATATTTTCTACTCTTTAGGTGGTTGGATGGAAACTCC  
CTGACCGGACCAATCCCTGATATGAGCAATCTTGTTAATTTGAGAATTATGTAAGATCTTTTCTAGTGGAT  
CACTATTACTACCACTTCAACAAGTAAATCTTTCTTTTTCTGTTTTTCTTTTTAACTAGATTGTTGTATTT  
TGTC AACATGCAGACATCTTGAGAACAACAAGTTGACTGGTCCAATACCTTCATACCTTGGAGGTTTACC  
AAGCTTATTAGAACTGTATGTTGTGATCTGGATAACAAAATCTTAACTTTATTTAGCGTATAACGCTTCAT  
AATTTGGCTACTCCAAATTTGAGTATCCAACATGGATAGTTGGTAGTCTTCTTTATATATTTTACTGTCAT  
AAAACACCTTGTATCAATTTTAGAAAATTTGTTTCTTTGTGGCAGAGATGTACAGAATAACAGCCTAACT

GGAGAAATACCGTCATCTTTATTAACAGGAAAAGTAACTTTCAAGTAAGTATAACTTTAATTCTGTACTG  
GATTGTTGTACCCATAATACCATGAGAATATGTTAGCAACTAGATCAAAGTAGCTATTTTACTATAGACT  
GATTATATTCCTTAGTTTGGATATCTATATCATAAATAAAGTTTCATTTTTTATGTCACATTATGCTAGGAA  
GAGAGCAAATAAAATTCATGAATTTTCATAAATTTCTTGTAAGTGAGAACTAGGAAGTAACATGTACATT  
TATCTTTGAACATAGTAAAAGAAAGAGAAAATTTCTTGTAACTTTCGGAGTACCACATGGATGTGTGTGC  
ACTGATGGAAGATCTGTTACAATCAGGAAATGAACGTCACCTTAAAAATGTGTTCCATGTCTCACAGGCAT  
GAAGGAAATCCTAATCTAAGACCCGAGTCAAAGCATAGTACACGTTACAAAGTGATACTAGGAGCTTCA  
ATTGGAGGACTAGTGATTATCTTGGTTCTATTTGCTGTCAGTATATTCTTTTTATGCCACTTCAGAACAAA  
AGTATCTCATCAAAAAGGTGATACAAATCCTTAAGTGTCTGATCTTAACTTTTAATTCTATTGCTCCAACA  
CCTTTTCATATAAATCATTTTCATCTGTACCTCCCAGGTGAATCTATGCGCACAAACGCTAAACCGTCAACA  
ACTTGTTCAATGGCAAGAGGTGGATCCTTAATGGATGAAGGTGTGGCATACTATATCCCACAATCCGAG  
ATAGAAGAAGCAACTGAAAATTTTTCAAAGAAAATTGGAAAGGGAAGTTTTGGACCTGTTTACTATGGA  
AGACTTAGGGATGGGAAAGAAGTTGCTGTCAAACTATGGCTGATTCATCAAGCCATGGAACCAACA  
GTTTCGCTACAGAGGTATATTAAGGTTGCTATACTTTTGGTATCATCTGAATAAAACATATTAATTTTCTAT  
TTGGAGTAGCTTATTTAAGCTGCTAATTGGCTTTAAGCCCAAATAATAGCAGCTGGCACAGCTATGGTAA  
TAAGGACTATGAAATTGTCTAAGCTAACACATTTGACACGGCGTAAACTGATCATAAGTCAGACTTCAT  
AAATTATAAGACATGACTAAAGAAATTGTTCTGTTGCTTATTTTCATTCTGTACAAATTAGAAAATTCAC  
AACTTGATATGATATTACTTTTGGTTGAAAATTTATACCATTTGTTAAATAACATACTTGCAGGTGGCTCT  
CTTGTC AAGGATCCATCACAGAACTTGGTTCCATTGATCGGATACTATGAGGATGACCATCAACGTATG  
CTTGCTATGAATACATGCATAATGGAACTTTGAGAGATCATATAACTGGTCTGCCCCTTTATGTATACTA  
TAATTGCTATACATTTTTCTGCATTATTTCTTCTTGAACCTGAACATCACACCACATATTTGTGAACAGAAT  
CCACTGATAAAAAGCATTGGACTGGCTAGCACGTCTTAATATTGCAGAAGATGCAGCCAAAGGTTACC  
AGAATTTTTTCATTGTCAATAACTTAGAAGTATGTATTCTCCTAGTTAGTCCGGAATCACAAGATAATATTT  
TCAGCCTCCTTGTAGGCCTTGAGTACTTACATACTGGATGCAACCCCTCTATCATTTCATCGAGATGTGAAA  
ACTAGCAACATTCTTTAGATATAAATATGCGAGCAAAGTATCTGATTTTGGACTATCAAGGCAAGCTG  
AAGAAGATTTAACACATGTCTCAAGCGTGGCACGAGGAACTGTCGGCTACCTTGATCCTGAGTAGGCCA  
TAATCTATCATGAGACTGAATATTTTGTAGTGATTTTCATTCTTTGTCCTCATGTTTCTGCATTTCCAACA  
GGTACTATGCAAATCAGCAATTGACAGAGAAAAGTGATGTATATAGCTTTGGGGTTGTCTTTTGGAAAT  
GATCTCTGGAAGAAAGCCTTTTTCTTCTGAGGAATATGGTGCTGATTGGAGCATTGTTCACTGGGTAAAG



TTTATCATACTTCTTTCTATACATTTTCAGGGATGCTATGCCATCCACTGTGATAATAACATATAGTTGAGCT  
TCAGCAGGGAAACATGGCCAGTGAGGATTCATATAGCGAACCCCACTTGTTTGAATCGAAGAATAGT  
TGTTGTAAATATCACCCACCGGCATCACGTTTTTATAATGCATATAAAAAAATTCAGATATCTCTTCTACA  
AAAATCACAATAACTATCAAAGCCAAAGCCAGCTCAGTAGAAAGTGCAGCAAAACACAAGAAATCAATA  
AGAAGCTGATCAGGGGAATATAAATTTTCAGGGTGGATAGTTATTGTAGTGATATATAAAGGATTCAGG  
AAATGAACTTAAGAAAAGTTAATGATTTGAAATGCTGGTATAGTGGTGAATCACCACACATAAAGTTCT  
GTCTGTCTGAGAAAAATCGAAAGACGAAAAACATGGTTCTTTTCTCTGGATAGAAGCAGAAGATACTC  
TATCAAGTTCTGGATGAGCTGTAGTATGCATGCCAATAAAATGTTGGGAGTGTTACGAAACTGCTAATTA  
GAAAACTGAAATAAATTGAATACAATCTGCTGATCCCAATCATGTTGAAGCATATGATCATCCATCTTC  
ATTGTTAAATTGTTAGAGGCATAGAGCATACTTCAAGTTAATTACATTATGCTTCAACAGATCTGACTGG  
CAATATTTTGCAGGCAAGATCATTGATTCGCAAAGGAGACGTGATAAGTATCATGGATCCTGCACTAGT  
AGGACATGTCAAAGTTGAGTCAGTATGGAGAATAGCAGAAGTTGCAATACAATGTGTGGAAAGGCATG  
GCACATCCAGGCCAAGAATGCATGAAATTCTATCAGCCATACAGGATGCAATCAAGATCGAAAAGGGG  
ATTGATAAACTGTCTTCATCAGGAAGTTCAAAGGCACAATCTTCCAGAAAGACACTCTTAACAAGCTTCC  
TCGACGTAGAAAGCCCTGACATATCCAATAGCTCACTTACCCCTTCTGCTAGGTGAACAAGTAACTAACA  
AGAACAATTGCCAATCACTAGTGTTAAACTTCTTGGTTTATGTCCTTGCTTCGTTATTTTTGGTTTTTGG  
TGTACATTAGTACATAATGTCTATTATTGTAAGTGTACATTAAACACAGACATTAATAGGATGTTACACACT  
AACAAAGTGAATCATATTTGGGGGGCAATAGTCAGTACATTATGTCTCAACTCAGAACTACAGTATCTAA  
CCATATACCTCTTAAGTTGCATGAAAGTAGCATCATTGAGCAATGTTTCATCCTCTATCTCTACTTGTTGTA  
ATTTGGACTAGTTTGGAGTTAAAATTTA

>PGSC0003DMG400012816 RLK with malectin domain

GCAAAAGGGAAATGTATTACAAGAAATTATAAGCAAATTGAAGAAAATTCAGAGCAGAAATTGGACTT  
AAAAATGCTCAAATTTCACTTTTTGTTGTTCTTCTTTGCTTCAAGATTGCTTTTTGTCTACCTGGTTAGCTC  
CTTTTTATGGTTCTCTTTTTCTTTTTGTATAATGTGAATTTGATTAAGGGGTTTAAAGGGTGTCTATATTAT  
GTAGTTATAATGTGTTTGAGTAACTTTTTTTTTTTGATAACTGTGATGTTTGGGTCAGTTTGTGTGCAGC  
TTGACTAATGGATGATGTAAAATTTGTGTTTGAATTCATTTTTTTTTGGTTTGATTGATTAATGTTAACTCA  
GAGCAGCATTGGACTCAAATGCTCAAATTTATATTTTGATCTTCTTCTTTGCTTTCAGGATTGATTTTT  
GTCTACCTGGTTAGGTTCTTTTATGTTTATTTTTCTTTTGTATGATGTGAATTTGATGAAGGACTTTAAA  
GGGTGTCTAAATTATGTAGTTTTAACGTGTTTTGAGTAACTTCTTCTTTGATATTCGTGATGTCTGGGCC

AGTTTGAGCGCAACTCAACTAATGGATGATGCAAAATTGTGTTGAATTCGATTTGTTGGTTTGATTGT  
CTAATGTTAACTAATTGCAAGTACTTAGCTGTTTGTGGTTGGTTCTATGATTATGTTGTTGGATTTAGTCA  
TGGACCTTATGGTGCCTAAATTTTCAATATTGGAATTGAAGCAAATTGAAGAAAACATAGCAGCATT  
TCAAAAAAAAAACCAACTTTTGTGTTCTGCTTTAAGTCGCCTCGTCTCAGCTCCTTTTATGTTTCTTATGC  
AATGTGAATTTAGTTGTAATTATGTAGCTGTAATTGTGTCTGCATTAAAATGTTTTAGTTTTGATTCACTA  
ATCTTAACTTGTGTTGGAAGTGCCACAAGCATGTGAGATGTTGCGATTAGACTCTTTATATGGTCTTGG  
AAATAGTTAGCTCATGTGCTAGATTTTTGCAAGTACTTGGCTGGTTGTGGTTAATTCTATGAGTATGTTAT  
TGGATGTAAGATACGATTCCTAATTATTCGTAACCAAATTGCACGTGCTCGTCAGTATAATCCTGTATATT  
TGCAAAATTTCTAATCGCTTCACTCCATGATATGATGAAGTATCTTGAGTCTTGTGTTAAAGAGGAAAA  
GAAATAAGTGAGGTGTCTTCACAACTTAATGAGCAGCTAGAAGTCTGGTTTTTTCATAAGAGATAAAA  
AATTTTGGTGCAAACATACTAGGTGATTCTTCTCATATGTCCCCTGGAATTAGTCGAGGTGCACGAAAAC  
TCGCCTGGACACCATGGTCATCAATAAATAAATAAATTGTTACAACGTTAGTGTAACTTTATAAGACGTT  
ATTGCTCCCTATATGTACTTTTTCTGCTGTTCTTTCCATTGCTAGCACTGTTACATGAAAAGAAAAAGGCT  
GCTCCTTTATTATTGATTAGCCTCTTCAAGTTGCTCTTTGTTACTATCTAATTATCTATCCTGTTTATTC  
ACTGCAGCACCATATGTAACGCGAATAAGCTGTGGAGCTCAAATGATGTTTCGTAGTTCCCAACAAAT  
ACCCTTTGGCATAAAGATTTTGGATATACAGGAGGCATACGTATGGAAGCAAACCGCCCAAGTTACATA  
ACACCTCCACTCGGCACATTACGGTATTTCCCTCTATCAGAGGGTCCTGATAATTGTTACAATATCGATAA  
AGTGCCACATGGCCACTATTCAGTGAGGATCTACTTTGGATTGGTTAAAGAACCAAGTTTTGATAACGAA  
CCTCTATTTGATGTTTCTGTTGAAGGGACCTTGGTTTATTCTTTGCCGTCTGGTTGGAGTAGTCACGATGA  
TGAACAAGCATTGTTGAAACTCTTGATTTCTTGAGAATGGTACTACCTCACTTTGCTTCCACAGCACTG  
GTCATGGAGATCCTGCTATACTCGCAATCGAGATTCAAGAAGTAGATGAGAAAGCTTACTATTCTGGTCC  
TGGATTTGGTCGAGGGACAATCTTTAGAACTAGCAAAAGATTGAACTGTGGAGATCAGAATCCAAAGTT  
TGACGTTGACTACGATGGGGACCGTTGGGGTGGGGATCGGTTCTGGAGCTCAATTATGACCTTTGGTCA  
GAATTCTGATAAGCCTATATCTACTAAAAGCACCATAAAGTCAGCTTCTGCAGCTCCAAACTTCTATCCAC  
AAGCTCTTACCAAAGTCTTGTAGTACCGACAACGATCCGGATTTAACGCACACAATAGACGTGCA  
TCCCAACAAAACTACTCTGTCTGGTTACACTTTGCCGAAATTGATCCTTCAGTTACAGATGTGGGACAA  
AGGGTTATTGACATTTGATTAATGGTAATATTGTGTTTCGAGATATTGACATTGTGAGAATAGCGGGG  
GGAGTTAACAGTGCTCTTGTACTGAACACAACCATTCCAGTCAGTGGCAGGATTTTGACAATCACATTAC  
ATCCAACAACGGGGACTCATGCCATCATTAGTGCCATTGAGATTTTTGAGGTTATACCAGTTGAATCTAA

AACATTACCAGAGGAAGGTAAGTTAAATGTTTCACTTGACTTCTTGGATGCTACATGTTTTTTCATCTCA  
TACACTTGACACACTTGAAAGGGGCCAAATGTAGTATGTTATTTTTCCCTTGTCCTTGGTCAAGCTTGT  
GCCTTTCTAATTAAGATAGTCTTTATCTTCTTTTCTTTTTCAGTAAAGGCTTTACAGTCACTGAAACTTGCA  
CTTGGACTTCCCCTTCGTTTTGGGTGGAATGGTGATCCATGTTTTCCGCAACAACATCCATGGAGTGGAG  
TAGATTGTCAGTTTGACAACCTCCAGCAATAAATGGGTCATCGATGGGCTGTACGTTTTTGGACCTTGACCT  
TAGATAGAAAAGTCCGCCCATCCACACACGTGCGCAAGCACACACACGTAAGTAACTGTAACACTCACATTG  
ACATATATTCCTGCTATTGATTTTCTGCACCCCAATTTAAAAGTTTTGCTGGACGATACTTGGCTTTCTTTC  
TATATTATGTGATTTTATTATTTTATTTAATGTGTCCTCTGTATCTGTTTTTCATGTAAGCACAGTGACCT  
GGACAACCAAGGTTTACGAGGTTTCTTACCAGATGATGTTTCTCAATTGCGTCATCTTCAGAGCATGTAA  
GTTTAAATGCTGTTTTTTAAAAAAAATCTATTTGGATGAAAGATGTGTATCTTCCAACGATCTTCTAC  
TACTTAAAATGGAGTTGATGATCAATAAGAGTTTTAGCCAATATATTGACACTTTTTCAAATTATTTGGA  
CATAATTTGTCTGAAGGAATTACATACTAAGCGTTAAATAACTTCCAGTTTAAGAGGTTTTCAATATTTG  
AGCATCTTTTAGAATGTCTTTTGGTTCATGTATATTGCAATGCCGGCGTCCACTTCTCAAACATGATCTTC  
TCTAACTTATGCTTTGCTTGTGTGCATTTTACAGAAATTTGAGTGGAACAACATTACGGGCTTATTCCC  
TCAGCACTTGGAAACAATAACTAGTCTGGAGAAATTGTGAGTACATTTGCGGAGAGTTGTGCTTTTCTGTA  
CTTGATATTAGATTTCTTAGCTGCCAGAGTAATAGTATATGAAAATATGGAAACAGAATATTTTTGTAAT  
CTACGTTGTGAATATGTTAGGCATACAATATATAATTATTGTTCTTTATCATCTATATGGGCCGCGGGAGT  
AGTGAATGTGCATACTGTTTGTGGTTGTTTATATGATAAAATCCTCACTTTGTGATTACCTAACAAAAGT  
TGCACAACAGGGATCTTTCATACAATTCCTTCAACGGGTGATTCTGAAAGCCTTGGGGAATTGACGTC  
GTTACTGACACTGTAAGCTACTTCAACAAGCTCAGTTGAGGACATTTGATGGATCAATAAAGAGCTCTAA  
TTTACTACTTTATTTATTACAGGAATCTGAACGGCAATTTGCTCTCTGGAAAAATTCCTGCAGCGTTAGGC  
GGAAGGCTCTTGACACAGAGCTAGCTTCAAGTATGTTCTCCTAATTGCACGTTCTTAGCATAAGGCTTCTT  
TTAGTGAAGCATCCTTCAGAAATTGCATCGTAACTATAGAAACGTAGAATGTACCAAATTAATCCATAT  
GTTTCAATTTGTTTGTCTGGTTTTGACTTGACACGGAGTTTAAGAAAGTAAAAAGACTTTTTGAATCTTAT  
GGTCTTAACTAAAGATATGTACAATGTACCAAATATCCTTTAATCTTGTGGTCATTAACATGCCATGTG  
GAAAGTTGAAATTAAGAGTTTGGACGAAATAGGAAAGAGACATTTATTTTGAATGGACTAAAGGAAA  
GTAAGACAAATGAATAGAAACAGAGGGAGCATCACTTTCACTTAGTTTTTCTTTTGTCCAACCTTTTATCA  
TCAAAAATACATACTACTTATGGTCGATATTCAATTTCTAGATGCGTCGATGAAGGTCTCCTTGTACCAT  
TTTGTGTTGATGATAACTGTGAAAAGAACAAGAAGTCTACAATCATAGCATTGATTAGAACACATTAT

AAGTTAAGGTTAAACAAGTGTACCGTTAAACTCCATTGATTTAGCATCCACAACCTGGCGGTTAGGCCTGA  
CACCAACTCCACAATCCACTAGCTACTTCGATGGATGGGCGTTAACTATTACCACATATTCAACAAATAA  
ATATGCTAGGCTTCTTTCTGATAGCTAGGTAAACGGGGGTTAACTAGGGTTCTTTCTGGGCCACGTCCT  
GTCTTTTGAGGCTATAACCAATTAACGTAAGTCCAAATTCTAACAGTAACATTTAGCATATTTCTTAAAA  
GAAATGCTGCGGTAATAGGTGTCAGTGTGTTTTGTTTAAAGGCAGAGATGCTAATTAACCTTACTATTC  
ATGTGGTGAAACTAATATGACAATTCATCGGTGTATTAACCTCGAGGATCAGATAAAAAAACTGTGAATTT  
TTTTGTTTCATTAGTACTTATGCTAAATACTTACTTTGGATGCTTTTCAGTTTTACTGATAATGCAGGCCTTTG  
TGGTATTCCTGGGTTACCAACATGTGGACCACATCTTACTGTTGGTGCCAAAATCGGCATTGGCTTAGGG  
GCGTGTGTCGCTGTTGTAGTTATCGCTACATGCATAACATGTTGGTGGAAAAGGCGGCAAAATATCCTC  
CGCGCTAAAAGAATGGCTGGTAAGAGTTTTTCAACATAACATGCTCTATATCCATATTCAAATGTATTTCC  
CATCTCTCCATGTATTGTTGTCAACATGGTGTTTTAAAGAAATGAATTTTCGAGTGAAGATGTATCTCTAC  
ACGATGAAATTAACGAGTTTCATGCTTTCTCATAGATGAATCACTGTGTTTTTTCTCTTCATTTTTTAT  
ACAGTGAGAGACGCTCCTTATGCGAAGAAAAGAACACATTTAAACCACATCCAAATGACAAGACACCAT  
CACAATGGTCATCATCACGAACATACTCGGACAGCTGTTGAGAATGGACCTCCTTTGCTTGTCTGAGTTC  
GAACAATTTTTGAGTCAACTCACACTAGAACTTCTTTCACGTCAAGAGGATTCAACAATTTATACATATA  
CCAACAAAACATTGTTTCGTATCCTACTCATAGTATAATTTTTGACAAAGGAAGGATCGTATGAATCCC  
ATCCGCAGACCTTGTAACCTCCATCGCAAGCTTAGTGAGAAGATTTCCAGATACAATGCTGCTGTTTTGTG  
GCTAGAAAATGTGTATAGTGGTTATGCAGATCAGGAATCAATTATAAATGCCATAGATGTAATTCAGTG  
CAAGAGATCTATGTTGTTCCGACTCTTCAAAAATGTCGACGGGTGCGTGTCCGATCCTCTAAAAATAGT  
GTATTTTTGAAGGATCCGACTCGGGTTCGGCAACATTTTTGAAGAGTCGGAGACAGTGTGTTGTATATTT  
TAACTATATACATGTATTCTTGTATCAGTTTTGGAGCTTTTGGTTAAAGACTCGTGTAACCTGTGAAA  
TGGTGAATTTAGTAGAACCACAGAATGTGATCGCATTATACGGTCTCAATTGAAC

>PGSC0003DMG400014875 RLK with malectin domain

TATTACTTCAACTGCATTCTGCCAAAACATTAATGGTATTCTCCATCCACCATGACTATTCTCCTCTCATT  
TCTCACTTTTTCTTTCTTCTCCTCCATTTTCCATTTCTCATCAACTGATTACACCTTCCCTGAGAAACAC  
TTCATCAATTGTGGTTCTGATTCTCCATCGTACTCAACCGCGGCGGCGGCAGCACCACTTTTGCCGGCG  
ACTTGAACCTCGACCCCAACCACAGTGACTCCGTTAAAGACCACACCACTACTACAGGTTTAGCTGGAAT  
CTATCAAACCGCCAGAAAGTTCACTAAATCTGGGTCAATAATCTTCCAATTGATGAAAATGGGGTTTAC  
ATGGTACGGCTTCATTTCTTCTTCTCGTTTCTATTTCGATGCGGAATTCAGTGTTCGCTTCTGGGTTT

TTGCTATTGTCCAATTTTAGCATACCTAGAACTTAATAACTTCCCCTGTTATCAAAGAGTTTCTGGTTCCT  
GTAATAAAAGGTCGTAATTTGGAATCATTTTCAGATCTGATTCTTCTTTTGCATTGTTAATGCAATAGA  
AGCATTGTTACTCCTCAAGGTTTCATTCTAACTCTAATGACACAACCCATGTCACTAGCAGCAAAAATG  
ATTTATCCTCGAGTGTTTTGAATGTTATTCATAGGATTAATGTTGGGGTCTAATATTACCGACGATACG  
GATACCATGAGGAGAAAATGGGTAGCTGATGATGATTACTTACTTATCAAAGATTTGCTAAGAACCTT  
CCAATGTATAGTGGTAGTCTTAACTATGATCAAGTAAGAGGGGCTACTCCGTATGATGCTCCTGATTTGG  
TTTATAAACTGCCAAAGAAATGAATAGTAATCATACTGAGACTCAAAGTAACATAACTTGGCGTTTAGA  
GGTAAAAGGAATGCTACATTTTTGTACGTCTACACTTTTGTGACATTGTTAGTGTTTCAGCGGAATGGT  
ACAGTTTTCAATGCCTATATATATGGTCAGTTTGGTAAGCCAATTAGTCCATATGATAGATTTGAAAAATT  
TGCAGTTCCTTTTTATGTTGATTTTGTGGTGGATTGAGATGGTTCTGGTTTTATGAATATCTCAGTTGGTC  
CTCGGAATGATTCAAAGTCTATAAATGCTTTTTTGAATGGGGTGGAAATAATGGAGTTGATTAATGATCG  
GGTTGAGTGGAGTGGAGAAAAGAATAACAATGTTTGGATAATTGTTGGTTCTGTTGTTGGTGGTGTGGT  
TCTCATTTCTGTTTCTATTGTGGTGATCTTGTGTTGTTTGAACCAAGAAAAGCACAAACGGTTGAGAACT  
CGAGTTGGTGGCCAAGGATGAGTGTTAATGCTGGAAGTACAGAGGATAGGACTACTGTAAGAACTCCA  
ATTGGTAGCACTACTCCTGATATGAACCTTGGGTAAAGATATCTTTCGCGGAGATTTTGCATGCTACTA  
ATAAGTTTGATCCCAAATTTATGATTGGTGAGGGTGGTTTTGGGAAAGTTTACAAAGGAACTTTACACA  
GTGGTGTAAAGTGGCTGTGAAAAGAAGCGAAGCTGGACATGGGCAGGGTCTTATGGAATTTCAAAC  
GAGATAATGCTCTTGTCCAAAATCCGCCATCAACATCTTGTTCATTGATTGGTTATTGTGATGAACGAG  
ATGAGATGATACTTGTATGAATTCATGGCGAAGGGAACCTTGGAGAGACATTTGTACAGTTCGAATG  
AAGATCTTGGTAAATCATCTTCACGGTCAAATTTATCGTGGGATCAAAGGCTTCAAATTTGTATAGGTGC  
AGCTAATGGTCTACAGTACCTTCATGCCGGTTTACCTGAGCCAACCTATTACAGGGATATTAAGTCAACA  
AACATACTTCTTGATGAAGATTATGTTGCCAAAGTTGCTGATTTCCGGTCTCTCAAATCAGGTCAACCTGA  
AGAAACACACATTGTTACTGATGTAAAGGTAGCTTCGGTTATCTTGATCCCGAGTACCTGAAATCAATG  
CAACTAACTCAAAGTCTGATGTCTATTCTTTTGGAGTTGTACTTTTTGAAGTACTTTGTGCTAGACCAGC  
TGTTGATAATATGCTTCCAAGAAATCAAATGAACTTAGCTGAATGGGGACTTTCTTGGCTAAAAGAAAAC  
CAGATCGAAAAGATAATTGATCCATTTCTGTAGGTAAAATTAACCCAACTCTCTGAGGAAATTCGGAG  
AAACAGCAGAGAAGTGTCTGCAAGAGAATGGCACTGATAGGCCTAAGATGATGGATGTGTTGTGGGAC  
TTGGATTACGCTCGACAGCTTCAACACCCTACAATGCCCCAACAACTTCATGAGGATACCAACTCCGATG  
TTTCGTGGCAAATGGCATTGCCTGGTATCAATCGCTTACCTTCTATAAATGTAAGCACAAAGCTTTGTGAGT

GTCACTGATAGCGAGGCTTTTTTCAGAATTGAGGATCGATGAAACCAGATGATTTGTGGCCTCGTTGTTGT  
TAGCATTCCATCTTATTCTACTTCATTCTGTCTAATGTAATTGTGTATCAAAACAGTGTGTAATAGTCAGT  
GTTTCAGCTTTAATTTCTGCATTGGATAATAGGCCAAATGCCTCTTGACAATGCATCTGTATTGATAGTATAT  
AATATTCATAATAAAGTCTCGTGTCTATTCTCCCA

>PGSC0003DMG400015547 RLK with malectin domain

CATCTTTTCTCTCTCTTTTACCCTCCATGAATGGGCTGAACAACATAACTCCACTCCCCATACACAGAA  
AGAGTCAACACCACCAAAACCCTCAAAAATATTAATTCTTGGCACAATATTTATACAAAATGGCCCCTTT  
TGACTTCATGAATTGCTAGTTCACATTCTAGAAAATGATGTTTTGTTTTCTTTGAATTTAAAATTCTATTA  
ATTTGTTTGTCTGAGGTGGGGTTTTTCAGTTAAAGCATCAACCTGCCTGTTAATGTTCCAAAATCCAAGA  
TATCATTCTGTTTTTCTTCTGTGCTACCTGAAAAATAAAAATAAAAACAAATATTTTCTGGTACCCCTCAA  
GAGTTTTTCTTCTGATTTATGTTCTGTTTGTTTCATTATTGATTTGGGTTTCTTTTTTATCAGTCTTGGAGC  
TCTTTTGAATGAAAAGGTGACATCTTACCCTTCTGTTGATGTTTCTTCTGATGGGTATTTCATATATTGT  
GCTTCTGTGGTGATGAAATAGTTGTTCTTTGAGTTACTTTTCTTTTCAAGAACTGCTTGTTTTAGCCTTTA  
AGGTCTAATTTTGTGTTCTTTGGGATTTGAATGATGATGGAAGGTTTTGGATTGTTAGTAAAGAGTTTG  
TTTATATTGGTGTGGGAGTTTTGTGTGTTTCTGGTTTTGAACCTGCTGATAATTTCTTAGTAGATTGTGG  
ATCATCTAAAGATACTAATGTTGGTAATAGGGTTTTTATGGCTGATAAATCAGCTTCAAAGTTTTTGTCAA  
CTACAAAAGATATATTGGCTGATACCCCTTCAAATTC AATTACAAAAGCTAATGATTCACCCCTTTATCAA  
ACTGCTAGAATTTTTACTCAACAATCCAGCTATAAATTTCCAATTAGCCTAACGGGGAGGCATTGGATTC  
GCCTTTATTTTTACCCGTTTGTTTACCAAGTTATGATATGAGCACTGCAATGTTCTCTGTTTCCACTCAA  
AGAATGTTCTTCTGGCAATTTCTCTCAAAAAATGCTTCTGTCAAGGAATTTTTCAGTAAATGTTACCTCG  
AATGACCTGTAGTAACGTTCTCTCCTTCGAGCAATTCATTTGCTTATATAAATGCTATGGAAATTGTCTC  
TGACCTGATGTTCTTATAACTGATGATGCCTCCACCATTAGTCCAGCTGGGACATTTAGTGGTATGTATG  
CACAGGCTCTCGAAACAGTTGCTAGGGTAAACATGGGTGGATCGTTGGTGTCGTTTGATAATGATACAC  
TTTGGAGAACTTGGGTTACTGATCAAAGTTTCTTGATTGAGCCGAGTTCAGCTAAATCGGTTAGTAAGAT  
TGGATCCGTAAAATATCCAGCAGATGGAGCAACACCAGATTTTGCACCACCGTCAGTTTATGGTACTTGT  
AGTAAGATGAACGTGGCTGGTACTGGTGATGATCCTAATGCCAATTTTAAACGTGACCTGGACGTTTAAAT  
GTGGATCCTGGGTTCCAATATTTCAATTCGCTTACACTTCTGTGACATAGTGAGTATAGCTGCCAATCAGCT  
GCTGTTTAAACATTTATGTTAACTCCTGGAACGTGGCTCATGATTTTATCCTGGTCAGAAAGCTCAGGGA  
ATTTTGGCCACAGCTTATTACAATGATTATGTTACTCCAACCGCTAAAAGTAATAGGCTTAAACGTTAGTGT

GGGCCCATCTTCAAGGAGTGCTTATCCTGATGCCTTCCTAAATGGACTGGAACCTTCTGAAGTTGAATAAT  
TCTCAGGGCAGCCTTAGTCAGGTAGATTCTGTTCTACTAACCCGAGTTCAAAGGCAAAGAAGAATGTC  
GGAGTCATCGTGGGTGTGTGTATAGGTGTCCAGTTGTGTTGGTGATGGTTGGCATCTTATTTTGCATGC  
ATAGAAGAAGAAAACAAGAAAAGCTTGCCAGTCAAAAATATGGATTCTTTATCTATGAATGGTGGCA  
CTTCACACACCATGGGAAGCAAGTATTCAAACGGAACAACCATAAGTGCTGCTTCAAACATGAGTTATC  
GCGTTCCTTTTGCAGCTTTGCTGGAAGCAACGAGCAACTTCGATGAGAGTTTGGTCATTGGAATAGGTG  
GCTTTGGGAAGGTATACAAGGGTGTGTTTGTATGATGGAACAAAGGTGGCTGTGAAAAGGGGTAATCCC  
AAGTCCCAACAAGGTCTTGCAGAGTTCCGAACGAAATTGAGATGCTTTCTCAGTTCGCCACCGGCATC  
TGGTTTCATTGATGGGATACTGTGATGAAAAAATGAAATGATTCTAGTTTATGAATATATGGAGAATG  
GGACCCTCAAGAGCCATCTGTATGGGTGAGATCTACCCAGTATGAGCTGGAAGCAGAGGCTGGAGATA  
TGCATCGGGTCGGCCAGAGGTCTGCACTACCTTCATACTGGCGATGCTAAAGCTGTTATACATCGTGATG  
TCAAGTCCGCAACATACTGCTTGATGAGAGTTTTATGGCAAAGTTGCTGATTTTGGACTATCCAAGAC  
AGGGCCTGAGCTTGATCAAACCTCATGTTAGCACAGCTGTGAAAGGAAGTTTTGGCTACCTAGATCCAGA  
ATATTTTAGAAGGCAACAGCTGACAGAAAAATCTGATGTTTATTCTTTCCGGTGTGTTTTATTCTGAAGTTC  
TTTGTGCTAGGCCTGTCATAGATCCATCTCTCCGAGAGAGATGGTCAACTTAGCTGAATGGGCAATGAA  
GTGGCAGAAGATGGGACAACCTGGAACAAATTATAGATTCCAATCTTGAGGGCAAATAAGACCAGATT  
CCCTCAGGAAGTTTGCAGAAACAGCAGAGAAATGCTTAGCTGATTTTGGTGTAGACAGGCCATCAATGG  
GCGATGTGTTGTGGAATCTGGAGTATGCACTTCAACTTCAAGAAGCTGTCATTCAAGATGATCCTGAAG  
AAAACAGCACCATCCTTATTGGCGAGCTCTCTCCACAAGTCGATGATTTAGTCAAGTTGATCCCGGTGC  
TTCTGCTGCTCATAATGGAACACCAAATTTGGATGACCTCTCTGGTGTTCATGAGTAGGGTTTTCTCAC  
AATTAGTCAAGTCTGAGGGTAGATAATTAAGTAAAAGGTACATACAGTGTGTTAGGTGTTTGTAAATCC  
ACTTTTGTGTTGTGGATCATATAAAGATTGATCTTTTCTTTCTTTTGTAAACAGTTTATTCTACGAATTTCCGA  
GTTTTAACTAGGAATGTATATCTGAAAATATGCATTGTTCTACCTGTGGATCTTCTTTTCATTTTCTTGGGA  
ATGCCC

>PGSC0003DMG400017662 RLK with malectin domain

CTAAACATGCACTTTTTTCTAATTCTAGGAACTGCAGCAGAAATGAAAACTGGAATGCTGCAAAGTAT  
TTTCATACAAAGAAATCAAAGCTGCTACAAACAACCTCAAAGAGGTTATTGGCCGTGGTAGTTTTGGATC  
TGTTTATCTTGGGAAGCTTCCTGATGGTAAACAAGTTGCTGTTAAAGTTTCGATTCGATAAACTCAACTG  
GGTGCTGATTCTTTTATCAATGAGGTTTCGCTACTATAACCATGCTAGTTCAGTTCAGTCTACAAAGAAAA

AAGAGATTCAAGAGCTCTCTTTATTATCTGTAGGTATCCCTTCTATCACAAATCAGTCATCCAACCTCTGT  
GTCGTTAGAAGGATTCTGCCATGAGTCAAAGCAACAAATTCTAGTTTATGAGTATTTACCTGGAGGATCA  
CTGGCTGATAACCTCTATGGTACGTCACGCGTGATCTCACCCATATTCACACTTTAAATCCATAATCCTCT  
TCTGTCACGTATCGTTTTCTAACTCTTAATAACTGTCTCAGGAGCAATGAGCAAGAAATTGACACTAAGC  
TGGGTGCGCAGACTGAAAATTGCAGTTGATGCTGCAAAGGTATGAGTAAAGAGAGGCATTATCATT  
CTTAAGTTTTTATAGTTTTTAATGTTTGATTATATAACTTGTAAGGTTTGGATTACTTGCACAATGGAA  
GTGAGCCAAGAATCATAACCCGTGATGTGAAGAGCAGCAATATACTTCTGGATGCAGACATTAATGCTA  
AGGTATCTGATTTTGGCCTTTCTAAGCAAGTAACTCAATCAGATGCAACTCATGTTAGCACTGTTGTCAA  
AGGCACTGCTGGCTATCTTGACCCTGAGTAAGCTTCAAGTCATTTATCATCCAGTTTAATATTTGGTCCTT  
CCTATCCTAATTCCTAAACCTCTCTTACTACTTGTCTCAGATACTATTCCACTCGACAGCTCACAGAAAAG  
AGTGACATATACAGTTTTGGAGTCGTTCTTCTTGAACCTATTTGTGGCCGAGAACCACTTAGCCACTCGG  
GGTCTCCAGATTCCTTCAATTTAGTTCTATGGGTAATAACAAGTCTTATAATGTTTTACACACAAAAGCAT  
TTCATTGACTTCCTATAATACTCACATGTTGTAACTAAATGTGAAAATTTGAGGCAAAGCCGACTTACA  
GGCTGGTGCATTTGAGATAGTAGATGAGAGCATAAAAGGAACATTTGACACAGAAAGCATGAGAAAAG  
CTGCTTTAATCGCCTCAAGGTCAGTGGAGAGGGATGCATTGCGAAGGCCGAGTATTGCAGAAGTATTAG  
CTGAGCTCAAAGATGCATACAGCATTCAACTTTCTATTTAGCATCTGAAGGACTAGCCAATTGATAAAT  
TAGACCTTCACTACTGCAGCTCACAATTTGCAAATATAAGGTTTTCTCTAGTTGAATCAAATGTTACTGTAA  
CTTTATGACAACTTTTAAATTTGAGCTCGGAAATGTTTTAAGTTATTGATATATATCACATTTAAAGGTCT  
CCTTTCCCCTTGAAGATAGGGGAAGTCGTGGATGATTTTCAACAAATAATAACAATGTCCATCCAGGCT  
TGCATCAGTGCTCGCCTCTACATTCTTTACGACTTGTGAACCAATCATAAAAAGTAATGAGTTGGCCTAACC  
AGAAAAGTGGCGCCGTAGATATAGGAATAATGCTGTAGAAGCAGCCACTGCATAGGGGAATATAGTCC  
AGATTCCCTGCACATTTATAGGAACCAGAATTGGATTCTTTGGTAATAAATGCAAATTTGGACAGAGCA  
AAAGAATTATGCTGTACCACTACAGTAGCAACTGTTGCAACGGCAAATACTGGACGCTCTCTTAGTAAAA  
ATCCAATTGTCAACTGCATTTTGGAGTAAAAGAAAAGGAGATAAGGCATGAACAGCAGGTAAACTTAAA  
ACTGGAAATCTGTTTCAAACACAAGACTAGTAACCTGAATTGGAAGAGTTATCAAGCCGCCACAACAGA  
CTCCAGCAAAGAAACACTCTGGTGATATATCCTGCAAATTTATGAGCAGAGAAATGATTGAAACAGTT  
ATAAATATCTGTTTACCGCGGGAGAATGCATTGAGTTGCTAACAATTTCTACATAGGGTTATAGCTACAA  
CATAACCCATCATAAGATTTATGGATATAGACATAAGGAAATTGGTTGCATTGCATTCTCAGTGATTGA  
ATTTCTAGTCAGAGTAGGCTCAGAATTAGCAAAGGAAAGTTGTAAGTACTGACGGACGGGGTCTGTCTATC



TTCTGTTTTATAGCAGGACTTCTACACTAAATATATCAATCGTTTTCAAAGATGAAATGAAATTATCAGAAC  
TTCTAAGCATTGTTATTGACCATCCTAACATATCTGACACCTTTTGTCTGTAGGTAACAGTATCATGCCTC  
AAAACCTGTAGTACCCAAAAGAGGGAACAAGAAAGTAGCAGAAGATGGTTAAACTGATCTAACCTCA  
GCATGTTAAGAAGGAAAACAGAAAAAATCACTCACCAGAGCCCCTGCAAGGAAAGCAGTGGGATTT  
CTTACTCCAAGAGAAAACCGTTCCACTGCATCAGCATAGGAAAATCCACCAGTAAGCAATTAAGAAGT  
CAAGGAACAAGAAGATCATATTAGTTAGAACAAGTATTTCCAGAAATATGATAGCACAAGAAACATCA  
GCTATTTTAGAATGTGAAGAAAAGTTCAGAGATTTAGGCATATAGACATAAGGATTAAGATGGACTAGA  
ACTATGCAAACCTTACGATAGAGGATAAATTTTGAGGTAGATCACTAATTTCAATCTGACATTTCCAGC  
AAATAGAGAATCTTAACACATAATTAATTGTACTCCTCCAGTACCAACATAGATGTGTGATAGTACTGA  
TGCTACATTATGATCATAGTAATAAGTGTGCGCATATCCAATGAAGAGGGTTAAGAACCATGAGGTTTC  
AAGTTCAAATCCCAACGAAGCCAAAAACACTAGGTGATTGCTTCCCATCTGTCCAAGCCTTGGTGGACA  
GAGTTACCCGGTACTTGTGCTGGTGGGAGGTAGCAGGTACCCATGGAATTTAGTCAAGGTTCTGTGGAA  
GCTAGCTCGAACACCACAGTTATATAAAAAAGAAAGAAAAGTGTGAGCATATCAGTGGAAGCAAGGGT  
TTCACAATGATTAAGTTTTTACAGTGCAAGAGACATTGGATTAATTCAGCATCTTTGTTGCAACTCAC  
CAAAACCAATGAGATTCCCATGTTTTTGTACAGCGTTTGTAAATATCTTTCCTTCTGATTTCCGATCCCTA  
ACTACAACCAAATTGACTCTGAATTACCAAATCAAGTTCATATATTTTAAAGTAAGAGGCTGAATATTTT  
AACATGAATAATATGCTAGTAGCCAAAACAAACCTTTGAGCAAACATCATCGGATGCACCAGATTGCTTA  
AAAAGCTTCCCAAGGTAAAAGGTATCATATCGCTGATGCAAACACCCCTGAATATTCAGGATCCACAAC  
AATATTAACATTGTGGAATCACTGTTTCTACATAATCAATTTTTACTGGCACTGAAGGTGCATAAAATCT  
TTTAATACAACAAAAGAAAAAGAAGGTTGTGTGTACTGCAGAATCATGAAAGGTTGGTCTGCACGTGCA  
TTCATCAAATTACTCAGAGGACACAGTTTCAACTAACCCAGTACACCCAAAGAATAGTGGATGTTATATA  
TGGAGCATTCTGGAAAAGGAGTTCACTAGTGATTGCCACGTCCCATCTAGAACAAGCATCCGTGCTAT  
AGAGATTCCAACCTACACCATTCTGCAATGAATTTGACTATAATAGTGAACATCATGAAGAAGGATAACA  
AGCCATTTTAGTGCCTATTCAAATGAATATAATAGTGAACATCATGAATAAGATAACAAGCCAACCTTAGT  
GCCTAATCAAATGACTATAATAATGAACATCATGAAGAAGGATAACAAGCCAACCTTAGTGCCGATTCAT  
AGACACTAAATAACAGCATAGTTCTAGCTTTTAACTTTTTTAGACAGGGTTCTAGCTTTTTAACTTTATAA  
AATTTTGAAGCTTCTTCACAACTCTTTTCTCCACATGGCCTCTCACTTTTTCTCACATCACTAAAGAACAA  
CTCTAAAGTCACTAATTTTAAAAGCAATGTCAAATCAAAGAAGAAAAATAATCGCAGGAAAACCTATACT  
ATCTGCAACGTGGCCATGAATCAGAAGACCTGTTAGCAGGGGAGTTCATGAACAGAAGTACCAGCAA

GGAGACGGACCCATATATTCAAAGCCTCCTCACTGATAAAAAGTCCAAAACCAGCTGCCATCAGAAGCC  
AAAAGTAGATCCATCTGAAGAATGAGAAGTACAAGGGCTTAATATCACATCCGAGTACGCTAATAGATA  
AGAGATCCAGGATATCAATTATATTAAGCATCTATCATAGTAGTGAATAAAGTATAATAAACATAAGGT  
TGATCTTGTTTTCTTCTTAGATCATGGTGAAACCCCTGATGAATGAAAAGTGGCAAGGATAATTAGTTGC  
TTACCCTGGAGCATATTCTGGCAGCATGACTCTATAGCCAAAAGCTTTGAAAGAAAAACCAGGAGCAGG  
TGTAGAAATTGTGGAAGATGATGATCCATCAACCAGATATTGAATTCAAAATTTGATCCTTGATTAGGC  
TGCTTAAGGCCTATGGATAGAAATGTAATAGTAGCAGCTATACCTAATGCTATTGCCAGTTTTGCCAAAA  
ATGAACTTCTGTGCGAACAGTTTTATCTTCCAGACTGCCAGTTAAGTCATCAGAAGCCTTGTGCACTATC  
TCCTCAGCATCCTCCGACTGTCCGGCTTCATAATTTTTAGCACTCACAAGCTGAAATCTTTTGATCCTACAC  
TTTGAATAGAGAATTTGCCATCACTTATACAAGGCCCGTTACAGTGCATAGATAAGCTCGGTACTGAA  
TGTGTTCATTAGCTGTTTAAGGAGAGACCTTTGAATTTCTAGGTGATACATAAATAATAATATAATCAA  
ATAACAAATAGCATTAGATAAGACATCTCCTTGTACATTCAATTCACAAAATGTACAGGCGTCTATGATG  
TTGTATATGTTAGCACTAAGTTGGAAGCGAACATAAAAGGGGCTTACAATTCTACTCTAAGAATTTATAG  
AGTATATATCAACTGCCCTAGGACTTCAGTCTAGTGGTAAGTGCAGCATGTAACGTGTAGGTTAGGCA  
CACATCACAAGTTTGACCTGCCACATACAAAAGTCTGATGATTAAGTGGAAAAGGATAGAGGGAGGACT  
CTTTAGTTATCCAACGAATTTCAAACCGTGTGCCCTCGAGGATCTCTCGGTTATTAATAAAGTAGTTCA  
GATCTACCTTCTTTCATCAGATCTGCCACTGCTCTTTAGCATAGGTTTATTTTACATAGCCATAGATGTTTT  
CAACATCTTTATGTTGGTGAACAAAGACTTGGGTGACATTCCGACATTTTACATAGCCTCGAGGTAGTGG  
TAAATTCTGCGTGACCTCACTTGTGAGATTTCACTGGGTATGTTGTCGTCGTTGCTGGTTCCATGCTACGA  
AATTAGAGATGTCCTATATGACAAAAAAATGCTGCACCGCATATTACAAATAGAGATTTTLAGAGACATC  
CAAGCAACCACCTACCCTACCTTACCTTCCCTCCCTTTGGAGTGATGACAAAAAAATCAAATAACAGTTC  
ATCAAATCCAAATTGGTAGGGTTCCATCCAGAATATTCAAACCAACAACAACATAGTCAGTATAGTCCCA  
CAAGTGGGTATGAGGAGGATTGGTTTTACAATGACCTTATCCCTATCTTTCTAGAGTAGAGAGGTTGTTT  
TTGAGACCCTCGACTCAGGAAAATCGTTTTTCAGAACAAGTTCCAAAGAAATGCAAATAAAAAACGCTA  
CTTTCTCCGTCCCAATTTATGTGACCTTTTGGATATCGAGATTCAAACAAGTCTATCTTTGATCATAATTTT  
TTTTATTTATCTTTAAAATATTTGGAATTGTCATTATTGTGAGTTGTGACTTATAGTACTTCTACCTAGT  
TTCCAAATATATAAATTTTGTTCAAAAAATTGAAGATTCCTAGCCCGAATTCAGGCTCAAATTGTGAC  
ACATAAATTGAGACAAAGAGAGTATGATGAAAATATTGAATAGAGAAAAGTAGTCATAGTAAAGATAA  
CCAAATTAATGAAACAACAACGAAATTTCAAACGACTAAATGAATCCATTTGTATCTATTCCAGTCTATTA

ATGCAGTAGAATTCCGTATCATCATAGTTAAACCATATTTACACATACAGCAACCATTCTCCTATGTAGGA  
AGTTAGAGATTGAGTATATTTTGAACCTACAGCAATACCTAGAGTATGAAGAGTAATTGTACTGCTGCTG  
CGGTGCACTACGGAGTTTCCACCGTCTACGAGTAAAACCGGCGAGGTGGTTAAGTTCTCGTAGAGTTGC  
AGATTGAGATGAAGATAATGAAAGAGATAGCAATATTTGATTATTACATAGAGTCACCATTATCTCTTCT  
CTAGCGGCGTTGTTGTGGTGGAAGTTGTTTGTACCAGGCGGGAATATTGTTATTGGTTAGGTAAGGA  
GTATATGCTCCTCGGGATTTCGAAAATCTTCAAGTCCTGTACAATTGACACGTGTCAGATCTGATTAGATG  
TTTGTGGACCAATGAATTGATAGTTGTATCCCTTGCGTTTG

>PGSC0003DMG400021186 RLK with malectin domain

CCCATCTTCCTTTATTATCTAAAAAAAAAAAAAGTGAACCTCTTTCCCTATAATCACCATTTTTAGGTGATCT  
GTTAAAGACTTAATTCTTCACCATTCTTGA AAAATTTGAGTTTTTTCTTCTTTTTTGCTTACCATTGTCTCCA  
AGATTGGAGCTTTTGACCATTTTATTGGTCTCAGATCTGTTGCTGATTTGCGGTTTTCTGCACTGAAA  
GTGTTCATTTTGAAGATATAATTTGTGGGTTTTGGTTAAAACCCATGTTGTTGAAGCTTTATGAGTTG  
CCTATGAGAGATTTGTGAAGGTATTCTTTAATGTTTATGCTTCACTTTTGATGTGTCTTGAGATATATAG  
ATTGTTTTGGTTTTGGGTAGAAAGTGAGTGTGAGTTAAGGGTTTTCTTATTTGAAAATTTGTCTAGT  
TTTGAACAATACTGGTGGGTTTTGGGTTTTGAGTTTTGTAATTGAATTTGGAAGAGTGTGTAGGTA  
GTATCAAAAAGGAAGAACTTTGGGGGAGTTATTGCCTTATTTGGGGATAGTGAAGTTATGAAAGTC  
AAAGGGAGGGAGGTGTTTGTGATAATTCCTCTTTTGGTATTAGTTGTGTTTGTGAAATTGGGGAAGCT  
CAAACAAAGACTTTGCTGGTAAATTGTGGTACAAATTCTAGTGTGAATGCAGATGGTAGCAAATGGATA  
GGTGATTCTGATCCTGGTAGTAATGTCACCTTTGAGTTCATCAGGTATTGAGGCATCTACTGACTCATTTAA  
TGGTGATCCATCTTATGAGTCACTCTACAAAAGTCCAGATTTTTTTTCGGAAAGTTTTAACTATACTTTCA  
AAGGATCACCTGGTAGTTATTTCTTAGGCTCCATTTCTATCCCTTACATTTAGGAATCGCGATGCGAAT  
GAGTCGATTTTTGCTGTTGCTGCAAATGGTTTGAAGTTGGTTTCGGAGTTTAATGTTGCTGGTGAGATTT  
TGCTCAAGAACTCGCTCTTGGAAAGGTTCTGGAGGCAACTCCAGTATCTTTTCATTGGTGAAGGAGTATTT  
TGTGACTTCTGATATCGATGTCTTTGTGCTCGAGTTTATTCCGAATAAGGATTCATTTGGATTTGTTAATG  
CCATTGAGATCATCCCTGTGACTGATAAGCTATTTGTTGACTCCATCAGTAAAGTTGGTGGCAATGGTGC  
TAACAGTTCTTTAAATTTGAGTAAACGAGGGATTCAGACTATGTACAGGTTGAACATTGGTGGTTCAGCA  
ATTAATCCACTCAAGATTCAGGGTTCAGGAGGAAGTGGGAGGCAGATTCAAGCTATATGATCATCGCA  
GATGCAGGTTCAGAAGCCAAAACCATTTCAACATTAATTATGCTTCCCCGAATGACACCTCTGTTGCTC  
CGCTTCTTGTGTATGAAACAGCAAGAATTATGAGCAACACAGATGTCATGGAGAAGCGGTTGAACATGT

CATGGAAATTAGATGTGGATCCAGATTTTGATTATGTAATCCGCTTACATTTCTGTGAGTTTACTATAAT  
AAACCAAATCAAAGGATCTTCAAATTTATATAAATAACAAAACACTGCAGCAGACAACACTACGACATTTTCT  
CAAGAGCTGGGGGAATGAACAAGGCATACCATGAGGATTACTTCGATGCGATATCCTCGAAAAGCAGT  
AGTCTCTGGGTTCAACTTGGTCCAGATACAACGACTGGTTCTGCAGGCACTGATGCTCTTTTGAATGGTT  
TGGAGGTTTTCAAGTTGAGTAGGAATGGTAATCTTGCCTACATACAGAAATATGAGGATGTTCCAGAAA  
AATCGACTTCGAAAAATTTAATCCTGTGGGTAGGAATTGGAGCAGGTGTTGCATCCATTATCTTTCTTGC  
AGGATTAGTCATGGTTATTATATGGCTGTGTAGAAGGCAGAGTAGCAAAGATGACACAAAGAAAACCTC  
ACCTGGATGGAGGCCTTTATTCTTCATGCAGCTGCTGTGACCAATACTGGTAATGGTAAGGGATCTATA  
CAATATCAAATCTTGAACTCTAAGATCTGGAAGGCGGTTTACTCTAGCAGAGATTAAGGAGCTACA  
AACAACTTTGATGAAAGCTTAGTGATTGGAGTGGGAGGATTTGGTAAAGTTTTCAAAGCAGAACTCGAT  
GATGGCACCTTGCTGCAATCAAGCGAGCCAATCCTCAATCTCAGCAAGGACTGAAAGAATTTGAAACA  
GAAATCGAAATGCTTTCTAAGCTAAGGCATAGGCATTTGGTCTCCATGATAGGTTTCTGTGATGAACAAA  
ATGAAATGATTTTGGTCTATGAGTACATGGCCAATGGAECTCTCAGGAGTCATCTCTTTGGCAGTGATCT  
ACCATCCCTAAGCTGGAAGCAAAGACTAGAGGCGTGCATTGGTTCAGCTCGTGGTCTGCATTACCTTAC  
ACAGGGTCAGAGCGGGGAATTATCCATAGGGATATCAAGACAACCAACATATTGTTAGACGAGAATTTT  
GTGGCGAAAATGGCTGATTTTGGGCTGTCTAAACTGGCCCTTCTTTGGAGCATACTCATGTCAGTACAG  
CAGTGAAAGGAAGTTTTGGTTATCTGGATCCCGAGTATTTAGGCGGCAGCAGTTGACTGAGAAATCTG  
ATGTTTACTCCTTTGGGGTTGTGCTGTTTGAAGTTATATGTGCGCGCCCTGTTATAAATCCAAGCTTACCA  
AGAGATCAGATCAATCTTGCAGAATGGGCTATGCGGTTTCAACGAAAAGATCTCTTGAACCATCATT  
GACGAACAACCTCGCAGGACAATATTCCACAGAATCGTTAATGAAATTTGGAGAAATTGCTGAGAAATGT  
CTGTCAGACGAGGGAAAGTTGAGACCAACAATGGGAGAAGTCCTATGGCATCTGGAATATGTTTTGCA  
AATTCATGAGGCTTGGCTGCGGAAGAATGCAGGGGAAGACTCTGCTTCTGATATTCGTGTTCTAGAGAC  
TGTTGAGGAGAGAGGAACTGAAACTTCTGAAGACCAGACTCATGTTGAATCAAAAAACAAAGAAGAGG  
GTGAACCTGCAACAAGTGCCAGTGGCACTACAGATGCCATGGCTAATGGAGTAGATGATTTTTACAAT  
TCCTCGGTCAAACGGAAGGTGAGATCCAAAACAACAGACAGTTGATTGTAATGTCTGGACCGTTATAG  
GCCTAAATCTTTCCATTTTTGTACATGCATCTGTGAGGACTTCACGATAACCTCAATCAGCTTCGACAG  
TGCTCATTAAAGCAGAAAGAGCTTAGAATGGAGAATGTGAAGATCTTGGTAATACCTTCATGCTTGTATTC  
TTTTACTCAGATTAGATTAATCTTTTTCTGCTGAATCCTTGTGCTCAGGATTTAATGATTCTTTTATTAT  
TGTATGTAATTCATGTTTGGAGAGAATGCCACTAAGTTGATGAATTGGAATGTAATATATATTTCACTTCTA

TTTCAATGGAAAAATGAAATCTTGTTT

>PGSC0003DMG400021842 RLK with malectin domain

TTTAAACTTAATGGCTAATAAAAATAGCCATTATATGAAAATATCTATTGCATGTACTIONTAGATAATCAACAA  
TGAAATTTTACACATTTTTGGTTATCATAACCACATTTTGTCCCTTCTAAGCAAGGTATATTCATTAACAA  
ATGTTACAAATTCTTATTCTTTGTTTTGTCTTGTGGAGCTACAAGTAATGCCACAGATGCAGATGGAAG  
GATTTGGAGTCCAGATTCTACATATTTCCCTTCTTCTTCTGGTAATTCAATCACATCTAAAGCTAAATATCA  
AGACCCTTATTGATATCTGATATTCCTTATATGACTGCTAGAATTTTCAAGAATCAAACCACCTATTCCTT  
CCCTGTTTCTCCGAAATCTCGTCATTGGATTAGACTTCATTTTTATCCTTCTTCTTATGACAATTTCAATTGC  
TCTAATTCATTCTTTTCTGTAAACATTGCGGGTTTTACTCTTCTAAACAACCTTAGTGCTTCAATCACAGCA  
CAGGCACTAACACAGGCTTATATCATAAGAGAATTCACTCTTGCCCTCTCCAAACTGCTACACTTAACAT  
AACATTTACCCCTTCTCCGCGTATAATGACTCATTGCAATTTATTAATGGGATTGAGATTGTTTCAATGCC  
TGAAATATTTGAACCCGCGCCTATGGTGGGGTTCTCAGATCAGACTACGGAAACACAAGCTTCTTCTATG  
CAAATATGTTTCAAGTTAAATGTTGGTGGACAGTATATCCAGCTAATAATGACTCAGGGCTGGGGAGA  
ATATGGTATGATGACGCGCCATATTTGTTTGGTGCATCTTTTGGTATCACATCTGCAGCTAATAACAGTAT  
GAAAATTTTATATCCTTCTAATTTACCTAATTACATTGCTCCGGAGGATGTTTATAGGACAGCACGATCGA  
TGGGGCCAAATCCAGATGTTAATAGGAATTATAATCTTACTTGGATCTTCCAAGTTGATACGAATTTTAC  
TTATCTTGTGAGGTTACATTTTTGTGATTTTCAAATGAAAAGGATGAATCAGAGGGTGTTCAGATATTT  
CTTAATAATCAGACTGCTTTAGAAGAAGCTGATGTGATTGGGTGGTCTTCTGCTCAAATGTGCCAGCAT  
ACAAGGACTTTGTATTATATCAAATGTTGATGATGAAATGTGGGTAGCTTTACATCTACTGATGAAAC  
GAAGGCCGAGTTTTATGATGCAATCCTCAATGGATTAGAGATTTTTAAGATCAACGACACAACGGGGAA  
TTTGGCAGGGCCTAATCCTGTGCCATCACCACCCCTAGCAGCTACAGACACTGATTCTCAGTCAAACCA  
GCATTTGCATCAAATAAACTAGTAAGAAAGGCATAATAGTTGGTTCGGTGGCAGGAATGACAGCTGG  
ACTTAGTATTGTTGTTGTTGTACTTACTTTTTGTCAAGCGAAGGAAGAATATAAACAATGGAGGGAATAA  
GTCTAGCAGAGGTGGTTGGTTACCTATTTATAGTTCTAGGAGTACAGAACTAGAACAACTATCTCAGGT  
AAAAGCAGTGGCAGTAGTCACATTTCCAACATTGGTGGAGGCCTTTGTAGGTACTTCACCTTAGCTGAG  
ATAAACAAGGTACAAAGAATTTTGTGACGAGTCACGAGTTATTGGAGTTGGAGGATTTGGTAAAGTCTAT  
AGAGGGGAGATTGATGGAGGGACTACGGTTGCTATTAAGAGAGCAAACCTTCTTCTGAACAAGGTCTT  
CATGAGTTCCAACCTGAGATAGAATTGCTTTCAAACCTTAGACATAGACACTTAGTCTCACTGATTGGGG  
CTTGTGAAGAGAATGATGAGATGATATTAGTGTATGATTACATGGCTAATGGGACATTGAGAGAGCACC

TTTACAAGCACAACAAGCCACCCTTATCATGGAAGCAAAGGTTGGAAATTTGTATTGGTGCAGCCAGAG  
GTCTTCACTATCTTCACACTGGTGCAAGGTACACTATCATCCATAGGGATGTGAAAACACTACAAACATTTT  
GGTGGATGACAAGTGGGTGGCAAAGGTTTCTGATTTCCGGTCTCTCAAAAACGGGACCTAATCTCCAACA  
AACTCATGTTAGTACAATGGTAAAAGGAAGTTTTGGATACTTGGATCCAGAGTATTTTCAGACGACAGCA  
ACTGACAGAAAAGTCTGATGTCTACTCTTTTGGGGTTGTCCTATTTGAAGTACTGTCTGGAAGGCCAGCT  
CTAAATGCTAGTCTTCCAAAGGAACAAGTCAGTCTAGCAGATTGGGCATTACACTGCCATAGGAAAAAT  
ACTACCAAGGAACCTTATGGATCCACATATTAAGGGGGAGATAATAACAAGAATGTTTGAAGCAATTCATT  
GATACAGCAGTGAGTTGCTTGTCTGATCACGGAAGTATCGTCCTTCAATGGGTTTCAGTGCTGTGGAATC  
TTGAGTACTGCCTTCAGTTGCAAAGTGATCCTGATGAACCAAAAATGGTGGCGGAACAGAAAGCTAATG  
ATGCCTATGCTATGCATACAGAGTTGTTAACGGTTGCCGAAGAAGGTAAGGAGTCAGAGGAGCACAGC  
ACGGACGCTGTCTTCTCACAATTGTAACCACAAGGTAGATAGTTGCTTAGTTCTACCGTTGTTCTTTT  
GTTTTGTTTAGATTTTTACTGTCAGGGTTAGCAATTATGAAGAGAGTTTATAATTGACAATGAGGCTTG  
CTTAGTTTGTAGAGAACCTCCATCTCCCACCAGTAGGTTGAGTGTTCAAGTCATGTGGATGGTACATGGA  
AGTACTAATAATCCTGCTAGGCTGGGGGTGAAAAACAATACTTGTAGCATGTACTTCTGTCATTCTT  
AGTGCCTTCATTATTGCTTCCCCGCGAGTAAAGCAGGTTCAATGTTATAACTGCATTGCTTATGATTAGCA  
CAACTCTATTTTCTGAGATTGAATCTATAATGGTCTGCGTTATTATTCAAGAAAAAGTAAACAGATCAAC  
TAGTA

>PGSC0003DMG400023419 RLK with malectin domain

AAAAATTCATTACTACACACATTCACCTCAACAGACCTAAAAGTTCCAAAATCTTGAAAAACACAA  
AAACCCCATCTTCAAATCACACTTCTCATTACCTTTTTCCCAAATTTACTTTTTGTTTCATCTTGTACAC  
ATCAGGTATGGCCTTTTTTGGCTTTGTTTCAGCTCAATTTGACAAGAAAATGAGTTTTTTCCATATGGGGT  
TTTTGTTTTCAGTCTTGTAAATGTTGTATTTTTGAGTAAAATGTGTTCTTGATAAAGGGTTGTTCTTGT  
CTGCTAGCATTGTGTGTGATTTCTCAGTTTTTGGTCATTGGATTTTGTCTTTTGTCTGTTTTCTGAGCT  
GTATTTTTGTGTA AAAATGTGTTCTTGGAAAAGGGTTGTTCTTGTCTTCTGCTAGCTTTGTGTGATCTCTC  
AGTTTTTGGTCATTGGATTTTGTCTTTTGTCCCAATAGACTGTTTTTGTGTTGTATATTTGAATAAAAAT  
GGTTTCTTAAAAGGGTTGTTGTTGTTTTCTGCTAGCATTTTGTGTTTTCTCAGTTTTTTCATCATTGGGTTT  
TGCTTCTTTTACCCCAATAGACTGTTTCTTGATTAGCTGTGGTGGAAATAAATCTATAACAAGTTGAAGATG  
GAAGGGTTTTTGAATCTGATTTTGGGGTTCTGATGTGGTGTGCTACAAATTCATTATAACTGTGTC  
AAATAATGAAAATGGTTTGTCTGAACTTCATAATTCTGCTAGATTGTTTACTAAAAGTTCAGTGTATA

CTATTAGTACAAAGCAGATTGGTAGACATTGGTTGAGGTTGCATTTTTATCCTGTAAAGAATAATAAGCA  
CAACCTAAAATCAGCTGTTTTTCTGTTGTGGCTAATGGGATTACATTGCTTCATGAGTTTTCTTTTCAA  
GATTGGGGAAAAGGAACCTTTGTTGAAGGAATACGTAATCGAAATAGGTGGATCGAGTAGTTCGGGT  
GATTTAGTACTTACATTATCTCCAGTTAGTGGCTCAGTTGCATTTATCAATGGGATAGAGGTGGTCTCTAT  
GCCTGAGGGTCAGTTTGATTTAGTGTGTTGCCAATTCCAAGGGGGCCGGGTTTTGTTGTTCCGTCTCTCG  
GTTGCTTTAGAGACAGCTTATAGAGTGAATATGGGAGGTCCAAAATTGACACCAAGAAATGACACTTTG  
TGGAGGGTGTGGAATTCAGATCATACTTTCTGTTAATCCTGCTAGTGCTCGGAAGGTGAGTACGGAT  
CCGAAATCAGTCAAGTATCCAGCGGGTGAGTCAGTTGATATTGCACCGAATTGGGTGTATGCCACTGCA  
CAAGAAATGGCAGATGCCAAAGTAATAGATCAAAAGTTCAACATTACATGGACATTTCCAGTCGAAGAT  
GGATTTATTTACTTCGTTAGGATGCATTTCTGTGATTTTGTTAGTCTCTCTTAAACAATTTGATCTTCGAT  
GTGTACATCAATAACCAAAGTCTGTGGAATCATTGGATATCTCAACAAAGACAATGGCTTTGTCAGCTG  
CTTACTTTGTGGATTTTGTAGTGAATATGTCAACGGGCTCGAATAAAATTTTCGTTCAAGTTGGTCCTTCT  
AATTTGAGGATTACTCCATCCAATGCTATTCTAAATGGTTTGGAGATAATGAAAATGAGCAATCCCAGTA  
GCAGCCTTGACGGAAAATTTGTCGGATATCCAGCAATTCCGAAAGATCAAATACTAAGAGACATGTAA  
TGCTAGTAATTTTTGCTATCTTAGGAAGTTTAGCTGGTTTATTGCTCATTGCAGCGTCTCTGTTTTCTCTGTT  
TCGTTTGTTCGGTAAGCCAAAGATGGTGAAACAAAATCTTTATCATGGTTATCTTTTCAAATCATATT  
GGAATTTAGAAACCAAATCTCAGCAGGTAGTTTTGCTTCAACAACACCTTCACGGACGTTGGGGCGT  
ATCTTCGCATTCTCTGAGATTCGTGAAGCTACGAAGGACTTTGATGAGAGCTTGGTCATTGGTGTGGTG  
GCTTTGGCAAAGTTTATAAAGGAGTGCTAGAAAATGGGGTAATGGTTGCTGTAAAGAGGGGAAATAGC  
AAGTCTCAACAAGGACTTGTGAATTCAGGACAGAAATCGAGATGTTATCTAAGCTACGCCACAGACAC  
CTGTTTTCTTAATTGGCTACTGTGAGGAGCTAAATGAGATGATCCTTGTATATGAATTCATGGCAGGGC  
GACCGCTCAGAAAGCACTTATACGGATCAGATTTTCTCATCTTTTCGTGGAAACAAAGACTAGAAATTTG  
CATCGGAGCTGCAAAGGATTGCATTATCTTCACACTGGTGCAGCTGAGTGCATCATCCACCGCGATGTC  
AAGACTACCAACATTTTATTGGATGAGAATCTCACAGCAAAAGTGGCCGATTTTGGTTTATCAAATTTG  
GCCCCGATTGGATCAAATCATGTGAGCACAGCCGTGAAGGGAAGTTTTGGTTACCTCGATCCAGAGT  
ATTATCGTAGACAGCAACTGACAGAGAAGTCTGATGTCTATTCAATTTGGAGTAGTACTCATGGAAGTCCT  
ATGTGCACGGTCAGCAATCAATCCTTCACTCCCACGAGAACAAGTAAACATAGCCGAGTGGGCAATGCA  
TTGGCAAAGAAGGGACAATTGGAGCACATAATCGATCCTTATCTTGCAGGAAAAGTGAGCATTGATTC  
ACTCAGGAAATATGGTGAAACCGCGGAGAAGTGTTTGGCTGAGTATGGTGTTGAAAGACCATCGATGG

GGGACGTTCTTTGGAATCTTGAATACGTTCTTAACTTGCAAGCTGCTGCCAGACAATCTTTAGAAGATGA  
AAACAGCAATGCCATACCAGATATACCTTACTCAATTCCCCGTGTTGAGTCGGGCGAGGCTGATGAAAT  
CGACATTGTAAGCCATGGAGAATCAGATGTAACAACCTCATCTGGAGTGTTCTCTCAGATAATGAATCCA  
AAAGGAAGGTAAAGAAGAAGCTTGTGTTTGTGAAGAAAAAAAAAATTTGAAATTGTGGTTATAGTATTT  
TTTTTTTTCATACTATAAGTAGATTTATACCTTATATTATCAATCTTAGGATGAAAATCCCTTGATGCATTT  
TTATG

>PGSC0003DMG400023508 RLK with malectin domain

CAAATTGAACGTAGAACCATTTTTCTCCATTCTTAAATTAGACTTCAAATTCTTGAATGCTAAGTGCAAC  
ACAATTACACAAAGTTGACAACCTTTTTTTTTTTCTTGAAAGTTTAGTCCATTTGGTGTGTTGGGGTTGTTG  
ATATCACATATTAAGTTCATTTCAAGATTTCAAAGTTTTTTTTTTTTTTTCACTTTCTTGAAAGTTTAGTCCA  
TTTGGTGTGTTGGGGTTCTAGTGAAATCAAATTTAAGTATATTTCAAGATTGCATTTTTTGAACAATGAC  
ATAAAAATTGAGTCTTTTTTAGCTCCTCATTACAAGAAATGAAAACCATTATGGATTTTGCAATACTTCAT  
TTGTTTGTGTTTGGTATTGTCTGTCTTGTGTTTGTGATGATATGTGCCTTAGAGTTTGATCCTGTTGATAACTAT  
CTCATAAACTGTGGTTCATTTGAAAATACTACTATAGGTGATAGAGTTTTCTTAGCTGATAACTTGAATTC  
CCCTCAAAGGGTATTTGTTAATACTACTAGAGTCTATTCCATCTAGTTATAGTTCAAATCTTTATCGAA  
CTGCTAGAATTCTTAATGAGACTTCAAATTCACATTTTCAATCAAGAAACAAGGGCGCCATTGGATTG  
CCTGTATTTCTATCCGTTTTCGTATGGAAATTTCACTCTTAGTTCTGCTAAGTTCTCTGTTTCTATTAGAA  
CTTCACTTTGATCAAGAGCTTTCAATCATTGAGTGGTCCTTTAGTAAAAGAGTACACTTTGAACATTA  
GTACTAGTCTTGTTCTTACGTTTACGCCTTTTTCTAGCTCGTTTGCATTTGTAAATGCGTTGGAAATCATT  
CACTTCTGATGAGCTCATTCTGTTGGTATTGGAACATAGTTTTGAGGGAACAAGCTTTAGAAACAGT  
TGTGAGGGTGAATATGGGGAATGTTGCAGTGTGCTCGAAATGATACCTCGTGGCGATCTTGGGAATC  
TGATGAAAGATACTTAACAAGCAGGAATCTTTTTCAGTTTGTATCGAGGACACAAGCTGTGAATTACACA  
CGAGGAGGGACTTCTAGGAATATTGCCCTCCATCGGTGTATGGGACTGCTACGAGGCTGCAAGTGGAT  
GATCCCGCTGTTTCTATAAACATCACGTGGTTGTTTGTGTTGATCCTGGCTTCGATTATTTATCAGGTT  
CCACTTTTGTGACATAGTAACTGGCTACAATGATCCAAACAGAGTAGGTGGCGACCATGAACTATTATTC  
AATGTTTACATTAATTCCCAATTTGCTTCGAGGGACCTTGATCTTAAAAACAAGACATCAAATGTCCTTGG  
TTCTCCGTATTACATGGATGTTTTTACAAGGTTAGAGAACATTCACAGCATTGGCATTAGCATTGGTCCA  
GCAGGTATACGTAATGCATATCCGGATGGCCTCCTGAATGGTCTCGAGATCATGAAAATAAGCAATGTC  
AAGGGAAGTCTTGATGCCTCAGACGCTGAGATTCAGTCCTCGGTGCCTACTTCAAAGAAGACTAAAACA



TGGTTGATCATTGGATCAACTATTGGAGGATCGACTATTTGCATCGTTTTGGTTGTGGTGTCTATTCTCTT  
TTGCAGAAGTAGAATACAGACAGCTGTTGATGACTCAACAGAGGAAAATCATACAGCAGTTGGAGCTA  
AAGAAGCATCTATCATTCCAAGTCGAATATGGGGTACCTGTTCCCTCTGTAGCAGTTCAGGAAGCAAC  
CGATCACTTCAGTGAAAGCATGATCATAGGCTTTGGTGGTTTTGGAAAAGTTTACAAGGGAATTTTGAA  
GGATAACACAAAGGTGGCAGTGAAGAGAGGATTTTCATCAATCACAAACAAGGTCTTGCCGAGTTCATGAC  
TGAAGTCGAAATGCTGTCTCAGTTTAGACATCGCCATTTGGTCTCACTGATCGGTTACTGTAATGAAAAG  
AATGAGATGATAATCATTTACGAGTACATGGAGAATGGAACCTTAAGGATCATCTCTATGGCTCGGAC  
CTTCCGAATTTGAATTGGACACAAAGGCTTGAAATTTGCATAGGATCAGCAAAGGACTTCACTATCTGC  
ATACTGGTTCTCATAAGGCAATCATACACCGAGATGTCAAGTCCTCGAATATACTTCTAGATGAAAATCT  
CCAGGCTAAAGTTTCTGATTTTGGACTATCGAAAATTGGTCCAGAAATTGATCAAACACATGTTAGTACT  
GCAGTGAAGGAAGTTTTGGATATCTTGATCCAGAGTATTTGACAAGGCAACAACCTAACCGATAAATCT  
GATGTTTATTCCTTTGGTGTGTTATGTTTGAAGTCCTCTGTGGAAGGCCGTTATCAATCCCTCTCTCC  
AGAGAATCAGTAAACTTGGTTGAATATGTGATGAAATGTTTAAAGTACAGGAGAAGCGGAGGCAATCAT  
TGATCCTAGGATTGCACATGAGATTACACCAGAATCCCTGATGAAGTTTGTAGAGACTGCTGAGAAATG  
CTTGGCTGAATATGGTGCAGACCGGCCAACTATGGGAGAAGTTTTGTGGAACCTGGAATATGCATTGAA  
ACTTCAAGGGAAAGACGAAAAACAACAAGAGAACGAGATATCGGATAATCAGTTAGATAACAGTG  
TCTTAAGTACAGAATACAGCATGGGGAGTATGGCTGATCTTGCTGGTGTTCATGAGCAAAGTTTTTTG  
CCAAATGGTAAAATCTGAAAACAAAACACTCATGTGATATATGTTAGGATAAAATGCAGGTCCATCTAAT  
GAACTCTGCCTTTGGATTGTATATTTGTATTCTTTTTCTTTAGATTTCTATGTTATAACAGATACTTGTGT  
GTTTCAATTGATTTGAAGCCGCGTTATACTATACATACATAAGTTTTTCATTAGGTTTTTTTTTACCGAGTT  
GTTCATAAGCACGATAGAGCAAT

>PGSC0003DMG400024665 RLK with malectin domain

ATGTATAGGTTTCTTGTTTTCAAACCAGGCAGACATTGGGTGCGTTTGTACTTTTATCCTATTCAACATCC  
AAATTATAATCTAGCAAGTGCTATGTTTACTGTTACTTCTGATAAATATTGTTTTACTTCATGATTTCTCAGT  
GAAAGATACTAGTAAAGTTGTGTTCAAAGAATACCTTATTAATATTACTTCATCTCAATTCACTCTCAAT  
TTTACCTTTGAAGAGATCTTTTGCTTTTATCAATGCCATTGAGTTTGTGTCAGCACCAGATGATCTCATTC  
CTGATTCAGCTGCTGCAGTTTCCCCTGTTGGTGATTTTAAATGGCCTGTCTCAATTCGCGTTTGAAGTAAGT  
TATCGGTTAAATGTTGGAGGGCCAATTGTCACACCAAAAAATGATACATTGTGGAGGACATGGTTGCCT  
GATAATAAGTACATGGCATTTCCTGAAGGGGCTCAGAATGTGTCGGTTCCTCTAACGACAATCGTTTATC

CAGATGGAGGGGCGACACCTTTGATTGCCCGAGTTCAGTTTATGCTACGGCTGATATGATGGCAGATT  
CTGGGGTGCCCAACTCGAATTTCAAGCTAACGTGGGAGATGGACGTTGATTTCGAGCTTTTCTACTTTAT  
CAGAATGCATTTCTGTGATATTGTGAGCAAAGGCCTAAATGAGTTGTACTTCAATGTCTATGTTAATGAA  
GTGGTGGGGTCTCTAGTCTTGACCTTTCAACACTGACTTCAGAGTTGGCCACCCCTTATTACAAAGACT  
TTGTGCTCAATGCCACAGCCATCACCAACGGTTCGATCATAGTGCAGGTGGGACCCGCGTCAAACGTCC  
AGTCTATCCTCCCAAATGCCATCCTCAATGGATTGGAGGTCATGAAGATGAGCAACATGGAGGGAAGCT  
TGGATGGGCTGTTCTCATCTGGTGGACGGCATGGTGTAAATGCCAAGATCACGCGGAATGAGAATTGCTG  
CAGCTTTTGGATTGGCAATGGGGGTTACAGCATTAGTATTGCTTTTGGATTGGGCATTGTTTCGTTGGCGAA  
GGAAGCCAACAAAGGGTTGGGAGAAGCAGAAGACATTCTTTCATGGCTTCCTCTCAATGCTAGTTACT  
GCAGCTTCATGTCAAGCAAGAGCAAGACTAGTTGTTCAACAATCATATCCTCTGGCCTCAACTTTGGCCG  
CGTCTTTACTTTCAATGAAATCAAGAAAACAACAAAAACTTTGATGAAAAAGCAGTCATTGGTGTGGGA  
GGCTTTGGAAAAGTGTATCTTGGTGTTCGGAAGATGGAACAAAAGTACTATAAAGCGAGGAAATCCA  
TCATCCTCACAGGGCATCAACGAATTCCTAACAGAAATTGAGTTGCTATCCAAGCTTAGGCATCGACATC  
TTGTTTCACTCATTGGTTATTGTGATGAACAATCAGAAATGATTCTAGTCTATGAGTACATGTCTAATGGT  
CCTTTGCGTGACCACATTTATGGTTCCACTTTGCCAACTCTGACATGGAAACAAAGGCTCGAAATCTGCA  
TAGGAGCTGCTCGAGGACTGCACTACCTTCACACTGGTTCAACTCAGGGAATAATACATCGCGATATAA  
AAACTACAAACATCCTCCTTGATGAGGACTTTGTCGCAAAGATGGCTGATTTTGGCTTGTCAAAAACCGG  
TCCTTCACTGGAGCAAACACATGTTAGCACAGCAGTGAAGGGTAGTTTTGGTTACCTTGATCCTGAATAC  
TTCAGAAGACAACAATAACAGAAAAATCTGATGTGTACTCATTCCGGGTAGTCTTTTTGAGGTAATAT  
GTGCAAGACCTGCTCTTGATCCTGCATTGCCAAGAGAACAAGTGAATTTGGCAGAGTGGGCAATGCAGC  
AACACAGAAAGGGCACTCTGGAGAAGATCATAGACCCTCATATTGCAGGAACCATTAGCCCTGAGGCGT  
TAAGGAAATACGTGGAAGCTGCAGAGAAATGCTTGGCAGAATATGGGGTTGATAGGCCTGCAATGGGA  
GATGTTTTGTGGAACCTTAGAATATGCCTTGACGCTTGAAGTGCATCCCCGAGTAGTGTCCAGTGAAG  
AACGAGAACGAGAAAGAGAATGAGAATGAAAATCCAAGCCAAGTTCTTCAGAACAGCCTGGAACGAA  
TTCGAAGAGCAATAAAGAAGCTCAGCTCATTGACATTAATGATGATTCTGGAGTGGTGGTTGGTTCTCCT  
ATGTTCTTAGAAGTTTTCAAGGAAGATAA

>PGSC0003DMG400025030 RLK with malectin domain

AGCTAGCTGTGGAGTAGCCACTGAAAAAGCTCTTGTTGTGATTGTGTTTAGAATTGGGTATTTCTTGTTT  
CTTTCTTCCTTTTGGTTCACACCCATGTCAAAGATTCAATGTTTCATATCATAATGGAATTGCACTAAAA



ATCCCTGATCAAGCAGTGGCTGTATCTCCCGTAGCACCTTTCAGTGGCCTTTCTGGACTAGCCCTCGAAA  
CTGTTTATCGTCTAAACATGGGTGGTCCTCATCTCACTGCTCTGAATGACACCTTGGGAAGAACGTGGGA  
GAATGATGTGAAGTACCTTCACGTCAACAGCTCTGCGGTGAGTGTTCAGTTAGCCCTTCAAGCATAAAG  
TATCCGGCTACTATGACTCCTGAAATAGCACCAAATTGGGTTTACGCTACTGCTGAAACTATGGGAGATG  
CAAATGTACCTAATGTGAATTTCAATATCACTTGGGTGTTCCCTGTTGATCCGAACTTCATGTACTTCATC  
CGAGTACATTTTTGTGATATTGTGAGCGAATCTTTGAATAGTCTTCTGTTCAACCTATATGTTAATAATGA  
TGCTGCTCTACTGGACCTAGACTTGTCAAACCTAGCTGGAAATTTGGATGTACCGTTATAACAAGGATTC  
GTCTCCAACCTCCTCAGTAAACTCAAGTATTCTGACAGTGAGTGTGGTCCAGATACGAGTGCGGATTGG  
ATAAATGCAATTATGAATGGACTGGAAATCATGAAGATTAGCAATGAAGCTAGAAGCTTGAGTGGGGT  
TCAATCTGTTGAGACTCTCTTTGTGTTGCCTCACAAAAGAAAAAGATAGGTATCATTCTTGGTTCTGCCT  
TAGGAGCATCTGCTGTTTTGGCGCTTATTGCGTTGTGTTGTTGCTTTTTATAGCTCGAAGATCAAAGACT  
TCCAACCAAGGACACTCATGGATTCCGTCCTTGATGGGAACTCTTAACTTTGACGAAAACAACAGTTT  
CTCGGGGAACAGCAAGCTGCATCTCCTTGGCTTACCGAATGTTGGACGATTCTTTAGTTTCCAAGAAAT  
AATGGATGCAACTAACAAATTCGACGAGAAGTCTTCTTGGTGTGGTGGTTTTCGGTAGGGTCTATAA  
AGGAACAATGGAAGATGGAACTAACTTGCTGTCAAAGAGGAAACACAGGATCTGAACAAGGTCTAG  
CTGAATTTCAAACCTGAGATTGAAATGTTGTCAAACCTTCGCCACCGTCACCTCGTGTCTTTGATTGGTTAT  
TGCGATGAGAGGTCGGAAATGATTCTTGTATGAATACATGGCAAATGGTCCTCTCAGAAGTCATCTTT  
ATGGAACAGATCTCCACCTCTCTCATGGAAGCAGCGTCTTGAGATTTGTATCGGTGCTGCAAGGGGCC  
TGCATTACCTTCATACAGGTGCAACTCAGAGCATCATTACCGCGATGTCAAACCACCAACATACTTTT  
GGATGATAACTTTGTGGCTAAAGTTGCTGACTTTGGTCTTTCAAAGCCGGACCAGCTCTTGATCAAACA  
CATGTAAGTACTGCCGTTAAGGGTAGCTTTGGGTACCTTGATCCTGAATACTTCCGGAGGCAGCAGCTG  
ACAGAGAAATCAGATGTCTACTCATTTGGTGTGCTAATGGAAGTTCTCTGCACCAGACCAGCATTGA  
ATCCGGTCCTTCTCGTGAGCAAGTTAATATAGCCGAGTGGGCTATGATTTGGCAAAGAAAGGCATGT  
TGGATCGGATAATGGACCAGAATCTCAAGGGGCAAGTTAACCAGCCTCCCTGAAAAGTTCCGGTGAG  
ACAGCTGAAAAGTGTGGCTGAGTACGGAGTTGATAGACCTTCAATGGGAGATGTGTTATGGAATCTA  
GAATACGCTCTTCAGCTTGAAGAAGCCTCATCAGCCTTGACAGAGCCTGATGATAACAGTACAAACCATA  
TCCCTGGCATAACCATTAACACCAGTTGAACCATTGACAACAGTGTTAGCAATATCCAAGGTATAGTTAA  
CTCAGGAACAGATGATGATGCAGGGGATGCTGCTACTAGTTCGGTTTTCTCTCAGCTGGTAAATCCGCG  
GGGAAGATGAGAAGAGATACTCCCTCATATACGTGCTTGAGTATAGTATTGAATCAAATTTTCCCTACTA

AAATGTTTGAGTGTGTATTGTATATGATTGATGTACCTAGCACATACGATGAAATTCATCGTTCAAATACT  
GCAAGTTGTAGTATTATTTCCATTGTTAGGTGATACATTGCCCTCTTTATCTGATAGATAGTCATGAATAT  
GTATTTGTAAAAGCACTATAATTGTATCCATTCATAGATAATAAATATTAAGCATATGTTGC

>PGSC0003DMG400025799 RLK with malectin domain

CTTTCTCCCCTTTACCAGGAGCAACCAGGCCTCTGCCTTATTCTGCCAAATTATTATTTCCCAAAAAAAAA  
AATGTCCACTTCCATTTTCTCCTTTGGCTTGTTAGCATCCCTCTAGCAATTCATGCCGCCATTAATGTTAA  
TCAACCTCAAGGTAAATTAATTAACATTGCTCGCGTGCCTTCTGTGAATCAACTGAACCTATTAATAATGT  
ATACATATAATAAGATGGCGCTCATTATATAAATGTTGTTTCAGGTTTCCTCTTAAATTGTGGTGGAAATG  
AAAAAATCAAACAAGATTCACTTACATATGGACCGGATGATAGGTTTCATAAAAAACAGGGAATAAAACAG  
AGATAAAACAAGAAGGTTTAGTGCCATTATTGTCCTCTGTTTCGTTATTTCCCGGATGATGCTGAAGAGAA  
ATTTTGTTATAATTTCCAGTGAACAAAGGGAGGAAATTGATTATCAAACTATATATTATTACGGAGGT  
TTTGATGGAGGCACAGAACCACCAATTTTGATCAAATCATTGATGGTACAAAGTGAATATTAATACAT  
CGGCGGATTATGCAGATGGCCTTAGCTCTTATTATGAGGTTGTTATGGTTGCTCATAATAAGGTTTTGAG  
TATTTGTCTTGCTAAAAATGAGCACACAACCTCCAACCCTTTTATCTCAGCAATTGAAGTGTGTATCTTG  
ATGATTCCCTTTATAATACTACTGATTTTGGGAAATATGCATTGGTTACTCTTGCTCGTCATAGCTTTGGA  
TCTCATGATAAACTAACGTATGTATGCCTTTTTTTTTTTTACCTCTTCTATCTATTTCTTTGGTATGAGTAA  
ATATGCGTACATTCCATCCTTCCAGACCCACCTGGAGGATCACATTGGCTTTGTGATATATAGTTTTATT  
CTTCTTTAAATGTATTTTTGTTACGTGCATATTAAGTACATTTGATTGATGATGTTGAACTAGCTTTCCAG  
ATGACAAATACAATCGACATTGGGATCCATTAGTAGACGACAATCCAGTTGTAACAAGCCAAGCCTCGG  
TAACTCCAACAACATTTTGAATATGCCACCAGAGAAGGTGTTTGAAAATTCAGTGACAGCCAGTAGAG  
GGAAGTCTCTTGTTGTTAAATTGGCCAAATTTTCCACTTCTAAGACTTATTACTACCTTGCTTTGACTTCC  
AAGATAACAGAACCCCAAGTCCGTATAGCTGGAGAGTTTTTGATGTCTTAGTGAATGGAGTGAAATTCT  
TTAGCAACCTTAATGCCACAACCAGTGGTGTAAACCGTTTATAGCACAGCTTGGCCTCTTGAAGGGGAGA  
CGAAGATCACATTGGTTCCCGCTAATACTAGTCCTGTTGGTCCGGTAATTGCTGCTGGTGAACCTTCCA  
ACTTTTGCCTCTTGCTGGAAGAACTCTCACTAGAGATGGTAATGGTTCTTTTTCTGCAATGTTTTCTAGGC  
AGTCTTAACTAGTCAGTGACGGATCCAAAATTCTAAGTTGATAGTCAGTAAGATAGTATGTCTAACTTAT  
CTGTCAATTTAGGCGTTAGCTTCTCTAGTAACACATTTTTGTTGCACTTAAACAGTATCAGTGATGAACGA  
TTTAACAAAAAGCTTTAACAAAAAACCTCAAGATTGGCATGGTGTATCCATGCCTTCCGAAGGACAAGTCA  
TGGAGTGGAGTAATATGTTCTTCTGGCATGAACACACGAATCATCTCCCTGTAAGTTTAATATTTCTGATT

TGATCCACGGTTAATATTAGATCAACGATATAACCATTTTTTTGATGCAACATTTGTGATCTTGGTTATGTT  
TTTCAATAAAGGAATTTGACGAATGCTGGAATTTCTGGATCATTGCCACCAAGCATATCTAAATTAAC TG  
CACTCAGTCATCTGTAAGCTATCCTTTTATCATATTACATTGCTTGGTTTTGTTATCTATCGATGGAATATA  
TATACTAATTGTGAATGACTCTTAAAGGTGGCTTGGAAAGCAATGAACTGACAGGTCAAATACCTGATTTA  
AGCTCATTGCAGAATTTAGAACTCTGTAAGTCCCATTGTTGTTTTCTTCTACTCTCTTTTTCTAATG  
ACCAAGAAATCTCAGAGAGTCAACTAGCTCATTGTTCCGGTAGATAATGAGCCTGCCTCTCTACCCTTCTC  
CACTTAATAATCAATTTTTTTCTCGAAAAGGAAAAAACACGAGATTTTTCTTCTCTACTTTACTCTAAT  
TCTTATCCTAATTTGTATTTCTAACAAATATATTCATCTCCCCTGAAATGGAAAAGGCACCTTGGAGAACAA  
CCAGTTGGAAGGATCAATCCCTGAATCGTTAGGAAAACCTAACTTCGAGAAGTGTATGCTGCTTTG  
TTTTTTTTATCTACTTAACTCAGTTTTTGATTTGTATATTTGATGATTAATGTTCAATTTCTGTAAGTCCATA  
ACTGAAATTTCTGGTTTTATAGTTTTCTCCAAAACAACCGTCTCAAAGGGAGTGTCCAGGAAGCCTAAG  
AAACAAGAATGGCATAAACCTTAAGTAAGCAATCTGTAAGCTTGAATTGAAACATGTCACTATTTCCGAT  
TTGATACAACTTCTGATCCTATTGATATTATACAAATATATGTTGTTTAGGGTGTCAAGTTAGGGACTGG  
AGTAACAAGAGAATTAATGAAGAACTACCAGAACTTGCTACATACTTCTGAAAGTGGACAGAGTTATT  
CGGGACCTTATATGAGAAACACAAGTTATAAGATGGAATGAAGGGATTCGGAAGAAGAGCTTTTTTAGT  
CTTGGTGTACTTTGGTCTTTGTGTATAGCATATCAACATTATGACATCTAATACTTAAAAACAAAATAAT  
TAGCAAAGTAAAGGTGATTTGTACATCAGTCATGACTAGTAATCATTTAATAGAAGATAGATGTAACCA  
CGTTTTTTTTTATTATTCAAATGAAAGATATGTATAAGCAATTCACAAAACAGTGTACATGCATGCAAGA  
TTTGATTAACACTATTTTACATTTAGTAACAGAAGAAAATTTAGAGCTACAGAGTAAGCATTACTGTGAA  
ATTATATCGTTACACAGTAGTTTTTGCAATAACACACATTAATTAGAAAAGTGAATCAAGCGATACATAA  
CAGCAACAGTCACTAAAGAAAACAAGAGAGGAGAACCAGAATTGCTGCAAACCTGCATTTTATATACA  
AACAGTGGATACCAAAGATCGACCAGTTGATTAAGAACTGTGGAACCTCAAACCTAGTTATATTTGATCTG  
TTGTCAATTTAGACATCCACATATCTTTTACATTGCATAGACAATCTCTCCACTGCTATCGATATCGAGGT  
CAGGATCACTCTCAAATCTTCTTCCATGTCATCGTCAATGTCCAAGCTTCCAGTGAGGTAATGATTAAG  
GCTGTTGGTCCCAGCAGGAATGGTGGCCTCAGTTATTATCTGCATGATTTTCGTCAATGCTCTGCATA  
CGTTGATCTGGCTCCTCAAACCTGGTTGTTGTAGTATTATCCATGAGATCTGCAGGTAGGTTCTTCAAGA  
ACCACTCATGGTTCTTGATCTCGGGGATTGATATCCTCTGTGCAATGCAAAAATAAAGCATGATGAAAG  
AAAGAAACCTCACATAAGAGAAATTTTCTAACAAAAGTCATTGAACTCCAGAACACTTGAGTATAAGATT  
TTTCTAACCAAGTCAGGATTGAAGTTCAAATAGTTATGAGCAATGCAACACAGTGTTACAACACCACAAC

CGACAATTACTAGAAAGACCTTAAACATATTGAGACAGAAGATGACCAAAGAAAATATGAAGAAAGAA  
CACTGAAATTATTTGTGGAAAAGATTACCTTTGCAGGATCTGCAACAAAAATCCTTGATATTAGATGACG  
ACATTCAGGAGAGATATGTACATAATCAGGAATTGAATACTGTACGTTCAAGATTCGCTGCATAACAGG  
AAATGATTTGAGTCAAATAAGACAGATTATGAGGATTTTGCCTAACAATATGCATAAGAAGTTACCTGT  
ATTGTCTCCGAAAATTTTAGGTTCTCTGGGTCTTCAAAGGGTATGCACCCACCAGCATGACATACA  
AAGTCACTCCACAAGACCAGACATCTGCAATCTGC

>PGSC0003DMG400026325 RLK with malectin domain

TAGAAAATGTGTTACGAGCCGCCACTTTTCTTTGTTTACACAGTATTTTGAACAGCTCTCCTTGACATTC  
ACATTTTGTCTTGCTTGAAAAGAATTCCTCACATCTTATTGTTAAAAAAAATAACAGAGTACAATAATT  
CTCTCATTCTTCTCCCATGAGAAGTTGTAAAGTTGTTGTTGGGTTTTTCATCCCTTGTTTCTGTATCATCTA  
TTTATCAGGTGCTTTCTCCCACAAGATAACTACTTGATAAACTGTGGTTCAAATACAGATGTCTTAGTTG  
ATAACAGACTCTTCTTGCTGACTCTAATTCAATTTATACCTCTCAAGGTAAGTCTGTTGTCTTTGAAGAA  
AATACAAACCCATCTTCCAATTTATCTTTCCTTTATTCTAGTGCTAGGGTTTTCAATGATGCTTCAAAGTAT  
GTGTTCAATATCAACAAGATTGGGACCCATTTCTGCGACTTCATTTCTCTCCCTTCACTTCTCACAATTAT  
GATCTCAGAAAAGCAATTTTCAGTTTTTCTGCAAATGGGGTTTTGCTTTTTAGTGTTAATACTACTATTAC  
TAATAGTGTGGTTAGAGAGTTCATATTGATGGTGGATAAGTTTGAACCTGAAATTAACCTCACACCTAAT  
CCTTATGAATCCAGTTTTGCTTTTGTAAATGCAATTGAAGTGTTTTCAGCTCCGGATGATTCATAATTGG  
TGATGGGGCTAAATCAGTTGGTCCCAAAGGAATTCGGGAGTTAATCAGAATATGACGTTACAAACATT  
AGAGACTGTTTCATAGGATTAATGTTGGAGGGTTAAAGTTAACTCCTTTAATGATACTCTCTGGAGAAGT  
TGGATTACAGATGAAGATTTTCTCATTTTGAATATGCTGCTAAAATTGCAAGAACTTCTCATGTTCCCAA  
GTATCAAAGGGTGGTGCTACAAGGGAAATTGCTCCTGATAGTGTCTATATGACAGCACAGCAGATGAA  
TACGGATAATGTAACACTACAGATTTCAAATTTAATATCACATGGAACCTTCTGTGCTATTAAAGATGCTT  
CCCACTTTGTTGCTTGCATTTCTGTGATATTGTTAGTTTGTACCTGGACAGTTGACTTTAATGTATATC  
TCAATGGCTTCACAGCATACAAAGACCTTGATTTATCTTCGCTTACATTCCGTGAGCTTGCTACACCATAT  
TACATAGATTTTGTGGTATACTCAGGTAGTTCAGGCGTTGTGCAAGTAAGCATCGATCCTTCTAACTTAA  
GTAGTTCAATGAGGAAGAATGCCATTCTGAATGGTGTGAGATTATGAAAATGGTCAATTTTGTGGCTTC  
CCGGACAGGTTCTAACAAGAGAAATGTTTGGGTTATAGTGAGTTCTGTTCTTGGAAAGTTTTGTTCTGCTG  
ACTGTGGTGATGATTCTTGCTGCTTTGCTATTCTTTGTCTGCAGAAAGAAAAAGCTAAAATCAAAGCCCT  
CAGAAAGTGCTGGATGGACGCCTTTACGTGATATGGAAGTAGTTCATGGTACATTGTCTGATGGGA

CTTCACCTGGACCAAATGGATATCTAGGCCAGAGGATTCCCTTTGCCGAAATACAATTGGCTACTAATAA  
TTTTGATAAGAGTTTGCTAGTCGGTTCTGGTGGCTTTGGGATGGTATACAAAGGTATTCTTGGAGACAAC  
AGAAAGGTTGCTATAAAGAGAGGTGTGCCAGGTTCCAGGCAGGGCCTACCTGAATTCAGACTGAAAT  
CACTGTTCTTTCCAAGATTCGCCACCACCATCTTGTTTCACTTGTAGGTTATTGTGAAGAACAGTCTGAGA  
TGATACTTGTTTACGAGTATATGGAGAAGGGACCTCTTAAGAGGCATTTGTATGGTCCAGGCATATCACC  
CTTATCTTGAAGAAAAGGCTTGAGATATGCATAGGTGCTGCAAGAGGTCTCCACTACCTTCATACAGG  
TTTCGCTCAAGGAATCATCCATCGTGACATCAAGTCAACTAACATCCTCCTTGATGAAAATTGTGTTGCTA  
AGGTTGCTGATTCGGTCTCTCAAGGACAGGCCCTTGCTTAAATGAGACCCATGTCAGCACTGGTGTA  
AGGAAGTTTTGGCTACCTTGATCCGGAATATTTTCGGAGGCAACAGCTTACTGACAAGTCAGATGTTTAC  
TCGTTCCGGAGTTGTTCTATTTGAAGTCTTATGTGCTAGACCTGCAATTGATCCTCTGCTTACACGAGAGCA  
AGTTAATTTGGCTGAATGGGCTATGCAGTGGCAGAAGGATGGACAACACTAGACAAGATTGTTGATCCCCA  
TATCAGAGGCCAGATAAAGCTAAACTGTTTGAGGAAGTTCGGGGAGACTGCCGAAAAATGTTTGGCTG  
ATTATGGAATTGATAGGCCAACAATGGGTGACGTATTGTGGAACCTTGAATATGCATTCCAGCTTCAAG  
AATCTGGAACACTTGGAGAAGTGCCTGAGATTTCCAATGAGCTTCCAGTGCCATTGCCAGAGGGTCTCC  
ACAATGAGGTGTATAATGGTGATGGGGCTTCAGATATATCGACAAGCAAGGTATTTTACAATTGATGA  
CTAATGAAGGAAGATAACTAGTCTACAGTATAGTGCACCATCAAATCATTGTTCAACAGTTTACAGGTAT  
CAATGTTGATTTTGGTTCACTTAAACATTTTCTTTTTACGTTTTTCTTAATTGGCAGAGCCATCATATACTCT  
TTGAACTAATACTATAAAAAGTGTGTATCATGCAATAACCTGTCCTATGATGTAATCCTTGTCATGTTCA  
TGCTCCTAACAAAAGAAACATAGCGCTGGATTGATGAACATCTATAAGCAGAAATGTTCTTGCGTACCAA  
ATCCATCATAGTCTGTTTCATGCTTTCTATTACCTCAAATCCCCTAATGCCTATCAAATAAGGGTCCCTACCG  
ATCAATGACCATGGTGTCTAAGGTGTGATCTTGTACCCATAGTGCAGTACACTGAACAGCAATCCAAACA  
ACCTGCCCTCAGAAAAAATAAGTGACCCCTTTGTATGATATTAGTCGGTTTCTATGTTTTTGGATGGTT  
TAGGACAAAGATATCCCCGAACTATCGTAAATGACATGCAGATACCATCTGATATACTTTTGGGACATTG  
GTGCTCCTGCCATCCAAAACTAAAGCATATATGCCCTTCACTCTAACAGAAGACTAAATAGGAACACGT  
GACGCTATCTTATCTGTGATCCGATATTTAATAAATGTCGGGATGGTGGATAAAATTATGACACGTGAA  
AGTCCGTTAGTATAAAGAGTATATATGCTCTAGTTTTGGACGGTAGAGGCACCAATATCCTAAAAGTATG  
ACGGAGGGTATCTGCATACCATTTACGATAGTTGGGGGTATATTTGTCCTTTTTCCCTTTTAAATATTATA  
GACATCTTACTACATTTAATGCCAAACACATACACAATCCCTCTAACTTGTTCTCATTTTTTATTTTGGCA  
CTCCATCTTAGCATTGTTCCATTTTAACCGTTACACTCTATTTTTTACTTACCATTTTAAACACGAAATACTAT



TTTTATGATTTGTTTATTTTTATATATGTTCTTCAATTGCATTTTCTTATTTTAAAAATCGGCATGTGTCAGT  
TAATTTTAGTAAAAATTTAAAATTAACGAACAAACATTGATTCTTTTTGAGAGTTTTTTTGTATATTTTGT  
GTGAAAAATAACCGACGAAATGTGTTGGTTTTCTTCTTAAAAAATTATCGACATCCCGACTCAGTCGAG  
TTTTAACATTTATTTAGTAGTGTATTAGCAAAGAACATGACTCTTTTTTACTCGTATTGAAGATGGATT  
TTTGTTATTCGTATTCAGTTATATTAATAAATAAAGCGAGTATTTGCATCAAATTCAAATAGGCTAAATG  
ATAAGAAACAAATGAATATGTAGTATTATTTAATTTAATTGAATGTTTAAGAAAGAAAATCAAAAAAAT  
TTGTCGATTTATTTCCATGCAAAAATATAGAGAAAAAATCTCAAAAAATAATTTTTTATTTCAAAAAA  
TCTATGTTCAATTCGTTAATTTTTAATATTTTATTTACGAAAATTAGCAGACACGTCAAATTTTAAATAAAA  
AACTGCAATTGAAGAACAAAAATAATAAATAAATAAAAAAACCCTGTTTGAATGGTACATAAAAAATG  
TAATTTAAAGGTTAAAATGAAATAAATAAAGTTGGAGTGTCAAATATAAATAAAGGAAAAGTTTGAG  
GGATTGTGTATGTGTTTGACCAGCAATTAACCATCATTTTTTACTCTTGTGCAGTTAACTCATTAAAGC  
AGTTCAGACCAAGAGTTGGTTTTACGATGAGTTGGGCCTAACTAAATTTACATTTACCTCCACTATGTTA  
TTTTCTTTGTAATTGTGGTATGAATATCTTAGCTTGTGACACTAGTGAATATCTTAAGCGTAATATAAAT  
CTTTAAACAAGGAAAAATGACCAAGAATATCCCC

>PGSC0003DMG400028407 RLK with malectin domain

ATATATGTAGGCCATACACAAAAGATAAATGTGACCATTATTGCCATAATAATCTAAAATGTAAGTTATT  
TTTTACCAAGCTGTAGTATTCGTAATGTTTTCTTGGCTTCTGCTTATTTGCCAAAATTTAAATGGCAAAATC  
AATATTTTTTTGTTGTAGAACAATGATTAAGGAACAAACGTGTGTTGCACGTTCTCAGAACTAGTATATA  
TATAAACACAAGTATCTCGTATCAAAAGTTGTCTCAATTAAGGAATGACAGTACTTTTCTCTCACACAG  
ATGATGAATTGTTTATCAACTGTGGTGGCAAGGAAGTTACTGTAATGGCAATCACTACTCTGCTGATCA  
GAACCCCAATGGATCATCAACGTTTTCTCGCAATGAAACAGGAGGTTGGGGTTATAGTAGCATGGGTCT  
TACCAAGAGTTTGGATAATCGACCTGAATCATTATAAATCAAGGATACATGTAATCTTTCCAATACTGCA  
GCACTTCTGGTTGAAACAGCCCGTGTAGCCCTGATCTCTCTCAAGTACTATGGATTTTGTCTCCAATGG  
AACTACACAGTCCAATATATTTTGTGAGATAGGCTCAAGTAAAAACAAGCCTATCCCATCACACCT  
AAACGAGTTTTTGTATTTGACATCCAGGTATTATCTAGGAATGACGCAAGTCATTTTCTATATATTAAGTT  
TTCCATGAGGAAGTCATATCTAGAAAAATATTTTCCGAGATCAATTTATGGTGTTAGGTTAAATAACCAA  
AATGAAAAATTTATGGAGTTTGGTACTAAAAAGGGCTTAGTTATCAAGAAAAACAACATTTTCCATCA  
AAAGATAGAAAAAGACTTCCTTCACTTGTGGATGGAAATCATTTTCTTATATAACTTTTCTCAATTTTTACT  
TGCTTCAAGTAACACTTAGATATCATTATTAATAAAAAAATTTACTCAAAGTTGCGTCAAACACTCCCCT

ATATATTATCATTGATCTATAAAGAGTGTTCCGGTGTGGCAATTTTCCATTGAAAATAATTTCTGAAAAAT  
GCTTTTTGAAAAAAAAGAAAGAAATTATATACAAAAATTGATTGAAACAGTAACAAATGGGAGAGTGT  
TTTGATGAAAATTTTCGAGTACTAAAGATTAATTAGGATGTGTAACTTTTTGGAGCCAGTAATATTAAGTT  
AAAAAGTTCTATAGAAAATTGACTTCTGTCCATAAGTGAGGGAAGTCCTATTTCTCATTTTGAAGGGAAA  
TGTTTTCTACCTTCTGGTAACCAAACAACAGAATCCGTCATATCAAACACACCCTAACATGTATATATTTT  
CCACTACAACCAAACACCATAAACTATTTTTTCCAGAAAAATATTTGTCATGGAGAACGACTTCTGTTATA  
CCAAATAGAATTGTAAAGGTATCATCTTTGTAGTTCTTCTTTGAAAAGCTGTCATTGTAGGGGGAGAATG  
TACGGAAGAACTACAATATAGAAGCAGAAAAAGAGAATGATGATGGGGATAAAATGGTGGCACATAAT  
ACTTCTATAAAATCCTATCTTGAAATTCCTTGTACTGGTCTGGTAATGGCTCGGCCAACTACGGTCCCCT  
CATTTCAGCTATTTCTGTAACCAAAGGTATGCTTTCTTTATCTGGTGTACTGTTAGTCATATTCTTCAGTGT  
CCTTTCTAAGACAACAATACTTTGATGGTAGTTCGTGTACAACCTACCACCAAGACACCATCCGAACTGA  
CTCCTGCGCTTAAGGCTGTGATAGCAGTATCATCACTGTTTTTTCTTGCTCTACTTTTGCTTTTACTAAGGA  
AATTGGGTTATCTTGGTGGAAAAAGATCATCAAAGGAAGGTTAGACGCAGTTATATATGGAGTTTGGTT  
TGGTTATTATTACAATATAAATTTGTATAACTCACTAAAATAAAATTCTGTTTGCTTCTTTTGTGAAATGCC  
AACACATATCAAAGAAGCTAAAAGCAACTGAATTGTTCCCGGGAGGAGTTTACACCTTTCGTCAAATAAA  
AGATGCCACTCAGAAGCTTCAATGTTGTGAACAAATTAGGTGAAGGAGGTTTTGGACCTGTTTATAAGGT  
TAGTTTTTGTGGATTTTTAGCATTCTGTTTATTCATCATATCATTCCCATGACCCTGGATTGAGCTGCTGC  
TTATGTAAGCATATAGTTACGGCCTTGGTGCTTTTTTTCTGAAGGGATTTTATGTACTTTATCTGTCACT  
GCTGCACATATAACATATGAAGTGCCCCTTATCATGTTACGTTTTTCGCGCCAATTCTAAATAATGGGGG  
GTGTCTCTCATCAATACAGGGCATGCTCCCTGATGGGACTACAATTGCAGTTAAACAGCTATCAGGAAA  
ATCAAAGCAAGGAATACGTGAGTTTGTAAATGAAATTGGCACGATTTACAGCTCTGCAACATCCGAATCTT  
GTGAAGTTAATGGGATGTTGTGCAGAAGACAACGAGCTCCTACTCATTTACGAATACATGGAAAATAAT  
TCTCTTGACCATGCATTATTCGTAATGATAGCAAGGCTCATATGTTTTGACAAAAAATTCTGAAGTAGTT  
AATAAAATAGTATGAAATTGCTTTTGCAGGTCCAGAGGAAATTAATCGAGACTAAATTGGTCGACGAG  
GGTCAAATATCCTCGGGATAGCCAAAGGATTAACCTATTTGCACGAAGAGTCCAAATTGAAGATTATC  
CACAGGGACATTAAGCCCACAAACATACTCTTGGACAAGGAGTTGAATGCAAAAATAACTGATTTTGGAA  
TACGCAAAGCTTAATGAAGGGGAAAATACTCATGTCATCACACGAATTGCTGGAACAACGTAATTTGAT  
AATCCTGCTAATCCTCCTCCACCCTGTTACCTTAAAGCTTATGCTATACATATATTTTCTTTTCGGATAAGTG  
TATTTTTTCTCTCATTGGAAGTTCTTTTATAGGGGATATATGGCACCAGAATATGCAATGCGCGGCTACTT

AACATCAAAGCAGACGTTTACAGCTTTGGGGTTGTTACACTTGAAATTGTGAGCGGGAGAAACAGTGC  
TAGTTGCAGGCCAAGTGATCAGACAGTTTACCTTCTTGATTTCGGTAAAGCCTCAAACAAGAAGTTTTCAA  
TTTCATTATTGATGCACATGCCTAATAAACAGTTGCCATTGTCATTTTACTTGAATAATGAGTTTGCTAAT  
TTGATCGACGTCTGCTGGTTTCGATTGCAGGCTTACGTGTTGCAAGAGCAGGGAAATTTGATGGATCTAG  
TTGATCCAAAATTGGAACAGATTATTCTTGGACAGAAGCTAATTCCATTCTGGAATTAGCAATGATGTG  
CACTAATCCATCACCAACTCTCAGGCCAACCATGTCTGAGGTAGTGAAAGTTATTGAAGGAAAACTAA  
AATCAAGACCACATCTTCAACAGTCCGGCGTTCAACAGACGAGATTGCATTGACTAAGGCCATGGCTGC  
ACTCTCTCAGCCTTCTCCATCTGAAAGCTATTCTACAGCCGGGCCATCAGAAGCTACTCCTCCCTTATCTG  
ACAGCAATAATATTACCAATGAAATTTGAATCCAACATCTCCATTTCTGAGATGATTACTCTACTTAGAC  
AATGAAAATCAAGGAGGCAATAATGCTTCGGTAGTATGAGTTTTCTTGTGTTTGAAGTATTGGTCTGG  
CATATATATCAGTATAAGATTTTCATTTTAGTAACCGTGTACATTGTTCGATGATTGTTTTCTGTTCTACCAC  
TGAATTCATTGAGGCTTTGGAC

>PGSC0003DMG400028454 RLK with malectin domain

CTCTTTATTCTATCCATTGAAATGTTTTAAACCAGGAATCTCGAGGCGAACCAGTTTTTCAGGCAGTGTCC  
TTCTGAACTAGGGAAATTGATCTACTTGCAAACCCTGTAAGACCTCTCATTCTCTTCCACTTTGTTATCTT  
CTCCTAAAGCAAACCTGAAGAATACTTGGCATTGTCACCTGAATGACTGATGCATAGATGAGTGGGTG  
ATTAATCTTTTTCTACTTTCAGGATTTTATCCTCCAACCAATTGGTGGGGAAGTTGCCAACTTCATTTTCC  
AAACTCGTAAATTTAACGGATTTGTAAGAGCATACAGTCTAGCCAAGCTCCTTTTAGCTCTTATCTTTCTC  
GGGGAATAGAATATCTCACAGTATAATTTTACTATACAGTAGGATAAGTGACAACAATTTTCAGTGGACA  
GATTCCAGATTTTCATACAGAACTGGAACAACCTACCAAACCTGTAAGATCTTTCGAAATACCTTCCAAACT  
TCAAATAATATTTTGGCAAGAGTTTCTAAACTTTTTCTTGACGATATCTGAAGGGAGATGCATGCCACC  
GGACTAGAGGGTCCCATTCCAACAACATATCTCTTCTGAATAAGTTAACAGATTTGTGAGTAGAGAACC  
TTACAACATTATCTTAACTAATTTTTATTAGATTTTTGTAGAGCATTACTCTTTCAGTTCTCTCACGGTC  
AATTTTGTATACAGGAGGATCAGTGACATAGGTGGACCAGTTCAGGCATTTCTTCACTGGGTGATATA  
ATGGGATTCCATAACTTGTATGTCAAATTATACCGATATGTGGAAACCGTTGCACAGTTATAGTGTGCTA  
TTAAGTATTCTAGCTTTCTTAAGCTAATTAATATGGATACAGGGTATTAAGAACTGCAGCCTTTCTGG  
AGAGCTTCTGTATATATTTGGGCGATGAAGGATCTGCAAACATTGTAAGTTATGGACTTATTCTTTTGC  
ACCTAATGTTCAAACCTTCTCAGCTGCATTCAAATACATGGTATTAATAGAGAGAGAGAGAGCTATT  
ACATGATTTTCTGCCTTCTCCTCTGTCCGTGACCTTTGGATTCTCTGAAGTCACACTATTTACTGTCCTCT

ATTGGCGCCTCTTTCAGTTAATACTGCCTTCCCCAGTCAAAAACAGTTGAGAAATCATTCTCTCTACCA  
AGAACTCCTGTAGAAATTAAGCCCCCTTTAATTTCTTGTTGGAAAATTGAAATATTTACATCTACTG  
TGCTCTCTGTGACTGTAAATTTTTAGCATTCCAGTTTTAAAAGATAATTGAGGCTGTTCAAGAAACAAT  
GCACTTGTTCTTAATTAGTATATGACACCTCAATATCAAAAGGTTTCATGCTGCTCTTTGCTTTTCACTAAA  
CTTCTCATCCTCCTATGTTTGTATCTCTCCAGTACATTATTTAGTCTAACATATAGAGTTGGCTCTTATAC  
ATTTTTCTTCTACAATATACATGTGGCGGTTGTAAGAGTTTGTGCTCACAGATTCATCTGCTCTATCTCCTT  
CTGAGAGTTCAAATGGTAATCATGATTTCTTTTTAATTTCTGCAGAGACGTTACCTTCAACAAGTTAGTC  
GGAGAAATCCCAAACAATATTAGTGCTAGAAGTATGCTGAAGTTTGTGTAAGTTGAATTGCAAAAAGTG  
GATTCTCTCAAATGTGATGTCCTTTTTATTTGTTATTAGCAAGTTACATCAGTCTCTTCTCAATCTTCTTTT  
GCTCATACCCCAACATCTTCAAGTATGAAGTGTATAACATGTGCTTGCCTTCCAGATTTGCTGTTGCCT  
AATTGCTTTATGTTCTCTACATAGGTTTCTTACTGGCAACATGCTCAGTGGAGATATACCAGACTCTCTTT  
TGAAGAGTGGAATAAATGTGTAAGTGTATATTTATTAATATTCTAATTTATAAACAATTTCTGCTGGTGT  
AAGATGGACTCGGTCTTTGCGGAACATGTCATAATTTTTATTATAAACATAATGGTTGTTTCTGCTGGCAT  
GCCAAAGCAATTTTGATTCATTACGTTGGCATTATTTTTCCATATTTTGTCTTCATGTGGATCTCACAAAC  
TGCTTGGTTCATAATCGGAAAGATGACATCTAACAGCGTCCTTTGCGCGCAGTGATCTTTCTACAATAA  
TTTTACATGGCAAGGACCTGACCAACATGCTTGTGAGCAGAACATGTAAGGATAGGTCCATTTTTGTTAA  
TTCATGCTTTTACATTGTTTATTGGATAAGCATATATGGTTCTGATAATTATTCCTTCTACAGGAATCTGTA  
TTTAAACTTGTACAAGAGCTCTGCAGCAGTAAGCCCCTTGTAAAGATGATTCTTATTATCCTGAAACATTAA  
AATTCTGATTTATGATGAAACTGAGAGAAAAAGGAAGTGCAAAGCAGAAGTGATTGCTTCTATCTAATT  
CGGATTTGGTTCTAACTGCTTTTGTGCTTTAACTCCTACAGAATGAGAATTCATCCATGTACGAAGGATTT  
TACTTGTGTCGGTGTAAGTATGTTCTTTTCTTCTCTGGAAAGTTATAACAATTTTCATATGGAATATGAAT  
CACATCCGTAGCAAGAATCTGAAACTATATCTTTAGCCGCTTTGCCATCTTCTCCTTCACTCAAATAGCAG  
ATTGCTCAACTATGCAAGAACTGTAGCAAGTTAGTTTCATTTTTGATATTTAACACAGAGACATTCTAAG  
GGTGTATTCAGTCTTAATGTCCGTTTGGATTGGCTTATTTTAGGTGCTTTAAAGCCAAAATAGCTTTTAAAG  
TAGTTTTGAAGTGTTGGGTAAAGTCAAAAAGTGCTTATAAGCGCTTACTTTAAAGTCAAAAATAACAAAA  
ATAAGCAAAAGCCGTAATTTAGAAATCCTAACTTATAGCTTTTGGCTTATAATTCATAAGCCAAAAGTCA  
ATCCAAACAGGTCCTTAACTCATGTATATAACAAGTATTTAGATGATTTGAGGATTCACCTAACCTAATCGTT  
GGAAATATTTTCTGCTTGATCATTTCCTCAACTTATGAAATATATTTTGGAGCATTGACTTCTATTATTTTCA  
TTGGCAGATGGGTGTTTATTACATGTTAATAGTGGTGGAAATGATTTTACTGTAAAGGAGAGCGATGGA

GAAGTTCATTATGCAGGAGATGCAAGCGTTGATGGTGGTTCTGCTAGATATTTTCAGCAGTAGCACCAAT  
TATTGGGGATTGAGTAGCACTGGGGACTTTATGGATGATAATAATGACCAAATGCACGTTTTATTGAA  
AGTACACAATCAAAAAGCCTCTCTGAATTGTACAATAATGCACGGATGTCTCCCCTCTCACTCACTTACTT  
CCGTTATTGCTTGAGGAATGGGAGTTACAATGTCAGCTTGCACTTTGCTGAGATAAGTTTTACAAATGAC  
AGCACCTATAACCAGTCTTGAAGGCGAGTATTTGATATATACATCCAGGTTGGTATGCCATTAGAAAAA  
CTTTCTATACGCTTAAACTATGTTAGATGTGTGAAAATATGAGGAAAAAAGAGAGAACTTGTATTGTAT  
TTGGTTGTAGATGATATACAAGATGCCTCCACATATAGAAGTTCAGGCAATTACAATTATGGTAAGCTCT  
AACCTAAATGAAATAAGAGAACTTATTAATTTGGGAATTTACCCATCCAGAATTAGAAAAAATGCTCTC  
TACTACTAACCTAGAATATATTTTAAACACATCACTGCATTAATTCTCCCACAACGCGCCTTCCAACTCAA  
GGTGATACAGCAACTTGTGTTTGCAAATCGAAAGTGAAAAGTGACATGATACTACCTGGACAAAATAGA  
GTAGGAGTTATGATTGAATTTGAGGACATTCATGTTGCGAGCGTATCTAGATGGCTACAGAGAAGCAAG  
CACTGTGCCAGATTGATTGGATAGATGATCATTACGGTGTTAACTTGGTGACGGTATAGTAACCATGC  
GTTGACTGGTACTAGTCTCAACTAAAAGTGTTCTCTAGAAAGCGACATGGTGCTGTCTGGATGGTGACA  
CATCAGCTAGCTGGACAGCTATAGACTGTTTGACTTGACAGGTTAACAGGTATAGAGTGATGATATCAA  
CCCAACGCGGACTGTGATACGTGGCACATGTTGCCAAAAGATGCTGGAGCCTGGAAGAGAGTAAAA  
GAGTGATGCTGCTTTATCTGGAAAGAGACGAGCCTTATTATGAAAAAATGAAAACTGTGTGGCAGGC  
AGCTTTAGATGGAAGCTATTAGATCTATAACAAGAAAGTAGTCTTTATATAGGAGTTTAGACAACCTAGG  
ATACAAAATTTTATCTTTCTTTATACTGAGATTTTTGAATAGGAAGAATTTTCGTATACTATTAATCTAGAC  
ATATTCTAACATCTCACTGAATAAGTTCCTGTGACTTTCCACAAGATACCTACACAATATTCTTTGTACTTC  
AGGAAAAATTAGTTTGGAAAGACTTCAATATTGTGAATGAGGCTGGTGGAGTTCAAACGCCTCTGGTTA  
GGCATTTTAAAACCAAGTGTGACAGATAATTTTTTGGAGATTGATTTTACTGGGCTGGCAAAGGAACTAT  
CAGAATCCCAGTTAGAGGGCATTACGGTCCCCTAATATCTGCAATCTCACTCAAACCAAGTAAGTTTCTT  
CAATATTCATCATTTTAAGGGGAATATCATAGTATATCTGCTTTTACACTTCTCACTTTGGTTTCCTTCAAG  
TATATTGTGATTTAAGCATGTCTCAGTGAGAACTAACACAAAAAGGCATGTATCAGTGAAACTTTAAA  
GTCCCAAGAGATATTCTAGAGATCGTACATATCATATGAGCAGGTTTCATACATGATAAATTTAATTGTTTT  
TAGAAGAAATACTGCAATTGAATGCATGATTACATGCTCTGTTTGCTTATTTGTGGGGTTGACATTGTTTA  
TCAACTCCGTTGTATAAGATAAAATTGCTGCTATCTAACATGATCCATGTTAATATTGTTGAAGTGTGTG  
ACCATCTCATCTGGTCTGATACCATATTGAAGTGTGTGATCATCTCATCTAAAAGCTTAAGCTACTAGAG  
AGAGCACACTTTAACAGTTAATTATATTCTCAACAAATATGTGGAAAATTCTGATATTTTTTTTGGCATTTC

CACCGTGCTATTTGAACACCAGTTGGCGTCTGAAATTGCAAAAGATAAATGGTTGGCTATCTCTCTCAAC  
CATTGATTTGCTTTGGTCTCTTTAGAGTTGCAACTTGCAACATTTATCTAGAGATCAAGTAACTATTATC  
AGCACAAAAGCCAATCTGCGGCTTTAACTTAGCCTGCTCCGAATGATTGAAAGAGTAATTTTTCAATAG  
CTTTCCTAATTTTTTACTGGGCAAAGTATTTTTTTGAACTAAGCTATTAAGTTCATACATGGCTTGATA  
TTCCTGTGGTTCTGTACCAACTATACGTATTAGTATGTTACTGATTTATAGTATAAACTTCGATGTTTACCA  
GGTGATAGAATATTTGTATTGTGGTTATTTCAACCAGGCTCTTCTTTTCGGCCTTCCAATAGATAGTTTTA  
AGCTCTAAATACCTTTCCTATTCTATTGCTATTTTTCTTTTCATCTAAAAAATAAGTAGGAGTTAAATCTC  
TTCTGGTATGTCCGATGTAGGCATACATTTTATAACTGTTTTCTCTCCTTTTTGGTTATTGATTCAAAGGGT  
CATTCTATATGGCCAAGGAAATCCATTTTCGTAATTTTGGTTGAATTAACAGACAGAAATTCTCAGCTTGA  
AGGAGTGTGGATGAGTGCCCATGTATTTTTCTTTGCTATTATTTTCCCATGAATAATATGCATGTTGATA  
TTCATATTCTATGTAATCAACTGGAAGAATCTTATTTTCTATTGCCCTGCTGTTGCATACACTTAACAATC  
TAGTCTTCATTTCTGTGCAGCTTTTGGATCTTGTTTCAGAGGAAGATAAAAAGAATAAAAAGAGTGCGACT  
GTTTATGTTATTGTTGGAGTAGTGGCTACATGCATTTTCTGTTGTTAATAAGCACGCTTTGGTGGAAAG  
GATATCTTCAATGCAAAAAGAAACAGAGAAAAGGTAATCACTGAACAGATGTTAGAATGAAGTAATTTT  
AACTAGCAAATTTTGTGACTAGGCAGCTAGCTGATCCATGCATTAAGTATTGAAAGAGCACAATCTACT  
GAAATGATAATCAAAGAAAAGTCCATATCCAGAAGTTGTGAGTTATAAATAGATGACTAACCAGTAAAG  
TTTTCTATTTCCATGACAGATTTAGAGGGCATGGAGCTGCAGACCATTTCTTTTACTTTAAAGCAAATAA  
AGGCTGCAACTAATAACTTTGATGCTTCTAACAAGATAGGGGAAGGTGGTTTTTGGTGCAGTTTTCAAGG  
TATCACTTTGGTAACAACAGTAATATAGTATCGTCTTTATCATTATTGGTTGTGAAGTCTGACCAAATATT  
TTATGTAGGGCCGGTTATCTGATGGTACTTTAGTTGCAGTGAAGCAGCTCTCGCGTCAATCAAGACAGG  
GGAACCGTGAATTTTTGAATGAGATTGGCATGATTTCTTGTGTTGCAACACCCAAATCTTGTTAAGCTGCA  
TGGTTGCTGCATTGAAGGGACTGAATTAAGTCTGCTCGTATATGAATACTTGGAACAATAGCCTCGCTCGC  
GCATTATTTGTAAGTTATTCAATCTCTTTTAAAAAAGTTCCTAAACTATTACTAACTCTCTATGAAAATGT  
CCATTAATAATTTTAGCATGTTGGATAACTTTAGATTCAGAGAAAAGTCAGTTGATGCTTGATTGGCCGAC  
AAGTTCAAGATTTGTGTTGGGATCGCTAAAGGTCTGGCTTTCCTTCATGAGGAATCAAGCCTTAAAATT  
GTACACAGAGACATTAAGCTACTAATGTACTGCTAGATAGAGAACTAAATCCCAAATTTTCGGACTTCG  
GGCTAGCTAACTTACTGAAGATGATAATACCCATATTAGCACTCGAGTTGCTGGAACAATGTAAGTTGC  
AACGTAAAATTCAAAGTACTGATCTTTCTTTTTTTTGGCGTTATCTTGTGTCAGCAGCGTGGTTAGGTAAAATT  
GTAGCATAATTGTATGTTGATAACTGCAGAGGATACATGGCACCAGAGTATGCACTATGGGGCTATTTG

ACTTACAAAGCAGATGTCTACAGCTTTGGAATTGTCCTCCTGGAAATTGTTAGCGGCAAGCACAACTATG  
GCTATGTGCCTTCCGACAATTTCAATTTGTCTTTTAGACTGGGTATCTTTCCTTTTCCTTTTGTAAATGCACT  
TCAACAAAGCCTGACTCGTCTACCATTTATAAGATTGAGAATCCTTGAACATTTTTAACCATGAACCTCCC  
GCACTCCCTTTGAAGTTGCTAGCTTATAAACTCTATTGCAGGCCTGTCACCTTGCTGCAAAATGGAAAAA  
TAGAGGAGCTGATTGATGATAAATTGGGTTCTCAGTTTAGCAAAGCAGAAGCCGAAAGGACAATAAAA  
GTAGCACTATTATGCACTAGTGCACGCCATCACTCAGGCCTGTAATGTCTGAGGCTGTAGGCATGCTTG  
AAGGAAAAATAGATGCCCTGATAGTATCCAGAAAGCAAGTATGTATACTGACGATTTGAGATTTCAAG  
CCTTCAAAGATTTCCAACAAGAGAGGCTAAATCAAAGTGCATCAAGTAATCAAGCTCAGTGTTCAAGCA  
TCCAACTGCCTCTGATCTCTGTGAATACAACCCCGAATCAAGATCTGACTGACTCTCTATTGTGTGTGTA  
TTCTTATTTAATCTCTTGCCGGTGTGCCTGTATCTTATGGCTCATGAGGGATTGCATTGGTTCAAAGCCAT  
TCATCGAGGTATGATTGTTGTAAGTTGTAAGTATTTGTTCAATTTTTGTGAGTAAGATTTCTAAATGTACA  
TAAATTAATCCCTAGAAAAAGTGTGAGGAGTTATATTTCTCCAGCTCTGCATTTTTGCACCTCCTAGCT  
AGATTTCAAAGTTGTATAAAATTCTGCCCATTTGTGATATACCTGAAATGTAGACTATATGGTCCTTCTGT  
AAACAAAAAAGGATTCATTGTTCAATTTGTGTCAG

>PGSC0003DMG400029712 RLK with malectin domain

TTTACCTGCACAGAACGTTTCCATTATCACTCCACTGATTATTGTGTGATAATTAGTGCCAGAAAACAA  
CAAGGGAAGTACAAGATTTGAGTATGAAATCAATGAGTTTCTAGAAGAAAATAACAACAAATTGAAGCA  
AATCTAAGTAGCATTGGAACCGAAATGCTGAGATTCCACTGTTTTTCTTGTTTCTTTGCTTCTGCGTGG  
GTCTTCAGCTTGTCTGCTCTGCCATGGTCAGCCCTTTTTCTTTTGTGTAATGTGAAATGGTTCAACT  
AATTTTACTGGGTTTCTTTAGTAGTGATAACTTAGTTTTTGGGATCTACTTGTTTTATTTGCTAGTAGTA  
ACTTTTTTATTAGCTATACTTTGCTTATGTAGATTTGTTTTTAGATGTAGTAATGGAATGATGTTTCTCATT  
AATTGGGATTTTGCAATGGACTTGCTTGGATTTTGAATGATATTATGCTGATTTTAGCTAGTTCTGATGTT  
TTATTCCTGAGTTGAATACTGGGAAGTTCTTTTTATTATTTATTTGAGTAATGGATTTAGGGGCGAAGATT  
CGTACTACTAAAATTCGTACATATATGATAATCAATGTAGTTGGAATAATCGTATTGAATAGTTGCATTG  
ATAGTTATCTTCACTCTCAAATTTGTTAACTGTTTTCTATTTTTGAAGCTCTAGTGATCCTTAAAGAAGTT  
AAGGTAGTCTGTGGAGTGCTCGCAGAATGCAAGACAAGAAAATGAGTCTATAATTGCAGTTCAATCCCC  
CAAATCAGCTCGGATCAGTTGTGATTAGCTATATTGAATTGAATCTTCTATGTGCATTCCACTCTACTTGG  
ACCTGTTCAATCCAATACTAGAACTTATGCCTTTTAAAGTCAACTTAAGGAGTCTTTGAATGTCGCGCTTA  
TCCCTATGCGCATTACTATTTTCTAAACAAGTAAACTTTTTGTAATGTTTTGTTGTTGCACACTTGCAGTT

AGTTGTTTTAGGTCATGTTTTACTTTGGCTCTTTTTGGTTAAGGGGTGGAAGTGGAAAGTCGGGTTTGA  
GAGGGAGTGAGCATGCTTTTTCTGGTTGTGCTTTGATGAATCATAGGAGGAACAAATAAGAGTAGACTC  
AGAAATCTGCTGAGCCTCTTTAGGTCTACTTTTTGCCCGTTAACGATAAGTTTTAAAGCGCATCAAATTA  
TGTAACATTAGTGAAAAATAAACACTATTCCATCTCAAATATTCAAGTTGCTCCTGCTTCATGTCAAGTGT  
AGAGTTTGATAAACTTGTCAAGTACCTCTAGGACTACATTTTTTTCAATAAAAAAAGCTTTCAAGTGCATT  
CAAGCGGTGTAACACTAGTGAAGGTTAAAGTTAGTTTACTGCTGATAATCAAGGTAGAGTCTACTGCTG  
ATATTCGAGGTGGACTTGCTTCCTCTTTGTGTACCTGTTCTGCTTTTCTGGATATCTAGTGCTTTTATTCC  
ATCATATTCGAAAATTAATTCTTGGCTATTACTTATTAGTCTCCTAGTTGGCATTTTGTGTTCACTCTACT  
GTTTACTCACCGCAGATCCATATGTAATGCGAATAAGCTGTGGAGCTCGAGATGATGTTCATACTTCCCC  
TACAAAGACTCTCTGGTATAAGGATTTTGCATATACAGGAGGGATACCTTTCAATGGAACATCCCCAAGT  
TTCATTGCGCCTCAACTCACTACGCTGCGGTATTTCCCTTTATCGGAGGGACCTGAGAATTGTTACAATAT  
CAAGAGAGTCCCCATGGCCACTATTCAGTGAGGATATTCTTTGGAATGGTTGTAGAACCAAGCTTTGAT  
AATGAACCACTATTTGATGTTTCTGTTGAAGGCACCTTGGTTTATACTTTGCCATCTGGTTGGAGCAATCA  
TGACGATGAACAAGTATTTGTTGAAACACTTATTTTTCTTGATGATGGTACTGCCTCTCTTTGCTTCCACA  
GCACAGGTCATGGAGATCCAGCTATACTTGCAATTGAAATTCTCCAAGTAGATGACAGAGCATACCATTT  
TGGTCCTGACTTTGGTAAAGGGACAATTATCAGAACTGTCAAAGACTCAGCTGTGGTGCTCAGGAATC  
ATTGTTTGATGCTGACTACAGTGGTGATCATTGGGGTGGTGATCGGTTTTGGAGTTCAATCAAGACATTT  
GGCCAGAATTCTGATCGCCGATTTCTACCAAAAACAGTACAAAGTCAACTTCCAAGCACCAAACTTTT  
ATCCAGGATCTATTTATCAAAGTCTCTTCTAGCACTGACAATGAGCCAGAATTAACATACACAGTGGA  
TGTCGATCCCAATAAAAAGTACTCTGTTTGGTTACACTTTGCGGAAATTGATCCTTCAGTTACATCTGCGG  
GACAGAGGGTCATGGACATTTCAATCAATGGTGACACTGTATTTCCAGATGTCGACATTGTGAAGATGG  
CTGGGGGTGTTAACAGTGCTCTTGTGCTGAACACAACAGTTCCAATCAGTGGCAGGACCTTGACAATCA  
CACTGCAGCCAAAAAATGGAAGTCTGCTATAATTAGTGCTATTGAAATTTTTGAGGTTATAATAGCTGA  
ATCTAAAACGTTACTTGATGAAGTACTTAAGTTTAAAATTTACACCAACATTTCTTGGATGCTTGTTC  
GAGTTTAAAGTGGGAAAGAAAGATAAAAGTCAAAGTTTGTACAAGTTTTACGCATGGTATAGGCGATA  
GCTTACTCGCTTTGTTATGCTATAGAAAATGGCCATAAGTAGTATCGTGTTCTTTTTTACTAATGAGTC  
CAGCTTGTGCCATTATCATTCTACTGCTCTGATTATGGAAGATTGGAAGTTATCTGGACGATTATTGATAC  
AATTTTATCCTTCTTACTTCTGCAGTCAGGGGTTTGCAGTCGCTAAAGAATGCACTTGGACTTCCCCTTC  
GGCTTGGATGGAATGGTGATCCATGTGTGCCCAACAACATCCCTGGAGTGGAGCAGATTGTCAGTTTG



ACAAAAC TAGCAATAAATGGGTCATCGACGGGATGTACGTCAATGAGCTTACTCTTAGATATACAAGTTT  
CTATCTATATGTATGTTTGTGTGGTTCGGACATATGGTATATCCATGGGCATATTCAAAAATCACTTGCATA  
CACCATGTACTTGTAATCTTCAGTCAAGCTCCCCACCTCAATATAGGTTTTGGTTGATAAGTTTCTGGACA  
ACTTGGCCTCCACTGTGTGTGAATTTTCTGATCAATCATGAATCAACCCAAGATAAATATCCTTTCCCCC  
CTCTCAAAGGAAAACGGAAAAAATGGGCATCTTTGCAATCACTTTTCTCAATTAGAGAACCTTGCAGCT  
GTAAAATTTTTATCCTATAAATATATATGCTCACGCACACATACTCAAACACCCGTTTGCTTTGTATTCTT  
TCCCTAAGTTCCACACCTCAATCTAACAGGGCCAGGTGGTAAGTTGTTCAACAACCTTGGCTTTCTCTGCT  
TTGTGTATTTCACTAATTAACACAGTTCATTACACATAAGTAGGGAAAGCCAAGTTGAGTGTGAATGTGA  
AATGCGGAATGAGGTGGAATATTGGGACTTTGAAGAGCAAAGGCCAGGGACTAGGGGGAGGCTGTGA  
AAGGGGAAAGTGAGAAAGAATGGTGGCAGTGGTCAGAAAGGGAAGTTGCGGCAATGAGGGAAAGGT  
TGGGTTTATGAAAGAAGGGAATGAGGAAGAGGACTGGGCTGATTGTTGTGGAGATCAAGGACACATT  
TCTCTAACTAGACCAGAAAGCCCAAGTGGAACTGGGGAACAGGCAGTTAATTAGTTAGGAACTTCTGGT  
TGCATAATATCGATTGCCAAAGTAACCAGCCCCATCTCTCGTCATGGTCAAAAATTTGTTATTTGAGTATCA  
AATAGTTTATGTATTGGGTCTTAAAATTAACCTTTAGTTTGTGATATAATGATAGTTGAAAGCTCTTTAGT  
GTACATTTTTTAATTTCATAAAAAATGAGATAAATTGTTTGTATTACACCTTCAATGTTAAAATTCTCAC  
AAATTCATATATTTTTTATCTCATTCTTTGTCCCACTAGGACAGTATAATTATGTATTTTGTGAGCAAGAT  
GCCTTTCCTGATTGGAATCCTCAATTTTCAAATCTGCATGTTAGCATGCCTACACTTTCATATTGTGTGG  
TTTTTACTTGCAAGCTTTGTGTAATGAATCTTTAGAGGAACTACATATCTGTCGCAGTAAATCCTGTTA  
TTAGAATAGCAAAACATGGTGTCTCCATTTCTTCTGTTCTATAATGCATAGCTTCTATAAGCTTGATTGGT  
TCATAGCAATTGTATTTTTTCTGAAAATGTGAATTATTGTTGATGCTATTTGCTATATAACATGTTACCTC  
TTGTGATGTAAGTCTTCTGTCTGTTAATGTCCCCTTTTGTCTTTACATTCTTCAGTGCTGGTTTTTTGACC  
AAATTTTATCATTTTCCTAAGGTCTATATTGCTTTTCTTACTGCGGTCTGCAGGAATGCTTTGAATTCGT  
TTGCATAATCATCTTTAACTCTTTTTCTTTTTCCAAATGGTTTACCTGTAAGGTCAGTGGCTTGGACAACC  
AAGGTTTAAGAGGCTTCTTACCAAATGAAATTTCTCGATTGCGTCATCTTCAGAGCATGTAAGTTAGCTT  
GCAAATGCTTTTTGTTTTGGGGAATACGTGTTGCCTAAGGCAAATACACCTTATGAAGAAATACATGACA  
CTTCCCAGAACTGCAACCTTCTCAAATTTTCTAAGCATCCCTCTTTTCTTAATGCTCCATTCTTGCATGTAG  
TAATGGAAACTGGAAACAACCATTTCAAATATGATATACTTTGACCATGCTTTCCCTTGTGTGCGTTTTTT  
TTTTCTTTACAGAAATCTAAGTGGGAACAGCATTTCATGGACCTATCCCCGGCATTGGGAACGGTAACT  
AGTCTGGAGACATTGTGAGTAAAGCTTTCAGGAACTTCATGTGCTTTTCAAATTAATTTAGATTTTTTCT

GCCGGACAATCAATTTTGAAATTAAGCGGTTTCTAAACTATACTTTTTTGAGGAGTGTTGAGTCATACAA  
CTGTCCTATTTCAATTAATATCATAGCCCCTCTTCTTAAAAATTAGGTAGGAATAAAGAATAAGTAATGG  
AAGACTCTTGATTATAATAGCTTTATGGATTGTGAAATACAAGTCATATTGCCCATATGGATATGATGGT  
AGTATATAAACTGTTCTTTGAAATTTGGATACATCTTTATGTTTTGGTTGAAATTCATAGACCTAAATAGA  
GTAGGACAATTTATAAAGGATAGAGGATAATGCTCATACTGAGAAACATAACAATTCCTTATGGGTACA  
ACTCTTATTTTAGCGGGGTGAAAAGAATGTTATATATTTATTGTGTATTAGAACAACACTATTACCTTAG  
TTCAATTAAGTGCTTCTCAATTTCTCTGGACATCTCTTTTAGTTAGAAATGATACAAGATGATCTCATT  
CCCTATTTAGCAAATAGTGAAGGATATTCCACTAGTAAAAAAAAGGTGGATCTCACCTGGTGAGTG  
TCTAACAAAGATTTGCATTACAGGGATCTCTCATACAATTTCTCAATGGATCGATTCTGAAAGCCTCGG  
GCAATTGACCTCATTACGGACGCTGTAAGATATTTAACTTTTGATCAGTTGAAGACAAAAGAATGATAG  
AACTATTTTTATTATTGTTTTGAGGGTAAAGAGTCTAAAAAATACTCCAACCTTGACTGAAATTGTTGTTA  
CGATACCAAACCTTTATGGAGGACCTTTTTACCCCTACACTATTTAATAGTGTATTTAATGGTATATATG  
TGCCACGTGGACACATTACTTTTTATAATGATGCAATATTTATGATTTCCACGTGAACACATATATACCT  
TTAAAATACACTATTAATAGTGCAGGGGTAAAAGGTCCTTTCAAAGTTCGGTATCGTTATAGCAATTT  
CGGTCAAAGTTCGGATGGATATATTTTACAGACATTTTTCCCTTGTTTTGATAAAGAGAATTAATTAATGTT  
TTGTTACAGGAATCTCAATGGCAACTCACTCTCTGGAAGGATTCCTGCTGCATTAGGTGGAAGGCTCTTG  
CACAGGGCTAAATCAAGTATGTTTTCTATCATCATATATTATTTGGCCTATGGCTTGTTCTTGGTGAAG  
CATCTTTTAATATTCTATCTTTTATAGTTGCTCTTGTTTTTCGATTTTGTGGTGCCAAATAATTATACTGCGT  
AGCATGATGATTCTTTATATGCCTTTAGAACATTGCTGTGCTTAGGAATTGTCTGACCATCTCCGACTGC  
CGTTATCATGATTATGCTGTCTTGACAAATTCCTTGGCCTCGACTAATTTCCACTAGCATGTACCAATTTTA  
TCCAAAATATGATGCCCTCAATCTGGAGTTGTATGTACGCTGAGAAATTTTAGAAGTTGCAAATTTCTGG  
CATGTTGTTTCTGTAGTTTATGACGATAAAATGCTTACAGTGGATGGTTCCAGTTTCACTGATAATGCAG  
GTCTTTGTGGTATTCCGGGATTACCAACTTGCGGAACACATCTCACAGTTGGAGCAAAAATTGGGATCG  
GATTAGGGGCGTGTGTATTTGTCCTGCTTATTGCTACCTGCATTACATGCTGGTGGAAGAGACGGCAGA  
ATATCCTCCGTGTGCAAAGAATTGCTGGTAATATTCTCATTTCAAACATTTTGTGATGCTAGATTCTG  
ACTAATCAACTGCTACCCTTGCTTATGGTTACTCTTCTAAACCACTGTCTATTTTTTTGTCCAGCGAGAG  
ATGCTCCATATGCAAAGTCGAGAACTCAATTCATCGAGATGTACAAATGGCAAGAAGCTATAGTCACG  
AACATACGCGAACAGCTGCTGAGAATGGACCTCCCTTGCTTACCTGACTGATTACTAACAAAACCTGGCA  
GATGCTTTGTGACTGAAAAAATGTGTATATTGGGTGGGCATAGAAGATTAGTTGAAATGGTGTGTTTTGCA

TAAAATGTAGTATCTTATATACACAGAGATCTTGGAGGGAATAGAAAGAATGTTGTATATTACTCGCACT  
CTTTTTGTTAGTTTTGATTAACCGGCACCATGTACCATGTAAGTAAATTGATGAATGGAAAGCTGA  
ACAAGTTTTTCTAGTCCCACATTTTGCTG

>PGSC0003DMG400029885 RLK with malectin domain

AATTAGTAGAGTTTTAATATCAAGCTCACAAGCAACTACCATCTTCCTTCAATTTCACTTCTCCATTGCTC  
TCTCTCTAAAACCTCAAACCCTATTCTCTCTCTTTTCATCTTCAGCTCACTGCTGCATTCAATTTACTTCTTT  
TGGTGTGGTCAACTCAGCAATGGCCTGAAGTTTGTGCTTTTGGATCTCTGTCTATTCTCATCTTTAA  
GGTATTCTTTTTTGTCTTCTCTACTTGTATGCTTTTGTAGCTCCCAAGATTTTGTGTATGTACATA  
TTCATGCTTGTAGCTGGATCTGATACTCTGGTTTCTTATTTTGGACTGAGCGCTTTCAGCCTTTCAT  
CATTTAGCTCCAAAGTTCTATTTTTATGCAATTTGCTGCTACTTCTGCTGGGTTTTCTTATATTGGACTGA  
GTGCCTTTCATTTAGCTGTAAAAACTTTTATCTGTCTACTTTATTCTATCCCCTGCTTCTTATACTGCATCG  
TGATGCTGAGTTTTATTTTTGGACTTAGTGTTTTTGGTCTTGTAGATTTATTTATAAAAAGAGGTTCCG  
GAGTTCATGCGATTATGAGATTTTCTTGTCTTGTGTGGTAAAATTGAGGGGAGGTCAACAGATGGAA  
ACTGATCTTCTTTTTGCAATTCTGTTTTTTTTTGTCCAGTGATTTCTGCGGATTACTATAGGCTTGTGCA  
GCATCAATGGCAGACGACAGTAAATTCTGTTTTTCTTGGTTTCAACATTTTTGTTGTTGGCTGTTGTGGT  
TAATGTGACATTGGCTGCCAATTATGTGCCCGGTGATGATATTCTGTTGAACTGTGGAGGTCCTGACAAT  
CTCCCAGATGCTGATGGTCGGAAATGGGGCACAGATATTGGGTCAAATATATGTTGGGTAGTAAGTCA  
TCAACCTCTGATGCTGCTGATCAAAGCCCTCTGTCCCTCAAGTTCCTTTTATGTCTGCCCGTGTTCAG  
TCTGAGTTCACCTATAGTTCCCTGTAGCATCTGGTCGTAAGTTTGTCCGTCTGTATTTCTATCCCTCGTCT  
TACAACAAGCTAAATGCTACTAATGCCATCTTCAATGTGGCCTCCGGACAATATACCTTACTTAGAAATTT  
CAGTGCAGCACAACTGCTGAAGCCCTCAACTATGATTACTTGACCAAGGAATTCTCAATAAATGTGCCA  
TCTGAACTTTGAACATCACTTTCACACCCTCTCAAATACTTCAAACCTCTTTCGGTTTTGTCAATGGGATT  
GAGATTATTTACACCCTGATATCTATAATACAGAAGATGGAAATACCTTCATTGTGGGTCAGAAATCCT  
CTTTCATCATTGGCAATTCTACTGCCTTGGAAAATGTTTATCGCCTTAATGTGGGAGGCAATGTAATCTCA  
CCATCAGGTGATACTGGTATGTTTAGGTCATGGGGTGATGACTCAAATTATTTTTGGAGCAGCCACCG  
GAGTTACCAATACTGCCGATGATGAGAATGTCACAATAAGCTATGGTAATGGGCAGCCTACCTACGTTG  
CCCCACTTGATGTCTATAAGACAGCTAGGTTAATGGGTCCAACCTTTCAAATTAACGAGCAATTCAATTT  
GAGTTGGGTTTTCTCAGTTGATTCAGGGTTCTCGTATCTTGTAGGCTCCATTTCTGTGAAATCACTAAAA  
ATATCACAAAAGTCAACCAGAGGGTGTGTCATCTACATGAATAATCAGACTGCAGAACCTGCAGCGG

ATGTCATTGCTTGGGCTGGTGGCAATGGAGTTCCTTTTACAAGGATTATGTGGTCTCTGTTCCCTCGTGG  
GGCTTCACAGCAGGATCTTTGGCTTGCCCTCCATCCAAACGTTGCTTCAAATCCAATTGGTATGATGCA  
ATTTTGAATGGAATAGAGATTTTCAAAGTGAGTGACACCAATAATAACCTTGCTGGGCCTAATCCTGTTC  
CAGTTGCAGAACCAGATCATATTGACCCTCTGCCGTCCAAACAGGTGAATCAAAAAATAATAAATCAG  
CTATTGGTGGAGGCGTTGGAGGAGGAATTGCTGCTGTAGTTCTTATTGGTTTAGTTGTATGCCTTGTGAT  
GCGCCGCCGAAACGTGGGAAGGTCCAAAGTCTAGTGATGGACCATCAGGCTGGCTCCCTCTTTCTTT  
GTATGGAAATTCACATACTTCTGGTTCGCTAAGACAAACACTACTGGCAGTTATGCTTCGTCCCTCCCAT  
CAAACCTTTGTCGTCACCTTTTCATTTGCTGAGATCAAGGCAGCCACCAATAACTTTGATGAAGCACTGCTT  
CTTGGGGTTGGTGGTTTTGGAAAAGTATATCAGGGAGAAATTGATGGTGGCACAAAAGTTGCTATTTAA  
CGTGGGAATCCTCTCTCCGAGCAAGGTGTTTCATGAATTCCAAACTGAAATTGAAATGCTCTCAAACCTTC  
GCCATCGCCATCTTGTTTCTTTGATTGGTTATTGTGAAGAGAACTGTGAAATGATCCTAGTATATGACTAC  
ATGGCTCATGGTACCCTTCGTGAGCACCTCTATAAGACCCAGAAGCCTCCTTTACCATGGAAGCAGAGG  
CTTGAGATTTGCATTGGTGTCTCGTGGGTTGCACTATCTTCATACTGGTGCCAAGCATACTATTATCCA  
CCGTGATGTGAAGACCACTAATATCCTCTTGGATGAGAAGTGGGTGGCAAAGGTTTCTGATTTTGGTTT  
GTCTAAAACAGGTCCTACATTGGATCACACCCATGTCAGTACGGTGGTGAAGGGCAGTTTTGGATATCT  
GGATCCAGAATACTTCAGAAGGCAGCAACTGACAGACAAATCTGATGTCTACTCATTGGTGTAGTGCT  
GTTTGAGATTTTGTGTGCTCGGCCAGCTCTGAACCCAACTCTTCCAAAGGAGCAAGTAAGCTTGGCAGA  
GTGGGCTTTCCATTGCTACAAGAAGGGGACTTTTGACCAGATAATCGACCCATATCTGAAAGGGAAGCT  
TGCACCAGAGTGCTTGAAGAAATTTACAGAAACAGCAGTGAAGTGTGTGTCTGATGTTGGTGTAGACAG  
GCCGTCGATGGGAGATGTGCTGTGGAACCTTGAATTTGCTCTGCAACTTCAGGAGAGTGACAGAGGAGT  
GTGGGAAGGGTTTTGGGAAAATGGACATTGAAGAAGGGTTTTGATGATGTTACATGCAAAGGAAAGAA  
GGATTTAAATGAATCCCCAGGTTATGATGCAAGCATGACTGATTCAAGAAGCAGCGGCATATCTATGAG  
CATTGGCGGCCGAGCCTTGCCAGCGAAGACTCAGATGGGCTAACACCTAGTGCTGTTTTCTCTCAAATC  
ATGAATCCAAAAGGACGTTAAAATCTCCTCATGTCTTGAAAGCAGCAAATACACGCCAAGGCAATGTTCT  
TTAACAGAGAGCACAAGTCGCTTTTTTTTTCTTTCCATTTTCTTTTCTACCTCGTACTGCCTGCCTTAT  
TCTTTTACTCACTATTTATTTTGAATTCATATGTTTTGTTTAAAGCTCGTTGTATCTACCAATACTCAAAAAG  
TGTGAAATTATCTTCTGTTGTACTATTAAGTATCATAAAGAGGTTGTTCACTATGGCAGTCTGATCTCTT  
GCTAGTAATCAATCGTTCTGTATATTATTATATGTTCC

>PGSC0003DMG400030658 RLK with malectin domain

ATGTGGTTTGGAGCAGGATTTCTAAGTATTCAGTGCTGTGCTACTGCAAACTTTACAGAGCCACGTACCA  
ACTTAAGTTGGATTTAGATGGAACCTGGTTCCCTGAAAATCAGAGTTGCATATCAAGGCCAGTGTACAA  
GAGTGCACACTATGAACGAGCTCGATCTTTTAGCTTAGACATTGGCCATAAGTGGTGTACAGCTTGCCA  
ACCAGGAAAGATCATGACTATCTAGTAAGAGGTACATTTCTTTCTGTCAAACAAGGGAAGACTCTTCCAC  
ACAGTTCTTTTGTGTTTTGATTGGTGTACACCAATAGCCACAGTAAAGTCATCTGATGAACTTACGGTT  
GAGGGAATTTTAGAGCTACTAGAAGCTATACCAACTTCTGCCTATTGAAAAAGAAGGGGAATCCTTAC  
ATTTCTAAGTTGAACTCAGACCGATAAATTCAGATTATCTGAAAAGGGAGCCTTCAGAAATACTCAAAC  
TTGTACATAGAGTTGATGCTGGAAACAAGGTTGCGGAAATCAGGTATTCTTTCATCCTATCACAAAATTA  
TATTTTGGATTGGCAATACAGTATATTCTTTCATGGTAACAAATCAAGTATCATGAAGTGATAATGTGAA  
GACTTGTCAACTCAGGTACCCATATGACCAGTATGATAGAATTTGGAGACCAGCCTCAAATCTAGAATCA  
CAAGTTACTCGAACGCAGCCATCCATTATCAAGCAGGTCATTGCAAGAAAACACAGTTTATTACCTCCTG  
CATTCTGATTACGAACATCCCTCACCCATCCAGAGAGATTGGACTTCTTGCATGAAGACCTTGACACAGG  
ATATTATACTTACTCTCTCTTCTGTAATTTCTAGAGCCCAATAACTCAGTTCAAGCTGGAGAAAAGGGTGT  
TCTATATATACATTAACAACGAAAAGAGACTCAAGGTTGATATACTGGCTAGTGGTTCCAGATACCTGGA  
TGTAATTTTGAATTTAGAGCAAATAGGTTTGTCAACCTGACGATGATCAAGGCCTCAAATCTATCTCAAT  
TGGGACCCATTTGTAATGGTTATGAGATTTTAAAGACTCTTCTCGGGTTAAAGAAACAGCCATGGAAG  
AAGGTAATTTTACTCAAGAATATGCATAGTAGCAGAATTTAAGATGCCATAGTAGAAAAGCATTACAGA  
GAAGTGCATTTATTATCTCTCTATATGTTTCAGTTGACATAATGGCGAATGTCAAGAAGGAATTATTGCA  
ACAAAACAAAACAATGAAATATGGAAGAGTTGGTCAGGAGACCCTTGTCTTCCCCTTCCATGGCCGGG  
TCTAACTTGTGATCGCGTTAATGGTACTTCAGTCATCACTCAGATGTAAGTTATTCCTCTCTATCAAATA  
CTCAAAGCAGTTTGGTTTTCTGAAAATTATCAAATAATATGTCTACCATTTTTTCCACCTCATTTATCCGTA  
GCATAGTAAGCGCGTTTGGAGATAGACGGATTACACTTCTGGTCATTTAATCCTTTTTCTTATTCCCTAC  
CACAGAGATCTCTCCTCAGGTGGCCTTAGTGGACCTAGCCCTCCTAGCATCCAAAACCTGATGCACCTGA  
GAAAACCTGTATGTCCAAGCCTTTGTCATCAACACTAACATTTACCTGTTAATTTCTTTTAAAACAAATTT  
ACAATCTGGTGTAGTTTTACTAAACAATCAAGTTATTTGCCAAGACAGGAATATCAGCAATAATGGCTCT  
AGTGGCACAAATTCCTCTTTACATCATCCTTTACATACTCTACAAGGTAAATCTCCTATGTTGGTTTCCAC  
ATAAAATAATTGCAAATATGAAGAAGTTAAATAATATCATACAGAGGATTAACCTCTGAAAAAATAC  
CAAAGCTGTACAAAAGTTTTACTAGCAAGCTGCCTTCATGCTTCATATGTTACAATAAAAAAGTATGAT  
GTGACACTAATATCTTTGTTTCCTTGTCCCTCCAGATACTTAAGCAGAAGCATTTCATATCAGCAACAAGCT

TTCTAGAAGCATCAAAGAATCTAATATTACAACAGAGTATGAGACCACTACCCTATCTTCAGAGAAAAAA  
AACAAATTTCTATGATTTTACGCTGTCCACTTTTTCTCCGGGGGTGGGGGAAAGCAATGGGATATCAGGA  
GCAGGGAGCTGAGAAATAAAGAAAAATAAGCCTAATTTGTTTTCTTTTTTACATTTACAGCAAAGGGATG  
GCTAATGTTAAACAAAACCTCAAGTTCAACACATAAACTTGTGATAGGAGCAGCTGTAGGTACAGCTCTCC  
TGGTGATCCTTGCAATTGTTATCTCTGTGGTCTGCCTCTTCAAAGACGAGTAATGGCAGGGCCAAAATT  
TCTTATGAGAAATTAATCGATCACAGGAGTAAGTACACTCTCAGCACACTAGAAATAATCCTGCACGCA  
TAATGCATGATAATATCATGATAATTTAAGAATCTTTTCTTGTGCTTGCAATAGCTTAAGATTGGACT  
CAACAAGCATAAATCATAAAACCTTCATGATTAATAAAGCAGAACTGTAACATATCATCTGTTGCAA  
AGAAGCTTTTTTGATAGGAACTCAAGAAATTTGAAACAGAGTTAATATCCTTAACATTTGGTACTTATATT  
CAATGAAGCAATATGCTCAAAAAAATATTCAAATGCAGATGCAATATATTCAGTACCAAGCACGGATA  
CTACCATGATGAAATCAATATCCTCCAGGAACTTCAAACCTGGAATATATAGAAGCTATTACTCAGAACTA  
CAAACCTTTGATAGGTGAAGGTGGCTTTGGATCCGTTTACCGTGGTACCTTACCTGATGGTGTAGAAGT  
GGCTGTAAAGGTCAGATCAGCCACTTCGACTCAGGGAATTCGAGAATTCATAACGAGGTAACAATTTA  
GAGTATTTGTAGACCAATTTCTCCCAACTTCCTTATTTGCATCAAACCAACAAAAAGATGTTACCTAAAA  
TGTGAGAAAAGCATCAGCACATGGAGTGAGCAATGAATCTTCTATTTTCTATTGCTATTTACATAGGGA  
ATACGCTCCACAAAATTAATACTTTCTCACAGATCCGTGATTTTCTTTCATAATTACTTCCGGCGAGGAG  
TGTTGCCTCTGAAACGTCTTAGCTCTTCAGGAGCCATCTTTATAATAATGCATCTTATCCATGCATATATA  
GTTAACACATGCATAACAAATAACACAGCCTGCAAATTAACCATTGCTGTAATTTGTATTACAGCTGAAC  
CTTCTGTCAGCTATCACGCACGAGAACCTGGTCCCTCTTCTGGCTACTGCTGCGAGAATGAACAGCAGA  
TTCTGGTTTATCCATTTATGTCAAACAGCTCCCTACAGGATCGGTTATATGGTACTGCATACATAAACAAA  
TTCAAGTCTATCACTTTTATCATAAGAACCAGCACTAATTTCTTTCTTGTCCCTCATCCTGTTTAGGAGCA  
GCAGCAAAAAGGAAGATTCTAGACTGGCCAGCCAGACTTTCCATTGCGTTAGGAGCAGCGAGAGGCAA  
GTAACACAAAACCTATGCTATTCATGCAACTCTTCAATGAAAAAGCCATATCTATGGACTTAAGCATGCG  
TAAATAAAAAGGAGAACGTGTTTACCTGAGAGACAAAGATTGAAGGCATAATATGAATCTAATAGAGTTT  
AACAAATCAATCATTCCCTGTTACTTATTATGAAGGCACATTTGTAACAGCAAATACCAAAGTTTGACGTT  
TTCATTATGTTATTTCTTTTAATCTTCTCAGGTTTGCTGCACCTTCACACATTCTCGGACCGTTGTCTGAT  
CCATAGGGATGTCAAGTCAAGTAACATACTCTGGATCAGAGCATGTGTGCCAAGGTTGCTGATTTTGG  
ATTTTCAAATATGCATCTCAAGAAGGTGATAGTGGTACTTCTTTAGAAGTAAGGGGGACAGCTGGGTA  
CTTGATCCAGAGTAAGTATTATATCTTCCAGATTGTGTCGTCATTATGAAATTAGGACAAGAGATAAGT

TTCTAAAGCATAGCCTAATGGACAGCTCTGCTACCTAATATGGATTACGCGAAGTGATTATTATTTGAA  
TCATCCGCAGGAGATTCTATTAGTATATTTATTGACTTTATTTTCGTTATAATTCACCATAGCACAAATGGT  
TCAAAAATCTTTGGGGAAATCAAGCTCATGTCCTTTTCATGAATTCTTTCTGCATAGGTACTACTCGACCC  
AACGTCTGTCAGCAAAAAGTGATGTCTTCAGCTTTGGAGTTGTCCTACTGGAAATCCTCACAGGTCGAGA  
GCCTCTCAACATAAACAAGCCAAGAAATGAGTGGAGCTTGGTTGAATGGGTATGGCCCAACTTAGCAAG  
CTATTTCTTTAACTGAAATTATCCAGATACAAATTGCTACTATTACCGAATCCTCAGAACCACACAGTCTC  
TTCCATAATTTATTTGCAGCAAACACTACAGTGCCATGAAAAGACTGAAAGAGTTTTTTTTTTTTTTAAAA  
CACAGAAAGAACTTCTGTTGTTACTACGACTTACGTGATAATTCACAGCTACTCAAGATGATAAACTGAT  
GTTGAGTGCTTAACTACTTTGCAACTATATACTCTTTTGATTTGCATGTTTACATCTGATCACAAGCAA  
GTATCCACTTTGAAATACAGGCGAAACCTCTAATAAGAAGCTCAAGAGTTGAAGAAATTGTGGATCCCA  
CTATCAAGGGAGGGTATCATGGTGAGGCACTGTGGAGAGTGGTAGAGGTGGCTTTGGCATGCACGGA  
GACATACTCGACTTACAGACCATGCATGGCGGATATTGTAAGAGAGCTCGAGGATGCATTGATAATAGA  
AAACAATGCATCAGAATACTTGAAGTCCCTAGACAGCTTTGGAGGATCAAATCGTTTCTCTATAGAAAG  
GTCCATTGTCCTTCCACCTATTAATCTCAAACAGAGCCATCCAGTCTCCTCTCAAACCAGCCCCTCCAC  
AACCAAGGTAA

>PGSC0003DMG400031802 RLK with malectin domain

TTAAGAGTGATATAGTCTACCGTTAATACGTTATCATATTCATAACTCTTTTTCTCTCTCTTTCAATTTAG  
AAACAAAATTTTAATTATCATTTTTTTAAGAAAAAGAATTAGCTACTCTGCAAATGGCAGCAAAGTGAAG  
CAGGCTGACCTGGTTCATTCCCGCGTGTCTTCTCCAAAAACAATGGCATTAAATCCAACCTTTGATCTTT  
CCTCTTACCAACTTCACCTCTCTTCTCCAAATTTCTATTCTTTCTTCTTAACTCACCCAAACGACTCAT  
TCAACTCCACTCCACCTAAAATCAACCTTTTTTCCCTTCTCAAATCATCACATGACTCTCTGTTTCTTCAA  
TCATCATCATTAAACCATGTCTTTCTTCTATTCTCCTCCTTCTCTCCCTTTTATCTTCCCTTCTGGTTCTCA  
ATCCTTAAGAGGTAAACCCCTTTTCCCCATTTATTAACCCCTTTTCAAAAATTTGATCTTTTTTTCAAGATT  
TCAACTTTTCTTGTTTTTTTTCAGGTGTTTTGATTGATTGTGGTGCTGTAGTTGATTCTGTAGTTAATGAGC  
AGAATTGGGTGTCGGATTCTGGTTATGTATCAGCAGGAAAACCAAGAATCTTACTGTTGATGTTCTTAA  
TTATACACTGTCAACTGTCCGTACATTTCCATTGAAGAACAATGTTTTCAAGAAATTCTGTTATGAGGTTCT  
CTGTTTATCGTGGAGGGAAGTACTTGGTCAGGACGACGTATTTCTATGGTGGGGTTAATGGGAATTTGA  
ATCCTCCTGTGTTTGATCAGATTGTTGATGGGACTTTTTGGAGTCCAGTGAATACAACCTGAGGATTATTG  
GAATGGAATGTCTTCATATTATGAAGGGTTTTTTAAGGCTGTTGGGAAGAATATGAGTGTGTGTTTGGC

TGCAAATAGTTTAACGGATTCTGACCCTTTTATATCTGCTTTGGAACCTTGTTTTGGTGTGCGGATTGTTGT  
ATAATTCTACAGATTTTAATATTTATGGATTGACTTTGATTACAAGGAGCAGTTTTGGGAACAATGGATC  
AATTATCAAGTAAGTTTGTTACCTATATGGACCTAAAGTTGTTAGCTTTGACTAAAAAAGATTGCTTTTG  
ATTTGATTAAGTTGGTATTTTTAAGTTCTGATTATGATTCTGAATTCGCGATGCAATTCAAATACATTTA  
CAGTTTATGTAGAACTGAATCCCAATTCAGGTGTTGAAATGATTAGCAATTTATGTATTTCAATCCCTATT  
GATCATCGACTTGCGCCTGAACTTTAAGATTTTAGAAGTTCTTTCAACTTTCAATATAGAATCTGCTGTAA  
TTTTGGTTAACTAGTCTGAATAACTCTTTTGATCACAATGTGAATTGAAACCTTTGAGGCTAAGTTCTTTC  
TAGTGCTCATTGGAATAGGTTATGAACTGCAGCAGAATCTATCCTATTCGCGTTTCTCCTAAATTTATTA  
CAAGGAAGATAGAAAAATGGCTAGGCATGAGTTATGCTCTTTGACTAACCAGATAACGGCCTTTGTGA  
GCATATCTTTTTGAGCGTGTTCTGAAAATTGTTCTCAAGCATATCTAAAGCAAGAAAATTCACCCCTTAA  
TATACATAGTTGCTAAGCTGTCTGAATGCAAATATACTCTAGTCTATTTGGTTACTAGTTTTATAGTGGTT  
GTTAGAGAAATTAGTATCTGATTATATCATCCATGTTTAAACAAACGTGTTTCTTTGGTTATGTTTATCAT  
AACTTCAAGCATTTTAACTGCTAGATATCCTGACGATGAATTTGATCGTTACTGGGAGCCCTATGGACA  
ACATTCTCCTGCAGAAAATTTAGTCATGTTTCTGTTTCTGGTATCTGGAATCACCCCCGGCAAAGTAT  
TTCGGACACGGTTAACAGTACCTAAGCCTGAAGCTATGGAGTTATTATGGCCTCCAGCACCTCTCCCAA  
CGCAACGTATTACATAGCTCTTTACTTTGCTGATGATCAAAATTCCTCTCAGGAAGAACTTTCAACATA  
GCATAAATGATATATTGTTTTATCCCAACCTTAATGTTGCTCCGGCTGGCATGGTTGTGTTTGAAGTCAG  
TGGCCTCTGTCTGGTATTACAAAGATAACTTTAACTCCGGTGATTGGATCAAGTGCTGGTCCGTTGATTA  
ATGCAGGAGAGGTTTTGAAGTGTTGCCCTCGGAGGAAGAACTCATACTCGAGACGGTAATCTGCTTT  
TCTGGCTTCTAATATAGCACTTGGATTAGCATGAGCAGTCCTCTAGGATTACTTTTTACCTCATTCTGTT  
GATTAATTACCTCTGCTACATCAATGTGATATATTTCTTACTGTAGTGATAGCTCTGGAAAAATTGAAGG  
AGAGCTTCAAGAATCCTCCCCAGATTGGAATGGTGATCCATGTTTACCTCCTCAATACCAATGGACTGG  
AGTTACATGTGCTGGAGGATCACGAATTCGTGTTACTTCTTTGTGAGTTCAGATGTCTCTTACTCCATTAG  
CCTCAAACCTCTCCACGTCACCCGCCTCATGAATAAGAAAAATGGGAAAAATGAATACCTTACCTTACCC  
CAACCCAAATTACGATTGGCCAACCTGTTAACTTGTTCTTTCTCCTTTGTCTGCAGAAACCTAACAAG  
CATGGGTCTTTCTGGATCAATTTACCTAGCATTGCCAGATTGACAGCATTGAATGGCATGTAAGTGAAT  
ATTAGTTTCTTAGTGCTCATATATTGATGGATGCAAATAGATTTCTTAAAAGTCTCGTACTTATCACAGAT  
GGCTTGCGGATAATAATTTGACGGGATCTATCCAGATTTGAGCTCACTGAGTATCCTGGAGACTCTGTA  
AGTAAAACCTTTGGTTTCTTTGTTCTTCTTCAAATGCTGTTGCAATAATGATCTTTCTAATTATAGCCC



AAGCATTGTGAAAAAGTCGGGGAAAAAAAACCTGTGTAATTAAGTATGTCTATTCCTAATACTCTCGT  
CTTTATTTTTCAGACACTTGGAAGACAATCAGCTTAGTGGAGAAATCCACCTTCTCTTGGAAACATTATGA  
GCCTTAATGAAATGTAAGTTCGTCTTTCCATAATAAAACAAAATGAGTATGATACATAATGGATTTTGAC  
CCCTAAGTTTGCATAGATTTCAATTAGTAATCTGCAACACTTCTGTTTTACACAATCATAGTTTCCCTATGA  
TGTATTATAAGTACACTTTTTCTCAAGTATAGTAGCCCTACGACGCTAGCTAGTATAAGCACAGTTTCTAT  
AACCACCTCAACGGATTTGCTAGACCTTTTCTCTGTGCGAAAGTGGGTGGTGGTGGTACACAGCGTCATT  
AGGCACATGCTAATCAAGGGAATTAGGATAGCTGGATCAACAGACAGGTGGATGTGGCTATGCAGCAC  
GGAATTAATAAGTACCTCAAATAGTGTCTCTTAAGTAGATTTCTCTTGGTATAGAGATCATTTTCAAAAA  
GGTTGAAGCAGGTTTTAGGAAAGCTTGTGTCAGATACTTAAATTCATGGATGGTAGAGCAGCCATTGAT  
CTCTTTAATGTGAGAATCCAAGTGTCAATTCGAGGTTTTTATCACTTACGAGTCATTACCTTGAGCATCAA  
CAAGCAAAAAGGTAAGTGTCTAGGCGCCGAGAAAGGACTACTATCCAAACTCATGGTA  
AATGAGAGATGTAATTATTGACCTTTGTATTCTGCCACCTAGTTCTAATATTTAGACTACTGCAAAAT  
TTATGAGTACATGAGAAATAGGATCACAGAGTTTAAACCGATAGTAGTTCTAGTTTTGGGATGCAAGTGG  
TGGGGCTGTTAAGTTGAATGATAGTTGTTAAACAAAGAAAGCAATGAGCTAGCTTACCACAGCTGTACA  
TAGCTCAAATTATTCTTGTTGCTTCAGCAACAGGATCTCTATCGAGCGAAATCACCATTAAAGCCCACG  
CGGTAATACTCATTTTGTAGAGCTTCCACTACAAAGCACTCATTTGATCAGAGCTTATAGAAGCTATTGT  
GTGAAAAACTAATGTTCTAAAGTCATTACCTTGAGCATCCTTGACTGCTTTAGACATAACTTTGCTCATAG  
AATTTCAATTCACAAGCACTCGTTATGTTTTTCTTTTCTAAGAGACCATAATAGAGATATATTAATGATATC  
AAATGCCATCGAGGAACCTTTCTTGATGTTGTATATGCTCATATGCTGAGGTAAAGTTAAATGACACATTA  
TTATTTTTGTTGCAGCTTCTTGCAGAACAATAATTTATCTGGCCAGATACCAAGCAGTCTTCTCGGAAAAC  
CAACGCTGAATCTCAGGTAATGAATCACTCATTAGTGATAAGCTTTTCGTTGCTTTTGCCTTTTGCTTTTTG  
TTCGAATATCAATCAAATTGCTCTGTTGCTTTAATTGTAGGACCACTCCTGGGAATCCATTGTTGTCACAG  
CCCCCTATATGAGGAGATTGTCCTTGCTACTTTGGACATTGAGAAGTATAAAAATATTCAGTTTTTCGACATT  
AGATTTTCAGACCCTCCAGTTCCTTTTTCTCAATATTTTTGAATTTTTGGTGAAAAGAAAAATCTTCAAAGCT  
TACTATTTTGGAACTCCGGAATACACTACCAAGACTAACTATTCAAATGGTTTGCAGCACATTGTCTG  
CCCAAGTAGTTTAGTAAAATGGAATTTTGTGTAATTTTTTGTGTGTCCATAGCTGTATGTACAGTCATT  
CAAGGTAACTCAAAAAGTTGTGTTTTGATTCATATATACTGAAAACCAATTGTATAAACATGTTTGTAA  
CTTGTTTATTATTGAAATGATGCAAGAGCTTTTGTATTGATTGTCG

>PGSC0003DMG400035816 RLK with malectin domain

ATGTTTCTCTCTCAGTTATTCATTCTCTTATTGTGTATTCAAACAATCATCATATCTACTGCAACTAACATTC  
ATGAAAACGTTGCCATATCATGTGGTGCCTCTGGCAATTACCCTGCACCAGATGGACGATTATGGATTG  
GAGATTCAACTTTCACTTCCTCATTCTACACTTAACTGGAAAATCTATTAATTCAAGAGTACCTCACCAA  
GCTGCCTTGTCCGATCCAGTTCCTTATAAGTCTGCTCGATCGTCTCGCCATCAGTTTACCTACAAATTTCA  
GTGAAACCGGGACACAAGTTCATACGCCTGCACTTCAAACCAGCTTTATACAATGGTTTCTACAAGTCCA  
AAGCCATTTTTACTGTCAAAACTGATCAGCATAACCCTGCTCAGTGACTTCATACCTACCCTTGCTGCAGGT  
ATGAACTATTTCAAAAAGGAATTTTGCATCAATGTACAAGAAAGTGAAACATTAAGCATAACATTCATAC  
CATCTCGAAAATCAAGCTTTTCAGAAGACACTTATGCTTTTGTTAATGCAATCGAGATTGTTCCATACCC  
TCTGGTCTGTATTTACACCTGATGGCGATCAGGGAGTCCCTATTGTTGGACGAAATTACAGATTCTACA  
TTGACAACAGCACAGCACTGGAGACAATTCAGCGAATAAATGTTGGCGGAAACTCTATTTTCATCCTTGG  
AAGATGCAACCATGTTCCGGGACTGGGAAGATGACACTAATTACCTGATTCAAGTAGGAGCCTTTTCGA  
TCAACAGAGCCGTTGATATCAGATATGCATCCTCAGCAACTCACGTTGCACCAAAGAAGTTTACCTGAC  
GGCCAGGTCAGTGGGTGCGCACTGCCATTGCAATTTCTGTAATCTCACATGGAACATTCCACTTGATTTG  
GGATTAGATACCTTGTTAGGCTTCACTTTTGTGAAATTGAACCTATGATCACATATGAAGGCCAAAGGA  
ATTTCACTATTGTTATAACAATCAGAATGCTGAAGATGATGCTAATGTGATCAAATGGAGTGGGGGGA  
ATGGAATTTCTGTATACAGGGACTATGTTGCCATTATGGAGGGTGATAGAAGGGAAGGGAAGCGTAAC  
CTTACTATAGTTTTGCAGCCAAAGTTTCCTTCAATCAGTAAACATGCTAATGCCATCTTAAATGGGATAGA  
AGTCTTCAAGATAAGCAATCCTGACAACAATCTTGGTAGTGTGAGCCCTGTGCATCCTGTTATAAGTTCA  
ACACCAGAAAAATCAGAGGAATCTGTGCTGTTCTATACAAAGAATCAAATTGCAACTGTACTGACATTTA  
TGGTCACTTTGGTCAATGTTGCTGTTTATTACATTAGGTGTATTTAGAGATGAACTCTGGAAAGACGAA  
CAATAGAATATCTTCAGGAGAGCATCAGTGTGTCGTCATTCTCATTGGATGAGATGGAAAGATCAACGAA  
CAATTTTGATCCTCAGCTTGTCATTGGTAGCGGTGGATATGGCCCAGTATATAAAGGGGATATTGATGGT  
GGAAAAACCACTGTAGCAGTTAAGCGATTGAAACGAGGATCTAGCCCAGGGGGAGAAAGAGTTTTGGA  
TGAAATCAATATGTTATCTACGCACCGCCATGA

>PGSC0003DMG400040066 RLK with malectin domain

ATGGGGCTATGGGTGCATTTGGTTCTAGCTTTTATGCTGTCTGTTTCTTGATGCAGGAGGCAAATGCTG  
CTTTACTCCTGCTGATAAATATTTGATTGCTTGTGGATCTTCAAAAATGTAACCTTTCTTGGCCAGATT  
TTGTTCTGACACACACCATTCTCAGTTGTTTTGGAAAGTGAAGAAAATTCTATTTCTGCAACATCTAAT  
TCCTCTGCTCCATTTTCAATTTACCAGTCTGCTAGAAATTTCCACACTACAACATCTTACGAATTTGATATT

CATCAACAAGGGCGACATTGGGTTTCGCCTTTATTTCTATCCTCTCCCTGGTCATAACTTAAACATCTGCCTC  
AATCACAGTTGTCACAGAAAATTTTGTCTGTTGAACAATTTCAAGATATAAGGGTACTTATC  
TATTTAAGGAATACTCAATTAATGTCACCTCAGATAGCTTGACTATTGCTTTAATCCCTTCAAACAACTCC  
GTCGCGTTTATTAATGCGATTGAAGTTGTATCAGCTCCTGATGAGTTGATTCTGATCAAGCAGTGACTG  
CATCTCCACCAGCACCTTTCAATGGCCTTTCTGGGCTATCCCTTGAACTGTTTATCGGTTAAACATGGGA  
GGTCCTTTGATTACTGCTCAGAATGATACTCTAGGGAGAACGTGGGAGAATGATGTTAAGTACCTGCAT  
GTTAATAGCTCTGCAGTGAATGTTTCAGTTATCCCTTCAAGCATAAAATATCCAGCCACCATTACTCTGA  
AATAGCACCATATTGGGTTTATGCTACTGCTGAAACCATGGGAGATGCTAATACTGTCGATGGCAATTC  
AATATCACCTGGGAGTTCCAGTTGATCCAACTTCATGTACCTCATCCGCGTACATTTTTGTGATATCGT  
GAGCGAGTCCTGAATACTCTACTTTTTAATCTGTACATAAATGATGACACTGCTTTACTGGACCTAGATT  
TGCTTTCAGTTGGTAATTTGGACGTGCCGTATTACAAAGATTTTGTCTCCAACCTCCACAACAAATTCAGGT  
GTTCTGACAGTCAGTGTGGTCCAGACACAGGAGCTGATTGGATCAATGCCCTTATGAATGGATTGGAA  
ATCATGAAGATTAGCAATGGAGCTAGAAGCTTGAGTGGGGTTTCATCTGTGGAGACTCTATTTGTGAGG  
CCTCACAAAAGAACAAAAAAGGTATTATAATTGGTTCTGTTGTAGGAGGAGCATCAGCTGCATTAGCA  
ATTATTGGGTTGTGTTATTGCTGCTTGGTAGCCCTCAGATCAAAGAGCTCCCGCCAGGGGCAGCCATGG  
CTTCTCTTCCCCTGTATGGAACTCTTTAACTTTGACAAAGATGTCCACAGTTTCTCAAAGAGTGGAAC  
GGCAAGCTGTATCTCCTTAGCTTACCCAATCTTGGTCGATTCTTCAGTTTCCAAGAAATAATGGATGCTA  
CTAACAAGTTTGATGAAAACCTTGCTTCTGGTGTGGTGGTTTTGGTAGAGTCTACAAGGGAACACTAGA  
AGATGGGACAAGGCTTGCTGTCAAAGAGGCAACCCGAGATCTGAACAAGGTCTAGCTGAATTTCGAA  
CAGAAATTGAAATGTTGTCCAAGCTTCGCCACCGCCATCTTGTGTCTTTGATTGGTTATTGTGATGAAAG  
ATCAGAAATGATTTTGGTTTATGAATACATGGCAAATGGGCCTCTCCGAAGTCATCTTTATGGAACGGAT  
CTTCCATCTCTTTCGTGGAAGCAGCGTCTTGAGATTTGTATAGGTGCTGCTAGGGGGCTGCATTACCTCC  
ACACTGGTGCATCGCAGAGCATCATTACCGTGATGTGAAAACATACTCTTGGACGAGA  
TTGTAGCTAAAGTTGCTGATTTTGGTCTTTCTAAAGCTGGACCAGCTATTGATCAGACCCATGTCAGCACT  
GCTGTAAAGGTAGCTTTGGTTACCTGGATCCCGAGTACTTTAGAAGACAGCAGCTTACTGAGAAATCA  
GATGTTTATTCATTTGGTGTGTCCTAATGGAAGTGCTCTGCACCAGACCTGCATTGAATCCTGTCTACC  
ACGGGATCAAGTCAATATAGCTGAGTGGGCCATGACTTGGCAAAGAAAGGCATGTTGGATCAGATAA  
TGGACCCAAATCTTACAGGGAAGGTGAATTCAGCCTCCCTCAAGAAGTTTGGGGAGACTGCGGAGAAG  
TGTTTGGCTGACTATGGAGTTGATAGACCTTCCATGGGGGATGTTCTATGGAATCTAGAGTATGCTCTC

AGCTTGAGGAAACCTCATCAGCTCTGGCAGAGCCCGATGATAACAGCACGAACCATATACCCAGCATA  
CTTTGACACCATTTGACAATAGTGTGAGTATGATCGAAGGGATCAACTCTGGAAGTATGATGATGCAG  
AGGATGCTGCCACTAGTGCTGTTTTCTCTCAACTGGTAAATCCACGGGGGAAGATGA

>PGSC0003DMG400041071 RLK with malectin domain

ATGTTTCTCTCTCAGTTATTCATTCTTTATTGTGTATTCAAACAATCATCATATCTACTGCAACTAACATTC  
ATGAAAACGTTGCCATATCATGTGGTGCCTCTGGCAATTACCCTGCACCAGATGGACGATTATGGATTG  
GAGATTCAACTTTCACTTCCTCATTCTACACTTAACTGGAAAATCTATTAATTCAAGAGTACCTCACCAA  
GCTGCCTTGTCCGATCCAGTTCCTTATAAGTCTGCTCGATCGTCTCGCCATCAGTTTACCTACAAATTTTCA  
GTGAAACCGGGACACAAGTTCATACGCCTGCACTTCAAACCAGCTTTATACAATGGTTTCTACAAGTCCA  
AAGCCATTTTTACTGTCAAACTGATCAGCATAACCCTGCTCAGTGACTTCATACCTACCCTTGCTGCAGGT  
ATGAACTATTTCAAAAAGGAATTTTGCATCAATGTACAAGAAAGTGAAACATTAAGCATAACATTCATAC  
CATCTCGAAAATCAAGCTTTTCAGAAGACACTTATGCTTTTGTTAATGCAATCGAGATTGTTCCATGCCC  
TCTGGTCTGTATTTACACCTGATGGCGATCAGGGAGTCCCTGTTGTTGGACGAAATTACAGATTCTACA  
TTGACAACAGCACAGCACTGGAGACAATTCAGCGAATAAATGTTGGCGGAAACTCTATTTTCATCCTTGG  
AAGATGCAACCATGTTCCGGGACTGGGAAGATGACACTAATTACCTGATTCAAGTAGGAGCCTTTTCGA  
TCAACAGAGCCGTTGATATCAGATATGCATCCTCAGCAACTCACGTTGCACCAAAGAAGTTTACCTGAC  
GGCCAGGTCAGTGGGTGCGCACTGCCATTTGAATTTCTGTAATCTCACATGGAACATTCCAATTGATTTG  
GGATTCAGATACCTTGTTAGGCTTCACTTTTGTGAAATTGAACCTATGATCACATATGAAGGCCAAAGGA  
ATTTCACTATTGTTATAACAATCAGAATGCTGAAGATGATGCTAATGTGATCAAATGGAGTGGGGGGA  
ATGGAATTTCTGTATACAGGGACTATGTTGCCATTATGGAGGGTGATAGAAGGGAAGGGAAGCGTAAC  
CTTACTATAGTTTTGCAGCCAAAGTTTCTTCAATCAGTAAACATGCTAATGCCATCTTAAATGGGATAGA  
AGTCTTCAAGATAAGCAATCCTGACAACAATCTGGTAGTGTGAGCCCTGTGCATCCTGTTATAAGTTCA  
ACACCAGAAAAATCAGAGGAATCTGTGCTGTTCTATACAAAGAATCAAATTGCAACTGTACTGACATTTA  
TGGTCACTTTGGTCAATGTTGCTGTTTATTACATTAGGTGATTTTCAGAGATGAACTCTGGAAAGACGAA  
CAATAGAATATCTTCAGGAGAGCATCAGTGTGTCGTAATTCTCATTGGATGAGATGAAAAGATCAACGAA  
CAATTTTGATCCTCAGCTTGTCAATTGGTAGCGGTGGATATGGCCAGTATATAAAGGGGATATTGATGGT  
GGAAAACCACTGTAGCAGTTAAGCGATTGAAACGAGGATCTAGCCAGGGGGGGAAAGAGTTTTGGAT  
GGAAATCAATATGTTATCTATGCACCGCCATGAGAACCTTCTCTCCCTAATTGGTTACTGCACTGAAGGT  
CATGAGATGTTATTAGTTTATGGTTATATGCCTCGGGGATCACTTGCTGACAACCTGTACAAAATGGACA

GAAATAGCTCATCTCTCTCTTGGGAACGGAGACTCAAGATTGCTATAGGTGCTGCACGTGGACTGGATT  
TCCTTCATACATCTCAAATAGGGTGATACATCGTGATATCAAAGCTCAAACATTCTGCTGGATGAAAA  
CTGGGAAAGTAAGATTTTCAGATTTTGGGTTGTCCAAAATGGGGCCTGGAAATGAATCAGCTACTCATGT  
TAGTACACAAGTCAAAGGCACATTTGGGTACCTCGATCCTGAGTACTTCCAGACTAAAAGATTGACATG  
GAAAGCTGATGTGTATGCTTTTGGAGTAGTACTATTTGAATTGCTCTCAGGAAGACCTGCAGTCGATATG  
GGCCTGCCTGAGGAGCAGCATGGACTTGTAGCATGGGCCAAGCAATGCATCAGGGAAGGAGAAGTTA  
ATAAGCTTATTGACCTGAATCTGGAAGGGCCTATCTCATCAACTGTTTGAAGGTGTTTCATAGGAATTGC  
AGAAAATGCTTGGATGATAATCCACGTGAACGGCCTCCAATGTCTAAAGTGGTGAAGGCTGGAATT  
AGCATTAGTATTTTCAGCAGAGTGCAGGTGAAGGCATCATTTTATTTGATGACACATCAACATCTCAGTCA  
AGGGCTGAAGCAGAAAGGGCATCCATCAAAGAGGGTTGTAATGGCATTGATATAGCAAAAAGGAGTGT  
CATTTACGGAGATGGTGGGATTTTTTTGGTCTTTTTCCAAAACACCACCAAAGCCAATAGCTCTACCA  
ACACCGCCACAAGTACTTTACTGCTTCCCCCTCAATGAGATGCTAAAGGCTACAAAAGATTTCAATGAGA  
GCCTGAAAATAGGTTTTCTAGGATCTGACAATGCATACGTTGGCTTCATAAATGGTCGACGTGTTGCCAT  
CAGACGTTACACACTGCAGAGTCAAGACTTCACATGGTTAGTGAGTTGCTAGCTAAAAGAGAAATGAG  
TCCCTTGCCTAGCCACATCAACATGGTGTCACTGATTGGGTTTTGCAGAAATGTTACAGAGATGATCCTT  
GTGTATGATTATGCAGCTGGAGGGACCCTACATGATTATCTCCGTGACCCTGATAGGAATCCTCTCTCAT  
GGAAGAAGAGGCTTGAGATCTGCATTGGTGCTGCAGAGGGTTTGAAGTATCTTCGGTCCATACTGAAGA  
TAACAGTTCTCCATTGCATTTTCAACTCCTCTATATTTTTTTGGATGAGAATTTGGTAGCCAAAGTTTCAG  
AAGTTAGCTGGTCAAAAACAAAAGGGATCAATACAGCGGGGGTAATTCATGAAGGGGGATATTTGGAT  
TCAGACTACTTACGAGATAAAAAGATTGACAGAATCATACGCATACTCATTTGGCTTGGTGTATTTGAGA  
TGCTATGTGCCAATGAAGCATTGGAACATTGGCTGAATCAGGGACAGGTCAGTCTAGCCCAATGGATTA  
AAACATGTTTTATGACTGTGACGTCCATTTCGATTCACCCATGCTTAGTTGGAAGAATATCACCTGACTGC  
TTTGAGCTGTTTGTAGATACTGCAATTAAGTGCCTGCACGATGAGGGTAACAAACGTCCATCAATGAATG  
ATATAATCACAAGTCTCAAGGAAGCACTCAAGCTGCAAGAGGCAGCTAATATTACATAG

>PGSC0003DMG400043836 RLK with malectin domain

ATGCCAAGAGGATCACCACCACCATCATCGTCTACAATAATGGCTAATATCCTCGTGGCGTTTGTGGCC  
TCATTTTCATCGGCCCTCGAGTGTAATTCAGTTTCTGCACAATCAGATTCTACTGCACCTGCAAAATCT  
TTTCCAGCATTACACCTTCAGATAACTACCTTATTAATTGTGGATCTACTTCTCTACTACTCTTCCAGGA  
AATCGCGCATTTCACCAGATGAAACCACAGCTAAATATTTAGCCTACAGCGGACGTGACCTTCACATTT

CTGCACCTGATAATAAAAATGTACCTTCACCTATGTACCTTAGCGCGAAAATTTTCGATAGTGAAGCTAC  
TTATACATTTTCATGTGGCCAGTCCAGGCTTGCAATTGGATCCGTCTTTATTTTTACCCATTACAAAACAATG  
AATTTAATCTCCAAACAGCCAAATTCTCTGTTTCAGTGGATACATTAGTTCTCCTCCGTGATTACCAAATG  
GAGAAAAACGAACCAGTTATGAAAGAGTTTCTTGTAATGTCACAACAGAGCGTTATGCCATCAAATTT  
GCACCTTCCCAAGGCTCAATTGCATTCGCCAACGCCATTGAGTTTGTTACTGCACCAGGCAAATTACTION  
ACTATTCTGTCCCTCTCCTTTTTCCCGTTTCACAGAAAATTTGATCTTTCCACTAGTAATTTCGAAACAACCT  
ATAGGCTTAATGTTGGAGGTGCATACCTTGATGCAACAAATGACACTTTAGGGAGAAGTTGGTTATCCG  
ATGAACCATTCCGTAATAGTGCCACAGGACAGGCGTTACTGTTGAGCCTTCTGTGATTCAATATCCAAC  
GGCAGGAGGGTTCGCTTTAATTGCTCCTCCTACAGTTTACAGTTCAGCAGTGAAAATGGCTGATTCAGA  
AACTACCATTCCCAATTTCAACATATCATGGACGATGGATATTGATACCTCATATACATACCTCATTCCGC  
TTCATTCTGTGATATCATTAGCAAATCGCTCAATGAACTGTATTTCAACGTGTACATTAATGATAAGATG  
GCAATTTCCGGGCTAGACTTGTCTTCTTTGACACAGCGGTTGCCACAGCTTTTTACAAGGACTTTGTGAT  
AGATGCCTCTTCAGCATCTAATCCTCTTAGTGTAAGGTTTCACCGGTGAACGATGTCCAAGGATTCAAG  
AATGCAATCCTGAATGGGCTTGAGGTTTTTCGGATGAATAATTCTATGGGTAGTCTTGATGGGCAATATG  
GTGTTGATGGAACGAAGAGTAGTGGCCCAAGCAAACAGTGGCTTATGTTGGTTTTGCTATGATGTTCCG  
GAGCATTGTAGGATTGGGTGCTATAGTTTTCAAGTGGCAAAGAGGCCTCAAGATTGGCAAAAAGG  
AACAGTTTCTCCTCTTGTTGCTTCCACTTCATGCTGGAGACACAAGCTTTATGGCGGGAAGCAAGGCTT  
CATTGTCGCGCAAGAGCCAATTTTTCTCTTCAAACATGGGGCTAGGCCGATACTTTTCATTTGCTGAGTTG  
TCAGACGCCACCAACAATTGGGAATCGACTGCCATAATTGGTGTGGTGGCTTTGGCAATGTCTATTATG  
GAGAAATCGATGATGGAACAAAAGTAGCTGTCAAGAGAGGAAATCCACAATCTGAGCAAGGTATCAAT  
GAGTTCCAGACTGAAATTCAGATGTTATCTAAGCTCAGACATCGCCATCTGGTGTGCTTGATTGGTTATT  
GTGATGAAAACACAGAGATGATACTGGTTTATGAGTTCATGCAAAATGGTCCTTTCAGAGATCATCTCTA  
TGGCAAGAACTTCCACCTTTGACATGGAAGCAGAGGCTAGAAAATCTGCATTGGCTCAGCTCGTGGGCT  
TCATTACCTCCATACAGGTGCATCTACAGCAATTATCCACAGAGATGTCAAACCACCAACATTCTTCTTG  
ATGAGAACTTAGTCGCTAAAATGGCTGACTTTGGGCTGTCAAAGATTGCCTTGCCAACGAGACTCACG  
TAAGCACAGCTGTGAAGGGAAGTTTTGGGTACCTCGATCCTGAGTACTTCCGTAAGCAGCAGCTAACAG  
ACAAGTCTGATGTGTACTIONTCAATTTGGAGTGGTACTTCTAGAGGCCTTGTGCGCTCGTCTGCCATTAATCC  
ATCACTTCCAAGAGAGCAAGTGAATTTAGCAGAATGGGGAATGCAATGGAAGAAAAAGGTTTGTGG  
ACAAGATCATTGATCCTACTCTTGTGGGACAAATTAACCCAGAGTCAATGAAGAAATTTGGTGAAGCAG

CAGAAAAGTGTGGCAGAATATGGTGCTGATAGACCTAGCATGGGTGATGTGCTGTGGAACCTGGAA  
TATGCTTTGCAGCTACAAGAAGCCTCATTACAAGGGAAGGCTGAAGAAGAAAACAAAGCATCTTCTTCC  
CCAGTCTCTCCTGTTATAGTTGCCCTACTCCTGCCCCGTCCTGCTCCTTCGACTCCTGACAACAGACCA  
GTTTCTACACCTGAGCAGACAAGAAATCCTGCTGAACTTCAAACAATTGACGATCATTAGGAACAAAAA  
TGTTTGATCAATTTGGTGCACCTAACGGGCGATGA

>PGSC0003DMG401015527 RLK with malectin domain

GCCTCATTGTCTTTCAATTCTATTCTTGAGTTCATTATTCTCTAGCTCAGCAGCATGGCTAGTAGTCATTTT  
CTCCTACTTGTTTTACTTCTTTCTGTTTTCTCTGTTTATGCTGATGGTAAGCTTTCTCCATTTTCTATATTTAA  
TTATTTGGGGTTGAAACCTTTTTGTCTCGATTAATTTGAATTCGTGTCAGATACGTCAACTAAGGAGTATA  
AAAAATCTACTTGTATACTAATCCAAATTCGTGTTTGATCATATATATATAGGTCCATTACTAGAAACAAA  
GGTTCTTTCCATCGTAAATTAGTGAAAACCTACTTGCCTAACTAATCCGAATTCACACTAGCTAGGTCTA  
CTAAGGGGGTAAATGTACCTATACTGAATTGAAAGGTTTTCAATTCTCATAATTTAACTTGACATCTTT  
GGTTAACGACAGAGGAATACTCTTTTCGTATATTATCTTTGATTATTTGATCTTTGATTTATTTATTTATTT  
TGTTACATTTTATTTGTAGTGTGGTGTGAGCCTAGATTGTGGATCATCAGAAGCATACTGATCATGAAA  
CTTCAATAGATTGGTTAGGAGATGCTGACTACGTAGCCAATGGAGAATCTCATGTTGTACAATCCAACAA  
CTCATTATCACACGTAATGAACACTCTAAGAGTGTTCAACAACCAGGACCAAGAATTGTTTCCTAATCGAT  
GAAATCGAAAAGGGTGGAAAAGTTCTAATTCGAGCTAGTTTTTACTATGGAAATTACGATGGGAAATCA  
AATCCACCATCATTTGCACTTCAATTTGATGGAAATCATTGGGCCAGTGTTACAACATGAGTGATCAAC  
TTGTATATTATGAGACAGTTTATGTCGTTAAAGGCGATTACCTTACTGTGTGCTTCTGCTCAGACAGAGGA  
CAATCAATCCCTTTTATCTCAGCACTTGAAGTTCGTGGCTTGGATTCAACTATGTATAGTCATGTTGATG  
ATAATCATGCTTTGTTCTTAAGAAGAAGAGTTGCTTTTGGTTCCAACAAAACACTATCAGGTAAAATATTCTA  
CCTAGCTATACATCAATGTTATCTTGTTGCTTCTCTTTGTGTTAGTTAGAGTACTTCTACTTAGCGTTAGTC  
AGTGGTGAAGTCAGAAATTCGACTTGCTTCATTTGTCTAACTCAAGAAGGGAAGATCGTTCAAGTCCAT  
ATAAGAAAGTCCCCCTGCATCACTGATGTAGGATTGTATTCATTATTCCTGGACTTTGATACCATGTTAA  
ATAGATTTTGGACCTATCTCAACTCAATGCACATTGAGTCTTAACTCAACCCCAAAAGCTAGCTCAAAG  
GGGAGCCCGATGTGAGATTTTTTTTTCATTCATCAATCGGACTCCCTTCTGATCATGTAGATCCACACCGGA  
TGCTGATAGAGACTAAATATATCTATATTTTTAGTTCTCTGTTTTATGATCATATCATCATTCTGTTTTCCG  
GATTAATACAATGACTCGATATATTTTGAATTTCTAGTACTTAAATATTCTCTATTTTTTAAAAGAAAAA  
GTCAAATATTGGATTAATGAACATAAATAAAGGGGCATGAATAGTGAAGATTCATATATTCGATATA

TATATGGACTTAGTTGCTACTTAACTTTGGAAGCTATACAACATTGGGGTTGTTGTTTTACTTCATTA  
CAAATTTCTTTTGAGACCCATAAAGGTAAAATCTGTCTACGTTCTATCCTCTCCAGATCTTACTTGTGGA  
TTACTGAATATGTTGTTGTTGTCGTAACAAATTTCTTTGATCAAATGGACAGGAACACAGATGATC  
CCTATGACAGAATATGGACTCCTGGTTCTGGAAATTTAATAGAAACACTCACTAGTGATGCCACA  
TGACTAGCCATGGAGATCAACCCCAACAAGTGTTACAAAATGCAATTTCCACAAACAATTCATTA  
AATATCATATCATGGAACATGAATTTCTCCTATTGATAGTGTTATCTACATGAACATGTACTTCTCTGA  
AGTAACTCAACTTGATGTCAACCAACAAGATCATTTAGAATTTTCAAGACAATGAGTCTATCTCTGACC  
CAATTTGCCACCTTATGAGGATTTTATTCAAATGTATGTTAGCAATCTCACTGTTTCACCAGCCACTATT  
TTTCTGTTGTGAGAACCACAAATTCACACTTCCTCCTTATCAATGCCTTGGAAATATTCACTATTGGTA  
ATGCACTGACTGATGGAACAAACAGCCAAGATGGTATGTACACCCTTTTTAATCTGTTGTAGCAGATA  
ACTTATTTGAGTTACTTATAGTTATTTGATTGTGAAATCTTTAACACGCTTTCACGTATAGAAATTA  
TCTCGATTTATGAGTTTGACTTCTATATGTTTGATAGTATAAAAGATTGTGTACACTTACCTAAAAGATTA  
TCATAGATAATTGTCCAGAGACCATAATAACTATTGATAACTTGAAAACAATATGTGTTTATTTATATTAT  
CAGTATATATAAGTTAAATACTTTATTTATTGATATTTCTAGTATTGTTGAATTATAAATGGGATATTATAC  
TACTGAAGTACTATATATTTTTTTATATATATAGTGGAGACTTTAATGTCATTGCAAAGGAATTTGAAG  
TATTACAAGGCTGGATTGGTGATCCTTGTCTTCCATCACCTTTTACATATGATTGGATCAATTGTAGCAGC  
AGTGATCCACCTCGCATTACAGCACTGTAAGTAAAATTAATTCATTTAATATGTGTTTTTACTTTTTAAG  
AACAGTCTGATGCACAAAACATTCCGCGTAAGGTCTGAAAAGACCTCACCAAGGGGTATAACACAA  
ATAGTTTATACTAATGCAAGCATTAGTGATTGTTTTATGGTTGCAACATGTGACCTATAGGTCACACAA  
AGATAATTTTATTGTTGTTTCAGGGCGCGCACCCCTTATATAATTGTAATTTTTTTTGTGAAATAAAATT  
AATTTACAGGTACTTGAGCAAATTCATCTATCAGGATCACTTCCAGATTTTAGTTCCATGGATGCTCTTG  
AGACAATGTAATGTTTCTGTTTTTTTTTTTTAAAATTATTAATTTAATACATTTCTCCTAAATAGGGATA  
TTTTAATTTAATTAATTTCTAACTTTTTTTTTTTGTGCTTCTTGGATTGCAGTGATTTGAGTAACAACGAT  
TTGGATGGACCTATCCTGATTTTTTTGGCACATTACCGAATCTAAAAGAACTGTTAGTATACA  
TATTCTGATCGATTTAATTAGCTTGTGGTCAATCTTCTCGGATGATAAAAGTATTTTGA  
ATTTATTTTAAAGAATTAAGGTGTTTGATAAAAGTTTTTTGTAAAAATAAAATAAAATTTCAAATAGTAG  
CAGAAGTTGAGAAAAAGGGGATTTCCCGTCAAACACTTTTTGAAATTTGACCAAGCACAAATTTGTTGC  
TCTATAATATTGAAAAAATTTTTTCGAGTTAACTAGATAAACTTTAAAAAACTATTCTTTTTATAAGA  
AAAAATAATATATATTTTCCAAAATAAACAGATTTTGTAAAACCTAACCAACAATCTATAATTTATATAA



ACTAACGATATTATAATTACTTTATAAATAACTTAGTAATTGTCTTTCTATATTTTAAAATAATTATGAGCT  
TGTTTGAATGGACTTTTGACTTTTGACTTTAGAAATCACTTATAATTTATTTTATTATTTTGATTTAAAATA  
AGTGCTTAGATTTTATTTTATTTTATCTAATTATAACAAAAATATTTAAAAGTTATTTTAACTTTAAAACA  
CCTAAAATAAGCTAATACAAACCTACCTTTGTAAAAAATAATGCTAATGCTTTTATTTTATCTTGTTAT  
GATACATAATTTTGGTCTAATTTCTTTTCAGGAATTTAGCAAATAACAAGTTCCTGGACCAGTCCCTGCT  
TCATTGTCAAACAAAAATGGCCTAACCATAGAGTAAGCAAAGCAACATTAACATATCTTCTGTTATAT  
TTCTTGAAGTGTAGCCATTGAAAAGTTAAAATTTTACATACCTAATAAAATTGTTTTAATCTTTG  
TTATTTCCATATAAAACATATCAAATTATAAAAAATAACATTTTAAAATACTTTCAAGCTATATATCAA  
TCTAAAATGTACTTAACTAATAAATAAACAGATCATATTTTCATCAGCTAATTTTGTGTTTTTTTTCCCCAG  
TACTTCAGGCAATTTAGGTTTGTGCAGTTCATCTGATGAATCTTGCCAAAATAATGATTCATCATCACCAG  
GAAATGATCAACCAGCAACTGGATCAACCAAGAAAAATAATAAGAAGAAGAAAAATAATATGCCAATA  
ATACTGGGTACTACAATTCCAGCCTTCTTGCTTGTGTGGGCTATTGTGGGTATTTTGTCTATTTTACACTA  
CAAAAACAAAAGGGCTACTACATCTCTGTCAATCCAGGTGAGGTTAAGAAACGGTTTGGATATAGAAT  
TGTTATAATTTTGGAATTCGAAAACTCTAAAAGGTTATTTTCGTAATTTTACTATTTATTTTAAAC  
ACTATTTTAAATCCAATTAATATGCACTAATATAAAGTTGCAATTTTCAGGGCAAGCTAGTGGAGGCA  
GCACCCCTTTTGTAAATAGAGTCCAAATGTCTGAAAATTTGAAAAGAATCCAGAGGTTGCTGCCCATGA  
TCATGAGAACTCAACAACCTGTTTAGCTTAACCTGATTCTTAATTTCAAAGGAAAAATAATGCAAGGTTA  
ATTAGAAATATCAAATTTATTATTGAGTTGGCTAGCAAGAAAATAATGCATGTAATGTAGTGAATGTTT  
AAGATTTTGAATTTGTTGTAATTAATGTTCTTGTGTTTTGGATCATAGTGGCTTTGTTTATCATACCGA  
TTCTTCCAATAGTATTTTG

>PGSC0003DMG401017656 RLK with malectin domain

CGTTAACACATTTTCAAAGACTATCAAATCACATCTTCCCCTTACTCAACTCTGTCAACAAAGCAACAG  
AAAAGGAAAGTAGAAAAGGACTTGTGTCTCTTCTTTTTTCTACTCACTCCTCTCTTTTTTCTCCC  
CTGCAAATCTTCTCTGCTTCAATGGAGCTGCATTGGTGTACTATTCTTGGTTCCTTCTATCTTCTATCTT  
CATCAAAGTTGCTTTTTGTGATCCTGAAGGTACGCTTCAAAGGCAGATACAAGATTTAACTTACGAGTT  
CCAACCTTTTAAACATTCTTATACTGTACTTCTAAAATTATGACTACAAAATGTACTATATATGTTAAAAGC  
CTAGTGGTTTCTTGATTTTACTTCTTCAATCTCTTCTTTTCTCCCTGTGTAAAGTTGAAGTTATATTTGCAT  
GTACGTGTGTGTTTCAGCACATGTGAACTCATAAACTTTAAATCCTGGATCTGCCTCTATCAGTATGCATTA  
CATTGAAAGAAAATGGAAGGTTTTAAGATGAAATGTTGCTTATGTTGTGAAATGTGCAGGATTCTTGAG

CTTGCTTGTGGTGGAAATACTACCTATGTTGATTCTCCAACATTACATGGACACCAGATGGTGCCTATA  
TCTCAGCTGGTAACATGACCACTGTTGATTTCTAGAGGGTCTCTTCATCTACTCTCCCAGTTAGGTTCC  
TTTTCTGATTCGCCACGTAGAAAATGTTACAAGATTCCAGTGAAGAATGTGTCATCCCTGGTCCTTGTC  
GGACACAGTTTGTGTATAAGAATTATGATGGACATAATAAGCCACCTGCATTCTCTGTTTCTCTGGGAG  
GGCTATTACAACAAATGTCAATCTTACTCATATCGATCCTTGGATCGAAGAGTTCATATGGCCAGTTGAT  
AAAGACATTCTGTCTTTATGTTTTCACTCTCTTCAAGATGGTGGATTTCCAGTCATTTTCATCCCTGAACTT  
AGGCCACTTCTCAAGAAGCTTACAGCAATGCCTGGGAGATTTTCCAATAAGTTGCTGAGGAAATGTT  
ATCGTATCAACTGTGGTTATAATTGGTCCCTGAGGTTAGAACAACTCTCACTTGTGCGATTATGTTATGTA  
TGTATGACTTATCGATTGTTTAGTCCTTAGTTTCTGTTTAGATTTGATGTTTTTCGTGCTATGTAAAAGGTA  
CCCGATCGATAAGTATGATAGAATTTGGGATGCTGATGAGGATTTAGCCCATTTTCATGTGTCTTCTGGT  
TTTGATATTCAAGCCAATTTCAATATGACAGTTCTCAAAGAGAACCCTCCTGCAGCTGTTCTTCAAACCGG  
AAGAGTTTTGGCACGGTGGAGTGATATGACATATAAATTTCTATTGATCACCAAGGAGATTACCATATT  
GTTCTCTACTTTGCTGGAATTCTGCCTGTCTCCCCTTCATTCGATGTATTGATAAATGGGCATGTTGTTCCG  
ATCAAACACTACACAGTTAATCGATGGGAAGTCAGTAGTCTGTTCTTTACAATGAAAGGAATCGAGAGCTT  
GAACATCACATTGAAGACTGTCCACTACTATCCATATATCAATGCTCTTGAGGTTTATGAGATCCTAGAC  
ATTCCTTGGAAACTTCTTCAACAACAGGTTCTAATACAGTTTTATTGTTTTTTCGACCTTTGAAGGAGTCT  
GTTAGAACCAATCACACCAACTTTTGACATTTTTTATGCTTGCAGTTTCAGCCCTACAGGTTATTCATCAG  
TCAACTGGTCTAGATCTTGATTGGGAAGATGATCCATGCTCTCCTAAATCATGGGAACACATAGAATGTG  
AAGCAAATCTCGTAACTTCATTGTATGCCAAAGTTACCCTAGAACTACATTTTCTTTTATTTTCTTTCTCT  
TGGTCTTATTTTTGTTAAGAGCAGAACATAATAAAGTTAAGACTTTATATAGGGAGCTTTTTTGATGTAAA  
CTTGAGGTCAATCAGCCCAACATTTGGTGACCTACTGGATCTCAAATCACTGTAAGAGTCATTAGTCTTA  
ACAACCTATCACTTAATAGCCATTGTTTGGCTATCTTGACTAACTTATTTGAGGTTCTCCTGTTGCAGAG  
ATTTGCATAATACTTCACTCGCTGGAGAGATACAAAACATCGGCAGCCTGCAACATCTTAAGAAGCTGTA  
ATACTTGATCTCGAGGAATTACCATGTTAAGTTAATGTACTTGAGAGAGCATTATCTAAAATAAGTTGTG  
CGCTCTCAACTTTGCAGGAACTTAAGCTTTAATCAACTTACAGCTTTTGGTTCAGAGTTAGAAGACTTGAT  
AAACCTTCAAATTTTGTAAAGTCTCACTGCTTGCATTAGATAGTGACTTCCTTCATTCTCCTTGCTAGTCC  
TGTTCAACAGTCTTTACAATTAGTGTCTTCTGTTGAAGGGACTTGCATAACAATAGCTTTCAAGGAACAG  
TACCCGATAGCGTTGGAGAAGTGAAGGACCTCCACTTGCTGTGAGTGAGGAAAATATATACTGGCATT  
TGAACCTTAAAGTACTTCACGTGATAAATTATTCTAATTTACCTCTCTGCAACATTCAGGAACCTAGAA

AACAATAAGCTGCAAGGCCCCCTGCCACAATCTTTGAACAGAGAGAGCTTACAAGTCCTGTATGAAATC  
AGAAAGTCTTTTGTGTTTTGCTTCTCATGTCAGTTTCTCGGCTTATCTTTTTCGCCCTATTTTGCAGATCATC  
AGGAAATCTGTGTCTTTCCTTCACTATGTCTTTATGCAATGAATTCTCAAGAAATCCTACAATTGAGACAC  
CACAAGTCACTGTCTTTGCACCTATAAAACACAAACGCCATAATCGATTCATAGTTATACTTGGTGCAGTT  
GGAGGAGCTGTGTTTGTCTATTTCGTTGTCTTTATATCAGTATTATTGTACATGAGGCGAAGAAAAAGTG  
GAGATACATATGCATCAAGTATGGAAAAAGTCAAACTTTTCTTTAACATTTCTCAGAATATTGATCAAT  
CTGCTTCTAAACATGCACTTTTTTCTAATTCTAGGAACTGCAGCAGAAATGAAAACTGGAATGCTGCAA  
AAGTATTTTCATACAAAGAAATCAAAGCTGCTACAAACAACCTCAAAGAGGTTATTGGCCGTGGTAGTTT  
TGGATCTGTTTATCTTGGGAAGCTTCCCTGATGGTAAACAAGTTGCTGTTAAAGTTCGATTCGATAAACT  
CAACTGGGTGCTGATTCTTTTATCAATGAGGTTTCGTCACTATACCCATGCTAGTTCAGTTCAGTCTACAA  
AGAAAAAGAGATTCAAGAGCTCTCTTTATTATCTGTAGGTATCCCTTCTATCACAAATCAGTCATCCAAC  
TCTTGTGTCGTTAGAAGGATTCTGCCATGAGTCAAAGCAACAAATTCTAGTTTATGAGTATTTACCTGGA  
GGATCACTGGCTGATAACCTCTATGGTACGTCACGCGTGATCTCACCCATATTCACACTTTAAATCCATAA  
TCCTCTTCTGTCACGTATCGTTTTCTAACTCTAATAACTGTCTCAGGAGCAATGAGCAAGAAATTGACAC  
TAAGCTGGGTGCGCAGACTGAAAATTGCAGTTGATGCTGCAAAGGTATGAGTAAAGAGAGGCATTAT  
CATTACTTAAGTTTTTATAGTTTTTAATGTTTGATTATATAACTTGTAAGGTTTGGATTACTTGCACAA  
GGAAGTGAGCCAAGAATCATACACCGTGATGTGAAGAGCAGCAATATACTTCTGGATGCAGACATTAAT  
GCTAAGGTATCTGATTTTGGCCTTTCTAAGCAAGTAACTCAATCAGATGCAACTCATGTTAGCACTGTTGT  
CAAAGGCACTGCTGGCTATCTTGACCCTGAGTAAGCTTCAAGTCATTTATCATCCAGTTTAAATTTGGTC  
CTTCTATCCTAATTCCTAAACCTCTTACTACTTGTCTCAGATACTATTCCACTCGACAGCTCACAGAA  
AAGAGTGACATATACAGTTTTGGAGTCGTTCTTCTTGAACCTATTTGTGGCCGAGAACCACTTAGCCACT  
CGGGGTCTCCAGATTCCTTCAATTTAGTTCTATGGGTAATAACAAGTCTTATAATGTTTTACACACAAAAG  
CATTTCAATTGACTTCCTATAATACTCACATGTTGTAAACTAAATGTGAAAATTCAGGCAAAGCCGTA  
ACTTACAGGCTGGTGCATTTGAGATAGTAGATGAGAGCATAAAAGGAACATTTGACACAGAAAGCATGAGAA  
AAGCTGCTTTAATCGCCTCAAGGTCAGTGGAGAGGGATGCATTGCGAAGGCCGAGTATTGCAGAAGTA  
TTAGCTGAGCTCAAAGATGCATACAGCATTCAACTTTCTATTTAGCATCTGAAGGACTAGCCAATTGAT  
AAATTAGACCTTCACTACTGCAGCTCACAATTTGCAAATATAAGGTTTCTCTAGTTGAATCAAATGTTACT  
GTAACCTTATGACAACCTTTAAATTTGAGCTCGGAAATGTTTTAAGTTATTGATATATATCACATTTAAAG  
GTCTCCTTTCCCCTTGGAAAGATAGGGGAAGTCGTGGATGATTTTCAACAAATAATAACAATGTCCATCCA

GGCTTGCATCAGTGCTCGCCTCTACATTCTTTACGACTTGTGAACCAATCATAAAAGTAATGAGTTGGCC  
TAACCAGAAAAGTGGCGCCGTAGATATAGGAATAATGCTGTAGAAGCAGCCACTGCATAGGGGAATAT  
AGTCCAGATT

>PGSC0003DMG402019252 RLK with malectin domain

AAAACAGAGCCTGGCACAGATAGATAAATATTACATTTAATGTATCACTTACAGAAGCTTCATAGCTCTT  
TCTGAGATACTGATGAGTGTATCAAATCAAACCACAATGTCCATTGAAACACAGCTGGTGTAACTGTG  
GGGGTGCGGGGTGGGGGTTCTTTTGTGGGGTCTCCATTTCTCCCCTTTGCTATATCTTCTGTAAAATGA  
CAGCCTAATCAACAGCCTGTAAAGAGCTGTTTTGGAACTTTGCACTAAAAGCTCTACTTGATTGTGT  
TTCATGGTGGCATTGAGGTATTCCCCTTCTGGGTTTTCTTTATTTCTTCTTTTTTCTGAATACCCATTTTTAA  
TCTTTTAAGTTTTTTTATCTCTAGGAATGAGGTAAGAGTAGTGAAAAAGATTCATTTTTTCTTGTTTTATTC  
ATTGCTTCTTTGCTACTCTTACATTGCTTCAGATAGATCTATTAATGGTTTGTAAGATTAGTGTTAGGTCT  
CCTTGGGGAATTTGGAGTTTGTGTGCCACCAGGTGTTTGTAAAATGGGGCTATGGGTGCATTTGGTT  
CTAGCTTTTATGCTGTCCTGTTTCTTGATGCAGGAGGCAAATGCTGCTTTTACTCCTGCTGATAAATATTT  
GATTGCTTGTGGATCTTCAAAAATGTAACCTTTCTTGCCAGATTTTTGTTCTGACACACACCATTCTTC  
AGTTGTTTTGGAAAGTGAAGAAAATTCTATTTCTGCAACATCTAATTCCTCTGCTCCATTTTCAATTTACCA  
GTCTGCTAGAATTTTCCACACTACAACATCTTACGAATTTGATATTCATCAACAAGGGCGACATTGGGTTT  
GCCTTTATTTCTATCCTCTCCCTGGTCATAACTTAACATCTGCCTCAATCACAGTTGTCACAGAAAATTTG  
TTCTGTTGAACAATTTCAAGTTTCAAGAGATATAAGGGTACTTATCTATTTAAGGAATACTCAATTAATGTC  
ACTTCAGATAGCTTGACTATTGCTTTAATCCCTTCAAACAACCTCCGTCGCGTTTATTAATGCGATTGAAGT  
TGTATCAGCTCCTGATGAGTTGATTCTGATCAAGCAGTGACTGCATCTCCACCAGCACCTTTCAATGGC  
CTTTCTGGGCTATCCCTTGAACTGTTTATCGGTTAAACATGGGAGGTCCTTTGATTACTGCTCAGAATGA  
TACTCTAGGGAGAACGTGGGAGAATGATGTTAAGTACCTGCATGTTAATAGCTCTGCAGTGAATGTTTC  
AGTTATCCCTTCAAGCATAAAATATCCAGCCACCATTACTCCTGAAATAGCACCATATTGGGTTTATGCTA  
CTGCTGAAACCATGGGAGATGCTAATACTGTGATGGCAATTTCAATATCACCTGGGAGTTCCCAGTTGA  
TCCAAACTTCATGTACCTCATCCGCGTACATTTTTGTGATATCGTGAGCGAGTCCTTGAATACTCTACTTTT  
TAATCTGTACATAAATGATGACACTGCTTTACTGGACCTAGATTTGTCTTCAGTTGGTAATTTGGACGTGC  
CGTATTACAAAGATTTTGTCTCCAACCTCCACAACAAATTCAGGTGTTCTGACAGTCAGTGTGGTCCAGA  
CACAGGAGCTGATTGGATCAATGCCCTTATGAATGGATTGGAAATCATGAAGATTAGCAATGGAGCTAG  
AAGCTTGAGTGGGGTTTCATCTGTGGAGACTCTATTTGTGAGGCCTCACAAAAGAACAACAAAAGGTAT

TATAATTGGTCTGTTGTAGGAGGAGCATCAGCTGCATTAGCAATTATTGGGTTGTGTTATTGCTGCTTG  
GTAGCCCTCAGATCAAAGAGCTCCCGCCAGGGGCAGCCATGGCTTCCTCTTCCCCTGTATGGAACTCTT  
TAACTTTGACAAAGATGTCCACAGTTTCTCAAAGAGTGGAACGGCAAGCTGTATCTCCTTAGCTTCACC  
CAATCTTGGTCGATTCTTCAGTTTCCAAGAAATAATGGATGCTACTAACAAGTTTGATGAAACTTGCTTC  
TTGGTGTGGTGGTTTTGGTAGAGTCTACAAGGGAACACTAGAAGATGGGACAAGGCTTGCTGTCAA  
AGAGGCAACCCGAGATCTGAACAAGGTCTAGCTGAATTTGAAACAGAAATTGAAATGTTGTCCAAGCTT  
CGCCACCGCCATCTTGTGTCTTTGATTGGTTATTGTGATGAAAGATCAGAAATGATTTTGGTTTATGAATA  
CATGGCAAATGGGCCTCTCCGAAGTCATCTTTATGGAACGGATCTTCCATCTCTTTCGTGGAAGCAGCGT  
CTTGAGATTTGTATAGGTGCTGCTAGGGGGCTGCATTACCTCCACACTGGTGCATCGCAGAGCATCATTC  
ACCGTGATGTGAAACTACAAACATACTCTTGGACGAGAACTTTGTAGCTAAAGTTGCTGATTTTGGTCT  
TTCTAAAGCTGGACCAGCTATTGATCAGACCCATGTCAGCACTGCTGTTAAAGGTAGCTTTGGTTACCTG  
GATCCCGAGTACTTTAGAAGACAGCAGCTTACTGAGAAATCAGATGTTTATTCATTTGGTGTGTCCTAA  
TGGAAGTGCTCTGCACCAGACCTGCATTGAATCCTGTCCTACCACGGGATCAAGTCAATATAGCTGAGT  
GGGCCATGACTTGGCAAAGAAAGGCATGTTGGATCAGATAATGGACCCAAATCTTACAGGGAAGGTG  
AATTCAGCCTCCCTCAAGAAGTTTGGGGAGACTGCGGAGAAGTGTTTGGCTGACTATGGAGTTGATAGA  
CCTTCCATGGGGGATGTTCTATGGAATCTAGAGTATGCTCTTCAGCTTGAGGAAACCTCATCAGCTCTGG  
CAGAGCCCGATGATAACAGCACGAACCATATACCCAGCATACTTTGACACCATTTGACAATAGTGTGA  
GTATGATCGAAGGGATCAACTCTGGAAGTATGATGATGCAGAGGATGCTGCCACTAGTGCTGTTTTCT  
CTCAACTGGTAAATCCACGGGGAAGATGAAAAGGAACAGTCTCTGGTGTATGTGACATCCATAATTTT  
TATTTTGTGGCTTCAACAAAATATTAATGTGATTTAAAAATCTTTTCATTCATAGTATTTGGGTCATTTTT  
CTAATAAATGCTCGGGTATGTAAGTAAATGATTGGTGGAGCTGGGCATCCATTGAAATTTGTCTTTGTA  
ATACTAAGAGTTGTAACCTTATATGAACTATTACATAGGTGATAGAGTTGCCTCTTTTACTCATAGATGTC  
ATGACTATAAATTGTCAAAGCTTCGTAATCAGTGATGTAGAGAGAAACAATATTAATCAATTGTTGCAGC  
ACTTCTGCTGAATTATCTTCTGATGGTGGCTGAGTTTGTGATGCTGTTACTGCTGATTAACGATGCTCTCT  
TAACTGATCGTTGTTGTGAGATAACCTCCATGTTGGAATCTGCTTCGACTATTATAGATGGAGCTGCC  
ATCTAAGTGGTATGAAACAGTTCAGTTGAACCCAGATTTTCTGTTTTGCATACACTAATCCTCTATAAAAG  
TTGTGTCGCGG

>PGSC0003DMG402027811 RLK with malectin domain

TTGAATTTAGGGTTGCAAAGCAGGACCAAGTTGATTTACATTGTAAGAATGGAGCTCAGTTAGGTAAGT

ATTAATTAACAACCTTCACACATGAAGTGATTTTCAGTATACGTCTTATGTTATGTTCCCTTATGACTAACTTCA  
CACATAATTATTTCAATAGTTAAATGTGTTAGTATCATGACTCGTGATAAGATTGCTGTTTTCTAGTTTG  
TCGTTTTCCACTAAAGTTGCTCGCATTTTGAGATCTCAAATGCACCATGTACTAAAATTTGTGTATCCAT  
TTGTAGATGACCATTTGTATATAAACTGCGGTGGTGAGTCTGTATCAGTTAACGGAAATGTCTATGAAGC  
TGATGTACATGAAAATGGTGGATCAACTTTCTTCATGAGTAATAATTCAAATTGGGGCTATAGTAGTATG  
GGAACCTTCTTATGGGCAAAACGTAACAGGTACACTCTAAATGATGTATGCGAAGTTCATACTGGTGAT  
GCCGAATTGTATGGAACAGCACGTTTATCCTCAATCTCTTTGAAATATTATGGATTTTGTTTGGTACCCGG  
TACGTACAAAGTGATTCTTCACTTTGCTGAAATATCTAGTAGAAAATATAGACTTTTCGCATGGCAAAACA  
AGGCGAGTCTTTGATGTAGAAATCCAGGTAAGGTACCAAACCACCTTGTTGATCCGTACGCAAACATA  
TAGAAGATCTTTACAGAATATTTATGCAGGGAACAAAGGTGCTGACAAGCTTCAACATAGAAGCAGAAG  
CAGAACGACAAGCTGTGAATGAGCCTATAACAAGGGAATATCCGCTGAAGTGCGTAACAATCTACTCG  
AGATTCATTATACTGGTCTGGAAAAGGGTCAATCTTATACCCATCAGATAACTATGGGCCCTTATATCT  
GCAATTACAGTAACTCTAGGTATTCATTCTGTGTCCAAGTGTACACTGTTTTACGAAGGGGAGCCTTGG  
AGCAACAGTAAAGTTGTCTGCGTGTGACCTATAGGTCACGGGTTTCGAGCCGTGGAAGCAGACACTAAT  
GTTTCATATTAGGGGTAGGCTATGTACATCACACCCCTTTGGGTGCTGCTCTTCTCGGACCCTACGTGAA  
CGCGGGATGCTTGTGCACCGAGCTACCCAGACTGTTTACCATTTTACATGGTTTTTGTCCCTATGTTGTG  
ACTGATATTTTCATGGTAACAATTTATGAACCAGATCAATCACATCTGTCCCTTGGAGTGCTTGTGGAATT  
TCAGGATCTGCATTACTTTTTCTAATATTGTTTCATTGTTTTTCTGGATGTACCAAGACAAATTACGTCGG  
GAAGGTAACACTACTTTTTATTATGGATTTATTTGGTTTCCATTGGGATTTGAAGCGAAGCAATCTTTGA  
GGCGATCTCCAAAATCTGAAAATGTTATCTCTCCTCTTTACTTGCCTTTACCATCCTGGAAAGGAGACCC  
AAGATCCATTTCTTATCATGGCATCAATATCAGATCTATCCCAATTCTTAGTTTACCGATGTTAGGCCCC  
ATATTATGTTTTCCACCCTCCCGTTGGTAAGCTTGGGCATAGGTTGGAGGGGTGCTAAGTTGTCCACAT  
TGGTCGTTAGCTTTTGGGGTTGAGTTAAGCCCAAGATACATTTTTATCTAGTTATCGGTTTTAATTACCAC  
CATATGAATCATAAGACACTTTATTTGTAGTAAGCTTCTTTACTTTCTTTCTGTTTTCCACTCAACTGATATT  
TATTTACTAATAATGTGCTGATATAGAGCTAGAAGTATTGAATTCTACCCTGGAGGGCTTTACAACATC  
AGAAAATTAAGCTGCCACAAATAATTTTCATGATGGCCGCCGGCTTGGTGAGGGAGGTTTTGGGACCG  
TCTACGAGGTTAGCTAGAATCTTTAACTCATTGCAGGTTATGATTTTTTGTGTTCTTTGTGATATGTCTTTG  
ACAGTTTTAGTCCGCCTTTGTATTCTTCATTTTCTTTCCGAAAAGATATTCTCTCATGACAAAAGTTGCAGT  
ACTAATATTGTGTAGCTGCACTATGCACAACCTTTCTCCGTTTGCTAGTTGGATGACCGGACATCTAGATA

TATACTCCCTCCATTTCAATTTATTTGGCCTATTTTGTCTTGGCACGGAATTTAAAAAGTAAAGAAGACTT  
TTGAATAATGTAATCTTAAACTAAAGATAAAGATATATAGAATGTAAGTAAATCCCTTCAATCTTGTGGT  
CTTAAACATGTCAGGTGTTAGAATTTAAAAAGTTACCAAAAAAGGGAAGGCACATTATTTTTGAAATAG  
ACTAAAATGTAAAGTAAGACAAACAAATTGAAACGGAAGGAGTAATTATTTTGTCTCTGATTACAAT  
TTCATCATCTAAAACACTTTACCAACATCCAGGGCACTCTTTTGGATGGGACTGCCATTGCAGTTAAAAA  
GCTTTGACAACAAAAGAAGGAATGAACGAGTTTGTGGAAAAGAGTCGTACAATTGCTGGCATGAAAC  
ATCCAAATCTTGTTACACTAATGGGATGCTGTGCAGGAAAGAACCAACTTCTGCTTGTCTATGAGTACAT  
TGGAACTAAATCTCTTGAAGATGCATTATTCGGTAACGTCTTCCATTTATGAAAAATTTCTTCATTAAGCC  
TCTGTAGTTGTAGTAAAGAATTTAGTTGTACAAATTAACGTGAGCTTTGGCTACTTACAGGTTCCAGAC  
GAACTTATAAGAGCAAGACTAGACTGGCCAACAAGATATAGAATTTGTCTTGGGCTAGCAGAAGGTTTA  
ACTTTTCTTCACGAGGGGTCCAAACTTGAATTATACACGGGAATATTAACCAGCGAACATTCTTCTTG  
ATAATGATCTGAATCCGAAGATATACGATTTTGGATTTGCAAAGCTTTATCACAAGCAAAAAGTCAGAAG  
GAACAATGTAAGGAAACACACTAACAAATTATTTCAAAAAGAGTTAATAGCCAAAAACACACCTAAA  
ATATCCCGGTTTTCTTAGTTTTACACTGAACTAAAAGGTGTGCGAGTTTCCTACCTGAACTATCACCAAC  
TATTTACCAAAACACACCTCAACTATTACCTTAAATATCACCATCATCATTACAGGTAGCTGGTGATCGTTC  
AGGTAGGAAACTCGAAAAACCTGGATACTTTAGGTGTTATTTTGACCTTTCACTCTCTTTCAGATACAAAT  
TAGTAATACTTTAGGTGTGTTAAAACCTTTGTATACATTGGCTATTACAATTGCACTTCTCAGTAATGGAAG  
CCTTTTGCAGGTCATACTCCGCGCCTGAAGTTAAAGATCGCGCCTTAGAAGCCAGCGCGGATGTGTATA  
GCTTTGGAGTTGTCATGCTTATACTTGTGAGCGGAATGAAAATCAAGACCCCGAGGGCAGGTGGTGACA  
CTGAATACCTCGTTGATGAGGTGAGTGAGACTCGATTAAGTCAATAGTAATGTACATTAATTTAGGAA  
ACTAGACAAAGTTATTGGTTTGTTCGACTACTATAGGCACAAATAAAGAATCGGAGGGGAACTCTAAT  
GGATTTAGTCGATCAAACCTCTGAATTACGACTGGGAAGAAGCAGAGATGATTCTAAGATTAGCAATCCA  
ATGTATAGACTCACCGCCATTACAGACCAACCATGTCTACAATCGTGAAGATTTTAAGGAAAGAACGTTCA  
ATAGAGACCATTTTGATCAAGCCAAATGGTGATTAACACTACAACATCTTGGCGAAAAAGGTTACAAAATCC  
TGTCTAGCTGATTGTTCTGCTGAAAAATACCACTCAGATTGAAAAGTGAAGGACTATCATATTTCTTTA  
ACAATGTGCTTGAGTAAGGGCGGAGCTAGAAGGCAACTTATGAGTTCAGCTGAATCAAGTAGTACGTCC  
GTCCTAAGTCTTGTATCAATCTATTTGTGTTGTAAAGTTTTCTAAATATGTGCAGATCTTAAATTAAGAGT  
TCAGTTATTAGCACTTGAAGTCGTTATTGTAAGATTCAGAACCAATTAATTCAAATGCTACTAGTGTTAA  
TGATTTCTTTTTATGAAAACATCTGTATTTGGTATGAAGG

>PGSC0003DMG400001269 RLK with WAX or WAX-EGF domain

ATGACTTACACTTCTTTTATATGCTTTCTTCTGATCAGTTACTTAGTTCAGGCAAATTGCAGAAATGATTCA  
ACTTGTCCAAAGTCCTTTTCATGTGGAAATCTTACTGACCTGAGCTTTCTTTCTCTTTCCACACAACCT  
GACTGTGGAATAGTGCCCATCTCTGGTTGTGATGCTAAACCATATCCGAGAATCCAAGTCTTCTGGAG  
GAGATTCGTACTATGCTTTAGGAAATCCATTTAATTATACAGTTTTTCTCGGGGACCCCAAGCTTCATGCC  
AAGTTGAGGCAACACAAGTGCCAAGCATTAAACAAAAAGTTCTCCCTTCCAAACTCTTCTTCTATTTCTTT  
CATACTTCTCCTATTGAATTTGTCAACTTCTCAAATGCAACATCACTAGTAATAGCACCCCAAACGTTAC  
CCACACAAATGACCATTTTGCTGGTTATAAAAGGTACAATGGCTGTACAGGCTTCAGCATATACTACAAG  
CTTCGCCTAGGTGATCATGAAGATGCTCATGCTGGCAATCTCCAGCCAAGTTCCTTAAACAGATTGC  
CAATTGGCTCGATATCAGATGAAGGTGGTTTGTCAATATGTTAAGCGCCGGTTTTCTAGTACAATGGAA  
ACTGTCTGCGGACTGTTACAAATGTCACTATGGCGGAGGTCAATGCCAGACCGATATAACCAACAAATT  
TCATTGTTTCATATCCAAATAATCCACATGATCATCAAAAAATGATCTAAATGCTCAAGGTCTAGTGCATA  
TTAATAAATTTCTTTCTCATTTCGTATCAAATATTGATAAATTTTCATAGAATTTTTCTCTTTTTTAGAT  
GCAAAAATGACTAGAAAGCAAGTTGGGACCGACTCTGGGAGCAGGTAGTTAAATATCCATTAAGTGCAG  
GGTCTTTCTTATTTTCAGCATAATCATGCATATCATTTAAATTTTCTTCTTATTGTGGTAAAAATTCAAAA  
AATTGAGGAGACACGTACTTCAGATTACAGAACGTATGGATAGTGGAGTTGAGTGGACATTCTTTCTAC  
TTGTGATGTTTTCTTTCTTTCTTTTCTGAAAACCTTGATAACTGACTGCATTTTTGTAGATATCTACTA  
TTTGCATAGTCCCTAAAGAAAATATACTTCCCTGATAGTGCATAAGACATTCAGAATTAGTTATATTTAT  
ATTCTCTGATGGAGCATGGCTTCATTTTGCTTTCAACAGGTGCAGTTCTGTTTACAGTTGGACTGTTGGTT  
TACTCTTTTACTTCAGAGAGAAGATTTTGTGGTACAAATACATCAGGTTTTGGGAGTCTAATGCTGAGG  
ATCACCAAATATTGAAGCATTTTTAAAGAACTATGGATCGTGTTATCCAAAGAGATACAACCTATTTAGA  
AGTCAAAGAATCACCAGTGGCTTCAAAAATAAACTTGGTCAAGGAGGATATGGTTCTGTATACAAAGG  
ATGTCTGCATAACGGAAGTCATGTGGCTGTGAAGGTCCTGAAGAACTAAAAGGCAGTGGTGAAGAAT  
TCATTAACGAGGCAGCAAGTATTAGCAAGACCTCACATGTTAACGTCGTGAGCCTTGTGGGATTTTGTTT  
TGAGGGATGTAAAAGGGCTCTCGTATATGAATTTATGCCAAATAGATCTCTTGA AAAATTTATTTATGAG  
GAAAGATCCGACAGTGTTCACCAACTGGCTTGGCCAATACTGTACAAAATTGCACTAGGCATAGCTCGA  
GGATTGGAGTACTTGCATCGTGGTTGTACCACTCGGATTTTGCATTTTGATATAAAGCCTCATAAAATCCT  
GCTTGATGAAGATTTTTGTCCGAAGATCTCTGACTTTGGACTAGCCAACTGTGCATGAAAAAGGAGAG  
CATTGTGTCAATGTTTAGTGACGAGGGACTATCGGTTATATTGCTCCAGAAATTGTTTGCAGAACTTG



GGAGGTGTCTCTCACAAGTCTGACGTCTATAGCTATGGAATGAGGGTCCTAGAGATGGTTGGAGGAAG  
AAAAAATGTTGACGTTGGAGTTGATCGCACGAGTGAAATCTGCTTCCACATTGGCTCTATCAACGAATT  
GAACTAGACGAAGAGCTTCAACTAATTGGGATAATGAATGAAGAGGAGAAAGAATGTGCAAGAAAGAT  
GGTGATGGTGAGTTTATGGTGTATACAGACTGATCCCTCAAATCGACCATCTATGAGCAAGATTGTGGA  
AATGTTAGAAGGGAAACTAGACTCTCTGCAAATGCCTCCCAAGCCTTATCCTTATTCTCCCTCAAGAACA  
GAGGTAGATTCATCAGTAGTAGAACTGGCCTAGCCTTATGTGTTTATATCTCAGCTAATATCACTGCAG  
TCACATTTTGTATGGAATTGTAGCATAATCTGGTACTGTTACAGGTTGCGTTTCTGATGTGTTTAGATGT  
CCTTGAATGTAAGAAGATGTAAGTTGATGTTTTCTTAATGATTTAATGCTAAAAGAAGAGTGATTTGCC  
TAGAGGAATGTCAGGATAATAAGCAGACCTAATTAGTGCTTTTCAATTTACCTGTTCAGCATATGTCTGA  
CTATAAGATAATTTCCAGACAATTAGATAATGGGATTGCCTTATTGGTTAGCCCAATTGTGGTCTGGAGC  
CTAATTCAATCCCAAAAGTTAGCGCATGTGATGAGATCTTTCCAAGACCAAATAAGGCGACTACAACAA  
GATACTCACTTTGTTCAAATGCAACAGAAGCTAGAAGAGTACTCATGAAGCTAGATATTTTTTGCGGAAC  
TTTCGCATATAGTCACTCAAAGATAGCTTAATTACGCTCCATAGATATAGTTTGGTAATTACGATTCGTAG  
CTACATGTTATAGAGAGAAGAGTGGCGAGCGAGATTGGGAGAGGGAAGAGAGAGGCGAATTGTATAT  
GTATATTTGTCAAATTGTATATGTATATCTGTGCAATAAATTGTATATATGTAAGTGGTACACATATGTATT  
TGTATATCTGGTCGAGCGAGATTGGGAGAGGGAGGAGAGAGTGAAGAGAGACGAACTATATTTGTATA  
TTTGTGAGATAATCGTATATATAACTGATATACATATGTATTTATATATCTGGCAAGAGAGATTGGGA  
GAGGGAGGAGAGAGGCAAGTGAGAAAGGTCAGAGAGTGGATAGAGATTAATTGTATTTGTATATGTA  
TTTATGTGATATAAATTGTATAAATATGTGTATAATTTATATTTGTATATGTATAAAAGAGGACAAGTGACG  
TAATTA AAACTAAAATTAAGTTGTGAGCCGTAATTAATTAACAACTATAGCTATATTAGCTAATTAAGT  
GTATGCTTGTGTTTTCTGTATAATTTCCCTTTTTTTTAGTCCATTA AAAAGACCGAGGCCTTTTAGCCCAGC  
CTAAGAAAGCCA ACTGGCCCTTAAGACTTGACGCCCGTGGGCCAAATGTAGTTTTGTTATTTCTACATGA  
CTTCAAGTCTTTCCTCACAGCCCCTTAATATACGTTTTAACA ACTTTTCCACATCCACTATGCTTTTAAAAA  
TGCGCAAGTACTTGTGAACA ACTGAATTCATAATTTTCTCTTGTTGATATAGGAGGAGACTTTTGCTTG  
ATCAGTGGGAGGATTTAATATGACTTTACCTCTGTTATATGCTTTATTCTGATCAGTTACTTAGTTCAGG  
CAAAGGGCAGAAATGATTCAACTTATCCAAATTCCTTTTTCATGTGGAAATCTTACTGACCTGAGCTTTCTT  
TTCTCTTTTCCACACAACCTGACTGTGGAATAATGTTCTTATCTGGTTGTGATGCTAAACCATTTCCGAG  
AATCCA ACTGCTTCTGGAGGAGATTCTTACTATGCTTTAGTAAATCCATCTAATTATACATTTGGGCTCG  
GGGACCCCAAGCTTCATGTCAAGTTGAGGCAACACAATTGTCAGGCTTTTAACAAAA ACTTATCCTTGCC

AGACTCTCCTTCTATTTTCATGTTTTGAAATCATCAAAGTGAATTTTCTCAACTTCTCAAATGCAACAGCAA  
CAGCACTAGTAGTAGCACCCCAAACATTACCCATAAGATGAAAGATCATTTTGCTGGTTATAGAATGTAC  
AATGGCTGTAAAGGCTTTAGCATATACTACAAGATTCAGCTATATGTTGAAGAAGACATTCTAGCTCGCA  
ATCTTCCTGCCAACAGTTCACTCATTAGTTTGCCAGTTGACTTGATATCAGATCATGGTGGTTTGTTC AAT  
ATGTTAAGGGCCGGTTTTTTTCGTAGAATGGAAGATCTCTGAGGACTGTTACCAATGTCACTATGGGGGA  
GGTCAATGCCAGACTGATATAACAACAAATTTCACTGTACATATCCAAATAATCCACATGAACAAGTT  
CAGTCACACAGTGCATCTTTTCGTAGTGTCTTTCTTGATTATCATATCACATATCTATAATATTTTCCCTCTT  
TTTCTTTAGATGCAAAAAGTCTAGAAAGAAAGTTCGGACTGACTCTGGGAGTAGGTAGTTAAATTTCCAT  
TAACTGCAGTGTCTTTTCGATCTTTTTCTATTACAGAATTTCCATGCATATCATTTGAGTTTCTTCTTCATTG  
TGGTAAAATCTCAAAACATTTCTTAATGATAAAGGATGATAAGAGAGGTAAGTACTTTAGCTTACACAA  
AATGATTGGATAGTGGAGTTGAGAGGACACTTTCTTTTCTTGATGTTTTCTTTTGTCTGAAAACCTC  
TGATTACTGATATTTTTTCCAGTTTTTGGTGGATTAGGATTGGTGTGATTTGTTTAGCTGTCTACTTTAT  
CTGGTGTGCAAGAGGAGGAAATTAATCCGCCCCACTTCTCTCAACAAGGAAATTGTCATGTACATTT  
AAAAATGATGTTGAGAGAGGCAGTATATACTTTGGCATCCCAGTCTTCTCTTATTCAGAAGTTGAAGAAG  
CCACAAATGATTTCAATTCCTCTCAAATCCTTGAGATGGTGGTTTTCGGAACTGTTTACTATGGTGAGAG  
ACTTCCTAATCCAACTGAGCTATGCTTCAATTCTTCTTCATATGCCTAATACTTGTTTACTTAATGACAAGG  
AAAATTAAGGATGGACGAGAGGTTGCTGTGAAGCGCCTTACGAGCACAAGTCAAACGAATGCAGC  
AGTTTGTAATGAAATTGATATCCTTACCAGGCTAAGGCACAACAATCTTGCTACTCTCTATGGCCGCAC  
TTCAAGGCGTAGCCGTGAACCACTCCTTGCTATGAATTCATTCTAATGGAAGTCTTGCCGATCACCTCC  
ATGGTGACAGAGTGAAGGACGGATCACTCACCTGGCTAGTCCGCATGAACATTGCCATAGAAACTGCTG  
GTGCATTGGCTTACCTGCATGCGTCTGACGTAATACTGCGATGTGAAGACTAATAACATACTCCTTGA  
TCACAATTTAATGTTAAAGTTGCAGATTTTGGGATATCACGGCTTTTCCCAAATGTTGCTACTCATATTT  
CAACTGCACCCCGGGGTACCCCTGGCTATATTGATCCAAAGTATTATGAATGTTACCATTTGACTAGTAA  
AAGTGATGTTTATAGCTTCGGGGTGGTCCCTTGTCGAGCACATTTTCATCAATGCCAGCTGTGGATATGACT  
AGGCATAGCCAAGAGATTAATTTGGCAAATTTGCAATAACAAGATTGTAAAATGTGCATTTAATGAG  
TTGATTGATCCATCCCTGGGGTTCGACTCAGATACCAAGATTTTGGAGATGACTACTTCAGTGGCAGAGT  
TGGCTTTTCTATGCTTACAGACAGATAGGGACATGAGGCCTACTATGGTTGAAGTTTTGGATATTCTAAA  
CGAGATTCAGATTAGTGAATTTGACAATGAGAAGAGAGCTGACTCTAATCTCAATGGAAATGAAGCTAA  
AATTGTTACAGCACCCAGTTTCACTGAATCAGAAGATATGTTTAAGCTGAAGCAAGTTAAATCACTACCT

TCTTCAAATTTTGTACTGATAAATGGGTTTCTTAG

>PGSC0003DMG400001271 RLK with WAX or WAX-EGF domain

GAATAAGATAACGACTAGTTATGGAACCTGAGCCTATAAGATAGTCTGTTAGCTAGAGTTGCAATTCAC  
AAATCTTCAGCTCTCTTTCCTTCTTGCAGTAGATATTCAATATGGCTTTGGCTTCTTCTTTGTTTGCTGT  
CTTCTATCTTCTTCTGATTTTAGTTTCAGGCAAAGGGGAGAAATGATTCAGTTTGTCCAAAGTCCTTTTC  
ATGTGGAAATCTTACTGACCTGAGCTTTCCTTCACTCTTCTAACACAACCTGACTGTGGAATAATGTCCA  
TTTCTGGTTGTAATGTTAAACAATATCCAAGAATCCAATTGCTTCTGGAGGAGATTGGTATGATGCTAT  
GGACGAGCCGTTTAATTATACAGTTTGGCTCGTGGACCCGAAGCTTCAAACCTATATTGAGGAAAAACAA  
GTGCCAGGCTTTTAAACAAAATATCTCCCTTCCAGATTCTCCTTCTATTTATTTCAAATTCTCCAAATATA  
TACGAGGGATTTTACAGATGCAACAGCACTAGTAGTACCCCGAAGAACAAGCATTCTTCTGGTTATAAA  
ATGTACAATGGTTGTAAGGCTTTAACATATACTACAAGCTTCCCGGAGATGATGATGAAGTCCTTCCAG  
CAGGCAATCTTACTACAACTGTTCACTTCTCCAATTGCCAATTCGCCAACATTAGATGGAACTTTTAT  
ACTCCCGGATTTCTAGTAGAATGGAACTCTCTGAGGACTGTAACCAATGTCTCTATGGCGGAGGTCAAT  
GCCAGACGGATAAAACCAACAAATTTTCATTGTACATATCCAAATAATCCACATGAACAAGGTCTAGTGTA  
TATTCCATGAAGTCCTATATCTTTTTCGTATCAAATATTGTTAATATTTTCATAGTATTTTTTCTTTTTTTA  
GATGCAAAAATGACTAGAAGCAAGTGGGGACTGACTCTGGGAGCAGGTAGTTAAATATCCATCAACTG  
CAGGGTTCTTTCTTCTTTAGATTTTCTACTTCACTGTGTTAAAATCTCAAAAATTGGAGAGACCAGTACTTT  
AGATTACACAACGTACCGATAGTGGAGTTGAGAGGACATTCTTTCTCCGGGCGAAGTTTAATTTATATTC  
TATGTTGGTGCATGACTTCGCTTTGCTTTCCACAGGTGCAGTTTTGTTTACAGTTGGACTGTTGGTTTTAC  
TCTTCTGCTTCAGAGAGAAGATTTTGTGGTACAAATACATCAGGTTTTGGGAATCTAATGCTGAGGATCA  
CCAAAATATTGAAGCATTTTTAAAGAACTATGGATCGTGTCTCCAAAGAGATACAACCTATTTAGAAGTC  
AAAAGAATCACTAGTAGCTTCAAAAATAAACTTGGTCAAGGAGGATATGGTTCTGTATACAAAGGATGT  
CTGCATAATGGAAGTCATGTGGCTGTGAAGGTCTGAAGAACTAAAAGGCAGTGGTGAAGAATTCAT  
TAACGAGGTAGCAAGTATAAGCAAGACCTCACATGTTAACGTCGTGAGCCTTGTGGGATTTTGTGTTGA  
GGGATGTAAAAGGGCTCTCGTATATGAATTTATGCCAAATGGATCTCTTGAAAAATTTATATACGAGGA  
AACATCCGACAGTGTTCCCAATTGGGTTGGCAAATACTGTACAAAATAGCACTAGGCATTGCTCGAGG  
ATTGGAGTACTTGCATCGTGGTTGTACCACTCGGATTTTGCATTTTATATAAAGCCTCACAATATCCTGC  
TTGATGACAATTTTTGTCTAAGATCTCTGATTTTGGTCTTGCCAACTGTGCATGAAACAGGAGAGTAT  
CGTGTCGATGTTAGGTCCACGAGGGACTATAGGCTATATTGCTCCAGAAATTGTTTGCAGAAATTTGGG

AGGTGTGTCGCACAAGTCTGGTGTCTATAGCTATGGAATGATGGTCCTAGAGATGCTGGGAGTAAGAA  
CAAATTTTGATTTGGAGTTGATGGTTGGAGGAAGAAAAATGTTGATGTTGGAGTTGATCGCACTAGT  
GAAATCTACTTTCCACATTGGCTCTATCAGCGAATTGAACTAGACGAAGAGCTTCAACTAATTGGAATAA  
TGAATGAAGAGGATAATGAATGTGCGAGAAAGATGGTGATAGCAAGTTTATGGTGCATACAGACTGAT  
CCCTCAAATCGACCATCGATGAGCAAAGTTGTGGAAATGTTAGAAGGGAACTAGACTCTTTGCAAATG  
CCTCCCAAGCCTTACCTATATTCTCCACAAGAACTGAGGTAGATTTATCAGTACTAGAGCTGGCCCAGT  
CTTAATTGTTTCATATCAGTGTAGTAGATCAAACATTAAGTCGATTACCAGGAGAAGTTTCGTTCAATCAA  
TGTAGTTGTAATAATCTGTCTAGATCTTCAAAGAAACAGTTATATTTAACGAAGATTAGATTTGTGTTGC  
AATTATCTTTATTCATCAGGGATGTAAAATTGTTACATGTTATATTGAAAGGATCTAATGACTTTACATAG  
TCAAATTCAAAGTTTC

>PGSC0003DMG400002038 RLK with WAX or WAX-EGF domain

TAAACCAAAGAAGAAAATAAGAAGAATAAATTTACTATAAAAATCAATCAAATTCACCCCTTCTTCA  
TCTTCCAAAAAAGTCATGGCTGCCCTGCTCCTCCTGCTTCTGCTAATCTGCAGCACCCCTGCA  
GTACTTTCTGCTCGTCTGTTGTGCTGATTGTGGATCTTCTCCTGTTCTTACCCACTCAGTACCGGCCAGA  
TTGCGGTGACCAATCTTACAAAATACGGTGCAGTAGCAACATCCAACCCGAACCTTTCTTCGATACGCTG  
AACAAATTCATATCCGATAAGTTCAATATCTCCCGAATCACAAAGACTTACTATCGAACCATCACCGTTTT  
ATCCAACACCTGCATCACCCAGGACATTTCTACCGTAGGTGTTCAATTGAATTCTTCTTCTTTCAACAT  
TACGAGCAGCAACACAATCATGTACTTAACTGTACTCAGACTTTGCTTTCGACTCTGCTTAATTGCTCCT  
CAGAGAGTTTGTGCATACTTACGTGAATGGAAGTTCTGGAAATGGAGATGGTGTGGCGCGTGTAGG  
AACGCGCCGATTTGTTGTACGTTTGGGGCAGGTGGATCGTCGACGGCGTATATGATTCGGGTTAGGGA  
ATCGGGTTGTCGGGCTTACCGGAGTTTTGTGAATTTGGATCCGTCGTTACCGGTTAGTAGATGGCCGGA  
AGCCGGGATGGAATTGCAGTGGGTTTCACCACCGGAGCCGTTTGTACGGGTCAGTCCGATTGTGATTC  
TGATTGACCTGTGGACCCGACCCGAATTTGAATGGAGGTGTTAACAGATGTTTTTGCATTCCGGGTTT  
CATTGGGACCCAATTGCCGCGTTATGTGCCCAAGGTAAGTTATAAAGAGAGTACTTTTTAGATCTCCTAA  
AAATTAACGCGTTACGGGTAAAATAAAGATCTTGATTAATAAATGACACAAAATAGTAAAAGATTAAT  
TATAAAAAGGCTAGAAAATCACTTCTCCGATTTGATTTGGATGTGTCTTTGTTTTAACTATTTCTGAATTC  
GATACGCAGATGTGACATGCCAAGATCGTGACGGTTGTGGTAGCGACCACACTGCACTCATAGCAGGTA  
TTGTATAATGGGTCACATTTAGTTTAGTTACTCTGTTTTATTTAAGTTGTTCCGATTCTATTTTTTTG  
TGCCACATATATGTCGAGAAGATGTGGGCGTGGGATTCATATCGGATTTGGTCAATCAAATTTGGATAC

TTTTATCAATATTAACGGAGAAATGCGGGATATATCTAATGATTTTTGTGATAAAAATAAAAGCTAAGGT  
GAAATTGAATAAATTTGAATTGACTTGTATAAAGAAATTTGTATGATAGTCCTTTTCCTTTTATCTCCTTAT  
AGGATTTTCTTTGTGATCAATATTTTTCTTTGGAATAACTAAGTTTTCTACCTAATGTCTCATAAACATAT  
AACTTTATTTTTAGATACTTGAATTATTTGGAGAGAATATCAAACACTCCTAAACTTGGCGCAAGTTAT  
TAGTTTTATCCCCGAACTATTGACAGCTTAAAAACACCCCTCTACTATTGCAAGATCGGGGGTGTATTTA  
GCTTCAATTTGTTAAGTAAATGAGTGTTTTAAGGCTGTCAATAGTTCGGGGATGAAACTAATAATTTGC  
ATAAAGTTTAGAGGTGTTTTGATACTTCTCTCATTATTTTTAGCTGAATCTTCGTACCTGTATTTGAATCC  
ATATCCCAGAATCTTATACTTTAGATCAGGAAGGTTAGATCTCTGCACCTGTATCAAACGCCCGCACAAAT  
TTGTTTTTTACTCTATTTTGAGACTTCAAGGAGCTTATAATAATTGAAATTATCTAGTTATTAAGATGGTT  
GATCAATACTATTTTTGGTTGTTGTGTTGATCAATACTTGAATACTTCTTGGATTTGCAGGTTTGACATCA  
GGCCTGGGTGTGGCGGTGATTGCTGCTGTAATTGGTTTTTTGTGTACAGACGTCACAAACGAATTAAG  
GAAGCACGAGATCGACTAACTCGAGAACGGGAAGATATTCTAAGCTCTGGTGGTGTTAAATCTGCGAA  
GCTATTTACAGGCAAAGAAATCAAGAAAGCAACAACAATTTCTCTACGGACCGCCTTCTTGGTGCTGG  
AGGTTATGGTGAAGTTTACTATGGTAAGCTTGATGATGGTACTGTGGTTGCTGTTAAATGTGCCAAGCTA  
GGGAATACTAAGGGCATTGAGCAAGTTCTCAATGAGGTCAGAATACTCTGTCAGGTTAACCACAAGAAC  
CTTGTGCGCATTCTAGGTTGTTGTGTTGAGCTTGAACAGCCATTGCTAGTTTATGAGTATGTCCCGAATG  
GAACTGTAAGTGATCACTTGTATTTGCAACGCAAACCTTCTAACATGGGATTGCCGACTCAGTATTGCTCA  
TGCAACTGCAGAGGGACTTGCTTACTTGCATTTCTCTGCAGTTCCTCCTATTTACCATCGGGATGTCAAGT  
CTAGCAACATTTTGCTCGATGACAAGTTGAATGCTAAGGTCGCAGACTTTGGTCTTTCACGGTTGGCACA  
TACAGACCTGAGTCATGTGTCCACCTGTGCTCAGGGTACCCTTGGTTATCTTGACCCTGAGTACTACAGG  
AACTACCAATTGACAGACAAGAGTGATGTGTACAGTTTCGGGGTTGTGTTGTTGGAACCTTTGACATCCC  
AAAAGGCAATAGACTTTGGTCGACCACAGGATGATGTAACTTGGCTATTTACGTGCAAAGGTTGGTAG  
AGGAAGAGAGAATAATGGATGCTGTTGATCCTGCATTAAGGAGGGAGCAAGCAGGGTGGAGTTGGA  
GACAATGAAGGCACTCGGTTTTCTGGCTGTCAGTTGCTTGGAGGAAAGAAGACAAAGCAGGCCTTCGAT  
GAAAGAAGTAGCCGAGGAGATTGAGTACATAATCACTATTGCTACTGCCAAAGCAATAGAATGACATGT  
TTAAAATGGTAAATGCAGTTCTTCTTATTGTGTAATTTTATAAGTTGTGAGTTAAAAGCCAGAAAGTAAG  
GGAAATAAAGACCCCTTATTAGTATTATTAATTTGATTGGATCTTCTTCTTTCAAAGCTTGTGTAGATAC  
AACTGGAGAGTGAGTTTATACATACATTGATAATCTTCAAAGCTTGGCCAAACAACCTATCTCTCTAAAA  
TAAGCACTTTTGGCTTCCCAAAAATGTTGCCGCACCAATATTAGAGACAAAATGCATAATTTTTGAAGGA

TCCGACACACAACAGGGCGGTATTTTTGAAGATTATGAGTGCTAGTTATTA AAAACTGAGTTAGACACAA  
AGTTTGTGTCCGATCCACCAATTCTTGTTTCATTTGATATCGGGACTCGTGCGGAGGGAGAATACCAG  
CTACGGGTTCAACTGAATTTAGCTTTGGTTCAACATTTTACTTGTCTTCAAGATTCAATTGACCATGTACA  
TATTATTA ACTTGGAACCAATAACTTTAAAACTTAGAATCCAAA ACTCACAAGCTTTAAATTATGGCTCT  
GCCTCTTAATTGGATTCCCACGTCCAGAACTTAGAAATTTCAAATTTGGATCC

>PGSC0003DMG400003343 RLK with WAX or WAX-EGF domain

GTTGGTTTGCTCTCATTACTTTATTTCTTCCCAATCCCTTTCATTCACTTTATCAATTTACCAATTTTCTTT  
CTTCTTCTTTCTCCTCCTCCCCTGTTACATGTCCCCAAAACATGAATTTTCTCTCCATTTCAGAACA  
ATTCTCTGTTTGTATTTTCAATTTTTCATCAAACATAGTTCTTGGATCAA ACTGTACCCATTCATGTGGA  
AACAGATTCCTTCCATTTCTTTTGGGTTTTCCCATGGCTGCCAATTCAGCTCAACTGTACCTCAAATGA  
AGAAATTTTCATGAACGATTTCCAGTTCAATCAGTAACTTCAGATACCATTTTAATCAATCTTTTAGCAA  
AATGCAGCCGACCATTTTCAGCAATTCATAATCTTTTTAGCCCAAATTACGCACCCACTTCAAGAAACGGA  
ATACTTTTCCAGAATTGCAGTTCTTACAATCCAGCTGTTTGATTCTTCTACGATGATTCAAACCCATTTT  
GACATTCTTGATTGTGGGAAAGAAAACATGAGCTGTTATTCTGAGCCGAATAGTGAGAACAATTTTATC  
AATTTGAAGAATTTGTCGAAAACAGGGTGTGGCTCTCTGTTTTCTGCAATTTCTGTGGAGTCGACTGTGA  
ATAGCTCGTCGGTTTCATTAGATGTTCAAGGTGGTTCAATTGGGGTGGTGGATTTCATGGACATTGTCTGGT  
GTTCTTCTAATGCGAATTGTACTAAAATATCGTCCCCATTAATGGAAAACGGGGATATCGGTGTCAGTG  
TTTTGAAGGGTTCATCGGAGATGGCTTCTTAGCCGGCTCCGGCTGCCGAAAGGTACGTCAGGCAGAAC  
ACAATTTTAATTACTTAATTAGGTGTCAAACACATTA AAATCTATCTAATTATGAGTAACAATGAGATTTG  
AACTTGACATATCATGTAAAATATGTGACAATTTTCATATAAAATTTAAAATTTTATCCGTGGAGGATCGT  
ATTACCAAAAAAATTACATTCAAAAATCCTAAATCCGCCTTCAATTGTAGGTAATTTTGCTTTAATTAGTTA  
ACTATTTATTCAACA ACTTTTTAAATAAAAACATGTTCTAGTTTAAAGAAAGTTATAATATAATGAAAATA  
AGTTTGACTTTTCAA AATTAGAAATTTTAGGTTGCATATACAAAATGTGATATTTTATATATTCAACTTTC  
TTCAAGTCACCTAATTTGGTTATGAGTTGGGTGGTTAACTAAATGAAATTGAAGTTTATGAGTGGGAAT  
TTTGACCAAATTTGGTGAGAGGAGAACATCATAATTAGATTTTTTTTTTAAAACATGGGTCCAAGTACA  
AATATATTATTA AAAGATGGCATGCTGAGGCGGCCTAAAAGAAAAGTAACATATAATTGATGAAAACT  
GTTAGATTGAATTGAATGATCAAACCTTCTCGATAAAGTGAAAGTATTGATAGTCAATCAATCAGAAAT  
ATAAAACAAATTATTCCTATACAAGTTCAATTTTCTCCA ACTATAGGGTCATGGAGTGCATGTTAAGGAA  
CTAGAAAGTCAATAGTGTATACTATTAATAAAATATAATAGAAGAAGAATTTATTTTTTTTCTCATGTTCA

TACTAAGAAAAGGTAAAATCAAGAAAAAAAAGCAAATTATAATTGTTTATTAGAGCAACTTGTGATTGTC  
GTTTTTCATAAATTAAGGTAATAATGGCAACATTAAGAAAGACAATCACGTATGCGTTTGCTTCATCAGC  
GGAACAACCTCGTGA CTATCTAGGTAGGACCCAAGAATAGTGATGGTTGTTGCCTTTAATGTCACTTATCA  
ATGCCAAAATTAAGGCAAATCTAAAATGGTTACATCTCGTATAAGTTTTAGTTGAAGTTCACGTAAAAA  
TAACTAAATGTTTGTGCATATCTAAAGCTATTTCGAGGTGGGTAGTCTTGTAATGTTACACACTACGAG  
TATCACTTAAATGGTGCTTCTGAAATCGAGTGTTTGTTC AATCAGACATCTAAATCACAATTAATAGGTTT  
ACGAAGACTTAATACCTTTTGTCCATACCCATACCCTATATGTGAACGAGTTATAATTGTATATTA ACTTG  
AGATTGTTGCAAAA ACTCACAACTTCAAATTTTGAATACTTTGATTGGTTGGTATAATGTCCATT CATGT  
TATTCCATTAAGATATCCTGCCAAAATTTGTTTCATCATTGGTCAAGGAAGAGGCCTTTTTTTTCTTTGTT  
TTCTTCATTTTCTATCAAACCCCATTTGGTTTTGAGTGAACAATGGAAACAAAGTCACTATCATATTACGT  
GAAGATAGTAACTCAACAATATCAATGGACCCTCGTGAAAAGTAATATACGAATTCGTGATTACTTTTTT  
TTTTGTTCCCATCCAATGTT CAGTATCTGTATTGGAGTCTGAACTAGTTCAAATTCACATCACCTATTA AAA  
AGAAACGGTCCCTATTAGGATTTTTTCCATACCCAAGGCATGAACGCGATAACTCAGGTC CCATCACAAC  
ACTTGAGTAGTATGTGTCCACTACTAATTCCATTTCTTTTTTATGTGAATGCAGATGAAACATCATGCA  
ACCTTCAAAGTACCTATCAGGCAAATGTGGAGGAACCACAAGAGTTGGTGTACTTGTTGGAGGTAATT  
CTACGTTGATTTAAGTTATATACGCTGACAGTGCAGAGTCTCAACATCTAGTACTAGTTGATATGAAATT  
GTTTTCTTATTCTTTCTTAATTCAATTTCTCTATACAACACATTAATCTAAAGTGATGAAA ACTATATTTAT  
TTCTCCAGGTATTGTAGCAGGTGCTTCGTTAATGGTTAGTATAGGCCTAATATGCTGCTTTATTTCGACGA  
AGATTGAATTTCCAAAACAGAAGAAGAAGAAACCGCGAGTTATGTGAGACTACAGGGATCAGCATCCCT  
GTTTATCAGTACAAAGAAATGGAAAAGGCAACCGATTTCTTCTCTGAGAAACGGAGACTAGGAAATGGC  
GCGTATGGAACAGTTTATTCTGGAAA ACTTCAAATGACAATTGGGTAGCTATCAAAGAATTAGACAT  
AGAGATACTGATAGCATTGAACAATTCATCAATGAGATCAAGCTCCTTTCTCTGTCAATCATCCGAACCT  
GGTTCGTCTCTTGGGCTGCTCAATCGAAAATGGTGAACAGATTCTTGTTTATGAGTACATGCCTAATGGA  
ACTTTGTCACAACATATACAAAGAGAAAAAGGGAACGGGCTTCCATGGCCTGTTCTTACAATTGGT  
GCAGAACTGCACAAGCTATAGCTTATTTGCATAATGCAACGCACCCTCCAATATATCACAGAGATGTTA  
AGTCAAGTAACATACTCTTGGATTACAATTACAAGTCAAAGTAGCAGATTTTGGACTCTCAAGACTCGG  
TATGGTTGAATCGTCTCACATTTCTACTGCACCACAAGGAACTCCGGGATATCTTGATCCTCAGTATCATC  
AGAACTTTCAGTTGTCTGATAAGAGCGACGTTTATAGTTTTGGTGTAGTTCTTGCTGAGATCATAACAGG  
ACTAAAAGCAGTAGACTTTGCTCGTCCTCAAGACGAAATAAACTTGGCTGCACTTGCTATTGACAGGATA

GGAAAGGGAAATTTAGATGAAATTATCGATCCATTTATCGAGCTACATATGGATGCTTGGACACTTTCAT  
CTATTCACAAGGTAGCAGAGTTGGCATTGAGGTGTCTGGCATTTCATCGCGATATGAGGCCATCGATGA  
TGGAAGTAGCGATTGAATTGGAGCAACTTAGGCTAAGTAGATGGACGAATTCGGAAGATAACATAACA  
GGTTCATCAGAGGGATCTTCAATTCATCAACTTCAGATGCAAGTGAAAAACCATTGAATCTTCAATTA  
AGAAGCAAGAAATGGATATATTTTCGACAGATAGTAAATAAAGGATTATCCCCTGTATCAGTACAAG  
ATCCATGGAGTAGTGAGCAAAGCTCTCCATCTTGTAGTAGTTTGCTTAATCATATAGTTAAGTGATTATG  
TAAAGGATTAATTTCTTCATTGTAATTTACTTACAAGAACATTTAGCAGTTGAAAATGTAGTATACTAGC  
TAAATATTACTACTAGCAAGAATACTACACATGCCAAATTTGGTCTGTACTCTAAATGTTCTTTTTATTCT  
TTTATATCAATTAGTACTTCATCG

>PGSC0003DMG400004553 RLK with WAX or WAX-EGF domain

ATCCAGAGATCAAGGCTTGGCCGCTTCAGTTGTTCTGTGTAACTCCTATATATCCCTTTAGCAATCTATA  
TGTTAGTTGGATGGACACAGATTAACATTCCATGCATTGATCATCTCTGTGGTTCGTTATGACTTCTAAAA  
CGTGCAGGGTATTTGCAAGCAAATTTATGATCGGCCTCCGTTAGTAATTGTATTTCTGGTGTACAAT  
TCAAAGGAGGCATTTGTCAATGTACGATACGATTGAACGCTTTTTGCAAACACAAAACAATTTTCATGCC  
AATCAGATATAATTACTCCAACATAAAGAGAATGACAAGAGGATTCAAAGAGAAATTAGGCGAGGGGG  
GTTACGGAAGTGTGTACAAAGGAAAGCTTCAAAGTAGAAGGGATGTAGCAGTGAAGATGTTGAGCAAG  
CCTAAAGCTGGTGGGCAAGATTTTCATGAATGAAGTAGCTACCATTGGAAGGATTCATCATGTCAACGTG  
GTTGACTCGTGGGGTATTGCATTGAGGGAACAAAGTGTGCTCTTGTTTACGACTTCATGCCCAATGGA  
TCACTTGATAAGTACATCAGCACCAAGTCAAGAAGGAAGTCCTCTGTAAAGTTGGCAGAGGAAGTACGAC  
ATTATTCTTGGAGTGGCTCGAGGAATTGGGTATCTGCATCGAGGCTGTGATGTACGAATTTTGCATTTTG  
ACATCAAACACACAACATTCTTTTGGATGAGAATTTTATTCCAAGATTTCTGACTTTGGGCTTGCGAAA  
TTATATCCAACAGATAAAAGCATTGTAATCTCACAGCTGCTCGTGGAAGTATTGGATATGTTGCTCCAG  
AATTGATCAACAGAAGCATTGAGAAATCTTACAAAGCTGATGTTTACAGCTTTGGAATGCTGCTAAT  
GGAAATGCTGGACTTGAATAGACATGAAGTTGCAAATGAAGAGAATTCAGCCAATAATTTCTTATAA  
TATTTACGATAAGTTCAACAAGGGGAAAGAGATTGTGGTGGATGAAGAAGCGAATGATGATGAAAAGA  
AGATTGCTAGGAAGCTGAGTTTGGTTGCATTATGGTGTATACAAACAAATCCGATACAACGCCCTTCAAT  
GAGTAAAGTAGTAGAAATGCTTGAAGGCGAAGTTGAAGTGCTAGAAGTACCTCCTCAGCCTCTTCAATC  
TCAACCGATTGTCCATCAGATCATGGGAAGTTCTACGACATTTTCGTCTGATTCAATAGCTTTGTTAGATA  
ATCCCGTTGAGGTAGACATTTATGCTGATTGATTATAGTTGATGTAATGTTTATGTGAAATAAACATAGC



CAACCCAACAATGTTTGGGACAAAGAATCGTGTTGTTATTGTTGTACTAGTTATATTATAGACATACATA  
AAAATGCCCTTTAATTTGGCCTCTGCGTAGAACTTAAACATGTATAAAATTGAACAAATAGACATACGC  
ATCATACTAGCATCTTACATGGAAATTTGAATCCTACATGGTGTCTATGTTTTCTCATTATTTCAACCT  
CAATATATTTTGAAGACAAACAAAAACACCTCACATACAATATTATTTCCCCTGTTATTACACCTTTAAGA  
ATTTCCGCAATTTCTCCTCTGTGAATTTGCCATCATCATCTCTAACAATCTCCACCGCAACTCCCAATTCT  
ACGATCAACCTAGCAATCATTGGTTGATCAAGATGAATAGGCATGGCAACTATAGGAACCCCAAAATCT  
ATACTTTCCATTGCTGAATTTCAACCACAATGACTTATAAATCCTCCCGTACTCGGATGATTTAGAATTCTT  
GGTTGTGGTGCAAATTTGTCCAAAA

>PGSC0003DMG400005730 RLK with WAX or WAX-EGF domain

ATGAGCCCACCTAGTCACTCTTTGATGAGTTCTCACAAATGCATGATCAAAGCTTACTTCTTTCACTCCAT  
CATCACCATCCTATGCTTCTTGAACACGTCCTCGCCATCGTATGGCCAAGAGGATAAACAGTATTCCACTT  
GTAATAGCTCCTACACCTGTGGGAATATTCAAATATCAGCTTTCTTTCTGGGGAGGTGATCGACCTCA  
AGAATGTGGTCTTCCACAATTCGAGCTTGCATGTGAAGCCAATCAGGATCCCCTTATACATATCGATGGG  
CATAATTTCCGCGTACTTGACATCAATGGAGACAATCAAACAATGAGAATTGCACGAAATGATCTTGAG  
GATGACATTTGTCCTGATAGACTCGGTAACACTAGCTTTAATGATCCCCTATTACGCTATGGTCCTGATT  
TGGGATTCTCATCCTGTTCTATGCTTGTCTTTTGCATATACCTTCTGAATCGAAAAAATTCACCTTCAGCTG  
CAATAACACCGGAGAGTCCAGTCATGGTTTCTATCCAGATCAGTCATTTATATCATTCTGGGGACCAAAG  
TATGGGAGTTGTGAGCGAAATGTCATAGTTCCTGTGTTGTTAACGGCATTAAAGCGGTTCCAAGACCAA  
GGAAGTACGAAAATATTGGAGCTATTGAAGCAAGGTTTTGATGTGGTTTACAACAAAAGTGTATTATGT  
CTGGCTTGTGAGAGATCAGGTGGATTATGTTGGTCAGAGACAGATTTTGCAGGAGCCATCTTGCCTTTGT  
CAGGATCGAACTTATTCTTACAACCTGCGGTTATAGATTACTGGCTCAAGGTGTGTTTAAATTAATCTCCCTA  
TTCCCTAATCTAGCTTAGTTTACGTTTACCAAATATTACTTGAATTCAATTGGCAGCTAAGAGTTTTAGTAC  
TGAACCTTCTGAAACCACTATTTTTTTTCTGTTGAAATAAGTACCATGATGAAATTGCAGTGCCGTCTCGA  
CCATAAAGCCACTAAAGCAATGGCTTGGGGCGCCAATTTTTTTGGGGCCTTCATTTTCTCTCAAAGATAA  
AAATACATGTATTGATAAATTTGAAAATAATTTTTGTATAGAAAATTTAATTGAGAAATTGAATATTGTTT  
AGTTGATTGTAGTGTCTTTTCTAGATTCTTATGTGGCTAGTTAATTGTAGTATCATTCTAGTTTTCGTATGT  
GGCTATCTATTTTGTGCTAGGTCATTTATATTGTGACGATTATCATGAACCAACAATATTGTGTTTCGTA  
TACTTACTTTTCTTTATTCTCCTTTCACTATTTTTTATTCTTTTATTATTGAATATTCTTAAGTCTCTCAAACG  
TTTAAACATTCAAACATTCTACATTACGTGATATCTATTGTTATGTGTTTATAAAAAGATCAAATTTATTTT



CGAGAAAGAGCTCTTATTTATGAATTCATGCCCAATGGATCACTCGATCAACACATTTATGGTGAAGATT  
CTAAGTTGGGATGGGAAAAGTTGTACGAAATTGCACTTGGGATAGCTCGAGGACTGGAGTATTTGCACC  
GAGGGTGCAATGCACGAATACTGCATTTTCGATATAAAACCTCACAACATCCTTCTTGATGAGGACTTTTG  
CCCCAAGATATCTGATTTTGGCTTAGCTAAACTATGCCTTCAGAAAGAAAGCATGATATCAATGTTGGAA  
GCAAGAGGAACCATTGGTTACATTGCTCCGGAAGTATTCAGTAGAAATTTTGGAGGCGTCTCACACAAA  
TCCGATGTTTACAGCTATGGAATGATGGTTCTTGAAATGGTTGGAGGAAGGAGGAACTACAGTGCTGAA  
AGAAGTCATCATAGTGAAATATACTTCCC GCGTTGGGCTTATCAACGCCTTGTGACAGCTGAAGACTTGA  
ATATACAATGCATCAAGACCAAAGAAGACGAAGAAATTGCTAAGAAGATGATACTAGTAGGCTTGTGGT  
GCATTCAA ACTGATCCCTCACAAGGCCACCAATGAGTAAGGCAATTGAAATGCTTGAAGGTA ACTTAG  
AGGCCATCCAATTTCCACCAAAGCCTTTTATATGTTCTCCCTCGCGATCAGAAGGATCATCGATGATCCCT  
TTGGGGAAGCCAACAAAGCCCTTTGTATATTCTTCTTCGAGTTCAACACTTGATTCTACAGAACATTTGGT  
TATATAA

>PGSC0003DMG400005975 RLK with WAX or WAX-EGF domain

GAAAAA ACTATAGTATAGTATACAATATTTTTTTTTGAGTATGGTATCATTAAATCTTTATCAATTTTCTTG  
ATTTTCGTATCAAATGGTGTATGTTTCTTCAGTTGTAGCGCAGAATCAAATTCAAAATAACAGCAGTTGTG  
TGGATGAATTCAAATGTGGAAATCTTGGAAATGTGAGTTTTCCATTTCTGTATCTTCACAACCTGATTGT  
GGATTGTACAGTATAGATTGTGATGTTACTCCCAATCCAACAATTCGTCTCGGAGAAAATGTTTATAGTG  
TTCTGAGACAACGAACTTTGATGGTTTTGAGTTTTAGATCATAGGCTTGAGGAATTATTGACGAGAAA  
CAGTTGTGAACTTTTCGATAGAAGTATATCGTTTTCAAATTCCTTCTGTCTCGTTTAGAATCAATGAAC  
GAAATCTTACTTTGTTTAGATGCAACAACAGTTTAGATATCAACAGAAGCATGAGTGATAATTATTTTCG  
CGAATATCTGAATTATACTAAATGTAGTGGCTTTAGTATATACTACAAGTATCCTAGTAGAGGACGGGG  
AAATTCCTCTGATACACCAGAAGAAGATATCCGGATAACTGTTCTCCGATTCAATTGCCAATTACATGG  
AACACTTCACAGCCAAATGATCAGAATAGTAGCTTGTTGATCTGTAACTGTGAATTTTGTGATTGAGT  
GGAGCCTGTCTGTTGATTGTAGTAAATGTC ACTATCAAGGAGGTCGATGTTTAACCGATAGCAACAATA  
GATTTCA TTGTTCCACAGGTAATATTTTATTTGCAATATGCTTGT CATATACTACTCTGAGCTTTGTCTA  
ATTCTACTTTGAATAGTTGCTTCTAGTTTTTGTACTCCAGCTTCGAGAGTGCACATCTACACACCTCAACT  
GGTCTCAACTGGACTCCA ACTCGTCCCTAGTGTGTCTCGTGGACACCTGCTACTGACGTGACACATAA  
ATATTGGAGGTGTGTAAGATGATCATTTTGTAAAGTTGGAGTGTTCAACTGACAGGGAGGAGACGAGTT  
GAGGTGTCTAGATGTGCATACTCGAAGTTGGAGTGCTTACTTGCCAGCTGAGGCCAAGTTTGTGAGTGTCT

GTTTTATGTATTATGCTGATTGAAAATAATGAAACACAAATATTCTGCTTGTTCCATTGTGTAACGTGGG  
ACAAATCGCCTGCAGGATTTATGTCTGTAGCTTCTTCATATTGATCTTGTTCTGAATTTAGTATAGCAGCA  
TAAGCTTGTCACTTAACTCTCAGTTCCTCCTCCGCGTGCAATAATTATCTAACTTTTTCGTGATTTGGTT  
TGGTTGCAGTAACAAGAAAGTCGAGACGAGTTCTAATTGTAGGTAACAATCTATAACTTCAAATCTTTTT  
CATATAACCACATGTTCTCAAGCATGTTCTTACTTTGAAATGCCAGCTTTTCGTCGAATTCTGTCTACTTTT  
CTGTAGCCATTTTTCAAACAAATTCTGATTAGTTTCTCTGCATTTGCTTCAGTCTTACCTGTGGTGATTGGC  
TTGACCTTTTTAATCTGTCTTGGTATTGTTATCTGGCGTTTCAAGAAAGGAAAAGGCTGTCGTTCTCACTC  
TTTACAAGAAATACATTTTTCTGATCCTTCAAGAAAAGATCTTGAAGGGGATAGCAAGTACTTTGGGGTC  
CCCGTCTTCTCCTACTCTACTCTCCAAGAAGCCACCAATAATTTTGATCCCTCCAAGAGCTTGGAGACGG  
AGGTTTTGGAAGTGTGACTATGGTAATAAACCACGTAAATCAATCATGACATTTTGAATCATATTTAGA  
AAAGCATTAGGCAGAGTTTTGCATTACTGTATTAAGAATGCAATGGTTTGGTAACATGATTCAGCAGCTA  
ACAATGACTTCTTTTATTAGGTAACTTCGTGATGGACGAGAAGTTGCAGTGAAACGCCTCTATGAGCA  
AAGTTCCAAGAGGATGGTGCAATTTAAGAATGAAATTGAAATTCTTACTCGCTTAAGGCACCAGAATCTT  
GTTATGCTCTATGGGTGCACGTCAAGGCATAGTCGTGAACTCCTCCTGGTTTATGAATACATCCCGAATG  
GAACAGTTGCTGATCATCTCCATGGCGAGAAAGCAAAGAACGGAGCCCTTATATGGCCTATACGCATGA  
AGATTGCTATAGAACTGCTAGTGCTTTAGCTTATCTCCATGCTTCTGACATAATACACCGCGATGTCAA  
GACTTGTAACATTCTACTTGACAACAATTTCTGTGTCAAAGTTGCAGATTTTGGGCTTTTCGCGACTTTTTTC  
CAAATGATGTGACTCATATCTCAACTGCTCCACAGGGGACACCAGGATATGTTGATCCGGATTATCATGC  
TTGCTATCAGCTAACTAGTAAAAGTGATGTGTATAGCTTTGGAGTTGTCCTTATTGAGCTCATATCGTCGC  
TCCTTGCTGTGGATATAAGAAGGCATAGGGATGAAATTAGTTTGGCTAACTTTGCAGTAAGCAAGATTTT  
GAAATGTGCATTCGAGGAGTTGATCGATCCATCTCTTGGTTACGAGTCCAATGCTGAAGTTAGGAGAAT  
GACTACTTCAGTTGCAGAGCTAGCTTTTCAATGTCTCCAACCTCGAGAAGGAAATGAGGCCAACAAATGGA  
TGAAGTGTGGAAATTCTAAAGGCAATTCAGAGTGGTGAGTTTGAAAACCAGAAGAAAGAAGAGATTA  
ACGTCGTTGATAATGTAGAAGTCCCTCAGGACCCTGAATCAGAAAATGATGATGCACAATTGATGAAAT  
CTAAATTACCTGTTTCGACGAATTCTGTGAATGATAAGTGGTTTGTAGTTGCTCTAGCACAGTTAGTATTAGC  
GGGTGAAATTCCTTCAATATTAAGCTAACTTCACTTTTTAGCTTTCACTCTCTTCTCATTCTTTTTTTG  
CTCTCTGCTTGTTTATGAGTTCAATACCTAATTGTATCAGAGATGTATTAATAAATAGAGAAGCCTTTTTTG  
TAAGCAAGCCATCACCTTAACGATGTGGGGGGTTAGGCTTGACCCGTACCATGTCTATAAACATCCAAA  
AAGTTATGAAAG

>PGSC0003DMG400006498 RLK with WAX or WAX-EGF domain

TCTCAACAATGATAAAAAATTTCTTATGCTGGTTTTAGCTTAGAACACAAGTCAATGATCAATTCATAGTG  
TTAACATGGTATCAGAGCTACAGTGAGTGAATCTAGGAGTTTCTTTCACAGTATGGTGGTGAAGAACT  
GAGAGATTCATCAGTCATAGTTGTAGATCGCTGAAGTTGATTAGCTATGGCGACTAAACCAGATCATAA  
TCATCCTATGTTTTAGTCTTCTTCTAACGTAGCTGGAGCTGTCTAGATTGGAATCCAGCTTGCAGGAATG  
GAGAACTACACATTGTGGAGTCATGCTATGCGACTGAATTTGCTTATAAGGAACAAATCAGGCTTCATTG  
ATGGGCTCGTCAAGAGTAAAGACTTCAAACTGATTCTGAAAAACAAGACTGGGATCGATGCAATGCCA  
TTGCTATTTTCATAGATTATGAACAATGTGAGTAAGGAGCTGGTTAGAGGCATTCTCTTCTGTTCAAGTGC  
GCACACAGTTTGGACTGATTTGAAGGATAGTTTCGATAAAGTAAACATGTCAAGGATCTTTCATCTTCATA  
AGGCAATCACTACATTGACTTAAGGAGTCTCCCAAGTATCTGTCTATTACTCTAGGTTGAAGGATCTATG  
GGATGAATACGATTTTCATCATTCCACCTCCTTCATGTGAGTGCTCCAAGTCTAAGGGCTACACTAAGGGA  
CTAGTAAGGCAGAACTATTACAATTTTTTATGGGACTGAATGACAATTACAGTCAAGCTTGCAGTCAAA  
TTTTGTTGATGAATCCACCACCAGGTGTAATCAATGTTATGCCATAATCATTGAGGATGAGAGTCAATG  
AATGTTATCTGGTGAACATCCATCTGGAAGTGTTCTGTTGATCCAATAGCCTTGTCTTCCTATAGATCTG  
GAAATTCAACTAACAGTTCAGGAATTTCTAGCTATTCTAGTGGTGGAGGGTCTCAAGTGGAAAGTTCAG  
GAGCAAGTTCCTTAATAGATCAAGGAGGACTCCTTCTGTGTATTGTGATTTTTGCCACATGAGAGGACA  
CTTAAAGGAAGCCTGTTATAAGCTCTTGCAATGCAGCTACTGCAACATGAAAGGTCACACCAAGGAAAC  
TTGCTATAAGTTGATAGGTTATCCTGCTGATTACAAGAAAAGAGGAAGGTTAATGCAGCATCTGCAAT  
GCCAACACAACGTCAGAACAATACAGCGATGCAGCCATACTTCACTCAGGATCAATACAATCAGATCCTC  
AGGATGCTAAAGAAACCTATGATTCAAGAGTCTACTAGTAATCTGGGAGGAGGTATTCATGCTTCTAAT  
GTCACTCAAGCAGGTACTTTTGCTAGTATTGTTTCTCCTAATCTTTGCCTAATAAGCATGCTAAATGGGT  
AGTAGATAGTGGTGCCACTGACCATATGGTAAACAATAACTCCCTATTGAATACCAGTCTGACAGTCTCT  
AATCCAGGCAAAATACAACCTCCAAATGGTGATTCTTCTATGGTAACTCAGTCTGGAAATTGTCAACTAG  
ATAGAGGTGTTGTAGTCCATAATGTATTATGTGTGCCAGCATTTCATTCAATCTCTTGTCTGTATCCAAA  
TTGACAAAGGAGTTGAATTATTGTGCAACCTTCTTCTGATTTCTTTATTCTATAGGATCTCTTTACTGGG  
AAGGTGAAGGAGATTGGTAGAGAGGAAGATGGTTTGTATACAATGAGATCAAGTATTGGACAGGCAG  
ACAACAAGATTCACTCTTTCGCTGTTAAAGGTTGCAGTGAAGAAGTTCTCTATGTCATAAAAAGAATGG  
GCCATATACCCATGACAGTACTTAGAAAACCTTGATGTAGTTAAGAATAGACATGATCTTGTGTTGAATAA  
TTGTTATATATGCCATTAGCTAGAAAACTAGATCTCCTTTTCTATCTAGCAGTAGTAGAGCTTCTCAGT

GTTTTGATTTGATACACATGGATGTATGGGGGCCATATAAATCAGATATATGCACTGTTCTTAGGAATTT  
CTTCCTTATGATTGCAACACAGTTTGAAAGAAAATAAAGATGTTGAGGTCTGACAATGGTGGTGAGTT  
TTTTAATACAAAATGCAGAAAATTATTTGATGATCATGGAGTTATACACCAAAGTTCTTGTCCCTACACTC  
CACAACAAAATGGAGTGGTATAGAGGAGGCACAGACACATCCTTGAGACTGTTAGGGCTATTAGATTTT  
AAGGTTCTCTACCTATTATATTTTGGGGTGAATGGGTTTTCGCTGTTGTGTATCTAATCAACAGAGTTCCA  
TCCACAATTTTGGGGAACAAGTCCCCCTATTTCATTTTATATCATGCACATGCTGATCTTTCTCACATAAG  
GACTATAGGTTGTTTATGTTATGCCACTAACTTGATCAAGGGGGATAAGTTTGGGGCTAGAGCCATTA  
ATCAGTTATGATGGGGTATAGTGCAACTCAGAAAGGGTAAAACTTTATGACTTGACAATAAATCTTTC  
TTTGTGAGTATAGATGTGCAGTTTTTGGAGCATATTTTTCTTTTCAAAGTGGTAATCCAAGTGTGAGTT  
CATAGCTGAGGATGAATTCCTGGTTCCCGACAATTAGATTTTCCCCTTAACTGAACCATGTTTGAATTCTA  
CACATTTAGCAGATTTGTCTCCACAAGAAGCTGTTTCTGATCATGTAATTGATCTTTTGATAGACTCACAC  
ATTCCCACACCAGTAGCTCCTGCTGCAAGTAGTTCCTGCTGCAATGGTTCCTTCTGTGGAGATTTTCATATG  
CTGAGATCCCAGAATGTACTCCATAATTGAGCATATGAATGATGATGCTGCAGTTTCCACTAGGAGAAC  
CTCAAGCAGACACATCAAACCTCTTATCTGGTAGAAAGAGTTTGTGACTGTACTAGGCTGCTCATTCTT  
GTTTATATCCTATTGCCAACACATCAACTATAGTGGTTTGTCTAGTACATATCAAAGTTATGTGGCTCAG  
TTCTCAGTAGACATAGAATAACCTCATATCATCAGGCAATACAGGATCCAAGATGGATACAAGCAATG  
AAAGATGAAATTCAAGCCCTGAGGACAATGGGACTTGGGAAGTTGTACCTTTACCAAATGGTAAGAAA  
GGCATTGGCTGTACATGGGTATACAAAATTCAGTACATGGTTGATGGACAAGTGAGATTCAAAGTTATA  
CTTGTAGCTAAAGTGTCAACCAAAGGAAAGGTCTTGACTATTAGGAAACCTTTTCCCCTGTTGTGAAGA  
TGGTGACTGTAAGAAGTGTGATTTTTCTGGCTGCTATTAGAGGTTGGTTCGTTCAACAAATAGATGTTTA  
CAATGCATTCCCACAAGGTGATGTAAATGAAGAAATGTATATGTAATTGTCATAGGTTTTTAAAAATGGG  
ACACAAGATCTCAAGGTTTACAGGTTTCTTAAGTCTATTTATGGTCTAAAACAAGCTTCAAGGTAGTGGA  
ATGTGAAGCTTACATATGCCCTTGTCACAAGTGTGATTTAAACAGAGTCATTTAGACTATTCTTTACTAACC  
AAAAGGTCATCAGATGAGATTGTGATTTTCTAATATATGTTGATGACTTATTGATCACAGGTAGTAGCC  
AACCTTATAGATGATGGTAAACAAGTTTTGAGAGACAATTTCAAATTAAGGACCTAGGGGACCTTAG  
ATATTTTCTTGGTATTGAATTTGCTAGACAGTCAATTGGCATTCTCATGAATCAAAGGAAGTATGCACTTG  
AGCTCATTCAAATTCAGATTTGAGTGGTTCTAAGACCATTGCTACACCTGTTGAGCTAAATCAAAGTT  
GACAAGTGTGAGTTTGACAAACATATTGGTGGCCCTCCTGACCCTTTCCTAGCAGATCCAGGGAAGTAT  
CAAAGACTTGTGGTAGACTGTTACATTTGACTATTACCAGGCCGGACATTGCCTTTGTTGTCCAAAGTTT

AGGTCAAATCATGCATGCTCCTAAGCAGTCCCCTGGGATGCTGCACTCAGGGTGATTAATACATAAA  
TTAGGCTCCAGGTCTTGGAGTTTTATTGTCCTCTTCGAGTTCAGCCTCACTCCAAGGTTTTGTGATGCTG  
ATTGGGGTCTTGTATAAACAGTAGGAGGTCCACTACTGGATACTTGATTAAGTTTGGGGATTCTTTGAT  
ATCCTGAAAATCCAAGAAACAGTCCACTATCTCTAGGAGCTCAGCTAAAGCTGAGTACATGAGTTTAGG  
CTCAGCTGTTGCTGAAATTGTTTGGCTAATTGGCCTATTCAAAGAACTCAATGTTGAGTTGCACCTAGCTC  
CCAGTTTCTTTCATTGTGACAGTAAAGCTGTCCTTCAGATTGCTGCCAACCTGTCTTTCATGAGAGGAC  
AAAACATATTGATATAGATTGCCATTCATTCGAAAAAAGGTTTAGAATGGCTTGATCCACACCAAGTAC  
CTAGCTATTGTTGAACAACATGCTGACATATTAACAAAAGGCCTTGGTTGTCTTCAACACACCTATCTACT  
TTCCAAGCTAGGGATGAAGAACATCTTCATACCACCTAGATTGAAGGGGGTATTGAGCACATGAAGAAT  
GATGATGCAGGATGATGTGTCATTTACTGATTGGACTAGAAGTTAGTTAATTAGAATTGGTTATAAGATA  
TTTTCTCATTTACGGTTAGTTAGGTTGTTAGAACTCTAGTTAATAGTCAGGTTAAGTTAACTGTGGTTAGT  
AGAGTTGGTTATTACTGCTATATAAACATTGTAATTAGTACACTGGAATTTGTAATGTTTGATCTTTTTCT  
CAAAACAATCTGAAATTCTCTCAACAATGGTGAAGATTTCTTCTGTTGGTTTTAGCTTAGAACACAAGC  
CAGTGATCAATTCGTAGTGTTTAAACAGTATTTACATGATATAATTGAAACGTTTCTTGAAAAGTCAAAGTT  
GTGATTCTTTATTATATGAATATATGAAAGTTGAAGTCGAACAACTATAGTTACCGATTTACTAAACCAC  
AAAATACCAAAAACAAATTTACACCAATTATTTTATAATGATAATAATATAGTATTCTTACATATCAAAA  
ACCAAAATTGAACAACCGATGTTTTTGATACCATATTATTAGACCACCAACTTGATAGTTTCGAGTGACTC  
GAGTTTGACAAGAGATTTACATGATGAACATAGCCAGGACCAAGAAGGGTGAGTCATAGTCGCGTAAC  
CGCCAATAGAGTCAAATTAAGAGAGTTGACCCATTACACATACCATACCCCTATGAAATTTTCATCCG  
CTATTTTCTGCTTGACTTCTTCGCTACTGATACCACTACAGATCACTAGGAGGGAGTGAGGATGTTCCAGG  
TCTGGATCCGGCTCCTCTCCATTTCTTCTCTCCATTTTTCTCAAGTTCTAGCTTAGATTGGAGACACATG  
TCATATTTTAGAATTAATGGTTGAGATCTAATTGATTAACAAAGTCCTAACCATAGTTATTTACTTCCA  
TATATATTTGCTTCTTAAATATTTTTGCAATCCATTATATTTTCTCAAATATATAAAAAGAAAAATCTTTA  
CTGCCCTACATATATATTTAAACTTTATAAATACTTTTACTTTTTTGAAAAAATTATAATACAATCAAAT  
ATTTTTATTATTCTAATAGAGTTTTAGGAACTACAGTGTCTATAGAGCAATATGGACTCCATTTAGGGAGT  
AAGAAAGAATTAAGTTGTTTGACAAGATTTATTTTACTCCTAAAATTAACAAAAACAAACGTCAGGTCA  
TAATTTTTAATTTTTTATTTGGCAAATATTATTTGTGAAATGGCAAACGTTAGGTAAAAAGTAAAAATC  
AGCAAAAAATTACTTAAGTAATTAAGAAAAGAAATCTTTTAAATACATTTAGGAAAAATATAATGTAAA  
TCTAGAATTGTTGGATTGCAAAAAATTTAAGAAGCAAATATATGGAAGTAAATAACTGTGGTTAGAACT

TTGTTTTAATCAATTAAGATCTCAACCATTAATTCTAAACTATGACATGTGTCTCCAATCCAAGTTAGAAC  
TTGGGGAAAATGGAGAGGAGCCGGATCCTTCAGGTCTGACCCTCATCAATATAATTTCAAAGAAAATGA  
GGTCTAATCCATTAATTATCAGTCATTTTCTCTCCTAGTCCTCTCTGAACTTTTCTTGATTACGCCATGTA  
TAATATTCCAACAAATACAAACATGAGAATGACAGCACTTGCTCATTCTAACCTTGACATTATTTTCTGAA  
AAAAATAATTATGTACTAAAGATTTTCGATATATAATTGGCTGCATAAAGTCGTCAATTCTCCTTGACATA  
GTCCACATTAATAATTAGTCCTTCAAATTTACAAGTAGCTACTCCTATAAAAAGTATCATATTTAGTATCAA  
AAAATCACAACACACACATAGCATGGCTCCTAATTATGTGATGATGGTTGGTCTCATAATATTAATTTGCT  
TTTCACTATCTTTTGGTGATGATGCTATGTTATCAACACACAACAATCTCATAGCCAAACCTAACTGCAAA  
AAAAGTTGTGGCAATGTCAGCATCCCTTTCCATTTGGGGTTACCCAAGATTGCGTTTTATACAATCAATT  
CCTTGTCACCTTGTAATTACACTTTTTCAACCTCCCCGGCTTTTTTTCTATGACTCTGCTATTCAAATCACAAC  
ATATCTCTCACTGGGCAACTTACAATCTTTCAATTCATATCCAAAGATTGTTATGAATCCAGGATAAACAC  
GGAGAATAACACACCATGGATAACATTAACACCATTGCTTGCTGTGAGTAACACTGCGAATAAGTTCATC  
GCGATTGGCTGTGACACATATGCTATAGTTCAGGGTTATTATTCAAAGTTTGAAAATATGACGACTATGC  
ATTACTCTACATAACAGGATGTACGTCCATGTGCAATAGTCTTGATGATGCTGATAATAACACATGTTCT  
CGGAGTTGGTTGTTGCAAGACATCCATCCCTAAGGGAGCATGGAATGTTACTATAACACTAAGTAGTTA  
TTATAATCACACTTATGTGAATGATAACCCTAGTTGCAGCTATGCTTTTGTGGTGAAGATACTAACCCCT  
ATGCTAATTTTTCGAAGAATAACCTCGAAAGTTTGAAGAACATGGATGAGCTTCCACTTGTGCTAGATTG  
GGTAATTGGTAAAGGAACATGTGAAATAGCTAAGAGAACTCGACTGCATATGGATGTAAGAGTGAAA  
ACAGTGATTGTTATGATAGTTCAATTGGATATGGATGTTCTGCATGCAAGGATATGATGGGAATCCATA  
TCTGAAAGATGGCTGTCAAGGTATGCATACTTTTACTTTTTGAACTTAGGTAGAAACACCCCCTAAATCCT  
AATCAAAGCTCAATTTACAATATAGTCACAAGTCTTACGTCAGGTAAACACCAAATAGTCTTGGAAGTGA  
ATTATAGTGCTACTTTATTTGTTGTTTGGTTGGCAAGTCCAGGATAACTTATTCGGGAATTAATAATTAGT  
ACCGAGATAAGTTATCGCTCCTCTTGGGTGGTATAGTAATCCTGGGTAACTTATCCAGGGATAAAAATAA  
GTGAATGATAAAAATATCCCTTTAAACCCTTTCTATGCATAATTTTTTTTTGAATATTTACGTTATCATAT  
GTTTGTACTCTACGAGTCTGCAGATATTGACGAATGTATAGATCGGCAACCAGATTATAGATGTGCCAAA  
GATGCCATTTGCCAGAATACAGAAGGGAATTATACATGTATATGCCCTCCAGATTTAGTGGTAATGGTA  
CTGTATGCAATCGTGACAATCCTCAGAGAATAACTCAAAAATATTTATTTTGTATAGGTACATCTCTTGAC  
TTCTTTCAAATGGATAACAATTTTCTATTAACGAACTACATACATCGACCTAAAATGTCAAATAAAGTTTA  
TATATTTTTATACAGGTGCTACAGCAGGGGTGCTTTTGGCATTATTATTGTTTTTGGCTGGTCATACACT



GCATTCCAAAGGAGAAAGATGTCAAAGATGAAGAAGAAGTTTTCCAGGAAAATGGTGGATTAGTTCTA  
CAACAGCGACTTACAAGGGAAGAGGGATCAAGTCATAATAACAATAAAGATTTTCACAGCGGAAGA  
GCTTGAAAAGGCAACTAATGGCTTTGACAAAGATAGAGTTGTTGGACAAGGAGTTTTGGAACTGTTTA  
CAAAGGATATCTGAAAGATAATTGCATCGTTGCCATAAAAAAATCTAAGGTAATTGATCGCAATCAGATC  
GAACAATTCATAAATGAAGTCCTTGTCTTTCCCAAATCAACCATAGAAATGTGGTTAAGCTCTTAGGTT  
GTTGCCTCGAGACGGAAGTTCCACTATTGGTGTATGAATTTATCAGCAATGGAACACTTTCTGAACACTT  
ACATGATAAATTGAAGGCGTGAATCTTTCTTTGGATATTCGTCTGAGAGTTGCTGCAGAACTGCAGG  
AGTACTTTCCTACTTGCCTCAGCAGCTTACCCTCCTATTATCCATAGAGATATTAAGTCAGTCAACATTCT  
TCTAGACAAAAGCTACACAGCCAAAGTGTCTGATTTCCGAGCATCCAGGTTGGTTCCTGCTGATCAAACA  
GAGTTATCTACATTGGTTCAAGGAACTCTAGGATATCTAGATCCTGAATACTTGCAAACAAATCAACTCA  
ATGAAAAAAGTGACGTATACAGTTTTGGAGTAGTGCTGTAGAGCTCCTAACAGGTAGAAAGGCCCTAT  
GTTTCGAAAGACCAGCAGAAGAGAGAAGTCTAGCTCAATATTTTCATATCTTCAGTGGAGAAGGGTCTTT  
TGCTCGATATTCTAGACGACAATATAGTTTATGATAAGACAAATGAAGAGAAATTGAAAAATGTTGTTAT  
GCTTGCACAGAGGTGCCTAAATGTTAAAGGGGGTGAGCGACCTACAATGAAGGAAGTTGCAGCAGAAT  
TGGAAGCTGGGTTGAGATTGAAGCACTCGTGGGCTGAAACTGATCGACATTCAGAGGAAAAAGAGTCC  
TACTGCCTGGCACACAAAGATTGAGATTTGGATACGAATATAGTGAACACAGTGCGGATGCTGATAGT  
ATAACGAGTCATGTAACCTTTACCTTTTCTGGAGGAAGGTGATCGATCATGCATGTTGATTTTTCTCAACA  
ATATAAACTCAGAACGGCCACGGCTTCAACATGAATTTCTTTTTGTCATGGGCATGTTAGAAATAAGAA  
CTAAGTTTGATTTAGTTACATCTCTTTTATTTGTCCAGAGAAAGTAAATTTGAGTAACAAATTATGTGCTT  
ATTTATGTATCCTTGTAATAGTTGTACATTTTGATGTTCTTCTTACACTTGAACATATCCTTCTTACATTGT  
TTTGTGCTCAACCCATGTGTTTTGC

>PGSC0003DMG400006729 RLK with WAX or WAX-EGF domain

ATGGCTCCTAATTATGTGATGATAGTTGCTCTGATAACATTTATTTGCTTTTCACTATCTTTTGGTGACGAT  
GCTATGTTACCAACAAACAACACTATCTCATAGCCAAACCTAACTGCAATGAAAGTTGTGGCGATGTCAACA  
TCCCTTTCCCATTTGGTATAACCCAGATTGCGCTCTACGCAATCAGTTCCTTGTCATTTGTAATTACTCCT  
TTCATCCTCCCCAGCCTTTTTTAGGAAACAGCCGTATTGAAATCACAAGCATATCTCTCGCTGGGCAACTT  
AAGGTCTTACAGTTCATATCCAGAGATTGTTATCGTGCTGGGATAAGCACGGATAATAACCAGCCATTTA  
TAGTATTACCATCGTTGTTAACTGTGAACAACACTGCGAATAGCTTCATCGCCGTTGGCTGTGACACGTA  
TGCAATTGTTCAAGGTTATTATAACCAAGTTTGGAACTAAAATCGAGTATCTCCCTTACATAACAGGATGC

ATGTCCATGTGCAATAGTATTGATGATGTTGGTCATGACACATGTTCTGGGGTTCGGTTGTTGCAAGACAT  
CCATCCCTAAGGGAGCACGGAATGTCACCATAACACTAAGCAGCTATTATAATTATAATGATACTGATAT  
GAAAAATGACCTTAGTTGCAGCTATGCTTTTGTGGTCGATCAAGCTAATTTTAGCTTTTCTAAGACTTACC  
TCAGCAGTTTGCAGAAAGCAGAGAAGCTTCCTCTCGTGCTAGATTGGGCAATTGGTGAAGAAACATGTG  
AAGTAGCTAAGATAAACTCGACTACATATGGATGTAAGAGTAAAAACAGTGATTGTCAGGATAATTCAA  
ATGGATATCGATGTTCTGCATGCAAGGATATGATGGGAATCCATACCTGAAAGATGGTTGTCAAGGTA  
TGTATATGTTTGTGAGTCTCCTAATATGATTTTATATCAAATCTATCATTTTGCAAATGAATGTTTATGGTT  
GTGCTCTACGAGTCTGCAGATATCAATGAATGTGTAGATCGGAAACCAGATTATAGGTGTGTCAAAAAT  
GCCATTTGCAACAATACAGATGGGAGTTATACATGCACATGCCATCCAGATTTTCAAGTGGCGATGGTTATA  
CTGAATGCAATCGTGACAATCCTCAGAGAAAAATTCAGAATATTTATCTTGTTATAGGTACCTTTCTCAAC  
TTCTTTGGAATTCTGCAGGCAAGAGGTTAATTCGGTCAAATATTACTACTTGTGGATTATTTCTTTCAAA  
CTGAACGGAAAAAGAAAACCACATGAGCAACGATTTTATTTTCATGAACTACATACATCAACCTAAATGT  
CTAATAAATGGCCTTATTGGGTACATCTATATATGTTAGTAATATATTTTTATTACAGGTGTTACAATAG  
GGGTTGCTTTAATGGTTTTTATAATATTTGGCTGGTCATATACTGCATTCCAAAGGAGAAGGATGTTAAT  
TATGAAGAAGAAGTTTTTCCAAGAAAATGGTGGATTAGTTCTATTGCAACGACTCAAAGTAGGGGAAGA  
GGGGTCAAGTAATACCAATACAGTAAACATTTTACAGCGGAAGAGCTACAAAGGGCAACTAATGACTT  
TGACAAAGATAGAGTTGTTGGTCAAGGAGGTTATGGAAGTGTGTACAAAGGATATCTGAAAGATAATT  
GCATCGTTGCCATAAAAAAATCTAAGGTAATTGATCGCAATCAAATTGAACAATTCATAAATGAAGTCCT  
TGTCCTTTCCCAAATCAACCATAGAAATGTGGTTAAGCTCTTAGGTTGTTGCCTCGAGACCGAAGTTCCA  
CTACTGGTGTATGAATTTATCAGCAATGGAACACTTTCTGAACACTTACATGATAAATTAAGGCGTCCG  
CTCTTTCTTTGGATATTCGTCTTAGAGTTGCTGCAGAACTGCTGGATTACTTTCCTACTTACACTCAGCA  
GCTTACCCTCCTATCATTATAGAGATATTAAGTCAGTCAACATTCTTCTAGACAAAAGCTACACAGCCAA  
AGTGTCTGATTTTGGAGCATCCAGGTTGGTTCCTGCTAATCAAACAGAGCTATCTACATTGGTTCAAGGA  
ACTCTAGGATATTTAGATCCTGAATACTTGCAAACAAGTCAACTCACCGAAAAAAGTGATGTATATAGTT  
TCGGAGTAGTGCTTGTAGAGCTCCTAACCGGTAGAAAGGCTCTATGTTTTCAAAGACCAGAAGAAGAGA  
GAAGTTTAGCTCAATATTTATATCTTCAGTGGAAAAGGGTCATTTGTTTCGATATTCTAGACGACAATAT  
AGTCTGTGATGAGGGAAATGCAGGGCAATTGAAAAATGTTGCTGTGATTGCACAAAGGTGCTTAAATGT  
TAAAGGGGATGATCGACCTACAATGAAGGAAGTTGCAGCAGAATTGGAAGCTGGATCGAAATTGAAGC  
ACTCATGGGCTCAAATTGATCAACAGTCAGAGGAGATTGAGTCCCTACTGCCTGGATTTGGATATGAAT

ATAGTGAACATAGTATCCATGTTGATAGTATAACGAACCATGCAACTATAACCATTCCTGGAGGAAGGT  
GA

>PGSC0003DMG400008482 RLK with WAX or WAX-EGF domain

ACTAAACATGCAACACAGACAAATTGCTCTGTTTTTTCATTTACTTGTCTGTGCTAATAATCTTGACATC  
AACCTCCGCCCATCCCACGGCAGACAGTCCCGTATCTCCTACTACAATCACAAAAGGTACAAATATCGCC  
AAACCAGGATGCCCAAAGCAGTGTGGGAACGTTACAGTTCCTGATCCTTTTGGTATTGGATCAGATTGT  
GCCATAGACTCAAGTTTCGAGATCAACTGTACAGGGTCTGGTGCAACTCTATAGATCACACATCAAAA  
TCTACGATATCTCAGACTCTGAAATACGCGTATCAAATATGCTGTACCAGAGATGTTACTCAGAAACAGG  
ACAGCTTTTAGAACCAGATAATCCAACATGGTTACGTTTCGAAAAATTAACACCATACAGTTTCTCAGCA  
CTTAACATGTTTACCGTAATTGGATGCGATGAATCTGCTATAATGACTGGAGATAACTTTTCGTAACGGAT  
GTTACGCTTTCTGTACTAATTCCAGTGGTGTTAATGTTGTTGTAGGAAGGTGTATGGGTACAGGGTGCTG  
TCAAATAGAAATACCTAAAGGATTGAAATACTTCAGCACGACGATGGACAGTGTGGAAAATCACACCGG  
AATTTGGTCTATTAATCGATGTGGATACGCGTTTTTAGGTGAGGCAAGCCGATTCCAATTCAAGGGCGA  
GCATGATCTTACTGATAATAATCTTAAAAACAGGATTTTGGATAATGTTCCCTATTGTGTTAGATTGGGCTA  
TCGGAAATAATCTTACTTGTGTTGACGCACAAAAGCGCAACGATTATGCTTGCCTCGTTAATAGCCATTG  
TGTTGATTCCGACACTGGCCTTGGTGGATATCGGTGCCATTGTGACCCGGGATATGAAGGCAATCCATA  
TATCCATCCAGGCTGCTCAGGTAACCTGATTTTATTGAAGTCGGAATTATCACTAACGATTTCAATTAAGT  
AAAAATAAATAGAGATTCAACATCTGCTATATATATATATAAATTTTAAATATGCAATTTTCCGGTTCCG  
AATGAACCCTTTAAGCTTAAATTGGATCCGCTTCCCGGCTGAGGCAAGCTAGATATCCGTCTAGGTAAC  
TGATTTCTTACTTTTAGTACTCAGGTTGAAGTCAGTGACGGAGTCGGAATTATTTAAATTTGGCTCCGCC  
CTGGCTGAGGCAAGCTAGATAAACTTCAACAAATTATTTTATTTCCATACTTACTAGAACAGTGACATT  
CTTTTCATATATATTACTCCATCCATTTTAAATTTGGTGTTTTATAGTTCGTTTTGAATAGAATTTTCTTCT  
TTTTTTTTTTGATAATTCTTTAATTTTCACTTTTCTATATGATATGTTTAATATCATAAGATCAATAAGGACA  
TTTCAATACTTTCTACATATTTTTAGCTTAAGACCAGGAAATTCAATTATTACTTTTTACTTTTTTAAAT  
TTTTCGTCATTTCAAATCATATAACAAGGGGAAAAACTCAAATATGCCTCTGAATTCTGAGAAAAAGC  
TCATCTATGCCATCCGTTAAAAGTTTGTCTATTTATGTCATTTTTGTTTGAGAAAAGACTCATCTATGTCAT  
TATTTGTTAACTGAAAATAGTTCTGCTTTTTCGAAACTATTTTTATAGGTGGTCAATTATGATTCGGTCA  
CGCCATTAATTACATCATTTTTAAAAGAGAAAAGGCTCAAATATGTCACCGAACTTTGAGAAAAGGCTCA  
TCTATGTCATCCGTTAAGTTTGGCTCATCTATGTCATTTCAATTAACAATCAATGGCACGGATGAACCTTT

CCTCAAATGGAAATGACACAGATGAGCCAAACATTTAATAGATGGCACAATGAACGTTTTTTTTAAAGT  
TTGATACATATTTGAGTCTTTCCCTATTAACCAATTGAAATGGAGGAATTAATAAAGTAAGAGGTATA  
AATTGAAAATAAGAAAAGAAATACTTTAGTAGGTTGGGTGTCAAGAAGGGTAGGATATCAAATCATA  
GGGACATTTATATTTATTGTAGGATAGTGAGTGCCTTTTAAACACCACACACTAGAAATTAATGAATCGA  
AGTACCTAATTATCTGCCTGATTGAAGCGTGGACACAACGATAGAGGTGAAGATGACTCCTCACTAATG  
TTTTGCTCTCATCAAATTTGACTAATTCAAACACTTATCACTATATAATAGTCACCCATCAACCTGACTTG  
TGGTATAGTGGGGAGGAATCCAGATTTAGTGAGAGATTTAAGTTTCGAACTCTAAATATAGAGA  
AAATTCTGTTAGGAGCGTCATCTCAAATGGGCCTTGCAGTGCATGATTAGATTTAATCAGAGCTCTAG  
TGTAGGATCAAACATCAAATTTAAGAAGATATTTCTTTATCTTGTATTTAACTAAGTTAATACATGTAA  
TTTTACTAAAAATATTTGCCTTATATTTAACTTTTTTTCTTTCATTCTCGGTAGGAAATATGGTTCAAAA  
GACACTCCAATTATAATCGAAATTATTATTACACACGCAAACCTTTGCAAGAGTCCTATATCCCCTCTAAAA  
TATTTTTTTAACTAGAATTACTCTACCCCTGAGTGCTTAGGTGACAAAGAAAATCTAATACACTCAATTTG  
AGAGAGAAAGCACGAAAAAATGCTAAAGTTTTTTATTTTGCATAATATTAGTCGGAGACAAGTTTATAT  
TGAGAAACATGGCCTAATTGTCCATCCTTTCTAAGTGTGATTTCTATGTTATGTATGGCCGTGCCTTAGG  
GCATATCGGTTGATTGAAGTAGATTCTGATTCATATGTAATGCTTAATTAGATACTCATAGTTGCCATTAA  
TGACAAAGTAATTAATCCTGGAATTTTCGTATGGTATAATCACAACCTGTGCTAGTTGTAAAACAAAGAA  
GATATAAAGACAGAGCCAAAGGGATTAATTAATGTGGTATGTTTCTCTGTTTGGCATGTTAGATATTGA  
TGAATGTCGAAATCAATTTCCAATACGTGTGAACACAACAATTGTATAAACACGCTGGGGAGTTACAAA  
TGTTTTTGCCAAAAGGATACACTGATGATGGTGAAACAATGGTCGTGTCTGTATTGCAACAAACTCCG  
AGTCCCATGGATCAAGTTTTCTGTTGGTAAGTTTCTCACGCATATATATATATATATATATATATATAT  
TGAAGTGATCAAAGGAATCACTTCTGTTGTTATAAAACACAGGTATGGGAGTTGGCTTTATATCCCTA  
GTGGTTGGGACAATCTTGCTCTATTTTTGTATCAACAAACGAAGACTCATTAAAAATAGGGAGAAGTTCT  
TCCAACAAAATGGTGGTTTACTCTTGAAACAACAAATCTCCTCTAAAAAGGGTGGTGTGGAAGCAACCA  
AAATTTTTACAGCTGACGAGTTGAAGAAGGCAACAAATAACTATGCTAGTGATAGAATTCTTGGTCGTG  
GCGGAAATGGAATTGTCTATAAAGGTATTCTACCTGATAACCGTATAGTTGCTATTAAGAAATCTAAGAC  
TGTGGATGAGAATCAAATTGAACAGTTCATCAATGAGGTACTTATTCTTACTCAAGTCAACCATAGAAAC  
GTCGTGAGACTCTTTGGATGTTGTTTGAAGATGAAGTGCCTTTACTGGTTTACGAATATGTTTCTCATG  
GAACTCTTACGAGCATATCCACAATCAAATGGAGCGCCTTGGTTATCTTTGCAAATCGGTTGAGAAT  
TGCTTCAGAGACAGCAAGTCACTTGCTTACCTTCATTCATCAGCATCGATGCCAATAATTCATAGAGAC

GTCAAATCTACTAATATATTATTGGATGATGGTTACACAGCAAAAGTGGCAGATTTTGGAGCTTCAAGAT  
TAGTCCCTCTTGACCAAACACGTGTTGCTACATTGGTTCAAGGAACGTTAGGGTACTTAGATCCTGAATA  
TTCCATACAGGTCAATTGACAGACAAAAGTGACGTTTATAGTTTTGGAGTAGTTCTTGCGAACTTTTA  
ACAGGGATGAAACCTATTTGAGGGACACAATTAGTGACAAGGACAAATGTTTGGTGGAGTACTTTGTC  
TCATCGATGAACAAGAATAGCTTATTTCAAATTGTTGATCGTAGAGTTGTAAGAGAAGGAGGTCTTGAG  
CAACTTCAAAGATAGCTGAGCTCATTAAGAGTTGCCTTCACTTGACCGAGAAGATAGGCCTACGATG  
AAGGAAGTGGCTATGGAACCTGAGAGTTAAGAAAGTTCACTAGCCTTTGGACTAATGGAAACGAACAT  
GAAGATGAGAAGGAAGTTGAATTAACAGATCTTTATACAATTCCAATTGACTCTAATATAGGTATGGAC  
AACTTCTCTGGACAATATCCTAGCTCCTACATAAATAGCAGCACCATCTTTTCTGGACAATATAGTTCCGA  
TAGTTCTTCATTACTACACAATAACAATATCCCGCGGTGATCGATCCAGAATAAAAGGTCAATATATATG  
TGAAGATTTTTCTCTGTTTTGTAAGTTCTTTTAGCTATCTTTCTTCTTGTGAATGTTGTTATGTATTTT  
TATTTGCGTCTGAATTTAATAATCAATTTATTGTTGATTGTATTGTATTAGTGACAAGAACTTTTAGTACAT  
TGAGCTTTAGAAATTATTTCCG

>PGSC0003DMG400008499 RLK with WAX or WAX-EGF domain

ATGCTAATTTTGACATTAGCCACTGCCAAAAAATTATCCCCTCTAACACCACTTCTCCTCCGCCGACAAA  
CACCACATCTCCGCCAACCAACACCACGACGACGATCACTAAAGCTGCGATCATTACAAAAGCAGG  
ATGTCCGAAAAAGTGTGGGAACCTAACAGTTCGTACCCTTTTGGGATTGGCTTAGGATCTGGTTGTGCC  
TTGGATCCGAATTTTGAATCAATTGTGATACTAATAACAACAGATTCTCCAACACCATTCATAGGGAATA  
TTCAAGTGTATGACATCTCTGACGCTGAAATGCGCGTATCGACTAACATAAATCGGAGGTGTTATTCATC  
GACGGGCATGTTGCTTCGAAATGATCCTTCTTGGATGAATTTAGGAACCTCGAGTCCTTACAGTTTCTCT  
ACCCACAACAGGTACGTACCTAATTATAAATTTTCTTGTAAACCTTATAAACTTGAATTTTGAATTCACCT  
ATATATACAGGTTACCGTTGTTGGTTGTGATGAAGCTGCTATAATTTGAAGGTGACTTTGCTAATGG  
CTGCCCCGCGATCTGTATTAGTTGAGTCAGGTAACCTGAAGGAAGGTGTATGGGTATTGGTTGCTGCCA  
AATAACAATACCAAAGGCTTGAAAAATTTCAACACAATGATGCAAAGTTCGCCACAAAATCACACTGG  
AGTTTGGTCTTTCAATCCATGTGGCTATTCATTTCTTGGTGAAGCTAGTCGATTCAATTCATGGGTTTAC  
AAGATCTAGGCGATCTTACTTTTAAAAAGAGGATTTTAGATAATGTCCCTATTGTGTTAGATTGGGCTAT  
TGGAECTTACTTGTGTTGAAGCACAAAAAGTAGTAACAATTATGCTTGTGTTGAATAATAGCCAATGT  
GTTGATCCAAACTGGCCTTGGTGGTTATAGGTGTGCCTGTAAACCGGGATATGAAGGCAATCCATAT  
ATCGGCCAGGTTGTCAAGGTAACCTTCAATTTCTTACTTCCCTCACATGTTTCAACTTACTTTTATGTGTAA

AATTTAGATATGATAAGTACCGTAAAATGTAATTCTTCTCAAGTCAATACGATAAACAAGTTAATTTTAAA  
ATGTTTGTCAAACCTTCGCATGCATAATCTTAGTTATAAGACAAGAGAGAGTTATTCTGAATGATAAGCACC  
CGAGTCATCAAGAGAGCAAAGGTGAGAGCTCCTGGGGAGGGAGAGAAAAAAAATAAAAAAGATTAT  
TATAAATTGGGACAAAGAGAATAAAACTATTTTATTGGGGAAAAAATACTAACAATTTGAGTTAAGAC  
TTTTTTGAGGTGAATCAGTCTAGCAATAAGGTCGCTATTAACCTATCTTTTTTTTTTATATAGAAATGATTA  
AATATTCAAAGTTGTACAAATATTAGTTAGCTTTTAAAATATTTAAGATATGTGATAATGAATATGGTTTA  
AATACTTGGAAAAAGAGTGACGCTAATTAATACTCCTACTTGCCATTAGTTAACAAAATAATGTAGGAC  
CGTACAACCTCACACGTAAATACGTACAAAATAAAGATAAAAAAATCAAAGTGTCACAAATTAATTTATT  
TGATCCACCAGCCAACGTAATATATATTTATGTACACTATGATTTTGACCGATGAAAAGAAATTAATCTATCT  
AATGTCATGATTTTTATTTACCTTATTGATCGATTAATCTTTCTTTAATTTTGGGTGACGCATCGTTTGGT  
TAATTGTACCCAGATATTGATGAATGTGCGAATCCAAATACTAATTCATGTGAACAAAATTGTATAAACA  
TACCGGGGAGTTACAATTGTTTCATGTCCAAAAGGGTACTGGTGATGGAAGAAAGAATGGTCGTGGT  
TGTATTGCACCAAACCTCGAACTCAGAGTTCCCATGGATTAAGTTTTCCGTTGGTAAGTTTCTCAGAAATTC  
GACTTGTCTCTACTTGCATATAGATAAACGTACTGAATTGTATTTCAATTTATCTGTCTTAATTTGACTGGA  
CACGAAATTTAAGAAAATAAATTTGTTGGATAAACACAGGTATGGGAGTTGGTTTTATGTCCCTAGTAGT  
TGGGACAACCTGGCTCTACTTCAGCATCAAGAAAAGAAAACCTAATAACTTCGCGAGAAATTCTTCCAA  
CAAATGGTGGTTTGCTGTTGAAACAACGAATATCTTCTAACGAGGGTGGTGTGGAAGCAACCAAAGTT  
TTTACAGCAGAAGAGTTGAAGAAGGCTACAAACAACCTATGCTAGTGATAGAATTCTTGGTCGTGGTGGAA  
AATGGAATTGTCTATAAAGGTATACTACCTGATAATCTCATAGTTGCTATTA AAAAGTCTAAGTTTGTGG  
ACGAGGATCAAATTGAACAGTTCATCAATGAGGTTCTTATTCTTACTCAAGTCAACCATAGAAACGTGGT  
GAGACTCTTTGGATGTTGTTTGAAGCCGAAGTTCCTTACTAGTTTACGAATACATTTCTAATGGTACTC  
TTTACGAGCATATCCACAACCAAATGGAGCACCTTGGTTATCATGGAAGAATCGGCTAAGAGTTGCTA  
GTGAGACAGCAAGTGCACCTTGCTTACCTTCATTCATCCGCGTCAATGCCTATAATTCATAGAGATGTCAA  
GTCTGCCAATTTATTGTTGGATGATGTTTACACCGCGAAAGTGGCAGATTTTGGAGCTTCAAGACTAATT  
CCTCTTGATCAAACACATATTGCTACATTGGTTCAAGGGACATTAGGATACCTAGATCCTGAATATTTTCG  
TTAAGTAAATTGACTGAAAAAAGTGATGTTTATAGTTTTGGAGTAGTCCTTGCAGAACTTTTAAACAGGG  
ATAAACCTATTTTCGAGGGATAAAAATAACGAGGACAAGAATTTGGCAGAGTGCTTCATTTTGTCTATG  
AGAAAGAATCAATTGTTTCAAATCTTGATCGTAGAGTGGTAAGAGAAGGAAGCCTTGAACAACCTCAA  
AAGGTGGCTGAGCTAGTGAAAAATTGTCTTAGATTGCACGGTGAACATAGGCCTACGATGAAGGAAGT

AGCAATGGAACCTGAGAGTTTGCAAAAGTTCACAAAAATAACCCTGGGCTGATGGACACGGACATGA  
AGAGAACGAAGATGAATCAACAGATCTTTATACAATTCCAATTGACTCGAATACAGGTATCAACAAATTC  
TCTGGACAATACAGTTCCAACGCCAACACAAATAGCAGCATGTTTTCTTCATTGATATATACTAGTACAAA  
TATTCCGCCGTGA

>PGSC0003DMG400009114 RLK with WAX or WAX-EGF domain

CAAAGTGTGAATAGCAAAAAGGAATGGTCATTTCTCACAGGCTTCCCAGTCAAACCTCCCCACACCC  
CCACCTAAAAAAAAGTGATTGAACTTTGACTTTTTGCCTTGGTTCTCTATAATCCCTGACCAGATTTTG  
GATAATTAGCTTTTGTTAATTGCAGTCCTGCTCCTCTGATGAAATGGTTGCTCCATAGTGTATTTGCAGAT  
AACATGTTTGTAAGAATGCTCTGTATTTCTGTTCTTGTATTACTTGTATTTTGCACAAACATATCCGAAGCC  
CAAAACAATACTCAGTGTTCTTCTTGTGGTGATATTCATAACATCAACTTCCCTTTTCGATTGAAATCT  
GATCCTGGGAATTGTGGAGATTCAAGATTCCAGCTTGATTGCCAGAACAATCGTACTGTCATTACTTTTA  
ATCAAGAAAATACAACGTCCTCGAAATCAACTATGATGAGTTCTTGATCAGAGCAATTGACCCTGGTTT  
GGAGCACAAAACAGTAACTGTACTTCTCCTAATTATCTCACCACAAATTATCCTTACTCCTCAACTTT  
TGACTTTGGTATTTTCGATCATTCCCATTATCTATGTCTATTGTTTCGGCCACTGTAAATCTTCGCGATATGT  
GGAGACTACTTTCTGTGGATCACTGAACAAGAGTCATAGCTATGTTGCCATAGGAGAGGGCATGTTGAT  
TTCGGATTTGGCTGAGAGTTGCAGAGTGGAATGGTGGGTTGGGGTTCGGCTCGTGGGCTTTTCGGGGG  
ATAATACTTCTTTTCGAGCATTGAAGGTGCCCTCAGTTATGGATTTGAACTTTCTTGGAAAGCGTACCTTC  
TTGTGCAGAGAATGTGAAGCGAGTCAAGGCAACTGTTTTGCTGAAGGTGACGGCTTTACTTGCAGCCAC  
CGCTGCTATGATGACTCGGGGTTTGATCTTCCCCTCCCTGTAAGTCAAATTCATTTTACATTTCACTAT  
GTTCAACTTATACCCCTTGTGGGATAGCCTTACCACTAGGTAGAGGTAAGACTGCATACACCGAACCCA  
GGATTTAAAGACTTTTCGAGCACACTAATATTACTTTTTCAGCTACTTAAAATAAAAACAGCGAAAAAAGC  
TTCAAACCTAGATTTGAACCCTTGTCTCACGAATGGTTTCTCTAGCTTGTACCAACAACACAAGGGCACTCA  
TTTGCTTCTCTTGGGTGCACTTTTAATTATATTCTAGTTTTTGTGAGTTTCTCAGGATAGATATATATATTA  
TATATACATGATTTTTTTTCGAAGTTAATGAGTGCACGTGCACCCCACTTACAAGTGTGGGTCCGCTTTTGT  
GCATACACACCACCTTCTCATACTCCACTTGTGAGACTACGCTGGGTATGTTGTTGTTGTTGTTGTTACT  
ATGTTCAACTAGGAATACCTTTTCGAGTTATCTGTTTTAACAAAATCAATCCCCATATATGAGGTTGAAGA  
TATGTTTTGTTTTCAGATTGTAGATGGTGGTAAAATTATTGAAGTTATATGGTATTGTGAGAACAGAAACAT  
CTCCTTAAATGATGTAACCTGGCATCCGAGCAATTTAACTGTACTTTCAAGTTTCAAATTAAGGTGTCATGA  
TTTACGACAGATTAGGTTGTCAATTAAGCTGGTTCGAAGATGAGACATGGTTCTTTTCATTTATTATATCCA

CTCTCTATGGGGTCTGTCCTTTGAAGTTATAAGAAAATTTGGATCTCTTTTGTATTCAACTCTCCCCTGGG  
TCCTCTTCTTATGCTTATCAGTTTCAATTCTCAGCAACTTATTTTGAGATGTAGCATCTGTATTTTACTCATA  
TTCTATATTTGGACAAATGCAGGTAGCATCCACTACTATGGCGGTACGTATTTGAGATACTGGAGTGCA  
ATAACTTCATTACACTAAGCATTTCATTGAAAGGAGATCGTTAAAGCAATATGTTTACCATTTATAGAATC  
TGCGTTCATTGCACTATATAGCTGTAAGCTATTTCTTCAAGACTCAATGATTTTACATCCTCTAACTTTATG  
TTTCCTTTGTGATTTGCCTGTTTTGACAGTTCTTACTATATTGTACGGTGGAATAGTTATAGGTGAGTCTT  
CTTATCTTACTCAAGGATAAGCATTCTTCGCACACTCAGAATTCTGAAAAATAATTAGCTTTTGAAGCTTT  
TCTCAAACCCATTTACCCCTATGAAAAAGATGTACTGGTTTTCTGTGCGATGACTTCCATTTTTATTTTTGA  
AATCATGCAGTATCAATTCTATCGTTACGACTTCTCTTTGGATTGGTGTTCCTGACTGCATTAATAGTGTA  
TAAATGGAGAAGACGACACTTATCTATGTATCAATCAATTGAAGACTTCCTGCAAGTCCAGAGCAACCTC  
TTGCCAATTAATACTCCTACTCTGAGATTA AAAAGATGACTAACAAATTCAAGGAAAAACTAGGCGAA  
GGAGCCTATGGAAGTGTCTTTAAAGGAAAACTGCGTAGTGGTCCTTTTGTGAGTGAAGATGATGCAC  
CAATCTATGGCGAGTGGGCAAGAATTTATCAGTGAAGTTTCCACAATTGGAAGGATTCACCATGTTAAC  
ATTGTGCAACTCGTTGGATTCTGTGTAGAGGGATCAAAACGTGCTTTGGTTTATGAGTTCATGCTCAATG  
GTTCTTTAGACAAGTACATATCTCCCAAGAAGGAACTGTTTCCTTGAGTTACAAGCAAATGTTGACAT  
ATCTCTTGGAGTGGCCTCTGGCATAGACTACCTACATCGGGGCTGTGACATTCAGATCTTACATTTTATG  
ATTAAGCCTCACAACATTCTTCTTGATGAAAATTTCAATCCCAAATATCTGACTTTGGGCTTGCAGAACT  
GTACTCCTCAGATGATAGTATTGTGAGTCTAACTGCAGCTAGAGGGACAATGGGTTACATGGCTCCAGA  
GCTGTTTTATAAAAATATTGGAGGAGTGTACACAAAGCCGATGTATATAGCTATGGCATGTTATTGATG  
GAAATGGCAGGCAGAAGGAAGAACATGAACCCATTTGAGGACCACTTAAGCCAAATCTACTTTTCTGCA  
TGGATTTACGACCAATTTAATGAAGGAAATGATATAGAGATACAGGATGCAAGCGAGGAAGATAGGAG  
ACTTGTCAAGAAGATGATGATTGTGGCTTTGTGGTGCATACAAATGAAGCCTGCTGATCGCCCTGCCAT  
GAACAAAGTAGTTGAAATGCTTGAAGGAAATGTTGAACTCCTACAGATGCCCCCAAGACCTTTTATAGCT  
CCTCGTGAGATTGCTGGAGACAGTATTGAGACAATACAAATTTCCAGTGACGTATAGGTGGTTGGCTAC  
TACTGTGCTGTGCAAACTAGAGTCAAATTCACCTAATTTAGTTCACGGCATCCAATATCTATCAGAA  
GAGCTCAATCTCAGGCCAACATTCCTTGAGATGTCACTGTGGATTA AAAAGAGTTGAACGAAAAGATGC  
CTATATCTTCGAGCAAGTAGTCATTTCTGTCCCATGGTGGTGACACTAGTTCCTCCTAGTTTTTTAGGTAA  
GAATTTGAATGTAATATGATGATTTAGTAAAGTGTAATTAGTTTGCATGTTGGTGTGTAATTTCTGG  
AAAAGGTAATTATCAAGCATAGATGTATCAAACAAGGAAATGATTACACCTTCAATTTTTTGTGTTAAA



CTACCATTGATTGTCTTTATGGATTGAGAGCATCTTCCGTTTCT

>PGSC0003DMG400010032 RLK with WAX or WAX-EGF domain

TGGATATGCGCTGCGTGTGCGTAAAAGAAGCTTCTTCCCCGCTGTATTTTAAAGTCTTCCCTCCGTGTATC  
TCCGATTACTATTTGATAGCTTCATTGTTAGGAAATTAACCCAGTTTTTTCAGAGCTGTTTTTGGAGATG  
AGATATTTCAAATTTTGGACTCTTTAATTGCTACTATTTGCTTCCAATCAAAGAAAGGAAAAGTTGCAGAC  
GAAGGAAGAGAGAGAAGTAAAAGCTAAGGTAGACATTAATACATGAAACCAGTCCACGGTACTCTTTA  
CTCTCTACTTTCCCTTCTATGGAATTCGAAAATAGCATTTATTGACAAACAATGAACTCCCCACCAACAT  
CAACTGCACCCCTTAATTTCTCAATAAATGGTCTTCAACAAGTCAAACCTTCTACTTTTTTTTTTCTTT  
TTCATGGGTAAATTAGCTATCACTCATTTTCATTTTCTCTTTGCAGAAGCAGATGATTGTTCTCTTTGATTC  
AATTTGAGCCATGGGTTTTTCATCAGATCATTATTATTAGATTCGTTTTCTCAATTTTATTGGGTTGGTTAT  
CATCGTCAGTTGAGGCTACTAATTCAACTAAGTGCAATCAGTACTGTGGAGCTGCTGGTTCTAATGGCCC  
GCGTGTTCCTTATCCATTTGGGTTCTCAGATGGTTGTGGGATTCGTTTAGATTGTAAGTAGTGGAA  
GAAATCAGAATTGGGAATATATAACAGAATGTGACTTCAGAGACTCTGATGGTGAACCTCCCGATG  
AATTGCAGCCGTCGATTGAGGATCTACAGGAATTTGATCGAACCAACTTTGGTATGACTTGGAGAAAT  
GGACTGCTTCTACACAATTGTAAAGTCCCGAGGAGTGAGTGTACCATACCATCGGAAATTTAAGCACG  
CGTTTGAATATACAGTCATGTGATTCGAAGAAAGAGAATGTCAGTTGTTATTCAGAGGCGAGGGCGGAT  
TATTTAGATTACCAGAACTGAAGAATACAGGGTGTGGAAGTGTGGTTTCGTCCATCTTGATTGGTATGG  
ATAATGATACAATGAAGAGTTCTGCCATGTTCTGGAGTTTCAGACGATGGAATTAGCGTGGGGATTGG  
TAGGGGATTGTGCATGTCATGACGATGCAAATTGTACCATCGTTTCTCTTCCGGGGAACCGAAAAGTTT  
CCGATGCCGGTGTAAGATGGATTTCGTCGGTGATGGCTTCCGCGACGGTGATGGGTGCCGTAAAGGTT  
AGTTCTTTTTTTTTCCAAGTGTTAAAATAGTTAATCTGCAACATTATTCACCTCCATGTTGTTGAATTGTGT  
GGATCATCTTAATTTAAATGTTTAAAGATAAGACCCCTTATTTAATATATATAAAAGAGATGGGAAGTT  
CAAAATGGAGATGTTAAATTTGAAGTTCAAAATTCATAAAATCTTACTTTTATTCTACATAACATATATT  
TCGTTTCAATGATATTAATTTCAAATTTGAACTCAAGAGTTCCATCTACAGGTATTGATAGATATTTTAAA  
TTTTAGTACTTGGAGACATATCATTAATGGAAATGCCGTGCAACTCAAATGTCTACTAAATTTGGTACA  
TGGCAATTCATAGAGACAACGTTTATTATATTAGGGGTAAAATTCAAAGTTAATTGCTAGATGGCCTAA  
TTGTTGTTTACTATGGGCAAAAAGTGACGTGAGAGATGATAAGATGACCAGTAGTTTTTATATTTGGCT  
TGACCAGTAGCAACACGCCACGAAGAAGGGCTGTTGTTAATTTCAATGGAGATTTACATGAATTGACTA  
TGATTAAACTAATGATATTTTAGTGTGATTAAGTTATTTAGGAATTCCAAATATTCCACAAGTTGTGTTAA

AACTTAAAAGAGCACTGCATATGCGGCTGGTCTAGTCAATAAAGCCTTCTCTTGATTTTGATATGGTCTGA  
ATTTGGGTTCTAAGCTGTCGACTGTTGAATGTCTCCTATATGACCTCCTCATGCGACTTGGGTTGTGTTGA  
TATTCTTTTGTACTCGAATTTATAGTCTCTAGCGGGTTTTTATTAAGATAAAAAAATTTATTTACGAAC  
AATTATGGGGGTTTCAGTTTTATCTTATCATTCTAATAAAGTAATGAATTTCTAGTAATTTATAAGTATGA  
AGAAAATAGATATTTTATGATCATTACCAATGAGAATGTTTATATGATGCAAAAATATAAAAGCTAAAAA  
AAATTGAGTTTTCAAACCTCAAACCTTCTTTAACAATGTATATTTAACTTTTTCACATTCCATCAAAAAAAT  
TGAAAAAATAAATTTCTTTAAAAATGACATTCTAGTCTACTGTGTTCTCCTCACCTTTTCATATTCACCC  
ACAGTTTCCATTCCCATTACCCTACATATTAGTTTAGATTATACGTCCAACAATAGTTGTCTACTGTTGATT  
TGATACACCCCTTAAGAAACAATAAATGATAGAGGTAATATTACTATATTAACCTTTGACTTTATTAATTT  
TATTGTTTTGAAAAATGTGTTACATGATAAATAATATTTAATAGCAAGGGTAAAGTTGACACAGAAGATA  
AATTATCTCTTAATTTTCTAAATTGGATAAGTATTGTTAGACAACCTATTTTTAAAGTAATAAATAACAATT  
GTTGAAAAAATGGAGTACATAAATACTTCGATGGAAAGTTTGATTTTCTCAGAATGTATCTTAATTTTGGC  
CTAATTCTTCTTGATGATCAATTCAACCTCGAATAAAAAGATATAAATGAAAAATAATTTTCTTCGT  
CTAAACATACCCTTGATCTCTTCTTTTTTTGTGCATATGGGACATTGGGACTTGGTCTCACTAACTTTTTCC  
CCACTAGGTTTCTAACCGGCCTGCCACCATTTCCGCGTATTAGGCTTTTAGGTATTACCCACAGTACCTTC  
CACTTTCTTTCTTCTCCTAGCTCCTGCACATGGACCCAAGACAAATAATATTATTCTTGTGAAGATATTT  
GATTCCATAAGAAGCATTAAAAAAGTTTGTGATTTTAAATGCACATTTTTGTGGATATAAAATAATGTT  
GTTAGCATTAAATATGATGTGTCATTCTTTCTTCCATAGACAAGAAAGGAAGAAAGGAAGAGTGTTGACTT  
TGTAACATTGTTATAAAGAAGTTGTCGGTACAATGATATTTCTATCACCAGTCACCAATGTGCCATGTCT  
GGTCTTTCTTAATAAGATGAAGAAGGATCTGAGTCTTTATGAGACTGCCGATTCGTGGTGGTAATGTAAC  
TTATCAAAATGACAAGTTTGAGCTCGATAACCGGAATTTTGTGAAATTGAGCTCTCAAATGAATTTGCTT  
GTCTTGAAGAGTTGAACACTTCAATTAGTTATCTTACCCAATTGCATATTGCATGATACGTTCAAAGATCT  
TACTTTTAAAAAATAAAATAAAGAAGCATTACTTGTGTTCTCTGACTCGAAGATGGTGAATGATG  
AGTTTGAATTACTCTATTCCGTAGATTATCAATTGGACAATCCCAGGTCAATGATTTTCTTGCCTTTTTA  
AGTTTATTTGAGGGGGACAGCACATGTTTGAACGGGTGAAAGTCAGAGGATGAACAAGACCTGGATT  
GTTGAATAATTTTCATATTTTATTATTGAGTAAGCGTTATGATAAAAGGATCTGGAATCGATTCCCCGTCTT  
AACTAAACGTGTAATGAGACGGCTTATTATTATGCCAGTTTAAATTTAAACAACCTTAGTACTTCACCTGA  
ATCAATGGCATAATTTGAAGGGATGAAAGTTGAAACTGCTTCATCTTCATTTTTACCAGTACATTCCATGT  
CCAGGAAACTATCTGTTAAGACAACATCTTGACTTTGGAGATGTAAACTTAACTGACTAGCACGTTTTTC

AGTGAATTGGTTTCATTTGTTGATCATGTGCTTGCTTCATGACTCTGGGCGGGCAAACATTTTCATTCTGA  
CGATGTTCTAAGATACTTTATCTATATATTCAATCAACTCTGGGAGGGCATAACATTTTCATTCTAACGATG  
TTCTAAGATACTTTGCCATATGCTCCTTCCTTCTACCTCTTTCTCTATGATTATCTTCAGTATGTCGTCTTTA  
TACTAACTTCTTCTTTATATTTGTCTCTCAAATCAGTTTCAAGATGCAATCCTTCCAGATAACCTCTCTGGCC  
GATGTGGTGGAACCTACCAGAATTGGTGTGCTCGTTGGAGGTATATTTCTTTCTTTTTTTGGTTAACTTGTT  
CAGAAAATGTTGGTAAATAGTAACCATTACTTCTCAACTCGTTTAAATGCACTAGTGTTCAATTCTGCATCT  
CCTGCTCCTCTGTTTCAATTTGGCAACACCTCAATTACCAAATGCGCACTCTTTAGTTTTCTATAAATGAGC  
TTGCAAGCCATCACAGATTGATTTTGTGTTCTTCATATGTACGCAAAAGAGTTGCTGACTGATCAGTCATC  
AGTAAACTTCCGAGCCTGCTTACTTTTACAGACGTTTGATTTAATAATAACTAGTGAGTTTGATCTCTTCT  
GGTCTAATGAAATTTCAACCACCTACAGGGATTATTGCTGGAGCTGGTTTAAATGGCTGCTTTAGCTGTTC  
TTTGCTACTGCATTGGAAGACGTTCTACATCTCTCAAGAAAAGAATGAGCGCAAGACGCCTTCTCTCTGA  
AGCTGCAGGCAGCAACAGTGTTTCATGTATTTCAATACAAAGAAATTGAGAGGGCAACAAATAGTTTCTC  
TGAGAAACAGAGGCTGGGAATAGGGGCTTATGGCACAGTTTATGCTGGAAAGCTCCACAGTGATGAAT  
GGGTTGCAATTAAGAACTAAGACACCGAGATCCGGATGGTGTGGAACAAGTGATGAATGAGGTTAAG  
CTTTTGTCTTCTGTAAGTCATCCAACTTAGTCCGCCTCTTAGGTTGTTGTATAGAAAATGGTGAACAGAT  
TCTTGTTTATGAATTTATGCCCAACGGAAGTGTAGCTCAGCATCTACAGAGAGAAAGGGGTTTCCAGGACTT  
CCATGGACAATACGTCTCACTATCGCAACAGAACTGCTCATGCAATTGCTCACCTTCACTCAGCAATGA  
ATCCACCAATATAACCACAGGGATATCAAATCAAGTAACATACTATTGGATTACAACCTTCAACTCAAAGGT  
TGCAGACTTTGGTCTTTCCAGATTTGGCATGACAGATGATTCCCACATTTCTACAGCACCACAAGGTACTC  
CAGGTTATGTGGATCCTCAGTACCATCAGAATTACCATCTTTCCGATAAGAGTGATGTGTACAGCTTCGG  
GGTGGTTCTTGTAGAAATCATCACAGCAATGAAAGTGGTTGATTTCTCTAGATCACACAGTGAGATTAAT  
TTGGCTGCACTGGCAATAGACAGAATAGGTAAGGGTTCGTGTGGATGAGATTATCGATCCATTTCTCGAG  
CCACACAGAGATGCATGGACTCTATCATCAGTTCATAGAGTTGCAGAGCTTGCTTTTCCAGATGCCTTGCAT  
TTCACAAGGATATGAGGCCTTCAATGACAGAAGTGGCAGATGAGCTAGAACAGGTCAGGCTCAGCAGT  
TGGGCATCATTGGAGGACAATGTATGCATGACATCATCAGTGAATTCCTCTTGCTCATCTCCCCGTAGTA  
TGAGTGAGACATCTTTTCGTAGTACAACAATAAGAAAGGAGTAGGGAGTAGGAGGTTGATTGTTCCGC  
AGAAGATAGCGAATTCCTGGAATCATGGAGGAAATAAAAGACAGTTCCTTCTGTGTCAGGATC  
CTTGGTTTAGTGAAGAGAGTCCCCCTTCAACTAACCGATTATTAGGTAATTCTGGTCGATGATGACTTGA  
AATAAAAGAAGTTTGTCTAGGTAGAAAATTGAGGGGGATCACCTGTAATCTATTACCACCTTTTCTTGC

CTTCTAATCTAGTGATAATAATATCAAAGAGTATTAGAGCACTTCTCTTTGTATCGAAATTTTATTGCTTCA  
TACGCAGAATTATACATCATGAAGAATGTGAAATAGTATTTGCAATACCATGAATTTGAATCGTCCTTGC  
GGAGTTGTGTTGTTATTTTTCTGTTATTTACAACAAGTGTAAATCCTACATCATAATCATCTTCAAGAATT  
TGAGTACCCCGGACATGTTAAATAATTAATAAAGACATAAGTATTATATAACAGGATTAATTGTTTACAC  
TAATAGAAATGCCCATGCTTTGAATTTAGCAAATTTAATTTGCAAATAACAACAATGAAAAGCAAGAATC  
TTTTCAAGATTTTTGAGGTTCCAGGTCCTAAAATACCATTAAACAACAGCTCCGGCAACCAAACTCCAACA  
AATTCAGCTCCGGCCACCGCTCCAGCTTGCGCCAACCCACCGAACTCACTGTACTCTCGATCTTCTCCTC  
CGCTGCTTCAATCCCCTTCTCAGCCGTCCTAATCCTTTCTCTGCCGCTGCGATTCCCTTGTCTGCCGCTC  
AAATCCCTCCTTCACTAATTCTTCTGCCTCCTTCTACTTTCTTAAGCTTCTTCTCAGTCCGAAGAGGCC  
AATGTCCGCAGCCTTGGACGGCATATCCAGCGCTTTAGTACCCTTGTGCGCCGTACCAGAGAGATCAA  
CTGCCTCCGCCCCGGGAGAGCTGCCGCCGCTGTTTGGTAGGAGGATTTGTGTTTGCATTTAGCACACA  
ACGGGATGGGAAAGTCCTTACTGTAAGTGAAGTAGTGGTGGAAAGCCATGGATTTGCTCTCTGTGCAATC  
AAAATGAGGTTTGCAGTTTGCACAACCTCCCTTGACACCACAATCACAAACAAGTGTGTGGACTGATATTT  
TTTGAACGGACAAGAGAAAATACAAATAAATTACTCCTAAAACCTCGGACCAGAAA

>PGSC0003DMG400010427 RLK with WAX or WAX-EGF domain

AAATGAATCTTGAAATTGTATGTTTGTGTTGCTTCTTTTATGGCTTATGGTTTTAGATCATTCAACAGCA  
GCTACATCTCTTGCAAAGCCTGGTTGTGAAGAGAGATGTGGTAACCTAACAATTCCTTATCCATTTGGAT  
TGAGTGCTAGTTGCTCCCTTAACTCGTGGTACTTGATAAAGTGCATAAAAGTTATAATCCTCCTAAGCC  
TTTTATGAATTCATTTCTGCAAGTTGAACTTCAAAGTGAGGTGATATCTGTGTCAATTGAAAACCAAACTA  
TCATTACCTCAGTTTCAATAGTGAATTTTTGCAACAAATCGAGTGAAGGTAGTAAAATCATCACAAACGGG  
GACAGATTTGTCTGGAAGTCCTTTTTATTACGCGAAGGATAGGAATAAGTTGATGCTTGTGGTTGTGGA  
AATGGTCTTGTGACACAGAAACAAAATATTCTCTCGGGGTGTACATCGATCTGTACTGAAGGTGCTACGT  
TGACAGGATGTTATGGCATCAACTGTTGTCAATCTCTAGTCCCTTTTATGATCTAAGTTCATACAAAGCAAAC  
TTCCTAACTCGGGGATTCAGCAAGGGGCTTACCCGAGATGTAGTGCAGTTTTCTTGGTAGACCAAACCT  
GGGTTCCAGATGAAGTTGCACAGCCCTTTGTTTTCTTGGTCATGCTCCTGTTGTTTGGCTCTGGACTCTC  
CAATCCAAAGAGTTAGAAGCCGGGTTGCTCTGTGACAAATCTGAGGCTGTTGTTAAGTTGGAAGATGGT  
ACTTCTGTGGCAAATTTGCAGTGTGCTGTGGACCTGGAACACAAGGAAATCCATACTTCTCTAATGGAT  
GCCAAGGTACATAATCATTGATATATATGTGTAGTTGTTAGCTCTCTGTTGCATTCAATAGTATCATGCA  
TATGCACATCAGGTCAGGTGAATAGTTTTTAGGAGAAAGATTGACTATACGTTTACGAGACTAGATTGA

ACACTATTCTAGATCAAATCAACATAAGTAGTTTTAGCATAGGTTGAGTTTTTTGTGTATCCAATTTAGGC  
CTTGCCCTGGCAGAACAGAATTGGGTCAAGTTGAGGTATACCATATTCTGTATAAAGTAATCCTAATTT  
TTTTCGTTTTGTCACACTCTTATCGCCAACAAGACCTGCTCCTGTATATGCACAGAATAGGGCTTCGATGA  
GCACTAGATGTAAAGGAGTTCTTGAACCCTTATGAGTAATTAGAAGAGTGCTGAATTGGACCATCCTCA  
AATAGATGGATATGAGATTGATTGTGGAACAGATTATAGAGAACTAAGGCTGGGCACCGGAACGGGT  
GTACCGGTACCATTCCGGTCCGTTCCGGTACCATTTCGGTTCGTTCCGGTCCGGTAGTATTCGGGACGGG  
ATGGGATACATTGAACCGGTACACGGAACGGAACGGTACCATGATTTGGTACCGGTATACCGGTACCG  
GTTTCATCCCGTTTCATTCCGGTTCGTTCCGGTCCGGTCCGGTACCAGTCCGGTCCCGGTATATCATT  
AATTAATAAAAAATAATATTTTTGTCATTATTTACTTTTATTAGCATTCTTTTTGTTATTTAATTTTTT  
AAAATTACAACTTAAGTTATTTAACTTACAAGTTATAAGTATAACTTAATAACTTATAAACTTCAAAGA  
TTCAAATCTTTAAACTTATAACATAACTACATAAGCTCAAAAATAAAAAAACTTTATTTAACTTAA  
CTTACAACTTATATACGTAAAAATTAATAAAATATCTTTAAATAAACTTAAGTAAATTATTATAAAT  
TTTAAACTTAAATACTATAAACTAATAACTTAGAAAAATAAAAAACATTCGTATTTTTCCCGGTAGT  
TCCGGTCCGGTTCATCCCGGTACCAGTCAACAACCCGGTCAAACCGTCCCGTCCGGTCCCGTCCGGTCC  
CGGTGCCAGCCTTATAGAGAACTGGGGCGCAGTGCCGGCTCTTGCCTATAAAATTTTAGGCATTGGCC  
TTAGGCCCAATTTTTGGGGCCTCAAATTTTTGTAAATAAAAAATATATATGTATTTAACCCATTC  
AAATAGAAGAAATTAAGGAAACATTGTTTTGGTTATTACATTTCTTCGTTAACTCACATTATTTATCC  
TTTGTAACCTTTTTGCACTCTATTTCTTCAAATCTTTGATAGTTAGAGTAATACACTCTCAAAAATATGAA  
TCAATAGTCGAAAAGTGTTGAACAAAGTGCATTACAAATTTTTTTTTTAATTTTTTTGTTAATTTTCATAT  
TAAAGTAGGTATACCAAGTTATCAACTTTTTGAATCAAATCTATGATTCTAACTCTTATCTTTAAAGTTA  
TCAACTTATTACTTATAAAATTGTGTTAATAATTCATATAATAATTGTCTCAATAAAAGGATGTTTTCAAT  
GTTGAATTGATAAAATCTTACTTAAACTAATAATTAATAAAAGTATTTGAAAAATCATTATATAAAAG  
ATATTAAGTAGTAATTTACATCTAAAAATTTAGAAAAATAAATAGATATAGATAAAATTTATATAGATTTT  
AGGCTTCTAATAAAAATTTTCGCTTTAGGCCACAAATTATGTTGAGCCGCCCTGCTGGGGCGGGCAGG  
AAGATAGGCTAGGTGGAGTAATCGCTCTGGAACAAGTTCTTCGACTGGATCAATGCATGTATGACAGAA  
CTGCCCCCTCCCCCTTCATTTCGTGCATTTAGAATCTAAAGCATCATTCTAACATTGTTTGGTATGTTAT  
CAGCCATTCAACGATGCACAAATTGCACAGACATGGTAATCTATATGAAGCGATCTCCACAATCGCTCT  
CTTCAGTAAGTCACCTTCTGTATTTCTTCTAGCCATTTGAAAACCAACTGTCAGAACTAAATCAAGG  
AAATGGTAGACATCCTTATTTTGATGCTTTGTGGTTCCAAAAGTTATCTATCTCTGCCTTTCTACCTTTTC

ACTCGCAGAAAGACTCGAAAATCTCCTTCAAATAGAGAATTCTAGCTTATTGGCTAACTCTCGTCACTC  
STATCTCCACAGGTGTATTCATAAGTATCGGAGTTTTGCTTCTACTGTTTGGGAGCTATTTATTGTACAAA  
ACAGTCAAGAAGAGAAGGAACATAAGACAAAGACAAAGGTTTTTTAAGCGAAATGGCGGCCTCTTACT  
ACAACAGCAGCTATCATCCAATAATGAAGGTACTATTGACAAAGGAAAACTTTTCACTGCTAAAGAGCT  
GGAGAAGGCAACAGACCACTTCAATGAAAATCGCATACTTGGCCGTGGAGGTCAAGGTACAGTATACA  
AGGGCATGTTACCTGATGGAAAGATTGTAGCAGTGAAAAAGTCTAAGCTGGTAGACGAAAACCAAGTTG  
GATCAGTTTATCAACGAGGTGGCTGTTCTTTACAAATCAATCACAGGAATGTGGTGAAGCTACTTGGCT  
GTTGTTTGGAAACAGAAGTTCCTCTACTAGTATACGAGTTCATAATTAATGGCACACTTTACAGCCTCATA  
CATAATGAGAACAAATGAGTTTCCCTTACTTGGAGCACGCGTTTGAGAATTGCCACAGAGGTAGCTGGA  
GCATTGGCTTATCTACACTCAGCAACTTCTGTTCCAGTCTATCATAGGGACATCAAATCAAGCAATATACT  
TTTAGACGAAAAATACCGTGCCAAGGTATCAGATTTGCGCACCTCAAGGTCTATTGCAATTGATCAAAT  
CACCTAACGACTGGAGTCCAAGGGACATTTGGCTATTTAGATCCTGAGTACTTCCAATCCAGCCAATATA  
CTGAAAAAAGTGATGTCTATAGCTTCGGAGTTGTTCTTGCTGAACTCTTAACAGGAAATAAAGCAATTT  
AACCAACAACAAACCAAGACAGAAGTTTAGCAACAACTTCCTTTTGGCAACAGAGAGAAATCTCCTTGAT  
ACGATTATCTATACAAAAATTTACAAGAAGGTAGAAAAGAGGATATAATGGCGGCTGCTAATATAGCG  
TATCGTTGCATGAACTTGAATGGTAAGAAAAGGCCAACTATGAAGGAAGTAACTACAGCATTGGAAGCC  
ATCAGATCACAAATGCCATCTGCAGCAGTAACAAATTTTCAACTGGATAAGGGTGACACAGCAGAAAGA  
ACTGTGATATCAGAAGTTAACTACACATGGACAAACACAAGTACCTCATCATCAGATATCCATCCATTGT  
TGTTTGAAGTAACTAGTTAATTACTCCCTCTATCGGAGAAAGAATGTGTGTGTCTGTTTGTCAACTTTAC  
AATAGTTTAAATGTCTATTTCTACACACCTATAGTTTGGAGAGCATGGATGCTAGCTGAGGCCAAGTTAA  
AGGGCACGTAAATATTATGCCTACAATAAGTGGCCGAAAATACCTCTAGCACCGAAATAACAAACAATT  
TTCATTTGACATAAAGTTTATTTTTTCATATAATAATATAACATGAGTTATGC

>PGSC0003DMG400010484 RLK with WAX or WAX-EGF domain

TTTTCTTTTTTCGGTTCTGTATTTCTCTTTGGATGACCACAATCAAGTTGATCAAAAACACGTTCTCCGC  
ATTCTTGCAAGTAAGCAATTCTGGTTTTATATAATGGTATCGTTGCAAGTTAAATTAATAAATTATTGAT  
TGTTGGTGATTTTGCAGAAATCATCCCTTGGATACTTCCCATAGCTGGTAAGTCACACCTTTCGTCTTTCA  
AATTTACTAGAAATTATTCTAATGTCAAATGATGGTGCAGATGTTGGTGGTTGAATTTTTAATTTAA  
CCATTCACAACTTTTCTTGCTTATTTGTGATGGTTGTACACAGGGTTTAGCATCGTGGCAAGAATCATT  
TATTTCCATTCATAGTTGTATTTCTAATGATTGAGTTACGAAGAAGACATTTGTCTATTTATGATGCAATT

GAAAGTTTCCTGCATGGTGAGAACAATTCGCGCCATTAGATATTCCAACCTCCAACATAAGAAAGATGA  
CTAGGAACCTTTAAAGAGAAACTAGGCCAAGGAGTTATGGTTCAGTATATAAAGGTAAGCTTCAAAGTG  
GTCCTAATGTAGCAGTGAAGATATTGAGCAAGCCCAAAGCTGATGGGCAAGACTTCATCAACGAGGTTG  
CCACAATTGGGAGGATTCATCATGTTAACATAGTACAACCTTATTGGCTATTGTGCTGAGAGATGTAAGCG  
TGCTCTCGTGTATGACTTCATGCCTAACGGATCACTTGAAAAGTACATCACATCTCAAGAAGAAGGAGCT  
GATCAACTGTAAAGTTGGGACAGAAAGTTTGAAATTGCTCTTGGAGTTGCTCGAGGTATTGAATACTTGC  
ATCGAGGTTGTGACATTCAGATTCTACACTTTGATATCAAGCCACACAACATACTTTTGGATGAGAATTC  
ATTCCAAAACCTATCTGATTTTGGTCTTGCAAAATTATACCCCGCAGATAAGAGCATTGTTACTCTAACAGC  
AGCCAGGGGAACAATTGGCTATGTAGCTCCAGAGTTGATCAACAGAAGCATTGGTCCAATATCTTATAA  
GGCAGATGTCTATAGCTTTGGAATGTTACTCATTGATATCGTAGGCTTGAAAACAACTTGGCAGCCAG  
AGAGGATGTGTCAAGCCAGTACTTCCCACATTGGATTTATGATCAACTCGACAACGGAAAGGAGATTGA  
AGTACTAGACGAGACACATGAAGACATAAAGAAGCTGACTTTAGTTGCTTTGTGGTGCATACAAATGAA  
TCCACTTGATCGTCCCTCAATGACTAAAGTAGTGGAATGCTTGAAGGCGAATTACAAGCATTGCAAAC  
GCCTCCAGGCCTTCTGAATCGCGGGTACCATGTTTCATTGGAATTCAATCTAATTAGTTCTTCAATAAGCT  
CTACTGAGTCTGTGAAGTTGCTTGAGAGTTGTTCTGATTCTGCAAAAATAGATGTAATTGTTGCTTGATA  
TCACACATTATGTACAAAATTCGTG

>PGSC0003DMG400010701 RLK with WAX or WAX-EGF domain

CCTAATAAAAATATAATGTCTGTAGTAACCAAGTTTCTTCTTACAATCCTCATATTCATGTACCTCTCAGAA  
ACCCATTAGCAGAACAAGACAGCAGTGTGTTCTTCTAGTTGTGGGCATATTCATAACATCAGTTATC  
CCTTTCGATTGAAAAGTGATCCAAAGCACTGCGGCCTTGAAAATTATGAATTGAGCTGTGAAGGAAATC  
GCGCCATATTAACAATACTGCTAAATGATTGGAATGGATCACTGAACTACTATGTTCAAGCCATCAATTA  
CGATAACTCCACTATCCGCCTTGTAGATCCTGGTATAAGAGAACAAGTTATTTGCTCTCTTCCTCAGAATT  
TGATTACGGTTAACACTGCCCTTCTTGGTTTTGATTCTATTATATATAACAATGTCTGATTATGTTCAATTTAC  
CAGTACCAATCACTCTTCAACTGTCCATTTGCCATAAATTCTCCAGTCTTTGTGGAAATCACTAATTGTC  
TCAACAGGAGTTATGCTTCCAATGTTTCTTCTGATTTATTTAAGGGACACACATATGCAACCATGACTAAA  
TTATCACCATCCGATTTGAAAGTCGGGTGTAGTGTAGACCTCATGTCAATGACTTCATGGCGTATTCAGG  
ATGCAAATGCTAGCATTCTATTTAAGTTTGCATAATGCTTTGGCATATGGATTTGAGCTTTCATGGTTT  
AGTTACGTTTATTGTGGCAAGTGCGCCGATCCATATCTATGTGTAGGGGAAAATTCAAGTGATGTTTCATT  
GTTTGGATATCGGCTGCACAGCTTACATTGATAGTAAGCAGTCGTACTTCTATTGTCAATTCTGTTTTATA

TAACAGTAGCTAGTTGCAAGTTAGATTAAGTGTGTTATTGATTCTTGGTGTCTTGCAGCAATCATCACAT  
GGATACCTCCCATAGCTGGTAAGCCACATCTTCGTCTTCAAATATATTACTAGAAATCATTTTAAT  
GTCGAAATGATGGTTGTACACAGGGCCTAGCATTGTGGCAAGAATCGTTCTATTTCCATGCATAGTTGTA  
TTTCTAATGATTAAGTTACGAAGAAGGCATTTGTCGATTTATGATGCAATTGAAAGTTTCCTGCATGGTG  
AGAACAATTTGCGGCCATTAGATATTCCAACCTCCAACATAAGAAAGATGACTAGGAACTTTAAAGAGA  
AACTAGGCCAAGGAGGTTATGGTTCAGTATATAAAGGCAAGCTTCAAAGTGGTCTAATGTAGCAGTGA  
AGATCTTGAGCAAGCCCAAAGCTGATGGGCAAGACTTCATCAACGAGGTTGCCACAATCGGGAGGATT  
CATCATGTTAACATAGTACAACCTTATTGGCTATTGTGCTGAGAGATGTAAGCGTGCTCTCGTGTATGACT  
TCATGCCTAACGGATCACTTGAAAAGTACATCACACCTCGAGGAGGAGGAGCTGAACTATTAAGTTGGG  
AAAGAAAGTTTGAAATTGCTCTTGGAGTTGCTCGAGGTATTGAATACTTGCATCGAGGTTGTGACATTCA  
GATTCTACATTTTGACATCAAGCCACACAACATACTTTTGGATGAGAATTTCAATCCAAAACCTATCTGATT  
TTGGTCTTGCAAAATCATACCCGACGGATAAGAGCATTGTTACTCTAACAGCAGTCAGGGGAACAATTG  
GTTATGTAGCTCCAGAGTTGATCAACAGAAGCATTGGTCCAATATCTTATAAGGCAGATGTCTATAGCTT  
TGGAATGTTACTCATTGATATCGTAGGCTTGAAAACAACTCGGCAGCCAGAGAGGATATGTCAAGCCA  
GTATTTCCACATTGGATTTATGATCAACTCGACAAGGGAAAGGAGATTGAAGTACTAGACGAGACACA  
TGATGACGTAAAGAAGCTGACCTTAGTTGCTTTGTGGTGCATACAAATGAATCCACTTGATCGTCCCTCA  
ATGACTAAAGTAGTGGAAATGCTTGAAGGAGAATTACAAGCACTGCAAACGCCTCCAGGCCCTCTGAA  
TCGCGGGAACCATGTTCAATTAGAATTCAATTTAATTAGTTCTTCAACAAGCTCAACTGAGTCTGTGAAGTT  
GCTTGAGAGTTGTTCTGATTCTGCAAAAATAGATGTAATTGTTGCTTGACATCACATATTATGTACGTAAT  
TCGTGTTGTTCTGAATAAAATATCAAGTTCATGCTAAATTT

>PGSC0003DMG400010963 RLK with WAX or WAX-EGF domain

ACCAAAACATTTAAAAATCACAATATGGATCCCCTTGTAAGTTATTACTTTTTTCGTTTGTGCGAGAAGT  
GGGGAAGCCTTAGCAGGTCCTATTTCAAAGTATAATGATGTTTGCAGAATTTTGTGTCATCATAAGATA  
TGATTCAACCAGAGAATGAGGCAGTAATACATACCAGTATACATGAAGATGCATATAACCATGTGGTCA  
TTTTTCACTTCTGATGGGGATGCTTTCTAAAGAAACAACCCAAGTTTCAGCTATAAGAATATGGTCATC  
ATCAGCAATATTATCTTCACAAAGGCCGCGATGCCAGAAAGATGTGGCAACGTAACCATTCCTTTTCCA  
TTTGAATAGGAAAAGAGTGTGCTTCAATGAAGCATTGAAAGTGAGATGCGATAACAACACTGCTTTT  
ATAAATGATTTGTCTGTGCAACACATATCAATGGACTCCATCACTATTTATATTACTTTTACTCCTCTCCAC  
TACAACAACCTCATCTGGAAAGAACATTTACAATGATTATCTTCAAGCAAACAGCGACGAGTATTTTCAGTA



TTCCAACAAGAACAACCTTAGTAGCCATTGGTTGTGACATTTATGCTTATGCCAAAGATTTAGACACCGG  
TAGTAGAGACAGCATTGTAAGTCAATGTGCTTCTTTCTGTGGCAACTCCACTTATAATGTTTCATCCTCTT  
CACCTTCATCATCTTATTGCACTGGGAATAGCGGTTGTTGTGTCAGTCTGAATTATCAAAAATAGTACCAAG  
AGACTTCAATATGTACATACAAACAATTAACACGGCGGAAACATCTTGGACAACCTAGCAATTGCAACTAT  
TACTTAGTTGTGGAAAAGGGCAGTTCTGAGTTTGACTTCACTCAGTTACGTGGTAAGTGCAAACAAGAT  
GATCATTATGAAGGAAGGATGGCGCTGGACTGGGTAATTGGCAATCTTAGTTGCAACAAAGCCACAAG  
AATGCCAAAATATGCATGTACAAAGAATAGTAGGTGCATCGATGATACTACTAGACCTGCTGGGGGATA  
CCGATGCGATTGCTCTTCTGGTTATGAAGGCAACCCTTACCTCCTTCATGGATGCCAAGGTACTATCCCC  
TGTTCAATTTCTCTTTTTGTTTTGCGATTTAACTTGTGTATATTACTACCTCCGTTTTAGCATACGTATCTT  
ATTTTCGTTTTTAGTCTGTTTCAACGAGGAGCTTCATGTTTTCTATATTTAGTAAGTTTTAATCCTATAT  
TCTCATATTTTACGCTTAATAAGACTCCCTTATAGGAATGACATGGAAATCCAAAATCACAGAATTTAAA  
GTACTTTTAGGGGTTGTTTCAGTACAAAATTAATAACGCAGAGATTAGTAATCTAGAGATTATTTTTATC  
AAGTGTGGTTTCATTGCTTCCACCTACTTTTGTGTAAACCTCTACAAAAGCTTCTTCCAATTGTACAC  
TTGAATTATTACAGAATTTTCTATTTTCATGTAATTGGGTCAAGGGCCTTCTAACTAGCTAGGAAAAGAAC  
AATTTTTGTCGCCATGTTTGCTATTTTCTCCATTGAATTATTTGAGGGTAAATAATTGTCATTCTAATAAAT  
TGATCACTCACAAATCGTCAATTTTAAATTTAAAAAAGATAGATCATCTACTTTCAAACCGAAAAGACG  
GTAAACAATACTAAAATATTGAATAAACCAATCTATTTTACACATAAAAATGGCAAGTTATAGTTTTAATA  
TGTATGCAATTTTATAAATTGTTCAAATACAAATAATCATAAAACCCACATATATATCAATAAATAATACA  
TTCAATTAAGATCACAAATTTTCATGTGGCCATATATGCCTTTTTAATTAGTAAATGTTGAACAACCTCACA  
TTTCAAATATTGTATTGATTTAATGATTTGTATTAGATTTATTTAGCAACAAACAACCTCTCTCTAAATAATA  
AAATTTGTAAGCAAATTTATTTAAATAAATTTACTAGTACAAATAGAAAACATAAAAATCAAGAAAGTAAA  
CAAAAATGATTAAGGATTTGACGGGTATTGTTGTCTTTACATATATTGATCCATTGTATTAATCGTAT  
GTATTATTAATAACACCAAATGGAAGGTATTAGTTATACACCCCATAAATACCATATAACATTTATAACTAA  
TACATGCATTAATTCTATATAGGCCAAAATTCCCACCAAACATAGTACTATATAATACTACACATAATAT  
ATGAACTATTTTCTAATGCAATCTACCAAACGACCCCTTAGTGTGTTATAGGCACCTTTTGTTTAATATC  
ACAAGATCCAATGTATTTTTATGTTTTTAAATTTTCGTGCAAAAATCAAATAAGACATATAAAAATGAAAC  
AAAGAGAGTAACAATATAACAATATCCCACTGTACCTCTTTATTTTAACTTGTTTTTAGCATGTAACATGT  
CTTATTTTCTAAGTTACTAATCTCATTTTTTATAATGATTTCTTGTTAATTTCCGCAGACATTGATGAGTGT  
GCAAGTCCAAAAGGAATCGTTGTCCGAACAATACTCGCTGTGTTAATACTCTTGGCACTTACCATTGTG

ACTCAAATAATGTGAGACATATGCTAGCTAAACAACCTCCATCGGTATTGTATAACTCTCTTCTTTGTCT  
TCTTTTTTCTCCTCTTGTTTCTTTGTTAGATTAACCTAAGCTTTCTATAGAGTTTTATTTGAGACAAATTACT  
CCTTTGAACTGTCCCAACAAATGATTCATAATCCTTTTCATGTTTATTCTAGCTAACTGCTCTTTAGAAAAT  
TAGAAGCTCAACTTAATATATGCTTTAAAATTACAAAGGGGCCTGGATAAGCATTAAAGCTCTTTCTCTT  
AGATTCTCAAATGAATTTATGCTTGTTTTAGATGAAATTGGTTTGCTCACAAGCAGGTATTGGAGCAGC  
AATTATTTTTGTGATCCTGGTAGCAGTTTGTCTTTGGCTATGCAAATGGCTCCGGAAGAGGGAAGAAAA  
CAAAGCTAAGCAAAGTATTTCAAGAGGAATGGTGGATTGCTTTTGCGACAACGTATTTCTTAAATGG  
AGAAAGTAGTGGTGGCTCTTTGCCAAAGCTCTTTTTGAAGGAGGAGTTGGAGAAAGCAACAGACAATTT  
CAATGAAATTCGAATTCTTGGTAAAGGAGGGGCTGGGACTGTTTACAAAGGAATGTTATCAGATGGAA  
GCATTGTAGCTGTGAAGAAGTCCAATGCAGTGGATAAAGATCAAATTGGACAGTTTATAAATGAGATAC  
TCATACTCTCCCAAATAAATCACAGACACATTGTCAAGGTACTGTTGATTTTTGTACTAGGCTCTTGCTAC  
CATTTTATTATGAATGGAAGAAGAGAGAAACACGATTCGACGATAGAGAAATTTATAATGCCTAAAGAG  
GATTGAAGAGAGAACTTATAATATTAGAAAGATTCTATACTTTACAAAATAACACACTAGACTTACAC  
ACACACGCAGTCGCACACACAGAGCTACTACATCAACTCGTGCTCCTATTCACTTCAACCATAATAACG  
AACAGTTTAGGATAACTCATTAGCCACTCATGAACCAAAGATAACTCAAATACAATTGAACTTAGTACT  
TCATCACACTTTTAACATTTAAGTTTACTGTTTACAACAGGTAAGTTGGTTGTTGCTTAGAAACTCAAGTCC  
CATTATTAGTTTATGAGTACATCTCGAATGGAACCTTGTCATCCCATATTCATGGAAACCTCAGTCACAGT  
TCTAACCTACTGTCTCAAAGTCTGAGTTGGATGATCAGATTCTTCCGCACCCAGTAATAATATTATCGTG  
GGATCATCGGGTGCGAATTGCTGCAGAAATAGCAGGGGCACTATCTTACATGCACTCATGTGCTTCTACT  
CCCATTCTTACAGAGATATAAAATCAAACAACATATTACTAGACGATAATTTTAGAGCAGTGGTTTCTG  
ATTTTGGACTATCGAGATTATTGTCTGTTGACAAGACTCATTTAACAACAATGGTAGGGGGTACATTTGG  
TTACATAGATCCAGAATACTTCCGCTCAGGTCAACTTACAGACAAATGTGATGTCTATGCCTTCGGTGTA  
ATTCTTGCAGAGCTTCTAACAAGTCAAAGAGTTGCACTTCAAACCAACCAGAAGATCCAGGTTTGGTTA  
TCCGTTTCACATTAGCATTGAAAGAAAAGTGTATAATTGAGATTGTAGACCCTGAAATTGTAAAAGAAGT  
TGAGGATGAACATGTGATTCTGCTGTGGCCAAACTTGCCAAGAGATGCTTAAATTTTAAATGCAAGGAG  
AAGGCCATCCATGAAGGAGGTGGCAGCCGAACCTGAACAACAAGGAAAAATGAGGCAAGATATGCCTC  
ATAATGAGAGTTTTCAAGATAACATTTACCAAAAAGTGAAAGTTCATGTAGTCATACTTCTGATTGTAC  
CGAAGAAGATCATCAGAACTCAGTGTCTCACAATGAAATGCATTATGACAGAAAGGGAAGTTTGTAAC  
TTATAACTTCAACTTTTATCTTTTGAATTGTAATGTCGAAGTAATTGCATGTATGGACACATAATCAAAT

GAAGATTAGCATGATTTGCATTAATATTTAAGTCGTATATATGATTTGTT

>PGSC0003DMG400011304 RLK with WAX or WAX-EGF domain

CCAGTTGCATCTTCTAGATGAGGACATGACCGTAAACTTTTTGGGCTAGAGCTCCCCACGAATGCAAA  
CACCGATAACAAAAGCATAGCGATGTTTACAACCTGGGGTTGGTTCTTTTGGAGGTTATTACAGGTAG  
CAGCTCAGATCATCTCCATCAAAGATAGCTTTACAGAAGATAACAAGTGGGAAGCTAGAAGAGATAGT  
CGATCCACGTCTTTACTATCACGAGCAGCCTATTTTCGGGAGGGAACAGATAGAGATAGTTGCAGACCT  
TGCAACAAGATGCATAATATTTGGTTGCCAAAATGGGAAATTTACATTGGAGATGTTTCAAGAGAACTT  
TTTACATAACAAAAGATGGAATTGATGGTAGAAGTAGGAGATGTCCATCAACTCATAATCTTGAAGAA  
ACTTTTTCCAATTCAAGCCTTCTTCAGATGATATCTATGTCTCCTGATTCAATACATGTCCCTGCAGCCAGA  
GGGTTCTCTTAAGCTATGTTGCCAATGTCAACGGCCGCCTGTCAGTAGTTGGAAAAGAGGAAGGCTCT  
CACATGCTGTAATTATGTACAGTAATGATTAACCTGCTGCTGTTATTTCCATCATAAACAGGCAATCCTAT  
TTTTGTTTCAATAAACTTCCAATCACATTGAATATATCCTGATAGTATTGCAGTTTGTAT

>PGSC0003DMG400011792 RLK with WAX or WAX-EGF domain

CTCAAACCATGCAGCATAAGAAAATTGTTAGTATGTATTTTTCTTTTTTCATGTGTTTGCTTTTAATCTTGA  
GATCAGCCAACGCCAAAACACCAACAACAATACAGATTCTACTACAATCACAAAACCAGGATGTCCAC  
AAAAGTGTGGAAACCTAACAGTTCCATATCCATTTGGAATTGGGTCAGGTTGTGCGTTAGACCCCGTATT  
TGAGATCGAATGCAACGTCACAACACCCTTCATAGGGAACGTTCAAGTGTACGACATCTCCGACTCAGA  
AATGCGCATATCTAACTCTGTAGTCTGGAGTTGTTACTCATCCGATGGAACACTTTTACTCCCAAATAATC  
CCATATCGATGAAAATAGGACCAACACACCCTTACAGTATATCAAACGTAAACAAATTCAGTGTGTTGG  
TTGTGATGACGGTTCTGTACTAAATGATTTTTACTTCGCTAGTGGTTGTGGCTCTCTCTGCAGTCATAATT  
CTAGTGATGCTGTTAATGAAGGAACATGTAAGCAAGAAAATGGTTGTTGTCAAATAGATATAACAAAGG  
GGATGAAATCCTTCGGAATAACAATGACTACCGTGTATAACCACACAGGAGTTTGGTCTTTCATCCATG  
TGGCTACGCGTTCCTTGGTGAGGCCAATAGCTTTCAATTTACAGGATTGACGGATCTAAATGATACGAAT  
TTGTAGAGAGGATTAACCGTAATGTTCTGTCGTGCTAGATTGGACCATCGGAAATCTTACTTGTGTTG  
AAGCAAAGAAAAGCAAAGATTATGCTTGTGGTTAATAGCCAGTGTGTGGATTCCGACACTGACAGTA  
TTGGTGGATATCGATGCAGTTGTAACCCGGGATATGAAGGCAATCCATACATCAATCCAGGCTGCCAAG  
GTAATTGACTTGATGTCCTAATTACTTTTACTAAGCTAGAAAGTGATTTTTTTTTTTTTGTTTTAATAAA  
GAGAAACAAAGTATAAGAAGAAGTGATTTAATAGGTTGGGTGGTAGGAGAGAACTGAAATTTCTAGG  
TCATTAATAATTAAGTTTTTTAAGGACAAGAATTCTCATGAGTCAATTCAGGTTACATACCAACTCAATT

TTAATGGATTGAAATGAGTTGAAGTAATGAATGAGCGGATCGATGACCCGCCAAACCTAAATGGATT  
GGACGAGTTGAATTACGACAATAGGGTTTTCCCTATTTCTTACTCCACCATCACTACTACTAGAAATAAA  
AAAGTAGTACCTTATCTGCCTGATTGAGGTGTGGACCTACCACATTGGACGTGAATTTTACTCAATGGAC  
AAGTCGAGTCAGATACGAGCTGATGTAAAATGAATTAGATGAGAATGAATAGTATATTTGACTCAATCA  
GTAATTGATAAGGATAAAAAATGGGTAAACTCCTTACTATTTTTCCCTTTTAGGGTATGTTGGTATGAAA  
GAAAATATTTTCATATTTTTCTAGAAAATATTTTTCTGATGTAAAAGAAGTTTTGAGAAAATATTTTTCACT  
TTATGTATGAAAGTCATTTTTCTTAAATTAGAGGAATATAAGTCCATTTCTAAAAACACCTAAATCAATCA  
AAAAGAGAAAATTGATAGAAAAAAAATCAAAAACATTTTCTTCATACCAAACACACACTTAATTTAAAA  
TGCATGTATTAACCTTTGTGTATTACTAGTACCTTGTTTGATACTCTTTTTCAACCTATGTATAACTAATGCT  
TGCATTAGTTATACACTCTATTGTGTATTAAGGTGTGCATTGCTAATACCATGGATTTCTAGGTATTAGCA  
ATGCAATGGTTTTAATGCATGCATTAATATAATAAAAGACTCAATTGCCCTCAAACCTTTTTTACATCT  
TTCCACCGTAAAAGTGAAGGGTATCTTTGTAAATAATTTTTAATGCAATACATACTATTTTTAATGCAT  
CAATCAAACAACACATTAATAAATCTATGTATAATTAATGCAAGCATAACTAATACATACATTACTAAT  
ACAAACATTACTAATACACTCTATTTAATATTATTCTTATACACTCTACTAAACGAGCAGTGCAATTTGTG  
GATACCCATGACTCATGAGTTATCTGTTTTCTATATTTTATAAGAGCTAATATACGTGTTCCATCCATATTG  
ACCACTTTAAATGATTGGATAGTCAACCATTTAAAATACATTGGGTGCGAGCGGATAACCATAAAATTTAC  
CCATTTTGTCACCCCTATTCATCCATCACTAACGCATTGATCATTCACTCTCTCCAAAATTAGTACTCCCTC  
CGTCTTATTTTAAATTTTCCCCTTAGCTCTTTTCATGCTCATTATGAATAATAATATATAAAGGTATACTT  
TATTAATTTATTTATATTTGTTAGATATTTTTGAAAATTGAGTTTATTAATAAGAAAATACTTTTTAATGC  
AATTAAGGGTATAGTTGGGTCTATTGTCAAGTTTAACTTGAATTCCTAAAATGTCAATTATTTTTAGA  
TTACTCCGTCCGTCCAATAGTATTCATAGTTTGACCATGATCTTTAAGAAATTACTCACCTTTATAAAGTA  
AGAAATGTTTTCACTAAATTACCATTAGTTTAAATATTAGTATCAATTAATGTAGTTTTTTTTGGCTATGTA  
AAAGCTCATCGATCTAAATAAAGATAATTTTGAAAAGAAAAAAAAAATAATTTTTTAAATTATTTATGGAA  
CTATTTACTTTAGATTGAATGCAAAGCTAAAACACTATATAATTGAATGTGAATCTAAAACACAACCTTC  
CTCCGTTCCAGTCCCAGTTTATATTACTCACTTTCTTTTTTAGTCGGTCTAAAAAGAATGACATATTTCTA  
CATTTAGTAAGAATTTAACTTTAAAATATTCATTTTACACTTATTTTAGATCACAAGTTTCAAAGTTATCC  
TTTTTTTTCTTAACTTCGTGCTGAGTTAACTAAGTCATATAGATTGAAACGGTGAAAATATTTCTTAAA  
GATAACTTTAAGAGATGAAAGTCATCTTAGATCATTTATCAAAGAGCTCTAACTTTGATTAGGCAAAGA  
AACAACTTCAGTGAAAAACATGTTTCTCTCAGTAAGTTCACCCCAATTAGCTAACTTGTTAGCCATCATAT

TGCCTTCTTTAAGGCAATGTTGGAATAAATAGTTCCCATTAATAATTTAAGTGTTATATTTGTTGAAGAATT  
TTCATGACTTTCCAGAGGGATTGAGTTCCTTGTTGATCATGTTGATGATGATTTGAGAATCAGATTCGA  
TAATGACTTGATGGAAGTTATTGACGAGCACCATCACATCCGTTATTGTTCTGAGATAATGATCATTAAAC  
TAGATTAGCTAGTGAACCTATGCAAAAATATAAGATATAAAGGCAAAGCGCAAGGGATTAATGTGGTAT  
ATTTCTCTGCTTTGCATGTATCAGATATTAATGAATGTGCTCATTCAAGTACCAATATGTGTGAACACGAA  
TGCATAGACAAGCCAGGGAGTTACACTTGTACTTGTCCAGAAGGATTCAGTGGTGATGGCAGAAAGGA  
TGATCGTGGTGTATTGCACCAAACCTCGAACTATGAGTTCATGGATCAAGTTTTCTATTGGTATGTTTC  
TCAAAAATTGAACTTAGCTTGTATTGAAAGTGATTAAAGGAATTCATCTCCTTTAAATTTTGTGTTATA  
AATACAGGTATGGGAGTCGGCTTTATATCCCTTGTTGGTTGGGACAATTTTGCTCTATTTTTGTATCAAGA  
AACGAAAACCTCATTAAAAATAGGGAGAAGTTCCTCCAACAAAATGGTGGTTTACTCTTGAAACAACAAA  
TCTCTTCTATAAAGGGTGGTGTGGAAGCAAGCAAAAATTTACAGCTGACGAGTTGAAGAAGGCTACGA  
ATAACTATGCCAGTGATAGAATTCTTGGTCGTGGTGGAAATGGAATTGTCTATAAAGGTATTCTACCTGG  
TAATCGCATAGTTGCAATTAATAAATCTAAGTTTGTGGATGAGAATCAAGTTGAACAGTTCATCAATGAG  
GTACTTATTCTTACTCAAGTTAACCATAGAAATGTAGTGAGACTCTTCGGGTGTTGTTTGAAGATGAAG  
TGCCTTTACTGGTTTATGAATACGTTTCTCATGGAACCTTTTACGAGCATATCCACAACCAAAAATGGAGTC  
CCATGGTTATCTTTGCAAAAATCGATTGAGAATTGCTTCAGAGACAGCAAGTTCACCTTGCTTACCTTCATTC  
ATCTGCATCCATGCCAATAATTCATAGAGACGTCAAATCCACTAATATATTATTGGATGATGTTTATACAG  
CAAAAGTGGCGGATTTTGGAGCTTCAAGATTAGTCCCTCTTGACCAAACACATGTTGCTACATTGGTTCA  
AGGAACATTAGGGTACTTAGATCCTGAATATTTCCACACAGGTGAATTGACAAATAAAAGTGACGTTTTAT  
AGTTTTGGAGTAGTTCTTGCCGAACTTTTAACAGGGATGACACCTATTTTGAGGGATACAAGTGACAAGT  
ACAAATGTTTGGTGGAGCACTTTATCTCGTCGATGAACAAGAATAACATATTTGAAATTCTTGATGATAG  
AGTTGTAAGAGAAGGAGGTGTTGAGCAACTTCAAAGATAGCTGAGCTCATTAAAGGGTTGCCTTCAGTT  
GCACGGGGAAGATAGGCCTACGATGAAGGAAGTGGCTATGGAACCTTGAGAGTTTAAGAAAGTTCACTA  
GCCCTTGGACTAATGAACACGGACATGAAGATCATAATGAAGTTGAATTAACGATCTGTATATAATTCC  
AATTGATTCTAATACAGGTATCGACAACCTTCTCTGGACAATATCCCAGTTCCTACACAAATAACAGCCTCT  
TCTTGGGACAATATAGTTCAGATAAATCTTCATTACTACTCAATACAAATATCCCGCGGTGATCCAAAATA  
AAATGTCAATATGATAATTAGTGATGATATAATTTTCTATGTTTTGTAAGTTTCTTTTCTGGCTATCTTTCT  
TTCATATTGAATGTATGTTGTTATGTATTTTATTTGCTTTTGAATTTAATCATCAATATATTGTTTC

>PGSC0003DMG400011793 RLK with WAX or WAX-EGF domain

GACATTATGTAACGACAAAGAACGTAACAATATATCCAAATATTGTATTTATTAATAATATAGCGTGA  
TACAATACAATACTATGAAACAATAGGTAACAACCATCCAAACAAAGTATTAGACATTATCAAAGTCT  
TTGCCTTTAGAATGTAATCCCTCTTCTCACGTCTTTCCAATTAAGTCTCCTTTATATGTATGAAAAAAGTTT  
TACTCAATTACATATCCTCCAAAATCATGCATCCTAAGCAAATTTCTTACTTTTTTCTTTTCAATGTGTGC  
GCTAATCTTGAGATTAGCCACAGCCCAAATCACTAGTAATTCTCCTTCCAACACCACCAACACCACCACAA  
CAATCACCAAAGCTGCTAACATCACAAAACCAGGATGTCCAAGAAAATGTGGAAATCTAACAGTTCCAT  
ATCCATTTGGAATTGGGTCAGGTTGTGCCTTAGACCCCGTGTTGAGATCGAATGCAACGTCGCAACACC  
CTTCATAGGTGAGTTGCAAGTCTACGACATCTCTGACTCAGAAATGCGCATATATAATTCTGTAGGCCAG  
AGGTGTTACTCATCCGAAGGAACACTTTTACTCCTAGATGATTCTCCAAATTTGGATTTAGGAGACACAT  
ACCCTTACAGTTTCTCAGATCTTAACAAATTCACCATCGTTGGTTGTGATGATTTGTCTTTTTTATCTGGCT  
CTAACTTCGCTATTGGATGTGGCTCTTCTGTACTGATAATTCTAGTCATGCTGTTATTGAAGGAACATGT  
AAGGATGGAGTTGGTTGTTGTCAATTAGAAATACGAAAGGGGATTAATATTTCCGGAACAACAATGGA  
ATCCAGAAATAATCATACAAGAGTTTCGTCTTTCAATCCATGTGGCTATGTGTTCCCTGGTGAGGCCAGT  
CGTTTTCAATTCGGGGATTGAAGGATCTAAATGACACGGATTTTGTAGAGAGGATTAACGACAATGTC  
CCTATCGTGCTAGATTGGACCATCGGAAATCTTACTTGTGTTGAAGCAAAGATTATGCTTGTCTAGTTAA  
TAGCCAGTGTGTGGATTCCCACACTGACATTGGTGGATATCGGTGCAGCTGTAACCCGGGATATGAAGG  
CAATCCATACATCAGTCCGGGCTGCCAAGGTAATTAATTCATGTCCTTACTTTTACATACTTCAAAGAGA  
GTACAATTAGTGCATTATTCATAATTCAAAGAGAGTTGATTCATATTTGACTCACTTTTTAATGATTATAT  
AACCAACCTACTTAAATGGATTGAATTGGCGGATAACCATAATTTTAAACCCACTTTGCCACCCTTATTCA  
TCACTAATACATTGATTATTCGCTCTGACCAAATAAATACTCCCTCTGTCTCATTTTAAATTTTTTCTTTAG  
CTCATTTTCATGTTTATTAAGAAAAATAAATAAATAAAGGTATACTTTATTAATTTAGATATTTTTTG  
AAAATTGAGTTTATTAATAAAGAAAATACTTTTTAACGCTAAGGGTATAGTTTTCAATTGTCAAGTTAAC  
TTTTCCAAGATGATACTATACTCCCTCCGTCCAATAGTATTCTTAGTTTGAACATACTTTAAGAAATTA  
CTCACCTTTATAAAGTAAGAAATGTTTTCACTAATTAATTACCGTTAGTTTAAATATTAGTATCAATTTAAT  
ATAGTTTTTTGGTTATGTAAGTTTATTGATCTAATAAGGATAAATTTGAAAAGAAAAAATGATATT  
TTTTCACTATTTATGGAATTTTATTTTGGATTGAATGTAAACCTAAAAACACTATATAATTGAATGTAA  
AATTAATAACACTATTTCTCTGTCCAGTTTATATCGCTTAATCTTCTGAGACACTGATCTTCTTGCTTTT  
ACTACTAGCTTGAAAGTGAACCTCTCCTTTAATACTAAAAACAAATGCTTTAATAGGTAGGGTCACAA  
TAATTGGTAGGAATCAAATATATAAACATCATTGGGACACTATCACTAGAAATTAATCAATAATGCGT

AGTCCTTTATCTGCCTTATTGGAACGTGGACCCTAACACTTGAGGTGAAGTTTACTCATCACTAGGGGTG  
CTAAACAGGCGGATCAAATTACATATTGGTTGATCAAAAATGGATAAATTATCTGACCCGATCTATATTT  
AAGGCAAGTAAAAATGGATAAACCCAAAAGATAATATAGATATTCATAAATTATCCGACCAACCCAATTT  
ATTTATTTTTCTCCTTTTGGGATGTGTTTGGTATGAAGAAAAATATTTTCACGTTTTCCAAGAAATTAATA  
TTTATCTAATTAAGTAAAGTTTTGATAAGAAATATTACTTACTTTATATGTGGAAGTCATTTTTCTTAAA  
TTAGAGGAAAATAAGTCCATTCAAAAATATGTTTTCAAATATTTAAATTAAGTGGAACTATTTTTCAA  
AAACATTTTTCTTCACACCAAACACATCCTTAATAAGTTACTTTTTTTAGAGGATGTTACACCCTTACGTAC  
TTAAGGAGAGTGCGATTGATAGATACTCATAATTTATTCATATTTACGTGGATAGTATGTTGATCCATA  
TTTGACCAATTTTTAAATGATTAATAACCAACCCATTTAAAATGGAAGAAGAAAGCTAACGTTTAAGAT  
TATCTATTGGTAAAAATTGAAGGGAAAGTAAATTTTTTTTTAAAAAGATTATCTAAGTTAAGGCTGAC  
GTGATGTCTTTAACCTATCACTCATCTAAAAGAATTGAGATCATGTGGCAAGCGAGGGGTGTTTTAAAA  
TCCAGTTGGTCAAGTGGAAGAAAGTTTCTAAGGCTATCAATAGTTTAGTGACAAAATTAATAATTCTCGC  
TAAGTTTGTAGGTGTTTTCAATACTTCTCTCTTCTTCAAAGGACTTTAACTTTAGTGAAGAACATGTTTCT  
CCCAGTGAGTTCACCCAATTAGCTAACTTGTCAACCACCATATTGCCTTCTTTATGGCAATGTTGGAATA  
TATAGTTCCCACTAGAAGTGAAGTTCCATGTTTGTAGAAGAATTTTCATCACTTGCCAAGAGGGGCTGGG  
TTCCTTGTTGATCATGTGGATGATAATGCTATGATCTTCCATATTCATCTTATAAATCCTAAGGTTTTCTAC  
TAGTTCATCAAGCGTCATGATAGAGATGTCCTTAGCTTCTTCTTTTGTTAATGGTAGTGGCTTTTACATCC  
CATTTAGTTTTGGAAAGGACTCTCAGAACTATATCAACTTGTTCTCAATAGTAAGAATCTTTCATGGCGA  
TGATAACTCATTGATTAAGTGGTGAAGTGCAGTGAATTTCTAGCATGCACTCACTCTTCTTCAATTTGA  
AAGTTTCATATTGAGTGAACAATATGGACACCCCAAACACTGACCTGACTAGTTCCTTCATGGGCATTG  
ATCAGTGCGCATCTCATATATGTTTAGTTGAAGTACAATCATCTACCCCTAAACCACACAATGGAATATTT  
TTTGCCTTCGCATTCTTTATGAGAGTTACAAGATTTTTAGCAGTGAAATCTCTCTTTATTTTTGAAACTTGC  
TCTCATTGCACAATTTTCATCGGAATGGTTGGTCTTTTAGTTATCCGATCATGTAGCTCGTAATCTTCAGC  
TTGGATGAAATCCTCCATGCAATGCGTTCCTTCCAACAGGTAAAGTGAGATCCATTGAAAAACAGATTGT  
TGATTGTCCTTCACTATGCCCGATTGGTGGTGTGAATTCATCATGATCTTATCTACCTCGCTCTGATACC  
AATTGATATTTTACACTACCTGAATCATGTTGCTTAACTGAACTTTTTCGCCTAAGTAAACTGGGTGCC  
TAATATGTTTCAACGAAGCAGTAAAACCAGTAAATTGAGAACACACTATTTTATGTGGAAACACCCGACT  
CACAAAAGGTGTA AACCTACGACATGTAGAGTTCATAAACTCCACACAAACCTTCCAAGGTATGTGTTT  
CCAAGTCTTCGAGTTACCCCAAATTGAAAATTATAATCCTACTTCAGTTACACCAACACTCAAACACAGA

GAAGAACTCATAGAACATAAACTCTGTAATAGGACCTGGTCTTCAAAGTGTTCCTCAATATTGAGTAG  
CACAAATGAAAGCCAATATGCCAATTGCCTTTTTGCTATGTAAGTGCCTGAGTATTCTAAATCAATTCTCGT  
CTATTTAAGCATAACTCTTTCATAGAGTTATTATTCACAACGAACCCTCTTTCATTCAATTCTCTGTCTTTG  
AGTTCTGATTCAAGTTGGATTCTCCATTAGTCAGACTTCTCACTTCATTGGTACAACCTCTATCATTCAACA  
CTCGTTTGTTTACTTTAAAAGATCGTTTGGTGTGATGGATAAGAAAAATAATTCGGGATAAATTTTAA  
GTGCCCTCAGATCTTAGCTCTATCAAATATTTATATGCCAATAACAATAAACATAAATTCTACTACTTT  
AGCCTTTTGGTAATAATGTTAACTAAGATGAGTTTAAACAGAGGAATATGGCTAGTGATGATTTATATGA  
TCGATAGTGATTGCAAGTCTATTAATGTAGTAGTTATAATGCTTAATTAATACTCTTTGATAGTTACCC  
TTAAAACTTCTGCAAATAAATATGTTAAAAGATAAGATATAATTAAGGCAAAGCGCGAGGGATTAAT  
GTGGTATATTTCTCTGTTTTGCATGTCAGATATTGATGAATGTGCTGATTCAAGTACTAATATGTGTGAAC  
ACAATTGCATAAACTCCCGAACTTCACTTGTTCCTGCTTAAAAGGCTACACTGGCGATGGCAAAAA  
GAATGGCCGTGGCTGTAATGCCCAAACCTCGAACTCTGAGTTCCCATGGATCAAGTTTTCTATTGGTAAG  
TTTCTCAGAAATTCAACTTGTCTTACTTGCATTTTGCTTCCCAAGGCCTATACCTCACAAAAGTATTAGCC  
GTATCTAGGGGTGCTCGTGGTTTCGGTTTGGATCGGTTATTGGTTAAAACCAAAAACAAACCAATCTAGTC  
AGTTTTTTAAATTTCTAAAATCAAACCAAACCAACGAAAAAATAACCATCGGGTTGGTTCAGTTTTTAT  
GGTTTTTTCGGTTTAAAAGTAATAAATTTTTTGAGAACATACGTATCTCGATAGATACAAACATCTAGTAC  
ATGAACAATCCATAGGAAAGCTACTTTCGGTTCAATTAAGCAATTAAGCAATACTAGAGTTATTATTACA  
TGAACAAAGTGATCCAATTAAGAGAAAGTGTGACTATCTTATGTGAGGTAGGATAGGTAAGATTAAGT  
AATGGATTTTGATGGACTTGGACTTAGGATTGTAATAGTTGAACTAAAATTTAACTATTGGACTTGAGAA  
AATGGTAAAGTTAAAGACTTAAGTTAATTAATAAATTTAACAAAATATTTATATTTTTTTATGAATAATGTTT  
AAATAATTATAAAATTTATATATCTAATTTATCGGTTTCGTTTTGGTTATTTTTGTAGTTGTTTTTTAGTAAA  
ACCAAAATCAAAGAAATAGTATCGATTTTCAAATTTAAAACCAAACCTAATCAAACCAAACCAATAT  
CGGTTTTTTTTAATCGATTTGGTTCGGATTGCAGTTTCGATTTAGTGTTTTTAACCATAAACCATGAACATCG  
CCCGTATCAAGTCATACACAATAACTCTTATCGGATATATAGTATGTTTAGAAGAATAGCACTCTGTGCA  
TTATTACAATAAATTGACCTACCATGTGCTTCTTATTGAATTTTTTTTTTACTTATATCTATATGTATACAC  
AGTAGTGATAAATGAGTATATATATTTTTGTTGTTATGAACATAGGTATGGGAGTTGGCTTTATATCCCTA  
GTGGTTGGGGCAATTTTGCTCTATTTCTGTATCAAGAAACGAAAACCTCATTAAAAGTAGGGAAAAGTTCT  
TCCAACAAAATGGTGGTTTACTCTTGAACAACAAATCTCCTCTATCAAGGGTGGTGTGGAAGCGACCA  
AAATTTTTACAGTTGACGAGTTGAGGAAGGCTACGAATAACTATGCCAGTGATAGAATTCTTGGTCATG



GTGGAAATGGAATCGTATACAAAGGTATACTACCTGATAAAAGCATAGTTGCTATTAAGAAATCTAAGT  
ATGTGGATGAGAATCAAGTTGAACAGTTCATCAATGAGGTAGTTATTCTTACTCAAGTAAACCATAGAAA  
CGTCGTTAGACTCTTTGGATGTTGTTTGAAGCTGAAGTTCCTTACTGGTTTACGAATACGTTTCTCATG  
GAACTCTTCTGAGCATATCCACAACCAAATGGAGCGCCTTGGTTATCTTTGCAAATCGGTTGAGAAT  
TGCTTCAGAGACTGCAAGTTCCTTACCTTCATTCATCTGCATCCATGCCAATAATTCATAGAGATG  
TCAAATCTACCAATATATTATTGGATGATGTTTACACAGCAAAGTTGCAGATTTCCGGAGCTTCAAGATT  
AGTCCCTCTGAACAAACACATGTTGCTACATTGGTTCAAGGAACGTTAGGGTACTTAGATCCTGAATAT  
CTCCACACAGGTCAATTGACAGACAGAAGTGACGTTTATAGTTTTGGAGTAGTTCTTGCGGAACCTTTAA  
CAGGGATGAAACCTATTTTGAAGGGGAACAAGTGACGAGGATAAATGTTTGGTGAATATTTTGTAACTG  
CGATGAAAAATAATAGCTTATTTCAAATCCTTGATGATAGAGTTGTAAGAGAAGGAGGTGTTGAGCAAC  
TTCAAGAGATCGGTGAGCTCATCAAGAGTTGCCTTCACTTGCACGGGGAAGATAGGCCTACGATGAAG  
GAAGTGGCTATGGAACCTGAGAGTTTAAGAAAGTTCACTAGCCCTTGGACTAATGCACACGGACATGAA  
GATCAGAATGAAGTTTAAGTTTGGATTAATCTTCATTAGTACCCAATACAAATATCCCAGCGGTGATCCAA  
AATAAAATGTCAATATGATAATTAGTGGGGATATATTTTTGTGTGTTTTGTAAGTTTCATTTCTGGCCTAT  
CTTTAATTAATTCATATTGGATGTTCTTATGTACTATATTTTCTTTTGAATTTAATCATCAATATAAGATTA  
CTCCTTCG

>PGSC0003DMG400013884 RLK with WAX or WAX-EGF domain

CAAATTTGTGATAGGCCTTCCGTTTGTAAATTGATTTCTGGTGATCAAATCAAAGGAGGCATTTGTC  
GATGTATGATACGATTGAAGGCTTTTTACAAACACAAAATAATTCATGCCAATTAGATATAATTACTCCC  
ACATAAAGAGAATGACAAGAGGATTCAAAGAGAAATTAGGTGAGGGAGGTTACGGCAGTGTATACAA  
AGGAAAGCTTCAAAGTGGAAGGGATGTAGCAGTGAAGATGTTGAACAAGCCTAAAGCTGGTGGGCAA  
GATTTTATGAATGAAGTAGCTACCATTGGAAGGATTCATCATGTCAATGTGGTTGGACTCGTGGGGTATT  
GTGTTGAGGGAACAAAGCGTGCTCTTGTATACGACTTCATGCCAATGGATCACTCGACAAGTATATCA  
GCACCAGTCAAGAAGGAAGTCCTCTGTAAAGTTGGCAGAGGAAGTATCACATTATTCTTGGAGTGGCTC  
AAGGAATTGGGTATTTGCATCGAGGCTGTGATGTACAAATTTTGCATTTTGCATTTGACATCAAACCACACAACAT  
TCTTTTGGATGAGAATTCATTCAAAGATTTCTGACTTTGGGCTTGCGAAATTATATCCAACAGATAATA  
GCATAGTGAATCTCACAGCTGCTCGAGGAACGATTGGCTATGTAGCTCCAGAGTTGATCAGCAGAAGCA  
TTGGAACAATCTCATACAAAGCTGATGTTTACTGCTTTGGAATGCTGCTAATGGAATGCTGGACTTGAA  
AAGACATGAAGTTGCAAATGAAGAGAATTCCAGCCAATATTTTCTTATTATATTACGATAAGTTCAAC

AAGGGGAAGGAGATTGTGGTGGATGAAGAAGCAAATGATGATGAAAAGAAGATGGCTAGAAAGCTGG  
CTTTAGTTGCGTTATGGTGCATACAAACAAATCCGATACAACGCCCTTCGATGAGTAGACTATTAGAAAT  
GCTTGAAGGTGAAGTTGAAGTGCTAGAAGTACCTCCTCAGCCTCTTCAATCTCAACCGATTGTTTCATCAG  
ATCATGAGAAGTTCTATGACATTTTCGTCTGATTCAATGGCTTTGTTAGAAAATTCTGCTGATAATCCCGT  
TGGACTAGACATTTGTTCTGATTGACTATAGTTGATGTAATGTTTATGTGAAACAAATATAGCCCACCCA  
ACAATGTTTGGGACAAAGGGTGTGTTGCTATTGTTGTACTAGTTTAAAAACACACCTAGAAGCTAACTG  
ACCAAGTGTTGGAATACAATAGCCAAAACGCTCGTGATAACTTAATTTGCCTGTAAAATTTTCG

>PGSC0003DMG400014060 RLK with WAX or WAX-EGF domain

TAGAAATTTAACTCATCTTCGAACAACCTGGTTCATGGTGGCGACAGGTAACCTCATCTTCTTTTTCTTCTC  
TGTAACGGCACTGCAGTTTCATAGATACCATTGCTTCCCTTTTGCTCTTTCGACTTGTATTTCTGTCTCT  
GTACGTATCTTCTATATGAATTGTCCAAAACACAGACTGTTCCCAAATAGTTCATAGGACTTCCAGACTG  
AATTTAATTTATACTCTCTGATGGTGCATGACTTCATTTTGCTTCCACAGGTGCAGTTTTGTTTACAGTTG  
GACTGTTGGTTTTACTCTTCTGCTTCAGAGAGAAGATTTTGTGGTACAAATGCCTCAGTTTTGGGAATC  
TAATGCTGAGGATCACAAAAAGTTGAAGAATTCTTAAAGAACTATGGATCATATGCTCTAAACAGATAC  
AATTAGACAGACATCAAAGAATCACAGTCACTTCAGAAGCAAACCTAGGCCAAGGAGGATTTGGTAAT  
GTATACAGAGGAAGTTTGCGTAACGGGAGTCAAGTGGCAGTGAAGATCCTGAATAAACTAAAAGGCAG  
TGGTGAAGATTCATTAACGAGGTGGCAAGTATTAGCAGAACATCGCATGTTAACATCGTGAGTCTTGT  
GGGATTTTGTGTTGAGGGTCACAAAAGAGCTCTCGTATATGAGTTCATGCCAAATGGATCTCTTGAAAAG  
TTTATCTATGAGGAAAGATCTGACAGTGTTCGCCAATTGGGTTGGCCAATACTGTACAAAATCACACTAG  
GCATTGCTCGAGGATTGGAGTACTTGCACCGTGGTTGTAACACTCGGATTTTGCATTTTATATAAAGCC  
TCATAATATCCTACTTGATGAAGATTTTTGCCTAAGATCTCTGACTTTGGACTAGCCAACTGTGCATGA  
AAAAGGAAAGCATTGTGTCAATGTTAGGTGCACGAGGGACTATCGGTTATATTGCTCCAGAAATTATTT  
GCAGAAGCTTGGGAGGTGTCTCTCACAAGTCTGACGTCTATAGCTACGGAATGATGGTCCTAGAGATGG  
TAGGAGGAAGAAAAAATGTTGATGTTGGAGTTGATCGTACGAGTGAAATCTACTTTCCACATTGGCTCT  
ATCGACGAATTGAGCTAGATGAAGAGCTCCAATTAATTGGGATAATGAATGAAGAGGAGAAAGAATGT  
GCAAGAAAGATGGTGTGATGGCGAGTTTGTGGTGCATACAGACTGATCCCTCAAGTCGACCATCGATGAG  
CAAAGTTGTGGAAATGTTAGAAGGGAACCTAGACTTTCTGCAAATTCCTCAAAGCCTTACCTATATTCT  
TCCTCAAGAACAGAGGTAATTTATCGGAAGTCGAACTGGCCTAGTCTTAATTTGTTGTAACCTTTTAGC  
AAAAGCTGTATTTTTCTTCGACAACCTGAATTTATTACTAATTTCTCTATCCTATTTTATGAGACACACTTTC

CTTTGTAATCTGTTTTCTACTGTATCCAGTTGAAGTTCAAATAATCAAG

>PGSC0003DMG400014064 RLK with WAX or WAX-EGF domain

AAAAGTCACTCAACTATGCCTTCTTTGCACAGAAAATCACTCAACATATTTAATTATTTTTTCACTAAAAT  
TTTTCTGACACAGACTTTTTTTTTTAACCAAATTTAAGAACCAAATATATATCCATTTAAACCATTTAAT  
GATCTGACCCATTTAATTCGACCCACTAAATCATTAAAAAGTCGTCATTCTCTCTTAATGGTTGTGTTTCTG  
ATATCAAGGACGTGTCACTCGATCATCGCCCTTTTAAGTTTGTTGAGGTATCAAGAATTTACTTGCTGTCA  
AAGTGTAATGGATCGATATCTGAGAATCTTTCGAAGCACATGATTGGTTTTGGTTGTGGTGGAGAAAAT  
GGGAATGATTGGGGTCTTGCAATGTTGCTGAGGATGAGAGCTTTGAGTCTGCATTACAAGTGTGTGAA  
AAACATGTAATGGCACCAGTAGAAATAATGCTTGGAGATGAGGGAAGTAATCGAGATGTTGACTATCT  
GGTGCTTTTGAGAAGGGGGTTTAGATTGAAATGGACTGCTAGTAATTGCAGTGAATGTGCAGAAAGTG  
GAGGACATTGCGGATTTGATGTTATCGATTATAAATTCGAATGTTTCTGCACTGACAGGCCTCATGCTTG  
GAATTGCCACCTACCAGTAAGCCCCTATCTAGTAGTTAATTTCCAGTATAATTATGCAGAACCTTATCT  
TATGATTAGGCACCGTGCTTTAGGTTCTTTTCTGTGATTACCAAGCGCACAAAAAAGTATCGTTTGATG  
ATCTAGACATCAAGATACTGCTGCATTAAGCATTGGATTATTGTTAACCACAAAATTTTGCAGCCAA  
CTTTTAAAAAAAAGATAAATAAAAATTGGTGGTAGGGGAAGGGGAAATGGTGAAGGGATTACAA  
GATAGGGAATCGAACACCAACAAGGTGAACTTTATGTATCCAACCAATTGAGGTACGGAGATTTCCCT  
GTGCTGCCAAGTTAATATTCTCGTAGCAGCTAATTACTTCTCTGATGAATGGTGTCTTGTCTGATTAATT  
ACCATGCATTTAGGGTTTGAAGTCTTGTCTGTTAACCTGTGGTTATGCCAGCAGTATTTTCTGTATCT  
TACTTGTTGAAATTTAGAGTTAGACTACTGACTGCAGCCGCCTTTTCTGCTATGTTCTCTATGTTTCATCG  
GCTTATCTTTAACTTAGTTCAATTAGAGAGTAAATCTTGTCCAAAAGAGTTTCGTTGTGGAAGAGTGGAA  
CCACAAGTTATCTTTCCACCTCATGTTCTATTTTGAGTCTACAACAATATTACTTTGTACTTTCAAATAC  
ACAAATAAAGTATGCTGATTGATCGTTATTTCAAAGTTATAAGAACTACTCGAGTTGTCATGCCTTTAGC  
TTTTAGTGTCATAAACAAAGAATTAATCAAAGCCATAGTATTCAAGCTAGTGATCTTCCTGCAAATTCATC  
CTTCACCTTCAGAACCAAATTCTACTGATTTGTTGATCTGTTGACTCCTAGTTTCACATTAGATTGGAATT  
GTCGTTAATTATCCAACATCTTCATAGAGAAGGGCGATGCGAAAGTGACATCGAAAACAACCTTTTT  
GCTGCAGAGGTATTGGATATAAGAAACCTGTCAGTTGCTTGTGTATGTCTGGTTTCATTTTTGGAAAGGA  
TTTAGATGTGTGTTGGTTGGTTCAATCCAAGATGTTTAATATGTCAACGTGAACGGAAGTGAGTTGCTTT  
CACTCTTATTGTGACTTATTAATCTTTCATTTCTGTGTATTTGCAGAAGCAAAAAGAAATTTGGGACTGAT  
ACTAGGCACAGGTACATGTCTGTTATCTGTAATTAGACTTGCACAAAATCTCCTATTGCCTTGCAAATGTT

GTAATTGTTGTGTTGCCTCAAACCAGGCTCTTTCCGGTGCATGACTTTCCTTTTTCCCCACATTTGCAGT  
TTTCTTTCATCGGAGTCGTGATTTTGCTCTTCTGCTTGAGAAAAAGATTTTCTGGGACAAAAATCTCA  
GGTTTTGGGAATCTATAGCTGAGGATCACCGAAATATTGAAGCATTCTGAAGAACTCTGGGTCATATG  
CTCCAAAAGATACAGCTATACAGACATCAAGCGAATCACCAATCACTTCAAAAACAACTAGGCCAAG  
GAGGATTTGGTAATGTATACAGAGGAAATTTGCGTAACGGGAGTCAAGTGGCAGTGAAGGTCCTGAAT  
GAACTAAAAGGCAATGGTGAAGATTCATTAATGAGGTTGCAAGTATTAGCAGGACATCACATGTTAAC  
ATCGTGAGCCTTGTTGGGATTTTGTGTTGAGGGTCACAAAAGAGCTCTTTTATATGAGTTCATGCCAAATG  
GGTCTCTGAAAAGTTTATCTATGAGGAAAGATCCGACAGTGTTCCGCAATTAGGCTGGCCAATATTGTA  
TGAAATTGCATTAGGCATTGCTCGAGGATTGGAGTACTTGCACCGTGGTTGTAACACTCGGATTTTGCAT  
TTTGATATAAAGCCTCATAATATCCTACTTGATGAGGATTTTGTCCAAGATCTCCGACTTTGGTCTTGC  
CAAATATGCATAAAAAAGGAGAGTATCGTGTCAATGTTAGGTCCACGAGGTAATAGGCTATATTGC  
TCCAGAAGTTGTTTGCAGAACTTGGGAGGTGTCTCTCACAAGTCTGACGTTTATAGCTATGGAATGATG  
GTCCTAGAGATGGTTGGAGGAAGAAAGAATGTTGATGTTGGAGTTGATCGTACAAGTGAATCTACTTC  
CCACATTGGCTCTATTGACGAATTGAACTAGACGAAGAGCTTCAACTAATCGGGATAATGAATGAAGAG  
GAGAACGAATGTGCAAGAAAGATGGTGATAGCAAGTTTGTGGTGCATACAGACTGATCCTGCAAATCG  
ACCATCGATGAGCAAGGTTGTGGAAATGTTAGAAGGGAACTAGACTCTTTGCAAATGCCTCCCAAGCC  
TTACCTATATTCTCCCTCAAGATCAGAGGTAGATTCATCAATAATAGAACTGACAACAACAACAATT  
AGGAAAAAATACCCAGTATAGTCCCACAAGTGTGGCGTGAGAAGGGTAAAGTGTACGCAGACCTCAT  
CTCTACTTTTGTACTTTTGTGGGGTAGTGAGTTTTTTTCGATAGACTCTGTATGCCATGGAACGAAAACG  
ATTAATTCGTCCATCATTCCCAAGAATGTCAACAATTTTGTACAATTCTTTCTGATTTCTTCTTCATCTCT  
AGTTGAGTGTTTTATTACGATTGACATCAGAGCTTACTATATTGGTTCTGTCAAATGAAAAGTGTTCTCA  
GATACCTATTTTGAGATTC

>PGSC0003DMG400014577 RLK with WAX or WAX-EGF domain

ATGGATTTAGTTTCTTGGTTTTTCGTCTTCATTTTGTTGCATCAGAGGTGTTTTGATTCTGTTCAAGGACA  
GAACACACCTTATTCAAATGTCCTCAAGAATTCCAATGTGGAAGTTCAGAACTTCTGAGTTTTCTTTCT  
ATAAACCTGATCAACCTGACTGCGGATTATGTAAAGTTGATTGTGATACTGCTCCACATCCGATGATCGA  
ATTGGAAGGAGTAAAGTATCAAGTACTTGAAAAACAGAATGCTTTTGTCAAATACGGATCCTGTTCTT  
GAAAATCTCTTAAAGGAAAAGAGTTGTCGATCTTTTCGATAGAAATCTATCTCTCCCAATATCTCCTATAAT  
CACCTATAGTGTCTACCCTTTTCTCACCTTGTTTAAATGCAATACTAGTAATGATATCTCGTACGAGGGCT

TTCAGAGTTACAATGGTTGCGAAAGTTTCACATTATACTATAACCATTTCGTCCGTTTCTTCTGTTGGATCT  
ACTCTTCCTACTAAATGTTCAATGATTCATTTGCCTATGGTGTGTCAGGTTATGAATCAAATCGAACAATAG  
TAACTTGTTGATATGTTGGCTGCTGATGTTACTCTAGGATGGACAGTGTCTAATACATGTAATCATTGTT  
ATTCGAGTGGAGGACGATGTCAAGTTGATAGTAACAACAAATTTCTTTGTTCTGTTACTGATCAAGGCAA  
AGGTATTCAAGAAGTAAAATATGCTTGATTCCTTCATCTTAGTACTCTTTATTTATTCGTTTTTCGTATTGC  
AGGAAAGCATCTTCGTAGAATATGGATCATTGTTTTAGCCACAGGTAACCTTTTTGTAAACTGTACTAG  
TTGCATTGTCTCGAATAGAGACTCTTCACCGGTGTATGACTTCATTTTCCTCTGTATAGTTGCAGTTTTCG  
GTTGCATTGGAATTTTGATTTTGCTGTTCTGCTTTAGAAAAAAGATTTTCTGGCATAAGTACCTCAGGTTT  
TGGGAATCAGAAGCTGAGGATCATCGAAATATTGAAGCATTCTCAAGAACAACGGGCCATATGCTCCG  
ATGAGATATAGTTATTCAGACATCAAAGGATGACTAGTAGCTTCAAAAACAAACTAGGCCAAGGAGGA  
TATGGTTATGTATACAAAGGAAGTTTACATAATGGAAATCCTGTTGCTGTGAAGGTTTTGAATGGACTAA  
AAGGCAGTGGTGAAGAATTCATTAATGAGGTATCGAGTATTAGCAGGACATCACATGTTAACATCGTGA  
GCCTCGTGGGATTCTGTTTTGAGGGTTCGAAAAGAGCTCTAGTTTACGAATTCATGCCAAATGGATCACT  
AGAAAAGTTTATCTATGAGGAAAGATCAGACACAGACAGTGTTTCGTCAACTAGATTGGCAAGTACTGTA  
TAAAATTGCATTAGGCATTGCTCGTGGATTGGAGTATTTGCATCGAGGTTGTAACACTCGAATTCTACAT  
TTTGATATCAAGCCTCATAACTACTTGTATGAAGATTTCTGTCCTAAGATATCTGACTTTGGACTTGC  
TAAACTCTGCGTAAAAAAGGAAAGTATAGTGTCAATGTTAGGTGCACGAGGGACTATCGGTTACATTGC  
TCCTGAAATTGTTTGTAGAACTTGGGAGGTGTCTCACACAAGTCTGATGTTTATAGCTATGGAATGATG  
GTGTTAGAGATGGTTGGAGGAAGGAAAATGTTGTTGATCGAACGAGTGAAGTCTACTTTCCAGATTG  
GCTTTATCAACGAATTGAACTAGATGAAGAACTTCAACTAATCGGGATAATGAATGAAGAGGAGAAAAG  
AATGTGCACGAAAATGGTGTATAGTGAGTCTATGGTGCATTCAAACCTGGTCTTCAAATAGACCATCTAT  
GACTAAAGTTGTCGAAATGTTGGAAGGGAACCTTAACTCTTTGCAAATTCCTCCAACACCTTACCTATATT  
CTTCCTCAAGGTCAGAAGTAAAATTGATCTCATCAGTAGAAGAATCGAGTTTCCGATCAACTCTCTCTAC  
CTCCACGAGGTAG

>PGSC0003DMG400017105 RLK with WAX or WAX-EGF domain

ATGTCCATGTGCAATAGTATTGATGATGTTGTTTCATGACACATGTTCTGGGGTCGGTTGTTGCAAGACAT  
CCATCCCTAAGGGAGCATGGAATGTCACCATAACACTAAGCAGCTATTATAATTATAATGATACTGATAT  
GAAAGATGACCTTAGTTGCATCTATGCTTTTGTGGTCGATCAAGCTAATTTTAGCTTTTCTAAGACTTACC  
TCAGCAGTTTGCAGAAAGAAGAGAAGTTTCTCTCGTACTAGATTGGGCAATTGGTGAAGAAACATGTG

AAATAGCTAAGAGAAATTCGACTACATATGGATGTAAGAGTAAAAACAGTGATTGTCAGGATAATTCAA  
ATGGATATCGATGTTCTGTATGCAAGGATATGATGGGAATCCATACCTGATAGATGGTTGTCAAGGTA  
TGTATATGTTTGTGAGTCTCCTAATATGATTTTATATCAAATCTATCATTTTGCAAATGAATGTTTACGGTT  
GTGCTCTATGAGTCTGCAGATATCAATGAATGTGTAAATCGGAAACCAGATTATAGGTGTGTCAAAAAT  
GCCATTTGCAACAATACAGATGGGAGTTATACATGCACATGCCATCCAGATTTTCAGTGGCGATGGTTATA  
CTGAATGCAATCGTGACAATCCTCAGAGAAAAATTCAGAATATTTATCTTGTTATAGGTACCTTTCTCAAC  
TTGTTTGGAAATTCTGCAGGCAAGAGGTTAATCCGTCAAATATTACTACTTGTTTAATTATTTCTTTCACAA  
CTGAACGGAAAAAGAAGACCACAGATTGTGGAAGTGTGGAGATTAATATGGGCAACGATTTTATTTTCA  
TGAACACATACATCAGCCTAAATGGCTAATACAATGGCTTTATTGGGTACATCTATATATGTTAGTAATA  
TATTTTTATTACAGGTGTTACAGTAGGGGTTGCTTTAATGGTTTTTATAATTTGGCTGGTCATATACTG  
CATTCAAAGGAGAAAAATGTTAATGATGAAGAAGAAGCTTTTCCAAGAAAAATGGTGGATTAGTTCTAT  
TGCAACGACTCAAAGTAGGGGAAGAGGGATCAAGTAATACCAATACAGTAAACATTTTCACAAAGGGC  
AACTAATGACTTTGACAAAGATAGAGTTGTTGGTCAAGGAGGTTATGGAAGTGTGTACAAAGGATATCT  
CAAAGATAATTGCATCGTTGCCATAAAAAATTCCTAAGGTAATTGATCGCAATCAAATTGAACAATTCATA  
AATGAAGTCCTTGCTCTTTCACAAATCAACCATAGAAATGTGGTTAAGCTCTTAGGTTGTTGCCTTGAGA  
CGGAAGTTCCACTACTGGTATATGAATTTATCAGCAATGGAACACTTTCTTTGGATATTCGTCTTAGAGTT  
GCTGCAGAACTGCTGGAGTACTTTCTACTTACACTCAGCAGCTTACCCTCCTATCATTCATAGAGATAT  
TAAGTCAGTCAACATTCTTCTAGACAAAAGCTACACAGCCAAAGTGTCTGATTTTAGAGCATCCAGGTTG  
GTTCTGCTGATCAAACAGAGCTATCTACATTGGTTCAAGGAACTCTACGATATTTAGATCCTGAATACTT  
GCAAACAAGTCAACTCAACGAAAAAAGTGATGTATACAGTTTCGGAGTAGTGCTTGTAGAGCTCCTAAC  
CAGTAGAAAGGCTCTATGTTTTCAAAGACCAGAAGAAGAGAGAAGTTTAGCTCAATATTTCTTATCTTCA  
GTGGAAAAGGGTCATTTGTTTGATATTCTAGACGACAATATAGTCTGTGATGAGGGAAATGCAGGGCAA  
TTGAAAAATGTTGCTGTGATTGCACAAAGGTGCTTAAATGTTAAAGGGGATGATCGACCTACAATGAAG  
GAACTTGCAGCAGAATTGGAAGCTGGATCGAAATTGAAGCACTCATGGGCTCAAAGTCAACAGTCA  
GAGGAGATTGAGTCCCTACTGCCTGGATTTGGATATGAATATAGTGAACATAGTATCCATGTTGATAGT  
ATAACGAGCCATGTAACATATAACATTTCTGGAGGAAGGTGA

>PGSC0003DMG400017728 RLK with WAX or WAX-EGF domain

GGCAGGTATAGATTTTATAAAATAATAGGAGATAAACTTGCAACACACATCTCTATGATCTATTTCTGAG  
AAGAATAGATCGGTCAGCATATGAAAAAGACATCTGTATGATATATTGGCTCAAGAGGAAGTTAACTTT

TTGACTTCTTAATCTTGCAGCGTATTCGGGCGCAAAATTTGTAATAGGCCTTCCGTTGGTAATTGCATTTCT  
TGGTGATCAAATTCAAAAGGAGACATTTGTCCATGTATCATGCCATTGAAGGCTTTTTGCAAACACAAAA  
CAATTTTCATGCCAATCAGATATAACTACTCCCACATAAAGAGAATGACCATAGGATTCAAAGAAAAATTA  
GGCGAGGGAGGTTACGGCAGTGTATACAAAGGAAAGCTTCGTAGTGGAAAGAGATGTAGCAGTGAAGA  
TGTTGAACAAGCCTAAAGCTGGTGGTCAGGACTTCATGAATGAAGTAGCTACCATTGGAAGGATTTCATC  
ATGTCAATGTGGTTGGACTCGTAGGGTATTGTGTTGAGGGAAACAAAGCGTGCTCTTGTGTACGACTTCA  
TGCCCAACGGATCACTCGACAAGTACATCAGCACCAGTCAAGAAGAAAGTCCTCTGTTAAGCTGGCAGA  
GGAAGTATGACATTACTCTTGAATGGCTCGAGGAATAGGGTATTTGCATCGAGGCTGTGATGTACGGA  
TTTTGCATTTTGACATCAAGCCACACAACATTCTTTTGGATGAGAATTTTCATTCCAAAGATTTCTGACTTTG  
GGCTTGCAAAATTATATCCAACAGATAATAGCATTGTGAATCTCACAGCTGCTCGTGGAAACAATTGGATA  
TGTAGCTCCAGAGTTGATCAGCAGAAGCATCGGAGCAATCTCTTACAAAGCTGATGTTTACAGCTTTGG  
AATGTTGTTAATGGAAATGCTGGACTTGAAGAGACATGAAGTTGCAAATGAAGAAAATTCCAGCCAATA  
TTTTCTTTTTATATTTACAACAAGTTCAACAAGGGGAAGGAGATTCTGGTGCATGAAGAAGCAAATGAT  
GATGAAAAGAAGATGGCTAGAAAGCTGAGTTTAGTTGCGCTATGGTGCATACAAACAAATCCGATACAA  
CGCCCTTCGATGAGTAGAGTATTAGAAATGCTGGAAGGTGAAGTTGAAGTGCTAGAAGTACCTCCTCAG  
CCTATTCAATCTCAGCCGATTGTTCTTCAGATGATGGGAAGTTCTATGGCATTTTCGTCTGATTCAATGGC  
TTTGTTAGAAAATCCTGCTGATAATCCCATTGAAGTAGACATTTGTTCTGATTGACTATAGTTGATGACTT  
GATGTAATGTTTATGTGAAACAAATATAGCCGACGCAACAATGTTTGGGACAAAGGTGTGTGTTGCTAT  
TGTCATACTAGTTATGCAAGGGGAAGTTACCAACCACATGAAAGTTGTAGTAAATGACCGACTATCCACT  
TTATGCGAGACAGATGATAGTCTAAGATTGTAATTTTTGTTTGTAAACCACTGCAAAATCAACTTCAGGT  
CTACAAAACAGAAGTTGGAAAATCTTAATTCTTACACTTCAATTTTCAGACAATTTTGAAAGCATGCAAA  
CTTGAAACACTTTTGTGTTGAAGTTTGAACATAATTCTAACTTTAGAAGAGAGTGCAGCTGTAATCCTTTTCT  
GAAGTGATTCAGTCTGAGATCATGGTACCTGCAATATGCAGAAGCCAAGAGAATAATGCTCCGACATTC  
TTAAAATTCATGTTCCAAAT

>PGSC0003DMG400019167 RLK with WAX or WAX-EGF domain

ATGAGTTTGCTTCTTACCTCATTGCTTGTGCATGTGCTAATACTAACATTAGCCACTGCCAAAACAGTAC  
CACTAATAGCACCAGCATCACTATAACAAAACCAGGATGCCCTAAGCAGTGTGGGAACGTAACAGTTCC  
GTACCCATTTGGTATTGGCTCAGGTTGCGCTTTTGATTCAGGGTTCGAGCTCAACTGTAGCACATCGGAT  
GATGGTTCTCAGAACTTCTCATAGGAAGTAACATTGTGGTGTACAACATCTCCGATGCTGAATTCGCA

TCTCCAATTCAATCGGTTGGGGATGTTACAACCTCCAGTGGAGCTGTGCTAGACGAATCACTCGCTTGGAC  
CACATTTTTAGAAACAACGCCGTATAGTTTCTCTGCGCGGAACAGGTTTACTTTAGTTGGTTGCGATGAC  
TATGCTTCCATCACAGGGCCTAATAACTTTGAGTATGGCTGCAATGTGAGCTGTACAAGCAGAGGGGAT  
GTGATAGAAGGAGAGTGTATGGGAAAAGGCTGCTGCCAGAAACAGATACCCAAGGGCTTGAATACTA  
TAACACAACCATGTCTAGCACACAAAACCATACCGACGTTTGGTCCTTTAATTCATGTGGGTATGCATTC  
TGGGTGAGGCAGATCACTTTCGTTTCCAGGGCTTGCCAGATCTCGGTGATGATCTAAATGTTAATTATTT  
TTATGAGAGGATTAAGGCTAGTGTCCCCATTGTACTGGATTGGGCCATCGGGAGTCTTACTTGACACA  
AGCTCTGAAAATCGAGAATTATGCTTGCAGTGCAAATAGCTACTGCATTGATTCAGATACTGGTCTTGGT  
GGATACCGCTGCAGCTGTAATACAGGTTATCAGGGCAATCCTTATCTCAATCAAGGCTGCAAAGGTATA  
AGTAATGTTTCAATTCTTTGTGAAGAACTTAACTTTCATGCATTAATTTGATGGTGTTATATTGATTTGATC  
TTTTTTCAGATGTTGATGAATGTGCTGATCACCCAAATAACAGTTTGTGTGAAAAGATGTGCATAAATAC  
CCCAGGAAGTTACAATTGTTCTTGTCCCCAAGGATATACTGGTGACGGCAAAAAGGATGGTCGTGGTTG  
TATAGTCCCTACCATGATGAGTTCCCATGGATCAAGTACTCCGCAGGTAAATATCTCACTATACGTGGG  
CGACTCAATAAAAATTAGTGGCCTAAAATACTTAAACGGGAGGCCTTATTTTCCATATCAATATTTTTCA  
AAGCCAGCTTTAAGTGGCTACTGGCTTGGTAGTTGGTCCTTCTGGCCGAACCTGCTTTCATAACCACAAA  
TACTATTTCTTCTTTCCAGAAGTATTGATAGATTTCTATATTAATAAACAATTAACCTTACACTTCTCATT  
GATCCTTAATGAGAAGCTTTTATGGTCACACACATGCTATGAATACACACAATTTAGTTTAGTTTTGTAAA  
TTTAGGTTGGTGACCCTGTCTTTGTCCATTCAACTAATGGTAATTACAGAAAGATAAACAATTCTTTTATC  
TGTGTTTGAACAGCAACTTGAATACAACTCGTTAGCAGATATGTGTACAATTAATCCTGTACTTTTG  
ATCTAGTTGAAATAGAGAATAAAAAGTTCAATCCACTAATTACACAGGTATAGGAGCTGGTGCCTTTATA  
TTCCTACTGGTTGGAATAATTTGGTTCTGTTTCAGAATCAGGGAAAGGAAATTGATTGAAGTTAGGGAG  
AAATTCTCCAACAAAATGGTGGCTTATTATTGAAACACAGAATCTCCACTAACGACCGTGGTGTTAAAG  
CAACAAAAGTATTCACAGCGGAGGAGCTCAAGAAAGCTACAAACAATTATGCCAATGACAAAATTCTTG  
GTCGCGGTGGCCATGCGATTGTATATAGAGGTGTGCTAAGTGATAACCACATAGTCGCAATTAATAAAT  
ACAGAATTGTGGATGAGAGTCAAATTGAGCAGTTTATCAATGAGGTGCTTATTCTCACTCAAATCAACCA  
TCGAAACGTGGTGAGACTGTTTGGGTGTTGTTTGAAGATGAAGTTCCTTTATTGGTTTATGAGTATGC  
TCTGAAGGAACTCTTACGAGCACATTCACAATCAACGTGGAGGGGGTTGGTTAAATTGGCAAATCGG  
TTGAGAATTGCCATAGAGACAGCCACTGCACTTGCTTACCTTCATTCATTTGCCTCGATGCCTATAATTCA  
TCGCGATGTCAAGTCTTCCAACATATTGTTAGATGAATTTCCACAGCTAAAGTGGCTGATTTTGGAGCTT



CAAGGCTCATCCCTTTGGATCAAACACGTGTGGCTACATTAGTTCAAGGTACATTTGGGTACTTGGATCC  
TGAATATTTTTTCAAAGTCAATTGACGGATAAAAGTGATGTTTACAGCTTTGGAGTAGTTCTGGCAGAA  
CTTCTAACAGGGTTAAAGCCAGTTTCTGGAGATAGAAATGACGAGCAAAGAATTTGGCTGATTACTTT  
GTTTCGTCTGTGGATAACAATAGCTTATTTCAAATTCTTGATCGTCGTGTTTTGCGAGAAGGGAATCTTG  
AGCAACTTCAACAGATGGCTGAGCTAGTGAAGAACTGTCTTCAGTTGCACGGAGAAGATAGGCCTACAA  
TGAAGGAAGTGA CTATTCAACTTGAGGGTTTGAGGAAGGTA ACTGGAGTCTCTTGGTCTAATCAACACC  
TACACGAAGAGAATGATTTATCAGATCTTTACACAGTTCCAATAGACGCCTATGGAAAAACCCCAATTC  
AGATAGTTCTCGTATCATGCATCCTGCATACAATCCAAGTTGA

>PGSC0003DMG400019170 RLK with WAX or WAX-EGF domain

ATGGACCTAAAACACATGAATTTGCTTCCTTACCAAATTACTTGCTTTTACGGTTGTGTGCTGCTGCTACT  
ACTACTACTGACATTAGCCCCAGCCCAAACACGACTAGTAGCACCAGCATCAAAGCTGCCAATACAACA  
AAACCAGGATGCCGTAAGAGGTGCGGGAACGTAACAGTTCCATACCCATTTGGTATTGGCTCAGATTGC  
GCCATTA ACTCAGGGTTCGAGGTCATCTGCAACGTTTCGACTGATGGTACTCAGAAACCTTTAATAGGAA  
GCATTGAGGTGTACGACATCTCTGATGCTGAATTGCGCGTCAAAAATGCCATCGCTTGGAGATGTTACA  
ACGAAAATGGATCTATGTACAGTGAAAATCTCAATTGGATGTATTTGGGGGGCTCAATTTATCCCTATAG  
TTTCTCTGCAAGGAACATGTTTATCTTGGTCGGTTGTGATGACAATGCCCTCATCACGGGCCCAAACCTTT  
GGGTATAACTGCTCCACCAGCTGTACCAGCTCGAACGACGTGATTGAAGGAAAATGCATGGGTAATGG  
CTGCTATCAGGTGCATTTACCCAGGGGCTTTAAAACTTTACACCAACTATTTCTAGCACACGAAACCAC  
ACGGATGTTTGGGATTTTAATCAATGTGGGTCTGCATTTCTAGGCGAGGTAGATCGATTCCATTTCAGGG  
GCCTAGAGGATGTAAGTAATGTTACTACCTTTTATAAGAGTATTATGGCTAGTGTGCCCATTTGTGCTCGA  
CTGGGCCATCGGGGATTTACATGCACACAAGCGCAAGATGGCAAGGATTATGCTTGCAAGGAAAATA  
GCGAGTGTGTTGATT CAGATGCTGGTTTTGGTGGCTACCGCTGCAGCTGTAAACCAGGTTTT CAGGGCA  
ATCCATATCTCACTGCAGGCTGCCAAGGTAGGACGATTAACACAGTTTTT CAGGGCAATTCATATTT CAT  
ACATGGAAAAGATCAAGGCAAACCTTTTACACCAATGAAGTCTGCTTAATTCTCCATTTGATCAATTGAA  
ATGCTTTGATATAAGTTATACCAGCGTTCTACTTATTTGGTTTTTCCAGATGTTGATGAATGTTCTGATCC  
AAGCGCCAATACGTGTGAAAAGA ACTGCACAAACACCCCAGGGAGTTTCTATTGTTCTTGCCCCGATGG  
ATATACCGATGATGGCAAAAAGGATGGTCGTAGTTGTATTCTCCCTACACTGATCATCAGTCGCTATGG  
ACCAAGTTCTCTTAGGTAATATCTTGGAAAATTTT CATAACCGCAATACTCCCTCCCTTCCATTTTATCT  
CATGTTGTTTGACCAGGCACAAAGTTTTGGAAAGAGACAATGTCTGGGAAGCTTGGAAAGTCTATTTCAA

ACTATTTTTGCTCACTGATAACTTTATTTATCCAAAATTTGAATAATACATTTTTCTCTTATATAACAG  
TAAATCATATCCGCACCACATAAGTGACAAAACAGTACTTTTTGTTTTACATATTCTTATGTATTTTTTAT  
TATGAATGTGGGAAAACCTCCAATATTTCTGACATATGATTATTATGATCTATGACCAAGAACAACCTCAAT  
TTTTTTTTTACAGAAATCCAGATTCCAGACTATGTTTGAATAATACAGAACTTGCTTTTCATATGTTTGAA  
ACAGCCTCTAGGAACACCAATATGTTAGCATGTAAATTCAACAGTAAAATGAAAGTGTACAATCCTGAAC  
TTTTGTTTTAGCTCAGTTGAAATAGGCAATAAAAGTTCAACTCTACTACTTACACAGGTAAGTGGAGTTGG  
GTCAATCTCCCTAGTGGTTGTGATAACATTGCTCTACTTTTGCATCAAGAAAAGAAAGTTGATTCAAGCC  
AGGGAGAAGTTTTTCCAACAAAACGGTGGTTTACTATTGAAGGAAAGAATAGCCACAAAAGAGGGCGC  
TGTGGAAGCAACAAGAATTTTTACAGCTGAGGAGCTCAAGAAAGCTACAAACAATTATGCCAATGACAG  
AATTCTTGGTCATGGTGGAAATGGGATTGTATATAGAGGTGTGCTACGTGATACTCGCATAGTTGCCATT  
AAGAAATCTAGAAGTGTGGATGAGAGTCAAATTGAGCAGTTTATCAATGAGGTGCTTATTCTCACTCAA  
ATCAACCATCGAAACGTGGTGAAGCTCTTTGGGTGTTGTTTGAAGATGAAGTTCCTTTATTGGTTTATG  
AGTATGTCTCTGAAGGAAATCTGTACGAGCACATTACAACCAACGTGGAGTGGGTTGGTTAACTTGGC  
AAAACCGTTTGAGAATTGCAGCAGAGATAGCCACTACACTTGCTTATCTTCATTCATTTGCGTCCATGCCT  
ATCATTATAGAGACGTCAAGTCTGCCAACATATTGTTGGATAATGTTTACACAGCTAAAGTGGCAGATT  
TTGGAGCATCAAGGTTAATTCCTCTGGATCAAACACATGTGGCTACATTGGTTCAAGGAACATCAGGGT  
ATTTGGATCCTGAATATTTTCGCACAAGTCAACTGACTGACAAAAGTGAAGTTTACAGCTTTGGTGTAGT  
TCTGGCAGAACTTTTGACAGGGTTGAAACCTATTATTAGAGCTAGAAGTGAAGAGAACAAGAATTTGGC  
CGATTTTTTTGTGTTGTCCATGAACTCGAATAGCTTGTTTCATATTATTGATCATCGTGTGTTTGCGGGAAG  
GGAGTCTTGAGCAACTCCAAAAGATGGCTGAGCTGGTGAAGAACTGCCTTCAGCCGCATGGAGAAGAT  
AGGCCTACAATGAAGGATGTGTCTATTGAACTTGAAGTTTGAAGGTAAGTAACTGGAATCTCTTCGTCT  
AGTCAACATGAACAGGAAGAATATGATCAGGATGAAATATCAGATCTTTACACAGTTCCCATTAACCTCT  
ATGAAAATACCCCAATTCAGATAGTTCTCGTATAATGCATCCTACATACAGAGGAGCTCAAGAAAGCTA  
CAAACAATTATGCCAATGACAGAATTCTTGGTCATGGTGGAAATGGGATTGTATATAGAGGTGTGCTAC  
GTGATACTCGCATAGTTGCCATTAAGAAATCTAGAAGTGTGGATGAGAGTCAAATTGAGCAGTTTATCA  
ATGAGGTGCTTATTCTCACTCAAATCAACCATCGAAACGTGGTGAAGCTCTTTGGGTGTTGTTTGAAGA  
TGAAGTTCCTTTATTGGTTTATGAGTATGTCTCTGAAGGAAATCTGTACGAGCACATTCACAACCAACGT  
GGAGTGGGTTGGTTAACTTGGCAAAACCGTTTGAGAATTGCAGCAGAGATAGCCACTACACTTGCTTAT  
CTTCATTCATTTGCGTCCATGCCTATCATTATAGAGACGTCAAGTCTGCCAACATATTGTTGGATAATGT

TTACACAGCTAAAGTGGCAGATTTTGGAGCATCAAGGTTAATTCCTCTGGATCAAACACATGTGGCTACA  
TTGGTTCAAGGAACATCAGGGTATTTGGATCCTGAATATTTTCGCACAAGTCAACTGACTGACAAAAGT  
ATGTTTACAGCTTTGGTGTAGTTCTGGCAGAACTTTGACAGGGTTGAAACCTATTATTAGAGCTAGAAG  
TGAAGAGAACAAGAATTTGGCCGATTTTTTTGTGTTGTCCATGAACTCGAATAGCTTGTTTCATATTATTG  
ATCATCGTGTGTTTGC GGGAAGGGAGTCTTGAGCAACTCCAAAAGATGGCTGAGCTGGTGAAGAACTGC  
CTTCAGCCGCATGGAGAAGATAGGCCTACAATGAAGGATGTGTCTATTGAACTTGAAGTTTGAGGAA  
GGTAACTGGAATCTCTTCGTCTAGTCAACATGAACAGGAAGAATATGATCAGGATGAAATATCAGATCT  
TTACACAGTTCCATTAACCTATGAAAATACCCCAATTCAGATAGTTCTCGTATAATGCATCCTACAT  
ACAGTCCAAGTTGA

>PGSC0003DMG400019171 RLK with WAX or WAX-EGF domain

ATGATGCACCCAAAACAAATGGTTTTGCTTGCTTGCTTTTATATCTGTGTGGTAATATTGACATTAACCAT  
GGCCCAAACCATCACTAATAAACTTCCACCATCACTAAAGGTGCCAATGTCACAAAACCAGGATGCCCT  
AAGCAGTGTGGGAATGTAACGGTTCCTTACCCATTTCGGTATTGGCTCAGGTTGTGCTTATAATTCGGAGT  
TTGAAATCGACTGCGACATTTATATTAATGGTTCTCAGAAAGCCTTCATAAGAAAAGACAATATTGTTGT  
GTACGGCATCTCGGATGCTGAATTGCGGTCTCCTGTGACTACGGTTGGAGATGTTACAACCTCCACTGAA  
CCCAATGAGGCAATGGTTTCCATCGAATTTTCAGAATCAAGTCCGTATAGTTTCTCTGCACTGAACAAGT  
TTACTGTAGTTGGTTGCGATGACTACGGTTCATCTTGGGGCCTAACAACCTTTGAGTATGGCTGCAATGT  
CAGCTGTACAAGCAAAGAGGATGTGATGAATGGAGGAGAGTGTATGGGAAAAGGCTGTTGCCAGAAA  
CAGATACCCAAGGGCTTGAAATACTATAGCACAACCATGTCTAGCACAAGAAACCATACCGATGTTTTGT  
CCTTCAATTTATGTGGGTATGCGTTTCTGGGCGAGGCAGATAGCTTCCATTTCCGGGGCTTGCCAGATCT  
AGGTGATGATTATACTGTTGATATTTTTTATGAGAGGTTAAAAGCCACTGTTCCCATTGTGCTGGACTGG  
GCTATCGGGAATCTTACTTGACACAAGCTCTGAAAAGAGAGGATTATGCTTGCAAGTAAAAATAGCGAG  
TGTGTTGATTTCGGATACTGGTCTTGGTGGCTACCGCTGCAGCTGTAATACAGGTTATCATGGCAATCCTT  
ATCTCAATCAAGGCTGCCAAGGTATATATATATATATAAAGGACCATTTCCAATGAAAGCTATTTTAT  
GCTCCATTTGATCAACTTATCACAAGCTTTGATATAACGGTGTCTATTTTTTTTTTTTTTTTTTTTTCAGATA  
TTGATGAATGTGCTGATCCAAGCACAATACGTGTGAAAAGATCTGCACAAACACCCAGGGAGTTTCT  
ATTGTTCTTGCCCTGATGGATATAACCGATGATGGCAGCAAGGATGGTCGTAGTTGTATTCTCCCAATAA  
TCAGTCCCATGGATCAAGTTCTCTCTAGGTAATATCTTGGAAAACCTTCATAACCACAAATATCCATTTT  
ACGTGATGTTGTTTGACGACCAAAAAAATCGTGGTCCAAAATATTACATTTGTGTAGCTTTAAATAATCT

CATTAAGGGTAAAATGATAAATTTAAAGTTAAATTATTTTTGAATATATAATACGTCAGTCTTCATTTAGG  
ATAACTAAAAAAGTTATCACCGAGAATTATTGTTTTCTGTGCTAGAAATGACTTGAGTGGGGGAGCTT  
GGAGTTATATTTCAAACCTATTTTTGCAAACCTATTTCTTTATTTAACCAAACCTTCGTGGGGTAATAGGATC  
TTAGTATAGTATAAGTGTGTCTAAGTTGGGGGTACTIONTATGCATTTTCTCTTAATTAAGAAGACTCCAAATT  
TTGGTATTTATATGGATGATTATGGTATAAGACCAAGATCAAACCTCAACTCCTTTTCTTCTGAAATCCGAA  
CTACGTTTGAATATTACATAATGTGTTTGTGACTATAAAAGTGTTACTCCACTGATAACTGATTATTCAGG  
TATCGGAATCGGCTTTATCTGCCTAGTGGTTGGGGTAACCTGGCTCTATTTTCATCATCAATAAAAGAAAA  
TTGGTTAAAGGCAGAGAGAAGTTCTTCCAACAAAATGGTGGTTTATTATTGAAACACAGAATGTCTTCTA  
AAGAAAGCGGTGTGGAAGAAACAAAATTTTTACAGCTGAGGAGCTCAAGAAAGCTACAAACAATTAT  
GCCGATGATAGAATTCTTGGTCGTGGCGGCAATGGGATTGTGTATAAAGGTGTGTTAGATGATACTCGC  
ATAGTTGCCATTAAAAAATCTAGAATTGTGGACGAGAGTCAAATAGACCAATTTATCAATGAGGTAGTC  
ATTCTAACTCAAATCAACCATCGAAACGTGGTAAGACTCTTTGGATGTTGTTTGAAGATGAAGTTCCTT  
TATTGGTTTATGAGTATGTCTCTGAAGGAAATCTTTTCGAGCACATTCCACAACCAACGTGGAGCGGGTTG  
GTTAACTTGGCAAACCGTTTGAGAATTGCAGCAGAGATAGCCACTACACTTGCTTATCTTCATTCATTTG  
CGTCCATGCCTATAATTCATAGGGATGTCAAGTCCGCCAATATATTGATAGATAATGTTTACACAGCTAA  
AGTGGCAGATTTTGGAGCTTCAAGATTAATTCCTTTGGATCAAACACGTGTGGCTACTTTGGTTCTAGGG  
ACAACAGGGTACTTGGATCCTGAATATTTTCGCACAAGTCAAACCTGACTGAGAAAAGTGATGTTTACAGCT  
TTGGAGTAGTTCTGGCAGAACTTTTGACAGGGTTGAAATCTATATTTAAAGACAGAAACAATGTGCAA  
AGAATTTGGCTGATTATTTTGTTCATCTGTGAATAACAATTGCTTATTTCAAATTCCTTGATCGTGTTTTGC  
AAGAAGAGAATCTCGAGCAACTCCAAAAGATGGCTGAGCTGGTGAAGAAGTGTCTTCTGCCGCTTGA  
GAAGAAAGGCCTACAATGAAGGAAGTGGCTATTGAACTTGAAGGTTTGAAGGTTTGAAGGTTAACTGGGATCTC  
TTCGTTTAATCAACAGAGGCAGGGAGATAATGATCAGGATGAACCAGTTACTTACACAGTTCCAATAGA  
CTCCATACCCCAAATTAG

>PGSC0003DMG400019172 RLK with WAX or WAX-EGF domain

ATGGCCCAAACCAACGCTAATAACAATTACACCATCACTAAAGGTACCAATGTCACAAAACCAGGATGCC  
CTAAGCAGTGTGGGAATGTAACAGTTCCGTATCCATTCGGTATTGGTTCAGGTTGCGCATTGATTGGG  
GTTTGAGATCCACTGCAACAATTCTGAGAAACCCTCACAGAAAACAATCTGACGGTGTATGACATCTCG  
GATGCTGAATTGCGCATCTCCAATGTCTTCGGTTGGAGATGTTACAACCTCCACTGGAGCTGTGATCAGTG  
AGGATATGGTATCCAAAATTTTATTGGAATCAAGTCCGTATAGTTTCTCTGCGCTGAACAGGTTTATTGT

AGTTGGTTGCGATGACTACGGTGCAATCTCGGGGCCTAACAACTTTGAGTATGGCTGCACTGTCAGCTG  
TACAAGCAGAGAGGATGTGATGAAAGGAGGAGAGTGTATGGGAAAAGGCTGCTGCCAGAAACAGATA  
CCCAAGGGCTTGAAATACTATAACACAACCATGTCTAGCACACAAAACCATACCGACGTTTGGTCCTTTA  
ATTCATGTGGCTATGCATTTCTGGGCGAGGCAGATCGCTTTCATTTCCAGGGCTTGCCAGATCTAGGTGA  
TGATCTAACTGTTGATTATTTTTATGAGAGGTTAAAGGCCACTGTTCCATTGTCCTGGAATGGGCCATC  
GGGAATCTTAGTTGTGCGCAAGCTCTGGAAAGACTAGAGGATTATGTTTGTAGAGAAAATAGCCACTGT  
GTTGATTCAGATACTGGTCTTGGTGGCTACCGCTGCAGCTGTAATACAGGCTATCATGGCAATCCTTATC  
TTAATCAAGGCTGCCAAGGTATATATAGGAACAAATTTGACACTTTTTAAACCTTTATTCAAAGTAAAAAC  
TGTTTTGTGGTTTGATATAACAGTATTCTATTTATTTGGTTTTGCCAGATATTGATGAATGTGCTGATCCA  
AACACCAATTCGTGTGAAAGTATATGCATAAACATCCCAGGGAGTTATAATTGCTCTTGTCTGATGGAT  
ATACCGATGATGGCAAAAAGGATGGTCGTGGCTGTATTGCTCCCTACTGTGAATCCCCTGGATCAACTT  
CTCTCTAGGTAAATATATCTTGAAAACCTTGGTGTGTGAATACACTCTTTTTATTTAAAAAATTATCA  
CATCATACTTCACATGGACAAAACAACTACCTTTACAAAATTAATAAATTATTATCCCAAAGAATATT  
GTTTATAAAATAAAATGTAATAATTTTTTTAACTTACTCCTTCACTTCTCTTAACCCGGCCCCCATT  
TTAGTTTTTTTTGGTTAAATTTCTTTTATAAAAGTATTTAACTTTTTTTACTTCATCTCTCCTCCCCCTTCAA  
ATACTAATTTAGATATTATTTTATTTTATAAATAATTCTACCCACTCCACCTAACCTCCGCTTCCAAT  
TCTTTTTCTCGTTTTGTATTAATATATACATATCAAAAATTTTTTTACTTGTGCGCCGAATACTTTTTTTA  
AATAATATTTATACTTATGTTATATTCGGTACACAAGTAAAAAGAAGTTCCTATAAATATAGGTACATATC  
TAACACAAAACGAGAATTTTTTTTTAAAATAAAAATAAATTAGAAGTGGATGGTTAAATAGGATGAGGT  
AGAATTTTTGGTTTGAGGGGGGGGAGGGGGGCTAGGGTGAAGTATGAATTTTTTTTTAAATATTTTATAAA  
AGAAATCTTTTTTAAAATAGGACGGGGAATTATTTATTTTTTTTTGGGGGGGGGGAGGGAGAGGGTG  
AAGGGGAGGAGGCGGTGGAGTGAATAAGAAAAATAATTTAAATTTTATTTTTTAAGAAAATATTTTTT  
GGGGGATAGTAATAATTTAATCTTTAACTTTTAAATGTATATTAATAGTTTATTATTCAATTTTTGTCAAGGT  
GAAATATTTTATCCATGTGGAATGCTATGTATCAAGATTTTTTCAAATAAAAGAGAGATTGTATTATTGAT  
CATTGAGGTGTGTTTCTTAAACGAATAAGTGATAATTTAAGTATGGAATTTACACTCTCATTAGTTTAGAT  
ATGAAACTCAAATAAAATTTAGGTGTGTTTTTTGACACTTTAATCTTTTTATTTAAACCAACTTTGAGATT  
TACATGTTTCTTATATGATAGTTCATCATAACAGGTACCACATATGGCAAAACCGCAAAGTATTACTTTT  
GTTTTCCCATATTCTTTTGTATTTCTTACTACGAATTAAGAAGTCCACATTTGCTATTTATGATGATTAT  
GATATAAGACCAAGATCAACTCAATTATTTTTCTGAAATTCGGACTATGTTTGAATAATACAGAATGTGTT

TGAAACAATAAAAAGTTAAATTTTATGAATTATTCAGGTATCGGAATCGGCTTTATCTCCCTAGTGGTTGG  
GATATCCTGGCTCTATTTTCAGCATCAAGAAAAGAAAATTGATTAAGTCAGAGAGAAGTTCTTCCAACAA  
AAATGGTGGTTTATTATTGAAACAGAGAATCTCCACTAAAGAGGGTGGTGTGGAAGCAACAAGAATATT  
TACAGCTGAGGAGCTCAAGAAAGCTACAAACAATTATGCCAATGATAGAATTCTTGGTCGTGGTGGCAA  
TGGGATTGTATATAGAGGTGTGCTACGTGATACTCGCATAGTTACCATTAAAAAATCTAGAATTGTGGAT  
GAGAGTCAAATTGAGCAGTTCATCAATGAGGTGGTCATTCTAACTCAAATCAACCATCGAAACGTGGTA  
AGACTATTTGGATGTTGTTTGAAGATGAAGTTCCTTCATTGGTTTATGAGTATGTCTCTGAAGGAAATC  
TTTACGAGCACATTCACAACCAACGTGGAGGGAGTTGGTTAACTTGGCAAACCGTTTCAGAATTGCAG  
CCGAGATAGCCACTACACTTGCTTACCTTCATTCATTTTTCGTCCATGCCTATAATTCATAGGGATGTTAA  
GTCTGCCAACATATTGTTAGATAATGCTTACACAGCTAAAGTGGCAGATTTTTGGAGCTTCAAAGTTAAT  
TCCTCTGGATCAAACACATTGGTTTTAGGAACATCAGGGTACTTGGATCCTGAATATTTTCAGACAATTC  
AACTGACGGAGAAAAGTGATGTTTATAGCTTTGGAGTAGTTCTGGCAGAACTTTTGACAGGGTTGAAAC  
CTATAATTAGAGATAGAAACGATGAGCAAAGAATTTGGCTGATTATTTTGTTCATCCGTGAATAACAA  
CCACTTATTTCAAATTCTTGATCATCATGTTTTGCAAGAAGGGAATCTTGAGCAACTCCAAAAGACAGCT  
GGTGAATAACTGTCTTAAATTACATAGAGAAGATAGGCCTACAATGAAGGAAGTGGCTATTGAACTTGA  
AGGTTTGAGGAAGTTAACTGGAATCTTTCGTCTAATCAAATGGACAGGGTGATAATGATCATGATGA  
ATTTTCAAATTTTACACAGTTCAGTTGACTCGTACAAGAATACCCCAATTCAGATAGTTCTTGTATATT  
GCATCCGACATACAGTCCAAGTTGATCTAATGTATTCCTTTCTTTTCTCTCAATTTAGATTTTCTTTTA  
AGATGCAGTGTGGAGATCTTTCAGATTATATATAGTCGACCTTTTAATGATAAGAGTTTTTTTTTCTT  
TTGTTGCATATTGCATTTTGACAAAATAAATAAATCCAATAGTCAAATCATTGAAACAAATTTTGTTC  
AAGCCAACCTTACCTCAAATGTGAAGAGTAGAGAGTTAGATAACAGAGAAAAGCTGCAATGTAAACA  
GAGAATCATTGCTTATTTTATCTTTCAGTTTCCACTCTCATTAGACCAAAGTCCAAACCAACAAAGATGA  
CTTAAAACGCAACTAATAACATCTTAAGGATTTGGGAATCAGAACCTAAAATTTGCAATCAGGTTCTTCG  
GATGTCAGGATTATGTTAGCATTATTTTCACTCCATAATCATAGTAGTTGTTTGACATAGATTTCTTCTTG  
ATTATATCTGGTTTTTATTGCTGCTAAAGTTACAGCCTTTAACGGCAACTGTTTAGCCAATTGAAAATGCA  
TTCACAAAATGGCTAATTTTACCTTTGGCATCCATTTTCGGTTGTCGATAAATCCAATTAATTAACCTA  
AAAATCGCAAGCTTTAACAGTAATTGTTTAGCTGCTAAATCCAATCCGAAAATGTCTAAATATGCACTTTT  
AACATCCATTTTATTGCTGGTAAATCCAATTAATGTTGGAATCATCCTCTTAACAACAAATTTAAGGT  
GCATTCTATTCTAAGACATTGAAGTTTTTAGCGGCAGTTGCAATGGAATCAACACTATATAGAAAATAG

TCTTAAAAATGCACTACTTAGGGACTAGGAGAATACTCGCTTCAAGAGACCTCATACTACAAATGCCCTC  
TACTTCTTGACAAAGTAATCTGATCCGTTGCTACTATTTGCAGCTGTTGAGCGAGTTACCAAGGGTACGG  
TGGAAGAGTCTCATGTTTGGCAACGTAACCAAGCTAGACCAAAACTTGTTTCATCATGTGTCTGACCTT  
ACAACAGTGA

>PGSC0003DMG400019173 RLK with WAX or WAX-EGF domain

ATGCACCCAAAACAAATGGTTTTGCTTGCTTTTTATATCTGTATGTTAATATTGAAATTAACCATGGCCCA  
AACCATCACTAGAGGTACCAATGTCACAAAACCAGGATGCCCTAAGCAGTGTGGGAATGTAACGGTTCC  
GTACCCATTCGGTATTGGCTCAGGCTGTGCTTTTGATTCCGGGGTTCGAAATTGACTGCAACATTTATATT  
AATGGTTCTCAGAAAGCCCTTATAGCAAAGTACAATATTGAAGTGTACGACATTTCCGGATGCTGAATTGC  
GCATCTCCTGTGACTTTGGTTGGAGATGTTACGACTCCACCGGAGCTCTGCTTGATCAGGATATGGTTTC  
CATCAACTTTTTAGAATCAAGTCCGTATAGTTTCTCTGCTCTGAACAGGTTTACTGTAGTTGGTTGCGATG  
ACTATGGTTCCATCTTGGGGCCTAACAACTTTGAGTATGGCTGCAATGTCAGCTGTACAAGCAAAGAGG  
ATGTGATGAACGGAGGAGAGTGTATGGGAAAAGGCTGCTGCCAGAAACAGATTCCTAAGGGCTTGAAA  
TACTATAACACAACCATGTCTAGCACCGGAAACCATACCGACGTTTGGTCATTTAATTCATGTGGCTATG  
CATTTCTGGGCGAGGCTGATCGCTTCCATTTCCGGGGCTTGCCAGATCTAGGTGATGATCTAACTGTTGA  
TTATTTTTATGAGAGGTTAAAGGCCACTGTGCCATTGTGCTGGACTGGGCAATCGGGGGTCTTACTTGC  
GCGCAAGCTCTGAAAAGAGAGGATTATGCTTGTAGAGAAAATAGCCACTGTGTTGATTCGGATACTGGT  
CTTGGTGGCTACCGCTGCAGCTGTAATACAGGTTATCACGGCAATCCTTATCTCAATCAAGGCTGCCAAG  
GTATATATAGGAACAAGTTTGACTACCTTTAAACCTTATGCTGCATATTTGATCAACTCATGTGGTTTGT  
ATAACAGTATTCTATTTATTTGGTTTTGCCAGATATTGATGAATGTGCTGATCCAAGCACCAATTCGTGTG  
AAAGGATATGCATAAACATTCCGGGGAGTTATAATTGCTCTTGTCTGATGGATATAACCGATGATGGCA  
AAAATGATGGTCGTGGTTGTATTCCTCCCTACTCTGTATTTCCATGGATCAAGTTCTCTTTAGGTAATAT  
CTTGGAGAACTTTCATAACTACAAATTTTGGTATCTACGATGATTATGATCTAAGACAAAGATCAACTCA  
ATCTTTTTCTTTTTGAAATCCAGACTATGTTTGAATAATACAGAATGTTTTTGGAAACAATAAAAGTTGAA  
TTCCACCTAATTATTCAGGTATCGGAATCAGCTTTATCTCCCTAGTGGTTGGGATAACCTGGCTCTATTT  
AGCATCAAGAAAAGAAAATTGCTTAAAGTCAAAGAGAAGTTCTTCCAACAAAATGGTGGTTTATTATTG  
AAACAAACGATCTCCACTAAAGAGGGTGGTGTGGAAGCAACAAGAATATTTACAGCTGAGGAGCTCAA  
GAAAGCTACAAACAATTATGCCAATGACAGAATTCTTGGTCGTGGCGGCAATGGGATTGTATATAGAGG  
TGTGCTACGTGATGCTCGCATAGTTGCCATTAATAAATCTAGAATTGTGGACGAGAGTCAAATTGAGCA

ATTTATCAATGAGGTGGTCATTCTAACTCAAATCAATCATCGGAACGTGGTAAGACTCTTTGGATGTTGT  
TTGGAAGATGAAGTTCCTTTATTGGTTTATGAGTGTGTCTCTGAAGGAAATCTTTACGAGCACATTACA  
ACCAACGTGGAGAGGGTTGGTTAACTTGGCAAACCGTTTGAGAATTGCAGCAGAGACAGCAACTGCA  
CTTGCTTACCTTCATTCATTTGCATCCATGCCTATAATTCATAGGGATGTTAAGTCTGCCAACATATTGTTA  
GATAATGTTTTACACAGCTAAAGTGGCAGATTTTGGAGCATCAAGGTTAATTCCTCTGGATCAAACACAT  
GTGGCTACATTGGTTCAAGGGACATCAGGGTATTTGGATCCTGAATATTTTCGCACAAGTCAACTGACTG  
ACAAAAGTGATGTTTACAGCTTTGGAGTAGTTCTGGCAGAACTTTTGACAGGGTTGAAACCTGTAATTA  
GAGATATAAACAATGAGCAAAGAATTTGGCTGATTATTTTGTTCGTCCTTGAATAACAATCTCTTATTT  
CAAATTATTAATCGTCGTGTTCTGCAAGAAGGGAATCTTGAGCAATTTCAAAGATGGCTGAGCTGGTG  
AAGAACTGTCTTAACTTGCAAGGAGAAGATAGGCCTACAATGAAGGAAGTGGCTATTGAACTTGAATGT  
TTGAGGAAGTTAACTGGAGTTTCTTTGTCTAATCAACATGGACAGGGAGATAATGATCAGGATGACTTA  
TCAGATCTTTACACAGTTCCAATAGACCCCTATGGAAATACCCCAATTCAGATAGTTCTCACATAATGCA  
TCCTACATACATTCCAAGTTGA

>PGSC0003DMG400019720 RLK with WAX or WAX-EGF domain

CATCTCTATGGTTCGTTATAACTTCTCAAACGTGCAGTGCATTTGGGAGCAAATTTGTAATAGGCCTTCC  
GCTGGTAATTGCATTTCTGGTGTACAAATTCAAAGGAGGCATTTGTCAATGTACGATACGATTGAAGG  
CTTTCTGCAAACACAAAATAATTTTCATGCCAATCAGATATAATTACTCTCACATAAAGAGAATGACCAGA  
GGATTCAAAGAGAAATTAGGTGAGGGAGGTTACGGCAGTGTATACAAAGGAAAACCTTCGAAGTGGAA  
GGGATGTAGCAGTGAAGATGTTGAGCAAGCCTAAAGCTGGTGGGCAAGATTTTCATGAATGAAGTAGCT  
ACCATTGGAAGGATTCATCATGTCAATGTGGTTGGACTCGTTGGATATTGTGTTGAGGGAACAAAGCGT  
GCTCTTTTATACGACTTCATGCCCAATGGATCACTTGACAAGTATATCAGCACCAGTCAAGAAGGAAGTC  
CTCTGTTAAGTTGGCAGAGGAAGTATGACATTATTCTTGGAGTGGCTCGAGGAATTGGGTATTTGCATC  
GAGGCTGTGATGTACGGATTTTGCATTTTGCATCAAGCCACACAACATTCTTTTGGATGAGAATTTTCAT  
TCAAAGATTTCTGACTTTGGGCTTGCAAATTATATCCAACAGATAATAGCATTGTGAATCTCACAGCT  
GCTCGTGGAACGATTGGTTATGTAGCTCCAGAGTTGATCAGCAGAAGCATTGGAGCAATCTCTTACAAA  
GCTGATGTGTACAGCTTTGGAATGCTGCTAATGGAAATGTTAGACTTAAATAGACATGAAGTTGCAAAT  
GAAGAGAATTCCAGCCAATATTTTCTTATTATATTTACGATAAGTTCAACGAGGGGAAGGAGATCCCG  
GTGGATGAAGAAGCAAATGACGGTGAAAATAAGATGGCTAGAAAGCTGAGTTTAGTTGCATTATGGTG  
CATTCAAACGAATCCAATACAACGCCCTTCAATGAGTAGAGTATTAGAAATGCTTGAAGGTGAAGTTGA



AGTGCTAGAAGTACCTCCTCAGCCTCTTCAATCTCAACGGATTGTTTCATCAGTTGATGGGAAGTTCTATG  
ACATTTTCGTCGATTCAATGGCTTTGTTAGAAAATTCTGCTGATAATTCTGTCAAAGTAGACATTTGTTT  
TGATTGATTATAGTTGTGTATTGTTCAATTTAAAATGACATATATGTGAGAAGGGCTTCACATTATACCAA  
GGGTCGGGTCTGAATTGGTCCGTCTCATTGTTGTTGCGACTGACCAAATACACATG

>PGSC0003DMG400020023 RLK with WAX or WAX-EGF domain

ATGGCTCCTAATTATGTGATGATAGTTGCTCTGATAACATTTATTTGCTTTTCACTATGTTTTGGTGATGAT  
GCTATGTTACCAACACACAACAATCTCATAACCAAATCTAACTGCAATGAAAGTTGTGGCAATGTCAACA  
TCCCTTTCCCATTTGGTATGTCCCGAGATTGCACTCTACGCGATCAGTTCCTTGTCACCTGTGATTACTCCT  
TAAATCCTCCCCAGCCTTTTTTAGAAAACAGCAGTATTGAAATCACAAGCATATCTCTCGCTGGGCAACTT  
AACGTCTTACAGTTCATATCCACAGATTGTTATGGTGCTGGGATAAGCACGAATAAGATTAAGTCATTCA  
TAGCATTACCGTCGTTGCTAACTGTGAACGACACCTCCAATAGGTTTCATTGCGGTTGGCTGTGACACATA  
TGCTATTGTTCAAGGTTATTATACCAAGTTTGGAGCTAAAATCGAGTATCCCTCCTACATAACAGGATGC  
ATGTCCATGTGCAATAGTATTGATGATGCTGTTAATGGTGATAAAAACTCATGTTCTGGGGTTGGTTGTT  
GCCAGACATCCATCCCTAAGGGAGCATGGAATGTCACCATAACACTAAGCAGCTATTATAATTATAATGA  
AACTGATATGAAAAATGACCTTAGTTGCAGCTATGCTTTTGTGGTCGATCAAGCTACTTTGACTTTTCTA  
AGAGTTACCTCAGCAGTTTGCAGAACACGAAGAAGCTTCCTCTTGCTAGATTGGGCAGTTGGTGAAG  
AAAAATGTGAAATAGCTAAGAGAAACTCGACTGCATATGCATGTAAGAGTAACAACAGCTATTGCCATG  
ATGATTCAAATGGTTATCGATGTTCCCGCATGCAAGGATATGATGGGAATCCATACCTGATAGATGGTT  
GTCAAGGTATGTATATGTTTGTGAGTCTCCTAATATGATTTTAATTATATCAAATCTATCATTTGCAAAT  
GAATGTTTACGGTTGTGCTCTACGAGTCTGCAGATATCAATGAATGTGCAGATCCGCAACCAGATTATAG  
GTGTGTCAAAAATGCCATTTGCAACAATACAGTTGGGAGTTATACATGCACATGCCGTCCAGATTTTCAGT  
GGTGATGGTTATACTGAATGCAATCGTGACAATCCTCAGAGAAAAATTCAGAATATTTATCTTATTATAG  
GTACTTTTCTTAACTTCTTTGCAATTCTGCAGGTAGTTCTTTGATAAGCCCGTCAAATATTACTACTCGTTT  
GATTATTTTCATTCACAACCTGAACCGAAAAAGGAAAACCACAGATTTTCATGTATATTTGTTAATCACATAC  
TTTTATTACAGGCATTACAGCAGGGGTTGCTTTAATGGTTTTTATAATATTTGGCTGGTCATATACTGCAT  
TCCAAAGGAGAAAAATGTCAATGATGAAAGAGAAGTTTTTCCAAGAAAAATGGTGGATTAGTTCTACAAC  
AGCGACTCAGAAGGGAAGAGGGATCAAGTCATAATAACAATAAAGATTTTCACATCGGACGAGCTT  
GAAAAGGCAACTAATGGCTTTGACAAAGATAGAGTTGTTGGTCAAGGAGGTTTTGGAAGTGTGTACAA  
AGGATATCTAAAAGATAATTGCATCGTTGCCATAAAAAAGTCTAAGGTAATTGATCTCAATCAAATTGAA







TACTCCAACATAAAGAGAATGACAAGAGGGTTCAAAGAGAAATTAGGTGAGGGGGTTACGGAACTGT  
GTACAAAGGAAAGCTTCAAAGTGGAAGAGATGCAGCAGTGAAGATGTTGAGCAAGCCTAAAGCCGGT  
GGGCAAGATTCATGAATGAAGTAGCTACCATCGGAAGGATTCATCATGTCAACGTGGTTGGACTCGTG  
GGGTATTGTGTTGAGGGAATAAAGCGTGCTCTTGTATACGACTTCATGCCCAATGGATCACTTGATAAGT  
ACATCAGCACGAGTCAAGAAGGAAGTCCTCTGTTAAGTTGGCAGAGGAAGTATGACATTATTCTTGGAG  
TGGCTCGAGGAATTGGGTATTTGCATCGAGGCTGTGATGTACGAATTTTGCATTTTGACATCAAACCACA  
CAACATTCTTTGGATGAGAATTTCAATCCAAAGATTTCTGACTTTGGGCTTGCGAAATTATATCCAACAG  
ATAAGAGCATTGTGACTCTCACAGCTGCTCGTGGAACGATTGGATATGTTGCTCCAGAGTTGATCAGCA  
GAAGCATTGGAGCAATCTCGTACAAAGCTGATGTTTACAGCTTCGGAATGCTGCTAATGGAAATGTTGG  
ACTTGAAGAGAAATGAAGTTGCAAATGAAGAGAATTCAGTCAATACTTTCCTTATTATATTTACGATAA  
GTTCAATAAGGGGAAAGAGATTGTGGTGGATGAAGGAGCGAACGATGATGAAAAGAAGATTGCTAGG  
AAGCTGAGTTTGATTGCATTATGGTGTATACAAACAAATCCGATACAACGCCCTTCAATGAGTAAAGTAG  
TAGAAATGCTTGAAGGCGAAGTGAAGTGTACAAGTACCTCCTCAGCCTCTTTAATCTCAACCGATTGT  
CCATCAGATCATGGGAAGTTCTATGACATTTTCATCTGATTCAATAGCTTTGTTGGATAATCCATTGAGG  
>PGSC0003DMG400020899 RLK with WAX or WAX-EGF domain

ATATATAAAGTCACGACTGTTCAACACAAATACACAATTTGAGCAAAGGTGTGTTTGGCATATGGGGG  
AAACATGACATTTCCATCTCCCTCACTAATAAATTGGTAAACCGTCAAAGTCTTCCTCTTGAGGGACCTC  
ATCAAATTGCAACTTCCCCATCAAGGACCAACACAAGTCTTCCATTGGCTTGGGACCCAAAGGAGTAAT  
ATTGGTAATGAAAAGTCCACAAAGCTTCAACTTGCTAGATGGTTTAATTGCATTTTTACTCTTATATATGA  
TAACAGCAATTATTGTGAAGTCTCAGCTGAACCTGAGTAATACACAAATGTCTAAAGGAAACTGTCAGCT  
TAAATACTTTACATTAATCCTTCAAATCATCTTTCTGCAAACATGCCATGCTCGGAAGAGCAAACACTACT  
GTCCTCCTTCTGCTTGTGGCGATATCCGTAACATAAGCTACCCTTTTCGTTTAAACACCGATCCAGAATAT  
TGCGGAGATGATAAAAAAATTGAATTAGCTTGTGAAGGTAACCAAACAGTTATATGGCTATTCTCCAAA  
AAGTTGCACGTTCAAGGCATCGGCTATGATAATCGGACAATTCACCTGGTTGATCCGACTTTACAAACAC  
AAGAACAAGATGATCTATGTTCTTTCAGACCTCAGCTTAATTTCAACCAATACAATAGAATCTTTCAATCA  
TATACGTATACTAATGAATATTATAAAAACAATAGCTGAGCCCATCTTCATGTTCAACTGTCCGTTTGCTGT  
TAATAATTCTTCGACATTTGTGGAAATTAGTGGCTGCAAATTAAGCAGATACACTTATTTAAAGATTGGA  
GAAATGAATGTCTCTGAAGTGAGTGATGGATGCAGAGCGGAGTTTATAGGCTTAACCTCATGGCCTAAT  
ATTAAGATGCAGAGAACAACATTTCCCTTTCTGATTTTCATCAAGCAATCCTTTATGGCTTTGAGCTCTA

TTATCCGCGTTTCGGAAAAAGGATAAGTAACGACTTCAACTATATATGATTTTCTCCTTTATTAGGAAAAC  
AATGGATTCACTCACTACAATTTGATTTCTTCATGTCTTTGTAGGTGTTGCTTTAATGATTCTCTGTGAGTA  
CTCAAACTTTTCTCTACATATGCTTTTAATTCTCCATTGATCTCTCATTCTAAATATTTTGCACCTTAATCAA  
ACCAGGGAGCAGTCAGTTGCTACTTCTGCTTTTCCTGAGTAAGCTCTTATTACTTATATATCCCTTCATTAA  
GCTGTATGTTATTTGGCTGCACAAAACCTATCATTCCATTGATCATGTGTTTAAATGGCCTCACTGGCATA  
AAAGTGAGCACGACACAAAATTCGAAAACCTAATTTCTTCGAATCCTTTATACGTCATGATGATATAAGT  
AAAGCTTGTGTACCTTATAGTGTTAAGTATAGAAAGCTGTTAATAGCAATATTTCTGAAAACATAGCCTT  
CTATCTCCTTATCATTCTATGTTTTGTTGGCCTAAGGGGAAGTTACTTTCTATGATTTCTCAAACGTGCAG  
TGCATTTGGTAGCAAATTTGTGATCGGCCTTCCGTTGGTAATTGCATTTCTCGTGTACAAATTCAAAAG  
GAGGCATTTGTCAATGTACGATACGATTGAAGGCTTTCTGCAAACACAAAATAATTTTCATGCCAATCAGA  
TATAATTACTCCAACATAAAGAGAATGACAAGAGGATTCAAAGAGAAATTAGGCGAGGGAGGTTACGG  
AACTGTGTACAAAGGAAAGCTTCAAAGTGGAAGAGATGCAGCAGTGAAGATGTTGAGCAAGCCTAAAG  
CTGATGGGCAAGATTTTCATGAATGAAGTAGCTACCATTGGAAGGATTCATCATGTCAATGTGGTTGGAC  
TCGTGGGGTATTGCGTTGAGGGAAACAAAGCGTGCTCTTGTATACGACTTCATGCCCAATGGATCACTTG  
ATAAGTACATCAGCACGAGTCAAGAAGGAAGTCCTCTGTTAAGTTGGCAGAGGAAGTATGACATTATTC  
TTGGAGTGGCTCGAGGAATTGGGTATTTGCATCGAGGCTGTGATGTACGAATTTTGCATTTTGACATCAA  
ACCACACAACATTCTTTTGGATGAGAATTTTCATTCCAAAGATTTCTGACTTTGGGCTTGCGAAATTATATC  
CAACAGATAAGAGCATTGTGACTCTCACAGCTGCTCGTGGAACGATTGGATATGTTGCTCCAGAGTTGA  
TCAGCAGAAGCATTGGAGCAATCTCGTACAAAGCTGATGTTTACAGCTTCGGAATGCTGCTAATGGAAA  
TGTTGGACTTGAAGAGAAATGAAGTTGCAAATGAAGAGAATTCAGCCAATACTTTCTTATAATATTTA  
CGATAAGTTCAACAAAGGGAAAGAGATTGTGGTGGATGAAGAAGCGAATGATGATGAAAAGAAGATT  
GCTAGGAAGCTGAGTTTGGTTGCATTATGGTGTATACAAACAAATCCGATACAACGCCCTTCAATGAGT  
AAAGTGGTAGAAATGCTTGAAGGCGAAGTTGAAGTGCTAGAAGTACCTCCTCTGCCTCTTCAATCACAA  
CCGATTGTCCATCAGATCATGGGAGGTTCTACGACATTTTCGCTGATTCAATAGCTTTGTTAGATAATCC  
CGTTGAGGTAGACATTTATGCTGATTGATTATAGTTGATGTAATGTTTATGTGAAATAACATAGCCAAC  
CAAACAATGTTTGGGACAAAGAATCGTATTGTTATTGTTGCACTAGTTATATTATAGACATAATACATAA  
AAATGCC

>PGSC0003DMG400025598 RLK with WAX or WAX-EGF domain

CAAACCTGCAGCGTATTTGGTTACAAAATTTGTGATCGGCCTTCCGCTTGTCTTGTATTTCTGGTGATCA

AATTCAAAGGAGGCATTTGTCGATGTATGATGCGATTGAAGGCTTTTTGCAAACACAAAACAATTCAT  
GCCAATCAGATATAAATACTCCACGTAAAGAGAATGACCAGAGGATTCAAAGAGAAATTAGGTGAGG  
GAGGTTACGGCAGTGTATAACAAGGAAACCTTCGTAGTGGAAGAGATGTAGCAGTGAAGATGTTGAAC  
AAGCCTAAAGCTGGTGGGCAAGATTCATGAATGAAGTAGCTACCATTGGAAGGATTCATCATGTCAAT  
GTGGTCGGGCTCGTGGGGTATTGTGTTGAGGGAACAATACGTGCTCTTGTATACGACTTCATGTCCAAT  
GGATCACTCGACAAGTACATCAACACCAGTCAAGAAGGAAGTCCTCTGTTAAGTTGGCAGAGTAAGTAT  
GACATTGTTCTTGGAGTGGCTCGAGGAATTGGGTATTTGCATCGAGGCTGTGATGTACGGATTTTACATT  
TTGACATCAAACCACACAACATTCTTTGGATGAGAATTCATTCTAAGATTTCTGACTTTGGGCTTGCA  
AAATTATATCCAACAGATAATAGCATTGTGACTCTCACAGCTGCTCGTGGAACTATTGGATATGTAGCTC  
CAGAATTGATCAGCAAAGCATTGGAGCAATCTTTACAAAGTTGATGTTTACAGCTTTGGAATGCTGCT  
AATGGAAATGCTGGACTTGAATAGACATGAAGTTGCAAATGAAGAGAATTCCAGCCAATATTTTCCTTAT  
TATATTTACGATAAGTTCAACAAGGGTAAGGAGATCCTGGTGGATGAAGAAGCAAATGATGATGAAAA  
GAAGATGGCTAGAAAGCTGAGTTTAGTTGCATTATGGTGCATTCAGACGAATCCAATACAACGCCCTTC  
AATGAGTAAAGTATTAGAAATGCTTGAAGGTGAAGTTGAAGTGCTAGAAGTACCTCCTCAGCCTCTTCA  
ATCTCAACCGATTGTTTATCAGATGATGGGAAGTTCTATGATATTTTCGTCTGATTCAATGGCTTTGTTAG  
AAAATTCTGCTGATAATTCTGTCAAAGTAGACATTTGTTCTGATTGATTTGTATTGTTCAATTTAAATGAC  
ATATATGCGAGAAGGGCTTCACATTTTACGAAGGGTCGGGTCTGAGTTGGTCCGTCTCGAGACACTGCA  
TTGTGTTCTCGCTGAACAAATACACATGGACATAATAAAAGTCTATTTTCAACCTTAAGACTTTAGCACT  
CGATTATGGGGCTTGGGATTATAGTTTGGG

>PGSC0003DMG400025668 RLK with WAX or WAX-EGF domain

TCTACACCATGCAGCATAATCAAGTTGCTCTGTTTTCTTTCCCACTCCTCTGTTTTATGCTAATCTTAACAC  
TAACCACCGCCCAAATTATCCCCTCTAACACCACTTCTCCTCCTCCTTCTAAGCCCACGAACGCCACTTCTC  
CGCCAACCAATGCCAACGCCACCACCTACACAATAACCAAACCTGCTAACATAACAAAACCAGGATGTCC  
AAAACAATGTGGGAACCTTACCGTTCCATATCCATTTGGAATTGGAATAGGTTCTGGTTGTGGATTAAC  
CCGAATTTTGAATCAATTGTGATACTACTACAACAGATTCTCCAACACCCTCATATGGAACATGCAAGT  
CTACGACATCTCGGATGCAGAAATGCGGATATCAAATACCATAAATATAAAGTGTTACTCACAAACAGG  
AGTTTTGGTTCAAATGAACCTGCTTGGATGGGTTTAGGAAGATCAAGTCCTTACAGTTTTTTCTTCCCTAA  
ACAGGTACGAGGCGTATTCGCAATTAGTTTACATAATTCTTAAATTAATTTATAGTAGTTAAAACAGTG  
TAATCTCACTACTCTATTCGTTTTGATCCAATAACATGATGGACGAGTCATAACTCAACTTGAGCTGATCT

CGCGGTCTCTTTACATACTGATTCTAAATTATAAATTCACCTCTGCAGATTCACGGTGGTTGGTTGTGATG  
ATGGTGCTCTAATGACCGCACTTAACTTCGCTAATGGTTGCCCACTGCCTGCAGAAGTACAAGTGATGT  
AACTAAAGGAAGATGTATGAGTTCCGGTTGTTGCCAAATGATAATACCAAAGGCTTGAAATATTACAA  
TACAACTATGATCACCACGAGAAATCATAGTTTATCTTGGTCGTTTAAATCCATGTGGATATTCGTTTCTTG  
GTGAAGCTAGTCGATTCGAGTTCCAAGGTGTAGAGGATCTCAGTGATGTTAATTTTGCAAAGAAGATTA  
TGGATAATGTCCCTATTGTGCTAGATTGGGCCATTGGAATCTTACTTGTGTTGAAGCACGGGAAAGTA  
ACGATTATGCTTGCCTCGATAATAGCCAGTGTGTTGATTCTGACACTGGCATTGGTGGCTATCGGTGTAG  
CTGCAACTCGGGATATGAAGGCAATCCATATATAGGCTATGGCTGCCAAGGTAATTTGATTTTTGTACAC  
TCTCACATCATCTACAGGTTTTATGCTGAACGCAATCGTATATCATATAGGCAATTACAAGTATTTATGTT  
ATTCCATCTGTCTCATTTTGTGTTGTACTTCTCGTTTTTACTCTATTTGAAAAAGAATATTACAATTCCAAC  
TTCCACATGAAATGTTTAACTATAAGATTAAGGTCATTTTGATACATTTGACATATATTAAATTTAA  
CATGACAAGATTCAATCGACAAAATTTCCGACACTACATCAAAAATGTTCTCTAACGACAATTAATTAAT  
GACAACAACCTTAATTGCTGCTAAATATGTTCTTTTAGAGGCAATTGACACTCTTTATAAGTGTCTTTAAAG  
CATATTGTGATATTAATCTAATGATAATTGTAAAGATTTAACACTCTTTGTCAATGTGCATACTTATTGC  
TGCTAAAAGTTGTTTTTGTATATTGAGGGATTAATACTATCTGTTTTGCATTCCAGATATTGATGAATGT  
GCAGATCCAAATACCAATTCATGTGAACAAATTTGCACAAACACGCCAGGGAGTTACAATTGTTCTTGTC  
CAGAAGGATTCTCTGGTGATGGCAGAAAGAATGGTCGTGGCTGTATTGCACCAAACCTCGAACTCCGAGT  
TCCCATGGATCAAGTTTTCTGTTGGTAAGTTTCTCAGAATTCAAATTTTATTTGTCACTACTCGCATATAGA  
TAAACGTCTTGCTTACATTCTATCAAAAAGTCATGGTTTATACATGGTAGTGACAAATCATGAATCATTTT  
TTGAAGTGAAAAAATAAAAATTACATGCATGTTTCGTTTCGATCTATTGAATTTCTAATTC AACATTTGTTTCG  
ATAAATACAGGTATGAGTGTTGGTTTTGTATCCCTAGTGGTTGGGACAACATGGCTCTATTT CAGCATCA  
AGAAAAGAAAACCTATTAACTTCGCGAGAAATCTTCCAACAAAATGGTGGTTTGCTCTTGAAACAGC  
GTATCTCTTCAAACGAGGGTGGTGTGGAAGCAACCAAATCTTTACAGCTGCGGAGCTGAAGAAGGCT  
ACAAACAACCTATGCCACTGATCGAATTCTTGGTCGTGGTGGAATGGAATTGTCTACAAAGGTATTCTAC  
CTGATAATCGCATAGTTGCTATTAAGAAATCAAAGTTTATGGAAGAGGAACAGATTGAACAGTTCATCA  
ATGAGGTACTTATTCTTACTCAAGTCAACCATCGAAATGTGGTGAGACTCTTTGGATGTTGTTTGGAAAGC  
TGAAGTTCCTTACTTGTCTATGAATACATTTCTCATGGAACTCTTTACGAGCATATCCACAATCGAAATG  
GAGCACCTTGGTTATCTTGGCAAATCGGTTAAGAGTTGCTAGTGAGACAGCAAGTGCACTTGCTTACCT  
TCATTCATCTGCACAAATGCCAATAATCCATAGAGATGTCAAGTCAGCCAATTTATTATTGGATGATGTTT



ACACCGCGAAAGTGGCAGATTTTGGTGCTTCAAGGTTAATCCCTATTGATCAAACACATCTTGCTACAAT  
GGTTCAAGGGACATTAGGATACCTAGATCCTGAATATTTTCGCACAAGTCAATTGACTGAGAAAAGTGA  
TGTTTATAGTTTTGGAGTAGTTCTTGCCGAACTTTTGACAGGGATGAAACCTATTTGAGGGATAGAAAT  
GACGTGGACAAGAATTTGGCAGAGTATTTGTTTTGTCCATGAGAAAGAATCAATTGTTTCAAATTCTTG  
ATCGCAGAGTGGTAAGAGAAGGAAGCCTTGAGCAACTCCAAAAGGTGGCTGAGCTAGTGAAGAGTTGC  
CTTAGTTTGCACGGTGAAGATAGGCCTACGATGAAAGAAGTATCGATGGAACCTGAAATTTAAGAAAG  
TTCACAAAAATAACCCTGGGCTAATGAACATGGACATGAAGAGAACAGAGATGAATTATCAGATCTT  
TATACCATTCCAATTGACTCTAATGCAGGCATCGACAATTTCTCTGGACAATATAGTTCCAATTCCAATAC  
AAATAGCAGCAACTTTTCTGGACAGTATAGTTCGGGTAGTACTTCTAACACAAATAGCCCATTGATCCAA  
AACAGAAGGGTAATTTGATAATGCATTTTGAATTTTCTGATGTAATTTTCTTCTTGATTCGTAATTTCT  
TCTTTAAATTTTGTACATTGGAGTCAACTCCCCTTATGTGATAAATTTGGTGTTAGACTATTTTCGT  
ACATTTTATATAAATTGGT

>PGSC0003DMG400026383 RLK with WAX or WAX-EGF domain

ATGGAAGGCCTTCTCTTTTTCGAATTCTAGCTTGCACAGTACTCTTCTTCATCATAATTCATCTTCTCCTC  
TCTCTCCGTCGAAAACAAGTTGTTTTCCAGCTGCGGCAAGTCCTTCAACTGCGCAAACATAACAGAAAT  
TACTTATCCTTCTGGGGAAATGATCGACCGAAGGAATGCGGTTATCCTGGATTCGAGCTTCAATGTGAC  
GATCAGGAAAAGACTATAATACAGATTGCGAACATAAATTACCTTGTCTGGATATTAATTTGGATGCTC  
AAATTATTACAGTTACTAGAAAAGATCTAGGTATAGATGGAATTTGTCAATTTAACTCAACTATAGATAA  
TTCCAATACATTGAGTATGCTTCGAGCTTAGTGAATTTACATTCGATTACGCGTGCTCGCCTGGATCG  
GATCGTTCAATTGTCCGATAAATGGAATGAATTATAAGAATAGTTTTACAATTGGAGGTGAAGAGGGAG  
CTGGGACATGTCATGCTAGTATAGTTGTACCAGGTCGAAAGGAGTTACCGTCTGGAGGAATAATTCGAG  
ATTTGGGGGATTTGAAGCAGTTGCTGGAACAGGGGTTTGATGTGAAATGGAAAGTGGATACTAGTCAT  
TGTAAGGAATGTGAAAAGTTTGGGGGACGTTGTGGATTTGATGCCGGTGCTAATGAATTTAGGTGTTTG  
TGCCCTGATGATCAATCTTCTTCTTTCGTCGTCATCGTCCAATAATGCGTGCATCAATGGACTTCCT  
TTCTCTGAACTGAAAAGAGTAAACCGCTTTCATCCCTGGCTACACCGCCTGGTACGTTTTTCCGATTTCC  
TTCTTAA

>PGSC0003DMG400026384 RLK with WAX or WAX-EGF domain

TCTCAATTTGGTGTTCTCTTCCAAACCTCCTTCTCTGTCCCTTAAATCCTCATCTCCTTTCAGCTTAGCTCC  
TGAATAAAGCTCTTTTGCCACTATTACCAGTTAGCGCCTCTCTTCTAGGTGGTGCTAGTTCCTTAATCA

AACAGAAATGCATCCTTATTTTTGCTCTTCACTACCACAATTTATCTTGATCTATATACCCGGGTCTTT  
CTGTCAAGATGACGAGCGATACAGGAGTTGTGGTGAGGAGTTTCGCTGCGGCAGCATGGATATAATTT  
ACCTTTTTGGGGAGGGAGACAACCAGAGTATTGTGGTCATCCAAGTTTTGAGATCAAGTGCGAAAGTA  
ACATACCCAAAATTGCAATTGAATCAACAAGCTACGAAGTGATAAATATCAACGCTCCTAATCGAATTGT  
AACCTGGCTCGGGATGATTTACTGAGTAGTATTTGTTTGGATAATCCTAAGAATGCCTCCTTTGATTTAA  
ACACTTTCAGCTATGTTTCTAGTGACCTGAATATACTCTGTATTTCCACTGCACCGTCCGCCCTGGTTTGC  
AATTACCACCTTCGCCTCAAATAGGTTCAATTGCGATAGCAACATGTTTGGTATATACACGCTGATCAA  
CGTTCCTTCGACCTTAGTCTGGTAACATGCGAGGAAGAAATAATAGCTAGGGTCAATCAAACGAGTGC  
TGTGGCATTAGCCAGTCTACAGCTCCGTGGATGCTCTGACAAGAGCCATTGCTGGCGGTTTTTCAGTT  
AATTGGACGGCAGGTATTGACTCTAAGTGCCAACAATGCCGCACGTCAGGTGGAAGATGTGGATCCAAT  
CCAGATTCTGGAGACTTTGCTTGCCATTGTGTAAATGGTACTCATTCAAACGACTGCTACGACGGACAAA  
ACCAAGCCGGCGGTAATCTTCTCTACTATTACTCATAATTTACTTCGTCCCTTCGTTTCCAGATAAATAC  
ATGTCCGATCCAAACCATCATTCCAGTCCTTTCCCAAGAGATTTGAATTACATACGCTAACTTAGTAAAGA  
TTCTTTCGCAATCAGTATAGTATCAATTTTATATGAATTCTTGCTTATGTGAAAAAATCAGGATAACTTTA  
AAGGAAAAACCCCAATTAATACCTTGTTAATTATCTTGAAAAAATATTTATTTTTGGACTAACTAAAAAT  
ATCGTATAATATGGACCAACGGAAGTACTTCTTTTGCATTGCTTACCTAGAATTTAACTCTCTATAAAATT  
TTGTACGTGTTTAATTTTGTCCAAATTCATATGAAACTCTGAATACTACAACCTCTAGCCCTCTATCTACG  
TTGGTCCAGCTCCAATCCTTGAGCGTGTTAGTATAGCTCCTTTTTTTTTTTTTTATATATCAGCGTAAATAA  
TCGTTTATATTATATGCAAATAATATTCGTATACGAACCTTCTTAAAATGTGAAATTGAAATCTTGAAAAA  
TAAGATATGTTATTGCTACAACAAAATAAAAAACTCGGGACCTAATTTTAGACTTAGTACTGTGTCTGTG  
TTTCTGCCATTGTTGTATTGTTTACTTCTCGTCGGCAATTCAACATTTGGCATTGTCAAACACAAGAAAC  
TACTATTCTTAATCCGAGTAGAATAAGCCTCGGATTAATAAATATTATAAATAATAGGAAAAGTACAATA  
ATTCTCTAACTAACCAGAAAAAATACATATATTTTATTGAACCTTTTTATTGACAAAGTAAACAAGGATA  
CAGTTCTTTATTTGTAGTTCTTGTACTTTTAAAGTTAGTTCTGTGTTATAATTCAAACCTGGTTGGCGCTTGA  
ATAAAACGAGGGGAACTGAAACGACTTTTTTACTGTGATATTATTATATAATATATAGACGCTCTACCTG  
CCTTTTTTAAAAACACAATTTGATTTTCAAGATAATTCTATTGATCAATGCATTAAACATATATAAAAA  
ATTACAGTTGGTATTTTTTTTTCTTGTTTCTAGTGGAATTCACACTAAACCTTTTATGATTCAATTTTATTGA  
GGTTTGACCACACCAAGTTAGGTGCTACTCCCCGATTTTACTTTAATTCATATCTACTTGACATAA  
TATTAAGACAGTTTTGGTTAAGAATATTTTTTATTGAATTAATTTTTATTAATAATATATTGAAACCTTAAC

TTAATTATTGCTAGTTTATGTAGTTATTTAATATTAAGATAGTAATATGGGCAAATATAATTA  
AAAAAATAAATTTATTAATGAATAAATAAAAAATATAAGACCAAGTAAATGAAACAGAGGGAGTAATTACT  
CTTTTGGTCTTGGTTTATAAATTATATAGATCCTTAACATTCAATTTTTGGCATAATAAATAAATATTCAT  
TTAACTTGACTTCATATTTATGTCCTTCAATTTGGATTTATACAAATTGTTGTTCACTCTTCTATTTTTGG  
ATATTGTCGTTATACTATTTTGAATGTCTAACATTACTTATCCACTTTATGAAATCAATTGATAATTTTA  
CAGTTAGTTCATAATTTATCGTTTATCATTAAATTATAGTTATTTCTCTATTATATTTTTATCATTTAATATATT  
CAAAGGATGATAAACTTACCCTACTATTTATAATAAGTAGTTACTTAAATTTATATAGAATTGAACATATA  
GATATAAACATCTTATATGTTAATTCGTGACACGTATGTCTACTTATTTTTATTTTTGTACAAATTTAAATAT  
ATATTTGTGTATATTCAAATTAATGAAATAAATGTATATTAGACCAAGTGAAAAGGTATATTTATGTTT  
CATTTATTAAGTTAGGCGTCTATCAACCTTCTTTCTTTTCTTATTCAACGTGCAGTAATAATATTCAACTTT  
CAGTCAAATCCTTTTTGTCTCTCTTTCAAATGTAATCTCAGATTCTCACCATCTTCAAATTCCTGTCAA  
CAATAAATATACAGATATGAATCTACAGACTACAAATAATTCCAGATATGACTCTCACTCACTCATTCTCT  
TTTCGTATTCCAAATGACTCTCTCCTACCCTTCCACCACTACCAATGGCCGCCGCGGCCACCACCACAA  
CTACTCTCTTCTCGCCACCTTTATTCTCACAAATCCTTCTCCTTCTCCTTCTCTGATGACAACGTCTTATT  
CCCCAATTGTCATCTCACTTTCTCCTGTGGTTCCATCCGTAACATCACCTACCCATTACCGGCCGGCGATC  
GCCCTAACTACTGTGGCCTCCCGGATTTCAAACCTCCGATGTGTTGACGACAAACACACCGAGTTTACTCA  
CCAATCACTTACTTACCGTGTCTTTCTATTAATCAGTCATCAACGACCATGACTGTATCGAGAATCGACC  
TCTGGAAAATTCCTGCCCTTCGCAATTCATCAACACTACTTTTAATTCTTCTTTTTCAACATTGACCGTA  
ACGAAGACGAAGAACTTTCGTTGAGCTACGGCTGCGATGTCTCTGCATTGGTTATCACGCCTCAGAATTT  
GTTCAACTGTAGTGTAGATGGTTTGAATTTACCGGCCGATTTTACTTACTAGGTCCAATTCGAAGTGACC  
CTTTTCTGAATGTCATAACTTGTACAACCTATGGTCACTGTTCCGATGTTTAGAACAGTGGGTAAAATGCTA  
TATAGCAATGAGATTACTCTTGGGGAGGCATTGATGCAGGGGTTTGTGAAATATGATACCCCTTAT  
GATAGGCGCTGTTCTGAGTGCAAGAGTCTGGGTGTGAATTGCGGATTTATTGTGGGGTTGTCTCAGCTA  
ATTTGTATTTGTGGAGAAATGCCTTGTACATTTCTTCGAGAACATTCTCATGAAAGTTCCTCACAAGGTAC  
TGACAACCTGAGAACCTTTATCCTTTAATTTTACTACTAATCAGGAGTTCTTATTATTAACATAGAAATCTAT  
AGTTTGAATTCAGGACTGAATGGATTTAGCTTAACAGTAACCCAGTTAGAGAATCGGTACATATAGGT  
GTCGATTGTTCTAGTTGATGAATCCTGAGTTCATGGTCTATGACATTGTTTGTCTACTCCAACATGATTA  
CATTGCGGTTGATTGGTATATGTGTAGTGTATCCCGTGTAACTTACAAGTGTGGTCTAGGAAGGGTGG  
TGTGTGCGCAGTCTTCGCCCTACCTTGTGAAGATAGAGAGGTTGTTTCAAATTATAATTTTCATGCTTTTGC

ATTTATATTTGTTATGACTGTATGAGTAGTTGTTATCTTATAGCACCTATTATATAGGTCTTTGATTAAGG  
GATACCTAAAAAACAATATGCGACTTGCTAACACAAAAGTGAACCTGAAACGAAGCGTAATCCAATATG  
ATTTACTAGAATCTTCATGTTAGTTTTAGATTTCCATGGTATGTTCTCTTCAGGTATCCCTAGGAATTCTT  
GTTACAGTATGCTTCTTTCTTATAGTTTATACTTCTCAGATCTATTATTAGCGAATACACCCATTTGCCCAC  
ATGAGTTTTGTTTGTCTCTAATTCCAGCCGGATATACCTTATGTTTACCTGAGCATCAATTGTAGTTAC  
CACTTAATTGACGACATTATGACTGTTTTGCAGATAACCGAAAGAAAAATCAGATGCCACTTGCAGTAG  
GTATTGTCTTTGTTCTAACATTATACTGGTACAACCTCAATAGACACGGTCAATGCCTTGAGAAGATTGTA  
AACTTTCTTCTTTGATTGCAGGCATTAGTGTAGGAGGTGCTGTACTTGCCAGCATTGGTGTGGGTGGC  
TAGTCTTCTTCTGCAGACAAAAGAGAAAGCGGATTGCATCACAGGCTTCACTTGCCCAAACCGAAAGGA  
AGGATCTTCCAATTTAAGTTCAAGCAACGGCCTGAGTTCCTCTTCTACTCCTTCTCAACCACTTTACCA  
GAAGCATTCCCTCTTATCCCTCTTCAAATCTGAAGCTGATTACGGGAGGGGAAGCTCCTACTTTGGGGC  
TCATGTCTTCAGTTTTGCTGAACTTGAAGAAGCCACGAATAATTTTGATCCATCTAAAGAACTTGGGGAT  
GGTGGTTTTGGTGTCTGTACTATGGTATGTGTATTCTCTTTCTTGCATTATTATTATTTTGTGAGAGGGC  
TTCCTAACAAATCCAAGTAATTTGTTATCAGGCAAACCTCCATGATGGTCGCGTGGTTGCAGTCAAGCGCT  
TGTATGAGAACAATTTCAAGCGTGTGGAGCAGTTCATGAATGAAGTAGAGATTTTAACTCAGCTCCGCC  
ACAAGAACCTAGTGATGTTGTATGGGTGTACATCTAAACGAAGCCGAGAGTACTGCTTGTATGAGT  
ATATACCAAACGGGACTGTGGCAGATCATCTGCATGGTAAACGGGCCAAATCTGGCTTACTCTCTTGGC  
CTATCCGAATGAACATAGCCATTGAGACTGCTGAAGCTCTGGCTTATCTCCACTCCTCAGTTATAATACAC  
CGTGACGTCAAACCAACAACATTCTGTTAGACAATGATTTCCATGTGAAAGTTGCTGATTTTGGGCTAT  
CAAGACTGTTCCCAACTAATGTCACACATGTCTCTACTGCTCCACAGGGTACACCAGGCTACGTTGATCC  
TGAATACTACCAATGTTACCAGCTCACTGAAAAGAGTGATGTCTATAGTTTTGGGGTGGTCTTGGTAGA  
GCTGATCTCATCATTAGAAGCTGTGGATACCAACAGGCACCGCCATGATATTAATTTGTCTAATATGGCT  
GTCAACAAGATCCAAGGCCATTCAATACATGAGTTAGTTGATCCAAGTCTTGGATTCTCAACAAACAGCT  
CCGTGAGGAGGATGACTACATTAGTCGCTGAGTTAGCTTTCCGATGTCTGCAACAAGAGAGAGATCTGA  
GACCTTCAATGCAAGAAGTGCTGGAGACATTGAGAGGCATCCAGAATGGAGAGTCGAAAGCACACAAT  
GCTGAGGTACTGGATATTGTGGTAGATGATGTTGGGCTCCTAAAGGAGGGCCCTTTTCTTCTCCAGATT  
CAGTTGCCGCTGACAAATGAGTTGACAGCTCCACACCACATTCTAGTGGATGAAATATCTTTATCAGGTT  
GGTTGAATTCAATGCTAGGTGTGGAAGCAACTACTATTTTGGCACTTGTGATCAGTGTCATGTTTGGGCT  
AGTATCTCGCGTCTTCCATAGATAATTAATTTCTATTTTTGCTTACATATAGTTATCTTGTATCGTCAAT

ATTTTCTGTGGGAGATTATCTAAACTGCTTTTCGCGTAAGGCAATGTATATAAATAGTGAATAGGGCTG  
CCAACATTCTAGTATACATATGCATCTTTTGCTCTTTGTACATCAGGTTTTGTTCTTTACCGACCTTATGG  
TCCTTCTGTTACCTTAAAGTTCATTTATGTTGAGGACATGAAAATCATATGTAACAACAATAATGCACTGC  
AGCAGAACATATTCTAAGCCTATTCGTAGCTTGGAGTGCTAGGTTTTGCCTAAGGAACATGCTCTGATAT  
TAAATTGTAAAGAGAAAA

>PGSC0003DMG400026388 RLK with WAX or WAX-EGF domain

TGGATAAGCAGTTTTAAAAGGCAAATTTAAAAAGAAAGATTGGACTGAATTTGCTCCAAAAGATGCTC  
TCAGATCTCCACTCAACTGTCATTCTGTTTATCATTCTATGCTTTCTCCATATGCCCATATCCCTCGGTCAA  
GATGACGAGCGATACAGGAGTTGTGGTGAGCCGTTTCAGTGCGGCAGCATGAATATAATTTACCTTTT  
TGGGGAGGGAGAAAACCAGAGTATTGTGGTCATCCTAGTTTTGAGATCAAGTGCGAAAGTAGCATACC  
CAAAATTGCAATTGAATCAACAAGATACGAAGTGATAGATATCAACACCCCTAATCGAATTGTAACCCTG  
GCTCGGGATGATTTACTGAGTAGTATTTGTTTGGATAATCCCGAGAATGCCTCCTTTGATTTAAACACTTT  
CAGCTATGTTTCGAGTGACCTGAATATTACTCTGTATTTGCGCTGCACCGTCCGCCCTGGTTTGCAGTTAC  
CACCTTCGTCTCCAAATAGGTTCAATTGCAATAGCAGCATATTTGGTATATACACTCTGATCAACGTTCCC  
TTCAACCTTAGTCTGGTAACATGCCAGGAAGAAATAATAGCTAGGGTCAATCAAACGAGTGCTGTGGCA  
TTAGCCAGTCTACAGCTTCCGTGGAAGTTCTGAGAAGAGCCATTGCTGGCGGTTTTTCAGTTAATTGGA  
CGGCAGGTATTGATTCTAAGTGCCAACAATGCCGCACGTCAGGTGGAAGATGTGGATCCAATCCAGATT  
CTGGAGACTTTGCATGCCATTGTCTAAATGGTACTCATTCAAACACTGCAACGATGGACCAAACCACTT  
ACCCGTAATCTTTCCTCTACTAATCCTCATAATTTACTACTACTAGAATCACTTGAAGACAAGTTGTAGG  
AGAAAGTATCTTGTCCCAATTTAGACTTTGAATAAAACAGCTATAATTCCTAGGAATTTCTACATATTCAA  
ACGTATACCTTATGTATCTTAATTTAGTTACTATCACTCTTTTCCTTAGTTTCAGGTATAAACCATACATGAA  
TTCTCATATCAATTAAGTACTAGCATATGAACTACGAAAATTGGTAGATGATAAATCTAGCTTATATCCAACATC  
CCTTTTAAACTATATTCATCACTTCAAGAGACAGTATGGAAGAATTCGATCTTCAAGGTCTTTTGAAGGT  
ATCCAAAACCTTGATCTTGCGACTTTCATGGAACCTTCTCTACCTAATTTATGTGCGAGTGCATCTTTGATGA  
GAGCCACCTGTTTCATCATTCTTCTTGAGAAAACTCTGCTTGAAAAGCATATACAACATAATTCTTGTT  
TTGGTTAGTCTTTCATGGACTTGCAAAAATCAAGTTCATTAATGGTCGTGATGTTCAAGTCCTTGAC  
TCTTCTGGATTGACTAGTCATTCATCAATTCACCTTCTTTTTTTTTCTAAATTCTCTCGATCTATAGCTTTTC  
CTTCATTTTTCTTTTGTAGTCTCTGTGAAAGAGACATTTTGAAACTGTGACACGGTTCGCTTGAGTTGTT  
CATTTCATGATAGTCCTTTGTAGTTGCGCTCAGATAAAATCCTGAAATGAATGATAAGTTATTGGCACATA

TTGCAGGTT CAGTAATGATTCCGACAGCTGTAATAGGTAAAGCATCCCTGTGTCATTCCCTCAATCTGCTT  
TTCTGCATTTG TACTTGATCTATTAACAATATCTATATGCAGTTGCCGAGTTTGTATCGCAGGGCTGGCC  
ATAATATCAGTTCCAATCATCTATTGCCTCAGAAGTCGAGGGTCATCCTGTAAGTCACTGATTTGCTGGA  
AGATTGAATCACAAGATCACAAAATTGAAGAATTTATGAGAAATTACGGATCTCATGCTCCAAAGATGT  
ACAGCTATTCAGATCTAAAGAAAATAACAAGCTCATT CAGCCATAAAATAGGACAGGGAGGATTTGGTC  
AGGTATACAAAGGAAATCTACCTGATGGTCACGCAGTAGCTGTAAAGGTCCTGACAGAACTAATGGTG  
ACGGAGAAGAATATATAAATGAGGTAGCCAGTATAAGTAGAACTTCCCATGTTAACATAGTAGGGCTTT  
TGGGATTTTGT TACCAAGGAAATAGGAGAGCCTTAATCTATGAGTATGTGTCCAATGGTTCACTGGACA  
AATTTCTTAACAGTGGACCATCTAGCACAACTTGTACCTTGG AATGGACGACATTGTACAGTATCGCAGT  
TGGGACTGCTCGAGGGTTGGAATATTTGCACCGAGGTTGTAACACAAGAATAGTGCACCTTTGACATAAA  
ACCTCACAA CATTCTCTTGGACGAGGATTTCTGCCCAAATATCTGACTTTGGCCTCTCTAGATTGTGCG  
AGAGAAAGGAGAGCATTCTATCAATGTTAGGTGCCAGGGGAACTGCTGGATACATTGCTCCAGAAGTG  
TTCTCTAGAGCGTTTGGACACGTCTCTCACAAATCAGATGTCTACAGCTACGGCATGCTTGTTCTTGAGAT  
GGTTGGAGTGAGAAACAATGTTAACATGAACCAA ACTAGTGAAGTATACTTTCCAAATTGGATCTATGA  
ACATCTCGAGCTGGGGAAGGACCTAAGTCTACAAGGTATCATGAACGAAGAAGATGAAGAATTAGCAA  
GGAAGATGATTTTAGTGGGCTTGTGGTGCATT CAGACCAAGCCGTCAGATCGACCAGCAATAGAAAAG  
GCAGTTGAAATGCTGGAGGGAAGCCTTCACTCCCTACAAGTTCCACCAAACCTGTCTTGTTTTCTCCAA  
CAAGATCCATCCTAGAGTCATTTACATCAACATCCACATCGACCTCGGAAAGGAGGTTGTTTTCTGGAGC  
CAATATCGCTTCCGAGTAAAAACAATTGATGCAATTTGTAAGTATATTCAAACGAAAGTGTTGATTAA  
TTTAGTGGGAGTACTATCCCGAGTTTGATCACC ACTGATTAAGTTTCGGAGCCGTTAGTGTGTTGATAAA  
ATTATTGCCAATTGGTAACAAGCAGAGAGAGAA CATAAATTTCTCATTTATGGTGGCCTCACCAAACATT  
CTAACTCATTTGGTTAATCTAGCTATGTCATA CAATGCTTGTGCCAACGTAAAATACCCAAGGCTGTCATC  
CAAATTATATATGTATCGTCTCCTGCTGTAAATGAGCAGCCACAACCTGACCACACTTGTTTTGATAAATT  
ACACTAACACCTATGTCGTAGTCTTGTGTTAAATGAAGGATAAGCCATAGGTGCACTACACTCTGGATTG  
ATGATCACTAAATAACAATGAATCCTCCTGGTAACCCCATCTCATCCTGCATCACAACCATCTTTTACTG  
CAGTGTGGATTTGCCACTCCTCGATTAAAGAACTTAATTTTAAAAGTCAATGTGTGGTAAGAACAGGTCC  
TTGTAATGCAATCTTCCATTGAGTGGTATAAAACATTTCTGCAGTAGTTCAAACCTAGAATTGGCACAAT  
ATCACAAAGTTGCTGCAAGAGAGGAGGAACAGTGTCTTAAATTCAGCAGTGCAATTAATGTTTACCGA  
CTCCGTGCTGTATGGAACAAATCCCTGTAGTATGTT CATCTTCTCCCTCCTCCAAATGTCTGTTTTATTGCT

TTCAAGTGTAGAGGTGGGCCTACTTAATGCTTCGACAGATAATTCCTGTAATACAGGTCATGGGACTTGA  
GGTTTGAGTTCTGGAATAAATCAAATAATCTTAAACCTTACCAGATCATGCAACAAGTATCAGTCCTTT  
GAAATTGTCTATTATGTAATGTTAGCAATGTTACTCTATCAATCCATTGCTTCTGCAGTCCACCACCATCCT  
GCCACACAAGATACAGATAAGTGAACCTACACCATGGTTGAGAATTCGACTGTCCCAGTTCTACAGCTAT  
GGAAAAACCGATCAGAACTATTAACCTAAACTGAAGC

>PGSC0003DMG400027391 RLK with WAX or WAX-EGF domain

ATGCTTCTTAACATGGCTCTACTCCACTTGATGATACTAATATGTAGCTTGTTTTTCAGTTTCGTCGTTACAA  
TTCACAGCAAATCCATTGCTAATGCTACTACCATAACCAAACCTGGCTGTGATAGCAAATGTGGGAGCT  
TAACTGTTCCATTTCTTTTGGTATTGGTAACGGAACAGGCTGCTCGATTGATCCTTCATTCGATATCACT  
TGCAACGTTTCGTTCAATCCTCCAAAGGCTTTTCTTCTGGCAAAGATATTGAAGTGGTTGATCTCCTAGA  
TGAGCATATACTTGTTAAGAACAATGTTGGGAGCAGGTGTTATGATCAAGCAGGGGCGTTGATCAATGA  
TGACTCGATAAACTTTAGCTTGGGATCGACGTCTTCTCCTTCTCTGATCTCAATAGTTTGATGGTAACTG  
GCTGCGATGACTTAGCTATCATTGCGCGCTATGAAGGGAGGAACTTTACTAGTGGATGCATTTCACTATG  
CGCGAAAAAAGAGGATATAGTTGATGGATATTGCTCAGGAATCGGATGTTGCCAGACTTCAATCCCAAC  
AGTTTTGAAGAGTTTTGTGAGTCTAACAAGGAGTTTGAATAACCATACAAATGTGTCTTCTTTAAACCG  
TGTGGCTACGTGTTTCTTGGTGAGCCTGATAAGTTCATTTTCAAGAGCTCGGATTTGTCAAATTCGAGTTT  
CAGGAACAAGGTTATAGAGGAAGTCCCTGTGGTGATTGATTGGGTTATTGGCAATGGTAGTTGTACTGT  
GGCTAAGAAATCAGCAGATTATGCTTGTGGAGAAAATAGTGTGTTGTAGATTCTAAGACAGGCCTCGG  
AGGTTATCGTTGCAGCTGCAAACCGGATACCAGGGTAACCCTTATATCAGTCCAGGTTGCATAGGTAA  
GACTGAATGCATATTTTGAACTTTTTGTGTTGAGTTTGAATTGTTGTGCTTGTGTTAGTAAAGTTTGAGC  
CAAAGTTATTGTGTTGCAATGATGTTATATGTGTTGTTAGTGTGCTTTGAGCCGAGGGTCTATCAGA  
AACAACTCTTTGCGTTCTGATGTTTGATTAATTGACAGATATAAATGAATGCGAGAACGAGAATCCTTG  
TGATGGGATATGCAATAACTTTCCTGGAGGCTACAGCTGCACTTGTCCACATGGTCAGATTGGTGATGG  
CAAAAAGGACGGCCACGGTTGCATCCCTAAGAACTCTAAATCACCCATCCTTCAACTCTCACTCGGTACG  
TCTACTCTGTGTGTTCCAATCAAACACCTTCATATAAATGAGAAAGGTTAAGAGTATACTAAAGTTGCAC  
TTTCATTGCAGTTTTGTGCTTTGGTTTTCTGGCTTTGGTCATCAGTGCAACTGGATATACTTAGGCATCA  
AAAGAAGACGACTCATAAGACTCAGGGAAACGTTTTTTCAGAAAAATGGTGGATTGATGCTCACGCAGA  
AACTCCGATCAAATGAGGGTGGTATACAGTATGCAGCTAAGATCTTTACAGCAGCAGAACTCGAGAAAT  
CAACCAACAACCTATGCTGAGGATCGTATCCTAGGCCGAGGTGGTTATGGTACCGTTTACAAAGGTGTCC

TTCCGGACAAACGTGTAGTTGCAATTA AAAAGTCTAGAACAAATGGACGTCAGCCAAATAGAATTGTTCA  
TCAATGAAGTGATCATTCTTTCAGAAGTCAATCATCGAAACGTGGTGAAACTCTGGGGTGTTGTTTGA  
GTCTGAAGTGCCTCTACTAGTCTATGAATACATTTCCAAAGGTACTCTATGACCATATTCATGATGGTG  
GAGATCAAACGCGTTGGTTTTTCATGGGAAAATCGATTAAGAATAGCGTCTGAAGCTGCTGGTGCACTCG  
CGTATCTACATTCTGCAGCTTCTACACCTGTAATTCATCGAGATGTGAAGTCTACAAACATTCTACTAGAT  
GAGAATTACACCGCAAAGATATCAGATTTCCGGGGCTTCTAGATTAGTGTCAATTGGATCAAACCTCAAGTG  
ACTACATTGGTTCAAGGAACTTTAGGTTACTTAGATCCTGAATACTTCCACACAAGTCAATTGACAGAAA  
AGAGTGACGTTTATAGTTTTGGCGTGGTTCTTGCAGAGCTCTTAACAGCGCGAATGCCACTAGATACTAC  
AGCATCCGAACAAGAGAGAAAATCTAGCTGCATTTTTCGTTAGGTCTATTAAGGAAAATCGATTGTTTTCAA  
GTACTTGAGTCACGTGTGGTTCGAGAAGGAAGTTTTGAGCAATGTCAAGGTGTTGCTGAGCTCGCGAAG  
AGATGTTTAAGGTTAACGAGTGAAGAAAGGCCTACGATGAAAGAAGTAGCCATGGAGCTAGAAGGACT  
AAGGAAGTTCACAAAACATCCATGGTCTAAAACCTCAACAATGTCAAGATGAGGAGAGTCTTGGATTAAT  
TACAGAACAAACATTGGACCTTTACGCGATCAATATGAACACGAACTTCATGTCTAACGGAGAATTCTCA  
GGACAACAGAGCTTGGATAGTCGGATGATGTTACAAATTCATAGTCCCCGGTGA

>PGSC0003DMG400027392 RLK with WAX or WAX-EGF domain

AAAAATGTTTACCACTTCAGCATGATCCCTCGTTGTTAGATGAAGGAATGGTTCAATCTTCCATCATTTC  
TAGCCAACCCCCCGCCCCCTTTCTTCCCTCGCCCCATATACACCCTCTCAAACCCACCATTAATACAA  
CTCCAAATTTCTTCTCCAGTAGTACACACTCATCAAGATTCAATACAAATGTCTTCTTCAAATTTGAAC  
CAAATGATGACATACTTGATTTTGTAATCAAGAAAGCAAATGGACTAAAAGGCCTAGTAGACACAAACC  
TTGAAATTATCCCAAATCAATGCATTCAACCAAAGAACAAGACTAGACAAGTCCCAAATTGATAATCA  
AGAATCAATCCCAACAATTGATTTATCAAATTTTGATGATTTAAATGTTGAAAAGTCAATTCAAGAAGCA  
GCAAGCAAGTGGGGTTTCTTCCAAATCATCAATCATGGCATCCCAATTGAAGTTCTTGAAGATTTGAAGG  
ATGCGGCACACAAATTTTGAATTGCCAGCTGAAGAAAAAGTTAAGTATCATAAAGAAAAAGTTAGTC  
CTGGTGAATCTGTGTTTATGTTTTGGAGTGCTATTGGTGAGAAAGATGAGAAAGTTTTGGAGTGGAGGG  
ATAGTATAAAACATGGTTGTAATCCACAAAATGATAGCAATCTTTGGCCTCCTCAAACAAGGTAACCTT  
TTGGGGTTTTCTACTCTGTGTAATCAATAGGTCACGGGTTTTCAAGTAGTATTACTTTTTGGGAGGTGCTT  
GACGTTTCTGAACTATCACCAACTATTTATCAAAGATATTTAAAACTAACTAGATTAAGTGGTTGAATA  
CAAATTTATATCAAGATTTTATAATGGTTTTTATACTTAAATCAAAGTATATCGTATATGTAGGAGAAA  
AGTTATCTTTTATACGATTACATATCTAGTATAATCTCACAAGTAGAGTATGGAGAGGGTAGAATATACG



CATATTTTACCTCTGTCTTAGCAGCATAAGGAGGTTGTGATTTTATAGACTTACGAAATATTCTTAGTGAA  
ATTCTTAACTTTGACATTGAATCTTGAACGTTATTAGAGAAAAATTTGACCTTCCCATTAAACACTAATGC  
TCTTAATAAAAATTCCTGAGTTTGTATTGATTTATAGGAACCAAGTTTTGGAGTATCAAAAAGTGGGTAA  
ACCACTTGCTAAAAAATTGCTTGAGGTGCTATTGAAGGGTCTCAATGTCAATGAAATTGACGAATCTTTA  
GAACTTCTCTTGATGGGAACATATGTCTATAAACATCAACTACTATCCACCATGCCCAAATCCAAGTATCGC  
CATGGGTTTTCTGATGACTGCGACATGGGCTGCATAACTTTGCTCCTCCAGGACGACACAGGAGGCCT  
ATATGTCCGAGGGACTAAAGGCAACTGGATTCACGTAAATCCTATCAAAGGTGCCTTAGCGGTTAATAT  
AGGTGACTCATTGCAGATCATGAGCAATGATCGATACAAGAGTATCGAGCATTGTGTAGCAGTTGATTC  
GAGCAGGACTCGAATATCTGTACCGCTATGCGTGAATCCTAGTTTTGATAGTGCATTGGTTCATTCCCA  
CAAATGCTAAAAGATGGAGAAAAACCAGTGTACAAACATATTTTGTCTCTAATTATTGGGATCATTGCT  
TTATTAAGAGGCCTTCTGGTAAAGCATCACTAGATTTTGCAAAAAATTGATGCTTTAATTTTCAAATTTCT  
TGTATGTTAATGTTTTGTATTATAAATCTGTTATTGTAATGACGATAACTGTTATTTTATGTAACCTGCAA  
TTTGGTGTGATCCTGTCCGTTATTTATTTATTTTTCTTTATCTTGCCCTTTCTTATTTAAGAACAATGTTG  
GGAGTAGGTGTTATGATCAAGCAGGGGTCTTGATCAATGATGACTCGATAAACTTTAGCTTGGGATTGA  
CGTCTTTCTCCTTCTCTGATCTCAATAGTTTGATGGTAGTTGGCTGCGATGACTTAGCTCTCATTCTCGGCT  
ATGAAGGGAGGAACTTTACTAGTGGATGCATTTCACTATGCGCGAAAAAGAGGATATAATTGAAGGA  
TATTGCTCAGGAATTGGATGTTGCCAGACTTCAATCCCAACAGGTTTGAAGAGTTTTGTGAGTCTAACAA  
GGAGTTTGAATAACCATACAAATGTGTCTTCTTTTAAACCCTTGTGGCTACTTGTTTCTGGTGAGCCTGAT  
AAGTTCATTTTCAAGAGCTCGGATTTATCAAATTCGAGTTTCAGGAACAAGGTTATAGAGGAAGTCCCTG  
TGGTGATTGATTGGGTTATTGGCAATGGTAGTTGCACTGTGGCTAAGAAATCAGCAGATTATGCTTGTG  
GAGAAAATAGTGTGTTGTAGATTCTAAGACAGGCCTCGGAGGTTATCGTTGCAACTGCAAACCGGGAT  
ACCAGGGGAACCCTTATATCAGTCCAGGTTGCATAGGTAAGACTGAATTCATGATTTGAACTTTTTGTGT  
TCGAGTTTGAATTGTCGTAACCTTGGTTAGGAATCTACGATTTGTGCTTGTTTAGTAAGGTTTGAAGCAA  
AGTTACTTTGTTTGAATGATGTTATATGTGTTGGTTAGTGTGCAATTTGAGCCGAGGGTCTATCAGAAAC  
AACCTCTTACGTTCTGATGTTTGATTAATTGACAGATATAAATGAATGCGAGAACGAGAATCCTTGTGA  
TGGAATATGCAATAACTTTCTGGAGGCTACAGCTGCACTTGCCACATGGTCAGATTGGTGATGGAAA  
AAAGGACGGCCACGGTTGCATCCCTAAGAACTCTAAATCACCCATCCTTCAACTCTCAATCAGTACGTCT  
ACTCTACTCTGTGTGTCAGTCAAACACCTTCATATAAAGTGAAAACGGTTAAGAGTAAACTAAAGTTGC  
ACTTTCATTGCAGGTTTGTGCTTTGGTTTTCTGGCTTTGGTCATCAGTGTAACCTGGATATACTTAGGCAT

CAAAAGATGACGACTCATAAGACTCAGGGAAACGTTTTTTCAGAAAAATGGTGGATTGATGCTCACGCA  
GAAACTCCGATCAAATGAGGGTGGTATACAGTATGCAGCTAAGATCTTTACAGCAGCAGAACTCGAGAA  
ATCAACCAACAACATATGCTGAGGATCGTATCCTAGGCCGAGGTGGTTATGGTACAGTTTACAAAGGTGT  
CCTTCCGGACAAACGTGTAGTTGCAATTA AAAAGTCTAGAACAATGGACGTCATCCAAATAGAATTGTTT  
ATCAATGAAGTGATCATTCTTTTCAGAAGTCAATCATCGAAACGTGGTGAAACTCTTGGGGTGTGTTTGG  
AGTCTGAAGTACCTCTACTAGTCTATGAATACATTTCCAAAGGTACTCTATTACCATATTCATGATGGT  
GGAGATCAAATGCGTTGGTTTTTCATGGGAAAATCGATTAAGAATAGCATCTGAAGCTGCTGGTGCACCT  
GCATATCTACATTCTGCAGCTTCTACACCTGTAATTCATTGAGATGTGAAGTCTACAAACATTCTACTCGA  
TGAGAGTTACTGCAAAAATATCAGATTTTCGGGGCTTCTAGATTAGTGTCAATTGGATCAAACCTCAAGTG  
ACTACATTGGTTCAAGGAACTTTAGGTTACTTAGATCCTGAATACTTCCACACAAGTCAATTGACAGAAA  
AGAGTGACGTTTATAGTTTTGGCGTGGTTCTTGCAGAGCTCTTAACAGCGCGAATGCCACTAGATACTAC  
AGCATCCGAACAAGAGAGAAATCTAGCTGCATTTTTCGTTAGGTCTATTAAGGAAAATCGATTGTTTCAA  
GTACTTGAATCACGTGTGCTACGAGAAGGAAGTTTTGAGCAATGTCAAGGTGTTGCTGAGCTCGCGAAG  
AGATGTTTAAGGTTAACGAGTGAAGAAAGGCCTACGATGAAAGAAGTAGCCATGGAGCTAGAAGGACT  
AAGGAAGTTCACAAAACATCCATGGTCTAAAACCTCAACAATGTCAAGATGAGGAGAGTCTTGGATTAAT  
TACAGAACAACATTGGACCTTTACGCGATCAATATGAACACGAACTTCATGTCTAACGGAGAATTCTCA  
GGACAACAGAGCTTGGATAGTCGGATGATGTTACAAATTCATAGTCCTCGGTGATCAATTACTTGTGTAT  
GGCCTGCATTTGTGTCCTAACTTGTATGTTACATTCATGAAAATATGATTCGTCAAATCCGTCCAAGTTTG  
GCCTAGTCATTGGTTCTAGTAATACGATTCGTCAAATCCGTCCAAGTTTGGCCTAGTCATTGGTTTCGTCTA  
TTTACTCATTTCAACTCATTAAAAGACTAGGCTGATATGTTGCAGAATGTAATCCCCTTATTATTTTGTTT  
TTTACAATTTAACTTGTATAAATTAGTGTATAATTCATATTTCTTGAATTTTGAGCATTGTCATAGTTGA  
TTTTTTTTGTACATTTTAACTTTTGACATTATCAAACACATTTATTTAGAGAGAGGCAAATAGGTGCATT  
TCTAGCAAATGAAGGACACTAAACATTTGAATTTTTTAAGTGGTAGTGCTTTTAAAAGACTGTTTAAAGC  
TTTTTCTACTTAGTAAAAAATATAATTCACATTTAATATATGTCTCCATCAAATTTATAGCTATAAAAGTT  
ATACTATGAAAAGTAAATAAGAAAATTAATTATATCTATTTTTACTGATAATTTTTATGGATATAATATA  
CAAAATTCATCATTATAACAACCGACAAAAAAAAGTTTTGGATGTTATCTACGAACCACAATTCACCCAT  
GGACATCAAGAAGCCACCTACCAATTTCAAATAGCTATTTTATGATAATGATGTTTGATTAATAAAAA  
AATAAAAATTCAAAATACTAAATAAAAAACCAATTCAAGAATTTTGTGTTAGGTCATTAATATATCATCCAC  
ATATCCCATCCCTACTACCTTCAAATAATAGATTAATCATTGATATTTGATATTCATATTGAGTCTAACTA

AAATTGAATTTGCACCGAAAAGTCTTATATTGAAAAGTAAAACAATCTCTAATAAGAACAATATTGTATT  
TGGAAAATTTCGAATACAAGACATTTGATTAATAATGAAAATATTTACCACTTCACTATAATCTCTCGTT  
GCTAGATGAAAGTATGATTCAATCTTCCATCATTTTCATAGCCAGCCCCCTTTTGCCCCACCTCCCTTGAA  
ATAATAGAAGAAGGAATAATATTTATTTTTTATCATCGGAGGTTTGATATTCATATTGAGTCCAATGAA  
ATTTGAATTCGCACCAAAAAGTCTCATATTAAGAGGATGTTTTTAAATAAGTCAATTTTGTATTCAGGAA  
ATTTGAATCTAAAACATCTGATTAAGACGAAAAAGTATTTACCACTTTATAATAACCCATCGATGTTAAA  
GTAATGATTCAATCTTTCATCATTTTCATAGTCCACTCCCCTTCTTCTCTCCCCCATAACACACCCCTCTCA  
AACCCACAGCTAAAAAAAACCCCAAATTTCTTCTTTCATTAGTACACACTCATCAAGATTCAACACAAAT  
GCCTTCATCAAATTTGAACCAAATGATGACATACTTAATTTTGAATCAAGAAAGCAAATGGACTAAAA  
GGTCTAGTAGACACAGGCCTTGAAAATATCCCAAATCAATGTATTCAACCAAAGACCAAAGACTAGAA  
AAATCTCAAATTGACAATCAAGAATCAATCCCAACAATTGATATATCAAATTTTGATGATTTAAGTGTTGA  
AAAATCAATTCAAGATGCCGCAAGCAAGTGGGGTTTCTTCAAATCATCAATCATGGCATCCCAATTGAA  
GTTCTTGATGATTTAAAGGAAGCAGGACACAAATTTTGAATTGCCATCTGAAGAAAAAGTTAAGTATA  
ACAAAGAGAGCTATAATGCTAGTGAATCTGTGTTGATGTTTTGGAGTGCTATTGGTGAGAAAGATGAAA  
AAGTTTTAGAGTGGAGGGATGGTATAAGACATAGTTGAATCCACAAAATGATAGCAATCTTTGGCCTC  
CTCAAACAAGGTAACTTTTTGGGGTTTTCTGCTCCATGTAATTTATAGGTCACAAGTTTCCAAGTATTACT  
TTTGCGAGTTTCATATCTTTTACTATAAGGTGTTTGTGTTTCTGAACTATCACCAACTATTTATCAAACAC  
ATTCAAAACACTGACTAGATCAAGTGTTTGAATACAGTGCGTCACAACCTTAATTTGCCATAGAATTTTGTC  
CAAATGGCAAAGTAATTTTGATGATAGTCCATATAGGAAAGAAAACCTCGTGAAAACGTGATACTTCAGA  
TGTGTTTTTATCATTATCTCAAGACTTTTTTTATAACGGTGTACATATATCTTTTTTACAATTACATATCCA  
CTATAATCTCACAAGTAGAGTATGGAGAGGGTAGGATATACGTAGACTTTACCTCTATCTTTACTACATA  
AAGAGGTTGTTTTATAGACTCTTGAAACATTCTTAGAAAAATTTATGACTTTGACATTGAATCTTGAACA  
TTATTAGCAAATTTCTTGATCTTACCATTAATTTTGAACACTCTTAGTGAAATTTCTGACTTTGATACTGT  
TTTACAGGAATCAAGTCTTGGAGTATCAAAGTGGGCTACACCACTTGCTAAAAAATTGCTTGAGGTGCT  
ATTGAAGGGTCTCAATGTCAATGAAATTGATGAATCTTTAGAACCTCTCTTGATGGGAACTATGGCTATC  
AATATAAACTACTATCCACCTTGTCCAAATCCAAGTATCGCCATTGGTTTTTCGTAGACACTGCGACATGTC  
CTGCATAACTCTGCTCCTCCAGGACGACACGGGAGGCCTATATGTCCAAGGGACTAAAGGTGATAACTG  
GATTCACGTAAATCCTATCAAAGGTGCCTTGGCGGTTAACATAGGTAACCTCGTTGCAGATCATGAGCAA  
CGATCGATACAAAAGTATCGAGCATTGTGTAGCAGTTGATTCTAGCAGGGCTCGAATATCTGTACCGCT

ATTTGTGAATCCTAGCCCTGATAGTGCATTGGTCCATTCCCACAAATACTCAAAGATGGAGAAAAATCA  
ATGTACAAACATGTTTTGTTCTCTGATTATTGGGATCATTACTTCAGTAAGAGGCCCTCTGGTAAAGCATC  
ACTAGATTTTGCTAAAATTTGATGTTTTAATTCACAAATTTCTTTGTTATGCAATGTCAAAAAGTATTTCTT  
TATGTAACCGGTGAGTTTGTGTGATTGTATTGTTATCTTATTTTGTCTAATGATTTTCATAATCTTATTTTG  
CCCTTCATCCTACTTTTTGTTTATAATAACTTTCCCCCATATTTTTTTTTCAATGTAATAATGTCAGGGGTG  
GACCCACATGTTGAACCCACTCGGTTGGAAAATTT

>PGSC0003DMG400030291 RLK with WAX or WAX-EGF domain

ATGTACCTCTCAGAAACCCATTAGCAGAACAAAGACAGCAGTGTGTTCCCTTCTAGTTGTGGGCATCTTC  
ATAACATCAGTTATCCCTTTGATTGAAAAGTGATCCAAAGCACTGTGGCCTTGAAAATTATGAATTGAT  
CTGTAAAGGAGATCACACCATATTAACAATACCGCCATATGATTGGCACGGAACACTGAACTACTATGTT  
CAAGCCATCAATTACGATAACTCCACTATCCGCCTTGTTGATCCTGGTATAAGAGAACAAGTTATTTGCTC  
TCTTCTCAGAATTCGATTTACGTTTACACTTCCCTTTTTATTTTGTTCCTTTTATAGAATTAATGCCTGGT  
TTTGTTAAGTTAATCACTCTCTTCAGCTGTCCATTTGCCATAAATTCTCCAGTCTTTGTGGAATCACTAAT  
TGTCTCAACAGGAGTTATGCTTCCAATGTTTCTTCTGATTCAATTAAGGGACACACATATGCAACCATGGC  
TGAATTATCACCATCCGATTTGAAAGTCGGGTGTAGTGTAGACCTCATGTCAATAACTTCATGGCGTATT  
CAGGATGCAAATGCCAACATTTCTATTTAAGTTTGCATAATGCTTTGGCATATGGATTTGAGCTTTCATG  
GTTTATTTACGTTTATTGTGGCAAGTGCGCCTATCCATATCTATGTGAAGGGAAAAATTCAAGTGATGTT  
CGTTGTGTGGATTACAGCTGCAAACTTACCATTTTAGATTCTTCAAATCGTCGTGTGGTAAGAACATTCC  
TAATGTCATGCTTAGACACTTTTTTTAGCATTTTTTCTGTGCATGTTTTAATGATTTTTTCTTTGGATGAC  
CACAATCAAGCTTACTATTCCCACGTTCTTGATAGTAAGCAGTCGTACTTCTATTGTCAATTCTGTTTTATA  
TAACGGAAACTAGTTGCAAGTTAGATTAATAAATTATTGATTGTTGGTGTCTGTCAGCAATCATCCTAT  
GGATACTCCCATAGCTGGTAAGTCACATCTTCGTCTTCAAATTTATTACTAGAAATCATTCTAATGTC  
GAAATGATGGAGCAGACGTTGGTGGTTGAATTTTTAGTTAACCATTACAAATTTTTCTTGCTTATATGT  
GATGGTTGTACACAGGGCTTATCATTGTGCCAAGAGTCATTCTATTTCCATGCATACTTGTATTTCTAATG  
ATTGAGTTACGAAGAAGGCATTTGTCGATTTATGATGCAATTGAAAGTTTCTGCACGGTGAGAACATTT  
TCGCCCCATTAGATATTCCAACCTCAACATTAGAAAGATGACTAGGAACTTTAAAGAGAACTAGGCCA  
AGGAGGTTATGGTTCAGTATATAAAGGCAAGCTTCAAAGTGGTCCTAATGTAGCAGTGAAGATCTTGAG  
CAAGCCCAAAGCTGATGGGCAAGACTTCATCAACGAGGTTGCCACAATCGGGAGGATTCATCATGTAA  
CATAGTACAACCTATTGGCTATTGTGCTGAGAGATGTAAGCGTGCTCTCGTGTATGACTTCATGCCTAAC

GGATCACTTGAAAAGTACATCACACCTCGAGAAGGAGGAGCTGAACTATTAAGTTGGAAAAGAAAGTTT  
GAAATTGCTCTTGGAGTTGCTCGAGGTATTGAATACTTGCATCGAGGTTGTGACATTCAAATTCTACATT  
TTGACATAAAGCCACACAACATACTTTTGGATGAGAATTTCAATCCAAAACCTATCTGATTTTGGTCTTGCA  
AAATCATACCCGACGGATAAGAGCATTGTTACTCTAACAGCAGTCAGGGGAACAATTGGTTATGTAGCT  
CCAGAGTTGATCAACAGAAGCATTGGTCCAATATCTTATAAGGCAGATGTCTATAGCTTTGGAATGTTAC  
TCATTGATATCGTAGGCTTGAAAACAACTCGGCAGCCAGAGAGGATATGTCAAGCCAGTACTTCCCAC  
ATTGGATTTATGATCAACTCGACAAGGGAAAGGAGATTGAAGTACTAGACGAGACACATGATGACGTA  
AAGAAGCTGACTTTAGTTTCTTTGTGGTGCATACAAATGAATCCACTCGATCGTCCCTCAATGACTAGAG  
TAGTGGAATGCTTGAAGGCGAATTACAAGCATTGCAAACGCCTCCCAGGCCCTCTGAATCGCGGGAAC  
CATGTTCAATTAGAATTCAATTTAATTAGTTCTTCAANNNNNNNNNNNNNNNNNNNNNNNNNNNNNNNN  
NNNNNNNNNNNNNNNNNNNNNNNNNNNNNNNNNNNNNNNNNNNNNNNNNNNNNNNNNNNNNNNNNN  
NNNNNNNNNNNNNNNNNNNNNNNNNNNNNNNNNNNNNNNNNNNNNNNNNNNNNNNNNNNNNNNN  
NNNNNNNNNNNNNNNNNNNNNNNNNNNNNNNNNNNNNNNNNNNNNNNNNNNNNNNNNNNNNNNN  
NNNNNNNNNNNNNNNNNNNNNNNNNNNNNNNNNNNNNNNNNNNNNNNNNNNNNNNNNNNNNNNN  
NNNNNNNNNNNNNNNNNNNNNNNNNNNNNNNNNNNNNNNNNNNNNNNNNNNNNNNNNNNNNNNN  
NNNNNNNNNNNNNNNNNNNNNNNNNNNNNNNNNNNNNNNNNNNNNNNNNNNNNNNNNNNNNNNN  
NNNNNNNNNNNNNNNNNNNNNNNNNNNNNNNNNNNNNNNNNNNNNNNNNNNNNNNNNNNNNNNN  
NNNNNNNNNNNNNNNNNNNNNNNNNNNNNNNNNNNNNNNNNNNNNNNNNNNNNNNNNNNNNNNN  
NACAGAGTGAGAGAAATTTGCTATAAAATTTTAACTATAACTATGAATTATAATTCTTTTAACTATAGTT  
AATGTAAAGTAAATACATATCACAAAGTTTATCTTACGTACTATATAATTTTCTGAAGAAGAATAAGATT  
ATTAATAATAAACAACAAAACAAAATGAGAAGAAAACACTAAGGTAACGACATAATCGCGTTAAATCAGT  
TGTTACACATTATGAGACTTTTCGTTGTTATCTAATTATGAATTTGAACGATACGCTACAATAAAATATAT  
ATAACAATCAAAACAAACATAACATTTAACTAACAATACAATACTAATCGGTAACAACCATCCATACAA  
TGCTATTGTAAAGAGTTCAAGAATTTAGTTGTATTAAAGGTGAAGAAAACATGATATGACACAACCCAA  
AATTAATTAACATAGAAAAGTTTTCTTCATGACTCATTAAATATCAAGAAAATTGGTTTGTAAAGTTGTCT  
TCTTTATTATTATTATTATATTAGCAAATTTCCAATATTGTGTTGAATATGCTAATATTACGAACCCCCC  
CCCTTTATTTTTTCCACATGTTATTGTTCCAATATTTTTTATATCAATCTTTAATTTGGTATCATATTATTT  
TTGGCCAATTAATGACAAAGAAGACTTTAAGTCAACTAATGGCATAGAATTCTTTATCTTGAAAGTGTTG  
CCACTACTTAGTCAAGGAGTCCAAATAAAGAAGTGATTTTAACTTACATTAATAAAAAATAAAATCATGTG  
GTGTTCTAATTTTGTGTTGCCATTTAAGTAACATTTGTTATAAAAATTACACGAATATTTAGTCATGGCTG



AATCATTTTAATGTCAAATGATGGAGGAGAAGTATTGTAATAACCTCTGCTTATATGTGATGGTTGTAC  
ACAGGGCCTAGCATTGTGGCAAGAATCGTTCTATTTCCATGCATAGTTGTATTTCTAATGATTAAGTTACA  
AAGAAGGCATTTGTGCGATTTATGATGCAATTGAAAGTTTCCTGCACGGTGAGAACAATTCGCGCCCATT  
AGATATTCCAACCTCCAACATAAGAAAGATGACTAGGAACTTTAAAGAGAACTAGGCCAAGGAGGTTAT  
GGTTCAGTATATAAAGGCAAGCTTCAAAGTGGACCTAATGTAGCAGTGAAGATATTGAGCAAGCCCCAAA  
GCTGATGAGCAAGACTTCATCAACGAGGTTGCCACAATCGGGAGGATTCATCATGTTAACATAGTACAA  
CTTATTGGCTATTGTGCTGAGAGATGTAAGCGTGCTCTCGTGTATGACTTCGGCTATTGAGCTGAGCGAT  
GGAAGCGAGCATTTCGGGTATGACTTCATGCCTAACGGATCACTTGAAAAGTACATCACACCTCGAGAAG  
GAGGAGCTGAACTATTAAGTTGGGAAAGAAAGTTTGAAATTGCTCTTGGAGTTGCTCGAGGTATTGAAT  
ACTTGCATCGAGGTTGTGACATTCAGATTCTACATTTTGACATCAAGCCACACAACATACTTTTGGATGA  
GAATTTCAATCCAAAACCTATCTGATTTTGGTCTTGCAAATCATACCCGACGGATAAGAGCATTGTTACTC  
TAACAGCAGTCAGGGGAACAATTGGTTATGTAGCTCCAGAGTTGATCAACAGAAGCATTGGTCCAATAT  
CTTATAAGGCAGATGTCTATAGCTTTGGAATGTTACTCATTGATATCGTAGGCTTGAAAACAACTCGGC  
AGCCAGAGAGGATATGTCCAGCCAGTATTTCCACATTGGATTTATGATCAGCTCGACAAGGGAAAGGA  
GATTGAAGTACTAGACGAGACACATGAAGACGTAAGAAGCTGACTTTAGTTGCTTTGTGGTGCATACA  
AATGAATCCACTTGATCGTCCCTCAATGACTAAAGTAGTAGAAATGCTTGAAGGCGAATTACAAGCACT  
GCAAACGCCTCCCAGGCCCTCTGAATCGCGGGAACCATGTTCAATTGAATTCAATCTAATTAGTTCTTCA  
ATTAACCTCAACTGAGTCTGTGAAGTTGCTTGAGAGTTGTTCTGATTATGCAAAAATAGATGTAATTGTTG  
CTTGACATCACATATTATGTACGTAATTCGTGTTGTTCTGAATAAAATATCAAGTTCATGC

>PGSC0003DMG400030533 RLK with WAX or WAX-EGF domain

TCTAGAGTCACAATTCACAAAGCTTTAGCTAGCTTTCCTCTTATTGCAGTTAGATTAGTATGGATTTGTC  
TTCTTCTTTTATTTGTTTCCTTCTGTCTCTACTTGTGATGTTAGTTTCAGGCAAAGGGCAGAAATGTTTCAAC  
TTGTCCAAAGTCCTTTTCATGTGGAAATTTTACTGACCTGACATTTCTTACTCTCTTCCCACACAACCCGA  
TTGTGGAATAATGTCCATGTCTGGTTGTGATGCTAAACCATATCCAAGAATCCAATAGTTTCTGGAGGA  
GAATGGTACTATGCTTTAGAGATGCATAATTCATCAGTTTGGATTGGGGACCCTAAGCTTCAAACGACAC  
TGAGACAACACAAGTGCCAGGCTTTCAACAAAAATTTCTCCCTTCAAACCTCTCCTTTTATGTCTTTCCATA  
TGATTAATATTAATAAGTTCTTCAAATGCATCAGTAGCAGTAATAATGCCATAACATTATGCAGAAGAA  
GAACAATCATTTTGTGGATTATAATATGTACAGTGGCTGTGAAGGCCTTAGCATATACTACAAGTTTTCT  
GAAGTTGATGAATACATAAGAGCAGACAATCTTCTACCAACTGTTCACTTATCAGATTGCCAATTCAAT

CAAGTCATGGTGATTTGTTTCGACATATTAGGTCCCGAAATTCTAGTAGAATGGAACTGTCTGAGGAAT  
GTAACGAATGTCATTATAGTGGAGGTCAATGCCAGACTGATAAAACCAACAAATTTTCTGTACAAAG  
GTAGACATCTCCAAAATAATCTATAATTTCAAGGTCAAGTTCATGCTTCTTAAGTCCCTTTTTGTTTCATG  
CCACATAAATAATATATTTTCGTATTATTGCCACCTTCTGTAGATGCAAACCACCTACAGGTAGTACCGAT  
CAAAGAAAAGAAACAACACTGGAAGAAATATGGTGGGGCAGATTCTGGGAACAGGTAGTAAAATATGTTT  
AATTGCTGCCATGTATTCTTATTACAGAATATTCAAGCATATCATTTAAAATTCCATCATTTTGTATAAGCT  
CAAATCCTTTCTCTAGCAATAAAGGAACAGAAAGAAGAGACTTAAACACAAAATGTATGGATGTGGAGT  
TGAGGGAGAATTCCTTCTAGATGCTATTTGTTTTGCTTTTCCAAAGACATTGATTACTAACTTCTCTTCCA  
GTCTTTGGCGGAGTAGGATCGGTGATGATAACTTCTTTAGCTGTATACGTTATCTGGCGTTACAAGAAGA  
GGAAATTTAGTTCATCCCCTTCTTCTCGACAAGGAAATTGTCAAATATCTTTAATCATGATGCTGAGGG  
AGGCAGTATATACTTTGGTGTTTCAGTCTTCTTATTCAGAACTTGAAGAAGCCACAGATGATTTCAATT  
CCTCTAGAGTACTTGGAGATGGAGGTTATGGAAGTGTACTATGGTGAGAACTTCTTAACCTGGATAT  
GTATCAACTGTTTCTTCTTCTGGCTAATTCTTTCCCATCGATGAACAGGAAAACCTAAAGATGGACGGGA  
GATTGCTGTAAAGCGCCTCTACGAGCACAACCTGCAAGCGAATGGAGCAGTTTGTAATGAAATTGATAT  
CCTTACTAGACTAAGGCACAATAATCTTGTCACCCTCTATGGATGCACTTCAAGACGAAGCCGTGAACTA  
CTCCTTGTCTATGAATATATTCCTAATGGTACTCTTGCTGATCACCTTCATGGTGACAGAGCGAAGGACG  
GATCACTTACCTGGCCAGTCCGCATGAACATTGCCATAGAACTGCTGGTGCATTGGCTTACCTGCATGC  
TTCTGATGTAATACTGCGATGTGAAGACTAATAACATACTCCTTGATCACAACTTTGGTGTTAAAGTT  
GCGGATTTTGGGATTTCAAGGCTCTTCCCAAATGATGTCTCTCATATTTGACTACACCCCGGGGTACCCC  
AGGCTATATTGATCCAAAGTATCACGAATGTTACCAGCTGACCATTAAGTGTATGTCTATAGCTTCGGG  
GTGGTCCCTTGTGAGCTCATTTTCATCAATGCCAGCTGTGGATATGAACAGGCATAGCCAAGAGATCAATT  
TGCCAACTATGCAATAAACAAGATCATAAAATCTGCAGTTAATGAGTTGATTGATCCATCCCTGGGGTT  
CGATTCAGATACCAAACTCGGGAAATGACTACTTCAGTGGCGGAGCTGGCTTTTCTGTGCTTGCAGAC  
AGATAGGGACGTGAGGCCTACTATGGTTGAAGTTTTGGATACTCTAAACGAGATTCAGACTAATCTCAA  
TGCCAATGAAGCTAAAATAGTAGCAGCTCCTCCTTTCCCTGAATCAGAAGATATTGTTTTGTGAAGAAA  
GTTAAATCACTACCTTCTCCAAATTCTGTGACTGACAAATGGACTACTTGCTCTGATATAACTTGTACAAA  
GTAGTTAAGATTTCTATACTTCGTTTCTTTGTTACTTCTATGTAATTTTGGGAGACTGCATATGTACTACT  
GTGAGAAGTTTCTTGAGCTATGTACTATGAGTAGAA

>PGSC0003DMG400030535 RLK with WAX or WAX-EGF domain



ATGAGTTATCCTTTTTCAGAATTCAATAAACCATATTGTGGATTATCAAAGATTGATTGTAACAACACTTT  
TCAATATCCAAAAGTTGAGATTGAAGGAGTAACATAACAATGCTTACAAGAAGTGGCTATGGGTTGATGG  
TATCGATCTTTCGGACTCGATTCTTGAAGGTTATTTATCTAATAGAAGTTGCAAATCCTTTGAAAGGAACT  
TATCTTTTCCTAATACACCTTCTGTTTCATTTGGTGTATTCAACAATATCACTTTGTTCAAATGTATGAATG  
GTAGTAGTAGTACTAGTAGTAATGAGGAGATAGATGGTTATTTTCGACGTTATGAGAAGTACTTGAATT  
GTGATGGATTTAACTTGTACTATCATAAACCAAGAACAGATCATAGAACTATAGTATTCCAGTTGATGA  
GGATGATCTTCTGCAAACCTGCTCGATTATTCGATTACCTTTGAAGTATATTCCAACCTTCAGTACCAGTTC  
CATCTGATTTGTTTGAGTTGTTGAGTTCTAATTTACATTGGATTGGGAAGTTTCTAAAGATTGTTCTAAG  
TGTTTTTATAGAGAAGGACAATGTCAAAGTGACAGCAAAAATAACTTCTTTTGTCCAAAGGTATTTGTT  
GCTTCTTTAGTATGTTAATGTGGATGAATGTGCATTTATTTTCAGTCTTATTGTGACTGATTGAACTGTCA  
TTTGTGTGTTTTGCAGCAGCAAAAAGAATTTGGGATTGATTCTAGGCTCAGGTACTTGACTATAATCAA  
TAACTTTTAGCATAATGCAGGAATAGACACTCGAACTTGATCTCAACCGGCAAGTAAACATTCCAACCT  
TGAGTATTTTTGCACATCTAGTCATTTTAACTTGTGTTTATTGTGTTAGTTGAACATTCCAACCTATCAAAT  
GATCATCTGAACACCTCCTGAATTTATGTGTCACGTCAACATCAGGTGTCCATGAGATATAGTGAGGATG  
AGTTTGGAGTGTTTAGTTGTCAGTTGAGACTAAGCTGAGGTGTCTAGATGTGTACTCTCAAAGTCGGAG  
TGCTTACTTGTTAGCTGAGGCTAATACTATGCCATAACTTTTATTTGCAACTCTATGTTGCTCGGACTCTTC  
AAAAATGTTGTCAGGTTTCATGGCGGATCCTCGAAAAGTAGTGAATTTTTGGAGGGTCTGACACGTGTAC  
GAGAGCATTTTGGGAGAGTCTGAGCAACATTGAGTAAAATGTAACCTGTTTAATATCTCATCTGCTCTGC  
AGTGCTTGGTGGAATGCTTATAATAGCAATCAGCATAGTGATCAATATAATCTGCTGTTGCAAGAAGGG  
TAATAGAAGTTTTACTAATGTTCTTCCAAGAAGCACCCCTCAGAGCCCTCAACACAAAGCTACGAATTA  
GACAGCGGGTCTTTGGGGTTCCTGCTTCTCTTATGCTGAACTTCAACAAGCTACCATGAATTTTCGATTC  
ATCCAGAGAGCTCGGGGATGGAGGATATGGAACAGTGTACTATGGTAAGAACTTTTGACAATGCAGA  
TGTCTAGCCATCACTTTCTTCATTTTCGTTTATTCTAATTCTTGTATGCTACAACTAGGGAACTTCAGGA  
TGGAAGAGAAGTTGCAGTAAAACGCCTCTACGACCACAATGCTAGGAGAAAGGAGCAGTTTGTAACCTG  
AGATTGAAATTCTAACAAAGGTTAAGGCACAAAATCTTGTCACTCTTTATGGCTGCACGTCTAACTCAG  
CGATCAACTCTTACTTGTATGAGTATGTCCCAAATGGAACGATTGCTGATCACTTACACGGTCATAAG  
GCGAAGGATGGTTCACTCACGTGGCCTATCCGCATGAAAATTGCTATTGAAGCTGCCACTGCTCTAGCAT  
ATCTGCATGCTTCTGATATAATCCACCGCATGTGAAGAGTAACAACATACTACTTGTCAAAACTTCTG  
TGTCAAAGTTGGAGATTTTGGACTTTCAAGACTTCATCCAACCTGATATTTCTCACATATCAACTGCACCTC

AAGGTACCCCTGGCTATGTCGATCCAAAGTACCACGAATGTTACCAGCTTACTGATAAAAAGTGATGTTTA  
TAGCTTTGGGGTAGTCCTTGTTGAGCTGTTATCATCCATGCCTGCAGTAGACTTCAGTAGACGTAACGAA  
GAGATCAACTTATCTAACTATGCAATAAACAGGATTTTAAGGTGTGCATTCAATGAGCTGATAGACCCGT  
CCCTCGGTTTTAGTCTGATGCAGAAGTTAGGAGGATGACTACTTCAGTAGCCGAGATATCGTTTAGATG  
CTTGCAACATGACAAGGACATGAGACCTACTATGGTTGAAGTACTAGAAACATTGCAAGAAATTCAGCA  
TGGTGAGTTTACACATGATAAGAAAATCGATTGTGACGGAAACTAAAGAGAGTGTCCAAGTCCCTCT  
TTCACCTGAATCAGAAGTAGATGTATTATTGAAGAACTCAACAAGTTTCCAACCTCACCAATTTAGTAA  
CTCAAGTGTGGATTAGTGACTCTAGCACAAGCACCCTAGTACATAA

>PGSC0003DMG400030536 RLK with WAX or WAX-EGF domain

CTTTAACTAACATTCTTGCTTATTCTTGTTGTTTATTTAATCCAAAAGGGTTCATCATGGATATGTTCTCTT  
GTTTTTTCGTCTTCGTTTTGTTTCACTTTTGGTGCTTTGATTGAGCTCAAGGACAGAACACATCCTACCCAA  
ACTGCACTAAAGAATTCCAGTGTGGGAACCTAAGAAATTTGAGTTTTCTTTCTACAAATCCACTGAACTT  
GATTGTGGATTGTCCAAAGTTGATTGTGATGTTAGTCCAAATCCTATTATTGAATTAGAAGGGGTGAAAT  
ATCAAGCTCTTTTAAAAGCTGATGTTTTTATCAGACTTAAGGACACTAGTCTTGGAGAACTTTTGAAGAA  
GAACAGTTGTGAGACTTTTGATAAAAATTTCTCGATCGCTATTTCTCCTTCAATAACATATAGATTTGATC  
CCTTACTCACTTTGTTCAAATGCAACAGAAACCAAAGAGTAGAAATGAAGAATTTTTCAACTCCAGCAG  
TTATCAAAGTTACAATGTCTGTGATAGTTTCATATTATACTATAACATCTCCATCCATTATTATCAAGTATC  
TGAAATTCCTAGTAGCTGTTCAATTTATTGAGTTGCCTTTGACATCAAATTCAGAAGCAAAAACAAATGGA  
AGTGGCTTATTTTATCTGTTAACTGATGAAGTTATGCTAGGATGGACTGTGTCTGATGAGTGCAATCAGT  
GTTATTATACCGGAGGAAGGTGTCAAACAGATAATGCTACTAATAGATTTCTTTGTTCTGATACCAATGG  
TAAAGAGAAGATTTTTTTCATGATTCATACTAAAGATTTTGGTTCTTTTCTTTTCTTGGTTCATCTTACATTTT  
CATTTTTACTGTGATTGCAGGTGGTCATAAATTTGCGAAAGTGATTGTTGCAGGTACCTATCTTTTTAACA  
TTTTGTCTGCAATTTTGTGTTTACATTACAAGATTTTAGCCTTTAAAGGTTTATTTCTACAATGAGTATGA  
TATAACAAGAAGTAGCGTTTTCCACCGCTTGAGCCTGTGATCTCCTTGGTCATATGAAGGAACTCTTAT  
TGTTATGTCAAGGCTCCCCTTATCAATAACAAAGATATAAAGAATCTAAAATATTTAACTTTAGTCCATGT  
TTTGTCCGTTGATCGGTTGTTATTGTTTTTGTTCAGTTTCAGTATTTATCGGTTCTGTTGTTGGACTTTG  
TGCAATTGCCTGTGTTCTATGGTTTTACATGAGGAGGAGAAATGGTTCTTCACCATTTATTTCAAGAAAT  
ACATCTGGTATTTCAATGATTCATCACGAGCTCGAGGAACGTTGTGAGTACCTAGGGATTCCTGTATTCT  
CCTATGAAGAAGTTGAAGAAGCCACCAACAAATTCAGCTCTTCTAGAGAAGTTGGTGATGGAGGTTATG

GAAGTGTACTATGGTAAGAAAGCTTTTTTCATAGAAGTTACTCCCTCCGTTTCAATTTGTTTTCTGGTT  
TTGACTTGACACGGAGTTTAAGAAAGTAAAGAAAACCTGTGAGTCTTGTGGTATGTAGAATGTACCAA  
ACGTTCTTTGATCTTGTGGTCTTAAACATGTCATGTGAAAAGTTAGTATTAAGAGCTGCCAAAAAAGA  
AGATGCATTCTTTCTGACACTGACTAAAAAGGAGAGTAAGACAAACAATTGAAACGGAGGGAGTAAT  
AATCTAAAGACAATCCACAAAAGTCTTTTTGTTTGTGTTTCTTTTCGAGGGGAAATGTACGTAGTAAGC  
ATCTTGATCTAACAGCTATTTCTGTATGTTCTAAAATCAGGAAAACCTTAAAGATGGAAAAGAAGTTGCAG  
TTAAGAGACTTTATGAGAACAATCACAGACAAATGGAGCAGTTTATCAACGAAATTGAAATTCCTACTCG  
CCTTAGGCATCCGAATCTTGTTACCCTTTATGGATGTGCATCAAGACGTAGCCGTGAACTCTTCCTTGTT  
ATGAGTACATTCTAATGGAACAATTGCTGATCACCTGAATGGACATAGAGCGAAGGATAAGTTACTAA  
CATGGTCTATAAGGCTCAAATCGCCATTGAACTGCTAGCGCGTTGGCTTACCTTCATGCTTCTGACAT  
CATAACCGTGATGTCAAACAATAACATTCTCCTGGACAATAAGTTTTGTGTCAAAGTAGCAGATTTTC  
GGGCTGTCAAATCCTTCCCTAATGATGTTACTCATATCTCAACCGCACCTCAGGGGACCCCGGGATATG  
TTGATCCTCAGTATCATGAATGTTACCACCTACTGATAAGAGTGATGTTTATAGCTTTGGGGTTGTCCTT  
GTTGAGCTCATATCATCAAAGCAAGCTGTAGATATGAACAGACATATGCACGAGATTAATTTGGCAAAC  
TACGCGATGAACAGGATACTAAAATCCGCATTTGATGAGGTGATTGATCCATCTCTTGGATTTCGAGACA  
GATGCTGAAGTTAGGAGGATGACAACATCAGTGGCAGAACTAGCTTTCCAGTGCTTGCAAGTTGTCAAG  
GACATGAGACCTACAATGGAAGAAGTACACGAAGCGTTGAAGCTTATCAAATACAGTGAATGGAAAAA  
TTATCAGAAAAAGGATATCAATAGCTGCAATACCAAGACAAGAACTGTAAAAGTTCATCGTCATCCTTCT  
GAAACGGATGATGCTGTGTTATTGAAGAAAAACATTCCAGCTTACCTGATACTGTGATTGATACATGG  
GCTAGTAGTTCCACTACAAGTACTGGAGGGTGATATTTTATAAACTCATTTTTCCCCTTTATGTTAGA  
TACATATCATGATATCATTTTTATAGAGTTTTTTCAGCTTGTTCAGCCTGTTTATGAATATAGTAGATGAA  
GCTTTCTTAAAGTGTTAGTTATAGTCACATATGTATATGATTTCCCTTTAGACTATGTTGCTCAGATTCTCC  
TAAAATGTTGTTGCACGTGTGTCTGATCCTCCAAAAATGCACTACTTCTAGAAGATCCGCACACACTTGT  
GAGCATTTTTGAAAATTTTCTCTATGGATTATCCTGGCTTTAAATATGTCTTTGCTACTTTTGGTGAATTAT  
AAC

>PGSC0003DMG400030578 RLK with WAX or WAX-EGF domain

ATGTACAATGGCTGTGAAGGCTTTAACATATACTACAAGCTTTCCGAAGATGTTGATGAATACATAGGA  
GCAGACAATCTTCCCACTGTTCACTTATCAGATTGCCAATTCATTCAAGTCGTGGTGATTTGATAAA  
CCTGTTAGGTCCCGAAATTCTGTAGAATGGAACTGTCTGATGAATGTGGCGAATGCCATTATGGTGG

AGGTCGATGCCAGACTGATAAAACCAACAAATTTTCTTGTCACAAAGGTAGACATCTCCAAAACAATCTA  
TACTTTATAGGTCAAGTTCATCCTTCTTAAGTCCCTTCTTGTTTCATGCCGCATAGATAATATATTTTCGTA  
TTATTGCTCCCTTCTGTAGATGCAAAAACACCTACAAGTAGTACTGATCAAAGAAAAGAAACAACCTGGAA  
GAAATGGAAGAAACATGGTGGAGCTGATTCTAGTCACAGGTACTAGAATATATTTAATTGCTGCCATGT  
TATTCTTATTACAGAATTTTCATGCATAACATTTAAATTCTCATCATTGTGTATAAGCTCAAAAACCTTCT  
CTAGTGATATAGAAACAAAACAAGAGAATTAATAGTTTTCGGTCACAAAAGTATGGATGTGGAATT  
GAGAGAAAAAAATTTCTCTGATGGGGCATGATTTTCATTTTTTCCACAGGTGCAAGTTTATCTACTGTT  
GGACTGTTGGCTTACTACTCTTTTGCTTCAGAGAAAAAAGTTGTGGTACAAATACCTCAGGTTTTGGG  
AATCTAATGCTGAGGATCACCAAAAAGTTGAAGAATTCTTAAAGAACTATGGATCATATGCTCCAAACA  
GATACAATTATACAGACATCAAAAGAATCACCGGTCGCTTCAGAAGGAACTAGGACAAGGAGGATTT  
GGTAATGTGTACAGAGGAAGTTTGGTAATGGGAGTGAAGTGGCAGTAAAGGTCCTGAATGAACTAAA  
AGGCAATGGTGAAGATTTTATTAACGAAGTGGCAAGTATTAGCAGAACATCACATGTCAACATTGTGAG  
CCTTGTTGGGATTTTGTGTTGAGGGTCACAAAAGAGCTCTTGATATGAGTTCATGCCAAATGGATCTCTT  
GAAAAGTTTATCTATGAGGAAAGATCTAACGGAGTTCGCCAATTAGGCTGGCCAATATTATACAAAATT  
GCATTAGGCATTGCTCGAGGATTAGAGTACTTGACCGTGGTTGTAACACTCGGATTTTGCATTTTGATA  
TAAAGCCTCATAATATCCTGCTTGATGAAGATTTTGTCTAAGGTTTCCGACTTTGGTCTAGCCAAAATG  
TGCATGAAACAGGAGAGTGTTGTGTCAATGTTAGGTCCACGAGGGACTATCGGTTATATTGCTCCAGAA  
ATTGTTTGCAGAACTTGGGAGGTGTCTCTCACAAGTCTGATGTCTATAGCTATGGAATGATGGTCCTAG  
AGATGGTTGGAGGAAGAAAAATGTTGATGTTGGAGTTGATCGCACGAGTGAAATCTACTTTCCACATT  
GGCTTTATCAACGACTTGAACACTAGACGAAGAGCTTCAACTAGTCGGGATAATGAATGAAGAGGAGAAT  
GAATGTGCAAGAAAAATGGTGTAGCGAGTTTATGGTGCATACAGACTGGTCCATCAAATCGACCATCG  
ATGAGCAAGGTTGTTGAAATGTTAGAAGGGAACTAGACTCTTTGCAAATGCCTCCCAATCCTTATCTAT  
TTTCTCCCTCAAATTCAGAGGTAGATTCATCAGTAGTAGAACTGGCCTAG

>PGSC0003DMG400030579 RLK with WAX or WAX-EGF domain

ATGGCTGCTGCCTGTTTTCTGCTATGTTCTTTATGTTTCATCTTCTTATCTTCAACTTAGTTAAAGTTGAG  
AGTAAATTATCTTGCCAAAAGAGTTCAATTGTGGAAGACTTGGTACCATGAGTTATCCTTTTTCAGAATT  
CAACAAACCATATTGTGGATTATCCAAGATCGATTGTAACACCACTTTTCAATATCCAAAAGTTGAGATT  
GAAGGAGTGACATACAATGCTTACAAGAAGTGGCTATGGGTTAATGGTATCGATCTTTCCGACTCGATT  
CTTGAAAGTTATTTAGCTAATAGAAGTTGCAAATCCTTTGAAAGGAATTTATCTTTCCCTGATACACCTTC

TATTACATTTGGTGTATTCGACAATATCACTTTGTTCAAATGTATGAATGGTAGTACTAATGAGGAGATA  
GGTGGTTATTTTCAACGTTATGAGAAGTACTTGAATTGTGATGGATTTAACTTATACTATCATAAACCAA  
GAATAGATCATAGAACTACAGTATTCCAGTTGATGAGGATGATCTTCCTGCAAATTGCTCGATTATTCCG  
ATTGCCTTTAAAGTATATTTACCTTCAGTACCAGTTCCTCATGATTTGTTTGAGTTGTTGAGTTCTAATTT  
CACATTGGATTGGGAAGTTTCTAAAGATTGTTCCACGTGTATCCATAGAGAAGGGCAATGCCAAAGTGA  
CAGCAAAAATGACTTCTTCTGCTCCAAAGCCAAAGGTAATGCATATATGATGCTTTGTCAGTTGCTTGA  
ATTGGTTCATTCATTTCAAGATGTTTAATATTTCAATGTGAATTGAAGTAAAAATTGCTTTTACTCTTATTG  
TGACTATTATTAATCATTCAATTTCTGTTCTTGCAGCAGCTAAAAGATATTTGGGACTGATTCTAGGCAT  
AGGTACATGTCTAACTTTTATCTGTAATTAGACTTGATCAAGCTAAGAATTATTTTACTATATATGTTTTGC  
AAATGTTGTAATTGTTGTGTTGCCTCAAACCAGGTTCAATTTGCAGTTTTCACTTGCATTGGAATCGTGAT  
TTTGCTCTTCTGCTTCAGAGAAAAGATTTTGTGGTACAAGTGCCTCAGGTTTTGGGAATCTAATGCTCAG  
GATCACCAAAGAGTTGAAGAATTCTTAAAGAACTACGGATCATAACGCTCCAAACAGATACAATTATACA  
GACATCAAAGAATCACCGGTCGCTTCAGAAATAAACTAGGCCAAGGAGGATTTGGTAATGTATACAGA  
GGAAGTTTGC GTGACGGGAGTCAAGTGGCAGTCAAGTCTGAATGAACTAAATGGCAGTGGTGAAGA  
TTTCATTAATGAGGTAGCAAGTTGTAGCAGAACATCACATGTTAACATTGTGAGACTTGTGGGATTTTGT  
TTTGAGGGTCACAAAAGAGCTCTTATTTATGAATTCATGCCAAATGGATCTCTTGAAAAGTTTATCTATG  
AGGAAAGATCTGACGGAGTTCGCCAATTAGGCTGGCCAATATTATATGAAATCTCACTAGGCATCGCTC  
GAGGATTGGAGTACTTGCACCGTGGTTGTAACACTCGAATTTTGCATTTTGATATAAAGCCTCATAATAT  
CCTACTGGATGAGGATTTTTGTCCAAAGATCTCCGACTTTGGTCTTGCCAAACTATGCATAAAAAAGGAG  
AGTATCGTGTCAATGCTAGGCCACGAGGTACAATAGGCTATATTGCTCCGGAAGTTGTTTGCAGAAAC  
TTGGGAGGTGTCTCTACAAGTCTGACGTCTATAGCTATGGAATGATGGTCTAGAGATGGTTGGAGGA  
AGAAAAAATGTTGATGTTGGAGTTGATCGTAGGAGTGAAATCTACTTTCCACATTGGCTCTATCGACGA  
ATTGAACTAGACGAAGAACTTCAACTAATCGGGATAATGAATAAAGAGGAGAACGAATGTGCAAGAAA  
GATGGTGATAGCGAGTTTATGGTGTATACAGACTGATCCCGCAAATCGACCATCGATGAGCAAGGTTGT  
GGAAATGTTAGAAGGGAACTAGACTCTTTGCAAATGCCTCCCAAGCCTTATCTATATTCTCCCTCAAGA  
TCAGAGGTAGATTCATCAATAATAGAAGTACAACAACAACAACGTACCGAGTATAGTCCACAA  
GTGGGGTGTGACTTCATTTCTTAG

>PGSC0003DMG400030581 RLK with WAX or WAX-EGF domain

ATGATTGGTTTTGGTTGTGGTGGAGAAAATGGGAATGATTGGGGTCTTGCAATGTTTGTGAGGATGAA

AGCTTTGAGTCTGCATTACAAGTGTGTGAAAAACATGTGATGGCACCAGTAGAAATGCTTGGTGATGAG  
GGAAGTAATCGAGATGTTGACTATCTGGGGATTTTGAGAAGGGGGTTAGATTGATATGGACTGCTGCT  
AATTGCAGTGAATGTGCAGAAAGTGGAGGATATTGCGGATTTGATGTCATCAATTATAAATTCGAATGT  
TTCTGCACTGACAGCCAGGGGCGGACCTAGGTAGAGCCCAGGGGGTTCATCCGAACCCCTCGTCAAAA  
AATTACACTGTATATATAACGTTAAATTCTGATTTTATGTGTATATATATTTAAATGAACCTCCTGAAAAC  
AAAGGACAGACTTGGCTCAATGGATAAGTGATTCATGTAGCACCCCTATGTCATGTGTTCAAGTTCCAAT  
GGCAACATTTTTTCCCTTTTTTAATACTCCTCCGTCCACAATTATTTGGCAGGTATACTAAAAATAGATGTC  
CAAGATTAATTGTCAATTTAAACAATCAAGAAACAATTAATCAACCTGAAAAGTTATGTGGACTTTTGAT  
ATTCTTGATATAATAGGGTTATATTAGTCAAATTACACCTTCTATTAATTTTTCTTGAGGAATGTGCATG  
ACCTTACCCTGACAAACAATTGTGGACGGAGGGAGTATTAGCTTTGGAAAATGGAATTTTTTGGCTTAG  
ACCTTCTTCTTTTTTCAATTATTTTTTCTTTTTATTCCATTTCTTTTTTAAATTTATTTTTGTTTAAATTTATT  
AGACACATTCTTTTTATTTTTATTTTTATTCTTTTTATATCTATTATTCATTTAGTTTCAACGTAACCTTTTT  
TTCACATATGTTTGAATAAATTTTTAAAAAAAATGATGAATTATTTAACTTGAAATTGAGATAGAAATAT  
AGTTTATTTTTAAAAAAAATGTAAATTAGATGTAATTGAATTTTTTACAAATTATGACTAACCTAGTAA  
ATTGAACTATATGAACTAAAAAATTGACGATGATATTTATTTATATTAATAATATGCATTATAATATTAG  
TAACTCTATTCTTACACACTTTTAGAGAATCTTGACGATTTTCATAGTAATATTTGATTGAATGGATATTA  
TTTAAATTTTTTAAAAAGTGAAATATAAAGTAAAACATTACAAAATAAAAGTATAAAAAGCACAAGAAAT  
TTTAAGAATGCTCGATGGAGCATGATAAAAGTAAAAGAAATGTTTAATACGGTATGATAAAGTGAGTT  
AAATTTAGCATGATAAGGTAAATTTTTTCTCCCGTCTCACTCCCTTTTTCATCATTTAATTTTCATGTGT  
TTTAGGAATTAACCTTATGTAATACAGTCGATCCACTAAAATTCTTATCAATGCAACTTTGTTCTCGATATCT  
TTGATTAGCTTAGTCTTTACTTTTTATGAACCAATGAAATATCTATGGTTCTTGTACAAAGAGCATGCCGAG  
GGGCTACTACGCTCACCGCGCACTTGCATTACCACCTAACTTCTTCTTTATACTTCGAACCCCTTAGCA  
AAAATCCTGGGTCCGCCACTGCTGACAGCCCTCATACATCGAATTGCCACCCTCCGGTAAGCCCCTATC  
TAGCAGTTAATTTTCCAGTATAATTATGCAGAACATTATGCTATGATTACACATACTTTAGGTTCTTTTCGT  
GTGATTACCAAGTGCACAAAGAAGTATCACTTGATGATCTAGGCATTTGGATTATGCTGTGGATGATTAA  
AAAATGTGTGAACCACAAAATTTGCGCAGCCAAGAAAATATCCTTATAGCGGCTGATAACCTCTTGTCT  
TTTAATCCTGTGATACTAATTGAAGACTTGTTTAAATCTTTTCTCAATCTAATAGGCCACCTAATCTCCTTC  
TTTTGACTCAAAGTCTTTAAAATCATAACAATTATGATCTTCTCTGTTGAGCCTTATCAATCAAGTAGCA  
TTGTGGTTATGGAACAACCTAGGACATAGCGAAAAGTCAGTTTCTAGTCTTCTTGTAGTTACGGAAGTGCC

TAACTATTTGGAAATGACAACAACTAACAAAATCTAAGTCAAGATTCACACATCTATGAAGATGACCAATCTT  
AATTTCAAGAATCATGAATAGAATCCTTACTTCACTAGAAAAAGCCTAAACTTATTTTCCTAAAAGATAA  
GTTTGAGTTTTATGATCAGACACTTTGGCGTTTACATTATTTTTATTTTATAGCTCTTAATATCTGTTTCTTG  
AATTATAGTAGAAGGTCAGATAGTCCAACTCAAGTATAGGAGGATTCAGAGGTAGTCAAGAGAACATT  
AATTTTGGGTACTCATATTTGTCTTATATATTTCTGTATGTTACTTGTTAAGTTTAGATTTAGACTAATGA  
CTGCAGCCTCCTTTTCTGCTATGTTCTTATGTTTCATCTGCTTATCTTCAATAGTTCAATTAGAGAGTAAA  
TCTGACTTTGTACATTGTGGAAGAAGTGAACCATTAGTTATCTTCTCACACCTCATGTTCTATTTTGAGT  
CTACAACAATATAAATTTGTACATTCAAATGAACAAATAATAGTATGCAGATTGATGGTTATTTTCAAAGT  
TATAAGAACTACTCGAATTGTGATGCCTTTAGCTTATTCTGTGCATAAACTAAGAACAGATCAAAGACATA  
GTATTCCAGCTAGTGATCCCTCGGTTATTCGATTGCCTTTTCAGTATCGTTCACCTTCTGAACCAAATTCTA  
CTGATTTGTTTGATCTATTGACTCCTTGTTTCACATTAGATTGGGAATTGTCGTTAAATTATTCCAAATGTC  
TTCATAGAGAAGGGCAATTCCAAAGTGACATCGATAACTTCTTTTGCTCAAGAGGTATTGGATATAAGA  
AGCTTGTCAGTTGCTTGTGTATGTCTGGTTTTCATTTTTGGAAAGGATATAGATGTGTGTTAATTGGTTCA  
TTCCAAGATGTTAGCTATGTCAATGTGATAACTTAATTTCTTTCCTTATTGTGACTTAAACTTTTCATT  
TCTGTGTTCTTGCAGCAGCTAAAATAAATTTGGGACTGATTCTAGGCATAGGTACATATCTATAATCATT  
ACTTTTGTCTGTAATTAGACTTGCACAAAAATCTTATATTGCCTTGCATAAACTTAGAACTATTTAATATGT  
TTTGCAAATGTTGTGTTTGCCTAAACATCAGGCTCTTCCGGTACTTTGCTTTTTTCCCCACATTTGCAGT  
TTTCTTGCATCGGAGTCGTGATTTTGTCTTCTGCTTGTGAAAAAGATTTTCTGGCACAACAATCTCA  
GGTTTTGGGAATCTAGAGCTGAGGATCACCGAAATATTGAAGCATTCTGAAGAAGTCTGGGTATATG  
CTCCAAAAAGATACAACACTACGCAGACATCAAACGAATTACCAGTCGCTTCAAAAACAACTAGGCCAAG  
GAGGATTTGGTAATGTATACAGAGGAAGTTTTCGTAACGAGAGTCAAGTGGCAGTGAAGGTCCTGAAT  
GAACTAAAAGGCAATGGTGAAGATTTTCTTAATGAGGTAGCAAGTATTAGCAGGACATCACATGTTAAC  
ATAGTGAGCCTTGTGGGATTTTGTGTTTGTGAGGGTCAAAAAGAGCTCTCATTATGAATTCATGCCAAATG  
GATCTCTTGAAAAGTTTATCTATGAGGAAAGATCTAACGGGGTTCGCCAATTAGGCTGGCCAATATTGTA  
CAAAATTGCATTAGGCATTGCTCGAGGATTGGAGTACTTGCACCGTGGTTGTAACACTCGGATTTTGCAT  
TTTGATATAAAGCCTCATAATATCCTACTGGATGAGGATTTTTGTCCAAAGATCTCCGACTTTGGTCTTGC  
CAAATATGCATAAAAAAGGAGAGTATCGTGTCAATGCTAGGCCACGAGGTACAATAGGCTATATTGC  
TCCGGAAGTTGTTTGCAGAACTTGGGAGGTGTCTCTCACAAGTCTGACGTCTATAGCTATGGAATGAT  
GGTCTAGAGATGGTTGGAGGAAGAAGAATGTTGATGTTGGAGTTGATCGTACGAGTGAAATCTACT

TTCCACATTGGCTCTATCGACGAATAGAAGACTAGACGAAGAGCTTCAACTAATTGGGATAATGAATGAAG  
AGGAGAACGAATGTGCAAGAAAGATGGTGTAGCAAGTTTGTGGTGCATACAGACTGATCCGGCAAAT  
CGGCCATCGATGAGCAAGGTTGTGGAAATGTTAGAAGGAAACTAGACTCTTTGCAAATGCCTCCGAA  
GCACTTATCTATATTCTCCCTCAAGACCAGAGGTAGATTCATCAATAATAGAAGTACAAACAACAACAAC  
GTACCCAATATAGTCCCACAAGTGAGGTGTGACTTCATTTCTTAG

>PGSC0003DMG400030704 RLK with WAX or WAX-EGF domain

AGTACAATCACGATCTCAACAACAACAATAAGCATATAATCTCACAAGTGGGGTTTGGGGAGGGTG  
GGGTGTACGCAACCTCACCCCTACTTTGTGAAGTTAGAGAGATTGTTTCCAATGGATACCTCGGTTCAAG  
TAAACATATCAAATGAGGCATGGAAAGGGAAACAGTAGATACAATCACTATCTCCACTATTCAAATTA  
AGAATAGGATGTTAGAAACTCCACGTAAAAAGACCAGCTCGATCCAACAATGATGAATCGAAAATGCAA  
ATTAAATATTAACCGGACCAAAACATTTAAAAATCATAATATGGATCCCACTTGTAAGTTATTACTTTTT  
TCGTTTGTGAGAAAGTGGGGAAGCCTTAGCAGGGCCTATTTCAAAGTCTAATGATGTTTGCAGAATTTT  
GTGCCATCATAAGATACGATTCAACCAGAGAATGAGGCAGTAATACATGAAGATGCAGATAACCATGTG  
GTCATTTTTTATTCTTCTGACGGGGCTGCTTTCTAAAGAAACAACAAGTTTCAGCTATAAGAATATGGT  
CATCATCAGCAATATTATCTTCACAAAGACCTGGATGCCCAGAACGATGTGGCAACGTAACCATTCTTTT  
TCCATTTGGAATAGGAAAAAGTGTTACTTCAATGAAGCATTGGAAGTGAGCTGCGATAACAATACTGC  
TTTTAGTCATGGTAATGGTTTGCCTGTGCAACACATATCAATGGACTCCATCACTCTTTATATTACTTTTAC  
TCCTTTCTCTACAACAATCATCTGGAAAGAACATTTACAATGATTATCTTCAAGCAACCAGTAACGAGT  
ATTTAGTATTTCCAACAAGAACAACCTTAGTAGCCATTGGGTGTGACATTTATGCTTATGCCAAAGATTTA  
GACACCGGTAGTGGAGGCAGCATTGTAAGTCAATGTGCTTCTTTCTGTGGCAACTCCACTTATAATGTTT  
CATCATCTTATTGCACTGGGAATAACGGTTGTTGTCAGTCTGAATTATCAAAAATAGTACCAAGAGACTT  
CAATATGTACATACAAACAATGAACACGGCGGAAACATCTTGGACATCTAGCAATTGCACCTATTACTTA  
ATTGTGGAAAAGGGCAGTTCCGAGTTTACTTCACTCAGTTACGTGGTAAGTGCAAAGAAGATGATCAT  
TATGAAGGAAGGATGGCGCTGGACTGGGTAATTGGCAATCTTAGTTGCAACAAGCCACAAGAATGCC  
AAAATATGCATGTACAAAGAATAGTAGGTGCATCGATGATACTACTAGACCTGCTGGGGGATACCGATG  
CGATTGCTCTTCTGGTTATGAAGGCAACCCTTACCTCCTTCATGGATGCCAAGGTACTAATCCCTGGTCA  
GTTTCTCTTTTTGTTTTTGCGATTTAACTTGTGTATACGTATCTTATTTTCGTTTTTAGTCTGTTTCAACAAG  
GAGCTTCATGTTTTTCTATATTTAGTAAGTTTTTAATTCCTATATTCTCATATGTTATGCTTGATAAGACTC  
CCTTATAGGAATGCCATGGAATCTCTAAGATCACAGGATTTAAAGTACTTTTAGGGGTCATTCAATACAA



AGATTAATAATGCAGAGATTAGTAATCTATAGATTAATAATACAGAGATTATTTTTTATCTGGTTCATTGC  
TTCCACCTATTTTTGTGTAAACCTCTACAAAAGCTTCTTCCAATTGTACCCTTGAATTATTATACAATTT  
TCTATTACATGTAATTGGGTCAAGGGCCTTCTAACTAGCTAGGAAAAGAACAATTTTTTGTGCGCGTGT  
TGCTATTTTTCTCACTTGAATTATTTGAGGGTAAATAATTGTCATTCTAATAAAATTTTTTGAGAATAATTGT  
CATTCTAATAAATTGATCACTCACAAATCGTTAATTTTTAATTCAAAAAGATAGACCATCTACTTTCAAA  
ACCGAAAAGACGGTAAACAATACTAAAATATCGAATAAACCATCTATTTTTACACACAAAATGGCAAGTT  
ATAGTTTTAATATGTATGCAATTTTATAAATTGTTCAAATAACAAATAATCAAAAACCACATATATATCA  
ATAAATAATACATTCAATTAAGATCACAAATGTCACGTGGCCATATATTTGTCTTTTCAATTAGTAAATGT  
TGAACAACCTCACATTTCAAATATTGTATTGATTTAATGATTTGTATTAGATTTATTTAGCAACAAACAACT  
ACTCTCTAAATAATAAAATTTGTAAGCTAATTTTATTTAAATAAATTTACTAGTACAAATATAAAAACATA  
AAATCAAGAAAGTAAACAAAATGATTAAGGATTTGACGGGTATTTTTGTCTTTACATATATTGATCC  
ATGGTATTAATCCTATGTATTATTAGTACCACCAAATGGAAGGTATTAGTTATACACCCTATAATAATAC  
CATATAACATGTATAACTAATACATGCATTAATTATATATAGGCCCAAATTTCCACCAAACATAGTACTA  
TATAACTATACATAATACACGAACTATTTTTCTAATACAATCTACCCAGTGTTTCAGGAAAGCGAGCGC  
TTCAGTTGGCTGAAGCGAGGCATGTGAAAAGAAGCGACCACTTCTGGGCTTGAAGCGCGATGCGACCA  
GAAGTGGTGAAGCGAGAAAAGCAATGCTTTTATTTTTCTAAGTAATAAGTGATCGATTTTAAAGAATAA  
AAATAGGCATGACTTACCTAGTTCTTCTTCTTCTTACTACTACCACTACTACAACCTAGCCTAGGAT  
ATTTCTTCTTTTTTTTCCACTTTGTTGTTATTCTATTTTCTTTGCCCTGTTAGCTTTGATTATTTAAATTA  
TATGTTGTTAATTTTTTCTCACAGTGATTAATAATACATCGCCAAATTGTTTTGTTTCTTAACAATGA  
CTAAAATGTTGTTGAATTTTTTCTAATAGTGATAAAAATATAATGTTGATTAGTTTTCTTAAATCTTATCT  
GCGATTAATAATGGCTAGCCCAACATGAAAATATGGGGGAAAAGTGAGACCAATAGGACAACAATTG  
TATGTCTGTTTTCTAGTATTTAATATGAATTTTTGCTTATATATTTGTCTATTTATTTGGTCTTTTTTCT  
TTTAAATTGTGCTTCACTTCAATGAAGCGAGCGCTTCGCTTCACGCTTCACGCTTCACGCTTCACGCTTCA  
CGCTTCACTTAAAGCATGAAGCAGGGCCTTGTGCTTTTTACTGCTTTGCACTCCCCTAAACACTGAATAT  
ACCAAACGACCCCTTAGTGTGTTATAGGCACCTTTTGTCAACACAAGATCCAAAAGTATTCTTTAGGTTT  
TTAAATTTAGTGCAAAATCAAATAAGACATAAAAATGAAACAAAGAGAGTAACAATATAACAATATCCC  
ACTGTACCCCTTATTTAACTTGTTTTTAGCATGTAACATGACTTATATATTTTCTAAGTTACTAATGTCA  
GTTTTTATAATGACTTCTTGTTAATTTTACAGACATCGATGAGTGTGCCAGTCCAAAACGAATCCTTGT  
CCCAACAATACTCGCTGTGTTAATACTCTTGGCACTTACCATTGTGACTCAAATAATGTGAGACATATGCT

AGCTAAACAACCTCTCCATCGGTATTGTATAACTCTCTTCTTTGTCTTCTTTTTCTCCTCTTGTTTCTTTGTTA  
GATTAACCTAAGCTTTCTATAAATTTTTATTTGACACAAATTACTCCTTTGAACTGTCCCAACAAATGATTC  
ATAATCCTATTCATGTTTATTCTAGCTAACTGCTCTTTAGAAAATTAGAAGTTCAACTTAATATATGCTTTA  
AAACTACAAAGGGGCCTGGATAAGCATTAAAGCTCTTTCTCTTAGATTCTCAAAATGAATTTATGCTTGT  
TTTAGATGAAATTGGTTTGCTCACAAGCAGGTATTGGAGCAGCAATTATTTTTGTGATCCTGGTAGCAGT  
TTGTCTTTGGCTATGCAAATGGCTCCGGAAGAGGGAAGAAAACAAAGCTAAGCAAAAGTATTTCAAGA  
GGAATGGTGGATTGCTTTTGCACAACTGATTTTCTTAAATGGAGAAAGTAGTGGTGGCTCTTTGCCAA  
AGCTCTTTTTGAAGGAGGAGTTGGAGAAAGCAACAGACAATTTCAATGAAATTCGAATTCCTGGTAAAG  
GAGGGGCTGGGACTGTTTACAAAGGAATGTTATCAGATGGAAGCATTGTAGCTGTGAAGAAGTCCAAT  
GCAGTGGATAAAGATCAAATTGGACAGTTTATAAATGAGATACTCATACTCTCCCAAATAAATCACAGAC  
ACATTGTCAAGGACTGTTGATTTTTGTACTAGGCTCCTGCTACCATTTTATTATGAATGGAAGAAGAGA  
GCAACACAATTCGACGATAGAGAAATTTATAATGCCTAAAGAGGATTGAAGAGCGAACTTATAATATTA  
GAAAGACTCCTATACTCTTACAAAATAACACACTAGACTTGCACAGTGGCGGAGCCAGACATTTTATGAA  
GGGTGTGCAAAATTTTTAAAAAGTAACCAACAAAATATTTAGTGAGTTTTGACTAACAAAAAATGATGTTA  
AAAACCTAAAGTTAGCAAGAATCGAACCTAGCACTTGATCACACTTTTAAACATTTAAGTTTACGGTTTACA  
ACAGGTACTIONGGTTGTTGCTTAGAACTCAAGTCCCATTATTAGTTTATGAGTACATCTCGAATGGAACC  
TTGTCATCCCATGTTTCATGGAAACCTCAGTCACAGTTCTAACCCCTAATAAATTGATCACTCACAAATCGT  
CAATTTTTAATTCAAAAAAGATAGACCATCTACTTTCAAACCGAAAAGACGGTAAACAATACTAAAATA  
TCGAATAAACCATCTATTTTTACACACAAAATGGCAAGTTATAGTTTTAATATGTATGTAATTTTATAAAT  
TGTTCAAATAACAAATAATCATAAAACCACATATATATCAATAAGTAATACATTCAATTAAGATCATAAAT  
GTCATGTGGCCATATATTTGCCTTTTGAATTAGTAAATGTTGAACAACCTCACATTTCAAATATTGTATTG  
ATTTAATGATTTGTATTAGATTTATTTAGCAACAAACAACCTCTCTCTAAATAATAAAATTTGTAAGCTAAT  
TATTTAAATAAATTTACTAGTACAAATATAAAACATAAAATCAAGAAAGTAAACAAAAATGATTAAGG  
ATTTGACGGGTATTTTTGTCTTTACATATAATGAACCATGGTATTAAATCCTATGTATTAATACCACCAA  
TGGAAGGTATTAGTTATACACCCTATAATAATACCATATAACATGTATAACTAATACATGCATTAATTATA  
AATAGGCCCAAAATCCCACCAAACATAGTACTATATAATACTATACATAATACATGAACTATTTTTCTTA  
ATACAATCTACCCAGTGTTTCAGGAAAGCGAGCGCTTCATTGCTTTAAGCGGTGAAGCGAGGGTTTCAGCG  
CTTCAGTTGGCTGAAGCGAGGCATGTGAAAAGAAGCGACCGCTTCTAGGCTTGAAGCGCAATGCGACC  
AGAAGCGGTGAAGCGAGAAAAGCAACGCTTTTATTTTTCTAAGTAATAAGTGATCGATTTTAAAGAAT

AAAAATAGGCATGACTTACCTAGTTCCTCCTCCTCCTCCTACTACTACTACTACTACAACCTAGCCTAGG  
ATATTTTTATTTTTTTTCCACTTTGTCGTTATTCTGTTTTCTTTGCCCTGTTTAGCTTTGATTATTTAAATT  
ATATGTTGCTTAATTTTTTTTCTCACAGTGATTAATAATACATCGCTAAATTGTTTTGTTTCTTAACAATG  
ACTAAAATGTTGTTGAATTTTTTCTTAATAGTGATAAAAATATAATGTTGATTAGTTTTCTTAAATCTTATC  
CGCGATTAAAAATGGCTGGCCCAACATGAAAATATGGGAAAAAAGTGAGACCAATAGGACAACAATTG  
TATGCTGTTTTCTAGTATTTAATATGAATTTTTGCTTATAAATTTTGTCTATTTATTTTGGTCTTTTTTCTT  
TTAAATTGTGCTTCACTTCAATGAAGCGAGTGCTTCGCTTCACGCTTCGCTTAAAGCATGAAGTGGGGCC  
TTGTCGCTTTTTACCGCTTTGCGCTCCCCTAAACACTGAATCTACCAAATGACCCCTTAGTGTGTTATAGG  
CACCTTTTGTTC AACACAAGATCCAAAAGTATTCTTTAGGTTTTTAAATTTAGTGCAAATCAA ACTAAGA  
CATAAAATGAAACAAAGAGAGTAACAATATAACAATATCCCCTGTACCCCTTATTTTAACTTGTTTTTA  
GCATGTAACATGACTTATTTTCTAAGTTACTAATGTCAGTTTTTATGATGACTTCTTGTTAATTTTACAGA  
CATCGATGAGTGTGCCAGTCCAAAAGGAATCCTTGCCCAACAATACTCGCTGTGTTAATACTCTTGGC  
ACTTACCATTGTGACTCAAATAATGTGAGACATATGCTAGCTAAACAACCTCCATCGGTATTGTATAACT  
CTCTTCTTTGTCTTCTTTTTTCTCCTCTTGTTTCTTTGTTAGATTA ACTTAAAGCTTTCTATAAATTTTTATTG  
ACACAAATTACTCCTTTTGA ACTGTCCCAACAAATGATTCATAATCCTATTCATGTTTATTCTAGCTAACTG  
CTCTTTAGAACTTAGAAGTTCAACTTAATATATGCTTTAAAATTACAAAGGGGCCTGGATAAGCATTTA  
AAGCTCTTTCTCTTAGATTCTCAAATGAATTTATGCTTGTTTTAGATGAAATTGTTTGCTCACAAGCAG  
GTATTGGAGCAGCAATTATTTTTGTGATCCTGGTAGCAGTTTGTCTTTGGCTATGCAAATGGCTCCGGAA  
GAGGGAAGAAAACAAAGCTAAGCAAAGTATTTCAAGAGGAATGGTGGATTGCTTTTGC GACAACGTA  
TTTTCTTAAATGGAGAAAGTAGTGGTGGCTCTTTGCCAAAGCTCTTTTTGAAGGAGGAGTTGGAGAAAG  
CAACAGACAATTTCAATGAAATTCGAATTCTTGGTAAAGGAGGGGCTGGGACTGTTTACAAAGGAATGT  
TATCAGATGGAAGCATTGTAGCTGTGAAGAAGTCCAATGCAGTGGATAAAGATCAAATTGGACAGTTTA  
TAAATGAGATACTCATACTCTCCCAAATAAATCACAGACACATTGTCAAGGTA CTGTTGATTTTTGTACTA  
GGCTCCTGCTACCATTTTTATTATGAATGGAAGAAGAGAGCAACACAATTCGACGATAGAGAAATTTATA  
ATGCCTAAAGAGGATTGAAGAGAGA ACTTATAATATTAGAAAGATTCCTATACTCTTACAAAATAACACA  
CTGAACTTATAATATTAGAAAGACTCCTATACTCTTACAAAATAACACACTAGACTTACACACACACGCA  
GTCGCACACACTGAGCTACTACATCAACTCGTGTTCTATTTCGCTTCAACCATAATAAGCGAACAGTTTA  
GGATAACTCATTAGTCACTCATGAACCAAAGATAACTCAAATACAATTGAACCTAGCACTTGATCACAC  
TTTTAACATTTAAGTTTACTGTTTACAACAGGTA CTGGTTGTTGCTTAGAAACTCAAGTCCCATTATTAGT

TTATGAGTACATCTCGAATGGAACCTTGTTCATCCCATATTCATGGAAACCTCAGTCACAGTTCTAACCCCTT  
CTGTCTCAAAGTCTGAGTTGGATGATCAGATTCTTCCGCACCCAGCAATAATATTATCGTGGGATCATCG  
GGTGCGAATTGCTGCAGAAATAGCAGGGGCACTATCTTACATGCACTCATGTGCTTCTACTCCCATTCTT  
CACAGAGATATAAAATCAAGCAACATATTACTAGACGAAAATTTTAGAGCAGTGGTTTCTGATTTTGGAC  
TATCGAGATTGTTGTCTGTTGACAAGACTCATTTAACAACAATGGTAGGGGGTACATTTGGTTACATAGA  
TCCAGAATACTTCCGCTCAGGTCAACTTACAGACAAATGTGATGTCTATGCCTTCGGTGTAAATTCTTGCA  
GAGCTTCTAACAAGTCAAAGAGTTGTCACTTCAAACCAACCAGAAGATCCAGGTTTGGCTTCCGTTTCA  
CATTAGCATTGAAAGAAAATCGTATAATTGAGATTGTAGACCCTGAAATTGTAAAAGAAGTTGAGGATG  
AACATGTGATTCTGCTGTGGCCAACTTGCCAAGAGATGCTTAAATTTAATGCAAGGAGAAGGCCAT  
CCATGAAGGAGGTGGCAGCTGAACTTGAACAACAAGGAAAAATGAGGCAAGATATGCCTCATACTGAG  
AGTTTTAAAGATAACATTTACCAAAAAGTGAAAGTAGTCATACTTCTGATTGTTCCGAAGAAGATAATC  
AGAACTCAGTGTCTCACAAGTCACAATGA

>PGSC0003DMG400030705 RLK with WAX or WAX-EGF domain

ATGTGGTCATTTTTTATTCTTCTGACGGGGCTTCTTTCTAAAGAAAAACACAAGTTTCAGCTATAAGAAT  
AGGGTCATCATCAGCAATATTATCTTCACAAAGGCCTGGCTGTCCAGAAAGATGTGGCAACGTAACCAT  
TCCTTTCCATTTGGAATAGGAAAAGAGTGTTACTTCAATGAAGAATTTGAAGTGAGCTGCGATAACAAC  
ACTGCTTTGAGTAATGATATGTATGTGCAATACATATCAAAGGACTCCATCACGGTTGATAATGATTTTTT  
ATCGCACCCCTACAACAAATCATCTGGAATGAACATTTACAGTGATGCATTTATTAAAGGAACTAGCGAC  
GAGTATTTTCAAGTTTTTCCAACAAGAACAAGTTTATAGCCATTGGGTGTGATGTTTATGCTAATGTCAAAG  
ATTCAGACACTGGTAGCAGTGTAAGTGGATGTGCTTCTTACTGTGACGACTCCACTAATAATGTTTCATC  
CTCTTCACTTCATCATCATATTGCACTGGGAATAACGGTTGTTGTCAGTCTGAATTTTCAAAAACAATAC  
CAAGAGAGTTCACCATGTCCACACAAACAATGAACACGGAGGACACATCGTGGAGATCTAGCAATTGCA  
CCTATTACTTACTTATAGAAAAGGGCAGTTCTGAGTCTGACTTCACTCAGTTACGTGGTAAGTGCAAAGA  
AAATCATTATTTAAAAGGAAGGATGGTGTGACTGGGTGATTGGAAATGTTAGTTGCGACAAAGCCAT  
GAGCAGGCCAAAAGATTATGCATGTAGAAATAACAGTAGGTGTGCAATGACACTTCTAGACCTGCTGG  
GGGTACCGATGTGAATGCTCTCGTGGTTATCAAGGCAACCCTTACCTCCTTCATGGATGCCAAGGTACT  
AATTACCCTGTTTCTTTCTTTTTTTGTTTTTGTGATTTAA

>PGSC0003DMG400031485 RLK with WAX or WAX-EGF domain

CCTAATAAAAATATAATGTCTGTAGTAACCAAGTTTCTTCTTACAATCCTCATCTTCATGTACCTCTCAGAA

ACCCATTAGCAGAACAAAGACAGCAGTGTGTCCCTTCTAGTTGTGGGCATATTCATAACATCAGTTATC  
CCTTTCGATTGAAAAGTGATCCAAAGCACTGCGGCCTTGAAAATTATGAATTGAGCTGTGAAGGAAATC  
GCGCCATATTAACAATACTGCTAAATGATTGGAATGGATCACTGAACACTATGTTCAAGCCATCAATTA  
CGATAACTCCACTATCCGCCTTGTTGATCCTGGTATAAGAGAACAAGTTATTTGCTCTCTTCCTCAGAATT  
CGATTACGGTTGGAACACCCTTCTGGTTTTGATCCTTATATGTATAAAATGCTTCATTTTGTTGATTTAA  
CAGTACCAATCACTCTCTTCAGCTGTCCATTTGCCATAAATTCTCCAGTCTTTGTGGAAATCACTAATTGTC  
TCAACAGGAGTTATGCTTCCAATGTTTCTTCTGATTCATTTAAGGGACACACATATGCAACCATGACTGA  
ATTATCACCATCCGATTTGAAAGTCGGGTGTAAGTACTGTAGACGTCATGTCAATGACTTCATGGCGTATTGAG  
GATGCAAATGCCAACATTTCTATTTTAAGTTTGCATTATGCTTTGGCATATGGATTTGAGCTTGGTGTCT  
TGCAGCAATCATCCCATGGATACTTCCCATAGCTGGTAAGCCACATCTTTCGTCTTTCAAATATATTA  
GATATCATTTTAATGTCAAATGATGGAGGTGAAGTATTGTAATAACCTCTACTGAACATAACACATTGG  
TGATTGAATTTTATGTTAACCATTACAATTTTTCTTGCTTATATGTGATGGTTGTACACAGGGTACAC  
AGGGCTTAGCATTGTGGCAAGAATCGTTCTATTTCCATGCATAGTTGTATTTCTAATGATTAAGTTACGA  
AGAAGGCATTTGTCAATTTATGATGCAATTGAAAGTTTCTGCACGGTGAGAACAATTCGCGCCCATTA  
GATATCCAACCTCCAACATAAGAAAGATGACTAGGAATTTAAAGAGAACTAGGCCAGGGAGGTTATG  
GTTGAGTATATAAAGGCAAGCTTCAAAGTGGTCTAATGTAGCAGTGAAGATCTTGAGCAAGCCCAAAG  
CTGATGGGCAAGACTTCATCAACGAGGTTGCCACAATCGGGAGGATTCATCATGTTAACATAGTACAAC  
TTATTGGCTATTGTGCTGAGAGATGTAAGCGTGCTCTCGTGTATGACTTCATGCCTAACGGATCACTTGA  
AAAGTACATCACACCTCGAGAAGGAGGAGCTGAACATTAAGTTGGAAAAGAAAGTTTGAATTGCTCT  
TGGAGTTGCTCGAGGATTGAATACTTGCATCGAGGTTGTGACATTCAGATTCTACATTTTGACATCAAG  
CCACACAACATACTTTTGGATGAGAATTTCAATCCAAACTATCTGATTTTGGTCTTGCAAATCATAACC  
GACGGATAAGAGCATTGTTACTCTAACAGCAGCCAGGGGAACAATTGGCTATGTAGCTCCAGAGTTGAT  
CAACAGAAGCATTGGTCCAATATCTTATAAGGCAGATGTCTATAGCTTTGGAATGTTACTCATTGATATC  
GTAGGCTTGAAAACAACTCGGCAGCCAGAGAGGATATGTCAAGCCAGTACTTCCCACATTGGATTTAT  
GATCAACTCGACAAGGGAAAGGAGATTGAAGTACTAGACGAGACACATGATGACGTAAAGAAGCTGAC  
TTTAGTTCTCCAGGCCCTCTGAATCGCGGGAACCATGTTTATTGGAATTCATCTAATTAGTTCTTCAA  
TAACTCAACTGAGTCTGTGAAGTTGCTTGAGAGTTGTTCTGATTCTGCAAAAATAGATGTAATTGTTGC  
TTGACATCACATATTATGTACGTAATTCGTGTTGTTCTGAATAAAATATCAAGTTCATGCTAAATTT

>PGSC0003DMG400036044 RLK with WAX or WAX-EGF domain

ATGGCTTTTCTGCCTTTATGCTTCTTGTCTACCTATGTTAGCTATGTCAATAGAGAACACAAACATGAT  
GAGCAACAACATGGCAAAGCCTGGATGCCAAACAAAATGTGGGAACCTGAGTGTCCTTATCCATTTGG  
TATTGGTATAGATGCTGGTTGCTCTATACATCCTATATTTGACATTAGGTGCAACACTTCCTCGAACCCCTC  
CAATTGCCTATCTCAACACCGGAGCCACGAATGTACTAAACATAACAATAAACCATGGAGGTCATCGA  
CATAACAATAAGCCAAATACCGTATTAGAAACGTGTTGGCAAGCAAATGTTATGAAGAACATGGTGAAC  
TATCTGCTCAACAACCTTGTTTTCTCAATACAGGAGTGTGTTTTTACGTTATCTGAGAAAGATAACAAG  
CCCCGAAATAGCCCCGAAACCACACTAATGTATGGTCCTTTAACCTTG TAGCTACGCATTCCCTGGC  
GATCATGAAAAGTTCACATTTAGGGGTACATCAGACTTCATGGACCCAAACTTTGTGAACAGAATAGTG  
AATGATGTTCTATTGTGATTGACTGGGCAATTGGGACTAAAAATTGCAGTGTGGTTAGAAACTCAACA  
ACTTATTCATGTATGGAACATAGTCTATGTATTGATTCTGAAAGTCGACGTGGAGGTTATCGTTGCATTT  
GTGAGGAAGGATATGACGGAAATCCTTATCTTAGTCCAGGCTGTCAAGGTTTGTGTGACCATCTCATCTA  
AAAGTTTAAGCTGTTAGAAAGAGTCAAGCACGTGCATGCTTTCAGGATTTTTGTCTGCTCTGATACCATG  
TTGAACTGTGTGACTATCTCATCTAAAAGCTTAAGCTGTCAGAGGTACATTAACCTTTCTGATGAAGTAATT  
TGAGTGTTCTTGTAAATAGATATCGATGAGTGTGCAACGAGCCCTTGATGGAATTTGCAAAAACACTCC  
AGGAGGGTTTGAGTGTTCTGTCCGAAGGGATATTTGGCGATGGAAAGAAGGGACGTGGTTGCCAGA  
AGGACCATGATTTCCCATCTTAAAGTTATCTCTTGGTATGTAAACACAATTACAATGGCATGAAGTTTCA  
ATTTATCAAACCATAGACATAAAAAATATAAACATTAGATGATTATAATATGGTTAGAAATTATAGAACC  
AAGCTCAAATGATTTAGGTAGTTTTAGTCTTTAATTATCTTAGTCAATAAGCATATCACTATAATAGGGA  
GATTTTACAATTACCAGTACATGTGGAGAGGAGACTCTCCAACTTATATATTCAACATAAACTATCTTTA  
ACATGAAAAAACTCAAATATGTCATCAAACCTTTGAGAAAAGATTCATATATGCCATCGTTAAACGTTTGG  
TTCATCTATGTCATTTCTATTTGAGAAGAAGGTTTATTGATGCCATTATTTGTTAACGTAAAACAGTTCCA  
ATTTTGCAAATATTTTTTATATGTGGTCAATTATGATTTGGCCACGTCACTAATTAATCATTTTTTCAA  
AGGGAAAAAGTTTAAATATGTCATCAAACCTTTGAGAAAAGGCACATCTATCTCATCAGTTAAAAATTTGG  
CTCATCTATGTCATTTTCAAGTTAACATAGATAATGAAATGGATGAGCCTTTCTCAAATGGAAATGACATAG  
ATAAACCAAACCTTTAACGGATGATATCGATGAGTCTTTTCTCAAATTCGATGACGTATTTGAGTCTTTC  
TCAAAAAACAAAACCCTCTTTTGGAGACACAATTCCTCGGTACACACTATGTTTCTCCTTATGACTTGAATG  
AATAATATAAAGAAAAAAATACCTAAATACACAACCTATTTTTATCATATTTTTAAAAAATTTCCACCATTT  
GAAAAAATTACAAAATCCTTACTCCCTCTCCTCGGATATATCACGATGTATCGGTCCGATAACATCACTTT  
ATCCATCGGATAACATCATTTTACACGATCGTATCGATCCGAAATCAAGACGCGATGTATTGGAATATTGA







CATGTAGCAACTAATACAATTTATTTTCATTTTGGAGATAACAAATCTTACCTTAAAAGAAGATTTATCTG  
TAGGTATCTTTGAAGTGACTTGATAATAATAATAAATTTAAAAAATAGCGGTATATATTTAACTTAATACA  
CTTTTTTTTTAGTTAGTTAAAGTAGACTAAAATGGAAATAATGTAGTGTCATGTTAGCTACTACTATGCTC  
ATTTACAGGTGATATGTAATTAATTAATTTTTTTTTTTGTTACGTAATTTCTTTATATATTTTTCTTCATTT  
AGGATAAGATAAAAAAATAAAGGAAATGTTCAAAGGCAAAAACCTTAGGCCAAAAAATAATAATCTG  
TTCTAGCATTACAAAAATTAAGTTAGGGGATCCTATGGGCATAGAACATGGAGTTTGTTTCTTGATATA  
CCAAGATTGTTGCTGATTTGACGTATATTCCTATTTATTTATTTTTATCTAGACACACTAATATATATTTA  
ACTTAAAAAACTAATGTAAAACATACACCCTCTATCGCAATATATGTGACATAATTTAATTAGACCAAAA  
AAAATTTAAGAAAAAGTTAGTGAAACTTGTGATGTAAATTAATAAAGGTATAGATATTTGTGTGACTAT  
AAATAATCTTATTTAGGATAAAGAAAGCGTGACGTGCCTTTTGAGAATTAAGATAGATTAAAAAAAT  
ATGTCGCATTAATGTTGTAATTAGTGATAGGTCCATATATTAATTCTGGACAACGTAGATTAATTAATTA  
TATAATACTCGAAGCAAACAAATTTCTCAAGTGGACCACATACAAAATTTTGATTTCAAAAAGAAGGA  
ATTAATAATTAGTTGTTCAATTTGTTTATGTACTTTAGGTTTTCTAAAGAAAACTATGTAAATTC  
ATTGGCTATTGTTTAGGGATTTGTAGTAGATTTTGATCCTTGCTTCTGCCCAATCAAATTTACATTACAT  
AGTGAAGATTTAAGAATAATAATAAATTTAATAATAAATGAAATAATTATTTTATTATATTATTTTAGTT  
AATTATTCTTAATATAAATCATATAAATATTGAAAAATGATAGTAGTATTTAATAATAAAATAAAATATGT  
ATAAAATGATTAGCATATTTACATAGTTGGATGTGATCAAATTATAATTAATTAATTTGACTCATAAACAGTT  
TAAGAAATTATCAATTATATAGATTAAAAAAATGTAAAAAATATTTATAAGTTAACTTGACTAATTTTTAT  
TTCTTAATTTACGCAGAATGTGCACATGGCACAGCTTGCAAATTCGAAGGAACAAAGCGCCTCTTATTG  
CAGGTTCTCTTTTTTATTTTCTTATTTTTATCACTTATCCAATTACTCCCTCACTTACTTAATCACTATCGGT  
TGTTTCAATTGATCATCTGAATATAATAATAAAATATTTTTATTAGATACGTTATATTTAAATTTTGAGAAA  
AAAACTTGTGTGATTCTCAAATACCTATTAGGTAGTTAATTTGACAACATAAAATATGTCATTTCTTT  
AATTATATGCATAAGTCTGAACTGAAACACGCTAGAGGTTTTATAGCTTGTTGAGGTTAACACATATAAT  
CAAAGAGATAACATATTTTAACTGATTAACCTTATTAATTACCTAATGGACTATCGAGAACACGAGCAAA  
AGTTTTTTTTAAAATTTAAATTAAGGGTCTATTTAGAAACATTTTACTATGTATTCAGAAGTTCATGAAC  
TAGAACAAAGCCGTAGTTGAGTGTATTATAATAAGTGCTAATTCTATATATATTTTTTTGTTTCATTTTCAGT  
TGCTGTTATATCAGTGCTTCTCATGCTCTTAGGTGGATTTTTAGTCCACAGACGTTACCTAATAAAAAGAA  
GAACAATAAGGTTACTTGTCAAAGAAAGAGAAGAAATATTAAGTGCAAATACAAGTGGAAAATCAGCT  
AAAGTTTTCTCTGGCAAAGAAATAAAAAAATCAACAAATAATTTTGCCAAAGAAAATCTTTTAGGCACAG

GTGGATTTGGTGAAGTATTTAAAGGTA CTTTAGATGATGGTACTATAGTTGCAGTTAAAAGAGCGAAAC  
CCGTAACGCTAAGGGCACGTTACAAGTCCTTAACGAAGTTCGAATTTGTGCCAAGTGAACCATCGTG  
GTCTAGTTAGACTACTCGGTTGTTGTGTGTCGAGCTCGAGTTACCTCTTTTAATTTACGAGTACGTACCTAAT  
GGTACGCTTTTCGAACACCTCCACGTGTTCCGTCTCCGCGAGCGGCCCCCACTTACTTGGTTGAGGCGTC  
TAGTGATCGCTCAACAAACCGCGGACGGACTCGCGTACCTACACTCGTCGGCCGTTCCGCCGATTTATCA  
TCGCGATGTTAAGTCGAGTAATATTTTACTAGACGATAAGCTCGATGCTAAGGTTTCGGACTTTGGACTA  
TCGAGATTAGTCGAGCTAAGTGAAAGTGAGAACTCATATCAACACATCCGCTCAGGGTACATTGGGG  
TACCTCGATCCTGAATACTATCTGAATCTTCAACTTACTGATAGGAGCGATGTTTATAGTTTTGGAGTTGT  
GCTTCTAGA A C T T T T G A C G T C T A A A A G G C A A T C G A C T T C A A T C G A G A T G A G G A A A A T G T G A A T T T G G T T  
GTGTACATGAAGAGGATCATGGATGGAGAAAAATTGATGGATGTAATTGACCCTTTTATTAAGATGGG  
GCAAGTAAAGTGGA A C T T G A G A C A A T T A A G G C T G T A G G G A A C T T A G C A T C A G C T T G T T T A G A T G A A A G  
GAGACAAAATAGGCCATCAATGAAAGAAGTATCTGATGAACTTGAAGTATGTTATTGGTATTGTTAGTGG  
CCAGGCTTCAAAAAGTTAG

>PGSC0003DMG400037856 RLK with WAX or WAX-EGF domain

ATGTCCACGTGCAATAGTATTGATGATGATACATGTTCTGGTGTGGTTGTTGCATGACATCCATCCCTA  
ATGGGGCATGGAATGTTACTATAACACTAAGGAGCTATTATAATCATACTTATGTGAAAGATAACCCTAG  
TTGCAGCTATGCTTTTGTAGTTCAAGAAGCTAATTTTAGCTATTCTAAGAATTACCTTAGAAGTTTGGAGG  
ACAATGAGGAGCTTCTCTTGTGCTAGATTGGGTAATTGGTGAAGAAACATGTGAAATAGCTAAGACAA  
ACTCGACTACATATGGATGTAAGAGTAACAATAGTGATTGTCTTGAAAATTCAATTGGTTATCGATGTT  
TTGCATGCAAGGATATGATGGGAATCCATATCTGAAAGACGGCTACCAAGGTATGTATATGTGA

>PGSC0003DMG401005729 RLK with WAX or WAX-EGF domain

CAATACCTGTATTAAGAAATCCA A C T C T C A A T A A C A A A T G A C A A A A T A G T T T G G T G C C T A T C C A T T A G A C T  
ATAAAGCTTTACAACCTCCAAAAATTCAACATTT C A T A C T T C A T G T T G A C A A A A A T A T A T A C T T C T T T C G T T  
CTAATTTATGTGGCGATGTTCGAATTTT G A G A G T G T T A T T A C A T T T G A A G C T G C A A A A G T T T A T A C T A C T A  
CTATCTCATGTATACCAATCAGCTTTGCAATTTGTTT G A T A T C A A T T G A T C A T G T T T C A A A A T C A A T C A A T C  
TGCTTCTTCTACTACTACTTTTTTTGTGTCTCTGTTTTCTCCTTCGTCAGATCCAGTGCAAATAATGATACTT  
CCTTGAAGTATGCATTTTGTCTAAATCAACCTGCAATGGTGTGAAATTT C A T A T C C A T T C T G G A G A C T T  
GACAATTACAACGCCAGCGCTCCTCAGTACTGTGGTTATCCGGGATTTGGAATCAATTGCACAAAAAATC  
AACCGCTTCCGATTATTTACCTTCCAGGCGATGCTTTCTACGTCAAAGTATAGATTATAAAAGCTATTCT

CTCGCTCTAGTGGACGCTGATGTTTTCAACGAGAAATGCCCTAGAGCACGTCACAACCTTACATTGGAGA  
AATTGCCGTTGAAGTTTTCCGATTCCGCTTGGAACTTACCTTCTATTTCAATTGTACGGAACCTCTACCT  
GATTCTCTCCCGCAGAATGCTTAAAATCAAATGGAAACAGGACGCATTTCTACGTTGGGGAAACTGAG  
CCAGACGATTTGAACTGGTTTGGGATTTGTGAAGAGAAAGTGGTGGCGACGGTGACGGAGAGGAGAA  
GCTTCCAGAACGATGATTGGATTGGAGGATTTGGTGCGGCCATGGAAGACGGTTTCGTGCTGGACTGG  
CGGAGCGCGGCGGAGTGCGGCCAGTGTGAGGATTCAGACGGGAGGTGCGGTTATAACAATTCAACCC  
ATAACCTTTTGTGCTATTGCCAAGATGGTACCGTTAAGTTAAACATTGCAAAGGTACACCCAAAACCTT  
GCTATTTATCTTCTCATTCTTATAGAACATTGTATTTGCCGCTAAATTTTCATAATTTGCTTAAATCTAGC  
TATAATTATCTTATATTTTTATATAAGAAAAATCGAATCCCTTATTCTTAGAAATTGAACTCAAAAATTT  
TAATTATAAGTAAAAAAGTTGTTATTGAATCAAGGTTTCGTAAACTTGCCTTAAACCTAAAGGTGATA  
AGTCAAGACGTGTTCCATAAATTTAGAGGTCATTTGGTTATGGGTTAGGAAGAGAATTATTTATGTATCA  
AATTAGCATAGTGAAAACCTTCAAACCATATTTAGTAGCTTGTAGTTGTTTATACAAAATTTAGCACGTCA  
AATATGATGTTTAGTTATCATTTTACAATCTCATATAAATAAAATATGTATAAATTATGAATCAACTTATAT  
CTTATTTTATAGTACAAAATAGAAGATGAAATAATCAATGTAATTAATCTTTCATTATTAACCGAGGACC  
AATCAATCTCTTATAAAATAAATAATAAATAAATAAATAAATAAATAAATAAATAAATAAATAAATAAATA  
TGATACAAAGGTTTGATCACTTATTTTTCCAACCTAATGCTATTTAATTAATCTAGAAAAAGTCCAATGTT  
GTGATTCCATAGTTGGCGTACGTGTTTAGTCATTATCATATTATCTTATTTAATACGCGAATCAGCCAATG  
GTAACAAGTTTTTTTTGAGTATAGCTGATGTTAGTATTTGACTTTAATTCTAATTTTTGCATACTTTGAATTC  
AAAAGAATCAAAATGCATAGTTTATAATTTTAAATTTTTGCTTACTTTGAATTCAAAATGCATAGTTTATT  
GCGTCTAAAATCTGAAACAAGATTGAATTTTCCAGAAAGAGAGCCAAAATGAAGGGGCTACTGCGAAT  
ATACTGAATTGAAAGGCCCATTAAGATTGGGCTAGTGGCTAAGGATGCCAAACTAAGCCCAAAAATAA  
AGGTCCC GCCCAACTTGCGATTTTGATTTAGGGAAGACAGAAAAAAGTGGGTTGAAATTAAGGGTAT  
GTTTGCTACGAAGGAAAATGTTTTCTGGAAAACAAGTAGATTTTTGACTTATTTTCTCATGTTTGGTTGG  
TGACTAGAAAAAATAATTCTGGGAAAGATTTTTACTGTTTGATTTATGAATGAAAATTATTTTTGAGA  
AAATATCTTTTATTTTACTAGAGAGTAGAAAATAATTCTTGAATTGAAATTGAAAATATTTTTAAAAAA  
TAACTTAATTTTATTTGGGGAGGGTGGGATGGGGAGGGTCGCGGGTAGGGTGGGGGTAGGGGTGAG  
ATGGGTAAAAAATAAAACATCAAAGTTGAATAATATATTTTTAAAAAAGCTTAAATTTATTTTTTCAA  
CAAAAAATTGTATTGAAGTTGGAGGAAAGTTTTGGAAAATGTTTTCTTACTTTTTGAAGGGAAGTCAT  
TTTTCTTGAATTTGAGGAAAATATTTTACCCAACCAACATGAGAAAATTGAAAAACATTTTCATACCAA

CACACCCTAAGAATTAACCTAGGGTAAGCTGAAAACCTATTTTAAAATGGTGAATAATTGAATGAGTTACA  
ATATAGGAAATCTACCTATTTAGACAATCATCCTTACCATAGCTACTAAATTTCACTATACTTTAGAATAA  
TTACATCATCTCTCGCTCCTTCTCGGATAGATCAGTGGATATTAATACTCGATACACAAATACATGAAATT  
ATGAAACACAAATACAAAGAAGTAGAGGAACGAGAGAGGGAGAGAAGTGAGATATATTCGTTAGATA  
TAGTATATCTAGAGGAAAATATTCGATATCTAGAGACAACTCGGACAAAATACGTAATTATTATTGAAAC  
TATGGATGCGTTGAGTAATTAGCATCTATACTAGTGTGCTTTATAAAAGTTGTTCAATTTACCCATTATTA  
AATTATCTTAAGCTCAATTCATAAAAATCTAAGATGGATTGAGCGGGTCTTTTTTTGGGCTTAGTTTGAC  
ACCCCTAGGCTAACCCACTTTAACCTATCCAATTTAGGCAACTGCTCATTATACCCCTAGGCTAGCC  
CATTTGTTTTAGGACAAATCCATGAAAATTAGGGAAGAAAATTAGAAAAGATGACAACAATTGCGTTAG  
AACCTTACGCTTATGTGATGCAGTGCGAACCTACAACCTCAAGTCGCAGTTTCTCTCTTCAGCACGACCCAA  
AAGAACTTTTTATATATATATAAATAAATAATATATACTATAAAAAGAAGCCTTGTTTGTAGACAAAATTC  
AGTTTCTGAGTGTGATGGTCTAAAATAGCCTCTACCCCTTTTTATTACTCTGTAATATTCTGACTATCAA  
CTTCACAAAATGCCAAAAATATTTTAAAACCTTAATAATATACAAATTGTCAACAGGTGCATATGAATAT  
GATGCGATTTTTGGAATTTTATATTCCACTCAAAGAAAGAATTCTCAAACACACATGTCCTTTTCTTGTT  
AAGAGTTTCCGCTCTTTTCTTTTTTTACTTTGTTTTCTTTCATCTAGACCTGTAATTTTTAGTCTGCGGAA  
AGTTTCAGCTTTCAAGGTTATTGAATGGAAGTTACCAATAAGATTGGTGTAATAATTTATCCCTTTTTTA  
TTCATTTGAAATTTCTCCTTCTAGTTGTGAACAAATGAACTTATTATCGTCCCACTCGTCTAAGTTGAAA  
AGTGAAATTTTCTATAGTAAAATAATCACAGAAAAGTCTTATAAAGCATGAGCAGCCATTTCTTTTTTCGT  
TTATAACAATTCTCAAGTTTGCATCTTTTGTAGTCAAACTGGATTAACCTTTGACACTTGAACAACCTCA  
ATTGAATCATATATTTTGCCAACTCTTCTAATACATAGGTTCTCCAACCAACATAGTCTATCATTGATGA  
GTTCTCACAAATGCATGCTCAAACTTCCCTCTTCTGCTCCATTCCATCATCTCCTTCTATGCTTCTTG  
ATCACGTCCTCGCCATCCTATGGCCAAGAGGATAAACAGTATTCCAATTGTAATAGCTCCTACACCTGTG  
GGAATATTCAAAATATCAGCTTCCCTTCTGGGGTGGCGATCGACCTCAAGAATGTGGTCTTCCACAATT  
CAAGCTTACATGTGAAGCCAATCAGGATCCCCTTATACATATCGATGGTCATAATTTTCGCGTACTTGGC  
ATCAATGGAGACAATCAAACCATGAGAATTGCACGAAATGATCTTGAGGAAGACATTTGTCCTGATAGA  
TTCGGTAACACTAGCTTTAATGATCCCCTATTACGCTATGGTCTGACTTTGGGATTCTCATCCTGTTCTAT  
GCTTGTCTTTTGATATACCTTCTGAATGGAAAAATTTACCTTTAGCTGCAATAACACTGGAGAGTCCAG  
TCATGGTTTCTATCCAGATCAGTCATTTATATCATTCTGGGGACCGCAGTATGGGAGTTGTGAGCGTAAT  
GTCATAGTTCCTGTGTTGTTAACGGCATTAAAGCGGTTCCAAGACCAAGGAAGTACGAAAATATTGGAG

CTATTGAAGCAAGGGTTTGATGTGGTTTACAACAAAAGCCTAGTATGCATGGCTTGTGAGAGATCAGGG  
GGGTTATGTTGGTCAGAAACAGATTTTGCAGAGCCAACCTGCCTTTGTCGGGACCGGACTTATTCCTATT  
ACTGCGGTTTTGTACAGGAACAAGGTGTGTTCCATCTCTAACTTATCTTTTTTGCCAAAAATTAGTCGAAC  
CTAACTGGTAGGTCAGAGTCTTCAACTGTCAAATAAGACTGCCAGAGAAGAGAAAAAACCTATAGGC  
TGCCATGTTTTGGTGGAACCTCCAATTATTTTACACCTTCTATTTTATTCCATCCCTTGTAAACATTTGTT  
GGGGCATTCTTTATCATGTTTATGAAGCCCAGATAATAAATACTTACAGTTTGCCTAGCACAAAGCCC  
TTTTGATGATGCCTGTTCTAAGAATTTAGTAGTACTAGGCAGCAGCAAGTTTGTATGTGCTTCACCCAG  
CAAGATAGGTATATCAAAATTTGTGATCAATGGAGATAACAATGCATTTTTTGAAGATTAGTTCATTAG  
TTTAGCAACCGTTTAGCAATGGATTCTATTTTCAAGGAATGAGAATTTCTAAGGGATTGGTTTTCAAGA  
ATTAGCTGAGATATATGATAGAATGGACATAAAACACCTATGATATGTGATAGAATTTCCAGAAACCA  
ATGATCCGAAGTGATCATCTCAAGATTCTTGAAAACCATAAATCTGTGAAAGGGAGAAATACAATACTTC  
TGTAAGTGAAGACGAGAATTTTGCATTTGCAAGTCTCAGTCAGGGTATTCTTTGCTAGTCCCTAAGGCGCA  
TGTGGATGCTATGACAAAATAAAACAACCTTTTTCCACTCTGTTTCCATGATTTTACTTCTACCAACCTAA  
GATTTGAATACTTCCCGAATTTCTTTACCTTTCTAGTTCTTCTGTCTAATCCGTGATTGAAATCTCTAATTC  
TTTTGCCGCATCTAGAGTCTTTTACTCTTACCCAGTAGGTGTTGAAGGTGGACTTTAGATGTTAATAAG  
ACTTACAAATTATTTTACCTATTCGCCTGACTTCAGTATTCAGGCTTTTCAAATGTTGTTTTAACAGCA  
GTTATTTTCTTGCTTCTTCTTATCTGGTTTTTTGTTTTCTCCATTTGTAAACTGCGCCAGCAATGCCA  
CAGATTATTGTTTTGTGATTATTCATACTGAGCTTCTAGTGCATAACTATGCAGTAGAATTATGCAAG  
AACCTGTTTATGCAAAAATGAATTACCAGAACTTCTGCAAAAGGGAATGAGGCTAATATGTCAAGATT  
GCCTGAATAACAGAGGGCACTATATGTTGTGCTTGAATAACAAATACAACCCTAAACAGAACAACGTTTT  
CATAGTAAATTCAGAACTTTAAGTCCAAATCCACGTTTACTGTGTTTCATAACAGACTAGAAAATAAC  
CACATAATTCCTTTATAAATTAGAAACAGTAAGAAGTTGTATTTATGTCTTTATAATACTACTGGAGATAT  
TTTGTGCGTGGTTCTGTATCATCACTTGTATGTCTGCATTACAGGTGATAAAAGAGATATCAGAGTGAA  
GGTTGCCGTAGGTAACCTTTCTTTGACCATGTTTCATCATATGATATCCTTCTCTTTAAATGATCAAGAACTT  
CCTAGTCACATATTTCTCTTTTCAAGGTGTAACCTGCAGCTGCATTCACTGCCATTGTGGCATGTGTAATTT  
TCTTTCTCTATTATCGTCGACAGAAGAAAAGTCATGCTGGTTCGTCTTTGATAACCAGAAGTATCCTTTCC  
TATCCCTCCTCAACAATGGACCCTGAAAAATCTTCTCACTATTTGGGAGTTCATGTCTTCGACTACAATGA  
ACTGGAAGAAGCCACAAACAGTTTTGATTCCAGCAAAGAGCTAGGAGAAGGTGGATTTGGCACAGTAT  
ATAAAGGTAAGAGAAATTATCCTGAAGTGGGCTTTCTCTCACTGCCAACCTGCTACTAAACCTAAACATT

TGATCTGATTCATTAACCATATGATTGAACATGACATGTTATAGGTAAACTTCGAGATGGGCGTGTTGTT  
GCTGTAAAGCGTTTATATGAGAACAACACTACAAGAGGGTTGAGCAATTCGAAATGAAATTGAAATCCTC  
ACTCGTTTGCGCCATCGAAATCTAGTTACCCTTTACGGATGCACATCTCGCCATGGCCGTGAGCTTCTTCT  
TGTGTATGAATATATTTCCAATGGTACTGTTGCTGATCATCTTCATGGGGAATTCTCAAAGCCTGGATCG  
CTTTCATGGAATACACGAATGAGCATTTCATAGAAACGGCAAGCGCGCTAGCCTTCTCCATAATTCAG  
AGGTCATTCACCGAGATGTAAAACTAACAATATCCTCCTAGACAGTAATTTCTGCGTCAAAGTAGCTGA  
TTTTGGATTGTCTCGGCTTTTCCCTACTGATGTTACACATGTCTCAACAGCTCCACAGGGTACCCCTGGAT  
ATGTTGATCCCCAGTATCACGAATGCTATCAACTCACCAGTAAAAGTGATGTTTATAGTTTCGGGGTGGT  
ATTAATCGAGCTTATATCCTCTCTGCCAGCTGTTGATATCTGTAGGCATCGACAGGAAATAAATCTATCA  
AATATGGCAATTAACAAGATTCAGAGCAACGCATTACATGAGCTGGTTGATTCAAATCTTGGTTTTGACT  
CCAATGACTTGGTAAAGTTGATGATCACTGCCGTGGCAGAGTTGGCTTCCAGTGTCTTCAGAACGACA  
GGGATTTGAGACCATCCATGCCAGAGGTTTTGGAAGCTCTACTGGGAATTCAGAGTATGGATAAAACAG  
CAACAGAAATAGGGAAGCCAAGTCCCGGTGATGATGCTGGATTGTTGAAGAATCACACATTATCTCTCT  
CACCCGATTCAGTTATTTCAAATGGACTAGCAGTAGCAGTTCAACAACACATGCTTCCAGTATTGGCTA  
AGTTTATGCCCTTAGTTTGTCTAGTTTGTGGTTTTCTTGATAGTGATTCTTCAGCCACCTGCTCTATTGGTC  
GCGGAAGGTGAATTTTAGTGTCTTTCCTTTGAGTACTTTGGACCTTTTTCTATCTTAAAGAGGTTGTACAT  
ATCTCGTATGCAGCAATTTAAATTTATCAATACTAATTCAATTCATTTCTTAAATCTTTAGTTAAATTGTG  
TAGATACTTGTTCAATTGATCATCTTTGTCATAACAGATTTTGA

>PGSC0003DMG401008483 RLK with WAX or WAX-EGF domain

ATGGAGGATCTAAATGATTTGAATTTTGTGAGAGGATTGTCAATAATGTCCCCATTGTATTGGATTGGG  
CTATTGGAAATCTTACTTGTGTTGAAGCACAAAAACGCGATGATTATGGTTGTCAAGGTAATAGCCAATG  
TGTTGATTCTGACACTGGCTTAGGTGGATATCGGTGCAGATGTAACCTGGGATATGAAGGAAATCCTTA  
CCTCGGCTGTCAAGGTACAATAACACTAGCCCTGTGTATAACTGAATTCATAAAATGATAAAATGTACT  
ATGTTTATATATTTTCTTCTTGAATTTGTATGCTAGATATTGATGAATGTGTGAATCCAAATACTAAT  
TCGTGTGAACAAAATTGTATAAACATACCGGGGAGTTACAATTGTTCTTGTCCAGAAGGATATACTGGT  
GATGGAAAAAAGAATGGTCGTGGTTGTAATGCTAAAACTCAAACCTCGGAGTTTCCATGGATCAAGTTT  
TCCGTTGGTAAGTTCCTCATCATATAAACTCTAAGAATTCTTCGAGTTTACATTGATATTTGTCATGAAGT  
TTTTAATATTTTCAGGACGATTTAACATCTGTTCTACTCAGTACAGGTATGGGAGTTGGGTTTATGTCCCT  
AGTGCTTGGAAACAACCTGGCTCTATTTTAGCTTCAAGAAACGAAAACCTCATGAAACTCAGGGAGAAGTT

CTTCCAACAAAATGGCGGATTCCTCTTAAAACAACGAATCTCCTCTAACGAGGGTGGTGTGGAAGCAAC  
CAAAATTTTTACAGCTGAAGAGTTGAAGAAGGCTACAAACAACATGCCAACGATAGGATTCTTGGTGC  
TGGTGGAAATGGAATTGTCTACAAAGGTATACTACCCGATAATCATATAGTTGCAATTAAGAAATCTAAG  
TTTGTGGATGAGAATCAAATTGAACAGTTCATCAATGAGGTACTTATTCTTACTCAAGTTAACCATAGAA  
ATGTAGTGAAACTCTTTGGGTGTTGTTTGGAAAGCTGAAGTCCCTTTACTAGTTTATGAATACGTTTCTAAT  
GGA ACTCTTTACGAGCATATCCACAATCAAATGGAGCGCCTTGGTTATCTTTGCAAATCGGTTGAGAA  
TTGCTGCAGAGACAGCAAGTTCACCTTGCTTACCTTCATTCATCCGCGTCCATGCCAATAATTCATAGAGAT  
GTCAAGTCTGCCAATTTATTGTTGGATGATGTTTACACCGCGAAAGTTGCAGATTTTGGAGCTTCAAGAT  
TAGTCCCTCTCGATCAAACACATGTTGCTACGATGGTTCAAGGAACGTTAGGGTACTTGGATCCCGAATA  
TTTCCACTCAGGTCAATTGACAGAGAAAAGTGACGTTTATAGTTTTGGAGTAGTTCTTGCTGAACTTTTG  
ACAGCGTTGAAACCTATTTTGAAGGACGAAAATGAAAAGGACAAATGTTTAGTGGACTATTTTCATCTTGT  
CCATGAACACGAATAACTTATTTTCAGATTCTTGATCGTAGAGTGGTACGAGAAGGAAGTCTTGAGCAAC  
TTCAGAAGATTGCTGAGCTTGTTAAGAGTTGCCTTAGTTTGCACGGAGAAGATAGGCCTACTATGAAAG  
AAGTGGCGATGGA ACTTGAAAGTTTGAAGAAAGTTCACAAAAAATAATCCTTGGGCTAATGGACATGAAC  
ACGAAGAGAATGAAGATGAAGTAAGAGATCTTATAACAATTGATCCAATCGACTCTAATACAGACAACG  
ACTTTTCTGGACAATATAGTTCGTATAGTCCTTCATTAATATATCATACAAATATCCCGCGGTGA

>PGSC0003DMG401030531 RLK with WAX or WAX-EGF domain

GTCAGAGCCAGTTGCAGAGAGCAAAAAATCCATCTTTTTGCTTAAAAAATCAATCTTTCTTCTATAGGA  
AAAAACCCAAGAAACCCCTTTTCTCTTTTAGTATAATTTTCATTATCTACTTGTGTTAGTTTGTATATTTTCA  
GCTGTTTCAAGATTACAAATGAAACAAGAAAAAAGGTATTTCTTGATAGTATCATTAAACCTTTGTGTTTT  
ATGCTTCATTTTGCAAATAGATAAGTGTCTGCTGTTGATCCACAGTTTGTAGTATGTAATAAATCAGTAA  
ATTGTAAATATGGTCCAAGAATAAGCTTTCCATTTTATATTGAAGATGTTCAAGAATCTTATTGTGGGTAC  
CCTGGATTTGGGCTAAATTGTAGTGAACAAGGGTTTCTGTTGTACATATAGCTGGAAATGAGTATGTA  
GTTGAAGATATTAGATATCAAGATCATACTTTTCAGCTTAAAAATTCAATCTTTAACAGTAGTGTAAGGA  
ATGGATGTGTTTCTGATATCAAGAATATTTCACTCGATAATCGCCCTTTTCAGTTTGTAAAGAAATCGAAA  
ATTTACTTCTTGTCGAAGTGAATGGTTCGATATCTGGGAATCTTTTGAAGCACATGATTGTTTTTGGTTG  
TGGTGGGGAAAATGGGAATGATTGGGGTTATGCAATGTTTGTGAGGATGAGAGCTTTGAGTCTGCAT  
TACAAGTGTGTGAAAAACATGTGATGGCACCTGTAGAAATGCTTGGGGATGAGGGAAGTAATCGAGAT  
GTTGACTATCTGGTGCTTTTGAAGAAGGGGGTTTAGATTGAAATGGACTGCTAGTAATTGCAGTGAATGT

GCAGCAAGTAGAGGACATTGCGGATTTGATGCTATCAATTATCAATTCAAATGTTTCTGCACTGACAGGC  
CTCATGCATTGAGTTGCAAACCTTCCAGTAAGCCCCTATGTCCTTATCTACCAGTTAATTTTCCAGTATAAT  
TAAGCAGCACCTTATGCTATGCTAGGCACCGTGCTTTAAGGTTTTTTCGTGTGATAGCTTGATGATTTAGT  
CAAGATACAGCTGAATTAATCGAATGGATATAGCTATGGATGATTAATAATGCGTTTACAACAAAGTGT  
AGCCAAGGAAATATCCTTATAGCTTCAAAGGATAAGTTAAATTTCCAGTATAGTTATGCAGCACCTTATC  
TTATGATTATGCTCCGTGCTTTAGGTTCTTTTCGTGTGATTACAAGCGCCCAAAAATGTAACCTTGATTTA  
GGCATCATGATACAGCTGATTTAATCCTTATTAGTAGTATTATTTAGTAGTCGCGTAGTTTCTTATTCTTTA  
ATGTGTATTACTATCTGTTGCTTCATTTGCTTTATATCTTGTTATTTTGCTGTCATATTTTTCTTGGAATCCT  
GCTATGAAAACGTTTCTTTGAGCTGAGGGTCTATCGGAAACAACCTCTTACCCCAAAAAGGTACAGCTAA  
GTGCAGGAAGTATCCTTATAGCTGCTAATACTGAATGGTGTCTAGTTTTGGTTAATCCAAGCATTTTCTG  
GTTTGATATTTTGTCCAGTTAATCTTTTTGTTACACCAGTATTATTTGTTAAGTATAACAAGGATACCAATT  
GAAGACTTCTTTAATTCTATTCTCAATCTAATAGGCCACTGAATCTCATTTTTCTTAGCCCATTCAACTTCA  
CATTTTCGAGTACAAAATTACAGACTCAAGGTCTGTTAAAGGAAAACCGCTTGTGATCATATCTGATTTGA  
GCTTTATCTATGATAATTCATGTCTAAGAAGCGATCTTTAATGATACTTATGAAGGACTAGGTTAATAGTT  
TGACATGATTAGTTGAAGTAGGCTAATATGAACTCAGCAACCGGTTGTTAACAACCCACAGCTGTAAT  
TAGTATGTATACATTGGCTGCACATATTGAGCAGTTGCTTGTTTGACGGAATCAGAACTTACATTATTGA  
CTTTAATATAGGTAGGAAACTGCAACATGTAAAACCTAGTCAAACCTAAAATAAGAATAAGTAGAACATT  
TCAGAAGTATGTAATCAGGAGCTGACTTTTATCTTACTTTAGTAACTTTAATATCAGTAGAAAATTGCAAC  
AACTACTATGTTTTATACTTGGCATACTGTTACATATTATTTTACTTGAGCCGAGGGTCTATCGGAAACAAC  
CTCTCTACCTTCTCAAGGTAGGGGTAAGGTCTGCGCACATACCATCATCCCCAGACCCCACTTGTGGGAT  
TACATGGTATGTTGTTGTTGTATACGTTACATATTATTTTACTTGAGCCGAGGGTCTATCGGAAACAACCT  
CTCTACCTTCTCAAGGTAGGGGTAAGGTCTGCGCACATACCATCATCCCCAGACCCCACTTGTGGGATTA  
CATGGTATGTTGTTGTTGTATACGTTACATATTATTCCTTCTTACTCATCAAGTACCCTTTTTATATCTTAG  
ATATAAATCCATGTTTATGTGGTTTTGGTTATTTACGCTACTTTACTAAACCTCCAGCAGTCACTAAATTAC  
CAAAGTATCTCCTATGAGAGCCAATCATTTTGGTTAGTGAATGCTGGCATAGTGAGTTATTCGTTTATA  
GCTCTTCTGAGGTTTTTTGCTTTTGATCGATTTCCCTTCATGTTTGGCTCAACTATATTATAGTAAATCTTT  
AATTGTTTCAATAACTCTATTCCATAAAGTGCGCCAAAACCCAATTGCTTGTGCTTCAAATGATGTGAA  
TCATCCCTATCCTGTTTTAGACAACGGGAAAAACCAAGTCGATTGTAGTGCAATGCCTTGAGAGTCATAT  
GTTGTTGCACCAGTTAAAATAGGAAAAAGAAAAGCAATAAGAAATGCCAATAGATAGACTATTTAAGGT



TGTCAGAAAATGAATTAATACTACAATGATCTTGGGAATAAGTTAGTGGCTGTGAAAGGACAGCAACCAT  
TCTGGCTCTGAAAATGGTGAACCTGTTTGTTATCGCTCTGTTAGGTTTTGCCAGAATCATTGCTGGATGG  
TAAATGCTACTTACCAAGCTGCTAATTTAAGATTCTAGGCATAAGATACTAACTATTTGCAGAGTTATAA  
AAGCTAAAACAACGATCAACGAGGTTTTTCATGTGCATCATAAACATCAAAAACCTCTTCTTATCTATTAC  
ACCCTCTGTCCCAATTTAAGTGTCTTAGTTTGACTTGACACGGAATTCTAGAAATAAAGGGAGACTATTG  
AATCTCATGGTCTTAAATCAAAGATGTGTGTAGTCCTTTAATCTTGTGGTCTTAACTTGACAAGTAGAA  
TGTTGGAATTGGAAATTTACTAAATATAGAAAGAGACACTCTTTTTGGGACAGACCAAAAAGGAAAGTA  
ATACATTTAAATTGAGACGGAGGGAGTAGTATAAACTGCATAATCTGATTTGGAGAGGATTATATTCTTT  
TCTGTTCTTTTACTACCTGTTTGCGTTTAGTATAGTTTTGGCAATAGTGAGATTATAGGTGAGTTTTCACTT  
ATTCCACTCCCTTAATTCATGGTCATAGAGTGCTAACTTGTCTGAGATTGACCTATGAATTTTCCCCGTAT  
GGTATTTTCGGTGCTGTTCTAAATGTGGTATTAAGAAAACCAATGTCTAAACGACAATCCTTGGACAT  
TTCTAAAGATTGTATAGCACATCCAGAAGCAGTTGCCTACTGGTCCAAAACCAATAATTATAAATGCATG  
TCCCTGTATGTCCATTTCCATCCACTGAAACATTTTATAAGTTCTATTTTCTTTCTTGTGATGCAGATCA  
TTATTTTTCGATACTACCTCCTCCACGATTTGTCTGACACTTCAATTTTCAGGGAATTATAATTTGGGGT  
TGATTCTTGGCTCAGGTAAATCAGTACTGTATTATTATCCCTGAATTTGACATTTCAACATAGTTCCAC  
ATCTTGTTTACTTCATTTTTGTCTTTTTCAGTTTTAGGTGGAGCTGTGTTTATAATCCTCGTGGTCACTTTCA  
TTGTTTGTGTTACAAGAAAGAACACAAAAGTTGTTTGTACTTCACCTCGCGAAAAAATCTTGTGATCG  
TTCCTTAACACATGATTTTGATGGAAGTAGTAATTACCATGGAGTCTCGGTCTTCTCCTATGTTGAACTTG  
AAGAAGCTACAAGTAACTTCGATTCCTCCAATGAACTAGGAGATGGAGGTTTTGGTGCTGTTTACTATG  
GTAAGAATCTTGAAAGCAAATCAGATGTTCAAATGACACGACTAGATAGCTAAATTTGTACTACCTTTCT  
TACTAGGTAACTTAAGGATGGGAGAGAAGTTGCAGTGAAGCGACTTTACGAGCACAATTGCAAGAGA  
ATGGAACAGTTTAAAAATGAAATTGACATTCTCTCGCCTAAGGCATCGAAATCTTGTTACCCTTTATGG  
TTGCACATCAAAGCACAGCCGTGAACTCCTCCTGTTTATGAATACATTCCAATGGAACAGTGGCAGAT  
CACCTGAATGGGGATAGAGCAAAGGACGGATTCTCCCATGGCCTATCCGCATGAATATTGCTGTAGAA  
ACTGCTTGTGCATTGGCTTACCTCCATGCTTCTGACATAATACATCGCGATGTGAAGACTAGCAACATAC  
TCCTCGACAGCAATTGTTGTGTCAAAGTTGCAGATTTTGGGCTTTCGAGACTTTTTCCGAATGATGCTACT  
CATGTCTCAACTGCTCCTCAAGGGACTGCTGGATATGTTGATCCAGAGTATCATGAATGTTACCAGCTCA  
CTGATAAAAGTGATGTTTATAGTTTTGGTGTGTCCTGTTGAACTTATCTCATCAATGCCTGCTGTTGAT  
ATTACTAGGCGTCGACATGAGATCAATTTGGCCAACCTTAGCGATAAACAGGATTCAGAGATGTGCATTT

GATGAGCTGATTGATCCATCTCTGGGATTTAAATCAGATGCACAGGTTATGAGAATGACTACTTCAGTAG  
CAGAGCTAGCATTCAATGCTTGCAGCTTGAAACGGACTTGAGACCAAAAATGGATGAAGTACTAGAGA  
CACTCAAACATATTCAAGGCACCTATACGGATCAAATCAAAGATGAGAAGACGAATGACTCAATTGTTG  
ATAACACAGAATGTAGTGGTGAAAAAGTCCCTACTTCTCCTACATCAGATAAAAATAGTTTTGTAAAGAA  
AATGCATTTGCCACCTTCACCTATTTCTGTAAGTACTGAGAGCTGGGTTAGTAGCTGTGGCAGTAGTAATGTT  
AGCGGGTGAAATTCTTACACTCTTTGCTTTCATTTCAACATAAATGTTACAAATATGTAAGTACTCATTGATAAT  
CTGTAAAGGAATAAGTTGCTGAGACGTTCTTTTATCTTTATTAGTTTTTACTCTTGTCTTTATTGCGGT  
TTTCTGAACACAGTGGAGTGTAACTATTGAATATGGGCATGCTTCTGCACTAACGAGCATGCATATTTT  
TACTATCCTGGATTTGAGGTTACTTAAATGAAT

>PGSC0003DMG401030532 RLK with WAX or WAX-EGF domain

TCTAGGTAGAGTTTATACTGTATAATGAAAAACCTTCAGCTAGTTTTCTCTTCTTGAATATGGATTTT  
GCTTCTTCTTTATTTTGCTTCCTTTTATCTGTTTTTCTGATGTTAGTTCAGGCAATGGGCAGAAATGATTCA  
ACTTGTCCAAAATCCTTTTCATGTGGAAATCTTACTAACCTGAGCTTTCCTTTCTCTTTCCACACAACCT  
GACTGTGGAATAATGTTCTTATCTGGTTGTGATGCTAAAACATTTCCGAAAATCCGACTGCTTCCTGAAG  
GAGATTGGTACTATGCTGTAGTAAATTTGTTAATTATACAGTTTGGGTTGAGGACCCTAAGCTTCATGC  
CAAGTTGAGGCAACACAAGTGTGAGGCTTTTAAACAAAACCTTATCATTGCCAGCCTCTCCTTCTATTTCTT  
TTGAAATTCTCCCAGTGAATATTCTCAACTTCATCAAATGCAACAGCACTAGTAGTAGCACCCCAAACATT  
ACCCATAAAATGAAAGATTATTTTGCTGATTATAGAATGTACAATGGCTGTAAAGACTTTAGCATATACT  
ACAAGCTTCATGGAGGCGATGATGAACACGTTGAGCAGGCAATCTTCTGCCAACTGTTCACTTATCAG  
ACTGCCGACCCACTCGAGATCAGATGATGGTGAATTTGTTCAATATGTTAAGCGCCGGTTTTCTAGTAGAA  
TGAAACTGTCTGAGGACTGTAACAAATGTCACTATGGTGGAGGTCAATGCCAGACTGATATAACCAAC  
AAATTTCAATTGTGCATATCCAAATAATCAACATGATCAAGGTCATCAAGAAATTTCTTCACTTGAAAAAG  
GATCAGTCACTCAGTGCATATTTCTTAGTGTCTTTCTTGTGTTTCATATCACATATCTATAATATTTCATAA  
TACTTTCCCTCCTTTTCTTTAGATGCAAAAATGGCTAAAAGAAAGTTCAGACTGACTCTGGGAGCAGGT  
AGTTAAATTTCCATTAAGTGCAGTGTCTTTGATCTTTTCTATTACAGAATTTCCATGCATATCGTTTGA  
ATTTCTTCTTCAATTGTGGTAAAATCTCAAACATTTCTTAATGATAAAGGATGATAAGAGAGGTAAAGTA  
CTTAGCTTACACAAAATGATTGGATAGTGGAGTTGAGAGGACACTTTCTTTTCTTGTGATGTTTTCTT  
TTGTCTGAAAACCTCTGATTACTGATATTTTTTCCAGTTTTTGGTGGATTAGGATTGGTGTGATGATTTGTTT  
AGCTGTCTACTTTATCTGGTGTGCAAGAGGAGGAAATTAATCCGCCCACTTCTCTCAACAAGGAAA

TTGTCATATTTATTTAAAAATGATGTTGAGGGAGGCAGTATATACTTTGGCATCCCAGTCTTCTCTTATTC  
AGAACTTGAAGAAGCCACAAATGATTTCAATTCCTCTCGAATCCTTGGAGATGGAGGTTTCGGAAGTGT  
TACTATGGTGAGAGACTTCCTAATCCAAGTACTGAGCTATGCTTCAATTCCTTCTTCATGTGTCTAATACTTGT  
CATTAAATGTCTAGGGAACTTAAGGATGGACGAGAGGTTGCTGTGAAGCGCCTTTACGAGCACAACTGC  
AAACGAATGCAGCAGTTTGTAATGAAATTGAGATCCTTACTAGGCTAAGGCACACCAATCTTGTCACTC  
TTTATGGCTGCACTTCAAGGCGTAGCCGTGAACTAATCCTTGTCTATGAATACATTCCTAATGGAAGTCTT  
GCCGATCACCTCCATGGTGACAGAGTGAAGGACGGATCACTCACCTGGCTAGTCCGCATGAACATTGCC  
ATAGAACTGCTGGTGCATTGGCTTACCTGCATGCGTCTGACGTAATACACTGCGATGTGAAGACTAAT  
AACATACTCCTTGATCACAACTTTAATGTTAAAGTTGCAGATTTTGGGATATCACGGCTTTTCCCAAATGA  
TGTCACTCATATTTCAACTGCACCCCGGGGTACCCCTGGCTATATCGATCCAAAGTATCATGAATGTTACC  
AGCTGACTAGTAAAAGTGATGTTTATAGCTTCGGGGTGGTCCTTGTGAGCTCATTTTCATCAATGCCAGC  
TGTGGATATGACTAGACATAGCCAAGAGATTAATTTGGCTAACTTTGCAATAAACAAGATTGTAAAATGT  
GCATTTAATGAGTTGATTGATCCATCCCTGGGGTTCGACTCAGATACCAAGATTTTGGAGATGACTACTT  
CAGTGGCAGAGTTGGCTTTTCTATGCTTACAGACAGATAGGGACATGAGGCCTACTATGGTTGAAGTTT  
TGGATACTCTAAAAGAGATTCAGATTAGTGAATTTGACAATGAGAAGAGAGCTGACACTAATCTCAGTG  
GAAATGAAGCTAAAATTGTTACAGCACTCCCTTTCCCTAAATCAGAAGATAAGTTTATGCTGAAACAAGT  
TAAATCACTGTCTTCTCCAAATTCTGTTACTGATAAATGGGTTACTTGCTCTGATATAACTACTACAAAGT  
AGTTAAAAGTTCTATACTCCCTTTCTTTGTTATTGATGTGAATTTTGGAGATTACGAATGTACAACTGTA  
AGAGTTTCTTGAGCTATGTATCTATGAGTGAAAGTGATTCAATATTTGATTTGATTATATAAGAGCTGTC  
>PGSC0003DMG402005729 RLK with WAX or WAX-EGF domain

CAAGTTTGTATCTTTTGTAGTCAAAGTGGATTAAGTGGTACTTGAACAAGTCAATTGAATCATATA  
TTTTGCCAAACTCTTCTAATACATAGGTTCTCCAACCAACATAGTCTATCATTGATGAGTTCTCACAAATG  
CATGCTCAAAGTCCCTCTCCTCTGCTCCATTCCATCATCTCCTCCTATGCTTCTTGATCACGTCCTCGC  
CATCCTATGGCCAAGAGGATAAACAGTATTCCACTTGTAAAGCTCCTACACCTGTGGGAATATTCAAAA  
TATCAGCTCCCTTTCTGGGGTGGCGATCGACCTCAAGAATGGTCTTCCACAATTCAAGCTTACATGT  
GAAGCCAATCAGGATCCCCTTATACATATCGATGGTCATAATTTTCGCGTACTTGGCATCAATGGAGACA  
ATCAAACCATGAGAATTGCACGAAATGATCTTGAGGAAGACATTTGTCCTGATAGATTCGGTAACACTA  
GCTTTAATGATCCCCTATTACGCTATGGTCCTGACTTTGGGATTCTCATCCTGTTCTATGCTTGTCTTTTG  
ATATACTTCTGAATGGAAAAATTTACCTTTAGCTGCAATAAAGTGGAGAGTCCAGTCATGGTTTCTAT

CCAGATCAGTCATTTATATCATTCTGGGGACCGCAGTATGGGAGTTGTGAGCGTAATGTCATAGTTCCTG  
TGTTGTAAACGGCATTAAAGCGGTTCCAAGACCAAGGAAGTACGAAAATATTGGAGCTATTGAAGCAAG  
GGTTTGATGTGGTTTACAACAAAAGCCTAGTATGCATGGCTTGTGAGAGATCAGGGGGGTTATGTTGGT  
CAGAAACAGATTTTGCAGAGCCAACCTTGCCTTTGTCTGGGACCGGACTTATTCCTATTACTGCGGTTTTGT  
ACAGGAACAAGGTGTGTTCCATCTCTAACTTATCTTTTTGCCAAAAATTAGTCGAACCTAACTGGTAGG  
TCAGAGTCTTCAACTGTCAAATAAGACTGCCAGAGAAGAGAAAAAACCTATAGGCTGCCATGTTTTG  
GTGGAAACTCCAATTATTTTACACCTTCTATTTTATCCATCCCTTGTAACATTTGTTGGGGCATTCTTT  
ATCATGTTTATGAAGCCCAGATAATAAAATATACTTACAGTTTGCCTAGCACAAGCCCTTTTTGATGATGC  
CTGTTCTAAGAATTTAGTAGTACTAGGCAGCAGCAAGTTTGTATGTGCTTCACCCAGCAAGATAGGTATA  
TCAAATTTGTGATCAATGGAGATAACAATGCATTTTTTGAAGATTAGTTCATTAGTTTAGCAACCGTTT  
AGCAATGGATTCTATTTTCAAGGAATGAGAATTCCTAAGGGATTGGTTTTCAAGAATTAGCTGAGATAT  
ATGATAGAATGGACATAAAAACACCTATGATATGTGATAGAATTTCCAGAAACCAATGATCCGAAGTGA  
TCATCTCAAGATTCTTGAAAACCATAAATCTGTGAAAGGGAGAAATACAATACTTCTGTACTGAAGACGA  
GAATTTTGCATTTGCAAGTCTCAGTCAGGGTATTCTTTGCTAGTCCCTAAGGCGCATGTGGATGCTATGA  
CAAAATAAAACAACCTTTTTCCACTCTGTTTCCATGATTTTACTTCTACCAACCTAAGATTTGAATACTTCC  
CGAATTTCTTACCTTTCTAGTTCTTCTGTCTAATCCGTGATTGAAATCTCTAATTCTTTTGCCGCATCTAG  
AGTCTTTTGACTCTTACCCAGTAGGTGTTGAAGGTGGACTTTAGATGTTAATAAGACTTACAAATTTTTT  
TCACCTATTCGCCTGACTTCAGTATTCAGGCTTTTCAAATGTTGTTTTAACAGCAGTTATTTTCCTTGCTT  
CCTTCTCTTATCTGGTTTTTTTTGTTTTCTCCATTTGTAAACTGCGCCAGCAATGCCACAGATTATTGTTTTGT  
GATTATTCATACTGAGCTTCTAGTGCCTATAACTATGCAGTAGAATTATGCAAGAACCCTGTTTATGCA  
AAAATGAATTACCAGAACTTCTGCAAAGGGAATGAGGCTAATATGTCAAGATTGCCTGAATAACAGAG  
GGCACTATATGTTGTGCTTGAATAACAAATACAACCCTAACAGAACACGTTTTTCATAGTAAATTCAGA  
AACTTTAAGTCCAAATCCACGTTTACTGTGTTTCATAACAGACTAGAAAATAACCACATAATTCCTTTAT  
AAATTAGAAACAGTAAGAAGTTGTATTTATGTCTTTATAATACTACTGGAGATATTTTGTGCGTGGTTCTGT  
ATCATCACTTGTATGTCTGCATTACAGGTGATAAAGAGATATCAGAGTGAAGGTTGCCGTAGGTAA  
CTTTCCTTTGACCATGTTTCATCATATGATATCCTTCTCTTTAAATGATCAAGAACCTCCTAGTCACATATTT  
TCTCTTTCAGGTGTAACCTGCAGCTGCATTCACTGCCATTGTGGCATGTGTAATTTCTTCTCTATTATCGT  
CGACAGAAGAAAAGTCATGCTGGTTCGTCTTTGATAACCAGAAGTATCCTTTCCTATCCCTCCTCAACAAT  
GGACCCTGAAAAATCTTCTCACTATTTGGGAGTTCATGTCTTCGACTACAATGAACTGGAAGAAGCCACA

AACAGTTTTGATTCCAGCAAAGAGCTAGGAGAAGGTGGATTTGGCACAGTATATAAAGGTAAGAGAAA  
TTATCCTGAAGTGGGCTTTCTCTCACTGCCAACCTGCTACTAAACCTAAACATTTGATCTGATTCATTAAC  
CATATGATTGAACATGACATGTTATAGGTAAACTTCGAGATGGGCGTGTTGTTGCTGTAAAGCGTTTATA  
TGAGAACAACACTACAAGAGGGTTGAGCAATTCCGAAATGAAATTGAAATCCTCACTCGTTTGCGCCATCG  
AAATCTAGTTACCCTTTACGGATGCACATCTCGCCATGGCCGTGAGCTTCTTCTTGTGTATGAATATATTT  
CCAATGGTACTGTTGCTGATCATCTTCATGGGGAATTCTCAAAGCCTGGATCGCTTTCATGGAATACACG  
AATGAGCATTTCATAGAAACGGCAAGCGCGCTAGCCTTTCTCCATAATTCAGAGGTCATTCACCGAGAT  
GTAAAACTAACAATATCCTCCTAGACAGTAATTTCTGCGTCAAAGTAGCTGATTTTGGATTGTCTCGGC  
TTTTCCCTACTGATGTTACACATGTCTCAACAGCTCCACAGGGTACCCCTGGATATGTTGATCCCCAGTAT  
CACGAATGCTATCAACTCACCAGTAAAAGTGATGTTTATAGTTTTCGGGGTGGTATTAATCGAGCTTATAT  
CCTCTCTGCCAGCTGTTGATATCTGTAGGCATCGACAGGAAATAAATCTATCAAATATGGCAATTAACAA  
GATTCAGAGCAACGCATTACATGAGCTGGTTGATTCAAATCTTGGTTTTGACTCCAATGACTTGGTAAAG  
TTGATGATCACTGCCGTGGCAGAGTTGGCTTCCAGTGTCTTCAGAACGACAGGGATTTGAGACCATCC  
ATGCCAGAGGTTTTGGAAGCTCTACTGGGAATTCAGAGTATGGATAAAACAGCAACAGAAATAGGGAA  
GCCAAGTCCCGGTGATGATGCTGGATTGTTGAAGAATCACACATTATCTCTCTACCCGATTCAGTTATTT  
CAAATGGACTAGCAGTAGCAGTTCAACAACACATGCTTCCAGTATTGGCTAAGTTTTATGCCCTTAGTTT  
GTCTAGTTTGTGGTTTTCTTGATAGTGATTCTTCAGCCACCTGCTCTATTGGTCGCGGAAGGTGAATTTTA  
GTGTCTTTCCTTTGAGTACTTTGGACCTTTTTCTATCTTAAAGAGGTTGTACATATCTCGTATGCAGCAATT  
TAAATTTATCAATACTAATTCAATTCATTTCTTAAATCTTTAGTTAAATTGTGTAGATACTTGTTCATTTG  
ATCATCTTTGTCATAACAGATTTTGA

>PGSC0003DMG402008483 RLK with WAX or WAX-EGF domain

ATGGTAACCACAAAAATCATAGCTTAATTTGGTCGTTAATCCATGTGGATATTCGTTTCTTGGTGAAG  
CTAGTCGATTTGAGTTCCAGGGTATAGAGGATCTCAGTGATGTTAATTTTGCAAAGAAGATTAGGAATA  
GTGTCCCTATTGTGCTAGATTGGGCCATTGGAAATCTTCTTGTGTTGAAGCACAAAAAGTAACGATTA  
TGCTTGCCTCAATAATAGCCAGTGATTGATTCTGATACTGGCGTTGGTGGCTATCGGTGTGGCTGTAA  
TCGGGATATATAGGCAATCCATACATTGGCTCTGGCTGCCAAGGTAATTTGGTCTCTCTGCTTCTCACAT  
GTTTGGACTTTCTTGTGTTATAAGAAGTTTGTCTCTTTTTTTCCCTCTGTTTCAATTTGTTTATTATACGT  
TCTCTTTTAGTCTGTTTAAAAGTAATGTCAGTTTCATTTATAACAACCTTTAATTCCAACCTTTGATAGTA  
AGTATCTAAAAGAAACAAATAAAAAGGACAACACGTCTGGGATTAATTTTCTCTGTTTTGCATGCCAGAT

ATCGATGAATGTGCGGATCCAAATACCAATTCATGTGAAAAGATTTGCACAAACATACCTGGGAGTTTC  
AATTGTTCTTGTCCAGAAGGATACACCGGTGATGGCAAAAAGAATGGTCGTGGTTGTATTGCACCAAAC  
TCAAACCTCAGAGTTCCCATGGATCAAGTTTTCTGTTGGTAAGTTTCTAAGATATTTCAACTTGTCTCTACTT  
TCCCTTCTCTTATATTTCTAATTCTAATAAAATTCGTTTCGATAAACACAGGTATGGGAGTTGGTTTTATGTCC  
CTAGTAATTGGGACAACCTTGGCTCTATTTCTGCATCAAGAAAAGAAAACCTATTAACCTTCGCGAGAATT  
TCTTCCAACAAAATGGTGGTTTGCTTATGAAACAACGAATGTCTTCTCACGAGGGTGGTGTGGAAGCAA  
CCAAAATTTTACAGCTGCGGAGCTGAAGAAGGCTACAACAACCTATGCTAGTGACAGAATTCTTGGTC  
GTGGTGGAAATGGAATTGTCTATAAAGGTATTCTACCTGATAACCGCATAGTTGCTATTAAGAAATCTAA  
GTTTTATGGACGAGGAACAGGTTGAACAGTTCATTAATGAGGTACTIONTATTCTTACTCAAGTTAACCATAGA  
AATGTGGTGAGACTCTTTGGATGTTGTTTGGAAAGCTGAAGTTCCTTTACTGGTTTACGAATACATTTCTCA  
CGAACTCTTTACGAGCATATCCACAATCGAAATGGAGCACCTTGGTTATCTTGGGAAAATCGGCTAAG  
AGTTGCTAGTGAGACAGCAAGTGCACTTTCTTACCTTCATTCATCCGCGCAAATGCCTATAATTCATAGA  
GATGTCAAGTCTGCCAATTTGTTATTGGATGATGTTTACACCGCGAAAGTGGCAGATTTTGGTGCTTCAA  
GGGTAATCCCTATTGATCAAACACATCTTGCCACTATGGTTCAAGGGACATTAGGATACCTAGATCCTGA  
ATATTTTTCGCACAAGTCAATTGACTGAGAAAAGCGATGTTTATAGTTTTGGAGTAGTTCTTGCCGAACTT  
TTGACAGGGATGAAACCTATTTCCAAGGACAGAAATGAGGAGGAGAAGAATTTGGCAGAGTATTTTGT  
TTTGTCTATGAGAAGGAATCAATTATTTCAAATTCTTGATCGCAGAGTGGTAAGAGAAGGAAGCCTTGA  
GCAACTCCAAAAGGTGGCTGAGCTAGTGAAGAGTTGTCTTAGTTTACACGGAGAAGATAGGCCTATGAT  
GAAAGAAGTAGCAAGTGAACCTTGAAAATTTGAGAAAGTTCACAAAAATAACCCCTGGGCTAATGGAA  
ACGGACATGAAGAGAACGGAGATGAATTATCAGATCTTTATACAATTCCAATAGACTCTAATACAGGCA  
TCGACAATTTCTCTGGACAATATAGTTTCAATTCCAATACAAATAGCAGCAACTTTTCTGGACAATATAGT  
TCAGGTAGTACTTCTAACACAAATAGCCCATTGATCCACAACAGAAGGGCAATTTGA

>PGSC0003DMG402011794 RLK with WAX or WAX-EGF domain

AGCAGAGTAGCCTCTAAACTGAATGTGTCTTATAGAGTCCCACAAAATTTTATTGTCTACAAACTCATACT  
TGATTTGCGGTTGTGATTGGTTTCTTTAACGTACATTTCAACTCGAATTAATAATGCAGGCTTGGGGTTT  
GGCTTCTTGTCTTAATAATTGGTTTCGAGTTGGGTATACCTTATCTTCAAGAAGAGGAAGCTCATCAGGC  
TTAGGGAGAAATTTCCAACAAAATGGTGGCGTACTAATGAAACAACAATCTCGTCAAATGAAGGTG  
GTGTAGAATCTGCCAAGATTTTACGGCGCAGGAGCTAGAGAAAGCTACCAACAAGTATGCAGACGAT  
AGAATCCTTGGACGAGGTGGTTATGGTACGGTTTACAAAGGATTTTACCTGATAAACGCATTGTTGCAA

TCAAAAAGTCGAGAATGATGGATGGCAGTCAAATAGAACAATTCATTAATGAGGTGATTATTCTTACTCA  
AGTTAATCATCGACATGTGGTGAAACTCATAGGGTGTTGTATAGAAGCAGAAGTTCCTTTACTAGTATAC  
GAATACGTCTCTCATGGAACACTGTTCCAGCATATTTACAAGAAAGATGGAGTACTTAGTAACTGGTTAT  
CGTGGGAGAATCGTTTAAGGATTGGTGCAGAAGCTGCTGGCGCGCTTGCATACCTTCATTCTGCTGCAT  
CAAAGCCTATTATACACAGGGACGTCAAGTCTGCTAACATACTGTTAGATGAATATTACACCGCGAAAAT  
ATCAGATTTTGGTGCATCGAGGCTAGTTCATTAGATCAAACACAAGTCACAACCTCTAGTCCAAGGTACG  
TTAGGATATCTAGATCCTGAATATTTCCACACGAGTCAATTAAGTGAAGAGCGACGTCTACAGCTTTG  
GAGTTGTCCTGGCAGAACTTCTAACAGGGAAAAAACCCTTTGCATGGAAAGAACAAGAAGAACGA  
AATTTGGCAACTTTATTCCTCATTGCTATGAAGGAGAATCGTCTGTTTAAAATTCTAGAGCCGAGATTATT  
GAGAGAGGGATCATTAGAACAACCTCAAGTTGCAGCTGAACTTGTCAAGAGATGCCTTCAATTGAACGG  
TGAGGACAGACCTACGATGAAAGAAGTTGCAATTGAACTTGAACGTCTAAGAAAATTCAACAAAAATCC  
TTGGACACATGATCAACAAGGACACGACGTGTCTGCTTGTAGTGGATGAAAATGAACCGTTGGATCT  
TTACAGCATTATGCTGAGTCATACACAAATGCCAATGAAATTTGGAACAATTCAACTTGGATAGTTCT  
AATCTGATGATATTCCCAGGAAATAGTCCACAATGATCACGAGAATTGCATCAATTATATCATAAAGAAT  
TGACACCAAAATATTTGCTTTATTGTTCTTTTGTATATCGATTTCTCCCTTATGTGAAAGCTTGGGATTGT  
TGATTTTGAATTTTGC

>PGSC0003DMG402012981 RLK with WAX or WAX-EGF domain

GGAAAATTGCCATGGGTCCTAAGTGATATATACAAATTGTGGTTCATATTGAGGATGTTATCTCTATTTTC  
CCTCTTCTCTCTAACAAAAGATGACACACATAGAGAGAAGATGAAAAAATAATCTTATTGCTACTTCC  
ATAACTGTCAAGAATGGATCTTCTCCTCTACCATCCTCTCAAAGCCACCCCTTCTCAACTCTCTCCCCTC  
AACTCCCTTCTCAGGTAAGTGTCTCTCTCTCTCACACACACACAACACACACAGAGAAGATGAAAAGA  
TTACTAATTGAAGCTAAAGTTTGAATCTTGAAGTGTAGGAAACAGACCCATGTCCTAATTGAAGCTAA  
AGTTTGAATCTTTAACTTGTAGGAAACTGACCCATGTGGCTAGTTGAAGCTAAAGTTTGAATCTTTAACTT  
GTAGGATGGCCATGTTACTAATTGAAGCTAAAGTTTGAATCTTGAAGTGTAGGAAACAGACCCATGTC  
ACTAATTGAAGCTAAAGTTTGAATCTTGAAGTGTAGGAAACAGACCCATGTCCTAATTGAAGCTAAAG  
TTTGAATCTTGAAGTGTAGGAAACAGACCCATGTCCTAATTGAAGCTAAAGTTTGAATCTTGAAGTGT  
TAGGAAACAGACCCATGTCCTAATTGAAGCTAAAGTTTGAATCTTGAAGTGTAGGAAACAGACCCAT  
GTCCTAATTGAAGCTAAAGTTTGAATCTTGAAGTGTAGGAAACAGACCCATGTCCTAATTGAAGCTAA  
AAGTTTGAATCTTGAAGTGTAGGAAACAGACCCATGTCCTAATTGAAGCTAAAGTTTGAATCTTGAAG

TTGTAGGAAACAGACCCATGTCACATAATTGAAGCTAAAGTTTGAATCTTGAACCTGTAGGAAACAAACCC  
ATGTTAAAGTTTGAATGTTGAATTTTCAGGAAACAGACCCTTTCAGCCAACCTGGAGTAGAACAGCTTTA  
CCTTGTGTTTGCTTGTCAAATCATCATCTTTGGATGTTCCAGAAAAAATATTTCTCAGCAGAATGAAG  
GAAGAAGGGCAATGATGGGCTCTTTTCTTATAGCTGGTAGCTCTTTCATTTCTATTTCTTGTTTTTCAGT  
CTTTACATTTTCATCATTTTGAACACATTGAGTTGTAGAATGCTAGAATCAATAGAATTTCTTGAAGTTTG  
TTGCTAATTATCATTTGTAGATGTTATACCCCATAGAATAAACTTGTATGATTGGTTCATAGAAAAGCACC  
CTACATACCGCTACGGAAGCAGGTACCCGTGGAATTTGTGGATGTGCGTGTAAGCTTGCCCGGACACCA  
CCTTTATAAAAAAAGAAAAAGAAAACTCCATCACTTTCCCTTCTCATCATTTTAATACTTTTGCATTCTAG  
TTCTGTGTTAAGTGTTAATTGGTATTTTATTGTATGACTGTCCATTAAGAGTATTGGTAGTTGTTTCAGAT  
TTCTTTTCAAGATTCATTATTTTTTGTATGGATTACTTATTTCTCACCCCTTGGGATGCGGCCCTTCTG  
GTCTTCCCTGGTCTGTATGAATGTGGGATGCTTTGTACATCGGATTGCCTTTTTGTTACTTATTTGATCTCT  
TTCATACTCAGCTGCTGGCCTTGCCTCTGCGATGTGGCTGGAGCCGCTAGCACAAGCAGAAGAGCTG  
TAAGAATAAATTCCATCTGCCTTATATGGATGCTGAGAATGCTCTTCTGTATTTATGGAAATTTGTGT  
ATTTTTCTTTTTGCAGCTCAGGGGAGCAAAAATACCAGAGAGCGAGTACACAACCTTCCAAATGGTCTA  
AAGTTAGTATACAATTTTGAAGCATCTGAGTACTGTTTTCCCTACATTTGGATTTCTTTTACATTTGGTTGT  
TGCACAAATTATAAAATCCCTTGGACTTGAAACAAGATTACTGTAGCTAACTCGAGTCTAGGGACGCAAT  
ATCTTAGCTCAACATATAATGTACACATTTTCTCATGCAACATTGTCCTCCTACAATAAAGGAAAAGAAAT  
ACGTATTCGTCCATCTAATTTTGTAGGCTAGAAGCAGTAGTCTGATTTGTGATTTCTGCCTTATTTGTGGA  
TTATTCATTTATTCTTCGGTGTAAATCTCTCAGGTATTATGACTTGAAGGTCGGCGCTGGAGCTGAAGC  
AGTGAAGGGATCTAGAGTTGCAGTACGGTTGTGCCAAAGTTGAATTGAGTATCTAAGTACAATGTTTGA  
TTTATCTCGAAAAACATATTTGTATAAGTTAATATGCAACACCACATCATTAAATCCACCATTAAGTGCATT  
GTAAAATGTACCTTCTTTGTTTGTAGCTTTCTAGATAGCAGTTCCACAGCATCCAAGCTTTCTAGTTTAGAG  
CAAAACACTTTGAGATCATTGCATCACATGTGATATACTAATATAGACTCATAGGATTTATATTAAGAACT  
AATCAGACAACAGGATGTAATAGATTGCTGTCCTGTATGGAAGTTTCAGGGGCTTTTGTGAGGTTCAA  
ATTTCTACTGAGCCCTAAAAGGATCTCTGTTATGGTGACATGTTGCCACTTCTCACTCCACAACCACTAC  
TAGTCTTGACCCTCCACAATGCTTTTCTGAAGTTCAGGCCAGCACGATATCGTTAGAGTGGTATTTAGG  
ATAGAATTATAACAAGAACCGAAATAACCAATCATGTTGATCCCACTACCAATGAGTCAAATGAAGCTAAA  
AACGACATCTCAGTAAATGCTTCATCAATCTAAATTTTAGTTTCATAGGTTACAAGGAATGCCATAGAC  
CTTTCATGAATTGTTAATGGTATTGGTGATCTCTTTGTTTATCGTAACAGTTAGGCATGTCACATGCCAA



TGTTGCCCTTGAAACCTTATATTTTGAGTCATTTTATGATATATTTGAAAATGTAATGCATGTAGTCTCTCT  
GTACTTTGCAGTTTCTTCGTTCACTCAAGTATAATATATTTGTCAGAAATCTAGATTTACAGAATGCTTC  
TTAAAGTCTGAATTGTTTATTATGTCATAATTCTAGATCCACTATGTTGCTAAATGGAGGAACATCACATT  
CATGACAAGTAGACAAGGAATGGGAGTTGGTGGTGGAAACAGTAAGATTCATCTGCTTTATTTTTTCCAA  
CCTGTATAATTTGTATGACAAATATCGGGAAATCTTAGTAGCTTAGTTGGTTGGCTGACTACCTGAACTTT  
TCTCCTTGTTGGTGAGGATTCGCTTCCCCACCCTGTAATCCCCTTCCCCATTTCCCCTTTAGAAAAAAAAA  
GTAATGGAAATATCAGATTCAAGCTTCAAGTGTGGAAACCTGCTACATGTAAACAATGAATACTATTGC  
ATGATTAGTCAAGGCGCACCTTGGAAAGCTAGATTAGAACTCAAGCACCTTCATTTGAAATGTTTTGTAT  
AGAAACCTTCGGTATAATTGTGTTATGACATTCCCGTTAGCTTAATTGATAGATTGATGTCATTTCCCTGC  
TTCTGGACAATGCCTATGTAATATTTCTGCGTCATGTTTATTTAATAGTCCTTGATTTGGAGCTACGTGAC  
TTACTTTTTCTGTTTTGAGATGCCATCATGTTTCTTATCCAATATCCTTTACTTCTGTAGCCATATGGATT  
TGACGTTGGTCAATCAGAAAGGGGAACAGTCCTTAAAGGATTAGATCTCGGTGTTCAAGGGATGCGAG  
TAGGAGGGCAGGTGAGACAATTACCTTAATTGACTTTTCATCACATTCAGGATATTTCTCAATTGAACTG  
CATAACCTTCTAATGGAGTTTCCTGAGGAGAGGAATATGCTAAAGCTTGTTTTTATATATTTTATTTTTTC  
TAATTTGAAGAGTCAACTTCATGCCCCGTTGAACCTCCTGCTCTAATTGTGTGATCAATATTCAACTGCT  
AAAGTTTTCTAAGCTTTTCAGTGTTAGCTCCCTCAAATGAGAAAATGGGAACAATTTGAAATGAAAATC  
CAACACTATTGCTGAAGTCAGATCAAAGAAGAAGAAATAAAATAGGATAGCTCAAACCTGAAGGAATG  
ATACAGGACTTCTATGCAGTAAGAAAAGATCGGACAACTACAATTGAAGTTCCGTTGAGCAGTTCTAA  
GACGAGTAATGTTTTATGGGGTGAATTAGGCTTCTAATGTGCAACATATGCTTAAGATGGGTGCCCTTG  
AAATGTAGATGTAAATTTTGATGTGCGATCATAACAAGATTAGAAATTATAACATCTAACAAATTTGCAC  
AAGTGGATATATATAGAAGATAACCTGAGAGAATGCTGCTAAGATGGTCTGGTTATGTCCTAAATAGAC  
CTACAAATGCATAGATCCAATAGGTGCGACAATGTGATGATTGAATGTTTTAAAGGAAATGTTGTAAA  
CCTAAAGTCAACATTGGGGAAAGTTAACTCAAGAGGCCTGCAGTCTCTAGATCTAGTGCAGACTTAACTA  
AGAACTAAACACGATAAAAGAAAAAGATCTATATAGGTGATGCCAACTAGTTGAGAATAAGACTTAGTT  
GTTATTATTACCCTCACATTAGGTTTGACTTTTCCACAAGTCCTCCTTATCTAAATGAAGACTTGAATATCA  
GTATAAGAATAAATGTGAGATTTTAGAGAACCTCTAGTTGCAGAGAACTCTACTTGCCTAAAAAGAGA  
AACTATGTAGTTATTGTAATGAAATGTGCCGAATAGAGCATGGATATAGAGGATTCATATTAATGTATT  
GGAATTGAGGCATAATTGATTGAAAGTATAATTGTGGTCACATTAATGAGATCATCCTGTACTTGATAGT  
CGGTGCACAAAACATTTAAGTATATGTAGGCTTTTCATCAAATGTCCTTTAGGTTCTAGCTTTTCCCTGA

GCTTAGAATAATGAACTACAATAATTAAGTCATAATTCAGGGTGTCATGCCGATGACCGATGAAATTTA  
ACTCAGCATAGTTGCATCAATAATGATGGATTAATTACTTTACACGGAGGCGATAAACATTTGAAAATGA  
AAATGTTATGTATTTGCAGCGCCTGCTCATCGTTCTCCTGAGCTAGCTTATGGGAAAAAAGGCGTGCAG  
GAAATTCCTCCAAATGCAACAATTGAGGTATCATTTTGTCTGTTGCATTCATGTGCTTATACCGAAATTCCA  
AGAAAGACTAATCTTGTTTATCAAATAGTTTCTGAAGGCCATTTGGATTCAACTGTTTTGCACCTATTGTG  
GTCTATTAACCTTTAAGTTGGTCTGTGGAATGCAAATGCTGTCTTTACCTTTTCGCTATGAAAGATCAT  
CATCATCACTTTTTTAGAATTAAGTTATCAGAATCATCAAATATGTGGCTAGCAGAAAACCTTTCTAATGG  
GAGCCTTCACCGTGAACCAGAGATTTGTGTTGATAGAAATATCGTGTTGGCATCTAACAGATGCAGAAC  
ATTCTTATCAACAGAAAAGTGTATTCTGCACGTATGGAATTTTATCTTTTTTGGGAAAAGTATGTGGGTG  
TGCAAATACAGCAGCCTCATAAAAGTGTAACCTCCGAAAACAAAGATGACATAATCTTTAAAATATTC  
TTTTTATGTGGTCACTTGTTAGCTTTGTTCTTGTA AAAAAGAACGACCCCAAAGAAATGTTATATGAAAA  
TTCTTTAAGTCCTTTTCCAACTGAGTGACATGTGCTTGAGCTAAACCTTTTAGAGAAATGAAAAACATA  
AAATCTGCTACCTCTACACATTCTCCCCCTGTAATAATGTGTGTCATCATGTTTTATAATATGGCTACAA  
AGTGGTGATATTGCAGTAGCCTGATAAACTAGCAACTTTGTAGTTTGAACGAAAACCTCAAAGTACA  
ACAATGTAGAGAACTTTAAAATTTGTGTCAAGACTGTAACGTTATATATAACCCCCACAATTAACAGCT  
GCACCTTGGATCACAACATCATTTTCTAATTAGTTTTCTGCCCCAGTTCCGTGCAAGCTAGCCCAAACATC  
CCCTCTACCCAAAAGAACA AAAATATCAGTTTTCCGCCACACCTTTTTGCAAGTTTCATCTATT CATAATTT  
ACTTATTCTTGAAATGGATGGTATTATCTCTAACATTATTATGTGGTCATTGTATCTTTATTACTTCTTTCA  
CCTACTGATTTTTAAATCTACAGATGGATATTGAACTGCTGTCTATTAACAAAGCCATTGGGGTGAGT  
AGCCAACTTTTAGAATATTCAAAAAATTAATGGACTTATTTCTTGATTTAGCTTCATTATCCTCAGCATCT  
TATGTATTTACTGTACATTCTATTTTTTTTTCTTTCCGGTGCAGAACTCCTGTCAA AATTGTTGAAGGATAAC  
CACAGTGTTACCTACTTCATGTTATAATGATTCATCACCTGCAA AAGCACTCAGCCTATTGTATGAATTT  
TGAGAATACTAAGAGATCTGCTTCTGATTTGATATTTTACCAGGAAAATGTCCCTAAATATGTTAATATTG  
TATAGTTCAA ACTCATTTTCATGTTATGAGATTCAAATTGCTTTGAGCATATAAAAGTGCTGTAAGGACTT  
GTTTCGAGAATAACCCCAAAGAATTGCAGTGAGAAAATTGAGATATAGATAACTGAATCAATCAGGGGTG  
AAGCAACTAGTTCCCAGAGATATAAATAGTACAAAAGACATTAAGACTTAGTTTAGGACAAATTCAGCTC  
TGTAAGAGTCATTTAGGTGTCAAATTTACCGTCTTGACAAAATTCTTAGCTTCTCATTGGCTAGATTAT  
GACATTTATAGTGTCTACCAAGATGGCTTATACTTCTCATTATGGCTTGCGGTCTCTCTCTTTATAGATTT  
TAGTACTGAATTTTATACTGGCACAGTCGTTTACATACTTCTTGACAGACTGCATTATTATATAGTGATGA

AGTAATAGAGGACAGCTGCACATGTATATTTATTGACAACTTGCAAAGTAATTATGTGGAAGCTGAAATCA  
TCCTTAGAATTTGATTCTCTGTCATTATCCTCCTTTAGGCAAGTTCTTACCTTAATAAGCAAATATTATATA  
CCTCTTTCCAGAAAGTGGTAATTGAATTGCAGGTATAATAAAAATATTCTACAGGCAGAATTGCAGGGT  
AAGGTTGTGTACAATAGACCCTTGTGGTCCGGCCCTTCCCCGGACACGCGCATAGCGGGAGCTGAGTGC  
ACTGGGCTGCCCTTTTTGTGTTTGTACCTTCAGATAAGAATCCCTTTGCTCAATGATTGCCAAATCTTTTT  
GCTTTTACTAGATTCTTTTGAATACTTCCTTTTCATTTTTCATTACCCACTTTATTCTCTTTCCCTTGCCTAT  
ATTTACCCCTTATGAAATCCTTTCTACCATAATAATTTCAACCTCTTCTTTGCTCTCACAAAATGACCATG  
ACTATTCTTTACAGGAGGAAAATAACCTGTATGTCTTACTGTTACTCCACTTCTTTTGTACTCTTGTTC  
CAAAGACATGTCCAACTGTGGTTCTCTAGAGGTTCCATATCCCTTGAGCACGAATCCCAACTGTGGCA  
ACCCTGACTATTCTATCCGTTGTGATCCTCACTCTCACAAGCTCTATCTTGATACCCTTAATGGAAGCTCTT  
ATGTCATCCTCAGAATTATGGCCTCGTTCAGCGTATGGTGGTGCAATCATCACCTGGATGCCTGGTAC  
CTGTGTTACACAAGACATGTCAGTGAGTGAGGGACTGTGGTTGAACCAGACTCTCCGTTTAAAGTACT  
TCTTCTAACACTATCTTCTTATTTAATTGTTCTCCTCGTCTTCTAGTATCCCCTTTAAATTGCACACCTTCTA  
GCTTGTGCCATAAATATCTGCTTAGCTCTGGACATGTAGATGCTAAAAGGGAACCTTCAGTGTGCAAGTG  
GTGTTTATCCATGTTGCACATTTATTGCTGGCGGTATGCCCTCAGCATAACAAGATACGCCTGCATATCTCG  
GGTTGCCAAGCATTTAGAAGCATTCTACACTTGGATGCTATGAAGCCAGCTAATGAATGGGAGGAGGG  
ATTGGAATTCAATGGTCTCCTCCACCCGAGCCACACTGTAAATCACAATCTGATTGCTCTGGAGCTTCTA  
CATGTTACCTTCTGGTAAAAACAGTGTCTTTCGCTGTTTTTGCAATCGTACTATTATTGGAACAGAAGT  
CAAGGAAATTGCATGAAGAAGAAACACTCTGGTTTTGTATTAATATATCTATTGGGATTGCCTTGTTTTT  
GGCTTTTGCTGTTGTGGTGATTGCAGTGGCTTTGAAAAGATCAGGAAGAGTCTCAGCCAGGGCTAGGCT  
TGCTAAGGCAAGAGAAGACATTCTAAAATCAAACAATGGTGGAAAACCGGCCAGGATGTTTTGTCTTAA  
GGAGATGAAGAAAGCTACAAATGGATTCTCAAAGACAGAATCTTGGGCCATGGTGGTTTTCGGAGAAG  
TTTATAAAGGCGAGTTTCAGGATGGAACGATTGTAGCAGTAAAGTTAGCCAAAGTGGGAAATGTCAAG  
AGCACTCAACAAGTACTCAATGAAGTTGGGATCCTTTCTCAAGTCAATCACAGGAACCTGGTCAAGCTTT  
TAGGGTGCTGCATAGAAGCTGAACAGCCTTTGATGATTTACGAATACATTTCCAACGGAACCCTCCACGA  
TCATCTTCATGGTAAGTACTCCACCTTTCTTACTGGAAAACAAGGTTGAAAATTGCTTCACAACTGCA  
GAAGCATTGGCTTATCTTCACTCAGCTGCTTACCCTCCCATCTACCATAGAGATGTCAAATCTACAAACAT  
ACTCCTGGATAACGAATTCAATGCCAAAGTTTCCGACTTTGGGATATCAAGATTGGCTTGTCCAGGGTTG  
AGTCATGTGTCCACTTGTGCTCAGGGTACATTAGGTTACTTGGACCCTGAATATTTTCGCAACTATCAGCT

AACCGATAAAAGTGATGTTTACAGCTTCGGGGTTGTGTTACTAGAACTTCTTACTTCTCAGAAGGCAGTT  
GACTTCTCTCGAGACGAAAATAGTGTCAACTTGGTTTCTTATGTCATTCAGCAAGAAAACCATGGTTCAG  
TTATGGATGTAGTGGACAGGCGCTTGCTTGGGGAGGAGCCTTTGACTAATGTAECTACTGGTATGGACT  
CGTTCTTGGCGCTTGCACTTTCGTGTTAAGAGAAACGAAGACAGAGAGACCCTGCATGAAAGATGTTG  
TTCAGCAACTTCACTGCATAAGTGAAATAGTTGATCAAGAAGAGCCTATTGAGGTTAGTTAGAAGTATC  
ATAGTCCTACAAAAATAAAGTGCTACTGGTCTTGATCTTTTAAAATTCATATTAGTGTAAGAAGAATTTT  
ATAAAAGGCATGGATCTTTTTGTTGTACTTTGAGGTTGGGATCAGATGCTTCTTTTCTTACACTGGAAAA  
GTTAAAGAAGGGGACCGTTGGTGTGGCGTAACTAGTAAAGTTGTTGTCATGTGATTGGAAGGTCAGG  
GGTTTGAGCTGCCGAAACATTCTATTGCAAAAATGCAGGGTAACTTGTGGTTAGTGCACCGGCCACCGG  
GCTACCCTATTTCCAACCTGGTGTCTAGAATCCGCATTGGGGTCTGACTTTCCAGGTTGGTGCCGCTTA  
AGGACCATTAAGTGGGGGATGAGCTCCCTACCATAGTATATATATTTTTTTCATTCTCATAGCTAGAACCT  
GAGATCTTTGGTCTAGAGTGGAGGGATCTTATCCATCCGACCATAACTCTTGATGGGATCAGATGCCTTA  
CTTTGTCCAAAAGCAGGATAGACAGAGTTTATGGATTGCAACTATGTGATAGTTTTGAATTTGAATAG  
AATTTAGTATATTTGGTTATGCACTTTGCACTTAGAAGTCAAC

>PGSC0003DMG402015827 RLK with WAX or WAX-EGF domain

TTCCTCTATATACAAATTATCCCTTTGTCTTTTCTTCTTGTTTTAAACATCATATGAATCTTCAAAGCCTATT  
CATGGTAAAGAAATCTGTTTCTGTTCTTGTAGTCGCGATTCTTTTCTTACCTTAACAGATGCACTCTTTC  
TATTTACCTCAATTCTAGTGCTTGC GTTACACAGAATTGTGGTGATGGAGTGAACATATCATAACCCTTTTT  
GGATTCTGAGAAACAGCCATCCTACTGTGGCTTACCAGCTTATAATGTCACTTGCAACAAACATAAGCC  
ATTTGTTCATATTTCTGAAGAGGAGTTTATCATTAAAGGAAGTATATTACACAAACTACTCGATTCTGCTAG  
CGAAAGCAGACGTGTTTGTGATGAAGAAAACAAATGTCCAGTACCAAGACATAATTTTAGCACAAGGGGTA  
CTTCATTTTCTTTGGGACTTAACTGCAGATCTCTTTTTCTTCTATGACTGCACTCTACCTTATGAAAGGG  
AGACATATGATGTCAATTGTGCCCGTAATGCCACTCACCATTCTTTCGCGGTTTTTTCATACTGAGCTTCTG  
GAGCACTATAACTATTAGTGAATCGTGTGTCAGGATCCTGTTTATGCCCTTGTTGAGACTGATTCCATAG  
ATAGATTGCTAAAAATGAATTACACACAAGTATTACAAAAGGGATTCTTTCTGCAGTGGGATGGGAGTA  
ATTGTAGAGATTGTCGGAATAGTGGAGGGCGTTGTGGTGCTCAAAGTAATGATTTTTTGTGCATTTGCA  
AAGACCAAACCAACCAAGAACATGCTTTCATGGTAAATTTAGAACTATTATAAGTTTAAATCCATGTTT  
GACATTGAGTAGAGAATATCTCCTTAATCCTAGATAAAAAAGGTAAACCATTCTGTTATTTATTGATCAT  
GTTAAGGGAATAACGTTTCCGATTGAGGTGATACTGATAGCAGCTAATTAGTTATGCTTACTGTGATAC

ATTACAATTGTTCCGGTATCAGTTGATCACCTGTCATGTTTTCAATTCAGGAAGAAGCAGAATCGGAGTAA  
AGATTGGCATAGGTGATTGTCCTTTGAATATGTTCCACCCTGATTTGTCTTATTATCCTCTTTTCTCAAGAA  
TACTGAAATTCCAATACACATTTCTTCTTGCAGGTTTTGGTACGGCTGCATTTACCGCTTTGATGGCAGGT  
GTAATTTTCCTTATCCATCGTCGTAGACAGAACAGAAAAAGTTATGCTGGTTCGTCATTGATCACCAGAA  
ACATTTCTTCTATCCTTCTCCATGAAGGATCCTGAAAAGGCTAATATAGCTATGGGAGTTCACCTCTTT  
GACTACAATGAACTGGAGGAAGCCACTAACAAATTTTGATTCCAAGAAAGAGCTTGGAGATGGTGGATAT  
GGCACAGTATATAAAGGTAAGTAACTGATCTAAAATTGAAATTTACTGATAATGTGTCACTCAACTC  
ACACACCTGATTGATTCATTAAGCATTGGTTGAATATGATATGCTTATAGGTAACTTCGTGATGGACG  
TGTCGTTGCTGTTAAACGTTTGTATGAAAACAACCTGCAAGAGAGTAGAGCAATTCATGAATGAAATTGA  
TATCCTAACACGGTTGCATCATCAAACCTTGTCACTCTTTACGGATGCACATCTCGCCATTCCAGTGAGC  
TTCTACTTGTATGAATACATTCAAATGGCACAGTTGCTGATCATCTACACGGTGGAGATTCACGGCG  
TGGATCGCCTTCATGGAATACACGAATGAAAATTGCCATAGAAACAGCAAACGCACCTGCCTATCTCCAT  
GCTTCAGACGTCATCCACCGTGATGTAAAACTAATAATATCCTTCTGGACAATAATTTCTGTGTTAAAGT  
AGCAGATTTTGGCTGTCTCGGCTTTTCCAACGCATCTTACTCATGTCTCAACAGCTCCACAGGGTACTC  
CTGGATATGTTGATCCTGAGTACCACGAGTGCTATCAGCTCACTGACAAAAGTGATGTTTATAGTTTCGG  
AGTGGTATTAGTTGAGCTTATATCATCACTGCCTGCTGTTGATATCTGTAGGCACCGACATGAAATTAAT  
TTGTCAAATATGGCCATCAACAAGATTCAGAGCAATTTATTACATGAGTTGGTGGATTCAAATATCGGGT  
TTGACACTGATGATAATATAAGGTCAATGATAACTGCAATGGCAGAGTTAGCATTCCAATGTCTACAGAA  
CGACGGGGATATGAGGCCATCTATGCAGGAAGTTGTGGAGGCTCTACTGAGAATTCAGAGAATGAATA  
AACTGGGAAAACAGACAAGGGTCATCCTGATGACGATGATGCAGGCTTGTGGAAGAATAACACATCA  
TTAGTTTCACCTGATTCCGTTACTGCAAAATGGAGTAGTAGTTTAAACAACACCCAATGGTAGTACCTAGC  
ATTTGGTTCTCTAAGGTGGTGCCTCAAACGCCTTCCATGTTGGTTTCCAAAACCTGAATTACACACTTTG  
ATTACCTTGGTTTTCTCTGTTAAAGAGGATGTACATATGTCAGTGCAACACGTTTAAATGATTCAATTTGAA  
CTTCTCAAGTCTTCTTTTATCTTTTCGATCTTCTCAAGTGATCTGCTGATTTATTTTTGTAGCAGTACATGTT  
TAATTTAGTGCGTAGCAATGGAAGAATAGGATTAGTTTCAAGAGAACATTATCCGTATAGTGATGATG  
ACAACTGACTGATTTGAAATGTAACATAGAAGTTCAGTGCTCTTAAGCAAGAAAGATTGTAC

>PGSC0003DMG402030531 RLK with WAX or WAX-EGF domain

CCTCACTTGAGTCCTGTTTCTTTTCCAAAGTCTTTGTAACAAAATTCCAAGTTCACATATAGAAAAATA  
AACCAAATAACAAGGTTAAATTCCAATTTTCTTGTGTGTGAGACCATATAGAGTACACAATATGGCTTC

TGCTTTCTTGTTTTCTGTTGTTAATGATCTTTAGCCTACATCAAGTACTAGGTA ACTCCAAATCCA ACTG  
CACCGATGAATTCGAGTGTGGAGGCCTTGGAGCTATGAAGTTTCCTTTCACAAATTCAGCAACCTTCAG  
TGTGGATTATGCAGGTTTGATTGTCATGCTAAACCATATCCTAAGATTGTATTTGGTGGACAAAAATATG  
ATGCTTTAGTGAAGAAGGGTGATTTTTCTTATTTTCAGATCCTAAACTTCAAGAGTATTTAAATAACAAA  
AGTTGCAAGTCTTTTAGCAGAACTTCTCATTTACAAATCCCCTTTGATTTCTTTCAAATTGTTCTAAC  
TTAACCTTGTACAAATGCAAACATAGTCATGGCAACACCATCCAGAAGACTAATGATTCCTTTTTCAAAG  
ATTTTGATAGATACTGAGTGTGAAGGTTTGAATGTTTACTATCACCATCCCAATAAAACAATATTGGG  
AAATACTAGTGCTAAGATAAGTGGCAAACCTCCAAAGCACTGTTCACTTGTACAGTTGCCAATTCCATTG  
CCTACACCATCAAACTATATGCAGGTGGCTTGTGTTGAACTGTTGACTTCTAGTGC ACTTCTAAACTGGG  
AGTTGTCCAAAGATTGTCATCTGTGTCTTGACAAAGGAGGGAAATGCCAGATGATCGATGAACACGAGT  
TTCATTGTTCCATTAAAGGTATATATAGTATTGTTAAGAAATAAATCTTGTTCTGCTTGTTTTCTATTGAGG  
TTTATCTAAAAAGATTTATCTTTTTCTTTACTGCAGGACAAAATGGACAAAGTAATTCGAAAATGATTA  
TTATGGCCTCAGGTGATTAATAGACAATGACCACATTTTTATAGTAGTAGTTGCTTCGGAGCAACGGTA  
AAGTTGTCTTGGGTTTTGAGCAGTGGAAATCAGCCACTGAAGCTTGCATCAGGGTAGGCTGTCTACATGA  
CACCCCTGGGGTGTGCCATTCCCCGGCCAGGCTCCCTTTTTTTTTGTGGTACACTTTCAAAGGATTAGAT  
TTTGATTACTGTATCTTATGTTTTCTAGTTTTAGGTGGAGTTGGTTTGATCCTACTATCTTCCATTTTCGCCT  
TGTCTATCTGGTGTGCGAAGCGAGGGAAGAATGGTTTGACACAATTCATCAGGATCTTGAGGTAGAGA  
GCAAATATTTTGGATTTAGGTTCCAGTTTTACCTATGCTGAACTTAAGGAAGCCACCAACAATTTTGAT  
CCCTTGAATGAACTAGGAGATGGAGGTTTCGGAAGTGTATATTATGGTAAGTTTTCTTTGAACCTAAGA  
ATTATGTTAAAAAGACAGCAATTTCCAAAAGGTGAAAAGTAGCTAGTGTTTCATGCTCAGTGGCGAAACC  
AAGAATTTGTTGACGGTGTATAAACACTTTAACTTGGCCTCAATTGACACCTAAACACTCCA ACTTTGA  
GTATGAACATCCAGGCACCTCAACCGTCTTGTGTCAGTTGAATACTCCA ACTTACAAAATGATCATCTAG  
ACACCTCCAAAATTTATGTGCCACGCCTATGTTGGATGTCTACGAGACACAGTGGGGACGAGTTGGAAT  
GTTTAGTTGCCAATTGACACTAAGTTGAGGTATCTAGATGTGCACTCTCAA AATTGGAGTGCTTACTTGC  
TGTCTGAGTCCAAGTTTGAGTGTCTGTTTATGTATTATGCCTTAAATATATATTTATATAAAATCCTTCTCA  
AAAAATAAATATATGTATAAAATGTA ACTTTTTGACCTTATACTTGGTATAGTTTTCGGTATACACCATA  
TAATTTTGACGAAGGGTGTTC AACTGATCACTTTTCACCATGTGTGCGAAA ACTCAGTATCTCATTGTTAT  
TTCACATTATGAATTAGGAAA ACTATATGATGGAAGAGAAGTTGCAGTAAAATGCCTCTATGAGCACAA  
CTGCAAGAGAATGCAGCAGTTCACAACCGAAATCGAGATTCTTACTCGTTTGAGGCACCAAAAATCTTGT

GTCCCTTTATGGCTGCACATCAAGACGCAGCCGTGAACTTCTCCTTGTTTATGAATACATTCCACATGGAA  
CAATTGCTGATCATCTCCATGGTGAAAGAGCAGCAGAGGGATCTCTCACGTGGCCCATCCGTATGAACA  
TTGCAGTTGAAACAGCCAGTGCATTGGCTTACCTCCATGCTTCTGATGTGATACATCGCGATGTCAAGAC  
TAACAACATCCTTCTCGACAACAACCTTTCGTGTCAAAGTAGCAGATTTTGGACTCTCGAGACTTTTCCCCA  
ACAACGTTTCTCACATATCAACAGCTCCTCAAGGAACGCTTGGGTACGTTGATCCTGAGTATCACGAATG  
TTATCAGCTTACTGACAAAAGTGACGTTTACAGTTTCGGGGTTGCCTTATCGAGCTTGTATCATCAATGC  
CAGCTGTTGACTTAAATAGGCACAAGAACGAGATCAATTTGGCTAACTTGGCGATAAACAGGATACAAA  
GATGTGCATTTGATGAACTGATCGATCCATCACTCGGGCTAAACTCAGATACGCTTGCTAAGAAAATGAC  
TATCTCTGTCGCGGAGCTAGCTTTTCGATGCTTGCAACTTGATAAGGATATCAGGCCAACAAATGGATGAA  
GTATTGGACATTTAAGAAGGATTCAAGGTGGAGAGTTTCATCAAAATGAGAAGACATTTGACACTAGT  
GCTAGTTTTAATTTGTCAAAGTCTAAGAGTGTTAATATCCCTCCATTTTCCCCTGAATCAGATCAAGTTGC  
ACTGTTAAAGAAAGTTAAGTTCCTAAGTTCATCAGATACTAATAGTGAGGTATGGATTAGTGGCTCTACC  
ACAACAAGCACTAGTGAGTGAGTGACTATCTATGTTGCTCGGACACTCAAAAAATGTTGCCGCACTCAT  
GTCAGATCCTTGAAAAATGCGTAGCTTTTAGAGGATCTGACACACACCTGACGATATTTTTGAAGAATTC  
GAGCACCATAGGTGAATATCTTAGCTAATATAGTTTTCAGACTTCAGAATCTACTAACTCTTAGCTAAAG  
CATTTGAGCTTATAGGAATGTACATATAATAAATTATGTTCTTGATGTTATGCTTCTTTTGCCTTTTCAATT  
GTCA

>PGSC0003DMG402030532 RLK with WAX or WAX-EGF domain

TTAGTATTTCTTTTTGACAAGTTTTACCAGTAAGATGGAGACTATTAATGGAGAAAGTGTTTAGAAGTTA  
TGGCACTTGATCTTATAAGATACCAGTCTGGTGAAGTAGAGTTGCAATTCACAAAAACTTCAGCTAGCTT  
TGCTCTTCTTGCAGTAGGATTCACAATATGTCTTTGGCTTCTTCGTCTGTTTGCGTTATTCTATCTTCTTC  
TGATGTTAGTTCAGGCAAAGGGGAGAAATGATTCAACTTGCCAAAGTCCTTTTCATGTGGAAATCTTAC  
TGACCTGAGCTTTCTTTCTCTTTCCACACAACCCGACTGCGGAATAGTCCCATCTCTGGTTGTGATG  
TTAAACTATTTCCAAGAATCCAAGTTCCTGGAGGAGAATGGTACTATGCTATAGGCAAGGAGTATA  
GTTATACAGTTTGGGTCGTGGACCCGAAGCTTCAAAGTATATTGAGGAAAAACAAGTGCCAAGCTTTTA  
ACAAAAATATCTCCCTTTCAGGCTCTCCTTCTATTTCTTCTCTGTCAGTTAACCTTCAGAACTTCTACAAAT  
GCAATAGGACTAGTAGTAACAACCCATACATTAATCAGCAGATGAAAGATCATTTTGATGGTTATTACTC  
ATATGATGGCTGTGATGGATTCACCATATACTACAAGTTTTATGGAGTTGATGATGAAGACATTCTAGCA  
GACAATCTTACTGCCAACTGTTCCCTTATCAGATTGCCATATTACCAAACAGAACCTGGTAATAATTTGGT

CAACTTCTTACGTTCTGCATTTCTAGTAGAATGGAAATTGTCTGATGACTGTAACAAATGTCACTATGGTG  
GAGGTCGATGTCAGACTGATAAGAAGAACAATTTTCTTTGTTACAAAGGTAGACATCTCAAATAATTA  
CATGTTCAAGGTCAAATGCATATTTCTTAGGGTCCTTTTTTGTTCATATGACATCTGATAATTTCCCTCT  
TCTGTTTAGATGCAAAAGCAAATAGAAGCAAGTTGGGACTGACTCTGGAGCAGGTAGTTAAATATCCA  
TTAACCTCATCTTTCTTTCTATTTCAGAATTTCCATACATGTTCTTTGAATTTCTTTTTTATTGTGGTAAATT  
CTCAAACATATTCATAATGACAAAGTGGAGTTGAGAGATTGCGATGTTTTGCTTCTTTTTTTTTGAAAC  
CTTCGATTTTTATTTATTTCCAGTTTTTGGTGGAGTATTGGTGATGATAACTTGTTAGCTGTCTACTTTAT  
CTGGTGTTACAAGAAGAGGAAATTTAATCCACCCCACTTCTCTTAACAAGGAAATTGTCATATATATTTA  
AAAATGATGTTGAGGGAGGCAGTATATACTTTGGCATCCCAGTCTTTTCTTATTCAGAACTTGAAGAAGC  
CACGAATGATTTTAAATCCTCTCGAGTTCTTGGAGATGGAGGGTTCGGAAGTGTACTATGGTGAGAG  
ACTTCCTAATCCAAGTACTGAGCTATGCTTCAATTCTTTCTTCATGTGCCTAATACTTGTTCACTAATGACTAGG  
ACAACCTAAGGATGGACGAGAGGTTGCTGTGAAGCGCCTTTATGAGCACAACTCCAACAAATGCAGCA  
GTTTGTAATGAAATTGAGATCCTTACTAGGCTAAGGCACACCAATCTTGCTACTCTTTATGGCTGCACTT  
CAAGGCGTAGCCGTGAACTAATCCTTGCTATGAATACATTCTAAGGAACTCTAGCTGATCACCTCCA  
TGGTGACAGAGCGAAGAACAGATCACTCACCTGGCCAGTCCGCTTGAACATTGCCATAGAACTGCTGG  
TGCATTGGCTTACCTTCATGCTTCTGACATAATACTGTGATGTCAAGACTAATAACATACTCCTTGATC  
AGAGTTTCAGTGTCAAAGTTGCAGATTTGGGATATCACGTCTCTCCCTAATGATGTCTCTCATATCTCA  
ACTGCACCCCGGGGGACCCCTGGCTATATCGATCCAAAGTATCACGAATGTTACCAGCTGACCATAAAA  
AGTGATGTTTATAGCTTCGGGGTGGTCCTTGTTGAACTCATTTCAATGCCAGCTGTGGATATGAAGA  
GGCATAGTCAAGAGATCAATTTAGCTAACTTTGCTATAAACAAGATTGTAATGTGCATTCAACGAGTT  
GATCGATCCATCCCTGGGGTTCGATTCAGATTCCAAGATTTGGGAAATGACTAGTTCAGTTGCAGAGTTG  
GCTTTTTTATGCTTACAGACAGATAGGGACATGAGGCCTACTATGGCTGAAGTTTTGGATACTCTAAAAG  
AGATTCAGACTAGTGAATTTGACAATGAGAAGAGAGCTAAGTTATTGCTGAATCAAGTTAAATCACAGC  
CTTCACCAAATTCTGTGACTGATAAATGGACTACTTGCTCTAGTACTATAGCTAATAACAAAGTAGTAGCA  
GTGTTGTTGCTACTGTGAGAAGTTTCTTGCTATGTTGTTGCTCCGACTCTTCGAAAATATCCTCTGGTGTG  
TCGGATACTCCATAAGTAGTGAATTTGAAGAATCCAAGTCCGGGTGCAACAAATTTTTTGGAGAGTCTGC  
GCAACATAGGTAATAGGTTTTATGTATCTTAGTATATCTAACTTTAATTCTATCTTGTTATATCACATGTGT  
GTTATAAAC

>PGSC0003DMG403005729 RLK with WAX or WAX-EGF domain



CTTATCTGGTTTTTTTTGTTTTCTCCATTTGTAAACTGCGCCAGCAATGCCACAGATTATTGTTTTGTGATTA  
TTCATACTGAGCTTCTAGTGCACATAACTATGCAGTAGAATTATGCAAGAACCCTGTTTATGCAAAAAT  
GAATTACCAGAACTTCTGCAAAAGGGAATGAGGCTAATATGTCAAGATTGCCTGAATAACAGAGGGCAC  
TATATGTTGTGCTTGAATAACAAATACAACCCTAAACAGAACAACGTTTTTCATAGTAAATTCAGAACTTT  
AAGTCCAAATCCACGTTTGACTGTGTTTCATAACAGACTAGAAAATAACCACATAATTCCTTTATAAATTA  
GAAACAGTAAGAAGTTGTATTTATGTCTTTATAATACTACTGGAGATATTTTGTCTGGTTCTGTATCATC  
ACTTGTTTATGTCTGCATTACAGGTGATAAAAGAGATATCAGAGTGAAGGTTGCCGTAGGTAACCTTCCT  
TTGACCATGTTTCATCATATGATATCCTTCTCTTTAAATGATCAAGAACTTCCTAGTCACATATTTCTCTCTT  
CAGGTGTAAGTGCAGCTGCATTCACTGCCATTGTGGCATGTGTAATTTTCTTCTCTATTATCGTCGACAG  
AAGAAAAGTCATGCTGGTTCGTCTTTGATAACCAGAAGTATCCTTTCCTATCCCTCCTCAACAATGGACCC  
TGAAAAATCTTCTCACTATTTGGGAGTTCATGTCTTCGACTACAATGAACTGGAAGAAGCCACAAACAGT  
TTTGATTCCAGCAAAGAGCTAGGAGAAGGTGGATTTGGCACAGTATATAAAGGTAAGAGAAATTATCCT  
GAAGTGGGCTTTCTCTCACTGCCAACCTGCTACTAAACCTAAACATTTGATCTGATTCATTAACCATATGA  
TTGAACATGACATGTTATAGGTAAACTTCGAGATGGGCGTGTTGTTGCTGTAAAGCGTTTATATGAGAA  
CAACTACAAGAGGGTTGAGCAATTCCGAAATGAAATTGAAATCCTCACTCGTTTGCGCCATCGAAATCTA  
GTTACCCTTACGGATGCACATCTCGCCATGGCCGTGAGCTTCTTCTGTGTATGAATATATTTCCAATGG  
TACTGTTGCTGATCATCTTCATGGGGAATTCTCAAAGCCTGGATCGCTTTCATGGAATACACGAATGAGC  
ATTTCCATAGAAACGGCAAGCGCGCTAGCCTTCTCCATAATTCAGAGGTCATTCACCGAGATGTAAAAA  
CTAACAATATCCTCCTAGACAGTAATTTCTGCGTCAAAGTAGCTGATTTTGGATTGTCTCGGCTTTTCCCT  
ACTGATGTTACACATGTCTCAACAGCTCCACAGGGTACCCCTGGATATGTTGATCCCCAGTATCACGAAT  
GCTATCAACTCACCGTAAAAGTATGTTTATAGTTTCGGGGTGGTATTAATCGAGCTTATATCCTCTCTG  
CCAGCTGTTGATATCTGTAGGCATCGACAGGAAATAAATCTATCAAATATGGCAATTAACAAGATTCAGA  
GCAACGCATTACATGAGCTGGTTGATTCAAATCTTGGTTTTGACTCCAATGACTTGGTAAAGTTGATGAT  
CACTGCCGTGGCAGAGTTGGCTTTCAGTGTCTTCAGAACGACAGGGATTTGAGACCATCCATGCCAGA  
GGTTTTGGAAGCTCTACTGGGAATTCAGAGTATGGATAAAACAGCAACAGAAATAGGGAAGCCAAGTC  
CCGGTGATGATGCTGGATTGTTGAAGAATCACACATTATCTCTCTCACCCGATTCAGTTATTTCAAATG  
GACTAGCAGTAGCAGTTCAACAACACATGCTTCCAGTATTGGCTAAGTTTATGCCCTTAGTTTGTCTAGTT  
TGTGGTTTTCTTGATAGTGATTCTTCAGCCACCTGCTCTATTGGTCGCGGAAGGTGAATTTTAGTGTCTTT  
CCTTTGAGTACTTTGGACCTTTTTCTATCTTAAAGAGGTTGTACATATCTCGTATGCAGCAATTTAAATTTA

TCAATACTAATTCAATTCATTTCTTAAATTCTTTAGTTAAATTGTGTAGATACTTGTTCAATTGATCATCTTT  
GTCATAACAGATTTTGA

>PGSC0003DMG403014059 RLK with WAX or WAX-EGF domain

TTTTTCAACAGGTACAGGTTTATTAAGTGTGGACTGTTGATTCTACTTTTCTACTTCAGAGAAAAGATTA  
TGCGGTACAAGTGCCTCAGGTTTTCGGAATCTAATGCTGAGGATCACCAAAAAGTTGAAGCATTCTTAA  
AGAAGTATGGTTCATACGCTCCAAACAGATAGAATTATACAGACATCAAAGAATCACCGGTCACTTCAG  
AAGCAAAGTGGCCAAAGGAGGATTTGGTAATGTATACAGAGGAAGTTTGTGTAACGGGAGTCAAGTGG  
CAGTGAAGGTCCTGAATAAAGTAAAAGGCAGTGGTGAAGATTTTCTTAATGAGGTAGCAAGTATTAGC  
AGAACATCGCATGTTAACATCGTGAGCCTTGTGGGATTTTGTGTTGAGGGTCACAAAAGAGCTCTCGTAT  
ATGAGTTCATGCCAAATGGATCTCTTGAAAAATTTATCTATGAGGAAAGATCCGACAGTGTTCGTGATT  
GGGTTGGCCAATACTGTACAAAATTGCACTAGGCATTGCTCGAGGATTGGAGTACTTGCATCGTGGTTG  
TACCACTCGGATTTTGCATTTTGTATATAAAGCCTCATAATATCCTGCTTGATGAAGATTTTGTCCGAAGA  
TCTCTGACTTTGGTCTTGCCAAACTGTGCATGAAACAGGAGAGTATCGTGTCAATGTTAGGTCCACGAG  
GAACTATCGGCTATATTGCTCCAGAAATTGTTTGTAGAACTTGGGAGGTGTCTCTCACAAGTCTGACGT  
CTATAGCTATGGAATGATGGTCTAGAGATGGTTGGAGGAAGAAAAAATGTTGATGTTGGAGTTGATC  
GCACGAGTGAAATCTACTTTCCACATTGGCTCTATCAACGAATTGAACTGGATGAAGAGCTTCAACTAAT  
CGGGATAATGAATGAAGAGGAGAAAGAATGTGCAAGAAAGATGGTGATGGTGAGTTTATGGTGCATA  
CAGACTGATCCCTCAAATCGACCATCTATGAGCAAGATTGTGGAATGTTAGAAGGGAAACTAGACTCT  
TTGCAAATGCCTCCCAAGCCTTATCTTTATTCTCCCTCAAGAACAGAGGTAGATTCATCAGTAGTAGAACT  
GGCCTAGCCTTTATGTGTTCAATTTCTCAGCTAATATCACTGTAGTCACATTTTGTATGGAATTGTAGCAA  
AACTGGTACTGTTACAGGTTTCGTTTTCTGATGTGTTTAGATGTCCTTGAATGTAAGAAGCTGTAAATTC  
ATGCTTTT

>PGSC0003DMG403030532 RLK with WAX or WAX-EGF domain

GATCTTAGTTCAGGCAAAGGGAAAAAATGATTCAACTTGTCCAAAGTTCTTTTCATGTGGGAATCTTACT  
GACTTGAGCTTTCTTTCTCTTTCTCACGATCTGATTGCGGACTAATGATCATGTCTGGTTGTGATACT  
AAACCATATCCAAGAATCCAAGTCTTCTGGAGGGGATTGGTACACTCCTATGGAAAAACCGCATAATT  
TTACAGTTTGGCTCTTGGACCCGAAGCTTCATACCATGTTGAGGCAACACAAGTGCCAGTACTTTTAGAC  
TAAAAGTTTCTCCCTTCAAGACTCTCTTCTATTTCTTTCACTACCCCTACGCTTCACGATTTCTTCAAATG  
TAACAGCACCAGTCGTAATGCCCAAACACTACCCATAAGAAGAATGATCATTTTGTGTTATAAAAATA

TACAATGGTTGTAAAGACTTTAGCATATACTACAAGCTTTCTGGAGATGGTGATGAAGACATTCGAGCA  
GGCAATTTTCCTGCCAATTGTTCACTTATCAGATTGCCAATTGACACGTTAGCATATGATAGGGATGTGTT  
CAAAATGTTAAGTCACGTTTTTCTGGTACAATGGGAACTGTCTTACGACTGTTACCAATGTCACCAAGGT  
GGAGGTCATTGCCAGACTGATAAAACCAACAAATTTCAATGTACAGGTATAAATAATCCACATGCTCAA  
GGTCTAGTGATATTTCTTACCCTTTCCTATTTTCATCTCACATATCATTAAATATTCATAGTATTTTCGCTCT  
TATTTTAGATGCAAAAACAACAAAAGCAAGTTAGGAGTGAAGTCTGGGAGCAGGTAATTTAATATCCAT  
TAACTGCAGAGTTCTTTCCTATTTTACGAAATTTACATGCATATCATTTAACTTTATTAGATAATGACAGAA  
TGATAGGAAAAGACAAGTACCTTAGGTTATGTAAATGTATGGATACTGGAGTTGAGGGAGATTACTGAC  
TTCTCTTTCAGTTTTTGGTGGTGTAGGATTGGTGATGATAACTTTAGTTGTCTCCTTTATCTGGTGTTACA  
AGGAGAAGAAATTTAGTCCATCCCGCTTCTCTTAACGAAGAAATTCTCGGACATTTTCAAACATGATGT  
TGAGGGAGGCAGTATATACTTTGGTGTCTAGTCTTCTTATTTCAGAACTTGAAGAAGCCACAAATGAT  
TTCAGTTCTTCTAGAGTCCCTGGAGATGGAGGTTTCGGAACCGTTTACTATGGTGAGAGACTTCCTAATC  
CAACTGCGCTATGCTTCAACTGTTTCTTTCATGTACCTAACTCTTGTTTCATCAATGACCAGGAAAGCTTAAG  
GATGGAAGAGAGGTTGCTGTGAAGCGCTTTACGAGCACAACCTGCAAACGAATGCAGCAGTTTGTGAA  
TGAAATTGAGATCCTTACTAGGCTAAGGCACAACAATCTTGTTACCCTCTATGGTTGCACTTCAAGGCGA  
AGCCGTGAACTACTCCTTGTCTATGAATATATTCCTAATGGAACCTTGCTGATCACCTCCATGGTAATAA  
AGCGAAGGATGGATCACTCACGTGGCCGATTTGCATGAACATTGCCATAGAACTGCTGGTGCATTGGC  
TTATCTACATGCTTCTGACGTAATACTGCGATGTCAAGACTAACAACATACTCCTTGATCACAACITTA  
GTGTTAAAGTTGCAGATTTTGGGATTTCAAGGCTTTCCTCAATGATGTCTCTCATATTTCAACTGCACCC  
CGGGGAACCCCTGGCTATATCGATCCAAAGTATCACGAATGTTACCAGCTGACTAGTAAAAGTGATGTT  
TATAGCTTCGGGGTGGTCCTTGTGAGCTCATTTTCATCAATGCCAGCTGTGGATATGAATAGGCATAGCC  
AAGAGATTAATTTGTCTAACTTTGCAATAAACAAGATCGTAAAATGTGCATTTTCATGAGTTGATTGATCC  
ATCCCTGGGGTTCGATTCAGATACCAAGATTTGGGAAATGACTACTTCAGTGGCAGAGCTGGCTTTTCTG  
TGCTTGCAGACAGATAGGGACATGAGGCCTACTATGGTTGAAGTTTTGGATACTCTAAACGAGATTCAG  
ACTAGTGAATTTGGCAATGAAAAGAGAAGTGAAGTCTAATATCAATGCCACTGAAGCTAAAATAGTAACA  
GCTTCTCCTTTCCTTGAATCAGAAGATACGTTATCGTTGAAACAAGTTAAATCACTACCTTCTCCAAATTC  
GTGACCGATAAATGGATTACTTGCTCTGATATAACTAGAACAAAGTAGTTAAAAGTTCTACACCCCATTT  
CTTTGTTATTGATGTACTACTGTGAGA

**Notes S2** Fasta file of the 977 RLP RLK genes from M6 genome used for generating the

RLP/KSeq enrichment library

>M6-PGSC0003DMG400009417 M6 C-LecRK

AACACAATTAGGAGTCCAAGCTGAATGAAAAGAGAAGAGAACACTGGAGCTTATTTTTTATAGATTTTT  
TTTTAAAGTTTCAGTGTTCTCTTCTTTTTCGTTCAGCTTGGACAAGCTTAGTTTAATGCAAGTTTGGCTT  
TGTTTGTGAGAAGTTGGTACTTTCATTTATCCTTCATACTTGAATCTAGCACACCTTCCCTCTCAACAAAGG  
AAAAGTGAAAAGTGAAGACACACTGTCGATGTCAAACCTCCACTAATTTGAGTGATATCACACAATCCAT  
AACACGGAGGCCAAGCAACGACTACTCCTATCAGGTTTATAAGACACAGGGGTAGAGGGCAATGACCT  
GGTGTCAACATCGTTCTTGGGCCTTCTATTTCTGTAAGCTTAGTTTGGAGATGGCAGTGGAGGCCAATTGT  
GGTGAACCGTGAATCTTTCAATCTTCAAATCTTGGAGACCTTATCTGAAATGAATCTTATTTTGAAGCTG  
ATCCCTCAATTGTTAGCATAATCAAGTAAATAAATCCATTAATGAAGATAAAGATACTTTTAGGGTGAAA  
AGTTATCTTTAGTTGTGGTATTAGAAATAACTAGTTCAGAATACCCGAGCTTTATTGTCCATTATGAGGTA  
TTTATTAGTTATAAACAAGTTCATGATACCTGAGTTTTACCTACCTAGATACAAACAATATTCTACCTA  
GCACTTTCCAGTCCCCGCAATCTTACTAGTATTATTTACAACCTGAAGTCGATGTTCAAACCTAAGGAAACA  
ACAGAAAGAAAAAACATTAATAACTACAAATATAGAAAGATGGTGAAAAGAATCAACAAATGTGTACAA  
GAGTTGGAGATCATGTGGCTAAATGGATGGGGTTAGTGCAGGAATGTCAAGTTTGGAGCCACTTTTATAA  
CATTAGGAACACATATAGACTGATAGAATAACATTAGGGGTATATATGTAAGTATGTTAATGGAGGG  
TAAAATTAACCTTTTCAATAGTACAGCTGTACAGGAAGTGAGGGACAAATATGACCCTTTTCTAATTT  
CTTTTCTTCTTCTTAGATAAATGAAGAAGTTAGATCAAGTATTATTAACAACACTAGTGCAACTGAACTTA  
TTTGGACCTCTCAACATGGTTTTTCTTAGTGTATGTTTTTATTTTAATTGGTCAAGTTATTATGTCTCATC  
TCTTTGGCACTGTTGTTTATTGTTTCTCAAGCAGGAAGATGTGATCCTGGTTGGTTTAGCAGCCCAAATG  
GGAAAAAGTGTTCAAATATAATGCGACCTCTTTCGAATGGAATGAATCAGAGACTTACTGCAATGGTTT  
TGGAGGAAACCTGGCTGCCATAACATCTTCAGAAGAACTGAACTTTGCCAAAAGCTCTGTGGCAATGA  
TAGTAACGGATGCTGGGTGGCGGAAGGAGCATCAATACCACAGCTGGGTGGGTGGAAATGGTCTG  
ATAATGCTTCTAGCTGGAATGAGAGTATTGCTCCTAAGACAACCTTTGGACTCAAGTTGCAAAAATTTCTC  
ATGCTATGGCTTTAAGTCGGTGGATTTGTGTACATCGATAACCAATGGTGCTATTATAGCTGAGAGATGC  
AATGTAACCTCATGCTTCTATATGCACACTTGATGCTGGTAAGTGATTGCAGACCAATTTATTTCTAATTGT  
TTCTTTCACCCAGTGTAATTTTAAAAGTAGGAGCAAACTCTTTCCCTGATATAGTGTGGTTATAATATG  
TGATTAAAAGCCTCATAGTCCCCTTTTGTTTTTTCCATGAGAAGTGCATTTTAGCTAACCATTATACAGGC

CTACATTGTTATCTGGATAAATCTATTACATTCCTTAATTGGTTTTAAATAATCCTCTAAATTTTATATTAG  
GGAGCAAGTGTGTCATATGCGTTGCCACAGGGAGTATCTCATTATTCTTGACAGTTGTGAGTGGGTTGA  
TCCTTTGCACTACTTTGGCTATTGTGATATGGCTTCTTGTATTTTCGGCGAAGTAAAAGACGCAAAAGATC  
ATCGCGTGCATCATTAGCATTAGTTCCTCCGTCTTGGAAAATTTCAATCGTGATGAAGTAAAGTCCATG  
ACAAAGAATTTTCAGTGAAGCAAATCGTCTCCTTGGGGATGCCAAAACAGGTGGTACCTATAGTGGGCTT  
TTACCTGATGGTTCAAGGGTGGCTGTGAAAAGATTGAAGAGGTGTGGTATTACAGAGGAAGAAAGAGTT  
CTACTCTGAGATTGGAAGAGTTGCGAGACTTCATCATTCAAATCTGGTGTCTATCAAAGGATGTTGCTAT  
CATCATGGTGACCGCTATATTCTGTATGAGTTTATTATCAATGGACCCCTGGATAGGTGGCTACACCATA  
TTCCTAGAGGAGGTAGGAGTTTGGACTGGAGCATGAGAATGAAGGTGCCACCACCCTTGCTCAAGGG  
ATTGCGTAAGTAGTGTTCCAACATTATCTTCATGTGCATTGTAGATTAGGAATAAATATTTAACTTATCC  
GTGAGGTGGATTGATTTTAGTCAGAAATGTGAGTTTATTCTTTAAATTTTATCATACTTCCCTTCTTTGTCA  
TGAGTATGAACTCATATATACATGTTTGGGTTGATGTCCAATGAAGATGTTATCGTGGAAAGTCAAACAA  
GGGTGAAAATAGATGATAAGAATGCATTATCTATATTGTTAAGAAAAAAGGGTGTGTTATCTGTCTTGC  
AATATTCCTTTTCTATTTTCTTTTCTTCCCTAGATTTTTTCATTCAGAAGAAAGTCAAATTCTGCACATCT  
TGACCAAGATACTTCTTGTTAACATATAATGCAATTAATAAATGAAAACCTTTTTGGTTTACAACATCCGT  
TCCAGTACTAAGGAGAATTCACCTCCTAGGGATCTACCTATCTGCTTTTCTACTCCAGCTAGATCTTACC  
ATTGCCAAACGTGTTTTTGCAGCACTGGCCTTCTGGCTTCTCATGTTTCTTTTCAGGTTTGGGGTGGATCT  
TTCCTTTCTCAATTATCACATACTCGGTTAGGTCGCCCGTGTGTGTGTTTTTCAATTTAAGTGTTTGAACA  
GGAECTCTTTCATGAATTTCACTAAAATATTGTAGGAAAGCTATGATTGATTTTCTATTTCGGGGATTTCAT  
TATTAECTATTTATGACCCTATTTATTGGTGACAGAATTGTTGAACTTTTATCTAGGGAATATTTCTTGAC  
ATGGAAATTATGGCAAAAATTTTTTTCAGGGGTTTGTGAGACTACTCACCACCTAACCCCAACAACAAA  
TATACATGGAAGAAATATTGAAGTGACAAAAAGAAGCCAATATATTATTCGAATTATTCACGATGATAT  
AGTGAAATAATTAGCATAAGATAGACCAAACCTTAGGCTTATCTACATCACCATATTTAATATATGCAAT  
GTATTATGTATGGTCCCTGGTAGTTTTAACTTTTCATGGACTTCTTTGTTAAGAGGTATTATTTTCCATAAT  
TTATTAGTGTAAGTTGAAAAATATAGGCCACTTGAGTAAGCTGGGTTTCATTTTATAATGTACATACTTTT  
AAAGATTTTCGATAGTTTGAAGTAGGTCTTTGTAATTTTATATGCTACAAGGAATCCAGAGAGAAGCGA  
GTGAGAAAAGATGAAATGCTTAAGGAAATGGATACCAGCGACATCTTAGTAAGAAAATAAAAACTGCA  
TATTACTTTCTGTTGTCTTCATGAGCTTTTGTCCAAGTGTCTTACCTTGTCTAGGGCGGATGTCTATGG  
AAAGTGAAGTCATAGAAAATAGGATGTCTATGGAGGTCACTGTTATAAGCGAAGCAACCTAGATGCCTA

ATATATCGATGGATAGATACTTTAAGACCAGTCATGCCTATGGCATATTTGTTAAAAAAGGGAAAATAAA  
CAGAGACAATTCAGGGTCTATTACTAGTTTATTACCTTTGTAATTTATGGAATTGAAGGATCTAGCATGTT  
AATCAACTGCATAAGGTGAAAATGAGTGGTCTGGTTGTGTTATGGTTGTATTTTTAACCATGAAAGGTG  
GTGATAGTTGTTAAAACTCTGTTTTGTGTCACTGTGTCAGCTAGTGCACAAGAGGAAGTGCAGAGTGGAC  
AAAAGCATGACATTGTTTGTGTAATCTCTGTGATGTCAGTTTCTTTGCTTATATTGTTAATGTTTACT  
TTCATCATATGTGACAGGTTTCTTCACGACAAAATGAAGCCACAAGTTGTGCATAGGGATATCCGTGCAA  
GCAATGTTCTTCTTGACGAAGACTTTGGCGCCCATCTAATGGGAGTTGGTCTGTCTAAGTTTGTACCATG  
GGAAATTATGCATGAGAGGAGAGTCATGGCAGGTGGTACTCATGGGTATCTTGCTCCGGAGTTTGTTTA  
CAGAAATGAGCTTACTACAAAGAGTGACGTCTACAGCTTTGGAGTTCTCTTGCTTGAAATAATTAGTGGA  
CGAAGACCAGCACAGGCAGTTGATTCTGTTGGATGGCAAAGTATATTTGAATGGGCCACTCCTCTGGTG  
CAGGCTCATCGATATGTTGAACTGTTGGATCCTCTCATATCATCTTCTTCTCTCAGATTCTGAAGTT  
GGAGTCATCCAAAAGTTGTTGATCTTGTATTCTTGTACACAACATGTACCATCAATGCGTCCGAGGA  
TGTCACACGTGTCATCAGCTACAACAATTAGCTCAGCCCCCTATTGTAAAGTAAGTGGATAAGAATTA  
TAGTTCAGCATTCTTTTACTGAAATCAGCCTGCAATCTTTTATCCTAGTTGCAAGGGCTAATTGTATTA  
GGCATTATTTTTGAACTTGACATGCAAGGCCTTGAGGCTTGAACCAGTCCATGATGTTTGAGATGTAATA  
CAACAACTAATCTGTATCACTAAAGCCAGTATGCTTTTCATCTGCTGCTGCTTTGCATTGTTTACTTGTAAC  
ACCTGTATTTTTAAAATTTGTTTCTGTTTCTGTGTTAAAATATCACTATGCATAACAACCAATTCAATAAA  
TGTCATGAAATTTT

>M6-PGSC0003DMG400000179 M6 G-LecRK

CAAATATTCTCTGAGCTTTTCAATGTTTCTTATAAACCAAATCTTTTTTCTTTAGCTAAAGCAAATTC  
ATCACCATGATTCCACAGAAAGCAATTCTCATTTTACTTTTCATCACAATTTCTATGGCATTGAGATCAGT  
TCAGAAACAGTAAAGTCAAGAATGCAAATGTAAACATGACCCATGTAGCTGAACTCACTAAAGAGTCT  
GTTTCAGCTGAAAGAAAGTTGGGATCTTTAGAAGGGAGCATAAAGTTTGAATCTTTGAACAAATCTAGA  
GTTTTACTAAGTGGGAACCTCACTGTTTTGAGTGAAAACAAGACATTTGAAATGGGGTTTTTCAAGACTA  
ATGATGAAAGTAAATGGTATTTAGGGATTTGGTTGCTTCAATTCCTACCCCTACTTTTGTGTTGGGTTGCT  
AATCGTGAGAAACCCATCAAGAATCCATTTTACTTTGGAGTTTAGTGAGGATGGGAGATTAGTTT  
TGAAGGAAGATTCAAGAACCATTGTATGGGAAACAACCAATTTGGAGAAAGCTAGTGATGTGAAGCTTT  
TGGACCAAGGGAATTTGGTTCTGTTTCTAATAAAGGTGTTTTGGTATGGGAAAGTTTTGATTTTCTAC  
AGATACATGGCTTCTGGGATGAACTTGACTGCAACAAAATGGCTGACATCTTGGAGAAGTACTAATGA

TCCATCACCTGGAAGGTACTCTTTAAGGCTCCAGCCACATAGTTATGGTGAGATAGTTCTTTTTATAATG  
GTACTTATCCATATTGGTCCACTGGGAAATGGAGTGAAAATGCATTTGTTGATGTACCAGAAATGACTGT  
TCCTTACATTTACAAGTTCAATTTTGAATCACCTTTTACCCCTATGGCATCATTGGATACTCAGAGGTGA  
CATTAGAGAATGGAATGCCTCCTCTTTAACTAGGTTTCATGGTTGATTTCACTGGACAGGTAAACAGTT  
CACTTGGATCCAACAGGCGCAAAGTTGGAACATGTTTTGGTCACAGCCAGAGAATATGTGTAGTACTTA  
TGGTCTTTGTGGGAATTTGGGGTTCTGTAATAGTAAGTCATTGAATCCATGTAAGTGTACCAGGGTTC  
ACCCCTTTGGATGGTATTGATGGGATGCAGGGGATTTTTCGGGTGGCTGTCGCCATGAGAGTAATGAA  
GTTTGTGGTGAGAATGATAGGTTTGAAGAGTTGGAATGGCTAAATATGATGGAGCAAGGGTAGTTTC  
AGTTTCTGGAAGTAGAAATGAATGTGAGAGAGAATGTTTAGGTAATTGTTTCATGTATTGGTTTGTATCGC  
AATGAGAAGACTAATTTGTGCAAGAGTTTATATGGGTCATTGCTCAATCTTAGGAATCTTACTTCTGATG  
GCACTGTTGAGGATAAGCTATATGTTAGAGTTCAAGGAGGAGGGAATACTCGAAAGAATCAGATTCAA  
GTCAGATTACTTGTGATCGAAATGATCTGTGGATTTGTGGTAATTCTGTTAGTTGGAATTGGGGCTTTCT  
TGGTAGTTAGGAGGAGAAGAGTAAGGAGGAAGAAAAAGATGAGGAAGATGTATTTCTATAATGAA  
TTTGAAGGTATTTTCATACAAAGAGCTTAATGCTGCAACAAAGGGATTCTCGGAGAAGCTTGGTCATGG  
TGGTTTTGGAACCGTGTTCTAGGGGAGCTATCGGATTCTTCACTCGTAGCTGTGAAGAGACTTGAAAG  
ACCTGGTGGTGGTGAAAAGGAATTCGAGCTGAGGTATGCACAATAGGGAACATTCAGCATGTTAATTT  
AGTGAGATTGAGGGGATTTTGCCTGAAAATTCTCATAGGCTTCTGGTTTATGAGTACATGTCAAAGGG  
TCCTCTTAGCGCATATTTAAGGCAAGATGGTCAGAATCTAAGTTGGGATGTTAGATTCCGAATTGCTGTA  
GGGACAGCAAGAGGTATTGCTTATTTACACGAAGAGTGTGCAATTGTATAATACATTGCGACATTA  
CCAGAGAATATTCTGCTACATGAAGATTTTTCAGCAAAGGTTTCTGATTTTGGACTTGCAAAGCTCCTTG  
GTAGGGACTTTAGTAGAGTGTGGCAACCATGAGGGGTACCTGGGGCTATGTTGCACCCGAGTGGATC  
TCTGGATTAGCGATCACAACGAAAGCTGATGTATATAGCTATGGCATGACATTATTGGAAGCTGATAGGT  
GGTCGACGCAATGTAGAGTCACCGCCTTCAGCTAAAGGTGAAGAGGGCGGAACAGAGGAGAAGTGGT  
TTTTCCACCGTGGGCAGCACGTCAAATAGTCGAAGGAAACATTGCTGCAGTTATGGATGAAAGACTAC  
ATGGAACGTACAACCTCACGGAGGCAGAACGTGTGGGATTGATAGCTATTTGGTGCATTCAGGACGAT  
GAATCAACGAGGCCTTCCATGGGAATGGTGGTAAAATGTTGGAAGGAGTTGTCGAGGTGACAATGCC  
TCAACCTCCGAAGCTGCTCCAAGCATTAGTATCTGGTGAATCATTCCATGGGGTAGGAATTGATTCAAGT  
AACGGGACATCACGAGACGGAGGTTTCAGCTCGGGTTATAATCCTCAACGTTCAATATATTCAAAGAC  
TCTCAAGCTTCAAGTTAGGTCTGCTTCTCAACTAGTATGCAAGTTGATTTTTCCAGCTTCACTGAATGTA

GAGTTCCTTTTTATTGTCTTCAAAAATCCCCTGAGAATTAGTAGCAAAATGCTCATCTTGGTATTTTGTA  
AAATGTATCATGAATATAGAAAATCTTGTTTACTTTGCTTAAAAATTGTCACCTTTTTTTTTTTTGTAAG  
TCCAAGAACCAAAGCAAAACAAAACATACATTTCACTTTGGATCAGAGGGTTGGGGCGGAGCTAGTAC  
ATTACACTATTGATATATGGTTAAAATTATTTTTTTATGTATATATAATAGACATTGAACCCTTAACTCT  
TCGTGTGTTTACTTCTTCATATTTTGAACCTTAATGAAAATTGTGACTTGCATAGGATTATAGGAGAGG  
GCTTCCTAACCTTAGAATGAGACAATAGTTGAAAATATCAAAAGTTATAATAGCAGAATTATTTAATGGA  
TATATCTTTATTGGTAGATATTTTCGTATAGTGAACCTTAAAATGAGATATAGGTGTATAATAAAGCATT  
AAACATGTGTTTGGATTATACCAACCAAACATTATGCAAAATTTTATATTGAGATTATTTTTGTTAATATG  
GTAAACCAAATGACTAATAAGAATATACCCTCTACCTAATTTAATGGGAGAGTTAATTTTATATTTTATAA  
ATGAGTGTAACGTTTGTACCTGCCCAATTATAACCACACTTTACTTTCTAAGTTTAATTTACATAACTGTCT  
TGACTACAACAATAACAATAACCACTTGTCAATAGTTTCCTCTTTTGTAGCTAAATAATATAACAGAAAT  
TGAAACAAGAAAGACCATATACTCTCACACAAACAAGCAAACAGAAAAGGAGAAATGTTTTCTAACT  
TGCAACTTTAGTAACAAAATTTTCCAAAATTAATTTTTTCAAAGAGTAAAGATTGAGGGGGTTAAAG  
AAAATGGTCAAAGGAGAGCAGAGGTAGACAACCTCTGCACTCTCACCAAAGAAGTTTGTTACCTTGGAAA  
TGGAGACACCTGGCAGTTCAGGTGGGGAGGTGCCGATATATGGGGGCTCCTCGTCTATGGAGCCGACT  
GAGTTACACTCGGCTCCATCTACCATGCTGGCGGATTATCCGCCAGTACAAGGCTTTCAAGATTTGAAGA  
ACTTGGTTAGCATGGAATCTGGCAAGTTATGGACTATTGCAGGTCCCATAGCCTTTAATATTCTGTGTAA  
TTATGGGATTAATTCTTTTACAAGTATATTTGTTGGACATATTGGTGATGTAGAACTCTCTGCCGTTGCCA  
TATCTTTATCGGTGATAGCAAATTTCTCATTCCGATTCTTGGTTAGGTTCTTTTTTTGTTCTTACTAATTCTC  
AAAGTTCTGTTCTTTTTTATATTATGTTATATGGGCATTGAGTATTCGTATAGCCGACCCCAACTTGCTTG  
AAATAGCGGGATAGTTGTTGTTATTGTTGTGATTGTTTGTAAAATGTAATACATCGAAGATATGTTGGAT  
TTTGTGCACTCTTTGATGAGACTTATGACTATAGATCACAATAGTTTATTATGAAACAGAACTAGGAT  
TTTGATTGTCAAATGATATAAAGTCTCAAAAAGGTTAGAATAAGCATTCTTTTAGGTTATTGGTTATGTTA  
GTTTTCTAATCTTTATCTTATTTTTGATGGATTATCAGTTAGGCATGGGTAGTGCACCTTGAGACACTTGG  
TGGACAAGCATTGTTGTCAGGCCAAATAGAATTGTTAGGAGTTTACTTGCAGAGGTCATGGATAATACT  
TGTTGCTTCTTGCTTCTGCATAATGCCACTCTACATCTTCTCCACGCCGATACTGAAGTTATTAGGCCAAA  
GAGATGACATAGCAGAGTTAGCTGGAAAATTTTCGATACAAATCATACCTCAAATGTTCTCCCTTGCTAT  
CAACTCCCAACCCAAAAGTTCTTGCAAGCACAAGCAATGTCGCGATCCTGGCATGGGTTGGGTTTCAT  
GGCTTAGCCATGCATATCGGGGTGCTCTTTCTTTTTATCAAAGTTTTCCGATGGGGCGTTACTGGTGCT



GCTGCAGCCTATGATGTTTCTGCTTGGGCTATTGCTCTGGCTCAAGTGGTTTATATTGTTGGCTGGTGCA  
AAGATAGTTGGAAGGGGTTGTCTTGGTTGGCCTTAAAGGAACTTTGGCCCTTCGTAAAGCTTTCTGTTGC  
ATCAGCAGTGATGATTTGCTTGGAGATCTGGTATTTTATGACTATAATTGTTCTAACTGGTCATCTTGAG  
GACCCCGTCATCGCTGTTGGATCTCTTTCTATCTGGTACAATCTTGCAAATATGCACTTAAAATTTATAAT  
GTGTTCATAATTGTTCTGTTTTTCAAGCTTAGATTCTTTCTTCTTATTGTTTCAGTATGAACCTTAATGGA  
TGGGAAGGCATGTTGTTTATTGGAATTAATGCAGCAATAAGGTATACTACTATACTAGTTATAGCAGGA  
CATTGTCAGTGCACAAAAGTTAACTCTAACGAATAGTGTAAGTACTGCTAACGGTTGTTTTTCAATTTGTTGATA  
TTTCAGTGTTCGCGTTTTCCAACGAGCTTGGATCAGGCCATCCTAGGGCTGCAAAGTATTCCGTCTTCGTC  
ACAGTAGCTGAATCTCTCATGATTGGGATATTCTGCATGGTACTAATCATATTAACAAAGGACCATTTTG  
CATTGCTTTTCAACAAGCAGTGAGAAAATGCAAAAAGCTGTTTCTAAGTTGGCATATCTTCTTGCTGTTACA  
ATGCTGCTTAATAGTGTTTCCAGCCAGTTATATCAGGTACCAAAATATGTGTGTTTCTTACTTAAAACAGTTC  
TCCACACACACATCAGTTGATGTGCCAAACAAATAGTACTATTTGGTACAAATCTATGTTGCTCGGACTC  
GTCAAAAATGTCAATGGGTGTGTGTCGGATTCTTGATAAGTAGAGTATTGTTGAAGAATCCGCGCAAT  
CAAAAAGTTAAGAGTCTGCGCAACTTTAGGTACAACTCAAAGAATAAATTAGATTGTTCTAATATTGA  
AGGTGTTGCTGTTGGAGGAGGATGGCAAGCTCTAGTAGCATAACATTAATTTGGCTTGCTACTATGTCATT  
GGCCTCCCACTTGGATTCTTCTTAGGCTATAAAACAAGTTTGGGAGTTCAGGTAACAACATAAATCTTTTT  
ACTAGTATTAATTTAGCTCCGTTTTGATCATAGATTTTAGAGTAGATTAATAAAAAAAAAAAGGTATACTAAC  
CTGTTCTTTTACTTGATCTCAACTAGACATCTATGCCCTCCAATTTTGAATCAAATACTTGAACCTTATATGA  
AGTTGAACAAATAGACACATGCGTCCTATATGGCATAATGAAAATCAGTTTGGGTGTATCCACATGAA  
CAAATAGACACATGCGTCCTATATTGCATAATGAAAATCAGTTTGGGTGCATCTCACGTGAATTGGCACG  
TAGGACGCATTTATCTACTGGTACAACCTTLAGACAAGTTTAAAGTGTCTATTTGTGCACGCCCAAAGTTGA  
AGGGCAACTGAAGTCAAGTTAAAGAGCGTTTATGTATTATTTTGAACATTGTTTGTTCATGAAATTTGGT  
CAGTTTTCTAAAATATTCAATTGAGCTAAGTTTTTGGATGAAATTTACGTCTACTCACGAAACAAGTAA  
AATGCATGTCCAAACATAACTTCATATTCAAAAACTATTGTTCAACACAACCTTCAAAAACCTCACTTTTTCA  
AGTTTCAACTAAATCTATGGTCAAACTCAAACTAGCTTGAGTTTGGAGTTTLAGGAGGGAACTTTGAA  
TTAACGATAAAGTTAATAAACTATTGATGTTTTCGTCGGATAAATTGTCTACATTACACTAATTGTCACT  
TCATTTTTTTCTTTTTCTGTAGGGAATATGGATGGGCATGATTTTTGGAACCTTTTTTGCAAACAATAATT  
CTCTGTGTTATCGTATACAAAACCAATTGGAACGAAGAGG

>M6-PGSC0003DMG400000915\_ M6 G-LecRK

ATGGAGTTAATCTTATTCTTTCTCATTATCTTTGTCCGGTATTCTGTCTTTGGTTTTTTATCAAAAGAAT  
TTGTCTATCCCAACTTTACTGCTTCCAATTTCCAATTTGTCGATAGCACCGGAAGTTTCTGGTTTCTCGCA  
ATGGAACATTCAAAGCTTCTATCTTCAATCCCGGTCTGAACAAGTTAATTTCTATTTGTGTGTTATCCAT  
GCTGAATCCAATACCATTATCTGGTCTGCAAATGGTGATGCACCTATTTCAACTTCAGGAATTATGAGGT  
TGACCAAGAATGGTATTAGTATTACTGAAAAAGATGGCAGTTTTAAGTGGTCAACTCCACCATTAAAGTT  
AGCAGTATACGCGATGCAGCTAACTGAGACTGGAAATCTCCTTCTCTTTGATCAGTTTAATGGGACACTT  
TGCAAAGCTTTGATCATCCGACAGATACAATTGTAATTGGACAGAAGTTGCGTGTGGCATGATGCTTT  
CAAGTGCAATAGCAGGTGATGACTTGTCAAAGGGTCATTACAGGCTTTCTTTGTCTGCTCCGATGCTAT  
GTTACAGTGGCAAGGTCTGACATACTGGAAATTGTCCATGGAAACCAAAGCTTATACTAATTCAAATTAT  
GCAGTGGAAATACATGTCTGTCAATCAAACAGGTCTTTATCTTTTTGGTCAAGGTGGTTCTGTAGTTGTGA  
TAATGGTGAACCTGTTACAATCCACTTTTAGAATTGCCAAATTGGATGGTTCAGGTCAGTTGATCGTTATT  
AGTTTTGTTGGTTCTGACATCAAACGAGATTTTGTGGGCCAGTGGATGGGTGTAGAGTACCTTATGTTT  
GCGGAGGGCTTGGTGTATGCACCTCTGATGTATTATCAGATAATCCTAAATGTTCTGTCTGCTAACTTC  
AATCTTGGATCACATGATTCAAGAAGCTGTGTGCCTAGTGATAGTTCCTATTCTTTGCCAGTTTCTTGTA  
TTCCACCAACCACAGTAATCTGTGAATTCTTCTCCATGTCGTACATAGGACTTGGCTTTGGTATGGACT  
ACTTCACTACTGATTTTACCAAGCCCTTCAGGGATGGGGTAAATTTGTCCGTTTGTCAAATCTCTGCTCA  
GTAGACTGTTTATGCTTGGGGATATTTTATGCAAACCTCGTCTGGTTCTTGTACAAACTGAAGATGAAA  
TAGGGTCAATTATGTTAAGGACTAGTAGAAATGATGATCTGTTGGGATTTGTTAAGACCCTGGTAGGAG  
TTTCAACAACCTTAGGAAACAATGATAATTTTATGATCAGGAAGCTGCAGACTTTCCTTTAGTTGCAACAGT  
GATCTTACCTTTCACAGGAATCTTCTACTCATGGCGCTGGGTTTCATTATGTGGAGAAGATCTAGACCC  
CAAAGAACGGGAAAGATAGAATCCAAAAAGAGCCAACCCAATTCTCCTTTTTTCAGAGGACCTGGATGCC  
TTCTCCATCCCAGGATTACCTGTACGGTTTGTAGTACAAACAGCTTAAGGCTGCAACTGATAATTTCAAGA  
CTCAGATCGGCACAGGAGGCTTTGGTGCTGTATATAAGGGTGTGCTCCCTGACAACACTCTGGTTGCAG  
TAAAGAAGATAATAAATGTAGGCATTCAAGGGCAGAGAGACTTTTGTACTGAGATTGCAATCATTGGCA  
ATATTCACCACATAAACTTGGTCAAGTTAAAAGGTTTCTGTGCTCAAGAGAGACAACGCCTATTGGTTTA  
TGAATTTATGAACCGTGGATCGCTTGTATCGCACTCTTTTTGGTTCATGTACCTGTATTGGAATGGCAAGAA  
CGGTTGAGATAGCTCTTGGTTCTGCCCAGGACTTGCATACTGCACAGTGGCTGTGAACAAAAGATT  
GTCCACTGTGATGTGAAGCCAGAGAACATTCTTGCACGATAATTTTCAGGCAAAAATATCTGATTTTG  
GCCTCTCCAAGCTGCTGAATCGTGAAGAATCCAGTCTATTCACAACTATGAGGGGGACTCGTGGCTACCT

TGCTCCTGAATGGCTCACAAGTTCTGCAATCTCAGACAAAACGGATGTGTATAGCTTTGGAATGGTACTC  
CTTGAAATTGTAAGTGGAAGGAAAACTGCTCTTTAAGAACACAAAGTCACAGCCTTGATGATAGTGCT  
ACTGGAGATCACTCATCATCTTCATCTGCACAGGGACTTGTTTATTTCCCTTTATTTGCATTAGAGATGCA  
TGAGCAAGGAAGGTACCTTGAACCTGCTGACCCAAAACCTGAAGGGCGGGTCAGTGGTGGAGATATTG  
AGAAGTTTGTGCGGGTAGCATTGTGCTGTGTCCATGAGGAGCCATGTCTCAGGCCAACTATGGTTAGTG  
TTGTTAGCATGTTAGAGGGTGAGATACCACCAACTGCGCCAAGAATGGAATCTCTGAACTTTTTGCGCTT  
CTACGGGCGACGTTTTTCAGAGGCATCAAACATGGAAGAAGCTGGAGGCCAGATTGATGCCATGTTATA  
TCCGCAGGCAAATACTTCTCATACAACCTCTCGGAGCGTCTCTAATGCTTACTTCTCTTATATTTGTCCTCA  
ACAAATCTCTGGTCCAAGATA

>M6-PGSC0003DMG400001059 M6 G-LecRK

AAAAATTTTATACTAGAACAAATAGTTCTTTAATGGCATGTCTAAAAATCCTACTATTTTTCTCTTCATGAA  
CATTTCTTTTGCCTAAAAAACACAATTTTTCAAGGCCAACACCTTAGAGTTGGAGAAAAATTGGAATCA  
GCAAACAAGGAATTCAGACTTGAGTTTTTTAGCCTTGATGCCAATAAAACACATTATATTGGCATATTCT  
ACAATTTACCTTCTAACATGACCTTATCCCCGATGATGATCGCCCCGTTTGGGTTGCAAATCGCGATATT  
CCGATACAATATGCATCAGGTAACACACTCACATTGGATGATGATGGAAAGTTGAAAATTTTCTATGGA  
GAGGATAGTTTTTTTATGTTAAGTTATTATAATGTAACAACAAGAAATACAAGTGCTACACTATTTGATA  
ATGGAAATTTTGTGTTGGTGGAATTGAATACTAATGGTTCAGAGAATAAAACATTGTGGCAAAGTTTTG  
ATTATCCTACTGATACACTATTACCTGGGATGAAACTTGGGAGAAATGTTAAAACAGGACAGATGTGGT  
CACTGGTTTCTTGATAAGCAAAGATGTACCTGCCTCGGGGTCATTTACGCTTGGTATAGACATGAATGA  
CATTGACCAATTGATAATATGGTGGATGGGAAGTGTGTTTTGGACGAGTGGACGCTGGGGAAATGAGA  
CGTTTGGCAATGTATCGCGAGTATCACACTATGAGTATGTTAACTTGAGTTTTGTTTCGACAGAGGATGA  
GAAGTATGTGACTTATTCTGTCAGTGAGACTCGAACTTTGTCTAGATATGTAATGGATACATTTGGTTTTA  
TTAAGGAAAGAGGAGCAGCAGGACCTTTTGGGGTGTGTTTTTACAAGCCTAGTGCTGGTTGTGTGACAG  
AAGAATCGATTGGGTGCTCGATCAGAAACGATTCGTGGTTCAAGAGGAGTCCAAATAGTGTCTCTGGTA  
ATAGGTTTAGGTTTGAAGACAACCACATGAGCTTATTTGATTGCAAGAGACAGTGTGAGAAAACTGTT  
CTTGCTGCTTTTTGCCTCTATCACAGCTAATGGAACCTGGTGTGATATTTGGAGTAACGTATCGATTTG  
AACTCACTTGAATCGGATGTTTTTATTCTTGGTGTGAAAGAGGTATGTTTCATATTTATCTCAAATATCCT  
TTTTATGTTGTTGTCGTGTGACCAGGAGGTCACAACTCACGGGATCCAGCTATGGAACTGCCTCTTGC  
AGAAATGCAAGGTAAGGCTGCGTACAGTTGACTCTTGTGGTCCAGGGAAGTGCCTATTTCTATTGTCT

AGCAAGTAACTTGAGTTAGTAAAGCGGACTCTAACGATGAATTGTGCAATGTGTATTCATAGATTTGGT  
GCCAATAAGAAATCGGAACAGCACAGATGTACCAAGCACAATCTCACTTCCTCCAGATTTAGCACCAGA  
ACCATCTCCTTATTCAACGTCAGGATCATCTAAAGGAACTTGATGTATTGTGTATAATCTTGCTCTTGAA  
TTATTGTATATGATTGAAGGTGAAAACCTTTTTTTGATTGTTTCCTCGATATAGTCCATTTAGTAAAGAAC  
TATACGTTTTAGGCACGTATTCTTTTGTAGTATCATCATTACACAATCTAGTCCTTGTTTCGAGTATATCCA  
GAAAAAGATCATTTACATCATCTGTATTGATGTTGTTACTGCTCCTTTCCTGAATGTTCTACACTGTTTTCC  
TTTTACTTGTCATGTTTTCTGCACTGTCGTTTTTCTCCGTTCCATACTACTATGATTTGTTGCTCTTGAG  
CCAAGGGTCCTTCAAAAACAGACTCTCTACCTTCACATGGTAGGGGTAAGGTCTGTGTATACTCTACCT  
CTCCAGACTCCACTTGTGGAATTTCACTCGTTATGTTGTTTTGTTGTTGATGCAGCAAGAAAATGGTGGG  
TATGGCTTATAGCTGCAAGCGTTTTGACACCATTTGTAGGATTTTTCGCCCTATGCTACTTTCTACACGGA  
AAAGGTGAGCGCTCAAAGAATTTATCTAGAAGCTTGACCAGTAAACTCAACTATGTTGCTCGGACTCT  
GCTAAAATGCTGCCACAGTACTCCTGTCCGATCCTCAAAAAAAAAAACGCACTACTTTTGAAGGATCTAA  
CACACTAAACAACATTTTTTAAAAGTCCGAGCAATATAGAAATGCTCTATACTATGGTTTCTGATCCCA  
CAACTTCCTCTTTCACTATCAGGGAAAGCAAAAGCAACAGCTTTGCTATTGCTTAATCAAACAGCAAATA  
TATCTAAAAAGAGAAAAATAGACAAGAAAATGAGCCATGAAGTGCAGTTATACAGCCTCGAGAGCCTA  
GCAATCGCCACAGACAATTTTTACCAGGAAATAAGCTCGGGGAAGGTGGATTCGGACCAGTTTACAAG  
GTAAACATGAAACCTTTTATATGAATATGATTCGCGTAAGCATAAATACTTAAACGAGTCATTTTTTTTCA  
GGGAGAAATGCCTGATGGGCAAGAAGTTGCCATAAAAAGACTTTGACTAGTTCAGGACAAGGCCTAT  
TGGAGTTCAAGAATGAAATTCTATTGATTGCAAACTTCAACATACTAACCTTGTTAGGCTTCTAGGATA  
CTGTACTCTACGCGAAGAACGGATTATAGTTTATGAATACATGCACAACAAAAGCCTAGACTTCTTCCTC  
TTTTGGTAAACATCATGTTTTTCATCTTCAACAATTAGAACAACCTTTGTCAAGAAATTTTCATCTTTTACAATG  
ATATGAACAGATAGTAACAAAAAGGAGCTACTAAATTGGGACACACGATTCAGAATCATCGAAGGGATT  
GCTCAGGGTATACTGTATCTGCATAAATATTCAAGGCTGAAAGTGATTCATAGAGATTTAAAAGCAAGC  
AACATCTTACTTGACGCGGAAATGAATCCAAAGATATCAGACTTTGGCATGGCGAGGATATTTGGAACA  
CAAGAATCTGAAGCAAACACGAAAAGAATTGTTGGAACACAGTAAGTAAATAAGCAATGTTTTCATAAA  
CAAGTTTTTATATAATATTACTTGAAGTTCTGAATACATTTTTTCGGATACTACTTCAGTGGCTATATGTCTC  
CAGAGTATGCCTTGAGAGGCATTGTTTCAACGAAAACGGATGTATTCAGCTTTGGAGTTTTACTGTTAGA  
AATTGTTAGTGGCAAGAAAAACAACAGCTGCTATGATTCCGAACATCCACTAACCTCATAGGACTGGT  
AAGTTTCTAGATTATATTATGAACATATCTCGCGAAATGGAGAAACATATACTATTAGTACTATGTTTTT

AGGCATGGGAATTGTGGAGAGAAGAGAGAGCTTTGGAGCTAATAGATGCAACATTAATTGAATCATGC  
TCGCGTGATGAAGTAATGAGATGCATACATGTGGGACTCCTTTGTGTGCAAGATTATGCAAAAGATAGG  
CCTTCAATGTCAAATGTTGTTTCAATGCTTGTGAATGATACGAAACAACCACCACCACCAGAACGAC  
CAGGATTTTTTCATCGAGAGAGGGGATCAACGTGCAGAGATCTCCGAAGAAGTAGTCAGATACTCGATA  
AACGGGCTATCAATATCAGAGTTGAGAGCAAGATAAGATAACAAGATGGTCAATTGGGAAGTAACTTATT  
TAACATTCTTTTGTGATGAAGTGTA AAAAGTTACCAACTTCAAGTACATACTTATAGGACTAATTTTCGAGTCC  
TGTTTCTTTGATACTGTTGCATTATGATGCATTTTGTGAGTAGAATATTTGAGATGGATCCAGAATTTAAG  
TCAAAGATGGTAAACGAGATAAGGCAAGGCGAAGTTATGGCAATGGAACTTCACCATTACCTTCCCC  
TCCCGCCTGATAGCAACGTCAACGTTACATTTAAAATGTTTTGAATACACTTGACACTCATCGATTATAT  
AAGTTGAAAGAGAATATGAGAGGAGTTTCTGAACTATCAATATTTGTATATTAGACAAAAGAGGTA  
AAGTGTACATATATTTTCTCATTCTGAGCTTTACATGTTCCACAAATGGGCTGTGAATTAGTTTACTCA  
ATTCACTACAAAATAAAGAACAATTTTGGTTTTCACCTAACTCACTACAATTCTGATGATTTAGCTTCA  
TCAATATTGTTATCTTTATCGCTAACAAAACAACTAAACGATCACCATCTCTGATCAACTCAATTTTCGTCGATT  
TCAGCTCCATCTTTGCTTACAACCTTGGCCTGAGAGATACCATATCTACTAGAACCAAGTTGAAGTAGCTC  
TTTAAAACCTCTGTGGGAGTAAAATGAGTTTCCCCCGTTGTCTCCTTTCTCAGGGCAACACACTGTC  
ACTC  
GGGGAGCATAAGTCTTGGTTGTCATGACACTTACACTGTCGTTTGCAGATAAAAGCACGTCATGCTC  
ATTGGTCTGCTTTGCTGACATTATCCCGAATAATGAGTTGTGGAAGTTATTAGACCTACGTCTAGGACGC  
GAACGCCCTAATGATCCATCTAGTCCTAGAAATGAGACTCCATGGGATGCAGGGGTGATTGTTGGTTCA  
CTTTTGAACCTCCAAGAAATCTAACCCCTCGTTCTCGGGGATAGGATCAACGGATCGAGTTCTCATCA  
TTACCCTGGATTCTGAAGAGTTCTTTGATGTCTTCATGTCTTGTGCTCAGCAAGGTCCCGGGGGTCCA  
ATTATGTTCTGCTGGTTGATCAACGTTAGCCCTCGATCCAAGAGGTACTTTACTATTTCTATGTTATCTTC  
ACAAACAGCAACATGGAGAGCTGATGAACCGTTGATCTTGGGAAGCGTGACATCCCCGCCATGACGGA  
CAATCTCCTTGAGCAAATTCAAGTTGTTTTGTTCAACAGCAACGCAGGCGAAATGTCCACATCACCAGC  
TGATAGTTTAGCACCGTTGTCAACGAGTAACTGGATAACTGACTCGTGCTTCCCATGATAGCCTCCCAC  
AATGGCACATTGCCTTCTGAATCTGTGTATACACAAGAAACAAAATCAAATCTTATATCTGGCTTTGTGT  
CAGTGGACATGGTAGGAAAAGGAGACAACACTGATAGTTAGAGTGTGAAACTCGCAAAAAAAAAAACGAT  
AGTTGAGGTGTGTTTTGACTATAAACTCTCTAATGTTTGGACCAAAACAACTTTTGGCAACAACAGAA  
TTTGAAAAAAGAAATGGAGCATACTCTACTATTGGGATCAGCCCCAAAATCGAGCAGAAGAACCACAC  
AGTTCTCAATGCCTTTAGACGCAGCGATA

>M6-PGSC0003DMG400002017 M6 G-LecRK

AATTCTGCTCACTAAGGCTTAGGTAGTTGTGAAAGAACACCTATGATGGTTTTGCTCCATTGGAATCTG  
AACTTGAACCTCATGTTTTGGGCTTCATGTATTAGTTTTTTTCTTATCGAGTTGCCTATTGTCATGTAGATA  
AGAGGAGGATGCTAACGGGAGCCCATATTGCAATTATTGTCTCCGCGACATTCAGCCTGATTGTTATTGT  
TTGCACTATATATGTATTCAAGATCCTGAAAAAAGGTAAAAAAGTCAATTTTTACAATTCTTAG  
AGGCACAACTTTTCGCTATCTTTGGAAAGACTTTAATTTTTACTAGATTTTATAAAGCATTGGGAGTTTA  
GTCCATTTTTGCATCGCTTCAAACACTCTCCGCAACAAATTTGCTTCATAACAGGTTTACTCAAGGTAA  
CAGTTTAGAATTACCAGTTTTCCGCTTCAAGTGCATAGAACTGCTACTAAGAACTTCTGCTAACGAAAT  
AACTTGGAGAGGGGAGATTTGGACCTGTTTACAAGGTATATATATATCACTCGTGTGCTCTAATCTTCG  
AACTTCACTAGAAAAAGTAGAGAAAATTTACATAGTTTATACTCATTTGATTATTAGTTGAAGTCATGT  
GTAATTCATATATAGGGGATATTAGCTGATGGACAAGAGGTTGCTATTAACAACCTTTGGAGGAGCTTA  
GGACAAGACATTGAAGTGTCAAGAATGAGGTTACACTAATTTCCGAACCTTCAACACAGAACTTAGTC  
AACTGATGGGATTTTGCATTAACGGGGAGGAAAAGTTGATGATCTATGAATACATGTCCAACAGAAGC  
TTAGATGTTTTCATATTGGGTGAGCTAATTAAGAAGAGTACTTAAACAGTACTTTTCTTGATGAATGATG  
GTTAAATTACTCTTTGTGCTTGAAGGAGGATCAAGATCTAATGATCAGGCGGCATTGAGTTGGAATAT  
CGTTGAAGGGATAGCTAGAGGTCTTCTTAATCTGCATCGTGATTTCTGACTAAAATCATTACAGAGAT  
CTTAAGACGAGCAATATTCTGTTAGACGAAGATGTGAATCCCAAATCTCAGATTTTGAATGGCTAGG  
ATTTACGGAGGGAATCAAATATAGCAAATACCAACAGGATTGCCGGTACCTAGTAGGTATTAATTGTT  
CATAGCAGTGAAATTGATCCTAACTAATTTGTATAATTGCATATCAATGCAGTGGTTACATGTCTCCTGC  
ATATGCAATACATGGAATTTTTTCCGAGAAATTAGATGTCTTCAGTTTTGGTGTCATATTGTTAGAGATTA  
TCAGCAGTAAAAGAAACAACAATATTGTCACTCTGAAGACTCTCTCAACCTCCCGGACCAGGTAAAAAC  
TGAAAAACAGAAAGAATTTCTCATTTTCTCATATATAGTCAAACCACTTTATAATAACGTTATCTATAGTG  
AAAATGTAGTATAGAGAACGTATAATATAACATAATATGGAAGTTCAAGAAAACTTGGTTGAGTATGA  
TTGTTATCGATAGGTCTGAATGGAGTTGAATATTCTTCTATCCTATACTACTACTATTTTCAAATGACAAA  
ACTACTATAATTGGATCTTAGGCATGTCAACTTTGGAATGAAGGCAAGATACTCGAGTTTCAAATCCAA  
ATGTGTTTGTTCCTTGAAACACCAACACAAGTTGTTAGATGCATCATTCTGATTGGTGGGATTGCTTTG  
TGTGCAAGAACATGCAAGTTACAGGCCAAATACAGCTACAATTGTTTCCATGCTCTGCACTGACACAGTT  
CTTCCTTCGTCTAAGCGATTGGCATATAGCAGCAAAGGCTCTTGATCCAAATATTTACCTTGCTCTAG  
AAATTCCATTTCTATTTCAAATGTTCAAGCATGTCAA

>M6-PGSC0003DMG400003313 M6 G-LecRK

TTCAAAATTACATATTCCGAAACTTTTGTACGAATTTTGATTTCACTATAACATGAATATAAAAATTTTCA  
ATTCTTCTTTTACCTTTGCTTGTGTTTCATCTTATTGTTCAACAATCTTTAGTTTATCATCTGAAGGTTAC  
TTTCTGCTCCACAAGATTTAATTCGTCTTGAAATGGAAAATTCCTGCTGGTTTCTACTCTGTTGGTGAT  
AATGCTTATATCTTTGCTATATGGTTTACTAATTCATTGGCTGATGGAACCAACACAATTGTTTGGATGGC  
TAATCGTGATCAACCGATAAACGGACAAAAATCACATCTGTCGCTGTTTAAATCAGGCAATCTTGTACTG  
ATTGACGCGAATCAGATCAATGTTTGGGAATCTGGTACACAATCATCAACTTCTTCTGTTGAGTTAAGAT  
TGTTGGATAATGGAAATCTTGTCTTGTAACTTATGAAGGTCAAAGATTATGGCAAAGCTTTGATTACC  
AACAGATACACTTCTTCTGAACAACCACTTACGAAAACCTCAAAGCTTGTATCGCGTAGAAGCTTGAAT  
AATTTCTCCTCTGGATTCTATCAGTTACATTTAATGAAGATAATGTCCTGCATCTTGTCTTTGATGGAATA  
GAGATGACAAGTGTGTTTTGGCCAAGCCCGTGGTTAATCGTTTGGGATGCAGGTTAGTAGAGACGGATT  
CAGAATTTAAATTTGATTCGTTAAATCCTTAGTTTGTGTCCTCAACTCACATATATTATTTTGCATGAA  
AAATACTAGTTTTAGTTGAACTCATTATATGGTTCATTTGAGTGTATTGGTTAGGAAAGACGGATTACAG  
ATTTAAATTTGTTGGTTCAATATTTAGTACAACCTATTTTTGAAGTTTTCGGTTTTAACTGAACTCATTGC  
TGATATACTCCATCCATTTCTGCAGGTCGATCCACTTATAATGACAGCAAACAGCAGTTCTTGATCGTTT  
TGGGAATTTTACATCGAGTGATCGATTTGGATTCCAATCTGCTGATTATGGTTTGGAAATTGCAAAGAAGA  
TTCAGCCTTGACTTAGATGGAAACCTTCGATTGTACAGCCTAGATAAGCTGAGCAACATTTGGAAAGTTT  
CTTGGCAGTTATTTCCAGCAGCCTGCAGGATTCATGGAGTTTGTGGATTGAACAGTTTATGTTCCCTATGA  
TCCTGTCTCTGGCAGAAAATGTTCTTGTGTACCAGGATACAGGATGAAAAATCCTAAAGATTGGTCCTAT  
GGTTGTGAACCAGAATTCGATATCTCTTGAACGATACAAGCTCGTTGGACTTCATTCCACTTCGCCATGT  
TGAGTTTTACGGGTATGATATTGCATATTTTCGCAATAAAACATTGCAAGAATGTAAAGATTTGTGCTTG  
AAACATTGTGATTGTAAAGGTTTTGAATACAAGTATGTTGAGGGTAATGGCACCTATGGTTGTTACCCGA  
AAACACTTCTGTTCAATGGCTATGTTCAAGCTAGTTGGCCTGATTTTGTACCTTAAAGTGCCTAAAGCA  
CGACGTTCTGGCAGGAGCAGTATGAAGGAAATCTTCAATGTGACGATAAAAAGGTGATGTTGGATAG  
AGCTTATAGAAGGAAAGAACATGGTGGATGGATGAAGCCATTCATTTGGTCAGTTGTTGTAGGTGGAG  
TCTTTGAAATTCTCTGTGTTCTCACTTACTTTATTTAAAACGAGAAAAAGCTCGAATGAAACCACACAAGG  
CTACCTTCATCTTTGACAAGATTCAAGAAATTCACCTATGCTGAGCTTAAAAAGGCCACTTCCAATTTCA  
GTGAAGAGATAGGTCGAGGAGGTGGTGGTATTGTGTACAAAGGGAAGTTGTCTGATGACAGAGTTGCA  
GCTATAAAGTCTCTCTATGGAGCTAACTATCAAGGAGAAGCAGAATTTCTAGCTGAAGTGAGCACTATA

GGCAACGTTAATCACATGAATTTGATCGAAATTTGGGGATATTGTGCTGAGGGAAAGCACAGGCTTTTA  
GTTTATGAGTACATGGAGTATGGTCTTTGTGTCAGATAATTTGAATGCCAACAACTTGATTGGGAAAAAT  
GGTTTGAATCGCGTTGGGAACGGCTAAAGGACTTGCATACTTGCATGAAGAATGCTTAGAATGGGTTT  
TGCATTGTGATGTAAAGCCTCAGAACATACTTTAGATTCCAATTACAAGCCAAAAGTTGCTGACTTTGG  
GCTTTCAAAGATATTTAACAGAGGTGGCTTGGATCATTCAAACCTTTCAACGATAAGGGGGACGAGAGG  
ATACATGGCTCCAGAATGGGTATTCAAGATGCCTATTACATCCAAAGTCGATGTCTATAGTTATGGCATT  
GTTTTATTAGAGATGATCACAGGTAAGAGTCCAGAAGTTTGTGCTGATGGTGGCTCGGGGGATGATGAT  
TCTATGGGACTAGGATTGTTGGTCACTTGGATTAGAGAAAAAATGCGCGAAAACAGTGAAAGAAAATC  
ATGGATTCAACAAATTGTGGATCCTGCATTGAATGGTAAATTCGATTTGAAAAAATGGAGATCTTATTA  
GAGTTAGCTTTGCAATGTTCCGAAGAAGATAGAGATGCAAGACCTACCATGTGTGAGGTGGTGGATAA  
AATGCTTCATCCAGAAAATTTCAAGTTAAAATTAGACATGTTAATGTAGTTTCTCAAGATGTAAAATCTTG  
CCAAAGGTGATATAGTACAAGCTTATATGTAATGTGTCTTGAGTAGCAAGTACTTTTGAATTCCAAAATG  
TAAATCCTTATAGAATGACATAGTTTCTTAACAAAATTGTGCATTATAGCAACTGTTATGGTCTTGTGCAT  
CAGTGATAGATGGAAAGTGTGTATGAGTACAT

>M6-PGSC0003DMG400003982 M6 G-LecRK

GAGCTAAACAGGCAACGGATGGTTTCAAAGAGGAATTAGGAAAGGGTGCTTTTGGAGCAGTATATAA  
AGGGAGCTTTGACAAAGGTAAAAACCTTGTGGCAGTGAAGAGGCTAGAGAAGGTAGTGGAAGAAGGT  
GAAAGGGAGTTCAGAGCAGAAATGAAGGTCATTGGTAGAACTCGACACAGAACTTGATTCGTTTGCT  
AGGATATTGTGCTGAAGGATCAAAAAGAGCTCTTGTATGAATATATGAGCAATGGTTGCCTAGCAA  
TCTGTTGTTCCGAGGAGCTACTCGGCCGGATTGGAATCTAAGAGTAAATATTGCACTAGATGTGGCCAG  
GGGAATCCTCTACCTCCATGAAGAATGTGAAGCTCCAATTATCCACTGTGATATAAAGCCACAAAACATC  
TACTCGACGAGTTGTTGACAGCTAAAATCTCAGATTTTGGTCTGGCCAAGCTGCTAATGCCTGATCAA  
CAAGAACATTCACTGGTGTAAAGAGGGACTAGAGGGTATTTAGCACCAGAGTGGCAAACAAATGCCCCC  
ATCTCTGTCAAGGTTGATGTCTTCAGCTATGGTATTGTATTGCTAGAAATCATTTGCTGCAGAAGAAACA  
TTGAAGTCTGTGTGACTAAAATAGAAGAAATCCAGCTTTCTATATGGGCATATAGTTGCCTTGTGAAGG  
TGAAGTAGACAAGCTTGTGGAAGTGAAGAAGTAGACAAGAAAACCTTGAAGGAATGATCTCTGTAG  
CGATTTGGTGCATTCAGGACGAACCAGCTCTTCGTCCTCCATGAAAAAAGTATTACACATGTTGCAGGG  
AATTATTGATATTCCAATTCCTCCATGTCC

>M6-PGSC0003DMG400003999 M6 G-LecRK



GAGCTAAACAGGCAACGGATGGTTTCAAAGAGGAATTAGGAAAGGGTGCTTTTGGAGCAGTATATAA  
AGGGAGCTTTGACAAAGGTAAAAACCTTGTGGCAGTGAAGAGGCTAGAGAAGGTAGTGGAAGAAGGT  
GAAAGGGAGTTCAGAGCAGAAATGAAGGTCATTGGTAGAACTCGACACAGAACTTGATTCGTTTGCT  
AGGATATTGTGCTGAAGGATCAAAAAGAGCTCTTGTATGAATATATGAGCAATGGTTGCCTAGCAAA  
TCTGTTGTTCCGAGGAGCTACTCGGCCGGATTGGAATCTAAGAGTAAATATTGCACTAGATGTGGCCAG  
GGGAATCCTCTACCTCCATGAAGAATGTGAAGCTCCAATTATCCACTGTGATATAAAGCCACAAAACATC  
TACTCGACGAGTTGTTGACAGCTAAAATCTCAGATTTTGGTCTGGCCAAGCTGCTAATGCCTGATCAAA  
CAAGAACATTCACTGGTGTAAAGAGGGACTAGAGGGTATTTAGCACCAGAGTGGCAAACAAATGCCCC  
ATCTCTGTCAAGGTTGATGTCTTCAGCTATGGTATTGTATTGCTAGAAATCATTGCTGCAGAAGAAACA  
TTGAAGTCTGTGTGACTAAAATAGAAGAAATCCAGCTTTCTATATGGGCATATAGTTGCCTTGTGAAGG  
TGAAGTAGACAAGCTTGTGGAAGTGAAGAAGTAGACAAGAAAACCTTGAAGGAATGATCTCTGTAG  
CGATTTGGTGCATTCAGGACGAACCAGCTCTTCGTCCTCCATGAAAAAAGTATTACACATGTTGCAGGG  
AATTATTGATATTCCAATTCCTCCATGTCC

>M6-PGSC0003DMG400004000 M6 G-LecRK

GAGCTAAACAGGCAACGGATGGTTTCAAAGAGGAATTAGGAAAGGGTGCTTTTGGAGCAGTATATAA  
AGGGAGCTTTGACAAAGGTAAAAACCTTGTGGCAGTGAAGAGGCTAGAGAAGGTAGTGGAAGAAGGT  
GAAAGGGAGTTCAGAGCAGAAATGAAGGTCATTGGTAGAACTCGACACAGAACTTGATTCGTTTGCT  
AGGATATTGTGCTGAAGGATCAAAAAGAGCTCTTGTATGAATATATGAGCAATGGTTGCCTAGCAAA  
TCTGTTGTTCCGAGGAGCTACTCGGCCGGATTGGAATCTAAGAGTAAATATTGCACTAGATGTGGCCAG  
GGGAATCCTCTACCTCCATGAAGAATGTGAAGCTCCAATTATCCACTGTGATATAAAGCCACAAAACATC  
TACTCGACGAGTTGTTGACAGCTAAAATCTCAGATTTTGGTCTGGCCAAGCTGCTAATGCCTGATCAAA  
CAAGAACATTCACTGGTGTAAAGAGGGACTAGAGGGTATTTAGCACCAGAGTGGCAAACAAATGCCCC  
ATCTCTGTCAAGGTTGATGTCTTCAGCTATGGTATTGTATTGCTAGAAATCATTGCTGCAGAAGAAACA  
TTGAAGTCTGTGTGACTAAAATAGAAGAAATCCAGCTTTCTATATGGGCATATAGTTGCCTTGTGAAGG  
TGAAGTAGACAAGCTTGTGGAAGTGAAGAAGTAGACAAGAAAACCTTGAAGGAATGATCTCTGTAG  
CGATTTGGTGCATTCAGGACGAACCAGCTCTTCGTCCTCCATGAAAAAAGTATTACACATGTTGCAGGG  
AATTATTGATATTCCAATTCCTCCATGTCC

>M6-PGSC0003DMG400004928 M6 G-LecRK

GGATCATTCACTATGGAAATTGGAATGGTATCAACCAGCAGAAAGCAAATGAAAAATTTCTGCTTATGT

TGCACATATTGTTATGTGGTTTTGTATGCTCAATTTCTAGTGCAAAGATAACCATCACTACAACCTGACTTT  
CTAATAGAGGGTAAGACCATTGTTTCATGTGATGAAAGCTTTGAATTGGGATTTTTTTCCCCAGGTAGTT  
TCGCGAATAATTGGTATATTGGAATATGGTACAAGCACGACGATGGGCCTGACAAGTCTGTTGTATGGG  
TTGCCAATAGAGAACTCCACTCAACAATACATCAGGTGTTATGCTGAAAATCGTTGATCCAGGACGACT  
TGCTCTTGTTACTTCTGCTAATATGAGCATATGGTCTACTAATTCGTCAAGGATTTTGTCTGTGAAGAATC  
CAATTGCGCAGTTGTTGAGTTCAGGGAATCTAATCATAAGAGATGCAAATGAACTAAAACAGAGAACT  
TCCTGTGGCAGAGTTTTGATTATCCGACTAATACGCTCTTACCAGGCATGCAACTGGTAAGAACTTTGT  
GACTGGACAAGAATTTTACCTGTCCTCATGGAAGAACGAATATGATCCGGCTCCAGGGAAATATACGTA  
TCATTGTGATCCTACTGGATATCCTCAGGTTGTCATGAGGAAAGGTAAGTTAAGGTGTTGAGTGGCGG  
ACCATGGAATGGACTCCGCTGGAGTGGTGTACTAGGATTGACAAAAATACAATTTATACATTTAAGCT  
GGATTTTGATGAAAAGAAAGCAATTTACAGCTACGCGCTAGTGGATAATTCTGTTTTATCGAAATTAACC  
TTGAACAGTCATGGTATGCTTAAGCGTTGGACGTGGGATGAGAAGATAAAGGAATGGCATGTTTACCTG  
GCTTCACCAGCAGATGCCTGTGAAAATTATGGAGCATGTGGTGCCTATGGTAGTTGCAACATCATATTTT  
CTCCTGTTTGTGCTTGTAGACAAGTTTGTGCCTAAAGATCTGAAAAATTGGTCAGTGACAAAGTGGTC  
CGGCGGGTGTATTAGAAGGACACCCCTTAATTGCTAGAATGGAGATGGATTTCTCAAGTACTCTGTTATA  
AAGCTTCCAGATACACAGTATTCACGGTTTGATGTGAGAATGACTCCGAGAGTGCGAGAAAGTTTGC  
CTAAGAATTGTTCTTGTATGGCTTACTCAAATCTTGATATACGCAATGGTGGCAGTGGCTGTTTGCTTT  
GGTATGGCGACTTAATTGACATTCGAGAATTACCTGGAGGACAGGACATTTACATAAGGATAGCTAACT  
CAGAGTTAGGTAAAATTTATGCAACAAATTCATTAATTTGATCAATATGAAGCATTAGCTGAATGAAG  
TAACTTCATAATTCCTAGCTTTCGTTGTGTTTTGCTTATCTATTTGTTAAAAAGTTCACATAGCATATATT  
TATTTTAGTTTACCCTCCATTTTTTTTTCAGGCTCGAAGAAGAAAATGAAAACACTTGTGCTGAGTCTATCA  
TTGTTGAGCGGAGTGTCTGTCATTGGCCTGATCATAGGGCTGTATATTTTGATAAAGGCGAGAAAGAAG  
AAGAGGAAGATGATTCTGAAAGATGATCTAGAACTTCCACTGTTTTCCCTATCAACAGTAACTAAAGCGA  
CCTCTAATTTCTCAGACAAGAACATGCTCGGAGAAGGTGGATTTGGATCTGTTTACAAGGTAGCATATCT  
TGTAGGTTTATTATATGTACTATAATTGACAGTAAACAGATAAGTAACACTTTGAATTATCCCTGTCAAAA  
CATCCTTAGCTTCAATATGAGTCAGCTGTATGTTATGATATCGTAGGGAATCCTGGAGGAAGGACAAGA  
AGTAGCTATAAAGAGGCTCTCAAATCTTCCTTGCAAGGAGTCAACGAGTTCAAGAATGAAGTTAATTG  
CATTGCCAACTTCAGCATCGAAACCTTGTGATGCTTATAGGTTGCTGCGTTGAAGGAGAAGAGAAAAT  
TCTGGTCTATGAATACATGCCCAATAGAAGTCTTGATTTCTTCATATTTGGTATGCTTACTCTTGCTTAACA

CATAAACCTCAAGTACTGTTTCATAGTATAGCATTGAGCTTGCAGCTTTCACCATGATTTTGAAAAAGGT  
TGTTAATTTCAAATGGAAGTAGATTCTGTTTAACTAACTAAAAGCAGTTAGAGCATCAGTTACTATACTA  
ATTGTTGGAAGATCTGTTAACAGATGAAGGGAAGAGCTCGATACTCGATTGGCCTAAGCGCTTCAACAT  
CATCAATGGAATTGTTAGAGGACTTTTGTATCTCCATCAAGATTCTCGGCTAAGAATTATCCATAGAGAC  
CTCAAAGCTAGTAACATTTTGTAGATGCTGACATGAACCCCAAGATCTCAGATTTTGGCATAGCTAGAA  
GTGTGATAGGGAATGAGACGGGTGCTAATACACATCATGTGGTTGGGACACAGTAAGTGATTTCACT  
GCGACCTTTTAGCATTTATCCCATGTACTACTCATATAATATCATCTGTCTAACACTATTTTCTGTCTAATA  
TGTGATGCAGTGGCTACATGTCCCAGAATATCTAGTACACGGTGTTTTCTCAATAAAATCAGATGTATT  
TAGCTTTGGCGTGTTAGTTCTAGAGATAATCAGTGGTCGAAGAAACAGAGGATTTGCCCGTGAAAGTCA  
CAGTATCAACCTTCTCGGACATGTAAGTCTTGTATGTTAAAAAGTACTTACATATTCAGACCACTCGTAAG  
GTAATTACAAGTGATAGTGTAATAACTGATAGTGCAAAAAGTCTTACTAAGTGTCGGTGTATACAAC  
TAAATCTATCAAACATGCTTCACTTACTTATACATGTTCCCTTATTACTATATACTGATTGTGTTATTAACAG  
GTATGGAACTTTATAAAGAAGGTAGACCATTGGAGCTGATTGATGTGCATATTACAGATTCATGTTATT  
TACTGAAGTGCTACGGTTAATTCATGTGCTCTATTATGCGTACAACATAGTCCAGAAGACAGGCCAGA  
CATGTCTGAAGTGGTTGTGATGTTGGCTAATGATACCATTTTGCCTGAAGCTAAGGAGCCTGGTTTTTTC  
ACAGAAAGTAAATCCCTGATTCTGAATATTCTACAAGCATGTATTCGAAAAATGAAATCACTATTACAC  
AGTTAGATCCCCGGTAAATTAATTTCATTTTCTTGTAGATCTTAAAGTGTCTAGAAGCTTGAATAACAGA  
GGAGAACATTTTATGAGTTGTATCATATTAGGAAAGAATTTACCTAACTCTTGAATTAATAAAGACAGT  
CCGGTGCCTAAGTTCCCAACATTCATGGATTCCGGGTCAGAATTGCACACGGGTCTATTGTACGACAGTT  
TTACAGGAACCTTGAGTGTTAGTTACAAATTGCCATTGTTGTGTATGTTACATGGTTTTTGTATACTTACAG  
ATACGTATCCACTCTGGGTGTGTGTAAGAATCTAATATGAATACTACAGTTTTTTTTGAAATTTAATTTA  
CTCTCCA

>M6-PGSC0003DMG400004930 M6 G-LecRK

ATTAAGGCTTAGGCATCAAATACATTGATGGAATCTAAATACTTCATACTTTTCTTACTATCTTTCTACT  
CTTTTATACCGAAGATTAGTTCTACTACGACAAATGTAATCAATACTAATCGGTTCAACAGATGGTGA  
CACTATTGTTTCATCTGGTGGAACTTTGAGCTGGGATTTTTTCAGCCCCAATGGTTCCACAACGCGATATA  
TTGGGATATGGTACAAGCAAATTCTTCTTATGTCCAAACAATTGTATGGGTTGCAAACAGAGAGAAAC  
CACTACCAATACATCTTCAGTCGTTTTGAAGGTCAACAAGCCGGGAATACTTGCTCTTCTTAATGACAA  
GAATGAACTATATGGTCCACGAACACCTCACGATCAGTCCAAAATCCAGTTGCAGTGTTGTTGGATTCT

GGTAATCTTGTCTAAAAGATGCAAATGATGACAATCCAGAAAATTCCTATGGCAGAGTTTCAATTTTC  
CAACTGATACTTTCTTGCCTGATATGAAACTCGGAAAGAATTTTAAGACTGGTATTGAAGTTTACCTTTTA  
GCATGGAAGAACGATAACGATCCAACCTCCAGGGGAATACAGTCTCCACATTGATCCTACTGGATATCCA  
CAAGGCCTCATTAGACATGGGGCAAGGGTATCAGCTCGAGCAGGACCATGGAATGGTTTACGGTGGAG  
TGGAGCACCTGCACCACTACAAACACAAAGCAGCATATATACTTTTCAATTTGTTTTCAATGAAGAGGAG  
GTTTACTATAGTTTTTCTCTCATTAACAACCTACTGTTAACAAGGTTAGTCTGACTAACAATGGTTTTATA  
CAACGTTTGACGTGGGTGGATAGGACAAAGAGTTGGCATCTTTACCTCAATATTCCTCTGGATACTTGTG  
ATACATATAGCTTATGTGGTGCATATGGGAACTGTGTCATAGATAGTTCTCCTGTTTGTGGATGTTTGA  
CAAGTTTGAACCTAAATATCCACAAAATTGGCAAACAGGAGACTGGTCACAAGGGTGTGTTAGGAAGAC  
ACCTATTGATTGCAACAAGGAACATGGATTTCTAAAATATTCTGGAATCAAGTTGCCAGAACTAACAAC  
TCTCAGTACAATAAGACCATGCACTCGAAGGATGTAGGCAAGTATGCTCGACGAACTGTTCTTGCACA  
GCTTATTCGAGCCTAGATATAAGCAATGGAGATAAAGGTTGCTTGTTTTGGTCTGGGGAGTTGATTGAT  
ATCAGAGAGCTCTCTGGAAGAGGACAAGACATTTACATACGAATGGATTCTTCAGACCTAGGTAAGAAC  
TTATATTAACGAAATTTCTAATGATGTGTTTTTGAACTTTTAAATTTTTGAACATATGTAGACCATATTATA  
TATGCAAAGTAGAGGCCTATATCAATTCGAAGAAGCTAATTTAGAAAATGGTTGTAGTATCTCAGGCA  
AGTTCAAACAGAAAGAAGACAGGGACAGTACTCGCGGTGAGTTTCTCGTTGTTGGTGGCAGTGATTCTG  
CTAGGCCTGATTTTGTTCATGTACATACGTAAAAAGAAGAACTAAACTCAAAGAAGATTTTGAGCTGC  
CACAGTTTCAATTGTCGTTAATAACAAGAGCCACAGATAACTTTTTCGGTCAACAACCAGATTGGAGAAG  
GTGGATATGGACCTGTTTATAAGGTATAAACTAAAAATTATTGGAATAGTGACCAGGCTAGAGATGACT  
TTCATTCTGTAATACTCGCTCGTCTTTGTAAAATATATTTCTTCTGATATACTTTTTCCATTTCAAGGGAG  
TGCTCGAAGAGGGACAAGAAATTGCTGTGAAGAGACTTTCAAGGACTTCCATGCAAGGAATTGATGAA  
TTCAAGAATGAAGTTACCTATATTGCCAAGCTTCAGCATAGAAATCTTGTGAGACTTCTGGGTTGCTGTA  
TTCAAGGGGAAGAAAAGATGTTGATCTATGAATACATGCCTAATAAAAAGCCTGGACTCATACATATTTG  
GTTTGGTTTTCTAAACTATTCTACAAGCTAAAATGACATGTTTTCAAAGTTGCTAACAAGAAAGCTTTTC  
TTCTTTTTTTTTGTAGATCAAACAAAGAAAAAGTTACTTGATTGGTCAAGGCGTTTCGACATCATTAATG  
GAATTGCTCGTGGCTTATTGTATCTCCATCAAGATTCTAGACTACGTATTATCCATAGAGACCTTAAAGCA  
AGCAATGTTTTGTTAGATACAGAAATGAATCCAAAGATATCAGACTTTGGGATGGCTCGAAGTGTTGCA  
GGAAATGATATGGGAGCAAAAACATGCCATGTAGTTGGGACACAGTAAGAATCGATCATACAGAAGTA  
CTCTCATATGAAATCCCCCTTCTCATGGTGTAGTTCTTTTTTTTGGAACAGCGGTTACATGTCCCCTGAATA

TGCAGTAGATGGAATCTTCTCAGTAAAATCAGATGTGTTTAGCTTTGGCGTATTGGTGTAGAGATTGTG  
AGTTGCAAGAAAAATAGAGGATTTGTCCATCAAGATCACAACTTAACCTTCTCGGTCACGTAAGCACTC  
TCTCTATACATTCTTGTGATCTATATTACATATAGAATTAATTTGTCATGATCTAAATTACTCAAACAGGCA  
TGGAAGCTTTACAAGGAAGATAGGTCCTTGGAACAAATTGATGAGAAGCTAGCTGAATCTTGTGATATTT  
CTCAAGTTTTAAGGTCAATTCAAGTGGGACTATTATGTGTGCAACACTGTCCTGAAGATAGACCAAACAT  
GTCTTCTGTGGTTCAAATGCTAGGTAATGAGAGTTTACTTGCAAAAAGCTAAAGAACCAGGATTTTTCATG  
GAAAGAACGTTACATGATTCAGATAATTCAGGAATGCAGACAGGAAGTTCGAAAAATGAAATAACAAT  
GACAATGTTAGATCCTCGGTAGAGTACTGTGATTGAGGCAACTACTGTTGATAAGCATGAGTTTTTAGA  
GGGCATGATAACAACATTGAAGCGCCTGAGAAGCGCTCAAGCATCACCTCAGGGATTAAGCGTGCCTTT  
GAGTATTTAGAAAAATGGTTCATAATTGCCATGCTAGCTATTATAAGTAGCTATTCAACTGAATTTTCAT  
TTGTATCTTATCTTAGAAAGAAATGTAAATTCTAGTAAGCAAAAATGTCCAAATTATATTGCCTATGACAA  
TACATAAAATCGAATCAAACCGACAGATGCATGAGCTCTCCAATATCTGCATGGAATAGTCCAATATGTT  
GAAAT

>M6-PGSC0003DMG400005044 M6 G-LecRK

ATGTCACCAGAGTATGCAATGGGAGGACTATTTTCTGAGAAATCTGATGTCTACAGCTTTGGTGTATTGC  
TACTAGAGATTGTCAGTGGAAAGAGAAACAGCGGATATTATGACCACGAAAGGCATCTCAACCTTCTCA  
GTTATGTAAGTGCAAAATCAGCAGGATCTCTTGCCACAAGTTATTCACACAACTTATAGTATAAATGAT  
TTCAGGCATGGAAGCTACAGACCGAAAGCAAAGAGTTAGACTTAATGGATAAATCAATTTTGGACTCAT  
ATTCATCTGCAACAGTGCTGAGATGCATACATATTGGCCTGCTTTGTGTCCAGGATCATGCTGTTGATAG  
GCCATCAATGCCGTCTATCGTTCTTATGCTAAGTAGTGAGATGGATCTGCCTCAACCAAAGAAACCTACA  
TTTATATTTCAAAGATGGTTGAATTCTAATACCCAATCACAATTCAGCAAACTCAGTCTGTTAATGATCT  
TACTGTCTCTGTGGCAGAAGGCCGATAA

>M6-PGSC0003DMG400005689 M6 G-LecRK

AAAAAACCTGGTCAACAAAAGAAATCAAAGCCAACAGCATGCTTGTCTCTGTTTTGGTCATACTATTTT  
GACTGTAAACATTCATGTGTGGATTAAGGAGCTTCTCTCATATGGCTACCAACAGAATTCTGATTGCTTTC  
ATCCTCGTGTTATCCTGTCACTTTTTGCGTGCAGATTTTGCTAATTTCAACTCAATATTGAAGGGAGAAAG  
TTAGCTGATTACCAACAGCTGGTCTCAGCAAATGGCTTCTTCAAATGAAATTTTTTCAGTCCAGGCAAG  
TCAAGGAACCGCTACTTGGGTATATTTTACTCAGCCAAGTCTTGATATGTAATGTTAATGGAG  
GAGGAGATGAAAAAGCTTTATGGATAGCTAACAGAGACGATCCGATAACGGATACATCTGGAAGTTTTA

TGATTGCTCCTGATGGCAGATTAATAATTTCTCATAAGGAAGGTAATATTACTTTGTTTCAGTGCTACACCA  
ACAACAGCCACTAACTTAAGTACTACTCGATAATGGGAATTTGTGCTGAGGGAAGTGAATACCA  
ATAGCTTTGTAAATCGAACGCTATGGCAAAGCTTTGATTATCCAAGTACTGATACACTTCTGCCTGGAATGAA  
GCTTGGGATTAAGTTCGGAACGGGGCATAAATGGTCATTGACTTCATGGGTAAATGATCAAGCACCTGG  
TTCAGGGTCTTTTACCTTTGGTCTTGACCCTAATGGTACAAATCAGCTGATGATCTTGTGGATGGGCAAG  
GTCTATTGGAAGAGTGGCCCGTGGCCTACTGGCCATCTTGCTCTTAAATATGTCTCAAATGAGGATGAG  
AAATACTTTATGTATACTGTTGAATTGGAATATCAAAGATACTTTGTGAGTCCATTTGGAATAATTCAGG  
ATACTTTTAAAGGAAATGCAGTGTGGTAATTGTAGTAATGAGACTCCCCATGCTGGCTGCGTAAAGCA  
GGTATTGCCCCAGTGCAGGGCAGCTAAAAAGTACTGGTTTGAGCTTAGACAAGTTTACATGTTTGGAGA  
CAGCGTTAAATTTGATGAGAACTATACTTTGAGCCTCTCTGATTGCAAGGCCAAGTGTGAGAATGACTGC  
TCGTGTGTTGCCTATGCCTCAGTCGATAGTGACACCGGAATTGGCTGTCAAATTTGGGGGAATGACACG  
AGTTTTGTGACAGCACAAAACAGTCTAGCCAGAGATGTTTTCTTCTTACAAGAAAAGGTAATTCTTGAG  
TACAAAGTTATTCAATAGAGTGAGAGGACATGTTAATAATGTTGCATCTCATATTATGATTACTTTATCCA  
GCTCAAGATAAATTGTTTTGTGAGGGCATCACACTAATATCACCAATCTGCATTACTCTCATTGACAGTC  
ATTCAAAAATTACTAGTACTAGAACAAGCAATTTCTCCGATCGCGATGCTGCAGGATTTGAGTTAATA  
AGAGTGCATCTTCATTTCAAAAATACACTCGAGCAAATGAACAACCATACCATAGAGAATCTTGTTTTG  
GAGGCTATTAAATTATTATTTTTGGTATTTCTAGAGTACCGACAATTATGATAGCATCATAGTGTATTCC  
CAAGGTAAATATGTGGAATTTGGTCATAAACACTGACTTGCAATTTGACAGATAGGAAGCGGAAATG  
GTGGATATGGTTGACAATAGCAGTGTCACTAATGGTATTTGCGTTTATTTCTCTTTATTCTGTCTGATAC  
GAAGAAAACCTCAGAGCAAGAGGTGAGCAATACATCCGCTCTAGCATTAGTCTAAGGTGACATTTTTTTTC  
CTTTGAAATCTTCAATTTTGCATTTGTACCTAGGCAAAGTCAGACAAATGGAGAAAATATTATACGAGC  
TTGAAGATCCTAAGACCATTTCTGGCCAGTACAATACTAACAAGACTGCTAGACTAAGGAAGAAGTTCA  
GGCATGATATACACATATTCAGCCTAGAAACTATGAATATGGCCACAAACAATTTCTCGTCTTCTAATAA  
GTTGGGACAGGGCGGTTATGGACCTGTTTATAAGGTAAACGTTTAGAAGTTTGTGCTTAAAGCTGATTT  
TTAGATTTGCTAAGTAGCAAAAATTTAGGGGATGTTACTCGACGGGCAAGAGATAGCCATCAAGAGAC  
TTTCAAGAAGTTCAGGGCAAGGATTGGTTGAGTTTCAAACGAAATTGTGCTGATTGCTAAACTCCAGC  
ACACTAATCTTGTGACTTTTAGGATGTTGCATTGAAGGGGAAGAGAAGATATTAGTTTATGAATACAT  
GATGAACAAAAGCTTAGACTTCTCCTATTTGGTATGGATTTCCAATTCATGCCTAAATTGCTTAATTAA  
TCATATTTGATAACTAATACCCCTTCCCATTTTATTGATTGAACAGATCCTAGCAGAAAAGATTCACTAAAATG

GAATACGCGTATGAACATTATTGAAGGAGTTGCTCAGGGACTACTTTATCTCCATAAGTATTCAAGGCTG  
AGGGTGATTCACAGAGATCTAAAAGCCAGCAATGTCTTGCTTGATGACAATATGAACCCCAAAATCTCA  
GATTTTGGGTTGGCCAGGATATTTGGAATGCAAGAATTTGAAGCAAACACGGAGCGAATTGTTGGTACC  
TAGTAAGTCCTTAATAGATATAATTATCTAACAATGGTGATTCACTGTGTCCTTTTTATTATGCGCTAAATT  
GCTACCTTTTCAGTGGTTATATGTCTCCAGAATATGCCATGAATGGCATTGTGTCCATGAAGACAGATGT  
ATTCAGTTTTGGAGTTCTAGTACTCGAGATTTTGAGTGGCAAAGAAACAACAGCTGCTATCATTTAGAA  
CGCCACTAAACATCATCGGATATGTAAGTTCCTCTCGTAAAATATCAATATAGCATGATCAAGAGGCGG  
ATGGAGTGTATTCAATGAGTTCAACTAAACCCAATACTTTAGAAACGAAACATAAATATACAACATCA  
ACATACCCATTGGAATCCACAGGCCACAAGTTGGGTCTGGGAGGGCGGTGTGCACACAGACTTACCTA  
CCTAATAAAGGCAGATAGGCAGTTTTCAATAGACCCTCGACTCAAGACACGAAACATGGATATACATGT  
GAAAATCACTTGAATTATAAAATTCTGAAGTATAATGAGTCTAGTTCTAAAACTTTAAAGGTTCAACCT  
GTCAACTTTACATTGTTTTGGATCCGCCCTGGCATGATCACTTAGTTGAACAAGGAAATTTCAAACCTGAT  
ATGCTCAATTTGTCTCAGGCATGGGAATTGTGGAAAGCAGGCAGCGTCCTTGAAGAACTAACAGATCCT  
GTATTGACAAATGAATCAACACCAAAGAATGAAGTGATGAGATGCATTCATGTAGGATTACTCTGTGTT  
CAAGTCAATCCTATGGACAGGCCATCCATGTCAAATGTGGTTATGATGCTCACAATGATAGCCTACAAC  
TACCCGTCCCAAGCAACCAGCATTTTTATTGAGACAGCTATGACTGAGACTGAAACTCGCGAAGAAG  
TTGGACATTGTTCCACAAATGGGCTATCAATTTAGATATGGTAGCGAGATGACTTTTCATCATTGCACCC  
CTCAAAATTGTCAAAAATGGTAATATGCAATCTCCCTAATGATACAAAATAAAAACCACTGCTTGTCTCCT  
TCATCCAGATTTTACTTTATCTAGCATCGAAATTAAGTATGAGTTGTTGACAAAATAAAGTAAGCTTGTTA  
GAGCCTTTTGAAGATTATACTGTGTCTAAACAATTTTTACACATTTGTTTTGAATGCAAATGAGTTTTAG  
AGTATCAATTGTTACTGAAATCAGAACTCATAAATGTAGTAATTGTCACTAGTTTTGCAAAGATGATTAG  
TATCTGTACACTAGAAAATCAAATGGATGTTTCCCACGTTCTTTGTTGCTTG

>M6-PGSC0003DMG400007073 M6 G-LecRK

CCAATCTAAGAAGCAAATGTATCATATAACAAACAAGCTAAAACAACAACTAAACATGTCTCCTTCAT  
GGCCTACTACACTTCTTGCCTCTCTCTTTCTTTCTCCCAAATATTTTCTTGCAATTGCTCAAGTTCCAGCTGA  
AAACACCTTTAAATTCGTGATGAAGGCGAATTAGGAGATTATATTGTAGAATACAGAGCAAATTATCG  
CGTTATTAGTATTTCAATAACCCATTTAGTTCTGTTTCTACAACACAACCTCCTAATGCATGGACATTAGC  
ATTGCGAATGGGCACTGTCCGTTCTGAATCACTCATGCGTTGGGTGTGGGAAGCAAATAGGGGAAACCC  
CGTTAAAGAAAACGCGACATTCACATTTGAACTAACAGAAATCTTGTATTGGCGGATGCAGACGGTTG

AATCGCTTGGCAGACCAACACGGCCAATAAGGGGGTCACCGGGTTCAAGTTGTTACCTAACGGTAATGT  
TGTGCTACATGACTCCAAGGGTAAATTTGTCTGGCAGAGTTTCAACTATCCCACTGACACATTACTAGTG  
GGCCAAACTCTCCGATTGTCCGGCCCGAATAAGCTTGTGAGCTGGGCCTCGGTGAAAAAGAATGCGAAC  
GGGCCTTATAGCTTGGTGGTCCAGCCGAGATTGTTGCTGTCTACAAGGGAACAAGGTAGACGTGGA  
ATTAGCTTGGTTCGATTATGGGAATAACACGTTGGAATCGATAAAATTGAATAGTGGGAATCAAAGATT  
GAAATTGGATTATAGATTTGCAAAATCAACACAGAGAAGTTCACATGTGATGGCATTACTAAATACAAC  
ACAACATTGACATATCTTAGACTTGAAATTGATGGAAATCTAAAGGCTTATACTTTCGTTAGAGATGAAG  
AAGCAGATGAATTCCGTTGGAAAGTAACTTACAGTAGGATTTAAAACGTTTCATATTTGAAACGTCTAAA  
TCCATGTGCACATTATCCTTTACGAGCAAATTTACGGGTTATATTATTATTGTTGTTGTTATATTGTTGTA  
AACGTAGCTCTATAAGATAATGATTAGTGTGTCAGTACAATAAGTGGGTCCACAACCTAGTAGTCCAATA  
AATGAGTAGTACTTCCTATTTAATGTCAATTATATTTTTCTTTTTCCTTTTTGAAAAATATTATGTTTTGG  
TTGAATTAAGA

>M6-PGSC0003DMG400007455 M6 G-LecRK

ATTTTTAGAGGAATGAGGTGGAAAAAGGAAAAAAAGAAATTGGGTCCTTTGTGATTTCTTGCATTGG  
CAGTAACCAACGTCCGAAGGCCAAATCTCATCGATTGTGACATTGTAACAAAATATACATAATTCATCAA  
TCTTCATAAACCTATCATCATAATCATAATCAATACAACATTATTGTAACAAAACAATATTCCTTCTGT  
ATATACACACAATATTAATAAAATTATAAACTTTTTTACATTCTTGATTGTGTATGTGGGAAATTGGGCAGC  
AAATTTGCAATTTTTGATCCTGTATCTAATGCTTTGTGGATGTTTTACAATTTGATTCACCTTTTTGGAGT  
GGGTTTTCTTAGAAAGGGTAAATTCTACATAATCTGAATTTCTATATCTTTTTCTGATTTGGGTGTCT  
GGGTATTCGAATAAATCTGTTTGGTGTGTGGATGTTTCTTGAACTGCATTTGGTGATCTGGGGTACTT  
TTATTTGGTCATAGTTGCTGGTGATAATCATTATTTGGCTGCTTTGTTTAGAAAGATTGAATCTTTTTTAC  
TCTGATAAGGTTCTGCAGTGTGTGGAGGGATTGTTCTTATGAATTATAGCTAAAAAGGAGATATTGTTCT  
GCTTTAGACCTGTCACTAAATTCTGTGTCCTGTGGCAACATTTTGATTTGCTTAAAATCTGATATGTTTA  
AGGTTGAGGTTGAGGTTCTTGTGTGTGAAAATCCTAGCTGTTAACTTGGGGGTGGTGTGTGTGTAT  
ACTATGAGTGAATTGGTTGGTGGAGTTTGGATAAATTTGGAATAAGAGGAAGTAATTTACTGCATATTA  
GGGATATTAGTTTTATGTCAGCAAGTCTGCATTGTATAAGAAATGTTGTAAATGTAGCTAGCTTTGGTGG  
TGGTGAGATGTTAAACTTTAATCATCCACCTCCAAGTTATAGAATTTGAAGTTCCATTATCTGTGACTTC  
TCTCCGGGATCGTTACTCTTTTCGACAAATGCAAATATAGTCTGTCCTAGCCTCACTACCAATCTTACAG  
ACTTATAATGGATTCTTCACCATCTCATGAAGAATCTGCTCCTCCAAGTATGTGGCACCTCCAAAGTTTA



GTCCTCCGCCTACACCTTCTAGTCCATCTGATAGCTCACCACCACCTCCATCTTCTAGTCCACCTCCTAGTT  
CACCGCCACCTGTATCTTCTAGTCCACCTCCTAGTTCACCTCCACCTGAATCAACTAGTCCGCCACCTAGTT  
CACCACCACCTCAATCTTCTAGTCCACCACCAGCCTCACCTCCACCTGAACCAACTCCTTCTTCTCCTGTCA  
GTTACCTCCACCAACTTCATCACCTCCCCCTGCATTGTCACCTCCGCCACACGTACAGAATCCAGAACCT  
CCTCCAGCACCACAATCACATGGAAATTCATCCCCACCACAATCTCCTGAACCTAAAAAAGGTTTCATCATC  
ATCTTCACCACCTTCACTACCTTCATCCAACCTCACCTGGGGATGGAGGTGGAGGTGGAAATTCACCACCA  
TCCCCAATATCTAAGTCATCAGATAATTCGCCTCCTTACCAGCCTCAGGCCCTCCTAAAGATTCGCCACC  
TTCACCAGCTGCATTATCTCCAAGTAACTCACCATCTTCTGATTCACCCTCAAACCTCATCAACACCAACATC  
TGTAATACAATGGTCACCACCACCTCCATCCTCTAATGGTGCACAATCTTCTCTTAATCCTCCTTCATCACA  
AGTTCCTAGTAACCATAGTTCGGGAAACCATTCAACAGGAAGTCCAAAGCCTGCTGGTGGCAACAGCAA  
TGGTACTGCAGAGACAGTTTCCATTGGCGTTGTAATTGTTCTTTTTTGGTTGGTATCATCGGAGCAGTT  
GCATGGTGCATACGGAAGCGAAAGAAGAAGAATTCTGTCCATTGTAGTGGTTATGTCAAGCCAATCTCT  
GCGTGCTCCTCTCCAAAATCAGGTAAATTTTCAGAACTATAAAATCATTCTTTTAGTTTGTATTTCAGT  
GTTCAAGATGCTTGCAAGAAAAATCAATGTAATATTTGTAGTTGAGACCTTTC AAGTGAAATCTGAGAA  
GATGTGAAAGTTGTGTACAGAGTCTGCTTTATTGAAGGTCAATGAATCAGCACCTGAGAGAAATGGAAC  
GAGCTCTAATTTCTCAATTCTCCAGCAGACCCTGGCGGATTCAACAGTTCAAAGGCATGGTTTACTTATC  
AAGA ACTTGTTGAGGCCACTAATGATTTTTTCAGCGAATAATGAATTAGGGAAGGGTGGATTTGGTTCTG  
TATACAAAGGCTATCTAGCAGATGGAAGATATGTCGCGGTAAAACAGCTAAATATTGGTGGGAGCCAG  
GGCGAACGGGAATTTAGAGCTGAAGTTGAAATCATTAGCCGGATACACCATCGTCATTTGGTTTCACTT  
GTAGGTTATTGCATTTAGAGAACAAAAGGCTCCTCGTTTATGACTATGTATCCAATAATACCCTTTACTT  
CCATCTTCATGGTAAGCATAACATTTGTAGATTTAATTATTTTCAATTTGTTATGTTTGGTCACTAAAGCGAG  
CTGTTGATACTTGCAAGTTACAGCACAAGGGAGGCCTGTCATGAATTGGCCAACACGTGTTAAAATTGC  
TGTTGGTGCAGCTCGTGGAAATAGCTTATCTGCATGAAGATTGTAATACTGCTCTCTTCTCAATTCTTATG  
AGTTATCCATGTTTTATTCATGTGATATCTTTCATTGGTTGAACAAACGTCCCCCTTATAGTTAAAAGAGA  
ATGTACAGTTAAAACTTTACCACA ACTTGGAAATTAGTTTTAATGATCCCTAAAGCTGTGGCGGGATCAT  
GGATGGAAATTTAAGCTCCACAACCACCTTCTTCTACTCTTCTTAAAGCATACTTAACGAAAGGAAA  
ATAAAAAAGAGAGAGAAAACAAAACATGTAGTAATAATTTTCAGCTCATAGAAGTAGAAGGCCTTCCAG  
TTGGCATTTCCTTTTTGTAATGTAATGATATTACTTATGCCATTTAGAATTGAGTTCTAAGGTCCTTTTTCA  
TGCCATAAATTACCTCGTTATATAACTTTTTGGCATGAGTGTGGATTATCATATCTGCATTAAGATTGTAA

GTAGTGTTCTGTTCCCTTAATCCTTTTATGTTATTCATGTTTATTTTTATTTTCAGTTCGTTTGTATGGCTGAAA  
AAAAATGTTTCTCCTCTTTCTGCCCAAAGTTAAGAGAGAAAGCAGGTGGTAAAACCTTTTACCATAT  
GACGAATCGGATTGTGATATTAGATTATGTGTTCCCTATCATATCACTTACATTCTTTTTATTGATCCCTACT  
CCACTAGCTGAACAGCTGTAGTAAATTAATGATGCAATCTGAGCTACTTCCAGAACCAACTTTCTCCTAT  
TATCCCTATAAGAGGACTTGAAGTAAAAAGAGAAAATGGAACGTATAAATAGTTTAAGCTCAATGGAAG  
TAGCAAGATCTTGATATTGGATTTCCCTTTGGTAATGTTATAATAACTCCGCAATTTAGAATTGTGTC  
ATCAATTTTTATGCATCTCGTAAATTATCTCGATTATATGACCTTTTGGCAGTATAAATAATGAATTCTAAT  
CACTTCTCTAATTAGTTACTTAAAAGATGTTTTGTAGCTGAATGTACCAAATGAGGCTCAAATCGAACT  
AAGACTGAACAAAACATGATTGGTTCCATTGAGAGAACAGAAAAAATTGTATGACTAAGTTCTTTATACA  
CTCTTGATTGCACCATGTAGTTACATTCCCGAGAAAGAAATAATTTAATCCATGAGCAGGCATAGTCTC  
CTTGAACATGAGTATATCTTCCACACTGAAGTGAGCGCATCAGGCTCTGCATTTGTAGTGCATTATATGC  
TTTTCGCTTGCCAATATTCACTCTACGACAAGCATTGAATAAATCTTCACTGATCGAGCCAGGTTGAAAA  
GTGAGAGAAACATGTTCAACTGCTCTTGTGAAGCATATAGTGAAAAGCAAGTGACAACTGGTTTCTCC  
ATATAACAAAGCTGAATGTGTTAATCATCACTGAGTTATTATGCTATACTGTTGAATAAGTAATGAAAAG  
TTAAGAAAAGTAGACCAGGCGAAGAGATTGTGATTTTCTATGCTCATTACCTTCACTTCTTGTACTTGAGC  
TACCTTTAATTATATAGTTAAAGTATGATACTCCTTTTTATTTGGTTCTTAATTAATTCTTTGGTGTGGAT  
GACAGGTTATCCTCGTATTATTCACAGGGACATTAAGTCATCAAACATTCTTTTAGATGATAACTTTGAG  
GCCCATGTATGTCTAAGTCTTCGAACTCCTATATCCACATTCTTTGTCTCACGAGCCGCCTTTTACAATTA  
TTTACTTTCAACAGGTTGCTGATTTTGGACTAGCTAAATTAGCTCAGGATGCAGAAAGTCATATCACAAC  
ACGTGTCGTGGGAACATTTGGGTATGTTTCAGTGCCAACTTTTATATTAAGTTGACAGCATAAAATAAAT  
ATTTTATTCCATCTTTTTGAATTTACATATTTATTCTAATTCCTTAGATCTGACTCAGATACATGGCTCCTG  
AATATGCATCAACTGGCAAGCTGACTGAAAAATCTGATGTATATTCCTTTGGCGTGGTGCTTCTGGAGCT  
AATTACTGGAAGGAAGTCAGTGGATACATCTCAGCCTCAGGGCAAGAGAATCTAGTTGAGTGGGTAT  
GTTTGTAGCCAATCTATTATTTGTCTTTCTCGAAATCCATATTTTCATCAGGTCTCCTTTATTACCTCTTTGT  
TAGAAATTTTGACATTAATATCCGACCTAAGGCAATGAAAGTGCATATCAGCATGCAGAGAGAACTTAA  
TTTTTAGTCCTTTTAGCTAGGATAACCTACAAAATTTCAATTTGAGTCAGGATTTGGTTGTTCTCCGTCTTT  
TCCCATACTGCACAAGAACTTGGTAGCTGATATGTGAAGAAACCGCCATTTTGCTACTGTACAGTAGGCC  
TCTAGTTGGTCTGCTAGTGAAGTTCCTCTTCTTTATTTTTCCCTTTTTTACCATGAAATGTGCCTTATCCTG  
GGAAGAATGTGCTTGCAATGCTGTAAGCCTGAAACATTGTGTCTACATTTTTATTTTTATTTTACAACAAT

CAAACAGCTTGATCAAGTTATCCGCTTTAATTCATTGATCCTTTAATGTTAGAAAACCTGAAAAACCATTA  
ACAGTAGCAGCCGAAAACCTGTATCTTTTATCATGCTGAATGTGTGAATTCCATTTACTATAGTTATTTTA  
TTTTCGAACTCTTTTGTTTTCTTATCGTCAGTGCATAGTAGCAGTAGCCAGTTTACAACTTTTAATGCGTT  
GTATTCTGGTACTAGTTTCCACTGCTAAATTTGAACCAGGCTTAAAAATAACTACTCCATTATATTGACT  
GTAACCTGATTTTTTTGTTGTCCAGGCACGACCTTTGCTTAGTCGAGCACTTCAAAGGAGGAATTTGAT  
CTGTTAGCAGATCCGTGCCTTGAAAAGAACTACGTTGGCACGGAGATGTTCCGAATGATTGAGGCTGCT  
GCATCTTGCCTGCCTCACTCATCTGCAAAGAGACCAGCAATGGGACAGGTAACCTTGTCTGTTATATT  
GAAAACCTATGCAAAGACACCTTCAAGACTCTTCTGTGAAGGGCATTTACAACATTCTGAATTCTGAT  
CATGGTTATGCTTCGTAGATCATGAGAGCTTTTCGATGGTATGGCTATACAAGATCTGTCAAACGGGATG  
AAAGTTGGTGAAAGTGCAATACATAGCGCTGCACTACAATCTGCAGAAATAAGTTGGTTTAGGAAAATG  
GCATTTGGTAAGCAAGATTTTAGTTCGGATTTTTTCAGCGAAAGTAATCAGAATAGTAGAGAGTCAAAT  
GAACATCCTTAGAGGATTTTATAGAACAAAAAGGCTTATTGAAGCTATGTATGCATCTGTTGATACATCA  
AAGGTACCTTGTTAGCTTAGAGATGCCTTGGTTTAGCTTTCATATGTATAAGTTCCCTTTTGGCTTTGAGT  
AATTTTC

>M6-PGSC0003DMG400008493 M6 G-LecRK

TAAAAGTTGTATATAGCTAGTGTCCGGCATGCTTTTATTTCAACTATAATGGCTTTTGATTTTCAATCAC  
AACAAGAAATCATGTACGTATAGATTATTATCTAAATTTTCATGTTTTTCCATTTGTCTAAGTAGATTTTA  
TAGTAGTTGATTATTTTTTTTTTCGTATTTCTTTTCATTAATTTGCAGAAATATTAGGTGCTACAAATTTAA  
AATTTTGAATATTTGAGCAATGGGTTGGAATTGCTTTGGAGTTTTGCAATCATACAAAAACAATAGAGAG  
ACTCAAATCCAAGGTAAGTACACTCATAACTCTTATTTCTGTTTTCTCAATTACATGCTTAAAACAAATCGT  
TCTTATAAAATTCAGAATCCAAAAATTTAAAAATTTGACGCATCTGCTCTACTTTTTGTAGTCCATCCAA  
ATTTGAGAAGTACTTCACATAATTTTCATTTTCTTTTTGTGTTTTTCATTGTGTAGAGTTCACGACCAACAA  
TGTGAGGGTTTTTTCCTATAACTCATTGAGATCAGCAACAAGTCACTTCCATCCATCTAACAAAATAGGA  
GGTGGTGGTTTTGGAGTTGTTTATAAGGTAATCATCTCTTGTATGGTGTGCATGCCTTTAATGGTCCTT  
GTGGATGCTAGTTATTAAGTACTGAGTTTAAACATCTATACGTTCAAATTTAGAAGAAGTCACCTAAAAG  
ATAACTATAATAATTTAAATCATTGAAGTGGGATTTGCTAGTGAGTAGAAAAATGAGAGCATGTAAGG  
ATAGATGCAGCCTAATGATCAATGAAGTGGGATGGGAATAATGAGATTTTTAGGTTCAAATCTCAATGG  
AGGCCCAAAAAGGGTACCGCAGCCTAGATAGATTCTTCCAATGTAACATACTTTGGTGGAAATAGCGA  
GGTACACATAAGCTGATACAAACACCACCATCATAAAAAATTAATTAATAAGGTAGATTACCTGCTACA

TTAATAATGTAAAAATATTTTACACTATCAATATATATAGGTTAAATCTTTTATGTATTTCCAACCTTTGTGTA  
CTTATGCAACTTTGTTCTTTAAATGTAGGGAGTTTTGAGAGATGGAACCTTGTGTTGCCATTAATGTCTCT  
CTGCTGAGTCAAAACAAGGGACTAAAGAATTCTTAACAGAGATTAATATGATTTCAAATACCCAACATCC  
AAATCTTGTTGAGTTGATTGGTTGTTGTGTTGAGAGTGGCAATAGAATGTTGATATATGAATACTTGAAG  
AATAACAGCCTTGCCAGTGCTTTACTAGGTAATGTTCTCACAGATCAGTTTGAAAAAAAAAACTTATTTT  
GAACCAAATGAACATGTCATAGTTGAAGTTAGGAATGTTAAATGAGCAGATTGGACTGAATCTGGACG  
GGTAAAATTGTTATTTGAGTTCTAATGGTAAACGCGTTGCCCTGAATTGGCCTCAGAGAGTTGCTATA  
TGTTTAGGTACAGCATCTGGTTTAGCATTCTTCATGAGGAAGCCTCACCGATTGTTTCATCGAGATAT  
TAAGGCTAGTAATATCCTTATAGATGAAAACCTTCATCCTAAAATTGGAGATTTTGGTCTGGCTAAGCTTT  
TTCCTGAAAATGTCACTCATCTAAGTACGCGAGTAGCAGGAACAATGTGAGTAGTTACATTGAATTTGAG  
TTTCATAACATTGATATTCTCTCCTGTCTCGTCTCAGTAAGGTATTCTGATGTGCAGAGGTTACCTTGC  
TCCGGAGTATGCCTTGTTTGGACAACCTCACGAAAAGGCTGATGTCTATAGCTTTGGAGTTCTTGTACTT  
GAAATCATAAGTGGAAGAAGCAGTAGTAAATCAGCATTGGAGTGGATCTCTTGGTTCTGGTGAATG  
GGTAGGATTATACTTTGAGCTTTATGATCTTCAAGATTCATCAGTAATCAGCATTGAAAGTTTACGCGT  
TGCAGGTATGGAAGCTAAGAGAAGAAGCACGGCTTCTGGAAATCATTGATCCAGAGCTAACAGAGTAT  
CCAGAACTGAATTGCTGCGGTTCAAAAGTTGCTCTCTTTTGCACACAATCAGCACCTACCCAAGAC  
CTAATATGAAACAAGTGATTGAGATGTTGTCTAAGGAAGTCAACCTCAACGAGAAGTCGTTAACTGAAC  
CAGGAGTTTATAGACCACATAGCTCGAAACGATCAAGTTATGGTAGTCTGCAGAAATCATCCTCTGCGG  
GGAAGAATGGGGTGCAATCTGTAAATCCTTCTGTAACATCAACAAAGTTTGGAGAGCTTTGAGAGTGTCA  
CCCAAATGCTTCTAGATAATGTTAACTGGTGTCTTATTCTTCATACTTGTATATTGTCGTTCTTCTAACG  
TGGGCTATCGAGGAGTAAATGTATTGTCTCTCATTAGACTTACCTTTTTCATACATTTTCTCATGTAATGT  
AAAGTTGGCAGTAGCTGATAAGGGAGAAAGAGAGACAAATCACACAGAATGAGCTACTATGTAACACTAC  
AAATTTGAGATATGAAGATGAAGTTTACAGCAGAGACTATGAACACAGTAAAGGATAGAACTTTTCTC  
TATGCACATATTAGCTCCTAAAACCTAGAAATGAAGGTAAAACTTCTGATAGAAGTTATTCTCAAACCTC  
ATAACATTTAAGTTAACGTATAAAGGATGACTGCTTTACAAGATCAACACAGTAGCATTTCATTGTGCA  
GCAGAGAATAAACCTTCAAGATGCAGCAGTAGTAGCTTGGAGGCTTGCAGAGGCAGCAACAGAAGTTT  
CTATTCTGTCTTTGCATCTTTTCTGGTTCCGAAGATGGTTTTGCAGAAGGCTTCATATGCTCAGGGGG  
GTTGTGTTTGGAGTTTACAAGTATTTGACGCATTCTAGAGAGTTCAGTTGGCCTGCCAGGTTTGGGTCTC  
TGGATGACATTGATGGATGGCTGCTTCTCCTTATCCTTCTTTCTTTCTTCTATGGTTCGGGACCTCCTTT

GGGATAAGCTCTCCAATTGCCCTCCAATAAGCCTTATTAGCTTCAGTATGGAACCTTCTCTGGTTGGCCAA  
GAATAACTGGAAAAAAGAAAAAGATGACACATGAACTGCAACACATTGATTGACTAAGGAGGAACTT  
GCCGTACTGTGGAACCTATGTTTAGAGATTTGACAAACCATAAAACCAAAGACATAGTTCTGTGGAGATT  
AGCAAATAAACTCACCAAAGCACAAAACTCAGCATATATTGTTCTAAAGGTTATCAGCACATTTTGAT  
CTCTTGTGGAAAACTTCCACTTTCAAAAATTTAATTTACACCTCTTACGCAGTATTAATGCTAAATCATAT  
GAAATGTAAACAGACAAAATGTAGAACTGCTTTTCTCTGTGTCCCTACCTTGGTTGAGTCGAAAGTACC  
AATACAATGATTTTTTCAAACCTAATAACTTAAAAAGGAGAGTAACAAGTACTATGATTAATAATTGGAT  
GGTACTTTTACTAGGTTAACTAGGTTAATCTCCCTGTCTCAACACTCATATCCTATTCCGAAGAGTTGAAA  
GCAATGATTAGGAAGAGAAGGTAACCTAGATGCATGACATGTCAGACCTTCCAGCTAAAGCAACTGTTTG  
GAAAACAAACATCCAGCACAAAGCAAATTTATGCCAACTAGTTAACAAACCGTGACTTTAAGCAAATG  
CCTCGGAAAGACTTTTAATTTATATAGCTATAGGTCTCACCTTCTCCTTCTCCCGGTTAGCAGCTATGTTG  
TTCTCACATCTAAGTTTCCATTTCTATAGTACTCTGCTTTGTATTCTCTGCTTCTCTGATTATTTCCCTAA  
CAATTTCTTTCTCCCTTTTCTCCTTCTCCTCCAGCCGTATGGCGTTCAAT

>M6-PGSC0003DMG400008508 M6 G-LecRK

CATGGAAATGAAGAACAATCATTACTTTCTGCTACTCTTTTTATGCTTCAGTCTCAACAGTAATCTCTGTAT  
CGGAAGGGACACCATTTCTGCGACTGAATCTCTTTCTTTGGTGAAACTCTAGTCTCTTCAGGTGAGATA  
TTTGAGCTTGGTTTTTTCAAACCAGGTAACCTCTCTAAATATTATCTAGGCATATGGTACAAGAACGTTAT  
TTTATCGCAAACAGTAATTTGGGTAGCAAATAGGGATAAACCCTTGATTATGGTGCTGCTGGGATGAT  
AATTAATCAAGGAAACCTGGTGCTTCTTGATAGATTTCAAGGCGAAGTTTGGTTCGGCACTTCTGCGAAA  
CATCAATCCAGATATTTCAAGTACTGCACTTCTTCGTGATGATGGGAATTTGATTTTGAGTGTTGTGTCAA  
ATTCATCAACACCCTTACTACTTTGGCAAAGTTTTGATCACCCAACACACACTTTTATGCCTGGTGCTAAG  
CTTGGATATGACAAACGTACACAAAGAAAACAGGTTCTGGTTTCATGGAAGAATTCGAACGATCCAGCA  
CCAGGATTGTATTCTATGGAAATGGACCCAAAGCATGCCAGTTTGTTTTAAAATGGAATAGGACTACA  
GAGTATTGGGCAAGTGGTTCATGGGATGGCCAAAGATTCAGCTCAGTGCCTGAGATGAGGTTAAACTA  
CATATATAATTACAGCTATATCGACAATGAGAATGAGTCATATTTTACATATTCCTTTACAATAGTTCAA  
TCTTATCAATATTCATTATGGATGTCTCGGGACAAATTAAGCAACTAACATGGTTGGATGATAGCAGTGT  
TTGGAATCTATTCTGGTCTCAACCAAGACCAGATTGTGAGGTTTATGCTAAATGTGGGGCATTGGAGTC  
TGTGATGAAGCTAATGCAACCTGCAATTGTTTGAGTGGTTTCAAGCAAAGATCAGATACAGAATGGAAT  
TCAGATGATTATTCTGGTGGCTGTGTAAGAGACCAAAGGTGCAGTGTAAATGCAATTACTGAAGACACA

GATAGTTTATGGATAA CTTCAATTGTGAGAGTACCTTCTTCTCAA AATACTAATATCACAGTTGGGGAAG  
CCTCACAGTGTAGATCTGCATGTTTCAACGATTGCTCTTGCACTGCTTATACTTATGATGGTCCGGTACC  
TGTTCTATCTGGACAGGGGATCTGTTCAATCTGCAACA AACTCAGCACAACTGAAACAGAAAGGACTATA  
TTTGTCAAACGCAGCTCACCTGAAGGTTAGAATAGCATAGTATAACATGCTTTGATTCTTTATTTTCATATT  
AGTACAATGTTATGAATAGAATTCCTTATTAACGTTAGCACTTAACAACAATGATTCTCCTTTCAGCTCAA  
ACTAATGCTAAGAAATCAAAGAACTAAAAGCAATCATTTGTC AATATCAACTTTGATGTTTCTACTCAT  
AGGCAGCATTAGCTACATTTACTATAGAAGAAGAATGGCAAAAAGAGCAGGTATTTGCTGAATGAATCT  
AACTTTGGAAGATATTTTCTTATAACCATTTTGGACTTAATTCCA AAGGTCATCCTCAATCCAATTGAGG  
TAATGAAATCCCTCCCACTCCCCTTTTCTATTTT CAGATAGTAGTAAAGGTA CTCAAGGGGCACGTAAATCT  
CACTGGCACAAAGCTGAAGGAGAAGCAAAAAGTATTAATGAATGAAAACAGTGATGAAGCGATTGATGT  
TCCATACTTTCACTTGGAGACTATTTTGG AAGCTACAGACA AACTTCTCAAATGCGAATAAGCTCGGACAA  
GGAGGATTTGGTCTGTTTACAAGGTTAA AACTTCATTCTACATCTATGTGGACTGGCATTGACCCATA  
GTAATGAGATGAATTTTTTTTTG CAGGGTATCTTTCCGGGTGAAA AAGAAATTGCGGTAAAACGTTATCT  
AGTCAATCAGGACAAGGCATAGATGAATTTAAGAATGAAGT GACTCTAATTGCAAAGCTTCAACATCGA  
AATCTGGTGAGGCTATTGGGCTATTGCATCAATGCAACCGAACA AATATTACTTTATGAATATATGCCGA  
ATAAAAGTTTAGATACATTCATATTTGGTGAGTTAGCCTTAATA AATTCTTTATTCTCAAAGTCATACATT  
CTTATGATGATCTAATTTTTATTGACGTACCAA AACTTTGTTATGGTAACAATGCAAGATGGAACACTTTGTC  
AATTATTGGATTGGAAGAAACGTTATGACATCATATTGGGCATTGCACGGGGTCTATCTTATCTTCATCA  
TGATTACGACTAAGGATCATT CATAGAGATTTAAAACCAGTAACATTTTATTAGATGAGGAGATGAAC  
CCGAAAATTT CAGATTTTGGCTTGGCAAGGATTGTTGAAGGAAAAGTAACAGAAGCAAATACAAAGAA  
AATAGTGGGGACCTAGTAAGTATAATATTCCTTCTGTCATTAATTTCTTACAAAAGGAGCTTGGGAGAA  
AATCTTATACATAATGTTTTGTTGACCTGGTGAAATCTAGTGGCTATATGTCTCCTGAATATGCACTAGAT  
GGATTGTTTTCCATTAATCAGATGTATT CAGTTTTGGAGTAGTCGTA CTTGAGATAATCAGTGGAAGAA  
GGAATACAGGATTTTATCAGTCAGAAGAAGCCTTAA AACTTGTGGGCTATGTAAGTGAAGAACTTCCC  
ATGACTTAATTATTATATCTTCTTCTTAGCTTTGTCTCTCTGATATAAAAATTATCACAGGCATGGAAATTG  
TGGACAGAAAAAGCTGAGACACAATTAATAGAGAAGTCATTACTTGAATCATGCAACAGAAGTGAAGC  
AATAAAGTGCATAAATATTGCGCTCCTGTGTGTACAAGAAGATCCA AATCATCGTCCTAATATGTCAGAT  
GTCATTTTGATGCTGGGAGGGGAAGGTA CTAACCTTCCAACACCTAATAGACCAGCTTTTGTAAATAAGG  
ACGCATGCTTCTAGTACATCTTCTTCTCCTCCGATAAGAAATACATCGTATCCAACAATCAGGTGACGAT

TACAGTTGAAGAAGGACGTTAGCAGGAATAGTGAAGGCATTTAATTCGTATGGAAAGGGCTAGGGTGG  
CACTAGCTAGGACTTATAGATGAGCCATATTATACTTTTTTAACCTCTACTTTGGTCCTTAAAAAGTCCAG  
GGATACTTGACCAAATGTCGTCTTCTCTATATATAATAGTTAGGACAAAAGTGGAATGTTGGGAAAAC  
TTCAAGTGTGGAACTCAAACATATACTATATTTTTGGTTTAGAATATAGTAGGCCTTAGCAATCAAGTAC  
AAGAATAATTCGATTATTCCTGATTCTTCAAGCTTCAAATATATAAGCAATGTAATTTTTTTTTTTT

>M6-PGSC0003DMG400008523 M6 G-LecRK

AAACAAGAAACTGTTTTGACTAGTTTCATGGACTCCAAAGAAGAAAAATCTCCTTCCGTAAACACTTGC  
ACTCCTTATTTTTCTCTCATTCTTTCAGTCATCAATTTCTCTATGTACGTAGCATGGAAATGAAGAACAATCA  
TTACTTTCTGCTACTCTTTTTATGCTTCAGTCTCAACAGTAATCTCTGTATCGGAAGGGACACCATTTCTGC  
GACTGAATCTCTTTCTTTTGGTGAAACTCTAGTCTCTCAGGTGAGATATTTGAGCTTGGTTTTTTCAAAC  
CAGGTAACTCTCTTAAATATTATCTAGGCATATGGTACAAGAACGTTATTTTATCGCAAACAGTAATTTG  
GGTAGCAAATAGGGATAAACCACTTGATTATGGTGCTGCTGGGATGATAATTAATCAAGGAAACCTGGT  
GCTTCTTGATAGATTTCAAGGCGAAGTTTGGTCGGCACTTGCTGGAAACATCAATCCAGATATTTGAGTT  
ACTGCACTTCTTCGTGATGATGGGAATTTGATTTTGAGTGTGTTGTGTCAAATTCATCAACACCCTTACTACT  
TTGGCAAAGTTTTGATCACCCAACACACACTTTTATGCCTGGTGCTAAGCTTGGATATGACAAACGTACA  
CAAAGAAAACAGGTTCTGGTTTCATGGAAGAATTCGAACGATCCAGCACCAGGATTGTATTCTATGGAA  
ATGGACCCAAAGCATGCCAGTTTGTAAAAATGGAATAGGACTACAGAGTATTGGGCAAGTGGTTCA  
TGGGATGGCCAAAGATTCAGCTCAGTGCCTGAGATGAGGTTAAACTACATATATAATTACAGCTATATC  
GACAATGAGAATGAGTCATATTTTACATATTCCTTTACAATAGTTCAATCTTATCAATATTCATTATGGA  
TGTCTCGGGACAAATTAAGCAACTAACATGGTTGGATGATAGCAGTGTGGAAATCTATTCTGGTCTCAA  
CCAAGACCAGATTGTGAGGTTTATGCTAAATGTGGGGCATTGGAGTCTGTGATGAAGCTAATGCAACC  
TGCAATTGTTTGAGTGGTTTCAAGCAAAGATCAGATACAGAATGGAATTCAGATGATTATTCTGGTGGCT  
GTGTAAGAGACCAAAGGTGCAGTGTAAATGCAATTAAGACACAGATAGTTTATGGATAACTTCAA  
TTGTGAGAGTACCTTCTCTCAAATACTAATATCACAGTTGGGGAAGCCTCACAGTGTAGATCTGCATG  
TTTCAACGATTGCTCTTGCCTGCTTATACTTATGATGGTTCCGGTACCTGTTCTATCTGGACAGGGGATC  
TGTTCAATCTGCAACAACCTCAGCACAACCTGAAACAGAAAGGACTATATTTGTCAAACGCAGCTCACCTGA  
AGGTTAGAATAGCATAGTATAACATGCTTTGATTCTTTATTTTCATATTAGTACAATGTTATGAATAGAATT  
CCTTATTAACGTTAGCACTTAACAACAATGATTCTCCTTTCAGCTCAAACCTAATGCTAAGAAATCAAAGAA  
ACTAAAAGCAATCATTTTCGTCAATATCAACTTTGATGTTTCTACTCATAGGCAGCATTAGCTACATTTACT

ATAGAAGAAGAATGGCAAAAAGAGCAGGTATTTGCTGAATGAATCTAACTTTGGAAGATATTTTCTCTT  
ATACCATTTTGGACTTAATTCCAAAGGTCATCCTCAATCCAATTGAGGTAATGAAATCCCTCCCCTCCCC  
TTTTCTATTTTCTAGATAGTAGTAAAGGTAAGTCAAGGGGCACGTAAATCTCACTGGCACAAAGCTGAAGGA  
GAAGCAAAAAGTATTAATGAATGAAAACAGTGATGAAGCGATTGATGTTCCATACTTTCACTTGGAGACT  
ATTTTGGAAAGCTACAGACAACCTTCTCAAATGCGAATAAGCTCGGACAAGGAGGATTTGGTCCTGTTTAC  
AAGGTTAAAACCTCATTCTACATCTATGTGGACTGGCATTGACCCATAGTAATGAGATGAATTTTTTTTG  
CAGGGTATCTTTCCGGGTGAAAAGAAATTGCGGTAAAACGTTATCTAGTCAATCAGGACAAGGCATA  
GATGAATTTAAGAATGAAGTGACTCTAATTGCAAAGCTTCAACATCGAAATCTGGTGAGGCTATTGGGC  
TATTGCATCAATGCAACCGAACAAATATTACTTTATGAATATATGCCGAATAAAAAGTTTAGATACATTCAT  
ATTTGGTGAGTTAGCCTTAATAAATTCTTTATTCTCAAAGTCATACATTTCTTATGATGATCTAATTTTATT  
GACGTACCAAACCTTTGTTATGGTAACAATGCAAGATGGAACACTTTGTCAATTATTGGATTGGAAGAAA  
CGTTATGACATCATATTGGGCATTGCACGGGGTCTATCTTATCTTCATCATGATTCACGACTAAGGATCAT  
TCATAGAGATTTAAAACAGTAACATTTTATTAGATGAGGAGATGAACCCGAAAATTTAGATTTTGGC  
TTGGCAAGGATTGTTGAAGGAAAAGTAACAGAAGCAAATACAAAGAAAATAGTGGGGACCTAGTAAGT  
ATAATATTCCTCCTGTCATTAATTTCTTACAAAAGGAGCTTGGGAGAAAATCTTATACATAATGTTTTGT  
TGACCTGGTGAAATCTAGTGGCTATATGTCTCCTGAATATGCACTAGATGGATTGTTTTCCATTAATCA  
GATGTATTCAGTTTTGGAGTAGTCGTAAGTGAAGAAAGGAATACAGGATTTTATCAG  
TCAGAAGAAGCCTTAACTTGTGGGGCTATGTAAGTGAAGAACTTCCCATGACTTAATTATTATATCTTC  
TTCTTAGCTTTGTCTCTCTGATATAAAAATTATCACAGGCATGGAAATTGTGGACAGAAAAGCTGAGAC  
ACAATTAATAGAGAAGTCATTAAGTGAATCATGCAACAGAAGTGAAGCAATAAAGTGCATAAATATTGC  
GCTCCTGTGTGTACAAGAAGATCCAAATCATCGTCTAATATGTCAGATGTCATTTTGTGCTGGGAGGG  
GAAGGTAACCTTCCAACACCTAATAGACCAGCTTTTGTAAATAAGGACGCATGCTTCTAGTACATCTT  
CTTCTCCTCCGATAAGAAATACATCGTATCCAACAATCAGGTGACGATTACAGTTGAAGAAGGACGTTA  
G

>M6-PGSC0003DMG400008524 M6 G-LecRK

GTGAAGTTTCTCCACTTGCCATAATCTTGTCTCCAACCCATTAAGAGAAAAAAAAAATAAAATTAACA  
ACAGAGCAAGAAAAGCTGGAGCTCAAGAAGGTGAATGATACTCAAAGAAGTGAATACAGGAAGAAA  
AATTGTTTGGATTTTCTAAAATCCAATTTAATTTAAGGTAATAGTTTTAGGTACTTTTAACTTTATTTT  
GGAGTAAATATAATGTGTATGTTATTCATTTTCTTTTTATGGCTTTTATGGTCTTGAGTGATTGATTTT



GGATTTTCATCTTGGTTGTTGCATGTTATTTGCTTTTTGCGTGTGTGTGTGGATTTTCATGGTTCTTGAG  
TTTATTCTGATTCAATAATGAATTCTTGAAAGTTAGTATAGTTTTTCATATTGAATTTACATGTGGAAACTA  
CTTTTGATTTTGACTTTTATGTTATAAGCATTCTAGGTGGAAAAGTTATTTAAAAATTGTTATATATAACTT  
AAATCCTTTTCGACTTTTGTCAATTCAGGCATTTATGTTTGTATTGGGTATATGTGTTATCAATTACTACAA  
TTACCTAAAAAGAAAAATTGTGTCTTATTACTCTCAACATAATTCGTTGTCTAGCAAGATACGTCTAGTT  
CTCCCTCTACTTACCTATCCATTAGGAAAGTGGAACCTTCTTGACCTTCGAAAAGGTATAAAATGGTTTTA  
TAAATATGGTATGTTATATGGACTAATTTGTTAGGTGCTACTTGCTTGCTTCAAGCACAACTTTGATTT  
CTTTTTAAAGTTTTAGACAAAGGCGGAGCCAAGATTTAAAATTTATGGGTTTTAGATTCTAATCTTTTATG  
TACTGGGTTCTAAATTGATAAAATGTATAAATTCAAAAGATTTTAAAGACAATTACAAGATTTAAACTA  
AAACTACTTTATTTCAGACTTAACCCTTAGCTGATATTCTAGCTCCGCCCTAGACTTTTTTATTAGCATCCT  
CAAATACTAAAGTGGTGTATTGCCCTTCTTTTGTACACTTTTTAGCTAGTTTTCTCAAATGCATGAAA  
AGGAAGAGATGCTCTATTTTCATCTTTAAGTTTAATTCTTGAGGCTATTTCTTGAATTCATTTTTTTTTTA  
AAAAATAAAATAAAATTGAGGGCCTAAGAAAGGGATTACAATGTGGGGAATCGAATACTCACACACGT  
AGACAATAACTGAGTTATTGAGATTCTCCTTATCTTGATTTACATGATTTGCTTATATTTTGTGTGAT  
CCAAGTTGTCTATCTATTTTAGCTTTAGGTTATCAGTTCTGTTCTATTTTCAGGCTAATTGCAAATGATTTG  
AGGCTTTGAAGGTTAAGAGGATGTTGGACTTAAACAAAATAGAACCTGAAGAAGGGAAGCTAGACTT  
GGATCTTCGTCGCGTTAACTATGATCTTGATGACAAATCTCATCTTAGATATGGTGATTGGGTCACTTTCA  
AGAGCCATTCATCTAAAAAAGTTAGAATCTCTCGACCTGAATCTCCGAGAGGTGAAAATTCAGATAGAC  
AACCTCAGGATGCAGATTATCCCTCACTTAGCTATGAACTCGAAAGTGAGATTCTAGCCAGTTTCCTAG  
GTGGGAGTATTGGAACTTAGCCTCGTAAACAAGAGATGTTCAATGCTTCTAAAGAGCGGTGAGATATT  
TGAGATTCGTAAAGAGAATGGATTTAAGAACCTTCGGTATATATGTTAGCAAGTGGGGAGACTAACTG  
GTGGACATTTGATCGAGAGTTAAGTCCCGGAGGAAAATCCCTGACTTACCATCAGATGTGTGCTTCACA  
TTTGCGATAAGGAATCGCTTTGTGCAGGCACACATTTACTTGTTTCGGGTAGGGAAAATCGATGGCCTA  
GTTATATGGAGGTTTGAATTAGCAACGAATTGTTGGTACAAAGTCCCTCTATGGTTAATCCAAGATGTT  
TATTTGCATCAGCTACTTGTGGCACCTCTGTTTTGTTGCTGGTGGTATTATGGCGAATAGTGA  
GGTATACGACACAGCTGAGAAATACAACCCCGATAGCAGATCGTGGGACCTACTACCGAGGATGAAGA  
GGAAGAGGAAGCTTTGTTTCAGGATGTTACATGGACAAGAAATTCTACGTGATCGGGGGGAGGAATGAG  
AACGGAGAGCTTACCTGTGGAGAATTCTTCGATGAGGGTATGAACAAGTGGGAGCTGATTCCGGACAT  
GTTGAAGGATGATCCAGTCCTAACATGCCACTCACCACCCCTCATTGCTGTCGTGAACAACGAGCTGTAC

TCACCTGAGGCATCTTCAAACCAGCTGAAGCTTTACCTGAAAAAACCAACACTTGGAAAATGTTAGGAC  
AAGTGCCAGTGAGAGCTGATTCAAACAGAGGATGGGGCATTGCTTTCAAGTCATTGGGAAATGAACTC  
TTGTAATCGGAGCTGCTTCGTCTTCAGCCTCTTATTCGGGTAATTCATGGCTATATATACTTGCTGTCCA  
GATCCTGATGTAATTGATTTGCAGTGGAAACCTCTAGACAGTGGTCGAAATCGGCTTAGTAGTTTCATCT  
TAAACTGTTCTGTTATGGTAGCTTGAATAATGTCATTTATCTAGCAAACAAATTATGTATTGTGATCAAAA  
TATATAAGTGGCATATGGCCACTGGTTTCTGATATTTTCTTGCATATATTCACTACTGTTTGCTCTGCTATG  
TTTGATGTAATTTGCATTTATTGTTGCATTATTATGATTTATATTGAAGGTGTTATTCTA

>M6-PGSC0003DMG400010240 M6 G-LecRK

TCTTCTTTGCTTGTAATAACACTTTGTTCCCTTATTCATAGTAACATTAGCTAATGTTCCCTCCTTCCAAAACCT  
TCAAGTACATAAATGAAGGCACATTTGGCGAATACTCCGTTGAATATTTTGCAGATTATCGTGTGTTGGA  
CATTGTCAACTTCCCTTTACCCCTTTGTTTCTTCAATTCTACTCCAAACACCTTCATACTTGGGCAACGAAT  
GGGTCATCGTAGATCTGAGTCCATTATGCGATGGGTCTGGGAGGCTAATCGTGGTAAGCCTGTTTCGCGA  
AAACGCCACTCTAACGTTTGGTACTAATGGGAATTTGGTACTAACTGATGTCAATGGCACGGTAGCTTG  
GCATACCAATACTGTCAACAAAGGTGTAAGTGGGCTAAAACCTTTTGCCAAATGGCAACTTGGTTTTACAT  
GACAAAATGATAGATTTGTTTGGCAAAGTTTTGATCACCCAACGGATACACTTTTGGTGGGCCAAAGTT  
TAAGGGCTAAAGGCCCATCTAAGATTGTTAGTAGAAAGTCCAGTAAAGAACCTGTTGATGGGCCTTATA  
GTTTTATCCTAGAAGGGAGACATTGGGCCATGTATTATACAAGTGTAATTCACAAAAGCCTTTACCATA  
TTTCAAATCAGATGATTTTGGTAATGGGAAAGGCTCTTTAGCCAATTTTGATTTCTACTGTGAGCCAGAA  
TATGGTGAAAATTATGCTTTTGGAGCTAGGATTTAGGATCAACATGACCAATTCTCCTAGCTCTGGCACAT  
CTATATTTACTAGGCCCAAATACAATAGTACATACACTATGTTTAGAGTTGATATGGATGGTGATTTAAG  
AATGTACACTTATGAACCAAATGTTGATTGGGGAGCATGGGAAGTCACATATCGACTTCTCGATAGGGA  
CAACGATGGAAAAAGTGAATGCAAGCTACCGAGGAGGTGTGGATCATTAGGCGTTTGTGAGGACAGCC  
AGTGTGTGGCGTGTCCGAGCCCTCAAGGCTTGATTGGGTGGAGTAAGGGATGTGCACCACCAAAGTTG  
CCAGTATGCAGGGGAGGATCAAATGTGGACTATTATAAGGTGGAAGGAGTTGAACATTTTACTAGTGAT  
TATAATGAAGGAGTTGGACCTATAAAAATAAGTGAATGCAAAAATAGGTGCAGCAAAGATTGCAAATG  
TGTGGGCTTTTTCTACAAACAAGAGTCATCAAATGTTTGGTTGTACCTGAGCTTGGAGCTTTGGTTAAA  
GTGGACAATTCCTCCCATGTTGGCTACATCAAGATCTCAAAGTAGATTAAGTTACTGATTTGTATTTA  
TATCAAGCAAGCATTTTATATTTTTTTAAAATTTTCAAGTAATAATAATGTAACCTTTTGTCAAATATAATGAT  
AAAAAATGCAC

>M6-PGSC0003DMG400011251 M6 G-LecRK

ATGTTAATTTCTCCAAAAAGGAAATTTATTTTGGGATTTTTTAGTCCAAATGTTTCTAATAATCAAAGGTT  
TGTTGGTATATGGTATGTTGATGGTCCAAAAAATTCATTTGTTTGGGTTGCAAACAGAGATAAACCAATT  
TTTGATAAAAATGGTGTTTTTACTATTGAGAAAAATGGGAATTTAGTGGTGAAAAATGGTCGTGGCGAT  
TTAATGTGGACGAATAATGTTACTGCTATGAATAATAATTGTACAGCACATCTTTCTGATAATGGAAATC  
TTAGGATGTTTAATGGCAATAACAAGGAGTTGTGGCAGAGTTTTTCAGCATCCTACAGATACATTTTTACC  
AGAAATGAGATTTTTATTTGGATGAAGTTTTGAGGTCATGGACTAGTGATAGTGATCCTTCACCTGGACG  
GTACGTAATCTTGATCGTTTGATCATCTTATCTGAAATCTTTTATTTACTTAATTTTCTTTTGTACATGCC  
CCTCACGTTTGGTATGAATTTTTACATAATGTGTGGTGGTGAGACTCTCTGATAGCATGTTGCGTTTGTG  
ACATCTCATTTAAAAGCTTAATTGAGAATGTGCTTTTTTATTTTACGTAATTTTGTTTTGAACACAACCCCT  
CACGTGTTTGACTCATGGAAGTTGAAAGACAGAAGGGTTGTTGGTCAGTCACGGACTATTTGATTTTCATT  
ATGACAATTCAATGTTAATGACCTCATTCAATATATATATATATTTTTTTGATCCTTCACTATTGTGGGCTGGA  
TGGATAGCTAGTAGTTGTGAGTAGCAGTCCCCTTTTTATAGATTAAAGGTGATGATTTTTTGTATATGGGG  
TGGTAGGGAGACTCGAACCTACAACTTTGCTTGCCTGATATGGTAATGCATTTGTGACATCTTATCGA  
AAAGATTAAGTTGAAAACATGTTTTTCTTACTTAATTTTGTTTTTAACACGACCCCTCACGGTTTCTTGAA  
TCTTTGATATTGGGTGATAGTGAGACTCGAAACCTAAGAACTCTACTTGCACTGATATGGTAATGCATTT  
GTGACATCTTATCTAAAAGATTAAGTTGATAACATGTGTTTCATAACTTACTTTTTGTTTTAACACAACCTC  
TCATGTGCTTCTGAATCCTTGATATTGGATGGCAGTGAGATTCGAACCTAAGAACTATGCCTGTTCCGGA  
TACAATGTTGCATTTGTGACATCCCAAAGTCAAAGAGCATATTTTTATTTACTTAATTACGTTTCCAACAG  
GTACTCATTAGGAGTAAATACTCGCGGATCACCACAAATTGTGATTTTGGATGGAGAGAAGAGACGTTG  
GCGGAGTGGATATTGGGATGGACGCATATTCACAGGAGTTACAGATATGAAGCCCGAGTATCTACATG  
GTTTCAAGCTTTACAATGAAGGAGATATGCTATACTTCACTTACACTGTTGCAGATTCTTCTGATTTGGTG  
AGGTTCCATATTAGTCCAACCGGATACGAGCTGGAACAAAGGTGGGATAAAGATAACGAAAACCTGGAG  
TATAATACAGTCTCATCCATCAGGTGATTGTGACTTGTATAACTTATGTGGGAATTTTCGCGAAATGTGAT  
GTCACATATTTGAAAAAATGCATTTGTTTAGTTGGATTTGTACCGAAAGATTTGGGGCAGTGGAATGCG  
AGGAACTGGTCAGAAGGGTGTGTTAGGAGGAAAGAAGTGGAAATGCAGAGGAAATAACAGTGCGTTGA  
AGAGTGTTAGTGGAAGAAGGACGGATTCTTTGAGATTGAGAAAAATCAAGTTGCCGGATTTTGTGATA  
CTGCATATTTACAAAATATCGATGAGTGTGCAAGCATGTGCCTTGAAAATTGTTTCATGTACTGCTTATGCT  
TTTGTAGCGGAATCAATTGCATGATGTGGAGTGGAGATTTAGTCGATATGCAGCAGTTTCAGGAAGGC

GGAAACACTCTCTATGTTGCGCTTGCTGATTCTGAATTTGGTAAAAATGTGTAATACTTTTCTGTTGGTA  
TCATTTTAGATGTTCTTATTATAAACTTTCTTGAAACAGCTGGAAGCAACAGGACAGTCAAATTTGTGGT  
AATACCCGTTATGGTAGCCGGGGCTTTACTTGTGGTATGGTAGTTTTCTACTATGCAAGTACAAAGCC  
AAACTCGAGGTAAGATTTTCAGAAAGGCTGGTGTTTTACGACAGTCATTTGTTGTTATGCAATATACCTA  
TATCTTCTTCAATGTCCCATTTTCAGTGTCCAATAGGATCAACCAAATGGAGACAAGCGATCCAAGTAGG  
AGCGGAGAGTTTTCTATGAACACATCAGGAGCAGGAGACTTGAGTATTGAAGGGCATCAAGGGAGTGG  
TTCAGAACTTATATTCTTTCAGTTTCAGCGGTGTAGCAGCAGCTACCGACAACCTTTTCTAACGAAAACAAG  
CTGGGACAAGGTGGATTTGGCCCTGTCTACAAGGTTGGTTTTTCATTCAATTGACAAGTGTGTCTTACTTT  
TCTAGAGAAGTATGACATTATTGTGTTAACTAACGTCGATGTTTGTATTTAGGGAAAATACTACTATGT  
GGCTTAGAAAATTGCAGTGAAGAGACTTTCAAGAAAGTCAGGACAAGGTGTGGAGGAATTCAAGAATGA  
GATCAAGCTAATCGCCAAATTACAACATAGAAATCTTGTTAGACTTATGGGATGCTGCATTGAAGGAGA  
AGAAAAGATGCTTCTTTACGAGTACATGGCAAACAGAAGTTTAGATTCATTTCTATTTGGTTAGTACTCT  
AGATATGCTATAAATTATTTTCATCGATAGAGAGATCGATCACTTACAATTATTTTGGTTGGTAAATTTTT  
GACAGATCCTGTTAAGCAAGCTCAATTAGACTGGAGGAAACGCTTCAACATTATTGAAGGGATTGCACG  
AGGGCTATTGTATCTCCATAGAGATTCGCGACTCAGAATAATCCATAGGGATTTAAAGGCTAGTAACATT  
TTGCTAGATGAAGATATGAACCCGAAAATTTTCAGACTTTGGTATGGCTAGGATATTTGGTGGAAATGAA  
AATGAAGCAAATACAAATAGAGTAGTTGGGACATAGTGAGTATCATTGATTTTTATACCTTTAAGAGTG  
AGTACCTTTTAACTTGTTCAAAGAACTAACTCCATCAACGCGTTTCTTTTTTTGTTTTTACTTAAATCAGCG  
GATATATGGCTCCTGAATATGCAATGGAAGGCTTGTTCTCCGAAAATCTGATGTTTATAGCTTTGGTGT  
ACTATTACTGGAGATCATCTGTGGACGGAGGAACACAAGCTTTTCGTTCAAATGAACACTCTGGCATTATT  
GGTTATGTATGTCCAACAATACTTTTCAATATCTGTTGTTAAGTTAAATCATTTAACAACAATTCTACGTT  
TTTCTTTTTAGGCATGGCAGAAGTGGGATGAAGGTACACCAATGGACTTAGTAGACCGTTCTATTTGGG  
ACGAGTGTCAATATGATGAAGCATTGAGATGTATACAGTTAGCACTAATTTGTGTACAAGACATGGCAG  
TTCACAGACCGAGCATATCATCCATCGTGTTAATGTTGGAGACGGACAATATACGATTGCCCTTGCCTAG  
GCAACCTACATATACCTCAATGAGAAAACATGAAAATGCAGAAAACATGGAATGAGAAGCAGGATTTTTC  
TGCAAACAATGTCACAATTAGTGTTATATTTGGTAGATGA

>M6-PGSC0003DMG400013383 M6 G-LecRK

AGACTCCATAGCTGTAAAGCTTGCAAACGATGTCGCTTCATCCTTCTTCTTCATCCTCACTTCTCTTCTTCC  
TTCTCTTCTTCTTCTTGAACCCCTTTTTCTTCTTCTCACAAAAATCCTCTCATCATTCAATTCAAATCCCCT

CCTTGAATCCAACCCAAAACCAAATCCTACTTTCACCCAACCTCCACTTTCGCTGCTGGGTTTCTTCAATCT  
TCCAAAATTCTTCAATTTCTCCATTTGGTACTACAAAATCCCAGTCAAACCGTTGTTTGGTCAGCTAA  
CCCAAATCCCCACTTAATTCCTCAGCTACCCTTTTCAATTTCTCCTCCGGTGAACCTCAAGCTAACCCCATC  
TACATCTTCCTCAGCTCCAAATTTATGGCCTTCAATTATTCGAAACACCTCCTCTGTTCTTTTCTACAAGA  
AGATGGAAGCTTGGTTTATGCAAACCTGGAACAGTTTCTTGAACCCAACCTGATACTTTTCTCCGACCCAG  
AACATCACCGGAACAAATTTAACTTCCGGTAATGGAAAATTCAGTTTGATGGATCGAATTTGAATACCC  
TTTTCTTCGATGAAAATGATAGTTATTTCACTTTTCCCAAATGCCCTTCAGAGGTTGGAGGAAACAGG  
GGAAGTTACTCAAGTTAATGGAAGATTTTTTTTCGTCGGATTTCCGGGAGAAAGGGAAACTGAGAAGGA  
TGAAATTGGATGAAGATGGGAATATGAGAATCTATAGTTTTGATCTTAGTTCAAGTTTAGCTAAAAATTG  
GACAATTGTTTGGGAAGCAGTTAATCAATTATGTACAATACATGGTACTTGTGGTACAACTCTATATGC  
TTGTATGATACTTCTACAACCTCAAACCTTCTTGTGTTTGTCCACCTGGTTTTAGGAAAGACGCTAGTAAATC  
TTGTGTGAGGAAAATTCATTGATGACGAAGGATTCGAAGGCTAGTAAGTATTTACCTCTTGATTTTGT  
AGTTTTACTGGTGTGGGTAACCAAACAGACCTTAAAGCTTTGAGCTTTTCGAGTTGTGAAAAGAATTGT  
CAGATAAGAATGATTGTTTAGGTTTTTTGTTAAGTATGATGGGACTGGATATTGTGTGCTTGTTTTGA  
GAAATTGTTGTATGGATATTGGTCACCAGGTAAGTTGTTATGTATTTGAGAGTTGATAGTAAAGAG  
AACGATATATCGAATTTACAGGCCTGACTAGTTTGATGGAGACTTCATGTCCAGTGAGAATTAGCCTTC  
CATTTCCACCAGAAGAGTCTAAGACAACCACTAGAAATATTGTGATCATTTTCGATGCTTTTTGCAGCTGA  
GTTGATTAGTGGAGTGTTCTTCTTTTGGGCATTTCTCAAGAAGTATATTAAGTATAGGGATATGGCTAGG  
ACTTTTGGTCTTGAAGTCATGCCTGCGATTGGACCGAAAAGTTTTAGCTTTTCTGAGATCAAGAATGCAA  
CTAATGATTTCACTGATAAAATTGGGAGGGGTGGATTTGGAGATGTTTACAAAGGGGAAGTTGAGTGAT  
GGACGTGTTGTTGCCGTGAAGTGCTTGAAGAATGTAAGGTGGTGTGCTGAGTTCTGGGCTGAGGT  
CACGATCATAGCACGTATGCACCATTTGAATTTGGTGAGGTTGTGGGGTTTTGTGCTGAGAAGGGTAG  
AAGGATACTTGTGTATGAGTATGTACCTAATGGTTCATTGGGTGAATTCCTCTTCCAAAAGGCACCGATC  
CAGTCACCAGATGGGCAGAAACCCATACTCGATTGGAATATAAGGTACAGGATTGCGCTTGGTGTGGCA  
CGAGCAATTGCCTATCTACATGAAGAGTGTGTTGGAATGGGTATTACATTGTGATATCAAGCCTGAAAATA  
TCCTCTTAGGCGACGATTTCTGCCCAAAGGTGTCTGATTTTGGGCTAGCGAAGCTAAAGAAGAAAGAGG  
AGATGATGACCATGTCAAGATTTTCGAGGCACGCCAGGATATGTAGCACCGAATGGACCAAGGCTGAT  
CCAATTACTCCAAAAGCCGATGTGTACAGCTTTGGATTGGTGCTGTTGGAGATAGTTTCAGGTACAAGG  
AACTTTGAGCATCATAACTCAAAGGTGGAAAGTGATCAATGGTTTTTCCCTGCTTGGGCATTTGATAAGG

TGTTTAAGGATATGAATGTTGACGATATTTTGGACCCTCAAATCAAACAATCGTATGATTCAAGGGCACA  
CTTTGACTTAGTGAACAGGATGGTGAAGACAGCAATGTGGTGCATCCAAGATCAGCCAGATGCACGACC  
ATCAATGGGGAAAGTGGCTAAGATGTTGGAAGGGACGGTGGAGATCATCGAGCCAAAGAAGCCTACC  
ATTTTCTTCTTATCAGAGGAATAATATAAGGCTCAATCCTCTTCATAATTCCTCAAATGCTGTCTCAACA  
AGTTGCAGTAAGCATGTATTCCATGTTGTTTGAATTTGGATCATGTTGTGTTTTGTCTGTTTTTTTTTCCA  
GTTTTGTAATCTCTTGTGTTGTAGTTGTAAAGTACATTTTGATCAATGAAGAAGCAAATGGTTGTTACATA  
GAAG

>M6-PGSC0003DMG400013882 M6 G-LecRK

TTCATTTTGGTCCAGAGTTTAAAGTTTGAGGAACCTAAACAGAGAAGATTACCTTGTTAGAAAGCATCAG  
CTATGTGTCAGAAGAAAGAGTTGTTGATAGTAATTGTTTCATTTCTTGTCCTTTTGTAGTTCCATAGAT  
ACCATTTCTTTAACCAATCTCTCAAAGATGGTGATTTGTTGATCTCTCAGGGAAATCTTTTGCTTTGGG  
TTTCTTTGGGAATTCCCCTGGTAAACGTTACGTCGGAATTTGGTACAACAATGTTCTGAACTAACTGTTG  
TTTGGGTTGCCAACAGAGACAATCCTGTTAATGGCACATCTGGGATTCTCACCATCGATTCAACTGGAAA  
TCTTGTTGTACATCTTGATGCGGAAACAAAACTACAGCCTGGAGAACAATGTTTCTTCAGCTACAAAA  
CGAGCAAACCTCGTATACAGCTAAGCTGGAGGATTCAGGGAAATTTATATTGTTTCAAGACTCCAAAATG  
GATGTTACTGAGTGGCAGAGCTTTGATTATCCTACTAATACTCTGCTTCCTTCAATGAAATATGGAATAG  
ACAAGAGGACGGGTTTGAACCGTTTCTAACATCCTGGAAATCGTTGAACGATCCAGGCACTGGAGAGT  
ATCGTTACACAATGGAGCTCAATGGGACACCTCAAGTTTTCTTGTACAAGAACTCTAGCAGGATTTGGCG  
GACAGGATCCTGGACGGGTGATGTTGGAGTGGTGTACCAGAAATGAGCCCACGATTCATCTTCAGCCT  
TAGTTATGTGGACAATGATACCGAGGTTTCTTGACATATGGCATAACATGACAGTTCAATAATCTCAAGA  
ATGGTCTGAATGAATCAGGGATCGTGAACCGTTAACTTGGCAAGAGAGTGAGCAAAGTGGGTGCA  
ATTTTGGTCTGCCCCTAAAGACCCTTGTGACAATTATGAACATTGTGGAGCATTAGCAATTGCAATCTGT  
TCAATTTGGCTGAATTCGAATGCAGTTGTCTTCCAGGGTACGAGCCAAAGCTAAGCCGACAATGGTTCTT  
GAGAGATGGCACTCATGGATGTTTGGAGGAAGAAAATGAAGAGGTGTGCAACAGTGGTGAGGGATTC  
GTCACATTAAGTCATGTAAAGTCCCCGACACAGGTGCAGCTCGGATGAACAAGAGCATGGGATTGAA  
GGAATGTGAAGAGTTGTGTCTGAAGAACTGCTCCTGCACAGCCTATGCAAGTGCTAATATTAGTGCAGG  
AGGAAGTGGATGCATCACTTGGTATGGTGGAGTTGACAGACATAAAGCAATTTATAGATGGGGCCCAAG  
ATTTATATATCAGAGTCTCTGCATCTGATTTAGGTAAGGAGTTAACTTAATATATTATGTGAGGATTTAG  
GTAATTCAATATTATGTGGAGAAGAATGTGCAAGTTGATCATTTTTGGTTAGTAGTAGTACACAGTATCT

TACCCTGGTGTTTACTGGAAGTTCTCATTTTTTGTGGTTTCAGCGCAATTCTCGAAGAATTCAAGAGGCCA  
TAATAGGAAAAGAATGATAGGGATTCTAGTAGGGTCTGCTGCAGCAATAATTCTTTACTCTCTTTGGCA  
TGTTGTTTGGTGATCAATATAAGGAGAAATGGTAAGGATATTATTCTACATCATACTTTAGTCGAATATTT  
TCAGTATCTGTACAGCAGCTACAATGGTGAAGCAACTATAGCAACCTAGACCTTCTACTACCTTTCTATAT  
CGTGCAGCAAAAACAATAACATTACTGCAAATTTCAATTTGATCCTAATCGGTGTTTGCTGATGTCACAGA  
TAATGAGAGAAGTGAAAGTATAGCATCCTATGACGGCATGGATGAAAGTAAACATACAGAAATCTCTAT  
CTTTGATTTAACCACAATAACTAATGCCACTGATAAGTTCTCTGATGCTAACAACTTGGTGAAGGAGGA  
TTTGGTAGCGTATAACAAGGTAACAACCTCCCAAACATGATTGAATTCCTAACAAATCAACATTATCTTTATAG  
GAGGCTACAAATAGATTTAATAACTTGTAAACCAAGATTTTCTCCCTAAAATAAGAAGAAGAAGCT  
ATGTTTACCAAATAATAATCTGGAATCAATATCAGGGTCACCTGACAGATGGACAAGTAATAGCTGTCAA  
AAGACTTTCAGTAACTTCAGGGCAAGGGACCGAGGAGTTCAAGAATGAAGTCACACTAATTGCAAGACT  
TCAGCACAGAAATTTGGTGAGGCTTTTAGGATGTTGCGTTCAACGAGGAGAGAAGATGTTGGTTTATGA  
ATATATGCCAAACAAATCCTTGGACAGTTTTATTTTTGGTAAGGAACATCTCCAGAACCGGAATTTCTCC  
ATTGACCTCCAGTCTCTACATGCTTTTACATGTTTACTGATGATTAATGATTACTGCTTTAACGTGTGTGT  
GTGTCCCTAAAAGATTTCTTATGCACAAATTTTTAACTGTGATCCAGATAAAACAAAAGGGTCTTTGTT  
GGATTGGGGAAAACGGTTTGAATCATACATGGGATTGCACGAGGAATGTTATACCTTCACCAAGACTC  
TAGACTAAGAATTATTCATAGGGATCTAAAAGCAAGCAATGTTTTACTCGATGCCTCCATGCAACCAAAA  
ATATCAGACTTTGGAATGGCCAGAATATTTGGAGGTGACCAAATGGAAGCAAACACAAATCGAGTTGTT  
GGAACATAGTAAGTATGTCAAGTTGTGTATAAACATAAATGAGTTATGTTAGATATGTGCATGTGATCTT  
TAAAATGATAAATCTTGACATTGCTTATCTATTGCAGTGGTTATATGTCACCTGAATATGCAATGGTAGG  
GCACTTTTCAACAAAGTCTGATGTTTTAGTTTTCGGTGTTTTGTGTTTGGAAATTATCACTGGCAGAAAGA  
ACAACAGTCATAAGGATCAGGAGCAATCTCGACATTTAGTTGGATATGTAAGTACAAACATATATATGCT  
GTTAAAATCGATAAATTGCATTTATTATCTTACAGTTGCCTTAGACATAAGCTGTGTCATGGATGGTAGT  
ACTGCAAATAATAATTTGGAAACAATCCCTTTAGGTTGTTAAAAGTGCTGAATAGATCGAGATTTTGT  
ATTTGAGAATTTCAATTTTTGGTGTATAGTCGCTTCTCTTATAGAGAAGAAATTGTCTGAAATTTTGATT  
GTGATGCATTGTGGTGTCTTATTTTCAAGTTTGGGATCTTTGGAAGGATGAAAAGGCATTAGATGTTGTT  
GATCCATTGTTAGGTGGCTCATATGAAGCTTGTGAAGTTTTGAGATGCATCCACATTGGCCTTTTGTGTG  
TACAACCGTTTACAGATGACAGACCGACTATGTCAGAATTGGTCTTCATGCTGTGCAATGAAACAAATCT  
TCCTTTCCCTAAACAACCTAGCCTTATATTCAGATCAGAGAATCATAGTTCAGTTAAACACTCTTCATCAG

CAAGTATAGCAACATCTTCTGTCAACGATATGTCTATTTCAACAGTTCATGGTCGCTAGAGCTTATGCTAA  
CTATTCAAGAACTATTTTGAAAGAAATACAGAATTCCTTTCTGTACTTTGCTTTCATATTATTAGAGAGA  
TTTATTGGTGAGTTATACACAACATTTAACATGCTAGTCCATTCTTGATTGAACTAGTGGGGTTGGGCT  
CTAATAGCACTGGAACCAAACTGACTTCTGATTCCCATGGCCCATGTTACAGACTTAAAGGTAGGTGG  
GTGGCAAAGGATTGGTAGGAAAGAAGCATAAACACAGAGGGTTTCTATTTTCATCTGTGAATTAATGGT  
GCTCTTTGTCAGCTGTATTTGATAATTGCCACACTTCATGTTTTCTTTAACAGTCTTCTCTGTGTTCA  
TGCTCTAAAAGCAACAAAGGCTAATCCTGCTAGCCACACACAACCTTTTCAGTGTTTTTATTGATTTGCAGG  
ATAGTAATTTGGTTGTGGAGTTTTGTCAATTAATGAGATATTTAACTATTATTAGTTGGTTATGTTTTCT  
CAAAAATTATTGATAAAAAAATACAAACATGTAAGTTATCTTATGAAAGATTTTAACTTTTGTTCATAAT  
TAGATCATGAGATAGACATGTATCAAATACAACAATAATATTATGATCATGAGTAAGAGCACTGTTGTCT  
CAATCTTTCTGTGATGAGTATCTGTAAAAGTAATATCAACTAGTCTATTGAAAATCTTTTAGCATTATTG  
CATTGAAACATTGAAGACTATATCATACTTTGGGAAGTAATGAGCACTAGATACATTTGATAAACAGATA  
ACAGGAATACATATACACATCAGACAACCTAACGAACATAAGGTGCTGTAATTGTCACCTCGTTGATCGAA  
GATGATGCTGTTTCGGTAGTAATCAAGTCTGAGTTAGGGGTAATGAAGGGCTGCTTCGGGAAGGGAAC  
TGTTGCTTCAATACTTAGCATGGACAGAATTGTTGACATGGTTGGTCTGTCTGCTGCGTTGAGTTGCAAA  
CACAATAGTCTACTAGAATGCAGCGTAATGCTTCCTCACTGGGACAAGAATCAACTATTGATGGATCTA  
CCAGCTCAAAGGCCTTACCATCATTCCACAACCTCCAGGCCTGAAGCAGCAGTTCA

>M6-PGSC0003DMG400013885 M6 G-LecRK

GGGATGTGTACCAAAATACCATCTTCCTTCCCTCTTCTATCAAACAAGAGAAGAAGTACACCAAC  
AAATGTCTCAAACACCAACTCTGCAGCAAAAACAAATACTCTTTTCTTAAATTCCACAATGAGAAACACC  
AAAGATTACTACTTTACCAATTCTTGTTCTTGATTTTGATTTCTCAATTTCTTCATCCAATTCTTGCTATAC  
CCACTGATACAATCACCCCAACACAGCCTTTAACCAAAGATCAAACCTTAGTATCTTCCGATCAACACTTT  
GAATTAGGCTTTTTCTCTCCCGCGGTGCAAATTCAGACAAATGGTATATCGGTATTTGGTACAAAGAGA  
TTCAAGACAGGACTATTGTCTGGGTTGCAAACAGAGCTAAACCCCTTTCAGCTTCATCAACATCAGTCCT  
AAAAATCGCAGAAATTGGTACCCTTCTTCTCGTCGATGGCCAACTGGAAATTCGTCTGGTCTTCCGAG  
CAAACCTCCGGCGACCAACGTAGTTGCCAACTCCTTGACTCCGGGAACCTTTGTCATTGACCGGAAAACG  
ATGACAGAGAACAGAGCTACCTGTGGCAGAGCTTTGATTATCCAACAACACTTTATTACCTGGGATGA  
AACTTGGGTGGGATTCAAATCCGGGATGAACAGAAACATAACATCATGGAAATCAGCAATCGATCCAG  
CTCCCGGAGATTACACCTTCAAGATCAACACCAGTGGGTTCCCGGAAGTTTACTTAACAAATAAACAACA



AACTATCTACAGGAGCGGCGCTTGAATGGAATTAGATTCAGTGGGGTACCGGAAATGAAGGCAAGTG  
AGATTATCTCATTGGAATTCAGTTCAAATCAGATGAAATTACTTACATGTTCAAATTACACAACAAAAC  
TTATACTCAAGATTGTCTGTGAATCATACTGGTTATCTTGAAAGATTCACTTGGATCCCAACAAGCAACAT  
GTGGAATCGATTTTGGTATGCTCCAAAAGATCAATGTGACGGATACACAGAGTGTGGGGTATCTGGAAT  
TTGTGACACAAATATTTACCAATCTGCAAATGTATGGTGGGATTCAAGCCTAAAAATCAAGTGGCCTGG  
GAATTGCGAGATGGGTCTGATGGTTGTGTTGATTTCATAAATTGGATTGTAAACTGATAAATTTAACG  
TATTGAGGAACATGAAGTTGCCAGATACGACGAATTCGTTTGTGGATACAAATATGAATTTGGATGAAT  
GTGAAGCTATGTGTATGAAGAATTGTTCTTGACGGCCTATACAAATTCGAATATTAGCGGAAGTGGGT  
CGGTTGTGTGATTTGGAGCACCGAACTTATTGACATGCGGCAGTATACGGCGGCGGAAGGTGGCCAA  
GTTCTCTACGTTAGGGTGGCTTCTTCTGACGCAGGTATCATCCTATTTCTCTACTAGCTTCGCTTGCCATTT  
CTTTTTTCGCTTAGTACAATGATAACGATTAATAATCGATAAAAAATAGTTGTATTAAGAATTTGTAC  
AATTAATTTAAGTAATTTGGGGTTGAAATTGATGGTTAGATAATCCACTTCTCTGTCAAGATCAAATTT  
TGGGTCACCGGGATGATTTGAGTCGACTAGGTCTGCACGAGTGGAGTTAGTTGGAATTTTTTATTACTT  
GTTAGTTAGACGATATTTCAACACAGAGAAGTAGAGTAAAATAGAAAGGGTGATGAAGTTTTTGGAA  
AATATTTTTGTGGAAGATTGGAGAGTATTTCCATGATTGAAAATATGCAATTTAATATTCTCGTTTAAGTT  
TATGTGTCACCCAATGTTTTAATTTAAAATAAATAACATATTTTCATGTATATAGTAACAATTCAATTTT  
AAAATGCTTATTTTATTCTAATGAGATAATTTATAGCTATACAAACGATGACTTGTATTTTACCACAAATT  
TCAAATGTCTTTTTTAAAATTCTGTGTCAAATTAATTAATATCACATAAATTGAGACGAAGAAATAGTA  
ATAATATTTTGCATATTTTTGTCGGAAGTTGATTTATCTCATTCAATTTGTAAACTTGCTATTCTCTGCATTAT  
TCCACTATATACATACTGTTCTGTTTGAATCTATTTTCATAATTTCAAAGTCGAGTTCAAGACGAAAAATC  
TATTTGTCCAAAATTGTTAGTACCAGTTTTGCATGTCATCCAATCCAATGGACCAAATATTCCTTGAAT  
AATATTTTAAATGTATTGTTTTGTCATTTAATAAGAAGCATATTACACATTATCATAATTTAATTTACTCT  
TTTCTATTGAATTCCAAGTTGGGAAGCATGCCGTTAGATTTGCCTCTAATAGATGAAATTACAAAAAT  
ATATTTATTTTTTTGAATTTTCTTTTCTATTTTTTTTTTTTTGGGTATTGCTATTTTTTTTAAACCACCCCCC  
CCCCCCCCTCCACAAACGTCATGCAGAAATTAATAGAGATTTTATTTTGTAAATAAATACTCTACCCCC  
TTTGAACAACACGTATAGTTGTCTTTAATATCCTTGGTCCCCTTTTTAAATTCCTTTTACGTTACCTACTT  
TCGATCTAATATTTTACATAATCAACTAGATTTCAAATAAAAAATAAATTCATAATTGCTAGTTGAAAAA  
ACAAGAAGTTAGTATAATAATTATTGAGTGCATTTAATCCTGAAAAGGACTTGTAACAACCTACTTTTC  
AAAGTTATTCTGCTAATGAGTTTGCCAATATATTCTTTGTGGTATGCACGTTTTCAATATAATTTTTCTTTT

TCTATGCTTTGTGTATTTTACTTTGAAAAATCGAAAAGTATAAAAAACCTAACCATATCTACCAATCCCC  
ATCAACAATTTGCCTTCAATAGGGACTTAATTTTATACAATTTGCTTTCAATAGGGACTTAATTTTATTTAT  
TACTATATTTGGACTTTCTTTTTCTCATTTGATTTGATAGGGATGATTAGTATTTGGAAAATATGTTACAC  
GGCCAAGTATCTCAAGGCTCTAAAAGTAATCAGCCACCTAATTCCACCTTCTTTCCAATCACCTGTTCATA  
AATTTGAACAAACATTATCGATTTATTGTCACAATTCAGCTCGTAATAATAATAAATAATCGAAATGTGCA  
TTTGCTTTTTCTTTGTACTTTCCTCTTAAATCTGCATGCTTAAGAGGAACTTTTAATTATGGTGGGAAA  
TAAAATTTCCAATAAAGCTTATTTAGCTCTAAATTTTTCCATTAATTGGTCCCACAATAAATGGGTCC  
CACAATAAATGGGTCCCACAAAGAGATACTCCTTTGCATTTCAAACGGTGACGACGCAATTTCTGGTC  
GGTGTAAATGGGCCCTTACATGGCCGTCGATCTTGACTTTTATTGGGCCATCCCGGCCAGTTGTTTTCCCT  
TTTTCTCCTTTTTAGAGAAAAAAGCATATGTTTCCTAATGTAATACAAGAAAATGATTGGACACCAATT  
CCTTTGACACGTTTGGGAAATGGTCATATACAGGTTTGAAAAGTAAGGTTTGGTGGGGTAAATTAATTC  
AAATATTACAAAGGGATTAAGAAGTATTTATTAAGCTAATTATTTTTTTTTACCAAGAATATGTCATGGAT  
GATATTAATAGTTTTTTTTGGACACAACCTTTGTGAAGTAGGTGAATTAGATCATGTTTAGTGACACCATTG  
GACTGTAGTCTTTTCAATTCAAACCTTTGCTATTGTCACCGAAAATGATCTTTAACAACACTATAGGTTTTC  
ATACATAAAGAGACATTCAAATTTGGCCTCAGCTTGCAAGTAAACACCTTAACTTTAGTATACATACCTA  
GACACCTCAAATTATTTCTTCTGTCTCAATTGAACTCTCCAATTACAAAATGATAATCTAGACACCTTCAA  
AATTAATGTGTCAAGTCAGCATGGGTGTCCATGAGACATAGTGGGACGAGTTGGAGTGTCTAGTTGTTA  
GTTGAGGTGTCTAGATATGCTCTTTTGAAGTTGGAGTGCTTACTTGTCGGCTGAGGTCAAGTTTGAGTGT  
TTCTTTATGTATTATGCCAGTAAAAAATGATGAACTTCTTCTTGCAGAACTAACTCTTGAATAAAATTA  
GCATGATTAATTAACCGAAAACTTTTAATTTTCAGTGCAAATTGGAGGTGTGGGATCTGGAAATAGTTC  
TGGCAAGACAAAATAGTTGCAATAGCTGCTGGGGTTACAGTTGGTATAGCTCTTGTGCTATTTGGACT  
AACCTTTGCTTCTTATCAAAGAGAAGAAAACATCAAGGTTCAATCCGAACTAAATCCGTAAACAGAGGT  
ATTATATGAATCTATCATGATAAATAAGATTGTCTAATATAAAATGCTTCATTTTCTAATGAATGTTTCTTA  
TGATCCTAAACCAGGCACTAGTGAACGAAGTCAAGAACTTCTGATGAATGCAACTATTATTCCAAGTAAA  
AGAGAATTTTCTGGTGAACTTCCACGGAAGAGTTTGAATTGCCATTGTTTGATTACAGTACCCTAGCTA  
CGGCAACAGAAAATTTTTCTGATGCGACTAAGTTGGGCCAAGGTGGATTTGGTTGTGTTTACAAGGTAA  
AATCTCAGTTATATGTAAACCATAGTGGTATAATAAAGAAGAAAAAATGATCGACAACTCAATAATATA  
ATCTTTTGATCAGGCAATGCTGGTTGGTCAAGAAGTAGCAGTCAAAGGCTCTCGAAGAATTCCGGACA  
AGGAGTAGAGGAATTTAAAAATGAGCTAAGATTAATTGCCAGGCTTCAACACAGAAATCTAGTCCGGCT

TCTTGGCTGTTGTGTTGATATGGAAGAGAAGATGCTGATCTATGAATACCTGGAGAATAAAAGTTTAGA  
TTCAATTTTGTTCAGTAAGTCTCTTCGTTGTATCGCCAAGAGAGTAGTGTTCACATCATTTACTTACAG  
GCTTATATAATTTGTGACTCACATTTGAATATGTTCTCAGATAAACAGAATAGCTCGCTGCTCAACTGGC  
AAAAGCGGTTCAATATTATTTGTGGTATTGCTCGGGGGCTTCTATACCTTCACCAAGATTCAAGATTTAG  
GATTATCCACAGAGACCTTAAAGCAAGCAATATTCTGCTTGATAAGGATTTGACCCCCAAAATATCAGAT  
TTTGGCATGGCAAGAATATTTGGCGGAGATGAGACTGAAGGAAATACAAAAGAGTAGTTGGAACCTA  
GTAAGCACTCAACATAATTTCTTCACATAATTCATAGAACCCTTAAAGCTGTTACTAAATCTGTTTTTTTGT  
TTTGATGTAGTGGTTACATGTCTCCGGAATATGCAATGGATGGCCTCTTCTCTGTAAAGTCCGATGTTTTC  
AGCTTTGGGGTTTTGGTGTAGAAATAGTAACCGGGAAGAAGAACAGGGGATTCTATTATCAAATAAC  
CAACTCAACCTTCTTGACATGTAAGCTTCATTATTGGTAATACATTCATCATTTGATTCATTTCTGATAAA  
CAAAGTAACCGATTATGCAGGCGTGGAGACTATGGAAAGAAGGGAGCGGCTCAGAGCTACTAGATCCA  
TCTTTTGGAGAATCGTTTTCTCCGTCTGAAGTAATGAGATGTATAACAAGTTGGACTGTTGTGTGTCCAGG  
AACAAAGCAGAAGACAGACCAAACATGGCCACTGTGGTTTTGATGCTAGGTAGCGAAAGCGCGTCACTA  
CCTCAGCCTAAAAACCCAGGATTTTGCCTTGGAAAGAAGACCCGTTGATTCTGATTCATATTGACTAATT  
ATGAAGAACTTGCACTGTCAATCAAGTTACAGTTACCATGATAGATCCCCGGTAGTTGATGGTATATAT  
CGCCCTCAAGAAGTGTATATTACTACAAGAGGTTACAATTTTCTCTCGTATAATTTCTCAGTTTTTGCTT  
TTGGGTAAGTTTTGTGTAAGATAAAGAGTATAATTAGGTCTTTTTTTCTCATTACATACAATTGTGAGTTC  
AAAAATCTGTCTTTTTTTCATCATCAATGTAATAGTCCAATCATTCTTTTCCATATCCTTGAAATCCATTGT  
AAATCACTGTGC

>M6-PGSC0003DMG400013886 M6 G-LecRK

GCCTCATCAGAACCTTCTTCTTTCCTTTTGTCTTCTATACCCTTTACCATTCTCCTTTCTAAATTCCAATTTT  
CTCCATTCTTGATTTGTGGCATCATCATTTCCAAATTCTGAATGGCCACTGGCTATAGATTTCCCCCTTT  
TGGTTCTTGTCTTTTTCATTCTTTCTTGTCTCCTCATTCTGTTTAGGTGGTGACAGAGTTACACTAGGA  
GAGATTATTAAGATGGTGATAACATCACTTCTAAAGGAGGGGATTTTGTGTTGGGGTCTTTAGTCCTG  
CAAATACTAGTAAAAGGTATCTTGGTATATGGTATGTTGACGTACCAGTAAAGACATATATTTGGGTGC  
CAACAGGAACAATCCTGTTTCATGATAAAAATGGTACCTTTTCAATTGATAAAAATGGGAATTTGGTGGTT  
AAAGATGGACATGGGGATTTACTATGGTCGTCTAATGTTTCTGTTAATACCACAAATTCTACGGCTTGTC  
TGAGAGACGAGGGAAATCTTGTCATCCTTAATAATGACAGGAATGCTACGAGGTTAAATTCTGAATTGT  
GGAAGAGCTTCTCGGATCCTACAGATACATTTTTGCCTGGAATGGAAGTTCTCATAGAAAGACGAGGCC

AAGAGCAAAAAGTTTTCCGTTCTTGGACAAATGAGAGTGACCCTTCACCTGGGAGGTA CTCAATGGGAG  
TTGATCCTCGCGAACACCTCAGATTGTTATTTGGGATGGACCGAATAGACGATGGAGGAGTGGACATT  
TTGATGGAGCGGAATTCATTGGTGTCCAGATGTGATTAGAACTACTTTTTCTCTGGCTTCAGAATTCAA  
AACCAAGGAGACGATAAATTGTTACTCACTTACAGTGCCTCAAATACATCTTCTTTGTGAGGTTTCAGCT  
TACTGTGACTGGAAATGAGCTGCAACAGAGGTGGAACGAAGACCAGGGTGAATGGAACACGTTGCAAT  
CTAGGCCTGTAGGTGGTTGTGACTTGTATAACTTCTGTGGGAATTTGCAGAATGTGATAAAGATGTATG  
CCAATGTTTAAAGGTTTTGTACCACGTGTTCCAGGAGCAATGGCATGCTGGGAACCGAACCGGAGGATG  
TGTTAGGAAGACAGAATTGGAATGCAGGAGAAATAGCAGTGTTC AAGGAATGATAGTTCAAAAGATG  
ATGGATTCTCGACTATTCGGAGAGTTAAATTACCTGACCATGCTGATGTTTCAGAAATAACACAGACGA  
GTGCAAATCAGGTGCCTGAATGATTGTTCTGCAATGCTTATGCTTATGTCAGAGGAATCAATTGTATG  
ATATGGCGTAATGATTTAGTTGATATAGAGCATTTTCAGGAAGGTGGGAACACTCTTATGTTCTGCTTC  
ATCCTTCTGATATCGGTAAGCACAATACTTTCTGCTGAATTCATAAATCTCTTACCAGTTTTCTTCTCATTC  
GTGCAATTATACAAATCTAAAACCAAAGTAGTTTGTGCTTTAGTACAAAGATCAATTTCTGTTTGTCTTT  
ACTCTTTATTTGTAGCAAGCTCAAACAATAAGCAATATATCTTTTTCTCCTTGTGTTTGAAGAATGATTA  
GCCTTTCTAATTTCTTGATTTCTCCTTTGAATATCTTTTGAACAGGTCAAAAAAAGAAGACGATCATAAT  
TGTTGTAATATCAATTCTAGCAGCTCTGGCTTTGGTTGTTATGGTGGCCATTTGGCTAGTATGCAAGTAC  
AGGGCCAGAAAACGAGGTAAATTTTGATGCAGTAACATTTCTGACTTGTTAGTTGCATTTATTATATGTT  
CCATATTGTA CTTATACTTTGACTTGCAATTTTCAGAATCCAAGAGGACCAGTGAAATCCCAAAAACCA  
TTTAGTTAGGAGTGGAGAGTTCTCCACAGAATATTCTGGACCAGGCGACATCAGTGCTGAAGGGCATCA  
AGGAAATGGTTCAGAATTAGCATTTTTTCAGCTTCAGCATGGTGGCCACAGCTACTGATGACTTCTCTCTT  
GCAAACAAGCTTGGGCAAGGGGATTTGGCCCCGTTTATAAGGTAAATTTTCAATCTTGATAGATTATTC  
TGTTCTTTAGGAAGTATATGGCCATGTTTTGGACTAAAGTTGATGTTTTTCAAATCTTTAGGGAAAGCTA  
CCTTGTGGTCAAGAAGTTGCTGTAAAAGGCTTTACAAAAGTCTGGACAAGGCGATGAGGAGTTCAA  
GAATGAGATCACTCTAATAGCAAATTGCAACACAGAAATCTTGTTAGACTTTTGGGTTGCTGTGTTGAA  
GGAGAAGAAAAAATGCTGATTTACGAGTACATGCCCAACAAAAGCTTAGATACATTTCTATTTGGTAAG  
TTCAGGAAATTCTATCAAATAATTTCTGCTGCTCCACAGATGTACTATAGCAACACATCTCATTGAGAT  
AGACACTAACAACTGTATTGGCTGTAAACTTTGACAGATACTGCTAGGAAATCCCAGTTAGACTGGAG  
AAAACGCTTCAACATTATCGAAGGAATTGCCCGAGGATTACTGTATCTCCATAGAGATTCAAGGCTTAGA  
ATAATCCATAGGGATCTAAAGGCTAGTAACATTCTGTTGGATGAAGAGATGACACCAAAAATTT CAGAC

TTTGGCATGGCCAGAATATTTGGAGGAAACCAAATGAAGCAAATACAAATAGGGTCGTAGGAACATA  
GTAAGTATCATTTGATTTTAAATCTTTAAGAGACTAATTTCAAATTTCTTGTTCTGGAGCTAAATCCAT  
TTCATTTTGTACCTTGTTGCTAAACAACAGTGGATATATGGCTCCTGAGTATGCTATGGAGGGCCTGTTC  
TCTGGCAAGTCTGATGTCTACAGCTTCGGCATAATATTGCTTGAAATTATATGTGGACGTAGAAATACAA  
GCTTTCGGACAGATGAGCATTGAGGCATCATTGGATATGTAAGTCTGACTAATTTTCTCCAACCTATTTC  
TCTTTTAGTCCAGAACAAGCTGTCTGAATAATGGGGCTAATTTCTTGTTGTGATGAGCAATGACGGAGTG  
ATCATCTTTCTCATATTTTCTGGTGGAAAATATTTGAGGCATGGGAGAAGTGGGATGAAGGTAGACCA  
ATGGACCTAGTGGATCGTTGATTGGGATGGTTGTCAACACAATGAAGCATTGAGATGTATACTTG  
GCATTGCTTTGTGTTCAAGATTTGGCCGCTCACAGACCAAACATGTCTTCTGTGGTTTTGATGCTGGAAA  
CTGACAATGTAAGGTTGCCCTGCCTAGGCAACCTACCTATACTTCAATGAGAAGATCTGTGGATGAAG  
ATATATGGCATGGGAATCAGGATTTAACATCTTCCAACAATGTCACAGTTAGTGTACTAATAGGTAGATG  
ATTGGTTAATGCTTGTTCTTCTTACATACCTGCTTCATTTGAAGAGAATGGGATCAAGTAGTGTAACAT  
GTAAAGTTATACTTGGAACCTATGTTTCATAATTTTTGTTAGCTAGGTAACTTTAGCACATCATGTGTATT  
GTAATTAGAAGGTGGTTCAGCTCTGTAAGCTGAAAGAGAGATATTTCAACCTGTTCAATCAGTATGC  
TTGAAGTTTTTTCTTACTGTTTGTAGATGGAGATGCTCCACCAATCGAGCAAACCCCACTTGTCATATC  
TAGTT

>M6-PGSC0003DMG400013887 M6 G-LecRK

AGTAATACTTTTAAAGGGGAAGTGCACCTTTTGTGTAGTACACCTGTGTATATATAGACTAAAGTTACCA  
GTTTCAAAAAAATAAAAATCAATTAGTGCTTTCACTTCCATGGAAAGAAAGATATGCTCACGAAGAACT  
GTGTATGGCTCATAACATGTTTGCAGCTGCAAATGACAAGAAAGACATTCCTGTAGCAGCTATTGCAACCA  
CAGTCTTAATAGGCTCAATAACAGTTATCTTATGTGGATATCTTTTCTGGAAATTGTTGGCTAAGCACAG  
AGGTAATTAATCAAATAAGATTTTTGAGAAGACAACTAGAACTTCTCTGTCTGCAAATGGTTTGATTC  
TGAATGTCCACTCTAAACCAGAAAGGAAGAGGAAAAATGAAGCACTCTTAAGAGAAGCATCTCCAAAAT  
TTTACCAAGAAGGCATGAGTAAAGATGACATCAATCAAGTCAAATTTGAAGACATCACCTTGACATATT  
TGATATGTTAGCGAATGCCACTGACAGTTTTACCCAGCTAGCAAGCTGGGGCAAGGAGGCTTTGGTCC  
AGTCTACAAAGTAATGTTTCTTGATGCATCTCTGCAGTGTCTGACAAATGAACACAATATAAAATAAAT  
TAGATCAATTATCTGCAGGGACAATTGCCATATGGACAAGAAATTGTAGTAAAAGGCTTTACAGTCTT  
CCGGTCAGGGGCTACAGGAGTTTATGAATGAGGTCGTTGTGATTTCTAGACTACAACATCGTAATCTTGT  
TAGACTCCTTGGCTGTTGCACAGAGAGAGGGGAAAAGATGCTGGTTTATGATTTTCATGCCAAATAGAAG

CTTAGATGCATATGTTTTGGTCAGTGCAGAATTTCTTTCATTGGTTTTGCCTGTCCTTCAACTTAAGTAC  
TTCCAGAATCAAAGAAAGCTGTATTTCTTTAAGGAAACAAAATCCATCATACTTCTCAGTGATACCT  
TTCAGGTTACACCAGGAAAAGGTCCTTGATTGGGGTAAACGAGCCATCATTATTGAAGGAACTGGTCTG  
AGGCCTCCTTACCTTACAGAGACTCAAGACTATGAATTATTCATAGAGATCTGAAGGCAAGCAATATC  
CTGTTGGATGAATACCTAAACCCAAAAATTTCAAATTTGGCATGGCGAGGATTTTTGGAGCAATCAAGA  
TCAGGCCAACACTATAAGAGTTGTTGGCACATAGTATGTTTGCATTGCTTCCTTCATTTTTTCATGGATGA  
ACTGCCATCATTAGTCATTGATTTTCTGTGTAATATGTTATGCAGTGGTTACATGGCCCCTGAATATTCAA  
TGTACGGAAGATTCTCAGAAAAATCAGATGTCTACAGCTTCAGTGTGTTGGTATTGGAAATTGTCAGTG  
GAAGGAAGAACTCTAGTTTTTATGATGATGAACTGACTCTACTTGCATATGTAAGTTCATTCTTGCAACTA  
TATATGAAGCTTTAATGTTCTGCTAGCTCATCAAACCAAAAAAATAGAGGAGAAAAATTATGGAAGTCT  
GAAAATAACATTTTTGCTGTTTGACAATGTCATTGTTTATTAGGCATGGAAGTTGTGGAATGAAAACAAT  
ATCATAAAATTGATAGACCCCAAAATATTTGATTCATGCTTTGAAAAACAGATGGTGAGATGTGTACATA  
TTGGATTATTATGTGTTCAAGAATATGCAGAAGATAGGCCAAATGTCACCACAGTTCTGTTAATGCTCAC  
TAGTGATATTGCTGAACTACCTACTCCTAAACAACCTGCATTTACCGGAGGACATGCTTCACCACAGCAA  
GTATCTTCTAAAAGCCAAGGGTCCGTGAATGCTGATACCATAACTGTATTGGAACCACGATAGGATGCA  
GAGTTTTCAACAGGCAGGCAAAGATCAGTACTTTCCCTAAAATGGTAACAGTAGCATAGTATTTCTTTCT  
TTTGAATGTGCATAGGGTAAAACACGCTCCTGCAATAACTCGCAAAACACACAAAAGAGGTAAAAGTGC  
ACTAGCTATGTGATGAATTAATTACAGAGTGAGCTTGGAGAACATGAAACAGTTGATCAATTTTTAACTT  
TGCATTATGAAAATCCTTAGAAAGAAAGTAGACAAAAGGACAAAAGAACCACAAATCCCAATTAACA  
AGTTCAAATAATGGCAATCAAAGACTTGAAAAATCATACTGCTGTACTGATACACGAAACGGCGTAAG  
CGAAAAATAGCCACTCGTTTTACCACTGTTTTTTTTCTTAGAAAATTACAGAGAAGTGAATTGGTGAATTA  
ATCAATGTTGAGGAAAAGTAACTCTGCATTATTTAGGTCATTCACATTCACACAAGTATTTGGGTGT  
TGGTTAAAGACTATAATTGTTTCATTTTTAAAATTTTTTGCATAAACTAATGTGAACTTACCTAAATCTC  
ACTAGTTTAGGAGTTAATTACTTATATGTATTTAGTTTGTAAATATTACGTGTGTTACCCCAATTTTGGTG  
CACTAAGAAACATCCAATACATGTATTTCTGAATATATGGGCCAAAATTAGGTGTAAGTTGTTTTAGAT  
ACATTGTATCCAAGTAGATTTACATGTATTTCTGATACATAAAAAAATTGGTTCGCCTCCTTCACCTCTCTC  
CCATATCGCTCACCACTCTCCAATGTATTAGGGATACATAATAAATCTCGCTCACCTCTCTCCCTATTTAG  
TCTATCCAGAA

>M6-PGSC0003DMG400015476 M6 G-LecRK

CTTGGTGGGTTCTCTAAGAGTCAGTTCACTTATGAGGAGCTAGCTAGAGCGACTTCTGGATTTCTAAGG  
CCAATTTGTTAGGCCAAGGTGGTTTTGGGTATGTACATAAAGGTGTTTTGGTTGATGGAACGGTGGTAG  
CTGTCAAGAGTTTGAAGTTGGGCAGTGGACAAGGTGAACGAGAATTCAGGCAGAGGTTGATATCATT  
AGCAGAGTTCATCATCGCCACCTTGTCTTCTTGTGGATATTGCATTGCTGATAGCCAGCGAATGTTGG  
TCTATGAGTATGTTCCCAACAAAACCTTGAATTCCATCTTCATGGTACTTCCCCTGTCATTGAATACTCCC  
T

>M6-PGSC0003DMG400017034 M6 G-LecRK

TGGAAGAAAAGGATTCCAATTGTGGTAGGACAGGTTTCATGGAGTTGTACTIONACTTGTGTTTTAGGAGGG  
ATTGGTGATACTATGTAATCCAAAAGAGAAAATAGTTGTGCACAGATACTTGTACAGCCATTGACATTG  
TATAGATGAGAATTTTTTTCAAGATAGCATTCTTCATGGAGATACTAATTGACTCTCTGAAAAA

>M6-PGSC0003DMG400017106 M6 G-LecRK

TCTCTTGTAACCTACCCTTTTCAACCTCCTCAGCTTTATCTCGGTGACACAACCTATTCAAATCACACGCATAT  
CGCTCGCTGGGCAACTAACAGTCTTACAATTTATATCGAGAGATTGTTAAAAGTCCGGGATAAACACGG  
AGAATAACACACCCATGGATAGCATTACCACTGTCGTTTTCTGTGAATGACACCACAAATAAGTTCATCGC  
AATTGGCTGTGACACATATGTTATAGTTCAGGGTTATTATTCCAAGTTTGAAAGTAGTAAAATCGAGGAT  
TATTATTCCTACATAACAGGATGATGCATGTCCATGTGCAATAGTATTGATGATGATAAATGTTCTGGTG  
TTGGTTGTTGCATGACATCCATCCCTAATGGGGCCTGGAATGTTACTATAACACTAAGGAGCTATTATAA  
TCATACTTATGTGAAAGATAACCTAGTTACGTTGTAGCTATGGTTTTGTAGTTGAAGAAGCTAATTTTA  
GTTATTCTAAGAATTATCTAAGAAGTTTGCAGAATATGGAGGAGCTTCCCTTGTGCTAGATTGGGTAAT  
TGGTGAAGAAACATGTGAAATAGCTAAGAGAAACTCGACTACATATGTATGTAAGAGTA

>M6-PGSC0003DMG400017277 M6 G-LecRK

ATGATTGCAGAGCAGAGAGTGTATCTTCCTATCCTTCTCTTCATTTGTCTCCACTTTTTTTCATCCCGGTTT  
GCTTTCTCGCAACCTTTCTGGAACATAATGTCAGTTTTTTGAATTCTACTACTGGACTTTCCAATTATTGG  
ATCAATATTCCGTATGTTAGAGTTTACAATACCTCCGAGCCTTCTGAAATGACGCCTATTATTTGGAGCAG  
AAAGGATAGCCCTCAGTTTCTTTGCCTTCTATTGCCCTTCTAACTAACAGTACCACAGAATGCCTTCT  
TGGTATCCTTTTGTATCACACAGATCCGATGGGGTTTCAAGTATTCCCAATTAGTTTGGTCTGCTAACA  
GGAACCATCCAGTGATAGTTAATGCAACGTTGCAACTAGGTCAAATGGCGACTTGGTCTTGACAGACT  
CTGATGGCACTCTTGTGTTGGTCCACTAATACTACTGGAAAATCTGTTTAAGGCTTAAACATCACAGAAAT  
GGGAAATCTTGTGCTCTTTGATAAGAGAAAGCAAGCAATTTGGCAGTCTTTTGATCATCCAACAGATTGT

TTGCTTTCGGGGCAGAAGTTGATTTTGGGGCGGAAGCTGATAGCAAGCATTTCAGAATCCAATCAGTCC  
TTTTCTTTTACTATTCTTAATGGAAGGCTGGTGTCTTCCATAGATGCCAGCCCACCTCAGTATTATATCGCT  
TCAAGTGGGGATGATGCTCAAATAGTCCTTTTTACAATTTTGACGGTTGAACATTTACTGCTCTACAAG  
ACCCTTATACATCCCAATTCATAAAGCTTGGGCCTGATGGACATTTAAGGTTATAACCAGTCGGGTGCATA  
TGATTGGAACAATTAGATGAGGTCATGGATTCATATCTAGGGAAGTGTGGGTATCCAATGGTGTGTGG  
AAGATATAGCATTGTACAAATGATGGGCAATGTAATTGTCTGGTAGAAGGAACTTCTTTAGGCCAAT  
AAATAGGAACCCGGATCTCGGATGTTACAGCTAACATCCATTTCTTTCAACTCTTACATTATCATAGTC  
TTATAGAGCTCAGCTACACCACATATTTGCATTTGAGATCAACTTTTACGCAAGTTCAAACATGTGGCTT  
GAGGGAACAAAGATGGAAAATTGCAAAGCTGCCTGTTTGTAGTAACTGTTCCCTGCAAAGTTGCTGTTTGG  
TCTAAAACCTTAGAAAAAACTGCTTATTACTGAATGAAGTCTTCTCTCTTAAGGACAACCTGGTCTGGTA  
GTGACAACACAAAAGTTTTTCTTAAGGTGCAGAATTTACAAAAGGCTCAGTATCAGCCGACAATCGTTTC  
TCAAAGAAAGCAATCAAGACCTCTGAAAGTGATTGTAGCATCTGCTCTTGCTGCTTTAGTGGGAATAATT  
TTAAGTATTAGTGCATGGTTTGTCTTTTCAAAAAGAGGGTGTCTGTCAAGGCTAGGGATCTTCTGGAT  
TTAGCACCAATCTTACCGGGAATCCTAACTCGATTCTCTTACAATGAGTTGAAAATAATTACACAAGATTT  
CAGCAGAAAGCTCAGGGAAGGAGGATTTGGCTCAGTATATGAAGGAACACTGAGTAATGGCAACAAAA  
TAGCTGTGAAGCGTCTGAATGGTTTAGGTCAAGTAAAGGATTCATTCTTAACAGAGGTAAAGATAGTTG  
GTAGCATTACCATGTCAACTTGGTAAAACCTCATCGGCTTTTGTGCTGAAAAAGATCACCGGGTTGTGAT  
CTATGAGTACATGGTAAATGGATCATTGGATAGGTGGATTTCTCATGAAAAGCAAGAAAATGGGCTTGG  
CTTACGAGGCAAAGGATAATATCGGATATTGCAAAGGATTAGCTTATCTTCATGATGAATGCAGCTAG  
AAGATAATTCATTTGGACATCAAACCACACAACATCCTCTTAGATCAAATTTCAATGCTAAGATATCTGA  
TTTTGGTTGTGCGAACTAATAGAGAAAAGACAAAAGCAAAGTTGTGACTAGAATTAGAGGAACACCCTG  
TATTTAGCTCCTGAATGGTTGAGGTCGGTGATCACTGATAAAGTAGACGTATATGCCTTTGGAATTGTGC  
TCTTGAAGTTTTCTGTGGGCGAAAGAATTTGGATTGGTCGCAGGCTGATGAAGATCATGTCCATTTGCT  
TAGTGTTTTTAAGAGAAAAGCAGAACCAGAGCAGCTCATGGATATGGTTTACACAAACAATGAGGATAT  
GCAGCTCCACAGAGAAGAAGAGACAGAAATGATGAGCCTCACAACATGGTGTCTACAAGGCAATTTCA  
ACAAGAGGCTGTCCATGTCAGTGGTGGTAAGTATTGGCAGGTTTAGTGTCTGTTGAAAC

>M6-PGSC0003DMG400017278 M6 G-LecRK

CAGAATTTGGTTTAAGGGCAGAAGCTCATAGCAAGCGATTCAACAACCAATCAGAGTCAAGGTTTGATT  
ACTCTTACTGTTCTCAATGGAAGCTGGGCAACTTACACAGATACAGATCCACCTCAATAATACTACAAAT



CATAATATAAAGAAAGACCTTATTACAGTTTTGATGGTCAAACCTTTAATGCTTTACAAAATCCTAATAAA  
TCAACAGCTCAATTCATGAAGATAGGGCCAGATGGACATTTAAAGGTATACCGATGGTTTATAGATGAT  
TGGAACGAAGTATCTGACATTTTGTGCGCCATATGTAGAAAACCTGTGGGTAACCAATGGTATGTGGAAGT  
TAAAGCATTGTACAAATAACGGGCAATGTACTTGTCCGCAACAGGAAAACCTTCTTAAGACCATTTTCTG  
AGAGGAAACCAGATCTTGGATGTTACAGCTAACTTCCATTTACTGCAACTCTTCGCAGTATCATAGTTTC  
GTAGAGCTCAAGAATACTACATATTTTTCATTTAACATTGATCAGGAACTAAATTCGAGCAGATTAAGGC  
TTGGGCAGACAAAGTTGGAAGATTGCAAAGGGCCTGTCTGAATAACTGTTCTTGCAAAGCTGCTGTTT  
TAGAATATAATTGGAATGGGACTCGAAGAGGGAACCTGTTTGTACTGAATGAAGTTTTCTCTCTCAAAG  
ACAGCGAAGAAGGAAAAGGCAAACAGTATTTCTTAAGGTGCAAATACCTCAAAGACACAGACTCAG  
TCTCTAATCATTCTGGAGGAAAGAAATCAAGACCTTTCAAAGTGATAATAGGATCTACTCTTGACAGCTT  
TCTTTGGGATAATTTAAGCATAGCTACTTGCTTTGTTATTTTCAGAAAGAGGACACATGAGTCCAGAAA  
GGCTGCGGATATTGTGGATCTAGCACCAATCTTACCGGAATACTAACACGATTCTCTTACAATGAACTG  
AAAATAAATACAGATGATTTCAGTAGAAAGCTCGGGGAAGGAGGATTTGGCTGTGTTTATGAAGGAAC  
ACTGAGAAATGGCACTAAAATAGCTGTGAAGCATCTGGATGGTGTAGGTCAAGTAAAGGAATCATTCTT  
AACAGAAGTAAAGGCAGTCGGTGGCATTACCATATCAATCTGGTAAAACCTCATTGGATTTTGTGCCGA  
AAAAAGCCACAGGCTTCTAATCTATGAGTACATGGTGAATGGATCGCTGGATAGGTGGATTACTCATGA  
AAATAAAGAAAATGGGCTTACATGGAACACAAGGCAGAGGATAATATCAGATATTGCGAAAGGATTAG  
CTTATCTACATGAGGATTGCAGCCATAAGATAATTCATTTGGACATCAAACCACAAAACATCCTTCTAGAT  
CAATATCTCAATGCTAAGATATCAGATTTTGGGCTGTGCAAGCTAATTGAGAAAGACAAAAGCAAAGTT  
CTGACTAGAATGAGAGGAACACGGGGTATTTAGCTCCTGAATGGTTGAGCTCGGTAATCACTGAGAAA  
GTTGATGTTTATGCTTTTGAATTGTCCTTTTGGAAATTCTCTGTGGGCGAAAGAATTTGGATTGGTCTCA  
ACCTGATGAAGAAGATGTCCATTTGCTGAGTGTATTTAGGAGAAAAGCGGAACAAGATCAGCTCATTGA  
TATGGTTGACAAAATGAGGATATGCAGCTCCACAGGGAAGCAGTGACAGAAATGATGAGCCTTGCTG  
CATGGTGTCTACAGGGCGATTTTTCCAAGAGGCCTTCCATGTCATTGGTGGTTAAGGCATTGGAAGGTTT  
GGTGAAGTGTGAAACCAACTGAATTATGATTTACACATGTACCTGAGGTTGGAGCAGGCAACCAAGA  
GAGGGAAGCCATTAGCAGTTCAAATTTCTTCAATTTTATCGGGACCAAGGTAAACAATATG

>M6-PGSC0003DMG400017282 M6 G-LecRK

GAAAAAACTACTCAAATAAAAGGATGAATTTAAGATTGAGACTGATCAATCAAACAGAGCCTTCTTTCT  
GAAAAAAATAGTACAATGGCGCTTAATTATAGTGCCATTTCTTTTCATGGCCAGTCTCCTCTTCATTTCTTC

ACAGCATCTAATTAGTTGTCAACCTCCTGAAACATTTATCACCAATTCCTCCATTTCTGGATCAATAGCC  
GCGCCCGCTCCTATGTAGTGAATTCCACAGATGGAGCCACACTGACACCCATCCTATCGAGAGAAAGGA  
ACGAGACTCTCTTTGTCTGTGGTTTCTTATGTGATTACAATGGTACTGCTTGCGTTTTTGGTGTCTTTTAT  
CCCCAAAGATCAGTAGCAACAATTCTTATCTATATTACGCTAGATTAGTTTGGTCAGCAAATCGGAATAA  
TCCAGTTAGAGCTAATGCAACCTTGCAACTTAGGCAAGATGGAGGCTTATTCTTGATGGACTCAGATGG  
CACTTTGATTTGGAGTACAAGCACAAGCATAAGAGGAAAGGTTGTTACGGGATTCAAATTGACAGTACT  
GGGAAATATTGTTCTCTTTGACAAAAGTAACAACATCATTGGCAGTCTTTTGATCATCCTACAGACTT  
TGGTTCCTGGACAAATGACAAATGCTGGACAAAAGCTGAGATCCAGTGTATCAGCAACAAATTGGAGTG  
AAGGTTTGTTCACATTTGAAGTTCAACTATTTGGCTTTTTAGCATACATTGAGTCAAATCCACGTCAACTC  
TATGTCTCAAGACTTGGGGATAAAGGTTTCCCGTTTCTGGACTATTCTTTGATTCGAAAATAATGATTTT  
CAACGGGACATTATTCCTAAATTTGCATTTTCAAATACTAGATTCATGAGGTTTGGGGATGATGGGCAT  
TTAAGGGTGTATCACTGGAGAGGATCTTGTTAGAGGAGGCTGATCTATTGACAGACTACATTGGTGAG  
TGTGGGTATCCAAGTGTGTGGGAATACTCTGTTTGTGCAAATAGGCAGTGTACTTGCCTCAAACCG  
CGGTTGATCAGACTAACTTTCTCCAGCAAAAAAATTACAGGCAGCCAAACCAAGGGTGTGTCTTATCAC  
ACCTATCTCTTGTGAAAATCCCAATATCATATTTTTATGGAGCTCAAGTACATAGCTTATATCCCCTCTA  
TTTGCAATATGGTACAAACAAAACAGATTTGGAGAATTGCAAAGGTCTTGCTTAAGCAATTGTTCTTGC  
AAAGCAGCTCAATTTCAATTTAGTGGTCCTGGTAACACAATGGGTCCTGCGCATTGTTGAATGATGTAT  
TTTCGCTCACATACGATTATGGAGCACCAACAAGACCACTCTTTTCATCAAGGTGCAGAGCTCTTCTAAC  
TTACAAGCCTCTCCATCACTTTTCTCTTCAGAGAAGAAATCAAAGCGTGTCCAGCAATTGTAGGATCCA  
CCATCGGAGCTTCATTTGGTTTGCTTCTCATGGTTTTAACTTGCTTGCCTATATTTTCAGAAGGAGAAAA  
GGGCTCGAGGAAGACGAGGAGGAGTTCCTTGATCAAATACCAGGAATGCCTACTAGATTTTCTATGAG  
GAACTCACTGTGATGACAGAAAATTTCAAGTGAAGAACTTGGGGAAGGGGGATTTGGTTCTGTATTTGAA  
GGAACAATGAGTGTGATGGCACCAAAAATAGCGGTGAAGCGTCTGCAAGGTTTTGGTAATGTGAAGAAATC  
ATTCTTAGCTGAGGTAGCAACAATCGGTAGCATTGAGCATGTCAATTTGGTGCAACTTGTGGATTTTGT  
GCTGAGAAATCACACAGACTTCTGGTTTATGAATATATGGCCAATGGCTCTTTAGATAGGTGGATTTTTC  
ACGGAAAGCAGGAACGATCTCTCACATGGGATATCAGGAAAAAGATCATATCAGACGTTGCCAAGGGC  
CTAGCTTACCTACATGAAGACTGTAACAACAAAATTATTCATTTGGATATTAACCTCAGAACATTCTTCT  
TGATCATAATCTCAATGCAAAGTATCAGATTTTGGGTTATCAAAGCTTGTGGGGAAAGATGAAAGTAA  
GATAGTTACAACAATGAGAGGAACACCAGGCTATTTAGCACCTGAATGGTTACATGAGGTCATTACTGA

GAAAGTGGATGTTTATAGCTTTGGGGTTGTGATCTTGAAATCATCTGCGGCCGGAAGAATTTGGATCG  
TCATCAAGATGAGGATGATATGCATTTGCTTAGTTTGTTCATGAGAAAGGCAGTGGAGAGACAACCTCTT  
GGAAATGGTGGACAAGAAGAGCGAAGACATGCAGCTACATAGAAAAGAGGCTGTGGAAATGATGAAG  
ATTGCAGCCTGGTGTTTACAAAGTGATTATACTAAGAGGCCTCCATGTCATTGGTAGTTAAGGTGTTTC  
AGGGTTTAGTGGCTGTTGAAACCGACTTGGATTACAGCTTCACATTTCCAACAATGACGAGAAGAGTTG  
CCGGAACATAATCAAGAAAGGGAATCTGTGGTTGGTATCAGTTTTCCACTTCCATCACAGTTGTCAGGACC  
TAGGTAAATTCTTAGTAGTATTTATCATCAAGACTGAATAGCTAATAAGTCACAGCCATATGTCACATACCT  
TTGAGTTATTACTTGTATTTGCTGCGAAAAGACATTTTGTGTTTTTCATAATCCTTATTATATCAACTACTA  
TTTCAGAAACATAATTTAGAAAAGTAGAACACACTGTCTACTATAGAAATGTTAGTTTTCGTGCAGTCTA  
ATTAACCTATTGAGTAT

>M6-PGSC0003DMG400017284 M6 G-LecRK

CCTCTGCTGTTTCGTCTCGATTTGCTATATCGCAACCTTTACAGGACTACAACCTCACTCTTTCGAATTCTAC  
TGCAGGGCTTGCCGGGCTTTCCTCTTCTGGATCAACAGGCCCTCTCTTAGGCTTAATTCCACCGACGACT  
CCTTTGGTTTGGTGCACCCATACTTCAGCGAAGAAATGCTGGCACACGATTCTCTGTGGCTTCTACTG  
CAAATACAATGAAAAAAATGCCTTCTTGGTATCCTTTGAACCACAACAATACAACAAAAAAACAGT  
ATAATAAATAAACCCAGTTAGTTTGGTCTGCTAACAGGAACCATCCAGTGAAATTCAATGCAACCTTGC  
AACTAGGCCATGATGGCAACTTGGTCTTGACAGACTCCGATGGCACTCTTGTGGTCCACTGATACAAT  
TGGAAAATCTGTTTCTGGCTTAACTTAACAGAAATGGGAAATCTTGTACTCTTTGATAAGAGAAAACGA  
ACAATTTGGCAGTCTTTTGATCATCTACAGAATCTTTGCTTCCAGGGCAGAATTTGGTTAAGGGCAGA  
AGCTCATAGCAAGCGATTCAACAACCAATCAGAGTCAAGGTTTGTACTCTTACTGTTCTCAATGGAAG  
CTGGGCAACTTACACAGATACAGATCCACCTCAATAATACTACAAATCATAATATAAAGAAAGACCTTAT  
TACAGTTTTGATGGTCAAACCTTTAATGCTTTACAAAATCCTAATAAATCAACAGCTCAATTCATGAAGAT  
AGGGCCAGATGGACATTTAAAGGTATACCAATGGTCTGTAGTTGATTGGAATGAAGTTTCTGACATTTT  
GTCGCCATATGTAGAAAATGTGGGTAACCAATGGTATGTGGAAGTTAAAGCATTGTACAAATAACGG  
GCAATGTACTTGTCCGCAACAGGAAAATCTTAAGACCATTTTCTGAGAGGAAACCAGATCTTGGATGT  
TCACAGCTGACTTCCGTAACTGCAACTCTTTCGGTATCATAGTTTCATAGAGCTCAAGAATACTACATA  
TTTTTCATTTAACATTGATCAGGAAATAAATTCGAGCAAATTAAGGCTTGGGCAGAAAAAGATGGAAGA  
TTGCAAAAGGGCCTGTCTGAATAACTGTTCTTGCAAAGCTGCTGTTTTAGAATATAATTGGAATGGGACT  
CGAAGAGGGAACTGTTTGTACTGAATGAAGTTTTCTCTCTCAAAGACAGCGAAGAAGGAAAAGGCAA

GACAGTATTTCTTAAGGTGCAGAATTCCTCAAAGCCACAGACTCGGTCTCTAATCATTCTGGAGGAAAG  
AAATCAAGACCTTTCAAAGTGATAATAGGATCTACTCTTGACGCTTTCTTTGGGATAATTTTAAGCATAGC  
TACTTGCTTTGTTATTTTCAGAAAGAGGACACATGAGTCCAGAAAGGCTGCGGATATTTTGGATCTAGCA  
CCAATCTTACCGGAATTCTAACACGATTCTTTACAATGACCTGAAAATAACTACAGATGATTTTCAGTA  
GAAAGCTCGGGGAAGGAGGATTTGGCTGTGTTTATGAAGGAACACTGAGAAATGGAATAAAATAGCT  
GTGAAGAATCTGGATGGTGTAGGTCAAGTAAAGGAATCATTCTTAACAGAAGTAAAGGCAGTCGGTGG  
CATTACCATATCAATCTGGTAAAACCTATTGGATTTTGTGCCGAAAAAGCCACAGGCTTCTAATCTAT  
GAGTACATGGTGAATGGATCGCTGGATAGGTGGATTACACATGAAAATCAAGAAAATGGGCTTACATG  
GAACACAAGGCAGAGGATAATATCAGACATCGCCAAAGGGTTAGCATATCTACATGAGGATTGCAGCC  
ATAAGATAATTCATTTGGACATCAAACCACAAAACATCCTTCTAGATCAATATCTCAATGCTAAGATATCA  
GATTTTGGGTTGTGCAAGCTAATTGAGAAAGACAAAAGCAAAGTTGTGACTAGAATGAGAGGAACACG  
GGTTATTTAGCCCTTGAATGGTTAAGCTCAGTAATTACTGAGAAAGTTGATGTGTATGCTTTTGGATTT  
GTGCTCTTGAAATTCTCTGTGGGCGAAAGAATTTGGATTGGTCACAACTGATGAAGAAAATGTCCAT  
TTGCTAAGTGTATTTAGGAGAAAAGCGGAACAAGAGCAGCTCATGGATATGGTTGACAAAAATGAGGA  
TATGCAGCTCCACAGGGAAGCAGTGACAGAAATGATGAGCCTTGCTGCATGGTGTCTACAGGGAGATTT  
TTCCAAGAGGCCTTCCATGTCATTGGTGGTTAAGGCATTGGAAGGTTTGGTGACTGTTGAAACCACTTG  
AATTATGATTTACACATGTACCTGAGGTTGGAGCAGGCAACCAAGAGAGGGAAGTCATTATCAGTTCA  
AAATTTCTTCAATTTTATCTGGACCAAGGTAACAATATGCTTAAGATTTTGTCTTTGAAGGAACCAACA  
TATGGTTGCGTAATGTCAAATATCGCAACATTTTCAATTCTAGCATAACTTTTTTACCCTGTATGGGATTA  
TAATTCATGAAATGTAATGTTTCAGTACTTCTATATTAATTTTTGAGCTTCATGTTACTATCATGTAGAG  
GCTTTTCAATTCATGTGTGAAAATAAGTAATGATATTGTACGTGGTGGTGCAGCTACTGAATTCAAA

>M6-PGSC0003DMG400017286 M6 G-LecRK

TACAAGTACAGATATCACTTTGGATATTCTGTATGCTCATTCTTTCTTCAACTATAGACAACAAAATTCCA  
TATATTTTATTGATTTTATTAGGAAACAATGTTAGCAGAAAAGAGACTGTATTTTCTATCCTTCTCTTCA  
TTTATCTCCTCTGTTGTTTCGTCTAGATTTGCTATATCGCAACCTTTACAGGACTACAACCTTCACTTTTCGA  
ATTCTACTGCAGGGCTTGCCGGGCTTTCTCTTTCTGGATCAACAGGCCCTCTCTTATTATTAATTCCACC  
GCCGACTTCTTTGGTTTGGTGACACCATACTTCAGCGAAGAAATGCTGGCACACGATTCCTCTGTGGCT  
TCTACTGCAAATACAATGAAAAAAATGCCTTCTTGGTATCCTTTTGAACCACAACAAATACAACAAAA  
AAACAGTATAATAAATAAACCCAGTTAGTTTGGTCTGCTAACAGGAACCATCCAGTGAAATTCAATGCA

ACCTTGCAACTAGGCCATGATGGCAACTTGGTCTTGACGGATTTTGATGGCACTCTTGTTTGGTCCACTG  
ATACAATTGGAAAATCTGTTTCTGGCTTAAACTTAACAGAAATGGGAAATCTGTACTCTTTGATAAGAG  
AAAACGAACAATTTGGCAGTCTTTTGATCATCCTACAGAATCTTTGCTTCCAGGGCAGAATTTGGTTAA  
GGGCAGAAGCTCATAGCAAGCGATTCAACAACCAATCAGAGTCAAGGTTTGATTACTCTTACTGTTCTCA  
ATGGAAGCTGGGCAACTTACACAGATACAGATCCACCTCAATAATACTACAAATCATAATATAAAGAAA  
GACCTTATTACAGTTTTGATGGTCAAACCTTTAATGCTTTACAAAATCCTAATAAATCAACAGCTCAATTC  
ATGAAGATAGGGCCAGATGGACATTTAAAGGTATACCGATGGTTTATAGATGATTGGAACGAAGTATCT  
GACATTTTGTGCCATATGTAGAAAAGTGTGGGTAACCAATGGTATGTGGAAGTTAAAGCATTGTACA  
AATAACGGGCAATGTACTTGTCCGCAACAGGAAAAGTCTTAAGACCATTTTCTGAGAGGAAACCAGAT  
CTTGGATGTTACAGCTAACTTCCATTTACTGCAACTCTTCGCAGTATCATAGTTTCGTAGAGCTCAAGAA  
TACTACATATTTTTCATTTAACATTGATCAGGAACTAAATTCGAGCAGATTAAGGCTTGGGCAGACAAAG  
TTGGAAGATTGCAAAGGGCCTGTCTGAATAACTGTTCTTGCAAAGCTGCTGTTTTAGAAATAAATTGGA  
ATGGGACTCGAAGAGGGAACTGTTTGTACTGAATGAAGTTTTCTCTCTCAAAGACAGCGAAGAAGGAA  
AAGGCAAAACAGTATTTCTTAAGGTGCAAATACCTCAAAGACACAGACTCAGTCTCTAATCATTCTCG  
AGGAAAGAAATCAAGACCTTCAAAGTGATAATAGGATCTACTCTTGCAGCTTTCTTTGGGATAATTTTA  
AGCATAGCTACTTGCTTTGTTATTTTCAGAAAGAGGACACATGAGTCCAGAAAGGCTGCGGATATTGTG  
GATCTAGCACCAATCTTACCGGAATACTAACACGATTCTTTACAATGAACTGAAAATAAATACAGATG  
ATTTAGTAGAAAGCTCGGGGAAGGAGGATTTGGCTGTGTTTATGAAGGAACACTGAGAAATGGCACT  
AAAATAGCTGTGAAGCATCTGGATGGTGTAGGTCAAGTAAAGGAATCATTCTTAACAGAAGTAAAGGC  
AGTCGGTGGCATTACCATATCAATCTGGTAAAAGTCTTGGATTTTGTGCCGAAAAAGCCACAGGCTT  
CTAATCTATGAGTACATGGTGAATGGATCGCTGGATAGGTGGATTACTCATGAAAATAAAGAAAATGGG  
CTTACATGGAACACAAGGCAGAGGATAATATCAGATATTGCGAAAGGATTAGCTTATCTACATGAGGAT  
TGCAGCCATAAGATAATTCATTTGGACATCAAACCACAAAACATCCTTCTAGATCAATATCTCAATGCTAA  
GATATCAGATTTTGGGCTGTGGAAGCTAATTGAGAAAGACAAAAGCAAAGTTCTGACTAGAATGAGAG  
GAACACGGGGTTATTTAGCTCCTGAATGGTTGAGCTCGGTAATCACTGAGAAAGTTGATGTTTATGCTTT  
TGGAATTGTCCTTTTGGAAATTCTCTGTGGGCGAAAGAATTTGGATTGGTCTCAACCTGATGAAGAAGAT  
GTCCATTTGCTGAGTGTATTTAGGAGAAAAGCGGAACAAGATCAGCTCATTGATATGGTTGACAAAAT  
GAGGATATGCAGCTCCACAGGGAAGCAGTGACAGAAATGATGAGCCTTGCTGCATGGTGTCTACAGGG  
CGATTTTCCAAGAGGCCTTCCATGTCATTGGTGGTTAAGGCATTGGAAGGTTTGGTACTGTTGAAACC

AACTTGAATTATGATTTACACATGTACCTGAGGTTGGAGCAGGCAACCAAGAGAGGGAAGCCATTAGC  
AGTTCAAATTTCTTCAATTTTATCGGGACCAAGGTAAACAATATGCTTAAGATTTTGTATTGAAGGA  
ACCAACACATGGTTGCGTAATATCAAATATTGCAACATTTCCGATTCTAGCATAACTTTTTATAATTCATG  
AAATGTAATGTTTCACTAATTCTATATTGAATTTTTGAGCTTCATGTTACTATCATATAGAGGCTTCTCAAT  
TCATGTGCAAAA

>M6-PGSC0003DMG400017315 M6 G-LecRK

ATGTTTGTAGAAACGAGACTGTATTTTCTATCCTTCTTTCATTTATCTCCTCTGCTGTTTGTCTCGATTT  
GCTATATCGCAACCTTTACAGGACTACAACCTTCACTCTTTTGAATTCTACTGCAGGGCTTGCCGGGCTTTC  
CTCTTTCTGGATCAACAGGCCCTCTTCTTAGGCTTAATTCACCGACGACTCCTTTGGTTTGGTGACACCCA  
TACTTCAGCGAAGAAATGCTGGCACACGATTCTCTGTGGCTTCTACTGCAAATACAATGAAAAAAATG  
CCTTCTTGGTATCCTTTTGAACCACAACAAATACAACAAAAAACAGTATAATAAATAAACCCAGTTA  
GTTTGGTCTGCTAACAGGAACCATCCAGTGAAATTCAATGCAACCTTGCAACTAGGCCATGATGGCAACT  
TGGTCTTGACAGACTCCGATGGCACTCTTGTGGTCCACTGATACAATTGGAAAATCTGTTTCTGGCTTA  
AACTAACAGAAATGGGAAATCTTGTACTCTTTGATAAGAGAAAACGAACAATTTGGCAGTCTTTTGATC  
ATCCTACAGAATCTTTGCTTCCAGGGCAGAATTTGGTTAAGGGCAGAAGCTCATAGCAAGCGATTCAA  
CAACCAATCAGAGTCAAGGTTTGATTACTCTTACTGTTCTCAATGGAAGCTGGGCAACTTACACAGATAC  
AGATCCACCTCAATAATACTACAAATCATAATATAAAGAAAGACCTTATTACAGTTTTGATGGTCAAACCT  
TTAATGCTTTACAAAATCCTAATAAATCAACAGCTCAATTCATGAAGATAGGGCCAGATGGACATTTAAA  
GGTATACCAATGGTCTGTAGTTGATTGGAATGAAGTTTCTGACATTTTGTCCCATATGTAGAAAAGTGT  
GGGTAACCAATGGTATGTGGAAGTTAAAGCATTGTGACAAATAACGGGCAATGTACTTGTCCGCAACAG  
GAAAAGTTCTTAAGACATTTTCTGAGAGGAAACCAGATCTTGGATGTTTACAGCTGACTTCCGTTAACT  
GCAACTCTTTGCGGTATCATAGTTTCTAGAGCTCAAGAATACTACATATTTTTCATTTAACATTGATCAG  
GAAATAAATTCGAGCAAATTAAGGCTTGGGCAGAAAAGATGGAAGATTGCAAAGGGCCTGTCTGAA  
TAACTGTTCTTGCAAAGCTGCTGTTTTAGAATATAATTGGAATGGGACTCGAAGAGGGAAGTGTGTTA  
CTGAATGAAGTTTCTCTCTCAAAGACAGCGAAGAAGGAAAAGGCAAGACAGTATTTCTTAAGGTGCAG  
AATTCCTCAAAGCCACAGACTCGGTCTCTAATCATTCTGAGGAAAGAAATCAAGACCTTTCAAAGTGA  
TAATAGGATCTACTCTTGCAGCTTTCTTTGGGATAATTTAAGCATAGCTACTTGTCTTGTATTTTCAGAA  
AGAGGACACATGAGTCCAGAAAGGCTGCGGATATTTTGGATCTAGCACCAATCTTACCGGGAATTCTAA  
CACGATTCTCTTACAATGACCTGAAAATAACTACAGATGATTTTCAAGTAGAAAGCTCGGGGAAGGAGGAT

TTGGCTGTGTTTATGAAGGAACACTGAGAAATGGAACAAAATAGCTGTGAAGAATCTGGATGGTGTA  
GGTCAAGTAAAGGAATCATTCTTAACAGAAGTAAAGGCAGTCGGTGGCATTACCATATCAATCTGGTA  
AAACTCATTGGATTTTGTGCCGAAAAAAGCCACAGGCTTCTAATCTATGAGTACATGGTGAATGGATCG  
CTGGATAGGTGGATTACACATGAAAATCAAGAAAATGGGCTTACATGGAACACAAGGCAGAGGATAAT  
ATCAGACATCGCCAAAGGGTTAGCATATCTACATGAGGATTGCAGCCATAAGATAATTCATTTGGACATC  
AAACCACAAAACATCCTTCTAGATCAATATCTCAATGCTAAGATATCAGATTTTGGGTTGTGCGAAGCTAA  
TTGAGAAAGACAAAAGCAAAGTTGTGACTAGAATGAGAGGAACACGGGGTTATTTAGCCCTTGAATGG  
TTAAGCTCAGTAATTACTGAGAAAGTTGATGTGTATGCTTTTGGATTTGTGCTCTTGGAATTCTCTGTG  
GGCGAAAGAATTTGGATTGGTCACAACTGATGAAGAAAATGTCCATTTGCTAAGTGTATTTAGGAGAA  
AAGCGGAACAAGAGCAGCTCATGGATATGGTTGACAAAATGAGGATATGCAGCTCCACAGGGAAGCA  
GTGACAGAAATGATGAGCCTTGCTGCATGGTGTCTACAGGGAGATTTTTCCAAGAGGCCTTCCATGTCA  
TTGGTGGTTAAGGCATTGGAAGGTTTGGTACTGTTGAAACCAACTTGAATTATGATTCACACATGTAC  
CTGAGGTTGGAGCAGGCAACCAAGAGAGGGAAGTCATTATCAGTTCAAAATTTCTTCAATTTTATCTG  
GACCAAGGTAAACAATATGCTTAAGATTTTGTCTTTGAAGGAACCAACATATGGTTGCGTAATGTCAAAT  
ATCGCAACATTTTCAATTCTAGCATAACTTTTTTACCGTGTATGGGATTA

>M6-PGSC0003DMG400017318 M6 G-LecRK

GAAAACCTTCTTAAGACCATTTTCTGAGAGGAAACCAGATCTTGGATGTTACAGCTGACTCCGTTAACT  
GCAACTCTTTGCGGTATCATAGTTTCATAGAGCTCAAGAATACTACATATTTTTCATTTAACATTGATCAG  
GAAATAAATTCGAGCAAATTAAGGCTTGGGCAGAAAAAGATGGAAGATTGCAAAGGGCCTGTCTGAA  
TAACTGTTCTTGCAAAGCTGCTGTTTTAGAATATAATTGGAATGGGACTCGAAGAGGGAAGTGTGTTA  
CTGAATGAAGTTTTCTCTCTCAAAGACAGCGAAGAAGGAAAAGGCAAGACAGTATTTCTTAAGGTGCAG  
AATTCCTCAAAGCCACAGACTCGGTCTCTAATCATTCTGGAGGAAAGAAATCAAGACCTTCAAAGTGA  
TAATAGGATCTACTCTTGCAGCTTTCTTTGGGATAATTTAAGCATAGCTACTTGCTTTGTTATTTTCAGAA  
AGAGGACACATGAGTCCAGAAAGGCTGCGGATATTTTGGATCTAGCACCAATCTTACCGGGAATTCTAA  
CACGATTCTCTTACAATGACCTGAAAATAACTACAGATGATTTTCAAGTAGAAAGCTCGGGGAAGGAGGAT  
TTGGCTGTGTTTATGAAGGAACACTGAGAAATGGAACAAAATAGCTGTGAAGAATCTGGATGGTGTA  
GGTCAAGTAAAGGAATCATTCTTAACAGAAGTAAAGGCAGTCGGTGGCATTACCATATCAATCTGGTA  
AAACTCATTGGATTTTGTGCCGAAAAAAGCCACAGGCTTCTAATCTATGAGTACATGGTGAATGGATCG  
CTGGATAGGTGGATTACACATGAAAATCAAGAAAATGGGCTTACATGGAACACAAGGCAGAGGATAAT

ATCAGACATCGCCAAAGGGTTAGCATATCTACATGAGGATTGCAGCCATAAGATAATTCATTTGGACATC  
AAACCACAAAACATCCTTCTAGATCAATATCTCAATGCTAAGATATCAGATTTTGGGTTGTCTGAAGCTAA  
TTGAGAAAGACAAAAGCAAAGTTGTGACTAGAATGAGAGGAACACGGGGTTATTTAGCCCTTGAATGG  
TTAAGCTCAGTAATTAAGTACTGAGAAAGTTGATGTGTATGCTTTTGGATTTGTGCTCTTGAAATTCTCTGTG  
GGCGAAAGAATTTGGATTGGTCACAACTGATGAAGAAAATGTCCATTTGCTAAGTGTATTTAGGAGAA  
AAGCGGAACAAGAGCAGCTCATGGATATGGTTGACAAAATGAGGATATGCAGCTCCACAGGGAAGCA  
GTGACAGAAATGATGAGCCTTGCTGCATGGTGTCTACAGGGAGATTTTTCCAAGAGGCCTTCCATGTCA  
TTGGTGGTTAAGGCATTGGAAGGTTTGGTACTGTTGAAACCAACTGAATTATGATTTACACATGTAC  
CTGAGGTTGGAGCAGGCAACCAAGAGAGGGAAGTCATTATCAGTTCAAATTTCTTCAATTTTATCTG  
GACCAAGGTAAACAATATGCTTAAGATTTTGTCTTTGAAGGAACCAACATATGGTTGCGTAATGTCAAAT  
ATCGCAACATTTTCAATTCTAGCATAACTTTTTTACCGTGTATGGGATTATAATTCATGAAATGTAATGTT  
CAGTTACTTCTATATTAATTTTTGAGCTTCA

>M6-PGSC0003DMG400017327 M6 G-LecRK

AGAGACGCGTTCCCAAAGAAAGGCATTATTAGAACACAGAAGGAGTAGATTGCAAACATTTTGTAGC  
TTTAGTAAGAAATGATTGCAGAGCAGAGATTGTATTTTCTCATGTCCTGTTTCATCATTTTTCTCCACTTTT  
TGTCATTCAGGTTTGTTCATCCCAGATTTTCATGGTACCTAAATGGCAGTTATTTGAATTCTACTGCTGGA  
CTTTCCACTTCATGGACCAATAGGCCGTTTTGGTTTGTATGCAGAATCCACATATGGATTGTCTCTCTTGAC  
ACCTATCCTTCTGAGTGAATAAATGGAAATAAATACCACTTCTGTGGCTTCTACTGCAATAGCCAAAGT  
GTTGAATGCCTTCTCGGGATCTTCTTTGCATTCCCAGACAGCTCCTCTACTGAACACAAATTAATGGATCC  
CCAGTTGGTTTGGTCTGCTAATCGAGACCGTCCAGTGAAAGCCAATGCAACCTTGCAACTAGGACAAGA  
TGGCAACTTGGTCTTGGCAGACTCTGATGGCACTTTTGTGGTCCACTAATACTACTGGAAAATCTGTTT  
CTGGCTTAAACATGACAGAAACGGGGAATCTCGTGCTCTTTGACAAAGCCAATCGCACAGTTTGGCAGT  
CGTTTGATCATCCTACAGATTCTTTGCTCCCGGGGCAGAGCTTGGGTTCTGGGAGGAAGCTCATAGCAA  
GCGTCTCAGCAACCAATTGGAGTCAAAGTTTGTCTTTCTTAACTATTATCAATGGAAGCTGGGCCACTTA  
CATCGAATCTGATCCACCTCAGTTTTACTATGCTTCAAGTAATCCGGATACTAGTACTTATTTAGTTTTGA  
TGGTCAAACACTTACTGTTTCTGCAAGACCTCCTAAATCACCAGCTCAATTCATGAAGCTTGGGCCTGAT  
GGACATTTATGGGTATACCAATGGGACGAGAATGCATTAAATTGGAAAGTCATATCTGATGTTTTGTTTA  
ATGTACATGCAGAGAACTGTGGGTACCCAACGGTGTGTGGAAGATATGGCATTGTACAAGTAATGGG  
AAATGTAGTTGTCCGCCAGAGAGAAATTTCTTCAGGCCATTAGATGAGAGGAACATAGATGTTGGATGT



TTACAGCTGACTTCCATTTACTGCAACTCTTCGCAGTATCATAGTTATGTAGAGCTCAAGAATACCACATA  
TTTTGCATTTGAGTTCAGTGATGAACTAATTTTCGGGCATATTACCGTTTGAGGGGAAAAAGTTGGAAGAT  
TGCAAAAGGGCCTGTCTAAGAACTGTTCTGCAAAGCTGTTGTCTTCGGATATGATTCAGATGGGGCA  
AGAAGTGGGAGATGTTTATTACTGAATGAGGTCTTTTCTCTCATCGACACTGAGAACGGAATGGACAAC  
AGAGTATTTCTTAAGGTGCAGAATTCCTCAAACACTCAGAATCAGTCTCCAACCATTCTGGAGGGAAAA  
GATCAAGACCTCACATACTGATAATAGGATCCACTCTTGCAGCTTTCTTTGGGATAGTGTTAAGTATCAC  
AGCTTTCTTTGTTATCTTTAAAAAGAGGACAAAAGATTCCAGAAAGGCTGGGGGTTTTCTGGATCTCGAA  
CCAATCTTTCCGGGAATGCTAACTCGGTTCTTTACAATGAGCTAAGAATAATAACTGAAGATTCAGCA  
GAAAGCTCGGGGAAGGAGGATTTGGCTCAGTATATGAAGGAACACTGAGTAATGGCACCAAATAGCT  
GTGAAGCGTCTGGATGGTCTAGGTCATGTGATGGAATCATTCTTAACAGAAGTAAAGATAGTCGGTGGC  
ATTCATCACATCAATCTGGTAAAACACTATTGGATTTTGTGCTGAAAAGAGCCAAAGACTTCTGATCTATG  
AACACATGGTAAATGGATCACTAGATAGATGGATTTATCATAAACATGAAGAAAATGGGCTTAGATGGC  
ATACAAGGCAAAGGATTATAACAGATATTGCCAAAGGATTAGCTTATCTTCATGACGAATGCAGCCAGA  
AGATAATTCATTTGGACATCAAACCACAAAATATCCTTCTAGATAAAAATTTCAATGCTAAGATATCTGAT  
TTTGGGCTGTGCAAACTGATCGATAAAGTCGAAAGCAAAGTTGTAAGTAACTAGGATGAGAGGAACACCAGG  
TTATTTGTCTCCTGAATGGTTGAGGTCAGTTATCACTGAGAAAGTAGATGTGTATGCCTTTGGAATTGTG  
CTCTTGGAGCTTTTGTGTGGTTCGAAAGAATTTGGATCGGTCCCAAGCTGATGAGGATGTCCATTTGCTAA  
GTGTTTTCGAAAGAAAATCGGAACAACAGCAGCTTATGGATATTGTTGACAAAAACAATGAGGATATGC  
AGATCCACAAAGAAGCAGTGACAGAAATGATGAGCATTGCTGCGTGGTGTCTACAGGGTGATTTACCA  
AGAGGCCTTCCATGTCATTGGTGGTTAAGGCATTGGAAGGTTTGGTGACTGTTGAAACAAACTTGGATT  
ACGATTTACAAGCCTACCCGAGGTTGAGGATTGCAACCAACAGAGGGAAGACACTATCAGCTTAGTAT  
TGCCTTCAATTTTATCCGGTCCAAGGTGAACAACACTAGCTTAAGAGGTTGTAAGTTTTTTTTTCTTTCCCA  
AGTCTGTCTTTCTTTTGTGAAAATGTATTTCCATGATTCATCACCAGATCCATCTTTCTTTGTACATAAAT  
TTGGCTAACAGGTAACACTATGTCATAATGTAAAAGGTAACTTAAGTAGCTTTGATAGATAACCAATTA  
CGTCTTGTGGCAGTGAGTGATATTATTTCTTTTTTAATTTGCATCTTTGTGGATCAATACATCTTCTTATG  
CAGCACATTTTATATTTCTAAGAGTAAGGGGTCTACTTATTCTGTGTTATAAACAGAAAAAACTGCAG  
>M6-PGSC0003DMG400017330 M6 G-LecRK  
AAACAACCCAAGATCTTAAATTTAAGTTCAATCATTTTTCATCTCAATGATGAGCTAAATGCCCTTGCCT  
TCTTTGGAAAACCAAAAAATTGGTCTTTATGGCTTTATGCCAGATCTTACCTTTCTTTTGTCTTCATTTTT

TGTTGTTCTTTTCATTTGATAACCAGCCAACCTTATGATTATCCATCTGCAAATCTTTCTACAACCTGGGTC  
AACAGCATTTTCGGCAGACCATTCACTGGATTCACTGATGGCTCAACAGTAAGAGCCATACTACTCAGA  
GGAAGTTTTGGTCCAAAATATGCTTGTGGTTTCTACTGTAATGGAAATTGTGATACTTACCTCTTTGCCAT  
CTTCATTTTGCAAACCAACAGTGGTCCGGAATTACTCTTACCACGATTGGGTTCCCACAAGTTGTTTGGT  
CTGCTAACAGGAATAAACCTGTTAGGATCAATTCTACTTTGGAACCTACAGCACAAGGAGATTTAGTGCT  
TAGAGATGCTGATGGTACTTTAGCTTGGTCAACTAACACTACTGGGAAGTCTATTGCTGGCTTAACTTG  
ACCGATGAGGGGAATCTTGTCTGTTTGATTGCAAGAATGCAACTGTTTGGCAATCGTTTGATCACCCAA  
CTGATGCTTTAGTTCCAGGGCAGAGGTTAGTATCAGGGATGAAGCTGACAGCAAGTGTTTCAACGACAA  
ATTGGACTGATGGAGGTTTGCTTACTCTCTGCTACCGATGATGGTTTGGTTGCTTTGGTAGAGTCAAA  
TCCTCCAAAACATACTTTAAAGCGACTATTGGTGGATTGAATGCAAGCAGAGGCTCAAATTATGTTGTG  
TATTTGAATGGTAGCCTAGCTTTACTCTCAAACCTCTAGTAATTCCAGCAATTCACAGACACTGGTTCCACT  
TAATCTAGCGACCTCAGCTCAATATATGAGACTGGAGTCTGATGGACACTTGAAAGTGTATGAGTGGCA  
AAGTGGGTGGACTGAGGTGAATGATCTCCTCACAGGTTTTAACGGCGAGTGTTATTATCCAATGGCCTG  
TGGAAGATATGGCATTGCTCAAGGGGGCAGTGTAGTTGTCCCAAATCGAGCTCTAATTC AACGACCTA  
TTTCAGACAGATAGATGATAGGCAGGGTAATCTGGGTTGCTCTGAGGTCACAAGGCTGACATGTAATGC  
TTTAAGTAACCACAGATTTTTGGATCTTCAAGATGTGGACTATTTACGTTTACGACAGATATCACAAACA  
CTAGTATGAATACCTGTAAAGATGCATGTTTGAGGAACTGTTCTGTAAAGCTGCTTTGTTTCGCAGTGG  
TTTAAACTCATCCACGGGAGACTGCTACCTACCATCCGAGATCTTTTCACTAGCGAATAATGAGAAGGAC  
AAGACAAGGTATGATTCCCATGCATTTATAAAAGTACAGGTTGAACCTGAAGTAGCTGCTGCTGAAGAG  
AAAAAGCGCGTTAATGGTGCTATACTGGGCTCTGTCATAGTAGTTTCCATCTTAGGGATCATAATTGGAA  
TTGCAGTTTTCATATTCTGGAAGAAGAAGAGAAAGGCCAATGAAGATGAGGAGGATTATCTAGATCAC  
GTACCAGGAATGCCGACTAGATTTTCATACGATGATCTAAAGGCTGCAACGGGAGAACTTCACCAAGAAG  
CTTGGTCAAGGAGGATTTGGGTCAGTTTTTGAAGGGTGCTTAGCAGATGGCACAAGATTGCAGTGAA  
ATGTCTTGATGGAATAGGACAAGTCAAACGTCATTCTTAGCTGAGGTTGAAACTATTGGCAGCATACA  
TCATGTAAACTTGGTGCAATTGATTGGCTTCTGCGCTGAGAAATCTCATAGGCTTTTAGTATACGAGTGC  
ATGAGCAACGGATCACTAGAAAAATGGATCTACCATGGGAAACAGGAGCAAACCTCTAGATTGGAACCTG  
CAGGAGGAAGATTATTCAAGACATAGCCAAAGGATTAGCTTACCTTCACGAAGAATGCAGGCAAAAGA  
TTCTGCATTTGGATATTAAGCCCCAAACATACTCCTGGATGAGAAGTACAACGCTAAACTCGCTGACTT  
TGGGCTTTC AAAGCTAATTGATCGGAATCAGAGCCAAGTTATGACTCAGATGAGAGGCACTCCTGGTTA

TTTGGCTCCTGAATGGCTTAGTGGAGTAATAACAGAGAAGGTAGATGTCTACAGCTTTGGCATTGTGCT  
CTTGAAATTTTGAAGTGAAGAAGACATTTTGAAGCATCGGAGTCTGAAGACCAACAGGTAATGGTGA  
ACTTATTCAGGAAAAAGGCAGAGGAAGGGCAGTTGGTGGATCTTATTGATAAGCACAGTGAAGATATG  
CAGTTTTACAAAGAAGAAGTAGTAAAGGCGATGCAGATTGCTGCCTGGTGTTTACAAAGTGATTACACG  
AAGAGGCCATCAATGTCGATGGTGGTCAAGGCCATGGAGGGTGTATAGATGTTGACAAGGATCTAGA  
CTACAGCTTTAGGCCACAAACCGTTTCAGCAATACCAAATATCATTTTTGCAGATTCAACTCCTTTATTGC  
CTTCGATCCTATCAGGCCCAAGGTGAGGAGGAAGTTCCTTGGAAATTTTTGTTAATTTCTTGTGTTTATGCT  
ATTGCAGCTTGCTCGCTGCTGTGTAAATTTCTTTCCAATGTTCACAAAGTTATGATTGTTTTCTTCAATTT  
ATT

>M6-PGSC0003DMG400017331 M6 G-LecRK

TTTAAATCATCTTCATTCAGTGTCTTAATGGCTTTATGCAAGATTTTTCTTTTGCCTTCATCCTCCTTTGT  
TGTTCTTGTTATCTGATATCGGGCCAACGTTTCGATTACCCCACTGCAAATCTTTCTACAACCTGGATCAA  
CAGTGTCTTGACACCCCATTCAGTGGATTTCACTGATGGCTCAAGAGTAAGGGCTATACTACTCAGAGGA  
ACTTTTGGTCCAAAATATGCTTGTGGTTTCTACTGTAATGGCAATTGTGATACTTACCTCTTTGCCATTTTC  
ATTGTGCAAATAATAGCGCGTCCCAAATTACTTCTCCCGCGATTGGATTCCCACAAGTTGTTTGGTCTGC  
TAACCGGAACAATCCGGTTAAGATCAATTCAACTTTGCAGCTAACAGCACAAGGAGACTTGGTGCTCAG  
AAATGCTGATGGTACTTTGGCTTGGTCAACTAACACTGCTGGCAAATCAGTTGCTGGTTTAAGCTTGACC  
GATGAAGGGAATCTTGTTCTGTTTGATTCAAAGAATGCAACTGTTTGGCAATCGTTTGATCACCCGACAG  
ATGCTTTAGTTCCAGGGCAGAAGTTAGTATCCGGGATGAAACTAACAGCAAGTGTTCACAACGAATT  
GGACTGAAGGAGGCTGTTTTCCCTCTCTGCTATCGATAATGGTTTGGTTGCTTTCATAGAATCAAATCCT  
CCCCAACATACTTTGACGCGACTATTGGTGGATTGGATCCTAGTGGAGGATCCAATTATGTTAAGTATT  
TGGATGGAAGCTTAACTTTCTTCAAAATTCGAGTGGTACAACCGAGTTGGTTCTGGTTTCTATTACTCCA  
GCATCCTCTGCTCAGTATATGAAACTCGAGTCCAATGGACACTTGAAAGTGTACGAGTGGAAAAATCGA  
TGGGGAGAGGTGGATGATCTTTGACAGGCTTTCGTGGCGTGTGCAATTACCCACAGTCTGTGGAAGA  
TATGGCATTTCACAATGGGGCAATGTAGTTGTCCATAAGCTCTAATTCAACCACCTATTTAGACCGA  
TAAACGTTAGGCTGCCTAATCTTGGTTGCTCTGAGGCCAAAAAGCTAACTTGTAACAACCTTAAAGAAACA  
CAGACTTTTGGAAAGTTGAAGAGGTGGACTATTTACGTTTACTGCAGATATTAGTAACACAGATGTGAAT  
ACTTGTAACGCGCATGTTTGAATAAATGTTCTGTAAAGCTGCGTTCTTTTCGTAGTGGTTTAAATTTCTC  
CAGGGCCATAGGGGAGTGCTACTTACCAAAGTGGATCTTTTCACTAATGAATAATGAGAAGGACAAGAC

AAGGTATGACTCTGTGCGGTTTATAAAAAGTACAGGTTTAAGCTAAACCAGCTGCTGCTAAAGGGAAAAA  
ATCGCGTTTTATGTACAAAAATGAATCTATGGGAGGACATGGATGGAACTTAGCAAATTATGCGCGGG  
ATTATAAGTTCATGCTAGACATGAACTATATGAAGGTATTATTACATAAATAAATGGTTTGATAAGCCAA  
ATTAGTGTTAAGAGTTCTCTGTATTCCTTCATTTCTCTGTGTTATCTGTAATTTCAATTCAATAGACTATAA  
TAAAGACA

>M6-PGSC0003DMG400017946 M6 G-LecRK

AGCTATGCAAAATTTCCACGCGACTATGTTTTATGTCAACCGTAGCAAATAGATTATGAAGCTTCATATT  
CTGAACATCTCCATGACTCCATCTGCAAGTCAAATCAAATTCATCTGCTATCTCATTTTAATGGAGGCCA  
TAAACATACTTTACTTCTTGTTCATCCATATGGATTCTGTGAGTGTGAGTGCTCAACATACCATACCTGCA  
AATCAACCTCTAACAGATGGAAGCACCATTATTTTCATCAGATGGCAAGTTTAAGTTGGAATTTTTTTCCCC  
TGGGACATCCGGGAAACGCTACTTAGGAATATTGTTTAATAAAGTTACTGTACAGACAGTGGTATGGGT  
TGCTAATAGAGACAATCCACTCAATGACACATCGAGTGTGCTAAATTTTACCAGACAAGGAATTCTTACT  
CTTCTAAATGGTTCTGGCAGAGTCATTTGGTCTCCAATTCCTAGACATGGGCAAATCCAGTAGCAC  
AACTCCTTGATTGAGGCAATCTTGTTGTTGAGATGCAGCCGAGGATAAGCCTCAGAACTACCTGTGGCA  
AAGTTTTGACAATCCAGGTGACACGGCTTTACCTGGAATGAAGTTGGGATTAATCTGAAAACCTGGTTTT  
CATCGTCCCTTTTCGTCATGGAAGAGTACAAATGATCCTTCCAGGGGTCAGTTTACCTGGACATTTGATA  
CTGGTGGATTCTACAAACATTCGTTATGAATGGTTCCATTGAACTCTACAGAGCTGGACCATGGAATGG  
CCGAGTCTTTCCTAATGCACCATCTCGTGACACATCGTGGAATGGTTATAACTATACATACTTATCTGATC  
CTAATGAAATATCATTTCATGTATGAACTTACAGACAGCTCTATCATTGCAAGGGTAGTGATGCAACTAAA  
TGGATTTTTACAGCTTTCAGAATGGAATAATCGGACCCAAAATTGGGACGATGTTGTCAGTGCACCAGCT  
GATAACTGTGACATTTATGGCCAGTGTTCATTCATATGGTTTGTGCAACAGCGGCAATTCCCAATCTGCA  
GATGTTTGGATAAATTTGAACCCAAAGATCCAACAGAATGGGCAAGGGGAAATTGGTCTGGTGGCTGT  
GTTAGAAAGACAGCAATATTGAATTGCCAAAAGGAAGTTAAATTCTTCAAGTATCAAGGCATCAAGTTG  
CCAGACACTCGTTTTTCTGGTACAGTGGAGGAGTGACTCTTAATGCATGCGAAGAATTGTGCTTGAGA  
AACTGCTCGTGTATGGCTTATGCAAATCCAGACATAACAGGGACAAATGAAGACTGCTTGCTTTGGTTTG  
ATGAGCTGATGGACATCAGAGAGTTTGGCGCTACTGGGCAAGATATCTATGTAAAGTTGGACTCTTCTG  
AGTTTGGTATAAATCTGTTTCTATACTTTTTTCATGTTAGGCTGTTAAGTATGCCACATTAGATTTTGGAT  
TCTAGACCAAATTAATGCCATTTAGTGAGCAAGTTGAGGTTTCTCTACATTATTTGAAAACCAAACAG  
TTTTTTTTTTTCGTCTTACGAATTTATTTCTGTCATCAGGTAACCTCCAGTACAGGGAAAGTAAACAACTG

ACAATCAGCTTGCCACTGGCAGCATTAGGTCTGCTCCTAGTACTATGCTTAATCATGTACATAAGGCAAA  
ATAAGAAGAATCAGCAATATTTTAGAAAAGGTAAACCTCAGAGGTTTTGCTGCTTTTGAATTTGTGGTTT  
TGTTTTTTCTAGAGTTACATTTGGTAAATATCAGAATTTCTCTTTACATCCAATTAAGTCCTTATTTAACA  
GGAAGAAGAACAATAATCTCTGAAATGTTCTGCACTAAAGAAAGGAAAGATAAAGAGCTAGATTTACC  
GTTGTTTGATTTTGAAACTGTATCTCATGCTACCAATAACTTTTCATTGAACAACAAGCTTGGAGAGGGT  
GGTTTTGGACCTGTTTACAAGGTAECTATTTTAACTTCAGCTCTTTCTATTTTCATCCAAAATAACTGCCTAA  
AAAGGAATTTCCGAAACTTTAAAACGAAAACACATGTTTCGGTAAGAAAATTGATATGTCATTCTCCTAT  
TTCATCTAAACAGCAATGTCAAAATCTAGTTTATTGTTTGTGTCAGTAAAATATTCTGGAGAAGCTCATTCAA  
CTAATTTACTGGATATCTAGGGTATGCTGAAAGATGGACAAGAAATAGCAGTAAAGAGACTTTCAAGAT  
ACTCAGCACAGGGAGCTGACGAGTTCAAGAATGAGGTTATCTTCATTGCTAAACTCCAGCATAGGAATC  
TTGTGAAGCTTCTTGGTTGTTGTATCCAAGCAGAAGAAAAAATGTTGGTTTATGAGTACATGCCTAATAA  
TAGCTTGGATTGGTTCCTTTTTGGTTGGTTCTCACTTCTCTCAACTCTTAACACATTTAGTTATCTGTAGTA  
ATAGTTCAATCGTCAGCTGAATTTTGTTATCTGTTCTTTGATTTGAAATATCTGAAGTGTCTACTATAAG  
CTCAGAATTTTTGCAGATACAGATAGGAGGTCCTGCTTGATTGGCCTAAGTGCTTCCATATTATTAATG  
GAATTGCTCGCGGACTTCTCTATCTTCATCAAGACTCAAGATTGCGGATAATCCACAGAGATCTTAAACC  
TAGCAATGTTTTGCTAGACATAGATATGAACCCAAAGATATCCGACTTTGGCATGGCAAGAAGTTTTGG  
AGGAAATGAGACTGCAGCCAAGACAAAAACAGTGGTTGGGACATAGTAAGAATCTTTAAACCGATGAA  
GTATTTGCAGTCTACTAAAAAGCTACTTACTTTGTTTATTTGACATTATCCTACAGTGGATAACATGTCCCC  
GGAGTATGCAGAAAAAGGAGCATTTTCAGTGAATCAGATGTATTTAGCTTTGGAGTTGTAGTACTGGA  
GATTTTAAGCGGGAAGAGAAATAGAGGGTCTTGCATCCAGACCATAACCATAATCTTCTAGGACATGT  
AGGTGATCTTCTGTCTATCTTATATGTTTAAAGTAAAACCTTATAGCATCTAACTGCATGATAGTAAATGTT  
CAGGTGTGGATCCTTTTCAAAGAAGGCAGGGTTATGGAAGTAATTGATACACAATAAGGCAGTCATGC  
AATCAGTCTGAAGTTCAAAGATCAGTTCATGTAGGTCTGTTATGTGTGCAGCAGTGTCCAGAAGATAGG  
CCGAATTTGGCATCAGTTGTACTCATGTTGGGTAGTGATGTCGCACTACCCTCGCCTAAAGAGCCAGGCT  
TTTTCAATGGCAGGAACCAATTCATTGAAGCTGACAGTTCATCTAGCAAGCATGGAGAAACTTCAGTGA  
ATGAATTAAGCATCACACAGTTGGATGCCAGATAGGAGATAAATTTTCAGGTCATGGATGTTTTCTGTAC  
GCTATATTAECTTAATTGTTGCGGTCATATAGAACAAGAATACTGGTTGTTCAACTAAATAGTTTTACTC  
AAAAATCTGTGGCATGGTATTAAGCATGACAACCTTGACACTCAGTTTGCTGTATATAAAGATAGGAGCA  
GAGTTGTGAAAAGAGATAAAAAATATTCTCTACATACAAAAGCACCTAGTACATTTGCTTATTTAAGAAGA

ACAGCTTATTCTGTAAAAAAGCTTTTAGCCTCCCTTGGGGAAGTAAGAACAATTTTTCCTTCGTTGGCTTGT  
ATGAGTCCACGACTAGTCAGGAGACCAGGTCCCTTGACTGTAGTAATAACAGGAAGTAATGTAAATGCT  
CAAAGTAAAGAACATAGATGTTTACCTGGAACTTCCTTGTTCAAGAGAGGAAAAATTACGACCTGTCA  
CACAGGATTTCTCAAACTCCAGTAACTTCAAGTAACTTGTGAGTACTGGCTCTAGTAATCACAAGGATT  
AATATCTTAATCCTACAAACCTTTAAACACCTTTATTACAAAACACAAAGCAATAACCCTATTGTCCACTTT  
ATCAACTACCTCTAAGTAGTATAAACTTCAACAAATACCACTCAGCTAACTCAAGCCGCAAACTTAACTAA  
CACTAATATGATATGGCATGATCTATATCCCGTATAACATAGGAATATATTCTTAATAAAAGACCATAA  
GACTAGACTCAAATAACAACCTCAGACTCTGCAAGACTAAACCGGGTCCCTCATTGTGTGTCAGAGTA  
GTTCTTTCTTTAAAACGGGTTTTGCTTTTGAATAATCCTAATTGCAAATAGTAGGTTGTTTCTTGCAACAT  
TTTCAATATATAAGAGACACAAAACAACCTTAGCAGCATGTCATTGGTCGAGGACTGTTGTCCTTTCTGCG  
CCTCTACTATAGTGCCACCAACCACTGTAGTTTCTACAACCTTACAACACTACGCTTCATTGACTTGTCTTT  
ACGACAAAAACACAGAGGACCAGGTCCCTTTACTAGATCCTATTTCTTTATAGCTTGTTAAATCATCAAAA  
TCCCAACATACAACATTTTCCCCCTTTTTGATGATGATAAACTATTGCCCATGTCTACATATCTTTTGCTTG  
CACATTCCCCCTATCAACATGCTTCCCTTGTGCGAAAGACCTGATCCCTTGATCTGAACTGGCATAACATGT  
TATCAGTGTATCTTCTCCTTTTGTACATCATAGAAAAGTAAGAACAGTGAACCAAGCAAAAATTACATGCA  
TTCTGGGTAAATTCATGGCCACTAGGCAATACTAATATGAACAAACAGACAGAAAGAAAGGAGCGAGA  
AACAAACATTCTTGTTTTCCAACCTCCGCCCTCTCACTTTTCCATTGTTCAAACCAAAAATTGAGTAACACAC  
TTTGGTTGATAAGCGGTCAGCTCCGCCTTCTCCACCGTATAAAAAAATCCATAATTCCGACTATCTTATAC  
ACCTTATCAATGAACTCTTGAGGATCCTCATCAACCTTGAAAACATGGAACCTTCGAGGGATTCAACCTAG  
TGAAGTCCCTTATCCTTGTAACCTGCCGTACCCTCATTGGATTCAAGGGAG

>M6-PGSC0003DMG400017949 M6 G-LecRK

TATATATGAGCTATTTTATCAATAATCCCTGCCGACTATTGAAGGAGAATCCTGCAATATTTTCTTTAGT  
AAAACAAGGATGATGGAAAGCAGACATGTTTATTGTTATTATTATTATTATGTTACATGTTTTGTGTTTT  
GATTCTTACTAGAGCTGCAGATAATATAGCTAGAGATGAACCTTTAAGAGATGGAAAAACGATTGTTTC  
GTCAGGTGGAAATTTTGTAGTTGGGATTTTTCTCCCAACTCCAACATCGAGTAAACGATACCTGGGAATA  
TGGTTCAACAAAGTATCTGTACAGACGGTGGTATGGGTTGCTAATAGAGACACTCCACTGAATGATAAA  
AATGGTATGCTCAATTTTACAACACAAGGAAATCTTATTCTTGTAATGGTTCTGGCAGTGTGGTTTGGT  
CTTCCAATACCACAAGAGGAGGCGTGCAAAATCCAATAGCACAGCTTCTAGATTCAGGCAACCTTGTGT  
TAGAGAAGATGCAACTGAGAATTCGAATTATGTATGGCAGAGTTTTGACTATCCTGGTGACACAGCTTT

GCCTGGAGTTAAGATTGGGATCGATCTTAAGACTGGTTTTCGTCGTTTCCTCTGGTCATGGAAGAGCAG  
AAATGACCCTTCTAATGGTCAATATAGTTTCATATTTGATCCTAATGGATTCCCACAGCCATTTCTCATGA  
ACGGTTCCATCCAACGCTTCAGGGGTGGAGCATGGAATGGTCAAAGCTTTGCTAATTCACCATCTCTACT  
ACCAAGTCCTTCTTATAAATACATATTTGCATCCGATCCAGATCAAGTATACTTTACTTATGAGCTCATTG  
ACACTTCTGCTATTGCAAGGGTAGTGATGCAACTAAATGGGTTTCTAGAGCTTTGACGTGGAATAATCT  
AACTCAGAATTGGGATAACTTTGGTAGCGCACCAGCAGACAACCTGTGACATTTATGCCAGTGTAACGC  
ATATGGTTTGTGCAACAGTGGAACCTCTCCAATCTGCAGTTGTTTGGATAAATTTGAACCCAAAGATCCA  
ACAGAATGGGCAAGGGGAAATTGGTCAGGTGGCTGTGTTAGAAAGACAACAATATTGAATTGCCAAAA  
GGAAGTTAAATTCTTAAAGTATTCAGGGATCAAGTTGCCAGACACTCGATTTTCCTGGTACGGTCGAGG  
AGTAACTCTTAATTCATGTGAGGAATTGTGCTTGAGAACTGTTTCATGTGTGGCCTATGCAAACTAGAC  
ACAACAGGGACAAATGAAGATTGCTTGCTTTGGTTTGATGAGCTGATGGACATCAGAGAGTTTGGTTCT  
AGTGGGCAAGATATCTATATAAAGTTGGACTCCTCTGAGACAGATATAAGTACAGGTTGGTATGCTTCTT  
TACATTAGTCTTGAGTTTTCTAGACCAAATTGAACTGTCTATTAATAAATTTGATAAGACTAAGATGAATTT  
ATATGAATCATCAGGAACTCCAGTAAAGAGATATTAAGAAATTTGAGAATCTGCTTGCCATTGGCAGC  
ATTAAGTCTTCTCTCAATGCTATGCTTGATCTTGTACATTAGGCATACGAAGAACAAGAAGAAGAAAGAA  
GAGGAGAATCAGAATCAACAACGTTTTAGTGAAGGTAAACCGGATGTTTTGCTACTTTGAAATTTGAAA  
TAAGTGGCTTGAATTGATGGTAAATCTTAGAAATTCCTCTAACAGGAAGCTCTGAAATGTTGTACATTA  
ATAAGAGCAAAAATGATGATCTAGATTTACCATTGTTTGATTTTGCCACTATCTTGGAGGCTACCAATAA  
CCTTTCTTTGAGCAACAAGCTTGGAGAGGGTGGTTTTGGACCTGTTTACAAGGTAACGCTGTTAACTACA  
ACTCTTTCTTTTTCTCTAAACAACTGCTTATCTTCAATATATTATATATGCTGGAACATTGACAACTTTC  
GGAACCTTTAAAAGGAAACAAGTTCCCGATTAGAAAATATGTCTCCGATTCTCCAGAAATGTCATTAATA  
GTTAATTCCACTTCAAACAAGCTATCTAAAAAAGTTTACTCAGAATTTTTCAATCGAAAACTAGAGAAG  
CTAATTGCCTGAGGATATGTAGGGTGCCTGAAAGATGGACAAGAAATAGCAGTAAAGAGACTTTCAA  
GATACTCTGCACAAGGAACTGATGAGTTCAAGAATGAGGTTATCTTCATTGCTAACTCCAGCATAGGA  
ATCTTGTTAAGCTTCTGGTTGCTGTATCCAAGCAGAAGAAAAGATGTTGGTTTATGAGTACATGCCAAA  
TAATAGCTTGGATTGGTTCCTTTTTGGTTGGTTCTCACTTCTCTCAACTCTTAATACATTTTGTTATCTGTA  
GTAATAGTTCAATCAGCTGCAGATGGAGTTGGTTATCACTTCTCTGAACTTTTGATTTTTGCACATACAGA  
TAGGAGGTCCTGCTTATTGGCCAAAGTGCTTCCATATTATAAATGGAATTGCTCGAGGACTTCTCTAT  
CTTCATCAAGACTCAAGATTGCGAATAATCCACAGAGATCTTAAACCTAGCAATGTTTTGCTAGACATTG





CAGAGCTATTTATCGGGCCACTCTAGATTATGATGGGAATTTTCGACTCTATTCTCACGAATTCAACTCCA  
ATGGGAATTCTAAAATGGTAATGGAGTGGGAGGCAATTGATGATATTTGTCTTGTGAAGGGTTTCTGTG  
GCCTTAATGGCTATTGTGTTGGAAGTAATCACAATGCACCGTCTTGTATGTGTCTACCAGGGTCATACTT  
GAGAGAGAATGATCCAAGCTTTGGTGATTGTCAAAGGAACTTCACCAGAGGAAAGTGCATTAATGGGA  
AAGAAGATGTAAGTGTCTACAAGATTACTACCACAACCAATTTGACCTGGGAGGATCCTCCTTACTTTGT  
TACATCACTTCTAGGAAAAGAAGATTGTGGTAAATCTTGTTTGGAGGACTGTGATTGTGATGCTGCTCTT  
TTTGATGAAACTGGCCAGTGTATGAAACACAAGCTGCCTCTGAGGTATGTCAAAGGTGCTCCTGAAGGA  
TCTCACACAGCTTACTTCAAAGTCAGCAATCTAGCAGTGCAAAATCCAACAACGGATTGAGTGAAGCCAC  
CATGGGTGGTGTCTTGGTTTTATCGATAAGTTTCGTTATGTATTCAGGTAAGTGTGCTCTTGCATTTTCAGGC  
TTTTATGTCTTCAAATCCGGATAATAAAGTACAGGAAGCTACTTCAGACAGGAACACAGGCTTAACGA  
AGGATTTCACTCAAACCTTGCTCTTACAAGGAGCTAAAACAGGCAACGGATGGTTTCAAAGAGGAAT  
TAGGAAAGGGTGCTTTTGGAGCAGTATATAAAGGGAGCTTTGACAAAGGTAAAAACCTTGTGGCAGTG  
AAGAGGCTAGAGAAGGTAGTGGAAGAAGGTGAAAGGGAGTTCAGAGCAGAAATGAAGGTCATTGGTA  
GAACTCGACACAGAACTTGATTCGTTTGTAGGATATTGTGCTGAAGGATCAAAAAGAGCTCTTGTTTA  
TGAATATATGAGCAATGGTTGCCTAGCAAATCTGTTGTTCCGAGGAGCTACTCGGCCGGATTGGAATCT  
AAGAGTAAATATTGCACTAGATGTGGCCAGGGGAATCCTCTACCTCCATGAAGAATGTGAAGCTCCAAT  
TATCCACTGTGATATAAAGCCACAAAACATCTTACTCGACGAGTTGTTGACAGCTAAAATCTCAGATTTT  
GGTCTGGCCAAGCTGCTAATGCCTGATCAAACAAGAACATTCCTGTTGTAAGAGGGACTAGAGGGTA  
TTTAGCACCAGAGTGGCAAACAATGCCCCATCTCTGTCAAGTTGATGTCTTCAGCTATGGTATTGTA  
TTGCTAGAAATCATTTGCTGCAGAAGAAACATTGAAGTCTGTGTGACTAAAATAGAAGAAATCCAGCTTT  
CTATATGGGCATATAGTTGCCTTGTGAAGGTGAAGTAGACAAGCTTGTGGAAGTGAAGAAGTAGACA  
AGAAAACCTTGAAGGAATGATCTCTGTAGCGATTTGGTGCATTCAGGACGAACCAGCTCTTCGTCCTTC  
CATGAAAAAAGTATTACACATGTTGCAGGGAATTATTGATATTCCAATTCCTCCATGTCCAAGTCCCAGT  
AGTTAATTTAGTAGTTGTAAGTGGTTTGGTTTATTATATTGTTGTTTTCTTCAATAACATCTAGTGAGGA  
TATATAGTTAATCAACATACATGAGTTCAGATTATGTTTTATTTAATGAGATCATTTGCAGGCCCTATG  
GGTGAATCTTGAAAGATATTACTCAAATGAGAATGTTTTGATGTGTCAGAGTATCAAATACTCAAC  
TATTACACTAGGAGATTATCAAATATGCTTCCATCATATGTTGGGAGTTGCGAAAATTTAGACATAT  
ATACATGTGGGAATATTTAAGGTGTTGAGAGCCACTAGATTTGGAGCTTCTAATTAAGGTGGATAACAC  
TTCAATATAGTGTGATATTATGCAGGGAAAGGGTATTCTTCTGGCACCTTGATAGTATTGTGGTTAA

AGGCTTAAAGCAAGGAAGACTCTTTATCAAACCAATGGCATTATTTATTGCTGTAGAAAAGGAAATTA  
ATAGTGGATGCAATGGCTAACTGGAGTTTAAAGGGGCATACATCTATCAGTTCAATGATCTACTACAAG  
AAGCTAAAGCTGCATACAACAAATTGTACAAAATTCAGATGCTTAGTCAAAGGTGCAGAGTATGCAACA  
AGATTCTTGTAAGAACTTCATGCATCAAGACATGATAAACCACTTCATATTTTGTACGTTCTTATAAAATC  
AGATAGAAAAAGTAGTCGAAAGATGATTTTATTAATTCAGTAGTCA

>M6-PGSC0003DMG400018457 M6 G-LecRK

GGAGTAATACTACCATTTAAATTGGAGATGTCCAAGTTAGTATACAAAAGAATACTTATCAAAGAGTGT  
ATCCATATCCCATCCTTGTGTCATGGCTAACTTAGCATTTACTTTTCATGTTGTTGATGCTTCCATTTGTAT  
TTGCAGCTATTCAAGTTGGAGCTCAGCAACAGCCCTCCAACATAACCTTAGGTTCTTTTCTTTATCCGAAC  
CGAAATCCAAGCTATTGGCCATCTTCTTCAGGCCTTTTCTCATTTGGTTTCTACCAAAAAGGGGATGGATT  
TCAAGTTGGCATATGGCTACCTGATAAACTGTTGTTTGGACTGCGAATAGAGATGATCCTCCACTTCAT  
TCGGATGCATATATCGAGTTCACAAAGGAAGGCAAACACTGTTACTATGGACAAAACAGAACAAGAAAGTC  
ATTGCAGAATCTCAAAGCCAGTAACTTCAGCATCCATGCTTGATTCTGGTAACTTTGTTATCTATAACAA  
AACAAATGTTGTTTGGGAAAGTTTTGACTATCCAACAGACACCATCCTAGCCGGTCAGCGTCTAACATTA  
GGCCAGAGCCTTGTCTCTAGTGTTACTGAAGTTGATCATTCAAGTGGAAAGATTTTATCTTAGTATGCAGG  
CTGATGGGAACCTTGTGCTACCCAACCAATTATCTAAATGGACCTGAGGCTCCTATTGGGGTTTTAT  
GCTACAAACCAGAGGTGAATTTGGTGAGGTTAGCTCAGTTTTTCATAGGTCTTACTCCAACAGGCCAACTC  
TTTCGGAATGCTTCTAATGGTTTTCGTTTTCCAAGTCAATACCATAGCGAATACCTCTAATCAATCATCAAC  
CAACAAAGCAGCAGCAATTTATCGCGCAACTCTTGATCCTGATGGGATTTTTAGGCTTTATACACATAAC  
TTCGACAACTCAAGCTTGAAATCAATTGGTCAGCGCTGGAAAATCAATGCAAAGCCAGGGGATTCTGT  
GGTTTAAACAGTTATTGTAAGTGCAAAAATGGCAGCAGCATAGGCGATTGTTCTTGTTCCTGGATTTT  
CATATGTCAACCGTGCAATGAAATCCAAGGCTGCTATCGGGGATTCGTTTATGAAGAGTCTTGTGGAA  
GCAGCATAGACTCAACATTGGCCTACAATGTCACGGCGATTCAACACTTGAAAGTTGGAGGATATCCAT  
TTTCTCAGGTTTCAATGGTTGAGCAGGACTGTAGAAATTTGCTTGGATGATTGTAAGTGTGGGCTGC  
TCTATACATGAATGGATTGTGCAGCAAATTTAAGCTTCATTAATTGATTGACAATTGAACAAAATGAT  
GAGTCCATCAAGAGTTTCGTCAAGCAGAGCTATAACATCTCCCAAATGGCAGGTCACTCTATTCCCTATC  
CTGGAAAAACAGGGAAATAGAAATGAAAGTCGGAAAGAGATAATATTGATTCTATCCCTGGTTCTTGGTT  
CTGTAGCATTCTGTTCACTGTTTTTGCAATTTTCAGTTATATTTTCTACAGAAGCAGAGCGGACGAATAC  
CAAAAGCTATTGGAAAATCCATATTTGGGGCCAAATGAGGAGTTCCTTTCGATCATTTTCTTACAGTG

AGCTTGAGAAAGCCACTGAGCATTTC AAGGAAGAGGTAAGGCATGGTTCATTTCGGGAACGTCTATAAA  
GGAATTCTATCAGAAGGTAACAGAACAGTTTCTGTAAAACGACTGGAGAAAATCGGGGATGAAGGAGA  
AAGGGAATTTAAAGCAGAAATGACTGCGATTGGGCAAGCTCGTCACAAAACTTGGTTCATTTGCTTGG  
TTTTTGCTTGGAGGGATCAGAAAAAATTCTTGTGTATGAGTACATGAGCAACGGGTCACTCGCAGATAT  
CATATTCAATTCAGAAACAAGACCTTCTTGGGAGCAAAGGATGAGACTTGCACTGGACATATCAAGGGG  
AATACTTTATCTGCATAAAAAATGTGAGACTTGATAATTCACTGCAACATAAAGCCACACAATATCCTA  
GTAGATGATTCGTGGACGGCTAAAATCTCTGAATTTGGGCTTGCAAAGTTTCTGGTGCCTGATCAAGTA  
GGAAACCAACTTCAGCTTAAAGGAACAAGAGGATATTCGGCACCAGAGTTGCAGAATAGTGCATTGATC  
TCCGATAAGGTAGATGTTTATAGCTATGGAGTAATGCTCTTGGAGATCATATGCTGTAGAAGTAATATG  
GATGTCAACGTCTCAACCGAGGATGAAATCTTCTCCTAATTGGGTACACAAATGCTTTGTGCGAGAATG  
ATATCATTAAAGCTAGTGGGAGATGAGGAAGTAGATGTGAAGTCCTTGGAGAGGATGGTGAAGGTTGGA  
TTGTTATGCATTCACGATAATCCTGATCTGCGCCCTTCTATGAGGAATGTAGTTCTCATGTTAGAAGGTAC  
TATGGATATAACATTTTTGGCATGGTATTAAGTCTTTTACACTTCGTTTGGCTGGTTGCTACATCTCATTCA  
AAATGTATCATATTATATTGTATTGTGTTGTGACTTGTATTATATTGTTTTATGAATACAAC

>M6-PGSC0003DMG400019062 M6 G-LecRK

ATGGTTCTGTGTGGTATTATTTATATAATTTATCTGAAAAGAGTGGCAAGAAGTAAAGGTAACAATGTA  
GAATTTTCATCTGCTTTTTCTCAACTACTCCAACTTTTGGATATCGTAATCACTTCAATTGTTTTGATTATA  
GAAGCCAGAGAAATTGTTTTGGGAATGCCTATGGAGTACTTGCCTCATAGAGATAGTTTTGATGAAGAT  
TTAATCACGGAAGATGATAAGAAACGGATTGATGTCCCGTTTTTTCAGCTTCAATAGCATACTAGTTGCTA  
CCGAAAACCTTCTCAAATGCAAGTAAGCTCGGGAGAGGTGGATTTGGACCTGTTTATAAGGTTTTTGCAA  
CTTCTTTTTTTTTCTTCTTCTGTTCTAAGTTGTTTTACCATTAGATTTTTTTCTTTCGTTTTCGTTATATAA  
CAGTCTGGAGATATATTTATGCAGGGTACGTTTCTCGGAGGTACAGATATGGCAGTTAAAAGGTTGTCA  
AGTAATTCTGGACAAGGTGTTGAAGAATTTAAAACCTGAAGTAATGTTGATTGCCAACTGCAGCACAGA  
AATTTAGTTAGGCTTCTAGGCTATTGTGTTGAGAGAAATGAAAAGATTTTGTATATGAATATATGCCCA  
ACAAAAGCTTGGATACGTTTCTATTTCGTTAGTATACTTCCCTCCCTACCATGAAGCTCGTTGCAGTAATA  
GTTTTATGATTGATTCTCTCTGAATTTATCTTACAAATCTTGAATTAGATCATGCATTCTGTGCGATTACTG  
GACTGGAGGATTCGTTTTGAAATTATATTGGGTATTGCTCGAGGGTACTTTATCTTACCAAGACTCGA  
GGCTAAGGATCATTATAGAGATCTAAAGACGAGTAACATATTGTTAGACCAAGAAATGAATGCCAAAA  
TATCAGATTTTGGCTTGGCAAGGATCGTTGAAGGCCAAAAATACAGAAGCCAATACTAACAAAGTCGTTG

GAACATAGTAAGTCTCTCGGTTCTGTTTTACCTTTGATTTGGTGGGTAAAAGATAGATATATATACATCT  
AAAACCTGGTATTAGTTCACTATATGTATTGGTTTACACAAATTAGATGCTAAAATAACCTATTCTGGAAC  
ACTAAAAACAGTGGCTATATGTCTCCGGAGTATGCATTGGAGGGACTCTTTTCAATCAAGTCTGATGTAT  
TTGCCTTCGGAGTAGTCTACTCGAGATCATAAGTGGGAGGAGAAACATGGAATTTTTCGAAGATGTAA  
ACCTCATTGGTCATGTAAGTACCAAAATTTCCCCCATTAAATAAACATCTCATTCTGTTAAAGCTTTCATT  
GACTCAAATTACTTATCACACACAGGTATGGAGACTGTGGATGAAAGATAGTGCATTAGAAATGATGG  
ATCAAACCATAGTTGAGTCGTGCGATGAAAGTGAAGTGCTAAAGTGCGTGAATGTGGCACTCCTATGTG  
TTCAAGAAGATCCAGCTGAGCGTCTGTAATGTCAAATGTTGTTTTTATGCTTGGAGGTGAAAGCATAAC  
ACTACCAAGACCAAATCAACCAGCTTTTATAGCACGAAGAAATAGTGCTGGTGCAAGTACATCTTCTTCG  
TCTTCTAAGCTATAACAACACTTCCAACAATGGGTTGACAATAACTCAACAAGTAGGCCGATGA

>M6-PGSC0003DMG400019237 M6 G-LecRK

GCCAAGTGTAAATTCAAGAAGTGGACAACCTTTGTCAAATTCAAAATTGTCCAAAATCTTGCAAGCCCCAC  
TTTGCTTCCAAGTAATTCAGTCACAAAAATGAAGTCTTGGTCATATTGACATGTTATCACAGCACCAACA  
CCTTTTAATATTTTTAAATTTTTTTTTGCCTTATTTTGTATAACCAAGAAATGAAAAAGGGGTAGTAGCTAT  
GGAGAAATTTCTACCTTTTTTGCTTCTTTGCTTTTTAATTTTTCTTCGAAAAGTTAATGGACAAGGAGATAT  
GATAACTACCACTAAGTTTGTCAAAGATGGTGAACTATTGTTTCTTCTGATGGAACTTTTGAGTTGGGA  
TTTTTCAGTCCTGGAAATACTTCTACAAATCGTTATGTTGGAATTTGGTACAAGAAAATTTCTGTTGTTAC  
TCCTGTTTGGGTTGCTAATAGGTTGGTTCCACTTACTAATAAATCCGGGGTTTTGAAAGTTATTCAATCG  
GGCGGTGTTGCTCTTCAAATGCTACAAATTCACAATTTGGTCGACAAATTCATCGAGATCCGTGCAAA  
ACCCCGTTGCGCAGTTGCTGGACACGGGAATTTTGTGTTGAGGGATGCTAATGATACGAACCCAGAGA  
ATTTCTCTGGCAGAGTTTTGATTACCCTACTGATACGTTGATTGCGAATATGAACTTGAAGGGATTT  
GGTACTGGTTTTGAAAGGTATCTTAGTTCATGGAAAAGCAGTGATGATCCTGCCCGGGGGATTATAC  
TTATCATTGTGATCCAACGGGTTATCCACAAGACGTTATGCGAAAAGGGGCTGATGTGATTTATAGAGC  
AGGGCCATGGAATGGTTTAAGGTGGAGTGGTGACCTAATATGGTGAACAATTCAATCACTTCGTTTGG  
TTTGGTAATGAACAATAAGGAAATTTATTATAAATATGAACTTGTGAACAAATCTGTAGTTTCAGCTCTA  
GTAGTAAAGCCTAATGGGAACACTATGCGTTTTGATTTGGATTGCGAAGACTCAGGGTTGGGTTAATTAC  
CATTCTGCTGATGCAGATGACTGTGACACTTACAAATTATGTGGTGCATATGGGACTTGTAACATTTTGA  
GTGATCCTGTGTGTCATTGTTTATAGATAAATTTGAGCCAAAGCATCAGGATGATTGGAATAGAGCTGATT  
GGACGAGTGGTTGTGTCCGAAAACCCATTGAATTGACTGGAGATGGATTTATTATGTATTCTGGTGT

TAAACTGCCTGATACACGAACTTCTTGGTTCAATGAGACCATGAGTTTAGATGAATGCAGGGCGGTTTG  
CTTGAGGAATTGTTCTGTATGGGTTATACTAATCTGGATATACGCAATGGAGGAAGCGGGTGCTTGAT  
ATGGATTGAGGAGCTGGTTGACATCAGACAGCTATCTCAATCAGGACAGGATATCTACATTAGGATGTC  
TGCTTCAGAAATAGGTAATATGCAATTTACTGAGGTTTTCTTTATCACACAATGCTTGTTATCAAGAATGA  
TGTATTGAATAGTTCAATTCTATAAGGCTGATTAACGAACGAAGAGTAATGCATTTACAGGGAATTTAG  
GTGTAACATCCTCAAGCAATGGATCCTTTTGTGAGAATAAGACTTATATGACCATCTTGTTCTACAATA  
AAATAATTTGCACAGGATTTAAAAGTTTATCGGAAATTCTAATCAAACAACCTGAAGAACTTTT  
GGATGGAAAATGTTGCAGGTTCTGCTGGATCAAGTTCAAAGGGAGATAAATCTGTTATACTTGACAGTAG  
CTTTGCCACTATTGTTTGCCTTGATTCTTCTAGGTTTAGGTGTTGGCCTGATTCTTTATAAACGGAGAAGG  
AGAGAGGATCCAGTGGTTACGACAAGGGGTAAGTGAACATAACAAGTTTTTATCTGTTGAAAAGCCGG  
AAGTAATTAATGGTTATTAGTTCTGTATTCCATTAGTATCTCTTTTCAAGCTCGTTGTTTGAACAAAGTCT  
GCTTGGTTGTTCAAATTGCAGGGAGATTTAGTGGTCACAACAACAAGAATGATAACAGTAATCAAAGTC  
ACCATGAAGATTTTGAGCTACCACTTCTTGATTTGCTTACATTAATCAATGCTACTGACAACCTTTTCAATTG  
CGAACAAGATTGGAGAGGGTGGCTTTGGACTAGTTTACAAGGTAGAAACATTTGATCCTTGAGAGCACA  
TTGAAACCTTAAATCGATTTAACTTTTTTGGTTGAAATGAAAGTAAGTTCTACTTTTACAGGGTGTGTTAG  
AAGGGGGGCAAGAAGTAGCAGTGAAGCGGCTATCAGAAACATCAAAGCAAGGATTTACAGAGTTCAA  
GAATGAAGTAACTGCATTGCTAACTTCAGCATCGAAATCTGTAAAGCTTCTAGGATGCTGCGTTCAA  
GGAGAAGAGAAGATGTTGGTCTACGAATACTTGCAAAACAAGAGCCTTGATATATATATATTTGGTTAG  
TCTTTCACATCCAGTGTGCATCCATTTCTTCAAGTGAACCTTCTGATGTGATTTCACTGAGCTTTGTTTCGT  
GTTTAGGAGAAATTATAATAAGTTGAAAACATTTGGCAGATGAAGAAAGGAGCGCATTACTTGATTGGC  
CAAAGCGCTTCAACATTATCAATGGAATTGCTCGTGGACTGATGTACCTCCATCAAGATTCGAGGCTCAG  
AATCATCCACAGAGACTTGAAAGCTAGCAATGTCTTACTTGATACTGAAATGAACCCAAAGATATCAGAT  
TTTGGGATGGCTAGAAGTTTCGGAGGAGATGAGACAGGAGCCAATACACGTCGTGTTGTTGGAACATA  
GTAAGATTTAAATCTTTGATTATACATATAGTTATGCACATTCACA

>M6-PGSC0003DMG400019238 M6 G-LecRK

TATATATATGTATAGCTAGGAACTAAAACCTTTAGTAGAATAAAAAGGCTACTACTTAGATTGAGGTGTTGA  
ATTTTAAAGCTAAATCTATAAGCATAATGAGTTATTGCATCTGTCAGCTAAAAATCTAAGACGAAATAAA  
AGAGGAATTTAGTTGGAAAACTCATTGAGAACTAAACATATGATTTGCAGTACTTCAAATGTTTGCAGA  
ACACCTCTACTAAATGTCAACAAATTTAAAATGACGTACCGTACTTCAAATCCAGCAGAATGTTGCAAC

TCAATATCAGTTATCAACTCCCCAAGTGATCAACAGGTAGAGACAGTCAAATTTATTGATTACTTTGTTG  
GAATGGACCTTGCAGATAGTCTGGAGAAATCAGATGGTGAAAAAGGAAGAGCACTATGCTGGATTCTT  
CCATTATCCGTTGGTTTGTAGTTCTGGTAATCCTTAGCATATTGCTGATATGCCACAGGAGAAGGAAGAAGG  
CTTTAAAGCTTAAAACGAAAGGTAAGCTGGATAGGTCACTTTTTGCCTGATCGTTGAGCAAATAGAG  
GAAGTGAAATTCAATTAGACGGTCTTTGCTGCTTAAACACAATTCAATCAATTTCTTTTAGCTGCAGAAA  
AATCGAGATACAGCGGAAGTATCAAGCAGGATTACAACAGTGGTAGTTGCACTGAAGAATTTGAGATA  
CCACTGTTTGACTTATCTACCATAACTAAGGCTACCGATAACTTTTCAGTAAACAGAAAGATTGGAGAGG  
GGGGCTTTGGTCCTGTTTATAAGGTA AAAACACTTGTTTCATGGGCAATTTTGTACAAGAAAAATACCAG  
CTTATCACACAAAGTCTAGATGACTGACAGAAGCTTCTGGTCCTCCAGAGCAAAGCCTTCATCTTTAGT  
AGGCAAATGTAATGAATTAAGTATATGCTGGAGCGTTTTTTGACCTAACTATACTTAACTGATTCTC  
GTAATTCCTCCAGTCCTTTTTCGTGGGAAGCAGCTTACTTTGTACCTTATACTTTCAATTTAGATATTATT  
ATTGTTTTTGAGAAAAAGATATAAAATATATCGGAAACAATCTCTCTACCTTCAAAGGTAGTGGTAAG  
GTTGTGTACACACCAGTTACCACCCTCCCAGACCCCACTTGTGGGATTACACCAAGTATGTTGTTGTAC  
AATATGTAAAATATTTAACTTGCAGATTTTGATGTTTAGGGAATACTTGAAAAAGGACGAGAAATAGCT  
GTGAAGCGGCTGTCTAAAACATCCACGCAAGGAGAAGATGAGTTCAAGAACGAAGTGGTATATATTGC  
CAAACCTCAGCATAGAAATCTTGTGAAGATTCTAGGATGTTGCATTGAAGGAGAAGAAAAAATGTTGAT  
ATATGAGTACTTGTCAAACGGAAGTCTTGATTCATTTATATTTGGTAACAAATCCCATACCAATATTGTA  
TATACTGAATTATCTTCTCCAGTTTTCGAATCTCCCATCAAATAAGAAAAAAAAAAACATGTAAGGAGTG  
AACTAAGACCTCAGCTTTATTAGAGCCTAATAATAATGTACACAGTAGCCCAAATGATCTTTACGTTCAA  
TACGTGAATGGACTGATTTAGTTTGATGTTTTAGAACTACTTTCTATCTATAGCTTAGTGAACCAACAAAA  
TTTGGCAGGTGGCAGACAAAGCAGGATATTAGACTGGTCTGAGCGATTTACATCATCAATGGGATTGC  
TCGGGGACTTGTGTATCTGCATCAAGATTCTCAACTGCGGATAATTCATAGAGACCTGAAAGCTAATAAC  
ATCTTGCTAGACAATGATATGAATGCAAAGATATCAGACTTTGGCATAGCAAGATGCCATGAAGAGGAT  
GGTAATGAAGCCATGACAAACCGAGTTATTGGAACATAGTAAGAATCTATTACTGGGTAGTAGGAAATG  
CTTGAGATAGTTATGTTTTCCAGCATTAGTAACTATATTTTGTGTACATTTTCTGCAGCGGGTACCTCTCA  
CCAGAATATGCGCTATATGGGCAATACTCTGTAAAATCAGATGTGTATAGCTTTGGTATCTTAGTACTGG  
AAATTGTGAGTGAAAAAGCAACAGACGATTCGCTCCTTCAAACCTTAACCGTAGTCTAATCGGGCATG  
TAAGATTTTTATGTATTTTTCTTATCTATTCATTGGTGTTATCAACTAACAAGTATCTTGTAAGGCTAGTGA  
TGCTTATAAGCTTGTAAAACACTGCAGGCATGGGAGCTCAACAAGGAAGGGAGGTCAATAGAACTACTTG

ATGAACGTGTAGGTGATTCTTGTCTACACCTCAAGAAGTGGTACGATCAATTGGTGTGGTCTATTATG  
TGTCCAAGAACGTCCAGATGATCGTCCAAGTATGTCTTCCGTAGTTCTAATGTTAAACAATGAAGGTACG  
CTGCCTCAGGCTAAACTACCAGCTTTTTACATGGAAGGAGATGTATCAGATACTGAATTACTTTCTACCC  
AATTTGCACATATTACAACGGATGACACCCCGTTAGAAATTAGATGA

>M6-PGSC0003DMG400019241 M6 G-LecRK

TTGATTTTTCACATTTTCCCAAATATTCCAAAAGGACTAAACAATTTCCATGAAACGCTTTATCTTTTTCTA  
TTTCTGTTCTCTAATATAGTGTCAATTTCTATTTCATATTTTCCACTGCTTTAGACACTATATCGAACGATAG  
CCCCATAAAAGATGGACATACCATAGTTTCAGCTGGTGAAACTTTGAGCTTGGATTTTTCAGCCCTGGA  
AATTTCCAAGAATCGGTATATCGGTATATGGTACAACAATTTACCTAAAGGCAGAGAAGTAGTGTGGGTT  
GCCAATAGAGTGAACCCACTGAATGACACTTCTGGCATATTAACAGTCAGTAGCAAAGGGATTGTACTA  
CTCAATGGAAACCAAGATGTGATTTGGTCATCAAATTCATCGAAACGTTTGATGAATCCAGTGGCTCAGC  
TTTTGGACTGGAATCTTGTCTTAAAAGATGACAGTTTGGTAAATCAAGAAGACTATGATTGGCAGA  
GTTTTGATTATCCAGACAGTACTTTGTTACCTGGCATGAAATTAGGCCTTAACTTGGTCACGGGCAAGTA  
TTGGACTATGTCGTCGTGGAAGAGCAGTGATGATCCTTCTCCAGGAGAATATTTGGATCGCCTCGACAC  
CAGTGGTTATCCTCAATCCTTGTGTGGGAAGGTCCTGCAATAAAGTTTAGCTCAGGAATATGGAATGG  
ACATTTATTTGTTGGAGGACCAAATTTGAAACCAAATCCTTATTATACATTTGAGTTTGTGAACAATGACA  
AGGAGATCTACTATAAATATGAGCTTATCAATACTTCTCTCCTACCAGGTTGGTCTTGAATCCAGCAGG  
CCTGCTTCAACGACTTTTTGTGGATCGAACGGAACCAGAACTGGTTCCTTTACTCCACTGGACAGATGGAT  
AATTGTGATCGTTATGCCTTGTGTGGTCAATTTGCGCGGTGCAACATCAATGACTCACCTCCATGTGATT  
GTTTGAGAGGATTTCAGCCTAAAAATCAACAAGGATGGGATGCAGCAGATTGGTCTAGTGGGTGTGTA  
CGAAGAACTCCGTTGACATGTGGGACAAGTGACAGGTTTCTGAAGTATTCTAGTGTGAAATTGCCAGAT  
ACACGCCATTCCTGGTTTGACAAAAGCATTGGCCTCGAGGAATGCCAAAGGCTGTGTCTGAAAACTGT  
TCGTGTACAGCATATTCCAATCTTGATGTAAAAATGGCGGGAGTGGATGCTTACTTTGGTTTAATGAAC  
TCGTTGATATCAGGGAATATGCTGAACTTGATCAAGATCTCTATGTAAGGATGGCTGCATCAGAATTAG  
GTAAGTCTCCTTATGCTAAGATGAATCATACCACAGGGAATCTTAGTAACTCAATTGATTGACTATCTGA  
ACTTTCACCTTGTTAACGAGGGTTGGGTTTCCAACCTTGTTAACGAGGGTTGGGTTCCCAACCTTGTAAAT  
CCCCTTTCCCATTTCCCATTTAGCCTTCCCCTACCCCAACCCCATTTCAAAAATAAGAATCATACCGGAAG  
GTTTTACAAGTCATAATGAACTTTTACAGGTTTCCAGGCTATATGGGAAACACAAGAATATCAGTCATTG  
CAATTATATTAACAGTTTTCAGCAATCATCCTTGTGGTTTTCTATTTTGGTTTGCTATGCAGAGAAAGAAA

GGGGAAAGAGGTTAGAAAATTTGTCCGTGGCGTTGAAAGTAAAGTAATTTTCATTCAGCTCAATATCTTT  
ACAAAAAAAAAGTTCAATTTTACAGGAGTAGGAGAAGGAGAAGGAAAGGAAGATATGGAATTACCTTTG  
TTTGATGTGATGACTGTTTCTGCTGCAACTAATAATTTCTCATCTGCTAATATCATTGGAGAGGGTGGTTT  
TGGATCTGTATATCGGGTAACTAGAATTATATTCTCTCTGTATCTTAGTCAAATATATGAATGATTCTCTT  
GTGGCTTAGACTTCGCGTGGATTATGTGACAGGGAAAACATCAACAGGACCAGAAATAGCAGTAAAG  
AAGCTCTCCAAACATTCCGGACAAGGTTTCGAAGAGTTGAAGAATGAAGTTGTTCTGATTTCCAACTTC  
AGCATAGAAATCTAGTTAGGCTTCTAGGCTGTTGTCTTGAAGGGGAAGAAAGGATGCTAATTTATGAAT  
ATATGCCAAACAATAGCTTGGACTTCTTCATCTTTGGTTGATTCTCTTGACTCATTTTCATCAAAGATTCA  
TCTTATCATATCAGCATTGTTCTGCTAATGCAAAATGAACTGATGTTTCTGCAGATGAATGCAGGAAGAA  
ACAACTCCCTGGGAAAATCGTTTTTCGTATTGCAATGGGAATATCAAGGGGCATTCTTTATCTTCACCAG  
GACTCCAGATTAAGGATCATAACAGAGATCTAAAGACCAGCAACATTTTACTGGACAGTGAATTGAAT  
CCCAAATTTCTGACTTTGGACTGGCCAGGATTATTGGTGGTGACCAAACGAAGCAAGAACAAAGCGA  
GTAATAGGGACATAGTAAGTTCAATTAGATAACTCATTGATGTTTTTCATCTTTTCTCTGTTAGAGTTCCA  
CATTGGTTGGGGAATTGACTGGTTTATATGGACTTGGGCAATTCTCCCTCATAAACTAGATTTGAGTTGA  
GTTAGACTCAAGTGTCATATCCTTACATGGTATCAGAGGCAGGTAAATCCCGGTTGGGGCTCCTGGTCC  
ATGTTGGTGGTTTGCTTATATGAAATTGGACAATCTCCCTTATGAGCTAGCTTTTGGGGTTGAGTTAG  
GCATGTGTCAAATCTTACAACCTCCATAAAATCATTTAACCCATATTAACATTATATGTCTTTGTGCAGT  
GGCTATATGTCTCCAGAATACGCAGTTGATGGGAAATTTTCAGTGAAATCAGATGTCTTCAGTCTTGGTG  
TTCTTCTACTAGAAATAGTCAGCGGAAGAAAGAACAGAACATTTTCATCATCCAGATCACCATCATAGTCT  
TATAGGACATGTAAGCAAGATACAAATCCAGACATTTGCTTTTGTCAATTCATACTACATTTGTATTTCT  
ACATATCATTGAAAACATACTTGATTTTTCTATAGGCTTGGTTATTATGGAATAAAGGGAAGGCTTTGG  
AAGTAATCGATGATTGTTTAAAGAATCGTTTGTGGAATCCCAAGTCCTAAGATGTGTTTCATGTGGCACT  
GTTATGTGTTCAACGACTAACAGATGAAAGACCAACAATGTCATCAGTGGTTTTTCATGTTAAGCCATGAA  
GAAGTGGCATTACCTCAACCAAAGGAGCCTGGTTTCTTCATAGAGAGAAGTACAGCTGAAACAGATTAT  
TCAAATGAGAAAAGATGTATCAGTGACAATGATTTGACATTAACAATTTCAACCAAGATAGCAATGGT  
GGAACCAGAAATTCAAGAACCTTCTATTGTATAAAGGTGATTCAACAACATAATGTATATACAATACAGAA  
ATTCTGTTTCATCCCTATATGTACAGCAAAATATTTGACGACGAAGGGGCTTCAATTGAACCCCTCTAG  
ACCATGCAGCTCCGCCCTGATTGTTATTGGACGAGCATTTACTAACATGCTTACACGGAACAATTGTGT  
ATATCTTTCCGATATTTGATTAAGACTCAAGAGCCATCGGGACCATTGTGTCAAGTTGTGCAAATTGTCA



GAACATGATGGAAATGGACATATAAGTTGTTACACAGTATAATGACTAATAGTAGATCTGAATGGCTAA  
ATGATAGCCACTGACTTTGTTGAGCAATTATTTTCTCAGGACTACAAATCAACATCATGTCCTGGGGG  
AGTGTATCTTTGCAATCACATTCATCATATCTTTTTCCACATCTCTATCACCAAACCTCAAGTTTTGTGCAA  
CTTTTTCTGATTTTTCTACCCGGTGTTTCAGTACCAGCTTTGGGG

>M6-PGSC0003DMG400019275 M6 G-LecRK

AAACTTGCTAGGACATAAAATTATTACAATTTCTAACAAGATACTAAAATATTATCTAATTCCTTCATGCT  
CAAAAAGTCAAGAACTATTGACCACCTATAATATTTCTAATTCCACAACAGCTCCCGTTTAGTCTTGTT  
ATTATCCAGTCAGATCTTATAGCAATCTATGAAGACCTCATTATCTTTGAACTGCAGCAACATTTTCCTCA  
TGTTTGATACTGCTCAGAGCAGATATGCCTTTTACTAAATTATTCGTAAAATATATACTCAAAAGTCCAAA  
GCAGCCATTAACCTTTTTTATAAGCAGCCATGACTTGAAGCAGCCTCAACTCTCATTACAAAGCTAAGACT  
TTTCATAGTCATAGACCTTTCCTCCTTTCAAATAATACTCTTTCATATGTTAGAAAGCTCAAGTGATGGCT  
ATTTTAACACTCGTTTGTTTCAGTTTCTTCTTGTAAAGATTCCTGTCTGAAAACAAATTAAGTGTCATTACT  
ATGCAGCATTGACATAGAAAAAATTGGATCTCAAAGCATGAAGGCATTACTAAGGGAAAGTTTTTAC  
TTATCTTTGCTCTTGTGTTTGTGTTTCATCAACCGAAGCTTTGGCGCTACAGATAACAATAACTACACCTCAT  
TTTCTGAAAGATGGTGATGAAAATGTTGCTTCAACTGGTGGAATATTCGAAATGGGGTTCTTCAGTCCAG  
GTAATTCGAAAAATCGCTATGTGGGTATGTGGTATAAGAACACATCTGTTAGGACAGTGGTGTGGGTTG  
CCAACAGAGAAGCTCCTTTGACTGGTGGATCAGGTATCTTGAAAATAATCAAGCCAGGAATTCTTGTCT  
TGCAATGGCACTAGCCATGTTGTGTGGTCAACTAATACTAGATCTGTGCAGAATCCTGTAGCGCAG  
TTGCTAGATTCTGGAAATCTTATTGTCAAAGAAGCTAGTGATGATAGCCCGGGGAATTTGATATGGCAG  
AGCTTTGATCACCCAACGGATACGCTATTAGCAGGCATGAAGCTTGGTAGGAACTTTGTAAGTGGCAGA  
GAGGTGTACTTGTATCATGGAAGAATGAGGAGGATCCAGCTCCTGGTGATTCTACATATCACTGCGAT  
CCTTCTGGTTACCCGCAGAATATCCTGAAGAAGGGGTCGGATGTAGTATACCGCTCTGGACCATGGAAT  
GGTCGCTCTTTCAGTGGGAACCGAACTCAAGAGAAGGTCCTTCTATACATATGGAGTATATTCAAGTA  
AGACAGAGGTGTATTTTGGATATAACCTCACAACCTCAATTCTCGTGAGGTTGACATTAAGTCACAATGG  
AGTCTACAGGTTTGGACTTGGGGTGTATGGAGACCAAGGTTGGATCCCTTTCTCTTAATACCCGCTGAT  
AATTGTGATATGTATAAGTTGTGTGGCGCATATGGCAGCTGCAACAGTCAAGATTCTCCAGAATGTGGA  
TGCTTAGACAAATTTGTGCCCAACAATAGTGATGCTTGGAAAGAGGAAAGACTGGTCAGGTGGCTGTGTT  
CGGAGAACTGAACTAAATTGCCTCCAAGAAGATGTATTTTTGAAGTATTCGCATATCAAATTGCCAGACA  
CACGGAATTCCTGGTCCAATGTGACTATGACACTAGAAGAATGCAAGAACACCTGCTCTAAAAATTGTTTC

TTGTATGGCTTACTCCAATTCTGACATACTCAACGGAGGAAGTGGATGCTTATTGTGGTTCAAGGATCTG  
CTTGACATTCGGCAGGCGCCCAACGGAGGGCAAGATATCTACATTAGAATGGCTTCTTCTGAATCAGGT  
TGGCTTGTGCAACTTAATTTATTTATTTTTTTGATAGATTGCCTGAAGCTAGTAAAGGAATTTAAGGTTG  
CAGGCACTTTAATAAAGCAGACTGTAGTTTTGTGCCTATGCTTACTATGATACTATCTACTGCCAACTCCT  
ACCATATATAGCCCGTAACTACCAAATAATAGCAGTACAGAAAGCAATTATTTTTGAGTGAAGTTGGTAT  
GAATTTACAAGCCAAATCTGCAAGCATGATGACTATAGAACAAGCATTGATATGACTTGCATTACACAA  
GGAATTGAAGAACCTTGACAACCTCAACCTCAACAACTAAAAAGGATGTGCAGTACTCAAAGGCTTGC  
AGAGACTTTTAAAACTCAAATAAAAAATCATCTCCGATGGATAGGATAATTGCAATTTATTATTTATGTTT  
GTTGAATTGATACTTGCAGATAGTCTGGAGCAATCAGATGGAAAGAAAAGGAAAGTACTTTTCTGGATT  
CTACCATTATCAGTTTGTTTGATTCTGGTATTCTTACTCTGGTGGTCTACCATAGAAGAAGGAAGAAGG  
CTTTAGAGCTCAAAAACAAAGGTAAGCTGGATACCCCTTAATTTTTTCTTGACATCTAAAGTCTAAGCAA  
AATAGAGGAAAAGACATTTAAATTATACTGAAAAGAACTTTCACCTTCATTGCTTTCTTTATAGGCAA  
ATTATGTCATTTGGTTTTGGCAGGAAGGTCAGGATACAGTGGCAATTACAAGATGAATTACAACCGTGG  
CAATTGCACTGAAGAATTTGAAATACCACTGTTGACTTATCTACCATAGCAAAGGCTACCAATAACTTTT  
CAATTGACAGACAGATTGGAGAGGGGGGCTTTGGACCTGTTTACAAGGTATATACACTTAAGACCTGGG  
TCTTCAGAGTAAACCTTCTTCTTTAAATACAATATAGGAGTTGTATGATCAAAGGTATAAGCCTTTGCTTT  
GTGAAACCAAAAAGGAGACCTATAACAATAGCTAAGGGAAGAAAGGTTGGGATATGGGGGATATCCTTCT  
CAGAATGTATCCAAGAACCACTAGTCTAGCTTTTCAATAAGTGTGTCCAAGTTAGTCAATATAGAGCC  
TTTAGCATTTTCAAGAAAAAGCTGCAAGAGTAACCCATCACCTTTGGGTGGAAGTGCAGATTAAGGTG  
TGAGGATATAGTTTGTTTAAAGAAGAGAGTCATTTGTTCTTTGTAGTCATTTATTTGTTTCATCTTTCCATGG  
TGACAAGTGGCAACTAATTCCCAAATCAAAGGGCGAATATTTCTTATAGACTTTAGTTTTAGTTTTAAA  
GAAGATTATCATAGGGCTAAACTGAAAATATAATGAACTTATAATAGGGATTTGGCACATTTGACCTAAA  
TTTGTTAACGGAGATTTTGATCAACTTAGGTATTGAAAATATTAACATGCAGAGATTGTGATGTTTAGGG  
CATACTTGAAGGACAGGAAATAGCCGTCAAGCGTTGTCTAAAACCTTCTACACAAGGAGAAAAAGAGTT  
CAAAAATGAAGTTTTATATATTGCTAAACTTCAGCAAAGGAATCTGGTGAAGATTCTTGGCTGTTGCATT  
GAAGGGGAAGAAAAAATGTTGATTTATGAGTACTTGCCAAATGGGAGTCTTGATTCAATTTATATTTGGT  
ACAACTTCTCAATCCAATATCATGCATTTGAATAATAATTGCATTTAGTTAATTGATGCCTATAGGCATA  
CACTGATTTTCTTCCAACCTCAAATCCCATAAAGCAGGGAAAAAAAATGTAAGGAGAGAACTAAGAC  
CCCAGTTGTATACGAGCCTAATAATTACATACTTGGTAGTTCAAACCTTCTCGTATTATGTTTCCATCAGCA

AGGAACTGATTTTGTTTTAGGTTTTAATACTACCTTCCACTAAACCTATTTAGTGTGTTAATGACCCAACA  
TTATTTGGCAGATGACATACAAAGCAAGGTATTAGACTGGCCTAAACGATTTACATTATCAATGGCATA  
GCTCGGGGACTTATGTATCTGCATCAAGATTCTCAATTGAGGATAATCCACAGAGATCTGAAAGCTAAC  
AATATCTTGTTAGACAAGGACATGAATCCAAAGATATCAGACTTTGGCATTGCAAAAATATGTGATGGG  
AATGACATTGGGGACAAGACAAACCAAGTTGTTGGAACACAGTAAGAACCTTATACTTGATAGCTAGAA  
ATTTGAACCTAAGAAGAGTTTTGAGATATTAGGTACGTTTTCCAGCATTAGTAATTCTATTTTTGTTTAC  
ATTTCTATGCAGTGGGTACCTCTCACCGGAATATGCATTGCACGGGAGATACTCAGTAAAATCAGATGTA  
TTTAGCTTTGGTATCTTAATATTGGAAATTGTAAGTGGGAAAAGCAACAGAAGATTCTCTCATCCAGACC  
ACAACCTTAATCTACTTGGACTTGTAAGATTTGATGAGTTTCATTTACTTATCCTTTGGTCTTATGTTATC  
TTCTAGTAACAGATATCTGCAAATCTAGTCAGCGTTAATAAATCGTGTAATCTACAGGCATGGAACTCT  
ATAAAGAAGGCAGGTCAACAGAACTACTTGATGAATACCTAGGGAATTCTTGTTCAACACCTGAAGTGG  
AACGATCAATCTGTGTTGGTCTATTATGTGTCCAACAATGTCCAGAAGATCGTCCAAGTATGTCTTCTGT  
GGTTATGATGTTAAACAATAAAGGTGTATTGCCACAGGCTAAACGGCCAGGTTTTTACATTGAAACAGA  
TGCACCGGATGGTGAACCTCTCGTCTAGCCATACTGAGACCCCATCACAATATTGGTAGCCCGATAAGA  
AAATATTGTTTCACTTGCTTTCAACAAGCTTGCAAGTTGTAAAAAATCTTTTCTTTTATTCTTTGTAGAAATG  
TGGTAAAAAAATATTTGGTATATCAGCTATTTCGAAC

>M6-PGSC0003DMG400019276 M6 G-LecRK

AAAAAATGAAGTCTTGGTCATCTCTGAGACAATCTTACTGAAAAGAATACCACAAGAGATGGAATATGA  
TAAATCTTTTTAACAATTTTGAAGAAGAATGCAATGCAACAAAAGGTAAATATACTATCATGGATATA  
ACAATATTTCAATTTATTCTACTTCTCTTGTATTTTGTGTTTCTTCAAATGCTAGTGGTCAAGGAGATACC  
ATAACTACAACCTCAATTCATTAACATGGTGATACTATTGTTTCGTCTCGTGGAACGTTTCGAGTTAGGATT  
CTTCAGTCCTGGAGATACTTCTACAAATCACTATGTTGGAATATGGTACAAGAAAACCTCTGCTACTACTC  
CTGTTTGGGTTGCCAATAGACTAGCTCCTGTCACTAATAAATATGGGGTGTGAAAGTCATTCAGCCAGG  
TCTGATTGACTTCTGAATGATACTAATGCAACTGTTTGGTTCGACAAATTCATCAAATCTGTGCAGAATC  
CTGTTGCTCAGTTGTTGGACACAGGGAATTTTGGTGGAGGGATGCTAATGATCCGAATCCAGAGAATT  
TCCTCTGGCAAAGTTTTGATTATCCTAGTGATACGTTGTTGGAAGGTATGAAACTTGGGACGGACTTGGT  
GACTGGATTAGAAAGGTATCTTACTTCTTGGAGAAGTAGTGATGATCCTGCTCCGGGGGATTATACTTAT  
CATTGTGATCCTACGGGTTATCCACAAAACCTTATGCGAAAAGGGGCTAATGTGACATTTAGAGCAGGG  
CCGTGGAATGGTATCAGGTGGAGTGGTGCACCAAATCTGGTGAACAACTCTATCATTCTTTCCGGTGTG

GTTATGAATAGTAGGGAAATTTACTACAAGTATGAGATGGTGAACAAATCCGTTATTTCAACATTTGTTT  
TAGAGCCTTACGGGAAAGCTATGCGTATCATCTGGATTGGAAAGTTTCAGGGATGGGTAAATTACCACT  
CTGCAGTTGTGGATGACTGTGACACCTACAAATTATGTGGTGCATATGGGACTTGCAACATTTGAGTG  
ATCCTTTTTGTCAATGTTTAGATAAATTCAAGCCAAAACATCCTGATGATTGGGAAAGATCTGACTGGTC  
TAGTGGTTGTGTCCGGAAGATCCCACTGAATTGCACAGGAGATGGATTTATTAAGTATTCTGGTGTTAAA  
CTGCCTGATACGCGAAATTCTTGGTTCAATGAGACAATGACACTAGATGAATGCAGGGTAGTTTGCTTG  
AGAAATTGTTGCGTGTATGGGTTATACTAATCTGGATATACGCAATGGAGGAAGCGGGTGCTTGCTATGG  
ATTTGGGAGCTGGTTGACATCAGACAGCTACCTGCATCAGGACAGGATATCTACATTAGGATGTCTGCTT  
CAGACATAGGTAATTAATAATTAATATGCGAGTTCATAAATCATAACCATGTCAATTGTACTTCAATGCCA  
GAAAGTCAACTCATATGAGGGACAAAGGTAATCCAAGTCCACATTATGGGAATAAGACTTCAAGGACCG  
TCCTGTTTTCTCGACATAAATAACAACAAATATAAAAAGAAAAAAAAACTTCTAGCATTACTAGAAACAAC  
TATTGATAATATTTCCGGTGGGAAATGTTGCAGGTTCTGCTGGATCAAAGGAAAGATAGCTGTCATACTT  
GCAATAGCTTTGCCACTATTGGTTGCATTGATTCTGCTCGGTTTAGGTGTAGGCCTGATTCTTTGTAAACG  
AAAAAGGAGAAAGGATCCAGTGGTTACAACAACAGGTAAGTGGAAGTACCAATTCTATCTATTGTAAAA  
CTGGAAGCACCTAGTGGTCATTAGTTCTGTATACCACTAGTATTTCTTTTCGAGCTCCTTATTTGAGCAAG  
GTCTACTTGTATGTTCAAATTGCAGGGAGATTAGGTGGTCACAGCAACAAGAATGATAACAGTAATCAA  
ATTCACCAGGAAAATTTTGAGCTTCCACTTTTTGACTTATTAACGTTAACCCATGCTACCAACAACCTTTTCA  
TTTGCAAACAAGATTGGAGAGGGTGGCTTTGGACAAGTTTACAAGGTAGAAACATTCCTCAGACCCCAA  
GTAATGATACTCGAGACTTAATTTCTTTGCTTTTCTTGAAAGGAATATTAACCTTGGAGTCCGTACATAC  
AGCAGTGTGGCTAGTATGATGAGCGGAATGAGTGTTAAGTTGAGAGCCTTGTTCAGACCGATAATG  
TTTTATAAAATAAAGTTTTCAAATTCAAAGAAAAGGAATATCAGCTGGAAAGATTACCAACCATGGGAG  
AAGCTGTGGAATAAAATGTGCAAGTAGATGCTGCCTGAACAAGAACTTGATTGCAATAGTAAGGAAAA  
AATGACGATTCACTCCATCGAATTTCTAACAGGAGTGCTACTTTTACAGGGTGTATTAGAAGGTGGACAA  
GAAGTAGCAGTGAAGCGGCTTTCAGAAACATCAGAGCAAGGACTTCACGAGTTCAAGAATGAAGTTAA  
GTGCATCGCAAACTTCAGCATCGGAATCTTGAAAGCTTCTCGGATGCTGTATTCAAGGAGAAGAGAA  
GATGTTGGTGTATGAGTACTTGCCAAACAAAAGCCTGGAATTATATATATTTGGTTAGTCTTTCACATCTA  
CTGAGCGGCCATTTCTTCAATGCAATCAATTGTGATTTACGAAGTTTGGTTTCGCTGTTATAGAAACT  
TTAGTAATAAGTTGAGAACATTTGACAGACGAAGAAAGGAGTGCATTACTTGATTGGCCTAAGCGCTTC  
AATATTATCAATGGAATTGCTCGAGGACTGATGTATCTTCATCAAGATTCTAGGCTCAGAATCATCCACA

GAGACTTGAAAGCTAGCAATGTCTTACTTGATATTGAAATGAATCCAAAAATATCAGATTTTGGGATGGC  
TAGAAGTTTCAGAGGAGATGAGACAGGAGACAATACACGCCGTGTTGTTGGAACATAGTAAGGTTTAA  
TATTTGATTATATATGTAGTCATGAACACATGGTGCATTATATAATCCTGTAGTTTCTTTATTGCAGTGGT  
TACATGTCCCCGGAATATGCAGTCGAGGGGATATTCTCAGTGAAATCAGATGTCTTTAGCTTTGGGGTAT  
TAGTACTAGAGATTGTGAGTGGAAAGAAGAACCGACGATTTGTTTCATCCAGACCACCACCTCAACCTTCT  
TGGACATGTAAGTACAGTAACTCCTAACGGTAAAACTCAGAAAAAGTGTGTTAATGCATTTAAGTTT  
TATGTGCCGACAGTAAATTACATGTAATCTCTTTTATAAGAGCTTGTTAACTAACCTACTATCCCAAGTT  
AAACCACAATGCTAGAGTAAAAAGTCTTTGTACTATTACTGGTATAAGTTAAATCCTTTGTTGATGGAGG  
GATCGTTTCATGCAGGCATGGATTCTTCATAATGAAGAACGGGCATTGGAAGTACTAGTAGATCCATATCTCG  
TAAACTCATACTATATATCAGAAATACTAAGATCAGTCCATGTGGGATTGTTATGTGTTCAACAAAATCC  
AGAGGACAGGCCAAGCATGTCAACTGTGATTATGATGCTGAGCAATGAAGGCATTTTGCCATTGCCTAA  
ACATCCCGGTTTCTTCACGAAAGGAAAGTTGAAGATGTTGATCAATTGTCTGGAGTACACAAACACC  
AAGTTCTATAAACGAAGTTACCATCACGCAGTTGAATGCTCGATAGAAGCATGTCCATGTCCATAGTCAG  
TGGCAAAGCCAAGATTTTCACTAAGAGTTTCAAATATGAAAGAAGTAAACACACAAAGTCAAGATGAT  
TCAACAACACTATTATATATACATAAACAATTAATTGTAGACCTTACATATAGAGTGTAAATTTTTTGCGAA  
AGGGTTCGGATGAACCCCTTGCATCAACTGGCTCCATCCTTGTCGATTGTGAGTGTCAATTCATTTCTCAG  
AATTGTATTAATCCTCCCTTTTTTTCTTTAAGAAATTAAGCAAAATCTGCAGGAATTGTATTGAAG  
TATGTCTAAATTTAAGGCCTTGAATTCATTTTCAG

>M6-PGSC0003DMG400019278 M6 G-LecRK

TATGCCTTCACACGACTCCTCTGTCTGTTCCCTATACCATGTTAATTCGTTAATTGTGTATTACAGGTATCC  
TGAACAATGGTATGCAGTGGACTGGTCTAATGGTTGTGTAAGGAAAACCTCTTTGTCTTGTAAACCAAGAT  
GGTTTTCTTAAATTTAGGAATATCAAGATGCCGAATTCTAGACACTCCTGGTATAATGTAAGCATTAACT  
TGAAGAATGCAAGAATATGTGCTTGGCTGATTGCAATTGTACAGCCTACTCAAATCTTGATATAAGAAAT  
GGCGGAAGTGGATGCTTACTATGGTTCGGTGAACCTCATTGATATTAGAGAGTACAACAAAATGAGCAA  
CACCTGTTTGTGAGAGTTGCTGCTCAGAATTAGGTAATGACCCTACTCTATACCATTTTCGTGTTCTTTT  
GCACAATATAAGCACAACTCTTTAGAATTTAAGGAACCTTACTATCTGATGTCACTGATAGTAACATATG  
ATAGTCGCGGAAGCTATTCATACTGATATTGCCAATTCATATGTCAATTGAAAACCTGCTTATGGACTTTTT  
ATTAACAGATTCAGTCAGGAATCGGAGGGGAAAGAGGTCAGCCCTGATTGCGGTCATTGCAGCACTA  
GTAGCAACTTCTATCCTCATCTTTGTAGCTTGGTTTACCTTCAAAGAAAGAACAAAAAACAGATAAAC

ATACTGGAGGTATTAGAAAATTGTTAACTGTGAATGCTTTTTTACCTCCATCCAGCTAACATTGTTGACT  
TTATCAAATGATTGAGGAAAAGTTCAATTATATCATGTCTGTGATTGGAAAATATATGTTGACAGGTTCA  
GAAGTTGGAAACAAGGACCTCGAGTTGCCATTGTTTGATTAGTTACTGTTACTACTGCCACTGAAAATT  
TCTCTTCTGCGAATGTGATTGGTGAGGGTGGCTTTGGACAGGTTTACAAGGTAAATCAACTTTGATCTTC  
AACTAAAAGCTAGAAGGGACATATTTGACCCTTGAGAGAAAATCGCAGGGTATTCTACCAGATGGACTA  
GAGATAGCAGTAAAGAAGCTATCAACGTATTCTGGACAAGGCGTTCAAGAGTTAAAAAATGAAATTGCT  
CTCATTCCAAGCTGCAACATAGGAACCTTGCAAGCTTTGGGTTGCTGCCTGAAGGAGAAGAAAATA  
TGCTAATCTATGAGTTTATGCCCAACTCTAGCTTGGACTGTTTCATTTTTGGTCTGCTTTTAGTGATTCA  
AACTAAATATTACTACTTGATAAGTCCTCAATATCTCTGTATCACTCAAGAGTTGAATTTACATTGTGCAG  
ATCCAAGCAGAAAAGCTTCACTTGCATGGAAGAATCGCTTTGAAATTTCTGTGGGAATATCTCGAGGTCT  
TCTTTACCTTCACCAGGACTCAAGATTTAGAATTATTCATAGAGACCTCAAGACCAGCAACATTTTACTAG  
ATGGCGGCATGAATGCCAAAATTGCTGACTTTGGCCTTGCCAAAATTTTTGGCGGAGAACAAGTGGAAAG  
GAAATACTAAGAGAGTGATAGGGACATAGTAAGTTCTACAAATCTTTATGATAGACATTCATACAGTAC  
ATGCACTTAAATTTGATGTTGATGCAGTGGATATATGTCACCTGAGTATGCTGTTGATGGGAAATATTCA  
GTAAAATCCGATGTATTTAGTATCGGCGTTATCATTCTAGAGCTAGTCAGTGGCAGAAGGAACAGGAAA  
TTTCGTCAATTTGGAACATCATCACAATCTTTTGGGACATGTAAGCACATGCAACACTAACTTCGTTCCCT  
TAAGTCACTTTTTCTTTAGTGAATGCATTTGTATAAATGTGTTCTGTTTGAATTTAGGCATGGATACTTTG  
GAATGAAGACAAAGCGTTGGAAGTATGGACGAATGTTTGAAAGAATCATTTTCAGAATCTCAAGTGTT  
GAGATGCATCCAGGTTGGTTTGTGTGCGCCCAAAAACACCCTGAGGATAGGCCTACAATGGCATCAGT  
AGTTTTCTGGTTGGGAAATGAAGGCCTGGTTCTTCTCAACCAAAGCAGCCTGGATTTTTTATAGAAAGG  
AATTCAATGGATTCAACAGAATCAGCTCAATTGATCGTTAGCTCGTTGTAATCGGGCAAGGGCATTGTG  
AATTCAAGTTCAATCAACACATATAATATCTAATTAATGAGAAGAAAATCTGAAAGTGTGTATACACATT  
TCAGCACACGCTTTGTAGCACAATTAATCCGGATTCACACTGGAAACTACAACTTTTTGGAGAGAACTTA  
AGTCTCCTCATCAAAGTGACTCCATTCAAGAAGTTGAAGATTCTTCTGTAGCATGGCAAACACTATTCTTT  
ATATTTTTTCTCTCAGTTGAATATTAGATGGTGACTTCACAACTTTATAAAATAAATGCATTAATATTAATA  
GAAAATAAAAAAGACATCAGTTCCTTTTTCTTAGTTCTGCTATTACTAGTCCAAGATGACACATCGTCAT  
TACTACTAACTCATTTTAGGAAGACTTTAGGCAATTTGCTCCAATACATTTTCATGTGTTTACACCAAGAAA  
ATAACCGCATGCCATATGTTTGTATGAATAGTTCTATAGCGTGCAATTGCAAACACCAGGTTAATGGTGG  
AAATGGGAAGTCAAAGGCATACAACTTTTGACAAGTTCAAACCTTTGACATCTAATTCTTGGCAGCAGTTG

TTGGCCTTTCATTCAAAAAAGTATTTTTTTCATTTTATTTATATAAAACATTTTTAGGCATGGTTGTTAATT  
CTAAACTGAGAAAACAAGAAGTTATCAGTATCTTTTCTGTGTCAAGGCTTTTTTGAAGTTGTCAATCAAAA  
ACATGAGTCAGAATCTATCAAAAGGGCTACTGTTTTTATTCTTTTGCTCACATTTTTTCTTCATCTTACTAA  
TTTCCGCTGCATTAGACACGATCACAAACAGATAAATCCATTAGAGATGGTGACACAATTGTTTCAGCTGG  
TGGGATTTATGAGCTTGGATTTTTTAGTCCTGGAAATCCGAAGAATCGTTACGTTGGCATATGGTACAAG  
AAGATATCACCTAGAAGTGTGTGGGTTGCAAACAGAGATATTCCACTTAATGACACATCAGGAGTTT  
TAACACTCAAACCAATGGGATTCTGTACTTGTGATAATTCCAATATCTCAATTTGGTCATCAAACCTCA  
TCAAGATCCTTAAAGGATCCAAAAGCACGGATCCTGGATTCCGGGAACCTTGTGTCAATGATGTAAAT  
GAAAGAGACCTGGAAATTAATTTGCGTGGCAGAGTTTTGATTATCCAGGAAATACTTTTATACCTGGCA  
TGAAACTTGGACGTAATTTGGTCACGGGCATGGATTGGTACATGTCATCATGGAAGAGCATTGATGATC  
CTTCTCCTGGTGAATATATAAACCGTCTTGATTCTCATGGATACCCGCAATTGTTTGTGTGGAAAAATTCA  
ACTATAGTGTCTAGCTCAGGGATGTGGAAAGGTAATGCATTTAGTGTTAGTGCAAATAGTAAACCAAT  
ACACATTACACTTCCGAGTTTATTATTGATCAGCAGCAAATTTACTACCAATTCAAGCTTAAGAATGAGTC  
ACTGCCCAGCAGGATGGTGCTTAACCCGGAAGGTCTGATAGAACACATAACATGGATTGAGAGCAGTC  
AGAGTTGGTTTTCTCTACTCAACAGTACAATTTGATAACTGTGGTCGTTTTGCTTTATGCGGTCCTTATGCA  
AGTTGCAACATCAATAACTCCCCTCCATGTGACTGCTTGCAAGGTTTCAATCCTAGGTATTGTTAAATGA  
GTGATCATCAAACCTTAAGCTATTAGAGATAACACACTTGATTACTTAGTTATGATTTTACACTCCCCCTC  
ATGTGTGTGCTTGATTCTATTTCTTGGGCCAAGCACATAGATATTATATTGATTACTTAATAATGACTTCA  
CAGGGTTCCTCAACAGTCTGCAGCAGATTGGTCTACTGGTTGTGTTAGGAGAACTTCTTTGGATTGTAAC  
CAAGATGGTTTTCTTAAATTTACGGGCATCAAGATGCCTGATTCTAGAAACTCCTGGTTTAATGAGAGCA  
TTAACCTTGAAGAATGTGAGAAATTATGCTTAGCTGATTGCAACTGTACAGCCTACTCAAATCTTGATGT  
TAGAAATGGGGGAAGTGGATGCTTACTATGGTTTGGAGAACTCATTGATATTCGAGAATTGAGCCAAAA  
TGAGCAAAACCTGTTTGTGAGAGTTGCTGCTTCAGAAATAGGTAATAATCCTACTCTGCACCATTTCTC  
ATTTTGTGTTCAATATAAATGCACAGCTCTTTAAACTGAAGAAGCTCTGGTCAGCAAGTCACTCATTCA  
GTTTCATGGCCAACTCATATGTAAATTGAAGACTGCTTATGAACTAATTATTGAACATATTCAGACAGGAA  
GCGGAGTAGAAAGATGTCAGTCCTGATTGGTGTCAATTCAGCAGTGGTAGCAACATTTATCCTCAGTTTT  
TTAGCTTGGTTTTCTTCCAAAGAAGGAAAAGAAGAATAGGTAAATATAGTTGAGTCACTCTTGTCTACC  
AACTTTATAAGAAAATTGTCAAGTCTAAATGCTGTTCTGGCTAGGTGAATTTTCTATCTAGCTGACATTGT  
TTGCCTTTACATAATTCTCATTGATATCATGTTTGTGGTGGGCGACTGTATATTGACAGGTCCATCTGTTG

AAAATGAGGACATGGAGCTTCCATTGTTTGATTTAGTTACTGTTACTAGTGCCACTGGGAACCTTCTCTGC  
TAAGAATGTGATTGGGAAGGGTGGATTTGGACCGTTTACAAGGTAAATCAACTTTGATCCTCAACGTC  
TAACTTGAAATGGCATCTTTGACCCTTGACATAAATCTCAGGGTATCCTACCAAATGGACAAGAGATAGC  
AGTAAAGCGGCTATCAAAGCATTCTGGACAAGGCTTCAAGAGTTAAAAAATGAATTCGTTCTCATTTC  
AAGCTGCAACACAGGAACCTTGTTAAGCTTTTGGGTTGCTGCCTTGAAAGAGAAGAAAGGATGCTAATC  
TATGAGTTTATGCCCAATGCTAGCTTGGACTATTTCATTTTTGGTCTGCTTTTCATGATCCATTAATAAATA  
GTACTTGATATAAGTCCTCAATATCTCTGCATCACTCAATGATTAGTTCTACATTGTGCAGATCCAAGCAG  
AAAACTTCACTTTTCATGGAAGAACCGCTTTGAAATTGCTATAGGAATATCTCGAGGTCTTCTTTACCTC  
ACCAGGACTCAAGATTAAGAATTATTCACAGAGATCTCAAGACCAGCAACATTTTATTAGATACTAACAT  
GAATGCCAAAATTTCTGACTTCGGCCTTGCCAAAATATTTGGTGGAGATCAAGTGGAAAGGAGAACTAA  
GAGTATAGTTGGGACATTGTAAGTTTCTACACATCTTAAATCGTATAATCTTTATTATATTAGATCAGTA  
CATGAGCGTAACTTATTGAATTGATGTAGTGGATATATGTCCCCGGAGTATATTGTTGATGGGAAGTAT  
TCAGTAAAATCAGATGTATACAGCATCGGCGTAATCATTCTTGAAATAGTTAGTGGCAGAAGGAACAGG  
AAATTCATCATTTGGAACATCTTCACAATCTTTGGGACATGTAAGCATATACATTACACAACCTTCATTC  
CCTTAATTCGCTCTTAGCTTGCTATTGCGAATACATTTGTATAAATGTGTTCTGTTTGTAAATATAGGCATG  
GTTACTTTGGACTGAAGGCAACGCGTTGGAAGTATGATGGAATGTTTGAAGAATCATTTTCAGAATC  
TCAAGTGTGAGATGCATCCAGGTCGGTTTGTATGCGTCCAAAACCTCCAGAGGATAGGCCTATAAT  
GGCATCAGTGGTTTTTTGGTTGGGAAATGAAGGTCTGGTTCTTCTCAACCAAAGCATCCAGGTTTTTTC  
ACAGAGAGGAATCCAATGGAATCTACTGATGAAGAATGTCTAAGTAACAACGCGACGTTAACAGTTCTT  
GAGCCAAGATAGACAAGTAATCACTATTGGATGTTTTGAAATGTATTTACTTTGTCTTGTGTTGTCAAACA  
GTACTAGTGTATATATGATAGAATATACTAAAAGAGATAGTTTAAATGCCAGTGTTTCATATCAAGGCAGG  
GCAAATAATTGATATACAATTCTTGCTTTGATAATTGAGCAATCAATGGACTAATTATTGGCAAAAATTTG  
TAAGCATAAGTAGTTAGAGGAATCTATATCATGCATTACTTTTTTGGGGGACAATGAATATATTCATCAA  
ACATAGTTTGCTATACATGATACATAAGCCCTATTCTATATGAAGTATTTTTTTTTGTTTCCCACTCGGTGT  
TTGGAGCCCACATTGGAGCTCCGTTAAATTCGAGTTGCCCATAGCAG

>M6-PGSC0003DMG400021804 M6 G-LecRK

TATGCTGAACCGGTGACCATGATGTCTAGACAAATAAAAGAGCTCTAATGTTGTCCTGTCTAACAAGCTG  
ATGGAGAAAGTCGAACTGATTACCTATATTTGGGTTGAATAGTTGCAGCTAGTCCGGTGAATCAAATG  
GACACAAAGGAAAATTACTCTCCTGGATTATCCCGTTATCGGCTGGAGTGATTTTGATAATCCTAAGCCT



AGTGATCTGGATTAGAAGAAGGAAGATATGTTCAAAGAAAAAGAAAGGTAACCTCGACAAGTCATTAT  
GTTTCGGAATATAATTAGTAGATGAACTCAAATTCAAAGGAAAATCTTTCTTGTCTAGTATTTGCCAACT  
GAATTTGGGACATTGGTCTTTTGGCAGGATGCTGGGGGCGCAATGGCAATTACAAGATGGATTACCTCA  
ACGGAAACCTCAGTGAAGAATATGAGTTACCACTGTTGACTTATCTACAATAGCTAAATCTACGAACAA  
CTTTTCAGGGATGAGCAAAATTGGAGAAGGTGGATATGGACCTGTTTACAAGGTAATCACTTATAGCAT  
TTGCAGTTGTTTACATGAAATAAGCAATTCACAGCCACATAATTGAGCATAGAGTGATTCTGGGAAGAC  
TGACAGTAAGGAATGATTTAATGACTTTATAGTTTTGGAAGAGTTTTATAAACATTAGCTAAACTTGATT  
GAATGTATAATAGTTGCTTCATAATTTGAGCTTCTACCTTTTGGTGGAAGTATAATTTAACTTTCATGTT  
GGTGTGAAAAAACTTAACGTGTAGATATATGATGTTTAGGGCGTGCTTGAACACGGACAGGAAATAGC  
TGTGAAGCGGCTGTCTAGGACTTCCACACAAGGACAAGATGAGTTCATGAATGAAGTGATGTATATTGT  
GAACTTCAGCATAGAAATCTGGTGAAGATTCTCGGATGCTGCATCGAAGGAGAAGAAAAAATGTTGAT  
CTATGAGTACATGCCAAATGGAAGTCTTGATTCATTTATATTTGGTAAGGATTTACAAAAAAAAGAAAA  
AAATTGTGCTTAATAGTTACATTTGAGTTGATAGATGCCTTGTAGGAGTACCCAAATAATCCTCTTGCCCC  
AAAGTTATGTTTTTATTGTTACTTTTCCGATTTAGTTGATGTTTAAATCCTACTCTCAGTTTTACCTGATT  
TGTGTGAATTAATGCTCCAATGAACTTTTAAACAGATGACACACGAAGCACGGTATTAGACTGGTCT  
AAGCGCTTTCACATAATCAATGGGATAGCTCGGGGACTTATGTATCTGCATCAAGATTCTCAGTTGAGGA  
TCATTCACAGGGACCTGAAAGCTAACAACATTTTACTAGACAATGACATGAATCCAAAGATATCAGACTT  
CGGTATAGCAAGAAGTTGTGAAGACGACAAGTTTGGAGCCAAGACACACCGAGTAGTTGGAACATAGT  
AAGAATCTTAAGATGATATTTTACTGAATCATTCAAACTGGAATAGAAGAAGAGCCTTGAGATTATCGT  
AGTATGTTTACCCAGTATTAGTAACGCTAATTTCTTTTACGTTTTATGCAGTGGCTACCTCTCACCGGAA  
TATGCTGTACATGGTGTCTACTCGGTGAAGTCAGATGTATTTAGCTTTGGTGTCTTAGTTCTTGAAATTGT  
GAGTGGGAAAGGGAACAGAAAATTCTCTCATCCGGACCATAACCTTAACCTCCTCGGACATGTAAGGGT  
TGTGTTTTTCATTGTCTATCAGTAAATTATCTCGTAAACCTGGTCATGCTAACACGATACTAATATCTACA  
GGCATGGACTCTATAAAGAAGGTAGATCAATGGAATTAATCGGGGATTTCTCATTGATGTTTATTCT  
ACACCTGAAGTTATACGATCAATCCATGTTGGTCTATTGTGTGTTCAACATCGTCCAGAAGATCGTCCAA  
GTATGTCTTCAGTGGTTATGATGTTAAACAATGAAGGTGTAAGTCCACCTGCTAAACAGCCAGCTTTCTT  
CGTAGAAACAAATACACCAGATAATGAATTCTTCTAGTCAATATGCACATAGTACAGTGAATCAGATC  
ACCATCACAACATTAGAAGCCAGATAGTAAATTCTTATTGCAAATAGCAATCTATTATACTCTTCTTCT  
TTTCTTCTTTGTAGCA

>M6-PGSC0003DMG400021993 M6 G-LecRK

AAAAGTATGAAAATTTTATGATGATGAATTGATGGAGGACAAAAAAGTTTATTCCCTTAGCCCTTTTACTT  
GTGATTTTATTGATCACACTCATCGTTATCGCACGTATAACGTTGAAATATTCGGAGACATTTTTTCTTATT  
TTCGGAGCTGATATCGCGTTGATTATTGGTGTTTTTGCTGGTGTTTTGATCCGAAGGAAGTTCAACAACA  
GGAGGTTATTGCTAGAAAATCAGTTAGACTCTGATGGACGCGAGCTGAGGATCGAGTATAGTTTCCTAA  
GGAAAGTAGCTGGTGTCCAACAAGATTTAAGCTGAAAGAGCTCGAAGAAGCAACCAATAACTTTGGAT  
CGTTGGTAGGACGTGGATCATCAGCTTGTGTTTTCAAGGCGTGCTTAGTGATGGTGCATCAGTAGCTG  
TTAAAAGGATCGATGGAGAGGAAGTTGGCGATAAGGAATTCAAATCAGAAGTTGCAGCTATTGCTAGT  
GTTCAACATGTTAATCTTGTACGTTTACTTGGATACTCTAGTGTTCCCTCCATCAGGACCTCGATTTTTGGTT  
TACGAGTATATAGTTAATGGATCACTTGATAATTGGATTTTTCGAAAAAGGGGAATTCGAGGTTGTTTGT  
CTTTGGATTTGAGGTGTAGAGTTGGTCTAGATGTGGCTAAGGCACTTTCTTATTTGCATCATGATTGTAG  
ATCGTGATTTTACATCTCGATGTCAAGCCTGAGAATATACTTCTAGACGAGAATCATCGTGCTATTCTAG  
CTGATTTCCGGGTTGTCTAAGTTGATGGGGAAAGATGAGAGTAGAGTTGTTACAACGATTAGAGGTA  
GGGGGTATTTAGCCCCGAGTGGCTCCTGGAGAACGGGATTTCTGAGAAAAGTGATGTTTATAGCTACG  
GAATGGTGCTATTGGAGATGATTGGAGGGAGGAGAAATATTACTTTAGCTGAAAATGGAAAGAGTACC  
AATTCAAAGAGTAAGTTCAGCTATTTTCTAAGATTGTGAGTGAGAAATTGGAGCAGGGAAAGATCATG  
GAAGTCGTGGACGAGAGGCTCGTCCACGAGGCAGCTACAGGAGGTGTAGCTGTAGAAATGCAAGTGA  
AAAGATTGGCGTGTGTGGCGTTGTCTTGCATCCAAGAACGGCCTAGTCTTAGGCCAACAAATGGCACGAG  
TCGTGGAAATGTTGGAAGGTCGTGTGCCAGTAGAAGCGCCTACACAAACGACAATGTTGATCCTCGATC  
TATTAGACGAGGGTGTGATCATCATCCCGGATACCTAGGGTTGCTGCAGCCATGGCAAGATCTAGTG  
ATACTAATTCGCTTCGCTCTTATAACAATGTCTATCCTCTCAGGGAGGTAGTACCTACATAATACATAACGG  
ATTCGTTTGCTTCTATCAAATTTTTCAATATCAATAGGTTGATTGTTTCTCTGGTGTTGTATCCTGAATC  
CGAAAGTGAGTACTTGAATTCTCCCCATAACAAAAAAGTGTAAGAATTTGATTTTGTACACCAAATA  
TA

>M6-PGSC0003DMG400022391 M6 G-LecRK

AAAGATAACATTCAAAGCATAACGAAAAGAGAAAGAAGTGTGAGCAAATAGTATTGCAGGCTGCAGCT  
ATAGGTATTCTCCATTTTAGCTTATACAGAATTAATCCACATGCAAATTGGCAGAATAAAAACTTCATAAG  
CAATGAAATTAAGCACAAGAGAGATACTTCTATTTCCAGCTGTTCTTGTCTGTTTCTTCTATATCAACTG  
CTTCAGGTATCATTAGCACCAATAAATTCCTGCGAGATTCAGAACTTTAGTCTCCAATGACAAAAGATT

CATAATCGGGTTCCTTAGTCCTGAAAATTCGACGAATCGTTATGTTGGTGTATGTTTAATGTCCAACCAC  
CAACTGTTGTATGGGTTGCCAACAGAGAGAAACCTTTACAGGATTCTAGTGGAAGAGTGACAATATCTG  
ATGATGGAAATCTTGTAACTTGAACCTCACAGAATAGGAGTATATGGTCATCAAATATTTACCAGCTGT  
TAGAAATTCTACAGCGCAGCTCTTGGATACTGGTAACTTAGTTTTGAACGATAGCTCCAACGGGAGGGT  
TCTCTGGGAAAGTTTTCGGGATCCTTCAGATTGCTTCTTGCAGACAATGAAAATTGGCGTTGATGTAAGT  
ACTAACACGACAAATCTGCTGAAATCATGGATAAGTCCTTCAGATCCATCTGTTGGGAGTTTCTCAGTTG  
GTATTC AACCTGAAACAGTTCTCAGATTTCCATATGGAAGAATGGGAAACCTCATTGGCGTAGCGGTCC  
ATGGAATAAACAGGTTTTTCATTGGGGTACCAGACATGACTTCATTCTATCTCAATGGATTTGATCTAGTT  
AATGACAACAAGGGCACCGTGTACCTTACCTATTTATATGCAAATCAGATTGAGCTGACGTTTTTACCTT  
GAACTCAACAGGGTTTTTGCAGCAGAAATATATGGATCCTAGTAAGAATGATTGGGAAGTAACATGGG  
AATTTCTGCAACTGAGTGTGATTTTTATGGAAAATGTGGACCTTTTGAAGCTGTGATCCTACAAGCTC  
ACCAATCTGTTCTTGTAGAGGGATTTAAGCCGACAAGTGAAGAGGAATGGGGGAAAGGAACTGGA  
CTCGTGGATGCAACAGAAAGTCCACGTTAGCGAGCGAAAGAAACAGTTCTAACCTTGAGCAAGGGAAG  
CAAGATTGGTTTCTGAAGCTGCAGTCAATGAAAGTGCCGGATTATGCTATTTGGGTACCTTTTGTAGATG  
AAGATTGTGTTAACAATTGCTTGAGGAATACTTCTGCATAGCTTATTCATACTACACAGGCATAGGATG  
CATGCATTGGGAAGGAAGCTTACTTGATGTTGAGAAATCTCTATGGGTGGGGCAGATTTATTCCTTCGC  
CTTTCATATTCTGAGCGTGGTAAGACCTGCATTTCAGAACTATAATATAAGCTATAAACTCTGCTTGCCA  
ATGACATATGTATAATGGACACTTATTTCTGTAATGCAGATCAAAAGAGAGAATATAAAGTAGTCATTGCC  
ATCATAGTCCCAGTAGGCTCAATAATTCTTGCCATTTTCGGATACATTTCTGCAGATATGTAGCTAAGCG  
CAGAGGTAACAAGCTTATCTGAAACATTAGAAAATTCATAGTAGCTTTAATCATAACGAATCACTTTATCTC  
TAATGTCTGTCCTCTTGAATCAGGATGGAAGAGAATGAGTAAGATCTTATTAAGTGAATCATCGCCAAAC  
TATTACAAGGAAGACAAGATAACAGAGGACATCAATCAAGCTAAATTGGAAGAACTGCTTGTATACAAC  
GTTGATATCTTAGCAAACGCAACTGAGAATTTTCATCTGTCCAGCAAGCTTGGACAGGGAGGTTTTGGTC  
CAGTTTACAAAGTAAGGATTTGTTTGATTGAGTGTCTTGTAAATTGTTTTTAAGAAAAGATATCTAAGTATA  
TGATATGATTGCAGGGGAAATTGCCAGATGGACAAGAGATTGCTGTGAAAAGGCTTTCACAGTCTTCTG  
GTCAGGGGCTACAGGAGTTCATGAATGAGGTTGTGGTGATTTCAAAACCTCAACATCGTAATCTTGTTA  
GACTTTTTGGTTGCTGCATAGAAAAGAGGGGAAAAGATGCTGGTTTATGAATACATGCCAAAAGAAAGCT  
TGGATGCCTATCTCTTTGGTTCGTTATGATTAGTTTTCTTTATTTTCCATAGAGTCTAACTAAAACAACT  
TTTCTTTGATTTAACTTGTCAAATTCGCAATGTATTTTCAGGGTCACAACAACAAGAGGAAGAGTTCCTT

GATTGGAGTAAACGTGTGATCATCATTGAGGGAATTGGTCGAGGCCTTCTTTACCTTCACAGGGATTCA  
AGACTACGGATTATTCACAGGGACTTAAAGGCCAGCAACATATTGTTGGATGAATACCTAAACCCCAA  
ATTCAGATTTTGGGATGGCAAGGATTTTGCAGGCAACCAAGATCAGGCCAACACAAGCAGAGTTGTT  
GGAACCTAGTAAGTTCTTGTATCTTCCCTTTTATCTTTTCATGAATGAAAAGAACAACAAGTAAACAT  
TCAAAATTATAACATGATGCAGTGGTTACATGGCACCTGAATATGCAATGGAAGGAAGATTCTCAGAAA  
AATCAGATGTTTATAGCTTTGGAGTATTGTTATTGGAAATTACAAGTGGAAAGGAGGAACACTAGCTTCA  
CCAAGATGATGGTGCATTAAGCCTGCTAGCATTGGTAAGTTTTTATGAAAATTAAGCTCCAATTCATAG  
AAATGCCAACTTTTCATAGTTCAAGTTTTCAATGTTTTGTCAATGTGCTTGCTCTTCAGGCGTGGAATGT  
TGGATTGGAAACAAGATTGTGGAATTGGTTGATCCCAAGATAACTGACCTGCACCTTGAAAAGGAAATG  
GTGAGATGTGTACAAGTTGGATTATTATGTGTACAAGAATATGCAGAAGACAGACCAAATGTCTCCACA  
ATTTTGTCTATGCTCACCA

>M6-PGSC0003DMG400022426 M6 G-LecRK

CACAAATTTGAAGAGAAGTCATTTTCCTTAAATTTAAAAAAATGAGTTGATTTGAAAAACATTTAACCC  
AATCAAATATGAGAAAATTGGAAAACATTTTCCTTCGTACCAAACACACCCATTGTAAGCAAACATATTT  
GATTTCTAAAAAACTGCTACCTTCAATTGTTCTTTTGATCATCAATTGGTTTTCGTTTTTGTCTAATGTTGTG  
ATTTTCTACTTGTTTTGCAAGATCATAGGTACGCCATTGTTGAATTGGAATATCCGCTTCGAAATCATA  
TTGGGCATTGCTCGTGGACTTCTTTATCTACACCACGACTCCAGATTACGTATCATTATAGAGATCTAAA  
AACGGGCAATATTTTATTAGACGAAGAGATGAATGCCAAAATATCAGATTTAGGCTTGGCCAGGAATGT  
TGAAGGCAAAAATATTGATGCTAAGACGCAAAAAGTTGCCGGAAGTTAGTAAGTATATATATGCGCTTT  
CAGTTTAACTTTCTGCAAAAATATATAATCGCAAAAAGCTTATGAAAATACAAGTACATGGTGCTAATCG  
GAAAATTGTGCAATCACCTGTTTATAGAGAGCAGCCTTGTTTCATGAACTAGCCCCTCTCAAATCCCCACT  
TGATCAGGAATTCTTCATTGACAGTGTACCCGGAGCTAGATGGATCTTAATTACTGGTGTGATATTATTG  
AATTTTTAGTCAAATCATTCTTAAAATATAGAGAAAATACATTAAAAAAACCCCTGAATTTGTCCACTAA  
ATTTACTTTAGTACTTTTAGCTTTATAAATAATTATTTACTTCTAAATCTCATTTCAGTGAATTAATAATCCA  
CCCAAAAAGCTGACGTCGCAATAAAAAAAGAAAGGCTAGTAAAACGTAAAATATCAAAAATAAATA  
CTCTTTCTGTCCCTAATTACTTGTCCACTTTCTCTTTTATAGTTATTTCTAATTATTTGTCCATTTTGACAAAT  
CAAGAAATGACAAATTTTTTTACCTATTATACCCTCAATTAATTACTTTGAAAAGGTAGAATTTTTTGAA  
AATCTTAAATTTTAATTCATTTACTTCATAATTAATAAAGGTAACATGATAAACTCACTATGTCAATAATTA  
TTTTCTTAATAGGTGTGTCAATTCAAAGTGAACAAGTAATTAGGGACAGAGGAAATAAATAAATAAAGC

CTTTTTTTCTTTCCAACCAATAAGGTTTCATCTTCCTCACACCCCACCACCTTTCTCTGCCACAACCCCACC  
CTTACGCCTCGAACCCCCACCTGCACCTCTTTCCCTATTTCGAACCTGCCGCCACCCACACTTGCCT  
CACCCCTTTCTTCTTCTTCTCGAGCACCCGTCCTGCCACGTTTTTTCTTCTTTTTCAAACACTCCCACAC  
ATTCTTCATTTCAAATTATTCTTGCTTATTCTTAGAAATGATGAATAGGAAAAAAAAATGAAAAACCAAC  
AACTTATTATTGCTTCAAGATCTTACTTTTGGGAAGGGTTGTTGATTGTGATGAACTTGAAGTTTTTTAAT  
AAAAATAATATAATTTCTTCATCTCAAATTAGTTTTTTAATTTGTA CTCTATTATTTATTTATTTGATAA  
TGTGCTTTAAAAATTGAATGTTTTCTAGTCTTGGATCCATAGAGTTTGATTTTATTTTATAATCTTAGATT  
AATTCTCAATTTTTTTCTATTTTTTACCTTTCTAAAATTGTATAAATAAAAAGAAACAAAAAGAATTAAA  
AAAAC TCAAATTTAAATAAATTTCAAGGTGGCGCTGATGTGACAATGATGTGGCATTGATTTGGCAAT  
GAAATGGAGCATGTGTAATACACTTGCCATTGTGAGACTGATATTGTAATATTAGATTTGAAAAAAATC  
ACTTCAAAAATGTTAAGGGGTATTTAAACATCCATGTAGTTTAAATGCTAAAGTAAGTTGTGCTGCCAAG  
TTAAGGGGGTTTTTTTTATGTGTTTTCTCTAAAATATACCCTAACTTAACTATATCCTTAAAATATTAT  
TCTTATCAAGAAAACATTTTTCAAGTATTTAAAAGTGAATAATTTTCATCCTTCTACTTGAATTTATGAGAA  
ATCTAACAAATCCCACAAAAATCAAGTTATTCCTTCGTAATTATTATTCTTAGATACGCCAAAAATACTAT  
CGTGAAC TTTTATGGTAATTGAGTTTAGCATTATGCAAATCTTTAAATTTGACAGTTTTTTTTCATTTATTT  
TTCATGTAATTCATATTTAAAATATTATTAGTTGGTATAAGTTTCTTCTCAATTGAATATACTAGAAGTGA  
CGTTTGTGCGAAACTTCCCCTTCTAATAATGTAGAATGAAACTCAAATGCGAGACATGATCAATATTTTG  
ATTACTTCAATATCAGATTGACCCAAATATTTATTGATCTAAATACAATTTGACTTTGAAAAAGGTAAAGG  
TAATTAAGCTTCAGCTTATTTCTGTTATTAATGAGAAAAAGAGCTGATCATGTATCCTCACACCTTCCAA  
ACATTTTTTGTTCAGTAAGCAATGGTGTCTAAGATTCTTAATATTTATTTTCGAAACTTCTTATAGCAGGT  
AATGAAATTATGTAAGAAAAC TTTTGTGATAGTCACATGAATTGCTCATGTTTTGTAGGATCCCTTAGTT  
TTTTACTATATCTAACATAAGGATGAAAATTGTTAACTTTAAAATATTTAGAGGATGTTTTTTTGCCAAA  
AAAGATATTTTAAGGATGTAGTTAAGTTTGGGGTATAGCATAAGGATGTTTTTGACCAAAACTTTGATA  
TTGTTTCCCGTAGTATTTTTCCCAATTGAGTTGTGCTATCATGGGCCGAGCCGCTTTTACCCGAAAATT  
ATGCGGTGAATAGAGGTTAAATGTTAATTATTATGAATATATATTTAATTTTGTATATTATTCACCTAACT  
AAAAAGAAAATTTGCAAATCCTCGCCACAGGCGTTTACTGATCATGTATTCAATCATCTACTCAAGGCCG  
TTTTTATCTCATATACATGATGGTATACGTTATCTTGACTCATACATGGTGGGATACACTATCTAAGATAA  
TTAATCCTGGGATTACTTGTCGTTTAATTGGATTAATTCTTGTCTTGTGATATACAGCGGCTATCTTGCA  
CCAGAATATGCATTGGAAGGACTTTTTTCAATCAAGTCTGATGTTTTTGCTTTTGGAGTGGTTGTACTGG

AAATCATTAGTGGAACAAAACTTGGATGTTCTTGAAGACACAAACCTCTGGGTCATGTAAGTACCAA  
AATACTTTCTCTATTTAGAACATGTAATCTTAAGACATAAACGAAATGTGAAGATTGACATATAAAGTAG  
GCCTTCTGTCCCAATTTATATGAATATTGGGCATCGTTGATAACTCGAAATTAATATAATTACAGGCTTG  
GAAACTATGGATGGAAAATAAGGCATTGGACATAATGGAACAAAGTCTAGTGGATACATTCAATGAAAT  
TGAAGTAGTAAAGTGCATAAACATAGAACCTTTTATGTGTGCAAGAAGATCCAGGTGATAGGCCAATTAT  
GTCAAATGTGATAATTATGCTTGGAAAGTGATAGCATGCCTCTTCCAAGACCCAATCAACCAGCTTATGTC  
ACAAGGAAAAATTACACAATAGGAGCAAGCACATCATCCTCCTCTTATAATTATAATAATTACTATAA  
TTATGATTCATTCACTGACTCCAAAAATGAGTTGACCATCACTGATATGCAAGGCCGATAAATATTATAT  
AATAGTAGTAAGTTTTGCACGATATGGACATGTTAAATACGTATTCTAAGCTTAGTGTGAATGACAATAT  
TTATGTAGTAGGCGGATCTACGTAGAGGAGAGGGAATGCAAGGGCACCCGATCGAACACTCGAGAAGA  
ACTTCATGTATAAATATCTCGAGTATATATATATGTATGTACTCCATTAATCTATGTGTGTTAGCATAT  
ATTGAATGTAAATATAGTAATTTGTATATTATGATAAATATAGGGCTAATAGGTTAGGGTTAGCACTACT  
ATTGTCGACTATTCTTGTATGGAGCACACAATTGAAGCAGATATGTTGATGCTCAGCTTTGTGCTTATA  
GTAATTCTTGGATAGTACTAATACTTTGACTGGTAATAAAATCCTTGATAATCCTCTAAATGTTGCATTA  
GTTTTC

>M6-PGSC0003DMG400022787 M6 G-LecRK

CACACTTCGACTAATTCATAGGATACGTATCACCTCTCACCAGCAACAAAATCTTGATTTGTGGAAAAA  
AAAAAACCAAAGTGATGATCACTAGTCTACAATATTTGCTTGTCTTCATCTTTCTTACTTAGGACTTTGCT  
TATCAATATGTAACATTAATAGCACTCAATATCTAAAAAGATCCAGCAACTTTATGGTGTCTGATAACAT  
GTTCAAGTTGGGATTTTTTCAGTCCTGGAATACTACGAATCGTTACGTTGGTATTTGGTACAACCTCTCAG  
AAACAACCTGTTGTTTGGGTAGCAAATAGAGTTAAACCATTGAAAGATTCATTTGGTGTGTTTCAAATTTT  
TGAGGATGGAAATCTTGTTGTGATGAATGGAATGAAAGATGTTATTTGGACATCGAACATTTTCATCTACT  
TCACACGTTGTTACGAGTTCTATTGCTCAGTTACGAGGAGGGAACCTTGTTTTACTTGACAACCTCGAAAA  
ATAGGAACATTATATGGCAAAGTTACCAACATCCTAGTGATACATTTTTGCCTAAAATGAAAATACCTATT  
AACTCTGTAAAGCAGGGGAGAAAACAGGGCTAAGATCTTGAAAAGTCCTTTGGATCCAAGTTTT

>M6-PGSC0003DMG400024258 M6 G-LecRK

ATGGTGTGCATCGACTCAATTCAGGAGGTTTACGTATACTGAACTTAAGAAAGCAACAAAAAACTTCAAG  
GTTGAGCTAGGAAGAGGAGGTTTCAGGAGCTGTTTATAAAGGAGTTTTAGCAGATGGAAGAGCGGTAGC  
AGTCAAGAACTTGCAAATGAGTTTCAAGAAGAATTTTGGGCAGAGATGACTACCATAGGAAGAATCAA

CCATATGCATTTGGTGAGGATGTGGGGATTTTGTCTGAAGGTAGACGTCAGCTTTTGGTCTATGAATAC  
GTCGAGAACTCATCACTAGACAGGCATCTTCCAGGGCTGATATTCTTGGATGGAAACAAAGGTTTGCA  
GTGGCACTAGGGACAGCCAAAGGTCTGGCATATCTTCATCATGAATGTCTTGAATGGGTGATTCATTGT  
GATGTTAAGCCTGAAAATATACTTCTCGATAGTGAATTCGAGCCCAAGATTGCAGATTTTGGACTTGCAA  
AGCTGTCCCAAAGAGGTGGCCCTGGTTCAGATTTACAAAGATTCGCGGTACTAAAGGCTACATGGCTC  
CTGAATGGGCTTTGAACCAACCTATAACAGCAAAGTTGATGTTTATGCCTTTGGGATTGTAATACTAGA  
AATGATCAAAGGAAGTAGGCTGTCAAGTTGGGTGGTGGATGATAGTGAATGTGATCATGAACAAGATT  
CACAGCTCGGAAAATTTGTCAGGATGGTGAAGAGGAAGATTCAAAGTGGAGAAGATTCTTGGGTGGAG  
AACTTGTGCGATCCACGACTAGAAGGCAAATTTAGCAAGAACCAGGCAGTGACACTGATTGAAATAGGC  
CTTCTTGTGTTGAGCAGGACAGAAATAAAAGGCCTACAATGGCCTCAGTAGTCCAAACATTGCTGGATT  
GTGAAGATGAAACAACACATACAACATAG

>M6-PGSC0003DMG400024259 M6 G-LecRK

ATGAAAAGTTTGAATCTTACCATCTTTTTCCCTTTTATGTTTTCTTATTTCTTGTTTTGTCTTTCCCTTGGAT  
AACATCATCAAGAATTTTGTCTAAAGGTGATTCTTTTTAGTTAAAGATGATTCACATTTCACTACTCTCC  
ACAAAAACATTCACCTGTGGTTTTATCCTATAGAAAGTACTAGTAATGCTTATTATTTTGGAAATTTGGT  
ATACAAATTCAAGAGATAAACTGTTGTTTGAATGCTAAACAAGATAGGCCTGTTAATCTCAAAGGGT  
CAAAGTTGACATTAAGAAAGAATGGAGCTTTAGTTTTAACAGATGTTGATGATACAATTGTTTGGCAAAC  
AAACACAACATCATTTGATGTTGAAAAGGCTGAGGTTCTTGAAACAGGAACTTAGTATTGAAGAATCC  
TAAAGGTGATGTTTTGTGGCAGAGTTTTGATTTGCCTACTGATACTTTGTTACCTTATCAAAGATTTACCA  
AGAATCATAGATTAGTTCCTCCTTTGAGGAAAGGGAGTTTATCACCTGGATACTTTAGTTTGTACTTTGAT  
AGTGATAATGTATTGAGAATGATTTATGATGGTCCTTTAGTTTCGAGTATATACTGGCCTAATCGCGATA  
GGGATGTGTATGGGAATGGTAGAACTAGTCAAATAGTAGTAGATTTGCTTATTTTGTGGAATGGGTA  
GATTTTTCTCAAGTGATATGTTGCAATTCAATGTTTCTGATATGGGGTTTGGGATATTGAGAAGATTGAC  
TATAAATACTGATGGGAATTTGAGGATGTATAGTTTGGATAACTCGACAGGGTTATGGAAGATGTCGTG  
GCAAGCTATTGCACAACCTTGTATTGTGCATGGAATATGTGGAAGATTTTCGATATGTACTTATGTATCG  
AAGCCTAAATGTACATGTCCTCCTGGATATGAGATGGTTGATGGAAGTGATTGGAGTAGAGGTTGTAGG  
CCAATGTTTAGATCAAGAAGTTTGAAGTCTAGACATGTCAAGTTTGTGGAAGTTCCTAATGTTGATTATT  
GGGGTTTTGATCTCAATGCTACTACTCCTTTGTCATTTGAATCTTGTAGGGAATTGTGCTTGGGTGATCCA  
CGTTGTCGTGCATTTGTCTATAGGCATACTGGGGAGGGATCATGCTATACTAAAGGCAAACCTTTTCAATG

GATACAGGTCTCCTGGTTCCCTGGAAGTGTATTCTTGAACTCCCTATGAATCTAAGTGCATCAGAATC  
AGGTCATTTGATGCTTGAAGTACTGATGCAAATGTGGATTGAGTCCCGAAAATGTTCTTTTTGGTTCT  
CCTTCTATGTATGTATTGGATTTAAGAAGGTGAAGTGGATTTATCTTTACCTGTTTTGTTCCACCCTGG  
TGGAATAGAGATTCTGTTCTTCGTGTTAGGCTGGTGGGCGTTGTTTAGTAAACATGGGATTCTGCTTCC  
ATTGAGGATGGATATAAAATGGTGTCACTCGACTCAATTCAGGAGGTTTACGTATACTGAACTTAAGAAA  
GCAACAAAAA ACTTCAAGGTTGAGCTAGGAAGAGGAGGTT CAGGAGCTGTTTATAAAGGAGTTTTAGC  
AGATGGAAGAGCGGTAGCAGTCAAGAACTTGCAAATGAGTTTCAAGAAGAATTTTGGGCAGAGATGA  
CTACCATAGGAAGAATCAACCATATGCATTTGGTGAGGATGTGGGGATTTTGTCTGAAGGTAGACGTC  
AGCTTTTGGTCTATGAATACGTGAGAACTCATCACTAGACAGGCATCTTTCCAGGGCTGATATTCTTGG  
ATGGAAACAAAGGTTTGCAGTGGCACTAGGGACAGCCAAAGGTCTGGCATATCTTCATCATGAATGTCT  
TGAATGGGTGATTCATTGTGATGTTAAGCCTGAAAATATACTTCTCGATAGTGAATTCGAGCCCAAGATT  
GCAGATTTTGGACTTGCAAAGCTGTCCCAAAGAGGTGGCCCTGGTTCAGATTTACAAAGATTCGCGGT  
ACTAAAGGCTACATGGCTCCTGAATGGGCTTTGAACCAACCTATAACAGCAAAAGTTGATGTTTATGCCT  
TTGGGATTGTAATACTAGAAATGATCAAAGGAAGTAGGCTGTCAAGTTGGGTGGTGGATGATAGTGAA  
TGTGATCATGAACAAGATTCACAGCTCGGAAAATTTGTCAGGATGGTGAAGAGGAAGATTCAAAGTGG  
AGAAGATTCTTGGGTGGAGAACTTGTCGATCCACGACTAGAAGGCAAATTTAGCAAGAACCAGGCAG  
TGACACTGATTGAAATAGGCCTTCTTGTGTTGAGCAGGACAGAAATAAAAGGCCTACAATGGCCTCAG  
TAGTCCAAACATTGCTGGATTGTGAAGATGAAACAACACATACAACATAG

>M6-PGSC0003DMG400024260 M6 G-LecRK

ATGAAAAGTTTGAATCTTTACCATCTTTTTCCCTTTTTAGTTTTCTTATTTCTGTTTTGTCTTTCCCTTTGAT  
AACATCATCAAGAATTTTGTCTAAAGGTGATTCTTTTTCAGTTAAAGATGATTCACATTTCACTACTTCTCC  
ACAAAAACATTCACTTGTGGTTTTTATCCTATAGAAAGTACTAGTAATGCTTATTATTTTGGAAATTTGGT  
ATACAAATTCAAGAGATAAACTGTTGTTTGAATGCTAAACAAGATAGGCCTGTTAATCTCAAAGGGT  
CAAAGTTGACATTAAGAAAGAATGGAGCTTTAGTTTTAACAGATGTTGATGATACAATTGTTTGGCAAAC  
AAACACAACATCATTGATGTTGAAAAGGCTGAGGTTCTTGAACAGGAACTTAGTATTGAAGAATCC  
TAAAGGTGATGTTTTGTGGCAGAGTTTTGATTTGCCTACTGATACTTTGTTACCTTATCAAAGATTTACCA  
AGAATCATAGATTAGTTCCTCTTTGAGGAAAGGGAGTTTATCACCTGGATACTTTAGTTTGTACTTTGAT  
AGTGATAATGTATTGAGAATGATTTATGATGGTCCTTTAGTTTCGAGTATATACTGGCCTAATCGCGATA  
GGGATGTGTATGGGAATGGTAGAACTAGTCAAATAGTAGTAGATTTGCTTATTTTGTGGAATGGGTA



GATTTTTCTCAAGTGATATGTTGCAATTCAATGTTTCTGATATGGGGTTTGGGATATTGAGAAGATTGAC  
TATAAATACTGATGGGAATTTGAGGATGTATAGTTTGGATAACTCGACAGGGTTATGGAAGATGTCGTG  
GCAAGCTATTGCACAACCTTGTATTGTGCATGGAATATGTGGAAGATTTTCGATATGTACTTATGTATCG  
AAGCCTAAATGTACATGTCCTCCTGGATATGAGATGGTTGATGGAAGTGATTGGAGTAGAGGTTGTAGG  
CCAATGTTTAGATCAAGAAGTTTGAAGTCTAGACATGTCAAGTTTGTGGAAGTTCCTAATGTTGATTATT  
GGGGTTTTGATCTCAATGCTACTACTCCTTTGTCATTTGAATCTTGTAGGGAATTGTGCTTGGGTGATCCA  
CGTTGTCGTGCATTTGTCTATAGGCATACTGGGGAGGGATCATGCTATACTAAAGGCAAACCTTTCAATG  
GATACAGGTCTCCTGGTTTCCCTGGAAGTGTATTCTTGAACTCCCTATGAATCTAAGTGCATCAGAATC  
AGGTCATTTGATGCTTGAAGTACTGATGCAAATGTGGATTGAGTCCCGAAAATGTTCTTTTTGGTTCT  
CCTTCTATGTATGTATTGGATTTAAGAAGGTGAAGTGGATTTATCTTTACCTGTTTTGTTCCACCCTTGG  
TGGAATAGAGATTCTGTTCTTCGTGTTAGGCTGGTGGGCGTTGTTTAGTAAACATGGGATTCTGCTTCC  
ATTGAGGATGGATATAAAATGGTGCATCGACTCAATTCAGGAGGTTTACGTATACTGAACTTAAGAAA  
GCAACAAAAAATCAAGGTTGAGCTAGGAAGAGGAGGTTTCAGGAGCTGTTTATAAAGGAGTTTTAGC  
AGATGGAAGAGCGGTAGCAGTCAAGAACTTGCAAATGAGTTTCAAGAAGAATTTTGGGCAGAGATGA  
CTACCATAGGAAGAATCAACCATATGCATTTGGTGAGGATGTGGGGATTTTGTCTGAAGGTAGACGTC  
AGCTTTTGGTCTATGAATACGTGAGAACTCATCACTAGACAGGCATCTTCCAGGGCTGATATTCTTGG  
ATGGAACAAAGGTTTGCAGTGGCACTAGGGACAGCCAAAGGCTGGCATATCTTCATCATGAATGTCT  
TGAATGGGTGATTCATTGTGATGTTAAGCCTGAAAATATACTTCTCGATAGTGAATTCGAGCCCAAGATT  
GCAGATTTTGGACTTGCAAAGCTGTCCAAAGAGGTGGCCCTGGTTCAGATTTACAAAGATTCGCGGT  
ACTAAAGGCTACATGGCTCCTGAATGGGCTTTGAACCAACCTATAACAGCAAAGTTGATGTTTATGCCT  
TTGGGATTGTAATACTAGAAATGATCAAAGGAAGTAGGCTGTCAAGTTGGGTGGTGGATGATAGTGAA  
TGTGATCATGAACAAGATTCACAGCTCGGAAAATTTGTCAGGATGGTGAAGAGGAAGATTCAAAGTGG  
AGAAGATTCTTGGGTGGAGAACTTGTGATCCACGACTAGAAGGCAAATTTAGCAAGAACCAGGCAG  
TGACACTGATTGA

>M6-PGSC0003DMG400024426 M6 G-LecRK

CATTGTTTGGGAGAACGGCAGGGTTAAACGACGTGTTTTGACATAAAGTGTGATCATCAAGACTTTAT  
AAAAATGTCTTCATCATCTAAGGATGATCAATCATCCAATACACCATCTTCGGATTCTTCATCAAATTCAC  
CATCATCATCTTCTCGAATTCTCCACCGTCTGGCTCATCCTCAAATCTTCGCCATCCCAAGACAATTCAT  
CTTCATCCAATGATTCAAATCCCAATCTCCTCCTCAAAGTAATTCATCATCTTCTCCGCCATCAGGGGAT

AATAATAACTCGTCTCCTTCCGGTGGTAACAACAACAATAATGACAATAACAACGACAACAACAACA  
ATAATGGTAACAGCAACAACAACAATAATGGTAACAACAACAACAATGATGGTAACAACAACAACA  
ATGGTAACAATGATAACGACAATGATAACGACAACAATAACAACATCGGTAACAATAAGAATGACAATA  
ACAACAATAATGGTGGGAACAATAACAACAACAATAATGGTGGTAACAAAATAATAACAACAACA  
ATGGTGGTAACAACAATAATGGTAACAAATCTTCACCACCAGGAAAATCGTCAAATCAAATGGAGGTT  
CATCACCTCCTCCACCCCCACCACCACCACCTCCTCCACCACCTCCTCCTTCTCCTTTTTCTCCAACTCTGG  
GTTTCTTCTCCTCCAAAGCATAAGCCACCACCAAGCAAGTCCCTAGATAATAATAACAACAAGCCT  
AATGATAATGGGACAGCCATCATTGTAGGAGTTGCTGCTGCAGGAGGTCTATTACTTCTGTGCATGTTAG  
TTTTCTTATATCATGTTGTAAACGCAAAGGAGAAGGCCGCGACCAAATGGGCTACTACAGGGACA  
ATTCTCATGGAGGCAATAGTATGTTCTTCTCTTAACTTATACTGTATGTTTTATGTTGAGAGCATACT  
GTTTTCAAATAGAATTAGCTTCAAATGCAGTAGCTATGAAGAGAACTGGTAAATGTGCAGAGTAGTGAA  
TATGTTTAGGTTTAAATAGTGTTAGTATTGAGAATGTATATATGGTGCAGGTAAGTACTACTATAACAGT  
GGACCATATGGGAATTGGCACAACAACAACAATATTCAATCAACGGATCATATGGTGAAAATGCCTAAT  
CCACAAGCACCGAGTACTAACGTAAGTTCAGAAGTTCAGTGGCCAATAGCACCTCCACCACCACCACCA  
ATGATGAGTAGCAGTGAATTAAGCTCTGCTGCTTTCTCTGGTCCGCAACAACCTCCATTGCCACCCCCAC  
ACCCATCAATGGCTCTTGTTTTAACCAAAGTAGTTTTACATACGATGACTTATCTACCGCAACTGGAGG  
ATTTGTTAAGTCTAATCTATTGGGACAAGGTGGTTTTGGCTTTGTACATAAAGGGGTCTTGCCTAATGGT  
AAGGATATAGCTGTCAAAGTCTAAAAGCTAATAGTGGACAAGGTGAACGAGAATTTCAAGCTGAAGTT  
GAAATTATTAGTCGTGTACATCATCGACATCTTGTCTCTTAGTCGGTTATTGCATTGCTGGATCTCAAAG  
GTTATTGGTATATGAGTTTGTTCCTAATGGCACTCTTGAGTATCACCTTCATGGTATTAACCTAATTTCTT  
TTTGTTATCTAAATACTCATTCTACATATGTCGTATTTAACTCATTGATCCCTTATTTAATTAGGAACTGGT  
CGCCCTGTTATGGACTTCCCTACTAGGCTTAAAATTGCATTAGGATCTGCCAAAGGCTTTGCGTACCTTCA  
TGAAGATTGTAAGTTCATATATACTATTCTCATGTCTATATATTCTCATCACAATTAAGTTCTATTTTCAT  
ATATAAATTACAGGCCACCCTCGTATTATTCACAGAGACATTAAGCTGCTAATATTTTACTGGACCATAA  
CTGTGAAGCTAAGGTATTTGGTAAAAATAGCTGAAACATTAAGCAAATTGATTCCTCATTGAGTTTCTA  
ACAAAGTTTATTACTCCCTTTGTAAGGTTGCTGATTTTGGATTAGCTAACTTTCCAACGACACTAAT  
ACACATGTTTCTACACGTATCATGGGCACTTTTGGGTGAGTTTAGTTTGATAATTTTTCAAATATATCCAA  
TGGATTTGCATTAATCGAAAGAGTATATTTATTTGTGTAGGTAAGTACTTAGCACCAGAATACGCTTCAAGTGG  
CAAGCTGACTGAAAAGTCTGACGTCTATTCTTATGGTGTATGCTGTTGGAAGTATAACTGGGCGTCGT

CCTATAGACATCAGCAGTGATGATGATACTTTAGTGGAATGGGTATACCATGATGATTACTTTACATCTT  
CGAATGATAAAAATTAATTCAGTAGGACATCGATCAGATTATTTAAACATATATGTATATATGTGCAGGC  
TAGGCCAATTCTGATTCGTGCAACAGAGGGTGGAACTACGATGAATTAATAGATCCACGTTTGGAAGG  
AAATTTTGATGCCCAAGAGATGCTATGTATGGTAGCTTGTGCTGCTGCATCCATCAGACATTCAGCAAGA  
AGACGTCCCAAATGAGTCAGGTTAATTTCTTCTTAATATTTGTCAAAGCTTTTCCTAATTCACAATTTTA  
AAAAGTATAGTGGTCCAGCGACTGACATATATATATATATATATATATATATATATATATATATATATA  
TATGTTGTAGATTGTACGTGCTTTAGAAGGTGATGTGTCTCTGGATGATTTAAATGAGGGAATGAAGAA  
GTCCCGAGTACTGCAATGTTTGGTTCTAGTGAAAGTTCTGAATACGATGGAGGTTTCATATGACCTTAAG  
AAATCAAGAAATCTGGAATGTGCGAGTCAAGAATTCACAAGCAGTGAACATGGTACCGGTGAATTTGTC  
CATTCCGGTGGTGAATCTCAAGAACATGGGCAGAAAAGGCACACCCCTTAAGGAAAATGGATCATACT  
TCAACTTCTGATGGATCTATAAGTAATAATTACACACATTTGTTGGGCTTACAAGGATGCTTTAGGCATTA  
AAAACTAGTTTTATGGGGGAAATATAATAATGTATTTAAACAACAATTGTGAAGCTTTATTAGAGATTT  
GAATGCGGGTTGTAAAGAGTATCACATCCTCCTAACCATTTTGTGGTTGGCTTTGGTTGTCAGTTTGAAT  
CATTTAGTTTTGTTGACTTTTGAAGTTGGGATATATACTAATTCTGAATTGTTTTCAATATATTTTCGTC  
AATGTGTATGCTAATTAATCTTTTCTTTGTTT

>M6-PGSC0003DMG400024998 M6 G-LecRK

TTTTTAACCATACTGATATGAGAAGAACTGCAATTTATAGTACTTTTCGTATAGTTATTTCTGTTGTTGTT  
CTTTACTTTGGTTATTCTTGGTATTTGTAAGTACTGTGGATACTTTTTTGTTCATATTTTCATCTTAACATTGTA  
TTATTGCTTTTCTTTCAAACCTTTTTTATAAACGTTTTTCTTGAGCTGAGGGCCTATGGGAAACAACTCTG  
TTTATGTTGTTGTAGTAGTAGTACTTTTGAAGTATTGTAATTTAATTTGAAATTATTGAGTTAATCTAATG  
TAATCTGATATCAGGTAATCTTGTGCATCAGGGAAGAAAATGAAAACAGGCCTGAGTTTTTCGCCTGGAA  
GAGTTTCGATTATCCAGGGGATACTCTGTTGCCTGGAATGAAGCTCGGGCGGAATTTGGTAACAGGCCT  
GGATTGGTACATGTCGTCGTGGATGAGTCCTGATGATCCTGCTATAGGTGAATTTGTTGACAGGATGGA  
TGTTCAAGGGTATCCACAGTTATTTGTATGGAAAGGTTTCATCAATTGCATTTAGTTCAGGTCCCTGGAAT  
GGTTTAGCATTTAGTGGGAGTCTAGTTTGAACCGAATACGTATTTTACGTTTCGGTTTTGTAAGTGAATC  
AGGAGGAAGTTTATTACAGATATGATCTTAAGAATGGATCACTGCTCACCAGGGTGGTACTAACCCTG  
GAGGATTGATAAATCACTATACCTGGATCGATCGTACGCAGAGTTGGTTCTTTATTTGACAGCACAGTT  
TGATAACTGTGATCGTTTCGCGTTGTGTGGTCCTTATGCAAGATGTGTTATTAACAACCTCGCCCCGTGT  
GACTGTCTGAGGGGTTTCGAGCAAAGTATCCACAGGAATGGGATGCAGCTGACTGGTCTAGTGGATG

TGTTAGGAGGACTCCGTTGGCGTGTGTCAGCAAGATGGATTTAGGAAGTTTACAGGGATTAAAGTGCCTGA  
TACGCGGAAATCACGGTTTAACGAGAGCATTGGACTTGAGGAATGCAGAATGTTGTGCTTGGCTGATTG  
TAACTGTACAGCCTACTCAAATATGGATGTTGAGATGGTGGAAGTGGATGCTTACTCTGGTTCCGAGA  
CCTCATCGATATCAGAGAACTTAGTCCAAATCAGCAGGACCTGTTTGTGAGAGTGGCTGCTTCAGAAGT  
AGGTAATAACTACTTACTGTTTTTCGTTTCTCTATCTTGATCTTGTTGAATGTGGCGAAAAACATGTATGT  
AAAATTCAGCAAGTATGTATCTAGATAGTCAAAAGTCTCGATAGTTAGCTCGTGGGGTCTTCAGTCAAT  
AGAAAAATCATCTATGAATGTGTGTTGGTGCATTGTTCTCTCTCACTCAAAGACGGAACGTTGCCTGTTT  
CTTATGGTCTAAAATTTTTGTTGGGAACTCATGAATGTGAATCATATTGTTATGACAATGTTGGAATTTTC  
TGATCGATTATGTACTAECTTATCGACAGACAAGAAACGAAAGAATAAGAAGTCAAGGCTGATTGCAAT  
CTTATCAGCAGTAGCCGCGACTTGTATCCTCAGCCTTCTAGCTTGGTGTGCATTATTCCACAGAAGAAAA  
AAGAGTAAAGGTAACAACACTGTTGTTCAATTGTTATCAAAAGATCGTGTGCTAACGTTCTATTTGTATCA  
GGCTAATGTATACATTTATACCAATTGATTGCTCATTTTACAGGTAGGGAAGTTGGAGCAGACGATATG  
GAGTTACCATTGTTGATTTAGTAACTGTTGCTAACGCCACTAAGAACTTCTCTTCTGCTAATATTATTGG  
AGAGGGTGGCTTTGGACCTGTTTATAAGGTACAATAACTATCCCATCGTCGAATTTTAGCTAAAAAAG  
GCATCTTAAACACTTTGTTTTGAAAAAAATTCAGGGGAACTACGAAATGGACCTGAGATAGCTGTGA  
AGAGGCTTTCCGGAATACTCAGGACAAGGTCTTCAAGAGTTAAAAAATGAACTGATACTGATATCCAAAC  
TACAACACAGGAATCTTGTCAAGCTTTTAGGTTGTTGCCTTGAAGGAGCAGAGAGGATGCTGATATATG  
AGTATATGCCAAACAATAGCTTGGACTATTTCATTTTTGGTCCGGTTCTCTCGACTAGTTACCTTTATACTA  
TGTTGCTCGTATCCTCCAAAATGATGTTTCACCAGTGTGGATCCTCAAAGATGCACTACTTCTGGAA  
GATCCAACAAGGGCGCGGAGGCAATTTTGGAGGACCTGAGCAACATAGCCTAACTATTTATTTCCAATG  
TGCTACTAATGAATGAATGAATGAGGATTCCTGACATTTTACATATTGCAGATCCAAGCAGAAAAGAAT  
CACTTACTTGGAGAAATCGCTATGAAATCGCGATGGGAATATCTCGAGGCCTTCTCTATCTTCATCAGGA  
CTCAAGATTAAGAATAATACACAGGGACCTGAAGGCCAGCAACATTTTGTGGATACTGACTTGAATCC  
AAGGATTTCTGACTTTGGTCTAGCTAAGATATTTGGTGCAGACCAAATGGAAGGAAAAACAAAGCGAGT  
AATCGGAACATAGTAAGTCTTATAAACAACACTCTATGATAGATGTTTTTGTGTTGTTGATCAACTTAAA  
TTTGATGCATTGTGCAGCGGATACATGTCTCCGGAGTATGCTGTGATGGGAAATATTCAAGTAAATCT  
GATGTCTTCAGCCTTGGCGTGCTTTTACTCGAAATTGTCAATGGCAGAAAGAACAGGAAGTTTCATCATT  
TGAGTCATCATATAATCTTTTGGGACATGTAAGTACATATAGCACTAAATTTTACCCTTTAGCCTCTTTT  
TTTACTAAACACTCGACCCCGTTTGGAGCTTACTCACATCACCGGTCCCAAGCTCCCATAAAGGAAGAGGG

TTGCAGCAGGGTAGCAGCCAGTATAAACTAGTCAGTTCATGTGCGAATCCTCACAATACAGTCGGA  
GAGGCGTTGTAGTAGTTGTTATAGCCTGTTTTCCATTAATAAACTTGACCTGCCTGAAGTACTCATAT  
TACCGGTCCCAAACCCTCATAAAGGAAGAGGATCACAGTAGGCTAGAAGCCTCTATTAAGTCAAT  
TCATGACGAATCCTCATAATACAGTTGGGGCCGAGGTGTTGTAGTAGTAGTTGTTATAGCCTTACATTC  
CATTCCCAAGCCCCTACAGAAGTAAGAGGGTCACAATAGGCTAGCAGCCAAGCATAAACTAGTCAATT  
CATGACGAATCCTCATAATGCAGACGGGACTGAGGCGTTGTACTAGTCCACATAGCCTTTCTTTACTAA  
TGCAAATGTATAATTCATGATGACCGAGGCATTGTAGTAGTACCCTGTTAGCCTCTTTTTCTAAATGCA  
TTTGTATAACTGTGTTATCGTAAAAAAATTTAGGCATGGTTACTATTGAATGAAGGCAATGCATTGGA  
ACTAATGGATGAGTGTTTAAAGACTCATATGTTGAATCACAAGTGTGAGATGCATTCAAGTAAGTTTA  
TTGTGTGTACAAAACTCCCAGAAGACAGGCCTATAATGGCATCAGTAGTGTCTGGTTAAGCAATGAT  
GGTGTGGAATTGCCTCAACCAAAGCAGCCTGGTTTCTTTATAGAGAGGGATTCAACTAATCAGTCAAAT  
GAATCAACTGATGAAAGATGTGTTACTGACAATGAACTTCTACTAACAATTCTTGAGGCAAGATAGACA  
AAATATGAACTTGCAGTCGTGTGACTAGGAGGTCAAGGGTCAAGTCATGACAATAGCCTCTTGCGG

>M6-PGSC0003DMG400025558 M6 G-LecRK

TGATGTTATTTAGTTTTGATGATACAAACAAAGGAATCTTATAATAGTACATGATCCCTTGCCCAATTC  
GTGGAAAATGCCAGCTGGAAAAGTATAGAAAGTTGGTGAGGTTGGTACACGACTTCCAAGCGTGATA  
GAATCCTCGGCAATACCATGGCTTCTCATTTTTTTCTTTAGATAAAAGGCTTTGATCAATAGACATAA  
TCTTAGTTTTTGCATTCTGAAATCCTCAAGAACACAAGCAACAACCACTCCGTCCAAGAAGTATTATCCT  
CAAGAGCAACAGGACTTGATAGAGCTGCATGCTACCTAGTTGTCTTAGGATTATATCTTTGTGCTTAAT  
TGTAATATATCCCTAATCTATAAAGGAATTAGATCGTTGTTGAGTCTTCTAAAAGTCTAAGTCAGTTGA  
TGTTAACTGATTTAGTGGGCAGTGTTGTATCTGGTTAGTCAAATCTAAATCATCTAAAGTTAGGTGGTT  
TAGTGGACAGTGTTGTATCTGCTTAGTTGAAGTCTAAGTTATCTAGAGTTAGGTAGCTTAGTGGGAAGT  
GTTGTATCTTCTAGTTGCTCTCTTTCTAGTAGAGTTACTACATAGGGGGGGGAAGAGATTTAGAGGTA  
AATTCCTAGGTTGTAGCTGTTGTAATGTTGCTCCATTTGAGTGAAATAGAGTTGGATTGAAAG  
CTTGAGGACATGTCATGATTTTCGCCACCCTTGAGCAAGGGGGTTCCACGTAACTACTTGTGTTGA  
TTTCTTTATTGTTAAGCCTTCATAACTATCATACTGAGTCAATGTACCTGGTCCGTTGGCTGATAGTGG  
ACGCATGAATCTTAACA

>M6-PGSC0003DMG400026154 M6 G-LecRK

GTCTCACTGAAATGAAATAGAGGGCAAGAGCTACCTATTTGAATTTATTATGTTCTTCATTCAAATCATCA

ACAATTCCATAAAACAATGCAATTAAGTAATTTTCTCTTGTTGTTGTTGTTTGCAGCATTGATGATTTTACA  
TCGATGTGATGCAAGGAGGAGCACCATTGATGGAAGCAGTAAATTAGTTGACAATGGCGAAACACTTG  
TATCTGCTGGTGAAAATTTTGAATGGGATTCTTTTCTGATGATGACGGGTAAACAATATGTAGGCAT  
ATGGTATTACAAATTAAGTCCTAGAACTGTTGTATGGGTTGCTAATTGGAATAATTCGATTCAGGGTAAA  
AGAATAATGAATGAGGATAATTCGGTTGTCGTTGAAGATGGTAATCTCAAAGTTTTAAGTAATGGGAGT  
ACTTATTTCTCCACACTATTAGGTGGTGGTCTAACAGGAAAGTAGAGTTGTTGGATACAGGGAACTTAG  
TTTTAGTTGATGAATCAGGAGGTGAAATGTGGCAGAGTTTTCGCAATCCAACCGATACATTCCTACCAGG  
TATGAAAATGGATAGTATTTTGAATTTGATTGATTCAAATATGTGAACTACATATTCCAATTAGATCAAT  
CAAGTGACAAGGAATATGTTATAATTGCAAAGCAGGGCGGATTTGCTGGAAAGGGTCTGCGAAATCA  
GGAAATTTAAGATTAGGTGAGATGCCTGGTTATGTTGCCTACATGTTATCCAACCTTCACTAATAAAAACA  
TTGTCAATAATTCATTGGAATCGATAGGAACATTTAACAAGAGTAGGCTCTTAATGAACTCCTCTGGGGA  
AATACAATTCTACGGTTGGGATAAGGAGATCAGTGGATGGTCTTTGAAGTGGTCAGCGCCAAAGGATA  
CGTGTGATTTGTTAAGTTTTGTGGGAAGTTTAGCATTGTAAACAGCAAACATGATCCAGTATGCAAATG  
TTTGCCCGGGTATAAGCTCAATCCTCCAGATAAATCAAAGCAGGAGATTTTTCAGGTGGTTGTTCAAGG  
ATGTCAGTTAGCTCTTGCAATGAAGACAATGTAGAAGTACTCGACACGTTCTTGGATTTGAGGTCAATGA  
AATTCAAGAGTCCAGACAAGATAATCAGTAATATTAGTACCCGTGAGGACTGCAGGAGATTTTGTCTAG  
GCAACTGTACGTGCCAGGCCTATACTTACAATGATTCTGTATGCTGGATTTGGGACACTAGTCTCATGTC  
TCTCCAGGAGAACTATGCTGGTGGCTTCAACATCTCTGTTGTCAGCATTTCGATATTGGTAATTTCT  
TTTTCGATTTAACTTATGTACACTGACAGTTTAAAGCTAATGTGTGACCACAAATAGTACAGTAATTTGATT  
TTTGTGCATTGCAGAAGCAACAAGGAGAAATTGCAAGCCTTGTGGCATAAACCTAATACCCTATCCATTA  
AGCAGTGGACCAAATTGTGGTGACCCTCTGTATTATAGTTTCTCATGTGATGATTTAGCTGGTCAGGTAA  
GCTTCTACACATCGAATGGCAAGTATACTGTCGTTAACTTTGATAAAGATAACAAAACATTTGTTATAGA  
AGCAGCTCATAAAGAATCTGTTGGTACTTGTGATGACAAAGGACCGGTGACAGGAATTTCTTGGTTCAA  
CCAGTCATCACCTTTAAGGTGATAAACTGGTGTACAATCCTGAAGAGAATCTTACTTCAGGACCTTTTA  
GTCGAGGGAAAGATTTAATATTGATTAGTTGGAACCACCATTGGAGCCATTTTGAAGACTTCAGAAG  
ATTGCAATGATTGGCCAAATTCTAGTTGCAATATGACAAAACAAGGAGAAAGAAGATGTATATGCCAAA  
CTGATTACAAATGGAATGGCTTGACTTTAAATTGTTCCCTTGAGTTTAGGTATATGGATCAATGTTACTTAC  
TACAAATGATTTTCTTGCCAATAGTTCAATGATACCTTTTTCTATGTTCTCCATTTGACCTTTTATATGACC  
AACACATATTTCAATTTCTAAATTTGCTTCAGAACTTGAACACAAGGATCATTCAATACGAAGCTGGCAT

CCTCACGGAATCAGAGAACCCTTGTTATTTCCATCTCTGTAGTCTTGGAGTTATAACTTTGTGCAGCATT  
AGTTATATAATTTATCAGAACACTAGAGTGACAAGAAGTAGA

>M6-PGSC0003DMG400026155 M6 G-LecRK

ATCTGATTGAAAGGAAAAACCAAGTCTTACCATGACTATCAACATGATCTTAATTGATGATGTGCATCT  
TCTGTTAACAAATTTGGTGCAACCATGCAACTGCAACATTATTCGATTCGTCTACTTTTTGTGATCCTAAC  
ATGTTTATTTATCAGTATTCATCAGTCTCTCGGAGTTGAAATGATTTAGTAAATCACTCTGTTTCTGGAA  
ACCAAATATCGTCTCTTCGGGAGAAAACCTTTGAATTAGGATTCTTTTTCTGGTAGTTTCGAAAAATTAC  
TATCTTGGTATATGGTATAAGAATGTAATGCCACAAACAATAGTATGGGTAGCAAACAGGGAGAAGCCA  
CTTTCTGCTACTGATATGAATTCTGTTGAGTTGAAAGTTTTGGATGGTAATTTAGTGCTTATTACTGAATC  
CAAAAACCTGTTTTGGTCTACAAATATCAGCAACACAATTAGTTCAAATACACTAATGGCAATTCCTTCTG  
ATGATGGTAATTTGATTTTTAGTGATGGATCAAATTCAACTACACCCTTTGGCAAAGCTTCGATAACCC  
GACTAATACATGGTTGCCGAATGCTAAGGTGAAGTATGACAAGCGTACAAATACAACAAAGATTCTTAC  
TTCTTGGGAAGAACTCAGAGGATCCATCTCCGGGGATTTTTCCGTGGAAATGGATCAGAGTAATAAGCA  
GTTCTTGATAAAATGGAACAGGACTGAGATGTACTCAGCTACTGGATCTTGGAAATGGGCATATTTTCAAC  
ATGATGCCTGAGATGAGTTTGAATTCTGATAGATACAGATTTTCATATGTTGATAATGAAAATGAGAGCT  
ATTTTACTTATTCCTCCGTAACCTCCAAAATCAGATTAACACTAGATGTCTCTGGGCAAATCAGGCAT  
CTGATTTGGGCCGAAAATTTAAAGGAATGGCAAATTTTTACATCTCAACCAAGACAACCCTGTGAGGTGT  
ATGCTAGTTGTGGTGCCTTTAGCATTGCAATAAGGAGTCCGCGACCTTCTGTAATTGCTTGACTGGTTT  
CACACCTATATCTGATGCAGAATGGGACTTGAATGATCATTCTGGTGGCTGTGTTAGGAAGGAAAGCTT  
GCAGTGTGGTATGGTAAAATGAAGGGCGGTTTTTCGGAGAATCCCATGTGACATTGCCCGGATATTC  
TCTAACTGTGTCGGCTGCTAGTTCTGAGGAATGCCAGTCGACTTGCTTGAGTAACTGTTCTTCATGTAAT  
GCATATGCTTATGATAATAATGTGTGTTCAATTTGGAATGAAGTTGTGAATCTGAAGCAACTCTCACCAG  
GAGATGGTAGTGGAAGTGTGATTTATACCAGACTCGCTGTCTCTGACGAAGCATAACGGTGAAGGTAAGT  
TTAAAGTTAAGAGTTGATTTGATAGTGTGTTGCCATTTCTATGTATGCAATGCTCATCTCAAATAGCTAC  
CGATAGAGCTTTCTATGGATGTTTGTGTTTTCTGTCTGATGTTTCAGTCTTTACTTCATGTCTTTCAACA  
GTACGAGTCTATACATTCTCTAAATCTTAGTGCTCATAAGAATTAAGTTTACGCAACATCATCTACGT  
CACCTTCTATGTTTTAAACAAACATCAGATAGCCACTGTCCAAATTTAAGTTTACGCAACATCATCTACGT  
TATAAACACACATAAGATAGTCACTGACCAAATGTATGGTTTTCATGTTTTGATTAGTTACAACACTAGCCAA  
AATGAGTTGAAGATCTTTCGCCAGTAAACATTACCAGTTCGTTGAATTCCACATCAGCTCTTTAAGGAT

GGGATGGTCTTTTCATATGGTTTTGGACAGTTCTTACCTCATAAACTAGCTTTTATAGTTGAGTTAGCCTC  
AAGGTCCATTTCTTATCACGTTATTAGAATCAGACCCATCCCAAATAGTCTATTTCTTGTCACAATTCCT  
TATGTTTCTTCTTTCTGTCATCAGATGCAAATTCAGGGAAATTGTCCCTGAAGGTTAAAGTCATCATATCT  
GGCGTGGTAGCCGTTGCAGTTCTACTTCTATGTAGCTTTAGCTACATTTATCATAGGAGAATAATGTCAA  
AGAAAACAGGTACTIONTGTGTTGCTATTACAATCTCTGGAGTAGTTGTTTTACCACTACCAGAAAAATTTCTC  
CTTCCATTTTTTTTTCCGAATCAGATCAAGAGAGATATCTCAAAGGGCTGCTTTTTTTTTTTTTTTTTAT  
CTTAGCAAGCCAACAAAGCACAGGAGGCAATCCAGTTCCACATTGGTTAAACAGAGAAAGAGAAGCAC  
AAATTCTGATTAACGAAAATGATAAGCAAAACATTGCCGTTCCATTCTTTAGTTTGAAAACATACTAGC  
AGCCACAGATCATTCTCAGATGTAAATAAACTTGGACAAGGAGGTTTTGGTCTGTTTATAAGGTTAGC  
ATTAATAATTCACTTAACATGAGTTCAACTTTATGTAGTCATTTATAGCATCCTAGTTCCACATCGAAA  
ATCTTTTCAAGGTATATTTTCAAGATGGACAAGAAATTGCTGTGAAAAGGCTATCAACCCAATCTAGACAG  
GGCATTGAAGAATTCAGGAACGAAGTCATACTGATCTCGAACTTCAACATAGAAATCTAGTCAGACTTT  
TAGGCTACTGTATCACAGGGTATGAACAGATTCTACTTTACGAGTATATGTCAAACAAAAGTCTAGACAC  
CTTCATATTCGGTTAGTATATATATCTGAACTTATCTTATTTCTTAATCTCTCTATTTACTTGATCAATGTTG  
CTAAATTTTCTCCTTGGTTACCAAAACAAGATCCTACACTTAGCAAGTCATTGAATTGGAAAAATCGATT  
GAGATCATATTAGGAATTTCTCGAGGGCTTCTCTATCTTCATGAAGACTCAAGGCTCAGAATCATTATA  
GAGATCTGAAAACAAGTAACATTCTTTTGGATCAACAAATGAACCCAAAAATCTCAGACTTTGGCTTGGC  
AAGGATAGTTGAAGAACAACAACAGAAGCAAGTACCAAAAAAGTGGTTGGAACCTTAGTAAGTAATAC  
AAACATGACAATGTTATGAACTTTGCTTAATTTATCGCACATCTGACTCATGATTATTCATCATTATTTG  
ATTTAGCGGATATATGTCTCCTGAATATGCATTGGAAGGAGTATTTTCGATTAAGTCAGACGTATTCAGC  
TTAGGAGTAGTTATACTGGAGATAGTAACCGGAAGGAGAAATACAGGATTTTATCAATCTAAAGAAGCA  
TCTAACCTTTTGGTCCATGTGAGTGCCTTGAGTACACGTTATTTTTTCCAATGTGTACGTTGATCTTCATA  
TTCATTATTCTAAATCATGATATCACAGGCATGGAATTACTGGAAAGAAAAAAGAGCACTACATTTGCTG  
GATCATTATTGCTCGAATCATGCAACCCGAAAGAAGCAATGACGTGCATAAACGTTGGACTCTTATGTG  
TGCAAGAAGATCCAGGTGATCGTCTTCCATGTCAATTGTTGTTATGATGCTTCGTTGTGATAGTACGTC  
TCTTCAAAGCCTAATCAACCTGCTTTTGTGTCTAGGTGAAATGTTTCTAATTCAACTTCTGTTTCATCTGG  
TACACCACCTAGCTTCTCCAAAATTGAGTTGACAATCACAGTTGAAGAAGGCCGATAACGTGATGAATTC  
ATTAGTTTTTCAAATGAATTTAAACGCGAATTTAAATTATTTTTTACCTTAGATTAATAAAACAAAATTAC  
AGGAATACTTGATCCTTTTCTTTTCTCAATTTTTTGTGTTTAGGCAGTAGAAGACTTGGGACCAGTAC



TGCTGATATTTATAGTGAAAACACTGAAAGGTATATATGCTTAATATTGTGTACAACATAGAATATATTGTG  
TTGATAAAAAAAGTTCATTTTCTGTTTCATTTTGGTCTCTTCTACCTTCTTAACTTGTCTTAAACAGTAA  
GAATGGAAGAAAAAAA

>M6-PGSC0003DMG400026156 M6 G-LecRK

TTAAACAGGAGCAACTTACAAGGAGGTGTACTAGGAAAAATAATGGAGTTGGATTGTGTTGTAGCTAT  
TTAATTGTATTTTGTGTTCTTTTCGTTATGCTTCTGGCAAGTGAAGAAAGTATCAAGATGGGCAAATCAA  
TCACTGGTAATCAGAAAATGATTTTCAGCTGGTGGAAAGTTTTTCCTGGGCTTCTTCACTCCACGTAATTCT  
ACATTTACCTATCTTGGCATATGGTACAACACGATCCCCGAACAAACAGTCATTTGGATTGCTAATAGAG  
AATCTCGAATTCCTCAGAATTCTACTGTTGTTTTCACTATTGGTGAAGATGGGAATTTAGTGATTTTTGAA  
GTAAAAGATCAACTTATTTGGTCATCAAATGTTTCATCCATAACTTCAAATTCTACTGTAGGAGCACTACT  
AGATAATGGAAATCTAGTGCTTACATGGTGAGTCTGATATATTGTGGCAGAGCTTTGATCACCTACC  
GATACGTTTATGCCTGATATGAAACTTGGTTATAATAGAAAAACAGGACAACGGACTCTGATCAATTCGT  
GGACAAGTAATGAAGATCCTCGGCCTGGAAATTTCTCGTTTGGGATAGATCCTGAAGGGCAGACGCGTT  
TTTATATATTGAAGCAGAACAGTATTTATTTTAGGTTTGATGATAGTAATGAATACACTGGAGGGAATAT  
CGGAGGAATTGCTTGGTATATTTCTGTTGTTTCGGGAAATGATGGAGTTTTTGTACGTATGGTTATACC  
AAAGGGTTGGTAACATTAAGGATTGTTTTGCATCCTAATGGTTACATTCAGTTATTGGTATGGCGTCAAA  
ATGCTAATAAGTGGATAGTTAACTTCAGGCACCAGAATTTCTTTGTGAACGTTATGCGGAGTGTGGTCC  
ATTTGGCAGCTGTGATGTTTGTATCAAGTGGATTATGCAGATGCTTAACTGGATTTGAACCAAGATTTTCG  
ACAGATTGGGAGAACGGGAAATGGAATGATGGTTGTGTTAGAAAAGTAGCATTGAGCTGTGATGACGG  
AGACATATTCTTGAAACATGACGAGGATATGAAGTTCCGGATCATGCTATTTCTTAGGACATATGAGC  
ATTAAGGACTGTGAAACTCGCTGCATTAGGAACTGTTCTTGTTTCAGCTTATGCTTATTCAAATAGCACCTG  
TTAATTTGGTTTGGAGATTTACTGGACCTTTCCACAACCTTCTGTTGGCAGAGTTCTCAATGTTTCGAG  
TTCGTGGCTCCAAGCCAGGTATTTCACTTCTATCCTTACTAATTCTACTAACAATGATTCTCTACACGTC  
TTTGGTCAAGAAAACATAATTTATTTACTTTTTGTCTTCTGGATGCAGTTACTCATGGTGGATCTAGGAAT  
TTGGCTCATAGACACAAAGTTTTCGTTGCGAGTATTGTTTCTGCAATATCTATCATCTTGGTTCTTATAAG  
TATTTTTTTCTTTATCTTCAAAGAAAGCACTTGAGAAGACAAGGTATGTTTAGTGTACGTCTTAATTGTA  
AATACAAATACTGAATTCGAATTCGTATAGATTACACTGATTTGCTTTACTGATTGCTGTTTGAATTAG  
GCTGGAAGAATGGAACATAAGCTTTCATTAGGTCCGTGTCTGGTTTATATTCGGTTGAAAAAGCGATA  
TGAAGTTGCTGCAGTACAACCTTTCAGCAAATAAGAGAGGCTACTAACAACCTTTCATGGAGAACACAAAC

TTGGAGAAGGTGGATTTGGTCCTGTGTTTAAGGTGCTAAACTAAATTCATTGTTGATATTTTACTGCTG  
CTACTTTGAGAGAGACGTCATACGTCTCATTTTCGTTTCATGACTATGGTGGATGTGGATTTACATATTCT  
GTTTCAGGGGTTTTTAGCTGAATTCGGAGACGTAGCCATCAAAGGATAAGCAAGAGGTCATCACAAG  
GACTGGAGGAGTTTATGAATGAACTGAAGCTAATCGCGAACTGCAGCATAAGAATCTTGTCAGCCTCT  
TAGGATGCTGTGTTGAAGGGGAGGAGAAAATACTAATCTATGAGTATATGTCCAATTGCAGCTTGGACA  
AATTTCTGTTTGGTTCGTCCTTCTACTCCGTTTTAAGACTTCACATAACTTAAATTTTTACTCCTCTCAATTCC  
CTTTGGTTAATGAGATGTTCAAATGTCTTTTTAGACCCTTCGTTGAAGGTTACTCGATTGGGTTACACG  
TTTGGGATAATAGAAGGAATTGCTCAAGGAATGCTTTACTTGCATAAGTACTCGAGATTAAGATCAT  
CCACAGGGACTTAAAGCAAGCAATATTTGCTAGATCAAGAGATGATCCCTAAAATATCAGACTTTGG  
AATGGCAAGGATTTTCGGGACTGATCAAACACAGGCCAATACAAATCGAGTCGTTGGTACATAGTAAGT  
AATAACCCCTTATGATTTGTGGTTTCCAAGCTTTACTAGCTTTTATGTCATTTGTGCATATCTAATGGATAC  
TTATTTATACAAATATGGCATAGCGGCTATATGTCTCCAGAATACGTAGTATATGGCCAATTTTCAGAGA  
AATCAGATGTTTTAGCTTCGGAGTATTGCTCTTAGAAATCCTGAGTGGTGAACGTAACACTCAGACTTTTT  
AATGACTGAAATTTCCGCGTCCCTCTTAGGATGGGTAAGAACAACACTCAAGACTTTAATTAATTCTGTTTTCT  
TTCACTTTTTTTTCGTGTTTTATATATATGGTGCAACTCATTGAACTTTTTTTAGGCATGGAATAAGTGGAA  
AGAAGGAAAATCTTGGAGTTGATTGATCCGTCCATAAGAGAACTTGCGACAATAACAAAGCAACAA  
GATGTATTATAGTTGCCCTTCTTGTGTTCAAGAAATCCCAATTGATCGACCAACAATGTCTGATGTATCT  
TTCATGTTAAGCAACGAAACAACGCCATCCCTGAACCAAAGAACCTGCTTTTCGTAGTAGCTGGCAAT  
CTCAGCAGTTAAGTATGATCCATAAATGAGATGACGATTACCTTGCCAAAACCGCGATGAAATAATTT  
AAGTCTCCTATTTCTTGTAGTAAATTTTTCTTGTAGCATAGAGCTGTCATAAATTTTTTTTTGTTGAACTT  
ACAAAAGCGTAGCTCTGGAAGAAATATAGACTAAATTTCTCTGTTAATTGATGTTTTTCATGTTTTTTTTT  
CTGTTTCTACAGTGTATCAAGTTTGTGAAAATGTTGTTTTCAACATTCACTTGGATT

>M6-PGSC0003DMG400026183 M6 G-LecRK

AAAACAATGGAGTTGGATAGTTTCTTACCTCTTTTACTGTTAATTTTCTCATGTTCTTGCTTACCCGTTCTT  
CCTTGCCAAAATTGTGTCAAAGTTGGCAAATCAACTACTGGGAATCAGAAATTGGTTTCAGCTGATAGA  
AGTTTTGCCTTAGGATTTTTCACTCCATCAAATTCACGTACACCTATCTTGGCATATGGTACAACATAAT  
CCCTCAACAAACAGTCGTTTGGGTTGCCAACAGAGAATCTCCCATCCACAGAATGCTTCACCAGTTTTC  
ACTATCGGCGGTGATGGAAATTTAGTGATTTTCGATGAAAAAGGCAAACACTCATTGGTTCATCAAATGTCT  
CATCAACAGCACCGGAATCATTATTAACCTCAAATTTTACTATCGGAATATTGTTAGATAACGGGAACCTT

GTTCTTCGACACTACGGTGAGTCCAATTATTTGTGGCAGAGCTCCAGTATCCTACAGATACGTTATTAC  
GCCATATGAGATTTGGTTTCAATAAAATTAGTGGCTTACGAAATGTGATCACTTCATGGACGAGTAATGA  
AGATGCTCGCCCCGAAATTTCTCTTTTGAATAGACCCTACTGAAGGAGTTATGCGTTTTGTCATTTGG  
AATCGAAACGGTATTTATTATAGATTTGACGATAGTTGCAGAGTGTATACAGTGTGGTGTTCGCTGTTG  
TACTGAAAATGATAATGTATATCTTAATTTAGATTACTACAGAATCTTTCTGAGATTAAGAATCGTTCTG  
AATCCGAGCGGGCACCTTCAGGTGATGGTGTGGAATCGGAATGGAAGTAACAAATGGAATGTTGAATT  
TGAAGCACCACAATCTAAGTGTGACCTTTACGCGCAGTGTGGTCCGTTTGGTATCTGTGGGATCAGATCA  
AGTGGATTATGCAGTTGTTTAGACGGATTTGAACCTAAATTTACGACAGATTGGGTAAATGAGAAATGG  
AATGGAGGTTGTGTGAGAAAAATAGCGTTGGGATGTGATGGTAGAGATCAGTTTTCGAAGCACGAGAA  
TATGAAGTTGCCAGATCATGCTGTCTCTTTAGGAAATATGAGCACTGAAGAGTGTGAAACTCAGTGCATT  
AAGAACTGCTCCTGTTGAGCTTATGCTTGTACGAAAAACGCCTGTTTTATATGGCATGGAGATTTACTGG  
ATCTTGGGCATGACACTACTAACGGCAGAGCTCTCTATGTTTCGAGTTCACGTGTTAGAGCTAGGTATGTT  
TACTTGTATCATTGTTGGTTCTGTTAACAACAAGTAAAAGACTAGTATAATTTTCGTGTTGTGGATGCAGT  
TACTAATAATCTATCTGGCTCAGGGAATTCAGCTCGAAGATACAAAATTCTCACTGTGAAAATTGTTTCT  
GCAATTTTTGCAATCTTTCTTCTTGTAGTATCTCTGCTTTTATCTTCAAAGAAAGCGCTTGAAAAGACA  
AGGTGAATCTAGCATTCTAGACTGTAATGATTTGAGATTTTCAATTTGTTTACGGTGCTTTGCCTTACTGA  
TGGTTGTTTGAAACTAGATAAGATGGACGGAGATTCTGCTTTAGTTAGCTCCATGCCTAGTGGATCTTTA  
GTTGGGAAAGATGATATGAAGTTGGTACAGTACAGCCTGCAGAATATAAGAGACGCAACAAACAACTT  
CCATGAAAGTAACAACTTGGAGAAGGTGGTTTTGGCCCCGTGTTTAAAGGTGCAAAATTCAATATTTTG  
ATGTTTCGTATTTAATTTTCAATATAGAGAATTGTGGCTTTAAACATTCTGTTTCAGGGATCTTTGGCTG  
AATTTGGAGACGTAGCCATCAAAGGCTAAGCAGGAGGTCATCACAAGGACTGGAGGAGTTCATGAAT  
GAGTTGAAGCTAATCGCGAATTTGCAGCACAAAAATCTAGTCAGCCTCTTAGGATATTGCGTTGAAGGG  
GAGGAGAAGATATTGATCTATGAGTATATGCCCAATTGCAGCCTGGACAAATTTATTTCTGGTTATACTC  
ATTAGTATTATTTTACGAGAATCATAACTTTGTTTTCTCATTTCGGTTGGCTAATTGGATATTCATTTTTT  
CTTTAAGACCCTTCGTTGAAGGTTACAATCAATTGGGATACACGTTTTGGGATAATTGAAGGAATTGCTC  
AAGGAATACTTTACCTGCATAAGTACTCGAGATTTAAAGTCATCCACAGGGACTTGAAGGTAAGCAACA  
TTCTGCTAGATCAAGAGATGATCCCAAAAATATCAGACTTTGGAATGGCAAGGATTTTCGGGACTGATC  
AAACACAGGCCAGTACAAAACGAGTGGTTGGTACATAGTAAGTATAGTAGCCGCATCTGTAACCAGTTT  
TTATGTTAATACCTCTTGTGTATAGCTACTTAAACTGATTTACGCCAATATGGCATAGTGGCTATATGTC

TCCAGAATACGTAGTATATGGCCAATTCTCGGAGAAATCAGATGTATTCAGCTTTGGAGTATTGCTGTTG  
GAAATCTTGACTGGTGAACGAACTCAGACTTCTTCATGACTGAAATTTGTATGTCTTTATTAGGATGGG  
TAAGTACACTCGCGCATTTGAAAACCTCAGTCCAAGTTTCTTTTAGTTTCTTTAACATTTACGTCATTTGG  
CATGTTAGGCATGGAAAATGTGGAAAGAAGGAAGAATATTGGAGCTAATAGATCCATCAATAAGGGCG  
ACCTGCGACAGTAACAAAGCAACACGGTCTGTTCTGGTTGCTCTTCTTTGCGTTCAAGAAATTCCTACTG  
ATCGACCAACAATGTCTGATATAGTTGTCATGTTAAGCAACGAAACAACGCCATCCCTGAGCCAAAAG  
AACC GGCTTTTCGCAGCAGCTGGCGACATCAAAGTTAAACAATTTTCCATAAATGAGTTGACATTTAC  
TTTGCCAGTACCTAGATGAAAGGATTTAGCTTTCCATATTTCTTATGGAATTAATCTTATTTTGAAAAGAA  
CCATCTTTGAAAAAATGTTTAGCACTGTAAATAAAAAATCAAAAACCAATTCAATTACTACCTCTGTCCC  
AGTTTATATC

>M6-PGSC0003DMG400026184 M6 G-LecRK

ATGGCGAAGAAAACAGGTTTGTGTTGCTATTACAGCCGTTGCAATTCTACTTCTTTTTTTGCTCTATGAA  
TCAGATAAAGAGAGAAATCTAAAAGACTGCACATGTTTTCTGATCTTAGCAAGCCAACAAAGCACAGG  
AGGCAATCCAGTGCCACATTGGTTCAACAGAGAAAAAGAAGCACAAAACCTGATTAACGAAAATGATA  
AGCAAACATCGCCGTTCCATTCTTTGTTGGAAAACATATTAGCAGCCACAGATGATTTCTCAGATGT  
AAATAAGCTTGGACAAGGAGGTTTTGGTCCTGTATATAAGGTTAGCACTATTTTTCACTTCAATAGTTCC  
ACTTTATGTAGTCATTTCATAGCATCCTAGTTTACACATCGAAAATCTTTCAGGGTATATTTTCAGATGGA  
CAAGAAATTGCTGTGAAAAGGCTATCAACTCAATCTAGACAGGGCATTGACGAATTCAGGAACGAAGTC  
ATACTGATCTCGAACTACAACATAGAAATCTAGTCAAACCTTTTAGGCTACTGTATCACAGGGTATGAAC  
AGATTCTACTTTACGAGTATATGTCAAACAAAAGTCTAGACACCTTCATATTCGGTTAGTATACATATCTG  
AACTTAGCTTATTTCTTAATCTCTCTATTTACTTGATCAATGTTGCTAAATTTCTCCATGGTTACCAAAC  
AAGATCCAACACTTAGCAAGTCACTGAAATGGAAAAAGCGATTTGAGATCATATTAGGAATTTCTCGAG  
AGCTTCTCTATCTTCATGAAGACTCAAGGCTCAGAATCATTATAGAGATCTGAAAACAAGTAACATTCT  
TTTGGATCAAGAAATGAACCCAAAATCTCAGACTTTGGCTTGGAAGGATAGTTGAAGAGCATAACGAC  
AGAA

>M6-PGSC0003DMG400026185 M6 G-LecRK

ATGATCTCAGTAAATCACTCTGTTTCTGGAAATCAAAGTATCGTCTCTTCAGGCGAAAACCTTTGAATTAG  
GATTCTTTAAACCTGGTAGTTTCGAAAAATTACTATCTTGGTATATGGTATAAGAATGTAATTACACAAAC  
AATAGTATGGGTAGCAAACAGGGAGAAGCCACTTTCTGCTACTGATATGAATTCAGTTGAGTTGAAAGT

TTTGGATGGTAATTTAGTGCTTATTACTGAATCCAAAACTTGTTTTGGTCAACAAATATCAGCAACACAA  
TTAGTTCAAATACACTAATGGCAATTCTTTCTGATGATGGTAATTTGATTTTGAGTGATGGATCAAATTCA  
ACTACACCACATTGGCAAAGCTTTGATAACCCGACTGATACATGGTTACCGAATGCTAAGGTGAAGTAT  
GACAAGCGTACAAATACAACAAAGATACTTACTTCTTGGGAAGAACTCAGAGGATCCTTCTCCGGGGATT  
TTTTCCGTGGAGATGGATCAGAGTAATAAGCAGTTCTTGATAAAGTGGAACAGGACTGAGCTGTACTCA  
GCTTCTGGATCTTGAATGGGCGTATTCTCAGCTTGATGCATGAGATGAGTTTGAATTCTGATAGATACA  
GCTTTACATATGTTGATAATGAAAATGAGAGCTATTTTATGTATTCCCTTCGTAACCTTCCAAAATTAGA  
TTAACTAGATGTCTCTGGGCAAATCAGGCATCTGATTTGGGCGGAAAATTTAATGGAATGGCAAATT  
TTACATCTCAACCAAGACAACCGTGCGAGGTGTATGCTAGTTGTGGTGCCTTAGCATTGCAATAAGG  
AGTCCACGACCTTCTGTAATTGCTTGACTGGTTTCACACCTAAATCCAATACAGAATGGGACTTGAATGA  
TCATTCCGGTGGCTGTGTAAGGAAGGAAAGCTTGCAGTGTGGTGATGGTAAAAGGGCAGGTTTTTGA  
TGAATCCCAAAGTGACATTGCCGAATATTCCATATCTGTTCCGGCTGCTAGTGCTGAGGAATGACATTC  
TACTTGCTTGAGTAACTGTTCTCATGTAATGCATATGCTTATGATAATAATGTGTGTTCAATTTGGAATG  
AAGTAGTGAATCTGAAGCAACTCTCACCAGGAGATGGTAGTGGAAAGTGTGATTTATACCAGACTTGCTG  
TCTCTGACGAAGCATAACGGAGAAGGTAAGTTTAAAGTTAGGAGTTGTATTTGATAGTGTGTTGTCATTTCT  
ATGTATGCAATGCTCATCTCCAAATAGTTACTGACAGCTTCTATGGATGCTTGTTTTTCTTGCTAATGT  
TTCTTCAGTTCTTTACCTTATGGACTTCAACATTACGAGTTCTCTAAATCATAGTGTTCAACAAGAATTAAT  
AGGCAATTATAACTTCACATAAACAGACCTTACGTTTTAAACAAACATCAGATAGTCACTGACTAAATAT  
AAGTGACGCAACAGCCTCTATGTTATAAACACACATAAGATAGTCACTGACCGAATGTATGGTTTTTCAT  
GTTTTCATTAGTTACAACACTAGCCAATATGAGTTGAAGACCTTTGCCAGTAAACTATTACCAGTTGGTGAG  
TTCCACATTGGCTCTTTAAGGATGGGATGGTCTCTTCACATGGTTTCGGACAGTCCTTAACTCATAAACT  
AGATTTTATAGTCGAGTTGCCTCAAGGGTCCATTTCTTATCACATTATTAGAATCAGACCCATCCCGATTC  
TTTGTTTACCCCATATTCTGCCCCATCATATTGTTACGCTCCAGTTGGCAGGCCTAGGCATGAGCGATGT  
TGAGTTCCACATAGTCTTTAGGGATGAGATGTTCTTTTTATATGGTCTCGGACAATCATCATATCATG  
AAGCTAGCTTTTAGAGACAAAAGTTTATTTCTTGTCACAGTTTTCTTATGCTTCTTCTTTCTGTCATCAGA  
TGCAAATCAGGGAAATTTCCCTGAAGCTTAAAGTTATCATATCTGGCGTGGTAGCAGTTGCAATTCTA  
CTTCTATGTAGCTTTAGCTACATTTATTGTAGTAGAATGATGGCGAAGAAAACAGGTTTGTGTTGCTATT  
ACAGCCGTTGCAATTCTACTTCTTTTTTTTTGCTCTATGAATCAGATAAAGAGAGAAATCTAAAAGACTGC  
ACATGTTTTCTGATCTTAGCAAGCCAACAAAGCACAGGAGGCAATCCAGTGCCACATTGGTTCAACAGA

GAAAAAGAAGCACAAAACCTGATTAACGAAAATGATAAGCAAACATCGCCGTTCCATTCTTTTGTGG  
AAAACATATTAGCAGCCACAGATGATTTCTCAGATGTAAATAAGCTTGGACAAGGAGTTTTGGTCCTG  
TATATAAGGTTAGCACTATTTTTCACTTCAATAGTTCCACTTTATGTAGTCATTTATAGCATCCTAGTTT  
ACACATCGAAAATCTTTCAGGGTATATTTTCAGATGGACAAGAAATTGCTGTGAAAAGGCTATCAACTCA  
ATCTAGACAGGGCATTGACGAATTCAGGAACGAAGTCATACTGATCTCGAAACTACAACATAGAAATCT  
AGTCAAACTTTTAGGCTACTGTATCACAGGGTATGAACAGATTCTACTTTACGAGTATATGTCAAACAAA  
AGTCTAGACACCTTCATATTCGGTTAGTATACATATCTGAACTTAGCTTATTTCTTAATCTCTCTATTTACT  
TGATCAATGTTGCTAAATTTCTCCATGGTTACCAAACAAGATCCAACACTTAGCAAGTCACTGAAATG  
GAAAAAGCGATTTGAGATCATATTAGGAATTTCTCGAGAGCTTCTCTATCTTCATGAAGACTCAAGGCTC  
AGAATCATTATAGAGATCTGAAAACAAGTAACATTCTTTGGATCAAGAAATGAACCCAAAAATCTCAG  
ACTTTGGCTTGGCAAGGATAGTTGAAGAGCATAACGACAGAAGCAAATACCAATAAAGTAGTTGGAACCT  
AGTAAGTAATAAAAACATGACAATGTTATGAACTTTGCTTAATTGCATCGCACAGCTGACTCGTGATAAT  
TCCATCATTATTCGGTTGATTTAGCGGATATATGTCACCTGAATATGCATTGGAAGGAGTATTCTCGATTA  
AGTCAGACGTATTCAGCTTAGGAGTAGTTATACTGGAGATAGTAACTGGAAGGAGAAACACAGGATTTT  
ATCAATCTAAAGAAGCATCTAATCTTTTGGTCCATGTGAGTGCCTAGAGTACATGTTAATTTTTTCCAATA  
TATATGTACGTTGAACTTCATATTAATTATTCTAAATCATGATATCACACACAGGCATGGAATTACTGGAA  
AGAAAAAAGAGCACTACATTTGCTGGATCATTATTGCTCGAATCATGCAACCCGAAAGAAGCAATGAC  
GTGCATAAACGTTGGGCTCTTATGTGTGCAAGAAGATCCAGGTGATCGTCCTTCCATGTCAAATGTTGTA  
ATGATGCTTCGTAGTGATAGTACGTCTCTTCCAAAGCCTAATCAACCTGCTTTTGTGTCAAGGAGAAATG  
TTTCTAATTCAACTTCTGTTTCATCTGGTACACCACCTAGCTTCACCAAATTTGAGTTGACAATCACAGTG  
GAAGAAGGCCGATAATGTGATGAATTCATTAGTTTTTACGCCAATTTTCTCCGCATGAAATTATTTTTTCA  
CCTTAAGAGAAGATAAAAATACATCAAATCAACTTGATAGCAAACCTTTTTTATCAGTTTAACTACAATGGT  
G

>M6-PGSC0003DMG400026810 M6 G-LecRK

ATTGGAAGAGACATTATTCAAAGTGTCTGAAACCTTTTCAGACCACTCCCTTTTACTCCAGAAAAATTTT  
GCTTTGTTGATTTTCCGGCATTCCCTTCTCTTGTCTTCCAGGGAAAGATAAAGAGTTGAAAATTTACAATG  
TGAGTCATATCTCTTGTAAATTTAAGCTCACCACTCAAACCTCCCAAGATACTAACTTTCTGTTTCACTC  
TAGCTTTTTCACTGAGATATGTTGATTTTAAAGCTTTTTCACTTTGGGGTTCTCATTTTCTTCAAATCTTG  
AAATACCCATTTAAGGATTTCAACTTTTGGAGTTATGTTAGACCGAGTACTTTTGTCTACATTGTCCTTA

AAATTGGGATGTAATTGTAAAGATTCATTCTTTCTTGCATGTTCACTTAGATTTGTTCTCTTATCTTTCCTT  
AAAAATAATTTTTCTCTTACCTAAATTGCTCTTTTTGCTTAGAAAAATTGAGATATATATGTGTGTATGT  
GTGGACTCACGGTTTCTTTGCAACGCGTATTTTGTCAAAGGCATGTTTGTTCGAAGTCTATGCGTCTATA  
TTGACTTTTAAATAGTTAATTTTTGGGGTATTAACTACTCCCTGATTAGGTTTTCAACTTTGGATGCTTGC  
AAAACATATTTTAGTGTCACTTTAAAGTATAGAAAAGTGGTTGAATATGCATAAGGACCTAAATAGGGTC  
CCATTTGTAGTTTTGAACCAGGATTTCAAACAAAAGCTGTTTTCTTTAGCCATTTTCTTTAGCCACTTTTAA  
TTAATTTCTTTGTGTACTGTTTATTTTATGGTCCATCTGTAGGTCATATTTTTTTTAGTTCAATCATAAGGT  
GTGGATCTTTTGTCTCACATGGCAAGTTTCTTATAGGGAAGCATTGCTGTTTCAAGAAAGTGTCTGC  
AGGCAATATTCTTCCAATTGATGTGGTTTGGATGTCTTTTCTGAGGTTCAATGCTTCCCTTCTCTTTCAATC  
AATTTCCACCTTTTGTGATCTTGGTGTAACTTGAATCAATTGGTAGTTTAAAGAGTTTTACCTTATAGT  
TGATTGTGATATTTCAATTCCTTTACACAAAAGAACAGTTTCTGTTTCATTGTAAATCAGTGGAAATGACTG  
AACATATATTTGCTGATATGCAGAAGCTGGAACCGTTTTCTGTCTTTTCATCTGCTTCCGCAAGTAGTG  
ACAGATATGGATAGAGGAGACAGAATAATAGCCTGTTATTCTAATTTGCTGCTTTCTGTCTCTATCGGGT  
TCTTGCTTTTTTCAGTTGTCAGTTCACAAATTCCTTTGGGTTCCAAACTAACAGTAGAAGAGAACAATTAT  
TGGTTCTCATCCAATAAGGACTATGCAATTGGATTCTTGAACCTTCTCCGACCAGTATAGCTTTGGTGTCCG  
TTTCAATGCAATTTATATACCTAGCAGTGAGCAAGCAGCCATTTGGACTGCAGGGTGGAAATGTTAAAGTT  
AGTAGCAAAGCATATTTTGTAGCTTCCCTAACTGGGGAAATGATATTGTTTGTATCCAGCAAAGGGAAAA  
ATTGTTTGGCAAAGCAAACACTGGCAACACATCAGTTGAATCAGCTGTTCTTCTTGATGATGGCAACTTTG  
TCCTGTAAATAGGAATAAGAGTGCTGTTTGGCAGAGTTTTGAAAGTCCATCTGACACAATGTTGTCTGG  
CCAGAGTTTATCTGTTGGCCAGTCTCTTCGAGCTTCTAGCAGGGGTTCTTTAACAAGTTATTACAGTCTTC  
ATATGAATGTTTCTGGTGAGATGCAGCTTAGGTGGGAGACTAGTATCATTTACTGGACTGTTGGGGGTC  
CTAAATCTGCTGTACGAGCCATTCTTGGCTCTGACGGAATCCTCCAACACTTGTATCAGCAATCGCAAGC  
TGTTTGGTCAGTCTATGGTGAGGACCACAATGATTCTGATGTGAAGTTTCGGTTCCTCAGACTAGATTCT  
GATGGTAATCTTCGGATATACTCATGGGAAAATAATGCAACGTCATGGAGAAAAGTTTGGCAAGCTATA  
ATTAATCAGTGTGATGTCTTCGCAACCTGTGCTACCAATGGTATTTGCACCTTGAATGCATCTGACTCTTA  
TGTTTGTGGTGTCCATTTAGATCTACAAGAGACTCAAACCTCTGAATGTCTAATTCCATATAAACCAAGTT  
GTGAATCTGGTTCATCCATGATCCTTCATGAGCATATGTATTTGTACGGAATATAACCACCAAACAACAC  
AGTTGTGCAAACCAATTTGCAGCAGTGTAGAAGTCTGTGTGAGAAAGATCCATCCTGCCATGCTGCATCC  
TTTATCAACAATGGCACTCCACAATGCCACACGATGAACTCCCGGTATGTTGGTGGTCAATCAGATCCTT

CTTTGGGTTCCGTTACTTTTGTCAAACCTTGTTTCAGACCCAATTGCTGTTTTACCTCCGCCTGTACCTGCTC  
CGAGAAAGGTATCACAGAAAATCTGTGTTGCTTGTCTGTTAGAAGTTGCTGCTGCGTCAATCGTTGTGTT  
TGTCATGCTTCAATTCAGCATTGGAGTTTACCTTTTCAGGAGAAGGAAACATATGATGCAGAAATCTGCT  
TTACCCCATATAGTGCCTAATGCTACTGGCTGCATCGTGTCTTACTCTGAAATCAAAGATCTGACTGA  
TAATTTTAAGCAACAAATTGGGCAGAATGTGTTCAAAGGTCTACTTCCATATAATAGGCTTGTTGCAGTT  
AAAGATCTCAATGCCTCTATTGATGAAAGGAGGTTCCGGGCTGCAGTTCTAAAATAGGAAGCATATAC  
CACAAAATCTTTTGAGGCTGGATGTTATTGCTGTGAGTCCGGCCGTAGGTTATTGGTTTATGAGCTTG  
CCAAATATGGTTCTGTTGACAAATGTTTAGAAGAACCTAGAATGTGCAAGAGATTGACGTGGAGAAAAA  
GAATGGATATATGTTTGTGAGTGGCAAGGGCCATATCTTACTTGCATACAGGATGTAGGGAGTTTATTA  
GTCATGGAAATCTTAAATGTGAAAATGTTGTCTTAGATGATGAATTAGAGGCCAAAGTTAGTGAATTTG  
GGCTGAGGACTATTCAAGCTGAGGCTTCCAGTAGCGGGGGGCTAGCAGAGACAGATGTAAGAGATTTT  
GGCAAAGTGATGGTGGTATTAATCACTGGATGCCAAAATGCGGATGAAGCTTGTTATTGGTCCTATGAA  
AAATGGGTGAAAGCTGATAAGGAAATGGCCATGGATCAGCGAATTGTGGTTGGCGCCGATTCCAGAAGA  
GTTAGAACGAGCATTAAAGAATTGCATTTTGGTGCTTACAAGGTGATGAACGCATGAGGCCATCAATGGG  
AGAGGTAATCAAGGTACTGGAGGGCACTCTGACTGTGATCCTCCACCACCTCCTTTTGTCTATAATCAA  
CAATGGCCACCTGATGACGAATCACCATCTGAATCATATTAAGTTCTAATTCGTATATTTCAATCCCATT  
AAGTCATCTGTTTCTGTACAGAACTTACCAGGCACCTTCGACTTGGCATGATGTAGAATGCCTAGTTTTTC  
CAGTATGGCATGCTTAATCTGAAATTCAAGACGAGCATCCCACTCTGCCTCTTCTGAAACTGTAACCTTG  
GTATGTAACCCTCCAAGTACAGTTTTGTGTTAGAAAATCCTGATTCAGAAATCCAGTTTTCTTTTAAAGT  
TTTTGATTCTGTTTCATGTTAATTATCGCTTCTTATCACATGTGTTTACATTTGATATTTTCTGGAGGTGAC  
TAACTTCCTTAACTCTGCCAAAATGTCTCCTTGGCTTGTGCTATCAGTTGGCACTGGCTTTTTTACTAG  
GCAGTGGTCCAAGAGATCGCGGATGGGGTTTGAACCTGGACATCTCTATTCTTAGGATTACTCTGACCAT  
TAAGTCGATCCTAACTTAAAATGGAAATGGAAGTTTGTGTCTTTTTTCTAACAGAGGTGGTGTCCATG  
CTATTTGCACCTCGACCATTTACCAGGTAAGTGGTATCTCCACCAACCTAGGTATCAGGTAAGTCTATCT  
CTAAAGGTTAGAAAAATGGAAAGAAATCACCTAGCATTTTGAATTTGTTGATAGGTCACACTTGTGTTT  
TATATATGTTCTGTTTTGATTTTGGCTTGTGCTGACCTTGTAGCCTGGTAAATAGGGTCATTTTCGGTGAA  
CATCCATGATCAGTATTTTCAAGCAATGAACACAATTTTCAATATTTTTATTAGTGAAAGAGTTG

>M6-PGSC0003DMG400027233 M6 G-LecRK

AGTAAGCCTTGCTACCAAGATCAACTGAGATTCAGCTTTTTGTTGCTCTGATTCGTTTTCTGTTCTCCTTTT



TCAAGTAGGTAAAGTAGGTTGACTCGCTACTTTACCTACTGTGTATAAGGAGACGGAGCAGAGTAAGAA  
ATGCAACTTAGTATGGTATGCAAAAAGATTCTTGATTTCAAGAACTGATTTTTTTTTCAAGTTTTCATTGTT  
GTTAAGAGCATGGGATCATCTTCTTGTTATTCATTGTTGCCCTTTTGTTATCTTGTTTTGTTGTACTCT  
GGTCCTCTTCTCTTCAACCATTAECTCCAAATTTCACTGCTTCAAATTTCAAGTTCATTGATACTTCTGGA  
TCATTCTTGTCATCACCAAATGGAACTTTTAAAGCAGCAATTACAAACACAAAATCCCAAGAAAGATCCT  
ATTACTTTGTCATCGTTCACTCGGAATCTCATGTAGTTGTTTGGTCAGCAAATCGCGATATGCCTGTATCT  
GATTCAGGTGAGTTGCACCTTCTGTTGATGGCCTTGCTCTTTTTGATGATTCAGGTGACACGGTTTGGTC  
AGCGAAGCGTAGTAGTACTAGTAGTTCTGTTACTTCAATGCAGCTTCTTGAATCAGGAACTTTGTGTTG  
GTTGATGCTTTTAATAATATTGTGTGGGAAAGTTTTGATTCTCCTACAGATACAATCGTTGTAGGCCAAC  
GATTGCCTGTTGGGAAATCGTTGGTTAGTTCAGTGAACGAAGATGAAATTGCTAAAGGCGATTATAAAC  
TTGTGGTTGTAGAGAATGATGCAATGTTACAATGGAATGGAATGACTTACTGGAAGTTAAGTATGGAAC  
CTAAGGCTTTTACTGATGCATATACTCTGGTGGAGTATATGATGATCAGTAGCAACGGGTTGTTCTTGT  
AGGGGCGAATGGGACGGAGAGAGTATTGATTGAGGTTATTTGGATGAGGTGAAAGATCCTGACTTTAGGA  
TTGCGAAATTGGAAGAGAATGGACAGTTCAGTGTCAAACGATTTAGTAACGGAAATTGGATATCTGAAT  
TCGATAGTCCTATTGATAGTTGTCATGTTGCTTTCCTTCAAGAAGCTTGGAGTTTGTGATGAGGGGAG  
ATGTTCTTGCCACCGGATTTCTGTTAGTTCTGAGGTGAATGGTAGTTGTGCTCCAGTTGATAGAAAT  
TTGGTAATGCCAGTTTCTTGAATGCATCTTGAATATGAATGTAAGTGAATTGGGAAATCGTGTTTCGTA  
CTTGAGGCTAGAGAATGGTATGGACTATTTTGCTAATGATTTTATCGAACCTGTGAAGCGTGGTGTTAAT  
GTATCTGCTTGCAAGATCTTGTCTAAGAAGTGTCTTGGCTTGGAGTGTTCATGATCAGTCGTCGGG  
TTCATGTTATATGATTGAAAATTTCTTGGTTCGATTTTGAGGGGTTTCGGATTCTGGTAACGGAAGAGGT  
AGATTGGGATACGTTAAGGTCATTTCTGAACCGTCATCATTTGATCCAAATGACAACCTCAAGTGACAATA  
GGTCAAGATTACCGTCGTTGCTTGGTTTTACTTCTTCTTCTGGGCTTTTACTGATCATTGTGATGATG  
GCTGGGATTATGTGGTTGATGAGAAGAAAAAGATTGATGCAGATTTTCAGGGAAAGAGTTTGGACGGAC  
GGATTCTTCTCGTTTCTGAGCTTGATAACATTTCCATACTGGGGTTGCCTGTGAAATTTGACCATGAG  
GAGATTCGTGTAGCCACGGAGTATTTAGAAATCAAATTGGTACTGGTGGATTTGGAACAGTATATAAA  
GGTACTCTTCTGATGGAGCTGTTGTTGCTGTCAAGAAGATGAATGCTCTTGGGGCTCACGGAAATAGG  
GAGTTTTGCACTGAGATCGCGATTATTGGGAGAGTTCACCATGTTAATTTGGTTAGTTTGAAGGATTTT  
GTGCACATAGGGGAGAAAGGTTTCTGGTGTATGAATATATGAATCGAGGCTCATTGGATCGAACCTTT  
TTGGAATTGGACCTGCCTTAGATTGGCATAACCAGATATGAAATCGCGCTTGGAAACAGCACGTGGGCTTG

CTTACCTGCATGGTGGTTGTGAGCAGAAGATCATACATTGTGATGTGAAGCCAGAGAACATACTCCTCC  
ATGACAACCTGCAAGTAAAAATATCAGATTTCTGGGCTTTCCAAGCTTCTTAATTCTGAGCAGTCTAGTTG  
GTTTACCACGATGAGAGGAACTCGAGGCTACTTAGCTCCTGAATGGCTGACTAGCTCAGCCATAACTGA  
GAAATCAGATGTCTACAGCTACGGAATGGTGCTACTAGAAATAGTACGAGGGAAGAAGAACTCCTCGTT  
CCAACCACCAAATGACACTACTTCTCAAAGCGAAAAGTAGTGAAAGGAATAGGCTTCTCCATCGTCTCTT  
GCCTCAGCAAATCAGCCAATCTACTTCCCATTATTTGCGTTGGAAATGCATGAACAGAAAATGTACCTGG  
AGCTTGTGGATCCTCGTGTCTGGGGAGTGTCAAATTGAGGAAGTCGAGAAGCTAGTACGTGTGGCTT  
TGTGTTGTTTGCATGAAGAGCCAACCTCTGAGACCAACAATGGCCAATGTTGTTGGCATGTTAGAAGGTG  
TGTTGCCTTTGGCTATGCCACAGGTTCAATCACTCAATTTTCTACGATTTTATGGTCGTAGATTCACTGAA  
GCATCAACGATCGATGGGGATCAAGGGGTTAATGTGTTTGTGAGTTACATCAACAAAACAGGAACCTTAGC  
AGTACTACTAGTAGCTCTTACAATTCCTTCTTATATGTCTTCACAGCAAGTCTCAGGTCCAAGATAGCA  
CTAGTAAATCTTATGTTGTTTGAACCTCCAAAATGTTGTACATTATGTCTGGTCTCCAAAAGTGCA  
TTGCTTTGGGAAGATCCAACATAATTTTGAACATTATTTTGAAGAGTCGGAACAACACGGAGTAAATCTG  
CTTTGTTAGTTCAATTTGTTATGCTACTGTTTGAACCTTTAGTTGTGATGTGATGTTTGCACCTCTTCTGT  
GAGGCAGTAGAAAGAGTATAAATATAAGTTGTAATTTATTCAGTTTC

>M6-PGSC0003DMG400028461 M6 G-LecRK

AAATACAACATCAGCTTCAAATCATCTTTACCCTATCTAGACAAGTAGTTAAGCAGATGGGAATAGATTC  
ATTTCAATGATCGTCAAGTCATTGATATAAATTAGAGGTTTACAGATGAACTATTTGTATGTATAAGAA  
TTCTTTTCCCTTCTAATATGTTTTTGGTCAATGAACATTTTAGTTTTTTGTCTAACAGAATCATGGCTTT  
ACCCTCTGTCAAACATTCGTTGACGCTTTTGTATCATTGTGCTCCTTGAGTACCTTACTTTGGCTCAATTTCC  
TGATTATCACACGGTGAATTACCCACAACATGGATAAACAATAAAGTCTCGTCTATCAATGTTACAAAG  
CCCTTGACATGGCCTTTTTACTCATTCAATCAATCATCTGGACCTTTCATGCGAATTCTGATGCTCAAAGA  
GATAGAAAAGGACATGGGGTATGCTTGTGGTTTTGCTTCAAATGGAGAGGACGATTCTTTGTGTTTTCC  
ATTGGAATTATACGTCTTCGTCAGGACTTTCTAGGAGCTCAGCGCTGGACTGACCTTGAACCTGGTCTGGT  
TTGCAAACAGAAACCATCCAGTTCGTGAAAATGGAACGCTGCAATTGCTGCAAGATGGAGATTTAGTGT  
TAAAAGATGTGGATGGAACCTTGTATGGTCTACAGGCACAGCGAATAAGTTTGTTCGGGCATTAAGA  
TGATGGAGACTGGGAACCTTGTGCTTCATGACATGTATAATCAGACTGTATGGCAGTCTTTTGTATCATCC  
AACAGATGCATTGCTTCCAGGCCAGAAATTAAGGTCTGGTCAAAGACTTGCGGCTAGAGTTTATTCGTCC  
AATTGGAGTGAAGGGAATTACTATATCTCTGTAACCAATCAAGGCTTGTGTTGCATTTTACATATCAGACA

AGCCACAGATGTATTTAAGTTTTGGTCAGTGGAGAAAGGGATAGCTTTGATGAAAGTTATGTCAAAG  
CAGTGAATGGTACTCTTGCCTTGTACATATCTTCAACCGAGCCGAATGAGCCAAATGCTGTCTTCTCAAG  
ACCTTCAAGGATGAAATATTTGAGATATGATTATGATGGACATCTTCGAGCCTACACCGAGGGAAAGTGA  
TCAGACAAATGATCTTTTGGCAGATTTCAATTGGGCTTTGCGTTACCCACAGCTTGTGGCAGTTTGGAGC  
TTTGCTCAAATGGAATTTGTTCTTGTCCAGGTCCATTAATAAAAAGTAATGATCGACAAAACAACGGATG  
TGTGGAAGTTAGTCCGGTGAATGTGATGGACAACGCTCCCACAGAATGGACCGTGCTTCGGATGTCTA  
TACTTAAACTATGTCGACACTGATGCAGCAGCTCTGAGAGGAACAGATGAGGAAAGTTGCCAAGAGTT  
GTGCTTGAAGAACTGCTCTTGTAAGTAGTTCTATTCCGGTATTTCACTAACTTTCAAGTGGTACTGCT  
ATTTACCTCTCCTGTTCTGTCACTTATAATTGATGGAAAGGGAAGAAGTGTCTATGAATCATCTGCATTC  
ATCAAATTACCAAATGATGCAGAAAAAGGTAAGTCTACAGCTACAAGAAGAACTGGCATAATAGCTGGA  
TAACTGGTGGAACAGTTCTGCTGGTAGCATTAACTGTTGGCATCTTGATTGCTTTCAACAGAAAACACA  
CATTACAAGAAAATAATGATGATTACTCCGGGGAGATATCTGGTCTTGTAAAGATTTTCTTATGAACAGCT  
GAAGATGGCAACTTGAATTTCCAGAAAAAGCTTGGTCAGGGAGGTTTTGGCTCAGTTTATGAAGGAGT  
TATTCGAGATGGTCAGAAAGTAGCAGTGAAGGTTCTTGATGGTTTTGGCCAAGGAAAGAGGGAATTCTT  
GGCAGAGGTCCAGACCATAGGAAGCATCCATCATGTTAATCTTGTTAGACTAATTGGAGTTTGTGCTGA  
GAAAGAGCACACAATATTAGTTTATGATTTTATGAGTAATGGATCATTGGATAAATGGATTTTTGGCACA  
ACCTCTACTCAATTTACCTTGATTGGAAAATAAGAAGAAAAATCATCCATGATATAGCAAAAGGATTGG  
CTTATCTTCATGAAGAATGTATGCAAAGAATAGTCCACTTAGATGTTAAGCCACAGAACATTCTGCTGGA  
CGAGAATCTTTGTGCAAAAGTATCTGATTTTGGCTTGGCCAAGTTGGTGGATAAAAATCAGAGCCACAT  
AGTGACCAGAATTAGGGGAACCCCTGGATACTTGGCTCCTGAATGGTGTAGTGCATTCATTACAGAAAA  
AGCAGATGTCTACAGCTTTGGAATTGTTGCAATGGAGATCCTCTGTGGACGCAAGAACGTGGACTATTC  
ACACTCACTCGAACATCCACATTTGCTTAGCTTATTTATGGAGAAAGCCGAAAACAATCAGCTTATCGAT  
ATGATGGGAAACTACAGCGATGATCCACAATGCAATACATCAGAAGTCATCCGTATGATGAAGCTTGCT  
GTCTGGTGTCTTACAGAATGATTTTACTCTGAGGCCTTCATGTCAATGGTGGTTAAAGTAATCGAGGGG  
ACAATGGACATTGAATCTCACTTAGACTATAGTGTCCAAATTCACAAACAATTGCAGCAATCAAAGAG  
TGGCAGACACCACGACTAACTGTTTCCTTCAATTCTTTAGGACCTAGGTAAGCATTCTAAGCATGATG  
AAGAGTCAATAGAGAAAAAGAAAATCCCCCTCCTTTATCCTATTTCTTGTCTGATCCCATGATCATCATT  
GTTGTATAGCTATTTATTGGTTTCATTTGTGTTGTTTTCTATGACTTAGTAAGATACTACAATTAATTAAG  
AACCATGGCGTGATTCCA

>M6-PGSC0003DMG400028617 M6 G-LecRK

GTCACAGTAAAAGTTCTACAAACAATATCATCGAAACTTGGGAACACACATTGGAATGTCAGCCGAGCG  
TCTTGTATGCAGGAGAGGGATTTTAACATGACGGATCCTAATTATAAAGAAGTTTTTCAGCAATGTAAAAT  
GTAATTGTTCAATCAATAATGGCTCAGTTTGCCATGTTGTAACAATGTAAGCTCTGCTTTGATCTTAAAA  
CTTCACATTTTACTCTTAATCAGAAAAGTATTACAGTTAAACAGATGCCATCTTCTGCATCATGTAATGAGA  
ATTTCTTACGCTTTTTTTGTTGATACAGCCAATTGAAGCGTCTTAATATGACAGGAATTCTGCCTCCAGAA  
TTTGCAAATCTTACTCATCTGCAAGAATTGTGAGTATCAGTTATAGTTTTTCTCCCTTTCCGATTACAGA  
AACTTTTATTCAATTGTTTTTATAAAATCGTAACAGTAGTAGCAAGTTAACTGTTTGTGCTTTTATTATA  
CCCTTCGAGGTGGCCTAGTGGTCTGGGCTTGGGAATCCATGTCGGAGGTCTCAAGTTCAAACCCTTT  
GTCAAGCGAAAACACTGACAAGGGGTTTGCCTTCTGCTTGCCTAGTGCGGGTTACCTCTCCTGTGTGCATAA  
GAGTGGGGATTTTACCTGTGGCTTAATCAATTTTTGCATTTCCAGAGATCTGACTCGTAATTACTTAAGTG  
GATCGATTCCCTCAAGCTATGGCCAGCTTCGCGTCACTATTTTGTAAGTTCTTTTCTGTTAATCTTTTCA  
TTGAAGAATTTTTGACATTTTGTCAAACACTCAGGTCCTTGGGTAACCGTATCAGTGGACCGATTCCG  
AAGGAGTTAGGTGACATTTTCACTGGAAAAACTGTAAGTTGAAGATATTGCATACTTCCTTTAATTTT  
CTACATATGTCACATTCATGAATTCCATATTTTTCAGAGTTTTGGAAAATAATCTACTTGAAGGACCTCTTC  
CTCCGAACCTTGGTAGCTTGAACCGCCTCAGAGAAATGTAAGACATAGTAACCATATATTCAACGTTTAA  
TATCTACTTATTGTTATATCTATTCCAAATTATTTGGCACTTTTCGATTTCCACTTGTCAAACATAAATTGCAT  
TTCTTTACCGTTTTTTATTTGAAAAGAACTGTCAAGTACATGAGGTTAATGAAGTATATCTTACCCATGAT  
AGAACGATTTTACTCACTAGTCTATTGGTACCTAAAATAGTGGTGTCAACGAACCACTCAACAAGAGCAA  
AATACGCTCGAATTTATTTGTGCAAAAAGAAGAAGTTCAGAACATTCGTAAGGAATAATCTGAGGAA  
ATAGATTTATTTATAGCCATAGAAGTACTGTTTCTGAAAGTTTGCAACCTTCCAGAATAACTTAAGAGAA  
GTAATTTTCGGAAAGTTTCCTTAAGATTGTTGTTTATCTGTATTAATAGGATACTAAGAACAATACTTTG  
CAGAACTTCTTAAGAAACATCCCTTCATTTCTCATTTATTATTATTATAACCAACACTTTTAATATGAA  
GAAAGAGTTAATCTAGTTTAATTTTCGCTCCAAAAGTTGGTCAAATTGTATCAAACATAAGTAAAAAGTGT  
TGATCAAATTGGGATGAACAGTGTGATTTTTTCAGTTATCGTGGTTAATTGATGGATCATTTTGCAGGTTT  
CTTTCTGCCAATAATCTCAATGGAACCTATACCTGAGAACTTCAGCAATCTTAAGAATATGACAGATTTGTA  
AGCAAGAAAATGTTTTAAGGTACATTTGACTTTTGTGCTTCAATCTCTTAATTCTTTCTGCTGTTTGCAGTA  
GGATCGATGGGACTAGCATATCTGGAACCATAACCAGATTTTATTGGCAATTGGACCGAAATGGATAGAT  
TGTAAGTATGCATCTTGTAGTTGTAATGTTGATGGAATATTCTTCTCCCGGAAGGATTCTAAACTTTAAA

AAAAGCAAAAATTGGTATCATACATTGTATTTAATAGCAAATATCATGAAACTTTTTGCAGAGACATTC  
AAGGAACGTCAATGGAGGGACCTATTCCTCCTACAATATCCCAGTTGAAAAACATGAAAGAGTTGTAAG  
TACACACGTCTCTCGTACTACCTGCTATAGCGGAAGTTCTCATGTGCATTGTTGTTTTCAGGACAATATCT  
GATTTGAGAGGAGAACAAATGCAATCCCAAATCTTAAGGGCTTGACGAATATGGAAAGGCTGTGAGT  
AGTTGGAAATTTAGCTATTACATCTCTTCATTTTAATTTTGTATTCTCATGGTTCTTTAGTTTGACTCAGGA  
CTTTGAGAAATTGCTCAATTTTTGGTCCGATTCCGAGATATGTAGGTGACATGCCTTTGAAACTTTTTGTAA  
GTTTGTATCTCTCTTTTCGAAAAAAATTAATTTGTCTGTAATGCAAACCTGGAATTACCCTATATTGT  
ATAAAAGGAAAATCTTCTACATACCAATGCATTCGTCGTATTTGCATGATGGAGCAAAGATTTTCACTAA  
TTGTCTGGATAACCACAGTGATTTGCTTTGATGTCTGGTTTGATGCTAATCCTACCTGCTTCTGATAAGAGT  
TATTTACTTGCAGGGACCTGAGTAACAATATGTTGAATGATACAATCCCAGATACATTTGAGAAGTTGGA  
TTTTGATAACATGTAGGTACCTTGCAAGTGAAACTTTTACAAGTTGAAGCATAAATCTTGTACATGTTTGT  
TTTTTTCTTTTCTCTCAAATTTTCATTCGGTTATAACAAGCAAAGTTTTATCTGCAATGTAGGTTGCTT  
GGTAACAACACATTAAGCGGAGCAATTCCCAGCAGGATGTTGAGTATGAGTGGTAGAAAGAACATGTT  
GGTATTTGCTCAATTTGTTCCGTTTTCTCATCTTAGTAGTAAATTTTGGTTATTATTATAGTTAGCCACAC  
TTCAAAGTTAACAGTTATTTTCCCATAGCTTTTTGTTTACTGCAAGGACACATTTACAAGAATTTGATGGC  
GTCGACAACATAATTTTATGCAGTGATTTATCATAACAATTTCACCCATACATCTACTCCAGAATGCC  
AGCACTCTACCGTGTGAGCATTATATATTGCTTTTTTTATTAGTGAGAGTTTCGGTCCTTTAACTGC  
ATAACTTACTAACATTCTTTCTTTAATAGAAACATAGCCGCCAGCTATTCAGGTATAATGAACACGTTCAA  
AAACACGTAAGTCTCCTAAATGTTGTCTTATGCATCAGGTGCTAGTTTGTGTTGATGCCTTCTATCTATTG  
TCGGGCTTAATCTATTTCGAAATTGTAGGGATGCCTGGTGTCCATGAAACCCCTCATTTGTCCACAGAA  
GCGAAATGTAAGAGTTACATCCTATTAACCTTTTCTTTTTTATACCTGAAAATTCATAAATGAAGTAGCAG  
TTTGTCAAAGGACCTCAGGGGTTATGTCTGGATCGTTTACCACTGAATCGACTCTTGGAGTGGCAGACTG  
TGGAGTTTGAAGTACAAAAGCATAGCCTTGGAGTTGAGAGATAATTTCAACAACCCTCCTCATGTTATGG  
TCTTTATGTCAATTGCAGATACTTCTCTATTATCATAAACTGTGGAGGAGGTAGAACTACATTTGAGGGAAA  
TGATTATGAGGAGGACAAGATCAGTTCGGGTCCATCATATTTTTCTTCGTCTCCGATAAATGGGCATTC  
AGCAGTTCAGGAGTGTACATGGGTGACAAAAATAGCTATATTGCAACAAATACATTTTCACTGGATGTG  
TCCGGTCTGACTTTTACAACACAGCACGCCTTGCCCCGAATTCTCTCAAATATTATGGGCTTTGTCTACG  
AGAAGGTATCTACAGAGTGCGCCTTCACTTTGCTGAAATAATGTTTTCTAATGACTCAACATATAGCAGC  
CTTGAAGGCGGATATTTGATGTAGCAATACAAGTAAGTTTGAGGCCTAACTTCTTTGTAAATAATAAA

TATGTAATCTAAAATGTCGATTTATTCAGTTCTGATATGATTTGGCCACTTTCTGGTACTTGATGTAGATA  
TACCGAATTCTGATATGATTGGCAACTTTCTGATTTAATATTGAATGTTGGAGATAAATTTGATTTCTTAC  
ACAGGGGAGAGTAGTTTTGAAGGATTTCAACATCATGGAGAAAGCTAATGGTGTGGAAAAGGTCATA  
CCGAGGACTTTGATGATATTACTGTTAGTAGCACTCTGGAGATTCATTGTATTGGACCGGGAAGGGGA  
CTAACGCCATTCCAGAAAGAGGTGTATATGGACCTCTGATTTAGCTATCACAGTGACACCAAGTCCGTT  
TATCTCTCTCTGCCTATAGACTTTACACTTTTCTCCCTCCCACAATCTTATCCCATTTTCTTCTTGCAGACTT  
TAACACAGGCTACGGGTTACCTGTGCGAGCTGTTATTGGCATTGTACTTGCTTCAATTGTGGTGGTTCTG  
ATAGTGTATTTGCTCTGTGGAAGAAGGGCATTTTTGGAGGGAAAAATAATGAAGAAGAATTAGGTAA  
ACATACCTCAAAGAATTAATTAATCACTCTCTATATTTGATATGGTGATACTTTTGTGTGATAATCAGAA  
TTATTTACGAGATTTCTAGCTGCGACATACAAATAATAATCTGCCTGTAATTGACCAGCATTGAGATGATT  
GTTCTGTTGGTGGATCGACATCACGACATATCATAGATAGTTAGCACACAATAATGCTCATGACTGCT  
TAACTATATATCTTCGTCATACAGATGTTTATTGTTTTCATCATACAGATGTTTTAGAAGATCTATATAT  
ACTGACGTTTGCAATATTCTTCTCGTTTACAGAACTCAGAGCCCTTGATTTACAAACAGGTCATTTTAGAC  
TAAGACAAATTAAGCTGCTACAAATAACTTTGATCCTGCCAACAAAATTGGTGAAGGAGGGTTTGGAC  
CAGTTTACAAGGTATCAAATCTCTATCTATCTCTACCCATACTGATTTTGTGTAAGGACAGCTTGTGGTTC  
TGTGGTGATATTTCTACTATGCGTAACGCTTATAGGAAAATAGCTGATATAATCCATATCCTACGTTCTT  
CCTTCCGTGTGTGATATGATCGTTGTGAATTAATCTTGCTATCTGTAGGGTGTACTCGCGGATGGTGCAG  
TGATAGCTGTTAAGCAGCTGTCTTCCAAGTCAAAGCAAGGAAATCGTGAATTTGTCAATGAGATAGGCA  
TGATTTCAGGTCTACAACACCCAAACCTTGTCAGCTTTACGGTTGTTGTATAGAAGGGAACCAAGTTATT  
AGTGATATACGAATACATGGAAAATAACTGTCTTGCTCGAGCTCTCTTTGGTAATGCTTTGCAATACCATT  
TTGAAAATTATTAATCATGTAATGATAATTTTATGCTTATTAGTCCTCGTATTCTCCTTTCTTAGGCCGTGA  
CGACCAGAGGTTGAACCTAGACTGGGCAACCAGAAAAAGGATATGCTCAGGAATAGCAAAAGGGTTAG  
CTTACCTTCATGAAGAATCAAGGTTGAAAATCGTACACCGAGATATCAAGTGTACCAATGTGCTTCTTGA  
TAAGGATCTTAACGCTAAGATTTCCGATTTTGGATTAGCTAAATTAGATGAAGAAGAGAACACTCATATT  
AGCACCCGAATTGCTGGAACAGTGTGAGCCTTCTTATCATAACTATCTCTGTACTATCATTGAAATTTGTT  
CGTCATGGTCAGTTTGAAGTATCTTACATTTCTTTTTCCGTTTTTGAAGAGGTTATATGGCTCCCGAGTAT  
GCAACGAGAGGCTACTTGACAGATAAAGCTGATGTTTATAGCTTCGGAGTCGTTGCATTGGAGATTGTC  
AGTGGGAAAAGCAACACAACTACAGGCCAAAAGAGGAATTTGTTTACCTTCTGACTGGGTAACTAT  
CTTTCTACTAATATCTGCAACATTATATCTTTAGTTTAAGACCACAAGATGCAAATGTCTTTGTTACTTTCT

TAAACTCTGTACGGAGGGATCTTTGCATATTTAGTTTTCTTTCTGTAGCTAATTCATGTTTGCTATGTA  
TGTGAATGTTTGTAGGCTTATGTCCTACAAGAACAGGGAAATCTGTTAGAAGTGGATTACATC  
TCGGTTCCAATTACTCCAAAAAGAGGCAATGCAGATGATAAATCTTTCTTTTGTGCACAAATCTCTCT  
CCTACTCTCCGACCATCCATGTCTTCTGTGGTGAGTATGCTCGAAGGGAAACTCCCCGTGCAAGCACCAA  
TAATCAAGCTGACTACATCAACCAACGAAATGAGATTTAAATCGTTTGAAAAAATTCACATGACAGCCA  
AACACATACTCTCAAGAGTCTCAAGGACAAGCACCTTGAATGATTCGTCAGGGTCAGGGTCTCTGCC  
TGCTAAAGATGAAAAGTTTAGTTCCTCGAGTACACTTCTCCAGATCTTTATGATATAAACATAGATTGAT  
TTTGATTTGATTTTCACACAGGATCAAATATTTATTTCTTGTGTATACTACTTTGTAA

>M6-PGSC0003DMG400029520 M6 G-LecRK

CCCCACGCCACCCCCTCCTTTGAATTTCTGAATATCCACATAAACACGGTTCCTTAATGTACCAAAAA  
CCTTAAAATTTGAATTTTCTATTGCATATACTTTGTACAAAGTCCTCTTGAGTTTTGAATGGACTAATT  
ATTTTTGTGTACCAGCTATGACCAAACCAAAAAAATTCTTGAGAACTTTTTGAAACCCTTTTTCTCAAGC  
TCCAACAAAGGTAAGCAAAAAATCTTGTGAGGGTACCCTTAATCTTGATTTTTTTTTTTGTTGTTCTAATG  
GTGATTTGGGTTTTCTTGTGTTGAATTGACTAATCAAAAAAAGGGAAAAATGAGGAGGACTTAGA  
GAAAATTGCAGCACAAGAACAGAAGCAATCCCTTTTGAAGTTCTTGTCTGCTACCAAAGATTTTCAC  
CCAGATAACAAGCTTGGTGAAGGTGGATTTGGGCCTGTATTCAAGGTAAAAAAAATGAAAATCAAC  
AAAATTGAGTCTTTTTGTGATTTGGGTGTTAACAAAACTCAAGCTTTCCTGAAAAGATTGAGTCGTTTT  
GTGATTTGGGTGTTAACTGAACTCAAACCTTTCTTAAAAAATTGTGTCTTTTTGTGATTCTTGAAGAAAA  
TGAATCTTTTTGTGATTTGAGTATGAACAAAACCTCAAGCTTCTTGCAAAAATTGAGTCTTTTTGTGATT  
CTTAAAAAAAAGAAGAAGTCTTTTTGTGGTTGGGTATGAACTGAACTAAAGCTTCTTAAAAAATT  
GAGTCTTTATGTGATTTGGGTATTGAACAGAACTCAACATTTCTTAAAAAATTGAGTCTTTTCTTATTT  
ATAGGGGAAATTGAGTGATGGGAGGCAAATAGCTGTGAAGAAGCTTTCACATAGTTCAAGGCAGGGG  
ATGAAGGAATTCAAGAATGAAGCTAAGTTGTTGGCTCGTGTACAACACAGAAATGTGGTGAATTTGTTA  
GGGTAAGTGTACATGGGGTAGAGAAGTTGCTTGTCTATGAGTATGTTGCTAATGAGAGCCTTGACAAA  
ATCCTCTTCAGTAAGTTTTATTAGTTTTATCTTCTTAGATCTACTAGCTTTTGTATGTTCTTTTAAATGAA  
ATGAAATGACATTCATTGAGAGGCGTAGCCAGGATTTTAGTTTATGTGTTCTAGGTCATAATTGTGTTT  
GTTTACTGAATTCTGGATAGATTATTCGTAATTATTAGATGAATTTTTAATGCAATAACAAGGTTTGAGC  
CAAAGTTACCGGGATCTGCAGAACTAGTAGACACCTGTGGCTCTGCCCTTGTCTTCACTATCCAAAGATT  
AAAACAAATTGAACTGCAGATGGATGCTCTTGTGAGTTTTTTGAGGAGTGAGATACTGGAAATAGCCTT

GGGATATGCATTTTCATTTTGCTATTGGGTCCAGAAATTTTCTTTCAGTTACGTTGTCAGTAATCTAGTTC  
AATGATCTCTGTGTCAGTCCGTGAAACCACTAGGGATCGTCATATTGTTCTGTATTCGTGTGTTTTAGTTG  
CTAAACAAACTCTAAGCTCAAATGTTCCCTGAACTCCAGTGATGGACATAACGTTTATTGTTTTCTCGACA  
TCCAGCAACAAACATGTGGCTGTTCTTCTGTTGTCTTCTTCTTTTTTGATAACTTTGATGTTTGGACCAG  
CATGTGTGCACCTCAACTACTTCATGGAATACTTGCATCCTCCTATCAATACATGTATCATGTAAATCTGT  
TCACCAACGGTTAGACAGATGAAAAGAAATTACTTAGTTTGTTTTTTGCCTTTGCTAGGATTCGTACCCC  
ACCCATTGTGTTTCATTCCAGTTTCATCAACCTTAGGCGGCCGCAGTACGTTATTGAAACTTCTTCTGTGCG  
AAACAACCTCCCATTCCCCACTAAGGTACATCATACTCCCTAGACACCACGTGTGGGATTACACTGGG  
TATGTTGTAGTAGTATTTGTAGATATTGAAACTCCTTGTACTTCTCAAGAATTCTGTAACCCTGAAACATC  
ATTCGACGACATTTGAGGACCTTAACTTCCCTCGTGTAAGTTAACTTATCAGTAGAAGCAATTTGTGAT  
TCCGAGCCCGAATATAATATAATTCTTCAAGCAAGCAATTTTTCTCATAGTGGTCTTAGAAAAACCAGAC  
TCTTTACTTTATGAATCTTTTTAACCTTTCCGAGTTTTGAGCAAGAAGAAACATGTTTAGTAGTTTTAGAA  
ACTAGTACTGACTCTTAAATTTTTGTATTAGAATCTGTAAACAGAGATGCACTCATCTGGAAGCAACGGC  
ATGACATAATTGTTGGCATTGCTAGAGGGTTGCTATATCTTCATGAAGGTTACATACTTGCATTATCCAC  
CGTGACATAAAAGCTAGCAACATCCTACTTGATGACAAATGGGTGCCCAAGATTGCTGATTTTGAATG  
GCTAGACTCTACCCTGAAGATAAAACACATGTTAACACCCGTGAAGCTGGTACAAAGTATGATTCTATAG  
AACCTTATAAACTGTGTTTAGTGATGACTATGTAGAAATTTGTTATATTGCACAAGTACACTCACTCGAT  
ATTGCTAACAACTCTCTTTGATAATTTAACTTGAAGCCAGTGGCTATATGGCGCCAGAGTACGTTATGC  
ATGGACAACATCAGTGAAGGCTGATGTATTAGTTTCGGAGTTGTAATTCTGGAGCTCATAAGTGGCC  
AGAAGAATTCTACGTTTAAACAGAGATCCTGATTCTCGAAGCCTTCTGAATGGGTAAGAACTTGATTTCT  
CTGCACTTTTCAGTCTTGATATTCCTTGAATTTCTGGATTACAAGAAGAATAACCTGTCAATGCCTT  
CATTCTGTTGAGTATAATAGGAGAGTCCTCGGAATCAATTCGAGCTTCTATAAACATGTAACAGAAAA  
AATAATATAGCCATATCGTAGAACTTTTTAACTACTTGAAAAGTAAGATCGGACTACTTTTATCTATGTTG  
AGGGTGCAAAACATAATCAAATCGGTAGATGGAGGGAGAAGGACTTTACTTATAAGGTGTAGGTATAC  
TCTTAATGGTGTGAGACCTTTGGGAGAAAACGTGTGGCTGTGACTGTAAGTGGATAGTATCACACCAT  
GTAAAGGTATTTTTTAGGCCAATTTAGCCTAAAAGTGGGTAGTAGTGCCAATTTTACGGATAGAGT  
ATGGAGATGAAGGCATTGGGTGAGTTTGCTGCTAGTCGTTGGAAATGCACAAAGGAAAAAACTATCA  
GTCTTGGTGA

>M6-PGSC0003DMG400030209 M6 G-LecRK



TTTTGATATTTTCTTTCAATTATTAACCAAAAAAAAAACACCAATTCTTCTGGCCAAAAAAGTATTTCAAAA  
ATGAAAATTCAACTTAAAAGAAGGCCAAAAGTAGAAATGTAAAGTCAAAGTGGACTCTTCTTCTCCCACC  
TTCCCCTGTTTTCTCCACCTCCACAACAATGGCACACAACCTCATAAATCCACACCAAATACCTCATTCTTCT  
TCACCCATTTCTCCAAAAATGAGACTACTATTACTTTTTACCATTCTTATCATCACCATAGAAGCTGC  
AGATATTCTTCTAATACTACCCTTTCAGCTTCCAACCCAAACTCCAGATGGTCATCTCCAAACAACACCTT  
CTCTCTTTCTTCTACAGCTCGACCCCAAAACCAGAGTTCCTATTTTGCTGCTATTTCTTACAACAATAT  
ACCCATATGGAAAGCCGGCGCCGATACCGTTAACGGTGGAGCAGTTGATATCTCTGGTGAACACTACGGTT  
CCTCTCTAACGGTGACCTCAGCTCATAAGTGGATCATCTGGTCTGTGTTGTTGGAGTTCAGGAACTGTA  
AATCGTGGTGTCTTCTCAGCTTCTTCTGATGATAATGGAAATTTTCGTCTCAAAAACGGTACGGTATCGA  
ACATTTGGTCTACTTTTGATAACCCAACTGATACTATTGTTCTGGACAGAATTTCACTAATAATCATGTTT  
TGAGATCTGGGTTGTATTCTTTTAGGCTTATGAATAATGGAACTTGTCACTTTTGTGGAACGCTTCTATA  
GTGTATTATAATTCTGGGTTGAATTCTTCTGCAAATGTTAACTTGTCTTCTCCTAGTTTGGGAATGCAGCC  
TATTGGGATTCTTTCACCTTCTGATCCTAGTCTTTCGAACCCTTGAATGTTGTTTATAGTAGTGATTATGC  
TGATGAAGGGAACATTCTAAGGTTTTTCAAGCTGGATGATGATGGAAATCTTAGGATTTATAGTTCTACA  
CAGGGTAGTGGGACTCAAATGTGAGATGGGCTGCTTTAACTGATCAGTGTGAGGTTTTTGGTTATTGT  
GGGAATTTCGGGGTTTGTAGTTATAATGAACTGATCCAACCTTGTGGATGTCCTTCGCAGAATTTGAGC  
TACTGATCCGAATGATAGTCGAAGAGGGTGTAGGAGGATAGTTGAACTTAGTAATTGTCCTTCCAATG  
CAACTATGTTGCAATTGGATAATGCTAAGTCTTTACTTATCCTCCGGAATTATCTGAGCAGATTTTTTCT  
GCTGGTATTTCAGCATGTAGTTTAACTGTCTTGTTAATGGTGTCTGTGTTGCTTCGACTTCTTTAGCAGA  
TGGCACGGGGATGTGTTATATTAACAGCCAAATTTGTTAGTGGCTATCAGGCGCCGACCCTTCTAGC  
ACTTCATTTCTTAAGATATGTGGGCCTGCAATGCCTAATCCTACTGCAGTTTCAGAACTGTTTCAGGAGA  
AGAATGGAGGGAGGGTTCCTGGCTGGGTTGTCGCAGTTGTGGTTGTGGCTAGTTTCTGGGTTTGATCC  
TGTTGGAGGGTGGTTTGTGGTGTGGTCTTTAGGAATAGTTCTAAATTTGCATCACTGTCATCTCAATA  
TGCACTTCTTGAATATGCCTCTGGTGCCCTGTGCAGTTCACATTCAATCAGCTTCAGCGGGCAACCAAG  
GGGTTTAAAGGAGAAGCTTGGTGCAGGAGGATTTGGGGTTGTTTATCGGGCAGTTCTGGCTAATAGGTC  
TGTTGCTGCAGTGAAGCAGCTTGAAGGAATTGAGCAAGGAGAGAAGCAGTTCAGAATGGAGGTTGCTA  
CTATTAGTAGCACACACCATTTGAATTTGGTGAGATTAATTGGGTTTTGTTCTGAAGGGCGCCACAGGCT  
ACTGGTTTATGAATTCATGAAAAATGGTCTCTTGATAAGTTCCTCTTTTCAGAAGATCATTTCGTCGGGAA  
GGCTTTTGAACCTGGGAGCAACGGTATAATATTGCTTTGGGGACAGCAAGAGGTATCACATACCTTCAGC

AGGAATGCCGAGATTGTATAGTTCCTGACTGTGACATAAAGCCTGAGAACATACTGTTGGATGAGAACTACA  
TTGCCAAAGTATCAGATTTTGGCCTCGCCAAGCTCATTAACCCAAAGGACCACAGACATAGAACCTTGAC  
AAGTCATGTGAGGGGTAAGACTAGAGGATATTTGGCTCCTGAGTGGCTGGCCAATCTTCTATAACTTCCAAA  
TCTGATGTGTACAGTTATGGTATGGTATTACTGGAAATAGTGAGTGGAAAAAGGAACTTCGAAGTCTCT  
GAAGAGACTAACCAGAAGAAGTGCTCTTTGTGGGCATATGAAGAATTTGAAAGGGGTAATATGGAGGC  
CATTATGGACAAAAAGCTTTCCAATCAGGAGATGGATATGGAACAAGTTATACGAGCAATTCAGGTGAG  
CTTTTGGTGCATCCAAGAGCAACCATCTCAAAGGCCAACGATGGGCAAGGTGGTTCAGATGTTAGAAGG  
CTTTTTGAGATTGATCGGCCACCAGCACCTAAAGCTACTGAAGGGTCCCTTTGCTGGAACCAGCTTAACC  
GCCAGTAGCACAAGCGGTCTCTCCACCTTTGCAGTCTCGGCCCCAGCTCCCTCTTCATCATCATCATTCCA  
AACTGCAGGATTCTGTCTTCATCTTCTGCAATGAATGTCGAGAGGCAAATCATCATCACTTCTACACTCC  
GAAATTAAGTGAGTCTAAACCATACTTTAGATTCCCTACAACAAGTATGGGAGTTTGGAGTTTTAGT  
ATCTCAAAGATCATAGTTTGAAGTGTCTTACAATTCATATTGTATAATAGATAGGGTTTGCATATATAT  
ATATATATATATATATATATTGATATGTTTCATATTAGAAAATACCATTCACTTATTTCCATATCCTATTAT  
TCACCAGAATTCGACGACTCTCTCATGTCCTGTCTGTCTGTGGTGCTTGCCAACCTCTTTTTATACATGA  
AGCTAGGGGTATGCATCAGTTGGTTCGGTTTATCGTTTTTTCGGGGTCAGGGATGATTTGATTAGGGGGT  
GGTTGATGTGAACCAGAAACATGACTATAATATCAT

>M6-PGSC0003DMG400030225 M6 G-LecRK

ATGTCTGGTAAAGCTGGTCATAATGCACCTGTATTTGAGAAGTACCCGCAGAAAGCAAAGAACTTTATG  
TGTTTCATGTCTTGCAAAGGGTGACAGAAATACCCAGAAAAGTCTCTGGAGGTCTCATCTATAGGCAAAGA  
TGGAACAATATGTAGTTTGTACTAGTGCTGCATTCCTGCCACTACTTATTCTGACTATTTGGCCTCTTCT  
GGCAATACCTCAAGTGTCTTCTGGTCTGTTTCTCCGAATGAGCTTCTCTCATTGCTAAGTCTCAGGTA  
AAGATTTAACTTTGATAGAGTGCTACAAGTCTGTATTATGACGATTCATCATAAATTGAAGCATGGAAC  
TAGCAATGTGTTCTTGGTGAACATAATCATCATGTTTGTGTTGTTCTAGGTGGACTACATTCTTGGTGACA  
ACCCGAGAGCAACAAGTTACATGGTGGGATATGGAACAATAACCCAAAGACAAGTACACCACAGAGCT  
TCCTCCATTGTCTCGTTTAAAGGTTAATCCTAGTTTTGTTAGCGCCAGGGAGGCTATGCTACCTGGTATAGT  
AGAAAGGTGAGCGATCCTAATCTCCTTACTGGTGTCTTACCTGATGCCTATGACAACCTTCGCTGATCAA  
AGAGACAACCTATGGGCAAAGTCTGAGCCTGCCACTTACAACAATGCTCCGTTGATCGGTGTGTTGGCAAGA  
CTTCATGCTGGTCAACCGTTACAATCAGCTCCTCCCAGGTAAATTTTAGTGAATTAACATCTTTATATG  
AGCATTCCGAGGATTCATCATAAAATGACTAGTGTAGCCACCTACTACAACCTGCTTGGGATTGAGAC

GTAGTAGTTGTTGTAGTACTAAAATTTTCGTATAACTCATTTAGTCTCAAGTTCTAACCTGTAATAGAGAA  
AACCCACTCAATGACACATCCAGTGCCTAAATTCTACCAGACAAGGAATTCTTACTCCTCTAAATGGTTC  
TGGCAGAGTAATTTGGTCCTCCGATTCCACTAGACATGGGCAAATCCAGTAGCACAACCTCCTTGATTCA  
GGCAATCTTGTAGTTCGAGATGCGGCCGAGGATAAGCCTCAGAACTACCTGTGGCAAAGTTTTGACAA  
CCAGGTGACACAGCTTTACCTGGAATGAAGGTTGGGATTAATCTGAAAAGTATTTTCATCGTTCCCTTT  
CGTCATGGAAGAGCACAAATAATCCTTCCAGAGGTGAGTTTAACTGGACATTCGATACTGGTGGATTCC  
TGCAAACATTCATTATGAATGGTTCATTGAACTCTACAGAGCTGGACCATGGAATGGCCGAGTCTTTCC  
TAATGCACCATCTCGTGACACATCTTGAATGGTTATAACTATACATACTTATCTGATCCTAATGAAATAT  
TATTCATGTATGAACTTACAGATAGCTCGATCATTGCAAGGGTAGTGATGCAACTAAATAGATAA

>M6-PGSC0003DMG400030553 M6 G-LecRK

AAAAAATGTCTCCTCTCTTTGTTTTCTCTTTGTACTCTCTTTTTCTCTCTAAAAATTTAGCAAAAGCTAA  
CAATTTACAAGCCAAAATAGTTCAATAATTGGTAACACAATTGGTGGAAACAATGGATTTCAATTGCC  
TCAACAATAGTTTCTTCAAGTGGTAATTTGAATTGGGATTCTTACACCAGGTAACAATTCCAATTATTA  
CATAGGTATATGGTACAAAAAATAAGTAAACAAACCATAATTTGGGTTGCAAATAGAGAGACACCAAT  
TTCCATATATGAAATGGATTTTGCACAATTCAAGATTGATAATGGTAATTTAGTACTCATAAATGGTACTA  
GACACATAATTTGGTCCACAAATATCAATTTACAACAAATTTCAACAATTCACAAGTTGTAGCAACACTA  
TTTGATGATGGCAATCTAGTATTAAGTAATCAGGATATTACCAATTCGACGAATTATCTATGGACAAGTT  
TTGATCATCCCTCTCATAACGTTTCATGCCTGGTTCAAATTCGGTTACAACAAACATAACAAGATTTAAACAG  
GTACTTACTTCATGGAAAAACGCAAACGATCCATCACCAGGACCCTTTACACATGAAGTTTACATGGAAA  
ATAAGTATATTGGACAAGGTGTTAATATGTGGAACCATAGTGTTGTTTATTGGAATAGTGGACCTTGG  
CAGGTAACAATTTTACAGGGGTACCATATCAACCAATCCTATGTTTAATTATACATATGTTAATAATGAT  
GATGAAGTTTATTATATGTATAATTTCTTTAACCTTCATTAATATCAAATTTTATTATGGATGTTAATGGA  
CAAACAAAACAAGTATTGTGGATGGATAGTACTAATGATTGGAATGTATTTTACACTGATCCAAAACAA  
GTTTGTGATGTTTATTCTTATTGTGGAGTTTTGGTATTTGTAATGAGGTAACCTTACTTCAACATGTGA  
TTGTTTGAATGGTTTTAAGCCTAAGTTTGGAGAAAGATTGGAAATTGAGTAGTTTTTCAAGTGGATGTATG  
AGGAAAACAAGTTTGAATTGTGGTATTTTGGTGAAGGATAGGTTTTGGATGTATAAGAATATGAGA  
TTACCTACAAATAATGAGAGTTTGGGAGTTGGAAATGAAGTAGAGTGTGAAAGTGGTTGTTTGGAGGA  
TTGTGATTGTGTTGGTTATGCTTATGGTAGTGGAAATATTGGGTGTTTGGATATGGAAAAGGGAGATGTT  
GAATTTGCAACAACCTTCTCAAGATAATGTTAATGGAAGCACCATTTATGTTAGGCTTGCAGCTTCTGAG

TTTTCAAGTAACCAAGGTAATGACTTGCAATTTCTCCTATTTTGTGGAATTTAGATGCATGATGTACTTTA  
TTTTGTTTTTTTGGTTCTCGTTTGGTGTATGATATCTGTTTTGGGATCTGACTAAGATGTATTCGCACCACT  
TTTAGGGATGGGGTGGGGGAAGGGGAAGCTTTTCCTACCGAAAACGACTTCAATCTCAAACCTTGAAC  
AGAGACTAGAGACATCTAGTTGAGGATAGAGGAGTACTTACCAGTTACCACTTCACCACAACCTTTGAT  
AATACATATATGATATATACTTCAAATTGTTACCTCTAACCAGTTACCATTCCATCACAACCTTTATACATA  
TATACTTCAAATTGTTACCTTTGTAGGTAGAGTGGATTTACCTAGTTTATAAAGTTTCTTTTGAGTCCAAA  
TTTGAATTTCATTAACTTCTTTTTTTTTCTCTATTATCAAGAAAATGAAAACCAAAAACACATATTTTCT  
TGGTTAACTATCCAGTAGCTGAAGTTTACTGCCTTGATTAATTTAGGTTTACATCAGGTAAGCCTAATTA  
AGGTGTTAAATCTTTTTCTATTAATTCATTATTGAATTCGAGACGTCTGGTTAAAGATGGAGGCCATCACT  
CACAATTAGTGACACATTGAAACATACTAACATTTTTTTTTCTCTTTGTTATTTGTCTATTTATGAACTTG  
CATTAACTTTTCATTTTACTTGGTAATAATGTGTTCTTTGTTCTTTCATAAACAGATCAAAGCAAACCT  
CAACAAAGCTGAAAATTGCAATTCCTATTGGTGAATTGCTGCACTTCTTATTCTATCATGCTTTACCTAC  
ATATACTTTAGAAAAAGAAGAACTCAAAGTCAAAGGTAACAACAAATGTCTCTTTTTTTAATGACAT  
TTTTCTCCTTTTTATTAATAAAAATATACAAAATTTAGTCTTATCAAGACTCTAAACTCATTCATTTTTTTT  
ATTTTTAAATATAGAGAGTACTACAAAATTTACAGGCAGAATACAGAAGGGGAAAGACTAGAATTGAT  
AGATATTCAAGATGATGATATTGAGGTTCCATTTTTTAGCTTTGAAAGTATATTAGTGGCAACAGATGAC  
TTCTCTGAACAAAATAAGCTTGGTCAAGGAGGATTTGGTCCTGTTTACAAGGTATTTATGCAATATCATT  
TGCGATTTATTTTTATAAGTGGTGCACGGTTCAAACCTCGATTTGTACATGTTTGGCAGAACCCAATAATT  
TTGATTCATACGTTATATTTGTGTTTAAAAATCGATTAATAAGTATAAATATTTTATCCACATCCCAATAA  
GCTCTCTTTTCAAGAATCTGAAATCTATACTCAAATTTCTAGTTTGCTGCATGTACTACTTTTCTTATTA  
GTTGTCATATCCTTTTTATTGCCACTTTCCTTTTTTTCAAACACTTTTGAAATGCTTTTCTCGAGTTTGATTG  
TCTATCAGAAACAATTTCTCTATTTCCATGAGGTAGGAGTAAGGTCTATGTACCATCTACCCTCTCTATGC  
TCCACTTATGAAATTACACTACTGAATATGTTAGTAGTATTATATTGTTTTTGATGTGGTGGACGAACCTG  
TGACGTGTGCCTAACCAACATAATCACTTTTTAAAATAAATAAATAAATTGTATCACAGTATTTATTTTTA  
AAAATAAATAATTTTTTTGTAGGGAATTTTTCTGGAGGAAGAGAAATTGCATTA AAAAGGTTATCAAGT  
CATTCTGGACAAGGTATAAATGAATTCAGAATGAAGTGTGTTGATTGCAAGGCTTCAACATAGAAAT  
CTTGTTAACTTTTGGGCTATTGCATTCAATCAAGTGAAAAGATTTTACTCTATGAGTATATGGCAAACAA  
AAGTCTAGACACCTTCATATTTGGTTAGTATTTTTATTTTTAACTAATATCTTTATACTGTGATGTCTAC  
AAGTTAAATTTATTTGATTGTTTTTCTTGCATAAGATCGAAAACGAAGCGTGGTGTGGATTGGAGAAAA

AGATTTGAGATTATAGAGGGAATTGCTAAAGGACTTCTTTATCTACACCATGATTCAAGATTAAGGATTA  
TTCATAGAGATCTCAAAACAAGTAACATATTATTAGATGAGGAATTGAATCCAAAATATCAGATTTTGG  
ATTAGCAAGAGTTGTTGAAGGGAAAATTACACAAGCAAATACAAATAAAGTGGTTGGAACCTAGTAAGT  
ACTCATAACTCCCTATTGTGATGTGACCCTTCTCCAGAATCTGCTAACGTAGGATGTTTTGTGCATCAGAC  
TGTCCTTTTTCAAATAATTTGCCAATTGTGTTGATTTTCTTGTTCAATTAATATGTTTTGTTGATACTATTAAT  
GCAGTGGTTATATGGCTCCGGAGTATGCAATAGACGGATTATTCTCAATTAATCAGATGTATTTAGTTT  
TGGAATAGTTATACTCGAGATCATCAGTGGAAGAAGAAATACTGGATTTTTTAATCAAGAAGAAGCGTC  
GAATCTCTTAGGCCTTGTGAGTGAATCATTACTTAAATTCTTGCTTCTTTTTTTTCAACACTGTCACAGAGT  
TTCAAACCTCATAGGTTAAACTCCAGTACATTGTCACGGAATTTACCTATGAAATTTGAATCGGTCTCTA  
TGACATTTATTTCTCAATTACATGACTGAAAAGTGACTAGTCCGCGCTATGTATTACAAAACCTTTATGCTA  
ACATAAATATGTGTACTATATTTTAGGCATGGAGATTGTGGACAGAAGATAAGTCAATGGACTTAGTGG  
ATCAATCACTACATGAATCATGCAACAAAGAGGAAGCAATTAATTAATGATAAATATTGGGCTTTTATGTGT  
ACAAGAAGATCCAAAAGATAGGCCCAATACATCAAATATAATAATGATGCTTGGTAGTGAAAATTCCAA  
TATTATTTCACTTCCAAGACCAAATCAACCAGCTTTTATGACAAGAAAATGTGGTAATAATAACACATCTT  
CTTCTTCTAATGCTAAGTCTGATGGTGTCTCCAACAATCAGCTTACAGTCACCATTGAAATGGGTGCGATA  
ACGCACTACTAGAAATCAGTCAATTTTTCATCATGAGCATGTTCAATAAAAATCCATCGAAAATATTTTT  
GATAGAACGTCTGTTGAAAATTGACTGATTTAAGAGTGAGATGCCAGCAATTTTGACATAGCAATATTGT  
AGTTTTATCTTTACTTATTCAATGTATATATTCAACTTAAGTATGTACTTTAAAAACATCTTTAGTAATTA  
ATTATGTATTTTT

>M6-PGSC0003DMG400031860 M6 G-LecRK

CTTTGATAGTACAAACAATTTCTGGTTAGACCAAGAAATATAGTGAGCCATTGTGTATATGAAATCATT  
GTTACTTCCTATTGTCTAAACCAAGGCCTTCTGATTTCATAACAAGATGAGAATATCTCTTAATCTTCTTGCA  
TTCCTCCTCCTAGTCCTTCATCATCAGTCAAATGGCCAAAATAATCCAAATATTAGCATAGGTTCTACTTTC  
ACTGCTGGAGAAAATGTTTCTTTGTTATCCTTGTCTGGGGACTTTGCCTTCGGATTTTATCCTGTTTCAGA  
TACTCTTTTCTAGTTGGAATTTGGTTCAACAAAATCCAGAAAACAACACTTGTATGGTCAGCAAATCGC  
GACAATCCAGCTGAAATCAGATCAACTATTAGTCTAACAAATGGTGGTCAGCTTGTGCTCAACTATGCTA  
ATGGCACAGTTCAACAGATTTACAATGAGTCTGCAAGGTTGGGAACCATGCAAGATGATGGAAATCTTG  
TGTTGAGAGACTCAAGTTCAAATAAAGTTTGGGAAAGCTTTAAATCTCCCACTGATACACTTTTGCCAGG  
ACAAACTTTATTATCAGCAGGAAAGCTCTATTCTAATTCTATTTCCGGATGGGAATTCGAAGTACTCTAAAG

GGAAATTCATGCTAGAAATGCAAGCTGATGGAAAATTGGTACTATCTGCTTATCATTTTGGAGACACAG  
GATATTGGCTGAGTAGTCAAGATGATAAAGGAAACCGTGAAGTGAAATTAGTTTTCGACCAGAGGAAT  
GCATCTTTGTACCTTGTGAAAGATAACAATAACACAATTTTTTCTTTCCATCGAATGTGCCAACCCAGT  
TGAAGACTACTACCACCGTGCAACTATAGACAGTTTTGGCAACTTCCAGCAGTATGCTTATCATAAGACT  
AATGGTAGCAATTGGATTAGAGTTTTGAAGATCCCTTCAGAGCCATGTATGGTTAATGCTGTTTGTGGG  
GCTTATGGATTCTGCAGCTCAAATGATAATGAACTGTAAATTGTGACTGTCTCCGGGGTATGTCTTCTT  
GGATCCAAGTAATCCTACCAAAGTTGTCATCCGGAGACAATGATCAACTTCTGTGCAGGTCATCTATCT  
AGCGGAAATTTACAATAGAGGCTATTCAGGATAGTGACATGCCTTACAATGAGGTTGGGGATTATGAA  
ATTTATCGTGATGTTGACGAGGAGGAATGCAAGAAAGTTATCATGGAAGATTGTTATGCCATGGCTGCT  
TCTCTAATCAATAGGGAATGTCACAAGAGGCGTACTCCTATACTCAACGCCCGTAGAATTTCTATGACCA  
CAGGCAGCGTTTCCTTCATCAAGGTGCCTATTAAGTCAGCTAAAGATGACATATCAATAAAAAAGAAATC  
CAACACCAGAGCCCATCTCACTGCTGGCCTTATAACTACCAGTTCACTTACTTTCTATTTGGAGCCTTGG  
CGTTTTACTATCATCCTGCTCCTCGGAGACTTGTAACGAGAGTGGAATCCAAATTCATCAAGAATAGG  
TATCAATTTCCGCGAGTTCACATACAAAGAAGTGCATGAAATAACTAATGGCTTCAGCAAGCAACTTGG  
AAAGGAGCTTCTGCAAAAGTTTACTATGGTAATCTCAAGTTAAAGGATGTTCAAGTAGAGATTGCGGTG  
AAGCTGATGCAAGACGTTGCAGAGCCAAGTGAGAAGGTATTTATGACAGAGCTAAAAATCATAGGCAG  
AACTCATACAAGAATTTGGTAAAGCTATTAGGATTTTGCATTGAGGATAATCACTTCATTTTGGTTTATG  
AGTTGATGAAGAACGGAGCTTTATCAGATTTTTTGTTCAGGAAGAAATACTGCCTACTTGGAGTCACA  
GAACTGAAATGGCACTAGGAATTGCAAGAGGACTGCTTTACTTACATGAAGAATGTGATTCTCCAATCA  
TCCACTGTGACATAAAGCCTCAAAATGTACTTCTTGACAGTAAATATAATGCCAAGATTTAGATTTTGG  
GCTATCGAAACTCTTGAAGAAGGATCAAACAAGAACAGATACTTGCGCAAGAGGGACAGTGGGATATT  
TAGCACCAGAATGGCTAAAGAATGCTCCAATAACACCCAAAGTTGACATTTTTAGTTTTGGTGTAAATGTT  
ACTGGAGATAACATGTGGTAGAAGGCATATTGAGCTTAGCAGGGTAGAGGAAGAGAGCGAAGACGAT  
GAAGGTGATGATTTATTGCTTGTAAATTGGGTTTCAGGCTGTGTGAGAAGTGGTGAATTGACAACTT  
GCAAGGAGTGATCCTGAAGTATTGAATGATATTAAGACTTGAACGATTCGTGAAGGTGGGATTGTG  
GTGTGTCCATCCTGATCCAATGTTAGACCTTCAATGAAAATAGTGATGCAAATGCTTGAAGGCATAACT  
GAGGTTGGAGTTCCTCCAATGTTCTATAACTAAATGATTGTTTAAATCATCAACAGGGAGGAGCATCGG  
AACAAAGACGAAAACTGGAAGGAAAAAGGCCTCCTTGGCTTTGCAAACTGGAAGTGAATAATGAAAAT  
TGTCATAATGTTAATATTTAATACTTGTGCTATTGTAATAATTCTAAGTCTCAGAGTTTGATTGTTAAGT

TTTTCTTTTTGTATGAAGTCCTGAATTTGAATTGTTACTTTTGCTAGTTTATAATCTGCACTTCAGTTTC  
TCCCTGGTCA

>M6-PGSC0003DMG400031861 M6 G-LecRK

GAAAAGAATTCCACACATTCCAGTGACCTCATAATCATAGCCTTCTGCATTATAATATGCAAGTCTTTGAA  
TCATGGCATTGACTAATAGATTTTTACTCTCCATTTGTATCAAATAAGTTTATTTGTTGTGAAAACAATT  
ATAATATCTCAAAAAGAATAAAGTTTTTCCGTAAGATTCCAACAATTCATGGTGTAACAATGGTTTCTTG  
GAAAATCCTGTTATGGTTTGTCTCAATTTATCTCACATTTATTAGCTCTTTCTGTCAAGAACTACAAATAT  
TGTCCCTCTGGTTCCAATATCATAGCTGGAAGTGAATCTTCACACTGGCTTTCATCCTCTGGAGATTTTG  
CTTTGGTTTCTACCTTCTAACAGTACTGGATTATTCCTTGTGGCATATGGTTTGATAAAATCCCATATA  
AAACTCTCGTTTGGTCAGCCAATCGCGATGATCCAGTTCATGCTGGATCAAAGGTTAATCTAACGTTGAG  
TGGACGCCTCGTGTGACAGATACTAATGGGAGAGAGTTTGTGTTTGTACAATGGCACAGGCACTAGTCA  
TGCTACTATGCAAGATGATGGAAATTTTGTCTGAAAATTCATTCTCAGGTGTCTTGTGGGAAAGCTTT  
GATTTCCCAACAGATAACAATTTGCCTGGTCAATATCTTGATATGGGGCAGGCGCTGTTTTCCAGTGCCA  
ATGGGACAGTAGATTACTCGACGGGGAAGTATAGACTACTGGTGCAGACTGATGGGAATGTGGTCTTG  
TCTGCATATAGAAGTCTGATTTTGGCTACTGGAATTCTGTAAGTATAAACAATAATAATGTAAGACTGG  
TTTTCAAAAACACCAGTCATACTTTGTTCTTACAAATAGAAGCTCAATCTTATCCAAGTTGACAGCGAACT  
TGCCTGATTAGTTCAAGATTATTACCACAGAGCTATGATCACTGATAAAGGAGATTTCCAACAGCTCTTC  
CACAGAAAAGTAAATGGGAGAGGTTGGAATGTTGCGCTGCAAGTTATCGAGAAGCCTTGTATTGTGAA  
TAACATTTGTGGTGTATATGGCTTTTGCCAATCACCAGACAATAAGGAAGTCAACTGTAGTTGCTTGCCA  
GGCTATTCTCCAAGGGATCAGTACACTCCATCTAAAGGATGTTATCCGAATGAGATGAAAGATTTTTGTG  
ATCTGAATTCTCCCTTTCCGGATGTCTACGTTGAAAGGATCTCTAATGCTGATTTCCCTAATAGGATGTAT  
GCTGAACTAGAAAGGGTATATGATACTACAGAGGAGCTTTGCAGGCAGGAAGTGTGAAATGATTGTCTT  
TGTGAGGCAGCTGTGTTTAAATGATTCAACATGTTTCAAGAAGAGGATGCCTATACAGAATGCCAGAAGT  
ATTAATCCTGATACAAATAACATGGTTGCATTTCTTAAAATTAGCAACTCTTCGATAACTCAAAACAAAA  
GCACTCTCTATCAAAGGGTGTGTTTGGTAGCTGGTGTGACAGTATGTTCAAGTACTCGCTCCGCTTTTTGCA  
GCAATTGCTATATATTATCACCTTTTGTGAAGAAACATAGAGATGCCAAAACCCCTCCAAAAAGAAAGG  
CAATTGAGATGAATTTAAGGGCATTTCGTTCCAGCAGCTGCACGAAGCCACCAATGGTTTCAAGAATA  
AATTAGGCCAAGGGGCTTCTGGTGTGTTTATAGCGGAATTCTCAAGTTAGAGGATGAAGAAGTTGAAG  
TTGCTGTGAAGAAATTAGGAAATGGAATTGAACAAGGTGATGATATAGAATTTTTGGCAGAAGTAAGG

GTGGTAGGCCTAACACATCACAAAATCTGGTTCATTTGTTAGGCTTCTGCAATGAAAAAGCAACAGG  
CTTGTTGTTTATGAATTAATGAAAAATGGGGCTGTGTCAAATTTTATCTTTCGTGATGGACAAATACCAAT  
CTGGAAGCTAAGAAGTGACATTGTACTIONGACATTGCCAGAGGCCTGTTATACTTGCATGAAGAGTGTGA  
GAACCAGATCATTCAATTGCGACATTAAGCCACATAATATCCTTCTTGACTAGAACTACTCTGCTAAAATTG  
CTGATTTTGGTTTTGCAAAGCTTCTTATGAAAGACCAGACGCTAACAAACACTAATTTTAGAGGAACCAT  
GGGTTATATGGCACCAGAATGGCTAAAAAATGTGCCCGTGACAACCAAAGTTGACATCTACAGCTTTGG  
TGTTTTGCTGCTTGAGATTATTTCTGCCAAAGGCACATGGACTTGAACCCAATCGGCCAAGAAAATGAA  
GAGCCCGAGTTGATCTTAGTCGATTGGGTTCTTCATTGTATGAGAAACAAGAAGCTGAGAGCTGTTGCT  
AGTCTTGATGAAGAAATTATGTTACATTTTACAATTTTGGAGAGGATGACTATGGTTGGCCTATGGTGCT  
TGTGTCCTGAGCCAAATCTTCGACCATCTGCAGCAAAGCTTGTTTCAGATGTTGGAAGGAACTATAGA  
AGGTGTTCTCCTATGGTTGATACTATATGAGTCATTTTCTGTATTATCTTGTAATTTTCCAACAATT  
ATCATTCTATTTTATTAGTCATTAGACCTGGTTAAATTTAGTGTTTTTTCTCATAGTTCTCTGGTGCAAAA  
GTTAGTGTTT

>M6-PGSC0003DMG400032782 M6 G-LecRK

CTCTCTCTCTCTCTCTCTCTCTCTTATCTCATATCAGCAAAAAGCCACACAAAACCTGCGTTTGCACCAAAC  
AAATGCAATTTTGTACCTCTTCTGTTTCATCACTCTTCTTGCATACGTGCTGTCTTCTGTGTAGACTGTCT  
TCCTCTCTGGTTGTTTCATTCAAATGAATTTTTTTCAGAGCTTTGACTTGAATGATTTCTTATTGCTTCTTCTG  
CTCTTGTTGGGTCTTGTTCACCTTTCACGTTTTTTGATTCTTGGACCATAATTTTCATACCCCATGTGAATGTG  
ATAGACAATGTCATTTATGAGTTCCCTGCCTTCTTCTTATCATAATTCTCATTCAACTTTTCCCCTTTTGA  
TCTGAGGTTTTGGTGGATATTTTCCAGATTGTTCTTGTTCCAAATTGGGTAATGGAGTCTTGGATTTCCCT  
TTATTTAGTAATGATCTTCTTCTTCTGCTGAGACTTGTATAGCTAGTGTTTCTGAGATAAAGGCAGACTGA  
ATCTGGGGTTTTCAAGGCTCTCAAATGACTTGGATAGACAACGATGGATTAATTCTTGTTTCCAATAGCTC  
CAAATTTGCATTTGGATTTAACCTACTAATGATGTTACCTTGTTCCTTCTTGTGTCATCCATGTAAGTAG  
CTCTACCATCGTTTGGTCAGCTAACAGAGATTCCCCTGTTCGAAATAATGATAATTTTGTTTTTGATGATA  
CTGGAAATGCCAATTTGCAAAGTGGGAAATCATCAATTTGGTCTACGAATACGGCTGTAAAGGAGTTT  
CCGCCATGGAATTGAAGGATTCGGGGAATCTAATTTTGGTTGGGAAAGATGGTAGCGTTATTTGGGAAA  
GCTTCACACATCCTGTTGATACTCTTCTGTCAGGCCAGAATTTCACTCAAGGAATGAAGCTTGTAAAGCAC  
TCCTAACAAACAATAATTTGAGTTATTCATTTGAATTTAAGTCTGGGGATATGGTTCTTCTGCAAGTTTTT  
AGCCTCCACAGCCTTATTGGGCTATGGGGAAAGATGATAGAAGGACTATCAATCAAGTTGGAGGAGGT



GTCACTTCAGCAATTCTTGATGGAAATGCTTGGAAAATTTATGGTGAGAAGAGAGTGTTGCTCTGGCAG  
TTCATTTTCCCTGATGATAAATATCCAAATGCGACTCGGTTGGCTGTTCTTGGAGAAGATGGTTCCATTAC  
TTTTAGCATTCTTCAAGATGAATCGAAGCTTGACTCGGGGACAAGAATTCCACAAGATGAATGCAGCAG  
ACCAGACTCTTGTGATCCATATTTCAATTTGTTATAGTGGCAACAAGTGTCAGTGCCCATCAGCCCTCCAT  
CTTGCAAACCTGATACTGCTTCGTTTTGCAATAAAGATGTGGAGCTTGTAGATGCTGGGGATAGTCTTGG  
TTATTTTGC ACTTGGTTTTGTTTCTCCATCTGCTAAAAGTATTAAATGGTTGCAAAGCTTCTTGCGTTGG  
CAATTGCTCATGTGCTGCTATGTTCTTTGATAGCACTTCAGGGAATTGTTTTATGTTTGATCAAATAGGAA  
GTTTACAAGGTTTCGGTTAATGGAGCTGGTTTCAAGTCATACATTAAGTATCAGCTAGCCAGGGGAATG  
GGGATAGCGGTGGTGGAGGTGGAGGTGGGAAGGGACGATTACCTATTGTCTTTGGTATCGTCATTTCTT  
CGGCTATTGTCATTCTTGGCCTAATTTATGGAGGTATTAGATATCAGAGGAGAAAGAACAACAAGATGC  
CTGATTCTGCAAAGGGGAGTTCAGAAGAAGACAATTTCTTGGAGGGCCTATCAGGGATGCCGATTTCGTT  
TTAGTTACAAAGAACTTCAGAATGCAACTAATAACTTCTCAATAAACTTGGGCAAGGAGGGTTTGGTTC  
AGTTTACCAAGGGGTCCTTCCAGATGGGACTAGACTTGCTGTGAAGAAATTGGAAGGCATTGGCCAGG  
GAAAGAAAGAATTTGAGCAGAAGTTAGTATTATAGGCAGCATCCATCATCTTCATTTGGTGAGACTGA  
GAGGTTTTTGTGCTGAAGGAACACACAGGCTTCTGGCTTATGAGTACATGGGAAATGGATCTTTAGAGA  
AATGGCTTTTCAAGAAGAACAAGGAATTCTTGCTAGACTGGGATACACGATTTAATATTGCACTTGGCAC  
AGCAAAGGCCTAGCTTACCTCCACGAGGACTGTGATGTAAAAATTGTGCATTGCGATATCAAACCTGA  
AAATGTACTTCTTGATGATCATTTCTCGCCAAGGTCTCAGATTTTGGCCTTGCTAAGCTGATGACCAGA  
GAGCAGAGCCATGTTTTCAACCATGAGGGGTACAAGAGGATATCTCGCACCAGAATGGATCACAAAT  
TATGCCATATCAGAGAAAAGTGACGTTTTTAGTTATGGAATGGTTTTGCTTGAGATAAATTGGAGGTAGG  
AAGAATTATGATCCTTCACAAAGTTCAGAGAAATCCATTTTCCCTCATATGCCTTTAGGATGATGGAAG  
AGGGGAAATTGGAAGACCTTATCGATAGGAACTTGAAAGTTGAAGAAGAGGATGAAAGGGTCTCCATA  
GCAATTAAGTTGCTCTGTGGTGTATACAGGATGACATGTCTCTCAGGCCATCCATGGCTAAGGTTGTGC  
AAATGCTGGAAGGGATCTCCCATGTCCCTTACCGCCAAGTCTTCTCAAATGGGGTCACGACTTTTTTC  
AAGTTATTTGAAATCACTAAGTGGCGAGGGTACTTCATCCGGCACCTCTGCACCATCAGACTGCAACAGC  
GATGCTTATCTTTGCGCTGTTGCGCTCTCAGGTCCAAGATAGCATTGCAAGAAGCATAAACATAGTCGT  
TCATGTAAGGGCTGTTGTAGATGATTGACAAACATGTGCAATGGTTTCATACCTTTAGTTTTTCTGTATA  
TTAAAATTATCTAGGAAATTTTTTTGCCATATTAGCCATGACAAAGGTTGGAGTTGATTGAGAATGTTTTA  
TTTGTATATATATCAATGTTATAAATGAGTTGAAAATAAACAAAGAAAATGCATTTGGTAACACTCATCCT

GGATTTCAAGTACAGCATGTGTG

>M6-PGSC0003DMG400034859 M6 G-LecRK

ATGGTACAAAGATGTAGGTCCCGGTACCGTTGTATGGGTTGGCAATAGAAGAAATCCAGTTAATTGTGG  
TGTATTGCTAGGACTATACACAGAAGGAGACATTTTTCTCCACGATATACTGGGAACAACGGTATGGATT  
CATAAGCCCAACAGTACAGTTCCTTACCAGTACTGAAGCTCCTTGATTCAGGTAATCTTGTGTTTGGAG  
ATTCTAGCAACTAACGGCTGGAGAGTACCTATGGCAAAGCTTTGACCACCCAGTTGACACATTGTTACCA  
AAAATGAAGCTTGGTTGGGACAAGAAAACCTGGCATCGATCGATCCATGAGGTCCTGGAGGACAGAAGG  
TGATCCAGCTCCAGATGATTATTTGTTTCAGGTTAGACTCAGGTGACTCAGGTCAGTTACCCCAACTAGTT  
CTTGAGAAAAACCAGCGAATACATTCAAGATGGGGTCCTTGGGATGGACAGATCTAGAAATTCAGTGG  
CGGTTATGCCCTCATGGATAACCATGCATTCAAGCCAATATTTTCATTCCGATACAAATGCATTTTTTTTCA  
CATTGAAGCCAAGAACGATTAGAGTTTGAAACTTTCACTGAATCCAGATGGAAAATACAATTCTTGAG  
GTGGAATAATGCTACCAATTACTAGGAGGAAGTGAATACACTGAATAAGGACACATGTGACCAGTATTG  
CACTTGTGGGCCTTATGGAGTTTGTAGTGATGGAGATCTCCCCTGCGGGTGTCTGATGGTTTTACAGCT  
GCATCACCAGATGAATGGGGCATGATGAATTTTACGGAGGTATGTAGGAGAAACACCTCACTTAACTAC  
ACCAATAAAGACGTCTTTGTGGAGAATACTGGATTGAAGTTGCTTGATAATGCTACTTACTAGGGAATGT  
TGTACCACCAGGAGTGTGAACAGAAGTGCTTAAATGAAAGATCGTGTATGACTTATACTATCATCAATAT  
CAATGGAAATGGAAGCAAATGTGTCGTTTGGTTGGGAAATTTACTTGATATGAGACATTCACAGATAGT  
TGGGAACAACATTTTTATACGGATGGCACCTGAAAACTAGGTAAAAATGATTGCTTGCTTTAACTGATT  
TAATTCCTAGATTATATTATTAATATGGTGCAAACAATGTGTGCAAGAATGACATTTGAAAGGTGAAGT  
AGTTAATTGTTGTGTAGGTTTGTATTATTTACACAGAAACATCAATTAATAGAATTTCCATATTAATTCTTG  
ATTAAGTGGTTCATCGCAGATCGATGTTTGAAGCATTAGATTGAATGTTGTCACATAACTGCTATATAAT  
CGAGCATAAGATGAAACAACCCTGCATGCATCTAGTTATTCTCATTGCAAAATCTTTAACATAATGAGTA  
AATACCTCTAGAAATTCCTATAAAGTTTATGTCAAATTTGAAGCCTAATTTTATGAGTAAGAAACAATAA  
CACTTTTAACTTTCTTATGGACAGATGCACATGTTTCCGACATCAGATGGAAAAATGAATGGACAGCTTT  
TGCTTCTTTAATCTCAGAGTTGGCACTACTTATTATTTTTCTTATAGCTGTTGTGGTTCTATGTCAAAAAAT  
GAGGACAGAGGTGCTAGGTAAAAAGAATCACCTTGCCTGCTATTATATTATTTTCATAGTTCTTTATTA  
CAAATAAGCTTAGTTTCACTAGAACACTATTATTTAGCAAACACAAGACCTAAGTAAGAAAGCTAGCCT  
AATACTCATATTAAGGTATGATTCACATCCATTATTTCTGATTAATTTGCTTTCTCATAGCAGATGAACAA  
GAAATCAATCAGCCGACAAATTCTCAAGGAGCTTTGCTGCAAGGCACTAATGTCATTGCATATGATTCCA

GTGATCTAGCTGCAGCCACTAACAAATTTCTCGCTGGCTAAAAAGATAGGGCATGGTGGCTTTGACAATG  
TTTGTAAAGGTTATTATTTCTTTTCGACAAGCATGAAAATGAATATTTACAGTAACTCAGACAACGTAATTA  
TACCTAAATGATACATTTGTAGGGTGTACTAGAGAATGGAGTAGAAATAGCAGTGAAGAAGCAGGACG  
TGACTTCATGTCAAGGATTTACTGAGTTCGAGAATGAAGTCAAGTTAATAGCAAAGCTACAACATCGTAA  
CCTAACCAAATTGTTGGGATACTGCATTAATGGAACAGAAAAATTTCTAGTCTATGAGTTCATGGCGAAT  
AATAGCCTAGACAAGGTCATATTTGGTATGACATCTTAAATAATATTTTTCTTTTTTACTATTGTCTGTGT  
TGTTTTGATATTGGAAAATCCACAAAAGACAGAAATTTAGGAGTATCCGAGTGAAATTGAGTAACTGTTT  
TCTGTACATGTCTAGATCCTGCAAGAAGGGGTACAGTAACATGGCCAATGCGCTTAAACATTATCAAAG  
GAATCGCAAAGGATTAGTTTACATGCATCATGACTCAAGGTTGACAATAATCCACCAGGACTTAAAAG  
CTAGCAATGTCTTGCTAGACAGAGAGATGACACCCAAGATATCTGACTTAGGGTTGTCAAGGGTATTCG  
AAGATGATGTTGAAGAAAAGACTCAGCATTAAATTGGAACACGGTTAGTATATTATCATTAAAGACTACAT  
GTTTATGTATATTTTAGAGTTTTTACAGATGGTTTTATGTTGTGGCTGTAGTGGTTATATGCCTCCTGAGT  
ACATGAAAATGGACATTATTCAACAAAATCATGACGTTTTTAGTTTTGGAATCCTGGCATTGGAGATTG  
TGAGTGGCCAAAAGAATTATGATTATCGGCACCCAGTCTATGATATTGGTCTAGTAGACTATGTACGTAA  
GTACATCATCGATCCCCTGGTTATCGTCATTACTTCACTTAAATTGGTTACATAGAAGTTTCACCTTGTGCT  
AAAACAATTTACATGATTGATGTTTCGATCTATTGTTGGTCAAGCTTGGAGAATTTGGAGTAAGGGGAAT  
GCCATAGAACTACTGGATCCAATGATTGAAAAACCAGGTGATGAGAATGAAGTTTTAGGATGCATCCTT  
GTTGGGGTCTTGTGTTGTCAACGCCGTGCCCAAGACAGACCTTCAATGATTCAGGTGGTTTCCTTACTGG  
AGGAGAATGAAATGTCAAGGTTAAATTTGTGCCTCAGGAACCTTAA

>M6-PGSC0003DMG400035841 M6 G-LecRK

GGAATTCTTACTCCTCTAAATGGTTCTGGCAGAGTAATTTGGTCCTCCGATTCCACTAGACATGGGCAA  
ATCCAGTAGCACAACCTCTTGATTCAGGCAATCTTGTAGTTCGAGATGCGGCCGAGGATAAGCCTCAGA  
ACTACCTGTGGCAAAGTTTTGACAATCCAGGTGACACAGCTTACCTGGAATGAAGGTTGGGATTAATCT  
GAAAAGTACTGTTTCATCGTTCCTTTTCGTCATGGAAGAGCACAAATAATCCTTCCAGAGGTGAGTTAAC  
TGGACATTCGATACTGGTGGATTCTGCAAACATTCATTATGAATGGTTCCATTGAACTCTACAGAGCTG  
GACCATGGAATGGCCGAGTCTTTCCTAATGCACCATCTCGTGACACATCTTGAATGGTTATAACTATAC  
ATACT

>M6-PGSC0003DMG400042814 M6 G-LecRK

ATGGAGATCAAACACAATTATTTCTCCTCTTTTCTTTGATGTACCTATGTTTCTCTCTCAAACCCATCTCT

CCATTGAAGCTGCTGACACCATTTCTGCAAATCAATCCCTTTCTGGAGACCAAACAATTATCTCTTCAGAT  
GGAAAATTTAAGCTTGGTTTCTTCAAACCAGGTAATTCTACCAACTAATACATAGGCATGTGGTATGATA  
AAGTGGTTGAACAACTGCTGTTGGGTTGCAAACAGGGAAAAACCAGTTCTTGATAAGAATTCTGCAG  
AGTTAAAGATCTTAGATGGTAATTTAGTACTGGTGGATGAATCTCAAACCTCAATTTGGTCCACAAATAT  
CAGTTCCAGCAACTCGAGTTCTGTTGTAGCAGTCCTCCAAGATGATGGTAATTTGATCTTGACAGATGGG  
TCTAATTC AACACCACCTTTGGGAAAGTTTTAATAACCCCACTTGGTTGCCTGGTTCTAAACT  
TTCTTACAACAAAGTCACCAGAACAAAGCAACTTCTTACTTCATGGAAGAGTGCAGATGATCCTGCACCT  
GGGCTGTATTCACTTGAACCTCGACCCAAATGAGAAGCAGTATATTATAAGGTTCAAAGAAGTGAGCAA  
TATTGGAATACTGGACCATGGAATAATCGAATTTTCAGGGATGTGCCTGAGATGAGGACTAACTATATTT  
ACAATTTTAGCTATGAGGACAATCAGAATGAAAGCTATTTTACATATCCCTTTATAATGATTCTATTATC  
TCAAGATTCATTATGGATGGCTCTGGACAGATTAAGCAACTCACATGGTTGGATAATACAAATCAGTGG  
AATCTGTTCTGGTCTCAACCAAGACAACAATGTGAAGTTTATGCATTTTGCGGGCCATTTGCTACCTGTCA  
GGAAACCAATCCCTTCTGTAATTGTTTGGATGGTTTCAAGCAAAGTTCAGAGACTGATTGGAATCAAAT  
GATTTTTCATGTGAGAGGCCAAACGAAGTCGCAATGTGGCAATGGTAATGGGGAGAAAGATGACTTTTG  
GATGCATCCCCAGATGAAAGTACCTGAAAATGCTCAAATATTTCTGCTGGAAGTGCTGAAGAATGCAG  
ATCTACCTGTTTGAATAATTGCAATTGCACTGCTTATACTTATGAAAGTTCATGCTCAATATGGAATGGTG  
AACTCTGAATATGCAGCAACTCCCACAAAATGATGGCAGGGGCGAGTTGATCTATGTCAGGGTAGCTG  
CATCTGACATCCCAAAATCAAAGAGTAAAAGGGAAATCCAATTGGTGTCTGTGGGGTCTGCTGCTG  
CCGTACTGATCCTTCTGGGAATTCTTTTTGTTGTATTCCGGAGAAGGCGTAGGCATATTGGAAGTGGGA  
AAATAGTGGAGGGTTCATTGGTTGCATTTGATTACAAAGACTTGCAACATGCGACTAAAAATTTCTCAGA  
GAAGTTGGGTGGTGGAGGCTTTGGTTCTGTTTTCAAAGGGAACTATCTGATTCATCTGTTATTGCTGTT  
AAAAGGCTCGATAGCATCAGCCAGGGAGAGAAGCAATTTGATCAGAAGTCAGCACAATCGGGACAAT  
CCAACATGTTAATCTTGTACGCCTTCGTGGATTTTGTCTGAAGGTAACAAGAACTACTGGTTTATGATT  
ACATGGAAAATGGATCCTTGGATTCACATATTTTTACCGAAAAGCAGTCAGATGTTATGGATTGGAAAA  
CGAGGTACCAGGTGGCACTAGGGACAGCTAGAGGCTTGACTTATCTCCATGAGAAGTGCAGGGACTGC  
ATCATAATTGTGACATAAAGCCTGAAAACATCCTTCTTGATGCACAATTATGCCCAAAGTAGCAGATT  
TTGGCCTGGCAAAGCTTGTGGGCGGATTTTAGCAGAGTCCTTACTACTATGAGAGGAACAAGAGGTT  
ATCTTGCAACCAGAATGGATATCAGGGGTGGCCATTACAGCCAAAGCCGATGTTTATAGCTACGGCATGA  
TGCTTTTGGAAATTGTATCAGGGAGGCGAAACTCAGAATACTCTCACGATGGGAAAGTGAAATCTTTC

CTAGTTGGGCTGCACGTGTAGTAGTTGATGAAGGCGATATCCTTAGCCTATTGGACAATAGGCTGGACA  
GAGCTGCTGATGCTGAGGAGGTGTCAAAAATATGTAAAGTTGCATATTGGTGCATCCAAGATGATGAAT  
TCCAAGACCCTCAATGGGTCAGGTTGTTTCAAGATTCTTGAAGGAGTTTTGGATGTGAATTTGCCTCCTCT  
CCCACGCTCTCTTCAAGTTTATGCAGACAATGAGGAGCACATCGTTTTCTTACCGAGTCATCCTCGAGCC  
AGACTAGTTCACAAGCTCAGAGCAAGACTTCAAGTACAACATCTCAATCTAAAAGCATCACAGAGTCTAC  
GAATTCAGGTCTTGA

>M6-PGSC0003DMG400042886 M6 G-LecRK

ATGGACTTAGTTAACTCATTAACTCCTTTGAAATTAACTCAGTTTTTCATTATTTCCATCTTTTTCTCAATTT  
TTTTCAAATTGAAGTTGAATCTGAGACACCCAATCAATTTTTCAAAGGATTTAAAGCAAACCCAGATCCC  
CAAATTTGCAATTTTCAGCCTCTTCTTACTGATTCTACTGGAAATTATCACTGAGTTTTCTTCGAGTTGAA  
GAAAATCAACTCAGTCTTGCTATTATCCATGTAAATCTTTGAGTCGATATGGGTTGCTAATTTGACCCG  
TTAGCTAAATGGGCTGACCCGACTGAGCTCTACTTCAATGGCAGCCTTGTTCTGTCTGATTCACGTTGAG  
GGGTATTTTGGTCAACTCACACTGATGGAGACCGTGTTGGCTTTCAAATACATCGAATTTGCAAGTTCA  
GAAGGTTGATAATGGAGTGACGTCACCTTCTGTTTTATGGCAAAGTTTTGATTTCCCTCAAATACCCTTG  
TGAAAATCAAATTTCACTAGTGCCATGACTTTAGTTTCTTCAAATGGGCTTTATTCCATGAGATTGGGC  
TTTGATTTTTTCGGGTTGTATTTTAAAGGTGAATCGGGTTCGGGTCCGGGTCGGATCTATTGGAGGCATA  
AGGCATTAGAAGCTAAAGCTGATGTGATGGAGGATCAAGGACATATTTATGTTGTATTAAGTCAAATG  
GATTTTTGGGAATGTACCAAATGAGTCAGTCCCAGTTGATGTTGAATCATTTAACAGCTTTCAACAACC  
CTTATCCGGTGTCCGTCGGGTCCGGGTCAACCGGATGGTAACTTAAAAGGGTATTTTTGGGACGGGTG  
GAGTTGGGTATTGGACTATCAAGCGATAAAGGAGACATGTGAATTGCCTAGCCCCTGTGGGGCATAACG  
GGCTCTGTCATCCAGGCAAGAGTTGTTCTTGCCTGGATAACAACACGGATTATAGTATCGGCGGGTGTG  
TCTCGCTGAACACTCAGGAGCCCCGCGATTTTTGCGGGGCCTCCTATGATCTTGATCACAAGAAGTACAA  
GGGTTATCAAGAAATGGTGTGATTTGCCTAACACTGAGTTAATGGACTATCAACATATGGTTTCTTTT  
CAAGAATGTCAAAGTGCATGTGAAGGAAATTGTACATGTTGGGGTGTGGTGTACACTAACACATCTGGA  
TTTTGCTACATACTAAATTACCCATACAAAGTTTAGTAGGGGTGAGGGATGAGTCCAAGATGGGGTTTT  
TCAAATGAGGGAGGGTGTAGGAAAAGATAAGATGGGGGTGGGGTTTGGTGTAGGGGTAGGGTTATT  
ATGTGGGGCCATCTTGGTATTAGGTGGGGTCATAGGTTTAGGGTATTATAGATATATAAAAAGAAAAAG  
AGAAAGAGGAGTTAGTGGTTATGTTGATGATGATGGAGTAGTGGTTGGACCATATAAAGATTTGGGAA  
ATGCAAGTTTTAGGTCAATTGAACTAATTGAAAGATGA

>M6-PGSC0003DMG400044943 M6 G-LecRK

ATGGCTCCATGCTTTCTTTGTTACTATCTGTCATCTTTTTATCTCCATAGCCCTGTATGCATGTTCCGCTG  
GTGCTACTGACTCCTTGTTTGCATATCAATTCATCACCAACTTGAACCCTTTAGTTTCATCCAACCATAATT  
TCGTAATTGGATTTTTTGGTTATTATTCATCGACTCTACGTGTATGCAAGACGTACCTGGGATTGGGGTA  
CAGGAGTGTAGATCCCAGGGCTATAGTATGGGTAGGTAATGAATTGAATCCACTTGGATGTTTTACAGC  
GCTAGCACTAACCAAAGAAGGATTTTATGTCAAAGATATAGTACTGGGAACAACGGTATGGATTCATAA  
GCCAACAGAACAGTTCGGTCACCAGTTCTGAAGCTCCTTGATTCAGGTAATCTTGTGTTTGGAGATTCT  
AGCAATCTGACGGCTGGAGAGTATCTGTGGCAAAGCTTTGACCACCCTTTCACACATTGTTACCAGGAA  
TGAAGCTTGGCTGGGACAAGAAAAGTGGCATCGACCGATCCATGAGGTCCAGGAGGACAGAAGATGAT  
CCAGCTCCAGGTGATTATTTGTTAAGGTTAGACTTAGGTGACTCAGGTCAGTTACCCCAACTAGTTCTTG  
AGAAAAACCAGCAAATACAATCAAGATGGGGTCCTTGGGATGGAGAAAAATTGAGTGGCGGTAATGCC  
CTCATGGATAGCCATGCATTCAGACCAATATTTTCATTCCGATACAGATGCGATTTTTTTTTCACATTCGAAGC  
CAAAGAGGATTCGAGTTTGATACTTTCACTGAATCCAGATGGGAAACTACAATTCTTGAGATGGGATAA  
TAATGCTACCAATTTCTGGGATGAAGTGAAGACACTCAATATGGCCATATGTGACCAGTATAGCACATGT  
GGGCCTTATGGAGTTTGTACTGATGGAGAATTCCCCTGTGAATGTCCTGATGGTTTTACAGCTGTATCAC  
CAGAAGAATGGGACAAGATGAATTCATGGAAGGATGTAGGAGAAACACCTCACTTAACTATACTGATA  
AAGACGTGTTTGTCAAGAACACTGAACTAAAGTTGCCTGATAAAGCTACTTACTGGGGAATGTTGTACC  
CTCAGGACTGTGAACAGAAGTGCTTAAACAAAAGATCGTGTATGGCTTATACTAACATCAATATCAACG  
GAAATGGAAGCAAATGCGTTGTTTGGTTGGGAGATTTACTTGATATGAGACGTTACCGGATAGCTGGGA  
ACGACATTTTTATAAGGATGGCAAATGGAAAACCCGGTAAAAATGATTGCTTACTTGTGATATGATTACT  
TGCTTATGACACGACAATAATCAATGCCTAAATTATTTTTAGTATAGTGCAAAGTTATGTGTGCATGAA  
TGACATTTGAATGGTGAAGTAGTTAATTGTTGGTGCATAAACATCAATAAATAGAATTTCCATATTAGTG  
CTTGATTAAGTGATTCCCTGCAGCTTTGTCTTTTTTAAAAAAAATAAAAAATTGTGTCTATAACTTGATTCT  
TACATGAACCACTCATCCCTCATCTCTATCAGAGGGAAACAGTTCTATAACTTTTTCAAATGCATATGTAT  
CTCCGTTATATAGAAACATTAGATGTGTTTCAAGCATTTTACTGAATGTTGTCACATAACTGCTACACAAT  
CTAGCAAAGTTGACACTAACCTGCATGCATCTAGTTGTTCTCATAGCAAATCTTTAACTTTGTATCAAC  
AGAATATTATGAGTAAGAAAACAATAACACCTTTTACTTTCTTATGAACAGATGCACCTGTTTCCCATGG  
GAAAAGAAAATTGAATGAGGGATCGATAGCAGTGATTTCTGTATTAGTTCTGGAAGTACTTATCTCGATT  
TCATATATTGTGTATACACATCGAGCAAAGAGTACAGAGGTGCTAGGTAAAATGAATCACCTCTCGCTG

CTTATATATTATTTTCATAGTTATTTTTTTTCAGCCCAACCTTAGTTTCACTCAAACACCATTTCATGAGCAA  
ACCTCCTTCAACTCTTGAGACAACAAGAATGAGCAGAGACATTGTTCAAAGCATCTTGTTCTGCCAAT  
ACCTTTAGTTTGTAATGAAAAACAAAATTTACTTAGAGCACACATGACTCTGTAACCTAGCTTGTGGTTC  
GCTTCCATTATTGTCTGATATATTTGTTTTGAAAATGAATATCTTCATCTGAGCAGATGTCATTGCGCCA  
GAAAATTCTATAGGAGCTTTGCTGCAGGGAACAGATGCTATTGCATATGATTCCAGTGATCTAGCTGCA  
GCCACTGACAATTTCTCGCTGTCTAATAAGATAGGGCATGGTGGCTTTGGCAATGTTTATAAGGTTAGTA  
TTTTTTTTCAACAAGCATGAGCATGCATATTTACAGTAACTCAGACAACACAATTAATACCCAAATGATAC  
ATAAATCTGTAGGGTGTACTAGAGAATGGAGTAGAAATAGCAGTGAAGAAGCAAGACGTGGCTTTGCG  
TCAAGGAGTTGAGGAGTTCGAGAATGAAGTCAAATTAATTGCAAACCTACAGCATCGTAATCTAACCA  
GTTGTTGGGATACTGCATTCATGGAATAGAAAAATTCGTAGTCTATGAGTTCATGGCGAATAAAAGCCT  
AGACAAGGTCATATTTGGTAGGTGATCATCTTAAATAACAACCTTTGTTTTACTATTATTTGTGTTATTTG  
ATATTGGACAAGCCATAAGAGAGAAATTTTATTAGGCCTATCCGAGTGAAATAGGGTAACTGTTTTCTCT  
ACATGTCCAGATGCTGCAAGAAGGGCTACAGTAACTGGCCAACGCGCTTAAACATTATCAAAGGAATC  
GCAAGAGGACTAGTTTACATGCATCATGACTCGAGGTTGACAGTAATCCACCGGGACCTAAAAGCTAGC  
AATGTCTTGCTAGACAGCGAGATGACACCCAAGATATCTGACTTTGGGTTGGCAAGGGAATTTGAAGAC  
GATGTTGAAGTGAAGACTCACCGTGTAGCTGGAACATAGTAAGTAGACTAGCACTCATTATCATTAAACA  
CTACATGTTTATGCATATTTTACAGATAGTCTTATGTTGTGGCTGTAGTGGCTATATGTCTCCTGAATACA  
TGCAAGCTGGACATTATTCAACAAAATCAGATGTGTTGAGTTTTGGAATTTTGACATTGGAGATTGTGAG  
TGGCCAAAGGAATTCGATTTATCGGCACCCAACCTATGATGTTGGTCTAGTAGGCTATGTAAGTATATCA  
TCCCCTGATTATGGTCACTACTTGTACACCTAAGTTTTACCTTGTGCTAAAACAATTTACATGCATGATTG  
ATCTTTTGTGTTGTCAGGCTTGGAAAATTTGGAATGAAGGGAATGCCATAGAATACTACTGGATCCACTGAT  
AGATAAACCAGATGATTTGGATGAAGTTTTAGGATGCATCCATGTTGGGATCTTGTGTTGTCAACGGCG  
ATCCCAAGACAGACCTTCAATGGTTCAGGTGGTTTCCTTACTGGAGGAGAATGAAATGTTAAAGTTTAAT  
TGTGTGCCCCGGGAACCTTACTTCTATAGGGAGACGAGTCAGAGTAGCAGGAGTCGCGAAAGTATGAA  
TGGGCTAAGTATTACTGAATTCACCGGAAGATCATGA

>M6-PGSC0003DMG400045997 M6 G-LecRK

ATGACTTTTTTAGCTATGCTTCTTGTTGGTCTCTTATTGTTTCCCCTTCAGCCATTGCTCAATCTTACCAA  
ATGTTAGTTTGGGTTTCATCACTCACTACAAGTGATGTTACTAGCTTTTGGTCATCCCCATCTGATGAATTC  
GCTTTGGGCTTCCAAAAAATTGGAATGAATCAAGGTACTTACTAGCCATATGGTTCAACAAAATCACAG

ACAAAACCATAGTTTGGTCAGCCAATAGGAATAATCTTGCCTTAGATGGATCCAAAGTTCAGCTCTCCGC  
GGATGGAAGACTAGTCCTCACTGATCCAAATGGTCAAGAGATGTGGGCTCGTGGCATGGCGAATGCTC  
AATTGGCCTATGGAGCCATGCTTGATAACGGAACTTTGTGCTAGCAACTAGTAGTTCAGACACTCTATG  
GCAGAGTTTTAATGAGCCCACCGATACGATTTTGCCTGGTCAAGTACTTAACCAAGATCACAGTCTTGTT  
TCAAGTTTCTCTGACACAAATGTATCGAGTGGGAGGTTTGAGTTCATACTTCAAAGTATGATGGAAATCTAG  
TGCTTTACACAGTCAATTATCCAGCTGAGACAACAAATGCTGCATATTGGTCATCTATGTCAGTTGGCAG  
TGGTTATCAGGTGATCTTCAATCAATCAGGCTTTATTTTTCTTCAAGCAAAGAATGGAAGTTCGATAAATT  
CGATATCTTCTAATGTGGAAAATTCAAGAAGCCAATCAATGTATCATCGAGCGATTCTTGAATATGATGG  
AGTTTTTAGGCACTATGTCCATCCGAAATCTTCTGGTAGGGAAACCGATGGCATGGTCTAGTTTGTATAAC  
ATTCCTGATAACATCTGTTTGTCTATCAGGCAAGGTACAGGAGGGGGTGCCTGTGGTTTCAACAGCCTAT  
GCTCAATAGGAACTGATCAGAGGCCGAGATGTGATTGTCCACTCGGATATATCTTGGATGATCCAAATG  
ACAAATTAGGCAGCTGCAGACAAAATTTCTCTGAGCAAACTGTAACCATGAATCGCGAGAAGTTGAGT  
CTTTCACATTCCATGAAATGTTGGATACTAACTGGCCTGACTCTGATTATGAGTCTCACCGCGATGTTTCA  
GAGGATTGGTGCAGACAGAATTGCTTGAATGATTGTTTTGTGATGTTGCCATTTACAGTGACGACAACA  
TCTGTTGGAAGAAAAGGTATCCTCTTCAAATGGGAGAGTAGGTCCAACGATCGGAGGGAAGGCTTTG  
ATAAAAATAAGGAAAGACAACCTCCACAGTGGGAACACCAAATGTTGAAATAAGAAAAAAGAAAAATCA  
GTCTACTCTGATCATTCTGGTTCTGTGTTGTTGGCCAGTTCAGTTTTCATGAATTTGTTCTTAATTCTTTT  
GGTCCTATTGTACATTTTTAAGTTTATAGGGAAAAACGAAAGAGGACTGCACTGTATTAGCTGTTCCG  
GGAGTGAAGTAAAGAAGTTTTAGCTACAAAGAGCTAGAACAAGCTACAAATGGATTCAAGGAAGAATT  
AGGAACTGGAGCTTTCTCAACAGTTTACAAAGCGTTCTTGATGATGAAAATGGGAAAGTCGTTGCTGT  
CAAAAACTCCGAAACATGGTAACAGAAGGAGAAGGAGAAGAAGTATTTGAAGCTGAAGTGAATTCAA  
TCAGCAGGACTAATCACAAGAACTTGGTCCAACCTCCTTGGATTCTGCAACGAAGGCCAACACCGCCTTTT  
GGTATATGAACACATGAAAACCGGCTCAATAGCACACTTGCTATTCAAAGATTCTAGGCTTAGTTGGTCC  
AAAAGGGTACAAGTTGCCATCGACACTGCCAAAGGACTTTGTTATTTGCATGAAGAGTGCAGTACCCAA  
ATTATACATTGTGACATCAAGCCCCAAAATGTGCTTTTGGATGAAAATTTGACAGCAAAAATAGCAGATT  
TTGGTATGGCCAAGCTACTGAAAAACATCAGACTCAAACAACCACTAGGATACGTGGAACCAAAGGGT  
ACGTAGCCCCAGACTGGTTCAGAAGCATGCCTGTAAGTGTGAAGGTTGATGTGTACAGCTTCGGGGTCT  
TGCTCTTGGAGTTGATTTGCTGCAGAAAAACTATGAGCAGGATGTGGCAAACGAGAACGAAATGATA  
CTACTGGAGTGGGCTTATGATTGCTATAGAAGAAATAAGTTGCATTTACTTGTAGGTGATGATGAAGAG



GCATTAGAAGATATCAAGAGATTCGAGAAGTTCTTGTTGGTTGCAATTTGGTGCATTCAAGAAAATCTA  
GCATCAAGGCCTAACATGAAGAAAGTCATGTTAATGCTTGAAGGTTCTGTTGAAGTATCAATTCCTCCTG  
ACCCTTTTTCGTTTGTGCGATTCTATTTAG

>M6-PGSC0003DMG400046324 M6 G-LecRK

ATGGTTGTTAATTATAGTGCCACTCTTTTCATGCTCAGTCTCCTCATTCTTTCTTCACAGCATCTGATTAGT  
TGTC AACCTTCTGAAACCTTATCACCAATTCCTCCATTCCTGGATCAATAACCGCGCCCGCTCCTATGTA  
GTGAATTCACAGATGGAGCTACACTGACACCGATCCTCTTGAGAGAAGGGAACGAGACTCAGTTTGT  
TGTGGTTTCTTATGTGATTACAATGGCACTGCTTGCCTTTTTGGCGTCCTTATATTACCAAATATCTATGA  
TCCTTATCTATATAACCTGAGATTAGTTTGGTCAGCAAATCGGAATAATCCGGTTAGAGCTAATGCAACC  
TTGCAACTTAGGCAAGATGGAGGCTTGTCTTGATAGACTCAGATGGAECTATGATTTGGAGTACAAGC  
ACAAGGGGAAAGGTTGTTGCGGGATTCAACATGACAGTACTGGGAAATCTTGTCTCTTTGACAAATAT  
AACCACACCATTTGGCAGTCTTTTGATCATCCTACAGACTGTTGGCTTCCTGGTCAAATGACAAATGAGG  
GACAAAAGCTGAGATCCAGTGTATCAGCAACAAATTGGAGTGAAGGTTTGTTCACATTTGAAGTTCTAC  
GATTTGGCTTTTTAGCATACTGAGTCAAATCCACGTCAACTCTATGTCTCAAATCTGATTGGGAAAGA  
GCTTTCATGTTTCCTCGACTAAGATTCATTGAAGGGATGTTAATTGTAAATTTGAATTTTCAAATGCTAG  
ATTCATGAGGTTTGGGGATGATGGGCATTTAAGGTTGTATCACTGGGAAGGATCTTGGTCAGAGGAGG  
CTGATCTACTGCCAACCTACATTGGTGAGTGTGGGTATCCAECTGTGTGTGGCAATTAATCTGTTTGTGG  
AAATGGGCAGTGTAGTTGTCCTCAAECTGCGGTTGATCAGACTAACTTTCTCCAGCAAATCAATTACAGG  
CACCCAAACCAGGGGTGTGTCCTTATCACACCTATCACTTGTGAACATTCCTCAATATCATATTCTTATAGA  
GCTCGAGGACATAGCTTATATTCCCCTCTACTTGCAATATGGTACCAACAAAACAGATTTGGAAAATTGC  
AAAAGGCTTTGCTTAAGTAACTGTTCTTGCAAAGCAGCTCAATTTCAATTTAGTGGTCCAGGTAACACAA  
TGGGTGACTGCGCATTGTTGAATGATGTGTTTTCGCTCACAAACAATGATGGAGCATCCAATAAGACCA  
CTTTTTTCATCAAGGTGCAGAACTCTTCTAACTTACATGCCTCTCCACCACATATCTCTACAGAGAAGAAA  
TCAAAGCGTGTCCTCAACAATAGTAGGATCCACCATCGGAGCTTCATTTGGTTTGCTTTTCATTGTTTTAAC  
TGGCTTTGCCTATATTTTTCAGAGGGAGAAAAGGACTCGATGAAGACGAGGAGGAGTTCTTGATCAAAT  
ACCAGGAATGCCTACTAGATTTTCTACGAGGAACTCACTGTGATGACAGAGAATTTCAAGTGAAGAACT  
TGGGGAAGGGGGATTTGGATCTGTATTTGAAGGAACAGTGAGTGATGGCACCAAATAGCGGTGAAG  
CGTCTGCAAGGTTTTGGTAATGTGAAGAAATCATTCTTAGCTGAGGTAGCAACAATCGGTAGCATTTCATC  
ATGTTAATTTGGTAAAATCTGTTGGATTTTGTGCTGAGAAATCACACAGACTTCTGGTTTATGAATACAT

GGCCAATGGATCTTTAGATAGGTGGATTTTTACGGAAAACAGGAACAATCTCTCACATGGGATGTCAG  
GGAAAAAATCATTGCAGACGTCGCCAAGGGCCTAGCTTACCTACATGAAGATTGTAACAACAAAATTTTT  
CATTTGGACATTAACCTCAGAACATTCTTCTTGATCAGAATCTCAATGCAAAGTATCAGATTTTGGGT  
ATCAAAGCTTGTGGGTAAAGATGAAAGTAAGATAGTTACAACAATGAGAGGAACACCAGGCTATTTAG  
CACCTGAATGGTTGCATGAGGTCATTACTGAGAAAGTGGATGTTTATAGCTTTGGGGTTGTGATCTGG  
AAATCATCTGTGGCCGGAAGAATTTGGATCGTCATCAAGATGAGGATGATATGCATTTGCTTAGTTTGT  
CATGAGAAAGTCAGTGGAGAGACAACCTTTGGAAATGGTGGACAAGAACAGTGAAGACATGCAGCTAC  
ATAAAAAAGAGGCTGTGGAAATGATGAAGATTGCAGCCTGGTGTTTACAAAGTGATTATACTAAGAGG  
CCTTCCATGTCGTTGGTAGTTAAGGTGTTTCAGGGTTTAGTCGCTGCTGAAACCGACTTGGATTACAGCT  
TCACATTTCCAACAATGACGAGAAGAGTTGCCGGAGCTATTCAAGAAAGGGAAGCTGTGGTTGGTATCA  
GTTTACCACTTCCATCACAGTTGTCAGGACCTAGGTAA

>M6-PGSC0003DMG401004946 M6 G-LecRK

ATGGGATTTTTTTGCCCGGCTAGTTTTACGAATAATTGGTATATTGGAATATGGTATAAGCACGATGTAC  
CTGATAAGTCTGTAGTATGGGTGCCAATAGAGAAAATCCATTCAACAACACATCAGGTGTTATGTTGAA  
AATCATCGATACAGGACAACCTTGCTCTTCTACTGCTGCTAATAAAATCGTGTGGTCTACTAATTCATCGA  
GGCCTTTGGCTGTGAAGAATACAGTTGCACAGTTGTTGAACTCGGGGAATCTTGTGATAAGAGATGCAA  
ATGATACCAAGCCTGAGAAGTTCCTGTGGCAGAGTTTTGATTATCCTACTGATACACTCTTACCAGGCAT  
GAAGATGGGTAAGAACTTTGTAAGTGGACAAGAATTTTACCTGTCCTCATGGAAGAACGAATATGATCC  
AGCTCCAGGGGAATATACGTATCATTGTGATCCGACTGGATATCCTCAGGATGTCATGAGGAAAGGTAA  
AGTTAAGGTGTTCAAGTACTGGACCATGGAATGGACTCCGCTGGAGTGGTGTACCAGGACTGACAAAAA  
ATACTATTTATACATTTAAACTGGATCTTGATGAAAAGAGAGCATTTTACAGCTTCGCGCTTTTAGGTTCT  
GTTATGACCAAATTAACCATGAACAGTAATGGTGTGCTTCAGCGTTCAATGTGGGCTGAGAATAGACAG  
GAATGGCATGTTTACATTTCTTACCAGGAAGATACTTGTGACAATTATGGAACATGTGGTTCATATGGTA  
GTTGCAACAACATACTCACTCCTGTGTGTAATTGCTTAGACAAGTTTGTGCCTAAAGATCCAAGAAATTG  
GGCAATGACAAATTGGTCCAGCGGGTGTATTAGAAGGAAACCGCTTAATTGCCAGAATGGAGATGGAT  
TTCTCAAGTACTCTGGTATAAAGCTACCAGATACACAGTATTCATGGTTTGATAGGAGTATGACACTCCA  
CGAGTGCAAGCAAGCTTGCTTGAGGAATTGCTCGTGTATGGCTTACTCAAATCTTGATATACACAATGGT  
GGGAGTGGCTGTTTGTCTTGGTGTGGCGACTTAATTGACATTCTAGAATTACCTGGAGGACAGGACATT  
TACATAAGGGTTGCTACCTCAGAGTTAGGTAACATTTGTGAATTTGATCAAAGTTGGAGTATTAGCTGAA

TGATTTAAACTTCCCAATTCTCAGATTTAGTTGTATTCTACTTAGATATCTGTTAAAAGTTCACACAGTATA  
TGTTCACTCTTCCATGTCTATTTAGTTTATTTACCCCTCCATGTTTTGTTTCAGGCTCGAAGAAAACAAAAC  
TACTCGTGTGAGTCTGTTACTGTTGATTGGAGTACTGTGACTGGCCTGACCATAGGGCTGTATATTTG  
GAAAAGAAGAAGAAGAGGAAGATGAATTTGAAAGATGACCTAGACCTCCCACTGTTTACCTTATCAAC  
TCTAACTAAAGCATCCTCTAATTTCTCAATCGAGAACAAGATTGGAGAAGGTGGATTTGGATCTGTTTAC  
AAGGTAACATCTTAAGTTTATGAATCATTCTTTCAGTAAATAATATCTACTATTATTGACAGTAAACAGAT  
GACACTTACTGAATAACTAAGCCAGATATATGTTGATATTATAGGGAATCCTGGAAGGTGGACACGAAG  
TAGCTATAAAGAGGCTATCCAAGTCTTCTCGCAAGGAGTTAACGAGTTCAAGAATGAAGTTATTTGCAT  
TGCCAAACTTCAGCATCGAAATCTTGTGAAGCTTATAGGTTGCTGCATTGCAGGAGGAGAAAAAATGTT  
GGTCTATGAATACATGTGCAACAGAAGTCTAGATCTCTTCATATTTGGTCTGGTACTCTCTCTTAACTCG  
AATAACCTCTATTAGTACAAATAGTAAAGTTGATAGTTTAAATCACATTATCAGTGTCTAACAGAGGACC  
TGTTAACAGATGAAAAGAGGAGCTTGTTACTCAACTGGCCTAAGCGCTTCGACATCATCAATGGAATTG  
GTAGAGGACTTCTGTATCTCCATCAAGATTCTCGGCTAAGAATTATCCACAGAGACCTCAAAGCTAGTAA  
CATTTTGCTAGATGCTGACATGAACCCCAAGATCTCAGATTTTGGCATAGCTAGAAGCGTTGTAGGGAAT  
GAGACTGGTGCTAATACACACCATGTGGTTGGGACACAGTAAGAAATTTAATACTACTCACTTCTTAGCA  
TTTATATTATGTATAATATCCTTTATTTTACATTACTTTCTGTTTGCAGTGGTTACATGTCCCAGAGTATG  
TAGTCCATGGTGTTTTTTTCAGTAAATCAGATGTATTTAGCTTTGGCGTATTAGTGCTAGAGATAATCAGT  
GGTCGAAGAAACAGAGGATTTGCCCGTGAAAGTCACAGTATCAACCTACTCGGACATGTAAGTCTTGTT  
TGTAATTAAGACGAGTTTAAATTTTGTGCACTATATGGTAGCTACAGATATTTCTCTAATAATTAATT  
GATAACACCTCGTACAAATGATAGTTAAACTGCATTGAACTTAAATCCATCAGGCACATCAACCGCTGCA  
TGTTTCTTGATTATGTAAGTATTGTTATTGATAGGTATGGAACTTTATAAAGAAGGTAGACCATTAG  
AGCTAATTGATGGCCATCTAATGGATTCGCGTTATATTTCTGAATTGCTACGCTTAATCCATGTCGCTCTG  
TTATGTGTACAACAATGTCCAGAAGACAGGCCAGATATGCCTACAGTGATCTTGATGTTGACTAATGATG  
CTATTTTGCCTCAAGCTAAGGAACCTGGTTTTCTTACAGAAAGCAAAGTCGCGTCTGAATGTTCTACAAG  
CATGTGTTCAACAAACGAAATTACCGTCACACAGTTAGAACCCCGTAAATTACATTACATGTTCAATCA  
GATCGTTCAATGTCAACAAGCTTGAATTACAGTGTGTTTGTGCTGTAAAGCCATAATTTCTATGGTATCTG  
TTATTAGTAAATATGGGTGTGTTGTAGTTTTTATTAATTCTAATGTATTTTAAAGTATTCGTACAAAGTAC  
CTATTCAACAGTACATCAAATAATCGAAAGATCCATATAAAATGAATCAACACAATGAGAGTTCACAAAT  
AACAAACAGATGCCATTGTTGATGGCTTTTAGAAGCTCCAGTCCCATAGTACTCCATTAAGTACAGAGTAT

CAGTTTTGTTGTTCCATTCTCCGAGTTTAGGATATTCATTAAGTGTGGGGTCCAGTTATACGATCAAAC  
ATCAGGCAGTCGCTACGCTAACAATTTGAATGATAGCAGAATGGTTGATTAAGTCATGAAATTGCCAA  
GACTACAGTGAATGGAAGAATTGCAATTCTAATTTCTTATTTCTTTCTAGGAAATGTACAA

>M6-PGSC0003DMG401005047 M6 G-LecRK

TTCACGTAAATTCAATAGCTTTTATTTAGATCATCGTTTTCTTTCGGGTGAAGCTATAATAAGTATGTAGG  
CAGGTTTGATAGAAGCTTAGTAGCTTTGATCTATACTCTGTATTTTTGCTTAAAAACTCTAATCATGTATA  
AATTATTTATCAAGAAGCTCAGCAAGCTAATTTTTCTAGAGTTTATAATTTATAAACTTAAAATTTTAGCTC  
AGACTCTTATTATAAATATTCGTAAACTTCAAATCTTAAATCCGGCTCATTATAAGTTAATGCTTACCTAA  
AAAAAGAAGGTGAGAAAAGGGGTTTAAAATTA AACATGGTCATAAAGTGAACAAAGCGTGTGTTAC  
ATTTTTTATTTTGTATTTTGTATTGCTAACGCGAATTGTTGCGTGACATAATGAAAAATACATTAATTTTT  
TGCTGCTTTTATTGTTATATTTTCATGAGGATATCGTATCTTTTTTAAATTTTAAAATTTTGGACAATAAATG  
TAAAACTAAAATTAGTGGACAATTGGTCCTAAAAGTTAGGTGTAAGTTCACACAAAAGATTCTTTTTG  
AAATGGATGAGAAGAAATCATTTTTTTGGACCCACTTTATATCCAAAATAGTCACTTGCCGATTATTT  
TGACTTTGATTAATTTCAAATTTACATATAGTATGAGTTCTACTTTTTAATTTTATTTTACTTTGATTAATTT  
CAAATTTTACATATAGTATGAGTTCTACTTTTTAATTTTTCATGAGGTTTACTTTTCATATTGTAAATATAAAA  
AATAAATACTTTTTGACAAGGACAAAGTCTTTGGGTCATTTGAATGGTGTACAAGTTACATTTAAATTAT  
AATATTA AAAAATAAATAATATTATTTAATATATATGTATTTGACTTTACATTGGATAAATTAGTATTA  
ATTATATTTTCTATTTTAACTTAGATTTAATCTAAAGGACCTTGGAAGAAGAGTCTCAAGAAAGGCCATT  
TTGGTCATTTTTTGTATTTTATCTAGAGATTATTATCCGTATTAAGGTTGTATAAAAATAATATCACAA  
ACGGTGTAAATGGCTAGCCCCAAAATCAAATTTCAATCACACGGAATAATAATCTCACATTTTCATCTCG  
GGATTGTTATCTATTATTCCAATCAACGACTATAGTAATTACTAAGTTATGTAATGTGCACTAATGT  
TTTTGGATTCATGACAAAAGAACTTGATCTTCCATTCATTTGTATTTTTCGAGCAATTAACACCTAGTTCA  
AGTACTCAATCGTGATAAAAAATAATTTTGTGACTTTACTGTTAAAAAAAATAACAACCTTTGATGGAA  
GACTCATTTTTATGTGTTAATTTTTCAGCAAAAAGTGGAAATGTTGGATCTGAAGATGGTTCTGGCAAAC  
AAAAAGAATTGCTATGGCTACTGGAATTACAGCTGGTGTGTTCTTGTCTAATTGGAGTTGTAAGCATT  
TGCTTTTTATCAAAGAGAAAAAATTATTGGAAGATCCAATAAGAAAGAAAACAGAACAAGAGGTATG  
TTATAATATAAGCCTATAATTTGATTTTCAGTATGGTATTCGATATTTACTTTAAGGCATAATACATAAAG  
AATGCACATCTATAGACACCTCGACTCGTCTTCACTGTGTCTCATGGACACCTAATACGTTATTGTGACAC  
ATAAATTTTGGAAATGTCTAAATGATCATTTTGTAAAGTTGGAATGTACGTTCACTAGACATGATGGAGAC

GAGTTGAGGTGTCTAACTATACATTACTCAAAGTTAGAGCCTTCAGTTGTTAGTTGAGGTCAAGTTAAAG  
TGTCTATCTGTATATTATACAGTAACCATCTCATAATTCATACTTCTTACACTATTTTTGAACCAGGCTCTA  
TTGAAAGAAGTCAAGATCTTCTAGTGAACACAGCCATTATTCCAAGTAAGAGAGAAATTTCTGGCGAAA  
CTGTCGCGGACGAGTTTGAATTGCCATTATTTGATCTCAGTACCTTAGCTGTGGCTACTGAAGATTTTTCT  
GATGCAAACAAGCTAGGCCAGGGCGGTTTTGGTTGCGTTTACAAGGTAAAGATCATCTAGACGTTAAAA  
AAGCAAAGCTTATGTTGCTCGGATTGGTCAAAAATATCATCATATCCATGTCAGATCCTCCAAAAACAC  
ATTACTTTGGAAGATGTAACACGTGCAGTGACATTTTTCGAGGATCATAGCAATACATCAATTAAGTAGT  
ACTTTTTTGCATTTACAAGTTAAAGCTGATCATATATCAGTAAAAAGAACATATGCTGCTCAGACAGGAC  
AAAAATGTCGTTGCATGCACTCGTGTGTCAGATCCTCCAAAAATGCATCACTTTGTAGGATTGATCTAACAC  
GGGTGCAGTGACATTTTTCGAGGATCTGAGCAATAAAAACTAATCCTTTTTTTTTGCATTTACAATGTAAA  
GCTCAACTAGATGTGAAAAAACTTTTTGTTGTTGCGATTCTACAAAAATGTCATTGCACCCTTGCTGATC  
TGACTGGTGTACAACATTTTCAAGGATATGAGCAACATATGAAAACTAGCCCTTTTTGCCTTTACA  
AGGTAGACGTGAAAACAACCTATGTTGTTGTCGATCCTCCAAAAATATCATTGCACCCTTGTCGGATCTCC  
AAGAAAATGCTTCATTTTTGGAGGATCTGACACGAGTGACGTGACATTTTTCAAGATTCGAACAACATTG  
GGAAAGACGGACTCTGTTTTATTGGAAAATGTGAAGACATTCAACAAAAGAACATCTTTTTTTTTTTATTA  
TCAGGGAATAATAGATGAAGGTCAAGAAATAGCAGTGAAAAGGCTGTCAAAGAATTCAGGCCAAGGA  
GTAGAGGAATTCAAGAATGAGCTAAGATTGATTGCAAGACTTCAACACAGAAACCTCGTTCGCCTTCTT  
GGATGTTGCGTTGAGATGGAAGAGAAAATGTTGATATACGAATACATGGAAAATAAAAGCTTGGATTG  
AATGTTATTCAGTAAGTCGTTTTCCGTTCAATATATTCTTATGATCAGTAACTATGTTTATGTGTGCTATTG  
GACTTCAAATTAACAAATATACGCGTCTCAGATAAGCAGAAAAGCTCATTGCTAGATTGGCAAAGACG  
ATTCAGCATTATCTGTGGGATTGCTCGGGGGCTTCTGTATCTTCATCAAGATTCAAGATTTCCGATTATCC  
ACCGAGACCTCAAAGCAAGCAACATTCTCCTTGACAAGGAAATGATCCCGAAAATATCAGATTTTGGCAT  
GGCACGGATTTTTGGAGGCGATGAGACCGAAGGAAATACAAAGAGAGTTGTTGGAACCTAGTAAGTAG  
AATCACATTATTCCTTATAAATCATTCAAAAAACACTTTGAAAAGTGTTGGTAAATCGACTTTTTTTCTC  
TCTTAATGTAGCGGTTACATGTCTCCTGAATACGCGATGGATGGTCTATTCTCTGTTAAATCAGACGTTTT  
CAGCTTCGGAGTTTTAGTGTTGAAAATAGTAACAGGGAAGAAGAACAGAGGATTTTATTTTCAGAACAA  
TGAAAGAAACCTTCTTGGCCATGTAAGTACACCAAATTATCACAACCTTAGCCATCATTCTAACAAAGTC  
AGAACAGAGAATTTGAGTTTATGCGTTCTGAATTCTTAAAAAATATAGCTAATTAGTAGGTTCTTGAT  
AAATTATTTATGCATATTAAGTAGATTTTATAACATAAATACAAGGTTTTTACTAAAGTTGCTACTGAGTT

CTGTCGAACCTGTAACCTTCTCTCTAGTTCCGCCCTAACTATGTAATCACTCTGCAGGCGTGGAACCTAT  
GGAGAGAAGGAGGAGCCTCAGAACTACTCGATTCATCAGTTGGTGAATCATTTTCTCCGTGTGAAGTAA  
TCAGATGCATACAGGTCGGGTTATTGTGTGTTTCAGGAACAAGCAGAAGATAGACCGAACATGGCAACC  
GTTGTATTGATGTTAGGAAGTGAAACCGCAACAATGCCTCAGCCTAAACACCCTGGTTTTTGCCTCGGAA  
GAAGACCTGTTGATGAACACTCGGAAACTATTTACGAAGAACTTTCACTGTGAATCAAGTAACGATTAC  
CATGCTTGATCCCCGGTAGAGTTAAACGTTTCAGACAGATCATAGGCTAGCCCCGTTCAACGTGACAGAA  
TAGAAATCAAGGCAAATTCGCTGATGGGAGTGTGAACATAGAGATTCCACGACGAATGAATGCAATAC  
ATGGAGGATGGGTCCCTGCTGGCAAAAATGTATAGATAGTACATTAGTGTTTTTTCTCCACCCGACCATA  
TCAGGAGGATCAATAGTGTTTAACTTACCCTCGTATAGTACATTAGTACTACGAGTGGTTAAACAATTTTC  
TCTTTGTACACTTACCTTGATTCTTTTTACAAAATAATGTTGTTTTTTGGGTAGTTAATTATAGAA

>M6-PGSC0003DMG401009323 M6 G-LecRK

GCTGCCAAAATGAAATCTTTAGCCAATTCCATCTTCATCTTAATATTGACCTTATTCTTCAGCCATACATG  
TATCATTAACCTTCCATCTGTGGCTGCAATAACCTCTATGAAGCCTGGTGATGAACTCAATCACACTCAG  
GTTCTTGATTCTGAAGATGGAATATTCAAGTTAGGATTTTTTTCTATCTCACAAACAATAACTTTTATCTT  
GGTATATGGTATGCAGGTGATCCAAAAGATAAGAACTATGGATAGCCAATCCAAATACGCCTTTATTG  
AACAAATTCAGGATTGCTCACTATAGATACTACAGGAACATTGAAAATCACTAGTGGAGGGAAAACAGTT  
GTGAATATTACCCCTCCTTTATTGACAGGAAGTTTAATAGCTAGGCTTCAAGATTCTGGAAATCTTGTGCT  
TCAGGAAGAACTCAGAACAGGACTTTATGGCAAAGCTTCGATCATCCTACCGATACTCTTTTTCCAGGT  
ATGAAGTTTGGTTATAACCTTACAACAAAGCAGAATTGGACTTTAACTTCTTGGTTGAGTAGTTTTATTCC  
GGCTTCTGGGGCTTTTACTTTAAGTTTGGAGTCCATTCAAGATGCATTTCACTGCTGGTTATACGTGAAGA  
GGAGAGGTTTATTGGACAAGTGGCGCTTGGACAATGAAATTTTTCCATTCTTAACTGCATTGTATGATT  
CTTCTAACAGATATCAGTATAATCTCAACTGGTGTCTGAAAAGATGGTGTGTTCTTCCAATTTGATGCT  
CCAGATGGAAGTTTCCAAGTCTTGTGTTGATTTTTAATGGGGCTATTCTTGGTGGTGGTGAAGACAGTC  
GTGTATACGCCCTTTATAATGAGTTCTGTTATGGTTACGAAAGTCACGATGGTTGTGTCTTAATCAGTTA  
CCTGAGTGCCGAAAGGATGGGGATAAATTTGAGCAAAGAGTGGAGACTTTATCGATAGATCTAATTTCT  
AACAGTTATGATAATGCAAGCACTAGTCTTGGTGATTGTATGAAGAGGTGCTGGGAGCACTGCAGTTGT  
GTTGGCTTACCACCACCAGCAATGGAACAGGCTGCATAATTTGGAATGGTGTGATGGGGAGTTTCAAGTT  
GATGAGAGTGGTAATACAGTGAAAAAATATGTTCTGGTTTCATCAAATCATCTAATGGTAAATCCTTAT  
AGCAGGAATGCACCTTGCTTATGAACTAATATATTTTGAATAGATCAAGAGTCACCTGTATAACACTCAG

CAACCTATGTGTGCAGGAAAACAAAAGAATTGGATATGGATAGTAATTGTTGTAGCTATTGTTGTCCCTA  
TGCTGATATCTGGTTTCATCTGCTACATTATAGTGAGAAGGCGCAAACACTACAAGGTAAATCTCTGAAAA  
GTGAAAATTGATTAAGTAACTAGTAAGCTTTTTTATTAATTATGTTAAGCATGTTTAAATATCTACAACTTTTCT  
TGCACAGCTGAGAAAAGAAGGGAGGAAGAGTATATACGTGAGTTGACAGCATCCGATAGCTTCAACGA  
CACCAATATGAAAGAAAAGGATGGAAGGGAAGTCCAAGATTTGAAGATATTTAGCTTTGGATTTGTATT  
GGCAGCCACAAACAATTTCTCAAGTGAAAACAAGCTTGGAGAGGGTGGTTTTGGACCTGTTTATAAGGT  
ATAATTACATTATATGCCTTCGAAAACTTCAGTGCCATCATTGCATTAAGTAACTGAATTACCTTTAAAATTTA  
TGACAGGGAAAATTTCCAGATGGGAGAGAGGTGGCAGTCAAGAGACTTTACGAACATCAGGTCAAGG  
GCTTGTAGAGTTCAAGAATGAGCTTATACTCATTGCAAAGTTCAGCACACAAATCTAGTTTCGAGTTCTA  
GGATGCTGTATTCACGAAGATGAGAAAATTTTGATATATGAGTATATGCCTAACAAGAGCTTGGACTTCT  
TCCTATTCGGTTCGTTACCATTTCAAACAAAAGAATTAATAGCTCAAATAAGTTCTGAAAATTTTGACCTG  
AAATGCTTTCTGTCTTTGACAGATCCTGAAAGAAAAGAAGCTACTGGATTGGCAGAAACGTTATGAAATT  
ATCGAAGGATTTGCTCAAGGATTGCTCTATCTTCACAAATACTCAAGAATGAGAGTGATACATAGAGATC  
TTAAAGCCAGTAATGTGCTATTGGATGAGAACATGAATCCTAAGATAGCTGATTTTGGTATGGCAAGAA  
TTTTCAAACAGAACGAGACGGAGGCAGTGACTGCCAGGTTGTTGGAACATAGTGAGTAGAACTTATTT  
CATGATATAAGTTTTATTCATTTAGACATTTTCATATTGACTAAACGGGTAATGTTTCCTGTCCTCTATA  
GTGGTTACATGGCTCCCGAGTTCGCAATGGAAGGAGCATTCTCAATCAAGTCTGATGTCTTCAGTTTTGG  
AATCTTAATGCTGGAAATTGTGAGTGGTAGGAGAACTACTAGCTTACAACAATTCGATCGTCCACTCAAT  
TTTATAGGTTATGTAAGTTTTCTTGACACCCCTTTTTCTTTTAAAGTACTATAATACATAAAGTTTGAGAA  
TACTGATCATTTTGGTTTAGGCATGGGAACTATGGAAAGAAAAGTGTGCACTGGAATTGAAGGATCCAG  
CTCTTGAGATTTATGTGACACTAACTGTTGTTACGAGTTATTCATGTTGGACTATTATGTGTACAAGAA  
GGAGCAACTGATAGGCCAACAAATGTCTGATGTTATCTCATTGCTTGGTAATGAAAGTATGCCACTGCCTA  
CGCCAAAACAACCAGCATTTTTTCACAGGAAGAAATGAAGCAGAATCAAATTCATCGGGTATCAAAGCAG  
AACAAATGTTCCGTTAATGATTGTTCCATCACTGTCATTGAAGCAAGGTAGCTTAGAGACATTATCTTGCT  
GTATTCTGTTGTGCAACTCAGTAGCTATACATGAAAAGCATGTTTCCTTATGGTATAGATTAGTCAATT  
TGTAAGTTAACAATTGTATAGCTGTCTTTAGCTGACTTTGTAACAATATATTAATCTCTCTCTACAAAG  
ACTAGAATTATCATTAACTTTTCTGTTTTTTTTGCATTTTCTCACTTAAATGTAGTAACATTTATTAGTATA  
CAACCTAAGATTGTTAGATTCTCTTTATTTATTAGCTCCTTTATTTTTTAAAATTAGGAGACTCATCAAT  
GATGATATTTTTTTGTGGTCCACATAAATGGATAACTTATCTGAGGATCATAATTCATAAGGATGACTGT

AAACTAATCTAGTCCAAACAACCTACTCGACTAGTTAAGGACATTCTTAATCTTGATTCAACAATGCATCA  
ATGAAGTTCACAGTGTATTTCAACAAGTAGATATGATATCTTTTTGAATTATATTAGCAAGCAGCAAAT  
GAAATAGAGAAATATGAGGAAGAAAAAGAAATTAGAAAAGTCAAAGAAAGAACAGAAACAAAATGC  
AAATTGATTTACATTTCAACAAGAAAATTAAGATTGTCTCTTTCAACAAATTTTCTTACAAGTAAGGTA  
ATATTTCTACTTAGAAAAATCTTCAAATTTCTGGTTGGAAAATGTTTAATATAATTGTCTATTCTCTAATG  
CATTATTGGCTTTGAACAGTAAACAACCTAAAAAGGAATAATCTATTATTATCTGCAGCAACATTTCTTTC  
TTTCTGGCTGCCAAAATGAAATCTTAGCAAATTACATTTTCTCCTCATTTTGACTTTATTCTGTAGCCAA  
ACATGTATCATTATCTTTCCATCTGTAGCTGCAATAACCTCAATGAAGCCTGGTGATGTACTTAATCATT  
ACAGGTAATTGATTCAGAAGGTGGAAGATTCAAGTTGGGATTTTTCTCTATCCCACAAACAAATAAACT  
TATCTTGAATATGGTATGCAGGTGATCCAGTAGAGAAAAAATTATGGATAGCCAATCCAAACACACCT  
ATATTGAACAGCTCAGGATTGCTCACATTAGATTCTTCAGGATTATTGATAATCACCAGTGGAGGTAAGA  
CAGTTGTGAATATTACCACTTCTTTATTGACAGGAAGTTTAATAGCTAGGCTTCAAGATTCTGGAAATTTG  
GTGGTTCAGGATGAGACTCGGAACCGGACTTTATGGCAAAGCTTTGATCATCCTACTAGTTGTCTTTTGC  
CTGGTATGAAGCTTGGTTATAACCTTACCACACGGCAGAATTGGACTCTAACTTCTTGGTTGGTTATTAG  
TACAATCCGGCCTCAGGGGCTTTTACTTTAAGTTTGGAGGCAATTCAAGATGCATTTAGTTGGTTGTT  
AGACGAAGGGGTGAGGTTTACTGGACTAGTGGGGCTTGGAACTATCAAGGTTTTCCATTCTTACCTTCAT  
TCCGTGATTCTGCTACTACTTATCAGTACAATCTCAACTTGGTATCCGGTACTGATGGGATGTTCTTCCAA  
TTTGAGGCTACAAAGGGAAGTTTCCAAGTCTTGAGTTGTTTTAGATGGAGCTATTGCTGCTGGAGAC  
GGAAGTATACACCCGTTTTAATAAGTTCTGTTATGGTTATGGAGGTGATGATGGTTGTGTCTCTAGTC  
AGTTGCCTGAGTGTCGAAAGTACAGTGATAAGTTTGGCAAAGATAGGAGACTTTATAGATTTATCTG  
GTACTACTACTAGTTATTATGACAATGCAAGCATTAGTCTTGGTGATTGTATGCAGAAGTGCTGGGAGCA  
CTGCAGTTGTGTTGGATTCACCAGTCTTAACAGCAATGGGACAGGCTGCCGAATTTGGAATGGAAAGAG  
GGATTTTCGAGTCGATGAGAGTGGTAATGCAGTTCAAAGATATGTTCTGATTTACCAAATCATCTAAA  
GGTTAGTATTTATGTCATAAATGCACATTGTTTATGAACTAAATTTTTGGTCGAACGAACACATTTTGTG  
CAAACATCCAAAACAGAATACAGTATATCCTAAGTAAAAAGCTACAACCTGACCACAGCTAAACAAATTT  
AAAAACAGCCCCTACTCTTCCCTTCTATACAGTTTTTCTGATTGTAAAGTTCTT

>M6-PGSC0003DMG401013876 M6 G-LecRK

GAAAACTTGAGACTTTAAGAAAGGGGATGAGAGGAGTACACATTTTCGTCACAAGGCGCATAATTTCC  
ATAGCAGCTGACGACAACCCTTTAACCCTTTGTACGTAATTCCTACTCAAGCAAATCTTTCATTGGGCT



GTCTAATTCTTGTGCCTCTTCGTAGTTTAACTTAGGCCAACATCTTAGCCAGCCTCAGATAATTGGTCC  
ATAAGCATTATATGGGCTATCCATGTTCACTTTATTAGTACTTATTTTTTAGTGAATGATTGCACTA  
CTGCAGTTTGATGTCATTTTCATCAATTGGATATTTTCCTTACGTAGAATTTCAAATATTTGACTAAGT  
GTTTGATTAGTTGCGTAACTTTGGTTTGGTAGAATTCTCATAGACTAATTTATTTTTCTGTTTCTCTGAG  
ATGATAGCATTGATATACTTATGGATACTTGAATGTTGTTGTGTTAATTCGTCTATTCCCTCGACTTGTC  
AAACTTTTTAAAACAGGTATTTGGGAATGAAGATATTGTTGGTTGATTTAGTTCTCTTGCTTTCTTGTT  
TTCATTTAGTTAGGTGCAATAATACGCGTTCAGACAACCTATTGCCTGGACAAATCCTTTCCTTTCTGCA  
GCAGATACTTTAGTGTCCAAACAAGGGAAGTTTGAACCTCGGTTTCTTCTGTCCAGGTAATTGTGAAAAGC  
TTTTATTGGTATATGGTATACAAACATAAAGCCCAAGACCGTCGTTTGGATAGCAAATAGGGACAACCC  
TATCCGCCCTCCGTTCAATAATTCTCATCTAGAGCTGTCTGATGGAAATCTAGGAATCTTTAATGCACGTA  
AACAGAGAGTTTGGGACTCTAATTTATCCACAGCAGATGTCAATAGGGCAGTACTTCTTGATTCTGGAAA  
TTTCATTTTGACAAATGGCATTGAAATACAGTGGCAGAGCTTTGATTATCCTACCGATACATGGCTGCCT  
GGTGCGAGGATTGGATTTGATAAGTCCAAGAACACACTCCAGAACTTACTTCTTGGATGGATACGAAT  
GATACCGCTTCAGGACACTTCTCTTTGCAATTAGACCCTAATCAAAATGGTGACTTAGTCATACTACGTAA  
CCTCGTGGAAATGTGGATCTGGGTGCCTTTGAATCTCGTGGTATCCAACCTCAGTTATAATCCAACCTGAA  
CATAGTGCATTTATTACATACAATGTCTTTGGTGAATCTGTCATTTCTCGAATTGCCTAGATCATAGCGG  
GTTTCATGAGGGAACCTTCTGGTCTAATGAACGTCAGAATTGGATGGTTGTGTGGTCTGTACCTGTTGAT  
ATGTGTGATGCAACGAGTTTATGTGGTGCTTTTGGAAATTTGTGATATGAATACCAGTCCAATCTGTGGAT  
GTTTACAAGTTATGAACCAAGTTTCGATTAGGTTGGGAACTAATGATTATTCTGGTGGGTGTGTGA  
GAATAACTCCGCTGCAGTGTGGCAGCAATAACTATGGTTTTGTTTCGTATGCAAATGTTGAACTTCTGC  
ATCATCTGAATCAGTGCAAGTGGGAATGATCAGATCTGTGAATATATATGTTTCATCCAATTGCTCATGC  
AATGCTTATACTTACAGCAATAGTGGAGTGTGCTTATTATGGAATGATGATCTTATCAATCTGAGAAGAT  
TATCTCATAATTCACGTCAAGCAGTGTTAAGCATAAAAATGTTTGAGCGTTCAAACAAAGGTTAGGTGCT  
TCTAAACTGCATCTTGTTCTAATTGTGCTTACTTGAACTGACATTATGTTTCGTTTTCTCCTCTCCCCATCTA  
TCTTATTGCTCAGGCAATAAAAAGTCATCGTTTGTAGTGCTAGTAGCATCCATCACTTCAGCAATTTTTGT  
CTGTGGTACATGCTGTTACTTTCTATGGAGACGAAAGCTCAAGAAAAAAGGTACTTCTTTATACTTCCAA  
TAGCTATGCCAGCGCTTTATGAATGTTAATGTGGCCTACATTGGTTGAGGCCATGAGGGTATAGGATCTT  
GTCTCCTTATATTGTCTTGGCTATCCTCACCTCATGAACTAGCTTTCAATCGAGATTGACATTTTCTTAACA  
ATGAACATATGTGGGATGCCAATAAACGAACCTAGTCCTTCTTGATTCATTATTAACCTGTGCAGTCTTC

GTGTGATATTCTAGTTCTTACTAGTAGTAGCAGGTTATCTGACTTAACTGTGTTCTCGCTGTCACACTCAC  
TACAATCATGGATTAGATTATAAGTTAAAATTACCAATGTACAGCTTCATCTATAGACTTCATGTTTCTAT  
TGCCTTTTCAGGGATTTTGAGAAAGATGAAGTTCAGGGAAATGTTACTTTCTGACTCAGCAACTAACATG  
TCAAAACCTGGAACCTCCATTGGAAAGGGACAAGAAAAGAACGGTGACATTGAACTGAAGTTCCTTGAA  
CTACATGACTTGAAAGCCGCGACAGACAATTTTTCCCCTGACAATAAGCTTGGAGAAGGAGGTTTTGGT  
CCTGTTTTTAAGGTATTTTTACTACAACCTGAATACCTGCAAGTCTGCAACACAAATATGCGCTCACACCT  
AAAGAAAATGGAAAGAAATCCCTCCGAAATAGCCATAGTACATATCCTGATTTTAGGTAATATCTTTGC  
TAGCTGTACTTATGTTTTGGAGGTGTGACAAATGTTTTTTGCAATTTCTAGGGTCAATTGCCAGATGGG  
CAGAAAATAGCTGTGAAAAGGCTGTCAACTCAATCAAGGCAAGGCATTAGTGAATTCAAAACCTGAGGCC  
CTTCTCATTGCAAACTCCAACATAGAAACCTTGTTAGGTTCTTGGCTGCTGTGTAGAAGAAGAGGAGA  
AAATGTTGGTATATGAATATATGCCAAATAAAAGTCTAGACTATTTTCATATTCGGTATGATAATTTACTAC  
TATCTGTTTTTGTGTTAACCTTTCTCCTGTCAAATGTGTGCTTACTGGATAAATTTGATATGTACAACCT  
AGACAAGAGCAGGAGGTCGTTGCTTGATTGGAAAAAGAGGCATGAGATCATTATTGGTATAGCTAGAG  
GGATACTCTATCTGCATCAGGACTCAAGATTGAGAGTAATCCACCGTGATCTGAAAGCCAGCAACATTCT  
TTAGATGAAGACATGAACCCCAAGATATCAGATTTTGGTACAGCAAGAATATTTAGCGGAAACCAAGA  
TGAAGCAAATACTCTTCGAATAGTTGGCACATAGTAAGCAAGCAAATACTGAAAGGTCTTTTCCCATACT  
ACTTACCAATATTTTGCCTACTCATTATAGCTCCTTTTCTATGCAGTGGCTATATGTCACCTGAATATGCTC  
TTGCTGGTCTCTTCTCAGTAAAATCTGATGTCTTTAGCTTTGGTGTCAATTATTGGAGATCATTAGTGGA  
AAAAAGAACAGAATCTCTTATAATAGTGATTCCCCTCAAATTTGATACGACAGGTAAGTTGTAAAATGC  
AAATGTTGCAATCTTTCTTTGATTAAGAATCAAATTTATCCATTTCAATGAACTAATGATTCAGGCCTGGG  
AGCTTTGGAATGATGGCAAGGCCTTCGAGCTGATAGATCCAACCATAGTTGATTCTTGCCCCAGTGAGG  
AAGCACTACGCTGTATTCAAGTAGGACTTTTGTGTTTGCAAGTGAATGCAGGGGACAGACCAACCATGT  
CATCAGTTCTATTCATGCTAAGTAATGAAGCAACGATTCCCTCCCCAAAGCAGCCATTGATTACCCCTAAC  
TCTGACTCGGGTACAACAGAAACAACACCATCTTCGATCAATGAGGTGACTATTACTGTACTIONGATGGTC  
GTTAGTCAGCTGATGAGTGATGAATCATCAGTCATCAGCCAATCCGTTTCGAGTGTGGGAGGGTTATTGA  
CCCGTCCATTTACTAGCTCAACGAATTGGGTTGATATACTGTCCAAATTGATTCAGGAGAGACTGTCAAA  
ATAATTTTCAGAAGACATTTTTTTATTTGATATGTTATATATATAGTTACCATAAAGAAACCAATAATTTA  
GGTACTAAAAATTCATAAAGAACAATAAATAATTAACCTTACTAAGAATTGAACAAATTGAGTTAC  
AACTCACATTGCAGTCCTGTTTCAGTCAAATTTAATCCACTCAAATTCTAATCAACCCGTCTAATTGACAC

GTTAGATC

>M6-PGSC0003DMG401019239 M6 G-LecRK

CAAATAGCCGTACCACTAACTGATTAATTAATAAGATTACATTGGGATAAAACGCTTCCTAACAAAGG  
CGACTTCATAAGACTGAAACCCGAGACTTTTAATTAAGAATGAAGGAGTCATATCACCACAACTGTGTCA  
GTGATTTGATGTTGTTGTAAGCAAATAAGATAGAGCATGGCCCCAACATCCATGTGTGGCTGTAATTAA  
ATTCAACTATTCATTATAAACAAATAATCTCAAACCAAAGAATACGATGAGTATTAATCAAACCAGCCA  
AGCTACGGTGTGTTCAAATAGGACTCAGGTCAAGTGTCATCAATATGCTGCATGAACTGGTCATAAGAG  
TCGGAAGGCAGACTTGCTAAGCACTTCGACATAGAGGAAAGACAACACAACGTCTATTGGATCGCGAA  
GCATGAAGGAATTACTAAGGGAGAGTTTTCACTTATTCTTGCTCATGTATTTGTATTTTGTTC AACGCAGC  
ATTGGCGCTACAGATACCATAAGTACAACCCACTTTCTGAAAGATGGTGATGCCAATATTACTTCACCTG  
ATGGAACCTTTGAAATGGGGTTTTTCAGTTCAGGTAGTTCAAAAATTGCTACGTGGGTATGTGGTACAA  
AAGCTTATCTGTTAGGACAGTGGTGTGGGTTGCCAACAGAGAAGCTCCCTTGACCAGTGGATCAGGTAT  
CCTTAAGGTTATTGAGCCAGGACATCTCGTCCTTCTCAATGACACTAACAAATGTTGTATGGTCCACCAATA  
CCTCTACATCTGTGCAGAAATCCATTGCACAGTTGCTGGATTCTGGGAATCTTGTTGTGAAACAAGCTGG  
TGATGATAATTTCTTTGGCAGAGTTTTGATCACCCAACTGATACACTATTACCGGGCATGAAGCTTGGT  
TGGAACTTTTAACTGACAGAGAGGTGTA CTGTGCATCGTGGAAGACCCAAGAGGATCCAGCTCCAGGT  
GATTATACATATCACTGTGATCCTTCTGGATATCCACAGAACATCCTGAAGAAGGGGTCAAATGTTGTCT  
ATCGATCAGGACCGTGGAATGGTCTTCATTTTAGTGGAACAAGAAACCCAAGAGGCAGTCATTTATACA  
AATATGAGATATTCTCAAGTAAGACACAGGTTTATTTTGGATATAAGCTCATATCTTCAGTTATCACAAAG  
GTTGATACTAAATCAGAATGGTGCCTAAACCTTTGGACTTGGGGTGATCATGTATCTGATTGGATCCCT  
CAACTCTCAATACCCGCAGATAACTGTGATGCTTACAACTGTGTGGCGCATACGGGACTTGCAACAGTC  
AAGATTTTACTGTATGTAGATGCTTAGACAGATTTGTGCCCAACAATAGTGAAGCTTGAAGAAGAGAA  
ACTGGTCAGGTGGCTGTGTTTCGGAAAACAGAACTAAATTGCCTTCAAGGACATAGATTTTTGAAGTATTC  
GCATATCAAATTGCCAGACACACGGAATTCCTGGTCCGATGTGACTATGACACTTGAAGAATGCAAGAA  
TACCTGCTCTAAAAATTGCTCTTGATGGCTTACGCAAATCCTGACATACGCAATGGAGGAAGTGGATGC  
TTGTTGTGGTTCGAGGATCTGCTTGACATTAAGGTGGTTTTCCGATGAAGGTCAAGATATCTACATAAGAA  
TGGCTGCTTCTGAACCAGGTAGGTTTTGTTGTCACTTAAAGATTTTTGATGGATTACCTGAAAATAGTAA  
AAGAATGTATGGTTGCAGTCACTTCTTTGGAAACAATTGATAGGTATTTAGTTTTCTGTAGAACAAGAAG  
TTGAGATGCATGTGGCTTGAATCAAAGAAAAAATCTTCTCAAATTAAGAGATTTATAGTAACATTCAA

AAATTA AAAATGACTTGCATTATATTGAATTCTAGAACCCTTACA ACTCAATATCAACAAATTCAA AATGATGTGCAGTACTCCAAAGCTTACAGAATCCTTTTTAATTCAATATAAAAATTATCTCCCCGTGGATTGGACAGAAAAGTGAAATTGATTATTTTTGCGGAATGGATACTTGCAGATAGTCTGGAGAAATCAGATGGAAAGA AAAGAAAAGTACTTTTCTGGATTCTGCCATTATCAGTTGGTCTGATTCTGGTAATTCTTAGCATGTTGATC TTCCATAGAAGAAGGAAGAAGGCTGTACAGCTCAAAGGAAAGGTAAAATAGGATAAATCTCATTTTTGTCTTGACATCTTAGCAAAATCAAGGAACATAATTCAAAGAAAAGTGAAGAATTTTAATATTTGGTCTGGATCACAGCTTAAACAAAATTCACTTCGTTTGCGGGCAGGTAGGTCGGGACGCAATGGCAACTACAAGATGGATCATAGTGGTAATTGTGAGGAAGAATTTGAGATACCAATGTTTGACTTATCTACCATAATGAAGGCTACCAATAACTTTTTCAATAGACAGAAAGATTGGAGAGGGGGGCTTTGGACCGGTTTACAAGGTATAACTGGTGCACAGGCAAAA ACTTCTGATCCTATAGAGTAAAGTTTCATCTTTAGATT CAGTACAGAAGTTGTATGATGAAATGCATAATGAAATAAAGCTTTGGCTTGTGAAACCAAAGGAGACATATACAATAGCTAAGGAAGACAAGGATATGGTGGAACACA ACTGATTGTCTCTTTCTAATTGGAACACAATTGACTCTGTGTACTTCTACATCAAGTAAGGTAATGAAAATATTAACATGCAGAAATTGTGATGTTTAGGGCATACTTGAAGAACGGGAAATAGCTGTCAAACGGCTGTCCAGA ACTTCCAACAAGGAGAAGGTGAGTTCAAGAATGAAGTTTTATATGTTGCAAGACTTCAACACAGGAATCTGGTGAAGATTCTTGGTTGCTGCAGTGACGGGGAAGAAAA GATGTTGATCTATGAGTACTTGCCGAACGGGAGTCTTGATTCATTTATATTTGGTACTATTCTCCATCCAA TATTGTGCAAATTAATAAATAATTGTGTTTCAGTGATGATGCCTATAGTAGTACTTCATTAATCTTTTTTA TTTTGAAGTAAAAGTAACTAGTAGTACTTTGGTAATTTTGTCCAATTATGAAAGCACCATAAAGCAGGA AAAATATTGATAGACCAAATCTGTTGTGGGAGTATTTAATACTACTTTCTCCTATAACCAATTAGTCAGTTAATGACCCAACAAAAAATTTGGCAGATGACACACAAAGCAAGGCATTAGACTGGCCTAAGCGATTCACATTATCAATGGTATAGCTCGGGGACTTATGTATCTGCATCAAGATTCTCAATTGAGAATAATTTACAGAGACCTGAAAGCTAACAACATTCTGCTAGACAAGGACATGAATCCAAAGATATCAGACTTCGGCTTGGCAAAAATATGTGAAGAGGATGACATTGGAGCCATGACAAACCGAGTAGTTGGAACATAGTAAGAACCTTCCACTGGATAGTATTATTTTGATAAGATTTACTGGATAATAATTTGAACCTAAGAAGAATCTTCAGTTAGTTAAGGCATGTTTTCCAGCATTACTAATTATAGTGTTGTGCACATTTAATGCAGTGGGTACCTCTCACCGGAATATGCATTGCACGGAAAATACTCAGTAAAATCAGATGTATTTAGCTTTGGTATTTTAGTATTGGAAAT TGTCAGTGGGAAAAGCAACAGAAAATTCTCTCATCCAGATCATAACCTTAATCTACTCGGGCATGTAAGATTTTACTTGTTTTATTTCTATTTTTTTGATAACCGAGGTGTTGGAGCCAACATACTTGAGCCGAGGGTCTATAAAAATAGTCTCTACCAACGAGGTAGTGGTAAGGCCTACATACACACTACCCTCCCCAAACTCCA

CTAATGGGATTATACTAGGTATATTGTTGTTGTCGTGGTGCCGAGGCCAGCTTGCGCACACCTCAACTTA  
TTTCACGGGATACCTGCAAACCTCCACCACCAATAGGTACCGGATAACTCTGTCTAACAAGGTTAGGACT  
GATGGGAAGAAATTGCCTAGTGTTTTGTCTCTGCTGGAATTTGAAACAGATCATCGACCACTAGGTCAC  
ACCCTTGGGTGCAGTTGTTTAGTTTTATTTATTCCTTGGTGTATGTTATATACTAGTAACAAATATCTTGTA  
AAACGACCCCTGCTAATAAGCTTGCAATATCTACAGGCATGGAACTTTATAACAAGGTAGGTCAATA  
GAACTACTCGATGAATGCCTAGGTGATTCTTGCAACATCTGAAGTGGTACGATCAATTAGTGTTGGTTT  
ATTATGTGTCCAACAATGTCCTGAAGATCGTCCAAGTATGTCTTCCGCAGTTCTGATGTTAAACAATGAA  
GGTGTGTTGCCGTTGGCTAAACAACCAGGTTTTTACATAGAAGGAAATGCACCGGGTGGTGATTTCACT  
CCTAGCCAACCTGCACAGATTACAGTGAGTGACACCCCATCACAATACTAGCTGCTCGATAGAAGATAT  
TGGTTCACCTGTTTGCAACAAGCTTGCAGTTGCAATGATCTTTTCTTAATTCTCTATAGTAATGTGGTGAA  
AAGAATTTGTGCATGATTGTGCATTTTTAGGTCTATCAACTATGTCAAACATATGTAGGAAGCTTGCTGA  
CTGGCTGTTACTTTGATTTGCGCAGTATATCTGAT

>M6-PGSC0003DMG401019242 M6 G-LecRK

ATGTTACTAACTTCAGCAGCATTAGACACAATCACTACAGATAAATCCATTAGAGATGGTGACACAATTG  
TTTCAGCTGGAGGAATTTATGAGCTTGGATTTTTTCAGCCCTGGAAATTCTAAGAATCGTTACGTTGGCAT  
ATGGTACAAGAAGATATCACCTAGAACTGTTGTGTGGGTTGCAAACAGAAACATTCCACTTAATGACAC  
TTCAGGAGTGTTAACACTTAATCCCAATGGAATTCTGTACTTGTTGATAAATCCAATGTCTCAATTTGGT  
CATCAAACCTCATCAAGATCCTTAAAGAATCCAAAAGCACAGCTCCTGGATTCCGCGAACCTTGTTGTCAG  
TGATGGAAATGATAGAGGCCTGGAAAATAATTTGCGGTGGCGGAGTTTTGATTATCCAGGAAATACTTT  
GTTACCTGGTATGAGGATAGGAAAAGATTTGGTCACGGGAATGGATTGGCATCTAACGTCATGGAAGA  
GCACGGATGATCCAACCCCTGGTGAATATGTAGATCGTGTTGATTCACATGGATACCCTCAATTGTTCTT  
GATGAGAAATTCATCTGTAGTGTTTAGCTCAGGGCCATGGACTGGTGCTTCATTTTCTAGTAGTCCTAGT  
AATAAACCAACATTGTATTATACGTTGAGTTTTGTTATCACTCAGAAGGAAATTTACTTCAAATACGAGCT  
TAAGAATGACTCTATGCCACCAGGGTGGTGCTCAATCCGGATGGGGTGATACAACACCTAATATGGAT  
TGAGCATACTCAGAGCTGGTTTCTCTACTTGACAGCACAACCTTGATAATTGTGATCGTTTTGCTTTATGCG  
GACCTTATTCAAGTTGCAACATCAATAACTCCCCTCCATGTGACTGTTTGAAAGGTTTTGAGCCTAGGTTT  
GTATTTGTAAACTATGTGATCATCTCGGTTAAGCTATCAGAGAGAGTGCACTTTTGAATTTTGATTACT  
AAGTTATGTTTTACACACCCCTCATGTGTGTGCTTGATTCTTTTTCTTGGACCAAACACATATAATTATTT  
TTTGCCTTCACAGGTATCCTCAAGATTCTGCAGCAGACTGGTCTAGTGGTTGCGTAAGGAGAACTTCTTT

AAATTGTAACCATGATGGTTTTCTTAAATTTACGGGTATCAAGATGCCGGATTCTAGAAACTCCTGGTAT  
AATGAGAGAATGAACCTTGAAGAATGCGAGAAAATGTGCTTAGCTAATTGCAATTGTACAGCCTACTCA  
GATCTTGATGTTAGAAATGGCGGAAGTGGATGCTTACTATGGTTTTGGAGAACTCATAGATATACGAGAG  
TTCAGCCAAAATGAGCAAAATCTGTATGTGAGAGTAGCTGCTTCAGAATTAGGTAATCATCCTACTCTGC  
ATAAATGCACAACTCTTTAGAATTGAAGGAACTCTACACCTAATATACTTACATGATGGACATTAAGTT  
GATTAGGTGCTTTAGTAGTTGGTAATATGGCGATTTCATTTTCTGTGGTACTGGAACGGAAGTAGCTTGC  
TGCAAAGAGCATTGAATAATTCATATCTTACTCTACGACTATATGGATACTAGGACATAACCGGTTAG  
TAGGATTGCCAAGGGATGAGACTTCATTCCCTTAAAGGCTTAAAAATATGCTAGACCTCATGACAGATC  
AAGGCTGTTGACAGCAGGTGGTAATCATATGCATTCTGTCCTTAGTAGTGCCGCTTGTAATCAGTGACAC  
TGTACTTTAATGTGTCATCTTTCAAAGAAGATTTCCGATTTAAACAATGCAGCTTCAAATCAATTAACATT  
GACTACTTTTTAGTAATCTTGTGATTGAATGCCCTGGTCAACAAGTTACAAAGTCTGCAGGGCTTCATA  
ACAAAATAAGAAGTAATACAATCAATGCAATTAACTACTGATATGCCTAACTCTTATGTAAATTGAATAC  
TGATTATGAACTAATATAGAACATGTTCCAGACAGGACGCGGAGGAGAAAGAGGTCAGTCATGATTGGT  
GTCATTTAGCAGTGGTAGCAACACTTATCCTCAGCATTTTAGCTTGGTTTTACTTCCAAAGAAGGAAAA  
GAAGAAGAAGAATAGGTAATATAGCTGAGGTACTCTTGTCTATCTGGCTGACATTGTTGCGCTTTACCAA  
ATTCTCATTGATATCATGTTTGTGGCAGGCGAATGTATATTGACAGGTTCAAAGTTGAAAATGAGGATA  
TGGAGCTTCCATTGTTTATTAGTTACTGTTACTAGTGCCACTGGGAACCTTCTTCTGCTAATGTGATT  
GGGGAAGGCGGCTTTGGACCAGTTTACAAGGTAAATCAACTTTGATCTTCAACTTCTAGTTAGAAGTGTC  
ATCTTTAATCCTTGATAGAAAATTGCAGGGTATCCTACCAATGGACAAGCAATAGCAGTAAAGAGGCT  
ATCGGAGTATTCTGGACAAGGCATTCAAGAGTTAAAAAATGAAATCGTTCTCATTTCAGTTGCAACAT  
AGGAATCTTGTCAAGCTATTGGGTTGCTGCCTTGAAGGAGAAGAACGGATGCTAATCTATGAGTTCATG  
CCCAACGCTAGCTTGGACTATTTCATTTTTGGTCTGCTTTTTCGTGACTTATTGGCTATACTAGTACTTGAC  
AAGTCTTCAATATCTCTGATCACTCAATGATTAGTTCTACATTGTGCAGATCCAAGCAGAAAAGCTTCACT  
TGGATGGAAGAATCGTTTTGAAATTGCTATGGGAATATCTCGTGGTCTTCTTTACCTTACCAGGATTCA  
AGATTAAGAATTATTCACCGAGATCTCAAGACCAGCAACATTTTATTAGATAGTGACATGAATGCCAAAA  
TTTCTGACTTCGGCCTTGCCAAAATTTTTGGTGGAGACCAAGAGGAAGGAAAAACTAAGAGAGTAATAG  
GGACATAGTAAGTTTCTACACATCTATAAATCATAGAACCCTTTATTACATTTAATCAGTACATCATGAGCA  
TAAATATATTGAGTTGATGCAGTGGATATATGTCCCCGGAGTATGCTGTTGATGGGAAATATTCAGTGA  
AATCAGATGTATTCAGTATCGGCGTAATCATTCTTCAAATAGTTAGTGGCAGAAAGAACAGAAAATTC

GTCATATGGAGCATCATCACAATCTCTGGGACATGTAAGCACATATATATGGAACAAAACCTTCGTTCCC  
TTTATTCACTCTTAGCTTTCTATTGTGATTAATTACAACGTATAAATGTGTTGTTCTGTTTGTAATTTAGG  
CATGGTACTTTGGAGTGAAGGCAACGCGTTGGAACGTATAGACGAATGTATCAAAGAATCATTTTCAG  
AATCTCAAGTGTTGAGATGCATCCAGGTTGTTTGTATGCGTCCAAAACTCCCCGAGGATAGGCCTAC  
AATGGCATCAGTAGTTTTCTGGTTAGGCAATGAAGGTCTAGCTCTTCTCAACCAAAGCAACCTGGTTTT  
TTCATCGAGAGGAATTCTATGGAATCAACAGAGTCATCAGCTGATGAAGTATATGTAAGTAGCAGCGTG  
TCGATAACAGTTCTAGAGCCAAGATAA

>M6-PGSC0003DMG401028902 M6 G-LecRK

TTTTGGCCATTTTGTGTCAATCCTCTAAATAGAAATCCCCAGTCAGCAAAGATGCAATCTTGGAGTTTGG  
CACCACAGGAAATCTCTTGTGATGGATGGAGACACCACAGTGTGGGCATCAAACACCTCGGAAGCAG  
GCGTTGAGTTGGCTGTCATGTCTGAAAATGGCAACTTCATTCTCTACAGCACCAATCTAAGTACCATTGC  
ATGGCAAAGCTTTTCACATCCATCTGATACTCTTGCCTGGTCAATCCTTAACAGTGTCACTAGAATTAA  
CATCATCAAATTACCTTCTCATGGTGGTACTACACTTTAAAAATGTTGCAGCAGCCTACTTCACTAAGT  
CTTGCAATTGACCTATAATGTCCCAACTACTACGATTCATCGCCTGAATTTTACAGCAATTTTTCTTATTGG  
TCAGGACCTGAAATATCAAATGTGACTGGAGATGTTACTGCAGTATTGGATAAAGCAGGAAGCTTTGGT  
ATAGTTTATGGCTCATCTTCAGATGGAGCAGTTTATGTATATAAAAATGATGGAGATTATGGAGGACTAT  
CATCGGCTGTAAATCAAACGAATTCCAATGTTCCATCTATTCTTCGTCGATTAACCCTTGAGGTTAATGGA  
AATTTACGTTTGTATCGATGGGATAATGATGTGAATGGATCAAGGCAATGGGTTCCAGAGTGGGCAGCT  
GTGTCTAATCCATGTGATATTTCTGGAGTTTGTGGCAATGGGATATGTAATTTAGACAGAAGCAAACA  
AATGCTTCTTGACATGTTTGCCAGGGACTTCTACGGAGGGAGATGATGTTTCATGTTCCGGGAAATCCTT  
CAGTGACAGGGAAATGTGGACCTCAGCATGAAAATATGATGTCCAGTTCAAGATTTCTACGGTTCAGA  
AAACGAATTATTATTTCTCAGAATCATCTGTTATAGGAAATTATAGCGATAAAGGGTCACTGTCCAAATG  
TGGTGATGCTTGCTTATCAAACGTGGTTGTGTTGCATCTGTTTATGGACTTAGTGAGGAAAAGGCTTAT  
TGTTGGTACTCAGGAGCTTGAATTTGGTGGATTTGAGGATCCTGTTTCGACCTTATTTGTGAAGGTTG  
AGGCCAATGCCTCGGTATCTGAAAAACCTGGGAATTCATCAGATGAGTCGAAGAGTAGGCACGATAAG  
GTTTTGGTACTTCTATAGTCTGAGTATGACTGTTCTCATTTTGCTTCTCTGTTGTTTATTGTATATCAAT  
ATCCATAGGAGAAGATCTATGAGAAGGGCACTTGAGGGATCTTTGCTGTTGTCTGGAGCTCCAATTAGC  
TTCAGCTACCGCGACCTGCAATGTTGGACTAACAATTTTTCCGAGTTACTTGGAACAGGTAAAGATATAG  
AATTTTTATTACTTCTATGATACTAACCTCTCAACTATAGAAATAACAAGCACAGAAAACCTGTTCTCTTCA

GATAAGGTAAGAATATGATCAGTAACATTGCTGCTTTGACAGGTGGATTTGGAAGTGTGTATAAAGGAA  
GTTTAAAGGATGCAACATTGATTGCAGTAAAGAACTTGATAAAGTTTCACCTCATGGGGAGAAGGAAT  
TTATAACAGAGGTCAAACCATTGGCTCTATGCATCATCTGAACTTGGTTCGTCTATGCGGTTACTGTTCT  
GAGGGAACCCAACGGTAAGTTTTAACTTTTTTTCATTGTAATTTGTGATGTATAGATTGGGAAGTACGTA  
GAATTGTAGCATTACAGTCAAGCACTAGCACAACCTTTCACTAAAATTTTCACTCTTTGGCAGGCTACTAGT  
GTATGAGTACATGAAAAATAGCTCATTAGACAAGTGGATATTTCACTCATTAGTACAAGAAATAGACTA  
CTGGATTGGGCGTCACGTTTTCGCATAGCAGTTGGCACTGCACAAGGGATAGCCTATTTTCATGAGCAAT  
GTAGGAACAGAATTATACATTGTGATATCAAGCCAGAAAACATACTTCTGGATGAGAATTTCTGCCCTAA  
AGTATCTGATTTTGGACTAGCTAAGTTAATGGGAAGAGAGCACTCTCATGTTGTCACAATGATCCGAGG  
AACGAGAGGTTATTTAGCTCCCGAGTGGGTCAGCAATCGACCTATCACTGTAAAAGCTGATGTTTACAG  
CTATGGCATGCTTCTTCTAGAGATCATTGGTGGTCGGAGAAATCTTGATATGACTTGTGATGCAGATGAC  
TTCTTTTATCCTGGATGGGCTTACAAGGTACACACGCAATCCTCTAATTGTATTCATAGTGTCCCTCCTTT  
CTGGTACATGTTCTTCTCACTATCTTCTCCTTTTTTTCAGGAGATGACTAGTGGAACACCCGTAAAAGTT  
GTAGATAGGCGACTTAGAGGAGCAGTAGAGGAAAAAGAGGTAACGAGAGCACTGATGGTCGCCTTCT  
GGTGTATTCAGGATGAAGTGTCAAACAGGCCTTCCATGGGAGAAGTGGTGAAGATGTTGGAAGGATCA  
GTTGACATGAATATGCCACCAATGCCACAGACAGTTTTGGAGTTAATAGAGGAAGGCTTAGATCAAGTA  
TACAAGGCAATGAAGAGGGAACCTCAATCAGTACAGTTCTTCTCCATTGCTACTCATCCATCATCTAATG  
CTACATGCAGTCACTCCAGTATGTCACCTAGATAGTTGAAGGTGAAATCGAACACAGTTTTTCTAGGAT  
TAAGTAATCGTATCATCATTGATTATTCATTCCTCCCGTCTCCAAAAGAAGTCCCGAAAAAGAATAAGAA  
GGGAACACAACCACTTTTGTATCATGTGTTGCTACAACACCATACACGTTGCAAGAACTCACTGTCTTGTT  
TTATTGTTAATTTCACTCAATTCCTCTGGTCTCTAAGATATCTCCACCATTTCTCTGTATAATTCGTCCT  
ATCTCTTTTTCGGTTTCTTTTATA

>M6-PGSC0003DMG401029444 M6 G-LecRK

TGGAATAAAATGAAAAGCACTTAGGTTAATGTCAATTTGTGCAACAATACATTTTTCAATTCCTAGGT  
GCATTATTAGTTGACAATCATGTTGATGATGAGGTGCTAGCTTATTGTCAAGGTCCCACTCAATTCTCAC  
ACTAACGTGGCTTTTGGATTTTCACTCATTTTACTTTTTCGAAATAGTTTAAATATATCAATCATTATATTT  
CTGGTCTAACGTTGAGTTAAGCTTAGATGTCATATCTTACATCAATACCCATTTTATTTATTTTCTTCTC  
TTTTTCAATGAGCATTTAATAATTTAAGGAAAAGAAATGTGTTATTTCAACCAAGTTAAAACCTGTCAAT  
TCACAATGTTATTTTCAGGAACATACTACACAATGATAGTGATGGGAGAAAAGACTTATATTGTCAGCGC



GTATAGAAGTTAAACTCTACATTTTTTCATTATTCGTTTTTAAGTGTCAATATTTCCATTGGCCTAAAAGTCT  
CTGATTGAGAATGGTATGTGGTTTGTGATATTTCTACAGAGTCAACAAATTAATAATCCTATTTGGCTGC  
TTGTGCTATTAGACTTTGACAACATATTGTGCTTTTGTTCATATAGTGTGGTAATAAGAAAAGTCTTAGAA  
AACCAAAAAGATGAGCAACAGCAGCAGCAGAAGAAGAAATTTGCAATATTTTGTTCATATAATTCTTGTT  
ATTCTTCGTTTTATCGATACAGGATTATGCAGTGAAGTGGATAACATTACCAGCATTCAATCTCTGAGAG  
ATCCTGGAATTTTATCGTCTCCAGGAGGCTTATTCAAGTTAGGATTTTTTCAGTCCTCAAAACAGTACTAAT  
AGGTATGTTGGTATTTGGTACAATTTTTCTGTAACAACACTGTCATTTGGGTGGCTAATAGGGACAAACCTT  
TAAGAGATTCTTCTGGTGTGTAAAGATATCTCGTGATGGAAATGTCGTTATAACGAATGGAGAGGAGG  
AGATTCTTTGGTCATCAAATGTTTCTACTTCTCAGGTAAACTCAATTGGCCTTCTCCAAGATTCTGGGAAC  
TTTGTACTCGTAGATTATCGAAACAATATGAGCACAATATGGCAGAGTTTTGAACATCCTTCTGATTCAA  
CTATTCCTAGAATGAGAATAAGTGAAAATACAAGGACAGGGGAGGTGGTAGAAGCAAGATCTTGGAGA  
AGTCCTTCGGATCCTAATATCGGAGACTTTTTCTTAAAGAATGAACTCTGGAGTCATTCCTCAGGTGTATAT  
ATGGAAAGGAAACCGTCCCTATTGGCGAACTGGTCAATGGAATGGACAGATCTTTATAGGAGTGCAGA  
ATATGTATGCTGTGGTATCTGATGGATTTAATGTAGTGAATGATCGTGAAGGTACTGTATATTTTACTGG  
ACCTATTCGTGATAATTTTTCAAGGATATTAGTCTTGGATTGGAGAGGGAACTTGGTTCAATCATATTGG  
AATGTGACTGAGACAAACTGGAAGATAATATGGTCAGCTCCCAGTAACGATTGTGAAGTTTATGGAACG  
TGTGGTCCATTTGGGAGCTGCAATCATTGGAGTCGCCGGTCTGTTCTTGTCTGAAAGGTTTCGAGCCAA  
AGCATAGGGAAGAATGGGAAAAGGGGAATTGGACTAGTGGTTGTGTTAGGAGGAGTGCTTTGCAATG  
TGAAGTTAAGAATAACACCGCGAATTCAAGTAAAGAAGACGGATTTCTAAAGATGGAGTTGATGAAATT  
GCCTGATTTTGTGAAAGGTCATCTACTACAGAAGACTTATGTAGAAGCCAATGCTTGGGGAATTGTTCC  
TGCATGGGGTATGCATTTGATTCAGGTATCGGCTGTATGTCGTGGAGTGAAATGATTGACATTCAGCAG  
TTCCAAAGCTCGGGGAAAGATCTCTTTATTCATGTGGCACATTCAGAGCTTGGTAAGTATTCTGGTGCTG  
AATAAAAGACTCATTGTCAGTCATTTGAGATAGACATAATGCATAAACGTGCCCTTTTACTTGGCCTCAA  
TTCACATCTATGCTCTCATGCACACTCAAAGTTAGATGGCATGGATGTCAGCAAAGGCCAAGTCAAAG  
ACACGTTTATGTATTATGCCTTTGAGATATGTTGACTTAATTGAATTCCATGTATTCTGTAAAGAACTGA  
TTTTTGTTCACCTTTAGTGTTTTCTGCAGATCATGGTAAAGACATAAAGAAAATCGTAATTCCAGTAATCG  
TTGGCTCTTACACTCTGTGTTTGTCTGTTTCTTTGCTATATAATGGTGATCAGACGTAGAGGTAAACGT  
GCTATTAAGTTTTTGTATTATACATTTAGAAGCACTTTGTTGCTATAGTTAACTTGTATTCTGCTGATAT  
TAGGAGTGAAAATAGAGGAGGTAGCTTTACTTGGTAACAAAAGTTCAGTTAATATGGAAGAATTACCAG

TCTTCAGCCTCGATACGATTGCAAATGCAACATCCCAATTCAATGAGGATAATAAGCTTGGTCAGGGCG  
GTTTTGGTCCAGTTTACAAGGTACGAGTTTCATCTCTCTCGATCACTTCCCATATTTCAAGTTACTGATATT  
GGTGATTCTTGTAGGGGAAATTGGAAGATGGGAAAGAAATAGCTGTCAAGAGGCTTTCAAAGCCTC  
GAAACAAGGGCTAGAGGAGTTCATGAATGAAGTGTTGGTGATCTCGAAAGTCCAACATAGAAACCTTG  
TTAGACTCTGTGGATGTTGTGTTGATAAAGAGGAGAAGATGTTGATTTATGAATATATGCCAAAGAAAA  
GCTTAGATGTGTTTCTTTGGTTAGTCCTTGTTACTTCTCATCTGCATTACTCCACGTCTATGTTGCTCGG  
ACTCTTCAATAATGTTGATGGATGCTTGCTAGATCCTCCAAAAGTACTGCATTTTTGGAGGATCTGACAT  
GATTACATCAGCATTCTGAGCAACATTACTCCACATTTCTTCTGATCCTTTTGTAAATTCTGCATTCATA  
TTTGACAAACATCTAGATGAAGGACATCGAGACATTTTGGATTGGACAAAACCTTTCCATAATAATCGAAG  
GAGTTGGTCGAGGACTCCTTTATCTACACAGAGATTCAAGATTGAAGATAATTCATAGAGATCTAAAGC  
CAAGTAACATCTTGCTCGATAATAACTTCAATCCAAAGATTTAGATTTTGGCATGGCTAGGATTTTCGG  
ATCTGATCAAGATCAAGCAGACACAATGAGAGTAGTTGGTACTTAGTAAGTGATCATTTATCTATATACA  
ATACCATAACTTTGCATAATTTCCACCATATTTACCAACTAACTACTCGAATCGTACTGACATTTTTACA  
GTGGATACATGGCCCCGAATATGCAATGGAAGGAAGATTCTCAGAGAAATCCGATGTTTTAGCTTTG  
GAGTTCTAGTCTTAGAGATCATAAGTGGTCGAAAAGTTCAAGTTCTTGGACTGAAACATCCTCTTTGAG  
CCTTTTGGGATATGTAAGACTCCTCTTGTAGTTGCTATAGTGAATGTTTGTATAAAGAATGAATAATAT  
AACATAACATGAAAAATCAGTTCCAAAAAGAAGTTGGCTGTTATATAATGAAATGATATTATAAAGGA  
CGACTGTTATAAAGAGATGCGACTGACTATAGGTGCCTTATATTTAGTTTGATGATCAACTTTTCATTGTT  
TTCAGGCATGGAAGTTATGGAAAGAACAAGATTTATCAACTTTTATCGATCCGTTTATATTGAATACGAG  
CTCGGAAATGGAGATCAGAAAATGCATACAGATTGGTTTACTATGTGTTCAAGAATTTGCTGAAGACAG  
TCCAAGTATTTCTCTGTTCTTGTATGCTTACTAGTGAAACAAGTAGTCTTCCAGCACCATCACAACCTG  
CTTTTACTGAAAGAAGACACTTCAGAATGTGCAATGAAAATAGAGAACTAAGTTTACTTTGAACAAAAT  
GAGTATCACAAACCTTACTGGTAGATAACATGAGCATATAAAAGTACTTTTTTAAGATTTGCACAATTGT  
TATAGTATGATCCATTTTGTCTCAATTTGTATGATACCTTTTGTTCAAAATGTTTGACAATACTGGATCCG  
TGTAAGCACGGAGTTTTTGTCACTAGTTTCAA

>M6-PGSC0003DMG402003983 M6 G-LecRK

GAGCTAAAACAGGCAACGGATGGTTTCAAAGAGGAATTAGGAAAGGGTGCTTTTGGAGCAGTATATAA  
AGGGAGCTTTGACAAAGGTAAAACCTTGTGGCAGTGAAGAGGCTAGAGAAGGTAGTGGAAGAAGGT  
GAAAGGGAGTTCAGAGCAGAAATGAAGGTCATTGGTAGAACTCGACACAGAACTTGATTCGTTTGT

AGGATATTGTGCTGAAGGATCAAAAAGAGCTCTTGTTTATGAATATATGAGCAATGGTTGCCTAGCAA  
TCTGTTGTTCCGAGGAGCTACTCGGCCGGATTGGAATCTAAGAGTAAATATTGCACTAGATGTGGCCAG  
GGGAATCCTCTACCTCCATGAAGAATGTGAAGCTCCAATTATCCACTGTGATATAAAGCCACAAAACATC  
TACTCGACGAGTTGTTGACAGCTAAAATCTCAGATTTTGGTCTGGCCAAGCTGCTAATGCCTGATCAA  
CAAGAACATTCACTGGTGTAAAGAGGGACTAGAGGGTATTTAGCACCAGAGTGGCA

>M6-PGSC0003DMG402004946 M6 G-LecRK

ATTTTAAGGCCTTCAGAACTAGCTAGATTTACACTGAAAAGGTCAGGTTACCTCCAGATATCTAAACCTG  
CATAGGATAGGTAGCATGTGATAGAGCAGTTCCTAATGGAAAGTTTTGTGCTTATATTGCAGATATTGTT  
ATGTTGTTTTGTATGCTCAATTACTAGTGCAAAGATATTATCACTACAACCTGACTTTCTAACAGATGGAA  
AGACCATTACTTCATCTGATGGAAGTTTTGAGATGGGATTTTTTTGCCCGGCTAGTTTCACGAATAATTG  
GTATATTGGAATATGGTATAAGCACGATGTACCTGATAAGTCTGTAGTATGGGTTGCCAATAGAGAAAA  
TCCATTCAACAACACATCAGGTGTTATGTTGAAAATCATCGATACAGGACAACCTTGCTCTTCTCACTGCTG  
CTAATAAAATCGTGTGGTCTACTAATTCATCGAGGCCTTTGGCTGTGAAGAATACAGTTGCACAGTTGTT  
GAACTCGGGGAATCTTGTGATAAGAGATGCAAATGATACCAAGCCTGAGAAGTTCCTGTGGCAGAGTTT  
TGATTATCCTACTGATACACTCTTACCAGGCATGAAGATGGGTAAGAAGTTTGTAACTGGACAAGAATTT  
TACCTGTCCTCATGGAAGAACGAATATGATCCAGCTCCAGGGGAATATACGTATCATTGTGATCCGACTG  
GATATCCTCAGGATGTCATGAGGAAAGGTAAGTAAAGGTTCAGTACTGGACCATGGAATGGACTCC  
GCTGGAGTGGTGTACCAGGACTGACAAAAAATACTATTTATACATTTAACTGGATCTTGATGAAAAGA  
GAGCATTTTACAGCTTCGCGCTTTTAGGTTCTGTTATGACCAATTAACCATGAACAGTAATGGTGTGCTT  
CAGCGTTCAATGTGGGCTGAGAATAGACAGGAATGGCATGTTTACATTTCTTACCAGGAAGATACTTGT  
GACAATTATGGAACATGTGGTTCATATGGTAGTTGCAACAACATACTCACTCCTGTGTGTAATTGCTTAG  
ACAAGTTTGTGCCTAAAGATCCAAGAAATTGGGCAATGACAAATTGGTCCAGCGGGTGTATTAGAAGG  
AAACCGCTTAATTGCCAGAATGGAGATGGATTTCTCAAGTACTCTGGTATAAAGCTACCAGATACACAGT  
ATTCATGGTTTGATAGGAGTATGACACTCCACGAGTGCAAGCAAGCTTGCTTGAGGAATTGCTCGTGTA  
TGGCTTACTCAAATCTTGATATACACAATGGTGGGAGTGGCTGTTTGGTTGTGGCGACTTAATTGA  
CATTCTAGAATTACCTGGAGGACAGGACATTTACATAAGGGTTGCTACCTCAGAGTTAGGTAACATTTGT  
GAATTTGATCAAAGTTGGAGTATTAGCTGAATGATTTAACTCCCAATTCTCAGATTTAGTTGTATTCTA  
CTTAGATATCTGTTAAAAGTTCACACAGTATATGTTCACTCTTCCATGTCTATTTAGTTTATTTACCCCTC  
CATGTTTTGTTCAAGGCTCGAAGAAAACAAAATACTCGTGTGAGTCTGTTACTGTTGATTGGAGTGACT

GTGACTGGCCTGACCATAGGGCTGTATATTTGGAAAAAGAAGAAGAAGAGGAAGATGAATTTGAAAGA  
TGACCTAGACCTCCCCTGTTTACCTTATCAACTCTAACTAAAGCATCCTCTAATTTCTCAATCGAGAACA  
AGATTGGAGAAGGTGGATTTGGATCTGTTTACAAGGTAACATCTTAAGTTTATGAATCATTCTTTCAGTA  
AATAATATCTACTATTATTGACAGTAAACAGATGACACTTACTGAATAACTAAGCCAGATATATGTTGAT  
ATTATAGGGAATCCTGGAAGGTGGACACGAAGTAGCTATAAAGAGGCTATCCAAGTCTTCCTCGCAAGG  
AGTTAACGAGTTCAAGAATGAAGTTATTTGCATTGCCAACTTCAGCATCGAAATCTTGTGAAGCTTATA  
GGTTGCTGCATTGCAGGAGGAGAAAAATGTTGGTCTATGAATACATGTGCAACAGAAGTCTAGATCTC  
TTCATATTTGGTCTGGTACTCTCTCTTAACTCGAATAACCTCTATTAGTACAAATAGTAAAGTTGATAGTT  
TAATCACATTATCAGTGTTCTAACAGAGGACCTGTTAACAGATGAAAAGAGGAGCTTGTTACTCAACTG  
GCCTAAGCGCTTCGACATCATCAATGGAATTGGTAGAGGACTTCTGTATCTCCATCAAGATTCTCGGCTA  
AGAATTATCCACAGAGACCTCAAAGCTAGTAACATTTTGCTAGATGCTGACATGAACCCCAAGATCTCAG  
ATTTTGGCATAGCTAGAAGCGTTGTAGGGAATGAGACTGGTGCTAATACACACCATGTGGTTGGGACAC  
AGTAAGAAATTAATACTACTCACTTCTTAGCATTATATTATGTATAATATCCTTTATTTTACATTACTTTC  
TGTTTGCAGTGGTTACATGTCCCAGAGTATGTAGTCCATGGTGTTTTTTTCAGTAAAATCAGATGTATTTA  
GCTTTGGCGTATTAGTGCTAGAGATAATCAGTGGTTCGAAGAAACAGAGGATTTGCCCGTGAAAGTCACA  
GTATCAACCTACTCGGACATGTAAGTCTTGTTTGTAAATTAAGACGAGTTTAAATTTTGTGCACTATATGG  
TAGCTACAGATATTTCTCTCTAATAATTAATTGATAACACCTCGTACAAATGATAGTTAAACTGCATTGAA  
CTTAAATCCATCAGGCACATCAACCGCTGCATGTTTCTTGATTATGTA CTGATTGTGTTATTGATAGGTAT  
GGAACTTTATAAAGAAGGTAGACCATTAGAGCTAATTGATGGCCATCTAATGGATTTCGCGTTATATTTCT  
TGAATTGCTACGCTTAATCCATGTCGCTCTGTTATGTGTACAACAATGTCCAGAAGACAGGCCAGATATG  
CCTACAGTGATCTTGATGTTGACTAATGATGCTATTTTGCCTCAAGCTAAGGAACCTGGTTTCTTACAGA  
AAGCAAAGTCGCGTCTGAATGTTCTACAAGCATGTGTTCAACAAACGAAATTACCGTCACACAGTTAGA  
ACCCCGGTAAATTACATTACATGTTCAATTCAGATCGTTCAATGTCAACAAGCTTGAATTACAGTGTTTTGT  
GCTGTAAAGCCATAATTTCTATGGTATCTGTTATTAGTAAATATGGGTGTGTTGTAGTTTTTATTAATTC  
TAATGTATTTTAAAGTATTCGTACAAAGTACCTATTCAACAGTACATCAAATAATCGAAAGAT

>M6-PGSC0003DMG402005047 M6 G-LecRK

CAATGGCTATCTCATGAAAAGAACCATAGCAATTGTGACAATCTGCATTGGTGAATACTCATCGCGCTC  
TCGTTTGCCTGTTGTTTGGTAATAAGGAAAAGGAGAAGAGGTAAAGGTACCCCTTAATTTCTTCGTGTGT  
TACTTCTTTATTGAATTCCCTTAGTGAAATCTGGCTCCGCGAATTACAATAGTACTAAGTTACTTCATGTA

CAGATAAGGAGGACCAATTCACCAGTTTGAACACTTTGACAAGGAATTTAGCATCCTATGAGAACTCTTC  
AAGAGGTAATGAGATGGATGGAAGTGAACACGTTGATGTGTTAATCTTTGATCTAAGCACTATCATTCT  
TCCACTGATGATTTCTCTGATGCTAACAACTCGGAGAAGGAGGCTTTGGTAGCGTTTACAAGGTACCTC  
CCGATATTTTACAACCTTCTTACTCATTGTTGAGCCAATTTTACTTGACAACAAGCTTACATTTTGATTCA  
GGGACAGCTAAACAACGGCCAAGAGATAGCGGTCAAAGACTTTGAAAAATTCAGGGCAAGGAGTG  
GAGGAATTCAGAATGAAGTAACGTTAATCGCGAGAGTACAACACAGGAATCTTGTGAGGCTTTTAGG  
ATGTTGCATAGAAAGAGGAGAGAAAATGTTGATCTATGAATACTTGCCAAACAAGGCTTAGACTGTTT  
CATCTTTGGTACATATATACATGTCCAGATTGTGTAAAAAATATAAATAGGCATGTTACTGATCCTTTG  
ATCGTGTATTGCAGATAAACTAAAGGGTTGCAGTTAGATTGGAGAAAACGATTTGAAATCATCGTTGG  
AATAGCACGAGGATTGTCATACCTACACCACGAGTCACGAGTACGAATCATACACAGGGATCTAAAAGC  
TAGCAATGTTTTACTAGATGCCTCAATGCACCCGAAAATATCAGATTTCCGAACTGCTAGGATATTTGGT  
GGTGACCAAGTTGAAGCTAACACGAATCGAGTCGTTGGAACATAGTAAGCATCACTTTTATGTATGAAC  
ATATGTGTATTTTTCTCAAAGGCACTTAACTTGTATAAAGTTGAACAAGTAGACACACTCGTCCTACATG  
ACGATTCGCATAAGATACACTCGAACTGATTTGTATTATGCCATGTAAGACGCATATTATGTCATGTAGA  
ACGTTTGTGTCTACTTCAACTTTATATAAGTTTAAAGTGTCTACTTGTGCACACCTCATAGATGTCAGCTGA  
GACTAAGTTAAATGGCACGTTTATTATTATGCCAAATTAATTTGTGGGTCTTGACATAGCTATTGGTTC  
ATTTGAGTGGTTATATGTCACCAGAATATGCAATGGAAGGGCATTTTTGAGTAAATCTGATGTTTTGAG  
TTTTGGTGTCTGTTGTTGGAGATCATTACTGGCAGGAAGAACTACACATTATCAGGATCATTGTTA  
AATTTAGTTGGAATGTAAGATATCTCTTCATCAAGAAGTACCTTTAGTTAAGAAGATGTATATATCTTG  
TTTTGCTTTAGCCCTTATACCATTGCTCTAGAGAAGGATATGTGGAAATGTTTCATCTCTTTTTTTTTCTT  
ATACGATGGAGTCGGGGCTAGCTTGTGCATACTTTGACTATTACACTGTACTTGCTACCCTCCACCAGCA  
TAGGGATGGAAACAATGGCGGAGCTACATGCATTGGAAGGGTATTCAAATTGAATCCCCTTCTTTAGGA  
AGCTATGATAGAACTATTGGGTGTGTCTAAACAAGTCCCACATGAAAAGTAAAAAAAAAACTACTTT  
AAGATGTCGGATAATCTTAATGTTATGAAGTCTTCTGAAAAAACTATGCGGGTTTGGTCCAAGGGGAC  
AATATCATGCCATGTTTCAGAGTATCTTATTGGATTATTTAGCCTAACAACTGATATCAGAGCCAGTGGTT  
TGGCAGGACAATTATTGAGATGGTAGAGTGTGAGTGGGGTCCGACTTGGTGCCTTTGACCATCTATG  
GGCCGATTTACTATCTTTACCTGTAGCCTTAGAGATGCTTACACAAAAAGAAGGTAGTGGCCGTTTGTGA  
CCATAAATACTCTATTCATATGGTGGCACGCAGTGAATCTCCAGATAAGCCTATAAAGTGATAGGTCAT  
GTGGAACCTCAGTTTAAAGGAGAAGACTGTTGAGTGTACGTAAACAAGTTTCACATGAAAAAATAGAAAA

AAGATAACTTATAAGGTATTGGATACTCTTAATATTGTGAGGCCTTTTGAGAAAACCGTTGGGATTTTGT  
CCGCAAACCTGACAATGTCACATCATGTTAAAAGTATCTTTGAGTTATTTTAGCCCAGTAGAAACACATTCT  
TTCATCGAACATATATGAAATTTTGGACCCCTTAACCCAGACACGACATTTTGTATTTACTTGAATTCC  
CTAATCGAAAATCCTGGCTCCGCCACTAACCAGAAATGTTGACTTTGCTCTCCCTTGTTTCAGGTTTGGGA  
TTCATGGAATGATGACAGAGCTTTAGATGTTGTTGATCCCTCATTAGGGGATTGGTATGAAAGTAGTGA  
AGTTTTGAGATGCATCCAATTGGACTATTATGTGTACAATCATATGCAAATGAAAGACCAATGATGTCT  
CAAGTTGTATTCATGCTTTGCAATGAAACAAATTTGTCTAATCCTGGACAACCTGGTTTTGTGTTTCAGATC  
AAGAAATTCTTCTTCACTTCCTTATTCATCATCAGCTAGTATTGGAAATTCTGTAAATGACATTTCTATTAC  
TGCACAACATGCTCGCTAAGTGTGTGTCGGATCCTTCAAAGTAGTACCATATATTTTTGTGGATCTGAC  
ATTGGTGCATCAATATTTTTGAAGAGCACTGAGCCATATGGTCATTAGGTAATTTATACTTGATCTATTTA  
TTGATTTAGTTAAGATTTTTTACATTTATCAATACTGTATTTAACGTGTTATAACAGGTAGCGTATCTT  
>M6-PGSC0003DMG402007101 M6 G-LecRK

CAAGAAGCAAATGCACCATATCAACAAGCTAAAACAATAAACTAAACATGTCTCCTAATTCATGGCCTA  
CTACACTTCTTGCCTCTCTATTTCTTTTCTCCCAAATATTTTCTTGCATTGCCCAAGTTCCACTTGAAAACAC  
CTTCAAATTCGTCAATGAAGGTGAATTAGGACCTTATGTTGTAGAATATCAAGCAGATTATCGCGTTCTT  
AGTATTTTCAATAATCCATTCCAGCTCTGTTTCTATAACACAACCTCCTAACGCATGGACTCTAGCTTTGCG  
AATGGGCACTGTCCGTTCTGAATCACTCATGCGGTGGGTGTGGGAAGCAAATAGAGGAAACCCCGTTA  
AAGAAAACGCGACCCTCACGTTTGGAACTAACGGAAATCTCGTATTGGCTGACGCTGACGGTCAATTG  
CTTGGCAGACCAACACGGCCAATAAGGGGGTGACAGGGTTCAAGTTGTTACCTAGTGGTAACATGGTG  
CTACATGACTCTAAGGGTAAATTCGTTTGGCAGAGTTTCAACTATCCCACTGACACATTACTAGTGGGCC  
AAACTCTCCGATTGTCTGGCCCGAATAAGCTCGTGAGCCGGGCCTCAGTGAAAAAGAATGTGAACGGG  
CCTTATAGCTTGGTGGTGCAGCCAAAATTGTTTGTCTATCTACAATAGGACTAAGTTAAGCGTGGAAC TAG  
CTTGGTTCGATTTTGAAAACAGTACGTTGGAATCAGTAAAATTGAATAGTGGGAATCAAAGATTGAAAT  
TGGATTATAGATTGGCAAATCAACAAAGAGAAGTTCACATGTGATGGCATTACTAAATACAACACAA  
CATTAAACATATCTTAGACTTGAAATTGATGGAAATTTAAAGGCCTACACTTTTGTAAAGATGAAGAAGC  
TGATGAATTCCGTTGGAAGGTAACCTACCAAATGCTATAAGAAAATGTTTTTTTTTTTAAATAATAATATT  
AAAACTAACTTTATAAGATAAGGATTTCAATTCAGTAAAATAAGTGGAGAAAACGAGTGGGTCCACA  
GCTATTATTTTCTTTTTATTTTGGTTGAAGGGTGTATTTTATTATTATGATTTCTATTTTTCATTTCTGTTA  
AAGGATGTATTTAATTATGCTTTCTACTATTTAAGATGCTATGACAAATGTGAA

>M6-PGSC0003DMG402009323 M6 G-LecRK

ATTAAGCTTGGTTATAACCTCACCACAATGCAGAATTGGACTTTAACTTCTTGGTTGAGTTTTAGTGTTCC  
TGCTCAGGGGCTTTTACTTTAAGTTTGGAGGTTTTTGAAAATGCATTCAGTTGGTTATTCGTTGAAGG  
GGTAAGGTTTATTGGACTAGTGGGGCTTGGAAACAATCAAGGTTTTCCATTCTTACCTTTATTCCATGATTC  
TGCTACTATTTATCAGTACAATCTCAATTTGGTATCCGATAAAGATGGGATGTTCTCCAATTTGATGCAA  
CAGAGGGAAGCTTTCCAAGTCTTGCATTGAATTCAGATGGGGATATTCTTGGTGGATACCGGTTTACATA  
CACCTTTTTAAAGACTTCTGTTATGGTTATGAAAGTGAGGACGGTGTGTCTCTACCCAGTTGCCTGAG  
TGTCGAAAGGATGGGGATAAATTTGAGCAAAAGAGTGGAGACTTTATACATTCATCTAGTATTACTACT  
GAGTTTTATGACAATGCAAGCATTAGTATTGTTGATTGTATGCAGAAGTGCTGGGAGCACTGCAGTTGTT  
TTGGCTTCACCACCGCCAGTGGCAATGGGACAGGCTGCCGATTTTGGAAATGGAAATGGTGATTTTCGTG  
TCTATGAGAGTGGTAATGCATTGCTAAGATATGTTCTAGTTTCACCAAATCATCTAAAGGTAAGTCTTT  
ATATCAGGAATACTCATTTTTATGTA CTCAATTGTCAACTGTATAACTCTCAGCATGCTATGGGTGCAGGA  
AAA ACTTGGATATGGATAGTAATTAGTGTAGCTTTTTTTATCTCGTTGCTATTATCTGGTTTCATCTGCTAC  
ATTATAATGAGAAGACGCAA ACTACAAGGTAATCACCAA ACTGAGGATTTAGAAGCTAGTAGGTTGTT  
TAGTCATTTATTTAAGCATGAATGTATATCTACATACTCTTCTTACATAGATGAGAAAAGAAATGAGGA  
AGCATATATACGCGAGTTGACAGCAGTAGACAGCTTCAACAACGCAAATATTAAGAAGAAGATGGAA  
GGGAAGTACAAGATTTGAAGATATTTAGCTTTGGATT CATATTGGAAGCCACAAACA ACTTCTCTAGTGA  
AAAGATGCTCGGAGAGGGTGGTTTTGGGCCTGTTTATAAGGTATATTTGCACTATGTTATATGTAGCTCA  
GAGATTTGCTTACTGCTCTCACTACATAACGAATCAACTGTAAAAATGGATGTCAGGGAAAATTTCCAGA  
TGGTCGAGAGGTGGCAGTCAAGAGACTTTCAAGAACCTCGGGACAAGGGCTTGTGGAGTTCAAGAATG  
AACTCATACTAATTGCCAAAGTTCAGCATACAAATCTAGTTTCGAGTTCTAGGATGTTGTATTCACGGAGA  
TGAGATAATGTTGATATATGAGTACATGCCTAACAAGAGCTTGA ACTTCTTCTCTTTGGTCTGTTACCAT  
TCCACAAAAAAAAGACAGTAATTTTTCCGGTATTTAAAAAAA AATTGATGTAAAATGCTTTCTCTTTAAC  
AGATCCTGCAAGAAAGGAGCTACTGGATTGGCAGAAGCGATTTGCAATTATCGAAGGAATTGCTCAAG  
GATTGCTCTATCTTCAAAATACTCAAGAATGAGAGTGATACATAGAGATCTAAAAGCCAGTAATGTGCT  
TTTGGATGAAAACATGAATCCTAAGATAGCTGATTTTGGTCTGGCAAGAATTTTCAAACAGAACGAGAT  
GGAGGTAGTGACTGGCAGGGTTGTTGGAACATAGTGAGTTGAGCCTAGTCATTTCTTCGATATAAATCT  
ATGGAACATGTGTACTTATTCATACTTACTGAGTAAAAAATGTTTTCTATCCTCTGCACAGTGGTTACATG  
GCTCCCGAGTTCGCCATGGAAGG TACTTTCTCAATCAAGTCTGATGTCTTCAGCTTTGGAGTCTTAATACT

GGAAATTGTGAGTGGTAGGAGAAATACTAGCTTACAACAAATTGATCGTCCACTTAACTTAATAGGTTAT  
GTAAGTTTTCTTTAAACCTTTCTTTCTTTAATGTACTAAAGTTCACAAAGTTCACAATACTGATCATTTTG  
GTTTCAGGCATGGGAACTATGGAAAGAAGGGTGTGGACTAGAACTGAAGGATCCATCTCTTGAAGATCT  
TTGTGACACTGAACAATTTTTACGAGTTATTCATGTCCGACTATTATGTGTACAAGAAGGTGCAGCAGAT  
AGGCCAACAAATGTCTGATGTTATCTCAATGCTTGGTAATGGAAGTATGTCACTGCCAATTGCAAAACAAC  
CTGCATTTTTACGGGAAGAGATGAAGCTGAATCATATTCGTCCACAATCAATACAGAAGAATGTTCCGGT  
TAATGATTGTTCCATCACTGCCGTTGAAGCAAGAT

>M6-PGSC0003DMG402013876 M6 G-LecRK

TTAGTCCTCTATCAGACTTCCCCAAAGTTTCATTGCCATCACCTAGGAACTTTCTTTATTCTTCTCTTTTCG  
TTTTTATGTAGTAGTGAGAAATGAAGATAATATTGGTTCTCTTGCTTTCTTACTTTTCAATTAGTTAGCTGCA  
ATAGTACACGTTTCAGATACCTTGTTCCTGGCCAGTCCTTTTCTTTCTGCAGAAGATACTTTAGTATCC  
AAACAAGGGAAGTTTGAAGTTCGGTTTCTTCTGTCCAGGTAATTGTGAAAAGCTTTTTATTGGTATATGGT  
ATACAAACATAAAGCCCAAACTGTGGTTTGGATAGCAAATAGGGACAATCCTATTCGTCTCCGTTCAA  
TAATTCTCATCTAGAGCTGTCTGATGGAAATCTACAACCTTGGATGCACGTAAACAAGAGTTTGGAGT  
TCTAGTTTATCCACACCTTCAGCATATGCCAATAAAGCAGTACTTCTTGACTCTGGAAATCTGTTTTGAC  
AAATGGCATTGACAGACAGTGGCAGAGCTTTAATTATCCTACAGATACGTGGCTGCCTGGTGTGATGAT  
TGGATTTAATAAGTCCAAGAACACACTCCAGAACTTACTTCTTGAGGGATCTGAATGATCCAGCTTCA  
GGAAGCTACTCTTTGCAATTAGGCCAGAATCAAATGGTGAGTTAGTTGTTCAACATAATTTCCAGGAA  
GAATGGAGGTCTGGCCTTGAATGAAGGAGGGTTGCTATTCTAGGACAACAAAATTATTATAAGGAT  
TTATTCGACTTCAGTTATGATCCAGCTGAATATAGTAAATATATTACTTACAATGTCTTTGATGAATCTGA  
CATTTCTCGAATTGTCTTAGAATTTAATGGGTTCGATGAAGCAATGGTTCTGGTCTAAAGATCATCAGAGT  
TGGCAGTTAGTGTGGTCTCGATCTACTGATAATTGTGACCAAATAAATTTCTGTGGTGCTTTTGAATTT  
GTGACATGAATGCCAGTCCACTCTGTGAATGTTAAAAGGTTATGACCCGAAGTTTAAATCAGATTGGG  
ATATTAGAACTATTCAGGTGGGTGTGTGAGAAAAATTCCAATGCAGTGTGGCAGCAATAACAAAAAAT  
TTGTCCGATGCCAATGTTAACTTCCTGTGTCATCTCAATCAATGAAAGGAGTAAATGATCAGATCTG  
TGAATATATATGTTTCATCCAATTGCTCATGCAATGCTTATGCTTACAGCAATAGTGGAGAGTGCTTATTAT  
GGTATAGCGATTTGATTGATCTGTCAATATTACCTAATAATTCAAGTCAAGTAGAGTTCAACATTAAGCTT  
TTTGAGCGCTCGAACAAAGGTTAGGTGCTTCCAAGCTGCATCTTATTTCTAATGTGCTCCTTTTCAACCAA  
AAATATGTTATTTTCTCCTTTCTTGATCTTCTTAATGTTTAGGAAAGAAGAACTACTACTGGTAGCGC



TAGTAGTGCCATCACTTCTGCAAGTTTTGTCTGTGGTACATGCTGTTACTTTCTATGGAGAATAAACTC  
AAGGAAAAAGGTACATTCTAATTCTTGCTAGTAGCAGTTGAGTAACTTAAGTTTCACTTCTATTTGGCAT  
GACTGAAAGAGGTCAATCAAATGTAACCTTTGATTTAATTAGTCATGGAAAGGAAATTATATTCTCTGA  
ATCATGCTTAGATAAAAAGTTAAAATTGCCCATGTCCAGCTTCTTCTAAACTCATCAATAAACTTCCTGTTT  
ATATTGATTACATCAGGGATTTTGGGAAGGAAAAAGTTCAGGGAAATGTTACTTTCTAAATCAGCAACT  
AACTTATCAAACCTGGAACCTCCAGTAAAATGGGACAAGAAAAGAAACGTTCCATCGAGCTGAAGTTC  
TTTGAATTACGTGAGTTGAAAGCTGTGACAGACAATTTTTACCTGACAATAAGCTTGGAGAAGGAGGT  
TTTGGCCTGTTTTTAAGGTATTGTTACTACATAAGAAAATATATTGACAACCTGAATAACTGCAACACTA  
AATTCTACTCAGGCCCAAAGAAAATGGGAAAAAGTCCCTCTTGAGGTGAACAGGTAGCGTAATGGTTTT  
AACTAAAATCTTTTCCATACTTGTGTTTTAATGGTGTGATTAATTGCATTGCAATTTCTAGGGTCAATTGC  
CAGATGGGCAGAAAATAGCTGTGAAAAGGCTATCAACTCAATCACAGCAAGGAATTAGTGAATTCAA  
ACTGAGGTCCTTCTCATTGCTAAACTTCAACACAGAAATCTTGTTAGGTTTCTTGGCTGCTGTGAAGAAG  
ACGAGGAGAAAATGTTGATCTATGAATATATGCCAAACAAAAGTCTAGACTATTTTCATATTTGGTATGAT  
AATTTACTACTATCTGTTTTTGTGTTAACCTTTCTCCTAAGTAGTGCTTACTGGATAAATTTGATATGAG  
CAACTTAGACGAGAGCAGGAAGTCATTGCTTGATTGGAGAAGGCGGTATGAAATCATTATTGGAATCGC  
TAGAGGGATACTCTATCTTCATCAGGACTCAAGATTAAGAATAATACACCGTGATCTGAAAGCCAGCAA  
CATTCTTTTAGATGAAGCTATGAACCCCAAGATATCAGATTTTGGTACTGCTCGAATATTTAGTGAAAC  
CAGAATGAAGCTAAGACTTCGAGTTGTTGGAACATAGTAAGCAAGAAAATACCAAAGGGATTTCTC  
TGTCGCATCCTTACCATTTTTCAATACTTGGCTCATTATTGCCTTTTCTTTGCAGTGCCTATATGTCACCT  
GAATATGCTCGAGCTGGTCTCTTCTCAGTAAAATCTGATGTCTTTAGCTTTGGTGTATATTATTGGAGAT  
CATAAGTGGCAAAGGAACATGGTCTCTTATAATAGTGATTCCCCTCAAATTTGATACGACGGGTGAG  
TTTTAAGATACAACATTTGAAACTATCTTTGATTTAATAATCATACTTATTTTCTAAATGAACTGCTGCTT  
CAGGCCTGGGAGTTGTGGAATGATGGTAAGGCCTTTGAGCTGGTAGATCCATCAATAGTTGATTCTTGT  
CCCAGTGAGGAAGCATTACGCTGCATTCTAGTAGGACTATTGTGTTTGCAACTCAACGCAGCAGACAGA  
CCAACCATGTCAACAATTCTGTCCATGCTAAGTATTGAAGCAACAGTTCCCTTCCCGAAGCAGCCCTTCAT  
TACCCCTAACTCAGACTTGATTACTACCGAAACAGCATCATCTTCGATCAACGAGGTGACAATTACAGCA  
CCTTATGTTTCGTTAGTTGTCTGATGTGTATATGTATTCTGTTATCTGTTTATCAAATGTATCTAGTGCTCA  
TACTTCCCAAAGTATGATATAGTCTTCAATGTTTCAATGCAAATAATGCTAAAAGATTTTCAATAGACTA  
GTTGATATTACTTTTACAGATACTCATCACAGAAAGATTGAGACAACAGTGCTTACTCATGATCATAAT

ATTATTGTTGTATTTGATACATGTCTATCTCATGATCTAATTATGAAACAAAAGTTAAAATCTTTCATAAG  
ATAACTTACATGTTTGTATTTTTTATCAATAATTTTTGAGGAAAAACATAACCAACTAATAATAGTTAAA  
TATCTCATTAAATTGACAAAACCTCCACAACCAAATTACTATCCTGCAAATCAATAAAAACACTGAAAAGTTG  
TGTGTGGCTAGCAGGATTAGCCTTTGTTGCTTTTAGAGCATTGATGAACACAGAGAAGACTGTTAAAGA  
AAACATGAAGTGTGGCAATTATCAAATACAGCTGACAAAGAGCACCATTTAATTCACAGATGAAATAGA  
AACCTCTGTGTTTATGCTTCTTTCCTACCAATCCTTTGCCACCCACCTACCTTTAAGTCTGTAACATGGGC  
CATGGGGAATCAGAAGTCAGTTTTGGTTCCAGTGCTATTAGAGCCCAACCCCACTAGTTTCAATCAAGAA  
TGGACTAGCATGTAAATGTTGTGTATAACTACCAATAAATCTCTCTAATAATATGAAAGCAAAGTACA  
GAAAAGGAATTCTGTATTTCTTCAAATAGTTCTTGAATAGTTAGCATAAGCTCTAGCGACCATGAACT  
GTTGAAATAGACATATCGTTGACAGAAGATGTTGCTATACTTGCTGATGAAGAGTGTTAACTGAACTAT  
GATTCTCTGATCTGAATATAAGGCTAGGTTGTTTAGGGAAAGGAAGATTTGTTTCATTGCACAGCATGAA  
GACCAATTCTGACATAGTCGGTCTGTCATCTGTAAACGGTTGTACACACAAAAGGCCAATGTGGATGCA  
TCTCAAACTTCACAAGCTTCATATGAGCCACCTAACAAATGGATCAACAACATCTAATGCCTTTTCATCCT  
TCCAAAGATCCCAAACCTGAAATAGAAACACCACAATGCATCACAATCAAATTTTCAGACAATTTCTTCTC  
TATAAGAGAAGCGACTATAACACCAAAAATTGAAATTCTGAAATACAAAATCTCGATCTATTCAGCACTT  
TTAACAACCTGAAAGGGAATTGTTTCAAATTATTATTTGCAGTACTACCATCC

>M6-PGSC0003DMG402014514 M6 G-LecRK

TTTCTCCTATTGCCTGACTCGTGCTTGGTACTATCATACATGTCCTTACTTTCCCTAATATAAGCCTCAGG  
TACACCTTTAGCCTCCAAACATCACCAAAGAACCCTCTAATGACGTTGTTGTAAGATTTTTCTACGTCAAT  
GAACATCATATGTAAGTCCTCTTTCTCTCCCTAAACTGCTCGATTAATCGCCTAACGAGATGTATGGCTTC  
TGTAAGTTGAAAGCCCTACGATAAGTCCAAATTGGTTCTAGCTGATAGATACACCCCTCCTCAACCTCATCT  
CCACCACTCTCTCCCAAACCTTTCATAGTGTGGGTCAACTAACAACTTGATATCCCTATAACTGGTACAATC  
CTGAATATCACCTTGTCTTGTACAACAAGATCAAAGATGATTTAATTAATAATTAATTTATCATTATTT  
TGTTTTATGATTTAGTAGGGATTATTAATCCTTTTTACTGATTAAGTGGTGACTTTATCTCTAAATTCAACT  
ATTGAAAATTAGTGATCCAAATTGCTATTTTTCTCATACAATTTAATAGTAACTTCTTTAAAATTTACT  
AGTAATGAAAATAGTGACTTATGTTTCTAAATTCATTGTGACAGACAATTATCATTTCTTAAATTTTATACT  
TCTTATGTTTATTTATATGATTGTGTTTGAATGTGTATGGACTACGGAGTTTTAAGAAGAAAAGGGAC  
TTTTTGAGACATAATCGAGTATATGTCACATACCAAAGTATCTATAGGATCTTATGCTTTTAAACATGCC  
ATGCCATTCTGGAAATGTGACAGTTTGGACATTAATCTCTTAAATGTGAACTTTCTCCGTCTGACCAGAT

ATAATGCTTAAATCTTGTTATAAGAGGCTCCTTGTTTCAGAGCTTGTTTTTCATTGATTGCAATTTGCATTTA  
GAATGGGGTCCAAATTGTTGATATTATGAAATTTAGCAGTTTAATCTATCAACATAAGTTCAAAAAAGCT  
GTTTACTAACCAGTATGAGTTCAACTTGGTATATTCATTTGCTAATTGTTTCGGTCGATTCATCAGATGAC  
TTGTACCATGTTCTGCGTCAAAGTTTTAGACAGCAGAATGTAGAAAATGGTTCTCCTGTTTCCCAAAGC  
AAGTGACACCATTCCGCCACTTCACTACTTTGACAACAATGCTCATTCCAATTCCCTTAATTCAGAAGCT  
GGCAGTCATTTTTACCAAAGACCACATAGTGGATTTAGCTGTTTCGGGTGGCAATTTACATATGAAG  
AGCTGTGGTTAGCAACTAGTGGATTCTCTACATCCAACCTTCTAGGTGAAGGTGGATTGGGTATGTACA  
CAAAGGAGTCCTCCCTACTGGAAGAGAAATTGCAGTTAAACAGTTGAAGGTTGGTAGCCATCAAGGGG  
AGCGTGAATTTCAAGCAGAAGTAGAGACTATTAGCCGAGTGCATCATAAACATCTTGTGTCTTTGGTTG  
GATACTGCATGAATGGAACAAAGAGATTGCTTGTTTACGAATTTGTTTCCAACAGGACCTTAGAGTATCA  
TTTACATGGTATGTTCTTTCTTTTTCTTAATTCTTTGGTCTGAATCCTGTATCAATAAGATTTGTGACCA  
GCTTAAGTCATTTTTGAATTATGCTAATATTTGTACAGCAGAGAGTTGATAATTAAGGTTAAAATAAATC  
TACCTTAACGGGGGCTTCCTAATGCAGCTTAGTTTCACTGTATTGATTTTGAAAAGCATGTAAAATACAC  
CTCACGAGTTATGAGTTCCATGTTAAATGGACAATCTTTAAGGGGGTACTTAACCAAGCCTTTAAGTAA  
GATTCCTCGTGGTATATGCCTATAACCACAAAAGGTGGCCTAGAATTTTCATCAAACCATGGTTTTAACA  
TGAGAAGGTAAAAGAAGAGCTTGCAAATACATGCTACTTCTGTAACCAAGCCCTTAATCTTGCATGGT  
AAAGCACTGCTATTTCTATGCTTTTGGAAAGACCAACATTTAATATCTTCTGACTTCTGCTGTCCCAGGCA  
CTTCATTTGCAATTTCCACATACTTTTCTATACCCTTATGGTGTATTGGTTTAAACACTTCATGTGAGGT  
ACATTTGATGGAGGATCTTTATAAGTACCACATTTTAGATGTGTGATTTGTTTCATCATCTGTTTTAAGG  
TTTGTATAAAGAATGTTCCCTATCCACCCTGATGCATGTTTTCTTTTGAACTTTTGTTTTACAGAAATGCTCT  
TGTATCAGTTTATACTTCTCTGATCACTTCTAAATATCCGATTGAATAGAGTTTCCATAAGTTCCTCTGATA  
TAAAGGTCTTTCTACCAAGATGCTATTTAGAACAGATTGTATGATATGCAGGGGAGGCACAATCCACGA  
TGAAATGGGCATCTAGAATGAAAATTGCTATAGGGTCAGCCAAAGGATTGGCTTATCTGCATGAAGACT  
GTGAGTGCGCTTCATCTCTGTCTTGGCTTCTATGTTTGTTCTTAATTTGCATGTTTCGTCATTAGTTGACT  
AGAGGTGTCCAAAGGGGTAAATTGAATATTAAGTGGCCTGGATGCTTTTTTAAACAACGTTGAACATGTTT  
CCAAAGGGAACCTCTTGTTAGTGTGTTTGTAGATTGTGACAAGTTGGGTAACATAATGGTTTTTCATCAT  
ATCTATCTTCACTTTTTCTCCTGAAAAGGATGTAAATCTAATTTTCTCCCTCCCAATAGATACCATTGATCC  
TCACTTCTATAATACCATTTCTGAATCTCCTCGAGATTTGAGAGCTGAATACCTCGGTTCTAGGGTCTGCT  
AATGGATAGCAGAAGGCCATAATAATCCTAAATTGTGAAAGATATAACATGAATATGCATCAGGCAAA

CTG TACTTTCCCCATATAATTTTATATGCCATG TACTTTCTGTCAAATATGAAATCAAATAGTTTTAGTAT  
ATTTTCTTCCACTACTACCAATTTAATATAGATGTCAACGTATCTTTGCGCTCTGTAGGACAATTTAATTGT  
GGTTGCTTGAATTAGCTTGAATAGAATAAATATCACTTCTTTTGATGTAGCAACAACAGGTAATCGTTCTC  
TGAAGATACTAACTTGTGGCTGCAGGTAACCCCACTATCATTTCATCGTGATATCAAGGCAGCTAATATTC  
TTCTTGATTCTAACTTTGAAGCTAAGGTAAC TTTGTGTTTCGCTTTTTGGTATTGCCACTATATTTTCTGTT  
CTATTTTTGAGAACTGTTTTTTTATTTTTTTT GAGAACTATTTTCTGTTCTATCTTTACTATCAAAGAAAG  
GTCGGGCTGTTTTCTATTATCGACAAC TGGCTTCTGAGTACACCTAGAATCCGCTGTTGATGTAAC TAGTT  
TTTTGTTTTTAACAATAAAATCCATATGAAGAGATTAATTTGAACCCAAATGAGCATCTACTCAGGTGCA  
AATGTTAACTGCATTATTGATTCTGATTTTTG TTTCTTTAATTTTCATGTGACAAC TAAGAACATATTTCT  
CGAAAGTTATTTAACATGAATGGGAAC TTTGATTTGTATCCAGGTTGCAGACTTTGGACTTGCCAAGTTC  
TTATCTGATTCAAACCATCATGTCAGTCATATCTCCACTAGAGTGGTGGGAAC TTTGGGTGAGTTTTATT  
GAACCTGTCTCTGCTACCATGAATTAGATATCAGAAGGAAAAAATTGACTAGATCAAGCAA AATTACTA  
TATACAGGTCACCATACTGAGTGGACCAGTCTCTTCTACTTTTATCAAGTAAAAAGTGGTGCTTCCCTCGT  
TCTAGCGTTAATAATATTCATTTTTTTGGGCTAACCTCATACGTAGCATAGGCTATGCCCTTCCCATGTTA  
ACTTTGTTTCATCCAAC TTTGCAAAC TGGATATCTATATCAGATACCTATAGAAAATCGAGCTAGAATGGGA  
CTCTCAAATCTGGGGATTTTAAAGACATTGATGACTTGCATGACCTCGATTTTAGGTCAACCTGCTCATAA  
TGCAGTGATTCTCTCAGAGTTATAACCGAAG TTTTCTGCTAGTCGGAGGATGAGAAGAGCGCATGGG  
ATGTTACTGCTGTTTTCCCGTGTCTGATAGTGTGGGTTTCTTAGTCCTTGATTTTCCCTTACCAACACTGA  
TTGGGGAAAGAGGGGGTTTGGGGGGTTAAGGAGAGGGGCTTGGATTTTGGAACTGTAGA ACTTAAAG  
CTACTTCATGATTAGTAATGATTTCTGGATTACACAGCTTCAGGTAGATGGACAACGTAAAACTAACAG  
GGTAAACCTACATTTCTGATCACAATTTCTTCATGTATTTGATAAACTGACGTCTTGCAGGTATCTGG  
CCCCAGAGTATGCACAGAGTGGAAAGACCTCAGATAAGTCCGACATCTTTTCTTTGGAGTCATGCTCCT  
GGAGTTAATTACAGGGCGTCCACCTATAATCTCAACTGAATCCTCCGCATGCAGCAGTTTGGTCATATGG  
GTATATTA ACTGTTCCACTTTCTTGACCGCTATTCAGCATTCTTAAGTGCCTAAAACTAATGTTCAACTAG  
ATGCATGAGTAAAACGTTTGTGTGCAACCTTTATAACTGGTTAAATAGCATAATGCTTAAATTTACTTTCT  
GTCCAAC TACACTAATCAAATCCTCAATATGGAATAACATTTCATCTTACTATAATCTTATCCTTAATTAGCT  
ATGTATGCACTGTATTTAATCTGAGGCAGAACATGCAAGCACAGCTTATGCAATTCTCTGAGGTGGCCTT  
TCTATTTATAAGAGATCTTGATCCTCCGGAAGGTTTATCATTGTGGTTTTAGAAGTACTGGGTGGTTTTA  
TCCTTTATTGCTTTTCTTTTTGCGAGTGATAAATGGTTGAGAAATTTTATCACGGCAGTAATCAATATCA

CGGAAACAACCTTTCTACCTCCACGAGGTAGTGGTAAAGTCTGCGTATACTCTACCCTCCTCAGACCCCA  
CTTGTGGGACCTCACTGGGTATGTTGTTGTTGTTGTTGTTGTAATAATCAATCACTTAAAAAAGAAACATG  
GAAAAGCATTGGCTTAAAATCAGAATTTGGCAGACCACCGTCCTTGTACAAAAGAAATGTGCAAATCAA  
AAGGATCTGGTGTCTTGAAAAGTTCATCTCTGTCAAGCCAAAGGCATAAAAATTCACGTCCATCTTACA  
AATTTTTAAAAGAAATTTGTCATCCTTGTACCAAATGATTTGGCTTTTGGACACCCGTTTTGATGATGGAA  
CATATCTCAAGTTTTCTGTTGCATCTTTTACAACCTATTAGTTTGACCAAAGTTTCAGTCTTAAAGCATGGA  
GTTACCATGAATTTGATATCATAATCTATCAAATTTCCCAAATAAGGCTCCCTTTTTAGGAAATCTTG  
GAGATACGGGTTCTGGAATCATTTTGTGATCTCAAAGATTACTGTTGGTTCTACTTAAGTCCCACA  
ATTGATCAGAATTAATTAACATAAGTTAATTCGAAATTGAGATCAGAAAGACGGATTCAGAGTTAGCA  
GCTTCTTGCATGCAGCCTACTCACAGACAGAATTAGTTATGTCACCTTAGTTAATCAGAATTAACCTTTACA  
CCTCTTCCGGGGCATTTTTTTTTATAACCTCGTCATCAAATACAATATTTTGTATTAGGAATCATTACCGTA  
GTTTCTGGTTTTCATATTCTTGGTTTTTGTATTAAGTACTTTTTGAGAGTCGTTTATTAAGTGGATGTACACA  
AATTTCTTGATCAACATATTGGTTTCTGTAGCAAATAACAAAATATTTTGGGAACTAGAAGCATCTCTA  
GGCCGATGCTTAAATGCATTTTCAAAGATATGGATATCATTGTTGTCAACCCTCTTCTTATAGTATACCAC  
TTGTACATAGCATAAGAAGACTCTTCTGATACACAGGCAAGGCCTTTGCTTAGAAGTGCATTGGATGAT  
GGAAAATTGGACGCCCTAGTAGATCCATGTTTGGGACAAAATTATAACAGTGAAGAGATGGCTAACATG  
ATTGCTTGTGCTGCTGCTTGTGTGCGTCATTCATCACGGAGAAGACCGCGGATGAGTCAAGTAATAACA  
TCTTCTTAGTTCTTTTTCTGTTAGTGTGGCGGATTTCTTTAAAGGGGTTTATAAACCAAACCTTGCTT  
CTTATTTCTTCTTCTTATTGTTTCAGGTAGTTCGTGCTTTAGAAGGCGATGCCTTTATCCTGGACCTTGATG  
AGGAAAATAGACCAGGACAGAGTACCATTTGTGACTTTGATTCTGATGGAAGCAACTATTTTGAAGAAGT  
TCAAGAAAATCCAGCGGAGCACTCTGAAATCAAAGAAGAATGGTAATACCACCGTGCACCGGGGGCT  
GTCATGGAAGTACACCAACTGAAGATGGAGTGAGATGAACGAAGCTCTTCTCCCCTTTTTATCTTTCTTT  
CACTGATGTAGATGTAAATCGAGGGTGAATATATGATCACAACCATCAAAGTTGTCTCACTTAGTGAG  
AGGATTGATAGTTTGTAGTTACTTGAAAGTGCAAAAAGAGAAGAAAAGGAATTGGCATGAGATATTC  
AGTATACCAAGTAAAAATCTGTGTATAAAGATGCATGTTTCAGATGTACATATAGATTTCTTCCCCTCT  
CTTTTTCTTATTCTTTTTGC

>M6-PGSC0003DMG402019242 M6 G-LecRK

AAGTCTGCAGGGCTTCATAACAAAATAAGAAGTAATACAATCAATGCAATTA ACTACTGATATGCCTAAC  
TCTTATGTAAATTGAATACTGATTATGAACTAATATAGAACATGTTTCAGACAGGACGCGGAGGAGAAAG

AGGTCAGTCATGATTGGTGTCAATTCAGCAGTGGTAGCAACACTTATCCTCAGCATTITAGCTTGGTTTTA  
CTTCAAAGAAGGAAAAGAAGAAGAATAGGTAATATAGCTGAGGTACTCTTGTCTATCTGGCTGAC  
ATTGTTGCCTTTACCAAATTCATTGATATCATGTTTGTGGCAGGCGAATGTATATTGACAGGTTCAAA  
AGTTGAAAATGAGGATATGGAGCTTCCATTGTTTATTAGTTACTGTTACTAGTGCCACTGGGAACTTC  
TCTTCTGCTAATGTGATTGGGGAAGGCGGCTTTGGACCAGTTTACAAGGTAATCAACTTTGATCTTCAA  
CTTCTAGTTAGAAGTGTCACTTTAATCCTTGATAGAAAATTGCAGGGTATCCTACCAAATGGACAAGCA  
ATAGCAGTAAAGAGGCTATCGGAGTATTCTGGACAAGGCATTCAAGAGTAAAAAATGAAATCGTTCTC  
ATTTCCAAGTTGCAACATAGGAATCTTGTCAAGCTATTGGGTTGCTGCCTTGAAGGAGAAGAACGGATG  
CTAATCTATGAGTTCATGCCAACGCTAGCTTGGACTATTTCATTTTTGGTCTGCTTTTTCGTGACTTATTG  
GCTATACTAGTACTTGACAAGTCTTCAATATCTCTGATCACTCAATGATTAGTTCTACATTGTGCAGATCC  
AAGCAGAAAAGCTTCACTTGGATGGAAGAATCGTTTTGAAATTGCTATGGGAATATCTCGTGGTCTTCTT  
TACCTTCACCAGGATTCAAGATTAAGAATTATTCACCGAGATCTCAAGACCAGCAACATTTTATTAGATA  
GTGACATGAATGCCAAAATTTCTGACTTCGGCCTTGCCAAAATTTTTGGTGGAGACCAAGAGGAAGGAA  
AAACTAAGAGAGTAATAGGGACATAGTAAGTTTCTACACATCTATAAATCATAGAACCTTTATTACATTT  
AATCAGTACATCATGAGCATAAATATATTGAGTTGATGCAGTGGATATATGTCCCCGGAGTATGCTGTTG  
ATGGGAAATATTCAGTGAAATCAGATGTATTGAGTATCGGCCTAATCATTCTTGAATAGTTAGTGGCA  
GAAAGAACAGAAAATTTCTGCATATGGAGCATCATCACAATCTCTTGGGACATGTAAGCACATATATATG  
GAACAAAATTCGTTCCCTTTATTCACTCTTAGCTTTCTATTGTGATTAATTACAACGTATAAATGTGTTG  
TTCTGTTTGAATATAGGCATGGTTACTTTGGAGTGAAGGCAACGCGTTGGAACGTATAGACGAATGTA  
TCAAAGAATCATTTTCAGAATCTCAAGTGTGAGATGCATCCAGGTTGGTTTGTATGCATCCAAAAT  
CCCCGAGGATAGGCCTACCATGGCATCAGTAGTTTTCTGGTTAGGCAATGAAGGCCTGGTTCTTCTCAA  
CCAAAGAAGCCTGTTTTTTTATCGAGAGGAATACAACAGAATCAGCAGAGTTATCTGATGAAGGATATC  
TAAGTAACAACGTATCGATAACAGTCTAGAGCCAAGATAGACATAAAATCCAACAATTAGAACCTTTGA  
AATGTATCCACTTTGTCTGTTTTTGTCAACAGTATTAGTGTATTTATGGACTATATCATGAAGTGCATTG  
AGGAAGATAGTCTAGTATTTCTGTTTTTCAATGACATGTGTATTCTTCGATACTATAATAAACGTAACGAA  
TTGGCCTATTCTGAGTAACTTGTGAAAATTCTGTCTCCACTTCTGGCCATCAAAAT

>M6-PGSC0003DMG402026153 M6 G-LecRK

CAGAGAAATTGTTTTGGGAATGCCTATGGAGTACTTGCCTCATAGAGATAGTTTTGATGAAGATTTAATC  
ACGGAAGATGATAAGAAACGGATTGATGTCCCGTTTTTTCAGCTTCAATAGCATACTAGTTGCTACCGAAA

ACTTCTCAAATGCAAGTAAGCTCGGGAGAGGTGGATTTGGACCTGTTTATAAGGTTTTTGCAACTTTCTT  
TTTTTTCCTTCTTCTGTTCTAAGTTGTTTTACCATTGAGATTTTTTCTTTCGTTTTCGTTATATAACAGTCT  
GGAGATATATTTATGCAGGGTACGTTTCTCGGAGGTACAGATATGGCAGTTAAAAGGTTGTCAAGTAAT  
TCTGGACAAGGTGTTGAAGAATTTAAACTGAAGTAATGTTGATTGCCAACTGCAGCACAGAAATTTA  
GTTAGGCTTCTAGGCTATTGTGTTGAGAGAAATGAAAAGATTTTGTTATATGAATATATGCCCAACAAAA  
GCTTGGATACGTTTCTATTCGGTTAGTATACTTCCCTCCCTACCATGAAGCTCGTTGCAGTAATAGTTTTA  
TGATTGATTCTCTCTGAATTTATCTTACAAATCTTGAAATTAGATCATGCATTCTGTGCGATTACTGGACTG  
GAGGATTCGTTTTGAAATTATATTGGGTATTGCTCGAGGGTACTTTATCTTACCAAGACTCGAGGCTA  
AGGATCATTATAGAGATCTAAAGACGAGTAACATATTGTTAGACCAAGAAATGAATGCCAAAATATCA  
GATTTTGGCTTGGCAAGGATCGTTGAAGGCCAAAATACAGAAGCCAATACTAACAAGTCGTTGGAACA  
TAGTAAGTCTCTCGGTTCTGTTTTACCTTTGATTTGGTGGGTAAAAGATAGATATATATACATCTAAAAC  
TTGGTATTAGTTCACTATATGTATTGGTTTACACAAATTAGATGCTAAAATAACCTATTCTGGAACACTAA  
AAACAGTGGCTATATGTCTCCGGAGTATGCATTGGAGGGACTCTTTTCAATCAAGTCTGATGTATTTGCC  
TTCGGAGTAGTCCCTACTCGAGATCATAAGTGGGAGGAGAAACATGGAATTTTTCGAAGATGTAAACCTC  
ATTGGTCATGTAAGTACCAAAATTTCCCCCATTAAATAACATCTCATTCTGTTTAAAGCTTTTCATTGACTC  
AAAATTACTTATCACACACAGGTATGGAGACTGTGGATGAAAGATAGTGCATTAGAAATGATGGATCAA  
ACCATAGTTGAGTCGTGCGATGAAAGTGAAGTGCTAAAGTGCCTGAATGTGGCACTCCTATGTGTTCAA  
GAAGATCCAGCTGAGCGTCCTGTAATGTCAAATGTTGTTTTTATGCTTGGAGGTGAAAGCATAACACTAC  
CAAGACCAAATCAACCAGCTTTTATAGCACGAAGAAATAGTGCTGGTGCAAGTACATCTTCTTCGCTTC  
TAAGCTATAACAACACTTCCAACAATGGGTTGACAATAACTCAACAAGTAGGCCGATGAAATCAATATACA  
TATAAGTTAAATGCATAACGCACACAAGCCAATAATGTGCCGGTATATCTTTTCTTCAATTCAGTTTGAA  
TTTCTGTTAAATTATTTTGGCACGCAAATAACCGATTGTGTTGTAGTCTCGGA

>M6-PGSC0003DMG402029906 M6 G-LecRK

AGTTTTTGATATGTGAAAATGACATACTTCACAAAATATCTTCTTGTCTTGTCTTCTCATCTTTCCCCTG  
CATATTTTAGCACAACTATACCATTAGGCAGCTCTCTCATAGCAAATGATGAAACAACACCATGGCTTTC  
TCAATCTGGAGATTTTGCATTTGGATTCAAGAAAATTCAAAGTCAAATCAGTTCTTGCTTTGCATATACT  
ATGCCAAGATTAAAGATGCCACCATAGTTTGGTATGCAAATGGTGGTAACCTCGTGCCACGAGGCTCTA  
TCGCGGAGTTAAATCCTCAAAGGGACTAATTCTCCGCGATCCTAAAGGGAAAATGATCATTGGAGCA  
CTGGTCGGATTGGTTCTAATGTTGCTTATGCTGTCATGAATGATACTGGAACTTTGTTCTTGTGGGGTT

GATTCTTCAGTTTTATGGGAAAGTTTTCAATATCCGACTGATACCCTTATGCCTACTCAAATACTAGAGAT  
TAACAACAAGCTTGTTGCTCGAAAATCGGAGTCTTCTTTGTTCTGCTGGTAGATTTTATCTTCGTATGTTGA  
GTGATGGGAATTTGGTTCTTGTTACTCAATCCAAGCCAACGAATTTGATTATGATGCTGAGTATTACAA  
CAGTCATACTTCTGATTCAGGAGATGAAGCCAATTCTGGTTATGGATTGGTATTCGATGAGTTTGGTTCA  
GTTTACATTTTAAAAAGGAACAATCAAAGACTTGTGTTGACACCTCCAATGTTCTTCAATTTAGAAAA  
CTATCACAGGCTAAGTCTTGATTTTGATGGTGTTTAACTCATTATTATCATCCTAAGAGTACGGGGGATC  
AGAAGTGGAGTACTCTTTGGTCTTGCCTGATAACATATGTCTAGCAATTCTTGAAGATGTTGGAAGTGG  
AGTTTGTGGATTCAACAATGTATGCAATCTAGGTGAAAATCAAAGACCATATTGTGAGTGTCCAAAAGG  
GTATTCGTTGATCGATCCAAATAATAAGTATGGAAGCTGCAAACCAAATTTGTTTCATAGTTGTGATGAA  
TTTGGACAGGGAAATCCTGAAGAATTATATGATTTTGATGTGGTGACAGATGTTGATTGGCCGTTATCA  
GATTCGAGAGGATTTATCCTTCTGCTGAAGAAGAATGCAAGAAGGCTTGTTTAGAAGATTGTTTCTGTG  
CTGTTACTATTTATAGAAGCAATAGTTGTTGGAAGAAGAACTTCCATTGTCAAATGGGAGAGTAGATA  
CCTCTTTGAATGTAAAAGTTTTCTTAAATAAGGAAAGTTTGAACATAAGAGCTTCTTAAATTAGATATA  
ATGTATGTCTGCTATAGGTTTCATGGTTGAATTCGTCGATCCAACCTGCAATTTTACACAATTCAATAGTTT  
GGATTTGTAATAATTAATGGACCATATTGTATAACAACTTTGATTAGCAAATAATGAAATATTTTCATACA  
TTTCAAGAAACATATTGCACTGAGATACAGATACAAGTTATTGATGTACTCTTTAGGTCCAAGCAAATGA  
ATAATTGAAAAAAAAAACATGGTTGATCTAAATAGAATCGACAAACGAAAAAGGGTCAGGAGGAATT  
GATACTTCAACAGAACCTTCAAGCATTAAACATGACTTTCTTCATGTTAGGCCTTGATGCTAGATTTTCTTG  
AATGCACCAAATTGCAACCAACAAGAACTTCTCGAATCTTGTATCTTCTAATGCCTCTTCATCATCAC  
CTACAAGTAAATGCAACTTATTTCTTCTATAGCAATCATAAGCCCACTCCAGTAGTATCATTTTCGTTCTCGT  
TTGCCACATCCTGCTCATAGTTTTTTCTGCAGCAAATCAACTCCAAGAGCAAGACCCCGAAGCTGTACAC  
ATCAACCTTCACAGTTACAGGCATGCTTCTGAACCAGTCTGGGGCTACGTACCCTTTGGTTCCACGTATCC  
TAGTGGTTGTTTGAGTCTGATGTTTTTTTCAGTAGCTTGGCCATACCAAATCTGCTATTTTTGCTGTCAA  
TTTTCATCCAAAAGCACATTTTGGGGCTTGATGTCACAATGTATAATTTGGGTACTGCACTCTTCATGCAA  
ATAACAAAGTCCTTTGGCAGTGTGATGGCAACTGTACCCTTTTGGACCAACTAAGCCTAGAATCTTTG  
AATAGCAAGTGTGCTATTGAGCCGGTTTTTCATGTGTTTCATATACCAAAGGCGGTGTTGGCCTTCGTTGC  
AGAATCCAAGGAGTTGGACCAAGTTCTTGTGATTAGTCTGCTGATTGAATTCACCTCAGCTTCAAATAC  
TTCTTCTCCTTCTCCTTCTGTTACCATGTTTCGGAGTTTTTTGACAGCAACGACTTTCCATTTTCATCATCA  
AGAACCGCTTTGTAAACTGTTGAGAAAGCTCCAGTTCCTAATTCCTTGAATCCATTTGTAGCTTGTTT



TAGCTCTTTGTAGCTAAAACCTCTTAAGTTCCTCCCGAACAGCTGAATACAGTGCAGTCCTCTTTTCGTT  
TTTTCCCTATAAACTTAAAAATGTACAATAGGACCAAAGAATTAAGAACAAATTCATGAAAACCTGAACT  
GGCCAACAACACAGAACCAGAAATGATCAGAGTAGACTGATTTTTCTTTTTCTTATTTCAACATTTGGTG  
TTCCCACTGTGGAGTTGTCTTTCCTTATTTTTATCAAAGCCTTCCCTCCGATCGTTGGACCTACTCTCCCAT  
TTGAAAGAGGATACCTTTTCTTCCAACAGATGTTGTCGTCCTGTAAATGGCAACATCACAAAAACAATC  
ATCAAGCAATTCTGTCTGCACCAATCCTCTGAAACATCGCGGTGAGACTCATAATCAGAGTCAGGCCAG  
TTAGATCCAACATTTTCATGGAATGTGAAAGACTCAACTTCTCGCGATTCATGGTTACAGTTTTGCTCAGA  
GAAATTTTGTCTGCAGCTGCCTAATTTGTCATTTGGATCATCCAAGATATATCCGAGTGGACAATCACATC  
TCGGCCTCTGATCAGTTCCTATTGAGCATAGGCTGTTGAAACCACAGGCACCCCCTCTGTACCTTGCCT  
GATAGACAAACAGATGTTATCAGGAATGTTATACAACTAGACCATGCCATCGGTTCCCTACCAGAAGA  
TTTCGGATGGACATAGTGCCTAAAACCTCCATCATATTCAAGAATCGCTCGATGATACATTGATTGGCTT  
CTTGAATTTTCCACATTAGAAGATATCGAATTTATCAAAGTTCATTCTTTGCTTGAAGAAAAATAAAGCC  
TGATTGATTGAAGATCACCTGATAACCACTGCCAACTGACATAGATGACCAATATGCAGCATTGTTGTGTC  
TCAGCTGGATAATTGACTGTGTAAAGCACTAGATTTCCATCAGTTTGAAGTATGAACTCAAACCTCCAC  
TCGATACATTTGTGTCAGAGAACTTGAACAAGACTGTGATCTTGGTTAAGTACTTGACCAGGCCAAAAT  
CGTATCGGTGGGCTCATTAAAACCTCTGCCATAGAGTGTCTGAACTACTAGTTGCTAGCACAAAGTTTCCG  
TTATCAAGCATGGCTCCATAGGCCAATTGAGCATTGCCATGCCACGAGCCCACATCTCTTGACCATTTG  
GATCAGTGAGGACTAGTCTCCATCCGCGGAGAGCTGAACTTTGGATCCATCTAAGGCAAGATTATTCCT  
ATTGGCTGACCAAACCTATGGTTTTGTCTGTGATTTTGTGAAACCATATGGCTAGTAAGTACCTTGATTAT  
TTCCAATTTTTTGAAGCCCAAAGCGAATTCATCAGATGGGGATGACCAAAGCTAGTAACATCACTTGT  
AGTGAGTGATGAACCCAACTAACATTTTGTGTAAGATTGAGCAATGGCTGAAAGGGGAAACAATAAGA  
GACCAACAAGAAGCATAGCTAAAAAAGTCATGTAAGAAAGAGGCAAAGTTATAAATGGATATTATGTA  
CACC

>M6-PGSC0003DMG403026153 M6 G-LecRK

ATACCATAAAAAATGTTACTGACTCAAGTAGTTGCTGGAAAAGTTTATGTTATACAAATGAGTAATTTTG  
TCTTGTTGTTGTTTGCAGTGTGGTGATTATATGTGGATGTGATGCAAGGAGCACGATCGATGAAAGGA  
GTGAGTTAGTAGACAACGGGGAAACACTGGTATCTGATGGAGAAAACCTCGAAATGGGATTCTTTTCTG  
AAGGGTTAACAGGTATGTAGGTATATGGTATTACAAGTTAAGTCCTCGAACTGTTGTATGGGTTGCTA  
ATTGGAACAATTCGATTTCGAGCTTCAACAAAAAATAAGGAGAGTGTTCATTGTCGTTCTTGATGGTAA

CCTCAAAATTTTGAATTCAAGTAATGGCGAACTTATTTCTCCTCAGGATTAGATGGTAACTCTAGCATTAGAGCAGAGTTGCTGGATACAGGGAATTTGGTTTTAGTTGATGAATTAGGAGCTAAAATGTGGCAGAGTTTCGGAATCCAACGAATACTTTCTTCTGGCATGAATATGGAGAGTCTGGAATTAACCTCATGGGAAGGATCTGGAAATTGGAAGTACAAATTCAAAGTAGATCAAGGAGACAACAAAAATATGTGATAGTTGAGAACGGAGTGGGTACTCACTGGCAAGGGTCTGTAGGAGGGTTTGCCAAATCAACTGCTTATGAATTCTTCAGATTCAATGATATGCCTTTTTTTGTAACCTTCTTTTTATCCAATAATTCAGTTGAAGCGAGAAGAACATTATCAATAATTCAGTGGAAATTGACAAGAACATTATTCAATAATAATCGTAATTTTACTCCGATTGATTTTTCAAGTTAGTCAATCATAGTAACAAAGATTCTATTTCAAAGGTACTAGACTCCTGATGATCTCCTCTGGAGAAATACAATTCTACTTTTTGGGATTACCAGAGTGGATGGTCCTTGGTCTGGTCTGCCCCAAGAGATAAATGCGACCAGTTTAGAAAATGTGGGAAATTTGCGATTTGTAACAGCAATGAAAGTTCAGAATGCAGATGTTGCCTCGTTTTCAGAATGATCCTCCAGAAGATAATGGAGACGGGGAATATTCAGCTGGATGTTGAGACATCAGATAACTCATGCAAAGAAGACACATTTGTGCATCTGAGCTCAATGAAATTTGGAAATTCAAATTGACAGATAAAAAGATTAATAACCAGTGAGAAATGCATGAGTCATTGTTTAAGCAACTGCTCATGCAAAGCATATACATATTATAACAATTCTGGATGCTGGTTTTGGGGTTCGAATCTCAATAATCTCCAGGAGAACTACCCTGGTGGCTTCAACCTCTCTGTCCGCGTGCCCCCTA

>M6-PGSC0003DMG400000578 M6 L-LecRK

CAATCATTAAAGCATTAAAATTTACATTCCATCTGAATTACTATATTTTGTTTACTGAAACTGAAATAGGACAAAAATTGCATTATGTACGTGAGGACTTTAAGTTCTCTTGTGTTTGAAGAAAGTGAATGAAGTTATCTATAGACCACATCCTTATGTACAACCTTGACAATTGATAATTTGCTACTCAAAAAATTCAAATCCCAAAAACCTTATCACTAGCCAAGAATTAGCTCATCATGGATTACTTCTTCTGGTTTTTCTTCTCGTTTGCCATACTAGTTAATAGTAATTTAGGTTTCGTCGCGGACGGACCTTCAATTAACGTGACGAAGCATATCTCTTTTCAAGATTCAGTTCTAGTAATCCCAGATTGAAGCAAGATCTTACACTTCTCGGTAGTGTTATCGTCTCGGATGAAAAAAATCCGTTCAAATTCCTGATCCTGAGCGAGAAGGTGATGATCTAAAGCATCTAGCAGGACGAGCTATTTATTCTTCACCTATCCGTTTCTTTGATCCTCGGACTCAAACACCGGCTTCTTTTGAACGACTTTCTCGTTTCAATTTCAAGTGAAGTCCAATTCAGCAATGAGACGTCAGATCAGGGGAAATCTGTTGGTGGTAGTGGCCTTACTTTTATAATCGTTCCGGATGAATTGACTGTTGGCCGTGCTGGTCCGTGGCTTGGGATGCTGAACGATTTGTGCGATGAGGATTATAAACAGTAGCTATTGAGTTTGATACTCGGCAGAACCCTGAATTGGTGACCCGAATGATAATCACTTGGGCATTAATTTGGGTAGCATAGTATCAACTGCAGCGATTAATGCTTCGGATGCCGGAGTTCAATTGAATGATGGATCAATTCACAGAGTATGGATATCTTATGATGGGCGAAAG

CGATTTGTTGAAATTCGTCTTGCTCCTGATGGCAGAGGATATCCTTCTAAACCAGTTTACTCTGGTTTACT  
TGATCTTTCACCTTACTTGAATGAGTATATGTTTGTGGATTTTCAGCTGCTACTGGTAACCATACACAAA  
TCCACAACATTCTGTCATGGAATTTACCTCAATTAGTCAAGCTTCGCTTCGAATTCCTTCAACAGAGACG  
TGCCAGAACAAAATCATGCTTCAAATAGCACACAATCTGAAATTGATCATCGGAAAACCTCCTAATAGTT  
TCTTTATTTTCCTTGCTGTTGTCATTCTTCTGGTTATCGTTCTTATTAACCTCTATTTCAAGTAGCTACAAGAG  
AGATGACAATTCCGACGAAGCATTCACTCTGCCCCAGAAAAAGCAGAGACCGCGGCCACCAAACAAGG  
CACGTCGCTTACAATAGCTGAGATCTCCATCGCAACAAGGAATTTAGCGAGTTACAAATATTAGGCA  
GTGATGAGAAGAGCATTACGTATAAGGCCACGATCCTGAACGGGTGCAACGTTGTTGTAAAACGATTTT  
TAACTCAATTTTTCAACACACACGGGTTTAAAAGCATCAATTTACAAGGAAATCAAGGCTATCACCAG  
AATTCGTCACCCGAATTTGGTCCAATTAGAGGATGGTGCTATGACAACCAAGAAACAATAGTTGTGTA  
CGATTTTCATCCCCAATGGAAGCCTCGATAAATGGCTGTTCCGGCGTTGGCGTCTTGCCTTGGACGAGACGT  
TTAAGGTCGTTAAAGATTTAGCAGATTCTTGTCTACCTTCATTCAAAGCAACTCGCTCACAAAACGT  
TAAAAGTAGCAGCGTGTTCCTTGACGTGAGATTAGAGCAGTAGTGGGTGATTTCCGGTTTGTGCTTAC  
TTCAGCCGGGTCAACCCGGTTTGAGGCCATGGTGAGTCAGACAGCTGATGTGTTTGAATTCGGAGTAGT  
CGTGCTAGAGATCATTGCGGGTCCGAGCAGAAAGTCCAACCCGGGAGAGCGAGACTTGTGGATCTTG  
CATGGGCAATGCATGAGGTACAACAGAAGGAACTCTAGTGGATCGAAGAATGGGCGCAGTCGTGAAC  
CTGGAGCAGGCGATTCCGGCTTTGGATATCGGGTTGCTCTGCACGTTGAACGAGAACAAAGGAAGGCC  
TACTATGGAAGAAGTGGTGGAGTTCCTGAATATGGAGAAACCGATAACCGAGTTGCCATCGGGTTCGAC  
CCGTTTGTGTTCCCGTACAGCAGCACCACAGGCTTATGCAGTGGGTACGCTTGTACAGCATTCAAATG  
AAGTCATGTTTTTTGCTTGACCAATTGGTCTTCGGCGTTCCACGTAAGCAGCAATTATTCTTATCTGTTAT  
ACTACAAAATAATGACAGGGAAGCACATGTATATGCTATGTGACGTTATTTTCATGACATAGACAATAT  
TGTCTGATCTGTGGTCGGAGTTAAATATCACAAGAACTCCTAAAACGATTTGAAATTATTGTAAATTATG  
TACTGCAATTCAAATGTTCTATATATAAAATT

>M6-PGSC0003DMG400000789 M6 L-LecRK

ATGCGTTTTTGTGGCAAAATCTCATAAGGGTCACTCTGTTCTTCATCTTACCATAAATTCACCTTCCCTT  
TCAGCTCCTTCTTGCTATAAACAATGTAACCTTTATGGTGATGCTTCATTCACCGCAAATCAATCACC  
CTCACCCAAGAACGCAACTGTTTCATCATCATCTTCAACACCTCCCATTTCTGGCATTGGAAGAGCTTTCTA  
CACATACCCAGTTCGTTTTCTTGATTCTTTAACCAATAAACTGCTTCTTCTTGTGTACTTTCTTTTTACT  
ATACTTCCAACCCCTTCTTGCCCTTTTGGTGATGGCATGGCGTTTTTGGTCACTTCTGATGTTGATTCTTTG

AGCATCTCTGATGGGTATATGGGTCTTCCGAATCCCGACTCGGAAGATTCGTTCTTGGCTGTGGAATTCA  
ATGCCAATGATAACCGTATTGGTGTGATACTAAAGAAATTAGGTCTTTGGCTTCTACTAATGTTTATTCA  
GCTGGGATTGATTTGAAAAGTGGGAAAGAAATGGCGGGTCGGATTGAGTATAAAGATTCAGAGAAAAT  
GATCAGAGTTTGGATTGGGTATGAACTGCAAATTAGGCCTCCTAATCCTGTTCTTTCTACCAGAATTGAT  
GTTTCCAATCAGTTGAAGGAGTTTATGAGGATTGGTTTCACTGCTAAAGGGTCTGCAGTTTATAGCTTTA  
GTCGTTGGCGATTTAGAACGTTTGGATTGATTCGTCTCCAATATCATCGTCTTGGGATCAATCTGATGA  
AGGAAACTGTTTATGATGTGTTTCCCTGAGGAGGAAATTGGTGGGCATATTTCTGATTCTCATCATAGTAGT  
AGTAGTAGTGGTAGTAAAAGTTTACTGAAATTGACTTATGGAGGGTTAGCTGCAATTGTCACACTTGTG  
GTTGTGCTTTGTCTGTTGTGTTTGTCTTTCGTTGAGAAGGAAAAACGCGATAGAGTAGGGGAGACCA  
ATGAACGGCAAATGTGTAGATTACAAGGAAATAGAGTGCCTCAAAGATTGTCATTATCTGAAATAAAAT  
CAGCTACAGAATGTTTTAATCATGAAAGGATAATCGGAGAAGGAGCATCTGCTGTTGTGTATGAAGGG  
GAAATTCCTTCTAGGGGATCTGTGGCTGTTAAGAGATTTGTCCAAGGAGTAGATTGGGTCCTTCACAT  
ATTCCTTTTAATACTGAATTTGCTTCTATGGTTGGCTGTTAAGACACAAGAATTTGATTGAGCTTCAAGG  
GTGGTGTGTGAGAGAAATGAATTGGTGTAGTGTATGAATTCATGCCTAATGGTAGCCTTGACAAAAT  
CCTCCACGAGCGATCGCATTTGACCAAGTTTCTGACTTGGGAGAGAAGATTGAACATAGTTATTGGTGT  
GTCATCTGCTCTTATGTATCTTCATGAAGAGTGTGAGAATCATATAATCCACAGAGATGTTAAGAGTTGC  
AATAAATGCTTGATGCTGAGTTCAATGCCAAGCTTGGAGATTTCCGGTTTAGCAGAGGTGTTTGATAATT  
CTAAGACAAGGGATGCTACTGTACCAGCTGGAACAATGGGATATTTTGCACCTGAGTATGTCTATACTG  
GTATTCCAACTGTTAAAACAGATGTGTATAGCTTTGGTGTGTGGTACTGGAAGTGGCATCAGGTAGAA  
AGCCTATCGATGAAGGTGGAGGTTTATTACTGATTGGGTGTGGGACTTGTGGGAGAAAGGGAGGATA  
ACTGAGGCTGCTGATCCTAACTAATGGGGCGGTTTCAGAAGAACGAGATGGATAGAATGCTCATTGTG  
GGACTTTCTTGTGTGCATCCCGATCATGAGAAGAGACCGCGAATAAGAGATGTTTTCCGTATGTTTAAAG  
ATGAAGCTCCACTTCTCATTTTACCTCCAATGAAGCCCACTGTGAGAATTCAATCTGTTTTACCAGAGAGC  
TGTGAAGAAATCATGAATTGGGCTGCAAGAATGGATGATACCATGGTCCACTCCTAGAACTCATTTTA  
GCAAGAACTAG

>M6-PGSC0003DMG400001773 M6 L-LecRK

CCAACGGCTAGTTTATGTAACCCACGGCGGATATAACTACATCTGCCACATCGCCCCCTCCGGAGCAAC  
AGATTGCTCCGAAGGAGGCTAATGGTACTGCAGTACAGAAAAACAGCAGCAAATGTCATAATAGTTTTT  
GTAAGCAGGGTGCTGGTGTGTTGTTGGGGTTGTTACTGCTGGAGCATTCTTTCTAGCTTTTGCTACATT

GGTACTTATTTGGTTGTATTTCGAAAAAATTCAAGAATGTGAAGACTTCAGAGTCTATGTTGCCTTCTGAT  
ATTATCAAAATGCCAAAGGAATTTAGCTATAAGGAGCTTAAAATCGCGACGAAAGGGTTTGATTCTACT  
AGGATAATAGGGCATGGTGCATTTGGTACTGTCTATAAAGGGATTTTGTCTGAGACTGGTGATATTGTT  
GCGGTAAAGAGGTGTAGTCATAATGGACAAGGGAAAGCTGAGTTCTTTTCTGAATTGTCGATAATCGGA  
ACACTTAGACATAGAAATCTTGTTAGGCTACAAGGATGGTGTGCATGAGAAAGGTGAAATCTTGTTAGTT  
TATGATTTGATGCCAAATGGTAGTCTTGACAAGGCGTTATTCGAGTCCAGAATGATCCTCTCGTGGCAAC  
ACAGGCCAAAAATCTTGTTAGGTGTTGCTTCTGCATTAGCATATTTACATCAAGAATGTGAAAACCAGGT  
GATACATAGGGATATCAAGAGTAGTAACATTATGTTGGATGAAGGGTTCAATGCAAAGTTAGGAGATTT  
TGGACTAGCACGACAAATCGAACACGACAAGTCCCCCGATGCAACGGTAGCAGCCGGTACAATGGGGT  
ATTTGGCACCAGAATACTTGTTGACAGGTAGAGCAACTGAGAAAAGTATGATGTGTTTAGTTATGGGGCAG  
TGGTCTTGAAGTGGCAAGTGGGAGGAGGCCAATTGAGAAAGAAACAGCAACTAGTGGTGTGGATTA  
AACAGCAATTTGGTTGAATGGGTGTGGGGATTACACAAAGATGGGAGTTTACTATCAGCAGTTGATTCA  
AAATTGAATCTTGAATTTGATGAAAAAGAAATGACAAGAGTGTGTTAGTTGGTTTGGCTTGTTCACATC  
CTGACCCTATAGCTAGGCCAACCAATGAGGGGGGTGGTACAAATGTTAGTAGGTGAGGCTGAAGTACCA  
ATTGTACCAAGGGCTAAACCATCAATGAGTTTTAGCACATCTCATTGTTAATGACATTGCAAGATAGTG  
TTTCTGACTTGAATGGTATGATCACACTTTCAACTTCTTCATCAGAAAACAGTTTCAATGGTGTGGTGA  
CATGATGGCATGGACCTAGTTTAG

>M6-PGSC0003DMG400004396 M6 L-LecRK

ACATTTCTCTAACTATGGCTGTTTTTGCATATTTACATACCTATTTTTGATAATCCCCTTTGTCACTTCATT  
GTCCTTCAATTTTGATAGTTTCAATCCCAATGATATGAATGTAACATATGAAGCAGATGCTTCTCCAGCAA  
ACGGTGTAAATTCAGCTCACCAAAAACCAGCTTGATAGTAGTGAAAGCTTTAGCGTAGGCCGAGCTACAT  
ATTCTAAAGAACTCTATCTTGGGACAAGGCCTCTGGGAAAGTCACAGATTTCTCTACGCACTTCTCCTTTG  
AGATCAATTCACAGGGCAGAAATTATTATGCTGATGGTCTTGCCTTCTCCTCGCTCCTGCAGGTTGAGTA  
ATTCCTGAAAAATACTCAGCTGCAGGAGAGGGCCTTGGCCTTGCAATTGATAATGGACTAAATACATCG  
AGAAATCAGCCTTTTGTGCTGTGCGAGTTTGACACCTTTTAGAACGCTTATGATCCACCAGGTGATCATGT  
AGGCGTTGATATCAACTCCATGTTATCTCTTGTAAATGTGGCCTGGCTTAGTAGAATCCCTATGGTACGA  
AAACTGATGCCTGGATTACTTATAATTCAACCTCAAGAAATCCTAGTGTGCTTCACCGGTTTCAGACAA  
CAAGGGAATACCACAGTCACTGTCCTGCAGAACCTATCTTACAATCTTGATCTGAGGGAATATTTGCCAG  
AATGGGTAACCTTTGGTTTCTCAGGTGCAACAGGAACCTTCTTTGCAATACAAAACATATATTCTTGGAA

TTTTACTTCTTCTTTAAAATATAGTGACAGCATAACAGATCCAGATGTACCCCAACCAAGCCCTGTGCCAG  
AAGATACTTCAAGCAAAAAGAAGTCAGGACTAGTGATTGGATTGATTTCTGGTGGTTGTGTTTCGGTAG  
CAGTATCTGTTTTATATTGTTTGCATTTTGGAGAAAGAGGAAGGTCAGAGAAGATGAAGATGATGATA  
TTATTGATGGTTCCATGACTAATGAATTTGAAAGAAACACAGGACCAAAGAGTTTTTGTACGGTGAGTT  
GGCTAGATGTACAAATAACTTTTCGCCGGAAGAGATGCTTGGGCATGGTGGGTTCCGGAGGTGTTTATAA  
AGGATATCTCAGGGAATATGACTCCTATATTGTTGTTAAGAGGATTTCAAGGGAGTCAAAGCAAGGAAT  
AAAAGAGTATGCATCAGAAGTCAGGATTATCAGCCGGTTAAAGACATAAACATTTGGTGCAACTCATTG  
GTTGGTGCCATCAAAAAGAGAACTTCTACTTGTCTATGAGTTTATGCCTAATGGAAGCTTAGATCATCA  
TCTTTTCAAGGGAAAAAGCCATTTGACATGGCCAATAAGATTCAAGATTGCTCAAGGCTTGGCCTCAGC  
GTTGTTTTATCTACACGAAGAATGGGAACAATGTGTGGTGCATAGGGACATAAAGTCGAGCAATATTAT  
GTTGGATTCCAATTTCAATGCTAAACTTGGGGAAAGCTTTGGCAGGCACGATGGGTTACATGGCTCCTG  
AATGTCTCACCCTGGCAAAGCTAGCAAGGAACTGACTTCTATAGCTTTGGTGTTCGCGTTAGAAAT  
AGTTTGTGGAAGGAAACCTATTGATCCTAAATCTGAGGAGCATCAAGTAAATATTATCGAATGGGCTTG  
GAGACTTTACGGGATGGGAAATCTTAGTGAAGCAGTTGATCCTAGACTCTCATCAGAGTTGAATGAACA  
GGAGGTGGAGCACTTGCTAATTGTTGGCTTATGGTGTGCTCGATCATCCAGATAACAATTGCAGACCTTC  
TATTAGGCAAGCAATTCAGGTGCTTAATTTTGAAGCTCCATTGCCACACTCCCTCCAAACATGCCTGTGC  
CGATATATTGCAGTTATGAATCAATTACTTCACTTGCATCACCATACGACTCCAATGGTCCTCAGATTTCT  
GAAATAAACTCTTCAGTGACTAGAGATCATTGACACAGCAGCATCTTCGCCTTCCGCATCACTTCTGTAC  
ACACGTTGATATTGTCTTGTAAGGAACTGGTTTTTTATTTCCCTGCAGTGTCCAACCTTTTGTCTTCGTAT  
TCTTTATTATTTATACTGTTA

>M6-PGSC0003DMG400004397 M6 L-LecRK

ATGGCTGTTTTTGCATATTTACATACCTTATTTTGATAATCCCCTTGTCACTTCATTGTCCTTCAATTTG  
ATAGTTTCAATCCCAATGATATGAATGTAACATATGAAGCAGATGCTTCTCCAGCAAACGGTGTAATTCA  
GCTCACCAAAAACCAGCTTGATAGTAGTGAAAGCTTTAGCGTAGGCCGAGCTACATATTCTAAAGAACT  
CTATCTTGGGACAAGGCCTCTGGGAAAGTCACAGATTTCTCTACGCACTTCTCCTTTGAGATCAATTCACA  
GGGCAGAAATTATTATGCTGATGGTCTTGCCTTCTCCTCGCTCCTGCAGGTTAGTAATTCCTGAAAAAT  
ACTCAGCTGCAGGAGAGGGCCTTGGCCTTGAATTGATAATGGACTAAATACATCGAGAAATCAGCCTT  
TTGTTGCTGTGAGTTTGCACCTTTTAGAACGCTTATGATCCACCAGGTGATCATGTAGGCGTTGATAT  
CAACTCCATGTTATCTTGTAAATGTGGCCTGGCTTAGTAGAATTCCCTATGGTACGAAAACCTGATGCCT

GGATTACTTATAATTCAACCTCAAGAAATCCTAGTGTTGTCTTCACCGGTTTCAGACAACAAGGGAATAC  
CACAGTCACTGTCCTGCAGAACCTATCTTACAATCTTGATCTGAGGGAATATTTGCCAGAATGGGTAAC  
TTTGGTTTCTCAGGTGCAACAGGAACCTTCTTTGCAATACAAAACATATATTCTTGGAAATTTACTTCTTCT  
TTAAAATATAGTGACAGCATAACAGATCCAGATGTACCCCAACCAAGCCCTGTGCCAGAAGATACTTCAA  
GCAAAAAGAAGTCAGGACTAGTGATTGGATTGATTTCTGGTGGTTGTGTTTCGGTAGCAGTATCTGTTTT  
TATATTGTTTGCATTTTGGAGAAAGAGGAAGGTCAGAGAAGATGAAGATGATGATATTATTGATGGTTC  
CATGACTAATGAATTTGAAAGAAACACAGGACCAAGAGTTTTTGTACGGTGAGTTGGCTAGATGTACA  
AATAACTTTTCGCCGGAAGAGATGCTTGGGCATGGTGGGTTCCGGAGGTGTTTATAAAGGATATCTCAGG  
GAATATGACTCCTATATTGTTGTTAAGAGGATTTCAAGGGAGTCAAAGCAAGGAATAAAAGAGTATGCA  
TCAGAAGTCAGGATTATCAGCCGGTTAAAGACATAAACATTTGGTGCAACTCATTGGTTGGTGCCATCA  
AAAAAGAGAACTTCTACTTGTCTATGAGTTTATGCCTAATGGAAGCTTAGATCATCATCTTTTCAAGGGA  
AAAAGCCATTTGACATGGCCAATAAGATTCAAGATTGCTCAAGGCTTGGCCTCAGCGTTGTTTTATCTAC  
ACGAAGAATGGGAACAATGTGTGGTGCATAGGGACATAAAGTCGAGCAATATTATGTTGGATTCCAATT  
TCAATGCTAAACTTGGGGAAAGCTTTGGCAGGCACGATGGGTTACATGGCTCCTGAATGTCTCACCCT  
GGCAAAGCTAGCAAGGAAACTGACTTCTATAGCTTTGGTGTGTCGCGTTAGAAATAGTTTGTGGAAGG  
AAACCTATTGATCCTAAATCTGAGGAGCATCAAGTAAATATTATCGAATGGGCTTGGAGACTTTACGGG  
ATGGGAAATCTTAGTGAAGCAGTTGATCCTAGACTCTCATCAGAGTTGAATGAACAGGAGGTGGAGCA  
CTTGCTAATTGTTGGCTTATGGTGTGCTCGATCATCCAGATAACAATTGCAGACCTTCTATTAGGCAAGC  
AATTCAGGTGCTTAATTTGAAGCTCCATTGCCACACTCCCTCCAACATGCCTGTGCCGATATATTGCA  
GTTATGAATCAATTACTTCACTTGCATCACCATACGACTCCAATGGTCCTCAGATTTCTGAAATAAACTCT  
TCAGTGACTAGAGATCATTGACACAGCAGCATCTTCGCCTTCCGCATCACTTCTGTACACACGTTGA

>M6-PGSC0003DMG400004401 M6 L-LecRK

TCTCTCAAATACTTGCTTCTTATCATAATTATCCCTCTAGTCACTTCACTCTCCTTCAATTTTGATACTTTTA  
CACCCAATGATCACAATGTAACCTATGAGAGAGATGCTTCTCCAGAAAATGGTGCAATTCTACTCACCAA  
AAACCTCCTCAATCGCGATATTAATGCTAGTATAGGTGAGCTATATATTCAAACCACTGCATCTATGG  
GACAAGGCCTCTAGAAATCTCACTGATTTCACTACACATTTCTCCTTTAGCATTAAATCACAGGGAATAAC  
AAAATATGGAGATGGTTTTGCCTTCTCCTTGGCCCTGCAGGTTCAACAATTCCTTATAATACAACAAGAG  
GTGGAAGTCTTGGCCTTACAAGTAATAATGAGCGACTAAATTCTTCGAGCAATCATTTTGTGCTGTGGA  
GTTTGACACCTATCAGAACCCTATGACCCAAGGGTGATCATGTAGGTGTGATATCAACTCTATGCAA

TCTGTTGTTAATGTGACTTGGTTTAGTAGCATTCCAAATGGTACGAAAACCTGATGCCTGGATCAGTTATA  
ATTCTAACTCAAAAAATCTTACTGCTGTCTTCACTGGTTTTCAACTCCAAGGGAACAATATCACAGTCACT  
GTCCTGCAGAACCTATCTTACAATCTTGATCTGAGGGAATATTTGCCAGAATGGGTCACTTTTGGCTCA  
CTGGTGGAGCGGGAAGGAGATTTGCATTTCAAAGAATCTATTCTTGAATTTTACTTCTTCTTAGATAA  
TACGACAGATACAGGGGTAACCTTAACAAACACCATGCCAAAGGATGCACCAACAAAACTAAGTTAGG  
ACTTGTGGTTGGATTGATTTCTGGTGGTTGTGTTTTGGTTGCAGTATGTGCTTTGGTGTATTTCATTTT  
GGAGAAAGAGTAAGGTGAGAGAAGATGATTATGTCTTTGATGGTTCCATGACTAATGAATTTCAAAAA  
GTGCAGGACCAAAGAAGTTCTTGTACAGTGAGTTGGCTAGATGTACAAATAACTTTTCACAGGAAGAGA  
TGCTTGGGCGGGGTGGATTCGGAGGTGTTTATAAAGGATATCTCAGTGAATCCAACCTTATATTGCTG  
TTAAGAGGGTTTCAAGGGAATCACAGCAAGGAATAAAGAGTATGTATCAGAAGTCAGGATCGTCAGC  
CGGTTAAGACATAAACATTTGGTGCAACTCATTGGTTGGTGCCATCAAAAAAGAGAACTTCTACTTGTCT  
ATGAGTTTATGCCTAATGGAAGCTTAGATCATCATCTTTTCAAGGGAAAAAGCCATTTGACATGGCCAAT  
AAGATTCAAGATTGCTCAAGGTTTGGCCTCGGCGTTGCTATATCTACACGAAGAATGGGAACAATGTGT  
GGTGCATAGGGATATAAAGTCTAGCAATATTATGTTGGATTCTAATTTCAATGCCAAGCTTGGGGATTTT  
GGGTTAGCTAGGCTAGTTGACCATGATAAGGGATCCCAAACAACAGTTTTGGCAGGCACAATGGGTTAC  
ATGGCTCCTGAATGTGTCACCACTGGCAAAGCTAACAAGGAAACAGACGTCTATAGCTTTGGTATAGTC  
GTGTTAGAAATAGGTTGTGGAAGGAAACCTATTGATCCTAAAGCAGAGGAGCATCGAGTAAACATTGTC  
GATTGGGTTTGGAGACTTTATGGGATGAGAAGTATTCTTGAAGCAGTTGATCCGAAACTATCATCAGAG  
TTCAATGAAGAGGAGATGGAGCATTGCTAGTTGTTGGCTTATGGTGTGCTCATCCAGATAATAATTGCA  
GGCCTTCTATTAGGCAAGCAGTTCAGGTGCTTAATTTTGAAGCTCCATTACCCACTCTCCCTCGGAACATG  
CCTGTGCCACATATTGCAGCTTCTCACGCCATTTACCAACTATTTAGTTTTATCAACACATGAAACCAG  
CGGTACAGAGATTGCCCTTACCCAAATCCAGCATTAGTAAACGGAAACACCACTGATGGTTCAATAAA  
AAGAACATCTTCTTCAAGCATCTTCAATCTTCAACATCAGTTTTGTATCCAAGTTAATATTGCCCTGTTATAAC  
CCTGCATTTTGTCTTCCATTAGCAGTGTCCATCTTTTCTTTCTTACTTTTTGCTGTTTCTTCTAATGAAG  
AGGATTCTTTGGATTACATTTCTGTAATTTTAACTGTTCTATTAAC

>M6-PGSC0003DMG400008822 M6 L-LecRK

ATGTTCTTCAATCTTTTCATACTAGTAGCACTCTTTTTAGTTGATTTTTACCAGCTTCTTGTGAAGTTGAT  
GCATTCATTTACAATGGATTCCAATCAGCTAATCTTAGCTTGGATGGCATAGCACAGTTCACATCTGATG  
ATCTTTTGTGTTAACAATTCAGGAACACAAAATCAGGGCCATGCTTTCTATCCAATCCAATTCATTTT



AAGAATTCATCAAATGGTACTGTATTTTCTTCTCCACAACCTTTCGTGTTTCGCGATAAGGTCTGATTATGG  
AAATTTGAGTGGTCATGGACTGGCTTTCGTTATCGCGCCACATAAAGGACTTCAGGGGTCTTTGGCAAAT  
CACTATCTTGGTCTTTTTAACTCTAATAATAATGGGAATAGATCAAACCATGTCGTTGGAGTTGAGCTCG  
ATACAATCATTAGCGAGGATTTTGGTGATATCAATGACAATCATGTTGGAATTGATATAAATGGATTGAG  
GTCTGTAGCATATCATAACAGCAGGTTATTTTGATGATACTGGTTTTTTTCATAACTTGACTTTAATTAGTG  
GCCAGGAAATGCAAGTTTGGATTGATTATGATGGGAGGACTAAGCAAATGAATGTAACAGTAGCTCAA  
TTACATATGGAAAACAGTTAGACCACTTTTGGCTTGAATATGATCTTTCGTCTATTCTTGAGCAGAG  
TATGTATGTTGGTTTTTCATCGTCAACAGGTTCCAGTCCCGACACATCATTATATCTTGGGATGGAGCTTCA  
AGACAAATGGGAAAGCTCAAGAACTCTCGCAACTTCCTAAGCTTCTCCTCTTGGGAGTAAAGGGACGT  
CAAGATTTGTAACGATTGGTTTGCCTATAATCTCATTGGTTTCACTTGTTGCAGCTGTGTTAGCGGTGGTT  
TTTTATGTAAGAAGGAAGAAGTATGAAGAAATTCATGAAGATTGGGAACGCGAGTATAGACTACAAAG  
GTTTAAGTATAAAGAATTGTACATTGCTACTAAGGGATTTCAGAGAAAAGGAGGTATTGGGAGCTGGAG  
GATTTGGTAAAGTTTATAAAGGAGTGATGCCTATCACTAACTTGAGATAGCTGTAAAGAAGATATCTC  
ATGAATCAAGACAAGGTATGAAGGAATTTGTTTCGGAGATTGTAAGTATTGGTCGCATGCAACACAGGA  
ATGTAGTACAACCTTTTGGGTTATTGCAGGCGAAAAGGGGAGTTGATTTTGATATATGAATACATGTCTAA  
TGGAAGTCTAGACAAGTATTTATACGATCAACCAAGATACACCCTCGATTGGAACCAAAGATTCAAAGTC  
ATTAGAGGTGTAGCCTCAGGACTATTTTTCTACACGAAGAATGTGATCACGTAGTGGTTCATAGAGAT  
GTTAAGGCCAGTAATGTCTTGTAGATGGTGAACATAATGGCAGGTTAGGTGATTTTGGACTCGCAAGG  
CTGTATGGTCATGGGACCGATCCTCAGTCTACTCGTGTGTTGGTACTCTTGGTTACCTTGCACCAGAGC  
ATACTAGAACTGGCAGGGCAACACCGAGTAGTGATGTATTTTCATTTGGGGCATTCTGCTTGAAGTTGC  
ATGTGGTAGGAGGCCGATACAGCCAAGACAAGACGGTGATGATCTGATTTTGGTCGATTGGGTGTTCTC  
GTGCTGGAATAGGGGTAATATACTTGATGCTGCTGATCCAAACATAGGCATTGATTTTGTCCAGGGCA  
AGTGGAGTTGGTCTTAAAGTTAGGCTTGTCTGTTCTCATTAGATCCTTCGTGTAGGCCAACCATGCGA  
CAAATCTTGTGTTCTTGGATGGTGTGTTGGCCTTACCAGAGTTATCAGAACTCGGTGTTTCATCAGCTA  
ACCTAACATTTGAACATCGCGGAGGTTTTGATGATTTTGTCAAGTCATATCCAGCTTCTTTGGGCTATGCA  
TATTCCTGCTCTCCATCTGTAACAGACTCCTTCTCTCTGGTGGCCGTTGA

>M6-PGSC0003DMG400008897 M6 L-LecRK

ACTAGATTTGACTATATTGTGTGATTATTTTTCATATATACATATTGAAGTTTACTGGCCTCAAGAAAAT  
GACATTACAGAGTTTACATTGTAGACTTGAGCATTAGGAGATAGATAGTCATATTTGTGATTGTTATCAG

CACTAATCCTAGGAGAGTTCTGAGCAGACATGGAGAAATTGTTTTAGCCATGATTTTTAGTTTTCTTGG  
TTTTGTTTTTTCATGCTCCATTAGGCTATGCAGCTGCAGAAGATCTCGATTTACCTACAACGGGTTCCACT  
CAACAACTTGAGTCTTGATGGAATAGCAGAGTTCACATCAGATGGCTTGTTAAGGCTAACTAATGCTTC  
TCAATTGCAGGAGGGTCATGCTTTTTATCCTAGACCTATCAATTTTCATGAATTTAGCATCCAATGGTTCAG  
ATTTCTCTTTCTCAACCACATTTGTCTTTGCCATAGTGCCTCAGTACTCGATTTTAGCTGGTCATGGTATGT  
CTTTGTGATTGCACCAGCTAGAAGGCTTCCAGAAGCACTTCCAAGCTTTATCTTGGCTTGTTAATGAT  
TCTAGTAATGGAAATGCCACCAGCCATGTTGTTGCGGTGGAGTTTGACACGCTACAGAACCGTGAGTTT  
GATGATATTGACAGCAACCATGTTGGCATTGACATCAATGACCTAAAATCTGTAATAGCCAAGCCGGCC  
AGTTATTATAACAGTAATGAGCAATCCTTCAATAACTTAACTCTAGCTAGTGGCCAGCCAATGCAAGTTT  
GGGTGGAATATGATTCTGTGGATAAGCATATGAATGTCACAATGGCTCCACTGCACGTTGCAAAACCAG  
ACCGTCTCTCCTGTCTTAGTCTACGATCTTTCATCTGCCACGGATGAAAACGTGTCTGTTGGCTTCTCA  
GCATCCACCGGTGCAGTTGTTTCAACACATTATATCCTTGGATGGAGCTTCAAATTGAATGGAATGGCTC  
GAGGGCTTGATCTCTCAACTTCTAAGCTTCTCGAGTAGTACCTAAGAAAGAATCCAAGCTTTTATTG  
CTTGGCTTGCCCGTGATTTCTTCAGTTTTCATTTGTGATTGTAGTCTGGTAATAATTTATTGCATAGGAAA  
GAAGATGAAGTTTGCTGAATTGCAAGAAGAGTGGGAGCTTGATTATGGACCACACAGGTTCAAGTACA  
AGGATTTGTACTGCCACAAAGGGCTTTAGCAGGAAGGATTTGTTGGGATCCGGCGGATTTGGTAGA  
GTCTACAGAGGGGTATTGCCATATCCAACATTCAGATAGCAGTCAAGAGGGTCTCTCATGAATCAAGA  
CAAGGGATGAGGGAATTTGTTTCAGAAATTGTTAGTGTGGCCGGCTACGTACAGGAATTTAGTACCA  
CTTTGGGTTATTGCAGGCGTAAAGGAGAGTTACTTCTGGTTTACGAATGCATGCCTAACGGAAGCCTA  
GACAAGTATTTGTTTGACAAACCAAGCTGCACTCTTGATTGGAACCAAGATTTTCGAGTCATCAAAGGTG  
TAGCATCAGGACTAGTCTATCTTCATGAAGAGTGGGAACAAGTAGTGATTCATAGAGATATAAAAGCGA  
GTAACGTGTTGTTAGATGTTGAATTAATGGAAGATTAGGAGATTTTGGGCTAGCAAGATTGTATGATC  
ATGGGACAGATCCTCAGACTACGCATATCGTTGGAACCTCTCGGATACCTTGCCCCAGAGCATAACAAGAA  
CAGGCAAAGCCACGACTAGAACTGATGTATATTCATTTGGAGCATTTTTACTTGAGGTGGCTTGTGGGA  
GAAGGCCAATAGATCAAAGGGTATCGGACGAGGATCTCGTTTTGGTTGACTATGTATTCTCTTGTGGA  
CTAGAGGTGATATTCTGAAGCCATTGATCCAACTTGGGCAATAACTATGTAAAAGAAGAGATTGAGT  
TGGTACTAAAACCTTGACTATTGTGCTCTCAGACAGAACCAGCAGCTAGGCCAAATATGAGGCAAGTGT  
TGATGTACTTGGAAAATGCCCTGCCTTTGCCAGAGTTATCACTGATGCAAACTTCAAATTTTAGCTTAACT  
TTTGCAGGCTTTGATCATTTTGCAATGTCATGGTCTTCTTCTGTTACTGACTCCCTTCTCTCCGGTGGTCGA

TGACTCGGGCGAAATTTAATATATTCCTAGTAAAAATAAACTTGTTATATAAGCTATATTTCTTCCACC  
TAAGGTTGTATACTTGGTTCATTTAGGCATCTTGGAG

>M6-PGSC0003DMG400010466 M6 L-LecRK

CGTGTTTCCTTTGGATTCTCTGCTTCATTCACACCCCTCTTCTTCACCCCTGTTTCCAGTTTTCTTCAAAAA  
AAATCACTATTTTCTAAGCTCAAAAAATAGCTAAAAATGAAATCTTTGTGCAATTTTCATCTTCATTGTGTA  
ATGGGGTTTTGCTAAAATCTAGCAATGAAGTCAATTCTTGAAGAAGTTTCCAGCAACATATTCCTGTAAA  
AGTCATCCTGTTGTAGTGTGTTCTCTCCTGTCTACTTTCTGCGTTTTCACTGTTTCTAAGCTAAAAAAA  
AGCTAAAAACAAATCTTTGTGCAATTTGATTTTCATTGTGTAATGGGGTTTTGCTAAATCAATTCTTGAA  
GAAATTCCTTCTGTAAAAGCCATCATGTTGTAGTGTGTTCTCTCCTTAATCCTCACTCTACTGTGTCAGT  
TTTCTACTTTTTTGCATTTTCACTGTTTCTAATCCCAAAAAAAGCCTACCCTTTTTGTATCTTCACCAAATT  
CTTGTGATTTGGTGTGAAAAATCTTACTTTTGTACACTTTGATCTTCATTCTCTGATGGGTTTTTTCTAGA  
ATCTAGCAATGACATCAAATCTTGAAAAAAATTCAGGGGCTTTCTTGTATGGCTCATCTTATTGTTCTGT  
TTCTGTAGTATTAGTTCAACATTTGGTAAAATGATTTTCGATTTTGAAAATTTAACACTAAGTAGTTTAAA  
ACTTCTTGGTGTATGCACACTTGAGTAACAACACTGTAAGGTTGACAGGTGATCTTGCTGTACCAAATTCC  
GGTGCCGGAAAAGTTCTGTATTCAAACAGTAAGATTCCGGCAACCGGGTTTTGATTTTCCGGCGAGT  
TTCTCGACATTCTTACATTTTCACTTACTAATTTGAACCCATCATCGATTGGTGGTGGTCTTGCTTTTTGTG  
CTTACGCCGGGTGATGAGTTAGTAGGTGATGCTGGTGGGTATATGGGAATCTTGGATGCTAAAGGGAC  
ACAAATTGGTACAATTGCTGTGGAATTTGACACCCTTATGGATGTTGAATTCAAAGATATTAATGGTAAT  
CATGTTGTTTTGGATCTAAATTCATGATTTCAACTGAAATTTGGTAATTTGGATTCCATTGATATTGATCT  
CAAGAGTGGTGAATTTGGTTAATTGTTGGATTGAATATTCTGGTTCTAATGGAGAGATGGATATATTTGTG  
TCATATACTAATCTCAAGCCAAAAGAATCATTTTTATCAGTTAACATCAATCTTGCTGAGTATGTAAATGA  
TTTCATGTTTGTGGGGTTTTCTGGTTCAACTCAAGGGAGTACTGAGATTCATAATATTGTGTGGTGGAGT  
TTCAGTTCATCATTTGATGCAACTCCAAACTCGGGGGAGGTGGTGGCTGAGCCACCACCGCCAACGACT  
AGTTTGTGAAACCAACGGCAGATTCTGTAACGTTGCCAACACCTTCTATGGCTCCATCAGAGTCTAATA  
GTAGCACAGGTGTATTGCAAGAAAAGAGTAGTAGGAAATGTCATAGCAATTTTTGTAGACAAGGTCCTG  
GAGCTGTTGTTGGTGTGGTGACTGCTGGTGCATTTTTTCTTGCAATTTGCTACATTGGTACTTATTTGGTTA  
TACTCCAAAAGATTCAAGAGAGTGAAAAATTCTGAAATTGTGGCATCTGATATCATCAAATGCCTAAG  
GAGTTCAGCTATAAAGAGCTTAAATTGGCCACAAAAGTTTTATTCCAACGAGAATTATAGGCCGTGGT  
GCATTTGGGACTGTTTACAAGGGCATTTTATCGGATACCGGTGGCATTGTTGCAGTCAAGAGATGTAGT

CATAATGGACAAGGGAAAGCAGAGTTCTTATCTGAATTATCTATAATTGGAACCCCTTAGGCATAGAAATC  
TTGTTAGGCTTCAAGGATGGTGCCATGAGAAAGGTGAAATTTTGTGGTTTACGATCTTATGCCTAATGG  
GAGTCTTGATAAGGTACTATTTGAATCAAGAATGGTTCTTTCATGGTCACATAGGCGAAAAATCTTGATA  
GGTGTGCTTCTGCCTTGGCATATTTGCATCAAGAATGCGAAAACCAGGTGATTCATAGGGACATTAAG  
AGTAGTAACATCATGTTGGATGAAGGGTTCAATGCAAGATTAGGAGATTTTGGATTAGCAAGGCAAGTT  
GAGCATGACAAGTCCCCGATGCAACGGTAGCAGCCGGACAATGGGCTACTTGGCTCCAGAGTACTT  
GTTAACCGGTAGGGCAACCGAAAAAACTGATGTTTTAGCTATGGAGCAGTGGTTCTTGAAGTGGCTTG  
TGGAAGGAGGCCAATTGAGAGGGAAACAATAAGTTGAGAAAGTTAGAGTGAATAGCAACTTGGTTG  
AATGGGTATGGGGGTGCATAGAGAAGGGAATTTACTAAATGCAGCTGATTCAAGACTTTGTGGTGAG  
TTTGATGAACAAGAAATGAGAAGGGTTCTAATGATTGGACTAGCTTGTTCACATCCCGACCCTACGGCTA  
GACCAACAATGAGAGGTGTAGTTCAAATGCTGGAAGGTGAATCTGAAATCCCAATTGTCCCAAGAATA  
GACCTTCTATGAGTTTTAGCACATCACATCTTCTAATGAGTTTGCAAGATAGTGTCTGACTTGAATGGT  
TTGATCACACTTTCCCTTCATCATCCGAAAGTAGCTTACCGGTGGTCGCAATGGCAATGGCATGGAGT  
TGGTCTAAATGCAAGACTAAAAAAGACTTGACTTTTCGAGTTAATGCACCTATAAGAGCCCAACAATCCC  
ACATATGGGGCCACCATCAAGGCGAACAGACACAATGACTACTCTGATTGGGCGTGGACAAGGAAAA  
AGTGGCGTCTTTTTGTTTTGTTTCATAAATTCATTAATTTTATTCATAATATATATGTACCAAATAAGCTTT  
AAGATTTAGTAATGTAATTTTCTCCTTTTCTTTTCATATACTATAGTCCATTGAGTGCAAGATTAGAGATAT  
TTAGTGGGGGAAAAATAAA

>M6-PGSC0003DMG400011071 M6 L-LecRK

AAAAAAAAAAAAAAAAATCTCACTATCCATCACCAAATCTTGAAAAAAAAATCTTGTGTATTGTCTTTTTTTTAA  
GGCAAATCGACTTCGATTCTTGAATAATTCACATCACTTATGCTTCTATATATCTTGCTTTAAAATGTTCAA  
TTTTCTCACATTCCTCTGCTTTGTCATTTCTTCTCAATTCTTGCTTCATCTCAACTTGATGAATTCATTTCA  
CAAAATCAATCAACCAAACAACAACATAACCTTAAGTGGAGTAGCAAAAATAAGCCAAAATGGGTTTA  
TTCAATTAACCAATGACACAAGTAGACTAATAGGACATGCTTTTTACTCTTCACCTTTCCACTTCAAGACT  
ACTAATGCCTCTACCTTCTCTTTCTCAACGTGTTTCGCGTTGGCCATAGTCCCCGAGTATCCAAAACCTCGG  
GGGCCATGGCCTAGCGTTCACAATTTCTCCGTCAAAGACTTTAGTACAGCTCTCCGAGCCAGTACTTA  
GGTCTGCTCAATGCTAGTGATATTGGTAACTTCTCTAACCATATTTTTGCTGTTGAATTCGATACGGTACG  
TGATTTTGAGTTTGGTGATATTGATGATAACCATGTTGGTGTTAATATTAACAGCTTAGAATCAAATAAA  
TCAGCTGCAGCTGGCTATTTTATTAACGATCAAATGTGAAACAAGATTTGAATCTTAAAAGTGGGAAA

GTCATTCTTGTTTGGGTTGAATATGATTCTGTTACAAAATTAATTAATGTAACCTTTACCAAATTCTTTA  
AAACCAAAAATTCCTCTTTTATCTTATAATTTTGATGTCTCTACAATTTTTAAAGAAAATATGTATGTTGGC  
TTCTCTGCTTCTACTGGTTTGCTTGCTAGTTCACATTTCATTTTGGGTTGGAGTTTTAAGTTAAATGGAGA  
AGCAAATCACTTGACTTGGATTCTCTACCATCACTTCCTGGACCTAAGAAGAAGCACAGAAGACTAATT  
ATTGTCATCTCGATTATAGTGTGGTTCGCGTTAATTTCAATCTTGATTGCTTTTTATAACAATACGGAGA  
TTCAAGAATGCTGACGTGATTGAGCAGTGGGAGCTTGAGATTGGTCCTCATAGATATTCGTATCATGAA  
CTCAAGAAAGTACTAGAGTTTTAAGGAGAGTGAACACTCGGGCGAGGTGGATTTGGGAAAGTTTA  
CAAAGGTGTTTTGAGAAATCAAAGCAGAAATTGCTGTGAAACGAATTTCTCACGAATCTAAACAAGG  
GTTGAGGGAATTTGTGTCTGAGATTGCGAGCATTGGAAGACTCCGTCATAGGAATTTGGTTCAATTGTT  
AGGATGGTGTAGACGTCGTGGTGATTTGTTGCTTGTGTATGAGTTTATGCCTAATGGAAGTTTGGATAA  
CTTCTGTTTGATGAGCCAAAATGGTGTGACATGGGAACAAAGGTTTCAGGATTATTAAGGGGTTGC  
GTCTGGTTTACTTTACTTACATGAAGGCTATGAACAAGTCGTGCTACATCGAGATATTAAGGCAAGTAAT  
GTGTTACTAGATGGTGAATTAATGGTAAGTTAGGGGATTTGGACTTGCTAGATTGTATGAGCATGGG  
TCTAATCCGTCCACGACTAAAGTTGTAGGTACATTAGGGTACCTTGCACCAGAATTACCAAGAATAGGAC  
GAGCCACTACAAAGACTGATGTGTTTGCCTTTGGTGCTTTGTTACTCGAGGTGGTTTGTGGACGTAGGCC  
AATTGAACACAAAGCAGGACCCGAGGAGTTTGTCTCGTGGACTTGGTGTGGGATAAATGGAGAGAAG  
GTAAAATACTTGACATTGTGGACTATAGATTGAAAGGCGAATACAATGAGAGTGAGGTTTTGATGGTGT  
TAAAATTGGGACTAATGTGCTCAAATAACAAGCCATTGGCGCGACCAAGTATTAGGCAAGTTGTAAGAT  
ACTTTGAAGGTGAAATTGGGATGCCTGAGGCTCCAACAACACAAGGTTCTGATGATCTTGAAGGATTTG  
GATTCGATGAAAGTGAACGTTGGAATTCCTTAGCATCGACTAGTATTATGATCAAGTCAAGTTCATTTAC  
ATGTTTGTCTAATGGAGATGAAAATAGTACTAATTATGTTTCCTCTTCTACTTCACCACTTCCACTTCTATA  
TAGTAGTGAATGTACCTAGATACTAATGTGAACTAGCATTGCAAACCTTTCTATATTTTCTGAAGAACAC  
TAATGTACATTGTTTTTCTTTTCTTTGTGTTACCTCTTTGTAGTAGTTTTTTTCCACAGAAAACCTTAGGA  
AGCTTCCCGGTATTTTCAGTGAGAACCTGTTTTCCACCATGTGTTTTCCAGTTACCTGGTTTGATGGGAAA  
TGGGTGGAAAATCATGTTTTATAATACAAATTTTTCATTGATTCGCGATGGAA

>M6-PGSC0003DMG400018184 M6 L-LecRK

TAGGAATTAATAATTAGTCAAAGGATGAGTCATCTGCATCATTTTCAGAGAAACAGCACTCATCTCTA  
ATTCCTTCAAAGTACCATGTAATTAACACATAATTTCCAGTTTCTTCACAAAATTCTCTTCTTCTTCTC  
ATGCAAACCCCAACAATATGCCACCATTATCACTGTTCTTCAATCAACCTTACAATCTTCCCATCCA

TTTCGCCGTCGAATTTCTCTTCAACTCCTTTACTGCTAACACCACTCCTGCCCTCAACCTCATCGAGGATG  
CCCGCCTTGAGCCACCAGTTATCCGCCTCACAAATGACTCCAACCAATTTCCCTTGGCCGAGCTTTTTAC  
CCATCTCAAATTCCTATAAAAATCCACTTCAAATCCACTTCAATTTCTTCTCTTTCTCTACTCAGTTCATCT  
TCTCTGTAATTCCTGATGATTCCTCTAGTCCCGGATTCGGAATTGCTTTTGTCTCTCTGCTTCAACATCCC  
CACCTAATGCCCTCTCCAGTCAATACTTTGGACTTTTCTCTAACGCCACCGTACACACGGTGGCCCCACTT  
CTCGCCGTCGAGTTTGATACGGGTGCTAACCCGGAATTCAATGAACCAGATAGAAATCATATCGGGATT  
GATCTTAACAGCATTGAATCTATTGTTACCCAAACGGCTGGGTATTATAGTTCTTCTGGTAATGATAATG  
ATTCTTTTGTGCCTTTAAATTTGCGGTCTGGGGAAAATATACATGCTTGGATCGAGTTAATGGACCTGA  
ATTCGAGATTAATGTTACTATAGCTCCGGCTGGTATGTCACGGCCTGTTAGGACTTTGTTGAGTTATAGA  
AACCCATAATTGCGAATTACACGTCTGCCAGATGTATATGGGGTTCTCTGCTTCCAAGACTCAATGGG  
TTGAGGCGCAAAGACTTCTAGCTTGGAGTTTCAGTGATTCTGGAGTTGCAAGGGATATTAATACTACGA  
ATTTGCCGGTTTTTTCAGCTGGAAAATCCGGGTCTTCGCTATCTCCCGGTGCTATTGCTGGGATTGTTATT  
AGTTCTGTGTTTGTGTGTTGGGTTGTTTATTTATATTTTATTGGTTTTGGTGGCGTAAGAAGGAAGAAG  
ATGATGTTATTGAAGATTGGGAACCTTGAGTACTGGCCTCATAGATTTTCATATGAAGAACTTAGCCAAGC  
TACAAAAGGGTTTTCTAAAGATGAGCTACTTGGGGCTGGTGGTTTTCGGTAAAGTATACAAGGGAACATT  
TGCTAATAACACAGAAGTGGCAGTGAAATGTGTGAACCATGACTCAAGACAAGGAATTAGGGAATTCAT  
GGCTGAGATATCTACTATTGGAAGGCTTCAACATAAGAATTTAGTACAAATGAGAGGGTGGTGTAGGA  
AGGGGAATGAACTTATGATTGTGTATGATTACATGCCTAATGGGAGTTTGAATAAATGGATATTCGATA  
AGCCGGAGAAGGTTATGAATTGGGTAGACCGGAGGAGGGTCTAGCTGATGTTGCAGAGGGGTTGAA  
CTATTTGCATCATGGTTGGGAACAAGTTGTTGTACATAGGGATATTAATCTAGAAATGTTTTGTTAGAT  
AGTGAAATGAGAGGGAGATTGGGTGATTTTGGCCTAGCTAAGTTGTATACTCATGGTGGTGTCCCTAAT  
ACTACTAGGGTAGTAGGTACATTAGGGTACTTGGCACCTGAAGTGGTGACAAGGGCTAACCCAACTGCT  
GCTAGTGATGTTTATAGTTTTGGGGTGGTGGTTTTGGAGGTGGCATGTGGGCGAAGGCCGATTGACTTT  
GGGATTGTGTTGGAGGAAGAGGAAGTGTGATTGATTGGGTTAGACAAAAGTACAGGGAAGGGCGAT  
TATGTGAGGCAGCAGATAAAAGGATTAAGGGGCAATGTTTCAGAGGAAGAAATGGAAGCTATGTTGAAA  
CTAGGACTTACATGTTGTCACCCTGATCCTCTCCGTCGACCTACTATGGGAGAGGTTGTTGCTGTATTGCT  
TGGTGAGAATGTGGATGCAACGCCAAATGAGTTGATCGTTGAATTAGCACCTAGTGAAAGGAACACGA  
GAGATAGAAGCGACTGGTCAACTGAGGAATCAGAACCCTTTCGGCTGTGTAGATATTATACTTTTTGTTT  
CCTTTATTGTTGAATCTTTTTCATCCCTTGAAATTATTGTTTAAGGTTTGTCTTTGTATTGTTCTTACATGC

TTTTGAACTCTAAACTTAGCATTAGTTGCAAATAGTTATGGATATGCTGCTATGCCTTTGCGCTACCTTAA  
AGGGTCAACATCCATGGCAATTAGCAAACGTCTATACGCATTAAGATTCACCTCGGTGGAATAACG

>M6-PGSC0003DMG400018677 M6 L-LecRK

ATTTTACACAACCTCCAACATGCTTCAAATAGCTTCTTTTATTGACCCTTCCTCTTATTAATCCCTTACAT  
CTCTATACTTCTTTTCACTACACAATATGGAATTTTTGACACCAAAAATCTTCATATTTTTCTTTGTCTTCT  
ACTCATATCACAAGCCAAAATCATAAAATTTGACCAACAATATGGTGACCCTTTTGATCATACATATGTTCC  
CCTTACTTGAAATCAAACATCCTGCACAAATAAGCAATCAAGCACTTCAAATCACCCCAGACTCAGCTTCC  
TCTGCTTACCAAATGTTCAATAATTCAGGCAGAATCCTATTAAGCAGCCTTTCAAACCTATGGGTAGACA  
ATGATATTTCAAGGACAGCGTCTTTCAACACATCATTCTAGTAAACATTTTTAGACCGGACAACAATACA  
CCAGCTGAAGGTCTAGCTTTCTTGATATGTCCAAATTTTGATTTGCCACTAAATAGCCAGGGCCAGTATTT  
GGGCCTAACGAATGCTACAACAGATGGTGAATTATCCAACAGAATAATCGCGATTGAGCTAGATACATT  
CAAACAAGAATTCGATATTGATGATAACCATATTGGGATTGATATAAACAGTGTTAAATCCGTTAAGTCG  
GAACCTTTAACACCACATGGAATTGAACTAGCTCCAATAGGTGAAAGAGTTTACAATATATGGATACACT  
ATGACGGATTCAAGAAAGTACTTGATGTGTACATTATTGAACAAATGAGGAAAAATGGGACAACACCAA  
CAAGGCCAAAAGTACCAATACTAACACACAATGTTGATTTGAGAGAATTTGTAAATCAAGAATCATATTT  
TGGATTTTCAGCTTCAACAGGACATTTCAATCAGTTGAATTGTGTGTTGAGATGGAATTTAACAGTTGAG  
TATTTTCAAGAAAAGAATGATCAAGAAAAGGTACTAATAATAAGTCTAAGTGTTGGTGTATCAGTATTG  
GTTGTTTTATTGATTTTGTGAGGGTATTTTGGGTATTTTTTTTATAAGAAAAAAGGGATGATAGGTCAC  
AATCTAATATATTAGGGGCATTAAAGAGTTTACCTGGAATGCCTAGGGATTTTGAGTTTAAAGAATTGAA  
AAAAGCTACTAATAATTTTGATGAAAAGAATAAACTTGGTGAAGGTGGATTTGGAGTTGTGTACAAAGG  
GTATTTAGTTGGTGAAAATTTGGAAATTGCTGTGAAGTGTTTTCTAGGGAAAGTATCAAGGGTCAAGA  
TGATTTTTTGGCTGAGTTGACAATTATCAACCGTTTAAAGGCATAAACATCTTGTCAAACCTACTTGGTAAGT  
ATTTTGAACCTTTTACTCTTATGGTTTTTTTTTTGAGTATTTGTTTTTTGTTCAAGCTCGGATAAAGGAGGA  
ATGTTATGACTACCAGCAAAGAATAATCAAAGTTTTTTGAGTGGATATAAAGATTTTGATATATATGCT  
TATTGAGTTGAAGTGTAATTGGTTGATAGATTTGTCCTGTCTTTGGAATTTTATCCATGTTTTATGTATAG  
GTAGCAAATCTACTAAGATTTTATGGAGAAAAAAGAGACAGGTTTTACACAGTCATTTCTCCGTT  
TTGAGGACACTTTTTATTTATTGAGTCGTGTTTCTTATCCTTCTCGACATAGTAACCGCTTTCATATTTTT  
ATAACTTTCGAGTACAAGTGCATGTTTCATCCATCTTCATAGTCATTTCTTTGTTCTTTAGTCGTTTTGATT  
GCACTTTTTTTATTGAGTCGTATTTCTTCTCCTTCTCAACATAGTGATTTGTTTTATGTTTTTTTTTTTCAA

TTTCATAACTTTTCGATCACAAGTGCATGTTTCATCCATCTTCGTTTTGAACTAAAGCTTGAATTAATTTTAT  
TAATTAAGGTACCAAGAATATTTTCTTGTGTTCTAAGGAGTTCCATTTTGACTCATGTTAGGCCCATCTCC  
ATCTTGAAAACGGTCCCAATAATTATATCCAACACTATAAGATAAGTGAAAAAGTTAAAAGCTTTGATG  
CAACTTGCAAGTGTCAAAAATGGTGTGCTCATGTACCTTTTACAATAGTTTGAAAGTGATAAACATATAC  
TTTTTCGTCTCAAAAATATTTATTTATATATTTTTTATACGCTTTTTGAGAAAACATTAATTAGTAAAGATATT  
TAATTATTTCCCCCTTATTTATATTTTAAAACATAATCTCTATTTATATGTCATATTTGAGGTATCTGTAAT  
TTCAAAAATAATTACTAACTACTAAATATAAAATGAGGTAGGGGTGATTAATTTAACTTGAATTTTTAA  
ATATAATCCAAAGTTTCTTGGAGGACCTACTAACTAATAATTTTAAATGCCCTCTGGATGAAAAATCTAAA  
GTTAATAAATATTAATTTCTTAGCTGGAAGACAGAAGAGCACTGATTCCATTTCTTTGTGTCTTTTTGGT  
TTTCTATACCACCAATTTTGAACATAGGGTCCCACACTCTTTTGTCTTTGTTAGCTTCGGTATAAATATCG  
AGTAATTCTGATCATTTAAATTAATTATATGAAAAAATTGTCTAGTATTTTTATTTTCGATTAATTTGAAT  
CATTGTTTGAACAACTTTTCTTTTTTAGGGAAGCTTCTGTCTTTGAAAATCACTTTTCATTCAAATGTCAC  
CTATTATGATAAGTTTGGTACTTTCTAATATTAATATAATATAAATTGGACAATTGCTTCAAGATG  
CACTCAACTCCAATAAGACTAAGATTGTAACCCTACAACATGTCATCATAATTGAGAGAGGTCCAGATA  
TTCCAAAATTAGGTCCTACAAAAAAGTTGATTGGAACACATACAACCCAACCTTTTTTGCCTTGTAAGAT  
TTGATATCCTCAAAATAGTATTGATTAGATATATTTATAGATTATTATTATTGTAGTAACAATTTAGCTTAT  
ATATGCATTAACAATTTTAACTCCACCCATGTGAGCTCGCTCAAATTGTCTGCTTAATCCGAATAAAGA  
AGGAGGGTTGTTGAGGATCACTCAGAAACACCATTCTCTATCCATAAGAGTAGGAGTAAGGCTGCATC  
AATTCATAGATCATTATTATTGTAGTCATAATTTGGCCTATATATATGTACTAATAACAATTTCAACTCTGT  
CATCAGTGTGATCTCGCTCACATTGTCGGTCTCAAGATTGAATATAGAAGGAGAGTTGTCGAGGGTCAA  
CCGAAAACGGTCTCTCTGCCTTATAAAGATATGAATAAGGATATTTACATCTTACCTTTGTCAGACGTACC  
CCACTTGTAGGATTTCACTGAATTTGTTGTTATTATTGTTGCACTAACAATTTCAAGTGATCTAAAGTAAT  
TTTTGAACCTCCTTACCTTCTAATGAGAACGTAACCTAGATGTTACATGTAGTTATCATTTAGGTGACCT  
AATGGTATAAAAGTTCTTTTACGCTGTCAGTGTATATATATATGCTAATCACATGCATATTATTGTGACAG  
GATGGAGCCATAAGCATGGTAAGCTACTACTTGTATATGAATACATGCCAAATGGTAGCCTGGACAAAC  
ATCTCTTCTCATCAGAGCAAGAAAAAGAGCCACTCAGCTGGAGTGTGAGGTACAACATTGTATCGGGAG  
TCGCGTCAGCTCTGCACTATCTTACAACGAATACGAGCAGAAGGTAGTCCATCGCGATCTCAAGGCAA  
ACAACATCATGCTCGACTCAAACCTCAATGCACGTTTAGGTGATTTTGGATTAGCACGAGCAATTGACAA  
TGAAAAGACCTCATATGCTGATGAAGCTGAAGGTGTACTTGGCACGATGGGATACATCGCGCCAGAAT



GCTTCCACACAGGAAAAGCCACTCAACATTCTGATGTCTATGCATTCCGGAGCTGTGTTGTTGGAGCTAAT  
ATGTGGCCAAAGACCTGGAATAAGTTAATGGCTTCAACTCTTCTTGATTGGGTTTGGTTCTTGCATC  
GCGATGGGAGAATCCTTGAAGCCGTTGACAAGAGGCTCGAGGATCAATACGTGGTTGAAGAAGCAGA  
GAGATTGTTACTACTTGCTCTGGCTTGCTCCCATCCAATTGCCAATGAAAGGCCTAAAACACAAACAATA  
GTTCAAGTTATATCAGGATCAGTACCAGCGCCACAAGTACCACCATTCAAACCATCATTTGTATGGCCTT  
CTATGGTCCAATTGACATAGATTCATCGAGCATTGTGATACAATATCCATCACAACTCCTCAGTACAGT  
TCAGAGAACAACAGTATTGAATATCAAAGCAAGTAGAGATAGCAATAGCTTGATTTAGGCCACTAAGAG  
ATTTTTTTTTGCTTATTGTGTAATGACAAGAATAGCAGCTCATGTATATATTTCTCAGCCTTTTATGTTAAA  
TTCCATCCTATACATTGTTCTTCTACGGTTTGACTGTTTGGTTTGTGATTAAAAATGATGTGTATTGCA  
TAATTTATAAAAAGAAGTTGTTG

>M6-PGSC0003DMG400020326 M6 L-LecRK

CAACAATAGAACAAATTAGCATATTTCTCTCCACCAAGAAAATATTACCAATGTTGTTAAATTTTGCAT  
ACTAGTGTCTCTCTTTGCACCAACTTCTTGTGAAGTTGATGGATTCATTTACAATGGATTCAAATCAA  
GTAATCTTAGCTTTGATGGCATTGCTAATATTACATCCAATGGTCTTTTGTGTTAACAGATTCCAAAACA  
CAAGATCAAGGCCATGCTTTCTATCCAAATCCAATTCATTTCAAGAATTCACCTAATGGTAATGCATTTTC  
ATTCTCTACAACATTTGTGTTGCGGATAAGGTCTGATTATAGACCATTGGATGGTCATGGACTAGTTTTTG  
TTATCGCGCCACAGAGAGGAATTCAGAAGGCTTTGGCAAACCACTATCTTGGCCTTTTTAACTCAACTAA  
TAATGGGGATAAATCAAACCATGTTGTTGGAGTTGAGTTTGATAACAATAATTAGCGCGGATTTTGGTGA  
TATGAATAACAATCATGTTGGAATTGATATAAATGGATTGAGGTCTGTGGCAAATCACACAGCAGGTTA  
TTTTGATGATACTGGTTTGTAAACAACCTGATTCTAGTTAGTGGAAGGCAATGCAAGTTTGGGTGGAT  
TATGATGGCAGAACTAAGCTAATCAATGTGACAGTAGCTCCATTACATATGGAAAAACCAGTTAATCCAC  
TTTTGGCTTTGAAATATGATCTTTCGCCGATTCTTAATCAGATTATGTATGTTGGTTTTTCATCATCAACTG  
GTTCAGTCCCAACACATCATTATATCTTGGGATGGAGCTTTAAGGCAAATGGGAAAGCTCAAGAACTTTC  
TCAACTTCCTAGTCTTCTCGTGTGGGCGCAAAGGAACCTCAAGATTTGTAACGATTGGTTTACCGGTG  
ATCTCTTTGGTGTCAATTGTTGTAGCAACCTTAGTGGTGGTTTACTATGTAAGAAGGAAGAAGTATGAAG  
AAGTTCTGAAGATTGGGAACGTGAGTATAGACCGCAAAGGTTTCAAGTTATAAAGATTTGTACTGCTA  
CTAAAGGATTCAGAGAAAAGGAGCTGTTGGGAGCTGGAGGATTTGGTAAAGTTTATAAAGGAGTGATG  
CCTGTAACCAAACCTGAGATAGCTGTAAAGAAGATATCTCATGAATCAAGACAAGGGATGAAGGAATTT  
GTTTCGGAGATTGTAAGTATAGGCCGTATACAACATAGGAATGTAGTACCACTTTTGGGCTATTGTAGG

CGAAAAGGGGAATTACTTTTTGGTTTATGAATTCATGTCTAATGGAAGTCTAGACAAGTATTTATACGACC  
AACCAAGACTCACCTCGATTGGAACCAAAGATTCAGAGTTATTCGAGGTGTAGCATCAGGACTATTTTT  
CCTACATGAAGAATGTGACCATGTAGTGGTTCATAGGGATATTAAGGCTAGTAATGTCTTGTTGGATGG  
TGAACTAAATGGCAGGCTAGGAGACTTTGGACTCGCGAGGCTATATGGTCATGGGACCGATCCTCAATC  
AACTCGTGTCGTTGGTACTCTTGGTTATCTTGCACCAGAGCATACTAGAAGTGGCAGGGCAACACCTAGT  
AGTGATGTATTTTCCTTTGGGGCTTTTTACTTGAAGTTGCATGTGGTAGGAGGCCGATAGAGCCAAGAC  
AAGCCGGTGATGATCTGATTTTAGTGGATTGGGTGTTTTCGTGCTGGAATAGAGGTAATATTCTTGAGG  
CAGTTGATCCAACTTAGGCAATGATTTTGTCCAGGGCAAGTGGAGTTGGTCTTAAGTCTAGGCTTGTT  
CTGCTCTCATTAGAGCCCTCATTTAGGCCAACAAATGCGACAAAACGTGTTGTTCTTGATGGTGTGTG  
GCCTTGCCAGAGTTATCAGCCCTCGGTGTTTCATCTGCTGGTCTAACATTTGACCATCGCGGAGGTTTTG  
ATGATTTTATCAAGTCGTATCCAGCTTCTTCTGTTAATGCACATCCCCCGCTTCATCCGTAGCAGAATCA  
CTCCTTTCTGATCCCCGATGAGTTGGACATATCTTCTTTGGTGTATTATTGATATACTGATCCTGGTAAAT  
ATAACATGATTTTAGTGATTATGTACTTCTGATAAATTATCGCAATTCATACACCTGAAATATATTGTGAC  
ATATCTTAAGATATCTGCTATGGTATCCTGATCTTATTGTTTACTTCCAATGCTAAATAAATACTAATCTGA  
GATTCAGCAATGGC

>M6-PGSC0003DMG400020327 M6 L-LecRK

AAAAAATGGATAAAAAAGATCATTTTTTTGTCATATCAAGAAATGTATAAACAGTAGAACAAATTAGCTT  
TATTTGGTCACAAATCACAATATTATCTCTCAATCAAGAAAATATTGGCAATGTTGTTCAATCTTGTCATA  
CTAGTGTCTCTTTTCTTAGTTGGTATTGCACCAGCTTCTTGTGAAGTTGATGCATTCATTTACAAAGGATT  
CCAATCAAAGAATCTTAGCTTGGATGGCATAGCAGAGTTTACGCCGATGGTCTTTTGCTGTTAACAGAT  
TCTGAAACTCAAGATCAGGGCCATGCTTTCTATCCGAATCCAATTCATTTCAAGAATTCAACTAATGGTAC  
TGTAGTATCATTCTCCACAACATTTGTGTTTGCTATAAGGTCTGATTATGGAATTTTGAGTGGTCATGGAC  
TGGTTTTTGTATCGTGCCACAGAGAAGAATCAAGGAGCTTTGGCATAACCACTATCTTGGCCTTTTTAAC  
TCAACTAATAATGGGGATAGATCAAACCATGTTGTTGGAGTTGAGCTCGATACAATCTACAGCGAAGAA  
TTTGGTGATATCAATGCCAATCATGTTGGAATTGATATAAATGGATTAAGGTCTGTAGCAGTTGAAACAG  
CAGGTTATTTTGATAATACTGGCTTGTTCATAATTTGACTTTGATAAGTGGCCAGCCAATGCAAGTTTGG  
GTGGATTATGATGGCAGCACTACGCAAATTAATGTAACAGTAGCTCCATTACATGTGGAAAAACAGTT  
AATCCACTTTTGTCTTTGAAAACCTGATCTTTGCGCGATTCTTGATCAGACCATGTATGTTGGTTTTTCATCA  
TCAATTGGTTCAGTCCCAACACATCATTATATCTTGGGATGGAGCTTCAAGATAAATGGGAAAGCTCAAG

AACTCTCTCAACTTCCTAATCTTCCTCGTCTTGGACGCAAAGGGACATCAAGATTTGTAAAGATTGGTTTG  
CCATTAATCTCTTTGGTTTTACTTGTGTAGCAACCTCAATGGTGGTTTATTATGTAAGAAGGAAGAAGTA  
TGAAGAACTTCTTGAAGATTGGGAACGCGAGTACAGACCACAGAGGTTTCATGTACAAAGATTTGTACAC  
TGCCACTAAAGGATTCAGAGAAAAGGAGCTGTTGGGAGCTGGAGGATTCGGAAAAGTTTACAAAGGAG  
TGATGCCTATCACCAATCTTGAGATAGCTGTAAAGAAGATATCTCATGAATCAAGACAAGGGATGAAGG  
AATTTGTTTCGGAGATTGTGATCATAGGTCGCTACAACACCGGAATGTAGTACCACTTTTGGGTTATTG  
CAGGCGGAAAGGAGAGTTACTTTTGGTTTATGAATACATGTCTGGTGGAAAGTCTAGACAAGTATTTATA  
CAACAAACCAAGATTCACCCTTGATTGGAGCCAAAGATTCAGAGTTATTAGAGGTGTAGCATCAGGACT  
ATTTTTCTACACGAAGAATGTGACCATGTAGTGGTTCATAGGGACATTAAGGCCAGTAATGTGTTGTTG  
GATGGTGAACATAAATGGTAGGCTAGGAGACTTTGGACTTGCAGAGGCTATATAGTCATGGTACCGATCCT  
CAGTCTACTCGTGTGCTTGGTACTCTTGGTTACCTTGCCCCAGAGCATACTAGAAGTGGCAGGGCAACGC  
CTAGTAGTGATGTATTTTCTTTGGTGCTTTTCTGCTTGAAGTTCCTGTGGTAGGAGGCCAATAGAGCC  
AAGACAAGACGATGATGATCTGATTTTAGTCGATTGGGTGTTCTCATGCTGGAATAGGGGTAATATTCTT  
GAGGCTGTTGATCCAAACATAGGGATTGATTTTGTCCAGGGAAAGTGGAGTTGGTCTTAAAGCTAGGC  
TTGATCTGCTCTCATTAGAGCCCTCGTATAGGCCAACCATGCGACAAATCTTGTGTTCTTAGATGGTGT  
TGTGGCCTTACCAGAGTTATCATCACTCGGTATTTTCATCAGCTGGCCTAACGTTTGACCATCATGGAGGT  
TTTGATGATTTTGTACGTCCTATTCATCTTCGATTAATGCACATCCCGCTCTCCATCTGTAACAGACTCC  
TTTCTCTCTGGTGGCCGATGATTCTTACATTAAATATGTTAGTAACTTTAACTTGTAAGTTGTAATCATGA  
TTAGCACCTTATCTTAGTTTTAATTGAATCTCTATACTACTGCACCTCAAATAAGATGGAAATGCA

>M6-PGSC0003DMG400020328 M6 L-LecRK

AAAAAAAATTAGCCATGTTTTTCAAGATTGTGTCCTTGATTGTGTCTTCTCTTTTTGTTGTTACAAATTCTG  
AAGACTTTGGATTCATTTACAATGGGTTCAATAGAGCAAATTTGAGTCTTGATGGCATTGCACAATTGAC  
ATCAAATGGCTTATTAGAGTTAACAATACTTCTAGGCTACAAAAGGGACATGCTTTTTATCCTACACCA  
ATTAATTTCAAGAACTTAACAATGGTTCAAATTTCTTTTTCTACCACTTTTGTCTTTGTTATTGCGCCTT  
CTGTTTTGCCTGGTCATGGTATGGCTTTTGAATTGCACCTGTTGGTGGTCTAGTAGATGCACCTCCAAGC  
CCATTTTTAGGCCTTTTCAATGATAACACTACTGGGAGAGTCAGTAACCATGTTTTCGCGGTGAGTTTG  
ATACTTTACAGAACAGAGAATTCAATGATATTGATGGTAACCATGTTGGAATTGATATCAATGGATTGAA  
ATCCGTTGAATTGAAAACAGCAGGTTATTATCATGGCGTTAAATTCGATAACATGACTCTTGCTAGTGGT  
CAGCCAATGCAGGGTTGGGTGGACTATGATGGTGTGGCTAAGCAAATTAATGTAAGTCTGGCTCCAATG

AATGTAGCAAACCAAATGCACCACTTTTGTCAATTGTTGTATGATCTTTCACCAATCTTGAATGAAACCAT  
GTATATCGGCTTCTCTGGATCGACCTGCTCGGTTGTTTCAACACAATATGTTCTAGGATGGAGCTTTGAA  
ATGAATGGAATAGCTCAAGGTCTTGATCTTGCTAGACTTCTAAGCTTCTCGAGTTGGACCGAAGAAAC  
AATCTAAACTTTTGTGATTGCTTTGCCAATGATATCGGCAGTTGTTGTAGTAATAGCCTTTTCTGTGTTG  
ATTTACTATGTCGGAAGGAAGAGGAAGTTTGC GGAATTGCTTGAAGATTGGGAGCTTGAATATGGACCT  
CATCGGTTCAAGTACAAAGATCTTTATATCGCGACAAAGGATTTGCTAACAAAGAGTTGTTAGGTTGT  
GGCGGTTTTGACAGAGTTTACAAAGGAGTATTACCAACTTCTTCAATTGAGGTAGCAGTCAAGAAGGTG  
TCTCATGACTCAAACAAGGATTGAGGGAATTTGTAGCAGAAATTGTTAGTATTGGTCGTCTACGCCACA  
GGAATTTAGTGCCACTTTTGGGTTATTGCAGGCGTAAAGGAGAGTTGCTTTTGGTTTACGAATACATGCC  
TAATGGAAGTCTTGATAAGTTCCTATATGACAAACCAATATGTGCTCTCAGTTGGAACCAAAGATTTGGA  
GTCATCAAAGGCGTAGCATCAGCACTAGTCTATCTACATGAAGAATGGGAACAAGTTGTAATACACAGA  
GATGTGAAGGCTAGTAATGTGTTGTTAGACAGTGAATTGAACGCGAAGTTGGGAGATTTTGGACTAGC  
AAGATTGTATGATCACGGGAGCGATCCTCTCACTACACATGTAGTTGGAAGTGTAGGTTACCTTGCCCCT  
GAGCAAACAAGAACAGGCAAAGCCACAACCATTAGTGATGTATATGCTTTTGGTGCATTTTTGCTTGAG  
GTGGCTTGTGGGAGAAGGCCAATAGATCCACGAGTATTGGATGAGGACATTGTGTTGGTTGATTACGT  
GTTTTCTTGTTGGAGTAGAGGTGATATTCTTCAATCCATTGATCAAAATTTGGGGAATGAATATGTTAAA  
GAGGAAGTTGAATTGGTACTAAAACCTCGGACTTGTTTGCTCTCAGACAGAACCAACAACGAGGCCAAGT  
ATGAGGCAAGTTTTAATTTACTTGAAGATATCGTGCCTCCACCATTGCCAGAGTTGTCATTGTTACAAA  
GTTCTGCCATTATTTTTTCAATTTCCAGGTTCTGATCATCACTTGTCTATGTCTTCATCATTTTTCTCCAGAGAA  
AGTACTTTCATATCCCTCCACCGATTCCGAACCTCTCTCCATTACATGTCCACGATTAGAACTCTTTCTGTA  
TTGCCTTGATGAATTGTGATTCCAATCCCAACTGCAACAACAACCTGACTTCAATTCCAACAAGTCCGTG  
TTAGCTATGTGAATTCTTACTGTCTATATCGTTTTCAATTAAGCATGTAATATTTGTTACGATACAAATAAT  
GGACTAATGTACACTTAGAATGATCCGATTTCTTTTGTATCTATAATGTTGTCGACATGTATTGCTA

>M6-PGSC0003DMG400023671 M6 L-LecRK

AAAAACATAGTTTTTTGTTATATGTTGATATGTATATTCTAGGCAAGATTAGTTATTTAACTAACTTTGTT  
CATCTTTTGTATCATATTCATATTTTTGGTTCTTAGAGTGGATTGTATGAGTTTCTAGCTACCAAAAATTCACC  
AAGACAAACGAAAACGATTTTCAATGCTACTGAGCATTCTTACATAGCCGCTGATGCTATCCAAGTAACTC  
GCGATGTTCTGGTGTCTTCCATCAGTAATTTGTCTGGAAGGATATGGTATTCACAGCCTATGAATCTATG  
GAACAGAAGGAAAAACAGAACAGCCTCGTTTAATTCAACGTTTGTGATCAATATCAAACCTGAGAGTGA

TCCATGGGGTGAAGGATTGGCTTTCATATTGACTAAAGAAAGTGGTACTGACTCAATCCCGGATAACAG  
TTATGGACAATGGCTTGGGATTGTGAATGAAAGTACTAATGGATCTTCTTCAAACAACATATTTGCAGTT  
GAATTTGATACAAGGAAAAGTTACCCTGATGATCTTGATGATAATCATGTTGGCATTGACATAAACAGCA  
TCAATTCTGTCAAGCAAGTCTCGTTGATTGATCGTGGTGTTAACCTTTCCTAGCTGTTGATGTTATAGCA  
AGTGTCCGGTACGATGGAGAATCCAAGATGTTGAAGGTTTATACATTCATGAGCAATCAAACCGGAGAC  
AATGAGAGAAATCCCATCATTTCCATGCCTCTTGATCTTTCTAATTATCTCCCCGAGGATGTTTTCGTTGG  
ATTTTCAGCCTCAACTGGGATATATAATCAGCTGAACTGCATAAAGGCATGGAATTTTACAAGCACAGAT  
ATTGGGAACAGTAATGAAGTTAGCCTGTTATGGTTGTGGATCTTGATACCAGTAATGTCAGTTCTTGTTA  
TGTTCTTAGGTGGGGTTTTCGTATATTTTAGCTGGTGGAGAAAAAGAAGAGGATGCAAGTGTTAGACC  
AATCTGAGAATATAGAGATTCAGATTCAGAATTCAGCTACTGCACCTCAGAGATTCAGCTGAAGGACTT  
GAAACGAGCAACGGGGAACCTTGATCCGAAGAACATTCTTGGAAGAGGAGGATGTGGAGTAGTCCTCA  
AAGGGATGTTAGATCAAAAAGAGGTGGCTGTGAAGAGATTCTTTAATGATTCAAGTCAAGGGGCAAAA  
GATCTCATAGCAGAAGTCACAACCTATAGGCAATCTGCACCATAAAAACCTTGTCAAATTGATAGGATGGT  
GCTATGAGAGCAATGAACTCCTTGTTGGTGTATGAGTTCATGCCAAATGGGAGCTTAGACAAGTTGATAT  
CTTGCGAAGAAAACGGAAAAGTTTTGAGTCTGAATTGGGAAATAAGGCATGGTATCATCTGTGGGATT  
GCTCAAGCACTTGATTATCTGCACAATGGATGTCAAAAAGAGTACTTCACAGAGACATAAAAGCCAGC  
AACATCATGCTTGACTCAGAACTCAATGCTCAGCTAGGAGATTTCCGATTAGCTAGGACAGTTCAAGTG  
AATGGAAAGACTCACCATTCAACAAAAGAGATTGCTGGTACTATAGGCTATATGGCACCAGAGAGTTTC  
CATATAGGCCGAGCCACAGTTGAAACAGACGTCTTTCATTGGAGTGCTAGTTCTTGAAGTTGCTTGTG  
GTCAAAAACCTGGAAATCGATATGAGGAGAACAATTATACTAACAGAGTCATTGAATATGTATGGGACT  
TGTACAAGATTGGAAGGATCATTGATGCCATAGATGTCAGATTGGATAGAGACTTCAATGAAGAACAAG  
CCGAATGTGTGTTAATATTAGGATTGGCTTGTGCCATCCAAATCCTTACGAAAGGCCAAGCATGAAAAC  
TGCTTTACAGATTCTTACAGGGGAATCAGTTCTACCAAACATCCCAACTGAGAAACCTGCATTTGTATGG  
CCAGCCAAAGCTCCATCGTCCAACGAAGCTGCTAGTGGCTCTCTCCTGGATGACCAACTTACACAGATTA  
CAGTACTCAGTGGCAGATGACTGCAGAGTATGAGGAACCTCAGCAAGGTTAGGTAACCTTTTAGGAGG  
CAAAAGATACCTGTAAATTCACATATGTAAAGGCATGAATGTCTCTTTATTTTTTTCTTTCTATGTATGTG  
GTGGGGAGTGGGAGATATCTTCTCCGAGTGTTTCGTTTTTCTGCATTATAAATAACTTTCTATTTAGTCAA  
TGTCATAATCAACTTTACAAGTAAATACTGAAAACAAAAGCAGCAAGCATTGCAACAAAGGCAGCTAGC  
TACATGAGTTACTCCTACAAAACATACATGTTCTACCAAATCACTAGAAGATCCATAATCATCTTCATGT

TCTACCACAACAAGAACAGTTTCTCTGGATTGTTTCATGTCTGCTACGTCCATCGTT

>M6-PGSC0003DMG400026646 M6 L-LecRK

CACAAATACTTAACAATTTGTACTTCCAACAACCTCCATGGACAATCCCTATAGCCTAGTTATTCTTGCAATT  
GATCTTTTGCACACTATTCTTGTAAGAGTTCAATCTTTTGATTTTGCTTACAATGGATTCAATAACTCAAATAT  
CATTAGAGATGGAGTTGCAATTATCAATCCAAGTGGTGCACCTAAGCTCACTAATAGATCATATAATGTT  
ATAGGTCATGCTTTCCACCCCAATCCTGTACCAATTTTCAACTCCAGTACTAAAAATGTTACTTCATTTAGT  
ACATACTTCGTCTTCGCCATTTTCCCTCTTTAGAAAACCTCTGGTGGCTTTGGTTTTGCTTTCACCTTATCA  
CCATCCCCAGGTTTTCCAGGTGCTGAGGGAGATCACTATCTTGGAGTCGTCAACAGGATGAACGATGGC  
AATGATACTAACCACATCTTTATGGTTGAATTTGACACTGTGAATGGTCACAATGAAGGTGTGGACACA  
GATGGAAATCACATTGGGGTCAACAGAAATGGCATGAGGTCTATAGCGTCAGAATCAGCTGACTACTAT  
GTTAATGATTCTCTTGTAGCAGAGCAGGTAAATCTACAAAAGGGAGAATCAATTCAGGCTTGGATCGAT  
TATGATGGAATGAGCAAAGTGGTGAATGTA ACTATATCTCCATAACACTTCCAAGCCAAGTAGACCTC  
TGATCAGTGGGGTTCGTAGATTTATCTACTGTGTTGGACGAACTATGTATGCTGGTTTTCTCAGCAGCCAC  
GGGAAGAAATAAAGCGAGCTCTCATTACATCTTGGGTTGGAGTTTTTCGGTTGAATGGAGCTGCTGATCC  
TTTAGATCTTGATAACCTACCTGTTGCCCCACCTGAAGTGGTAAGACCCTCTAAGAATCCCATCTCAAAA  
GGGCCTTGATAGGAACATTTTGCTCCGTTGTTATCCTGCTCCTTGGTGCATTTTATATCTATAGAAGGATG  
AGGCTTCATGAAGTTCTAGAGGACTGGGAGCTGGATTGTCCTCACAGGTTCCGATTTAGAGATCTTTATA  
AGGCAACTAAGGGATTCAAGGAGAGTGA ACTAATTGGAGTTGGGGGATTTGGTGCTGTTTACAAGGGT  
GTTTTTCTACTAATGGAGCCGAGGTTGCAGTGAAGAAGATATCGAGCAATTCTCTCCAAGGAATGAGA  
GAATTTGCAGCGGAGATCGAAAGCTTAGGCAGGTTAAGGCACAAACACTTGATCAACCTTCAAGGCTG  
GTGCAAGAACAAGAATGATCTTCTCCTAGTGTATGACTTTGTCCCAAATGGAAGTCTTGATTCATTACTTT  
ACAGGCAGAAAAGGGACATTGTTCTAACATGGGAACAGAGATTTAACATCATCAAAGGGATTGCTGCA  
GGGCTTCTTTACTTGCATGAAGAATGGGAACAAGTGGTAATACATCGCGATGTGAAGAGCAGTAACGTC  
CTAATTGATGGGGAAATGAATGGTCGTTAGGGGATTTTGGGCTAGCAAGATTATATGACCATGGCAA  
GAATTCACACACAACAATGTTGTTGGCACAATAGGGTACATTGCACCAGAATTGACACGGACAGGGAA  
GGCCTCAACGAGCACGGATGTGTATGCATATGGTGTACTACTTCTTGAAGTAGCTAGTGGAAGACCTCC  
TATTGTCTATGAACCAGGGAAAGGAGCTTTAGTACTAGCTGATTGGGTGATAGAATGTTTACA ACTAGG  
TAATATTCTTGATGCAGTTGATCAAAGGTTGAATTCAGTCTATGTAGATAAAGAGGTTCAAATGATTTTC  
AGTCTTGGGCTTGTGTTTTCACACCCAAGACCAGAAGCTAGGCCAACAATGAGACAAATAATGAAGTAT

CTCAATGGAGATGAATCACTTCCAGTTTTTGAGCAGCAGTTGAGCTGTATTGGGTCTGATAGGGTTGAT  
GAAATCACAGCTAAGTTCTTGAAGTGTTTTCTACTGATACAATCAATATATCACGTCGTTTCGCTATCCGT  
CGGACAGATATCATCTAGTTCACTCCATTCTGGTAGATGAAAACCTGTATAAAGGACATACACTCTTCTT  
TTGTTTTGTTAACCACCTTTGTTGGGATTGATTAAGTAGCTTCTATTTACCCAAATCCTGTTTTTCTTCCTCA  
TAATTCTGCAATTTAGATAGGTCATTTATTTTTAGGCTCATTGAGCATTACACAAGTTAACATAATCTCACTT  
CTATGTCTGCAATATCACTTATCACATCCTATATTTTTGTTTATGTACAAAC

>M6-PGSC0003DMG400026647 M6 L-LecRK

TAATTGTCTCTTTAAATTGAATATAAATATTGCACAAAACTTAACAATTTGTACTIONCCAACGACTCAATG  
GACAATTCCTATAGCCTAGTTATTCTTGCATTGATCTTTTTCCCTATTCTTGTGAGAGCTCAATCTTTTGAT  
TTTGCTTACAATGGATTCATTAACCTCAAATATCATTAGAGATGGAGTTGCAATAATCAATCCAAGTGGTG  
CACTTAAGCTCACTAATAGATCACAAAATGTTATAGGTCATGCTTTCCACCCCAATCCTGTACCAATTTTC  
AACTCCACTACTAAAAATGTTACTTCATTTAGTACATACTTCGCTCTTCGCCATTTGTCTCTCTTGAGAAAAC  
CTCTGGTGGCTTTGGATTTGCTTTACGTTATCTCCATCCCCGGGTTTTCCGGGTGCTCAGGGAGCTCATT  
TACTTGGAGTCGTCAACAGCAAGAACGATGGCAATGATAATAACCACATCTTTATGGTTGAATTTGACAC  
TGTGAATGGTCACGATGAAGGTGTGGACACAGATGGAAATCAAATTGGGATTAACAAAAATGGCATGA  
AGCATATCGAGTCAGAATCAGCTGATTACTATATTTATAGTACTTCTGAAACAAAGCCAGTAAATCTTCA  
AAATGGAGAATCAATTCAGGCTTGGATCGATTATGATGGAATGAGCAAAGTGGTAAATGTTACTATATC  
TCCCATAAAAGTTCTTAAGCCAATTAGACCTCTGATCAGTTTGGTTGTAGATTTATCTCCTGTGTTGAACG  
AGACTACGTATGCTGGTTTTCTCAGCAGCCACGGGAGATAAAGCGAGCTCTCATTACATCTTGGGTTGGA  
GTTTTCGGTTGAATGGAGCTGCTGATCCTTTAGATCTTGATAACCTACCTGTTGCCCCACTTGAAGTGGT  
AAGACCCTCCGAGAATTCCCATCTCAAAGTGCCTTGATAGGAACATTCTGCTCCTTCTTTATCCTGCTCC  
TTGGGGCATTTTATATCTATAGAAGGATGAGGCTGCATGAAGTTCTAGAGGACTGGGAGCTGGATTGTC  
CTCACAGGTTCCGATTTAGAGATCTTTATAAGGCAACTAAGGGATTCAAGGAGAGTGAACCTAATTGGAG  
TTGGAGGATTTGGTGTGTTTACAAGGGTGTTCCTACTAATGGAGCCGAGGTTGCAGTGAAGAAGA  
TATCGAGCAATTTCTCCAAGGAATGAGAGAATTTGCAGCGGAGATCGAAAGCTTAGGCAGGTTAAGG  
CACAAACACTTGATCATCCTACAAGGCTGGTGCAAGAACAAGAATGATCTTCTCCTAGTGTATGACTTTG  
TCCCAAATGGAAGTCTTGATTCATTTACTTTACAGACAGAAAAGGGACATTGTTCTAACATGGGAACAGA  
GATTTAACATCATCAAAGGGATTGCTGCAGGGCTTCTTTACTTGCATGAAGAATGGGAACAAGTGGTAA  
TACATCGCGATGTGAAGAGCAGTAACGTCCTAATTGATGGTGAATGAATGGTCCGGTTAGGGGATTTTG

GGCTAGCAAGATTATACGACCATGGCAAGAATTCACACACGACAAATGTCGTTGGCACAATAGGGTACA  
TTGCACCAGAATTAACACGGACAGGGAAGGCCTCAACGAGCACGGATGTGTATGCATATGGTGTACTAC  
TTCTTGAAGTAGCTAGTGGAAGACCTCCTATTGTCTTTGAACCAGGGAAAGGAGCTTTAGTACTAGCTGA  
TTGGGTGATAGAATGTTTACAACACTAGGTAATATTCTTGATGCAGTTGATCAAAGGTTGAATTCAGTCTAT  
GTAGATAAAGAGGTTCAAATGATTTTGAGACTTGGGCTTGTGTTTACACCCAAGACCAGAAGCTAGG  
CCAACAATGAGACAAATAATGAAGTATCTCAATGGAGATGAATCACTTCCAGTTTTTGGAGCAGCAGTTG  
AGCTGTATTGGATCTGGTAGGGTTGATGAAATCACAGCTAAGTTCTTGGAAAGTGTGTTTCTACTGATACAA  
TCAATATATCACGTTCGCTATCCGTCGGACAGACATCATCTAGTTCACTCCATTCTGGTAGATGAATC  
TGTATAAAAGGACATACACTCTTCTTTTGTGTTTGGTTAACCCTTTGTTGGGATTAATTAAGTAGCATAGA  
ATAATATATAACTAGGAAAAAGGTAAGTCTCAAGTCAACATTTTCACTTAGCTGGAGTGCAAAAACCATG  
TAATTTTGGAGAAAGAAAAGTTATAAAATTAGTCTAGAAAGTAAATTTGTAATTATAAACAAAAAAAATA  
AAAAAATCTATGTAGAATATTCGTTATAAAATCTATTTGTAATAAAATGGTGACATGATACAGA

>M6-PGSC0003DMG400027140 M6 L-LecRK

CCCCACTTTTCTTCATTCTTTGTAATTACACAGACAAATCACGTGGCAAATCAAAGTTGAACTCTACAA  
AAAGAATGTCTAGATTCAGCTATAAATCATCACCCACGCCGTTCTTCAGCTCTACAAACAAATTTCAATC  
TAACTATGCCATGGCCAAACAAATTACACCAACCCTTTTCTTGATTCTCTTTATTTTGTGTCAAGAACAGT  
TTTTTCTGATGAATTTGTGTATAATGGCTTTAATGGGGTTGAAGCTAGTAATCTTACTGTAAATGGGGTT  
GCTCATATTTTAAAGAATGGTGCTTTAAAGCTTACAAATGAAACATCTAGAGTTGTTGGTCATGCTTTTTA  
CAAAAATCCAATTAATTCAAGAATCCCAATCTGGTAAAGTTTCTTCTTTTCTACTGCTTTTGCTTTTGG  
GATTGTTCTGAATATGCTAAGTTAGGTGGGCATGGCTTTGCTTTTACAATTTCAAGGACTAAAGAGATG  
AAAGGGGCTCTTCTAGTCAGTATTTAGGTCTTTTAAATTCAAGTAATATTGGGAATTTTTCAAATCATGT  
ATTTGCTGTTGAATTTGATACTGTTCAAGATTTTGAATTTGGTGATATTAGTGATAATCATGTTGGTATTG  
ATGTGAATGATTTGAAGTCTAATGCTTCAGTAAATGCTAGTTACTTCTCTGAAGGAAGTTTTAGTAAACA  
AAAGCTTTTTCTCAGAGTGGAAGACAATTCAGGCTTGGATTGATTATGATTCAAGTAGAAATGTGTTG  
AATGTTACACTTTCACTTTCTTCAACAAAACCAACTTTTTCAATTTTGTCTTTCCCTTTGGACCTTTCTCTAG  
TTTTTGAGGAATTCATGTATGTTGGATTTTCTGCTTCAACTGGTTTGTGCTTGTAGCTCACATTATATTTG  
GTTGGAGTTTCAAGATGAATGGAAAAGCTCAATCTTTGGATCTTGATTCATTGCCTTCTCTCCCTAAGCCT  
AAGAAGGATCAAACAGTCTTGATTGTAGCTACCACGATATCGGCTGTTGTGTTTCTTGTATTCGGACTCA  
TTTTAGCCTTGATGTCATTTGGAAAATCAAGAACATAGATGTGATTGAGCCTTGGGAACCTGAGATAGG



TCCACATAGGTTTTCTTACAAAGAGCTAAAGAAGGCTACTAGGGGTTTTAGAGATAAAGAGTTGCTCGG  
GTTTGGTGGATTTGGTCGAGTTTATAAAGGAACACTGCCTAAGACGAATACCGTTGTAGCTGTGAAGCG  
AATACATCATGAAGCAAACAGGGTCTTCAAGAATTTGTGTCTGAAATCGCGACTATTGGTCGCCTTAGA  
CATAGAAATTTGGTTCAGCTCTTAGGATGGTGTGCGCGAAGAGGTGATTTGTTACTTGTGTTATGACTTTA  
TGCCTAATGGAAGCTTAGACAAATACATTTATGATGAACCAAGAGTTACTTTAACTTGGGATCAGAGGTT  
CAAGGTTATTAAGGTGTGGCTTCTGGTCTGTTGTATTTACATGAAGAATGGGAACAACTGTGATTCAT  
AGAGATATTAAGCAGGGAATGTGTTGTTAGATTCCGATATGAATGGACGACTTGGAGATTTCCGACTT  
GCTAAGTTATACGAGCATGGAGCAAATCCTAGCACAAACAGAGTAGTCGGTACGTTGGGCTACTTAGCT  
CCAGAATTAACCAAGACCGGAAAGCCACACCAAGTTCAGATGTTTTTGCCTTGGTGCATTGCTGCTAG  
AAGTTGCTTGTGGAAGGAGGCCAATTGAGGCAAAGGCATTGCCTGAGGAGTTAATCCTAGTGGATTGG  
GTATGGGATAAATGGAAGGAAGGTGCCATTCTGAAGTGGTTGACTCGAGATTAATGGCGAGTATGA  
TGAGATGGAGGCCATAATGGTGCCTAAATTAGGACTCATGTGTTCAAATAATACACCATCTAAGAGGCC  
TAGCACGAGGCTAGTGGTGAGATACTTGGAAAGGGGAGGTGACACTCCAGAGACGCTGGCAGCTCCCC  
ATGAATATGATGGAAAGAAGGGCGGTACTAGTGGTATGGAGTTAGAGGTCTTCATAGATTCCATCCGT  
CTTCGTCTTATTTTGAGAAAGTAAGCACATGGTCATCACCTTATGACGGTGAAGGCGATATTGATATTGA  
AGCTAATTCAGTAACGCCATTAACGGATTCTGGCAGAGAGGACAACAGGTAGCCATGCAAATGGAGG  
GACCATTCTACTTGCCCTCCCAAACCTCCCTCTATATTTTAGTACTTCTTTTTACGGTTTGATTTTTGACTTAA  
ATGTAAATTATTGCTTTTGAAATGAAAATGATATTAGTATCAACCATTCCATGGTTTTGAGAATATTGGT  
GTTAGTAGGATGTGAATATATTTTTGCAATCAAATCAAGTTTGAATCTTGATGAAGCTT

>M6-PGSC0003DMG400029735 M6 L-LecRK

GAATGATATTTCCCATTTTTCTCTGCTTCCATAATTCTTTATCCATGTGAATTAGCTCTGCTTCTTTCTTAG  
AATGAACCAATATTATCCAAAAATTCTTCTTTCTTACCTGTTGTTAACCTATTTTCTTGTAATCAATCAGTT  
GCAGAAACTGATTTTGTCTTCAATGGCTTTAAACAATCAGATGTGTCAATTTTTGGGAATGTTACAATTG  
AATCTAGAATTCTTACTCTTTCAAATGACTCAACTTTTTCAATTGGTAGAGCTCTGTACCCTTCAAAGATTG  
TCACAAAAGAAGCCAATTCATCTAAAGTTCTTCCCTTTTCAACATCTTTCATTTTTGCAATGGCTCCTTACA  
GAGACAGGCTTCCAGGACATGGTATAGTTTTCTGTTTGTGCCACACACAGGTATTGATGGTACTACTTC  
TGCACAGAATTTAGGTTTCTTGAATTTTACAAATAATGGGAATCCTGATAATCATGTTTTTGGGGTTGAG  
TTTGATGTTTTCAAGAATCAAGAATTCATGATATAAATGAAAACCATGTTGGAATTGATGTTAATTCTCT  
TGCATCAGAGTTTGCTCATGAAGCAGGATATTGGCCTGATGAGAAAAATAAGTATAATAGTGATGGTAG

CCTAAATGAGGAGTCTTTAGAGACTTTTAAGTTGAATAATGGAAGAAATTATCAAGTTTGGATTGATTAT  
GCTGATTTCAACATTAGTGTAAGTATGGCACCAGTTGGTATGAAAAGGCCTAAGCAGCCTTTGTTGGATT  
TTCACCTAAATCTTTCCAGGTTTTTGAGGAAGAGATGTATGTTGGGTTTACAGCAGCCACAGGAGAACT  
TGCTCAAAGTCACAAGATTTTAGCTTGGAGTTTTAGTAACTCGAATTTTTCTATAGGTGATGGTTTGATCA  
CACAAGGGCTGCCTTCATTTGAGCTTCTGAGGATCCAGTTTATCGATCGAAGGGATTTCATTGCAGGTAT  
GACAGTGTTAGTCTTGTTTCTTGTTGTGGTCATTGCTGTAGCTTCATGGCTTTTGATTAAGAGAAGAAGG  
AGAATGAAAAGGAAAGAGAGGATATGGAAGATTGGGAATTGGAATATTGGCCACATAGGATTACTTA  
TCAAGAAATTGATACTGCAACAAAGGGTTTTGCTGATGAAAATGTGATTGGAATTGGAGGTAATGGGA  
AGGTTTATAAAGGGGTTTTGGCTGGGGGTTTCAGAGGTTGCAGTAAAGCGAATTTCTCACAAAACAGTG  
AAGGGGCAAGGCAATTCTTGGCTGAGATTTGAGTCTTGGTAGGCTAAAGCAAAGAAATTTGGTGTCAT  
TAAGAGGGTGGTGCAAGAAAGATAGAGGCAGCATGATTGTGGTTTATGATTATATGGAAAATGGGAGC  
TTGGATAAAAGGCTGTTTGAATCTAATGAGAGAAACATGCTGAGTTTTGAAGACAGAATTAGGATTTTG  
AAAGACGTGGCATCAGGGGTTCTATACTTGCATGAGGGATGGGAGTCAAAGTGTTGCATAGGGACAT  
TAAGGCTAGCAATGTTTTACTTGACAGGGACATGAATGCAAGGCTAGGTGATTTTGGTCTAGCTAGAAT  
GCATGATCATAGTCAAGTGGCTAGCACGACTCGAGTTGTTGGCACGGTGGGATACTTGGCGCCAGAATT  
TGCCAAGACTGGCCGTGCCTCCACACAAACCGATGTTTTTGGATATGGAGTGCTAATTATGGAGGTGAT  
GTGTGGAAGGAGGCCTATAGAGGAGGAAGGCAAGCCACCTTTAGTGGATTGGCTGTGGGAATTAATGA  
GACGAGGTGAATTGATTAACGCCTTTGATAGTCGATTAAGGACTAATCAAGATTTCAATGAAGAGGAAG  
CTTTAAGGGTGTGCAATTAGGCATGATATGCGCGAGCCTAGATGCCAAAGCTAGGCCAAGCATGAGAC  
AAGTGGTGAAATCTTTGACAGGAATAGTGATATTGATGAATATGAAACTGAGGATATGGATGCTTACC  
TTCTAGAGAGTTTGAGATCTAATACCATGTTGTCCAATTTCTCCTTAAGTTTAAGCCATGGTTCACATCCA  
ACATTTGAAGAAATTAGAGAAGGTTTTTCTTCTCCATGTCAATTTCTTGGACAAATTTCTCTGGTGGATGG  
TAGATGAGTTTAAATTTGGTTGGTTTATGTCCATCACTCTGATTTAACTTATGTTACCTTCCAGGGCCTT  
GCTTTGATTGAATTTGCATTTGGCAATGCTGCTTCATGTACAAATTTATATGATGGAGTAGGAAAAGGA  
TTTGGTTATGACTTATGAGATATACATGTATTCATTTCTTATTTGTACCTTGATACTATTTGTAGTAGAAG  
AGTTTGTCTCTTTTTTTGTTTTGTTTTACTATAGAATTTGTTCTTTATCTTTTTCATTTTACACAAGATAAG  
>M6-PGSC0003DMG400030144 M6 L-LecRK  
GTATATATAAAATTTATTTTTTAGCAAAGCACTAACAGAGTGGTTGGTGGTTATTGTATATATTCAGTTG  
AATGTCTAACAATGTGATTAACATATTGTCCAATATGGTTGTTTTGTGCTTTTATCTTCTCTCAAATACT

TGCTTCTTATCATAATTATCCCTCTAGTCACTTCACTCTCCTTCAATTTTGATACTTTTACACCCAATGATCA  
CAATGTAACCTATGAGAGAGATGCTTCTCCAGAAAATGGTGAATTCTACTCACCAAAAACCTCCTCAAT  
CGCGATATTAATGCTAGTATAGGTGCGAGCTATATATTCAAACCACTGCATCTATGGGACAAGGCCTCTA  
GAAATCTCACTGATTTCACTACACATTTCTCCTTTAGCATTAAATTCACAGGGAATAACAAAATATGGAGAT  
GGTTTTGCCTTCTTCCCTTGCCCCTGCAGGTTCAACAATTCCTTATAATAACAACAAGAGGTGGAAGTCTTG  
CCTTACAAGTAATAATGAGCGACTAAATTCCTCGAGCAATCATTTTGTGCTGTGGAGTTTGACACCTATC  
AGAACCCTATGACCAAAGGGTGCATGTAGGTGTCGATATCAACTCTATGCAATCTGTTGTTAATGT  
GACTTGGTTTAGTAGCATTCCAAATGGTACGAAAACCTGATGCCTGGATCAGTTATAATTCTAACTCAAAA  
AATCTTACTGCTGTCTTCACTGGTTTTCAACTCCAAGGGAACAATATCACAGTCACTGTCCTGCAGAACCT  
ATCTTACAATCTTGATCTGAGGGAATATTTGCCAGAATGGGTCACTTTTGGCTTCACTGGTGGAGCGGGA  
AGGAGATTTGCATTTCAAAGAATCTATTCTTGGAATTTACTTCTTCTTTAGATAATACGACAGATACAGG  
GGTAACCTTAACAAACACCATGCCAAAGGATGCACCAACAAAACCTAAGTTAGGACTTGTGTTGGATT  
GATTTCTGGTGGTTGTGTTTTGGTTGCAGTATGTGCTTTGGTGTATTTGCATTTTGAGAAAGAGTAAG  
GTGAGAGAAGATGATTATGTCTTTGATGGTTCCATGACTAATGAATTTCAAAAAAGTGCAGGACCAAAG  
AAGTTCTTGTACAGTGAGTTGGCTAGATGTACAAATAACTTTTACAGGAAGAGATGCTTGGGCGGGGT  
GGATTCGGAGGTGTTTATAAAGGATATCTCAGTGAATCCAACCCTTATATTGCTGTTAAGAGGGTTTCAA  
GGGAATCACAGCAAGGAATAAAAGAGTATGTATCAGAAGTCAGGATCGTCAGCCGGTTAAGACATAAA  
CATTTGGTGCAACTCATTGGTTGGTGCCATCAAAAAAGAGAACTTCTACTTGTCTATGAGTTTATGCCTA  
ATGGAAGCTTAGATCATCATCTTTTCAAGGGAAAAGCCATTTGACATGGCCAATAAGATTCAAGATTGC  
TCAAGGTTTGGCCTCGGCGTTGCTATATCTACACGAAGAATGGGAACAATGTGTGGTGCATAGGGATAT  
AAAGTCTAGCAATATTATGTTGGATTCTAATTTCAATGCCAAGCTTGGGGATTTTGGGTTAGCTAGGCTA  
GTTGACCATGATAAGGGATCCCAAACAACAGTTTTGGCAGGCACAATGGGTTACATGGCTCCTGAATGT  
GTCACCACTGGCAAAGCTAACAAGGAAACAGACGTCTATAGCTTTGGTATAGTCGTGTTAGAAATAGGT  
TGTGGAAGGAAACCTATTGATCCTAAAGCAGAGGAGCATCGAGTAAACATTGTCGATTGGGTTTGGAG  
ACTTTATGGGATGAGAAGTATTCTTGAAGCAGTTGATCCGAACTATCATCAGAGTTCAATGAAGAGGA  
GATGGAGCATTGCTAGTTGTTGGCTTATGGTGTGCTCATCCAGATAATAATTGCAGGCCTTCTATTAGG  
CAAGCAGTTCAGGTGCTTAATTTTGAAGCTCCATTACCACTCTCCCTCGGAACATGCCTGTGCCACATA  
TTGCAGCTTCTCACGCCATTTACCAACTATTTCAGTTTCATCAACACATGAAACCAGCGGTACAGAGATTG  
CCCTTACCAAATCCAGCATTGAGTAAACGGAAACACCACTGATGGTTCAATAAAAAGAACATCTTCTTC

AGCATCTTCATCTTCAACATCAGTTTTGTATCCAAGTTAATATTGCCCTGTTATAACCCTGCATTTTGTCTT  
CCATTAGCAGTGTCCATCTTTCCCTTCTTACTTTTTGCTGTTTCTTCTTAATGAAGAGGATTCTTTGGAT  
>M6-PGSC0003DMG400047213 M6 L-LecRK

ATCTTGCTATTTTTAGTAATTTTTGTTATCCCTTCTTATATTCATTGAACTTCAATCTCACCAATATCAATC  
CTTCTTATGTTAATCTCTCTATCAATGTCACTGGAGACGCCTATGTAACGAAAGAGGGCATAACAAGTTAC  
GCCTAATGAACGTAACATTACATTAAATGGGAAAACAGGACGCGCCACGTACATTGAGACACTGCAGTT  
ATGGGACAAAGCTACAGGGGAAATGACAGATTTTACTACACATTTCTCTTTTGTATTGATTCAAATGGT  
AACGATTGTTTTGCTGATGGACTAGCCTTTTTCTTAGCTCCTGTTGGTTCCAGTATTCCAGTTGGTTCGTCT  
GGCAGTGGCCTTGGTCTTGTGATGCTGAGACAGAAAACATGTCATCACATGAGTCATTTGTTGCTGTAG  
AGTTCGATACATATGTGAATAACTGGGACCCCTCAGACATACATGTAGGCATCAATATAAATTCTATGGA  
ATCTGTTACTACAACAATATGGAAAAATGACATTAACTTGGGAAGAAAAATGATGCTTGGATTAGTTAC  
AATGCTAGTTCCAAGGTTCTTGAAGTTGTTTTACAGGATTTTGGAAAAATATAATCGAGACAAACTAA  
GCTACCCGGTTGATCTGAGGGATTATTTGCCTGAGAATGTTAGTTTTGGCTTCTCAGCATCAACTGGACA  
ATTGTTTCAGAAAAACAATGTCAAGTCTTGGGATTTCAATTCAAGTTTGAGTTTTGATGCTATCAAAGTTC  
CACAACAGCCTAGTGCAAGTCCTCCTATACAAGCTCAAGATCCAAGAAATCATCCTATTCAAGGTCATAA  
TCCAAATGATCCTCCAATTACTCATGTTCAAGAACCAAGGGTCCTCCTCAAGAAGCACTCAGCACCTCA  
GGAAAAGGAAGCAAGGGACTAGTAGTCGGATCAAGCATAGGTTTACCTATTCTGATTCTTGGTTTGATA  
ACTGCCAGTTGCTTTTTGTGGAGGAAAAAGAGGAAAGGAGATAAGAAATTAGACCATGTCTTCATTGAT  
CTAGCTATGGATGATGAATTTGAAAAGGTTACCGGTCCTAAGAAGTTCTCGTATAGTGAATTAGCTCGTG  
CAACAAACAACCTTTGCTGAGGTACAGAAGCTTGGAGAAGGGGGATTTGGTGATGTTTATAAAGGTTTCT  
TGAAGGAATGTAACCTCATATGTTGCTGTTAAGAGAGTGTCAAAGGGTCTAAACAAGGATAAAGGAG  
TATGCATCAGAAGTGAAGATCATCAGTCGATTAAGGCATAGAAATTTGGTTCAACTTATCGGTTGGTGTC  
ACGAGAAAGAGAAGCTGCATCTTGTATGAATTGATGCCCAATGAAAGCCTAGATAAACATCTTTTCAA  
AGAAAAGTCATTGTTGGTCTGGGAAATAAGGTGGAAATTTGCTCAAGCAATTGCCTCAGCTTTGCTGTAT  
CTACACGAAGAGTGGGAACAATGCGTAGTCCATAGGGACATAAAAGCAAGTAATGTCATGTTGGATTCA  
AACTTCACTGCTAAATTAGGTGATTTTGGGTTGGCTAGGCTTATTGACCATGACAAAGGATCTCAAACAA  
CAATGTTAGCAGGGACGGTGGGGTATATGGCACCGGAATGTATCATGAATGGAAAAGCTAGCAAGGA  
GTCAGATGTATACAGCTTTGGAATAGTAGCATTGGAAATAGCAAGTGGAAAGAAGATCAATAAATATTAA  
AGCACCAGAAGATGAAGTGAGATTGGTTGAATGGGTGTGGAGCCTCTATGGAACGGGAGAGCTAGTCA

AAGCAACTGATCCAAGATTGAATAAAATGTTTAATGAGAAAGAAATGGAACGTTTAATGGTCATCGGTC  
TATGGTGTGCTCATCCAGACAACAACTCAGGCCATCAATAAGGCAAGCAATCCATGTTCTAAATTCTGA  
AGCCCAATTACCAATCTTCCATCAAGAATGCCAGTTGCAACATTTTCACCCCCTCCATTGAATATGTTTT  
CGTCTCCATTTTCAAATACCTATGAAGTTAATAAGCAGGAGCAGACTATGACTTACACTATTTCTCAAGT  
GTCTATACTTCGTCAGCTGCTTCATCGACAAAATCACTTTTGTA

>M6-PGSC0003DMG401009415 M6 L-LecRK

AAAAAAAATGGCTTTTACTATTGTTTTTCAACTTTACAATAATGTTTGAGATTATAAGATTAAAAAAT  
ATTTTGATATACATATGTTTAAATTAAGACCATAAAAAACCTAAAATCTTCTTTATTATCATAAACTCTGCAA  
GTCAAAAACAAGACAACATATTGAAACGGAAGGAGTTTATGTAATATTATTATGTTGTTTCAGACTCTCC  
AAAAATGTTGTTGCACATGTATTGAATTCTTAAAAATAATACTACTTTTGAAGGATCCGATCGGTATCC  
ATCCACATATTTAGAGAGAGCGAAGCAACACTAATTCAATAGACTCATTAAACCGCGTGAGCACATGCCCT  
TATCTTTTTATGCTTTTCTTTTCTAGTAGCTAGTAAGTGATCAATGTCTTATATGCTTATTCAATTAATTTA  
TGTAATTTTAACAAGGGACTAGTCTTCTATTCTTACATTTAGTAGTCTAGGAATTTTGACATGGGACTAG  
TTTTTCTAGTCTGACATTTAGCGTGCTAGGAATGTACTAGGTTGGATCATCTTCTGACAAGCAAATTTCCC  
CTTTGGAAGAATCAAAGTCTTCTTGAACATTTAATAACTTGGTCCTTCTTTTTGTCTTCAATCTCCTTTTCT  
TTCTTAGAATTCTCAAGTCATCCCAAGGGTTTGTCAAAGTTTCTTTTACCCTGACTAACTAGATTTGCGTA  
GCATAGGGCCCAACAAAGTGAAAAACGCTATATATCAAGACCATTTTTTAATACTTGAAGTCGAGACCTC  
TAGTTAAGGAATCACACTCCCCGTTAGGCGATAGTAAATGTTTTAATAGTTGATTCATACCATTTGGTAA  
GTAAGAGTTTAAGCCAAAAATATCAAGGATGTAAGAAAACTAATGTAATGCCTTAAAGTTTTGACCAA  
GAACCAACTTGCTACTATGGTCCCTCCAATTTAGAAAAACAAGGCACTATCTTGAAGCCCTTCATTTTGAT  
TTGCTTAAAAGAAGATGATCATCCTTTGCTGACCATGGAATAAGCAGCCATTTGTCAAAGTTCAAACAA  
TTTTTATGTCAAATTTTGGGAAGCTTCTTCTTGTCTAACAGTCCTAACATCCCTTTCATTCATTGTCA  
ACGATTAAGACAAGTTTTGGATGTTAGTTGAATGATGGTAAATTAATCCAATGAAAAGGACATTAATTC  
TGTATTTTAGTATACATTCATCTTCAAACACCTAATCTTTGTGTACCTACTCTTGTCTATCTGACCCTACAA  
AGAGATAAGGTTTGTAAAATACAAAAAAAAGTTGACCATTTGGGTATTCTGCAACTTCTGTGTCTAGCTG  
TTTTTACTGATTAAAAAACAAACATATGCATCTTACAAAATTACATGTTATGGTAACAGGATGGTGTAC  
AAGAATGGAAAGTTACTGCTTGTATATGAATACATGCCTAATGGCAGTCTAGATATGCACCTCTTTGCGG  
GCCAGATAAAGAGCCGCTGAGCTGGCTCGTCCGCTACAAGATTGTGCAAGGTGTTGCCTCAGCATTGC  
ACTATCTGCACAATGAGTATGAGCAGAGGGTGGTCCATCGCGACTTGAAGGCAAGTAACATCATGCTTG

ACTCAAAGTTCAATGCGCGCCTTGGGGACTTTGGCCTTGCACGGGCACTTGACAACGAAAGGACCTCGT  
ATGCTGAGGCAGAAGGAGTGCTTGGTACAATGGGATACATTGCACCAGAGTGTTCACACAGGGAAA  
GCCACACAGCAATCTGATGTGTACGCGTTTGGGGCAGTGTTGTTGGAAGTTGTATGTGGCCAGAGACCT  
GGAACCAAGATTAATGGCTTCAATTCTTTGTTGATTGGGTTTGGTACTTGCACCGCGATGGCCGTATCT  
TGGAAGCTGTTGATCCAAGGCTTGGAGGTGACTATGTTGCTGATGAAGCAAAGAATCTTCTACTACTTG  
GTTTGGCTTGTGCACATCCTATAGCTACTGACAGGCCTAAAACACAGGCAATAGTTCAGATTATATCAGG  
GTCAGCACCAGCACCAGAAGTTCCACCATTCAAGCCAGCATTGTGTGGCCATCAATGATGCCAATTGAC  
ATAGACTCAAGTGTATGGACACAACATCCATTACTACTTCTCAATTCAATTCAGGATGGAGTCTTGACTA  
TCAAAGCAGGGAGACCCCAACATATGCAGACCACTCTTGGTGTAGTTACTTTGATGGTAAACAACACTATT  
ACCAAAAGGAAAATTGATTTTTTTGGCCTTCTATTTTTTAAAAATATTTCTGTAATTATGTTTTCTTGGGA  
GGAGGTTAAAATTCCTTCAGTTTTTTACTTTTTTGTGTTGATGTTTTCTTTTTCTTTTCAATTTGTTATTGG  
GGCATGATGAAAAGATCAGGCAGCCTATGTACATTCATATAACTCAGTACTGTTACATTATGTCATATTT  
ACTGTTTTCTGTCTTTGTCAACCAAATTATGTAAAAGAACTCATGTTGAGCCAAATTGGAGGAGACA  
GAAAATGAATAGTGGCGAAGTATCTTTTTGCCTCAATTGTACTACTACATACAACTTAAAGAATTCCAA  
GATCTCAAATTGTAATGAAAGATAAGACCTGATCAATTCTTATAAAAGCAATAGATAACAGAAGAACAC  
AATACAAAGATAGATCATAGAAGCTTTGTTGATATGCATAAATGCTCTGCCATTGTAGTATTAGATCGTT  
GACAATATATAGTAGATGAAATCCCACTAAGATTTATATTCTTTCTTACTTTCAAGATCATTCTGTAAATT  
AATATAATGGAGGACCTGAGATGCTTGCCAAAGTTTTACAAGTTAGTGCGCATAAGATCAAGAGTTTCC  
CCCGCCTGCAACTTTGTTGATAAACGGAGCTTTCTATAATCAGTGAAAGTGAAAGGAACATAGATACGG  
GGGTGTTGAGCATCCACCAGCTCAGGTGGTGGTCCACTGCTGTGTCCCTTGGTCCCAAGAGGAATGAT  
GCAATAGACACCCGTAGTTTTGCTTCTTGCATATCACTCTATGCTTACTGTGTGTAATCTTCCATTGCTC  
CATACTTCACATAGCAAAGCAAGTATCATTGTCTAGTTCTTTTTTCTCAATCTTAGAAGGGGTAACGGA  
GTAGGAATTATCTAACTTCTGCTAAACAAACCCCGCCAGAGGCTAGCATAAGATTGTTGGAACAATTCA  
AATCTTGAAAATGAACTAGGTAGAGTAGCAGCATAGTTACCGTGCCTATGTCTCCAAGATTCACAAGGA  
GGGTGTTTGGCCAAGGATCAACTGCTACAAATTCACCAGACTTCTTCATGACCTCAAGACCGCCAACGCT  
TTCATCATCCTGTAGAATAGTAAGGAATCCTGAGTCTGTGTGTATCTGAACCCAGAGGAACCTACAGCT  
TCTGGGGTGAAGTGGTACTTGTTAATCCTAAACTGACAAGGCCAATCCTCAAAGGAAACATTTGGCAGT  
CCCAACCCTTCACTCATCTTTCGCAGAATGTCCGTCATTAGTCCATTAATTGCTGTAGCATACTTCTTGATT  
GTCTCTCTGTTACAGTAGGAATCAAACCTGCTTTTAAGCATTCTAGTAAAGCAGTCTTTT

>M6-PGSC0003DMG402009415 M6 L-LecRK

TGCAACTTCTGTGTCTAGCTGTTTTACTGATTA AAAAACAACATATGCATCTTACAAAATTACATGTTA  
TGGTAACAGGATGGTGT CACAAGAATGGAAAGTTACTGCTTGTATATGAATACATGCCTAATGGCAGTC  
TAGATATGCACCTCTTTGCGGGCCAGATAAAGAGCCGCTGAGCTGGCTCGTCCGCTACAAGATTGTGC  
AAGGTGTTGCCTCAGCATTGCACTATCTGCACAATGAGTATGAGCAGAGGGTGGTCCATCGCGACTTGA  
AGGCAAGTAACATCATGCTTGA CTCAAAGTTCAATGCGCGCCTTGGGGACTTTGGCCTTGCACGGGCAC  
TTGACAACGAAAGGACCTCGTATGCTGAGGCAGAAGGAGTGCTTGGTACAATGGGATACATTGCACCA  
GAGTGTTTCCACACAGGGAAAGCCACACAGCAATCTGATGTGTACGCGTTTGGGGCAGTGTTGTTGGAA  
GTTGTATGTGGCCAGAGACCTGGAACCAAGATTAATGGCTTTCAATTCTTTGTTGATTGGGTTTGGTACT  
TGCACCGCGATGGCCGTATCTTGGAAAGCTGTTGATCCAAGGCTTGGAGGTGACTATGTTGCTGATGAAG  
CAAAGAATCTTCTACTACTTGGTTTGGCTTGTGCACATCCTATAGCTACTGACAGGCCTAAAACACAGGC  
AATAGTTCAGATTATATCAGGGTCAGCACCAGCACCAGAAGTTCACCATTCAAGCCAGCATTGTGTGG  
CCATCAATGATGCCAATTGACATAGACTCAAGTGTTATGGACACAACATCCATTACTACTTCTCAATTCAA  
TTCAGGATGGAGTCTTGA CTATCAAAGCAGGGAGACCCCAACATATGCAGACCACTCTTTGGTGTAGTT  
ACTTTGATGGTAAACA ACTATTACCAAAGGAAAATTGATTTTTTTGGCCTTCTATTT

>M6-PGSC0003DMG400000295 M6 LRR-RLK

TTTGCCAAATGTT CATACAA ACTTAGAAAAATCACCAAAAAAATGTCCAAAATTATTTTTCACTTTTC  
ATTTTTCTGTTTTTCATCATTCTCATGGAAAATCCCAAGAATCTCAAATCAAGAAAAGGCCATTTTACTC  
CAACTAAAACAACACTGGTTTACTTCACCAAATGTCACAAAATGGATTTTCATCATCAAATCATTGTTCTTG  
GGATGGAATAATTTGTACCCAAAATTTAGTTTCTGGTATTCAAATCCCTTTTGGAAATATCTCAAACCAA  
TTCAAATTTCA TTTGTGATCTTAAAAATCTCATCTTTCTTGATTTTAACCATAATTTTCATCCCTGGAACTT  
CCCTGATATTTACAGTTGTTCAAATCTTGAATTCTTAGATCTTTCTTATAACTACATGGTTGGTAATCTCCC  
TGATGAGATTAACCGTCTTTGAGTAATCTAAAATACCTAACTTAACTGCCAACA ACTTCAATGGTGAT  
ATCCCTAAAGGAATTGGTGGATTGAGTCATCTCAAAGTACTTGATCTGATGGTGAATTTGTTTTATGGAT  
CTTTTCTGAAGAGATTGGTGAATTGTTGAATCTTGAAGTACTTATGTTGAGCTTGAATGGTTTTGCTCCA  
CATGCTATACCATCACTATTC ACTAAGTTGAAAAATTTGAAAATTTTTTGGATGACAGAAGCACATTTGAT  
TGAAATATCCCGGAAAATATTGGTAATATGACAAGTCTTGAATTTTTGGATTTGTGGAATAATGGATTG  
AGTGGTAGTATCCCTGATGGTTTGTTCATCTCAAGAATTTGAGTATTGTGTATTTATTTACTAACA AATT  
GTCAGGGGAAATACCACAGTCAGTTTCTTCAATGAATTTAGATGTTGTTGATTTGTGTAACAACAGTTTG

ACAGGAAAAATACCAGAAGATTTCCGAAAAATTGACTAAAATGACTGGATTGTCTTTGTTTTCAATCAAT  
TATCAGGTGAAATACCATTGAGTATAGGCAAGTTATCATCATTGTTATTTGTTAAGTTGTTTGGGAACAA  
GTTATCAGGTGAAATTCCACCTGATTTTGGTCGATTTTCGAAACTTTTTGACTTCCAAGTTTCAGAAAATC  
AACTTGTTGGAAAGTTACCTGAGGGTATTTGCAATAACAAGGCTTTAGCTAGGATGGTTGCTTTTGGCAA  
CAATCTAACAGGTGAACTGCCAAGTTCACTTGGAAAGTTGTGACAGTCTGAGGTATCTTCGAGTCGAAAA  
TAATCGACTTTCTGGTGAGGTTCTGATGGATTATGGACAGGTAAGAGTTTGTCAATGCTTTTAATGAAG  
AATAACTTGTTAACTGGTCAGCTTCCACATAGAGTGGCATCAAATTTGTCAACAAGTTGATATCAGCAATA  
ACAAGTTTTCGGGGGAATTACCAGCTGGTATGGGTACTTGGCACAATCTAAGTGAGTTCAAGGCAAGTA  
ATAATCTCTTAAGTGGTCAAATCCCTCAAGAATTGACTCTTCTCCAAGGATAACTAACTTTTTCTTGAT  
GGTAATCTACTATCTGGAAATTTCCATCGAATATATCGTCGTGGAAGACTCTTGTCACATTAATAGCA  
GAAAAAATCAGCTTTCAGGTCCTATACCTTCTGCACTTGGTCTTTTACCAAATCTCATTGATTTGGACTTG  
TCAAGTAACCAATTTTCAGGTGTTATTCCAAGTGAATTAGGTAAGTACTGAGGTTAACTTCACTTAACCTGTC  
ATCCAATCGCCTGTCGGGTGAAATCCCATCTCAGTTGGAAAATGCAGCTTTTGGTAAGAGCTTCTCGGAT  
AATCCTGGTCTTTGTGCAAGTAATCCATCAGTAGAAGTCGCGTCTTGCAAGAGGGAAACTAAGTCAGAT  
ATGTTTCCTGTTGGACTTGTGCTGCTCTTGCTAGTGTAGCAGCAGTACTTTCCTTGTGGCAGTTCTGTA  
TGGTCTGTTTGTGTTGAGAAGTCATAGAAAAAGTAAACAAGAATCAGTTTCGACATGGAAACAAACATC  
ATTTACAAATTAGACTTCACAGAATCAGACATTGTATCCAATCTGACCGAAAACAACATAATTGGAAGT  
GGAGGATCTGGACAGGTTTACCTCGTGCCTTTAAGCCGATCAGGTGATTATGTTGCTGTCAAGAGGATT  
TGGAGAAACCAAAGGTTGGATCACAAAGCATGAGAAACAGTTTCTTGCTGAAGTTCAGATATTAGGCACG  
ATTCGACACTCCAATATAGTGAAACTCCTCTGCTGCTTCTTCAGTGAAGAGTCGAAACTTCTTGTCTACGA  
ATATATGGAGAACAGGAGCTTGGATATATGGCTTCACTCAAAGAATAGGTTGAACAATGCCTCAAGATC  
AACTCCACATCTGGTCTTGAATGGCCTAGGAGGCTGCAAATTGCTATAGGAGCTGCTCGTGGTTTTTGC  
TACATGCACCATGACTGCTCACCTCCTATTATTCATCGCGATGTGAAGTCAAGCAACATCCTATTGGATT  
TCAATTCAATGCAAAAATTGCAGATTTTGGCCTTGCCAGGATGTTACTCAAGCCTGGAGATAACACAGTG  
ACAGCAGTAGCTGGCTCTTTCGGATACATTGCACCAGGTATAAGACCATCAACTTATCTATAACATCATT  
ATAAAGTTTAGAAGTTGGTTTAATCTCTTTCATGGAAAAAAGTTTCTATGCTACACAATTCAATAACATA  
TCAAGGGGTCGTTTTGTTACGTAAGTATGCATGAGTTGTAACACGGGTTGTTTATGTAGTAAATAG  
TAATGTAGATATTAGTACGCGAGTAGTTATTCTTAGTACACTAATTCTCGCGTAACTCATATAAATGCTAA  
TATATTCATGATGGTATTTTCAGAGTATGCGCGAAAAACTAGAGTGACAGAGAAAATTGATGTGTATAGT



TTTGGAGTCATACTATTGGAAGTGGTACTGGAAAAGAAGCCAATCTTGGAGATGAAGATTCTTGTCTT  
GCAGACTGGGCATGGCGCCACCTTCAAAAAGGGAAACCGATGGCTGATGCATTAGATGAGGACATCAA  
AGAAACGCGATACTTGAAGAAATCTTCGTTGTGTTTAAGCTTGAATCTTTTGCACCAGCACATTTCTT  
CATCAAGGCCAACAAATGAAGGAAGTTCTGCAAATCTTGATCCAATGTAGCAACAGTTCACCTACATCTGG  
AGAAAAGAAAAATGAAACAGAACAGGATGTTTTGCCACTCCTCAAGAACTCAAGGAGTGAGAGGATTG  
AAGAAAATGATGATGTTGGTTAACATCAATTATTTGATGGCATTACAATATGATTAGAGTGAAGGAGA  
GCCTTGACGTAAGTGGTAAAGTTGTTGTGGAATAGTCTCTCGCAGAAATGCAGGGTAAGGTTATGTAC  
AATAGATTCTTGTGGTCCGGTCCCTCCAGGACCTTGCGCATAGTGAAAGTTTGTGCACCCGGGCTGCCT  
TTTTTAACAATATGATAAGAGTAAGAAATAGCAAAGAATAAGACCAATAGATAATGTATCAGGTAGTGA  
AACTAGCATTGTACATACTGTATTGGATCCATAGTGTGCTTTGCATTGTTTTGCTACATAAATTTG  
CTTTTCCAATGTTTTCTTACTCATAAAATAACTGTCAAAAAGGTACATTAACCATAAACTATTGAATG  
GAGGATAGATTTCTAAAATCCAGAAAATAGAAACAAGCTTGAACCTCAGTACTTTAACTTTTGG  
CAACCATAACAACATATCCGATGTAATCCCATGAGTCCCAAACCTTTTGGCAACAATACAACAACATAT  
CTGATTTAATCCCACAAGTGGCTCTGGGGAAGGTAGTGTGTACGCAAATCCTACCCCTATCTCGTAGAGA  
TAGAGAGGTTGTTTCCGATAGTAACTTTTTGGCAACAATAAATCTTGTAAGATCACACAAAAATGTGGC  
TACTAGAAGAACTTTATTTGTATCCTAGCTTTATTTCTGTCTAGTGAGGAAAAATTTAAGTTTACTGG  
GGATAAAGATGATCCTTAGAGGCACCAGGAGTGAAAAGGTCAGCATATTGATGTTTAGCTGAAGAGAG  
ATGTGCTCATTGGTACATTGAACTATGGCTCACTTCAAAGCTCACTCTTGCATGACGCGGTGCACAAGG  
AAGCAAGAAATATTTCAATCATCTTGGAGAAGAAAGTAAGAAGAGGGTTCTTTAGCAAGAAGAGGG  
GTGATTGTAAACGTACAACTTTGACTAGCTAGGCACTTTTGGTTGTGTCACTCTGACCATGATCATGATT  
CCTCGAGATCTGTGTATTGGGAATGCGAGGCAGCCAAAAGTGACAGCTCCAACGCCTGAACCATCATTAG  
AAAGCTCAATGACTATGCTGTCCGCAGCTTCTCCAGTAACTCTTTCATAGTTTCTCCAAGCAATTTCTG  
AACTGGTGTAACGCTCAAACAATGCACCGTCCACAGCTATGACAGACCTCTGGTTCTCTCCGTCCTTCA  
AAGTGTCTTTTCCAATTTCTTGAGGATGCCACGATTCCTGCTGCAGAAAGACGAGCTCCATGAGAGGT  
GATAATGTCGCATAGCTCCACAACATTTTCTCATTTTCAAGGTAGAATTAGGTACCTGTGAAAAAAT  
GTATATATAGCAAATAGGATGAGAAAGACGTTCTCCAATTAATTAAGCCAGCCAACATTGTGATGTTCA  
GACAGGAGCTAGGAATTTGAGTTTATGGGTTCCGGATAAATTATTTACACATATTAAGTGGGTTTTTTAG  
TACAAATACAAAGCTACTGGTTTTTTGTCCTATCATATATAGGACAAAAAAGATGAGAACTTCAAAGACT  
AGTAATGTTTCACTTTAAGTCAAATGTTTGATCTTAATACCTCTAAGATATCCTTCAGTTTATTGCCAACCA

CCTTGAGATCAGCCGACTCGTCGTGATGCATAGCAGCCATATCCGGAGTCCTGCATGTGTGGCAGTAAA  
TAACCTTTTTACAATATTTGACAATTCAAAGCTTACATATGCTTAATAAACGTACACGAATCTAGTCCAA  
CGAGAAGCATAACTTACAGTGTAAGAGATTAGTGCAATTACATAAACCTTAAGTTGCACTAATTGCATGG  
AGAAGAATAAGGTTAAAATTGATGAATGCAAATAGGGCCTGCCAAAAAATAAATTACTGCCGTAATAAA  
TGTGTTGGTCAAAGCAATACCCTACCTCAATATGAAAGGAATTTTCAGTTTGGATGGGACATAATCACCG  
AATAATGAAGCTTCTTTAGCCATTCTACACAATACTCTACGCAAATTTCTCCAAGATACATCCCGGAGAT  
CATCTTTTCATAAATCTGTGCAGTTTCCGAAAGTTCAACAACAGATGTAAGATAGAAAATGTAGAAAGGA  
AGGGGATTGTCTTAGTTACCTGCTCCCCGGGGTTTAACTCTCAACATCAAGATTTTGGTCATATTCTGTT  
ACTGGAAGATGTGATGAGCGGAAATTACCCATTCCATGTTGATAACCTTTAAAGGCCAGTCAAATTAC  
GTTTAAGTAAACAAACGTGTATGAATCTACCAAGGAAAATATTTTTAGGAAATGAATTAGGCACATATCA  
AGTCATGAAGGTGTTATGAAATGTCATAAGCATCTACCATCTCTCCGGATTTCCGGCAACAGACCATGCCA  
TTTGGGAATCACATGAGCCCGTTCAACATATGCTGCATTGGTTCCAGTACCCAAAATTACTGCAGCAATG  
ACATCAGGATTATTGTACCGACCTCCTGCTAACGTTCCAACAGTATCATTGACCTAAACAACCAAGTCAA  
CTAAGAAATTCAGGCTCAGGAATTGCTTAAGATTAAAAATCAGAAATATCACACATACAAAAACCTAATA  
CATGAAAATCATCAGCTTACTTATATTTTATCGAATTTGATTGGGAAAAAACTTACTAAAGCAGCCACA  
CGCACATCAAGGCCGGCCCTTTCCATTGCTTTTGCTAATTCTCCAACCACATCTTGGCCAACCTATGTTAG  
ATTCCATGAGGAGTAGTTCAGAATTGAAATACATTA AACATTACAAAAGGAACTCTTTATAACGTACTT  
TAAATCAAATTGGTGAAAATGCAATGAAACAATGATCAACTTTGCTTGTATATAGTTGTATGCATTAAT  
CCTCATCAATGCCAACCTATTTTAGGCCATGAGGAGTAGTTCATCATTGAAATACAACATAACGTTGGAA  
AAGGAAATCCTACAACGTATTTTAAATCAACTCAGTGAAAAAGCAATGAAATATACGTTGTCGGACTCTC  
CAATAATATTGCCGCACCTTTGTCAGATCCTTCAAATGTACTGCTTTTGAAGGATCCTACAAGCACCTGG  
CGAGTGGCGAAATTTTTGAAGAGTCTGAGCAACATAGATGAAATAATCATCAACTTTGCATGCATAAAG  
TTGTATGCATTAATCATCATCAATGCAAACCATACATTGAAATGAATGGACTAAATCTAAGGTTGATT  
GTAGGCATGATCAATCGGAAGTGAAAATCAGAACTCTGTATGACTAACCACGTCTTCTATGGAGAAGC  
CCTTTGTCCATTAATAAGAGTTCCTGATGCAATTGACAATTGTTTCACAGGGGAAAGAGAAGGTAAAGCC  
TAACTCCCTTTGTCTACCAGGTGGAAGATGAAAATCATCACCTTCTGTAGCTACAAATTCTGCAAGTGCT  
GTGGCAATAAAATCAAATAACACCTGCAATTAACAGTTTGAAGTTTAATAATGTGAGTACAACCTTGATT  
GGATTA AAAAGTTGCAGGATGCATGGCTGATACAGCATAAGACTTACTTCAGATGACGATCCAGCCAT  
CACATTCTGTGGAATTGAAACTTCTTTAACTTCATGTTTAACTATACGCTTTTCTTTCCACCCAACTGCAC

ACGCATCACACGAAAGTTTGTGCCGCCTAGATCCAATGCATAAAACAGACCTTCTTCGTCCTAAGATGA  
AGGAATAAAAGTAATACCAGTCATTAAGTGAAGATAACAATCATACATGGAAAACATACCCACCCCTA  
ATGCACTACAGAGGTCTATTGGCAGCAGCTTTGAAAATTTGTCGATACATGTGAATTTTTATACCCAATT  
TTAGTAAGTTTATCACAAGAACATGGAATTGTTACCAAGTCCCTACCTCCGCCTACTACTATAGGTATGCC  
ATTTTTAACTTTAGAGAATGTCAAAGTATTGTCATATATTCTTTTCTTATGGATCTAACTTCATT  
ATGTTGATCACAGAGATGTCTGTGTAGACAGCACAGTAACAAATAATGAGCAGACAGAAGAAGATGGA  
ACTGAAAAATTTACACGCATGATAATTGTTAAAGAATGGAAGTGGCAATGTAAAATTCAAAAAAGGTGG  
TCAAGATACAAAACAGTAGAAGAGAATATAGAATAAACATCAAAGTCCAGGATCCATAGATAATGAGTGA  
CCTGATCACTTGTGAGTTAGAACTTCTTAGTGGACTCCAAGTTCAACAAATACTTCAAATAATAGAGTTT  
CATTTCTGCTCTTTGTGATTTATAACGATGCTCAAGGTAATCACCTTAAGAACATCAAAGAATCATACTT  
TAGGACTAAATAAATTTGAAAAGTACTTAATCAATTATCCAAACATTACGAAAGTGAAATCAATCTCC  
ATGATCACAGCTTTATTCAAAAAGAGAAATCTTGACACCCAAATTAGCAAAAATCAGTTTGTGCACAT  
ATACACACACAAATACTCATCCAATGTGGAGGCTATCAACTTAGCTAATAAGCATCTTTAGTTTGCCAAT  
GAATCGTTAGTAAAACACACAATCTGATATAACTCTCCACCCATAAGCTAAAATCAAGAGACAACACTA  
CCAAGATCACAGCTTTATTGAAAAAGAGACAAATCTTGACACCCAAATGAGCAAAAATCAGTTTATAC  
ACACAAAATACTCTCCAGTCGGATGGTTATCAACTTAGGTAATAACCATCTTGAGTATGTCGATGAAT  
CAATTGAAAAACACAAAAAAGAACTGACATAACTCCAACCCAGAAGCTAAAATAAAGAGACAACACCT  
CCAACCGAGTTGGAGCTAGAATTTGATGTTTATTGGTTCTGAACTTGTGCGAGAAAAAACTATTAGGTTCA  
TCCGAACCTGTATCTAATATGTAGCTCCACCCCTGCCTCCAAAATCACAACCTTACTGAAAAAGAGACAA  
ATTCTTGAACACCCAAATAAGCAAAAAGACAGTTTATGCACATTCTTTTTTTGAGAAGGAGTTTATGCACA  
TTCTTAAACACCCAAATTAGCAAAAACAGTTTATCCACATTATAAACACCCAAATAAGCATAAAAACA  
GTTTATCCACATTCTCAAACACCCATATAAGCCCAAAAAAACAGTTTATGCACATTCTTGAACACCCAAA  
TAAGCCAAAAACAGTTTATCCCACTCTTAAACACCCAAATAAGTAAAAAACAGCTTTACTTAAACACCC  
AAATAAGGCACTCAAGGGTGTGGCCTAGTAGTCAACAACGTATTGAGCACCATGAAGTCTCAGGCTCAA  
TTCCAGCTCTATCTATTCTAGCCTTGGTGGACT

>M6-PGSC0003DMG400000358 M6 LRR-RLK

TTTGCCAAATGTTCATACAACTTAGAAAAATCACCAAAAAAATGTCCAAAATTATTTTTCACTTTTC  
ATTTTTCTGTTTTTCATCATTCTCATGGAAAATCCAAGAATCTCAAATCAAGAAAAGGCCATTTTACTC  
CAACTAAAACAACACTGGTTTACTTCACCAAATGTCACAAAATGGATTTTCATCATCAAATCATTGTTCTTG

GGATGGAATAATTTGTACCCAAAATTTAGTTTCTGGTATTCAAATCCCTTTTGGAAATATCTCAAACCAA  
TTCCAAATTTCAATTTGTGATCTTAAAAATCTCATCTTTCTTGATTTTAACCATAATTTTCATCCCTGGAAACT  
CCCTGATATTTACAGTTGTTCAAATCTTGAATCCTTAGATCTTTCTTATAACTACATGGTTGGTAATCTCCC  
TGATGAGATTAACCGTCTTTTCGAGTAATCTAAAATACCTAAACTTAACTGCCAACAACTTCAATGGTGAT  
ATCCCTAAAGGAATTGGTGGATTGAGTCATCTCAAAGTACTTGATCTGATGGTGAATTTGTTTTATGGAT  
CTTTTCCTGAAGAGATTGGTGAATTGTTGAATCTTGAAGTACTTATGTTGAGCTTGAATGGTTTTGCTCCA  
CATGCTATACCATCACTATTCACTAAGTTGAAAAATTTGAAAATTTTTGGATGACAGAAGCACATTTGAT  
TGAAATATCCCGGAAAATATTGGTAATATGACAAGTCTTGAATTTTTGGATTTGTGCAATAATGGATTG  
AGTGGTAGTATCCCTGATGGTTTGTTCATCTCAAGAATTTGAGTATTGTGTATTTATTTACTAACAAT  
GTCAGGGGAAATACCACAGTCAGTTTCTTCAATGAATTTAGATGTTGTTGATTTGTGTAACAACAGTTTG  
ACAGGAAAAATACCAGAAGATTTTCGGAAAATTGACTAAAATGACTGGATTGTCTTTGTTTTCAATCAAT  
TATCAGGTGAAATACCATTGAGTATAGGCAAGTTATCATCATTGTTATTTGTTAAGTTGTTTGGGAACAA  
GTTATCAGGTGAAATCCACCTGATTTTGGTCGATTTTCGAAACTTTTTGACTTCCAAGTTTCAGAAAATC  
AACTGTTGGAAAGTTACCTGAGGGTATTTGCAATAACAAGGCTTTAGCTAGGATGGTTGCTTTTGGCAA  
CAATCTAACAGGTGAACTGCCAAGTTCACTTGAAGTTGTGACAGTCTGAGGTATCTTCGAGTCGAAAA  
TAATCGACTTTCTGGTGAGGTTCTGATGGATTATGGACAGGTAAGAGTTTGTCAATGCTTTTAATGAAG  
AATAACTTGTTAACTGGTCAGCTTCCACATAGAGTGGCATCAAATTTGTCACAAGTTGATATCAGCAATA  
ACAAGTTTTCGGGGGAATTACCAGCTGGTATGGGTAAGTGGCACAATCTAAGTGAGTTCAAGGCAAGTA  
ATAATCTCTAAGTGGTCAAATCCCTCAAGAATTGACTCTTCTCCAAGGATAACTAACTTTTTCTTGAT  
GGTAATCTACTATCTGGAAATTTCCATCGAATATATCGTCGTGGAAGACTCTTGTCACATTAATAGCA  
GAAAAAATCAGCTTTCAGGTCCTATACCTTCTGCACTTGGTCTTTTACCAAATCTCATTGATTTGGACTTG  
TCAAGTAACCAATTTTCAGGTGTTATTCCAAGTGAATTAGGTAAGTGAAGTTCACTTCACTTAACCTGTC  
ATCCAATCGCCTGTCGGGTGAAATCCCATCTCAGTTGGAAAATGCAGCTTTTGGTAAGAGCTTCTCGGAT  
AATCCTGGTCTTTGTGCAAGTAATCCATCAGTAGAAGTCGCGTCTTGCAAGAGGGAACTAAGTCAGAT  
ATGTTTCTGTTGGACTTGTGCTGCTTGTAGTGTAGCAGCAGTTACTTTCCTTGTGGCAGTTCTGTA  
TGGTCTGTTTGTGTTGAGAAGTCATAGAAAAAGTAAACAAGAATCAGTTTCGACATGGAAACAAACATC  
ATTTACAAATTAGACTTCACAGAATCAGACATTGTATCCAATCTGACCGAAAACAACATAATTGGAAGT  
GGAGGATCTGGACAGGTTTACCTCGTGCCTTTAAGCCGATCAGGTGATTATGTTGCTGTCAAGAGGATT  
TGGAGAAACCAAAGGTTGGATCACAAGCATGAGAAACAGTTTCTTGCTGAAGTTCAGATATTAGGCACG

ATTCGACACTCCAATATAGTGAAACTCCTCTGCTGCTTCTTCAGTGAAGAGTCGAAACTTCTTGTCTACGA  
ATATATGGAGAACAGGAGCTTGGATATATGGCTTCACTCAAAGAATAGGTTGAACAATGCCTCAAGATC  
AACTCCACATCTGGTCTTGAATGGCCTAGGAGGCTGCAAATTGCTATAGGAGCTGCTCGTGGTTTTTGC  
TACATGCACCATGACTGCTCACCTCCTATTATTCATCGCGATGTGAAGTCAAGCAACATCCTATTGGATTC  
TCAATTCAATGCAAAAATTGCAGATTTTGGCCTTGCCAGGATGTTACTCAAGCCTGGAGATAACACAGTG  
ACAGCAGTAGCTGGCTCTTTCCGATACATTGCACCAGGTATAAGACCATCAACTTATCTATAACATCATT  
ATAAAGTTTAGAAGTTGGTTAATCTCTTTCATGGAAAAAGTTTCTATGCTACACAATTCAATAACATA  
TCAAGGGGTCGTTTTGTTACGTAAGTATGCATGAGTTGTAACACGGGTTGTTTATGTAGTAAATAG  
TAATGTAGATATTAGTACGCGAGTAGTTATTCTTAGTACACTAATTCTCGCGTAACTCATATAAATGCTAA  
TATATTCATGATGGTATTTTCAGAGTATGCGCGAAAACTAGAGTGACAGAGAAAATTGATGTGTATAGT  
TTTGGAGTCATACTATTGGAAGTGGTACTGGAAAAGAAGCCAATCTTGGAGATGAAGATTCTTGTCTT  
GCAGACTGGGCATGGCGCCACCTTCAAAAAGGGAAACCGATGGCTGATGCATTAGATGAGGACATCAA  
AGAAACGCGATACTTGAAGAAATCTTCGTTGTGTTAAGCTTGAATCTTTTGCACCAGCACATTTCTT  
CATCAAGGCCAACAAATGAAGGAAGTTCTGCAAATCTTGATCCAATGTAGCAACAGTTCACCTACATCTGG  
AGAAAAGAAAAATGAAACAGAACAGGATGTTTTGCCACTCCTCAAGAACTCAAGGAGTGAGAGGATTG  
AAGAAAATGATGATGTTGGTTAACATCAATTATTTGATGGCATTACAATATGATTAGAGTGAAGGAGA  
GCCTTGACGTAAGTAAAGTTGTTGTGAAATAGTCTCTCGCAGAAATGCAGGGTAAGGTTATGTAC  
AATAGATTCTTGTGGTCCGGTCTTCCCAGGACCTTGCGCATAGTGAAAGTTTGTGCACCGGGCTGCCTT  
TTTTTAACAATATGATAAGAGTAAGAAATAGCAAAGAATAAGACCAATAGATAATGTATCAGGTAGTGA  
AACTAGCATTGTACATACTGTATTGGATCCATAGTGTGCTTTGCATTGTTTTGCTACATAAATTTTG  
CTTTTCCAATGTTTTCTTACTCATAAAATAACTGTCAAAAAGGTACATTAACCATAAACTATTGAATG  
GAGGATAGATTTCTAAAAATCCAGAAAAATAGAAACAAGCTTGAACCTCAGTACTTTAACTTTTGG  
CAACCATAACAACATATCCGATGTAATCCCATGAGTCCCAAACCTTTTGGCAACAATACAACAACATAT  
CTGATTTAATCCCACAAGTGGCTCTGGGGAAGGTAGTGTGTACGCAAATCCTACCCCTATCTCGTAGAGA  
TAGAGAGGTTGTTCCGATAGTAACTTTTTGGCAACAATAAATCTTGTAAGATCACACAAAAATGTGGC  
TACTAGAAGAACTTTATTTGTATCCTAGCTTTATTTCTGTCTAGTGAGGAAAAAATTTAAGTTTACTG  
GGATAAAGATGATCCTTAGAGGCACCAGGAGTGAAAAGGTCAGCATATTGATGTTTAGCTGAAGAGAG  
ATGTGCTCATTGGTACATTGAACTATGGCTCACTTCAAAGCTCACTCTTGCATGACGCGGTGCACAAGG  
AAGCAAGAAATATTTCAATCATCTTGGAGAAGAAAGTAAGAAGAGGGTTCTTTAGCAAGAAGAGGG

GTGATTGTAAACGTACAAACTTTGACTAGCTAGGCACTTTTGGTTGTGTCCTGACTCTGACCATGATCATGATT  
CCTCGAGATCTGTGTATTGGGAATGCGAGGCAGCCAAAAGTGCAGCTCCAACGCCTGAACCATCATTAG  
AAAGCTCAATGACTATGCTGTCCGCAGCTTCTCCCAGTAACTCTTTCATAGTTTCCTCCAAGCAATTTCTG  
AACTTGGTGTAACGCTCAAACAATGCACCGTCCACAGCTATGACAGACCTCTGGTTCTCTCCGTCCTTCA  
AAGTGTCTTTTCCAATTTCTTGAGGATGCCACGATTCTGCTGCAGAAAGACGAGCTCCATGAGAGGT  
GATAATGTGCGCATAGCTCCACAACACTATTTTCTCATTTTCAAGGTAGAATTAGGTACCTGTGAAAAAAT  
GTATATATA

>M6-PGSC0003DMG400000728 M6 LRR-RLK

ATCAGTGTATTTTCGTGTCTCTGAATTAGGTGGGACAAGATTCCCATAAAAGGCTCTCAAATTTTCAACCA  
AAAATTCAGTGCAGCACAAACACTATGCACGTTAAAGGTGCTTTGCAACTTTATGGATTGTGCCCATGTC  
TGGTTGACTAAAAATCATCTAAAGCCTATTTATAAATGATAATATTAGATGTCTGCTTCGCTCTTAGCTTC  
TCAGGATTTATAAAAGGAGGCAATGCATGGTTGATGGTTTTCTGATTTGCTATCAGTTGGAGATCTGTAA  
TGTTTATTGCCTCGTGAGACTATCATTATACAGAGTTCATCACATAAGGAATAGCCTCCACAATATCTGG  
ACCTGGAGCTTGACTCTATCAACTTGAGGGCTTCACTTGCTATCTTTATGAGCTACACCTGCATGTAATAA  
AAGTAAGAGTTTAGGAAACCTAAAACCTGTCTTTTAGGGCTTAGCAATGTAACGTCAAGAGCCATGCA  
CTTCTAAAATTGCTGTAAGCTCAGCTTCTATAGTTCCATGCATGGCTGCGATATCTCTAATCTAGGCAGTT  
TCAATTGTTAGATTCGGTATGAGGGATGTGGCCTTAGAAGATCTTGATGACATTATAGTTCTACTGTGCA  
GAGATATTGTGAATGCAGAAATAGAAAATTTCTCAAACCTAAGAACAGTTATGTTTTTTTTTAAAATTTTT  
CTTTTCTTATTATTGAACCTTCTCCATACATCAATCCTTTTTTTTTTGATAACCGTGGTGCCCGGGCTAGCT  
TGTGCACACCTTGACACAATCCCATCAATCTTAATCAACTAAAGGTAGTCTGCATATGACACTCCTCATCT  
TTTGTACCTTTTATCTCCATGGAACCTAAGCCAGTCAGTGAACCTATCTAATTTCTCTAAAACCTTTTCATCTG  
CATGTTTTGGGTTCAACCAATATTCTTTCACCGGGCAACCCCTAGGGATTTGGGTTAGTGGCAAGAGCAC  
AACTCATTATGTGTGGGTTAAGCTCACGTTATCAGTTTGAATCCTACCATAGACTAAAGCTTGGTATTTAA  
GTGGAGAAAGGTAGAAGGCTGGGCCATTATCCACCGACTTTTGGACCGTGCACCGAAAGAGCTGGGA  
GGATTTCTCAGTTACAAACAAAAGATCCTTTCATGGGGCATCTAATAGACTTTCTTGAACCGAATATCCAT  
TCCAGAAGGAGTTTCAAAGGAGATGCTTCTCTAATGTCCGCATAGTTTTTCTGCTGCAGTTCACCATG  
AAATTCTCAATGATTTAATTGCATGAATTAGTTTCTTGGATTCAACTCTTCCCTCAACAACCCACCCCCAC  
CCGCCAAAAAAGAACTTTATTTCTGTCAGAAGTTTGCTAGTGCATCATGTAGTGACATCTTCTTTTCT  
ATGCCTACTATTCTCACAGAGATGTTCAAGCAAGCAGCATACTTCTTGATGATAAGTTCGAAGTACGGCT

AGGGAGTCTAAATGAAGCCTGTGCACAAGAAGGAGAGAGCCATCAAATCGAATTTCCAGGCTGCTTA  
GATTTCCACAGTAAGTACTTGTTGGTAAATTCTGTGTTCTAACCATCCTTTTCTTTTCGAAGGCTAACCACT  
ATTACTACTAGGTTGTTATGTAATGTTCAATAATTTTGTTCATTTTTGTCTCCCATGATGGATCTTAAAA  
TCAGGCAGTTTTATAGTTAATATGTCTGTATCTCCAATTTGATGTTATAGAACTACTTTGGCCTGGTTTC  
TAAATTGGATTTGAGTTCCACAGTTTTGCTGCCACTCAAGTCTTTCTGGTGTATATTTATTAGCTCTGATAT  
AAATGAGAATCCTAACGTTTCATGCAGCAACCTTACTCTAACCTTGTCATCTCGTTATCTGTGCTTATACA  
AAAGGGCTTTAGCTTTGTTTCTAAATTAGAAAACTTGTAATATAGGCTCTGAATAGTTTAGTAGTCCTG  
ATGATAGTTATCATGCAGTTGCATATAATCTTATTTCTTCTCAGTATTCAAGTTACAAGGAACACTGTAAA  
GAACAGTGGGTCTAGTCTGAAAGACCATCACCCACTTGTTAATTACTTGTTTTATCCCTCAGTAAATTATT  
CCTTTTCTATGTTGTATGAATCTTTTTGCCTTGATTTACCTATGTCTAGCGGGTGTACATGGGTGTTGTTG  
TTAAGTAGAAATTAGCAAAAACTGTATGTACCCTTACTGGATACTTAAAACTCATGTATGGGATATGC  
ATGCGTAGCCGAATCCATGAAACATAGTCCTTTGATGTACATGTTTTCACTTAAGGAGAATTTGTTGGTT  
ATGCTATTTGGTAGGGAATGCATAGTTCTCATTCTTTTAGCTTTCCATCCTGTGCTGAAGTAAGTTAACT  
ATTTCTCACTCTCATTGTCTAGCTTTAACTATTACCTATTCTCGTTATGCCTACACATTGAATGCAGGAAAT  
TATTAATTTTGTATTGTGGTACTAAATACTTCTGGAACGACCTAGATATAATGGCATGTGAAAAATTGG  
TTTGAAGTCCCATGTTAGATGCCAAAGATTTTAGGCCTTCTATTCTATTATTTAATCTTCATGGCTTCTGT  
TAAAACTTCCAGGTTCTCTTATTTTAGAAATTGAATTTACGACCACTGATCACAGTAATCCAGTAAGCTT  
TTGTTTTATAGTGAAAACTTTTCCATATGTATTTCTGTCTTACAAATGGTTATCACTGTTTTTCCAGCTTTT  
CGTCGAAGCTTGTTGCATGATCTCAAAGTTTAGTTATATTCTTTCAACCAGTAACTGTTTAATAGTTTAT  
ACTGCTTATTGACATAGTTCTCCCTTTCTTATTTGCAGGACGTCGGAACAAGGTGCATCAGGTATGTGCA  
ATTTTATTTAGTTCTACTTTCTTTAAATAGAGTTTACTTGGATATTCTTAATATTTATTAAATTGGTGTAAG  
TAACTATTTAAAATTATTTGCGTCACATTTCCAGTATTGTTTGTGGTGGGTAAAATTTCTTAATGTCTAG  
GCAACAAATCAAACCTATAGATTCTCATTAGAAGTAAGAATAAGTGAGACTATTAGGTGGAAATTTACG  
ATATAAAGCTGATTCCAAAGAGTGTAAGGGCTGGACAACCTGTATATTGAACTGTAAGTGCCTAAAGAAC  
TGGAGATTTTATGATGGCGGTGTTTTGCTTTACTTTTTGTGGGATCTTTGTAGCTTGAACCTATCACTAGGGA  
ATACTTCAAAGTCTACTCCTCTCGTCCTAATATTCTTTCTTACCTGAATGGACAGGTACACCTAGTGCCACT  
TGTGCGTATGATGTCTACTGTTTTGGAAAGGTTTTGCTCGAGCTAGTAACTGGCAAGCTAGGTATCAGTG  
CATCCAATGACGCCAGCATGAAGGAGTGGTTGGATGGTACACTTAAGTACATTAGTATATATGATAAAG  
AACTTGTCACAAACATTGTGGATCCTCCCTAATCATAGACGAAGATTTATTAGAGGAAGTATGGGCGAT

GGCTATTGTTGCCAGATCCTGCCTCAATCCCAAACCGTCAAGGAGACCCTTAATGAGATACATCCTTAAA  
GCTTTGGAAAACCTTTGAAGGTAGTTAGGGAAGAACAACACTAGCTCAGCAAGACTTAGAGCAACTTCA  
TCGAGAAGTTCATGGAACGCTGCACTGTTTGGCAGCTGGCGTAGCTCCTCAGATGTAGCAGCCGTACCT  
GCTGCAGCTTCAGCACATAAGTTGGAAGGAACAAGTAGTTTGAAGCAATCCGGAACAACAGGCTCTCAA  
GGAAGTGGTCCTAATGGGGACAACAACGGTCATTCTTCATCAACTAGACGACAGTCCAAAGAGATTTTC  
CCTGAGCCATTGGAGGAGCACGATGTAGAGAGAGGACCACTGGCGGAGTAGAAGGGAGGGTGATTGT  
CATTAAATCTTTGTTAATAATGCAGCAGGATCTGCATTAAGGTTGCATTTTTGTTGGGGACACCTTGAC  
ATTCTCCGTTCCGGAATTCTTGAGTTTGCAAGCCATTGTCTTGCCTGATCTTGAAAATGGAGATGCATA  
GTTTACCTGGAGACAGCAAACATCAAATTGTTTATTGGGGTTTTGGGATTTTAAGTTCTTTTTCTTTTTCT  
GGGGATAGATTTGGAAAACAGGATTTAGTAGTGGTGGTGGTCTTTTTGTTAATTTGTTTTGGGGGGT  
TTATGTTTGCTTCAAATTCCAATTCTTTCTTATAATTCTTCTTTTTACTAGTCTCTCCATGGAATGTAAA  
TTATACACAATCTTTCATTTTCCAATTGGAGGAGAGGGAAAAAAGAAAAAGAGTATCCC

>M6-PGSC0003DMG400000996 M6 LRR-RLK

GGCTGTTGTCTCTTTTTGCCTTAAAACCTGAACTTCTCCTGAATTTTTCTACTCTACATATTACTGCAGGC  
ATGAAGTCTTTAATGTTTTCAATTTGTGTTATGCTTTCTTGCTTATTATGTGTTCTTTCTGCAGATGCATCTT  
CCAGGCTTGCTGGAAATGAAACGGATCACTTAGCCCTCCTCAGTATTAAGCACAAATAACATATGATCC  
TTCTGGTGTACAAATCTTGGAATGATTCCTCCATCATTGTAGTTGGCAAGGCGTTACATGTAGTGCTC  
GACATCAAAGGGTGACCGTGCTGGATTTAAGCTCTAAGCAGGTTGTAGGAACATTAGTTCCTCAGATAG  
GAAATATGAGTTTTCTTAGAGAACTAATTCTTCAAATAACACCTTCAATAGTGAGATACCACGCGAAAT  
CGGAAGGCTATTCAGGTTGAAGAATTTAGTGCTAAAGGACAACCTCATTTACTGGTGAAATTCCAGTGGA  
ACTATCAAATTGCTCTAGACTCATTTATCTTGATTTGGATGGTAATCACTGACCGGGAAAATCCCTGTGG  
AGCTTGGTTTGTCTTTGAGAAATCTTCAGGTACTTTTTCTTAGATCAAACAATTTAACAGGTGAACTACCA  
TACTCTTTGGGTAATCTTTCATCCCTTATTGCCTTAGCAGCAACAGAGAATAGATTAGAAGGAAGTATAC  
CGTATTCGTTAGGCCAGTTGACTAACTTGAGTTATATCTCTCTTGGTGGTAATATGCTTTCTGGTTCAATT  
CCCATTTCAGTTTTTAACCTTATCCTCTCTGTATCATCTTGCTGCACCAGTTAACCACTTAAAGGAAGTCTT  
CCCACTGATATTGGATCCACACTTCCGAGTCTTCGCATAGTTTTTTGTTCTCAAACCTTATTAAGTGGAGT  
GCTTCCAAGTTCATTTCTAACTTAACCAATCTTGAAATTCTCTCATTATCAAGAAACCAGTTGTCCGGGA  
AAATCCCTTCTCTGGAAAACTCCGTAATCTTCAAGGACTAGCTATGCATTTCAATAATCTTGGAACCGG  
AAGAGAAGATGACATGGATTTCTTTCTTTCATTGGTTAACATTACCAGTTTTAAAGAACTGAGTTTGAGT



GTGAATAATATAGCAGGCCAGCTGCCTAAGAATATTGGCAACTTAACCAATTTCCGGTCTATTGGTTTTG  
CTAGGAACAAACTATTCGGACGAATACCTGATGGATTTGTTGATCTCAGCAACATGGAAGTGGTAAGTT  
TGGAGTATAACCAATTGACTGAAGAAATCCAGCTAGTCTTGGTAAACTTCAAAAACCTCAAGTATTTCTA  
TGTTAACGGAAACAAACTCTCGGGGGAAATCCCTTCCTCTATTGGAAACATAACATCTTTATATGGACTT  
AATCTAGCTCAAAAACAACTTAGAAGGGACTATTCCTTCAGTTCTTGGAAACTGTCAGTTGTTGCAAATGT  
TGTATCTTTCTCGAAACAGACTCAGTGGGACGATACCAAAGAGGTTCTTAGTATCTCATCCTTGTCTATC  
CAACTAGACCTGTCTGGAAACCAGTTAAGTGGATCACTCCCCTTGAAGTAGGAAGTTTAGTCAATCTTG  
GGTTTCTTGATATCTCCGAGAACAAGTTATCTGGAAAACCTCCGAGCACTTTAAGCAGTTGCATCAAGTT  
GGAAAACCTCTACGTTCAAGAAAACATGTTTGAAGGTGTGATCCCATCATCTTTAAGTTCTTTGAGAGGG  
ATGGAATATTTGGACTTGTGCGATAATAATTTCTCTGGTCTTATTCCAAAGTACTTTGAAAACCTTCATATCA  
TTGAAAAGCTTAAACCTGTCATTTAACAATTTTGAGGGTGAAGTACCTCGAGAAGGAGTTTTAGTAATG  
CAAGTGCAGCAATAGTCAACGGAAACAGAAATCTTTGTGGAGGTTCTCAAATGCTAAAGCTACCACAAT  
GTAAGTTTCCAATGCCGAAAAAAGAAGATTGTCATCAACCTTGAAGATAACTATATCTGTTGCTAGTGC  
ATTATTTGGAGTAGCACTTGTCTGATGCTCCTAATTTTGTGTTTCTTAAAGAGGAAACGTAGCCCTTAC  
TCGATTTATCAGATGATTGTTCTTGAATACTCTACAGGGAACCTTCTGAAAGCAACTAATGGATTCTCC  
TCAGATTATTTAATTGGTAAGGGTGGTTTTGGTTCTGTATAACAAGGGAATTCTTGGTCCAGATGAAAAA  
CTGTCGCGATCAAAGTACTCAATTTGCAGCATAAAGGAGCTTTGAAAAGCTTCATTGCAGAATGTGAAG  
TCATAAAGAACCTCAGGCATAGAAATCTTGTCAAGTTAGTAACTGCATGCTCAGGTAATACTTTCAAGG  
CAATGATTTTAAGGCCCTCATTTACAAGTTCATGGTTAATGGTAGCCTAGACGATTGGCTACATTCATTT  
CTAATGATGGAAGTCTGCACGTTGATATCTAGATCTTTATCAGAGAGTAAACATTGCATCAGACATTGC  
TTTCGCGCTAGATTATCTTCATCATGGAACCCAAACACCAGTAGTTCATTGTGATTTGAAGCCAAGCAAT  
ATCCTTCTAGACAAGGACATGACTGCCCGTGTGGCGATTTTGGTTTATCAAGATTCCTCCAAGAAACAT  
CTCAAAGGGAAACTAGCACTATTGGTAGTAAAGGATCAGTTGGCTATGCAGCTCCAGGTAAACATCTCT  
TTCCCTATTTTAGCAACTCTCACATTCAACTTTGAGCCTGACATGTTTAAGATCATACTATGTTTAAGATC  
GTAATATTCAAAGTCTTACATACTTTCTTAACTTCGTGGCAAGTCAAACCAGACAAATATAAAATGG  
AGTGATTTTGATATGGACTAACGATTTTTTTTCTGCAGAATATGGAATGGTAAGTGAAGTATCAACTTAT  
GGTGACATATACAGCTATGGAATCATCATACTGGAGATGTTAACAGGGAAAAAACCGACAGACGACGC  
CTTTTCAAATGGAATGAACCTTCACAACTATGCTAAAATGGCTTATTCTACTGGTAGAGTCATGGAAT  
GTTGATCAAATGGTTTACCACAACCTGCAAGAAATGAAAACCAAAGATTACATTGAAGAGTGTTCATTT

GTATGTGTA AAAATTGGGATTGCTTGC ACTATAGATTACCCAAAAGAAAGAATGAGAATTAGTGATGTTA  
TTAAAGAGTTGCAATTAGTCAAAGAACTTTATCTTAATGTGATAGAACACTATGATATTAGAAGTAAAT  
CATAAAACATTATCTTTTTTGTCTATATATTGTGAGTTGGTAAAATTC

>M6-PGSC0003DMG400001185 M6 LRR-RLK

TCAATGGTAGTTTCTCTTGTCTCCTGTTTTACAACTTTTCTCTTTCATACTTTCGTCTCCAACCTAAC  
TGCTCAACCATCTAGCACAGACACAGACTTTTCATGCTCGTTAACTCTTCTTTTTCTTGTGATACTTTTAT  
TTCATATCGTGCCCGTCCACCAATTATTTAGATGTGCGAAGTATATCTGATCTTCTTGAAGTCAGTCGTT  
TAAGTATAGCTACGGCCACAGGTCTAGCCTCAGAGGATACCGAGCTATTCCCTGACCAGCTTTTACTTGC  
ACCTGTAAATGCTACTGCAATAGTTCTCATTATTTCTCCAATGTCACCTATCAGATCATGAAAGGCGACA  
GCTTTTATTCAGTTTCAATAGGAGCTTTTGAGAACCTTACTAATTATCACGTGGTGCAAGATATGAATCCA  
ACACTAGATCCAACCAACTTGACAATTGGTGCAGAAGCTGTTTTTCTTGTGTTTGTAAATGCCCCACACA  
TTCTGATCTCGAAAAGGGACTTCAGTACCTGGTCACTTATGTTTGGCAGCCTTGGGATGATGTGTTGCCT  
GTAAGCTATATGTTTGGAGCATCTGCAGCTGACATTCTGGCTGCCAACCAATTACAGAAATTTCACTGCTG  
CAATATATTCTCCTGTCTTGATACCAATAAATCTTCCTATTATTCTGCAATCTTACCCTCTTCTGCAAGCA  
GTAGAAAATCCAAACACGGATGGATAGTAATTACTGTTTTAAGTATTATGGGGTTGCTTGCAGTTTTTTC  
ATTTTTCTTGATGGTATACATGCGTCATCTAGACGAGAAGAGGAGGGCTAACTTAGCCATAACTCTTCT  
ACTCTTGAACTTCTGATCTTTTCATACCAAGAAAGCCTCAGAAGGTGAAATTACGGACCATAAGAACA  
TTCAAGATAAGCTTCTTCTGGAGTTTCTGGCTACATTGGAAAGCCAATAATATATGACCTGAAGATCAT  
CATGGAGGCAACTGTCGACCTCAGTGAGAGATACAGGTTAGGAGGATCAGTGTACAAGGTTACAATGA  
ACGACCAAGTTGTAGCAGTCAAGAAAACAAAACAAGCCTCGGAGGAAATGACAATACTTCAAAAACACTAC  
ATCATGCAAATCTAGTGAAACTAATGGGCTTTTCATCAGATTATCTTGGTAATTCCTTTTTAGTTTATGAA  
TATGCTGAAAATGGCTCACTGGATCAATGGCTGTTTCCCGGATTATCATCATCTTCTTCTGCCTCTGTCTT  
AGTGGCATCACTTGGTTGGAGTCGAAGATTACACATTGCCTTGGATGTTGCAAATGCTCTGCAATACCTG  
CATGAACATACTCAACCTAGTATAGTTCACGGGGACATCCTAACGTGTAGCATACTTCTTGATTCAAGGT  
TTAAAGCCAAAATTGCAGGTTTCTCTACAGCCAGACATGCCACCAACTCAATGATGCTGAAAGTTGACGT  
GTTTGCTTTTGGGATTGTGCTGTTGGAGTTGCTTTCAGGGAAGAAAGCAATGGAATCAAAGATTATAA  
TGATGAGACTCTGATCATGTGCAGAGAAATTAGTGAATCTTGAAGTTGAAGAGAACAGAGAGGAGA  
AGTTTAGAAAATGGATGGATCCAAAGTTGAGCTTTTACCCTATTGATGATGCTCTAAACTTGGCTGCCTT  
GGCGACAGCATGCACATCGGAGCAATCAGCAGAGAGGCCTAAGATGACAGATATTGTCTTCAACCTCTG

TTTTCTTGCTCAATCATCTTTTGAATGTATGGACCGTCTTGGACTTCAGGTGAAGCTGAGGAGATTGTC  
CAGATTGTTAGTCCTGTAATAGCACGTTGAGTTAAAGATGGAGCGTAAATATAGTTCAAGAACTTTTGTG  
AGTTCGTCTCAAATTTGTAACATATTCTGGATTGTAAAGCCACAGGAACGATAAATAAGCTGATCTCCAG  
AATATATTGCAAATTTGAGTTTTTTTTGTCCAGTTTTTCTTTGTATTTCTCTTGCTGCTAATTTAGTTGCTATT  
GTATATTCTTGTATTGGATGTTTTTCTCAACTTTGATATAAGTGGAGTGCAATTTGACCTGTATTTCTTTTCG  
TCCTCTCAAAGAAAAACAGAAAAATTAAGTTTCTGAAAAGACACGGCAAACCTCGTTCTTATTTATATT  
TATTTAAGATCCAGACGAGTACATGTTA

>M6-PGSC0003DMG400001301 M6 LRR-RLK

TAATTTCTTAGTAGCTAGCTTCTAAAGGCACCACTCATATTTGTAAAATAACAGACTGGGTTTTTCATTTGT  
CAAGTCAAATGCCTCACCAGTCTTCATCTTCCTTCTCCTTGCTATTTCTACCTATTTCTCTTGCGCATATTA  
TCAAACACCTTGTGCCAATTACCCAAAACCTGCTGTTGGATCCCTAAACCCCCAGCTAACGATGGCTCGT  
TTCAGATTTCTCCTTTTTCTTCTGTTGATTCTGATTTCTTGTCTTCCGTGCCTTGATGCTGCTGTAGTTG  
AAGATGATCTCAAGTGTTTGAAGGTTTCAAGAAGTCTTTGGAAGATCCAGCTGGGAATCTGAATTCAT  
GGAACTTTTAAAAATACTACTATCGGAGCTATCTGTAAGTTTACGGGTGTTGATTGCTGGAATGACAACG  
AAAATCGCATCATCAGCCTCATTCTTTGACTATGAACCTCGGAGGGAAGGTTACAGAGCCTGTACAGTA  
TTGTGCCAGCTTGACAACCCTTGATCTCTCTGGTAATCGCTTTTCTGGTCCAATTCCTTCTCAAATTTGTAC  
TTGGCTACCTTTTTTGGTAACCCTAGACTTGTCGGTAACGATTACTCCGGCCCTATCCCTGCTGATCTTG  
CTAAATGCACCTTTTTGAATAAATTATCGCTCAGTAATAATAAGCTTACTGGAAATATTCCCCCTGAATTT  
TCTAGTTTAGGTAGGCTTAAAGTTTTTCTGTGGCAAATAATCAACTCTCCGGTAGAATCCCGGCAGCTT  
TCGATTCTTCTAACTTTAATTTTGAAGGAAATAGTCTCTGTGGTGGACCTTTGGGGAAATGTGGAGGACT  
AAGTAAGAAAAGCTTAGCTATTATTATTGCAGCAGGAGTCTTTGGTGCTGCTGCTTCTATGTTGTTGGGT  
TTTGGTGCGTGGTATTGGTTTTTTACCAAGTCTGGAAAGAGGAAGAGAGGGTATGGAGTTGGGAGAGA  
CGACTCTGATAGTTGGGCTGATAAGCTGAGGGCTCACAAGCTCACTCAGGTTATGTTGTTCCAGAAACC  
GCTCGTCAAGGTAAATTAGCTGATTTGTTGATTGCCACAAATGTTTTAGGACGGACAATGTTATCAAC  
TCAACTAGAATGGGTACTACTTATAATGCTGTGTTACGTGATGGTTCTGCACTTGCCATTAAGCGGCTTA  
ATACTTGCAAACCTGAGCGAGAAGCACTTTCGTGATGAGATGTATAGGCTAGGACAACCTTAGGCATCCTA  
ATTTGGTGCCACTGTTGGGGTTTTGTGTTGTGGAAGAGGAGAAGCTTTTGGTTTATAAACACCTATCAA  
TGGTACTTTGCACTCATTCTTGAATGGGAATGCAAGTGAACCTGGATTGGCCTACTCGGTTTAGAATTGGT  
TTCGGTGCTGCTAGGGGCCTTGCTTGGTTACATCATGGTGTCCACCCACCTATCTTGACCAAACATAT

GTTCTAATGTTATTTTCCTCGATGAAGACTTTGATGCTAGAGTAATGGATTTTGGGCTGGCAAGGTTGAT  
GACATCAGATGCAAAGAGTCTAGTTATGTGAATGGGGAGTTGGGTGAATTTGGCTATGTAGCTCCAGA  
GTA CTCTAGCACAATGGTGCCTTCACTGAAAGGGGATGCTTATAGTTTTGGGGTAGTGCTTTTGGAGTT  
GGCTACTGGGCAAAAACCTCTTGAAGTTATTGCTGGTGAAGAGGGATTCAAGGGTAATTTGGTAGACTG  
GGTGAATCAGCTCTCTGCTTCAGGTCGCATTAAAGATGCAATTGACCAAACATGCGTGGGAAGGGGCA  
TGATGAAGAGATTGTGCAATTCCTAAAAGTTGCTTGTAAATTCTGTGGTTTCTCGGCCCAATGATAGGTGG  
TCTATGTATCAGGTTTATGAAGCACTTCAGAGCATGGCTGAAAAACAGGGTTTCTCCGAACAGTATGAC  
GAATCCCGTTACTATTTGGCAAAGAAGGTGCTACTAGAAGTCCTGTTTGAAGCCGGAATTGCGAAATT  
ATTACTAAATGTTCCACTCCAAATGAACATGATGCATCCTGTTGTAAGTTTTAGTTCTTATTGGTGTAAAG  
TGGCATGGCACTGTTTTGATTGGCTCAGAAGTACACCCTTTAAATATTTCTGTATTATATTTGCAAATGC  
ACAAATCATTCTTAAGTATTTGCTTGCTTGATATTTGTAGTATAGGAAGCAACTGATAATTATTGTTTCATG  
TTTGTGATTACCCATTGCCTATAGCATTAGATGTTATGTATTCAAAGGATTCTCAACTGAACGTCTCATTT  
ACTGGAAACTGGTCTATATTACTATTTACTGCCTGTCTAGCTCTTGTGGGAAGCCAATGGGGACG

>M6-PGSC0003DMG400002012 M6 LRR-RLK

TGTAAGTAGTTAGTCAAATTGTGTCTAAATGAAAGGTTTTTGGTGGTCTACTGTTTCTTCATTTATATAA  
GGAAAGTTGGTTTGACTAAAATAACATCCCCTATTGACTTGCTTATGGTATAGGGAAATGTAGGGTCTCT  
TGCTTTTGATTTGATGTATTGGTTATTGGTGAGTGAATTAATGGTGTCAATTTGCATTTTGGGACATTA  
TTGGTGTGCTGTTGGACTTCAATGAATTTAGTGACTGGTGTGTTGCTGCTTGTCTTTTATCTAGGTTT  
ATATACTCTCTTATTTCACTTACATAATGATTAGTGATGATTGCAGTTTGTGTTAAAAATTTGCTAATTC  
ATTTTCTGGGATTCTTGAAATGATTGTGCAATCTTGTCTTTCTACTTGGTGGGGTTTGTCTACTTTCTTGGC  
CCATTCTGAATTATTAGCTTTGTCAAATGCTGTCTTTTTTCTTTTTAGTTTCAAGTATTATATGTAACCTCT  
GCTAGTGTACACGGGTTTTTTCATTGGGAGGAAAATAAGAGGAGGAAATGCAATCTACCATTTGTTTAG  
TGCTGCTATTTTAGTTGAGTTAGCTAAAGGAAGCTTAGATTTGGATGCTCTTTTGGAGTTTAAGAAGGG  
AGTTTTGAAAGACCCTTCTGGGAAAGTCCTTTCTTCATGGGATTCTAAGTCATTGGGACCAAATGGTTGC  
CCCCAAAACCTGGTTCGGTATCGGTTGCAGTGATGGCCATATCACTTCAATTGAACTAAATGATGTAGGTC  
TGGTTGGAGTTTTGGATTTTGCAGCTATTAGTGGCCTAAAAATGCTGCAGAATTTGTCTGTTGCAAACAA  
CCAGTTAAGTGGGAAAATTAAGTACTGAGGAAGTTGGGTTGATTATGTCATTAGAATTTTTGGATCTTTCCAAG  
AACATGTTTAGGGGTTTTATACCCTCTAAGCTGACTAGTTTAAAGAACTTAGTATCTCTTAATCTTTCTTTA  
AATAGTCTCGATGGAATGGTCCCACTGGTTTTGCTAGTCTTGAGAAATTGAAGTATCTGGATTTGCACT

CTAATGCCTTCTCAATTGATATTATGCTTCTTCTGGCCTCATTGGGGGATGTATAGTATGTAGACCTCAGT  
AGCAACAAGTTTGTGGATCACTTGACCTGCAAGTAGGAAATTCGAGCTTTGTCTCGTCAATTCAGTATC  
TGAACATTAGTCATAATAACCTGGATGGAGAGCTATTTCTCACGATGGAATGCCATATTTTGACAGTTT  
AGAGGCTTTTGATGCAAGTGACAATCAGCTTACTGGTACTATCCGTCCTTCAATTTTGTAGTCTCCCTTC  
GAATTCTTAGGCTCGGGAACAATCAGTTGTCTGGATCACTCCCCGAAGCTCTTCTAGAGGATAGCTCAAT  
GATTTTATCAGAATTGGACCTAAGCCAGAATCAGCTTGCAGGTGTGTTGATCCTTTCTTCTTAGTTAATT  
TGTTTGGTTGAAGTCAATCTAAGTAATTTATGGTTAATTACTACTCCCTTTGTCCCAATTTATGTGACACTT  
TTGTTTTTTCGAGAGTCAAACAATTTAAGTTTGACCGGAAATTTGCGTGTGGAATCTTCAACTTTTTTGAA  
ATGAAATTTATATATTTGTAAACTACGTAAAAAGTACTATAAGTCACAATAATTGGCAATTCAAAATAATT  
AAAAGATATATTATAAATTTACGGTCAAAGATAGAATTGTTTGAATCTCGAAATCCGAAAAGTGCCACAT  
AAATTGGGACGGAGGGAGTACTATCTATGATCTTAGGTTGTTGTCAGTTAGATAACAAATGAATAATAT  
TTAGATTGCTATCTGCTGGAAAGCATGCTTGTTTTGGTTGCAATCAAATGTAATGTATAGAACAACAATTC  
CTGAGCACTTCGGAATTGTGTTCTAGAGGAATGCTGTATAATTCTCTGCTTATGTGTAATTATCATAACACA  
TTGTTCCCAATTCTCCCTAGGTTAGAGATATTTCACTTAGATTCAACTCTAAGGCAATTATTGCTGTAA  
ACTTGCAATTTAATTAGTGGAATGTTTCAGTGTCTTTTTGATTATTTTTTTTTGCTGCATTATTAATTTTCATC  
TCTCCTTGAGCCTAGGGTCTATTGGAAATAGCCTCCTTACCCTCACAAGGTAGGGGTAAGGTTTGCATTC  
ATGTTACCCTCCCTAGACTCCACCTATGGGATTATACTGGATTTGTTGTGGTTGTTGTTTGTGCGTTATA  
AACAAGCTGCATAAAGATATTCTTCATGCGGTTGGAGTTCTGATGTATTTAAGTCTTTTGTGTTCTTTT  
AATTATTATATTTAGTTGTTCTTACCACAGGCCTAAACCAAGCTACTTCTTTCCAACTATTTTCATGAAGC  
CATTTGCTATTTTGGCAGGTCCCATTGGAGGTATAAGTGCTGTGAATCTCAAGCTTCTAAATTTATCATAT  
AACCAGCTCTCAGGCCCTTGCCCTTCAAGGTTGGGCGCTGTGCCATCATAGACCTGAGCAACAATCGGC  
TAACTGGAAATGTGTCCCGGATCCAAGGTTGGGGAAATTATGTTGAAGTTATTGTGTTAAGCTCAAATG  
CATTGACAGGAACCTTTCCCAACCAAACCTCCAGTTCTTGAGGCTTACTTCGTTAAAGATTTCAAACAAC  
TCACTTGAAGGTTTGTACCAACTATGTTAGGTACATACCTCGAACTTAAACAATTGATCTTAGCATTAA  
CCAACCTAGTGGTACTCTCCTTCCAGCCTTTTCAACTCTACCAAATTGACTGATATTAATGTTTCTTTCAA  
CAAATTTACCGGTAGTGTACCTATCATGGCATTAACTCAGAGAATCTAAGCTTGATTTCTCTAGATGTTT  
CACATAATGCATTAGCTGGTCCGTTACCTCCGGGGCTGGACAAGTTCCCGGACATGGTAAATCTGGATCT  
CTCTGATAACAAATTTGAAGGTGGCCTTCTAATGATCTCTCGGACAAATTGGAATTTTTTAATGTGGCTA  
ATAACAATTTTTCTGGACCTGTGCCACAAAATTTATGGAGGTTTCTGACTCCTCATTCCATCCGGGAAAT

CCCTTGCTTGTACTTCCAAAGCACGCCAAAGCTCCTTCAGAGGGAGATTCAACTTTAAGCTTGAGAAGTC  
ATGGTTCTCGCATGAAATCTACCATCAGGGCTGCCCTCATTGCTGGGCTGATCTGTGGTGTATCTGTTAT  
ATCTTTGTTGACATTAATAATCTACCGCAAGGCCCATCAGCGAGATGGCGGGAAGGACGATATGAAAGG  
AACCAAGGAAAAGAAAGGTATGGAACCTATTCTTCTTAATAAGACAGGTGATCAGATCAACTGATACT  
AATGCCTTTTCATTTCCACAGGTTTGTCTTTATCTGATATAGAATGTGGACATGACTAGAGAACACAG  
CGTGCCAGTATCAACAGTTCAAATGAGCCATTATCTTCACCTATATCTGTCATGTCATCCGCCAATCTCT  
CTCCTTCTAAGTTCAAGATCAATCCAAAAGCCCAAACCTCTCTCAGGGTTTCTTCTCCTGATAAACTGGCT  
GGAGATTTACATCTACTAGATAACGCCTTGAAGGTCCTGCTGAAGAATTATCGTGTGCTCCTGCCGAAG  
CTGTGGGCAGAAGTTGTCATGGAACATTGTACAAAGCTACGCTTGGTTCAGACCAAGTTCTTGCTGTCAA  
ATGGCTTAAGGAAGGGATAGTGAAAGGCAAGAAGGAATTTGCTAGAGAAGCTAAGAACTGGGGAGT  
ATTAGGCATCCTAATTTAGTTTCTCTACTGGGTTACTACTGGGGTCCCAAGGAGCATGAGCGGCTTCTCA  
TATCAAATTACACCGATGCACCATGTTTAGCTCTTTATCTTCTTCGTAAAGGTCAGTCTCCCCTTTTCTATC  
TATAGAGTATATCACCTGCATTTATTTCTGTAGCTTTTCTGATTTTTGTATGGTGCTGAAGTCGTGATCCA  
GTTTTACCAAATAAATTAGTAGTACTCCTTCAATGAAATCAAACATAATGGACCGTGAATGCGCAATACC  
TTGAATGTGTATATTGTTATTGTAGTTGTCAAGATTGCTCATACCTGATATGCTGAAGTTAATCACCATC  
TTGCCACTTGATTTCCATTCCGGTGCCTCAAGTGTACTTTTCTTCCAAAAGATATTCTAGCTTGCTGGTTG  
AATATGTATCTGAGACTATTAATACACATTTACATAGCAACTTTTCATGAAATTTATAAATGGAGCTATCT  
TCCAAAATCTGAACTTTTCAATTCATATATATTAGCAATGTTAGAATTACACATAGCAGAAAAGATACACA  
CCTGTTTTTTGCTTTCATGGTAATACTAAAAGGTAAAACAGTTCCACCTTCGCTAATTTTGCCTTGATGGT  
GATAGTGGGAGAGTCAAAGTCGAAAAGAGGATTCCCTCTCTGTTTCTCTCATTCAAACCTGTGCATGA  
GAATTTTATCTCACGTGGCTCATTTTGTATTGATTACTTTGGTTGGGCTCGATTGATGTCATTTTGATAAG  
GGCATCCCGGTGCACTAATTAGAGACTGCTACTTTGAATTCCGTTTATTGCATATAGCACTGTACTTTGTT  
TTCTAGTTTTGAGTGATGATATGGATGCCGGTTTCATTCTTTGATGTATGCAGATGCAGAACCCTGTAAG  
TTACATCCTTTATCTCTCGATGATCGACTCAAGATCTCTGTAGATGTTGCTCGTTGTCTAAACTACCTTAC  
CATGAAAGTGCCATACCTCATGGCAACCTGAAATCCACAAATGTACTTATAGACACGTCTACCGTGAATG  
CCCTACTAACTGACTATAGTCTTCATCGGTTGATGACATCTGCTGGAACAGCTGAACAGGTTCTAAATGC  
CAGTGTAICTGGTTATCGTCCACCTGAATTCGCGAGTACAAGTAAACCTTGCCCGTCATTGAAAAGTGAC  
GTCTATGCTTTTGGTGTATCTTGTGGAACTTTGACTGGAAGAAGTTCTGCAGAAATTGTTCTGGGA  
ACTCAGAAGTGCTGGATTTAACCGAATGGGCGAGATTATTGGCTTTTCAAGACCGTTCAATCGAGTGCTT

TGATCCATTCTTATTAGGAAAGCAAAGCAACGACGAAGACATGCATACGATTCTTGATAGCATGCTTCAG  
GTTGCACTAAGGTGCATTTTGCCAGCTGATGAAAGGCCTGATATGAAATTGGTTTTCGAGCAACTTTGCT  
CGATAGCGCAATAACACAAGTTGAGGGGAGAGGGGTAAATTTGAATACTATGTAGTTGTATATTTGTAT  
CTTAAAAGTTGATATTTCAATTCATGTTCCATTTTTAATTCAATTGTTTTAGAAACAAATTCATTTGTGAATT  
AGCACATTAAGTGATGAATGAAGTTGTATTCTTCACATTTATTGACAAGAAATAAAATTTTCTTGAT  
>M6-PGSC0003DMG400002689 M6 LRR-RLK

TACACAAATTCAACTCTTTTGTTCTTAAATTCAACTTGTGTTTTTTGTTCTCTTCTAACTCCCGCGCTT  
TATGCCTTAAACCCAAAAAATGAACCGTTTTTTCTCCTTCATTCTCCTCCTCACACATCTCATCTCCGCCG  
TAACCGCCACCGGCGACGGCAACGACACCACCGCACTCCTCCTCTTTCAGTCACAACTGACATCCACGG  
CACTCTCCTTCACAATTGGACACTTCCGTTGAACTCCACCACCGCTTGACAGCTCAATGGCTTGGTATAA  
AATGCATAAACAACCGTGTCTCCGCCGTAATCCTCCCGTCGTTCAATCTCCGGGGACCCATTACCGCTCTC  
TCTTCTTTACCTTTACTCAGCCTTCTCGACCTCCGTAACAATCGCCTAACGGAACCCTCACACCCATTACC  
CAATGTACTAATCTTAAGCTCATTTACCTCTCCGGCAACGATTTTTCCGGCGAAATTCCGCCGGAAATTC  
TTCTCTCCGTCGTCTCCTCCGCCTTGACGTTTCAAATAACAACCTGAAGGTTCAATTCCGACCCAGATTG  
CGAATTTGACCCGATTGCTCACACTTCGTTTACAGAACAATGAACTTTCTGGAACAATCCCAAAATCCCTA  
AATTCTCTTCAAATCTTAAAGAATTGAACTTTTGAATAATGAGCTTTATGGGTCTGTTCCAAATGGTTT  
ATATAATCATTTTGGTGAAAATAGCTTTGATGGAAATGAGGGTTTATGTGGAATTGGGAATTTACCTCAA  
TGTTTCATATACAGGGGAAATAGTTCCTTCAAACCCTAGCTCTTGCCTACAACCTCCACTGCAACAATCGA  
AGAACCCACGAAAAATCGCGAAAAGGGTTGAGTAGAGGAGGGGTGGTAGCAATAGTGATGGTGAAT  
GTGGTGGCATTGTTAGTTGTAGTGTCAATTTATGGTAGCATATTACTGTGGGAAGTATTCAAGAACTCAGA  
GTTTTTCAATGTCAGGAAGTGAGTGTGGGAAGAGGAGGAGTAGTTATTCGAGTGAAAAACGAGTTTAC  
GCTAATAACAATGGTGGTGGTGGTGGTGGTGGTGGTGGTGGTGGTGGTGGTGGTGGTGGTGGTGGTGGT  
GTTTTTCGATAGGAGGAAGCCATTTGAGCTTGAGGAATTGTTAAGAGCATCAGCTGAGATGCTTGGTAA  
AGGGTGTITAGGTAAGTTTATAAGGCAGTTCTTGATGATGGGATTACAGTTGCTGTAAAAAGATTGAA  
AGATGCAAATCCATGTCCAAGAAAGGAGTTTGAACAGTATATGGATGTTATTGGAAAGCTTAAGCATCC  
AAATATGGTGAACCTTAGAGCTTACTATTATGCCAAGGAAGAAAAATTGCTTGTTTATGACTACTTGCCT  
AATGGGAGTTTGCATTCATCTTTCATGGTAAACATTAGTAAATGTTTCATGTCAAAGATTAAGATTGTTT  
TGTAATCAAGATTGTCTCTTTTGGGAGTTGTTAAGGTCTATATTGCTCAGACTCTTCAAATGTGATGG  
GGTGTGTCGGATCCTCCAAAAATAGTGCATTTTTGGAGAATTCTGACGTTGTAATTCAAGATTGTCTTTTT

TGGGGGTTGGTAAGGGTTATATTCCTTGGACTTTTCAAAAATATCGATGGATGTGTGTTAGATTCTCAA  
AAATCTCTAGAAATAGCGCATTTTTGGAGAATCTTACACGGGTATGACATGTTTTGTAATTCAAGATTGT  
CTTTTTGGGGTTGGTAAGGGTTATATTGCTCGGACTTCTCATAAATGTTGGCAGGTACATGTCGGATCC  
TCTCGAAATCTCCAGAAATAGTGTATCTATGGAGGATCTGATGCGGGTATGGCAACATTTTTGGAGAGT  
CCGAGCAAGTTGTAGGTATGATACTAATATTGATGGGATTTTTTTTTCTTGATTGTAATAGGAAACAGAG  
GACCAGGGAGAATTCCATTGGATTGGACAACAAGGATTAGCTTGGTGCTAGGGGTAGCTAGAGGGCTT  
GCTCACATTCATGAAGAGTATGCAGATTCAAGAATCCCACATGGGAATGTGAAATCATCTAATGTGTTGC  
TTGACAAAAATGGTGTGGCTTGTATATCTGATTTTGGGTTGTCATTGCTTTTGAATCCTGTTTCATGCCATA  
GCTAGATTAGGAGGATACCAAGCGCCCGAACAACTGAAATCAAGAGGCTATCTCAAAAATCTGATGTT  
TATAGCTTTGGAGTACTGTTATTAGAAGTTCTCACTGGTAGAGCTCCTTCAGAGTACCCTTCACCGACTA  
GGCCTCGCGATGAGGAGGAAGAATTGCCAGTGGATTTGCCTAAATGGGTTTCGATCAGTAGTGAGGGAC  
GAGTGGACTGCTGAAGTGTGGATCAAGAAGTGTGAGGTACAAAACATTGAGGAGGAATTGGTGTCT  
AATGCTACATGTAGCCATGGCATGTGTAGTGCCACTACCTGAAAAAGGCCTACTATGGTTGAAGTTGTT  
AAGTTGATTGAGGAGATTAGAGTTGAACAATCTCCATTAGGTGAAGATTATGACGAATCGCGCAATTCT  
CTTCCCCCTCCCTTGCCACCACTGAAGATGGACTCCCCGGTTACTAATTTTCGATCATCGTGGCATTGAT  
GTTTCATAGTCCTAGTAGTATATGTTCAAATTTGCAGCATCTTACTGCAAATTGGGAAGTTCAAAGCTAT  
GGACTTATGTTTAGTAGTTATTTGATTGCTTTGTGTTATTCCAAATTAAGTCACTTTTGGAAAATCTGATG  
ATCCAACAAGCATATAAGAAGTGCAGCAATCAGTCCATTATGTATTTTTTTAATGTAATGTTAATTCTTT  
GTATTTAATTCATTTTCAAGATTTGTGTTCTAAGGCAAAAC

>M6-PGSC0003DMG400002870 M6 LRR-RLK

TTTTGCATTATTTGTTGTTACCGGAGGTGGAGCTAGCAAGGGCCGAGGCCTCTTCCCCGAAAAGTT  
ACACCGTTTATACATGGTTTAAATTATTTTATGTATACATAATAGATGTTGAATTTCTTTGACTTCTTTGT  
AGTGAAAATTCTGGCTACGGCACTCATTGTTTTGCTTTCATTTCTGTATTCTTTTTTCAAATTGCTTGGAA  
AATACTTTTTTAAAAAAGTTAAAGGGTTTATTGAAAACAACCTCTTTGAGGTAGGGTAAGGTCTGCGT  
ATACTCTACCCTCTTCAAATCACGCTTGAAATCACATTGAATATGTTGTTGCGGATTTTGAATTTAAAA  
GCTCAAGAATTTTTTTTTCTTTTTTCTTTGGCAGTGCAAGCTTTAATGGAGATGAAGAAGAATTTAGATGA  
TCCACTTAATGTTTTAACTGGGATGGAGATGCTGTTGATCCTTGTAGCTGGAATATGGTCACTTGTTC  
AATGATAAATTTGCTACTAGCCTGTAAGTAGAACAATTTTCACTTATTCTAAAAATAGTATTCCTAACAAG  
ATTTCTTAAAAATAGTTGTATTATTGATTATGCAGGGAGTGTCCAGCCAAAATTTGTCTGGCAAAATATC



ACCATATATCCACAACCTTGACACACCTTGAACCTTATGTGAGTACTTACTTAACCAAAGTAAATAAAAAAC  
GTAATACATAAACGTGTCTTTTAACTTGGTGTGCATCTATCATCTACGCCTCCAATATGGATGTGCAGAAGT  
AGGCATACACGTCCTACGTGAAAATTCTCATCCTACGTGTATTATGCTACGTAGGATGTGAGTGTGCCTA  
CTTGTGCACCACCAAAGTTGGAGGATAGATGTCAGGTGACACCAAGTTAAATGACATAATTATGTATTA  
AGCCTGAATAAGATATCAAGACATTTGAGTTTTGATTCTTATTCTTAGATGTTAATATGAGTGTCTGTTT  
TTTACAGACTTCTACAGAGCAATAATATATCAGGATCACTTCCTATGGAGCTTGAATGCTTAAAAAACT  
TAAGACAATTGATCTTTCTGATAACAAGTTAACCGGCGAAATCCCCTCATCTTTAGCTCAGCTGAAAAGC  
CTTCAATACTTGTAAAGCAAAGAGAATTCTGAGATCTTATACAAACAAGTTTTTTTTGGGGTTAAAAACTAA  
TGATGTTTGTCTTGAATTTTGTGATTATAGGAGATTAAACAACAATAGTCTAACTGGAGCTATTCCTTT  
GGATTTGGCCAATATGACCCACCTCTCACTTATGTAATTTTCTAATAACATTTTCATGTTATGTTATGTTAT  
ATGTTCTTTATAACAACATTTTCGATATAGCAGCTAAAAAATATCCAGACAAATGAAGTACGCAGTTATAG  
AGAGGTTTGACTGTATTTTCACTTATGGAGTTGACTGTTTTGCATGTTTAGGGACTTGTCTTTCAACAA  
TCTCAGTGGTCTGTACCAAGGCTTCTAGCCAAAACATTCAAGTAAGGTTCTTGAAGAATTCCTTGTGTAT  
CACTTTTTCTTAATCAGTAAATGAAACCAATTTTTGTATTTATTTGTCTTTTTTTTTAACCTTATTGACACA  
GTATATTGGGAAATCCAATGATATGTGCAACTGGAAAAGAATCAGAGTGCAATGGAACAACACCAATGC  
CCCTCTCCTTCTCTTCAAACAATCCACAGAGTAAGAACTAACCTTATTTTAAACAGCCAAATGATAGTTTTT  
TTTTTGTTTTTTTTTATGACCGTGGTGTCCGAGCTAGTTTTCTTACACCTTAACTAATTCCACGAGATACCT  
ACCACCTCCCACCAACAACAGGTACCAGGTAACCTCTGTCCATCAATGCTCGGATGGAGGGGAGAATCAC  
CTAAGACCTCATGACTCTCAACCACTTATTGGCCAGTAGGCCACACCCTTGGGTGCACAACCAAATGAT  
AAATAAGCGCCTCTCTACCTTACAAAGGTAGGGGTAAGGCTACATACACACCACCCTCTCAAGACCCCA  
TATATGGGATTACACTGGGTATGTTGTTGTTGTTGTTGACGGTCGATATAATGATTATGATGTTTTTACTA  
GTCATACAGATTTATGAAGTAAATATGCTTCACTGATTTTCTCTACTGATAGATTCAATATTTATAGTTCAT  
TCCCAGCTAAAAATATCCTGTGTTATCTCAGATGTTTCTGAGCCTTCTGGAAAACCGAAGACTCACAAGGTTG  
CGTTAGCCTTTGGAACAAGTCTAGGATGCATCTTCTACTAATTGTTGGGTTTGGATTCTTTCTATGGTGG  
AGACAAAAGCACAATAAGCAAATTTTCTTTGACAGTAATGGTGAGTATTGTTTGATCAGAACAATTTGAA  
GTTACGGTTTAGCTCATCGATCCTCTCTTATAAACGTTATTGACATAAATTGCAGAACAACATATTGAAGA  
AGTGTGCTTAGGCAACTTAAGGAGGTTCCAATTCAAGGAACTTCAGTCTGCCACAAACAATTTTCAAGCAG  
CAAGAACATACTAGGGAAAGGTGGTTTTGGTAATGTTTATAAAGGACGTCTTAGTGACGGGATTATTGT  
AGCTGTGAAAAGGCTCAAAGATGGAATGCAGTTGGAGGCAATCAACAATTTTCAACTGAAGTCGCGT

TGATCAGTCTGGCAGTGCATCGGAATCTCCTCAGGTTGTATGGATTTTGTATGACACCAACTGAAAGGTT  
GCTGGTGTACCCTTACATGTCTAATGGAAGTGTAGCTTCGCGTCTCAAAGGTAACATATCTAAAACTG  
TCTCCTTTGGCCTATAATTACATTGTCCTTATTTGCTCAGCTCATAACGTATCATTTCTTGCAGCCAAACCA  
ACCTTGGATTGGGGTACAAGAAAAGGAATAGCTTTGGGAGCTGCAAGGGGCTTATTATATCTACACGAA  
CAATGTGATCCAAAGATCATTATAGGGATGTGAAAGCTGCAAATATATTGCTTGATGATTACTGTGAA  
GCTGTTGTTGGAGATTTCCGATTAGCAAAGCTTTTGGATCATCACGATTCACATGTCACAACCGCGGTTA  
GAGGAACTGTAGGACATATAGCTCCAGAATATCTCTCCACAGGACAGTCCTCTGATAAGACGGACGTCT  
TTGGTTTTGGTATTCTCTTGCTAGAATTAATCACTGGACAAAGAGCTCTGGAATTTGGTAAAGCAGCAAA  
CCAGAAAGGCGCTATGCTTGATTGGGTAAGTACGACAAATCCCTCGAATTGTAGTTACATTTCTTTTTTC  
AGCATGCTTTGACATGACTTCTTGAGCCAAGGGTCTATCAGAAACAACATAACCTCTCTACATCCCAAGG  
TAGAGTTAAGGTCTGCGTTCCTCTACCCTCACCATACCTCATTAGTGTGATTACACTAAATATGTTGTTG  
TGCTGTATACTTGTAAGGTGTGTAGGCGCACGTGCATTCACACTATCTAAAATATGGACTCTATAGGTAT  
TAAGAGATGCAACGAACAAACCATCTTTAAATCCTGGATCCGTCCTTGTTATTTTTTCACTTGCAGGTAAG  
AAAGATTCAACAGGAGAAAAAGCTAGACATGTTGGTGGACAAAGACATGAAAAACGAGTACGATAAGA  
TAGAGTTAGAGGAAATGGTTCAAGTAGCATTACTATGCACTCAGTATCATCCAAGTCATAGACCAAAAAT  
GTCTGAAGTTGTAAGAATGCTTGAAGGAGATGGACTAGCAGAGAAATGGGAAGCATCTCAAAGAGCAG  
AACCAACAAGATGCAGCAGAGCCAATGAATTTTCTCTTCAGAAAGATACTCTGATCTTACTGATGATTC  
TTCATTAATTGTACAAGCAATGGAATCTGGTCCAAGATGATAATTGAATTAAGACACAATGTCACCTT  
TTGCTGGTGGGAGGTGACAGGTCTCTCGTGGAAATTAGTCGAGATGCGTGAAAACCTGGCTCAGACATCAC  
ATACATAAAAAATAAACATGTGTCATATTGAGCTTTGTTTATAGGTTTATACAGAAGCTGCAAATAGAAT  
ATCATACTTCTGATTGTAAAGGACAATATAATAACTTTGTAAGGCTGAGAGTTGTTTTTCTGTTTTTCT  
TTTTGGTTCTTGTTGTTGAGTGGAATGTTTATGGGATGCTATAATTTGTTTATGTATATATATAATTA  
GAAATTGAA

>M6-PGSC0003DMG400002902 M6 LRR-RLK

AGAAAAGAAACAGAGAAGCATTTCAGATTGTTTCTTTAAGGGGAAGGTGGACATGTCTAGTAACAAA  
CATGGCCGCCGTTCCCCTAATCCTTCATCTCCTCCTCAAGCATCGTCTCCGAAAAACACCATCTTTTCT  
TATTCATATCTCCATTTTCTCCTCATTCTCTAGCTAATCCACAATTTTCTTTCTCCATTTCCGAGGACGAT  
GCCTTGATCAAATCAAAGAATCTTTAAAAACACAACATCTTTAGATTCATCTTGGCTTAAAGGTAAGT  
TCCATGTGACAAAAACAAGAAATGGGATCGTATTCAATGCGAAGGGAACGTGGTTGAAGGCCTCCTTTT

AGGTGAAGCTGGCTTATCAGGAGAACTAGATATTGATCCATTGGTTGCACTTCCAGGTCTCCGAGTTCTT  
GAAATTGCGAATAATTCATTTTCAGGCACAATCCCTGAATTCTTCTTGCTTGGTGCACCTAAATCTATATA  
TATAGATGGAAACCAATTCTCAGGTGAGATTCCTAAAGATTTCTTTGCCAAAATGGGGTCTCTTAAGAAG  
ATTTGGTTTGCACGAAACAAATTCTCCGGTTCAATTCCTGAATCTTTAACCAACTTGAAGTACTTGATGGA  
ACTTCGTCTTGAAAGTAATGCATTTTCAGGACACGTTCCGTCATTATCACAAGTGAGTTTAAACATCAATAG  
ATCTTTGGAATAACAAGTTGCAAGGCGAAATCCCTCAGGGGATGTCGAAATTTGGTGCTGATCCTTTTAA  
AGGAAATGCAGACTTATGTGGACAACAATTAGGGAAAGAATGTAATAAGGGAATCAATAAGACTCAAG  
GTGCACCAATGTCAAATTGAAATGGATCATTCTTGGTATAGTAGTTAGTCTTTTATTGGTGACCATTCTT  
TTTCGCGTCAAGCGCAAGGAAGATCATTTTCGACAAGCTTGGGAAAGAGAATCTTGATGAGGGGTTGCA  
CGTTGGTAGCTCGATTAGGAAGAGCACGAGCATTATAGCAAAGGAGGTGATTCTGTTCGTGGATCAAC  
ACGAAGGGGAGGATCACAAGGTGGTAAGGCTATGGGAGATCTTGTGTTGGTGAACAACGAAAATGGT  
ACATTCGGATTGCCTGATTTGATGAAGGCAGCTGCTGAGGTAAGGACTCGGAAACGGAGTGTTAGGATCAGCT  
TACAAGGCAAAAATGGGAAATGGAATGTCTGTTGTGGTTAAGAGATTGAGAGAGATGAATAAAATGAA  
TAGAGATGTGTTTATGATGCAGAAATGAGAAAACCTGGAAAGTTAAGGCACAAAAATTTACTTCAATTATT  
GGCATATCATTACAGAAAGGAAGAGAAATTGATGGTATCTGAATATGTTCCCAAAGGCAGCCTATTATA  
TCTGTTACATGGTATGACAATTTCTTTCATCTACAGTCAAACCTCTCTATAATAATGTCGTTTGTCTAGATA  
AGTTTTTGGCTGCTATAGCGAAATGTTGTTATCTAGAACATAAGTTTCATATCTCAACTGTTACTCCCTTT  
GTATTGAAACATACCTCGATGATGAGTTGGCCTACACACGCCTGTTGTTGATTGAGAACAAATATTTGAC  
CAACTCAACATCGAGGTGTGTTTTGATACAAATGGAGTGAATAGTTAAGGTAGGTTAAGAGAAAAATG  
GATAGTTAAAGTATGAAACTCGTGAAAAAAGGATAGTTTGGTGTGTTTTGACCATTATGGTAAAAAT  
CAGTTCTGAAGAAAACCTGGTCACTATTATAGTGAATGTTATTATAAAGGATGATTGTTATAGAGAGGT  
TTGACTGTATATCAAATCATTAAAGGTCTTCAACTTCTTTTCAACATTTGCACGAGTAGATTTTATCCGATAA  
TGTGATCCGATCTATACTTACCGGTCCCTTCCAAGACATCCGGTCACAATTGGGACGATACAAAGAAGAT  
TAGCATGATCCC

>M6-PGSC0003DMG400003002 M6 LRR-RLK

ATGTTTGACACAATTGTATGTGATGAAACAGTGACCAGAGATGCATTGCTCAAGTTTCTTGCAGAGGTTT  
CTAACAAATAATAGTACAATTCTTGGTACTAATTCGGGCTGGAACCTCGACATCTGATCCTTGCAAGGACAA  
GTGGCTTGGTGTACATGTAACGCGAAGACTCTCTGTGGAGAAAATCATTCTTGATGGTTATGATTTT  
TCATCTGGAACGTTTGTGCTACCACGATTTGTAATGTGGAGCCTATCGCGGACACCCTTTTCTCCTGA

GTCTAAAAAATGACCTACTTCAGGGGAAAAACTTTGATAGTATAGATAAATGTAAGCATCTAAGACATCT  
TGTTCTTGGTGGAAACCGTTCTCAGGTAGCATTCCACAGTCATTTTCAAGATTGAATAACTTGAAAAGC  
CTTGACATATCCAACAATAGATTATCAGGTGTTCTCCCTGATTTATCTAGGATTCAGGCTTGATTGAATT  
CGAGGCTCAGAATAACCAGCTATCAGGAGAGATACCTGAATTTGATTTCTCAAACCTTTGTTGCATTTAAT  
GTCTCTTTCAACAATTTAGTGGATCGATTCCGCCTGAGAGTGATAGTTTCCCTGTTAGTAGATACTTGGA  
AAATCCTCTGTTGTGTGGCTCCCCGTTGGCTGGAAAATGCTCATCACTGTCCGAAGATTCAGAATCAGCT  
GATCATGACAAGCCAAAGAGCAGCTTGTCAAGAGATGAAATTCTCATGTTTTAGGTTATTTCTCATAG  
GCCTGGCTCTGGTTCTTCTTATCCTACTATGCGTCTATAGAAAACGGAAGCAGAAGCAGCAGAAGAAGA  
AAGAATCAAGAATCGAGCTGATGAAAAAGGTTGCTACAGTTGATCATGACAGTACTACTACATCAATGG  
ATCAATCAAAGAAAGGCGCGAGCAATTCAGATATCTCATCAGCTGTCATTTCTCCGATGACAGCAACAC  
CGCGGTTTCACAGTCACTCGTGGTTCTTACGAGTCTGAGGCGAATAACGGATTGAGATTTGAGGATTT  
GCTTAAGGCTCCAGCAGAGTTGCTTGGAAAGAGGGAAACATGGTAGTATGTACAAAGTGATGTGTGACA  
ATCCCAAATGACACTGGCTGTTAAGAGGATAAAAGATTGGTCAATAACTGGTAGTGAATTCAAAAGA  
GAATGCAGAACTAGACAAAATCAGGCATCCAAATGTGTTGCCTGCTGTTGCCTTTTATTCTTCTAGACA  
AGAGAAGCTTTTGGTCTATGAGTACCAAGACAATGGCAGTCTTCTCCTACTTCTACAAGGTAATTGACTC  
TACTAGGCTATTCTTCTGTGTATTGAATTGTGCGACCATTTTCATCTAGGCATATAAACAGACTCGAACT  
TTGCCTTAGCTGGCAAGTAAGCACTCAACTTTGAGAGAGTGCACATCTAGACCCCTCAAATTGGTCTCAA  
CTG

>M6-PGSC0003DMG400003175 M6 LRR-RLK

ATGGGTGGTAGATGGAATACTTATGGATTCAAGTTATCATATCTTGCCTTCTGATTATTCTTTATGACGT  
TCACGGATGTAGCTCACTCAATTCTGAAGGTAATTCTATTCTATGTTTGGACTGTCCTACTGGTTTTGGTG  
TTTATGTCTTAGTTATATCTAGTTTGTATGTCCATTTGAATATTGGATTGGTCTACTTTGCAAACAAGG  
ATTGGCATTGTTCCGACTACGATCTAAAGTGGATTGTGATCCATATGGAGTTCTTGCAAACCTGGAATCTT  
GATCATTGTGACCCATGTATGTGGTTTGGAGTACAGTGTCTGGCAGGCAAAGTGCAAATGTTGTAAGTC  
CCTTGTTACATACGATCATATCTGTTAATGAGTATTCAATTCCATAAACTTACTTTATAATTGTAATGCTT  
TGTTTCTTTTTTAGTTAAGACCAAATCCGTTAGATTTATTTAATGACAACAAATGTGCAAAGATGAACT  
CATATGTTTTGACTTTTGGAGCTATCTCTCATGTTGTTAATTATTTCTTTTTCTTCTGTTTAGGGATCTTC  
ATGGACATTCTTTAGAAGGCACATTGGCACCAGAGCTTGGGAATCTCACTCACTTAAGATCAATGTAAGT  
TTTTACCTACGACAAAATGTTTTTTGCTTTTTTAGTTCATAAGTGAAAATTTGTGGGGAATTAAGAGAGA

TTGTTGCTTGTCATGGTTGAAAAGCTGATTAAGCTTAGTATTGGTTGAAAATAGCCTTGCGCATTGAAAA  
TAAGCACGGGTAAAAATGACCCTAATGAGTTAAATGGATTGAAATAGCCTGGCAGCTTAAAAATACCT  
CCTTCTTTTGATTTCTTTTTAACTTGCAATTTTTAAAAAAAATTGATCCTCCTCTTCTTTTGGTTTT  
TTGGTTAAAAAACTCCCTAAATAATCTTGTCTTGTGGAAAGCTTTTTGAAAGTGCTTGCCTCTCGACA  
ATGATAGCATTGAAAGGAGTGTCTAAGGATCGTTCTCCGTTACAATATTCCATAAATCATAGGTTTC  
AAGATATGAATTCATTTCACTGACCAAATCTGATAGTTTTGGTAGTGAAAATTTGTGGGACAATGAAA  
GAGAGATTGTTGCTTGTCATGGTTGAAAATTGGTTTAAATAGCCTTGAGCATTGAAAATAAGCACAGG  
TTGAAAATAACCCCTAATGAGTTCTAAAAAATAGATTGAAAATAGTCGTGGTGGGTAAAAATAGCCTT  
GACAAGTTAAAAATGGGTTGACAATAGTTCTTTAGAAGAACTCACATATCCATAAGATCAATGGGGCTT  
TGGATACTACTGTTGCTGTTTTTTAAAGATGGTGCAGCTAAATAATGTTGAAAATGTCTCTCAATTTTA  
TTAAGCATTAGAGGGGTTAATAAACAACTTGAAAACATAATTTGCAGAAAATCTGCATAACAAAAAGT  
AGTAGATTAGTAAATTGGGTGGAATAGACTAAAGATAATTAGTTCCATGTCTAATAATCATAGTTTTCAT  
CATCTTGCATGTTGTATCTTCTGTGTGTGTATGACTCCTTTTTAATCTTAACAATTTAAACGTTTTTT  
TCTCTATGATTGGCTCACAGTGTGCTGTCAGAAAACAATTTTTTTGGTGCCATTCCAAAAGAATTTGGAC  
GACTTCAAAGGTTGGAAGTGCTTGACTTGACATATAATAATTTGAGTGGGAGAATTCCAGCAGAAATAG  
GAGACCTGCATGCGCTAAGAAGCTTGTGAGTTCATAATTTAATTTTTGTGCATGTGAAGATGCGTGCTGC  
CTATATTAGTTTATATATGTGAGTATTCATGAGGAAGAACCATTAAAAATATTCTTTTGAAGTGTGCTTA  
TACCTTTTACAGGTTGATTCGTAACAACAACCTTGGAAAGGAAAAATTCCATTTGAAATTGGGAAGCTTCG  
TTTGCTCTCCGAATTGCAATTTGACGAAGAAGCTCATCCCTGCTGCTGCTGGTGGAAACATGCTGTTAAAT  
AGAAAATTTGTACTGTTAAGGTTCTTTTGGTTTTATTGGACCTTTTATATCCGTGTTCTGGTTCTTGTTA  
CATTTATGTAACCAAATATCAACATGCAAAGATGTCTGAAATGTATGAAATTTGTATTTAAGCCATTTAG  
GCTGCCATTATTTTCAAGATATGGTCATAATTCCTGTCATAAGGTTTTCTTGGTGGGAGTGAGGGGGTGG  
GTGAACACAAGTTGATAAAGTTGAGTATTAATGACAACAAGGGATATTGTCGTTTATGTCAAATCAAATA  
AAGCCTGGGAAATAGGTGATTTTATAGATGTGGCGATGCAATGACTTGTGTTGCTAATGCTTGAATTT  
ATTGCTAGTTTACATCTAGTAGTACTTGACCATACATCAACTCAAACAAAAAAGCTTTGTAAACTA  
CAAGGAGGTGATTGTCCAGTCATTGCATCCATCCAAGGCTAGGGTTGAGGATGAGGGATGCAATATATT  
GGAGATCTTGGGATTGATCCTGGAATCAAGAGAGCATCAAGTTATCATATTGGTTCTAATTTATTTAAT  
TTTTTATCAAGAACTCTTCTCAGATATCTTTAACTCTTACATAGAATACTGACTATCAAACTAATAGCA  
TGGTACTTTCAATAACAACCTTCTCAATCAGATATTTTCAATTTGCCTGCTTCTCTCTGGTAATTTGATGTCTG

TTTCTGGCAGCATCTGTCATGGCAGTCTGATACCATTAAAGACCGTAGACTCCTTTATCAAACCACTTAAA  
GGGACACTTCTGCGTTATTTCACTATGTAAGTAACTAAATGGTTTTCAATCACCATGTGTTTCTACTTACA  
TTTTATCACTCTAGAAGCGTCTTTGTGTCAATAAAGGTTCTCCAAACAACCTGGAAGTGGCTCATTGGAT  
AATCAGACAGGGTATTCTCTGACAACCTACCAAGTGAGTGAAAAAGTTTTACCCACATCATTAGCAGG  
AATTATGTTGAAAGTGCACAAAAGATTGTTTTCACTTTTCTTTTTTAGCAGGTTTCATCTAGGCCTCACATC  
ATCCATACTATTCAGAACCATGCGAATATCGCACGCCGCAAGTTAGTAGAACAATCCAGCAACCTTGCTG  
CTGTTCTGCCAATGCTGGGAAACCTTTGGGTCCTATTGTTTCAGTGCCAAGCACCAGAAGTAGTGGGTC  
ATTTTCATGTTGTGCCAAATACCCAAGAAACACCTCCTACACCCTTACCTGCCTCGCAACGACAGCCTGAG  
TCTCAATCCAAACCAATCCAATGGGACGGTCAAGTAGTGTGTTAAACAGCCAACTAATAGACAAGCTC  
CACCTGCCCAAAAATTTGGTGATACATGGAAGTATATAGTTGGAGGTTTTGGGTTTTTTCTGCTCATTGC  
TGTTGTAGCCGTGTTCTTAGTTTACAGAAGAAGAGCTGCAAAAACAATAGGCCCTTGAAGACTGGGTT  
GAGTGGACAGCTGCAAAAAGCATTGTGTCACAGGATTTCAATTAATAATTTGTGACAAGAATTAAGTTAA  
TATTCTGTCCACATTCTGATATTCAATGACAAAATCATTGTTGGTTGATAATAGTCTTAAATCACAGCCAT  
GAAAGAAGGTATAATCCTGATGTTGATTGCAAAAATTTGTTTCTCATTGCAGGGGTCCTAAGCTTAACA  
GGTCTGAGCTTGAAACAGCATGTGAGGATTTTAGCAATATAATTAGTAGTCATGATGCATATATAATCTA  
CAAGGGAACCTTTGTCTAGTGGAGTAGAGATTGTTGTTGCCTCGACTACTCTAACTTCTCTCGAAGATTGG  
TCTGATAGTTCAGAAATGGCCTTCAGGAAGAAGGTTTGTGTTTCCATTTACATCAAAAATAAAATATTA  
TCTCTCCATAGATCTCACAGTCTTACACTTCACATAATGACATTGTTGTTATCTCTTCATCCTTTTTCGGTTGT  
AAAAGACATGACATTTTGTGGTTGTGCTACTGAACAGATTGATACACTTTCAAGAGTGAACCACAAAAAT  
TTTGTTAATCTTATTGGATACTGTGAGGAGGATGAACCTTTCACTAGGATGATGGTCTTTGAGTATGCTC  
CAAATGGAACCTTTCTGAGCATCTACACAGTAAGATTCTTTGTTGTCCACAGTTCAGCTTTAATTAAGTCA  
CAATGATGGCTTGATTTAGTTCAGAATAACACTTCTTATTTTATTTTGAAAAAAAAAAAAAGATGTTTCAGA  
ATGACTTAAAATATAAGTTTAATTGTGTCAGTTGAAGAAACCGATCCTCTTGACTGGTCTGCAAGGATGA  
GAGCCATAATGGGGACAGCATATTGTCTTAAGTACATGCATGATCTGAATCCTCCAGTGCCCCATTCCAG  
CTTAGATTCAAATGCCATATTTTTGACTGACGATTATGCTGCTAAGGCTGCTCCGTCTTCTCAATATGT  
ATATATAATTTATCTACCATATTGAACTAAGAAACATTTTTCATTTGTATTTTCATATTGAAATAGAATTTTT  
TATATTTTACAGATTACAGAGATTGGTTTCTGGTCAGAATAAGCCAAAGTCTAAGGACTCTAGGGAT  
GATTTAGAAAATTCTGAGCTGCCAGCACTTGCTGATCCTGAAACAAATATCTATAGTTTTGGGATTCTATT  
ACTAGAAATAATTTCTGGAAAGTCACCTTATTCAGAAGAACAAGGATCTCTTCTGAACTGGGTAATGTC

CTTCATATGTTTCCCTTATTTTCTTATACTTGATCGTTACAATGCGTTCCTAGTCTGCATGCATTTTCTTGT  
GTGAATGTATTTTCTTTTCAGACTTATACCAATGCAAAGCATATTGATAACTATTATTTTATTTAGGCGGA  
GCAATACCTTAAAGATAAGATGAATGTGAGCTCCTTGGTTGATCCAACACTCAAGTCCTTCAAAAATAAT  
GAGCTTATGGCTATCCGTGTGGTAATTAAGAATGCCTTCAAGAAAATATAAGGAAGAGACCAACGATA  
ACCGAAGTCATTGCAAATAAGGGAAGCGATTGATATATCGCCTGATGCTGCAGTTCCAAGGCTTTCTC  
CCCTTTGGTGGGCTGAACTCGAGCTTATCTTCTGAGGCAGCTTAG

>M6-PGSC0003DMG400003210 M6 LRR-RLK

TCGCAGTATGGATCTAAAAACGTGCTGTATTATACTATTAAAAAAACTGAGAGAGACTGGCTCCCTCAT  
TAAGAATTATTGAACAACCAGCCAAACCAAGCATTAAATATTCTCCTATTTTGGTTGTTTCCTAACTCAT  
TCATTACCAAATACCACACTAATTAAGCATATGATTAGCTGAGGACACATATTATGAAACAACATTCTCA  
GGCGCCTCAGCCAAAAATTAGTTCTTGAAGTAGCAGCTCAGTGTTTTAAGAGGTCAGAGATGTTCTTGT  
TTCTGGTTAATTGCCTTCTCTTTGCTAATTTATTTGCAGCTTTTCGATCTCATGGCCTCAAGATTCTGT  
TCATCTACTTGGGTTTCGGAGCAATCTCCAGAGCTCTCTCAACAATTGCTCCCTTGAATCAGTCTGTCT  
CACACTGCCAATGGAAAGGTGTTTCCTGCTATTCAGACATAACTTCTCATGTCAAATCATTGATTCTAACA  
GACTTATTGCTACCTGGAACCTTGGACAAGGCCTTACCTAATCTCTGCCTTCTCCTCGCTTGGTCTCTCT  
GATCTCAGTGGCAACCATTTCACTGGTGGCATCCCTGATATGCTCGCAAACACTGCAGCCAACTTGACACGA  
TTCTACTCAACGACAACAGATTTTCAGGATCCATCCCACCAGAGATTTTCAAATCAAGCAAACACTCATAAA  
AATTGATTTGGGTTTAAATCAGCTCACTGGCACTATTCCCTCTGAGGTAATCCTTTCTACAAACCTTCAAC  
ATCTCGGGCTGTGGAACAATTTCTCAGTGGAAATATTCCAAAAGAGCTATTCAATTTGCCAAACTTGAC  
ACATCTCCACCTCAACACAAATGAACTGACTGGACCTCTACCTGACTTCCCATCCTCGTGCTCACTTTCCG  
AGTTTTTTATTTATGAGAACCGTTTGTGAGGTTCTTTGCCAATTACCCTAGGCAATTGTCACAACCTTACTT  
CATTCTCTGCATCATCTGCTCATCTTGGAGGAGTTATTTCCCAGAGGTTTTAAGGGACCTTTCAAATCTT  
GAATTTCTCTATTTAGATGATAACAACCTTTGAAGGGGAAATTCCTGAGACCTTATGGAATGGGAGCTTAC  
AAGAGTTAGCTCTTTCCTTGAATAAATTCAATGGTAGTATATCAGAAAAGATTGGTGGTTCTCATCAGAT  
AAATTACATTGATTTATCAGTTAACAATAACTGGTCAGCTTCCAAGATCAGTTGGACGTCTAAAGAAT  
CTGAACAAGCTTTTTCTGTATGATAACATGTTTAGTGGTTCATTACCAGCAGAACTTGGGAACTGCACTTC  
TCTTGTGCGATAAGTCTCGTCACTAACTTCATTGGTGGGGAAATTCCTCTAGAGCTCTGCAACCTTCACT  
CCCTAATAAAATTTCAAGTGTACGGAAATCAAATTCAGGGCCAAATTCAGAATGCATTGGCAGAATAA  
GTGGACTGGAGGAGCTAGATCTTAGTGAGAACCGATTGATCGGCAAGATAACCACCTGGAATCACAAT

ATGACGAACTTGTGTTACTCTCTTTGGCTCATAATAATCTTACAGGGGAGGTACCACCTAATCTTGAA  
AAAACAATTTTCTGGCTTATTTAAGGTTGATTTAGGTTATAATATCTTCAGCGGACCTATTCCTTCTGAA  
CTATGTAATGGTAACAGTCTTGGAGTCTGGTTCTTGAAAACAACAGTTTTAATGGCAGCTTCCCAACAT  
ATCTAGCAAAATGTGAATCCCTCTATAGGGTAAAACCTCCCAACAACAATCTGCAGGGGAGTATTCCTGA  
CTACATTGAAAAGAATGAGAAGATTTCTTACTTGAATGTTGAGGAAATATGCTTGCAGGAAGGATTCC  
AGCAGCATTGGTTATTGGACCAATCTTCAACAATTGATCTTTCAGAGAATATGTTTTCTGGTTCCATAC  
CTGCCGAAATGGGGAAGCTGCAAAATCTTGTAAGATTGAACATTTCTTCAAACAGACTGACAGGAAAA  
TTCTCTTCAGTTGAGTTACTCTGCAAACTGGCAGAGTTGGATCTCAGCAACAACAATCTTTCGGGTAG  
AATTCCGAAAGAAATTGCATCATCTTTAGTACTGACAAATCTTCTACTCCAGGACAACAACCTTTCTGGTG  
CTCTTCCAGACACTTTCTCCTCCTCACAAAAGCTTGTAAGCTGCAGCTCGGGGACAACCTTGCTTGAAGG  
CTCAATTCCATGCAGCCTCAGTAACTTAGGGAACCTAATGTTGCACTGAATCTGAGCATGAATAAGTTT  
AGTGGTCAAATTCCTAGGTGTCTGAGCAATCTAGACAATTTAGAAATCCTTGATATATCAAGCAACAAC  
TGCTGGCGCAATACCTTCAGAAATGGACAAGATGAGGTCCCTTTCGTTTTCTCAACATATCATTTAATAAC  
TTTTCAGGGGAGGTACCCATTTTGTGGGGAAAACCTATTAAGTTCACATCCAGGAACTTCCAGGGAAAT  
CCAGGACTCTGCTTATCAGACACTGAAAGTAGCAGCTGCAAGCATGTGAAAAAATCACAAAGAACTGG  
AGGACCTTGGCTGGTGTAATTAGTGGTGTGTTTTCCGTGGCAGTCATAGCTGCGGCAATATACTTGCTA  
GTGACTCGGATTCAGCACCTTCCCTGCTGAATAAGCATCGGCTCGTCAAGTATCAGGCAGAATTTGAA  
GATCTGCCAGATCGTATAAATTTTGAGGACATTGTACGTGCAACAGAAGGCTGGAGTGAAAAATATGTA  
ATTGGAAGAGGCAAGCATGGAACCTGTTTATAAGATGGAATCTGCGAAATCCAAAAGCTTTGGGCTGTC  
AAGAAGGTTGACTTAGCTCAGAGAGCATTAGCAATGAAATGAGAAGCCTCAATTCTGTCAGACACCGC  
AATTTGGTAAGATTGGGAGGACACTGCACCAGACATGGATATGGCTTCATTCTAACAGAGTTTATCCCTG  
GAGGAACTCTTCATGATGTCCTTACCAGAGAAAACCACCTGTAGTCCTGGACTGGGAGTCCCGCCATC  
GTATTGCTCTTGGTGTTGCTCAAGGTCTGTCTTACCTTCATCATGATTCTGTCCCTCAAATCATTACAGA  
GATCTCAAATCAGATAATGTAATGCTGGATACTGAGATGGAGCCAAAGATTGGAGACTTCGGGATTGCT  
AAAACAGTATCAGACTCTGATGAAAACCTGACAAACTCCAAAATTGTTGGGACACTAGGATACATTGCTC  
CAGGTTAGCCACACGTTACTATGCTAGTCTTCAGTAATAATTTAGTTGGCAGATTACTTTTGATGATTTAC  
TAAATTTTATTACTTTCTCCCCGGTCCCCCTCCTTCTCCTTGCTGTCCATCAATTCAGAGAATGCGTAC  
TCAGTTCAATTGACAGAGAAAAGTGATGTCTATAGCTATGGAGTCTTCTACTGGAGCTCTTCTGCAGAA  
AAATGCCAGTAGACCCAGCTTTGAAGAAGGATTAGACATTGTTTCTGGGTGAGGAAAAACTTGCACA



GAAGTGACAACAATTCCTTCACTTGCTTGATGAAGAAATTAGTTTTTGGTACATAGAAGAACAATGGAA  
GGCCCTGAAAATGGTGTATCTAGCGCTTCAATGTGCTGAACTCGAGGCAAGCACCAGGCCTGCAATGAG  
GGATGTAGTAAGGTCTCTTGTGCGAGTTAAATCATAGATGTAAAAGAGAAGAAATGAACTTTGAATAGT  
GAAAGCCATAATCAACTTTTCAAATCCAAAATCTTTTTTTCTTTGCTTACATAAAAATTGAACCATTTT  
TCGATTTGTGTGTGCATCCTTTCATTCAAGGGCTAAATTCTAACATAATCGATCCTGGGTGTTTCTGTTT  
AACTTTGTGACATCCACTGCAATAATATAGACTAAGAAAATGCATGGCGTTTCAAATCAATATATGGTAA  
AAGCAGTTTTCTCGTTCTAGCCATAGCTCTTTTCATAATGGGCCACTGTCCTTATCAACTTTTGCTTGTTAC  
TTTCTCCAGCTGCTCGAAAATCTGAACAGTTTTGAG

>M6-PGSC0003DMG400003211 M6 LRR-RLK

TAAAATAATCTCCTATATTCATTGTTCCCTCGGACAGTCGTTGCCTACTACCCCCACACGTATCTTTAAAAA  
ACAGGCTGACCTCAACTTAAACCTAAATAATAGTCTCAGGTTCCAGCCAAAAATTAGTTTTTGAACTA  
GCTCCTTATTGGATGCAGCTTCTTTAAAGAAGTGTGAAGAGTTCAGAAATGTTCTTGTTTGATCTTGTTT  
ACTGTTTTATTTTCTTTGCCAGCATTGTAGCGGTTTTTTCGGCATCATTGCCTCAAGATTCTGTTTCTAC  
TTGGGTTTTCGAAGCAATCTTCCAGAGCCCTCTCAACAATTGCTCCCTTGAATCAATCTGTCTCACACTGT  
AAATGGAAAGGTGTTACCTGCTATTAGACAAAACCTTCAAGTCAAATCATTGGATTTTCCAGAGACTTCC  
TTCTATCTGGAATCTTGGACAAGGCCTTTCAAATCTTTGCCATCTTCCCTCGTTTGATCTCCCTTGATCTCA  
GTGGCAACCATCTCACTGGTGGCATCCCTGCTATGCTTGCTAACTGCAGCCAATTGACACGATTTTCCCTC  
AACGACAACAGGTTTTTTCAGGATCCATCCCACCAGAGATTTTCAAATCCAAAAGGCTTGTATACCTTGAGT  
TGGGTTACAATCAGCTCAATGGCACCATTCTTCTGAGGTGGGCCTTTTCGACAAGCCTTCAATATCTTGG  
GCTGTGGAACAATTTCTTAGTGGAATATTCCAAAAGAGCTATTTGGTTTGCCAACTTGACAGATCTC  
TACATCCACACAAATAATCTAACGGGACCTCTCCCTGACTTCCCGTCTCATGCTCACTTTCCAGCTTCTT  
ATTCATCAGAATCGCTTCTCAGGTTCTTTGCCAATTTCCCTAGGTAATTGTCACAACCTTTCTGCATTCTAT  
GCAACATCTGCTCATCTTGGAGGAGTTATTTTCCAGAGGTTTTTAGGGCCTTTCAAATCTCGAATTACT  
CTATTTAGATGACAACAACCTTTGAAGGGGAAATTCCTGAGACCTTATGGAATGGGAAATTACAAGAGTT  
GGTTCTTTCCATAAATAATTTAATGGAAGTATATCAGAAAAGATTGGTGTGTTGCCATCAGATGACTTAC  
ATTGATTTGTCAGCTAACAAATTAAGTGGTTCAGATTCCAAGTCAAGTTGGACGTCTGAAGAATTTGTACA  
AGCTTCTTCTGTATGATAACATGTTTAGTGGTTCATTGCCAGCAGAAGTTGGGAACTGCACTTCTCTTGCT  
GAGATAAGTCTCGTCAGTAACTTCATCAGTGGGGAAATTCCTTCAGAAATTTGCAGCCTTCAAACCTAG  
AAACATTTAATGCATTCTAAAATAAAATTCAGGGCCAAATTCAGAATGCATTGGAAGAATAAGCGGGC

TGCAGGAGCTAGCTCTTTATGAGAACCGATTGACCGGCAAGTTACCGCTTGAATTACAAATATGACGA  
AACTTTCATTTCTGTCGTTGGCTCATAATAACCTTACGGGGGAGGTACCACCTGATCTTGGAAAAGATAA  
TATTCCTGGCATAGTTAAGGTTGATTTAGGTTATAATAACTTCAGTGGACAGATTCCTTCTAAACTGTGTA  
ATGGCAACAGGCTTGCAGTCCTGGCTCTTGAAAACAACAGGTTTAATGGCAGCTTCCCAACCTATCTAGC  
AAACTGCAAATCTCTCTATAGGGTAAAACCTTCCAACAACAATCTGCAGGGGAGTATTCCAGACGACATT  
GAAAAGAATGAGAATATTTCTTACTTGGATGTTAGACAGAATATGCTTGTAGGAAGGATTCCAGCTGCA  
TTTGGTTACTGGACCAATCTTCAATGATTGATCTTTCAGAAAATATGTTTAATGGCTCCATACCCACAGA  
ACTTGGAAAGCTTCAGAATCTTGTA AAACTGAGCATTCTTCAAACAGACTGACCGGACAAAATTCCTTT  
CAGTTGAGTCACTTTGAAAACTGGAGGAGTTGGATCTCAGCAACAACAATCTTTCAGGAAGAATTCTT  
AAAGAAATTGCATCATCTTCAGTATTGACAAATCTTCTACTCCAGGACAACAACTTTCTGGTGCTCTTCC  
AGACACTTTCTCTCTTCACAAATGCTTGTAAGCTGCAGCTGGGAAACAACCTGCTCGAAGGCCCAATT  
CCATGCAGTCTGAGTAAGCTTATGCAACCTGTTTTTCACTAAATCTGAGCATGAATAAGTTTACTGGTG  
AAATTCCTAGGTGCCTAGGCAATCTTGACAAATTGGAGGTCCTTGATATATCAAGCAACAACCTGTCTGG  
TGCAATACCATCAGAAATGGAAAAGATGAGTTCCTTTTCGTTTCTCAACATATCATTTAATAGCTTGTGCA  
GGAAGGTACCCAATACATGGGAAAACTATTAAGTTCACGTCCAGGATCTGCCTTGGGAAATCCAGGAC  
TTTGCTTAATAGACACGGATGGTAGCAACTGCAAGCATGTGAAAAAATCACAAGTAAAATGGAAGACTT  
TGGCTGGTGTAATTAGTGGATGTGTGCTTCCATGGCAATCATAGTTGCTGCAATGTACTTACTAGTGAC  
TCGGATTTGGCACCCATCCCTGCTGAATAAGCATCGGCTCGTCAAGTGTCAATCAGGAATTGAAGATCTA  
CCTGATGGTATAACTTTTGAGGACATTGTACATGCAACAGAAGGCTGGAGTGAAAACCTATGTTATCGGA  
AGAGGCACGCATGGAAGTGTATAAGTTGGAATCTGCCAAATCCAATAAACTTTGGGCTGTCAAGAAG  
GTAGACTTAGCTCAGAGAGCATTCAATGATGAAATGAGAAGCCTAAATTCTGTCAGACACCGCAATTTG  
GTAAGATTGGGAGGATATTGCATGATACATGGATATGGCTTCATTCTAACAGAATTTATACCTGGAGGG  
ACTCTTCATGATGTCCTTACCAGAGAAAACCACTGTAGTCTTGGACTGGAAGTCCC GCCATCGTATTG  
CTCTTGGTATTGCTCAAGGTCTATCATACCTTACCACGATTCGGTGCCTCAAATCATTACAGAGATCTC  
AAATCAGATAATGTAATGCTGGATTCTGAGATGGTGCCAAAGATTGGCGATTTCCGGGATTGCTAAAATG  
GTATCAGATGAAGAAAATTCGACGAACTCCAATATTGTTGGGACTCTAGGATACATTGCTCCAGGTTAG  
CCACACGTTACTATGCTAATTTTCAGTATAATTCAGTTGGCAGATTACTTTGATAAACTAATAACTTTTACT  
ACTTTCTTCCCTGGCCCCCTTCTCTTTTGTCACTCCATCTATT CAGAGAACGCATACTCAGTTCAACTGA  
CAGAGAAAAGTGATGTCTATAGCTACGGAATTCTTCTTTTAGAGCTTTTCTGCAGAAAATGCCAGTAGA

TCCCAGCTTTGAAGAAGGATTAGACATTGTTTTCTGGGTGAGGAAAACTTGCAGAGAAGCAACAATTT  
CCTTAGTTTTCTTGATGAAGAAATTAGGCTCTGGAATGTAGAAGAACAATGGAAGGCCCTGAAAATAGT  
GGATTTGGCGCTTCAATGTGCTCAACTCGAGGCAAGCACCAGGCCTGCAATGAGGGATGTAGTAAGGT  
CTCTTGTCGAGTTATGAAGAGAGGAATGCAAGATGATCTGAAGGCAGGTGCAGTTCAATCCAGAAGAT  
CAAGAGCTCCTGCATTTCTCTTCTTTATTTTTGGTGTAAGAACAGTTAGTTGATGATGTTGAATCATTAC  
TAGACTCTATGGCCTCTTTGTAAGTTTTGTTTGAGGCTGTATCTGTAGATATAATATAACCAGGTCTTTATT  
AGGGTGCTGATGAATATAACATGTTACCAAATTCAAAAGAGAATAGATGTAAAGATAAGTAATGAAAC  
TTTTAGTAGTGAAACCTGTGATCAACTTCCAAATTC AACATCTCATTTTTTCTTTTTTGCTTACATAAA  
AAAATTGGACAAAGAAAATACATGATGTTTCAGTTTAAACAAAATCGTGATCTTGGGTTTTTCAGTTTAAAC  
TTTGTGACATCCAATGTAGCAACATAGACTAAGAAAATGCATGATGTTTCAAATCAATTTTTGGTAAAAG  
CAATTTTCACCTTCTAGCCATAGCTCTTTTCATCATGGATCACTGTCCGTAATCAGTTTTTGCTTATTACTTT  
CTCCAGCTTCTCCAAAATCTGAACAGTTTTTCAGGTATCACAATTA AAATGAGAGTGTGAAGGAACAAGG  
CTTTGCTACAAGCTAGTCCTTATCTTATGGACTATAACATTCCGTTTTATAAAAAGAAATCAAAGAACAAC  
CCCCACCCAAAAGATAAGCTTTTGTGAATTTGGTTGACTAATGATGGTTCCTGCGAAAGAGTGCAGA  
AGACCTCCGCCTTACCGGTCTTTCTTTGTGTTCCAACTTGCAGTAGCAGAATTATTTGCAGAAAATATAG  
ATATGATGAATAGAAATGGCTTGTGGACAATCATTGTATTTCAAACAAATACAGATATTC AAATAAGGTA  
GATATAACTCAGATATGAGTTACCAACAGGACTTCTAACAAGACTTAACAGACGAATGGCAAATACATA  
GGAATATCAGATCAGGAGAGGAAAATAATAGTCCTTGAAGAATTGATCAGAATTCAGTAGAAAGGAAA  
TATGAAAGAAGTGCAAGAATAAACTGGAAGAAATACTCTGCAGGTGACAAATAGATGAAAGACATACC  
TCAGTTACGAAAACCTGCAACACCCTAGCACAATACGATGCGCACCTAAATAATCATCCAAGTAGGAGAA  
GCCCAACTTAAATGTCCAGATTCTTTTTCATATTTTTTATGTAGTTGACTTGGATGTGCATTACAAGAC  
AACTGTCACAAGATTTTGAGAATTTTTCATGTTAAAATATCCACCAGAATTTGCATTGGATATATTCACAT  
GGCACCACATATGCTGACAAATCTCAGACTTCTAATAATAGAGATTCCATTCTGAGACAGATCCACTAAA  
TTCCCAAGTTTCTGCTCTTAGCAAGTGCAGCACTATCACATATGATGATAAGTCTAGGACCTCTAGTAATA  
AAGCTTCCCTTCTGAGCCAAATCCACTAAATTCCTAGCTTCTGCTCTTAGCAAGTGCACTTTTGTGCAAG  
ACGATTAGAGACAAACTCCAGGAATTTGGTGCTTCTAATACCAAAGTTACAAGCAGCTCAAAGAG  
AAAATATAAAACACTAAACCACATTAAGAAAAGCTAGGAAGCTAAAACCAAATTTGAAGAAGAAAA  
GTTCCACACTGTTTCTTTAACAGAACAGGTGAAATTTCTATAAAGAGCTGATCATATCCTACATCCAAT  
CACTTTACTGAAGTTAGAGTACAGATAAATGTTTGAAAACCCTAGTGTCCAAAGATAGGGACAATAGAA

ATATGAAGCTGTAAAATGCTCCAAGAAAAATAATTAATTTCTGAGAGGATTTCCAAAATAGCCTCGA  
GGTAAAATATTTATACAAGGTTAAACTTGTCTGCTCCTCAGTCCAATAAAGCAGAGTTCAGGAGTTTTA  
CTTTGAAGAGACCGAACAAATTTAGAGAACTACTCCATTACTGGCTATGTAACCTATGGCTAACTAGATT  
AAATTAGAAGCTCAATGTGCATAGACGTGGTGTCTTGGGTTATACTTAAGACCAGCTAACTTGAAGAA  
GAATTCATTAGTATACATGGTTACGGACTGAGGCACAGTGCAACAGGATAATATTTTCAACTTAAGTAA  
GAAATTACCATTATAAAGATAGGATGTCCTTGATCACATCATAACAGAATTAGATACCTAATGGAGCTTGC  
ATGTCTGTTAATTAACACTAAACAATGTAACTATTGCAAAATGCTCAAGTTCACAATTTTATTTATATCC  
TCTCCACTTGAATATTTTCATGCAACATATTTTTGTCATTTGGATATATATATGTTGAATGAAATTAAGGA  
ACCTAAAAGTCAGTTCACCAGACAATCTATAATCAGTTATGTACCACATCTTTTTACCTAATACATTTTTTG  
TGAATCAACACCACTATTTATACCCTATTCTACATATCAAAGGGACAAGATGAAGTTTGAAGGATCAAT  
GCCTAGTTTATACTCAGCATACAAATAAAGCTCATATAAGATACAAAATAACTAAACCTCTTTTCATCTC  
CCAAATATAGTTTGAGCAATAAAATAGAGAGATGGAAAAGTATTATTTGATCGCGAAATTATTAACCAC  
AATAGATTGTGGCAGCAACACCAGACCTCAGTCACAGTCATACTAAGTCATCTACTTTGTTGTTTTTACACA  
TACTTTTTCCGCTTCAATTTAATCAAAGCCGAATGCTGATAGCCTGATATGCATTCAACTACAGATCCTT  
TTTTATTTTTGATGACAAGGGAAACCGCAGCCGCTACCCTTTGGGTGCGCACAGGGTAAAACCTCCCGCT  
CATATGCAATAGCTCGCAAACCACATAGGAGAGGTAACATGTGGGTGCGCACAGGGTAAAACCTCCGCT  
CCTATGCAATAGCTCACAAACCACATAGGAGAGGCAACCCACACTAAGCAAGTCTGGTGTGACGAGCTC  
GACCCAAAAGGCAAACCCTTGCTTCTCTGGCAAGGGGTTTCGAACTTGGGACCTCCAACGTGAAAGTC  
CCAAGCCCAATCACTGGGCCACCCGAAGGGTCAGATGTATGGATCCTTTTACCTAGATATTCAACAT  
CAAGGCATCTCAGAATTCTCAAAGCAATTTACTCCTGGCAACTTCTAATTTTGAATCCCTAAGTTCATA  
AAGGGGCTGTGCCAAGCATTAGAAAATACTAGCATTGCCTTCGAAGGTCAAATTATCGATTTAATTAATG  
GTACAGAGGGCTTTTAGAAGCGGAGAAATTGGGAACAGCATTGTACCTGTTAATTGTTGATGGAGTCAT  
CGGAATCAAAGTAACTCAAATTAACGAAGACAAATAAATAAAAATCTCATTCTCAACTCAAACCTATAT  
TGGATGGGCATAAATTTGTGGAACCCATTAAGCTTTTTTCTCCAACCTTGC

>M6-PGSC0003DMG400003280 M6 LRR-RLK

TTTCAGGTGATCGAGGGATATCACACGGTGAGCTAAACTGGCCTACTCGTCTAAGGATCATCCAGGGAG  
TTGCTGGTGGAAATGTGTTATCTTCATTCCGAGTTTGCATCGTATGCAGTGCCTCATGGAAACCTCAAGTC  
TAGCAACATTCTACTCAATGAAAAATACGAGCCACTTCTATCAGATTACGCCTTCTATCCACTGATCAACA  
ACACGCAAATTGTTCAATCCCTTTTCGCGTATAAAGCACCAGAAGCCATACAACATCAACATCTCACTCCA

AAATGTGACATATATTGTCTTGAATCATAATACTTGAAATCCTTACAGGGAAATCCCTTCTCAGTATCT  
CAACAATCAAAAAGGTGGAACGGACGTTGTTCAATGGGTGCAATCAGCTATAGCTGACCAAAGAGAAT  
CCGAATTGATTGATCCAGAGATAGCGTCTGCAACAGATTCCGTTGAACAAATGGTGAAACTCCTTCATGT  
AGGAGCTGCTTGTACTATAAGCGATCCGGATAAGAGGATTGATATGAAGGAAGCATTAAAGGAGGATAG  
AAGAGATAA

>M6-PGSC0003DMG400003429 M6 LRR-RLK

AAGCAACACGTCCACACTTCCAACCACAAAAAATAATGTCTTCTAGTCATTTTCTTTCAATCCT  
TTTCCTTTCTCTTCTAATTTCCGGGATCTTTTCGGACCTTAACGCGGATAGAGCCGCTCTACTCCACCTGA  
GTGCGGCCTTCAAAGGCCGCACTCTTGGGTGGAACACAACCAATTCAACCCCATGTTTCATGGCAAGGTG  
TCAAATGTGATACTACAATCAACCGTGTAAATTGACCTCCGTCTCCCCGGATATGGTCTATCCGGTGAGAT  
GCCCTTAAATTCCATCGGAACTTAACTGAACTCCGTACTCTCAGCCTTCGGAGTAACTCTTATCCGGTC  
TTCTTCCTTCTGACATAGGATCATGTACAGAGCTACGCATACTTAATTTGGAAAACAACGACTTCTCCGGT  
TCAATTCCAACGACTTTTTTCAATCTGAACAATCTTATACGTGTGAGTTTTTCAGGGAACAGATTCTCCGG  
TGAGATATCGGACGCATTTAACAATCTGACTAGGATGAGAACTCTGTATTTGGAGAATAACAACCTTCTCT  
GGCTCACTTCTGATTTGAAAACCTCTCACAGCTTAATGAATTCAATGTGTCTTTCAATAGATTAACCGG  
TTCGATCCCTTCAAGTTTAGGTCAATTCGTAGCTTCTTCATTTCTCGGAAATCACTCTGTGGCTCTGCTTT  
CTCTCTTAGTCCTTGTCTGAAAACAATAATATACCAATCAATCGGATAAACTTTCCGGTGGAGCAATA  
GCTGGAATAGTAATTGGCTCGATTATCGGATTCTTCATACTACTATTAGTTTTGTTTATGTTAGTGAGATC  
AATTTATAGGAGTAAAAAAGTTTCCGTCAAGTGAACGTCTCTCCTACGCCAAATCAAGTACTTTTCGAGT  
CCTCGTGATTCAATGGTGACAGAAAATCATGATATCGAAAATGTGTATTCGGAGAGGAAAGATAGCAAG  
AGGAAAGTTTGTGATGATAGGACAAAAGGATGGTGTTTTTTGGGGAAAGTTTTGAGCTTTTTAGTTTG  
GAGGATTTATTGATGGCGTCCGCGGAGGTTTTGGGGAAAGGGTAACTGGAACACTTATAAAGCATAT  
TTAGATAGAGATGTTGAAGTTGTTGTGAAGAGGTTGAGAAATGTTTGTGTTTCAGAAGAGGAGTTTAGG  
GGAAAAGTGGAGGAATTGGGAGGAATTAGTCATGGGAATTTGGTGCCTTCTAGAGCATATTATTATGG  
AAGAGATGAAAAGCTTCTTGTATGATTCTATGCCTACAAGTTTGTATGCTATTTTGCATGGTAAGTATC  
TTATTTCTAATAAACTTTAGCTTTTGTGTTTTAATAATAATATTTGCTACTTGCTTCTTTTTGGTAGTTCTA  
ATTGTTTTGTTTTCTCTGGTTTTGGTTTGGGAGTCGATCAACCTAATTAATAATTCTTAGCTTAGATTAGAT  
TAGCTTCTAGTTAATTGTTTTTTAGCTTTAGCTATGAAAACGAAATTATGTGGAAGAGATGGTATGAAA  
ACAGGGGAAAGGAAGAAGATCATTGGTAGTTCTCTTTTACATTAGTTAATTGTCATCAGATCCACTGTC

GCTACCCACTATAGGCTTAGTGGAATTTACAAAGAGTGTTAAAATGTAAAAGTCACTAGTAATTGCCTCT  
AAAAATATATTTAGCAGCAATTAAGCTATTGTCGTAAATTAATAGTGGCTAAAGATAATTTTTGATGTTG  
TGTATACTGATGTTACATCACAACCTAATGAAGGACCCATGTAATATTATTAGAGAGAGAGGGACGTAC  
AACAGAACCTTTCTGTGTAGAGGGAAAGCCTCCTTAATTAGTATTTAGTTGAATAGGCCTTCTATCAACT  
CACATTCTATTAATGTTATGAAAACGAACTATAGAATTTACTAGTATTAATTTTCGTATTCTAACCAA  
TACTATTACTATGAGTTAGTTTTAACCTTTCTGATTTTGTTAGGCGAAGGAAAAGAAGCATTGACATGG  
GTAATAAGGAGCAGAATTGCATTAGGAGTTGCCAATGGTATCGAATATCTCCATTCACTAGGCGCTAAA  
GTCACCTCATGGCAACATCAAGTCATCTAACATCCTCCTCACACTACTACGATGCATGTCTATCTGAATT  
TGGCATAACACAGTTGATTTCTCAACATTGAACTCCAAAATGACCGGATACTACGCGCCTGAGGTGACA  
GATATTCGAAATGTTTCCAGAAAGCTGATGTCTATAGCTTTGGCACGATTCTGTTGGAACCTCTAACGG  
GTAAAATCCTAGTAGTGTCATCAATGACGAGGGAATTGACCTGCCTAAATGGGTGAAATGTATAGTTG  
AAGAGAGGGGGACAACACAAGTGTGGATCCTGAGTTGATTAGTTTTCAGAATTGTGATGAAGAGCAA  
ATGGTTTCATTGCTGCATCTTGCTATTTCTGTACATCCCACCACCCCGAAAGGCGGCCGCCTATGGCTGA  
CACTACCAGGAGGATCAAAGAAATTGTTATGTGAGTTTTGTTAATGTTTGATCTTTCCCTCATTCTTGT  
CCAAATGAAGGTGAAAATCATGGTTTTATTCTTTCTTGTTCTACAAGAGGGGTGAATTCATACCTTAA  
AAATTGGGCACATGAATATGTGATCTCTATAAACTAGATATTTTATGTATATATATTTTGAATTAATA  
TAATATTATTTATTGCCTC

>M6-PGSC0003DMG400003551 M6 LRR-RLK

GTTAAAAGTGCTGGCCCTTGTTTTGAAAAGTGTTCAATTTGCACATTCTCCACTTCCTCCCTCACTCTTCTT  
CTCTGTGCTACTCTGTGCCTCTGTGCAAAGTGAGGGGGCGTCTGCCATGGCCATTAACACTCATTCTCTC  
CCCTTTATCATGCACCCATTTAACCTTCACTATAAACCAAGCCAACCTCCTTTTTCTTATGTTCTTGATTTCT  
TCTTCTTCATGGCTGCTTATCTACTTCTGTTTCTGTTTTCTCTCTACATTATGCTCTGCTCAGAGAACT  
CACAAACCCTTTTGGAAGTTCAAGCGCTTACTTCTTTTAACTTAGTATTCATGATCCACTCGGTGCACTC  
ACTGACTGGGATTCTTCTTCCCTTTTGCTCCCTGTGATTGGCGAGGTGTTTTCTGCGTCAATGGCCGGGT  
CGGTGAACTTCGTCTCCCTCATTGCAACTCAGTGGGCCACTCACTACCCAAATTGGTAACCTGCGCATG  
CTGCGCAAGTTAAGCCTCCGGTCCAACCTCTTTAATGGCACTGTTCCAGCTTCGTTATCCAAATGTACCCT  
TTTGCACTCTGTTTTTTTACAGGGTAACGCATTTTCCGGTAATCTTCCACCGGAAATATTCAACCTTACTGA  
TTTACAAATCTTTAAAGTTGCCGAAATCAGTTGTCTGGTGAATCCCCGGAGAGCTTCTCAGAGTCTA  
CGATACTTTGATCTTTTCGTCAAACCTGTTTTTTCAGGAGACATTCCGAGGAAATTTTCTGACCGGTCTCAGTT

ACTTCTGATTAATCTTTCTTATAATCGCTTTTCCGGCGAAATTCCGGCGAGTCTCGGCCGGCTTCAACAGC  
TTCAGTACCTGTGGCTTGCCTACAACAACCTTGGTAGGAACCTTGCCTCTGCAATTGCTAACTGTTTCATCG  
TTGGTTCACCTGAGTGCTGAAGGAAATGCTATAGGGGGTCTTATTCCGGCAGCAATTGCTGCTTTACCGA  
AGCTTCAGGTGATATCTTTATCACATAATAATCTCTCTGGTTCCTTACCAGCTTCATTGTTCTGCAATGTTT  
CCATTTATCCTCCCTCACTTAGGATTGTTTCAGTTGGGTTTCAATGCATTACGAATATTGTCAAGCAAGAG  
TCTTCTAAATGTTTTAGTTCTTTGCAAATTTGGATCTTCAACACAACCAATAACATGGTGAATTTCTTTG  
ATTTTGACGAACATTTCTGCATTGACGTCGCTGGATGTGTCATGGAATTTGTTCTCTGGAAAAATCCCAA  
GTGCCATTGGGAACCTTGTGGAGATTGGAGGAACTGAGAATGACAAATAACTCATTTGAAGGTGCTCTTC  
CGTTTGAGATTACGAACTGCAGTGAAGTTCTTGATCTTGAAGGGAATCGAATGACGGGTGACA  
TTCCAATGTTTTAGGTGATCTTAGAAGCTTGAAGACATTGTCAGTGGGAAGAAATCAGTTTTCCGGGTTT  
CATTCTTCTAGTTTTAGAAATTTGAGTAATCTCGAAAATCTCAACTTGGGAGGAAATGGTCTCAATGGA  
AGCTTGCCCGAGGAGGTAATGGGTTTGAAGCAATTTAAGCACACTGAATCTCAGTGGAAACAAGTTTTCT  
GGCAGTATGCCAGTTGATATTGGGAATCTTCAGCAGCTCTCGGTTCTGAATCTGAGTAAAAATGGCTTTT  
CAGGCACTATTCCTTCTAGCATTGGGACTTTGTATAAGCTAACGGTTGTTGATTTGAGCGGACAGAATTT  
CTCAGGTGAAATACCATTTGATCTTGCTGGTTTTGCCTAATCTACAGGTTATAGCTTTGCAAGAAAACAAG  
TTGTCTGGTAATGTTCTGAAGGTTTCAGTAGCTTATTAGGCATGCAATATTTGAATCTTTCTTCCAATTC  
CTTTTCTGGCCATATAACCATCTACATTTGGGTTCTTGACCTCATTAGTTGTACTTTCTTTGTCTAACAACCA  
CATAAATGGTTTCGATTCCTCCCGACTTGGGCAACTGCTCTGCTCTGGAGAATTTGAATCTTCACTCAAATT  
CATTGAGTGGCCAAATACCTGCTGATCTCGGGCGTCTTTCCCACTTGAAGTGTGCTAGATTTGGGTAGAAA  
CAACTTAACAGGTGAAGTCCCAGTGGATATTTCCAATTGTTTCATCCTTGACATCACTCGTACTCGACTTGA  
ACCATCTTTCAGGGAACATAACCAGAGTCACTATCCAGGTTATCAAACCTAACTGTCCTTGACCTCTCTACT  
AACAACTTCACTGGAGAAATCCCAGCTAATCTTACCATGCTCTCTAGCTTGGTGAGTTTCAATGTGTCAA  
ACAATAATTTGGGCGGCCAGATTCCGGAGATGTTGGGCTCCCGTTTTAATAACTCATTGGATTATGCTGG  
CAACCAAGGTTTGTGTGGGAGCCATTGGAAAGAAGATGTGAGACATCTGGTGATGGTGGGAATAAAT  
TGATTATGTTTCATTGCTGTGGCTGCCAGTGGAGCTCTTCTCCTTTTATCATGCTGCTGCTTATATACTTACA  
ACTTCTTGAGGTGGCGCAGGAAGCTCAAAGAGAAAGCAGCTGGAGAAAAGAAGCATAGTCTGCAAG  
GGCTAGTTCAAGGACCAGTGGTGGTCGTGGCAGTGGTGAGAATGGTGGACCCAACTTGTATGTTCA  
ATAACAAAATCACACTCGCTGAAACAATTGAAGCAACTAGAGAATTTGACGAGGAACATGTGCTAAGCA  
GAACACATTATGGGGTGGTCTACAAGGCCTGTTACAATGATGGAATGGTGCTCTCAATTCGTAGACTTTC

AAATGGAACACTAGGTGAGAACATGTTTCAGAAAAGAGGCAGAATCACTTGGCAGGGTGAAACACAGG  
AACCTAACAGTTCTGCGTGGGTACTATGCTGGCCCGCTAACCTCAGACTACTTGTCCATGATTACATGC  
CTAACGGGAACCTTGCAACACTGCTCCAAGAAGCATCCCACCAAGATGGTCATGTCCTCAACTGGCCAAT  
GCGCCACCTCATTGCACTTGGCATTGCTCGTGGCCTGGCTTTCCTTCACTCATCCTCAATGGTCCACGGAG  
ATGTTAAGCCGCAGAATGTCCTATTTGATGCAGACTTTGAAGCCCATCTTTCAGAGTTTGGCCTAGGCAA  
GCTTGTAGTAGCCACACCAACCGAGCCCTCCACATCAACTTCAGTTGGTACCCTAGGCTATATATCTCCA  
GAAGTAGCATTAAACCGGAGAAACCACAAGAGAATCAGATGCTTATAGCTTTGGCATTGTTTTGCTGGAA  
CTGCTAACAGGCAAAGACCCTTAATGTTACACAAGATGAGGACATAGTCAAATGGGTGAAGAGGCA  
ATTGCAAAGAGGGCAAATTTCCGAACCTATTAGAGCCAGGATTGCTCGAACTGGACCCTGAATCATCAGA  
ATGGGAAGAGTTCTTGCTAGGAATTAAGTAGGCTTGCTATGCACAGCACCTGACCCACTTGATCGTCCC  
ACCATGGCCGACATTGTGTTTCATGCTCGAAGGCTGTCGTGTGGGACCTGATATCGCGTCTTCAGCTGATC  
CCACATGCCAACCTTCACCCGCCTGAATCCCCGAGGTTCAATTCTTTTCCCTTTTTTATTATTAGC  
TCTGTATAAGTTGTGAGAGTAAATTTGCAATGCAATGCAACGCAGCAGTAGCTAGCTAGCTAGCAACT  
AGTTCGTTCAATTTTCATGATTTTTTTTTTCTTGTAGATTTTATCAAGGTAAAAGAGAAACAATATTTCTCT  
TTATTGATTCTTGTTTTATGCTATTATTCAAACACCTCACTCCCCATGGTGCCGGGATTTTTCTCCTTTGGC  
GTGGGGACCAAATGTAGTGCTATCAATAAGTCAAAGAAAGCTAA

>M6-PGSC0003DMG400003714 M6 LRR-RLK

GCTCAACACATGGCGTTAGTCTTTGTCAGTGCTGCTTCTTCTCCTTCTGAAACTGAAACTTTTTTTTTT  
TTCATCTCATACGCTCCTCTCTTCCCACTTCCATAACAACTCCATTGACACTCACCATTCTTGATTCTCC  
CCATTTGATCTTCTTCTTCTTCTTCTCTCTACCTTACCCACCACCACTCTTCTCATGTCAACGGCTA  
CTTTTCTTCTCTCTCCGCCATTGGTGGTGGTGGCACTTACATTGCTATTTATCAGTGTTTTCTCCATGGCTG  
AAAACGTTACAGAGACGGAAATGGCAGCTTTAATGTCGTTCAAAGGAATTTGGAAGACCCACTTGGG  
GTATTAGACGGTTGGGATTTTTCTACCACATTAGCTCCGTGTGATTGGCGTGGGGTTCTGTGTGATGCCG  
GCAGAGTTCGTGAACTCCGCCTACCTGGTTTGCAGCTGAGTGGACGGCTAACTGACCAGGTTGGTAATT  
TACGCCAGCTACGGAGGTTAAGCTTACATTCTAACAACCTTTAATGGCTCTGTCCCACGCTCTTTAGCTCAA  
TGTGCTTTGCTACGCGCTGTTTACTTCCATTACAACCTTTTTTCCGGTGAACCTCCCGCCGGCTATCTCGAA  
CCTCACTAATCTTCAAGTTTTAAACCTTGCTCACAACCTCCTCTCCGGTCATGTCTCTGGTAATGTTCCAGC  
AAGTCTTCGTTTTCTCGATCTTCTCGAATCTCCTCTCCGGTGGCATTCCGGGTAACCTTTTTCAGCTGGTTC  
TCAGCTCGAACTGTAAACTTGTGTTTAAACCGTTCTCCGGTGAATTCGGGCGAGTATCGGAGCTTTA



CAGAAGTTAGAGTATCTCTGGCTTGATTCTAACCAACTTTACGGCACTATACCTTCAGCAATCTCTAACAT  
TTCCACATTAATACACTTGAGCACTAGTGATAATCATCTTCAAGGACTAATCCCAGCAACAATCGGTTAC  
TTCCAGTTTACAGGTAATCTCATTGTGCGAAAATCAACTATCTGGTGTGGTCCCTGCATCGTTTTTCTGT  
AATGGGTCAGTAAATGCTCATGCTATTAGGATCATTGAGCTGGGTTTCAATGCAATCACGGGTTTAACTA  
AACCTGGGAATGCAACATGTTTGAGTGCTTTAGAGGTCTTGACCCTTCACGGGAATCGCATTAAATGGTGT  
TTTTCTGAATGGTTGACGAATTTTTCGTCGTTGAAGGTTCTTGATATCTCCGGGAATGCAATTTCTGGAA  
CTCTGCCAAGTGATTTAGGGAATTTAAGGTTTCTTGAGGAGCTTAGACTGGGTAACAATACATTAAGTGG  
TGATATTCCTTCTAGTATTGTGAACCTTTGGTTCATTGGGGGTACTTGATTTAGGTGGAAATCGGTTTTCTG  
GATTGATTCCACAGTCTTGGGTAAATTGACAGGGTTGAGAATGCTGTCTCTTATTGGGAATCGCTTTTC  
TGGTTCGATTCCGTATAGTTTGGGTAGTCTTTATCAGCTTGAGTTTTTTGATTTGAGCATGAATGTTTTGA  
ATGGGAGTTTGCCTCAAAACCTTATGTTGCTTAGCAATTTGACTAGTTTGAATTTGTCCAGCAACTTGTTT  
TATGGTGAAATTCGAAGAGGGATTGGAAGTTTGCATGGGTTAGAGGTTTTAAATGTTAGCAATTGTGGG  
TTCTCAGGGAACATTCCGACTAGTATCGGAAGTTTGTGAGGTTGACAACCTTGATGTGAGCAAGCAA  
AACCTATCTGGTGAATTACCCTTTGACATTTTCGGGTTGCCAAGTCTACAAGTTGTGGCTTTACAAGAGA  
ACATGTAACTGGGGATGGTCTTGAAGGTTTTAGCAGTTTATCTTGTCTGGAATATTTGAATCTGTCATCT  
AATGCCTTTTATGGGCAAGTTCCGAAGACATATGGTTTCCTTACATCCTTGAAAGTTCTTTCTATGTCTAA  
AAGTGGCATTAAATGGCTCAATTCCAGCAGAGTTGGGTAACCTGTTCCGGCCTTCAAGTGCTTGAGCTTCGA  
GGAAATAAGTTAACAGGTCAAATTCCGAAGGATTTCTCACATTTATCTCATCTAAGGATACTTGATTTGG  
GCCACAATGGGTTAACCGGGGAAATCCCTGAAAACATCTCTAATTGTTTGTCTTTGGCTACTCTCTTGTG  
GATTCTAATAATATCTCAGGTCACATACCAGAGTCGTTGTGCGAAATTATCAAACCTGGAAATGCTGGATC  
TCTCCTCAAATAATTTGAATGGATCAATTCCTTCAAGTCTGTCCCTGATTTCCAGTCTGAAGTATTTGAAT  
ATTTCCATAATCATCTCGAGGGTGAGATTCCAGAGGCGTTGGGTTTTTCGGTTCAAGGACCCTTCTTTGT  
TTGCTGCGAATAATGCTTTGTGTGGAAAGCCATTGAAGGAGTGCAATGACGGTAAAAGGAAAAGAAAG  
AAGTTGATCTTATTCATTGTTTTGGCTGCTGTAGGGGCCTTTTTCGTTGCAGCGTGTTGTTGTGGGTACAT  
CTACAGCCTTATACTTTGGCACAAAAAGTTAAGAGGTTTCTGAAGGGAAGAAGCGAAGCCCAGGCCG  
TGCGAGTTCAGGAGGAGAAGGGGTTTCGTGGAAGCGGAGAGAATGGAGGTCCAAAGCTTGTTATGTTTA  
ACAACAAGATCACTTATGCAGATACTTTAGAAGCGACACGACAATTTGACGAGGAAAATGTGTTAAGCC  
GTGGAAAGTATGGCCTAGTATTCAAAGCCACTTTTGCAGATGGAATGGTCTTGGCTATCCGCCGCCTTCC  
TGATACATCAATCGAAGTGAACACATTCCGCAAGGAAGCTGAATCCCTCGGCAAGGTGAAACATCGCAA

TCTGACTGTTGTTGTCGTGGATACTATGCAGGACCTCCACCTGATGTTGATTTGTTGTGTACGATTACATGC  
CTAATGGAAATCTTGCCACACTTTTACAAGAGGCATCTCATCAGGATGGCCATGTGCTCAATTGGCCAAT  
GCGCCACCTGATTGCTCTTGGCATTGCTCGTGGCTTAGCTTACCTTCATTCAGTTTCATTGATTCATGGGG  
ATGTAAAGCCACAAAATGTATTGTTTGATGCAGATTTTGAAGCTCATCTTTCGGATTTTGGTTTAGATAAA  
CTAAGCCTAGTAGCAACCCCAGCAGAGACTTCAACATCTTCCATCCCAGTTGGAACCTAGGCTACATAG  
CACCTGAAGTGGCATTAACTGGACATCCCACAAAAGAAGCTGATGTATACAGTTTTGGGATTGTATTGTT  
AGAGATACTAACAGGAAGAAAGCCAGTAATGTTCAATGGGGACGAGGACATTGTCAAGTGGGTGAAG  
AGACAACCTCAAAGAGGCCAAATTTCAGAATTGCTCGAGCCGGGGTTGCTTGAACCTGGATCCTGAATCA  
TCAGAATGGGAAGAGTTCTTGTGGGAATCAAAGTTGGTTTGTCTTGCACCATGCCTGATCCTCTTGAAA  
GACCATCGATGACCGATATTGTATTCATGCTCGAAGGCTGCAGAGTTGGTCCTGACATTCCTTCTCAGC  
TGATCCTACAACCTTTCCTTACCTATGTGATATGAAAATTCAATTCTTGCATGAAATCAATTTGCAAG  
AAAATGTCCTTCATTTTTCTCAGTTCAATGTTGTTTCATGCATCTTCAATGTATTGTTACTCCATTCATTAT  
CATTTTGCTTGTACATTGTTTCATTCAAGAGTTGGTTGGTTTTGTGCA

>M6-PGSC0003DMG400003790 M6 LRR-RLK

TTGAAAACCAAATATTACACATGACAACATTTCATACTACCTTAGTTTACATTTTGTATGTGCTACTTCTTT  
TTTCACTTCCATTAAGTATCACATCTTCAGCAAGAACAGAAGCTGAATCTCTTGTCAAATGGAAGAGAAA  
TTTACCTTCTACGTCTTTCTTGGACTCATGGTCCATTTGCAATCTCGAAAACCTGTGCAATTGGACATTTAT  
TGTGTGTAATGATGGTGGAAACAATTTCTGAGATCAATCTTTCTGATGCAGCCCTCTCAGGCTCACTTGAT  
CACCTTGATTTCACTTCATTTCCGAGTCTCGTGAATTTCAATCTTAATGGAAATAACTTCAGTGGATCGAT  
ACCTTCGAGTATTGGCAATGCCTCATTGCTCACTTTCTTGGACCTGAGTAACAATATCTTGTGAGGTGTCA  
TACCTGAAGAGATTGGAAAATTGAATCAACTTGAGTATCTAAGTTTTATAACAACAATATCGAAGGTGT  
GATTCCGTATCAGATTAGCAATCTGCAGAAGGTAATGCACTTGGATCTTGGATCAAATTTCTTAGAACT  
CCTGATTGGTTGAAGATGAAAAATATGCCTGTGTTGACGTATCTAAGCTTTGGTTATAATGAACTGAGGT  
TAGAATCCCTGAATTCGTACTTCGTTGTCATAATCTAACATATCTTGATTTATCGATAAATCATTTCAATG  
GTTGATTCTGAAACAGTATTTACCAACTTGATCAACCTGAAAGACTTAATCTTTCATCTAATTCATTT  
AAGGTTCAATTGTCACCAAATTTTACCAAGTTGTCTAAGTTAAAAGAACTTCAGCTAGGTGTTAACATGTTT  
TCTGGTTTAATTCCTGATGAAATTGGCTTGATTACTAGTCTTGAAGTTCTTGTACTTTTCAACAATTCATTT  
GAAGGAAAGATTCCATCTTCTATAGGTAGACTCATAAATCTTCAACGGTTGGATCTTCGAAAGAACGATT  
TGAATTCAACTATTCCTTCTGAGCTTGGTTTTTGTACTAACTCACTTTCTTAGCTCTAGCAGAAAATGACC

TGCAAGGGTCATTGCCTCCATCATTCTCCTCTCTTACTAAGTTATCTGATGTGGGGTTGTCTGATAATAGT  
CTTTCTGGTGAAATCTCATCGAATTTATCACCAATTGGACTGAGTTGACATCTTTGCAGCTTCAAACAA  
TATGTTTACAGGGAAAATCCCACCCGAAACCAGTCAATTGACAAACCTTGTATATCTCTACCTCTTTCATA  
ACAATTTCACTGGTTCATTCCCTATCAGATTGGGAACTTGCAAACTTGTGGAATTAGACTTTTCTGAT  
AACCAGCTTTCAGGCATAATACCTCCAACCATTGGAAATCTGACCAATCTGAAGACGTTGCAACTTTTTTC  
GCAACAATCTCAGTGGAACCATTCCCTCCTGAGATTGGAAAATTGATATCCCTTGTAACCATCGACATCAA  
CACCAACCGACTAAGTGGTGAGCTGCCGGACAGCATTTCTGACCTCAGTGAGCTGAAGATTCTTTCTGTA  
TATACTAATGATTTCTCAGGCATTGTCCCTAAGGACTTTGGAAAGAACAGTCCTCAATTGTCAAGTGCCA  
GCTTTGCAAATAACAGCTTCACTGGTGAACCTACCTGCTGGATTGTGTAGCCCGAATCTTGAGGAGTTGAC  
GATAAATGGGAACAAATTCAGTGGGAAGTTACCAGATTGCTTGAAGAACTGCACACTGCTAAGACGAGT  
ACGGCTTGAAGGCAACAATTTATCTGGTAATCTAGCTGATGCATTTGGAGTGCACCCGAATCTTGTTTAC  
CTTTCTTTAGTGACAACCAACTTTCAGGTGAACTTTACCTGACTGGGGGAAATGTGAAAATCTCACAA  
GTCTAAGAATGGATGGAAACAAATTTTCTGGTGTAAATCCCAAGTGAGCTAGGGAACTGAGAGCGTTGC  
GCGTGTTAGCTTTGGAAGGAAATGAATTGACTGGTGAAATTCCTTCTGAACTGGGGAGGTTAGACCTGC  
TGTACAATCTCAGCTTGAGCAAAAACAATCTTACTGGAGGCATCCCTCAGTCTGTTGGCAATTTAACTAA  
GCTCCAGTATCTTGATTTGTCAACAAATAAGTTAAGTGGTAACATACCAGTAGATCTTGGGAAGTGTGA  
GAGCCTGTTGAGCTTGAATCTTGGCAACAACCTCATTATCAGGTGGGATTCCATCTGACCTTGGAAATTTG  
ATGCAGTTGAGTATTCTTGTGGACCTAAGTAGCAATTCGCTAACGGGAACCATTCACAAAACCTTGGCCA  
AGCTCACCTCATTATGCATCTCAACCTCTCACATAACAACCTCTCAGGTAGAATTCCTCCAGCATTAGCT  
CAGATGATCAGTCTTCAGGAGATGGATTTTTCTACAATGAGTTTTCTGGTCCAATCCCAACCGACGGAG  
TATTTTCGAGGAGCATCCGCTAGTTCTTTTCTTGGAACTCTGGTTTGTGTGGAAATGTAGAAGGATTATC  
CTCATGTAATTTGGATACCCGAAATGACAAGTCCAGAAATAATAATCAAAAGATCCTCATTGGGGTACTT  
GTACCGGTGGTCAGCCTCATACTTTTGGCAATCCTGTTTGTTCATGTCTCGTGTCTCGAAGGAAGGCTA  
AGCAATATGATGAGGAGATCAAAGCTAGCCAGATACATGAAAATACAGAATCTCTGATTTGGGAAAGA  
GAAGGGAAAGTTTACATTTGGTGACATAGTGAAAGCTACTGAAGATTTTCAGTGAAAGGAACTGCATTGG  
AAGAGGAGGCTTTGGAAGTGTCTATAAAGCTGTTTTGCCCTCTGGGCAGATTGTTGCAGTCAAAGACT  
CAACATGTCAGACTCAAGTGACATTCCATTGACTAATCGTCGAAGCTTTGAGAATGAGATTAGAACTTTG  
ACAGAGGTGAGACACAGGAATATAATTAAGCTCTTTGGTTACTGTTCCAAGAATGGGTGCATGTACTTG  
GTTTATGAGTATATAGAAAGAGGTAGCCTCGGGAAAGTTCTATATGATAATGAGATGGGAATGGAACCT

GGATGGGGTACAAGAGTGAAAATTGTGCAAGGAATAGCTCATGCACTCGCTTACTTGCACCATGACTGC  
TCTCCACCCATTGTGCACCGTGATGTATCATTGAACAACATTTTGCTTGAATCAGAATTCGAGCCACGACT  
CTCTGACTTTGGCACAGCAAAGTTGCTAGCTTCAGACTCATCAAATTGGACCACAGTTGCTGGTTCTTAT  
GGCTATATGGCACCAGGTATGTTACATACTCATTACCTAATGCATCCATATTTCTGTTGATTAAGTAGTAT  
ATTCATTGGAAGGATACTTCAATAATAGTGTCTTTCTTCTTGTGCAGAGCTTGCACCTACCATGCGTGTTA  
CAGAAAAGTGTGATGTCTATAGTTTTGGAGTCATAGCAATGGAGACTATGATGGGAAGGCATCCAGGG  
GAGCTTTTAACTTCATTATCAGCATCAACAACATTGTCTCCAGAAATACTTTTGAAGGATGTTCTTGACCA  
AAGACTTCCACCTCCCACCAGCCACTTGGCAGAGGCAGTGGTTTTTGTGATCACAATTGCCTTGGCATGT  
ACACGTACCACTCCTGAATCGCGACCAACCATGCGTTGTGTAGCACAAGAATTGTCTGTTTCCAGACTTTGC  
CTTACCTTCCACAGCCATTGGGGACAATAGAAATGAGCAAATAACAAGTTTTTCCAGAAATAATGAGAAG  
ATAGAACCTCATGTACAGGTGTGAAATGTACAGACTGTAGAGTTTTAGTGTGTAATGCAACTTCTCAA  
GATCTAAGGTCTATATAGTATCAAGGATGAAACCTTGGATCTATCCAAATACTATGTTTTCTTTGCACTT  
TTCCCTAGAAAAAAGAAATAATATCATCCTGTTAATCATGAATGTTACAAAGTTGGTATATTCATTTGG  
ACTAGTATGAATGTTACAAAGTTGCACAATCCCTTATCCTAGTCTTTACGTTATTGCTAGGCCAAAACACT  
AGCAGAAAGATACAATGTGTTCACTTGAATAAAAATAGCAACCTAACAAAAATTTGGCAAAGAATACA  
TCACACAGATACCAGGCATGGTACTTAGCATTCCACTCCACACTGCTTGAGTATAGGTCCCTTCTGCTTTG  
GTAGGAATGGGTCTATTTCGCACCCAAACAAGTGAGAAGATTGAAGCAAGAAGAATTGACCAGAGGACC  
ACAATGGTGGGAGTCTGTTCTGCCTGCCATCAATCCCTTTAGGAAAGGATAGAGATGCACAATAACC  
CAAAGGGCGAAGAATAACTTTCCGAAGAGAGGACCCCATGAACCGTAACCATTGTTGATGGCATCCGAA  
ACACCAGCTACAACACCGACCATATTCAAGATGATCAGAGTGGTTGGTGGGATAAGAAGTGTGGTCCAT  
TTGAAGAGGTAAAGCTCCCCAAATTCAGCATCATCAGCTGCTTTTGTGTTACAGTAAAGTTTGTGTCTA  
CACCAGCAAGAACTTTAAGAAGGCCTTGGAAAATGCAAACAAATGTGCTGAAACACCACCGATGACCC  
AAAATTGCTCGTTACGCCACCAGGCCTCAATGCTTACTCCACTCCATCGCAGCTCGAGTACACTTGTGGC  
TATGATGGAGATAAAGAGAGCCATGAACCAAATGCTTGCAAAGTTGTTAAGCTACAAAACAAACATGGA  
TTTTGATTTATAAAATCTAAATCAAATCTTTATATTACCGAACCAAATGACTTCAGTTCCTTACTGTGGG  
GACGATAAAATTTCCAGTGAGAAGGCATACAGCTGGAAGGGTGCAGTAAGCTAGCAGAGCAATGGAAG  
TGAATGGGTAAACAATGGTGTAAATGTATGCTAGCCTTTCCAACCATTTGAGTTTTCCACCCAGGCATA  
CCAAAGGGGACAATGACGACTCATGAAGATCTCGACAGAACCAAGAGCCCATCTCAGGACTTGGTGCA  
ATCTATCTGATAGATTGATTGGGGCTGATCCCTTAAAAGCTGCTCTCTTCGGACAGCAATAAACTGATCT

CCATCCTCTGCAGTGCATCTTAAATCCAGTCAAATGTCCTCTGTGACAGAACCATAAATCCATCCAA

>M6-PGSC0003DMG400003918 M6 LRR-RLK

TCTATCTGGGAATCTTTTAGTAGGAGAAATACCACAAAACCTGTACAACCTTGCAAACCTTGATATCTTG  
ACTTACATCATAACCAACTGAATGGAAGTATTCCATCAACCATTGGAAATTTGTCTAACTTGCACTTTTTG  
GATTTATCACAAAATCTGCTATCTGGGTCAATCCCTGTTGCTCTTGGGGATTTGCAAAAATTTAACTCATT  
TAATGTATCTTACAACCTTTTATCTGGTGCTATTCCCTCAATTGAGAGCATCAAGAAGTTTGGACCCTCTG  
CCTTTTTTCATAATAGTGGTCTTTGTGGTGATCCTTTAGAAGTTTCATGCTCTGCCAGTGGCACTACTCCT  
GCAAAAGGGAAACCAAACCTTGAGTGTCTCAGCTATTGTTGCTATTGTCGCTGCTTCAATAATCCTTACAG  
GCGTTTGTCTGATAACCATCATCAATATGAAGGCTCGACGGAGAAGGAGGAGAGAAGATGAAACATTC  
GTTGTAGAGAGCACGCCACTGGCTTCAACAGATTCAAATGTCATTATAGGAAAGTTGGTTCTTTTCAGCA  
AGACTTTGCCTTCAAATATGAGGACTGGGAGGCTGGCACAAAAGCCTTGCTAGACAAGGAGTCTTTGA  
TTGGTGGGGGGACAATTGGATCAGTTTACAGAACTTCTTTGAAGGTGGTGTATCAATTGCAGTGAAAA  
AGCTCGAGACATTGGGGAGAATCAGAAATCAAGATGAATTTGAGCATGAAGTTGGCCGGTTAGGGACC  
CTTCAGCACCCCAATCTTGTTGCTTTACAAGGGTACTACTGGTCTCTAGCATGCAGTTAATATTGTCCGA  
GTTTGTCCGAATGGAAACCTATACGACAATTTACATGGACTTAGTTATCCTGGAACCAGCACTGGTGCT  
GGTAACCCAGAATTGAATTGGCCAAGAAGGTTTCAGATAGCAGTTGGAACAGCTCGAGCACTCACATAT  
CTTCACCATGATTGCAAACCTCCAGTCCTTCATCTTAATGTCAAGTCCACTAATACTCCTGGATACAAA  
CTACGAAGCCAAATTGACTGATTATGGCCTGAGTAGGTTCTTCCCCTGCTGGATAACTATGGACTAACC  
AAGTTTCACAATGCAGTTGGTTATGTTGCACCAGAGTTGGCGCAAAGTCTGAGACTAAGTGATAAATGT  
GACGTTTACAGTTTTGGGGTGATTCTGCTGGAGTTGGTCACTGGGAGGAAACCAGTAGAGAGCCCAGT  
AGCAAATGAAGTGGTGGTCTTGTGTGAATATGTTAGAGGATTGATAGAAAGGGTGCTGCTTCAGACT  
GTTTCGATAGAAGTTTGAGGGGCTTTGCAGAAAATGAGCTGATTCAGGTAATGAAGTTAGGCTTGATTT  
GTACTTCTGAAATATCCTCAAGGAGACCTAGCATGGCTGAGGTAGTGCAGGTTCTTGAGTCCATCAGGA  
ATGGCTTGGGATCATAGTAAAGAATCAGTAGAGCCATAAGACTATTTGAAACAGCAGCTGTTCATAGAA  
TGAGAAGAAAGCAGTCTAGCTGTTGTGCTAGACTCGCTTCTCATGAGATTCGATGAGGGAATCAGAAAG  
GGTCTCAAATAAGAGAGACGCGCAGACCAATTAATAGTATCAGTCATATTCTTGGATTTGGAATCAGAG  
TGATTAGGAGGTGACAGCTTTTGGTACAGAGAGAAGATTCTTTAGTATTTGATTTGTGATTCTTTAATC  
AATTGGTCATTGTAAGTTTACAATAAAGCAATTCTTTTCTGTAAGATGCAAAGGTATTTTGATGTCTCAT  
ATGCAGCTTGGCAACTGCTTTTTATAACCATTCAATATTGCTCTTCATTTACTGTTAAGAATTACCTTTGAC

ATGCATATATCAACAACCTTTGAAGGGATGAAAGAAATCGATTCAATTTCTCGAATTACATATCTAGTGCT  
AACACAAGAATGAATGTGAATAAATAATGAGTCCATACATCTACCTGTAECTATAACAACATGAGATAAT  
AAGAAAATATCAAGATTTAAGACCTTACTTATTGACACAAAGAATTTGGAAATGGATTTCAATTTGGAGCC  
ATTTCTACATGCTATATGTTTTTCCTTGCATCAACTTTGACTGCTAATTTAGCTATCTTCAAATCCATAAA  
CTGGGAGCTGGAATGCATTTGTGAAAATGACAGTTGGAGAGGACCAAGAACACACTTCTGGAATCATCT  
GCATACAATCTGGCCTTTTTTTGTTTCTCTGCATGTAGTTCTCAGTGCTGCTGCATTCTGATCTCAT  
TATCCGAACATTGATAACTTATGGATCCATTAATCACATAACACACGACCCTTAAAATCTCTGCAGAAGT  
TTTGGACCTTTGGTTACGGTTTACTGTAAGGGATCATATCATTAACTCAGAGACTTACGTAECTCCAAAA  
CTTTCTGGATACGCTGCATAACTGTGGAATGTCCTTCTCACTTAATGTCGAAAAACATAACCTGAACCA  
CCCAGGTTCAACACAGTGGCAGGAAGAACCAGGAGTTGCATTGATCTTAGCTACATTTAGTAGATTATC  
CCAAAGCTCAATCTCACCTTCTCATTATACGACCGAATTAACCTGCTCATGTCAGCCCAACAATAGAAAC  
CCCCACTACTTTTGGTGCCTCAATTCCCAGCTGCTTCAATCCACTGACAAATAGAGAAGACATCCTTCTT  
AGCCTCTCTGTTCTTTTTGATAAATTGTTGTACAACTTTGCATCTGATAGCATCTGGATGATTAATG  
CTGTGTTGGGGCTGAAATGGATGAGAATCTTGTCAACTTTTTCGCAGCAGCTAGAACATTTTCATTGCAA  
GAATAGATGACCCCCACCCTGAAACCAGGAAGAGAAAGTCCCTTAGAGAGACCATACACAATGTGTACC  
CTGCTCCTGTCAAATCTTCAGAATCAATTATCTCTGCTATGCTGACAAATCTTCACGTCCATAAGTTGA  
CCCTGCCAAGATTTCAATGGATATTACATGGATGTTCTTCTCAGTTGCAAAGTCTAAGAGGTTATAAAGT  
GTCTCCCTAGAGAAAATATTTCCACAGGATTTGAGGGTTAGAAATGATAATCCCTCGTACTTTAAGAC  
CACGTTTCTTAGCTTGGTTAAAAGCTCGGTCAAGAGCATCAATGCTCAAGTTAAAGTTGTCTGCACTGCG  
GCAAGGAACAGGTATAATCTCCACTCCAGTTCTCCATTTGACATCCCTATCAAGACTGCAAACGCATTGA  
GCTCATTTTATACACTATATACGTAAAGATGACCAAAGATTGAAATTTATTTGGGAAGGAGAATAAAAC  
TCACTCAGGATAATATGGTGAGGGAACAAGAAAAGCATTTCAGGATCAGCTAGGCAGAAGCTCAGTA  
TCTCAAGCGCAGGAGCGGCACCACCAGTTAGAACCATCTGCGAGGGGCTGAAGGACACTGATCTCTCCA  
GAGCTTGAGACATAAATTCTCCACAGCCTGCATACAGGTGAGGAAACATGAAAAGCAATTCAAAGAGA  
TACCATAAATAATGTAGAATCACACAAAACACCTAATTGTTTTTATGAATCGATCTTCATAGTGGCTCAA  
GATGATTTTCATATATTGCTGTTATAACAATTCTCAAACCCACAATTTAAAAGGTAATCCATCAGATCATC  
TCCCACCCTAGGATACCAATGACAAAGGTAGCCACTCATATTTCAAAGAGGCCAAAATTGCCTTCCATC  
TTCAACAGATACTGCAAATCTAGCAATAGATCCTTCAACAGGTTACACAATGATGAGTATTGAGGTGAGT  
ATCTGTCAAGGAAATGATAGACCACCTCTCAGAACTACTGAGTCCATTATTCGCTATTAECTTGCTTATAA

CGAAAACCATGCAAAGTAAAGCAGGTTAAACTATTCTTATGTGCTCAAAGTAGATTTTTATCATATCA  
CACTGCAAGGGATCCTATTGTTCCGGTCAGGACAAACATCACCACAGAAAATCATCAAATGCTGAAACA  
GCATAAATGACTGAGCTAGATCAACAATAATTATGAATTTCCAACTCAAGTTTTACCAATGTAACGCTCA  
AGTAGGAGAAGATATTTACCACAAAAAACACCCCATCCCTCTGGATACTGTTTCAATGCTTTGGCTGG  
TCAAACACATTTTCAGGTTTCAAATTTTCTATCATTCTCTTTTGTATTTAACCTCCTTTATTAGAC  
AGTCATGGGCTCCAAAAGCTCAAGAAAAAATCAAACATTCAGAACCGTGTTTATTTTTCAAAGTGTTG  
CTTAGTGTGCATAGCGTAGAAGTTAGAGAATTGATGAACTTTTCAGAAGTTAATTGGCACTGTAAAATG  
AACGTGAAGCTTATTCAATGCTTTTCTTATGTTTGTGCACTTTATAGACTTAGAAAAGCTAAAGACGGG  
ACATACTAAAACCTTGTATACAATAGGTAATTTTGGGATTGTCAAATGCCATAACCAATCCCGCATCCAG  
GGGTTACATTTCAAATTAACCAGCTATAAAGCACACTGGACTAGCGGATGGGTGACTGATATGGAGT  
AACTGTTACACAAGCATATGAACATAACATTTTGAATTATATGGGCATGACATGAGCCATCCTAGGT  
TACAACTATAAACTAATACCACCAAATAGGTATCTCGTTGATTTAATCCTATAGTCTAAACTCAAAGTAG  
CAACTTTAAATAATACGTACAAACTTTTTCAAGTAAATTTTTGTTCAATTTCTTCTAGCCTGTAAAAA  
CTATAGCCATATGAACAACACTACTAGTACTTTATTAGTTCAAGAAGAACATATTATATCCAATACATGTCAA  
CATTATATCAACAAACAAGTCACTAGTAGTGTGCAAGGAAAAATCAAAAAGCTTACCACTTTCAACTCCA  
ACAACCCATCAAATGGCTGATAAGTAGCTATTCCGGTTATACTCGAATCTTGAGTCATCCATCTTGACAC  
ATTTTCTGCTAGCCATTCTTGAACATAAATCCAATGACAACATAACCATACAAATAGAGACAAAATTCAA  
ATCATTGAAACAACAACAAGTAGATTCCCAACAAGAAATGTACTGCATTTGGTACATTTCTCTAGA  
AAATGATTCAATATATCCAACATTCAAATTTATTAGTACCTGTTTTCTGCTAATCCTAGCTGAATAACA  
CCATCTGGATTACTTGACTCATCATAAGGGTCTTCAGAAGCTCTTTTCAATCCAACATAGAAAGGGCTAC  
TATCAATTTGTTTTGAAATAATCGAATTAGCTCTAGCAGATACCTGAGATTGCCAGTAGTTCCTTCGGT  
GACAGTAAACACGTGAGTGAACCCTTTGTAACCCAGACCCAGAAGACACTTCCGGTAAATGGGTGCGAC  
GACGTTGACCTCGCCGGAGCCGTAGATTCGCCGTTATTGTCACCACCGGAGGAACGATTTGTTTTAGGT  
AGAGTTGCCAAAATAGAAAAGAGCACAGGGTATAACTGAACCTAAGAAAAGACCACCCCGACCTTGA  
ACTACACCTTGTAAGGGTACTATCACCTCATCGCCGTCGTGGCTCCTCCTCCGTCTCTGCCGCCGGCGCC  
GCCAGTTGAAATGGTTGTTGTTGTTCTAGTTGGTGAACGGTCTCGTGACCTTGTACATAACTGTGACA  
TATTGGGGGCAGAATTAAGACGTCACCTTATCGGAGTATGACGTCAGTCAGCTATCTGGCCGGCGAGAC  
GGTTGACGGAGAGTACGAAGGGGGGTGAGTGATGGAGAAGAGATTTGGAGAAAATGGTGGCAAATA  
GTTGGTCAATTATTATTTATCTTTTTGTCCGCCTAAAGTTTTTTGTTTT





GGAGAATCAGAAATCAAGATGAATTTGAGCATGAAGTTGGCCGTTAGGGACCCTTCAGCACCCCAATC  
TTGTTGCTTTACAAGGGTACTACTGGTCCTCTAGCATGCAGTTAATATTGTCGGAGTTTGTCCGAATGG  
AAACCTATACGACAATTTACATGGACTTAGTTATCCTGGAACCAGCACTGGTGCTGGTAACCCAGAATTG  
AATTGGCCAAGAAGGTTTCAGATAGCAGTTGGAACAGCTCGAGCACTCACATATCTTCACCATGATTGC  
AAACCTCCAGTCCTTCATCTTAATGTCAAGTCCACTAATACTCCTGGATACAAACCTACGAAGCCAAATT  
GACTGATTATGGCCTGAGTAGGTTCCCTCCCCTGCTGGATAACTATGGACTAACCAAGTTTCACAATGCA  
GTTGGTTATGTTGCACCAGAGTTGGCGCAAAGTCTGAGACTAAGTGATAAATGTGACGTTTACAGTTTT  
GGGGTGATTCTGCTGGAGTTGGTCACTGGGAGGAAACCAGTAGAGAGCCCAGTAGCAAATGAAGTGGT  
GGTCTTGTGTGAATATGTTAGAGGATTGATAGAAAGGGGTGCTGCTTCAGACTGTTTCGATAGAAGTTT  
GAGGGGCTTTGCAGAAAATGAGCTGATTCAGGTAATGAAGTTAGGCTTGATTTGTACTTCTGAAATATC  
CTCAAGGAGACCTAGCATGGCTGAGGTAGTGCAGGTTCTTGAGTCCATCAGGAATGGCTTGGGATCATA  
G

>M6-PGSC0003DMG400003958 M6 LRR-RLK

TATTTTCTAACTAACTCTCTTTTCTCCTTTGACAATTCACACCAATAAACTCCCCATTTTTCTTCTCTACT  
GTGAAGCACCATTGAAAATCCAATGCAAAAGCTCACTAGTACTTCATAAAAACTCAACTTTTCACTCAA  
ATCTGAAAGTTCACAAAGTTCAGAGAAATGGGGGTTAATTATTTCTCTTAACTTTCATTTTTGCTCTGTT  
TGTTCTTGAATTTTCTTGCATAGAACCTGTTTGTGGAAATGCTGAGGTGAGAGCTTTAATGGAGATTAAA  
ACAGCTTTGGACCCAGAAAGCAAGAACTTTCTTCATGGACAAGTGATGGTGATCCATGTAGTGGTTCTT  
TTCTTGGTGTGATTTGTAATGAACATCATAAAGTAACAAATATTACTCTGACAGATAAAGGACTTACTGG  
AAAGTTGTCACCAGCAATTGCCGAGCTGAAGTGTCTGTCTGGTCTGTTCTTGCATTATAATTCTTTAACAG  
GGGAAATACCAAAGGAACTTGGGAATTTGACTGAGTTGAATGATCTTTATCTCAATGAGAACAATCTTTC  
TGGGATTATACCACCAGAACTTGGAAACATGGCAAGTTTACAAGGTTTGTAGCCTTTGTAAACATCTTTC  
TGTTTAATTTTGTGGGAGATTGTTTCTTCTTTTCTTAGCTCCCACCTTTTTGCTGCTTTGGTGACTCAATC  
TTAAATTATCTGTTGTGATTTCTAAGAAATAGTTGTATTAATGATTTGTCATTTTAGAAGTTTTAAGATA  
AAATAATTATCCTTTTCTCATTCTACTTTTAATAGTAATTGTTCTTGAAGATCCTGTTTTGGTGACTCGAAC  
CGACAACCGTTGGAGGTAGAGAGTGCTTACAACCTGAGCAGCCCCTGCTATCAGGGAAATTGCTTGCTG  
TTTCACTACTGTTTTTTGTGTGTATTAGTGAATAATGAGTCTACGTGAATTTAGGTGACAGAGTAGACA  
AGTTGCAAAATTTCTTAGAGATCTATGCAGATTTTTTGGTTCTGTAAAGGTAGGACTTTGTGGGGATTGA  
TGGTTTACTCGGTTTTTTGAATTCCTTCATCCATAAATTAACAGTGCAAGTTTGAAGAGAAAATAAAGTGT

ACTAGTATATATATGAATTGTTGAATTTCTAACATAAGGAAAGCTTTAAGTACAACAGTAGAAGTGGCT  
CAAAATTGCTTTAAGTAGCAGATTTGAATTC AAGTATCCCGTGTTAGAATTTCTACTTCCGCCACTGTTG  
CACCCACACCCCCTTTTCTGGTCTTTATTCTTTCTTGTTAATTATATTTTTGGTCTGAACAGCATACTGAAA  
TTTTTTTTCAAATAAGGTGATGAAAGAAATGCAAGAACTCTTTTTTTTTCCCTTTCTACAATGATATGTG  
CTCTGAGATGATTTGTGCATTTTGTGGTCCACAGTGCTGGACTTGAGTTGTAACCAGTTGACAGGGAGC  
ATACCAACAGAGATTTGGTTCTTGAAGAAGTTGAGTGTCTCGAATTGCAACGTAACAGGCTGACAGGT  
AAAATTCCAGAGAACGTAGGAGTCTCGGGACGTTGAAAAAGCTATATTTGGGATTCAATCAGCTATCT  
GGTCCGATTCCATTAACTTAGCTGCTGCTCCCCAGTTGGAGGTTCTAGAAGTACAAAATAACACCCTCT  
CTGGAGTTGTTCTCCAGGTTAGTTTCCCTTTTTGAGTTCTTAACTTTTTATAAATCTTTTTTCTAGCTTG  
AAGTTATATCTTTGATTTCTGATTTTAAACCTTTTTTCTCTTTTTATCTGGACTGATTTGTAGCTCTAA  
GGAGATTAATGAAAAATTCAATCATGAAAGCAATCCTGGTTTATGTGGTACTGGATTTACTTCATTGAG  
AGTTTGCCTGCCTGGGATCATGTCAATGTGAATCAAGTTGTTCTGATGTACCTGATTCCAATAATAAC  
GGCATCCCTATAGATGTCCAGGAGCTGCTCATATTAGTCCGTTGCCTTGTAACTCAAATCATTGTTCAAG  
ATCATCAAATTTCTCAAGCAATTATCGTTGCTTCTGTGATTACAGTCACTGTAACCTTTGGTAGTAGCTG  
TTGTTTTCGGTATATTTAGACGAAGAAGGCTAAAACAAAGAGTAGGGAACACAAGTGATGCATCTGATG  
ATAGGCTTAGCACTGATCAGGCAAAGGAAATATACAAGAGAAGCCCTTCTCCACTACTTACTGTTGAGT  
ACTCAAATCGTTGGGACCCTATGACCCCTGAAAAGAGTTGCAATAGCATGTTCAATGAGTTCTTAAATGG  
ATTC AAGTTCAATTTGGAAGAGGTTGAGTCTGCAACTCAGCATTTTACAGAGACAAATCTATTGGGACG  
GAGTAATTTCTCTGCCGTCTATAAAGGAATTTTAAAGATGGATCTACGGTAGCTGTAAAAAGCATCAGC  
GTGACAAGCTGTAAGTCGGAGGAGACGGAGTTCATGGAAGGATTGAGCTTATTAACCTCCCTGAAGCA  
TGAAAACCTTGCAAGCTAAGAGGTTTCTGTTGTTCAAAGGGAAGAGGCGAGTGCTTTTTAATCTATGAT  
TTGGCCTCTAAAGGGAACCTTTCTCAGTATCTTGATGTTGAAGTAAACAGCAACCATGTTCTTGACTGGT  
CCAAAAGAGTTTCGATCATCAAGGGGATTGCAAAGGTTGGTCTTCTTTGCTTTTGTTCATCATTACATCT  
TCAACATTCTCTACAAATTTCTCAGAATATTTTAAAGTTCGGAAATATTATGGCTGTATAATATTTCCCCA  
TAATGTGGAGTCTTCTAGGAGTTCATTGCATAGGCAGTCTATTACCACTAAAGTGCTTCTCACAGGATT  
CAGGAACAGGATGTGACTGTAGATTCATTTGCATGGTAATTAGTGGCAGAGTCTGGACTTTCAATAAGG  
GGTTCAAAGTATGAAAAAGTAAACACACGAAGAAGCCGAAGGGTTCAACATCTACTATATATACATAA  
AAATAATTAACCATGTATAACAACGTAATTTTCTGCCGACCACCTCGGCCTACCTAGCTCCACCCCTG  
TGGTTAATATATTATCAAATTA CTCTCCATCCCAAATAAGTGTGCTTTAGTTCATTTACGCCCATTA

GAAAGGTAATAAATGCAAGGCATAGTTTACTAAGTCACCCCTAGTTATTAGATGAAGAGGAGTAGTTCT  
TTAATATAAAGGTATAGTTGGAACCAAGAAGTACTATTTTTGTCTTGACTTCTAAATAGGCAATTATTTT  
GGGATCAACTTTTATGCTAAAGCGACACTTATTTGGGACGGAGGGAGTAATATGAATACAGAGAGAGA  
CTGGAATTATTG

>M6-PGSC0003DMG400004146 M6 LRR-RLK

CAAACCATGAAACAAATTCATCTGTTTTGCTTGTTATTTTTGAGTGGTTTTTTCTTTGTTTCATCAAATAAG  
GATGAAGTTTCTATATTGTTAGCAATAAAGTCTAGTCTTGTTGATCCAATGGATCATCTCAAAGATTGGA  
ACTTTTCAAACAATGAAAGTTCTATTCATTGTAATGGAATGGTGTGTTTTGCAACTCAAAAAGCTATGT  
AGAGAAGCTTGATTTGTCAAACATGAATCTAAGTGGCAGAGTTTCAGATCAAATTCAAGGACTTCAGAG  
TCTATCTTTGCTTAATCTTTGTTGCAATGACTTCTCCACTTCATTGCCAAAGTCATTAGCTAATCTGACATC  
TTTGAAGAGCATTGATGTGAGCCAGAACAACCTTTGTTGGCGAATTCCCTGATGGTATTGGAATGTCGAA  
TCCTGGTTTGAAATATGTCAATGTTTCAAGTAATAACTTCGAGGGGTTTCTCCCTGAGGATCTTGGAAT  
GCTATGTTGCTCGAAGTCATGGATTTTCGAGGGAGTTTCTTTGAAGGTTCAATCCCTGGATGTTACAAGA  
ATCTGAAGAATTTGAAGTTTCTTGCTTATCAGGGAATAATCTTTCCGGAGAGATCCCTCGTGAGCTTGG  
TGAATTGAAGGCTATGGAGACTATGATTCTTGATATAATCAGTTTGGAGGTTCAATACCAGCTGAGTTT  
GGTAATATGAGTAGCCTTAAGTATCTTGACTTGGCTGTTGGCACGTTAAGTGGACAAATTCCAGCTGAGT  
TAGGTAAGTTGAAGAACCTGACTACAGTGTACTTGTATCAAACAGTTTTGAAGGTAAGATTCCAGCTG  
AAATTGGAAATATAACATCTTTAGTTTACTTGGATCTTTCTGATAACAAGATCACTGGGGAGATTCCGAA  
TGAGATAGCAGATTTGAAGAATTTGCAGCTGCTAAATCTCATGTGCAATAACTTAACTGGTCCTATTCT  
ACCAAACCTGGTGAGTTAGAAAATCTTGAGATACTTGAACATGGAATAATCATTAAATGGCTCTTTGC  
CAATGAATCTTGGGAAAAATCTCCCTTGCAATGGTTAGACGTTTCTTGAATATCTTGACAGGTGAGAT  
CCCTCCTGGCTTGTGTGATTCTGGCAATCTAACAAAGCTCATTCTGTTAATAATCCTTCTCTGGATCAAT  
CCCATTAGGCCTCTCTAACTGTTCTTCACTTGTTCGAGTTAGAATCCAAAATAATCTGCTTTCAGGAATGA  
TTCCGGTTGGGTTTGAACACTTCCTATGCTCCAAGATTGGAATTGGCTAAAAACAATCTCACTGGTGGA  
AATTCCTGTGGATTTCACTCTCTCCACCCTCTTTCTTTTATCGATGTCTCTTCAAACCATCTTGAATCATCT  
TTGCCTTCTAGCATTTTGTCCATTCTAGCCTGCAAACCTTCATAGTCTCCAATAACAATCTTAAAGGCAA  
CATTCTGACCAATTCCAAGATTGTCCTTCCCTTTCTTTGCTTGATCTTTCAAGCAACCATTTCTCGGGGAA  
AATTCCTCAGAGTATTGCTTCATGTGAAAAGCTGGTGAAGCTTAATCTAAGAAACAACCAATTCAGTGGT  
GAAATTCCAACCTCACATTGCCACATTGCCAACTTTATCTATTCTTGATCTATCAAACAACCTCGTTAGTTGG

AAAAATACCAATGGACTTTGGTAGCTCTCCAGCTCTAGAAATGCTTAATCTTTCCTACAACAAGCTTGAT  
GGTCCAGTTCCAAGAAATGGGATACTCATGACTATTAATCCCAATGATCTGATAGGAAATGCTGGTCTTT  
GTGGTGGCATACTTCCACCGTGTCTCAAAGTCTCACCATAACTTCAAATGCGAGAAAGAATCGTGTCAA  
TCACATAATCGTGGGATTCATTGTTGGAATCTCAGTTATCTTAGCTGTTGGGATCATGGTTCTAGCAGGG  
AGATGGATGTACAATAGATGGTACTTGTGCAACAGCTTTTTCAAGGAATTCGGTTCAACAAGAACAAC  
CAGAATGGCCTTGGAGGCTTGTAGCATTCCAGAGGCTTAACTTCACAAGTACTGATATTCTGGCTTGCCT  
AAAGGAGTCAAATGTGATAGGCATTGGTGGCAATGGAATTGTCTACAAGGCTGAGGTTCTGAGGCCAC  
ATTCTGTTGTAGCAGTAAAAAGTTGTGGAGATCAGATGGAGACATTGAAGCAGGAGATGATCTCGTTG  
CAGAGGTTGATCTTTTAGGGAAGCTTCGTCACAGGAACATAGTTAGGTTACTAGGCTATCTTACAATGA  
GACTGATATCATGATGTTATCTGAATACATGCCTAATGGAAATCTTGGAGCTGCTTTACATGGAAAAGAA  
GCTGGAAAAATGCTCGTAGATTGGTTGTCGAGGTACAACGTTGCCCTTGGTATTGCTCATGGACTCGCTT  
ATCTTCACCATGATTGTCATCCACCAGTCATACATCGCGATGTCAAGTCAAACAACATTCTCCTAGATTCA  
GATTTTGAGGCAAGAATTGCAGATTTTGGCTTGGCAAGGATGATGCTTCACAAGAATGAGACTGTTTCT  
ATGATAGCAGGATCATATGGCTATATAGCACCAGGTTAGTTACATTTCTGATAATGCCACTAACAAGAA  
AATTCATTTCATTTTATATAGTCTCATTTTCTTTCTCTGTTGTTTTTGGCAGAATATGGATACACATTGAA  
GGTTGATGAGAAGAGTGACATATACAGCTATGGGGTGGTGCTTTTGGAGCTTGTAACAGGAAAAATGC  
CATTAGACTCTTTGTTCCGAGAGTCGATTGACATTGTAGAATGGGTTAGAAGGAAAGTAAAGAACAAG  
GCATCAGAAGAAGCATTAGATGCTGATGTAGCTGGCCAATGTAAACATGTCCATGAAGAGATGCTTCTT  
GTCCTAAAAATTGCACTTCTTGGCACTGCCAAGCTTCCCAAAGAAAGACCATCAATGAGAGACATTATAA  
CCATGCTTGGAGAGGCCAAAACCAAGAAGGAAAAGTATTTGCCAGAATTGGGGTTATAGTACTAGTGCT  
AACAAAGACAAGTTAATCTTTGCTCATTACCAGTTATAGGCCTTCTATAAGTACCAAACCTTTTTTTTTT  
CACTTCAATATCTAGTATATCTTCATTTTCATTAGTTCATATGTAAA

>M6-PGSC0003DMG400004667 M6 LRR-RLK

ATCTAAAGCTGTCACCTTAGCTTACTGCTGAAAACTCATAAACCCAAAATTTTCAACAAACAATACCAA  
AAAAAAAAAAAAATATCTTCAAATTTTGAAGAATCATAGCAAAAAAAGTAATCTTGGCAAAAAAAT  
CAAGAACAATAGCAAAAAAAAAAAAAAAAAAAAAAACTCCATTGTTGATTGTTCTTAGATCTCTAAAC  
CTCCATTAATGGCACCCCAAGCTTTTTTTTTCTTGTTAACTTCTTCTTACCTTCATTTCAATTCACATTTCC  
GATGACAGCACGGTCATGTCAAATTTCTGAAGGGTCTGTCTAAACCACCATCTGGTTGGGATGCTTCAA  
AGTCTTACTGTGAATGGAGTAAAGTTACTTGTGATAAATCGAGTAATACTGTTGTTTCCATTAATCTTGAA

TCTCAAGGTCTTTCTGGGGTTTTGCCTCCTGAGCTTAATCAACTGTCAAATCTCAAACTCTTTCAGTTCA  
GAGGAATTCGCTTCTGGGATTCTCCATCTTCGCAAACATGTGCAATTTAGCTGAGATTTACTTGAATG  
ACAATGGATTACATCTGTTCTCAAGATTCCTTTTGGGCTTACTAGTTTGCAGACTTTTAGTATTAGT  
GAGAATGGGAAGTTGAGTCCTTGGCAAATTCCTAGTTATTTGATTGATAGCAACAATTTGGCTAATGTTT  
ATGCTAGTAATGCTAGTTTGTGGTGTATACCTGATTTTCTGGTAAATCCCTAATCTTCAGGATTTG  
AGATTGTCTTATAATAATTTACTGGTCTTTGCCTGCTAGTTTGGGGATTCTGAGATTAAGAATTTATG  
GCTGAATAATCAGGGTAAAGGGTTATCAGGAACTATTGATGTGATTTCAAGTATGGTTCAGTTGTCACA  
AGTGTGGTTACATGCTAATTCCTTTACTGGTCTATACCCGATTTGTCGAAATGCGAAAATATATTTGATT  
TGCAGTTAAGGATAATGATTTTACTGGTGTATACCTGATTCGGTGATGAACTTCCTAAGTTGTTGAA  
TATATCTTTGCAAAACAATAAGTTGCAGGGTCCAATGCCACAGTTTGGACAGGGGATTAATTGGAGAT  
TGAGGGTACTAATAGTTTTTGTGGATACTCCTGGACCTTGTGATTCGCAGGTTATGACGCTTTTAGAT  
GTGGCGGGTGGTTTTGGATATCCGGGGTTTTGGCTGATTCTTGGAAAGGAAATGATGCTTGTAAATGGA  
TGGTCACATGTAAGTTGTGATGGATCGAAAAGAATGTGGATGTTGTAACATTTGGTAAGCTACGTTTA  
TCGGGTTTTATATCTCCTGCTTTGCTAATTTGACTAGTTTGGAGAAATTTGTTATTGAATGATAACAATCTT  
ACTGGATCTATACCGAAAGCTTGGCAGCATTGCCTCTGCTTCAAACACTTGATGTTTCTAATAACAATTT  
ATCTGGTCTGTACCTGCATTCGATCAAATGTGAAGCTTATTAATGGTGGTAACGTGTTTCTTGGAAAG  
AATATTAGTGATGGAGGGGGTAGTGGTGGATCACCGGGTCTGGGTGCGAGTAGTGATGGTGGAAATTC  
ATCTGGTGGTTCGAAGGGATCCTCAGTTCAACCTGGAGTGGTGTCTGGTGTGTTATATCTGTCGTTATA  
TTTATCCTTGTGTTGTATGTGTCTTACAAATGTTACATAAGGAGACGGCATAAGAGATTTGGAAGGG  
TTCAGAATCCGGAAAGAAGCAATGATATGGTTAAGCCTGGTGTAGTGATAGGTAATGGATATGCAGGA  
GTCCCTAGTGAATTACAGAGCCAGAGCAGTGGGGATCATAGTGAGATGCCGATATTTGAAGGTGGAAA  
TGTTGCCATTTCTTTCAGGTGCTTCGACAAGTGACAAACAACCTCAGCGAAGAAAATATCTTGGGTAGA  
GGAGGATTTGGAGTCGTTTATAAGGGTGAATTACATGATGGGACTAAGATTGCTGTGAAGAGGATGGA  
ATCTGGCGCGATGGGTACTAAAGGAATGAATGAGTTCCAAGCTGAAATCGCGGTCTTACCAAAGTTAG  
GCATAGGCATCTGGTCGCTCTTCTGGTTCCTGTGTTAACGGCAATGAAAGACTTTTGGTGTATGAGTAC  
ATGCCACAAGGAACTTTAAGTCAGCATTGTTTGAATGGCAAGAACACGGGTGCCCAATTTTACCTGG  
AAGCAAAGGGTCACAATAGCATTAGATGTTGCAAGGGGAGTCGAGTATCTCCACAGCTTGGCACAGAC  
AAGTTTTATCCATAGGGATTTGAAGCCCTCTAACATACTTCTGGGGATGACATGAGAGCCAAGGTTGCA  
GATTTTGGATTGGTTAAGAATGCCCCCGATGGGAAATATTCTGTTGAGACACGGTTGGCTGGAACTTTT

GGCTATCTGGCGCCTGAATATGCTGGTAAGTCTGTCTTTCCTCTGCTGATCTTTAATCCTTTTAGTTGTAA  
AACTGGTAGAAAATAAAACAATATCCTATCATTAGCTTTCATGTTCTTTTAAATCTTCACTATATTAGAG  
ATAAATGGAGAGGTGTTAGCTTCGTTGAAGGTCATTTCCATGTTCAAATGCTAGTTTGTTAATCTCGATCT  
GATTCAAGGATTGATACCGCAAACGTTGTCCAGTAAATTAATAATGTTAGCAAAAAAGAGTACGATTT  
GAAAGACAAACATAAGGTAGAAATCTAGAAGCCCACTCATCCGGTTTTCAAATTGAAATTCGGATGTTG  
GTACAGCATGTGTGACTGATCCCATTGTATCTAAATAGAAATTTGGCTTTCAGAATATCACTCTTCTTCAA  
GACATTAAGTTCAACATATCTAGATTTAGTGTGGCTGTCAATAGTTTTCTGCTCGTAACATGTTTAAATTT  
CCTTTAGAGATCTTGTCTGGCCTGTTTCTTGCATGTCTTAGCAAGGTTGTCTGTGATCATTATTAAATTTG  
GATTAACGTGACTGCTCCTCTTTATTTACAGCTACTGGACGAGTCACGACCAAAGTAGATGTGTATGCA  
TTTGGAGTTGTTCTAATGGAGATCATCACTGGTAGAAAAGCATTAGATGAGACCTTGCCAGATGAGAGG  
TCTCATTTGGTCACCTGGCTTCGCAGGGTCCTTGTCAACAAAGACAACCTCCGAAAGGCTATTGACCCAA  
CTCTTGATCCTGATGAGGAAACATACGAGAGCATTGTGAAGGTCGCTGAGTTAGCAGGCCATTGCACTG  
CACGAGAACCATTCCAGCGCCCTGACATGGGACATGCAGTCAATGTCCTTGCCCCCTCATAGAACTGTG  
GAAGCCTACAAGAAATGAAGACGAAGACAGTGGCATCGACCTCCAAATGAGCCTTCCTCAAATCCTTCA  
AAGATGGCAAGCTGATGAAGGAACTTCAAGAATGTTTCGATGACATCTCCTTCAGTCAAACACATTCAAG  
TATACCCTCGAAACCTTCTGGATTTGCAGATACTTTCAATTCAACAGATTGCAGATGACATTAAGGCAAC  
AATCAAGAAAGGCACACAATTCATTTGGTTAATTGGTTTCGTCTTTAACAACGCTTTTTACTTCGTCTTTTC  
ATAGCCCTTTTGGTGATAGATCATTAGACCAAAGAAGCCAAGATGGATAGCAGAGTTTATTTATGTGGTT  
TTGTTAGAAGAGAAAAATTGTATTAATCTTTTAAATCTTACATAGTTGATGTAATAGATTTGAGTTCTT  
GTGTTAAACATGCAAAATATACTCTTGAAGTTTTTTACTACAAGATTTTATTATTTGTGCCACCAAGTGTG  
TA

>M6-PGSC0003DMG400004963 M6 LRR-RLK

CTTTTATTTCTTCTCTCTAAGAAAAACAATTTAATACAAATGACTATTCAAAAAATTATCACCCCTTGT  
GTTATTTTTCTTACTTTGACGTCCACTTTTGTCAAGGTGATCAATCTCAGTTCTTTGTAICTCATGAAGAA  
ATTTGTCACAGGAAGTTCTTTGTCTAATTGGGATATTGGAAAACCAATTTGTCAATACAAAGGTGTCGGT  
TGTGATGAAAGGGGAGACGTTATCAAATTAACATATCGGCCTGGTATTTATCTGGCCAATTTCCAAGTG  
ATGTGTGTAGTTATTTGCCAAGATTGAAAAGTCTTCATATTGGTCATAATAATTTCCAAGGTGGTTTTCT  
AAGTACCTAACAAATTGTTCTTTTTTGAAGAATTGAACATGACTAAAACATCACTTACAGGACAAATTC  
CTGATTTGTCACCATTACAATCTTTGAAACTACTTGATCTTTCATGTAATTAATTGACAGGGGATTTTCCT

TGTCAATTATTAATCTCACCAACTTAGTTATCCTGAATTTCAATGAAAATCGCCATTTCAATCCGTGGCGA  
TTACCAGAGGACATTTCCAGGCTTATAAATCTCAAGTGGATGATTTTAAACAGCATGTAATATGCATGGGA  
CAATTCCAGTGTCAATAAGTAACATGACTTCTCTTGTTGATCTTGAATTGAGCGCGAATCGCCTTGTTGGT  
AAGGTGCCTAGAGAACTCGGGAAGCTGAAGAATTTGAAACTCCTTGAGCTTTTTTACAACCTACTTGATG  
GTGAAATCCCCGCGGAGCTAGGGAATTTGACAGAACTTGTGGACTTAGACATGTCCGCGAATAATTTCA  
CAGGGAGAATTCCAGAGTCTATAAGCCGGCTTCTAAGCTGGAAGTGTTCAGCTTTACCATAACGCGC  
TATCTGGAGAGTTTCCAGCAGCACTTGCTAATTCACAACCTTTAACTATCCTGTCTCTTTATGACAATCTTT  
TTACAGGAGAAGTTCACAACACTTTGGTCTTTTCATCAGCTTTGTTGGCATTGGACTTGTCAGAAAATCG  
ATTTTCTGGAAAGCTACCGCCTTTTCTGTGTAGTGGAGGTAAATTGAGTTATATTCTTTTACTTCAAACA  
TGTTCTCAGGTGAACTGCCTGATGGATATGTGAAATGTCAGTCTGTTCTTCGCTTTTCGAGTGAATTACAA  
TCAGTTGGAGGGAAGAATACCACAAGAGCTTTTTACTCTTCCACATGTTTCAATCATTGATTTGAGTTATA  
ATCATTTTAGTGGTCCAATTCACAACAATTGGAAGTGCTAGGAATTTATCAGAATTGTTTATGCAAAG  
TAACAAGCTTTTCAGGTTTGCTTCTCATGAAATATCTACATCTTCTAATCTTGTGAAGCTTGATCTTAGCA  
ATAACCTTTTGTATGGTCCAATTCCTTCTGAAATTGGTGGTTAAAAAGCCTCAATTTGTTACTCTTGCAA  
GGTAACAAGTTCAATTCTTCAATCCCCGAGTCACTTTCTTCGCTTAAATATCTCAACTATCTTGATCTGTCT  
AACAATCTTTTGATAGGAAAGATCCCTGAGAGCCTAGGTGAATTGTTACCAAACCTCCATGAACTTGTCAA  
ACAACCTACTTTCTGGTGCTATACCTCTTTGTTTATAAAAAGGAGGTGTTTTGGAAAGTTTTTTAGGCAAT  
CCGGGACTTTGTGTCCCTACCTCTTTGAACTCAACAAACACAAGTTTTCAAACATGTTCCACATAGCTATAA  
CCATAAGAAGAGGAACAACATTGTTTGGGTTATTGGGACATCGGTGGGGATAGTCATTGTTGGATTAGT  
CTTGTATCAAAACGATGGTTTGGTAACAAAAAGCGGTGATGGAACAGGATGATCATTCAATTGTCATC  
ATCATTTTTCTCCTATGATGTTAAGAGTTTCCATCGATTGAGTTTTGATCAACGTGAGATCTTTGAAGCTA  
TGGTTGAGAAGAATATTGTTGGATATGGAGGGTCAGGGGCTGTCTATAAGATCGAGTTGAGTAACGGA  
GGAGTAGTTGCTGCAAAGAAGCTGTGGAGTCACAAACATAAGCATTCTGTTTCTGAGGATAAATTGGTT  
TTGGATAAGGAACTTAAGACAGAAGTTGAGACTCTTGGAACATAAGGCACAAAAACATTGTGAAATTG  
TACTGTTATTTCTCAAGTTTGGATTGCAGCTTGTGGTTTATGAATACATGCCTAATGGAAACCTTTGGCA  
TGCTCTTCATGGTGGGAAGTTCGTGTTGGATTGGCCTATTCGTCATCAAATTGCACTTGGAAATAGCTCAA  
GGATTGGCCTATCTTCACCATGATCTTATGCCACCGATTATTCATAGAGATATCAAATCCACCAACATCCT  
CCTGGATATTGATTATCAACCAAAGTCGCGGATTTTGGTATAGCCAAAGTGTTCAGCCAGAGGAGG  
CAAAGATTCCAGCACCACGGTCATCGCAGGAACTTATGGTTACTTGGCACCAGGTATAATTTTCCAATT

CATATTTGTTACTTCAATCTTTGAGCTTAAGAGTTATAATACATATCACAATCTTGATTGAGTAGATTA  
TTAAATCCTTTATGTGCAAATAACATCCCATAGTTGAAGTGGCCTAATGTTACTCTAAATTGGCCATTTAA  
TATAGTCATTGCCTAACGTTAAGAGTATATTTGACCCTTTCCGTTCTTAATTATGGCTTTTTATGTGTAAA  
AACCATCACATATGCTCAAGTTTCTTGATTGAACTTTCAATTAACACATGTTTAAGTGTCAAATTAGGCT  
AATGTTACTCAACTTTGGTGTAAACAGAGTATGCATATTCTTCAAAGGCAACTACAAAGTGTGATGTGTAT  
AGTTTTGGAGTTGTTCTAATGGAATTGATTACTGGAAAGAAGCCAGTGGAGCCAGAATTTGGAGACAAC  
AAGAACATTGTTTATTGGGTATCAACAAAAGTGGAGACTAAGAAGGTGCATTTGAAGTATTGGATAAA  
AAAGTCTCAGATTCTTTCAAAGAGGACATGATTAAGTTCTACGTATAGCTATACGTTGTACGTATAGTA  
CACCAACACTTCGTCCTACCATGAATGAAGTTGTTTCAGTTGCTAATCGAAGCGGATCCTTGCAAGTTCAA  
TTGTTGCAACATGTCAAATAAGAAGAAGAATGACACACAAGATCAACTGATCAATAAGCCACCAAAGAA  
CATATATGAGTTGTAAAATATTTAGTGTATCAAATTAGTATACAAGGTATATAGAATATGTGTACTCATG  
AGATATTACACCCTCAAAGAATCAGTCTTTATGTTTTCTAATAAATGCTACTACTTTTTATTAGTATATAG  
ATTCTCCAATTAGTGTACTTTGCTTTTTTATATTTTTTGGCCTGTTGTAAGTATTTGGGAATTTTATGAA  
>M6-PGSC0003DMG400004966 M6 LRR-RLK

GCGCTTTCATAGTCGTCTCCTTACACGTTTTTCTGAAGGCGGAAGAAAAAACTTCTCTTCGTCAACT  
CTTCGTGAGCTATGGCGGCGCTATTCAATTGCCGGCCGGAAGTTATCCACTTCTTCTATTTTTCTCCTTCT  
TCCTTCTTCCCCGTCGCTTTTTCCGACGAGCTTCAAACACTTTTATCCATCAAATCCTCTTTATCAAACCC  
CATCACCAATGTATTCCAAAATTGGGAACCAATACTCCTCTCTGTAAGTTCAGTGGCATCACATGTAATT  
CCGATGGGTCAGTCAAAGAAATCGAGCTTTCGAGTCAAAAAATTTCTGGGTTTGTTCTTTTGATAAAAT  
ATGTTCACTTAATTCATTGGAAAAGCTCTCTCTGGGTTACAATTCATTTTCTGGGGAATTTACTGATGATT  
TGAACAAGTGTGTTAGCTTGAATTACTTGGATGTTGGTAATAATGAATTTACTGGGTATTTCCCTGATGT  
ATCTTCACTCAGTGAGTTAACCCATTTTTATGCAAATAACAGTGGGTTTACAGGAAAATTTCCATGGAATT  
CTTTTGCAGTATGAGTAATTTGATTGTGCTTAGCCTGGTGATAATCAGTTTGATCGGACACCGTTTCCT  
GAAGTGATTTTGAAGCTTAATAAATTGAATTGGCTCTACTTATCGAATTGTGAGCTTGAAGGGGAAATTC  
CTGAAGAAATTGGAAATCTTACAGAGCTGATTGATTTAGAGCTGTGATGAATCACCTTACTGGTGAAT  
TCCTTCGGGAATTACGAAGCTGAAGAAATTATGGCAGCTTGAGTTGTATGAAAACCAGCTTACAGGGAA  
GTTGCCGGTTGGATTTGGAAATTTGACAAGTCTTGAATATCTTGATGCTTCGACTAATAATCTGTACGGT  
GATTTGTCGGAATTCGAAAGTTGAATCAATTGGTAAGTTTGCAGTTATTGCAGAACCAATTTTACAGGGG  
AAGTACCAGCAGAATTGGGAGAGTTCAAAAAGCTGGTGAACATCTCTTTGTACACTAACAACTCACTG



GTCAGCTCCGCAGAAGTTGGGTTCTTGGGCGAATTTTGATTCATTGATGTATCAGAGAATAGTTTCAC  
TGGTCCAATTCCACCGGACATGTGTAAGATGGGGACGATGAGAGGATTATTGATACTTCAGAACAATTT  
CACTGGCGGAATCCCTGAAAGTTATGCTAATTGTACAACAATGACGCGGATTCGAGTGAGCAAAAAC  
ACTCTCCGGTGTGATTCTGCAGGAATTTGGGGGCTACCAAAGCTCGAAATCCTTGATGTTGCAATGAAT  
GAGTTTGAAGGTACTATTACTTCTGTTATTGGAAATGCAAAATCTTTAGGTGAAATTGATGCGGCTAATA  
ACAGATTCTCTGGTGAATTGCCTTTTGATATTCGAATGCTTCTTTCTTAGTGAAAATTGATTTTAGTAAC  
AATCAGTTTTCCGGTGAATTCGGGAACAATTGGGGAGCTTAAGAAGATTGTTAATCTTAATTTACAGA  
ACAACAAGTTTTCTGGTTC AATACCAGATTCTTTAGGCTCTTGTTTCACTAAGCGACATTAACATGGCT  
AACAAATTTGCTTAGTGGCTCTATTCTGTTTCTCTAGGATCATTACCGACTTTAACTTCATTAACCTTGTCG  
GAGAATCAGCTTTCAGGGAAAATTCGACGAGTTTATCAAATCTGAAGTTAAATCTTCTTGATTTTTCCAA  
CAATCAGTTGACTGGAGCAATACCAAACCTCTATCAATTGATGCTTATAAGGGTAGCTTTGCTGGGAAT  
AATGGTCTTTGTAGCCAAAACATTAAGAACTTCGTTAGATGTTATGGTGAATCTGGAAAGCCTAGAGAA  
TGGTACACTCTGTTGATCTGTTTATTGGTGGCTGTGATTGTGGTGCTCGTTTCATTTGCGGGCTATTTGTT  
CTTGAAGAAGAAGAGTCATAAGGAACATGAGAGGTCTTTGAAGCAAAAATTCTTGAATACAAAGTCATT  
CCATATATTGACCTTCACAGAGGATGATATTCTTGATGGAATCAAACACGACAATTTGATTGGAAAAGGT  
GGTTCTGGTAGTGTATACAGAGTGCAGCTTTCAGATGGAACAGATTCGCGGTGAAACATATTTGGACT  
TCTGATTCAGGAAACAGGAAAATATCAGGAACAACATCTCCAATGTTGGGAAAACCAGGGAAGAAATC  
GAAAGAATTTGAGGCTGAGGTTGAAACACTGAGCTCAATTCGACATGTGAATGTGGTGAATTGTACTG  
TAGCATAACGAGTGATGACTCGAGCTTGTGGTGTATGAATATATGCCAAATGGAAGTTTGTGGGATCG  
ATTGCATACTTGCAAAAAGATGTCACTTGATTGGGAGACGAGGTACGAGATAGCTCTTGGTGCAGCCAA  
AGGACTGGAGTATTTACACCATGGTTGTGATAAGCCAGTGATTCATAGAGATGTAAATCAAGTAACAT  
CTTGTTGGATGAGTTTTGCAAGCCAAGAATCGCCGACTTTGGTCTTGCTAGGATTGCTCAAGCTGATTCA  
ACCAAAGATACAACTCATGTCATTGCTGGAACACATGGATATATTGCTCCTGGTAAGAAGCTCATTATAT  
TGTAGTTGATTTTATACGTAGAATTTGAGTATATCTACTTAACACTAACCATGTATTCATTTTTACCATCG  
GTAAAATTGACTTACGAAATAGGCAACTCCCATATCAAGCAATATGGTATCTTGAAAGATATAGTGAAA  
ACTTGCTATAAACAGTTGGATCACTATGTTGCTCGGATCCTTCAAAAATGTTGCTGCACCCGTGTTGGTTC  
CCTCAAAAATAGCGCATTCTTGGAGGATTTGACATGAGTGTGACAGCATTTTTGAAGGATCCGAGCAAT  
AAGTGAATTGCACTAATAAGAGTGTAACAATATTAGTGTTAATTAACCTTAGATCCTATCTTGATTATCT  
ATTCATTTGGTCATAGTGAGTGTCTCATTCTGGCATCCTTTTTGAACTTATTTGAATTGAATTGGTGTTC

AGAATATGGATACACACACAAAGTGAACGAGAAAAGTGATGTATATAGTTTCGGAGTTGTATTGATGGA  
GCTTATATCTGGGAAACGGCCAATAGAATCCGAATACGGAGAGAATGGCAACATAGTTACATGGGTGA  
GCAGCAAATTGAAGAGCAAGGAAAGTGTATTAAGCATAGTGGATTCAAGAATTCCTGAAGCTTTCAAGG  
AAGATGCAATCAAAGTCTTGAGGATTGCTATTGTATGCACATCTAGGCTTCCCACATTAAGGCCAACAAAT  
GAGAAATGTAGTCAAAATGCTGGAAAATGCAGAACCTTGCAGATTAGTTGGGATAATTGTAAGCAAAG  
ATGATGGTAGTATCAAGACAGAACAATTGAAGGATCACACCAAGATGTAATTGGATCCCCGTCTTTGC  
TCGTTTCACTCTTCAACCTGATCTCTGCTCCATGGAACATCGAATCTTGTAGCAGTATGTAAAGTTCTG  
AAGATGGCCTCTTGGCATTGTAACATATAGTAGAAGCTAGATCCATACTAGTATGTGGAATTAGATTGA  
ATTTAGAGATGCATGGCATAAGTGCTATAAGATTGGTTTAGTTATTCAAATCCCTTTTCAACCCTGCA  
>M6-PGSC0003DMG400004972 M6 LRR-RLK

AGCTTGAAATCTTTTGTAAAGCCGTTAACTATACCCTTACTAAATGATTCTCTATAAAATGTAATGTTTCC  
AGGACTTAAGAGCATTATACATTCAAATTTTTGGAATATTTGAAGCTTGATTAAATTTATATATCTTTTT  
AATCTTCTAAGGTGCCCATAGTATCTCAATTAGCATATGATTTGCTGCAACATTTTTGGCTGCAGTTTGTC  
TGGACATTTACAGAGTCTTAAAATTGAAAGATTATGGCTAATGTTAATCTTTCTGTCGTCTTGATTGATC  
GTGCTGGACTTCTGTTGACATGTATGTCTGTTGTACTIONAATTTAATACATTTGTTGTTCTCCTAGA  
AACTTCACACGATTACCGAGTGTAATGAAATCTTAAAGGGTTCAACATGTATATTCAAAGTCATCACTG  
ACGTTATCGGCAATATTCTGTATAGTTTCTGGAAAAATCAGTAAAAAGCCTCCTATGCTTGCTTGAACCTG  
TAATTGTTCTACATAGATCCCTTTTAAAGTTTTATCTCACAGTTGGTTTCTTAGTAATCGTCTTTTATTTTTGT  
TTAGGCATGCCTCTGGTGCCAAGCCTACTGGTCTTTGTCGTTTATCTCAACTGAGAGTTGCTGATTTCTCC  
TTCAACTTCTTCTTTGGTAGCATACCGAAGTGTCTGGAGTACCTTTCAAAGTATAGTTCTTAATTCCGATC  
CACAAGCATTTTTTATATTCTTTATTTCAATTTCTGAGTGCCTATTATTTTGTCTTTCTATAGAACTAGCTT  
TCAAGGAAATTGCCTTCAAGCAAAGATCCCAGGCAGCGTTCTACTGCTTTATGTGGTATGTGTAATCTG  
CTAGACAACCTTTACACTTTAGCAGAATCATTAAACCAAGCCTTTGAATCTTTTATGCATACATTAGTGTAC  
GAAAATGCAAGCTGGTCATGCTTACTTTTGATTGTATATCCTAAAGAGGCTTCTGCGACTAAGTTCGCCC  
ATTTCACTAACAGTCGCAGTTGAACAGATCAACTTTAAAATAATTGAATTGATTATTGTAACCTTTGCATT  
ATAGGAGGCACTCCACCTGCCAAAAGCAATCCAGCGCAGAGCAATAATAAGCACGGGACTGTTGAAGG  
AAGAGCCAAACATAAGTCTGCTTCAAACCTACCTGGCTTTTTGTGTTAGAAGTGGTAACTGGAGTTATT  
GCAGGTTCTCTCTTCTTGTGGCTATTTTGGCTGCCATTCAGAAGTGTAAAGAACGAATCTTCTATTATCAT  
CCCTTGGAAGAAATCAGCAAGTATGAAAGACCATTTGAAAGACCATATGGCAGTTTATGTAGGTGAGTA

CCATGCAATTCAGTTGGGGGATTACAGTTAAGAATTGCCTTTAAACATTTGTATTACTTGATTCTGTATT  
GACTTAGGGTGTGTTCCGGTATGAAGGAAAAATGTTTCCTTGAAAAACATTTTCCAGAAAATATGTGGA  
TTCTTACTTATTTTCTTCTGTTCCGGTATGTAAGTAAAAACACCACCCTAATAGGATTTGTATATAACCTA  
GACAAATACTATGGGAGGTGGGGGTAGGGGTAGGGGTCCCAAATGGTGGGGATGGGGCTTACGGGGT  
GGGGGTGAAGATGAGGTGTGTTGGAGGGTGGGGAGGACACAATTGATGTGAAATACCACTTGTGGAA  
CTTGTTTTCCCTACCTCCATACCGAACACACCCTTAATTCTTCTCATATAGGATCTGATTCTTCAATTTAGT  
ACTACAAATAGGACACCACGTAGGACGCAAATTGCCATGTAGGATGCCACTTAGGACGTGTGTATTTAT  
TTGTTCAACTTTATACAAGTTAAGTGTCTATTTGTGTATACCCAAAGTTGGCGGACATAAATGTGAAAT  
GAGGCCAAGTTAAAGGGCACATTAATGTATTATGCCTTTTTCTTTTTTATGATATTTTACAATAGCTTCC  
TACTCTTGTATTTTTCAAACCTGTTTTGGAAAACAATTCTCTACCTCCACAAAGGTAGGTTTAAGGTC  
TGCATACACCTCACCTCCCCAGACCCCACTTGTGGGATCACACAGGGTATAGGATCACAAGTTCAGAA  
GCATTAATTATAATTCACATTTCTATTAGTAACAAATGTTTCTTGTGTCAGATACTGAGATGCTAAAGGACG  
TTGAAAGATATAGCAGACAAGAACTTGAGGTAGCTTGTGAAGATTTAGCAACATTATTGGATCCTCAC  
CAGACAGCTTGGTCTATAAAGGAAGTGTGAAAGGCGGACCTGAATTAGCTGTAATTTCCATCTGTGTCA  
AAGAAGAGCAGTGGACCACCTATCTAGAGCTTTATTTTTCAGAAAGAGGTGAAGCCTGTTCTCTCCTTAAA  
ATACATGGCTACTGCTGAGCTCTCGTGCCCAATAAAAATTTTTCATCTTTGCTGCAATGCTCTAACTTGTATG  
GCTTACAAACTCAGGTAGCAGAATTGCCAGAATAAATCACGAGAACACTGCAAACTTCTAGGTTACT  
GCAGAGAGAGCAGTCCCTTACAAGGATGTTGGTGTTCGAGTATGCATCTAACGGGACTTTATATGAAC  
ACCTCCATTGTGAGTGGAAAAAACTATTTTTTATACATTTGCTACTGCATGTTTTAGAGGCTGAAATCCAA  
ACTCTTTGAACTTATCACAGATGGAGAAGGATGCCAACTTTCTTGGACACGGCGAATGAAAATAGTTATT  
GGCATCGCTAAAGGACTGAAATATCTCCATTCAGAAGTTGACCCGCCATTCACTATATCAGAAGTGAATT  
CAAATGCTGTATATCTCACAGAAGATTTTTCTCCCAAGGTAAGCGAAAGATTTCTGTATCACTGCTGCAA  
AACCAATTCAGTTAACTTTCTGGTTCATCTTACTGTCAATTGTGCTCATCCATAAGACAATTTTAGTTT  
ACTCTCCACGGTTTCTGCTCATTTTGTCTTTGAACTCGCCGAGTTTCCTTACAAACAATTTGGGCTTACATT  
TTTCCATTTTGGTTTCCTTCAAGCTCAACCCTTTGTGCTTTTTAACCCGAGCAATAGAAAGCTGATTTTCCA  
TACCCTTTTCTCTCAAAGTTTAATTTATCTGGTGCAGCTTGTGATTTTGAAGTTGGAAAACAACATTTG  
CCAGATCAGAAAAGAATTCCGGTGCTATCAGTAGTGAAGGAGCAATGTGTGTCCTTCCAAATTCTCTACA  
GAGCCGTCATCTTGACATGCAGGGTAACATCTATGCATTTGGAGTACTACTGCTCGAAATAATCAGTGG  
AAGACCTGCAAATTGCAAAGATAAAGGGTGCTTAGTAGATTGGGTAAGCATTCTTTTTCATGAAGTTTTT

GTATAGGCATAGTACATAAATATACACTCAAACCTGGCCTCAGATGGCAAATAAGTAGTCCAACCTTTGAG  
AGTGCACGTCTAGACGAGTTGAGTTGTTTAGATGTGCACTCTCAAAGTTGGGAGTGCTTACTTGCTAGCT  
TAGGCCAAGTTTGAGTGTCTGCTTGTGTATTATGCCTTTTGTATAATGATAACTCTCTCTGTGGAACCTGG  
ACTCGTGCTTTATGGAATCTCAAGTTGACTCTGATATGGCAGGCCAAAGAATTCCTTGAATTGCCAGAGG  
TATTGCCATATGTTGTAGATCCCGAGTTGAAACATTTTCAGATACGAAGACCTCAAAGTGATTTCTGAAGT  
GGTCAATCTCTGTATCCACCCAAGTTGAGTAGCAGGACTTCGATGAGAGATTTGTGTGCTATGCTGGA  
GAGCGACATTGACACATCCATAACTGCAGAGCTCAAGACATCGTCTTTAGCATGGGCTGAGCTTGCCT  
CTCATCCTAA

>M6-PGSC0003DMG400005103 M6 LRR-RLK

CTCATGGCCACCATCTTGAGAAAAAATTCTCCAATTTCTCTCGCGTGGATTTTCATGTTCCACAGAAACCA  
AACATCAAACATAGCCATACCAAACCTTTCTTCTCTATTCTTCTTACTAGCGAAAAAAAAAATGTCAGCCA  
GTGCCAACTTTTTCCGGCCATGCCCAATTTTATTGATCTGTTTTTTCATATTCTTGATTTCTCCTTCTCATCA  
ACAAGATGAGTTACAACCTCTTATGAATTTCAAATCCACTCTGAAAACAACACAAATTTACATCTTTTTG  
ACACGTGGACACCTCAGAATAACATTTGCAACTTCACTGGAATTTTCTGTGATTCTGACAGCAAATTGGT  
TAAAGAAATCAATCTTTCTGAACAGAATCTATCTGGGGTTGTCTCTTTTGATTCACTATGCTCTCTGAAAT  
CACTAGAAAAGATTTCTTGGTACTAACTACTTGTATGGTAGAGTCAGCGACCATTTGAAAACTGTAC  
AGAGTTGCAGTATTTGGATTTGGGTAACAATCTTTTTCAGGGGAAGTTCCAAATTTGTCTTCTTTAAGCC  
AATTGGAGTTTTTGAATCTCAATAGAAGTGGATTCTCTGGTTCATTTCCATGGAGTTCCTTGGAAATCTT  
ACTAGTTAACTTTCTTGAGTTTGGGTGACAATTCATTTAATAAAAGTCCATTCCTCTTGAAATCTTGAAT  
CTTGATAAGTTATATTGGGTTTACCTTACCAATAGTAGTATTGAAGGCCAAATTCAGAAAGGTATTGGAA  
ATCTCACTCTGCTTGAATAATTGAGCTTTCATATAATGACTTGTGAGGCAAATCCCAGATGGAATAAC  
CAAACCTTCTAAGCTTAAACAGCTTGAAGATCTATTCTAATGGACTCACAGGAAAGTTCCTGTGGAGTTT  
GGGAATCTCAGTAGCCTTGTCAATTTTGTGCTTCAAGTAACAATCTTGAAGGTGATCTTTCAGAGCTCA  
AGTCTTTATCTCTTCTTGAATCTTTCAGCTGTTTGAAAACCATTTTTCTGGTGAGATTCCTGTTGAATTTG  
GAGAGTTCAAGTTTACAGAACTGTCATTGTACAGAAACATGTTTTCTGGTCTCTTCTCCTCAAATATTGGA  
TCATGGGCAGAACTTCAGTACATTGATGTTTCTGAGAATATGTTCACTGGTTCATACCACCTGATATGT  
GCAAGAAAGGGAGTATGACTGATCTTTTGTCTCTCCAGAACAACCTTCACTGGTGGGATACCTTCGAACTA  
TGCTAATTGTTTGTGCTTGCAGCGTTTAAAGGGTTAGCAACAATTCATTTTCAGGAGTAGTCCCTAGTGGA  
ATTTGGAGTTTGCAGATTTGGAAATCATTGATCTCACATTGAATCTATTTGAAGGCCAGTGACATCAA

ATATTGGTGAAGCAAAGTCTTTAGCACAGTTGTTCCCTAGCCTACAACCGGTTCAATGGTCAATTACCACA  
GACAATATCAGAAGTTTCTTCATTAGTAGCCATTAATCTGAGCGGAATCAGTTCTCTGGTGATATTCCA  
GCAGCAATAGGTGAACTTAAGAAGCTTAATACTCTTCATTTAGAGTATAATTTGTTTTCTGGAAGTCTTCC  
AGATTCTATTGGATCATGTGTTTCTCTCTGTGAAATTAATCTTGCTGGTAATTCACTTTCTGGTGCAATTCC  
CGAAAGTCTTGGCTCTTGCCTAGCTTGAACCTCTCAATCTATCTGATAACAGCCTCTCAGGTCAAATTC  
CAGCGACCCTTTCGAGTTTAAGATTAAGCCTTCTTGATTTGTCAAACAATAGGTTGAGTGGTAGCATAACC  
GGATTCTTTATCAATAAAAGCTTTTAGTAATAGCTTTTTGGGAAATCCAGATCTTTGTAGTGAGAATTTTG  
GTAGTCTCAGGCCATGTTTCATCAGATCCTCACACATCTAGAGACCACAGGACAGTCATGTTGTGCTTGAT  
AGCTGGGGTAGTTGTTCTTGTCTGTCACTTACGTGTTTCGTGTATGTGAAGTTTAAGCACAATAATCAG  
AACACTCCCGTAAAGAGACTTGATTCTTGGGATATCAAACAGTTTCATGTATTGAGCTTTAGTGAAGATC  
AAGTCTTGAAGGCATTGAAGCAAGAAAATTTGATTGGTAGAGGTGGTTCAGGGAATGTGTACAGATTA  
GTCTTGAATTGTGGAAAACAGTTGGCTGTGAAACACATTGTTAAATCCGATTCTGGTGACCAAAAAAGTT  
ACCGGGACAGCTCAGCCATACTGGTGAAGGAGAATAGAAGATCAAAGGAGTATGATGCTGAGGTGACC  
ACGTTAAGTTCCATTAGGCATGTCAATGTTGTCAAATTGTACTGTAGCATCACAAGTGAGGACTCAAATA  
TGCTGGTTTATGAATACTTAATAATGGAAGCTTATGGGACCGATTGCACACGTCTCAGAAAGTCAAGAT  
GGATTGGTTGGTGAGATATGATATTGCATTAGGTGCTGCTCAAGGGCTTGAGTATCTGCATCACGGATA  
TGACAGCCCCGTGATGCACCGGGATGTCAAGTCTAGCAACATCTTGTGGATGAACAGATGAAGCCAAA  
AATTGCTGATTTTGGATTAGCCAAAGTTTTGCATGTTAATGGTAATAAGGACTCTTCTCAGGTTGTAGCT  
GGGACACATGGCTACATTGCTCCTGGTACATATTTTTCTCTCCCTTTTCATTTTCATTGTCACTTAAAAAT  
AACTTTGGCAAATTCTAAATTTTTCTTCTTCTTATTGTTTGACACAACAGAGTATGCTTACACAACCAAGG  
TGACCGAGAAGAGTGATGTCTATAGCTTCGGGGTGGTGCTAATGGAATTGGTGACTGGAAAGAAGCCA  
GTGGATGCAGAGTACGGGGAGAACAGTGACATAGTCCAATGGGTTTGTAGCAAGATAAGAAACAAAAC  
TAGCATGATCGATTTGGTGGATTCAAGCATTTTCGAGGGGTTCAAAGAAGATGCTGTTGAGGTTCTTAA  
AATTGCAGTTCATTGCACATCAAGGACGCCAGCATTAAAGACCTTCATGAGGATGGTAGTTCATATGCTA  
GAAGAAGCCGAGCCTTGCAAGCTGACAAATGTAGTCGTAAATTCACCGAATGAGGATGGCAGGAAACA  
AGGACTTGCTAACTAATGGCAAGTCATGATGTTGAACTATCTCGTTGAGAGCAGAGGAATTTTGCAGAA  
TATTGAACTATGTTGTAAGTTCACAAAGAATGCTTAGTGTACATATGACACTTTTGAAGAAATAGTGTAT  
TTCACAGCTGCATTAATAAATCCAAGTCAAGTAATGTATTTACATCCAAATTAATTATAGAACTGAG  
CAGTTGATCTACCCTACAACCAATTTTATTTTTCT

>M6-PGSC0003DMG400005254 M6 LRR-RLK

AAAGATTTAAAAAGTAATTGGCACCTTGCTTTTTAGTGGCCTACAATGGAAAGAATGGCTTTTATTGCCA  
AAAGGACTTTAGGCAAAGTATGCAATAAATCCTCTTCCCACTCACTTTGAAAATCTGTCTTCAGTAGTTCA  
ATTAGTATCTGTCATAATTCTTGCCTACTGGATTGATCCATTTTCAATATGAAGAGGTAGTAAATCAAATG  
AAGTTTCCCTTTCATTGAACAACACAGCTCTCAGATCCCTTTCATGCATATCATATAGGTAAGTAACTTG  
TGTGCCATATATTTTAGAACTAAAAGAGTAAATCTTGGCTTTCACAATAACCAAATGAATTTTTTCTATTC  
TGTCAATTCTGAGATAGAGTTCTTCCTTTTTCGTTACTTCTTTAGCTGATATTATTTCTGGATTGTATAGTTTT  
CTTGCATTGTGTTAAACTTTTTTATTGTATTTGTTAATGGTTTCTTATAGCAATCTGATTTTATCTCTCTTT  
CACAGTGGCTAATGAGCTGCTTCTAAGCGGAACCAACCGGCTGATTTTGTCTAATGCTCTTCAAAG  
TAGTCAAGGAGAGAGAGGGGAAGAAGTGAAGGACTGCTGTAACCTCGGATCTTGCTTTTGCATTTTGTCA  
GCCAGATCAGTGAAAACATAATGAAGCTTCAGCCTTACTGGCAGCTATTGCTTTTCTTATTCTGCTGCTA  
TCAGTATTTCTTCATGTTATAGCTGATCTTGATTCCGATAGACAGGCGCTACTCGACTTTGCAGAATCTGT  
CCCTCATATCCGAAAACCAACTGGAATTTGGCTCTCCCTATTTGCAAATCTTGGGCTGGTATAGCTTGTA  
ACAAAGATGGAACGAGAGTCATTGCAATCCATCTCCCTGCTGTAGGACTTTTTGGTCTATCCCAGCTAA  
TAGTATAGGCAAGCTAGATGCTCTTAAAGTCCTTAGTTTAAAGAGCCAATTATCTTAATGGAAGTGTTCTT  
TCTGATCTCCTTTCGATACCGTCTCTCCAATTTGTTTACCTTCAGCATAATAGCTTCTCTGGTGATATTCCT  
GTTTCTTTATCTCCTCGTCTTGGTGTACTAGATCTCTCCTTAACTCTTTTACTGGAGAAATCCCCCACA  
ATCAAGAACTTGACGCGATTATCTGTGTTGAACCTTCAGTTCAATTCATTGACAGGAGAAATCCCCAGCC  
TTGACACCCTCAGGTTAACTAACCTGAATTTGAGTTACAATATGCTAAATGGCTCCGTTCCAGACCCCCTC  
CAGAAGTTTCCACTTACATCATTTCGAGGAACTCTCATTATGTGGTACACCTCTAAATAGCTGTTCTCTC  
GACCCCGTCACCTTCTCCAGCAGCTGATGGCTCTGCAATCCCTGAAAAACAGAAGGCTGTCCACTCTAAG  
AAACTAAGTACCGGAATCATCATTGCCATTGTGGTAGTGGTTTCTTTAGTAATGTTTCTCCTAGTTTTAGT  
AATCTCCTTCTGCTGCTTGAAAAAGAAAGTGAGTCATAGCACTAGCATAATTAAGAGAAGGTGGCTAA  
TGGGGGAAGAAGTAAAAACCCGAGGACTTCGGAAGTGGTGTGCCAGATGCTGAGAAAAACAAGTTG  
GTGTTTTTTCGAAGGTTGCTCTTACAGCTTCAATCTGGAGGATCTTCTTAGAGCTTCTGCTGAGGTTCTTGG  
AAAAGGGAGTTATGGTACAGCTTACAAAGCTGTCTTGGATGAGGCAACGATTGTGGTGGTGAACGGC  
TGAGAGAAGTAGGGGTTGCCAAAAGGAGTTTGAACAGCATATGGAGATAGTTGGAAGGGCTGGGAG  
GCACCCTAATATCGTTCCACTCCGCGCATATTATTCCAAGGATGAGAACTTCTTGTTAATGAATACA  
TGCTGCTGGTAGCTTGTGAGCAGCCTTGACGGTATAATTGCTAACCTTTATCTAACCTGTGTTGCTCAG

ACTCTTCAAAATGTTGCTGCACCTGTGTCGGATCCTCCAAAATTTACTACTTTTTGGAGGACCGACATGTCC  
ACATTTTTGAAGAGTCCGAGCAACACAACCTCTAAACTTTTTCTTGACATTAATTGCTTTGATCATCTGT  
AATGATTCATATTTTTACGCAATCTTGATAATGAATGACAGGTAATCGAGGTATTGGAAGAACTCCACTA  
GATTGGGATTCAAGATTGAAGATATCTCAGGGAGCAGCAAAAGGAATTGCCACATCCACACTGAAGGT  
GGTGTGAAATTTACTCATGGAAACATCAAGTCCTCCAATGTACTCCTGACAAGAGACCTAGATGGATGC  
ATTTCTGATTTTGGCTTAACACCTCTGATGAACTACATATCATACAAATATAGATGTGCTGGTTACCGCGC  
ACCAGAAGTTATTGAAACACGGAAAGGGACACAAAATCCGATGTTTATAGCTTTGGAGTGCTGCTCCT  
TGAGATGCTAACAGGCAAATCCCCTCTCCATTATCAGGGCAGGATGAGGTAGTTGATTTACCTAGGTG  
GGTCCGGTCCGTTGTAAGAGAGGAATGGACTGCTGAAGTTTTCGACGTAGAGCTGTTGAAGTACCAGA  
ATATTGAAGAAGAGATGGTGCAGATGCTTCAGATTGGACTAGCTTGTGTAGCAAAGGTGCCTGATATGA  
GACCTGCTATGGGAGAAGTGGTTAGAATGATTGAAGAAATTTGACAACCAGAAGGTGAAACGAGACCT  
TCCTCGGAGGACAGCAGGTCCAAGGACTCTAATGCACAAACACCTGAATGAAAATGCAGTTTTTAGTC  
ATTCAGCTTTCAATCTTGATCATTTTAAGAATGCAATTTATCTCCATTGCCAACTTTTGCATGTTCTTGCC  
ATACAAGTAGTGTTATTTTTATTTATTTTTTTATCTTAATGTTATATCCTATTCTGGCCTCTATAGAACT  
TATCAGCTCAACATAAATGAGAACCTTTGTTTTCTCTATTTTTAAATCTTTG

>M6-PGSC0003DMG400005485 M6 LRR-RLK

CTAACAACGATAAATCTTAGGAATAATAGCTTCCATGGTGAAGTCCCTATGGAAATTGGCAACCTCTTGC  
AACTGCAACATCTTAATCTCACTTGGAAATTCATTTACTGGAACCATTCTGCTAATCTGAGTTGCTGTAAA  
GAACTTAGATCACTTGCTCTAGAATATAATAGTCTGGTTGGTAAAGTATTACCTGATCAGTTCAGTTCCT  
TTCAAAGTTGAATTATTTAGGCCTTGAAGCAACAATCTAACAGGAGGTATCCCATCTTGGATAGGAAAT  
TTTTCGACTCTTCGAGGTCTTTCCCTTGCAATCAACAATCTACAAGGACCAATACCTCGAGATATTGGACG  
TTTGTCAAACTTGCAAATATTCCAAGTTTATGGAAATCAGTTGAATGGTACAATTCCTCAATCTCTTTTCA  
ATATATCCTCTGTTTACTATTTCTCTGTTACTCAAACCTTGTTGTATGGAGAGCTTCCATCAGATATAGGCC  
TACTCTTCCGAATCTTGTGGTGTGGTGGTGTGCTGTGAACGATTTCACTGGACCAATTCCTGTTTCATTA  
TCAAATGCAACAAAACCTTGGTGTACTTGAATTGTCTCAAATAAGCTCACCGGAAATGTCCTACGAGTT  
TAGGACAATTGCAAGGGTTGTATAGGATGAACTTTGAGATCAATAGTCTTGGAAAGAAACACAAGTGGG  
GATTTGAGGTTTCTTGATTTCTAGTTAACTGCACAAGTTTGCAAGTTCTTAGCTTTGAGGACAACATTTT  
GGGAGGTGAATTGCCTAAAACAATCGGTAACCTTTCCACGAGGCTAGAAAATTTGCTCTTGGTTATAAT  
ATGATAGTTGGTTCTCTCCTACAGGACTAGAAAATCTTGTTAATTTGACCCTTCTATCACTGGATAATAA

CTACTTGAGAGGCAGTGTTCTGAGTCTTTAGGTAAGCTTCGACGCCTGCAAGGACTGCTGTTGAATGG  
AAACAAGTTATCAGGAAGGATTCCATCTTCTATTGGTAACTTAACATCTTGTCTACTTTACACATTGAGG  
ACAATGAATTAGAAGGAAACATACCTCTGGAGCTCGGGCAGTGCATCCGCTTATCAAGGCTAAACCTTA  
CAGGAAATAATCTTGTTGGTTCCATACCAAAGGAGCTTGCAGGTCTTCTTCTCTTTGATTTCCTTAGCC  
TTAGCAAACAATTCGTTGACCGGTTCTTGCCAGCTGAATTTGGAAAGTTGATAAATCTCAAGGAAATGG  
ATATTTACATAACAAATTATCAGGTGAAATTCCAAGTACTCTAAGTAGCTGTGTCAGCTTAGAGCGCTT  
CATAGCGAATAACAACCTGTTTCGAGGAGAAATTCCTGAATCCTTGCAAGGTTTAAGAGGTTTAGAAGA  
AATTGATTTGTCACACAATAACATCTCAGGAGGAATACCTGAGTTTCTTGGGAAACTTCCATATCTTAGG  
AAGCTTGATCTTTCATTCAACGAACTTGAAGGCGAAGTACCAACTGAAGGGATCTTTGCAAATGAAACC  
GCCGTCTCAATCTCAGGGAATGAAGAACTATGTGGAGGTCTCCAAACTACAATTTTCTACATGCCCTA  
AACAAAAAGATGCATCATCAAAGAAACACATTAGTTCAAGGATAAAAGTAGCAATTATTATTTGCGTTGC  
ATTTCTATTTTTACTTTTTGTGTTCTTTTGCAGCTTGCTATATAGTAATTAGGAAGTCAAGAAAGAGAGATC  
TACTGGACGGTCCTCAAGAGAAAGGCAGTCTGATCATTTTGATGATGAAGAACCTACTTTATTTAATGA  
TCCAATTTTGACAGCAAAGATAACTTACCAAGATATATTCAAGTCAACCAATGGATTTTCTGAGGATAAT  
CTAGTCGGTACAGGAAGTTTTGGTTCTGTTTACAGAGGAAAGTTTCAGGTTTTTGATAAAGTTATGGCAG  
TGAAAGTATTGAACCTTCAACAAAGAGGTGCTTTGAAAAGCTTTTCGGATGAATGTAGAGCTTTGAAAA  
GCATAAGGCATCGAAATCTACTTAAGATAATAGCTGTTTGTTC AAGCATCGATTACCAAGGTAATGATTT  
CAAATGCAAAGTCTTTGAGTTCATGGAAAATGGAAGCTTAGATGACTGGCTGCACTCGAAAGGTGATGA  
GCAATACCTCAATATTATCCAAAGACTAAACATCGCAATAGATGCTGCTTCAGCACTTGATTATCTCCACA  
ACAATTGCCAAGTATCAATTGTTCACTGTGATTTAAAACCGAGCAACATACTCCTCGATGAAGAGATGAC  
TGCCCATGTTGGTGACTTTGGATTGGCAAATTTCTCTTCAAATCATCATGGAACAAATATACATCTATTG  
CACTAAAGGGTCTATTGGTTACCACCAGGTATGTCATTAATCCATGTTGATTTCTTTCATATCTATTTT  
CCTTATCAAGGGTCCTAACATGTAAGATGTTTGTGTACCTCAATCTCATATACTCCCTCCCTCCGTTTCAAT  
TTGTTTGTGTGGTTTTGACTTGACACAAAGTTCAAGAAAATTAAGAATACTTTTGAATCTTGTGCTCTTA  
AACTAAAGATACATGGAATGTAAGAACATGCCCTTAACTGTTGAAATTTAAAGAGTTGTCAAAAAGCA  
AAGAGACACTCTTTTATAAATGGACTATAAAGGAAAGTAAGACAAATGAATTGAAACGAAGGGAGCTT  
ATCTTTCTGATGCTTAAGGTGTGCAATGAACAAATCAATAACTAAGCATTATGAGGTTGTCATTTTCA  
TGTGAGTGAACATATGTTGAGTGTCCCAACATAATTCATCATTATCTTGCAGAATATGGATCAGGTGTAA  
ATGTGTCCACTCTAGGAGATGTTTATAGCTTTGGTATCATGTTGCTAGAGTTGTGTACCGGTAGAAGGCC



AACCGATGAGATCTTCAAAGATGGCCTGAATATTCACCAATATGTCAAATCCCATCTGCCTAGACGTGTC  
ACGGAGATTGCTGATGCATCATTGCTTTTAGCATATGAAGAACAATATATATGAGGACAATGCAAGT  
GATTTGGAAGAAAAGGCAATACTTCAAGATGATGAGTATATATCCAAGCTAAACACCAGCACTATTATA  
CAAGAATGCTTGATCTCAATCATGAAAATAGGACTTTTATGTAGTAGCTCATAGCCAAGAGATCGAATGC  
CAATAAGCATAGCTTTGAAAGAGATTCACACAATCAAGAACTTATTTCTAGAGTCTAAGAGGATAAATAA  
TAGTATAGATAGATCAGATGGTAATAAGCTAATCAAATTATCATCTTCAGAATTTTATTGATGAAGGCTA  
ATATACATAGAATTACAACCTTTGAAATAGATAATTTACAATTAGTACTATAGATAGCCTCACAAAATGT  
GAATTGTGACCAAGAAATTAAGGGATATGGTCGAGTTTTTTTTTTTTGAGTAATGGATGGAGTTCCTTTTT  
CCATCCTATCCCATTACC

>M6-PGSC0003DMG400005896 M6 LRR-RLK

GAGAAATCAAAGGACAGAAGGAGACAGAAAAAAGGTGTCATGAATTTGACTTGTCTTTAGGGTTTG  
ATCCCACTGCACCACAACCTTTGCTAACTCATCTCTTTTTTACAAAATCACTCACATTATTAATAA  
AAGGTACCATTTTTACAACAATTTATAGTTATTATGTACTTGCATCCTTATATGTTACTGTTATGTACTTTG  
TTCATTTGGGGTTCACAATTCTTGAGAAAAAAGTATGTAATTTTATGATAATCTTGAATTTTCATCATGTG  
TGTATATAAGTATTGTGATTTAGAGGTGTTGTTATATACTTATGTACATTAGGTGTATTTCTTGTAATG  
TTGTTTCTGGTGTAAACAATTTGAATGATTTCAAGATTTTGAGTGATTTTAGAAATGGATTAGAGAATCCT  
GAACTATTGAAATGGCCTTCCAAGGGGAATGATCCTTGTGGTCCTCCTGCATGGCCTCATGTGTTCTGTT  
CTAGTGACAGAGTTACCCAAATTCAGGTTTCAAGAGTTTGGGTTTAAAGGGTCTTTACCTCAGAACTTGAA  
TCAACTTGATAAGCTTCAAATCTTGGCCTTCAAGGGGAATGGTTTTAGTGGGAAATTACCTACTTTCAAT  
GGATTATCTGATTTGAAATATGCATACTTGGACAACAATAAATTCGATACGATTCTGGTGATTTCTTTAA  
TGGTCTTAGCAGTGTTCAAGTTTTGGCTTTGGATTATAATCCGTTTAAATGAGAGTGGATGGTCTATTCCC  
ATTGAGTTGCAAGATTCAGCTCAGTTGACGAATTTTTCTTGTGTGCAATGTAATATAGTTGGACCTGTGC  
CTGATTTTTTTGGGAAATTGCCTTCTCTAAGTGCCTTGAAGCTGTGCGTATAATCGTTTGACCGGTGAGAT  
ACCGGACAGTTTTCGTGATTCAATGCTTCGAATTTTGTGGTTGAATAATCAAGATAGTCTGGAATGACG  
GGTCCAATCGACATAATTGGTACTATGGATCAGCTTATGTTGTTATGGCTTCAAGGAAACAGTTTTAGTG  
GACCAATTCCTGATACAATTGGTGATTTAAATGACTTGAAGGAGCTGAATTTTAAACGGAAATCACTAGT  
TGGTCTGATTCCGCAAGGTTTGGCAAATCTAGACTTGAGTGTGTTAGACTTGAACAATAATAAGCTCATG  
GGTCTATCCCAAAGTTTAGAGCTGCGAATGCTACATATTCCTCAAATCTTTCTGTCAGCCAACCTCTGG  
TGTTCTTGTACTCCTCAAGTTAATGCACTTTTAGATCTTCTTGTGGTTGGAATTATCCAGCCAACCTTGC

TCCTGAATGGAGTGGCAATGATCCATGTACAGGTCCTTGGTTGGGAATCAGTTGCAATCCTAAAGGCCA  
GATTACAATTGTTAATCTACAGAACAAGAACCTTACGGGTACGCTTAGCCCTTCACTTGCAAACCTGGAT  
TCACTGCTTGAAGTTCCTTAAAAAGAAATAGTTTGCACGGTCGAGTTCCTGCAAACCTAACAGAGCTCA  
GATCCTTGAGATTGTTGGACTTAAGTGGGAACAATTTTGATCCACCATTACCGAAATTCCGGGATCGTGT  
GAAAGTCATTACAGACGGAAATGCTCATCTTGTGCTAATGTAAGTGCAGGCTCCTCCTCCTGAGTATT  
AGCCCATTTCTCCATTGAGCCACAGTCCTAAATCAAGCAAGGAGTTACCATCGAAAAGCCCGTTTCCCG  
GTGATAATCAGCCAACATTATCAGATACACCGCCCTCCCAGAGAAAAGTTCAGGTTCCAGACTCAAAGTC  
TCCCAGGGGAACCAAAGGGCAGACCACATCAGAGAACCATGATAAGACCATGATCATTGTAGTTGTAA  
GTGCAGCTTCTTTTCGCTTCACTCTTCTTGCCGTTGTTTTGTATTTCAAGAGCAAGAGAAAACGAGAAAA  
GGATTCAGGTACTATTGTTATCCACCCCAAAGAGCCATTTCGATCAAGATAACATTGTTAAGATCACTATC  
TTAGAAGATCCCATGATGTACAGCTTACAGAGTGGTACTACAACAATACTACAATACTAGTGGTGGAAACA  
AAAGGAAGTCGAGTGATTGAGATTGGAAACCTTGTCATTTCAACCCAGGACCTTCGGAGGGTAACCGAT  
AATTTTGCACCAGAGAATGAGCTTGGTCGTGGTGGCTTTGGAGTTGTTTACAAGGCGTAATTGAAGAT  
GGAATTCAAATTGCAGTGAAGAGAATGGAATCTGCCATTATCAACAGCAAGGCATTGGATGAATTTCAA  
GCAGAAATAGCTGTGCTTTCTAAGGTTTCGACATCGCCATTTAGTTTCACTTTTGGGTTATTCCATTGAAGG  
AAATGAGAGGCTTTTGGTATATGAATATATGTCAAAGGGCGCTTTGAGTAGACATCTTTTCCGCTGGAA  
GATCCTGAACTTAGAGCCTTTATCATGGACAAAGAGACTCAATATTGCTCTAGATGTGCTCGAGGGAT  
GGAGTACCTTCATAATCTGGCACACCAGAGCTTCATACATCGCGATCTCAAATCATCAAACATTCTTCTAG  
ATGATGATTTTAGAGCAAAGTTTCTGATTTTGGATTAGTGAAACTCGCTCCTGACAAAGAAAGGTCGGT  
TGCAACAAGGCTTGCAGGAACATTTGGATACCTTGCTCCCGAGTATGCTGGTATGTGTGCATTTTTTTCC  
ATTGGTATCTCTTTCTTAGACACTCGTTTTGACTGTTCTGGTAAATATTATCATTAAAGCATCAATTGTATT  
TTTTACGCTCAGGTAAGCTGTTACATGAACACATCTCTACCTGAACGAAACCAATACTCTTTTAGTCCCTC  
TATTTTAAGAAATGCATCAGTTCTATAATGAGAATCCAGACTGCTGAATTGCGCTTCTGACCTTCCAAGCC  
CTTCCTTCTCCAGCCAAAATAGAACAGAGTAACTAATGGAGCATTACGTTTTTCTTTAAGTTGTGCGGTG  
TGCTACTAAATTGATATACCTCAGACATTGATGTATCAATCTCGCATCATTAGTGATATTCTCATTCTGT  
TCACTATCTTTGTTAAACAATTCAAGTAGAAGGTTTACATCCTCTCTCCATATGATCATTAGAGCATAG  
TTATCATCTTGATTCCATAAAAAGAAACAGAAACTCTATCCCTTTAAAGATACTTTTCCCTTGAGGCATGG  
TACTGAAATATGTTTGTGTAAGCTGTTCAACAAGCATGTCATACCTGTTAATTTTGGTGTAGAACTATT  
GCTTACTTTATCTTTATGTTACCCGTATATTTTAGTTCTCAGTCTTGTGTAACGAATTACCTAGTCACCTTC

ATATATCCTAACTCACATTTTACCTCTCCAGTGACCGGAAAAGTCACAACAAAAATAGATGTCTTCAGCTT  
TGGGGTGGTGTGATGGAACCTGTGACTGGACTAACAGCCCTTGATGAGCATCGGTCCGAGGAACTC  
GATATCTAGTTGAGTGGTTCTGGCAGATAAAATCGAATAAAGAAAACCTCCTTGCTTCCGTTGATCCAGC  
TCTTGACGTGAAGGAAGATATCCACAAGAGCATTGCACTATGGCTGAATTAGCTGGACATTGCACTGC  
AAGAGACCCCAATCACAGGCCTGACATGTCACACGTTGTGAATGTGCTTGGCCAACTAGTTGAGTCTTG  
GAAACCCGTAGAAGAGTTAGATGAATATTCAGGAATTGACTACAGTCCACCTCTGCCAGAAATGTTGAA  
GGACTGGCAGGATGAAGACACTGGAGACTTCACCAGTACTAGTCAAGATAGCAGAGGAAGTATTCCTG  
CTAAGCCAAATGGATTTGCGGATTCTTTTACATCCAACGATGCTCGATAGGTGAAGTTGGTTTTGGCTAC  
CAAAGTCCATTGCTTCCTTACTATTAGTTTTGCTAGCATTTCGACATGAATTTTGCTTTTGGCTCGTGAAA  
ATAATCTATGGAGGCATTGCGTCCAGTCTATATATGGTGAATATACAGATACCGAGTTGTCATGAATGAT  
TGATACAGAGCAAAAAACAGAAAAAATTTTCAATTTAATGTTGTTTACACAGTTATTTGTTTTGAATGTT  
GCTTGAAAAGTTATATTTATAATAGTTGGTCCAATTTGCTGTATAAGTTATTTACATGACACTCTTGAG  
AATCTTACGCATGAATTTGAGAGTGTTAATAATGCAAAAAAAG

>M6-PGSC0003DMG400006065 M6 LRR-RLK

GAAGAACATTCTTATTGATTCTTCTCTTTCAAATTCATTTTCTATGTTAACTGCTTCATCAAATGAGAC  
TGACCAACAAGCTTTACTAGCTTTCCAAAATCTTATTACAAGTCCGAGTCATTTTTTGGCCAGTAATTGGA  
CCAAAATATTTCTTTTTGCTCTTGGTTTGGTGTCACTTGCAGTCCAAAAGGCAAAGGATTGTGGCCTTG  
GATCTTCCTAATTTGCAACTTCAAGGACAAATTTCCCATCTTTGGCCAATTTGTCCTTTCTCAGAGAGCT  
GAATCTTGGGAACAACAGCTTTCACGGTGGCATCCCTTATGGACTTGGCCACTTGCCTCACTTGCAAGTG  
ATTGATATTCAAAACAATCAGCTTAACGGAAGTATACCAACAAGTCTATTTCAACACCGGAGAGTTCAGA  
AGATTTCAATTGGCTTTCAATAAACTCGGTGGTGAATGTGGAAAGTCCATGGTATGTACCCAAACTCAA  
AGTCTTTGATCTCAGGAACAATAGCCTCACAGGTATGATCCCTCCTTCTGTTGGAAATGCAACAAAGTTG  
CTGAACTTCAGTGGGAATAGAGTCTGCGGCAACATTCCAAAGGAAATTGGTAATCTCAGCAAACCTTGCA  
TATTTGTCCTTGGCCGATAATCAATTAACAGGTTCCATTCCCGCAGTACTGTTAATATCTCGTCGCTACTT  
GAAGTGCATCTGGGAATCAATAGCCTTTCTGGTCTCTCTTGCTAGATGAAGGGAATGCTGTGTCAAATC  
TGAAGTTTTTAAGTCTATCTAACAACCAAATTTCTGGTTGCATTCCTTCCAACATATGCCAACTCACAGAG  
CTCGAAGTTTTGTCCATATCTTACAACAACATAACTGGAGAAATACCCAGAAATATTGATTGTTTATCCAA  
GCTCAAAAAGTTCTTAATTGGTGATAATCCAACAAAAGGGACTATTCCACATCATTGGGAAATATTTCC  
ACTCTGCAATATCTTTATTGTGGAAACAATCGCATAGTGGGGCAAATTCCTCCGGAATTAGGGAAGCTAT

CAAATTTGCAGCAATTATGCTTTAGGAATAATTATAATCTAATTGGTCAAATTCAGAGGCTATTTTCAAC  
ATATCTTCTTTGGAAGTTATTGATTTCAATAACCTCTCGGGGAGAATTCCAACCTACAGGTCT  
TCATCTTCAAACGTTAAGGAACTTATCTTGGCAGTCAATCAGCTGAAAGGGGAAATTCATTGTTTACA  
ACAAATGCTTCCAAGCTTGAGAGATTGGGGCTAAATAATAACTTTCTCACAGGAACTATTCCTAATAACT  
TGGGAAATCTTCATGAGCTGCAAATACTGCTCCTACATACTAATCAACTTGCCAATGAACCAAGACAGCG  
TGAGTTGCTATTCTTCAATTCTTTGGCGGACTGTAGGATGTTGCGATATCTACAAGTGGGTAACAATCAG  
TTGAATGGTTTTCTGCCAATTCTATTGGGAATCTTTCATATACTATTCAAACCTTTTATATAGGAGATGC  
ACACATCAATGGCCTAATCCCCACAAGTATAGGCAACATGAGCGGTCTTACATTCTAAGCCTTGGAGG  
AAACAACCTTGACAGGGAGTATTCCTCTGAGATTGGTAAGCTTAAACAACCTCCAAGGGTTGCATCTAACT  
AACATAAATTGCAGGGACATATTTCTGAGGCAGTATGCAATTTATCTAATTTGGTTCAATTATATCTGG  
AACATAATGAGCTCACTGGAGTGATCCAAGAATGTATAGGAGATCTAAGCATGCTACAACCTGCTTTATTT  
AAATTCTAATAGATTTTTCATCAAATTTCCGTTGAGCCTTTGGAAAATGAGTGGTCTTCTTTCTAAACG  
TGTCACAAAATTTTAGAGGGAGAAGTCCATCAGATATTGGAGAACTTAAAGTCATTATAGCGCTAG  
ATCTTTCCAGTAATCACTTTTCAGGAATGTTACCAAGCAGATTGGGAGAACTCCTAAACCTGCAGTCTCTT  
GTCCTATCAAACAATTCATTTTTTGGACAAATTCATTATCCCTTGCCAACTTGATAAGCTTAGAATCTTG  
AATTTGTCTTTAAATGCATTGTCAGGTAATTCGAAGTCTTTGGAAAACTTTATACCTTAAAAGCAT  
TAATGTTTCATTTAATGATTTAGAAGGTGTAATACCGAGTGGTGGTGTGTTTGCAAATTCCTCTGCAA  
TCATTTCTTGGGAACAAAGGTCTATGTGGAGTCCACATATTGGAGATTCCTGCTTGTGCTATCACTTATCC  
TGAAAACAATCAAAGCTTAAAGGAGGTTGTGCTAAAAATTGCTACTCCAGTGGTTATTTTCATCCTTGATG  
ATATTCTTGTGGTTTTCAATTTGGATAATGAAACGACAGAAGAAAGGAAAGTCCAAAGATGTTGAAAAG  
GTACCGGAGATCAGGACTCATCAATTAGTTTCTTATCACGAGATTCAACTAGCAACAAATAATTTTGATG  
AATCAAATTTAATTGGTGTGGGAGGTTCTGGCTCTGTGTACAAAGGCACATTATCTGGTGGAACTTTGGT  
GGCCATTAAGGTTCTGGATTTGCGAAGTGAGGAAGTATGCAAAGGTTTGACACCGAATGCGAAGTGA  
TGAGAAATGTTAGACATAGAAATCTTGTTCCGGTGATTACTACTTGTCTAGTACTACATAAGAGCCTT  
CGTTCTGCAATATATGTCAAATGGGAGTCTTGAGAATTGGTTGTACAGAGAAGAGTTCAACTTAAACCTT  
CTTCAAAGAGTCGCCATAATGCTTGATGTGGCTGTGGCAATTGAATATCTACACCATGGGCATAAACCTC  
CAATAGTTCATTGCGACGTAAAGCCAGCCAACGTTCTTTTGGATGAAGATATGGTGGCTCATGTTGGTG  
ATTTTGGTATCTCTAAAATTTTAGCGATAAGCAAGTCCATGGCTTATACAGAGACATTGGGCACTCTTGG  
ATACATTGCACCAGGTATAAAAAAATCTTTTCTTTGATTTTCTTATCATAATTAAGCCTCTCCAAGT

TCTAGAAGTAAAAAGAGCAAGTCTTTATTTATGCAGAATTATTGTTGATTTCAATTGAGTAACTTTTCTT  
CAATCCTTTCCTAAGAATATGGCTTGGAGGGAATAGTGTCTGCTAGTGGTGATGTTTATAGCTACGGCAT  
CATGTTGATGGAGATTTTGACCAAAGAAGGCCAACAGATGAAGAGATATGCAACCAAATCTTGACTT  
GAGGAAATGGATCACACAATCATTTTCAGGGACTATGATGGATGTTGTGGATGCCAATCTTTTTCTGAG  
GAAAAACAAGTCACCTTGTAAGTGAATATGCATAGCCTCCATGATAGAATTGGCTTTAGACTGCAC  
AAAGGAAATGCCAGTATCAAGAATAACCATGAAAGAAGTAGTCAAGAGGCTTAACAAAGTCAAGAACA  
CATTTCTGGAAACAT

>M6-PGSC0003DMG400006280 M6 LRR-RLK

CCAAAGCCAAAATTACTATCATATTTTATCAGTATCAATGGAATCTTTCAAAATACTTGTTGCATCTTCTT  
CTTCTTCTTCTTACCTTTGATGTTTTCTAAAGTATTTGAACTTCAATTACTAGTTATCTAAATGGCTACTTCT  
AACACAAGTCTCTTCTTTTTCGCGTATTTCTACTCGTGTTCTCATTACTCCATCTCAATCGCATAACCTG  
TCTCTGAGACGACAGGCTAAAACCTAGTTTTATTGAAACAAGCATTGTAGTATCCTCTGTTCTAGTAC  
TCTGTCTACTTGGAACATGTCAAATTATATGTCTATATGTTGTTGGACCGGTATCACGTGTGATGATACCA  
AATCAGTAACTACCATTGATATATCCAATCTAAACATTTCTGGCTCTTATCACCTGATATTCATGAGCTCA  
CCAGACTTCGCATCCTGAATATTTCTAACAACTTGTTAGGTGGGAACTTGAGCTGGGAGTATCGAAAGTT  
TAACGTACTTCAAGTGTGGATGCTTATAACAACAATTTCACTGGTCCACTCCCCTTGGGAGTTACTCAAC  
TTCTGCAGCTGAAGTATTTGAATTTGGGGGTAACACTTTTTCGGGGAAAATTCCTCTGAGTTATGGTAG  
TTTTAATCAGCTTGAGTTCCTGTCTCTTGCTGGGAATGACTTGCACGGTCCTATACCAAGGGAGCTGGGC  
AACGTTACGAGCCTCAGGTGGTTACAATTGGGTTATTATAATCAATTTGATGAGGGGATTCCGCCAGAG  
TTGGGGAACTTGTAATTTGGTTCATCTAGATCTTCTAGCTGTAACCTGACGGGTTGATTCCAGCAG  
AATTGGGCAATCTTAATATGTTGGATACTTTTTCTTGCAAAAAAATCAACTTACTGGTGTATTTCTCTCTC  
AGCTAGGGAATTTGACAAGGTTAAAATCTCTTGATATATCCGTCAATGAACTCACAGGAGAGATACCAG  
TTGACTTGTCAGGACTCAAGGAGCTCACATTGTTGAACCTCTTCATCAACAATTTGCACGGTGAGATTCC  
TGGATGTATCGCGGAGCTGCCAAAGTTGGAAATGTTGAATCTTTGGAGGAATAATTTCACTGGATCGAT  
TCCTTCTAAGCTTGGGATGAACGGTAACTAGTTGAAATGATCTTCTAGTAATAGACTCACTGGCTTG  
ATACCAAATCTCTATGCTTTGGGAGGAATTTGAAAATCTTGATTCTGCTTGATAATTTCTGTTTGGACC  
TTTACCTGATGATTTTGGGCAGTGTGCAACCTGTCCAGAGTCAGAATGGGACAGAATTACTTGAGTGG  
ATCAATACCAACAGGGTTTCTTTATTTGCCTGAGTTGTCACTGGTGGAAGTGCAGAACAACACTACATCAGT  
GGACAACCTCTCGAACGAGAAAATCTCAGCGTCTTCTAAACTTGAAGGGCTGAACCTGTGCAACAATCGC

TTGTCTGGTGCACCTCCAGTGCTATTGGAACTATTCAGGGCTGAAGAATCTTGTGTTAACTGGAAATG  
GTTTCTCAGGAGATATCCCTTCTGATATTGGCAGACTAAAAGCATCTTAAAGCTGGACCTGAGTAGGA  
ACAACTTCTCTGGCACAATCCCCCTCAGATTAGTAACTGTCTTTCCTTAACTTACTTGGATTTGAGCCAA  
AATCAACTTTCTGGTCCTATCCCAGTTCAAATTGCTCAAATTCACATCTTAAATTACATCAATATTTCTGG  
AATCACTTCAACGATAGCCTTCCCGCGGAGATTGGCTCGATGAAGAGCTTAACTTCAAGCAGATTTTCCC  
ACAATAACTTATCTGGATCAATACCTGAAACAGGACAGTATTTATATTTCAACTCAACTCCTTCATTGGC  
AACCTTATCTCTCTGGATCCGACTCGACTCCTAGCAACATTACATCCAACTCACCGTCAAACTTGGAGA  
CGGAAGTGACAACAGAATAAGGTTCCAACAATATACAAGTTCATATTTGCATTTGGGCTCTTATTCTGC  
TCCCTCATTTTTGTTGTCTTAGCAATAATCAAGACAAGAAAGGGGAGTAAGAATCAAATTTGTGGAAGC  
TGACAGCATTTCAGAAGCTTGAATTCGGAAGTGAAGACGTCTTGCAAGTCTTGAAAGACAACAACGTCA  
TAGGGAGAGGTGGAGCAGGGATAGTGTATAAAGGAACTATGCCAAATGGTGATCATGTCGCGGTGAA  
GAAGTTGGGAATAAGCAAAGGCTCACATGATAACGGCCTATCTGCTGAACTTAAAACATTAGGAAAGAT  
CAGGCATAGGTACATTGTGAGACTGCTCGCGTTTTGTTCAAACAAGGAAATCAACTTGCTAGTTTATGAG  
TACATGCTAAATGGAAGCTTAGGTGAAGTGCTTCATGGGAAGAACGGCGGGCAACTCCAATGGGACAC  
TAGGCTAAAAATTGCCATAGAAGCTGCCAAGGGCCTTTCTTATTTGCACCATGATTGCTCCCCTATGATA  
ATCCACCGCGATGTCAAGTCCAACAATATATTGTTGAACTCTGAACTTGAAGCTCATGTTGCAGATTTTG  
GCTTAGCCAAGTACTTTCATAATAATGGTACTTCTGAGTGCATGTCTGCAATTGCAGGGTCTTATGGCTA  
CATTGCTCCAGGTAAGTACTAGTTTGTTCATACATTAGTTGATTTAATTTCTTCTCGACTGGCCTATTATGCACT  
CGGACCAATCTACAACCTACTAATAATGGTCTTTACATGTTATCTTTTTGTATAGAATATGCATACACGCT  
GAAAATTGATGAGAAAAGCGATGTGTATAGCTTTGGAGTGGTGTGTTGGAGCTTATAACAGGACGAA  
AGCCAGTTGGAAATTTTGGAGAAGAAGGAATGGACATTGTCCAATGGGCGAAAACGGAGACAAATTGG  
AGCAAAGAAGAGGTGGTGAATACTTGGATGAGAGGCTAAAAATGTTGCAATTGTAGAAGCTATGCA  
AGTATTTTTTGTAGCAATGCTTTGTGTTGAAGAGTACAGCATTGAGAGGCCTACAATGAGGGGAAGTAGT  
CCAAATGCTTTCTCAAGCTAAACAACCAATACTTTCCAAATCCAATGATCTAATTGTGGCTCTACTAATT  
CTTATAGTATATCTTTTTTTGTTTCTTGTGTGCTTGGGAAGACCCCTTTTGTAGCTTTGCAAACAATTAC  
AATTATGTTAGATCTTAGGGCATGATATCTAACTATCCTCTCAACTTGAATAGTGTATTGGATGTGTAG  
AACTAGTATTAGTATCCGCGTGATGTGTGGTGAATATCAAAGAATGATTACATAAAATGAATCTCTC  
TGTTTC

>M6-PGSC0003DMG400006364 M6 LRR-RLK

ATGTATCTTGCAAATTATGGGATTAGAGGTAACCTTCACCATCTAAATTTCACTTCTTTTCCCATCTCCAA  
TTGATTAATTTTTCTAATAACTCACTCAATGGTACACTTCCAAAAACATGTTCAATCTTTCAAGATTAAGT  
TTCTATATTTGAGTTACAATCATTTTGATGGTGTGATTCCACATGAAATAGGGCTATTGAAGAATCTCAA  
GCACTTAGACTTGTCGGTAAATCTTTTTATTGGCTTTATCCCTTCATCTATTGGTAACTTGATTAACCTGA  
GTTGTTATTTTTATCAGTTAATGAACTCTATGGCCCTGTCCCTTCAAGTTTTGGTAACTTAAAATCCCTTGT  
GCATTTGTGTTTGCTTAGAAATAAACTCAATGGATCACTTCCAAAAGAGTTTGAAAATCTTACACATATG  
CAAATTTTTCAAGTAGCAGAGAACAATTTTTCTGGTCATTTGCCACAAAATGTGTGCCTTGGTGGATCAC  
TTGCTAAATTCATAGCATATGACAATAAGTTTATTGGTCATGTCCAAAAACCTTGAAAAATTGCTCTACG  
CTATCAAGAGTTAGGCTTGATGGTAACCAATTGTCTAGCAATATATCAGAAGCTTTTGGTGTCTATCCAA  
GTCTAGTTTACATGGATTTGAGTCACAATAAACTATATGGCGAGTTATCGTCACAATGGGGCTTTTCTCA  
TAATCTAACAAGTTTGAAGATCTCCAAGAACAACCTGTTTGGTGCCATACCAGTTGAAATAGGAAATTTG  
ATCAAAGTAGAAATGCTTGATCTCTTCAAATCACTTGACCGGCGAAATTCCTAAAAGTTTLAGAGAGGC  
TAACTCTCTTGCTGGTACTTGATTTACATGAGAATATAATTTAGGAAAAATACCTATAGAAGTGGGGAA  
GTTGTCTAAACTTACAAGACTTAACTTAGGTGCGAATAATATGAGTGGAACGATTCCAGGAGAAATAGG  
AGATTGTAGGCAGCTTTGGTACTTGAATTTAAGCAAGAACATGCTGAACACAACCTATTCCTTCTAATTTA  
GGTAACTTGCACTCTCTAGCGTATCTTGATCTCAGTTATAACATGCTCAGTGGTGAGATACCGTGGCACA  
TAGGGAGTTTGAGAAGTTTGAAAGAATGAATCTTTCGCGTAATAACTTGTCTGGTTCAATCCCGCCTAG  
TTTCAATGAACGTGTTAGTTTGAGGTCAATTGATATATCTTGCAATCAATTGGTTGGTCCCCTTCCAAGA  
TCGTGGCATTTCAAAATGCATCGCGTGAAGAATTAAGAGATAACAAGGATTTATGCAGCAATGATCATA  
TTGGTATGAGACCTTGCTCTTCATTGAGGAAAAAAGAGAGAACAAGTAGAAAGCTTATACTGACCTTAA  
CTCTGTCTCTAATTTTGGTTGCCTTGCTTCTACTTGTGATTACTTGTATACTTTTTCGAATGAAAAGGAAAA  
GAAATAGAAGTATTCAGCCTAGAGAACCATCCAGCAATTCTTTTTCAGTTAGGGACTTTGATGGGAAAAAT  
AGCACATGAAAACATAATTGCAGCAACAGAAAACCTTTGATAGCAAATATTGCATTGGGAAGGGAGGAC  
ATGGAAGTGTCTATAAGGTTGAGTTACCATGTGGTCAAGTTGTTGCAGTGAAAAAAGTTCATGCTTTAG  
AAGATGAAGAATCTGATGACAACCTTGATCAAAGCTTTTCAAAGAGATACAAGCTCTAGTAAACATCC  
GCCATCGGAATATTGTGAAGCTTTATGGGTTCTGTTACACGCGCGCCATTCATTCTTGGTTTATGAGTT  
GTTGGAAGGAGGAACTTGTCTCAAACCTTAGCAATGAGGGTAGAGCAAGAGATTTAAATTGGCTCA  
AGAGGGTTGATATTGTCAAGGGGATAGCAAACGCGTTGTGTTACTTGCATCACGCGTGTTACCTCCTAT  
AGTTCATAGAGATATATCAAGTAACAATGTTCTCTTAGATGATGAAGGCAATCCCATGTTTCTGATTTTG

GTACTGCTAAACTCTTAAGGCCTAACTCCACCAACTGGACATCGTTTGCTGGAACCTCTGGCTATGTAGC  
TCCAGGTATTTAGTCTTCTTTATTTTCTTAAACTTCGTGTTAAGTCAAATCAGACAAATAAATTGAAACA  
AATGGAGTATATTTTAACTAGGAATTCATTGCTTCAAATTTGTTCACTCTTTCACACAATTTTCTAATTTG  
TTTGTAGAGCTTGCTTACACAATGAAGGTAATGAGAAGAGTGATGTTTACAGCTTCGGGGTGATATCA  
CTAGAAGTTATTATAGGTCATCATCCAGGTGATATACTCAAGCTATATCATCATTTTTCGCCAGCATCAGG  
AGCGAATGGAACGCTGTAAAGGAATTGATTGACAAACGGACACTAGCTCCTGGAAAACAAGAAGCAG  
AAGAATTGATCAAGATCACAAAACCTAGCATTGCGGTGTCTTCATCAGAGTCCTCTAGCTCGGCCAAGTAT  
GAAGCAAGTTTGTGCATCTTTATCAAAGAAAATTGGCCTTCAAAGGCTTGTCTCCACTGTTACATTA  
GGCCAGTTGATTGAACCAACTACTAAGATGTTGA

>M6-PGSC0003DMG400006502 M6 LRR-RLK

CCATGGCCTATTATCTTGACAAAATCTTCTTCTTATTTCTTTCACACTTAGTACTCCCTCAAATCAG  
ATAATATGACAGATATTGAAGCACTCTTGTCTATCAAGAATGAAATAATTGATCCCTTGAATCATTAAAGT  
TCATGGAATGAGTCTGTTCTTTATGTCAATGGCGTGGCGTTGTATGTGGAACGCGAAATCAACGAGTC  
ATTGAACTAAACCTTCTTGACCATAAGCTAGCCGGTGTGTTATCACCTTTGTTGGAAATTTGAGCTTCCT  
CATACGACTAGACATCGGAAACAATACCATTTCTGGCAATATCCCTCCTGAATTAGGCCGTTTGACAAGC  
TTACGCCATCTATATTTGCAAACAATTCATTTTATGGTGAAATTCCTGTCAATCTATCGTTTTGTAGTAAC  
CTCGTTGAGTTATGGGCATACAAGAACAATTTGTAGGTGTTCTTCCAAGGGAGCTTGGTTTACTTACCA  
AACTCAAATATTTAGATTTGCGTTACAACAAGCTCATTGGTGAAATCCCAAATCTTATGGTAACTTTTCA  
AGTCTATTGGAAATGTACCTTTTGGATAATGATCTCGAGGGTAAAATCCCGATGAGTTTGGGAAACTG  
AAGAGTTTGGAAATATTTGACGCGGACTTTAATAGGTTATCTGGTAGAATTCCGAGCTCATTGTACAATC  
TTACCTCATTGAAAGTCATTGATGTGTCATTTAACCAACTCGAAGGTAAGTCTGCCTCGGGATTTAGGGAT  
CAACCTCCTAACCTGGAGTGTCTCAGCATTAGTGAGAATCAATCACTGGATCGCTTCTCATTCACTTT  
TCAACCTCACAGGACTCGCGTACCTTTATGTTGGAAAAAATGACTTAGGAGGACGTGTTCTAGGTTTCGA  
TAAGTTGCATAATTTGTATATTTAAGCATGGAAAATAACCAATTTGATAATGACTTGACCCTCATGTCCT  
CCTTGACAAATGCAACTAACCTCAACCGTCTGTATATGCAAACAACGCGTTTGGAGGGACATTTTATGA  
GTTTTTCAGCAACCTTTCAAGTAATCTGGCGTTTGTAGACTTGTCAAGCAATCATTTTTCAGGACATATCC  
CGATAGACATTGGGAAATTCGTCAACTTGAAGAGCTTAGGCTGAGCGGAAACCAACTCACAGGTATCA  
TCCCTTCGACTATTGGGAAGCTTTATAAGCTACGATATTTACACCTGTCCCAAACAGAATTTGGGGTAG  
TATACCCTTTTCCATTGCAAATCTGACCCTTCTAACAGAGTTAAATCTTGATCATAACAATCTTAGAGGTA



GAATACCTTCAAGTGTTGCAAAATGTCAAAGTTTGTGTACCTTAACCTGAACCAAAACAATTTAATCGG  
TTTGATACCTAAAGAAATTTGTCTAATCTCTTCCTTAGTTGTTCTAAACCTTCCAGTAACAACCTTGACTGG  
CGCCCTCCCAAAGAAATCGAAAGCCTGAAAAATCTCTTATCATTAGATGTCTCTTTGAATAATCTCAATG  
GTGAAATTCCTAGTACACTTGGGAGTTGTGTGACAATTGTTAACTTAACAATGAAAAGGAATTTATTCCG  
CGGGATTATTCCTTCCACTTTCAGTTCCTAAAGAGTCTTCAAGTTTTAGATCTTTCGCGGAATAAGCTAT  
CAGGTATGATTCCAAAGTACTTGGAAAGGATTTGCCTTGCATTTCTTAACTTATCGTTTAATGATTTTGAA  
GGTGGCCTTCCACAACGAGGCATCTTTGAGAACGCGAGTGTAGACTCTTTCGTTGGAAATCTTAGAATCT  
GTGGTGGTGTACCTGGCTTGAAACTTCCCAATTGCAACTTCAGTCATTCAAAGAAAATGAACTTTAAGCT  
TGTTATTTTAGTAATATTAGGAATTTGGGGCTAGTTGTTATGGTTTGTGCTTTTTTCTTCTATCGATTTGG  
AAGGTCCAAAAGAACAATTCCTTCATTAGATAACAATCTAAACCAACTCATAGCTATGTCCTATCAAAGT  
ATTCTCAAAGTTACCAACGGGTTTTCTACGAGCAACTTGATTGGTGTGGGAGTCATGGATATGTTTACA  
AGGGAATTTTAGAAACGGATGGTAAACACGTTGCTATAAAAGTGTGAATCTTTTACAATATGGAGCTA  
TCAAAGTTTCATAGCAGAATGTGAGGCCTTGAGAAATGTTAGACATCGGAATTTAGTTAAGCTACTTAC  
TGCATGTTCTGGTGTGATTATCATGGCAACGAATCAAGGCACTGATTTACGAGTTTATGGCCAACGGA  
AGTTTGGAGGACTGGTTGCATCCAGATAATTCAAGACCGAATGTTTCAGCCAAGAAGGTTAGGATTTCTA  
CAAAGGCTGAATATTGCTATTGATGTTGCTAGTGCAATTCATTATCTTCATAATGATTGTCAAATATCAAT  
AGTTCATTGTGATCTCAAACCAAGCAATATTCTCCTTGACAATGAATTGGTTGCCCATGTTGGGGATTTTG  
GATTGTCAAGATTCCTACATCTTACTGACGAAACCACTTGTAGAATTCAGACAAGCTCTTCAACTTTTAAA  
GGATCTATTGGCTACATAGCTCCAGGTAAATTTCACTCTATATAAATGCCTCTAAAGACTTTAGTGACTCT  
GGATGCAATGACATTAECTCAATTGCCTTTATATTTTCATTGCAGAGTATGGTATGGGAAGCGAGGCATC  
AACGCAAGGTGATGTGTATAGTTTTGGTATCGTCTTACTTGAAATGTTAACTGGGAAAAGACCAACAGA  
TGACACGTTTGGCAGCGATTTAAGCCTTCATGATTTTGTAGGAATGCCATGCCTGATGGAGCACTTGAG  
ATAGTAGATCCAGTTCTTAATTTTGAAGAGGAAGAGATAAGCACAGAGAGGTCTCAAATCCAAGGTTT  
ATGAGAAGGCAAAAAATGGTAGAGGGTTTAATTTCTTATTTGGAGTTGGTATTGATTGTTCAATGTATG  
ATTCAAGTAAAAGAAAAACATGAAGGAGGTTGTTAGAGAGTTGTGTTCTATAAGAGATTCTATTGTTG  
GTTGTACAATATGAAACACTTTTCTTGTGTTTGT

>M6-PGSC0003DMG400006563 M6 LRR-RLK

AGTAAACATACAGAGCTAAGGAGATCAAGTGTCAATTACATTTCTGTATATTTAGGTCTCTGAAATGCATA  
GCATAGTTATTTAAAATTTATGTTTACTTGTGAGTAAGATTTTGGAACTTGCCTTGTATTTTTAAAGGTGT

GAAATTATGAACCAATGCAGGTATTCTTTAAAGCCAATAATTGAAAAGTTGGATAAACATATGTTTTTTG  
CTCATGGAGCTGTTAATTGTATAACGCCTGGCCATTTCTTTCGTGATTAAGGTGGTGTCTTGTGAGGACC  
TTGATTGGTCCAACATATACCTGCATTTACCTCTAAGCATTAGGCATATAAGGAAGAAGATGCCTAACTC  
TTTTTTGTCAGCTAGGATTCAAACCTCTAGATTTTCATGATTCTATATTCATCGAACACTAGACCACACCCTT  
GGGTTTGTATCCCTTTTCGACTTTCAGCTTGTGCATTTCTTCATCTGTTGTATTCCCTTTCTCTCTTTTGATA  
ATGTTTGACCCTTTATTTGCATTGTGGTTTCTTTTCTATTTCAGTCTATCAGGAAAATGGTGTGAGGGTT  
CAATAAGTTCACTAAACATCTGAAGACTAAGATGCTAATATTGATAGTGATCAGTTCAATTTCCACCTTTA  
ACTTTTTTAAATTGCATCGATCCTAGCAGAACTCTTATTCTATTTTTACTTTTTCTTTACATGTTAGATGATG  
ATGGAGAGAAAAGGATATGAAGGTATAACAGATATAATGAATTCATGATACATGTTGTGAAAAGACAAC  
TACCAAAAAGTTATATATGAGAAAAGGAATAAATCGAAACATATTTGGACTCCCACATTATGTTTGAATTT  
TTGAAAGACAGATTATGGAATATTTTATCATGATAGAACATGTTGGTAGAAAATAACATGAAGTTAGGT  
CCTCATCTTGACACTTATTGAAGATCAAATGCTGATTCTGATATTGCAGAAGTGCAGAAATTGCTCTTT  
GCAAGGATCCATTCCTGATTTTCAGCAGAATTGCAAACCTAAGCTATCTGTAAGTGCGAGTTTGTTATTGT  
TTTGTTCTTCTTTTGTTAAGCTTTATCTGTATATTTTTACTTCAAGATTGTTCAACTAGTAGATCTCTGAAAA  
TGTCTAGCTTCTGCTTGCTATACAGTGATCTCAGCTGGAATCAACTTTCTGGATCTATACCACAGAATAAG  
CTTTCCAACAATATGACAACTATGTAAGCCTTTTGATTTGGCCTCGATAGTTTCTTCATATAGTTATATAAA  
TTGACAGATGTTGGCTTTTGTTCCACAGCATTGAACTGGATTGCCTGGGTTCCCTTTACTTATTAGCAT  
ATTCTAATGTATATTTCAAATGCATGATGCAGTATTCTATCACATAACCGTCTTAATGGATCTATACCCAA  
GAGCTTTTCTCTCCTTCCCTGCAGAACTGTGAGAATCTGGACTTAGTCTTGCAATATCTACTATTTCT  
ACTGAAGGAAATGTACCATTAACGAATTGGTGGGACAAATTTGTCACAGGTCTCTTGAGAACAACCTTTCT  
GAATGGTTCCATTTCCACTGACATTTGGCAAAAACAAGATCTTTAATACAACCTCCAGACTTGTGATGTAA  
GATGTGAAGCAGAAAAATAACAGATCTTATTTCAATAGAAGTATTTACTTCCAGAGTCAAACCTTTGAAT  
GAGGATTTCTTTCTAACAACTCTTTCATTGATTTTGCAAACCTAGTGATCTGCGGAATAATTCAGTTTCAA  
ACATTTCGGGTGCTTTTGAACCTCATGTAATGTCACACTAAGGTATGATTTCTTCTTTCAAATTCAAAA  
TAGAACAAATTTGAATGTCGGTTTATGTCCTCATGGGCCACATAAATAGGACAAACAATGGGTAAAGAA  
ACTAGAATAACAGAAGCAATATGCCATACCAAAAAGGGAAAGTACGTCGATTTTCTCGTGTGTGTGAC  
AACAACTACTTAAATTAATTGAAGAAGCACAAATGCATGGAATCACTTCTGTTATGTTTTATCCACACACA  
CCGATACACATGCTTTTAGCAAATTCATATATGGTGCTTTATAAAATGTAAACAAAATGGAAAGAACAAG  
GAGTTGAGAGAACCTTTGTGGTTATCAGTTTTTTTTCATTGTTTGAAAAATTTAAGTATGCTTAAAAAGGAG

GTATAGATAGAAAAGGGAATTCTGAAATTCTTAGTCACATATTTTCATCTAGTTGCAGTGGAAAAGGAT  
GAAATGATGAAGGGCCCTATAATATTGGTTATGGTCCTGATCAGCGTAAATCTTGAAAAAGTACAAAGT  
TTACCCAATAATATAAATGAGAAGTGTGTGTGTGTGGGGGTGGGGGTAAAAAGATATAAATAGAGG  
GAAACTATGAGCATAAAAGGAGTTTTTGTCTTTTGTGAGTCTCTCATTATTCGTTGAAAGGAGGCCTG  
AACAAATGGAGAGGAAGGAAGATTCTGTAAAATTTGAGTCCACTACATGCCTTATGATGATTTTTTAATG  
TGACACAATGTAATTCTAATCTAAGTTGCTCGGACTCTTCACTTTTGGTGCCGCACCCGTGTCGACAGGA  
TATGGGTGTGGGTGTGGGATCCGTGTCCGATTTTGGGTATTTGGACCAAATGATGGAGAAAGTCTGG  
ACAGTTTTAATGATTTTTATAATCAATACAAAAGCTAAGGTGAAATTGAAGAAAATGGAATACCTTTTAT  
ATAGAAATTTCTATGTCACTCATTTTCTTTGATCTCCTTCCAAGATTCTCTTCAAGTTCTCCACATAATATC  
TCATAATATAGGTTTTATAACTCTTTTAGATATTTAATTATATTTAGGCGAATCCCTGCACCCGTATCCAT  
TCATGGATCCATATCCCTGAATCTTAAAAGTTATATCATATCATGAAGGATCGGACCTTTAGATCCGCAC  
ACGTATCGGACACCCACACCCTAGTCCAAGCAACTTAGATTCTAATAGTTTGTGAAACTGAGGGAGATTT  
TCTGCAGTATATCACATCAAGACAAGTGATATAAACTGGTATCATTAATTCTTGAAGAAGGAAAACATC  
ACATTTAGGAAAGTGGAGAATGGAAATTGTGCCAAACAAAAAGAGTTATTGGTCTAAAATTACTTGTAC  
ATCTTTGTTACTGTCTCTGGAGTTCATGTTTTAGTTATGCACTCATTCTTGTGTCCAATTATTCATAAAT  
ATCTGATTTTGACAGTGAATTGAGGTCATCTTTCAAAAATTACTTTCTGATCTTTTCTATCTCATGAGGTC  
AATTCATCTTGAATTCTTAATTGAAAATCTGCTCAATGTTTCTCAAAAAGAAACATGTCAATAAAAATGTTT  
TAGATTTAGTACTATGTTAAAATTCATTTATTATTTTCATAGTCTTCCCCTAACTTTAGCAGACGATTTCCA  
GGTTCCAAAGCAATCCCATCTGCAGCAGTACAAGTATCAGAAACATTGGTAAATACTGTGGCCCTGACTT  
TGGAGCAGATGACGACGAACCTAGTAATTCAACAAATCCAAGTGGTGTGGTGTCCCTATTCATGCTTGTCCA  
ACTGACAACCTATTATGAATATGTTCTGCATCACCTAAACCATGCTTTTGTGCCTCACCTCTTAGAATTGG  
GTACAGGTTGAAAAGTCCTAGTATTTCTTATTTTGTATCCGTACAAGCAACTATTCGAATCTTATGTGACTA  
GTTCCCTCAGTTGGACCTTACCAATTGTGGATCGATTCATATTTTTGGGAAAAAGGACCTCGTCTGAG  
GATGTATTTGAAGCTTTTCCCGGTGGTTGGGACAATACATTTAATGAAAGTGAGATTCTTCGTATCAGC  
GAGATTTTTGCCTCTTGGGAATTTGAGGAAGTCACTATTTGGACCATATGAGCTCCTGAACTTCACAC  
TCCTCGGACCTTATTCACACTGTAAGTACTCACAGCTTAAATTGATTCTAATTCAACTTGTAAACAACCTAG  
GCTGTGTTACTACAATTGCATGACAATTGAATCATTGACATGCAGCATGTGGATAAGATTGAAATATTTG  
ACTATCATTGCCACTTCTAGCCAACAAGTATAAGGATCTTAATTCATATAATCAAATAGTTTGTAGATAAGCA  
ACAAAAGACTATGATCCATGATCTTCTAAGGACTTCATATATATTGGGTTGAAAAAGACAATGAAGTCTT

TGTTTATATCCAAAGATTTTTTAAGACTTCAGATATTTTACGTTGAGGAACCTTACTTGATTAAGGTTG  
AAACTTCAAGGGGTTCAAACCTAGATAGTTTGGTCCAGTCTCTCTTCAAGAGCTTCAATTCTGGAGGTCT  
CAGCCCTTACAGTTTTTGTGGGATGAAAGTGGATAAAAAAATGGACCTTAGGCCTCCCAAAAAGCT  
AGCTCATGAGGAGGGGATTGTCCAAAATCATATAAGGAGAATAACCCTTGTCACTCCAACACCTTGCTG  
CACTCCCAAGAATTGACATTGGAGCGTGGACAATATAATAAGGGGGGGTTCAACACCGGAAACAATAA  
ATTGGGATCAGTGTGGATCTGAGACCATGTGGGAAATAAAGAAGAAAAATATTACTCCCTTTATCCAGT  
TTATATGACTTACTTTTTCTTTTAGTCAGTCTCAAAAAGAATAACACATTTCTATATCAAGTAATAATTTAG  
TTTTAAAATGTCAATTTTACCTTAATGAAATGATTTATAGCCACACAAATATCTATCACTTTTTTTTAGACC  
ACAAGTTTTAAAAGTATTCCTTTCTTTCTTAAACTCCGTGCCAAGTCAAACCTAACTCATATAAAATGGGAT  
GGAGGGAGTATTAATAATTATGTATTCTTTTATTACATTGAGCCCTATTTATAGATTCTACATTACAATTCA  
TTTCCAAGTAGGACAATATACACAATCCTATTGGAACACTCCCCCTTAAGCTGGTGCATACAAGTCAGA  
TGTACCGAGTTTGTTAAGATGTAATTAATATGAGGATCAGTGAAGGACTTGGTGAAAATATTTGCAAAC  
TCATCACTCGACTTCACAAATTTTGTAAACAATATCTCTTGGGATCATCTTTTCTCTGACAAAGTACCAGAC  
AATCTCAATGTACTTAGTCTTCTCATGAAATACCACCGATTTGATGTGATATCAAGGGCTGCTTGTTATC  
ACAGACAAGATAATGGCTCAATTGTTTGATTTCTTTGTACAAGCTTTGATTTCTTATATTATCTGCAGTG  
AATCCTGAAATGAAAGGTAAAAACAAAGCAAAGGCGTTGTGATAGCTTGCATTGTAGCAGCAGGTGC  
TTTTGCTGCCTTTGTTTCTCAATTGCCACTATATTAATCACAAGACGACGTGCTAAGTATCAAAAAGATCT  
TGTCAGAAAACGTTTGTGTAAGTCCTCTTATTAGATTAGCTATAATTTTACTTTATCAAGTCTGCTATTTT  
TAATTTCTTTCTGCAAATTTGATGACTATGGGTTTTTGTGGCAGCTTCAAGCCTCTCTATAAAAGTAGATG  
GCGTTAAAAGTTTACCTTCAGAGAAATGACTTCGGCCACTAACAACCTTTGATACCTCAACTCAAGTTGG  
TGAAGGAGGATATGGTTCCGTCTTTAGGGGAATTTTAGCTGACAAAACAGTTGTTGCTATCAAGCGAGC  
AAAAGTAGGATCCCTGCAAGGGCAAAGGAATCTTGACCGAAATAGAACTATTATCAAGGTTACATCA  
CCGTAATCTGGTTGTGTTGCTTGGATACTGTGACGAAGAAGGAGAGCAGGTATGACAAAAGCTGAAAA  
CCTTTTCAATTCAACTGTTTTAGTTACTAATAATTCACACCATTATCATTTTTAAATCATAGTTAGTCATAT  
TTATTTAGTGTAGCATCATAAACCTTCTTGTATTCTTTCTCACTTCAGTTGCTAATGATCAGACTGAATGTG  
TAGCAGACTAAATGCTTTCTTGAGCTACTGAAGTCTTCTTGTGTTAGCACAAAGAGTGATATAGTCGAGCA  
ATTATGAGTCTTCTGTATACATTTGCAGATGCTGATTTATGAGTTCATGCCCAATGGAACCTTTCGAGACT  
GGCTTTCTGGTAAGAAGTGTTCCTGGTTGTTTCTAGCTTTTCATATGATTAATCCTCCTCAATTTCTTTCTT  
TAGTTTAGTAGTGAAGATCCAATGCGGAGTTGCAATGTTTATAGATGTTCCCTTGACATGTTGTGTCATT

AGTAGTACTATGGTGAATTGATAATACAGGCTTCAGTATTTTATTGTGTTTGTGGAGAAACCATTGTCAA  
GGTGGTGATCGATCTAAAAGTTGCATAATGGAAAAGATATCGCAGGAAATCTAATAGTCAGAGAAACAT  
AGATTCCATCTTCTTTTTCTTATCAGAACAAAAAATTTGTTAGTTTCTTTATGCGGCTGTGATAAACTTC  
AAGAACTTTTGTATTGCTATCTAAGTAGGTGATTTCCATCATTGACAGCCAAATGTAAAAAATTTTGA  
AGTTTGGAGCAAGGTTGGGGATCGCACTGGGGGCATCTAAGGGCATCCTTTACCTCCATACTGAAGCTG  
ATCCACCCATATTCCAAAGGGATATTAAGCCAGCAACATTCTTTTAGACTCTAACTCACTGCCAAAGTT  
GCTGATTTTGGATTGTCTCGGCTTGCACCTGTCCAGGATGATGAAGGTCTTCTGCCTAATCATGTGTCAA  
CAATGGTGAAGGGGACACCTGTAAGTCTGTCTATGCTCTAGATTTAAGGAAATAATTGTGCAATGATCTT  
ACTGATTTTCTTATGTATATGCACAGGGTTACCTTGATCCCGAATATTTCTTGACCCGTAAAATGACAGAT  
AAAAGTGATGTCTACAGCATTGGGGTTGTATTTCTGGAGATCTTAACTGGCATGCATCCTATCTCACATG  
GAAAAACATTGTCCGTGAGGTATTTCTGTGCGCTGAACACCTATTGGAATACAAAAACAGTGAATATTT  
GTCTAGCATTTTAGCAATAAAAGCATAGGTGTATGTATATAACCATTAAGTGTCCATGACAGGTAAAAAT  
GGCTCATAAATCGGGAGTAATGTTCTCCATTATGGATAAGAACATGGGATCTTACCCCTCCGAATGTGCG  
GAGAAGATGGTGGAGTTGGCCCTGAAGTGTGCCAGGACAAACCAGAAGACAGACCCTCAATGCTGGA  
GGTGGTTAGGACGCTAGAAACCATACTCCAAATGATGCCATATACTGACGCCGATCCTTTGGATGATAA  
AGCCAGTTTCAGTGAACTACATCATCAGCTTCATTTTCTAATACTAGAAGTGGAGACCTATTTATATCAT  
CATCCAATGTATCAGGTGGTGATCTTATTAGTGGTGTACTCTTAATATTACACCTCGTTAACATTAGCTT  
GTCTTCCACTGCATAAACATTGGCTTGTACACTATGACTAGTAGGAAGTCTATACGACTTGTCTTTTATGA  
TGTATACGAGTGTACAATAATACCATCTTACTGCTTCTAGATTTATGTATATTCCTCAAGAATCTGTTGTG  
ACAGACAACCCTT

>M6-PGSC0003DMG400006923 M6 LRR-RLK

ATTTTGAAGTCACTGTAAATGGGTTTCTTCAAGATTTTGTGATAGTGTGGTTATTTGCGCTTCTTTAT  
AGCAAATACTTATCAGTTACAGTCCTATGAAATTCAGCTCTTCTTTCAGTTGAGGAAGCACCTGGAATAT  
CCAGTTCAGTTGGATGTTTGGGAGAATTACCATGGAGATTTTGCAGCTTGACTTCAACACTGCATATGA  
GCATTACCTGTCAAGATAACTCTGTTACTGAACTCAAATCAAAGGAGATAAGTTAGTTAAGTTGAATGA  
ATTTTCATGGATTTGCAATTCAAACCAAACATTATCTGAGGGTTTCTCCATTGATTCTTTTGTACCACATT  
GACAAGGCTAAGTAGCTTAAAGGTTCTTACTTTAGTTTCTTGGTATTTGGGGACCCCTTCTGATAAAA  
TTCATAGGTTAGCTTCACTTGAACCTTTGGATATGAGTTCAAATTTCTATTTGGTTCTGTTCTTTTTCAGA  
TGTCAAGATTGATTAAGCTTCATACTTTGACATTAGATGCCAATTTTTTCAATGAACTTTCCCTGATTGG

TTTGATTCCCTTACACAATCTTACTATATTAAGCTTCAAGAACAACAGGTTGAAGGGTCAGTTTCCTTCTTC  
AATGTCTAAAATCACAAACCCTCACTGACATTGTTCTGTACACAATGTGCTTTCTGGTAAATTGCCCGATT  
TAACGGCCTTGTCTAAGTTGCTTTTGTGGATTTAAGGGAAAATCATTGGATTCTGAATTGCCACCCTTG  
CCAAAAGGACTTACCACAGTTCTTCTTAGCAGTAACGTTTTTACGGGTGAAATCCCAGTAGAATTTGGCA  
CACTAAATCAACTTCAACACCTTGATCTGTGCAACAATTCTCTCAGTGGAATGCTGCCTGCTGGCTTATTC  
TCTTTGTCTAGCATTAGTTACTTGAATTTAGCGTCTAATGTTCTTAGTGGTTCACCTCCTAGCCATCTCAAT  
TGTGGGGGTGAACTTGGTTTTGTGATATTTCTAATAATAGATTAGTTGGTGGGCTTCCTTCTTGCTTGAA  
CACTATTTAGATAAGCGAATTGTTAAGGTTGGTGGAAATTGCTTGTCTCTTGACACTCAATATCAGCATT  
CAGAGGGCTATTGTAAACAAGCTAATTCGGATAAGAAACAGATCACAGGAAAACAAATAGCATTGTTG  
GCAGGTGTTATTGGGGGAATTGTAATTGTTGTGGTGTCTGTTAGTTGTCCTTTTCATCTTCCGTAGAAA  
ACGACATGCGCGTAACATGGTGGATAAGCACATTCCTCCGAAAGTTGTGCAAAATACACAGCCCGGGGT  
TCCCTCTGAACTCCTAGCAAACGCCAGTGAGTTGATGTTTTCTGATTTCATTTTAATCTGTTTAATTTAT  
ATGAAGGAAATGTTCTCCAGAAAAGCTTGATCTCAATCTTCGAATTCTCAGGAGTCATTTCTCAAGTGGC  
AAACACAGGATCACAAGGTGCCCCATCATATCGAGTGTCTCCATGGAAGAATTGCTAGAAGCAACAGA  
AAATTTTGATCAGTCAGCATTACTTGGTGAAGGGTCAGTTGGAAAAGTATGGCTTCAAACAATACTTAT  
G

>M6-PGSC0003DMG400006942 M6 LRR-RLK

GGTGCTTACTCAGGGAGTCCACTCCATTAACAGGATTAACAATAAATTAACCTTACAAATTCTCTAAATC  
CATAATCCAAGGTTCCACTTCATCATTCAAAGTCAAATGTCATCTTCTATTCTTTTGCTTTTTTCATACACT  
TATATTTCTCATGTAAACAATTCATCAAACACCTTCTATGCATCCCTACTCCCTAAAGCTCAAAGATGAAA  
CTTTTCAGATTTTTCAATCTTCCCCTTATAGTATTCATCTTATTGATTCTTGTATTTCAACCCCTTCTTCATTG  
TACTGCTGTTGCTGGTGTGTAGCTGAAGATGATATAAAGTGTTTAAAAGGAGTCAAGAACTCCTTAAC  
AGATCCAAAAGGGAACTTGAATTCATGGAATTTTGCTAATTCTACAGTGGGGTTTATATGTAAATTTGTT  
GGTGCTTCTTGCTGGAATGACCGTGAAAATCGTCTCATAAATCTTGAACCTCGGGATATGAATCTTGGAG  
GTAATGTTCCAGATTCGTTAAAGTATTGTGCAAGCTTGCAATATCTTGATCTTCTGGTAATCGGATATCT  
GGTCAATTCCTTCTGATATTTGACTTGGCTACCTTACTTGGTAACCCTTGATTTGTGCAACAATGAATTT  
ACCGTTCTATTCCGTCTGATCTTGTAGTTGTTCCCTATTTGAATAAATTGATGCTTAATGATAATAGGCT  
TTCTGGGAATATAACCACCTCAGTTTTCTAGTTTGGGGAGGCTTAAAATATTTTCTGTGGCAAACAATGAT  
CTTCTGGTAGGATTCCGGAAGCTTTTGATTCGGCTGAGTCGTTTGATTTTGGAGGAAATGATGGGCTTT

GTGGTGGTCCGTTGGGGAAATGTGGGAGGCTTAGTAAGAAAAGTTAGCTATTATTATTGCTGCCGGTG  
TGTTTGGTGCTGCTGCTTCTCTGTTGTTGGGTTTTGGGGCTTGGTATTGGTATTTTACGAAGGCGGGGAC  
AAGGAGGAAGATGGGGTATGGATTAGGGAGAGTTGACTCGGAAAGGTGGGCGGATAAGTTGAAGGCT  
CATAGGCTTACTCAGGTTACATTGTTTAAGAAACCGCTTGTGAAGGTTAAGTTGGCGGATCTGTTGGCTG  
CCACGAACAATTTTAGTACGTGCGAGTGTGATAAACTCGACTAGGACGGGGACTACATTTAGAGCTGTTC  
TACGTGATGGTTCTACGCTTGCTATTAAACGGCTTAAAGCTTGCAAGCTGAGTGAGAAGTTGTTTCGAAT  
GGAAATGAATGGACTAGGACAAGTTAGGCATCCTAATTTGGTACCACTTTTGGGCTTTTGTGTTGTTGAG  
GAGGAAAACTTTTGGTTTATAAGCACCTGTCAAATGGTACTTTGTATTATTGAAAGGGAGCGCAA  
GTGTGTTGGATTGGCCTACTAGGTTTAGGATTGGCTTGGGTGCTGCAAGGGGCCTTGCTTGGCTTCATC  
ATGGTTGTCAACCACCAATATTGCACCAAACATATGTTCTAACGTTATTTTCCTTGATGAGGATTTTGAT  
GCTAGAATAATGGATTTTGGGTTGGCAAGGCTGGTGACACCTCCAGATGCAAAGAGACTAGTTTTGTG  
AATGGGGAGTTGGGTGAATTTGGCTATGTTGCTCCGGAGTACTCAAGCACAAATTGTGGCTTCACTGAAA  
GGGGATGCTTACAGCTTTGGGGTTGTGCTTTTGGAGTTGGCTACTGGGCAAAGACCTCTAGAAATCACT  
GCTGCTGATGAAGGTTTTAAGGGAAATTTGGTGGACTGGGTAAATCAGCTCTCTGTTTCTGGTCGGATA  
AAAGATGCAATTGATAAGCATATTTGTAGAAAGGGCCATGATGAAGAGATTGTAAAATTCCTCAAAT  
GCTTGCAATTGTTAATTTCTCGGCCAAGGAGAGGTGGTCTATGTATCAGGTATATGAAGCACTGAAG  
AGCATGGCTGAGAAACATGGTTTCTCTGAACATTATGATGAATTTCCCTTACTATTTAACAAACAAGAGA  
CCAGCAGTCCCATTTGATACATGAATGGGAAAGCATTACGAGATGCTTCACATCTGGTGAACACAAATG  
CATTATGGTACGTTCTTCACTTCTCTTAGGTGCAAGTGGAAATCAGGCACGATACATATGGTTCTGTGAAG  
TACTACCACAGATATTGCTGTATTGTAAGTGTCAAATCATTCTGAGGTGTTCTGCTCGAAATTTA  
TGTTACAGATAGCTAATATTATTGGTATCTTAGGTTTATGTTTCTCTTTGCTCATACTTATGCATTAACAA  
GGCAGTAAGCAAAGCTGTCACAGTTTATTTGAAAGCTGTAATACCACTAATTTAGCTGTATATACTGA  
CCTGGGCATTGGCCTTTTTAGGGTCGAGATATCTTCAGTATGTCCCTTACAGTCATTTATGGTTTGTAAGA  
TCAAATCACACTAGATTTCCCTGATAGATTGGTTCGGTAGAATATCTGCCTCCACACAGATATTAATTCAT  
CTAACCGGAATGCTATCAAGCAGAGTTATTAGTATTTACTCCTTCTGATTAATTTGGATGATGTTGATCA  
GTAATTGTAGGTCCTTTTGCAAATTTGTGTCTGAATGGGAATAATTTTCACTAAAATGGAAGTTGAATG  
GGCTTTCTAAAAGTTATGTGCCCTCTTGAATTTGATTTGGCAGCTGAAATTTTCATTCATTTGATTCTAATC  
TGCTTCTTTACAATCTCAGAAACATAATGCACAATTAAGTTTCCAAGTAGGAAAAAAAATAATTCTTGTT  
GACAGTTGAAACTCTTTGCAATAGTAGTTATCAAACCTCTTACTTTTTCCCTCAAGCTCAAGCTCGGATG

CGTGTTTCCATGTGCTCTCCTGCTTCCCTGAAAAGTCATTTTGTAAATTTCAAACAATAACTTGTAGTCT  
AATAGTAAATGAAGGGAAAAGGTCTGTTAGCAAGTTATC

>M6-PGSC0003DMG400007234 M6 LRR-RLK

CTCATCTTTACTTGCCTTATTTTCTCAACCAATTTTTCTTACAATCTCATAACCATGAACCATTTCTATCT  
CACTACAATTTTCTTCTTCTCATACAATTTCACTTGTTTTCTCTACTTCAAATTTTCTTCAACTCATT  
CACTTTTATCGTTAAAATCTTCATTTCAAGATCCAAACAATACATTTCAAGATTGGAATCCTACATCAACT  
TCTCAAATTTTGGTTCACAACCCTTTGGTGTTCATGGTCAGGCATCAAATGTGACACAAAAACAAGTCA  
CATTACATCACTTAATCTCTCAAAGAGGAATCTTTCTGGTAAAATACCTCAAATATTGCATCCTTGATAC  
ACTTACATCACTTGAATTTAAGTGGAAATTCATTTGATGGACCTTTACCATCCATCATTTTTGAATTTCCAT  
TTCTTAGAACACTTGATATTAGTCATAATTATTTCAATTCAGCATTTCCTCTTGACGGGCTAACGAATCTCA  
AGTCCCTAGTACACTTGAATGCCTATAGCAACAGCTTTACAGGCGCGTTGCCTATAGAGCTTGTTGGGCT  
ACAAAATCTTGAGTATTTGAATCTTGGTGGCAGTACTTCACTGGTGAATTTCCGGCAAGTTATGGGAAT  
TTAACAAGTTGAAATTCCTACATTTAGCCGGAATTCCTGAGTGGGAAAATTTCCCGAGGAATTGAGAT  
TGTTGAACCAACTCGAACATCTTGAAATTGGATACAACAATTATACTGGAAATGTTCTCCTGGATTTTCC  
TCGTTATCGAATTTAGCCTATCTTGACATCTCACAAGCTAATCTTTCAGGTGAAATTTCAATTCAGCTTGG  
AAATTTAACAAGATTGAATCCTTATTTCTTTTCAAGAACCATTTTATCGGTACAATTTCCCTCGAGTTTTTC  
CAAATCACATTGCTGAAATCATTGGATTTATCGGATAATCGTCTCTCAGGCAACATTCCTTTTGGATTTT  
CAGAGTTGAAAGAGCTAATCATGTTGTATTTGATGAACAATAACTTATCAGGTGAAATCCCTGAAGGGA  
TTGGTGAGTTACCAAATCTCGAATTGTTAGCTCTTTGGAACAATTCCTCACTGGAATTTTACCACGAATG  
TTAGGATCAAATGCTAAGTTACAAAACTTGATGTGTCCTCAAACAATTTGACTGGTCCAATTTCCCAAAA  
ATCTCTGCCTCAGCAACAACCTTAGTTAACTCATTCTGTTTTCGAACGAGTTTACTGGTGAGATTCCTTCA  
TCCTTAACTAACTGCAACGCTTTATCCAGGTTGAGAATCCAAGACAACAACCTCAATGGCACGATTCCAT  
CAGGATTCGGTTTTTTGCCTGATTTCACTTACATGGACATCAGCAAGAACAATTTTCGGGGCAAATCCC  
AAAAGATTTTGGAAATGCCCGAAAATGATGTACTTGAACATTTCTGAGAATTTTTTCGGTAGTAACTTG  
CCTGATAATATCTGGAACGCCCGAATTTACAGATATTCTCAGCAAGTAAGAGTGGCCTTGTTGGAAATC  
TCCCTGATTTCAAAGGATGTCAAAGTCTTTACAAAATCGAACTCGAAGGAAACAATCTCAATGGTAGCAT  
TCCATGGGACATTGAACATTGTGAAAAGCTTATTTCTCTAAATCTTCGACGAAATTCATTTACAGGAATCA  
TTCCTTGGGAAATATCTGGTATTCCTTCGATAACAGACGTTGATTTGTCACATAATTTTCTCACAGGAACA  
ATCCCTTCCAATTTCGAAAAGTCTAGCACGTTGGAACATTTCAACGTGTCGTATAATCAGCTCACTGGTCC



ATTGCCTTCTTCAGGGTCTATGTTCTCAACGTTCCATCCTTCGTCCTTCGTAGGAAACGAAGGTCTTTGTG  
GTACTATCATAATAATCCGTGCAGGACTGATGAACTCAAAGATGGAAAAACAGATTTTTCGAACCATTC  
AAAGAAAACAGATGGTGCATTGATAGTATGGATTGCGTCTGCAGCATTGGAGTAGTAATTATCATTCTT  
ATTGTGGCAATTCGGTGTTTTATTCAAATTACAATCGAAGATTTCCATGTGACAAGGAAATCGGACCGT  
GGAAGTTAACAGCATTCAAAGGTTGAATTTACAGCAGATGATGTACTCGAAAGCATAGCAATCACAG  
ATAAGATCATCGGTATGGGGTCTGCAGGTAACGATCTATATTGTTAGTTATTATGAATTCAATTG  
AACCCGCAATTTTTATTAAAGTATATGTGGGGGGGAAATCATACAAAATTAGTGACATATGTTTTTAA  
AAAATGCTAACATCACCTAGACAAGTTGGCAATGTGGAATTTATTAATAAAAATCTC

>M6-PGSC0003DMG400007517 M6 LRR-RLK

TTACTCCTGGTGGTGTAAATTATGAAGGTTAGTTCTTGTTATTTTTAATAAAGATTGAACTTTGAGACAT  
TATTGGAATGAGATTGATCATATTAGAAAATATCAAGAATTTAAAAGTATGATTTACTCCTGTTGGTGT  
AATTATGAAGGTTGTTTCTTGTTGGTTTTCTCATTAAAGATTGAACTTTATGACTTTTTTTGTTGAAAAATC  
ATATGAGGTGTTGAAAATTTGAAAGGAATGAAATTTTGATCAAATTTAGAAATATCAAGCATTTTGA  
AATATGCTTACCCTTGTTGGAGTTGATTATGAAGGTTAGTTCTTGTTGGTTTTCTCATGAAGATTGAACT  
TTATGACTTTTTATTTGAAAAATCATATGGGGTGTGTTGAAATTTTGAAAGGAATGAGATTTTGATCAA  
ATTTAGAAATATTAAGAATTTGAAATATGTTTACCCTGTTGGAGTTGATTATGAAGGCTAGTTCTCAT  
AAAGATTGAACTTTGATACTTTTTTGTAATAATCATAAGGGGTTTCTGATTTTTTTGAAAGGAATGA  
GATTTGAACAAATTTAAAATATTTCAAGAATTTTCACTATTTTAACTTTCTTGTTATGTTGATTTTGGACAG  
TGCAAGCTTTAATGGAGATCAAGAACTCATTACATGATCCACTTGGTGTGTTGAAATTGGGATGAAAGTTC  
TGTTGATCCATGTAGCTGGAATATGATCACTTGTCAAATGATAAATTTGTCACTGGCTTGTAAGTATACC  
CGATTGTCTGGTATCTGCATTGGAGCCCGACTAACAAAACCTTTTCTATTCCTAATACTTGAACCGGAGA  
CCTCTAGTTAAGGATGAAAGTGCTTACAAGTTTTCTGAAATTGTGCAGGGCTTGTCAAGCCAAAGTTTG  
TCTGGGAAAATATCACCATAACCCAACTTGACTCACTTGGATCTACTGTGAGTACTTTATATGAAGA  
AAAAATAATGAAATTTCAAATGATTGATTATTTGAATCAAGAATATAGAAAATAGTAGTACTAATATTAC  
TTTTAACTTTTTTTTTTTTTTAAACAGGCTTCTGCAGAGCAATAATATAACAGGACCAATTTCAACTGAA  
CTTGGAATGCTTCAGAACTTAATACAATTGATCTTTCTGATAATCAACTCACTGGGAAAATCCCTTCATC  
TTAGCTCAATTAAGGCTTCAATACTTGTAAGCAAAGAAAATTTAAAGATTTTGATATAAAAATGA  
GTTCTTGAATTATAAAAAGCTAATGATTATGGTTTTTTTTCTTTTCAATTGTGTTATAGGAGACTAAACA  
ACAATAGTCTTAGTGGAGCTGTTCTTTGGAATTGTCTAATATGACTCAACTTACTCTTCTGTAAGTTCCT

TAGCTTCATTTAGTTTTGTTTATTTTCTCATACTTGAAGGGGAGCCTCGGAGCAATAGTAAACTTGTCTCC  
TTGTTATCTATATAGGTCACGCGTTTCGAGTTAGGGGTAGGCTGCCTATAGTATAGCCTTTCCCCGGACCT  
TGCGTGAACGTGGAATGCTTTGTGTACCTTTTTCTAATTGCTTTCTGTTTTCATGAGTATATTTTGATGG  
GATTTTTGTTGTTTTTTCTAGAGACTTGTCTTTAATAATTTGAGTGGTCCTGTGCCAAGGCTTCTAGCTA  
AAACATTCAAGTAAGTTTCTTGAACAATTCTTTGAATTTCATTTTTTTTCCCTTTGCTAAAGATTAGAGAAA  
ATAAATCATTTTTTCTCTCATTGATGCAGCCTTTTGGGAAATCCTATTATATGTGCAACTGGAAAAGAACC  
AGAATGCAATGGAACAACAACATCCATGCCTTTGCCCTTCACTTTGAACAACCTCACAAAGTAAGAGTCTT  
GAATCATCCTCCTAAGTATTTTTTCGAGCTAGCTTGTGTGCCTCTCGACTATTCCACAAATCTTGGTTGTT  
GTCAAGTCTCCTGCTTTCAATGTCGTTATGATTAACACTACAACCTATTATAAGGATTCATCATGAAGTCTT  
GGATAGTTTCTGTGTTGTACTATTCACAACTGAAAAGTCTCTTGTTATATCTCAGATGCTCAGCCTTTAG  
AAGATCTAAAACCTCACAAAATTGCCTTAGCCTTTGGGACAAGTCTTGGATGCATCTGCCTACTAATTATT  
GGGTTTGGAAATATTTCTGTGGTGGAGACAAAAGCACAACAAGCAAATTTTCTTTGACATCAATGGTGAG  
TATGATATGCAGCTAAAACCTATATTGCTCGAATCTCGAGATGCTAGTAATGTCTTGCTTTAACCAAGAG  
GATCATGCTTGTTGATAATTTCAGAACAACATCATGAACAAGTGTGTTTGGGACACTTGACGAGGTTCCA  
ATTTAGGGAACTTCAAGTTGCCACAAACAACCTTCAGCAACAAGAAGATACTGGGAAAAGGCGGTTTTGG  
AAACGTGTACAAAGGTTGTCTTAGTGATGGCACGATTGTTGCTGTAAAAAGGCTCAAAGATGGAAATGC  
AATCGGAGGAGACAAACAATTCCAAACAGAAGTTGAAATGATCAGCTTGGCAGTGCATCGCAATCTCCT  
ACGTTTGTATGGGTTCTCCATGACACCAACTGAAAGGCTTCTGGTTTACCCTTACATGTCTAATGGAAGC  
GTTGCTTCTCGTCTCAAAGGTAAAAAGAAACAACCTTAGAGAACTAAATATTCTGCAAGTATTCTTAAAT  
ATGGGGGATGGTTGAGATCCCGTCATCCTTAACCATAGTAGGCTTACCTGTGTGAACCGGAATAGTCGA  
ACTAGTGGACTTCAGATACCTGATGGTAGATTTCTCTATTTCTGTTGTTTCTTGCAGCCAAGCCACCATTG  
GACTGGACTACAAGAAAAAGAATTGCATTAGGAGCTGCAAGAGGTTTACTATATCTACATGAGCAGTGT  
GATCCAAAGATTATCCACAGGGATGTGAAGGCAGCAAACATATTGCTCGACGATGACTGTGAGGCTGTC  
GTGGGAGATTTTGGATTGGCAAAGCTATTGGATCATCGCGATTCACATGTCACAACTGCAGTTAGGGGA  
ACTGTAGGACATATAGCTCCTGAGTATCTCTCTACAGGACAGTCCTCTGATAAAACAGATGTTTTCGGGT  
TTGGAATTCTCCTGCTAGAGTTGATATCTGGCCAGAAAGCTCTAGAATTTGGTAAAGCAGCAAATCAGA  
AAGGCATTATGCTTGATTGGGTAAGTATTACACATTCCAAGAAGTGACAAAACCTCAGTTTC

>M6-PGSC0003DMG400007634 M6 LRR-RLK

TATATATTCATTTTTATCAATTTGGCATTTTCTTACACCTCCAATGTTGACCAAATCAACTCATAATTCTA

ACCCACCTTTTTTTTTTTTCATGGAGTTTTCCATTTCCGACCGGCATCTTCGCCGAAAACAGTCCCT  
TTATCTCATTCTTCTACTAAACTTCATACCCATTTTCGTAACCTCACAACTCCGGCCACTACTGAACGTGA  
CACTCTACTGAAGATTAAGCGTCAATGGGGAAACCCAGTAGCACTTGACTCATGGAACCTACTTCTTCT  
CCTTGTAGCTGGCCGAAATTGAGTGTGATGATGGGAAGGTTACCGGAATAATAATTCAAGAAAAAGA  
TATTACTGTTGAAATTCCAAGTTCTATTTGTGAACTTAAAAATCTTACTTTTCTTAATCTCCGGTTGAATTA  
TCTTCCCGGAAAATTCCCAACTTTTCTTTACAAATGTTCCAATTTGCAGCATTGGATCTTCTCAGAATTA  
CTTTGTGGGTTCCATTCCGGAGGATATCACCGGCTTGGGAACTCAAGTATCTTAATCTGGGTGGTAAT  
AATTCACCGGAGATATCCCGTCGTCAGTCGGGAATTTGACGGAGCTGGAGACTTTGTGCATGCATTCCG  
AACTGTTTGTGATGGGAGTTTTCCGGCGGAAATCGGAACTTAACCAATCTTGAAAGTTTGGGGTTGGAG  
TTAATGGGTTTTCTCCAATGGCACTACCGCCGGAGTTTGGGAAGCTGAAGAAGATAAAGTATATTTGG  
ATGAGAGAGACGAAATTAATCGGTGAAATCCCTGAAAGTTTTGGGAATTTCAAATCTTGAGCTTATT  
GATTTTGCTTACAACAATCTGGAAGGAAAAATCCCTTCTGGGTTGTTTCTGTTGAAGAATTTGACGATGA  
TGTAATGTTTCAAGTAATCGGCTTTCCGGTCAATCCCTGAAACTTTTGATTCATCAAAGTTGATGGAACCT  
GATGTTTCCAACAACAATAATTTAACTGGAACAATCCAGAAAGTTTTGGAGGGTTTAAACATTTGGAAA  
TTATGAATCTGTTTGGTAACCAATTGTATGGAGCAATTCCAGAGAGCATAGCCAAGATTCCATCTTTGAA  
GGTATTCAAAGTGTTTAGGAATAAACTGAATGGGAGCTTACCATCTGAAATGGGACTTCATTGAAACT  
CGAATCTTTGAAGTTTCACTGAATTCCTTCACTGGAACTTGCCAGAGCATTGTGTGCTGGAGGAACT  
CTTTTTGGTGCTGTAGCTTATGTTAACAATTTGTCTGGTGAATACCAAATCACTCGGAACTTGTCTAG  
CTTACGTTGATTGAGCTCTACAAGAATCAGTTTTCCGGTGAATTCATCTGGGGTTTGGACTTTGGTT  
GACATGACAAGTTTGTGTTGAATGATAACTCATTTTCCGGGGAGCTACCGAGCAAAATTGCATACAATT  
TTACGCGGTTAGAGATCAGTAACAACAAGTTTTCTGGTGAATTCCTGTGGGGATATCTTCTGGAGGA  
GTTTAGTGGTGCTTTTGGCAAGTAACAATTCATTTTCCAGGTCGGATTCCAGTGGAATTGACTAGTCTTTCT  
CAGATAACTCAGCTAGAGCTTGATGGTAATTCGTTATCAGGAGAACTCCAGCCGATATAATATCGTGG  
AAGTCGTTGACAATATTGGATCTTGCCAGGAACAACTCTCTGGCAAGATTCCAGCAGCTATAGGTTTAA  
TCCCTGATCTTGTGCTCTAGATTTGTCTCAAAATCAATTTTCCAGGTTCAATTCACCTCAACTAGGTGTAA  
AAAGGATCACTAGCCTTAACGTGTCGTTCAATCAACTTATCGGGAATATCCCTGATGCATTTGCTAACCT  
AGCCTTTGAAAACAGTTTCTTGAACAATCCAGTCTTTGTACCACCAACTCACTTCCATATCTTCCAAGTT  
GTAATAATGCGAAAGTCGCAATTCAAAAGATTGTCCCATAGAGTCCTAGCCCTGATTCTAGTCCTTGC  
ATTCGCTGTTTTCTATTTAGTGTATATCGACCTTGTTTCATGGTTAGAGACTACAGGAGGAAGAAGCAT

AAGCGGATGTTGCAAGCTGGAAGTTGACTTCATTCCAGAGGTTGGATTTACAGAGGCGAACATTTTG  
TCAAGTTTGACGGAAAATAACATGATTGGAAGTGGTGGATCGGGTAAGGTGTACAGAATTTCCGTTGGC  
AGACCAAATGAGTATGTTGCTGTGAAGAGGATTTGGAGTGATAGGAAAGTAGACTACATTCTGGAGAG  
GGAATTCTTGGCTGAGGTTGAGATATTGGGATCAATTAGACATTCCAATATCGTGAAGTTATTGTGTTGT  
ATATCAAGCGAAGATTCAAAGTTGCTCGTTTACGAGTACATGGTAAATCACAGTCTTGATGGATGGCTTC  
ATGGGAAGAAGAGAGTATCCTTGAGTAATAAAGTCATGGATTGGCCAAAAGATTGGAGGTTGCCATT  
GGAGCTGCTCAAGGACTTTGTTATATGCACCATGACTGCACTCCACCAATCATTGATCGCGATGTAAAA  
CAAGCAATATCTTGTGGATTCTGATTTACAGCCAAAATAGCTGATTTTGGGTTGGCCAAGATTTTAGA  
GAAGAAAGGAGAGCTTAACACCATGTCTGCTGTTGCGGGTTCCTTTGGTTACATAGCTCCAGGTAAG  
CAAAATCCAAGCTTGAACCTCGTATTACATCAATTTGTTAACATTATATCAAAAGTATGACTAACTAATA  
ATTTACTGTTTGGTTACAGAGTATGCTTATACTAAAGTGAACGAGAAGATTGATATCTATAGCTTCG  
GGTGGTGCTATTGGAGCTAGTGACTGGAAGACAACCAAATTTTGGGACGAGCATAACAAGCCTGGCA  
GAATGGGCATGGAAGCAGCACGGAGAAGGGAACACTGCCATCGATAATATGTTAGATACAGATATCAA  
AGAAACATGTTACTTGAAGAAATGAAGACTGTGTTGACTCGGGCTTATATGCACGAGCAACTTACC  
TGCAAGCAGGCCTTCATGAAAGAGATTCTGCAGATACTTCATCGATGCAAGTCCTTTAGGTATTCTGGA  
GGAAAATCACCAGACACAGAGTATGATGTTGCTCCTCCTTAGCGGAAACAACAGTGAAAAATACATT  
GCTAGTTACAAACGTATTAATTCCAATAAGGTAATAGATGATAGTAGTGATGATGGTCTAATAATTTCCA  
GTGTGTAATATTGGAGATGCCGAAGTAACTGAGTTGTTGTAAAATGATCATAGAATAGTGCCACTTAA  
GTAAAGTACAAGTTTGAATTTCTAGTGTACTCTGAATTTGTTCACTGCTTGTAGATTGAGTGAAATGCAT  
CATTTAACTTTTGCTAGTTATGTAGATTGTAA

>M6-PGSC0003DMG400007709 M6 LRR-RLK

TTTTCTCCATCTGTCTCTAACTATTCTCAAAGTTTTATCTGAGTAACGACTTCTCAAATGCAGATCATTGT  
TATCCAGAGGTATGCTTGGGTCACCTGAAAAGGTACACCCTTAAGGAACTGCGGACTGCCACTGACCAT  
TTCAGCTCAAACGTATTTTGGGAAAGGAGGATTTGGGGTTGTGTACAAGGCCAGCTTAAACAATGGT  
ACTGTTGTGGCCGTCAAACGATTGAACGACTACAATGCTGTTGGTGGTGAAGTCAATTTGACTGAA  
GTAGAATTGATTAGTTTGGCTGTCCATCGGAATCTTCTCCATCTTCTGGGGTTTTGTTCAACTGAAAGTGA  
ACGGCTTCTGTTTACCCCTATATGCCAAATGGAAGTGTAGCATCACGATTAAGGTTAGCTCTTGCCT  
CCATGTGTT

>M6-PGSC0003DMG400007862 M6 LRR-RLK

AGTTGAGGCCACTGTTATGATATGTGAATACTAATTGTGGTCATCTCCTGTGGCAGAGATCTGAGCAACA  
ACCATATTGGCGGAAGCATTCCGTCTAATCTGCCAGTTACCTTGCGGAATATGTAAGTTCTACCATTGA  
CTTATGAAGGATCCCCAGAAACACGGGAAAAAGAAAGAAAAGAGAGGACATATTGCTAAACCTAGC  
TTTACTTATTGACTAAAACAGTTGCTATTCTTCACCTTGGACAGTTTTCTTTCAGCTAACGCATTCACTGGA  
AGTATCCCTACTTCTTTGTCTTCCCTGAGTCAACTTTCAGCTATGTAAGTATCATTATAGTGTAGATTAAA  
AGTTGCTTTCTTCATGAAGAATCAAACCTCAGGTATTTGTTGTGTGTCAGGTCTCTGAATGGCAACCATT  
GACTGGAGAAATTCCTGATTCCTTCAAGGCCTTACCGCTTGGTCAATCTGTATGAAAGCAAACAAAAG  
CATTTACATACTTCCATTTAGTTTTTTCATATGAATAACTGGTTTGGGTGTTTATCTTTCAACAGTGATTT  
GTCAAGTAACAATTTAAGTGGATCATTGCCACCATCTGTAGGAAATTTGTCTTCATTGACCACTCTGTGA  
GTAATTCAACATATTATACAGTTTGTGTGTAACCTTATAGTTTGATCAATATGATAAACTAACTTCTTGAT  
TTCCAGATATTTGCAGAATAATCAGCTTCTGGAACCTTGATGTTTTGCAGGATCTTCCCCTTGCAAATT  
TGTA CTCTTCCAACTAGATTTTACTCAAATATAATTCAGTTCACTAGAATGATAGAATCTTACTAACATCT  
CTCCACCCTCCCTGTGTCTTTCTAGGAATGTGGAAAACAACCTGTTTTCTGGGCCCATACCTCAAAGTT  
GTTCTCTATTCCCAATTTCAAGTAAGTACATTCATTTTATGCTTTCATATACCCGTTTTCATTTTTGTTTATGT  
TGAGTCAACATCTTGTATCTTAAAATGTAATCTTGGTCACATTTAATATCACTGTATCCCTAGTCGTTTGT  
GGAGATATCATTTGACATGTAACATATCCCACAAAAAGATATATAATCATAGAAGACAATAGGCATGT  
ATGTCGAAACCGCGGAAACAATATCTTTTCAAGTTCAATGTTACTTAATACTGCTCCTTATTTTCCAATA  
ATGCCTCACTTTTGTACTATCTACCAGTGGTTATAACCAAACATATAACTTTTCTAGCTCCCAATACCCCC  
TTTAAAGCTTGAGAACTTGAATCGTCTGTGCTATGCTTCATACACACAAGTAAACCTTTCAGAACTTCTT  
GTTTACAAGTTCTGAAATCTTACTTAGTAAAAAATGGATGTACTTGTATGCTATGTTGCTTGGACTCGTA  
TTGGATCCTCCCAAAGTAATCCGACACTGGTGCAACAACATATTTGGAAAGTCCGAGCAACATAGCTTGT  
ATGCTGCATGACCAGAAATATAGACTTAAAGTCTGACATGGATATGAATCCTAACTTGCCTTAGCATA  
AATGAAAGCTCAATGAGTAAAAGTAAGAATAAAACAATAAGAAATTGACCTGAAAAAAGAAAAATAG  
AATCCTGACAAGCTTGTCAATTAATACATGAATTCTATCATATGGCCAGTCCCTCAAACCTTGGAAAGTA  
AACAACTCATATAGACACAATAAATAGACTGCAGATATAGGTATAGATTTACAAACCGTAGTACAATATG  
CATATGAAAACATACAAACAGTTAAGTTATGATATTCATGACCTGTAAAATAGACAAAATTGCAAGTTAT  
TTAGTTTAGCAAGCTGGCTCCTGGTCTAACTTGTATCATAATTTAAGTTCACATTCCATAGTGGCTATACT  
CTAGTTAGGTCACCCACCTTAATCATATATCGAGCCCTTAACTTTCAGGAGGCAAATAACATGGAAGTCA  
GGCAGTCTTATTTATTAAGCTGACTTAAATGGTACAAGTTGGTAGATATATTTGATATATGCAAAGATCA

ATGTATCAGTTGTTGGATCATTTTGTACCATCTGATACATGCCTTGTGCGATTATGATCAGTGATGGTTTG  
TACTGTCTTAGTTACCGGTTTTGTTTTTCGTGCAGAAAAGATGGAAATCTTTTCAACAGTAGTACTGCTCC  
TTTACCTCCACCCACATCATCAACAGCACCTCCCATTTCTGGGTCTCCAACCTCAGCACAGATGCCATCTTC  
TCAAAGCAAACCTAAAACACAGGCCGATGGACCATCAGCATCTGCAGAATCAAGTTCAACAGGAAAAAA  
AAAGTCTTTATCTGTTAAAAGGGTGGTCTGGATATCAATTGCAGCAGTTTTGTCATTTATCATATTGGTTT  
TAGCAATCCTTCTCTGTCTGCCAAAGTGCCTCAGGAAATGGCACGAGACTCAAAGAACCCCCAACACCA  
TGAAATAGCCCCTTATATGGGTGCTAGAGAGAATCTTGGAGATAGTGGTTCATTAGTCCAACCTGGCCA  
TGATATAGAAAAAGGTGCTACAAAATACTCAATATCTATGTTATTTTATGATATCTTTTATCACTGTTTCTT  
AAAGTTCAACTTTTTTCCCTTGGGCTTCGTTTGGTAGGATGTATTAGAGAAATTAATACATGTATTAGTGA  
TTGTATTACTTAATCCTTTGTTTGTAGGATTTTCAGCATATGTATACTAATATTATTCAATATTATAGGG  
TGTATAACTTATACCTAACAAACCATGGTATTAGTAATACAATGGTTATTAATACATGGATAAGTATGGT  
TAAAGACAGAACTGTCCTTAATATATCAAACCTAAACCGTGGATAAGAACTATATCTAGCATAACTAACC  
CCAACATAATTAATCCCAACATTACCAATCTCGGCACTACTAATACACCCTATTTCAATACTATTATACATT  
CTACCAAACGACCCCTTAGTTACTTGAAAAAAAAGATACTGGGTCTGTTGTGTTGGTGCACCTTGAGCCA  
AGGGTCTTTTCGGAAATAGCCTCTCTACCACCAGAGGTAATGGTAAGGTCTGCATACATTCTACCCTCCC  
CAGAACCTACTTAGTGGGATTTCACTGGGTATGTTGTTGTATTGGATGTCTGTTGTGCAGCATTTAGAAC  
TGAAAAGTTAATGAATCTCAAAGTTAACCTTCTACTCTTTAGTCTTTAGTGATAAGTGGCTTTCTTATGT  
GTTAAACAGCTCCCCTAGTTGTGACGCCAAAAGAAAAGCAACCAAGAAGACCGGCTCCTATTCCAAAGC  
CACAAGATGAGCAGCAGGTAATGTGCAAACCATGAGTGCTGTGCCAAAGAAGGATGATAGTGAGATA  
AACCTTGGCAGATTGGATATTGATTTGACGCCACCACCTCCGCCTCCTCCTCCTCCGCCTCCGCCTACTCT  
TCCACAAGAGAGAGTATTGTGCGAGCCGATTGCGCCTGCTGAAGATACAGCAACGAGGCTTCCAACCAG  
GCCACTTCCACTAACTTCTGTGAAATCTTACACAATTGCATCACTTCAGCAATACACTAATAGCTTCTCTCA  
AGATAATCTGTTGGGATCAGGAATGCTGGGTAGTGTATACAGGGTGGAGCTTCTAATGGAAAGGTAT  
AACTTTCAATCGGCATGAATATATTATGATGTACCAATTTATTAACCGTGGTTTCCTACTTCCACTAGATT  
GCGAGAGTCTTGACTTACCCTTTTTCTCTCCTTGCTTTTATTTCTCCATCATGTTTGGTATTCTGGAATGC  
TAAATTATCAGCAAGTAGCATCAAATGCTCCTTTATCTCTAGTATAAATTGTTACATTGCTTAGATTTAT  
CAAGAATGGTTGTGATACAAGCACAATTATATGCAAAAAGGCTGTTTTTAATGGAAAATTCACCTTCATA  
TATCCTTAATTAGAGCACTCCTTAGCAAATCTATTAATGAGTTCTACCTATTGTATCTGATATAATGTTTC  
TTGAATTACTTTAGCTAGTTGAGACCTGCTTAAGGACAAAAGTTGTAATTGCAATATTTTTCTCTAGGTT

TCTTCTAGTTCCTTTCTTTTCTCCTGTTCCAAATTAATCTTCAACTAGTATTTTTTTTTTCCAGTAACCAAC  
ATCATCGACGAAATCTTGTCTAGAAAGTGTATTACAAATTTGTTAAAATGAAAAACAGCCTTCTAGCTAT  
ATGATATTACTATTTTTCTGCCTTGACTTTTGTCTCACTTTATAAGAGGAACCGCCAGATACTGCTGCATCT  
TTTTCTGGTCATGATTTTAACTATTAAGTAAGTATATGCATGCTGTTTCATTTATATAAATTCCTTGGGG  
ATGTATATGCATTTCTCTGGCATGTAAATTTTACCGCTCTTCTTCTCTTGCCTATGCACCACATCATTCA  
AGTGGTTGCAACATTTCACTTCTGACACATGCTCCTTTTGGATGCTTCTGCAGTTGCTTGTGTCAAAAA  
CTGGACAAAAGAGTTTGTGATCAACAAAAGGATGATGAGTTTCTTGACCTAGTAAACAATATTGACAGA  
ATTCGTCATGCTAATGTTGTTGAGCTGATGGGCTATTGTGCAGAGCATGGTCAAAGGCTTCTGGTCTATG  
AGTATTGCTGTAACGGGACACTACAAGATGCACTGCATTTGACGATGAATTCAAGAGACAACCTTCAT  
GGAATACTCGCATGAGGATGGCTCTTGGAGCTGCAAGAGCTTTAGAGTATGTCAAATAACATTACATAC  
ATTTAATTATGCACATCATGTTTGTACACGCTCGCGTTCATGCGTGTGTGATTAGTGTGTTTGGGACCTAT  
AATCAGTGTCTTCTGCACATACCATATGATAAATCAGTGCTATTAACACTAAACAATAAAATGGTTCTGAT  
ATAGTGGCAAATTCATAACAAGCTCATTTTAGTCCTAACTTTCTTGTGTTGTGTATATTACATGATAGAA  
AGCCACACAAACGACTTGGAATGGTCTTAACTATATGTAAAATGTTAGATGTAGCTGTCTTTTGTTCCTC  
TCCTTTCTTGTCTTCTGAATGTTCAAGAAAAAGATGAAGAAAATTAATTAATTGGTTTGCCACGCTATGC  
TGTAAGGGGAAGCCCTATGCACAAAACATCCACATTAGCAGTCCGGGGAAGGGCCGTACCCCAAGG  
GTTGTGATGTAGACAGTCTACCCTAATGCAAGCATTAGTGGCTGCTTGAAGGCTCGAAACCGTGACCT  
ATAGGTCACACAGAGACAACCTCACCGTTGCTAAGCAGTCTGATTCTCATTTCAAGAATTGCATGAAAA  
GTGAGGTAGACTGCTAGAGCATGTTTGTAAATTAATAATTATTCTCGTTTGTGCAATGCAGGTATCTCCA  
TGAAGTCTGTGAGCCACCTATTATTCATAGAACTTCAAGTCTGCCAATCTTCTGCTTGTGAGGAGTTG  
GCTGTACATGTTTCAGATTGTGGTTTGGCTCCACTTATGTCATCTGGTGCTGTGAGTCAGGTAACCTGTG  
ACCCTAATGTTATGGAGTAGAAAGAATTGAAATGCTTCTTGGATTATTAGTTTCTCTATGAGCTGCAA  
GTGGAAAGAAAAATGGATTCTAGTGTGTTGATAGAAGTGAATGGGAGCTGAATAAATAATTTAAAAA  
AGGAACAGTAGTGATGGTCAAAGTGTTCACAAGATGTTGGAATAAGGAGCAGTAATAATGAATTCC  
TGTAATGTGTAAAGTATATTCTTTGGGAAATGGTTGGTCTCACCTGTAGGATAGGGTGAAGTGTGTT  
CAAAGGTGCGCTTAAAGCACGCTTGAACCCTGAAGTGAAGGCTCAAATGTGTTGAGCATTTCACATCGC  
TTAATGTGAGATTAGGGGTCTATAGGAAACAACCTTTCTACATCTGAGGTAGGGGTAAGGTTTGTAGAC  
ACTCTACCCTCCCAGACTCCACTGGGTATGTTGTTGTAAGTAAAGACAAATGGTGAAGGTGCTCTTCTC  
ATGATGTGTTTTATATGAACAGAAAATTTCTCTAGGATGCATGTGGATCATCTATCTTGCTGTTATTTGTT

GTTCTTTTGATAAAGTAGTCTTGGGATTGATTACTGTTACGTTCAATTTAAGGTATGTTAAAACTATATC  
AAGTTGACATTACACTGATTTTTTCAGTTGTCGGGACAACCTTCTCACACATATGGCTACGGTGCTCCCGA  
ATTTGAGTCAGGGATTTACACTTCCCAAAGTGATGTTTACAGTTTTGGTGTGGTGATGCTGGAACATAA  
ACAGGCAGAATGTCATATGACCGGTAAAAAGCCTTCTGCATCTTTTTGAGCTAATATAGTTGTGCCTCA  
TTTCTCAGTTAACACACCTGCATATCATATTCAGGACACGAAGTCGAGGAGAGCAGTTCTTGGTCAGGTG  
GGCAATCCCTCAGCTACATGATATTGATCTCTTGACAAGGATGGTTGATCCTGCTCTCGATGGAAAATAC  
CCCATTAAATCACTATCACACTTTGCTGACATAATTTCCCGCTGTGTTGAGGTGAGTTATTCTGTTGTTCT  
TCATGTGAAACACATAAATGCTTACTAATATGCATTGTCTAATCGCTGAGTGTACCGAATAGTCTTAGATT  
GTTTCGTCATCTCAATCGGTTGGAAGGATATTTCTAGGATCTAGTTGTGGAATAGGTTTGCCTTCAAATGT  
CACTTAACTTTTAACTCTTATACAGCATGAGCGAGAATTCAGGCCACCAATGTCTGAAGTTGTTGAGGA  
CCTCATACAAATGATAAGAAGAGAGTCTCACAAAAGATCTGATGGTGAATGATTTGAGTTAGACGCGCA  
TACTGGGAATTCAGCCGATGAGAACTAAGATTATTTCTTCTTGAAGGAGCTGAGATACTCGGAAAAA  
GAAAGGCGGTTTGCAGGCCAAGCACCGTGCTAAAGACAACCTTCAAAGTGAAGCAAAATGCACCTCAA  
GAAGCGCGATTTCATGAAAATACCAACACATGCAGGCGACTTAATGACCTGTAAAAACAGCTTGCTCATC  
TGATTCTTGTCAAGCTGCATCATTTTAATGTTTCATTTAGGCTTACATGTGAGCACCAATGCATATAATTCA  
TTGATCTTGACAAAATGGTATATTTTCTTGAAGTTGTATATCTTACTTGCTGCAACATGTACAACTTCAT  
TTGGTTGTACAAGGATACCTTCACTCTTCTCATGTACTTGTTGCACATGCCAAAGTTATTTACTACTAGTC  
ATTACCTAAGGAGTTGGAGACCTACAACCACTCAACCATGTAACAATATGTAAA

>M6-PGSC0003DMG400007948 M6 LRR-RLK

TTAATAATTAATTCTAAAATAACTTATTATTTTCGACCGTGAAACATTATGGCCATGGCTGACACAGAAAC  
AGAGAGAAAAATAGCCAGACTAAATATTGGAAGTCCCCACTTCCCTTTTTTCTTCTCAAAAATCTTCAG  
TGAATCTGACTCTGCCTTTTGCCATATCTTCTTAGACTGCTGCTTTTCTTCACTCTCCACCTCTTTTGTC  
ACGTATTGCACCTCTACACATATTCCACAACAATTCAATCTGGAAATTTTTTCTTAAACAAGATGAAAATA  
CAACAATTCTTACTACTAACCATTCTTCTGTTTTATCTGTTTCTTTTCATTCCACTGTTTCGTTGATTCCTC  
AGATGCATCAGCATTGTTAGCATTCAAATATAAAGCTGATTTGGACAACAACTTGCATTTTCTGCTAAT  
ACAAGTTTCAGATTCTGCAAATGGAAAGGGATACAATGCTCGGAGAAGAAAGTTATTCGTATTGTTATC  
GAAAGTTTTAGCTTACGAGGTACGTTTCCAGCTAATACATTGTCTATGCTTGATCAACTGAGAGTATTGA  
GTTTACATAACAACCTCACTTACCGGTCCGATTCCGGACCTTTCTCCACTTATTAATCTCAAAGTTCTTTTCC  
TGGACCATAATTTGTTACCGGTTCAATACCATCTTCCATTTTCACTCTTCATAGGCTTAAAACCCTTGATC



TCTCTTACAATAACCTCACCGGTTCAATATCCGTTGCAATCAACGGGTTGAACCGGTTGTACTIONTCTCCGG  
CTTGACTCGAACCGGTTAAACGGATCAATCCCACCGCTGAACCAATCTACCCTCCATATCTTCAACATTTT  
TCACAATGCCCTTTCTGGTCCTATTCCGGTAACGAAAACGTTATCCCGGTTTAAACGGCGTCGTTTTTCAG  
ATAATAAAGGACTTTGTGGTGAGATCGTACATAAAGAATGCCGTCCAATACAACCGTTTTTCAGTCCATC  
CACCGCTGCCGCCACTAAAATTACGCCGCCCGCTCTAAAACCTCCGGCAGAACTCGGCCAAAACGAAGA  
GTTACGACAGGGTAGCCCGTTAAACCGTAAAGAAAACAAATTACATAAAAGATCCTTACTCATTATTGGA  
GTTTCAACAGCTTGTTTAGTCCTTTTATGTTTCAGTTATACTATTAGCATTAGCGTCGAAGAAGCACAGGAA  
CTCGAAGAAATTAGGAGAACTAAGAAATCCGCATTTCGATCCAAGTGTTAGCGGCAATGCAGAAGCAG  
TAATAAGAATTGAAGAAGACAACAATGAACTGGAAGAGAAGGTGAAGAGAGTACAACAAGGAATGCA  
GCAAGTGATGGGTATAAGTGGGAGCTTAGTTTTCTGTGCAGGTGAGGTGCAGGTGTATACCCTGGAGC  
AGCTGATGAGAGCTTCTGCTGAGCTTTTAGGTAGAGGAACAATGGGGACTACTTACAAAGCAGTGCTTG  
ATAACCGTCTGATTGTATGTGTTAAGAGATTGGACGGTGGGAGATTGGCAGGTACAAGTCAAGAGGAG  
TTTGAGCAGCATATGGAATCAGTGGGCGGGCTTAGGCACCCGAATTTGGTTCCTTTTCGGGCTTATTTTC  
AGGCCCCACAAGAAAGGCTTTTGGTTTATGATTATCAACCCAATGGCAGCCTGTCTTCTTATTTCATGG  
TACGTTCTTCTCTGTATATCTTGTACTTATTATTTATTAAGATGCGCATAACTATAACGAAAAATATTATTA  
ATGCAATTATTTTGACCTTTGATAAGTAAAATATAATATAATGAACGGAGTATTTTGAAGGTGTTGTCCA  
ATCAAATAGGGTCCATACACCATACCCTATTGTTACAGTTTCTCAACCCCAATGTTCTCACAAACACAGAG  
AATCTTGCAGCTGACTCTGATGACATTTTTGGACACATATTTCTGTCATCGTAAAATACTTTTTATGTTTGT  
TAGTGTCTAATCATAGATTATAGTATTACTTTATTGAAGCTAGTTCTGTCTGCATTAAGAATGTTATTA  
TTTTGTTTCACGTGTGGTTGCGTAATGTGAAGTTAATAAGAGTACGGTGGTTAGCATTAAATAATTCATAA  
AGTAATATAAATAATAGCTTTATTTTCATATTTAATGCCACGACGGTACTGAATTTTTTGGTCAATCTGACG  
TGGCATATGGACTGGTCAACCTGCCACGTGTTCCAGGTTCCAAGTCATCAAGAGCAAAGCCACTTCACTG  
GACTTCATGTTTGAAAATAGCAGAGGATGTAACCTCAAGGACTTTTCTACATCCACCAAGCATGGAGGCTT  
GTCCATGGCAATCTCAAGTCATCTAACGTCTCCTCGGCTCCGATTTTCGAGGCGTGCATAACTGACTACT  
GTCTCTCCATCCTAGCTGTCCCCTCAGACGATGACAATCCTGATTCTGTAGCCTATCAGGCTCCAGAAATT  
CGGAAACTGAATCACAACAACCACAACCACCACCGCCAAGCTAGTGCCAAGGCTGATGTCTATTTCGTTTTG  
GCGTTCTTTTGCTTGAACCTTCTACGGGGAGGCATCCTTCGGAACATCCATATCTAATGCCAGATGATAT  
GATACATTGGGTGAAGTCTACTAGAGAGGATCATGATGGTAGTATTGGAGAAGATAGTAAGTTGGAGA  
TGCTTCTTGAAGTTGCTATGGCTTGTAGAGTGAGCTCACCGAGCAAAGACCAACAATGTGGCAAGTGT

TAAAGATGATACAAGAGATTAAGAAGCTGTTGTTATGGAAGATAGTCATGAAATGGACCTCCTCACTG  
GCCCTCCTAAATCCTAATTCTTAGTTATTATAAAAATTGAATTTGTATTATTTACTACATGAGACTTTTCA  
ATATTAGTAATTGCAAAAAGAAAGGAACAAAAGGGGAAAGACTT

>M6-PGSC0003DMG400008146 M6 LRR-RLK

ATGGATTCTTGATTGTTCTATCTGGTTGTTTTGGAGGGAAAAGGAGGAAGAAATTGAAGAAAAGGTGTT  
TTCTTGAAAAAATAAATACTCAAGAATGGCAATTTTGAGGTTTCTGTAACTGTGTTTTTCTAGTTGGT  
TTGTTATCAAGATTCCAATTGTGAATTCCCAGTTGGTATTTTCATGATCAAGATGTAGTGGAAGCAATTG  
GGAAAGAGCTATAAGTACCTGGATGGGGTGTGATGAACACAACCTGATTTCTGCTCTTGGCATGGAGTTA  
TTTGCAGCTCAAACAGTTCAATGGTGGAAAGACTTGATCTTTCTGGTTTTAGATTACAAGGTAATGTAAC  
TCTAATATCTGAGCTCAAAGGTTTAAAGTGGCTGGACCTTTCTAATAATAACTTCCAAGGTTCTATTCCAT  
TTGCATTTGGGAATTTATCTGAGCTTCAATATCTTGATTTGTCTTTAACAATTTGGAACTCAATACCTA  
GTGAATTAGGTAAGCTCAGAAGCCTAAAGGCATTGAACCTTTGAAAACTGGCTTACAGGAGCTATAC  
CTGATGAGCTTGAGGGGTTAGAGAATTTGCAAGATTTTCAATATTTACTAACAACCTGAATGGTTCTAT  
CCCAATGTGGATTGGTAATTTGACCAATCTTAAGGTTTTTGCTGCTTATGAGAATGAATTTAGTGGTGGT  
GTTCTGTAACTTAGGATTGTACTCTGATCTTTCTTTGTTGAACCTTCACTCAAACCAGCTTGAAGGTAC  
TATTCCTGAGAGCATTGTGCTAATGGGAATCTGAATTTCTGTTCTAACTCAGAATAAGTTGACCGGA  
AAGATTCCTGATTGATTGGGAATTGTAAAGGACTTTCTAGTATTAGAATTGGGAATAACAAGTTGATTG  
GAGGTATCCCTAAATCAATTGGGAATATCAGAAGCTTACTTATTTTGAAGCAGATAGTAATAGTTTGTC  
TGGTGAATTTGTCACCGAGTTGCAAAAATGCTCAATCTCACTTACTTAATTTAGCTTCAAATAAGTTTA  
ATGGAACCTATTCTCCTGAGTTTGGTCAGCTTAACAGTTTGAAGAATTGATTGTTTCTGGTAATAACCTT  
TATGGAGAGATTCCAATATCAGTTCTTAAGTGAAGAATCTCAATAAGCTTGACTTGAGCAACAACAAGT  
TCAATGGTACCATACCGGCAGATATCTGCAATACGTCCAGATTGCAATATTTGCTGTTGGGGGAGAACTC  
GATTCGAGGGGAGATACCTCATGAGATAGGGAATTGTGTAAGTTGCTTGAGTTGGAAATGGGGAGTA  
ATGAACTTACTGGAAGTATCCCTCCTGAGATTGGTCATATGAAGAACTTGCAGATTTGTTGAATTTGAG  
TCATAATCGTCTCCACGGAAAATTGCCTCAGGATTTAGGAAAACCTGACAAGTTGGTTTCTTTAGATGTA  
TCTGATAATCAGCTCTCGGGGAATATTCCGCCGGCATTGAAGGGCATGCAGAGTTTGATAGAGGTTGAT  
TTTTCGAGCAACCAATTCCTGGTCCAATACCTACTTTTGCACCATTTAGAAAAGTCTTAATTCAGTTTT  
CTTGAAACAAAGATCTCTGTGGTGATCCTTTGAGTGTGGTTGTGGGGATTTAAATGGTTATGACCACA  
GCGTTTACGGTCACAAGGTCTTACCGAATCGTTTTGGCTGTTATCGGTTCTGGTTTGGCAGTTTTTGTA

TGTGTCACAGTGGTTGTTTTGCTGTTTCATGATGAGGGAGAAACAAGAGAAAGCTGCCAAGGAAGCAGC  
TGGAAAAACCATTGATGAAATTTCTAGCAAACCAGTGATACTAGCGGGAAACGTCTTTGTTGACAATCTA  
AAGCAAGCAATTGATTTTGATGCAGTTGTAAAGGCAGTCATGAAAGACTCGAATAAGATTTGTGTTGGT  
ACTTTCAGCACTGTCTATAAAGCAGACATGCCTTCCGGGATGATTTTGTCGGTGAAAAAGCTAAAGTCAA  
TGGACAAAACCTATAATTCATCACCAGAGTAAGATGATCAGAGAGCTTGAAAACTTAGTAAGCTCGTTC  
ATGATAATCTTGCTCGTCCTATCGGATTTGGAATCTATGAAGATGTCGTTCTTCTGTTGCATGAATATTAT  
GCCAAAGGAACGTTGACTCAATATCTTCATAACTCTAGCCAGAAACCTGAATATAAGCCCGACTGGCCAA  
CAAGACTTGCCATTGCCACTGGAGTTGCAGAAGGATTGGCATTCCCTTCATCATGTTGCTATCATCCATCTT  
GACATTTCTTCCGGGAATGTGCTTCTTGATTCTAATTTCAGGCCTTTGGTTAGTGAAGTTGAAATCTCTAG  
GCTTCTCGATCCATCTAGAGGGACTGCAAGTATTAGTGCTGTTGCTGGTTCATTCCGGATATATTCCTCCA  
GGTACAT

>M6-PGSC0003DMG400008296 M6 LRR-RLK

TTATGTACTCCTAGGTTTCGAGTAGGTGACGAAGTTCTTGTTGCTTTTTCTTGTGTGGGGGTACATACAA  
CTTGTTCTTTAACACGGAGCATCCTAGATTAGAGGCATGCTTGGTATTTTGTAAACAAATTCATAGAATGC  
AAGTCATTTTCCTTAGTGTGAATGGATGACTAGTTGACTGCTACTGAAAACGGTGATTCACTGTACGATT  
CACTAAGAAATGTGTATAAAGGCTTCATTGTCAGCATAAGTATTTTCAGTGAGTGAAGCTTTTTTCTTTTG  
AAACAATGATGTCAAAGACAGTTGTATATGCATTAGCCATATTTTCTATTACCTTTCATACCTCTGTCAT  
CTGGGCAAAATCCAAGCTTTGAAGTTGAAGTTGCTGCTTTGAAAGCTTTCAAGAGCTCAATCTCTGACGA  
CCCTTTCAGTGCACCTTGTTGGATTGGACTGATGCAAATCACCATTGCAACTGGTCTGGAATCATATGTGAT  
CCTTCTTCAAATCATGTCATCAACATTTTCGCTTATTGAGACACAGCTCAAAGGCGAAATTTCTCCGTTTCT  
AGGAAACCTCTCCAAACTCCAGGTTCTTGATCTAACTTTGAATTCATTTACTGGAAATATCCCACCCCAGC  
TGGGGCATTGCACAGACCTGGTTGAGCTTGTTTTAACCAAAACCTCTTTTTTGGTGAAATTCCTGCCGA  
GCTGGAAAACCTAAAAAACTGCAGTTAATAGATTTTGGAAATAACTTTCTAAATGGGAGTATACCTGAT  
AGTATATGCAACTGCACTGAATTGTTGTTAGTAGGCCTCAACAACAACAATCTCACAGGTAAATTACCAT  
CTGAAATTGGCAATTTGGCTAATCTTCAGTTGTTTGTAGCTTATACAAACAATTTGGTTGGTTCTATTCT  
ACCTCCATTGGAATGCTGACAGCATTGCAAACCCTTGATCTGAGCGAAAACAGTTATCTGGACCTATAC  
CACCAGCAATTGGCAACTTGCAAGTTTAGGAATTTCTCAGTTACATCTCAACTCTCTTTCTGGGAAAATC  
CCATCTGAACTTGGCCTCTGTATCAATCTTTTACCTTGAACATGTATACTAATCAATTTACTGGAAGCAT  
ACCTCCTGAGCTTGGAAATTTAGAAAACCTTGCAAGTGCTCAGATTGCATAACAATAAGTTGAACTCCAGT

ATACCTGCCTCAATATTCCACCTGAAGTCATTAACCTATTTAGGACTCTCACAGAATGAACTAACTGGTAA  
TATTCCTCCCGAGTTGGGATCTTTAACGTCACTAGAAAGTGCTTACCCTTCACTCAAATAGGTTATCGGGG  
GAGATCCCATCAACTATAACAAACCTGGCAAACCTTGACATATTTGTCTTTGGGCTTTAATTTATTGACTGG  
ATCACTTCCATCGGAATTTGGGTTACTCTATAATCTGAAGAATCTAACTGCAAATGATAACCTCCTGGAA  
GGATCTATTCCATCGAGCATAACAAATTGTTCTCATCTTCTTGTTTTAACCTTGCTTATAATAGAATAACG  
GGGAAAATACCAAATGGGTTGGGGCAATTGTCCAATCTTACATTTTTGTCTTTGGGATCAAACAAAATGA  
TGGGGGAGATTCTGAAGATCTTTCAACTGTTCAATGCTTGAAATTCTAGATCTGAGTGACAACAATTT  
CAGCGGGAAACTCAAATCAATGATTGGCAGACTCTTAACTTCGAGTTTTAAGAGCTCGTACTAATTCA  
TTTCTTGGGCCAATCCCACCAGAGATTGGTAAACTGAGTCAACTCATGGATATAGTGCTTCACGAAAACA  
GTTTCTCAGGTGCGATACCACCAGAAATTTCAATGCTTTCAAACCTTCAGGGTCTTTTGCTATCTGAAAAC  
AAGCTGGAAGGTGAACTTCTGTGCAACTTTTTGAGCTCAAACAGCTCAATGAACTCCGGCTGAAGAAC  
AATAATTTCTTTGGTCCACTACCGCAACATATATCCAACTAGAATCACTGTCGCTCATGGATCTGAGTG  
GAAATAAGCTTAATGGCACAATCCCAGAGAGCATGGCGAGCCTCCGCAGATTGATGACCGTAGATCTTT  
CACACAACCTTCTTACCGGAACTATTCCAAGAGCAGTACTTGCCAGCATGAGAAGAATGCAACTTTACTT  
GAACGTTTCCAGCAATTTGTTGCACGGAGAGATCCCAGATGAGATAGGCGTGTTAGAAATGGTTCAAGA  
GATTGACATGTCAAATAATAAACTGTCAGGCAGCATTCCCAAATCCCTAGAACGCTGCAAAAACCTTATTT  
TCACTGGACCTATCAGGAAACATGCTCTCTGGTCTGCTCCAGGTGAAATTCTCACCAAATTAAGAGAGC  
TTGTGTTCTTGAACCTCTCAAGGAACAGATTAGAAGGCAGTCTTCTGAAATAGCAGGATTATCACATCT  
TCGCTCTCTTGATGTTTTCAAAAACAAGTTCAATGGAATCATTCCCGAGAGATTTGCCAATATGACTGCAT  
TGAAATATCTCAACCTTTCTTTCAACCAACTTGAAGGTCACATTCCAAAGGGGGGTGTATTCAACAATAT  
AAGGTCGGAGGATTTACTGGGAAATCCATCTCTAAGTGAACAAAGTTTCTCAGTCCATGCAACATAAA  
AAGAAACGGAACAAGTTCTCATGGTTTTTCCAAGAAAACCTGGATCATACTTGCAGCACTTGGATCTGTT  
TTCAGTCTCATTCTTCTTGTCTGGGAATATTTTTATTTTCATCGGTACATGAAGAAGAAGAAAAATGTGAA  
TGAAGCGGAGGATACAAATCCAAAGTATACCGCAGCACTGAGCCTCCAGAGATTTTATCAAAGGATTT  
GGAACATGCTACCAATAATTTCAAGTCCGGAAAACATTATTGGAGCCAGCAGTTTAAGTACTGTGTACAA  
AGGTACACTGGAAGATGGGAAGATTGTAGCAGTTAAGAAGCTGAATCACCAGTTCTCAGCAGAATCTG  
GTAAATGCTTTGATAGGGAAGTCAAGACTCTGAGCCAACTCAGACACAGGAACCTAGTTAAGGTGCTAG  
GTTACGCTTGGGAAAGCAAGAAGCTAAGGGCTTTAGTTTTAGAATACATGGAGAATGGGAACTTGGAC  
AACATGATTTATGGTCAAGTGGAGGATAACTGGACGTTGTCCAATAGGATTGACATTTTAGTTTCAGTTG

CAAGTGGACTGTCATACCTGCATTCAGGCTATGATTTTCCAATAGTGCCTGCGACATGAAGCCTTCAA  
TATTCTTCTGGATAAAAATATGGAGGCACATGTGAGTGACTTTGGGACAGCTAGGATGTTGGGTATTCA  
TCTCCAGGATGGGAGCAGCATATCATCAGCATCCGCATTTGAAGGAACGATTGGTTACATGGCGCCAGG  
TAATAATTCTTACAACCTTCTTGACCCACACTTTACTAACTAGATTATGTGTTACAATATCATGAATACAAG  
ATGTCTACAATGTAAACGAGCTTATATGGGTACCACAAATAATATTTTGTCCATGATGAATGTTTCAAAT  
ACATTCCATTTTAGCATCATTAGTAGTAACATAACTTCTGTCAATCACAATACGCAGCACAGCAGATTTT  
TTTTCTTTCAATCACAAAATACTGATTTAACTTTTATGTGGAAGAATAGACAAGCAAGTAAATGATGCA  
ATGTTTAGAACATATAATCTGTAAAGTATTTTTTAAATGATAATGTCAGTTTAACTATCCAAAATCTA  
GCGCAAGCTTTGAAAATTTGAATTTCTTGGACATTTTACATGCTCCTAATTTAATTTGAGACCTCACTTAC  
ATGAAATGTTATCTATGAAACAGAGTTTGCATATATGAGGAAAGTGACCACAAAAGTAGATGTATTCAG  
CTTTGGTGTCAATTGTGATGGAGATCATTACAAAAGAAGGCCAACAAAGTCTTACCGGAGCAGATGAATT  
ACCAATGACTTTGCATCAAATTGTTTCAAGATGCCCTTGCGAATGGCATAAACAAGCTAGTTCAGATTGTG  
GATCCTAATCTAGCTTCGTATGTCTCCAAGAAACAGGATGTAGTAGAGGGACTTCTTAACTTGGCTTTGT  
CCTGCACCTGTCTGATCCTGAAGATAGACCTGACATGGAACAAATTCTGTCTTCTTTCAAAGCTAAGT  
AAGATGGACTGCATGCCTTCGCATTTGGTAAAAGATTAATTTGATGTAGAAGAAGCTGGAATATCATC  
ACTCTTAATGTGAACCACCACCAAGTTTCCCATGGTGGCTAATGGAAGTACTAGTTCATAACTTAAATGTATT  
TACTATTTAAATAAATTTTCCATATTTCAAGCCACAAATGAACTCTCGAGTGTTCTGCTTTGCTAGAGAG  
ATATAATGGAAGTGTCCCATCAGATTATGTTGAAGTTGACATGCATCATGAAATTGAACAA

>M6-PGSC0003DMG400008403 M6 LRR-RLK

AGTGACCATATGCATGAAAAATCAAATTAGTTATTTGCTGATCTGAAGCAAATTTTTGAACAATGGCAGC  
CACTCGGCTGTTACTCTGCTTTATCGTCTTCTCGTCTGGCATTGATTCATATACACTGTTACAGATCCCAG  
AGATGGTAAGAAGCTTTGTATAAAATTGTCGGATCCAATATTTAACTTTATGAGTTTTACTATTTGTTGCA  
GTTTTTGTGAACTTTTACTTATAAATTTATGTTCTGCGTTGAAAGTACTGAGTTCAGATAATAATGTTTTGT  
TATGAATAAGTGTGAACCTGGTTGATTGCAGTAACGATACTTCGATCACTGAAAGATCAGTGGGAAAAT  
ACGCCGCCTAGTTGGCAGAGATCGGATGATCCTTGTGGAACATCTTGGGAAGGTGTAACCTGCAACAAC  
TCAAGGGTAACTGCATTGTGAGTATGCTGTTTTCTTCCAATATATCTAGGGATCGTTTGATTTACGTTTTA  
GTTATACGATGACTAATAACACATGAATTGTTATGCATGATTGCGTAATTTAAGTGCATTTCCACCTTCAG  
ATGCTCTTATCCACGTATTAATTGTAGATATATTCTTGTCCACATTCTATCTGTGAAAAATAATACATAGA  
TTCTCGTCTAAGTTATACGAGGTTTAGTTTCCAATATTAAGTCCATATGACTAGTGCAGAGTTTAAATACC

GGAAACAAAACATCATGTTAGTTATATGGAACTATATTAGCTTACACGTTTTTTACATTGAAAACCAAAT  
GTTGTATAAGTAAAATGAAAATTACTTCTTTTTTTTTTAGGAAAACTACATAATTAGGACATAGGTCGCT  
ATCGTAAATACTATTATTATCTATACTTTCAAATACTATGTATCTTACCACTAATTAAGAATTTCTTACCA  
TATACCAAGGAAGATACACTTAGATACATGTATTTTTGCTACCATATACACTAAAATAGGGAGAGAGGA  
GAGCGAAATGGGGAGGAATGCGAGCGAGATTCGCTATGTATCTCAAATACATAGGAGAGTGGCGAGT  
GAGATGGGAGAGAGGTGAGAGGGACAACCGAGATTTGTTATGTATCCCAGATACATGTGAATCCACTT  
GGATACAATATATCTAGAACAAATTACACTTAATTTTTACCCTATGTATCTTGAAATACATGTATCTGGAT  
GTATCTGGACGCACCAAAATATGGTAAGATACGTAATATTGCAAAGTGTATCAAAGTAATTAACT  
ACTAACTAGTGGGATTTACGTAAGTTTCTCACTTTTTTATACTTCAAACCAAGCCACAACCTTAGTTTTG  
AAATTGTTGTTTCACCAACGAAGTAGTTGTTAACAATTGATTGTGTTTATTGTTTCTTTCAGGGGATTATC  
AACAATGGGACTGAGAGGAAAATTAAGTGGTGACATTGGAGGGCTCACTGAATTAATTTCTTGTGAGT  
TCGGTTTTTAAATCCAATAAACTTCTGTATATGACACCAACAATTATTAGCAATAAGCTTGTATTTGTCAC  
CATAATTTGCTCACTTCAGTTGCTAACTTGCCTGCAGAGACCTGTCGTTCAACCGAGGACTTACAGGT  
TCCCTTCTCCGCGGATAGGAGATCTGCAGAACTAAACATATTGTAAGACTACGAAAACCTTGATCATT  
TGATTGTATAGTGTATACCTGCTATGTACACAAAATTGATATTTATAATATTTTCTTCATAGAATGATCATT  
TGATCAGCTTTCTTCTCGTAATTTGTATCATGATTCAATGACATACATAACTTACTTGTACGCGAATGAA  
TTTATTTACTTTTCAGAATCCTCGCGGGCTGTAGCTTCAGTGGCAGTATACCGAGGGAGTTGGGAAGACT  
TGCTGAGTTATCCTTCTTGTAGAATTTCTCAGCAACATCAACTTGTGATCGTTTTTGGTGTATCATCAAC  
TCATTTAGTTCCATGTAAATTTCTTGGACAGGGCACTTAACTCAAATAATTTACCGGTGAGATTCCACGA  
ACTCTTGGCAATCTGTCAAACCTGTAAGTGGCTTGTATCTAGCAGATAACCTGTTAACAGGACCAATTCCTG  
TTTCAACCTCCTCAAGTCCGGGGTTAGACCTTCTAAAAAAGCAAACACTTGTGAGTAACTTTATATG  
TCCATATTACATGCTGTTCTTAAGTTGGTATATATACCTCTTAAGGTCTGACTTCTACGTTATGTCATTATC  
GCAGCCATTTTAAACAAAACCAACTTTCAGGCTCCATTCCGGACATTCTTTTTAGTGCTGACATGGTGCTA  
ATACATGTGTAAGTCAAGAACTAAAGGGTGATTCGCGCTATTCTTCTGCCCTCCTTCTCACTTTGTGAA  
CTTCTGATATGGCAGACTGTTTGATGGAAATCAACTTAGCGGGAGCATTCCATTTACACTAGGACTTGT  
CAGACACTTGAGGTTCTGTGAGTAGAATTGACCGTCTTATTTATCCTATCTTTCGTGCTACTTCACCTTCT  
GTTTTGGATTATATGCTTGTACTCTTTTATCTTTGCTGGTATTCATGTAACCTAACATATACAGTCGGCTC  
GATAGAAATGCCTTAAATGGTAGCGTCCCATCAAACCTCAACAATCTCACAAGCGTTGTAGAGTTGTAA  
GTATACTTTTTCCCATCATTGCTCACTCAATTGTCTGCTTGAATCAATAACTTGTAGATTGAAGTAGTCCT

TTTGTGCTCTTATTTCTGTCTTCAGGAACTTAGCTCACAACGAACTGTCCGGTCCACTACCAGATTTAACT  
GGAATGAATCCCTTAATTATCTGTAAGGAAAATATCCAGAATCCTGATTTTCCCTAGTTGTTTCTTAATG  
TTGAAGTGATACATCATATTTTGTCTCTTCCAGGGACTTGAGCAATAATCCTTCCATAAATCGGAGGC  
GCCAATATGGTTCTCGACTCTAGAGTCTCTCACCCTCTGTGAGTATTAATCAGTTATGAATGCAACTATG  
AATTTCCAAAAAGTTTGATGAATCTAAGTAGGAAGAACTGATGTAATGCTCAGAGTCATCGAGTATGG  
CTCACTCCATGGATCAGTGCCTCAGAACTTTTCGCTTTACCTCAATTACAACAAGTGTGAGTCTCGCGAT  
CCTAACTGGATATCCATGTCTATTACCTGCAATGAAGAGGTCGTAATGATCATAATAACTTATGCAGGA  
AACTGAGGAACAACGCATTGAATGACACATTGAACATGGGTGGCATCAGTGGCAGGCAACTCACACTTG  
TTGATTTACAGAACAACGAGATTTCTCAATAACACTTGGCTCTGGATACAAAAATACCTTGATGTAAGA  
TGGTTCATTTCTCCTTTTCGTGATTAGATGATTGTTTTTTTTCTTTCTCCTTGATTGCTTTGTCGTTGTCCT  
CAGACTGATCGGAAACCCTGTGTGTGACACGGCCCTTGGAAACACGAACTACTGTCAGCTTCAGCAGCA  
ATCTGCAAAGCCTTACTCAACCAGCCTAGCTAACTGTGGGAGAAAATCATGTCCTGCTGATCAAAAAGTT  
AGCCACAAAGTTGTGATTGTGCTTATCCGTACCAGGGAACATTCTACTTTAGAGGACCCTCTTTTAGAG  
AGTTGTCCAATGATAATACGTTCCATTCACTCGAAATGAGCCTGTGGGTGAAGTTGGATCTCACGCCTGG  
TTCGGTTTCTCTGCAAAACCCCTTCTTCAACATTGATGATTATCTTCAGGTGCAGTTAGAATTATTTCCACC  
AACAGGAAAGTATTTTAATAGATCAGAGGTTGAGAGGATTGGATTCTCCTTGAGTAACCAAACCTATAA  
GCCGCCTCATGAGTTTGGACCGTACTATTTTATAGCATCTCCTTACACTTTCCAAGGTATAAATACTGAGT  
TTCTTTACAACGTAACTTCTGGACCAATACTGACTTAAACTAAACTGTTTCAGCCGAACATGGAGAA  
ACTTCTATTAGCTCAAAACAAGTTATAGGAATAGCTACCGGGTGTACCATCCTGGTCTCTTGCTCGTTGG  
TCTTGCAATATATGCTATTCAACAAAAGAACTTGCTGAAAGAGCTATTGGATTGAGTAGACCATTTGGT  
AATGTCATCTTTTACTGAAATAAACCGATGAGTTATAACTGCATATACATTCATGCCTCTCTATAACAGTT  
ATCCTCTATGATTACATTTCACTATAACGACCAAGTTTTCTTTGGAAGTATTTTTCATGTTGTATTGAATT  
ATATGTTTTCTATAACAACATCTCGCTATAGCAGCCAAAGAAATATCAGAACAAATGACGTCTTTATAGA  
GAGGTTTACTATATGTCCATAATGCAACTAGGATTAACCTAAATGTCTGATTACTTTGACCTTCTTTGT  
CCAGCATCGTGGGCTCCAAGTGGAAACGACAGTGAAGGTGCACCACAACCTAAAGGGAGCCAGATGGTT  
TTCTTATGATGAACTTAAGAAATGCACGGGAACTTCTCGGAGAGAAATGAGATTGGTTCCGGTGGCTA  
TGGGAAGGTTTGTACCAAAATCCACAGTAGATATAGAATAAAGGGATAAACTCTTAGTTACTTTGCTTA  
TTTGCCTGTTCTGTTTCTAGGTATACAGAGGAACACTCGCAAATGGGCAAGTAATTGCTATCAAAAG  
GGCTCAACATGGATCCATGCAAGGTGGACAAGAGTTCAAGACAGAAATTGAATTGCTTTCACGGGTTCA

TCACAAGAACCTAGTTGGTCTGGTTGGATTCTGTTTTGAGCAAGGGGAACAAGTACTGGTATACGAGTA  
TATGCCAAATGGTTCACCTCAGGGAGAATTTGTCAGGTAAGTTACATCCTCCTATACATTAAGACTGCTT  
CCTATTTATAGTAATTTACACAAAAAAGTTCCTAATATCTCCATTTGCTGTAGAAGTTAATTTCCACTATG  
CTCTACAGGGAAAACGAGCATTATCTAGATTGGAAGAGGAGACTTCGTGTTGCGCTTGGTTCAGCCAG  
AGGATTAGCTTATCTGCATGAGCTTGCCAATCCTCCTATAATTCACAGAGATGTGAAATCAACTAACATTT  
TGTTGGATCAGAACTTAACAGCAAAGGTCGGGGATTTTGGCTTGTCCAAACTCGTATCAGATAGCTCAA  
AGGGTCATGTTTCCACTCAAGTTAAAGGCACATTGGTCAGTACCACATCCTGCACATTTTCGCGTTCTATT  
TCAAGAAAAAGATTGAATTTTGTGAACTCTTGAAGCATGAAATTGAATTTAAGACTATTGATTACATTG  
CAGGGTTATCTAGATCCTGAATACTATATGACTCAACAATAACCGAGAAGAGCGATGTGTATAGCTTTG  
GTGTTGTAATGCTAGAACTCATAACTGCAAAAACAACCAATAGAGAAGGGGAAATACGTTGTTGAGAGAGA  
TGAGAACAGCAATAAATAAGAACGACGAGGAGCATTATGGCTTGAGCAATATGATCGATCCAGTCATTA  
GAAACATGCCAAATCTAATTGGTTTTACAAGGTTTGTGGACGTGGCGATGCAATGTGTTGAAGAGGCTG  
CTGCTGATCGTCCAACGATGAGTGAAGTGGTAAAAATGCTTGAAAGTATTCTTCAAATGATGGTCTGG  
AAACGAATTCTACGTCTGCATCATCATCGATAACGGATTTTGGGACAGCAATAGCTGCTTCTAGACATCC  
TTATAACAAGGAGGCTCTACAGAGAAAGGAGATCAATGATACTCATGCGTTTGATTACAGTGGTGGATA  
CACTCTTCCAACAAATGTGGAACCAAAATAGTGACAACCAAAAAAAAAAAGGACTTGTCTCTACTGTCTCT  
CATTCTTTAATTTATTCTCTAGAAAAAAATTGGAAAATTGGTGAAAGGGATAAGAGAATTTAGTTGTTG  
TATTGTCCCTATATTGGCTACTTTTCGCGAAACAATCACGTATAGTATCAGGATCGAAGTTCAGATTTTCT  
ATTGCCAAGACTTACTGTCTAGTGGTACTAGTGAGAGTCTCCTATACACTAAGTGTGAGTTCGATTTTAC  
CACCCCGATCCTCAAATGTAATAGAAAAAAGTTAAAAGGAAAAAATTTAGATTTTGTACCATCAAGGCT  
GCAGTCTAGTGGTATACCTAAGAGGTCTTCCATACACTAAGTGTGAGTTCGATTTTTACTATCTCCTTTC  
CCATTCCCTGATTCTACAATGTAATAGAAAAAATCAAATTA AAAAGTTCAGATTTTC

>M6-PGSC0003DMG400008581 M6 LRR-RLK

ATGAATTTATTAACCATTTTCATACTCTTCTTGTCTACTATTACAGTGTTTTTGCTAACGGAGTGGTTGCG  
AAAGTTGATTTGAATGATGAGGTGTCTATTCTACTTTCTATTAAGAAAGTCTCGTTGATCCATTGGATCA  
TCTTCATGATTGGACAGTGCCCAATAATGCAGCTGCAGGGAACAATAGAAGTATTATTGTTCCCTGCAGC  
TGGACGGGAGTTGAATGCAACTCCCATGGGGCAGTCGAGAAGCTTGATCTGTCCACATGAATCTCACT  
GGCACAGTGTCTAATGATATCCAAAAGTTGAAGAGTTTGACTTCTCTAAATCTATGCTGCAATGAGTTTT  
CATCGCCATTGCCGAAAAGTTTATCAAATCTAACTGCATTGAGAAGCATTGATGTGAGCCAGAACTATTT



TGTCTATGACTTCCCTGTAGGTCTTGGAAATGTCAGAAGCACTTATGTATTTGAATGCTTCGAGTAATAACT  
TCTCCGGTTATCTTCTGAGGATATTGGAAATGCTACATTGCTCGAGACATTGGATTTTCGAGGGAATTT  
CTTCGAAGGTTCAATTCCTAAATCTTATAGGAATTTGGGGAAATTGAAGTTTTTAGGTCTTTCAGGGAAC  
AATTTGACTGGACACATTCCAGGAGAGTTGGGGCAGCTTTCGTCTGCTTGAGACTGTAGTACTGGGATAC  
AATGTTTTCGAAGGTGGAATTCCAGCTGAATTTGGAAATCTGACAAATCTCAAGTATCTTGATCTTGCTA  
TTGGAAATCTTGGAGGTTCAATTCCTTCTGAGCTAGGAAAGCTGAAGCTGCTCGATACGATTTTCTTGTA  
CAAGAACAAGCTTGAAGGCAAGATTCCGCCAGAGATTGGCAATATGACTTCATTGCAGTTGCTTGATCT  
GTCTGATAACATGCTTACGGGTGAAATTCCAGCTAAGATTGCTGAACTTAAGAATTTGCAGCTTTTGAAT  
ATAATGTCAAACAAATTATCAGGTTCAAGTTCCCCCTGGGATTGGAGGTTTACTCAGCTGGAAGTAGTTG  
AGCTGTGGAATAACAGCTTTTCAGGTCCTTTGCCAAGTGATCTTGGAAGAAATTCGCCATTGCAATGGGT  
GGATATTTTCATCCAACCTCATTTACCGGTCCAATTCCAGCAGGATTATGCGCCAAAGGTGACCTCACTAAG  
CTTATCATGTTTAAACAATGCTTCTCAGGTCCAATTCCAACCTGGTTTATCAACCTGCACGCCCTTGTTCGT  
GTAAGAATGCAGAACAATCTTCTTTCGGGGACGATCCCAGCAGGTTTTGGTAAACTTGGGAAACTACAG  
AGGCTGGAACTGGCAAACAATAGTCTGACAGGACAAATCCCAAGTGATCTTGCTTCTTCTACCTCTCTTT  
CTTTTATTGATTTCTCTAGAAACCACATTCAGTCTTCTATTCTTCATTCTTGCAATTCCAACTCTTCA  
AAATTTCAATTGCCTCCGACAATAAGATGACAGGCGAAATCCCGGATCAATTCCAGGATTGTCCTTCTCTT  
ACTGTTCTGGATCTATCCACAAACCATTTCACTGGAGATCTTCCAGCTAGCATTGCTTCTGTGAGAAGTT  
AGTAACTTTGAACCTTCGAAATAATCAATTAACGGTCCAATTCCAAGAGCGATTTCCATGATGCCAACA  
TTAGCTATTCTAGATCTATCCAATAATTCTTTAACTGGTGGGATACCTGAGAAGTTTGGCAATTCACCAGC  
ACTAGAAATGCTGAATGTTTCTCATAACAACTGGAGGGTCTGTACCGGAAAATGGCATGTTGAGAAC  
AATCAATCCGGATGACCTGATTGGAATGCCGGTCTATGTGGTGGAGTGCTTCTCCTTGTTCATAAT  
GCAGCATAACATCAAAGCAGAAGAGCTTGACGTGAAGCACATCATTACAGGATGGCTAATTGGTGTG  
GCAGCTGTTCTGCTTTTTGTGACAGCAGGTCTTGTAGCTAGATCTCTATAAAGAGATGGCATGAAAATG  
GGAGCTGCTTTGAACCAAGCTTTGAGATGAGCCGTGGTGAATGGCCATGGAGGTTGATGGCATTCCAG  
AGGCTAGGATTCAGTAAATGACATCTTGGCTTGCCTTAAAGAGTCAAATGTCATTGGAATGGGAGCA  
ACAGGGGTTGTATACAAAGCTGAAATGCAACGCGAGAATATGGTTGTTGCAGTAAAGAAGCTGTGGAA  
ATCTGGAAGTGAATGAGATGGGGCACAGTGATGATCTCGTAGGTGAGGTGAAAGTTCTTGGAAAATT  
GAGGCATCGAAATATTGTCAGGCTTCTGGGGTTCCTTACAACAAACGTGATGCAATGATAATATACGA  
GTATATGCAAAATGGTAGCCTTGGAGAGGTTTTACATGGTAAACAAGCAGCAGGGAGACTGCTTGTAG

ATTGGGTCACTCGATATAACATAGCCCTTGGAGTGGCACAAGGCCTTGCTTATCTCCATCATTACTGCCA  
TCCACCAGTTATTCACCGGGATGTCAAGTCAAATAACATACTTCTTGATGCAAATCTAGAGGCAAGAATT  
GCAGATTTTGGTTTGGCAAGAACGATGCTCAAGAAGAATGAAACAGTTTCCATGGTTGCTGGATCTTAT  
GGATACATAGCCCCGGTAAGTCCTTCAAATTTTTTCATCAATGTTTACTCTAGAGTGATTTTTGTTACTAA  
TATTTAACAATCATTATCTGGATTTTGACTTTGCAGAGTACGGATACACGTTGAAAGTGGATGAGAAGA  
GTGATATTTACAGCTATGGAGTTGTTCTCATGGAGCTCCTAACGGGTAAACGACCTCTAGATCCTGAATT  
TGGGGAATCTGTTGACATTGTAGAGTGGTTTCGGATGAAGATCCGAGACAACAAGTCTTTAGAAGAAGC  
ACTTGACCCAAATGTAGGAGCAACACAACATGTTCAAGAAGAAATGTTGTTAGTTTTAAGGATAGCAAT  
TCTATGTATAGCCAAACTCCCCAAGGACAGACCATCCATGAGGGATGTTTTGACGATGCTCGAAGAGGC  
AAAGCCTCGGAGAAAAAGCAATAGCAACAGTGGAGGTAGCCATGATGCTACTACTAACAAGATAAGC  
CAATATTCAGTACATCACCTGTAAATGGTCTTTTGTA

>M6-PGSC0003DMG400009068 M6 LRR-RLK

CGTGATTAAGAGTGGTTAATTTCCCTTTCCCTTTTCGTAATTGCAATCTGTGTCTTCCCTTAGTGAAGAGCT  
TCAAAAATGGCGGAAATGGTGGATAATGCTCTTCTGGTGTCCCTTGCCTTACTGGCACCACGTGCACC  
CACTTCTCCTCTTCTTCTAAATCCAAGCAAATTGTTAAAGAATTGATTTTGTGTATTACTGTAACTTCTTC  
ATAGCATAGTAGTAGTAGTCCACTTTTGTCTCCACGTGCTTTTCCACTCTTTTCGCTTCTTTGTTAACCA  
AATACATACATATACCCATTTCTTTATTTGCTTTCTTCTTCAAATTAAGTGCCTTTCAATCATTATTG  
CCTCTCACCCACTTCCCCCTTCTTCTCATTTAATCATTGTTTCTCTCTAGCTACTTACTTAATTCTGCATTT  
ACTTCCCATCATTTTCTTCTTCTACTCTTCTTTTTCAGTTTACTCTGCCAAGTGTGGATTTTTGCCTCA  
CTGGTACTTGCTTGTATACTATACAGTTTCTGAATTTATGGGGTTTTCCGTATTCTCCATTTTGATGTGATT  
TGGCTATCTGGGTATTGCTATTCAGGTTCAATTTCAATGTTCTTTTTGTTATTGCCGACAGTTTTCAAATTAT  
GCATACTTTGCTTTAAGGTCAAGAAATGTGTTAAAAATTCAATCTTTGTATGTGTGTGTGCTTGGAATA  
GGTGAAGAACGTGAAATGCCTGTTTGTTCCTTTTTCTTTTTCTTTTTTTTCATTTTTGGCAGCCCCAAA  
GCTGACGGAAGAAATTTGTAGCTGGTTCTTGTTTTTACTTTAGCTGTTCTGTTTATTGAAACCTAACTTTT  
ACTTAACTTGCCTGGTTGACCCAAAACAAAATGTGTTCTGAGTGTCTACGTAACCTTAGTTGCCCTATA  
AATTGTATATTTATGGTTAAGAAACGGTCTCTAGTTTAAATGGTAATTATTTATAGTGAATAATGAACAT  
CATGCCGTTTCAATGTCTGATTCCATTTTTATTTTTTTTTGAAATTCTTGTAGAGATGAAGGGTGCTGTTAC  
TAGAAGTTGATGCCTTTGTAGTTTAGCTCAGAGGAGGAGAAGGATGGCTACAAAGTTCCTGTTTTTTTCA  
GTTTTATTCTGCACAGCTCTGTTCTTGTAGCAAGTAGTGAACCATATGAGGACAAAGAAGCGCTTCTTG

ATTCCTTAATAATGTTAATCATACCCGATACCTGAATTGGGATGAGAGAACTTCTGCTTGCAGTTCTTGG  
ACTGGAGTCACTTGTAAATCATGACAAATCAAGAATTATAGCAATTAGGTTGCCTGGAGTTGGATTCCGTG  
GTTTCGATTCCCTGGAAACACTCTTAGCCGCTTGTCTGATCTTCAGATCTTGAGTTTAAGGTCTAATAGTTTT  
AGTGGCAGTTTACCTTCTGATTTTGCAAACCTTGGAAATCTTACTTCTATTTATCTTCAATCCAATAACTTT  
CAAGGTCCATTGCCTGCTGATTTTTCTGCTTGGAAAAGCCTTTCGGTTTTGAATTTGTCAAATAATGATTT  
TAGTGGGAGTATACCTTCTTCAATATCGAACTTGACTCATTTGACTGCTCTGGTTCTTGCTAATAACTCGC  
TTTCTGGCAATATTCTGATCTCAATCTCCCTAGTTTGCAAATATTAGATCTATCAAACAATAACTTCACTG  
GAAGTATCCCCAATTCTCTTCAAAGATTTCTGGTTTCTGCTGGTAAACCGCTTCTCCTGCAAAT  
TTTTACCTTCATTTCTCCAGTTCTCCTCCAAGTGTCTACCGAAAAAGAAATCGTTTAAACTCCGTGAA  
CCTGCAATACTTGAATTGTAATTGGAGGGTGTGTTTTAGGTTTCTTGGTAGTAGCTGCAGTGCTGATTA  
TGTGCTTTTCGAAGAAAGAGGGTAAAAGTGGGGCCACAGAGAAATCAATCAAGAAAGAAGATTTAGTC  
AGGAAGGGAGTTTCCAGCAGTCAGCATGGAGTAGGGAATCTCGCATTCTTTGAGGGTTGTAATCTTGCA  
TTTGACCTTGAAGATCTGTTGAGAGCTTACGCGGAAGTGCTTGGAAAGGGAACATTTGGCACTACATAT  
AAGGCAGCTTTGGAGGATTCTACCACAGTTGTGGTGAAGAGATTGAAGGAGAGTGTGGGAAGAAAAG  
ATTTTGAGCAACAGATGGAGGTTGTTGGCAATATCAGGCATGAGAATGTGGCTCCACTGAGGGCATACT  
ACTATTCCAAGGATGAGAAGCTCATGGTGTATGATTTCTACAGCCAAGGGAGTGCATCTTTGATGCTGC  
ATGGTATGTTAAGCACCCAATTTCTACTAATCTTGCTGTTTTATTCTTGACCGATCCATAGAGAACTGGTT  
ATCAGGACCAAAAAGATAATGCAGATCATTTTTAGCTATGATGTGTCTTGTGCAGTAGTATTTGAAATTG  
CTTGTAGGCTAATTTCAACATAACCAATTACCTTTGAATTAATAGAGTATCTGCTGTTGTTGTCCTCTTGA  
TAGTTTTTTTTTATCATCAATAGCTTATAGGACAGCATAAGAGTCTCGGAGTCATGTCTAAGTGCCATTTT  
TGTTTTAATTTGTCAAATTTCAATAACATCATGTTGCTCGCGAACTTTGCTTTGGCGCTATAGTCAACTTTC  
ATCATTGTTAGGTGGATAGTCTCTTAACTGCACCTTCAAGTATTCCTATCATTATATCTGATGCACTCTGTA  
ATTGCAGCAAAGAGGTCTGCTGATCGAATTCCTCTGGACTGGGAAACCCGACTACGCATTGCCATTGGT  
GCAGCTAGAGGCATTGCTCAAATACATGGACAGTCTGGGGGGAGGCTTGTCCACGGGAACATAAAATC  
CTCAAACGTATTCCTCAACTCCAAGTTTTGGTTGATTTCTGATCTTGGCTTGGCAACTATAATGGGTC  
CAATTGCTACACCAATTGTGCGAGCTGCTGGTTATCAACCTCCAGAAGTTACAGATTCAAGAAAAGTATC  
TCAAGCCACTGATGTCTACAGCTTTGGTGTCTAATACTTGAACCTTCTCACTGGAAAGTCACCTACACATG  
CCACAGGTACAAGCGACATTGTCCACTTAGTCAGGTGGGTACATTCTGTCGTTTCGTGAGGAGTGGACTG  
CTGAAGTATTCGACGTGGAGCTTTTGAGGTATCCAATATAGAAGAAGAAATGGTAGAGATGTTACAAA

TAGGTTTGACTTGTGTATCCAGAATGCCAGAGCAGAGACCAAAAATGACTGAAGTAGTAAAGATGGTA  
GAGGGTGTAGGAGAGTGAATACGGGGACTCGAACATCCACTGAAGCTTCTACACCGAACCTGACACC  
ACCGATGACTGAAATAGGGTCGTCTTCCATTACACACTGATATTTCTTTGTTATTTAGTGATTAGTTACTG  
TTCTATATATGCTTAATTGTTTCATTGTTATAAGTTTTTCTCAGACTTCTGTCAAACATTATTTAGCTAC  
AAAATTGAATAGAAATATTTACTTGATC

>M6-PGSC0003DMG400009180 M6 LRR-RLK

ATTAATCAAATAAAAATAGGAAAGTTCTGACAAAGCCTTCTTCTGTTCCCGAGCTGAAGCTGGGGTT  
TTGTGTTTTGTGGTGCCCGTACTGGTGGTGAAAGAAAACCTCCGACGACTGTGACTGAGGTGGAAGAG  
GAGAAAACGACGCCGTGTAGATGAGGTTGCTGCTGCTGTTGCCGATACTCATCGGCATTTTGCTTTATTG  
TGCTAATTATGCCATTGCCGACACAGATCCAAATGACGGTCAGCTATTGCTTTAATCATTCTCATTATT  
GTTTCAATCTGTTTGTCTGTATGCTTACTGATCATTAAATGATTTAATGGAGGTTGATTGATTTGGAAAGTC  
AATGAGTATCAATCTACCTGACAATGAACTCGGCAACCGTCACAAATTTGTTGATATTTTCCTTACCTGGA  
TAGTATATTGTCTTATTGTATATGTAAAAATGCGACAAGTTCCTTCTAATCAAGGCATGAATCATATAGA  
GGGAGCTCTCTGGATTCTTATATATGTTATGTATGTATTGGCCATGTCGGTGGACTTTTAGTACTGTTGA  
ATCTTTGCATTATTACTTCCATTCTGAGAAGTCTGACATATTGAACTTCGTCAGACATATTTGACTTAG  
TTACCATTTTCAGCCAAGTTGCTCCAGAAGATTTTGGCTTTTCTTCTTCTGCTGCTTGAAGCGGGACAG  
GGTAGTGGGGGTGGGACGCCAAAACAAGTGTGATCAAGGGCATTATAACCTAAAAGACTCTTCTCCA  
GTGATAATACACAAATAGGTTTCATGGCTTCATCAACGCACTTGTGCGTTTCACCATGTTTATTGATGTCT  
TGTAGATTTACCACTCGTTAACAGTTTGTCCACCGTTTGATTACTCTTCAAGCTATTATTAATGAAAAGAA  
ACTTTTTGTTTGAACAGTATAAGAATATGTTGACCTGTAAGTATGCCTAGCTGATTTTTTTGGTGGCGCTT  
TGATTTTCAGCTTCTGCTCTGAGAGTTCTGTATAGCAGCCTAAATTCACCTGGACAGCTAACAAAATGGA  
ATGCCAATGGTGGTGATCCTTGTGGAGAATCCTGGACAGGTATTACTTGCTCGGGCAATAGAGTTACTG  
AAATGTGAGTTCCTCTCTTCTTACTGTTGTAAGTAATTATTGTTGATGTTTTCTTCTTTATCTTCTTCATC  
ATGTTTCAATACTTGAATTGTTGACTTGGTGATTTCTGATGCTTTCTCCCTTTTCATTTTCTCCAGCAA  
GATATCACGTCTTGGACTCTCTGGTCACTGGGCTACCAATTGGCAAGTCTTACATCGGTGACTAATTTGT  
AAGATAAATGGCCTTCAATAATGTCCTCATAAATGTTTCTTCGATCTATATCTATATCAAATTCTTACACAC  
TTCTAATTTTGCAGTGACATAAGTAATAACAATTTGGGAAACCAGTTACCTTATCAGCTTCTCCAAATGT  
GCAAAGATTGTATGTCTCGTAGTTAGTATATTTTCATCATTCCAGATGCTATTTTTCCACCTATCTTTCTTA  
AACCTTGCCTTGCAATGCAGAAACCTTGTGCTAATGGTTTTAATGGTGCCCTTCCATATTCCGTTTCGCA

GATGACTTCCCTCCGATACTTGTATGAAAAATCTTTGAATTTGACTGCAATTTGCTTTCCAGCAATAAGCT  
TTTGGTTTAAGGTTGCGCTTTTCAATGACTTTAATATTTTTATCTGGCTGTAGAAATGTCAGTCATAATCA  
AATTCAAGGACAAGTGACTGTCGCGTTGACTCTCTGTCTTCTCTCGATACATTGTAAGCCCTATCTTCTC  
TCATGCCATTTCTTGAGTGTTTTAATATTACAAAGTTGTGGTCATAACTCATATATGAGGTGTTGTAGATA  
AAACATGTCATTCTTACTTCATTAGTATAAACTTTTCTTCTCGCATCCGAGTTGTTGACTTGTGCTTTGGG  
AAAGAAAGTCAATATCATGAAAGACAGTATCTGATCCTTGTTGTAATCTGTAAACTTATGTGATTGTCCC  
AGTTAAGTCAACTAAGAAGCTGTATACATTTGAGATATTCTTAAGTCAAGTCTTAGAAACCTCTAAATG  
ACTAGTTTATCATTCTGTCTCATAGTTTTTGATTGATTGATCTGTACGCTTCAGGGATTTCTCATTCAATGC  
TATGACGGGTGATCTTCTCAAAGCTTCAAGACACTGACTAGTATGAATAAAATGTGAGCTAATAAATTT  
TCTGCTTCGTCCTTGTAGACAATTGGTTGAGTCCTTCAGTGGTGAAGTTTACATGTTGAAGTATGCAGGT  
ATTTGCAGAACAACCAGTTTACAGGAACTATTGATATCTTAGCCAATCTTCTCTTGATGATTTGTGAGTT  
TTCAGTCTATGCTTCTTTTAGATGTTATCCCTGATGTTTTATCTTATTTATATAGACTCGATTGAAAGCAT  
GGTTGAAAGTCATGTGTATTCTTTATGCTTTAGGAATGTTGAGAACAACCGTTTTACTGGCTGGGTTCC  
TGATCACTTGAAAGGGATCACGAAGTAAGTATATCATGTTAGAGTAATAAATTTTGAACCTTATATCAGA  
AGTATTTTGAATTTATTCAGGGTTTGTGACATTTCTGTTACAGATCAAATGGTAACTCATGGAACCTCAGG  
ATCTGCACCCCCTCTCCACCTGGCACACCCCCTGCAAGCAGGCCGCACCACAAATCTGGAGGCAATAAT  
AGCCCTACTGATGGTGCAAGCAGTGGTGATGGTGGTGGTAAATCGGGGATAGGGGGTGGAGCCATTG  
CAGGCATAGTGATATCTGTTCTAGTTGTTGGGGCAATTGTAGCATTCTTTGTTATCAAGAAGAGATTGAA  
GCGGTCATCGACGGACATTGAGAAACATGATAATCAGCCATTTGCTCCTCTTGCTCCCCCAGGAAGTA  
CATGGTACTTCTTTTCATAATTTCTTGGTTTTATCAGTTAAGATGTCTTTTAGACCCTTTTCATGGCCTCTGT  
GATTGTTATTTAACTGTGGAACATATCAATCAACCACACTATCATCAACCTCATTCTGTATCCTGCTTAA  
AAAGGTGTAAAATAAACCTGCTGCATAAAATGGAAATTTTATGAAAGTGAATTTGGAGAATCAATCTTAT  
CCTTTGTGCTTTATCACTGCCTGTGGTGTATGCCTAATAGTGGATCAACACAGCCACTGTCTTCGCTATAA  
AAGAAAAACACCAAAGTAAAAACAACTTTATATCGAAATGTAAACTGCTAAGGCTGATAGGTCTAT  
CTTCCATGGAAGCAAACCTTCTTGCTTACTGAAAAGTTCCAAGAACTTGATTGTAGAAATCTGAACTGAT  
GTTTATACTCTGTATTGCCTGTAGATGCTGATAGTGGGATAAAGAGAACTTCAGATTTTTTGTAAATGAA  
GAAAACCTCAGCTTTATGATCTCTTTCAGTGGATCTGGTCCTATGCTTGTATAAGTTAGCTCCACTTGAT  
GGTTTTCTTCTATGAAACTACTATTCATAAATCTTATTGACCTTTATAGAACAACCTATTGCTTCAAATG  
CAACTTTCAGCTAAGTAAAAGTTTCTCCATTCTAAACCATTTGTGCTCACCACCAAATTCACCTCTTTGCA

AATTCTAATTCTTTGCTTTTCTCAACTCCATCACTCGTGGTGCATAGTTATGCCTTTTAAGCCTCATCTCAC  
TTCCGTATCTCATTAAATCCGAACCTGAGTATGCATTTGCCTGTTTGTAACTTACAGTCTTGTGCTTCTC  
TCTGTCTGGATTTTCTGTTCAATTCATTGTCCTTTTTTTTTACTGCAGAATTGAAAATAATGAAGCTTCTC  
TGCGCCAATAGTGAAAGTATTTGAAGCTCCTGCAGTAGTAAATCTAAGACCTCCACCTATTGAACGCCAC  
AAGTCATTTGATGAAGTTGACATAGCAGCAAACCAATTGTCCCACCCAAGAAAGTTAATACAGCTAAA  
ATAGATGCAAGACAATATTCAATCGCAGACCTACAGATGGCGACTGATAGCTTCAATGTTGATAACCTTA  
TTGGCGAGGGATCATTGGGCGTGTATAGGGCTCAGTTCGAAGATGGAAAGGTATGATTTCTCTCT  
ATGACTGACTGACTATCTATGTGAAGAAAATGGCTCTCTCTAATTGGATAAAAAAATCATGAATTTTTAT  
GTGCTGAGAATGAATGTTTAAGCAAGATAGTTGAAATGACAGATAAACGTTCAATATGAAAAAGTACCT  
ATCTAAAGAAAATGAAAGAAGTTTGATCATTAAAAATTAGTTGAAAAATTATGTTTGTTCAAAACCTCAGT  
TCGGAGCTACTATCATCTTGTCTGTGTAACCTGAACCATCCTCATAAGTTCCTTTCTAATTTTTGAAATGCC  
ATAGGTTCTTGCAGTCAAGAAAATCAACTCTTCTGCACTCCAGAATCCTGAAGATTTTCTCGATATTGTT  
CTGAGATATCACGGTTGCACCATCCAAATGTTACTGAGCTGGTTGGATATTGTTCCAGAGCACGGGCAGC  
ATCTGCTGGTTTATGAATTCCACAAAAATGGTTCTCTGCATGATTTCTGCATCTGTCAGATGAGGAAAG  
CAAGCCTCTAACATGGAATAGCCGAGTTAAGATTGCACTAGGCACAGCAAGAGCACTAGAGTGAGTTTC  
CATGATCTACAAAGATATTTGATGCCATTTTATAATGTTACGGAGCTCATAACAAGGATTTATAATTTCC  
TTGTACCATTGGTTGAAATACTAGTCTCTGTCATATATTTTCTGGTATGTGTAGTCAAACAATAATGAAGT  
TTCTTTTCTGGGGGGGGAGGGGGGGG

>M6-PGSC0003DMG400009181 M6 LRR-RLK

GAGGAGAGGAGAATAGTATGGTAAAGTCTCTCTCTCTCTCCACGTATATTACACGCTTCAAATATCCA  
TAGAATAAACAAAGTCCACCAGCCATCTATCTATCTAGCCGTCCCAAAGTAAACGCTTTATTTCAAAAA  
CTCATACTCACCTTTTTGCTACATAAAAATTGCACCTTGTCAACATCAACTACACTCTCTCTTCTCTTCA  
TGGGGTTAGACTAAAGTCTGCACGATCAACAGGACAAAGAATTGCCAAAAAATAACCCACATGGTTGAT  
TGGAGTATCTTGGCATCTTCAACTGTCTTTCTTTCATCTTTAGTTGTCTAAAATAATAATGATCATGAA  
TAATAAAGACAGCCGCCACCAATCTGGTCTGACATATCATCAATTTGAGCAGCCATGCTTCTTACTTCT  
TTCATTCTTCTTCTTCTTTACCCACCATAAATCTTCAATCCAATAATATTGATAGTTGTTCTACTTCTTCT  
TCAATTGCTACCATCTGTCATGCTTCTTGAATCAGCTTGATCGTGACTCTTTGTTATCATTCTCTGTTGGT  
ATCTCTTACCTTCTCTTTGAATTGGTCTCTCCGTGGATTGCTGCACCTTGTGGGAAGGTGTTGGTTG  
TGATGATAATGGCCGAGTAACCACTCTCTGGCTTCCCTCAAGAAGCCTTTTTGAAACATAACCCCTGCT

ATTGCAAATTTGAGCAAACCTCTCTCAACTCAGCCTGTCAAATAATCGATTTATTGGTCCCCTCCCAGATGG  
ATTTTTCAAGTCATTTAGTAGCTTGCAGATCATTGACTTGAGTTATAACCGTTTATCAGGACGATTGCCG  
TATCAGATAGATTAACATCACCCATCAAGACAGTAAATCTCTCTAGCAACCACTTCAATGGGACAATTCT  
ATCATCATTTCTCGAGCCAGCAATTAATTTAGAGAGTTTCGATATTAGCAACAATAGCTTCTCTGGTCCAA  
TACCCTCCTTTATTTGCAGCTACTCAGCCGCTGTCAGAGTTCTTGATTTCACTTCCAATGACTTCAGGGGC  
CAGATGCCCCAAGGGTTTGGGAGTTGCTCCAGTTTGGTACTTTGAGAGCAGGATTCAACCATCTTTGCG  
GATTCATTCCTGATGATATTTATAGTGTGTCAACACTGCAAGAAATCTCTTTACCTGGAAATAAATTTCT  
GGACCCATCCCAGAAAGCATTGTCAACCTTGCAACCTCAGAATCCTCGCACTCTATGGCAATGAATTGA  
CAGGTTTGATCCCTCAAGATATTGGAAGGCTCTCTAGATTGGAACAGTTGCTCCTCCATATAAACAATCT  
AAATGGCACTGTGCCGCCATCGCTGATGACTTGCACCCGTCTCACTGTGCTCAATTTAAGGGTCAACTTC  
TTGGAAGGTGAACTCTCAGGTCTTGATTTCTCCAACCTTAGTCGACTTGGCATAATCGACCTTGAAATA  
ACTTCTTCACTGGAAGCATTCCACAAAGCCTTTTTTTCATGCAGGTCATTAAGTCAATCCGTCTGGCTACT  
AACTATCTGACAGGAGATATCTTGCCTGGCATAACGTCTTTACAAGCTCTGTCCTTCTCTCGGTTTCAA  
TAAAAGCCTAACCAATTTTGCAGGGGCAATAGAAGTCCTAAGGGTTGTAAGAATCTTACCACACTAATC  
CTCACCAAAAACCTTTTATAATGAAACGTTGCCTGATAATGAGAAGTCTGATTGGGTCTGAAGATTTTCAA  
ATCTCCAAATTCTGGGTTTAGGTGGTTGTAATTTACCGGACAGATACCCACATGGCTGGTTAAACTTGG  
GAGGGTAGAGTTCTAGACCTTTCTATGAATCAAATCACAGGCCAAAATTCCAGGTTGGTTGGGGACTTT  
ACAGAATCTATTTTACCTGGATTTGTCTCAGAATTTTCTATATGGAGGCTTCCCAGGTGAACTTACTCAAC  
TGCAAAGACTCGCATCACAAGAGGCTGCTGATCAGGTCGACAGAAGTGCTTTAGAATTGCCTGTGTTTG  
TTCAGCCAAACAATGCCTCAAATCAGCAATATAATCTACTGTCAAACCTGCCACCAGCTATTTACCTTGG  
AACAAACAACCTTGATGGCAATATTCCAACCTAAGATTGGCCAGCTGAAGTACATTCATGTTCTTGATCTGA  
GCAAGAACAACCTTTACAGGAAACATTCCAGAAACAATATCCAACCTCACTAATCTGGAGAACTAGACCT  
CTCTGCCAACCAACCTCTCAGGTGAAATTCCTTCTTCACTCAAGGGTCTTCATTTTTTGTCTTCTTTCAGTGT  
TGCTCACAACAATCTTGAGGGACCTATTCCAACAGGAGGTCAGTTTGACACATTTCTATCACTAGTTTCT  
TAGGTAATCCAGGACTGTGTGGTCAAATCCTGCAGCACCTTGCCCTGATCGATCAGGAACTACACAACC  
TTCTGCAGTTAGAAAAACCGCAAAAAGGAAAATCTTAATTGGACTCATCCTAGGGATCTCCTTTGGCATT  
GCCTTCACAGTCATCATCATAGCATTCTGGATATTCTCCAAGAGGAGGATCCTTCCAAGAGGTGACGCCG  
AGAAAAATGACATGGAAATTGTGTCCTACAACCTCACTTCTGGATTGTCTGCTGAGATTGGAAAGGATA  
ACAGCATGCTTGTTATGTTTCCAACCAATAAGGATCAGATTAATGATCTCACAATTTTTGACATTCTGAGA

GCCACGAATAACTTCAACCAAGCAAACATAGTAGGTTGTGGAGGCTTTGGCCTGGTCTATAAAGCAACT  
TTAGCAGATGGAACACTACTGGCTGTTAAGAACTTTTCAGGAGATATGGGTTTAATTGAAAGAGAATTT  
AAAGCAGAGGTGGAAGTTTTATCCACTGCCCAACATGAGAATTTGGTCTCTCTTCAAGGTTACTGTGTGC  
ATGATGGCTGTAGGTTGCTGATCTATTCCTATATGCAAACGGAAGTCTGGACTACTGGTTGCACGAGA  
AAACTGATGGAGCATTCTACTTGATTGGCCAACTCGACTGAAGATTGCACAGGGGGCAAGTTGTGGGC  
TGGCTTACATGCATCAGATATGTGAACCACATATTGTTTCATCGTGACATAAAGTCCAGTAACATCCTCCTT  
GATGAAAAGTTTAAAGCACATGTGGCAGATTTTCGGATTGTCCAGAATGATTCTTCTTACCAAACCTCACG  
TCACCACTGAACTGGTTGGTACCCTCGGCTACATCCCACCAGAGTATAGTCAATCATGGATAGCCACTTT  
GAGAGGAGATGTCTATAGTTTTGGAGTTGTGATGTTAGAACTCCTGGCTGGCAGAAGACCTGTGGACAT  
GAGCAAACCAAAGATGTCAAGGGAATTGGTTGTATGGGTGCACCTAATGAGAAATGAGGGTAAACAAG  
AAGAAATATTTGATCCTATACTGAGAGACAAGGGTTTTCGAAGAAGATATGCTTCAAGTGCTTGATGTTG  
CATGTATGTGTGTCAGCCAGAATCCTTTCAAAGGCCAACTATAGCAGAAGTGGTTGAGTGGCTCAACA  
GAGTAGTATCCAACCAGGGAGCACCTAAATAAGGTGGTGGTACACATAAATTTGATGTAGATGTGAGT  
GTCTGTATAGATGAACTTTTTGCTTTTTACACGTAGGAAGTTAACATACAGGAATAAATGTATAAAGTGAA  
CAATTTCTCAATAAATTACATTTACGATTTTTCGTCATGGCTAACATTGGATGACAGGTAATG

>M6-PGSC0003DMG400009196 M6 LRR-RLK

TTCTTGAAAGATGACATTGAGAAATTTGACTTACCTGATTTGTTGAAAGCCTCTGCTGAAGTATTGGGAA  
GTGGAGTGTGTTGTTCAACTTATAAAGCTGCACTTAGTACTGGTCCTGTCATGGTTGTTAAGAGGTTTAG  
ACATATGAATAAAGTTGGTAAAGAAGATTTCCATGAACATATGAGAAGGCTTGGAAAGATTGAGTCATAA  
GAACTTGCTTCTGTTATTGCTTTCTATTATAGGAAAGAGGAGAAGCTTCTTGTCTTTGAATATGTCAACA  
ATGTCAGCCTTGCTGTTTATCTTCATGGTA

>M6-PGSC0003DMG400009238 M6 LRR-RLK

ATGAAACACAAAACATTTGTTCCCTTTGTTCCCTCCCCTTATTTACCTGAGCTCAGAGAGTATATGCAAAT  
CTTGACATAGATTTTCTTGAAACCCCTTATCATTTTCTTGAAGTTTTTCAGCTTTCTGACTGTCAAAGCCAA  
AAACAAAAAATGAACCTTAAGGTATTCTCCCATATAGTTATTACTATATTCTTGTCTTTTTCTCTTCA  
AATTGTGTTTTCTCAATTGCCCCAAATCAAATTAATGACATGAGAAGTGTCTATGATCTGTTTCAGAATG  
AAACTGGTGCTTCTTTTGTATGGAATGGAACCTGATAAAGCTTCAACCCCATGTTCTTGGAAGGGGTTTC  
TTGCAATTCTGATAATTCTTCCCTTACCAAAGTTACCTTTTCATTGTTCACTATTTCTAGCTCTGAATTCTTG  
CCTGTTATTTGTCAAATTGATACTTTGGAGTCTATTGATGTTTCCAAAACCTTTTTGAGCTCTATCCCAAAT



GAGTTCATCACTGTTTGTGGGGGAATTAGTGGGTTGAAATTGTTGAACTTTAGTGGGAATAAATTGGAG  
GGTTTTTGCCTACTTTCACTGGTTTTGGAAAGTTGGAGTCTTTGGACTTTTCTGACAATAAGATGAATGG  
GAAAGTTGACTTGCAGTTGGATGGATTAGACTCACTCAAGAGTTTGGACCTTAGCTTTAACATGTTTAAT  
GGTTCAGTTCCTACCAGTCTTGGAAAATTTAATCTTCTGGAGGAGCTTCATCTTTCTGCAAATGCTTTTGG  
AGGTGAATTCCCCACTCAAATTGTGAACTTTGGCAACTTAACTTTGATTGACCTTTCTCTAAACAACCTAT  
CTGGTGTAATTCCTGATAGATTAGGTGAACTTTCAAATTGCAAGTCTTGATTTTGTCAACCAATAGATTG  
AGTGGACAATCCCACAATCCCTTAGGAATATCACAACGCTGACGCGTTTTGCTGCAAATCAGAATAATT  
TTGTTGAAATATAACCCTTGGTATAACCCACATAACTGAGGAATTTGGACCTCAGTTTTAACAGATTA  
TGGTACAATTCCTCAGGACCTCTTATTCCCAATGAAATTGCAGTTTGTGATCTCACTTCCAATAAATTAG  
AGGGACCTGTTCTTCAAACATGTCGATAAATTTGATCAGGTTGAGATTGGGGCAAATGCTTTGAATG  
GATCATTCCATCTGCTTCATTTGAAAGCCTTCAAAGTTTGACCTACTTGGAAGTGGACAACAACAGTTA  
ACTGGACCAATTCCTTCTGAATTGGGAAAGTGCCAAAAGATGGCCCTTTTGAAGTTAGCCCAGAATAAG  
CTGAGTGGTGTATTCTGTTGAGTTGGGTGATATTTCTAATCTTCAGGTTACTGAGTCTTCAGTCCAATAA  
CCTAGTTGGAGAAATCCAAGTAACATTTACAGTTGAACAGATTGCAGAGGATCAATTTAGCTAGAAT  
TAGTTGACTGGTTCATTCCAAGTTCATTATCAAGTTTGGAGAAATCTCACAACTTGAATTTGCAGGGGA  
ATAATCTAAGTGGTCGAATTCCGGTTGACATTAGTAACTTAAATATGCTATTAGAACTCCAAGTTGGAGG  
GAACCAACTCGGTGGGCCTATTCTGATATGCCTTTGAGTTTACAGATTGCTTTGAATCTGAGTGGCAAT  
CTTTTCAAGGACCTATACCAAGTAGTTTTTCAAGATTGACTTCATTGGAAGTTTTGGATCTCTCTTACAA  
CAGGTTCTCGGGTCAGATTCCAGACTACCTGACGGGAATGAGAGGATTGACTAGGTTGGTGTCTTCAA  
CAATCAACTGTCTGGAGTTATTCCAAAGTTTGAAGATTTGTCAGTGTGAGACAGATGGAAATGGGGA  
TCTGATATATCCATACACAGTTAATCCACCACAAGCTGCTGCAAAAAAGAGAAAATCAATAGTTGTTGCA  
GTTGTTGTCCCAATTGCATGTGTAGCAACAATTGCTGTATTAGTGGTGATTGCTATTTCAATCTCTAGAAG  
ATATTACAGGATCAATGATGAACATTTTCACTCAGGATTAGAAATTTCTCAATCCCCTGTCGTTGAGGGA  
AAGTTTTTAACTGCAAACAGCATTACAAGTCAAATATAGACTTCACAAAGGCCATGGTAGCAGTGTCT  
GAGCCCTCAAATGTTGTGTTCAAGACAAGATTTTCAACCTACTATAAAGCTGTTATGCCGTCGGGTACAA  
CCTATTTTGTCAAGAAGCTTAATTGGAGTGACAAAATATTTAGTTGGGAAGCCATGAACTATTTGGGGA  
AGAGCTAAAAAATATTGGAAAGCTGAATAATTCAAATGTTATGATTCCTCTAGGCTATCTTTGGCTGCT  
GATAGTGCTTATCTTCTACGAATTTGCCCCATTGGCTCGTTATATGATGTTCTTCGTGGTAGCTTGGG  
CTACTCGTTAGATTGGGCAAGTCGCTACAGCATAGCTATTGGAGTAGCTCAGGGTTTAGCTTTTCTTCAT

GGATGTGAAAAGGGTCCAATCCTCCTCCTCGACCTTCCAGCAAGAGCATTCTCTTGAAGTCCCAGAATG  
AGGCTCAGATAGGAGACATTGAACTCTACAAGGTGATGGATCCTTCGAAGAGCACAGGCAGCTTTTCTG  
CTGTTGCTGGTTCTGTTCGGTTATATTCTCCAGGTAATGAACTATTACTTGGTTAATGGTAAAAGTTTAAG  
ATCCTTCAACATTGATTTATACTCCTTAAGGGTAATGTGACGTTTTTTGTCCTAACTGTCGTACCATGCTTT  
AAACTCATCTTTTTGTGTTTAATCTTCATATAGTTATTGTTGTTTTCAAACCTAAGACTTCATTATATCCTCC  
CACCATGAAACGGTGTGAACTATCTTTCGATATCTAAAGTGAAACGGTGTGTCAGTATAGCTTAGAGA  
GGGTGGGGTGCATTAAAATGTAACATGAGAAGCCTCAAATTTGAGCATATATTTAGTGATGCATTTCTT  
TTTGTGTTACAGAATATGCATACACAATGAGAGTCACAATGGCTGAAATGTATATAGCTTTGGGGTTGT  
CCTGCTGGAATTGTTGACAGGAAGGCCTGCAGTTAGTCAGGGAACCGAGTTAGCCAAGTCAGTGCTGA  
GCAACTCTGAGAAGCACAGCAAGTGGGATCACATTCTGGATTCTAGCATTCTAAAACATCGCTCAACGT  
TAGGAGCCAGATGTTAGCAGTCCTCAAATTGGCTCTAGCTTGTGTCAGTGTATCACCAGAAGGCCGGCC  
AAAGATGAAGAGTGTGCTTCGAGTGCTTCTCCATGCAAGGTAATCGGACGTCAAAGGAAAGTTAAGGA  
GAAAACCTGCCAAGGTGGTTTTCTTTTTCTTTTTGGGGAGGAGCTGCAAGTGGTGAAGGTGTTGTGAG  
CTATGCAGAATATGCCAGTTTTGCCAGTTTATACATATTATATTAATGTAAACATATAGATATATGATGAT  
AGTAGTTACATAACTTTGAATATGATGTTAGTTCTCAGTGTAACATAGTCCATTTTTCTTGTTTCATGTGTA  
ATATATATAATATATAAAAAGGTCTTTGGGAGTGAATCCAATTT

>M6-PGSC0003DMG400009380 M6 LRR-RLK

AAAGCTTACACCATTTTAACAAGCTCAGCAAACACCCATTTACCATTATTACAGAATAATCTCTGTATCT  
TCTTCCTGTGCATGAAAAACCATGCAAATGAACTATTACTCTTCTTTCTGAGTACATTCCCTTTGATTTTT  
GCTTTAAATCAAGATGGGTTGTATCTACAAAAACTGAAACACTCTTTGTCAACCTCAGATCAAGGGGTAT  
TTTCTACTTGGTATGAAAATGATCCTACCCCATGTAACCTGGACAGGTGTCACCTGTAATGACGCCGGAGA  
TTCTCCCTCCGTCGTCGCTGTTAACCTCTCCGGTGCTTCTTTCGCGGACCCTTTCCGGTTTTCTCTGCCA  
TCTTACTTCGCTTTCGTCACTCTCGCTTTCGAATAATCTTATTAATTCTACTCTTCCGGTTTCTATTTCTGAA  
TGCCGTAGCCTCACGTACCTTGACCTTTCAGAAATCTCATCGGTGGAACCTATCCCCGACACTATTTCCGA  
TCTTCCTTACCTCAGGTAACCTCAGTTTGAACCTCAATTTGCATTTCCCTGTTTTTTTTTTCTTTCAATTTTT  
CGAAAAATATCAACTAATTGTGACTTACATTTAGCCATATATGCGTATTTGGGTCTGTTTTAAGGTGAATA  
TAAGATCTATAGTTAGTGATATAACATAAACATCTCGCATTAGCAAGGTCCGGGGAAGGGGCTGTAAG  
CAATGATTCAGCTGAACCCACATAACCTGCCCGGATTTGCTTGCTGGTGTATAGTAACTCTAAATTA  
TTCATTGTTTGAATAAAAATGCAGATGGAACGAAATGACTATTATGATCTTTTATTGCAGATTTTGTATT

CTTCTTGTTTCATTAGTATATATTATGATCTTTTATTGCAGGTATCTTGATCTTAGCGGATGCTATTTTTCG  
GGGAATATTCCGGCAAGTTTCGGAAGATTCAAGCAACTGGAGACTCTTATTCTGACTGAGAACATACTT  
ACTGGTGAAGTTCCTGCTGCATTAGGTAATGTAACGAGTCTCAAGACACTTGAACCTGCTTACAACCCCTT  
TTGCATCGAGTCAGTTTCCTCCTGAACTCGGTAACCTGACTAATCTTGAGACATTATGGCTAAGCATGTGT  
AGTCTTGTTGGTTCAATTCCAAAAAGTATTGAGAAATTGAGTCGATTGACTAATTTTGATGTGTCCAATA  
ATGGACTGGTTGGGTCAATACCAAGTGCAATTTTCCAGCTTAATAGTATTGTTCAAATTGAGCTCTACAA  
TAATTCCTCACCGGAGAATTGCCTTCGGGATGGTCTAACTTGACCAGGTTGAGAAGATTGATGTGTCCG  
ACTAACAAGTTAAATGGGACTATTCCTGATGAGTTGTGCGAGTTGCCACTGAGTCACTCAATTTATTTG  
AGAATCAATTTGAGGGGTTTCTTCCAGAAAGTATAGCTAACTCGCCGAATCTGTATGAGCTTAAGTTATT  
CTCAAACAGATTTTCTGGTTCATTGCCTAGTGAACCTGGGGAAGAACTCGGCTTTACAGTATCTTGATGTT  
TCATACAATACATTTTCTGGTAAAATTCTGAAAGTTTGTGTGAGATGGGAGCTTTAGAGGATATTATAG  
TGATATATAATTCGTTCTCTGGGAGTATTCCGGCTAGTATTGGCAACTGCCGGAGTTTACTTAGGGTCAG  
GTTTCGGGCTAATAAGCTATGCGGGGAAGTCCCAACTGAGTTTTGGAGTTTGCCTCAGGTTTATCTCTTA  
GACTTTTTGGCAATGCATTTTTCAGGAAATATATCACACATGATTTCTGGTGCCAAAAATTTGTCTAACCT  
ACAGATATCAAGAAACAAATTCTCAGGGGTAATACCTAGTGAAGTAGGAAAGTTGAAGAAGTTGGTTGA  
GTTTTCCGCGAGTCATAATGAGCTAACGGGAGAACTTCCAGACACATTAGTGCAGCTAGGGCAGTTAGG  
AACCTTGATCTTAGTTTCAATGAGCTATCAGGGAAAATCCCCTTCGGAATTCACACAATGAAGCAACTC  
AGTGAGCTTGACTTGGCAAACAATGGATTTTCTGGGGAAATTCCGGAGGAAATTGGGACTTTGCCCGTG  
CTTAATTATCTTGATCTTTCTGGGAATTACTTCTCAGGGGAAATCCCACTCAGTCTGCAAAGCTTGAAGCT  
TAATAAGCTAAATTTGTCTAATAATCAGCTGTCAGGGATGATTCCTGCAGTTTTTGTATAAGGGTGTTTAT  
AGAGACAGCTTTCGAGGTAATCCAGGTTTGTGTCAAGGTGTTGCTGGTCTTTGTCTACGAAAGGTAGA  
GGACAGCATGAAGGATACTTATGGACTTTGAGAGCTATCTACACAGTTGCTGGCTTCGTTTTTCTTGTCG  
GGATTGCTATGTTCAATTTGGAAGTATCAGAAATTCAAGAAGATTAAGAAAGGAAACACTATGACAAAGT  
GGACATCATTCCATAAGCTTGGATTTAGTGAATTTGAAATACCCGTTGGCCTAGATGAAGCTAATGTAAT  
TGCAATGGAGCTTCAGGAAGAGTGTACAAAGCTGTCCTAAGCAATGGTGAGGCAGTAGCTGTCAAGA  
AGCTATGGGAGAGAACAGTTAAAGATGAAACCCCTTATGGTGCTCTTGAGTCTGATAAAGACGAGTTTG  
AAATTGAAGTTGAAACTCTGGGTAAAATTAGGCACAAGAATATTGTGAGATTGTGGTGCTGTTGCGATA  
CTGGGGATAGCAAGCTCTGGTATATGAGTACATGCCAAATGGAAGTTTGGGCGATTTGCTGCACAGTT  
GCAAGGCCAAATTGTTGGATTGGCCGTTGAGGTTCAAGATAGCTTTAGATGCTGCTGAGGGGCTCTCTT

ATTTGCACCATGGTTGTGTTCCCTCCAATTGTTCCACCGTGATGTTAAGTCAAACAACATATTGCTGGATGAT  
GAGTTTCGAGCCAAAATTTTCAGATTTTGGTGTGGCAAAAATTGTTAAAGCAGGCAGCAAAGGTGACGTT  
GAATCCATGTCTGTAATTGCTGGTTCCTGTGGTTACATTGCACCAGGTATTGATTTGTTCAAAACTATATC  
ACTGGCTTTAGTCATTTTTACCGATATATTGGCTCATCTAGCTTATATTTTCGGAAAGATTGCAATTTTCATT  
TTAAAGTAGCCAAAACATACTTAGTGAAATTCATTGATTGCAGAGTATGCATATACTCTTCATGTGAAT  
GAAAAAAGTGACATATATAGCTTTGGAGTGGTCATTTTGGAGCTGGTGACAGGCCAAAAGACCAGTCAG  
TCCAGAATTCGGGGAGAAAGATCTAGCTACTTGGGTACACACGACGTTGAACGAGAAAGGAGTTGATC  
AGTTGCTCGACCCAAATCTAACTCCAGCTTCAAAGAACATATATGCAAGGTTCTTGATGTTGGTCTACG  
TTGTCTTAACCAAACCTCCAGCTAATCGCCCCTCAATGCACAGAGTGGTGAAAATGATCCAAGAATCAGTT  
CCTTATAATGTGCCAGAAATGGAAAACAAGAATGGTAACTTTCCCCTCACTTTCCAAAGTCTGTCTAGT  
TAATATATTAGATCAAGTAATAGAGCAGGAGTGTTTCTTGCAAGAATTGGCAAGGAAGAAGCTGCATA  
ATGAAAAATTAGTAGTCTTTTTCAAGAATTAAGCATATTGTAATCTTTGAATTCTACAACCTTTATGAAT  
CTATATTACGAGGATTCATCATGAATTAACAAATTTTACGCTAGCTGTCAGCCTACCGCAACACAGATGG  
GGTACTGAAAGTTGTAAGTATTCTTAACTAATGCCTTTGATTAAGTTTGTTAACTTAGGTCCTACTTTGC  
TGTCCATCATTCACTGAGCTGGGGCCTTTAGAAGTAA

>M6-PGSC0003DMG400009561 M6 LRR-RLK

AAAACACAAAAACAAAAACAAAAATCTTTCATTTGTAGGAGCCCTTTGAGAGGGCGCGCACCTGCAAG  
TGCGCGCACCCAGAAAAAAGTTTAAAAAATAAAGAAGACGGTCTCTCTTCTATGCAATCAT  
GGCATCACAAAAAACTACAAAAACAAAAACAAAAACAAACATGTCCTCCTCCTTGTATCATC  
ATGTGTTTCATTAGCATTTGTGACAGAGGGAAAATTATCAGAGCCTGAGGTTCTTCTCAAGTTTCGTCAAT  
CATTAAAGTTTCGATGGAGATCCCTTCTCGACGTGGGATATTAATGTACCACCTTGCATCAAAGAGAACAA  
TAAGCCTAAATGGAACAATCTATTTTGCGAAAGTGGAAAGGTTTATGGTTTGAATCTTGAAAATCTTGGG  
TTAAGTGGTACCATTGATTTGGACATACTTAAAGACTTGCCAAATTTGAGAACCATAAGTGTTTTCAAAA  
ATAAATTTGAAGGTTCCCTTACCAATATTAATAAATTGCCTGCATTAAGAGTGCTTATTTCTCAAATAAC  
AAGTTTTCTGGTCCAATTGATCAAAGATATTTGAAGGGATGAATTCATTAAAGAACTTCACCTAGCAA  
ATAATGAATTTACAGGACCACTCCCTCCTATTTTGGTGATATGCCAAATCTAAGGGAGTTGAATATTCA  
AAACAATAAGTTTGAAGGGTCCAATTCCTCCTCCTATTACATCTATATTTTCTGCTTATGATGGTAATTC  
CTACCTCGATCTTTTCTTTTTTATATTTTATTAATTATTGTGTCCAATGAATTAACACTTTTTTTGTTTATC  
ATTATGCCATGTTTGTCTTCCAATCCTAGATCATTAATAAAGATCATATCATTGGTTACATAATAAACA

GATCATTAGATTTCGGGTCATCCATGTAAATAATAAGGGAAGAGACACAACACTATTCAGATTATTTCTGAAA  
AGTAGTAGTACTCCATCTCTTTAGAATTATAAAAAGAATTGTCTTAATAGAAAACCAACAACACTTTTTCTTT  
TTTTCTTAAAAACAATCCTCTCTTCTTTCAAGTTCTTGTGAAAGGATTCATAGAACAACTTCTGT  
AACAGGTACGCGATTTTACTATGGCTTAATATGTAGTTCGTCTTTATATGTGATTACATCTAGTGAAAC  
CAAATTCATTATTGATTTATTAATACTAACTAAACATAAGTATTTTTCTTCTTATAAAAATAGGCAATGATGGTC  
TTTGTGGTCCTCCTTTAGCAAATCATGCAATAAGGAAGATGAACAAAAGAAGCAAGAATCATCATCATC  
GTCATCGTCATCAGGTTGGAAGATTGCCCTTATTGTGGTTATAGTAGTTGTAGTGATAGGCATTATTGTG  
TTTGTACTAATCAATCGTCGCAAGAAGAATCACCAACAAGAAGTAGTACTTGGAGGATCATCATTAAAGTT  
CTTCTCACCAACAAGTCAAGACCAAAAATAATCCCTCAATCTCATGATCATCTAAACAAAATGGAACA  
AGGCCAATCATCAGCTGCATCTACTCCTGATCGCGCGTCTAATGATGGCGGTAAAAGAGCTGAAGTTGC  
TGGACAAAACCTTCTATTCTTGAAAGATGACATTGAGAAATTTGACTTACCTGATTTGTTGAAAGCCTCT  
GCTGAAGTATTGGGAAGTGGAGTGTGGTTCAACTATAAAGCTGCACCTAGTACTGGTCCTGTCATG  
GTTGTTAAGAGGTTTAGACATATGAATAAAGTTGGTAAAGAAGATTTCCATGAACATATGAGAAGGCTT  
GGAAGATTGAGTCATAAGAAGTCTTCTGTTATTGCTTTCTATTATAGGAAAGAGGAGAAGCTTCTTG  
TCTTTGAATATGTCAACAATGTCAGCCTTGCTGTTTATCTTCATGGTACCTATCTCTACTCTTTTTGTTTCA  
ATTTGTTTGTCTCTTTTTAACTTGACATGCACCTTTAAGAAAAAAAAAGAAAACCTTTGAGACTAAAGATAC  
TTAAAATGTAGTAGAATATCCTTTAATTTAATTTTGTGGTATGAAAAATTCATCAGTAAAGTTGGAATTA  
AAAAGTTCCCTAAAAGAAGAAGAAGAAAGAAACATTCTTTTTGAAACCAACTAAAAGATAAAATAGAG  
TATTAATTATCCTTTCTGTCTCAATTTAATGTCTTACTTTCACTCTTGTCTTTTCTAAAAAGTGTGTCGGT  
TTCTATATTTAGTAAGTTTTCAAATTGTGACATTCTACCTGCTTAGTTTAAGACCACAAAATTAAAAAAA  
TTCTTTATTTTTTTTAAACTATTTACTGACTTAGATTAAGACACTTAAATTGAAAGGAAGGATGACTCCT  
GCATCTATCTTACTTGTCTAGTATATGGGATGTCCAATAACTTGTCCAGTTTATAAACTAATGAATA  
ATTTTTCATTTTATGTCTATTTACTTTTGTCTATTAAATACTATTCATTTTTTAATGTTTAAATGACTTATATT  
TAAATAAAAGTGATTTAATAAACTACCCCTATTATTTACTGCTTCATAATCCATGTGCCAAGTCAGTAGT  
GTACGACGGACAGAGGGAGAGGGAGTAATTTTTTTTTCATAGTTTTGACCACCTTTTCTGATTTTTTCAG  
GTAATAGCAAATCACGTGGTAACCAAAGTCTTGATTGGCCAACCTCGTTTGAAAATTGTGAAAGGAGTAA  
GCAAAGGAATTTTATACCTTTACAATGAGCTACCAAGCTTAACATCACCTCATGGTCACCTCAAGTCTTCA  
AATGTTCTTCTAACTGAAAACCTTTGAGGCAGTTCTCACAGACTATGCCTTACTACCAGTAGTAAATGCTG  
AACATGCACATGAACACATGATCTCATACAAAGCACCAGAGTTAAAACAATCAGGCAAAATCAATAGAA

AAACTGATGTTTGGACACTTGGTATGTTAATCCTTGAGATCTTGACTGGAAAATCCCTTCAAATCTTTTA  
GGCAAAGGAACACAAGATAGCGATGATTTAGCGACATGGGTTAATACTACTCTTGAGATGAATCATCT  
GAGAAAGAAGTGTGGATAAAGAAATGAAAGGAACAAAAGATTGTGAGAGTGAAATGATGAAGTTATT  
GAAGATTGGACTAAGTTGTTGTGAGGTTGATGTGGAGAAGAGATGGGATATAAAAGAGGCAGTTGAA  
AGGATTGATGAAGTAAAAGAGAAAGGTGATTCAGCTCTAATGTTGCAACTAATGAAGTTGACAATATG  
CATACTCAAGATAAAAAAATATTTTTGATTGATAAGCTCATGATCATAATATGGAAATTTTGATTATACT  
GGATGCATATTGCATGACTATATACTTTGGGTATATGATTTTGTTCATGGTGGAGGATAAATTG  
AACCATGATGTGGGGTTACTACAAAAGAAAAAAGAAAAAAGAAAAAAGAAAAAAGAAAAATAAGTGATAG  
AAAAATGAAGTACTTAATTTTTGTTTGCATATTGTAAATTTGCCTTTATGAATCTATAGTCTAGGTGTG  
TTTCTTTATTTTTTTTATTATTCAATCATCAAAGCTTATTTGGGACTTGCTTTGCAAAATTGGC

>M6-PGSC0003DMG400009843 M6 LRR-RLK

TTAGAGACTATTTTGACCCTACGGCCAAAATTAATGGACCATATTTGTCATTTTCTTCTTCTCACCCCTAC  
CCCTCGTTTTCCCACTTCACTCTTCTCCATAGTTCCTCACTGTCTCCGAAAATCCAGTCCATTTTTCAGACCT  
CCTTTAACGCACAACATGACAACAACAACACTAACTTGGCCTCTAGTCACTAAACCAAATCACTCGAC  
ATTTTTAGTTGCATAACTTGCAATGTCCCCATTGATGCTTCTGCTCTGTTTTCTTCTTCAACTAATCTACAG  
TTTCTACTTTTGTCTTCTTCTTCTTCTGCTGCTGCTGCTACCTCTACCCCTTCTGCTCCATTCAACTCTT  
TGCTTCCCTCCGACGCTGTTTCTTATTGTCTTTCAAGTCAAAGCTGACCTTGACAACAAGCTTCATTACA  
CACTTAACGAGCGTTTTGATTACTGTCAATGGCGAGGAGTGAAATGTGTACAGGGTCTGTGTTGTGCGTT  
TTGTTCTTCAAGGGTTTAGTCTCCGGGGTACTTTTCCGGCGAATAGTTTAACTCATCTTGACCAACTCCGA  
ATCCTTAATCTTAGGAATAACTCACTTTCCGGTCTATTCTGATCTTTCTGGTCTTCCCAACCTCAAACCT  
CTGTTTCTTGATCATAATTTTTCTCTGGAACTTTTCCCTTTCTGTTCTTTCTATTGCGCCGCTTGTTATTCT  
TGATCTTTCTCGGAACAATCTCACTGGTTCCTGTTAGGCTTACTGTTCTTGACCGGTTGAACTATC  
TCCGGCTTGATTCCAACCTGGTTAACGGTTCGATTCCGCCGTTGAACCAGACCCAACTCCAAATATTCAAT  
GTGTCTAATAATAACCTTACTGGTCCAGTACCTGTTACTCCAACCTCTGAAGAAATTTAACATACGCTCGTT  
CTTACGGAACCCTAGTCTTTGTGGTGAGGTTGTCGACAAGCCGTGCCGTTCCGGCTCCATTCTTTGATTGCG  
CCTTCTCTGCTGCCTCTCCGCCACACCGTTATACCAAACGCACAGTCGCAAGGTATTCTTATTACTCC  
TCCACCTCAGCACAAACACAAAAAAGTTGGTGTGTTTTGGGTTTTGTAGTTGGAACATTGATCTTGATT  
GCAGCTGTTCTCTGTCTTTTTGCTTTTGTGAAAAAGAGAAGAGAATAAACTGAACTGAATCAAAGCAA  
CAAATGTACCATTGAGACCATCACTAATAGTGCGGCGAACGCAACGGTTTCTGAGCCAGATGATAGTA

GCCAAGAGATTA AATTAGAAAAGGAAATGAAAGTGCTTCAAGCCCCAAACAACAGATGAAGAGTGGA  
AATCTGATATTTTGTTCAGGGGAAACAGAGTTGTATTCTTTAGAACAATAATGAGAGCATCAGCAGAG  
TTGCTTGGAAGAGGCACAATTGGAACAACGTATAAAGCTCTGATGGCTAGTCAGTTAATCGTTTCAGTA  
AAGCGATTGGATGCTGGTAAAACCTTCGATTACGAGTGCAGAAGCGTTTGAGCAACACATGGAGTCAGTT  
GGGATGTTGAGGCACCCAAATTTGGTTGCAGTCAGAGCATACTTTCAGGCTAAACAAGAAAGTCTTGTT  
ATCTATGATTATCAGCCTAATGGCAGTCTCTCAATCTAATTCATGGTAAAGTTTCTAACTTTTTAATATAT  
CATTACTAGTTCATCTGAAATGGATCAATGTTTATTTTTCATTTTTGGTAATTCTGCTAATTGGTCAATGTG  
AAGTCAATTTGGTGGACCTGTGATGGAGAAAAAAGTGGAAGAGTGAGTTGTCTGTGGCTACTGGCTAA  
TCACTATCTAGCTTTTTTTTTTTCTTTACAGAAATTAGTTGTAGTGTGTTTGGATCTTTCAGTGGTTGCTATG  
GTTGTAGTAGCAGGGGACTTTTTTAGCTTTTAGTGTGGATGCCTAACATGGCTCCCATTGAGTTCACTAC  
CGACAATTGCAAAGTTTGTGTTTACAGGGCAGCCAAATAGTAATGTGTTTGTAGTTTCAGGCTGTCACTGA  
CTGACCGGTATGGGTTGATAGCATTATATTCCTCAAATATTTTTATCATGCATTGAGGCAAATGGTCCTTG  
GCTCTTGCCTGTCTTTTTGGTATTTATGAGTATGTTTGCTTCTTCTTTAAGTTGAATAGGATGTTGACA  
GTAACTTTTTGGTGTGTTTTCTTTTACTTGTCCAAATGTTCTCTGTTTCTTAAATATTAAATTTACTTTAAGTG  
AACGTTAACGTTGTTAGATAGAAGGATTAAGGGAAAGATCTAGAACATCCTTGGGAACTCTTAGTGTAG  
TGACAGAAATGGTATGAATTTGCTTAATTTACATTTTTTTGAATCTTAGGTATTGCATTTTTTTGTATCCCT  
TGTGATACGCTATCAAGAAATTGGGATTTCATTTTCATAGATTACTCTGCTCAAGAAGATTGATTCCTCTA  
TATAATTGTGTGTGTTTTTTAAGTGGTTGGTCTTTTACCTAAAACCTGATAATCTGTTGTTGTTTTACTTA  
TATATTGTGTTCAATTTTCTATTGTTCTGTTGGCAGGTTCAAGATCAACAAGGGCAATGCCTCTTCACTGGAC  
ATCGTGTCTAAAAATAGCAGAAGATGTGGCTCAGGGCCTTGCTTACATCCATCAAGCGTCAAATCTCACT  
CATGGCAACTTGAAATCCTCCAACGTCCTTCTAGGGTCTGATTTTGGAGCCTGTCTAACAGACTACTCCAT  
CATCGCGCTTGCAGATATTTCTTCGGAGGATGATCCTGATTGAGCATGCTATAAAGCACCAGAAGTGCGC  
AAATCAGCACGAAGAGCCACACCAGGGTCTGACGTATATGCCTATGGCATTCTGTTATTAGAGCTTTTAA  
CGGGTAAACCTCCATCTCAGCATCCCCATCTCTCTCCCCCTGATGTGCCAGATTGGGTTAGAGCTATGAG  
GGAGGATGATAATGAGGAGGATAGATGGCTTGAATGCTAGTTGACCTTGCTAGTATATGTAGCTTGAC  
ATCACCAGAACAGAGACCAACAATGAGGCAAATCTGAAAATGATACAAGATATAAAGGATAGTGCAA  
TGGTGGAGAATAACAAAAGAGATGCACATAATGGATACTCATAGCTTCTTCTGAATTGCAGTTACACCAT  
TAACCAGCGAGGGTACATGGTCAATTGTAAGTAAGTGTCATCTCCCCCTGGCAAACCTGCCATTGATCGA  
CAGCATATCTGTAATTGAGGTTTGCTCAGATAGACCAAATGACTCATCAACTATAATGGTGCTTGTACCT

TACTATTCAGCAGTAAACAACCTAAAACCTGACAGGTTAAGGTCTATCTGCTAGAACATGGTCAACTTAG  
TACTGAAGATTACGACACATTTTGTTCGAAATCCCTCTCTTTTTGGTCACACAAACATATGGTGCCTAT  
ATTTTAGGGCATTGTAGTAGGTGGTTTTGGTTGATTCTTTTTCTAAAGAACTTCAAATGTATTGCT  
TTACCTTAGTGGCAGAAGAATATTGTATAATCTTGAATGGTAAAGCTAACCCAAATTCTGAACTTCCCTT  
CTCTGCATGGTTGGTTAGTATCAACTTAGCAGGAGAAGAGTTGTTAATG

>M6-PGSC0003DMG400009941 M6 LRR-RLK

CTTCAAATACCCTTAAACCTATCCTAAAATTTGTACAAACCAGACTGAACTAACAGTGTAAACAATGTCCT  
CCCCAAAAAATATCCCTTTTCTCCAAATTTTCATCTTTTTGGTTTTACCATTAATGCAAACCTGATCTT  
GAAACCCTTTTGAAGCTCAAAGAATCCATGGTTGCTCCTGGAACCTTCTGCACTTCTTGATTGGAACAACA  
ACACAAATTACCCTTTTCCCATTGTTCTTTTTCTGGTGTTACATGTAACAATAACTCTCATGTTATATCTAT  
AAACATCACTAATGTTCTCTATTTGGTACTATTCCACCTGAAATTGGTCTTTTACAAAATCTTGAAAATCT  
TATTATTTTTGGTGATAATATACTGGTACACTCCCTTAGAAATGTCACAACCTTCTTCTATTAACATGT  
TAATCTTTCTTACAACAATTTTCTGGTCCTTTTCTAGAGAAATCTTGTTGGGGTTAATAAAGCTTGAATC  
TTTTGACATTTATAACAACAATTTCACTGGTGAACCTCCTAATGAGTTTGTAAGTTGAAAAAGTTGGAA  
ACTTTACATCTTGGTGGAAACTATTTTCATGGTGAATACCAGAAGTTTATTCTCATATTGTAAGTTTAAA  
GTGGTTGGGTTTAGAGGGAAATCACTTACTGGGAAAATACCAAAGAGTTTGGCTTTGTTACCAAATCTT  
GAAGAACTTAGATTGGGTTATTATAATAGTTATGAAGGGGGTATTCCATCTGAGTTTGGTAATATTAGTA  
CACTTAACTTCTTGATCTTGAAATTGTAATCTTGATGGTGAAGTTCCTCCAAGTCTTGAAATTTGAAG  
AAGTTGCATACTTTGTTTCTACAAGTGAACAGACTTACAGGTATTCATGAACTCACTATTTGTTTAGTTAT  
ACAATCAAATCTCTCTAATAACGTCGTTTGTCTGAATATATATTAGTTGACATGGTTAAATATTGTTAT  
AGGAAACATATTTGTTACAAATCATTTTCCAAGATGTAAGACTGAACATCAAATTGTTTTAAAATACTCAA  
TAGTAATAGTTGTTTCTTGAGTGACGTGCAAAGTCTAGAGTTGATAAGTAAAAGTGAATGGAGTGAGAA  
TATCATAAAAAGTCTCTTTGAGAAAACTGTGTGTTTATAGTGAAATGATGTTAGAGTATGAGTGTTAAT  
AGAGAGGTTCTTGTAACATATATGTATATGTGCAAAATATTATGCATATAAAGTTTTGAAGTCATAAT  
TCTGATAAATTTGAATCTTGAATTCGTAAAATTTAAATCTTGGATTGTTTTATGATTTACAGGTCGCATA  
CCATCTGAACTATCTGGTTTAGAGAGTTTGTATGTCGTTGATTTGTCTTTAAACCAACTGACGGGAGAAA  
TACCAGAGAGTTTTGTGAAGTTGCAGAATTTGACATTGATTAACCTGTTTAGAAACAACCTGCATGGTCC  
AATCCCCCTTTTATTGGTGACCTTCCAAATCTTGAAGTGTGTCAGATTTGGGGAAACAATTTTACTCTCG  
AATTACCGGAAAATCTTGGGCGCAACGGGAGGTTTTTGTCTTGATATTTCTGTTAATCATTTTACTGGA





GGTGCATTTTTGTTTGGATATGAAACAGAGTATGCATACACATTGAAAGTTGACCAAAGAGTGATGTA  
TACAGTTTTGGAGTAGTACTGTTGGAACCTTATCACAGGTCACAAGCCAGTTGGTGAATTCGGAGACGGT  
GTAGATATAGTCAGATGGGTAAATAAAACAATGTCCGAATTATCTCAGCCATCTGATGCAGCCTCAGTTT  
TAGCAGTCGTTGACTCGAGGCTACATAGTTACCCTCTTGCAAGTGTTATCAATTTGTTCAAGATTGCTATA  
ATGTGTGTTGAAGAAGAGAGTTGTGCTAGGCCTACTATGAGGGAAGTTGTTACATGCTTACAAATCTT  
CCTCAGTCTACTACTACTCCTACTCTCCTTGCCCTTTAAAATTGTGCGGATATTAAGTGTCTGGTTGAA  
AACTCGTGGAGTTTGAGGCCGGGAACACGAGCCTCATGAGTCTATTTGGGTATGGGGAACAAAAAAT  
TGTGCAAGTAGAGATATGTATTTGAAATGTATTGCTTGTTTTATATTTTGAAGTAGTTGTATAAAAAGG  
GGCATGAAAAAAGAAGGAAAAAGACTCCTTAATTACTTATTATGGGTATCGAGTATAATTATGTGGC  
CTTAGGAAATAAATATCAATATGGCAATTAGTCAATATTTGCTTTAATAACATGGCCTATGTAATGTTTT  
CAAGAGTTTGCGAAGTTAAAATTTG

>M6-PGSC0003DMG400010055 M6 LRR-RLK

TGAAGAAGTGTGCTTAGGCAACTTAAGGAGGTTCCAATTCAAGGAACTTCAGTCTGCCACAAACAATTT  
CAGCAGCAAGAACATACTAGGGAAAGGTGGTTTTGGTAATGTTTATAAAGGACGTCTTAGTGACGGGA  
TTATTGTAGCTGTGAAAAGGCTCAAAGATGGAAATGCAGTTGGAGGCAATCAACAATTTCAGACTGAAG  
TCGCGTTGATCAGTCTGGCAGTGCATCGGAATCTCCTCAGGTTGTATGGATTTTGTATGACACCAACTGA  
AAGGTTGCTGGTGTACCCTTACATGTCTAATGGAAGTGTAGCTTCGCGTCTCAAAGGTAACATATCTAA  
AACTGTCTCCTTTGGCCTATAATTACATTGTCCTTATTTGCTCAGCTCATAACGTATCATTTCTTGACGCC  
AAACCAACCTTGATTGGGGTACAAGAAAAGGAATAGCTTTGGGAGCTGCAAGGGGCTTATTATATCTA  
CACGAACAATGTGATCCAAAGATCATTATAGGGATGTGAAAGCTGCAAATATATTGCTTGATGATTACT  
GTGAAGCTGTTGTTGGAGATTTGCGATTAGCAAAGCTTTTGGATCATCACGATTCACATGTCACAACCGC  
GGTTAGAGGAACTGTAGGACATATAGCTCCAGAATATCTCTCCACAGGACAGTCCTCTGATAAGACGGA  
CGTCTTTGGTTTTGGTATTCTCTTGCTAGAATTAATCACTGGACAAAGAGCTCTGGAATTTGGTAAAGCA  
GCAAACCAGAAAGGCGCTATGCTTGATTGGGTAAGTA

>M6-PGSC0003DMG400010230 M6 LRR-RLK

AAAAAAGAGAAAAAATCTTGTAGAGAGAGAAACAAGAGAGAGGAAAAAATTTTTTTTTCCACCATTT  
TCCCATATTTTCCCTCTTGTTCTCCTCAACCATTTTCTGAGAAAAAAAATAGTTAAAATGAAGCCTCT  
GTTTTGAAATCACCTGCAAACCTGCAGTCAAGAAAAAAAAGAAAAGATATTACACTATTTTTTACAAAA  
AAAGAAAAAAAAGATTGATTTTTTCTTGTGTGATTCAATTTCTTCTCAATCTCTGTTATTTCTTTAATTT

TTTTCAAAAAGAAAAAATAAATTCTGTCCACCGCCTGCATTTTCCTATTGCAGTTATTAATTTTTGGCT  
TTTTTTCAAGAAATGTGACGAATTGGCATTTCATTTCTGCAATAAAAAGCAGAAAAAGATTTCAATTCT  
GTCTGGTAAGTTTTACTCTATACATTTTACCATCTTTTGGGTTTTTGGATTTTTATTTTTCTTTTGATTGCTT  
GCAAATTCAGTTATCCCTCATCATCATCTTTTTCTTTTTCTTTTTCTTTTTCTCTCTCTCTTTTTCT  
TTTCATGGTTTGGCTTGTGAAGTGTCTTAGGTTTTTACCAACCCCTTTTCAAGAAACATATTTTTACTAA  
TTTTTTTTCTTTGTGTTTATTCATTTCCAGATAAAAATTGAATCTTGAGATTAATCAATCGAGTTTGTG  
GAAGTGTGGTGAGGGAGATGTTGTTATAGTCTAAATTTTAGAACTGTGAAAAATGAGAGACCCCAA  
TTTTGTCCATTGTGTCAATAGGGTTAATAGTTTTTCATTTAACTTGTAATATAGTTTTACATTGTA AAAAAT  
GAATGATAAGCAAGCAGTGGTGTATTTGCTCTCTTTTTTTCAACTTGTTTATATTTACGAGTGAATTCAA  
TTGTTTGGAGAGTAATTTGTACAAGAAAGCTGGCGATTTTGTATAGAGTCCTGGCTGTTGACAGATATT  
GTTACTGCCTCAACAAGTATTGATTGTTGTGCAAGCTATGGGTGGTAGATGGAACACTTATGGAATC  
AAATTGTCGTATCTCGCTCTTTGATTATCATTTTGGATATTCGCGTTGTTGTTCTTTAATTCGGAAGGT  
AATTCTTATGCTTGAGTACAGTTCTATTGGTTTTGTAGTTCCGTCTTAGGCTAGTTTTAAGTGTGGTAT  
GTTTTCTTGTGGTAATTATTGTTGGTGTGAGAAACAGGATTGGCACTATTGAGATTCCGCGTGAAAGT  
GGATTCTGATCCGTATGGCATTCTTGAAAAGTGGAAATTCAGATCATTATGACCCGTGCTTGTGGTCTGGT  
GTCCAGTGTATGGACGGGAGAGTGCAAATGTTGTAAGTCTTGTAAATATACCCAAAAATTTCTAGT  
GTGAATCCTTTCTTATAAATTTATATGTGTTGATTTGCTATCGACAAGCCGGTTGAAATGATAATGACAG  
ACAAAGTGCAAAAAGTGTGAGTTTTTCTGTTTGTGGTTCTTCGGATATTGTTAAATCATTGTCTG  
TTCTCTATTTAGGGACCTTCATGGATATTCGTTGAAAGGAAAAGTTCGCAGCAGAACTTGAAATCTTACT  
CACTTAAAATCACTGTAAGCTTCAGCTATACTTATATACTTCTCATTGTTTCTTTAGCTCATATTCCTGTCC  
TCACCATCTGAAAAAGATTGTTCCAATCATTGATGTTTTTTTCTACTTACAAAATGCTTTCATGATTCTGG  
TCTTAGTCTAGAAACAATTTAGTGTGCTATGTCATGGAACATAACTTCCCTATCGTGGTAGACACTAT  
CTTATCACTAAACAATTTGAAATTGCACTATACTTACATGTCTGGTCAGTACAGGTTTCCATTTTTCGTCC  
CATTTGTTACTTAGGAGATGTCTCAAAAATATAAAGAGCGTCATATACATTAGGATATTTAGCATATTTGG  
TCAGGCAAATTCACCAAAGAAAAACTTTACCTTTTTTTTTTCCAAAGAAAAATGTATAAAGTGAATTGG  
GTAGATTTATGGTAATCAATGTTTACCTTCTGTTCTGCATCTATGTAATTAATAAATTTTCTTCC  
TCTTTGAATGCTTTTCTCCACAGTGTGCTTTCTGAAAACCGTCTTTTTGGTGCTATTCTAAAGAATTTGG  
ACGACTCAGAATGCTGGAAGTGTGACATTAAGAACAACAATTTGAGTGGAAAGAATTCAGCAGTAAT  
AGGAGATTTGCAATCACTTAGAAGCTTGTAAAGTTGATAATTTGTTGTGTTTCCGTCTTATAATATATTTGT

ATGTATTTATGCTACAACATTGCTAACAAAATGTTCTTGAATTGTGCTTGATACTTCTTTTCCAGGTTGATT  
AGGGACAATAACTTCAAAGGGAAGATCCCTTTGGAGATCAGAAAGCTTCATCTGCTCTCGGAATTGCAA  
TTTGATGATTACCTCACCTCTGGTGTGCTGTGCGGAACTGGTTGCATAAATAGAAAATTTGGGCGTTGGT  
AAGACTTCCGTAGTTGTTTGGTCCTTTTATCTTCATGTTTCAGCTGTGCTGCATTTTAAAGTCGCAGACTT  
GTTTCTATGTTCAATTATATTGAAAATGCATAAAATCCATCATTTGAGGAACATATACAAATATACTACTT  
TCATACGAACTACCTCCTGCTATAAGTTTGGTATTAACATTAATTAAGTGCAAACAATTATCCCATGGAG  
TTGCACTGAAGATCTTTGAGACATTTTCTATGCATAGTGTGTCCCACTAAACTCTCATACTTCCCTTACAA  
TAGTGAAGCAACTATGATGGTGATTGTGCGAAAGCATTGCCATGGGGCACTTGATACTTTCCTGTCTCCAA  
CCCTAATATTCAGAGGGGATTAGACTTTAGTGTCTTAAAGTTGTGATTCATCTTCTTATTCATCAAGACC  
TGTTTATGTGGAAATTTGACTGATCTATTGCATAATATTTGTTTATTTGTGCGACTTTTCTGTACATTAACC  
AATAAAATTGCTGGAAATGTGGTTATTCTTTCCCATGAGTAGAAGAACAACCTGGATATTATCGTATTCCCT  
GTTTTGTAGCATGAAACTTCAGCCAGCTATATGAATAAATTTATTCTATTCATCCCGTTGACTATGTTTGA  
ATTCTGGATCGAGATACTCATCTTGGACAAGTACCTTCAGCTTTACCTTATAACTGATGACAGATTACTG  
ACTACCTCTTAATATGCTAATGTTTTATTTCTCAATCACGCACTTTTAAGTTTCATACTCCGCTCTGAAAAT  
TTGGTGACTTTTTCTTGCAGCATCTGGCATGGCAGTTTGAGGCCATATAAGACTATAGGCTCCTTTCTCA  
GACCAATTAAGGGATGCTAGCATGGTATTTTAGTTTTTTCACACTGTAAGTAACTAAATACGTTTTTTTC  
ACCTTATGCTCTCTAAATAAGTTTAATGGTTCAGAAGCAACTTTTTTGTTCCTAAAAGTTCCACGTTTT  
TTGGATGCTCAGGCAGACTTCTGCTCAGACAACCTACCAAGTGAGTGAAAATATTTTGTGACATATCTTT  
TATTCGATTTCAAAGAATTGTACACAAAAAAGAAAGTATTTTATTCTCTTTTGTTTTTGCAGGTTCAAC  
TAGGCCTCACAATATCCACGCTGTAGAGAATCAAGCAAACATTGAACGCCGTAAGTTAGCTGAACAATC  
CAGTAACTTTGCTGCTGCTCCTGCTAACGGAGGGAAACCATTGGGACCTGTTGATCCTATTCCAAGCAGC  
AGAAGTAGTGGTTCATTTCTGTGCTGTGCCAAGTACTGAAGGAGCTCCTCCACCTCCTCTGACTACACCAT  
CACGGACCACACATGATCATCATCCGCCTCAAATCCTGGGGGACACTCTAATGGTGCTGTAAACAGCC  
AATTGCTAGTCAAGCTCCACCTGGTGGAAAGTCTGGAAGTACATGGAAGTATATAGGAATTGGCATTGG  
GGCTTTTCTGGTTGCTGTTTTTGTGTGCCTGATAATCATCTGCAAGAGCAAAGCTGCACAAACAATAGGC  
CCTTGAAGACTGGATTGAGTGGACAGCTGCAGAAAGCATTATTACAGGTACTTTTGATTTAATATTGT  
GTCAAAGCTGATGAATCCATATGTTCTAGTTCAACTGTTGGATTCATTTTTCTCTGGTGGATATAATCCGA  
ATCTTCAACTCCTACAATAGTTTTTGTTCATACTCCAAGATGATGTTAAAAGCATGTATTAATACTCCTGT  
GCTATATTGTTTCTCATGTCTTATGCATGAAATCAATTTTGCAGGGGTCCCAAACTAAACAGGCCGGAG

CTTGAAAATGCATGCGAGGATTTAGCAACATAGTTTGCCATCAAGATACATTTACAGTCTACAAGGGAA  
CTATATCCAGTGGAGTAGAGATTGCTGTTGTGTCAACTGCTGTAAATTCTTTGAAAGATTGGTCCAAGCA  
TTCTGAATTGGCCTTCAGGAAGAAGGTTAGTAGTTGTCATCTCCTTCACAAATAAAAAAACTGCTCATA  
ACTTATTACCATCTCACTCTTTCTGTTGAGATATCCTAGTCGTCTCGGTTTTTTTACTTATAAGATTTCTACT  
TATTGTGCACTTGGGTAGATCGATTCACTCTCAAGGATAAACCAAGAATTTTGTTAATCTAATTGGAT  
ATTGCGAGGAAGATGAACCTTTCCTAGGATGATGGTCTTTGAGTATGCAACAAATGGAACACTTTTCG  
AGCATCTGCATGGTAACTGGTTAATTGTTCAAGTTTCAGTCTAATCATTTTTGTGATTTTCGTTTAGATTA  
ATGCAGTCTACATGTTTTGTTGTTTCAGATGAAGAACTGAACCTCTTGACTGGCCTGCAAGGGTACGAG  
CTATAATGGGAACAGCATATTGTCTCGAGTACATGCACAATTTGAATCCTCCTCTGTGCGATTCTGATGTG  
AATTCACACTCCATATTTTTACGGACGATTATGCTGCTAAGGTATGCTTCATTTTGTATACCACATTGAAT  
TTAGAAACGTTTTACTGTCTTGAATTAACGAATCGTTTTTTATTTACACAGATTACAGAGCTTGCTTTCTG  
GTCAGATATAATGGTGAAGTCAAAGTCCTCTAGTGGTGGTATGTAGAGA ACTCTGAGCTACCACCACT  
TTCTGATCCCGAAACAAATGTCTACAATTTTGGGATTTTGTGCTGGAAGTAATTTCTGGGAAGTCACCTT  
ACTCGGAACGAGATTCTCTTCTGAGCTGGGTAAAGTCTCAATCTATGTAACCTAATTTTTCTCGGTGTTT  
AATATAGACTAGTGAAACGTTCTTCTCTGCTTTTGTAGGCGGAGCAATGCGTTAACGATAGACAGTTG  
GTTGATCCAAAATTGAAGTCGTTCAAGAATAATGAGCTTATGGTTATGTGTGAGGTAATGAGAGAATGT  
ATTGGAGAAGATTCAAGGAAGAGACCAACAATAAAAGAAGTGATTA AAAAGCTAAGGGAAGCGATTG  
ATATCTCCCCTGATGCTGCAGTTCCAAGGCTATCTCCCCTGTGGTGGGCTGAACTTGAGATCCTATCCTCT  
GAGGCAGCCTAATACTGACTAATGTGTCTTCTACTTTTGTAAAGTAGATAGTTGCTTTGCTATGCATAAA  
TGTTCTGAAATATACTTCACTTAATGTCAACTGTGTACCACATTTTTCTGTTCTAAATATATTAGTTCATTC  
TTTT

>M6-PGSC0003DMG400010348 M6 LRR-RLK

CTCTGTCTTCATCTCTTCGTCATTAATGCAACGTCGCCACA ACTAACCAGAAGTGATATGACATTTAGGT  
TGACATTTTTGGCAAACATCTCATAAAGGCAATATTAGCACTGAGCCACTGATGAAGCAAGAAATGTGA  
TAACTTCTCGTTGTTGGTTAGGATGTTGCATAATTTGTCACCTCTATATTGATTCTACAGTTACTTCGCAG  
GGTGAATACTACTGGATATATGGATCAGAAGACAATTGTGTTTTACGGTTTAGTGTGCGAGGCGTGTGTC  
ATGATGTCAGATTTTGTGAGTGGCTTACACTTACATACATACGATTTTTTACCCTGCAGAGATACTTGTTT  
TAGAGCATAAGCTACTATACAATGAAGTAAATGATGTGCTAAACCTATTAATTATTACCAATCTCAAATA  
GCATTGATGAAAAAATTCTCTCAAGTTTCATAAACAACATTACAATGTTTTTGCCTGTATTTTACTGAC

AATAAGAAGATACTCCTATGTGAAACCGTCATCAGCAATGAAGGCTCTGTTGTTAAGAGAATTTGTGCTT  
TCCCGATCTAAAGAGAACTTGGACCAATATGTTGATTTTGGCATATCAAGCCATAATTTATACTGTAAAC  
ACCCAAATAAAGCCACAGGAACACCAACACAAGCAGCAATGAGCTTTGGCTCCCAACCAATATGATTAC  
TATAGACCAAAAAGAATGTTGCTGCAAAAGCCAAGAGCATGCTAACTATTGAGACAAACAGCATTGTGA  
GTCCAAACAATAACTTGGCTGGCAACGACACAAGAAAATCACCTTCAGCATAGTGGGATGTCACAATGG  
ACAAGAACATAATGATGGAACTATTGAGGTGAATAGTGCCACTGCATCTGAATTGACAAAGATCCTAA  
ATCCATACAATTTTAGCAATATCAGAATGCAATTATCACTGTTATTACCGCCTGGCACAGTGAATCCAGC  
AGCAAAGACCATGGTGGTAATCAAAGTAGCGATAATCATACAAGAATTTGCAGTGTCTTTCATCCACCTT  
TACCCTTCTTTCAGTAATAACTTATGCTCTTCTGTGAATATTTCTCTAGGGGTTTTCCCATCTTTGTTTTGT  
AGTGCAAAGTTTTAATGATAAACACTTATTCTTGCATCAAAAAGGAAAGAATCAAGAATGTGTACATCC  
TTGACTCTGTAAAAACAATGGAGGACATATAAGCCTAGCTTCAATGACTGATGATCCCTGAATTTGGC  
ACAAGAATTTGGCCATGCAAGCATGCGTCTAATAGAGAAATTAGCTAAAATGAGCTTGTAAATTGGACA  
CCACCATCACTTTTGTCTTTTTAGTTATTCCAAAACCTATCCTTGAAAATAAAAATAATTCAAAGTAAAAATA  
TAAATATGAACAATTAACCTCTTGAACCTTATCACTTAGAAAAGGTAAATGAAAGACAAAAATGGAAGA  
AATTTTTAACAACTCTCTTGAACATTGAATAATTGAAAAATGTCAAAAGTTCAATTAGTATGGACTAGAT  
GGAGTAAAATATATAGTTTATATTTTATTAGTCCATATATCATAAAACAATTTTTTTTTTTGTTTCTAGTCAA  
TAGTAATATGAATTTTACACATCATATTAGGCCTCTTATTGTAATTTGAAGTAATTCCATTGACCCATCCCT  
GTGTAACACACTTGTGGAGATGTGTAACACATTATGAAGGGTAGAGAGGACTATTGATAGACACAAAA  
ATCACGCCAAAACCTAATGGCAGTATTCAAATGCAAGGCCACAAGTAGTGATCAGAAAGACCAAGATTC  
TTGCACATTTCAATTGAAGGCCAAAAACATTTTCCCTGTAGGTCACTAATGCCATTTTCTAGTCTTCACTAA  
AAGAAGTTGTTGAACTCCAAATTGTCACTCTAAACCAAAAAATACTCCAGTCATCAATTCTTGTTTTAGGA  
AAAAGAGAAACCTGTCAGTTATAGTTATGGGAAGAAGTTGCGATCTTCTCTTTGCTCTTTCGGTTTTTCAAT  
CTGCTCCATACTTCACTATCTATTAGTACTGATGAAGCTGCTCTTCTTGCCTTCAAATCTCACATTTCTTCTT  
CTGATCCTAACAAACATCTTAGCAACCAACTGGTCTTCTTCCACCCCTGTTTGCACCTGGATTGGAATCACT  
TGCACCTCCCCACACCATCGAGTCGCAGCTTTAGACATTTCTAGTATGCAACTTCATGGTACCATTTCTCC  
ACACCTTGAAAACCTCTCATTTCTTGTTCCTCAACATTAGTAACAACCTTTTCCGTGGAGATTTGCCCAA  
AGAGTTGGCTCATTTGCAGAGGTTGAAATTGATTGATGTCTCAAGCAATAACTTCACTGGTGCCATTCCA  
TCATTTTTAAGTTTGCTAGTAGACCTTTGCATTTTGCGCCTGTGCGAGCAACCAATTTTCAGGAAAAATCCC  
ATCTTCACTTTCCAATCTAACAAAGCTGGAGGTGTTGAAAATAAAGGGAAATCTTCTCGAAGGAGAGAT

CCCTCGAGAACTTGGTGATCTTCATTACATGACTGCTTTAAACCTGGGAAGTAACCACCTTACTGGCTCTA  
TACCACCATCAATTTATAACATTACAACCATGCGAATCATTGCTCTTACCAACAATAATCTTAGTGGTGAG  
CTTCCAACAACCTATATGTGACCATCTTCCAACTTGGGAAGGGCTTTACCTCTCAGAAAACATCCTAGGTG  
GCGTTATTCCACCAAACCTGGAAAAATGCAAAAACCTCAAAATTTTGTGATTGTCTGTAAACGAGTTCAC  
TGGAACCATACCAAGAGAGTTAGGCAACATAACAGATCTTACAGATATAGCTCTTGGAAATACAGCACTT  
GGGAGGTAGTATTGCATCTCCTAGCAAGAAATTTGAATTTTCTCTTTTTCACTCTTCCACAAATTTGGT  
ACTCATATATATATATATATATATATATATATATATATATATATATATATATATATATATATATATAT  
TAAGAACTACAGATTCTGTCATTAAACGACTGTAAGCTTACTGGTTCATCCCCGCAAGCATTTCACA  
TGTCAGCACTGCAGCTCCTAGGAATATCAGAAAACAGGCTTTCAGGTA CTCTACCTTCAGATTTAGGTGCG  
TGGAATGCCAACCTAGAAGGATTCTTGTGTTTTCAGAATAGTTTGAGTGGTTTTCTCCCTGCTTCTATCT  
CAAACCTCTTAGACTCAGAGTACTTGAACCTCTCATATAACAGTTTTACAGGCCCAATTCCTGAATCAGTT  
AGTGACTTAGAATACATTGAGATTTTGAACCTGGGGGGGAATAATTTTTTCAGCAATTCAGCATTGAGCT  
TCTTGACATCTTTGACAACTGTAGGAACTGAAAGAAATCACTTTTGCCGAGAATCCCTTGGACGGTTT  
TTTGCTGCCTCCATTGGGAATTTCTCTGATTCTCTGCAAATTTTCCAAGGATGGTATTGTAAACTGAAAG  
GCTTCATTCTGGAGAAATTGGCAATCTTACCGGTGTGATAAAGATGGATTTGTCACAAAATGAGTTGAC  
TGGATATATTCCAAAAACCATCCAAGGCTTGCAAACCTTCAAGAACTTTACTTAGGTGGCAACATGATA  
AAAGGAACCATACCAGATGTTATGTGCAATTTAAATAAACTTGGAGCATTAGATTTGTCAAAAAATCAAG  
CTTCTGGTTCATACCACCATGCTTAGGGAACGTTACCAATTTGAGGTATCTTTATCTAGCTAACAACAGG  
CTGAACTGGACCTTACCTTCAAGCTTGGGGAGCCTTCAAGATCTCCTAGAATTCAATGTTTCGTCCAATTT  
ATTAAC TGGGAAGTTCCTATAGAGATTGGAATTTAAAGGTTGCAACACTAGTTGATCTGTCAAAAAA  
TGATTTTAATGGTAAGATCCCTAGCACACTAGGGGGTCTGGATAGAATGCTTAGTCTTTCTCTAGCACAT  
AATAAATTATATGGGCCTATTCCAGATTCATTTGGCAAATGCTGGCCTTGGAACTTCTGGATTTGAGCA  
ATAACAACTTAGTGGTGAAATTCCAAAGTCATTAGAAGCTCTCGTGTATCTCAAATACTTGAACCTTCTCA  
TTAATGAACTCAGTGGAGAGATTCCCACGGGTGGTCCTTTTGCAAATGCCACAAGTCAATCTTTCTTGA  
AAAATTATGCCCTTTGTGGCGACTCTAAGTTTCATGTTTCACCATGCATCATCAAATCTCCAAGAGGTCA  
AAGAAAAAAAAGGCAATATTGGTTTTGGGAGTGGGTATGCTTTTTCTTGATTAGCCCTCACATATGTAT  
TTTTGAGATTGAGAAAGAAAAAAAAGAATGCAGGTCAATCTGATATGTCTCTGATAAAATGTCATGAAA  
GAATTCCTATTATGAACTTTAACAAGCAACCGAAAGATTCAGTGAAAGCAACTTGCTTGGTAACGGGA  
ACTTCTGCAAGGTCTACAAAGGGAGACTAAAGGATGGTACTCTTTTGGCAGCAAAGGTATTCAATGTGC

AATTGGAGGGTGCATTCAAAGTTTTGATACAGAATGTGAGATGTTGCGCAACCTCCGCCACCGAAATC  
TGACCAAAGTCATCACCAGTTGCTCCAACCTTGATTTCAAAGCCTTAGTGTTGGAATACATGTCCAATGG  
GACTTGATAAATGGCTATACTCTCACAACCTGTTCTTGGATTTATTTAGAGATTAGATATAATGATAG  
ATGTTGCATCTGCAATGGTATATCTCCACAGTGGTTGTTCAAATCCGGTGGTGCATTGTGACTTAAAGCC  
AAGCAATGTCTTGCTAGATCAAGACATGGTTGGCCATGTCAGTGATTTTGAATTGCAAATTTGTTAGGT  
GCAGGGGAGACTTTTGTCCAAACAAGGACAATAGCAACCATTGGATATATTGCTCCAGGTATTAAGCT  
TTTACATCTTCTCATGTTTTTAGAATA

>M6-PGSC0003DMG400010350 M6 LRR-RLK

TTTCTTTCATTTTTATCTTCCGCCAAATTGGTACTAATCATGTATTTTCTCACTTAACAGGAGAGATTCCA  
GCAAGCATTCTAACATGTCAGAACTGCAGAACCTAGGATTTGCAAGAAACAGGCTTTCAGGTAATTGTT  
GTGTAACAAAAAATCTGAAGTGTATGTAAATATATGACACGTGAGCTAACTCAACCCAAAAACTAGC  
TCATGAGGGGAGGATTGCCAATTCATATAATCTGACCACCTGTCTATTCCCAAACAATGTGGGACTT  
TTAGCCACTCTAACTCCCTTTCACACCCAGGTCCAACCTGGAGCGTGGACCGGCAGCCCAAAGGGGATG  
GGATGACCCAGATACCATGTAAAGATATGACATCCTCTCCTCATGAACTAACTTTTGGAGGAGAGTTAG  
ACTCATGTGTCATATCTTACATGGTATCAAAGCCACGTCCATCCTCGTTTGGACTCCCGCTCATCACTCCA  
GTTAGGCCTAGGCAAGAAGGGGTTGTTAGAGTGGTTAAAAGTCCCACATTTGTTGGGAATGAACAGGT  
GGTCTGCTTATATGAACTTGGGCAATTCTCGCTCATGAGCTAGCTTTTGAATTGAGTTAAGCCACATTT  
CATATTTTTACATTCTCAAGTACTAACATGTCAACTCATATATTTCCCTCTTGACAGGAGAGATACCAA  
TGGAACTAGGTTATCTCAGAACTACTGTTTCTGGCATTAGACACAAATGAGTTGACTGGTTCTATCCCT  
GCAAGCATTTC AACATGTCAGCACTGCAGATCTTAGGAATTGCAGAAAACAGGCTTTCAGGTA CTCTAC  
CTTCAGATTTAGGTCGTGGAATGCCAACCTAGACGGATTCTATTGTTATCAGAATAGTTTGAGTGGTTT  
TCTCCCTGCTTCTATCTCAAATTCTTCAAGACTCAGAGTACTTGA ACTCTCATATAACAGTTTCACAGGCC  
AATTCCTGAATCAGTTAGTGACTTAGAATACATTGAGGTTTTGAACTTAGGGGCGAATAATTTTGT CAGC  
AATTCAGCATTGAGCTTCTTGACATCTTTGGCAA ACTGTAGGAACTGAAAGAAATCACTTTTGCCGAGA  
ATCCCTGGACGGTTTTTGCCTGCCTCCATTGAAAATTTCTCTGATTCTCTGCAAATTTTCCAAGGATGG  
TATTGTAAACTGAAAGGCTTCATTCCCGGAGAAATTGGCAATCTTACCGGTGTGATAAAGATGGATTTGT  
CACAAAATGAGTTGACTGGATATATCCAAAATCCATCCAAGGCTTGTGCAACCTTCAAGAACTTAACTT  
AGGTGGCAACATGATAAAAGGAATCATACCAGATGTTATCTGCAATTTATATAATCTTGGAGCATTAGAT  
TTGTCAGGAAATCAAGTTTCTGGTTCCATACCGCCATGCTTAGGGAACACTACCAGTTTGAGGTATCTTT



ATCTAGCTAACAAACAGGCTGAATTTGAGCTTACCTTCAAGCTTGTGGACTCTTCAAGATCTCATAAAAATTC  
AATGTTTCGTCCAATTTATTAAGTGGGAAAGTTCCTATTGAGATTGGAAATTTAAAGGTTGCAACACTAG  
TTGATCTGTCAAAAAATGATTTTAGTGTAAGATCCCTAGCACGCGGGGTCTGGATAGATTGATGAAA  
CTTTCTCTAGCACATAATAAATTAGATGGGCCTATTCCAGATTCATTTGGCAAATGCTGGCCTTAGAATT  
CTTGATTGAGCAATAACAATCTAACCGGTGAAATCCAAAGTCATTAGAAGCTCTTGTGTATCTCAA  
TACTTGAACCTTCTCATTTAATGAACTTAGTGAGAGATTCCCACGGGTGGTCCTTTTGCAAATGCCACAA  
GTCGATCTTTCTTGAAAAATTATGCCCTTTGTGGTGA CTAAAGTTTCATGTTTCACCATGCGTCATCAA  
TCTCCGAAGAAGTCAAAGAGAAAAAAGATAATCTTGGTTTTGTACATCCTTTTGGGAGTGGGTATGCTAT  
TTCTTGCATTAGCCCTCGCATATGTATTTTTAAGATGGAGAAAGATAAAGAAGAATGCAGATCAAGCAG  
ATGTCTTTCCCGTAAAAGGGAAACGTGAAAGAATTTCTTACTATGAACTTGAACAAGCAACAGAAGGAT  
TCGATGAAAGCAACTTGCTTGGTAGTGGGAGTTTCAGCAAGGTTTTCAAAGGGATATTTAAGGATGGTA  
CTCTTTTGGCAGCAAAGGTATTCAATGTGCAATTGGA

>M6-PGSC0003DMG400010351 M6 LRR-RLK

ATCAATTCTTGTTTTAGGAAAAAGAGAAACCTGTCAGTTATAGTTATGGGAAGAAGTTGCGATCTTCTCT  
TTGCTCTTTTCGGTTTTTATTCTGCTCCATACTTCACTATCTATTAGTACTGATGAAGCTGCTCTTCTGCCTT  
CAAATCTCACATTTCTTCTTCTGATCCTAACAACATCTTAGCAACCAACTGGTCTTCTTCCACCCCTGTTG  
CACCTGGATTGGAATCACTTGCACCTCCCCACACCATCGAGTCGCAGCTTTAGACATTTCTAGTATGCAA  
CTTCATGGTACCATTTCTCCACACCTTGGAACCTCTCATTTCTTGTTTTCCCTCAACATTAGTAACAACTCT  
TTCCGTGGAGATTTGCCCAAAGAGTTGGCTCATTTGCAGAGGTTGAAATTGATTGATGTCTCAAGCAATA  
ACTTCACTGGTGCCATTCCATCATTTTTAAGTTTGCTAGTAGACCTTTGCATTTTGCGCCTGTGAGCAAC  
CAATTTTCAGGAAAAATCCCATCTTCACTTTCCAATCTAACAAAGCTGGAGGTGTTGAAAATAAAGGGAA  
ATCTTCTCGAAGGAGAGATCCCTCGAGAACTTGGTGATCTTACATGACTGCTTTAAACCTGGGAAG  
TAACCACCTTACTGGCTCTATACCACCATCAATTTATAACATTACAACCATGCGAATCATTGCTCTTACCA  
ACAATAATCTTAGTGGTGAGCTTCCAACAACCTATATGTGACCATCTTCCAACTTGAAGGGCTTTACCT  
CTCAGAAAACATCCTAGGTGGCGTTATTCCACCAAACCTTGAAAAATGCAAAAACCTCAAATTTTGTCA  
TTGTCTGTAAACGAGTTCACTGGAACCATACCAAGAGAGTTAGGCAACATAACAGATCTTACAGATATA  
GCTCTTGAATACAGCACTTGGGAGGTAGTATTGCATCTCCTAGCAAGAAATTTGAATTTTCTTCTTTT  
CACTCTTCCACAAATTTGGTACTCATATATATATATATATATATATATATTTCCCACTTGACAGGAAAGATA  
CCAGTGGAGCTAGGTAATCTTAAGAACTACAGATTCTGTCATTAACGACTGTAAGCTTACTGGTTCCA

TCCCCGCAAGCATTTTCAACATGTCAGCACTGCAGCTCCTAGGAATATCAGAAAACAGGCTTTCAGGTAC  
TCTACCTTCAGATTTAGGTCGTGGAATGCCAACCTAGAAGGATTCTCTTGTTTTCAGAATAGTTTGAGT  
GGTTTTCTCCCTGCTTCTATCTCAAACCTTCTAGACTCAGAGTACTTGAACCTCATATAACAGTTTTACA  
GGCCCAATTCCTGAATCAGTTAGTGACTTAGAATACATTGAGATTTTGAACCTGGGGGGGAATAATTTT  
TCAGCAATTCAGCATTGAGCTTCTTGACATCTTTGACAACTGTAGGAACTGAAAGAAATCACTTTTGC  
CGAGAATCCCTTGGACGGTTTTTTGCCTGCCTCCATTGGGAATTTCTCTGATTCTCTGCAAATTTCCAAG  
GATGGTATTGTAAACTGAAAGGCTTCATTCTGGAGAAATTGGCAATCTTACCGGTGTGATAAAGATGG  
ATTTGTCACAAAATGAGTTGACTGGATATATTCCAAAACCATCCAAGGCTTGTCAAACCTTCAAGAACT  
TACTTAGGTGGCAACATGATAAAAGGAACCATAACCAGATGTTATGTGCAATTTAAATAAACTTGGAGC  
ATTAGATTTGTCAAAAAATCAAGCTTCTGGTTCCATACCACCATGCTTAGGGAACGTTACCAATTTGAGG  
TATCTTTATCTAGCTAACAACAGGCTGAACTGGACCTTACCTTCAAGCTTGGGGAGCCTTCAAGATCTCCT  
AGAATTCAATGTTTCGTCCAATTTATTAAGTGGGGAAGTTCCTATAGAGATTGGAAATTTAAAGGTTGCA  
ACACTAGTTGATCTGTCAAAAAATGATTTAATGGTAAGATCCCTAGCACACTAGGGGGTCTGGATAGA  
ATGCTTAGTCTTTCTCTAGCACATAATAAATTATATGGGCCTATTCCAGATTCATTTGGCAAAATGCTGGC  
CTTGGAACTTCTGGATTTGAGCAATAACAACTTAGTGGTGAAATTCCAAAGTCATTAGAAGCTCTCGTG  
TATCTCAAATACTTGAACCTTCTCATTTAATGAACTCAGTGGAGAGATTCCCACGGGTGGTCTTTTGCAA  
TGCCACAAGTCAATCTTTCTGAAAAATTATGCCCTTTGTGGCGACTCTAAGTTTCATGTTTCACCATGCA  
TCATCAAATCTCCAAGAGGTCAAAGAAAAAAAAGGCAATATTGGTTTTGGGAGTGGGTATGCTTTTTCT  
TGCATTAGCCCTCACATATGTATTTTTGAGATTGAGAAAGAAAAAAAAGAATGCAGGTCAATCTGATATG  
TCTCTGATAAAATGTCATGAAAGAATTTCTATTATGAACTTTAACAAGCAACCGAAAGATTCAGTGAAA  
GCAACTTGCTTGGTAACGGGAACTTCTGCAAGGTCTACAAAGGGAGACTAAAGGATGGTACTCTTTTGG  
CAGCAAAGGTATTCAATGTGCAATTGGAGGGTGCATTCAAAGTTTTGATACAGAATGTGAGATGTTGC  
GCAACCTCCGCCACCGAAATCTGACCAAAGTCATCACCAGTTGCTCCAACCTTGATTTCAAAGCCTTAGT  
GTTGGAATACATGTCCAATGGGACACTTGATAAATGGCTATACTCTCACAACCTGTTCTTGGATTTATTC  
AGAGATTAGATATAATGATAGATGTTGCATCTGCAATGGTATATCTCCACAGTGGTTGTTCAAATCCGGT  
GGTGCATTGTGACTTAAAGCCAAGCAATGTCTTGCTAGATCAAGACATGGTTGGCCATGTCAGTGATTTT  
GGAATTGCAAAATTGTTAGGTGCAGGGGAGACTTTTGTCCAACAAGGACAATAGCAACCATTGGATAT  
ATTGCTCCAGGTATTAACCTTTTACATCTTCCTCATGTTTTTAGAATA

>M6-PGSC0003DMG400010400 M6 LRR-RLK

GGCATTAAATCGAGCCTTCGATTGGAACCTCACCACATTTTGTCCAGAAATTGGAGCTCAGACACACAC  
TTCTGCAGCTGGTATGGAGTTTCATGCTTGCACCAGAGAGTTGTAGCTTTGCAACTTCTAATTTGGCCA  
TTCAAGGCAGAGTTTCTTCAGAAATTGCCAACTTGACTCAACTTGCTCTTCTTGACCTTAGTAGCAATGAT  
TTGAATGGCAATTTACCAAGTGAGTTGGGCTTCTTGCAACAACCTGAGACTTTTTAATGTGACTGGGAATT  
CTCTTGATGGAACCTTCTCTGAATATAAGCCGTTGTCGTGTACTGCAAGAACTTCATTTATCAGATAAC  
ATGATCAAAGGAAGCATACTCAAGAACTTGGTCGTTTAAGTCAACTTAGAATTTTGCCTCAACGACA  
ATAATCTGACAGGAAAGATTCCACCTTTATTAGGAACTTATCAAAGCTGGAATATTTTTATCTGCATGA  
AAATGATTTGGAAGGTGAAATACCTGATGAAATTGGTGATCTTACCAATTTGAGGCTCCTTTCCTTCGT  
GGCAATGACTTCACTGGATCGATACCTGCTTCAATTTTCAATATTTCAAGATTACAAATTGTGGATCTCTC  
GATAAATGCCTTATCAGGGGAACTTCCAAGTGATTTGGGTAATTATCTTCTATCCTTGAACATCTTTTTC  
TGGACAGCAACAGGATCACGGGGAAAATCCCGTTTCTTTATCAAATGCATCAAAGATTACTCATCTCTT  
CTTACTGAAAATGATGTGCAAGGAAATATCCAATGAGTTTGGTAAGTTGCATGAACTAGTCTGGTTT  
GAATTTGAATATAATCGAATTTCTGGTACCATTCCATCCAGCTTATTCAATATTTTCGTCTCTTGAATCCTC  
AAAGCCAGGCATAATTACTTAAATGGGCATCTCCATATGATCTTGGTACTTGGCTACCTAACTTGCAGG  
AGATTTTCCTTTCACACAACCAATTCAGTGGAGATCTACCCGCTGCAATATGCAATGCTTCAAAGCTTGA  
AAATCTTGAAGTTGCAAACAATAGTTTTACCGGACCGATTCCCATGATGTTAGGTAACCTGGTGGACCTT  
ATAACTCTAAATCTGCAAATAATCTGTTGGAGAACAATCCTGGAGCCACACAACCTTGACTTCTTGAATT  
CATTGGTAACCAGCAGGAATCTGGTGTACCTGATTCTTGCATCTAATCCTTTGAATGGAATTTTTACGGA  
ATCAATAGGAAATTTATCAAGCAATATCAGGGTCTTGATGCATTCGACTGTGGAATTAGAGGCAGTAT  
GCCAACAAACATTGGAAACTTAAGTGGCTTGATTTTCTGGGATTAGCAAGTAATAACATTGTCGGTAAT  
GTGCCCCCTCGTTTGTGGCCTGCAAACCTGGAAAGGCTGTATCTTACTAGAAATAAATTAGAAGGG  
ACATTTCCAGCTGAACTGTGCAGCATAGGAAGATTAGGTCTACTGCATTTGGGAGAAAACAGACTGTCA  
GGAGAAGTACCCTCGTGTATCGGAAATCTGACTGAATTAAGAGTAATGTCAATTGCTGCCAACAATTTCA  
GCTCAAAGTTACCTTCAAGTTTCTGGAGATTAGTAAAGCTTGATGATCTGAACTTATCGAGAAACCTGCT  
GCATGGTTTCTTCCCTTCTGATGTGGGAACTCTGAACGCAATGAGGATCATGGACCTCTTTTCAATAGG  
TATTTTGGTGAATACCCAATTCATAGGATCTCTTCAATATCTAGTTTCACTAGATATGTCAAGAAATGC  
ATTACAAGGTCCCATACCGGCCACATTTAGCAATCTAATAGTTCTTGAGGCTCTGGATTTGTCTACTAATG  
CTCTATCAGGTGTGATTCCCAAATCTCTTGAGCTATTGCGAGATCTCAAGTATCTCAATGTTTCTTCAAT  
AACTTGCAAGGAGAAGTTCCAAAGAAAGGGTATTTGCAAATGTTAATTACCGGTTCTTGATGGGAAAT

CCAAGACTTTGTGGAGCACCTGACTTATATATTCCTATATGTCCAGCTCAAGGTAGAAAGACAACAAGG  
AAAAAGTCCATTATTCTTAGAACAGCAGTACCTGTTGCTGTAACATTTCTGATATTGGTCGCGTTGTTTT  
CACATGGATGATTTGGTCAAGAAAAAACATGCGATTGGAAACAATGAATCGGATTACCTCCTAGAAT  
TGCACATCAGAAAATCACTTATTATGAGCTTCTCCAAGCTACAGAAAATTCAGTCAGTCCAAGCTAATA  
GGAAGTGGAAGTTCCGGTACAGTCTACCAAGGTACATTTTCTGGTGGTGTCTTTGCAATCAAAGTTT  
TTGATATGCAATGGCAACGGGGTTTAAGAAATTTTGATTGAGAATGTGAAATTTGAGCAATGTAAGAC  
ACAGAACTTGGTCAAGATAGTGTGACTTGTCAAATTTGGATTTACAGCAATTGTGCTGGAGTACAT  
GCCTAATGGAAGCTTAGACAAAAGATTATACTCTGATGAAAATTGCTTGAGCCTGGTTGAAAGACTCAA  
TATAATGATCGATGTAGCACTAGCCATGGAGTATCTTCATCATGATTATACAGTGCCCATTGTGCACTGT  
GATCTGAAGCCAGGTAACGTGCTTCTTGATCAGGATCTGACTGCTCATGTTGCAGATTTTGGAAATTGCAA  
AAATGTTGGCACAAGAAGGAAACATGGCTCAAACCAAGACTCTCGGAACTATTGGTTACATTGCTCCAG  
GTATGATAATGTCTTGAAATGAAGGTGTCCTATGCTGGTACTTTTTTCCTTTATGTCTACCATAGCTTTAT  
ACTGTAACATGGATAACTACACATTTTAACTGGGAATTTGTTGAAACAGAATATGGTTAGACGGGCAA  
ATTTCCACTAGCAGTGATGTTTATAGCTTTGGGATTTTGTGCTTGAGACATTCACAAGAAAGAAGCCTA  
CAGATGACTTGTTTAGCGGAGACTTAAGCTTGCATAAATGGACATCTCTCTCCTTTCTGATGCTGTA  
GATATTCTGGATGCTGACCTTGTAGCGACATTGGCTTTACAATTGATGAAAACCAAGCCAAATCAAAC  
AATTGCTGGTTTTGATAATAAATGTTGCATTCTGTGTTTGAAGAGTTGCCAGAGGAAAGGATAAACAT  
GAGAGAGGTTGTGGTGCAGCTAAACAAGATAAGAGCTGAATTAACCAAGCTTTTAACTCAATCCCATT  
AAAATTTGAGAAAGAGGATTGATGCAGCAACAACCAAATTCAGTTTTCCACCTTCTATGGCCTGTCAAAA  
CATCTGTTATTTCTTAACATTTTCTTT

>M6-PGSC0003DMG400011160 M6 LRR-RLK

AAAAATCTCTCTTCCCTCTCTCTGAGTCCTCTCACTTTCACTCATTCTTTCATATCATCTCCACACCTGAT  
TCTCTTACACCAAAAACACAGTACAAAAAAATAGTAAAAAAATTTGAAAAAAAACACAAACAA  
ACTCAGATAAAGCAAAGGAGAAACAGAGTTGGTACAAATACCAACAAAATAGACAGACTGATAAAGA  
ACCTGTTTCTTTTCTTTTACTCTCTCACTTTTTTTTTTTTAGTTTTTACTGAAAAAAGACACAGTTTTTA  
CTCATTTATATGAACCAAATGTTAAATAAATTCATGGGGTTTGTCTTAATATATGTGTTGAATCATTGAT  
TTACTTTCTTGGTTTTTTTTTTTATCATCAATGGCTTCCATTTCTTGATTTTTGTTCTCTTTGCTTCTGT  
TTTACCCTTTTCTTTGTTTTTTCATATGAAGCTAGGAATCATGAAGGTAACAAAAAAAAGAACCCC  
ATTTGCTTATTTTCTAGCTTTTGAATTTCAAATTTGATCTTTTGTGTTGATGTATAGTGGAAGCTTTGATT

GCTATAAGGAGAAGTTTGGATGACCCAAAAGGAGCTTTAAGTAATTGGGATGAAGATTCTGTTGATCCT  
TGTAGTTGGGCTATGATCAGTTGTTCTTCTGAAAATCTTGTTATTGCACTGTATGTTAATAGTGTGTTTTT  
TTTTGGAATTTTATGGTACTATATGATAATATTGGTTGTTAAAGATTGAAACTTTTACTGTTTTATCAACTA  
AGAAAGTATTTTTTTTTTGTGTAGAGGAGCTCCAAGTCAAGATTTATCTGGGGTTTTGTCTGGGATGAT  
ATCAAATCTTACAAACCTTAAACAAGTGTAAAGAGACAATTTTTTAATGTTTTTGTGTATGTAATTTCAA  
TTTTGATGACCACATTTGGTTAATTTTCTTGTATGTTGAAAATTGTGTAGTTTATTGCAAACAACAACAT  
TTCTGGGCATATTCCAAGAGAGCTAGGGAAACTTCTAATCTTGAAACATTGGATCTGTCTAATAACCAT  
TTCTCTGGTCATGTTCTGATTCTTTGGGTCTGTAAACAGTCTTCAGTATCTGTAAGTGTATTAACTTTC  
AAAATTTTCATTTTTGTGTGATTATCAAGATTATGTTTTAGAGTTGAATGGTCTAAAACACACCTGAAGT  
ATCACGTTTTTGCGAGTTTTCTACGAATTATCACCTAAAACATATCTCACCGCCATCTCATAGTCGATGTG  
TGTTTTGATAAATAGTTGGTGATGGTTAAGAAGGAAAAGTGAACACATGATAGTTTAGGTAGAAAATG  
TGCGAAATCGTGATACTTCAAAGTGTGGTTTTTACCATTATCTCTTGTTTTTCTGAGTACCCTTTTTCTTT  
AATTGTTGTTTTCTCATGTAGACAATGTTTAATTGCTATCTTATTCTTTGACTATATGTTTTTGTTTTTTTT  
GATGTCTTGTCTGGGGCTTGTCTTGTAAATGGAGTAGAAGGTTGAACAACAACAGCTTGTCTGGTGCTAT  
TCCTCTTTCTTTAGCCAGGGTACCTCAGCTTGCTTTCTTGTGAGTATTGCTTCTTTAAATCTATGACTTTTG  
TTTGATTTTGTTTTATTCTTTTGTCTGATTGTCCTGAGAATTGGAATTATCTAGTCACTTTCTTGAATCAGC  
CTTATGTTAAAGCTTTTTTGGTTAAAGGAAATTGAATAGTTTGTCTGTTTAGGGGTATTATTATCTTTTA  
ACTTATTATTCATTTTTATTTTATTTAGTATGACGATGATATGCAATGAGCTTAAATGAAAGTGGGGATTC  
ATATTGTTGACCCCAACTGTTTGGGACTGAGGCGTTGTTGTCGTTGTCGGATAGTGTGTCTTTTTTTTG  
TATAAAGAAATGAATAGTGTGTTCTGATTAGGGGTATTATTATATTTAACTTATTTTTAACTTTTATTATA  
TTTAGTATGACGATGATATGCAATGACCTTAAATGAATGTGGGGATTCATTATGCGGACCCCAACTTGTT  
TGTAAGTGAAGCGTTGTTGTTTTTGTGTCATCGAATAGTGTGTTCTGTTTTTGTGTAAAGGAAATGAAG  
AGTGTGTTCTGATCAGGGGTATTATTGTATTTTAACTTATTTTTTACTTTTATTTTATTTAGTATAATGATG  
ATATGCAGTGAACCTTAAATGAAAGTGGGGATTCATATTGAACCTGTTTGGGATTGAGACGTTGTTGTTGT  
TGTCGAATAGTGTGTCTGCTTTGTGTAAAGGAAATGAATAGTGTGTTCTGTTCAGGGTTATTATTATATT  
CTATACTTATATTTCACTTTTATTTAATCTAGAATGACGATGATATGCAACGAGCTTAAATGAAAGTGGCT  
ATTCATATTGCCGACCCCAACTTTTTTCTTGGTTGAGACTGAGGCGTTGTTTCGCGTCGTTGCTGTTGAAT  
AATGTGTTCTGTTT

>M6-PGSC0003DMG400011205 M6 LRR-RLK

ATGTCTATGATTGTTTCTGATCCATTTTCATGTAAGTTGGAATTCTTCCAACGTTTCATGTATGTAAT  
TGGACAGGAATTGTATGTGACAAGAAAATGCATAGAGTTGTTGAGCTTGATCTTAGTCATCATTTCGTTAC  
GTGGAACGATTTCTCCTTCTCTCTCTGGGCTCTCTTCTTGCAGATTCTTGATTTGTCTGGTAACTTGTTAG  
AAGGACAAATTCCAGCTGAATTAGGCAATCTTGTTAAGCTAAATCAGCTTAGTTTGTCTTCTAATCTCCTC  
GAAGGGGAAATCCCAAACGAGTTAGGATTCTTCATGAATTGAAGTATCTTGATTTGGGAACAAACAAT  
CTTTCTGGTGCAATTCTCTGTCTTTGTTCTGTAATTGCTCTGCTTCATTACAATATATGGACCTTTCTAAC  
AATTCGCTTCGCGGTGAGATCCCTATGAATGATCATTGTGAGTTGAGTGGTTTGAAGTTTCTTCTTTTATG  
GTCTAATGAACTTGTTGGTGAAGTTCCTATTGCTCTTTCGAAATCTACAAAGCTAGAATGGCTTGATCTTG  
AATCGAATTCGTTGAGTGGTGAACCTTCTTCTGATATTGTAAGTAAAATGCCAAAGTTACAGTTTTTGTAT  
TTGTCTTACAACAACCTTTGATAGTCATAGTGGTAATACTGACCTGACGCCTTTTTTTCGCGTCTTTAGTTAA  
TTCTACTAACTTGCAAGAACTTGAGTTAGCTGGGAATAATCTTGGTGGGGAGTTACCTCCTATTATCGGT  
AACATCTCCAAGAACCTTGACAGATTCATCTTGACGATAATCTTATCTATGGTCCAATCCCAAACACAAAT  
TTCGAGTCTTGAAATATTACTCTATTGAATTTGTCTAGTAATCATCTGAATGGTACAATTCCTCCTGAGTT  
GTGTCGAATGGGGAACTTGAGAGGCTTTATCTGTGCAATAATCACTCTCTGGTGTCAATTCCTTCTGCTT  
TTGGAAATGTTTCTCATTTAGGCCTTCTTGATCTGTGCAAAAACAACCTCTCTGGATTAATCCCAAATACC  
TTTGCTAATCTCCGCAACTGAGGAGGCTTTTGTGTCACGATAATCACCTCTCTGGAACGATTCCTCCGA  
GCTTAGGTGATTGTGTTAACTTGAAATACTTGATCTTCTCACAACAGAATCACGGGGACGATTCCAAG  
TGCAGTTGCTGGATTGAGTAGTTTGAAGCTCTATCTGAACTTGTCTAGTAATTACCTACATGGTCCAATTC  
CTTTAGAGCTCAGCAAATGGATATGGTGTGGCAATTGACTTGTCTTTGAATAATCTCTCGTCTAATGTC  
CCTTCACAGCTTGGCAGCTGCATTGCTCTCGAATACTTGAATCTATCGCGTAATTCCTTAGAAGGACCTCT  
TCCATCTTCGATAGGAAGATTGCCTTACCTTAAGGAAATCGACGTTTCATTCAATGTGTTGAGTGGGGAA  
ATACCACAGACATTTCAAGCATCGTCGACTTTGCAGAACCTCAACTTCTCCTATAACCGTTTCTCGGGGAA  
CGTGACAGATACTGGTGCATTTTCATCACTAACCATCAGCTCATTTCATGGGAAATTTCAAGCTTTGTGGCT  
CAGTACAAGGGATGAGAAGTTGCCATAAAAAGAGGGGTAGACATTTTATTATCACAATCCTCCTTTTATT  
GCTTATAACTCCTATATTTTGCATAGTCGGGTACCCTCTCCTCCTAAGATCAAGATTCAGGAACCAATTCCG  
CGAGTTTTAATAAAAAGCAAGGTAATTGAAGATGTGGAGCAAGGTGGTGGGAGGAAAGAGCAAAAAGTA  
CCCGAGGATATCTCGTATGCAGCTGATTGAAGCAACGGGAGGTTTTAGCAGCTCGAGTTTAATAGGAGC  
AGGAAGATATGGGCGTGTTTATAAAGGAGTCCTGAAGAACAACATGAGCATAGCTGTAAAGTAATTG  
ACACAAAAGGAGGTGGAGAGATATCAGGTAGCTTCAAAGGGAATGTCAAATCTTGAAAAGGACTAGA

CATAGGAACTTGATAAGGATCATAACGACATGTAGCAGACCGGACTTCAAAGCTCTCGTGTTCCCTCTGA  
TGTCAAACGGAAGCCTAGAGAACCATCTGTACCCAAGCCACAGGCTGAGACATCAACTTGACTTAGCTC  
AATTGGTTAACATTTGCAGTGATGTAGCAGAAGGAGTGTCTATCTCCACCACTATTCGCCTGTAAAGT  
CGTGCATTGTGATCTAAAACCAAGCAATATCCTTCTTGATTACAACATGACAGCTTTGGTAACAGATTTG  
GGATTTCAACATTAGTAAAAGCTGTTGAGGAAAATACTAATCCTATCGACGAATCAGTTAATTACAACCTC  
AACAGATGGATTACTTTGTGGATCAATTGGTTACATTGCTCCTGGTTAGTAACAAATAATAGTTCTATTCT  
ATCTAATTCATTTCAATTTATATGACTAAAGTTTCTGTTTCTTTGATTGTAGAATATGGAATGGGAAGGAG  
GGCTTCAACAAAAGGAGATGTATTTAGCTATGGAGTTTTGTTACTTGAGATTGTGACAGGTAAACGTCCC  
ACAGACGTTCTATTTCAACAAGGCTCGAGCTTACACGAATGGGTGAAGAGTCAGTATTCACATAAACTC  
GAGGCAATGATTGATGAAGCATTACAAAGATGTACAACAGTTCAACGCGATAGCAATATATGGCACGAT  
ATCGTGTTAGAGTTGATTGAACTTGGCTTAATGTGCACTCAGTACAATCCATCAACTAGGCCAACAAATGT  
TGGATGTTGCACTTGAAATTGGAAGGTTAAAACAGTATGTTTCAACTTCTTCAAACACTGTTACTGAAGA  
TGTCAACAACAAAAGTTGAACAGTTTTTTTTTTTTATATATCTAACAATGTACCTTTTAACTTTATTCATTGT  
ACTTCTATGTTCTTTTTTTTTTTTACCATTTAATTGTTCTTCTTGGGGTGCGGACCTTCTCTGGATTCTGC  
GTGAATGTGAGATGGTTCGTGCACCAAGACTACCCTTC

>M6-PGSC0003DMG400011509 M6 LRR-RLK

ATGAAAACATGGAATGCATCCACACACTTTTGCCATTGGTCTGGAGTAACTTGTGGCTGTAAACATGTTA  
GAGTCATTCAACTAAACGTTGCGAACCAAAAACCTAGATGGCCCCTTGTCATCCTTCATTGGGAACATGAG  
TTTCTCAGGTCTCTATACCTGTCAAACAATAGCTTCCGTGGTGAAATCCCTTCTGAGATTGGTCGTTTGA  
GAAGGCTACACCGATTGTATCTTGGTAACAACCTATTTTCATGGAGAGATCCCCTCAAATTTATCAAGGTG  
TTTGAATCTTGTATCTTGTCTTGAAGGTAACAAGTTAGTAGGAAGCCTTCCGCAGGAGCTAGGTGCC  
TTGTCCAAACTCGAGTACTTGTTACTCACTCGAAACAACCTGACAGGTGAAATCCCTTCTTCTTTGGAAA  
CTTAACATCATTGATAGGATTCTATGCACCATTGAATAATCTTCAGGGGAAAATCCCTGACTCTTTTGGGC  
AGCTGAAAACTTAGAAATTATCGGAGTAGCTGCAAACCTTTGTCAGGTAATATCCCTTCTGAAATCTT  
CAACATATCTTCCGTCACAACATTTGATGTTGGAATGAACCAATCCAAGGTACTTCCATCAAGTTTG  
GGAATCACCTCCCGAATCTTGAATTATTTATCATCGGTGGGAACAATATTTCTGGATCGATCCCATCTAC  
ATTGTCCAATTCATCAAAGCTAGTGTATTTTCTTGCTGAAAGAAATCACTTACTGGAAGTGTACCAAGT  
CTTGAGAACCTGAATGGGCTTCAACAGTTGACAATTCCTGGGAATTATCTTGGAACTGGAGAACCAGAT  
GATCTAAGCTTCATAGCCTCTCTGACTAACGTGTCCCGTTTCAGAATTTTGGAGATTCAAGTTCAATAGTTT

TGGAGGGGTTCTGCCTGCATCCTTTAGAAATCTTTCAACTGAGCTTCAGGTTGTGCAGTTGTCATAACAAC  
AGAATACGTGGTAACATACCGTCTGAGATTGAAAATTCGTCAACGTGGAAGAATTCAGGTGAGGGAA  
AACTTACTGGTACTATTCCAATCAATTTTGGTAAAGTTAAGAACTGCAAATTTTGGATTTGTCTCAGAAT  
AGATTTTCAGGGAAAATTCCGTCATCTCTAGGAAATCTTAGTGTAGTATCCATCCTTCTTCTGCACGATAA  
AAATCTCACCGGTGAGATCCCAGCAAGTTTAGGAAATTGCAATTACGTGATTGAAATATATGTTGCTAAA  
AATAACCTGTTAGGACAGATACCTAAGGACCTTTTTGCTCTTCTTAGTTGCTGTGGACATTTCTGAGA  
ACCATTTAGATGGTTTCATTCCTTGAAGTTGGAAATATGATAAATCTTGAATATCTTAATGTTTCCGTA  
AATAACTGACCGGTAAAATCCCAAGTACTATTGGTAGCTGTGTGACACTAGAAGCCTTAGACATGAAA  
GGGAACTTCTTTCAAGGGATTATACCTCCTTCTTTAGCTCTTTACGAGGTCTCCGTGTTTTAGACCTTTCT  
AGAAATAATTTGTCTGGCCAAGTACCAAATACTTGAAGATTTCAAGTTTCAACTCTTGAATTTAGCGT  
TCAATGATTTTGAAGGAGCGTTACCAAATGAAGGCGTCATTAAGAATGCAAGTGCTATATCAGAAATTG  
GAAATCCAAAACCTTTGTGGGGGTGTGCCTGACATACATCTCCGGGATGTGACATCAAAGATCGAAAA  
AATTTGGTTCGAGGTTTATCCTCAAGATTGTCATCTCTGTTGTCTTTGGTATACTAGGCCTTGGTATGCTT  
ATCACTTTACTATTTTGTCTTGTAAAGAAACCGAAAAGGCCGCTGTTTCAAGTTCATTGGGTGAGTC  
TTCATAAATGTGTCTTACCGAAGTTTGTCTCAAGCTACTACTGGATTCTCTGAAGACAACCTGATTGGTG  
CTGGGAGCTAAGGATCTGTTTATAAAGGAACTCTCGATGGAGGAATGGTTGTGCGAGTTAAAGTGCTAA  
ACCTCTCGCGACATGGAGCTTCCAAAAGCTTTATGGCTGAGTGTGAAGTCTTGAGAAACATTAGACATC  
GGAATTTGGTCAAGGTTCTCACAGCATGTTTCAAGGAGTTGACTATCGAGGGAACGATGTCAAGGCTTTGG  
TTTACGAGTTTATGGTTAATGGAAGCCTCGAAGACTGGTTGCATCCTAGTCCAAGTGAAGATACAAGTC  
AGGCAGCTGAAACAAAAAAGTTGAATATTCTTCAAAGGCTCAACATTGTTATAGATGTTGCTTCTGCAAT  
CAATTATCTTCATCTCCACTGCGAGACTCCGATAGTTCACTGTGATCTCAAGCCAAGCAACATTCTTCTAG  
ACAACCAATTGGTCGGGCACATTGGTGATTTTGGTTTGGCAAAGTTCCTTCAACCAACTGCACAAAATTC  
TTCTATTTTCAAGGAAGCTCTGGTCTTGTAGAGGAACAATTGGTTACTGCTCCAGGTAACAATTAA  
TACATAAACAAACACTCGAACTTGGTATATGCCCTTTTTTCTCTCTCATTCTTCTATTTTTTCTTGAAAAT  
GATATATTCATAGCAAAACCACACTGCTTAACCATAACTTGGTTGACAGAGTTAATTTATCAATATCATA  
AACTATCTCTTAATTGTCACACACATACTTCCATTACTTTTATAAAATCAAGTCATACTAAGTTATGTCCCT  
ATTAGGAAAGTTATTGTTCTCGTCTTTTTTTTTGTTTTGTGAATTTAGAATATGGGATGGGAAGCGAGC  
TATCGACTTGTGGTGATGTGTACAGCTTCGGGATCCTTTTACTAGAAATGTTACCGGAAAAAGGCCTAC  
TGATGGAATGTTTAGGGATGGGTTAGACCTTCCAAGCTTCGCTAAACATGCATTGCTTAATGGAGCTATG



GAAGTCATAGATCCATCCCTTATTTATGGAAGTGAAGAAGATGAGAAAGGTAAAAACACAAATATCTAC  
CAGAATAAGGTGTATCTGGTTTCTGTTCTTCGAGTCGGGGTTGCTTGTCTGCATATTCTGGAGCTGAAA  
GAATGAACATCACTGAAACTGTTCCCAATTGACTCTATCAAGGAAGCTCTTCTGAAATCAGAAAAAAA  
TTCAGGAGCACGTTGA

>M6-PGSC0003DMG400011580 M6 LRR-RLK

AATAAAGGTTGAATCTTTCTCATTTTTATCCAACCCCTTTCAAATCTTGCATGTATATAGGAAGATCCCC  
ACCATTATTGGAAAAATGTTATAGGTTCTTGGTTTTAGATATAGTATAATCTTTGATTTTATCTTTTCTCA  
ATTCATGAGTTTTATGGTCTTGTCTGTCATCATCTAAAGGAATTACTTGAGAGTTTTTGTCTTTTCTGG  
GTTTTTGGTGGAAATTCAGCTCTTTTGTACAAGGTGATGGACTCAATAGCCTAGAGGTATGCTAAAGCTTA  
GATCTTTAATGAGTTTCTTATTTATCCTGAATTATCCTTTTATATAGTTGAGTTTCTGGGCATTTCTGAG  
TTGATTGGATTCTTTGAAGTTAGTTGATTAATTGGTATGCATAGAACTTTTTCTGGTTTGTCTAGTTTATCT  
AGTTAGTATTGTCTCTTCTTGATGATTGACCTTAAGGGTGTGGAGGGTAGGACTTGGATTAGGGTAGTA  
GGTGGTAATGCGTTGTCTTGTGTCGTTTCATGTTAGTAGTCATACTATTGCTCATTCTGTTACTATATTTT  
GGTTCCTTATACCTCGATTGTGTACTGTTTTGTTGTAGTTTCTGTTCTGCTATTCTCTATTGTTTTGCTATTA  
TCTGTTGATTCTTGTACTTCCGTTACTTCATTTTCTGGACTGTTTTTCTTGAGCCGAGGGGCTACCGGAA  
ACAACCTCCCTACCTCTGAGATAGGGGTAAGGTTTTCGTACACTATAGTCTATACCCTCCCGAGTCCCCA  
CTTTGTGTGACTACACTGGTTATGTTGTTGTTGTTGTTGTTGTTGTTGTTGTTGTTGTTGTTGTTGTTGTT  
ACAGGTCAAACCTGAGACTGTCTTATTGGAAGTTTGTATGATGTCTGGAGATTTTGAATCAAGAAGTGGT  
TTGGTTCTTCTAATTTGGATAAGTGCTTTGGTGGCTGCTGTACTATTGCTGGTTTCTCTGCCGAAGGATT  
GAATCAGGAAGGAATGTACCTTCTGAATTGAAGAAGAATTTCCAGGATTCGTTTAACCATTTGGGGAA  
TTGGAATCCAAATGATGAAACTCCTTGTGGCTGGGTAGGTGTGAATTGCACTTCTGATTATAATCCAGTT  
GTGCAATCTCTTTATCTGAGCTATATGAATCTTTCAGGCACGTTGAGTTCTAGCATTGGTGGTCTTGAATA  
TTTAGCTTATCTTGACCTGTCTTACAATCAATTCACCGGGAACATTCCCAAAGAGATTGGAAATTGCTCAA  
AATTGCAGTCTCTCCAGCTCCATTTTAATACTTTTTACGGTCCGATTCTGCTGAACTGTATAACCTGTCTA  
ATTTGAAGGATGTGAACATGAGCAGCAACATGATCTCCGGTCTATTGCTGAGGAGTTTGGGAAACTCT  
CGTCTCTAGTTACTTTTCGTTGCATACCAATAATCTTACCGGTCCAGTGCCTCGATCTATTGGAAGTTTG  
AAAAATTTGACAATATTTTCGAGTGGGGCAGAATGCACTTTCTGGAAGTTTACCTGCAGAGATAGGTGGT  
TGTGAGAGCTTGGAAATCTTGGTCTAACACAGAATTGCCTGGAAGGAAACATACCAAAGAAGTGGC  
ATGCTTAGTAAGTTGAAAGAGCTTGTGCTTTGGGGAAATCAGTTCTCTGGTTATATTCCAAAGGAACTTG

GAAATTTAACACAAATTCAATTGCTTGCTTTATATCAGAATAACCTGATTGGAGATATTCCTGCTGAAATA  
GGTAAACTCAAACCTTTGACGAAGTTATACCTATACCGGAATGGATTAATGGTAGCATTCCAAGGGAG  
ATTGGGAATCTTTCTATGGCAACTGAAATTGATTTCTCGGAAAACCTTTCTGAAAGGAGAAATTCCAGTTG  
AGTTTGGCCAAATAAAAAGTCTGAAATTGTTGTTTCTTTCCAGAATCAGCTCGAAGGCGTTATACCAGA  
TGAACCTACTACTCTAAAGAACTTGATTAGTCTTGATTTGTCAATTAATCACCTAACAGGTCCTATTCCATT  
TGGTTTTCAGTATCAAAGGAATTGATTCAGTTACAGCTTTTTGAGAATTCTTTAACTGGTACTATTCTC  
AACGTCTTGGCATTATAGTCGACTTTGGGTGCTTGATTTAATAACAATCAACTCACAGGAAGAATTCC  
TCCATTCGTTTGTGAGAATTCCAATTTGATTTTGTGCAATCTTGCATCAAATAAATTGCATGGATATATTCC  
ATCTGGTGTCTTAAATGTGATTCATTGGTGCAACTTCGTCTGAACGATAACAGGCTAACAGGGACATTT  
CCTTCTGAGTTGTGCAAATTGATAAACCTGTCTGCTGTTGAACTGGGGCAGAACAAGTTCACTGGTCCAA  
TACCTCCTGATATTGGATATTGCCAGAAGTTGCAGAGGCTTGATTTCTCAGGCAATAGTTTCAACCAGTT  
GCCAAGGGAGATAGGAAATCTTACCAGGCTTGTGACATTCAATGTCTCAGCAAATTCGCTCACTGGACC  
GATACCTCCAGAAATTCGGAACCTGCAAGGCACTACAAAGACTGGATCTCAGCAAGAACAGATTTACTGA  
TGTTATACCTGATGACATTGGTAGCTTGTGCGAGCTAGAACGTCTTTTGCTTTCAGAGAATAAGTTATCTG  
GAAAGATACCAGCAGCATTGGGGAGCCTCTCTCATTTGACTGAGCTGCAGATGGGCAGTAATCTATTGT  
CAGGTGAAATACCATCAGAGTTGGGTAATCTTAGTGGCTTACAAATTGCAATGGATCTTAGCAACAACA  
AGCTCTCTGGCAGTATACCACCCAACCTTGGTAATCTTATCCTATTAGAGTACCTATATCTCAACAACAAT  
CATTTGAGTGGTGAAATACCAAGCACATTTGGAAACCTGACAAGTCTCTTGGGCATTGACTTCTCATACA  
ATGACCTGACTGGACCACTGCCGGATATACCACTCTTTCGGAACATGGATATCAGCAGCTTCATTGGAAA  
CAAAGGTCTTTGCGGTGGGCCTCTAGGGGAATGTAATGCATCTCCAGCTTATGATGCCAATAATCCTCCT  
AGAGTCGAGAGTGCAGATTCTCCTCGAGCAAAGATTACTGAGTTGCCGGTGTAAATTGGTGGAGTT  
TCTCTTGTGTTTATTGTTGTTGTTGTTGTTGTTGTTGTTGTTGTTGTTGTTGTTGTTGTTGTTGTTGTTGTT  
ATAAAGACATGGCATCTTCAGATCCAGACATTTATTTCCGTCCCAAAGAGGGGTTCACTTTCCAGGACTT  
GGTTGAGGCTACAAACAATTTCAAGATTGTTATGTTCTTGGAAAGAGGAGCCGTCGGAACAGTTTACAA  
AGCAGTCATGCAGTCTGGACAAACGATTGCAGTCAAGAAGCTTGCTTCTAACAGAGAGGGTAATAACAT  
CGACAATAGCTTCCGTGCAGAGATCTTAACTCTAGGAAAGATTAGGCATCGTAACATCGTAAAGCTATAT  
GGCTTTTGCTATCATCAGGGTTCTAATTTACTTCTCTACGAGTATATGGCCAGAGGTAGCTTGGGTGAAC  
TGCTTCACAGTACATCTTGTAGATTGGATTGGCCAACTCGCTTTATGGTGGCTGTTGGAGCTGCTCAAGG  
ACTTTCTTACTTACATCATGATTGCAAGCCCCGGATCATCCACCGTGATATAAAGTCCAATAATATTCTGA

TTGATGAGAAGTTTGAAGCTCATGTTGGTGATTTTGGTTTGGCAAAGTTGTTGATATGCCTCAATCTAA  
GTCGATGTCTGCAGTTGCTGGCTCATATGGCTACATAGCACCTGGTATGTCTTTCTGTTTTCTCCTGGACA  
ACTTCTTATGTTCCCTTGTTATCTATAGAAATATGTCGAGAAATGTAAGTCCATTGATCCTTATTCCCACA  
TATTTATCTGTATCTTCACTCTGAAAGTGTTACCTTTTTCTGTTGATATGAATAGGATTTTCTTGTTGAGAT  
TAGATAGTTAGAATTGTATGCAATGTCTATTTCTCGATTATCTGAAGACAACAATGAAATGCTTTTAACT  
TTTATCTGTGTATACTTCTCATTTTATATGTGTTCTATGCCAGGAGAAACCATACAAACCTGCTCTATGTATC  
TTAGGCAAACCTTTGGGGACTCTTCTGATGCATATGGAGCATTCTTGTTCCACATATTTATGTTTCAGTTT  
AGATATTCGACCATGTGTTGTTCACTTTGAAAGTCTAATTCTTCTCTTTGTGATATGAAATGCATATCTTGT  
TGAAGTTTGATAGTTAAAATTGTTTACGAACAAGTTAATTTCTTTGATGAAATGACAGAATACAAGAAAA  
AATGCTTTTAACTTTTCTCTGTCTATGTAGCTTTTAAATATCCCTCTCGTAATTTTCATTCTGTGTTATAAAC  
CATTTTTTCTTTTCAATTGATGTTTTCTACCTTCTCTGTTGCAGAATATGCTTACACCATGAAAGTTACGG  
AAAAATGTGATATCTATAGTTATGGGGTAGTCCTTTGGAGTTGCTAACTGGAAAAGCACCCGTACAGC  
CCCTAGAACAAGGTGGTGATCTTGTCTCATGGGTGAAGCATTATGTTAGGAACCATTTCATTGACACCAG  
GGGTACTCGATAGCCGATTGGATTTGGAAGATGTAATTAAGTGTAGTCATATGCTTACAGTTCTTAAAAT  
TGCTCTAATGTGCACTAGCATGTCCCCTTATGATCGTCCTTCAATGCGCGAGGTTGTTCTGATGCTGATTG  
AGTCTGAAGAGCAAGAAGGGAACCTTCTCTCATCTCCAGTTTATGATCCCCCTCTGAAAGATAATTCCTTC  
TAGATGCATGTAAGAAGCACATCTCAATTAACCTTTGATAATTTTTTAGTACTAATTCTCCTTGATTTTTTT  
TCTTAATGGCTAAATTATAGATATTCCCATGTATATTTCTCATAGTGAAAATTTTCATCAATCACTTTCTAGA  
ACTAGTTTGGAGGTGATTGATGTTATTTCAATAGTTCTCCATCTGATGGTTATGGAAAATAATATGCTTTA  
TGCTTTTCTCACTATATATTGAGGGCTACCTAGAT

>M6-PGSC0003DMG400011833 M6 LRR-RLK

TTTTAATACATAGATGGTGATAGTTCAGGTAAGAAAAGGGAACAACCTAATAGTTGGAGTGTGAAACTCG  
CGAAAAAGCAATAGTT

>M6-PGSC0003DMG400011932 M6 LRR-RLK

ATGTCACTACTAGCATTCAAGAATATGATCATTGATGACCCTTTCAAGATCATGGACTCCTGGAATGAAA  
CTATACATTTTTGTGACTGGCCTGGGGTTTCATGTGGTCGACGTCATCCCCGAGTTACAGTTTTAAATCTT  
ACTTCTCTGAAATTGAGGGGTTCTCTGTCACCAAGCATTGGTAATCTGAGCTTTCTTTATGTCCTTAAGCT  
CCAAAATAATAGTTTTTCAGGTGAAATTCATCAGAGATTGGCTACTTACATAAGTTAAAGTTTTTACGCC  
TTGATAACAACCTCGTTCACTGGTCATATCCATCAAACATTTCAAGGATGCTTCAATCTTGTTTCTGTTGTTT

TTTCGTATAATATGATGGTAGGCAAAATTCCAGCAGAATTAGGCACATTGTTGAAACTCAAACAACCTTC  
TCTTGTCTTCTAACTATTTTACAGGAGGAATCCGCCTTCATTTGGTAATCTTTCCTTACTTGATACCTTTCC  
GCAAGCAAGAATAATTTGTTAGGGAAAATACCTGATGAATTATGTCAATTGCTCAACTTAAAGTACTTTG  
TAGTGAATGAGAACAACCTGAGTGGTACCCTGCCTCCTTGTCTTTTCAATCTTTCCTCTATCGTGGCCATA  
GATGTTGGAACAAACCATTTAGAAGGAAAATTGCCTCCATTGCTTGGTATTACTCTTCCTAATTTAGAGTT  
CCTTAGCATTATAGAAACAATGTAACCTGGAAATATTCCGGTAACATTGTCAAATGCTACGAATCTTCAG  
TCTCTTATTGCTAGTAGAAATGGACTCACAGGAAAAGTACCACCCCTTGGAAATTTGCTGAAAATGCGG  
AGATTTTTAGTTGCTTTCAATTATCTTGGGAAGGGGGAGGATGATGACCTTAACTTTCTCACCACATTGG  
TGAATGCCACCAGCTTGGAGCTTTTGGAGCTCAATACAAATAATTTTGGTGGAGTCTTACCTGCATCTGT  
TAGTAATCTTTCGACTGAGCTTATAGAGCTTTCGTTGTCTTATAATCAGATTTCTGGAGAAATCCCAAGAT  
GGATATCCAATCTCAAGAAGCTTCAGGCTTTCTTTGTAGCTTACAACAGATTTACGGTGAAATCCGTCT  
GAAATTGGTGATCTGATATATTTGCAAGAGCTGGCTTTACTTGGAAATCAGTTCTCTGGCAAATTTCAA  
TCTCATTGGGAAATTTAGCTTCTTTAACCAAACTCAGTTAAGAGAAAACAATCTCCAGGGGAGAATTCC  
TTCCAGTTTAGGCAAATGCCACAATTTGGAACCTGTTGGATCTTGGTTCAAATAACCTTAGTGGGTTTATA  
CCATCAGAAATTTGAACTCTCATCCTTGTTCGGAGGGCGTGGACCTATCTCAGAACCAATTAACCTGGTT  
TCCTTCCGATGGAAATTTGGGAAGTTGAGAAATCTAGGCTACTTAAACCTGTCTGATAACAAGTTGCAGG  
GCCAGATTCCTACCAGTATAGGTAAGTGTGTGAACTTGAAGCACTAGACTTAAACAACAACAACCTTTCA  
GGGTAGTATTCCTTCAACCATGAATAGTTTGAAGGCCTGGAACCTTTAGTCCTTTCTCACAACAATCTGT  
CAGGTGGAATCCCGGATTCTTGAAGGACTTCAAATTTCTGCAGATTTTAAATCTGTCTAGCAATACTTT  
GGAAGGTGCTGTCCCAACAGGAGGCATCTTTAGTAATGCTACTGTGGTTTTCCATCATAGGAAATAGAAA  
TCTCTGTGGGGGTGTACCAGAGTTGGACCTTCCGGCTTGCCTTGTAGAGGTAAAGAAAGAAAGGAAAT  
CAGGTTTTCCCTTGAATAATAGTAATCCTGTAGTTAGTGGGCTTATAGGATTGACATTCATAGTTTGT  
CTTGGCATAACGACAGTTTGTAGATCGAGAAAACCAACACCTACATATCTACCTGAAAACCTAACCTTAA  
GAGTATCTTATCAGTGTCTACTTAGGGAAACTGATAGATTTTCTGCATCAAATTTGCTTGGAAATGGGTGC  
TTTTGGGTCTGTATATAAAGGAATTTCTGAACACGATGGTACGTTTTTTGCTGTTAAGGTACTGGACCTT  
CACACCATGCAGCTTCCAGGAGTTTTTTAGCTGAATGTGAGGTTCTAAAGAACATTAGACATCGTAATCT  
TGTAAGGTTCTAAGTGCATGCTCAGGTATTGATTATGAAGGTAATGAGTTCAAGGCCATAGTTTATGA  
ATACATGGATAAGGGAAGTCTACATGACTGGTTACATTTCACTCCTCAGGAGAAATCTGAGTCACAGGA  
AGAGCACAAGAAGCTCGGGTTTATTCAAAGATTAAACATTGCCATTGATGTTGCCTGTGCCCTGGATTAT

CTCCATAATGATTGCCAACCCCAATAATTCACCGTGATCTGAAGCCAAGCAATATTCTTCTCGATGAGA  
ACATGACTGCACATGTTGGTGATTTTGGTTTGGCAAGATTTGTTCCACCAGCAATCCAAACTCATCAGC  
AAATTCTAAAAGCTCTACAGGTGTAGGGGGAACCTATTGGTTATACACCTCCAGGTAATAATAAATCAAG  
ATTTCTGCTGTCATATATGTCTTTTGATAAGAACATCTCTAATTCTGTAGTATTTCTTGTTGACAGAATTAG  
GTATGGGAAGCGACGCCTCAATCTATGGAGATGTGTACAGCTTTGGCATCCTACTCTTGAAATGTTTAC  
CGGAGGAAACCAACTGATGAAATGTTCAAAGATAATTTAAACCTTCATAAATATGCCAATGCTGCTTTG  
CCAGACAGAGTGATGCATATTACAGATCCCATTCTTCTCCAGGAAAGAGATGAACTTGGAAATGAAATAC  
AATGTTGATGACAATACAAGCAGTGCTGGCGACATATTTCTGTCATTCTTAGTTAAGGTGATTCAAATCG  
GAGTTTCCTGCTCCGTTGAATCTCCAAAAGAAAGAAAGCAGATCAGTGATGTCGTTGGAGAACTCAATT  
CATTAAAGGAAGTTGTTCTTGGAGCAAGCATACCGGAAAGAAAAGGTTATAAGCTTCAGCCTGCATTGA  
>M6-PGSC0003DMG400011989 M6 LRR-RLK

CACAACTTCATCACAAAACCAAAAACAATCAATCATTTAGCCTTGATGATGGTTCCACAATATTTTATAA  
CCTTCCCTTCTTATATCTTTTCATAGTTATAACTTTTGCTTCCACTGAGGAAGCAACTGCTCTTCTTAAATG  
GAAAGCAACATTCTAAACCAGAACAATTCCTTACAGGCTTCATGGACACTAAGTAGTCTGCTGATACC  
AAGAATTCTTCCAGAATTGGAGCGACGAGTTCTGATGCATGCAAGGGCTGGTATGGAGTTGTATGAGTT  
AATGGTCGGGTTAACAGGTTGAATATTACAAATGCTAGTGTCATTGGCACACTGTATGATTTTCCATTTTC  
ATCACTCCCATTTCTTGAATATGTTGATCTTAGTATGAACCAGCTCTCTGGCACCATCCCACCTGAAATTG  
GTAAGCTCGCTAATCTTGTCTACCTTGACTTGTCTATCAATCATATTTGCGGCACAATCCCACAACAATC  
AGCTCACTAATAAAGCTTGAGACCCTCCACATATTTGACAACCAATTAATGGTTCCATTCCGAGGGGAAA  
TAGGTGCGCTAAGGTCTCTTACTGATCTAGCTTTGAGTTCTAACTTTCTTAGTGGTTCAATTCCTGCTTCAT  
TGGGGAATTTGAACAATTTGTCTTTTTTGTATCTTTATAATAATAAGCTTTCTGGCTCCATTCTTCAGAAA  
TAGGAAAACCTGTCAATCTTGTGAAGCTTATATTAGTAGAAATCAATTAACAGGTCATATTCCTCCAGA  
AATAGGTAATTTGATCAATGCAAAAGTGTTGTATGCTTTTTCCAATAACTTGTCTGGTCCCATTCTGATG  
AAATTGGGAAAATGAAGTCACTTGAGAACTTAAGCTTCCAGACAAACAATCTTTCTGGTCCAATTCCCAA  
ACAATAGGTGACTTAACTGAGCTCAAACCTTGCACCTTTATTCCAACCAACTTTCTGGTCCCATTCTCA  
GTGATTTTGGGAATCTGAAAAAATTGAATGATCTGCAATTATCCAATAATCAACTTACTGGTCTTATCCT  
GGTTCATTTGGCAATTTGAGAACTTGAATTTCTGTATCTCCGTGCCAACAACTTTCTGGTTCTATTCC  
AAAAGAACTTGCATATTTGGATAACTTGGTTATAATGGAAATGGATGAAAATCAGTTTTCAGGCAATTTG  
CCTGAGCATCTTTGTCAAGGTGGAAAACCTGAGAACTTCACGGTGAATAGTAACAAGCTGACAGGGCCA

ATACCAAGAAGCTTTAGCAAGTGCTCGAGTTTCAAAGAGTTCGCTTGGATAACAACAGTTTTACTGGG  
AATTTATCTGAAGCTTTTGGCGTCCATCCACACCTTTACTTCATTGATTGAGTGATAATGATTTTCATGGT  
GAACTCAGCAGAAACTGGGGGAAATGCAAGAAATTGACTGATTTTCAGATAGCCAGAAATAACATTAGT  
GGTAGCATAACCACCAGAGATTGGAAACATCAAAGGTCTTTTGGGACTTGATCTTTCAGCAAATCATTGGA  
TTGGGCGGATACCAAAGGAATTTGGAAAATTAACCTCTCTGGTTAAGCTTTCTGTGCAAAATAACTATAT  
TTCTGGCAATATTCTATAGAAGTTGGGGCACTGACAAAGTTAGATTCCCTAGATCTGTCAAACAATAGA  
TTGAATGGGTGCGATCCCAACGTTTATAGGAGATTACCAGCACCTATTTCACTTGAACCTGAGTTGTAACA  
AGTTTGGGCAGAAAATTCCAAAGGAGATAGGGAGGATAACTCATCTTAGTGTACTTGATTTGAGCTATA  
ATCTTCTTGATGGAGAAATACCTGCTCAGTTAGCTAGTTTGTCTGGACTTGGCAAACCTTGAATCTTTCCCAC  
AACAGCCTTGCTGGGCGTATTCTGAAGAATTTGAAAGTTTGACCAGTTTGCAGGATGTTATCTTGTCAT  
ACAATGAGTTGGAAGGTCCAATCCCTAATAATAAAGCTTTTCATGAATGCCTCATTAGAAGGTAATAAAG  
ATCTTTGTGGCAATGTGATTGGATTCCAACCTTGCGAAAGGCCATCTTCTATTGTGAAGAAGCACTCAAT  
GGCGAAGGGACATAAACTCATCCTCATCACTGTACTTCTATTATGGGAGCACTAGTACTACTCTGTGCT  
TTCATTGGTGTCTCTTTATGTGTAATAAAAGAAGGAGAGTTAGAGACGTTGAAAGAAGGGATTCCAGT  
GATGATGTTGATGGTTTGATTTACATATCCACATTAATGGAAATGCATTGTACTGGGATATCTTAAAAG  
CCACAAAGGAGTTTGATGCAATGTTTTGCATCGGAAAAGGAGGATCTGGAAGCGTTTACAAGGTA  
CTTCCAACAATAGAAAATGTAGCTGTGAAGAGACTTCATTCTTCATTTGAGGTTACCCATCGCAAAAGCT  
TCATGAATGAGATAAGGTCATTGACAAGTATCAAGCATCGCAACATTGTGAAACTCTATGCCTTCTGTAC  
AAATGCACAACACTCATTCTTGGTTTACGAGTACATGGAGAAGGGGAGCTTGTCTAGTATTTTGAGCAAT  
GAAGTAGAGTCCAAGAAATTGGATTGGCTTACAAGGGTGAATATCATCAAAGGTGTTGCTTATGCTTTA  
TCTTACATGCACCATGATTGCTCACCCCGATTGTTTCATCGAGACATATCAAGCAGTAATGTTTTGCTTGA  
TTCCGAGTATGAAGCTCGTGTTTCAGATTTTGGCATAGCTAAGATTCTAAAGCCAGACTCATCCAATTGT  
ACTGCACTTGCAGGCACATATGGCTATGTAGCACCAGGTAAGATCTAACTTCTTATCCTTATATTAGTTCA  
TGAAATATATCTGCAAAATCTATATTGTTTCTATCTCATTGAAACTTTATTGTTTCAGAGCTTGCCTATAC  
AATGAAGGTGACGGAAATGTGTGACGTCTATAGCTTTGGAGTATTAGCATTGGAGGTAATCAAAGGAA  
AGCATCTTGGGGAATACATTACTGTGCTAGCAAATTCATCGACAAGAGATCATGTGCAGCATAGCGATT  
TGCTAGATGAACGCCTTCCATATCCTGAAGATAGAGTAAAAGAGGTTTTGGTTTTTATCATCAAGCTAGC  
AAGCTCATGTTTGCTTGAACCTCCAAAATCAAGGCCAACAAATGCACTTCATCTCCAGTATGTTGTCAATG  
GATCCACCTGTTTCTCAAATAACTTCTATGAAGGCGAAAAGAGTCCCCGAGATGTAAGGTGTCAGTGTAT

GAAAAAAAAAGAAGCAAGTTTAGACACCAAGTGGTTGTGAAGTAAGAATAAGAAGCTATTACTGG  
TACTAGTATTTGTGTATTTTATTGTTAGTTATGCTTATCTAGTTTAGTGTGACTAGAGTGGATACAATAT  
CAAGTAGAAGGTAATATTTTAATTTTCTTGTGCCAATAAGTGCTAATAGAAAT

>M6-PGSC0003DMG400012218 M6 LRR-RLK

TAGCTATTGTGTATTTATGAGAAAATATTCGAAGTTGATCAATCATAGCGACGCTGGTAAAGGCCACACA  
CTTCCTTACTCCGCCGCTCCTTCTATTATCTCCTTCTCCATTTTCTGCTTGATTTTTTGTCCCTTATAATTT  
TAACATATAGTTTTTATAACCCCAAATTTCTTCTTTCAGCTCATAAATTCTCTGTTTCTAGACACCAAT  
CTCTCTTGAACCCAAGTTTTATTTTTTTAACTAAGTTGGTGACACTTAATAGTAGATTCCAACAAAAG  
GGTTGTACAGATTTAGATTCTTGAATTCACCTCTTAAGCTTTGTTAAGTTTTCTTGTAGTGTATCTTTCTCC  
CCTCACTTGTA AAAAAGACAACCTTATCTTTTTCCAGCTTTTTTTTTGTTTGTTTTCATCTACTGTCTTGGG  
TCTTTCTTGT TTTCTCTTTCAATTTTGTGGATTATTGCTTTTTGAATCTTTTGTCTTCTGGGTTTTCTTC  
TTTTGTTGATTGCTTAAGTTCTTGGAGACTGTTTCTTAGATGGGTTCTTTCAGTTCTGGATTTTTGTAGA  
AACTTAGTGTGTTCTTGTGGTGTGGAATTATTTGGGGGAAAAGATGAGACTTTGTGTTGTATTTCAAGTT  
TTAGTACTGTTGGACTAATTCTTGGGATTGTGATGCTTTCCATCAAATGAAGGTGTGTATTATTAAC  
TAAGTTCAGATCTTGATGTAGTTACTGCTGCAAAGATTCAATTTTTGTCTTTAATTGAGCATTAGTGT  
GTAATGTAATGTTGTTTAGGGAAGATCTTGTATTTTCTGTTTTGAGATACTTGCTATATTTGCTGTCATA  
TTTTCAAATTGTCTATCAGAAATAGTCTCTCTACCCTGCGAAGGTAGGTGTAAGGTCTGCGTACTATGTT  
GTTGTTGTTGTTGTAGATAGTTGCTGTATTTATGAGATTGTAATTC AAAGAGTAGGTAGTTTATTCTGA  
GTGAATCTGATTGGGGACTCTTGTGATACAGTTTATGCTCTCAATACCTTCAAGGAAGCTATATATGA  
AGACCCTCTTCTGGTTTTGTCAAATTGGAATGGTTTAGATTAGATCCTTGTGGTTGGGCTGGAGTCTTTT  
GTTCTATGGCTCAAGATCATGTCATGAAAATGTAAGTTAATTGTCATCAATTTTATGTGCAATACATGGAT  
AGGTTGTTGGTTAATGATTTTTCTCAACTAAAATGCAATCTAGTAAATCTTTTATGGACTCAAGTTTAGT  
GCAAATGAGTCTCTAATACGCATTTCCAACCTGGATTGTGTGACAGAAACATTTCTGGCGCTTCGTTGAAGG  
GGTTTCTTTCACCCAACCTTGCATTTACTCTCCTCTTTGCAAGAACTGTAAGTTATTTCCGAATAGATTTGTA  
AGGATTACATAGTTCTGGTTGTTCTTTTATGTGGTTTTGTTAAAGCTTATGTGATTCCCATGCAATATGCA  
GAATTTTGCATGGAAATGTGCTGATTGGTACAATTCCTAAGGAGATTGGTCTATTGAAAAACCTGAAGG  
CCTTGGATTTGGGTGCTAACAGCTAACAGGACCAATTCCTTCCGAGCTTGGCAATTTGACAAACATTAT  
GAAAATGTTAGTCTAACTTGAATTTTGTAGGTTCAATTTGACTTGCCTTTACCTATCCTTGTGTAATCTCCC  
TTACTTTTCTAGCTTCCATGTGTCTCTGCAGAAACCTACAATCTAATGGATTAACAGGGAAATTGCCTGCT

GAGCTTGGTAATTTGAAATACCTTGAGGAACTTCGGTTGGACAGGAACAACTCCAAGGACTAGTGCCT  
GCTAATACTGGATCAGATTTTACATCCGGTGTACGTGGAATGTGAGTTGATTAGCTACGTCTTGTACTTT  
ATCGTTTTTCTTTTGAATTTTCTGGTATGTGGATAAGGATTAATGCACGATTCTCTGTTTACTTGCAAGAT  
ATTTTTGGTTGTCCTTAGAGCGTTTTCCGTCTTGGCCCTCTAGGATTCTGTCAGATATTTGAAGGATTGAG  
TGACCAAAGAATCTAATTTTCTGATCTTTATGACAGTCATTGTCTGGAATGATGATGACAGAATCCAGGA  
AAGAGATGCTTATGGGATAATGTCTGTTCTTTCTGTCAGCATTGTTTGATATGTA CTGCCTGCAGATTGA  
CACTGATGGCTGTTTTACTTGAGTCTAGTGTAGTACATTCATTGTCTGTTGTTTGATGGGAGGATGGTGA  
ATTGGGGGACCCCAATGGAGTGTGTTTTGCTATAGCCTTTAATATTTGACCAAATGAGAGCAATGTTAC  
AGAGTTCAGAATGTATGTTTCAAAGTTTAAACGATGATGTTCTTGGAATTGATCTGTATTTCTGTGAAGA  
AAAATAAGTAAAACTGTTTGATGTCCTGTATATTTGACCCAACTGATTTTGCTATAGCCTTACGTCCATC  
ACATGTATCTTTATCTGATTGTTTTTTTTCTTTCTGTTGTACCCATTTAGGTATGCCTCTGGTGCCAGCGC  
TACAGTTTTTGTGCGCACATCCCAGCTCAAAGTGGCTGATTTCTCATTCAACTTTCTTATTGGAAGCATA  
CAAAGTGTGGGTTACCTTCAAAGTCAGTTCTTAATTCTACGCCATAATTCTTGTTTTACCTCATCTTCT  
CTATTCCTGAATGCCTATTAGTTTTGTTGCTGTAAATCTATATCCAAAGTAGCACTCTGATGCTCTACCAG  
TGTTGTTTCTCTTACCTTTTCTGTTTCTTAATGCCTGTTATTTTGTGATTCTATAGATCTAGTTTTCAAGGAA  
ATTGCCTTCAGCACAAAGACCCGAAGCAACGGTCTGCTGCTTTATGTGGTAAGTAAACAATCATAGTTAC  
AATTTTCAACACTATGCATAGGAGAATTGATGTCTCAACCTTTTTTCTTTAATAGTTGCAGTCAAATAGAT  
TTATTTAAGAACTGAACTGGTTGTTTTGACATTGCATTATAGGTAGCACTCCGCCTCCCACTAGCCATGC  
ATCGCACTCAGCAATAAGCACCAGCCTGTTGAAGAACCGAGACATCAGACTTCTCCAAGCCCACTTGG  
CTTTTGGCTTTAGAAGTGGAACAGGAGTTATGGTGGGTTCTCTCTTCATTGTAGGTCTTGTGACTGGCC  
TTCAGAGGCTTAAGATCAAATCCTCAATTATACCTTGAAGAAATCAGGAAGCGAGAAAGATCATATGA  
CAATTTATGTAGGTTAGTACTATCATGCACTTGAACCTGAGCACTTAGTACTTTCAAAGCATTGAGCCTA  
ATCTTCGTTTCTGTTTACCGCTGATGATCTTTGTAGATACTGGTATGCTGAAAGATGTTGTAAGATACAGC  
AGACAAGA ACTTGAAGTGGCTTGTGAAGATTTAGCAACATCATTGGATCCTCACCAGATAGCATAGTTT  
ACAAAGGAACCATGAAAGGTGGACCTGAAATCGCTGTAATATCCCTTTGCGTCAAAGAAGAGCACTGGA  
CAGCCTATCTAGA ACTTTATTTTTCAGAAAGAGGCAAGACTCAATTCTTTCTTCATCATCACTATTTATCTCT  
TCCAAAAGTTTTCATCTTTAGTTCCATGCTCTAACTTCTGTAAATTTACATTTAGGTGGCAGAATTGGCCA  
GAATAAATCACGAGAACGCTGGGAACTTCTAGGCTACTGCAGAGAGAGTAGTCCCTTTACGAGGATGT  
TGGTGTGTTGAATATGCATCTAATGGGACATTATATGAACACCTTCATTGTGAGTAAAGTGAATTAATTTTC



TCATGCACTTCATTTTATGTTTTCCAAAGCAAACCTCTAACTCTTTGAATGTATCATAGATGGAGAAGGAT  
GCCAACTATCTTGGACACGCCGGATGAAAATAGTTATTGGCATCGCTAAGGGACTGACATATTTCCATTC  
AGAACTTGACCCTCCATTTACTATATCAGAACTGAATTCAAATTCTGTATATCTCACCGAAGATTTTTCTCC  
CAAGGTAAACGAAAGACCATT

>M6-PGSC0003DMG400012307 M6 LRR-RLK

GTTTTTTAGAAGTTTTGAACTTTAGATTCTTGATGCTCTTTTTGTTCTTCTTATGTGACTACAAAAGCTAAG  
TTTTTGAGGGGTTGAGGGTATTCATAATCTTTGAAATGGTTAAAGTTTTGAGCTTTAGGGAGTGGTGGG  
GGATTGTTTCTTTGGGTTTCTTGGTGGGGTTGTTTCTGTTGTCACAAGACACTGTTGCTTTTCTTGAAAAT  
GATAAGCAAGCATTGTTGGATTTTGTTAATCAGTTGCCTCATTGTCACACTTTAAACTGGGATGCAAATTC  
TTCCGTTTGCAAGAACTGGACTGGAGTGGGGTGTAGTGAAGATGGTTCTAGAGTGATAGCACTGAGGT  
TACCTGGGGTTGGGTTCAATGGTCCAATTCCTAATAACATTGAGTCGTTTGACTGCATTGCAGATCTT  
GAGCCTTAGATCTAATGGTATCAATGGCACTTTCCCTATGGACTTTGATAACCTGAAAACTTGCTTATC  
TTTACCTTCATTACAACAATTTCTCAGGTCCTCTGCCTTTTGATTGCTCTGTTTGGCAAATCTCACCAATT  
TGAAGTGTCAAACAACAGATTCAATGGCACCGTTCCTAGCTCGATATCGGGTTTAAGTCATCTTACTCCC  
CTTAATCTTGCTAACAACACTCACTTTCTGGTACCGTTCCTGATTTTCATTTTCCCAACTGCAGCTACTGAAT  
TTGCCAAACAATAACCTTATAGGTATTGTGCCTAAATCACTTCAAAAATCCCAAAGAATGTGTTCCATTAG  
TAATGATATATCTTTACTTGACTATCCTGTTTCGAATTCTTCTATTGTTTCCCTGCCTCAGCAACCAAATCC  
AAAACCTCAAGAATGATGGTAAATTGAGTGAGCGG

>M6-PGSC0003DMG400012443 M6 LRR-RLK

CTTTGTCTAATCTTAATATAACTGTTCCCTTTGATTTGAAATCTCAATCTTTATCAGCTTAAATAACAATTGT  
ATAATCTTTTTTTTTCTTTATTAGATTCTGTCCCTCTTTCTTGAAATTAATAAAAGAGTTTGCTTGAGTTGA  
AAGTTGGGTTCTTGCTTCTTACAAGTGATGGGGTGTGAAAAATCTTATCTTTTTCATTTTTCTTCCTA  
GTTTTAGGCTTTGAGTTTTGTAATTTAGTGATTTATTTATGATTTGGAGTTAAGGGTTTGTTAATTCATAC  
AAGTAGTTATAGTTTGCTTTAATTACAAGTAGTTGGTAGGCTTTTTCTTTGAGATTTTTGAGGTGTTTT  
CTTGGGATTTGTGTTATTTGAAGTTTCTGCAACTGGGGTCTCTTCTTCTTACTATAATAAAGGGTG  
GTGGTGCCCTGCTGCTACCGTTAAGTAGTCTTGATTTTTTCAGTCTTGGGATCTGATTTGATTTTTGGTAC  
TAGGGGATCTGAGGAAGGTTCTTTCTTGGTGCTAATTTGCATCAAAGGTGGAACTTTTCTTCATTTGGA  
ACTGTGAATTTGGAATACATGGTGGTGGAACTTTGATTTTGAGCTGTTTATATAAAGATTTGTGTGTTTTC  
ATCAATGGTGATTTGGGAGTTTCTGCCAATGAGTTTTCTGTGTTGGGTGTTTTTGGCTTATCTTTTTTGTA

CATCTTTGAGTCTTGAAACCCCAGTTCAAACCTGTCATCCATATGATTTGTTGGCATTGAAAGAAATTGCT  
GGCAATCTAACAGATGGGGTTATTCTATCAGCTTGGTCTAATGAACCTAATTGCTGTAAATGGGATGGG  
GTTGTCTGTGGTAATGTTTCTGCTCAAAGTAGAGTGATCAGGCTAAATTTGTCAAGAAAAGGTTTGAGA  
GGTGTGGTTTCACAGTCCTTGGAGAAATTGGATCAGTTGAAATTGCTCGATCTTTCGCACAATCACTTGG  
AAGGTGGATTGCCTTTGGACTTGTCCAAATGGAAGCAGTTGGAAGTTCTTGATTTGAGTCATAATGTGTT  
GCTTGGACCAGTGTTGAGGGTGTGGATGGATTGGAATCAATCCATTCTCTCAATATATCAAGCAATTTG  
TTCCTGGAATTTCAAGTGGTGAATCCCTAACCTTGTTCATTAAACACAAGCAACAATTCGTT  
TACTGGTAGTTTCAAGTTGAAATTTGCAGTTTTTCCAAGAAGCTTAAGTTCTGGATATATCACTTAATC  
ATCTCACTGGTGATCTTGGAGGACTGGATAATTGCAGTTCATTGCTCCAGCAGCTACATGTGGATTCTAA  
TGATCTTGGGGTACCTTCCGGACTCGTTGTATTCAATGACATCTTGGAGCAACTTTCCTGTCTGCCA  
ATAATTTCTCAGGCCAGCTAAGCCCACAGCTTAGTAAGCTTTCCAACTGAAATCCTTAGTTTTATCAGGA  
AATCGCTTTCATGGTTTGCTTCTAATGTGTTTGGTAATTTGACATTGTTAGAACAGCTAGCTGCACATTC  
TAATAGATTTTCAGGACCATTGCCCTCTACGATTTCTGATCTTTCTGTGCTTAGGGTGCTTGATCTTAGGA  
ATAATCTTTGTCTGGTCTGTTGATCTTGATTTTACTAAATTGACAAGTTTGTGCACTCTTGACCTTGCAA  
CTAACCTTTCAAAGGTAACCTTCTGTATCGCTCTCTAGTCGGGAGTTGAAAATCATGAGTCTTGCCAA  
AAATGAATTCACCGGGCCAATTCCTGAGAACTATGCAAACCTTTCATCCCTTGTGTTCTCTCATTGTCCA  
ATAATCCCTTTCGAATTTATCTGGAGCTTTATCTGTTCTGCAGCACTGCAGAAATCTTCAACTCTTATTC  
TCACCAGGAACTTCCGTGGTGAAGAGATTCCGAAAAATGTGAGTGGATTTGAGAACCCTGATGATATTTG  
CATTGGGGAACTGTGGTTTGGAGGGGCGAATTCGATATGGTTATAACAATTGCAGTAAATTGCAAGTGC  
TTGACCTGTCATGGAATCATTGGATGGCGAAATTCCTCCTTGGATTGGTGAATGGAAAAATTGTTCTA  
CTTGGATTTCTCGAATAATCACTCACAGGTGAAATCCCAAAAAATTTAACTGATCTAAAGAGCCTCATT  
CCCCACAACTACGCATCTAGTCTGAATTCTCCACTGGTATACCGTTGTTGTCAAGAGAAATCAGAG  
CGGTAGTGGTTTGCAGTACAATCAGGCTTCAAGCTTCCCTCCGTCTATCTTATTGAGTAATAACAGACTA  
AACGGGACAATCTGGCCCGAAATTGGTCGTCTGAAACAACCTTCATGTCTTGGATCTCAGTAAGAACAAC  
ATTACGGGGACTATTCCTAGCTCGATTTCAAATATGGGGAACTGGAAGTTTTGGATCTTTCATGTAATG  
ATCTCAATGGATCAATTCCTGCTTCATTCAATAAGCTCACATTCCTTCAAAGTTCAATGTAGCTAATAATC  
ACTTGCAGGGAGCGATTCCAACAGGGGGGCGAGTTCTTGAGCTTTCCCAACTCGAGCTTTGAGGGTAATC  
CTGGACTTTGTGGAAAAATCATTCTCCTTGTGCTGCCAGCAATTTGGACCTCCGACCGGCTAGTCTCTT  
GCTTCTAGTAGTAGTAGGCTTGGCCGAGGCGGAATTATTGGAATTACAATCAGCATAGGGGTAGGAATT

GCACTTCTTCTTGCAATAGTGCTGCTTAGAGTGTCTAGAAGAGATGCTGGTCACCAGATTGGGGACTTCG  
AGGAAGATTTTCAGCAGACCACCTCGATCGTCTGATACTTTTGTTCCTTCTAAGTTGGTACTTTTTCAGAAT  
TCTGATTGCAAGGAACTGACTGTTGCAGACTTGCTTAAATCTACAAACAACCTCAACCAGTCGAACATTG  
TTGGATGTGGAGGATTTGGTCTTGTTTACAAGGCGGAACTTCCTAATGGCATAAAGACTGCGATCAAGA  
GGCTTTCGGGGGATTGTGGTCAGATGGAGCGTGAATTCCAAGCTGAAGTGGAAGCCCTCTCGAGAGCT  
CAGCACAAAAACCTTGTATCCCTTCAAGGTTACTGTCAGCATGGGAGTGATAGATTGCTGATATATTCTT  
ACATGGAAAATGGAAGCTTGGACTATTGGCTACATGAAAGAGTCGACGGGAGCTCATTAACATGGGAC  
ATTAGGTTAAAGATTGCACAAGGAGCTGCTCGGGATTAGCCTATTTGCATAAGGAACCAAATATAGTT  
CATCGCGACATTAACCAGCAACATTCTTTTGAATGAGAGATTTGAAGCTCATCTAGCTGATTTTGGAC  
TATCAAGGCTGTTGCATCCCTATGATACTCATGTCACGACAGATCTCGTTGGAACCTTAGGATACATTCCT  
CCTGAATATAGTCAAACATTAAGTACTTTTTCGGGGGGATGTTTACAGCTTTGGTGTGTTCTACTTGA  
GCTATTGACAGGCAAGCGTCCCGTGGAAAGTATGCAGGGGGAAAACTGCAGGGACTTGGTATCATGGG  
TTTTTCAACTGAAATCTGAGAACAGAGTGGAGGAAATATTCGATACATCGATATGGGATACAAGTTACG  
AGAGGCAGCTTTTGGAGGTGTTAACTATAGCTTGTCAATGCATAGTGCAAGATCCACGCCAGAGGCCCT  
CGATCGATCAAGTTGTCTTATGGCTCGAGGCAATCGGAAGTGTAAAAGAAAGATGAGATTCAACTAGTT  
TTTCCTTGTAGACTTGGCTTCTTTTGCTTACAAAGTGAAAAATATCAGTGTAAGCAACAGAAAAATTTCAA  
TTTTATAGAGTTAGTTATAAACTTATGAACAGCTTTGTTTGGTTCACTTTGTTTCATACACAAAAAATAG  
TGATAGTTGTGTTTGTATACATATGGTTAACTTGGGGACAAGTCCTTTACCAATATACAATAAATACTCC  
C

>M6-PGSC0003DMG400012514 M6 LRR-RLK

GAAATCGGGATTCTTAATAATTTGGTGATTTTAGCACTGGATACTAACCATATTTCTGGTAATATCCCAAT  
CTCCACATTCAATATCTCCTCATTACAGGTTTTGGTACTGAATCACAACAATCTAATTGGATCCTTTCCAA  
GGGAGGTTGGCAATTTGACAGAATTGCAAATTCTGGATCTTGCCGATAATAATCTTACAGGTATTCAAAA  
GGGGTATGCAAATCATTACTAGCAAGATTTATAATTTCTTAAATCTTAGTAATTACTAATACTATACATCTAC  
ATGCATACATTGACAGGTGAAATACCGAAAAATTTAGCAATCAGATTGAGTTGTTTGTCTTAGTTTCA  
ACAGGTTTACTGGTTCACTACCAATGGAGATTTTCAACATATCGGGTATGAGAGAGATTCAAGTTATTTT  
CAATAATGTGACTGGAACCTCTCCATTAACATAGGTTCTACGTTACCCAACATTGAAGTTATTCATCTGA  
GAACTTAAATCTTTATGGGACTATACCTCATTCTCTCTCCAATTGTTCCAACTCACTAGTCTAGACCTTT  
CTCTCAATAGACTAACAGGTTTGATTCCCAACTCTCTTGGAAAGTTTGACTCATCTACAGTCCCTAAGCTTG

GCAATTAACAATTTAATGGGCGATAGTAGGTTAAGCTTCTTGACTTCCTTGTCAAATTGTAGAGATTTAA  
AAATTATTTTCTCTCTGCGAACCTCTATATGGTGTGCTTCCAGAATCCATAGGGAACCTTTCCAGTACT  
TCTCTTCTAAGGTTTAGAGCTATTGATTGTAAAATTAAGGGGGAAATTCCAAAAGGATTTGGGAACTTAA  
GCAGCTTATTAGAACTCGATCTTTCTAGAAACGGTTTCACTGGACCAATTCCCACAACAATCAGCAACTT  
GAGATTCCTTCAGAGCTTGAAGTTGAGTGTCAACAACTTTCTGGATATATTGGAGATGATCTATGCAAA  
TTACAGAACTTGGGTTATTTAACTTGACTTTGAATCAACTTTCAGGATCTCTCCGAATTGTTTGGGAAA  
CTTAACTTCCCTTAGGGAGATGATTCTAGGTTCCAACAAATTGCGTTCAATCATTCCAAAAGCTTAGGA  
AACCTCATAAACCTCTTGAAGCTAGACTTATCTCAAACAACCTTGGGTGGCTCTATACCTCTGGAAATTG  
GAAATCTAAAGGCTGCGATATATATGGATCTATCAATAAATACACTCTCAAATGGAATTCCTAAAGAAAT  
TGATAGCTTGCAAAATCTTATATACCTTTCTTTGAGAGACAACAAATTGCAAGGATCAATTCCTGGCTCA  
ATGAGCAGCATTTCAGCTTTGGAATTTCTAGACCTTTCTCATAACAATGTTTCAGGATTGATTCCCAAGTC  
TTTGGAGAAGCTTCTATATCTCAAGTATTTCAACGTTTCATTCAACAAGTTGGTTGGTGAAATCCCCTCGA  
ATGGTCCTTTCAAGAACCTCTCCGGTGAGTTTTTCATGTCTAATGAAGCATTGTGTGGATCTCCAAGATTT  
TGTGTTCCCCATGCCACAGTAGCACATCAAAGCATAAATCCAAGAGGAAAAAAGTGATTGTTCTTGTTTC  
TACCGGGTACACTTGTATTAGTCTCCATCGCCTTTGCCCTTTTATGGTTAAGGTATACAAGAGGTAAAAG  
AACTGATCCTCAGCAAGCAGTTGATTCATCCTTTGTCATCTCAACAAAAGGAAGAATTCATACTATGAA  
CTACTTCGAGCAACTGATTCACTTAGTGAGATCAATTTAATTGGTTCTGGGAGTTTCGGCTCTGTTTACAA  
AGGCATCCTCAGAGATGGGACTTTCATTGCAGCTAAAGTGTTCAACCCACAATTGCAAGTGGCATTTAG  
GAGTTTTGATACAGAATGTCAAGTTTTGCGCAACCTTCGTCATAGGAATCTCACCAAAGTCATCACCAGT  
TGTTCCAACCTTGAATTTAAGGCTTTAATACTCGAGTACATGCCCAATGGGAGCCTCAATAAGTGGTTGT  
ATTCACACAACACTACTTCTTAGACATCAAACATAGGCTAAGTATAATGATAGATGTAGCATGTGCATTGGA  
ATATCTACACCATGGATGCTCATTACCCGTGATTCAATTGTGATTTGAAGCCTAGTAACGTCTTGTTGGATG  
AGGAAATGGTTGCCACCTAAGTGACTTTGGAATTTCAAAGTTGCTTTCTGAAGATGAGAGTTCTTTATA  
CACTAAAACATTAGCAACGTTTGGTTATATTGCACCAGGTACGTGATCTCTTAATCAATTGCTTTTGATTA  
TTTCTCTTTCCTTATTTTCCACTAGTAAATGTTGAATTTCAAATTTGATTGATTGCAGAGTATGGACTGGA  
GGGATTGGTGTCAATAAAAATGTGATGTTTATAGTTAAGGGATCATGTTGATGGAAACATTTACTAGGAA  
AAATCCTAATGATGAAATGTTTCGATGGAGATTTTAGTTTGAAGCAATGGGTGAGAAATTCCTCCACA  
AGCAGCAATGGAAATTGTTGATGCCAACTTAATATCGCCACATGATAATCAATTAATGAAAAAGCTAGAT  
TGTGTGGTATCCATCATGAAAGTGGCAATAGATTGTTGTGTTGAATCTCCAAAAGGAAGGATTGACATG

AAAGATGTTGTGGGGAGGTTAAAGACGATCAAGATTCAACTTCTTGTCATGTTGA

>M6-PGSC0003DMG400012588 M6 LRR-RLK

TGAGAGCTTCAGCGGAAGTGCTTGAAAGGGAACATTTGGCACTACATATAAGGCAGCTTTGGAGGAT  
TCTACCACAGTTGTGGTGAAGAGATTGAAGG

>M6-PGSC0003DMG400012594 M6 LRR-RLK

ATGCTGTAAGCAGTAACGAAATACTATTTCCATGGACAGAATCCCTCTGCCGCAGATGTTCCCATTGACA  
ATTTAAACACATTTTGAACCTCCTTTTCTTTTCTCTCAAAGGTGTAGCTTGTGGATGCACTTATTAATTTT  
TAATGTGCTACATAGCTATGTGATGACTAATGTATAGCCCCTTAATTTTTACAGATTGTGTGGTCCCTAAG  
TTTTAGAACTGATTTGCTTACGACCTCTTTTTCTAATTGCAGGGAACCTTATAGTAATAATATAAGTGGA  
AGAATTCCTTATGAACTGGGGAATTTGACGAATTTGGTGAGCTTGGATCTTACCTGAACAAGTTAGTTG  
GTCCAATCCCCGACACTTTGGGCAAGCTTCAGAACTACGTTTCCTGTATGGGTTACACATCCTTTTTCT  
CTTCTATATGTTTGTTTTTCTTTTTCTTTTGCTTGGCTGAATAGTTTCTTAAGCCATGAGCTTTATTTCTG  
AACATTTTGCTTAGTCAAGAAAGGCCACCTTCTATGTTAGTGGCTCTGTACTCTGTAGTACTATTTCTCT  
GTTTAGTTATTTGGAAATAGGGATAGACTTTGCTCCTTATTGGCCAAGTGGCAGACATGAAGATAAAAA  
CATTTCAATCACCTGGAGTATCATTACCAATGAGACAGCATCATAATTTTCTATGTGGCTTAAATTATTCA  
TAAAGAGAGAGAGAGGAAGAGGAGGCGGAAGAAGAAAACCTGAAGCAGCTCATAGAAGTACCCAAA  
GTTGGTGTCTTAGGGTGTCCAAAGTGTGGACATGCATGTCTGAAAATTCAAAAAATATACAGGAAGTT  
AGACACACACATTCTCAATGTGTGTCCAACACCAGTACTTGACAATGAAATTTGTCCATCATCCTTGGCA  
GTCATCGTTCCTATTTCCCTTATATAGGCTTGCAAAGGCTAGGTGGATTTGAGTGGTTGATAAAATTGT  
GGTTGCTGCTCTCTATAAAGGTTCAATTGGCGTGCTGCTGAACAGGATAAAAAATTTACATGCTATTCTTG  
TTATTTCCCGAAGCTCTGAAAAGTACTTCTGATGATCGTATATATGAGCATAAATCTCAACCTGCTA  
ACAGTGTGAAGAAGCTTTCTTAGATATTGGGCATGAATTTTGTAGCATCTTCTAATACTACTATTCTTCTT  
CATTAGTCAAGTATTTACTACAATGTACACATGGACTGATTAATTAGCCGAGTTCTGTCTGTTTAAGATTG  
ATCAAACCTTTTTTTTTCTTATTGTTATTGTTTTCTTTTTGCTAAATTGAAGGAGGCTTAACAATAACAGTTT  
GACTGGGCAAATTCCGATTCTTTAACCACAGTCACTTCACTTCAAGTGCTGTAAGTATAAAGCTGGCAC  
TTTTTATCATGTGGTTTTTTTTCGCCATCAGTTTTTTCTAATTCTTAGGTAATAATGTTTCACTTCTCGCAATG  
CAGTGATTTGTCAAACAATAATTTAACAGGACCTATTCCAGTCAATGGTTCCTTCTCGCTTTTTACTCCTAT  
CAGGTCTGTGAAAAGCACTAGTTTATATTTAAGTTCTGTCACTGGAATCATGATAATGAAATCTTACAT  
CTGAATGTCTATATTTTCAAGTTTTGCTAATAATCCATTGGATACTCCTCCACCTTCTCCACCTCCACCTATTTT

TCCAACACCCACTTCTCCAGGTTTGTTAAAATAATTTATGTTTTATGGGTTAAGACACTGCCCCCCCCCC  
CCCCCCCCCCCCCAAGGAAGAAGGCCAAAAGGGCTGACTGTTTTAGGGGAAGAGATTTGCACATTATA  
ATGAGTTTTAGTAGTGTATGTGAGATAAATTTTACAGGTGATTTTGGGGTTATCTACTGTTTGATAGGTT  
TGAATAAATAGATTAACTTACAAGTGATATTGAAGAGTGGATAGAAGTGGCCTACATCAGGAAATGCA  
ACTGTATGCATTGGATATTGTGACTATAAAGGACCCAACTTTCAGAATTTATTGTCATACATTCTCTCAA  
TTCTTTCCCATGTGTCTTATTTCTCACATGGTATCGGAGCTTTGGTGAAAAATTAGTTTCAGTGCATTTAC  
CAGCAACACGCGGGAGAAAAATCTCCTTGCTGTGCAATTCTCATTGACCATGAATGCTGTCAAAATGTAT  
GTATCCTTGCCGTCTCTGACTACTGTACATAAATTAACACCACCAAAAGGCCGAATAACAAACAAGTACC  
TGTTGTTATGAATAAACTGAAGGATCTTTACCTATTTCTGCATCTTTTCTATTTTGTAGCACTTTAGCTTT  
ACAACATAGTCCTCGGTGCGAGTGTAATGGTGAACTACCATATCCCTTTTCTCAATTTTTTTAACTAC  
TTGTGTTAAGTTTTTATCATCCATCAAAAAAGGGAATTAAACTTAAATTTTGAATTCCTAGGTATGG  
GAAACAGTGCAACCGGGGCGATTGCTGGCGGTGTTGCTGCAGGGGCTGCTCTTCTGTTTGCAGCTCCTG  
CGATTTTGCTTGCTGGTGGCGCCGAAGGAAACCGGAAGACCACTTCTTTGATGTTCCAGGTGGGAAGC  
CTCAATCAAACACCTGAATTAGTTTTTGTTCATTTAATTTAATTTAATGAGTTCTTGCAATTTTACATT  
CTTTTGCAGCTGAGGAGGATCCAGAAGTTCATCTTGGACAACCTCAAGAGGTTCTCCTTGCGCGAATTACA  
AGTTGCAACTGACAGTTTTAGCAACAAAAATATACTTGAAGAGGAGGATTTGGCAAGGTTTACAAGG  
GCAGGTTGGCTGATGGCTCTTAGTTGCTGTTAAAAGATTAAAAGAGGAGCGTACTCAAGGCGGGGAG  
TTACAGTTTCAGACAGAAGTTGAAATGATTAGTATGGCCGTGCATCGAAATCTACTTCGTTTATGGGGCT  
TTTGCATGACTGCAACTGAACGGTTGCTTGTATCCATACATGGCGAATGGAAGTGTTGCTTCACGATT  
AAGAGGTATCTCTTAGTCTTGAATTTTCCATCCTTCTTTTCTTGTCCATTGAGTCGAAATACATCAGAT  
CAAGCACTTGAAAAAGCTGAAAAATGATAACAACGTTTTTTTTGAACTTTTAAGTTATGGTCTGTAATA  
TAAGTTATCTGGAAAAGTTACTGCAGATGTGTACATCATTGTGTAACTTGGCATTATTGGATATTGTCG  
TGGTTGATTAGGAGTTAGTTTGTATAGTTAGAATATTCAATCCCGTAGTTAGAAGCTGTTGTTCTTTGT  
GATTTTACCCGTGGTCTATCAAGCAATTTCAAGAGCGTTGCTATCCTTGATGTCCTACCAAATATTAAGAT  
TTCCGTTCAAGTTTTATGTTCTGAATTCATAGTGCAGATATGGAAAGTAATCTTCATTTATGCATGAACC  
GCATATATCAATTAATTAATTGCGTTCAAGCTAAAATGGGAACCTGAACCAGTTTACTTGACATCTTGA  
ACTTGTCTTACAGTAATTTATTTTTCTTGTAGAGCGGCCAGAGTCAGATCCACCACTTGGCTGGCCAATA  
AGGAAGTGTATAGCACTTGGATCTGCAAGAGGCCTTGCTTATTTGCATGATCATTGCGACCCTAAGATCA  
TCCACCGTGATGTCAAAGCTGCAAATATATTGTTGGATGAGGAGTATGAAGCAGTTGTTGGGGATTTTG

GGTTAGCCAAACTCATGGACTACAAGGATACTCATGTTACTACTGCTGTACGTGGTACGATTGGGCATAT  
CGCCCCGGAGTATTTATCCACGGGTAAATCTTCAGAGAAAACACTGATGTGTTTGGCTACGGAGTTATGCTT  
CTAGAGCTCATAACTGGGCAAAGGGCATTGATCTTGCTCGACTTGCAAATGATGATGATGTCATGTTGC  
TAGATTGGGTAAGTATTTACTAGCCTACATGCTCTAGTTATTCTACTAGCTTATGTCTTTTTCTTTTTCTT  
ATTCGTTGAAACTTTATACTACTTACAATTGCTAGTTTTTGTCTGCAACTGACTTCAAACATGGAAGTGA  
GCACGGGTGAGAAGATCCCACTTTCCTGCATGCATCTCCCTATAAGCAGAACTCTATCATTGCTGTACCC  
AGCATGATGAAAAGCTGATTTGTAGACCCACTACAAATTAGGACTGGCGAATAAGACACTGTCATGTCC  
CTTCTCTTCCCCTGCCTTTTCCTTAATATCCCCAATCCCGTTCTGTTCTGTTATCGCTTCCCTACCCCGT  
ATGTAACCCACATCCCATATTCTCGTTTTATATCCTCATCCATCAATGAGAAATCTCAGCTTCATCTCATCT  
CCCTCACTCTTTTGCACAGATTACACACACTCATAGCTCTCTTTGTTCTTTACTCAAGTCTCAGGGCTGCAG  
TTCTGTTTAAAGTAAAAAGTTTTATATTGACCCCCCAAAAAAAAAAATAATAATAAAAAAAAAATTGTTA  
GCTCTAGTAGGTTTTGCATTGCAGTTTGGCATGTATGATTTCTGTAATCTTTGATACTACATCATACGAAA  
CATCCAAATTTCCAAAATAATTTGATTCCTGGGACTTGTATTTGTGCACATTCTTCATGTAATCTTTTTGTT  
TCTCTTTCTAGA ACTTAACCATCTTGCGAAAACATTTGTTGCATTAGCTGTATGGTCAGGGTGGATCACTT  
TCAATATCGTTTAGTAGCAGATTGTTCTGGAATTGCTTTTTAGTGTTAAAATCTTTTTCCCTTTGGTTAGCA  
AAAGCACTCATATAGCATATTGCTATATCAGAAGATTTAGATACTTTTTCCCTGCCATATTGACTGTCGCC  
TTCCGTGCAGATAAAACTACATCTCTTTTTTTTTCTTTGTATGGAATTGCTAGGCTATTTCTCTGTATTTG  
CATCACAGAGTAGGTGAGATAGAGAATACACTTTACGAGAGGGGACTTCTTTGGGAGGATCCTCTAGA  
AAGGGAACCCACCCTTTAGGACTTGGGAGTGCAGAAGATGGTCAATCTTTCACTATGGTTAAGTATA  
GAAAATTGAAAGACAAGTGGCTATCCGAACTTGGAAGTAAATAAAGTGGCTATCTGAACTTGGAAATT  
CAGTATCTCCCTATAGGGCTGCTTATCAAAAATCTCAACAACTTCTATGGTGAATGCTTTGTTATTTTAGT  
GATGAAATTAATTATTTGCTGACATGATGAGGAAAGTCCGCATGCACTGTGATTTCTTTTTAAAAAATGG  
CACTCAATTGAAAAAATGGTTATGTACCTTATTTGACCTCAAAAATTGTGTTAAAATTTAGGTAAAGG  
GACTTCTTAAGGACGAGAAGTATGAAACATTAGTAGATGCAGATCTTCAGGGTAATTACAATGAAGAAG  
AGGTGAAACAGCTTATTCAGGTAGCTCTACTCTGCACACAGAGCTCTCCTATGGAACGTCCAAAGATGTC  
GGAAGTGGTCAGAATGCTTGAAGGTGATGGCCTTGCTGAGAGGTGGGAAGAATGGCAGAAGGAAGAG  
ATGTTCCGTCAAGACTTCAACCATGCTCACCATCCTCACACTGATTGGATTATTGCAGACTCCACTTATAA  
TCTACGACCCGATGAGTTATCAGGGCCAAGATGA

>M6-PGSC0003DMG400012817 M6 LRR-RLK

GGCTTAATCACTTTTCCAGAAAAAATCCACTAATCCATTCATCTCCTTCAACAATGCATCTTCAAATCTTG  
CTTATACTTCTATTACCTACATTGATTCTCTCAATAAACCAAGAATCCCTTTATTTACACACCATAAAGCTT  
GGATTTGATGACCCAAATGGTGTTTTTTCAAACCTGGAATCTCCATGATAACTCCTCACCTGTAACCTGGT  
TGGAGTAAAATGCGACTCTTTAACTCGTTCTGTTACATCTATTGACCTCTCCAACACCAATATCGCCGGCC  
CATTTCCGGCTTCTCTTCTTTGCCGGCTCAAGTATATCAAGTACATTTCACTTCTACAATAACTCCATTA  
CGACTTCCGGTGGAGGAGTTATCCGCTTGTAATCTCTTGCCATCTAGATTTAGCTCAAAATTTGTTA  
GTGGGTAGTCTTCCATCGAGTTTGGCGGAGCTTCTGAGCTGAAATACCTTGATTTGACCGGAAATAACT  
TTACCGGCGAAATCCGGCGAGTTTTGGGGCATTCCGGCGACTTGAAGTTCTGGGTCTGGTTGAAAATT  
TGTTAACTGGGACTATCCCGCTGGAGATTGAAACATTTGAGTTTGAAGCAGCTGAATTTGTCGTACAA  
CCCGTTTTCTCCGGGTCGGATCCCGCCGGAGATTGGGAACCTCACGAATCTAGAGGTGCTATGGTTAAC  
TGACTGTGGGTTAATCGGTGAGGTTCCGGGTACGTTAAGGGGATTAATAAGCTTGTTAACTTGACCT  
TGC GTTAAACA ACTTGTACGGTCCTATTCCGAGCTGGCTCACTGAGTTAACTAGTGTGAGCAAATTGAG  
CTGTACAATAACTCGTTCTCTGGCGAGTTTCCGGTGAATGGGTGGTGAATATGACCTCGTTGAGGCGG  
GTCGACCTGTGATGAATCGGGTTACCGGTTCGATCCCGAGCGGGTTGTGTGAGTTGCCACTTGAGTCG  
CTCAATCTTTATGAGAATCAATTGTATGGTGAGTTACCTATAACCATTGCAAATTCACGCAATTTATACGA  
ATTAAAGCTCTTTGGTAATAGTTTAAATGGAACCTTACCTAAAGATCTTGGTAAATTTTCTCCATTGGTAT  
GGATTGATGTTTCAAACAATGAGTTTTCCGGTGAATTTCCGGTGAATTTGTGCGGAAATGGGGTTTTAG  
AGGAGGTTTTGATGATAGATAACTCGTTTTCCGGTGAATTTCCGGTGAATTTAAGCCAATGCCGGAGCT  
TATTACGTGTGAGATTAGCTCATAATAAGTTCTCAGGTGATGTCCTGTGGAATTTTGGGGGCTGCCACG  
CCTTTCGCTGCTTGAGTTAACGGACAATTCATTTTCTGGTGAATCGTGAAA ACTATAGCTGGTGCATCG  
AATTTATCCGCTTTGATTTTGTCAAAGAACGAATTTTCCGGTACTATTCTGAAGAGATTGGCTTTTTGGA  
AAGTTTGGTTGATTTTGTGGGAAATGATAACAAGTTTTCAGGGTCATTACCGGTTAGTATAGTGAATCTT  
GAGCAATTGGGAAGAATGGATTTTACAACAATGAATTAAGTGGTAAGTTTCCTAGTGGGGTTCATTCTT  
TGAAGAAATTGAATGAATTGAACTTGGCAAACAATGATCTTTCTGGAGAAATTTCCCGGGAAATCGGGA  
GCTTGTCTGTTTTGAACTATCTTGACCTATCAGGAAACAAGTTTTCCGGGGAAATTCAGTTGCGTTGCA  
GAATTTGAAGCTCAATCAGCTGAATTTATCGAATAATGGCCTTTCGGGTGGTATTCTCCTTCATATGCAA  
AGGGAATGTACAAGAATAGCTTTCTGGGGAATCCCGGTTTATGTGGAGATATTGGAGGCTTATGTGATG  
GAAAAGATGAAGGTAAA ACTGCTGGTTATGTATGGTTACTGAGATTGCTTTTCGTA CTGCTGTTTTGGT  
GTTTGTAGTTGGGGTAGTTTTCGTTCTATTGGAAGTATAGGAATTACAAGAAAGCAAAAAGGTTGGATAG



ATCGAAATGGACCTTGACGTCGTTTCATAAGTTAGGTTTCGATGAGTATGAAGTACTGGAAGCTCTAGAT  
GAAGACAACCTTGATTGGTAGTGGTTCTTCCGGGAAGGTTTACAAGGTCGTTTTGAGTAATGGTGAGGCT  
GCTGCTGTGAAAAAAGTTTCAAGAAGTTTAAAAAACAGATGAGAGTTGTGACATTGAGAAAGGTAA  
CTATCAGGATGATATATTTGAAGCGGAGGTTGAGACATTGGGCAAGATTCGACACAAGAACATCGTTAG  
GCTATGGTGTGTTGTACAACAAGGGGTTGCAAACCTTTGGTTTACGAGTACATGCCTAATGGAAGCTTG  
GGCGATTTGCTACACAGCAGCAAAGTGGGTTGTTGGATTGGCCTAAGAGATTTAAGATAGCTATGGAT  
GCTGCAGAGGGACTCTCATATTTGCATCATGATTGTGCTCCTCCGATTGTTACAGAGACTTGAAGTCGA  
ACAATATCTTGTGGACGGGGAGTTTGGAGCTCGAGTTGCTGATTTTGGTGTGGCAAAGGCGATGGAT  
GTTGATGACAAGGGAACACGTCTATGTCAGTCATTGCAGGGTCTTGCGGTTATATTGCTCCAGGTTAG  
AGGATTAATCCTTCACTTTGGGAGTTCTACTAACATGATTTTGTGAATTTGGTTTATGCCTTCCATTGCA  
AATTGTAGTTAAGATGTATGCCTAAATATAACATATTTTCATATATTGTTATATTATAATTAAGCGTCGAAT  
AAGGTCTGCTGTACACTCTACCCTCCTCAGGCCCACTTGTGGGATTACATGGGGTATATTGTCATTGAT  
GATTGTTAAACGTCCAATATCTATAATCAGGCAGACAGCTATATATGAGTAATTTTGGTCCATTCTTGAG  
CTATGTTGCTCAAATCCTTCAAAAAATGTGGCATGTCTTGTGCGGATTCTCCCAAAGTTATTCAATTTTGG  
AGGATCCAATACAGGCGCAACAACATTTTTGGAGGATCCGAGCAACATAGTACTTGAGTGCCTTGTAC  
ATTAACACTAAGGTTTGTCCAAGAACAGGGCATTCTTTGTTTACATTTGCTTTCTGGTTCTGGTAGTGCT  
CCTCCGTTGAACTAAATTCTGTTGCTTGCAGAATATGCTTACACACTTCAGGTGAACGAGAAGAGTG  
ATATATACAGTTTTGGCGTGGTAATCCTCGAGCTAGTGACAGGGAACTCCCTGTAGGTCCTGAATACG  
GGGAAAAGGATTTGGTGAAGTGGGTTTGTGCTACTCTAGACCAGAAGGGTAGAGATCATGTTATTGAC  
CCGAAACTCGACTCTTGTTC AAGGAGGACATAAGCAAAGTCCTAAAAATTGGCCTCCTCTGCACTAGCC  
CCCTCCAATTAACCGACCCTCGATGAGAAAAGTCGTAAAAATGCTGCAGGAAGTTGGTGGCGGAGACC  
AGCTCAAGACAGCATTAAACAGATGGCAAGTTGACCCCTTATTACCACGAAGACGCATCAGATCAAGGAA  
ATGTAGCTTAAAGATAGTCAACATATCTTTGCTTAGATGTAGCGACATGGACAGTGAAGATTCATAGGC  
ATAGTCGTTGTATCGTGAAAGTGAAGATGTGTGAATTTTTTTATTTGCTAATTGCTTAATACTTTGTCTAT  
CAATACGTGATTTTTGTTTGTATTTGGAGAGAAGGGGAAAACAGAATTGAGGTGAAATGTAAAAGGA  
>M6-PGSC0003DMG400012929 M6 LRR-RLK  
GCTGCCTGCAGTAACACCTTGAAAACCATATCTCATAGAAGCAAAAACAAGAGTCTGGTATTGTTGCT  
GGTAAATGATGAATGTTGTTGTAGTTGTGATCCTTAGTTTTTTCATTTTCAATCTCTGTTATATTTTCA  
TTGAATTCAGATGGTGTCTCTGTTAGCTTTGAAATCTGCAATTTCTAATGACCCATCTGGGTTTCTTCT

TCTTGGTCGGAGTTAGACTCATCAGCATGCCATTGGAATGGAATCACATGCGATGAAAATCAGAAGGTG  
ACTTCTATTTCTCTGTCGTGCGAAGAATTTGAGTGGTTACATTCCCTTCTGAAATCGGAGCACTTTCTTCTCTA  
TCAATTCTTTCTCTTTCTACAACAACCTTTTCAAACCAATCCCTATTCGTCTCTTCAATGCTACTTCCCTTC  
ACTCCCTTGACCTCTCTAACAATGCTTTACAGGATTCTTACCTCAACAAATCACATCCCTTATAAACCTTA  
AACACCTTGATCTTTCTTCTAATTTTCTCAATGGCTCACTTCCCAAGAGCTAACTCATCTTACACTTCTCA  
CTGGAACCTTAAATCTTTCATACAACAGATTTACCGGCCAACTTCCGGCGAGTTATGGTAAGTTTCCTGTA  
ACATTGAGTTTAGACCTTCGGCATAACAATCTGACCGGAAAGATACCTTCAATCGGGTCGTTGTTGAATC  
AAGGGCCTACTGCATTTTCCGGTAACCTTTTCTTGTGGGTTTCCATTGGAGACTCCGTGTGCAGAACC  
AGAAGCTCAAAAACCACCACCGAACCCGAACCCTAATGAGGAGGAGGTGGGGTTTGTAGGAAAAGGG  
AAATCGGGAAATGGGTGAGTGGTGGTTTCTTTGATCTCCGGCGTATCGGTTGTGATTGGGGTGATGTTT  
GTTTCAGTGTGGTGTGAGGAGAAAATGGAAGTTGGATGAGGGAAAATGGGAAAAGAAAAGTTGG  
AGAAGCCAGAGGAGGGGCAAAGGGTAAGTATGTAGTGTAGACGAGGGGTTTGGGATGGAAGTAGA  
GGATTTGTTAAGGGCTTCAGCTTATGTAGTAGGTAAGAGTAGGAGTGGGATAGTCTACAAGGTGGTGG  
CTGGCGCTACGGCTGTTGCTGTTGACGATTAAGCGAGGGGGATGTCACGTGGAAGTTCAAGGAGTTT  
GAGACGGAGGTGGAAGCCATTGGGAGAGTACAACATCCAAATGTGGTGAGGCTTAGGGCTTATTACTA  
TGCAAGTGATGAGAAATTGCTGGTAACTGATTTTATCCGCAATGGCACCTTGACAATGCTTTACATGGT  
AATCTCACTTCATTCTTACTTGAATTTTCTTACTGTTAAAAGAAAATCACTCTAACATACTACTTACG  
GAGTATTATTCTAAATCACTATAAGGATAAACTTTTAGTAGTGCTGGAGTAAGTTATCCTGCCTATGCGA  
GTGAGAAAGGGTGTACTTTTTTGGAGAAAATTAGATCAAATCCTCATAAGCAGTATTATCTCTGTGTCCA  
TGGTACTTCAGGGGTTTTATTAATATATCAGACAACCTGAAGGTGGCATTGTATTTGATATTTATGCAA  
AAAAAGAAGTTTAATGTCTACTCCATTGAAGTAAGTGTTTACAACCTAAGATTCCTTAAAGCTGCTCATG  
ATTATTCGTTGAAGTATTCTCTAGGCACATTTAAGAATTTCTGTCATGGTTTCAAGCATTCTCTGGTAAAT  
ATTAATGATCCCAAATTATATGCTTTTAAGTCGTTAGCTGCCTACTGTCCTTATCTTCTTTTATGATCAAGAAT  
AGGCAACCAAATGTAATTATGATGAACAAGAAGTGGGGTAGTGGGGTGGAGAGGGGAATAATA  
CGTGCATGGTTCAATTTGTTTTATCTGAGCAATTGGCATTGTGTTTTCTGCTTCTGGAAAACATCTATG  
CAAGTGTTAAGCTATTGAGACCTTTTGGGCTCCACAATTCAACATCTGTTGGTTTATTGTAATTCAGT  
TTCTGGTCCCATTATGGCATTTCCTTGTCTTCTAGGGAGTACATTTTATGTGGCCTAAGAT  
ACATTGAGAGAGGCTTTAAAGTTGAAGTAAACATTCGGAAGTTACACTAAGGAAAAAAAAACATTAGATC  
TATCAATTGGATGTTAAGCTATTCGTTGATTACGTTTATTAGGAATTGAACTAAGCATGGTTACACATA

AAATGTGAATCCAAAGTGTGAAATTTTTGCAGAACAAAATATCGACTAATCATAAAATGTTGTAGTTCCT  
CCTTGTAACATCTATCATTGTCAAGTTCACCTTAGGATGTTGGACTTTATGTAAAAGAGGCATTAGCTGA  
CACCGAGAAGAAAACACTATTACACCACAGGTTATTTTTGTCTTCAAATTCCTTTTTAACTAAGTGGAGAAGT  
CCACGACGTTAAGCTTTCTGATAGGTAAATATAAAACAAAAAAGATAATAAGCAAGACACGAAAACGAA  
ATTCATCTGATTCCAAGACTTGGTAAGTCATTCCCTGTTTCCTTAGTCTGTTTGTCTTGTTATTCAGAGG  
TGTCGTTAATGTACCTATAATTTGTATTGTGGTTATAGAATCCCTGAATAGGCAGTACTGGACTTGTGT  
TAGCCTTGATTTTTGCTCTCTTTATTTTCAGAACCTTGCACCTCACAAAACATTAATGTTCTTTTGAACCT  
CAGTTTGTCTTTCTTAACTTCAATCTTTGTGTACAAGTCTTCTCCACATAATCCTCCCTTTTGTCTCGTACTT  
TGGTATTGTCAATTGTGAACCAATCCTATATAAACACAAGTGGAAATGAAGATTGCACCTACTTTGGGGT  
GGCTTCTGAGAATGTGGTTCCTCTAGTTCATATTGGTAATTTTTGTCTCGACAAAATACCAACTGACCT  
ATTTCTTGTTTTCTTGACTCAGACTCCATTGTTTCAAGCACATATTTTTGTACCAATTCAGGATTTGAA  
GTGAAAATGTTCTATTTGTTATTCTGAAAAGCTGTCATCGATTTGGCATGAATCACTTTTTAATTTATCTT  
CCACAAGTCCAAAATATTTTTGGATTTCAAACCTTGCATTTCCGGCAAAAATTTCTCATGGAAAAAA  
ACACATACACAACCTAATTTCTCTAGAGAAGTGGGTGATTTCTTTTTATGTTGGAGCATTATCCTTGTTAA  
TCAATCTTTTTATGTTTATTTTTACAATTGCAGGAGGACTTGGTAATAACTTGCCACCTCTGTCATGGGC  
AGCTAGATTGAAGATTGCTCAAGGCACAGCTCGGGGTCTAATGCACATTCATGAGTGTAATCCCAGGAA  
GTATGTTTATGGGAACATAAATCAACAAAATCCTTCTTGATGATGACTTGAAGCCTACATATCTGGT  
TTTGGATTGACTCGCCTTGTTTCAGGTTGCTCCAAGCCCATAAACAGTAGTACCAAAAAGCTAAGTACAA  
GTCAAATCATAATAAGTCTCAAACCTCAACTCCGTCTTGACTATGTACATGGCACCTGAGGGTCGAGT  
GCCTGGCTCCAAGTTCACCCAGAAAAGCGACATCTACTCATTGGTATGGTACTTTTGGAGATTCTGACT  
GGTCAGTTGACAGATGGAGGATCGGAGGTGGAGGATGATGGGAAGGGGCTTGAGAGTTTTGTTAGAA  
AGGTTTTTAGACAAGAACGACCCTTGCTCTGAGATCATAGACCCTGCTCTCTTGAATGAGGTTTATGCTAA  
AAAGCAAGTTGTTGCAGCATTTCATATCGCTCTCAACTGCACAGAAGTGGATCCTGAGCTTCGGCCAAGG  
ATGAGAACAGTTTCTGATAACCTTGATCGCATCAAACCTGCAGTAAAAGAACTTGATCAATGTAAAGGCT  
TTCAATGTTTTGCTGACCGCCTATTGTAGAGCTGTTTAGTAATTGTGAATCAGAATTTTCAGTTTGTGTTG  
TGCCAAATCCTAGATTTGGCGTTTCTATTGTAACCTCTACTAATCAATGTTCTATTTGTTGAATCATCAAT  
GAAAATTGCTTGTGCTAGCGAATCTTACAAGGCTATTTGTGTTTGTATGTACGGACATGATCTGAATTCCA  
GATAACATGCAAAGGAGCATGGTCAGACCCTGCCTATTCAAATGATGTAGTTCAATAGTTGGAAAGTTC  
TGTATGAATTCTTGATTGCCATTACCCTATTCAATCTTTGAAACTTCACTCCACCTCTATTCTCTCATTCT

ACCAAGTGAAGTTGCTAC

>M6-PGSC0003DMG400012955 M6 LRR-RLK

CACCCCATTCCAACAGAGAAATACAGAGAGAAAGAGCAAATACAAAAGAGACACCAACTCATTTGCCA  
CTCTACCCCAAATATAAAAACCCTAATTTCCCTCTTTTTTCTCCTTTCCCAACTCTTTCCCCACACCCCAAC  
CCCTCTCTTACCACCCACCTACCCTAATCTCTCTCTGTCTCTGAACTCTTTCTTGATTCCATGGTGCT  
CTCTCCATAGTCATCCTTAAGCTTTTCTCCTTTTACCCTTTTTCAGACTTTCCTTCTTTTTCTCAATGCCTCA  
TTTTTAGCACTTAACTCACATTCTCAACCAATGACTCTCTCTCAATCTCTCTTTACTCCTCCTGTACTT  
GTGTTTCGGCTCAATGGGTCTTCTGCTGCAGAAGATGAAGTTCGATCACTTTTGGAGTTCAAAAAGGGT  
ATTA AAAACGACCCATTAGGTAAAATCTTCAGTTCATGGAGTCAAACGGGTCTTTCAAATCCATCAGCAT  
GTCCAAAGTCGTTTCATGGTGTCGTTTGTGATGAAA ACTCTGATTCTGTTTTCTCCATTTCTTTGACGGG  
CTTGGGCTTGTAGGTGACTTGAAGTTCTCAACTCTTAGTGGGTTGAAGCAGCTCAAAAATTCTTAGTCTTT  
CTGGTAACTCTTTTACGGGTAGGGTTGTTCTGCTTTGGGTTCAATGTAACTCTTCAGCATTGGATCTC  
TCTGGAATCAGTTTTATGGAACAATTCCAGCACGAATTAATGAGCTTTGGGGTTTGAATTACCTCAATT  
TGCCAATAATAATTTTACATTTGGTTACCCAATTGGAATTAGTAATCTTCAGCAGTTGAGAGTACTGGAT  
TTGCATAACAATGGGATTTGGGGTGATATCGGGGAGTTGTTTTTGAATTGAAGCGTATTGAGCATCTT  
GATTTGAGTAACA ACTCGTTTTTCGGGTCTCTTCTACGAGCCCGAAAATGTATCACTCTCTTCGACAAT  
TCAGGTCATGAATTTGAGTCACAACA ACTTGGGTGGTGGTTTTTTTCTGGAAAATTGTTGGAGGCATTT  
GAGAATTTGATGGTTTTGGATTTGAGGAATAATGCTATAATGGGGCAGCTTCCTTCTAACGGGTTTATGC  
ATAATTTGAGGGTTTTAAGGCTTGGGAATAATAAGCTTTATGGATTGATCCCGATGAGCTCTTGACGGG  
AACAGGTCCATTGGAAGA ACTGGATCTTAGTGGCAATGGATTTTCAGGTTGGGAATGGATATCAGTTT  
TTTGAATATTTACATTTCTTAGATCAGTATATATTGTTGTTGTTGAATGATCATAATCAAATACACCTTTT  
ATTTGTATAGTGTTTTTGTGGATGCCTTTAACTTCAAGCCTCTTAATTTTTGGAGGTGGACTAAAATTGGA  
AACTTTCTTCTGTTTTAGGCATTGAACTTTTACAGTTATGCAAAGTTGCGCGGACTCTTCACTTTCGATG  
CCGCACAGTGTCGGATTTTCAAATATACACTACTTTGTAGAATCCGACACGCACCCGTTGACATTTTTGA  
AGAGTCCGAGCAACATAACAGTTGTGAATGTAAAATCTCGTTCTTTTTGTTTTCTTGTCAGGTTATAATTA  
GTTTTCTTGTGTGAGTAGTGGTTGACAATCTATATAACAGAGAATAGAAATCTTCAAGGTCTTTCAGCTT  
ATGCCAAATACAGAAAAGTTTGCTTTTTTGTAGTAAGTAGGTTTTTTAAAAAATGTTTTAACAAAACCAGA  
TTTTGAACAACTTTTACCGCAAGCTTTTTTGTGCTTCAACAGAACGTGAGCAGCGTGGACTGTATA  
GACTAGTTTGAATTGCAAAGCATGTTCAATAGA ACTTGCCATAATAAATAGTCAACAAAGTGTTTCCTA

ATTGTAGTAAATTTAATAAAAAGCCCCTAATGGAATAGTTGCATGAATGATTGCATCATTAGTAGCCATAA  
ATAATCCTTTTTGCAATGGTATAACTGTATGCTCAAAGTTCATGGCAAGCTAGCTGGAGCAATATTTAGC  
CCAGTGTCATCAAAGGCGCTTAAGCCCTGAAGCAAGGCTCAAATCGTGTTGAGCGCTTCGCTTCGCTTAA  
TGTGCGCTTTAGTGTCGTCATCAAGCTTCTAAGGCATACTTTTCCTAAGTTTATATATTTGTAATTCATGC  
TTAGGACTAAAAATAAATATATTTATTTTTCTCCCTTTTCGCCTTTTCCATTAAAGCCCATACTTGTGCTT  
AAAGCCCAATCAAACCTTAGAGCTTTTTACTCTTTTGTCTTCGATAAGACTGATTTAGCCTTTATCTTGA  
AAAATTGAAAATGTTGAATTTTTCTTCTGCTTCCAATAGCCAATGTTATAGCACAATATTTGTACTIONACA  
GTAAAATGAGTTTTATTTCAATTAATGAGCTATTTGCTCTTAATATGCTCATCTTTCTATTTTGTATCATTGC  
ATTACACCGTCCAGGGCTTCCCCCTTCCCTCTAGTATAGGCCGCTCATGATGACGTTGGGCCTTGGAATT  
GGAAAATAATTGATGACAACATTTCTTTTTGATAAGGAATTGATGACAACATTCCTGTCTTCATTATTAT  
CAAATCAGTACTCAGATTAGAGAAAAGAATGGAGTCGGTGAGACTTGATTATTGAAGAAAAGCAGAGC  
AAATTTACAAGGGTGATAATTTGGGTCTCTGAGCTTAAACTCCTCGGTGACCCTCTGATAGGGAAGTTT  
GTTCTGTTTCATGAGCTACAGAGAGGGTTCAAATTTTCATATTTCTTTAGTTACACTTGGATATCTTTCAT  
CATAGGACCAGAGCGTGGTTCCATTTAGAGCCTAAATGTGGAGATCCTCTGTTCCAGAAGTTGAATGGTG  
CCGTTGACTGATGACTGATATTTCACTTCTCATCTTGCATTTATTCTTTGAGGAAATGACTCTCAGATCA  
GCTAGATAGTTTAGTATACTTGTCTCACTAATACTTTTTGCCTTCTAATTTTTTAGGCTATATAGTATT  
TCTACCATATTCTTTAGCTAGAAATAGTTGCACTTGGACCTGAAAGTTAAATTGGATGTTTAATAACAATG  
CACATTTTTTTTTAATAATATGAGCTTTTTCTGTTGGACTTGTAACCTATTCTAAAGAGATATTTAAAG  
TTAATATTTAGTTTCTACGCATGCAGGTTCAATCCGATTGTGAATTCAACAAAGTTGAGAGTTCTAAAT  
ATTTTCATCGAACCACCTATTAGGTTCACTGCCATCCTCCATAGAAAATTGTGCAGTTGTGGATTTGAGCA  
GAAATATGCTTGTGGATGGTATATCAGTTATTGAAAGCTGGGAAGTCAATTTGGAAATTATTGATTTGA  
GTTCAAATAGGTTAACTGGAAATATTCCCAATATAACCTCTCAGTTTCAACTATTGACTTCACTTAATTTG  
GAAACAATTCTCTTGAGGGAACCTTACCTTCAGCACTGGGCACCTTGCCAAGACTGGTTAACTTGATCT  
CAGCACCAATAAACTTGGTGGACCGATTCCATCTACATTTTTACTTCGACGACATTGATGAACCTAAATA  
TATCTGGAAATCAATTGTCAGGATCAATTCCTTGAAGGCTCTCATGCTAGCGAATTAATTGTTCAATCA  
CCATACCCTGCACTGGAGTCTCTTGATCTTTCAGAAAACAATTTACAGGTAATTTGTCTTCTGCCATTGG  
TAATCTGCGGAGGCTTCAAGTGCTAAATCTTGCTAAGAATCAGTTATTAGGCATGCTGCCTACTGAATTG  
GGTGACCTTAGAAGTTTGAATTCCTTGATATATCTAACAACAATTTTAGTGGTATGATCCCCGAAAATC  
TTTCATCAAATTTGAGGGTGTTAATGTGTCTAACAATGAATTAAGTGGTGCTATCCCTGATAACTTGAG

AAACTTTAATGAAAGTTCATTTTCGTCCTGGAAACTCAAATTTGGCAATCCCAAGAACTGGTTACATGAT  
AATCATGGTGATCCTGATCAAAATAGTCAGCACCATCATAACTCGAAATCCAGTATCAGGGTGGCTATTA  
TTCTTGCCTCAGTTGGAGCTGCTTTAATGATTGGTGTGTTCTCCTGGCTTACCATCGACAACAGTTCCAA  
GATTTCCACTTACCAAGTGGATTTAACAGCCAATCTGCTGGAAGGGATGTAAACTCGGGAGGTTCCAGC  
CGGCCTGGAATTTTCAAGTTCCATGGCTCCTCAGAACCACCACCAATTTCTTGAGTTTCTCTAATGATCA  
CTTGCTCACAGCGAACTAGAGATCTCTGTCTGGGCAAATTGAGTCTGGTACAGAAATTGATGAGCAAGT  
TTTTCCAGAAGGAGTAACTGCAGTTTCAGCATCTACGCATCTTGGCACTGTGGGTAATAATCCTGCAACA  
TCTGGCCGGAGATCCTCTCCAGGCTCTCCAATAGCTTCTCCCTCGTTTCGTCGACACAGTTGAACAACC  
AGAGACATTGGATGTGTATTCACCGGATCGATTGGCTAGGGAATTGTTCTTCTGGATGGTTCACTGTCA  
TTTACTGCTGAGGAGTTATCTCGTGCCACTGCTGAAGTTCTGGGTAGAAGTAGCCATGACACATTGTATA  
AAGCTACTCTGAATAGTGGGCATGTTCTTACTGTCAAGTGGTTGCGGGTTGGGTTGGTAAAAACAAGA  
AAGAGTTTGCAAAGGAAGTTAAAAAGATTGGATCTATTAGGCACCCAAATGCTGTTCTTTACGAGCAT  
ATTACTGGGGACCTCGGGAACAAGAAAGGCTTATTTTAGCAGACTACATACCAGGAGATAGTTTGGAGT  
TGCATCTCTATGGTAAGATTTTCTTACGAATAACTTCAACAATGATATTCCATGTCTTCCATTGTTGTTGG  
TACTGTTATTAGAAAGTTCCTTTTGCTGGTCTGGTGGGTGATTATCTTGTGTTAGGACCAATATTGATA  
TCATTCGCATAAATAGTTTCTATAGCAACATAGCTTATTTCTAGTGGTGGTTTTCTAATTGCTGAGATCTC  
TTGTGTTTTGTGGGATTGTTTGATAAAAAATTATGGAGGATAAAGTTGACTTGGCCCTATTATTTATTTTG  
GTTGGCCTCTCTTGCAAATGTCCCTCTTTTACATGTCTTACAATATGCAGATAGTGATGAGATCTTATTTG  
GATCTGTCGTCTCTTATGAATCCAGTGGTAGAGTTGTTGATCAAGCGGAAAAGGAAAAAATAGGACTG  
CAATTGTAGAATCTGAATGATTTTTTACAAAATTATGTTTGTTAGAATGTATGTGCAGATCTTTATGTGTC  
ATCTGGTAACCTTCAAAGGAGCTCCAAAAGGTACAATAGATCTTTGGTTCACTAATTGCCGTACCCAAC  
AGCCACACATCAATAGCCATTAAAATTAGGGAGTAGACCTATTCTAAGATCTCGTTAACATGACCTAGA  
ATGTAGTGATAGTTGCTCAACAATCCGCTTTAAATAGCATTTCATTGTTTCTGAATCATTGATGATGGTA  
AACTTGATAAATATGGAGAGTTGGCTTTGTCATAGTATCCCCTGTGCAGTGAGGACTGCTTACTTGTAG  
ACATGTTGGGGGTTGTTGGAACTTTTTACTTTTTGTAATTTTTGTCAGTTTTAAGTTTTAATGAATGTT  
ACTTTTTACAGAGACAACCCCTCGGAGGTAATCCCGTTATCCTTCAACCAAAGGTTAAAAGTTTCCATTG  
AAGTTGCTCGGGGTTTGACATATCTGCATGAGAGAGGGCTGCCTCATGGAGACTTGAAACCTACAAATA  
TAATCTTGGTTGGTGCTGATTACAGTGTCCGCCTCACTGATTATGGTCTCCACCGCCTGATGACTCCAGC  
AGGGATTGCAGAGCAGATACTGAACCTAGGGGCTCTAGGATACCGTGCTCCTGAACTTGCTACTGCGAC

CAAACCTATCCCATCATTTAAGGCTGATGTATATGCTCTTGGTGTGATTCTAATGGAATTGCTGACAAGA  
AGAAGTGCTGGAGACTTAATCTCAGCACACTCTGCTGCAGTTGATTTAACAGATTGGGTTAGGTTGTGT  
GATCAAGAAGGTAGGGGAATGGACTGTATCGATAGGGACATCGCAGGAGGAGAAGAACACTGCAAAG  
CGATGGATGATCTGCTAGCTGTGTCGTTAAGGTGATTCTTTTCGATAAACGAAAGGCCAAACATCAGAC  
AAGTTGTTGAAAATCTGGGTCCATATCTGTGTGAAATTTTTGTACATGTTGTCTTGAAATTACAATTCTT  
TTTTCTTTTCCTTCACATTTTTTATTATGTCCTATTGGTTGCCTTCTAATGTTGGTCAATCCTTACATATCC  
CATTTCTTTCCCTCCCCCTCAATTTTTTTGTAAAGGGATGATCAGTCCATTGATTGATTGGTTGACAT  
TTTTCTTAATTAGAAAAGATTGCAATTATTTATGTGTAATTTATTTTTGC

>M6-PGSC0003DMG400012992 M6 LRR-RLK

CTTACTGGTTCAATTCCGATTACTATAGGTCACTTAACTGAGCTCAAATTTCTATACCTTTTTCTAACCA  
CTTTCTGGTTTTATTCCCTAGAGAGTTGGGAAATTTGAAAAGCCTCGCTTATTTGGATTTATCCACTAATCA  
ACTTACTGGTCCTATTCCCTAGTGAGTTGGGGAAGCTGATAAATCTCATAGAGATAGATTTATCTAAAAGT  
CAACTACTGGTTCAATTCCGATTACTATAGGTCACTTAACTGAGCTCAAATTTCTATACCTATTTTTCTAAC  
CAACTTTCTAGTTTTATTCCCTAGAGAGATGGGAAATTTGAAAAGCCTCACTGATTTGGATTTATCCACTAA  
TCATTTTATTGGTCCTATTCCCTAGTGAGTTGGGAAATCTGATAAATCTCACATAGATAGATTTATCTAAAA  
GTCAACTTATTGGTTCAATTCCGATTACTATAGGTCACTTAACTAAGCTCAAATTTCTATACTTTTTTTCTA  
ACCAACTATCTGGTCCCATACTAGTGAGTTGGGTAATTTGAAGAACCTCAATGGTCTGTCCTGTACGA  
AAATCAACTTACTGGTCCAATTCCCTGCTTCCATTGGCAATTTGAGAAGCTTGCGATTTCTGTATCTCAGTG  
CCAACAACTTACTGGTCCAATTCCCGCTTCTTTGGCAATTTAAGAACTTGCAATTTCTGTATCTGAGT  
GCCAACAACTTTACGGTTCTATTCCAAAAGAACTTGCATATTTGGATAACTTGGAAGAGCTGATAATAA  
GTGAAAATCAGTTTTCTGGTCAAATGCCTGAGCATCTTTGCCAAGGTGGGAACTTGAGAAGCTTTACGGT  
GAATAGTAATAAGTTGTCAGGGCCTATACCAAGAAGCATGTCCAAGTGCTCGAGTTTCAAAGGGTTTCG  
CTTTGATAACAACAGTTTTACTGGAAATTTATCTGAAGCTTTTGGTATCTATCCGGAGCTACAGTTTATTA  
ATTTGAGCAAAAATGATTTTCATGGTGAACCTCAGTAGCAACTGGGGGAAATGCAAGAAGTTGACTAATT  
TTCGAGTAGCCAGAAATAGAATTAGTGGTACATACCACCAGAGATTGGAAATCTCAAAGGTCTTCAAG  
GACTAGATCTTTCAGCAAATCATTTGGTTGGGAAGATCCCTAGGGAAGCTTGAAAATTGACCTCTCTAGT  
TAATCTTTTTTTGCAAACAACAGATTTCTGGCAATATTCCTATGGAAGCTTGATCAATGACAAAGTTAG  
AATCCCTTGATCTATCAAACAATATGTTGAATGGGTCGATCCCAACATTTATAGGAGATTACATACACTT  
GTTTCAGTTGAACCTGAGCAACAACAATTTGGCCAAAATATTCCAATGGAGATAGGGAAGATAACTCA

GCTTAATGTA CTTGATTTGAGCAATAATCTTCTGGTTGGAGATATATCCCCTCAGTTAGCCAATTTAAAGG  
TCTTGGTAAACTTAAACCTTTCCACAATGGCCTATCTGGGCGCATTCTTAAAGAAGTTGAAAGTTTGAC  
TGGTTTGCAGTATGTCGTATTGTCATACAATGAGTTGGAAGGTCCAATCCCCAATAATAAAGCTTTTATG  
AATGCTTCATTAGAAGGTAACAAAGGTCTTTGCGGCAATGTAACAGGACTCCAGCCCTGTGATAGGCCA  
TCTTCTGTGGTGAAGAAGCACTCAATGGCAAAGGGATGTAAAGTCATCCTCATCACTGTACTTTCTGTTA  
TGGGAGCACTACTACTGCTCTGTGTTTTATTAGTGTCTTTTTATGTGTAATAAAAGAAGGAGAGTTAG  
AGACGTTGAAAGAAGGGATGGTGATGGTTGGCTTTCAATATCTATGTTAGATGGAAAGGCATTGTACAG  
GGACATCTTAAATGCCACAGAAGAGTTTGATGTAAAATTTTGCATCGGGCATGGAGGACACGGAAGCG  
TTTACAAGGTAAACCTTCAATCATTAGGGAATATAGCTGTGAAGAGACTTCATTCTTCATATCAGAATAC  
ACATCCCAAAGCTTCATGAATGAAGTAAGGGCATTGACTGGGATTAAGCACTGGAACATTGTGAACCT  
CTACGGCTATTGTTCAAAGCACAAACATTCACTCTTGGTTTACGAGTATGTGGAGAGGGGGAGTTTGTCT  
AGTATTTTGTAGTGAGGAAGTTGAGTCCAAGAAATTGGATTGGTTTAAAAGGGTGAATATCATCAAGGGT  
GTTGCTTTTGTCTTAGCTTACATGCACCAGGATTGTTACCACCCATTGTTTCATCGAGACATATCAAGTAG  
TAATGTTTTGCTTGATTGAGAGTATGAAGCTCGTGTTGCAGACTTTGGCATATCAAAGCTTCTCAAGCCA  
AACTCATCCAATTGCACAGCGCTTGCAGGGACATATGGTTATGTTGCACCTGGTAAGTTTAAAATATTTT  
ATGAACTAAAGCCAAACATTCTATTGTTTATATCTCATTTACATGTTTATATTGTTTTGGAAATTGTATTGT  
TCAGAGTTTGCATATACTATGAAGGTTACTCAAATGTGTGATGTTTATAGCTTTGGAGTATTATCTTTGGA  
GATAATCAAAGGAAAGCATCTTGGGGAATACATTACCGTGCTAGCAAATTCATCTACTATAGATCATGA  
GCATCTTAGTGATTTGTTGGATGAACGCCTTCCATATCCTGAAGATAGAGTAAAAGAGGTTTTTATTTTTA  
TCATCAAGCTAGCATGCTCTTGTGTTGCTTGAAACTCCAAAATCAAGGCCAACAAATGCACTTCATCTCTCAT  
AAGTTATCATCTATGGATGCACGTTACATACTCATGTAAAGCGAGTTC

>M6-PGSC0003DMG400013198 M6 LRR-RLK

GATGGGATAATTACTGCAGCAGATTTTCAAGCACTTCAAGCTTTTAAACAAGAATTGGTTGATCCAA  
AAGGGTCTTGAAAAGCTGGAATGATAGTGGATTTGGAGCTTGTCTGGTGGATGGCTTGGTATTAAT  
GTGCTCAAGGACAAGTTATTGTTATTGAGCTTCCATGGAGAGGTTTGGTGAAGAATTACTGAAAGAA  
TTGGACAATTTAGTCTCTTAGAAAACCTCAGCTTACATGATAATGTCATTGGTGGTTCAATTCCTTCTACT  
TTGGGACTCATACTAATCTTAGAGGACTTCAACTTTTTAACAATAGGTTATCTGGTTCTATTCTGCTTCT  
CTTGGTTTATGCCCTCTTCTTCAAACACTTGATCTCAGCAATAACTCATTCTCTGGTGCAATTCCAGACAGT  
CTTGTTAATTCAACTAAGCTTTATAGGCTTAATCTTAGCCATAATTCTTGTCTGGTTCAATTCACCAAGT



CTCACACAATCTCCCGCACTCATCTTTCTTGATCTCAAGTATAACAATCTTTCAGGCTCAATACCAGATACT  
TGGGATGGAAATGGAAATGGAAAAAGACTCTTCCAACCTCAGTCTCTTACACTTGATCACAACCTCTTTT  
CTGGAAGTATTCTGCTTCTTAGGCAAGTTGAATGAACTTGTTGAGCTTTCACCTTAGTCATAATCAATTG  
ACTGGAGTTATCCCAAGTCATATTGAGGGACTCTCTAGGCTTACAACACTTGATTTGTCTTATAATGCCAT  
TAATGGAAGCTTGTCTGATAGCTTCTTGAATCTATCCTCACTAGTGGTCTTGAACCTTGAAAGCAACCAA  
CTTGATAACCAAATCCCAGCAGCCATAATAAAATTGCAGAACTCTCAGTTCTCAACTTGAGGAGTAACC  
ACTTTAGTGGTGATATTCTGTCACTATAGGAAACATCTCTACTCTTAGACAACCTAGATTTAGCTCATAAT  
AATATAAGTGGAGAAATCCCAGCTTCTTTAGATACTTTACCAAATCTTAGTGCCTTCAATGTCTCATATAA  
TAATCTGTCTGGTCTGTCCAACTCATCTCGCACGGGAATTCAACTCGAGTGCCTTTGTGGGTAATCTTC  
AGCTATGTGGTTACAGTGCATCAACCCCATGTCCAATCTCTCCAGTTAGCCCATCCCCGAAACACCAAA  
AAAGCAACGTCGTAAGTTAAGTACTAAGGACATAATTCTCATAGCAGGAGGGGCACTTCTCATAATCTT  
GGCTCTGCTATGTTGCATTCTCCTATGCTGCTTGATCAGGAAAAGATCTGCAGCTGAAGCAGGGAAGGA  
TGGTCAAGGCACGAGTAGGGTGGCTGCAGCAGCCAGAGGTGAAAAGGGTGTTCACCAACTGCTGGA  
GAAGTTGAAGCAGCAGGAGGAGGAGATACAGGAGGAAAAGCTTGTCCATTTTGTGGACCTATTGTGTT  
CACAGCAGATGATCTTCTTTGTGCAACTGCCGAAATAATGGGAAAGAGCACTTATGGTACGGTGTACAA  
GGCCACGTTAGAGGATGGCGATCAAGTTGCTGTGAAAAGATTGAGAGAGAAGATCACAAGAGGTCAAA  
GGGAATTTGAGAGTGAAGTCAATATTCTTGGCAAGATCAGGCATCCAAATCTTTTGGCCCTTAGAGCAT  
ATTACATGGGACCTAAAGGAGAGAACTTCTTGTTTTTACTACATGCCTAAGGGAAGTTTGGCACTTT  
TCTTCATGGTAAGCACAAAATCAGTTTTCCATTTCACTTTGTATTTGTGAGAACTTCAGATTATAAATCTT  
CTGTTTTTTGCAGCTCGCAGTCCTGATACACCAATTGATTGGGCAACAAGGATGAGAATAGCAAAGGGT  
ACAGCAAGGGGATTGCTCTTCCTCATACAAATGCCAACATCATTGATGGGAATCTTACATCGAGCAATG  
TTTTACTTGATGACAACACAAATGCAAAAATTGCAGATTATGGTCTTTCGCGCCTAATGACTGCTGCTGC  
AAATGCAAATGTTATTGCAACTGCTGGAGCACTTGGGTATCGGGCACCTGAACTTTCAAACTCAAGAA  
AGCAAACACAAAGACAGATGTATACAGCCTTGGTGTATTATACTGGAACCTTCTAACTGGGAAGTCACC  
AGGAGAAGCAATGAATGGTGTGGATTTGCCTCAATGGGTGCATCAATTGTGAAAGAGGAGTGGACTA  
ATGAGGTATTTGATTTAGAATAATGAGGGATGCATCCGTTATCGGTGATGAATTATTGAATACCTTGAA  
ATTGGCTTTGCATTGTGTTGATCCGTCACCATCAGCTCGACCAGAAGTTCAGCAACTTCTCCAGCAACTA  
GAAGAAATTAGACCTGAAACAGCTACCAGTTCTGGGGACGACGG

>M6-PGSC0003DMG400013489 M6 LRR-RLK

AAAGAAAGAACTTGGCATTGGGTGTTTTGAGGTTTTCCAGTTCTTGAAAATGCTAGTTGTGTAACGA  
CTGAAACTTTGTCATTTGGGTGTTGAGGTTTTCCAGTTCTTGAAAGAGCTAGTTGTATAAAGACTGG  
AACTTTATCATTGGGTGTTGAGCTTTTTCCAGTTCTTGAAAAGCTAGTTGTGTAAAGACTGAACTTTA  
TCATCTGAGTGTTGAGGTTTTCAATCTTGAAATGAGCTAGTTGTGTAAAGACTGAACTTTGTCATTG  
GGTGTTGAGATTTCCAATTCTTGAAAGCTAGTTGTGTAAAGATTGAACTTTGTCATTTGGGTGTTG  
AGGTTTGCAATCTTGAAATGAACTAGTTGTGTAAATACAGAGACTTTGTCATTTGGGTGTTGAGCTTT  
TCCAGTTCTTGAAAGAGCTAGTTATGAAAACACTGAACTTTATCATCTGTGTGTTGAGATCTTCAATC  
TTGAAATGAGCAAGTTTATCAGGTGTTGTGGAGGTGTTGAAAATGGATAAAAAGGGCATTTTTTTTAAT  
GATAAATTATGGGGTTTTGTTAGAAAATTACTTTGTTGAGTAGGTGAGATTGTAGAAATCTGTAAGTGA  
AAGAATGTTGTATCTGTTTTGGAATGTGGGGCTGCTACTGTTTTGTACATTGATGGAGAGTTCTTCTGCT  
ACACTTTCTCCTGCTGGTGAACTATGAAGGTTAGCTTCTTCTTGAAATTTCTCACTTGTACTGAAAATT  
TCCTTTTATCAAATTAAGCTAAGAGTAGAAGAAGTTGTTAATTCCTCTGGATCAGAGTTAGAGCCACATG  
GGTGCAAGGGGTTTTCATCTGAATCCCCTTCGACGGAAAATTAAGTGTATATCTAAGGTTACGAATATTTT  
TATGTATATATAATAGACATTGAATCCCCTTGATTTCGCTCTGTGTTTACTTCTTACATAATTTGAACCCCTT  
AGGCCTTTGCAATGTATATGAGTATGTGACTATGTGTTCTATCTTTTTCTCTACGATTTCTCTCGTTATA  
TTGAATCTTTGATGCAATGACAACTGAAAAGTGAAAACAGTGGAAGTAATCTAATAGAGTGACTGTTT  
TTCCATATAATAATGTGCAGTTGTAGCTTTGACGGAAATTAAGAAGGCCTTACATGACCCCTATAATGTT  
CTGGACAATTGGGATGTGAATTCTGTAGACCCCTGCAGTTGGAGAATGGTCACTTGCTCCTTGGATGGC  
TATGTGTCTGCTCTGTAAGTTGTTGGATGAAAGAGTAATTTAGTAGAACTTAGTTGGCTCATGAAAAG  
GCCTGATTTAATCCAGTAAATTTATCGCTGAATATTTTCTTTCATCAGAGCACTACCTAGTCAAAGTCT  
AGCTGGCACCTTATCGCCTGGAATTGGCAATCTTACTAAGTTGCAATATGTGTAAGTTCTTACTATATAC  
ATCTCTTAGTTGCTGCTACTTGGTTCCGTAATACCTAAGGTCCTTCTTATATGATTTTCTTAGTGTTATTA  
AGCCATTTTCTCGCAAACTGTTCTTAACTTGTTCATGTAGATTGTTGCAAAAACAATGCCATTTCTGGTCAT  
ATTCCTGATGTGATTGGGAAGTTACAAAAGCTTCAGACACTTGATCTTTCCAACAATAAATTTGAAGGCG  
AAATACCCACTTCTTGAAGACCTGAAGAATTTGAATTTTGTGAGTTCATGAATTTTCACTTATTATT  
ATTCATTTCAAGACTCCAACCATATATTTCACTCTGTCAAAGATTGAATACATCATGCTACCTATTGACTC  
AAATCTTCTGTTTCGTCCTCATCCTTGTGATTGACTTAGCTGATCATTGCTTGCAGGGATGTCTCTTATAAT  
AATCTAAGTGGTACCCTTCTAAAATATCAGCGCGAGCTTTCAAGTAAGTCGGCCTTTTCTATTGCCGTAA  
TATACTCAGTTATTTCAATTTCAAGTAGTTATCTTAATATTATTGAAGTTAACTATTGCTGTACGGCTGTA

CATGTAAATCTCGATGCTTAGTTGATAAAAATCCATTATTA AAAATACATTGACAAATGCTTTTGGGTAA  
ACTGGTACTTGAAAAGTATTTTCATTAGTATTCCACACTATAGTGAGATTGACTTCCTCTTCATGGCTTTCA  
GAGTGCTCGGGAATCCTTTAATTTGTGGTCAAGGTTCTGAGAATAATTGCTCAGCAGTTTATCCAGAACC  
ACTGTCCTTCCCACCTGATAGTCTGGCAGGTACAGATAGCATTTCATGCTCAAGTCCCTTCCCTTGCACC  
TGAAAATGGAAAAGTGTAAAAACATATTATACATACTGAGGAAGTTTTGCTATTTGTGTTATTGAAAAT  
GTGTTGCATCTATTATTTTTGATATCACAGATCAATCTGGTGCTGCACGCAAGAGCCGTCGTGTGGTTGT  
TGCGTTTGTGCAAGTTTTGGTGCTGCTTTCTGGTCATAATAGCCCTCGCTTTGCTTCTTTGGTGGCGCT  
ACAGAAATAATCAGCAGATCTTCTTTGATGTCAATGGTTAGTTGATTTACTTTCCCCCCTCTTCTCTATGA  
TAATTTGAGCTTTTATTAGTTCTGCATTTCTGATTCTTTTCCTGCCACGGATATATAAGTTGAGCCAAGTG  
AGCTTTTGCATTATTGTCTGAGTGATTGGTGTTAGGTATCATGTGAATATTTTTTAAGCTAGGATGTTACA  
GAGTCACCTGCTTGTGGTTTGAATCTTTATTTAATCTCTAAAAAGATTTTTGTGATTGTTGATTTTAAATT  
CATTTGTTTAGTTTTAGAGAGGACATGAGTGGTCAAGGAATAGGAATTGGGGATAAATTCTGTGTTTAC  
CATATTC AATAAACCTGTTGAATATGAAGA ACTTTCGAACCCCGTCAGTTAGAAAATTATGCCCTTTGGC  
ATACTCAGTAGTTCTGGTCAATTTTCTAGTAAGGACTCAGAAAAGCTGTTTGAATTTTATTGTTATCGGG  
ACAAGTCCTGATCCACTACAGGCTACCTTAAACATTTAGTTCCAAACATTGACAGAATAATTTGTTAATCA  
CATATCTGAATAATTACACTTGCATTTTCTGTGCAAGTTGAAGTAAATATTTCTGTAAAAAGGAAGATG  
GTGTTATGTTCACTCTCTCGGGCCACCATGCCTGGTGAATTGCCTTGCCACATTCATTGCGTTGAAAGTTA  
CTCTTGATAATCTTGTA CTTTGGTTGTCTGATTCATATATGTGGATCAGTTTTGGGACGTTTTTGGCAAACCT  
CTATTATTTTCTCCCTGTTTCACTTTTCAAAGATTTTCTCCATCTGTCTCTAACTATTCTCAAAGTTTTATC  
TGAGTAACGACTTCTCAAATGCAGATCATTGTTATCCAGAGGTATGCTTGGGTACCTGAAAAGGTACAC  
CCTTAAGGAACTGCGGACTGCCACTGACCATTTAGCTCAAACGTATTTTGGGAAAGGGAGGATTTGG  
GGTTGTGTACAAGGCCAGCTTAAACAATGGTACTGTTGTGGCCGTCAAACGATTGAACGACTACAATGC  
TGTTGGTGGTGAAAATCAATTTAGACTGAAGTAGAATTGATTAGTTTGGCTGTCCATCGGAATCTTCTC  
CATCTTCTGGGGTTTTGTTCAACTGAAAGTGAACGGCTTCTTGTTTACCCCTATATGCCAAATGGAAGTGT  
AGCATCACGATTA AAGGTTAGCTCTTGCCTCCATGTGTTAATACATAATACTCACTATTGATTTAGATA  
ATGAGTCCAACATTTCCATTTATAAAAGTTAAATATTCTCACATGGTGTGTTGTTGTTACTACTCCCTTCAT  
TCATTTTGTGTTGACAGATAATTGATAGGATACAGAGTTTAAAATTTTAAATTTCTTTCATTTATTACTTTGTA  
GTAGAATAAATTTATTAAATAGTGGTTATTATACTTGTTAAAGAGAACATCATATAAATTTTAGAATGTG  
GATAGTATGAATTTGAGTTCTTAAAGCTGTAAAAGGTGTACGGACAAATATAATACTAGAATAGTGCCA

AATTTTGGACCATGTCTAATTTAAAAGAAGTCATGTTAGTGAACAGTCCCTACTTCCCAATTTATTGTCAT  
TAAACATTAGTGAGTGCTCTGAAGACCAGCAACCGTTGTCATTGGTGAATTGAGGCCATAAGAGTCTGG  
TTAAATACAAGCTTAGATGTTATGACCCACCCTTACGTCAGTCCATCCTTGAGCCCGCGGTGGGCTGCCC  
ACCTTCACATACTCTGTAAGTGTAGTTATATGATAAGACATTATCAGTTTGCTGCTGGCTGAAACCATT  
GTTGTGTGTTTCTGCATGTTGAAAGCCAAGTTCATTTACTTTTCTGGAACCTTATCAGTTACTTTTTAAT  
AGTTTCCAAGTAACTGAATTTTGTAAACAGTTGAAGCTGATACATATATTGGCTTGATTGAAAATGCATTG  
TGGTTTCTAAAATTTGCAGATAGCATAAATGGTAAACCAGTTTTAGACTGGTCAAGGCGGAAAAAGATA  
GCACAAGGTACAGCAAGAGGGCTAGTTTACTTGCATGAGCAGTGTGATCCCAAATTATCCATCGTGAT  
GTCAAAGCCGCAAACATTCTGTTGGATGAAGAATTTGAGGCAGTAGTTGGTGAATTTGGGTTGGCAAAG  
CTCTTGGATCACCACGATTCCCATGTGACAACCTGCTGTTAGGGGCACCATTGGCCACATTGCTCCTGAAT  
ATTTGTCTACTGGCCAATCATCTGAAAAACTGACGTTTTTGGGTTTGAATCTTGCTACTTGAGCTGATT  
ACTGGCCAGAAAGCTATGGACTTTGGTCGAGGGGCCAACCGAAGCGGTGTTGTTATGCTTGATTGGGTG  
CGTCTCCTCTTTCTCTTTCTCTGGATGTTGTACCAAGTACTTTTTGAAATATGTAAGTGTGAGTTGTGAGA  
GGGAATAAGCTATACAGAGGCGGGTTATGCGTCTCTCCTCTCTCTCTTTCTCATAGCTGTTCTCTTTTCAG  
TTATTAGGAGTTGTAGGTTCAAACCTCAAATATAGCTAGCTAGTGGTGTGTACATGTAGTTTACAAGGCT  
CTTTCCATTAGCATACTTCAACGAACTCTCTCGTTTAATTACTATTAATGATATGCAGGTGAGAAAGCTG  
CATCAAGAGGAGAACTGAACCTTATGGTAGACAACAATTTGAAAAATAACTTTGACCAGATTGAGCTA  
GAAGAGATGGTTAAAGTTGCCCTTCTATGCACCCATTTCAACCCTTCTCATCGCCAAAAATGTCCGAAG  
CATTAAAGGATGTTAGAAGGCGATGGATTGGCTGAAAAATGGGAGGCATCACAAAAGCTCGAGACTCCA  
AGAAACCGAGCTTTTGAACATACACCACAAAGATATTCCAACCTACGTCGAAGACTCTTCACTAGTTGAAC  
CAATGGAACCTTTCTGGACCTAGATGACATCCATTTTTCGTCTCGATTCTTATCATCCTTGAGTTGCTAAA  
GTTGAAGTGAGAAGTATTTCAATTGCTGTTGAATGTATGTATTCAATTTGTAAAAGAAAAGGGAATAAGTC  
ATGTGTAAGCTGAGTTCATATATGATATATTCCCTTGTCTTTCAATTTTGAATGATATGCTATGTAATT  
ATGATTTCAATTTGTTCTTTTTATAAGAAAGATTTTGAAGATTTATGAGTAATAAAACGCCATAGGCTTGCCA  
TTCTCATTAAGT

>M6-PGSC0003DMG400013500 M6 LRR-RLK

ATGGTTGGTTCTTTACCTCTTGAATTTGAAATTTAAAGGCTGCGACACTGATAGATCTGTCAATGAATC  
AATTCTCAAATGGAATTCCTATAGAAATTGGAGGATTGCAGAATCTGGTGCACCTTTCTTTGAGGCACAA  
CAAGTTACAAGGATCTATACCTGACTCATTGAGCAACATGGTAGGTTTGAATTCCTAGACCTTTCTCAT

AACAATATATCGGGAACCATTCCCTATGTCTTTGGAGAACTTCAAAACATGAAGTATTTCAATGTTTCTGT  
CAACATGTTGCATGGTGAAATCCCTCGGGGGTCCCTTCAAGAACCTCTCGAGTCAGTTTTTCATCAAC  
AATGAAGCATTGTGTGGTTCTTCAAGGTTTAGTGTCCCGCCATGCCCCACATCATCAAAGCATAGATCAA  
ATAGGAAAAAGTGCTTGTCTATTTCTTATGCTGGGAGTTGCACTTGTATTTGTTCTATTACCCTTTTGT  
TTGTATGGATAAAGCATAGAAGAGATAAGAAATACCCTCAACAAGATGATTCATTGTCTATTTCAACGAG  
AGGAAGAATTCGTACTATGAATTGCTCCAAGCAACTGATTCTCTCAGCGAGAGTAATCTGATTGGTTCC  
GGAAGTTTTGGCTCTGTCTACAAAGGCATTCTCAGAAGTGGGACTGCTATTGCAGTTAAAGTGTTTAATC  
TGCAACTGGATATGGCATTCAAGAGTTTCGATACAGAATGTGATGTTTTGCGCAACCTTCGCCATAGGAA  
TTCATAAAAGTCATCACTAGTTGTTCCAACATTGATTTAAGGCTTTAGTGCTCGAGTATATGCCTAATG  
GGAGTCTTGAGAAGTATTTGTATTCTCACAACACTTCTTGGACATCAAGCAAAGACTAAGCATAATAAT  
AGATGTGGCATGTGCATTGGAATATCTCCACCAT

>M6-PGSC0003DMG400013525 M6 LRR-RLK

GTAAACTCCATCCATCAGCAAGTTGTAGCTCATAATAAACCTCTAAATTATGTCATAAATTTCAATTCTCT  
TAGCTTAATTCCTTCAAATTCCTCATTAAATGGGGTTTTTCATCGAAATGGGTTTTTGTATTTACGTTATTTTC  
ATTCATAAATCTTTCAATTTCTGATCCAAGAGCAACAGAAGCAGCTCTAATTTGTACAAACAGAACAGCT  
GCACAATCCAATCGACAAGTCTATGTAGCAACTTTTCTAGAAGCCATGGATTCCATTACGCCATTAGTGG  
GGCGAGACAAATTTGGAGCAGTAATTAATGGAACAGGGAATAATACAGTTTATGCGTTTGGTGAATGTA  
TGAAGGACTTATCACAAACAGATTGTAATCTCTGTTTTGCTCAGTGCAAACTCAAATCCTACGATGCTTA  
CCTTTTCAAAGATTAGTTACTGGTGGGAGATTATATTATGATGGGTGTTTCCTAAGGTACGATTATTATA  
GATTTTTTAATGAAAGTTTGAGTTCCGTTGATAGGACGATCTGTGGGAACACGAGTTTTTCTGGGAATCA  
GAGTTTGTAGTGAAAATGTTGGGAAATTGGCGAGGGATTTGGAGTTTGGGGTTTGGAGGAATGATG  
GGTTTTGACTGCAGTTGTGAGTACTGGGAATTTGAGTGTTTATGGGTTAGCTCAATGTTGGGAATTTGT  
GAATGGAAGTGCTTGTCAAAGGTGTCTTTCTGATGCAGTTTTGAAGATTAGTTCTTGTTCGCCTAAGGAA  
GAAGGGAGGGTGTTGAATACTGGTTGTTATGTTAGGTATTCTACTCAGAGGTTCTTTAATAATTCTGCAA  
GTGATACTCCTCTGCTGGAAATGGAGGTATGTTCTTTCTTTCTTGAATGTATGAAATGAATAAATTGTTT  
CGTTTAGTTGTGCGATCATTTTCGTCTAAAAGTGTAAGCTATTAGAGATAGTACTTTTTGCTTGACATGTCA  
TATCTTTACATGGTGTCAATTGGGTCTGACTGTGAAGGGGTGTTAGAATGGTTAAAGTTTCACATTGGTTG  
GGGACTGACTTGAGCAATTCTTGTGATGAGCTAGCTTTTGGAGTTGAGTTAGACTCAAATGTCATATA  
TCTTTACGGATGTCATGTTTAGTTGTGTAATCATCTTATTTAACATATGCTTGCAGATGTTTCTGGTTTCAT

GAGTTATTTCAATCTTATCCAATATTCAATGATTTTAATGTTAATTTTGTTTTTGTATGATTTGCAATGAT  
ACTTGCTGCAAGCCTAACACTATTGGATGTAGAGCAAGAAAAAGTTCAACTTGTCTGCCCAATTATTTTT  
TTACTAACAAAACAGATAACTACTTTTGTCATTTGGAATGATTTGAAAAACGGCGGTTGGAAATCGAGGT  
GATTTGACATTTCTTGAAAGTTGCTCTTGTTATCTGTTTAAAATGTGGTAGTTTGTATTTCTTGGATTTTA  
GTTCCATTCCAGGATTTAATAACTATCTAGACATTACTTGTGATGATGTTTCTTTTTGTCATCTGATAAGTT  
GAAATGGTTGACTTATATATATACATGAAATGAATGAAGAGTGAATCAGCATTGAGGCAAATGCAGACA  
ATGAATCTTTTAGAAGCTGTGACAAAATAAACTGTTTATACAAAACACTATGTCATTCATGTTGTCGTATTTT  
GATTAATTATCAGGAGGATCGAATCGTTTGGCTGTTATTCTTGCAACAACCTCTGAGTATTTCTGCTTTCTT  
GCTATTTGTATCGGCTGTTTCATTCTTTGTGCGGAGGAAGGTTCTGAAACAAAAGAGAGGTTACTAATTTT  
TAAGTCAAATCATTTTCATTCTTTCCGAAAAAAGAAATCTCATTTAAGTCTGATTGATCAAATGGTAATTT  
GACTTGAATTTGCTTCGATGATGTAGAGAAGAAGCAGCTAGGAGCTCTCATAAGAACGGTTAATAAATC  
AAAATTGAATATTTTCATATGAAACTCTTGAGAAGGCGGCAAATTACTTTAACAACTCGAATAAATTGGGA  
CAAGGAGGTTCTGGTTCTGTTTACAAGGTAATTCTCTTTGAACATTATATTCATTTTTCTTATACTAATGA  
GATTTGCCTTACGATAGTCGTGTTTACACATGAAATAGGGGATCTTGCCAGACGGGCAGGTTGTTGCTAT  
AAAGAGGCTCTTCTTCAATACGAGGCAGTGGGTTGATCATTTCTTTAATGAGGTCAATTTGATTAGCGGC  
ATCCATCACAAAACCTGGTAAAGCTATTGGGTTGCAGCATTACAGGGCCGAAAGTCTTCTAGTGTAT  
GAGTACGTGCCCAATCATAGTCTTGCGGATTACGTCTTTGGTAAGTATCCAATCCACCTTAATTTATGAAA  
ATTTTTAAATTGGTGTAGTCTTATCTCGTTATGTAAATGCCTTTGTTTTGCACTGAATCAGACACAAAGAA  
CCTTCAACCACTTACATGGAGTCAAAGATACAAAATTGTATTGGGTTACTGCTGAGGGATTGGCCTATCTT  
CATGAAGAATCGAAATTAAGGATCATCCACCGAGATATAAAGTTGAGCAATGTTCTTCTAGATGAAGAT  
TTCACGGCAAAAATAGCTGATTTTGGTCTAGCCAGGTTATTTCTGAAGACAAGAGCCACATTAGCACAG  
CTATTGCTGGCACTCTGTAAGTTCAATAACTTTTTCCGGTACTTGTACTTTTTCTTTAATCAATACACTA  
AGAAAGTGCTGAATTAATAAGTTTTGGCATTGCAGCGGTTACATGGCTCCAGAGTACGTTGTACGTGGC  
ATACTGACCGAAAAAGCTGATGTCTATAGTTTTGGAGTTCTTGTGTGCGAAGTCGTGTGTGGAAAGAAG  
ACAATTATGTTTTCAAGAACACTAATTCTCTTCTGCAGCAGGTACTTTCTTGTGATATTTTTCTTTCCTT  
AACGGACATTAATAGTATTTACTCAACTCATGTCATTGTGGTTTCTAGTTGTGGAACCTGTATGGGATGG  
GGAAATCTTATGAAGCAGTTGACCCTTTATTAGAAGGTAACCTCAATAAAGAGGAGGCATCTAAGCTGC  
TGCAAGTAGGTCTTCTTTGTGTACAAGCATCAGCAGAACTACGACCCTCCATGTCAAGTGTGCGTAAAAAT  
GCTCACCGAGAACCATGAAATTCCTCTGCCAACACAGCCACCATTCTCAATTCTGGTAGTTCAGAATTTA

GTCCATTTAATCTGCATGGCAAAGATTTTTCGGTCAACCAAGTCCTCTACACAATCTTCTGGGAATAAA  
TTGACGGAGAGTTGGATTGAGCCTAGATAAACTAAGTTGATCATCTGGAATTGGTATTTGATTTTGTCT  
CAGCAAAGGCCAACTTCTTGAAGGTGAATTGTTGAGCCAACTCAAGTTTTTTCTGTGATTAAGTACTC  
ACTACTCACTCTCCATTTTTTTTACTGATATTTGTTAAAGTCTTATTTAGTCAACTTCCTTTTGTGAATAC  
CCCAGTGAGCTATTTCAATTTCTAATGTAAAAAATTGTATAGTATCTGCAGCAGTTGCCATTAAGTATATC  
TACTGTTTTCTATTTTCGATTTTCTATTTAGTAATTTTCATCAAGGATTATGCTTCACAATTGTCATCATCTT  
GTCTTAGAAGTGGCTATTCAGAATCCCCTGCCTAAAGTAACAGGCATTGGTGAACTACACATTACAATT  
ACATCTACA

>M6-PGSC0003DMG400013682 M6 LRR-RLK

CTAAGCTTCTCTTCCCTCACCTCCCTCCCATCTCTCTCTCTTTGTGCTTCCCATGCATGCCACACAATC  
CCATTTCCCTAGAGATGTTGAAATCTTTTTGCATGCCCTCTAAATCATAGTATTTTCTCATTATAATTGC  
CCTTTGTAAAGGGCGCGCACCCACAAGTGTGCGCACCCCTACAAGTCTATGCAATGTGGTGGCTTA  
TCGTTATAGCAACCACAATCGCCAGTATCGTTATCACCACCACCATCTCTTAATCCTTGTGCTGTTATTATT  
ACTAGTCGTTGTCCCGATCAAATCGGATAGTTCTGAGGCAGAAATCCTCTTTCGATTTAGCAAGTCCTTG  
CAGAAAAATGGTGCAACCGCTAATTGGAATACGAAAGTATTGCCTTGCATAAAAATACAGATAAACCT  
AATTGGGATAATGTTATTTGCGAAAACGGATTCGTTTTCGGGTTGCAATTGGAGAGTAAAGGCTTAAGT  
GGGGCAATAGATGTGGATGCTCTTAAAGACTTGCCTAATTTCAGGACCATAAGTGTATGAACAATAATT  
TTGAAGGACCTTTACCGAATTTAAGTAACTTGCGGGGTAAAAACGGCTTATTTACAAAATAACAAATT  
TTCTGGCCAAATTGACAATACTTTTTGAAGGGATGCATTGGTTAAAAAACTTCATCTTGCTAATAATC  
AATTAAGTGGTAAAATCCCATCTGTTTTGGGTCAATTGCCTAAGCTTACAGAATTGAGACTTGAAAACAA  
CAAATTTGAAGGCCAAATACCTGATTTTGTTCAGAGAGACTTATGGATATGAATTTTGCTAACAACCTCT  
CTTGAGGGTCCAATTCCTCATGGCCTTACTAGTCTCAAACCTCAGCATTGGAAGGTAACTTTTTTTTCCAT  
GTGTAGGATAAATTCATTTTCTGAAATTATTGTAACACTTATCTAGCTACGACGTACACAAATGTCTACA  
TTTTAAAATGTAGTCATAAAGATATGTCATGTATGCCTAACTCCACCTTAGAAGCTAGCAAGGATTGATC  
AAGTTCATATCATCAGTAGATCATCAATCCATTTCCAATCAATAGGAGACTCTTTAACACTTCTTTCACA  
CGCATCTCCAAAACAGAGATGAACCTGACTCTGACACCATATAAAGATATGACGTTTGCCTACTAACTAA  
ATCTCAAAGTTAACTCACGAGGAAAAAATTGTCAAAGTCCAATCAGCACATTCCCATATGGCGCTTTA  
ACCCACATTCTAACAATAGTTCTTCGTCATATTGACAATAGATCAAGAATTGTAGTTCATAACAATTTTA  
TATAGTTTTTAAATATCTAAATTTTTTAATTTTAGAATATTGAGTTAATCTAAACATGCTCTCATTTTTGTTC

ATTTGGTAAAATAATACAGGTAATGATCTTTGTGATGGTCCATTATCGAAATGCACAAGTGAACCAAAG  
TAGCTCTCTGGACAATTATATTGGTGGTTATCGCAGTTGCAGCAGCAGTAGCAGCAATTGTTGTTGTTAT  
CATCATTCTTCGTCTGGGGCAAGCAGACACCCGAAACTGAAACAAGACCAACACCTACACCCTCTGGAGC  
TGCAGGGGGCGCTACTAACCAAACAGGAGCGCCCTCAGCAGCAGATCTAAACAAAATGGAACAGGGCA  
GCAATCAAGCAATGGCTGCTCCTGCTCCTGACCAGTCTCCAGAGGGGACCGGTGGACTAAATAATAATA  
AGAGGCCTGAAGTACAAGCAATACAAAACCTTTTATTCTTAAAAGATGATATTGAAAAGTTTGATTTGCC  
AGATCTACTAAAGGCTTCAGCTGAAATATTGGGTAGCGGTGTATTTGGTTCGACTTATAAAGCTGCACTT  
AGCATGGGACGTGTTATGGTTGTCAAAAGATTTAGGCAAATGAATAATGTAGGCAAGGAAGATTTTCAT  
GAGCATATGAGAAGGCTAGGTAGGTTGAGTCATAAGAACTTACTTCTGTTGTAGCTTTTTACTATAGGA  
AAGAGGAAAAGCTTTTGGTCTCAGAGTATGTCAACAATGTCAGCCTTGACGTTTCATCTTCATGGTACGTA  
TTTCATACTTTTAAGTTTCCGCGCTAAAATTAGATCATAAAATCATGATTTGCGCTACCAGTTTATTATATT  
AACTCAATCTATTTTAACCTTTGTTTTATTCAATTCATTTCAAAACAGAGTTGAGATATGCAACTCAAATCT  
TTTGAAGAGGGCTCATTAATTTGTTGTTCTCTCTACTCTACTAGCTAGAGTGATGATCTGACGTGTG  
ATCATCTCATCTAAGATATTAAGTTTTTACTATGATGAACTCTGTGATCATCTCATTATACATATTGTTTAT  
TTTTTTCAGGTAATAAATCGCGGGGGCAACCAAGTCTTGATTGGCCAACTCGATTA AAAATCGTAAAGG  
GAGTAGCCAAAGGACTATTGTACCTCTACAACGAGCTACCAAGCTTGACAGCACCCACGGTCACCTCA  
AGTCCTCGAACGTGCTTCTGAATGAATCCTACGAGCCCCTCCTCACGGACTATGCATTACTACCCGTAGT  
AAACCTAGAACACGCTCAAGAACACATGATTGCTTACAAATCTCCTGAATTCAAACATAGTGGTTCGTATC  
ACACGTAAAAACGATGTGTGGACGCTTGGAAATATTAATCCTCGAGATCATAACGGGGTAAATCCCCTCT  
AATTTCTTGCAACAAGGCAAGGGGAGTGACACGGATTTGGCTACGTGGGTAAGGTCCGTGGTAAATGA  
GGACATGACGGAGGTAGATGTATTCGAGAAGGAAATGAGAGGTACGACGAATTCAGAGGGGGAAATG  
ATGAAGTTATTGAAGATAGCTTTGGGTTGTTGTGATCTTGATATGGAAAAGAGGTTTGATATGAAGGAA  
GCAATGGAAAGGATTGAGGAAGTAAAAGAGAGAGATGGGGATGATGATTTTTACTCTACAAGAGGATT  
ATCTGATGATTATACTCAAGTTTCTATGAACATTTGAAGAGTGCTGGTTATACATACTCATAGTTCGTGTG  
TAACACTTTTTTATTTGTTCAAAAATCATCATGGTAAATATGGAATGGGACTTTTTATTTGTTTGATGCAT  
GGTTGGGGGTCGTATATATATTGGTCAATGAAACCACAAAATAAATAAATATGAAAACAAAAAAAAG  
AGATAGAAAAAATGAAGTTAAGTGTTTTTTTGTTGTGATTCAATTGAAGCAAGGGAACATGTAAATTGTC  
CTTGATGAATCTAGTTTAGCTAGTTGCCTTCACTTTTTTTCTTTTCTTTTCTTTTGAACCTTTATCTAGTTTA  
TTATATTTGGGGCTTGTA AAAATTAAGTAAATCCAAAAGCATGCAAGAACAAGAATTATAAATCTTTCA



ATTGC

>M6-PGSC0003DMG400013953 M6 LRR-RLK

GGTTATGGCCTTGGCTCTTCCTGATTTGCAACTTCAAGGCACAATTTCCCCATCTTTGGCAAATTTGTCCT  
TTCTCAGTGTTCTCAATCTCCAGAACAACAGCTTCCACAGTGGCATCCCTTATGGACTTGGCCACATGACT  
CGCTTGCGAGTGATTGACGTAAAAACAATCAGCTCAACGGAAGTATACCAACAAGTCTATTTCAAACC  
GGAGAGTTCAAGTAATTTCAATGGCTTTCAATGAACTCGGTGGTGAAATGTGGAGAGGCCCATGGTATG  
TACCAGAACTCAGAGTCTTAAATCTCGGGAACAATAGCCTCACGGGTATAATCCCTCCTTATGTTGGAAA  
TGCCACAAAATTGATGAACATCAATTTGTCTGGGAATAGAATCAATGATAACATTCCAATGGAGATCAGT  
AATCTTAGCCAACCTTGCATTTTTGTCCTTGTTCAATAATCAATTAACAGGTTCCATTCCCTCCAACACTGTTT  
AATATCTCGTCACTACTTGGCATATATCTGTCATTCAATGGCCTTTCTGGTCCTCTCTTGCTAGATGAAGG  
GAATATTGTGTCAAATCTGAAGCATTAAAGTATGTCTAACAAACCAAATTTCTGGTTGCATTCCCTCCAACA  
TATGCCAACTCACAGAGCTCAAACTTTTGTCCATATCTTTCAACAATATAACTGGAGACATACCTAGAAAT  
ATTGGTTGTTTATCCAACTCGAAAGGTTTTATATTGGTGAAAATCCAATAGAAGGGACTATCCCACTT  
CATTGGGAAATATTTCTACTCTGCAATATCTTGATTGTGTAGACAATTGGATGAAGGGGCAAATTCCTCA  
AGAATTAGGGAAGCTATCAAATTTGAGGGAATTAAGCTTTGCCAATAATTCTAATCTTATTGGTCAAATT  
CCAGAGGCTATTTTCAACATATCTTCTTTGGAAGTGATCAATTTAGTTTGAATAACCTCTCGGGGAGAAT  
TCCAACCACTACAGGTCTTCATCTTCCGAACCTTAAAGAACTTTACTTGGGAGACAATCAGCTTGAAGGG  
GAAATTCCATTGTTTATAACAATGCTTCCAAGCTTCAAGACTGCAACTAAATGATAACTCTCTCAAAG  
GAACTATTCCTAACAAATTTGGGGAATCTTCGTGAGCTGCAAATACTGCTCCTACACTAATCAACTTACC  
AATGAACCAGGAAAGCATGCGTTGAAATCTTCAATCTTTGGCGAACTGTAGGATGTTGAGATATCTA  
GAAGTGGGTAACAATCCGTTGAGTGGAGTTCTGCCAAATTCTATTGGGAATCTCTCATCTACTATTGAAA  
AAAATTATTTAGCAGATGCACACATCAATGGCCTCATCCCCACAAGTATAGGCAACATGACCGGTCTTAC  
ATCCTTAAGCCTTGGCGGAAACAACCTTGACAGGGAATATTCCTTCTGAGATTGGTAAGCTTAAACAACCTC  
CAAGGACTCGATCTATCTAACAAATAAATTGCAAGGACATATCCAGAAGTGGTATGCAATTTGTCTGATT  
TGGTTCAATTATATCTGTATGGTAATGAGCTCTCTGGATTAATTCCAGAATGCTTAGGAAATCTTACCATG  
CTTCAACAACCTTTATTTGGCTTCTAATAAATTTTCATCAAAAATTTCCATTGACCCTTTGGAAAATGAGTGGT  
CTTCTCTATCTAAACGTGTCACAGAATTCAATAGAGGGAGAACTTCCATCAGATATTGGAGGACTGAAA  
GCCATTGTAGAACTATATCTTTCTGGTAACCACTTTTCAGGCATGATATCAACCAGATTCGGGGAACTCC  
AAAATCTGCAGTATCTCGACCTATCGAAAAATTCATTTTTTTGGCCGAATTCCATTATCCTTTGCCAACTTG

ATAAACTTGGAAATCCTTGAATTTGTCTTTAAATGCATTGTCAGGTAATTCCTAAGTCTTTGGAAAACT  
CTCATACTTAAAAGCATTAAATGTTTCATTTAATGATTTAGAAGGTGAAATACCAAGTGGTGGTGTGTTT  
GCAAATCCACTCTGCAATCATTTGTT

>M6-PGSC0003DMG400013956 M6 LRR-RLK

ATAAGAGCCTTTGTTCTGCAATTTATGCCCAATGGAAGTCTTGAGAATTGGCTGTACAAAGAAGATCGAC  
ACTTGAACCTTCATCAAAGAGTCACTGTAATGCTTGATGCAGCTATGGCAGTTGAATATCTACACCATGG  
TCATAACTCCAATAGTTCATTGCGACCTGAAGCCAGCCAACGTTCTTTTGGATGAAGATATGATGGCT  
CATGTTGGTGATTTTGAATATCTAAAATTTAGCCATAAGCAAGTCCATGGCTTATACAGAGACATTGG  
GCACTCTTGGATATATTGCACCAGGTAAAAGAAAATCTACTCTCATTGATTTTCTTTATCATAATTAAGC  
CTCTCCAAGTTGTAGAAGTAAAAGAGAATTATTGTTGTATTTCAATTGAATTAACCTTTTTTTTAAATCCTT  
TTTTAAGAATATGGCTCGGATGGAATAGTGTCTGCTAGTGGCGATGTTTATAGTTACGGCATCATGTTGA  
TGGAGGTTTTGACGAAAAGAAGGCCAACAGATGAAGAGATATGCAATGAAAATCTTGACTTGAGGAAA  
TGGATCACACAATCATTTTCAGGGAGTATGATGGACGTTGTGGATGCCAATCTTTTCTCCGAGGAAGAA  
CAGATCACTTCAGAAAGTGAAATCTGCATTGCGTCCATGATAGAATTGGGTTTAGACTGCACAAAGGAA  
ATGCCAGAATCAAGAATAAGCATGAAAGAAGTAGTGAAGAGGCTTAACAAAATCAACAACACATTTCTG  
GAAACATAGTAGTGATCAGTATCTATTCCGGTGGTGTCTTTTCTGAGCTGCAAAT

>M6-PGSC0003DMG400014281 M6 LRR-RLK

AAGCCAAAGGAGCATCTGAGTATCAACATTGCAACCTTTGAGCAGTCTTTGTTACGGATTAACCCTACAG  
CTATTCTCTCAGCCACTGAGAACTTCAGCAAGAGTTACATCATTGGTGATGGTGGTTTTGGTACTGTATA  
CAAAGCCAAACTTCCTGAGGGCCAGAACATTGCTGTCAAGAGGCTGAACGGAGGCCACATGCACGGTG  
ATCGCGAGTTCTTTGCTGAAATGAAACAATTGGTAAAGTAAAACATGAAAATCTGGTGCCATTGCTTG  
GTTATTGTGTCTTTGCAGATGAGAGGTTCTTGATATATGAATACATGGAGAATGGAAGCCTTGATTTCTG  
GTTGAGAAACCAAGCAGATGCAGTAGAAGCACTTGACTGGCCAACTCGTTTCAAGATTTGTCTAGGGTC  
AGCTGTCCGACTTTCCTTTCTACACCATGGTTTTGTTCCACACATCATCCACAGAGACATCAAGTCAAGCA  
ACATACTCCTAGACAAGAACTTTGAACCACGAGTCTCTGACTTTGGCCTGGCTCGAATAATTAGTGCTTG  
TGAGAGCCATGTTAGCACAAATCCTTGCTGGTACATTCGGGTACATACCTCCCGAGTATGGACAAACCATG  
ACGGCCACAACAAAGGGTGACATCTACAGCTTTGGAGTGGTGATGTTGGAACCTGGTAACAGGAAGGGC  
ACCAACAGGACAGGCTGATGTTGAAGGAGGCAATCTTGTTGGCTGGGT

>M6-PGSC0003DMG400014576 M6 LRR-RLK

TTGGTTTGTGTCTTGTTTTTTTTGGTTTTAGTTGCTTTTTGGCTGCAACTGTTAATAAGGACTGGTCT  
CTAATGCATATAAGAATAGAAACCCAAATTTGGATAGTTTGAAAGCATATTACTTTGCTAAAGATTGAGT  
AGTTGTTGGTGAGTTTGGTGTATGATTCATCACTTGTTTTGGCTTATTCATGGTAAATAGTATTCAACCT  
TTTGTCTTTAAGAAATTCATAGTACTAAAATATTTGTGAATTACTTGTTTCTTAAAGAAAAATGTGATCTT  
TAGCTTTTTGTTGTAGAATAGATTATTGATTGACCAATAAGGATTATAGTGGAGTTGTAAGTACTTCGTC  
ATCATTAACTGAGGTTTCAAGTTGAGCCTTGAGTATGGACTTGCCCTTGTTAGGTAGCGGTTTGTCTCT  
ACGTGGGACTTCCTAGCGCGAACCCGTATCCGGCTCCAATGCGGTTGCCGTACACCGGATGGGAAAAAA  
GGAGAAGATTATTGATTGATTTGGTGGTAAAGTTTGGCAAGTAGTATAGCATAATCACATGGGGTTTGA  
GTCTGGCTTTTTGTCTTTAATTGCTTTTGGTCTGCTACTGTTAACCAGGACTAGCCTTCTGATGCAATAGG  
AATAAAGATGGGATGCCTCAACTAGACAGTATTTGCTTTAGTTAATGTTTCTATTTACATAATTGAAAC  
TAGCCATGTGGGAATATTGAAAATCTATGTTGCTCGGACTCTTAAAAATATCGAGGGTGCGGCAACAT  
GAGTAAGCTTACATAGTCTTTTCAAGCTAAAATATAGAATAGTATGTTACTTTATTAACAATCTTTGTC  
ACATAAGCTATTCTTGATTTTCAAATGTAGGGAACTTAAATTATTTAACAATCTTTATCATCTTATTCTTGA  
AAAAGTTTTTAAAGGAATCTAATTTACTCATGATGGTCCTAAAGTGACAGAAGATTAGAGCAAAGGACT  
TGTTGTACCAGATGAATAGAATTATGTGTTCCCTCTGATTTTTGGGCCAAAGCAAAGAAAAAAATTCAC  
ACTTTTTTGGCAAGAGATGCCCTACTGTCCCATTGTGCTCTACAGCTTTTTTGTCTATCTTTTTGACCTCAC  
TTAGTATTCATATCTTGCAACTGTTTTGGTAGGTGGATAGTGAAATATAACCTCTTGTTTTTTTTCTGGTTC  
AAATGGTAAAGAATCAACTTCTTGTTGAATTGCACCTGTCATTCATGTAAACAGGAGACAGCTGCTTCATA  
TGTTAAATTTTCTCATTTTAGAATTATGAACAATTATGTGTTACTATTCTTACCATCAAAGTCTGCTATGTC  
AACTCAAACCTCCTTGCTCTCTGCCCAGGTTTTTGTCTTTTGTCTAGTTAAAGTTGCATCTTTATCTTTC  
TATAACAAATACTCCCTCCCCTCAATTTGTTTGTCTGGTTTTGACTTGGCACGGAGTTAAGAAAAGTAAA  
GAACACTTTTGAATCTTTTGGTCTTAGTTCTTAAACATGTCATGTGGAAAGTTGAAATTAATAGTTGCCAA  
AAATGGGAAAGGGGCAAATAAGTGAAAATGTGTAAGTGTTCATTTTATAGTAGTTTGAGTAAATGTTT  
TGATGGACATGAATCTTCTTGCTACAGGTAACAGAGGGCCTGGAAGAACTCCTTTAGACTGGACAACAA  
GGTTAAAGATTGCAGCCGGAGCAGCTCGAGGGCTAGCCTTCATCCACAACCTCATGCAAGTCTTGAAC  
TCACTCATGGCAACATCAAATCAACTAACATCCTCATTGACAAGAGCGGCAATGCACGTATCTCCGACTT  
CGGTCTAGCCATCTTCGCCACACCATCTCCGTCCCAAAAACCAACGGCTACCGAGCCCCTGAAGTCGCA  
TTGGATGGTCGTAAAATAACTCAAAGTCCGACATCTACTCATTGCGGGTCTTACTCGAGCTGCTAA  
CCGGTAAATGCCCTCAGTCGTGGACAACGGTGGTGGCCTCACAACCGGCTACGGAGGGGTTGTGGAC

TTACCGAGATGGGTGCAATCCGTGGTGAGGGAAGAATGGACCGCGGAAGTGTTTCGATTTGGAGTTGAT  
GAGGTATAAGGACATTGAGGAGGAAATGGTGGGGCTATTGCAGATAGCTATGGCATGTACTTCAACAT  
CACCGGATCAAAGGCCTAAAATAAATTATGTTGTGAAAATGATTGAAGAGTTGAGAGGTGTTGAAGTTT  
CACCTTCTCATGACACTGCTACTGATTCTGTTTCTGACTCTCCTGCTGTTTCTGAAGATAATACATGTGGT  
GCAGCTAGTCAGTAGTGAGAGTTTTTTTTTTTCTACTAGTTTGTATTCTGAGTTATGTAAATTAACCTCTT  
AGTTTTAATCCTTTTATCTATAAGATATAATTTAGGAGAAGTTTTATA

>M6-PGSC0003DMG400014917 M6 LRR-RLK

GTTCACTACTACTATTTTTATTTGTATCTCAATTTTGTCAAAAATAAAAAAATCCCCAACAAATGATGTGG  
AGGATATTCGTTTTTCTTGTCTTTTACTCAATTCTCATACCGGATTTTGTCTAACTCCGACGGACTTTCA  
CTTCTATCTCTAAAATCCGCCATGGATGATGGCGGTGGTGGTACAGTTTTCTCCGATTGGAATGAAAACG  
ATGATACTCCTTGTACTTGGACTGGCATTTCATGTGCTAACATTTCTGGTTCTTCAGAGCCACGTGTGCTT  
GGGATTACTCTTTCCGGTAAGAATCTCCGGGGATACTTACCGTCTGAGCTGGGAACGTTACTCTATCTCC  
GGCGACTGAATCTTCATGGAAATAATATTTACGGTTCTATCCCTGACCCTTTATTCAATGCGACGTCGCTT  
CATAGTATTTATTTGTATGATAATAATATCTCTGGTATACTTCCCTCCTTCTGTTTGAATCTTCCCTCGTTTGC  
AGAATTTGGATATTTCTGATAATTCACCTTCTGGAACCTTCTCTAAGGATCTACGTAATTGTAGGCAGTTA  
CAGAGGCTTATTCTAGCTCGGAATAAATTCTCCGGTGAGATTCCGGTGGGGGTGTTCCCGGAGTTGGCG  
AATTTGGAACAACCTTGATCTTTGTCGAATTTGTTCAATGGTTCGATTCTGAAGATATTGGTGAATTGAA  
GTCACTATCTGGAACCTTGAATCTTTCTTTAATCATTTTAGTGGAAGAATTCCCAAATCTGTAGGTGATT  
TACCTTTAACTGTTAGCTTTGATCTAAGGAATAATAATTTATCTGGTGAAATTCCTCAGACTGGTTCTTTT  
GCTAATCAAGGTCCGACGGCTTTTTTGAATAATCCCTTGTTATGTGGATTTCTTTACAAAAAACTGTAA  
AAATAGTTCAAACAATTCAACACAAGTTCAGGGTTCGTCTGATAACGAGGGAACGAATTCGCGCAAGGG  
GTTAAAACCTGGATTCATTATATTGATATGTTTGGCTGATGCATTTGGAGTGGCATTATAGGACTAGTG  
ATTATTTACTTGTATTGGAAAAAGAAAGACTCTGGTGGTTGCAGCTGTACTGGAAAAGGGAAATTTGGT  
GGAAATGAGAAGAGAATGCTTTGTAATTTCCCATGTATTAATGGATTTCCGAATAATGATTCGGAAGTTG  
AGTCTGAGAAGGGAGGTGGCGGTGGGGCTAGTGGTGGTGGTGTAGTGGTGGGGAGGGTGATCTTGT  
GGCTATTGATAAAGGTTTTAGCTTTGAGCTTGATGAGCTGTTGAGGGCTTCTGCTTATGTGTTGGGAAA  
GAGTGGGTTGGGGATAGTGTACAAGGTTGTGCTTGGGAACGGTATCCAGTGGCAGTGAGGAGGTTA  
GGGGAAGGTGGGGAACAGAGATATAAGGAGTTTGTGCTGAGATTCAGGCAATCGGAAGGGTTAAGC  
ATCCTAATGTTGTGAAGTTAAGAGCTTATTATTGGGCTCCTGATGAGAACTTCTCATTAGTGATTTTATT

TCCAACGGCAACTTGGCTTCTGCTCTTCACGGTGAGCTTTTCATTATAGTAAAACATCTTCAGTTTTGTTT  
GTCTAGTAGATATAACCTGTTGAAAGAATCATTAAACACATTCATATTTTAGATATCGGGGTATACTATATT  
CTTATCATTTAGTAGCATGATACACTGATGGATGTTTCGTACTTTCCAAGATCGATATGTGTAAAGTGTA  
TTCTTTTGCTGGATTAGTATTTTACTTATTGATCACTCTTTTGAGGAGTGGAATACAGTACAAGACTTTT  
GGTATTAGGTTAGTTAGGAGTTTGGGATGTTCTAGTATTTATTCAGTATAACTGTTTAATATATTCCC  
GATGACAAAATAATGACTTTTAGCTGTTGTGTGTTCTTGATGATTTTGAATAGCAATTATTTATATGCCA  
TCTAGTGATAATTTTATATTGAATGTGTCCCATGTGCTTGCAATCCTTGAGTGAAGGATGAGTTTTGTTG  
CGACTTGATAATTTGCGTAGGATTTTTGTTTAATTGTATCAGCTGATAGGATAGTCTTTATTATGTATCAT  
AGATGAAAAGTTATCTGCATAAAGGGTAAACCAACAACCTAACATTTTCCATCCATTTCAATGGATGTTA  
AAGCACATAGTAGTATATTAACCTATAATGATCCAGCTTAAGTCAATTTGCAGACTTTAACGATTTACTGC  
CGATGCAATAATCATATGTTGACATCATATCGAACCTGGTAGAAAGGGCATTGGGCATGTTTTGAAGA  
ATTTAGTCTCTTTTTTTCATGTGACATATGGTTGACTGCCCCGATAAACCTTGCGGAAAATGATTTATCA  
TCAATTAGAAGCAAACCAATAAGTACAAGGGGCCAAGAAGTGAATTATGTCATGTACTAGGTCAATTCC  
TTAAGTTGTGGAGTTACGTATTCTGTCTCTCAAAGAGTCTAGATATTACATTGTTTTATTATGTCTTTAG  
AGATGTATTACTGATTTGCATATGCTAATATTCAAGAATTTTGAATCGCTCCGCCTGGTGCAGTTTGACT  
TTACAGATGTTTACTTTTTCGAAGCAAACCTGGAATCTGCAGTATCTGGTCTGGTAACTACCATCTAGCATG  
AGCGGGACTTATACTCCCTTGAGATGGATTCTAGACTTCGAATTTTTAAAACCTTAGTTTTCTGCAATTGAA  
TTTTGCACTGTTGCTGTTGGTATAGCTGCTTGAATGTTACATTTTTAAAAGAATTAGATTTTTTCCCCTGA  
TACAAATCGTTGTTTACATTTATGAATATCTACTTCACTGCCTCATATACATGTCACTATGAATCTATAACA  
CATTGTTACCCAAGAGTAACTGCTTGCTTTCTGAGACAAATATATTTGATGACCTTTGGTTCTATGGTAC  
CTGATGTTCCCAGTTTCTTAATTTACCTGTTTTTAAAATTATGTAGCTGGAATTTGACAGTAGAGCAACTT  
ACTTTTGCATTCTGAAGAAGTTGAGGAGTGTTTTCTTTCAGCATCTTTTTTCAAATTGTTTTGCCATGC  
TAGATCTGTATGTATTGACGTAGTGACAGTAGTTTCATGCTCTAGCTGATTGAGATTAGCCAAATTAGTG  
TGAACACCGATTTGCCTATTGAGCTGAAAAGTTATTAACCTGTATCTTGTTTCGTCATACTGTGGTAAATGT  
TGTGATGACAATCTGTTTGCCTTTATACAGGGAGAAATGGGCAACCATCACCTAGTTTAAACATGGTCAA  
CGAGACTGAAAATTGCTAAGGGAACAGCGCGAGGTTTAGCCTATCTCCATGAGTGTAGCCCAAGGAAA  
TTTGTCCATGGAGACGTCAAACCTTCCAATATTCTCCTTGATACTGAACTGCAGCCATATATATCTGATTT  
TGGCCTCAATCGATTAATCAATATCACGGGAAACAACCCCTCCTTCTGGTGGATTTATGGGTGGAGCT  
CTTCCTTACTTGAAGCCTGCTCAACCAGAACGTCCAATAACTATCGAGCACCAGAAGCTCGAATCACTG

GTAACAGACCCACCCAAAAATGGGATGTGTACTCATTCCGGGGTGGTCTTGCTTGAAGTCTGACTGGAA  
AGTCTCCTGACCTCTCAGTTCCTACAACATCCACTTCAACGGAGGTTCCAGATCTTGTAAGATGGGTAAG  
AAAGGGATTTCGAGGAGCAAAATCCACTGTCCGATATGGTAGAACCAATGTTGCTTCAAGAAGTCCATGC  
TAAGAAGGAAGTACTAGCTGTATTTTCATGTAGCTCTTGCATGCACCGAGGCAGATCCAGATATTCGACC  
AAGGATGAAAACCTATCTCAGAAAACATTGAGAAAGTTGGAGCTTAAACTTTTTCGGTACACTCATGTCAA  
GGAGTTCCTGAGTTTCATGGACTTCTTTAATCCTTTTTTTTGCAGTAATTGCTCCTATTATTTTTTTCTTTT  
AGAGGTTAATCAAATCTTTACTTAACTACAGTACAAAATACTAGTGTGCTGCAACAAAATTCCTGTCATTT  
TTGAGAAGTTAATTAGTTGCTTATCTCTTTAATCTATTTCTGTAATTCTGATGTTAAAACAACCTTTTCATGG  
CCAA

>M6-PGSC0003DMG400015081 M6 LRR-RLK

CACAACAAGTTGCTAGGATCTATTCCTGACTCAGTGAGCAACATGGTAGGTTTGGAATTCCTAGACATTT  
CTCATAATAATATATCAGGAACCATTCCTATGTCTATGGAGAACTTCAAACCTTGAAGTATTTCAATGTT  
TCTGACAACAAATTGTATGGTGAAATACCCTCGGGGGTCTTTCAAGAACCTCTCGAGTCAGTTTTTCA  
TCAACAATGAAGCATTGTGTGGTTTGTCAAGGTTTAGTGTCCCGCCATGCCCACTTCATCAAGGCATAG  
ATCAAATAGGAAACAAATGCTACTTCTTTTTCTTTGCTTGAATTGCACTTGTATTTGTTCTATCTCCTT  
TGTGTTCTATGGATAAGGTATAGAAGAGGTAAGATCTCCTCAACAAGCTGATTCATTGTCTATTGCA  
ACAACAGAAAGAATTTCACTACTATGAACTACTCCAAGCAACTGATTCGCTTAGCGACGGTAATCTAATTG  
GTTCTGGAAGTTTTGGCTCTGTTTACAAAGGTGTTCTCAGGAGTGGGACTGCCATTGCAGTTAAAGTGTT  
CAATCTGCAACTGGAAGCGGCATTCAAGAGTTTTGATATAGAATGTGAAGTTTTGCGTAGCCTTCGCCAT  
AGGAATCTTGTAAGTCATCACTAGTTGTTCCAACCTTGATTTAAGGCTTTAGTGCTCGAGTATATGCC  
TAATGGAAGTCTTGACAAGTATTTGTATTCACACAACCTACTTCTAGACATTAGGCAGAGACTAAGCATT  
ATGATAGATGTAGCATGCGCATTGGAATATCTTCATCATGGATGCTCCTCTCCTGTGATTCATTGTGACCT  
GAAGCCTAGTAACATCTTGCTGGATGAGGATATGGTTGCCACCTAAGTGACTTTGGTATTTCAAAACTG  
CTTGGTGAAGATGAGAGTGATTTATACACAAAACCTTAGCAACATTTGGTTATATTGCACCAGGTACGT  
CTCTTTGTTTTTGCTAATTTAAACATTGATTTTTTGTCTTTTTTATTTCCAATCAATAAAGTATATTGCATCT  
TTAAATCAATTGTTTACTGTAGAGTATGGACTGGATGGACTGGTGTCAATAAAATGTGATGTCTATAGT  
TACGGGATTATGTTGCTGGAAACATTTACTAGGAGAAAGCCTAGTGAGTTTAAGGGAGATCTTAGCTTG  
AAGCAATGGGTGAGTTATTCCTCCAGAGGCAGTAATGGACGTTATGGATGTCAACTTGGTTACACCA  
ATGGATAATCGCTTACAGAAGGAGTTAGATATCGTGGCATCAATCATGAAAGTAGCATTAGATTGTTGT

GCTGAATCTCCGACAAGAAGGACAAACATGAAAGATGTTGTAGGGATGCTACAGAAGATCAAGATTCA  
ACTTCTTG CATGCTGAGCATGTCTCTGTATCTCTTGTCTGAATCGATCACTTTTTTTTGTGTTTGTGTTTAGC  
ACTTGATTTGTGCATGATTCTGTTTTCAAAAATG

>M6-PGSC0003DMG400015157 M6 LRR-RLK

TTCAGAACCACCAAGCAACTAAAAGAGACATCCTACTCCTAAAGCACCACCAGTGTGGTGCCTCATCCAA  
CTCCCAATTCCACCATAATACTGCACCAATCCGATGGCCTTCACAGCCTCACATATACACCTTTCTTTTTTG  
TCTTTTTTCACTGTCATCCTTCTTGTTC AAGCAAACTCAACCTTACTCACCTGATCACAGTGCTCTTTTGC  
TTGTCCAAAAAGGCTTAGGCATCCGTGCTCACCGCAATGCTCTTGAGAACCCATGCAACTCTGTTGGAAT  
AACATGTGAAAAACGACTCACAACAATTCATACGTGCTAAGAGTCACAAGGGTTGTCTTCAAATCCTAC  
GGGTTGAAGGGTACTCTGTCTCCTGCCATTGGGAGGCTTCTGAGCTCAAAGAACTGTCCCTCCAAAACA  
ACAAACTCTTTGACAGAATACCAACTGAAATCGTTGACTCGAGGAAATTGGAAATCTGAACCTTCAAAA  
CAATCAATTTTCTGGCAAAGTCCCACCTGAATTATCATCTCTAGTCCGCCTTCGTACCCTTGACCTTGGCTC  
TAATGAGTTATCTGGGAACCTGAACTTCTTGAATACTTTCTAACCTTGAAAACTCTCCCTTGCTGATA  
ACATGTTTACTGGCAGAATACCTCAATCCTTGAATCTTTCAGAAATCTCCGGCTCCTCAACATTTTCAGGC  
AATAGATTCCTTGAAGGTACGGTGCCTGTCGTGAGTCAAGTAGAGCACTTATCAGCAGAATTAATCGA  
AAAGATTATGTTCTAAGCGTTACATTCTTGCTGAGAACGAAAGAAGGCCAAGGCACAGCCCTGCAATG  
GCACCAGAGTCCAAATCAGGATATGCCCAAGCTCCAGGAACTAGTACAGTTGTAGTACCAGAAAAAAAA  
GACAAACACAACAAGATAAGGAAGGTAGGCGCCTGGATTCTTGGATTCTTTGCTGGAGTTTTCGCTGGG  
GGGTTATCGGCGTTGGTCTTCTCCGTCCTTCAAGGTGCTAATGTTTTTAATCAGAGGGGATCAGAAATG  
ATTCAGGCTTAACAATTTTCAGTCCATTGATTAAGAAAGCCGAGCACTTGGCCTTCTGGAGAACGAAGA  
TGGATTGGAATCGCTAGAACTCATTGGGCAAGGTGGATGTGAAAAGTTTATAAAGCTGCGTTACCTGG  
AAGTGACGGAAAGATTATAGCCATAAAGAAGATCATAACAACCACCAAGGGATGCTGCAGAACTCACTG  
AGGAAGATAGCAAGGCAATGAATAAGAAAATGCGCCAGATTAATCAGAAATCAAATTGTAGGTCAA  
ATCAGACACCAGAATTTGCTTCCCCTACTGGCACATATGCCAAGACCAGACTGCCATTACTTGGTCTATG  
AGTACATGAAAAATGGGAGCTTACAGGATACCCTCCAGCAAGTCAGAGAGGGGACACGGGAACTAGAT  
TGGTCGGCACGTCACCGAATTGCAATGGGAATAGCTGCTGGACTCGAGTATCTCCATATGAACCATACT  
CAGCGTATAATTCACAGAGATCTAAAGCCAGGCAATGTCCTCCTTGATGATGACATGGAAGCTCGAATT  
GCAGATTTTGGCCTTGCAAAGGCTGTACCAGATGCTCAAACACATATTACAACCTCAAATGTGGCAGGA  
ACTATAGGATACATAGCTCAAGAATATCATCAGACACTAAAGTTCACTAATAAGTGTGATATATACAGAT

TCGGGGTGCTGCTAGGCGTGCTAGTTATGGGAAAGCTTCCATCTGATGAGTTCTTCCAGAACAACCTTCTGA  
GATGAGTTTATGAAATGGATGAGAAATGTCATGACTTCTGAGGATCCAAACAGAGCAATTGATCCAAA  
GCTGATGGGTAATGGAAATGAGGACCAAATGCTTTTGGTTCTCAAGATTGCCTGCTTTTGTACCCTGGAG  
AATCCTAAGGAGAGGCCTAATAGTAAGGATGTTAGGTGCATGTTGATGCAGATCAAGCATTAAAGTATGT  
AGTGGATAACTTACAGTAAATAAAAGTTTGTAAATGAAACTAAAAAATATTTCTTGTGTATGACGGTCCT  
TGTGTATTCTTGTTACATATCCAATATGAGAGACTGTCCTTGTGTGTTTTGTTTCTCTCCAAAATGAGAA  
GTTTATATTTAGCTGTATGAAAGTTCTTTCGAGAAGTTTCTCTGCTATATTATGATACCTTAAAGCATGG  
TACGAAATGTGAATCGAATTCTTCCACTAGA

>M6-PGSC0003DMG400015162 M6 LRR-RLK

TTATGACACCTTGGTCCCCACATTCCACACTCACTCTTCCCTTCCCTTTAAACAGTCATGCATTTACATAA  
AGAAAGTGACTGTTTTTCTCTCTCTAAAATTCATCTTCTTTCATGGCTTCTCGCCGGAAAATCAAGAATT  
CCCGCCGGGAACACATTCTTGATTCGCATTCTTCTTTAAAAGGGTCGGAACAAGAAAAAAGGGTGT  
TTATAAATGGCGGTGTTTTTAAGGTTTGTGTTTTATTCTTTGCTTTACTCGGATTGAGTCGTTAC  
CGGGTTTTTTCAGAGCCTACACAGGATAAGCAAGCTCTCCTTGCTTTTTTCTCTCAGATCCGACATGCGAA  
TCGGGTCCAATGGAATTCTTCTGCTTCTGTTTGTACTTGGTTCGGAGTTGAATGTGACCCGAATAACTCTT  
TCGTTTATTCACTGAGACTTCTGCTGTTGGTCTCGTCGGAGAAATCCTTCTAACAGTTTGGGCCGGCTG  
AGTCAACTTCGAGTTCTTAGTCTTCACGCCAATCGTCTATCTGGTTCAATTCCTTCGGATTTTTCTAACCTT  
AAGCTTCTTCGTAGTCTCTATCTTCAAAAAATGAGTTATCCGGCGAGTTCCCGGAGAGTATCCCGGGT  
TGACCCGGTTAAACAGGCTGGATCTTTCGTCGAATAACTTCACTGGTACTATCCCTTCTCTATCAATAAT  
CTGACCCATTTGACTGGACTTTTTATTGCAGAACAATAGCTTTACTGGTACTCTTCTAGCATTAAATCCGCC  
TGGTTTAGTGGATTTCAAGTGTTCGAATAATCAGCTAAATGGGTCAATTCCTACTGCACTTTCCAAATTCC  
CAGCTTCTCTTTGCTGGTAACATTGATTTATGTGGCGGCCATTACCCCATGTACCCCATTTTTCTT  
CTCCTTACCTTCCCCTGAAACAGAACCAAAAACCCCTCCGTCAATTAAGAAATCCAAGAAGCTTTCAACA  
GCCGCCATTGTTGGAATAGTTATAGGTTCAATAATTGGGGTTCTTACTCTTGTTACTCCTTTTCTTCTGT  
TTAAACGAAGAAAAACCGACACATCAAAGGTACAAAAACCTCCAGTAGCATCAAGAGCTATCGGGGC  
AGTAACAGGGGCAGCGGCTGAGGCAGGGACATCGTCGTCTAAAGACGATTTAACCGGTGGTTCAGGTG  
AAGGGGAAAGGAATAAACTTGTGTTCTTTGATGGGGGTGGGTATAGTTTTGATCTTGAAGATTTGTTAA  
GAGCTTCTGCTGAGGTTCTTGGAAAAGGGAGTGTTGGAACAAGCTATAAAGCTGTTCTTGAAGAAGGTA  
CTACAGTTGTTGTTAAAAGGCTTAAAGATGTCGTTGTGCCAGAAAAGAATTCGAGCAACAATTGGAAG



TAATAGGGAAGATGAAACATGAAAATGTGCTACCTTTGAGAGCATTCTTACTATTCAAAGATGAGAAAT  
TGTTGGTATCTGATTATATGCCTGCTGGAAGTTTATCAGCTCTTCTCCATGGTACGCTGCTCTTATTATTTT  
TAGTTAAAACCTTGTTTCGTTTTAGTGTATAATTTGCTCTATTATATGTTACTGCAATTCTGTGTCTAAAATTT  
GCTCTCAACACTTAAGTTCCATTTTTCCACCAATGTTTTAAAACCTAAATGGCAATAAAGATAGTAGCATT  
CAATTCTTGCTAGATTTTAGTGACTTTGTTCTGATTCTTGAAGAGTCTTGAAGGGGGATAGGTGGGTTAT  
AGGTATGAAAAAGATTGAATTTTTATTTGTTTCTTTTTTTGGAAGAATAGATGGGGCTTCAATCTAATAC  
ACGTGCAGATCATGTACACATTGTAGCCATAGTTTTACAGCCCTTCTGAACTGGCATTGCATTATTGTTTC  
ACTCAATTATTGAAGTTTGGTACCACTTAATTTACTTCTTTAGTACATTTATTGTCAATTCAACCGCAAATT  
GCGCATTTTGTTTCTATAATTCCTTAAGCTACAGAACATTCTTTTTTTGAGAGAAATGGAACAATGACATTT  
TTATTATGATTTATTTCGAATCGAGAGCATATCGGATAACAATCTCTCTATCTTAACGGACACACTTGTTAGA  
TTACACTTTTACTCTTATTTTTTTTTATGAAACGAACGTTACAATGCAACAGACCACCATGATGGTCAACAT  
ACCTTCCTTTATAAATGATGAAATGAGTTTAAAAGTGGAAAAAGAAGGCTTCTTTCTTGTTCAAAGATT  
TTCCTTTTATTTTGCTACATTGCTTGCGTCTATTTATCAACAAATAACTTGTATTATTATAGTTATATATATT  
TTAAAATATTATTATACATAGGGGAAATGGGGGAGGGAATAACAAAGTGTGTGGAGTTTGGTGATAT  
CAAATATATTAATTAATTAATTAATCTTTTGTTTTCTAACCCACAATTTTCAAATCATGATTTAATTAGTAG  
TAATTGCTGTAAGTCTAAACAATACTTATATACTTAAAAGCTTATATTACTTTGGCTTTAAGCTATTTGGT  
GGTTATAACTGTCTGATTATTATTCATCTAATCTTGATTCTTTTGCTTTACTTTATTTCATCATTGTTTCTTGC  
TGTCCTCCATTTTTCTTCTTTTGTTGAAATAACGTGCTGCTTTACTCTATTGTCCATTGATTCTTGCTGTCAC  
CCATTTTCTTCTTTTTTTGGTGAAGTAAAGTGCAAAGAAAAGCTAATAATACAATGTGTCCTGTTGAGTC  
TTGAGTAGTTCAACTGCTTTGAATTTGAATCCAACCTTATTAATTTGCATTGACATTAGTTTGTTAACAACAT  
AACCAGTGTAATCCTACGAGTGAGGTTTGACTTTTGAGTAGGGTAGGATGTACACAGACCTTATCCTTAC  
CTTTGATTGTCGTTGGTTTGGTTGTCTAATTAATGTTAACTTTTGTTAATTCTTGTTAGGTAGTAGAGG  
ATCAGGGCGTACGCCACTTGACTGGGATAGTCGAATGAGAATAGTGTTAGGTGCAGCAAGAGGCATTG  
CGTACCTCCATATTTTCAGGAAAAGTTGTCCATGGAAACATCAAGGCTTCGAATGTTCTCTTAAACAAGA  
TAACCAAGATGCATGTGTATCTGACTACGGATTGAACCCTCTATTCTCCACCTCTGCACCAGTAAACCACC  
GTGTTGCAGGATATCGTGCACCTGAGGTTCTTGAACCTCGAAAAGTAACATATAAATCCGATGTGTATA  
GTTTTGGAGTGTTAATGTTGGAGCTCTTAACGGGGAAAGCTCAAACCAAGCTTCACTAGGTGAAGAAG  
GCATTGATTTGCCTAGATGGGTCCAAAGTGTTGTAAGAGAAGAATGGACCGCGGAGGTGTTTGATGTTG  
AGCTAATGCGATACCATAATGTGGAAGAAGAGATGGTACAACCTACTTCAGATAGGTATGGCATGTGTTG

CTACCATGCCAGACCAACGACCTGCCATGACCGAGGTGGTTAAGATGATCGAAGAAATGAATCGTGGT  
GATACAGATGATGGTCTTAGACAATCCTCCGACGATCCTTCTAAAGGTTCTGAAGGCCAAACACCTCAG  
GAGTCTAGAGGTTACCTCATGGTGTAAACACCATAAAATGAAATTAATCATAAAAATGGATGGCTTGATT  
TGTCAAAATTCTCAGAAAAGCCTAAAGTAAATTGTATTAGATTCTTAGGGGGGAGCCTTTTATGTGT  
TTATTTTATTTCATTTTTTTTTTCTTCTTGAAATTATTATTTGAGAAAATTTGTGGAATGATTTTACAGA  
TGGTTAGTTGAGAATTTGAATATTTCAAGTGAAGTGATTGGGAAATTGAAATTTG

>M6-PGSC0003DMG400015276 M6 LRR-RLK

CTATAACTATTTTTCAACTTTTTGATGTGTTGACATTGTTGAATTATACCCCAATGTTCAATTTACTT  
CACCTACTACATACAACTGGTAAATTCTCAATCTAATATTACTTATCTATTATTCTTCTAAGTCAAGGTTGC  
CACGACCAGAAATGCGTAGGACGATCCTATTTTTCGCTTTGTTTCTGGTGGTGGGAATCAGCTGAATTTT  
CCCAAATGAAAGAGATGCTTTGTTGCAGCTGAGAGATAGTGAAATTCAAGTGTCTTGATTTACATTCA  
CATTGGACAGGGCCTCCTTGTTACAACAACCAGAGTAAATGGGCTGGAATTTCTGTTCTAATGGGCAT  
GTAAATCAACTGTTTTAGAAGGAATTCAGTTAACTGGCTCACTCCACCAACATTCTTGTTGCACATAAC  
TTATTTGACAAAATCAGCTTTAGGAACAATTTATTGTATGGTCCTGTTCCCAATCTCACAGGACTAATCT  
ACCTGGAGTTTGTTTTTCTGTCAGATAATCGATTTTCGGGTTTGATTCCATTTGGGTACACTGAGTTAAAG  
AAACTAACAGAATTAGAGCTCCAGGGGAATGATCTTGAAGGTTCAATTCCACCATTTTATCAACAGACTT  
TGATTGGTTTCAATGTGTCGTCGAATAAACTGGAAGGACCTATCCCTGAAACTCCTGTCTGAAGAGATT  
TTCGAAGAGTTGTTATGAGAATAACGCGAATTTGTGTGGTGAAGTTGTAGGAATACCTTGTTCAATATCA  
CCTGCAAGTCCACCTAAAGCACCAAGTAAAAGAAAAAGAATGGCCTTAAAGTATGGAGTATTGCTTTG  
ATTGCAGCAGCAGTAGCAGTACTTGTCTAATTTCAATCATGTTCAATTTGTTCCGTTACTTTAGAAGATC  
TCAAAGAATGAAACACAAGGAGAAGACAAACAAGGTAACAGTTTTATTGTATCATCTATGTTATCCTA  
GCTAGTGCCAGTTATTCTGGGGGTAAAGTTATTACTACTTAGATTGAATTAGATGATGAGTTTATCTGGT  
GAGACACATTTTTCGAAGGAGAAATATGTATTTTTTCGATATGGTTTATGTTAATCGCGAAAAGGTCATT  
CAGAACTCGTTGGCTCCAGAGGCATTAAGATGTTTGTGATTGGGAAAAGGTCATTCAGAACTTGTTGG  
GGCTGCTCCAGAGGTGCTAAGATGATTAGTTCATGATAGGAAGACGACCAATCCATGTCCATTATGAAG  
TCGAATCAACCATTTCTAGCTCAATAAGATGGGATTTAGTCTCTCCCCCAGAATTGTGGCTACACAACA  
ACAATAACATACTAGTATAGACCATAAGTGAGGTCAGGGAAAGGGTGAGGTGCCCTACTTTTGTAGAG  
TAGAGAGACTGTTCCGATAGAATTGTGGCTATACAACATAGAACTAGATTAGCTAATTCAATTAACCTT  
AAAGATCCATGTGATGAAGGAGCAGTTTATATTGTTATTATTTCTCTTTTTAACATTTCCAGTTTCTATTT

TGACAGGTAATATTTCAATAGAGAATGTGGTAAAGAGAAGTTATTGGTCCAAGAGTACAGAAGATCCAG  
AAAAAACATTGGACTTAATATTCTTTGAAAAGGATATGTCAGTCTTTGACATGGATGACTTGTTAAGAGC  
ATCAGCTGAAGTTTTAGGAAAAGGAAAGCTAAGCACAACATATAAAGCAATCCTGGAATCTGGTTCTGT  
TGTTGCTGTTAAGAGACTCAAAGAAATGAATTCTTTGAGCAAAAAGGAATTCACACAACCGGTGCAGTT  
GCTTGGGAAATTGAAACATGAAAACCTTGTGGAGATGTTGTCCTTCTACTATTCCAAGGAGGAGAAGCT  
CATTGTTTATGAATATGTTCCACAAGGAGACTTGTTTGGGCTTTACATGGTTGGTTCATCAACTTTCTTT  
TACTTTTGGGAAAATGTCTAAAGTTAACCCCTCCTGAATGAAATACCTTAATTTTATCTTTTGTATACTTT  
GAGGTTATTCATATCCTTATCCTTAGTAAAACGTCTCCTGTTATACTTCGAGGTCATTCTGATTCTAAACTA  
TGAACTCATGATCAAATGACTTTTGAGGTGGGCTTTCCCTTCTCTATAGTGCTACTGTGAAAATTGAAATT  
GCTTAGAGGTAGGTGTAAGGTCTGCGGACACTCAACCCCTTGTGGGATTATACTGAACATGTTGTTGTC  
ATCTTATAGTAGTAATAGAGGAATATCTTTTACCATTTTCCCATCTTTTTTCCCTTAAGATTCAACCTTGT  
AAAACTTATGATTCTTGATTTTCAGAAAACAGAGGAATTGGGAGACAACCACTAAACTGGACAGCAAGA  
ATATCCATCATAAAAGATGTAGCAAAGGGTCTAAATTTCTTGCACCAGTCCTTACAATCACATAAGGTGC  
CACATGGGAACATCAGATCAAAAAATGTTCTAATCCAGCAAGACCAAAGCAAGAACTACCATTCTAAGC  
TGACAGATTATGGATTCTTTCTTTGCTACCATCTAAAGAATCCTTAAGAAAAATAGCAGTAGGAAAATC  
TCCAGAGTTCTCTCAAGGGAAAAAGTTAACAAGAAAAGCTGATATCTACTGCTTTGGTATTCTTCTGTTG  
GAAGTTATCACTGGAAAAGTACCAGGTGAATTGTTTTACCAGAAAATGGGGTACTAGTTATGTTGAT  
GATGATTTGTCAGAGTGGGTAAGGACAGTGGTGAATAATGATTGGTCAACAGACATTTTGGATATGGA  
AATACTTGCACAAAAGAAGGGTATGATGAAATGTTGAAGCTTACTGAATTGGCTTTGCAGTGTACAGA  
TGAGGCACCAGAAAAAAGACCTAAGATGAGTGAAGTGCTGAGAAGAATTGAAGAGATTGAGCTTGAAC  
CAAAGAATTTAGTCACTGATGTGGAAGATGATTCAGTCTTACTTGAAGACTTGAACCTTTCCCTCCTAAA  
CTGTAATCAAGCCGTAGCAACAACAACAATATATCCAGTATAATTTTCATCAGGTATAGCCTGAATAATAT  
ATTCAGTATAATCTTATCTACTGGAGTCGGATTCTGAAGAGAATTTCAAGTTGTGTCTGAACAATACATC  
CAATATAATCCCATCAAATGGAGATTACCGTAACCCAATCCTAACATGGGAGTAAAGAAAGGGTAAAAT  
ATGCACATACTTTACTCTGATTTCAACCGATGGGATCTTTGAGAGAATAGAGTATGCGCATATCTTACCC  
AACAAAGGATAGAGAGGCTGTTTCTAAATTGTAATCAAGAAAATAGATTAGAAATTTAGGAACAGGCTT  
TTAG

>M6-PGSC0003DMG400015391 M6 LRR-RLK

CAAGAATTTGGTGTCTTCTAAGTGCATGACAGCTATAATCTTTTTTATGCAGGGATATATCATACAACAAT

TTCACACAAATATCTACTTCAGTATGCGATTCCCTCTACCTTGTGAGCATTGTTCCCTCTTCATTTGGAACCTA  
CATTCACTACTATTTCTTTTTTTTTATAAGTGAAAATTTTGGTCCTTAACTACATTACTTACAAACCTTCC  
CTCTTTAACAGAACTTAGCTGCCAGCTATTCAAATACAATAAACACGCTCAACAACCTCGTAAGTCCTAA  
ATGTTGTCTTATGCATCAACTGCTAGTTTGTGGATGCTTTCTGTCTATTGTCTATAATTATGTGGATTAAT  
CTTTTTGAAATTGTAGGGATGCCTGGTGTCTATGAAACCCCTCATTTGTCCCACAGAAACGAAATGTAA  
GAGTTACAGCCTATAAACCTTTTTTTTATACTTGGAATTCTTAACTTGACCCTTGAGAGGGCCTGAAGTA  
GCAGTTTGTCAAAGGACCTCAGGGGTGGCAGCCTGTGCACTTTTAAAGTACAAAAGCATAACCTTGGAGT  
TGAGAGATAATTTCACAACTCTTCTCATGTTATGCTCTTTATGTCAATTGCAGATACTTCGCTATTCATAA  
ACTGTGGAGGACCTAGAACTTCATTTGAGGGAAATGATTATGAGGGGGACACGACCGACAGAGGTCCA  
TCATATTTTTCTTCACCCTCCGACAGATGGGCTTTCAGCAGTTCAGGAGTGTACGTGGGTCTTCAAGCAG  
CCAGTTATGTTGCAACAAATACATTTTCACTGAATGTGTCCGGTCTGACTTTTACAATACAGCACGCCTT  
GCCCCTAATTCTCTCAAATATTATGGGCTTTCCTACAAGGAGGTAGCTACAGAGTGCGACTTCACTTTG  
CTGAAATAATGTTTTCTAATGACTCAACATATAGCAGCCTTGGAAAGGCGGATATTTGATGTAGCAATACA  
AGTAAGTTTGAGGCCTAACTTCTTTGTAAATAAGGAGTATGTAATCTAAAATGTTGATTTATTTAGTTCT  
GATATGATTGGCAACTTTCTGATTTAATATAGAAGGTACCAATTTGTTGGAGATAATGTGGTATATTTTG  
ATTTCTTACACAGGGGAGAGTAGTTTTGAGGGATTTCAACATTATGGAGGAAGCTAACGGTGTGGAAA  
AGTCATTACCAAGGACTTTGCTGATGTTACTGTTAGTAGCACTCTGGAGATTCATTGTATTGGACCGGG  
AAGGGGACTAACGCTATTCCAGACAGAGGTGTATATGGACCACTGATTTTCAGCTATCACAGTGACACCA  
AGTCCGTATATCTCTGCTTATAGACTTTACACTTATCTCCCAATATTATCTTAATAAAAATCCCATTTTCT  
TCTTGCAGACTTTGATGTTGATACAGGCAGCGGGTTACCTGTCGGAGCTGTTATTGGCATTGTACTCGCT  
TCAATTGTGGTGGTTCTGCTAGTTTTATTTGCTCTGTGGAAGAAAGGCATTTTTGGAGGGAAAAATAATC  
AAGAAGAATTAGGTAATACATACTTAAAAGAATTTTTTCACTCTTCCATTTGATAAAATGGGGATTCTTC  
TGTTGTGATAAATAGAATTTTTTACGAGATTTCTAGCTGCGACAGACAAATAATTATCTCCCCGTAATTGA  
CCAGCATTGAGATGATTGTTCTGTTGGTGGATCGACATCATGACATATCATAGATAGTTAAACTGTCTTC  
GTCATACAGATGTTCACTTTTTAAAATTGTTGTTTCATCATAACAGACGTTTTAGAAGATCTATATACT  
GACGTTTGCAATATTCTTCTCATTTACAGAACTCAGAGCCCTTGATTTACAAACAGGTCATTTTAGACTTA  
GACAAATTAAGCTGCTACAAATAACTTCGATCCTGCCAACAAAATTGGTGAAGGAGGGTTTGGACCAG  
TTTACAAGGTATCAATTCTCTATCCATACTGATTTTGCATAAGGACAGCGGGTCTTTGGTGATATTTCTTA  
CTGGTTATCCTTGATGTCACGTTTATAGGAAAATAGAGTAGTAATAGTTGAAGTAACCCGTATCCTTCTTC



AAGAATTCACAAAGGGAACATGTCTCCACAGTTTGCTGTTGAATCTTTAGTCAATTTTACTCACTTGACAT  
CATTCAACTCATCAGGTTTTGTTCTTTCAGGGCAAATACCTGATTGGTTTGGCCAAAAGTTAACTCAACT  
AAACAACTTGATCTTAGTTCAAGTTCAATTCTTGGTTCACTTCCATCCTCATTAGGGAGTTTGAGTAATCT  
TGATTTTCTGTCTTTGTTTAAACAATTCAATTACAGGAACTGTTCCTTTAGAACTTGGAAAGTTGAGTTCTT  
AAGGGTTCTTGATCTTCTTGGAAATTCATTTACAGGTGAAATTCCAACCTCTGTTTCAGATATTAAGAATC  
TGCTGTTCTTGATTTGTCTTCAAATTTCTTTCTGGACAAATCCCAGTTGAGTTTGGTTCAATTTCTTGGAC  
TTAAGTTGCTTAAATTGTCAAATAACAGTTTAAAGTTCTTATATTCCTTCTGAAATTTCAAATCTTCTGCAT  
TAGTAGAACTTGATCTTGGCTATAACTACTTGTGAGGGTCATTGCCTGAGGGTTTTTTCAGAATGAGAAA  
TTTGAGTAAATTGTTAGTTGGAAATAATGAGCTAGAGGGTACATTGTCAAGTACTATGTTTACTTCAAAT  
GATTCTGTATTGGTGTATATAAATCTTAGTTGGAATCGATTCCAAGGCAAAGTTCCTGATGTTTTGTGGT  
CATTGTCTGATCATTGAGGATTCTTGATATATCAGGGAACAATTTTACTGGTGTGGTTTCAAATAGTACC  
TATTTTAGTGCTACTGGTGCTTCATATAACCTTCTAATAATCTTTTCTATGGAAATGTGACGTTTGATGTT  
CGGAGTTTTAGTCGATTGATCTGTCTAAGAACTATTTTCAAGGACTAGCACCTGATAAATCTGGTGTCT  
AGTTATGGATAATTGCTTTCGCGGGTATTGAATCAGAGGAGTTTAGATGATTGTAGTAAGTTTTATGCT  
GATAGGGGTCTAGTTTTTGTGATGGTGGAAATCCAACCTCCGGTGCAAAGAGCCTCGAAGGGCAGGCA  
TAAACGTTTGTATCATGGTTGGAGTTTTTGGTGGAGTTGGTGTCTTATGCTTATGGCATTAGTCATTT  
TATTGTTTTGGAAGGTATGCTATAGAGGGAATTCAAACGAAAGAGGCATATCGAATGTTAGTCCTGTTG  
TGGAAGGAGGAAATAATCAGGCACCACCAGTAAAGTTCTCTCGTGATACATCTGGTTTCGATAGAATCAT  
TACTTATGATCAGATACTAAAAGCCACAAGCAACTTCAATGAAACAGATCTTATCAAGAATGGTCATAC  
AGGAGACATTTCCGAGGAATATTAGAAGGCGGTGTCACCGTAGTTATCAAGAAAGTAAATGTACACCA  
TATCGAAAAAGAAACATACAAGTTGGAGTTGGATTTGTTAAATTGGACAACACACCATAGGCTTGTCCCT  
TTTTGGGACATTGCTTAGATCATGAGAATGAGAAATTCTTGGTCTATAAATATATGCCAAATGGAGATT  
TGTTCAATTTGTTGGCCCGGATATGGATTTAGAAGACGAAAATGGACAGTCTTGGATTGGATAACAA  
GATTAATAATTGCAACAGGAGCTGCTGAAGGCTTAGTTTATTTGCACCATGAGTGTAAATCCTCCCCTTGT  
TCATAGGTATTTTTTCTTCACTTTTTTGCATTTCTGTTTGATAATGTTGTACACCAAGCTAATTATATTCT  
GCATGTTCTTGTCTTGAAGAGATGTTCAAGCTAGCAGTATCCTTCTCGACGATAAATTTGAAGTAAGGC  
TGGGAAGTTTGAAGCAGTATGTGCACAGGAAGGTGATAGCCAGAATTTGATCTCAAAGTTTTTCCGCA  
CGACAAAGTAAGTATTACTATGATCATAGTTTGTCTAATACCAGATTTTTTCAGAAATGTAATAGACATT  
TAGTTAGATTTATGTGTTTACATTTCTGTATATTGCTTTTTGTTCAATGTTCTAAGATATATTATGTTTCTTG

TTGACAATAAACAGGAATCCTGAGGGAGAGCCTGCTGGTATGTACTATTCTTTTCGTAAAAAACGCAT  
AGTTGAATAGAGTTATTTTTCTGAATTTCTCATATGCTGCCTTTATACATGAACAGGATCTTCATTTACAA  
GTTGCAGTACTTATGATGTATACTGTTTCGGGAAGGTCTTACTCGAGCTTGTAAGGTTGGAGT  
AAGTCACTTAGATGATGCCTCAACCAAGGAGTGGTTGGACAAGCTTCTTCCTTTCATCACTATACGCGAG  
AAAGAACTAGTGTCCAAGATAGTCGATCCATCTCTAATTATAGACGATGACTTACTTGAAGAGATGTGG  
GCTGTAGCAATAGTAGCCAAAGCATGTCTTCATCCGAGGCCTTCTAGACGTCCTGAAATGAGACGTGTC  
CTGAAAGCTCTTGAGAACCCGTTCAAGGTTGTTAGGGAAGGAAGTTTCAACTCTATAAGGCTACGAAAT  
ACTTCATCGAGGCGATCATGGAGTGTCTTTTCTTGGTAGTTGGAATCATAGCTCACAGGATAGTGTTA  
ATGCTAGTGGCCAAACAAGCAAAGAAGCTGGCATGAACCTGAAACAGCATTCTATTAGCAGCGGGAAC  
GAACATTCATCATCGTGTAAAGAGATCATCGAGTGAGATTTTCCCGAACCTCAGGACACACTAGATATAG  
AGAGACAAGACATGAGCTAGCCGTCTAGCACGAATCTATGCCAAATGCATTTCTGCAGGCAGGGGTTTT  
GTAAGTATAAGGAACTTTGATTTTTTATTAGATGAGCGGCGTACTATGATCATTCTGAAGACATGGGG  
CCTACACACTACACACATGTTATGCGGTTGGTAAACTCTTTCCTTCTGCAACAGCCTATCAAATCGGATCA  
GTATTTTTGAATATGTTGTGTTACATCATGTACATGTATTCTGTTTTCTCTTTTCTTTTAGTGTGTCACAAA  
TGCTCATGTGCTTTGTAAATTTTCAAAAAGTTTACTCTTGTTCTGTGATGATAGAACAAGTATATAACTG  
TGCAAGACTCAAGAGTGTACACTATCTAATCCAGATTCACATTTTCATGATCTCATATTTTGCAATTGCA  
TGAAAAAGTATGATATGAATGAATAATAGAACCTGCACCTTCTTGAGCCGAGGGTCTATCGGAAACAAC  
CTCTATACCTAAGGTAAGGTCTGCGTACACCTGCTCGTCTCAACACCCTTGCAACCAGGTATGTTGTTGTAA  
TTGGATAAATAGGGCCTCAAAACTGCTATAGTGTGTAATCCCTTGGTGGCCTAAATGTAACTAAATACA  
TGTAGATGCACCTGACAGTTACAATGAGC

>M6-PGSC0003DMG400015666 M6 LRR-RLK

CAAATCCCAACTAGTATTTCTTTATCTTCTCCAGCTCAGACACAGACACACAGTCCATTTTTCTCTCTCAA  
AATCAACCAACAAGAAGATGAACAACATGTTTACCACTCCTTTGAACAAGAATTGAATCAAGAAATCAA  
ATTACCCAGAAAAATCCTGTTTGGGGGTTTTGGGTTTACCCAAAATCTTCAAAAAATGAGCTCAAAAAT  
CTTGTTTTTATTACCATTTCTGTATCAATTTTCACTCTTTTCTTGCCGACAAACTCCGACATTGTTTCCGAT  
CGAGCTACCCTTTTATCTATCCGATCTGCTCTTCGTGGACGTTCACTTTTATGGAATATCACAAGTCCAAC  
TTGTTTATGGCCTGGTGTATTTGTTTACCTGACAAATCTTCTGTTTTAGAGCTTCATCTACCTGGAATGG  
GACTTTTAGGCCAAATCCACCTGGGCTTTTCTCAAATTTGACTAAATTGAACTTTCTTAGTCTCCGGTAT  
AATGCACTTTCCGGTGTAAATCCGCCGGACTTGTTTACTTCACTTCATGATTTGCGTAACTTGTACCTTCA

AAATAATCTATTTCCGGTCCGATTCTGATTCAATCTTCTCTTACCAATCTTGCCGGCTTAATCTTGC  
TCATAACAATTTCTCTGGTTCAATACCGGAATCTTTCAACAATTTGACTAGTTTGGGTACACTTTACTTGC  
AGGGAAATGGGTTTTCCGGTTCAGATACCGGATCTGAATTTACCTGGTATGGTTCAGTTCAATGTATCGA  
ATAATCAGCTAAACGGGTCAATTCCTAGTAACTTGCGGGTCAACCCAAGGATGCTTTTTTGGGTACTTC  
ACTTTGTGGTAAGCCACTTGATTCATGTGATGGTAGTAGTAGTAGTATTGGAGAAGGTAAAAAGAA  
GAAACTTTCTGGTGGAGCAATTGCTGGTATAGTAATTGGTTGTGTTGTTGGTTTGCTTTTACTTCTTTGTT  
TGCTGTTTTTCTGTTGTAGAAAAAGGGGTAAAAAAGAAACAAGATCTGCTGATGTTGGTGCTGTTAGTA  
AGCAGGTTGAAGTTGAAATGCCTGAAGAAAGAGGGGTTGAGAGTAATGGTGGAAAAGATGGATTCTT  
GGGTAGTGCAATTGCAGCTATTGGTGTGGAGGGGGTAATAAGGATAAAGGTAAAGCTGAGGCTGTTG  
TAAATGATGGAAAAGTTTGGTGTTTTTTGGGAAAATGGCCAAAATTTCAATTTGGATGATTTGTTGAA  
AGCTTCTGCTGAAGTTTTGGGAAAAGGGACATTTGGTACTGCTTATAAAGCTGCTTTGGAATCAGGGAT  
TACATTAGTTGTGAAGAGATTGAGAGATGTTACTGTACCTGAGAAGGAGTTTAGAGAGAAAATTGAAG  
ATGTTGGGAAAATGAATCATGAGAATTTGGTTCCTTTGAGAGCTTATTATTATAGCAGAGATGAGAAGC  
TTCTTGTATGATTACATCTCAATGGGAAGCCTTTCTGCACTTTTACATGGTGAGAAAAATAACTTTTTTT  
TTTCTGTCATTCTTTTTCATGTCATTATATTGCTGTTATGCTGTTCCCTTGAATCGAGCGTCTATTGAATCAT  
GTCATTATAGTGCTGTAAGTTGTTTACCATTTACATGATCTGCAAATTTTAGTTGTCTGATTGACACTGA  
TACTACTGCTTTCTATGTTGCCTAGACTCTTAAAATGTGGTGCTTGTCCGATCCTGGATCCTCCAAAAGTA  
GTGTATATTTGGAGGATCCAAACACGAGTCCGAATAACATAGACTGTTTTTGCTGATTTTATGAGGCTAG  
TAAGTTTGGATGATCATTTGTTTTCTGGATCTTGTTATCTGTTACTGAATTTGGTGCTGTTGTGTAAGT  
TGCTGCATTTGCATTATTGTGCCCAATTGTGTTGAGCCACTAAAATTTAAGTTTTTTTTTTTACATTATTGT  
GCTGTTGTTGCATTGTTGTTTCAATGTTTAAATCAGATTTTATCGTAATCTAATGTGATGAACATTGTGTTAG  
TGAATATGATATCTGACATGTTTTATATAACTCAACCTGGAATGGCTTTACTATGTCCAATTGTTGCTG  
TTCAAACCTCGTGTTTCAATTTAGATTGAATGTATACTTTATCCACAAGGTGATCTGCACAATTTTATAGATT  
CCTAAGTCCGAGAGTCTATCAGAACTACCTCTCTACCTACAGAAGGTAGAGGTAAGGTTTTCGTGCAT  
CCCACCCTCCACAGACCTCACTTGTGAGATCTCATTCCGGTATGTTGTTGGAAGAGTTTAGGAAGAAGTCG  
TAAAATTGAATATATGTGTAGGACAGGTTCACTGCGTTCAACAGGACGAAACAAGATCATTTAACATTTA  
ATCTGTTTGTATGGATTTAAGCCAAATGTACCTTTGTTAACTTATCGACTATATGTTGGGTAAAAACTATG  
AATTATTTGGGTGCTTTATTCGGCATATTCCACTGCTACTATGTCATGTCACAATAGTTTTGTCATTCAACT  
TGCTTTTTCTATAGGCAACAAAGGAGCAGGTAGGACACCGTTGAATTGGGAAACAAGGGCTGGCATTG



CCCTTGGAGCTGCACACGGGATTGCGTACCTTCATGCACAAGGGCCCTCAGTATCACATGGCAACATTA  
AGTCATCCAATATCCTCCTCACCAATCATATGAGGCCCGTGTTTCAGATTTTGGCCTTGCTCAACTCGTC  
GGTCCATCATCAACTCCCAACCGTGTTGCAGGTTACAGGGCACCAGAGGTAAGTACTGACCCTCGTAAAGTC  
TCCCAGAAAGCAGATGTCTACAGCTTTGGCGTCTTGTTGTTGGAAGTCTAACAGGGAAGGCTCCCACAC  
ATTCAGTAATGAATGAGGAAGGTGTCGACCTACCAAGATGGGTGCAATCAGTGGTACGAGAGGAATGG  
ACAGCCGAAGTCTTTGACCTCGAGCTCCTTAGGTACCAAAACGTGAGGAGGACATGGTCCAGCTATTG  
CAAGTTGCAGTTGATTGCACTGCTCAGTACCCTGACAGACGCCCTCAATGGCCGAGGTCACTACTCGCG  
TTGAAGAACTCTGTCGTATGGATTCTGGAGGTGGTGACATAATTGACAATGATGCAGAAGTGCAAAGTGC  
CATGAAATTGAACAAGAAAAAATAGTTCCATCACATTATTTCAATTTTTTTCTTTTTCGTTTTCGATTGAGC  
ATTTGATAACTTTGTTTATTCTTTGGAGTTCTTCAGTGAAGATAAATTGTTTATTTTATTTTTTTTTGA  
ATTTATTTCCAGTAGCAACAGAGTTTTATTAAAGATCTGGTTGGTAGTTGAAATGGAGCTGTTTTTTTTG  
TTTTATAGATATTGATGTATTCTTTTTTTGAAGGTGTGATGAACTGTATAAATAATTGAGATGACCTGTAGT  
TACA

>M6-PGSC0003DMG400015806 M6 LRR-RLK

CATGAGAATTTGGTTCCTTTGAGAGCTTATTATTATAGCAGAGATGAGAAGCTTCTTGTTTATGATTACAT  
CTCAATGGGAAGCCTTTCTGCACTTTTACATGGT

>M6-PGSC0003DMG400015814 M6 LRR-RLK

ACCCCATGTAAATGGTCTTTTATAAAATGCAACTTTCAAGGTTTTATTACAGAAATCAATATTCAGTCTAT  
TCATCTTGAAGTTCCTTTGCCTACAAATCTTTCTTCATATAAGTACCTGAAGAAGCTTGTTATTTCTGATGC  
TAACATCACTGGTGAATACCCTTTAACATTGGTGACTGTTTCGTCCTTGTACTATTGATTTGAGCTCAA  
ATGGTCTTGTGGGTACCATTCTTTAAGCATTGGAACCCTGTAAACCTCAAGATTTGATTTTGAAGTCA  
AATCAGCTTACTGGGAGAATCCCAGTTGAGATTGGGAAGTGTAGAACTTGAAAAATCTTGTTCTTTTTG  
ATAACAGGCTTAGTGGTGGTTTACCAAGTGAATAGGGTTGTTGTCAAATCTTGAAGTGTTAAGAGCTG  
GTGGGAATAAAGATGTTACTGGTAAAATCCCAAATGAGTTTGGGGATTGTGGGAATTTGACTGTTTTAG  
GCTTAGCTGATACCAGAATATCTGGTTCTTTGCCTGTTTCTTTGGGTAAGCTTAAGAATCTTGAAACTTTG  
TCTATTTATACTACAATGTTGTCTGGTGAGATACCTTCTGATTTAGGTAAGTACTGACTGAGCTTGTGAACTT  
GTATTTGTATGAAAATAGTCTTTCTGGTTCAATCCCATCTGAGCTAGGGAACCTTAGAAAGTTAGAAAAG  
TTGCTTCTTTGGCAGAATAATCTTGTTGGTGTATTCCAGAAGAGATTGGGAATTGACTAAGCTGACTA  
TGATTGATTTGTCTTTGAACTATTTGTCTGGGAGTATACCATTATCTTTTGGTGGTCTTGTTGTGTTACAA

GAACCTATGCTTAGTAACAACAATGTTTCTGGTTCAATCCCTTCTGTTCTTTCACAATGTACAAGTCTTGTG  
CAGTTGCAGTTTGACACAAATCAGATATCAGGTTTGATTCTTCTGAGTTGGGGAATTTGACAAGTCTTG  
TTGTGTTTTTTGCTTGGGATAATCAACTTGAAGGAAGTGTGCCTTCAACTTTGGGTAGTTGTAGTAACCTT  
CAGGCATTGGACTTGTACATAACTCGCTTACTGGTAGCATTCTCCAGGCTTGTTCAGTTGAAAAACCT  
GACTAAGCTACTGTTGATTTCTAACGATATTTCCGGTACTATACCTCGAGAAATTGGATATTGTAGCTCAT  
TAGTGAGGTTAAGACTTGGAACAACCGGATTGCTGGTGAATTCCTAAAGAAATTGGAGGTCTTAAGA  
GCTTAAACTTTCTGATTTGTCCGAAATCGCCTTCTGGACCAGTTCCTGATGAAATAAGTAGCTGTACT  
GAGCTACAAATGGTAGACCTCAGCAGCAATACACTGGAAGGTCCCCTGCCTAACACTCTGTCTTCACTAT  
CAGGGATTCAAGTCTTGGACGTTTGAATAACCGGTTTGGAGGGCCTATACCGGCTAGTTTTGGGCGTC  
TTGTGTCATTGAACAAGCTGATTCTCAGTAAGAACTCGTTCTCAGGGTCTATACCTCCATCTATTGGCCTG  
TGTTTCGAGTCTTCAATTGCTAGATCTTAGCAGCAATGAGCTCTCGGGAGGCATACCGATGCAGTTAGGA  
AAGATTGAGTCCCTTGAATCACTCTCAACCTTAGTTTCAATGAACTAACAGGTCCAATTCCTGCTGAAAT  
TTCTTCACTAAGCAAGCTGTCGATACTTGACCTTTCGCACAACAAGCTTGAAGGGAACTTGAATCCACTA  
GCGAGGCTCGATAATCTTGTCTCACTGAATGTCTCATAACAACAACCTTCACTGGTTATCTCCGGACAATAA  
GCTCTTTCGACAGTTGCCATCATCAGACCTAGATGGAATGAAGGTCTATGTTTATTCCGGAAGGCCTTCG  
TGTTTTCTCAGCAATATTGATGGAGTAGGAGTAGCTAAAAATGGAATGATGAGGGAAAGGTCAAAGAA  
GCTCAAATTAGCCATTGCATTGCTAGTCATCATGACAATAGCAATGGTGATCATGGGAACTATTGCTATC  
ATACGCGCACGAAGGGCGATGAGAAGGGATGATGATTCAGAGATGGGAGATTCTTGGGCTTGGCAGTT  
TACTCCATTCCAGAAGCTCAATTTTTAGTGGACGAAATACTCAGATGCCTTGTGGATACTAATGTCATTG  
GAAAAGGGTGCTCGGGGATGGTCTATCGTGCAGTTATGAACAATGGGGATGTCATAGCAGTGAAGAAG  
CTTTGGCCAATAACCATGACTACAATAATGGAGGCAATGATGAGAAATGTGGGGTACGTGATTCGTTT  
TCTGCAGAAGTTAAGACGCTTGGTTCAATTCGACACAAGAACATTGTCCGATTCTTAGGGTGTGTTGGA  
ACAGAAGCACAAGATTGCTCATGTATGATTACATGCCTAATGGGAGCTTAGGAAGTCTTCTTCATGAGA  
GGGGTGGTAACCCTTTGGAATGGGAATTGAGATACCAAATATTGCTCGGGGCAGCGCAAGGGCTCGCC  
TACTTGCACCATGACTGTGCTCCTCAATTGTTACAGAGACATCAAGGCCAACAAACATTCTCATTGGTCT  
TGAGTTTGAGCCTTACATTGCAGACTTTGGCCTCGCAAACACTAGTCGATGATGGTGATTTTGGTCGTTCC  
TCCAATACAGTTGCTGGTTCTTATGGCTACATTGCTCCAGGT

>M6-PGSC0003DMG400016015 M6 LRR-RLK

TTTTTTTCCAATATATATCCTTTTTCCATTTCTTTCATAGTAGTATGTTTCAAGTGCGTAGTAACATCATG

GAGAAACACATTTTCTTATTGATACTTGCTATCTTAGTTCAATTTTTCTTTGTTTCTTCTATATCAGCTACTA  
TTTCTCAAATGAGACTGATCAAGAAGCTCTACTAGCTTTTCGAAATCTTGTTACGAGTGATTCTAGTCAT  
TTTTATCCAATAATTGGACCAAAAATACTTCATTTTGCTCTTGGTTTGGTGTCACTTGTAGTCCAAAAAG  
GCAAAGGGTTGTAGCCTTGACTCTTCTAATTTGCAACTTCAAGGCACAATTCGCCTTCTTTGGCCAATC  
TATCCTTTCTCATAGAGCTAAATCTCTCGAACAACAACCTCCATGGTAACATCCCTTATGGCATTGGCCAC  
TTGCCTCGTTTACGAGTGATTGATATTCAGAACAATCAGCTCCATGGTAGTATTCCAACATGTCTATTTCA  
ACACCTGAGTGTTCAAATCATTTCAATGGCTTTCAATAAACTCGGTGGTGAATGTGGAACGTACATGG  
TATGTACCCGAACCTCAGAGTCTTAAATCTCAGGAACAATACCTTCACAGGTATAATCCCTCCTTCTATTGG  
AAATGCCACAAAGTTGATGAACATCAGTTTGAATTGGAATAGAATCAACGGCAACATTCCAATGGAGAT  
CGGTAATCTAAGCCATCTTGTAGAGTTGTCGTTGTCTCGTAATCAATTAACAGGTTCCATTCTTCAACAT  
TGTTTAATATCTCCTCCCTTCTCGTCTTGTCTCTGGCATAACAATAGCCTTTCAGGTCCTCTGTTTCTTGATG  
ATCGACGTAATGTTCTTTCATCAAACCTCGAGCATATAGGTGTATCATAACAATCAAATCACTGGTCACATT  
CCTTCCAACATCTGCCAATCAAAGCTCTCAAAGTCTTGTCCATATCTTACAACAACCTTAACTGGAGAAAT  
ACCGAGAAATATTGGTTGTTTAGCCAAGCTCGAAGAGCTTTATATCGGTTATAATGCAATAGATGGAAC  
AATTCCTACTTCATTAGGCAATATTTCCACTCTTCAAAAACCTTCATTGTGGAAACAATCACATGGAGGGA  
GAACTTCTCTGGAATTAGGAAAGCTATCAAACCTTGAGACAAATCAATTCGAAGAAAATTATAATCTTA  
TAGGTGAAATTCCAATGCTATTTTCAACATATCTTCTTTGGAATTCATTGCTTTCACTTTCACAACCTCT  
CAGGTAGAATTCCAATCTTCTTCATCTTCCAACCTTATACAACTTCTCTTAGCAATCAATCAGCTCGAA  
GGTGAATTCCTCGGTACATTACAAATGCTACCAATCTTGAGCTATTGGAACATCAGATAACCTTCTCAC  
AGGCAGTATTCCTTATGATTTAGGAAATCTTCGCGAGCTGCAAGAACTTTTCTTCATCATAATCAACTTA  
CTGAGTTGTGATTCTTTGATTCTTTGGTTAAATGTAGGATGTTGAGATATGTACAAGTGGGATCGAATCC  
GTTGAATGTTGTTCTGCCAAGTAGTATTGGCAATCTTTCATCTACTGTTGAATACTTTCATATTGGAGATG  
CACAAATCAATGGATTCATTCCCACTAGTACAGGCAACATGAGCGGTCTTACAACGCTAGTTTTTCAAGA  
TAACAATTTTACAGGAAACATTCTCGTGAGATCGGTAAGCTTAAACAACCTCCAAGGTTTATTTCTAGTTA  
ACAATGGACTACAGGGGGATATAACAGAGGTAGTATGTGATTTATCGAATTTGGTTCGATTAGCTCTGT  
CTGAAAATGAGCTCTCGGGGGTATTCCGGAATGTCTAGGAAGTCTTTCATGCTACAACACCTTTTTTT  
AGGTTCTAACAAGTTTGAATCAAAGCTTCTTTAAGCTTTTGGAAAGATGAGTAGTCTTCTCTATGTAAACA  
TGTCGCGTAATTCTATAGAGGGAGAAGTTCCATCAGATATCGGAGAACTTAAAGCTATTGTAGCAATTG  
ATATCTCTGGTAACCACTTTTCGGGGATGATACCAAGCAATTTGGGGAACTTCAAAAACCTTGAAGTTACT

TTCCTTATCGAACAAATTCGTTTTTCAGGTCCAATTCCATTATCCTTTTCAAACCTTGAAAAGCTTGGAATTCTT  
GGATTTGTCTTTGAATGACTTGTGAGGACTATTCTAAGTCTTTTCGAAAAGCTTTTGTACCTTACAAGCA  
TCAACGTCTCGTTTAATGTTTTAGAAAGGTGAAATACCTAGTGGTGGTGTGTTTGCAAACCTCCACCCTGCA  
ATCATTCTCGGGAACAAAGGTCTATGTGGAAGGCAAATATTGGAGGTTCTGCTTGTGCTGCTACTACT  
CCTGAACAACAACAATCAAAATCTAAGAAGCTTGTGCTAAAAATTGCTACTCCGGTGGTTATTTCATTTTT  
TCTGATATTCTTGTGGTTGTCTCAATTTGGATAATGAAACGAAAGAAGAAAGTTAAGTCCAAAGATTTT  
GAAAAGGTTCCGGAGATGAGGACTTATCAATTGATTTCTTATCATGAGATTCAACGAGCAACAAATAATT  
TTGATGAATCCAATTTGATTGGCGTGGGAGGTTCTGGCTCTGTGTACAAAGCCACATTACCTAGTGAAT  
TGTGGTTGCAATAAAGGTAAGTACTGGATTTGGAAAATGATGAAGTATGCAAAGGTTTGATACTGAATGTGA  
AGTGGTGAGAAATGTTAGACACAGAAATCTTGTTTCAGTGATCACTACGTGTTCTACTGATCACATAAGA  
GCCTTCTTTCTGCAATATATGCCCAACGGAAGTCTTGACAATTGGTTGTACAAAGAAGATCGCCACTTAA  
ACCTTCGTCAAAGAGTCACCATAATGCTTGATGTAGCTATGGCAATTGAATATCTACATCATGGTAATGA  
CACCCCTATAGTTCATTGTGACCTCAAGCCAGCCAACGTTCTTTTGGATGAAGATATGGTGGCGCGTGT  
GGTGATTTTGGCATCTCAAAGATTTTAGCTGTAAGCAAGTCTATGGCACATACAAAGACATTAGGCACTC  
TTGGATATATTGCACCAGGTATACTACTATACTCTATACTAGTCTCTTTCCATTTCACTTATGTATCGAAGA  
CCTTTCAATTATTGTTATATCAGATGAGTAATTGAGTAATACTTTTTTTCATTTTCGTTCTTTTAAGAATATG  
GCTCGGAGGGAATAGTGTCCACTCGTGGTGTGTTTACAGTTATGGCATCATGTTGATGGAGGTTTTGG  
CAAAAAGAAGGCCAACAGGTGAAGAGATATTCGATGAAAATCTTGGCTTGAGAGAGTGGATAACGCGA  
GCATTTCCAAGAAGTGTGATGGAAGTTGTGGACGCGGATATTTTACATGATGTAGAAAAAATCACTTCC  
AAAAGTGAAGTCTGCATACTTTCCATGATAGAACTTGCTTTAGATTGCACAAAGGCAACACCATAATCAA  
GGATAACCATGAAAGATGTAGTCAAGAGGCTTAATAAAATTAAGAACACATTTTTTGGAAACATAGAAGT  
TAGTTAGAATCTCTTTTAATGTTGTTTTTCTTATAAGTTGTAAGTTGATACTCAATCTGTTTGTGATGCTTT  
TCATTCTAGTCCGTTATAAAAAGAATGTCTCTTTTCTTTTTTGGCAACTGTAAATTCTAACTTTCTACATG  
TCTATG

>M6-PGSC0003DMG400016164 M6 LRR-RLK

ATGTGCTACTCTAGAAGTATATATTTATCGATTTCTTCATCAAGCTGATATTAATCTGCTCATGATATTG  
GCACATTGCTAACTGCTCTTATTTGGGGGACTGGTGTGATTGCTTGTATCTTTGCCCGTGCATGGTTTGGGA  
TCTTAGCCTTTTCCGATTGTACTACTTTCCTACCCACACAAGCATGTGTAGAAATCTACTCGCAATTTTGGT  
TCTCAATATTCCAACAAAGAGTAGTATTCTTTAAGTTAATAATTAGGAAACAACATTCTTGAGTGTTTG

GTCATGCTTTTGCCAGAGTGTTGGATATTTTCATCTTCATTTCTTGTCGGTTATCACATTATTCTCGTAGTGC  
CTCTGATAAGCATTCTAAGGTCATAACTGGTAACATTTGCTAAGAAGATCTCCTAAAAATAAGTTTTTCATC  
CTTGCAATAGGAAGTTCTACTTTAGCGAGATTTGTGAACTCATCAATTTTCTTGTCCTTAGTTGTGTTAT  
GTATTGAACTGACTGGGCGGTCAACATCCTGGCAGTTCTTTGCAAGGAAATGGAATAACTGGTAAAATT  
CCTGAAGCATTAGGAAATTTAACCAGCTTGACCATGTTGGATCTGGAAAAAACAGTTTGTCTGGAGAA  
ATACCAGCTTCCCTAGGCAATCTAAAAAAGCTTCAATTTCTGTAAGTAATATTATTTTCATTGATTGTTGTTT  
TTTTTAGAACTGAGTTTTACATTTGGTGTTGACTTGGGAGTCTATAATGATGTTTCTTTGAACAGTTTT  
TGAGTCAAACAATCTGTCTGGGACTATCCCTGAGTCACTTTAGGCCTTCCCAACTTGATTAACCTGTAA  
GTGATTCATTTAGCCTGATCTTTGATGTGCTTACAACGTGTGCCAAGTGATACTGACCTGACCCGGTGAT  
ATCTCTTTGCCAGTCAGCTTGCATTAATGATCTTACTGGAAAAGTTCTGACAGTTTGTCCAAGTCCCG  
AAATACAAGTATGCAGATCTCAATTATTGCATTTTTTAATTTGATGATAGATTGAAGCTGCTTAATAATTT  
GAACATTTTAAAAAGTTATAATACATAAATAGACACTCAAACCTAGCCTCATCTGGCAAGTAAGCACTCC  
AACTATGAGAGAGCACATCTAGACACCTCAACTTGGTCCCAACTGACAACCTAAACACTCTAACTCGTCCC  
CACTGTGTCTAGTGAATACCTGACGCTGATGTGGCATATAAATTTTGGTGGTGTCTTGATGATCTTTTTGT  
AAGTTGGAGTATTCAACTGACACAGTGAAGACGAGTTGAGGTATCTAGATGTGCATACTCAAAGTTGGA  
GTGTTTACTTTCCAGCTGAAGTCAAGTTTGAGAGTGTGTTTATGTATTATACCCTTTTTATAATAGCCCTG  
CCTCTTGCATGAGTCAGAAGTGTGATATTAGTTTAACTCAGTTTGCCTACTAGTTTTTCAGAGAACCATT  
TGAATTGTGGCTTAACTTCAGTCGTCGTTGTGTATCTGACAGTGAAGGTAATTAATTAAGAGCAAAT  
ACCACATTTTAAACTACAAGTATTTACTTTAAAAGTTAGATGTTGCTGGAGATGTTTGGCAGTATTCTAA  
ATTCTAAAGTTGATATCCTGGCAGGTTCTCCAGTAAATCAAAGACTGGTCTCGTAATTGGTATCGTTGG  
TGGATTTCTTGGAATTATCCTTCTTGGGGGATTAATGTTATTTTTCTGGCGGGGAGGAACAAAGGCTAC  
AAACGTGAAATCTATGTTGATGTTCCAGGTCCTTATCAGTGTTTTACACAGTATTAACCTCAATATATGTT  
GTTAGCTCATCAAAAAAAAAAATACTCCCTCCATTTCAATTTGTTTGTCTTACTTTCTTTTTTAGCTCGTTA  
AAAAAGAATGTCCCTTCCCTTTTTGGCAACTCTTCAATTTCAACTTTTACGTGACATGTTTAGGACCACA  
AGATTCCTTCTTTATTTTTTAAACTCCATGTCAAGTCAAACGAAACAAACAAATTAACCGGTGGGAAT  
ATGTGTTAGCTCTCCTGAAAAAAAAAGAAGAAGGCTGAAGTAGTTACCTATTGCTACATTTCTTAGTTCCA  
TCTTACATTGGAGACTTGTCTTTTATCAGCAGTACCTTAGTTCACTTGCACTGTAAGATGGTATAGGCTC  
ATTGAGTATGTTGTGACATTTTTCTTGTGTCTGTTTCGATGTGCCAGGTGAGGTTGACAGACGAATTCCA  
TTTGGTCAATTGAGGAGATTCGCATGGAGGGAATTGCAACTTGCTACTGATAACTTTAGTGAAAAGAAT

GTTCTTGGACAAGGAGGTTTTGGCAAGGTTTATAAAGGAGTGCTCAGTGACAGCACTAAAGTTGCTGTG  
AAACGCTTAACTGACTATGAGAGTCCTGGGGGAGATGCTGCATTCAGCGTGAAGTTGAGATGATTAGT  
GTTGCTGTTTCATAGAAATCTTTTGC GGCTTATAGGATTTTGCACCACACCGACTGAACGCTTGCTAGTGT  
ACCCGTATATGCAGAACCTAAGTGTTCCTATCGTCTACGAGGTA CTTATTTTTCCACAATAGTGCTTAGA  
TCTTGGTTTGCAGTTTTCCCAAGGCTTTCCTTGTTTATCTCAATATCAAATTTTCCTGGGATCACTTATTTCT  
TTTGCTCCAAACTCAGCTGAATTTCTATAGAAGTCTGGAATTTTATGGTCAAATGCTTATGTCAATAGTCT  
AACTGTCTAATAGCCTATTTGGCCAAGCTTCTAAAATCAGCTTATTTTGATTTTAGGCTATTAGACTCCTAT  
CAAAGGTCTAATCACCTACTTTTTCTAGTGATCTTTAGTAGAGTAGACAAGTTGAACAGATAATAAAGG  
AGGGTATTTGCGTAGGTA CTCTGATTCTTAATATTCTTAGAAGTGTGTGAGTTCTTGAAAATTTGTTTCTC  
TTCAGTCTTCAAGAGCCATAGTTGGATTGTACCTCGTCACGAGGGA ACTTCCATCACGTATGAATTGACC  
GATATCCATAATGAGAGCTTAAATGAGTTCATGAATTCATTCTTGCGCATTATCATTCCCCCGAGGTG  
ACTTTTTTGAAAACCTTGCATGAATTGAAGATGACACATGCAGTAGTCGGTCAA ACTTTAAAATTCAGCA  
TTTATCTCCCAGAGATGATGAGATTTTGGTGGCTTCTTATTTGTAGTATTTTGTAAATGCAGAACTTAAA  
CCTGGGGAGTCTGTTTTAATTTGGCCAACCAGAAAGCGTGTGGCACTGGGCACTGCACGTGGACTTGAA  
TACCTGCACGAACACTGTAATCCAAAATTATTACCGTGATGTTAAAGCAGCCAATGTTTTACTGGATG  
AAGATTTGAGGCTGTAGTTGGTGATTTTGGCCTGGCAAAGTTAGTTGATGTTAGGAAAACCAACGTGA  
CAACGCAAGTTCGGGGTACTATGGGCCATATAGCTCCTGAATATTTGTCCACTGGGAAATCATCAGAAA  
AACTGATGTTTTTGGATATGGAATCACGCTTTTGGAGATTGTA ACTGGTCAACGCGCTATAGACTTCTC  
ACGCCTAGAAGAAGAAGATGATGTCTTGTTACTTGACCATGTGAGTGTACATAACTCAACGACTGATATT  
AACTGTGATTCTATTGGTCTGCATATTACTTTTAACTGTCTCTAAAATTATTAGTTTCTTCTAAGTTT  
ATTTTTTATCTTATACTTTCACTCTTCTCGAAGCTGCATATTGGTGGATGGCTCATTGTCCATCACAAGAC  
ATTCTCATGAATTATATACGTAGTTCTTCTTTTTATGTTGCTTCTTGGTATATGTGGTAATTTTATATTCA  
ACAGGAAGGAGGGACAAAAAAGAAGTTTCATTTTCCATATAGCACTCTTACGCAAATTCTTTTGCATGTC  
AAACATAGGTCTTAATACTCAGCCTCTTTTGTGGATACCCTTTT TAGGTGTAAAGTAAATTAGTGAAAA  
AAGGTGAAATAACATTGAGAGGACGCAAATTTCTAATTAGGGTAGAAGGATAGTAGATAGTGCATTT  
TCTCGCTATCCGTCCATTCTAGTAGTTGTAGTAGTCTCCTTAGTTTCTTGTCTATGGTTTTTGTACCA  
TCTGTTGTTTCTTGATTTTCGCTTGTCTGATTATTTGATGTAGTTATTGTTT CAGCATGCTTTGCTATGCTTT  
CACATCCATTACTTTTTCTGGACTGCTTTTGTGTTTTTCTTGAGCCGAGGGTCTATCGGAGACAACCT  
CTCTATTCTGAGGTAGGGGTAAGGTCTCTATGTAGACTCTATCCTCCAGATTCCACTTTGTGGGAGTAC

ATTGGGTATGTTGTTGGTTACTGAATGGCTGCATGTGTCATCTTGAAGGTCAAAAACTGCAAAGGGAG  
AAAAGGTTGGATGCTATTGTGCGACCGCAACCTACATAAGAACTATAACATGGATGAAGTAGAGATGATG  
ATTCAAGTTGCGTTGCTGTGTACTCAAGGATCACCAGAGGATCGTCCAGCAATGTCAGAGGTAGTACGA  
ATGCTTGAAGGAGAAGGACTTGCTGAGCGGTGGGAAGAGTGGCAGCATGTCGAAGTTACACGTAGGC  
AAGAATACGAGAGACTACAACGACGATTTGATTGGGGCGAAGATTCAATCTATAATCAAGATGCAGTTG  
AACTGTCTGGTGAAGATAACAAAATCTGTATCTCAAACAAGTACATAATTCCTGTAATAGTCTCTCCT  
TGATACATATAACTTGTGCTAAGTGGCAATCATTCCACGTTTTTCATATTGCTTGTGTCATATCTTGATTGT  
ATTGTTTTTCGTATGCTTCTTATTTAATCGATTTTTTCCCTGTATGATTGGCCTGTGCAGCGACATAATA  
TATATCGACTTTCTTTTTGTTTCAATTGTAACATCAATCTTTGTTATAGTGATTTGAGTTTTGC

>M6-PGSC0003DMG400016654 M6 LRR-RLK

CTCCCACTCACACCAGAGAGAGAGAGCGCTTTAATAAATGTTTAACTGACTCGCGGTCGCCGAAAAC  
CATTCTCCCTCCGGTGGATTTTTGTCTTAATTTCATTTTTGGATAAGGACAAGTATCCGGCGCCGGTGGTT  
TCTTTCCCGGAAAAAATCTCAGCTCACATTTGTGCTGCTTTTAGTTTGGAGGTTGAAACTTCTCTTCTCG  
CTAAATTAACCTCAACCGAGCTGTTTTTTTCAGTGAATTCGTAGGTTTATGCGTTTTTTATTTGTCTGTTC  
TTCGTTTGGGTCTTTTATAGTTTACTCTTTTTTAGCAGATTTGCACAACTTTTTTCCAGTTTCAGCTGTATT  
TTAGAATTCTAGGGTTTTGGGTTGAATTTTTACCCTGGACCCATTGCGTGCTTATTTAGTTGTAAGTGG  
TCATTTCAACTCCTATTTTGAAGTTGATTTTTTTTTGTCTTGAAAAACAAGTAGGGCCTCAACATTGTCTT  
CAGCTGACCTTGTCTATGGAATTATAAGCAACATTGGTTTGGAAATGAGAAAGGTGTTTGTACTGTGTT  
TTTTTTTCTGTTGGTGGAGGCTGTGTTTGTGGAAGCTTTGAACCCATCTTTGAATGATGATGTAAGTGGGA  
TTAATTGTGTTCAAATCGGACGTTCAAGATCCATATGGAAAGCTGAAATCTTGAATGAAGAGGATGAT  
AGTCCTTGTAAGTGGGACGGAATCAACTGTAACCCAGATCCAATAGGGTGACTGAAGTTGTTCTTGAC  
GGGTTTGGTTTATCTGGAAGGATAAGCAGAGGCCTTTACGCTTGCAGTTTCTTACAGACTTTCACTAG  
CAAAGAACAATCTTACAGGTAGCATTAGTGTTAGTCTTGCTCAACTTGCTTATCTCAAGTTTCTTGACTTG  
AGTGAAAATAACTTATCTGGTAACATTCTGGCGATTACTTTCAACAATGTGGGCCGCTTAGATCAATTT  
CTTTGGCTAACAAACAAAATTTCAAGGCAGATCCCAGAAAGTTTGAAGTCTCTGTGTTACACTTGCCTCCCT  
TAATGTATCGTCAAATCAGTTTTCAGGGTTGGTGCCTTCTGGGATTTGGTCTTTGAATGGACTAAGGTCT  
CTTGATTTGTCAAACAATTTATTGGACGGCGAAATTCAGTGGACATTCAGGGTCTGAGTAATTTGAGAG  
CATTAACTTGGGGAGAAATAATTTCAAGGGTGAATTTCCGGATGAAATTGGAGGTTGTTTGCTTTTGA  
GGTCAATTGATTTGAGTGAAAATTCTCTCTCAGGAGAGCTTCCAAGCACAATGCAGAAGCTTAGCTTGTG

TAGTGAATTCATTTTGAGACGTAATGCTTTTGTGGGCATTGTTCCCTAAATGGATTGGAGAAATGAAAAGC  
CTTCAGATTCTTGACGTTTCTGAGAACAACCTCTCTGGTATCATTCCAACCTCAATAGGGGAACTTGAGTC  
ACTGAAAGTATTAAAGGTGTCACGGAACGGGATTTCTGGAAGCTGCCTGAGTCCTTGAGCAGTTGTGT  
TAAGCTTCTGGAATTGGATGTTAGTCATAACTCTTTGGCGGGTAATCTTTCTACTTGGGAATTTAAATTGC  
AATTAATTCAGGTTATGTTTTCCGTGAATAAAATTAAGTCCCAATCTAAATAATGCATTGCTACACAACCTC  
TTATCACAATCTTGTAGCAGTGAGAGTTATCTGGTGAATTTAATTAAGTCTCTGAACTTCTCTTGCAGG  
CACCATTCTAAGACTGTCGGCCAATTGAAATCCTTGAATATTCTTGATTTGAGTGAAAATCGCTTATATG  
GTATTGTCCTGTGGAAATTGGAGGAGCAAATCTCTCATGGAACCTAGTCTGGAGAAAAATTCCTTGA  
CTGGAGAAATTCCTAGTTCAATTGGCTATTGTTCTTCATTAGTATCCTTGTAAGTTCTCGAACCTCCTTATG  
TTTCATTAATTTGTTTTGGACATTGCCTTTCTCTGCTTGAAGATTCTTAGAGGATAGTATAGTGGTATCT  
GGTGTTAAAGTTCTCTATAGTTTTAGGCCAGGGAATATTGTGTTAGAGGCAAGTTCAAATACGAAACCA  
TGTTTGATATTCTCAATCATTTTCTGCTGAAATTTAGTGGCTCTAGTAATCATGTAGAGTTTATAATTTGCA  
ATGACAATAAAATGGGATTATCAGCTTCTATTATAAAAGCTAATTGCAGAGTAGTATTAGTGGTAATGTG  
CCTAACTGTATCTGAATATAATTTGAGTGGTTATGACAGTAATATCTTACATGAGGCATGAAAGTAACAA  
CAATAATATATTAATAGGCTCTCAATGATCTATCTATTTATATCCATTATGTTTTGGCTGGTGTACCTGAA  
TACGAATTTTTTGCTACAATTAGTTAATGTTTTACTTCAATCAACTTGGCAGGTCTTTATCACATAACGGTC  
TAACTGGTCCTGTACCTGAAGCCCTAGCAAACTGACTTATCTTCAAAGTGTTGACTTATCCTTTAACAAA  
TTAACGGGAGTGTTGCCAAAGCAGCTTGGAGATCTTGGCCATCTCTCCTTATTCAACATTTACACAACC  
AGCTACAGGGCGAACTACCTTCTAATGGTTTTTTAATACTATTTCTCCTTATTCCGTGTCAGCAAACCCAT  
CTCTATGTGGGGCTGCTGTCAATAGGTCTTGTCTACAGTCATGCCAAGCCAATTGTTCTGAATCCCAAC  
TCTACTGATTCTTCTCCAACACTGTCCCTCAAAGTATTCGCCATGAGAAGAAAATCCTAAGCATCTCTGC  
CCTCATTGCTATTGGTGCAGCTGCTGTTATTTTTGTTGGTGTGATTGCCATTACTGTGCTCAATATTCGTG  
TCCGGTCAGCGGCACCTCGCTCTGCTGCTGCAGCCCTTACATTTTCTGGTGGAGATGATTTTAGCCATTCT  
CCATCCACGGATGCGAATTCTGGTAAGCTTGTGATGTTTTCTGGTGATCCCGACTTCAGCACAGGGGCAC  
ATGCTCTGCTTAACAAAGATTGTGAGCTTGGGCGAGGTGGTTTTGGAGCAGTGTATCGCACTGTCCTTG  
GGGATGGGCATCCAGTGGCCATTAAGAAGCTTACCGTTTCCAGTCTTGTTAAGTCTCAGGAAGATTTTGA  
GAGGGAGGTTAGGAAATTGGGAAAAGTACGTCACCATAATCTGGTCACCCTGAAGGTTATTATTGGAC  
ACCATCTTTACAGTTACTTATATATGAATTTGTGGCTGGTGGAAATTTGTACAAGCATCTCCATGAAGGA  
TCTGGTGGGTGTTTCTCTCATGGAATGAGCGGTTTAAACATCATTCTCGGGACAGCAAAAAGCTTGGCTC



ACTTGCACCAAATGAATGTAATCCACTACAACCTAAAGTCCAGCAATGTCCTAATTGATAGCTCAGGTGA  
GCCTAAAGTTGCAGATTATGGCTTAGCAAGACTATTACCCATGCTTGATCGATATGTCTTGAGTAGCAA  
ATTCAGAGTGCACCTCGGTTACATGGCACCTGAATTTGCATGCAAACTGTGAAGATAACCGAGAAGTGT  
GATGTGTATGGATTTGGAGTTCTTGTCTGGAGGTAGTCACTGGAAAGAGGCCAGTTGAGTATATGGAA  
GACGACGTGGTAGTACTGTGTGACATGGTACGTGGAGCATTAGAAGAAGGCAGGGTAGAAGACTGTAT  
AGATGCAAGGTTGCAAGGAAAATTTCCAGCAGATGAGGTGATTCCTGTGATGAAGTTAGGATTAATCTG  
CACATCACAAGTCCCATCAAACCGGCCTGATATGGGAGAAGTGGTTAACATTTTGGAGCTGATTCGATG  
TCCTTCAGAAGGCCAGGATGAACCTGTATGATGTTCACTAGATAAACACAGATTGTAAGATAAATGTCTC  
ATCATGGCAAAGAAGAATGCGGTTCAATTTATTCAGAGAAGTTGGAATTTGTTGTTGTAGAATATTTTGT  
CTTAATTGCTATAAAAATCCCTCCTTTGAATTACATCATTGTTATTTGCTTCTCTATGCCACTCATGGATT  
CCTTTTACCTGGTTCCAATGTTGGACTCACATGCTTATTACTCTTTTCTTCTCAGGGTTTAAGTC  
ATCTGCCGCTCCTTAAAATTGTGCTCATGTTTCACTTAGACACA

>M6-PGSC0003DMG400016685 M6 LRR-RLK

GAACATTTCTTCTTTCTTTCCACCATTTCTGCTCTGCTCACTCTTTCCCCTCCACCATTGAAGAAACATGCG  
TTTTCTTCTCCTCTTCTTCTTTCCCTTATTCACCATTTCCATCTCCTCCACTTCACCACCGCAAACCCACCT  
ACGTGCCGGAATACCGGGCATTACTCTCCCTGAAAACCTGCCATTACCGATGACCCACAATCTGCTCTTCTT  
TCATGGAATATCTCAACAAGTCATTGTACATGGAGAGGTGTCACGTGCGACCGGTATCGTCACGTGACT  
TCTCTCGACATCTCTGGTTTTAATCTCACCGGTA CTCTCACGCCGGAAGTTGGTCATCTCCCTTTTTTTGTT  
AATCTTTCTGTAGCTGTTAACAGTTCTCTGGACCCATTCTATAGAGCTCTCGTTTATACCAAATCTGCGT  
TACCTTAACCTCTCTAACAACATTTTCAATTTGAGTTTCCCTTCCCAGCTTACCCATCTCCGGTACTTGAAA  
GTTCTCGATATTTATAATAACAATATGACCGGTGACCTTCCGGTTGGGGTTTACAATTTGACAAATCTTCG  
ACATCTTCATTTGGGTGGCAATTTTTTTAGTGGCAGTATTCCACCGGAGTATGGTAGATTCCCATTCCCTAG  
AATACCTTGCAGTTTCTGGAAATGCGCTCGTCGGTATGATACCTCCGGAGATCGGGAATATTACCACACT  
TCGTGAGCTTTACATTGGATACTACAACACGTTTTCCGGTGGGTTACCGGCGGAAATAGGGAACCTTGTC  
GGAGCTCATTCCGTTAGATGCTGCAAACTGTGGACTTTCCGGTGAGATTCCGCCGGAGATAGGGAAGCT  
TCAGAAATTAGATACACTGTTCTTGCAAGTGAATGGTCTTTCTGGGTATGTTACACCGGAATTGGGGAAT  
TTAAAAGCTTGAAATCTTTAGATCTATCAAACAATATGCTCTCCGGTGAAATACCGTTCACATTCACAGA  
GCTGAAGAATCTAACTCTGCTAAATCTTTCCGTAACAAGCTTTACGGGTCGATACCGGAGTTCATAGAA  
GATTTGCCGAAACTGGAAGTATTGCAGCTTTGGGAAAACAACCTTTACCGGAAGTATTCCACAGGGTTTA

GGCAGAAACAGTAAGTTAACAAACGTTGACATCAGTACCAACAAATTAACCGGCAATTTGCCCCAAAC  
ATGTGTTCCGGCAACAAGCTACAGACGTTGATCACTCTCGGAACTTCTTGTTGGCCAATTCAGAAT  
CTTTAGGTGAGTGTC AATCACTTAATAGGATTAGAATGGGAGAAAATTTCTAAATGGGTCTATTCCAAA  
AGGGCTATTAAGTTTGCCGAAGCTTTCACAAGTAGAACTTCAAGATAATCTTCTCACTGGTACATTCCA  
GTGACTGGTTCTGTTTCAGCTAGTCTTGGACAGATTGTCTTTCGAATAATCATTTTACGGGGCCTCTACC  
ATCGAGCATTGGTAATTTTATTGGTGTTCAAAGTTGCTTCTTGATGGGAACAAGTTTTCTGGTCAAATTC  
CAGCTGAATTAGGGAAATTGCAGCAGCTGTCGAAAATGGATTTTAGTGGTAACACTTTTTCAGGCCTGA  
TTCCACCGGAGATAAGCCGGTGAAGGCTTTAACTTATGTTGATCTTAGTAGGAATAAGTTATCTGGTGA  
AGTTCCTACTGAGATCACTGGTATGAGGATACTGAATTACTTGAATGTATCTCGGAATCAGTTAGTTGGG  
AGTATTCCTGCACCTATTGCTGCAATGCAGAGTTTAACTTCGGTTGATTTTTCGTATAACAACCTTATCTGG  
ATTAGTTCGGGTACTGGTCAGTTCAGTTACTTCAATTACACATCATTTATTGGTAATCCAGATCTTTGCG  
GACCCTATTTGGGTCCTTGCAAAGAAGGTATTGTTGATGGGGTTAGTCGACCTCATGAGAGAGGTGCAT  
TTTCGCCTTCTATGAAGCTTTTACTTGTTATCGGATTGCTTGTTTGCTCGATTGTGTTTGCTATTGCTGCAA  
TTATTAAGCTAGATCGTTAAAGAAGGCGAGTCAGGCTCGTGCCTGGAAGCTTACTGCTTTCCAACGCCT  
GGATTTTACTTGTGATGATGTATTGGAATGTTTGAAAGAGGATAACATTATTGGTAAAGGAGGTGCTGG  
AATAGTATAACAAGGGGGTAATGCCAAATGGTGAACCTGTTGCTGTAAAAGATTGCCGGTTATGAGCCG  
TGGTCTTCCCATGATCATGGGTTTAAATGCCGAGATACAGACACTTGGGAGTATTCGACATAGACATATT  
GTTAGATTATTGGGATTTTGCTCAAATCATGAAACAAATCTTTTGGTTTATGAGTACATGCCTAATGGAA  
GCCTTGGTGAAATGCTTCATGGAAAGAAAGGGGGTCACTTGCATTGGGATACCAGGTATAAGATAGCA  
CTGGAAGCTGCAAAGGGACTTTGTTATCTTCATCACGATTGCTCGCCTTTGATCCTCCATCGTGATGTAAA  
ATCAAACAACATTCTTCTGGATTCCAGCTTCGAAGCTCACGTTGCTGATTTTGGGCTTGCCAAGTTTTTGC  
AAGACTCGGGAACATCAGAATGCATGTCTGCTATTGCTGGTCTTATGGCTACATTGCACCAGGTATGCT  
CTCAAATTTTACTTCTTTGTAGTCTTGGTTTTGATGTGTGTTGTTCTTTCAAAGAAGTTTATTATTGTT  
GTAAGTTGTCAACTAAAATTGTGATTTATCAGTCTCTTCAAGTGTTTATATGGTACTTCTTGGTGCTAGTA  
ATGATCAGTGTCTTGTATAACACGGAAGAACAACATGACACGAATATGTCCTTGATTGGTAATCTACA  
AGAACAACAACAACAACAAATGATAACTACGTGTTGAAAATGAATGCCTCTGTTTCATAGATGAGCCTTGTA  
ACTCTTTCTTTAATATGATAAACAGCCGTCAACTGGTGCTTTGATGAATTCAAATTTGGTTTCTTGCTGTTT  
GGCGATAAGTTTTTTCATTTTGACTTACAAAGTTTGCTTATTGCTTGAATACAATCTCTATTTTTTTTGTA  
TGCGCCTAATTTGTTTTTCATATAAACTGTGCAGAATATGCATACACACTCAAGGTAGATGAGAAGAGTG

ATGTATACAGCTTTGGTGTGGTTCTGTTAGAATTGGTGAGTGGGAAAAAGCCGGTTGGAGAATTTGGTG  
ATGGCGTTGACATAGTCCAATGGGTAAGGAGAATGACAGATGGGAAAAAGGAAGGAGTTCTCAAATC  
CTTGATCCAAGACTCTCAACAGTTCCCCTTCATGAGGTGATGCATGTGTTCTATGTCGCAATGCTGTGTGT  
CGAAGAGCAAGCTGTTGAACGCCCAAATGCGCGAGGTTGTGCAAATGCTAACTGAGCTTCCCAAGCC  
ATCTGGTCCAAAAACAGAAGATTCAACAATCACTGAGTCGCCCCATCATCAGGTCCTGCATTAGAGTCT  
CCCCTTCGACTCCTGGAGACACGAAAGACCAGTACCATCATCAGCCATCACCTCAATCTCCTCCACCTG  
ACCTACTCAGCATATGACCTACAATGTTCCCTTCTAATAGAGGGTGTAATTCTCTTCTTTAGTTTTATTAT  
CAGTTTTATTGGGGGTTGGTTTATTGTTTAGGCAATAAGCTTTTACTAGGAAGTGAGTTTCATTGTACAG  
TAACATTGGCTAAGGTATCTGAGTAACATTATCCTTCAAATTTTCCATTTGCTGTTTAGCTTTTTGATATT  
GAAAGAATC

>M6-PGSC0003DMG400016709 M6 LRR-RLK

CGACACCTGTAGATACACACTGCCAGTGGAGTCTTCTTATATAAATTTCTCTCTCTCCATTA AAAAGAA  
AGCTTGAATCGGAGAGTCTCTTAACGATGGTGACACCTACCACTAGTGACGACGTTACCTTCTTGTCAT  
TTCCCTGTCTTTCTTCGCCATGCTTCTTCTTCTCCTCTTACCTCTGTCTCTGCACAACCCCTTTAATTCTTG  
ACTAACAAGAACAAAACAGAAAATGAATAGAAATAGCTGTAAGCAAGACACCCTTTACCCCTTTTGCC  
AGTAGTGGTGATTGTGGCAGTGGGGTTTTACTCATCTTTTGTGCGGAAGGAAACACTGATCCGAATGA  
CTGTGAGTTTCTTCACTGGTTGAAAATCTGGATCCGTTTTTAGAGCTTCATTAGTGATTTTGTGCTTAGT  
GGGTTTAGGTGTTTTCTGTTTTCTTGAATGTGTTGAAGGAGGAGGCTTTTTTTGTTTTTTGTTTTTTGTTAC  
TAGGTGAATCTTGTGATATAAGAACGCCTTCTTGTGATTATTTGAATGCCTGATTTGGTTAATGGGGTA  
ATGTATTTGTTGCCCTTCTTCTGGGGTTCTTTTTCTTCCCTTTTTGTTGGGTTTCCAGTCAATGCAAGTC  
AAAGATTGATACGTTAGTACAAAAAATATGGATTCTTGATCTTTGTAATAAAAATTATGACTGGGATT  
TTCTGTGATTATAATGCGAGGACGCATGCAATTGAATTCGAATGCTAAACTGTTTGATTTGATAAGATA  
ATATGTTTTCTTGCCCTTCTTGGTGTCTTCTTGTATTTAATTAGTTTCAGAGCCAACACTAGCTTAAGAT  
TGAGGCTGTACTTTATTCTCAAAAAAAAAAAGATTGAGGCTGTACTTGTGAATCTTGATAAGATATA  
TATTGAATCATGGTTTTCTTGTGGAGAGATGTTCTGGCTTTGGCTTTGTCGTTGCCTGACTCTTGTAATC  
TGCAGTGCAAGCTCTTCAGGTCTTGTATGCTTCACTGAATAGTCCTTCACAGCTCTCTAATTGGAAGTCAA  
ATGGTGGCGATCCCTGTGGTGAGTCTTGAAAGGAATCACTTGTGAGGCTCTTCTGTTGTTTCAATGTA  
AGTTTGCATAGCATTAACTTTGTGCGCATCATTATACATTTTAGTTATGATTTGATTGATATAATGGTTGG  
TTCTTGCTGAAACAGTCAAATCCTGATTTGGGACTCAATGGAACGTTGGGATACATGCTAAATGGTCTT

ACCTCATTAAAGAACTTGTAAGAGCTTGTCTTTTAGTGGTAAAGGGTAATTTAGAGGACCTACTATCAC  
AATAAAATTGAACTTCTGCTATCTGTTGTCTTCAGGGATATGAGCGGCAACAACATTCATGATTCTATTCC  
ATATCAGCTTCCACCCAATCTCACTAGCCTGTAATGTTGACTCCTTGTTATGTGTTTGGTTTGTGGAAAA  
CTTCCCGGTTTATGATTGTCTCACTGGAECTATAATCATTGTCAATGCAGGAATCTTGCAAACAACAATAT  
AAGTGGAACATTCCGTATTCTTTGCTGGCATGGTTACACTTAGCTATCTGTGAGTGGCCAGATTCACT  
AGGCACTTCCAAAACAAAATAGCATTGCTTGGTCTTCTTTATTCTATTGAATCATTCTGGCAACTA  
TTTAAAATAGCTTACCCTACGATTCATTTTTAGGAATCTTAGCCATAATCACTCTCTCAAACAATTGGA  
GAATTGTTACCAACCACTCCGATCTGGGAGCCTGTAAGTGTCTACTTAATCTTTACTTGATTGATCCT  
TTCTGGTAATTTTTTTTTCTTTTCTTTTTCTAATAGAGTTCATTCAATTGCCACACTTGAAGGGCTTCTT  
TTCCTACACCAGTCCAATTAGTTACTAGCTTGAATTCATAACACCATGGTGTCTCCGACCCACAGTAGCTG  
GCCCTTCATTTGTTTTGACGTGCCTGCAATGTACAGACATGACTGCTTCAAATATGTTCTCAAACAAT  
ATAGGATCTAATCATAACAAAATGCCTTTTCAGAATCATTATCTGCTTAATTTAATGAACAATGAAGTCT  
GGAGGCTTGTAAGTCTACATTTTATTTCTTCGTAGCTTTTTATGTGGAAATTCGTTTTGATTGTATT  
AGGATAGGTGCCCTGCTCCTCTTTGAAGCTTTGTAACCTACATTAGAGCTCAGTACCCCTGCTACAAAG  
AGCTTCTGGCTATATTGATTCCTCATGTCTTTTGAACATCTGTTTCACTAGTTAATAGTTATAACTTTTCA  
CTGATTTGCTGCTACTTCAGGGATCTGTCCTCGAATAATTTTTCTGGAGATCTCCCCTTTCATTAGTTCCG  
TTGACCAATCTTCCACACTGTAAGCATAATAACTTTCTACTAATAGGATTTGCTGTTCCGCTACTTTACTT  
ACCCATGAAATTGGCATCCCCTGTAGTCATCTGGAAAACAATCAGCTAAGTGGCCCTCTCAATATCCTGG  
TTGGTCTACCTTTGACTAATTTGTAAGTTTCAATACCTCTTCTTGAATTAATGGGCTTAGCTAGTTTGATT  
AATGCCAGTAGAGTGTTTTATGGGCAAAAACAAAACCTTTTTGCAGAAATGTTGCAAAGAATCATTTCAT  
GGATGGATCCCGAATGAGCTCCAATCTATCCCTAACTTCATGTAAGTAATGTCACATCCTATATATTCTTA  
CATGGTTTAGAATGTTACGGACTTACAGTTTCAAGGGGTGTGACATAACATCTAATATGACAGATACGAT  
GGGAATTCCTTTGCAAATGGTCCAGCTCCTCCCCACCACCATACACTGCACCTCCTCTGGAAGATCTCG  
CAACAATCGTAGCCATTCTCCTCTAGTTCACGTGCAAGACCAGGTTCTGATGGCCAGCCATCTCCAGAA  
AATGGTGATAAAAAAAGGGATTGACAACCTGGAGCTATCATTGGCATAGCTCTTGATCTTCTCTTGCA  
ATTCTTTTTGCTCTGGTAGCGCTTGTATTTGCTTCCGGAGGGGCAAGGGCAAGGAAATTGCTACAAGAC  
CCTCTACAGGAAGTCTCCAGTTGGCACCGATAAAGGTGTGTTCCCTTAACTTTTTCTTCTGACTCA  
ATATTGTCATTGGTGCTAATACCCTCAGATGACTAACAGTTGTGGTGTGATGTGGCATCTAATTTGGAA  
ATTGGTACGAACTGGTTGATTTCTCATGTACTCTGTTAATCTTAGTGAATATGGAGGTACAAGAGCAA

AGGGCGAAGCCTGTGGCAGCTGTTGCTGACTTGAAGCCCCACCTACCGAAAAGGTGACTGTTGAAATG  
ATACAAGGGAAGAATGGATCTGTCAGGAGAGGGAAGTCTCCAATAACTGCATCTGCTTATACTGTTGCT  
GCATTGCAAACAGCAACAAACAGCTTCAGTCAAGAAAATCTCATTGGTGAAGGATCTCTTGGGCGTGTT  
TATAGGGCAGAGTTTCCTAATGGGAAGGTAATTCAGATGTTTAAACGTTGTAACCTTCTTACCTTTCCTACT  
CATGATGTGCATTCAAACTATTTGAAGCTGAACAATATTGAATAAATTTAATCTGTCTCTCATGGACATC  
TTTCATTTTTGATGCTTCAGAGAATCACATACTTGTGAGTTGTATAACGTTTCATCAGATACATAAGGACAT  
CAAAAGGGGTATATCAAGATGTTGGCCACTCCACCTATCACCTATTGCTAAGACGCTATAGCATAGTAT  
CAAGCCGTTACACGTGTGGGACAGTGTTCATTACCTAATGTCCAACCTCGGGTAAATGAGGCCATAAA  
GATATGGTAACTCAACCCCAATAGCTAGCTCATGAGGGGAGGATTGCCCAAGTCCATATAAGGAGACCA  
CCAGTCCATTCCCTAACCAATGTGGGACTTTTACCCACTCTAACACCCCACTTCACGCCCAGGCCCGCTGG  
AGCATGGACCGGAGCCCAAATGGAGATGAACCTTGATACCATGTAAAGATATGGCACCTGGGCTTAACT  
CAACCCCAAAGCTTCGCTCATGAGGGGAGGATTGTCCAAGTCCATATAAGGAGACCCAGTCCATTCC  
CCAACCAATGTGAGGCTTTTACCCACTCTAACAAAGGCATCCAAAGTAGTAAATAAGGTTCTTGTCTTAC  
TATATCCATTGCCTTAAACGTTATGGTTGAACCCTTAGATCCTTTCACAATATTTGTCAAACCGGGCAAACA  
CTAAAGGCTACATACTTGATCTATGTGTTACTAAACCTGAGTAGAAGTTAGTAGACTTCTTGATACTCTGC  
TCGCATGGGAGTTAAAGTATTTCTCTTGCTAGTACATAATCTGTTTTGAGTGATTCTCTTAACTGAGATT  
AAGTCCTTGATACTCTTTGATTCAACTTGCTCTTTTAGATCTTTCACAAAGTTGATTGCCACAGTAGGCTC  
ACATTCTGATGAACACATGTCAATTGTTCACTCCTCTGGTTGGTCTGGTCACATCTTTGCTTTTATCTGTCT  
TGTGATGTTTGATGGGTGTAATTATATGGTCACTTTGATGGTCATCTCACTTCTCTTCTCAGCCTGAATTA  
ACTATGATACTATAATCTTGTCTTTGGTTACATGATGCAGTCCTAAGCAAAAATATTCTTAGCAGTTTCA  
AAGTTTGACATTATATATCTTCTACTTTGTGGTTTATTATTGGATGTGCTACTGGTTATTTCTTTTTGAATG  
AACCAATTGTGTTGACTATTTCTCTGCTCCAACTTGATGCCAACTGTGTTCCAATGAATGATTTAAGAAT  
TTCATGTGTCAACAACATTTTTGATGAGGAACTTTTAGTTTTTCATTCATGTAGTTTCTACGGAAGGTGC  
CAACTGAAAATCTCAATTGATCTTTTGAAGTGTCTTACCAGATAATGGTCATCAAAAAGATCGACAGTG  
CAGCACTGTCGCTGCAGGAGGAAGATAACTTTCTTGAAGCTGTCTCAAATATGTCAAGGCTGAGACACC  
CAAACATTGTTCAATTGATAGGATATTGTGCTGAGCATGGACAGCGTCTTCTGGTTTATGACCATGTTGC  
AAATGGTAGCTTGATGATATGCTGCACTTTGCTGATGAGAGGAGCGAATTGCTTACTTGGAACGCCCG  
GGTTAGAGTAGCGCTTGGCACTGCTCGAGCTTTAGAGTATGTTATAGCTGTATAGTATTTTACCTGTCTT  
GCCCGTTTCTTGTGGGTTAGCTTAAACTTGACCGTCTTCTTTTCAGGTACTTGCATGAAGTCTGTCTAC

CTTCTGTTGTACATAGAACTTCAAATCCGCAAATATTTTACTAGATGAAGAGCTCAATCCCCATTTATCA  
GATTGTGGGTTAGCAGCTTTGACTCCAAACACAGAACGCCAGGTGAGTGAGTAAAGAAGATTTAATCTA  
CGTCGTCGTTTTAACAGAGGGTGTGATAATATTGGGTGGTACGTGATGCATATCATGTTTATGAGATGA  
TGCAATCAACTTACCTAGTACTGTAGTAGGAGCAATATTAATGAGCAACTATTTCTAGGTAGATCTTTAC  
AGACTCGGTCATGAAATTGGAGATTCTGATTGTGGCAGCTTAGTTTTGTTTTCTAATTCTTCTGGAGCAAT  
CTTGTTAGATGCTTAAACACTTGGCTTACCATAGTGCACAACTTTAAGGAAGACCCCTTCCCCCTGCCTG  
AAATTCGATTTAGTTCTGTGAATTATTTTTGTGAAAAGAGAACCTTCTTGTACTGAAGTTCGGGTGAAGG  
AAGCTAATGTGGGAAGGCTAATTGACGCTGTTAAGGGCATTGCCTAAAATTGTAATTACTTCTGAATGTT  
GACAGGTGTCATCCACACAAATGATTGGTTCATTCGGTTATAGCGCTCCTGAATTTGCTTTATCTGGAAT  
ATACACGGTAAAAAGTGATGTATATAGTTTTGGTGTGGTGATGTTGGAATTGTTGACAGGAAGGAAGCC  
ACTTGATAGGTAACTAGATCTTTTTACATTGCTAGTCAACTTTTACACTATTGAATTCTTTAATGACTTG  
ATTCTTGTTAACAATCATATAGTTCAAGGGTGAGATCGGAACAGTCCCTTGTGAGATGGGCTACGCCTCA  
ACTCCATGATATAGATGCCTTGTCAAAAATGGTTGATCCTTCACTAAATGGCATGTATCCTGCAAAGTCTT  
TGTCCTGTTTTGCTGATATTATTGCACTCTGTGTTCAAGGTGAGCTTTACTTGCATGTTCTTTCAATTTGGAGC  
ATAACAGTTGTTAACATGTGAAGCTTAAAAGATGAAACCACTTCTAAAATATCTTTGATGGAAGCGAAA  
GTCAATGATAATAGGGAATTTACACACTTAAGGACCAAACCTCGACATTCTAACCCGTCAAATAAATGATA  
CTCTACCAGTTTTTGCATTCTATATAAGTCCAAATTCAGGGGCGTGGATAGATTGGGACCACCTGCACTC  
TGAGTTTGCTCATGGCTCAGTGCTGAAGTGAATTGATGTGCTTCAGCAAATAGATGACCTTTCTTACACA  
TACTCGGTGAGTCTTGAATGGCGAGAGCACCCATCTTGTTTTAAGTTAGTTTGGGAACTTCCAAGGCG  
TAAGTCCTTGCACACCATGGTCCATAGTGGCTTTGGGGGCTTAGTCTTTAAATGAGAAGTTCTTAATTA  
GCTTTTCTTGATCTAAGGTGACTTCAAGACTCACTCAACTCACGAAGAAAAGTCAGATGGACTCAACAAA  
ATTATAATGAATACTTGCTCATTGACATATCTGAAGTGAATTACTTTAATTGCAATAATTTGAATGCGAGT  
GTTTTCTCCTTGGTAATAACATTTAACATGTATTTCTGTACAGCCTGAACCAGAGTTTCGACCCCAATG  
TCTGAAGTTGTGCAAGCACTGGTTCGGTTAATGCAAAGGGCGAGTGTGGTCAAAGGCGATCCAGTGA  
TGAATCAGCTTTCACATACAAGACTCCGGATCATGAGACGGTTGACATGCCATAGATAAACATACACGA  
CGAAGCAGCCTTTGCAATTTTGTAAAGTAACTTCTGTGAAGGTCAAGAGCAACTATGGCAGATAAACTC  
GGAGGTGTCAATACCAGGGACATTAAAATGTAATTATTTTTCACATCTTCTCGTTAAAAAAAAGAA  
GCTTTTTTGCATCCCAATTTGAGGTACATAATCACTGACAATGTCCTCCAGAGTATATTTACAAACCATC  
TTGGGATACTGGATATAATTTATTGTCAATAACAACATTGCTACACATTATCCTTCTGTGTTGTTTATATTA

CAGTTTTTCCAATAACTTTTGGCTAGCCTAAGAGCTAACTGTAGTGTGCATCGGTTGATTTGGTT

>M6-PGSC0003DMG400016872 M6 LRR-RLK

ATGTCTGGAGTATATGACTCAAGAACTGGTCTAATTCTGATTTGGATAGTTATCTTGTTGGCTTCCGTGA  
CGATGGTTTGTCTGCAGAAGGATTGAATGCTGAAGGAATGTACCTACTTGAGTTGAAGAAGAACTTAA  
AGGATGAGTTTAAACAATCTTGAAAATTGGAATCCTAGTGATGAGACGGCGTGTAGATGGAAAGGCGTA  
AATTGCACTTCTGATTATAATCCGGTTGTGCAATCTCTTGATTTGAGTTTTATGAATCTGTCAGGCACTTT  
GAGTTCTAGCATTGGTGGTCTCGTAAGTTAACCGTTCTTGACTTGTCTTTCAATGGATTCACAGGGAAT  
ATTCCGAAAGAAATAGGGAAGCTCAAAAATGCAGAGTCTTCAGCTCCATGATAATGAGTTTTATGGG  
CAGATTCCTGATGAATTGTATAACCTTTCTCATTGAAAGACTTGAATTTGTTCAATAACATGATATCTGG  
TCCTATATCAGAGGAGTTTGGGAGACTCTCTTTAATTTCTTTTGTGTCATACCAATAATCTCACTG  
GTTCACTCCCTCGATCACTCGGGAAGCTAAAAAATTGGAAACATTTCGTGTGGGGCAGAATCCGCTTTC  
TGGAACCTTACCTGCTGAGATTGGTGATTGCAAGAGTTTACAAGTTCTTGGTCTAGCACAAAACAATATA  
GGAGGAAATATACCCAAAGAGGTCGGTATGCTTAGAAGATTGAAACAACCTGTACTTTGGGACAATCAA  
CTCTCGGGCTATATCCCGAAGGAACTTGGAAACTGTACAAAACCTGAACTGCTTGCTTTATACCAGAACA  
ACCTGGTTGGAGAAATTCCTGCTGCAATAGGTAAGCTCAAATCTCTCAAGAGGTTATACCTATACCGGAA  
TGGATTAACGGTACAATCCAAGGGTCATTGGGAATCTTTCGTCAGCGATAGAGATTGACTTCTCAGA  
GAATTATCTAATAGGAGACATACCAATTGAGTTCAGTCAAATAAAGGGACTGATGTTGTTGTATCTGTTT  
CATAACCAGCTCAATGGTGTGATACCTCGGGAACCTTCTAGTTTAAGAAAGTTGGAACGTCTTGATCTGT  
CGATTACTACTTATATGGCTCTATTCCATTTTCATTTAGTATCTCACTGAATTGGTTCAGTTACAGCTCT  
TTCAGAATCTTTAAGTGGAACTATTCTCAAGGTCTCGGTAACCTATAGCCGACTTTGGGTGGTTGATTTT  
TCTGACAACTACCTCACAGGAGGAATTCCTCCTAATATTTGTAGGAATTCAAATTTGATTTGGCTAAATCT  
TGGTTCAAACAACCTGCATGGAGTCATTCCATCTGGTGTATTAAAGTGTGACTCATTGGTACAACCTTCGTC  
TTGACGGTAACTGGCTACAAGGGAGTTTTCTTCTGACTTGTGCAAACCTGAGTAATCTATCTGCTCTTGA  
ATTAGGACAGAACACGTTTCGGTGGTCTAATTCCTCCTGAGATTGGAACTGTCAAAGTTGCAAAGACT  
TGATCTTTCAGGCAATTATTTACACATGAATTGCCTCAAGAGATAGGGAATCTTGAACAACCTGTGACG  
TTAATGTCTCGTCTAATTTGCTGACAGGTCAAGTACCACAAGAAATCTGAAATGCAAGGCGTTGCAAC  
GACTTGATCTCAGTAGGAACAGCTTTAGTGGTGTCTATACCTGATGAAATTGGAAAACCTAGCACAGCTTG  
AACGTCTTTTGGTTTCGGATAATAAGTTCTCTGGAAAGATACCAGTAGCATTGGGGAGGCTTTCTCGTTT  
GAACGAGCTGCAGATGGGTGGAAATTCATTTTCAGGTGAAATACCATCAGAATTGGGTGATCTTACTGG

TCTACAGATCGCGATGGATCTTAGTGACAACAATCTCTCTGGTTCAATACCACCTAAGCTTGGAAATCTT  
ATTCTACTAGAGTGTCTCAATCTCAACAATAATCATCTGAGTGGTGAAATACCAATCACATTCGGAAACT  
TGACGAGTCTAATGAGCTGTAACTTTTCATACAATAACCTCACTGGACCATTGCCGGATATAACCACTCTT  
CAGAATATGGATGTCAGCAGCTTTATTGGAAACAACGGGCTTTGTGGTGGTCGTTTAGGTGGATGTAAC  
AAATCTCCTCCGTTCAATTCTGATCCTCCAACCAAAAATGCAGGTGCTCCAAGAGGGAAGATTGTTATTG  
TTGTTGTGGCTGTTGGTAGTGGTGTTTTTCTGTTTTGATTATGGTAATTTTGTATGTGATGAAGCGGAAA  
CCAGTTGATCAGATGGTTGCATCAGTAAAAGATAAGAATGCGTCATTTCCAGCTTCGGACATATATTTCC  
CTCCCGAAGAGGAGTTCACCTTTCCAAGACTTAGTTGAGGCTACAAACAGTTTTTCATGACAGTTATGTTGT  
TGGAAGAGGAGCTGTTGGGACAGTATACAAAGCAGTCATGCAATCTGGACGAAAAATCGCTGTTAAGA  
AGTTGGCTTCTAACAGAGAGGGTAATAACATAGAAAAGAGTTTCCGAGCAGAAATTTCAACTCTCGGAA  
AGATTAGGCATCGTAACATTGTAAACTGTATGGCTTTTGCTATCATCAAGGTTCTAATCTGCTTCTTTAC  
GAGTACATGGACAAAGGTAGCTTGGGTGAATTGCTTACGGTGCATCTTGTAGCTTGGATTGGCCTCAA  
CGCTTCATGATAGCTCTTGGGGCAGCTGAAGGACTTTCTTACTTACATCATGATTGCAAACACAGATCA  
TCCACCGCGATATAAAGTCCAATAATATTTTGCTCGATGAGAAGTTGGAAGCTCATGTTGGTGATTTTGG  
TCTTGCTAAAGTTATCGACATGCCTCAAACCTAAGTCGATGTCTGCAATTGCTGGATCATATGGCTACATA  
GCCCCTGGTATGTACATTTTATTATTTTTTATTAGAACTTGTGTAGTATTGCCTGTCTACTGTCTGCGAAT  
AATGTCAAGAAACATATGGCCGGCTAGATTGCTCTAACAAGACTAATATATTTTAGATAAGCAATGACTA  
TAACTCTTCATCGAAAAATCAGTGAACCTTACACGAAAAATCTCAAGTATAGTTCCTCCCATGAGCTGACT  
AGTGTATGTTAGTTTTTCTCACACTTTGACTAGCAAATAGTACTAGTGTTCCTTGGTGAACGTTTTTGT  
TCTTTTATTTATACTCAACAACAACAACATACCCAGTGAAACCCACAAAGTGCCATCTGGAGAGAGTAG  
AGTGAACACAGACCTTACCCTTACCTCGTAGAGGTAGAGAGACTGTTTTCAAAGACCCTCGACTCAAGT  
GAAGCGAAGAGAACAATACAACCTAGTAGAAAAGAGTGCAGAGCATAACATGCAAGGAATAGTAACATCA  
ACGACATAATACGATCACCTAACATAGTAAACAACAGATGATATTTGAAGTAAGGGTAATACTATTTGA  
TGAACATTTGAAGAGAGTAAGCAGAAGCGTCTACTTTGTTAACGGTTCTGCTTTTCCCATTGCAGAAT  
ATGCTTACACCATGAAGGTAACAGAAAAATGTGATATCTATAGTTACGGAGTAGTCTTTTGGAGTTGCT  
AACAGGAAGAACACCGGTGCAGCCACTCGATCAAGGAGGTGATCTTGTCACTTGTGTAAGGCATTATAT  
CCGGGACAATTCGTTGACACCAGGGTACTCGATATCCGATTGGATTTGACAGATAAACTACTGTTAG  
TCACATGCTTACAGTCTTGAAAATTGGTCTAGTATGCACTTGTTTGTCCCCGGCTGATCGCCCTTCAATGC  
GCGAAGTTGTGTCATGTTGATGGAGTCTGATGAGCAAGAAGGTAACCTTCATCTTGTCTCAAAGTTGA



>M6-PGSC0003DMG400017291 M6 LRR-RLK

TAAATGATCATCTCTAAGCTTCAAAAAATTATTAATATTATGGACTTGCTAAACTTCTAGTCTAATTTTGT  
GACTATTTTGCTTCACAGAGATGTTTCAAATAACAATTTTACATGGGAAACCTCACCTTTTGAATGTCCCC  
GTGGAAATCAGTAAGTTGTTTGATAAAATTGTTTTTCTTCATTTGACTTATTTGTTTGTGATAATTTTCTAA  
CATCAAGACGATTTATTCAGAACTTGGTGGAGAGCTATTCTGCATTGGGACAAGAATCGTAAGACTAA  
TATGCCTATAATAAATTTATCTGTTGCACTGATCTTACAGAGGAAATTATTGTTCCCTGAGTTCACCTATA  
ACTAAGAGTGAACTCTTACCTACCATAGAAAACTTTTGTAGCACTCTTAACAACTTTTTCTTTTGTCTG  
TGTTGCAGAAACAAAATTCATCCTGCCTGAAGCAGAATTTCCCTTGTCTGAGCCAATAGATCGGCGTA  
AGTAAACTTTTATGTGTCCATTTCTGTAATTGATAGCACAAACAAATCTGTCTCCTGTCACATAAATAGGT  
GTACTIONTGTAGTGTGAGGTCAGCTAGTGGCAGAAAATATAAACAAACAACATAGCCAGAGTAATCCCA  
CAAGTGGGGTATGGGGAGGGCGGTGTGTACGTAGTCTCACCCCTGTTAGAGTGGGTTAGAGTCCTATA  
TTGGTTGGGGAATGGATTGGTAGTCTGCTTATATTGACTTGGACAATCCTCCCCTCATGAGCTAGCTTTT  
GGGTTGAGTTAGGCCAGGTGTCATATCTGACTCCTAGTAACAACAATAATAACAATTTAAGAGTTTG  
GGACTGACTGCTGTCTTCTGATCTGTCCATTGTGATTTTCTGCTGAATTCTTGTTAAGAGTGCCTTGTCT  
ACTGTTTTGCAGAACAATATTCTATGCACATTAATTGTGGAGGCAAAGAGGTAACCATCAAGAATGGTA  
CAAATACGCAAATATGAAGCTGATTTAGAACCCAGAGGTGCTTCTATGTATTATTCAAGACATAACTG  
GGCTTTTAGCAGCACAGGAAATTTTATGGACAACGACGTTGAGTCTGATGTCTATATCAATACCAATGTC  
TCTGCCCTGCAAAATGTCAAGTCCCTGAACTGGAATAACTACTACTGCACGTATATCTCCCCTCTCCCT  
CACATATTATGGACAATGTCTAATGAATGGAACTACACTGTCAAGCTCCATTTTGCAGGATAATATTC  
ACAAATGATACTTCATTCAACAGCCTTGGAGAGCGTATATTTGATGTCTACTTGCAGGTAAATTCATGCT  
CTGGGAGAAAGTGAATTTTATGTTTGTGCCACAGTGCATTTATTCAATCTTCTTGAGACAGGAAAATT  
TGGTGTGAAGGATTTTAAACATTGCAAAGAGGCTGGTGGGCCTGGTAAGCCAATTGTGAAGACGTTCA  
CTGTGAATGTGACAAGCCACACGCTGAAGATACATTTTTACTGGGCAGGAAGAGGGACTACAGGAATTC  
CATTTAGAGGGGTTTATGGTCCTCTAATTTTACAGCTATATCAGTTGTTAATAGTATGTTCCTTTACTCTCTC  
AAGTTTATATCTGTCTTGTACAGTTGTATGCTCAATCTTCTTTAATGAATGCCATAGGGAACATAGGA  
CATTATTCTGACGTACTAGTCCCTTAAAAAACCTTTCCGAGACCAAATGACTCTACATACCAAGGCTTAAT  
AAGTTTTGTTAACCATCTTGATGTTATAAATTCTATTCTACTGATTCATTATGCATCTAAACTGCTGTCA  
ACATATTCTTTCAGGAAGTTAATGTGTATCAGAACCTAAGAACTTCATATACCCTTAAATTTTATGATGC  
ATTTCAAATACAGTGGGGAGACCACTTATAGTGTCCCAGTTCAGTTCCTTAATCTTGTCTGGTAGTGGGA

AGCATCAAGACTTATACTAAGACTTCAAAGAAAATGTTTCAAATTGCATATGCAAGTCAATTAAGCTT  
GCTAAAATCATCACAAGTTTTGAGATGTCATATTATTTTTCTTTCCGTGCAGATTTTCCCCCTCTCTGC  
CTGCTCGTCTGCCTGCTCATCTGCCTGCAGATCAAAGAGTAAAATTAATGTTGGCATAATTGCCGGCAT  
AATCGCTGGATCAGTATTTCTTGCTTCTGATTATTGGTATCTTGTACAAGGGAGGCTATCTAGGCAA  
AATGTATCTACTGATAGAGGTAATAACTACAAGTATTTACTTTTGAAAGTTTAGTATCCATTTATTTGAC  
CTATGAGTCAGCAATAATGTTCTCAAGTTAAATGCTAAACTACATAATTACTTTCTAGCCAGTATTTAGT  
TCATACCAAATTATATCAGCTCAAATACTTGAAGTTATGCTTTACGTTCTATTGACTTGCTTGTTTCATCTCA  
TCAATCATTATTCATTTTAGGCTTTCAAATCATTAAATGGTCTGAAGCACTTGACCAAAGTTTATATGA  
ACCTTGAAGAAACATAGTGTATAGCCATTAGCTTCCACTGAGATACTTTTCTCTTGAACAGAACTTAAA  
GGACTGGATCTACAAGCTGGACTATTTACTCTCAGACAGATCAAAGCCGCGACAAAGAATTTTGACCCA  
GCAAACAAGATAGGGGAAGGTGGTTTTGGTTCAGTTTATAAGGTAATCATCTTTTCTTGTCTATTTTAA  
ATCAAACACATAACTATAAATGTCATTATATTAGCATGAGAAGGATCATAATGGCATAGTGCAGATGTCT  
CTTAAGAGAGAAAATGAAAGACTAAAATCTTAAATTTTCAAACCTTCAAAGGAAGTGTGAATTTTACC  
TGTAATGAGGAGACTGCACAGGAAATGCTCTATTACCATATGTGTTTATATATATCTGAGAAGTGGAGT  
AATTTACTGATCTTTTTCCATTCAACTAAGATGGAGATTTCTTATCTTCGCGACATAGGATTCAATCTATTA  
TAATCTTACTTGCTGATCATAAGCTGCAGAAGTCTGAATAGAGTTTTGAATCATGACTTTTGTACACAGG  
GTCTATTATCTGATGGAACAGTAATTGCGGTGAAGCAACTTTCTGCAAAGTCAAACAAGGAACTCGAG  
AATTTTTGAATGAAATAGGGATGATCTCTGCTGTACAACATCCAAATCTTGTAAGCTTTATGGATGCTG  
CATTCAAGGAAACCAATTATTGCTAGTCTATGAGTACATGGAAAATAACTGTGTATCTCGTGTCTTTTTG  
GTAAATACTTCCCTAACTCCGATCAATCAAATATGTCTGCTTCTTATGCACTTGACATTGTTTATCTAACG  
GAGCTGGTATATACAACTTTTTCTTTTTGTTTGTCTTTCTTTTCAGGCAAAGGTCCAATTGGCAAATGA  
AATTAGACTGGTCTACTCGGAAAAAATTTGCCTAGGAATTGCAAGAGGTTTAGCATATCTCCATGAGG  
AGTCGAGCCTGAAGATAGTCCACAGAGACATCAAGACCAGTAATATTTTGCTTGACAAGGACTTCAATC  
CAAAAATATCTGATTTTGGCTTGGCAAACACTACATGAGGATGATACTACCCACATTAGTACCAGGATTGC  
AGGAACTGTGTAAGTATTATGAAACTAGTTCCTCTTGTTCGATCCATTAGCAACAACATTTGGTTGATA  
TGTTTCATAGAAAATGGCTCAACATTTAATCCACTCATTTATCTTGAACACTCGTGGTACTGTTCTCATCC  
GAAAGCAACTTTGCAGGTATAATCTGCCAAAAGTAAAGCAAGCCAAGAAGTTATTACCTGCCTAAAGAA  
ACTTAACTTTTATAGATATTAACAGCCTTTGTAGAACAGTAACATAGAATTTTATTCGTCATGGTAAAA  
CCACCTCTTTTCTTACCATAGTTGTAACCTCATTGGTTTGCTAATTATTAGCACCTCAACGTCTCACTTCG

GTCATAATTTTACATTTTGCAATTCAACATAGCTATAGGTGAACTTTCAAGAAAATATTTTCTTGCTACTTC  
AAATTTTAAGAAATGTGAAGATTGTTTGTATCAGAATTCTCTGTAATTAGCAAGTAACTGTATTAATGAT  
GAGGAAACCAAGATCTAATAAGTTGGAACATCTTTGGTATTTGGTGGTACAGGGGTACATGGCTCCAG  
AATATGCAATGCGAGGCTACTTAACTAGCAAAGCAGATATTTACAGCTATGGAGTTGTTGCATTGGAGA  
TTATTAGTGGGAAAAGCAATACAAATTATAGGCCAACGGAAGATTGTGTTTATCTTCTTGACTGGGTAAT  
TTAATATCTCTCTACAACAATAAACCAATGTAGTCCCAAAGCGGGGAATTTCACTACTTCTCTCTATT  
CGACCAATATCTGGGCTTCCATCATCCTTAAATCACTTCCCCTTCTAGTTTCATCTCAACCAGAGAACGT  
TTTATCAACATTCCGAGTAATGCTAATAGCATCTTATTAATCTTCCCCTGCATCAACTGTACATTTAGAGC  
CAAAGTACTTTAAAATTGGCTTTGGCAAATGAACATGTCATACTTTTTTAGTACATTAACTGTTCTTCATTT  
TCTGTTTTGATTAGGCTTATGTTTTGCAAGAGCGCGGGAGTATATTGGAATTGGTTGATCCAGACTTGGG  
TTCTGACTACTCGTCACAAGAAGCAATTGTGTTACTGAATGTTGCCCTTTTATGCACTAATGCAGCTCCAA  
CACTTAGACCAATAATGTCTCAAGTGGTAAGCATGCTCCAAGGCCAACTCTTGTTCAAGGATGTCCTTTC  
TGATCCTGGGGTGTCAACAAGCGGTTCCGGGATTCAGATCAACGAGAAGTCACCTTCTGGCAAACCTCAAAG  
CCTAACTGATGGTACGCTTACTGATTCCACTCTCTCAACTGGAATGCGGAAGAAATTGGCATTCTTCAA  
AGAGTAGAGCCTAATGTATCTAACAGTTAAACAAAATGTCTGTTAACACAAGCAAGTGTATATATGAAC  
ATCAAAATGTTTAATGAAGATTAAGTTTAGTCTTTACAAAACCTGCTAACTGGTCCCTCTTTTATAGTACTT  
CATTTGTTTATTTTCTAAGCCAACCTCATTGTTTCATAGTTCTATCAATTCCTTCTTTATTTTTTCT

>M6-PGSC0003DMG400017645 M6 LRR-RLK

TGTCACAAAAATTGTACAACACTAGACTAGCTATAGACAAACACATCTGTACTCCATTATTTAATCTCATCAT  
TTAAAATCACTTTTCTCTATGTATCATTACTCACTCTATTATAGATTCTTGAATTATTTTATTCCACATTTCT  
CTTTAATCACTTCAAAAAACAAAAAAGTGCTCACTCTTTTGTGAGCTCAAAGATTTTTTTGGGATTTT  
GAGTCTTTTAGCTATGAAGGGTTTCTGTTTCTTGGTTTGTGTTTTGTTTTTCTAGTTCCATTTTCATCATCT  
CAGTTAGTTCCTGCAGAAAGTAGAATCCTTTTTCAAATCAACAGTTTCTTGAAAATCCACCTGTTCTTCA  
AGAATGGAATAAATGGACAAATTTTTGTTTTCTCCACAATCTCCTTCTTGTATCACTTGTCTGGTAA  
TCATATAACTGAGTTAACAATTGTTGGTAACAAAAATCCCCTTTTGGAGTCTTTAAAATCCTTCTCCAC  
AAGCCCTTCTGGGAAATTTTCAATTGATTCATTTTTCACTGTTGTTACTAAGCTTTCTAGTTTAAAAAAGT  
TGCTTTTAGTTTCTTGGTTTGTGGGGTTCATTGCCTGCTAAGATTAGTAGGTTACATTCATTTGAGGTA  
CTTAATATAACTTCAAATTTTATTCTTGGTGAGATTCCATCATCTATAGTGAATTTCAAGAACCTGAAATC  
TCTTGTGTTTTGGCTAGAAATTTGTTAATGGAAGGTACCAGATCTGAAAGGGTTAAAAATACTTGAAGAG

TTGGATTTGAGTGGTAATAATTTAGGACCAAAGTTTCCATCTTTAGGTGATAACAACAACAATCTTGTTTC  
ACTGAATTTGAGTAACAATCTCTTTAGATCAGAAATACCTAATGGACTCAACAAGTTTACACATTTGCAA  
AATCTTGATTTGTCTTCTAACAACTAGTTGGTCCAATGCCTTCTTTCCTGTTTTCACTTCCAGCAATTCAG  
TCTATTAGTATTGCTAAGAATCAGCTTAGTGGTGCCCTCCAGGAAGTGTGTCTTGTAGCAACAATCTGA  
AATTTGTCGATTTTTCGAGTAATTTATTGATGGGAAAGTTGCCTGCTTGTCTTGGATCAAGTTCCAGAAAC  
AGGACAGTGATTAATGTTTGGAATTGTTTGTCAAGTACTAGTACTAAGTCTCAACATCCACATACATTTTG  
TGAGAAACAAGCTATAGCTGTTAAGCCCCCTCCAAGAACTAGTGATGAGAAGGAACAATCCACAGTTAA  
GCTTGGTGTGTCTTAGGACTCATTGCTGGAATTGTTGTAGTTGTGGGTGCAGTTGGTTTCCTGATCTTTT  
TCATTGTCAAGAAAGTTGTGAGAAATAGAGATCAAGGATATAAAAATGACAGCTTTGCTTTTGAGAAGA  
ATTCAACCCTTTCCAAAAGTCTGATGGAGGTAAATTTCTTAATGATTAGGGTCTATTGGAAACAGTCT  
CTTTACCGGTCTCTTTACCTGTCAAGGTAGGGGTAAAGTTTGTGCACACTCCCCACTAGACCCTACT  
GTGTATATTGAATCTTGAATAGTGATAGGGGTCTATTGGAAACAGCCTCTCTACCTCCCGAGGTAGGGT  
AAGGTCTGTGTACACTCTATCCTCTCCAGACCCCACTTGTGGAATTACGCGGGGTTTGTGTTGAATCTT  
GAATAGTGATAGTGCATCATTATGACAATTTTATTGATAACTTGATTTAATCAGGGAATGCAAGGAGGA  
CAATGAGGATGGTATCATTAGGACTTCCACCATATCATGTTTTCACTTTAGAGGAAATGGAAGAAGCAA  
CAAACAGTTTTGATCCAATAATCTGGTTGGAGAAGGTTCCAGGGTCAGGTAAATATGTTGATTCATTA  
TAAATAGCAAAAAAAAAAAGATATTTATTACTATATCCTGTCCATATTATTCGTCAATTTGGGACGCCGAACA  
ATTCCATTGTAGTCAAATACATAATCTACATGAGTATACGAGTCTGTAGATACTCATATTGCTATACTTCT  
AGTCTAGACCCAAAAAGTCAACCCGAACAACACTTGACATTTTAGAAAACTAAAGATAGTAATATGGA  
TATGCTTTTCATAAATCTTGGTGAATACAACTTGTGTTTTGAACATCGGGATTGATGTTATTATTAATGG  
CAGCTATATAGAGGTTGGCTTAGAGATGGATCAGTGGTCTAGTGAAATGTCTGAAATTGAAGCAGAA  
GCATTCACCTCAAATTCTGCAGCAGCACATGGAGATGATATCAAAGCTAAGGCATCGACATTTAGTAAG  
TGTAATTGGACTGTGTTGTCACTTACCAAGATCATCAAATACAGCTAGCACTGTATTTATTGTGCTTG  
AAAACGTCGTCATGGATCACTAAAGGATCATCTTAGTGGTAAGCTATTACGAGTTGATTTCTCTCATGG  
CCACTCAACTAATAGTTATTACCTCAGAAGTCACTTTGAAAAGGTGACTTCTGAGATAATGACTATTAG  
TTGAGTACTATCTAATAGTCATTACTTTCTTCAGTCGGAACGATGAAGGACTGAATTTTATATTCTGGGA  
TTCGTTCTTTGGCAGATTGGAGGAAAAGGGATGTATTGAAATGGCCACAAAGAATGGGAATAACGATG  
GGCATTGCAAAAGGAATTCAGTATTTGCACACTGGAGGAGTCACTGGAAATGATATAAAGCTTGAGAAT  
GTTTTGTTGGATGAACTCTTACTGCTAGAATAAGCAGCTACAATATATCGTTACCACCTAAGGTAATGC

TAGTAAATCACAACAAACAACACGTTAATCTTGGAGAAAATCTCATTTTTAACCATCCAAAACATTTCGCA  
GGTTGGTTCGGAAAGTCTTCTTGCTGGACCAGACAATTTTACCAGGTATTATATTACTCTGCAGCTACATT  
CACCTTAATTTCTCTGTTTCCTGGCTATCATTTCTGAATTGTCTGCTAATATAAACTTCTTATTCAGCGCGA  
AAGAAGCAGAAAAGGAAGACATTTATCAGTTGGGAATTATTCTACTAGAGGTTATTATTGGTAGACCAA  
TCAACTCTCGAAGTGAAGCAGAAGACCTTAAGCTTCAGGTATCAATAACAATATCCTAATAAACTCTCA  
AACGATAGAAATATATCAGATGGTCACTCAACTAATAGTAATCATTTTCAGAAAAGTCACATTTCTTCTTGAT  
TCGGACATTCTTTTACAAAGAAAGTGACTTTCTGAAATAATAACGATTAGTTGAGTGACCATCTGAGAAA  
TCAACTCAAAAAATAAGAGATACGCTATAAAGAATTAGAAGAATCACGAATTACGTGATATGAAAGAAC  
ACACATTTCTTCACATAATGCATAAGAGCCTAGTCTATTTACACAATCTATCAAACAACCTTGAACCAAAT  
TGCCTTTTATGACATTCAGGTGGAGACTGCCTTAGCGGAATCACCATCAAAGCTACGAGATTTAACAGAT  
CCTTGTATACGAGGTACATTTGCATATGACTCATTGAAAACGACAGTCCAGATAGCAATAAACTGCCTTG  
AAAAAGAACCAAGCAGGCGGCCATCAGTCGAAGATGTTCTCTGGCATATGCAATACTCAATTCAGGTTTC  
AAGAAGGAACAACCAACAGTGGAACCTCAGTGGGAACCAAAGTGGGAAACTCAGTGGAAAAATAAG  
TGAAATCTTAATAATAAGTTTTACTGATAATAGAGATCTGTCATTATATTGTTATATCTTGTTGTTTAGTC  
ATTTGTATGCATCCATCTTGTATAGCAAAGTTCAGTAGCTTACTGAATAAATGTTTTTGCTTTCTACATCAC  
AAAAATGTACCCAAGTTTACAATACAAAGCAATTTTCATGTGCGGAAAAACGGTGTTTACATCAACTCAA  
TGAAGACATAAAGTGTATCTTCATGTGCTTTGTTATCGCTGAGTGTAATCACCCCAACAACCTTCATCATC  
AATTATTTTCAAATAAACTAGCTGAAGATATAATTATAAGTAAACAACACTGCAGTCTCTATGGTCATGAT  
ATGATTCAATATCGTATCAGAGCAGGCAAAACCTCCCGGTTTCATGTCTCACCACCAGAAATTTCCATGTG  
CTTGGCCTATTAGGCCTTTACACAGAGTTATGTTGAGGATATAATTAAGTAAAAACTAAAAGTATTGTCT  
CTCCAGCAACTTACTTAACTTTTAGATGAAATGCTCACAACGTATCTTTGTTGACTTAAAAGGGTACTTT  
ATACCATTTTCAGCAGCCGCGCCTGCCACGGTGGCTGCAGCAACAGCAGAATCTGCTGTTGCATTCATCG  
TTGGTGCTCCAAGAGCACCGACATCAATTACCAATTCCAGCCACAACAGCTGAATTGGCTGATCAGGCT  
GCTTCTTCTATCTCTGCATTCTCCAGCACCCAAAGAACAATAACAGAGTAGTTAAGTATTCCCAAGTATCT  
TTCTCTCCAGCCATTACTTTGTGACACTACTAAAAAATCACTATTTTCTCCAAGAAATTTTCACTGATAT  
TTTGATTGAATCGGTGAGAAAAGAGTAATGTTCTCGTACAAAAAACTAGAAAAGTTTACCACTATTTTCAT  
TGAGAATCTGTTTTCCACCATGCATATTCCAGTGAACCTGATTTGGTGGAAAAACATGTTCTATAACACA  
AATTTCTCACTAATTCACCGTGGAAAAAATCTATTACTACTCATCATTAGTACTTCATCCGTTTCTCT  
TATGTTGAACTTGATTGATTAGGCGCGGCTAAGAGCAACATGGGAGGTTTTAAAGTTCAATTTTTTCCAA

ATATAGAAAAAGACACTTTTATAACGTAC

>M6-PGSC0003DMG400017690 M6 LRR-RLK

CACATGTTAGTTGGCATGTCTCATCTTAAGCGGCATGGTCTGCAAATTCTCAGAATAACTTGCTAATGAT  
CTCTTTTTTAATTCAGGGAACTTTATAGTAATAACATAAGCGGAAGAATTCCAAATGAATTGGGGAAC  
TTGACAGAGTTGGTTAGTTTGGATCTTTACCTGAACAACCTTAAATGGTCCTATCCCTCCCTCATTGGGCAA  
GCTTCAGAACTACGCTTCCTGTACGAGTTATACATTCTTTTTCTTCCGTTTTTTTTCTTCTTTTTGTTTC  
TTTTTCGGTTTGGTTATTTTTTTCAATGTTTCAAATCTTTAGCATATATATCTGAAGTTAGTTGAATCAG  
AAATGATCACCTTCTATTTTTATTTTTATCAAGAAAGCAGCGTCTATGTTAAGGATCCGTTTGGCTATAGA  
TTTCCCAAGTAAAATTTGGGGGAAAATTTGGCATCTAGTGTGTCCATACAATTTGCCATTATTTGGCAA  
ATATTTTTGGCAAATAACCCAAATTCCAAATACTAGAAAAAACTAGTATTTGGGCCAAATCTCATTATT  
TGGGATCTTTTAAAAATTTAAATGCTACACCAAACCTTTATCTTTTACAAAAACACCCTCTATAGTAGTTGT  
TTGCGTTGTATTACATAATTTTTTACGTAAACACCAAAGTAATGAAATATTCAGTGAATATGAAAGTGAT  
CATATGGTTATTGATGAAAATGATGAACAATCGGCTTAGGATAACAAAGTCACATCTTTGTCTACTTGAC  
GATGTATGGAATGATGCTTGTGCACTCACTCTGAACTACCATATTGCTCCAATGTCATGGGACTGCTT  
GTTATTTGTTGCAATGAAGATCCAATTGACTTGTAATATAAACTTATGGTTAGTTTTGATAGTTTTTAAAA  
CTTTTATAAATCATATTTCTAAAAAAGTGAAATATGTTTCCCAAATACTATGGCCAAACACATGGTGAAA  
TTTCACCCAAATTTTAAACACAAATAATATTTGCCAAAAATATTTGGAAATTTATGGTTAAACGCTAGCTAA  
ATCATGCAAATGGGGTTGTAGTTTCTAATTCTCTAAGCAAATCTGTATGATGTTCTGTAACTTTTCTGTTA  
ATTATGTTTACATTGATGGGTTCTGTCCAAAAAAATTGATGTGTGGAAGCATTATGAAAATCACTACTC  
CTGTCAGCGAATAAACCTTTGTAGTTTGAGAGGTCAACAGGGGAATATATCTGTATGATTCATTCTGTCTTT  
ACTCTGTAGTGGAAAGTTAGTTGATATGCTTGGCAAACCTTGTCTTGTGTTCCCAAATACTGTATGGTTGC  
TGAGTGAAGACCAGGTGACTGGACTGGACTCTTTTTTTGTACGACAAACAGAGATTAATAAGTAATAAT  
ATAAAATGTTAAGAATAATATGAACCAACTTGAATAAAAAATATATTCTAAAAGTATTCAATTATTATCTGA  
TTAACAAAGTTGTGCTTGCTTGGTCTCTCTCGATATAGACTCACAGCCGTGCAGCTCAACTGAAAGTGAC  
AATTCTGAGATACTTCTCATCTTATCAGGAAAATGGCCTGTGGATTTAGTTCATTGCTAAAATACTTTATG  
TATGAACGGTGATTCTCAACCTGCAAACACTATCAGCAAGTTTTTCTAGCATATTGGAATTAATCTTTCT  
GGAGTATCTTGTCTATATATATAAATGTATTTGTCTTTGTCTACCTTTAGCACATGTACGCTACATTTAGC  
ACATGTAAGTGAATGAGATCTAGACCAGTATTCGCTTTGACGAACTTCTTTTCTGTCTTGTCTACTCT  
TGATCAACTTCCTTTATCCTTTTTTTTTCTTTGCTGAATTGAAGGAGGCTCAATAATAACAGTTTGAATGA

AGGTATTCCCGTGTCTCTAACCACCATTGTTGCACTTCAAGTACTGTAAGTATAAAGTTGTTCTTTATTTA  
TCAATGCTGTATGTTGTCTGTGTTGTCTAGTTCTTCTGGGTTACTTATTGTCATTGCCTTTCAATGCAGTGA  
TCTCTCAAACAACCATTTGACAGGACCAGTTCAGTCAACGGTTCCTTTTCACTTTTTACTCCTATAAGGT  
GTGTTGGAAGCATAAATTTGTAGTTCCTTCTGTTCTGAAGTTACAATAGTGAATATCTAAAGATTGAGT  
ACCTATATTTAGTTTTGCTAATAATCAGTTGGAAGTTCCTCCAGTTTCTCCACCTCCTCCTCCTCCTAC  
GCCCTCATCGTCATCTTCAGGTTTGTGACATAATTTGTGTTTATGCTGTTATGAAATTGTGCTACCTCTCC  
TTTTCCCTATTCCAATTTAGTTTTCATGAAAATCCCTTAAGTTATTCACAATAAGGGGAGATGGCAATGG  
TAAGAAAGGAAAGGCCTGGTTGCCTGGGGAAAGCTGAAGAGATGAGCCCCAGACTGGATTCCCTTATG  
AAAGCACTTTCTTTATGAAAAAACTACCATTACTGTAGGCACTGTAAATTACTCTTTTTTAGATCAATTA  
TACAGGTATTGGGGTCTTGTGGTTATCCAGCATTGACTTTCCAAAATAAAAAATTCAAGTAAGCTTG  
GAGATACTATCAACATTTTTTTCTTTGTTGGAAATTAGATTTACTGTAAACTCTGAAGTTCGAGTGATACG  
TGTGTCAAAGTACCATATATTTTTTAGAATTGCCTGTATTTTAAAATTTAGGTCATACAAATAAAAAGTT  
AACTCAATCATCTTTTCACTGGGCAACAGCGCAACTGGAGCTATCGCTGGAGGAGTTGCTGCAGGCGCT  
GCTCTTCTATTTGCAGCTCCTGCAATTTTTATTGCTTGGTGGCGTCGGAGGAAACCGCAAGACCACTTCTT  
TGATGTTCTGGTTTTGGCAAACACATTGAATCTGAGTTAATTGACTTTCACTTGATGTGTTCTCACTC  
ATTATAACTGCTTTTGCAGCTGAGGAGGATCCAGAAGTTCATCTGGGACAACCTCAAAGGTTTTCTTGC  
GTGAACTACAAGTTGCCTCGGATAATTTTAGCAACAGAAATATACTCGGTAGAGGTGGATTTGGTAAGG  
TTTATAAGGGCCGGTTAGCTGATGGCTCTTTAGTTGCAGTGAAAAGACTAAAAGAGGAACGTACTCAAG  
GTGGAGAGTTACAGTTTCAAGACAGAAGTAGAAATGATCAGCATGGCTGTACACCGAAACCTACTTCGTT  
TACGGGGATTTTGCATGACACCCACTGAGCGGGTGCTTGTATCCGTACATGGAGAATGGAAGTGTG  
CATCACGTTTAAAGAGGTATCTTTTTTAATTTTTCATGTGCTTGCCTCTACTTTTTGCTCACCTTTAGGCAC  
GCTCACAACAACGACAACAACAACATACCCACAAAGTGGCGTCTGGGGAGGGTTCGAGCATATGCTGAC  
CTTACCTCAGATGTCAGGTAAGAGGTTGTTTCCAATAGATTCTTGGCTCAAGACAAAAATAGTCTAGAA  
AAAGACATAATTGAAGTACAAGAGAAAATAGATAGCAACAAAACAACAGATAGTATCAAACAGTAC  
TGCAACAAAGTAATACGGTAATAGAACTACATAAAACATCAAATATCAACAAAATCGAAGAACAAGAA  
ACTACAAGCATAGTACTACAACACTAGTAAGGGCAACAATATAATGCATTCTTACTACTAGTATGGAT  
GTACTTTTACTACTAATCTTCTACCCTAATTTGTGCTCCTCCACAGCTTTCTATCTAAGGGCATGTCCTCGG  
TAAGCTGCAATTATGCCATGCTGTATCTAATCATCGCTCCCCAATACTTCTTCGGTCTACCTCTACCTTTCC  
TAAATCCATCCATAGCCAACCTCTCTCACCTCTGCCCTTGGCATCCGTGCATCTTTTTCATCACATGTCCAAA

CAATCTCAACCTCACTTTCCGCATCTTGTCTTCCACCAATGTCACCTTCCACCTTGTTTTGGATATCCTCATCC  
TTAATCCTATCTCTCCTAGTAAACCCACACATCCATCGCAACATCCTTATCTCTGCCACTTTCATCTTCTAA  
ATACTGGCCAACACTCTGACGTTACAACATAGTTGGTCTAACCACAGAAAAAAGCCAATAGCTAATGTT  
AATGATAAGCCTTTAGTCTTTTAACTTTTCTTTCATAAATTTGTAACAAATTGAAAAAGTTACTGCAGAAG  
TGTAAGCCAGTGGTGGAAATCTTCACATCAATTTCAATTGTGCTATTAGTTATTATAGTGATTGAGTTTTTTA  
TGAGTTCTCATGATGGGTATGTATATTTAACAAGATGTCAATGTTGTTTATGATTTTGCTTGTGTTCTATG  
GACCAATTTACAAGTGGTGCTATCCTTGATATCTTACTGAATATAGAGACTGCAGTTCATGATAAAATTT  
ATTTAATGAGCACATCTGAAAGTCAAAAAGAATTAATGTCTTGAAAGAGAATTCATATTTTTATTATTGT  
ATGAAACTGGATAAGTAATGCCTCATGACTTGGCGTTTTCATGATTTAGAGTGATATTGACCCAAAAAGAT  
CAGTTTTCTTTTTATAACTTATTCAAGCTTAAATAGGAACCTGTTCCAGTTTGCTGAATAGCTTGAATTTA  
TGCTCATGGGATAATTTACATTTTTCTAGAGAGGCCTGAATCAGAGCCCCCACTTGACTGGCCAAAAAGG  
AAGCGTATTGCACTTGGATCTGCAAGAGGCCTTGCTTACTTGCATGATCATTGTGATCCTAAAATTATTCA  
TCGTGACGTCAAAGCCGCAAATATCTTGTTGGATGAGGAGTTTGAAGCAGTTGTTGGGGATTTTGGGTT  
AGCTAAACTCATGGACTACAAGGATACTCATGTTACCACTGCTGTACGTGGTACAATTGGGCATATTGCC  
CCTGAATATTTATCTACTGGTAAATCTTCTGAGAAAAGTATGTGTTTGGCTATGGGGTTATGCTTCTAGA  
GCTCATAACTGGGCAAAGGGCTTTTGATCTTGCTCGACTTGCGAATGATGATGATGTCATGCTGCTAGAT  
TGGGTAAGCATTTATACTGTCCTGTATGCTTAAGTTATTTGCTTCTGCTATCAATCAGCAATTTGGATTT  
GCTTAAAGATCAAGTCACTTCTGCTATCATTGAACAGTCTTGGAAATGTTCTGAAAAGATCAAGTCAACTC  
TCTCTTCTTCTATAAGTCAAAGTTTGATGTCTTTTTCTACTGTAGTGTTATTTGTTGAACACTGATGTGC  
TCATCCTGAAGAAATGGTGTGGTACGAGACCTGCATCGTTGCTTATTATTTATTGTGGTTTTGTGGTGTG  
AAAGTAACATTCGTTGCAGTTCCTGTGAGTAATTTTTTAAAAAAGGTTTAGATGTTTCAGGAGGATT  
TAACCATTCATTAATAAATTGCACGAGCATGTAGGTTATAATTTGAGTGGATTACTTTCATTATCTTATT  
CTTGCAGGTGCTTCAACAAGTGGTTGCCAAATTCGTCCCCTCAATTTGTGACTAATCTAGAAAATGTGC  
ATCTCCACTTCTCATTTCTGATGCTATCTGAAGATTAGAAAAATATACTTTTTTCATTTTCATTCAAATAAG  
CTAAGGTGTATCTGCAACTGCCATATTAATGTCACCTCAGTCATGTTGTATTGGGGGTAGATATAGTATA  
CTTTAGGACAGGTACTCATTGAGGAGCATCCTTTAGAAAGGCTAGTCTTACGTGGGATCGCCATCCTGGA  
GAAGGAAAAGGAGATGGTCAAAGTGTAGGAAGTACTATTAATAAATAAAGCTTTTCTGAACCTCTTG  
TGCTCTGAAACTGTAATAGCAACATGAACACTAATAGACAGCAATGCCACTAATGTCAATCAGAAACAC  
TTGGCTGTGTTTGGAGCCTCATGCACTGATGTGCTGTTTTTTTAGTCTCCCTTCAGATCTTAGTAGCTTTTCT



AGTGACTGTGCTCTTAGAGATGGCACATATGGTTGCATGCATGGCTATTATTTGACTTGTAACATTCCAC  
TGGATATTCAGGTGAAGGGACTCCTGAAGGACAAGAAATATGAAACATTAGTTGATGCAGATCTTCAAG  
GTAATTACAATGAAGAAGAGGTGGAACAGCTTATTCAGGTAGCTCTACTTTGCACGCAGAGTACGCCTA  
CCGAACGTCCAAAGATGTCAGAAGTTGTAAGAATGCTTGAAGGTGATGGCCTTGCTGAGAGGTGGGAG  
GAATGGCAAAGGAGGAGATGTTCCGGCAAGATTTCAACCATGTCCACCACCACCATACTGATTGGATA  
ATAGCTGACTCCACTTCAAATATCCGACCGGATGAGTTGTCAGGGCCAAGATGATCTTTCATTTATTCTG  
CCGGTAGCACATATAGGACCGACTCTTTTGAGGGAAAATCCGCTTTGTATCCTTGTATCTGTAATCGGTA  
TATGCCATCTTCTTTCTTTTTTTTTTTTTTTTTTTTTGGGTTAATTGGTATATGTCATCTTTGTGCATACCATTTTC  
CTTCTTTTTTTGTTTCAGTCAGTTATATTGTATTTGATTATGTCCAAATGTGTATAGGTGATTGGGTCATTA  
CAACAGGTCTGAACATGAAAATCAACTTATAGCAGGAATGGCTGTAGAAAGCATCTTTGCACCTTCTCTT  
TTTCTAATGTATCAGATAGAGTGGCGTTTGTTAAAGAATAAACACTTTGTAAACTTAAAGTAATCATAGT  
TTCTTTCATGTTTCAGTGACAGTTTGTACCTCCTCTTGATGGCTGAATTTTGTAGTGTTATAG

>M6-PGSC0003DMG400017713 M6 LRR-RLK

CAAAAACAATCAATCATTTAGCCTTGATGATGGTCCACAATATTTTATAACCTTCCCTTCTTATATCTTT  
TCATAGTTATAACTTTTTGCTTCCACTGAGGAAGCAACTGCTCTTCTTAAATGGAAGCAACATTCCTAAAC  
CAGAACAATTCCTTACAGGCTTCATGGACACTAAGTAGTCCTGCTGATACCAAGAATTCTTCCAGAATTG  
GAGCGACGAGTTCTGATGCATGCAAGGGCTGGTATGGAGTTGTATGAGTTAATGGTCGGGTTAACAGG  
TTGAATATTACAAATGCTAGTGTCATTGGCACACTGTATGATTTTCCATTTTCATCACTCCCATTTCTTGAA  
TATGTTGATCTTAGTATGAACCAGCTCTCTGGCACCATCCCACCTGAAATTGGTAAGCTCGCTAATCTTGT  
CTACCTTGACTTGTCTATCAATCATATTTCCGGGCACAATCCCACAACAAATCAGCTCACTAATAAAGCTTG  
AGACCCTCCACATATTTGACAACCAATTAATGGTTCCATTCCGAGGGAAATAGGTTCGCCTAAGGTCTCT  
TACTGATCTAGCTTTGAGTTCTAACTTTCTTAGTGGTTCAATTCCTGCTTCATTGGGGAATTTGAACAATTT  
GTCTTTTTTGTATCTTTATAATAATAAGCTTTCTGGCTCCATTCCCTCAGAAATAGGAAAACCTGTCAATCT  
TGTTGAAGCTTATATTAGTAGAAATCAATTAACAGGTCATATTCCTCCAGAAATAGGTAATTTGATCAAT  
GCAAAGTGTTGTATGCTTTTTCCAATAACTTGTCTGGTCCCATTCTGATGAAATTGGGAAAATGAAGT  
CACTTGAGAACTTAAGCTTCCAGACAAACAATCTTTCTGGTCCAATTCCAAACAATAGGTGACTTAACT  
GAGCTCAAACCTTTGCACCTTTATTCCAACCAACTTTCTGGTCCCATTCTAGTGATTTTGGGAATCTGAA  
AAAATTGAATGATCTGCAATTATCCAATAATCAACTTACTGGTCCTATTCCTGGTTCATTTGGCAATTTGA  
GAAACTTGCAATTTCTGTATCTCCGTGCCAACAAACTTTCTGGTTCATTCCAAAAGAACTTGCATATTTG

GATAACTTGGTTATAATGGAAATGGATGAAAATCAGTTTTTCAGGCAATTTGCCTGAGCATCTTTGTCAAG  
GTGGAAAACCTGAGAACTTCACGGTGAATAGTAACAAGCTGACAGGGCCAATACCAAGAAGCTTTAGC  
AAGTGCTCGAGTTTCAAAGAGTTTCGCTTGGATAACAACAGTTTTACTGGGAATTTATCTGAAGCTTTTG  
GCGTCCATCCACACCTTTACTTCATTGATTTGAGTGATAATGATTTTCATGGTGAACCTCAGCAGAACTG  
GGGGAAATGCAAGAAATTGACTGATTTTCAGATAGCCAGAAATAACATTAGTGGTAGCATACCACCAGA  
GATTGGAAACATCAAAGGTCTTTTGGGACTTGATCTTTTCAGCAAATCATTGATTGGGCGGATACCAAAG  
GAATTTGGAAAATTAACCTCTCTGGTTAAGCTTTCTGTGCAAATAACTATATTTCTGGCAATATTCCTAT  
AGAACTTGGGGCACTGACAAAGTTAGATTCCCTAGATCTGTCAAACAATAGATTGAATGGGTCGATCCC  
AACGTTTATAGGAGATTACCAGCACCTATTTCACTTGAACCTGAGTTGTAACAAGTTTGGGCAGAAAATT  
CCAAAGGAGATAGGGAGGATAACTCATCTTAGTGTACTTGATTTGAGCTATAATCTTCTTGATGGAGAA  
ATACCTGCTCAGTTAGCTAGTTTGCTGGACTTGGCAAACCTGAATCTTTCCACAACAGCCTTGCTGGGC  
GTATTCCTGAAGAATTTGAAAGTTTGACCAGTTTGCAGGATGTTATCTTGTACATAATGAGTTGGAAGG  
TCCAATCCCTAATAATAAAGCTTTTCATGAATGCCTCATTAGAAGGTAATAAAGATCTTTGTGGCAATGTG  
ATTGGATTCCAACCTTGCGAAAGGCCATCTTCTATTGTGAAGAAGCACTCAATGGCGAAGGGACATAAA  
CTCATCCTCATCACTGTACTTCCTATTATGGGAGCACTAGTACTACTCTGTGCTTTTCATTGGTGTTCTCTTT  
ATGTGTAATAAAAGAAGGAGAGTTAGAGACGTTGAAAGAAGGGATTCCAGTGATGATGTTGATGGTTT  
GATTTACATATCCACATTAATGGAAATGCATTGTACTGGGATATCTTAAAAGCCACAAAGGAGTTTGAT  
GCAATGTTTTGCATCGAAAAGGAGGATCTGGAAGCGTTTACAAGGTAAAACCTCCAACAATAGAAAAT  
GTAGCTGTGAAGAGACTTCATTCTTCATTTGAGGTTACCCATCGCAAAGCTTCATGAATGAGATAAGGT  
CATTGACAAGTATCAAGCATCGCAACATTGTGAAACTCTATGCCTTCTGTACAAATGCACAACACTCATT  
TTGGTTTACGAGTACATGGAGAAGGGGAGCTTGTCTAGTATTTTGGCAATGAAGTAGAGTCCAAGAAA  
TTGGATTGGCTTACAAGGGTGAATATCATCAAAGGTGTTGCTTATGCTTTATCTTACATGCACCATGATT  
GCTCACCCCGATTGTTTCATCGAGACATATCAAGCAGTAATGTTTTGCTTGATTCCGAGTATGAAGCTCG  
TGTTTCAGATTTTGGCATAGCTAAGATTCTAAAGCCAGACTCATCCAATTGTAAGTGCACCTGCAGGCACA  
TATGGCTATGTAGCACCAGGTAAGATCTAACTTCTTATCCTTATATTAGTTCATGAAATATATCTGCAAAA  
TCTATATTGTTTCTATCTCATTGAAACTTTATTGTTTCAGAGCTTGCCTATACAATGAAGGTGACGGAAA  
TGTGTGACGTCTATAGCTTTGGAGTATTAGCATTGGAGGTAATCAAAGGAAAGCATCTTGGGGAATACA  
TTACTGTGCTAGCAAATTCATCGACAAGAGATCATGTGCAGCATAGCGATTTGCTAGATGAACGCCTTCC  
ATATCCTGAAGATAGAGTAAAAGAGGTTTTGGTTTTTATCATCAAGCTAGCAAGCTCATGTTTGCTTGAA

ACTCCAAAATCAAGGCCAACCAATGCACTTCATCTCCAGTATGTTGTCAATGGATCCACCTGTTTCTCAAAT  
AACTTCTATGAAGGCGAAAAGAGTCCCCGAGATGTAAGGTGTCAGTGTATGAAAAAAAAAGAAGCAAG  
TTAGACACCAAGTGGTTGTGAAGTAAGAA

>M6-PGSC0003DMG400017864 M6 LRR-RLK

ATGAATATGAAGAAGTTGGAAAGAAGAAATACTATTGTTATTGTTATATTAGTTGTTGCATTTGATCACT  
TACTGCTTGTGGCTAACATTGCCACAGATGAAGCTGCTCTTCTTGCCTTCAAATCTCACATTTCTTCTT  
CTTCTTCTGATCCCAACAACGTAGTTGTCTTGCAAACCAACTGGTCTTCTTCAATTCCATCATCAGTTTGCA  
CCTGGATAGGGATCACTTGCAACGGGCGCCACAGAGTCACTGCTTAGACATATCTAGCATGCAACTTC  
ATGGTACCATTCTCCGCACCTTGGAAACCTCTCATTTCTCGTATCCCTTGACATTAGTAACAACACTTTCC  
ATGGAGATCTCCCCGAAGAGTTGACTCATTTGCGGAGGTTGAAATTGATTGATGTTACAAGAAACAATT  
TTAGTGGTACCATTCCATCATTCTTAAGTTTGTACCTAACCTTCGATTCGTTTACCTTTCAAACAACCAAT  
ATTCAGGGGAAATTCCATCTTCCCTTTCCAATCTAACAAATCTTCAAGAGTTAAGAATACAGAGGAATTTT  
CTTCAAGGAAAAATCCCTCTGAAATTGGCAATCTTCACTTACTTACTTTTTAGACCTGCAAGGTAATAG  
ACTTACTGGCTCTATACCATCGTCAATCTTCAACATGACTTCCTTGACAACACTTGCTATAATACACAATC  
GTCTTGTGCGTAAACTTCCTCTAGATATTTGTGACAATCTACCAAATCTTGAAGTTCTTTTACTATCAACAA  
ACAACCTGGATGGCCTAATCCCACCAAATTTACAGAAATGCTCAAACCTACAACCTGTTGACATTGTCTGG  
CAATGAGTTCACTGGACCTATAACCAAGAGAACTTGGGAACTTAACTATGCTCACAGTCTTGCATCTTGG  
GAAAACCATTTAGAAGGTACGTGTATGAATTACTCCCTCTGTTTCAATTTGTTTATCTAGTTTTGACTTG  
GCACTGGTTAAGGAAGTAAAAAGGACTTCTGAATCTTATTGTCTGTAGAATGTACCAAATACCCTAT  
AATCTTAGAGTCTTAAACAGGTCACGTGAAAAGTTGAAATTAAGAAAAAAGACAACTGACTAAAAAG  
GGAAGTAAGACAAACAATTGAAACGGAGGAAGTGTATCTTTATGCTTTTGTGTTTATTTAAGATTTCT  
CAAAGCTAAGCAATATCAATATGTACTAATGTTTATGCATTTTACTCTAATTGACAGGAGAGTTATCGG  
TCGAGATAGGTAACCTACAAAACCTCCAAGTACTTGGGTTAAGAAATAATAAGTTAAATGGTACTATTCC  
TGCAGAAATTTCAACATTTAGCATTGCAGATATTGACAATGTATGGAAATCAGTTATCAGGTAGTTTA  
CCTTCAGATTTAGGCGTTGGAATGCCTAGTCTTGAAGAACTTTACCTGGATCAAATGAACTCAGTGGAC  
GAATTGCTCCTACCATCTCGAATTCTTCAAAGCTAACACTTCTAGACCTTGCAGACAACAAGTTTACAGGT  
CCAATTCCTGATTCATTTGGTTCATTAGAGTTTCTTGAAGTCCTATTCTTGGGAGGTAACAATTTCAATGA  
TGAGCCATCTTCTTCTGAGTTAAGATTCGTCTCGTCCCTGACTAATTGTAGATATTTAAGAGAAGTAGTCA  
TTGAAGATAATCCTTTGAATGGTTTTCTTCCATCTTCTATTGGAACTTTTCTGATTCTTTTCGGATGTTTG

TTGCACGTAGAACCAAACCTGAAGGGTACAATCCCGGAAGAAATTGGAAACCTGAGTAGCTTAGGTGTG  
CTAGCTCTCTCATAATGACTTCACTGGTTCGATACCTGAGAAGTTGAGAACCATGAAGAATCTCCAAG  
AATTTTACTTGGAAAATAACAGCCTAAGTGGAAACAATACCTGATGATATCTGCAGTTTACGAAATCTTGG  
AGCTTTAAAATTGACTGGAAATCAAATATCTGGTTCAATTCCAGCATGTTTAGGAAATGTTTCTACTTTAA  
GATATCTTCATTTAGCTTTCAACAGATTGACTTCAACCTTACCTGAAACCTTGTGGAGCCTTCAAGATCTC  
TTGGAACCTCAATGCATCAGCAAATCTGTTTAGCGGGCGTATACCTCCTGAGGTTGGTACTCTAAAGGCTG  
TGCTACTAATTGAAAAGTTGATTAGTCTTCCATGGCACACAATAAATTGGAAGGGCCTATTCCGAGTTC  
ATTCCGGGAAAATGGTGAGCTTGGAAATTCTGGATTTTTCTTACAACAATCTTACTAGTGAAATTCCAAAG  
TCACTTGAAACACTTTACATCTCAACTACTTTAACATCTCTTTTAACAAATTAAGAGGAGTAATTCCTAGT  
AGTGGTCCATTTGCAAACCTTACCAGTCAATCTTTCATTTCCAATTCTGCACTCTGTGGTGCTCCTCGCTT  
AATGTGTCGCCATGCCTCATCAAATCCACCAAGAAATCAAGGAGACACAGAGTTCTAACAAGTCTGTATA  
TCATATTAGGTATTGGATCGATGATTCTCACATTGGTTCTAGGATATGTTTTGTTAAGGTGGCAAAGAG  
AAGGAAGAATCCAGGTCAAACAGATGCATCTTTGGTTAAAAGACATGAAAGAATCTCTTATTATGAACTT  
CAGCAAGCAACGGAAGGATTGAGCGAGAGCAATTTGCTTGGTACCGGAAGTTTCAGTATGGTATACAA  
AGGGATACTTAAAGATGGGAATCTTTTGGCAGCTAAGGTATTCAATGTGCAATTGGAGGGAGCATTCAA  
GAGCTTTGAAACAGAATGTGAGATACTACGCAACCTTCGCCATAGAAATCTAACAAGAGTGATCACTAG  
CTGTTCCAATCCAGACTTCAAAGGCTTAGTATTGGAATACATGCCCAATGGAACACTTGATAACTGGCTA  
CACTCTCATGATTTGTTCTTAGACATGTTGAAGAGGTTGGACATTATGATAGACGTGGCATCGGCATTAG  
ATTATCTCCACAACGGGTATCCAACACCCGTGGTGCATTGTGACTTGAAGCCAAGCAACGTCTTGCTTGA  
TCAAGACATGGTTGGTCATGTGAGTGATTTTGGCATTTCAAAATTGCTAGGTGATGGGGAGACTTTTGTA  
CAAACAAGGACTATTGCAACCATTGGATACATTGCTCCAGGTAATTGAAATTTCAAACCTTGACATCCTTT  
AGATTTTCACATTTCAAACCTTTATCTAACAAGATTTCTCCCATGATTGCAGAGTATGGACAGGACGGAAT  
AGTATCCAAATGTTGTGTTGTTTATAGTTTCGGTATCATGATGATGGAACATTTACAGGTATGAGGCCA  
AGTGATAAAATGTTTACGGGAGATTTGAGCCTAAGATGTTGGATTAATGATTCTTTTCTAATGGAGTTG  
TGGATGGCAATTTGTTAAGGCCAGAGGAAGAACAATATTAAGAGAAAATGCAATGTGTATTATCTATCA  
TGGAATTGGCTTTGAGTTGCACTTTAGTGTACCTGATGCAAGAGTTAACATTGAAGATGCTCTTTCAGC  
CCTCCAGAAAATAAGACATCAGTTTGTCAATAGTTGTGCAAGGACTTAA

>M6-PGSC0003DMG400017943 M6 LRR-RLK

AAGAATTAATAGTGGGAATTTCACTTCGGAGGGTTGCCAATTGTGTGTGCCTTATGAATGACAGCCAA

TGAGTAGTTGCAGAAGGTGAATGTTATAGTTAAGCTAGCATAAATGGTTGAAAATGATAAGCAAGAAG  
TAGTTGGAGAGGTAACCTCGAGATCTGTGCTAGGATAGCAGAGATTCCGTTTGCTTCACGAAGAAGCTC  
AAACATTATTCTTTATTTCTTTTGAAAAGAAAAGTTTTTTCCTCCTACTGCTTTGTTTTTCTACCGGTAC  
CACCAGCTGCTGCTGCAGAGGGAAGTAAAAGAATAATCTGATTTTGCAAAGTAAACAAAATGCCGTAC  
GTTGGAGTAGCAAGTTTAGAGGGGAATTGTAAGGCACAAGACTTCGACCTTTTTTCTCAATTCTCAACCG  
TTATATATTAAGCTCTCACCCATTTTCTTCATTGCAGTAGAGTTCACCATTATTCAAGGTATACTCTTTCCC  
CTATTATTTCAACTCTCTACTACCTTTGCTTACATTAGTGTTGATACTCCATTTTTCAAGGCACACCCCTCT  
GGCTCTGGCCATAGATTGTGTGTGGTAAGTGTTGGTTCATCAAATTTACTCATTATTTCAACTTCATTCAA  
ACATGTTTTCACTCATGTCCTAACACAACCTAACTTTCAAATTTTGATATGACAACCAATTTCTCAACTTA  
AGACATTTAACTACTTTCTTTGTCTAATGCTATGATGGAATGTTGAAATTAGGAAATAGAGGGTGGTAA  
TGCAGAAAAATCAAATCTTTTTCATACATGTCCGGTCTGCTCGGTATGGGATGCATCTAATAAGTTCATA  
GGGCTTCAGAATTTAGGATGTTTATCTCTAAACAAGGTTTTTACTCTTATTATGAATCCAAGTCTAAGCT  
TCTTTTCGCCTTGTTGACTACATATGAGAACGCCACAAAGTGTCTTTGCTCTACGGGGAATTAATTGTC  
TCTTCATTTCACTGTGATGGGGATATTTCCATATATCTAACTTCTCTGCCACATTTTTGTTTACCATTGT  
TACTAGGTGATGCAAATGGATGACATACAAAGTTGATATCTTATGGCAACTTGAGTTGACTTGGCAAGT  
CCAGGAGAAAATAGATTTAAATGATGAAGCTACACCCAATAATAGATCTACTTCCTCTTTCTCTCTCCTA  
TTTTTGCTCCTCTCCCAAATGTTATTGCTGACCTTAGCTCAGATAGACAAGCACTACTTGACTTTGCTTCT  
GCAGTACCTCATCTTCGAAACTTCAAGTGGAACACTAACTCTTCCATTTGCACATGGCATGGCGTAAGTT  
GCAGCTCAGATGGCACTCGTGTAGTTGCACTTCGGCTTCTGGTATTGGACTTTATGGTCCTATTCCAGA  
CAATACCATAGGAAGACTGGATGCACTAACAACCCTCAGCCTTCATTCCAATGCCCTCACTGGAAATCTT  
CCTTCAGACATCATCTCTATTCCGTCCCTCCATTTCATATTTATACAACAAAACAAATTTTCTGGTGAATA  
CCTTCTTCTATCTCTACAGCTTAACTTCATTGATCTCTCTTTCAACTCCTTCTCAGGGGAAATTCCAACA  
ACAATTCAAATCTGACACATCTTACTGGTTTAAACCTACAAAACAACCTCCCTCACAGGATCCATTCTAA  
TGTAACCTACCAAGGCTTAAGCAATTGAATATGAGTAATAATCAACTCAATGGTTCAATTCCACCATCC  
CTTGCAAAGTTTTCTGCTTCTTCATTTCAAGGAAATTCTCTATTATGTGGACAACCCTTGACTCAATGCCCT  
TCTTTTGCCTTACCATCTCCATTCCTTCAATTCCACCTTCTCCTTTGAGTCTAACACCACCATCTCGTT  
CTCCGAGCGTCTGCCAGCCTCACCAACAATTCCTGAAAACCATAAAGGCAAGAAAAGCTTGAGTACAC  
GGGTTATCATTGGCATTGTTGAAGGAGGTGTTGGAGGGATCCTATGTCTAGCTGTGTTGATTTTCTTGTG  
TTGTATGAAGCGATATTATACTAAGAGAGGTGTACAGCAAAGAAAAGACTTTAATGGAGGAGGAAGTC



CTACCTTACCCAACATTGAAAGACTTTATCTGCATAGCTTAACCAATCTTGTTGGGACTATTCCTCATTCTA  
TCTCCAATTGTTCCAAACTTACTAGACTAGAGCTTTCAGATAACAACTCACAGGATTGATTCCCAATTCT  
CTTGATATTTGACTCATCTACAATTCTAAACTTGGCCACAAACAATTTAACCAGTGATTCATTTTTAAG  
CTTCTCACTTCCTTATCCAATTGTAGAAATTTAATAGATCTTCTCTATCTTTGAACCCTCTAAATGCCAT  
GCTTCCGGTCTCCGTAGGGAACCTCTCCATATCTCTTATAAAGTTTGGTGCCAGTGCTTGCAACATCAAA  
GGCAAGATTCCAAATGAAGTTGGAACTTAAGCAACTATTAGACCTTGATCTTTCTAATAATAACTTGA  
TCGGATCAATTCCTACATCAATTCACAACCTTGAGAACTTCAGCGCTTGTACTTGAACAACAACAACCT  
ACAGGATTTATTGGAGATCATATCTGTAAATTGCAGCATTTGGGTGATACTGATTTGGGTCAAATCAAC  
TTTCAGGATCTCTTCTAATTGTTTAGGGAATGTTACTTCCCTTAGATTGATATATATGGATTCCAATAAAT  
TGAATTCCAATATACCAACAAGCTTAGGAAATCTAAAGATCTAATGGAGCTTGACTTATCGTCAAACAA  
CATGGTTGGTTCTTTACCTCCGAAATTGGAAATCTAAAGACTGCGACATATATGGATCTATCAATGAAT  
CAATTCGCAAATGGTATTCTAGAGAAATTGGAGGATTGCAAAATTTGGAGTACCTTTCTTTGAGGCACA  
ACAAGTTGCTAGGATCTATTCTGACTCAGTGAGCAACATGGTAGGTTTGGAAATTCCTAGACATTTCTCA  
TAATAATATATCAGGAACCATTCTATGTCTATGGAGAACTTCAAACCTTGAAGTATTTCAATGTTTCTG  
ACAACAAATTGTATGGTGAAATACCCTCGGGGGTCTTTCAAGAACCTCTCGAGTCAGTTTTTTCATCAA  
CAATGAAGCATTGTGTGGTTTGTCAAGGTTTAGTGTCCCGCCATGCCCACTTCATCAAGGCATAGATCA  
AATAGGAAACAAATGCTACTTCTTTTTCTTTGCTTGGAAATGCACTTGTATTTGTTCTATCTCCTTTGTG  
TTCCTATGGATAAGGTATAGAAGAGGTAAGATCTCCTCAACAAGCTGATTCATTGTCTATTGCAACAA  
CAGAAAGAATTCATACTATGAACTACTCCAAGCAACTGATTCGCTTAGCGACGGTAATCTAATTGGTTC  
TGGAAGTTTTGGCTCTGTTTACAAAGGTGTTCTCAGGAGTGGGACTGCCATTGCAGTTAAAGTGTTCAAT  
CTGCAACTGGAAGCGGCATTCAAGAGTTTTGATATAGAATGTGAAGTTTTGCGTAGCCTTCGCCATAGG  
AATCTTGTGAAAGTCATCACTAGTTGTTCCAACCTTGATTTAAGGCTTTAGTGCTCGAGTATATGCCTAA  
TGGAAGTCTTGACAAGTATTTGTATTCACACAACCTACTTCTAGACATTAGGCAGAGACTAAGCATTATG  
ATAGATGT

>M6-PGSC0003DMG400018171 M6 LRR-RLK

TAAACAAATCCGAAAAAACACCCATCTAAAATTCCTCCCCACTCTCTTACATAATGGCCTAGCTGTTC  
TTGGATCCGGAGATTCTGGCAACTTTTTCAAATTTTTATATGTAACCTACATAAAATCCATTAGCCCACAA  
GACATGATTTGGTTTTCTCTGTCTCTCCTCCCTAGGCTTAAACCTCTACACCAAAACCAAGAACAAGG  
CTTCTTTCTCTGCTTAATCTTGAAGTTGTAGCAGCAGTCACATATTTGTTCTAATCTAATGCCTGTTTAT

TCATGGACCCTCTTTTTCTTTTTCTCCTTCTTTCTCTTTAATACCTCCTCTGCTCTCAACCCTCAAGGTCAGG  
CTCTTCTTTCATGGAAGACAAGCTTAAATGGATCATTAGATGTGTTGAGTAATTGGGATCCTACTGATGA  
AACTCCATGTGGTTGGTTTGGTCTTACTTGCAACTTCAATAAGGAAGTTGTTGAATTGGAATTGAAGTAT  
GTGGATTTGCTTGGGATTGTTCTTCTAATTTAGCTCATTGGTGTCAATTGAACAAGCTTGTTTTGTCAGG  
GACTAATCTTACTGGTGTAAATCCAAAAGAGATTGGGATGCTTCAGGGACTTAAGTTCTTGGACTTGAGT  
GACAATGCATTGACAGGTGAAATTCCAAGTGAAATTTTTCACTTGCCAAAGTTGGAGCAACTTCATATCA  
ATTCAAACCGGCTGGTCGGATCGATCCAGAGGACATTGGTAACCTCACAAGCTTGGTGTGGCTTATATT  
CTATGATAATCAGCTGAGTGGTGGAAATCCAAGTAGTATTGGGAATTTGAAAAACTGGAGATTATTAG  
AGGAGGTGGAAACAAGAATCTTGAAGGTCCATTGCCTCAAGAAATTGGCAACTGTAATAATTTGGTTAT  
GTTAGGATTGGCAGAAACCAGCATTCTGGTTTTCTACCTTCTTCTTGGCCAGCTGAAAAGACTCGAA  
ACGCTTGCTGTTTACACCTCCTTGCTCTCTGGACAAATCCCACCAGAGCTCGGGGATTGCTCCAAGCTCC  
AAACATTTATCTTTATGAAAATCACTCACTGGTTCAATCCCAGCTCGGCTTGGTAACCTCAAGAACCTT  
CAAAACCTCCTTTGTGGCAGAATAATTTGGTTGGAACAATCCCTCCCGAGCTTGGGAAGTGTCAACAAT  
TACAAGTCATTGACATTTCAATGAATTCATTAACCGGAAGCATTCCGGAATCATTGGGAGATTGAATTC  
AATGCAAGAGTTACAGCTGAGTGTTAATCAGATTTAGGTTCGGATTCCAGCACAAATTGGCAACTGCAC  
TGGTCTTACTCACATTGAGCTCGACAACAATGAGATAACCGGTTCCATACCATCGGAATTCGGAAACTTG  
TCGAACTTAACTTTGCTGTTCTTGTGGCAAATCGTCTTGAAGGGGAAATTCCTTCTTCAATTTCTTGTG  
CCATAATCTCGAGGCTGTTGACTTGTACAGAATGCATTGACTGGTTCGATTCTAAAGAGATATTTCGAT  
CTTCAGAAGCTGAACAAGCTACTCCTACTGTCTAATAATTTCTCTGGTCCCATTCCACCAGAGATAGGGA  
AATGTTTCATCGCTGATTGACTTCGGGCAAATGATAACAAGCTGACCGGATCACTGCCACCGGAGATTG  
GGAAATTGAAGAACTTGAATTTCTTGATGTCGGATCCAATCACCTCACCGGGATCATTCCACCGGAATT  
ATCTGGATGCCGGAATCTGACATTTCTAGACTTGCATTCCAACCTCAATCAGTGGCAATTTACCGGAGAAT  
TTGAATCAGCTTGAATCCTCCAGTTCATTGATGTTTCCGATAATTTAATTGAAGGCACTTTGAGTCCGAG  
TTTCGGCTCACTGACTTCACTACCAAACCTGTTCTGGGTAAGAACAGGTTTTCTGGTCTATTCCAACCTC  
AACTCGGTTCTGCATGAAGCTTCAGTTGATTGACTTGAGTGGTAACCAACTCTCCGGCAAGATTCCGGC  
GAGTGTGGTAAAATCCCTGGTCTAGAAATTGCACTGAACCTCAGCTGGAATCAACTTTCCGGTGAAATT  
CCGGCAGAGTTCGCCGATTGGACAAGCTTGGAGTGCTTGATCTTTCTCATAATCAGCTCTCGGGGGAC  
CTCCATTTTCTCGCGGACCTACAAAATCTCGTGGTTCTGAATGTCTCGCACAAACAATTTATCGGGGCACGT  
GCCTGACACCTCATTCTTCTAAGCTCCCACTCAGTGTACTTGCTGGCAATCCAGATCTATGCTTTCCCG



GCAACCAGTGCTCCGCCGATAAGGGCGGGCGGTGTCCGTCGTACCAAAGCGGGCGAGGGTGGCGATGGT  
GGTGTGCTTTGCGCAGCTTGCCTCTCCTTGTGGCAGCTCTCTACATCATCTCAGCGGCAAAATACGG  
AACCGCAAGGCCACGATTACGATCTAGATGGCGACAATGACGTTGAACTTGGCCACCATGGGAGGTC  
ACAGTATACCAAAAACCTCGACTTATCTATAACTGACGTCGCAAAATGTTTAACCGTTGGTAACGTCCTCG  
GCCGTGGTCCGGAGTTGTGTATAAAGTGAATATTCCGTCAGGATTGACGATCGCTGTGAAAAGAT  
TCCGAGCATCGGACAAGCACTCGATGTCGGCATTCTCGTCGGAGATTGCCACGCTGGCACGAATTTCGAC  
ATCGGAACATTGTTAGATTACTTGGATGGCAGCAAATAGAAAGACTAAGCTAATGTTCTATGATTATTT  
ACCAAATGGTACATTAGGTTCATTTTACATGAAGGTTTTGGAGGGTTAATTGAGTGGGAAACCAGATTC  
AAGATTGCATTAGGGGTGGCTGAGGGCTTAGCTTACTTGCACCACGACTGCGTTCCGCCCATCCTCCACC  
GCGATGTCAAAGCTCAGAACATTTTGTAGGTGATCGTTACGAGCCGTGTTAGCTGATTTTGGACTTGC  
TAGACTCATGGAGGAGGAAAATTCTTCAGTTACAGCAAATCCTCAGTTTGCTGGATCTTATGGCTACTTT  
GCCCCAGGTAGATATTTCTTCTTCTAGTTCAAGTTCATTTCTTTAAAAAATCGACTAGTTATGATTCAT  
TTATTACTTTAGTTATTAGAGGAATTCTCCTCTAATGCAATTATGTGAGGTTTCATTTATCACTTAGTTCAA  
GTCCATGGTGGAGCTAGAGGGTGGAAGGGAGTTCCTTTGAACCCTCTTCGTCACAAAATCACACACATA  
TATAAGAACTATTTTTTCAATATATGTATGGAAATTGGAAGGAAGTAATCTCAAATACGCTTGATATCAA  
TACAGACTTAGGTAAAGATAGTACAAATGGAAGAAAAAGATCCATATATAGCTTAATGCTAAGGATAGG  
TTAAAGACTGGTATGAACTTTTATCATGATTATTAATAGTATTATATATTTTATATTTTTAACATATTTTTT  
TACTTTATGATGATGATATGATGTGAGCTTAAATGAAATTAGGATTCATATAGCGACCCAAGTTTGCCTT  
TGGATTTTTTCCGCTTTTTTCTTTATAGAAAAAAGAAGTGAATGCGAGGTAGCAGAAGAGAATAGATA  
TAAAGCACTGCAAACACAGAACAAGAAGGAGAATTCAGATGAAGTTGCTTCATACGGATGGAATTGG  
GTCATTATTTGACAATATATGCATGTGAAGCCATGTGCTAGCTTTAACTATGTGCAAAACCAAGTTTGT  
ATGACATACTTGGCAGCTACAGTGCTATTTCCCATCTTTTTGCCTGTGTATGGCCCCCACTAAAGATAC  
TTAGGATGGGGGATACTCTAAAAAACCATAACCTAAGTTAGTGGTCACACTTTCACCAGCCAAGCATG  
GACACATTGCTGCTGTCTCCATATCCCTTTGGCCATTGCTTGTGTCCGATTGCGATATGTGAAAAATAAT  
CGCCCAACAAATGCCTTTGTTATGTTTCAAAAAACATCAAGATCAAATAGGTGATAAATATCTGGCATGA  
AAAGGACTAACTCTGTTCTATTGTTTTGTCTTTTGCAGAGTACGCTTGTATGCTAAAGATTACAGAGAA  
GAGCGATGTTTTTAGCTTTGGAGTTGTGTTGCTAGAAATCATTACTGGGAAAAAACCAGCCGACCCATCC  
TTCCCTGATGGCCAACATGTTATAACAATGGGTTTCGCGACCACCTAAAGAGCAAGAAAGATCCAGTTGAC  
GTAATTGATCCAAGGTTACAAGGACATCCTGATACACAAATTCAGGAAATGCTTCAAGCCCTTGAATA

GCCTTGTTGTGTAAGTAAACCGGGCAGAAGATCGTCCAACAATGAAAGATGTGGTGGCATTACTCAAG  
GAGATTATCCATGAGCATGCAACAGGAAATGAAGCTAAAAAGACATTGAACAACCTCTCAAAAATGTCC  
GATACTTCATCATATTCTACTCGTCTTCATCTGTCACTCCAGCTCAGTTGCTACGCCTCCAAGGGTCGTTT  
AATTGCTCTCTGACTCACTCATCCTCCTCCGTTAGCTATAGCACCAGCAACCAATAATAATGTAGCGATAG  
TCATGATAGATCTGTTATTCTTTTGAAGTAGATAGTATTAGCAACCGTAAAGAGCTAGGTAGAGGGAACC  
TTATTGTCAATTTAATTGTTAAGCAAATGAAAATGAAATCCATTGTACAGCAAAGTCAAATTTTCTTTAT  
CTCCC

>M6-PGSC0003DMG400018253 M6 LRR-RLK

ATCTGTTCTTGATCTTTTCGCGTAATAACTTAACTGGAGAACTCAATGATCTTGATTTTGGGACTTGTCAAA  
ATCTCACTGTCCTAAATTTGTCTTTCAACAACCTTACCTCAGTTGAGTTTCCACCCTCTTTGGCAAATTGCC  
AGAGCCTCAATACACTGAACATTGCCATAATTCGATCCGAATGGAGATTCCTAGCGAGTTATTGGTGAA  
GTTGAAGAGCTTGAAGCGATTGGTGCTAGCCCACAATCAGTTTTTTGATAAAATTCCATCAGAATTGGG  
GCAGAGTTGCAGCACACTTGAGGAGCTTGATCTTTCTGGAAACCGGCTGACTGGTGAACCTCCTTCAACT  
TTAAATTGTGCTCCTCACTTTTCAGTCTCAATCTTGGTAACAATGAGCTATCGGGTGATTTCTTGAATAC  
TGTTATCAGTTCATTGACAAATCTTAGGTATCTTACTTGCCATTCAATAACATAACTGGTCATGTACCAA  
GGTCTTTGGTGAACGTACAAAACCTCAGGTAAGTCTGACCTTAGTTCCAATGCGTTTATTGGGAATGTACC  
TTTTGAGTTGTGTTTAGCTGCCTCAGGCTTTCCACTGGAGATGATGTTGTTAGCCAGTAATTATCTTACTG  
GAACTGTGCCTAAACAGCTTGGACATTGTAGGAACCTCAGGAAGATTGATCTCAGCTTCAATTACCTGAC  
TGGTTTGGTCCCATTGGAGATTTGGACCCTTCAAATCTTTCGGAATTGGTAATGTGGGCTAATAATCTC  
ACAGGTGAAATCCTGAGGGCATTTCATCAATGGAGGAAACCTTCAAACACTCATTCTCAATAACAATT  
TCATCTCAGGGGCACTTCCACAGTCCATTTCCAATTGTACCAACTTGGTTTGGGTTTCGTTGTCTAGCAAT  
CGACTGTCTGGAGAGATAACCACAAGGAATTGGGAATCTTGCAAATCTTGCTATCCTCAGTTAGGTAATA  
ACTCACTTACTGGATCGATCCCTCGGGAATTAGGTTTCGTGCAGGAACCTGATATGGCTAGATTTGAATAG  
CAATGCTCTAACAGGTTCAATCCCTCTTGAGCTTGCTGATCAAGCTGGCCATGTTAATCCGGGAATGGCT  
TCTGAAAACAGTTTGCTTTTGTGAGAAATGAGGGTGGAACTGAATGCAGGGGTGCTGGTGGACTGGT  
TGAGTTCGAGGGTATCCGCGAAGAGAGGCTTGCAATTTTACCTATGGTTCACTTCTGTCCATCAACTAGG  
ATCTACTCTGGTAGGACGATGTACACCTTACGAGCAATGGAAGCATGATTTACCTTGATCTTTCCTACA  
ATTCTTTTTCAGGAACCATTCCTGATAATTTAGGTTTATTGAGCTTCTTCAAGTTCTGAATTTGGGACAC  
AACAAATTTACCGGAACCATTCATTCAACTTTGGAGGTCTAAAGATAGTTGGAGTTCTTGATCTATCACA

TAAACAGCCTACAGGGATTCAATCCACCCTCGTTAGGAGGCCTTTCATTTCTTAGTGATCTTGATGTTTCAA  
ACAACAACCTTATCGGGAACGATTCCCTTCTGGTGGACAGCTGACTACATTTCCAGCTTCAAGATACGAAAA  
CAATTCAGGCCTTTGTGGCGTCCCCCTCCTCCTTGTGGCTCGGGCAATGGACACCATTCATCGAGTATTT  
ACCATCATGGGAATAAGAAGCCTACAACCTATAGGAATGGTGGTTGGTATTATGGTCTCTTTTGTATGTAT  
TA

>M6-PGSC0003DMG400018263 M6 LRR-RLK

GAGATATTATCCTCTTGCTGTTTAGAGAACAGTTTAACTCCTCAAACAAACCAACACTTGTGGTTTCTCT  
TTCTTCCATTTACTCTTCTTTTCTTTTCTTTTCTTTTCTTTTCTTTTCTTTTCTTTTCTTTTCTTTTCTTTT  
TAGTACACATATTGGCCTCTAAGAAGAACTAAGGTTGC  
ATGGTGGTGGATTTAAACAATGGTCCAAACAAGAACAATCCAACCTGATCATCTTTTGTCTGCTTATTATTT  
CTATGCAAGTTTTGGTGCAGCTGGGAGCTTCAACAAATTCTGGTACTGTAAGTCCTACTTATCACATCT  
CTTTTGTGTTTTTTAACTCTATAATTATGAATTTAACTTATATACACCATATCGCGAATAAAAAATAAAG  
TTATACTAGTACCTAGCACAGTTTAAACATGTTATATCGTAAGTTACTTATTGTAAATAGTTCTTTTTTTAGA  
TGATCTGAGTTATGAAAGCAAATTGTTTTCGTTTTTTTTACTAGGGAATATATTAGTGCCACTATTTTAA  
CTCCAATTTATTTTGTATCCCTTTTTCAAGTTCATTACTTAAAAGGTCATTTCAACTATTGAACATAGTAATG  
CTTTTCTTGTGTTTTGTATCAGAAAAGTCAAATATGATTTTCTTCATCAATTTCAATCCGTATGTTCCGAATT  
ATTTTAAAAATAATTAGTGTTTGGTATTTTTGTTCAAAAATAAAATGATTGGTGCAGATGTTGTGTTAGA  
GTCACTGAAGGAAGAGTGGGAAAACATACCTCCAAGTTGGGATGGGTCTGATCCTTGTAACGATCCATG  
GGAAGGCATCGACTGCAACAATTCACGTGTTATTTCTATGTAAGCTTTTTTTTTTGTGATTAAATTA  
TGTTAAAAGAGAATCATATTAATCGGAAATAATAATAATATTACCACTCTTTAAATTATCCTAAATTTAT  
GAATAAAATGTTGAAATTAAGAAATAAAAAACACAAGTGCCTCTGTCAAAAATTCATTTTTCTTAGCT  
CGACAACGTCACGTGTTTAAATTCAATGTTCAACCCACCTCATTTATGCCAGCTAAATAATATCTTCGATTTT  
TAAAAAATAAATCTTCAATTTTTTAAACTAGATAAATAAGGAATTTTCCAAAAAACAGC  
AAAATTTTTTTTTCTTAAAAATTCTTAATTAGTAAGAAAAGTACAAAAATATGTAAGTGTACTGTATTT  
ACTCTTCCATTTTGGTCAGTTCATGTGTATATATAATAGAAAATAAACTAAAATGCTTATTATCTAATGA  
AACTAGGTTAAATTAATCATATTAATTTGTTAAATGACATTGCTAATTGTAATTTGAGGTTACTAATTA  
ATGATTGTGAATTTAGAAAATTATCAAGCATTAACTGAAAGGGGAGCTATCTGGAGATATCGAAGGC  
TTGTCTGAATTGCAGATATTGTATGTCTTCTACTCATCATAATTGAAAGTGTAAAATTTGGAGAAAAAA  
AAATTGTCTTAATTATGTTTCGCTCTGTTTCAATTTATTTGTCTGATTTGGATTTGACACATAATTAATGAAA  
GTAAATAAGATTTTTGAAATCTTGTGTGGTAATATGACCATTTTTGTTTTGTGCTCGCCAAAGTGTTCCT

AAAGGATTCATTACAAAAATAATAGTTTAATGATTTTATTTGGTGCGATAAAATGAAAGTTGAGTGATC  
ATCTGTGAAATTATTCCTGTTCTTGAAGCACCATTTTGCTTGTGATCATGCATTGCATGCACACAAATATT  
TTTGAAGTGTGAAAGTTTTAAATTTATGTTCTGATTATCTGTTTCCTTAATAGGGATCTATCATAACAACAA  
GGCATGACAGGTTCACTCCCTCAATCAATTGGAAATTTGAAGAGTTTATCAATTCTGTAAGGGTATTATT  
ATATGATAATGATTAAATGTTGTTAAATTCACCAGCTGTTTTATTAGAGTAATTGCTCCGAGCTGCCTCG  
CAGGATCCTTGTTGGTTGTGGGTTTTCTGGACTGATACCAACACAATTGGATCCCTTAGCCAGCTGGAA  
TTTCTGTAAGGATATCAATTTCTTCTGTTTGCAACTTTTTATGCTTAACGAATTCAAGATATGGAGTATTTG  
AAGAACTTTTAGTCCTTTATGTTTTGTATAAAATTGGAAATTTGGCATGAGATGAGTTGGATGGAGTAAC  
TTGGTCAGTGAGGATTTATATAGCTGACCTCAACTGTTTGGGGACTGACGCTTAGTAATTTTTGTTGTT  
GTAGTAATTCTTGTATCCCTTTACTTTGTCAAAGTCTGAAGTCTTAGAGCTTCAGGTCCTAGATATGTTA  
TACTAGATTGAAATATTTTCTGTTTCTTCTACTGGGCTACATTTCTAAAATACTATCTGAATCATGCAGA  
TCTTTGAATTTAAACAACCTTTATCGGACCGATACCAGCTTCTGTTGGTAATTTATCAAAGCTACGTTGGCT  
GGACTTAGCTGATAATAAGCTCAGTGGACCTCTCCAGTTTCCCATGGAAGCACACCTGGTCTAGACATG  
CTTGTTACACAAAGCATTGTGAGTAATACTGATTACTGTCAGTTCCTTAAGTAACACCTTCGTCTCTCA  
TTTTCATCTGATATACCACTTACCTCGCAGTCACCTGGGGAGAAATCAGTTCTCAGGTGAGATTCCAGAT  
CAGCTATTCAGCTCAAATATGACTCTCAAACATTTGTAAGTTCCTAACTGGAAGTGTATATATTTTTG  
AGAATTATTTGATGGATCAACTTCATTATTGTCCCACTCCAACGCTATGGTGCTAGCTCTGACACTTGTTG  
CAAACACACCCGTTTGGCTAATGGTTTCTTCTGTTTGGGTCTTGTAAATTGCACAGGCTGCTTGAGCAA  
ACCAGCTTACTGGAAAAATACCCCTTCATTGGCACTTGTGCAGACTCTGGAGGTGGTGTAAAGTATTTCC  
AAAATCCATCATGCTCTTAAAAAATTCTAATAAGTGTCCATCTTTCTTCTTTCGATTACCTGGTGAAGTTT  
TATTAAGTATGATACCCATGTCCACTGTAGTCGTCTAGACAGGAATTCATTAGACGGATCGATTCCATCAA  
CCCTCAAAAATCTCACACTTATGAGTGAAGTGTGAGTAGACAAGCATTATGCTAATATAAAAAATCCTTTT  
TATGAGTGTATCAGACCATCTATAAATTTCCGTATCACTTGCAGCTTCTTATCAAACAATAAATCACTG  
GCCCCTTGCCCAATCTTGCTGGCATGAATGCCCTCTACTACTTGTAAAGTTCCTTGAAGTCTTTTCTGCTAA  
GAAAATGCAGCAATCTTGATATTGTGATAATTACAGATTATGCTTTTCAGTTACTTTAATTTGATTCTGTG  
GCCTATGGTCATGTTTTGCAGAGATATGAGCAATAATACATTCAGCTCAGCTGATTTTCCGCAGTGGTTT  
TCAACTTTGCAGTCATTGACGACTCTGTATCTATCTCTCTCTCGCTTTCTCTTTATCTCTTAACATGCATGTG  
TGTATCTGTCCCTGAGTTCACGTGCCTCAGCAGAACTCACATGCGTCTGAGTGTATATGTTATCCTAATGA  
AGTGGTTCATAGAATTTGTTATGCACCTCATTGTATTTGTTCTGCTCATAGGGTAATGGAGAACAACCTCAA

CTTCAAGGAGAAATTCCGCAAACCCTCTTCAGTCTTTTTCAGTTGCAGACTGTGTGAGTGTTCTGTACTT  
TTAGTACATGGTTCATGTCATGCAACTATTCTCATTTTTCGCTGTGTGCTAGTCTTGTACAAAGTTTAAAAG  
GTAGTACAAAGTGACCTAGTATATAATTCTATGTTTTGCATTTTCGATTTTACGACAATGAGGTGGTTATTT  
ATGACAGCAACTTGAGGGGAAACAAGATCAATGGAACCCTGAATATTGCATCCAATATAGCAGTCAAT  
TAAAAGTATTGATTTGCAGAACAAATCCATCGATTATACAGTAAGACCTGGATTTCTTTTTCAAATA  
ATGTAAGTCCTCAAGCCACTTTTTCTCCACTTTAGCAATGAGAAAGAAATAATGGATCATTATGTTAGG  
ACATTTGATTTCGTCTGAATACAATTTAGTCATTTAACAATCTCAGTTTTCTACTTGGTCACTTGGCAGACTT  
ATGCATAATCCAGTTTGTATGAAGAAGGATCAGAAGACTATTGTGGCATTTCCAAACGAACTTTGGAT  
ATGCAACTCCACAAGATAATTGCCTTAAAACACAATGCAGTTCTGATCAAATTCTTAGCCCTACCTGTAAA  
TGTGCTTATCCGTACACAGGCGACTTATTCTTCAGAGCTCCTTCCTTTTTCTGACTTGACAAACACAAGCAT  
TTATGAGTCACTTCAGAAGTCTATGCTATCTTCTTTTAGCCCAAATCAGGTGCCAGTAGATTTCAGTTTCT  
TGAGTAATCCAAAAAAGAATTCAGAGTACTACCTTGTGTTACACCTGCAAGTTTTTCCATTTGGCCAAGA  
TCATTTCAACCGTACAGGGATTGCCACAATTGGATTTGCACTTAGCAACCAGACTTACAAACCCCCACCA  
AATTTTGGACCATTCTTTTTCAGTGGTGAAAGCTACAAATACTTCGAAGGTGATTGGTCATTTTCATTTT  
TGATATGTAAATGTATTTCTTATGCACAAGTTTCATCTGTTAGCCGTAATATTAGTCGTGGTATTACTCT  
GTAGTTTCTGTCTTTAAGTTAGGTTATCGTCTATAGTTTTTTTACACTTCGATATATTGTTTTCAGTTGG  
ATCAAGAGGAACTCACAAGTCAATCACTAAAGGAATTATAATTGGAGCAGCTGCTGGTGGTGTCTGTCT  
TTAATTTTATCAGTAATAATAGGAGTTTTAGTTTGCCAAAAGAAAAGAGATCAAGAAGCTGTTAGAAAAG  
AGTAACCTTTTCGGTGAGTTCTGTTACTGTTCTTTAGTGTGCTTCTAACTTTTTATTTTCGCTGATGGTTAT  
CGTCTTTTTTATCTGTCCAGCTACATGGGATTCTATAAAAGACAGTGGTGGTGTCCACAATTAAGGT  
GTCAAATGTTTCACATTTGAAGAGCTGAAAAAATACACCAATAATTTTTCAGAAAGCAATTACATTGGAT  
CTGGTGGTTATGGGAAGGTTGGTTTCTATTGACTTTTGATAATACAATGTTATATTATAATGACTGGTTA  
AAAAGCTGTTGCTTTAATTCTATCCATACTATCTGCACCATCTTTCGGGCAAGCTAAAGTTAGTCGATCAC  
TTAAAAGTCTCGCGAACTTACAGGTATACAAAGGCACACTTCCAGATGGACAACCTTATTGCAATTAATA  
GAGCAGAACAAGCATCTAAGCAAGGCGCCCTCGAGTTTAAAAGTGAAGATTGAGATTCTTTCAAGGTTTC  
ATCACAAAATGTTGTCAGCCTTGTAGGATTTTGTTCAGGCAAGGTGAACAGATGCTGGTCTATGAGTT  
TATACCAAATGGATCCTTGAAAGAGAGTCTTTCAGGTATTTTGAAGTCTCATCGACTGTTGTTTTGAAAAT  
CAGCTGTAGGTTGGAATGTCTGGGCATTGATAAGTTAGTGTTAACTTCTGCAGGAAAGTCCGGGATTAA  
GTTAGATTGGAAGAGGAGACTTCGGATAGCCCTTGGAGCAGCCAGAGGTTTGAATATCTTCATGATCA

TGTTGACCCTCCTATCATCCACAGAGATATCAAATCGAATAACATCTTGCTGGATGAGCGCTTGACTGCA  
AAAGTTGCTGATTTTGGTCTTTCCAAGACGATGTATGAGCCAGACAAGGGTTACGTCAGCACTCAGGTT  
AAAGGAACAATGGTAAGTCCAGACTTTACAAATGTTGTCATATGGTAGCATTCTCAGTTTCTATATTTCT  
TAAGTCACTGGAACTCCTGTCCTTAATAGTTATAGACTGGTGATCGTCTTGGTTCAATTCTTAAAAGTT  
AACACTGAAGTTGCGTCCTGATCAATTACACATTGTGCTGAACTTATGTATGTAAGTTCATACAATGAAA  
GGAGTTCATTGGTTAAACTGCTTAAAAAGACTAAAACAACAGTTGATTTGTAATTTTCGCAGAGTAGAAA  
ACTTGAAACCCTTGAACACTTGCTATCAACTTTGTTTGAAGAATCTGTAAGTGAACATTTAATTAATACGA  
GCTGCTTTGTACATTTATCGGCTTAGGGCTACATGGATCCAGAGTACTACACAACACAACAGTTGACTGA  
GAAGAGTGATGTCTATAGCTTCGGAGTTCTGCTGCTAGAGCTTATAACAGCACGGAGTCCTATTGTGAG  
AGGAAAATACATTGTGAAGGAATTGAGGCAAGCGATAGACAAGTCTAAAGACATGTACAACATTGATG  
AGTTTGTGATCCTGCTATCCCCTCAAACATGACACCTATAAGCTTCAGGAAGTTTGTGGATCTAGCTTTC  
ACATGCCTCGAAGATGCAGGAGCTAATAGGCCAACAATGGCTGAGGTAGTGAAAGAGATTGAGAATAT  
CATGGAAATAGATGGATTGAACAGTTGTGCTGAATCCAGATCAACTTCTGTGAGCCACGAAGGAACCAG  
CGCAACCTTTGATCATCCTTACAGTGAGGAAAGCCTAAATCGTTACAATGGGGTCACCAATTCGCGATAA  
ACACCAACTCTTCTCCTGAAACCAGGTACATTGTCATAGAAATGGAAAGTGTATTCAAGCAACTGTTGTG  
CTTTTGTGTTAGCTGTGTACATTCTGTGAACCTCTGTGTGCGGCGTAAATTGCCTTATACTAGAAATGATT  
CAAAAGTCCATCTAAGGATTTTTATAAACAGCCTTGTATGTTTCAACTGTTTGCTTCTGATAATCCAGGAG  
CTAGACTCCGTGGATTCAAATGAGTGATTTTATTGTACGTATACATTTTAATTTTGATTTTTTTTTTACCT  
ATGTATACATAATACGAATCAAAAAGTAATGCTTCAATTGAACCTACACAGA

>M6-PGSC0003DMG400018264 M6 LRR-RLK

ATGGTAGTTTCTCTGGAAATGACACTGCAAATCTAGTCTATTTTCTGGTTGTTCTGATTCATGTTCTGTC  
AATAGCAGCATATACTAATCCTGTTGATGGTAAGTTGCTTTTATTCTTCTGTATCAAATGCTTCTTAACCA  
GTGTACACTAATATTTGATTTTCTGTGAGTACTAGTGTCAAATCTTAGGTTTCCTTTTTTGTAAATAATAG  
AAGAAGTTGTCTTAAAAAAAGTACTCCAATAAATAATCCAGAGATTATGGAAAATATTCAATAATCTT  
GAGGGAACATTATATTAACATTTCTGCTCTCTTCTAGATATGGTCAATTAAGTGTCTAGTATAGAAG  
AACTGATTCAATATTTTATACAGCTGCTGCTTAAAGTCTCTCACGAATTACTGGTATGGTCCTCCGATT  
GGAATGGAGAAGATCCCTGTGGGAGTAGTTGGGAAGGAGTTGGATGCAGAGATTCACGAGTGATTCC  
ATGTAAGAATTCGACGTGTATCCCTGCTTAAAATTACAGAAATCATATGGTTGATGCCATCTTCTCAATT  
TCAGAACATTGTCAAGTATACGTTTGAAGGTCAGCTATCTGGAGACGTCCAAGGATTATCTGAACTGG

AAACTTTGTAGGTTTTCTTTAACATTTTCATGTTTCTCCTGCACACCCTTTTTCTTATGACTGAGCAATACT  
TTGGGATAATTTTTCAATTCTAATTATTGACTGTGTCTTATAGGGATCTATCATATAACAAAGATTTGACA  
GGATCTCTCCTCAGTCTATTGGAAAATTGACAAAGTTATCAAATTTGTAAGTGAAGGTGAATAATCATC  
GCTCAAGTATTCACTTACCAGCTAATCTCATGATAATATGCTGGTGTCTTCTTAATTTTATGACAGGATCC  
TTGTTGGTTGTGGATTTTCCGGACCAATACCAGAATCCATAGGAGATCTGAGGCGGCTGGCTTTTCTGTA  
AGCATTCTGTGGAACCTTTGTACTTTGAACGCGGACCAGTACGTGACATATTTTACCAGAACTCCAAA  
GGTCATATATGAGCTTCTTAAAATGGTTAACGTAATGTGTGGCTTTTGGTGCTAGCTGTACTCAAATTT  
GGTCCATCTCCAGGATAGGCAATGCAGTTCAGTTCATGAGGAGTTAATCCATGCTGCTATACTTGTGTT  
TTATACGTTATCAAATCTGAATAGTTGTGTTTGAACCATATCTACCTGTATATGATTTCTTTCAATCCTTC  
TTCTGGTATATGCTCTAAAACAGCCCCATTCTGTATTATGCAGATCTTTGAACTCTAACCGATTTACTGGA  
AGCATACTGCTAGCATTGGCTATCTGACAGAGCTTCATTGGCTCGATTTATCTGACAATCAGATAGAAG  
GAAACATTCCAGTCTCTAATGGGAGCAACCCTGGTCTTGATAAGCTTGTTAACTAAACGCTTGACGC  
ATCTCCTTTTTCTTGATGTTTTTTGTCTCTCAACTGCATTTTCTAAGATTATTTACATTTCTTCAGTCACTT  
GGGAAGAATCAGCTATCCGGTGAAATTCCAGCTAGTCTTTTCCATTCTAATATGACTCTGACACATCTGT  
AAGTCCATCGAATTGGAGAATGGAGTGAATGAATAATTTTGTCCGTAATGGAGACCTCACTTGTAGTT  
GAGCTTGCCTTTTGATATTCTTGTTAGTGCATGTTTTTACTTCTGAGAGTAGTCATGTGAAAGAAGCTTGA  
TAATTATATCACAAACAACCTTCTTTTGATCATGCTTTACAGTTTCTCATGCTTGTATATTCTAACTTGTA  
GGCTAGTTGAGAATAACAAATTTACCGGGGTAATCCCGGATACATTAGGATTTGTCCAGACGATGAAAA  
TGCTGTAAGTATTGTTATCTGTGCTTTCCCTTTATAATCTAGTAAAATTTCTTGCTCTCTATGCCTTATAA  
ATTGTTTCTGGTATTGTAATAGTCGTCTTGACAGGAATT

>M6-PGSC0003DMG400018367 M6 LRR-RLK

CTCTGTTAAAACAATGCTTTGCTTGCATTTTTAGTTTTGTTCTTTTGTTCAGCTCAATTATATGAAATC  
ATGATGTTTTTCTCAGCTTCTCCTCATTATTTCTTCATAATCACTTCATATTTGGTGGGTTTTTCTTCTT  
GTTACTGTACTTCAATTTTTACTTCTCCTTCTCAACTGTCCAGAGTTAGTTTTTTTTTTTTTTTTTTTTGTTT  
CTAGATTTGTTCTATCCTTTTCTCAATTTTTGAATACCCATTTTGTATCAGTTGGGTGTCATTGATTGCTT  
CTTTTTGGTTGTGTTATGATGAATTTGGGTTTGAATTGAAGTACTGATTTTTATTTTTGGGCTCTTTCAGAT  
TGGAGGTTTATGTATTGGTTATGCAGAGTGTGTTTCAAAGAAAGAGTAGATTGAAGATAAGGGTTACA  
GTTTGGATCAATGGGTTGGAAGAGATCTGTGTTAGGGTGCTTGAATTTGGAGATCTTGGTGGGGATTTT  
GTTAATTTTTGCTGTTTCTCAGCTTTCAGATGAAACTGACCCCGGAGATGGTAAGGAACAACAATATTAGTA

TTATCTTTGAGTTGTTTTGCGTTGAAGGAGAGGAATGCTAATTTTCATGTTTTGGGCAATGCTGGTTAT  
GAGGGACTGAATTATGAGCTGAGCTAGTTGTTAACTTGAACCTTTATTTTGGGCAAACGTTTTCAAGTCGG  
GGGGGAGCTGGAGTTATCGAAATTGGTCGGTTAAATGAACAGTCTCTATCCATTTCCGGAATTAAGTTA  
GGGCATGACTTTAGATATGAGGTTGCGTAGGAAATAGATTAGGTAGAAGATTAGTAGGTAATGGAGTG  
TTGTCTTGCTTATCCTTTGATGCTGGTAGTCCTAGTATTTCCCTTGGTAGTTTCTTGTCTTGGATTTGTGT  
TACTATTATTGCACTGTTTTGTTGCGGTTACCGTTGCTTGTTTTTTTCTTCTCAGAATGCTTTGTCATGCTTT  
CTACAGTATTTGCCACTATTATTTCACTTCTGTTATTTCTTTTTTCGATATGCCTTTTTCTTGAGCTGAGGGT  
CTATTAGAAACAACCTCTCTACCTCTTAAGCTAGGGGTAAGGTCTGCGTACTCTACCCTCCCCAGACCCCA  
CTTGTTGGGATTACATTGAGTATGTTATTGTTGTTTGAAGTAATTTACAAACAACCTCCATCATAACAAACA  
AAAAACGTTAAAAATAACCTAATCGTTTCACTTACATTCTCAAAAACTTGCATGCCATAGTTACCAATTC  
TACTAACAGTGGACAAGCTGTCATTATTTAGAAAAAAGAAAAAGAAAAAGAGACAGTCCCAGGAAATT  
GAAGGGGGGAGAAGAGGAAATGAAGTACTGACTCCTAGGATGCTAGTCAAGTGTAGGGGGCTATGGC  
CTCGTCAAGTGATATGTGAATCAACACATATTATTGTCCTAAATATCTACTAAATTGCCATCTTGATCGT  
ATAAACTTTGCTTGGTTTGAAGTTAGCATGCTTTAAATGTTTGAATCAAATTTTCTAGTTCATTTCATGAT  
CAATATCAACAATATTCTTATATGGTTTGAATTTCTAACTCTGGCATTTTCTTTCTGCTGGTCTAGTTGC  
TGCAATTAATGCCTTACATGCTTCCCTGGGATCACCTCCCCTTCTGGCTGGGGTGTGAGTGCAGACCCA  
TGTGATGGACAATGGCAAGGGGTCGTATGCCAGGAGACAAATATAATATCCATGTAACCTACCTCTTATT  
CGTTGCAGCATTTTCATGGATATTTGGAAGTCGTAATGTTAATCCTTCTAATCATCTTCTTTGCAGTCAATT  
AAATGCTGCTAACTTGGCAGGTGAACTAGGGGATAACTTAGCATCATTTTCTTCTCTCAAACGATGTAC  
GTGTACCCACAGATATATCTCCTTTGACATATATTTGGTTGTGTTTTCTGTGCATGTGCTGCATATATTAT  
GTGGATGCTTCTTTTCTAGAGGTTTCTTTTATTGTGTGACATGTGAACAATAATTGTGGAACTTCTTGT  
GGCAGAGATCTGAGTAACAATCACATCGGTGGAACCTTCCATCCAGTCTGCCAGTTACATTGCAGAAT  
ATGTATGTATTATCATTATCCTAGAAGGGGAAGCAGAGAATGAAGCTTGAACCTATCACAGCTTACCTTTT  
GAGCAAACCATTTGATAGTCTTTACCTTTTGGCAGTTTTCTTTTCTTTCAGATAATGATTTAGCCGGAAGTATCCC  
CAGTTCTTTATCTCCCTAAGTCAACTGTCAGCAATGTGAGTTTTCAGCTTATATTTTAGATTGGAGATTTCT  
CCGTTACCGTAATCATGGTTCCAGTCAGCTATACTTCTTTTTGTTTCAGGTCTCTCAATGGAAACCAACT  
GACTGGAGAACTTCTGATTCCTTTCAAGGCCTTACAGCATTGGTTAATCTGTATGACACCAAAACAAAA  
GCATTTCAATATTTCCATAGAGGTTTTTAATTGTCCATAACTGGTGGATTATTTGTATTCTTGCAGTGATT  
GTCAAGTAACAGTTTCAGCGGAGCTTTGCCGTCATCAGTAGGAACTTGTCTCCTGACCACTCTGTGA



GTGATTCTACATATTGTTGAATTGGTTTGTAAATTTATGACCAATAGAAAAGCAGCTTATTTCTTTATCTCC  
AGACATGTGCAGAATAACCAGCTTTCTGGAACTCTTGATGTTTTACAAGATCTTCCCCTCGCAGATTTGTA  
CTCTTCGTCACCATTTTTACTCAAATATTAATTCCAGGTCCATAGAATGATATAGTATCGTACTAATAGCT  
CCCATCTTTTGTGTCCCTCCAGGAATGTGGAAAATAACCTGTTTTCTGGGCCCATACCTCAGAAGTTGTTA  
TCTATTCCCAATTTCAAGTAAGTACATTTCACTTTCTGCTTCTAATATTGTTGTTTATCTTCCAGCATGTAAT  
CTACAATATATTCTTGGCCGCCTATTACATTCTTGTGCAGTAGTGCCTCTTTGTTGACACAATCTGCTAG  
ACAGATATTCAGAACTATGGAGACAGATTCCTTGTTGAAGTTCGATTATTACATGCCAACTGCTCTGT  
ACTTTTTGTTAATACTTAATACCCTCTTTCTTAAATCTGAGTGACAACCTTGATCAGCTTGTTATTTCATGGA  
CAATTAAGGCAGATAAGATCTGAAGGGCTACAATCGTTAACATAAACAACAATTGTAICTCCACACTCCTA  
AAGCTGCAGCACATGTATCATCTGTAICTCAGCTTCATATCCCTACCCACTTCAGACCATACTAACTTTT  
AGTTAACATACTGGTGAATATCAAACCTCACTAAAGGGGAGAGTTTCTGTGCAAAATGACAAGACTTGA  
ATAGGCTTCATCATCTCATTAAAGTATAGATCAGCGGAAGAGTTCAGAGTGGCTTCTTTATTACACCCAAG  
TTTGTTGGTTGGCAAAAAAATGCAATTGCTTTTGGCAAACCTTCTCAATTTTCTGAACCTATATGTTTAAAC  
ATTTTATGTGCGTAGAAATTTGTGTGTGAGTGTGTGTGTGTGTGTCTGTCTTTATGTAAGTTTGTGAATG  
CAAGACCTCGTTAAATCCTATAAGCTAGAAGAAACCTTGATCTGAACTACATTACTCTTTGTCATAAGCA  
GGAAAAATATTATGAAATGTGTGTCGTGCTAGTCTGTATGTTAGCTGCACCATCTTTAACAATAGTATTTT  
AGAAAATTGTTGAGTCCCACATCGTGTAGCATGAGGAAGTTGACTCCTTTATATGGTCTTGGGCAATCTT  
CATCTCTTGAGCTAACTTTTGGGGTTGAGTTAGGCCCAAAGTCTTTTTTATACTATCGGAGATCTGATATG  
TGGAGGAATATATTTATGTTGCAAACCAGATTATGCTTACAGTTTTATGGCACTGACTTAGATTAGAAT  
TGCTAGTGGGCACACTGCATATCAACAGTTTGTGCTCTAAATGTTAGAATAATTTCAAATTACATTAGGT  
AAAGTAGCCAAATTTTGTATATCATCAGCACAATTACCTAAAAAAGAATAATCCTAACACTATACTGCTC  
AATTTGCCTACACAATAAATTGGAAAAAATGTGACGTATAACAAGCTAAAGGATTATAGTAGCACAAAA  
CCATATGACACCGATATATGATGTATATGTCACGCTGGACCATGGACTGCCAAGCTGGATCATGGACTG  
CATTTTGGTCATATTTAATAATTTAAGTTCACTAGCGGGCTAACATTTATTTAAGTTTTGAACACAGGCGT  
GATTTTCATATCATATTGTTCTATAAGATTTGTTTGGCGGAAGTTTTATTTATTGAACAATATTGGTGAG  
GGTACATATTGATCCATGCTAGGAAGATGTATCAGTTGTTTCATTATTTTTTTCAAGTGTCTTATATAGGT  
TTTACTCTTGATTGACTTTAATTATGAGAATTGATGGCTAATGCTTTTCATGTAICTACTAATTTTGTCTT  
GACGTGCAGAAACTGGAAATCCTTTCAACAGTGTCTCTCCTTTGTCTCCACCCAACAGTAGTACCGCC  
CCTTTGTCTCCACCTACTTCATTTACGAGACCCCTCCAGCACCACCAGGACCACCCTTTTTTAAGCCTCCA

ACTTCAACACAGACACCGCCGACTTCAGACAGAAAACCTGGACAAAAAGCTGATGGACCATCAGCAACT  
GCAGAATCTAGTTCAAAGGAAGCAAAAAGTCTGTTAAGAGGGTAGTCTGGATATCCATTGCATCAGTT  
TTGTCATTTATAATATTGGTAATAGCAATCCTGCTCTTTCTGCCAAGATGCTTTAGGGAAAGGCAAGAGA  
CTAATTGGTCCAGACGGCACGAAATAGCTCCTGATGTGGGCTCCAGGGAGAATCGTAGGGATAATGGT  
TTATTGGTCCTACCTGGACATGATGTAGAGAAAGGTACTGCAAATTATTAAACCTCTCAACTTTTATATCG  
TGTGTATTGTTGCTAGTATTTGTTAGTCTGGCTTTTTTCTTAGTTCTTACAGGGAAAAGTACTCTTTA  
ATTTAGGCTCTATTTAAATCTGCAGTCTTGACATCTAAGTATGCAGCTAAATATATAGTGGTTATCCATGT  
GCCCAGGGGCGGACCTACCCTTACCCAAGGCCTTCGTCAGAAAATTACATGGTATATAGAGGTCAAATT  
TTGATTTAATAAAAATATATACAAGTATTGACACCTCTTGACACAAGTTAAAGGTTTCAGTCTAGTGGTTAA  
GACATTGCTTAATGACTACAACCATTGACACCCCTTAATGACAATGGCCGCTACAGTATTGTCAAATTCTC  
TATTACAATCATAAATGCCCTACAAAAGATTCGTGAATTTGATATCTGTTTTTGCAACATTCATAACTAAA  
AAGCTATGACTCTTAACCTCTTCTACTCTTTGATGATAAGTGAACCTTCATATGTTTTGAACAGCTCCTCCTC  
TGGTGAGGCCAAAGGAAGAGCAACAACCAAGGAGACTGGCCCGCACTCCCATGCCACAGCAGGAGCA  
GGAGTTAAATGTGCAAAACCTGAGGGCAGTACCAAAGAAGGATACTAGTGAGATAAACCTAAGCAGAA  
TTGATATTGATTGATGTTGCCACCACCTCCACCCACCACCACCTCCGCCACCGCCACCACCCTTTTCTC  
AAGAGAGAGTTATTGTGAAGCCAATTCCACCTGCCGACAATACTTCAATGAAGTTTCCCACAGGCCACT  
TCCACTAACTTCTGTGAAATCTTACACAATCGCATCTCTTCAGCATTACACCAACAGCTTTTCTCAAGATA  
ATCTGATAGGATCAGGAATGCTGGGAACTGTGTACAGGGCAGAGCTTCCAAAAGGGAAGGTATAAGTT  
ATGAATGATATATAATGTACTGTAATTTGATACTCGAAATTACCAACTGTGTTTTCTACCCTGCTGTATT  
CTCTTGAACCTAGATTGTCAGCTTTTCTCTTCTTATAATTTCTTTTTTGGGGTCTTTACGGTGTCTGTG  
AGCACTAAAGATGCCTCTTATCTGTTGTTGCATTACGTATCTTGCTCTTGCAATTTCTATGCTTAATTGCTTA  
AGAATGATTCACGGTCTGATCGAATCGTATGTAAATATGGTTTTGTTGGTGGAAATCCAAAGTCATATAT  
ATTAGGGTAAACTGTATTTTATAAATACAGATAAAAGCAAAATGACTTCCAATTGCTGCATAAGATATTT  
CTTGTAACCTAAATTTTCTTTAGGACGTTTTTTGGTTCTTATCCTATATAATCTTTAAGTGGCATTTTCTTCC  
AAATAGCCAACACCATTGATCAACTGTTGTAATAGAACAATCAACATTCAAGTTGCATGAGCTTATCATT  
CTGATTTGTGCCTTAGTTTTGTCATTTGCTGTATAGCAGGATCTGCCAAATACTGATGCATCATTCTAAT  
GAGAACTATTTTATAATCAGAATATACAATGTCCCTGTTTTATTTTTCAGTGTACATTTATTTATCTGGCAT  
GCAATCTTAACTCTCATCCCATTGCTAACATTATTTGAATCATTGGTGGTGCACATTGTGTTACTTCTGACA  
CTTGACCCTTTGAATGCTTGTGCAGTACTTGCTGTCAAGAAGCTGGACAGAAGAGTTTCCAATCAACAG

AAGGATGATGAGTTTCTTGACCTAGTAAACAATATTGACAGAATTCGTCATGCTAACGTTGTCGAGTTGA  
TGGGCTATTGTGCAGAGCATGGTCAAAGGCTTCTGGTTTATGAGTATTGCAGTAGTGGGACACTACAAG  
ATGCGCTGCACTCTTATGATGAATTCAAGCAACAACCTTTCATGGGATACACGGATCCGGATGGCTCTTG  
AGCTGCAAGAGGCTTGGAGTAAGTAAATAACCAGTCACATATACATAGAAACCACATGCAAATATACG  
AGTATATACATATGAGCTATGGAAAATCTGATGTTGAAGAGTTATTTGGCAGTGATCTATAAGAAATTC  
TGTAAGCAGTACTAATAATAATTTAACTGGAAGGTAGCAAAGTACTCAAATCACAACTCGTCCTGAA  
CTTTCATGCTATGTACATACTACATGACATAAAATGATAAAATACTGTTGGGAGATGGTCTTTATAAGTA  
TATGTTAACATTATATTTGGTGCTGTATTTGGTTTATACTACTTTCCATTCTCCTCCACATGAGTTCATA  
CAAGGGATGCTGAACACGATTGTTGAAAGAAAATATCCTCATAGTCATCCCAGCCGTGAATTATTATTAG  
TGGGATTGCTAGGTGATCTAATTCTTAGATTTGCATGACAAGCGAGTTAAAGCAAATTTTAAATCTCATG  
TATTAATTATTTGTTCTTTTATGCAATGAAGGTATCTCCATGAGGTCTGCGAGCCACCTATTATCCACAGA  
AACTTCAAATCTGTCAATCTTCTCCTTGATGAAGAGTTGGCTGTGCATATCTCTGACTGTGGTTTAGCTCC  
ACTGGTATCATCAGGTGCCGTGAGCCAGGTAACCTACCATCCAAATATTCTGGATTAGAAGTGTGGAAC  
AAGCTGACATTTACCTCTTGGGGTGGGATGGTCATTTTCTGCTTGCATTTCCAGTTGAAAGAAAAGCAAG  
TTCCAGGTTTATGATGGAAGTGAAAATGTGAACTAAGTAGTAGTTGTTAAGAAAGGAGTGAATGATGA  
TCAAATGCTTCCAAGTAACACAACGGAGTAGAGCAGTAATTAATACTACAAATGCAGTTTCTCTTAAATGG  
ATAACTTATTGTTTAGAAATAGTTGATTTTGTAGTAGTGCCAGAAGTTATACGGTCAATTTCAGAAGGGT  
TAAGCTTTTTCCCTGTAAATCTGGAAATCAGGAAACAAATCTAGCTAGTCTGAGACTACCTGGTTGCC  
AGCTAGTCTGAAGTATTTGTATGTTTTAGGCTTTTATAACATTTCAATGCTTCACGAGATCTAATAGACA  
CTAGTAGAATTTGTAAGCGGGAGAGTAGATCCTTTCCAACATATGCTGGACTTGCCTTCTCATCTCACCC  
CTTGACAAAGAGATGAAATTTAGTAATCCTTGAAACTGTTCCCAACATTCTTCAGAAGTAGTTTTGCCGCT  
GCACATTTAGTATGATGGTGACTAGCTCCTGTATTTTTTTCCCTGTTGGAGAATTTTGACTTCTAAAGATG  
TGGGAAGAACAGTTTCACTATGTTAGTTTGACCTAGTCATACATAAAGACACTCTACAGGTGCTTTTGTT  
AGATGGGTTTTTCAGAACTGAAAATTCTATTTTATTTTTATGAAGTCCACATTGTCTCCTCTCATTAAATAA  
GAAACAGTAAAACACAAGATTGAACTAAACAAGACATCACGGATATGACTGTTTTTTTCACTTGTACTTC  
ATATGATTATAGATCTGCTACTCTAGGAGCATGTGGATCATCAATCTTGCTGAAACCTTACCTTTTTGT  
TTTTCTTATGCACTGTGCTGAAGAATTTGAAATTGAATAAGTGAAGTTGTACTTGATTTTCAGTTGTCAGG  
ACAACTTCTTACAACCTATGGCTATGGTGCCCCAGAATTTGAGTCAGGGATTTACACTTCTCAGAGTGAT  
GTTTACAGTTTTGGCGTGGTGATGCTGGAACCTTAACGGGCAGAATGTCATATGACCGGTAAAGCCAT

TTGCATCTCATTGAATAAATTTTGTGTCATGTTTTCTCCCAGCTTTATCATTACCTATATATCATATTCAGA  
ACTCGAAGTCGAGGAGAGCAATTCTTGGTCAGATGGGCAATCCCTCAGCTACATGATATTGATGCCTTG  
ACAAGAATGGTTGATCCTTCTCTCAAAGGAAAGTACCCACTTAAGTCATTATCACATTTTGCTGACATAAT  
TTCCCGCTGCGTTTTGGTGAGTTTTTAATCCTTTCTTTTATTACAAGCGAGTAATTTGTCCAAATCTCCAT  
TTTCTTCAATCCTTCATCAAACCTTTGGGTACAAATGAGGAAAAAGGTAACATGGAAAATGATTTATTTCTT  
GTCACAGAAATTAATAAGAAGTAAGTAAAGGAAGGAGCTGTACTGTGTCAAATAGGAACTCTAC  
ACATGGTGTCTTTTGTTCATAGCCACTAGATTATGAATTATTTACCAGTTTAAGGACATCTGTGAATC  
TGTAGTATGAGATGTACCAGGTTTATAGGTATAGTTAAAAGTTACAGGGAGCGGAAACATCCCATGTGCG  
ATGTTCCGATATCGTTTTCTGCTCAGGTGTCTGAATGCCTTTTCATGACTCGTTGAAGAGTGTGTGTATGT  
TGTAGTTGAAGCAAACAACACTAGGAAAGTCTGGATCAATGAGCAATTTACCATAATACCCTATTCACC  
AAATTAATCTTGTGGCAGAATACGCGTGGTAACTAGCACACAATCACACACCAAACAATAAATAATA  
AAAATAACACAGGGAATTTACTAGGTTTGTCAAACCCATTTCTCGGGGAAGAAGCGGAGAGAATTTT  
CCACTATAAAAGATAAGAAAACAGTACCAAGAGATCCCCTATTACAACCCTTTTAAATACCCAAGTGTTT  
GCCAATCCAACCTGCCCCAGCCTAACAATATAAGCAAATAATAGTGGTTCAAAGCTTTTCGGGGTTGGGT  
CACAATTCGGATCTGCCAGAATCCAGACACAAAGCTGTAGAAGCAACAGATATATTATATTTGCTTTCTT  
TCTTCTGCTTATTGTTCTCCTGTCTTTTTGTTTATTCGGTGGGTGTTGTATTTTCACTAGGTAATATGCAA  
TTTTTTGTACAACCAAATGCTTGTGTATGTGGGGGAGAAGAAGAATGAGGCACACTCTATTGATTGGAT  
ATTTGATTGCAACTGATAGATCCATTGTATTTATATAATGGTCAAATTTTCAATGTTTCAATGAACAGAAA  
TCGATACTGATAAGTTAAAAGGAACCAAGTAGTTGGTGTAACTCCAATGTGAAGCCTGTTACAGTGTC  
CTCCCCATTATCATCTTTCAGCTACCCTTCTAGCAATGACAGAGAAGAGATTAATGCATCATATGATTTT  
TTAGGGACTATTTCCATTTGGCTCCACCTTCCATATCCTATTCCCGCTATCTTATAGATTGATCGTACTCAC  
AATTGTGTGCAGGACAACACTAGTACAGAGTACTATATTACTGTTAATCAAGGAAGAGTGAAGTAGTTTTT  
GTGTGGCTGTTTTCTGAAGCCCATCTCATATCTTCTCCTAGCATGACTAAGATTTAGCTGTTGTATAGGAT  
TTGCCTTGCGCATTTTGTGTAACATCTTTAATATTTCTTGCAGCCTGAGCCTGAATACAGGCCACAAA  
TGTCAGAAGTGGTTCAAGACCTCATACAAATGATAAGAAGAGAATCTCCAGTAGATCCGATGAAGAAT  
GATTTGAACCAGACATGCATGCTATAGCAGATTCAGGCATGGAGTAACCAAGACTTCCAAGATTTTTTTA  
CTTTTGCAAAGAACTTAACTCGAACTGAGATACTTGGAAACCAAGATTTTGAGGCTGTAGATGCAGTGC  
CCTGCCAGCAAACCTTCATACCTCCAAGACAAAGGGCTGGCTAGAACTGCGCGATTTCAACCAACACA  
GCTCGGGTTATCCTGATTCTTAGTACAATTTTTTGAATCATTCTAATGTTCAATTTATAGTCCAAACAGAA

ACCACAATGCATAAAATGCACTAACCCATTGTTTTGAAAGCTTATTTATGGTTGTTAATTGGTATATCTG  
AAGTTGTAATCTTTATTTGTTCTGCTGTACATTTTCAATTGTTGTACAAGAATATTCTTCACACTTTCAA  
CATGGACTTTCTGTAGCACATTTTTCAGCCTTCAGTATCATCATGGATATATTGAATAATCACTTGAAG

>M6-PGSC0003DMG400018752 M6 LRR-RLK

TTAAGAAGTTGGTCAATCTGGTTCAAATCACGAATTTCTTGAGAAAAACAATCCTTGACAAGATGGAGA  
AAAGCTATGTTCTTTTCCTTATCTTATTAGTATTTCAAGAATCAATTTTTCCCTATATGCAACTTCCACAAA  
TGAAACAGACATAGAACTTTGTTATCTTTAAACAACACTATTACAAATAACTCTTCTTTCCCTTCCAAGAA  
TTGGACATCAAATACTTCATTTTGCTCATGGTTTGGTATCACTTGTAATCCAAAAACCAAAGAGTCATAG  
CTTTAAATCTCCCAAACATGAATCTTCAAGGCAAAATTTACCATCAATAGGTAACCTTATCCTATCTTACT  
ATACTTAACTTTAGTAACAACATTTTTCAAGGCACTCTTCTTATGAACTTGGAAATTTGCCTCTTTGGAA  
GTCATTGATGTTCATAACAATCAACTAGAAGGAACTCTTCATCCTTTTGTGGTAACATTACAAAGTTAGA  
GAGATTGAGGTTAGATGGAAATAGATTTAGTGGTAAAATTCCTACTGAGATTGGGAATCTAAGCCAACT  
TGTTGAGTTAGATTTGTCACATAATCAGCTTTCAGGTTCAATCCCTGGATTGATCTTCAGCATGTCATCGT  
TACGTGCTGTGATTTGGTTAACAATAGTCTTTCTGGTTCATTCTTGGTTGATGAAATAAATGGTGTGATG  
AATCTTGAAGTTATAGACCTTAGTTATAATCGAATCATCGGTGAGATTCCTTCAAGACTTTGTCAATTCAG  
TAAGCTAAGAACTCTTGTCTGTCTTACAACAATTTAACAGGTCAAATCCGAGAAATCTTGGTTGTTTAT  
CAAGGCTTGAGAGTTTTTATATAACTCAGAATGCAATAAGTGGTACAATCCACTTTCATTGAGTAATATT  
TCCACTTTTCAATTTCTTGGTTGTGTGAACAACCATATAAGTGGTACAATTCCTCAAGAACTTGGAAATTT  
ACCAAACCTGAAGATGTTGGGATTTGATTTCAATAATCTTACTGGTGTAAATACCAGAATCTATCTTCAATA  
TATCTTCTTTGGAGTACATTGCTTTCAGTGATAACGATCTCTCAGGGCGAATTCACCAACTCTTGGACTT  
AAACTTCCAAACCTTAAAGGAATTTCTTGCCAGAAAATCAACTTGAAGGACAAATCCCAATGTATATCA  
CAAATGCTTCTAACCTTATTGAGCTAGAGCTGTCCTATAACTTGTTACAGGCATAGTTCCAAGTGATTG  
GGAAATCTACACCAGCTCGAGTTCCTGAATCTTGGTGGTAATCAGCTTACAAATGAACCAGGACAACAA  
GAGCTTGGATTCTTGAACCTTTGGTGGATTGTAGGAGGCTGCAGTTTCTGATATTGGCTAACAACCCCT  
TGAATGGCATCTTGCCTGATTTCGGTTAGTAATCTTTCGTCTACTATTGAAATGTTAACATAGAGAATGGT  
CAGATAAATGGACAAATTCGAAGAGGAGTAGGCAATATAAGCAGCATGTTATCGCTAGTCTTGAACGGT  
AACCAATTGACAGGAACCTTCCACCAGAGATTGGTGAGCTAAAGCAACTTCAGAGGCTTTATCTAAGC  
AAAAACAAGCTACAAGTTCAATTCAGAGGAAATATGTGACTTGGTAAACTTGGGAGATACATTTCTA  
CATGAAAACGAGCTCTCTGGGGCAATTCGAAGTTGCATTGGAAAACCTCACTAGGCTGCAAAGGCTTTCA

TTTGGCTTCAATAAGTTCACCTCAAGCCTACCTTCAAGTCTATGGGAAATGGATAGCCTGATTTTTCTAAA  
CGTGACGCAAAACTCAATACAAGGGGAACCTTCTCTTGACATTGGAAAATTGAAATCTATTGAAGGTAT  
AGATTTTTCAAGCAACCAACTTTCCAGTGTGATTCCAAGTACATTTGGAGACCTTATAGGCCTTAGTTATC  
TTTCACTCTCAAACAACCTCGTTACGGAGTGCAATTCCTTCATCATTGGCAGTTTGTTAAGTTGGAGTTC  
TTGGATTATCTTCAAATGCGTTATCAGGAAGCATCCCAAAGTCCTTAGAAAACTTCAGTTCCTTAAAG  
AAATCAATTTTTCTACAACCATTTAGAAGGTGAAATACCTACTAGTGGTGTGTTTGCAAACCTTCTTCT  
CAATCTTTTGTGGAAATAGAGTTTATGTGGAAAACCTATATCAGAAGTTTCTCAATGTGCTACGGATA  
GTGCAACGAAACGATCAAAGTCTAGAAAACATGTGCTAGTAGTTGTCATTCTGTGATTGCATCAATTCT  
CCTCATATTTGTTGTTCTGTTCTGATGGATTAAGCGAAGATCAAGAAGAACAAAACCTTCAAGGCCATGAT  
CAAGAGTTAACAGAAATCACAACACACCAGTTGATCACATACCGTGAACCTCAACAAGCAACGGATAGT  
TTCAGTGGCTCTAACATGATTGGTTCAGGAGGTTCTGGTCTGTTTACAAGGGCATATTGGCTAACGGAA  
CAATGGTCGCGATAAAGTTCTAAATATGCAAATGAGGAAGGATGCAAGAGTTTGATAACCGAATGT  
GAAGTGATGAGAAGCATTAAACATAGAAATCTTGCAAGGTGATCACTACATGTTCCAATCAATACGTTA  
GAGCCATCGTTCTCGAGTATATGCCAAATGGAAGCCTTCAAAGTTGGTTGTATGATAAGGAACATCAAG  
TCTTAGACATGTTTCAAAGAGTTAGCATAATGCTTGATGTTGCAATGGCATTGGAATATCTTCACTATGG  
TTATGATACACCTATAGTCCATTGTGACTTGAAGCCTCAAATGTTTTATTAGATGCTGACTTGGTGGCAC  
ATGTTGGTGATTTTGGCATTTCAAAGATTTTAGGTGAAAACAACCTCCATGGCACAACCTAACACATTGGG  
TACTATTGGCTACATTGCACCAGGTAACAGTTCCTCTGACTACTCTTCTAATATAAGGCATATTTTC  
GGTCATCTTCTCTGAAAAATAGAATATTGGTCAATTAAGTTGATTTAGGTGCTACTTACTATGCCTGAA  
TCTAGTTTCACTAACGCTAGGCTAAGTCTTGAACCTTTGAGCTGACCGTTCACCTTCTTTGTAGCAAGAGG  
GCTTCTCTTTGCCCTTTATTGGTTGTATCAACTAACTGCCCTTTCATATAGATCGTCGCAGCATGAAACT  
ATTAATAGATTCTAGCTTCCTATTAATCTTGAAGTTCTAGCTTAGTCTTTTTTTTTGTTAGAATTATCT  
TTTTAATTAGACCGGACCCACTTTTATACTTATCCTACAAGTGCTATTGGGGACCCACTCAAAAAAAAAA  
AACTTAACTAAGAAAAATCCACCCTTAATAGATTAGGGCAGAATCAACTGGATTTAACTTATATCTACT  
GATAGTATAGAACTATGTTAATTCGTTATAACATATTAATTCCTTCTTTTGTGTTTTTAGAATATG  
GCTCAGAGGGAATAGTGTCCACGAGTGGTGATGTTTATAGTTATGGTATAATGTTAATAGAGATATTGA  
CAAGAAGAAGACCAACAAATGAGTTTCTCAATGAAAACATGAACTTGAGGCAATGGGTGAGTGAATCAT  
TTCCAAGTCTTTGAAGACAGTTGTTGATGAAAATATTTATTTGGAGAAAATGAGATTTTCATATTTAGT  
ATGATGGAGTTGGCTTTGGAATGCACAAAAGAAAGACAAGAAGAGAGGGTAAATATGAAAGATATAGT

GAATAGACTTGGTAAAACATAAGAGGACCTCTTCTTGAAACAAAGAAGAAAAATCTTATGAGTAAAA  
TTTTATTTATTTTTAGTTTATGGTTTAGTTATTCTTT

>M6-PGSC0003DMG400018811 M6 LRR-RLK

TAAGGGGTCGTTTGGTAGAGTGTATTAGCAAAAATAATGCATGCATTAATTATATCTATTAGTAATCCCT  
TGTTTGGTACATTTTTTCATGCTATGCATTAGTTATACACTCTATTGTGTATTGAAGAGTGTATTACTAATA  
CCATGGATTTCTAGGTATTAGTAATGCAAAGGATTTAGTACATGCATTAATATGGTTAAAGACTCAATTA  
CCCCCAAAGTACTTTTACATCTTTCCACCATAATTGTGAAGGATACTTTTTGTAAATAAATATTTTTAT  
ACAATGCATACTATTTTTAATACACCAAACCAAACAATGCATAAGAAATAATATATGCATAACTAATACA  
AGTATAACTAATACATGCATTACTAAAGCTTGCATTACTAATACACTCTATTGGGTATTATTTTTATACACT  
CTACCAAACGACCCCTAACTCTATAAA

>M6-PGSC0003DMG400018849 M6 LRR-RLK

ACTTAACCCACTAAAATCATCATGAAACACACTCTATTTTTCCAGCACTCCTAAAAAGCATTTTTCTCTCAA  
TTTACCTCTCTTTACATACCCATTTCTCAACCATTTCCACCATAAACAACATCACCATGAGACACTTGTTT  
CCTTTCTTTCTTACTACAGTTTTCTTCTTCTAACAAGAATTTCACTTGTTTTCTCCATTACCAATCTACCTCT  
ACAACTTATATCTCTTTTGACTTTAAAATCTTCTTTGCATGATCACCACAATACCTTCAATGACTGGGATCC  
CACCTCGCCTTCGCTAGACCGGGTTCTCACATTTGGTGTTCCTGGTCTGGTATCAAATGTGACAAGAAA  
ACTAACCAAATCACCTCTTGATCTATCGAAGCGCAATCTTTCTGGTACAATTCCAGAAGATATCAGAAA  
CTTGGTACACCTTCATCACTTGAATTTGAGTGGAAATGCTTTGGAGGGTCCTTCAAACAGTCATTTTTG  
AATTGCCTTTTCTCAAGACACTTGATATTAGTCACAACCTGTTAATTCAACTTTTCCCTCTGGTGTGTCAA  
GGCTCAAGTCTCTAACATACCTAAATGCTTATAGTAATGACTTCATAGGCCCTTTGCCTGAAGAAGTTGC  
TCAAATCCCAAATCTTGAGTACCTTAACTTTGGGGGAAACTATTTCAACGGTGTGATTCCAAAAAGTTAT  
GGTGGCTTAGCAAACTGAAGTTTTTGCCTTGGCTGGAAATTTATTGAATGGTCTGTTTTGCCCGAGT  
TGGGTTTCTTGAAACAGCTTGAACATGTAGAAATTGGTTACCAGAATTTCACTGGAGTTGTCCCTGCTGA  
ATTTTCTTCTTTGTCAAAGTTGAACTATCTTGATATCTCATTAGCCAATCTTTCTGGTAATCTCCCTGTTGG  
ACTAGGCAACTTGACAAACCTTGAACCTCTGCTTCTTTCAAGAACCATTTGTATGGTACAATTCCATTGT  
CTTTTGCCAGACTGACATCCTTGAATCATTGGATTTGTCTGACAACCATCTCTCCGGAACAATCCCCGAA  
GGTTTTTCAGGATTCAAGGAGCTTACAGTGTGAATTTGATGAACAATAACTTAACAGGTGAAATCCCA  
CAAGGCATTGGTGAGCTTCTAATCTTGAATTATTGGCTCTATGGAACAACCTCACTCACTGGGATTTTACC  
ACAGAAGTTGGGTTCAAATGCAAAGCTACAAAACTTGATGTCTTCAAATTATCTCTCAGGTCCCATT

CCACCAAATCTTTGTCTCAGCAATAGCTTAGTGAAACTTATCCTGTTTTCAAATCAGTTTATTGGTGAGCT  
CCCTTCTTCCTTAGCAAATTGCACTGCATTATTCAGGTTTAGAATCAAACAACAGACTCAACGGGTCAA  
TACCATTAGGCTTCGGTATTTTGCCCAATTTAGCTTACTGGGACTTGAGCAAAAACAATTTCACTGGTCCA  
ATTCCAGAAGATTTAGGGAATGCCGCGACATTGGCGTATTTGAACATATCGGAGAATTCATTCAACAGT  
GAATTACCGGAGAGTATCTGGACTTCACCATCTCTACAGATCTTTTCAGCTAGTTACAGTGGTCTTGTCG  
GGAAAATCCCAATTTCAAAGGGTGTAAGCTTTCTACAGAATCGAACTGGAAGGAAATAATCTCACAG  
GAAGCATTCCATGGGATATAGAACATTGTGAGAAGCTCATTTGCATGAATTTTCGACGAAATTCGCTAAC  
GGGAATCATTCTTGGGAAATTTCTGCAATTCCTTCCTAACAGAGGTTGATTTGTCTCACAATTTTCTTA  
CAGGAACAATCCCTTCGAATTTGCGCAATTCCTACTACATAGAAACTTCAACGTATCCTACAATCAGCTC  
ACTGGTCCAGTTCCTTCTTCAGGCTCTATTTTCTCCAGCCTACATTCCTCTTCCTTCATCGGAAACGAAGGC  
CTGTGTGGTACTGTCATTCAAAGCCTTGCGGGACTGACGGACTCGCAGCCGGGGCAGCGGAAATCAA  
GCCACAGCCGAAAAAACAGCTGGCGCTATTGTCTGGATCATGGCAGCAGCATTTCGGTATTGGTTTATT  
CGTCTCATCGCCGGTAGCCGCTGTTTCCACGCGAAATACAGCCAGCGATTTTCAGTAGAGAGAGAAGT  
TGGGCCATGGAAATTAACCGCATTTCAAAGGTTAAACTTCTCGGCCGATGATGTACTTGAGAGTTTGAC  
AATGACAGATAAGATCCTGGGAATGGGTTCAACAGGGACAGTGTACAAGGCGGAAATGCCAGGCGGA  
GAGACTATAGCAGTAAAGAAATTATGGGGAAAACAGAAGGAAACGATCAGGAAAAGGCAAGGCGTTT  
TAGCTGAGGTGGATGTGTTAGGCAATGTGAGGCACAGGAACATCGTGAGGTTGTTTCGGCTGTTGCAGC  
AACACGAGTGCACCATGTTGCTGTATGAGTACATGCCTAATGGTAGCCTGGATGATCTGTTGCATGGT  
AAGAATAAGGATGATAATTTGGTGGCTGATTGGCTCACTAGGTACAAAATTGCTCTTGGGGTCGCTCAT  
GGAATTTGTTATCTTCATCATGATTGTGATCCCGTCATTGTTTCATCGTGATCTTAAGCCTAGTAATATTCTT  
CTGGACGGTGATCTGGAGGCTAGAGTAGCTGATTTTGGTGTGTTGCCAAGTTGATTCAGTGTGATGAATCT  
ATGTCCGTGATTGCTGGATCCTATGGCTACATCGCACCTGGTAAGTTAATACTCCCTCCGTTTTAATTTA  
CATGAAATTTAAGAAAGTAATTCGTAATATTCAACTTTTTATCGTGTTCTTTAATTTAGTTAGTTATTAATG  
GCAGGAATATTTGTCTGTTTGCTTGATGGAATTACATGATTGTTTTGGAGTTCAAGTTTTTTTCTTGTGCG  
GCTTATTGCTATCCAAAATTATTTGTTTCAGATCAGTTTAGTTTCGTTCTGTAGGGTGACGAAAAAGAGTTC  
ACTTGCGTGCTAAAACGTGGTGTCAATAGCATGATGCATTTTTTTAGTGAAAGCATGATGTATAT  
TGTTTTTTTTTCGTCCACTATCGTCATTAAATCTTCTTTGCCACACAATTGTCAAATTCCTCAACTGATTC  
ATACTAGTGAATCTTCTTTAATCATAAACAGATCTTGAAGGCACTAATTCATTTTTTTGAATTTGAGCGC  
CACAAATATGATATAAATATCTAAATGTTGAAACTTTTTATTAGGAAGTTAAAATAATATTCTTATGAAGATT



CTAATATTAGTGTAGTGAAACAGTTAATATAATTTTCTTAATAAAAGGTATCAAGTATTTCTTTTCATAC  
TTCTTTATGACAATTGGTGCAAATATTTATTCTCTTTGTTTTGTCCATGATTTTGTGGTGCTTAAAGAGGG  
CATGGCGCACTAGCTGCGCGTGAATAGCTCCATTAGCCTTTAAGCTTTTATTTTACACTTTTTGTTATTCTT  
TGGACCCACCAAGATTTTGTCTTAGTTACTTATCTGTGATTAACCCTTTGATTTAATTAGTATATAATATAG  
TACTAGTACTACATTCTAATGCTTAAAGTCAACCATTTTGGGCACTAGTAGACAGAGTGTTATGATAACA  
AATTAATGATCTTATCTTTTTCTTTTTTTAATATAGTTATTGTAATAATATGTTTGTGATACAGAAT  
ATGCATACACATTGCAAGTTGATGAGAAGAGTGACATCTACAGCTACGGGGTTGTGTTACTTGAAATTTT  
ATCAGGGAAAAGATCGGTGGAACCAGAATTTGGCGATGGAAACAGCATTGTGGATTGGGTTAAGTCGA  
AGATCAAGACTAAAATGGCATAAATGATGTGTTGGATAAAAATGCTGGCGCTTCATGTCTTTTCAGTTA  
GGGAGGAAATGATGTTGTTGCTGAGGGTGGCATTGCTGTGTACTAGTCGTAACCCGGCTGACAGGCCA  
TCGATGAGGGATGTTATATCTATGTTGCAAGAGGCTAAGCCCAACAGGAAGTTGCCTGGAAGTGGTAT  
AATGCAATTGCTGCTATTCCTTTGGCACAAAATGCTAATGTGGAGTGTTGATATTATAGGAGGAGATTTG  
GGGTTGTTTTGATTTTACAACCTACTAATGAATTGTGGGGGAAATTGGTATAGGAGAAGATTAATAGTT  
TTATTTGCTTCTTAAATTTTGCATAGTAGGAAATTCTCCAGTGTTGTCATTCCAATGTTGTGATGAAATG  
GGTATCTTTCCAACAAATTAATCTTCAATAGCGTACTTGT

>M6-PGSC0003DMG400019051 M6 LRR-RLK

ATGAGCGGTCTTACAGCCCTAAGCCTTGGAGGAAACAACCTTGGCAGGGAATATTCCTTCTGAGATTGGT  
AAGCTTAAACAACCTCAAGGGCTGGCTCTATATAACAATAAATTGCAGGGACGTATTCCAGAGGTGGTA  
TGCCATTTATCGAATTTGGTTGGCTTATTACTGGATGGTAATGAGCTCTGTGGATTAATTCCAGAATGCTT  
TGAAATCTTAGCATGCTACAAGCGCTTTATTTGGATTCTAATAAATTTTCATCAAATTTCCGTTGAGCC  
TTTGAAGATGAGTGGTCTTCTCTATCTAAGTGTGTCACGAAATCAATAGAGGGGAGAACTTCCATCAGA  
TATTGGAGGACTGAAAGCCATTGTAGAACTATATCTTTACAATAACCACTTTTCAGGTGTGATACCAACC  
AGATTGGGGGAACTCCAAAACCTGCAGCATCTTGACCTATCCAACAATTCATTTTTTGGCCAAATTCATT  
ATCCTTTGCCAACTTGATAAGCTTGGAAATTCTGAATTTGTCTTTAAATGCCTTGTCCGGTACTATTCCTAA  
ATCTTTGGAAAACTCTCATACCTTAAAAGCATTAAATGTTTCATTTAATGATTTAGAAGGTGAAATACCAA  
GTGGTGGCGTGTGTTGCAACTTCCACTGTGCAATCATTTCTTGGGAACAAAGGTCTTTGCGGAATGCACAT  
ATTGGAGATTCCTACTTGTGCTATCACTAATCATGGAAAACAATCAAAGCTTAAGGAGGTTGTGCTAAAA  
ATTGTTACTCCAGTGGTTATTGCATCCTTTCTGATATTCTTGTTTCGTTTCAATTTGGATAATGAAACGACA  
GAAGAAAGGGAAGTCCAAGATATTGAAAAGGTATTGGAGATCGGGACTCATCAATTAGTTTCTTATCA

CGAGATTCAACAAGCAACAAATAATTTTGATGAATCCAATTTAATTGGTGAGGGAAGCTCTGGCTCTGT  
GTACAAAGGCACATTGTTTGGTGGAACTGCAGTGGCCATTAAGGTTCTGGATTTGGAAAACGAGCAAGT  
ATGCAAGAGGTTTGATACCGAATGTGAAGTGATGAGAAATGTTAGACACAGAAATCTTGTTTCAGTGAT  
TACTACATGTTCTAGTGACTIONATAAGAGCCTTTGTTCTGCAATTTATGCCCAATGGAAGTCTTGAGAATT  
GGCTGTACAAAGAAGATCGACACTTGAACCTTCATCAAAGAGTCACTGTAATGCTTGATGCAGCTATGG  
CAGTTGAATATCTACACCATGGTCATAAACTCCAATAGTTCATTGCGACCTGAAGCCAGCCAACGTTCT  
TTTGGATGAAGATATGATGGCTCATGTTGGTGATTTTGGAAATATCTAAAATTTTAGCCATAAGCAAGTCC  
ATGGCTTATACAGAGACATTGGGCACTCTGGATATATTGCACCAGGTAAAAGAAAATCTACTCTCATTG  
ATTTTCTCTTATCATAATTAA

>M6-PGSC0003DMG400019415 M6 LRR-RLK

ATGGCCTATTATCTTGACAAAATCTTCCTTCTCTTATTTCTCTTCACACTTAGTACTCCCTCAAATCAGAT  
AATATGACAGATATTGAAGCACTCTTTGCTATCAAGAATGAAATAATTGATCCCTTTGAATCATTAAAGTTC  
ATGGAATGAGTCTGTTCTTTATGTCAATGGCGTGGCGTTGTATGTGGAACGCGAAATCAACGAGTCAT  
TGAACATAACCTTCTTGACCATAAGCTAGCCGGTGTGTTATCACCTTTGTTGGAAATTTGAGCTTCCTCA  
TACGACTAGACATCGGAAACAATACCATTTCTGGCAATATCCCTCCTGAATTAGGCCGTTTGACAAGCTT  
ACGCCATCTATATTTGCAAAACAATTCATTTTATGGTGAAATTCCTGTCAATCTATCGTTTTGTAGTAACCT  
CGTTGAGTTATGGGCATACAAGAACAATTTGTAGGTGTTCTTCCAAGGGAGCTTGGTTTACTTACCAAA  
CTCAAATATTTAGATTTGTTTACAACAAGCTCATTGGTGAAATCCCAAATCTTATGGTAACTTTTCAAG  
TCTATTGGAAATGTACTTTTGGATAATGATCTCGAGGGTAAAATCCCCGATGAGTTTGGGAAACTGAA  
GAGTTTGGAAATATTTGACGCGGACTTTAATAGGTTATCTGGTAGAATTCCGAGCTCATTGTACAATCTT  
ACCTCATTGAAAGTCATTGATGTGTCATTTAACCAACTCGAAGGTACTIONCTGCCTCGGGATTTAGGGATCA  
ACCTTCCTAACCTGGAGTGTCTCAGCATTAGTGAGAATCAATTCACTGGATCGCTTCCTCATTCACTTTTC  
AACCTCACAGGACTCGCGTACCTTTATGTTGGAAAAAATGACTTAGGAGGACGTGTTCTAGGTTTCGAT  
AAGTTGCATAATTTGTATATTTAAGCATGGAAAATAACCAATTTGATAATGACTTGACCCTCATGTCCTC  
CTTGACAAATGCAACTAACCTCAACCGTCTGTATATGCAAAACAACGCGTTTGGAGGGACATTTTCATGAG  
TTTTTCAGCAACCTTTCAAGTAATCTGGCGTTTGTAGACTTGTCAGCAATCATTTTTTCAGGACATATCCC  
GATAGACATTGGGAAATTCGTCAACTTGAAGAGCTTAGGCTGAGCGGAAACCAACTCACAGGTATCAT  
CCCTTCGACTATTGGGAAGCTTTATAAGCTACGATATTTACACCTGTCCCAAACAGAATTTCCGGGTAGT  
ATACCCTTTTCCATTGCAAATCTGACCCTTCTAACAGAGTTAAATCTTGATCATAACAATCTTAGAGGTAG

AATACCTTCAAGTGTGCAAATGTCAAAGTTTGTGTACCTTAACCTGAACCAAAACAATTTAATCGGTT  
TGATACCTAAAGAAATTTGTCTAATCTCTCCTTAGTTGTTCTAAACCTTCCAGTAACAACCTTGACTGGC  
GCCCTTCCCAAAGAAATCGAAAGCCTGAAAAATCTCTTATCATTAGATGTCTCTTTGAATAATCTCAATGG  
TGAAATTCCTAGTACACTTGGGAGTTGTGTGACAATTGTTAACTTAACAATGAAAAGGAATTTATTCCGC  
GGGATTATTCTTCCACTTTCAGTTCACTAAAGAGTCTTCAAGTTTTAGATCTTTCGCGGAATAAGCTATC  
AGGTATGATTCCAAAGTACTTGGAAGGATTTGCCTTGCATTTCTTAACTTATCGTTTAATGATTTTGAAG  
GTGGCCTTCCACAACGAGGCATCTTTGAGAACGCGAGTGTAGACTCTTTCGTTGGAAATCTTAGAATCTG  
TGGTGGTGTACCTGGCTTGAACTTCCCAATTGCAACTCAGTCATTCAAAGAAAATGAACTTTAAGCTT  
GTTATTTTAGTAATATTAGGAATTTTGGGGCTAGTTGTTATGGTTTGTGCTTTTTTCTTCTATCGATTTGGA  
AGGTCCAAAAGAACAATTCCTTCATTAGATAACAATCTAAACCAACTCATAGCTATGTCCTATCAAAGTAT  
TCTCAAAGTTACCAACGGGTTTTCTACGAGCAACTTGATTGGTGTGGGAGTCATGGATATGTTTACAAG  
GGAATTTTAGAAACGGATGGTAAACACGTTGCTATAAAAGTGTGAATCTTTACAATATGGAGCTATCA  
AAAGTTTCATAGCAGAATGTGAGGCCTTGAGAAATGTTAGACATCGGAATTTAGTTAAGCTACTTACTGC  
ATGTTCTGGTGTGATTATCATGGCAACGAATTCAAGGCACTGATTTACGAGTTTATGGCCAACGGAAAGT  
TTGGAGGACTGGTTGCATCCAGATAATTCAAGACCGAATGTTTCCAGCCAAGAAGGTTAGGATTTCTACAA  
AGGCTGAATATTGCTATTGATGTTGCTAGTGCAATTCATTATCTTCATAATGATTGTCAAATATCAATAGT  
TCATTGTGATCTCAAACCAAGCAATATTCTCCTTGACAATGAATTGGTTGCCATGTTGGGGATTTTGGAT  
TGCAAGATTCTACATCTTACTGACGAAACCACTTGTAGAATTCAGACAAGCTCTTCAACTTTTAAAGGA  
TCTATTGGCTACATAGCTCCAGGTAAATTTCACTCTATATAAATGCCTCTAAAGACTTTAGTGACTCTGGA  
TGCAATGACATTAECTCAATTGCCTTTATATTTTCATTGCAGAGTATGGTATGGGAAGCGAGGCATCAAC  
GCAAGGTGATGTGTATAGTTTTGGTATCGTCTTACTTCAAATGTTAACTGGGAAAAGACCAACAGATGA  
CACGTTTGGCAGCGATTTAAGCCTTCATGATTTTGTAGGAATGCCATGCCTGATGGAGCACTTGAGATA  
GTAGATCCAGTTCTTAATTTTGAAGAGGAAGAGATAAGCACAGAGAGGTCTCAAATTCGAAGGTTTCATG  
AGAAGGCCAAAAAATGGTAGAGGGTTTAAATTTCTTATTTGGAGTTGGTATTGATTGTTCAATGTATGATT  
CAAGTAAAAGAAAAACATGAAGGAGGTTGTTAGAGAGTTGTGTTCTATAAGAGATTCTATTGTTGGTT  
GTACAATATGA

>M6-PGSC0003DMG400019698 M6 LRR-RLK

TCTTCACATTCTACTACTCCTTCCCTTCTCTATTTGTCTGTTTAAACTTCTACTAATCCTATCTTTCTTTT  
CAGAAAAATATGGAACCCCTTCAAGAACTCAAGCTATAGATTCAAGAAAATCTCCATTTAAGCTATAAAG

TTTCAATCTTTGAAGATGAAAGCTCACAAAAGTGTGTTTTACCAACACCCTTTAAGCTTAAACAAGCTTTT  
CTTTGTTCTTCTTCTTATCTTCTTCTCCTCCAGCTTCACCAGCTTCTGTTAATGGTCTTTTTAAAGACTCCC  
AACAGCTTATTTCTTTAAAGCTGCACTTCCACCAACCCCAACTCTGCTTCAGGACTGGTTGTCATCTACT  
GACCCTTGATGTTTCACTGGTGTTCATGCAAGAATTCTAGAGTTTCTTCTATAGATCTCAGTAACACTTT  
TTTAAGTGTGGATTTGAGTTTGGTCACTTCTTATTTGCTTCTTCTAATTTGGAGTCTTTAGTGTTAAA  
GAATGCTAATCTTAGTGGTTCTTTAACTTCTGCTGCTAAATCCCAATGTGGGGTTTCTTTAGACTCCATAG  
ATCTAGCTGAAAACACAATTTGAGGACCTATTTCTGATATCTCTAGCTTTGGTGTGTTGTTCAAACCTTAAG  
TCTCTTAATCTTCTAAGAATTTCTTGGACCCTCCTGGTAAAGAAATACTTAAAGGTGCAACCTTTAGCCT  
CCAAGTTCTTGATCTTTCTTACAATAATATCTCAGGTTTCAACTTGTTTCCATGGGTTTCCATCCATGGGGTT  
TGGTGAACCTGAGTTCTTTCTCTCAAGGGTAACAACTAGCTGGAAGTATTCCTGAATTAGACTTCAAG  
AATTTGTCACATTTGGATCTTTCTGCAAATAATTTCTCAACTGTTTTCTTCATTCAAAGATTGCTCCAAT  
TTGCAGCACTTGGATTTGTCATCCAACAAGTTTTATGGTGATATTGGTTCTTCACTTTCTTCATGTGGAAA  
GCTTAGTTTTCTCAACCTTACCAATAACCAGTTTGTAGGTTTGGTCCCTAAACTACAAAGTGAAAGCCTAC  
AGTATTTGTACTTAAGAGGGAATGATTTTTCAGGGTGTGTACCCAAACCAGCTTGCTGATTTGTGCAAAAAC  
TGTGGTGGAAATTGGACTTGTACATAATAATTTCTCAGGTATGGTTCTGAGAGCCTTGGTGAATGTTCA  
AGTTTGGAACTTGTTGATATTTCCAACAATAATTTCTCTGGTAAGTTGCCTGTTGATACTCTTGAAGTT  
GAGTAATATGAAGACTATGGTCTTATCATTCAACAAATTTGTTGGTGTGTTTGCCTGATTCTTCTAATTT  
GCTGAAATTGGAGACTTTGGATGTGAGTTCTAATAATCTCACAGGGGTTATTCCATCTGGGATTTGCAAA  
GATCCTATGAATAACTTAAAAGTGTGTACCTTCAGAATAACTTGTTTGAAGGTCCTATACCTTCCAGTCT  
AAGCAACTGTTACAGCTGGTGTCACTTGATCTTAGCTTTAATTACTTGACTGGGAGAATACCATCTAGTT  
TGGGGTCATTGTCAAAGTTGAAGGATCTCATCCTTTGGTTGAATCAGCTTTCAGGGGAAATCCACAGG  
AGTTGATGTACTTGCAGGCTTTAGAGAATTTGATTCTTGATTTAATGACTTAACTGGACCAATACCTGCA  
AGTCTTAGCAACTGTACCAAGTTGAATTGGATTTATTGTCAAATAACCAATTGAGTGGTGAGATACCGG  
CTTCTTTGGTCGTTTGTCAAATCTAGCCATTCTTAAGCTTGGAAACAACCTCAATCTCAGGGAATATACCT  
GCTGAGTTGGGTAATTGCCAGAGCTTGATATGGTTGGATCTCAATACTAATTTCTGAATGGCTCCATTC  
CGCCGCTTTGTTCAAGCAATCTGGCAATATTGCAGTGGCATTACTGACCGGGAAGCGATACGTGTATAT  
CAAGAATGATGGGAGTAAGGAGTGCCATGGAGCAGGGAAATTTGCTGGAGTTTGGAGGGATTAGACAA  
GAACAGCTGGATAGAATCTCAACAAGGCATCCTTGCAATTTACAAGAGTTTATAGAGGTATCACTCAG  
CCAACATTTAACCACAATGGCTCTATGATATTTCTTGATTTATCTTATAATAAGTTGGAAGGTAGTATCCC

AAAGGAATTAGGGACCATGTACTATCTGTCTATATTGAATTTGGGGCATAATGATCTGTCTGGTATGATT  
CCTCAAGATCTTGGAGGCTTGAAGAATGTTGCAATTCTTGATCTGTCAATAATAGGTTAAATGGCCCGA  
TCCCGAATCCCTCACAGTCTTACATTGCTTGGAGAGATTGACCTGTCAAACAATAATCTCAGTGGAAT  
GATTCCTGAATCTGCACCATTTGATACATTCCCTGATTATAGGTTTGCAAATAATTCTCTCTGTGGGTATC  
CTCTCCCCCTACCTTGTAGCTCGGGGCCGAAATCGGATGCAAATCAGCATCAGAAATCTCACCGCAGACA  
AGCATCGTTGGCAGGGAGTGTGGCGATGGGTTTGTTATTTTCCCTCTTTTGTATCTTTGGTTTGATTATTG  
TTGCCATAGAGACGAAGAAGAGGAGGAAGAAGAAGGAGGCTGCTCTTGAAGCTTATATGGATGGTCAT  
TCACATTCTGCAACTGCAAACAGTGCCTGGAAGTTTACGAGTGCTCGTGAGGCGTTAAGCATTAACTCG  
CAGCATTTGAGAAGCCTCTCAGGAAGCTCACATTTGCTGATCTTCTCGAAGCCACCAATGGTTTCCACAA  
CGACAGTCTTGTAGGCTCTGGTGGTTTTGGTGATGTCTACAAAGCTCAGTTGAAGGATGGCAGTGTGT  
GGCCATTAAGAAGTTGATACACGTCAGCGGACAGGGTGATCGAGAATTCAGTCTGAAATGGAAACCA  
TAGGGAAGATCAAGCACCGGAACCTTGTCCCTCTTTGGGCTACTGCAAAGTAGGGGAAGAAAGACTAC  
TGGTTTACGAATACATGAAGTATGGAAGTCTTGAAGATGTCCTGCACGATCGGAAGAAAATCGGGATCA  
AGCTGAATTGGCCTGCAAGAAGGAAAATCGCCATTGGAGCTGCGAGAGGGTTGGCTTTCCTACACCATA  
ACTGCATTCCACACATCATTCACCGGACATGAAATCAAGTAATGTCTTGCTTGATGAAAATTTGGAAGC  
CAGAGTATCTGATTTTGGAAATGGCAAGGTTAATGAGTGCTATGGACACTCATTTGAGTGTGAGCACTCTT  
GCAGGCACTCCCGGATAAGTTCCTCCTGAATATTACCAAAGCTTTAGATGTTTCGACAAAAGGAGACGTTT  
ATAGTTATGGTGTGCTATTACTTGAGCTTCTAACCGGCAAACAGCCAACAGATTCAGCTGATTTTGGTGA  
CAACAATCTTGTGCGATGGGTAAAGTTGCACGCTAAAGGAAAAATAACTGATGTCTTTGATCGAGAGCT  
ATTGAAAGAGGATCCAAGCATTGAGATTGAACTTCTACAACACTTAAAGGTAGCTTGTGCTTGCTTAGAT  
GATCGACATTGGAAACGTCCCACGATGATACAAGTTATGGCTATGTTTAAGGAGATTCAAGCAGGGTCA  
GGCATGGATTGACATCCACAATCGGAGCTGATGATGTCAATTTTAGTGACAGTTGAAGGAGGGATAGA  
AATGGGGATAAATGAAAGTATAAAAGAAGGCAATGAGCTAAGCAAACACCTTTGAATGCACTAAATCA  
AGAGTTTGTGAAAGCTCACAAATTTCCAAAATCATATGCAAAGAATTGCCAGTGTAATTTTAGCCAA  
TTATTGTATGTACCACTAGTCCCATCCATAAAATCTTGTGTTATTATACATAAAAGGAAGGATGTTTTTC  
TTTTTAAAACATGTAACAGTGTGTATATAAATAGTGTATGAGTTTGTTTTTGC

>M6-PGSC0003DMG400019801 M6 LRR-RLK

ATGGTTCCATGACTATTATTATAGAATTGCTAGTTTTGTTAACGTACCTCTTGGATACTAATGCATCGAA  
CATTTCAACTGATGAGGCTGCTCTTTTAGCTTCAAAGCTCATATAACTTCAGATCCAATGGAATGCTGTC

GAAAACTGGACAAAAGGGACTCACGTTTGCAATTGGATAGGCATATCTTGCAGTAGAAGGCATCAAA  
GAGTGACATCACTAGACCTCAACGGCCTTAGACTAAGAGGTTCAATCGCCACAGAAATCGGGAACCTCT  
CCTTTCTTAGTTTCCTGGACATTGGCAACAACAGCATCCACGGCGAAATCCCTGATGAACTCGGCTATTT  
GAGGAGGCTGAAATACTTGTCTTGTCAATGAATAATCTCACAGGTCAAATCCAGCTAGTCTAGGATTA  
CTGAGAAGGCTCGAATCACTTGATCTTTCTGAAAATGATCTCCTTGGATCTGTTCTTCGTCTATCTTCAA  
TGCTCTTCTTTGAAGGTCATCAATTTGATTTATAATGCACTGTCTGGGACTTTGCCGAATGACATTTTCC  
ATAATCTTCCGCGGCTGGAGGGCTTACAAATAGCAAGAAATCGACTCTCTAGCCAACCTACCAAGCAACT  
AGACAAATGCAAAGAGCTTACATACTTGTCTTGTCAATAAACCAGTTCACAGGTAAAAATACTGAACCA  
ATTTCTTTTTCTGCTACTTTTGGTTCATATTGACAATAAAGATTGCAGCAATTTTTAGTGAAAACAATGAT  
AGGCTGTTGAGAGGTATAACTTATTGTAACGTCTATTACAGGAAGCTTTCCTAGAGACATGTGGAACCTG  
ACAAAACCTCAACATCTATTTCTTGGATGGAATAACATAACAGGTACTTATAATGTTCTAGTTTAACTGAA  
TCTGCCTACAACCTGCATTTATTGCTGGACTTCTCACCTCATAGCACTAGAGATCTTTGACATTTCCAACTT  
GCTCTTCAAGTCATTTATATGAAATTAGTATTTGAATTTCAAAGGGTAGTAGCAGTAAATGTTAGTATAG  
CTCTTTGTTCTTCATTTTCAAACAACAACAGCAACTACTCCATCGGTTCAATGCTAGTTTGTGATGTGAAT  
CCTCATTATCCATGTTGATCCATTTAGTCCCATCTTCAAGAGGACGTTAAACAGATTGCGAGGATTGCT  
GAACTATTTAAAAGGCATACAACCTAACAGTTTTCTGTTATTTATAGTAACTTAGTGACTGTAAAGCTGTTA  
TACAGTATTGGACATTTAGTGTAGTAACCACACAATTCGACATATATTTTACAGGACATATACCAAGTG  
AAATTGATAACCTATCAGCAATTCGAAGATTAAGTCTACGACGGAACAATTTGGTGGGAAGTCTTCCACC  
AACTATTGGAAATTTGTCAAATCTAGAGATGATAGACCTAGGTGACAACAGACTATATGGTGGCATTCTT  
CAGGAGTTTGAACATCTTGTAATTTGAAAGAAGTGTATCTTGGTACAAACAGATTATCGGGTGAAGTT  
CCAAGGCGTATGTACAACATTTCTGGACTAAAAAAGATTTCAATTTGTAGCAAATACGCTTTCAGGAACAC  
TTCCCCAAACATAGGCCATACTCTTCCAAATCTTGAAGGCCTTACCTTGGGTAAAACCAGTTCACCGG  
GCTGATTCTACCTCCATTGTGAATTCCACCAAGCTTATCCAGCTTGATTTTGGTCGCAATCTGTTTAGTG  
GACCTGTACCTATGAATCTTGGAAAGCTACAACAGCTTCAATTCATCAACTTGCAAGTAAACCAATTGAG  
GAATGATCAATCTACAGGCGAGTTAAGTTTCTGACTTCATTATCTAATTGCAAGTATTTGAAAACCTGTT  
AAATAGGAGGTAATCAATTTAATGGAAGTCTTCCAAAATCTCTAGGTTTCAGGAACTGGTCTTTTTCCCT  
TGAATATTTCAATGCCCTTCAAAGTGGTATCACAGGAAAAATACCAACTAACATCAGTAACTTTAGGAAC  
CTGGAGTGGTTAAGCTTGGGAGAGAATAAGCTTATAGGTTCTATTCTCCAGATTTGGGGAACCTGAGG  
AATTTGAAAAGATTTAGCCTGGAGAAAAACAATTTAGATGGAATTATACCAACTAGCTTGTGTAACATG

GAAAACCTGTACCAAATTATCTTGGGGAAAAATCAACTTTCTGGCGAATTACCAAGTTGTTTTGGAAATC  
TTTCTTCTTTAAGAGAACTCTACTTAGATTCCAATGCACTAATTTCCCATATTCCATCAACTTTTTGGAGGA  
ACAGAGATATTTCAATTCTCACTTTGTCTCCAATTTGCTGAATGGGTCTCTTGCAGTAGAAATGGGGAA  
TTTAAGGAGTTTGCGGATATTACATTTACATGGTAATCAGTTCTCTGGTCAGATTCCTAGCACAATTGGCC  
AACTACAAAATTTGGTTAGCCTTTTCATTGTCAAAGAATATGTTAGATGGTTCCATACCTGAACTATTTGAA  
GATTTGGTTTCATTGGAACACTTGGATCTATCTAGCAACAATCTATCAGGCATGATCCCCAAGTCCTTGA  
GGAATCTTGAACATCTCATGTATTTCAATGTCTCGTTCAATGGGCTCATGGGTGAAATTCCAGATGGAGG  
GCCATTCGTAAATTTTACAGCTGAATCATTATGGGTAACCCTGCATTATGTGGATCATCACGCTTCCATG  
TGATGCAATGCAGAGTCACAAGTCTTGAAAGGAAAAGAAAGAGTAGAGTCTTAACTTCTGTTCTTGCAT  
CAGTTTCCTCAGGAGTTGTAGTCACAACCATTTTCATCATTGGTTTCTGAAATGCCGAAAAAGGAGTAC  
GGAACCTCCTCTAGTTGATACATTTGGTCAGGTACATAAGAGGATTTTCGACTATGATATTTCTCAAGGG  
ACAAACAACCTTTGATGAAGCAAACCTTGATTGGAAGGGGGAGCCTTGGTTTGGTGTACAAAGGGACACT  
AGCAGATGGAATGGTTGTGGCAATAAAGGTATTCAATACAGAACTGCAACATGCATTTAGAAGTTTCGA  
GGTGGAGTGTCAAGTTTTACGTAGCATTTCGACACAGAAACCTTGTTAAGGTGATAAGTAGTTGTGCCAA  
TTTTGATTATAAAGTGTTGGTGCTAGAGTACATGCCAATGAAAACCTCGAATGTTGGCTTCACTCTACT  
GACAAATTTTTGGATTTAACTCAAAGACTAAAGGTGATGATTGATGTGGCTTCCGCTGTGGAGTATTTAC  
ATGGAGGTCATTTGTTTGTAGTCGTCCATTGTGATTTGAAACCAAGTAACATACTTTTGGATGGAGATAT  
GGTGGCAAAGTGAGTGACTTTGGGATATCCAACTTCTAACAGCTGAGACGCTAATAGCACATAACAA  
GACTTTGGGTACTATAGGCTACATGGCACCAGGTAAATGTTATTATCAAGTTCATTTGAAGATTTTAAAT  
GACGTTAATTATTTTCACTAATGATTGCGTGATTTTTTGCAGAGTATGGATCAGAAGGCCAAAGTATCAAC  
CAAGGGAGATGTTTATAGCTTTGGTATTTTGTAAATGGAGACTTTTACAAGAAAGAGCCCCGTGGATGA  
TCTATTCGTTGGAGACTTCACCTTGAAAAGATGGACATGCCAATCATTACCAAACCGATTGGTGGATGTA  
GTGGACATTAATCTATTTTCACTGGACGAAGAAAATTTTACTTCTAAAGAGAGATGCTTCAAATCAATCA  
TGGAATTAGCTCTTGAATGCACAAACGATTTGCCTGAAGAGAGAATTCGCATAGAAGATATTACTCTGC  
GACTCAAGAAGATCCTAACTCAATTTCTGTAAAATGTTGTAACAACTAA

>M6-PGSC0003DMG400020594 M6 LRR-RLK

CCCAACCAACCCACCCACATCTCCATTCTCCTTATTTATGCACCCACCACCCTAACATCTCCACCCAC  
TCACTACAATCAATGGCTTTCCACCACCATCACTACCTCCTCCTCCACCTTCTCCTTTTCTTCTTCCCTT  
CTTTCACCTTCTCAGATGATGCTGATGTTATGTCCAAGCTTCTTGCAGCTCTTTCTCCAACCTCCTTCTGGTT

GGTCAACTTCTAAGCCTTTCTGTTCTTGGACTAATGTCATTTGTGACAAGTCTTCAGCTACTGTAACCTCA  
ATTAATCTTGATTCTCAATCTGTTTCTGGTTCTTTACCTTCTGAAATTACTCAACTTTCCAATCTTAAAACCC  
TTTCTCTTCAAAAAACAAACTTTCTGGCCCCTTACCTTCTTTTGCCAACATGTCAAATTAGCTGAACTTT  
TCTTGGACAATAACCAATTCACCTTCTGTTCTCAAGATTTCTTTTGGGGTTCCCAATTTAGTAACTTTAA  
GCATTAGTGAAAATGGGAGACTCTCCCCTGGCAAATTCCTATGTATTTGACTGAAAGTACAAATTTGGG  
ATCTTTATATGCTAGCAATGCTAGTATTGTTGGTGTCAATTCCTGATTTCTTTGATGTTTTTCTAATTTACA  
GAACTTAAGGTTGTCTTATAATAATCTTACTGGTTCTTTGCCTGCTTCTTTTGGTGGTTCTGAAATTATGA  
ATCTTTGGTTGAATAATCAAGTTAAAGGGTTATCAGGTAGTATTGATGTGATTGGAAGTATGACACAATT  
GTCTCAAGTTTGGTTACATGCTAATTCCTTTACTGGTAGTATTCCTGATTTGTCAAATGTGAGAATATAT  
TTGATTTGCAGTTGAGGGACAATCAGTTTACTGGTATTGTTCTGAGTCTGTGATGTCTCTTCCCAAATTG  
TTGAATATTACTTTACAGAACAATAGGTTGCAGGGTCCAATACCTCAGTTTAAAGATGGGGTTGAGTTA  
AACTTGGAACTACTAATAGTTTCTGTAAGGACTCCGGGACCGTGTGATCAACAGGTCACTGCACTTCT  
TGATGTGGCTGGTGGTTTTGGATATCCATTGTCTTTGGCTGAGTCTTGAAAGGGGAATGATGCTTGCAAT  
GGTTGGAGTTTTATAAGTTGTGATAACAAGGGGAAGAATGTAGCTGTTGTTACCTTAGGTAAGAGGGGA  
TTTTCGGGTACTATTTACCTGCTTTTGCGAATTTAACTTCGTTGAGGAGCTTGTTTTTGAATGACAATAA  
TCTTACTGGTACAATCCCAGAGAGTTTGACAACCTTGCCTAATTTACAAGTTCTTGATGTGTCTAATAATA  
ATTTGTCTGGACCTATAACCATTGTTTCCACCTAGGGTGAAGTTTACTCATACTGGTAACTTGTTTCTGGG  
AAAAATATAACTACTGGTGGTGGTGGTGGCGGAAGTGGTTCGGATGGTTCTGGATCGAATTCCAGTGGT  
CGAGGTGGAAGTTCATCTGGTGGTTCGAAAGGGCCTTCAGTTGGAATGATTGTTGGTGGTGTATAGCT  
GTTGTTCTTTTTGTTTTAGTAGTGTTATTTGTGTCTTACAAATGTTACATGAAGAGACGCCATAAGAGATT  
TGGAAGGGTAGAGACTCCGGAGAAAAGCAATGAAATGGTTAAGCCTAGTCTACCTAGTGTCTCGTGGTG  
GTTCAAATGGATATACTGGTGGCACCAGTGAGTTACAAAGTCAGAGCAGTGGTGGTGGTGGTGGTGGTGGT  
CAGTTTTTGAAAATGGAAACGTTGCCATTTCCATCCAGGTCTTCGACAAGTGACGAACAACCTCAGTGA  
AGAAAATATCCTGGGGAGAGGAGGGTTCGGAGTTGTTTATAAGGGCGAACTACACGATGGGACTAAAA  
TCGCGGTGAAGAGGATGGAATCTGGGGCAATGGGTACCAAAGGAATGAACGAGTTCGAAGCAGAAATT  
GCGGTCCTTACCAAAGTCAGACATAGGCATTTGGTTGCTCTACTTGGTTCATGTGTTAATGGCAATGAGA  
GACTTTTGGTGTATGAGTATATGCCGCAAGGAACTTTGAGTCAGCATTGTTTGAATGGCAAGAATTAG  
GCTACAAACCGCTTACTTGAAGCAAAGGGTAACGATAGCATTGGATGTGGCTAGAGGGGGTTGAATAC  
CTACATAGCTTGGCACAACAAAGTTTCATTCATAGAGATTTAAAACCATCAAACATCCTTTTGGGAGACG



ACATGAGAGCCAAGGTTGCAGATTTTGGTTTGGTTAGAAATGCCCTGATGGAAAATATTCTGTGGAGA  
CACGTTTGGCTGGAACTTTTGGCTATCTTGCACCTGAATACGCAGGTAAGCATTCTACTCCTTGTATCAT  
TACGTCTTTTTTAACTGAGAACTGATTTGTATGCCCTAGCTATAAACTTTAGATTTTTGCAAATTTTGAA  
ATTATTCGATCATCTGCATTGCTAGGCATTGTTATCTTCATTACATTAGAGAGACATTTGGGTTATAATGT  
TATTACTGAGGCAATCTCCACGCATAAATGCTGCTTTGTCATTTTTATCGAACCCATGAACTATATACTAC  
TATTATAAAAGATAAGTTTCCATTTCTGTGGATTAGCATCTGAATTATCCTATTACATCTCCTCTTTGTTA  
CAGCTACTGGACGAGTCACAACCAAAGTAGACGTTTACGCCTTTGGCGTTGTTTTGATGGAGATCATTAC  
TGGTAGAAAAGCTTTAGATGAAACAATGCCAGATGAGAGGTCTCATTTGGTTACATGGTTCCGCAGAGT  
CCTTATCAACAAAGAAAACCTCCGAAAGGCTATTGACTCGACACTTGATCCTGATGATGAAACATATGAG  
AGCATTTCOAAGGTTGCTGAGTTAGCTGGCCATTGCACTGCTCGGGAACCTTTTCAGCGACCTGATATGG  
GACATGCTGTTAATGTCCTTGGTCCCCTTGTAGAGCAGTGGAAGCCTACAACAAGTGAAGATGATGACG  
GCTATGGCATTATTGACCTCGACATGAGCCTTCTCAAGCCCTTCAAAGGTGGCAAGCTGATGAAGGAA  
CTTCAAGAATGTTGATGACTTCTCGATCAGTCACTCGCAGTCGAGCATACCCTCAAACCTTCCGGATTT  
GCAGATACTTTCAAGTCAACAGATTGCAGATGATATCCAAAAGAATTGACAACAGTTCAAGCCACGCCAC  
GCCACACGCGGTTTTAATCCTTTGTGGATCAACATAGAGTATGCCAATATTCATTTGATTAATTGGTTTCT  
TCTTGTCAATGTCATTTACTTTTTATGTGATTACATATTTAAGTTAATATAGTCTTGATGTAAGGTGTGATA  
ACAGTTAAAAAGTCAGGTGAATGTCACATTTTTCTTTGCCTCTTTGGAGACAACAGAAAATTGTAACA  
AATTCTTTCATATTACATTGTTAATGTAATAAAAATTTTGAACCTCCCC

>M6-PGSC0003DMG400020697 M6 LRR-RLK

ATAATGGAGAAAAGCTTCACATATTTTCACTTAATAGCACTCATGTTGCTTTACTTGTGTGTGGCTAGTTT  
AGCCATGACTCAAACGAACATTACAACCTGATCAATCCACTCTTCTTTCTTAAAATTCAAATCATTTCGG  
ATCCCTTTCACTTATTGGATGAAAGTTGGTCTCCAGCTATTTCTGTTTGTATTGGGTTGGAGTCACTTGT  
GGTTCTCGTCACAAAAGAGTGACATCATTGAATATTTCCAACATGAATCTTATAGGCAGAATTCCTTGTG  
ATTTTGGGAATCTCACATTTCTTGTCTTCTTACTTGGAGTAGCAACAATTTCTACGGAAAATTGCCTCAA  
GAAATGGCACATCTTCGTAGGTTAAGGTTTGTAAACTTAGTTTTAACAACCTTTAGCGGAGAGGTTCTT  
CCTGGTTCGGGGTCTTACACCAACTTCAAGTTCTGACTCTAAGGAATAACAGTTTCAATGGTCCCATCAC  
CCTCTCTTTATTTTCTAATATCTCCACACTTCAAACCTTTGGATTTGACATACAATTCCTTAGAGGGCCAAAT  
ACCAAAGAAATAGGAAATCTTGAAAACCTGAGGGTTTTAAGATTATCTGGCAACAAGTTTATAGGTTTT  
ATCCCTCCGTCTCTCTCGAACGCCTCAATGTTGATGACATTAGAACTATCTCTCAATTTCTTGGAGGAAA

CATTCCAGAAGAGATTGGAAAACCTCAAACCTAAAACCTTTTGTCAATAGAATCCAATCAACTTACAGGC  
TCTATACCATTCTCGATCTTCAACAATATTTCTGGAATTGAGATCATTGCATTTACAAATAATACCTTATCA  
GGAAATCTTCCTTATGATATGTGTAATTGTCTTCCAATGCTCGAAATGCTCTATCTAAGTGACAACAAGCT  
ATATGGTCATATGCCTGTAAGCTTGCCAAATTGTTGGAACCTTCAAATATTGTCTTTATCTAATAACAAGT  
TTGACGGACCCATACATAGTGAAATCGGGATTCTTAATAATTTGGTGATTTTAGCACTGGATACTAACCA  
TATTTCTGGTAATATCCCAATCTCCACATTCAATATCTCCTCATTACAGGTTTTGGTACTGAATCACAACAA  
TCTAATTGGATCCTTTCCAAGGGAGGTTGGCAATTTGACAGAATTGCAAATCTGGATCTTGCCGATAAT  
AATCTTACAGGTATTCAAAGGGGTATGCAAATCATTACTAGCAAGATTTATAATTTCTTAAATCTTAGTA  
ATTACTAACTATACATCTACATGCATACATTGACAGGTGAAATACCGAAAAATTTAGCAATCAGATTGA  
GTTGTTTGATCTTAGTTTCAACAGGTTTACTGGTTCACTACCAATGGAGATTTTCAACATATCGGGTATGA  
GAGAGATTCAAGTTATTTTCAATAATGTGACTGGAACCTCTCCATTAAACATAGGTTCTACGTTACCCAAC  
ATTGAAGTTATTCATCTGAGAACTTAAATCTTTATGGGACTATACCTCATTCTCTCTCCAATTGTTCCAAA  
CTCACTAGTCTAGACCTTTCTCTCAATAGACTAACAGGTTTGATTCCCAACTCTCTTGGAAGTTTGACTCA  
TCTACAGTCCCTAAGCTTGGCAATTAACAATTTAATGGGCGATAGTAGGTTAAGCTTCTTGACTTCCTGT  
CAAATTGTAGAGATTTAAAAATTATTTTCTCTCTGCGAACCTCTATATGGTGTGCTTCCAGAATCCATA  
GGGAACCTTTCCAGTACTTCTCTTCTAAGGTTTLAGAGCTATTGATTGTAAAATTAAGGGGGAAATTCOA  
AAGGATTTGGGAACCTAAGCAGCTTATTAGAACTCGATCTTTCTAGAAACGGTTTCACTGGACCAATTCC  
CACAACAATCAGCAACTTGAGATTCCTTCAGAGCTTGAAGTTGAGTGTCAACAACTTTCTGGATATATT  
GGAGATGATCTATGCAAATTACAGAACTTGGGTTATTTAACTTGACTTTGAATCAACTTTCAGGATCTCT  
TCCGAATTGTTTGGGAACTTAACTTCCCTTAGGGAGATGATTCTAGGTTCCAACAAATTGCGTTCAATC  
ATTCCAAAAAGCTTAGGAAACCTCATAAACCTCTTGAAGCTAGACTTATCCTCAAACAACCTTGGGTGGCT  
CTATACCTCTGGAAATTGGAAATCTAAAGGCTGCGATATATATGGATCTATCAATAAATACACTCTCAA  
TGGAATTCCTAAAGAAATTGATAGCTTGCAAAATCTTATATACCTTTCTTTGAGAGACAACAAATTGCAA  
GGATCAATTCTGGCTCAATGAGCAGCATTTGAGCTTTGGAATTTCTAGACCTTTCTCATAACAATGTTTC  
AGGATTGATTCCCAAGTCTTTGGAGAAGCTTCTATATCTCAAGTATTTCAACGTTTCATTCAACAAGTTGG  
TTGGTGAAATCCCCTCGAATGGTCCTTTCAAGAACCTCTCCGGTGAGTTTTTTCATGTCTAATGAAGCATTG  
TGTGGATCTCCAAGATTTTGTGTTCCCCATGCCACAGTAGCACATCAAAGCATAAATCCAAGAGGAAAA  
AAGTGATTGTTCTTGTCTACCGGGTACACTTGTATTAGTCTCCATCGCCTTTGCCCTTTTATGGTTAAGG  
TATACAAGAGGTAAAAGAACTGATCCTCAGCAAGCAGTTGATTCATCCTTTGTCATCTCAACAAAAGGAA

GAATTCATACTATGAACTACTTCGAGCAACTGATTCACCTAGTGAGATCAATTTAATTGGTTCTGGGAG  
TTTCGGCTCTGTTTACAAAGGCATCCTCAGAGATGGGACTTTCATTGCAGCTAAAGTGTTCAACCCACAA  
TTGCAAGTGGCATTAGGAGTTTTGATACAGAATGTCAAGTTTTGCGCAACCTTCGTCATAGGAATCTCA  
CCAAAGTCATCACCAGTTGTTCCAACCTTGAATTTAAGGCTTTAATACTCGAGTACATGCCCAATGGGAG  
CCTCAATAAGTGGTTGTATTACACAACACTTCTTAGACATCAAACATAGGCTAAGTATAATGATAGAT  
GTAGCATGTGCATTGGAATATCTACACCATGGATGCTCATTACCCGTGATTCATTGTGATTTGAAGCCTA  
GTAACGTCTTGTTGGATGAGGAAATGGTTGCCACCTAAGTGACTTTGGAATTTCAAAGTTGCTTTCTGA  
AGATGAGAGTTCTTTATACACTAAAACATTAGCAACGTTTGGTTATATTGCACCAGGTACGTGATCTCTT  
AATCAATTGCTTTTGATTATTTCTCTTTCTTATTTTCCACTAGTAAATGTTGAATTTCAAATTGATTGATT  
GCAGAGTATGGACTGGAGGGATTGGTGTCAATAAAATGTGATGTTTATAGTTAAGGGATCATGTTGATG  
GAAACATTTACTAGGAAAAATCCTAATGATGAAATGTTGATGGAGATTTTAGTTTGAAGCAATGGGTG  
AGAAATTCCTCCACAAGCAGCAATGGAAATTGTTGATGCCAATTAATATCGCCACATGATAATCAAT  
TAATGAAAAAGCTAGATTGTGTGGTATCCATCATGAAAGTGGCAATAGATTGTTGTGTTGAATCTCCAAA  
AGGAAGGATTGACATGAAAGATGTTGTGGGGAGGTAAAGACGATCAAGATTCAACTTCTTGCATGTTG  
AGGAAGATCTTATTAGAACTTTTCTTCCAAATCATCTCATTGTAACAAACATTTGCAATAATAGTTAGCT  
TCAAATAAGTTATAGCATTATGTCTTTCATAACATAGAGAATTGATGGGCATGTATACTTCTTAGGTCTTG  
AATTTGTAAAGTGGTTTTGGCCTAATACCTCTACTTTTTTCCATCTTTTAACTTTAACAATGTAAAACATAG  
AACTCTCAATATTGAATAACAGAATTTTCG

>M6-PGSC0003DMG400020744 M6 LRR-RLK

ATGTCACTACTAGCATTCAAGAATATGATCATTGATGACCCTTTCAAGATCATGGACTCCTGGAATGAAA  
CTATACATTTTTGTGACTGGCCTGGGGTTTCATGTGGTCGACGTCATCCCCGAGTTACAGTTTTAAATCTT  
ACTTCTCTGAAATTGAGGGGTTCTCTGTCACCAAGCATTGGTAATCTGAGCTTTCTTTATGTCCTTAAGCT  
CCAAAATAATAGTTTTTCAGGTGAAATTCCATCAGAGATTGGCTACTTACATAAGTTAAAGTTTTTACGCC  
TTGATAACAACCTCGTTCACTGGTCATATCCATCAAACATTTAGGATGCTTCAATCTTGTCTGTTGTTT  
TTTCGTATAATATGATGGTAGGCAAATTCCAGCAGAATTAGGCACATTGTTGAAACTCAAACAACCTTTC  
TCTTGTCTTAACTATTTTACAGGAGGAATCCGCCTTCATTTGGTAATCTTTCCTTACTTGATACCTTTTCC  
GCAAGCAAGAATAATTTGTTAGGGAAAATACCTGATGAATTATGTCAATTGCTCAACTTAAAGTACTTTG  
TAGTGAATGAGAACAACCTGAGTGGTACCCTGCCTCCTTGTCTTTTCAATCTTTCCTCTATCGTGGCCATA  
GATGTTGGAACAAACCATTTAGAAGGAAAATTGCCTCCATTGCTTGGTATTACTCTTCTAATTTAGAGTT

CCTTAGCATTATAGAAACAATGTAAGTGGAAATATTCCGGTAACATTGTCAAATGCTACGAATCTTCAG  
TCTCTTATTGCTAGTAGAAATGGACTCACAGGAAAAGTACCACCCCTTGAAATTTGCTGAAAATGCGG  
AGATTTTTAGTTGCTTTCAATTATCTTGGGAAGGGGGAGGATGATGACCTTAACTTTCTCACCACATTGG  
TGAATGCCACCAGCTTGGAGCTTTTGGAGCTCAATACAAATAATTTTGGTGGAGTCTTACCTGCATCTGT  
TAGTAATCTTTCGACTGAGCTTATAGAGCTTTCGTTGTCTTATAATCAGATTTCTGGAGAAATCCCAAGAT  
GGATATCCAATCTCAAGAAGCTTCAGGCTTTCTTTGTAGCTTACAACAGATTTACGGTGAAATCCGTCT  
GAAATTGGTGATCTGATATATTTGCAAGAGCTGGCTTTACTTGGAAATCAGTTCTCTGGCAAATTC  
TCTCATTGGGAAATTTAGCTTCTTTAACCAAACCTCAGTTTAAAGAGAAAACAATCTCCAGGGGAGAATTCC  
TTCCAGTTTAGGCAAATGCCACAATTTGGAAGTGTGGATCTTGGTTCAAATAACCTTAGTGGGTTTATA  
CCATCAGAAATTTGAACTCTCATCCTTGTGCGGAGGGCGTGGACCTATCTCAGAACCAATTAAGTGGT  
TCCTTCCGATGGAAATTTGGGAAGTTGAGAAATCTAGGCTACTTAAACCTGTCTGATAACAAGTTGCAGG  
GCCAGATTCCTACCAGTATAGGTAAGTGTGTGAACTTGAAGCACTAGACTTAAACAACAACAACCTTTCA  
GGGTAGTATTCCTTCAACCATGAATAGTTTG

>M6-PGSC0003DMG400020832 M6 LRR-RLK

AGATACCAATGGAGCTAGGTAATCATAAGAACTTCAGGTATTGGTATTATCACAGAATGAGTTTACTG  
GCTCTATCCCTGACAGCATTTTCAACATGTCAACACTGCAGTTCCTAACATTGTCAGAAAACAAGCTTTCA  
GGTACTCTACCTTCAAATGTAGGTCGTAGAATGCCAACCTAGAAGTATTTATTTGTGAAGGAAATAATC  
TGAGTGGTTTTATCTCTGATTCAATCTCTAATTCTTCAAGACTAGCAATATTGGAAGTCTCATTCAACAGTT  
TCACAGGTCCAATTCCTAAATCATTTGGTAACTTAGAATACCTTGAAGTCTGAACTTAGGGTTGAATAA  
TTTTATCAGTGATTCATCATTGAGCTTCTTACATCATTAAACAACTGTAGGAACTAAGATCACTCTGGT  
TTAATGAGAATGCATTGGATGGGGCTTTATCAGCGTCTGTTGGTAATTTCTCAAAGTCGATGCAAAATTT  
TCAAGGAAATGGCTGTAAGCTAAAGGGTGTCAATTCCTCGAGAAATTTGGTAATCTTACTGGAGTGATACA  
TATGAGTTTGTATAGCAATAAGTTGACTGGACATATTCCAAATACTGTCCAAGACATGTTGAACCTCCAA  
GAATTTTATCTACATAGTAACGAGATTAAGGTACCATAACCAATGTTATATGCAGTTTAAAGAATCTTG  
GTGCATTAGACTTGTGAGAAATCATTTTTCTGGTTTGGTACCCTCATGCTTAGGGAATGTTACAAGTTT  
GAGGTATCTTAATCTAGTTTACAACAGGCTGAATTCAAGATTACCTGCAAACCTGGGAGCCTTCAAGATC  
TCATTGAATTTAATGTTTCATCCAATTCATTAAGTGGTCATATTCTCCGGAGTTGGGAAATTTAAAGGCA  
GTGGCACTAATTGATTTGTCAAAAAATGATTTTTCTGGTAAAATTCCTAGCACTTTAGGAGGTCTAGCTG  
AATTGATTAATCTTTTTCTAGCACATAATAGATTAGAGGGGCCTATTCCAGATTCATTTGGCAAATTTGTTG

GCATTGGAATTCTTGGATTTGTCCTATAACAATCTTAGTGGTGATATTCCAGAGTCATTAGAAGCTCTTGT  
GTATCTCAAATACATGAATTTCTCATTCAATAAACTCATTGGAGAAATCCCATTGGCGGCCCTTTTGCAA  
ATGTCACTAGTCAATCTTTTTGTCCAATGATGCACTCTGTGGTGAATATCGGCTTAACGTAAAACCATGT  
CGAACCAAATCTACAAAGAAAAAGAAGTCAAGAAGAAAAAGAGCGCTGATAGGTTTATATACGCTGTT  
AGGGATTGTGTCACCTTGTGTTGGTAGTTGGATATGTGGTGTTAAGATTGAGAAAGACAAAGAAGAA  
TGCAAGTCAAGCAGATGTGTCTCTGGTAAAAGAACATGAAAGAATTCCTATTATGAACTTGAACATGCA  
ACAGAAGGATTGACGAAAGCAACTTGCTTGGTACAGGGAGTTTTAGCATGGTCTACAAAGGGATACTT  
AAGGATGGTACTCTTTTGGCAACAAAGATATTCAATGTGCAATTGGAGGGTGCATTTAAAAGTTTTGAC  
ACGGAATGTGAGATACTCCGGAACCTTCGCCACAGAAATCTGACCAAAGTTATTACAAGCTGTGTCAAC  
CTTGATTACAAGGCCCTGGTGTGGAATACATGCCCAATGGGACACTTGATAAATGGTTATACTCCCACA  
ACTTGTCTTGAACCTTATTACAGAGACTGGATATAATGATAGATGTTGCATCTGCAATTGACTATCTCCAC  
AATGGCTATACAATGTCTGTGGTTCATTGTGACTTGAAGCCAAGTAATGTCTTGCTAGATCAGAAAATGG  
TTGGTCATGTCAGTGATTTTGGCATTGCGAAATTGCTAGGTGAAGGGGAGGCTTCTGTTCAAACAAGGA  
CTATTTCAACCATTGGATATATTGCTCCAGGTATATTAGAACTTCTTAAAGTTTTTCTGTTTCTCATTTC  
GTTTTGGCATATTCCATTTTAACTAGGAAGCTTTTATGATAAATTTTTAAAATAATCGTAGAGTATGGAC  
AAGATGGAATAGTATCCACGAGTTGTGATGTTTATAGTTTTGGCATCCTGATGATGGAGACGTTCAAA  
GAACAAGACCAAGTGATGAAACATTTACCGGTGAATTGAGCATAACATCGTTGGGTTAGTGATTCTTTCC  
TGATGAAATTCATAAGGTGGTGGATTACTATTTGGTTCAGCCAGGGGATGAACAAATTGATGCAAAGAT  
GCGATGTTTGTATATATCATGGAATTAGCTTTGACTGCACTTTAGTGAGACCTGATGCAAGAATTAGC  
ATGAAAGATGCTCTTTCAACTCAAAAAGATCAGGCTACAACCTGTCAATAATCGGCACTAG

>M6-PGSC0003DMG400020848 M6 LRR-RLK

ATGGGAAGAAGTTGCAATCTTCTCTTTGCTCTTGCAGTTTTATTCTACTCCATCACCATGCTTTACTTTCT  
ACTGTTCTAATAAAGCACCGATGAAGCTGCTCTTCTTGCACCTGAAATCACACATTTCTTCTCATCCTAA  
CAACATCTTATTAAGCAACTGGTCTTCTTCGACCCCGTTTTGCAGCTGGATTGGAATCACTTGCAGCTCCC  
GCCACCATCGAGTCACTGCTTTAGACATTTCTAGCATGCAACTTCGTGGTACCATTCCCTCCACACCTTGA  
AACCTCTCATTCTCGTCTCCCTTGACATCAGTAACAACACTTTCCATGGAGATTTGCCAGTAGAGTTGGC  
TCATTTGCAGAGGTTGAAATTGATTAATGTCAGAAGCAATAACTTCACCGGAACCATTCCATCATTTTTAA  
GTTTGTACCAAACCTACGCTTTGTGTACCTCTCGAGCAACCAATTTTCGGGGAAAATTCCTTCTTCTATTT  
CCAATCTGACAAAGCTGGAATTGTTGACAATACACACAAATTTCTTGAAGGAGAGATCCCTAAAGAAAT

CGGTGATCTTCGTTACTTGATTGTCCTAACCTGCAAGATAATCAGCTTACTGGCTCTATACCACCCTCAA  
TCTTTAACACTTACTACAATGCAAGTAATTGCTCTTACTGACAACAATCTGACCGGAAATCTTCCAAAACT  
TTATGTGACCGTCTTCCAACTTGGAAGGGCTTACCTCTCAAGCAACTCCCTAGGTGGAGTTATTCCAC  
CAAACCTGGAGAAATGCCGAAACTTCAAATATTGTCTTTGTCTTACAATGAGTTTATTGGAACTGTACC  
AAGAAAGCTAGCCAACCTAACAGCTCTTACAGAATTATATCTTGGATTGCAACAGTTGGAAGGTAGTAT  
GCTATTTCTCACAAGATATCTGAAATTTTCTTCTTTCTCTCTTACCAAACCTTGTAICTCATATATTTCT  
GAAATTGACAGGAGAGATACCAGCGGAGCTAGGTAATCTTAACAACTACAGCTGCTGATGTTAGACCA  
GAATGAGTTTACAGGTTCTATCCCTGAAAGCATTTCATATATCAGCAATGCAGAGCCTAGATTTTCA  
ATAACAAGCTTTCAGGTCCTCTACCTTCGGATTTAGGTCGTGGAATGCCCAATCTAGAAGAAGCTTTATT  
GTGGAGGAAATAGTCTGAGTGGTTTTATATCTGATTCAATCTCAAATTCTTCAAGACTCAGAATGGTTGA  
ACTCTCAGACAACAGTTTCACCGGTGTAATTCCTGAATCACTAGGTAACCTTAGAGTACCTTGAGGTTCTG  
AACTTGGAGCTGAATAATTTTATCAGCGATTATCATTGAGCTTCCTTACATCATTAAACAACTGTAGGAA  
ACTAAGAGCACTCCGGTTAATGAGAATGCATTGGATGGGGCCTTATCGGCGTCTGTTGGTAATTTCTCA  
AACTTGCTGCAAAATTTTCAAGGAAATGGCTGTAAGCTAAAGGGCGTCATTCTCGAGAAATTGGTAAT  
CTTACAGGAGTGATATATATGAGTTTGTATAAGAATGAGTTGACTGGACATATTCCAAATACTATCCAAG  
ACATGTTTAACTTCAAGAATTTTATCTACAAAGCAACGAGATTGAAGGAACCATAACCAATGTTTTATG  
CAGTTTAAAGGATCTTGGTGCATTAGACTTGTGAGGAAATCATATTTCTGGTTTGGTGCCTCATGCTTA  
GGGAATGTTACTAGTTTGAGGAACTTAATCTAGCTTACAACAGGCTGAATTCTAGATTATCTGCAAACT  
TGGGGAACCTTCAAGACCTCATAGAATTCAATGTTTCATCCAATTCATTAAGTGGTCATATTCCTCTGGAG  
TTGGGAAATTTAAAGGCAGTGACACTCATTGATTTGTCAAAAAATGATTTTACTGGTAAAATTCCTAGCA  
CTTTAGGGGGTCTAGCTGAATTGACTGATCTTTCTCTAGCAAATAATAGATTAGATGGGGCTATTCCAGA  
TTCATTTGGCAAAATGTTGTCACTGGAATACTTGGATTTATCGTATAACAATCTTAGTGGTGAAATTCCAA  
AGTCATTAGAAGCTCTTGTGTATCTCAAATACATGAATTTCTCATTCAATAAACTCAGTGGAGAAATCCC  
ACTGGTGGTCCTTTTAAAATGTCACCAGTCAATCTTTCCTATCCAATGATGCACTCTGTGGTGTCTCTG  
GTTTAAACGTAAACCATGTCAAACCAAGTCAACAGAGAAGCCAAGAGGAAAAAGAGTGCTTATCGGTTT  
ATATACATTGTTAGGGATTGGATCACTCCTTGTGTTGGCCGTTGGATATGTGGTGTTAAGATTGAGAAAG  
ACAAAGAAGAATGAAAGTCAAGCAGATGTGTCTTTAGTAAAAGAGCATGAAAGGATTTCTATTATGAA  
CTTGAACATGCAACAGAAGGATTCGATGAAAGCAACTTGCTTGGTACCGGAAGTTTTAGCATGGTCTAC  
AAAGGGATACTTAAGGATGGTACTCTTTTGGCAGTAAAGGTATTCAATGTGCAATTGGAGGGTGCATTC

AAAAGTTTTGACACGGAGTGTGGGATACTCCGGAACCTTCGCCACAGAAATCTGACCAAAGTCATAACA  
AGCTGCTCCAACCTTGATTTCAAGGCCCTAGTGTGGAATACATACCCAATGGGACACTTGATAAATGGT  
TATACTCTCACAACCTTGTTCTTGAATTTATTGCAGAGATTAGACATAATGTTAGATGTTGCATCTGCAATG  
GACTATCTCCACAATGGCTATTCAACGCCTGTTGTGCATTGTGACTTGAAGCCAAGCAATGTCTTGCTAG  
ATCAAGAAATGGTTGGTCATGTCAGTGATTTTGGCATTGCAAATTGTTAGATGCAGGGGAGGCTTTCA  
TTCAAACAAGAACAATTGCAACCATCGGATATATTGCTCCAGGTATATTAGTTAAGCATTTCTTTCCCTTA  
GATATGGATTGATGCTTTTCAGTTTTGGCATATTCCATTTTAACTAGGAGGCTTTTATGATCATTTTTACTA  
TGATTACAGAGTATGGACAAGATGGAATAGTATCCACAAGTTGTGATGTTTATAGTTTTGGAATTCTGAT  
GATGGAGACATTCACAAGAAGAAGACCAAGTGATGAAATATTTACCGGAGAATTGAGCATAACAACGTT  
GGATTAGTGATTCCTTCCAAGTGGAAATCATAAGGTGGTGGATTACTATTTGGTACAGCCAGGGGATG  
AACAAATTGATGCAAAGATGCAATGTTTGTATCAATTATAGAATTAGCTTTGAGTTGCACTTTAGTGAC  
ACCTAATGCAAGAAGACTAGCATGAAAGATGCACTTTCAACTCCAAAAGATTAGGCTCCAGCTTGTCAGT  
AGTCAACACTAG

>M6-PGSC0003DMG400021008 M6 LRR-RLK

TATTTGTAGTTGTTGTAATCAAGGTGTAAGTACTGATATTGATTTCTTGTGTAAGTGAACCCCATTTTACATTG  
TGGTGTAGAAATGAAGTTACTCAAGTTCTTGATGGTTTTTGTCTTTATTTGGCTCTGTCATTGGGCAGC  
TTCCGTCTCCGGATATATTGGCTTTGCTCGAGTTTAAAGAAAGGTGTCGAATATGATCCAACGGGGTTTCT  
TCTTGAATCTTGAATGAGGAGTCTATTGATTTCAATGGATGTCCTTCATCTTGAATGGGATAATGTGT  
AATGGTGGTAATGTTGCAGGAGTTGTTCTTGACAACCTGGGTTAATTGCTCATGTTGATTTGAGTGTAT  
TTGCTAATCTTACAAAGCTTGTTAAGCTTTCAATGGCTAACAATTCAATTGCTGGGAAAATGCCTAATAAC  
ATAGATAGATTTAAGAGCCTTCAGTATCTAGATCTCTCAAGTAATCTATTCAACTCTTCTTTACCCCCAGA  
GGTTGGACAGTTAGGGAGGTTAAAGAATCTGTCATTAGCTGGTAATAACTTCTCTGGTATGATACCGGA  
GACAATTTCAAGGGCTTGTGTCTATGCAATCTTTGGACTTGAGTCACAATTTCTTTTCTGGGGCTCTATCTT  
CATCTCTGATGAAATTGACTGGTTTGGTATACCTGAATCTATCTGTTAATGTATTCAAAAGGAAATTCCT  
AAAGGATTTGAGCTGATGGAAAATCTGAAGTGCTTGATTTGCACGGAAATATGTTTGATGGCAATTTG  
GATGCAGAAATGTTGCTGCTTACCACTGCAACTCATGTTGACTTGAGTGAAATTTGCTAGTGAACACTG  
CTTCTCAGCAGCAGAAATTTTTGCCAGGTTTATCGGAGTCGGTGAAGTATTTAAATCTTAGCCATAATCA  
GCTAAAGGGTTCCTTGTAAAGTGGAAATGAAGCTCAGACTTTTGGCAACTTGAAGGTCTTGGATTTGAG  
CTACAATCAGCTCTCAGGGGAATTGCCTAGTTTCAATTTTGTATGATCTACAGGTGCTTAAACTTGCCA

ACAACCTATTTCCGGATTTATTCCGAATGATCTTTTGAAAGGAGATGCATTGCTTCTCACTGAGTTGGAT  
TTGAGTGGAACAACCTCACTGGTAAATACATGAAACCCTTTGGTAAATAACTCTTTTCACTGTTTTTCTC  
AATCTCTTCATTTTGCAGGTCCAATAAGCATGATAACATCCACAACATTGCGAACTCTTAACTTATCATCC  
AATGCTCTTTCTGGTGAACCTCCCTTTGTGACTGGAACCTTCTGCGGTGCTTGATCTCTCGAAAAATCAGTT  
CAAAGGTAATCTAACTAGAAATGCTGAAATGGGGGAATATTGAATTTCTTGACCTTAGCCAAAACCGTTTG  
ACTGAAACATCCCTGAGGTTACGTCTCAGTTTCTGCGTTTATATCACCTCAACCTTTGAGCAATACCTT  
GACAGGATCTATCCCGAAAGTTATTTACAGTTTCTAAGATCACTGTCCTTGATCTCAGTTTCAACCAGC  
TGGATGGGCCTCTTCTACTTCTCTACTAACTATGCCACTATTGAAGAACTTCACCTACAAAACAATGCA  
TTTGTTGGAAGCATTGATTTCTCTCCTCCGGCTAGTACTCCTAAGCTTCGTGTTCTAGATCTTTCTCATAAT  
CAGCTTGCTGGTFACTTTTCTGATGGATTTGGGTCACTGATTGCACTTCAAGTACTCGATATATCAGGAA  
ATAATTTCTCTGGATCTTTGCCAACTCCATGGGTAATGTTAGCTCTTACTTCTTTAGATGTTTCAGAGA  
ATCATTCTCAGGTGAACTGCCAAAAACCTGCCTAACAGCCTCCAAAGCTTTAATGCATCACTCAATGA  
CTTCTCTGGTGTCTGCTGCTGAGAATTTGAGAAAATTTTCTTATCATCTTTCTACCCGGGAAACTCTCAAC  
TTCAATTTCCGAATCCTCCTTCAGGATCTGGTCAAGCTTCAACAGAGAAGCATAAGAGCAGGCAACTTAA  
AACTATTATTAAGTGGTGATCATTGTTGCTTGTGTGGTTGTTCTTGTTGTTTTAATCATGCTAGCCATTTT  
TGTATTTTACTTGCGGGCATCGAAGAACTCTCAGGCACATGTTACTGACAAAGACATCCGCCATCAAACC  
CAATCAAATCCTTCTGGTTTTAGCAGTAGAGAAGGTGCAGTAGTTTCAGCACAAGATGTTACAGCTGCTT  
CACGGAAAGCATCATCATCAGAAGTAATTAGTGCTGATGAGAAAACGACAGGTTTCTCCCTTCGAAAA  
CAAGTCATTTCACTTGGTCACCAGAGTCAGGGGAATCATATACTGCAGAAAGCCTTGCCGATAATTTGGC  
TGGAGAGCTGTTCTTCTTGATGATACAATCTCTTTTACAGCTGAGGAACTATCTAGGGCCCCAGCTGAA  
GTCTTAGGCAGAAGCAGCCATGGGACATCTTACAGGGCAACACTAGATAACGGGTGCTCTTGACTGTG  
AAATGGTTGAGAGAAGGAGTGGCCAAACAGAGAAAGGATTTACAAAGGAGGCTAAAAAGTTTGCCA  
ACATTAGACATCCAAATGTGGTGGGATTAAGAGGTTACTACTGGGGTCCCACACAACATGAGAAGCTTA  
TTCTTTAGATTACATATCTCCCGAAGTCTATCAAGTTTTCTATATGGTAAACTTTATCTTCTCGCATCAA  
CCTTGACGTTTCTTATGCATATCGTTTGCTATAACACTTTGAACTCATAAAACACTTATAATCTTTCTT  
CTTTGATATTTTTAGTATTTTATGGCAAACAATTTGTCAGTTTGATATCTTGACTGTTCTTGTGGGGAAT  
GAATTTTCTCAGTCTGTGATACACGAATTAAGGATAAGAAGCCATTTCAATTTTTAGTTAGCATAGTGAG  
TCCAGCTAATTCATTCATTATACAGCTTGAATCAGTTCATTCACAATCATATATGAAACTACACTCT  
TTCTCTTCTGAATCTATTCTCTCAATATTTCTCCTTCTTTAGCTGTTCTTCTTGAGGGAACTCCTGAAACAGT



CACTTGATCCTCAAATTCCTTGTGAATTCTTGCAATCAAGTAACAGTTTGTATTATCATGAAATATAGTAT  
CACTTTCACTGTGGAATTCTTCAACTTAAACTGCTGATGTCTAGATTCTGATTTATTGTTGGAAAACCTTA  
AACTTGTCCAAGGCCCTATACACTACGTATGTCTTTGTTACCTGGTCCGACTGGACGTGTAAGCAGGCCT  
TACTTGGTTAATATACCTGCACTGGCAGTAAGGTTGAGCAATAGTTGTGGTACTTTGCTCATAAAAAGG  
TCACAATGAACTGCAAATTCCTCAGTGCTCAAATACCTTATTTTCGATTGGTGATTCTACCTGCTCAACTC  
TCTACTATTTTGTATGCTTTTGTGTAGTTTGTATAGTGTAAAGATTTCTGTATATACATTTAACGTGCGACAC  
CTTTGCAGATCGACCTGGAAGAAAAGGTCCACCACTAACCTGGCCCAAAGACTCAAATATCAGTTGA  
TATTGCGCGTGGCCTGAATTATCTCCATTTTGACCGCGAGGTTCCCTCATGGAAACCTTAAAGCAACCAAC  
ATCTTGTGGATGGTCCTGATCTTAATGCACGAGTTGGTGATTACTGCCTTCACCGTCTTATGACTCAAGC  
GGGGACAATTGAACAAATTCCTGATGCTGGAGTGTTAGGTTATCGTGCACCAGAGTTGGCTGCATCGAA  
GAAACCAGTGCCTTCCTTCAAATCAGATGTATACGCTTTCGGAGTCATTTTGTGGAGGTCCTAACTGGG  
AAATGTGCAGGTGATGTTGTTTCTGGTGAAGATGGTGGTGTAGACTTGACTGATTGGGTAAGGTTGAAA  
GTGGCAGAAGGTGGAGGATTCGATTGTTTTGATAATGCATTGTCATCTGAGATGGGAAATCAAACAATA  
GAGAAGCAAATGAAGGAGGTTCTTGAATAGCTCTAAGATGCATACGTTCCGGTATCTGAGAGGCCAGG  
TATCAAGACTGTATATGAGGACCTTTCATCTATTTAGTTTTCTCATTTCCTTGGCTTTTGCTTGGGAATCAAAT  
AGCTCATTGGTTTCCCTTGAGTTTGTAGAATTAGCAAGTTTAGTGTGTGAATGGTCTAGTTTTATTAACCA  
TTGTTTGTGTAAATTGGGGCATATTTATAATGTATACAACCTTTCACCCCCACCC

>M6-PGSC0003DMG400021017 M6 LRR-RLK

ATGGAGAAGCACATTTTCTTATTGATTCTTCTATTTTTTATTCAATTTTCTGTATCATTGCTACCTCAAATG  
AGACAGACCAACAAGCTCTACTAGCTTTCAAAATCTTATTACAACCTCCAATCATTTTTTGGCCAATAAT  
TGGACCAAAAATACTTCATTTTGTCTTTGGTTCGGCGTCACTTGCAGTCCAAAAGGCCAAAGGGTTGTAG  
CCTTGACTCTTCCTAATTTGCAACTTCAAGGCACAATTTCCCATCTTTGGCCAATTTGTCCTTCCTCAGTG  
TTCTCAATCTCCAGAACAACAGCTTCCACGGTGGCATCCCTTATGGCATTGGCCACATGCCTCACTTGCG  
AGTGATTGATGTTAAAAACAATCAGCTCAACGGAAGTATACCAACAAGTCTATTTCAACACCGTAGAATT  
CAAGTAATTTCACTGGCTTTGAATGAATTCAGTGGTGAGATGTGGAGAGGGCCATGGTATGTACCCCAA  
CTCAGAGTCTTAAATCTCAGGAATAATAGCCTCACCGGTATAATCCCTCCTTCTGTTGGAAATGCCACGA  
AGTTGCTGAACTTCAGTTTGTATGGGAATAAAGTTGGTGGCAACATTCCAAAGGAAATTGGTAATCTGA  
GCCAGCTTGCATTTTTGTTCTTGTTCATAATCAATTAACAGGTTTCATTCCTGCAACATTGTTTAATATTT  
CATCACTTGTGCCCCTATCTTGGAAACCAATAGCCTTTCGGTCCCTCTCTTGTGATAAAGGAAATAGT

GTCTCAAATCTCAAATTTTTAAGTATATATGACAACCAAATTTCTGGTTGCATTCTACCAACATATGCCA  
ACTCGCAGAGCTCAAATTTTTGTCCATATCTTTCAACAACATAACCGGAGACATACCCAAAAATATTGATT  
GTTTATCTAAGCTCAAGGGGTTCTATATTGGCGATAATCCAATAAAAGGGACTATTCCCACTTCATTGGG  
AAATATTTCCACTCTGCAATATCTTTATTGTGGAAACAATCGCATAGTGGGGCAAATTCCTCCGCAATTA  
GGGAAGCTATCAAATTTGAGGCAATTAGGCTTTGACCATAATTTAATCTTATTGGTCAAATTCAGAGG  
CTATTTTCAACATATCTTCTTTGAAAGGATTGATTCAGTTTCAATAACCTCTCGGGGAGAATTCCAACC  
ACTGCAGGTCTTCATCTTCCGAACCTTAAAGGACTTACCTGGGATTCAATCAGCTCGAAGGAGAAATTC  
CATTGTTCATAACAAATGCTTCCAAGCTTGAGATACTGGGGCTAAATAATAACTTTCTCACAGGAACTAT  
TCCTACTAATTTGGGAAATCTTCATGAGCTGCGATATCTGTTCTACATGATAATCAACTTACCAATGAAC  
CAAGAGAGCATGAGTTGCGATTCTTCAATTCTTTGGCAGACTGTAGAATGTTGCGATATCTACAAGTGG  
GTAACAATCCGTTGAATGGCACTCTGCCAATTCAATTGGGAATTTTTCATCTACTATCGAAAACCTTAAAT  
ATAGTAGATGCACACATCAATGGCCTCATCCCACAAGTATAGGCAACATGAGTGGTCTTACAGTCCTAA  
GCCTTGGAGGAAACAACCTTGATGGGAAATATTCTCCTGAGATTGGTAAGCTTAAACAACCTCCAAGGTC  
TGTATCTACGTTACAATAAATTGCAGGGACATATTTCTGAGGCAGTATGCAATTTATCTAATTTGGTTGA  
ATTATATCTGGAACATAATGAGCTCACTGGAGTGATCCCAGAATGTATAGGAGATCTAAGCATGCTACA  
ACTGCTTTATTTAAATTCTAATAGATTTTCATCAAATTTCCATTGAGCCTTTGGAAAATGAGTGGTCTTCT  
CTTACTAGATGTGTCACTAAATTCTATAGAGGGAGAAGTCCATCAGATATTGTAAGATTGAAAGCCATT  
GTAGAACTATATCTTTACGGTAACCACTTTTCAGGCATGATACCGACCAGATTGGGGGAACTCCAAAACC  
TGTTGTCTCTTGACCTATCAAACAATTCATTTTTGGACAAATTCATTATCCATTGTCAACTTGATAAGCT  
TGGAATTCTTGGATTTGTCTTCAAATGCATTGTCAGGTAATTCCTAAGTCATTGGAAAACTCTCTTAC  
CTTGAAAGCATTAAATGTTTCATTTAATGATTTAGAAGGTGTAATACCGAGTGGTGGTGTGTTTGCAAATT  
CCACTCTGCAATCATTCTTGGTAACAAAGGCTTTGCGGAATGCACATATTTGGGATTCTGCTTGTGCT  
ATCAATAATCCTGGAAAACAATCAAAGCTTAAAGGAGGTTGTGATAAAAATTGTTACTCCAATGGTTATTT  
CATCTTTTATGATATTCTTGTTCAATTTGGATAATGAAACGACAGAAGAAAGGGAAGTCCAAAGA  
TGTGGAGAAGGTACTGGAGATCAAACCTCATCAATTAGTTTCTTATCACGAGATTCAACAAGCAACAAT  
AATTTTGATGATGAATCAAATTTAATTGGTGAGGGAAGCTCTGGCTCTGTGTACAAAGGCATTTTATCTA  
GTGGAAGTGTAGTGGCCATAAAGGTTCTGGATTTGGAAAATGAGCAAGTATGCAAGAGGTTTGATACC  
GAATGCAAAGTGATGAGAAATGTTAGACACAGAAATCTTGTTCCAGTGATCACTACGTGTTCTAGTGAC  
TATATAAGAGGCTTTGTTATGCCAATTATGCCCAATGGAAGTCTTGAGAATTGGCTGTACAAAGAAGATC

GCCACTTGAACCTTCATCAAAGAATAACTGTTATGCTTGATGCAGCTATGGCAGTTGAATATCTACATCA  
TGGTCATGTCGCTCCAATAGTTCATTGCGACCTAAAGCCAGCCAACATTCTTTTGGATGAAGATATGGTG  
GCTCATGTTGGTGATTTTGGAACTCCAAAATTTTAGCTATAAGCAAGTCCATGGCCTATACCGAGACAT  
TGGGTACTCTTGGATACATTGCACCAGGTATAAAAAATCTACCCTCTTGATTTTCTTTATCATAATTAA  
GCCTCTCCAAATTCTACAAGTAAGAAAAAGCAAGGATTTATTTATGCAGAATTATTGTTGTATTTCAATTG  
AGTAACTTTTCTCAATCCTTTTCTAAGAATATGGCTCGGAGGGAATAGTGTCCGCTAGTGGTGATGTTT  
ATAGTTATGGCATTATGTTGATGGAGGTTTTGACCAAAAGACGACCAACAGATGAAGATATTTGCAATG  
AAAATCTTGACTTGAGGAAATGGATAACACAATCATTTTCAGGGAGTATGATGGACATTGTGGATGCCA  
ATCTTTTTTCTGAGGAAGAACAATTAATTGTAAGTGAATGTGCATAGCCTCCATGATAGAATTGGC  
TTTAGACTGCACAAAGAAAATGCCAGAATCAAGAGTAACCATGAAAGAAGTAGTCAAGAGGCTTAACA  
AAATCAAGAACACATTTTTGGAA

>M6-PGSC0003DMG400021018 M6 LRR-RLK

ATGAGTGGTCTTCTCTATCTAAACGTGTCACAGAATTCAATAGAGGGAGAACTTCCATCAGATATTGGAG  
GACTGAAAGCCATTGTAGAACTATATCTTTCTGGTAACCACTTTTCAGGCATGATATCAACCAGATTCGG  
GAACTCCAAAATCTGCAGTATCTCGACCTATCGAAAAATTCATTTTTTGGCCGAATTCCATTATCCTTTG  
CCAATTGATAAACTTGAATTCTTGAATTTGTCTTTAAATGCATTGTCAGGTACTATTCTAAGTCTTTG  
GAAAACTCTCATACTTAAAAGCATTAAATGTTTCATTTAATGATTTAGAAGGTGAAATACCGAGTGGTG  
GTGTGTTTGCAAATCCACTCTGCAATCATTTGTTGGGAACAAAGGTCTATGTGGAGTGCACATATTAGA  
GATTCCTGCTTGTGCTATCACTAATCCTGGAAAACAATCAAAGCTTAAGGAGTTCTGCTAAAAATTGTT  
ACTCCAGTGGTTATTGCATCCTTTATGATATTCTTGTTGTTTTCAATTTGGATAATGAAACGACAGAAGAA  
AGGGAAGTCCAAAGATGTGGACAAGATACTGGAGATGGGGACTCATCAATTAGTTTCTTATCACGAGAT  
TCAACGAGCAACAATAATTTTATGATGAATCCAATTTAATTGGTGAGGGAAGCTCTAGCTCTGTGTACAAA  
GGCACATTGTTTGGCGGAACTGCAGTGGCCATTAAGGTTCTGGATTTGAAAAATGAGCAAGTATGCAAG  
AGTTTTGATACCGAATGTGAAGTGATGAGAAATGTTAGACACAGAAATCTTGTTCCAGTGATTACTACA  
TGTTCTAGTACTATATAAGAGCCTTTGTTCTGCAATTTATGCCAATGGAAGTCTAGAAAATTGGCTGT  
ACAAAGAAGATCACCACTTGAACCTTCATCAAAGGGTCACTGTAATGCTTGATGCAGCTATGGCAGTTG  
AATATCTACATCATGGTCATGTCACTCCAATAGTTCATTGCGACCTAAAGCCAGCCAACATTCTTTTGGAT  
GAAGATATGGTGGCTCATGTTGGTGATTTTGGAACTCTAAAATTTTAGCCATAAGCAAGTCCATGGCTT  
ATACCGAGACATTGGGCACTCTTGGATACATTGCACCAGGTATACTAGTCTCTTTCTATATATTTTCACAA

AAATCAGAATTTAGCCCTTCCAAAATCATAAAAGCAAGTGTCTGTTAGTACATAATTATGTTATATTTAAA  
TGAGTAATTCATTTTCATTTTCATTTTCATTTCTTTTTTAAGAATATGGCTCGGAGGGAATAGTGTCTTCTA  
GTGGTGATGTTTATAGCTATGGCATCATGGTGATGGAGGTCTTGACGAAACGAAGGCCAACAGATGAA  
GAGATATGCAATGAAAATCTTGACTTGAGGAAATGGATCACACAATCATTTTCAGGGAGTATGATGGAC  
ATCGTGGATGCCAATCTTTTTCGTGAAGAAGAACAATCACTAGTAAAAGTGAAATGTGCATAGCGTCC  
ATGATAGAATTGGCTTTAGACTGCATAAAGGAAATTCCAAAATCAAGAATAAGCATGAAAGAAGTAGTG  
AAGAGGCTTAACAAAATAAACACACAT

>M6-PGSC0003DMG400021184 M6 LRR-RLK

TTTTTTTTAGAGAGAGAAGATGAGTTGTAAGAGAGAGAAAATATATGTCTGCAAGAAGACAAATGTTGA  
GTGTCACTGCCATTTCTGGGAGCTGTGAGGTTTCTCTTTCATTCATATACAAAACAAGACTAGGGTTTTAC  
CATTGTGGTTTTGGTTTTTACCTGAGCAGATAGAAATTTGAACTTCATTTATCAAGATTTCTAAAGGGCT  
AAATACTTTGCTGGCCATTTCATTTTCTGTACTTTAATGCAAATTTTTTTGAGGCCACCAGTTGAGTGC  
ATTAAGAAGCTTGAGGTTCCAAGATAACATGAAGCTGTAATCATTACAAGAAGTTGAATTTCTCAGTAA  
ATCTTTGAAAAAGACTCTTCTTTTTTTGTTTTCTTCTAGTTGAGCTGATGTTCTTGGTAAGGGAATACTGA  
ACTTGTTTTACTATCTTGAATATTTGAAAGTTCAGTCTGTACTTTGTTTTTGTCACTCATTGTCTCCTTTAG  
CTTGATACCTAGAAAAGTTTCTATTTTATGTTGTATCTGTCTTGTATTGCTGTTGAAGGAGGACTCTGGT  
GATTTTGGGTTGAAGTTGTGTACTTTTTCCCCTGTTGTTTTACTGCTTGAAGTGTGATGGTTGTTGTGA  
AAGATGGTTTTTCATATGTTGAGGTTTTGCTTAAAGTGATTCTCATACTTAAAGCTGCTCCTTTTGAATTTCT  
TGGAAGGTTGAAGATTTAGTTGATTTTTGGGAGTGAGTTTGTGTCCTTGGGCTAGTAAAGCTTTTTTC  
TGGTGTGCAATGAACCTATTTAGGTTTTTGATGCTTGTGCTTTGTTTTGGTTCTGCAATGGGGCAGCTTC  
CTTCCCAGGACATTTTGGCCCTGCTTGAATTTAGGAAGGGTATCAACCACGATCCAAGTGGTTATGTACT  
GCAGTCATGGAATGAGGAGTCCATTGATTTCAATGGTTGCCCTTCATCTTGAATGGTATAATGTGCAAT  
GGTGGTAATGTTGCAGCAGTTGTCCTTGATAACATGGGTTTATCTGCTGATGCAGATTTGAGTGTGTTTG  
CTAACCTCACAATGCTTGTGAACTCTCTATGGCTAACAATTCAATTGCTGGACAAATGCCAAAGAAAAT  
TGGTGATTTAAGAGTCTTGAATATCTGGATATTTCAAACAATCTATTCAACTCCTCTTTACCACCAGAGA  
TTGGGAAAATAGGAAGCTTGAAGAATCTGTCACTTGTGGTAACAATTCTCTGGCCCAATCCCTGATAC  
TATTTAGAGCTCATGTCAATCAATCTTTGGATTTGAGTCACAATTCTCTTTCTGGGCTACTTCTTCTTC  
TTTAACCAAGTTAAATAATTTAATATACCTCAATCTTCTCGTAATGGATTTACAAAGAAAATCCCTAAAG  
GTTTTGAGCTAATGGCTAACCTTGAAGTCTTGACTTGCATGGAAATATGCTTGTGGTACTTTGGATCC

AGAGTTCTTACTGCTTACTACTGCAACTTATGTTGACCTAAGTGGAAATTTACTCGCGAGTGCCGCTTCTC  
AACATGAGAAATTTTTACCAGGCATGTCCTCGTCAGTCAAGTACTTGAGTCTTAGCCATAATCAGCTTAC  
GGGGTCACTAGTAAGTGGCGGTGAAGCTCAGGCATTTGGAACTTGAAGGTTCTGGATTTGAGCTATAA  
TCAGTTGTCCGGGGAATTACCTGGCTTCAATTTGTTTATGATCTTCAGGTCCTGAAACTCAGCAACAACA  
GATTTTCTGGTTTCGTTCCAAATGATCTTTTCAAAGGAGATACTTTAGTTCTCGCAGAATTGGATTTAAGT  
GGAAACAACCTCACAGGTATATTCCAACTGCTCTCTGAAATTCATTTTGCAAATTAATAGTATTTTCGTT  
GTGTTGAACTTGAGTTACAACAAAGTAGTTAATTTCTGATCATTTTGTAGTGTGCTTTACTCAGTCCCTT  
CATTTTACAGGGTCGATAAGCATGATTACATCAACAACCTCTGCGCGTTCTTAACTTATCCTCCAATGCTCT  
TTCTGGTGAACCTTCCACTGGTGACAGGTAGTACTGCAGTTCTTGATCTCTCAAAAAACCAATTAGAGGGG  
AATCTAACTAGAATTCAGAAATGGGGAAATGTTGAATTTCTTGACCTCAGCCAGAACCAATTGACTGGA  
AACATCCCTGAGGTTACAGCTCAGTTTCTGCGATTAAATCGTCTAAACCTTCTCACAATGCTCTTACTGG  
ATCTCTCCAAAAGTTATCACACAGTTTCCCAAGATCACAGTCCTTGATCTTAGTTTCAACCAGCTGAATG  
GACCTCTTCTCACTTCTCTGCTAACATTACCCACTATTGAAGAACTTCACCTTCAAAACAATGCACTTGTTG  
GAAATATTGATTTTCGCTGCCCCCTCTGCTACACCACCCAATCTCCGCGTTCTTGATCTTCTCATAATCAGC  
TTGCTGGTTCTTTTCTGAAGGGTTTGGTTTTTTGACTGCGCTTCAAGTACTTGATATAGCTGGAAATAAT  
TTCAGTGGGTCTCTGCCTACATTGATTGGTCAAGTTGGTTCGCTCACTTCTCTAGACATTTACAGAAATCA  
TTTTACTGGTCTCTGCCGATGAACCTGACTGATGGCCTCCAAAGCTTCAATGCATCACTCAATGACTTAT  
CTGGTGTGTCCCTGATAATTTGAGAAAGTTTCCTTTATCATCTTTCTACCCTGGAAACTCTGAACTTCAAT  
TTCCAAATCCTCCCTCAGGATCTGGCCAAGCTTACCAGAAAACCAGAAAAGTCGATCACTTAAAATAT  
AATCAAGGTGGTAATAATAGTTTCTGTGTAATTGCTCTTATTATTTTGGTCTTGCTAGCCATTTCTTTTA  
TTATATACGAGCTTCAAGGAAGCGTCATCCTCGTGTGCTGAAAAAGTTGTTTCATCGCCAAGCCACATCA  
AATCCTTCTGGCTTTAGCAGTAGGGAGGGTGCCGGTGGTGCAGTTGTTTCAGCTGAAGATCTTATGACT  
TCACGGAAAGGATCATCAGAAATAATTAGTCCAGATGAGAAAATGGCTGCTATAACTGGTTTCTCCCCTT  
CAAAGGTAGCCATTTCTTGGTACCAGAGTCTGGAGATTCGTATACTGCAGAACTTTTGCAAGATT  
GGATGTGAAGTCTCCGGATCGTCTGGCTGGAGAGCTGTACTTCTTGATGATACAATCTCTTTTACACCT  
GAGGAACTTTCCAGGGCTCCGGCTGAAGTCTTAGGCAGAAGCAGCCATGGTACATCATACAGGGCAAC  
ACTGGAGAATGGGTTGCTCCTGACTGTGAAATGGTTGAGAGAAGGAGTAGCGAAGCAGAGGAAGGAT  
TTCGCAAAGGAGGCTAAAAAGTTTGCCAATATTAGGCATCCTAATGTAGTAGGATTAAGAGGTTACTAC  
TGGGGTCCCACACAGCATGAGAAGCTCATTCTTTCGGATTATATATCTCCTGGAAGTCTTGCAAGTTTCTT

CTATGGTAAGCTTCATGTATTCTAAACTCTCATATTATGTTTTGCTAATACTTTGTAAAGGCTTTGTGTCCC  
TGTTCTTTAATCTAGTCATTTTCCTCTGACTGTGTGATATATCTTACAGTTCATATGGTTTTTCCATGCACA  
TTATATATGAGCACTTTAAGCTGTGTGATCCTGTAGTGGGAATTTGTGTGAACGCAGTATTTAGTCCTTG  
GTTTGATGTGGTAATACTTTAGTACATCTAGAGCCCAATATATTATGCATGTCTTTTGTTTATGTAACTTTC  
ACACCAAGTAGTAATACACCATCACCATGTGCTCTTCGTATCAGGTCACATAGGCTGTGAGGGATT  
GCAGTATGGTACTTATTATTTCCAGTAGCTAAAATTCTGTATGTTTGAGTTCCTAATGGATCTGAAAATTG  
TGATGTTTAGCTTTTGTTTCATGATTAACTTTGTTAGAAATCAGCTAGAATATGATACATTTTCCTTCTTAT  
ATGAATCCTTCAAATGGACGTGCTTCTATTCAATTTGACTAACCAAATGTTTTCAATCAGTTGATAATTATA  
TATGTGGTCATTCTCAATATACTTCTCTAATGTGCTGCACGTTTGATAGATCGGCCTGGTAGAAAAGGTCTT  
CCACTAACCTGGCCCCAAAGACTCAAATATCAGTTGATGTTGCACGTGGCTTGAACCTCCATTTTG  
ATCGTGAGGTTCCACACGGAAACCTTAAAGCAACCAACATCTTGTTGGATGGGCCTGACCTTAATGCAA  
GGGTTGCAGATTACTGCCTTCACCGCCTCATGACTCAAGCCGGCACAATAGAACAGATTCTTGATGCAG  
GAGTGTTAGGTTATCGTGCCCTGAGTTGGCTGCGTGAAGAAACCACTGCCTTCTTCAAATCAGATGT  
ATATGCTTTTGGAGTTATTTTGTGGAGCTGCTAAGTGGGAAGTGTGCAGGTGATGTTGTCTCTGGCGA  
AGATGGTGGAGTAGACTTGACTGACTGGGTAAGGTTGAAGGTGGCAGAAGGTCTGATGCTGATTGTT  
TTGATAGCGTGTTGTCACCTGAGTTGGGAAATCCGGCAATGGAGAAGCAAATGAAGGAGGTTCTTGGT  
ATAGCCGTGCGATGCATTCGTTCTATATCTGAGAGACCTGGTATCAAACTATTTACGAGGACCTTTCTTC  
TATATAGTTTGTACTCATTTTGGTTTTGGTAAACCATATGTTTTGCTCTACTTTGGGAATCAAATAGCTCAT  
TGACTTCCCTTTGAGTAGATAATTAGCACAGTTAGTGTGTGAATGGGGCTAGTTTTATTGACCATTGT  
TTGTTGTAATTGGTGCATATTTAATGTGTAAACAACTTTTCTCCCCTTTTGGCCTATGAGCTATCAATG  
TTTGTGAGTTTTTTGGAGTAAATACTTGTGACTTTATTTTCCAAGTTTTGCAGCACAGTTTCACAGAACATT  
CTCAGATGGTCAATCAAACACAATGCTGACATCAACATTGCAGTGCAAACCTGACCGAAAAAGGTGTTCA  
AGAGAAAGTGCCAGGTTATGAACAAATGATACTGGTTTTTCTTGTCCACTTTTCATAAAAAGTTAAATTG  
CAACATCATTATAAGACACCTAAGGTGGAAAAAGGAAATGTTACAAAACCTACGGATGCCACTAGTTA  
CTATGCAAGTGAGGAGAGGGGTGGGATAAGGGTATGAATTTAAACAACAGGAACTCTAAATTACAGGA  
AAATATATCATAAGATGCAACATATTTTATTGTTGCAACTTTAACAATGTATGTTTCGTCAAACCTGAATCC  
AGCCATCTCTGCCTCCTTGACAGATATCCTTGCACTTAGCCACCCTCCAGAAGCCATATAAACTTTGATCA  
AGCAGCAGTATATGTCAAAGTTGGACTAAAACCTGCTTCTTAAGTTTAGAGAAATAGCGTACAGCCCT  
TGAGAGATCGTTCAAAGCAACAAAAAGCTTAATAACTACACGATAAGCTGGAAGATCAAAAAGGCAATT

TGAAGCCTCCATTTCCCATAGCATGTCTATTGCCTCTCTATATTTGTTTCGCTGAATAACGACAGTGAATCA  
GAGTAGTATACATAACTACACTTGGATTACCACCAGATTTCTGAACCAGTCATATAGTCCCTCCACGATC  
TCAAATCTTCCCAGCCTAATGCAAATCTTCATGATAGCTGTACAGTCCTGTGGTGTCAAATTCAGATCATC  
TCTCACAGCAAGCTCCTCTAATAATAACCAAGACAAGTGTGCTTTTATCAGGATCCTTACCAAGCTCTAAG  
ATTAGCTTAGCATAACCCCTAGTATCAAGCACTCTGTTAGATTCTTAGCCATTGAAAGTAGCTTCAAAGC  
AAGCTTCAGGCTTCCTCCTTTAATATAACCCCTTAACATTGCTTCATACACACCCCGACTAGCCAAGCCAG  
TGAAGTTGTCAAATCAAATGGCAATTTCAACTCATTGACCCCGCCAAAACCTTCAATGGTAGAACCAAG  
AATATGATCATCTGGGAAAAGATGGGGTTGTTTCTTACCCAACAGAATGTTTCAAGAGCTCTCTCCGGA  
AGCCCAAGTAACCCAACCTCTCGGATTGTCAACGACAACGATCCTTTCTAAGAAATGGACTCCATTTAC  
TGAGAACCTTTGATACATTTTCTCAGTTGAAAGGCCTTGATATCTTTGCCCCAAACCAATCAAGAAAGTA  
GGATTCTTGTAACACTTGCCTTGATATGGATTGCCTGAACGATTTGTGAATCCCTTTTGTGTAGGAAGTC  
CTAAAGGTGAATCTTGTAAGGAAGGGGCAGAGGTAGAGGCCTTTCTATCCGATTTTCCAGGCTTCT  
GAGGGATCCTCCCTTTGAAAAGAGATGAAATTGCTTCCATCTCATCAGACTCCAATATAATTCCCTCATCA  
TCATCACACATCCTTCTTTTTCTACTTCCAGCTCCAATTCTTCATCCATTCCATCAGAACAAGCCTCAGTT  
GCAACTCCCTCATCCTCCTCGTACAAGACCCTTTTAAACTATAGTCCACATCTGGTGGTAGCTTGGGTCG  
TCGAGGATTTCTAAGGTTCTTTGGAAGTTTTCTATGATTAGCTCTGTTATTAGATACAGCCATGAAAACAA  
CTCTTCCCTTTCTTCTTCCAAAACCTTAAAGGTGTTCCAGAAGCAGCTGTACTGGCACTACTAGACTGCGAG  
ATAGAATATGTGGGTGAAGACCAAGTAGAGGACTCATAAGTGGCCGAGAACATGCAATAACTCCTGCT  
GAGCATTGGTCGAGCAGCTGGTCGGCACAAATTTGTAACAAAGGGATATGAGAGACCTTATAGTGT  
GACGGAGTATAAAACCAACTGTTAAATGAAAGTAGAGCAGTTTTTTTTGACATATAAGTTACTAT

>M6-PGSC0003DMG400021353 M6 LRR-RLK

AGCATTCTCATATGAAAAATCCACTCTTTATGGTCATTTCTTGCTACTAAATCTTCACTTATAAAAAAAA  
GATTACATTTTTTGGATTACTCTGTGAAAACACTGTGTTGTCAGCAAGAACAACACCATAGTAGTAGCA  
ACTAGCAAGCATTGTGCTTTTTCTCACTCCAATTATCACTCTCTTTCTCCTTTTTTTGTTTTGGGGTTTAGTG  
ATCTGAACCCCATGTTTTCCACCTCTTATTGTCTCAAGATTTGACATGGGGGTCTTCAAGAATCAACCTCA  
TTAGGTGGCAAAGATTGTAGCTTTCTTGATTTTTGTTGTAGTGGGGGTTTGTTTTTTTTTTTGTTGAATGT  
TAATGCAAATGCTCAAATGTTGTTGCTTTGTGGATCATCTATGGAGTTTTATTTTCACTACATATGGTTTG  
TTGTAGCTCTGTTTCTTGCTTTTGCTTCACTTGTCTTCACTGTCACTGACCCTAATGACTTGTCTGTTATTAA  
TGAGTTGAGAAAAGGGTTGGAAAATCCTGAGGTCTTGAATGGCCTGAAAATGGTGGAGACCCTTGTG

GTTCTCCAGTTTGGCCACATATTGTGTGTAGTGGTAGTAGAATTCAGCAGATTCAAGTTATGGGGTTAGG  
GTTAAAAGGCCCTTACCTCAAACTTGAATAAGTTGTCTAGGTTGACACATTTGGGGTTGCAAAGAAT  
CAATTTAGTGGAAAGTTGCCATCTTTAGTGGTTTGTCTGAATTGAGCTTTGCTTACTTGGATTTCAATCA  
GTTTGACACAATCCCACTAGATTTCTTTGATGGACTTGTGAATCTACAAGTTTTGGCTTTGGATGAAAATC  
CTCTAAATGCCACTAGTGGTTGGTCATTGCCAAATGGGCTTCGAGATTGAGCTCAGTTGATCAATTTAAC  
AATGATAAACTGCAATTTAGCTGGTCCTTTGCCTGAATTCCTTGGAACTATGTCTTCTTTAGAGGTTTTGT  
TGTTGTCTACAAATAGGCTTTCAGGGCCTATTCCAGGACTTTCAAGGATGCAGTGCTCAAGATGCTTTG  
GTTGAACGATCAGTCGGGTGATGGTATGAGTGGTCCAATAGATGTTGTTGCAACAATGGTGTCACTTAC  
ACATCTTTGGCTTCATGGGAACCAATTTTCAGGTAAAATCCCAGTAGAGATTGGTAATTTAACAAATCTG  
AAGGATCTCAATGTGAATACAAATAACCTTGTGGATTAATCCCTGAAAGTTTAGCAAATATGCCATTAG  
ACAATCTTGATTTGAATAATAATCATTTTATGGGACCAGTTCCTAAGTTCAAGGCTACTATTGTTAGTTTT  
ATGTCCAACCTCTTTTTGTCAAACCAACAAGGAGCAGTATGTGCCCTGAGGTTATGGCACTTTTAGAGT  
TTCTTGATGGTGTGAATTATCCTTCTAGGCTTGTGAATCATGGTCTGGAACAACCTTGAATGGACG  
TTGGTGGGGAATTAGCTGTGATGATAACCAAAAAGTTAGTGTCAATAAAGTTCCTAAGTCTAATCTTTCC  
GGGACCTTGAGTCTTCAATCGGAACCTTGAATCCGTTACTCGCATTATCTTGAATCAAATAATCTTTC  
TGGTTTTGTTCCATCTAGTTGGACTAGTTTGAATCTCTGTCTATTCTTGATTTGAGTAATAACAATATTC  
TCCACCTCTACCTAAATTTACCACCTCTTTGAAACTTGTCTAAATGGAAATCCAAACCTGACTTCTAGTCC  
TCCTGGAGTAAACCCTTACCAAACAACAGCACAACCTCCCGCAGCTTCACCCGCGTCGTCTGTACCATCTT  
CACGACCCAACAGTTCAAGCTCTGTGATCTTTAAACCCGGTGAACAGTCACCCGAAAAAAGGACTCAA  
AGTCAAAGATAGCCATAGTTGTGGTTCCTATTGCTGGTTTTCTACTTTTGGTTTTTCTTGCTATTCCACTGT  
ACATTTATGTCTGTAAGAAGAGTAAAGATAATCATCAAGCTCCAACCTGCTCTTGTGGTTCATCCTAGAGA  
TCCATCTGATTCGGATAATGTGGTCAAGATTGCGATCGCCAATCAGACTAATGGAAGTCTTTCCACAGTA  
AATGCAAGTGGTTCTGCTAGCATAACAGTGGTGAATCCCATATGATCGAAGCTGGGAATTTGCTTATAT  
CGGTTCAAGTACTTAGGAATGTGACTAAGAATTTTTCTCCGAAAATGAACTTGGGCGTGGTGGTTTTG  
GTGTGGTTTATAAGGGAGAATTAGATGATGGGACACAAATAGCTGTCAAAGAATGGAGGCTGGTATC  
GTTAGCAACAAAGCTTTGGATGAATTTGATCAGAAATTGATGTTCTCTCAAAGTCCGGCATCGGCATT  
TAGTGTCTCTACTGGGATACTCTGTTGAAGGTAGTGAAAGAATTCTGGTTTATGAGTACATGCCACAAG  
GTGCACTTAGTAGACATCTTTTCCGCTGGAAAAAGTTCAAGTTGGAGCCTCTCTTGGAAAGAAAAGGCT  
TAATATTGCCTTAGATGTTGCTAGAGGTGTGGAGTATCTACACACACTAGCACATCAGAGCTTCATTCAT



AGAGATCTCAAATCCTCAAATATCTTGCTGGGTGATGATTTCCGAGCAAAAGTATCCGACTTTGGACTCG  
TGAAACTTGCTCCTGATAAAGAGAAATCTGTGGTCACCAGGCTGGCCGGAACTTTTGGATATCTGGCAC  
CTGAATATGCTGGTAAGCAATTTTTGCTTACTTTGTCAAAGAGAACAGATGATTTTTAAAATGCATGTT  
TATATGACAATTTTTACTTTTGCAGACACCTAGAGTTTGCTCAACTCAATTCTGATGTATAGCATTTTATTT  
TTTTGCATACCAATGTACTGTTTTCCGAACTAACATGAGATGTTTATTTGGTCCAGTTACGGGTAAAATCA  
CCACGAAAGCAGATGTCTTTAGCTTTGGTGTGTGCTAATGGAGTTGTTAACTGGGATGATGGCACTTG  
ATGAGGATAGACCTGAGGAAAGCCAGTACTTGGTTTCGTGGTTCTGGAATGCCAAATCCTCTAATGAGA  
AGCTTATGACAGTCATTGATCCAGCTCTAGACGTGAAAGATGAGATAACTAAGAGCATTTCCACCTTAGC  
TGAACTTGCTGGTCATTGCACTGCAAGAGAACCTGGTCAACGGCCAGATATGGGCCACGCTGTAAACGT  
GCTCTCCCCTTGTGAGAAATGGAAGCCTCTGAGGATGATCCAGAGGACTATTGTGGTATCGACTAC  
AGTCTTCCCCTCAATCAAATGGTCAAGGGCTGGCAAGAATCGGAAGGAAAAGACTTAAGTTATGTGGAT  
CTCGAGGACAGTAAGGGTAGTATCCCTGCAAGACCAACTGGATTTGCAGATTCATTTACATCAGCTGAT  
GGTAGATAATGGAGGTACTTCTATGTAGTAGATGTAGATATCAATTTTCTTTGTATTGTGTGAGATTTTG  
ATCGTATTTTCCACGTGCCTTCGTTCAATTTCTCCCCCTTCAATGTGAATGTATTAGAAATCAAACATATGTG  
TTGCCTCAGTTCCTTCTGTAGATACAAAATAGTGATGAAGGAGAACTATACATCGGTTAAACTCCTCGCT  
CAGTCACTATTTTCATCTTCTACTATGGTGAGATTTAAGATCATTTCATACAACTTTGCTTATTTTCGTCGT  
TTAGTTTGCTGCTTCAGAAGTTCTGTGTTGAGAAACATACTGACGTTGAAATAGCCCGGTAATAGAATAT  
GTCGTTTGATTCTGA

>M6-PGSC0003DMG400021394 M6 LRR-RLK

ACTTCTAATTGAGTTGTTGAATTTTTGTTGTAGATAAAGACAAGGTAAAGATTCTAAGTTGGGAAGAAC  
GTTTCCGTATTATAGTTGGAACAGCACAAGGCATTGATTTCTTCATGGAGGTTCCAGAGATCAGAATCAT  
CCATAGGGACATCAAGAGCTCCAATGTACTTCTTGATGAAAATCTTGAAGCAAAAATTGCTGATTTTGGG  
CTTGCTCGGTGTTTTGGAGCTGACAAAACCTCATCTCAGTACTGGAATTGCTGGAACATTGTAAGTCAACA  
ATTCACAAATACGTATCAATACAGTTCACAAACACTTGTCCGTATCTTAACTTAATCTGTGATTTTCGGT  
GTACAGAGGATATATGGTCTCCTGAATACCTCGTAAAAGGACAGCTAACAGAGAAGGCTGATGTCTATAG  
CTATGGGGTGCTTGTCTTGAATCGTTAGTGGCAGAAAAAGTATTGCCTTTGCAGAGGACTCTGGCTCT  
CTACTACAAACAGTAAGAATGCTATAGATTTCTCTTTATCATGGTCATTATATGAATATCATTGAACTTTA  
GTAGTAAAGTAAAAAAAACCTATTTTTATCATATAACTCAGTATATTGTCATTTTGGTTTCAGGTGTGGAA  
GCTGTACACAACAAATCAGGTAACCTGAAGCATTAGATCCTCTATTGAAAGGCGATTTTCCACCAGAAGA

GGCATCAAAGGTTACTAAAAGTGGGGTTGTTGTGCACTCAAGCTTCTGTCGCTTTAAGACCATCAATGAG  
TGAAGTTGTCCAAATGCTAACGTGTGAGGGCTATCAAATCCAGAACCATGCCAACCACCATTCTTA

>M6-PGSC0003DMG400021609 M6 LRR-RLK

CACAAAACACACAAGCCCACTACACTACCAATCTTAGTCATTATTTCTCTATCTACTATCACTCCTGTGAAT  
GCAGTTACTTCATTTTCCTTTCCACCTGTACACATGAATATCTAACAATAATCCCAAACCTCAACATTCATT  
CAATGAAACTTGTACTCCATTACCTAAAATTCACACCTTTTTCCCTTTTCATTTCCATTCCCTTCTCTAACT  
ACTCTGAAAAAACATTTGTTTGCTTCTCTTGTTGTAGGAACTAAAAAAAACACCATCATAAAAATGAG  
ATCTTTTAGTCCTTTTTTAGTTCTAATACTTCATTTGGCTTATTGTATGGATCTTTATTAGCTGATGATAAT  
ACTATGCAGCTTAATGATGATGTTTTAGGCCTCATTGTGTTCAAATCAGCTCTTCTTGATCCTTACTCAA  
ACTCTTATCATGGAGTGAAGATGATAACTCTCCTGTGCATGGGAGTTCATTAAATGCAATCCAATGAAT  
GGTAGAGTCACTGAGCTCAACTTAAATGGCTTGAGTTTATCAGGAAAGATCGGTAGGGGGCTCGAGAA  
GTTGCAATCTTTAAAGGTTACTATCTTTGTCAAACAACAACCTTACTGGTGCAATTAGCCCTGAGGTAGCCT  
TGTTGACAAATCTTGAAAATCTCAACTTTAGTCATAATGGCTTATCAGGGAATATCCCTGGATCTTTTTCG  
AATATGTCATCTTTACAGTTTCTTGATCTGTCTGAGAATGCGTTATCTGGACCTGTCTCTGATACCATGTTT  
GATAACTGTGGTGATTTCGTTACGTTATCTTTCTCTATCCGGGAATTATCTTGAAGGTTCAATTCCTAAAAC  
AGTTTCAAATGCACTAGTTTGAATCATCTCAATCTTTCAAGAAACCATTTTTCTGGTGACCCTGGATTTT  
CCGGGGGTATCTGGGGATTGACAAGGCTTAGAACATTAGATCTTTCACATAATGAACTCTCTGGATTAGT  
ACCAATTGGTGTTTCAGTTTTACATCAGTTGAAAGAGTGTGTTTACAAGGGAATCATTTTCAGTGGAGAT  
TTACCAGCTGATATTGGATATTGTCCACATTTGAATAGATTAGATTTGAGTAATAATCAATTCACAGGAC  
AAATTCCAATGTCACCTCAAAGGTGAATGTTCTTTCTTTCTCAGTTTATCAAACAACCTTGATAAATGGA  
GACTTCCCTCAATGGATAAGTAACATGAGCAGCTTGAATACTTGGATTTTTCAGGCAATAGTTTAGAAG  
GAGCATTGCCTGATTCAATAGGGGATTTGAAAATGTTGAAGTACTTGAGTTTATCTGGTAACAAATTGA  
GTGGAAACATTCCAAAGTCTATGGTGTATTGTACTAGTTTATCGACTATTCGGATAAAAGAAAATGCATT  
GACTGGTTGCATTCCTGAAGGATTGTTTGGTATAGGATTGGAAGAAGCAGATTTTTCAAGAAATGAGTT  
AACTGGTTCCATCCCTCCTGGTTCTGGTAAATCTTTGAATCACTTCAATTTCTTGATCTGTCAGGAAACA  
ATCTTACTGGAAACATTCCAGCTGAGGTGGGACTTTTTCTCCAAGTTGAGATATTTGAATCTTTCTTGGAAC  
AATTTTCAATCAAGATTGCCTCCTGAAGTTGGATACTTTCAGAATCTAACGGTGTGGATCTTCGACACA  
GTGCTTTAGTTGGATCAATCCTGGTGATATATGTGATTCTGGTAGCTTGGGAATTCTTCAACTTGATGG  
AAATTCATTCACTGGACCTATTCCTGATGAGATTGGAAATTGTTTCATCCCTCTACTTGTTGTAAGTATATTT

ATTCTGATTTATCTCATTATAGTTTGGTCCAGCCTCTCTATAACATTCATTTACCCATGAGAACCATGTTTT  
CTGTGGAACCGATCTCTCATGTTATGTTATATTACATGTTATATTATATGTTATCTATTACAACATGTTGCT  
ATAGCAGCAAAAATAATATTGGAACAAACAATGCTGTTATAGAGAGGTAGTAAGGGATATGTTTATTTG  
AAAATGAGGTTCTGTATCACTTTTGCTTTGTCTATATTCCCTGTAGTTCTTGAATTGAATGTCAAATTTGTT  
AAATGCAGGAGTTTGTACATAATAATTTAAGTGGGTCAATACCAAGGTCCCTTTCAATGTTGAAGAAGC  
TCAAGATTTTGAAGCTAGAGTATAACCAATTGAGTGGTGAATACCACAAGATCTTGGCAAGTTAGAAA  
ATCTTTTGGCTGTTAATATATCCTACAACAGGCTCGTTGGACGCCTTCCAATGAGTAGTATATTCCAGAAT  
TTAGACCAGAGTTCATTGGAAGGGAATTTGGGTATTTGTTACCCTTGTGAAAGGTCCTTGTAAAGATGA  
ATGTGCCAAAGCCTTTGGTTCTTGATCCTTATGCCTATGGAAACCAGAGGGGAGGTCAAACCGGGACG  
ATGGAACCTCAAGAAGCAATAACAAAAGTTTCAAGAACCATAGATTCCTCAGTGTTTCATCCATTGTTGC  
AATCTCTGCTGCAGCTGTGATCGCGTTGGAGTCATGATAATAACCTTACTCAATGCTTCTGTTCGAAGG  
AGGATCACATTCGTTGACAATGCCTTGGAAAGCATGTGCTCAAGTTCTTCTAAGTCAGGGAACCTAGCCA  
CTGGAAAGCTTGTGTTACTGGACACCAATCGTCCCCGGATTGGACTAGTAGCAGTCTTGAATCAATCCT  
AAACAAGGCATCTCAAATCGGTGAAGGTGTCTTCGGAAGTGTACAAGGTTCCATTGGGAGGGGAAG  
GAAGAATAGTAGCTATCAAGAAGCTTGTAAACATCAAAAATCCTCCAATATCCTGAGGATTTTGATAGAG  
AAGTTAGAGTTTTAGCAAAAGCAAGGCATCCAATCTAATATCCTTAAAAGGGTATTACTGGACTCCTCA  
ACTTCAGCTTCTAGTATCAGATTATGCACCAGAAGGAAGTTTACAAACCATACTGCACGAAAGGCCTTCG  
TCTTCAACTTCCCTTCCCCTGTCTTGGTCCACCCGATTCAACATTGTGCTTGGAACAGCCAAGGGACTTGC  
ACATTTGCACCACGCGTTTAGGCCAGCAATCATACACTACAACATAAAGCCTAGCAACATCCTCCTTGAT  
GAAAACCTCAACCCGAGAATATCAGATTTTCGGGCTGGCAAGGCTAGTGACAAAACCTCGATAAGCACATG  
ATAAGCAACAGGTTCCAGAGTGCACTAGGCTATGTAGCACCTGAATTGGCATGCCAGAGCTTAAGGGTG  
AACGAAAAGTGCGACGTGTATGGTTTTGGAATGTTGATTCTTGAATTTGTCACAGGTAGAAGGCCAGTT  
GAGTATGGAGAGGACAATGTGTTTATACTCAATGATCATGTGAGAGTTTTGCTTGGCAAGGCAATGTG  
TTGGAATGTGTTGATCCAACCTATGAATACTTATCCTGAAGAGGAAGTTTTGCCTGTTTTGAAGTTGGCAT  
TGGTGTGCACTTCTCAAATACCATCAAGTAGGCCTTCAATGGCTGAAGTGGTTCAAATCTTGCAGGTCAT  
CAAAACACCTGTTCTCAAAGAATGGCAGCATACTAAAACATGTCACAAAACCTTGATGAATTTCCCTTCTC  
TTTGGCTTCTATCATCCTATTGTTGTTATGTTAACCTCCTAATTTGATGTTTTTGGACTAGATAGTGATAG  
AGAGAGTTTTGTACTTCTCTGTCAATTTGATGAAATATATGAGAGGTTGGTTCAATGACTTCAATCATGTTT  
GTTG

>M6-PGSC0003DMG400021789 M6 LRR-RLK

CTTTAATGTTTTGTAGACATATTTTCATGGAAGATGGTGTCTTATGTCACAGTGATAAATTGCAACAAGG  
ATACTTGACATAAAGTGCTATATCCGAAAGATGGTACTGTTCTTTGCAATTGTGATATTGGCATGTCTCCA  
CTCATTTGTCTTACCTGATGGGCAAGGTACCTGGTCTTCCAGTTTTACATCATAAAAACAACTTTGTTTT  
TATTTATCTACTCAAATGGATAAATAATAATTTAGATGTGACCACTATATCTTGTTTACATTTTGCTTCTGC  
CGGTGAAATGATGTCTTTGTTCTTCTAATAAAGTAGGGTGACATTTGTTTTTTATACTCTGGCCCATTTT  
AGGAGATGCACTGTACACATTGAAGAACTCACTAAATGCTTCAAATGGTCAACTTGCTGATTGGAACCA  
GAATCAAGTTAGTCCTTGACTTGGTCCAAGATCACTTGTGATGATAAAGGCAATGTCATTATGGTGTA  
GTACTATTGTTAGAGCCATTAGAATCACCGTGTGCATATACTATGATGATACTTGTTTTTATGCACTAGAA  
AGGTTAATCTTTGGTTGGTCAACTTCCTTACTGGATGTGATTTTGATAATGTCTGAATCTGTATTTGCAG  
GTCATTATCAAGTTTGGGATTCTCGGGCACTTTAACTCCCAGAATAGGTGTTCTAAAGAATGTGAATACA  
CTGTACGTTTAAAGTACTCGGGCTGAGTTATTATTGATAGAATGATGTCTTGAATGCTGCCCACTTATAAT  
TTTCTAGATGCTATTTATTGCTACTTTAAAATGTTTATTTAAATTTTGTCTGAATATACAAGTTTGATGT  
CATGGCGTTGCACTAGAACAGAAATCCCTCAAATCATCAGATGTTAACTAAAAGTTGAGAACACAATG  
ATTAATATTTTCAAGGGAGCTTCACTTAGCGGAAGGGGGGAATAAGAAAAAGAAAGTACCTACATATTG  
TGGTGTATAAATGAACAAGGAGAAATATTTGGCCATTTACAAAGGCAAACAGCTTTAAGAGAGATGG  
AAGCTGTATGAACTGATCTAGCAAAAAGGGAGTCTCTGTTCCGGATGGCTGTCTTTTTTCTTGTTGTTAACT  
GTGTGGTGTCTCTACACCTGTAAGTCTGGTTCCGTTGGACTAAGAGCAACCTAAGCCATTTACGAAGA  
CTAGAAATGTGAACTATACAAGATTAGTCTCAGTATCAGTGACTTTATCTTTTTTCTGAGTGGTCATTC  
CGTCACATTGGTATTTGCACTTTGTCTACTTCTTAGGGTCTATTTTTGTATTTGACTTATATATATTTCAA  
ATCAATAATTTGGATGCATAACCATACGGAAGGGTACATAGTTCTTTGATGTAGCTCTTGATGAACTTTG  
ATTTGTTAGTATGTTGTTGAGCTCAAAATTGTTAGGTCTACGACTAAAATTTTTGGGATGATTTCTTGCT  
TCTTAGATCCACGACTAAAATTTTTGGGATGATTTCTTGTTTTCTGCTACTTACCTAGCTCACTATGTGTA  
TACTCCCTGCAGGTCCTTGCAAGGAAATCGTATAACTGGTGAATTTCCAAAGAGATTGGAGATTTA  
ACAAGCTTGACAATGTTGGATTTAGAAAATAACCGTCTTTCCGGAGAAATACCAGCTTCGTTGGGCAATC  
TTAAAAGCTTCAGTCTCTGTAAGTCATATTATTTCAATTAATCATTTGAGGATAGAAGTTAGTTTACTTG  
GTGACTGGTATAGGTGTGAACTCTATTATCCATTGAGCAGGTTTTTGAGTCGAAACAATCTCACGGGGA  
CTATCCCTCAGTCACTTTCCGGTCTTCCAACTTGATGAACCTGTAAGTTATTTATCTTGCTTTTCTTAT  
TCCAAGTATAAATACTTCTCTGAATAGGAGAATAATACATTTTCTTTGGGATGTCAATTCAGACTTCAG

TGATCCTAACCTGTTACCTGTATCATTGATATTTGACTTGATTCTCTGATTCCGCTTTGCAGTCAGCTTG  
GTTCCAACGGTCTTACTGGCCAAATTCCTGAACAGTTGTTCCAAGTTCCAAAATACAAGTACGATTACAG  
TTCTTACTTTAGACAGTAGCTCAAGGCTTCTTAGTTTTGCCTTCTTACTAATGCATAATATTTAATGTTA  
GTATAACTTCGTTTTATTCTAGTTTTACAGGGAATCATTGAATTGTGGCTTAAATCTCACTCATCATTGTG  
AATCTGCTAGTGGAGGTAAGTTCTACCAGCAAATATGTGAATTTTTGAACTGTATATACTTCATGCTTCTC  
TGTATTCTGGAAGAATGAAAGTAATGTAGCTAAAAATTTGAATTTTACTACCATTATCTTGATTTTATTT  
ATTATTATCTTTTAGCTATAAAGGAGGCTTTATCTTTTAGTTTACTTTATTAGAGAAAAAACTTTAGTATTT  
TCAAGAGGTCTAGCTTGTTAGGGGTTTCATATACTATATCTAGTATAAGTGTGTACTTTGTTTGGAACGA  
CACTTGATGAATAGACTCTATTAATTTCTTAATATGTCATCTATTTTTTCTTGTTTCTTTCCGTTCCCATTC  
TACTTAGTTCCTTCTCCCTTTTCTGGTGCTATTTCTCCTGTACGCAAGACATGGAACAAGATTAAAGT  
TATTAGTGTATTTAGAGTTATACTTGCCATTGGCTGTGGGATATGGTTGTTGTGTGGTATACTGGTATCT  
AATTTAATGGATGGAAGAATCAAGCACCTCATGGTGCTGCCTGCACTAAAAGGATGAGTTTCTTTCCAT  
TAGTCCTAATCTTGGAGAGGTGTAACCTATAACACTGTCTTACTTGTAGGTGCCAAGCATTCTTAACGGA  
GGGATAATGATGTAGCTGAAAAATATAGCATTATTTACTACCTTACTGTTGATCTATTGTCGTCATCTTT  
TAGTTAAAGTTTGAAGTTTGATATATATTTTTTTAGAAATACTATCATATTATAGTAGGAGAGAATTTTAA  
TAATTTTAGGTGTTGTAATGCTTAAAAAAGAATTTAGTAATTCTAAGAGTTGTAATGATTCTAAAAAA  
AGAATTTTTTAACTCTAAGAGTTGTAATGATTAAAAAAAGAATTTTAAACAATTCTAAGAGTTATAGTTA  
TCTAGGTTCCCTAATCTATAATTAGAGTCCATAATTCCTTTGCTTGGAACAACATTTGATGAGTAAATATT  
GTTGATCTCTTATTATATCTCTCGTCCCGTTTCTTCTCGTCTCTCCCTTAATCATCATGCTCATTCTCTCTC  
CTTTGGTGCTACATCTCAGAAAGTTTCTGAAGTTGATAAAGCTGTTGATTACCTATCCGATGTATTACTA  
TTCATTTAGCAAGGAAATCGTCATTTAACATATGCACCTTGTGTACTTTCTGGACAAACCAAATTCTAAA  
GTTGAATTTCTTGCAGGTTCTCCTAGTAAACCAAAGACTGGTCTCATAGTTGGTATTGCTGTTGGATTCT  
TGGACTTCTCGTTCTTGGAGGATCTGTGTTATTGTTCTGTAGGAGACGGCACAAAGGCTATAGTCGTGA  
AGTCTTTGTTGACGTTGTAGGTTTGTGTCACATTTTTTTGACAATAATTTATCAGTTTAAATCACCTGTTA  
TTCTTCGTAAGGGAAGAAGATATTCTGGCCATGCATTGTTGTATCTTGTAAATTCATCTTAAGTTAGTGAC  
CTCATTCTTTATACACCAGTACTTAGTTTTTATTTACCTTCAAGATGGTATGATTCCTTTGAGTATATTATG  
ATATTATATTTTATGTTTTATTTGGCGCACTCAGGTGAGGTTGATCGACGAATTCATTTGGTCAATTGAG  
GAGATTTTCATGGAGGGAATTGCAGCTTGCTACTGATAACTTCAGTGAAAAGAATGTTCTTGGACAGGG  
GGGTTTCGGCAAGGTCTATAAAGGAGTGCTCAATGACGGCATTAAAGTTGCCGTGAAACGGTTAACTGA

TTATGAGAGTCCTGGGGGAGATGCTGCATTCAGCGAGAAGTTGAGATGATAAGTGTGGCTGTTCATAG  
GAATCTCTTACGGCTTATAGGATTTTGCACCACACCGACTGAACGCCTGCTAGTATACCCATATATGCAG  
AATCTAAGTGTTGCTTATCGTCTACGAGGTATTGTTTCTTCATAGCATTGCTTTTATTCATTGTAGTTTCTT  
TTACATCCTGAGCATGCTATTTTCCCTTACTGTGCCTGTTTCATCTAATTTATTTTATCCCAATCAATAGATC  
CTTCATTTCATTAGTCTTACATCTCCTGCGGCGCATATTTTGATTTTGTGAGCTTGATTGTAAACAATCATG  
AGTCATTTCCCCGTTTCGATCTGTGAAAAAGTGTGCATTTGTCATTGTACGGTCTAAATTGACTATTAAGT  
ACTGTAGAACTGCTGATCTGGTAAAAGAACTTGTACATGGCATCAAGTTCGAGGGGCATGCTTATAGAG  
CTAATGTGTGTAGCTTAATTGGCAGAAGCATAAACCCCTTAATTTGTGTTTTTCATGCTTCAGAATCTTATT  
CTTTTTCTTCTCACAAAAGAATCTTATTCTTTCAACTTTGAATGAAGTGCTAGAAGTTAATGCCTTAGG  
GTTGCATCACCATGAGTAAAATTTGCATGCTTCTTTTTTCTCCCAGAATATGGTAGGGAAAGACAAGTT  
CTGAGCAGATTTAAGGGTTCTGTAGAATTATTTTCTGATATTCATTAAGGGGTTGAGTGTTCCGGAGATT  
GCAATTTTCTTTGGTCAAATGGCAATACTCAAATCATACTCATTAAATCATTAAATAGATGTATTCAGTTTTT  
TTTTTAAATCATTAAAAGATGTATGTGCGTTAAGTTGGTATCACAGATCGTGATAAGAAAGAGCTATGTG  
ACTTCATAAATTGATTCTTGTGATCCTGGCTTGAAGTGAAGGTGTTACATGAAGTAGTTGGTGCAGCTT  
AAGATTTTCAGCAGTTTTCTGCTGGAGTTGATCTGTCTGTTATTAGTTTTTCAGTGGTGTCTAATTAAGTTTT  
TAATCACTTACAGAACTTAAACCTGGGGAGCCTGTTTTGAATTGGCCAACTAGGAAGCGTGTGGCAGTG  
GGTACTGCACGTGGACTTGAATACCTACATGAACACTGTAACCCAAAGATTATTCACCGTGATGTTAAAG  
CAGCTAATGTGTTACTAGATGAAGATTTTGAAGCTGTAGTTGGTGATTTTGGCCTGGCAAAGCTAGTTGA  
CGTTAAGAAAACCAATGTGACAACCTCAAGTTCGTGGTACAATGGGCCATATAGCTCCTGAATACTTATCC  
ACTGGCAAATCATCAGAAAAAACTGATGTTTTTGGCTATGGAATCATGCTTTTGGAAATTGTAACCGGCC  
AACGTGCAATAGACTTCTCACGCCTAGAAGATGAAGATGATGTCTTGTGCTTGACCATGTGAGTGTACT  
TAACTCAATGATCTTCATATATTTTCAAATGGGCATCAAATTATTGCATCAAACTTTTTCATATATCTTATCT  
CTACTGACCAATCTTTGTTTCTCTCCATATTCTATTGGGACGACTCATTGTCCCTTGCATGAGAGCCTCTT  
GGATGGATATACATTTCGTTTATCTTTCTCCTATTGGTGAAACTGCTGCAATTATTCTATGATAATTGAAAT  
GGTGTAACAATTATTATTTTTCACGTAGCACCAGGGTACAAATGCTTTGAATATGAGCTAGGTCTTAAT  
ATTGAGCCTTTTAGGCACAAGAAATATGATGACTAATATATATTTGATGCTAATTTTTCTCTTTCAAAGT  
GTGGATATGTGGACCCTGAGTCTCTTATAACTTTACATGATTATTCTTTAAGCTTCATAGGACCTTTAT  
GTAGTATTAGTTGCTAAAAAGAGATCATCTTGAAGGTCAGAAAACTGCAAAGGGATAAAAGACTGGAT  
GCAATTGTAGACCGTAACCTGAATAAGAACTACGAGCTGGATGAAGTGGAGATGATGATTCAGGTGGC

ATTGCTGTGCACTCAGGCATCACCAGAGGACCGTCCAGCAATGTCAGAGGTGGTGAGGATGCTGGAAG  
GAGAAGGGCTTGCTGAGAGATGGGAAGAGTGGCAACACGTTGAAGTCAACCGTAGACAAGAATACGA  
GAGACTTCAGAGACGATTTGATTGGGGAGAAGATACAATGTTAATCATGATGCTGTTGAGTTGTCTGG  
TGGAAGATGACACATGAGTAATAACTTTGAACCACAAAAATGTTTCTTGATATATAGATGCCTGGTTGCT  
AAATGTTTTTTTTTTTTACTTTTTATGGAAAACCCCTTGTTCTAACTAGGCAGATCAACAGTGGACTCTGT  
ATTTATGTAAGTTTTAGTCATTATTTTCATGTTCCATCAACTCCTGGGAGTGGGAATTTGATTCTCAAATT  
GTTACATATTTTCTCACTAAACTATTTTT

>M6-PGSC0003DMG400022000 M6 LRR-RLK

ATGTTTTCCAGGACTATAATTATAGCATTCTAGTTTTGTTAATGTACCTCTCAGTTACAAATGCATCGAA  
CATTTCAACTGATGAGGCTTCTCTTTTAGCTTTCAAAGCACAGATAACTTCAGACCCCAATGGAATATTGT  
CAAAAACTGGACAAAAGGAACTCACATTTGCAATTGGATAGGCATATCTTGCAGTAAAAAGCATCAAA  
GAGTGACATCATTAGTCCTCATAAGCTTTGGATTTAGAGGTTCAATAGCAAAAGAAATTGGGAATCTCTC  
CTTCCTTAAACAAGTTGGATGTTGGAAACAACAGTTTCCACGGCCAAATCCCCGATGAAATTGGGAGTCTG  
AGGCGTTTAAACTACTTGTCTTTGCAAATGAATAATCTCACTGGTCAAATCCCAGAAAGCCTTGGATTTCT  
CACAAAGCTTCAACTTCTTGATCTTTCTGAAAATGATCTATTTGAAATGTTCCATTTTCCATTTCCAATGT  
GTCTTCCTTAAAGATCATTGATTTTGGATTTAATCGGTTTAGTGGGAATCTCCAAGGGGATTTTGTACTA  
GGCTTCAAATCTGCAAGGTTTATTTCTCTCAAAAAATCAATTAGCAGGCCAAATCCAAGTGGGCTGAA  
TCAATGCACACAACCTTATTTACCTTTCCTTGTATATAATCAGCTCACAGGTAATTAGTAATGTTAATTCAA  
TTCTTGGACTATATACTTGATTCAGAATCATTTAATCCTTCTACAATGTTATGATGCTATCTGATTGTGT  
TCATATATGTATTAACAGGAAGTTTGCCAAGAGACATGTGGAATTTGACAAAGCTTCGAGAATTATATCT  
TGGATGGAATAACATAACAGGTATCTTGGTTCTAAGTCTAATAATTTCTAGTTAATTAGAAATTGTAGTA  
GCAGCAAAAAATGTTTCATATAGCTCCTTGTTATTCATTTTCAAACAACAATGACTACTACTACATCGGCTC  
AATGCTAGTTTGTGTCAACTTTATGAATCCTCATTATCCGCGTTAATCCATTTAGTCCCCATCTCAGTCCAA  
GGTTCAATAATTTAAGTTTTCTAACATTAATAATTTCTCTATATTTTCTGTTAACATACAAATATCTAACAAG  
ATTAAGCATCCTAGCGAACATAGAGTAAGTTGGAGGTACCAACATGATTAATCTTTAATATCAACTAG  
TTGGTATCACTTTTATGGATCTTACTATTCCATTTTGTCTACTTTTCGCTGAGTCAAATGGATTCTAACA  
TATAGTTGGTCTTTCTTTCAACTTCTCCCATGTGATTTTAGATCTACCTTGTTCCTTTTTTAAGCAAATCCA  
ATCACCATATATAGTTTCATACCTGCAGACCAGTGCATCTAGAGATCTATGTAAGACTGAACTATCTCAG  
AGCTACTTAACCAATTGCTAACCATGGTAGTTTCTAATGTCTTATCTCAAGTGAATCACACATCCATCTTA

ATATAGATAATTGACTGACGATTTTAAGTTTCCTTTCTTCAGTTACCATATAAGAAGAGAGGAAAAGAGA  
ATAGCAGAAGTAAATGAATAGTTCTCATGTTGCCAATATTTAAAATTTAAATGCCCTAATTAATAGAAAA  
CCTTTCTAGGCTTGTTATTGTTTCGTCTTCAAGAGGACGTTGAAACAGAATACAAGGATTGCCGAECTAT  
CCGGGATTCTAATTCTTTACACAATATTGTACGTTTTAGTGTTGTAACCACACAATTTAATATATATTTTA  
CAGGACATATCCCAAGTGAAATTGATAACCTATCAGCAATTCGAAGATTAAGTCTACCACGGAACAATTT  
GGTGGGAATTTTTCCACCATCTATGGGAAATTTGTCAAATCTAGAGTTGATAGACCTAGGTCTGAACAGT  
CTACATGGTGGCATTCCACAAGAATTTAAACATCTTGTAATTTGAAAGGATTGTTTCTTGGTCAAAAACA  
GATTATCGGGTGAAGTTCCAGGGCCTATGTACAACATTTCTGGACTAGAAATGATTTTCATTTGTAGGAAA  
CGGGCTCTCAGGAACACTTCCCTCAAACATAGGCCATACCCTTCCAAATCTTGTCGGCCTCTATTTTGGGA  
ACAACCAATTTACCGGGCTGATTCCTACTTCCATTGTGAATTCCACCAAGCTTATCCAGCTTGATTTTGGT  
CGCAATCTGTTTAGTGGACCTGTACCTATGAATCTTGTAAGCTACAACAGCTTCAATTCATCAGCTTGCA  
TTTTAATCAATTGACGAATGATCCATCTACGGTTGAGTTAAGTTTTCTTACTTCATTATCTAATTGCAAGTA  
TTTGATGACAGTTCAAATAGGAGGTAACCAATTTAATGGAAGTCTTCAAAGTCCTTAGGATCAGGCAA  
CTGGTCCTTTCCCTTGAATATTTCTTTGCCTTTTATAGTGGTATCACAGGAAAAATACCAACTAACATCA  
GTAACCTTAGGAACCTGGAGTGGTTAAGCTTGGGAGAGAATAAGCTTATAGGTTCTATTCTCCAGATTT  
GGGGAACCTGAAGAATTTGCAAAAGTTTTACCTGCAGATAAACAATTTAGATGGAATTATACCAACTAG  
CTTGTGTAACATGGAAAGCTTGTACCAAGTTATCTTGGGCAAAAATCAACTTTCTGGGGAAATACCAAGT  
TGCTTTGGAAATATTTCTTCTTTAAGAGAACTCTACTTAGATTCTAATGCACTAGTTTCCCATATTCCATCA  
ACATTTTGGAGAAACAAAGATCTTTCAGTTCTCTATTTGTCCTCCAATTTGCTGAATGGATCTCTTGCAGT  
AGAAATAGGAAACACAAGGAGTTTGTGGATGTTAGATTTATCTGGCAATCAGTTCTCAGGTCAGATTCC  
TAGCACTATTGGCCAACTACAAAGCTTGGTTAGCCTTTCATTGTCAAAGAATATGTTAGATGGTCCTATA  
CCTGAACTATTTGAAGATTTGGTTTCATTGGAATATTTGGATCTATCTAGCAACAATCTAACAGGCATGAT  
CCCCAAGTCCTTGAGACATCTTGAACATCTCATGTATTTCAATGTCTCGTTCAATGGGCTCATGGGTGAA  
ATTCCAGATGGAGGGCCATTCGTAAATTTTACAGCTGAATCATTTCATGGGTAACCCTGCATTATGTGGAT  
CATCACGCTTCCATGTGATGCAATGCAGAGTCACAAGTCTTGAAAGTAAAAGAAAGAGTAGAGTCTTAA  
CTTCTGTTCTTGCATCAGTTTCTCAGGAGTTGTAGTCACAACCATTTTCATCATTTGGTTTCTGAAATGCC  
GAAAAGGAGTACGGAACTTCTCTAGTTGATACATTTGGTCAGGTACATAAGAGGATTTTCGTAATG  
ATATTTCTCAAGGGACAAACAATTTGATGAAGCAAATTTGATTGGAAGGGGGAGCCTTGGTTTGGTGT  
ACAAAGGGACACTAGCAGATGGAATGGTTGTGGCAATAAAGGTATTCAATACAGAACTGCAACATGCA





AAATTCCATCAGAATTGGGGCAGAGTTGCAGCACACTTGAGGAGCTTGATCTTTCTGGAAACCGGCTGA  
CTGGTGAACCTTCCTTCAACTTTTAAATTGTGCTCCTCACTTTTCAGTCTCAATCTTGGTAACAATGAGCTAT  
CGGGTGATTTCTTGAATACTGTTATCAGTTCATTGACAAATCTTAGGTATCTTTACTTGCCATTCAATAAC  
ATAACTGGTCATGTACCAAGGTCTTTGGTGAAGTGTACAAAACCTTCAGGTACTCGACCTTAGTCCAATG  
CGTTTATTGGGAATGTACCTTTTGTAGTTGTGTTTAGCTGCCTCAGGCTTTCCACTGGAGATGATGTTGTTA  
GCCAGTAATTATCTTACTGGAAGTGTGCCTAACAGCTTGGACATTGTAGGAACCTCAGGAAGATTGATC  
TCAGCTTCAATTACCTGACTGGTTTGGTCCCATTGGAGATTTGGACCCTTCCAATCTTTCGGAATTGGTA  
ATGTGGGCTAATAATCTCACAGGTGAAATCCTGAGGGCATTTCATCAATGGAGGAAACCTTCAAACA  
CTCATTCTCAATAACAATTTTCATCTCAGGGGCACTTCCACAGTCCATTTCCAATTGTACCAACTTGTTTTG  
GGTTTCGTTGTCTAGCAATCGACTGTCTGGAGAGATAACCACAAGGAATTGGGAATCTTGCAAATCTTGCT  
ATCCTTCAGTTAGGTAATAACTCACTTACTGGATCGATCCCTCGGGAATTAGGTTTCGTGCAGGAACCTTGA  
TATGGCTAGATTTGAATAGCAATGCTCTAACAGGTTCAATCCCTCTTGAGCTTGCTGATCAAGCTGGCCA  
TGTTAATCCGGGAATGGCTTCTGGAAAACAGTTTGCTTTTGTGAGAAATGAGGGTGGAACTGAATGCAG  
GGGTGCTGGTGGACTGGTTGAGTTCGAGGGTATCCGCGAAGAGAGGCTTGCAATTTTACCTATGGTTCA  
CTTCTGTCCATCAACTAGGATCTACTCTGGTAGGACGATGTACACCTTACGAGCAATGGAAGCATGATT  
TACCTTGATCTTTCCTACAATTTTTCAGGAACCATTCCCTGATAATTTAGGTTTCATTGAGCTTCTTCAA  
GTTCTGAATTTGGGACACAACAATTTTACCGGAACCATTCCATTCAACTTTGGAGGTCTAAAGATAGTTG  
GAGTTCTTGATCTATCACATAACAGCCTACAGGGATTTCATTCCACCCTCGTTAGGAGGCCTTTTCAATTTCT  
AGTGATCTTGATGTTTCAAACAACAACCTTATCGGGAACGATTCTTCTGGTGGACAGCTGACTACATTTCT  
CAGCTTCAAGATACGAAAACAATTCAGGCCTTTGTGGCGTCCCCCTTCTCCTTGTGGCTCGGGCAATGG  
ACACCATTTCATCGAGTATTTACCATCATGGGAATAAGAAGCCTACAACCTATAGGAATGGTGGTTGGTATT  
ATGGTCTCTTTTGTATGTATTATACTACTTGTTATTGCCCTTTATAAGATTAATGACTCAGAATGAGGA  
GGAGAAGAGAGATAAGTACATTGATAGCCTTCCAACCTTCTGGCAGTAGCAGCTGGAAACTATCAACCGT  
TCCCGAGCCTCTAAGCATTAAATGTGGCAACATTTGAAAACCTTGGAGGAAGCTGACCTTTGGTCATCTT  
CTAGAAGCGACCAACGGGTTTCAGCTCTGAAAGCATGATTGGCTCTGGAGGTTTTGGTGAAGTCTACAAG  
GCTAAGCTGAGAGATGGCAGTACTGTTGCAATCAAGAAGCTCGTGCACGTAACAGGTCAAGGAGACAG  
AGAATTCATGGCTGAAATGGAGACTATTGGAAAAATCAAACATAGAAACCTTGTCCCTTTGTTGGGATA  
TTGCAAGATTGGGGAGGAAAGGCTTCTTGTATACGAATACATGAAATGGGGAAAGTCTTGAATCTGTTCT  
TCATGATGGGGGGAAAGGAGGGATGTTTCTTGATTGGCCAGCTAGAAAGAAAATCGCGATAGGATCAG

CGAGAGGATTAGCATTTCTTACCACAGCTGCATACCACACATAATTCATCGCGATATGAAGTCCAGTAA  
TGTACTIONTTAGACGAAAACCTTTGAGGCACGAGTTTCTGATTTTGAATGGCAAGGCTGGTAAATGCTCTG  
GATACTCATTAAAGTGTGAGTACACTTGTCTGGTACTCCAGGTTATGTTCCCTCCAGAGTACTACCAAAGTTT  
CAGGTGCACCGCAAAGGGGACGTGTACAGTTATGGTGTACTACTGTTGGAGCTTCTTTCAGGGAAACG  
GCCAATAGATCCCCGTGTATTCCGGTGATGATAACAATCTTGTGGATGGGCAAAGCAACTTCATAACGA  
GAAACAAAGTCACGAGATTCTTGATCCTGAGCTAATAACAAATCTATCTGGTGATGCTGAACTCTATCAT  
TACTTGAAAGTTGCATTTGAATGCCTTGATGAGAAATCTTACAAAAGGCCAACAATGATACAAGTGATG  
ACCAAGTTTAAAGAACTACAACTGATTGAGAAAGCGATATTCTTGATGGCATTTCAGTGAAAGGTTCTA  
TACTCGAGGAATCGCAAGAAAGGGAACCGTAAATCAATGATATTTTCATCTTTTTGTGGTTAGAATTCTGT  
TCTTTTTTCTTTTTTTGGATTGCCTCATGGATAGTAGTAAAACTTTTATCTTTAATGGTTCTTACCAT  
TGAGATTGATAAGAGTTTATACTTCAGATTTTGCCTACTGTGTAATATTAGAACACGACGATGAATGGG  
AGATGTGAA

>M6-PGSC0003DMG400022189 M6 LRR-RLK

ATGGACAATCTTCTCAAGTTCATTGTAAGTGTTTTACTTTCTTCTTTTTATCAGATTCTGTAATGGAGGC  
GAGTTTATCGAATCCAAATCATTATCAGTTTTCTGTTGCTATTGATCCAAACAATGTACTAAACGTTGA  
TCGAAATGCTTTGTTTTCTTACCCTGTTACTACAAATTACATGGTGTAAAGTGTGATTTACGTTCCGGTG  
AAGTCATAGAAATAAGACTTGAGAACATGAATCTTAGTGGTGAATTGATGCAGAGTCACTCTGTAAAC  
TCTCAACTTGAGAGTTCTTAGCTTAGCTAGGAATAAGATTGAGGGAACTGTTCTGAATCAATATCATC  
GTGTAAGTTTAACTGTTCTTGATCTAAGCAGCAACTTTCTTAGTGGAACTCATTAGTACTAATGCAGT  
CATTGACAAGGATCAAGAATCTTAAAAACTTAACATTTCTAAAAACAATTTCACTTACTCACAACGTATG  
ATGAGTCTACACGCGTTGAGACGTGTAACATTAAGAATCTTCATCTTCAACTACAGTAAGTGATGATA  
AGAAGACAAAGAATCATCATGTGAGTCTGATGGTTTGGGTTCTCATATCTTGGAACTGTGATTGTGT  
TGTAAGTTTATGATTCTTGTATATGAGATGTGTTGGGACAATAAGGAGAAGGAGGTTATAAAGAAGT  
AGTTGATTACCCGTCCTCAAAAACTCCCTCAGATGAAGTTGTGGATGGAGTGTGTAACACTGAAGA  
GAAAAGCTCAGAACTTTACTTCTTCATGGAAGATGTTGAGAAGTTTACGATGGACGATCTTCTGAAGCA  
ACTGCTAACTTAACAAAACAAGGCATTTGCAGCAGCCTTTATAAGTTTCATATCAGTAGAAGTGGTGTGT  
TTGCTGTCAAGAGACTGAAGAACTACAAGTGGGGTTCAAGGAGTTCTCGCGAACGATGAAAAAGATA  
GGGAACTTGAAGCATCAAAATGTACTTCCACTTGTGCTTATTACTCTAGCAATGATGAAAAATGCTCA  
TCTACAAATATCAGAACAGTGGAAAGTCTACTAACACTTTTCGAAAGTAAGTAGTCAAGAAGTCAAAATTT

CTCATCTTGTAATTCAGAATTTTATATCATATTGTTGTTGTTTATTGTTGCAGATTATGCAGAGGGGAAAT  
GGAACCTCCCATGGAACCTTAAGGCTGTGCGATTGCAGTTGGCATTGCAAGAGGTTTCGCGTACTTATACA  
GAAGTTCAAAGAAAGGCAATGTCATTCCCTCATGGCAACATTAAGCCATCAAACATTCTATTAACGAAAA  
CGGGGAGCCATTGATAAGTGAGTATGGATATTACAAATTTCTAGACCCTGACAAAAGTTGCCTCTATAA  
AGACAATGGTTATACAGCCCCTGAGAAAACGTTGACAGAAGAACTGATGTCTATAGCTTCGGGGTGAT  
TCTGCTGGAACCTGCTAACCGGTAAAGTTGTGGAGAAGACAGGACTAGACCTTGTCAAATGGGTGAAATC  
TATAGTGAGGGAAGAATGGACTGGAGAAGTGTGGATAGTGAAGTTTCCAACCTATGAAATGTATGCTTT  
CCCTCTACTAAACGTTGCACTCAAGTGTGTGGATCGTTGCCTGAGGAACGACCTACTATGACAGAGGTT  
TTGGAGATAATCGAAGAAATTGTGAATGATCAAGAAGACATTTCTCCTTCTTCTATGACTTCTTTTGAATC  
CACCCCTGGTTCAATGAAGCATGTGTATGCTCTTTAG

>M6-PGSC0003DMG400022264 M6 LRR-RLK

GTTCAATAATAATAATAGAAAAATTCAAAGTGCTCTTGGATCCAGATCTTCTTCTGTTTTTCTCTATAAA  
CAAACATGGGGTTCCCCATTTACAATCCCAAAGTCCTCAACTTTCTCTCTTCTTCCCTCTAAGCAGCAG  
CAAACAATGCCTGCTCCTTCAACATATCCCTTTCTTCTTCTTTTACTTTTCTCTCTTCTTGTATTCACT  
TGATGTACAACTCAAACACTTCTTGCATGGAAAAAACATTAAACATAACTTCCAATGATGCTTTAACAT  
CATGGGATTCTTTAGATAAAAGTCCTTGAATTGGTTGGCATAAGTTGCAATTCCAATGGTCATGTTGTT  
AGTATAAATCTTAAATCAGTTGATTTACAAGGTTCAATGCCTTCAAATTTTTCAGCCTCTTAAATCTTGAGC  
AGTCTTGTCTTTTCTGTTAATCTTAGTGGTCCAATCCCAAAGAGTTTGGAGATTATCTTGAACCTTAA  
GTTCAATTGATATTAGTGATAATTCAATCACTGGTGTCACTTCTCAAGAACTTGTAAAGCTTATAAAGTTAC  
AACTTTATCACTTAGTTCAAATTTTCTTGAAGGTGATATCCCTTCAAGACATTGGGAACTTGTCTGATCTT  
AAGAAGTTCTTGATTTATGACAATCAACTTAGTGGTGAATTTCAAAGGGTATTGGAAAGTTGAAGAAT  
CTTGACGAATTTAGAGCTGGAGGGAATCAAATCTTAAAGGGGAACTCCCTTATGAGATTGGAAACTGT  
TTGAACTTGGTTTTTTTAGGCCTTGTGAAACAAGCATTTTCAGGGAATTTGCCAGTGACAATTGGAAACC  
TGAAAAAGATTCAGACAATTGCAATATATACAGCTCTTTTGTCTGGACCAATTCCAGAAGAGATTGGGAA  
TTGTAGTGAACCTACAGAACTTGTATTTGTATCAGAATTCGATCTCCGGTTTCGATTCCAAGGAGTATAGGG  
GAACTCAGGAAGCTTCAAAGTTTGTGCTTTGGCAGAATAGTATAGTTGGTGTGATTCCAATGAGCTTG  
GGAATTGTAAGGCTATTACAGTTATTGACTTGTCTGAGAATCTCTTAACAGGTAGTATTCTACAAGCTTT  
GGTGAACCTTCAAGTCTTGAAGAGTTGCAGTTGAGTGTCAATAAGTTATCAGGTACAATACCTACTGAAA  
TATCAAATTGACTAAATTGTCTCATTGGAAGTTGACAATAATGGCATATCAGGGGAAATTCCTAATGA

AATAGGTAAGTTAAAGAGCTTGACTCTATTCTTTGCTTGGCAAATAATTTAACAGGTGAAATTCCTGTT  
ACATTATCTAACTGTGAGAATCTTCAGGCTATAGACCTTTCTATAACAATCTTTTTGGTTCCATACCAA  
AGAAATCTTTAGTTTGAAAAATCTAACAAAGTTGTTGCTTCTTCCAATGATTTGTCTGGTTTTATACCAA  
CTGATGTTGGAACTGCACAAATTTGTACAGATTTAGAGTGAATAGGAATAGGCTAGGGGGTACTGTTT  
CATCAGAAATAGGGAAGTTGAGTAATTTGAATTTTCTTGACATGAGTGGAAATCATTTTATGGGAGAAA  
TTCCATCATCAATATCAGGATGTCAAATCTTGAGTTTCTTGATCTCCATTGGAATGCGTTTACTGGTTCTT  
TGCCAGAGAACTGCCAGGGAGTCTACAGTATGTGGATATTTAGACAACAGGCTTTGGGTTGTTAA  
GTTCAAGTGTGGTTCTTTAACAGAATTAACAAAATTGAATCTTGGAAGAATCAACTTTCTGGTAGAAT  
TCCAGCTGAGATAGTTTCTGTAGTAAGCTTCAGCTGTTAGATCTCGGGTACAATGGCTTATCAGGTGAT  
ATACCTAAAGAGTTGGGTGGAATACCATCCCTTGAATCTCTCTAACCTTAGTTGTAACCAAGTTTACAGG  
AGTGATTCCAAGTGAGTTTTAGGTCTTAGTAAATTAGGAAACCTTGATCTTTCCACAACAAACTCACC  
GGGAATTTGGACGTTCTCACGAACCTTCAAACCTTGTTTCACTCAATATATCATTCAATGACTTCTATGG  
AAAATTTCCAATGTTCCATTCTTTCATAAGCTTCTTTGAGTGATCTTACTGGAAACCAAGCTCTATACAT  
TTCTGGTGGGGATGTGATCCAAACGGGGCCTGCTGGACATGCTAAAACCACCATGAAGCTTGCTATGTC  
AATCCTAGTCAGTATAAGTGCTGTGCTGGTGCTGCTAGCCATCTACACATTGATCAGGATGCGAATGGC  
GGCTAAGTATGGACCGGAAGTTGATACTTGGGAAATGACTCTTTACCAAAGCTGGACTTTTCGATAGA  
TGACATTGTTTCATAATTTAACATCAGCTAATGTCATTGGCACTGGGAGCTCCGGGGTTGTCTACAGAATA  
ATGACCGAAAATGGGGCGACTTTAGCAGTCAAGAAAATGTGGTCATCAGAAGGATCAGGAGCATTGG  
TTCAGAAATTCAAACACTTGTTCAATCCGGCACAAGAACATCGTACGCCTTCTCGTTGGGCTTCAAAC  
CAGAACATGAAGCTTCTGTTCTATGACTACCTTCCAATGGGAGTTTGAGCTCATTACTCCATGGTGTTG  
GCAAAGGAGCAGCAGAATGGGAGAACAGATTTGATGTGGTCCTTGGAGTAGCTCATGCTCTTTCATACC  
TACATCATGACTGTGTACCCCTATAATGCATGGAGATGTCAAAGCAATGAATGTATTGTTAGGCTCTAG  
AATGGAGCCTTACCTGGCCGATTTGGGGTTGGCAAGGATTGTCAACACTGATGTTGATGCAGACTTGT  
GAAGGAGAGCCAAAGGCCTCATCTTGCTGGTTCTATGGATATATGGCTCCAGGTAATTATTTTTACTGC  
ATTTTTACTCACTATCTTAGATTGATGACGGAGAACGTAAGTAGTCAATTTATGATGAATCCTCACAAT  
ACAAAAGATATTGTTGGTGTGTACTIONTAGTCCTTATATCAGCTTGATTAGTTGCATCAACTTTTCTTG  
AATTGACAAAGACTCTTGCTTATTATGTGTCCACAGAACATGCTTCGATGCAACGGATCACAGAAAAGA  
GTGATGTATACAGCTTTGGTGTGGTCTCTTGGAGGTACTAACAGGAAGGCATCCACTGGACCCAACGT  
TGCCCGGGGGTGCACACTTAGTACAATGGATACGCGATCACTTACAAAGCAAGCGCGATCCAAATGACA

TTCTTGATCCAAAGCTTAGAGGCAGAGCTGACCCTGAGATGCATGAAATGCTGCAAACCTTAGCTGTTTC  
ATTCCTGTGTGTGAGCACGAAAGCTGATGATCGTCCGATGATGAGGGATGTTGTAGCCATGCTCAAGGA  
AATTCGGAATGTTGATCCTGTTGTGTCCGAATCCGACTTGTTGAAGAAAAATGCAAGTGTAAACACCTCTT  
CCAAAATCACCTGGCACCAAGAATGTGGATTCTCAAATGTCTTGTAGCTGCTCTTTTGTATTTTCTGATAA  
CTCTATCTCCAAATAAGGCATCAAAATAGTAAACAAATTTGTGAATATAGCATGGTTTATTAGCAGTATG  
AGTTAGAGCAGATTATAGATTTTAAAAGGAAATCATGTATTCTATTAAGAAGTTTTCAATTTAGCATAA  
GCATTATAGAGTGAAA

>M6-PGSC0003DMG400022425 M6 LRR-RLK

CTTTTGGTTGTTGGAGATTTGTCTGTTGTTTATGTTAAAGTGAAGATCTTAGTGTGTTTTGCAGAGTGTTT  
TCTTTTTGCTGGAAGTGTGAAGCAAAGATTTGAAGGAAAAAGGACAGAGGAAGAGGAAGCAGGAAATT  
TGTGTTCTTGGAGTGTCCCTTGGTGATGATTGGTCACAAGATGTGTGGACTATATATGAAGATTTTGT  
GTATTTGCAGTTTTTGTGTTCAAATTGCCAGGGTTTACTGATCCTCGTGATGGTATTAATAATCTCTC  
TGTGGTTTGAATTTTGTGTATTATACGGTATAGAATGTCTCAATAGTTTGAATTTGTTATCTTTTCTATTAG  
CTTTAATGAAATTACAGTTTGATGTTTTGTGTTAAAGAAAGGTGAAGTTTATGACTTTGTGTACTTTTCTT  
GCTCTCCAGTATTTGCCATAAATAGTTTATATACTAGTCTGGGCTACCCCTTGCTTCTGGATGGGTGCCA  
TATGGATTAGACCCTTGTGGTGATCTATGGCATGGTGTACTCTGTGTCAATTCCAATGTAAGTGGAAATGT  
AAGATTTCTTCTTTTTTTTTTTTTGCTTGTGTTTCTCACATGGTTTGTATACTTTATAATAGATTTCTTTCT  
TTTTTTGGCAGAGTACTAAATGATTCAAATTTGGGAGGTGAATTAAGTGAGGGCATAGGAAGCTTTGCT  
TCAATCATACAAATGTTGGTACCATCTTTATCTTCATCATTGCATTGATTTAACTTATGTTGCTGAAATTTG  
CCTTGTCATTTGGTTCTGTGCACTTTGTCATTCCCTGCATCATTGGCACCACTATTACATTGTTAATTCT  
ATGGATTTAGTTAACTGCTACGTATTAAATGTCTACGCTTTGTGTAATGATCAAACCAGAGATCTCAGCA  
ACAACCATATTGGAGGCAGTATACCATCCAATTTGCCTGTCACCCTCAAACCTTGTAAGTTAATAATCTT  
TGTCCTTACTGAGCTTCTTACCACCTTATAAGTTATTTGCTCCACATAAATCCACATTTTAAATCCTATTAT  
GGTATTTGTGTATATACAGGTCTATCTCTGGTAACCAGCTTACTGGGAGCATTCCAGAAAACATATCCTC  
GTTAGGGCAATTAACAGACTTGTGAGTTATATTGACTTATCTTGATATACTTTTCTATGACCATGCTTTT  
GTTGCCATTACATTTAATCCTTCCCTGTAGGTCGTTGAACAACAATCATCTCAATGGAGTCATTCCAGAT  
GCCTTTATGCAACTTAAGACTTTGATTAACGTGTACTCATACTTCTTTAGCTTTTACCTTTTCGCAGTGA  
TGAAACTACTATTCTTGGTGTGTTTGTATTTATGGCTTCATGCTCTTATTTTGCAGGGACTTATCTGGGA  
ACAGTTAAGTGGTCAGCTGCCTCCTCAGTGGGGACTTTGTCGTCATAACTACCTTGTATGTATTTCTC

CTTGTTGGTATGATAATTAGGGAAATATTAGGAAATGAACTACTTTTCTGGCTATGAGGAATGTGAGT  
GCTTTCCTCTCTCTAGACACTGAATAGAAGTTCAAATAAGTCCTTAATTCCTTCAGAAATTTAACATAAGT  
TCTGCTCATAcataAATTTAACTGATAAATTTTGTAAGATAAATATAGTTTTTGACATTTCAATTGCATATG  
TAACTATTGTATGGTTGTGCTGTATGTTGGTTTGTCAAGATGTGTTTTCTGTGAACAAGCTAGAGGAATG  
ATATTTGAGGATAAATACTTCACAAAGTTGATTAATTTTGTCTAGAATCTCAATTTGCAACCATTCAACTTA  
ATATACTTGGATGGTAAAAGGATGTTAACATAATTTCTCAACTGAACTTGTGAATATACTTGTATTTATGG  
TGAATTGTGATACTCTAGTTTTGATTTTTGAATATATACTTTTGGCTCTATGCAGACACTTACAGAACAAT  
CAGCTTCTGGGATCCTTGACGTTTTGCAAGATCTTGCTCTAACGGATTTGTAATCTCCTGGACTAATAAA  
TTTTCCATCATTATAGATAATGTCATCAACTATGTCATTTTCTGCTCAATGTGTGCTTAAATTTGGTCACTT  
TCTTGTCTGCAGAAACATAGAGAATAATTTGTTCTCTGGGCCTATACCACCAAATTTGTTGAGCATCCC  
GACCTTCAGGTAAAAACCTAGGAATTTTTTGCCTCTTAGTTTGAGTTTTCTTTAAGCTGATGAAATC  
CATTTTATTCTATCTTCAACTTCTGTAATATGAAATGGAGTATCTTATTTCTTTGTTTTAATTTGGCTTCA  
TCTCTCTGAGTACTTCCATCAATTTAAATTTGGATAAGCATTGGTCACTGTGGTAATGGGACAATGTGAC  
TTAAAAAATTTAAACAAAAGGGAGTTGTCTCTTTGGCTAGACTCTAAAGATTGCACTATTTAGATCTAA  
TTTCATTGCCAATTGTGCTTGAATGAATTTTTATGGGAAGCCAGTATAACTGTTGTTTCTAATAAACTTG  
ACACCATTCCATGAGCTGACCATGAAAATGTTGGTTTTACAAGTTTTAGTTTCTATAACTTTGTCATGCAT  
CGATCTGATAAATAAATCAGTACACTGGCTGATAAATGGGTAAAGTAGCAAACCTGAAGATATGGCATG  
TAACGATATTACTAAATAGTATGGTTATATGGCATGTAATGATATTACTAAATAGTATGGTCTTTTTGATG  
AAGACTGCATAGTACACCTTATGAACCAGTTCTTACTCCATCAATCAACCATCCTCAATCCCAAATTAAT  
TGTGGATGACTATATGAATCCTCTTTATCCGTTCTACCTTATGCATCATCCTACATGTCACTCTTAACTTTA  
TCTAAAATTCTATTTTGTGCAAGATTGATAATAGATATTTAGTTGATGTTTGTGTAAGCTCTTTTGGG  
GTTCTTTTAAAGACCTTATTGAAACCATGTTTGTCTTAAAGTTCTTATAAGAAAATTTTCATTTCAATGAA  
GAAGGGGGTTTGAGGGATTTTCATTAATAAACAATTCTTCTTCCACTTATAAAAAGTGCTCACAAATCTTC  
AAAAGATCAACTGTGTAAACACATTTGTTTTGCACATCTACAAAATATTTCTCCAGAACCATTTGATTGG  
TTAAAATGAAATTACAATGGATAACCAATCAACATGATGCATTTTTGTGATAGACTAGCCTTAGTCATGG  
CCTCAATTGTTTAGTTGATACTCTTTGGGGGAAGCGAACTATGGTAATCTTTTCTTCTTCAATGAAAGGTT  
AGTTGTATACTTGTAAATTTTGTGCTTACATGGTGAAATCTATGTTTTTATCAGACGTGCAGGGGAATC  
CTTTAATACTACTATCATCCCTTACCACCCATGATAACGCCTTCTCCAGCACCATTTGCGCTTTCTCCAG  
ATTTAGCCCCTTCACTGCCATATATTGTACCGCCAGGACAGGAATTACAGCCCTCTGGAAGGCAAAGA

GTAGTAATTCAACCAACATGTCAAATTGATTGCTATAGCAGGATTAGTATCCCTTGTCATACTTGGATT  
GGGTGTTTGCCTATTGATGTCACGATTCTGCAAAAGAAGAAGAGAGACCCAAAAAGAAACCAAGAGAC  
ATGAAACATATGATCATAGTTTGCCAAGGCCAAGGGTAACCCTAAGCATGATCAATCCCTGCAAAAAC  
CATATTATGATGCAGAAAAAGGTAAATAGTTCATATGTGTACTTTCTTCTTATAGATTTATGTTTATCGTC  
AGTTACCTGTTGTTTTAATGGCATTATGATGACAAAATGGATATGTCCAAAAGAAGCAGGTTTGAGGCC  
AGTGGCTGGAAATGGGAAAGCTCAGGGTAGGAACATGTCAATGAATACTTCAGAGGCTGTGCAGCAGA  
AAGACGTGAAGAGCACTATATCATATACAGACGATGAGCTGGGCTCGGAGATGGAGTCAATGATATCA  
GATGTTCTCCACCACCGCCACCACCTTTTCTCAAACCTTTTCTGCTGAGAGGATGGTTGTAAATCCAAT  
TGTTCCACAATTACCTCAGGCAAGCATGCTATGAAGAATGTAAACTCTGCAGAGTTCTTCACCATTGCC  
TCTCTTCAGCAGTATACAAATAGCTTTTCTCAAGATAATCTTATTGGAGGAGGCATGCTTGGAACAGTCT  
ACAGAGCTGAGTCTCCCAAAAAAGTAAGCATCTTTATTTTCACGAGCTTCAAATCAGTAAATACTGTGTG  
CTTGATGCATTGTGACTGCATCAGTACCACATCTTGAACCTCATTTCACCTTTTTAAAGGTGGAAATTAC  
TCGTTATTTTTTTATTAAAAGCATGGTTTTCTGTGACAGACATTATATCTATTTTACATTGAACTTGTAGAT  
GTTTTGTGGGTCTGTAATGTTTGACTCGAGTTTTGCATAATAGAAGTAGTCCAACCTTGTAGATGGCAAC  
AGTTTCCATTAGTAGACTGTGTAGATATACCTGACATGCCTCCTGATTCATTAAATTAGTTTCTGTTTTCA  
CAATAACCACTTGTACTTGTGCATGTTTGTATATAACCTATTTAGTTGCCGTACAAGGGTAGAAGGTGCTG  
AGACTTTGCTATTTCTTGATGCCTTTTGTGTTGTTAGCTATTGGCGGTCAAGAACTAGACACTGCTATGA  
CCAAGCGTCAAAGTGATCAAGAATTTGTTGAAATGGTTTCCAATATCTCTAAACTTCAGCATGAAAACAT  
TGTCAAACTTGTGGGTTACTGTTTCAGAGCATGGACAACGGTTGCTTGTCTACGAGTATTGTAGAAATGGT  
ACCCTCCACGAAGCATTACACTTAGATGATCAGATCCACAGAAAACCTTCTGGAGTACACGTGTACGCA  
TTGCACTTCAAGCAGCAAGAGCATTAGAGTAAGTACGAAAAAAGCTAAATGATATTAGTTTAGAAGTG  
CTTGTAACCTGTTTTAATGAATTGTGATGGTTAAATAAATTATAAATTGGCTGTTAAAGTCAGCTCTGCAT  
GTTTCCCGGGCTTAATGTTTGCTACACCACAATTAATTTGTAGTTTTATCCTTAGCTTGTAAACGTTTAGA  
GATTGAGTTGCTTCCAGTTTCACTGAAAGGTACTTGCATGAAGTTTGTCAACCACCTATTGTCCACCTGAA  
CTTCAAGTCCACTAATGTTCTCCTTGATGATGAACTTGCTGTACATATGTCAGATTGTGGTTTGGCACCTC  
TGATGTCATCTGATTCCATAAGACAGGTAATCCCTCAATCCTCAAACCTAGAAACAAGAATAACAGGAGA  
TTGACTTGCAAACCTGTAGTTATTCTGAATTCGTAATGGGAAAATTTATCCTTTTGGACTGTGATCTTCAT  
TGAACCTGTAAACACTTCCTTCTCAACTCTAGAACTGCATCATTATTCATTAGTATGAAAACCTAGGTGC  
CAATTGGCTGCTAAAAATTGGTGCATTCTGTTTAGAAATGGTTGTATGTTTCTATTTTCGAGGGGATTA





TTCAACAACCTTCAGTATCTTATGCTTGACTACAATGAGTTAGAAGGAACAGTTCCTTCTGCAATTTCGAAC  
TGTTTCGTCGTTGGTGCATTTGAGTGCCGAAGGGAATGGTATTACTGGTGTATACCGGCGGGGATTGCT  
GCTCTTCCGAAGATTCAGGTGATAAATTTATCGCATAATAAGCTTTCTGGATACTTAGCAACTTCATTTTT  
CTGCAATGGTTCTGTGTATCCTCCTTCCCTTCAGATTGTTTCAGTTGGGTTTCAATGCCTTCGCTGAGATTCT  
TCACCCACAATCGTCTAGATGTTTTAGTTCATTGCGAGTTTTGGATATTCAACACAATCAGATACATGGA  
GATTTCCCTTTTTTCTTGACAGACAATTCTGCATTGTCGTCCTTGGACTTGTGAGGGAATTTGTTTTCGGG  
TACAATCCCAGATTCATTGGGAATTTGTTGAGGTTGGAGCAACTGAGAATTGGAAATAATTCATTCGA  
AGGTAATATAACGGTTGGGATAACGAAATGTAGTAGTTTGAATGTTCTTGATCTTGAAGGGAACAGATT  
CATAGGGGAAATTCAGCTTTTATAGGTGAACTTAAAAGCTTGAAGATTTTGTTTCATGGGAAGAAATCA  
GTTTTCGGGTTCAATCCCTTCTAGTTTTAGCAATATCACTAGTCTTGAAGTTTGAATTTGGAAGGAAACC  
ATCTTACGGGAAGCTTGCCTGAGGAGTTGATGTTTTGAGCAATTTAAGCACATTGAATCTTAGTGGGAA  
CAAGTTTTCAGGTAGTATTCTGTTGGTATTGAGAACCTTCAGCAGTTATCGGTTCTAAATCTGAGTAAG  
AATGGCTTCTCAGGGACTATCCCGTCTAGCATTGGAACTTTGTATAAGCTGGTAGCTCTTGATTTGAGTG  
GACAGAATTTATCAGGCGAATTGCCATCTGTTCTTGGTGGTTTGCCTAGTTTACAAGTGATTGCTTTGCA  
AGAAAACAACCTTGTCTGGAAATGTTCTGAAGGTTTTAGTAGCTTAATGGGTTTACAGTTCTTGAATCTA  
TCTTCCAATTCATTTTCAGGTCATATACCATCTACGTTTGGGTTCTTGACATCGTTAGTTGTCCTCTCGTTG  
TCTAAGAATCACATATCTGGTTCAATACCTCCTGACTTGGGTAATAACACTGCTCTGAAGATTTTAAATCT  
GAGGTCAAATTCATTGAGTGGCCAAATTCCTTCTGATCTTGACAGTCTCTCCCGTTTGAGTGTGTTGGATT  
TGGGTAGAAATACCCTGACAGGTGAAATTCAGAAGTTATTTCCAATTGTTTCATCCCTCACATCAGTTGT  
GATGGACACGAACCATCTTTTCGGGAAACATTCCAGCATCACTCTCCAGCTTATCAAGCTTAATTACCCTTG  
ACCTCTCCGGAAACAACCTTGAAGTGGAAAAATCCCAGAAAATCTGACAGTGCTCCCAAAGTTGGTGAAC  
TCAATGTATCGAACAATAAGTTGGAAGGCCAGATACCAGTGAAGCTCGGTTCTCATTTTAAACGATCCATC  
GGATTTCAAGTGGCAACCAGGGTTTGTGTGGGGAGCCATTGAATAGAAAATGTGAGCGGACTGGTAATG  
ATAAGAATAGACTGATTATGTTTATTGCAGTGTCTGCTAGTGGAGGCTTCTCCTTGCATCATGCTGCTGT  
TTTTACATATACGCTTGTGAGATGGCGTAGGAAGCTCAAAGAAAAGGCAGCTGGAGAGAAGAAGCA  
TAGCCCTGCAAGGGTTAGTTGAGGACCAGTGGTTCTCGTGGCAGTGGCAACAATGCTGGACCAAACT  
TGTTATGTTCAATAACAGAATTACAGTTGCTGAAACAATCGAAGCAACTAGGGAATTTGATGAGGAAAA  
TGTTCTTAGCAGAACACGCCACGGAGTGCTGTTCAAGGCCTGTTACAGTGATGGAATGTTGCTCTCAATC  
TGTAGACTACCAGATAGATCACTAGATGAAAACACATTCAGAAAAGAGGCTGAATCGCTTGGCAGAGTG

AAGCACAGAAACCTAACTGTTCTCCGTGGGTACTATGCTGGACCTCCAGACCTTAGACTACTTGCATATG  
ATTACATGCCAAACGGGAACCTTGCAACACTTCTTCAAGAAGCATCCCATCAAGATGGTGGTCATGTTCT  
CAATTGGCCAATGCGACACCTCGTTGCACTTGGCATTGCCCGTGGGCTTGCTTCCCTCCACGCAGCCTCT  
ATCATTGAGGAGATGTTAAACCACAAAATGTACTGTTGATGCAGACTTTGAAGCCCATCTTTCAGACT  
TTGGCTTAGACAAGCTTACTGTAGCCACACCAATCGAACCTTCTCTTCAACATCAGTTGGGACTATAGG  
CTATGTAGCGCCAGAAGCAACATTAACCGGAGAAGCCACAAGACAATCAGATATTTATAGCTTTGGCAT  
TGTATTACTGGAAGTCTAACAGGGGAAAAAGTCGTTAATGTTCTCGCAGGATGAGGACATTGTGAAATG  
GGTAAAGAGGCAATTACAGAGAGGGCAAATTTTCAAGATTGTTAGAGCCAGGATTGCTTGAAGTGGACC  
CTGAATCATCAGAATGGGAAGAGTTTTTATTAGGAGTAAAAGTAGGCTTGCTTTGCACAGCACCGGACC  
CCCTTGATCGTCCCACCATGACCGACACTGTGTTTCATGCTCGAAGGTTGTCGTGTTGATCAAATTTCACTC  
TCCTGAAGAACCACGACCGGCAATGGTGACACGTAAAACCCAAGGTCTCATCCTAATTCTTTCCTTTCC  
TATTGACTCTTTGATATTTTGGAGGAGTTGCATTGCAATGCAACAATAGCTAGCACTAGCACTTAAGTTTTT  
TGTTAAGGAAAAGAACA AAAAGAAAATATTCTCAATTTTTTTTTAGCTATAGCTATTTTATTGATTTGG  
TTTTCTATTACAAAAGTGCCTCTTGAGTTGAAAACAATGAAATGAATTCTTTTTAAGTAATTCAAG

>M6-PGSC0003DMG400022632 M6 LRR-RLK

CAAACCTCAGTCAAATGACAACAAGCACAGCCTTTCATTCTTGTTTTGCTCTCCCCCTCTGTTCTCTT  
CTTCTTCTAACCCCTTCTCACTTCACTTCTCCACACTCAACCCACCCACCATGGCAGTAAAATCAACTAA  
CCCCATCTTCTTCTCACTCTTTTCTTCTCATTTCACATTAACCCCATCTTTTTCCATTGAAAATGATGTTA  
AATGTCTTGAAGGTATCAAATCTGCACTTTCTGACCCTTTAAACAAGCTCTCATCTTGGTCATTCTCAAAC  
ACTTCTGTAGCTTCAATTTGTAAACTTGTGGTGTCTTCTGCTGGAATGAGAAAGAAAACCGCCTTCTTTC  
TCTTCAACTTCCTTCAATGTCTTTATCCGGTTCCTCCACCTGCCCTTTCAGTTCTGTACTTCTCTTCAATCT  
CTTGATCTCTCTGGTAACTCTTTTTCCGGTCCAATCCCGGTTCAAATCTGTTCTTGGTTACCTTATCTCGTC  
AATCTCGATCTCTCCAGCAACTCTTCTCCGGTTCATACCCCTGAGTTTATTAAGTCAAATTCTTGAAC  
ACCTTATTCTAAATGACAACA AACTTACTGGGTCGATCCCATTTGAGATCGGCCGGCTCGACCGGTTGA  
AACGGTTCAGTGTGTCCAACAATGGCCTTTCCGGTTC AATTCTGATGATTTAGACCGGTTTTCGAAAGA  
TGATTTGATGGGAATGATGGGCTTTGTGGGAATCCAATTGGATCTAAATGTAGTAATTTGAGTAACAA  
AAATCTGTTATTATTATAGCTGCTGGTGTTTTTGGTGCTGCTGCATCACTGATTCTTGGATTTGGGATTT  
GGAGATGGTTTTTAGTTT CAGCCTAGTAAGAAAGATAGAGAATTCGGTGACGGTAAAGGTGGTGGTGGT  
ATCAGTGATTATTGGGTCGATAAATTGAGAGCTTACAAGCTTGTTCAGGTGACATTGTTTCAAAAACCTA

TTAATAAGATTAAGCTGAATGATTTACTAGTAGCTACAAATTCATTTGCTAGTGAAAATATTGTTATTTCA  
ACTAGAACTGGTATTTCTTATAGAGCTATGTTGATTGATGGATCAGCATTGGCTATTAAGGTTGAGTA  
GTTGTAAGTTAAGTGAAAAACAGTTTAGGTCTGAGATGAATCGATTAGGACAGCTTAGACACCCGAATT  
TAGTCCCATTATTGGGATTTTGTATTGTTGATACTGAAAGGCTTTTGGTTTATAAGCATATGCAGAATGG  
AAGTTTGTATTCGCTTTTACATGGTAATCTTAGTACTGGTATTAGAAATGATAGTTCTGAGCTTGGTTGGT  
TAGCAAGGGTGCGGGTTGCTGCTGGTGCAGCTAGAGGATTAGCTTGGCTTCATCATGGGTGTCAACCGC  
CATATGTGCATCAATACCTTAGCTCGAATGTGATTCTTGTAGACGATGATTTTGTAGCTAGGATCACGGA  
TTTTGGGCTTGCAAGGCTTATTGGTTCTGCTGACTCGAATGATAGTTCGTTTGTGAATGGGGATTTGGGA  
GAGTTTGGGTATGTAGCTCCTGAGTATTCGAGCACGTTGGTTGCTTCAATGAAAGGGGATGTGTATAGT  
TTTGGAGTAGTGCTGCTTGTAGTTGGTGACAGGGCGGAAGCCTCTTGGTGCGGGTAATGCAGAGGAGGG  
ATTCAAAGGTAGTTTAGTCGATTGGGTTAATCAGCTTTGAGCTCAGGTCATAGTAAGGACGCGATCGA  
CAAAGCTTTTGTGGAAGTGGTCAAGATGATGAAATTTTGCAGTTCCTTCAAATTGCATGTTCTGTGTG  
GTTTCAAGGCCGAAAGATAGACCTTCGATGTACACAGTGTATCAGTCCTTGAAGAGCATGGTGAAAGAA  
CATTGTTTCTCTGAACACTTTGATGAGTTTCCAATCAACTTGACCAAAGAAAACCATGATCATAAAGATTA  
GGTTATAGCATTGAAATGATTAGACAAATGTTTATGAATTTTGAATATTCTAGTTATGGCATTGTATTTC  
TTGATAACTCTGTATAGTTTGAAGAAGTAAATGCATGATCTTTGTACTTTCTTGACACATTTT

>M6-PGSC0003DMG400022900 M6 LRR-RLK

AAAAATTATACTAATTCTACCTAACAAAAAACAGAAATCAACCAAACAAGTAAATTTTTCTTTTGTATC  
TCTTAGTTAACAAATGAAAAATCCAGAAATTTACTTCATAACGGGGACGAATATAGTAATTTTGAAGAAA  
TAACATGGACATTTTTCTGTGTTATGATCAAAACATTCCTTCTTTGCATCGTCTTCTTGTATCAATTACCCCGT  
GAAAATAATTTAGTTTCCGATACTGATGCTTTGTTGAAGCTGAAACAATCATTTACAAATGCAGCGTCA  
TTGGAATCCTGGAAACCTGGAACGGATCCGTGTGACAAAAATATACGTTGGTTGGGTGTTTTTTGTCAG  
AAAAAATGGTACTGGACTTCTTCTTGCAGAAACGAATTTATCTGGAATTATAGACGTTGAGGCATTAT  
CACAAATGCCTGCTCTGCGTACACTTAGTTTTCAAAGCAATTTATTTTCTGGACCAATTCCGGAATTCAAT  
CGAATGGGTGCTTTAAAGGTCTTTATTTGTGCGAAAATCAATTTTCTGGTGAAATTCCATCAAATTA  
CGAAAAAATGTTGTCGTTGAAGAAGTTATGGCTCTCTGACAACAAATTTTCTGGGTGAAATTCCATCTTCA  
TTAATGGAGCTGCAATATCTCATTGAATTGCACCTGGAGAACAATCAGTTCACAGGTCCAATACCGCCAA  
TCTCGAAGTAGTCAACATTAGAATCAATCGATCTTTCTAATAATAACTTGAAGGGGAAATCCCTGTTTCT  
TTATCAAGATTCAATGAGAGTTCGTTTAAAGGGGAATTCGAGCTTTGTGGTGAAAAATTAGGCAAAGCT

TGTAATCCAACCATAAATAGCAGCAACGACAACAACACTAATAATAACGCAAATAATGGCACTCAACAA  
AGTCCGGATAGTAATTCGAATAAATGCATCTCAATGTGGATTATGATATCATCAGTTGTTCTTTTATTGAT  
CATGATCATAGTAATATACCTCATATGTCGCTACCATCAAATCGTCTTGCTTCAATTGAAAGTTTTGATG  
AGCCATCACTTGGGAGGCGAATTTGAGTGATAGCAAGAAGTCATTTGAACTAAGTAGACGTGGCAGTT  
CGATTAGAAAAGGATCGATAATGGGAAAACGTGTTGGAGATTTGACAATGGTGAATGATGATAAAGGT  
GAGTTTGGTTTAGCAGATTTGATGAAAGCTGCTGCAGAGGTGTTAGGGAATGGGCCATTGGGTTCTTCT  
TATAAGGCTATGATGTCAAATGGATTGACAGTTGTGGTAAAGAGGATCAAAGAAATGAACAAGATCGG  
AAAAGATGGTTTCGATGCAGAGGTTATACGTTTAGGAAGATTGAGACATAAAAATATTCTAACACTTTTG  
GCTTACCATCATCGCAAGGAAGAGAAGTTGTTTGTGTATGAGTACATTCCTAAAGGAAGCTTGCTATACA  
TATTGCACGGTAAAGTACCTAGCTCTAATTTTATTATGTCATAAATAGAAATGCATGGTAAGACTGCGTA  
CAATAAACTCATTTTTGTTAATTTTGTGCATGTGCTTAGAATAGGAGGCCAAAACTTCTACAAGTCGTAT  
GTTTACATTGTATTAGTAGTCTAATCGTCAAGTGTTCATATTAGGTGAGGAACAGAAAGTAGTCTCCTT  
GTATAATCTTGCCAACTATACGTCTATATCCATGAACTAGCTTTGAAGTTGTGTGAGGTCTAAAGGTCC  
GTTTGCTTCACAAGTTATCAAAGCCAGACTCATCTGTACTCTTGACATGTAGGCCCCCATGTTATATTGGG  
ATTATTCTCACCTTATGGTCTTTTTCAAGGCCACTTTTTGAATTATGTTCCCGTTAGCCCAGTGGGTTAAG  
GGGAACATAAGTTAAATAGAGACCTCAAGAAAGGTCATTTCTATAGTTGTCCTGTTATTTTCTCCATGTTA  
ATTAGTTGAGGGACGGATTTGGGCTACGCTTAACTCATGAACTAGTTTTCGAGGTTTAATTAGGCATAAT  
ATTCATTTTCTTCGCGCTAATTAGTCTGTGCATGATTACTTATAAAGATATGAATGATCACAGGTGAAAG  
AGGGCTGCCCCATGCTGAGCTCACCTGGCCAGTGCCTAAATATTATACAAGGAGTAGCTCAAGGACT  
AAATTATCTTCACACTGAACTTGCTTCTTCTGATTTGCCCATGGCGATTTGAAATCGAGCAATATACTCA  
TAAGCACAACCACGAGCCATTACTCACTGGTTACGGATTCTGCACCTTAATGAACAACGCGCATGCAGT  
TCAAGCACTAATCGCGTTCAAGTCACCAGAAGCAGTACAAAATAACCAAGTTACACCCAAATGCGACGT  
TTATTGCCTTGAATTGTGATTCTTGAGATAATAACAGGGAAGTACCCGTCTATATATCTTAATACCGGT  
AAAGGAGGGATAGACATAGCACAATGGGCAAATCCGCGATTGCTGAGGGAAGAGAACTGAATTAT  
GTGATCCACATATAATAGCAAGCGCGAAAGATTCAATGAGTTCAATTAAGGAACTAATTCACATTAGTGC  
AGCATGTGTAGAGAGTAATCCGCAACAGAGGATAAATATTAGAGAAGTCATTAGGAGGATTGAAGAAA  
TACAACAACAAAACGGAGTAGGCCAAACAGGACAAACAACAACAACGCCTCAGTCTCAAACGGGA  
CAAGCAATTGAGATAATGCCGTCTCAAGAGATGGAGATGCTGAAATACAAGTGTGAGAATCCTAACAA  
GGAACAACAAATCATTAGGAATTTTAGCAGACTCCGGTAATTCAAGGCGTGGTTAATATCACAGCTTCTC

CTATGGTCATCAGACTAATGATAGTGCTTTTTTTTTCTTCATTTTTTAAGGTTTCGTTAACTAGGGATAGTAC  
ATATATTACTGACTAAGTTTTAGTTTTCATTTTTGTGTATTTTCCCCCTCTTTTAGATGCCCCATTATCTCCCC  
TAGTAGAACAAAGAAATGAGAGGAGAAGCTGTATCCTGTGTAGAGATGAAAGAGCTTAATGCTTGCTTTA  
GAATTTTATATGCAATACAATTCCTGTTTCTACCATGTTGAGTAGTACTTAACTCTTGTAGACCAAAAAT  
TCCTCAATTACAAAATACAATTATTGACCATGTCACAAGTACGCTAGCTTGTCCGTGCTTTGACTAATTCC  
ACTGGATATAGTCATTTCTAACCAACAACATGTATCAGGTAACCTTTCTTACTTATTGTTTTTATCTCTGC  
TAATTTTTGAACCTTAGACCTCATAATTCTCGATCCACTTTGTTGATCACTTAGATCACTATTGGACGTTGT  
ATGTTAATATTTTTTACACAATAATAAACAGAGAAGTATGGAAGGCCCTATCAGATAACTATAAC

>M6-PGSC0003DMG400023004 M6 LRR-RLK

TTATCTTGAGCCAAGGGTTTATTGGAAGCAAACCTCTCTACCTCCAAGGTAAGGGTAAGGTTTGCGTATAC  
TATACCCTCCCAGAGCCTACTTTGTGGGATTACATTGGGTATGTTGTCGTTGTTGTAGTTCATCCCCGTT  
GCTCTAAAGGTGGCTTTAAGTTTGTGTTTTGGGTGTCTATTTATAACCTCATTTTGATAATGGAGTCTGTCT  
CACTTAGTTTATTGTCTTGTTCCTTATTGTACAGTTTTGCAACTATGCTATAACCATTTTACTGGTAGCAT  
ACCCACTCAACTAGGGACTCTAACAAAGCTCAATGTCCTGGCTCTGCAATCCAATCAGTTAACTGGTGCG  
ATCCCCGCTAGCTTGGGTGACTTGGGAGTGTTGATGAGGGTGGACTTGAGTTATAATAGTCTTTTCGGTT  
CAATTCCTCAAACCTTGCGGATGCTCCCCTACTTGAAGTCTTGATATCCGAAACAACAAGATTTCTGG  
CAATGTGCCTCTTGGTAATGAATTTTCTCGCCCTACATTGACTCTTTCATTGGAATTTGAGAGTTAAC  
CAATTTTTTTTTTTTTTTTTATGACATTTCCGTATATGCCTTTTAGATAATTTAGTTGTTAATTATTGTGTTTC  
ATAGTACTTATTACGTAGTTTTCAAATATATAAGTCTTTTTCAAAAACCTTAAAGCTTCTATGTCCGATTCA  
TGGTCAAAGTTTAGACGTTTGAATCTTGAATTCCAACCTGTGCCACATAAGTTTGAGACAAAGGGAGTTA  
TGTATATGTAGCCCCATAAGAGTCGTACGTATAGTTTCTTGGTAAATTATATCTTATCTGGTCTTTTGTGTTT  
CTGTCTTATGAAGCTTTGAAGAGATTAGTTGGAGGTTTCCAGTATGAGAACAATCCAGGACTATGCGGT  
GTGGGTTTCCCATCCTTGCGAATTTGTACATCTTTGGATCGCTCGAATCCTAATAGACCAGAGCCCTATG  
GAGTTGGCTCAAGTGGTTTATCTACTAGAGATATTCCAGAAACAGCTAATCTCAATCTAAATTGCAGCGG  
AAATGCCTGCACAACGTCGTCTAAAACCTCACAGGCATCTGTTGTTGTAGGGGTTATTGTGGTTACTATT  
ATTGCATCTGCTATAGGAATTTCTTCTTACACACTATAGAAGACGAAAGCAGAAACTTGGAGGTGGA  
CTGGAAATGTGTGATAGCCGTCTCAGTATCGACCAGGCCAAGGAAGTTAATAGGAAGAATGGTTCTCCC  
CTAGTCAGCCTTGAGTACTCGATTGGCTGGGATCCGTTGGCTGAGGGCCGGCGTTATGGTGGAGTTTCC  
CAAGAGATTCTGCAGAGATACAGATTCAATTTGGAAGAGGTGGAGTCAGCTACACAGTACTTTGCTGAT

AAGAATCTATTGGCTAAGAGCAACTTTTCAACTACATATAGAGGGACTCTAAGAGATGGATCACTTGTTG  
CTGTTACGAGAATTGCCAAAATTAGCTGCAAGTCAGAAGAAGCTGAGTTTTTAAGAGGACTAAACATTT  
TGACGTCTCTGAGACATGATAATTTAGTTAGGCTGAGAGGTTTCTGTTGCTCTAAAAGCCGGGGAGAAT  
GTTTTCTTGTTTATGATTTTGTGCCAAGAGGAACTTGTTGCACTACCTAGATTTGAAGGAGGACGAAAC  
TCGTGCTCTTGAATGGTCCACGAGGGTATCTATCATTAGTGGCACTGCAAAAAGGTCAGTTTTTGAATCAA  
CTCTATCTTGTAAGATATAAAGTACAGTAATTTGACATTATATTACTTTTTCTGAGCTTACTGTCAACAATT  
CAATCATGCCTTTTTATCTATCTTGAGCAGGCGTTGAGTATTTGCACGGGTGCAAGGTGAATAAGCCAGC  
TCTAGTGCATCAGAATATCTGTGCTGAAAACCTGCTCCTTGACCAACGATTCAAACCATTGCTTTCAAATT  
CAGGCCTGCATAAGCTCCTCACAAATGATACCGTCTTTTCAACACTCAAGGCAAGTGCTGCCATGGGATA  
TTTAGCTCCAGAGTACTCCACTACAGGCCGATTTACTGAGAGGAGTGATATTTATGCCTTTGGAGTGCTC  
ATTTTCAAATTTTATCTGGCAAGCGAAAATTCACCAGTTCAATGCGTGCTGCTGCTGAATTGTCAAATT  
CCACGACTTGATGGACGTGAATCTCCGTGGAAGTTCTCTGAGTCTGAAGCAACAAAACCTAGCGAAAAT  
CGCTTTGTTATGTACACATGAATGTCCAGAGGAGAGACCAACCATGGAAACAATCGTACGAGAAATTGG  
TAATTTAGGTAGTCCCTCCTAATGCTAATGATCTTCTCCATCAACTATTGCCTGTGGCAAATTTTCAATCC  
TCCTAACTTATTAGCTGGAGATAGATTCGCACTAACCTCTCACGAGTATTGGAGCTTCAAATATTTAGTCA  
GTCTGAGAACTTCTTCGACTGAGGACTTGACCATTTTGTGAATGTTTGCATCTCGTATGCCATTTAACCTT  
AGGATTTCTCATGTTGGAAAATTTTCTCTGTTTATCTCATGGATTCTAATTAATCTGTTTGTAAAAGAT  
GAATGTTCTTCCATTTACCTAGGATCATTGCTTCGTTTTCATTTTGTGCCT

>M6-PGSC0003DMG400023057 M6 LRR-RLK

ATGTCGATGTTTAACAAATTGTTGTTGGTTTGGTTTTTGTGTAACACTGGTTCTTGGATATGTGTTTTCT  
GAAACAGAGCTTGAGGTTCTGTTAGAGATAAAGAAGTCATTTCTTGATGACCCTGAAAATGTTTTGTCAA  
ATTGGTCTGATAAAAATCAAATTTCTGTCAATGGAGTGGTGTTCATGTGAAGAAGATACATTGAAAGT  
TGTGAGATTAAATCTTCTGATTGTTCAATTAGTGGTTCAATTCACCTTCTATTGGCTTTTTGCATGACCT  
ACTCCATCTTGATCTTCTTCTAATCTATTATCAGGTCCCATTCCACCTACTCTGTCTAATCTTCTTCTTAC  
AATCTCTTCTTCTTATTCTAACCAACTCACTGGCCCCATTCCAATGAAATTGGCTTGTGAAGAATCTCC  
AAGTTCTTAGAATTGGTGATAATGTTGGCTTAACAGGGCTGATTCCAAGTACTCTTGGTGATCTTGAAAA  
TTTGGTACTCTTGGTTTGGCTTCATGTAGTTTGTGAGTGGTATGATTCTCCTGAATTGGGAAAACCTCGGG  
CGGGTTGAGAATATGAATCTGCAAGAAAATAATCTTGAAAATGGAATTCCTGCTGAGATTGGTAACTGC  
TCTAGTCTTGTGCGTTCAGTGTGTCAGTTAACAATCTCAATGGATCAATCCCGGAGGAATTATCCATGCT

GAAAAACCTTCAAGTTATGAATTTAGCGAATAATAGTCTTTCAGGACAGATTCTACTCAGCTTGGTGAA  
ATGAATGAGTTGCAGTATCTCAATTTGCTTGGTAATCAGTTGGAAGGTTGATACCAAAGTCGTTGGCG  
AAGTTGAGTAATGTTCCGAATTTAGACTTGTCTGGTAATAGACTTACTGGTCAAATTCCTGGAGAATTTG  
GGAGCATGAATCAGCTACAGTTCTTGGTTCTGACTAGCAATAATCTTTCGGGTAGCATAACCGAAAACAAT  
ATGTAGTTCTAATCGAAACAGTAGTTTGGAACACATGATGCTATCTGAAAACCAACTTTCTGGTGAGATT  
CCTGTGGAGTTGAGAGAATGCATTTCACTAAAGCTGCTGGATTTGTCTAATAACACGCTTAATGGTTCGA  
TACCAGTTGAGTTGTATGAGTTGGTTGAGTTAACTGATCTCTACTTAACAACAACACATTGGTTGGTTC  
AGTTTCTCCGTTGATTGCAAATCTTACCAATCTTCAAACATTGGCATTGTGCGACAATAGTCTTCATGGCA  
ATATACCGAAAGAGATTGGGATGGTCGAAAATCTTGAGATTCTGTTTCTATATGAGAATCAGTTCTCTGG  
AGAAATACCAATGGAGATAGGCAATTGCTCCAGATTGCAAATGATCGATTTTTATGGGAATGCATTCTCA  
GGACGCATTCCCATTACAATTGGAGGGCTGAAGGAGCTGAATTTCAATTGATTTTAGACAGAATGATCTCT  
CTGGTGAGATTCTGCCAGTTTGGGAACTGTCATCAGCTGAAGATCCTTGATTTGGCGGATAATCGTCT  
ATCTGGTAGCGTTCCTGCTACGTTTGGTTATCTTCGAGCATTGGAGCAGCTTATGCTTTATAACAACCTCAC  
TTGAAGGTAATCTTCTGATGAACTGATCAATCTTTCAAACTTGACAAGAATAAATTTTTCTCATAACAAA  
CTGAATGGTAGTATAGTTTCCCTGTGTAGTTTCGATGTCTTTTCTTCGTTTGATGTTACAAATAATGCATT  
GATCATGAGGTTCCACCTCATTTAGGATATTCACCATTTCTTGAAAGGTTAAGGCTAGGAAACAATCGTT  
TCACCGGAGAAATCCCTTGGACATTGGGATTAATCCGTGAGTTATCACTGCTCGATCTCTCTGGAAATGA  
ATTGACTGGTTTAATACCTCCACAGCTTTCCTACTATGTAGAAAGCTCACACATCTCGATCTCAATAACAACC  
GGCTTAATGGATCAATTCCATCTTGGCTCGGAAACTTGCCACTCTTAGGTGAGCTTAAGCTGTCCTCAA  
TAAGTTCTCGGGACCTCTTCTCGAGAATTGTTTAACTGCTCAAAGCTTTTAGTGCTATCTCTAGAAGAGA  
ATTCAATCAATGGAACCTGCCCCCTTGAATAGGTGAACTCAAGTCCCTAAATATCCTAAATTTGACAA  
AAACCAACTCTCTGGTCCCATTCCATCTACCATTGGCAACTTGAGCAAGCTATATATACTCCGTCTCTCGG  
GAAACAACCTAACCAGTGAATACCAAGTGAAGCTTGGAGAAGCTCAAAAATCTTCAAAGCATACTGGATT  
TGAGTTTCAACAACATCAGTGGTCAAATTCCTCCTTCTGTTGGGACACTCACGAAGCTTGAAGCACTTGA  
TCTATCTCATAACCATCTCACCGGAGAAGTTCCTCCTCAAGTCGGTGAATGAGTAGCTTGGGAAAGCTT  
AACCTCTCCTACAACAACCTTCAAGGCAAATTGGACAAACAGTATGCACATTGGCCAGCTGATGCATTCA  
CGGGGAATCCACGTCTTTGTGGAAGTCTCTACAAAATTGTGAAGTCTCTAAGTCCAACAATCGGGGTTT  
AGGACTAAGTAACTCGACAGTTGTGATCATTTCAAGTATCGACTACTGTGGCGATCATACTTATGTTG  
CTTGGAGCTGCACTCTTTTTCAAGCAAAGGCGAGAAGCCTTTAGAAGAGGAAGCGAAGTAAATAGTGCT



TACTCATCCAGCTCTTCCCAAGGACAAAAGAGACCACTTTTCGCAAGTGTGGCTGCTAAGCGTGATATCA  
GGTGGGATGACATCATGGAAGCAACAAATAATCTAAGCAACGACTTCATAATCGGATCTGGTGGTTCAG  
GAACTGTCTATAAAGCTGAGCTGTTTAACGGAGAGATCGTGGCAATCAAGAGAATACCAAGCAAGGAT  
GATCTCTTGCTAGACAAAAGCTTTGCAAGAGAAATCAAGACACTTTGGAGGATAAGGCACAGGCACTTG  
GTGAGGCTACTTGGATACTGTAACAACAGCGGAGAAGGTTCAAATGTATTGATCTATGAGTACATGGAG  
AACGGAAGTGTGTGGGATTGGCTTCACAAGCAGCCAGCTAATAATAACAAGAGGAAAACATGCCTCGA  
TTGGGAGGCAAGGCTGAAGATAGCGGTGGGATTAGCACAAGGAGTTGAGTACCTTCATCATGATTGTG  
TACCCAAGATCATTATAGGGACATCAAATCAAGCAACATTCTACTAGACTCAAACATGGAGGCACATTT  
GGGAGATTTTCGGGCTGGCTAAAGCCGTTTATGATAACTATAATTCCTACAACACTGAATCAAACCTTGTGG  
CTTGCTGGTTCATTTGGTTATATTGCTCCAGGTATATATCATTCTGAATTCTCGAGTATTAGCATTTCGAA  
AATATTTTTTTCTTTTTATACTAAGTTGCTTATTTGTTTCGCAGAGTATGCTTATTCTTCGAAGGCAACTGA  
GAAGAGTGATGTTTATAGCATGGGGATTGACTGATGGAGCTAGTGAGTGGAAGGATGCCAACTGATG  
GGAGTTTCGGAGAAAACATGGACATGGTGGAGGTGGGTTGAATCATGTATCGAAATGTCTGGGACAATT  
AGGGAAGAGCTCATTGATCCTGTTTTGAAACCATTGTTACCTAATGAAGAAAGTGCTGCACTTCAGGTGC  
TGGAAATAGCACTTGAATGCACCAAAACTGCACCTGCTGAAAGGCCATCTTCGCGTAAAGTTTGTGATCT  
GTTGCTACATGCATTCAACGACAAGGTGGTTCATTCTGATAAGATGAGTCCAGACAATTACGTCTAG

>M6-PGSC0003DMG400023192 M6 LRR-RLK

ATGACAACCTTTGTCATATTTTTTCATTATATTCTTCTTGTTAAGTTGTTTGAGTCCAAGAAGAGTGAACCTC  
CTGTCTTCTGATGGAAAAGCTTTGCTCTCTCTTCTCAAAGCAACTTATGACCCTTATGCTAAATCATCATCA  
TCTTTTGTACTTTCTTCTTGGAAATGCTTCAACTTCAACTCCATGTTCTTGGCAAGGCATTTCTTGTCTCCTC  
AACAAAGAGTTATTTCTGTTTCTATTCAAATACATTCTCAATCTTTCTTCTTTTCCCTTTGAGCTTTTTTC  
ACTTTCATCTCTTCAGCTTCTAAATCTTTCTTCTACTAATATATCTGGCTCAATACCTTCATCTTTTGGTTTG  
TTTACACATCTTAGGCTTCTTGATCTTTCTTCTAACTCTCTTTTCAGGACCTGTTCCCTCAGAAGTTGGTGGGA  
CTTACCTCACTTCAGTTCCTTTTCTTGAATTCAAACAGATTGAGTGGAAGAATCCCATATCAACTTGCTAA  
TCTTTCTTCACTAGAAATCCTCTGTCTTCAAGATAATCTCCTTAACGGGTCAATTCCGAAAGATTTAGGCT  
CATTGGTATCACTCCAACAGTTCAGGATTGGAGGGAATCTAGAGTTGAGTGGTGAATACTGCAGAGC  
TAGGAATGCTCACCAATCTTACGACATTTGGTGTGCGGGCTACTGGACTTTCAGGGGTTATTCCACATAC  
ATTTGGTAATTTGATCAGTCTACAACTCTGGCAGTGTATGATACTGAAGTGTGGTTCAATACCACCT  
GAACTTGGGATGTGTTTCAAGAGCTCAGGAACTTGTATTTGCACATGAATAAGCTCACCGGTCCAATCCCTC

GTCAGTTGGGTAAGTTACAAAAGATTACTAGCTTGCTTTTATGGGGAAATTCGCTTACTGGCCCTGTCCC  
GGCTGAGTTATCGAATTGTTTCATCCCTTGTTGTTCTTGATGTCTCTGCAAATGACTTGTCTGGCGAAATTC  
CGGGTGATTTAGGGAAGCTTGAAGTCTTGAACAGCTTCACTTATCTGATAATGCACTTAGTGGGGCTAT  
TCCAATGCAGTTGAGTAATTGTAGCAGCTTAACAGCTCTTCAGTTGGATAAGAACCTTTTCTCCGGCACG  
ATTCCTGAGCAAGTTGGTGAGTTGACGTAAGTGCAGATTTTCTTGTTGTGGGGGAATTCGGTTTCAGGAA  
CTATCCCGGCTGCTTTTCGAAACTGTAAGTGCAGTATTCGCTTGACCTCTCAAGGAACAATCTCACTGGT  
TCAATACCTGAAGAGATATTCAGTTTGAAGAAGCTGAGTAGGTTGTTGCTTCTTGGGAATTCGTTAACGG  
GAAGATTGTCTCCAAGTGTGGCAAATGCCAGTCTCTGGTCAGGTTGAGGATTGGCGAAAACCAGTTTT  
CTGGACCAATACCTGATGAGATAGGACAGCTGCAGAATCTTGTTTCTTGATTTATACATGAACCATTT  
CTCTGGTGAATTGCCTTCTGAAATTGCCAACATTACGGTCTTGAGCTGTTGGATGTGCATAACAATTACC  
TAACCGGGGAAATACCATCATCGCTGGGAGAGCTTGTGAATTTAGAGCAGCTTGATCTCAGCAAGAACA  
GCTTCACTGGTGAGATTCCGTGGAGTTTTGGTAATCTCAGTTACTTGAACAACTTATTCTTAGCAATAAT  
CTGCTTACTGGTCCAATTCCAAAGTCATTTAGCAACTGCAGAAGTAACTCTACTTGATTTGAGCTCCAA  
TAGTTTTTCTGGTGCAATTCACCTGAGATTGGTTACATGACAAGCTTAAACAATCAGTTTAGATTTGAGCT  
CAAACCGATTACAGGTGAACTCCCTGAGACGTTATCCGGATTGACACTGTTGCAATCTCTTGATATTTCT  
CATAATATGTTGAGTGGAAGAATCACAACCTAAGCCTCTTAACCAGTCTCGCTACTCTAAATGTATCGT  
ATAATAATTTCTCAGGGCCTATTCTGTAAACACCTTCCTTTAGAACTCTAACATCAAACCTTTTTCTTGAGA  
ACTCACTCCTTTGTGAATCAATTGATGGCTTCACTTGTCTGCACATATAACTAGAAGGAACGGATTGAA  
GTCTGCAAAAACCATAGCTTTGGCTGCAGTGATTGTGACTTCTGCATCCATAACAGTCGTGGCAACGTGG  
TATCTTGTGACAAGGAAGCATAGATATGAATTTGAGAAATCACCTGGCATGTCGGTCTCTGTAATAGGG  
ACAGAAGATTTTTCTATCCGTGGACTTTCATCCCTTTCCAGAAGCTCAATTGCACCGTTGACAACATCTT  
GGATACCTTGAAAGATGAAAACATTATAGGGAAAGGCTGTTCCGGGGTGTGTTTATAGAGCAGAAATGC  
CAAATGGCGAGTTGATTGCAGTGAAGAAGCTCTGGAAAACGAAGAAAGATGAGGAACCAATAGATTCT  
TTCGCTGCTGAAATTCAGATTCTCGGTCACATTAGGCATCGAAACATAGTGAAGCTCCTTGGATATTGTT  
CAAACAAGAGTGTTAAGCTTCTTCTCTACAACCTACATCTCAAATGGTAATCTTCAACAGCTCTTGCAAAGT  
AACAGGAACTTGGATTGGGAAATCAGGTACAAGATTGCGGTTGGATCAGCTCAAGGCCTTGCTTATCTT  
CACAATGACTGTGTGCCAGCAATTCTCATAGAGATGTCAAGTGCAACAACATACTCCTCGACTCTAAAT  
TCGAGGCTTATTTAGCAGATTTTGGACTTGCAAAGCTGATGAATTCTCAAATTATCATCAAGCTATGTCC  
AGAGTAGCAGGCTCTTATGGCTATATAGCTCCAGGCAAGTATCTTTCAACTTTATTTTCTCATCTTAACCT

AAATGTTGTGCAGCTATATGATTCTTTGAATCCTTGTGTTGAATCGTGTGATCATCGCATCTCTAAAAGCT  
TAAGTTATTAGAGAAAGGATACGCTTTTGTATACACTTTTCTCTACTAAATCATATCTTCAACACATGTGG  
CTCTGATTCTTGCCAAGCACGTGGATAATGGGTGACGCTTAGACTTCAACCTAGGATACCATGTTGAAAT  
GTGTGACTCTCTCATTTAGTTAAGTTATTAGAGATGGTACACATTTATTTACTTCATTATATCGTCAACAG  
TTCCCAGATATAGGTCAAACGAGAGTCACAACGTTATGAGCTATAGTCAAATTTGGAAGGATAAACTA  
AACAAAGTTATGCTTCATAGATGTTAACTATATTTTACCACTATGGTTGCAGAATATGGATACACAGTA  
AATATAACAGAAAAGAGCGATGTCTACAGTTATGGAGTGGTGCTGCTGGAATATTGAGTGGACGTAG  
TGCGATTGAGCCTCAGATTGGTGATGGACAACACATTGTGCGAGTGGGTGAAGAAGAAGATGGGAAGCT  
TTGAACCAGCTGTTACAATTCTTGATTTGAAGCTACAGAGTTTACCGGATCAAATGGTGCAAGAAATGCT  
TCAAACACTTGGAATAGCTATGTTCTGTGTGAATTCATCACCCACTGAAAGGCCAACTATGAAGGAAGTA  
GTGACACTTCTAATGGAAGTGAAGAGCCCACTGAAGAATTTGGAAAACTTCTCAGCCTTTAATCAATC  
AGTCAACTCAAAGTTGA

>M6-PGSC0003DMG400023282 M6 LRR-RLK

TCATCTCTACCAATAATAAATATCATGTAACCTATTTACCAAAGTTAAGGTAGATGAAAAGTAATAACC  
TAGTGTTTTTTTTGTCTCTACTGGGATTTTAGCTTACCTCATAGTTATCACTTACTTCATTGACCAATAGGCC  
ACAACGTTGGTGCAATAAGTTTAGAACTATTCAGTTCAAGACTTTAATCTTTTCTGGTGTTATTTTCTATCC  
CACTATAGTCAGATCCTCCTGTGCTTCAGATATGGAGAATTTGATTGTAGGAAAGATGAAAAACAAA  
GGCCGCTCTTTAGTATCTTTCCTTGTAACCAAGACTATAAAGTCAAGTGAACATTATATACTTGAGTCAC  
TTCAAAGAAAGATGTAAATTCATTGGCAATATAGTAAATCCACAATAAATAACAATTGACATGTTAAAC  
ACATCAGCTAATCACCCAACATCCTGTATGTGTTTGTGTATATCTGTTTAAACATCTTTCATATGTGCTTTAC  
TGAATTCCTAAGTTATCTTATTCTTTAAGTGAATTTTTTAGTTTCTTATAATAGATAAATTATACAACAAA  
CATTTGATTAGGTATACATTGCTTTTAAAGTAAAAGGGGTTTGTATATGTATATTCTTGTTTCTATACTTTA  
TTGTTTGGTACTGATTGCTACTTTTCTTTCAGTTTCTCATTAGAATGGGCATCCATCATATCTGTTA  
TGGAGTTTGTATCCCCTGTGAAATGACTGTTTAGCCCTTCCATAATCAATCATGTCTAGAATCCAAAC  
TCTCCATTCCCTCAAATCGTTGTTATTTTCTGAAGTTTCTGTTTTCTTAATTCATTGTCTGTTGAGACA  
GAAGCACTTCTTGAATTTAAAAGCATCTTGTTGACCCTTGAATGTCTTGAATCTTGAATATTTCAGA  
TTCCCCTTGTAATTCTATGGCATTCAATGTGACAAACACACTGGCTTGGTCACTGAAATTTCACTTGACA  
ATAAGTCCCTTTATGGATTTATTTCCCCTTCAATATGTGTCCTCAAAGCATTACTTCTCTAGTGCTTCCTT  
CAAATCACCTGTCTGGAATCTTCCAAGTGAATTGGCGGATTGCGCCAATCTCAAAGTATTGAATGTTAC

TGACAATAACATGAACGGTGCGATACCTGATTTATCTAGCTTGGCTGAGTTGGAGGTGTTAGACTTGTCA  
GATAACTGTTTTCTGGAAAGTTTCCAGCTTGGTTTGGAAAGTTGACTAGTTTGGTTGCATTAGGCCTTG  
GTGGAAATAAGTATGATGAAGGTAAACTTCTGATTTGTTTGGGAAGTTGAAGAAAGTTTATTGGCTTTT  
CTTGGCAGGGTCAAATTTGACAGGACAAATCCCGGAATCTATTTTCGAAATGGAGGCACTAGGTACATT  
AGATATTTGAAAAACCAGATATCCGGGAATTTTCAAAGTCGATAAACAAGCTGCGAAATCTCTTCAAG  
ATTGAACTTTATCAAAACAATTTGACCGGGGAATTGCCAGTAGAACTTGTAGACCTTATACATCTGCAGG  
AAATTGATGTATCTAGAAACCAGCTGCATGGGACTTTGCCTAAGGGGATTGACAACCTGAAGAATATAA  
CGGTTTTTCAAATATTCAAGAACAATTTCTCTGGGGAAATCCCTCCAGGATTTGGAGATTTGCAGCATCTT  
AATGGCTTTGCTGTGTACAACAACAGTTTTACTGGAGAAATTCCAGCTAATCTTGGCCGGTTTTCGCCAC  
TGAATAGCATAGACATATCTGAGAACAAGTTTAGTGGTGCATTTCCAAAATATTTATGTCAAAACAACAA  
CTTGCAAAATTTGCTTGTGTTGAAAACAGTTTACAGGGGAGTTTCCAGGTAATTATGCTTCTTGCAAG  
ACTTTAATGAGATTGAGGGTGAGTCAGAATCAACTCTCTGGGAGAATTGCTGAGGGTTTATGGGGGCTT  
CCAGAAGTCACAATGATAGATTTTCAGTGATAACAACCTTCACTGGAAGTGTATCTCTGGAATCGGCGCTG  
CGACTAAGTTGAATCAGTTGGTATTATCAAACAACAGATTTTTCAGGTGAGCTTCCAAAAGAAGTTGGAAA  
GCTCACACAGTTGGAAAGGCTATATTTGGATAACAATGATTTCTCTGGCATAATACCATCTGAACTTGGC  
ACATTGAAGCAAATTTTCATCTTTGTATTTAGAGAAAACTCACTTTCCGGGTCGATACCATCGGAGTTGG  
GTGAGTTCCAAGGTTGGCAAACCTTGAATCTTGTCTTCAAATCTTCTCACAGGCAACATACCGAATTCGTT  
GTCAATGATGGCCTCGTTGAACTCTCTGAATCTTTTCGAGTAACAACTCAATGGCTCAATTCCAACAAGC  
TTGGATGACCTGAAGTTATCTTCATTAGACCTCTCTAACAACTGCTAACTGGAAGAGTTCTACAGATCT  
TTTGACGGTGGGAGGAGAAAAGGCATTTGTAGGAAACAAGGGGCTTTGTGTTGATCAAAGCATCAGGA  
ATGTCCGAAGGAACTCAGGCATTGGCGCTTGTAGTGGAAAGGCTGCTCAGGAAGTGTTTCATGAAGAGC  
AACTAGTTGTGCTTTGCATTGTATTACTTTCTTTGGCTGTTCTAATGGGTGTTTTTCATGCTTTTGAGTTAC  
TGGAAGTACAAGTGCAACGCTGAAGCTGATTCAGAAAAGTGTCTGGGACATGCAAATGGAATGAATCC  
AAAATGGAAGCTTGAAAGCTTCCAACATGTGGAACCTTGATGTAGATGAAATATGTGATGTTGGTGAGGA  
CAAGCTGGTAGGAAGTGGAGGCACAGGAAAAGTTTATCGGTTAGATTTGAAGAAAGGTTGTGGCACAG  
TGGCAGTAAAGCAGCTTTGAAAGGAAATGAGGTGAAAGTTTTGACAAGGGAAATAGACATTCTAGGA  
AAGATCAGGCATCGAAATATAGTTAAACTGTATGCCAGTCTAATGAGAGAAGGTTTCAATATGTTGGTT  
TTCGAGTACTTGCCAAATGGTAATTTATTCGAGGCACTACACCGGGAAGTCAAGGCTGGGAAGACAGAA  
TTAGATTGGTACCAGAGGTATAAAATTGCAGTTGGAAGTCAAGGGGAATTGCTTATTTGCACCATGATT

GTGTCCTCCTATTATTCATAGAGATATCAAGTCAACAAACATTCTACTTGATGAGGAGTATGAAGCGAA  
AGTTTCTGATTCGGGGTTGCAAAAGTTTCAGAAATTCCTCTAGAGTCTCCGAGTTCAGCTGCTTTGCA  
GGCACTCACGGCTATTTAGCTCCTGGTATGTTTCAAAGAGGAAAAACCAATACTATGTTCCCACTTCTTT  
CTATTTTCACTCTTGCTAGTTTCCTAACATCACATTTGAATTTGTTTTATTGACAGAGCTAGCATATACTTC  
CAGAGTGACAGAAAAGAGCGATGTATACAGCTTTGGAGTTGTTCTATTAGAATTAGTAACTGGAAGGAA  
ACCAATAGAGGAAGCCTATGGAGAAGGCAAAGACTTGGTTTATTGGGCATCAACTCATCTAAATGACAA  
AGGAAGCGTTCTGAATATTCTTGATCAAAGGTGGTTTCCGAGCTTGTCCAAGATGACATGATCAAAGT  
GTTGAGGATTTCTGCCCTATGTACGACTAAGCTTCCTCATTACGCCCCAGCATGAAAGAAGTAGTAAAG  
ATGCTTGTTGATGCTGAACCTTGAACATTTAGTTTTCAAGCAAATGTGAGAAAAATGAGAAAGATCCTTT  
GTAGTTTTCTCCTTTCCCTCTTACCATATAGTTTAAATTCCAATCTCAGTATAGTTTTTGTTTTATGATTA  
TGCATATGCCATGTAAAATTGTATCCAACCTTTGTCTGTACAAGTTCATTTTGTAATAATGGAATGCATTTT  
CTGGTTGAGCTTATAA

>M6-PGSC0003DMG400023283 M6 LRR-RLK

ATGATTGTCTTGAACCTAGTGAATTGTTTGGTCCATTGTCACCAGCAGTTGGTAATCTTAGTTTCCTCAG  
GGTACTTTGGCTCAGCAGAAACAGTTTCACTGGCAAAATCCCTGGAGAGATAGGAAAGCTATCGAGATT  
ACAGAGGTTGAACTTAGCAAACAATTCATTTTCTGGTGAAATACCAAGAAACATATCGCGGTGCTCCAAT  
CTTAATTATATTCATTTAGGTAATAACAATCTGAGTGGAAGCATTCCAACAGAGTTGAGATCATTGAATA  
AACTTGAGAATTTACTACTTCAGTTGAATAAATTGACTGGAGAAGTTCAGCTTATCTAGGTAATCATTCT  
TCACTCTTGGCAATTGCATTAGGAGATAATCAATTACATGGAAAGATACCTGATATTTTTGGTGGACTCA  
AACATTTGGTGTTCCTTGATTTGCTTTGAATTATTTGTCTGGAGAGATTCTATGTCGATTTTCAACTGT  
CATCATTGCACACACTTCAGATAACTTTTAATAAACTTGAAGGGGGTCTTCCATCAGATATGGGGTTCAA  
TCTTCCAAGTTTAAAGTTCTTTCTCCTTGTTGGGAAATCAACTGACAGGAAAGGTTCTACTTCAGTACTGA  
ATTCTACATCACTTATGGAATTTGGTATCGACGGGAATAATTTCACTGGACAAGTACCAGCCTTTGGAAA  
CCAAAAGGATTTGTAAGCTTGGACTTGGACTTGTGAAAATCATTTTGGAAATGGAATGTTGGATGATTTGAA  
GTTTATGTACTCCCTACAAAATTGTACTAGTTTAGAGCAGCTAATACTGGAAAACAACAATCTTGGAGGA  
GTACTGCCAAGCTATATAGGCAACATGTCCAATCTTTTGGCGCTTCTGTAGGGGGGAATCTCATCCAAG  
GAAACATTTCCACAGAGATTTTACAGCTTGAAAACCTGCAAGTACTTGGTCTCGATAAAAATAATTTTAC  
TGGTATGATTCCTGAGTCTATTGGACAATAAGCCAACCTTAGTAGGTTATACATTCACCACAACAGATTTT  
CAGGTGAGATTCCACATTCTTTGGAAATTTGACGAGGTTGATTGAACTCGATTTGGGATCAAACAACCT

GCAAGGTA CTGTGCCTTCAAGTCTTGGAAGCTGCAAGTTCTTATCACTCTTGTATCTGAATGGAAATCAA  
CTTAGTGGTCTTATACCAAAGAAGTGTGGGGCTCTCCCTTATAGAGTTTGACCTCTCAAACAACCACTT  
GACGGGGTATTTTCCTGTAGGGATTGGCTCTGGAACTTGACTGGACTGATAAACTTGATCTACATGAA  
CCATTCATACAACAATTTATCAGGTGAAATACCAAGCAGCTTTGGCACTTTGACTAGTTTGAGGGAGCTA  
TACCTTGGTAACAATGCCCTCAGGGAGTTATTCCTGCATCCTTTAGTTCTTTGAGAAGTCTTGAATATAT  
TGATCTTTCTCATAACCACTTTGTAGGGAGGATTCCAAAGTTTCTGGATGAACTTGTCTCCTTGAAGTTCT  
TAAATTTGTCTTATAATGATTTGGAGGGTGAGGTACCTTTGAAAGGAGCTTTCAGAAACATGAGTGCTGT  
TTCACTTGTGGGAACAGTGAGCTCTGTGGGGGTATTCCAGAGTTCAAATGCCAAAGTGCAGCAACAA  
AGTAGCGTCAAGAAGACGAAGGTTATCTCATAGATTGATAATAGTAATGCTGGTTATTGGAGGATTATT  
GGCAGCAACAACAGTGGCCATTCTTATTTCTTGTGTGCTAGAAGAAAAAGAGGTCTACTTCATCAGA  
GAATTCATCGTTGGACGTGATCCCAAGAGTGACTTACAATAGTCTTTACAAAGAACTAATGGCTTCTCT  
ACGTCAAACATGATTGGTTCGGGTGCATTTAGCTTCGTGTACAGAGGCATTCTAGAGGAAAATGGAAAA  
TTTGTTGCCATAAAGGTGCTCAAACCTCAAGTTAGGGGAGCTTCTAAGAGCTTTCTTACTGAATGTGAAG  
CACTAAGGCATATCAAGCATAGAAACCTGGTAAAACCTTAACATCATGTTCAAGCATTGATTACCAAGG  
TAACGACTTCAAGGCTCTCATTTATGAATACATGGCCAATGGTAATTTGGCAAATTGGTTGCACAATAGA  
AGTACAGATGGTGAAGAAAATCATGAGCCTAAAACCTTGCACATGCTACAGAGACTCAATGTAATAATT  
GATGTGGCTTCTGCATTAGATTATCTTCATCATCAATCTGGAACGCCATTGACACATTGCGATATCAAACC  
AAATAATGTGCTTTTGGATGAAGATTTTGTGCTCATTTAGGTGACTTTGGACTGGCAAGGTTTCTGCCT  
GATGCTGCAAATCTGCTCTCCTTAAGCCAATCAGCCAGCTCTCTCAATATAAGAGGAACTATTGGATATG  
TTCCACCTGGTAATTAACCTTCTCCCTCTCTAAACATCATTTTATATTTATGAAGGTCTCTTACTTATCAA  
GTTTGTCAATTTATGTATGTGCAGAATATGCTACAGGTAATACGTTTTCGACCTATGGAGATGTCTATAG  
TTATGGAATTCTACTTTTGGAAACATTTACTGGAAGAAGTCCAACCTGATGAGATTTTCAAGGATGGTCTA  
AACCTTCATGATTTTGTAAAGAGAGCCATACCTGAGCAAGCGAAAGATGTTTCTGATCCTAAACTTGTCT  
ATGATGAAACGGGCAGACTGATCAGCAACAATAAAACAATCGAGTGCCTCACATTGATTTTTCGAGTTG  
GGATTGCTTGTTCAGTGGACTCTGCAAAGATCGCATGGACATTGCCAATGTTGTTAATGAACTGAATGT  
AATCAAAGATGCCTTCTGAGGAACTAGCAATATTGGCTATGAAGTTTTTGAAGTTTTCATAATAAAGATAC  
TACTTGTATAAGTTATATTCTCACTATCCACTTTTCCCTTCCCTTTTCTGCTTCTTCTTATGTAATGGAAA  
>M6-PGSC0003DMG400023329 M6 LRR-RLK  
CAAATGTTCTATTCTACTTTCTTGAATGCTTTGTGTGTCCCACTTTACACATTACACTAAACCCCCCAA

TTGCCATTTGAATCTCACCTATTCATCATCATGTCATCAATTATCTACTATTA CTTCCTTGTATATCTTAA  
TCATTCATTCTACTCTTCAAATCCATGGCTATTAGTCCAGGTCAC TTTTCTACTAACTTGTATATTTACAT  
ATTACTATTTGCATATATACATGTTGTGAACCTCATATAGTCGACCTCAACTTGTTAGGGACTGAGGCGT  
AGTAGTTCTTATACATGTTGTGAAGCTTATATAGTCGACCTCAACTTGTCAGTGACTGAGGCGTAGTAGT  
TGTTATACATGTTGTAAAGCTTATATAGTCGACCTCAACCTGTCAGGGACTAGTATTTGTTATACATGTTG  
TGAAGCTTATATAGTCGACCTCAACTTGTTAGGGACTGAAGCATGGTAGTTGTTATACATGTTGTGAAGC  
TTATATAGTCGACCTCAACTTGTTAGGGACTGAAGCATGGTAGTTGTTATACATGTTGTGAAGCTTATAT  
AGTCGACCTCAACTTGTTAGGGACTGAGGCGTAGTAGTTATTATACATGCTTTTATATAATTTTCTTGATA  
TTTTTTGGGTATATTGAACTAAGTTAATTTTGCCTTAGCTTTTAAATGAACTTATGTTAAGGGGATTCAA  
CAGTCTAATATATATATATGTGCCTATCATTTAACATACGTATGTCATGTATTTTTGTACCTTTGTCGTCC  
CTCAACCCCTCTCCAATCTTTTCTATCTATCATTAGAAGTAGGACGAGTAATATTCCGGTGAAGGGAATA  
AAAATTAGTTTAAAGCCTTTATGTTTTGATGATCATTTGAGAAATTA ACTCCTAGGAAGACTAGTCACTCA  
GAAATAGTCATTTTGGTTCTTTTGTCTTGCTGAGTATGAGCATGAAATATATTGGTAGCACAAAAAGAA  
GTGGATACTTCTTGAAC TAATTGGTAATATTTTCATTGTGTTGCAGCTACAAGGCCTATTTCTTTGACATC  
ATATTCTCCGACCTAGACTTGTTTGAGATTGAGGCGTAATTGTTGTTGTTATATAGAGTATCGGAAACAA  
GGAGAAGGATCAACTGGAAGCTCCTCTGGTTGATAGAGAAAATTCAATGTTTACAGCCTTTTCGTTCC  
GGAATTTTCACTTGAAC TTGCTGATATTCCTACTTTTATGCAGCAATGGTCTCTCCTCAAATGATTATGAT  
GTTGAAGGTATGGAGTTATAGGTTTTGGTTACTGTACCTGTGAAAATTT CATATGCTTGCAAATAATGT  
GCTAATAAAATCGCGATAACTGTTATTCTTTATTGAAATCATATATCATATATACATCATTT CAGGTCATG  
CTTTAATTGAGTTGCTGAGGGCTCTGAATGATTCACACAATAGAATCAAAGATTGGAACATTGATTTTGT  
GACTCCATGTTTCAGTTGGTCTCATGTTACATGTAAAAATGGAAATGTCATATCCCTGTAAGACTAATTCT  
TTCCTTTCTGTTATAAGTAAATCAAGTAGATTCATATAGTCGACCTCAACTTGTTTAGGACTGAGACATAA  
CTATTGTTGTAATCAAACAGGA ACTTAGCTTCTAATGGATTCTCAGGAACACTTTACCGTTCGATAACCA  
AATTGAAATTTTTGGTTAGCTTGTAAGTATACTGCACTTTGTATTA AATTAGAGTTGCTGGTAAAAATCA  
CACCTATAGTATCCCCTTTTTTCGAGTTCCCTATCACCAACTATTTATCAAAAACACACCTCAACTATTAGT  
TGTTCCCTTTTTCTACCTGAGATATCACCATCGTTCAGGCAGGAAAAATGAAATGTTGCTATTACTCTAT  
GTCTCGCGAACCTAGGAAAATTTGTGAAGTGTTGCTAAAATGTTAATGGA ACTGTGCAGGGATTTACA  
GAACAATGATCTATCTGGTTCCTTACCTGATTACCTTAGCAGCATGTCAAATCTACAAA ACTTGAATCTTG  
CAAACAATAATTTCAATGGCCCTATTCCACCAGATTGGGGTCAGCTCTACAA ACTTAAATATTTGTAAGT

ACTTGTTTTCTTTGTTTCTTTGTTCTCTCCGTTTTCTAAAATATCAAGGAATGTCACTCGGACTCTTCAA  
AATGATGACAGGTTTGTGTCAGGTCCTCCAAAAGCAGTGCATTTTTGGAGGATCCAACACGGGTGTGAC  
AACATTTTTGAGAGTCCTAGCAGACCTAACATAGCTCTTATTAATAGTTCTTGTAAACAAAGTCTTTCT  
ATGATATGTCCTTTTGTCTGCATCAGGGTCATGAGAGGAAATCACATAACTGGAAGTGTCCAAATTCA  
CTTATAACATCACAGGCTTAAAAGAACTGTAAGAACTATGTTTACCTTACGGGCGTAATTTACTGTTCCG  
TTTGAAATTTTCGGTTGGATTGAGGCCTATGTTGCTCAGACTCTTCAAAGTACTATAGTATGTGTGTCG  
GACCCTCAAAGGTACCATTTTGAAAGTCCGAGCAACATAGAATGAGTTGTTATTTGATGTTTTCTT  
TATTTCTGGTTGTAGTTCTTACTTGCTTTAATTCTTACAGGGACCTGTCCTCCAATGATCTGACTGGAGG  
TATCCCACTGCAGTTGTTTTCAATACCAACATACAGGTAATGTCATCATTTATTCTTCTTTCTTGCCAACTT  
GTTTAGCCTTTCCATTTTATGATGTTGAGCTCTCAAAAAGGGCTACTCATGCACAAAACAGACATGGGGGTG  
TGACATAGGCAGTCTACCCTGGTGCTAGCATCAGTAGCTTATTCCACAGCTCAACCTCATGGCCTATAGG  
TCATATGGAGACAACCTTACGTTGCTCCAAGGCTCCCTCAACTGATAAAAAAATGAATTTGTTACTC  
ATGACTGCATTAATCAACTTGAAGCTATTATTATTGACTTAGTTGCTTAACTATGTTGTTTTAACAATCATT  
CTATACGTCGTAATCAGTTTTTCAGGAACTCATCTTGCTTGTTGGCAATAGATTTTCAAGAAACCCTGTGTTTC  
TAGTTCCTCTGCTCCAGGTTAATAGTCTTGTCCCAATGCATCTTTTAGTTCTTAAATCTTAGCCAACCAA  
TGATTATTGCTCAAGTGATATTTTTTTCAACAGCTTCTAGCAGAAGACCAAACCTTGAGGTTGCTATTACT  
GGTGCAAGTTGTGGTGCATTCCTTCTTCTTAGTTGGGGCTATCATCACATATCGTTGTAATTATAAACG  
TAAACTCAAACAAGATCAATTTTTTATGATGTGGAAGGTATATGCTTTACTCCTATTTCTTCAACAGAAAGAG  
TACATGGTTTTTCTGTACTGAACAAATTTCACTTCAAATGCCATCTACTCATATGGCATTTTAGGTGACATT  
GAGCGCAACATTTTATTAGGACAATAAGAAGATTCTCATGGCGGAACTTCAAGATTGCAACAGACAAT  
TTCAGTGAAAGCAACATTATAGGACAAGGAGGTTTTGGTAAAGTTTACAAGGGCTATCTTTTCAAGACAAC  
ACAAAAGTGGCAGTGAAAAGACTCACTGATTACCACAATCCTGGTGGAGAGGCTGCATTTCTAAGGGAA  
GTGCAGCTGATTAGTGTTCAGTTCATCGAAATCTCCTACGTTTGATCGGGTTCTGTACAACCTCTTCTGA  
GAGAATTCTTGTTTATCCATTTATGCAGAATCTTAGTGTTCATATCGGTTAAGAGGTATGCCCCCTATCA  
CTCAACCACTTTTTTGTACTTCTGATACTATTAGTCTGTTAAGTCTGTGTTTGTGTTTTTCTCTCTT  
TTCGACAGATTTAAAACCTGGAGAGAAAGCTCTGGATTGGCCAACGAGGAGACGGATAGCATTGGAG  
CAGCACATGGTCTAGAGTACCTACATGAGCATTGTGATCCTAAGATCATTCATAGAGATCTAAAAGCAG  
CAAACATCCTCCTAGATGATAACTTTGAACCTGTTCTTGGAGATTTTGGACTAGCAAAGCTAGTTGATAC  
AAAAGTACTCATATTACAACCTCAAGTTCGCGGAACAATGGGCCACATTGCTCCAGAATACTTGTCTACC



GGAAAATCATCTGAGAAAACAGATGTATTTGGATATGGTATTACTCTTTTAGAACTTGTAACAGGGCAAC  
GTGCAATTGATTTTTCGCGTCTTGAAGAAGAGGAAGATGTCTTGCTACTGGATCATGTAAGTCCCTACTT  
CCACACTTTCCAATTTTTGAAGAGTCATAACGGATACCTTTTTACTTCTACAGATCAAGAACTACTAAGA  
GAGAAAAGGCTAGGTGACATTGTGGATGGAAACATGAAAACCTTATGAACCCAAAGAAGTTGAGACAAT  
CCTTCAAGTTGCATTGCTTTCACCCAAAGTTCACCTGAGGAACGTCCGAAAATGGCACAAGTAATCACC  
ATGCTAAAGGGTGTAGGTTTAGCTGAAAAATGGGCAGAGTGGGAGCAACTTGAAGAAGTAAGAATTCA  
ACAATTTTCGCTCATGTGCGGACAGTTTATGTGGGCTGAAGACTCAACACATGATCAAGAAGCTATACAA  
TTGTCTCAAGCAAGATAAACAAAAAGAAGATGCAGAGAAATGTATGCATAAGTACTTCTGCAATAAAAT  
TTAAGAGTAGTTTTAGCTTCTGCTGCAGCTATAGCTAGTTATGTAACATGTAAGAGTAATTTTATCATACA  
TCTAGCTAGTTATGTATCATGTAAGAGTAATTTTATCATATACGTATATAAGGCACTAAGGTGTCTTGTTT  
AATTTTACAATGTATATATATATAGAGAGATAGAGAGACCATCTATTACTGAATTTACTCGATTCTAGCT  
CGTTGTAATAAATTCCTGCTCGATATTTATATTTAAGTTCC

>M6-PGSC0003DMG400023550 M6 LRR-RLK

ATGTTGAGATATCTAGAAGTGGGTAACAATCCGTTGAGTGGCGTTCTACCAAATTCTGTTGGGAATCTCT  
CATCTACTATTGAAAAGATTTATATAGGAGATGCACACATCAATGGCCTCATCCCCACAAGTATAGGCAA  
CATGAGCGGTCTTACAGCCCTAAGCCTTGGAGGAAACAACCTTGGCAGGGAATATTCCTTCTGAGATTGG  
TAAGCTTAAACAACCTCCAAGGGCTGGCTCTATATAACAATAAATTGCAGGGACGTATTCCAGAGGTGGT  
ATGCCATTTATCGAATTTGGTTGGCTTATTACTGGATGGTAATGAGCTCTGTGGATTAATTCCAGAATGC  
TTTGAAAATCTTAGCATGCTACAAGCGCTTTATTTGGATTCTAATAAATTTTCATCAAATTTCCGTTGAG  
CCTTTGGAAGATGAGTGGTCTTCTCTATCTAAGTGTGTCACGAAATTCAATAGAGGGAGAACTTCCATCA  
GATATTGGAGGACTGAAAGCCATTGTAGAACTATATCTTTACAATAACCACTTTTCAGGTGTGATACCAA  
CCAGATTGGGGGAACTCCAAAACCTGCAGCATCTTGACCTATCCAACAATTCATTTTTTGCCAAATTCC  
ATTATCCTTTGCCAACTTGATAAGCTTGAATTCTTGAATTTGTCTTTAAATGCCTTGTCCGGTACTATTCC  
TAAATCTTTGGAAAACTCTCATACCTTAAAAGCATTAAATGTTTCATTTAATGATTTAGAAGGTGAAATAC  
CAAGTGGTGGCGTGTGTTGCAACTTCCACTGTGCAATCATTTCTTGGGAACAAAGGTCTTTGCGGAATGCA  
CATATTGGAGATTCCACTTGTGCTATCACTAATCATGGAAAACAATCAAAGCTTAAGGAGGTTGTGCTA  
AAAATTGTTACTCCAGTGGTTATTGCATCCTTCTGATATTCTTGTTGTTTCAATTTGGATAATGAAACG  
ACAGAAGAAAGGGAAGTCCAAAGATATTGAAAAGGTATTGGAGATCGGGACTCATCAATTAGTTTCTTA  
TCACGAGATTCAACAAGCAACAAATAATTTTGATGAATCCAATTTAATTGGTGAGGGAAGCTCTGGCTCT

GTGTACAAAGGCACATTGTTTGGTGGAAGTGCAGTGGCCATTAAGGTTCTGGATTTGGAAAACGAGCAA  
GTATGCAAGAGGTTTGATACCGAATGTGAAGTGATGAGAAATGTTAGACACAGAAATCTTGT

>M6-PGSC0003DMG400023554 M6 LRR-RLK

GGTTCATTCTGTAGGACTATTTAATATCTCGTCGCTACTTGCCATAAATCTGCTATAACAATAAACTTTCC  
GGTCCTCTCTTGTAGATGAAGGAATTTTTTGTCAAATCTGAAGTTTCTAAGGATATCTCGCAACCAGAT  
TTTAGGATGCATTCTTCCAACATATGCCAACTCAGAGAGCTCAAAGTTTTGTCCATATCTTTCAACAACA  
TAATTGGAGACAAACCCAAAAATATTGATTGTTTATCCAATCTCCAGGAGTTTTATAATCGTCATAATTCA  
ATAAAAGGGACTATTCCCACTTCATTGGGAAATATTTCAACTCTGCAATATCTTTATTCTGGAAACAATCT  
CATGGTGGGGCCAATTCCTCCAGAATTAGGGAAGCTATCAAATTTGAGGCAATTAATTTTTTCCAATAAT  
TCTAATCTTATTGGTCAAATTCAGAGGCTATTTTCAACATATCTTCTTTGGAATTAATCAATTTGAGTTTC  
AATACCCTGTCGGGTAGAATTCCAACCACTACAGGTCTTCATCTTCCGAACCTTAAAGTACTTGACTTGG  
GAGTCAATCAGCTTGAAGGGGAAATTCATTGTTCATAACAAATGCTTCCAAGCTTCAGATACTGTGCGT  
AGAACATAACTCTCTCTCGGGAGCTATTCCTACTAATTTGGGAAATCTTCATGAGCTGCAATCACTCTTAC  
TACATACTAATCAACTTACCAATGAACCAAGAGAGCATGAGTTGAAATCTTCAATTCGTTGGCGAACTG  
TAGGATGTTGAGATATCTAGAAGTGGGTAACAATCCGTTGAGTGGCGTTCTACCAAATTCTGTTGGGAA  
TCTCTCATCTACTATTGAAAAGATTTATATAGGAGATGCACACATCAATGGCCTCATCCCCACAAGTATA  
GGCAACATGAGCGGTCTTACAGCCCTAAGCCTTGGAGGAAACAACCTTGGCAGGGAATATTCCTTCTGAG  
ATTGGTAAGCTTAAACAACCTCCAAGGGCTGGCTCTATATAACAATAAATTGCAGGGACGTATTCCAGAG  
GTGGTATGCCATTTATCGAATTTGGTTGGCTTATTACTGGATGGTAATGAGCTCTGTGGATTAATTCCAG  
AATGCTTTGGAAATCTTAGCATGCTACAAGCGCTTATTTGGATTCTAATAAATTTTCATCAAAATTTCCG  
TTGAGCCTTTGGAAGATGAGTGGTCTTCTATCTAAGTGTGTACGAAATTCAATAGAGGGGAGAACTTC  
CATCAGATATTGGAGGACTGAAAGCCATTGTAGAACTATATCTTTACAATAACCACTTTTCAGGTGTGAT  
ACCAACCAGATTGGGGGAACTCCAAAACCTGCAGCATCTTGACCTATCCAACAATTCATTTTTTGGCCAA  
ATTCCATTATCCTTTGCCAACTTGATAAGCTTGGAATTCTTGAATTTGTCTTTAAATGCCTTGTCCGGTACT  
ATTCTAAATCTTTGGAAAACTCTCATACCTTAAAAGCATTAAATGTTTCATTTAATGATTTAGAAGGTGA  
AATACCAAGTGGTGGCGTGTGTTGCAACTTCCACTGTGCAATCATTTCTTGGGAACAAAGGTCTTTGCGGA  
ATGCACATATTGGAGATTCTACTTGTGCTATCACTAATCATGGAAAACAATCAAAGCTTAAGGAGGTTG  
TGCTAAAAATTGTTACTCCAGTGGTTATTGCATCCTTTCTGATATTCTTGTTGTTTCAATTTGGATAATGA  
AACGACAGAAGAAAGGGAAGTCCAAGATATTGAAAAGGTATTGGAGATCGGGACTCATCAATTAGTT

TCTTATCACGAGATTCAACAAGCAACAATAATTTTGATGAATCCAATTTAATTGGTGAGGGAAGCTCTG  
GCTCTGTGTACAAAGGCACATTGTTTGGTGGAAGTGCAGTGGCCATTAAGGTTCTGGATTTGGAAAACG  
AGCAAGTATGCAAGAGGTTTGATACCGAATGTGAAGTGATGAGAAATGTTAGACACAGAAAT

>M6-PGSC0003DMG400023587 M6 LRR-RLK

ATGGAGAAGCACATTTTCTTATTGATTCTTCTACTTGTAAATCAATATTACTCTGTTGCTTCCTCAAATGAG  
ACTGACCAACAAGCTCTATTACTTTTCCAAAATCTTATTACAAGTCCTAATCATTTTTTGGCAAATAATTGG  
ACCAAAAATACTTCTTTTTGCACTTGGTTTGGTGTCACTTGCAGTCCAAAAAGGCTAAGGGTTGTAGCCT  
TGACTCTTCCTAATTTGCAACTTCAAGGCACAATTTCTCCATCTTTGGCCAATTTGTCCTTCCTCAGTGTC  
TCAATCTCGAGAACAACAGCTTCCACGGTGGCATCCCTTATGGCATTGGCCACATGCCTCGCTTGCGAGT  
GATTGATGTTAAAAACAATCAGCTCAATGGAAGTATACCAACAAGTCTATTTCAAACCGAAGAGTTCAA  
GTAATTTCAATGGGTTTCAATGAACTCAGTGGTGAATGTGGAGAGGGCCATGGTATGTACCTGAACTC  
AGAGTCTTAAATCTCAGGAACAATAGCCTCACGGGTATAATCCCTCCTTCGGTTGGAAATGCCACAAATT  
TGTTGAACTCAGTTTGTGGGAATAGATTAGCGGCAACATTCCAAAGGAAATTGGTAATCTGAGCCA  
ACTTGTACAAATGTCCTGACTGATAATCAGTTAACAGTTCCATTCCCGTAGAACTGTTAATATCTCGT  
CACTACTGTCCATACATCTGCGATAACAATAGCCTTTCCGGCCCTCTCTTGCTTGATCAAGGGAATATTGTA  
TCAAATCTGGAGCATTAAAGTATTTCTTTCAACCAATTTCTGGTTGCATTCTTTCAACATATGCCAACTC  
ACAGAGCTCAAAGTATTGTCCATAGCTTACAACAACATAACTGGAGAAATACCCAGAAATATTGATTGTT  
TATCCAAACTCGAGATGTTTCTTATTGGTGTTAATCCAATAAAAGGACTATCCCCACTTCATTGGGAAAT  
ATTTCCACTCTGCAATATCTTTATTGTGGAGAAAATCACATAGTAGGGAAAATTCCTCCGGAATTAGGGA  
AGCTATCAAAGTTGAGGCAATTAGTCATTTTGGATAATTCTAATCTTATTGGTCAAATTCAGAGGCTATT  
TTCAACATATCTTCTTTGGAAGTGATTGATTTAGTTTCAATAACCTCTTGGGGAGAATTCCAACAACACTAC  
AGGTCTTCATCTTCCAAACGTTAAGGAACTTAGCTTGGCAGTCAATCAGCTGGAAGGGGAAATTCATT  
GTTCATAACAATGCTTCCAAGCTTGAATTACTGGAGCTAAATGAAAACCTTCTGACAGGAACTATTCTT  
ACTAATTTGGGAAATCTTCGTGAGCTGCGAGCACTGCTCCTACATACTAATCAACTAACCAATGAACCAA  
GAGAGCGTGAGTTTTTATTCTTTAATTCATTGGCTGACTGTAAGATGTTGAAATATCTACTAGTGGGTTT  
CAATCTGTTGAATGGTGTCTGCCAAATCTATTGGGAATCTTTCATCTACTATTCAAACCTTTTATATAG  
GACATGCACACATCAACGGCCTCATCCCCACAGGTATAAGCAACATGAGCGGTCTAATGACCCTAGACTT  
TCAAGGAAACAACCTTGGCAGGGAGTATTCCTCCTGAGATTGGTAAGCTTAAACAACCTCCAGGGGCTGTA  
TCTAACTAACAATAAATTGCAGGGACATGTTCCAGAGGCGGTATGCCATTTATCTAATTTGGTTCTATTAT

TTCTGAATGGTAATGAGCTCTCTGGATTAATTCCAGAATGCTTAGGAAATCTTAGCATGCTACAAATGCT  
TAATTTGGGTTCTAATAAATTTTCATCAAAATTTCCGTTGCTCCTTTGGAAAATGAGTGGTCTTCTCTATCT  
AGACATGTCACAAAATTC AATAGAGGGAGAAGTTCCAACAGATATTGGAGGACTGAAAGCCATTGTAG  
CTCTAAATCTTTCCGGTAACCACTTTTCAGGCATGATACCAACCAGATTGGGAGA AACTCTAAACCTGCA  
GTATCTTGACCTATCAAACAATTCATTTTTTGGCCAAATTCATTATCCTTTGCCAACTTGATAAGCCTGGA  
AATCTTGAATTTGTCTTTAAATTCCTTGT CAGGTA CTATTCTTAAGTCTTTGGAAAACTTTCATACCTTAA  
AAACATTAATGTTTCATTTAATGATTTAGAAGGTGAAATACCGAGTGGTGGCGTGTGTTGCAAATTCCT  
CTGCAATCATTCTCGAGAACAAGGTCTATGTGGAATGCACATATTGGAGATTCTGCTTGCCTATCA  
ATAATCCTGGAAAACAATCAAAGCTTAAGAAGGTTCTGCTAAAAATTGTTACTCCAGTGGTTATATCATC  
CTTTCTGATATTCTTGTGGTTTTCAATTTTGATATTGATACGACAGAAGAAAGGAAAGTCGAAAGATGTT  
GAAAAGGTACTGGAGATCGGGACTCATCAATTAGTTTCTTATCACGAGATTCAAAGAGCAACAAATAAT  
TTTGATGAATCCAATTTAATTGGTGAGGGAAGCTCTGGCTCTGTGTACAAAGGCACATTGTTTGGGGGA  
ACTGCAGTGGCCATTAAGGTTCTGGATTTGGAAATTGAGCAAGTATGCAAAGGTTTGATAACCGAATGC  
AAAGTGATGAGAAATGTTAGACACAGAAATCTTGTTTCAGTGATTACTACTTGTCTAGTACTATATAA  
GAGCCTTTGTTCTGCAATTTATGCCAACGGAAGTCTTGAGAATTGGTTGTACAGAGAAGATCTCCACTT  
AAACCTTCATCAAAGAGTCACTGTAATGCTTGATGCAGCTATGGCAGTTGAATATCTACATCATGGTCAT  
GTCACTCCAATAGTTCATTGCGACCTAAAGCCAGCCAACATTCTTTTGGATGAAGATATGGTGGCTCATG  
TTGGTGATTTTGGAAATCTCTAAAATTTTAGCCATAAGCAAGTCCATGGCTTATACCGAGACGTTGGGCAC  
TCTTGGATATATTTACCAGGTATAAAAAATCTATTCTCTTTGATTTTCTTATCATTATTAAGCCTCTTC  
AAATTCTAGAAGTAAAAAAGCAGGTCTTTAATTATGCATAACTATTGTTGTATTTCAATTGAGTAACTTT  
TCTTCAATCCTTTTCTAAGAATATGGCTCGGAGGGAATAGTGTCTGCTAGTGGTGATGTTTATAGCTACG  
GCATCATGTTGATGGAGGTTTTGACCAAAGAAGGCCAAGAGATGAAGATATATGCAATGAAAATCTTG  
ACTTGAGGAAATGGATAACACAATCATTTTCAGGGAGTATGATGGACATTGTGGATGCCAATCTTTTTTC  
TGAGGAAGAACAATCACTAGCAAAAGTGAAATGTGCATAGCCTCCATGATAGAATTGGCTTTAGACTG  
CACAAAGGAAATGCCAGAATCCAGAATAACCATGAAAGAAGTAGTGAAGAGGCTTAACAAAATCAACA  
ACAAATTTCTGGAAACATAG

>M6-PGSC0003DMG400023612 M6 LRR-RLK

ATGGTGGGGCCAATTCCTCCAGAATTAGGGAAGCTATCAAATTTGAGGCAATTAATTTTTTCCAATAATT  
CTAATCTTATTGGTCAAATTCAGAGGCTATTTTCAACATATCTTCTTTGGAATTAATCAATTTCAAGTTTCA

ATACCCTGTCGGGTAGAATTCCAACCACTACAGGTCTTCATCTTCCGAACCTTAAAGTACTTGACTTGGG  
AGTCAATCAGCTTGAAGGGGAAATTCCATTGTTTCATAACAAATGCTTCCAAGCTTCAGATACTGTCGCTA  
GAACATAACTCTCTCTCGGGAGCTATTCTACTAATTTGGGAAATCTTCATGAGCTGCAATCACTCTTACT  
ACATACTAATCAACTTACCAATGAACCAAGAGAGCATGAGTTGAAATTCTTCAATTCGTTGGCGAACTGT  
AGGATGTTGAGATATCTAGAAGTGGGTAACAATCCGTTGAGTGGCGTTCTACCAAATTCTGTTGGGAAT  
CTCTCATCTACTATTGAAAAGATTTATATAGGAGATGCACACATCAATGGCCTCATCCCCACAAGTATAG  
GCAACATGAGCGGTCTTACAGCCCTAAGCCTTGGAGGAAACAACCTTGGCAGGGAATATTCCTTCTGAGA  
TTGGTAAGCTTAAACAACCTCAAGGGCTGGCTCTATATAACAATAAATTGCAGGGACGTATTCCAGAGG  
TGGTATGCCATTTATCGAATTTGGTTGGCTTATTACTGGATGGTAATGAGCTCTGTGGATTAATTCCAGA  
ATGCTTTGGAAATCTTAGCATGCTACAAGCGCTTTATTTGGATTCTAATAAATTTTCATCAAAATTTCCGT  
GAGCCTTTGGAAGATGAGTGGTCTTCTCTATCTAAGTGTGTCACGAAATTCATAGAGGGGAGAACTCC  
ATCAGATATTGGAGGACTGAAAGCCATTGTAGAACTATATCTTTACAATAACCACTTTTCAGGTGTGATA  
CCAACCAGATTGGGGGAACTCCAAAACCTGCAGCATCTTGACCTATCCAACAATTCATTTTTTGGCCAAA  
TTCCATTATCCTTTGCCAACTTGATAAGCTTGGAAATTCTGAATTTGTCTTAAATGCCTTGCCGGTACTA  
TTCTAAATCTTTGGAAAACTCTCATACTTAAAAGCATTAAATGTTTCATTTAATGATTTAGAAGGTGAA  
ATACCAAGTGGTGGCGTGTTTGCAACTTCCACTGTGCAATCATTTCTTGGGAACAAAGGTCTTTGCGGAA  
TGCACATATTGGAGATTCTACTTGTGCTATCACTAATCATGGAAAACAATCAAAGCTTAAGGAGGTTGT  
GCTAAAAATTGTTACTCCAGTGGTTATTGCATCCTTTCTGATATTCTTGTTTCGTTTCAATTTGGATAATGAA  
ACGACAGAAGAAAGGGAAAGTCCAAAGATATTGAAAAGGTATTGGAGATCGGGACTCATCAATTAGTTT  
CTTATCACGAGATTCAACAAGCAACAATAAATTTGATGAATCCAATTTAATTGGTGAGGGAAGCTCTGG  
CTCTGTGTACAAAGGCACATTGTTTGGTGGAACTGCAGTGGCCATTAAGGTTCTGGATTTGGAAAACGA  
GCAAGTATGCAAGAGGTTTGTATACCGAATGTGAAGTGATGAGAAATGTTAGACACAGAAATCTTGTTTC  
AGTGATTACTACATGTTCTAGTGACTATATAAGAGCCTTTGTTCTGCAATTTATGCCCAATGGAAGTCTTG  
AGAATTGGCTGTACAAAGAAGATCGACACTTGAACCTTCATCAAAGAGTCACTGTAATGCTTGATGCAG  
CTATGGCAGTTGAATATCTACACCATGGTCATAACACTCCAATAGTTCATTGCGACCTGAAGCCAGCCAA  
CGTTCTTTTGGATGAAGATATGATGGCTCATGTTGGTGATTTTGGAAATATCTAAAATTTTAGCCATAAGC  
AAGTCCATGGCTTATACAGAGACATTGGGCACTCTTGATATATTGCACCAGGTAAAAGAAAATCTACTC  
TCATTGATTTTCTTATCATAATTAAGCCTCTCCAAGTTGTAGAAGTAAAAGAGAATTATTGTTGTATT  
TCAATTGAATTAACCTTTTTTTTAAATCCTTTTTTAAGAATATGGCTCGGATGGAATAGTGTCTGCTAGTGG

CGATGTTTATAGTTACGGCATCATGTTGATGGAGGTTTTGACGAAAAGAAGGCCAACAGATGAAGAGAT  
ATGCAATGAAAATCTTGACTTGAGGAAATGGATCACACAATCATTTTCAGGGAGTATGATGGACGTTGT  
GGATGCCAATCTTTTCTCCGAGGAAGAACAGATCACTTCAGAAAGTGAAATCTGCATTGCGTCCATGATA  
GAATTGGGTTTACTGACAAAGGAAATGCCAGAATCAAGAATAAGCATGAAAGAAGTAGTGAAGAG  
GCTTAACAAAATCAACAACACATTTCTGGAAACATAGTAGT

>M6-PGSC0003DMG400023614 M6 LRR-RLK

ATACCCAGAAATATTGATTGTTTATCCAAACTCGAGATGTTTCTTATTGGTGTTAATCCAATAAAAGGGA  
CTATCCCCACTTCATTGGGAAATATTTCCACTCTGCAATATCTTTATTGTGGAGAAAATCACATAGTAGGG  
AAAATTCCTCCGGAATTAGGGAAGCTATCAAAGTTGAGGCAATTAGTCATTTTGGATAATTCTAATCTTA  
TTGGTCAAATTCCAGAGGCTATTTTCAACATATCTTCTTTGGAAGTGATTGATTTTCAGTTTCAATAACCTCT  
TGGGGAGAATTCCAACAACACTACAGGTCTTCATCTTCCAAACGTTAAGGAACTTAGCTTGGCAGTCAATCA  
GCTGGAAGGGGAAATTCATTGTTTATAACAATGCTTCCAAGCTTGAATTACTGGAGCTAAATGAAAA  
CTTTCTGACAGGAACTATTCCTACTAATTTGGGAAATCTTCGTGAGCTGCGAGCACTGCTCCTACATACTA  
ATCAACTAACCAATGAACCAAGAGAGCGTGAGTTTTTATTCTTTAATTCATTGGCTGACTGTAAGATGTT  
GAAATATCTACTAGTGGGTTCCAATCTGTTGAATGGTGTCTGCCAAATTCTATTGGGAATCTTTCATCTA  
CTATTCAAAATTTTATATAGGACATGCACACATCAACGGCCTCATCCCCACAGGTATAAGCAACATGAG  
CGGTCTAATGACCCTAGACTTTCAAGGAAACAACCTTGGCAGGGAGTATTCTCTGAGATTGGTAAGCTT  
AAACAACCTCCAGGGGCTGTATCTAACTAACAATAAATTGCAGGGACATGTTCCAGAGGCGGTATGCCAT  
TTATCTAATTTGGTTCTATTATTTCTGAATGGTAATGAGCTCTCTGGATTAATTCCAGAATGCTTAGGAAA  
TCTTAGCATGCTACAAATGCTTAATTTGGGTTCTAATAAATTTTCATCAAAAATTTCCGTTGCTCCTTTGGAA  
AATGAGTGGTCTTCTCTATCTAGACATGTCACAAAATTCATAGAGGGGAGAAGTTCCAACAGATATTGG  
AGGACTGAAAGCCATTGTAGCTCTAAATCTTCCGGTAACCACTTTTCAGGCATGATACCAACCAGATTG  
GGAGAACTCCTAAACCTGCAGTATCTTGACCTATCAAACAATTCATTTTTTGGCCAAATTCATTATCCTTT  
GCCAACTTGATAAGCCTGGAAATCTTGAATTTGTCTTTAAATTCCTTGTCAGGTAATTCCTAAGTCTTT  
GGAAAACTTTCATACCTTAAAAACATTAATGTTTCATTTAATGATTTAGAAGGTGAAATACCGAGTGGT  
GGCGTGTGTTGCAAATTCCTCTGCAATCATTTCTCGAGAACAAGGTCTATGTGGAATGCACATATTGG  
AGATTCCTGCTTGCCTATCAATAATCCTGGAAAACAATCAAAGCTTAAGAAGGTTCTGCTAAAAATTGT  
TACTCCAGTGGTTATATCATCCTTTCTGATATTCTTGTGGTTTCAATTTTGATATTGATACGACAGAAGA  
AAGGAAAGTCGAAAGATGTTGAAAAGGTAAGTGGAGATCGGGACTCATCAATTAGTTTCTTATCACGAGA

TTCAAAGAGCAACAAATAATTTTGATGAATCCAATTTAATTGGTGAGGGAAGCTCTGGCTCTGTGTACAA  
AGGCACATTGTTTGGGGAACTGCAGTGGCCATTAAGGTTCTGGATTTGGAAATTGAGCAAGTATGCAA  
AAGGTTTGATACCGAATGCAAAGTGATGAGAAATGTTAGACACAGAAATCTTGTTTCAGTGATTACTACT  
TGTTCTAGTGACTIONATAAGAGCCTTTGTTCTGCAATTTATGCCCAACGGAAGTCTTGAGAATTGGTTGT  
ACAGAGAAGATCTCCACTTAAACCTTCATCAAAGAGTCACTGTAATGCTTGATGCAGCTATGGCAGTTGA  
ATATCTACATCATGGTCATGTCACTCCAATAGTTCATTGCGACCTAAAGCCAGCCAACATTCTTTTGGATG  
AAGATATGGTGGCTCATGTTGGTGATTTTGGAAATCTCTAAAATTTTAGCCATAAGCAAGTCCATGGCTTA  
TACCGAGACGTTGGGCACTCTTGATATATTTACCAGGTATAAAAAAATCTATTCTCTTTGATTTTCTCT  
TATCATTATTAAGCCTCTTCAAATTCTAGAAGTAAAAAAGCAGGTCTTTAATTATGCATAACTATTGTTG  
TATTTCAATTGAGTAACTTTTCTTCAATCCTTTTCTAAGAATATGGCTCGGAGGGAATAGTGTCTGCTAGT  
GGTGATGTTTATAGCTACGGCATCATGTTGATGGAGGTTTTGACCAAAGAAGGCCAAGAGATGAAGA  
TATATGCAATGAAAATCTTGACTTGAGGAAATGGATAACACAATCATTTTCAGGGAGTATGATGGACAT  
TGTGGATGCCAATCTTTTTTCTGAGGAAGAACAATCACTAGCAAAGTGAAATGTGCATAGCCTCCATG  
ATAGAATTGGCTTTAGACTGCACAAAGGAAATGCCAGAATCCAGAATAACCATGAAAGAAGTAGTGAA  
GAGGCTTAACAAAATCAACAACAATTTCTGGAAACATAG

>M6-PGSC0003DMG400023638 M6 LRR-RLK

ATGAAGAAGCACATTTTTATATTGACTCTTCTCTTCTAGTTCAATTTTCTCTATCAATTGCCTCCTCAAAT  
GAGACGGACCAAGAAGCTCTACTAGCTTTCCAAAATCTTATTACAAGTCCGAGTCATTTTTTGGCCAATA  
ATTGGACCAAAAATACTTCTTTTTGCTCTTGGTTTGGTGTCACTTGCAGTCCAAAAGGCCAAAGGGTACA  
AACCTTGACTCTTCTGATTTGCAACTTCAAGGCACAATTTCCCGTCTTTAGCTAATTTGTCCTTTCTCAG  
CGTGCTCACTCTCCGGAACAACAACCTTCCATGGCGGCATCCCTTACGAACTTGGCCACTTGCCTCGCTTG  
CGAGTGATTGATTTTCAAACAATCAACTCCAAGAAAGTATTCCAACAAGTCTATTTCAACACCAGAGAG  
TTCAAATCATTTCAATTGGCTTTCAATAAACTAGGTGGTGAAATGTGGAAAGGGCCATGGTATGTACCAG  
AACTCACAGTTTTAAATCTCAGGAACAATAGCCTCACAGGTATAATACCTCCTTCTATTGGAAATGCCACA  
AAGTTGCTGAACTTCAAGTTTGTATGGGAATAGAGTCCGGCGGGAACATTCAAAGGAAATCGGTAATCTC  
AGCCAACCTGAAATTTTTCTCCTTGTTCGATAATCAATTAACAGGTTCTATTCTGCAGCACTATTTAATATC  
TCCTCGCTTCTGTACATCTCTAGCATTCAATAGCCTTTCCGGCCCTTTCTTGCTTGATGAAGGGAACGT  
AGTGTCAAATCTAGAGTCATTAACATATCTAACAACCAATTTCTGGTTACATTCTTCCAACATTTGCC  
AACTCACAAAACCTCAAAGCGATGTCCATATCTTTCAACAAGATAACTGGAGGAATACCCAAAAATATTGG

TTGTTTATCCAATCTCGAGGAGCTTTATATTGGTGACAATCCAATAAAAGGGAATATTCCCGCATCATTG  
GGAAATATTTCCACTCTGCAAAATCTTTATTATGGAAGCAATCACTTGGAGGGGCCAATTCCTCCAGAAT  
TGGGGAAGCTATCAAATTTGAGGCAAATTAGCTTTGTCCAAAATAATAATCTTATAGGTCATATTCCAAA  
GGCTATATTTAATATATCTTCTTTGGAAATAATCGATTTAGTTACAATAACCTCTCGGGGAGAATTCCAA  
CCACTACAGGTCTTCATCTTCCAAACCTTAAAGAACCTTTCTTGGGAGTCAATAAGATCAAAGGGGAAAT  
TCCATTGTTTATCAATGCTTCCATGCTTGGAGATACTGGGGCTAACAGGAACTTCCTCACAGGCAAT  
ATTCTACCAATTTAGGAAATCTTCGTGACCTGCGACGCTTATACTTAGAGGGTAATCAACTTACCAATG  
AACCAAATAATCATGAGTTGCAATTCTTTAATTCTTTAGTGGACTGTAGGAAGCTGCAATATCTAACAGT  
GGGTAACAATCCATTAATGATATTTTGCCCGATACTATTGGAAATCTTTCATCTACTATTGAATCAATTC  
ACATGGGAAATGCACAAATCAGTGGCCTCACTCCACAGGTATAGGAACTTAAGCGGTCTAATGTCAC  
TAGCTTTTGTGGAAAACAACCTTGATGGGAACCATTCCGTCTGAAGTCAGTAAGCTTGAACATCTCCAAGG  
TCTGTATCTATATAGCAACAAATTGCAAGGGAATATTCCAGAGGTAGTTTGTCAATTTACCTTATTTGGTTA  
CATTATCTTTGCATGTTAATGAGCTCTCTGGGGTGATCCCAAATGTTTAGAAAATCTTACCACGCTACGA  
GTTCTTTTATTGAGTTCTAACAAATTTTCATCAAAGCTTCTTTGAGTCTTTGGAAGATGAGTGGACTTCT  
CTATCTTTTTCATGTCACGAAATCTATAGAGGGAGAAGTTCCACAGGACATTGGAGGAATGAAGGCCAT  
TGTAAAACTAGATCTTTCTGGTAACCACTTTTCCGGCATGATACCAAGCCAATTGGGGGACCTCCAAAAC  
ATGAAAGTTCTTGACCTGTCAAACAATTCATTTTCAGGCTCAATTCCTTATCCATTGCCAATTTGATAAG  
TCTAGAATACTTGAAATTGTCTTTCAAAGCATTGTCAGGTAATTCCTAAGTCTTTGGAAAAGCTTTTCAT  
ACCTTAAAAGCATCAATGTCTCATTTAATGATTTAGATGGTGAGATACCTAGTGATGGTGTGTTTTCAA  
TTCCACTTTGCAATCATTCTTTGGGAACAAAGGTCTATGTGGAGTAAACATATTGGAGATTCTTGCTTGT  
GCTATCACTAATCCTAGAAAACAATCAAAGACTAAGGAGCTTGTGCTGAAAATTGTTATTCCAGTGGTTA  
CTTCATCCTTTCTGATATTATTGGTTGTGTCAGCTTGGATAATAATGAAACAAAAGATGAAAGGAAAGTC  
CAAAGAAGTGGAAAAGGTACCAGAGATCAGGACTTATCAATTGGTTTCTTATCATGAAATTCAACGAGC  
AACAAAAAATTTTGATGGATCCAATTTAATTGGTACGGGAGGTTCTGGCTCTGTGTACAAAGGTACATTA  
TCTAGTGGAACTGTGGTGGCAATAAAGGTTCTCGATTTGCAAAATGAGGAAGTATGCAAGAGGTTTGAT  
ACTGAATGTGAAGTGTGAGAAATGTTAGGCACAGAAACCTCATTTTCAGTGATTACTACTTGTCTAGTG  
AATACATAAGAGCCTTTGTTCTACAGTATATGCCCAATGGAAGTCTTGATAATTGGTTGTACAAAGAAGA  
TTGCCACTTGAACCTTCTTCAAAGAGTCAACATAATGCTTGTGTTGGCTGTGGCAATTGAATATCTACAC  
CACGGTCATGATACTCCAATAGTTCATTGCGACCTAAAGCCAGCCAACATTCTTTTGGATGAAGAAATGG



TGGCACATGTTGGTGATTTTGGCATCTCTAAAATATTAGCTGTAAGCAAGTCCATGGTACATACTGAGAC  
ATTAGGCACTTTTGGTTACATTGCACCAGGTACGTACACTAGTTTCGTTCTTTTCACTTATCATTAAACCT  
TTCTCTTATCAGAACTAAGCTCTCCGAATTCTGGAATAACAGAAACCAAGTCTTTCATTGTACAAAAC  
AATTATTATCTCCGATTGTAATTTATTTTTCATTTTCATTCTTCTAAAGAATATGGCTTGGAAAGGAGTAGT  
GTCCATTAGTGGTGATGTTTACAGCTATGGCATCATGATGATGGAGGTAATGACAAAAAGAAGACCAAC  
TGAAGACGAGATATTCAACGAAAATCTTGGCTTGAGGCAGTGGATAAGACGAGCATTCCCAGGACAAT  
TATGGAAGTCGTAGATGCCAATCTTTTCAAGAGGAAGAATCTGTCAATTTAAAAGTGAAATATGCATA  
GCCTCCATGATGGAATTGGCTTTGGATTGCACAAAGGAAATGTCAGAGACAAGGATAACTATGAGAGA  
CGTAGTCAAGAGGCTTAACAAAATCAAAAACACATTTTATAGGAACATAG

>M6-PGSC0003DMG400023639 M6 LRR-RLK

GGAGAAGCACATTTTTTTATTGACTCTCCTCTTCTAGTTCAATTTTCTATATCTTTTGCTCCTCAAATGA  
GACAGACAAAGAAGCTCTATTAGCTTCCAAAATCTTATTACAAGTCCTAGTCATTTTTTGGCCAATAATT  
GGACCAAAAATACTTCTTTTTATTCTTGGTTTGGTGTCACTTGCAGTTCAAAAACGCAAAGGGTTGTGGC  
CTTGGCTCTTCTAATTTGCAACTTCAAGGCACAATATCCCCGTCTTTGGCCAATTTGTCCTTTCTCAGAGA  
GCTCAATCTCGAGAATAACTTATTCCATGGTGGCATCCTATACAGACTTGGCCACTTGCCTCGCTTGCGA  
GTGATTAATGTTTCGAAACAATCAGCTAGAAGGAAGTATTCCAACAAGTCTATTTCAACACCAGAGAGTTC  
AAATCATTTTCATTGGCTTACAATAAACTCAGTGGTGAAATGTGGAAAGGGCCATGGTATGTACCCGAAC  
TCAGAGTCCTAAGTCTCAGGAATAATAGCCTCACAGGTATAATCCCTTCTTCTGTTGGAAATGCCACAAA  
GTTGCTGAACTTCAAGTTTGTCTGGGAATAGAATCAATGGTATCATTCCAAGTGGTAATCTTAGC  
CAACTTATAGAGTTGCATTTGTTCAATAATCAATTAGCAGTTCCATTCCCGCAACACTGTTTAATATTTT  
GTCGCTAATTAGAGCATCTCTGGCAAGCAATAGCCTTCTGGTCTCTTACTTGATGAAGGGAATATT  
GTGTCAAATCTGAAGTATCTAAGTATATCTAAGAACCAAATTTCTGGTTGCATTCCTTCTAACATATGCCA  
ACTCACAGAGCTCAAATTTTGTCCATATCTTATAACAATATGATTGGAAACATACCCAGAAATATTGGTT  
GTTTATCCAAAATCGAGGAGTTTTATATTGGAAATAATCCAATAACAGGGACTATTCCCACTTCATTGGG  
TAATATTTCCACTCTGCGGAATCTTTATTGTGGAACAGTCGCATAGTGGGGCAAATTCCAAAGGATATT  
TTTAACCTATCTTCTTTGGAAATGATTGATTGCAGTTACAGTAGCCTCTCAGGTAGAATTCACACATC  
AGGTCTTCATGTTTCAGAACCTTAAAGAACTTTTCTTGGGACACAATCGGCTCGAAGGGGAAATTCATTG  
TTCATAACAAATGCCTCCAAGCTTGAGAGATTGGGGCTAGAAAATAACTTTCTCACTGGCACTATTCCTA  
CTAATTTGGGGAATCTCCGTGAGCTGCAAGAAGTTCCTACATGATAATCAACTTACCAATGAACCAAG

AGAGCATGAGTTGCAATTCTTCAATTCTTCGGCGGACTGTAGGATGTTGCGATATCTACAAGTGGGTCC  
AATACGTTGAATGGCATTCTGCCAATTCTATTGGGAATCTTTCATATAGCAGATGCACACATCAATGGC  
CCCATCCCCAGGGGTGTACGCAACATGAGTGGTCTAATAGCCCTAAGCCTTGGAGAAAACAACCTGGCG  
GGAAGTATTCCTTCTGATGTTGTTAAGCTTGAACAACCTCCAAGGGTGTATCTACATAACAATAAATTGC  
AGGGACATATTCCAGAGGCGGTATGCAATTTATCTAATTTGGTTCAATTAAGTCTGGCTGGTAATGAGCT  
CTCTGGATTAATTCCAGAATGTTTAGGAAATCTTAGCAAGCTACAAGCCATTATATTGAGTTCTAACCAAT  
TTTCATCCAAGATTCTTTGAGCATTGGGAAGATGAGTGGTCTTCTCTATCTAATCATGTCACAAAATTCT  
ATAGAGGACTGAAGGCCATTGTAGGACCAGATCTTCTGGTAACCACTTTTCAGGCATGATACCAAGCC  
AATTGGGGGACCTCCAAAACATGAATACTCTTGACCTGTCGAACAATTCATTTTCAGGCTCAATTCCATTA  
TCCTTTGCCAACTTGATAAGTTTAGAATTCATGGATTTGTCTTTAAATGCGTTATCAGGTAATCCCAA  
GTCTTTGGAAAAGCTATTATACCTTAAAAGCATCAATGTCTCATTTAATGTTTTAGAAGGTGTAATACCGA  
GTGGTGGTGTGTTTCGCGAATTCCACTCTGCAATCATTCTTGGGAACAAAGGTCTATTTGGAATGCACAT  
ATTGGAGATTCCTGCTTGCTATCACTACAACCTGGGCAACGATTAAAGTCTAAGAAGCTTGTGCTTAAA  
ATTGTTATTCCAGTGGTTGCTGCTTCTTTCTGATATTTTGTCTTTATAGTTTGGATAATGAGACGACAG  
AAGAAAGCAAACCTCCAAAGACGTGGAAAAGGTACCAGATATCAGGACCTATCAATTGGTTACTTATCAT  
GAGATTCAACAAGCAACAATAATTTTGATAGATCCAATTTAATTGGTGCGGGAGGTTCTGGCTCTGTGT  
ACAAAGGTACATTATCTAGTGGAACCTGTGGTGGCAATAAAGGTACTCGATTTGCAAATGAGGAAGTAT  
GCAAGAGTTTTGATACTGAATGAAGTATGAGAAATGTTAGGCACAGAAACCTTATTTTCAGTGATTACT  
ACTTGTCTAGTGAATACATAAGAGCCTTTGTTCTGCAGTATATGCCCAATGGAAGTCTTGAGAGTTGGT  
TGTACAGAGAAGATCGCCACTTGAACCTTCTCAAAGAGTCACCATAATGCTTGATGTGGCTCTGGCAAT  
TGAATATCTACACCATGGTCATGAACTTTGATAGTTCATTGCGACCTAAAGCCAGCCAATGTTCTTTTGG  
ACGAAGAAATGGTGGCACATGTCGGTGATTTTGGGATCTCTAAAATACTAGCTGTAAGCAAGTCCATAG  
CACATACTGAGACATTAGGCACTCTTGGTTACATTGCACCAGGTACGTACACTAGTCTCATTCTTTTTCAC  
TTATCATTAACTTTTCTAATCAAATTAAGCTCTTTTCGATTTCTAGAAATATTTAAAATCAAGTCTTT  
GATTGTA AAAACAATTATTATCTTTGACTATAATTTATATAATTTTCATTCTTCTAAAGAATATGGCTTG  
GAAGGAAAAGTGTCCAGTAGTGGTGAAGTTTACAGCTATGGCATCATGATGATAGAGGTATTGACAAA  
AAGAAGACCAACTGATGACGAGATATTCAATGAAAATCTTGGCTTGAGACAGTGGATAAGACAATCATT  
TCCAAGACAATTATGGAAGTTGTGGATGTCAATTTTATTCATGAGGAAGAACATTTCAATTCAAAAGT  
GAAATATGCATAGGCTCCATGATGGAATTGGCTTTGGATTGCACAAAGGAAATGCCAGAGTCAAGGAT

AACAATGAGAGACGTAGTCAAGAGGCTTGACAAAATTAAGAACACATTTTTGGGAACATAGAAATTAGC  
ATCTTTTAAAGTGGTGTCTTTTTTAGTTGCAAGTTAATATGTTGATCAGCTTTTTCTGTTTAAATGGTTTA  
TAAGGAATGAAGTTCGAGGATTAATGGAGCAAGTTGGGATGGAGTACCAAATGAAATTTGGTG  
TAAGTTAGAGGGGCTATCTATGTATTTGACCTTGTGTGAATGTACG

>M6-PGSC0003DMG400023643 M6 LRR-RLK

ATGGAGAAGCACATTTTCTTATTGATACTTCTTTTTAGTTCAATTCGTATATCAATTGCTTCCTCAAAT  
GATACTGACCAACAAGCCCTACTAGCTTTCCAAAATCTTATTACAAGTCCCAATCAATTTTTGGCTAATAA  
TTGGACCAAGAATGCATCTTTTTGCTCTTGGTTTGGTGTACGTGCAGTACAAGAAGGCTAAGGGTTGT  
GGCCTTGGCTCTTCCTAATTTGCAACTTCAAGGCACAATTTCCCATCTTTGGCCAATTTGTCCTTTCTCAG  
AGAGCTCAATCTCGAGAACAACCTTATTCAATGGGGGCATCCCTTACGGACTTGGCCAGTTGCCTCACTTG  
AGAGTCATTGATTTTCAAACAATCAGCTCCAAGGAAGTATTCCAACAAGTCTATTTCAACACCAGAGAG  
TTGAATCATTTCATTGGCTTTCAATGAACTCAGTGGTGAAATGTGGAAAGGGCCATGGCATGTACCAG  
AACTCAAAGTCTTAGATCTCGGAACAATAGCCTCACGGGTATAATCCCTCCTTATGTTGGTAATGCCAC  
AAAGTTGATGAACTTCGATTTGTCTGGGAGTAGAATCAATGGTACCATTCCAATGGAAATTGGTAATTTG  
AGCCAACCTGCATCTTTGTCCTTGGTTGATAATCAGTTAACAGGTTTTATTCTGGATCACTGTTTAAACAT  
TTCATCACTACTTGGCGTAACTCTGGGATTGAATCACCTTTCTGGTCTCTCTTGCTTGATGAAGGGAATA  
TTGAGTCAAATCTGAAGATACTAAGTATATCTTTCAATCAAATTTCTGGTCGCATTCTTCTAACATATGC  
CAACTCACACAGCTCAAATTTTGTCCATATCTTTCAATAGCATAACTGGAGACATACCCAAATATATTGG  
TTGTCTAGCCAAGCTCGAGATGTTCTTAATTAGTGAGAATGCAATAAGTGGGACTATTCTGCTTCATTG  
GGCAATATTTCCACTCTGCAACATCTTGATTCGGGGGACAATCGGTTGGAGGGACAAGTTCTCAAGAA  
TTAGGGAAGCTATCAAATTTGAGGGTGTTAACTTCCACAAGAATTTAATCTTATTGGTCAAATTTCCA  
AGGCTATTTTCAATATATCTTCTTTGGAAGCGATTGATTTCAATAACCTCTCAGGTAGAATTCCA  
GCCACTACCGATCTTCATCTCCGAACCTTGAAGTGTATGTTGGCATTCAATCAGCTCGAAGGAGAAA  
TTCCTCAATACATAGCAAATGCTTCCAAGCTTGAGATACTGGCGCTAAATTATAACTTTCTGACAGTTGCT  
ATTCTACTAATTTAGGAAATCTTCGCGAGCTGCAATCACTGTTCTAGATCATAATCAACTTACCAATGA  
ACCAAGAGAGCCTAAGTTGTTATTCTTGAATTTCTTGGTGAAGTGTAGGATGCTGAAATATGTAGATGTG  
GGTTTCAATCCGTTGAATGGCGTTCTTCCAATTTCTATTGGGAATCTTTCATCTACTATTGAAGTATTTGA  
TATAAGAAATGCACACATCTATGGCCTCATTCCAACAAGTATAGGCAACATGAGTGGTCTTATATCCCTA  
GTCTTTAATGAAAACAACCTTGACAGGATATATTCCTCCAGAGATTGGTAAGCTTAAACAACCTACAAGGTC

TGTACCTAAATAACAATAAATTTTCAGGGACATATTCCAGAGGCGGTATGACATTTATCTCATTTGGTCTGA  
ATTAGCTATGGATAGTAATGAACTCTCTGGATCAATTCCAGAATGTTTAGGAAATCTTGGGATGCTACTT  
TATCTTTTCGTTGGGATCAAATAAATTTTCACCAAATTTCCCTCGAGTCTTTGGAAGATGAGTGGACTTCT  
CTACCTAAACATGTCACATAATTCTATAGAGGGAGAAGTTCCACCAACTATTGGAGAAGTCAAAGCCATT  
GAAGAAGTATATCTTTCCGGTAATCACTTTTCAGGCCAGGTACCAAGCAGATTGGGAGACCTCCAAAGA  
TTGAAGACTCTTGACCTATCAAACAATTCATTTTCAGGCTCAATTCCATTATCCATTACCAACTTGATGAG  
CTTAGAAGACTTGGATTTGTCTTTAAATGCATTGTCAGGTATTATTCTAAGTCTTTGGAAAACTCTCAT  
ACCTTACAAGCATCAATGTTTCATTTAATGATTTAGAAGGTGAAATACCCAGTGGTGGTGTGTTTGTA  
TTCCACTCTGCTATCATTCTCGGGAACAAAGGTCTATGTGGAATGCACATATTGGAGCTTCTGCTTGTC  
CTATCACTAATCCTGGACAACAATCAGTGTCTAAGAACTTGTGCTAAAAATTGTTACTCCAATGGTTATT  
TCATTGTTTCTGATATTCTTGTTGGTTTCAATTTGGATAATGAAACGAAAGAAGAAAGGGAAGTCCAAAG  
ATGTTGAAAAGGTTCTGGAGATCAAACCTTATCCATTGATTTCTTATCATGAGATTCAACGAGCAACAAA  
TAATTTTGATGGATCCAATTTAATTGGTGAGGGAAGCTCTGGCTCTGTGTACAAAGGCACATTCTCAAGT  
GGAAGTACAGTGGCCATAAAGTTCTGGATTTGGAAAATGAGCAAGTATGCAAGAGGTTTGATACAGA  
ATGCGAAGTGATGAGAAATGTCAGACATAGAAATCTTGTTCCAGTGATTACTACTTGTCTAGTGACTAT  
ATAAGAGCCTTTGTTCTGAAATATATGTCAAATGGGAGTCTTGAGAATTGGTTGTACAGAGAAGCTCGC  
CACTTGAACCTTCTTCAAAGAGTCACTGTAATGCTTGATGCGGCTATGGCAATTGAATATCTACATCATG  
GCAATGACACTGCGATAGTTCATTGCGACATAAAGCCAGCAAACGTTCTTTTGGATGAAGATATGGTGG  
CGCATGTTGGTGATTTTGAATCTCTAAGATTTAGCCGTAAGCAAGTCCATGACACAAACCGAGACATT  
GGGCACTCTTGGATACATTGCACCAGGTATACTAAAATTATAACCTTTCTATTTAATTTTTCTTTATCAA  
ATAAAGCCCTTGAAAATTCTAGGACTAAATAAAAAGCAAGTCTTTGTTAGTATGAGCATTATTGCTATAT  
CCAAATGAGTTAGTTCTTTTTCGTTTTCGTTCTTTTAAGAGTACGGCTCAGAAGGAATAGTGTCGGCTAG  
TGGTGATGTTTACAGTTACGGCATCATGTTGATGGAGTTTTGACGAAAAGAAGGCCAACAGATGAAAA  
GATATGCAATGAAAATCTTGACCTGAGGAGATGGATAACACAATCATTTTCAGGGAGTATGATGGACGT  
TGTGGATGCCAATCTTTTTCTGAGGAAGAACAATCACTAGTAAAAGTGAATGTGCATAGCCTCCATG  
ATAGAATTGGCTTTAGACTGCACAAAGGAAACGCCAGAATGCAGAATAAGCATGAAAGAAGTAGTGAA  
GAGGCTTAACAAAATCAACAACACATTTCTCGAAACATAG

>M6-PGSC0003DMG400023953 M6 LRR-RLK

AATTCTATTCTTTAAGATTGAAAATGAGAGATCAAGATCGAGTTTTTACTAGTTTTGAACCATACCCTTTT

CGAGTTGTTAAACAAGTTTTTAACTCGAAAAGGAGGAGCTGGTAGATGTATAATTTCTCATCTTGCAAAAA  
GGTTCTTTCATTTTGCTCAACTTTTCTTGTTATTTCAAGTTACTGATATTTGGGATTCAGCCAACCTCAGGTG  
AAGATTGGGATGGGATAATTACTGTCAGCAGATTTTCAAGCACTTCAAGCTTTTAAACAAGAATTGGT  
TGATCCAAAAGGGTTCTTGAAAAGCTGGAATGATAGTGGATTTGGAGCTTGTTCTGGTGGATGGCTTGG  
TATTAATGTGCTCAAGGACAAGTTATTGTTATTCAGCTTCCATGGAGAGGTTTAGGTGGAAGAATTACT  
GAAAGAATTGGACAATTTCAGTCTCTTAGAAAACCTCAGCTTACATGATAATGTCATTGGTGGTTCAATTC  
CTTCTACTTTGGGACTCATACCTAATCTTAGAGGACTTCAACTTTTTAACAATAGGTTATCTGGTTCTATT  
CTGCTTCTCTGGTTTATGCCCTCTTCTCAAACACTTGATCTCAGCAATAACTCATTCTCTGGTGCATTC  
CAGACAGTCTTGTTAATCAACTAAGCTTTATAGGCTTAATCTTAGCCATAATTCTTGTCTGGTTCAATTC  
CCACAAGTCTCACACAATCTCCCGCACTCATCTTCTTGATCTCAAGTATAACAATCTTTCAGGCTCAATAC  
CAGATACTTGGGATGGAAATGGAAATGGAAAAAGACTCTTCCAACCTCAGTCTTACACTTGATCACAA  
CTTCTTTTCTGGAAGTATTCTGCTTCTTAGGCAAGTTGAATGAACCTTGTTGAGCTTTCACCTTAGTCATA  
ATCAATTGACTGGAGTTATCCCAAGTCATATTGAGGGACTCTCTAGGCTTACAACACTTGATTTGTCTTAT  
AATGCCATTAATGGAAGCTTGTCTGATAGCTTCTGAATCTATCCTCACTAGTGGTCTTGAACCTGGAAA  
GCAACCAACTTGATAACCAAATCCCAGCAGCCATAATAAAATTGCAGAACTCTCAGTTCTCAACTTGAG  
GAGTAACCACTTTAGTGGTGATATTCTGTCACTATAGGAAACATCTCTACTCTTAGACAACCTAGATTTAG  
CTCATAATAATATAAGTGGAGAAATCCCAGCTTCTTAGATACTTTACCAAATCTTAGTGCCTTCAATGTC  
TCATATAATAATCTGTCTGGTCTGTTCCAACCTCATCTCGCACGGGAATTCAACTCGAGTGCCTTTGTGGG  
TAATCTTCAGCTATGTGGTTACAGTGCATCAACCCATGTCCAATCTCTCCAGTTAGCCATCCCCCGAAA  
CACCAAAAAAGCAACGTCGTAAGTTAAGTACTAAGGACATAATTCTCATAGCAGGAGGGGCACTTCTCA  
TAATCTTGGCTCTGCTATGTTGCATTCTCTATGCTGCTTGATCAGGAAAAGATCTGCAGCTGAAGCAGG  
GAAGGATGGTCAAGGCACGAGTAGGGTGGCTGCAGCAGCCAGAGGTGAAAAGGGTGTTCACCAACT  
GCTGGAGAAGTTGAAGCAGCAGGAGGAGGAGATACAGGAGGAAAGCTTGTCCATTTTGATGGACCTAT  
TGTGTTACAGCAGATGATCTTCTTTGTGCAACTGCCGAAATAATGGGAAAGAGCACTTATGGTACGGT  
GTACAAGGCCACGTTAGAGGATGGCGATCAAGTTGCTGTGAAAAGATTGAGAGAGAAGATCACAAGAG  
GTCAAAGGGAATTTGAGAGTGAAGTCAATATTCTTGGCAAGATCAGGCATCCAAATCTTTTGGCCCTTA  
GAGCATATTACATGGGACCTAAAGGAGAGAACTTCTTGTTTTGACTACATGCCTAAGGGAAGTTTGG  
CAACTTTTCTTCATGGTAAGCACAAAATCAGTTTTCCATTTCACTTTGTATTTGTGAGAACTTCAGATTATA  
AATCTTCTGTTTTTGCAGCTCGCAGTCTGATACACCAATTGATTGGGCAACAAGGATGAGAATAGCA

AAGGGTACAGCAAGGGGATTGCTCTTCCTTCATACAAATGCCAACATCATTTCATGGGAATCTTACATCGA  
GCAATGTTTTACTTGATGACAACACAAATGCAAAAATTGCAGATTATGGTCTTTCGCGCCTAATGACTGC  
TGCTGCAAATGCAAATGTTATTGCAACTGCTGGAGCACTTGGGTATCGGGCACCTGAACTTTCAAACCTC  
AAGAAAGCAAACACAAAGACAGATGTATACAGCCTTGGTGTATTATACTGGAACCTCTAACTGGGAAG  
TCACCAGGAGAAGCAATGAATGGTGTGGATTTGCCTCAATGGGTTGCATCAATTGTGAAAGAGGAGTG  
GACTAATGAGGTATTTGATTTAGAACTAATGAGGGATGCATCCGTTATCGGTGATGAATTATTGAATACC  
TTGAAATTGGCTTTGCATTGTGTTGATCCGTACCATCAGCTCGACCAGAAGTTCAGCAACTTCTCCAGC  
AACTAGAAGAAATTAGACCTGAAACAGCTACCAGTTCTGGGGACGACGGTGTCTGCAGCTCCCTCAGCAA  
GCGATGATTAGATATTAGATTTCTCATCTAAGTCATTTTTAGGCAGGTGTGTTAGGAGTTAGGTGCCACA  
ATTCTTTCATTCTTGAATTAGGTTGATTAAGAGAGTGATTTTTGTTCTTCTACTGTCTGTAGATACCCAAGT  
GTGCTATTTTGTGTTATTTTGTGAGCAGCAATGGAATCCTCTTAATTTCTGGCCCTAGAGACAGAAAATA  
CACTAAAAACTGCACA

>M6-PGSC0003DMG400024485 M6 LRR-RLK

ATGTTGCTAGTACTTGCAGGTTGAGACTCTGGAAGTGAGACGAGCATTAGTTAAGTTTATGAACAAG  
ATATCACTTGGGAACATTTCAAAGAAGTAACTTTGGATGGGATTTATCATCTGATCCATGTACCAACA  
AATGGGAAGGGATAACTTGTGATTCAAGAAACCAACATGTAAAAAATATTGTTCTTGATCAGAAGAATC  
TCACTGGAATTCTTGATGCTTCTTTTGTCTGTGAGGCTACTCCCTTGCTGTACTGAGCTTGAACGAAAAC  
GAAATTGTAGGAACATTACCTCAAGAAATATCAAACCTGCAGACGTCTCACACATTTGTATCTGCGTGGCA  
ACAAATTATCAAGCAATCTACCAAGCTCTCTTTCGCGGTTGAGCAATTTGAAAAGGTTTGTAATTCAGG  
CAATGCCTTCTCGGGGCAGATACCGGATATGTCAAGAATCTCAGGGCTGATAACTTTTTTGGCTGAAAG  
AAATCAGCTAACAGGGCAGATACCAGAATTTGATTTTTCCAATCTTGTAAGATTCAATGTCTCATACAAT  
AATTTAACTGGTCCAATCCTGATGTCAAGGGCCAGTTTAGTTCCAGCAGTTTTTTCGGGTAATCCCGGAT  
TATGTGGAGTGCCATTGCCAAGCATATGTCCACCCTCGCCACCTCCACCTCCCCATCCAGTTGCTAAGGA  
GAAAAAAGTTTCATACTTTATTTATCTTGGCTATGCTATTCTTGGGCTGATTATCATACTTCTACTTGTATG  
GAAGCTTTTTAAGTTCATAAGGAAGAAAAGAGCAATAGTACTCCAATGGATCACAACAAGACTATTAG  
CTCTTCTGGTGTACAAAGACTCCTAAAAATAGGTCAGAATATTCAATAACATCTAGTCCCGAAAACCTCTA  
TGCTCTCAGCATCATTTGAAATCCTTTCAAGTCCCCTGGCTAACAAATTGAGATTCGAGGATTTGCTTCGA  
GCTCCAGCTGAATTGATTGGGAAAGGAAAACATGGAAGTGTTTACAAGGTCAATGTTGATGGAGTGAC  
ATTGGTAGTAAAGAGGATCAGTGGTTGGAATATTTGAAAGACGATTTCAAGAAGAGGATGCAGAGAA

TACATAGAATGAAGCATCATCATGTATTGCCCTTGTTGCCTTCTATAGTTCCAAACAAGAGAAGCTAAC  
AGTTTACAAGTACCAACAGAATGGCAGTCTATTCAAGCATCTCCATTGTAAGTTTTATTAGCGCAAACCT  
AAATATTCTCACTTGAATATCAAACCATAGAATGATACATGAGTAATAGGCCTTCCTGTAAGAACTATCA  
AGAATTGATATCAGTAAAGTAAAATGTTAGATAGAACTATAGTTCACTTACCATATTCAGGGTCTAGCTA  
ATTCAAAATCTTAAAGTATTTTATCAGTCTAAGCTGCTCTGACTCTCCAAAATATTGCCACACCTGTGTCA  
GAACCTCCAGTAAAGCATTACTTTTGGAGGATCCGACAAGCACCTGTCTGAAATTTTTGAAAAGTTTGAG  
TAACATAGTTGTCGGTTGATGAAGTAAGAAAGAACTATAGTAATTAGTATTATTAGTTTGGGTAGCGA  
GATA

>M6-PGSC0003DMG400024661 M6 LRR-RLK

TTTGTATTA AAAAGTTTGGTTTGGTCCATTTTGCAGGCCCTCTCTTCTGAAATCAACTCCATTTTCCCAT  
GTTTATACCCTGCACAGAGATATTGTTTCTGAACTACCAAACCCCTTTTCTTAATTATAGTAAAATACCA  
TTTCTTTCTTGTTTTGCACAAATTTCTATAACAACAACAACTCATCTGTCACACAACAAAAAATAAATAA  
AAATAGAACAAATAGTACTGGAAGAAATCAAGATTCAAGATTGAGTTATGTCAGAAGAGGAATCTGATA  
TTCTTCTTCTGTTGTATTATTCCACTTCTTGCTTCTAATCACTACTGGTAAGTCTGAGTTTTTTTTTTTTCG  
AATTTTCAAGATTGTA CT CAGAATTCAGATTGTTGTTTTATGAGGTGTTTTAGCTGATTTGTAATACTAAA  
GTTTTGATTTTTATTATAGTTTGTGGAGATACCCTGGAGAGTGACAAGCAAGTGTTACTGAGTTACAAG  
GATTTTCTTGAACATCAAATCCGGTTAATAAAGGATACAGGCATACAGAATGGAATGCTTCTGATTCGT  
CACCGTGTAATTGGCGTGGGGTTTTTGTGATGGCGGAGTTGATCGTGTTACTCGAATTGATCTCTCTGG  
TGATAGTTTGGCTGGAAATATGTTTTACA ACTTCTCAGCTATGACAGAGTTGACATATATTGATTTGTCTA  
TGAATACAATTGGAGGGTCTATTCTGCAGACTTAGGCCAATGTAAAAACCTGAGATTCTTGAATTTATC  
GCATAATATTATTGATGGGGAGCTTAATTTGACTGGTTTGAACAATTTGCAAGTTCTTGATTTGACCATG  
AACAGGATTCATGGTGAGATCAGTTTAACTTTCCCTGGAATTTGTGATAGTTTGGTGGTTGCAAACATTT  
CGAATAACAATTTTACTGGTGAGATTGGAAGA ACTTTTGATCAGTGCTGGAATCTTAGATATCTTGATTT  
GAGCTACAATAACTTGACTGGAGGATTGTC ACTTGGTTTTGATAAGCTTAAGGAGTTTTCGGTATCTAAA  
ACAAGTGTAATGGCTCTCTGACTTCGTCGTTTTTCACTCCAACTGCACTTTGCAGGTGTTGGATTTATC  
AGAAAATGGATTCGTTGGAGGAGTGCCTAAAGAGATATCGAATTGTAAAACTTGGAGGACTTGAATTT  
GTCTGGAAATAACTTTTCAGGGCCAATTCCTGAGGAAATTGGATCAGTTATGAGTCTTCAAGCACTTTAC  
TTGGGAAGCAACAATTTTCAAGGGATATTCCAGAGAGTCTATTAAGTTTAAGTAACTTAGTGTCTTG  
ATCTTAGTAGAAACA ACTTCAGAGGAGAAATACAAGAAATTTTCAGGCAATTTACACAGGTAAAGTTTCT

TCTGTTGCATGGTAATTCTTATACTGGAGGTATAGTTACCTCTGGAATCCCAACTTAGTGAACCTATCTC  
GATTGGACTTGAGCGATAACCAATTCTCCGGTCCATTGCCAGTTGAACTTTCCAAGATGAAAGGCTTGAA  
GTTTCTGATTCTTGCATATAACCACTTTAATGGAAGTATACCATCAGTATACGGGGATATTCCGACACTTC  
AGGCCCTTGATCTTTCATCTAATAAGTTAACTGGCGAAATACCACCAAGTTTAGGGAAACTAAGCTCACT  
TTTGTGGTTAATGCTTGCTAACAATTCATTGACCGGTGGAATCCCACCCGAGTTGGGAAACTGCAGTAGC  
TTATTGTGGTTGAATCTTGCAAACAATCAGCTTTCAGGTCCAATTCCACCTCAGTTAGCAAGAATTGGCTC  
AAATCCTATGCCTACTTTCTTGTCGAATAGGGCTAAGGATAAGGTGACTGCTGGCTCGGGGGAATGCTT  
TGCTATGAAGAGATGGATAACCAGCTGATTATCCTCCATTTAGCTTTGTATATCCTCTCCTTACCAGGAAGA  
ATTGTAGAAGCCTATGGGATAAATTGCTCAAAGGGTATGGTTTATTTCCAGTGTGTGAACCTGGTAGTA  
ATGTTTCGTTCAAATCAGATATCAGGCTATCTTCAACTTAGTATGAACAAATTTTCTGGTGGGATCCCTCCT  
GAAATTGGCAACATGCAGAATTTAGTATGCTTCATTTGGGTGTAATGAATTCGCTGGCACGCTCCCTT  
CAGAGATTGGAAAATGCAGCTAGTAGTACTTAATATTTACAAAACAGAATATCTGGCGAGATTCCAA  
GCCAGATTGGCAACATTAAGTGCTTACTGAATCTTGATCTGTCCAGCAACAATTTCTCTGGTCTGTTCCCA  
GCTAGTTTTAGTAAATTGACTGATCTAAGCAAGTCAATATCTCTTACAATGCGTACATCTATGGTACTAT  
ACCAGAAAGTGGGCAATTAGCCACATTCGAGAAGTCATCATACTTGCGGTTCCATTGCTGCACCTTCCA  
CCTTTCATTGATAACACTAGGAATAATACTATAAACAAAGGTGGAAGTTTCAAAGGCCTACAAAGGTT  
GGTACAGTTTTGGTAATCATGGCTTTGCTACTGGCTTTGCTAGTTTGTGGACTTATGACACTTGTTATCTG  
CCTCGTTCTAAAATCTCCGATAGATAAACAGGATACCTACTGGAGGATTCAAAGGGCCGACACGATCTT  
GCATGGAGTTCAGGTGCATCCTCACCATGGTTGTCTAATGATGTTAAGGTTATCCGCTTGACAAAACAA  
GCTTCACACATTCTGACATATTGAAGGCCACAGGCAGATTCTCGAATGACAGAATTATAGGGAAAGGAG  
GATTTGGGACAGTTTATCGAGGAGTCTTGCCTGATGGAAGGCAAGTGGCGGTGAAAAAGCTACAAAGA  
GAGGGAATTGAAGGGGAAAGAGAGTTTAGAGCTGAAATGGAAGTACTAAGTGGAATGACTTTGGTT  
GGCATCCGAATCTTGTAACACTTTACGGTTGGTGCCTTAATGGATCAGAGAAATTGTTAGTCTATGAATA  
CATGGGAGGTGGAAGCTTAGATGAGATCATCACAGATAGAACCAATTCACATGGAAGAAACGACTCA  
ACGTGGCAATTGATGTTGCACGTGCTTTAGTCTTCTTACACCACGAGTGTTACCTTGTATCGTCCACAGA  
GATGTCAAGGCAAGCAACGTGCTGCTAGACAAAGACGGAAGGGCAAGAGTCACAGATTTTGGCCTAGC  
TAGGGTTATGGATGCTGGAGATAGTCATGTTAGCACAATGGTTGCTGGTACAGTCGGGTACGTTGCACC  
AGAATATGGACAGACATGGCAGGCCACAACAAAAGGCGATGTCTACAGTTATGGAGTGCTGGCAATGG  
AGTTAGCCACAGGGAGACGCGCTGTAGATGGAGGCGAGGAATGTCTAGTTGAATGGGCGAGACGTGT



GATGGGAGACGGAAGGCAAGGATTCACCAGAGCCATAATACCAGTTTCTCTTTGGTATCAGGCCTAGC  
AGAGGGAGCAGAGGAATTGTGTGAGTTGCTTAGAATAGGAATAAGGTGCATTGCTGATAATCCTCATG  
CTAGGCCTAACATGAAGGAAGTATTGGATTTGTTAATCGCGATTTGCGCAGCCAAAGATCAGGATCCA  
GTCGTAGCACTTCTCCTTCATTTTGATCAATTTTGTTCAAATTACACAGCAAAGTGTCAATAGTTTTTTT  
TTCTTCACATTTGTAACATACACACATTACATTCTTCTGTAAACAGTTCTTTTTAGATTCTTTGTTTCAGGC  
ACTCTTGTGTTAGGATCATAAGAG

>M6-PGSC0003DMG400024795 M6 LRR-RLK

CCTATGGCCAACCCTGTCCTACAACACTGTGTCAAGTGTCAATCTTGACAATGAATCTAATTGAAGACAG  
ATATATTTGGAGGAAAATCAAGATTTCTGAAAATTCATTTGTTTCTTTTCTTTTACATAAAAATTCTCTGTT  
GTGCATTTCCAACACCAGTAAACCATGATAAAGAAATCATTGCAGATAACCTCTTTCTTATGACTACTACA  
TTTGGTGCAAATGAAATAGAAGTACAGTAGATCAGAGAGTACATACACACCCTCATTGTCATCATAATCA  
TGTCAGGCCAACTAACAGTCATCTTATTCTTCTGTTTCTCAACATATCTTTTTTATTCCCAACATCCATTTT  
TGGTTTAAATCAAGAAGGGGTTTCTTTAATGTCATGGCTTTCCACTTTTAACTCTTCTGCTTCTGTTGCACC  
TTTCTCCTCATGGAATCCAAGTCATGAAAATCCATGCAAATGGGATTATATCCAATGCACCAGTAATGGA  
TTTGTTCAGATATCAAGATCAGGTCGATCAATCTTCCCGGATATTCCCAAGTCAAGTTCTTTCTTTTAC  
TTTCTGGAAGTGCTAGTTTTATCAAATTGTAACCTCACTGGTGAAATTCCTGCTTTTATTGGAACTTGTC  
ATCGTCTCTGAGGATTTTGGATCTCAGTTTCAATGCTCTAACAGGAAGTATTCCACCTGAAATAGGAAGA  
TTATCACAGCTGAAGCAACTTTTGTGAGTTCTAATTTCTTTCAAGGTCAGATACCAAAGGAGATAGGAA  
GATGTTCTGAATTGCAGCAGCTTGAGCTCTTTGACAATCAGTTTTCTGGAAAGATACCTGAAGAGATCGG  
TCAGTTAACGAGTCTTGAAATCTTTCGTGCTGGTGGGAACGTGGGAATTCAAGGAGAAATCCCAATGCA  
GATATCAAGCTGCAAAGAGTTGGTCATTTTGGGTCTTGCAGATACCGGTGTTACGGGTCAGATTCCACAT  
AGTATAGGTGAACTCAAGAAGCTGCAGACTCTTGCTGTTTACACAGCTAATTTGACTGGTGAAATCCCTC  
CAGAAATTGGGAATTGCACTTCTTTAGAAGAATTGTTTGTCTATGAAAATCAAATTACAGGAGAAATCCC  
AAGTGAACCTCGGTCTCTTGAAGAATCTTAAGAAGGTTTTGCTTTGGAAGAACAATCTGACGGGGGAAAT  
TCCAGGAAATCTTGGAACTGTTCAAGTTTGAAGTGATTGATTTCTCTGTGAACTATCTATATGGTGAA  
ATCCCTCCGTCTTTGAGAATTTAGGCACATTGGAGGAGCTTCTATTATCAGAAAACAGCATTCTGAGG  
AAATCCCATACTATATTGGCAACTTTTCCAGCTTGAAGCAGCTTGAATTGGACAACAACAACATTTTCAGG  
TGTGATTCCACCTACCATTGGGAAACTAAAGGAGCTAAATCTGTTTTTTCGCTTGGCAGAATCAACTTCAA  
GGGAGCATACCGACTGAGCTAGCAGATTGTCAGAACTTCAGTCTTTGGATCTTTCTACAATTTCTTA

CAGGGTCCATCCCAAACACTTTATTCAATCTCAGGAACTTGACTAAGCTGCTGCTGATATCAAATGTTCTG  
TCCGGTGGAAATCCACCTGATATTGGAAATTGCACCAGCTTGCCAGATTACGCCTTGATCAAACAGGT  
TAGATGGTCCAATTCCTCCAGAAATAGGGCGTCTACCGAGTTTGAGTTATCTTGAAGTGTGCGAAAATCA  
ATTCAGTGGATCAATCCCTCCAGCTATTGGTAACTGTCCGCAGCTAGAAATGGTTGATCTTCATGGAAAC  
AATCTTCAAGGAACAGTTCCTTCCTCTTTTGTGTCCCTCACTGGTCTTAATATATTAGACCTATCCATGAAC  
AGAATATCAGGTAGCATTCCAGAAGATATAGGGAACTCATATTACTGAACAACTCATACTGAATGGA  
AACACATAAACGGAACGGTTCCTAAATCACTTGAAGTCTGCCAGGATTTGCAGTTGTTGGATTTAAGCA  
GCAACAGACTCGCGGGCTTAATCCCTGAAGAGATTGGTAACTCCAAGGACTAGATATTCTGTTCAATGT  
AAGTCGTAATTTTCTGACCGGACAGATTCTGAAAGCTTCTCTAACCTCTCCAAGCTAGCCAACATGGAT  
ATTTCTCATAACATGTTGACTGGAAGTCTTAGAGTACTCAGTAACCTTGATAACCTTGTTTCTCTGAATGT  
TTCATAACAATAACTTTTCTGGTGTTCCTAACACAAAATTCTTTCAAAGTCTCCCTCTAGCGCTTTTATT  
GGTAATCAAGAGCTCTGCACTGACAGAGCTGCATGCCACTTAAGTGGTGATCACCATGGATTTAAATCC  
ATAAAGAAGATCACCATTGCTATTGTACTCAGCATTTCATGACCATGCTAATTGTGACAGCTTCTATTGC  
CATCTTTATCCGAACACAGGGAGAGATATGTCAGAAGGACGACGGAGAAAATGGTTTGCAGTGGGAAT  
TCACCCATTCCGAAAGCTTAGCTTCTCTGTAAGTGTAGTGCCAAGACTTAGTGAATCTAACATTGTT  
GGAAAGGGCTGCTCAAGCTTTGTTTATCGCGTTGAGACTCCATCAGGACAGGTGATCGCGGTGAAGAA  
ACTATTGGCTAAGAAAATCGGTGAGGTTCTCAGAGGGACTTTTTTTCTGCAGAAGTTAGAACAAGTGGG  
ATCAATCAGGCATAAAAACATAGTGAGGCTTCTGGATGTTGTAATAATGGCAAAACAAGATTGTTGTT  
GTTTGATTACATTAGTAACGGGAGTTTATCGGGACTTCTCCATGAGAAGAGGGTATTTCTGGATTGGGA  
TGCTAGGTTTAATATCATATTAGGAGCAGCTCAGGGCTTAGCTTATCTTCACCATGACTGTAGTCCTCCTA  
TAGTCCATCGCGATATCAAACCAATAACATTTTGGTAGGTCCACAGTTTGAAGCTTTTCTTGCAGACTTT  
GGACTTGCAAAGCTATTAACACATCATCAGATACTTCAAGAGCTTCCACCATAATAGCTGGTTCCTATG  
GGTATATAGCTCCGGGTGAGTACATTTCTCAAATTTCCGCCCTATATATTCAAATAATTATTAAGTGCTC  
AACATTTTGATAACATGATTATGCTAGTACTATTGAATATTAGCTTTAAAGAAACACTTGAAAGTTCACTA  
TATTAGTCTTGTACCCCGTGAATTCGCTGTGCAAGACATATAGTAGGTATATATACTATGTTTGGACAG  
CATTCTAAATGTTTTGGTCTACATTGCAGAATATGGATATAGTCTAAGAATAACTGAGAAGAGTGATGT  
CTATAGCTATGGCATTGTGCTTCTCGAGGTCTAACGGGGATGGAACCAACTGATTCCCGGATACCAGA  
ATGCACCCACATTGTCAGTGGTCAATCAGGAGCTAAGAGTAAACATAAGGAATTCACAACAATTCTT  
GATCAGCAATTACTTTTAAGGTCTGGTACACAACTCAGGAGATGCTTCAAGTCTTGGGGTGGCACTAC

TTTGTGTTAACCCATGAGCGAATGAAAGACCAACAATGAAGGATGTAGCAGCAATGCTAATGGAAATCA  
GGCACGAAAATGAAGATCTTGAGAAGCCTAATCGAGGAGTGGTACCAAATCCTAAAGAAGCAATTAGT  
TGTCTAGTTTCTCTGGTTCATCTCAACCTCTCATCAGATCCCCTCCTAAGTAACTCTAGTTAACTTAGCCT  
CTCTCTAGTTCTAACTAGTTGATTCTTCAAGTAACTAATAAGGATGTATAGATTATCAATATTCATTTAC  
AAAATAAGAACATTACTCTTCTAGTCCCGACTATAAGTCGTTTTGACA

>M6-PGSC0003DMG400024890 M6 LRR-RLK

ACCATTTAATTTAGGCTAAAACTAACTTTGATCTTCTATGTAATGTGTTGTTCTTCAGTGAGAGATAAAA  
GGAAAAAAGCAAAGAGAGGAAAAGGGGAGGCTTAGCTTCTCCTTGATCTTGAAGACTCACTTTCTTT  
CTTTTGAAGATGTTTGATTCTTTAAATCTATCTATACCTGAAGTTTCTCAGATTCCCTTAACTTTTTTCTCCT  
TTTACATTGCCTCAAAGTCTCATAATAACTCACTTTGTTTCTTCTTCAAGTCCAAACAAATTCACTTTCTTTG  
AAAACTTCCAAGAAAATATGTTGCCACTTATTCTTGTCACACTCTTACTCTTGTATGCACTTCCATTTCC  
TCCTCTTCTCTTCTATTAGTACTGATTTTCATGCTTTGTTGAGTCTAAAAAAGGATTTGACTTCTCAAAT  
TCTGTTTTGAGTTCATGGGATAGTTCAAATCCTAGCTCAGTTTGTCTTGGATGGGAATCAAATGCTTACA  
AGACCGAGTTGTATCGATAAACTTATCCAATATGGAGCTTTATGGTTCTGTTTCCCCTGCTATTTCAAGGT  
TAGATAAGCTTGTTGAGCTTTCAATTGATGGAAACAACCTTCACTGGTGAAATCAAGATTGAGAACATGA  
GGAGTCTTCACTCAACATTTCAAACAACATGTTTAGTGGGAGTCTTGATTGGAACACTACACAAGTTT  
GGCTAATTTGGACGTTCTTGATGCTTACAACAATAACTTCTCTTCTTTTCTCCTGTTGGAGTTGTTAGCTT  
GGAGAACTCAAGTACTTGGACTTAGGTGGCAATTATTTCTATGGACGAATACCGGAGAGTTATGGGGA  
TTTGATTGGGTTGGAATACTTACAACCTGCTGGGAATGACCTGCATGGAAGAATCCCTAGAGCTTTGGG  
GAATCTTACTAACTTCAAAGAGATTTATTTGGGATATTTCAATGTTTTTGTAGGTGGGATTCCTAAGTAAT  
TTGGAAAGTTGGTGAATCTTGTTACATGGATATTTCTAACTGTGAATTAGATGGTCCGATTCCTCCTGA  
ATTAGGGAATTTGAAATTGTTAAACACACTTTTTCTACATATAAATCTTCTTTCAGGTCCAATTCCAAAGG  
AACTAGGCAACCTTACTGGCTTAGTCAATCTTGATCTTTCAGCCAATGCACTTACTGGTGAAATCCCATTT  
GAGCTCATTAACCTTCAGCAGCTAAGTCTTTTCAACCTGTTTCATGAACAAATTACATGGTTCTATACCGGA  
TTTCATCGCTGATTATCCTGACCTGAAGATTCTTGGTCTCTGGATGAACAACCTTACCGGTATAATCCCGG  
AGAAGTTAGGCCAAAATGAGAAGCTACAAGAGCTGGATTTGTCTTCAAATAAGCTCACTGGTACAATTC  
CTAAACACTTGTGTGCTTCTAAGCAACTCAGAATCTTGATTTTACTCAAGAATTTCTCTTTGGTTCAATCC  
CAGAGGATTTAGGCACATGTTTAAAGTCTTGTTAGAGTGAGATTGGGACAGAACTACTTGAATGGTAGTA  
TTCAAATGGATTCATTTACATGCCTGACCTAACTTAGTTGAGCTTCAAGAATAACTACCTGTCTGGTACC

TTATCAGAAAATGGTAACACTTCTTCAAAGCCAGCCAAGTTAGGTCAATTGAATTTATCAAACAATCAAC  
TTTCAGGTTCTTTACCATTTTCACTTTCTAATTTCTTCCCTTCAAATCCTTTCACTTGGAGGGAACCAATT  
CTCTGGTCTATTCTACTTCTATAGGTCAACTCTCACAAGCTTTAAAAATTGACCTCAGTCAAACTTTCT  
TTCTGGTGAAATCCCCCTGAAATAGGCAACTGTGTCCACTTGACTTATCTAGACTTGAGCCAGAACAAC  
TTCTCTGGCTCAATTCCACCCCGAGTATCCGAAATCCGAATCTTGAACTACTTGAACTTGTCAAGAAACCA  
CTTGAATGAGACCATACCAAAGTCAATTGGCACCATGAGGAGTCTCACTACTGCTGATTTCTCATTCAAT  
GATCTATCAGGCAAGCTCCCAGAATCAGGCCAATTTGCTTACTTCAATGCTACTTCTTTTCGCGGGCAATCC  
TCAACTCTGTGGTTCTTTATTGAACAACCTTGCAATTTTACACTAATCACTGATCCACCAGGAAAGTCTC  
ATGGAGATTTCAAGCTGATCTTCGCCCTCGGATTGTTAATCTGTTCACTAGTCTTTGCAGCTGCAGCTATC  
ATAAAGGCCAAGTCTTTCAAGAAAACAGGCGCGGACTCTTGAAAATGACAGCATTTCAGAAGGTTGAA  
TTCAGTGTTGCTAATGTTCTTGAATGTGTAAAAGATGGCAATGTGATAGGCAGAGGAGGAGCCGGGATT  
GTGTACCATGGGAAAATGCCAATGGAGTTGAAATTGCAGTCAAAAACTGCTTGGCTTTGGGAACAAT  
AGTCATGATCATGGTTTCAGGGCGGAGATTCGGACACTAGGCAACATTCGACATAGAAACATTGTAAGA  
CTAGTTGCTTTTTGTTCCAACAAGGAAACGAATCTCCTTGTGTATGAGTACATGAGGAATGGTAGTTTAG  
GAGAGGCGTTACACGGGAAAAAAGGCGGATTCCCTAGCTGGAATTTGAGGTATAAAATTGCTATAGAA  
GCTGCTAAAGGATTGTGCTATCTTCACCACGACTGTTGCCATTGATCGTTCACAGAGACGTCAAATCCA  
ACAACATTTTGCTGAATTCAAACCTTTGAAGCTCATGTTGCTGATTTTGGACTAGCAAAAATTTTGGTAGAT  
GGTGGCGCCTCAGAATGCATGTCTGCTGTTGCTGGCTCCTATGGTTACATTGCCCTGGTACATTACTTTT  
TATTTTTTTTTTTTTTTTTTTTTTATTATTTATTATTTATTTTTTTTTTTTTTTTTTTTTTTTTTTAATTTATTATCT  
TTTAATTTTAAATTTTATTTTGTTTTATTTTTTAAATTTTTTTTTTTTTTTTTTTTTGGGTTTATTTTTTTTTTAAAT  
CATATATGTACGTTGGTTAGTTAATTTAGTTAGGTATGTAGACATTACCTGACAAAGTGATTTTTGCCTGG  
TCGTACATAACAACAATTAGTCTTATCAATTGGTCATAAAATCAAACCTTTAAGATAAATATTTTATCG  
CATTTTGTTTTTTTTAGTTTGGAGTATGTTGAATTAGAGAGAAATTTGGGCTAAGGCCCAAGATCACCC  
GTGATTGAAGGCATAGAGTTTAGGGCTTTGTTGGAGTTTTCTGGGTAATCGTAAATCGTATCATGGGCC  
CGTTTTACGAGAAAGCACTTAATTTCTGTGCCATAGAGAGAGTTCTTAGTGGGGGCCCAATAGAAGATC  
ACTCTGCTAAAGTGGGTCAAAAACTGACTTGACTGACACACAAAGATAATTGGGCCCCCTCGATTGTC  
GTGCTTGCCAACTCAACATGCACTTGTTCAAAGAAATTAGGCATCAACTAAATGGAATAGAGTATATAA  
TTTATAGTCACAATATTACATATTTTACTGTATAACTCTTTAAAGGAGTCAACTTTTTTAAATTAAGGA  
GGGAGAGAAAAGCAATAGTGTGAATAGCAATGAAGTCAAGATATTCATTAAGGAGATTTCGTACATATAT

TTAAGGGGTGTTAACTGACTCCAAATATTGTTTAAATGCATATATATTAATTTGCATATACATTGTCATAA  
ATATTAACCTATTTTTTAAAAAATGTTGCAGAATATGCATATACATTGAGAGTAGATGAAAAGAGCGA  
TGTATATAGTTTTGGTGTGGTTCTATTGGAGCTGATCACCGGGCGTCGTCCGGTGGGTGAATTCGGTGA  
CGGAGTGGACATAGTACAATGGAGCAAGAAAGTGACAAATTGTAAAAGGGAACAAGTGACGCACATTG  
TTGATCCAAGGTTAACCCTGTGCCTGAAGATGAAGCCATGCATTTGTTCTTTATTTCTATGCTATGTATT  
CAAGAAAATAGCGTAGAACGTCCAACAATGAGGGAAGTCATTCAAATGTTGTCCGAATTTCCACGACAA  
TCATCAGAATATAATCAACCTTCGTCTTCAAAGTTGTTTTACGGAAGCTAAAAAGCCTTGAGAATGACC  
AAACTACTTGTCCGAAGATTCGGAAGAAGTCTTTGGTCTAACCAATTTTCATTTTTATATAATATGGTCTC  
CTTGGCAAGTTGTTTTAATTTAACTTTGTATTATTCTTTATGCTTATTTAAGGTTAGGGGTTTTGTGACAA  
AGAGAAGTAGGAATATAATTAGTACTATGTGTTATTAGTGGTTAATTAGTTGCTTTTGATTAGTTGTTAG  
GGTTGGGGGTGCTTAAGTTCTTGGCAAAGGCAGACCAGGCCCAATTAAGTTGGTTCTGAATGCTTTTTG  
TATCATATGGTTATATACAGGTATATATTCTTCCTTTACGGGTGAATTGATTCTCGTTCCAATAATGTTTA  
ATTGTTTATTGTTGGTCATGTTGTTGCGGGTGAATTGGTTCTC

>M6-PGSC0003DMG400024954 M6 LRR-RLK

GGAAGGTTGGTTTTCGATGAGCTGTGTCTTCTTCTCTCAATATTTTATAAACTCCCTTCACATGGTCC  
CCTTTTTATCATAAATCTACACTTATTCTCCTAACTTTTTTCTATTCAATTCCTAAAAAAAACAGAGATGT  
GGGAACATTTAGAGACGCCATGAAATCCAAACCTTTGATCTTGTTCTTCTTTTTCTACTACTTGAATA  
TCAAGCTTCTGGGCTTAACAATGATGGACTTCTGTTACTGACATTCAAGTACAATATTCTGAGTGACCCTT  
TAAGTGTCTGCAGAAGTGAATTCTTGGGATGATACACCATGTTTCATGGAAAGGGGTAGGTTGTGGAA  
ATCCAAATGCTTCAGACCCAAACCTTCGAGTGACAAATTTGTCTCTTCTAATTCTCTGCTTCTTGGTTCTA  
TTCTTCTAGTCTTGGTATGATTCAATATCTTACAAATCTTGATCTTTCTAATAATTCCATTAATGGCTCTAT  
TCCTTCTACTCTTTAGTGCCCCTGAGCTTCAACGCCTTGATTTTTCTAACAACAGAATATCCGGCCAGTT  
GCCTGAGCTTGTGGACATTTAAATAATCTTCAGTTTCTTAACCTCTCCGGTAATGCTTTGACGGGAAGAT  
TACCGGCAAATCTCACTAGGCTTAGTAATCTAACTGTTGTTTCTTTGAAAGATAATTATTTTTTTGGTGCT  
GTTCTTTTTGGGTTTGATTGAGTTCAAGTTTTAGATCTGTCTTCAAATTTGATTAATGGGTCATTGCCTCT  
AATTTTGGGGGCAGTAATCTCCGTTACTTTAATGCTTCTTTAATAGACTTTCTGAAGATATCCCACCGGA  
ATTTGGCAGCAAAATCCCTCAAATGCAACTATAGATCTCTTACAACAATTTAGCGGTGCAATTCCA  
GAGTCAATTGTTTTATCAACCAAATAGAAAAGCTTTTTCTGGTAATCCAGAATTATGTGGTGCGCCGC  
TGAAAAATTTATGCCCAATTCGTCAACAGTAACAACCTCTGCCAAATCCCCTGAACCAACTTCTCCCCA

GCAATTGCAGCCATTCCGAAACCCACAGACTCAAACCCAGCCGCCGAATCTCCAAAAGAGGGGCAAAAAT  
GGGTTGAGAACTGGCACAATTATAGGCATAATAGCAGGGGATATTGCAGCAGTAGGAGTTTTAGCACT  
GATTTTCATGTACGTATACCGAGCCAAAAGAAGAAAAGGAACATAGAAAATAGCATTAAAAAGAAG  
CTGAAACTGCAAAAGATTTTACTGGGCATCGTCAGCATCAGAAGAAGAATACAACCTGGTTAAGGTCAT  
GGACTTGCTTGAAAAACAAAGGCACGGAGATGATGACGAATTATCAGAAGCTTCCCATTAGAAAAGTG  
AAAAATCCCAATTGGGTCATCCTCAGCAGAATCACGTGCATACAGAGCAGAAAACAGGTGAATTAGTAA  
CGGTTGATGGAGAAAGGGAACTCGAATTAGAAACACTACTAAAAGCATCTGCATACATTTTGGGAGCTA  
GTGGGTCGAGTATAATGTACAAGGCAGTGCTAGAAGACGGTACTACACTGGCGGTGCGACGAATTGGT  
GAAAGTGGTGTGGAACGGTTCAAAGATTTTCGAGAATCAAGTAAAGGTAATTGCTAAATTGGTGCACAC  
AAATTTGGTTAAAATCCGTGGCTTCTATTGGGGCGCTGAAGAGAAAATTGGTCATCTACGATTTCTGTTCT  
AATGGTAGCCTTGCCAATGCACGTAACAGTAAGTCCACTTTTTCCCATATACATTATGTTTTAGATCAAAT  
AACGTTACATCAACTTTTTTATTGAGTAGAATCGCGTTTTTTGTTATTGTTTTACTATTTTGCTCCTGTTTTA  
CAGTGGAGAATAAATTGAAACAAAATTGACTAGTCATTATGTGTGTACATTGTACCTAATCATCTCTAAT  
TCTTAATTTGTTCAATAAGTATCTTTGCATAATTGCGAACATTTTGAATATAAAAAGTTCGGAGTAGGT  
TTGTACTTTAAGACATTTGTTATGCTTAATATTCAAAGAAAGACGTAACAAGTCACTCAAATTAAGTTC  
ACACAAGTATAAATTTGTGCGCAAATTAGAAAAATATTATGAATTTCTGTTAAAATGCGCGGGAAGTAA  
AGGAGATAGTGGACCTGGGGTGGAGTTGTTGAAACTTTAGTGTTTGTTTTTAATGTGGAAAATAGCAG  
TAGTTCCTCACTGCAAGTCAACCGTGTCTGTTTCTAAATGGGCGCCTCACAAATTCATAAATACCGCCAA  
ACGCCCCCTCTTCTGCTGTCACTTACATGGAAAATGACTACCTTTTTTTTTAAAAAATATTGTACTCTGTAG  
GCCATAAGTATTCTCTTTTGTATGTCAAATTCATGCATTTCTTTTGCCACAACACCAATAATGTTAAAAG  
AATCTTCACCTTATTACCATTTATAGTATGTTGTTTATTTTATAGATATTATTATTGTGAGAATCTTAGCG  
CTCAGTTGATTGACTAATTATAACGTGCGCATTTTGATGGTTTCAGGAAAGGCTGGTTCTTCGCCATGTC  
ACGTACCCTGGGAAATCCGGCTGAAGGTTGCTAAAGGTGTGGCTCGTGGGCTCACTTACATTCATGAAA  
AGAAGCATGTCCACGGCAACTGAAGCCCAGTAACATTTTACTAGGGGAAGATATGGAGCCCAAGATTG  
GTGATTTTGAATTGAAAGGCTTGTAACAGGAGACAGTAGTCATAAGACCTATGGATCTGCTCGTAATT  
TTGGAAGCAAAGGTCCACAGCATCCCGTGAGAGCTTCCAGGACTTTACATCTGGGCCTACTCCAACCCC  
AAGTCCAAGTGCATTGGGCATATCTCCTTACCATGCACCCGAATCGCTTCGTAGCCTCAAGCCCAACCCG  
AAATGGGATGTATTCTCATTCTGGGGTAGTCTTGCTGGAGTTGCTAACTGGAAAGGTGATTGTCTCGGAT  
GAAATGGGACCCGCATCGGTCATCGGTGCTACCACATCAGCAGAGGAAGAGAAGAGTAAAGTGTTACG

GTTGGCTGATGTGGCGATACGTGCTGATGTGGAAGGGAAAGAAGATGCTTTGTTGGCACTAATGAAAG  
TAGGATATAGTTGTATATACCAATACCTCAGAAGAGACCAGGCATGAGAGAGGTTGTTCAAGCATTGG  
AAAAATTTCCAATAATTCAACCAGTTCATCATACTATTATGGACCTTAATTAGCACTGATTAAAAGATGG  
ACACAATTGTAGAGACAAGAGACTTTGTATGTAATGAGACTGACATCTATGTTATTTTATTTTATTTTCAA  
TTTTTTTTGGTTTGTCTCTTAATATAGTATTAGCCATTGGTTTTCTTTTTAACAGTGATTAGTGTAAATTGTC  
CGCGTTTTGTTGTGTTGATTTTCTAAACCTTATGGTGACTTTGGATTACCAATATATATGACAACCTATT  
CTGTG

>M6-PGSC0003DMG400025076 M6 LRR-RLK

TAATCTCTTTGCTATATTTAATGTATAGTTTCATTTGTTTGTCTTTAGTTTCTCAAGAACTGTCACTCTCAC  
TCAAAATCCTCTCCGCCACCGTCAACCGCCGTCAACCACCGTCAACCGCCGTCATGAAAAATGCAAAAT  
GACAAATGTGTTTGGTTCATGCTAGTGACCATTTATCTTCACCACCTTCATTAGTGAGCTGCTAGCTAGCG  
CCGCCGTGTACGGAGGAGCAAAGAGGAGCTGGTTTTCTCCAGTAAGAGAACTTTAATAGTAGCAGTTTA  
GTAAATGTTTCATTAAGATAAACAAGAACTTTTTAGTTCACATGCATGGTAAGTAAATTTTTGAGTTAG  
TGTGAGTTTGAAGCAAACCTCCATTAACACACCACATGTATGCTGTCTTGTTAGAGTGAACCTTCAAACA  
CTATTATCATTTTTTTCAACAACCCCATTTCTTGACTTTGATTTTCACTCAATAATGGAGAAGAAAAGCTAC  
CATTTTTACACTTTCCCTTCATGTTATTTCTTGTTTTGTTGATTTCTTGGTTAAGTTTGAGTCCAAAGATTG  
TATTTTTAGTGAGCTCTGTTTCTCAGATGGACAAGCGTTGCTTCTCTGCTTAAAGCAGCTGACCCTTAC  
ACTAAATCATCATCTTCTGTGCTTTCTTCTTGAACCCTTCAAGTTTAACTCCATGTTCTTGGCAAGGGATT  
ACTTGTCTCCTCAAGAAAGGGTATTTCACTTTCTATCCCAAATACTTTCCTAAATCTCTTACTTGCCTT  
CTGAACTCTCTTCCCTTTCATCTTGCAGCTTCTTAATCTTCTTCTACTAATATTTCTGGAACAATCCCTCC  
ATCTTTTGGTTCTTTTTCTCATCTTAGGCTTTTGGACCTTTCTTCTAATCACTTTCAGGTTCTATTCCATCA  
GAACTTGGTGGGCTTAGTTCACCTCAGTTCCTGTTCTTGAATTCAAACAGATTGACTGGTAAGATCCCACC  
AGAGTTAGCTAATCTTCTCATTAGAAATCTTTGTCTTCAAGATAATCTCCTTAATGGGTCAATTCCATC  
ACAGTTAGGGTCCTTAGTGTCACTCCAGCAGTTTAGGATTGGTGGAAATCCATATTTGAGTGGTGAAATT  
CCTGCACAATTAGGCCTGCTACCAATCTTACCATGTTTGGTGTGCGGCGACTGGTCTTTCGGGTGTTA  
TTCCGCCAACATTTGGGAATTTGATCAATCTTCAAACACTGGCAATTTATGATACTGAAGTATTTGGTTCG  
ATACCGCCTGAACTTGGGATGATTTCCGAGCTTAGGTAAGTTGCAAAGCTTACTAGCTTGCTTTTATGGGGAAATTCATTAAGTGG  
CGATCCCTCCTCAGTTAGGTAAGTTGCAAAGCTTACTAGCTTGCTTTTATGGGGAAATTCATTAAGTGG  
ACCTATACCAGCTGAGGTTTGAATTGTTGTCCTTGTGATTCTTGATGTTTCTGCGAATGAATTGTCTG

GTGAAATTCCTGGTGATTTGGGGAAGCTATTGGTTCTTGAACAGCTTCATTTGTCTGATAATGCACTTAC  
CGGTTCTATACCGTGGCAGTTAAGTAATTGCACTAGCCTGACAGCTCTTCAGCTAGATAAGAACCAATTA  
TCAGGGCAAATTCCTGGCAAGTTGGTAAGTTGAAGTACTTGCAGAGTTTTTTCTTGTGGGGGAATTCG  
GTTTCAGGAACCAATTCCAGCTGCTTTTGGAACTGTACTGAGCTATATGCACTTGATCTTTCGAGGAACA  
AGCTCACTGGATCGATCCCTGAGGAGATATTTGATTTGAAGCAGCTGAGTAAATTGTTGCTCCTTGGGA  
ACTCGTAACTGGACGATTGCCTCGAAGCGTTGCAAGATGCCAGTCTCTGGTGAGGTTGAGGCTTGGTG  
AGAATCAGCTTTCAGGACAGATTCTAAGGAGATTGGTCAATTGCAGAATCTTGTGTTTCTTGATTTGTA  
CATGAACCATTTCTCTGGAGGCTTGCCTTCTGAAATTGCCAACATTACAGTTCTTGAGCTGTTGGATGTGC  
ACAACAATTACCTAACTGGGGAAATACCACACCAGATGGGGGAGCTTGTGAATTTAGAGCAACTTGATC  
TTAGCCGGAACAGCTTTACCGGTGAGATCCCTTCGAGTTTTGGCAATCTCAGTTACTTGAACAAATTTATT  
CTCAGTAACAATCTGCTTACTGGTTCAATTCCAAAGTCTTTAAGAACTTGCAGAAGTAACTCTACTTGA  
TTTGAGCTCGAATAGTCTTTCTGGCGAGATTCCATCTGAGCTTGGCTATGTCACAAGCTTAAACAATCGGT  
TTGGATTTGAGCTTGAATTGTTTACGGGTGAACTTCTGAAACATTGTCCGGTTTGTACAGTTGCAAT  
CTCTTGATATTTCTCATAATTTGTTGAGTGGAAGGATCACAATTCTAAGTCCCTGACCAGCCTTACTTCC  
CTGAATGTTTCAGACAACAATTTCTCGGGCCTATTCTGTACACCATTCTTTAGA ACTCTCACTTCAGA  
TTCTTTTCTGGAGAATTCACTCTGTCAATCAGTTGATGGTTATAGTTGTTCTTACATATAATGGGAAGGA  
ATGGGTTGAAGTCACCGAAAACCATAGCTCTGGTTGCGGTGATTCTGACATCTGTAGCCATAGCAGTCG  
TGGCTACATGGATTCTTGTGACGCGAAACCACAGATATGTGTTTCAGAAGTCCCAAGGCGTGTCTGCCTC  
TTCGGTAGGAGCAGAAGATTTTCTACCCTTGGACTTTCATCCCCTTTCAAAAGTTCAATTTACCCATAG  
ACAACATCTTGGATTGCTTGAAGATGAAAACATCATTGGGAAAGGATGTTCCGGTGTGTATACAAAG  
CAGAAATGCCTAACGGTGAGGTGATTGCAGTGAAGAAGCTTTGGAAAACAAGAAAGACGAGGAGCC  
AGTAGATTCTTTTGCAGCAGAAATTCAAATTCTTGGACATATTAGGCATCGAAACATTCTGAAGTTATTG  
GGATATTGTTCAAACAAAAGCGTTAAGCTTCTTCTCTACA ACTACATTTCAAATGGCAATCTCCATCAGCT  
CTTGCAAAGTAACAGAAATTTGGACTGGGAAATTAGGTACAAAATAGCCATTGGATCAGCTCAAGGCCT  
TGCTTATCTTACCATGACTGTGTTCCAGCCATTCTTCATAGAGATGTCAAGTGCAATAATACTGATCG  
ACTCCAAGTTTGACGCTTATATTGCAGACTTTGGACTAGCAAAGCTAATGAATTCGCCAAACTATCACCA  
CGCTATGTCCAGTGTAGCAGGATCTTATGGATATATTGCTCCAGGTATGCATGCACTTAGAATATTTTCA  
ATTACTAATATTTCAACATAAAAAGCCAAATCGATCATAACATCTTTCAAATATTTACTTTATGAGTCATAG  
TTCGTTGAGTGTGACACAAATATTTGTCAACTATGGTTGCAGAATATGGATATACAGCGAATATAACAGA



AAAGAGCGATGTCTATAGTTATGGAGTGGTGCTACTGGAAATACTTAGTGGGCGTAGCGCTGTTGATTC  
TCAGATAGGTGATGGGCTTCACATCGTTGAATGGGTAAAGAAGAAAATGGGAAGCTTTGAACCAGCTG  
TTACAGTTCTCGACACTAAGCTACAAGGTTTACCCGATCAAGTAGTCCAAGAAATGCTGCAAACGCTTGG  
AATAGCGATGTTCTGTGTCAACTCATCGCCGGTTGAAAGGCCAACAATGAAGGAAGTTGTGGCACTTCT  
AATGGAAGTAAAGAGTTCACCTGATCAAGAATTTGGGAAAACCTCTCAGCCTCTAATAAAACAGTCCTCA  
ACTCAAAGTTGATTAATTTTGTATGTTTTTTTTTTTTGCTTTTGACTAAGAGGAGTAGGAATTAGTTTTT  
TTTAGTTCCCAAGATATGATCAATTCATTGTTCCAAGCATTGGATAATGTCTTGGGGTCCATTGTGTACAT  
ATTTAGAAACATTTATGTAGTTTATTTGCTTCTTCATTTCTCCTATCCATCTCTGTGCTGAGATTTTAGCT  
TTCAAATGCTTGCAGTTGCACCATATAATATTATAGTTTACCATAGTTTCAAAAAAAGAGAAATATAGTT  
TGACCTATTCAGAAAAATTCTATTGTTGGTGTACGAATGTGGTTTCAAACCTTCCGGTGATGCTAAAAGT  
AGTTTCAGAAAAGAGAAATATAGAAAAGAAGAAATCAAAGAAGGGGAATATTGAAGCAACGGTAAAATT  
ATCTCATGGGTTCAAACCGTGAAGCAGGCATTAATACATTAGGTTAAATTGTCTACCTCATATCCTTTG  
AAGTGTGGCCTTTCTCTGAGCTTTGCTAACACATGATGTTTTGTTTCATTGAGTTGTTGTAGAAAAGA  
AAACAAACAACCTTAAAAACAAATATAATACTCATGTAATATCATTAGAGACTATTGGTCTAGTGGTAA  
GAGTGTAGCGCATAATGCGTGGGTAGTTGTGTC

>M6-PGSC0003DMG400025330 M6 LRR-RLK

TTTTGAATTCTCCACTGGTGTCTGGACAACGGTCTTCTCTCTTTTCTTTTTTCTTTCTTTCTATTATACACA  
ACTTTCTAGACTACTTTCAAAGTAAAGTCTTCTTTTTTCAAATACACACCCCCGCCCCCTCTTCTCTT  
TTTCTCACTTCGTGCTTGAATTTTCATTATTATGGATTTTCTTCTGTAAGAACTGTAATCATACCAATTGT  
TTCTATCAAACCCACCATTTTAGCTTTACTTTTTTTTTTCAAGATCTGTATTGATTTTTGAACTTGCTA  
CTACTCCACATTGCACTTGATATTTCTAGTCCAAACTGAAAAAGTAAGCTCAAATTTGCATTTTTCATCGA  
GAAATCGAAATGGGTGTCTGGGAGTTGATCATTTTGGGACTATTTACAATGACCATTTTTCAGTAGAAGCT  
GTTTTTCACTAACCCAGATGGTAAAGTTTACTTCTTTGTCTAAGGTTTTTTCAGCATTGTATGTTGTTCTTGA  
GCTGAAAAGATTCTACTTTTTTAGGTTCTGCTTTGTTGGAAATGAGAACCCTTTTGAATGATACAAAAAT  
GTTTTGAGCAACTGGAATGATTCGGATGAGTCGCCTTGCAGGTGGACTGGCATTCTTGCTATCCTAATG  
ACCAAAGAGTTCAATCTATGTATGTTAAATCACTTTTTTATTTTCACTATCAGTGCTTTATTCACTTTGTTT  
GCTTGGGTTCATTTTCTGCATTTTGTTTTTAATTTTTCAGCAACTTACCTTATATGGAACCTTGGAGGAATTA  
TATCTCCTAGCGTTGGTAAACTCACCAGATTGCAGAGATTGTAAGTCCCATAGTCATTGAGGCAATGCAA  
CAAAATTGATTTGGGCTAAAGTTTCTGTCTTGCTACTTGCCTTGATAAACTATGTGTTCTTTCTAAAACC

AGGGCACTTCACGAAAACAGTCTGCACGGTGTGATTCCTAATGAGATTGGCAATTGCCCTGAACTCAGA  
GCTATGTAAGTAGGAGTTTCATATATAACTGAGTGATAACATGTTTTCTTGGAGATTCCACATGTTTCTTG  
ATGAATTTGTCACAAGCTAGGCATTATTTATGTGTACAGATACCTCAGGGCGAATTTTCTTCAAGGAGGC  
ATACCATCAGATATTGGAAATCTTCAACTGACCATATTGTGAGATATATAAATTTTTTAATTCACCAT  
CTTTTTATATAGTTAATGAGGTTGTTGTTTTAATGATTGGTACCTTTAATCCTTTTTAGAGATTTATCAAG  
CAATTCACTTAGGGGTGCTATACCTTCTTCTTGGTCGCTCAGACATCTTCGTCTTCTGTAAGTTCAATT  
TCTGTTCAATTGTAAATTTTTAATTTGATAACTTAATGCATTACACTGATGTGTTAAACATGAAAATCAATTC  
AGGAACTTGTGAGCAATTTCTTCTCGGGTGAGATCCCAGATGTTGGAATACTGAGCACTTTTGGTAACG  
ATTGTAAGTTCTCCTTCCATTGGAATATAATCCCACATTTGATTTTGCCTCTGTATTCATCATTCTATA  
TACTGTAAATAAATTTAGATGGCTCAAACCTCAGAAAATACAATTAATCGTGAATAATGCTTCACATTAT  
ATGTATAGAAGTGCAGCAAATATTACATTCCATTTGGCACTACAATCACACTTATAGGAAATACAATA  
CAAGATAAATCAGGTCTTTGCACACCAGTTTTCTGGTGATTAAGTCTGTTTGGTGCATAGGCTAGGTTT  
GTGGCAGTGTTACAATGACACCCAGCAAATACAACTAAGCAGAATACCCATCAAAGATCGATGTATT  
AACATCACAAGTGCAGTTGAGATTTTTTACAACCTGAACAAACCGAATCTATCAATTGATAGTCCTTTAATC  
ATGATCCTAGAAGTTAAATACCATGTGATAATTGAGATGGGAACTACATTAGCAAATTGATGGTGCTTCA  
ATTTTAAAGATGGTGATTAATTTGTAAGTATACCTGACTTAAATTTATGGTACTCCAATCATGCATATGTG  
TTGCATATGTTGAGATAGACTTTTTGGTGTTAAATTGCCTAGTGGGTGATTGGCTGCTACATAGTTGAAA  
CTAGGAATCTAGTCCTGTATCATGATCAGTTTTACTTGTGTACCTTGCAAAAATTATTCTTCCCCATCATCT  
CAAAGGGGAATTTGAAGCTTGATGCTCTCAAAGTCTCAAATAGTTAAGCTTATAAGTATTTTCAAATGT  
CACAAGGGCAAGAATGTATGTGATGGGTCAATTCACGTAGGTTTCTTCTGGAGTAAATTCTTAGTCATC  
CATTGGTAAGGGTGTTCATCACCAACACTAGCTAGAAACAACCTGTTTAACTGGAGTCTCGTGAACCTGA  
CCTGCCGTTTACCTTTCTTCTTCATAGTCTTGGGAGATAATATTTTCAGTGTTAAATTTTTCTATTAATGGC  
TATCTTATAGCAGACTATTCTGATGAGGATAATGCTTATGCTTAGGTTTATTGGCAATTTAGATCTCTGTG  
GTCAACAAGTCCGCAAGCCTTGCAAGAACATCTATGGGATTCCCTGTAGTATTGCCTCATGCTGAAAGCGA  
TGAAGCTGCAGGTTGTTATTTGCTACTGCTTCATATCTATTTCTTTTAGAAGTTTACTGGCTTTTGGAACT  
TCCCTTCTCCACCAACTGAATCTATTTTTTTCTCTTTACTTCTATGTAGAAAGCTTGATTTGTTGCTAA  
ATTAATGTGATTTCTGCAGTCCCTACGAAGCGATCCTCTCACTATATTAGAGCAGCAGTTATTGGTGCAA  
TAGCAACATTGGGTTTTGTAICTATTGTGTTCTTTATTTCTCTGGGTTTGGTTGTTATCTAAGAAGGAA  
AGGACAGCAAAAAAATACACAGAAGTCAAGAAACAAGTCCACAAAGAGCCAAGTAAGTGGGTGAATA

GTACAATACCATTTCTTTTCCTTCTCCCAATTTTTGTCTTAATTTGTCGAGGCTTCAGGTGCCAAGCTTATT  
ACTTTCCATGGAGATCTTCCTTATCCTTCATGCGAGCTAATAGAGAAGATTGAATCCCTTGATGATGAAG  
ATGTTGTTGGGGCAGGAGGGTTTGGTACTGTATATCGGATGGTTATGAATGATTGTGGAACATTTGCTG  
TTAAAAGAATAGACCGGAGTCGTGAAGGCTCTGATCAAGTCTTTGAGAGAGAGTTAGAAATCTTGGGTA  
GCATCAAACACATTAATCTGGTCAATCTACGAGGTTACTGCAGGCTTCTACTGCAAGGCTTCTCATCTAT  
GATTATTTGGTCATGGGAAGCTTGGACAATTCCTACATGGTATGTTTCCAACTTTTCAAATTTGTCCCC  
AGATCCTTCTCTCCACATCTCCTCTTAAGCTTATACAAGACATCAAATATGGAAAGTGTGTATATTTT  
TGCCATACATTTTTTATTTGGTTTATCCCGAATACAACCATTATTTTCAGTCATCTGTTTTTAAACTGGAGA  
GGGGGAAAAGCGCTATTGCTTTCATTTAAACAATCTGTTTTTCTTGGCTATTCATTGCATGCATCTTTATT  
GTATTTTTGCAGAACGTGTGGATGATCGGTTGTAAACTGGAATGCACGTCTGAAAGTAGCTCTTGGTTC  
TGCAAGAGGATTGGCCTACCTACATCATGACTGTTGCCTAAAATAGTTCATCGAGATATCAAATCAAGC  
AACATACTCCTTGATGAGAATCTAGAGCCTCGTGTTTCAGACTTTGGCCTTGCCAAGCTTTTGGTGGATG  
AGGAAGCTCATGTCACGACTGTGGTTGCGGGTACTTTTTGGTTATTTAGCACCAGGTATGCATATTCACTT  
AAATCAGCAAGGCATAAAGATAGATTCACATATATGTTGCCTTTTAATTGCAAGAATGGTTTATTTTCTTA  
TTTTTCGCTTGGATAAACCTTAACCTATTCTTCTTTTTATAATCATCTGTATGTAGGTTTGATTTGCTTAAC  
CTCTATAAATTGAAATTCCAAACCTCACCTCATCTTCTAGTGAAATGTCTGACCAACGATTTCTTGTTTGTA  
ATTGTAATATAACCAGAGTACTTGCAAAGTGGAAGAGCCACAGAGAAATCTGATGTGTACAGCTTTGGG  
GTTCTCCTTTTAGAGCTTGTGACTGGAAAAAGCCAACAGATCCATCCTTCGTAAACCGAGGCTTAAATG  
TGGTTGGCTGGGTATGCATGCTTCCCTGAAACTACCAAATTTTAGAATTTTCATGAAGACTCGTTAATTT  
TTAAACTTCATAGGAGACACTAGTTCGGAAATTATGGGTGATTGTGATATGGAACCTCCCTTTTCTGTAT  
TTAGCTGTACAATTTCCACATATTGATAGTGTACAATTTGAAAAATGAACAGATGAATACCTTGCTGAA  
GGAGAATAGACTGGAAGACATCCTAGATGCGAGTTGCAGAGATGCCGATGCAGAGACGGTAGAAGCA  
ATTATAGAAATAGCTGCAAGATGCACTGATGCAAATCCAGATGATAGACCTACAATGCAACAGGTGCTG  
CAATATTTGGAGCAAGAGGTCATGTCACCATGCCGAGTGATTTCTATGACGAGTCTCATTAGATTATT  
CTTGATGTATGGAATAATTTCTGGGACAAATATTTAGAAACAATTTGCAGCCTGATACTGAAATGTGTA  
ATCTGCCATTGCAGATACTCTGTATGCTCCTTGCTTTTGGAGCCCTGCTGCTTTTCTCCTAATGTCTTTGT  
GCATCTCTTGTGCCTTTTTATGTAGATACCTGCAGTTAGTTTTAAAGCTACAATTATGAGTCCTAACTAGC  
CATGGCATTATGTAGTATTTATAATCTATTCATCACTATTGAATTTTCTTCACCTATAATAGAGTTTAGGT  
TCCTCCTAAGAAAGTTCTTTAAGAAAATTTGATGAAATATTTGAGGACACTCAACTACTGGTGGATGTCA

TATCTGCAAAGCATATTGTATGCCACTCAATTATCA

>M6-PGSC0003DMG400025635 M6 LRR-RLK

ACCAAGTTGAGGCTTCTTGGATTGTCAGTAAATAGCTTATCCGGGGAGTTCCTCCTCCATTGTACAATTT  
GTCATCCCTGGAACATAATCACTTTCTTTAACAACTTTTCTGGTAATCTCAGATCCGGTTTAGGCAACT  
ACTTCCCTAATCTCCAAATACTTGGCGAAATGTCAATTCATTGGTTCCATACCGTCCTCTTTGGCCAATGC  
TTCAAATTGCTAGAGCTTGATTTTCTGTAAACAATTTCACTTGAAATATACCCCAAGGGTTTTGGTAAC  
TTGCAGATTTTCTGTGACTCAACGTTTGGAGTAACCAACTTGGATACGGTAAGCATGATGACCTTGACT  
TTGTAATTTCTCTTACCAACTGCCAGCAGTCTATAAATGCTCCATTTTGGAGACACCAGTTTGTACGTGCA  
TTACCTCATTCAACAGTCAACCTTTCTAGTCAGTTACAACGCCTACTCTACTACGGAAACAGAATTACTGG  
AAGCATACCCAGAGATATCTCCAACCTGGTGAATTTGATCTACTTGAGATGAGTAACAACAATCTTACAG  
GTAGCACTCCAGGTTCTATTGGAAGACTGACAACTTGGGAGGTCTCAACTTGGGTAACAGTCTCTTGA  
CAGGGGTCATCCCTTCTCAATAGGAAACCTCATTGAACTCGTCTATCTTTATTTGGGACTAAACAGGTTA  
TAGGGTAACATACCTTCAACATTGGGAAACTGTAGCCAAGTCTAAAATTGGGTATTTCTGAAAACAGCC  
TAACAGGAACTATACCACAACAACCTTTTTCTCTCATCCCTCACAAATATTTATGCATCTTATAACTCTT  
TGACTGGTCCATTACCGGTCTATATTAGTAACTGAAGTTATCTTACTTATCTTGATTATTCTCACAACAATT  
TTTCGGGGTTGATTCCACGAACTCTTGAAAATGCTTGGCCTTGGGGGATCTATTTGAAGGGAAACTCCC  
TCCAAGGGACCATTCCCAATTTAGAAGATCTGCCGGATCTCCAATCCTTGGATCTTTCCCAAATAATCTA  
TCAGGGCCAATTCCTCACTTCATTGCAAGTTTTACTTCCTTGCTCTACTTGAACCTTATCTTTAACAACTA  
GACGGTGAGGTTGATGTCACCGGAATATTTCAAATTTGAGTGCAGATGTATTAACCTGGAACCTCCGAG  
CTTTTTGGTGGGATTCAAGAGCTGCATTTACGACCTTGTTTATCAAAGACACGGAAGAAGCATGTAC  
TTCCCTCAAGCATGATACTTCACAGAATGAATATCATAATATGTGGCCTCTGCACTTCATTATCTTACCA  
TGAGTGCCAAACACCCATGATCCACTGTGATATAAACCACAGAACATTCTTCTTGATGAAGATCTCACAG  
CTTATTTGGGTGATTTTGGTTTGGTGAGACTCATTCTTGATGAAGATCTCACAGCTCAGTTTAGCTCACTT  
GGAGTTATGGGAACCATTGGCTATGCAGCTCCAGGTAGTGTTCTAGGTTAACAAAACCTGTGATATGA  
AATTTCTTCAAACAATAGTTGTTTATTTATAAGCTAAATTTGCTTGTGTCAGAATACGGCATGGTAAATAA  
GGTCTCCGCTTTAGGAGCTATGTACAGTTTTGGGATTCTCATATTGGAGATATCACTGGAAGAAGACCC  
ACAGACACTTTGTTCCAAGCAAGCTCTAGTCCCCACCACTTTGTCGAAACAGCGTTGCCAGAGAAAGTTA  
TGGAGATTCTAGACAAAACAACCTTTTCATGGTGAGATGAGTAAAGCAACCAACGTCAAAGAATACTGGG  
GCAGTATCAAGAAAGAAGAGATGGAATGCTTGGTTAGCATACTTGAGATTGGTGTGCATGTTTCTGCTG

AATCCCAAGAGACAGATTGACCGTGACACAAGTTTACAGTAAGTTGACACTAATGAGAGAACAATTC  
TACAAAGGGGAGGTTGAGGCCACAGGCTACAAGTGAAAGCATTGGATTTTCATCTAAAATGGTTTAAATT  
CTGTCTACTTGGTAAGAATGGTAACATTCTGTCCAGCATGCAGAAGAACTAAGGTAGTGTCAGATTTCTT  
GTTACTTAATGGATTTAGTCTAGAAACATCAGATATTAGTTCTTAATGTCTACATCAGATAATACGTTTCA  
TTCATGAATGTAAAGAATCAGATGTTTTAGGAGATCATAAGGCAAGATCAAATGGTCATGGTGAGAATG  
TTCCTTTAAGGTTGTGATTCTAGACACAGATGAGGTATTCTTGTCCCAAAGTTGGAGCATCATGATCAAT  
ACTTGGAGGGTTAGTGAGAACTGTTGATCTTTCATTGCTTCCCTTAGCTTTGATTGTCGTTTGTCTTG  
TCCTTTATTTGAATACCAATGCCATGCCACATGACATTGTTTAGCCTTCATCTTGTCAAGTCCACACCAA  
GTTGCCTTGCCCTCAAGTCCTTGGTCCTCACTTGCCACTTTGGAATCAAGCCTTGGTGCCATTGTGCACAC  
CTTAGCTTTGTCAACCGTCCGTCGCCAACTTAG

>M6-PGSC0003DMG400025771 M6 LRR-RLK

CAACACTTTCTTTTTTTTGCCTTAACAATTCTCCATCTCTTGCTGCCTTTTTGGTCACCAAACAACCTTCTCT  
AATAGTTGGTTTACCTCTTCTCTTCTTCTTATGTATATAGAAAGTAATCATGAATAATCACTTCAAGAAA  
TGATGACTATCTCAGAACATTACTATTCTTCTGGTCATTTGGGGTCTTTTTCTTCTTTTATGTCCTTC  
ATTTGGTCTCAACATAGATGGAACCTCTTGTGTTGCTTTCAAATACTCTGTTCTTGATGACCCTTTATCAGT  
TCTTGATAATTGGGACTAAAATGATGCAACCCCATGTTTATGGACTGGTGTAACCTTGTGCACCAGACATG  
TTTAGAGTCATTAGTTTACTACTCCCAAATTCTAACCTTGTGGTTCTGTTCCACAAGAATTAGGCTATATT  
CAACATCTTCATACTATTGATCTTTCAAATAATTTCTTGAATGGAACACTTCTGTTTCACTTCTCAATGCT  
TCTGAACCTCAAGTTCTTTCACTGTCAAACAATGCTATTTCTGGTGAACCTTACTGAATCTATTGGAGTGTT  
AAAGAGCTTAAAGGTTCTAAATCTTCTGTCAATGCATTTGTAGGAAATATCCACAAAAGCTAAGTTCT  
TTGCAGAATCTAAAAGTTGTTTCTTGTAGTAAAAACCTATTTCTGGTGAATACCAACTGGATTTTCAGTT  
TGTTGAAGTGTTGGATCTTCTTCTAACTTGTGAATGGAACATTACCTGATGATTTTGGTGGTGATAGTT  
TGAAATACTTGAACTTTTTCATCAAACAAGTTATCTGGTTTAGTGTACCACAATTTGCCAAGAAAATACCA  
ACAAATGCTACAATTGATCTTCTTCAACAGCTTACAGGTGAAATCCCAGAGTCATTAGCTTTATCAAA  
CCAGAAAACAGAATTCTTTCAGGAAATACAGATCTTGTGGCAAACCACTCAAGAACTCTGTACAATC  
CCTTCAACACTTTCATCTCCACCTAATAAACCCTAATCCTCCAGCAATTGCAGCCATTCCAAAAGAAAT  
TAACTCAACCCCACTTCAAGATTCTGATGGAACAACCTCAAACCTGCAGCTCAGAATCAACAACAGCATGGG  
CTAAAGCCAGGTACCATAATAGGAATCATAGTTGGTGACTTAGCAGGTGTTGGTGTCTTGTCTATTGTCT  
TTCTTTATGTCTACAAATTGAAGAAGAAGAATAAAGCAAGTGAGGCAACCATAGAAAGCTCAATTGACA

AAGATCAAAAATACAACAAAACACCAGAACCATCAATACTTGTTGTAAAAGAAAAAGACACCATTTTTCC  
TAGTTGGCCATGCTTGACCATAAATCAAGAAAGTTCAGATACTGATGACAGCAAAAACCAAGAAAGTGA  
AGACCAAATTGAGTATGAAACAGAACAAAAGAATGAGAAAAGCAAGAAAACAGAAAGGTCATTTGTAA  
TGGTGGATGGTGAACAGAATTAGAGCTAGAGACTTTGTTGAAAGCTTCAGCTTATATTTTGGGGTCAA  
GTGGAGCTAGCATAGTTTACAAAGCTGTGTTAGAAGATGGAAGTGCATTTGCTGTTAGGAGAATTGGCG  
AGAGTGGTGTGATAAATTGAAGGATTTTGAGCAACAAATTAAGGAATTAACAAGCTAAGGCATCCAA  
ATCTTGTTCTGTTAGAGGATTCTATTGGGGAGATGATGAGAAATTAGTCATCTATGATTATGTTACTAA  
TGGAAGCTTAGCCAATATTGGTTACAGTAAGTACTTTCTTTTCATCTTCATTATCTTATCATAATTATAGT  
TTTGATAAATCTTTTCTGTCCTTATCATAATTACCTCCAAATATTCGGATTAGTCAAGTGTACTTGACATTT  
AATGTCACTGATATATTTGCAGCAACATTCCTGATTTGTCACTTAACAAAAACATTAAGCCTATAGTTT  
AGCGGTAGTAATAAATACTGTACTAAGGGGTCGTTTGATAGATGATTAGAATTATGATGATATTAGTAA  
TATAGGAATTGATATTATTTTCATGCTCATATTAATTATGCAGTGATTAGTTATTCCACCATGTATTTGTCAT  
GAGGGTTTTTAAATTGCAAACTAGAGCTACCAAACCTACTTTTGCAGAACTTAATTAATACCTGCATAA  
CTTACATCTAGACCAACTACCAAACAACCTCTTTTTTAAGTACACTGTCTGTCATTAGAAAAACAAGTAGT  
TTAATTTTAGTGTACATGTACTACACAGGCATGGATTTTCGTTACTCAATTTTGCAGATACTATACTTCATA  
TGTGGTTGTGTTTTGAGGCTCCCAATGGTCCTCCATGTGACATTGTCATAATCCGTGAAAGTCCCCAAC  
TATACTACAATACATATAATACGTCAAAATACATGTGCACCCCTTCTCCTCAATATTGTACTACCACAAAC  
GTTTCGGAGACTTGATTTTTTCAAACCTCCACGTTTAAGATTATATTGAGTGTATTATTATTGTTT

>M6-PGSC0003DMG400026004 M6 LRR-RLK

TTCTTCACAAAAGCCAACACTCCTTTCTTGAAATTTGTCACTAAAACCAACTTTCCCTACAAACTTTTCCAT  
CAATTTTTCTTGCAAAAACCAAAAATGGGTTTTCTCTCTGTTCTCTCTTCCATTTTCTTATCATCCTTATAT  
TAACATTCCCACAACAAAGGGTTTCTTCTGAAGCCATTAATGATAGTACTAAAACCTCTTTATCTTTGCTT  
ATGACTATCAAAGCTTCTTTGGACCCAAAAAGCCTCATTCTTTCATCATGGTCACCTACTTCTACTGACCC  
ATGCAATGATTCTTTTGAAGGTATTGCTTGTAAATGAGCTTGGTCAAGTTGTTAACATTTCTTTGCAAGGCA  
AAGATCTTACTGGAAAAATCCCACCTGAGATTGGTCAGCTTCAAAGCCTGTCTGGATTGTACTTGCACTT  
TAATAAGCTACATGGGGTTGTACCTAAAGAAATTGCCAACTTAACCTCAGCTCTCAGATTTGTATCTTAAT  
GTGAATAATCTCTCTGGTGTATTCTCCTGAGGTTGGCAACATGTCTAGTCTTCAAGGTAGGTTCTTTTT  
TGCTTTCCTGTTTTGGCTAGTTATGGTAAAAAGCCTCTGTCTTTATGCTTAGTTTTGACTTAATTTGAATGA  
ATGTTTGAACCTTGCCAAATAGATCTATACCTCTATTAATGAAATGGGTAGCTCAATAAAGTGTCCAATA

AGTGATAATGCTGTTAGTTATTGAGTAATTTACAATGCCTATGGCTTTTCTTGAAAAAGATTGGATTTT  
TAGTACTCATTAGTCATTGAAAGTCTATATTA AAAAGGTTCTTGAAGTATCTTTTATGAGGTGATTTTTGT  
TCCTATGTAGCTTACAGCTAGGTGCTTAGAACATGAAACACTTGAAAAAGCCTCCATCTTTGGTTTTATGT  
TAAGCTTTTCTCTGTCATTTGTCTCTTTCCCATTTGATTTGAGCTTCAATATGGGCTAATGCTTGAATAAAG  
TTTCAACTTTCTGGCAAACCTGCAAATTTCTTAGTCTCTTGTGGGTGGCTTTTCTGCATTTTTGGTGG  
AATAAATCTCAAATAAAAGTAACCGAGCTCCATTTGTTTTCTGTTTTACACAGTACTGCAACTATGTTAT  
AACCAGTTGACTGGAAGTATACCTAATCAACTTGGAGCTTTGAAGAACTGAGTGTCTTGCTTTGCAAG  
TCAATCAGTTAACTGGAGCAATTCCTGCAAGCTGGGGGATTTGGAGATGTTAACCAGGCTTGACTTGA  
GCTTCAATAATCTTTTCGGGTTCGATTCCAGTGAAACTCGCTGATGCTCCAAAGCTAGAAGTTCTTGATATC  
AGAAATAATACCCTTTCTGGCAATGTCCCTCAAGGTAGTTCTATTTGATTTTCTTGATAGTACCTTAATCC  
TATTTCAATTGCTTAATATGCTTAAGAAATGAAGAAATCTTAGGTTCTTTGATTTCCCTAATATCAATCCA  
AATGTTTACTAATATTAGACATTATAGTAGAACTAACTCTTTTTGGTCTTTTTGGTTTGGGCAATGGAT  
GAAATGAAGCCTTGAAGAGACTGAATGAAGGATTTAGTATGCAAACAACCCAGACTTGTGTGGAATTG  
AATTTTCTTCTTGAACCTCTGCACTGTATCTAGTCTAAACCAAACAGACCACAGCCATTTGAACCTGGT  
TCGAATCGTCTTCCACAAAAGACATTCCAGAGTCTGCAAATGTACAAACAACAAATGAGTCAGTCAA  
GAAATCACAACTGCTGTGGTTGTTGGTGTATTGCACTTTTTGTTGCAGTAGCAGTAACTGGACTTTT  
CACATTTTCGTTGTACCGTGAAGGAAACAGAAAATTGGAGGTACTCTTGATACCTCCGATAGGCGACTC  
AGTACTGATGAGGTGAAGGAGATCTCTAGAAGAAGCGCGTCGCCCTCATCAGCCTGGAATATTCCAAT  
GGCTGGGATCCTCTAGGCAAAGGCCGAGGTGGAAGTGCTTTCTCTCAGGAAGTATTTGAGAGCTTTATG  
TTCAATTTGGATGAAGTTGAGTCAGCTACACAGTACTTTTCAGAAGCAAACCTGTTAGGCAAGAGTAATT  
TCACAGCTGTTTATAAAGGGACATTGAGGGATGGGTCTGTTGTTGCTATTAAGTGCATTTCCAAGACTAG  
CTGCAAGTCAGATGAACTGAATTTCTCAAGGGACTAAAACCTTAACCTCATTGAAACATGAAAATCTT  
CTGAGGTTGAGAGGCTTTTGTGTTCAAAGGTAGGGGGGAATGCTTTCTGATCTACGATTTCGTTCCAA  
ATGGAAATTTGTTGCAGTACCTTGACGTGAAGGATGGAAAAGGAAAGGTCCTTGATTGGTCTACCAGAC  
TTTCTATAATCAAAGGCATCGCCAGAGGTGAGCTACTGTTGGTTATTGTCCCATGTTTGATGTTTTATTT  
ATAGCTCTTTGACGACCAGATTTGAATAACAACATTTGTTTTCTATTGTTTTACAGGTATTCATTACTTGCA  
TGGAACAAGGGAGGCAAACCTGCTCTGGTCCATCGAAATATATCAGCTGAAAAAGTACTTGTCGATCA  
ACACTACAACCCATTGCTCTCGGATTCTGGTCTGCACAACTACTAGCAGATGACATTGTCTTCTCAACAC  
TCAAGGAAAGTGCTGCAATGGGCTACCTAGCTCCTGAATATACAACCACTGGACGGTTCACCGAAAAGA

GTGATCTTTATGCATTTGGCATGATCATATTTTCAGATTCTCTCCGGAAGACGTAAAATCACCCCTTCTAAC  
CATCAAGGGGCAGAGTTGTGCAGATTTGAAGACTTCATTGATCCGAATCTTTGGGGCAACTTTGTTGAA  
GCGGAGGCAGTTCAGATGGCAAAGGTAGCTCTACTTTGCACGCACGAGTCACCAAATCAGAGGCCAGA  
CATTGAAATCGTCATGCAAGAACTGAATGATTTAACCTCCAGCAAGTCGTGAAAGCTATTGCAAACAACA  
TCCAAGTTCTCCAATGACCATTAGGAGCCTGATACTAACTTCTTACTGATGCCAGGAGTAGGCACCCTTTT  
CCCATCCTTTTGATCCTGCATGACTTGTGCCTGAGGACAACACATGAATGTCAGGTGCCTGTTCCACATA  
GTTTAGTACTAATGCACCTCGACGTAGGTAGCCTCAAGTGATCAGTTCTTGTATTATGTAECTTAACCA  
TAATTCTAAGCAAGTTTTCTCCACTTGCAAAGTGTACCAGAAGTGCAATTTCTATTTAGTATCATATA  
TGACCTCTTGC

>M6-PGSC0003DMG400026072 M6 LRR-RLK

CTAAGACCTCATTTTCTATCATCACTAAATGGACTAAAACTAACAACTCTGCATTCAGAACTTCTTTTT  
CTTTTATCTATTTCTGGTGACTGACACTGCAAATCCCATTTTCCCTTTAGAGGGGTCTCATTCAAACCTTT  
GAATTTTTTTGGGTATTCAAGAAAACAAAAAGTTGAAGCTTTCTGCCTCTTTATGTGTGAATAAATAAG  
AGAAACAGAAAATCATCTTACTATTTTCAGGTATAACTCATGTTTTCTTTAAGACTTGTTCAATTTGCTAGTCT  
TTTAATTACATAAAAATCCAACTTTATGTGTTATATGAGTTATCAGATGATTCTTAACAACCTAAGCTAGC  
ATTTAGCCATAGATTTTAGATGATATTTTGAAAATTTATATTCCTATCTGTTTGGCCATGAAATTTGACATT  
TTTGGAAATTTGGGACTTTCGCTCTTAAACTTCAAATCTATAGCCAAACAGGACCTAAAGGATGCATG  
TACTTATGAGTTCTTAAGAAAGTTTACTTTTTTTGTTTCTATGTATATCTCTGTTTCTGTAAATTATGAAA  
GCTGTTTGTCTGTCAATTAGTTGATTTCCATGTTCCCTGTTTGCCTATTGTAGTTTGCTACAACCTTCTT  
GGAAAAAAGTTGTTTTGTTATTGTTACAAATATGGAAATCCTAGATTTCAATCTTCTTGCTTATATTCCTAT  
AATTCTTGCAATTATGTTTCGAGGGGTCTATCGAAAAAGTCTCTACCTACCCAGATTCCACACTTGTGT  
TTTGGGGTAAATGAGTATCTTCTTTCATCTGGACAGTCTGTAAAATAAGGTGAAACTATTATATTTTGAGT  
CACTTTAAAGGGAGATAATTTAATTTTTATATAGTGTAATTCACAACCTAAATGAGAAATTGACATCTTAAC  
ATAAGTTTATTTCTTCCCAACCCACCCAACAATTCCATCTTTTATAATCTAGACTTCTGTATCTGTAAG  
TTTTCTTTTTCTGAACTACAATTTTTATTTTCATGTTGGAAAGTTATATGAAGTATATGACAAACATTTTGT  
TAGGTATACATAACAACCTTTAAAAAAGACAGCTTTTTTTGAATTGGATATGAGTATTATCTTGTTTTTT  
TTAATATACCACTTTATCTTAGTGTTGATATCTGAGTTTCCACTGTTTTTCTTTCAGCTGCTTCTTGGATG  
GACACCCATCATGGCAATAATGGAGTTCTTGATTGGATTTGTGTCCCCTTTATGAAATGACCCTTTTGCCC  
TTCTCAAATTTCAAGAATGGCCAGAATCCAAAACTTCAAACCTCTCTCAATTCTTGCTGTTTTCTTGT



TTTGAATTTTTTTGTCCAGACATGTAAGTCCTTAACCTCAGAAAGTGAGGCTCTTTTGCATTTCAAAGAGC  
AGCTTAATGACCCTTTGAATTACTTGGATTCTTGAAGGACTCAGAATCTCCTTGCAAGTTCTATGGAATT  
ACATGTGATAAAAATACTGGTCTTGTTATTGAAATTTCCCTCGATAATAAGTCGCTTTCCGGGGTGATTC  
ACCTTCAATTTTTTCACTCAAAGTCTCACTTCTCTTGTGCTACCTTCAAATGCACTATCAGGGAAACTTCC  
TAGTGAAGTTACCAACTGCACCAGTCTCAAAGTCTTGAATGTCACTGGAAATAACATGAACGAAACGAT  
ACCTGATTTGTCTAAGTTGACTAACTTAGAAGTGTGGACTTGTGATTAATACTATTTTTCCGGGGAATTCC  
CATCTTGGGTTGGAAATATGACTGGTTTGGTTGCGCTAGGCCTTGGAGATAATGACTTTGTTGAAGGTA  
AAATTCCTGAGACTCTTGGGAATTTAAAGAAAGTGTATTGGCTTTACCTGGCAGGTTCAAATTTGACAGG  
AGAAATCCCAGAATCCATTTTTGAAATGGAGGCACTAGGTACATTGGATATTTCAAGAAATCAAATTTCT  
GGGAATTTCTCTAAGTCAGTAAACAAGCTGAAAAATTTATGGAAAATTGAGCTGTTTCAGAATAAGTTG  
ACAGGGGAACTTCTGTAGAACTGGCAGAGCTCTCTTTTTGCAGGAATTTGATATCTCTAGCAACCATA  
TGTATGGGAAGCTGCCTCCAGAAATCGGGAACCTGAAGAAGTTAACAGTTTTTCATGTATTCATGAATA  
ACTTCTCTGGTGAATTCCTCCTGGTTTTGGAGATATGCAGCATCTTAATGCCTTTTCTGTGTACAGGAAC  
AATTTTTCTGGGGTATTTCCAGCAAATCTTGGTCTGTTTTCCCCCTGAATAGCATAGACATATCTGAAAA  
CAAGTTTACTGGTGGATTCCCAAAGTACTTGTGCCAAAATGGGAACCTGCAGTTTTTGCTAGCTATTGAG  
AACAGTTTCTCAGGGGAGTTTCCGAGTACTTATTCGTCGTGCAAGCCTTTACAGAGATTGAGGGTCAGTA  
AGAATCAACTTTCTGGGCAAATTCCTAGTGGTGTATGGAGACTTCCAAATGTATTGATGATGGATTTGAG  
TGATAACGAATTCAGTGGAACTATGTCCCCGGAATTTGGGGCTGCTACTAGCCTGAATCAGTTGGTATT  
ATCAAATAACAGATTTTCAGGTGAGCTTCCAAAAGAACTTGGGAACTCACACAATTGGAAAGGCTTTA  
CTTGGATAACAATAACTTCTCGGGCGCAATACCTTCTGAACTTGGTAAACTAAAGCAAATTTTATCTTTGC  
ATTTGGAGAAAACTCATTCTCGGGCACTATCCCATCAGAATTGGGTGAATTTCTAGGCTTGCAGACCT  
GAATCTTGCTTCAAATCTTCTTACAGGTAACATTCCCAATTCCTTATCAACAATGACCTCTTTGAACTCTCT  
GAATCTTTCACACAACAGACTCACTGGTACAATACCAACTAGCTTGGACAATCTGAAGCTGTCTTCATTG  
GATCTCTCAAACAACCAGCTATCAGGAGAGGTATCATTAGATCTTTTAACTGGGAGGAGACAAGGCA  
TTAGCTGGTAACAAAGGACTTTGTATCGACCAAAGCATCAGATTCTCGATCAACTCAGGCTTGGGCAGTT  
GTGGTGGAAAGGCTGCTAAACATAAGTTAAACAAACTAGTTGTGTCTTGCATTGTGTTGCTTTCCCTTAGC  
GGTTCTAATGGGTGGCTTATTGCTCGTCAGTTACCTAAACTACAAGCATAGTCATGAAGTAGATCATGAA  
GAAAACTGGAGGAAGCCAAGGGAACAAATGCAAATGGAACTTGAAGATTTCCACCCTGTGGAATT  
TGATGCAGATGAAGTTTGTGATTTGATGAGGACAATTTGATCGGAAGTGGAGGTACAGGAAAAGTTT

ATCGGTTAGACTTGAAGAAAGGTTGTGGAACAGTAGCAGTGAAGCAGCTGTGGAAAGGGATTGGTGTG  
AAAGTTTTGACAAGGGAAATGGAAATCTTGGGAAAAATCAGGCACAGAAATATAGTTAAGTTGTATGCC  
AGTCTAATGAAAGAAGGTTCAAATATCTTGGTTTTCGAGTACATGCCAAATGGTAATCTTTTCGAGGCAC  
TACACCGAGAGATCAAGGCTGGCAAGCCAGAACTAGATTGGTATCAGAGATATAAAATAGCCCTTGGA  
GCTGCAAAGGAATTGCTTATCTGCATCATGATTGTTACCCTCCTATTATTCACAGAGATATCAAATCAAC  
CAACATTCTACTTGATGAGTATTATGAAGCAAAAGTTTCAGATTTGCGGGTTGCAAAGTTTCAGAAATT  
TCTTCAAGGGGATCCGAGTTCAGTTGTTTTGCAGGCACTCATGGTTACATGGCTCCTGGTAAGTTTCAAG  
AAAACCTTAAATGAGTGACCATTTGTCTCTCCTGTTACTTTCCATTCTTGAATTTGCATTTACTTTCTA  
TATGTTTGCTTGACAGAAATGGCATACTCTCAGAGTGACCGAAAAGAACGACATTTACAGCTTTGGT  
GTCGTGCTATTGGAGCTAGTAACTGGAAGAAAACCAATAGAAGAAGCCTACGGAGAAGGAAAAGACCT  
GGTCTACTGGACCTCAACTCATCTAAATGACAAGGAAAGTATAAACAAAGTTCTTGATCAAAGGTGGT  
ATCTGAACTTGTTGAGGATGAAATGATCAAAGTGTTGAGAATTGCCCACTTTGTACTACTAAGCTTCT  
AATTTGCGTCCCAGCATGAAAGAGGTTGTCAATATGCTCGTCGATGCTGAACCTTTGACGTTTAGGTCTT  
CAAGCAAATCTGAGAAAAAAGGGAACAATTTTTCTGAGGTCTAGTTTCTTCTTTTTTTATTGGGTTTTC  
CCTGTTGATAGTTGCTCTGTAGTATAATTCTCAAGTTAGTTTTAGGTATCTGATATACATAAATTTATACC  
ATGTGATGTGATATTCCACTTTCTTTATGTAAAAGTTGCAATTGTGTAAGATAAAATGTACTTTTTTCTGC  
CGTGATTGGAACTTCAGAAGTTGGATTAATCAGAAATGTGGGTAGTTAATGTCCATGATTAAGAGTCC  
CACATCGGCAAAAATACATTAGATATGTTGATTATATAAATTAGCAGGCCTTACATTCTAATAATACTTCT  
TAAAGCTGCATAGGTGTAGACTCAAAGCTAACAATATCACTAGCGAGCTGGGCCTTACACGAAAACCTG  
TTTTGTTGTAACTTTGAATCTGATTCAATGAATATCCACATAGATAGTTGGAAGCAAAAATGATATACA  
TAAACATTTACATATTTGTATAAGAGGGATGGAAACCAACAATATTACTCTTTTTATCTTTTGTGATCCT  
CCTCAGTATTACATGGTACATTCTGCAGATTTTTCTGCTCTCTATGACATTACGGTTCCAAATCTTCACTC  
CTTTGCTTCAAGAAGTTGAGTTAATGCACCATCAATTTGAGCAAATACCTCCTCTTTGGAAACGCTCCCGT  
CCACCTGAAATTAATAAGCTCAGAGAAGATGGAGAAAGAAGATAGAAGTTTTAACACTGAGAAATGA  
TAAGAACACGTTTCATGCACGCGTATGGAAAGAAAGAACATACAGTATCCTTGTTGAGTGAAGAAAAAGA  
GAAGGGTAAGCGAAAGGGGAGTCCTTGACTAAGTATATTTCCCCCAGATTGTTTGGTATGAACGTAAA  
ACTCAAAGGATTTGCTCTTCTTTATCTAATTGAGGAGAGATGAATAATTTAAGATAAAAGAGGATGTA  
TGGCCCTTTTGCTTTGGCTTCGCTTTGTTTTACAGCTGTTGAGAGGAAGGATCAGCCTGGATGAACTGGA  
AGATAATTTAAATTAATCATTTTGTAACTACATGTCAAACAACATAATTTTATAACCATATCATTGTTCTT

TTGCCAATTAGAATACCAAACCTCTTTTTCTTCAAACCATTTCCACCCAGTCCCTTCCACATTGTCTTTTTT

>M6-PGSC0003DMG400026749 M6 LRR-RLK

AGTTTTATCTCGTAATTTACTTCAAGGGAACATTCCAGAAGGGATTGGCAATCTACACAAGATGAAATTG  
TTGTCCATACAACATAATAAACTTGCGGGTTTTATACCGTTCACAATTTTCAATATTTCTAGAATCGAATTC  
ATTGCATTTACAGACAATAGCTTATCAGGAAATCTCCCAATGGTTTATGTAATGGTCTCCCAATACTCAA  
AGGGCTTTATCTATCCACAAACAACTTCGTGGTCATATGCCTACAAGCCTGTCAAATTGTTCACAACTTC  
AAATATTGAATTTATCAGGCAATGAGTTTGGCGGACGAATACATAGTGAAATTGGAAGATTGAGTAATT  
TGCTGATATTGTATCTTGGATCTAACCATTTACAGGTACGATCCTAGCCACAGAATTATTAGTTGTTTTA  
TGGATTCTTTTATGAACACTTGTAATATTGAACTTGAAGTGCAGGAATAATTCCACAAGAGTTAGGAAAT  
CTTGCTAATTTGGCGAATTTAGGCATGGAGGATAACCAGATTAGCGGCTCTATCCCGATCAACATATTCA  
ATATCTCCTCACTGCAACGTTTTGGACTATGGCGGAACAATCTCAAGGGATCCTTACCACAAGAGATTGG  
CAACTTAACCAAGATACAGATTCTAGATCTTAGAGAAAATACATTTATTGGTACGTATTCTGAAGTGATAG  
GAAAATTATAAACTTATACTAGCTTGAAGTAACTCATTCTTAATTTCTTTAGGTGAAATACCCAAAGAGAT  
AAGCAATATGATGGAGTTGGAGATACTTAGTCTCGGGTTAAATAGTTTCAGTGGTCACTTCAAATAGA  
GATGTTCAACAGTACTTCACGCTTGAGGATAATTTCTCTTACAACAATAATCTATCAGGAACTCTACCAT  
CAAACATAGATTCTGTCTTACCCAACATTGAAGAGCTTTATTTGGGTGTCTTAACCAATCTTGTTGGGACT  
ATACCTCATTCTATTTCCAATTGTTCAAACTTACTAATCTAGAGCTTTCAAATAATAAACTCACTGGCTTG  
ATTCCCAATTCTCTTGGATATTTGGCTAATCTACAGTTCCTAACTTGGCAGCAAACAATTTAACAAGTGA  
CTCATCGTTTAGCTTCTCACTTCTTAACCAATTATAGAAATTTAACAATCTTTTTCTATCTTTGAACCT  
CTAAACGGCATGCTTCCAGTATCTGCAGGGAACCTTTACACTTCTTACAATGTTTTATGCCAGTTCTTG  
CAATATTAAGGGCGAATTCCAAATGAAGTTGGGAACTTAAGCAACTTATTAGGGCTTGATCTTTCTGGA  
AACAACCTGGTTGGATCAATTTCCACATCAATTGGCAACTTGAGAAACCTTCAGCGCTTCAACTTGAGTT  
ACAACAACTTACAGGATTTATTGGAGATAACATTTGTAAATTGCAGCATTGGGTGCTATTTACTTGGG  
ACAAAATCAACTTTCAGGATCTTCTTAATTGTTTAGGGAATGTTACTTCCCTTAGATTGATACATCTTG  
GTTCCAATAAATTGATTTCCAATATACCACCAAGTTTAGGGAATCTTAAGGATTTAATGGAGTTTGACTTA  
TCCTCAAACAACATGGTTGGTTCTTTACCACCAGAAATTGGAAATCTAAAAGCTGTGACACATATGGATC  
TGTCGATGAATCAATTATCAAATGGAATTCCTAGGGAAATTGGAGGATTGCAAAATCTGGTGCATCTTTC  
TTTGAGACACAACAAGTTGCAAGGATCTATACCTGACTCAGTGAGCAACATGGTAGGTTTGGAAATCCT  
AGACATTTCTCATAATAATATATCAGGAACCATTCCCATGTCTATGGAGAACTTCCAAACCTGAAGTATT

TCAATGTTTCTGTCAACAAGCTGTACGGTGAAATACCCTCGGGGGTCCTTTCAAGAACCTCTCGAGTCAA  
TTTTTCATCGACAATGAAGCCTTGTGTGGTTCTTCAAGGTTTGTAGTGCAGACCATGCGCCACATCATCAAA  
GCATAGATCAAATAGGAAAAAATGCTTGTCTATTTCTTGTGCTGGGAATTGCACTTGTATTTGTTCTTA  
TTACCTTTGTGTTTGTATGGATAAGGTATAGAAGAGGTACAAGTGATCCTCAACAAGCTCACTCATTGTC  
TACCGTAACAAGAGAAATAATTCATACTATGAACTGCTCCAAGCAACTGAGTCGCTTAGCGAGAGTAAT  
CTGATTGGTTCTGGAGGTTTTGGCTCTGTTTACAAAGGTGTTCTCAGAAGTGGGATTGCCATTGCAGTTA  
AAGTGTTCAATCTGCAATTGGAAGCGGCATTCAAGAGTTTTGATACAGAATGTGAAGTTTTGCGCAGCC  
TTCGCCATAGGAATTCATGAAAGTCATCACTAGTTGCTCCAACCTGGATTTTAAGGCTTTAGTGCTTGA  
GTATATGCCTAATGGAAGTCTTGACAAGTATTTGTATTCGCACAACACTTCTCTAGATATCAGCCAGAGA  
CTAAGCATTATGATAGATGTGGCATGTGCGTTGGAATATCTCCATCATGGATTCTCCTCACCTGTGATTCA  
CTGTGATCTAAAGCCTAGTAACATCTTGTAGATGAGGATATGGTTGCCACCTAAGTGACTTTGGTATT  
TCAAACTGCTTGGTGACGATGAGAGTGATTTATACACAAAACCTTAGCAACATTTGGTTATATCGCAC  
CAGGTACGTCTCTTTGTTTTTGCTAATTTGAACATTGATTTTTCGTCTTTTTTTTTTCCAATCAAGAAAGTAT  
ACTGCATCTTTAAATTAATTGTTTGACTGTAGAGTATGGATTGGATGGACTGGTGTGAGTAAAATGCGAT  
GTCTATAGTTACGGGATTATGTTGCTGGAAACATTTACTAGGAGAAAGCCTAGTGATTTTGAGGGAGAT  
CTTAACCTGAAGCAATGGATGAGTTATTCCTCCCGAGGCAGTAATGGATATTGTAGATGCCAATTTGG  
TAACACCAACGGATAATCGCTTACAGAAGGAGCTAGATGTTGTGGCTGCAATCATGAAAGTTGCATTAG  
ATTGCTGTGCTGAATCTCCGGCAAGAAGGACAAACATGAAAGATGTTGTAGGGATGCTACAAAAGATCA  
AGATTCAACTTCTTGCATGCTGAGCATGTTTTCAGAATCTTGTCTGAATCGATCACTTTTTCTGTTTTG  
TTTTAGCACTTGATTTGTGCATGATTCTGTTTTCAGAAATGCTAGTTGGTTGCAATAAATGTCACTTTTTCC  
TCTT

>M6-PGSC0003DMG400026760 M6 LRR-RLK

TGAATTTTCTTGTTCATTTCATCAATGGTGACACCCAACCAAATCAAGAATCCATTTTTGCAGACCTCTTT  
AGTCTCAAACTCCATTTTTAGCTCTGCACTTTGGACTTTCTTGTTCATTCATCCATGGTGACACCCTA  
CCAAATCAAGAATCCATTTTTGTAGAGACCCCTTAGTCTCAAGACTCCATTTTTAGCTCTGCATTAGATC  
CCTTTAGTGTTAAGACTCCATTTTTAGCTCTGTAAGTTGAGTATTTAGTGTCAAGACTCTATTTTTAGCTC  
TGTATTAAGCATTTCAGTGCTCAAAAATTGTCAAGTTCAATGAAAATCAAGAACCATTTTTCTCTAGAG  
TTGAACAACTTAAATGCTCAATCATTCAACAATGGAAATGTCAATTTCAATGGAAATCAAGAACCCTGTT  
TTGTTTATAAGGTACTGTTCTAGTCACAAATTCTGTTTTTCATTTTCTCAATATTTTCCATAGTTTTACCAC

TTGTAAGATCAGATGATGCTGAAGCACTTTTAGCATTGAAATCCACAATAGACCCCTCAAATTTTCTTGAT  
TGGAAAAAAGGAACTGATTTTTGCCAATGGCAAGGTGTTAAGAATGCATGAAAGGTAGAGTTACTAA  
GCTTGTTGTTGAAAATCTCAATTTGAGTGGTTTATTGGACCAAATGCTCTCAATCAACTAGATCAATTAC  
GAGTTTTAAGCTTCAAAGAAAACCTCATTTCGGCCAAATCCCAAACCTTGCCGGACTTTCCAATCTGAA  
ATCCCTTTTCCTCAACAACAACAACCTTTTCGGGTGAGTTTCGGGCTACCATTACCCTCCTCCACCGTATCAA  
AGTTGTGGTTCTCGCCGGAACAAACTCTCCGGTGACATTCCTCCGGCGTTAACAAATTTATCCCGGTTG  
TATGTTCTTTATCTAGAAGACAATCACTTCACCGGAGAAATCCCACCGTTGAATCAGCTCAGTTAAGGTT  
CTTTAATGTGTCAAACAATCAACTTTAGGTGAAATCCCGAATACTCCGGCGTTATCTCGGTTCAATGAAT  
CATCTTTCGCCGGAATGTCAATTTGTGTGGAGTACAATTGCATAATAACTGTCCTTCAACTAGTCCAGC  
GTATCCCATCATTCCAGAAAATGTATCTCATCATAAAAAAAGCAAAAAGCTTATCATCATCATTGTCCCTG  
TGGTCGCCGGAATCTTGATCCTCTGTGTTTTGATGGCGATTTTTATAGCATGTGTTCGAAAACGAAGAAG  
AAAAACTCAAGATGGAAAGAGTAAAGGAGTTGAAGCCGGTGGAGGCGGGGGAGGGGGAGGGGAAG  
AAGAGGGGACTAGTCGCGGTGGCAATGGCAGTGGTGGTGGTGGTGGCAGGGATGGTAATAATGGTGG  
AAAAGAAGGGGCATTTTCATGGGATCAAGGAAGTGGAGGACTAGGGACATTGGTGTTTTGTGGACCAG  
GTGATCAACAAATGAATTACACCTTAGAGGATTTGTTGAAAGCATCAGCCGAGACATTAGGGAGGGGT  
ATAATAGGAAGTACATATAAAGCCGTGATGGAATCTGGCTACATTGTGACAGTGAAGCGGTTGAGGGA  
TTCGAGGTTTCCGAGGTTAGAGGAATTCCGGAGGCATGTGGAGATTATTGGTAGGCTAAGACATCCTAA  
CTTGGTCCCACTCCGAGCATATTTTCAAGCTAAGGAAGAACGTTTGCTTGTTTATGATTATTTCCCTAATG  
GCAGCCTCTTCTCCCTCGTTCATGGTATGTATCCGTCGTTCAATTTATTTATTTATTTAATTTTGTCTTTA  
TCCATTTTTGTGTAAGTGAAGTCTAGTGAAGTAAAGGAGGAAAAAACAGGTATAGTTGAGCTCATGA  
ATAGTGAAGGAAGTTAAAAAGGATAAATTTGGCAGGATGAACTTGTACTTGAGTGGTATAAGGTGG  
AATAAGATAAGGGGAGGTAAGTATTTACGTCTAGTATATGCATCGATCGAATAGATGCATTACATGTGT  
TTTTTACTAAATTAGTTATTGAATAGTTTATCCTCTCTTGAGGTTACACTAGTTTAGTTTTGTGCAAATAC  
CAAGTGGGGACAAATCTTTTCATGAGATCACTAGTTTATAACTCAATCTCTCGAAGATTCTGCTCCTTTA  
TTGACATGAGTCATTTTCTTATTTTGAATTCAAATTTGTTACCTCTTTATGCTTGGCTGTTTTGTGGGGGAG  
CATTGGAGGACTTTAGTGTCACTTTATTTTCTATTTTTTGTGTTTATTTTGTGTACTTTGCACATTTTCC  
TTGAATTGTTTATACTTTTTAATATGTTTCTTTATCTTCTCAGTATTCTGTCCCTTCTAGTTTGTTTTTTG  
TTATTTTTGAATAATTTCCATATAATTGTTTTGGTAGTGTATCACTTTCTGGTCTCTCCTGTGGGTTCTGTT  
TGGTGATGGTGGGGAAGAGAGGGCCAACAAGGAAGCTTGTAGGAGCCAACAAGAATTGAGATAGC

TGGCCAAGTAGGACAAATATGTAAATTTGTAAAGGAAGTTCCAAACTTGCTTTGGTATACTGATGTGAA  
GATTATAGAAAAAATTGTTTTGTTTAAATAATTAAGTTAAAAAAAATCAATAATCAAATAAGTAACT  
CTTCTCATCTTGTCTCTACGACTACGGATGTTATACAAAAAGAGGATAAAGAACAAAAGGGGAGTATA  
GTTATATATTGGCCTTTTGAATCTTAAGAAGGATGATATTTCAATCAAATGGATTCTGAAAAAGATGTC  
TATTGTGTTTCGGTTATTGCACTATTTTGTGTTGTTACAGTTAATTTTATGAATGCTTTGTGCTTTCCTTAT  
TATTTGCCATATTTCTTCAATGCCATTTTTCCTTTCATAACTACTTTGTTTAGCTGCACAAGAGCCTAGGGT  
CCTTCGGAAACAACCTTCTATCTCAACGAGGTAAGGTCGCGTATACTCTACCCTATCTAGATCCCCTTG  
TGGGATTTCACTTTGTTGTTGTTGGATTGTGAAAAAGATGGCCCTCTGGGAGGAGGAACTCAAATTAG  
GAACCAAAACAATGATGTCACCGCTACACTCGCATATTTTGGCCTTGTCATTTATTGCATAGAGCCAAAA  
CAGTTGTCCACCATATATGGAGATAAGGCATGATACTTTGAAATTAGAAAGAC

>M6-PGSC0003DMG400026792 M6 LRR-RLK

TTATCACATAACGGTCTAACTGGTCCTGTACCTGAAGCCCTAGCAAACTGACTTATCTTCAAAGTGTTG  
ACTTATCCTTTAACAAATTAACGGGAGTGTTGCCAAAGCAGCTTGAGATCTTGCCATCTCTCCTTATTC  
AACATTTACACAACCAGCTACAGGGCGAACTACCTTCTAATGGTTTTTTAATACTATTTCTCCTTATTCC  
GTGTCAGCAAACCCATCTCTATGTGGGGCTGCTGTCAATAGGTCTTGTTCTACAGTCATGCCCAAGCCAA  
TTGTTCTGAATCCCACTCTACTGATTCTTCTCCAACACTGTCCCTCAAAGTATTCGCCATGAGAAGAAA  
ATCCTAAGCATCTCTGCCCTCATTGCTATTGGTGCAGCTGCTGTTATTTTTGTTGGTGTGATTGCCATTACT  
GTGCTCAATATTCGTGTCCGGTCAGCGGCACCTCGCTCTGCTGCTGCAGCCCTTACATTTTCTGGTGGAG  
ATGATTTTAGCCATTCTCCATCCACGGATGCGAATTCTGGTAAGCTTGTCATGTTTTCTGGTGATCCCGAC  
TTCAGCACAGGGGCACATGCTCTGCTTAACAAAGATTGTGAGCTTGGGCGAGGTGGTTTTGGAGCAGTG  
TATCGCACTGTCCTTGGGGATGGGCATCCAGTGGCCATTAAGAAGCTTACCGTTTCCAGTCTTGTTAAGT  
CTCAGGAAGATTTTGAGAGGGAGGTTAGGAAATTGGGAAAAGTACGTCACCATAATCTGGTCACCCTTG  
AAGGTTATTATTGGACACCATCTTTACAGTTACTTATATATGAATTTGTGGCTGGTGAAATTTGTACAA  
GCATCTCCATGAAGGATCTGGTGGGTGTTTCTCTCATGGAATGAGCGGTTTAAACATCATTCTCGGGACA  
GCAAAAAGCTTGGCTCACTTGCACCAAATGAATGTAATCCACTACAACCTAAAGTCCAGCAATGTCCTAA  
TTGATAGCTCAGGTGAGCCTAAAGTTGCAGATTATGGCTTAGCAAGACTATTACCCATGCTTGATCGATA  
TGTCTTGAGTAGCAAATTCAGAGTGCACCTCGGTTACATGGCACCTGAATTTGCATGCAAACTGTGAA  
GATAACCGAGAAGTGTGATGTGTATGGATTTGGAGTTCTTGTTCTGGAGGTAGTCACTGGAAAGAGGCC  
AGTTGAGTATATGGAAGACGACGTGGTAGTACTGTGTGACATGGTACGTGGAGCATTAGAAGAAGGCA

GGGTAGAAGACTGTATAGATGCAAGGTTGCAAGGAAAATTTCCAGCAGATGAGGTGATTCTGTGATG  
AAGTTAGGATTAATCTGCACATCACAAGTCCCATCAAACCGGCCTGATATGGGAGAAGTGGTTAACATT  
TTGGAGCTGATTGATGTCCTTCAGAA

>M6-PGSC0003DMG400027071 M6 LRR-RLK

CAACCATTTTTGATTCATATAACCACCAATACACACTTATAAAAAAATCCATTAACCACCACAGCCTGGTT  
ACCTCATCACTTCTTCCCTCCCTCCCTCCGTCGGCCTACCGGAAAAACAAGAATCTCAATGGCTTC  
AAATTTCCACTTTTTTCTTTATACCTTGACCTTTTCTTTTTGCTCAAGCAAGACTGAATCTTTATCCA  
CCAGATCATGCTGCACTTTTGCTTGACAAAAGGACTTAGGCATCATTTCTTTAACAACCCCTGTACGCT  
CGCAGGAATATCCTGCGAGCGTAGACCGGGTAACAGAACAAGTTCTGAGAGTTACCCGTATTGTATT  
CAGATCCAATGGATTGAAGGGAACCTTTGTCTTCTGCTATTGGCAAACCTCTGAGCTCAAAGAGCTTTCT  
CTTCCGACAATCAACTATCTGAACAAATCCCGATTGAGATTCTTGATTGTCGGAAATTAGAGATTCTTGA  
ACTTCAAAGAAACAGATTTTCTGGGAAGATTCCATATGAATTGTCATCTTTAACCCGTTTAAGGCTAGTT  
GACTTTTCATCGAATGAGTTTTCTGGGAATCTTGATTTCTTGAAGTACTTTCTAATTTGGAAAACTGTC  
TCTGGCTGATAATATGTTCACTGGAAAAATACCCTTTTCATTGAAATCTTTCAGGAATCTTCGTTTTCTCAA  
CATTTCAAGGAATAGTTTTCTTGAAGGTCCAGTACCTGTCATGAGTCAAATTGAGCATTATCAGCAGAT  
TTGAATCGAAACAATGCCGTTCCCAAACGTTACATTCTTGCTGAGAATTCAACAAGGTCAAATCAGATAT  
CTGCAATGGTGCCTGCTCCAGCTCCAGCACCGGTCAATCGTGTTGTACCTGTGGTGCATAAACGTAACAA  
GAAGAAAAAGAAGTTAAGATCTTGTTTTCTGGTTTTCTAGCTGGAACCTTTGCTGGGGGTATATCTGCT  
GTGATCTTTTCGTTGCTATTCAAGCTTGTAATGTTCTTCTGTAAGAAGGGGAAAGAACGATAATTCAAGTT  
TAACGATATTTAGTCCGTTGATCAAGAAAGCGGAGGACTTGGCTTTCTTAGAGATGGAAGATGGAGTAG  
CATCACTTCAAATGATTGGAAAAGGTGGATGTGGAGAAGTTTATAGAGCCGAGTTACCAGGGAGTAAT  
GGGAAGATTATAGCTATAAAGAAGATTATACAATCCCAATGGATGCTGCAGAGATCACGGAGGAAGA  
TACTAAGGCGTTGAACAAGAAAATGCGTCAAGTTAAATCAGAAATTCAAATTGTAGGTCAAATCAGACA  
CCGGAATCTGCTTCCATTACTGGCGCATATGCCAAGGCCAGACTGTCATTACTTGGTGTATGAATATATG  
AAAAATGGGAGTTTACAGGATATCCTGCAGCAAGTCACAGAAGGCACAAGAGAATTAGATTGGTTGGG  
ACGACACAGAATTGCAGCGGGGATAGCTGCTGGTCTTGAGTATCTCCATATAAACCATACTCAACGCAT  
AATTCACAGAGATCTAAAGCCAGCAAATATCCTACTTGATGATGACATGGAAGCTCGAATAGCTGATTTT  
GGGCTTGCAAAGGCAGTTCCAGATGCTCATAACATATTACGACTTCAAATGTTGCAGGAACTGTGGGA  
TATATTGCACCAGAATATCATCAGACACTGAAGTTTACAGACAAGTGTGATATATACAGCTTCGGTGTG

TGCTAGCTGTGTTGGTTATCGGAAAGGCTCCATCTGATGAATTTTTCCAACATACTTCTGAGATGAGTTTA  
GTTAAGTGGCTGAGAAATGTAATGACTTCTGATGATCCTAAAATAGCAATTGATCCTAAGCTGATAGGA  
AATGGATATGAGGAGCAAATGCTTTTGGTTCTCAAGATAGCTTGCTTTTGTACTCTCGACAATCCAAAGG  
AGAGGCCTAACAGTAAGGATGTTAGGTGCATGTAACTCAGATCAAACATTAGCTAAGTCATACGGGGT  
ATACGTTGGTTATGTAAC TAAGAATGTGTTCTGTATTTCAAGTTTTTCAAGTTGATTTTTTGTGTAATTGTG  
TTATACATGTCAAATCTTATATGTTTACTGCAGTGTTAATAATTATGTTCTTTCCACTTTGCTACTTAATTTA  
CTAAA ACTCTA

>M6-PGSC0003DMG400027115 M6 LRR-RLK

TTCTTGTGGTGTGTGTA AAAAAAAAAAAAAAAAACTCTCCCTATCCCATTCTATACTTATCAAAGCCAAATAA  
AAAACAAGAATGTCAACTGAAAAATCCCATTTTTCTAACAATAATGAAAAATCAAGACCAAGTTCAAG  
ATTTTAGCTGTTTTTACCAGTACCCATTTGGGGTTTTTCATGTTTTTAATCCAAGAAAGAGATGTGGGGTGT  
GTTAAAAAGAAGGAAAAATGGATACCATTTATCAAATTTTGTGTTTTTGCAGCTGATGATTTGTGGAG  
CTCAGTTAGCTTTAGGTCAAGTTTGGGATGGTGAATTATCATTGAGGCAAATTATCAAGCACTTGAAGC  
GCTCAAACATGAGTTAGTTGATCCTAGAGGGTATTTAAGTAGCTGGAATGATAGTGGTTATGGAGCTTG  
TTCTGGTACTTGGGTTGGCATAAAATGTGCTCAAGGACAAGTTATTGTTATTCAGCTTCCGTTAAAAGGA  
TTTGGGGGAAGAATCACTGAAAGTATTGGTCAATTTCAAGCACTCAGAAA ACTTAGTTTTCATGATAATG  
AAATTGGTGGTTCAGTACCTTCATCTTTGGGTTTTTTACCCAATCTAAGAGGTGTTCAATTGTACAATAAC  
AGTTTTTCTGGTTCTATTCTCCTTCACTTGGTTTATGTCCAGTTCTTCAAACACTTGA ACTTAGTAACAAT  
TCTTTATCTGGTGCAATCCCTGATAGTCTTGTGAATTCATCTAAGCTTTATAGACTTAATCTTAGTTACAAT  
TTATTGTCTGGTTCATTCTGTTAGTATAACTCAATCACGCTCTCTAGTCTTTATTGACTTGACATATAAC  
AATTTGTCAGGGTCTATTCCAGATTCTTGGGGTGGAAATGGAGATAGACAGTTTTAAATTAGAGTCGTTG  
ACGCTTGATCATAACTCTTTGTCTGGTGGAAATCCTGTTTCTTTGGGAAGTTGAGTGAGCTTCTTGAGAT  
TTCGTTGAGTCATAATCGTATCGTTGGTGT CATCCCAAATGATATTGGAAGGCTTAGTATGGTTAGGAAT  
CTTGATTTTTCTTATAATGAGATTAATGGTAGTTTGCCAGAGAGTATAACCAATCTGTCCTCCCTCATGGT  
TCTCAACTGGAAAGTAACAATCTTGATGGTGAATCCCGTTGGATGTAAAGAAGTTGCAAAGTTGTT  
GTTTCTTAACTGAGGAATAACCGTTTTAGAGGTGATATTCCAGCTGCTATCGGGGACATTTCTGGTCTA  
GTCGAGATAGATTTGTCTCGTAACAATCTAACCGGAGAAATCCAGAGTCTGTTAGTGAGTTACCTAATC  
TTAGTTCCTTTAATGTTTCATATAACTCTCTGTCTGGTCTGTTCTACTTATCTTGCTAAGAAATTCAATTC  
AAGTGTTTTTGTGGGTAATGTTT CAGCTATGTGGCTATAATACTTTGAATCCATGTCTGTTACGCCTTCTC



CAGTTACACGAGGTAGTAAACGAAGTATTAAGACATTATTCTCATAGTAGTAGGGTGTCTTATAATAGT  
CTTGTCTTCTACTCTGTTGCATTCTCCTCTGCTGTTTGATCAAGAAAAGAGGTGAAGCCAAAAAGCAAAA  
GACGTAAAGGATGTTCCCTCCAAGTCCCGGAGAAGTTGAGGCGGCTGGGGATAACGGAGGAAAAGTGT  
CCATTTTGGTGGAGGTATGATGTTTCAAGTGCAGATGATCTTCTATGTGCTACTGCAGATATATTGGGAAAG  
AGTACTTACGGTACAGTGTATAGGGCTACATTAGAAGATGGAAGTCAAGTTGCAGTGAAAAGAATGAG  
AGAAAAGATCACGAAAGTTCAGAGGGAATTCGAGAAAGAAGTCAACTTTCTGGAAAGATAAGGCATC  
CGAATCTTCTGGCTATTAGGTCTTATTACTTAGGTACGAAAGGCGAGAAGCTTCTTATTTTCGACTACATG  
CCTAAAGGAAGTCTCTCAAATTTTCTTCATGGTAAGCAGAAAACAGATTTCCATTTGACATTCTTTTGCTT  
CTGTTTTTTTTGAGAATCAGATACTTTCTCTGTCTCATTTTAACGTAATGAAAATTGGATTATGTATCATATC  
GGAAACAAGTCTCTAACTCACACAACGTAGGTAAGGTCTACTTACACTCTACACTCCCCAGACCCCACTT  
GTGAGATCGCATGGGGAGGAAATTGTTATGGAGGGGGTAATATAGCTTTATTGTTTTTGTTCAGCTCG  
TGGACCGGATACCAATTGATTGGCCAACAAGGATGAGAATAGCAAAGGGACTACGAGGGGATTGC  
TGTACCTTCACTAATGCCAACATCATTTCATGGGAATCTTACATCAAGCAATGTTCTACTTGATGAAAAC  
ACAGATGCAATAATTGCAGATTATGGCCTTTCACGCCTTGTAAGTCTGCTGCTGCAAATTCAAATGTTATAG  
CCACAGCAGGGGCACTTGTTATCGCGCACCTGAGCTTAATAAGCTCAAGAAAGCCAATGTGAAGACG  
GATGTCTACAGCCTCGGAGTCATTATACTTGAAGTCTAACTGGCAAGTCTCCAGGTGAGGCAGTTAATG  
GTGTAGATTTGCCTAGAAAGGTGGCGTCAATTGTGAAAGAGGAGGGAACAAAAGAGGTATTCGATTTG  
GAACTAATGAGGGATGCATCCATAATTGGTGTGATGAATTGTTAGTTACTAAAATTGGCTTTGCACTGTG  
TTGATCCCTCGCCATCAGCTCGACCAGAAGTTCAGCAAGTTCTCCGGCAACTGGAAGACATCAGGCGTG  
AAACGCCAACTGCAGGTCCCTCGACAAGTACTAGATACTCAGTTTTTGATTTTATTAACATGATTCTTTC  
ATTCTTGAATTTTATTGCTAGAGTACTAGATCTGTTTCAAGTGTCTTTAAATAAACGTGTGCAACATTGTT  
AAAAGTGTGGAGCTTAATGGAGTCTAAATACCATCCCTTTTGGCCTAAAGAACATAACTTGAGATTG  
AG

>M6-PGSC0003DMG400027467 M6 LRR-RLK

ATGTGGTAATGGTAGATATGTTTATCTCCTCAGATTTTAAAGCTGGAGAAGATTGTTACAAGAATGAATT  
TTATTGAACTATCAAAAGCGACTTCGAATTTAGCCAAGACAATGAAATCGGGAATGGAATGCTGGGGA  
AAGTGTACAAAGCACTAGTCCCAAATGGATGGACTGTTGCCATAAAGAGGCTCCAAAGTTCTGAGGATT  
TGGAGGAAGAGTTTGTTCGAGATCACAAGTCTAGGTATTTGAGGCATCCGAATTTAGTGGCCCTAAT  
TGGATTTTGTATGAGAGGGACGAGCGGATTCTGGTTTACAATAACATGCCTAATGGAACTTACATGA

GTGGCTACATTCAACCGACGACAGGGCAAGACTCTTGGACTTCCCTCTAAGGGTTAAAATTGTTGTTGGT  
GTCGCGAAAGCCCTGGCTTGGCTTCATGATGGTGGAAATTTCCATGTCGTGCATAGTAACATTAGCACAC  
AATGTATCTTGCTCGATGAAAATTTGATCCCAAGTTATCCAATTTTGGGAGGCAACATTTGTAGAACCA  
AATGACATAGGTTCAAACCTTGAGTCTATCGCCAATGGTCGAGTTTTTAGACTTTACAACATACAAAAAG  
ATGTCTATAAATTTGGGGTTGTGCTTCTCGAGATTTTAACGGGGAAGGAATCTTACGAATTGAGCTGCTC  
GAGTCTAAATTTATCGAGCAGCTTTTTGCCAGTCCTTGTGATGTGGATAAACTACTGTTAGGCCAAGGA  
TTTGATGATATGGTAATGCAACTACTTGAACCTGCAAGTAACTGCATGAAATTCATCCCGGATCAAAGGC  
CAACGATGCAACAAGTGTATCAGACTGTTGCTGCGATTGCTCGAGTCCATGACCAAACAGGGGACTCTG  
AAATACAATTGCACTTGGACTAG

>M6-PGSC0003DMG400027468 M6 LRR-RLK

TTTCAACAATGTGTAACCTGCAACATTCCTTACTTAGTACTACCATTTTTCTACTATTTTGCAGCTTTTCTCT  
AAGATGCAACGCGGTGCAGAGTGATATCGATTGCTTCAAATCGATAAAAGATTCGTTGGTAGACCCTTT  
AAACATGTTGAATTCTACATGGAAGTTCGATAATCAGACAGAAGGTTTCATATGCAGATTTGCAGGAAT  
ACAATGCTGGCCTCCTGATGAGAGCAAAGTTTTATCCATTAGTCTCCAGACATGGGACTAAAAGGTGA  
GTTTCCGCGAGGCATACAAAATTGCACTTCTTTAACTTCTCTAGATCTTTCAAGCAACGAGCTATATGGAA  
CCATCCCTTCGGATATATCAAGATTAATTGGATTTATTGTAACGGTTGATCTCTCAAGCAACCTATTCTCA  
GGCGCGATCCCAAGTGACATTTCAAATTGCTCTCTACTCAATTCCTCAAATTAGAAAACAATAAACTAG  
AAGGACTGATCCCACCTGAAATTCGCTTGTTAAAGCGACTCAAGACGTTTAATGTTGCAAATAATATGTT  
GACAGGGCCAGTGCCAAATTTGTCACTTTTCCAGTTGAAAGCTATGCAAATAATCCAGGACTTTGTGGT  
AGTCCTCTGGAATTATGTGTTACAGAACGCGTAGTAAGCCGTCATATTCTGTTTGTGTTGTTTGTGA  
CGGTTGGTCGCTTTCTACACTTGGTGTATATCTTTTTTTCTTTGGTGTAAAGAAGATGTTTCTATTGA  
TCAACAAGAGAACAAAAGTAATGGTGATTGATGGAAATAAAGTAAACAACAACCAAAAAGGTAATTTTG

>M6-PGSC0003DMG400027482 M6 LRR-RLK

ATTTGGTGCCTATAATAGGCTTTTGTCTGAGAGGAAAGAGCGAATTCTAATTTACAAATACATGCCTAA  
TGAAACTTACATGAGTGGCTGCATTCAACCGACGACAAGGCAAGACTCTTGGACTTTCCTCTAAGGGT  
TAAAATTGTTTTAGGTGTCGCGAAAGCCCTGACTTGGCTTCATGATGGTGGAAATTTCCATGTTGTGCAT  
AGTAACATAAGCACACAATGTATCTTGCTCGATGAAAATTTGATCCCTAAGTTATCCAATTTTGGGAGG  
CAACACTTGCAAAAACAATGACAGAGATTCAAACCTGAGTCTATTTCCAATAGTCGAGTGTTTAGACTT  
TACAACATACAAAAAAGATGTTTATCGATTTGGGGTTGTGCTTCTCGAGCTTTTAACGAGGAAAGAATCT

TACATATTGAGCTGCTCGAGTCAAATTTGTGCGAGCAGCTCTTTTGCCAGTCCTCTTGATGTGGATAAACT  
ACTGCTAGGCCAAGGATATGATAATATGGTAATGCAACTACTTGAAGTTGCAAGTGATTGCATGAAATTT  
ATTCCGGATCAAAGGCCAACGATGCAAGAAGTGTATCAGACTGTTTCTGAGATTGCTAGAGTCCATGAC  
CAAACAGGGGACTCTGAAATACAATTGCACTTGGACTAGAAGCAGGGGCGGAGCCACTAAAGGGACGT  
GTAGCTTTGGCTCAAACCATGTATTTG

>M6-PGSC0003DMG400027499 M6 LRR-RLK

GTGACAGTATTCTTTAAAAGTGCATGCAGCTTCTCAACCCCAAGCATTCTTGAAGTTTACAGCTTTAAT  
TCCTGAAAAAAACCAGAAAAAAGTTGCATTTCCATGGGAATGGCAAAAACAGTGCAGGGGCTCATGTTG  
GCTTCTTGATTTCATGGTGTCTTCTGTTTAATTTATCAGATGAGTTCTTAGAACCTTCACAATCTGAAGC  
TATAGTGAAAATCAAGCAGCTTTTGAAGTTCCCTCAAGATTTGAGTAGTTGGAGTGACAATACAGACTTT  
TGCAATAGTGAGCCAAACACTGCCTTAACACTCATGTGTTATGAAGATAACATAACACAGCTTCATATTT  
CTGGCTATAACTGGTTTCCTAATTTGCCTCAGGGGTTTTCTACAGATACCCTTTTCTAATCTTGCTCTTT  
TGCTAATTTAAAGTACTTTCTTTGGTTTCTTTAGGTTTGAGAGGAACTTTACCTAAAAAGATTGGATT  
TTATCTTCTTTGGAGATTATTAATATCAGTTCAAACCTCTTTTATGGTGAGATTCCAGGAGAGATTTCATA  
TTTGAAGAGTCTTCAGACACTTATATTGGATGATAATAAGTTTACAGGTCAAGTTCCTGAAGGGGTTGGT  
TACTTCATTCTTTGTCTGTTTTGAGTTTCAAGAACAATTCATTTTCAGGTTTCATTGCCTAATCTTTGTCAA  
ATTTACAAACCCTAAGAATCCTTTCTATTTCTGGTAATAATTTTTCTGGGGTTGTTCCAAACCTTCATAATC  
TGTCAAATCTTCAAGTTCCTGATTTGGAAAGTAACAATCTTGGACCTAATTTCCCTAATATTCCAACCAAG  
TTGGTATCTTTGGTACTTAGGAAGAACAAGTTCAGTTTAGGGGTACCAAAGAAGTTCAGTTTCATGTTATC  
AGTTGAAGAACTGGACATTTCTCCAATGAGCTTGTGGACCCTTTTACCAACAGTTTTATCATTGCCA  
TCACTCAGCTATTTGGATATTTCTGGAAATAAACTAACTGGGAAGCTTCTAAAGAATGTGACATGTAGTC  
AAGACCTTTCAATTTGTGAATTTATCATCAAATTACTTGACAGGGGAGTTGCCTGATTGCTTGAAACCTAGT  
TCTAGTTCCAAGATTGTATTGTTTTCTGGGAATTGTCTGTGCAATAAAGAGCAATGGCAGCATCCTTATTC  
ATTTTGCCATAATGAAGCTTTGGCTGTTAGTATTGAGCCTCATAAGGGAAAGGTTAAAGGGGGAAATGG  
TAAAGCTGTTCTTGCATCAAGTATGATAGGAGTTTTGTTGGAGTAGTAGCCATTGTCGTTTTGGCTTTT  
GTGGTTGTTAGAAGAGAGTATGCCAAGCAGAAAGCTTGCCAAGCCCCTCAAACAAGATTGATACTTGAA  
AAGGTCTCTCCTGCTCACACTCTTAAGCTGCTTAATGATGCAAGTAAGCTCTCTCTTTCTCTCACACAAAC  
ATATTATGTTAATGATTTCAACTTATGAAACTTTTTAGGTCCTGATAATTGTAAATCTAATGTTCTGTAAG  
GTCTGTGTACTCTACCTCCCCTAATCCCGCCGGTGGGATTACACTGAGTATGTTGTTGTTGTTGTTAT

CATTGTA CTTGAAAAGTCTATGTAAACATTTGAATTTAAGCATTATTCCACAAAAGGAGTTTTCTTTATAT  
ATAGAATGAAAATATCAATTTGCTTCAGGAAATTGTCCAATACTGTGTTATTGGAATAAACTCTGCTCTTG  
TCTAAATTTCAAGATGTATCTTGATCTTTGATTCTTGATAGGGTATCTTTCTGAAACGAGGAAGTTGGGAT  
TGCTTGGGGCCCCTCCTTATCGAACGTTTGTCTTGGATGAGCTTCGAGAGGCCACTAATAACTTTGATAT  
ATCAAATCTAATCGGTGCAAGCTCCAGTGGGCAGGTATGGATTTCTTACTAAATACTGTAAGACTGTTT  
GAACAATGTTAGTCCACATGGACTGTTTTGTAGTTCATTCTCAATTCTTTGCATCTATGGTGAATGCTG  
ATTGTGCTTTTATATATTTTGAACAATAGATTTACAAAGGGCGTCTCACAGATGGCACTGTGGTTGCTAT  
AAAAAGCATAAAAATGAGGAAGAGGCATAGTGTCCAGTCTACACTACCAACTCGGGCGTATTTCAA  
GATCAGATACTGCCATTTAGTTAGTACTATTGGCACTGCTTTGAGTGCTACCAAGATGACTCAAGTGTT  
AGCCGAATATGTTTAGTCTTTGAATTCGTGCCAAATGTGACGCTGCGGGGGGTCATATCAGGTATATAG  
TCTAGATAACTTCATCTGCTTCGCGAGTTATCATTGGCACAACA ACTGCAACAGTTTATAATTGAGCATT  
TAATTTACTTATTTGACTATTTCTACCATTTTACATAAATTATACTAAGTCTAAGTAATTGACTTCTTGGTAT  
GTAGACGTTATAGAAAACAAGCATCTTTGCAACAATCTGTTCCATGTTGTTTTGATATATATTACTAGATT  
GTCCTCAATCACGACAAGTACCTACTACATTGTACTTCTTGCAAAAGTGCTGATGAATTTTAAGGAGAC  
ATGAAATGCTTTTAATTACTTTCTCCTAGATTATGCAACGCGTTGTTTCTTCTTTGCCCGATGCTTAAATGT  
ACAGGTGTTTATTGTCTTTAAGACAGTTGTTCTGAATTCCTTGCAAATGCTCGGTTTTGTAGAAGCAAATT  
CAGCTCAAAGTTTACATGGACGCAACGGATGTCAGCTGCAATAGGGATAGCAAAGGGAATTCAGTTCC  
TTCATACTGGAATAGTGCCAGGGATATTCTCCAATCAATTGAAGATTACAGATGTATTACTGGATCAGAA  
TTTCCACGTAAAGATTAGCAAATACAATCTGTCTTTGTTAATTGAAAATAAGAAAATGGTATGCAAACCT  
CTCTTCTCTACTATATTCTCTATTAATCACTCATTTCATTCTTGAACATTCACATTTGTTATTGCAACTGTT  
CTTAGGATGCTGGACCGTCTTCTAGTGGATCAAAGGGAAATGATGGGCAAAGGTAAATGATCTCATCAT  
TCTCAGCTGCTACTGCTACTGCTACATTTTCGGTCTTCATTACTCCACTTTTATGGTTGATTTCAGAAGCA  
CCTATTGGAAACTAATCTTTTTATACTTCTAAATGCAAATTGGTCTAAAAGGTTTTAGAGAATCTTAAGT  
GTATCTCGACCAATTCTAGACAACACCTCTCCAGCCACTGCTATTGGGGGTAGGCACCGTTATAGCATCA  
TGCCATTCATTGGTTATGATTCTTGAAGACAATATATAGAGCCATAGACTTGGACCGTCTTAGGAGATTC  
CGAGATAGTACTCTACCGTTTAGTAGACTATTAATGAATTCCTTCTTTTGTAAATATCTTCTGAATGCAG  
GTTAAAATACGAGGAGAAAGATGATGTGTATGACTTTGGAGTAATCTTACTCGAAATCATATCGGGAAG  
GACAATCGATACAAAAAATGATATAGATGTTTCTAAAGACATTGTAAGAGTCACTTATGACATTTATGAG  
AAAATTCTTTCAAGTCATCAAGTTGAAGAACTATTTTGTAAAACTTTTTCTTGTTGTTCTTATTGCAGCTA

ATAGTTAGCTTAACAGCTGACGAAATAGGTCGGAGGAACATCATTGATCCAGCTGTTCCGGAAGGAATGC  
TCAGATAGTTCTCTTAGAACATTAATGGAACCTATGCATAAAATGTCTTTCAGATGAACCATCGCAACGTC  
CTTCTGTAGAAGACTTGATATGGAACCTGCAGTTTGCAGCTCAGGTCCAAGACCCTTGAATAGAGACA  
CTTATGGCAACCAAGAGTCCCCTGGTCATGTGTAAGAACTTGTGCAAATATCCAATGATCAATGGACCTT  
TTCTTGTACAAAATGTAACATTATACCACTAGGATAGTAGTTTCAATTATTTAGTAGTCTCTATTGCAACA  
CTTTTGGCTATATGAGGTTTCAGTACTCTTTTGGAGTTAACTCTACATTTTAGCCAAATTTTTTAAGCAAAT  
GGCTATTTCTTGCACTTTTTTTTTTAACGAGCCTAAAATTTAAAGGTGGGCCTTGACCCGACCATCCAAT  
GGACCATGGACTAAACGGCACCCAAAAATG

>M6-PGSC0003DMG400027536 M6 LRR-RLK

CTCTGCGCACACACAACTCAGTAGAGAGAGAAAGAGAAGCAGTACAAAAATGTGAAAAGTTGTAGCAG  
ATAAAAAAAAAAAGGGGTTTCATCAGAAGAAGGAGAAGAACTAACTGAACTGAGAAATACAAAAAAG  
GTTTGTTCAGTGAAGAGTAAAAGGGGTAGCAAATCTTGGAAATTAAGTGTAATAATTTGATCTTTTTT  
GTTGGGTTATGAGATGAGATCGATTCTTGGGTTTTGAGCTTTGTGGGTGTGTTTATCTTGGTTCATGGTA  
ATGAGGGGTAGGGTTTTCTGAATTTTTGGGTAAATGCTGGGTTTTTTGAGTTTGCTTTACTTGGATCTAC  
GAGATTGTTTAGTCAGCTGGCTGCTTGATTTGTAAAAAAAAAACAGTATTTTGATGGTGAAGGTGATG  
GAGAAGGATGCTGTGGTGGTGTCACTGGTGGTATGGCTAATCTTGGTTGTACATCATCTTAAGCTCATT  
ATGCTAATATGGAAGGTTTGTGGGTCCATCATCCTCATTTAGTTAATTTTTAGGTCTATATTTGTTGTTCT  
GTTTTGTGAGATGAGTTTCAAATGTCGAACTTTTCGTA TAGAAATTAATATTTGCTGAAAGTGAAAT  
GAGTATGTGCAAATTGGATTTTGAATTTGACTAATGTGTGAGTTGTTGAATTTCCCAAAGGGTAAGC  
AAGATGTGCAGTGAGCTCCCTGCATTGTTACGGTGGCAAGCAGTTTAGTTTTAATGTCAGTTAAATGTGA  
AAGTTTTTAGTTATCATTGCCATTCAACCTTAGTGCATTATGTTTCCTATACAAGCTTGAATAATTTGATGT  
GATTTAATTTGGTTGTTGCCAAAATCTTGATAAACTGTTTTTTTTCAGTGAATAGATTAATTTTTATGTGC  
ATTTTGGTGGATTAAATATCGTCTATGTTTTCCTAAATGGATACACGAACAGGTGATGCATTGCATAGTC  
TACGCGTCAATTTACAAGATCCTAACAATGTGCTACAGAGCTGGGATCCTACCCTTGTTAATCCTTGCAC  
ATGGTTTCATGTTACCTGCAACAATGACAACAGTGTTATAAGAGTGTAAGAATCTGTTGTCTGGTTTACC  
TCCGTTTTAATGGATTTGCAATCCACTCTCTTGTGGTGGTGAGCAAATATAATTGCAGTTTGTGCTTCCA  
TAACACTTGTTATATGATCAACCTTCCAGTGATTTAGGAAATGCTGCTTTATCTGGTCTGTTAGTCCCAC  
AGCTTGGCCTTTTGAAGAATTTGCAGTACTTGTAAAGTCTCACTTCATGAACTATGTTTGGAAATTTTTAT  
GAATTTAGACTTGAAAACTGGCATTAAAGTGATTGGTTTTTCCAGATGTTGAAGATTTTTTCATATTACCT

CTAGAATTTGCTGCATGGAAATACCATAGATGGCTTGCATATTAACTTTTGCATAAAACAAAGCTGTTGT  
AAGTGGCAAAGCGAGCAGAGAACACTTTCTCCTCTCCATCTCTTGTTCACCTGGTGTGTAGTCTATTG  
CATAGTTGTTAATGTGTTCCCTGAACAACACAAATTTGAATGTATACTTCATAAAAAAAGATTTAAATTT  
GTGTTTCACAATACATACTAGTAAATTAAGGAACTCGGATACTTGGATGAGACTAGCAGTGAATTAECTT  
ATGTGGCAAAGTAGTGTCTGTAATTGTTTGTGAAAACATTGTAGTTGAACTTAAATTTCTGTCATACACTC  
CCCTATCAAAGATAAGCATAGATTCTAAATATCATTACATTAGCCAGTACCCTAAGCACTCTTTTTTTCT  
TTTTGGTTTCCCACCCGGTGTCCAGTACCCACATTGGAGCCCAGCTAAATGTGGATTTGTGTTGGGAAGT  
CCCACATTGGGGGGTAAAGCGCTCCCTAACAAAGGCGACTCCGTATCCTAGAGGGGCTCGAACCCGAGA  
CTTCTTGGTTAAGGATGAAGGAGTACTTACCACTCCACCACAACCCTTGTGTTGTTACCCTAAGCACTCTTAA  
TTTGAATAACAACTTCAACTCATATCAAATCCTTTATTCCCTCTTTCCTTGTCCCAGGTAGCGTCTAATC  
ATGATTTAGGATTATGGAATAGGATAAAGCAAACAAGAGAAACAAGTCCATTGTAAAAGTAAAGCAA  
ATCTAGACTTAGAAAGAGGAAATATGGCTTGAGGGTAGGTTGATATCTTGGAGGAGAAGATCTGAAGT  
TTTGTGGTCATATAACAGATGCTATTCTGGTTTTACCAAGAGTTTGAATCATGATTCAATTAAGCATAGA  
TTTTGTACATGTGTTAAGCTTAGTTTTGGAGTTTGATAATATACCGTTCACTTAAATTGTCAACGTGCTATA  
GTCATATTCTGTCTCAAACCTCGCTTTCATAGTTCTTATTGTAACCCATGCTCTTTTGAAGATGCAACTGTAT  
GGAAGTTCACAGAGACAGTAAGTGCATGTGCACCTGGTGAAGCTGGGCATTACATGATGTATACCCATG  
CATCAGACAATGTTTTAATGATGGGCATAATTATTACCTAGTGACTGCTTCATTCTGCTCACACATTCATA  
TATTCTATGGATGCCTAGATTTTTCTGGAGGCTTGTGTAGTATGTGTGCTAAGTATTTTCCAAGTGTATGC  
AAGTGACAATCACATCAAGAATGAAACAATATAAAAAGAACATCAAGAATGCTGATGGAATTTAACGAT  
CACTGGGCATACACACTGTTTAGATGAAGTTCGAAATTAACATAATGACAAACGTTAAATTTTTATTGAT  
GAGCTATAAAGATTGTATGAAATGTTTGTAGGCTGATCCTTGCAGCACATGGGATGACAGATTTTTAT  
CTAGCAAATGCTTGTAACCAAATATAAGAAAATTCCTCCATGACATAAACATTGGTAACTAGTTATAAT  
TGTTAGCTTGGAACCTCCAGACCTTCTCATTGTTGACATTTAACTGTTGCTTGATGCCAGTTTTGATGA  
ATGTGTGAACTTTGCTTCATTATCTTTGTTGCCCATATCCTAGGGATGTCATTGGTATGATATATTGAA  
TTGATTCATTCTCTGTTTTCTGTACAGGGAGCTTTACAGTAATAACATAAGTGGTCTAATACCTAGTG  
ATCTTGGGAATTTGACTAATTTGGTCAGCTTGGATCTCTACTTGAACAACCTCGTTGGTCCCATCCCAGAT  
TCCTTGGGCAAACCTGTCGAAATTGAGATTCCTGTATGTATTTTTATTCTATATTAGATTTATGTGGATATT  
GTGATGCCAAATGTGTATGTCATCAACCAAGATGGACCTTCTTTGCCGGCATGTTGAGAAAGGAAAGG  
AAGCCTGAATTCCTTTCTAGTTTTACATAAGATTACCTCTATTAGTATTAGTTTTCACTAAGTTTTGAT

GGTAGAAAGGTATTTGAGGACTTTATGGGTCTGATATCATTATAAAAACAGATCTTACATATAAGTCTTT  
TTATTTTCTCCCTTTGTTCTAATCCTTATATAAAGGAAAAGAATAGAAGCCTATGCTTTGTCTGATATTTGG  
CCCTGATATTGTAAAATTAATCAGAGTTTAGTAATTGGTGTTTTATTTTCTCCATTGTTGGGATCCTTTT  
CTAGAAGAGAAAAGAAGTTACGAATCCCATGCTTCATCTTGCATTTTTCACTTCTGAAGTTTCTCTTGCTT  
AATGCTCCACAACTTCTTTCTTTTGGCTTGACTGTCTAAGAAGTGTACCAAATAGGTTCTATTATGCAGA  
ATCAGCATGAAGCCTCATTAAGTGCATCTTGGGACTTACTATAGAAGTATTGCAGTACTGCCAATGTTGA  
CTGACATGATTTAGTCCAAAAGTGTTCAGTTTCTGTTTGTGAGGGGGAAATGTTTTGAGGCTGTTT  
ATTGTTGTTCTGAAGTACAAGTTCATTTCCAGCTGAAGTGCCGGTTCTGGCTTGAAGTTCGAATATGTTT  
TACATCCACATATAAATAATTTATTAAGATGATTCTCCTTGTCAATAAATAAATAAATTAAGATGATTCAA  
TTAGTAACCTTTTCTTCTGTTTTATTCTCCAATTATTACTTTTACCAAAGTGAAGCTCATTCTGTACACCT  
TTGTGATTTTTTTGCAAGGATAGTCGGCTCAACAATAATAGCTTGACTGGTAACATCCCTATGTCACTGAC  
TAATATCTCATCACTACAAGTGTGTAAGTACACTAGTTATTTTGTGACTTAACTTAGATAATTCTTTCTGT  
CTTCCATATCTTTTCATTCATTTCTTTTCTTCTAGTGCATATACAGATATACTCATACTCAATTCTGTCT  
CATCTGTGTATAGGGATCTGTCAAACAACCGTCTCTCAGGTGTTGTTCCAGATAATGGTTCCTTTTCTCTA  
TTCACGCCTATCAGGTATATTTCAATTAAGGTGGTGCACCATCAAAGTGGCTGGTGGTTTTAGTATGCTG  
CTATTTGCTAATATATTTTGTGTTGAATTTACAGTTTTGCGAATAATTTAGATCTTTGCGGGCCTGTAAGT  
GACGTCCTTGTCCGGGATCTCCTCCATTCTCCCCTCCACCTCCATTTGTTCCACCACCACCAATTTCTGCTC  
CAGGTGGTTCTCTAAATTGGTGTGGATAAATTGTTTTCTTTTTTTTTTGTGTTTGAAGTTTGGTGATTT  
TTGTTGGTCCATCCATCTTGCCTCTCTTAGTTTTTCTAACCTAAGTGAGAATTTGTGCTATAGAAGTACT  
GACAAGAAAGGGGCAGAAGAGGAAAGCCCATCTTAGCTAGTCAGGCATTTTGGTTAAGTAGTTCTTATG  
GGAAACTGGTATGCACGAGACTACATTTAGTCTTTAAGCATTCTGGTCTTTATACAAATTTAATTCAGCAT  
TGTGGAGATCTTTTCTTTGGTCCCCTTGTAATTAATTATCTGTGGTATTTGAAGTTGAGTATGTCTGAAAT  
TAATCATATTTATGCCAGAAGTGTGAAGATTTTCTTTGCTTTGTAAAACTGTCCTGGAAATTAGATCTG  
AATGATAGATACAAATTTGTGTACTTCTTTCTTTTTGAAGTGATTTAATAATGAAGGGCCAAAATTGTGT  
TAAATATAGTCTGGATCATATGAAGGAAATTAATCAAATTTATGGTAACTTCAGGAGGAAATGGTGCAA  
CTGGAGCAATTGCTGGAGGTGTAGCTGCTGGTGCTGCTCTACTATTTGCTGCTCCTGCCATTGCATTTGC  
CTGGTGGCGCCGTAGAAAGCCACAAGAATATTTCTTTGACGTACCAGGTTAGCAGTATTCACAAATCAC  
AATACCCAACCATAAGTCCATAACTCCTACTTACTCCCTCGCGTGTTTGTGGTTTCTCTTGCATGTTTATTT  
TTTGGCTCCATAATTACCGTTTTTGTCTAACTTATTGCAGCTGAAGAAGATCCTGAAGTTCCTTAGGTC

AACTGAAAAGGTTCTCCCTCCGAGAGCTACAAGTTGCAACCGACAGTTTTAGCAATAAAAATATTCTGG  
GTCGAGGTGGATTTGGTAAGGTATACAAAGGACGCTTAGCAGATGGATCATTGGTGGCTGTTAAGCGG  
CTTAAGGAGGAGCGTACTCCTGGAGGGGAGTTGCAATTTCAAACAGAAGTTGAGATGATTAGCATGGC  
AGTGCATAGGAATCTTCTACGATTGCGTGGTTTCTGTATGACACCAACTGAAAGACTGCTTGTCTACCCC  
TACATGGCGAATGGAAGTGTTCATCATGCCTTAGAGGTGACGCCTTCTGAAATCTATCACTCCGTAACA  
TATTTGGATGCTCTCACCTTAATTTAGAGGGTATTATTACATAATGCAAGAACTTCTTTCGCTGGTTAAC  
GTTCTATCTGGCATAACATACTCTTTATAATAAAACATATTCTTGTATGTTATTCCTGTAACCTGGTAAAAG  
GTAGAAATATAATTTATTTTGTATTCTCTTGACAAATTAATTTATTTTATCAGAACGACCGCCTTCTGAACC  
GCCACTTGATTGGCCAACGCGAAAGCGCATTGCTTTGGGGTCTGCCAGGGGATTATCGTATTTGCATGA  
TCATTGTGACCCTAAGATTATCCATCGTGATGTGAAGGCTGCAAATATATTGCTAGATGAAGAATTTGAG  
GCTGTTGTTGGAGACTTTGGTTTGGCTAAACTTATGGACTACAAGGATACACATGTTACAACCTGCTGTGC  
GTGGTACAATTGGGCATATAGCTCCAGAATACCTGTCCACAGGGAAGTCTTCAGAAAAGACTGATGTTT  
TTGGGTATGGGATCATGCTTCTGGAGCTAATCACCGGCCAACGTGCTTTTGATCTTGCTCGGCTTGCAAA  
TGATGATGATGTCATGTTGCTTGACTGGGTATGTTGTCATCCTGCTTTACATGTAACATTACACGAGTACC  
ATAATGTGCTCATTTTTTAATCTGTGCATCACAACTAGCTGACTAATAAGTGTTTCTGCCTTTAGCAGG  
AATCTTTATGTCTATGTCTGAACTTGTTGTGGTTCTTGTTTCAGGTGAAAGGACTCCTCAAAGAGAAGAA  
ATTGAAATGCTGGTTGACCCTGATCTTCAGAACAAAGTATGTGGAGGCTGAGGTGGAGCAACTGATCCA  
AGTAGCATTGCTTTGTACACAAAGCAACCCAATGGATCGGCCTAAGATGTCGGAAGTGGTGAGAATGCT  
TGAAGGTGATGGTTTGGCTGAAAGATGGGATGAGTGGCAGAAGGTAGAAGTTCTCCGGCAGGAAGTG  
GAACTTGCAACCATCCTGGTTCTGATTGGCTTGTTGACTCAACAGAGAATTTACACGCAGTTGAATTAT  
CGGGTCCAAGGTGACCGACCTCGTACTACCCCAAGTAAAGAAAATCAAATCATTAGGAACTCTTTATTTT  
TGTTGACCTTGTAAGTTTTTCTTTGTGAAATTTAATGAAAATCTCCAGTTGTAAGCCCATGAAGTGTCT  
GTTACATTGTGCATACAAATTTGACTGACAGGAAATCCAAATCCATTCCCTGACAAGTTGGCACATAG  
GCGTAGTAGTTAAGTGCTTTAAAATTGTCCAACACAGTAACTACTGTCAAGCAGGCTCTTGTTTTAGT  
GTCATTGAAAATGCTATCAATTTGACAAGGTTATTTACAAGATTTTGGATTTTACAATCAAAGAATAGTG  
CTTAACATTCTTACGGTTTTTATCATAATCTCGTGCTACAAGATAATGGCAAATATTTTCATCAATAGGC  
CACTTGCAAGAGTTTGTGTTTGGCGCTCTATGCCCAAATTTGGGCTCTTCTGACAATTCAGATTAGTACCA  
GATGCTCTGATACAAGTACAAGATCTGCTCAGTGATACTTTTCGATCATTCTGTCATTACTTTTTACTCCAA  
AGAAAATTTCTTACATGCAAATTTTTTGAAGTGCATACTCTTCAACATACAAGGATCCATCGAATGTACTA



CAGACCAAAGGGCAATAGAATAAACAGAAGAATCTCAAAACTCACAATCAACAAACAAACCAGAGCCT  
GCAGAAGGTAGAGAAATACACTTCACTTATCATGGCTGGACCTGATATTATCTTTGAATGACTGTGAACG  
AGAACCAGGATTAGAGCCATTTGTTGCATTAAACAGGTTTGGATATGAATAATATGTTTCATCGTCCATG  
GAAGGCAATCTCTGTGGTTGGTGAAGACCCTGACCAGGATGATGAATATGGGAGATGGGAGACTCAAC  
ACCCACTGTTGAATCATCGTATGAAGGAATATTCGACACCTGATGTTCCAATGGACTGCCATGAAGTGG  
GCTGGGGATACCATCAGAGTTTGACGATTGGCGTTGGAGGTCTAAGTGAGGCTTTTCTAGGATGTGAGA  
TTCTTGTTTCTCAGCATAAAAGGGTTCTCACTGGGGCTTACAGGCACCTCTTCGCTCCTTTTCTGGTAA  
GCTCGCTGATTCTAACCTGAGCAAGGCTAGCTGCTGAGCGAGCAGCAGCAGCTGCACGTTCCGGCTGAAT  
CAGCAGCTGCTTGGGCAGCAGCCAATACATCTTGCAAATCTACATCAGTCTCAACTTTGGTCTTTGTAGT  
AGAGGGTGGTTGAGTACTTTGGGTTGTGGTTCTTTCTGTTGAGGAGAATGGAGGTGATTTTGGTGGGG  
GAACCATGAATGGCAAAAAGTCTCTTCTTCCGGTGCAGATAAACTATCAGCTGATCCAAAATCTTTT  
GAAACTACCTTCTCTTGCAAAAGTTCATCTCGCTCCATATCTTGTGTTGTGAGTTTTGAGCTCACCGTCTCA  
GAAGGCTTAGCTACCTCCTCATCGGAGTCAGATAGTGCAGAGGCTGGGAAAGGAAGCATTTTCAGGGGC  
AGAAACTCCACCGGTGCTAGGTCGTAGTGGCTGCTTAGGGACTTCTGGAAAATCTAAGTCAAAATCAGC  
CTCAGATTCCGTTTGTGTTATCAAAGACTTGATCTGATGCAGAGTGCTGCACCTCATCCAACCTTTCTTTGG  
GAAGTGGCACCTTAGCCCCACTGACAAATTGTGTGGGCCATTCTGCAAAGCAAAGGGAAGAAATCATG  
ATGATTGAAAAGAGGACAAAATCAAAGCCAGTACAGACTGAAATATAACCAGCAAGTCCTCATGTGACTT  
CAACAGCTCAGTTTCAGAAGCACTTGGATCCCAATCTAGCTGATGCTCCTCCGCAATTTCTTTAGCAGCT  
TCATTTTACATCAGGAGCAGGAGCTCGAATAGACAGCAACTCTATCAACTGTCAGAGACAAGAAAAA  
GAGAGAAAAATCAGAAACAAGAAACAGTTCCTCTTTCTCGTTTAGCTATGGCATAAAGGAGATCTAAGG  
TAACCTGGCGATTGACTCCGCATTCTGGCATGAGCTCTGTAGCAGCAGCAATGAATTCCTTCCCATATTT  
ACCAGCAAACATCATCTGAACCTGCAGCAATTCCGGAAGATCTGCACATCTTGGTGCAGCAAAACAAAC  
ACTTGAAATAGCTTCTTTCAGATCTAGAGGGCATTCCCTGGACATTATAGAGTTTGGGGTTCAGCTCTT  
TCCAATTATTCAAGTTAAGAAAATTATCAACAAAATTCAACTAGAAGTCTAGAATATTAAGACTTGGAAA  
GAAAACCTCCACATTGCAGGACAGTCAAGTTCAAGAGTATCAGTTTGCTTTAAAACAAATATCGAAGAT  
GAAGCGCTTTGGGTCCATTTTGAAGTACTAGAGATCCACATTTATGGTCTCATGTAGATGATCAAATTTTT  
AAGGTTTCACTCCATAACACAAGCAAGAATGTATTGTTTCTTCTATGCCCTAGATACTTCTCGGTCAT  
ATAAGCAGAAAGTTAAACGTAGTTAATCCTTGTGTTGGCTAAAATTGACTTTATGCAAAGGATCAAACAT  
GCTGCTGCTCGGATACATGCACATACTTCCATTTAATCGACCTACAACCTTAGACATTTCAAAGTTGGTAAC

TTTTTTTCAGAATACATGAAATTTAGCAAATTAAGTACTGTGATTCATTAATTGAACTAGAGTCGCTCCA  
TGAAAAAGTATCCATATCTAGTGCAGATAATTCTCGCAAACAACAGCTAGGGTGGAGTATAGTAGATC  
TGAAAGTTTGGTATTGAAGGAGATATGGAACTAAATGTTAACAGCAGCATAGACAGCAAAGGCTAGAG  
GCAAGCAAGGAAGACAGAGAGGAACATTTGGGACCCGTTTGGCCATAGATTTCCCAAGTAATATTTGG  
GGGGAAATTTGGCAAATAGTGTTTGTCCATACAATTTGCCATTATTTGGCAAATATCCCAAATCCCAA  
TACTAGTTTTTTATAGTATTTGAGCCAAATCTCATTATTTGGGATCTTTTAAAAATTGAAATTTTATACAA  
ACTTTTATCCTTTACAAAACTCCCTCTATAGTAGTTGTTTGC GTTGTATTACATAATTTTTTACGTGAACA  
CCAAAGTAGTGATGAAATATTCAGTGAATATGAAAGTGATGAACAATCGGTCCAGGGTACCAAGTCATG  
TGCTTTGTCCACTTCATGATGTATAGAATGATGCTTGTTCACACTCGCTCCACACACCACATTGCTCCAGTT  
TCATGGACACTACTTGTTATTCGTTGCAACGAAGATCCAATAACTTGTAATACAACTTATGGTTAGTTT  
TGATAGTTTTTAAAACTTATGGTTA

>M6-PGSC0003DMG400027555 M6 LRR-RLK

CAGCTGAAGAAGATCCTGAAGTTCACCTTAGGTCAACTGAAAAGGTTCTCCCTCCGAGAGCTACAAGTTG  
CAACCGACAGTTTTAGCAATAAAAATATTCTGGGTTCGAGGTGGATTTGGTAAGGTATACAAAGGACGCT  
TAGCAGATGGATCATTGGTGGCTGTTAAGCGGCTTAAGGAGGAGCGTACTCCTGGAGGGGAGTTGCAA  
TTTCAAACAGAAGTTGAGATGATTAGCATGGCAGTGCATAGGAATCTTCTACGATTGCGTGGTTTCTGTA  
TGACACCAACTGAAAGACTGCTTGTCTACCCCTACATGGCGAATGGAAGTGTTCATCATGCCTTAGAG  
GTGACGCCTTCTGAAATCTATCACTCCGTAACATATTTGGATGCTCTCACCTTTAATTTAGAGGGTATTAT  
TACATAATGCAAGAACTTCTTCGCTGGTTAACGTTCTATCTGGCATAACATACTCTTTATAATAAAACAT  
ATTCTTGATGTTATTCCTGTAACCTGGTAAAAGGTAGAAATATAATTTATTTTGTATTCTCTTGACAAATT  
AATTTATTTTATCAGAACGACCGCCTTCTGAACCGCCACTTGATTGGCCAACGCGAAAGCGCATTGCTTT  
GGGGTCTGCCAGGGGATTATCGTATTTGCATGATCATTGTGACCCTAAGATTATCCATCGTGATGTGAAG  
GCTGCAAATATATTGCTAGATGAAGAATTTGAGGCTGTTGTTGGAGACTTTGGTTTGGCTAAACTTATGG  
ACTACAAGGATACACATGTTACAACCTGCTGTGCGTGGTACAATTGGGCATATAGCTCCAGAATACCTGTC  
CACAGGGAAGTCTTCAGAAAAGACTGATGTTTTTGGGTATGGGATCATGCTTCTGGAGCTAATCACCGG  
CCAACGTGCTTTTATGCTTGTCTCGGCTTGCAAATGATGATGATGTCATGTTGCTTGACTGGGTATGTTGT  
CATCCTGCTTTACATGTAACATTACACGAGTACCATAATGTGCTCATTTTTTAATCTGTGCATCACAACACT  
AGCTGACTAATAAGTGTTTCTGCCTTTAGCAGGAATCTTTATGTCTATGTCTGAACTTGTTGTGGTTCTTG  
TTTCAGGTGAAAGGACTCCTCAAAGAGAAGAAATTGGAAATGCTGGTTGACCCTGATCTTCAGAACAAG

TATGTGGAGGCTGAGGTGGAGCAACTGATCCAAGTAGCATTGCTTTGTACACAAAGCAACCCAATGGAT  
CGGCCTAAGATGTCGGAAGTGGTGAGAATGCTTGAAGGTGATGGTTGGCTGAAAGATGGGATGAGTG  
GCAGAAGGTAGAAGTTCTCCGGCAGGAAGTGGAAGTGCACCACATCCTGGTTCTGATTGGCTTGTTGA  
CTCAACAGAGAATTTACACGCAGTTGAATTATCGGGTCCAAGGTGACCGACCTCGTACTACCCCAAGTA  
AAGAAAATCAAATCATTAGGAACTCTTTATTTTTGTTGACCTTGTGAAAGTTTTTCTTTGTGAAATTTAAT  
GAAAATCTCCAGTTGTAAGCCCATGAAGTGTCTGTTACATTGTGCATACAAATTTGTAAGTACTGACAGGAAAT  
TCCAAATCCATTCCCTGACAAGTTGGCACATAGGCGTAGTAGTTAAGTGCTTTAAAATTGTCCAACACAG  
TAAACTACTGTCAAGCAGGCTCTTGTTTTAGTGTGTTGAAAATGCTATCAATTTGACAAGGTTATTTAC  
AAGATTTTGGATTTTACAATCAAAGAATAGTGCTTAACATTCTTACGGTTTTTATCATAATCTCGTGCT  
ACAAGATAATGGCAAATATTTTCATCAATAGGCCACTTGCAGAGTTTGTTTTGCCGCTCTATGCCCAAATTT  
TGGGCTCTTTCTGACAATTCAGATTAGTACCAGATGCTCTGATACAAGTACAAGATCTGCTCAGTGATAC  
TTTCGATCATTCTGTCACTTTTTACTCCAAAGAAAATTTCTTACATGCAAATTTTTTGAAGTGCATACT  
CTTCAACATACAAGGATCCATCGAATGTACTACAGACCAAAGGGCAATAGAATAAACAGAAGAATCTCA  
AAACTACAATCAACAAACAAACCAGAGCCTGCAGAAGGTAGAGAAATACACTTCACTTATCATGGCTG  
GACCTGATATTATCTTTGAATGACTGTGAACGAGAACCAGGATTAGAGCCATTTGTTGCATTAACAGGT  
TTGGATATGAATAATATGTTTCATCGTCCATGGAAGGCAATCTCTGTGGTTGGTGAAGACCCTGACCAG  
GATGATGAATATGGGAGATGGGAGACTCAACACCCACTGTTGAATCATCGTATGAAGGAATATTCGACA  
CCTGATGTTCCAATGGACTGCCATGAAGTGGGCTGGGGATACCATCAGAGTTTGACGATTGGCGTTGGA  
GGTCTAAGTGAGGCTTTTCTAGGATGTGAGATTCTGTTTCTCAGCATAAAAGGGGTTCTCACTGGGGCT  
TACAGGCACCTCTTCGCTCCTTTTCTGGTAAGCTCGCTGATTCTAACCTGAGCAAGGCTAGCTGCTGAG  
CGAGCAGCAGCAGCTGCACGTTCCGGCTGAATCAGCAGCTGCTTGGGCAGCAGCCAATACATCTTGCAA  
TCTACATCAGTCTCAACTTTGGTCTTTGTAGTAGAGGGTGGTTGAGTACTTTGGGTTGTGGTTCTTTCTGT  
TGAGGAGAATGGAGGTGATTTTGGTGGGGGAACCATGAATGGCAAAAATGTTTCTCTTCTCCGGTGC  
AGATAAACTATCAGCTGATCCAAAATCTTTTGAAGTACTTCTCTTGCAAAAAGTTCATCTCGCTCCATAT  
CTTGTTTGTGAGTTTTGAGCTCACCGTCTCAGAAGGCTTAGCTACCTCCTCATCGGAGTCAGATAGTGC  
AGAGGCTGGGAAAGGAAGCATTTCAGGGGCAGAACTCCACCGGTGCTAGGTCGTAGTGGCTGCTTAG  
GGACTTCTGGAAAATCTAAGTCAAATCAGCCTCAGATTCCGTTTGTATCAAAGACTTGATCTGATGC  
AGAGTGTGCACCTCATCCAACCTTTCTTTGGGAAGTGGCACCTTAGCCCCACTGACAAATTGTGTGGGC  
CCATTCTGCAAAGCAAAGGGAAGAAATCATGATGATTGAAAAGAGGACAAAATCAAAGCCAGTACAGA

CTGAAATATACCAGCAAGTCCTCATGTGACTTCAACAGCTCAGTTTCAGAAGCACTTGGATCCCAATCTA  
GCTGATGCTCCTCCGCAATTTCTTTAGCAGCTTCATTTTACATCAGGAGCAGGAGCTCGAATAGACAG  
CAACTCTATCAACTGTCAGAGACAAGAAAAAGAGAGAAAAATCAGAAACAAGAAACAGTTCTCTTTC  
TCGTTTAGCTATGGCATAAAGGAGATCTAAGGTAACCTGGCGATTGACTCCGCATTCTGGCATGAGCTCT  
GTAGCAGCAGCAATGAATTCCTTCCCATATTTACCAGCAAACATCATCTGAACCTGCAGCAATTCCGGAA  
GATCTGCACATCTTGGTGCAGCAAACAAACACTTGAAATAGCTTCTTTCAGATCTAGAGGGCATTCCCT  
GGACATTATAGAGTTTGGGGGTTGAGCTCTTCCAATTATTCAAGTTAAGAAAATTATCAACAAAATTCA  
ACTAGAAGTCTAGAATATTAAGACTTGGAAGAAAACCTCCACATTGCAGGACAGTCAAGTTCAAGAGT  
ATCAGTTTGCTTTAAACAAATATCGAAGATGAAGCGCTTTGGGTCCATTTTGGAACTAGAGATCCACAT  
TTATGGTCTCATGTAGATGATCAAATTATTTAAGGTTTCACACTCCATAACACAAGCAAGAATGTATTG  
TTCATTCTATGCCCTAGATACTTCTCGGTCATATAAGCAGAAAGTTAAACGTAGTTAATCCTTGTTTGGCT  
AAAATTGACTTTATGCAAAGGATCAAACATGCTGCTGCTCGGATACATGCACATACTTCCATTTAATCG  
ACCTACAACCTTAGACATTTCAAAGTTGGTAACTTTTTTTCAGAATACATGAAATTTAGCAAATTAAGTAC  
TGTGATTCATTAATTGAACTAGAGTCGCTCCATGAAAAAGTATCCATATCTAGTGCAGATAATTCTCGCA  
AAACAACAGCTAGGGTGGAGTATAGTAGATCTGAAAGTTTGGTATTGAAGGAGATATGGAACATAATG  
TTAACAGCAGCATAGACAGCAAAGGCTAGAGGCAAGCAAGGAAGACAGAGAGGAACATTTGGGACCC  
GTTTGGCCATAGATTTCCCAAGTAATATTTGGGGGGAAATTTGGCAAATAGTGTTTGTCCATACAATTTG  
CCATTATTTGGCAAATATCCCAAATTCCCAAATACTAGTTTTTTATAGTATTTGAGCCAAATCTCATTATTT  
GGGATCTTTTAAAAATTGAAATTTTATACCAAATTTTATCCTTTACAAAACTCCCTCTATAGTAGTTGTT  
TGCGTTGTATTACATAATTTTTTACGTGAACACCAAAGTAGTGATGAAATATTCAGTGAATATGAAAGTG  
ATGAACAATCGGTCCAGGGTACCAAGTCATGTGCTTTGTCCACTTCATGATGTATAGAATGATGCTTGTT  
GCACTCGCTCCACACACCACATTGCTCCAGTTTCATGGACACTACTTGTTATTCGTTGCAACGAAGATCCA  
ACTAACTTGAATACAACTTATGGTTAGTTTTGATAGTTTTTAAACTTATGGTTA

>M6-PGSC0003DMG400027581 M6 LRR-RLK

ATGAAACTACAAGATTTACGTGCAACTATTGTCTTTTTCTATCATTGCTAGCAATTCCTCCTCACATTATT  
GCTAATCTTGATTAGACAAACATGCTCTACTTCAATTTGCTGCATCTGTCCACATCTTAGAAAACTCAA  
CTGGAACCTCTGCTTTGTCAATCTGCAATTCCTGGATTGGGATCACTTGCAACAAAGATGGAACGACGCGA  
GTCGTTGCAATTCATCTGCCTGGTGTGGACTTACTGGCCATATCCCAGCAAACAGCATTGGCAAACCTAG  
ATGCTCTCCAAGTCCTTAGCCTAAGAGCAAACAATCTAAATGGAATCTTCCTTCTGATATTCTTTCAATC

CCTTCTCTTCTCTCTATCTACCTTCAACATAATAACTTCTCTGGTGATATTCCTGTTTCCTTTTCATCAACAC  
TTGGTGTAGTAGATCTCTCGTTTAACTCTTTTACCGGAGAAATCCCCCACGATCAAGAATTTGCCTCGA  
TTATCCATGTTGAACCTAAAGTTCAATTCATTATCTGGATCAATCCCAATCTTGATGTGTCAAGGTTGAG  
TTTTTTGAATTTGAGTTACAACATGTTAAATGGCTCAGTTCCATATTCCCTCAGGAAGTTCCCACTTTCTTC  
TTTTGTGGGGAACTCTAATTTATGTGGAACACCTTTGAGTAGCTGTTCTTCGAGATCTCCATCGCGTAAA  
GGTGACAACCTTAAGAACTTAGTAATGAAATTATCATTGCAATTGCAGTAGGTGGTCCTTCTGTTATAA  
TTCTCTTGTTTTATTCATCTACTTCTGTTATTTTAAACAAGAAGGTTGATAACAACACAAGCATGGTTGAA  
GAGAAGAATGAGAAGTTAGAAGACTTTGAAAATGGGGTTCAAGATTCTGAAAAGAACGAGTTAACGTT  
CTTTAAAGGGTGCTCTTATAACTTTGATCTTGAGGATCTGTTGAGTGCTTCTGCTGATTTTCTTGTTAAAG  
GGAGTTATGGAAGCTTACAGAGTTTCGTTGGATGAGGTATCGATGATAGTTGTGAAAAGGCTGAAG  
GAAGTAAGGGTTGTTAAAAAGGAGTTTGAACAGCATATGGATATTGTTGAAAGATTACAAGGCACCC  
AAATATAGTGCCATTTCTTGCTTGTATTACTCAAAGGATGAGAACTTCTGTTTGTGAATACGTCCCTT  
ATGGTAGTTTGTGCATCCGCCTTATATGGTATAAGCTGCTTAACTCTTCTTAGATAAAA

>M6-PGSC0003DMG400027585 M6 LRR-RLK

GAGAGAGAAAGATAAAGTGAACGTTAATAAATGCTCCCACTGACCCGCGTCCCCGGTAACACTTTACT  
TTTTTCTACTTTCTCCGGCTTATTCCTCCCTACCTCATCAACAACCTTCAACTTCACCGGCGCTTTACATTTT  
CCGGCGAAACCCCAAATTCACTCTCATTGTCTCCTTCTTCCCTTCAGATTTCCCTTTTTCTGCTGCCAA  
AATTCAACTGTTTCTTCCACTCATTATCTACATTTTCTTCTTCCACTTTGTTTCATTAATAAATTCACTCTT  
TCCGGATTTCTAGGGTTTTTAAAGAACTGGGTGTTTTTAAAAAAAATTCCTACCCATTTTATTGGCGGTT  
ACGTTCTTCTTGCTAAAGATTGTATCTTTTGTCTTCTTGTATATAATTATGTATACCCATTTGGGGTT  
GCTGATGGGATTATGAGTAACTTATATATTGCTTTGTGATTATTGAGCTGGGAGTATGAAATGAGGAA  
GGTTTTTGGTATAGTAATATTTGTATTTTAGTATCTCCTGTTTTTGTAAAGCCTTGAACCTATCTTTAAT  
GATGATATACTGGGGTTGATGGTATTCAAGGCTGATGTTCAAGATCCACAAGGGAAGTTGGTGTCTTGG  
AATGAAGAAGATGATAGCCCCTGCGGCTGGAATGGTATCCATTGCAACCCAGATCCAATAGGGTCTCT  
CAGATTGTTCTTGATGGGTTTGGGCTTTCAGGTAAGATTAGTAGAGGTCTTATGAGGTTGCAGTTTCTTC  
GAAAGCTTTCTTTCGAAGAATAATTTTACAGGGAGTATAAGTAGCAGTGTTGTTCAACTTGCTTATCT  
AAGGATTCTAGACTTGAGTGAGAACAACCTATTTGGGACGATTCCGGGTGATTTTTTTGAACAATGTGG  
GCCATTGAGATCAATTTCTTTGGCCAAGAATAAGTTTTTCAGGGAAAGTTCCAGAAAGTTGAACTCATGT  
GTGGCATTGGGGTCTTTAAACTTGTCTCAAATCAGTTTTTCAGGATTGTTACCTTCTGGAATTTGGTCTTT

GAATGGGCTAAGGCTACTTGATCTGTCAGATAATTTGCTGGATGGTGAAATTCCAGTAGGTATTGAAGG  
TATGTATAATTTGAGAGCCATAAATTTGAGGAAAAATCATCTCAAAGGTGAAGTTCCTGATGGAATTGG  
AAGTTGTTTGTCTGTTGAGGTCAATTGATTTGAGTGAAAATCTTTCTCTGGAGAACTTCTAAAACAATG  
CAGATGCTTAGTTTGTGCAATGAGTTGATTATGAAACACAATGCATTAGTTGGTAGTGTACCTGAATGGA  
TTGGAGAAATGAAAAGCCTTGAGATGCTTGATCTTTCTGGGAACAACCTTCTCTGGTCAGTTCCTGAATTC  
AGTTGGGAAGCTTCAATCACTGAAATTACTGAACGTGTCGCGAAATGCTATTTCTGGGGACTTTCCCAAG  
TCCATGAGCAGTTGTGTTAATCTTATGACACTGGATGTTAGTCACTCACTCATTGACGGGTGATCTTCTCC  
TTGGGTATTCAAATTAGGATTGCGACATGTTTTGTTTTCTGAGAATAAATTAAGTAGGGGCTTGAAGAAT  
GCTATTGCTTCTCACTGGAAAACCTCTCGACAAAAGCTTCTAGTTCTCGATATCTCTTGCAATGAGTTAGC  
TGGTGAAATTCATTTGCTATTGGTGATTTAACAGCTTGCAGTCATTGAATTTATCTAGAAATTCATTG  
CAGGGAACATCCCTGAGACTGTTGGCCATCTAAAGTCACTGGATGTTCTTGACTTAAGCGAGAATCAGTT  
AAATGGTAGTGTCCCTCTGGAGCTTGGAGGAGCCTATGCTCTCAGGGAACGAACTGGAGAAGAATG  
CCTTGACAGGAGAAATTCCTACTTCTATTGGAAAACGTTCTGCTCTTTTGTCTTGTAAAGTTCTTGTTC  
TTTATCGTTCATTTATATCTTTTCAATTTGAGATAATCTCTCTGCTTGGAGGTTTTTCATAAGGACAATGTAGTG  
GTAAGTTATTGTACAGAAGAACCTGATTGATATATAGTTTGATAATTAAGGAACTAGCATTGCAATCTTT  
TTCGCAGTTTCCTCTCAGACAACGTTGTTTTGGATTGTCAAATCTAGTGACTAAATCAAGCACGAATCC  
TTATATTAGAGATTCTTTATCATGTTCTACTAATTAGTTAGTTCTAAGCTTCTAGCAATCATTTAGAGTTTC  
CATATTGAGTTAATCAAGTAGCTTCTAGTGCATGATTTTAGATAAAAATCCTTTTTTTTTTCTAGATAAGGC  
AATTTCTATACTTAATATTTTACATAAAGTATAATGTAACAACATCACATTACCTGGTTTTTCGATGTTTT  
ATGTGACGTAGCCTGTAAATTTATTTATGAAGTAGTCTTTGAATATCAGCTTTCCTCAAAGCTTGGTTAAT  
CGTTTTTGTTCATCAACTTGGCAGGTCTCTGTACATAATGGTTTAACTGGCCCTGTACCTGCAACCCT  
TGCTAAACTATCTAACCTACAAAATGTTGACCTTTCCTTCAACAAATTAACCGGAATCTTACCAAAGCAGC  
TGGTAAATCTTGGTCACCTTGAGTTGTTCAACATCTCACACAACCAGTTAAAGGGCGAACTGCCTTCTGG  
TGGTTTTTTTAACTATTTCTCCCTATTCAGTGTGAGCCAATCCATCTCTTTGTGGAGCTGCTGCTAATAG  
GTCTTGTCCAACCTGTCTTCCCAAGCCGATTGTTCTGAATCCCAACTCCACAGAATCTATTCTGGTACTA  
TCCCTCTGACTGTGGGCCACGAAAAGAAAATCCTAAGCATCTCTGCCCTCATTGCCATTAGTGCAGCTGC  
TATTATTGTTGTTGGTGTATTGCCATTACTGTGCTAAATCTTCGCGTACGGTCTGCAACATCTCACTCTG  
CTGCTGCCCTTACATTTTCTGGTGGAGATGACTATAGCCCCTCACACAGTACAGATGCAAATCTGGTAA  
GCTTGTGATGTTTTCAGGCGAACTTGACTTCAGCACAGGGTCACATGCTCTGCTTAAACAAGGATTGTGAG

CTCGGACGTGGTGGTTTTGGAGCCGTTTATCGCACTGTCCTCGGAGATGGGATGCCTGTGGCCATTAAG  
AAGCTTACTGTCTCAGGTCTTGTTAAGTCTCAGGTAGACTTTGAAAAGGAGGTTAAGAAATTGGGAAAA  
GTTTCATCACCTAATGTTGTGGCTCTTCAAGGTTATTATTGGACTCCGTCACTACAGCTACTTATATATGA  
ATTCATAACTGGTGGAAATTTGTATGATCATATCCATGAAGGTTCTAGTAAAAGCATGCTCTCATGGAAT  
GAGCGGTTCAACGTTATTCTTGGGACAGCAAAGGCATGGCTAACTTACATCAAATGAACATAATCACT  
ATAACCTCAAGTCCAGCAATATTTTGATTGACAGCTCTGGTGATCCTAAAGTTGCAGATTATGGGTTAGC  
AAGGCTGTTACCGATGTTAGATCGATATGTTTTGAGCAGCAAATTCAAAGTGCCTCGGTTACATGGC  
ACCTGAATTTGCATGCAAGACTGTGAAGATAACTGATAAGTGCATGTGTATGGGTTTGGAGTCTTGT  
CTGGAGATAGTCACTGGAAAGAAACCGGTTGAGTACATGGAGGATGATGTTATTGTATTGTGTGACATG  
GTACGGGGTGCATTGGAAGAAGGCAAGGTGGAAGAGTGTGTTGACAAGAGGCTGCATGGAAAATTC  
CAGCAGAGGAAGCGATTCTGTGATGAAGTTGGGTTTAACTGACATCACAAGTCCCTTCAAACAGGC  
CTGATATGGCAGAAGTGGTTAACATATTGAAATGATCAGATGTCCTTCAGAAGGCCAGGAGGAACTA  
GTATGATATCCCACTAACTGATGGAAAATTTTAAACATATGCTATTAGTCCCGGAGAAGAAGAATCCGC  
TTGATCTATTCATATTATGGTCATTTAAAGTTTCAATTTTTTTTAAATTATGTTATTGGTTCTCTGTTGTTCCG  
GGTTACCGGATTCCTTTTACCGGGTTTTAGTATGTGAGGATCCTTTTTTACGGTCTTTTTATGTAACAA  
TTGATTCTAACATGTAATTCCAGTAACCTCTTGCGTTTGTGTTCAAATGAAGGAAGGTCCAAATGTTGAT  
AGTGGATGTGCCAATAAGTATATTTTCATGACAAAATGATCAAACAAGC

>M6-PGSC0003DMG400027586 M6 LRR-RLK

GCTAAACAAGGTATATAATTAAGAACCCTTGTTGACATATATAGTTATGGGCAGAAGTTCATTGTCC  
TCTTTGGTCTTGCAGTTTTTATTCTGCTTCATAACCAAACCTCACTTGCTACTGTTCTAATATTAGCACTG  
ATGAAGCTGCTCTCTTTGCACTGAAATCACACATTTCTTCTCATCCTAACAAACATCTTAGAAAGCAACTGG  
TCTTCGTCCAGCCCGTTTTGCAGCTGGATTGGAATCACTTGCACTCCCGCCACCATCGAGTCACTGCTT  
TAGACATTTCTAGCATGCAACTTCATGGTACCATTCTCCACACATAGGAAACCTCTCATTCTTGTTCCTC  
TCAGGATCAGTTACAACGCTTTCCATGGAAATTTGCCAGCAGAGTTGGCTCATTTGAAGAGGTTGAAATT  
GATTAATGTTAGAAGCAATAACTCACTGGAGCCATTCCATCATTTTTGAGTTTGTACCAAACCTACGCA  
CTGTGTCCCTCTGGAGCAACCAATTTTCGGGGAAAATTCCATCTTCCCTTTTCAATCTAACAAAGCTGCAA  
GTGTTGAGTTTACGGAGTAATTTCTCGTAGGAGAGATCCCTCGAGAAATTGGTGATCTTCGTTACTTGA  
CTGTCCTAGACTTGCAATTCAATCAGCTTACTGGCCCTATACCACCATCAATATTTAACATTACGACAATG  
CGAGTGATTGGTCTTACCAACAACAATCTTACTGGAAAGCTTCCAACAACCTATATGTGACCATCTTCAA

ACTTGGAAGGGCTTCAACTCTCAAGCAACTCCTTAGATGGAGTAATTCCACCAAACCTTGAGAAATGCA  
GAAAGCTTCAAAGATTGTCATTGTCGTCCAATGAGTTTATTGGAAGTGTACCAAGAGAGCTAGGAACT  
TAACGGCTCTTATAACATTATTTCTTGGACAACAAGTACACTTGGAAAGGTATATAGTATGATATTTCTTA  
CAACATTATATCTAAAAATTTGATCTCTCTTCCGCCTAACTGGTAATATTTCAAACAATTGACAGGAGAG  
ATACCTGTGGAGCTAGGTAATCTTAAGAACTACAGATGCTGGGATTAGCTGAGAATGAGTTTACTGGT  
TCGGTCCCTACAAGCATTTTCAACATATCAGCACTGCAGCTCCTATCACTTTCACTAAACAAGCTTTCAGG  
TACTCTACCTTCAGATTTAGGTCCGAACCTAGAAGAATTTTACTGTGGAGGAAATAATCTGAGTGGTTTT  
ATCTCTGATTCAATCTCAAATTCTTCGAGACTCAGAATGCTTGATCTCTCATTCAACAGTTTCACAGGTCC  
AATTCCTAAATCACTCGGTAAATTAGAATACCTTGAGGCTCTAACTTGGGAAACAATAGTTTTATCAGC  
GATTCAACATTAAGCTTCCTTGCATCATTGAATAACTGTAGGAATCTAAGAAATCTCTGGTTCTATAATAA  
TCCTTTGGATGCCATTTTTCCGGCATCTGTTGGTAATTTCTCCGACTCCTTGCACGGTTTTGAAGCAGATG  
GTTGTAACTTAAGGGCATGATTCCCCAAGAAATTGGTAACTTACTGGTTTGACAAAGATGAGTCTATC  
TAACAATGAGTTCACCGGATTTATTCCAAATACCATCCAAGGCATGTTGAGCCTTCAAGAACTTTACCTA  
GATAAAAACAAGATAGAAGGACCCATACCAGATTATATGTGCAGTTTACAGAATCTTGGTGCATTGGAC  
TTGTCACAAAATAAATTTTCTGGTTCCGTGCCACCATGCTTAGGAAAATTTACCAGTTTGAGGATACTTCA  
TCTAGATTACAATATGCTGGATTCTAGATTACCAGAAAGCTTGGGGAGCCTTAAAGATCTTTTAGAATTT  
AGTGTTTCATCCAATTTATTAAGTGGGCAAATTCATTTGAAATTGGAAATTTACAGGCGGCAACAATCA  
TTGATTTGTCAAAAATGATTTTTCTGGTAAGATTCTAGCACTCTAGGGGGTCTAGATAAATTGATTTAT  
CTTTCTCTAGAACATAATAGACTAGATGGGCCTATTCCAGATTCATTTGGCAAATGTTGGCATTGGAAT  
TCTTAGATTTATGCTATAACAATCTTGTGGTGAATTTCAAAGTCATTAGAAGCTCTTGTGTCTCTCAA  
TACCTCAACTTTTCATTCAATAAACTAATTGGAGAGATTCCCACTGGTGGTCTTTTTTCAAACGCCACAGA  
TCAATCCTTCTGTCTAATGATGCACTATGTGGTGATGCCAAGTTTAAATGTGACAACATGTGTCTATCCAAA  
CACCCAAGAGGAAAAAGGCTAACTTAGTTTTGTACATCAGTTTGGGAGTGGGTCTGTTACTTCTTGTATT  
AGCCCTTGCATATGTATTTGTAAAATTGCGAAAGACAAAAAGAATACAGGTCAAACAATGTGTCTCC  
GTTAAAAGAGCATGAAAGAATTTCTATTATGAAATTGAACAGGCAACAGAAGGATTCAACGAAACCAA  
CTTGCTTGGTAATGGGAGTTTCAGCATGGTCTACAAAGGGATACTTAAAGATGGTACCCTTTTTGCAGCA  
AAGGTATTCAATGTGCAATTGGAGCGTGCATTCAGAAGTTTTGACATAGAATGTGAGATACTCCGAAAC  
CTTCGCCACAGAAATTTGACCAAAGTCATCACCAGCTGCTCCAACCTTGATTTCAAAGCCCTAGTGTTGG  
AATACATGCCCAATGGGACACTTGATAAATGGTTATATTCTCATAACTTATTCTTGAACCTGTTGCAGAGA



TTAGATATAATGATAGATGTTGCATCTGCAATGGACTATCTCCACAATGGTCATTCAACAGCTGTGGTGC  
ATTGTGACTTGAAGCCAAGCAATGTCTTGCTAGATCAAGAAATGGTTGGTCATGTCAGTGATTTTGGCAT  
TTCAAATGTTAGGTGTAGGGGAGGCTTTTGTTCAAACAAGGACAATTGCAACCATTGGATATATTGCT  
CCAGGTATAGTACAACCTTTCAAAGTTTTCTCATATCGTTTAAATACTCAAACAATTCTTCTCCCCTAAA  
TATAAATGGATTTTCTTTGTTTTTGCATATTCCATTTAACTAGGAACTTTTATAATTGTGATTTAGAG  
TATGGACAAAATGGAATTGTATCCACAAGCTGTGATGTTTATAGTTTTGGCATCATGATGATGGAGATGT  
TCACAAGAACAAGACCAAGTGATGAAATATTTATCGGAGGCTTGACCATACAACGTTGGGTAGTGATT  
CCTTTCCAGGTGAAATCATAAGGTGGTGGATTCTAATCTGGTACAGCCAGGGGATGAGCAAATTGATG  
CAAAGATGCAGTGCTTGTGTCTATCATGGAATTAGCTTTGAGCTGCACTTTTCGTGACACCCGATGCAAG  
AATTAGTATCGAAAATGCTCTTTCAACACTGAAAAAGATTAGGCTCCGGCTTGTCAGTAGTTGGCACTAG  
CTGGTGGAATTGGACCGGCTACTCTTGATGCTATTTGATTA ACTATGCCAGTAACATTA AACTTTCAATT  
TTGC

>M6-PGSC0003DMG400027683 M6 LRR-RLK

GTCGTCGCCTGTCCCCGTTTTAACTCTTTTTCTTTTTGCAATTTCTTTCAGTTTTAGTTCT  
CACTGTTAGCCTTCTTTCTTTGACCAAAGAAAACTGTATCATCAAAAAATACTATCTTTTTGCCCTTT  
CTTCTTTGTAATTGACCATCAAGATCCAGCATTGATATCCTCAACTGGGTTGTAAGTATCTGCATCTGT  
AATTTCTTGGTCTTCTTTGATATTTTAATGCTCAATTTGTTTATTGGTAGAATTTCTTATAAAAATTATT  
TCTTTATTATGTTGTGCTTGCCCTTGACCAAGGACTTGGTAATTTGTTGAATTTTGAAAGTTGTGTAGAA  
AGGGTTGGACTTAATTTATGAAATTGAAGTTTTTTTTGGTATTTCTTCTAGTTCTTATAAAAGATTTT  
TTTTTTTTATTGTTTTGGTAGCTGCTTTGAATAAGGACTTGGTAAATTTGTTGAATTTTGAAAGTTGTATA  
GAAAAGCTCTGGACTTGTATTTCTGGAAATTGAAGTTGAATTTGGCCTTTTGTGTTGATCTTAAGAACC  
CTTTTTGGGTTTTGTGGATTATGTGAGATGGGGTTTGTTAATATCTGGTAGGGGTCTTTTTCTTTTTG  
AACTTTCTTCTTGAAGGTGTGAACCTTTGAGCTTTTGGATGTGGATGTGGAAGATCAAGTAAATTCTGTA  
TTTCGAAAGAATCTCTACCATCTCAAGGTAGTAGGGTAAGGTTTGCAGTACCCTCCCTAGACCC  
GACCTGTGGATTACACTAGGTTTGTGTTGTCATTGTTGTTGACCTTAGTAATTCTGACTAACCATT  
TCTTAATACATTGGTTGCCTTCTGAATACTTTGAAAAAGGACAGTGGTTTATTATTTGTTGAAATTTGG  
AAGTCGTGGTCAAAAAGCTCTCAACTTTGAACTTTCTGGAATTGGAATTCCTCTGTTGTTGTTGATT  
TCAGAACCTTTCTGGGTTCTACTAGCCTTGCTTGTGGGATTCGTTGTATAGCAAGTAAGGAGGGTTTC  
TTCAACTCCATCTTGGAGGTGTGAAGTTTGTGCTTGTGGCTTTGTAAGGTCAGATAAAATCATCTTTCAA

TAAAAAATTCGTGTGTTTTGTTTATATCAAGTAGGGGTGTTCTTTTTCTTCTTTTCTTCAACTCCGT  
GTGAAAGGCGAAAACCTTTATGGTTGTCGCTGTAGATGATCAGGTGAAATCATCTTTGAATGAAGTTTT  
CCTTTGTTGATGATAATTTTATGTAAGTGCATCTCTTAGATTGCTGTAATTGTGCTTTTTCTCTCCAGG  
TCTTTTTGCCTCCTTGTTTGCTGTTTTCCATTAAAATCTGCAAGGAACAGTTTTCTGCTTGATCTGAC  
TTGTTGATAATCTTTATTTTGGTTGTCCTGTAAGTGTGGGACTTGAGTACCTTACTTCTGGAGAATCAC  
TAGTTTGCTTAAGAAGAAAAGTTGTCTAGTGTTGATATGAAATGAGTCCTAATTGAGCGGATGAAACGT  
AAATTCGTATAGTTTTTTCCGACTAGTTTGGAAGTGAGGCAGCGTTGATTGATTGATAAACTGATTCAT  
CGTCTATTTTTTCTTGCAGCCTTACATTTGCTTTTTAACTCGGGAGAAATTGGATTTGTTCTTGCAA  
GGATTTTTCGGGGTTGCAAAGTCTATACAGATCTTAAATGTTTCAGTCAACTGCTTAATTAGGACCTT  
TGATTGTTGCGGTTATGACTGGGCCTCTACCAAGATGGCTTTGGATAACAGAGCTCTTACTACCTTGC  
TGCTATTTGATCTACTTGGCCTTGAGCTGTGCTGTTGCTCTGCTGTTCAAAGCGACATTGACTGTCTGA  
AATCTATAAAAGATTCATTTGAAGATCCATTGAATTTCTTGAACACAACATGGAGGTTGATAATCAGAC  
CGAAGGTTTCATCTGCAAGTTTGCTGGGATTCAGTGCTGGCATCCTGATGAAACCAGGGTTCTGAGTATC  
AGTCTTCCTGACATGGGTCTCAAGGGCAAGTTCCACATGGTCTTGAGAATTGCACCTCTATTACATCATT  
AGATCTTTCGAGCAACAATCTCCATGGAAGTATCCAAATAATATCTCCAAAATTATAGGTTTTGTGGTA  
ACGCTGGATCTCTCATCCAACCATCTATCAGGGGATATCCAGTTAATCTTGCAAAGTCTTTTTTGAA  
TAGCCTTAGACTTGACAACAACCAGTTTACGGGTCAAATTCCTCCAGAAATTGCCCTGCTTGGTCGGCTC  
AAGAATTTAATGTAGCAAACAATCAATTGTTTCGGACCAGTCCACGTTTCATAAATCAACTTTTTCTGT  
AGAGAGCTATGCCAATAATGCCGGACTGTGTGGACCACCATTACCTCTTTGTGAGGGTTATGCTAAGAA  
ACCCCGTACTGGAATCATTGTTGGTGCAGCTGTTGGTGGGGTGACTTTAGGTGCTGTATTATTGACCATT  
GGTATGTTCTTCTATATGAGAAAGATATCCAGGAAGAGGAAAAAGGAAGATGATCCTGAAGGGAATAA  
ATGGGCGAAGAGTATTAAGGGTTCCAAGGCAATCCAGGTGAGAATTAATAAACTGTGTCATTACTGAAA  
CTTCTGTTGCGCTTTGTTGATAGGTCATAAATCAATTCTAGTGGGTTGTGGTTTGTGTTTACGGGTCTA  
CTGTGGCTTTGCGATCATATTTAGAACCATAAATTCGTGTTTTCATATAAGCATTTAACTAATGAGTTTTTC  
ACCATAAGCTCTTGTGTGAGTTTTCTTGTCTCAAGCATTCTTAATTGACTTAAGGTGCCTTATTTTCAGCT  
TTCAATGTTTGAGAAATCTACTTCAAAAATGAGACTAAGTGATCTCATGAAGGCCACCAACAACCTCAGC  
AAGAACAATATTGTTGGGTCAGGAAGAACCGGGACATTCTACAAAGCAGTACTTGATGATGGCACTTCA  
CTTATGGTTAAGAGGTTGCAGAATACTCAACACTCAGAGAAAGAGTTTACATCCGAGATGGCTACGTTG  
GGAAATGTAAAGCACCGTAACCTGGTGCCTCTTTTAGGTTTCTGCATGGCTAAAAAAGAAAGGCTGATG

GTCTACAAAGACATGCCAAATGGCACCTTGCATGATAGGTTGCATTCGGTGAGTGAAGGGGAAAAAAC  
ACTTGAGTGGCCTATAAGAATGAAAATAGCCATTGGAGCAGCCAAAGGATTTGCATGGCTTACCACAA  
CTGCAATCCTCGTATCATTACAGAAATATTAGTTCTAAATGCATCTTGCTGGATGTGGAATATGAACCTA  
AAATATCGGATTTTGGACTTGCCAGGCTCATGAATCCAGTTGATACTCATTTGAGTACCTTTGTAAATGG  
GGAATTCGGGGACTTTGGTTATGTTGCTCCTGAGTATGCACGAACTCTCATGGCTACACCAAAGGTGA  
TGTGTACAGTTTCGGTGTTGTACTIONCTCGAGTTAGTTACAGGTGAGACACCAACTTCTGTGCCAAAGCT  
CCCGAGACCTTTAAGGGGAATTTGGTGGAATGGATCACACAACTCTCTGGTGAATCTAAACTTCAAGAC  
GCGATTGACCATTTCATTGTCTAGTAAAGGTTATGACAGTGAGATCTTCCAGGTCCTTAAAGTTGCTTGTC  
GATGTGTGTTGTCTGCTGCTCCTAAGGAGAGGCCAACAAATGTTTGAAGTGTACCAGCTTCTGAGAGCCAT  
CGGAGAGCGATATCATTTCACAACTGATGATGACATTATGATGCCTGAGAGTGATAGCGGATTCCAAAT  
GGACGAGCTCATTGTTGCTCAATAAGTAAACGAGGCCCTTCGATAATGGTTGAGTAAGATAACAATAATT  
ACTAGATCATTTTCTATCCTGTACAAATACCACGGTTCACTATCTATATAGATCATTCTATTTCTACTGTAA  
GTCCCTTATTCATAACTACCCAATATGTAATTTGTGCTTCTTTTTCTGTATTTTTAATGGTGAAGAGATTT  
CTACAGATTGGTGTTAGTATTTTTCTCTTTTCAGATTTACTGCTTGAACAGCGTAGTCTCATCTTCCAGTA  
ATTATAAAATGCAAAGTTGGAAAAAATCCACCACTCAAAGCTGAC

>M6-PGSC0003DMG400027703 M6 LRR-RLK

TGAATCCTGATATTCAAGCTAAACATAAAAAACAAAGGTGCTATCATAGCTATCGTTGTATCAGGTGTTTT  
TGCTGCATTTGTTTCAGCAATTTTAACTGTGTTAATCAAAAAACGACATGCCAAATACCAAAGCATCCTAT  
CAAGGAAACGGCTATGTAAGTTCTCTATTTTGGTTATAAGCTACCTTACTTCATAAGAATATGTTTCTT  
TCAATTCTTTCCGCAAATGACGAGCATAAAATGTTTAAATTCATAATGCCAGCCGCAAAGCTTTCTATA  
AAATTGGATGGCCTTAGAAGCTTCACTTTTCAGAGAAATGACCTTGGCCACTAACAACTTTGATCATTCAA  
ATCAAGTTGGTGAAGGAGGATATGGGGCTGTCTTAAAGGGAATTTTAGCTGACAAAACAGTTGTTGCTA  
TCAAACGAGCAAAGAAGGATCAGTACAAGGGCAAAAAGAATTTTTGACTGAGATATCTTTGTTATCAA  
GGGTACATCACCGGAATCTAGTTTCATTGCTAGGATACTGTGATGAAGAAGGAGAACAGGTATGATAAA  
CCTCAAACTTCAAAATCCAAATCTTTTTGAATCTACTCATTAAAGATGGAATTCATCATGTTGATCCTTTC  
CTCGGCCATATGAGTAGTTTCAGGCTCACATTGTATGCTATAGCTTCTTATTTTGTCCGTAGCAATCTTTT  
GTCATTCGTTCTGACATCTCTTTGGTATATCATCTATGTGAAGCAATTAGTGTGTTTCTGTTTATGTATTG  
CAGATGCTGGTTTATGAATTCATGTGCAATGGAACCTTTCGAAACTGGCTTCTGGTAAAGAACTGTTTC  
CCTGTTTATTCTGATCCATCATCTTCTCTGCTTATTTTTGGTTAGGGAAGCTATAGAGCCAGCAGAGG

AATTTGACATTTATCATTCTTCTAATAATTGTGTTGTGTAAGCTAGCTTGCTTGCCTTTGACTAATCTATT  
AAATACGTGCTACCTCCCCTAGCACAAATATCAGATAACTCCGTCCTTCAAGGTTTAGGAAGATGGATC  
ACCTCTGTTGGCGTTCCAACCTTTAATTACCAAGTTTATTACTCCAAATCTACCACCACTAGACCACCTTTCA  
ATGTTCCCTAAACAAATAGTAGCAGTATCATTGAACTGGTACAGTAGACGGGTAATATATGCTCTTAGACA  
TTGTTTTTTAAGTCTATAGATGGAGATCAGATATCAAGAAGCAAGCTTTGATCTAATAACTGTATGTCCA  
CATGGTTATCACCTAATTTAGATTATCTTGTTGTAGTTACTGCTCCACTACTATCTGCTGTTTTTGTACTAT  
GTGTTGTTTCTGGTACTTCTGTTACTTCTTTTTCTGGACTGCTTTGGACTATTTTTCCCTTGAGCCAAGGAT  
CTATCAGAAACAGCCTCTCTACCTCTAAGGTAGGGGCAAGGTGTACACTCTACCCTCCCAGACACCACT  
TTGTGGGAATACACTAGGTATGTTTTGTAGTTGTAACACTTGATATCATTTTTTGACAGCTAATTGTAAA  
GGAACCTTGTCGTTTGCTACAAGATTGGAGATTGTAAGTACTAGGTGCAGCAAAGGGCATTCTTTACCTCCATA  
CAGAAGCTCATCCACCTATATTCCATAGGGACATCAAAGCCAGCAATATTCTTCTTGACTCAAAAATGAT  
AGCCAAAGTTGCTGATTTTGGATTATCTAGGCTTGCACCTGTTTCCAGGATGATGAAGGTGTATTACCTAAT  
CATGTTTCAACTATTGTGAAGGGAACACCTGTAAGTCTCCACTGCATCATTATGTTCTATTTGACCTCAC  
TTGTATCATTAAAATTTAATGTATTGAGACTCTGCTTGTATATGCAGGGTTATCTTGATCCCGAATACTTC  
TTGACCCGTAAATTGACAGATAAAAGTGATGTTTATAGCCTTGGAGTTGTGTTTCTAGAAATCTTAACCG  
GAATGCGTCCCATCTCACATGGAAAAACATTGTCCGCGAGGTATTTCTCTCATTGTCAACTTCCCGATT  
CCATGTCTTATCGCGTGCATATGTTTGATAGATGATTTATCCGCACACACAAAGTGAAGTACTCCTGACT  
GATGTAAGTGTAGGGATAGAGGCAGATTCACGAATTAACCTTGTAATGCTCTTAGTTGTTACCATTGAAC  
ACACTACATGTCGCACTTTTGAATGATGCTTATAGAATTTACTTTTTGTTGATACATTTTAGTGATTTTAC  
ATATGTATGTTATAGAACCCAACAATTTTATGGTGCATCCTCCTCTGGGCTGAGAAGGGCTAAGGGGAA  
ATGTGAACATAATTTTTACGCAATCTTTCTTGCATTTCTGCTATGAAGCTTCACCCTTCGAATCTAGCTCC  
ACCATGTTTAATAGTCCCTTGTACCATCAATGGCAGGTAAATTTGGCTCATGGCTCTGAGAAGATGTTCT  
CAGTTATGGACAGTACAATGGGATCTTATCCTTCTGAATGTGTGGAAAAGTTTGTAGCTTTGGCCCTCAA  
GTGTTGCGAAGACAAACCAGAAGACAGACCTTCAATGTTGGATGTGGTCAGGGAGCTGGAAACTATTC  
AGTCTATTATCAATATGATGCCAGATATTGACGCTGATTCAGTAGATTCTAAAGCAAATTTAATGAACC  
AAAGACATCGTCTTCATTTTCTGATTGCACTAGCAAGGACGCGTTTTTATCGTCCTCCAATGTATCGGGA  
GCTTACAGTATCAGTGGTGTGAGTCTTACTATGCCTCGCTAACAGAATAGACAATAGTTGCTCATCTTTTG  
TACTAGAGAGAAAATAGCATGTAGAATAGAGAGTTAGCTTCTGTTTTATATATGTATATTTCAAGGATTT  
GTTAACAAAAACCTCTTTATCATAGCCTTCTGAGTTCTGACAGTATGTGTATGTAATCAGAATCCAAAAC

TTTCTACAAAATGGACTGAGATAGGTACTGCTATTTGTTTGCAAGGAGTTGCACCAACCAATTCCTCAA  
ACAACTGACAACAGCGGAAGGGGGTTCATCGCCAGAAAATCACACTGTATATATAAAAGGTCAATCTTT  
TTATCTATATAAATGATGAGAACCCTCTTGTAAATCCAACATCATTACCAGAAATAGAAATATTATCTAAGC  
TATGGCAACAATGAGAGTCATACAACAAAACAGGCAAAACTCGTTAGTTTTGAAGTAATGTTATCTTTAG  
ATCACATAACATGTCATTGTAACAACACAAAGGAACAGAAAACAAATCCTCGAATCAATATGAGCAAA  
CTCCTATTTTGTCTATGGAACCAAAGTTAGACATGGTTGACACACTCCAAGCTCCTACAAGAAGTCAGA  
AAGACTATTTCTTGGACTAAAAGACAGCAAAGTTCATTTTTATTTATAGATCATAGTAAGAGAACAGCG  
GGTAAATGGCTCTACCGGGAGGGAGGGAGCCGGTTTTGGATTGGTGTGTATTTGAAACAAATAT  
TGACAATCACTTTGAAGCAGCATCAGCAGTATGCATACTGTCGTCATTCTGGTCCAGCAACCTCTCTTCT  
CTCCAAGTGTGTCTTCAACACGAACAACCTTTCTTCATCTGGTTTATCTGCTTTCTGTGATCCTGTGA  
ACTTTGCTAACATGACGAATGTCATTCCCCAAGAATGTTATTTGCGCATCTCAAAGCAATAACCGAGGT  
CTTAAATACCAAAGGAGGAAGACCTTTAGCTAGCACAACTCAACACCGTTAAGTGTGGATATCTTAAA  
TTACTACTGAGACCCATATGTATTGCCATGTTGCTGCATTCAAAGTGTAGGAGGTGGCTTGTGGTG  
TTTCGAAATTCGGATCCATCTTCTCCTCAACTTGATTAACCATTAGATAATGCAGTCCCAACAAGCCCT  
GCTGCAAATCCAAGTGCAGCAAAGTGCAGTTCCTTTGTACACAAATGTACCAAGCCTACTCAATAAACCAT  
AAGAACCAGACTGAAACATGTGGCTCGGTGGACAAGTGCAGCAACATCAAAGGGAGAGTTTGGATCGAC  
GCAGATGCCGTTGGTGCCAACAGATACATCAACACAAAATTCATAATCGAACCAACAACAAGCGTCGAA  
AACACAAAATCTAATTCATTAAGCCCAAATTAGGCCTTGATGCCATATCTCCAAGAACATTAGCACTTAC  
ACCAACCAATTCCTCCATAAGAACCTTAAAAGGAAACTGTGGATCTGCAGCCACCCTTGATCTCCATCCA  
TTAACAAAAGCACCAATTGGTCCGATACTATCCCAAGAAGACTTTGAATCATTGAAATCTCCACCTTACT  
CCAATCACCCTACCCCCACCCCACTACCCCTTCCCATCCAATACTTCTCCATCACCTCC  
ACCAACACCAACACAAGAACTTGATACTTCAAGTGCAGTCAATTTGTTAAACACAGTATCCCCAGTTTTCA  
AAGGGTTAAAATAGACCCTATTATCACAAAATCTGGCTGAAACACCAGAAAGATCACGACTTTGATTATG  
ATTCTGATAGTAACCCGTAAGAGGAGAACAACGAAGCTGAGACATCGCCACCATTTTCTACCAACCAAC  
CTAATAAAATGGGAAAATAGAAAGTAATGGCCATATTATTCATCACATCAACAAACAAAGAATCAGATT  
CACTAAAAGATCAAGAAAGACTCTTTCTTTGACACAAATAATATATATACACACAACAAAAAAGATGCAA  
CAGATTTAATAATAAATCAAGAAAAGGAAAAGGGGTTACCTTTTATGAAGAGATGTGTTCAAGGGGCTGC  
ACATCAAGTGCATGAGCAGAGCAAAAAAAGATGGCAGCAGCGGCTAAAGTGACTAAAATGGGGATCT  
GCATGAAAGTGGGAATCTTTATAACCTAAATAAAAATACGGGCGGCAGGGCCGAAGTTAAAGAAAAAC

>M6-PGSC0003DMG400027710 M6 LRR-RLK

ATGAAGTACCTGGAAGATTGGGAGAAGGGTGATCCATGTACATCTAACTGGACAGGAATTCATTGTTTT  
AACAAAGTTGGAGCCAATGGCTACTTGCATATCAAGGAACTGTATGTTATTATATTCTTCTCTCTTATTAG  
TTGTTATGTTTTCTTCTTCTTTATACCTGGAATTGCTGCACTTGAGTAGAGGGTCTTTCGAAAACAGTCTCT  
CTACCTCCACAAGGTAGTGGTAAGACCTGCACACACTCTACCCTCTCCAAGCCCCGGGATTCACCAAGT  
ATGTTCTTGTTGTTGTAATTAGGTAGATTCAAAGCCAATTTACTCTAGCGAAACTTGGGTTGGTGTGTTGA  
AAAACCCGAACCAACCTTGCCTATGTACACCTCTACTTTGGGCCATAAAAATACCCTTGATGTTAGAAAA  
TCTTTGTATCTTTAATCGAGTTCTAGTACGGTGGATTTACGTGTAAGAATATATCAGGAAAAAGGTCTA  
AATTTACCCCTTTGCTTTTGGTTGTGGTTAAGAAATTACCTTTCATTATGCTTCAAGTTGGAGTTCCTCTAG  
CATTAAACAGCAAAAGAAAGAGACTTGGTTCTTTCGATATCTGCATAATACTCCTGCAATCCAGTTAGCAG  
CATAACTAGTATCTCCAAGGGGGGACCTGGTTCTTTGTAGTTGTTGTTGATCATCAAATCAATTTAAG  
CTCATCTCAACAGTTTGCTAACGACAAGGGCATGAATAACTAAGTTAACTCATAAATTAGAGCACTTAGT  
TGTAAACTCTAGCAAAAGATGTGTCTTTACTACTTTGAGTTATGACTATCTTGTATTCTTGTGTGAGGGTG  
ATGCATGACGCATTAAGCATATTATATTTCCCTTTGTGCAGCCGTATGATGGCTATGAATCTTTCTGGAA  
GTTTAAACACCTGAGCTTGGACAACCTATCTCATCTTCAGTTTCTGTGAGTTGTTACACATATTACTACATTGT  
ACAAATATTTTGATTTTAAGATATAGTAGAGTTTACTGATTTTCTATCTGTTTTACTTATTTTTATCTTTA  
TAATTCATTTCTGAAAGGAATTTTCATGTGGAATGATTTGACTGGGAGTATACCGGAAGAAATTGGAAA  
CATCAAGTCTTTGAAACTTTTGTAAAGTTGAACGAAATTTGATCTGTTTTTTTTGGTACCATCTTCTTGATTT  
TGCAGTACCCTACATGGTTCCCGAGTGCTTTGAACCCTGAACTATCTTATCTAGGAGATCTAGATAATC  
ATTTGGCTATGATGGTGATATACTTTATGTTGGATAGAACAGGTGGATTTATGATTTTAAGTTTGATGGT  
TTCAATCTTTACGTTCTTATCACGGAGTCCATTACATTTTCAAACCTAGGGGTTCAAAGTTCAATATTTTTA  
AATTTATAGTGATTTGTCATATATGTATCTGTGCTTCCCGTCGAAAATGTTGAGTTTAGTTGAACCTATTA  
ATTAGATCCTTCATCCGCCACTGGATAGAATTGAGGAACATTTTTTTCTTGAATTTCTTATGAAAATTGT  
GCTTAATGTAAGATTGTTTCAAGAAGAAGTAAACCTAATGCTTGGAAAGATCATGACTATGTCGATTG  
GTTTAAATCCCTCAGAATTATGTTTCATGCAGGCTCTTACTGAAACAACTTTTCAAGGATCTTTATCTGAT  
CAGCTTGGGTATCTTCCGAACCTGAGAATATTCCAGATAGATGAGAACCAGATTTCCGGAAGAATTCCTA  
AATCCTTCTCCAATTTAAACAGTGTCCAACATATGTAAGTGCAACTCATTTGATTGTTTTAAACAGTGGAA  
CAAGTCTAAGGTTCTACCTTTGTAATCTTATGTGATATATCATGTGTCTACAGCCACTTCAACAACAACAC  
ACTGATTGGCCAGATCCCTCCCGAGCTTTCCAATTTGTCCACTCTGCTTACATGTAAGTTTCTTAGTTTCT

CTTCTTCAATAGACATGCATACTCTCAGTAGAAGTTAGAGCAAAGCAAGTTTTTGTAACCTCTAAAATGA  
CTTTTATCTCTACTTATGTCTGTAACTAACGGAGTAATGTTTTGTGATGATACTTTCTTTTTGTCAACAG  
GCTTATGGACAGCAATAATCTTTCAGGATACCTTCCTCCTGAGTTTTCAATATTACCACGTCTTCGAATAA  
TGTATGTCCTACTCACACACACATATATGATATGCATATATTGAACCTCATATGCAACTTTCATTAGCTG  
TATTTTGCTCAAGAGGTATAAACTAACTGTTACAAAAACAATTGTTATTCAGAGGCAACTTTAACTG  
AACTTTCTGAAGTAACTAGTTATAAATTTGAAGGAATGCTGATTCCTTACTACCTATGAGTGAGACTGTCT  
ATGTTTGTCTTAGTTGAAGTGCGTATTGGCCAAATGATCGAACAACTGAAGCTGAGAACATTTGTTA  
CAGACCTATCCTCAGAACCCTCTAATTATCATCTTCAGATCTTTCTGTTGATTATAAAAATTCATCGATAATC  
TTTGCTTGTAATATCCAATGATAAAAAATTGATCTTATATAAGACAAATATAGTAATCCTTGTCATACAAT  
AACTGCTATGCCATTTGCAGTTCCTACTGAGAGGTGCATGGGTTGAAATTTATGATGAAGTTCTGAATTT  
CTTATGCAGACAACCTTGATAACAATAATTTAGCCGTTCCGAGATTCCAGCTTCGTATGGGAACATGTCA  
TCATTAGTGAACTGTAAGTGATCCTTGAAAATGTTCCCTCTTTTTGTTCTTCTCTATTCTCTATGACTCA  
GCATTATAAGTTATACATTTGAAGGACAACAATGGTAAATAATATGTACAAACATAAGCATATATTCATT  
GTGTACAATGTATATGAAAGAGGGAATGTTCCAGGACATCTTATTATGACGATTAGGGTAGATAGAATAA  
GATGCAATAGTTGAATACTACTGTACCTAATCAAATGAAGATTCAATGCTTCTGATAATATTGCAGAAG  
TCTCAGAAATTGCACGTTGCGAGGATCCATTCCTGACCTTAGCAGAGTACCGAGTCTACACTATCTGTAA  
GTTCAAGTTTTGAAATTGTTCTTCTGTTCCCGTTGATTTGTGACCTTTATACTTCATGCAACATGATTGTA  
AGATCTTCTAAAATGTTAACACTTCTTGCTTACTGTTTGTGCAGTGATCTCAGCTGGAATCAACTGTCTGG  
ATCTCTACCAAATATGCTTTCCAACAATATGACTGCTATGTATGCTTTCTACAGATTTCTTCATATATCTAG  
CATCTTAGTTCAGCCATATTTTGTGTTAGTTCATTATCTCATGTTGTGAAGAGTTCTACATCAGCCCTTAA  
GAAACATTACTAAAGAGCTAGCCTTTGGGGTTGAGTTAGGCCCTACATCCATAACACAAGTTAAACATAA  
TTTTTATCATGATTGCACATTTCTCTGTGTTTTTCTGTCAATTTCCCTAATCTAATGTGTTGTTGTACATTC  
TCATGCAGTATTCTGTACACAATCGTCTTGATGGATCTATTCCGAAGAGTTTTTCATCTCTTCTTTGTTG  
CAGAACTGTAAGGATCTTCACTGTGTCTTGAATACATTCTCTATAGTACTGGTTCTTTAACATTTCAA  
GCTCAATTTCTGTGATAACAATTGATTTGACGGACTTGTACAGGACAATGGATAACAACCTTTTGAAT  
GGTTCCTTTTCTACCGACATTTGGCAAACAAGTTTACTTCAACGTGTCCTGTTGATGTAAGACCTGAA  
GCTAAATTGTAACATCAAATATCTGATATGAAATGTACTATCATTTACACAGAAGTCTGGGAGTCTTTTTA  
ACCTTTCTATCTTCTTTGCAAACTAGTGATCTTCAGAATAATTCATTTCCGACATTTCCGGTACTCTTGA  
ACCACCTCTGAATGTCACTCTAAGGTAAGGTTTTTCTTTCCATATTCAACGACAAAACCTAAGAGAAGCC

ATTGAATTACTAATTTTATGATCTGGCTATCACTTCATGTCCACATTTTCAATAATAAAAGACATTAT

>M6-PGSC0003DMG400027967 M6 LRR-RLK

CAAAATTTTGTACCTTTATTCTAACCAACTTTCTGGTCCCATTCTAGTGAATTGGGGAATTTGAAAACC  
TCACTGATATGGAECTATCCCATAATAAGCTTAGTGTTCAATTCCAATTACTTTAGGTGACTTAACTGAG  
CTCAAATTTTGTACCTTCATTCTAACCAACTTTCTAGTCTCATTCTAGTCAGTTGGGGAATTTGAAAA  
CCTCACTGATCTGGAECTATCCCGTAATAATCTTACTGGTTCATTCCAATTACTTTAGGTGACTTAACTG  
AGCTCAAAGTTTTGTACCTTTATTCTAACCAACTTTCTGGTCTCATTCTAGTGAGTTGGGGAATCTGAAA  
AACCTCACAGAGCTGGATATATACCATAATCAACTTAGTGTTCAATTCCAATAACTCTAGGTGACTTAA  
CTGAGCTCAAATTTTGTATCTTTATTCTAACCAACTTTCTGGTCCCATTCTAGAGAGTTGGGGAATTTG  
AAAAACCTCAATGATTTGGATCTACAAGAAAATCAACTTACTGGTCCAATTCTGCTTCTTTGGCAATTT  
GAGAAAGTTACAATTTTGTATCTCCGTGCCAACAACTTTCTGGTTCATTCTAAAGAACTTGCATATA  
TGGATAACTTGGTAGAGCTGATACTAAGTGAAAATCAGTTTTCAGGCCATTTGCCTGAGCATCTTTGCCA  
AGGTGGGAAACTTGAGAACTTCACGGTGGCCAGTAACAAGTTAACAGGACCAATACCAAGAACTTGA  
GCAATTGCTCCAGTTTTAAATGGGTCCGCTTTAACAAACAACAGTTTCACTGGGAATTTATCTGAAGCTTTT  
GGTATCTATCCGAAGTTGCTGTTCAATTTGAGCGATAATGATTTTCATGGTGAECTCAGCAGCAAGT  
GGGGGAAATGCAAGAATTTGACTGATTTTCGGATTGCCAGAAATAACATTAGTGGTAGCATACCACCAG  
AGATTGGAAATGTCAAAGGCCTTTTAGGACTTGATCTTTCATCGAATCATTGATTGGGCAGATTCCAAA  
GGAATTTGGAAAATTAACCTCTCTAGTTAATCTTTTTCTGCAAACAACCGAATTTCTGGCAATATACCTG  
AGGATTTTGGGTCACTAACAAAGTTAGAGTCCCTCGATCTATCAGACAACAGATTGAATGGGTCAATCCC  
GATGTGTATAGTAGATTTTCGTACTTGTTCAGTTGAACCTGAGCAACAACAAGTTTGGGCAGAAAATT  
CCAAAGGAGATAGGGAGGATAACTCAGCTTAATGTACTTGATTTGAGCTATAATCTTCTGGTTGGAGAT  
ATACCCCTCAGTTAGCCAATTTGAAGGTCTTGGTAACTTAAATCTTTCCACAATGGCCTATCTGGGCA  
CATTCTACAGAACTTGATACTTTGACTGGTTTGCAGGATGTCATATTGTCATACAATGAGTTGGAAGGT  
CCAATCCCTAATAATAAGGCTTTTATCAATGCCTCATTGGAGGGTAATAAAGGTCTTTGCGGCAATGTAG  
CAGGACTCCATCCCTGCGAAATGCCGTCTTCTGTGGTGAAGAGGCACTCAATGGCGAAGGGACGTAAAC  
TCATCCTCATCACTGTACTTCTGTTATGGGAGCATTAGTACTGCTCTGTGTTTTTCATTGGTGTCTCATT  
TGTGTAATAAAAGAAGGAGAGTTAGAGATGTTGAAAGAAGGGATGGTGTGGTTGGCTTTTCGATATCC  
ATGTTAGATGGGAAGG

>M6-PGSC0003DMG400027971 M6 LRR-RLK



ACAGGGCCAATACCAAGCAGCTTAAGCAAGTGCTCGAGTTTCAAAGGCTGCGCTTCAATAATAACAGT  
TTTACTGGGAATTTATCTGAAGCTTTTGGCATCCATCCACACCTTCATTTATTGATTTGAGCGACAATGA  
TTTTTATGGTGAAGTCTCAGCAGCAACTGGGGGAAATGCGAAAATTTGATTGATCTGCGTGTAGCCAGAAA  
TAACATTAGTGGTAGCATACCACCAGAGATTGGAAATGTCAAAGGGCTTTTAGGACTTGATCTTTTCATCA  
AATTATTTGATTGGGCAAATTCCAAAGGAATTTGGAAAATTAACCTCTCTGGTTAATCTTCTTTTTCGACA  
CAACCAAATTTCTGGCAATATTCTATGGAAGTTGGTTATTGACAAAGTTAGATTACCTTGATCTATCAG  
ATAATAGATTGAATGGTTTCGATCCCACCGTTTATAGGAGATTACCAGCACCTGTTTCACTTGAACCTGAG  
CAACAACAAATTTGGCCAAAAAATTCGAATAGAGATTGGGAAGATAACTCACTTAATGTACTGGATTTG  
AGCCGTAATCATCTTGTGGAGAAATCCCCCTCAGTTAGCCAATTTGAAGGTGTTGGTAAACTTAAATC  
TTTACACAATGGCCTATCTGGGCGCATTCTCAAGAATTTGAAAGTTCAACTGGTTTGCAGGATGTCGT  
ATTGTCATAAATCTGTTGGAAGGTCCAATCCCTAATAATAAAGCTTTTATCAATGCCTCATTGGAGGGT  
AATAAAGGTCTTTGCGGCGATGTAGTAGGAATCCATCCCTGCGGAATGCCGTCTTCTGTGGTGAAGAAG  
CACTCAATGGCGAAGGGACATAAACTCATCCTCATCACTGTACTTCTGTTATGGGAGCACTTGTCTACT  
CTGTGTTTTTATTGGTGTCTGTTTATGTGTGATAGAAGAAGTAGAGTTGGAGATGTTGAAAGACGGGA  
TAGTGATGGTTGGCTTTTCGATATCCATGTTAGATGGGAAGACATTGTACAGGGACATCTTAAACGCCAC  
AGAAGAGTTTGTGCAAAATTTTGCATCGGGCAAGGAGGACACGGAAGCGTTTACAAGGTAAACCTTC  
CATCATTAGGGAATATAACTGTGAAGAGACTTCATTCTTCATTTGAGAATACAGCTCCCAAAGTTTCTTA  
AATGAAGTAAGGGCATTGACTGGGATTAAGCACAGGAACATTGTGAACCTCTATGGCTATTGTTCGAAT  
GCACAACACTCGCTCTTGGTTTATGAGTATGTGGAGAGGGGGAGTTTGTCTAGCATTTTGTAGCAACAAG  
GTTGAGTCCAAGAAATTGGATTGGTTTAAAAGAGTGAATATCATCAAGGGTGTGCTTTTGTCTTATCTT  
ACATGCACCAGGACTGTTCAACCCCGATTGTCCATCGAGACATAAGTAGCAGTAATGTTTTGCTTGATTC  
TGAGTATGAAGCTTGTGTTTCAGACTTTGGCATAGCGAAGCTACTCAAGCCAGATTCATCGAATTGCACT  
GCACTTGCAGGCACATATGGCTATGTTGCACCTGGTAAGTTTTAAATATTTTCATGAAAGCCAAACACTAT  
TGTTTTTATCTTATTTACAAGTTTAAATTGATAATATTGTTCTGGAACTGTATTGTTTCAAGCTTGCATAT  
ACTATGAAGGTTACACAAATGTGTGATGTCTTTAGCTTTGGAGTACTATCATTGGAGATAATAAAAGGA  
AAACATCTTGGGGAATACATTACCGTGCTAGCAGATTATCGACTATAGATCCTGAGCAGCTTAGCGATT  
TTCTGGATGAACGCCTTCCATATCCTGAAGATAGAGTAAAAGAGGCTTTGGTTTTTATCATCAAGCTAGC  
ATGCTCTTGTGTTGCTTGAACCTCCAAAATCAAGGCCAACAATGCACTTCATCTCTCATAAGTTATCATCAA  
TGGATGCACATCCACCTATTCATCAGAGAAACCCCATGTAAGGCGAGCAATATAA

>M6-PGSC0003DMG400028123 M6 LRR-RLK

CAGTTACAAGAGAGCATAATGTCTAATGCAATGTCAAGAAAGAATGTGGTTGATCCAGCAATTAGAAAT  
TCGTGCTCGGATGAATCATTGAAGACGATGATAGAAATATGTTGCAGGTGTTTGGAAACAAGATACAGAA  
GATATGCCCTCAGTTGAAGATGTAATATGGAATTTGCAGTTTGCTGCTCAAGTTGAGGATTCATGGAGA  
AAAGACTCTTCAAGTAGTGATGCCTCTCCAATTTACATCTCTACAGCTTCAAACCCAACCTGTCGCGCAA  
TAGCAATAGCTCGTTTGTGTGACAAGCTATTTCTAACGTGGATAACTAATCTCGATACTATTATTCCATCC  
TGTGACAAGAATAACTAACTAAACAATTTATGTAATAATTTTCTTTCATAGCTTATACAAAAAAGTAAGT  
TTTCATACAATCTTTTTCTAACAGCAGATGCCATAGCAATTTCTTGTGTATATACCAACCCAACCTTAA  
TAGTACCTAGATATTACAAGAGCAACATATAGTGCAGAAACCTATATTAGACGTGGACGATGAAAAACA  
AAAACAAAAGAATGCAAAGAGGGACTAGTTAATGGAAAAGGGAAGCATTGCAAATGATTTTTCGGAC  
AGTAGAAACAGACTATCTATTCGTTTGCAGGAGGAGTTTCCATTTTCTGAACTTGAGGGGCTGTCACTGC  
CACTAAGCTAAGATCAGATGAGTTTGAATCTCCAGATCTTTCACGGATCTCCCGGTACTCCTGGCATATG  
GCACATAAGTGGCAGAAAAAGTGTGTGGCGAAGTCTCCACATGGAGCTTCTGCATATATATCAGGGCA  
CACAAAATTGTTAAATGCAGAAATACTGATGTAAGCAGTTTGCATCTTTCTATTAGGCATGGAACCATA  
GTATTTTCGTAGAACAGAAAAGGGGGCAGGAGCTAATGGGAGGAGAGGAAGATGAAGAATTAAGAATT  
CACGGTAACTGGTTATAAATGCTGCAAACCTCATCCAATAACAACTCAAACCTGAAATTTCTAACTCAGA  
CATCATCTCAATGTAAACCAAACAGAATAGGAACTGAAGTCAGTTCTCTTTCTAGATGGAGTCCTAATT  
TTCCCGATCTGAAGTTGATAGTTTATCGAACTGAAGTCCACCACTACTAATTCAAATGAAGTATAATCATC  
TCTCCCGTGGAGTCGATTACACACTGTAACCTTTTTAATCTTTTGTAACTTCTACAGATAACATCCAATTCAA  
AAGAATGTATGTGGAATTTTAAGACATTTCTGATTAATTTTTCTTTCTAATGAAAAGGTTAACTTCAAAC  
ATCATCATAGAAGTCTTAATATAGTCATTAATATTAATATATATACACACCATAATGGGGAGTTTATGCATA  
GACGTAAAGAAACATCCTCCCATGCATAGCCCATGTTATAGGAGATACAACTATGAATATGGAAGGTTA  
GATTGAAGGTAAATTTTCAAGCAATCTAACTTCACTCATTTTTTCAAATGTCTTTCTGTTGAATCAATAG  
AGCTACTGATAATATGCTAAACCACATTCTCATCCATGTGCACTATAAACAGCAAACAACAGAGATGGC  
TACCTGAAGATTGTACTTTGATCTCAATGTCTTTTCGATAGCCACAGGCATAACATGCAACAAAGCACCCA  
GGCAAACCCAGAAGAATGCCTTCAGTCAAGAAGCAGCAAATTGTGTTGAAAAAAGCCACAAAATAAA  
GTGAGTTGTACATGATCCCATCAAGGTTCTGACCCCAAGAAGTCCGCATTTTTTCAAACAGAAAGCAA  
GGGCAAAGAAGTCCAATAAAACCTGTGCTCAAATTTTGAATTAGTGCTAACTCGAGGTTGTCAACCA  
ACATCTAGTGTCAATTCCTCTGGGATGACAGAAGAGCCATTGCTTAGGAACAGGTGTTGGAATTTTAAAC

ATAAACACACATAATTAACCCTCAAAAGAGAAGTTCCACAATCACACTTTCATCTTATTATATGTTTCAGAA  
AGGAATGATTGATCTAGTCCCATCGGCACTGCTGAAAACCAGTTTCAGGAAATCCGTCAGTTGTATTAT  
TTATAACTTCATGAATATGACAAACAGTGAGACCACAAGGGGGAGCAAATAGCAAATAATCTGGAAACA  
GAATGGAAGCAGTGTTGACTGTTGAGAAAAGAAATGCATGAATTTTATCCAGAACTCTATGGAATTACA  
CTACACTGGGTATGTTGTTGTTTCATAAGAATATATACATAAATCCTGTGGGATTACACTACACTGGGTAT  
TATTTTGTGTTGTTTCATAAGAATATATACATATATCCTTATGGGTATACTTTTGTCCCAGCAAAGAGCA  
CCAAGAAGGTTCTGTATATGTACAGTATACAAAACTCAGATACCCCTTTATAAATGCAGGGCACTGAG  
GAACTCTAGCAAGGCACCTAAATCATGCACACTTAAGCATGTTACACCATAAATCAAAAAAGTACAGGC  
ACTTCTAAGTTCCTAAGTCTGGATAGGACTAGTTTTGCAAATTTGGTAAGAACTGTATTTTCAAAGGCA  
TACCAACTTCAAGCTAAATTTTTATCTAAGAATCATATAAGCAGAGAAAAATACTTCATTCCATTATAGAG  
CCCGAGGAAAACCTCAATTAATGTATGGCTTATAATAGCTTCCTTAGTGGTTCCTCAGAGATTTATCAT  
GTTTTCCATCTAATAAGATAAGAGGATAATTAATCATGAATCTTATTTTACTACCCAAAATTGCACCTTTC  
ATTCACTTTTTTCCCTTCTCATAAAGCAAGATCACAGGGACGAGAGTAGCGTACAGCTCTGTGGATCATC  
AAAACAAGCACAGATTCCAGAACTCCACTGAGCATGGTCATCTTTTTTGGTCAGTTGAATTTCTTCTGTAG  
TAGAACTTGTGGTACTTCTGCATCGGACTGATCCAGAGGAATATAAGGTGGAGGTGAATAATTCTTGT  
GCCCTACCATTATTAGTCAGGTGCAAACAGCAACCTGCAGCACAAATTCAGAGAAAGCAAAAAATATC  
AATTAAGAACAAGCGAGTTACACATAAACATCAAATCAGTTCTCTGATATCATGAAGGACGGTACTTTT  
TGACTAAGTTGCTCGGACTCTCCAAAATGTTGCCGCACCAGTGTTGGATCCTTCAAAAATACATTATTTT  
TGGAAGATCCGACACACACTTGTCAACTTTTTTGTAGAGTCCGAGCAACATAGCTT

>M6-PGSC0003DMG400028147 M6 LRR-RLK

TCTCACTCCAATTATAACTGTATATACTGTTTCTCCATTATTCTTGGCTTTGTAGTGATCTGAATCAACCC  
ATGTTTCCCACCTCTCCTTGTCTAAATTCTAACATGGGTTTGTACAAAAACAGCCATTAGTTGGCACAAA  
GAAATCAACTTTCTTGATTATGTGATTCTTGTCAATACATGCTGTCTAGTGGTTCTTGGTGAAATCATCAT  
CAATGGAGGCTGTTTCAGCTAATGGGGTTTGTCTAACACTCTTTATTTCACTTTTTTTCAGTTGTTTACAGT  
GTTACAGACCCTAATGACTTAGCCATTGTCAATGAGTTCAAGAAAGGGTTAGAAAATTCTGAGCTTTTAG  
AATGGCCAGTTAATGGTGATGACCCTTGTGGTCCTCCAGCTTGGCCTCATATAATTTGTACTGGAAACAA  
AATTCAACAGATTCAAGTTATGGGGTTGGGGTTAAAAGGCCCTTTCCTCCGAACTTTAATAAGTTGTCT  
AAATTGACTAATTTGGGGTTGCAAAGGAACAAATTTAGTGGAAGTTACCATCTTTTAGTGGTTTGTCTG  
AGTTGCGCTATGCTTCTTGGATTTCAACATGTTTGATAGTATTCCATTAGATTTCTTTAATGGGCTTGTG

AGTTTAGAGGTGTTGGCATTGGATGATAATCCTTTGAATGCAACTACTGGTTGGAGTTTGCCTAATGAGT  
TGCAAAGTTCAGCTCAATTGACTAACTTGACTTTGATGAACTGCAATTTGGTTGGTTCTTGCCTGAGTTT  
CTTGAAATATGTCTTCTTTAGATGTATTGTTGTTGTCCAAGAATCGACTTTCGGGGACTATAACCAGGTAC  
TTTTGAGGATTCTGAGCTCAAATGCTTTGGTTGAATGATCAGACTGGTGATGGCATGAGTGGTTCAATT  
GATGTGGTTTCAACAATGAGATCACTTACTAGTCTTTGGCTTCATGGGAACCATTTTTTCAGGTAAAATTCC  
ACAGGAGATTGGTAATTTGACATATCTGCAGGATCTTAATGTTAATAGCAATGATCTTGTTGGTTAATT  
CCTGAATCTTTAGCAAATATGCCATTAGGCCATCTTGATTTGAATAATAATCATTTTTATGGGGCCAATACC  
AAATTTCAAGGCTATAAATATTAGTTATCAATCCAATTTCTTTTTGTCAAGCCAAAATTTGTGCACCTGAGG  
TTCTTGCTCTTTTAGAATTCCTTGATGAGTTGAATTATCCATCTAACTTGTTGAATCATGGTCAGGAGAT  
AATCCTTGACGGGCGTGGTGGGGATTAAGTTGTGACATTAACCAAAAAGTTATTGTGATAAACTTG  
CCTAAGTCCAATCTTTCTGGTACCTTGAGTCCTTCAATTGCAAATTAGATTCTCTTACTCATATTTATCTT  
GGATCTAACAATATTTCTGGTTCTATTCCATCTAGTTGGACTAGTTTGAAACATTTGGTTCTGCTTGATTT  
GAGTAATAACCACATTTCCCTTCTCTGCCTGAATTTACTCCCCCTTGAAACTCGTCCTGAGTGGAAT  
CATTACTGAACTCTAGTCCTTATAGCAAGCCCTTTGCAAAGAATAGTACATCCACTGCTGTTTCACCC  
TCTTTGCCGACCAATAAGTCAAGCTCTCCAAGTCTAACTTAGTCATATTTGTGGTTCTATTGCAAGTTTC  
GCACTTTTAGTTTCTTTTGCTATGCTACTATATGTTTACGTTGAAAGAGGAGTATGGATAGGCACAAAG  
GTCCAACCTCTCTAGTGGTTCATCCTAGAGATCCTTCTGATTTGGATCGGATGGTCAAGATTGCAATTTCC  
GATGAAACTAAAGGAAGTCTTTCGATACTGACTGGAAGGGGTTCTTCTAGTATACACAGTGGTAAATAC  
CCTGTGATGGAAGCTGACAATTTGGTCATATCAGTTCAAGTACTTAGGGATGTAACCAAGAACTTTGCTC  
CAGAAAATGAACTCGGGCGTGGTGGTTTTGGAGTGGTTTATAAAGGAGAATTAGACGATGGAACAAAA  
ATAGCTGTCAAAGAATGGAGTCTGGAGTAATTAGCAGCAAAGCGTTGGATGAATTTCAATCTGAAATT  
TCTGTTCTTTCCAAAGTCAGACATAGGAATTTAGTGTCTCTATTGGGATATTCTGTTGAAGGCAATGAAC  
GGATTCTGGTTTACGAACACATGCCACAAGGTGCTCTTAGCACACATCTTTTCAACTGGAAAACTTGAA  
CTTAGAGCCTCTTTCATGGAAGAGGAGGCTGAATATTGCATTAGATGTTGCTAGAGGAATGGAGTATCT  
ACATACGTTAGCTCATCAGTGCTTCATACACAGAGATCTCAAGCCCTCAAATATCTTGCTGACTGATGATT  
TCCGAGCAAAGTATCAGACTTTGGACTCGTGAAACCCGCCCTAATGGAGAGAAGGGCTCTGTGGTCA  
CTAAGCTAGCTGGAACCTTTCGGATATTTAGCACCTGAATATGCGGGTAAACATTTCAATTTCTGTTGTTTT  
ATTCCTAACATGACATTTTATTTGTAAAACAGGAAACAGATGTTCTATTTGCCATTTGATGTTCTCTTTGG  
TATGATTACAGTTACATAAACTCAAATAGTTTACTGTTGTCTGTTTTGGGGTGGATAAGTTAAGG

ACTATTTTGCATAGTCTAATTAAATCTTATGTCACCTAATAAATCTGTTCACTGATAACTAGTTAATGACTA  
TTCTTGTAGACACCTAGGATTTTCTTTAGATGATTCTGTCTTTTCCGCTGCTGGTTTCCCAACTCATTTTG  
CCTGCTGTTTAAACAGTTACTGGTAAAATCACCACTAAAGCCGATGTCTTTAGTTTCGGTGTTGTCTT  
ATGGAGTTGTTAACTGGATGGATGGCACTTGATGACGACAGACCAAATGAGAGCCAATACTTAGTTGCA  
TGGTTCTGGAACATCAAATCCTCTAAAGAGAACTTATTGCAGCAATCGATCCAGCTCTGGATGTGAAAC  
AAGAGAGTACATTTGAGAGCATCTACACCGTTGCAGAACTTGCTGGTCACTGCACAGCAAGAGAGCCTG  
GCCAACGCCCGACATGTCCCATGCTGTGAACGTGCTCTCCCGCTCGTTGAGAAATGGAAGCCTCTTGA  
GGAAGATTCAGACGATGATTGTGGTATCGATTACAGTCTTCCAATCAAATGGTTAAGGGTTGGCA  
AGAATCAGAAGGAAAAGACTTGAGTTGTGTCGACCTTGAAGACACTAAGGGTAGTATCCCTTCAAGACC  
TACTGGATTCGCCGAGTCCTTTACATCAGTTGATGGTAGATGAAAAAAAGGTAAGTACTGCACTACTTCTAGT  
GTAGTTGATCTGATATTCTTATTACAGTAAATGTGGATAGCATTTTTGTGTTTGTGTTTGTGTGATATTTGATC  
CTGTTTTTTATCTATGCTTTCTTCACTTTTATTTGTAGAAAATTTACTCCAATGTATAGTCTTTTGAAGTT  
ATGTGGGATGTAGATATGGTATAGTGATGATTGATGAATGAAAACCTGTTTCCA

>M6-PGSC0003DMG400028429 M6 LRR-RLK

TGAATTCTAAAAGGACTTTTTCTGAAAGCTCTGCACCAAATCTTTCTTTGGGTAATTTAGCTTTTGG  
GATCCAAATGGTAACTTTGCTACTCATTTTCTCATTTTCTTCATTGGGTGGCCACCACTCCAGCTTCCAT  
GGGTTTTCTTTCACCTAAAGGTGTCAACTATGAAGGTAAAGATTAATACTTTACTATAATCCAATCATTTT  
TTGTTTTTTTTTCCAGTGAAAAATCCAACTTTATTGCTTAGCACTTGTTTATTTTTGTTTTCATAGTTTAG  
AGTGGTAAAGATGAAAACCTTACTACAATCCAAAATTTGTTGTTTTTTTTCCAGTGAAAAATCCAACT  
TTGTTGCTTAGCACTGTTTACAAGCATTTATTTGTTTATGTTTTCATAGTTTAGAGTGGTAACTTTACTTAA  
AGATTTGTTGAATTTATTGTGGGGTAAGCAGTGGCTGCATTGATGTCTATGAAGAATATAATGAGAGAT  
GAATACCATGTGTTAGATGGATGGGATATAAATTCTGTTGATCCTTGTACTTGGTACATGGTTGGTTGTT  
CTTCAGAAGGCTTTGTTATTTCTCTGTGAGTTTTCTCCCTTCTGTTACATCTTGTCCATTTCTTTCCCTTC  
TGTGAAAATAATTTATTATTCTTTGGTTATATATTCTTGGCAGTGAAATGGCAAGTATGGGATTATCT  
GGCACACTTTCGCCTAGTATTGGGAATTTAACTCATCTTCGGACAATGTAAGACTAATTTGACATGAATTT  
CCCACTTTATTCTTATTTTGTGATGTGATGCTGCTCACATATATCTTGGAGATACTTGAAGTTAAAATCACAT  
AGTACTTTTAGTTAATAATACTAATACTATTAAGAGTGACATTAAGTGATTTAATTGCAAGATATGTTG  
AAAAATATCTTTAATATGATCTGTTAAGTCATTTTGCATTGGTTTTTGTGTTAGGTTGTTGCAGAATA  
ATCATTTATCTGGTCCAATTCCTACTGAAATTGGACAGCTCACTGAACTGCTGACCCTTGATTTGTCTGGT

AATCAGTTTGATGGAGGAATTCCTAGGGCGTTGGGTGCGCTGATTTATTTAAATTACTIONTGTGAGTGTAGG  
CTAAACTCTGATTTTGTCTATCTTTACTCGTATGTTACAGTCCCTTGTGGCTGTGTATGTAATTC  
TTTGGTGTGTCAAATTCAGGAGGCTTAGCAGGAACAGATTGTCTGGACAAATTCCTAAACCTGTGGC  
ATACCTTTCAGGTCTTTCATTCTTGTATGTCTCCATCCATGACATTTATATGTCCAATACAAGGGCTGTAT  
GAGAGTTAAATAAACTGTGGATGGTGTGTGTAGGGACTTATCATTCAATAACCTTAGTGGTCCAACCTCC  
AAAAATTTGGCCAAAGACTACAGGTAAGATCCAAGGAAATATTATTATATCTGTCTCAATGTTTGGTCC  
TCAATAGTCGGTGAAGTGAAGAATTCTCGGGTCTCTAGTTTGATGAATCAAGGAATTCAGGGTTTACA  
CTTTACTATGAGGAGGATGGTATATGCCACAGTACTGTGCCAGAATCTTATTCATTAATGGAGTTTAAAG  
ATAAACACCTTGATCTTAAATCAACTGCAAATAGAAGCTTGATTCAATATTGTTGCATCTGCGACATGC  
CATATGGCGCAGTGCCACACATAATGTTTCTCTCGTAATAAAGTTATGCTTCTATAGTTTTAGTAACTGT  
TATTTTGCATTCCAATTTGTTGTTGTGGTATGTCCCTTCACTGGAAACCAGCAGTCAGTTCTTGCAGACCT  
GAAAGTAATATCTCAAATCTCATTATCAAAAAAAGAAGAAAAGAAGAAGTAATATCTCAAATCTCCTTA  
TCAAAAAAAGAAGAAGTAATATCTCAAATCTTATCATTGAAGTATTGTCTTCTTACCTGGTCTAATGGAA  
CTTCCATGATGTTTGTGATATAATTCCTATATTGCTAAATATGCTAATGTCAAGCAGAATATTTGCTTG  
AGATAATTTCTGATGTTATAGAAGTTTTCTATTCTACTTGCAATGCTTGTTGTTTACCTTCCCCCTGTCATC  
ATACTAGCAACCTTCGGGTTCTTTGTATTCTATTTTCACTTATAATTTGGTTGTTGCCTTAGTATTGCAG  
GAAACAGATTTCTTGTCTGCATTGACCACACAAATTTGTGGGGGTGTGCCAAAACCAGTAAATGGTAT  
TGTTGAAATTTTACCAGAACTTGTCAATTATATTGAGGCTGATGTTTTAATCAAACCTCTATTTTTACCATGC  
AGAAACAACCTCAGACAAGAGGATTAGCAATCATCATCGATGGGTTGTTTCTGTTAGCGTTGGGGTCAG  
TTGCACATTCATAGTTACAGTCTTGCTTCTGGTTTGTGGGTGCATTGGTACAGATCTCGTGTCTCACAG  
GATATGGTAATTACAAGATTAGAAACACATCTCCGATTTCTTGCACATTAAGACTAGATACATTATGAGT  
CTCTGATCATTGATCTGCAGTGCAACACGATTGTGAGTTCGCCACTGGCCACCTGAAGAGATTTTCATT  
CGTGAACCTGCAAATTGCCACTGGAAATTTCACTCTAAGAACATACTAGGACAAGGTGGATTTGGAGTG  
GTTTACAAAGGATACCTTCAAATAGGACAGTAGTGGCTGTCAAAGATTAAGAGATCCAAGTTTCACT  
GGAGAAGTGCAGTTTCAAACAGAAGTTGAGATGATAGGCTTGGCTGTGCATCGGAACCTTCTACGTCTG  
TATGGATTCTGTACGACTCCCGAGGAAAGATTACTTATTTACCCTTATATGCCAAATGGGAGCGTTGCCG  
ATTGCTTGAGAGGTTTGTCTTGAAGTATATTTGCTTGGTGCTTTTGTGAAGCATTCTTTTTCTTTTACA  
ATGGATTTCTGTAACCTGATCAAGTTTAAACATATGCATTTCAATTATTCCTAGTGTCTCAATGTTAATCTG  
GCAAAAACTCTTGAAGGTCATGGTTTATGGAAATCGAGGACGTTGTGCTTTATTTTTACTGTACATCTG

AAAACACCAGGGCCCTATGATGAAAACAACCTTTTGATTGATTATCTTAGATAGTTAAATTGGATTTACAT  
TGTCAATTTTTCTTGTGAAAGTGAATGAAATCTATTATCAACATATCAATCAACAATGCATCAAACCCAA  
TCTAGTTGGGGTTGACTATATGAATTTTTGTATCCATTGCAATTAAGACTCCTGATGTAGTGCATTACTT  
AAGTAGGCATGCCTCTAGCAATCTATTGCGACCTTACGTGCTATTAAGCTTAATTTTTATGTGACAAAGTT  
TCTATCCATCTTCTGAAACTCTAATGCCATTTATGGTATCGACTTACATTATCCATGAATAAAATAAATTGT  
TATTTGGCAGTAAGGTAAGTCTGTCGTGTTGTCATTAATTTTTAGCATGACCAATTCAAGTCAATTTTTAGGT  
ATATGAACACAAAAATCAAGTTGGAATTATTGGAATGTAAACACATTAGCTTGATGTAGTACTGTGTCA  
TCTTTTGCTCTGTTCTCACATAATCTTTTGTATCTACCAGACAATGGCCGGGATAAACCATTTTTGGATTG  
GAGAAAGCGCATGCATATAGCTCTTGGAGCTGCCAGAGGTCTTCTGTATTTGCATGAACAGTGTAACTCT  
AAAATAATTCACAGAGATGTTAAGGCGGCTAATATTCTGCTTGATGAAAGTTTTGAAGCTGTTGTTGGTG  
ATTTTGGTCTTGCTAAGCTTTTAGACTGTAGAGATTCTCATGTTACAACCTGCAGTTCGTGGTACTATAGGT  
CATATAGCACCAGAGTATTTATCAACTGGTCAATCATCTGAGAAGACAGATGTCTTTGGATATGGGATAC  
TACTTTTGGAACTCATTACAGGACACAAGGCATTAGATGCAGGAATTGGTCAGGGTCAGAAAGGAACTA  
TTCTTGACCGGGTGTGTAGCTTCTAACCCCTCTACTGTTTGAAGCTTTATATAGTTGTGCATATAATTTCTA  
GACTTTATTTGATTAACCTGTTAATAGTTAATCTTCTTGCAGGATTTTGTGTTGAGTCATAATCAATATCAAT  
ATTTGACTTGAAATTTTTCACTAAAATTGACGCAATAACTAGTGTCTAACGCAGAAGTTGCTCCACATCTT  
ATGAGAGAAGTACAGTTCCAAAATTCTGAATCATTGCTCGAAAATTGTTCTTTTTACTGACTGCATAATC  
TGGTTCATGATCTGTAGGAATTATGGACAACATATTCAAGGTTTTTGAATCACTTACTGATCAGTGCAAT  
AAAATTATTGCTGTGTATAACCTTACTGTTGCATACTTTAAGCCCTTAATATAAATTATTTGGTTGATTTT  
TTATTACATATAATGTTACACTTGCATACTTTAAGCCCTTGATTAACCTATTTGGTTGATATTTATTACATT  
ATCATGTAAGTCTGAACAACCATGTATTATTCTAGAATAGTTGTGTGAAAAAGGTACCCGTTCTATGCT  
TCTTCAATTATGATTTTTCTTCTTCTCAGGCTGTTTTATGTGGAGTAAAGATTTTCAGAACATGATAGAG  
TTCAGAGTTTGTTATGTCTATTATTCGGGCCTATTCATTCTGACAACCTGTCCAATTTACAGGTCCGGAAT  
TTATTTGAGGAAAAGAAAGTGGAAATGCTTGCGGATAGGGATCTAAGAGGATGTTTTAATGCAGAGGA  
GCTAGAGAAAACAGTTGAAGTGGCTCTACAGTGTACTCAATCTAACCCCAATAATCGGCCTAAGATGTC  
GGAAGTTTTGAGAATCCTGGAAGGCGTTACAGAACAATGGGGCATGTGGACGAATCACAAGGTGGAA  
GCAACACATGTCAAACAAGGGCTTTCAGCTTCTCTAGGAATTTTAGTGATTTTCATGAAGAATCCTCATT  
ACTTTTGAACCAATTGAGCTTTCAGGACCCAGATAACAAAAGCAGCCTGCACTGGCATCGTCATAAAAA  
GCATGCAATCTTGATATATCTAGTGTAGCCATACATACGAGTATATTGTTGCTTTAAGTCAATGTCCTAGT

ACTCTGTAAGTTACTGTAATTTGTAAATTTTGTGCAAAAACATTCATTATACTAGTTCTTGGTGGTTCAC  
AATCTGTGTTAGAAGCTAGCTAGCTAACTTCATTTTGGAACTTCATTCTTTGGAAATGACAAACTTC

>M6-PGSC0003DMG400028435 M6 LRR-RLK

TTAGCATGAGGCTAAGCACCAAAGTTTGTTAATTGAGAATTAACACCTTGAGCAACATCATAAAAATTTG  
CAAATTTGCTTGCCGTTTGTCAAATAATTTGCAGGCACAATTCCAGCAAAGATTGGTAATTTAGGAAAG  
TTGCAGCAATTACAATTGGAGAACAATCGCATCGTGGGTTCAATACCGCGCACCATATCGAACTTATCAT  
CACTATGGATGCTTAATTTGAACACAAATAATTTATCAGGTACCTTGGTCTTGTGTTGCTTGGAAATTAATT  
GTTGTTTTTTATCAACTCTTATATACTGATGGGCACAATCAAATAAAAGTAATTTAGATTTATTCTTTTCG  
TGTGGCAGGTATTATACCCAGAGAGATTGGAAATCTTCACAACTGGAGATACTTTATTTGCAAATTAAT  
AAGTTAAGTGGTTCATACCGGAAGGGCTCTTCAATATCTCTACTCTAACAGAGGTGTCAGTTTTCTTCA  
ATAACCTTTCGGGTAGTCTTCCATCTGCTTCAGGGTACTGGCAAACAATCTACAGCGTTTGAATCTTGG  
TCAAACTACATTGGTGGAGTTATACCTACTTCAATCTCCAATTCATCAAATCTAGAGATTGTAGATCTTA  
GTATAACAAATTCAGTGGCCAAATTCCTAACTCGTTGGGGGATTTGAGGAATCTTGAATATCTGGACTT  
GTTTCGTTAATAATTTATCGTCTCCGCACCTAAGTATCTTAACTTCATTGGTGAACCTGCATATATTTGAAAG  
AAGTAATATTAGGGGATAATCCTCTGAATGGTGTCTTCCAGATTCCATTGGCAATCTCTCCACTTCTATC  
ATGGAACTTGAGTTACATCATTCTGAAATTAGGGGCCAGATACCATTAGGAATTGGGAATTTAAGTAAC  
TTAAACACTTTGACCCTATACGGCAATGACTTGACTGGATCATTACCAACAACATTATGTGATTTACACAT  
TCTTCTAAGGCTAGGACTTGGTGGTAATAGGTTGAGTGGATCCTTGCCAGAGTGCCTTTGTAAAATGTCA  
TCGTTGGGCTTGCTTTCTTTGACTATAATCGGATTTCTGGTCCGATACCATCTTGCATTGGTAATGCAAC  
CTCTTTGAGAAATGCTTATCTAAATCAAATAGGCTCACTAACATACCCATAAGTCTGTGGAGCCTCAAAT  
ATCTTTTGGTGCTTAACTTGTCAAATAATCTTTGATTGGTTCTATACCTCCAGAATTAGGGAACTTGAAA  
GCCATAACGTCCTTAAATCTGTCCTGGAATCACTTTTCAGGAAGTATTCCCTCCACAATTGGAGACTTGCA  
GAGCCTACTTTATCTTTCTTGTCTTATAATGAGTTACAAGGATCTATTCCAGAGTCATTTGGGAAAATGA  
TAAGTTTGGAAATCGGTTAATCTATCCAATAACATTCTTTCAGGTACCATTCCAAAATCATTAGAGTTGCTT  
CGGTATCTGAAGAATTTCAATGTATCATTCAATAGATTAGAAGGTGAAATCCCAAGTAAAGGACCTTTTC  
TCATTTTCATCTCTCAATCTTTTATGGGAAATGGAGGGTTATGCGGCGGTTTAGTTTTCCAACCTTGTATG  
ACTAGGGCTTTTCATCATTCAAGGAGAATCAAAGTCTTCTGATTTTACTTGTCTCACTGGGAGCTGCTGT  
AATGGTACTTGGCTCAATCGCTGTGTTTATGTTAAGGAGACCTCGGAATAGAAATATTCCAACCTCAAGCT  
GAATCCTTTGCTGCAACCACACTAGCCAGGATTCATACATTGAAATTGAAAGGGCAACTCAAGGGTTC



GACCAATGCAACTTGCTAGGCTCTGGAGGTTTTGGCTCTGTTTACAAGGGCATGTTTGCAAATGGGATG  
ACTTTGGCAATCAAAGTGTTTAATTTACAGGTTGAAGGTGCGTTAAAGAGTTTTGATGCTGAATGTGAA  
GTTTTACGCAACCTTCGTCATAGAAATCTTACCAAAGTTATCAGCAGTTGTACTAACTTGGATTTTAAAGC  
ATTACTTCTTGAGTATATGCCCAATGGAAGCCTAGAGCTGTGGTTACATTCTGATGATCGCTTCTTGAATA  
TGATCCAAAGATTAGACATAATGATCGATGTTGCATTTGCTTTGGAATATCTCCATCATGGTTATGAAAC  
AGTTGTTGTACATAGTGACCTGAAGCCTAGCAACGTCTTGCTAGATGAAAAGTTGGTTGGACATGTGAG  
TGACTTTGGCCTGACCAAGTTATTAGGAGAAGGGGAATCAATTGCTCATACTAAACACTTGCCACAAT  
GGGCTACATTGCACCAGGTAACCTTTCTTTAAGTCCTTTTATCATCGCCTATGATGTGTTATTTTACATCAAA  
TAATTAGTTGACTGGTTCTAATATAATGCATCACATTAGAAGTGGGTGAACGCCTAGGTGGATGGCTTAT  
ATTAATGGGAAGAAATCACCTAGTGTTTTTGTCTCTTTGTTGGAATTTGAACCTGAGATCTCATAGTTCT  
TAATCCACTTCATTGGCCATTAATCCACTATTAGCCTTGGGTATAAATATAGATAGTATTTTGATTTCTTTA  
TTTGGCTCGTCAAGAATCTAATTACTCTGGTAACATTGGATCAGAGTATGGATCAGTAGGATTAGTTTCT  
ACAAGATGTGATGCGTACAGCTATGGCATTATGCTCATGGAACTTTTACAAGAAAAAGGCCATATGAT  
GAAATGTTTCAAGAAAATTTGAGCATGAGGAGTTGGGTCTGCAATTCCTAACTGCAATGCCAGAGGAT  
ATTATTGATGCCACATTAATGGAACCAGAAAAGACTCATTTTCAGGAAAAGTTGCATTGTGTGTCTTCTA  
TTTTGGAGTTGGCATTGCATTGCACAACTGAATCTCCCAATGAAAGGTTGAACATGATAGAAGTCCTTGC  
AAATATCAAGAAGATCAAGTTGGAATTTCTTAGCAAATGATGTACGTCGCACTGGTAACTATCCCTTTTTT  
AAAATATTCTAATGTCGTCTAGATATATTATTTCTTATTCAGGAATAGAAAAAATTATTGTCTTGTCTTTA  
TCGTACATAAATATTGAATTGGATATTCTGGTTTTCCATACAAATATATCCACTTGTATAAGAAAAACAA  
GAACTAATTGAAACATAACTTTAATCATGATTTTATAAGTAGAAGAATCCAACATTTTTGCCCATGGAAAT  
TTGAATTGTGATGAATGTTGAAAAGTGAAGTAAACAACTCAAGTCTCCGTTACTGTTAGTTTGTTTTTGCA  
GTGTCAACTCAAGTTTGATTCCAATTGAACATTTGTGCAGGTTGTGCTGCCGTTTTCTGGCTTCTAGCAA  
ATTTGGGTGACACCAATTGAGATGAAAAATCAACATTTGTTCCAGATTTGAAATTTTCTGTTTCTGTTG  
TGTTTTTGTCTTGTGCATATTTGACATTTGGTAAAATAAGTTTTAATATAAGATGTGTACTACAGTTG  
GAATGGAAGAATGCCCTGTATAATATTGGATTGT

>M6-PGSC0003DMG400028436 M6 LRR-RLK

TATATACCTTGATATCACCTTCTTATTTATCCTTTCTGCCTGAAAACCTTAATTTGTTCCCATGGAGAGAT  
CATACTGTTTCTTTCTTTCACTACTACTATTGAACTCTACTTGTTCGAGGCCACAGACATAAAAACAGAT  
CAATCAGCTCTACTTGCCTTAAAAGCTAGCTTTACTCTAAATCTTCTCATCCCTTGAATCAAATTTGGTCT

TCTCAATCTTCCGTTTGTGATTGGATTGGAGTCACTTGCGGCTCTCTTACCATAGGGTGACTTTACTAAA  
TATATCCAACATGGACATTCTTGAACCATTCCCCAACTTGGGAAACCTCACCTTCCTCGTTTCTCTTG  
ATTTGAGCAACAATAATTTACATGGAGACCTCCCTCAAGATTTTTCTTGTTTACGTAGACTGAAGGTGAT  
GGATTTTGC GTTCAATAATTTCAAGCGGAGAGATACCAGTGTGGTTTGGTTTCATTTCAAAGTTAGAAAACC  
CTGAGTGTGAGAAACAATCATCTTCAAGGCAATATCCCTAAGGAGATTGGGAATCTTGAGTATCTAAAG  
GAGTTGATTTTATTTGAAAACCAATTTACTGGCTCTATCCCGCTCTCATTTCATATGTCGTCGTTGGA  
AATTTAGGTCTAACATATAATCAATTAAGTGGGAGTCTTCTGTAGATATATGTCTTCGTCTTGCAAAAA  
TAAAGAGCATTTCATCATTTCCAACCACTTGAGTGGTCAAATTC AACAGGTTTGTCTAACTGCACAGA  
ATTGCATGATTTTTATTGTCATACAATAACTTCAGTGGAAACCATTCCACCAGAAATTGTAACTTGGTGA  
GGCTTGAGCTCTTAAATCTCGGGGGAAACA ACTTGCACGGTACTCCTTCGTCCACTTTTACTTGTTCAAT  
TTAGAAAATAATTGTATTTATATTGCTGCTTAAGGATGGCCATCCCATTTGGCAAAATACATCTAACTTGT  
CTTTATTTTTCATTTTGATACTTCATCTTAACCTTGTATGTTTCATTTTAACCCTCCAATTCTATCATTITAT  
TTTTACTTTATAAAATAAGTTTATCCATATTC AAAAGCCTTCTAGCATGAGGCTAATTCGAAGTTTGTTA  
TTGAGCAACAGGATAAAGGTTTACAAGTTTGTTCGCGCTTGTC AAAATAATTGTCAGGCACAATTCCAG  
CAAAGATTGGTAATTTACGAAAGTTGCAGCAAATACAAGTGGAGAACAATCAAATTGTGGGTTCAATAC  
CGCGCACCATATCCAACCTATCATCACTATGGGTGATTAATTTGAACACAACTATTTATCAGGTAGCGT  
ACGTGGTCTTGTTTGGTTATCCGGAGGCAATAAAATAAACTAATCGAGATATATATACTCTTTCATGTGT  
CAGGTGTTATAACCAGAGTGATTGGGAATCTTCACAAATTGGAGACTTTATTTGCAATTTAATCAATT  
AAGTGGTAATATAACCAGAAGAGCTTTC AATATCTCTACACTTACAAGGGTTTCTTCTCTTTAACAACG  
TTTCGGGTAGTCTTCCATATGCTTCAA ACTACTGGCTAACAAATCTAGAGATTTTGAATCTTGGTGTAAC  
AACATTGGTGGAGTTATACCACCTCAATCTCTAATTCCTCATATCTAATGAGATTATATCTTAATGGTAA  
CAAATTCAGTGGTCAGATTCCTAACTCATTGGGGGGTTTGAGGCATCTTGAACATCTGGACTTGTCCAAC  
AATAACTTATTCTCTCTGCACCTAAGTATCTTAACTTCATTGGCAA ACTGCAGATCATTGAAAGAAGTTTA  
CTTATAACCATAATCTTCTCGACGGTGTTATTCCAGATTCCATTGGCAATCTCTCCACTACCATTATGGAATT  
TTATTTAGATAGTTGTGAAATAAGGAGTCAGATACCATTAGGAATTGGGAATTTAAGTAACTTAAACACT  
TTGTCCCTATCCCGCAATGATTTGACTGGATCAGTGCCAACAACATTATGTAATTTACATATTCTTCAAAG  
GGTAGCAATTGATGATAATAGGTTAAGTGGACCGTTGCCCCAGTGCCTTTGCAAATTATCATCCTTGGGC  
TTGGTTGATTTTTCTAATAATAGGATTTCCGGTCCGGTACCGTCTTGCAATTGGTAATGCAACCTCTTTGAG  
AAATGTTTATCTAAATTCAAATAGGATCACTATCATACCCATGAGTCTATGGAGCCTCAAAGATCTTTTGG

ATCTTAACTTGTCAAATAATTCCTTGGTTGGTTCTATACCTCCAGAGTTAGGAAAGTTGAAAGCCATAAC  
ATCCATAGATCTTTCCAGGAATCACCTTTCAGGAAGTATCCCTCCACAATTGGGAGACTTGCAGAATCTAT  
TTTATCTTTTCGTTGGCTTATAATGAGTTACAAGGATCTATTCCGGAGTCACTCTAGAATACGATAAGTTTG  
GAATCAGCAAATCTATCCAATAACTTTCTTTCAGGTATGATTCCAAAATCATTAGAGTCACTTCGACATCT  
GAAGGATTTCAATGTATCATTCAATAGATTAGAAGGTGAAATCCCAAGTAAAGGACCTTTTCTCAATTC  
ACCTCTCAATCTTTTATGGGAAATGAAGGGTTATGCGGCGGTTTGCTTTTCCAACCTTGTAGGACTAGGT  
CTTTTCATCATTCAAGGAAAAGCAAAGTCTTTTGGATTATACTTGTCTTCTGGGAGCTGCAGTAATGGTA  
CTTGGCTCAATCGTTGTGTTTATGTTAAGGAGACGTCGGACTAGAAATGTTCCAACCTCAAGCTGAGTCCT  
TTGCTGCAACCACACTAGCCAGGATTTACATATTGAAATTGAAAGTGCAACTCAAGGATTCGACCAATG  
CAACTTGATTGGCTCTGGAGGTTTTAGCGCTGTTTACAAGGGTATGTTTGCAAATGGGATGACTTTGGCA  
ATCAAAGTGTTTAATTTACACGTTGAAGGTGCGTTAAAGAGTTTTGATGCTGAATGTGAAGTTTTACGCA  
ACCTTCGTCATAGAAACCTTACCAAAGTTATCAGCAGTTGTAATACTTGGATTTTAAAGCGTTACTTCTC  
GAGTATATGCCCAATGGAAGCCTAGAGATGTGGTTACATTCTGATGATCACTTCTTGAATATGATCCAAA  
GATTAGACATAATGATAGATGTTGCATTTGCTTTGGAATATCTCCATCATGGTTATGAAACAGTTGTTGT  
ACATAGTGACCTGAAGCCTAGCAACGTCTTGCTAGATGATAAGTTTGTGGACATTTGAGTGACTTTGGC  
CTGACCAAGTTATTAGGAGAAGGGGAATCAATTGCTCATACTAAAACACTTGCCACAATGGGCTACATT  
GCACCAGGTAACCTTTCTTTTAGTCCTTAAATATCGCATATGATGTGTTATTTACATAATAATTAGTTTACTA  
TTACATCACATTAATAACTAGGTGAAGGCCTGAGTGGATAACTTAATTAAGAAAATGTAATATATCACAG  
ATTAAGTATGAACAAAAATGGTATAGAAAACATTGAAATATGACTGTCAAACCTCTATATGCATGCATCTA  
CGAATTTTTTTTTATCAAAGTTCTCTCAGAGGATATTAATAGATAAGCCAAAGGGGCATAGAGGGGG  
ACTATGCCTGACCTCAGCAATACAAATTTACGATATTAGGAGTGAGGAAACGAAAAAGTAGGGGGGGG  
GGGGGGGGTTAAGGGTTGCCCCACATCAATTAAGCATACAAAAAGATAAATTCTAGGATTTTAGAGCAA  
GCAAAGAAGACTCAGCCAGGATCAAAAAGAAAGTTGTTCTTCACTTAGATTCTAATGTTAGGCTTGCC  
AACTACATCATTCTTCAACGTGGATATAATCTTAAACGGAAGATTTATAGGCCTAGTCTCAGTGAAGAAG  
GTAGTCATTTTGCATATTTAGCCAAGTTAGCAAGCATGTGAGCAGGAGTGTTACCTTCTCTTAAAGGTAT  
GTGTGAAAGTGAAACGGCTAAGTGAACCTCATAGATTGGATCTGTCTAATATCATCTTTTATCTGCTAGAA  
GTCCATATCGTTTCAATTGACTGCCTTACACTGTTTCATTCCAATTATACTTTCAGTTTTTAAAGTCCTTAT  
CTGCTCAAGGTAAATTCAACTATTTTCAATATCTAGCAAATATATATATATATATATATATACAGACAC  
AAACACACACATATATATGTATAATATTTTCATTTCTTTATCGGGCTCGTCAAGAACTAATTACTCTGGT

AATATTGGATCTCAGAGTATGGATCAGTTGGATTAGTTTCTAGAAGATGTGATGTGTACAGCTATGGCAT  
TATGCTCATGGAACTTTCACAAGGAAAAGGCCATATGATGAAATGTTCAAGGAAATTTGAACATGAG  
TAGTTGGGTCTGTAATCACTACCTGTAGCACAGATGATATTATCGATGACACCTTATTGCAACCTGAA  
GAGATTGATTTCAACAAAAAGTTGTGTTGTGTGACCTCTATTTTGGAGTTGGCATTGAATTGCACAGCTG  
AATCTCCTAATGAGAGGCTCAACATGAAAGATGTCCTGGCAAATATCAAGAAGATCAAGCATGATTTTCT  
ATGCAGATGATGTAACAAGTTTATTCAATGGTAGGTATCCAACTTTTTAAAACATTCTAATGTCATATG  
GAGAAATTATTTCCCATTTTCAGGAATAGAAAGATTACTGTCTTGTCTATACCATGTAGAAATGGGTTTTT  
CCATACAAATAATAATAATAAAAAATAAAAAATAAAAAATAATAATAATAATAATAACTTAAATCAAGG  
AGAACTTCATTAGTTTTGAAATTGGTCACATAATCAAGGAGAACTTCATTAGTGAGTAAAGTAAATCAAG  
AATTCATGAGGACCAACATTTGGAAATTATGATGAATGTTGAAAAGGGAAGCAAACAACATCATGAATCC  
GTTACAATTAGTGATTTTTGTGTGTGCTATGAGTTTTTATCTGCAATGACTGCCAACTCAAGTTTGATGC  
CATTTAAATTTTTGTACAGGTAGTGCTGCCTTTTTGCCTGTCGTTGGCAAATTTGGGTTACACCAATTGA  
GTTGTCAACAAAGATTTGGTCTGAGATTCGGTCTTCTCTTATTTCTGTGCCTTCTCTTGTGCATGTTTCA  
AGTTTGAGTATGTTTATGTAATAAATTTAATATATAAGATGTGTATTAAAGTATCATACTGGTGATCATGA  
ATTATTATTGAGATAGCAGCTTCAATAGTTTATGAAGA

>M6-PGSC0003DMG400028437 M6 LRR-RLK

AATTTTCAAATGGTATTCCAAGAGAAATTGGAGACATGCAAATCTGATACATCTTTCTTTGGCACAAAA  
CAAGCTACAAGGATCTATTCTGACTCAATTGGTAGCATAACCGAGTTTGCAATTTCTAGACCTCTCGAAT  
ACAATCTATCTGGATCAATTCCGATGTCCTTAGAGAAGCTTCAGTATCTCAACTATTTCAATGTTTCCTT  
AACAGCTTGCAGGGTGAAATCCCTTTAGTGGTCCCTTCAAGAACCTTCCAGCCAGTCATTCATGTTCAA  
TAAAGCATTGTGTGGTGCTCCAAGATTTCTGTGCCCTCCGTGCCCACTTCTTCAAACCATAGATCAAAG  
AAGAAGAAGTTACTTCTGATAGTCTTCTCTACTGGGAGCTGCTGTGATAATTGTTTTGTAACATTGGC  
ATTTATGTGGATGAGGTACAGAAGAGAAGGAAATGTTCCAGTTGAAGCTGATTTGTTAGCTACAATGGA  
AAGAATTTCATACTATGAAATCATAACAAGCCACTAATGATTTTAGTGAGAGTAATTTCAATTGGTTCGGGG  
AGTTTTGGTTCTGTTTACAAAGGAATTCTCAGAGATGGGACTACCATTGCAGTTAAAGTGTAAACCTAC  
AAGCTGAAGGTGCATTCAAGAGTTTTGAAATAGAATGTGAAGTTCTTCGCAACCTTCGCCATAGGAATCT  
CACCAAAGTCATTAGCAGTTGCTCCAACCTTGATTTCAAGGCTTTAGTGCTCGAGTACATGCCTAATGGG  
AGCCTTGAAAAGTGGTTGTATTGCAACAACCTACTTCTTAGACATCCTGCAAAGACTAAGTATAATGATCG  
ATGTGGCACGTGCATTGGAATATCTCCATCATGGTTGCTCAACACCTGTGATTCATTGTGATCTGAAGCC

TAGCAACGTTTTGCTAGATGAAAACATGGTAGCTCATGTAAGTGACTTTGGCATTCTAAACTACTCTGT  
GAAGATGACAGTGATTTACACACTAAAACCTTAGCAACATTTGGCTACATTGCACCAGGTAAATCTCTTA  
TAATTCTTGTTCAGTATCCTATCTTCATTTTCCTTTTCTCGGTTTAAATGATAATCCGTAAGTGTGATTAC  
TGTAGAGTATGGAAGGGAAGGATTGGTGTGCTAAAATGTGATGTTTATAGTTATGGGATCATGCTAAT  
GGAAACATTTACGAGGAGAAGGCCTAACTATGAAATATTTGATGGAGATCTTAGTTTAAAGAAATGGGT  
AAGTGATTCACTCCTAGAGGCAACAATCAAAGTTGTAGATGCAAATTTGCTAAAGCCAGAAGATAAGAA  
ATTCATGGACAAGGTAGATTGTGTAGCATCCATCATGAAAGTGGCACTATATTGCTCTGCTGAATCTCCT  
GAAGAAAGAATCAACATGAAAGATGTCGTAGGAATGCTACAAAAGATCAAGATTCAACTTCTTTCATGC  
TCTACAAGTACATAAAAACATATCAGTCATGCCACTTAAGGGTATAGCAAGTGTGGTAAACTTCGTAT  
CTGCATACATAGACTGGTTTCTTTTTAGCTGCATAAGGTTATTTTCTGCAGCACTATGTAAAATCGG

>M6-PGSC0003DMG400028438 M6 LRR-RLK

ATGAAGAGAAAATTAATTTCCCTTTCCCTCTTGTAGTTTCAGTAATATGGCATCATTTTCTGATATTATCA  
GCCACTGCAGAAGTCAATCTCAAACCTGATGAAGCTGCTCTACTTGCTTTGAAATCCTATGTTACTTCTGA  
TACTTACAATATCTTGACAAGCAACTGGACCTCAACTACTTCCGTTTGCAATTGGATTGGAGTCACCTGTG  
GCTCTCGCCATCAAAGGATCATAACCTGGATATTTCCAATATGGGATTAATAGGTACCATCCCTCCTCAC  
TTGGGAAATCTGTCCTTTTTGGTTTCTCTCGATATCAGTAGCAACGGTTTCCAAGGAATTCTGCCACGAG  
AGTTGGCTAATTTGCATAGATTGGAGTTAATAAATGTCACTTCTAATAAGTTCACTGGAGATATTCCCTC  
GTGGTTCTCGCTTTTCCAGAACTCCAGCACTTGCATCTAGCTTTTAAACAGTTTACAGGTATTATTCCAC  
CAGATAGTTGTAACGCTTCAAACCTGAGAGTTTAGTCTTGGGATTTAATCAGTTACAAGGGGAAATTC  
AAATGAAATTGGTAATCTTCAGAACTTGACTTGGTTGAGCTTGGGATCAAATCAGCTAACAGGCTCCGTA  
CCACTTAGCCTGTACAACATTTTCATCGTTACAACGTTTGGTTTTGACAAAAAATAGTTTGTCTGGAAATCT  
TCCTGTCGATATATGCTTGAACCTTCCAGAACTTATGGTGCTTGCACCTTCTGACAATGAATTTGATGGTC  
AAATTCCTTTGGGGATAGATAAATGTTCAAAGCTTCAAGATTTTGTATTGTCATTCAATAAGTTCAGTGG  
ATTGATACCTAACAGATTGGGAACCTTGAATGTGCTGTCTATTTTATATCTTGGTCGTAATGACTTGAAA  
GGTGAGTTATACATATTTGCTTTTAGGTTCTTCTTGTTCATACATGAAACATATTTTTGAGTCATGTAT  
GCACTCCTTAATTGATATACTGCAGAAAGTAGACTTTCTATTTATGATTTAATTTGCAGGTGAAATTCAG  
AAGAGATTGGAATCTTCGTAATCTAGAGATATTGGATGCACAGAACTGTAGCCTAAGTGGTCCCTTACC  
ATCTTCTATAAGTAACTTAACTTCACTTCAATCACTCAATCTTTATGGCAATAATCTCTTTGGCACCTTGCC  
CCGGTATATATGTTTGAACATGCCTGATCTCAGTGCATTTCGATCTTGGGAATAATTTATTCAAGTGGAAAC

ATTCCAAAAGAATTTGGAAACTGCAGTTCACITTTCTGACCTCTTCCTAAGAGAAAACAACITTAACAGGTA  
TCATCTTGTCATTTTCTTTTCCATTATTTGGTGTATGTTCTATGTTTTTCATATCCTAATAAGTCACTCAA  
ATGTCATCAGGTGAGTTACCAAGGGAGATTGGTAATCTTTTCAATTTGGGAAGATTAGATCTACATTACA  
ATTTCTTAACAGGTCCTATTCCATCTACAATATTCAACATGTCAAACATAAGGGGCATTTTCATTTTTAGGG  
AACTTCTTTACTGGAAGTCTACCATCAGATATAGGACTTGGTCTTCCTAATCTTGAAGAACTTTATCTTGG  
TTACAATAACCTTACTGGAGCCATCCCTAATTCTCTCTCAAATGCTTCCAATATTTTCCGGCTTGGAAATG  
GATATAATGACTTTTTCTGGTCATTTTCCGAGGTCGTTTGGTAATCTAAGACGTTTAGAGTACCTCAACGTG  
AACGGCAATCATTTCACAAGAGATCCTTCATCTCCAGGATTGACTTTCTTTGATTCCCTTGACAAATTGCAG  
ACATTTGAGAAAACITGTGGATTGGTTATAATCCACTCAATGGAAATCTTCCGGCTTCTATTGGAAATCTCT  
CAAGTTCTCTCGACTACATTTATGCTGTTAATAGTGAAATCAGAGGCTACATTCCCAGTGAAATAGGAAA  
TTTAAGTGGTTTGTCTTTCTTGTACTTCAAGGCAATTATTTGAGTGGGTTTATTCCAAGAACAATAGGGA  
ATTTAAAGAATCTTCAAGCTTTGAATTTGTATGACAACAAAATGATAAGTGGACCTATCCCTGAGGAACT  
CTGCAATTTAAAGAAATTAGGATTCTTGAGCTTGGGAAATAATGAGCTTTGCTGTTCTATAACCATCATGTT  
TAGGGAACATTACATCTCTTAGATACATTTACCTTGGTTCCAACAAATTGACTTTTAGCATACCTCCCAGC  
CTGTGGAACCTCAATGATCTCTTGCATCTTGATGTATCCTCAAATTCCTTGAAAAGCTCTCTACCTCCAGA  
AATTGGAAATCTGAAAGTCGCAACATTGCTGAATATATCGAAGAATCAAATCTCAGGAAGTATACCGAG  
CACAATTGGAGGCATGCAAAATATGGCTGAACTTTCTTTTGCAGAAAATAGACTAGAAGGGTCAATTCC  
AGAGTCAATGGGGAACATGGTCGCCTTGGAAATCGCTAGACTTGTCTATAACAAGCTCTCTGGTGGCAT  
TCCCAAATCATTGGTAGCTCTTTCACATCTCAACTATCTTAATGTATCTAACAACAGATTGAGTGGTGAAA  
TTCCAATTGGAGGTCCTTTCGTGAACTTCTCTTATGATTCATTCTTTCAAATGAGGCATTATGTGGTGCT  
GCTAGGTTGCAGATACCAGCATGTAGGTCTAATTCTCTATTAGGAAAAGAAAAAGAAGGTGCTTCTT  
ATTGTGTTGATCTTGTGGTGGCTTCTTCAGTAATAATGCTCTCAGTCATGCTCACCATCTTTTTGGTGATT  
AGAAGTCGAAAGAGGAAGACAAACATTGCTACTCATCAGGCTGATGCCTCTCCAGCCACGGTACATGGA  
AGAGTTTCATACCATGACCTTCAACAAGCAACCAACAGATTTCGGTACAAGCAACTTGCTCGGTTCTGGAA  
GTTATGGCTCTGTTTACAAAGCAACATTTGGGAGTACTATAGTGGCCGTTAAGGTATTCAACTTGCAAAC  
AGAAGGCGCATTCAAGAGTTTTGATACAGAATGTGAAGTCTTACGCAACCTTCGTCATAGAAATCTGAC  
CAAAGTCATCAATAGTTGCTCCAGCATTGATTTCAAAGCCTTTGTATTAGAGTACATGCCTAAGGGAAGC  
CTGGATGATTGGCTTCACTTCTGAAACTTGTTCCTTAGATATAATGAAGAGAGTAGACATAATGATTGATG  
TGGGATCAGCATTAGACTATCTTCATCAAGGCTATTTTGTGCCTGTAGTTCACTGTGATCTAAAGCCTAGC

AATGTCTTGCTCGACGAAGATATGGTTGCACATGTGAGTGACTTTGGCCTGGCTAAGCTATTAGGGGTA  
GGAGAAAGTATTGTACAAACCAAACACTTGCAACCATTGGATACATTGCACCAGGTAATAATCATGTC  
AACAAAGCTTCATTTCTCCTTCAAATTTCAACCATTTTAAATATAACCATATTCTCTTGATAAATTGTTTTATT  
CAATGTAGAGTTTGGATTGGAAGGACTTGTATCTACAAGGTGCGACATTTACAGCTACGGTGTCATGTT  
GATGGAAACCTTTACGAGAAAGAAACCAACGGATTGAATGTTTGCTGAAAATTTAAGCCTGAGGGAGT  
GGATAAGACAATCATGGCCACGCAGAATGGACGAGATAATAGACCCCGAGCTTATGATACCAGTGGAG  
AAGAACAACAGGAAAGGTGCAGTGCTTATCATCCATCATGGAATTAGCTCTGAGGTGCACTGCAGAC  
TTGCCAGAGGAAAGAATGAATATCAAACATGTTCTTGCTCAACTGAAGAACATCAGAACTATGTTGGAA  
AATGTAATAAATCACTAA

>M6-PGSC0003DMG400028473 M6 LRR-RLK

ATGAATATTAGCACTGATCAATCTTCTTCTTGCCTTCAAATCCCACATCACTTCAGATCCTTTTCATGTT  
CTTTGACGAACTGGTCTTCTTCTACCTCTGTTTGTGATTGGATTGGAATCACTTGTAGCTCTCGCCATCA  
ACGAGTGATTGCACTGAATATTTCAAACATGGGTTTTTCGGGTACTATCCCGCCACAACCTTGGCAACCTC  
TCTTTTCTTGTTTCACTTGATCTAAGCAAAAACGATTTACAGGGTGAACCTCCATCAGATTTTTCTCATTTA  
AGGAGATTGAGAGTCATTAATCTTAGTTACACCAACTTCACCGGGGAAATCCAATAGGAATAGCCACT  
CTTCCGAGTTTGATACGGTTTTCCATGGGATACAATAAATTACTCAATGGCTCCAATGTGCTCTCTAAATT  
CAACATCTCAACCCTTGAATATTTGGATCTCAGAAATCTGGTTTGACTGGTGATTTCCCTTCTGATTTAT  
GTCATCGTCTCCTAGATTGCAAAAGCTTGCACTTGGCGACAACATGTTAAGCGGAGAGGTACCAAGAA  
ACATATCTGAATGCTCAGAGCTTCAACTCCTAATGTTGTTTCAAATAACTTTGTTGGAACAATTCCAAGA  
GAAATAGGTAACCTGCAGCTGCTGCAACATTTAGATCTTGCAGATAACACGTTAAAAGGTATGGCTTTAC  
CCTTTTTTCTCAGGACATTAGATTTAACTTATTTAAAAGAAAATGTATTTTAGAGAGTTGAAGTGTTTGG  
ACAATCTTTAAAAAATGTAAGTATTTTTTAATAGTAGCATAAGAAGATTTGTTTGTTTTCACTAATTGC  
TCTGTCACTTCTCCTCTCGATTTGTATACTTGTGCGGTTTGACCAAGCTTCTGGCATAACCATTTGGAA  
GTTAAACTCTTGTTAAATATATGTTTTTATGTGATATTTCTGTTTAAACAATATGACAGGCACAATTCCTGA  
TGAGATCGGCCATCTTTATAACTTAAAGAACATATTCATGGATAAAAATTTAACAGGCTCAATCCCTT  
TAACCTTATTCAACATTTTCATCACTTGAAATGCTATATATGAATGATAACAAGCTTGAAGGACCTTTACCG  
AGACAGGTTGGAAATTTGACTATGCTTGCCTGGTTTGATCTTTCCAATAATTACCTGGCAGGTACGGAAA  
AAAAATCTAATTCAAGTCATGTTAGAATTTTTAGTTTTTTGGGATATGTCTACTGATCATAATCATACTGA  
ATTTTTCAGGTGTAATTCCACATGAAGTTGGTAACCTTCAAGGGTTGACAGATCTTCCATTGTCTTACAAT

GAATTTAGTGGGTCGATCCCTATTGGTATCTTTAATATCTCATCTCTTGTA ACTATTGGACTCACAGAAAA  
CCACATTT CAGGTAATCTTCCGTCCACTATAGGCAATGGGTTACCTAATGTTGAAAAATTATTTCTAGGTG  
GAAACAACATTAATGGTGTTTTACCTGGATCCATCTCAAATTTGTCTAAGCTCACCTTTCTCGAACTCTTTA  
GTAATGAATTTACTGGTTCAATTCCTGACTCTCTGGGAAATTTAAGACA ACTTGA ACTTCTCAACTTGAC  
GGTAACTCCTTTACAAGTGAATTGAGCTTCATTACTCCTTTGGCCAATTGTAAACACTTGAGAATATTGAT  
ATTGTCTTTCAATCCCCTAAATGCAATGCTCCCAAGATCCATTGGCAATATCTCTTCTCTCAATCATTAT  
TGCTGTAGGCTGTAACCTCAAAGGCAATGTTCCAAGTGAGATCAGAAATATGAGAAATTTATCCACTTGG  
TCTCTGGGAGGTAATAACCTTACTGGAATTGCCCGACGACATTAAGTTCTTTGAAAAACCTGCAACGGC  
TTTTTCTTGATGCAAACAGAATAACTGGTCCTTTCCCAATTGTTTTATGTGAGCTGCCCAACTTGGGGATA  
CTAAGCCTTTCACAAAATAAAATTTTGGGACATATTCCTAGCTGCGTGGGGAATATGACATCCCTAAGGG  
AGGTTTATCTTGATTCCAATAACTTTACTGCTAGCATACTTCAAGTCTATGGAACCTCAAAGACATTTTG  
AAGCTGA ACTTGTCTTCTAATTCCTTCAATGGATCTCTACCACTAGAAGTTGGAAACCTCAAGGCTGCACT  
ACTTCTGGATCTTTCTAGGAACCAAATATCAGGCAACATTCCA ACTTACATTGGGAGGTCTACAGAAATTG  
ATTCAACTATCTTTGGCTCATAACGGAATTGAAGGATCTATTCTGAGACATTTGGGGA ACTCCTAAGTT  
TGGAAGCATTAGATCTTTCATATAACAAAATGTCTGGTGTGATTCCAAAGTCATTAGAGGCACTTAACCA  
GCTAAACTCCTTTAATGTCTCATTCAATAGGTTACACGGGGAAATCCGAGTGGAGGACCTTTTCTTAAT  
CTACCTTACCAGTCTTTCATGTGCAATAAAGGATTGTGTGGTAACCCTCAAAGCATGTCCAGCTTGTC  
TTCTTATTCAAAGAATCAGTCTAAGTCGAAGAAAAGAAATCTGATATGGATTAAAGTTACCTCTTCAGTT  
ATCTCTGTAACAGGGCTTGCTTCAGCAATAGTTTTCATGTTGATGAGACGTGGGGGTAAAACGATCAAT  
GCTGAAGTTGAGTGGTCTCCTGAAGTAGCACCACAAAGATTTTCTTACTATGAACTTCAAAGAGCAACTC  
AGAGTTTTAATGAAAATAACTTGCTTGGTAGTGGAAGTTTTGGTTCCGTTTATAAAGGGATGTTGGCTG  
ATGGGATGATTATAGCTGTTAAAGTTTTCAATGTGCAGATGGAAGGAACATTT CAGACCTTTGACAGAG  
AGTGTGAAATCTTGCGGAATCTTCGT CACAGAAATCTCACAAAGATCATTAGCAGCTGCTGTA ACTTGGA  
TT

>M6-PGSC0003DMG400028474 M6 LRR-RLK

AACACATTTTCTCCATTCACTCAGAAAAAATGAGGATTTAATTAATGGAGAAAAATCCCTCTTTTACCT  
TCTAACAAATTTGTTTCGTTCTTCTTCATGCTCTAGCAACTTGCTTAGCCATGAATTTTAGAACTGATCAAC  
TTCTCTTCTCGCGTTGAAATCCCAAATCACTTCAGACCCTTATCAAATCTTTCAACAAACTGGTCTTCTTC  
TGCTCTATTTGTAGCTGGATTGGTGTCACTTGTGGCTCTCGTCATCAACGAGTTACTGTA CTCAATATTT



CAGACATGGGCTTTTCGGGTACCATACCGTCACAAATTGGCAACCTCTCTTTTCTTGTTTCACTTGATCTA  
AGCTACAACCTATTTCCATGGTGAACCTCCACTTGAGTTTTCTCGTTTGCGAAAATTGAGAGCTATTAATCT  
TAGTTTCAACAACCTCACCGGAGAAATCCCTAAATTCCTCGGTGATTTTCAAGACCTTCAAATATTGTCTC  
TTGAAAACAATAGTTTCAGTGGGTTCAATCCTTCTTCTATCTCAAATATGAAGAATCTTGGATTCTGAAT  
CTGAGGTACAACAATTTAGAAGGAAATATTCCAGCTGGAATAGCCGCTCTTCGGAGTTTCAAATGGTTG  
AGCTTTGGATTTAATAAACTCAATGGTCCAATGTGCTCTCTATGTTCAACATCTCTACACTAGAATATTT  
GGATCTCAGAAATGCTGGTTAACTGGTGATTTTCCATCTGATTTGTGTGGTCTTCCAAGATTGCAA  
AAGCTTGACTTAATTTCAATATGTTAAGTGGAGAGATCCCAAGACGTATATCAGAATGCTCGCAACTTC  
AAGCTTACTGTTGATGGAAAATAAATTGATTGGAACAATTCCAGGAGAAGCTTGGGAAATTACAACCTGC  
TGCAACAATTAGCTCTCGGAAATAACAAATTAGAAGGTATGTTGCTTCCAATCTTAACAATATCTACATAT  
ATAGTAAGAAATCGAAGATATTGTTTTGTGCTGAGCACATGCATTCCCTTTAATTTTTCAGTTTCGACAAGA  
GGTTAAGTGTTCAATTTTCTCTCCTAAACAAGCATATGTATGGTTTTGACCTGGTGTGAGAATTCGTTAC  
ATCATAAAGTAGACCTTTGCTTATACCTGTCTGATAAATTATTTAATGAGGTATTGCAATTTGTTCAACTT  
AATTCCTTAGAAGCTTCATTTGATACTTTTGCATAACAATTTGACAGGCACAATTCCCAATGAGATTGGTCA  
TCTTCATAACTTGAAGCAATTGGGATTGGAACAAAATGCATTAACAGGCTCAATCCCATTAAAGCATATTC  
AATATTTCACTCACTTCAAGTTTTATCAATGTGGGACAACAAGCTTGAAGGAACTCTACCAAGAGAGGTTG  
GAAATTTGACTACGGTTAACGTACTTGATCTTGAATGAATAGCCTGACGGGTATGGAATAATATTTGAC  
CACAGGATTTCAGAATGCTAGTTCTTTCAATACTTCTTCTAATGGTAATCTTACTTCATTCTGCAGGCGTA  
CTTCAGATGAAATCGGTAACCTTCAAGAGTTGCTGATGCTGAAGTTGGATTTCAATAACTTTAGTGGGT  
CGATCCCTATTGGTATATTTAATATCTCAACTCTTGATCTATTACACTCACACAAAACCGCATTTTCAAGTA  
ATCTTCCTAACACTATAGGCAGCGGGTCACCCAATCTTGAACGAATTTTTCTAGGTGCAAAAAACATTGA  
TGGTCTTTTACCTAGTTCCATCTCAAATTTGTCTAAGCTTACTGTTCTCGAACTTAGTGCGAATGAACTCAC  
AGGTTCAATTCCTGACTTTCTAGGAACTTAAGACTTATTGAAATCCTCAACTTGCAAGGTAACCTCCTCA  
CTAGTGACTCTTCAATCTTGAGTTTTATTACTCCTTTGGCCAATTGTAATACTTAAGAGAACTGATAGTG  
TCTATCAATCCCCTAAATGCAATACTTCCAAAATCCATAGGGAATCTTTCGTCTCTTCAAACGTTTGAGGC  
AATAGGTTGTAATCTCAAAGGCCATATTCCAAATGAAATTGAAATTTGAGAAATTTATCTTATTTGAAG  
CTGGATAAAAATGACTTCACTGGAATTGTCCGACGACAATAAGTTCTTTGGAAAACTTCAACAGTTTT  
CACTTGGTGCAAACAGAATTAGTGGTCTTTCCCAATGTTTTATGTGAGCTACCCAAGTTGGGCATGCT  
AAACCTTTCACAAAACCAAATGTGGGGAAAGTATTCTAGTTGCTTAGGGGATGTGACTTCTCTAAGGGA

GATTTATCTTGATTCCAATAAATTCAGTCTAGCATACCTTCAAGTCTATGGAACCTCAAAGACATTTTGA  
AGCTGAACTTGTCTTCTAATTTCTTCAATGGCTCTCTACCATTAGAAGTTGGAAACCTCAAGGCTGCAATA  
CTTCTGGATCTTTCAAGGAACCAAATCTCAGGCAACATTCTAGTACATTGGGAGGTTTGCAGAAATTGA  
TTCAGCTATCTTTGGCTCATAACAGAATTGAAGGATCTATTCCTGAGACATTTGGGGAACCTCGTAAGTTT  
GGAAGAATTGGATCTTTCAAATAACAATATTTCTGGTGTGATTCCAAAGTCATTAGAGACTCAAGCAA  
CTACATTCCTTTAATGTCTCATTCAACAGGTTACATGGGGAAATTCCGAGTGGTGGACCATTTCTTAATCT  
CCCTTACCAGTCTTTCTGTGCGAATGAAGGATTGTGTGGTAATCCTCAAAGCATGTCCCAGCTTGTCTGTT  
CAAATTCAAAGAATCATTCTAATTCAAAGAAAAGAAGATGATATGGATTGTAATTGTCTCTCAGTTAT  
ATCTATAATAGGGTTTGTCTCAGCAATAATTTTCGTGTTGATGCGACATCGGGGTAAAGTAATCAAAGGT  
GGAGATGAGTGGTCACCTGAGGTAGCACCACAGAGATTCTTACTATGAACTTCAAAGAGCAACTCGG  
GGGTTTGATGGAAACAACCTTGCTAGGTAGTGGAAAGTTTTGGTTCTGTTTTAAAGGGACGTTGGCAGAT  
GGGATGATACTAGCTGTCAAAGTTTTTAATGTGCAGATGGAAGGTACATTTCAAACCTTTGATAGAGAG  
TGTGAAATCTTGAGGAATCTTCGTCACAGAAATCTCACAAAGATCATTAGCAGCTGTTGTAACCTGGATT  
TTAAAGCATTGGTACTTGAGTACATGCCAAATGGGAGCTTAGACAAGTTGCTATATTCTAGAGATTATTC  
TCTAAGTATAATGCAACGATTGAATATCATGGTCGATGTTGCATCTGCTCTGGAATATCTCCATCATGGTT  
ACTCTGTACCTGTTATTATTGATCTGAAGCCTAGCAACGTCTTACTTGACAAAGACATGGTGGGACA  
CCTAACTGACTTTGGCATAGCAAACTTCTAACAAAAGAGGAATCTATTGCTCACACTACAACCTTTGCC  
ACAATTGGTTACATTGCTCCAGGTGAATCATTTATTTAACTTGTAACAAAGTTTTTGAGTAACAGTTGATC  
AGATTTATGCCTTATAAGTTCAGTTGCTGATGTATTTCAATTTTTCTTTCTAGAATATGGATTGGAAGGA  
CTTATATCCAAGAGGTCTGATGTTTATAGTTATGGTATCATGTTGCTGGAACTTTTACAAAGAAGAAAC  
CGAATGATGAAATGTTACGGGCGATTTGGATTTGAAAAGCTGGGTACATAGTTCACTTCTGATAAGC  
TGGATGAAATCATAGATGCCGACTTACTAACACTAGATGAACAAAAGCTAAATGAAAAGTTACAGTATG  
TGTCATCTATCATGGAGTTAGCTATGAATTGCACAGCTAAATCTCCGTTGAAAGGATGAACATGACTGA  
TGTTGTAGCAGCATTGGAAAAGATCAAGCAGCAGCTTTCTTCATGTTACTGATTGAATGGTTTAATGACA  
TGACATCAGGTACTTTTTCCATATCACTTTTGGGAGGCAAAAAGGAAAGTTGTAAAACAGTTCACTAGCA  
TTTTAATCAGTAATTGTTCTTCAAATGCTTTTGAAGAGACTGTTTGGCTATCGTAATTGTCCTTCGTTGA  
GATGAGTATTCTGTACAATGTATTGCTAATTAAGGATCAATAAAATACAGTGCTTCTTAAATTCAAGTGA  
AGTGATCCTCATCTGGCCTTAGTAAATATATCCAAAAGAGTCACTTACCCTTGCTTTAATCTTGTATCCAG  
TGAAAA

>M6-PGSC0003DMG400028478 M6 LRR-RLK

CAATTCTATTGGACTTACTTACCTCCACTTGAAATCCCCTTAATACATCTACTCTTATCAACTCTATATGGC  
ATTTACATCAACTACTTCCAAGTAAAGAAACAATCACAATTCCCACAAACAAAAAATGAAAATCTTGTTT  
ACACTCTTCATCTTCCTTTCTCTTTTACATTCTCAAATCAGAATCCCCTTGCAAAAACAACACAGATTTA  
GATTTATCTCTTGTTTTCAAGGCTTTCAGTTCTGTTTATGGTTTCAACATCTCTTGTTCAACTCAAAGT  
TCTTCTCCAATAACTGAAATTAAGTTATCTTCAAGAAACCTCACTGGCATAGTTTCATGGAAGTACTTAAC  
AAATTTGTCTCATCTTCATACTATAGATCTATCAAATAATTCCTTAAAGGGTTCTGTTTCATCTCTGTTTTG  
GTCCATTTTCATCTTTGGTTCAAGTCAATTTGTCAAAGAATAAGCTAGGTGGAGCTGTTGCTGTAGCAAGA  
TCATCATCATCTATTCAAAGACTTGATCTTTCTTTCAACAGGTTTACCAACTTAGGCTCTGTTTTTATGGT  
TTTCCTAATCTTACTTCTCTTGACCTTTACATAATGATATCAAGTTTTTACCTTTTTGGTTTACCAACCTAA  
CTAAGCTTGAAAATTTGAGCATTCTAGCTGTAACATTTATGGTAATCCAGAACCCTTTACATATCAAG  
TCACTGAAGCATTAGATGTTTCTGTCAACCATATGAATGGTAAATTCCTAATGATTTTCTCTCTGTCT  
GGCCTCAATTTCTGAATATCTCATTCAATAACTTTACTGGGGAAATACCCAAAGACCAGTTTGCTAAATT  
TGGAAGTCTTCTTTTATTTCATGCTGGGCACTTGCAAATCAAGAATCTTTACCAAATCCCAAGAATTCCT  
CACAGTTACACATTAAAAATCATAACTTTACTACCCCAACACACAAAAAATGTTGCCTTTGAGACACAA  
ACCTATCAAACCAACACACACAAGAAAAAGCCCAAATCAAGAAAGAAAGTTTTAACCATAGCTATTTCC  
TCTGCTTCAGCATTCTAATCTTGGCCATGGGATTAGTCATATTGTGTCTATAACAAGAGGAGAAAACAAT  
TGGCTAGGAAGAACAATGGTTAATTTCAAAGCCAATACAAATACCCTTTAGAATGGACAAATCAGGGC  
CATTTTCATTTGAAACAGAGTCAGGGAATTCATGGGTTGCTGACATAAAAGAACCAAGTTCAGCAGCTG  
TAGTTATGTTTGAGAAGCCATTGATGAACCTAACATTCAAAGACCTCATAGCAGCCACATCTCACTTTGG  
AAAAGAGTCATTGTTAGCTGAAGGAAGGTGTGGGCCCGTTTACAGAGCCGTAATCCAGGTGACCTCCA  
CGTGGCAATCAAGGTCTTGAACATGCTAGGGAAGTACCCATGAAGATGCTAATACCTTGTTTGAACA  
ACTCTCCAGGCTTAAGCATCCTAATCTGTTGCCTATTTCTGGTTACTGCATCGCAGGTACAAATCTTCTTTC  
ACTTATTACTGTTTCTCTGTCCACCGTCGATCGATGTGACACAATTCAAATTTTAAAGGGGAGAAAAATAT  
CTAGAGGTGAGCATATTGAATGCATTCACGTGGGAGGATGGGATGAGAAATAGGACAGACAGTAGTAA  
ATGAGACAGAAATCTTTGCAACCATAGAAACGTAGGCAGTAGTTATGATTACATACAACAAGATGAAGC  
AGTAAATAGGAATGCGTGACTTATTTGGATGTTAGTACTATGACTACATCATTCAATTTATATGTGCTTTT  
AATGCTCTTGGTAAATTGTGTCCATTTTTTACCCTACAAAGTCAAATTTCAAATCTTATGCCAGATTGGG  
ATTTGAAAAATACTGAAACTGCAGTATGGTTTGGTTCGCAGAATTACGATAACCAATGATATTCTATGAA

TTGAGATATTTCACTACATTTATCTATCGTGAAATTTAAATGGTGGAAATAAAAGAAATTTGTGATTAATTA  
ATATCTCAAACATAATATGAAAAAATAATTTTTAATTTTATTTTCGAGATTATAATTTGTATCACATATAT  
CACCACGACATTTATGATGATGCTCTTGGTAAATTGTGTCCATTTTGCACGATAAGGTCAAATCTTTAAAA  
ATCTTACCCGATTGGGAGTTCTACTGTTGAGCCTTGATTTATGATTTTTGGAAGAATGTTGCACAAATATT  
ATCCATAAAGTATTATTTTATGAAACCGTTATTGAATTTAAAAGATAAGAGGATATTTTAAAAGCATTAA  
TGGTTCAGAAGAATGTCATTTTCAATTGAAAATGCTTAAAGTTGGAAAATTATTTTCATGACATGCATTGA  
TTGATCAATTGTAGTATCAAAGTCTTGTCAAATAATTTTGGAGGACTTTTCTAGCTAGGAACCAAATTGC  
TCCATTTGATAAGAACAGAATCCAATTATATTTCTTTCAATTAAGTCATATTTAAAGCTAATTTAATACTT  
CCCTTTGATGCAGGGAAAGAGAAGCTAGTCTTGTACGAATTCATGTCCAATGGTGACCTCCACCGATGG  
CTACACGAGCTTCCAACCTGCTACCACCAAAGTGGAAAGACTGGACAACCGACACGTGGGAGTTACAAAAC  
GGTCCCAAATTACGTCACCCGGGAAAATGGAATGGCACACACGCCACCGTATTGCGGTTGGCGTAGCA  
CGTGGACTAGCCTACCTCCACCACGCGCAGTCAAACCCGTGGTCCACGGTCATTTGGTGCTATCTAATG  
TCTTACTAGCCGATGACTTTGAGCCTCGGATAGCCGATTTTGGATTGAGCCAAAACCAAGCCGAGGGAT  
CTAGTGAGATGGATGTGTACGATTTTGGAGTCGTATTAGTAGAGATATTAACAGGGAAAATTGGCTCGG  
ATGAGACGATTAATGGGTGAGGAGGCTAGTGAAGGATGGACATGGAGCTGACGCGCTTGATTCGAG  
ACTAAGACTCGGTGGTGACTCGGTGAGTGAGATGGTGGAGTGCCTCCGAGTTGGGTACTTGTGTACGG  
CGGAGACCCCAAATAAACGGCCTAGAATGCAACAAGTTTTGGGTTTGCTAAAAGACATACAGCCCCACT  
ACCAACTCGGGAAAACGCAAATTTATAATCTTTAGGTAAACCACTCTCACTCCAGCGCGTGATTTACAC  
GACGAGGAAGATTGATTGGCAGCATTGCATTATTGTACTCCCATGTGTTTGGTTGACCATTGAAAAGTCA  
AAAGTACAAGGCATCTATTCCACTTCATCAATGGCATTTAGTCACGTGCAGATCACGTGATGAAGTGTAG  
TGAGAGGAACATGTTTGCTTGCTGTCTCATTTTATTCTCTCTCTTTTTTTTTAAACCTTTTTTTTTTTTTT  
TAGTTTTGTATAGTATTAATTAGAAAAAGAAAAAAATTGTGGGTAAATCTTTTTTTTTTAAATATATAA  
A

>M6-PGSC0003DMG400028688 M6 LRR-RLK

CTGTAAAGAACACTTGTTTTCTGTTTTCTTCATTGTCTTGTCAAAAAGTTTCAATCTTTGCAAAGAAAT  
GAACACCCTTCTTGTTAAAGCTTGTATCTTACTTGTCTATAAAGAACAACACTGGGTTCTTGTTTTGTCA  
AAAAGTTTCAATCTTTACAAAAGAAATGAACACCCTTCTGGTTTAAAGCTTGTAGCTTACTTGTCTAT  
AAAGAACAACCTCGGGTTCTTGTTTTTTTTCATTGTCTTGTCAAAAAGTTTCAATCTTTACAAAAGAAATGA  
ACACCCTTCTGGTTTAAAGCTTGTATCTATACTTGTCTTGGTATTTCTGCATTTTTTTTTGGGTGTTGAGT

CTCAAGATGATGATGTTTCAGTGATGTTAGCTTTGAAAAAGAACTTAAACCCACCTCAAGAAGTTGGATG  
GTCAGACCCGGATCCATGCAAATGGAACCATGTGGGTTGTTCCGATAAACGGGTACCCGGATCCAAAT  
TGGGCGCCAGAACATTCAAGGTACCCTCCCTCCAGAAATCTCTAACTTACTGAACTTGAACGTTTAGAG  
CTTCAAGGGAACAATATTTCTGGCCCTTGCCAAGTTTGAGTGGTTTGAGTTCATTGAAAGTGTTACTGC  
TTGGTGAAAATCAGTTTAGTTCAATTCCTGCTGATTTCTTTACTGAAATGTCTTCATTACTCTCTGTTGATA  
TTGATAAGAACCCTTTTGTGGTTGGGAGATCCCTGAAAGTCTTAGAAATGCTTCTTCACTTAAAACTTT  
TCAGCAAATTCAGCAAATGTAATTGGGAGAATTCCTAACTTTTTTAGTCCTGATGAGTTTCTGGATTGGT  
AAATTTACATTTGGCTGGCAATAACTTGAAGGTGAATTGCCCTCCAGTTTTTCTGGCATGCTGCTTGAG  
TCTTTATGGTTAAATGGACAGAAGCTTAATGGAGGAATTGATGTTCTAACAAACATGACATTCCTGAAG  
GAGGTTTGGTTGCATTCCAATAACTTTTCGGGGCCGTTGCCGGACTTTTCAGGATTAAGGCTTTGGAGA  
CATTGAGTCTTAGAGATAATGCCTTTACAGGTCCCGTGCCAAGTCTTTGATGAATCTTGAGTCTTTGAA  
GTTTCGTTAATTTGACGAATAATTTCTTTCAAGGACCAATGCCGGTGTCAAAGTTCTGTTGTTGTTGATT  
CGGCAAAGGTACAAATAGCTTTTGCTCGTCACAACCAGGTGATTGTGATCCTAGAGTAAATACATTGCT  
TTCAATTGCAAAGCAATGGATTATCCAACAAATTTGCGAAGAAGTGAAGGGAAATGATCCCTGTGC  
TGATTGTTTTGGTCTTACTTGACGTAATGGAAACATTAAGTGCATAAATTTCCAGAAAATGGGGCTTTCA  
GGAACAATTTCTCCTGAATTTGCTTCACTGAAGTCACTACAAAAAATAGTTCTTGCAGATAATAATCTGAC  
TGGTACAATTCAGAAGAGCTAACCACATTGACAAGCCTTACAGAGTTAGATGTGTCAAACAATCAAATT  
TATGGAAAAGTACCAGCTTTTAGGAAAAATTTGATTTTGAATTTAGTGGTAACCCTGATATTGGAAAGG  
ATAAGAGTGATGCACCATCCCAAGGCAGTTCTCCAGGTGGTTCAACAGGCTCTGATGATGGAAATGCC  
AAGCAGCTCGTAAGAAGTCCAATCGCCGGGTTGGAATTGTGGTGTGTTTTCTGTAATTGGAAGTGATTTAT  
GCTTTGTTGATTGGAGTGGCAGCTTTCTGTCTGTACAAAAGCAAACAAAAGCGTTTTAGCCGAGTGCAA  
AGTCCAAATACCATGGTGTTCATCCACGTCATTCTGGTTCAGACAATGATAGTGTGAAAATCACAGTTG  
CAGGATCTAGTGTGAGTGTGGTGCAGTACTGAAACTCATACTGTTTCTGCTAGTGAAGCTGGTGATGT  
TCAAATGGTTGAAGCAGGAAATATGGTGATTTCCATCCAAGTACTGAAGAGTGTGACCAACAATTTAG  
TGAAGACAACATACTAGGCCGGGGAGGCTTTGGCACTGTCTACAAAGGTGAATTGCATGATGGGACTA  
AAATTGCAGTCAAAGAATGGAAAATGGAATCATCACTGGGAAGGGACTAGCTGAATTCAAATCCGAG  
ATTGCTGTATTGACTAAGGTCAGACATAGGCATCTTGTTGGACTACTTGGTACTGTCTTGATGGAAATG  
AGAACTTCTAGTCTATGAATACATGCCTCAAGGAACATTAAGCAGTCATCTTCAACTGGGCAGAAGA  
AGGGCTTAAACCCATGGAATGGACAAAACGATTGACCATTGCATTAGATGTTGCTAGGGGTGTAGAGTA

CCTCCATAGTTTAGCACACCAGAGTTTCATTCACAGGGATCTGAAGCCTTCAAATATTCTTCTAGGGGAT  
GATATGAGGGCTAAAGTTGCAGATTTTGGCCTTGTGAGACTTGCCCCAGAAGGGAAAGGTTCTATAGAG  
ACAAGGATTGCTGGGACATTTGGATATCTGGCACCGGAATATGCAGGTATGCTCTTTGCTTACTTATATG  
TGTATGCTAAATTGCTGATAAAATACTTGTATGCAATTTGTGCCTAGATAAACTTGGTCTTAAGTCCAATA  
CCTCTAAAGTATGAATTATGTGAACCTTAGGGGTTTGATCTCAGGATGCTTCCAGAGAATTAGCATT  
TTGACTGATAAGAGTCGGATGATAAACTGTAAGCAAGAACTTAGCCTGTTTTACATTAATCAACTTT  
TGTCTATAATAGGTTTATAACAGTATATTTAATATTTTGTCTTTTTCTAAGTCAATTATACTTGTGCTCA  
TGGTTAAGAACCTGCCATTCATACATTGTCATATATCAAATATCCTTATTGATTCTGTCATCCCCTTTAATG  
CTATGATTTCTTGGTTTCTAAAAGTGGATACCCATCCTACTGGAAACACTTTTTCTGATGCATTTGCTTAA  
TGCCACCAGTGTCTACTTTGGCCTAATCGCACACTTTAAACATGTTATTAATCTTATGACAGAAGATCCTC  
CTTTTTACTTTTCCGCTTGGTGGAAATTGGAATTCAAGGATAGCCAAATTCGTTATTTGCTCACTTTCCTG  
ATCGTGATATGTGCATAGGAGTTTTTGGAAATGTAGATACATCATTATCTAACTTGTATTTTATCTTGTTT  
CGTCTGCCAGTAACAGGGAGAGTGACAACCAAGGTGGACGTGTTTCAGTTTCGGTGTGATTTTAAATGGAG  
CTCATCACAGGAAGAAAGGCTCTTGATGAAAGCCAGCCTGAGGAGAGAATGCATCTAGTAACATGGTTC  
CGAAGAATGCATCTGAATAAGGATACATTCAGAAAGGCAATTGACCCCGCAATTGACCTTAGTGAGGAA  
AACTCGCCAGTGTGAGCACTGTAGCTGAGCTAGCTGGACACTGTTCTGCAAGGGAGCCATATCAAAGG  
CCTGACATGGGCCATGCTGTCAATGTTCTTTCTTCTTGTGGAGCTCTGGAACCATCCGACGAGTGCT  
CAGAGGACATATACGGCATTGATCTCGATATGTCATTACCCCAAGCGCTTAAAAAGTGGCAGGCTTATG  
AAGGTACAAGTCACATGGATTCATCCTCATCTTCTTACCTTCCAAGCTTGGATAAACTCAAAGTACTAGCATA  
CCTACTCGCCCCTACGGATTTGCCGAGTCATTTACATCTTCTGATGGTAGGTGAGAAGTTGACACTCTTTG  
ATCTAGGTTTGGTTGTTTATTCTCTCCGTTTTCTTCTCATCGCGAGTCACACATCATTTTTTTTTTGCTTTT  
AACTCTGATGCTTTTACCTTAACTCATTGTTAGTTTTGGCACTGTGGTGAATAGGGATTCTTTTTAAGATT  
TTTGTCTTTTACTTATTGTATGATGAATCTCTCTCTCTTTTCCATGTGAATACATTGTGGTTTGGTT  
GGAAATGAAAGGGATGCCATCAATTACCAGTAGATCATAGTACTTTTGTATTCTTGAATTGTTTTTTTGT  
AGAAAAATTTGTAGGTGCAAGCTGTATTGAAATGTAAAGTGGCATTGAAGTGTCAAATCATAATGTTA  
GCTTTTTGCTTATGATGCTTTTTCAAGCAAAATGTAAAGTTTTTTGTTATGATTACAGATCAACTGCTG  
>M6-PGSC0003DMG400028801 M6 LRR-RLK  
AACACATCCTAGAACTACTATACATTTTTTCACTACTCCTACAAAGAACACCATTCTTTCTTACTTCTGCT  
ACTACATTTCTCTGCTATGAATTTCTAGCAGTTCTTGGTTCTTGCATATTCAGCTAAAACAAGTAG

GCACTGCCCATTTTCAGTTGGCTAGTTCAATTTTCAGTTTCACTGTCAAATTTGACAATGGTGTTGTTAATCA  
TCTTCATAATTCATGTTTTTCATGTTTGTAACAGCTTCGTCGGATCTTAGTCCGACCGTGCTGCACTTTTAG  
CTTTTCGCTCCGCCGTGGGTGGCCGTACATTTCTCTGGAACACCACCAGTACCTCCCCATGCAACTGGGC  
TGGTGTACAATGTGAAAACAACCGTGTTACAGTTCTCCGGCTACCGGCGTCAGCTCTCTCCGGTACCCTT  
CCGGTGAACACAATTTCCAACCTCACTCGTCTTCGTACACTTAGTCTTCGTCTCAATCGCCTTTCCGGTCTT  
CTCCCTTCTGATCTCTCAAAATGTGTTGAGCTCCGTAACATTTATCTCCAGGGTAACTTTTTTACCGGAGC  
TATTTCTTCTTTCTCTGGGCTTCACTCTTAGTTCGGTTAAATCTTGCTGAAAACAATTTTTCTGGAGA  
AATTCCATCTGGGTTAACAGTTTGACCCGATTGAGAACATTTCTACTTGAGAAAAACCAGTTTTCTGGG  
TTAATGCCTGAGCTAAAGTTTTTCCCAAATCTCGAACAGTTTAAATGTGTCTTTCAATAGATTAAATGGGTC  
TATTCCGAAAAGTTTGGAGGTAATGCCAGTGAGTTCTTTACTGGGAATTCTCTATGTGGAAAGCCTATT  
AATGTTTGCCAGGAAGTAAGACTCAGCCTGCTATAGCTACTGATGGAATCGAAATTGGGAATTCAAAT  
AACAGAAGAAGAAGCTATCTGGTGGAGCTATTTCCGGTATTGTCATTGGGTCTGTTGCTGGATTTTTCA  
TTCTTTGTGCGATTTGTTGTGTTAGGTAGGATGAAAACCGGTGATAAAACAAGGTCTCTTGATGTTGA  
GACAATTAAGTCACCGGAAACAGAAGTTCCCGGGGAGAAACAAATTGAGAAACCCGAAAATGGAGGTG  
TAAATAATGGGAATTCAGTTGCTGTAGCAGCACCTGCTGCTGCAGTATTGAATAGTGGTGAAGAGAATT  
GGGGAGAAAATGGGGTTAGGAAAAAGCTTGTGTTTTTTGGAGATTATTATAAAGCATTGGAATTGGAG  
GATTTGTTGAGAGCATCTGCTGAGGTTCTTGAAATGGGACATTTGGAACAGCTTATAAGGCAGTTTTG  
GAGATTGGTACAATTGTTGCTGTTAAGAGATTGAAAGATGTGGCAATATCTGAAAGGGAGTGCAAGGA  
GAAAATTGAAACAGTTGGAGCAATGAATCATGAGAATTTGGTGCCTCTCAGAGCTTATTATTTTCAGCAG  
GGAGGAAAAACTTCTTGCTTTGACTATATGCCAATGGGAAGCTTGTCTGCTCTTCTTCATGGTAAGTTAT  
AGTTACTCTTTTACTGTGATTCATCTTGTTCCGACTCTCTAAAAATGTTATCGCATCTGTGCCAAATCC  
TCGAAAATGCATTACTTTGGAGGATTCAACACGCACTCAGCGGTATGGATCCTTTAACAAATACACTACC  
TTTTTGGAGGATCTCACATGCACTTAGCAGCATGGGTCTCAAATATGCACTACCTTTGGAGGATCCAA  
CACACTCAGTGGCATGGATTCTCAAAAAAAAAAAAAATCACTATTTTTGGAGGGTCGACATGTATTGGT  
CGATATTCTTAATGAGTTCAAGATACACTATATTTGTTCCCTTATTCAGTAGATACACTATATTTTGTTC  
AGATTTTGACATTTTGTAGAGTAATTAGTTTGACTTGTGCTAACAGTGTAACATGCAATGTCTGTAGTA  
TTTGGCCCCTCAATCCAATGAAAATGTGATCCTAGAATTAAGCATTAAATTTGTTATCATTACCTTAGTCTTC  
ATTATGTAAAGCATGCTTCTAATATAAGAAAGTATGTTAAATCTAAAGTTGTTTGTAAATTAAGAGCAATA  
AGTAGTACTCCATTTCAATTAGTGCTTTTATTATAGTAAAAGGGTCTTTGTTCTTTATAGATACCCTGTCC

ATATACAGGGGAAAGGTGAACAAGCACACATATAATCTTTCACCTTGGCCCTACAGTAGTAGGGTCTATC  
ATTTTATGTTCTTTTTCTATCTAGAGCATCTGTATAGGACTAGAAATTTGAATCTCCGAAACTAATTATTCA  
ACTGGTGATTAGTTTCCTGGCATGTGAATCTTGCATGAACATGTACATTTTTCGCCTTTGGTATACTTGAA  
ACTTGTTAAGTGACTAAGAAGCTGTAATGAGCTGTATGCTGCAACTCTACTTTCTATTCACTACAATTTTT  
TTAATTTACTAGGAAGCAAGGGGGCTGGCAGAACACCATTGAATTGGGAAATCAGGTCCAGTATTGCC  
TCGGAATTGCACGTGGCATCAAATACCTTCACTCTCAAGGTCCTGATGTCTCCCATGGGAATATCAAATC  
ATCCAATGTTCTTCTCACCAAATCATACGAAGCACGTGTCTCAGATTTTGGCCTGGCTAACTTGGTTGGAT  
CGCCATCCTCCCCTACTCGAGTTGTTGGATATCGTGCTCCAGAGGTAAGTATCCTCGCAAGGTTTCCCA  
AAAGGCTGATGTCTATAGCTTTGGAGTATTACTCTTGGAGCTTCTTACTGGAAAAGCACCTAGTCATGCC  
CTCTTAAATGAAGAAGGTGTTGATTTGCCAAGGTGGGTTCAATCTGTCGTTTCGTGAAGAATGGCCTTCTG  
AAGTTTTTGATATTGAGCTCCTCAGGTACCAGACTGCTGAAGAAGAGATGGTCCAACCTTGCAGCTAGC  
AATAAATTGTACAGTTCAATATCCTGATAAGCGACCTTCAATGGCTGAGATCTCTAAACAGATTGAAGAG  
CTTCGACACCCAACCTCACATGATAAACAAGAACTCTCTGATCTTGCCAATGCAACAGAGTGAAGTGGTT  
ATTATTAGTCCCCCTCGAGATGTGCAGTAATTAAGCTTAAACTCAGATTCATCACCAATCTTTTTTTAAGC  
ATATTAACTTGTTGTTTGTGGGGGAGGGGTGTCTCATCTTCTTTCTGTTTGAATTAAGTATCATGGCC  
CCTTTTTCTCTATGTTTCTGTAGTAGTCTAGTGGTTACCCCTTTCATTTTCTTTAGATGAGGGGCCAAAGC  
CAATATCTGTACCATTTATTCTTGTGGATGTATAATGCTTTCTGTAATTACTGCTTCTGCTTTACTTC  
TGCTTTGTCAGTTGCAACTGTCGATGGCTATTCTGTGTGTATATGAGGCATGCATGCATGTGGTTCTTGA  
TATACTGAAGCCAGCAGGGAGATTGCATTGAGAGTTTTCATAGATGCTGAGTTGGCCAAATATTG

>M6-PGSC0003DMG400028845 M6 LRR-RLK

TGTGTGGCTTTGGATTCTTGTAGCTGAATAGTGGTTTTTCTTTAGAATGGCAAAGCATCTGACCCTTTTC  
TTCTTTTAGTGTCTTTTTCTCACTCAAAAAAGAGTCTTCTGTGTAATTTTGTGTTGTTGGTGTGGGAGAG  
ATGAGGTTGTTGTTGCTCCTGGCAGTAGTACTGTTGGTGGCCATTTTGGCGAATTTTTCAAGCTTTGTTA  
ATGGTGATACAGACCCATCTGATGGTTAGCCCCTTTGATTTATTCATCATTCTCTTTATTTATTTATTTGTT  
TTTTAGTATGTGAAGTAGTAAGTACAAGTTCCAGTTTTCTGTTCTCAAGGAAAAATTTAGCTGAGAGTG  
GGCTTGAGTCTTGACAACCTCATGAAATGAACAAACCCAACCTGAAAAAAGCTTTTCTTTGAAGCCCCATG  
ATATTGAAAAGAAAATAGCATTGAAAACACTAGGTCTAGGCTTGGTAGATAGAGTTATGTGGTACATG  
TTGTTGGTGGGAGGTGGCAGGTATCCTTGAATTAGTTAGTTGCACACAAGCTGGCTCGGACACTGTGG  
TTATCATAAAAAAGATCTTTGAAAATGATGGATATAATAAGTCTTGCTTGGGCTGCATCAATGGTAGTCT



TCACITTCGAGTAAGGGAAATACTCATTACTTATGGCTGAACAACCCCTTAGTCTTGTCGACTAGATTGA  
GTCATAGTTATTGTAATTGTTGTATTTACTGTTGCCGATGCATTTAATAGTTACAACAACATATCCAATGA  
AATCCTGTAGCTGGGGTTTGGGAGGGTAGAGTGTATGCAGACCTTACCATACCTCGTGGAGGTAGAGG  
GGAGACTCTTTCGGGAAGATGCACTTAATAGCTAATAGAAAACGTCAACCTTCGCACAATAATTTTCTTT  
CATTAAAAATTGAACAAGTCTGGGTAAAAGGTAAATCCTTACAGAACTTGTGGTTTGTGAATGTGATT  
GGTTTTAGTTACTATTGCCAGCCTTATATAAGCAATTACTGGATAATGTTTTCTACTTTATGTGGTAAGGG  
GTGACAAAACCAATGAGTTTGAAGTTGATCAAAAACCTTAATAAGCTATATAATTTACTTTTGGACTCC  
TGATGATCCAAAGAGTTTACAGTCATGGTTTGGTTAAGTTGCTCGCTACTTTGTACCATGCTGGTCAAG  
TTGCCGTAGCTGCACATTCTTTAACAGATTGTCCTATGTAAAATCTGTCTCTTGAGCCGTTCTCTGTCCAT  
ATATAACTATTTCTTTATCATTAAAATTTCTTACACAATCACATATGTCTTGATTTTAAAATAATCTAGTTG  
ACTTCTGTTTGGTTTTTCAGCATCTGTTCTGAGAGTCTGTATACCACCCTAAACTCACCAGGGCAGCTGAC  
AAAATGGAATGCCAATGGCGGTGATCCTTGTGGAGAGTCTGGACAGGCATTACCTGCTCGGGCAATA  
AAGTTACTGAAATGTGGGGTTCGGTCTTCCTTTTTGTCTTCATCTCCATGTTGTTTCAACTTTTTGGAATTA  
TTGACTAGGTAAACTGATGATTAGTTTCTTTTCATTTTCCTCAGCAAGATGTCAGGTCTTGGGCTCTCAG  
GTTCAATTGGGGTCTCAGCTAGATAGTCTAAAATCTGTGACCAATTTGTAAGATAAATGGCCTTCATTTGTT  
CCTTATTAATTGGATTTATGTTGAATTCCTGAATGTGGTCATCTTTGTGAATGTTGCAGTGACATAAGCAA  
TAACAATATGGGGAGCCAGTTACCTTACCAGCTTCCTCCAAATGTGCAAAGATTGTATGTTTGTATTG  
CATATCTTCCTCCTTGCAGGTTCTATTTTCTCCTCTTATCTTTCTTAGAACTTGCCTTGCAGAAACCTCGCT  
TCTAGTGGTTTTAGTGGTGGCCTCCCATATTCATTTACAGATGACCTCCCTCCAGTACTTGTAAGTGAA  
TGCTTAAATTAATATTTGCTTAAATACTTGGTCCTCTTCATTCTCTTTGGGGCTCCTTATGGTTCTTTGCA  
ATGTTTATGCCTGGTTGTAGAAATGTCAGTCATAATCAAATTCAGGATCAGTGGTTGTCTCGTTTGACT  
CGCTCTCTGCACTCAACACATTGTAAGGCCGATTCATCTCCTTCCATTACACCAGAGTTTTCATATTGCCTA  
ATTATGATCTGAATGAGAATAGTTTGCTGTTCTCAAATGTTATGATGAAAGTACACTTATTCTATTATTTA  
AGTTGTCTCGATTTGAGAAAGAGGTTAAACACACTTGTTCATTTCCACATTACTGTGCAGAAGTGAGT  
CATGTCTTTGGTCTGCTGCCAAAGTATTGAATTATGCCAATTGAGCTTAGTTGCTACTTAGATTGACTTA  
TTCTTAAGCAAGTATTAAGCCTCAAAGGTGCGCTTAAGCCCTAAAACGAGGTTTAAAACGTGTTGAG  
CGCTTTCCTTGCCTTAATGTGTGCTTTAGTGTATCATCAAGGTCCTAAGGCATACTTTCCCTTGACTAAA  
CAAGTGATATTTCACTTTATCGTAAAAAAATCCAATTTCTTTGTTTCATATATTTGTCATGCATGCTTATAAT  
TATTAGTCTTGGACTAAACATATATATACTTGTATTTTTTTCTCCCTTTCACCTTTTTTTTCATTAAAGCTTA

CACTTTATTTGCGCTTAAAGCCCCAATGGACCTTAGAACTTTTTGTGCTTTTTGCTTTTGATAACGCTGGT  
ACCTTATCATATTTTCTTGTTTAAAACATAATAGTTTGAAATTTATCATTCTCGGTCACAATTTTGATTGAT  
CTTTTAAATGCTTCAGGGATTCTCTTTCAATTCTATGACGGGTAATCTTCTCAAAGCTTCCAGTCACTAA  
CTAGTATGAACAAAATGTAAGAAGAGTTTTCATACTTCATCTATCTATTTGCAAACCTCCATCAGATATAG  
AAGTTTTGTTGTTATAATATGCAGGTATTTGCAGAACAACCAGTTTAGTGGAACCTATTGATGTCCTGGCC  
AATCTTCCCCTTGGAATCTGTGAGTTGTATGCCACATGTGTAGATATTATGTCTTATGTCTACATCTCAC  
TTCAGTTTCAGTTAAATCCATTGGTTGAAAACCATGTTGATTCTTCTATTCTTTAGGAATGTTGAAAACAA  
CCAATTTACTGGCTGGATTCCAGATCAGCTGAAAGGGATAGTGCAGTGAGTGTCTTAGATTGCAATAAT  
TTTCATTCTTCTTTGCAAATTCTTTGGGGAGTTCTTTCTAATTGTTTTCTGCATTTATGAATCTTTCATAACA  
GATCAAATGGTAATTCATGGATCTCCGGACCTGCACCCCCACCTCCACCTGGCACACCTCCTGCAAACAA  
TCCCAATGGAGATCACAAATCCAGAGACAACAGCAGCAATTCGGGCAGTAGGAAATCAGGTATAGGGG  
GTGGAGGTGTTGCAGGAATAGTGATATCTATTCTAGTTGTTGGAGCAATAGTAGCATTCTTTATTATCAA  
GAAAAGATCAAGAAGGTCGTCCACAGACATAGAAAACTTGATAAGCAGCCACTTGCTCCTCTTACTTCA  
CAGAAAGTAGAAGGTATTTGGCTTTCATAATTCTTGATATTGTTAGAAATGTCTTGAATTCTCTCTCAACT  
CTTTGGATATTTCTTAACGAATAATTATAATCAATTGCGGTGTTACTATTTACTCAGTTGCTTGGGAATAT  
GGAAAATGATGTCTAACCTCTATCCTTACCTTGCTAATGAGTGGTCATAAACCATGCAAGTAGTATCAAA  
ATTTTGCAAGGGGTTGCCATTGATACAGAAGGAAGCAGCAAAGCTGGAAAATATTTATCTTCGAAGTGG  
AAAACTGTATGGATTTGAAAGATCCTAAGTTCTGAACAAACAAAAGTTTCATACTTTATTGGTAGTCCC  
GTAGGTATAATCTTTAGAAATTCAAACTGATCTTTTGGAGGAGTTCCTAAATTACGTGGTGCTTTTAAAG  
CTTATGATTATTTTTTGACAAATTAACATCAGCTACCCTTGATGGTTTAACTTCTGGGAGACAAAACTC  
TTGAGAATATAGTTGACCCGAAGAACTCTTGCTTCAGACAAATATGAAGTTGCTTCTCCTTTTTAATCCA  
TCAAAAGCCCACAAAACAAACCGTCTCTTACAATACGAGTTCCTTCTCATTGCAACTTCATCAGTAATTT  
TCCAGTTCATGCTTATAACTTTCATGCCTCATTTTATTATCGACTTCAATGATGTCATGGAATCCAAATTGG  
AACTTGTATTTGCTTATGTCTAACTTTTTTATTGTTGTGTTGCTGTTTTTTTTAAAAGGTAACATCACTGTT  
ATGTTTTGTTTGTCCCGAATTCCTACTCATTGTCTGTTTTTGGTTGCAGAGTTGAAACCTTATCAAACCT  
TCTCCACAGTAAGCACGGGCACATTTGAAACTCCCACTGCTGTAACCTCTAAGACCTCCACCTATTGATCG  
CCTTAAGTCTTTGATGAGGTTGACATTTACCGAAACCCATTGTTCTCCCAAGAAAATTAATACAGCTC  
AAATCAGGGCTACACAGTTTTCAATTGCAGACCTACAGATTGCTACTGATAGCTTCAATGTTGAAAACCT  
TATTGACGAGGGATCAATTGGGCGTGTATTGCGCTCAGTTTGATGATGGCAAAGTAATACTTCTCTCT

ATGACTACCCATTAAAAAAAGCTTTTTCTTTCTTATGACTATATAAGATGATTTAGTGATGCTAACACAT  
GTTTAGGCAAAAATGTATTATCAGAGAACTACATACTTATTGTGTTCCCTTCTGTTATTTGAAATGTTGT  
AGGTTCTTGCTGTCAAGAAAATCAATTCTTCTGCCCTCCAAAATCATGAAGATTTTCTCTATATAGTTTCT  
GAGATATCACAGTTGCACCATCCAAATATAATTGAGCTTGTTGGTTATTGTTTCAGAGCATGGACAGTACT  
TGCTAGTTCATGAATTCCATAAAAAATGGTTCTCTGCATGATTTCTGCACCTGTCAGATGAAGACAGCAA  
GCCACTGGCATGGAATAGCCGAGTCAAGATTGCACTTGGTGCAGCACGAGCACTAGAGTGAGTTTTTGC  
AATCTCAGAATTATTTTATCATATTTTATATTCAATTGGTTACAGTTATGCGGGACTATTTCCCTTATTGATT  
CATTCCAGAAAGGATGACACGTTTCTGTATTTGAAACAATCACTTTATATTTCCATTTTTACCATTAGT  
GAGAAGTTTTATAGCAACACAAATGTTATGGTATGTTTAAGGCCACAAGTTTCAAAGTTTTATAGTCAG  
ACAAATGCTATGCCATGTTTAAGATCGATCACAAAGTTTCAAATTTTTTATCCCTTCTTAGATTCAATGCC  
GATTGGAACATATGTCACATAAATTGGAAGGGGAAGTAAAATTCATGGAGCATGCAGCAATGCTATGTTT  
TTCTCTTTATTTATTGATGGCCAATTACTAGTAGTTTACATGAATCTTCTGCTTATCTATAACCGGAGATTCA  
TAGAGTAGATCTTCTGGGTAGAAGAAAAGGGGATTCTGTGAAAGTCAATACCAAGCACGTAGTCGTGA  
CTCGTGATGAACTTTACCAGAGGATCCATAGTAATATTGCATTTAGAGGTCATACTTGTGGACTAAAAA  
GACCACTATAGAGTTTAGTCTTTTTTAAACATTGATGACCAGTAAGTTAACATAAAGAAGAGTTCATTTAT  
TCCTTTTAGTTAGAGCCTAGTATCCTAAATATGCCGGTCTTGCCAATATAAAGCTAATCAAACCTTCAATG  
CTCCCATCATTTGTTTTATGTGGTGGTGTGTTGAGTGGGGACAGAGTTCAAAAAGAAAGAAAGACTTCT  
GGAACCTGTGGTCTTAACCTTGCCATGTCATTTGTGTGGCTATAAAAGCATGTCATTAGGGCTAACAATG  
AAAATGTGAAGTTAAAATTGTTTCAAATATAGGAAGGCGTCAATCTTCTTGAAAAGGCTTAAAAGGAA  
ATCCGCCATATAAAATGATACAAAGGGTGAACAAATTTCCAATTTATGTGGTTTTCATATCTGTTCAATTT  
CCTGTTTTCCATACACAAATTTCTTCACTAGCTAATATAAGCATCCTTGCAGGTATCTGCATGAAGTTCAT  
TCACCATCATTGGTTCATAAAAACATTAATCGGCAAATATTTTACTTGATCTGGAACCTCAATCCTCATCT  
ATCAGACTCTGGATTAGCAAGCCTTATTAATGATGCAGATCAGGTGGCTTTAAGCTCCTTACTTTATGCAT  
TGTTGCAAAGTGTTCGGTGGATTTCGATATAGAAGCATGCATGCACATAAGTACACATGTATTATATAGG  
CATGTTTTGACATACTATTGGCTGTGTATGTGTCCTTTTCAAGGAGATAAGAAATATCAAAAAACCAT  
GGTTGAAACGTCATTTGTTTCAGGAGAAGCTTTGTTTTGTGCACAAACCTTTGAAACATGAAATCATTTA  
CAACAGTTTCTGGGGTGCATAAATTGGATTCCAAGAGAAGTTGTCAAGTAAAAACAGAAAATTTTATC  
CAAATCTAGAGCATGGAATTATCCAGTATATTCTATAGAAGTAACACTACCATATAAGTCATTTTAATGA  
ACTAGTCTCTCTATGGTCCCTGTTGCTTTATCTCTTGCTCTTCTACTTACTCAATTGGTAAAATTGTAGC

CGTTTCTTCTTCTTCTTAAAAGATTCACATAACTATCATCTTCTCAAGATGTTTGAAAGTGATCATCTTTGC  
AGGCACTAAACCATAATACAGGGTCTGGATATGGTGCACCTGAGGTAGCTATGTATGGGCAATGCACCA  
TAAAAGTGATGTCTACAGCTTTGGAGTTGTTATGTTGGAACCTTACCGGACGGACACCTTTTGACAG  
GTAAAGTTACTTAGGCATCATGATATTGTGTCAAATTAAGAAACAAACAGGAAGAAATTCAGAAAG  
TCTTAACTTTCTTGATCAATATGTATGCTCTTGATGCAGTGAGAGACCAAGATCTGAACAATCTTTAGTTA  
GATGGGCAACACCTCAACTCCATGATATTGATGCCTTAGCTAAGATGGTTGATCCAGCACTCAAAGGGC  
TCTATCCTGTAAATCCATTTCCCGCTTTGCTGATGTAATTGCTCTTTGTGCCAGGTAATATTTGTATAG  
ACAGTGTGCCAAATTCATAAATCTGCTGTGTTAATCAAGAACCTAGTTCTGTTAGTTCAGTCAACACTATC  
TCATTGTCCTGTATGCTATTGTTGACAGCCTGAGCCTGAGTTCCGGCCACCTATGTCAGAAGTGGTTGAA  
GCCTTAGTTCGGCTAGTTCAACGAGCAAATATGAGCAAGAGGACATATAGTATTGATCGGGGTTCAAGG  
GGTGAAACAGATGCTCAAGACAACCAACCTTAGTTCCGATGTAATGTAGCCTTTTCTACCAGAATGTCTC  
TCTTTATAGTTTGTGTTTATGGGATCTATCAGCTTATCTGTTGAGCAAGATCTTGTTGGTTTCATTGCGTT  
GTACACACTGCTAGATACTAAAATCTGTTTCATAGTGCATATTCAATTTTCATTTTTCCCTGTATCTGCT

>M6-PGSC0003DMG400029146 M6 LRR-RLK

GGAAAATGAAGGATCATTATAGAAAAAGTTGCTCAAGCTTTATTTAGTTCCTCTTTTTCCATGCAA  
CTTATGATATAGAACTTTCATATCTAGCTAGAGAGAAAAATGGCCAGCATAGGATCAAATCGATCAT  
GTGTTTGATCGTGTCGTGCTATTTTACATGCAGCAAGTCAAAGTATCTCTGAGCTGGAGCTACTTTTTAT  
CGATGAAAACATCGATGAAGGATCCATTAGGATCTTTCATGATTGGATTCCGCGGTCTCAATCTTTTTG  
CCATTGGAATGGTGTGTTTGTGATGACTTGTTCATGTTGCAAAAATTGAGCTATCAGGGAAGAACTTA  
TCTGGTAAATTATCCGAGACGATTTTCAACTTCCACACGTTGAATCGATTGATCTCTCGAATAATCAACT  
CTATGGAGAAATCCAAGCAATATCTCAACTTGTGTTGGTGTGAGATTTCTCAATCTTAGTAACAATAACT  
TCACAGGTCCACTTCCCAAGGCTCGAGAATCCCACTTGTGAGACATTGGATCTCTCAAACAACATGAT  
TTCGGGGAAAATCCCCGAAAATATTGGTTTATTCTCAAGGCTCAAAGTTCTTGATTTTGGTGGAAATGTG  
TTGGTTGGAAGCATTCCAAAGTCTATTGCAAATATTTCTAGTTTGGAGTTTTTACTCTTGCTTCAAACCA  
ACTAATCGGAGAAATCCCTCGAGAACTAGGTCTTTTGAAGAACTTGAAGCTTATTTATTTGGGATACAAC  
AATTTCTCTGGTGGAAATACCGGAGGAGATTGGTGAATTGTCTTCTTTGTATCATCTCGATCTTGTGTACA  
ACAATCTCACAGGTGAAATCCCTTCATCTTTAGGTAATCTCACCAATCTTGAATACCTTTTTCTTTACATAA  
ACAAGCTCACTGGCCCAATTCCAAGATCTCTATTTAATCTCAAGAAAATCATCTCGCTTGATTTAAGTGAT  
AATTTCTTGTCTGGTGGAAATCCTGAGCTTATTTCCCAATTACAAAATTTGGAAGTTCTACAATTGTTTGC

GAACAATTTCACTGGTAGAATTCCAAATACTTTATCTACCTTACCTCGACTTCAAGTTCTTCAACTATGGTC  
TAATAAATTATCTGGTGAGATTCCCAAGGACCTTGGGAAACACAACAATCTCACAATTCTAGACCTTTCC  
ACCAATAACCTCACGGGTAAAATACCCGAAACCATATGTTACTCCAACCATCTTTTCAAACCTCATACTCTT  
TTCAAATTCACTTCATGGCGAAATCCCTGTAAGCTTGAGACATTGCAAAGCTTACAAAGGGTCCGCCTT  
CAAAACAACCACCTCACCGGTGAATTGCCTCAGAATTCACAAAGCTCCCACTTGTTACTTCCTTGATAT  
CTCAGGCAACAATCTATTTGGCTCCATTAGCGAAAGACGATGGGATATGCCATCACTTCAAATGCTAAAT  
TTGGCTAGGAACAAGTTTTTTGGTACCTTGCCTGATTCTTTTGGTAGCAAGAACTCGAAAACCTGGACT  
TATCGGAAAATGATTTTAAACAGTACTATTCCTAAGAATTCGGAGAGTTATCAGAGTTAATGGAGCTCAA  
ACTAAGAAGCAACAAGCTTTCAGGCGAAATCCCCAATGAATTGTCTTCATGCAAGAAGATTGTGAGTCTT  
GATCTGAGCCATAATCGATTTTCAGGTCAAATCCAACCTAGTCTCTCCGAAATGCAAGTTCTTAGCCTTCT  
TGATTTGTCAATGAATGAATTATCAGGTGAAATCCCGCCTAATTTGGGGAAAGTTGAATCACTTGTCTTG  
GTTAACATCTCTCACAACCATTTAGTGGATATTTACCATCCACCGGAGCTTTCCTAGCCATAAATTCAAG  
TGCGGTGGTTGGAAACCAACTATGTGCCCGTGGGGACGACGACATTACAAGCGGCTTAACGCCTTGTA  
ATCGCTCAAGAAAAGCTCAATTTGGTGGTTCTTCTTGACATTTCTTCTTGAATACTAGTTTTGCTAGTAT  
TCTCGGCTTTAGTTGTTGTATTTATTCAAAGAAGAAGAGAATTGAAGCTAAAGAAAGTGGAGAGTACTA  
CTCAAGATGGTAATAATTGGGAAATTCAATTCTCGATTCAAAGCCTCAAATCCATCACCTAGATGA  
CATCTTAGGGATTGGAGTTTTCGTACAAAGGTTTTATTCTGAAATAAGTAACATGCAAGTATTCGTGAAG  
AAGTTGAATGTGAATATTCCAACAAGTTTTTTGGACAAACATCCAAGAAGTGGAAATATTCGACATCCAA  
ATGTTGTGAAGATATTGGCTGCATGCAAATCGGAGAAAGGAGGTATTTTGGTTTATGAGTATGTAAAG  
GGAAAGATTTGAGTGAAGTGATTGAGTCATGAGTTGGGAACGTAGACAAAAAATTGCTATTGGCATAT  
CTAGAGCATTGAAATATTTGCATTGTTCTTGTTCACAAAGCATTTTCATCGGTGACCTTTCTACCCGGAAA  
GTTATCATTGACGGAAAAGATGAACCTCGCCTGAGATTGAGTCTTCCCACTACGTCCTACGTTGGTCCAG  
GTAAATTTACCATTTTACCCTTGCATCTACGGTACTTCTTCTTGTGTTTTGACATTTCTTAAGAGTTTAAGTA  
ATATACAACCATAAGCTAAAACATCATATATTCTATCAGTTAACATGCATGTCTTATTTGCAAGATTATAA  
TTAAGCTTACCTACATACATCTTTCAATTGACTAGATCGTGTAATTAATTTATATTGATGATGCATATAA  
CTTAATTAACCTGTTAGTTTAATAATTAACAACCTTTGTTATAACTTAAACAAACCACATATAGTTTCTAAA  
GAGTGTAACGTAGCTATGATGACTTTAATGAAAATTGATTTTTTCAGCTTTAGCATTGATGTGATAGGAA  
TGTCATGTTATGTTGAAAATTATTTGATCTAACTAAAAGAAATTTTGTATTTTTCTAATTATTAGAATAGA  
AATAATTCTTAGAATTTACGTACTTGGTCTTTATTTGGTTTCTATTTTAACTTTAGTTCTCATAGTCTCTAG

GAGTAATGATAAGGTCAAGGAATTAAGCAAACAAATGTCATGGAGGCAATCATGAATGTTTTTTCTCTT  
AAAATAAATGTAGAGAAATATAAATCTTATCATTCTTTCTTTACGTAGAAAACAATAAATCTAGTCTAGT  
GTAACAAAAGTCATGACCTTTTATGCCATGCAAGTACAATACTGTTACTTAATTACGAGTTACAACCTTTTC  
TCATAAATTGTAGAATACAATGGAATATCGGAGAAGAGCGATATACATGGATTTGGGCTTGTTTTGATT  
GAGTTATTGACTGGAAAAAATTGCGATGATGCTGAATTTGGGAAGCGTGAGAGTATAGTTGATTGGGC  
GAGATATTGTTACTCAGAATGTCATTTGGAGACATGGATTGAACCACTATTGAAGAGTGATGCAGTGAA  
TAATCAGAATAAAATGGTGGAAATGATGAATGTGGCTCTTCAATGTACTGCTAGTGAGCCAGCAGCAAG  
GCCTTGCTAGTGATGTTGCAAAGACATTGGACTCTTTTGTTAGATCAAATTCTTGTTGTTTAGGGTTG  
AAAAGGTGTGGTAGTGTTTAGATTTTGGGATTTCTAACTTCAAGTCCAAGATTTTTGTTTTATGTTAATG  
TTACTTTTTTTTTTTGGTTTACTTTGTATTGGGCATAAATTAATGAGTGTTGCTCAATGTTTTGGATGTTAT  
TTGAGTGTA AAAATGTAGATATGAACTAAATGCTAATATATAT

>M6-PGSC0003DMG400029442 M6 LRR-RLK

TTCCAACACTCACTAAAAGCTTACTCTCTAAGCTCTCTTCTTTCATTTTTTTTCTATCTATTTTCTCTATGCA  
TCATGGACAACATGAACACCAACTCTGCTATAACATTGCTCATTGTCTTGTTTTTTTTCTTGATTCTTGCAT  
CCGTACACACGGTATCTTCTCCATCAAACTGATGCTGAATCACTCTTGCTATTCAAGAATATGATACAA  
AAAGACCCTTCTGGTGTTTTATCAGGATGGCAACTTAAAACAATCCATGTTTCATGGAATGGTGTAACCT  
GCAATAGTCTTGGTAGAGTAACAAATCTTGATCTTCAACAATCTGAACTTGTTGGAGAGGTTTCTTTTTCT  
CCTTTCAATTCTCTAGATATGTTAACTGTCCTTAATCTTTCATCGAATTCGTTTTATGTAAATGCATCAACC  
TCTTTAACTCAGTTACCTTATAGTTTGAACAACCTGAACTTTCATTCACTGGCTTAGCAGGCTATGTACCT  
GAGAATTTCTTTGCAAAATGTCCAAATCTTGAATATGTTAGTCTTTCTTTCAATAACATAACAGGTTCTTT  
GCCTCAGAATTTCTTGTTGCATACTGATAAGTTACAGTATCTTGCAATGGACTATAATAATCTTACAGGAT  
CAATTTCTGATATCATGATTGAGAGTTGTAATTCATTGTTACGACTCGATTTGTCAGGGAATCAGATAAT  
GGATTCAATTCCTTCTGCTTTATCTAATTGTACAACCTTCAAGAATTGGTTTTGTCTGAGAATTTCTTCTC  
TGGTTCAATTCCAACCTCTTTTGGTGAGCTTATAAGTTTGCAAAGATTGGATCTTTCTAAGAATCATTAT  
CTGGTTGGATCCCATCTGAATTAGGAACTCATGTAGTTCACTTGTGGAACTCAAGTTTTCTAATAACAAT  
ATCACTGGTTCAATCCCGAATTCATTCTCATCATGTTCTTCTCTTCAAAATCTTGATTTGTGGAATAATAAT  
CTAACCGGTCCATTCCCTGATTCCATCCTACAGAATTTAGCTTCTTTAGAGTCTTTGCAAATGAGTAGTAA  
CAAGATTTCTGGTTCATTTCTGCTTCTCTTTTCATATTGCAAGAACTCCGCGTTGTAGACTTTAGTTCCAA  
CATGATCAATGGGATGATTCCACCAGATTTATGCTCTGGAGCTTCATCATTGGAAGAGCTGAGAGCACCT

GATAACTCACTTTATGGTCCAATTCCATCTCAATTGTCTCAATGTTCCACAGCTCAAGACTATTGATTTTAGC  
TTGAACTATTTGAACGGTTTCGATTCCATCAGAGCTAGGAAAACCTTGAGAAAACCTTGAGCAGCTTATTGCTT  
GGTACAATAGTTTGGGAAGGGAGCATACCAGCAGAGTTGGGAAAATGCAGTAACTTGAAGAATCTTATA  
CTTAATAACAACACTACTTGAGTGGGAAAATTCCAGTTGAATTGTTAATTGTGGTAATCTTGAGTGGATTG  
CTCTCACAAGTAATGGACTTAGTGGTGAGATTCCATAAGAATTTGGCCATCTTTCAAGGCTTGCTGTTTT  
GCAACTAGCAAATAATAGCTTGAGTGGTCAGATTCCAAGTGAATTAGTCAATTGTAGTAGCTTGTTTTG  
GTTGGATTTGAGTAGCAATAGTTAACCGGGGAGATCCCACCGCGACTTGGTAGGCAGCAAGGGGCTA  
AAGCATTGAGTGGGATTCTATCAGGTAACACATTGGTGTTTGTCCGAAATGTAGGTAATTCGTGCAGAG  
GCGTTGGAGGATTGCTTGAGTTCTATGGGATACATCCTGAAAGGCTTTTACAGGTTCCATCATTAAAGAG  
TTGTGATTTCACTAGGCTGTATTCTGGTCCAGTTCTTAGTGCTTTTACTCGGTATCAGACTATCGAGTACC  
TTGATCTTTCGTACAATGAGCTTCGTGGGAAAATCCCTGATGAATTTGGTGATATGATAGCTTTGCAAGT  
TCTTGTTATATCACATAATCATTGTGTCAGGAGAGATTCCCTTCATCACTTGGAGGGCTAAAGAATTTGGGA  
GTGTTTGATGCATCACATAACAGATTGCAGGGTCAAATTCCTGATTGTTTTCACTTCTTTCTTTCTTGGT  
GCAGATTGACTTGTCTAATAATGAATTGACAGGACAAAATCCACAAAGGGGTCAGCTTAGTACACTTCCT  
GCAAGCCAATATGCAAACAATCCAGGACTCTGTGGGGTTCCATTGTCTGAATGCCAGTATAACTCACCTG  
CCACGAATACTGGAGACGGAGGAGGAGGAAAAAGAAGTTCAACTGCATCATTGGCTAATAGCATTGTT  
CTTGGAGTTCTCATTTCATTGCCTCAGTATGCATTTTGATTGTTTGGGCTATTGCTATGCGTGCAAGGCG  
TAGAGAGGCTGAAGGAGTGAAAATGCTTAGTAGTTTGAGTACTAACTATGCAGCTTCATCATGGAAGAT  
TGACAAAGAGAAGGAGCCATTAAGCATCAATGTAGCAACTTTCCAAAGACAACCTTAGGAAGCTGAAGTT  
CTCACAACCTATTGAGGCCACAAATGGATTCTCAGCTGCAAGCCTCATCGGTTCTGGAGGATTCGGAGA  
AGTCTTCAAGGCAACATTGAAGGATGGATCAAGTGTGCAATCAAGAAACTCATCAGGTTAAGTTGCCA  
AGGCGACCGAGAGTTCATGGCTGAAATGGAGACATTTGGAAAGATCAAGCACAAAGAACCTTGACCTCT  
CTTAGGATACTGCAAGGTTGGTGAGGAAAGACTTCTAGTTTACGAGTTCATGGAATATGGCAGCCTAGA  
AGAAATGCTTCACGGGAAGACAAGAACGCCTGATAGAAGGATCCTAACATGGGAGGAAAGGAAAAAA  
ATAGCCAGAGGAGCAGCCAAAGGACTCTGCTTCCCTCACCAATTGCATCCACACATCATAACCCGCG  
ACATGAAGTCAAGCAACGTGCTATTAGACAATGAAATGGACGCCAGGGTGTCTGATTTTGGCATGGCAA  
GGCTGATAAGCGCACTGGACACACACCTCAGTGTGTCCACACTAGCAGGAACACCAGGATATGTACCAC  
CTGAGTACTATCAAAGTTTTAGGTGCACAGCAAAGGGAGACGTGTATTCGTTTGGAGTCGTGCTTCTTG  
AACTCTTGACAGGTAAAAGGCCAACAGATAAGGAAGATTTTGGTGACACAACTTGGTTGGATGGGTG

AAAATGAAAGTAAGAGAAGGGAAATCAATGGAAGTAATTGATCAAGAATTGTTATCAGTGAATAAAGG  
AAATGATGAAGCAGAAGTTTTAGAAAGTTAAAGAGATGGTAAGGTACTTAGAGATAACAATGCAATGTG  
TAGAGGATTTTGCATCAAAAAGGCCTAATATGTTACAAGTTGTGGCTATGTTGAGAGAACTAATGCCTG  
GAAGTAGTTCAAGCAACAGTGGCTAAACAGCAAACCAGAAACAAAAAAGGAAAAAAGAAGAAAA  
AAACCAAAGAATGTAAAATTCTTCTTGTGTTTTGTTGTGCAAGTATTCATCTGCATTTGTATTTAGTCAAC  
AACCTCTTATTTTTTTGCAATATTATTCCCATGTTTTAAGAATCTTGTGTATGGATATTGATAACAT

>M6-PGSC0003DMG400029644 M6 LRR-RLK

AAAAACAGAGCAAAACCAAGAAACAAAAAAGAAGGGATTTTTACTTAGTTTTTGATATGCAATTGC  
AAACCAAGAAGAAATTTTTGGAATTTGAGGCAAAGATGTCTTCTTCTTCAAATCCCAACAAAAAAT  
ACCATTTTTTCTTTCTTGGTTACCCTTTCTTCACTTCTTCTTCTTCTTCTGCTGCTGTTACTGATGTTGT  
GCACCATTTTCTAATTGGGACATTCTTGATGATACCCCATGTAAATGGTCTTTCATAAAATGCAACTTTCA  
AGTTTTTATTACAGAAATCAATATTCAGTCTATTCATCTTGAACCTCCTTGCCTACAAATCTTCTTCATA  
TAAGTACCTGAAGAAGCTTGTTATTTCTGATGCTAACATCACTGGTGCAATACCCTTAAACATTGGTGACT  
GTTTCGCACTTGTTACTATTGATTTGAGCTCAAATGGTCTTGTGGGTACCATTCTTAAAGCATTGGAACC  
CTTGTAACCTTCAAGATTTGATTTTGAACCTCAAATCAGCTTACTGGGAGAATCCCAGTTGAGATTGGGA  
ACTGTAGAACTTGAAAAATCTGTTCTTTTTGATAACAGGCTTAGTGGTGGTTTACCAAGTGAAATAGG  
GTTGTTGTCAAATCTTGAAGTGTTAAGAGCTGGTGGGAATAAAGATGTTACTGGTAAATCCCAAATGA  
GTTTGGGGATTGTGGGAATTTGACTGTTTTAGGCTTAGCTGATACCAGAATATCTGGTTCTTGCCTGTTT  
CTTTGGGTAAGCTTAAAGAATCTTGAAACTTTGTCTATTTATACTACAATGTTGTCTGGTGAGATACCTTCT  
GATTTAGGTAACCTGACTGAGCTTGTGAACTTGATTTGTATGAAAATAGTCTTCTGGTTCAATCCCATC  
TGAGCTAGGGAACCTTAGAAAGTTAGAAAAGTTGCTTCTTGGCAGAATAATCTTGTGGTGTATTCCA  
GAAGAGATTGGGAATTGACTAAGCTGACTATGATTGATTTGTCTTGAACCTTTGTCTGGGAGTATAC  
CATTATCTTTGGTGGTCTTGTGTTACAAGAACTTATGCTTAGTAACAACAATGTTTCTGGTTCAATC  
CCTTCTGTTCTTTCACAATGTACAAGTCTTGTGCAGTTGCAGTTTGACACAAATCAGATATCAGGTTTGAT  
TCCTTCTGAGTTGGGGAATTTGACAAGTCTTGTGTTGTTTTTTGCTTGGGATAATCAACTTGAAGGAAGT  
GTGCCTTCAACTTTGGGTAGTTGTAGTAACCTTCAGGCATTGGACTTGTACATAACTCGCTTACTGGTA  
GCATTCCTCCAGGCTTGTTCAGTTGAAAACTGACTAAGCTACTGTTGATTTCTAACGATATTTCCGGT  
ACTATACCTCGAGAAATTGGATATTGTAGCTCATTAGTGAGGTTAAGACTTGGAAACAACCGGATTGCT  
GGTGAATTCTAAAGAAATTGGAGGTCTTAAGAGCTTAACTTTCTTGATTTGTCCGGAAATCGCCTTT



CTGGACCAGTTCCTGATGAAATAAGTAGCTGTACTGAGCTACAAATGGTAGACCTCAGCAGCAATACAC  
TGGAAGGTCCCCTGCCTAACACTCTGTCTTCACTATCAGGGATTCAAGTCTTGGACGTTTCGAATAACCG  
GTTTGGAGGGCCTATACCGGCTAGTTTTGGGCGTCTTGTGTCATTGAACAAGCTGATTCTCAGTAAGAAC  
TCGTTCTCAGGGTCTATACCTCCATCTATTGGCCTGTGTTGAGTCTTCAATTGCTAGATCTTAGCAGCAA  
TGAGCTCTCGGGAGGCATACCGATGCAGTTAGGAAAGATTGAGTCCCTTGAAATCACTCTCAACCTTAG  
TTTCAATGAACTAACAGGTCCAATTCCTGCTGAAATTTCTTCACTAAGCAAGCTGTGCATACTTGACCTTT  
CGCACAACAAGCTTGAAGGGAAGCTTGAATCCACTAGCGAGGCTCGATAATCTTGTCTCACTGAATGTCTC  
ATACAACAACCTTCACTGGTTATCTTCCGGACAATAAGCTCTTTCGACAGTTGCCATCATCAGACCTAGATG  
GAAATGAAGGTCTATGTTCAATTCGGAAGGCCTTCGTGTTTTCTCAGCAATATTGATGGAGTAGGAGTAG  
CTAAAAATGGAAATGATGAGGGAAGGTCAAAGAAGCTCAAATTAGCCATTGCATTGCTAGTCATCATGA  
CAATAGCAATGGTGATCATGGGAAGCTATTGCTATCATAACGCGCACGAAGGGCGATGAGAAGGGATGAT  
GATTCAGAGATGGGAGATTCTTGGGCTTGGCAGTTTACTCCATTCCAGAAGCTCAATTTTTTCAGTGGACG  
AAATACTCAGATGCCTTGTGGATACTAATGTCATTGGAAAAGGGTGCTCGGGGATGGTCTATCGTGCAG  
TTATGAACAATGGGGATGTCATAGCAGTGAAGAAGCTTTGGCCAATAACCATGACTACAACCTAATGGAG  
GCAATGATGAGAAATGTGGGGTACGTGATTCGTTCTCTGCAGAAGTTAAGACGCTTGGTTCAATTCGAC  
ACAAGAACATTGTCCGATTCTTAGGGTGTGTTGGAACAGAAGCACAAGATTGCTCATGTATGATTACAT  
GCCTAATGGGAGCTTAGGAAGTCTTCTTCATGAGAGGGGTGGTAACCCCTTTGGAATGGGAATTGAGATA  
CCAAATATTGCTCGGGGCAGCGCAAGGGCTCGCCTACTTGCACCATGACTGTGCTCCTCCAATTGTTAC  
AGAGACATCAAGGCCAACAAACATTCTCATTGGTCTTGAGTTTGAGCCTTACATTGCAGACTTTGGCCTCG  
CAAACTAGTCGATGATGGTGATTTTTGGTCGTTCTCCAATACAGTTGCTGGTTCTTATGGCTACATTGCT  
CCAGGTAAAAAAAATTTTATTTTCATGTCATCATTTTTCTTACACCTAGCATATTATTCTGAGTATACATTT  
TGCTTAGTTATAGTATAAGCATTGATTGCGTATTGCAACCACAACAACATAACCCAGTGTAGTCCCACAGA  
AAAAGAAGTAACGGATGTGAAAGCATAACAAAGCATGCTGAACACTAACTTCATCAAAAATAATATGATA  
ATCGAAGTACAAGAAACAACAGTAGTAACAAAATCGAAGGACAATGATTGCACATTGCATTTATCTA  
CAAAGAATATTAGTAGTTCTTGATGATCATTGATCCAAGGGTACCAATATTGTTCAATTTTTTATTACAGAA  
TATGGCTATATGATGAAGATAACTGCAAAGAGCGATGTCTACAGCTACGGAGTGGTTGTATTAGAAGTC  
TTGACAGGTAAGCAGCCAATCGATCCAACAATCCCGAAGGAGTGATCTAGTTGATTGGGTAAGACGG  
AAAAGAGGAGGAATTGAAGTCCTCGATCCAAGTCTACACTCGAGACCAGAATCAGAAATCGAGGAAAT  
GTTACAAGCATTAGGAGTAGCCCTGTTATGTGTCAACTCCACTCCTGATGAAAGGCCTACAATGAAAGAT

GTAGCAGCAATGCTAAAGGAAATCAAACATGAAAGGGAAGAATACGCCAAAGTCGATGTTTTACTCAA  
AGGCTCTCCAACAACAACAACACTACTACTGATCATAATCAAGAAAACAACAACACTCATCAAGGGTGTTTTA  
GCAACATCTTCATCAGGACAGAAAGCAAGAAGTATGTATACAATGAGCAATAACACAAGCTTCTCTGCTT  
CATCATTGCTTTATTCATCATCATCATCATCAAATGCCAAAAGT

>M6-PGSC0003DMG400030035 M6 LRR-RLK

GGCTAGGGTACCAAATGAAGTTTCCAAGTAAAGTCCTTGAATAAACAAGTGAAGATTATAACAAAGGGC  
TTTGTCATATTATGATGATCTGTCGTTAGCTTTTACTCAGTCATCAAACCTTGTGAATCTTCAATCTCTCT  
CTCAAGTCTCAACCATTTTTCTACGTCATAGTTTTTTTTGAATAGAAGAAGTAGGCAACTTGTATTGAAAAT  
TCTATCTGAAACTCAAAAAAGAAAAATTCACGTTTTTTCACAGTAAACCTTCTTCTCCTTGTTTTCTATTG  
GCAAAGAAGACAATACCATTTTTGCCTAAAGTGAATAAAGTCAAAAAAGAGCTCCAGTTTTTGTTTGCT  
TGGTTTTGTTGTTTTTACGCGTTTTTTCGAACAAACTCAGTCTCCTATTTGTTTTTCCCTCTTCTTCTACTA  
TTTTATTTACTGGGTTTATTCAATTTCTGGGTTTTGGAGCGGTGGACTTTTAATTAATTGTGAATTTTAGC  
GATTGTTTTTCAGTTTTGGGTAAAAGATATACTAGTGGGTTTTGTTTATGTTTTGTGTGAAATGAATTGGC  
AATGGAAATTCAGTGAGAATAGCTTGTTGTTGGTTATTGTGCTGTTCTTGTGTTTGGTGCATCAGGAATT  
GTGTTTCTGTTGGTCTCTCAATGATGAGGGTATTACTCTTCTTCTGTTATTATTTGCTATTTAAGACTTAC  
TTTGTTAGAAATGGCAATAAAAAATTTGTTATTTTGCTTAAAGTTTTAGTCTTTATTGCTGCAGGTTTGGC  
ACTGTTAAGATTCAGGGAGAGAGTGGAGAGTGATCCATTTGGGGCTTGTGTAATTGGAAAGATGGTG  
ATGGAGTGGAAAATCCATGTACTTGGTTAGGAGTTGGGTGCGTTAATGGGAATGTTGTGTCTCTGTAAG  
TACTAAAAATTGCTCTTTTCTCTTGTATTGTTCTGCAGAAGTCTTCTTTTTCAATTTGATCTGGTTGG  
CTTATATAGATGATTCTAAATTTGGTCTCTGATTGAATTCTGAAACTTTTTGTTCCATGAGTTGGCGGTGAT  
TCCAGAAGGGGTATGATCAAAGACAGATAAATGAGAAGCTTTTGGCACCAATTCCTGTTGAAGCTTTA  
GTATAATGAACATCTTTTGGTGTTTTGTACCTGGAGTGTAGCTAATGTGTTCTTGTAAGAGGGAGCTAT  
TTTAAAATTTGATTTTTATTACTCAATATTTGAGAGGCTAAGCACAATCTTATGATATGTTGGTGATCAA  
GATAATTAACATAGCCTCGAGAATGGATGTAAATAAGTTGATGTCTAAATTCAGAATGATGAAGCATC  
TGACCGTGGGTCTAATGGAAGGGAGAGATTTGGAAAACCCGCCCTCCTCTAGAAAGGGCAAACATGGC  
GTTAGATATAGTAACAAAGATATAAATATTATCAGAGATCAAATAAAAGGAGGCAAATTTACATACTA  
CCTTCGATGTCAACTTTCTCCAGTTTATTTATTTTTCTCAAATAAATGTAAACTAGATAATTAGAGCTACAT  
GTATAACATGATCTCTTTGTTTCTTGACCTGATACATGATTCTATATTTCTATGAATTAAGTGGCAGTCGA  
ATTTTGTGAAACGGGTAATTATATCATAGATAGAATATATTCATCCCTAGCTAACTTTAGAAACGCATTTT

ACTGTAGTCATTTTCGTAAATGCAATAATTTTCATACACAATTATCTCCATTTATTATCATGAATATAATTT  
TCAAGTCGGTAAGTAGCATAGTGTCTAAGTTGAATTGGCTATTGTAAAAATTATCCATGATACTGATGTT  
CTAATCTGTGTTTTTATCTACTCACAGGGACTTGAAAGATCTCCATCTATGTGGTACCCTAGCTCCTGAT  
CTCGCGCACTTGGTTCACCTGAAGTTTATGTATGTGCACATTTAACTAGATGTCTTCATTTTCCTAGTCG  
CTGTCATTACAACTCTTAATTCAAGTCTTTTTCTTTAAGATAATTCGCAACTCACTGGAGACTTCTTTACA  
GAATTTTACATAACAATTCCTTTACTGGGTTCATACCTGATGAGATTGCAAAGCTAAAAGAATTGGAGAT  
TCTGGACCTGGGATCTAATAACTTTAGCCAGCCGCTGCCTTCCGAGCTTTGCCATAATCCCTCTCTGGAAA  
TAATGTGAGTTCAAACAGAGGTGGTGTCAATTTCTAATTTTACCACCTGTTCCCTTACTTACAGAGTTAC  
ACTAATGCAGCTTATCAGACAACAATGAGCTGTTTAGCAGCATATTTCTGGAACCGATAGACTTGAAAT  
GGTCCCAAATGTCCAAGAAAATAACAACCACGCTACGAGAGCCCAACCTTTGTCACTTCCCAATGGGAG  
ATTGATATTAAGGTAAACATCTTTCAATCAAATGAAATGTATATTTTAAAGAGCAATCATGTGTATTTGTAA  
CTTTAAATGTCCAACATAGTAATAGTAAAATGACTTAAATCATTAGATTCAGTTATTGGAATACATATTCC  
TGGAATAAGTATGCATCTGTAGCAATTCATTGCTTGTCTTTTGACCCCTGATGCTTGCGAAGACGTTT  
AGAAGTCCCATCAATTTTCCCTGTCTTCTAGTTGTCTTTTCTTATGGTTTGCCTTTCACATTGAAC  
ATCTCTTGTTCCTTAATGGCCTGATAGGTGATTGTTAAGCACATTTTGATTCATGTTTGCACAAACAAT  
GTTTCAAGTTAATTTCTGATATTTCTGAAAAGACACTACTAATCTTTTCTTTTTCATCTTGTGATAATTTTCTC  
ATTTTCAATCAAGCTTTGCACTAGCTTCTTTTATGGGTATATACTTCTATGGTAACAACCTTACATAGTTATC  
ATGAAATTTAAATTATTTGTAGGACTACTGAAGCACTTGGAAATGTAGCTGGAAGAAAATTAAGAG  
TATCATCTTTTTCTGTCTGAATAACTTCCAGAAGCAATTTCTGCCAGTCTTCCGACTTCTAGACCGTCGTG  
AAGTTGCTGTTGAGAACAGCGCACCTTCATCATCACCATCTCCATCACCGAGTCTTCTCTTTCCCGTCT  
CCTACACCGGCAATTAAGTGCAGAACCTCATATGGCTCATTACCAAGATCCTCTCCTTCTCCATCTTCACTT  
CCCAGTCTGCAGAGAACAGCAGTAGAGTTGAAGATGCCAGACGAAGTAATCATCGAGTTTTAATATTG  
TCTGCAGCTATAGGAGGTTCCGTTCTACTAATAATATTGATAACTGGCACTATCGTCTTTCGAAGCAACA  
AAATGGCTGTTGTAAAGCCTTGGGCCACTGGATTGAGTGGACAGTTGCAGAGAGCATTTCGTTACTGGTA  
ATTTTCTATCTTTTCGATGAATGAATAGTATTTCTATTTTGTAGAACAAAATAGTTGTCTTAAAAATCAGATC  
CATAAAATAGAAGCTTATATGAACATGTGTAGCTGTAAAACAAAATTTTCTTAAAAGTATTACCCAA  
ATGGGAGAAGCTTAAATGGACCTTTTCGCTCCCATATGAGCTTGTACAAGCTTTCTTTTCTAATTGTTA  
ATGATCTTTTCCCTTTTCCCTTTTTCTTCTTGATATCTCGAACTTTTGTATCAATATGAGCAAATAGTC  
TTAGATAGAGAGCTGAGTTCTATCATTCTTACTGTGAACAGGTGTGCCAAAGCTTAAAGAGATCAGAAGT

GAGTCAGCCTGTGAAGATTCAGCAATGTGATCGGTTCCCTCATCTGTTTGCACATTATATAAGGGCACAT  
TATCCAGTGGAGTTGAGATAGCTGTGATATCTCGTACAGTGGCATCTACTAAGGATTGGTCAAAAAGATA  
TGGAAGCCCATTATAGGAAAAAGGTGATTTAGATTTTCCAGTTGGAATTTTACATCTCATTTTTTCCAATA  
TGCGAGTTTCTAAATGCTTTTCTCCTCCTTTTACCAGATCGATACATTGTCAAAGGTCAATCACAAGAACT  
TTGTCAGCCTCCTTGGGTTTTGTGAAGAAGAGGATCCATTTACCAGAATGATGGTTTTTGGAGTATGCTCC  
TAATGGGACCCTCTTTGAACATCTTCACAGTAAGTTTCTGATTCTAATGGTGTATCTGTTGTGATTTACTC  
AATATTGTTACCCAACCTCGTCTACATCTGCTTGATTGAACTGCACTAGGATATACTTTTATATAGCAGGTA  
AAAACATACCTGCATTTGGTGTTTACACAAACCATATTAATTTACCATTGTTAAGTGATAAATTGACGTGA  
GAATGTGTATTAATTAACCTTTGGTTCAATGATACTAGTGGGTGTGAAAACACATCTTATGTATTCATTGG  
GTGGTGTAAACACCAAGTGTGAATAAGTTTTTCTCTACCTCGAGTATGATGTATACGGACGTGTCTTTG  
GTCTCGTGTGATAATTTGTCTGTAATTTGAGAAGTAACCATTTTCACTTTAGCCTCATAAGATGTGTTCA  
CACCTGTACAAGACATCTTTGGTATTCATTTACATGCTCTTTCAACAATTTATGTTTAGCTTTCCCTGTGG  
TAAACAACCTATTCTTATGTAATCTATTATGACCGAAAAGATCTCTAATTCTAGTGTGTTTGTAGTAAGGGAA  
GCTGAACACTTGGACTGGGGGATGCGAATGAGGATAACAATGGGAATGGCATACTGCCTTGAGCACAT  
GCACAATTTGTCGCCATCGTTACCTCATAAAAACCTTGACCTCCTCTGCCGTATACCTCACAGAAGACTCTG  
CAGCCAAAATATCGGATTTTGGGTTCTGGAATGAGACAGATGCAGCTGAAATGGTGTGAGTCCAGAA  
AGTAATGTTTACAGCTTTGGTGTCAATCTGTTTGTGAGATGATGACTGGTAGGCTCCCTTACTCAGCAAACA  
GTAGCTCTCTTGACGACTGGGCATCAGACTATCTTAGGGGAGGAGAATCCCTGAGAGAAATGGTTGATC  
CAACTTTAAATTCTTTCCAAGTAGAGCAGCTAGAGAGAATAGCTGTTGTGATTAATGTGTGTACATCC  
CGAGCCAAGACGAAGACCGACAATGAGAGAGGTTTCTTCCAGATTGAGAGAGATAACAGATATTGGAC  
CAGATGGGGCAACCCCAAGACTCTCTCCTCTATGGTGGGCTGAGCTTGAGATTATATCAACTGAGGCTT  
GTTAATGCATAGGTACCTCAGTTTTGCCTTTAGATGGTAATTAATATATAGGCTGTATATACAAAGATTTT  
TCTTTTGTGTGGATAACAAGAGCATATCGACTGTGGGGGCTAAAGAGAAGTTGTTTGGGTACAAAAATG  
GAAAATTTAGTAAGTAAAAAAAATTTCTTTTTTATTTTATATTTTAGTATGTAAGTAATTTCTAAATCGCC  
TTAATTTGCTTTCTTGGCGGCTTGGGATCAATTCTATTGCTTATGAAAACATAAGGACCCTAGACAAAA  
GGGATAAAACCTAAGGGGTCGTTTGGCTTTATCGCATTAAACAAAAAC

>M6-PGSC0003DMG400030113 M6 LRR-RLK

GAAGTTGACTTCATTCCAGAGGTTGGATTTACAGAGGCGAACATTTTGTCAAGTTTACGGAAAATAA  
CATGATTGGAAGTGGTGGATCGGGTAAGGTGTACAGAATTTCCGTTGGCAGACCAAATGAGTATGTTGC

TGTGAAGAGGATTTGGAGTGATAGGAAAGTAGACTACATTCTGGAGAGGGAATTCTTGGCTGAGGTTCA  
AGATATTGGGATCAATTAGACATTCCAATATCGTGAAGTTATTGTGTTGTATATCAAGCGAAGATTCAA  
GTTGCTCGTTTACGAGTACATGGTAAATCACAGTCTTGATGGATGGCTTCATGGGAAGAAGAGAGTATC  
CTTGAGTAATAAAGTCATGGATTGGCCAAAAAGATTGGAGGTTGCCATTGGAGCTGCTCAAGGACTTTG  
TTATATGCACCATGACTGCACTCCACCAATCATTATCGCGATGTAAAAACAAGCAATATCTTGTGGATT  
CTGATTTACAGCCAAAATAGCTGATTTTGGGTTGGCCAAGATTTTAGAGAAGAAAGGAGAGCTTAACA  
CCATGTCTGCTGTTGCGGGTTCCTTTGGTTACATAGCTCCAGGTAAAAGCAAAATCCAAGCTTGAAGTTC  
GTATTACATCAATTTGTTAACATTATATCAAAAAGTATGACTAACTAATAATTTACTGTTTGGTTACAGAG  
TATGCTTATACTAAAGTGAACGAGAAGATTGATATCTATAGCTTCGGGGTGGTGCTATTGGAGCTA  
GTGACTGGAAGACAACCAAATTTGGGGACGAGCATAACAAGCCTGGCAGAATGGGCATGGAAGCAGCA  
CGGAGAAGGGAACACTGCCATCGATAATATGTTAGATACAGATATCAAAGAAACATGTTACTTGAAGA  
AATGAAGACTGTGTTGAGACTCGGGCTTATATGCACGAGCAACTTACCTGCAAGCAGGCCTTCCATGAA  
AGAGATTCTGCAGATACTTCA

>M6-PGSC0003DMG400030117 M6 LRR-RLK

GGAATTCCTGGCTGAGGTTGAGATATTGGGATCAATTAGACATTCCAATATCGTGAAGTTATTGTGTTGT  
ATATCAAGCGAAGATTCAAAGTTGCTCGTTTACGAGTACATGGTAAATCACAGTCTTGATGGATGGCTTC  
ATGGGAAGAAGAGAGTATCCTTGAGTAATAAAGTCATGGATTGGCCAAAAAGATTGGAGGTTGCCATT  
GGAGCTGCTCAAGGACTTTGTTATATGCACCATGACTGCACTCCACCAATCATTATCGCGATGTAAAA  
CAAGCAATATCTTGTGGATTCTGATTTACAGCCAAAATAGCTGATTTTGGGTTGGCCAAGATTTTAGA  
GAAGAAAGGAGAGCTTAACACCATGTCTGCTGTTGCGGGTTCCTTTGGTTACATAGCTCCAGGTAAAAG  
CAAAATCCAAGCTTGAAGTTCGATTACATCAATTTGTTAACATTATATCAAAAAGTATGACTAACTAATA  
ATTTACTGTTTGGTTACAGAGTATGCTTATACTAAAGTGAACGAGAAGATTGATATCTATAGCTTCG  
GGGTGGTGCTATTGGAGCTAGTGACTGGAAGACAACCAAATTTGGGGACGAGCATAACAAGCCTGGCA  
GAATGGGCATGGAAGCAGCACGGAGAAGGGAACACTGCCATCGATAATATGTTAGATACAGATATCAA  
AGAAACATGTTACTTGAAGAAATGAAGACTGTGTTGAGACTCGGGCTTATATGCACGAGCAACTTACC  
TGCAAGCAGGCCTTCCATGAAAGAGATT

>M6-PGSC0003DMG400030119 M6 LRR-RLK

GGAGGAAGAAGCATAAGCGCGATGTTGCAAGCTGGAAGTTGACTTCATTCCAGAGGTTGGATTTACA  
GAGGCGAACATTTTGTCAAGTTTACGGAAAATAACATGATTGGAAGTGGTGGATCGGGTAAGGTGTA

CAGAATTTCCGTTGGCAGACCAAATGAGTATGTTGCTGTGAAGAGGATTTGGAGTGATAGGAAAGTAG  
ACTACATTCTGGAGAGGGAATTCTTGGCTGAGGTTGAGATATTGGGATCAATTAGACATTCCAATATCGT  
GAAGTTATTGTGTTGTATATCAAGCGAAGATTCAAAGTTGCTCGTTTACGAGTACATGGTAAATCACAGT  
CTTGATGGATGGCTTCATGGGAAGAAGAGAGTATCCTTGAGTAATAAAGTCATGGATTGGCCAAAAG  
ATTGGAGGTTGCCATTGGAGCTGCTCAAGGACTTTGTTATATGCACCATGACTGCACTCCACCAATCATT  
CATCGCGATGTAAAAACAAGCAATATCTTGTGGATTCTGATTTACAGCCAAAATAGCTGATTTTGGGT  
TGGCCAAGATTTTAGAGAAGAAAGGAGAGCTAACACCATGTCTGCTGTTGCGGGTTCCTTTGGTTACA  
TAGCTCCAGGTAAAAGCAAAATCCAAGCTTGAACCTCGTATTACATCAATTTGTTAACATTATATCAAAA  
GTATGACTAACTAATAATTTACTGTTTGGTTACAGAGTATGCTTATACTAAAGTGAACGAGAAGATT  
GATATCTATAGCTTCGGGGTGGTGTCTATTGGAGCTAGTGACTGGAAGACAACCAAATTTTGGGGACGA  
GCATACAAGCCTGGCAGAATGGGCATGGAAGCAGCACGGAGAAGGGAACACTGCCATCGATAATATGT  
TAGATACAGATATCAAAGAAACATGTTACTTGAAGAAATGAAGACTGTGTTTCAGACTCGGGCTTATAT  
GCACGAGCAACTTACCTGCAAGCAGGCCTTCCATGAAAGAGATTCTGCAGATACT

>M6-PGSC0003DMG400030169 M6 LRR-RLK

AAGCCCCAAGATAAATAGTATTAAGCAGGGTACATGATCACACGAACTTCCATTAATACAAGGGAAACT  
AGGTAGGTAGAGCATCCTACCAGGATGTTTTTGTGGTCTCTTAAAGAGGTAAAGACGGGGAAAAAGT  
ATTTGCAGGTTTAAATGGTTAGTTTCAGTTTTCGGGTACAAAATTTTCTGTTAGTTCAAACCTGTTTTGT  
AGATTGACATGACCAAGCAAAACAATTTTATGCATGATTAGTAAAAGTTTTACAAAACAACAGATCTTC  
TCAAAGAAATTTTGGATGTGGTAACACAGCTGGAGCATAAAAGAAAATAAAGACTTGTTTTTCTGCTTA  
GATGCTTCATGAGATTGAAGTTTGTAAATTAGGACTAAAAGATATGCACAAAATTTTGTAAAGTTGTTTAT  
CGTGAGTTTACTTTAGCACTCTTCAAAGGGTATCAGTTTCTACTCTAGGACCATACTAAGTTCAACTAG  
GATATGATACAATATTAGGATTAGTCGATAGTACATAGCATAACTAGCCCTTGGTTAAGGGTCGTAAAG  
AGAGTTATTTTTAACTATTTATTTGTGTTTCCTTAAATTGAAATTTTTATTTTTGGTTTATGGGATTTCTTA  
TCCTATAGTGCATCTTAGTTAGGTTAAAATCATCTTATTATTTTACCTCATGTAATTTGACAGATGAAGAG  
GTTATATGGTTTGCCTTTATAATGGATAAATTTATTATTTTGGAGTTGGCATTATGCAGCCACCAGAAGAC  
TTTTCCCTTATCTCCGTCTTGTGTTCTTGCACCTACAACGAGTTAAAGATTTTGGAGACATTAATAATCT  
GGCTGGTTAATCAATTTGCAGCATATTGGTTGCTGCTGTCTCCTGGCAATTATACCCTCTCAAGGTCCACA  
TTTTGTTTGAAGAATTATCTTTTGGTCCCTGAAGACATCATTCTACTTTTATTAGCAGGTGTTATGAAAAG  
CCTATGCACGAGTACATCACATAATTTAAAGTTATAGACGTCTTAAATCTAACAGGTCTCCAATAGGAA

AAAAAGAAAAGGGAAGTATATGAAGTGACTTTGTTTCGCATGGAGTATGGAATATAGAATACGCTGCCTT  
AAGGGGTTTTAGGTGCAAAAGGTGTCCACACACTTCACACTTCAGAATTGCGAGCTTGTGCTGTCACA  
GTAGTATGCACTATAGCTAATAGCAGATTAAGTGAACCTTTGCTTAGCATGCGTAATTTATCAGTTGTAT  
ATCATCGCTTAATGTTGGTAGGACTGGAAATTAGTCGTTTTTGCAGTTGGAAGGAGGATTCAAATTGGA  
AATAGGTGTTAGGATTTGTATTTTATAGTGTTCCTTTTATTGGGTGCAGTTACGCCAGAATATTGACTCTT  
CAGATAAAAGTCATGTTTAAGTTGTTTGACACTTGATACATTTTGTAGATGATGTTTGACACTTGATACA  
TTTTGTTAGATGAGGTCTGATATCTAAAAATATCTGTACATCACATTTTATTGTTTTGATATCTGAAAGGC  
TAAACTTCATTCTGCTACTCTTTGGCAAGCAGTGCTTTACTTTGGTTGCTAGAGGTTGAAAGTTGTGA  
ACCATAAACTTGTAGATTCAGTTCATATCTATAAACCATTTTATCTTTTTTTATCATTGTA CTCCATTATAAT  
GCCATTGTTCCCTTGCTGTTCTTG CAGATATTTACCTCCGAAATAGCCTGCCTCACTAAATTGGAGTGCCT  
TGATCTTTCATTCAATAAGATGAAGAATTTACCTGTTGAGATAACTCATCTTAACTCCTTGCTGTCACTGA  
AGTTGCTAATAATAAACTGATTGAAGTACCTCCGGGGTTGTCTTCTCTGCAAAGATTAGAACGTTTGG A  
CTTTTCTAAC AATAGATTAACATCCTTG GAGAATCTTGATCTCCTTCAATGTATAATCTGCAGAGTCTCA  
ATCTTCAGGTATGTGCTACTGAAATTACAGTTTCTTCCAGTCTTTTGCTTTTAGGCTTTTTCTCTAGTTTC  
TTTTCTTCTCTGATAAATGTTTATAACATGAGAGGCATCTACTCTTAATGTGGATGAAATTCCTG CATCC  
CACTGGAAAAAAACCCGAAATGTATTTGTCTCAATTGTCTAGTCAAGAACTTGATATATTATAATTACCT  
TATCCTGACCCATATATCTTCATTGAAATTTGCTGAAGCACAATAAGCTTCTTAGGTGTTGTTTCGATTCCCT  
CATGGGTATGCTGCAATTTGGAGGGGAATTT CATAGATTTGTCCAAGGATGACACCACCAGTTCATCTTC  
AGAAATGGACGTGCTTGAAAGTTATGAACAAGAACTTCTGAGAATACCCAAAATGGTGAGTTCCTCGG  
AATCTCTGTCTCCCCTCCTTATATCTATTGCTATTTCTGCACATTCTGATTCCTTTGGATCTTGTTTGTTC  
CCTTCTAAGAAGTGTTGTTTCGGAAGGGTAGTACCTTTGAGAAGTCTGATGTGTGAACTTTTAATTGTGTA  
GGAGTTTCTACCAAATTGTCAGGTCATTTATGTGGCTCATCACCCAGTCATCGATGTTTTCGGCCTCGAAA  
ATCCAAGAAATGGAAGCGGCAGTATTATATGCAACAGAGGGCTCGTCAAGAGCGATTA AAAAACAGCA  
GGAAATGTGTTGCCTGCAAACATTCTAAGCTAATTGATGATTCTCTGGTGGAGGCCTCATCAAGCATAGT  
GGATGATGATACACATGTTAAAGAACTGATTACTGAAGAAGCTGAGTGCAAAGGCTCTTAGCTAGTGG  
TATTGATGAACATATCAGATTAAGGAGGACAATTATATAGGAAGATCTTCATATGTTGCTTCTGACTCC  
ATTGAAACATGCATAGATATTCAGAATTGTAAAACATGTGATGCTTCAGTAGGTTCTGTTTCTGATGCTG  
CTGATGTGGCTGAGGAAAGTTTGTCTTCAGAGGTGACTAATAGTCCTCCAAAATCGAAAAGGCACCTGG  
ATGGGGTCATTGATAATCCAAAACCATGCAAACCCG CAGACCAACAGATCATT CAGAGGTATCCTGCA

AATACAGCATGATGTCTTTCTGTGGTATTGATGATTATTTACCAGATGGCTTTTATGATGCTGGGCGAGA  
TCGGCCATTTATGACGCTGAGGAGTTATGAGCAGAATTTGCATCTTGATTCACGGGAAGTCATTATAGTT  
GATAGGTAACCTCCATGTTTGCATGCCATTAATAGACTAATAGTTATGGACCTCAACTACTAACTTCAGG  
GAATGCTTTGCCTCTCTACTCATTGTTGATTACTTATTTAATCTGTTTAGGCAAAGAGATGAAATGCTGGAT  
GCCATTGCTCTACGTGCTCAAGCTCTAATCTTTCATTTAATCAGATAGATGGTCTGTTTAAAGATAGAGA  
ACATGTTGCTGTAGACAACCTGCAAATTGCATCACTGCTTGCACCTTTTAGTGTCGGATCATTGTTGGTGGA  
AGTGACAAAAGTAATATTGTACAGAAGGCAAGGAAAGATGTATCTGGGTCGAACTATAGCAAGCCTTTT  
GTCTGCACATGCCCTACTGGAAATGATGACACTACCAGCATGGTCACAAAAGAAAGTCCTAGCATCTTA  
GAAGATATACTATTCCTTAATCTTTGTGAGAAAGCACTTCACTCAATAAAATCAAGGCAAAATTCTATTGT  
TGTTCCATTGGGAGTTTGCAGTTTGGTGTATGTAGGCATAGGGCCTTGCTTATGAAGGTATTTTGCAT  
CAGACATGTTTCTAATTAGATATGGTGGTACTGAATTTAGTTTATTATTATGAACTGATAAATTCGTTTG  
TCTTCTGCAGTACCTGTGTGACCAAATAGAACCTCGAATATCTTGTGAGCTTGTTAGGGGTTATTAGGAT  
TTTTACCCGCATGCGTGGAATGTGATCGTGGTAAAAGGGGTGAATCATGGGTTTCAATGATAGTTGAT  
GCGTGTATCCCTTGATATCAGAGAAGAGACAGATCCAGAATACTTTTGCAGGTCAATGATTTTCCAAT  
TCTGTGTTACTTTCTTCATGACTAATTTCTGGTACTACAAGCATTTATATCAATACACGTGTATGACGATAT  
TGCATTTTCAATTTAGCCAGTGTGATTATTGGTTATTTTGGGGTGAAATTGCCAGCTTCTTGAGTAGTTCC  
TTAGTTACTAAAATCTCTAGTTTACCTGAGTTATTTCCGAATGAAAATGGCCAGATAACTGAGCTTGCT  
GTTTCTTTTCAAGGTATATTCCACTGAACGGGGATAAATGTTCTGTTGTGCCAGATGCTAGTCCTGGTCAA  
GTTAGTTCTTTTCTTCTAACCAGGTGATGATAAATTCATAAAGCTCCCTCCTCAACCCTCGTCCCGTGT  
AAATTGGGAATTTGGGATCCCTTGAGACTTTGGCAAAGGTGTGGTTCCTGATTGCTTTTAACTTCTCCAG  
TTATTATTATGCAAATATACTTAAGTTCTTATTCCAACTTCAATGACTTGAATTAATATGTTTTATTCTTA  
GAGTGACTGAACTACATGTATATGTGTTAACCCACAACAATTAGAAAATGATTTTTCTGGCTTTATTGTAC  
TTCCATTATTGACTGGAATTTACCAGTCTATCTGGTCTTGTGCTTTTGATTTGTTTTGGAAATCTGAAATA  
GATAAGAAGCAAAGCAATCCTTTTTGACTTATTCTGCTATTCAGCAGGAATCCATTATATTGCAGGCTTAT  
GCTTTTCATTTTGCAAATTTTTCATTTATCTTCTGATAAACTTGATTAGTGACAAGTATTATACCACTAGA  
TGTGGGAATTTTTCTTGGCTAGCATCTTATTGACGAGGCATAGTTGATTTTTTAAAAATTTATTCTGCT  
CAATTAACCTGAATTGAGCAGAATGAATATAAAAGAGTCATATGACTGATACCGACTAGTTCAGGATTG  
AGGTTTAGATGATTGAATGAACATTTTTGCCACTGCAGGTGCGAACTATAGAGATGTCCAAGTCCACGG  
CGGATGAGATTAAGAATTTTGTGTTTAACTGTATTGGAGAAGTTAGGGTGTGGGTGCTTAAACAGTT



CGTGCATTGTCAAATATTATGGTCATCAAATATCTTCAAGATGGGTTCCCTTCATCAGATGGCAGTTCAGA  
AAGTCGTACTTTGCAGTCTGCCATTTTGATGGAGCATATTAAGGGGGTTCCTAAAGGTATATGTTTTC  
CTAGAACTCTTCTCGTACCTGACTTTCTCTCCTTTATTTCCCTTCCCTTTTGAGGTGGGAAGGGTATAAAT  
AACACCTGATTGCCTTTTGTATTAGCTCATTCTTACTTTCTTATCCTTAACTGGCAGAAACATGTAGATAA  
GCTATCTAATGCTGGTGAGAAGCGTCTTCCCGTTGAGCTGTCGGTATTTATTGCCCGAGATGTAGCAAGT  
GCATTGACAGAGCTGCATTCTAGGCATATCATAATCGTGATATAAAAAGTGAAAACATCCTGATAGATC  
TGGATAAGAAGAGAGCTGATGGTACCCCTACAGTAAAGCTATGAGACTTCGATATGGCAATCCCTTC  
GTTCATACTTACATACTTGCTGCATTGCCATGCTGGAATCCTCCACCAGATGTTTGTGTTGGTACACCT  
CGTTGGATGGCTCCTGAGGTCTTTCAGGCGATGAATAAGCGCAATATCTATGGGTTGGTAAGTCACCAA  
TCCTTCTGACCAAAAAAAAAAGTCACCAATCCTTGAAGTTAGAATCCTAACCATTGAATTCTCTACTAACAA  
GTACCAATTAATGCCCCACCGGGTGCCTGATCTGCTAAAACAATGTGGTTCTTTCTGATTTGCCAATTT  
GTCACCCTGGGGTAAAATCAATTCAACACAATCAAGAACTTACCACCTTCAAAGACACACATTTTCTACT  
AAAACTGATATATCACTCATTCTCTATTAATAAATTCAGCTTTATCTTGTCATTATTAACCTCAAATGTTTT  
AAGCTAGAAAAGAAAGCATGTTTTGTCTGCTCTATTGCTGCACTGCTACAGATTAAGAACAATAATATG  
TACTCATTGACAAATTCAAATTTTCACCTTTCTTTCTTGGAAATTTGTTTGTAAATTTCTCATTTTTGAT  
GCTTGAATCTATTTTCGGAGATGAGGATTTTGTGTTTGGAGAGACTATTTTATATGACGGCTAATCTCAGA  
GGATGTATCCTGTGGCAAAGGGGTTGGGGAATATTATCTTACTTCTTTGAAGTTGAAAAGGTCTGAT  
GAGTTGCTTCAAGGTAAAAGGTTTTCTTGCTTTTACTTTGCAGGTTCCCTTTTCAATAGGTAGATGAA  
AGCTAATGGACCTAAAATAAGTCCACTATGGCCAAAAAATATCAGGAGGGGCGGGGAGCGGTTGGATT  
ATTTACCCTTAACCCAAATTC AATAGATGGGTAAATTGGCTAGAATGGGATATTGAACAACAAAAAAGT  
ATTTATAGGTGCTAATTTCTGTATTATCTTTTTCTTTTGAAGATGAACAAATGAGTTTAATTGCTTTGAG  
TTGGTGACTTGAAAGATAAAGTGAGTTTTTGTCTGCTAAACTGCAATTCTAGCTTAATGTATTCAAAG  
GTTTTCCAAACTAGGTTTTTACTTGTCTTTCTTTGGATGTAGGGTGCTGATATATGGTCGTTTGGGTGCGT  
CCTTCTGGAATTGTTAACTGCAACTTCCTTACTCAGAGTCATCCGAGTTAGATATCCACCATTCTCTTCA  
GGTATTTCTGATCTCTAACCTTCGATCTATTAATGCTCTAATAACCATGATGAGTACCTAGTGTGCTTGA  
AATATCATTGTGTGATGAGGACTTCAGAAGTTCAAAGTCCCTGTTGGACAATCTTTATTATGGCTGCC  
TTTGGCTGCTCAAAGGCTAATGTTCTAGCATCTTGGTTGTTGGATATTTTCGGAGCTCTCATGGTTTTCTT  
CCTTATATTGCTTTCGTTTATAAGAACTGCCTGCAGAAGTACACTTGTCCCATGCACATTTTTAAAAAAT  
AAGTTTTTGTGTTGAATTGCATTAATGGTAGAAAACAATATAATTCATGTTTAAACACATGCAGGAAGGTA



CAAGTTAAGTCATGAGTTTAAAGTTGAGTTCTCTTTTTAAAGGCTATTAGGGAACTAAGTATCCCAAAG  
GAGGTTATAAATGCTATTACATTTGAGTAAGAGGGGAACCATGTTTTCTCTTTTTCCAAGAGAGCCTTT  
GGGCTAAGTTTTGAGTAATTATCTCAACTAAAGAAAAATGTGTTTAAAGATAGTTATGAGCCAAAGTATT  
TTTTTTGGGAGTAGTATTGAGCACCGAATTGGGGACACGAGTTCTGATTTACTCAACTGTCCATAAGAA  
CCATGCGCCAACATGGGATTTCTCGGATCATACTTTTTAGATGATCACGAAAGTTAAGCTAGTGGATCCA  
CTAAGTAAAGTTAGCTTCTATATCACAGCAAGGTATAGGATGGTCCTTGGGCAACGCGAGGTAAAGCG  
TTGTATCATCACTAGGGCTCATAGTGGTGGTTGTCGGTTAAAGAACCTCCACATAAGTTATATCACTTTT  
ATATAAGTACAGTTGAGTTGTTATTGTTTTATCATTAAACAAGCTAAGTTGTTTATACTGTTTTACAAGCTAT  
ATATATTGCATGCGTCTTATTGCTTTATATATTGAGTTCAGTTAGTCATGAGTCGTACAGAGCCAAGGTA  
AGTGTCTCTTGTATTTCTTTCAAGCTTAAGTTGTGTTTTGGCTTTCCCGCTCGCATACTCGTACATTCCA  
TGACTGATGCCAGTTGCCTACATCGTTTGATGATGCAGATTCAGGTACCCCGGATCAGCATCCTGTAC  
GTCGTTGATCCAGCTGAGCACTCCAGAGTCAGTGGTGAGCCTCCTTGCAATCCGGAGGACTCAATTATTT  
TGTGTTCTTAATTTTTGTCTTATTAGGATGTTGCGGGGTCTGTCCCAACATCCATCTCAATATTTTAGAGG  
CTTTATAGACAAATAGTCAGTCAGTTAGTTTTGAGTCTTATCTATGTATATATGTAAATATCCTATTTTG  
AGATTCGAGTTGCCTTATGGCCATATTTTATAGGTTAAGTTGTTTTGTAATATTGCATTGCATTGAGCTAT  
TCTGTTGAGTTAGGTTTCCGCTGAGTTAAGAAAGCCAGGCCAAGGGTTCGCTTGGGGCCAGAAATGGTC  
TCCGGGTGCCGGTCCCGCCCAGGGTGTAGGCTCGGGGCGTGACA

>M6-PGSC0003DMG400030443 M6 LRR-RLK

ATTTGATCCATCCCTAAATTTATATTCTTTCTTCTCTTTATAAACTTTGTGTGAAGTTAATTAATTTGG  
GCGAACGAGAGAGACTAATTCAAATCGGCGAGTTTTGAAACCAGAACGCACACTACAACATGTTATCC  
CTGGGATTCTCACTTCCTCATCCTTCCAATAATAAACTAATTATTACCAACAAAAACCAATTTAATTTTCGT  
ACCAATTTAGCCAAGGTTTGTCTAATAATGTTAATGCAGCTGGGGATCAATTAGTGACACTGCCTGAGG  
GCCTCAAACATGTTGCAGTGATCATGGATGGCCATAGAAGGTGGGCAAAAACAAAGGCTTGACTGTA  
AAGCAAGGTCACCGCGCTGGCGGAGAGAAAATTCAAGTCCTCACCCGCTTTGTAGCCAGTGGGGAGT  
CAAAGTTCTCACCATTTTTGCATTCTCTACAGAAAATTGGGTTGCCTCAAAGTAAGTCATTGTATTCCTT  
CCATCCTAATTTACATGACACAGTTTGAATTCGAAAGTAAAATAGTATAATTTTGATTGTGATTCCGGG  
GAATCTCTAACTTTTGAATAGAATTTACATATTTGAAAAGTAAAGTAAACTACTATAAGTCACCATAAT  
TCATAATTCAAGATGTTTACATGAAAAATCCGGTCAAATAAAGATTTATTTGAATTTCTAAATTTGAAAT  
TAGGTGCACCATAAATTGGGGAATGAGGGAATAACTTTTTATGACGATCTATCAATCATGTTAAAATAAAT

CATCAAGAAAATAAATTAATAAAGAACAACAATAACATATTCAGTGTAATTTTATAGGTGAGGATCTGA  
AAATGATATAATATACGCTGAACTTACCCACCTCGAAAAGATATTAAGTTGTTTTAAAGATCATC  
GACCCAAGTAACTTGTACAAAATCAACGACTATATATATATATATATATATATATATATATATATAT  
CAGAGAAAGTGACTTTCTTTCTAACAAATGAAATTAATTATACAAGAAATGAATCATATGTCTGATTATAT  
TAACTATATATAATTATAATTACATATGATTTATTAATTTAATTTCTAATACACCAATGTTTTGTTTTGTTT  
GTTAAACAACGCAACTCTAACTTGAGTGCCGCAGGAGGAAGTTGACTTTCTTATGAAGTTGTTTTAGAG  
CTGATAGGCTCACAAGAAAAGTTGGATGAGTGGACAAGGTATTCTATATATTATCTATATGTGATAAATA  
AAAATATCTTGTGTGATCAGCTATCCGACTATCTATATAAGAAGATCGTTAATTCCACCATTTAATGCAA  
AATGGCTCCCGAACTAACTCCTCATGGTTTAGTAAATGAAAGGTGGTGTGGATATTCATTTTGAAATT  
CAACTTATTCGAATTAATTATATTATGTGATAGGGATGGTAGACGAGTATCATTATTGGGGATAAATC  
AATCCTTTCCAAGTCTTTACAGAAAGCTCTTGCGGTAATGGAGGAGAGAACAAAATGTAATTCTGGACT  
ACATGTTATTATAGCAATCAATTACAGTGGACGACATGATATATTACAAGCAACTAAAAGCATTGCCAGT  
AAAGTGAAAAATGGACATTTAACTGTAAAAGACATTGATCAGAGCCTATTTGAACAAGAACTGGAACT  
TATTGCGCTGAATTTCTGAACCAGATTTGTTAATTAGAACAAGTGGAGAGAAAAGATTTAGCAATTTCA  
TGTTATGGCAATTAGCTTATACTGAATTCTATTTGCGGAATAAGTTATTTCTGACATGGAAGAAGCTGAT  
TTTATGGAGGCTTTAATGTCGTTTAAGTCGAGACAGAGACGTTATGGTGGACAAAAAATCTAGTAATATT  
TTCAACAACCTCCATTACTTAGAATTAACCTAGCTCGACATATGAAGAATTATTGATTAGATCCCTTGAA  
TTTCTCTTGCTATTAGTACTATTAATAATTTTATGGTGGTTCGATTGTATCTATACCAGCACTATATAAGC  
ATGAAATATCGTCATGTGGTTTGTGCTGAGTTTTTTTTCTTTCCACCGGCCAGTTAAATTTGAATCAC  
GCACTTTGAAGGACTTGTAGCACTCCCAACAAGGTATTCATATATTCATAATTAATAAAAAAAAAAAAAAA  
CAAGGAGTGGGGCAACGCCGAAAATGAGACTATAAAAAGTCTTCAAAGTCATATATGCTTCCAAGATG  
TCAATCACATCACATCATTCAATTTGTTGGTTCAAAGTGATGAGTGGATATAAAATTTTCATTTTTTTA  
CATCACATTTGATTTTTGCTAGACTATAATATAGTAAATTAATTATAAAATTGAGGCGAAAAATATAATA  
TATTAATTAACATCAATAATAATATCATATATTAATTGAATTAGTATTAATCGTAACTTGTCTTTTTAGC  
AAATCCTTAAATTTTTAGATGAGGGAAGTTCACTTTCTTTAGTCAAATGTCAACTCATTAGTCATTACTCA  
TCTCATTATTCAAAGATCCTTGGAATAAAAAGATTTGACAAACAATAACAACTCTTTGGTCTTCTCCT  
TTCTCTTAAAGGGAGAGTCGTTTACCTATACAAGTCTATATTTGTCGAACACTTAAAGTCATTGGCCATAC  
TTTACTCAAGGGATGGTATCCTGTTTGATTGGTAAATCTAGAACCTTTTTTTTTTTTTTATTATTATTATTA  
TTATTATTATTATTATTATAGTTGTAGTATTCAAATCAACTTATAAGCATCTTGATTAATTTACAAGATAT

GTTAGCTTCCATCAACACAAGTACTGAGTAAGATTTGCTAAGAAAGTGCCTTTCCCTTCACATGATCTTC  
TTTTTTTATTACAAGTTATATGCACTAATTGAGTCAAATAACTACACAACCATGTCACCTTGTAATAAT  
TCATGTAAATATCACAATATATATATTGATAACCCGATAAAAATAATGTCTAACCTGATATAATAGGTAA  
ATTACATTGAAAATGGTTGTAATAATTTGTACTACTACCATTGTGTACAACCTTTAAGCCCTTTTTCTCAA  
CACTTTTGTACCCACATAAGGAATAATGAACTCATTATAATTAGCAGAATCAAATGTGACTCAGTATTAT  
TCCCTTTCTCCACATATCACCTAACCTTCTCAATCCCCAAATGGAGCTTCAAACCTTTTTGTTCAATCAAG  
CTCTCTTTTTTTCTGTCAATCCATGCTATTCTCTTCATGTTCTATACTTTTCTTTCCAGAGTGTGCTTCAG  
CAGGCATACTTGGGAATCAAACAGACAACTTGCATTACTTGATCTTAAGTCTCAAATAACTGAAGATCC  
ACAAGGACTCATGGATTCTTGAATGCCACTCTTAATGTCTGCCAATGGCCTGGTGTACATGTGGCCAT  
AAACATCAAAGGGTCATTTCTTTAGATCTCAAAGAACATAGATTGGCTGGCACTATATCACCTAGCATTG  
GCAATCTTTCATTTCTTCGAATTCTTGACATCTCAGATAACTCCTTTCACGGTGTAAATCCCTCCAGAGCTTG  
GCCAATTGATCAGACTTCAAACCATGAACTTAAGCTTCAACTTCTTGAGAGGTGAAATCCCGTTTACCCT  
GTCTCGTTGTGTTAACGTTGTTAACCTTATTCTAGACCATAATATCCTTGAAGGACACATTCCTACTGAAC  
TTGGTTCATTGACAACGCTGGAAATGTTGTACCTCAAGAACAACAATCTCACAGGAAATGTTCCGAATTC  
TGTTGGAAATCTTACGTCTCTAAGAGAGCTTTACATTTCTACAATGACTTGGAAGGTGAATTACCTGAA  
ACAATGGCCAATATGAGAAGCTTGATTGAGTTAGGTGTTTCAGTGAACCTCTGTCCGGAGAATTTCCCC  
CTGCACTCTACAATCTTTCATCTCTTACACTTTTAAGCTTGTCAATTAACAAGTTCAGAGGCAGACTTAGA  
CCAGATATTGGCCTTGCCTTCCCAAATCTTCAGAGACTGTATTTGGCCAACAATTAATTCCTACTGGTTCAAT  
ACCAGCTTCATTGTCCAATTGTTGAGATCTTCTGCGGCTTGATATTCCTCTAAACAATTTACAGGAAATA  
TACCGTTGAGTTTTGGAAACCTTAAGAATCTCTTATGGCTAAATGTTCTCAATAACCAGCTTGGAAATGGT  
GCACCTGATGATCTAAATTTATAAATCTTTAACCAATTGCAAATGCTTGAGTTCCTGGACATTGCAAA  
CAACAAATTTGGAGGTATGTTGCCCTATTCTATAACTAATCTCTCAACAACCTTTGACAAAGCTACTGATTG  
GATACAACAGGATAAGTGGAACCATACCTAGAGAGATCTCCAACCTTGTCAACTTGGATATGCTTAGCA  
TCCAAGGAACTCTTATCAATGGTAGCATTCTGATTCTATTGGAATGTTATCAAACCTTGAAAAATCTGCAC  
ATGGAATCGAATCAGTTGACAGGAAATATCCCCTCTCCTTAGGAAACATTAGAGGATTGCTGTACATTT  
ATTTGCAAGATAATAGCTTGGAGGGAACCATACCTTTAAGTTTAGGAAATTGTACATCTCTCCAAACCTT  
AGACATCGCTCAGAATAAACTCAGTGGTAGTATACCCAAACAAGTCATTGCACTCTCTCCCTTTTCGGTA  
CTCCTTAATATGTCTTACAACCTTTGAGTGGTTCCTTGCCTGTTGAAATAGGTAACCTGACCAATCTTGC  
TGCACTTGACATATCGAACAACAACCTGTCTGGTGAATTCACACTCACTGGAGAGTTGTTCAATCCCTT

GAAATACTCTACCTGCAAGGAAACATCTTTGAAGGAACTATTCCTCCTCTGGATGATTTGAAAAACATTC  
AGTATCTTGATCTTTACGTAATAACTTGTGTCAGGCAACATTCCTAGGAGTATCACCAAGCATGTTTCATTA  
CAGAACCTCAATTTGTCGTTTAAACCACCTTGACGGAGAGGTGCCATTTCAAGGTGTTTTTCTGATGCAA  
GTAGAATTCAAGTGATGGGAAATATGAATCTTTGTGGGGGAATTGAAGAGCTGCATTTGCATCCATGTC  
TCAAGCATGCAAATAAAAGACCCCAGAAGCACATTGCCCTCATTTTGGTGCTGGCACTGGGTACTAGTG  
CTGCATGTTTAACTTTGTTGCTGCTAGTTTTCGTATTGCTGCGTGAAAAAGGGGAAGCATAGGCCTAGCAC  
AGCATCTTCATTGAGGAAAGTATACTCAAGTTTCTATGAAGATCTCTTAAATGCAACTGGTGGGTTC  
TCTTCAAATAACTTGATAGGATCAGGAAGTTTTGGCTCCGTTTACAGAGGAAATCTTTCTCCAGAAGGAA  
CAATTGCAGTAAAGGTACTAAAACCTTGAAAAAAGGGTGCTTCTAAAAGCTTTTTGGCTGAATGTGAAG  
CCTTGAGGAACATAAGGCACCGAACCTGGTGAAGATCTCAACTGTTTGCTCAAGTGTTGATTTTGATG  
GCAATGATTTCAAAGCTCTCATTTATCCATTTATGGAAAATGGGAGCCTAGACGAGTGGTTGCACCCAAA  
GGAGGGACAGATGCTGCAGAAGAGATTGAGTATCTTACACATATTAACATCACAATAGATGTGGCTTC  
AGCATTGCATTATCTTACAGTCAATGCCATACATCTATAGTTCACTGTGATCTTAAGCCAAGCAATGTTCT  
TACTGGACAATGATCTGACTGCTCTTGTAGCGACTTTGGTTTGGCAAAGTTCCCTGTCTGACTCGGGTCA  
AAATGCCGATGTAAATCAGTTCAGCACAACTGGGATTAAGGCACAGTAGGTTATGCTGCTCCAGGTAA  
ATATTATAGTGCGGATCTTAGTCTAAATATTGTCTGAACTCTGAAATCCATTTTTTCTCCATAAGACCATA  
ACATATTAACAATTTAAGCAATTACATACTTCCTTTAGAGACTCCGGATGCTTCTTGTCTAAGCCCCAGG  
CATCCGTTACCTTTGCAGATCACTACCTCATGATTTTGCGCTATTGATTCTTATAACCAGAGGCAGAGGAA  
GCTTTAATTTAATGGATTCAACCAATCTAGTATTTTCGACACTGAATATGGATATATAAGTTAAAAAAAC  
TACTTAAATTTCAATAAATATCATATTTGAACCCATAATTTCAGAAGTACAATGATTTTCAGTTCTAAGAA  
TCTTAGATGTTGAATCCATCAAATTTAAATCCTGGATGCCTCTTCTCTCAGATATAATTCCTGACTAGTCAT  
TGTTTTTCTAAGGACCTTAATAAGAGGTTTCAGCTTTCTGGGGCATTTTACATAACATTCTCTATTGGAAA  
ATCGATAACAAGTGATCTGTGTTGCTTAGGCATTTTGGACAAATGTTTAGGATCCCTAATATTACTATGAAA  
CACCTTCTCTGATACATCAAATTTTTCAGAATATGGCATGGGTGGTCAGGTATCATGTCAAGGAGATGTC  
TATAGCTTTGGGATTCTTCTATTAGAGATTTTCACTGGACGAAGACCAACCAGTGAATTTGAGGACA  
ATGAAACTCTTACAGTTTTGTTAAGCAGGCATTGCCCGGTCAAGTGATGGATGTTGTGGATCAATCTGC  
TTTGTACGAGACAGAACCAGGGGATTTTATGGATATACTCAGCTGCAGAAGTGACTTCTCGGATGAATT  
TGTTGAATGCTTAGTTTTCTATTCTACTGCTGGAGTTTCTTGTTTCAGAGGAACTCCACAAGCCAGAATAA  
GCATGGGTCAAGTTATTTTGGATCTCATTTCTTCAGAAACAAATTGAGCAGAATTTTAGTTCATTCAGA

GAAAGTGATCTCAAGAAAAGGTGAATCATAA

>M6-PGSC0003DMG400030474 M6 LRR-RLK

AAAAACAGATTCATTACAAAAAGCTGAAATTCCTTTACCATTTCTCCACCTCTCACTCTTCACTTTGTA  
CTTGGCACTAAACACTCCTTCTTCTTCTCCATTAACATAGATCCAAATCTTACTACTTCAGCTCAAGCTA  
AACGGGTCGGGTCGGGGTTTTATTCTGCGCAAAATGTGGTACTGCAACTCGATGAATTCGATTTGATG  
TTCATGTTTACTGTTAATTTACCTCAGAACCTCAGTATTACTCCTAGAACTTCAAGTGCTTTCTCTATTTT  
ATAGGTAATTACACTGCGATTTCATATTGTTTGTGAAATTTATAATTTTGTATTTGTTTAGCTTGATTTCT  
TTTGTGTTTTCTGCTAATTTTGGTGGCAGATCTGTTTGCCTATTTGTTTCTATTTGTTTGGCATTGTTAGA  
TTGAGCAGTCAATTTTTATCTATTTTGAATATGATTTTTGAAGGTTTTCTGATAGTATTTTTTTTTGTAGC  
TTTAAATTTGATTTTTAGAAATTAATTAGGAAATCCGTGACGAATTCATGCAGAAAATTAGACTCATTGG  
AGGGAGGAGTATTAAGTAGCGGCAGAGCTAGGATTTTCAGTAAAGTGATTGAAAATATAAAGAAAGAA  
ATATAATGATAAACTATGTATGATTTTTTTCTATTTCTTTTTTTTTGAACCTGTATATATGGTATGATTTTCC  
AGCTTGCACCCCTGGCTCCGGCGGTGGACTATTAAGTAGCAAGACCATGTTAGGTTCTGTATGTTGTTTA  
GTCTTCAGTGTTTGTCTTTGATAATGTGGAAGTATAATGAATTGAGAAATTGAAAATGTTGTTAGTCA  
TTATGAACTATCATTGGATTATATTTGTGTAAAGGAAGCTTAGGATTCCTATTACTGGGACCTCATATGA  
GTTGGGGTTGTTCAATAGTCTTAATTAACCCAACCTCTTTGACATTTACTTGAGAGAAGAATTATGAATG  
TGGTAATAGGTAACCCCAACCCCAATAATAATAATAAAAAATCCCATGATCTGGTAGATTTTTTTGAT  
GTAGTTCTTCTCATCAACTGTTTCAAGCTTCAACCTTGAATAAGAATTATCATGAGGATTGAAAACTTG  
TGATTAATGGGTTAGTCTAGTCCGGGTTGACTTGAAGGAGTGGTTATTTTCTTCCCGTTGCTTATTA  
GATACTATCATGTCAGAATACTTAAGTGCTAGCTATTTGTATGTATTTTTTTTTCTCAAACATTTCTTGT  
TTATTAATAATATAATTACAAAAGAGGGTGACATAAGGCCTAACACCTCTTCTCACACGTAACACCAAAA  
AAAAAAGAGTTTCCATCCCGGAAGGCTTCTTCTCAATTAGAGTTTTTACCAAACCGAGGGTGGCTCAT  
AATGCCAACCAGAATGGTTTTCTTTTTTTGAACCTAAAGGAGGCAAGGTTAAGTTTATCCATCCTCAGAA  
GGTTTATTTGTATGTATTAGCTCTTGCTCTTCTACTTCAAGACTCTTTTTTTCATGAAATTGAGAATGGAAT  
ATTTGTGAACCAAAGTTTTTCTGTAAATGTTTCTTCTACTATATTCTTTTCTAATCTCGCTAATTCTT  
CTGTTTTGAGCTGTTAATATTGTACATGGTTTGGTATCTCTTAGCATCTTTTTATTTTATTTTGGTGTAATC  
ATTCATCCATCTGTAACATTTTCACCCACTTCGTTGTTAAGGTTTTCGTTATTTTTGGCTTAGAAAGTGATA  
TGGCAAGGTTTCTGGTTTTTGTTCAGCATCTTTTTGCATTTTGTATTTCTTGGCATCAGTATCTATG  
AGATTGAATAGCTTTTGAAGTAATTATAAGTTGTTAGTATGGTGGATAAGATTTTAAACCAAGTCAGCAG

AGCTTTCATCATACTATGTAATTTGACTGACTGGTTTTTTTTCTTTTTTATTCTTCTTTTTATGGTTCCATGA  
GAACATGATTAGTTTTATTAATCTTCTTCTGCAGATGGTGAAAAATTAGTTAAATGTAGAACAATTACTAT  
TTGGAATTCATAAGCAATTGTATAAGTCTAGTTCATTGCTAAGTGCTTTTGGAACGTATGTGCAAAGAGA  
AACATTAGTTGGACACATAATAATTGCTAATTGGAATCCACAAAAAGTCATCCAGTTTTAGTTCATGAAA  
ATTTAGTGCTGATTCCAAACATATTTCTTGAGGATATTCTTATAACTTTGACTGCATAGATGCTTGCTATG  
TCATAATGTCTTTTTAATCCTTCTCTCACCTTTGGTGTTTGTGGTTCTCAAAATGTTTATCTACTGA  
ATTATTCCAGGACGATCACAATACTGGCAGCATAGTGGCTTCAATCTGTTGAAGGTTTCTCATGAGAA  
TCTACTACACCAATCAACTGCTACATTCTTTTTGTTGTAGCAACTCTCCTTCGCTGTGCCGTGGTGATC  
TAAACTCAGACAAACAAGCCCTTCTGACTTTGCTGCAGCAGTCCCACATGGCAGGAAGATCAACTGGG  
ATCCTGCCACTCCTATCTGCTCATCTTGGGTAGGTGTTACTTGTAGTAATGATGGAGCCCATGTGGTGGA  
AGTACGACTTCCAGGAGTTGGACTCATTGGTTCACTCCGAAAAATACTTTGGGAAGATGGATAGCTTA  
AGGATTATCAGCCTTCGATCCAATCGTCTCAGTGGAAACCTTCTTCCGCTATCACTTCACTTCTTCTCTC  
CAATCCCTGTTCTTACAGCAAATAACTTATCTGGACCTATTCCTTCTTCTTTCAAATAAACTGAATGTT  
TTGGACCTATCACATAATTTCTTCACTGGAAAGATACCTGAAACAATTCAGAATTTGTCTCAGCTAACAG  
GTTTAAGCCTCCAGAATAACTTACTTTCTGGACCCATACCCAATATTACTCTTCCAAGGCTAAAACATATT  
AATATAAGCCACAACAATCTTAATGGTTCTATTCCATTATCCCTCCAGAAGTTTCCAATTCCTCCTTTGTG  
GGGAACTCACTCTTGTGTGGACTACCCTTAAATCCTTGTTACCTGTTCTACCACCATCCCCTCCTCCCCT  
TCCCCTTCCCACCTGCACCCTCCCCAACTCTCAAGAAAAAGTTCAAAAAAGAACTTAACTAGGAG  
TTATTCTTGCTATTGCTGCTGGAGGGTGTGCTGGTCTTGTGCTAGTTGTGATCCTGGTTTTGTGCTGC  
CTGAAAAGAAAAAGGGGTGATGGCAGAGGTGTGCGGAAAGGGAAATCTCCGGGTGGAGGAAGGAGT  
GAAAAACCTAGGGAAGAGTTCGGTAGTGGGGTGCAAGAACCTGACAAAAATAAGCTTGTTTTCTTTGAA  
GGCAGCTCTTACAATTCGATCTCGAGGACCTATTGAGGGCCTCAGCTGAAGTGCTAGGAAAGGGGAGT  
TTTGAACTGCTTATAAGGCTATTTTGGAGGAGTCATCAACAGTGGTGGTTAAAAGACTAAAAGAAGTC  
ATTGTGGGAAGAAGGACTTTGAACAGCAGATGGAAATTATTGGTAGAGTTGGACAGCATCCAAATGT  
GGTTCCTTACGTGCTTATTACTCCAAGGATGAGAAGTTACTGGTGTATGGTTATTTCTCAATGGGC  
AACTTGCAATGCTCTTGCATGGTAAGGCATCATATGCTCTCATCGTCATTCCTTTTTCTATTTCTAGCGT  
TTGGTGGAGTAACTTGATTCGCCCTTGTATTGAATGCCTAATAGTAAGCTTCTAACACAATACAAAAT  
GCACTCAAGTAATGTCCTAAACGAATCTAAACAATGTGAGTTTGAACTTTTAATTTGTGAACTGGTGTG  
AAAAGAAGCTTTCTTCTTGTAGCTTATTGCAAAGTTCGAGAAGAAAAAGTCTTCTTAGAATATATGCA



TCAGTTTGATCTTTATAGGTCTATTATATGAGTATAAACAGCTCTTATGCTATTCTGTATCTATTGTTTCTT  
TAGAACTTGCTGGCTTTCTTTACTTATCACTGGTAGTTTATCACTCGCACTATCT

>M6-PGSC0003DMG400030572 M6 LRR-RLK

CTATTTTCCCAACGTCTCTTTATTTTCTTAGCTGAAATCAACTTTACCTTTTCTCACTCTCAAAAAGTCTCACC  
TTTCACACTCTTTTTTCTCTCTTAAGCTCCATTCTTGGTTATCTGGTGTACAAAAGGTAAGGTCTTTGAGAC  
ACCCTTTTGCTCGTTTTTCATTTTTCAGTTGTCCTGTTCTTGATTTCATCATATTTGTAGATAAAAATGCA  
ATCTTTTTTGTTTTTGCATTTTCTTGATTCTGTGTAGTTGTGTTTTGTTACTTCTTTGAATGATGAAGGA  
ATAGCTCTTTGGTCATTCAAAAAGGTATTGGACAAGACCCTGAAGGGTCACTTAAAAATTGGAACCTTT  
CTGATGAAACCCCTTGTCTTGGAAATGGTGTACATGCAAAGACCTAAAAGTTGTATCTGTTAGTATACC  
TAAAAGAAACTCACTGGGTTTCTTCTTAGTCTTGGATCTCTTACTGAGCTTAGACATGTTAATTTGA  
GAAGTAATTTGTTTTCTGGTAGTTTACCTGTTGAGCTTTTTGAGGTTCAAGGTTTGCAAAGTTTGGTTCTT  
TATGGGAATTCCTTTTCTGGGGTTATACCTATTGAGGTTGGGAAGCTAAATTATCTTCAAACCTTTGGATTT  
ATCACATAATTTCTGAATGGGTCTGTGCCTATAACATTACTTCAGTGCAAGAGATTGAAGTTTCTTCATT  
TAAGTCATAATAACTTTACTGGTGTGTACCTGAGGGGTTGGGGTAATTTGTCTGCATTGGAAGA  
TGATCTTGGATTCAACAAATTTGATGGTAAAATTCCAAGTGATTTGGGAAATTTGTCTAATTTGAAAGGA  
ACTGTTGATTTGTCTCATAATATGTTTAGTGGTTCGATTCCGGCTAGTCTTGGTAATCTTCTGAGAAGGT  
GTATATTGATTTGACTTATAACAATTTGAGTGGTCCAATTCCACAAAATGGTGCTCTGATTAACAGAGGA  
CCTACTGCTTTTATTGGAAATCCTGGGCTTTGTGGACCTCCGTTGAAAAACCAAGTGTCTGCGCAAAGTG  
ACGCAAGTTCACCGTCCTCGGAACCTTTCTTGCCTAATAACGTACCTCCCTTAGATGGTGCTGGAGGGGA  
TGGGAATGGTAGAGGTCTGAGTAGAGGTGCTGTAATCGCGATAATTGTGGGGGATGTGGTTGGAATTT  
GTGTTATTGGGTTGTTATTCTCGTATTGTTATTCGAGAATCTGTGGTTGTGGGAGGAAAAAGGATGAATC  
CAGATTTGGTTTTTCAGAAGGGGGGAGGGAAAGGAAGGAAAGAGTGTTTATGTTTTAGGAAGGATGAG  
TCGGAGACGTTATCGGAAAATGTTGAACAATATGATCTAGTGGCACTTGATAATCAAGTGGCATTGAT  
CTCGATGAACTTCTCAAGGCATCTGCTTTTGTCTTGGTAAAAGTGGTATCGGCATTGTGTACAAAGTTG  
TGCTTGAAGACGGACTTAACTTGGCTGTGAGGAGATTAGGCGAGGGTGGTTCGCAGAGATTTAAGGAA  
TTCCAGACGGAGGTGCAAGCAATTGAAAACTGAGACATCAAAATATCGTGACTCTTCGTGCCTATTATT  
GGTCTGTGACGAGAAGCTACTGATATATGACTTCATTCAAATGGAAACCTTACCACTGCAATTCACGG  
TACGCTTCAAACCTCAGGCTGTTGCCTTCTCGTTTATCCTTTTTCTTTGATTTCCACAACCTGTTTTAACTTT  
CGTGATTATTAAGTTGTTAACTTGTCTTTTTGCTTGTGTAATCAATTCTTAGGAAAACCTGGTATGGTGTCT

ATTTGCACCGCTTTCGTGGTCCATTGACTGAAAATAATGAAGGGTACTGCAAAGGTTTGGTTTATTTA  
CATGAGTACAGTCCCAAGAAATATGTTTCATGGTGATCTAAAGCCATCTAATATATTACTTGGACACGACA  
TGGAGCCCAAATCTCCGACTTTGGACTTGGACGTCTTGCTAATATAGCCGGAGCATCTCCTACGTTGCA  
ATCCAACCACATGACCTCTGACAAACCACAACAAAGTAAGCAAGGCAGTGCACCATCAGAGTCCGGGAC  
AGTTACATCAACTACAACATCTGGTTCTTGCTACCAAGCTCCCGAGGCATTGAAAGTGGTCAAACCATCA  
CAAAAATGGGACATTTACTCGTATGGAGTGATCTTGCTTGAAATGATCACGGGAAGAACCCCGATTATC  
CAAGTAGGTTCTACAGAAATGGATCTAGTAAACTGGATTCACTGGTGCATTGAAGAGAAGAAGCCACTT  
TCGGATGTATTGGACTCATATTTAGCACAAGATGCTGATAAAGAAGAGGAAATGATCGCGGTTTTGAAG  
ATTGCAATGGCGTGTGTTACAGCAGCCCGGAGAGGAGACCTTCAATGAGACACATATCTGATGCATTA  
GAAAGACTGCAAGCTTCTCTGAATGAACGATCGAAACAGAACCTGAAGGCTTCACATTGCAGTAAGGA  
TCACAGCATCTAACCGATAACTATGGAGCACGATCACTGCTTGGCGCGGATCATATTGACTAACAGTA  
GTAATCTCCACTTGTCTGTTTGAATATTGGCCTTCTTGCTCTAATTGCAAGGTTTTTGTGTGTCTATTT  
GTTGTTTCTTCTATTGATGAACATAAGTTATTTGTTCTCTTATTACTACTACTATTCATCTTTGTGTGTCA  
CAAATGAGTTCATGTAAATAAAAATGATTGTCAAATAATAAATAAGATAGGTGTAAGCAATAACTATAT  
GTCTGTTGTGAGTCTGCAAG

>M6-PGSC0003DMG400030625 M6 LRR-RLK

ATTTACTCAAACAAAAGAATATACACCAAACGGATTACCCACCCCAAACCAAATCCTCATTTTTGCTTT  
TCTCACTCTCACTGAGTGAAACCGCAAACCAAACAGTTGGTGGACATTAGATTAAGGAAGGAAAATGC  
GTCTTCTTTTTCTTCTTCTTCTTGTATGCATTTTACTGACTTTTCTGCCGGTCGGTTACCGGAATACCAGG  
CATTGCTTGCCCTGAAAACCTGCCATTACTGATGACCCACAGTTAACTCTTGCCTCATGGAACATCTCCACC  
AGTCACTGTACGTGGAATGGTGTACGTGCGACACGCATCGTCACGTGACCTCTCTTGATATCTCTGGGT  
TTAATCTTACCGGTACTCTTCCGCCGGAAGTTGGGAATCTTCGTTACTTACGAAATCTGTCTGTCGCTGTT  
AACCAGTTTACTGGACCCATTCTGTTGAAATCTCCTTTATTCAAATCTTGGTTACCTTAATCTTTCTAAT  
AACATATTCGGGATGGAATTCCTTCGCAGTTAACCCGTCTGCGTAACCTCCAAGTCCTTGACCTTTACAA  
CAACAATATGACCGGTAAACTTCCCCTTGAGGTGTATCAGATGACTAACCTTCGACATCTACACCTCGGC  
GGGAACTTTTTCGGTGGCCGCAATTCCTCCGGAGTATGGAAGGTTCCCGTCTCTAGAGTACCTCGCAGTTT  
CAGGCAATGCACTGGTAGGAGAGATACCACCGGAGATTGGAACATCACTACACTTCAGCAGTTGTATG  
TAGGATACTACAATACCTTACCGGTGGGATTCCGCCGGCAATAGGGAACCTTATCGCAGCTCCTCCGGTT  
AGATGCTGCTAACTGTGGACTTTCGGGGGAGATTCCACCGGAGATTGGGAAGCTTCAGAACCTTGACAC

CCTCTTCCTGCAAGTGAATTCTCTGTCTGGGTCATTA ACTCCGGAGATAGGTTATCTGAAGAGCTTGAAA  
TCTTTGGATCTGTGCAATAACATGTTCTCTGGCGAGATACCGCCAACATTTGCGGAGCTTAAGAATATCA  
CTCTTGTTAATCTTTTTCGGAATAAGCTTTATGGGTCAATACCAGAGTTCATAGAGGACTTGCCGGAGCT  
AGAGGTGTTGCAACTTTGGGAAAATAACTTTACTGGAAGGATTCCACAGGGGTTAGGCACAAAGAGCA  
AGCTCAAAAAAGTTGATCTCAGTTCCAATAAATTGACTGGAAATTTACCCCCAACATGTGCTCCGGTAA  
CAATCTGCAGACAATTATCACTCTTGGGA ACTTCTTGTTTGGCCCAATTCCTGAATCTTTGGGTAGGTGTG  
AATCACTTAATCGGATTAGAATGGGAGAGAATTATCTGAATGGGTCAATTCCAAAGGGGCTCTTAAGCT  
TGCCACATCTGTCACAAGTTGAACTTCAGAATAATATTCTCACTGGTACATTTCTGATATTTCTTCCAAT  
CTAATAGTCTTGGGCAGATTATCCTTTCAAATAATCGCCTAACTGGACCTTTGCCGCCAAGCATTGGAAA  
TTTTGCTGTAGCCCAAAAATTGCTTCTTGATGGGAACAAATTTTCGGGACGAATTCCAGCAGAAATAGGA  
AAGCTTCAACAGCTATCCAAAATTGATTTCAAGTCACAACA ACTTTTCTGGACCCATGGCTCCGGAGATTA  
GCCAGTGCAAGTTGCTGACTTATGTTGATCTCAGCAGGAACCAACTTTTCGGGTGAGATTCTTCTGAGAT  
CACAGGTATGAGGATACTCAACTACTTGA ACTTATCGAGAAACCACTTAGTTGGGAGTATTCCTTCCCCT  
ATTTCTAGTATGCAGAGTTTAACTTCTGTTGATTTCTCATATAACA ACTTTTCTGGTTTAGTTCTTGGAAAC  
GGGCAATTTAGTTATTTCAATTACACCTCATTCTGGGCAATCCAGATCTTTGCGGACCCTATTTGGGCCC  
TTGCAAAGAGGGTGTTGTTGATGGGGTTAGTCAACCTCACCAACGAGGAGCCTTATCGCCTTCGATGAA  
GCTTTTACTTGTTATTGGTTTGCTTGTCTGTTCTATTGTGTTTGCTGTTGCTGCAATTATAAAGGCCCGATC  
TTTAAAGAAGGCAAGTGAAGCTCGTGCCTGGAAGCTCACTGCTTTTCAGCGCCTAGATTTTACTTGTGAT  
GATATTTTGGACAGCTTGAAGGAGGATAACATTATTGGAAAAGGAGGTGCTGGTATAGTCTACAAGGG  
GGTAATGCCGAGCGGGGAACATGTAGCGGTTAAGAGGTTGCCAGCTATGAGCAGGGGTTCTCTCATG  
ATCATGGGTTCAATGCAGAGATACAGACTCTTGGGAGGATCCGACACAGGCACATTGTTAGATTATTAG  
GATTTTGCTCGAATCATGAGACAAATCTTTTGGTTTATGAGTACATGCCTAATGGAAGTCTTGGGGAAAT  
GCTTCATGGAAAGAAAGGCGGTCATCTACTTTGGGATACCAGGTATAAGATAGCCGTGGAGTCTGCAA  
GGGTCTTTGCTATCTCCATCACGATTGCTCTCCTTTGATCCTCCACCGTGATGTGAAATCAAACAACATTC  
TGCTAGACTCCAGCTTTGAAGCTCATGTTGCTGATTTTGGACTTGCTAAATTCTTGCAAGATT CAGGGAC  
ATCAGAATGCATGTCTGCTATTGCTGGTCTTATGGGTACATTGCTCCAGGTATTTTG TAAAAGCCTTCGT  
ATCTTGAAATTCTTAGTTTCTAACATGTGTT CATATTTATTTTTCTTGTCACATCATGCTATGCGAGTTAG  
TGCCGAAGTTACAACTTACTGATGAACTAAAGTTTATCAGCTGAGACTAATTATCAGTCTGT TAAAAAT  
GAAGCTTAGGTGTTCTAAACATCATAAATGTGCTATCCTATAGTCTTGATTTCCACTACTAATAATGTTA

CGATGAAGGACAGCATTAAAGACATTGATAGTGGTGGTCCTTGACTGGTAGTAAACTAGAGGATTGGGC  
CTTCTTACTTTTAAAAGGATCTCTAACTACTTCGGTGATGGTTAGGTTGGAATTTATAAATGCTTATGTA  
ACTTGTAAGTAAGGCAACTGTGTTGCATGCTCCTGAAGCAAAGCAACATTAATAGTGGTACTGGTAC  
TTGATGAACTATTAAACTGTTGGAACGGGTAAGGGGATGTAAACTCTGGTTTCTTGTTTAGTTATCTA  
ACAACTTACTGATTGCTAGCAATTATTTGTTCTGCTCTATTGTCTACTTCTCATTAGCATCTTATTTTCAAT  
TTTGCAGAATATGCTTACACGCTTAAGGTTGATGAGAAAAGTGATGTATATAGCTTAGGTGTGGTGCTAT  
TAGAACTGGTAAGTGGCAAAAAGCCAGTTGGAGAATTTGGTGATGGTGTTGACATAGTCCAATGGGTT  
AGGAAAATGACTGAAGGGAAAAAGGATGGAGTTCTCAAGATCCTTGACCCAAGACTCTCAACGGTTCCC  
CTTAATGAGGTGATGCATGTCTTCTATGTCGCATTGTTGTGTGTTGAAGAGCAGGCTGTGGAACGCCCC  
ACCATGCGAGAGGTAGTGCAAATACTAACTGAACTTCCCAAGTCACCAGGTGCAAATCAGATGACTCA  
GCCGTCCTGATCAGTCACCCCCACCATCAGCCTCTGCATTAGAGTCCCCAACCTCAATCCCCGAGGAAA  
CAAAGACCACCATCAACCAACACCTCAAGCAACTCCACCTGACCTACTCAGTATCTGATTTGCAATGTTCC  
TTGAAATAGGAGTGTTTTATTTAGTTTGATTCTCTAGTTCTATTATGATGAATTGTGCTAGCTTTGTTCTTT  
TTTTAAAAAAATTGGGTCTATTTAGGCTCAGGGGTTTTATTTAACTCCAAGATGGGTTTAAATGCTCAGA  
AGTTTTCTCTTGACAGTAAGATTGGTAAGGTTTTCTCAAGTGTATTAATGGAAAAATTGCCCTTCATTT  
GCTA

>M6-PGSC0003DMG400030626 M6 LRR-RLK

TTATGCAATATTATTTTTGAGTCCAAAACCTTATCATTACTCTCTGATTCAAGTTACTGTAACCTTGTCT  
TGTTCTTCGCCATTAGAGTCCAATACTACTAGCTTCTTCTTTTTCTAATGTGTGAACACTCTTCACGCTTT  
CAGTACTATTTCTTCTCCTTAACTCTGCCTCCGTTACACTTGTAATCCATGCAAAAATTACCCCCACCTCT  
TTCTAACTCTTATCTTCCCAACATTCAACCTCCATTTACAGATGTTTATGATTAATCGATTCTTGCCTTTTTA  
AGGACTTGGAGGTAGGGGAGATTCATTAGTCATCAATGGATTACATGAAGCTTCAATTTCTGATACTC  
GTTTGTTTTTTTTCTCTTCATTGTTCCGGCGAGTTCATCGCCTCGGGATATCGCTATTTTACTCCGGGTTAAG  
TCCGATCAACTCGAAGACCCGAATGGGTTGCTTGATGATTGGAACGGGTCTGCTCCAAATGCGCCTTGC  
AGCTGGAACGGGATTAAGTGTGATCGGAAAACCGGTCAGGTTGTGTCCATTGATTTTGAAGTTTTGGA  
ATCGCTGGTCGTTTTCTGCTGATTTCTGCCGATTTGACTTTGCAGAACTCAATCTGGGTGATAACA  
GTTTTGGTGAGTCCATTTCTCTGACTCATGGTCACTCTGTTTCGCATCTACACTTTTTGAATATTTCTTTAA  
ATTTCTTTGTTGGCCGGCTGCCGGAGTTTATTACCAAGTTCGATAACTTGACCATCCTTGATGTTAATTCA  
AACAAATTTCTCCGGTGAAGTTCCGGCGAGTTTAGGCCGTTTACCCAATTACAAGTGTGAATATAGCTA

ACAATCTCCTCAATGGTTCAATTCCTGAGTTCTTGACGAATCTTACCGAGTTGACTCGATTGGAAATTGCT  
GCAAATCCGTTTAAGCCAGGTCCATTGCCTTCCTCAATCGGCCGACTCGGTAAGCTTCGAGTTTTCTATGC  
TCGGTATGCGAACCTTATTGGAAATTTCCAGATTCTATCAAAGACCTGAAATCTATTCAGAATTTTGATG  
TGGCAAACAACAATCTCTCCGGAAAAATTCCAGAAAGCTTCGGAGAACTCAAACCATAACAACAATAG  
AGCTCTTTGGAAACCATTTTTCAGGCGAATTACCGGACATGTTTTCCGGTCTTGGTTCTCTTTCCAGGTTT  
GACGCTTCTGAGAACAATCTCACCGGGAAAATACCTGAAACCCTTGCCATTGGAATCTCTAA  
ATCTCAATGATAACCAATTAGAAGGCGAAATTTAGCTCTTAACCCAAATCTTAGTCAGTTCC  
AAGCTTTTTAACAACAGATTTTCAGGTACTTTACCTCAAAATTTGGTTTAAGTTCAGATTTAGATGAGTT  
TGATGTCTCCGGCAACAATCTAAAAGGTTCTTTACCTCCCAACCTATGTTCTAGAAAGAACTTAGGATTT  
TGAACCTGTTTGATAATAAGTTCAATGGGCCAATCCCAGAATCCTATGGGCAGTGTTATCACTATCATA  
TGTGCGTATCTATAACAATCAATTCTCTGGTGAATTACCAACTGGTTTCTGGGGATTTGATGGATACACA  
TTTCTTGAAGTGCAGAAACAACAATTTCAAGGTTCAATTCCAGCTTCAATCTCCAATGCTCGAGGCCTGAC  
ACAAATCTTATCTCCGGCAACAAGTTCTCCGGGGAATTGCCAACAGAAATATGCAATTTGGAAGAGGT  
TGTGATCATGGACATTAGCAAGAATCAATTATCAGGGGAGTTGCCTTCGTGTATCACAAGATTGAAAAC  
ATTACAGAAGCTTGATCTTTCACAAAATAGGATCAAGGGTCAAATTCACAAATCAGTTAGTTCTTGAAT  
GACCTGACTGAATTGAATTTAGCTAACAATCAATTGACAGGTGAAATTCAGGTGAGCTTGGGACGTTA  
CCGGTCTTAACCTACTTAGACCTTGCCACAACTTACTTTCTGGCGAAATTCATCTGAGCTGAGCAAGCT  
CAAGCTCAACAAATTCATGTATCAAATAACAGGCTGGAAGGGAAAGTTCCACTTGGGTTTGATAACGA  
TTTTTTCGTCTCAGGTTTACTGGGCAATCCGGATCTTTGAAGTCCGGATCTTAAGCCTTGCCCCAATGCC  
GAAGACCCAAAAGTGTAAGCTTGACTTGGTGTGAATTTATCAGCTTTTGCCTTCATACTTGTCTGGGTC  
ACTTGTGTGTCTTACTCAAGGCCAGTAAGCTGCTACCAATCCGTAGTAAGCGTAAAAGTGTGTGGAG  
AATTACTGCATTCCAACGCGTCGGTTTCACAGAGAGAGAAGTGTTAGATGCACTGATAGAGGAAAATCT  
CATTGGAGCTGGTGGGTCGGGTCGTGTGTACCGGGTCAAATTGAAAAACGGACAGATGGTAGCAGTGA  
AGAACTTTGGGCGGCTAAACGGGAAAGAGAATCAGAGGAGGTGTTTCCAGGTCTGAGGTGGAGACATT  
AGGGAGAGTCCGACATGGAAACATAGTCAAATTAATACTGACTGATGACTTTAGGATATT  
GGTGTACGAATACATGGAAAATGGAAGCTTAGGAGATGTATTACATGGGGAAAAAGGTGGCTTGTTAT  
TGGATTGGCAGAGGAGATTTGCCATAGCAGTTGGAGCAGCTCACGGATTGGCCTATTTGCACCATGATT  
CTGTGCCAGCAATAGTGACAGAGATGTTAAGTCTAATAACATTTTGTGGACGAGGATTTAGGCCCA  
AAGTGGCTGATTTTGGGCTAGCTAAGGCAATGCAACGGGATGCTGAGGAGAGTGAACAAGCCATGTCC

CACATTGCTGGTTCCTAAGGCTACATTGCACCTGGTAAGCTTAAATTCCTTATTGTTTTCCACATTTATTT  
TAGGTCCAATGACTGTTAGAAATTTCTAGTCTTGTTAGAAATTTATTTGCCAATAAAAAATGTTGAAAAA  
ATCTAGTGCTAAGGAGACTATTTTAAAAAATAATTTGATCCAAGATAGGCATAAATGAAGTGGTAT  
GGACAGCAGGAATTCATATGCTAACCTCTACTTGTGGGATCGGGGCCTAATTATTGTTGTCGTTCAAC  
TTTTTGTACTTGTGTGAAAAGATATTTAATATCTTGCCTTGGCATAACCAAGGACATCCAAAAATAG  
TTTTGTGGAAGTTTTGGTAACTTCACATACTATCTTAAATTTTGATTTGATTTGATTTGAAATTCTTTAA  
TATGAAGCCAGAGAAGATTTTAGGAGATGATTCAAACATATAAGTAGATTGGAAACCTTAATAATATCC  
ATTTAATTGTAGCATCTAGTTTCATTCCTCTAACTGGACGTTGTTTCTGAAGTCTGCATATTCTTGTGGTC  
TTGCTAATGCTTGATTATATGTTTAAACAAGGGGATTTGTCAAAGTAAATCAAAGAATGATTGGGCACCC  
CATTTTTGAAGTCTGCATGACTATTTAGTTTTAACTACCTGTAATATTTAATCCTGAGTTTCGTTGGGATT  
TGTCAAAGTAAATCAAAGCATAGTAGGGCGCTCCTTTTTCTGAAGTCGGCATGACCATTTATTCTACAC  
CGGTAGTAATATTTAATTCTGAGATCACATCAAATTATTGAATGATTTTGTACCCAATGTTTGTACACA  
GTCAAGATTTGTTGAAAGAATAAAAAATAGGAGGGTCATGTGTGTCCTGTCACCTAGCATTGTGTTAACA  
TATTCAAGATTTGATCTAAAAGAATAGGATTGAAAGAGACATGTGCCTAAGTATTGTTACTTATTTATCT  
AATTTGTCGATATCTTAAATTCTATTTACTCCCTAAGTCCTCTTTGATTGGACATACAGTTTCATGTGCC  
TTCCTTTGCAAACTGAGAGAATACAGAAACCAATATCCTTGATGGAAATTTTTGTGGCCTTTTGATACT  
AGAAAACATTCCGGTTGCAATGACAAACAGTTTGTTAAGTTGATCTTGGCTACATAACGATTAGGAAGA  
TGCTAAATATCTCATGGGATGGCACATGTGTTATCCAAGTTTTTCAGCTGCACGATTAACTTAACCTCG  
ATTCCTTTGTTTCAATTGCAGAATATGCATACACTCTGAAGATCACTGAGAAGAGTGATGTTTATAGCTTT  
GGTGTGGTACTGTTGGAACATAAATACTGGTAAAAGGCCTAATGACTCCTCTTTTGGAGAGAACAAGGAC  
ATTGTCAAGTGGGTGTTAGAGGTTGCAACATCGTCTAAGAAAGATGAAGGAACTGGCCATATTGTTACG  
TGCGCAAGTGGTATTCTTGATTTGAACCAGCTAGTTGACCAGAGAATGAATCCATCTGCAAGCAATTATG  
CAGAGATTAATAATGTTTTCGATGTGGCTTTGCTTGCACCTCAGCATTGCCTATTAATAGGCCCTCCATG  
AGAAGAGTTGTTGAGTTGCTGAAGGGTATCCCCTCCGCTCGCACTAAAACAACCCATTAGCTTTTCACAG  
TTTCAACATGTCCTTGCTCAAGTAACTTGATACTATTGTAACTGTAAAAGAATGTGTGAAATTAGGTGT  
GTTTAGGTCTGCTTCATAGGTGATTTAGTTTGCTTGTGGTTTAAACAAGCACCTTGTTAGATACTCCA  
GTACTACACAGAGTAGCTTAACTAAAAGTTTGCTGACCCTGTAAAACCTCATGTTGTAACGACTAAACCTT  
AGAGTTTTTGTGCAATATATGAACTTTACTATCATATACAAGTATTCTATTCTGTATCCATG

>M6-PGSC0003DMG400031028 M6 LRR-RLK

ATGGAGGTGAGCGTGAAGATGAAATCCCCTCACAAGCACTACTGTTGGCTCTATTGCTTGTTTTACCGA  
TCGTTTTAGCTCTCACCGAAGAAGGTAAGTATTTCTTTGAACATCTAGAAGCTGTTTTGGTGTCTTCTAGC  
TCCTCTGTTTTGCTAGCAGAAGGTAGTGCTTTGTGTGCTATCTAGGAAATACGAAAGTTATTGTTGGAAT  
TTAGTTTTTATTTTCAGTTTCTGGAGCAGCATTCCATGCTATTTAACTCTGATAACGAAAAATCCGTGTTAT  
TTAAGATATATTTAGCCTCCAGTTTATGGCATAACAACCGTAATACTAGTTGATGAAAAGTAAAATGGT  
TATGACTGCTTGCGCAGGCGAAGCATTAAATGTCGATCAAGGCATCGTTTAGCAACGTGGCAAACGTGTT  
GCTAGATTGGGATGATGTCCATGACGAGGATTTTTGCTCATGGCGAGGCGTGCTGTGTGGAAATTTCTC  
CATTTCCGTCGTTGCCCTGTAGTTTTCCATCCTTGTCTCCTAACTTTTACTGATACACCAGAACAAGCA  
GTCTGATGACCTGCTAGCTATTGTATAGCTCTTTGTTAATTTAGCTAAAAGTATAACGTCTTTTATTTCAAT  
TTGCCTTTTCTGCTTGCGAAGGAATCTGTCCAATCTTAACTGGGCGGGGAAATTTACCAGCCATTGGA  
GATTTGAAGAATCTAGCGGCATTGTATGGTCCATGTTCTCTTTTACTGTTCTTGGTCCATTGACTGTTATTT  
TTCCATGCTGATATTATATTCTAATGTTAATGACAGAGACCTTCAGGGAAATAAATTAAGTGGTCAAGTC  
CCAGATGAAATTGGCAACTGCATTTCACTGATCTATCTGTAAAGTGTTTTAACTATTCTTTTAAATATCTT  
TTTCTTGCGTGTGAGTAAATTTAAAGTGTTCACACTAGTTGATTTGCCATTTTCTGCAGTGATTTGTCTGAT  
AACTTGCTCTATGGAGATATACTTTTCTCAATTTCTAAGCTCAAGCAGCTAGAGTTATTGTGAGTTATTTA  
ATCACGTAAATTGATATCTTCTCATATCTGATATGGTTATGATGAATTAATTCATATGTGGTACAGGAAC  
CTGAAAAACAATCAGTTGTCTGGCCCAATCCCATCCACATTAAGTCAAATCCCTAATCTAAAGACGCTGT  
GAGTTCCATGACTTTAGTTTATCTCACTCAAATTTAGTCCAATATACATGATTAAGTAAATGGTTATTTGAT  
GGTGAAGTGATCTGGCTCGAAACCAGCTCATTGGTGAGATACCAAGGTTGATCTATTGGAATGAAGTTC  
TGCAATACCTGTGAGTGCATGTTCTGGTGTGTTTTGGAGGTTTTCTTTTTGTTGTGAAATTTACAATGTT  
ATAATTACCTTCTGTTTTGCAGTGGCTTAAGAGGCAACATGTTGACAGGAACATTGTCCCCTGATATGTG  
CCAGTTGACTGGTTTGTGGTATTTGTATGTGCTCTGCTACAAGCTGTCTATACGGAATGCTCTGTTGTCTG  
TTTGGTGTATGTTTTATTCTAACATAAGAAGTTTCATATTATTTTCAGTGATGTGCGGGGCAACAACCTCAG  
TGGAATAATTCCAGATAATATTGGGAATTGTACAAGCTTTGAGATACTGTCAGTGTCTCTCCTCGCTCTT  
GTAGCATTATGCTACGTTTTTACTCCTACTGCTGCCAATTATAACAAAGTATTTTTTTCGTTATTTTCAGG  
GATATCTCATAACAATCAGATAACTGGAGAAATCCCTACAATATTGGATTTTTACAAGTGGCTACCTTGT  
AGTAAATCAACTTTTAAATGATTTTTAGCTGTTGTCAATTTTTACCTTGTCTGTTCTGTTATGGGGTTCATT  
TCTGTGAATTGTAAATGGTGAATTGTGGTCTTTCAACAGGCTTTGCAAGGAAATAGGCTAACTGGGAA  
GATCCCAGAAGTGATTGGTCTAATGCAAGCTCTTGTGTTCTGTGAGTATTCATACTACTACATATTTTAA

TTTTTTTTATCAACTCCATTTCTTACTATTTACTACTTGCAAGTTAGAAGGTTTCATGATGTCTGTTTCCTCT  
GTAGGGACTTGAGTGAAAATGAGTTGGTGGGACCAATTCCTCCAATCTTTGGCAATTTATCCTACACTGG  
GAAGCTGTAAGTTTTACCCCTATTTAATGCATATACTTTTCTACGTGTGGCTCGTTTGTCTGATTCACTT  
GTACATTCAACAGGTACCTGCACGGCAACAACTTACGGGGCCAATACCACCGGAGCTAGGAAATATGT  
CTAAACTTAGTTACTTGTAAGAGGATTAATTCACAATTCAGATACATTATGCAGTCACCTTTTTTTTTGCT  
TCATGCATTGAGCTATCTTATTACAGGCAATTAATGACAATCAGCTAATGGGGCGAATTCCTCCGAA  
CTTGGCAAACTGGACCAGTTATTTGAATTGTGAGCCTTTTATTCTTGTAGTATATAAATCTGGTTCCATTT  
CTCTTAGAATATTGTGTTCTCAGCTTTCCTTACCAGGAATCTTGCAAATAACAAGTTGGAGGGACCAATT  
CCTGAAAATATCAGCTCCTGCTCGGCATTGAATCAACTGTAAGATTGTTGCGTATCCTTAGGAACTTCTT  
TTTTCTCTTCTCTTGCTATTTTCATTCATTCTGAGTCTAAACATATTTGTTTCTTCTTTCAGTAATGTTCA  
TGGCAACAACCTTAACCGGGTCCATTCCTTCAGGGTTAAGAATCTTGAGAGCCTGACGTATCTGTATGTT  
ATATGCTTCTGGTTTGTCTAGTGATCATGAAAATGATTTTGAATTTCTTTCATATGGTACAAACTCATTGG  
TGACATTTTGTGATATATACCTGGCAGAAATCTTTCAGCAAATAAATTTAAAGGTCACATACCCTATCAA  
CTAGGGCGAATCATCAACCTTGATACATTGTGAGTCTTGACTGTCAAGGTCAATAAAAATTTATTAGTTC  
AAGTGATTTCTTGTACTAAAATTTGTACTCTGTAGGGATCTATCTGGCAATGAATTTTCTGGGTCTATCCC  
TGGTTCTATTGGAGATTTGGAGCATCTCCTCACACTGTAAGATATTAACATTTTGTATGTACAAGGAGCT  
TGTATCATATTAAGACTTGAACATAATCACAATATCATTGCACATTGTAGGAATCTGAGCAGCAATCATC  
TTGATGGACAAATTCCTGTAGAATTTGGAAATCTGAAAAGTATACAGACCATGTGAGTTTCTGCTGAGA  
GCTTAGGTTACACTGCCTTCAAATGTGTACTTCTTAGTATACTGATTTTCTTGTCTGTGATTGGTTTCTA  
TTCTTTCAGTGATATGTCGTGCAACAAGATTTCTGGTGGCATCCCAAAGAGCTGGGACAGCTGCAGAC  
CATGATAACTCTGTAAGTACATTTAGTTTTTGTCAAGTAAATTGATGTAGTGTTTAATCAGTTGTCCTTAA  
AATCAGTCAATTCTAATGAATTTTGTATTGGCTTTGTTTCTTATGAAGTACTTTGACAGCTAACGATCTTA  
GTGGAGCAATCCCTGACCAATTGACCAATTGTTTCAGCCTCACTAGTTTGTGAGTTCATCTATCTTTGTCT  
TAACATCATAGACATTCTAATTCTCCTACAGTACTGATCTTATGCCATTTTCTTLAGGAATATATCCTA  
CAACAATTTTAGTGGTGTGTTCTCTTTCACGGAATTTCTCGCGGTTTGCACCTGACAGGTATTTCCAT  
ATAGAATGAAGCTTCATCATTATATATGAACATTAGTACAAGTTAATGACCACCTTACTATGGTCATCAG  
CTTTTTGGGGAATCCATTTCTCTGTGGCAACTGGAAAGGCTCAATATGTGACCCCTATGCACCAAGGTCT  
AACGGTATGACTTCATTTTGTGCATTGGTTAGTGAATCTTTGGTATGCTAGAGTCATGTGCATTAATAA  
GACTTGTTACTTTTGCAGCCTTGTCTCTAGAACAGCTGTTGTTTGCACAGCATTGGGTGTCATAGCACTC



TTATCCATGGTTATAGTGGCAGTGTACAAGTCAAACCAACCACACCAGTTTCTGAAGGGGCCTAAGACC  
AATCAAGGTAAAAATTAGTACATGTCCATTCTGTTCTTTTGTTCAGTACTTTCAGGTATTTATGTTAGC  
TTAATCTTGTTCCCTCTAATTCCCTAGGTTCCCCAAACTTGTGGTTCTTCACATGGATATGGCCATCCA  
TACATATGATGACATTATGAGGATTACTGAGAACTTCAATGAGAAATTCATCATAGGATATGGTGCTTCC  
AGCACTGTATATAAATGTGTTTTGAAAGATTCCCGACCGATTGCCGTTAAGCGACTTTACACTACACATC  
CGCACAGCTTGCGAGAGTTTGAGACTGAACTGGAGACAATTGGAAGCATCAGGCATAGAAACCTTGTTA  
GCTTGCATGGTTACTCCCTTCCCTCATGGGAATCTCCTTTGTTACGAATACATGGAGAATGGTCACTC  
TGGGATCTACTTCATGGTTAGTAACCCTCTTTCCCTGTAATCTTTTATAAAGCATCTTCGTGTAAGATATT  
TATTACTGTTTTCCCTGTCCGAGAATGGTGCTATAAGCCAGGATTGATTTGAAAATGGCTAATTATCAAC  
TGAATACATGTCATAGGGCCTTCCAAAAGGTGAAGCTTGACTGGGAAACACGTCTGAGGATTGCTGTT  
GGTGCTGCTCAGGGTCTTGCTTATCTTACCACGATTGCAACCCAAGAATCATCCACAGAGATGTGAAAT  
CTTCAAACATTCTAGTTGATGAAAATTCGAAGCTCATCTTTCTGATTTTGGGGTTGCAAATGCATCCCT  
ACTGCAAAAACCTCATGCATCAACTTTGGTGTGGGTACCATAGGTTACATTGACCCTGAGTATGCCAGGA  
CTTCCAGGTTAACTGAAAAGTCAGACGTCTACAGCTTTGGCATTGTTCTCCTAGAGCTTTTGACAGGAAA  
GAAACCGGTTGATAATGACTTGAACCTGCATCAGCTGGTATTACTCTCCTTATAGTCTACGTACGTTGT  
TACTTGTA AAAAAGATTTAACTCAGACTGGATATAGAAAAGAACAATTATCTCCAATTTTCTACCTTCC  
TCTTAGCATTGCGATATTATCATTCCATCAAATGTCTTTTGTCTTTTAACTCCTGTATTATATTTGATGTCT  
TTATAGAGTACTTTGATTTGTGTTACAGATAATGTCAAAGGCGGATGATAACACCGTGATGGATGCTGTT  
GATCCTGAGGTATCTGTTACATGTATGGACTTAATGCATGTGAGGAAAACCTTTTCAGCTTGC GTTGCTGT  
GCACAAAAGATTTCCATGTGAGAGGCCAACGATGCATGAGGTAGCTAGGGTACTTGTTTCCTTGCTTC  
CTCCCCGCCAACCAAACCTTGTTTAGACCCACCTCCCAAATCCATTAATTATACAAAGTTTGTGATTGGG  
AAAGGACTACCGCAAGTTCAGCAGGGTGATGATTCCTCCGAAGCACAGTGGCTTGTTAGATTTCAAGAA  
GCTATATCCAAAACCTCCCTTGACTTGGGTTTCATAGACACTAAATATCAAATCAGAAGAGAATATGGAA  
CACATATATATGTTGGCCAAAGGTTTTTGTGTTAGAGATTTCCCTATAAGATGGTTAGGTACACGGT  
AATAGCTTAGTGATTTTACATTTGTAGATGGAATGTTTTATGGTGTGGATGATATCCACAGTAGGTTAG  
ATCTACAACCAGTGCAGTTTAACTAAATCTTTGTTGA

>M6-PGSC0003DMG400031103 M6 LRR-RLK

CAATTTTATCATCACCATATAGTTGTATTCAATCACATATCACACTCACATGTTCTAGTACTCCTTCCATTCT  
GTAAAGTTCTAGTTGACTCTCTCCCTTTGTGGTCCCTTTCCATTTTCTTGCCTTATCAATCAATCAACTTTCT

TAGCCAATTTTTCTCTGTTTTACATCCTTTTTATCCTCTTATTTAAGTTTTAGCTAAACCCCATTTCTTG  
ATTTTTAGTCTTTTGCATGTCCTGAGTGGCATTATTTTTCAAGATTTTATATTATAGCTAAACCCCATTTCT  
TGATTTGTAGTATCTTGTCTTTTGCATGTCTTGAGTAGCATACTATCCAAGATTTTATATTATAGCTAAACC  
CCATTTCTTGATTTTGTAAAACCTTTGGTGATTTGCATGTCTTGAGTGGCATGTTTTTGTGGTCATTAAGG  
TTAAAACAATTCAAGATTTTATTTATCCTTTGCTTCTTGAAATTGGGTTGAGTTGTATACTGAGAGTTAT  
GGGCCCTGGAATCTCAAACTTGCTTAATGGTATCTGTTTCTTGGTCTGCCATTACCTCTGTTACAACCTT  
TGGGCATTGCCATACTCATAAGTTTCTAATTTTTCATCCATAAAAAAATATTGACATGACTTTAGTGTA  
ACTAACAGCATGTCATTCATGCTCTTTTATCCTTGGAAATGGCAAGTTATAGTAACTCTGCAATCCAACA  
GCATTTGCTTTTTGTGCTGTTGATTCTTCTTTTCTTACTGGTTTTGCTGAATCTTTAAATGAAGAGGGACT  
TATTCTTTTGGAGTTCAAAGAATCCCTTAATGATCCTGATAACAATCTTGAAAGTTGGAATCTTCAAAC  
TGAATCCTTGCAAATGGGATGGTGTTAAGTGTAGCAAAAATGATCAGGTGATTTCTCTCAATATCGATAA  
TCGTAACCTGTCTGGTAGTTTTTCTCAAGAATTTGTGAACTTCCTTACTTGACAGTATTGAATGTGTCATC  
AAATTTTCAATTTCTGGTCAAATTCCTGATGATTTTCGCGTCGTGTCATAGTTTGGAGAAATTAACCTTTGTA  
CCAATAGGTTCCATGGAGAGTTTCTGTCCAATTATGCAATATTACCTCACTTAGACAGCTTTACTTATGT  
GAGAATTACATTTCTGGTGAATCCCTCAGGATATCGGAACTTGTCACTTCTTGAGGAGCTTGTTGTTT  
ATAGTAACAATCTTACTGGAAGAATACCTGTTTCAATAGGTAAATTGAAAAACTTAGGATCATCAGGGC  
CGGGCGAAACTATCTGTCTGGCCCTATTCTGTCTGAAGTTAGTGAATGTGATAGTTTACAAGTGCTTGGT  
GTAGCGGAAAATAGGCTAGAAGGGTCTTTTCCAGTAGAGCTACAAAGGCTTAAGAACCTCATCAACTTA  
ATTCTTTGGGCTAACTCATTCTCTGGTGCAATTCCTCCTGAGGTTGGGAACTTCAGTAAGTTGGAATTACT  
CGCGTTGCATGAGAATTCATTAGTGGACAAATTCCTAAAGAGATTGGGAAGTTAACTAATTTGAGAAG  
GTTGTACATTTACACTAATCAATTGAATGGAACAATTCATGGCAAATGGGGAATTGTTTGTAGTGCAGTT  
GAGATTGATTTATCCGAAAATCAGTTGAGAGGAAGCATTCCGAAAAGTTTGGGGCAACTTTCTAATCTG  
CGGTTGCTTACCTTTTTCGAGAACAGATTACATGGGAAGATTCCAAAGGAGCTTGGAGAGTTGAAGCTG  
CTTAAGAATTTTACTTGTCTATAACAATTTGACAGGTAGAATTCAGCAGTGTTCAGCATCTTGCATT  
CTTGGAGAATTTACAACCTTTTTGACAATCACCTTGAAGTCTATTCCGCGATTTATTGGCCTCAAAGCA  
ACCTCACTGTAGTGGACCTGTCCAAGAATAATCTTGAAGGAAGAATACCTTCAAATCTTTGTGAGTTTCA  
GAAGTTAACATTCCTGAGCCTCGGGTCTAACAAGTTGTCTGGCAATATCCCTTATGGCCTAAAGACTTGC  
AAGTCCCTTGAGCAGCTAATGCTAGGAGATAACCTGCTCACTGGGAGTTTTTCTTTTGTATCTTAGCAAGC  
TGGAGAACCTTTCAGCTCTTGTGCTTTTTTACAATAGATTTTCTGGATTGCTACCACCAGAGGTGGGCAA

CCTTAGAAGATTAGAGAGGTTGCTCTTGTCAAATAACAACCTTTTTGGGAAAATTCCTCCTGATATTGGA  
AAACTTGTGAAGCTTGTTGCTTTTAATGTTTCCTCCAACCGGCTCTCGGGTGATATTCCTCATGAATTAGG  
GAATTGTTAAGTCTCCAAAGGCTTGATCTTAGCAAGAAGCTCGTTCACTGGAAATCTCCCGGATGAACTT  
GGTAGGCTAGTCAAGTTGGAAGTCTTAAGCTATCTGATAATAAGTTTAATGGACAGATACCTGGTGGC  
TTAGGTGGACTAGCAAGACTAACAGATTTGGAAATGGGAGGCAATTTCTTCTCTGGTAGTATTCCTATTG  
AGCTTGGCTACCTTGGAAGTCTTCAGATTTCTCTGAATCTGAGTCACAATGCTCTCAATGGATCGATTCT  
AGTGCCCTCGGGAAGTTCAGATGCTTGAAACATTGTAATAATGACAACCAGCTTATTGGTGAGATT  
CAACTTCAATAGGGCAGTTGATGAGTCTGATAGTATGCAATCTTTCTAACAATAACCTTGTGGGATCAGT  
ACCAAACACGCCTGCCTTTAAGAGGATGGACTCGAGCAACTTTGCTGGAAATGTTGGGTTATGCACGTC  
CGATTCCATCCACTGTGATCCTCCTCCGGCCCTTGATTGCTCCAAAGTCAAAGTGGTTGAAACACGGT  
TCTTCTAGGCAAAAAATAATTACTGCTGTTTCTGCGACTGTTGGGATGATCTCTTTGGTATTGATTTTAGT  
TATATGTAGGATCATTAGAGGCAACAAAGCAGCTTTTGTGTCCGTGGAAAATCAAGTAAAGCCGGATGA  
CTTGAATGATCATTACTTTCCACGAAAAGGGTTCACGTATCAGGACCTTGTGATGCTACTGGAAATTC  
TCAGACAGCGGATCATAGGAAGGGGAGCTTGTGGCACTGTCTACAGAGCTCATATGGCTGATGGTGA  
GTTTGTGTCAGTTAAAAAGCTGAAGCCACAAGGAGAAACCGCGAGTGTTGACAGCAGCTTCCAAGCTG  
AATTATCTACACTTGGTAAGATAAATCACAGAAATATTGTCAAGCTATATGGTTTCTGCTACCATCAAGAT  
TGCAATCTTCTTGTATGAGTACATGGGAAACGGAAGCCTCGGGGAAGTACTTCATGGGAATAAGACA  
ACTAATTTACTAAATTGGAATAGCAGGTACAAAATTGCCTTAGGAGCTGCTGAGGGACTGTGCTATCTG  
CACCATGACTGTAAGCCACATATCATTACAGGGATATAAAATCGAACAACATTTTGTGGACGAATTGC  
TTGAAGCACATGTAGGAGACTTTGGCTTGGCAAAGCTAATTGACTTCCCTTACTCAAATCCATGTCCGC  
GGTTGCTGGTTCATACGGCTACATTGCCCTGGTAAGACCGGTGTTTAGGCAATTAACGATACTCTTT  
ATTAGGATTACTTACATAATACAGAAACAACTAAGTTCTAGTTTTTTCTTTTTTTCAGAATATGCATACAC  
AATGAAAGTGACAGAGAAATGCGACATCTATAGTTATGGCGTTGTTTTGTTGGAATTGATTACTGGTAG  
GTCTCCAGTTCAACCCCTCGAACAGGGAGGCGATTTGGTGACTTGGGTAAGGAGATCAATTCATGAAGG  
AGTGGCACTAACTGAGCTTTTTGACAAAAGACTGGATTTTAGTGTGCAAGAACCAGAGAGGAGATGTC  
TCTAGTTCTCAAGATTGCTATGTTCTGCACCAATACATCCCCTGCCAATAGGCCTACAATGCGAGAAGTC  
ATCGCCATGCTGATTGAAGCCCGGAATTTGTGTGCACTTCACCACCATCACCATCCTCCGAAACTCCTCT  
GAGTGAAGCTGATGCTAATAAAGGTGCATAAAAACAACCTCCTCATCTTTCAATCTTTTCACTACAGTCA  
AACATCTCTATAACAGTCATCCTCTATAACAACATTTCAATATAACAACGGGTTTTCTATGGAACCAATT

TTCATGTTATGTTACATTACATGTTCTCTATAACAACATTTGCTATA

>M6-PGSC0003DMG400031228 M6 LRR-RLK

CAAACCTGCAGGAGTCTTAGGAACTGCAACTTGCAAGGAACAGTTCCTGATCTAAGCACAATACCACAC  
CTTCTTTACTTGTAAGCATACTTCATTGAGAAATTCCTGTGTCCTGTAAACCACATTTTGAAGCTTATGTT  
CTTGTTGTTCTAACCTCTTGGTAATGTTGATATCTGCTTAATAATTCTTATATGCCATCTGCTTAATAATTC  
TTATATGCCAGATGTAGTTGAACTCATCTGCCACTCAATTTGTGCTAAATATAGAAAGTTAAATTTACAGC  
CAGTGGCAATTCATCTGATATAAATTTCTCATGTACAGAGACCTTAGCAGAAACCAACTCACAGGAAAT  
ATACCCTCCAATAAGCTGTCTGATAATATACAACCATGTAAGTTTCTGGTTAAGTGATGATACTGCTGAA  
ATCTTTCTGGTTTGATTGAGTCATCTTTAATCACACTTCCTTCTTCCCCCCCCACCCCAACTCTCTATCG  
ATATCTGTGGATAGGTGGTTGAATGGACATTAGTGTCTTAACACGCACTCTTTTCTTTTGGATGTTTGAGT  
AACTCGGTCTTGGTATCAGACCCTCAATAGTGAACAACTACTTTGATGATGATTGCAGCATTCTGTCAG  
GAAATATGCTTAATGGTTCTATCCCTTCGAACTTTTCTGTCCTTCAAATCTGCAGAGGCTGTAAGGAGCT  
TCATTTGCTCAATCCTTGTTTCTTGATCCTCTGTCTGTTTCAAATTCATGTGATACTCTAATAAATGCAG  
TATTGACACTACCTTTCCTTAAATTATTTTTCTTGAGGTCACTCAACAATAATAGGTTAAGTGGTTTTGTG  
CCAACCACCATTTGGGAGAATAAGACATTTTCCCCAGGCGCAAACTTAGATTGTAAGTGTCTCATTGT  
ACCTTTTCTCTTATCAGTAATTTGATTTTCTGTTTCTGTTGTCTGCTGCCCCACAATCTATTGGCCAATTA  
AAGTTTTTAACTGTAAGATACAGACAAAACTTTTTGTAGAGAGTCGAGCCAAATTTGTGTGCCTATTCC  
ATTTTGTAGCTAGTCAGTACACATTTTGGATATGCATAGAAGGTATCCTGGAAAAAATAGTACAGTCAA  
GGAATAGTGTGCCATTGTCAACAAGGGTTTCTATCTCTATACAGTTAATATATAACAAGGGATAATAT  
GTCTGATGTTTGTGTTTGTTCGAGGTAATGTAGCATGTATTCTTCTCTTACTAAACCATGCCATGTCTGA  
CTAGAAAAGGCCCTTAGATGTTAACATATCAGATTGCCAGGCTGATCCAGTTGTTCTACTTTGTGCAGG  
AACTTTCAACGTAATTTTCTCTCAGATATTTGGGTAATCTTGATCCACCTCAAATGTCGATATTATGTAA  
GACCTTATATCCGGTAGTCTTGTACATACATATTTGCGGACTTACTTTAGTTCTTGGCTTTTATATTTAGA  
TGTGGCGAATCAAGCTCCCCTAATTCAATTGCTATCTAACTTTTATTATCCTGTTTTTGTAAAGCTTCAAAT  
TACAAAGTAATTCTGTGGAGTCTTAGTTTCTATTTAGATTCTGTTATTCAACAGAACTACTATCATGAG  
GAAGGCAGGAAAACCTTGCTATAGAATATCCCATGACAACATTTAGGATAGTTGCATAAACAACACTGCCTTCA  
TTTGCTGTTTTCTGCTAAACTCTTCCATCAGTGTAGAGATTTACTTCGAGTATCCATTAATGAAGCTAG  
AGTAGTGAACCAACACAGTTTCAACTTCTTTATTTTTTTCATCGTTTCAAACCTTCATTTTTTGTGAGAAG  
ATGGGTAGTTTTCTTGCTAGCAGTGCACCTTATATGGAGCTCAAAAACAATGAGGTCAAATTCATATATG

TGAATTTCTTTCCATATGATATGGCAATATGACAAAGCTAGGGTTATGGGGGAGAATTTGGTGGCAATA  
GGGGCCTGGGGAAGCAGTGGGGATGCGACCAATATGTGGGATAGGACCTCTAGTTGCATAAGGGAAG  
CGACTAGAGAGGTCTTGGGGGTTTCAAAGGTAAGTCTAGTGGACACGGAGGAGATTTCTGGTGGATT  
GGCAAAGTCCACGTAAGGTAGAGGTAAAGAAGGTGGCTTATGTGAAGTTGCTGGAGACCAAAGGAT  
GAGGAGGATAAGAGGGCGACGAGAGAAGTATATAAAGTGGAGATGAAGGAGGCAAAGTTGGCAGTT  
ATGGAGGCAAAAATGGCAGCTTTGAGCGCTTGTATGAGGAACTAGGGGACAAAGGTGGAGATAAGA  
AGTTGTACAGGCTACCCAAGGTGAGAGAGAGGAAGACTCGAAACCTGAACCAAGTGAAGTGCATTA  
GATGAGAAAGGCAGAGTATTGGTGGATGAGAGGCGAAGTTGGCAGTTATGGAGGCAAAACGGCAGCG  
TTCGAACGCTTGTATGATGATCCCTGCATTATGATCTTTTTATTTTTATTACAATTCTGGCATAACTTGCCT  
CTAAACCAGACAATACTAGTTACATACTGAAGTGGTAACAACTTTCCAATTTGATGGAGAGATCATG  
CCTCAGCAATATCTTTCAAGCTGTATATATTTAATTCTAAAAGCAAATTGTTCAACTTCTTTAAATAAATC  
CGGCTTACCTACTAACTTTATTTTTTTGAAGAGCAGCTTACCTACTAACTTTATACATGTTTGTGTGCAG  
CTGTGTGCGCCATATTTGCTGATTTTCATGAATAACATAAATAATGAGTTTGAGTTTTGTTTTAAACCCATT  
TACTGGTACTTTAACGTGCAAATATTTTCAATGGCATAAAAATCCCTACATACATTTTGCTTTATCACTCCTT  
TATATTTCTGATTAAGTATCCATTAGGTGCGACACTTTAACTGAATAACTTTTCAGGCTTTATGGAAATCCT  
GTTTGTGGAAATGCAAATGAGCGCCAGATTACCCAATTTTGTAATCAAGAGATGGAGGTGAAGAGTAT  
GGAGGCTTGAACAACCTCTATTCCAAGTTGTGCAGCCCAGCTGCCTTGCAGCATGGATTTTGAACATGTCC  
CAGCATTAAATGGATGGCTGCTTTTGTGCAGCACCTTTTGGAGTTGGTTTGCCTTAAAGAAGCCCTAGCAT  
TTCAGACTTTCCTCCACATTATAGTGACTTTGAACAGTGGATAACAAAAAGTGTTAATTTGAATGATTATC  
AACTGCACATTGATTCGGTTGCATGGCAAAGCGGTCTAGGCTTAGATTCTTTTTGAAATTCTTCCCTCCA  
CGTGCAAATGACTCTGGAACCAATGATTTTGGCAAATTTAATGACAGCGAGATAGTACGGATCGCAAAC  
AAGTTTGCCTTTTTTAATCTTACTGGAAGTGATATCTTTGGCCCATATGACCTGCTCAATTTCACTGCCAT  
GGCGTATAATTCTGGTATGTCTCCAAATCCATTATGTTCTTGCATAAGTAGGATATAATAATACATTAACA  
TGTGGACATTTTCAGTTGTGGTTCTGTAATGATTTCTGAGGAATTTAAAGTAAAACCAATGTGAACAAT  
AATAGAAAAAACAACGTGAATCTCGTTTGTTTTTTACAACCTTAGGTCATGCACGGAGAGTGGCAAAAA  
CTCAATTTTTTTTAGTTAAATCTCTCTAGGGAGGAACAAGAACCAAGTTGAGATTAGCATGCAAGCC  
GAGAGAAACACCTTTATTGTAAAACCTGTTTCTCAGTTCTAATTTTGTGTTAATGCCAAATATTGGATA  
CTTTTCAACTAGACTGGAATCTGGAACCTTGTGCACCCGCATGACTAATTTTTCTTTGTTCTTGCTGAT  
TCTTGAATATAATTATTATGATTATTATTTTTTTTTATCTTACTGGTCATGCTAAGATAAAAAGTTCTCTT

TCCTATTGTGCTCCATTTGCTTCTGAAAATGTCTAGTTATATCGTTTACCCTGTGATATAGAACATGTTTT  
TCTTCTTGTGATAGAAGTATGCGAGTATGAAAATCAATGAAATGGTCTAGATATCATGCATGCTTTGAA  
GCTTAGCATCCTCATGGACATGGTAACCTGACAGAGATGCTAGTAATCTCTTAGATACTCTGTAAGGGTC  
AAGAGACTAAATTGACTACCTTAGTACAAAATCTTGATTAAGTAAAATCTTAGGTGAACCATATGGTACT  
TTTAAAATATGTGAATATCCCCATTTAGAACTCAAGATGAATTGGCTACTTTTGTTTTATTTTTGCTGTAA  
AGAAGAATTTGTTAATGACGCAGAATCTGTGTGAAGAAGCCTTATAGAATCTTTGTAAGAAGAACAAGG  
ATTTACTATTTTTTTCTTTCTATTTGAGATGTCTCACAACACAGTTCTTGTCTGAATATAAATATACCATT  
GTTACCTTTCTTCAAAAAAATATATGCTATCATATAAGAGAGCCATCAACTTTTTTGAACTGATAAGAGA  
GCCAATAACTTGCTCTGTTCTTGTCTTTCTTTGTGCTTTCTCAAGATCAAATAACAAATGTTTTCTTTCTTG  
CAGTCCTTTTTCTCCGTTGGGAGGAGAGGGAAGCAGAAAAACAGAGGCACTGTGGTTGGAATTGTCT  
TAGGGTCCATATTTGCTGCAGCTGTGCTACTTATGGCCATAATATTTGTGTTGCTTAAAATGCGGCGGAG  
GTTACACGTTTCAAAGATCAACCATGTGAGTTAATCTTCAGTTATTTTATGTGACTTTTCTCAGCTATG  
GGGAGTTTCTTCTCCATTTCTCTCATTACCCCACTAGGACCTGCTGGTTTAGTAGACAATAGGTTTAACT  
TTTCTTTGGTAATCTGTTGAATCTCCAAAATAGAGGACATGAAACCACATTCTTTGAGTGCTTCATGCATA  
TAATGCAAACCTTGCACCTGATAATTTCCAATTTCCATCTTCTGATAAACAAAAAGATGCCAAAACCATAA  
AATCTGTCTTCCTTCCTTAATTTTCTTGTTAAGTTCTCTATTTAATCAAGAAATAACAAGAATTGCCAGT  
GTTAACCATCTTTTTCTATGTGGCAAATTATCTTTCTTAGTATGTATATTTGTAATTTAGCTATGATACTGC  
TTGGTGTTTTACTTTAAGTAGAGAGTATGGTGCTTAAATCCTCACATGGACAGATAACTTTACGGTTTT  
ATGGGAAGTTTGTGCATATTTATGAGTAACTCTCTGGCAATGCCCATCACCTTAAAACAAAAAGTGG  
AAAAGAAATAAATAGGAAGTGTGTGCTGGGCAAGGGGCATGTATATCTAAGTAATACTCTTGTTGTAGT  
GCTTCTGCTATTTGTACATTAATTAGACGATTATTTCTGTTCTTTTCTTAGCCAGATCAATTGATATTCTTA  
AAGTGAACAAAGTTAGCTGAAGCCAACCTATTGTATCAAAGGTTCAATTTGCATTAAGTCATGCTACCATC  
ACCTAAGCTTTTTCTTTCAATTTTTATGTCAACTTTTCATGCTAAAGTTTTCAATGAATATCTGATTTTT  
AATAAATTGAACCATGTGGCGATGATGATTTCTTGCTTAAACAACTTAGCCAGGACCACGTGGAACCTC  
ATAGTGATATTCCTTTCAATTTCTTTGTAGTACCAAATTTCCAATGCGAATAGAAGGTGTTAAGGCATTG  
GGTTTAAAGGAATTAGAGGCAGCAACTAACAGTTTTAGCAGTGCTACTGAAATTGGCCAAGGAGGCTAT  
GGGAAGGTCTACAAAGGCACTTTAGCAGAGGGAACAATAGTGGCAATTAACGTGCACAGCAAGGCTC  
ATTGCAGGGTGAAAAAGAGTTCTATACTGAGATAGAATTACTTTACGTGTGCATCATCGAAATCTTGTT  
TCCTTGGTGGGATACTGTAATGAAGGAAGTGAACAAGTAAGATTCTCCAACTGGAAAAATAATACACA

CACACAGACTAGTTCATGTTGCTATTCCTGCATGCAGAGGGGAGAGGGGAGTATGTTCCGGTGAATAAT  
TTCTATGATGTATCAGTTCAGCCACTTGTTGAATTCTGATTGCCAGTTCTGGTTGAATACCTAGGTCAA  
TTGAATTTTTTGCATATCCTTGATCATTAGGATGCCTCATTGCCGCTGTGCAGAAGCAATTAATCATAA  
TGTC AATTACCTTGACTACTTAGAGAAATCCATTTGATATCACTCTAGATGCAAATGAAATGACCAGAA  
TCACACAAATGATAGTTGAATTGCAGTGCAAAGTTCAGACTTACTGATTCATCTGTAAAGTAAAATCAA  
GCAAAAGCCTTCTGAGATATTATTTTCATCATACTTCTTTTTTGTCACCAATTATTATCACACGTTAAGTG  
ATTCAATTTGTGAGCATATCCAGTCTACAGTACTTGGATCACTGAATATTAAGTTCAACCAAATCCCATC  
TATCAGTAGGCAGTGGCTCATCAGTTACATCCCTCTTATACTTGCGTAGTCTCTAGTCTGGTCACATTAGT  
GAAATGCATGTCTTCTGAAAAAGTAATCAAATCAAAAGCAGATGGAAGGATAAGAACAGATATTATGT  
TTTGTGGGTTTTTATTCTACTTTTGTAAATAGTTGGTTACATGTGCATGCAGATGTTGGTGTATGAGTTCAT  
GCCAAATGGTTCCTTGCATGATCTTCTAAAAGGTATGTGATGTATCCTTACTTTGCCTATGTTGTCATTTG  
ACTTTCTTTTGTGAGAATCAAGCACATCTATTCTCCTCTTATCACTTTTTTTTTCTGGTGTAGTAGTTCTTT  
TCTGAAAAAGAGGGTGAAAGATATGTTCTCTAGTAAAGAATACTTGTATAGATGAAAGTATTTCTAAAT  
TATCTAATCACTCAGAGATTTTTTTTTCTGAAGTTTTTACTTCATTTTGACTCCTGAATCCTGACAGTCACT  
GTTAGTTTTCTACTTTCTTCACTTGTGTGGTCATCAACAAGCTTATCACATGGAACCTTATATTCTTAATT  
TTAGTCATGTGTCAGTTCCAATATGAATATCAAACAGGTATCTCCAAAATAAGATTATTAAGATATTATA  
CTTATTTTTACAGCTAGATATGGGGAACGTCTGAGTCTTGGAAACAAGGTTATACATTGCTTTAGGTGCTG  
CCAGGGGAATCCTCTACCTCCATACTGAAGCTAATCCTCCAATAATCCATCGTGATGTCAAAGCAAATAA  
CATACTGTTGGACTCTAAGTTCACCGCAAAGTCTCTGATTTTGGAAATCTCAAAGCTTGCACCATTACCTG  
ATGCTGAAACGAGTGGAAATGTATCAACTGTTGTGAAAGGAACTCCTGTAAGGCTTTACTCATCTTATAT  
AAACCTGCAATAGAAAATCTAGAAAATCACAATGAGATAAGACCTGCAACTTGAGTAATCTAGGTAGCA  
TGGCTACAGACCAGGAGAACTTCATTCTCT

>M6-PGSC0003DMG400031752 M6 LRR-RLK

TTCAACAATGCATCTTCAAATCTTGCTTATACTTCTATTACCTACATTGATTCTCTCAATAAACCAAGAATC  
CCTTTATTTACACACCATAAAGCTTGGATTTGATGACCCAAATGGTGTTTTTTCAAACCTGGAATCTCCATG  
ATAACTCCTCACCTGTAAGTGGTTTGGAGTAAAATGCGACTCTTAACTCGTTCTGTTACATCTATTGAC  
CTCTCCAACACCAATATCGCCGGCCATTTCCGGCTTCTCTTTTCCGGCTCAAGTATATCAAGTACAT  
TTCATTCTACAATAACTCCATTAAGTTCGACACTTCCGGTGGAGGAGTTATCCGCTTGTAATCTCTTGCC  
ATCTAGATTTAGCTCAAAATTTGTTAGTGGGTAGTCTTCATCGAGTTTGGCGGAGCTTCTGAGCTGAA

ATACCTTGATTTGACCGGAAATAACTTTACCGGCGAAATTCCGGCGAGTTTTGGGGCATTCCGGCGACTT  
GAAGTTCTGGGTCTGGTTGAAAATTTGTTAACTGGGACTATCCCGCTGGAGATTGGAAACATTTGAGTT  
TGAAGCAGCTGAATTTGTCGTACAACCCGTTTTCTCCGGGTTCGGATCCCGCCGGAGATTGGGAACCTCA  
CGAATCTAGAGGTGCTATGGTAACTGACTGTGGGTAAATCGGTGAGGTTCCGGGTACGTTAAGGGGAT  
TAAATAAGCTTGTTAACTTGACCTTGCCTTAAACAACCTGTACGGTCCTATTCCGAGCTGGCTCACTGA  
GTTAACTAGTGTTGAGCAAATTGAGCTGTACAATAACTCGTTCTCTGGCGAGTTTCCGGTGAATGGGTG  
GTCGAATATGACCTCGTTGAGGCGGGTTCGACCTGTCGATGAATCGGGTTACCGGGTCGATCCCGAGCG  
GGTTGTGTGAGTTGCCACTTGAGTCGCTCAATCTTATGAGAATCAATTGTATGGTGAGTTACCTATAAC  
CATTGCAAATTCACGCAATTTATACGAATTAAGCTCTTTGGTAATAGTTTAAATGGAACCTTACCTAAAG  
ATCTTGGTAAATTTTCTCCATTGGTATGGATTGATGTTTCAAACAATGAGTTTTCCGGTGAATTCGGT  
GAATTTGTGCGGAAATGGGGTTTTAGAGGAGGTTTTGATGATAGATAACTCGTTTTCCGGTGAATTC  
GGTGAGTTTAAGCCAATGCCGGAGCTTATTACGTGTGAGATTAGCTCATAATAAGTTCTCAGGTGATGTC  
CCTGTGGAATTTTGGGGGCTGCCACGCCTTCGCTGCTTGAAGTTAACGGACAATTCATTTTCTGGTGGAA  
TCGTGAAAACCTATAGCTGGTGCATCGAATTTATCCGCTTTGATTTTGTCAAAGAACGAATTTTCCGGTAC  
TATTCCTGAAGAGATTGGCTTTTTGGAAAGTTTGGTTGATTTTGTGGGAAATGATAACAAGTTTTCAGGG  
TCATTACCGTTAGTATAGTGAATCTTGAGCAATTGGGAAGAATGGATTTTCAACAATGAATTAAGTG  
GTAAGTTTCCTAGTGGGGTTCATTCTTGAAGAAATTGAATGAATTGAACTTGGCAAACAATGATCTTTC  
TGGAGAAATTCGCCGGGAAATCGGGAGCTTGTCTGTTTTGAACTATCTTGACCTATCAGGAAACAAGTTT  
TCGGGGGAAATTCAGTTGCGTTGCAGAATTTGAAGCTCAATCAGCTGAATTTATCGAATAATGGCCTT  
CGGGTGGTATTCTCTTCATATGCAAAGGGAATGTACAAGAATAGCTTTCTGGGGAATCCCGGTTTATG  
TGGAGATATTGGAGGCTTATGTGATGGAAAAGATGAAGGTAAACTGCTGGTTATGTATGGTTACTGA  
GATTGCTTTTCGTACTIONGCTGTTTTGGTGTGTTGTAGTTGGGGTAGTTTCGTTCTATTGGAAGTATAGGAAT  
TACAAGAAAGCAAAAAGTTGGATAGATCGAAATGGACCTTGACGTCGTTTCATAAGTTAGGTTTCGAT  
GAGTATGAAGTACTGGAAGCTCTAGATGAAGACAACCTTGATTGGTAGTGTTCTCCGGGAAGGTTTAC  
AAGTTCGTTTTGAGTAATGGTGAGGCTGCTGCTGTGAAAAAATTTCAAGAAGTTTGAAAAAACAGAT  
GAGAGTTGTGACATTGAGAAAGGTAACCTATCAGGATGATATATTTGAAGCGGAGGTTGAGACATTGGG  
CAAGATTCGACACAAGAACATCGTTAGGCTATGGTGTGTTGTACAACAAGGGGTTGCAAACCTTTGGT  
TTACGAGTACATGCCTAATGGAAGCTTGGGCGATTTGCTACACAGCAGCAAAAGTGGGTTGTTGGATTG  
GCCTAAGAGATTTAAGATAGCTATGGATGCTGCAGAGGGACTCTCATATTTGCATCATGATTGTGCTCCT



CCGATTGTTACAGAGACTTGAAGTCGAACAATATCTTGTTGGACGGGGAGTTTGGAGCTCGAGTTGCT  
GATTTTGGTGTGGCAAAGGCGATGGATGTTGATGACAAGGGAACCACGTCTATGTCAGTCATTGCAGG  
GTCTTGCGGTTATATTGCTCCAGGTTAGAGGATTAATCCTTCACTTTGGGAGTTCTACTAACATGATTTTG  
TTGAATTTG

>M6-PGSC0003DMG400033049 M6 LRR-RLK

GAGGAAAACAAGATTGTAATTAAGTGACACTAATTATCATGTCTGAAGTGGAATCTCATGTTCTTCTTCC  
CATTGTATTACTCAATTTCTTCATTCTCATAACAGGTATGTCATATTTGATAGCTTTAATTTGATCAAGTTT  
AGTATTAGAGTCTCATTGTACATAATTAAGAATCAATTTTTAAACAACATTTATTGCAGTAAGAC  
TAATGTTTTTTAACTTAGCAAATCATAGGACCATTCTTGATTGTGTTACTCCAACACCAAGCATTAAA  
TGTTGTTCTGTTTTGTTTTGGGAGAATTGACTTGTATTTATTGTAGCATGATTAGTTTATGCAAATATTA  
TATAGGTAGGCTTGTGTGGAGACTCAATTGAGACAGACAAGCAGATGCTGCTGAACTTGAAGTCATT  
TCTTAAGGAACAAAATCCTGTTGACAAAGGATTCAAATATAACCATTGGAATCCTACAGATTTGTCACCA  
TGTAGATGGCCTGGAATATCATGCAGTACCTCCATCAATCGTGTCACTGGAATCGATCTCTCGGAAAGTA  
ATCTGGCTGGGAAATTGTTAATAAATTCTCAGCCATGACAGAATTGAACTCTCTTGACCTGTCCAAGAA  
CACATTTTCAGAGTCCATTCCATCAGACTTAGGCTGGTGTAGAAATCTGAAGTTCTTGAACCTGTCACAC  
AATATCATTGTTGGTGAGCTCAACTTGACAGGCATGAACAAGCTGGAAGTTCTTGATTTGACGATGAAC  
AGGATCCACGGGCTAATGATCCCTGAGATTTGAGACAACCTAGCTGTTGCAAATATTTCTAACAACAATT  
TCACTAGTGGGAGTGGATTTGAATTTTCTCACTGCAAGAACTGAAGTATCTTGATCTGAGCTACAATTA  
TTTGACAGGGAATCTGTCGTTGCGGCTTGATATGCTGAATATGTTTTCAGCATCTCATAACAACCTAAGT  
GGCTCTCTGCCTTCTGGATTTTCACTCAAACTGCTCTTTGCAAGGTTTGGACTTATCAGAAAATATGTT  
ATTTGGTGAATTGCCTACGTCTATCGCGAACTGTAAACGATTAGTAGAGTTGAATTTGTGGGGAAATAG  
CTTTTCAGGGTCAATCCCTAGAGAGATTGGATCAGTACAGAGTCTTAAAGAACTATGCTTGGGAAGTAA  
CAACTTTTCAAGTGATATTCCAGACACTCTATCAGGTCTAAACAATTGGTATTTCTGGACCTAAGTAGA  
AACAACTTTGGAGGAGAAATACAAGAAATTTTCGGGCAATTGACACAGGTAATTTCTCGTGCTGCAT  
GGAACTCATATATTGGAGGCATAGTGCATCAGGAATCCAACTTGGTGAACCTTTCGCGGTTGGAC  
TTGAGTGATAACCAATTCTCTGGTCCATTACCAGTTGAAATTTCTCAGATGAACGGTTTGGAGTTTTTGT  
TCTTGCCACAATCAGTTTAGTGGCAATATACCTTTAGAATATGGAGATCTTACTGCACTTCAGGCTGTTG  
ATCTTTCTCTAATAGGATCAATGGTTCAATACCACCAAGTTTCGGGAAGCTAAGGTCACTATTGTGGTT  
GATGCTTGCAAGCAATTCGTTGAGAGGTGAAATCCCATCAGAGTTGGGGAAGTGCAGCAGCCTGTTATG

GTTGAATCTCGGAATAATCAACTTACTGGTCCAATTCCTCCTCAATTAGCAAGTATTGGTGCAGATCCAC  
TGCTACTTTTTTGTGAATAGGGGAAAGGAGAAGCTCACTGCTAGCCCAGGGGATTGTTTTGCCATGA  
GGAGGTGGATAACCAGCTGACTACCCTCCATTTAGCTTTATATATCCTCTATTGACAGGGAAGAGTTGTAG  
AATCCTGGGGGATAAGTTGTTTATGGGAGATGGTTAATGCCAGTCTGTGAACCTGGTAGTAATGTCCG  
AAAGAATCAGGTACCGGGCTATATACAACCTTAGTGATAACAAATTGTCTGGTGAGATCCCTCCTGAGATT  
GGCAACATGAAGAAAATGAGTATGATGCATTTGGGTGCAAATGAATTTTCTGGCAGGCTCCCTTCAGAG  
ATTGAACAAGTGCACCTAGTAGTCCTTAATGTTTCACAGAATAAATTTTCTGGTGAAATCCCAAAGCAGA  
TTGGCCATCTTAAGTGCTTAAACCTTGACCTTTCAATTAACAATTTTCTGGTCCATCCCAGTTAGCT  
TTAGTAACTTGCATGATTTGAGCAAGTTCAACATCTCTTACAACCCATACATCTATGGAACTGTACCAGAA  
ATCGGGCAACTGCCTACATTTGATAAGTCATCATTTCTTGGTAATCCGTTGTTGCGTCTCCATCCTACAT  
GCATAACTCTAACAACAACACAGAACGAAACAAGAATGACAATAACAAAAAGCACAAAAAGGTGGGTG  
CACTTTTGTAATTGTGTTCTGGTACTAGCTTTCCTAGTCTGTGGAGTCATGTCACTGCTTGTCTGCCTC  
CTTATCAAAGTGCCAAGGGGTTCCCCAGGAATCTTACTGGAGGATACAGAGGGGCAGACATGATTCTCCA  
TCAAGTACTAATGCATCCTCCTCACGGTTGTGTGCATCCTCATCACGGGGTTCTGATGATGTTAAGGTTAT  
CCGTTTGGACAGAACAAGCTTCACACATTCTGATATACTGAAGGCCACATGGAACCTTCTCGAATGATAGA  
ATTATCGGGAGAGGAGGATTTGGGATAGTCTATCGTGGAGTCTTGCCTGATGGAAGGGAAGTAGCAGT  
GAAGAAGCTACAGAGGGAGGGAATCGAAGGAGAAAGAGAGTTCAGAGCTGAAATGGAGGGGCTCAG  
TGGGAATGGCTCCGGTTGGCCTCATCCAACCTTGTAACCTTTATGGGTGGTGCCTTGATGGATCAGAG  
AAACTTCTAGTCTATGAGTACATGGAAGGTGGTACCTTAGAGGACTTCATTACAGATAGAACAAGGTTT  
ACATGGAAGAGCAGAATTCAAGCAGCAATCGATGTAGCACGTGCTTTAGTCTACTTGCACCATGATTGC  
TATCCTTGCATTGTCCACAGAGATGTCAAAGCTAGCAACGTGCTTCTTGACAAGGACGGAAGAGCAAAA  
GTCACCGACTTTGGCCTTTCTAGGGTCATGATTTCTGAACATACTCATGTTAGCACAAATGGTGGCAGGGA  
CTATTGGTTATGTTGCACCAGAATATGGGCAGATAATGCAGGCCACTACAAAAGGAGATGTCTACAGCT  
ATGGGGTGCTAGCAATGGAGCTAGCAACTGGGAGACATGCTATAGATGGGGGCGAAGAATGTCTAGTT  
GAATGGGCGACAAGGGTCATGGGAGACGGAAGGAAAGGGTTACCAGAGCCATTATACCAGTTGCTCT  
ATTGGTACCTGGCCTAGTAGAGGGAGCAGAGGAAATGTATGAGATGCTTAGGATTGGGATAAGGTGCA  
CAGCTGAGACGCCTCATGACCGGCCTAACATGAAGCAGGTATTAGATATGTTGATTAGTATTCTAGCA  
GCCAAAAGGGATCCAGCCGTAGCTTTGGATCAAGTCGTAGCACTTCTCCATTATTATGATAGACTTTCTT  
GGAACCCAAGAGATAAAAACGTCAATAGTTTCTTTACAAGATGTGTAACATACCTAGCAGATTCTTCTTG

TAAACAGTTTTCTTTTTTACATTTGTTATTCTAGGAAAATGTAAGTCAATTTTGTGGTTGGATCACA  
AAATGTTCTCAAGGATATCAATTTTTGCTATGAAATTGAAGCACTCAAATATTTGACCCACCTACAAAGTT  
ACACTACAGACTACAGCAGGTGGCAAGATTGTTCCCCTTATCAGGTACATTATTTGTCTGGTGCAATTCA  
AAGTCTCTATTTCAAACAAGATTCCTCTACCAGGGACTGTGCAATAGCAACTACAAATAGGAGTGTCCAA  
ATTTCAACTTCTGGACCACATCTGATGGAAAATTTTAGTATACTTCCACTAAATCAACACACCACCAATTG  
TCAACGCCACAATACTCATTTTCATATCAGGCTAGCTTCATCATCCGTGGGAATAATGTGGATATGCACTC  
AAGCATCATACTGATTTCAAGTTAAGGCTCAAAATTTTAAGTCACTCTCTGATGTATAAACTGCTAATA  
GAAGAGTACAAATTCTGTCTACCTGCTTAACAAAAAGAACTACAGATAACGTTTAGTGAAACTCTTAA  
TGGTGTGAGACCTTTTAAGAAAAACATCGCGAGGTTGGATGAAATCTACCAGTATCCTACCATGTTAAG  
AATGTCTTTGGGCTAAACGTAACATTAATCTAGAGGTCACCAATG

>M6-PGSC0003DMG400033667 M6 LRR-RLK

CAATTTGGCATTCTTTTCCACACCTCCAATGTTGACCAAATCAACTCATAATTCTAACCCACCTTTTTTTTT  
TTTTCATGGAGTTTTCCATTTTCCGACCGGCATCTTCGCCGAAAACAGTCCCTTTATCTCATTCTTCTAC  
TAAACTTCATACCCATTTTCGTAACCTCACAACTCCGGCCACTACTGAACGTGACACTCTACTGAAGATT  
AAGCGTCAATGGGGAAACCCAGTAGCACTTGACTCATGGAACCTACTTCTTCTCCTTGTAGCTGGCCGG  
AAATTGAGTGTGATGATGGGAAGGTTACCGGAATAATAATTCAAGAAAAAGATTAATGTTGAAATTC  
CAAGTTCTATTTGTGAACTTAAAAATCTTACTTTTCTTAATCTCCGGTTGAATTATCTTCCCGGAAAATTC  
CAACTTTTCTTTACAAATGTTCCAATTTGCAGCATTGGATCTTTCTCAGAATTACTTTGTGGGTTCCATTC  
CGGAGGATATTCACCGGCTTGGGAACTCAAGTATCTTAATCTGGGTGGTAATAATTCACCGGAGATA  
TCCCGTCGTCAGTCGGGAATTTGACGGAGCTGGAGACTTTGTGCATGCATTGAACTGTTTGATGGGA  
GTTTTCCGGCGGAAATCGGAACTTAACCAATCTGAAAGTTTGGGGTTGGAGTTTAATGGGTTTTCTCC  
AATGGCACTACCGCCGGAGTTTGGGAAGCTGAAGAAGATAAAGTATATTTGGATGAGAGAGACGAAAT  
TAATCGGTGAAATCCCTGAAAGTTTTGGGGAATTTCAAATCTGAGCTTATTGATTTTGCTTACAACAAT  
CTGGAAGGAAAAATCCCTTCTGGGTTGTTTCTGTTGAAGAATTTGACGATGATGTACTTGTTTCAAGTAATC  
GGCTTTCCGGTGAATCCCTGAACTTTTGAATCATCAAAGTTGATGGAACCTGATGTTTCAACAACAA  
TAATTTAACTGGAACAATCCAGAAAGTTTTGGAGGGTTAAACATTTGGAAATTATGAATCTGTTTGGT  
AACCAATTGTATGGAGCAATTCCAGAGAGCATAGCCAAGATTCCATCTTTGAAGGTATTCAAAGTGTTTA  
GGAATAAACTGAATGGGAGCTTACCATCTGAAATGGGACTTCATTCGAACTCGAATCTTTTGAAGTTTC  
ACTGAATTCCTTCACTGGAACTTGCCAGAGCATTGTGTGCTGGAGGAACTTTTTGGTGCTGTAGCT

TATGTTAACAATTTGTCTGGTGAAATACCAAATCACTCGGAACTTGTTCTAGCTTACGTTTCGATTCAGCT  
CTACAAGAATCAGTTTTCGGGTGAAATTCATCTGGGGTTTGGACTTTGGTTGACATGACAAGTTTGTG  
TTGAATGATAACTCATTTTCCGGGGAGCTACCGAGCAAATTCATACAATTTTACGCGGTTAGAGATCA  
GTAACAACAAGTTTTCTGGTGAAATTCCTGTGGGGATATCTTCTTGGAGGAGTTTAGTGGTGCTTTTGGC  
AAGTAACAATTCATTTTCAGGTCGGATTCCAGTGGAATTGACTAGTCTTCTCAGATAACTCAGCTAGAG  
CTTGATGGTAATTCGTTATCAGGAGAACTTCCAGCCGATATAATATCGTGGAAGTCGTTGACAATATTGG  
ATCTTGCCAGGAACAACTCTCTGGCAAGATTCCAGCAGCTATAGGTTTAATCCCTGATCTTGTGCTCTA  
GATTTGTCTCAAATCAATTTTCAGGTCCAATTCCACCTCAACTAGGTGTAAAAAGGATCACTAGCCTTAA  
CGTGTCGTCCAATCAACTTATCGGGAATATCCCTGATGCATTTGCTAACCTAGCCTTTGAAAACAGTTTCT  
TGAACAATCCCAGTCTTTGTACCACCAACTCACTTCCATATCTTCCAAGTTGTAATAATGCGAAAGTCGCC  
AATTCCAAAAGATTGTCCCATAGAGTCCTAGCCCTGATTCTAGTCCTTGCATTCGCTGTTTTCTATTTAGT  
GTTATATCGACCTTGTTTCATGGTTAGAGACTACAGGAGGAAGAAGCATAAGCGCGATGTTGCAAGCTGG  
AAGTTGACTTCATTCCAGAGGTTGGATTTACAGAGGCGAACATTTTGTCAAGTTTGACGGAAAATAAC  
ATGATTGGAAGTGGTGGATCGGGTAAGGTGTACAGAATTTCCGTTGGCAGACCAAATGAGTATGTTGCT  
GTGAAGAGGATTTGGAGTGATAGGAAAGTAGACTACATTCTGGAGAGGGAAATTCTTGGCTGAGGTTCA  
GATATTGGGATCAATTAGACATTCCAATATCGTGAAGTTATTGTGTTGTATATCAAGCGAAGATTCAAAG  
TTGCTCGTTTACGAGTACATGGTAAATCACAGTCTTGATGGATGGCTTCATGGGAAGAAGAGAGTATCC  
TTGAGTAATAAAGTCATGGATTGGCCAAAAGATTGGAGGTTGCCATTGGAGCTGCTCAAGGACTTTGT  
TATATGCACCATGACTGCACTCCACCAATCATTTCATCGCGATGTAAAAACAAGCAATATCTTGTGGATT  
TGATTTACAGCCAAAATAGCTGATTTTGGGTTGGCCAAGATTTTAGAGAAGAAAGGAGAGCTTAACAC  
CATGTCTGCTGTTGCGGGTTCTTTGGTTACATAGCTCCAGGTAAAAGCAAATCCAAGCTTGAACCTCG  
TATTACATCAATTTGTTAACATTATATCAAAGTATGACTAACTAATAATTTACTGTTTGGTTACAGAGT  
ATGCTTATACTAAAGTGAACGAGAAGATTGATATCTATAGCTTCGGGGTGGTGCTATTGGAGCTAG  
TGACTGGAAGACAACCAAATTTTGGGACGAGCATAACAAGCCTGGCAGAATGGGCATGGAAGCAGCAC  
GGAGAAGGGAACTGCCATCGATAATATGTTAGATACAGATATCAAAGAAACATGTTACTTGGAAAGAA  
ATGAAGACTGTGTTTCAGACTCGGGCTTATATGCACGAGCAACTTACCTGCAAGCAGGCCTTCCATGAAA  
GAGATTCTGCAGATACTTCATCGATGCAAGTCCTTLAGGTATTCTGGAGGAAAATCACCAGACACAGAG  
TATGATGTTGCTCCTCTCCTTAGCGGAAACAACAGTGAAAAATACATTGCTAGTTACAAACGTATTAATT  
CCAATAAGGTAATAGATGATAGTAGTGATGATGGTCTAATAATTTCCAGTGTGTAATATTGGAGATGCC

GAAGTAACTGAGTTGTTGTAAAATGATCATAGAATAGTGCCACTTAAGTAAAGTACAAGTTTGAATTC  
TAGTGACTCTTGAATTTGTTCACTGCTTGTAGATTGAGTGAAATGCATCATTTAACTTTTGCTAGTTATG  
TAGATTGTAAGGAAGTGGGAAATTGGAAAATGAAAATGCCAATTTATATAATCAAAGAGAAATGACAG  
TAGAGTGTGAAATTGGAAAATAAAAATGCCAATTTCCAGCTCAACACGTAGTTCATTAAGAAGATTTGGT  
TTCGACTGAAAATGACTCAATAGGAGGGTGTGGTGTGGAGGCGAT

>M6-PGSC0003DMG400033914 M6 LRR-RLK

TTTAATCTTTCTCATAATACGTTTTATGGAAATTTGCCATCCTTAAACAGAAGCTTCAGTTTTCTAGATCTA  
TCAGGAACTATTTTGAAGGCAAACCTCCAGATTATGCACAACGTAACGTGTCAATTAGTAGCAATTGCC  
TCCAAAATGCGACAAGTCAAAGGAATAGGAGCGAATGTGCTTCTTTTTATAGCGGGCGTGGCTTGTGT  
TTGATAATTTTGGAGAGCCAAATGCCACAGAGCCTCTTCCAACCTCCAATCCAACAGAAAGAGTCACAG  
AAATAAAATCATATTGGCGGCTGTTCTGGGTAGCGTTGGATTACTTGCCTTGTCTTTATCTGTATATTC  
TGCTGATTTTTTGCACCCGCAAACGGGGTGCCACGAATCAAAGAGCCACTGAGGTTGGGCCTGGTCCTG  
CCAGTTCAAGTCCACCACCTCCTGCACCTGGAGCATCATTGAATTTTTCAAGTTTAGGAGATGCATTTACC  
TACCAGCAGATTCTGCAAGCCACAGGTGAGTTCAATGATGCAAATCTTATGAAGCATGGTCATTCAGGT  
GATCTCTCCGTGGCACCCCTAGAAGGCGGGACACTTATAGTTGTCAAAGAATAGATGTGCAGTCTGCA  
AGGAATGAAGCATACTTGTGAGAATTGGACTTCTCAGCAAGGTTTCTCACTCCAGATTAGTACCTTTTAT  
GGGGCACTGTTTGGAGAATGAGAATGAGAAGTTCGTGGTGTACAAGTATATGCCAAATGGAGATCTTTC  
CAGTTCTTTGTTTAGAAAAACAATTCAGATGATGATAGTTTGCAGTCATTGGATTGGATAACACGACTG  
AAAATTGCTATTGGAGCTGCTGAGGGTTTGTCTTATCTACATCATGAATGTAACCCGCCTCTAGTGACA  
GGTATCAAGGACTTGTATATTACATTTATCTTACTTCCA

>M6-PGSC0003DMG400038191 M6 LRR-RLK

TTGATTTTTCTTACAACAATTTTTCGGGTATGATTCCACTAACTCTTGGAAAATGCTTGACCTTGTGGGAG  
ATCTATATGAAGGGAAACTCCCTCCAAGGAACCATTCCAATTTAGAAGATTTGCCGGATCTCCAATCCT  
TGGATCTTCCCTAAACAACCTATCAGGGCCAATCCCTCACTTCATTGCAAATCTTACTTCTTACACTACT  
TGAACCTATCTTTAACAATCTAGAGGGTGAAGTTCCTGTCACCGGAATATTTTCTAATTTGAGTGCAGTT  
GTATTAAGCGGAAACTCCAAGCTTTGTGGTGGGATTCAAGAGCTTCATTTACAACCTTGTATTTATCAA  
AGACACGGAAGAAGCATGTGCTTGCCTCAAGTTTATTTTGATAATTGTTTTTGTGCTTCATTTTCAATC  
CTGGCCTTGTTAGTAGTTTTCTTTGTTGGAGAAGAAATTTGAACAATCAACCAGCACCAGAAGATAGTT  
CTAAATCTGCGCATTCTACCCCAATATTTTGTATGAAGAGCTCCGCACTGCAACAGGTGGATTTTCTTCT

GAAAATCTTATTGGCTCTGGCAGTTTTGGAAGTGTATAAGGGAAGTTTTCCCTCCAATGGAACGGTCTG  
TTGCTGTGAAGGTAAGTACTCAAAGTCCAGCTTGAAGGTGCTTCAAAAAGCTTCTTAGCAGAATGCCAAGCATT  
GAGAAACACAAGGCACCGGAATCTTGTCAAGGTCATCAGTGTATGCTCAAGTTCTGATTTCAAGGGAAA  
TGACTTTAAAGCTTTAGTCTTTCAGTTCATGCCAAAAGGGAAGTTGGACGAATGGCTACATCCAGAA  
>M6-PGSC0003DMG400039680 M6 LRR-RLK

GAATTTGCAGAATTTGCTTCATGGCTTGCCACTCGGGGTTTGAAGTACTACTAAAGACTATAACCACGGAC  
ATGTAGGAAGAGGAGGATGATAATAATAATAGTATTCATAATGTTTGTCTAAAGGGTTGTTAATCACTT  
AGAGATATAGGCACAAAATTGTGCTTGGCACTGCTAGAGCACTTGCATTTCTACACCATGGTTGTTCCACC  
TCCCATTATACATAGAGATGTCAAAGCTAGCAGTGTATTTTTGGCACAAGACCCGAGAATCATGAACTT  
GGATCCTAGACTATCCAATTTTGGATTGGCCAAAATCTTTGGCACAAGACCCGAGAATCAGATCAATCGC  
>M6-PGSC0003DMG401000515 M6 LRR-RLK

TTTTATCATATAACTCAGTATATTGTCATTTTGGTTTCAGGTGTGGAAGCTGTACACAACAAATCAGGTAA  
CTGAAGCATTAGATCCTCTATTGAAAGGCGATTTTCCACCAGAAGAGGCATCAAAGGTAAGTAAAAGTGG  
GGTTGTTGTGCACTCAAGCTTCTGTCGCTTTAAGACCATCAATGAGTGAAGTTGTCCAATGCTAACGTG  
TGAGGGCTATCAAATCCAGAACCATGCCAACCACCATTTAAATTCCAAGTATTAGTTGGCGGTTCA  
GTCAAATCCAGTATAAGAAGTTTAGTCTCAAATGCACTCTATAAACTTGATGAATCATCATCTTATGCCAC  
CACCCTGGGTCTCAAGTATGCAAAGCTCATCAACTGGACCACACAAAAGTGACGAATTCCTTTTAAAA  
GAGTCTGAAAATAGGAAATAATTGCAAAGACAAATATAGAAATGGAAATTTTGGAGAGATTTTTGATCAG  
TACATTTTTTGTACAGTAATAGAATTGCTGTAGTTGTGCATTTTTATGATTTTTATTTTTGCATTTTTGGTGA  
GTGATGATACAAGAAAGTGTAGGGGTGGCAATTTTCCAGCCATATAAGTGAATGAAACTATTTTTGCCCA  
TATTAATTAATGGATCACTCATATT

>M6-PGSC0003DMG401002925 M6 LRR-RLK  
TGGACTTGTAGACTTGAATCAAACCTGTCGCAAATTTTTATCATAAGCTTGGTGAGGGGTCAAACATG  
TCTATTGAAGGTTATGGGATGAGCAATGCTGGTGGTTCTGGTGCAATGGCGGTGGATAACAGCAGTGTT  
GGATCAAATGATTCACACTCATATTCTAAACCAGCAGGGTAATCACATCCACAATAACGATTCTGTTG  
CTGCTAGCGTAGTCAGGGGGAGAGTTACTAGGTTGAGCGATGATGCCCTTGCTCAAGCCTTGGTTGATC  
CTCAATTCCTCACTATTGGGCTTGAATTTATCATGAGTGGACAATTGACTTGAGGAGGCTTACCATTGG  
ACAAGCATTGCTCAAGGATCTTTTGGGAAACTCTATAAGGGAAGTTATAATGGTGAAGATGTTGCCATC  
AAGCTTCTAGAGAGGCCAGAGCATGATCTTGAGAAGGCTCACTTTATGGAGCTGCAATTTTATCATGAG

GTCAAAATGTTGGCAAATTTGAAGCATCCAAATGTAGTACGATTTATTGGTGCATGCCGTAAAGCCATG  
GTGTGGTGTATTGTGACTGAATATGCAAGAGGGGGTTCAGTGCCTCAGTTCCTCACGAGGCGGCAAAA  
CCGAGCTGTGCCATTGAAGTTAGCAGTTGTGCAGGCCTTGGATGTGGCTAGGGGGATGGAGTATGTGC  
ATGGCCGGAATCTGATTCACCGAGATCTGAAATCCGACAATCTGCTGATTGCTGCTGACAAGTCAATCAA  
GATTGCAGACTTTGGTATTGCTCGAATTGAGGTGCTGACTGAAGGAATGACACCAGAACTGGAACCTA  
CCGCTGGATGGCTCCGTAAGCATCTAGACTCTTAGCAGCCTTGTCAAATCTGGTGTCTTGATCCAGTTT  
GATTTTATTGCCAAACCCTATAATAGAGCTCTTAAGCTTTTTATCCTATTCTTGTGGGCTATTTTTCTCTG  
TCTGCATTACTTTCTGTATTTTTTTTCAAATTTGCTTTGATATGTGTTTCTTAGCCAAGCATCTTCCGGAA  
ACAACCTCTCTTCCACGAGGGCAGGCTAAGGTCTGCTTTCTCTACCCACCCAGACCCCACTGAGT  
GGGATTTACAGGGTATGTTGTTGTTGTAGCATGCTGGATTCCCTTATGGAATAAATTTATTAGAACT  
GAAGTGAAGAGCATGGTGGTTGATGGGTTCAAGTCTGTATGTCCTTTTATGATGCCACCTCACTGATTGTG  
ATTGTATTTCTATTGTATACCTAGTGTCTTCCAGTTAACTTCTTAATTTAGTTCTGTACCTGTTAATGAA  
GGATAAAGAGTTGATTGACTTTACTTTCTTTCAATTCCTTTCCCTCTTTTTCTTTTCTTCTTGTCCATG  
ACTTGTAACCTGATTCAAGTTAGACACACTCAAGGGTGTCACTTAGTTGTCAATGAAGTAGGAGCAAACC  
TTTGGAGATTAGGGTTCAATCATCCCAGAGACAGAAAACCAAGTGTCTCTTCCCATATGCCTAAACC  
TTAAACCTTTGTGGGTATAGTTACCCGAAATCGAGATGCATGCAAGTTGGATTGGATACCATTTTCAGAA  
AGAGTAAAATTGCATATATCTGAAAATGGGTCTAAGACATTAACCTACCACACTGGGTTCACTTTCAGGAT  
GTGTCTGAGAGATATGAACCACAATTCTATTCTTATTGAATATGTAGATGAAAGTTCTATGGGAAGTATA  
TTATCTCTTTCTCTCCTTTGTGAGTTTCGACCTTCCAGCATCATCTTAAACATCACCTCTTTCTTCAAAGCAG  
TGAGGCTATTTTGGAAATAATGTATTGGTAAGAAAGAGAATGGGGAGGTGCGATTACCAGAGATCTCT  
CTCTTTATAGGATGACATACATCCACAAGAGTCGCATTGTTTGTGCTGCTGGAGAACTTAAAAAGAGC  
AAGGGAATGACATGTCTACCAGAAACATTTCTGTTTAGAGTGGAAGTTGGTTGCCGAATGAAAGTTTTT  
AAGTTGTTAGTAGTTGAACAGCATTCTGTTTGGCTCGTGCTAACTTTCTCAAAGCACTGAAATGA  
ATCAGTTAAAGAAGGATTGTTTAGGACATGTTATTTGGACATACACTGGTGTCTCTGGAATCTGCAGGG  
CTCTTGTTAACTTTCTCAAAGCACTGAAATGAATCAGTTAAAGGAGGACTGTTTAGGACAATTTAATTGG  
ACATACTAGTGTCTCTGGAATCTGCAGGTAGATTTTAAAGTTGTGCAGGTGGAAGTCATTGCTCTGTTG  
GAGGATGGCAAAACAAACATCGATTTTTTTTTATGACAAAGGAAACCCGCAGCTGCTATCCATTGGGTG  
CGTACACGGTAAAACCCCGTTCCTATGCAATAGCTCACAAAATTCGTAAGAGAGGTAACCTGCACAAG  
GCAAGCTCGGTGCGACGAGCCTGACCCAGAAGACAAAACCCCTTGCTTTTGTGACAAGGGGTTTTGAAC

TTGAGACCTCCAAAATGGAAGTCCCAAGCCCAAACCACTAGGCCACCCCAAAGGGTAACTGACATATCT  
ATTCTGATGTTTCTGGAAGGAATTCTAGGAGGGCCTTACAGAACTAGACTCTACAACGATAATATGATT  
CTCCGCTGAGTTACTACATAGACTTTTTTTCATCATTAGACAATCTCTACGGAAAGGTAAAAGTGAATAT  
TTGGCTCAATCTTCAATGAATCTAAATCATTTATTGGAACCTTCACTATTCTTTAGGAAGAGGCCTCTTTA  
AAAGCATAAAAAGCGACAAGGTGATGTTTCTATAATCTACAATGATTATGTGGATTCTGCATTGAGTTGC  
TACATGGACTTGTTCCGCCATAAGACTATTTCAATCTCTATGGAAAGGTAGAAGTGAATACATGGCTT  
AATCTTCTCATATTAAGCAAAAACGATCCATGGAGTAAAAGCTTGGAGTGAAGCATAACAAGTTAT  
GGAAAAGTATAATGAAGTACCATCCACAAAGAAATTTAGTAATCTTCTCATGAACTTGAAACATTTGTTG  
AAACCTCCAATTATTGAGAGTACTGTTATTAGAAGCGAGAAACACAAAAAGCGACAAGTCCATGGAGT  
TTGAAGCAAATATCGAGAAGTGAAGCACAATGGCTATGAGAAGTAAGTAATGCCGAACATAAAAAGGAT  
TTAGTACAATAAAGATGCAAATAAAATAAATGGTTTTTGCATCTAGTTTACTTAATATTGATATTGATCTT  
GCTCTTCAAAGTCGAGATTCAAAAAGTAGATCCTTTCTTGTTAGGATCATTTTCGCACGTCATTGTTTAAA  
GCAGTGCATGGGTTCAAGAAGTAATCCCATTCTTCAAATTGCTTTAAGTGATGGCTTTGAATAATAATGT  
GGGAGAGATGTGACACATGATGAAATCAATGCCAGTAAGAAGAATGATAAGAATGCCTTATTTGGTAT  
TAAGTCTTACAACAGGTGTTGCTAGACCTGATTTGACAAATGCCTTGTATAAGTTGAAGTAGATCGTTTA  
GAAACAAAAGGAGCATGAAAACCTCATAATGATCAATCAATTAGTATAACTTGTTAAATTACGGAGATCT  
TACGTCAGGCCGATTATGACTCAGTATTTCTGACATCTAACTTTTAGTGCCTCACACACTATGTTGTATCG  
GTCCTTTGCATTACATACATGTTGAAATGGGTGTGTCATGGTTGCGCGTACTCTTCAAGATACACAAATA  
ATTTACAAAATGATACTTACATCTGATAAAATTCATACTCACAAACGAGTCAAGAAGATTTAGGATTTAA  
AGTTAATCGGTTCCCAATGATATCAAGTTTAAAAAGTAAATTATTATATGTGCCCAAGGGGAATCGAGCC  
TTCAATGAGGAGGGCAATAAAGCTCAAGCAAGTTCCATTTATGCCACTGGACCAAGAGCTTACTTTGTT  
AGTAGATCCCAACAAATACTTTATATATTTAATTGACTGGATTCCACAAAACCTACACATGATACTTTAGG  
TCCGCCCTGTTCAATAGCAACAACAACATACTCAGTGCAATCCCACATGTGGGGTTTGGGGAGAGTAG  
AGTGTATGCAAATGTTACCCTTAACTTGTTGAGATAAAGAGGTTTGTCTGAAAGACCCTCAACTTTAAA  
TAACTTGCCAAACAGTTTGCAAAAAGGGAATACAAATATTCGGAGCAATCACAATGACACATTTATGTAA  
AATGGCAAGTGTTACATAACAAACAAGTGAAGAACAATAACAAAAGTGAATAATGCAATAATCGACA  
CACAAAAAATTTCAAGAGTAGTGCTAATACTACTGATAAGAATACTAGTGAAAGCCTATCTCGCAAAGA  
AGCAAGAGAATGCTCAATTACCAACTAACCATTTACCCTAAAACACGACCTCTATACTCTCCTATCAAATG  
CCATGTCCTCGGTAAGATCTAGATGCACTCCGTCTAATCACTTCTCCAATACTTCTTCGGCTCGATTTTA



CCTCTCTTGATGTCCTCCCTTGCCAACAACCTCACACCTCCTCACTAAGGCATCTATACTCCTCCTCACGTGT  
CCAAATCATCTCAGTTTCACTCCCTCATCTTGTCCAACATGGAGGCCACTCCTACCTTGTGTGGATATCT  
CCATTCTTAATCTTGCCACTCTTAGTATGCCACACACCCACATCAATATCCTCATTGAAACGATTTTCTTC  
TTCTGAACTCGGGATTCTTAATAGGCCAACACTCCGCCTCATAAAATGTGGTGGTCTAACCCTACTCT  
GTAGAACTTACCCATCCATACTCCATATAATATGGATTTCATGTTATTTTAGTTGTGGAAGAATAAGTATA  
TTTGAACATTTTGGATTCTCCACTAAAATTCATCACCTCTAAAGAATGATAGAAAAACGAAAGCATC  
AAATCTATTTAGGTGCCACGGGTGTCCACATGGGCTTGATTTGCCAAGTTTGTAAATATGTAATGAAA  
CGCCAAATTAATTTAGAAAGTATGCATTAGGTATGTAATAATATTTTACTATTTGTTTTATGTATTACG  
GTGCATGCATAGGCTGACTGTTGTATTGATTCATGCATTAGCGCCTGATTGTTAACTGTTGAAAATTTAT  
TGACATCTATTGGAAGATCTCCTTGGTTGGCACAATTTGACCTGGAGGCTGCAAAAATTATGACAATAA  
GAAAATTACTTCATTTTGTCTCAGTTTATTGTTCTACTGATACATGGGGTTTTCTGTATTTAGGGGTCGTTT  
GGTGTGAGGGATAAAAATAAATAGTCCTGGGATAAAAAAATAGTCTTGGGATTAATTTTGGTGTCTTG  
TTTGGTTGCCATGTTTGGGATAACTTATCCCACCATTTATACCATAGTGATGGGATAAGTTATCCCATATA  
CATGGCAGAATAAGTAATCTCAGGATAATTAATCATGGGATAACTTGTCCCAACCAAATGACCCCTTAG  
AGTCTTATTTAAGAGTTGGTAATATTTAGTGACTCTTTTGAGAAAAAATTTCAAATCACGATTTCCCTTA  
TGATTCTGCTCTTAAAAGTTCAGTTATTTGTGTCTCAGGCATATATGGCAGTTAGAATTTAAACCTTGAAT  
TAGATCATCAATTCAGGTTGGTTTAGAGAATATGGTATAGAGTTAAATAAATCCCTTCAATCTGGTGGGA  
GATTGATTGCTATATCCAGTTGAGGGTAGACTGATGATAGAAGTGGCATTTTTTTTATTTCTTTTGTCC  
TGGACAGAAGTATCGCCATCAGTTTCCGTTTGGGTTGTACCTTACACAATGTTAGAGAGGAAAGCATAT  
TCCTTGTAAGCTAAGTGAGTTGGAGATTAAGCTTTTGTCTTCTTGTAGATAATGTGACAAGTGGAGAAGTT  
TTGATTTCTAATAGGACATTTCTTTCAGACTTGATAAAAAATAAGTGTTCATGTCTGCCTGAAATATCTTC  
AAAATGGTTGGGATCAGAAAGGATTTAGGAGGTTGACCCGGTGAGTGGTGGTAATTTTATAGTCTTCTC  
TGTGTGATAATAGGCTAGTATGATGAATGGCCTTCTTGGGGAAATAGACAAAATAATATGTTTGCTTTT  
GTTAATTTGATGTGATAATGAAAGATCTTGCCAAAAGAGGTGTGGATCGGATCTCAATATCTGGTAAAA  
CTCGAATACGTGCAGCCAGTCTGACTCTTTGTATAATTCTAGTATACTCAAATTTTTATTCTGATTAAGTGA  
GAAATGAAGTACTTTTCAAGTTTACTCTTGAGAAATTAGTTATTCACATTCTGCAGATCCTATCCCGTTT  
AACTTTGTGAATTATTGGCAAGTGTGTCTGGTTTCTTCTTTTTTTCAGAAAAAAGAAAAATGGATGTTCAA  
AGTTGTTAGCAATAGCATCTGTGTTTCGTTGTGGATCGCTAAGCGTTTGACTTTGTTTTGTAGGGAGATG  
ATCCAGCACCGGCCATACACCCAGAAAGTTGATGTTTATAGTTTTGGCATTGTTCTGTGGGAGCTCATAA

CAGGGTTGCTTCCTTACCAGAGCATGACTGCTGTGCAGGCTGCTTTTGCTGTTGTCAACAAAGGCGTCCG  
TCCAACAATCCCCATTGATTGCTTGCCTGTCTTATCTGATATCATGACCTGCTGCTGGGATTCTGACCCTG  
ATAATCGGCCAACTTTCTCTCAGGTGGTCAAGATGCTTGAGGCGGCTGAGACAGAAATCATGACTAATA  
TCAGAAGGGCACGTTTCAGGTGCTCCCCTCATCCTACGGCTACAGGGTAAGAGGAAACTGGAGGCAACT  
GATTTTGAGTCTGCCATGTGTATCTATGAGGCACAATTTCTTTGCAAATAGAAAAAGGGCTATAGTTATG  
AGAAAAAACTAAACATTTCTCTGCTGTATTTGTTTCTTTCTTTAATCCGTGTATTTAAGTGGTACTAGT  
TGGTAATACAGGATATCTGATGTGCATGTCAGATTATGGCTGTATTTACTGAATTTGTTCAAAGTTATATC  
AGGTTCTGAATTA

>M6-PGSC0003DMG401006401 M6 LRR-RLK

AACCAACTTTCTGGCCCCATTCTGCAGAAATAGGAAACTTACCAGCCTTATAGAAGTGGATCTTGATA  
CAAACCAGTTAACAGGTCATATTCCTCCGGATATAGGCAACTTGATCAACGCAAAGCTGTTCAAGTCTTT  
CTCCAATGAACTGTCTGGTCCCATTCTGCAGAAATAGGGAAGATGAAGTCACTTGAGGAGTTAATGTT  
ATACAGAAACAATCTTTCTGGTTCGATTCCAAAAGCTTTAGGTGAATTAACCAAGCTCAAAAATTTGTACC  
TTTATGTTAACCAACTTTCTGGCCCCATTCTGCAGAAATAGGGAAGCTTGTCAATCTTGTTGAAGTTGAT  
CTTGATACAAACCAGTTAACAGGTCATATTCCTCCGAAATAGGCAACTTGATTAATGCAAAATTGTTCT  
ATGCTTTTTCCAATGAATTGTCTGGTCCCATTCTGCAGAAATAGGGAAGATGAGGTCACCTGTGGATTC  
ACTGTTCCAGAGAAACAATCTTTCTGGTCCCATTCTAGTGAGTTGGGGAATCTGAATAACCTCAATGAT  
CTGGTTTTATCCGAAAATCACTTACTGGTTCAGTTCCTACTACATTTGGCAATTTGAGAACTTGCAGAC  
ACTGCATCTCCATACCAACAACTATCAGGTTCCATTCCAAAAGAACTTGCATATTTGGATAACTTGCGA  
GTGCTGACAATGACCAAAAATCAGTTATCAGGCCATTTACCGGACCAGCTTTGTCAAAATGGGAACTT  
GAGTTCTTCACTGTGGCTAGCAACAAGCTGACAGGGCCAATACCAAGAAGCTTGAGCAACTGCTCGAGT  
TTCAAATGGGTTTCGCTTTAATAACAACAGTTTCATCGGAACTTATCTGAAGCTTTTGGAACTATCCAGA  
GCTTCTGTTCAATTGACTTGAACGACAATGATTTTCATGGTGATCTCGGCAGCAACTGGGGAAAATGCGA  
AAAATTGATTAATCTGCAGGTAGCCAGAAATAACATTAGTGGTAGCATACCACCAGAAATTGGAAACAT  
CAAAGGGCTTCTGGACTTGATCTTTCATCGAATCATTTGATTGGGAAGATTCCAAACGAATTTGGAAAA  
TTAACCTCTCTGGTTAAGCTTTCTGTGAAAAACAACAATATTTCTGGCAATATACCTGAGGAGCTTGGGT  
CACTGACAAAGTTAGAGTCGCTTGATTTATCAGACAACAGATTGAATGGATCAATCCCAACGTGGATAG  
GAGATTTTGTGCTGTTGTTTCAGTTGAATCTGAGCAACAACAAGTTTGGACAAAAGATTCCAAAGGAGA  
TAGGGAGGATAACTCATCTTACTGTACTTGATTTGAGCCATAATCTTCTTGATGGAGAAATACCTGCTGA

GCTAGCCAGTTTGCTGGACTTGTCAAACCTGAATCTTCCACAATGGTCTATCTGGGCGCATTCTCTAAA  
GAACTTGATAGTTGACTGGTTGCTGGATGTTGTATTGTCATACAATGATTTGGAAGGTCCAATCCCTA  
ATAATAAAGCATTATGAATGCTTCGTTAGAAGGTAATAAAGATCTTTCGGCAATGTAACAGGATTCCA  
GCCCTGCCAAAAGCCATCTTCTATGGTGAAAAAGCACTCAATAGCAAAGGGAAGTAACTCATCCTCATC  
ACTGTACTTCTGTTATGGGAGCACTAGTACTGCTCTGTGTTTTATTGGTGTCTCTTTATGTGTAATAA  
AAGAATGAGAGTTAAAGACGTTGAAAGAAGGGATGGTGTATGGTTGGCTTTCGATATCCATGTTAGATG  
GAAAGGCATTGTACCGGGATATCTTAAACGCCACAGAGGAGTTTGATGCAAAATTTTGCATTGGGCAAG  
GAGGACATGGAAGTGTTCACAAGGTAACCTTCCATTATTTGGTGTATAGCTGTGAAGAGACTTCATTC  
TTCATTTTCTAATAACACATCCCAAAGCTTCATAAATGAAGTAAGGGCATTGACTGGGATTAAGCACCG  
GAACATTGTGAAACTCTACGGCTATTGTTCAAAGCACAACACTCGCTCTTGGTTTACGAGTATGTAGAG  
AGGGGGAGTTTGTCTAGTATTCTGAGCAATGAAGTTGAGTCTAAGAAATTGGATTGGCTTAAAAGGATG  
AATATCATTAAAGGTGTTGCTTTTCTTTATCTTACATGCACCAGGATTGCTCACCACCAATTGTTTCATCG  
AGACATATCAAGCAGTAATGTTTTGGTTGATTCTGAGTATGAAGCTCGTGTTCAGATTTTGGCATAGCG  
AAGCTTCTCAAACCAAACCTCATCCAATTGGACTGCACTTGCAGGAACATATGGCTATGTTGCACCTGGTA  
AGGTCTAAATTTAATTTTCGATTTTATTCTGACTTCGTGAATTATAGCCAAACACTCTATACTATTTTTATCT  
CACTTACACATATAAATTGTTATACCATTTTTGGAAATTGTATTGTTTCAGAGCTTGCCTATACAATGAAG  
GTTACGGAAATGTGTGATGTCTACAGCTTTGGAGTATTAGCATTGGAGATAATCAAAGGAAAGCATCTA  
GGGAATATATTACTGTGCTAGCAAATTCATCGACTATAGATCATGTGCAGCTTAGTGATTTGCTAGATG  
AACGCCTTCATATCCTGAAGATGAAGCAAAGGATGTTTTGGTTTTAATCATCAAGTTAGCAAGCTCTTG  
TTTGGTTGAAATTCAAAATCAAGGCCAACAAATGCACTTCTCTGTCATAGGTTATCATCAATGGATGCA  
CGTCCACCTACTCATGTAAAGTGACCTTTG

>M6-PGSC0003DMG401009161 M6 LRR-RLK

TGTACTTTCTTCTTGGAAATGCTTCAACTTCAACTCCATGTTCTTGG

>M6-PGSC0003DMG401013731 M6 LRR-RLK

GCTTTGCTGTCTGGTGTATGCTAATCCTGCCTGCTTCTGATAAGAGTTATTTACTTGCAGGGACCTGAGCA  
ACAACATGTTGAATGGTCCAATCCAGATACATTTAGGCAGTTGGACTTTGATAACATGTAGGTACCTTG  
AAGTGAAACCTTTACAAGTTGAAGCATAAATCTTGTAAATTTTTTTTTTTTTTCTCAAAGTTTTCTTTCAGT  
AACAAGAAGCAAAGTTTTATCTGTGATGTAGGTTTCTTGGTAACAACGCATTAAGCGGAGCAATTCCC  
AGCTGGGTGTTGAGTAGTGATAAGAACATGTTGGTATTTGCTCAATTTGTTCCGTTTTCTCATCTAAGTA

GTAAACTTTGGTTATTATCATGCCGGCACACTTCAAAGTTAACAGTTTTTTTCCCAAACATTTTGATTGC  
TGAAAGGACGCATTTGCAAGAATTTGGTGTCTTCTAAGTGTATGGCAACTATAATTTTTTTTGCAGTGAT  
ATATCATACAACAATTTACCCATACATCTACTCAAGGATGCCAGCCCTCTACCATGTGAGCATTGTA  
CTTTGTTTGGGAACCTACATCCGTGTATTATTTCTATTTTTATTAATTAGAATTTCCGGTCATTTAACTGCAT  
AGCTTACAAACCTTCTTTCTTCAAACAGAACTTAGCCGCCAGCTATTCAGATACAATGAACACGTTCAAC  
AACACGTAAGTCCTAAATGTTGTCTTATGCATCAGGTGCTAGTTTGTGGATGCTTTCTGTCTACTGTCTA  
TAATTATGTGGCTTAATCTATTCGAAATTGCAGGAATTCCTGGTGTCTATGAAACCCCTCATTTGTCCCA  
CAGAAGCGAAATGTAAGAGTTACAGCCTATAAAAGGACCTCAGGGGTTATGTCTGGATCATTTACCACT  
GAACCAACTCTTGGAGTGGCTGCCTGTGGACTTTTTAAGTACTAAAGCATAACTTTGGAGTTGAGAGAT  
AATTTCACAACTCTTACTCATGTTACGTTCTTTATGTCAATTGCAGATCATTGCTATTCATAAACTGTGGA  
GGAGGTAGAATTACATTTGAGGGAAATGATTATGAGGCGGACTTGACCTATAGGGGTCCATCATATTTT  
TTTTCATCCTCTGATAGATGGGCATTCAGTAGTTCGGGAGGTACGTGGGTCTTGCAAATGTTAGTTATA  
TTGCAACAAATAGATTTTTACTGAACATATCTGGTGCCGACTTTTACAACACAGCAGCCTTGCCCCTAAT  
TCTCTCAAATATTATGGGCTTGCCTACTAGGAGGTAGCTACAGAGTGC GGCTTCACTTTGCTGAAATAA  
TGTTTTCTAATGACTCAACATATAGCAGCCTTGAAGGCGGATATTTGATGTAGCAATACAAGTAAGTTT  
GAGGCCTAACTTCTTTTGAAATAATAAAAATGTAATGTTGATATACTGAGTTCTGATATGGTTGGCAAC  
TTTCTGATTTAAGATTGAAGGTACCAATTTGTTGGAGATAATGTGGTATATTTTGATTTCTTACACAGGG  
GAGAGTAGTTTTGAAGGATTTCAATATCATGGAGGAAGCTAACGGTGTGGAGAAGTCATTATCAAGG  
ACTTTGATGATATTACTGTTAGTAGCACTCTGGAGATTCACCTGTATTGGACCGGAAAGGGGACTAACGC  
TATCCAGACAGAGGTGTATATGGACCTCTGATTTCACTATCTCAGTGACACCAAGTCCGTATATCTCT  
GCCTATAGACTTTACACTTATCTTCCCACAATCTTATCTTAAGAAAATCCCATTTTCTTCTTGCAGACTTCA  
AAAAAGGTCGCAGGTTACCTGTCAGAGCTGTTATTGGCATTGTACTCGCTTCAATTGTGGTGGTTCTGAT  
AGTTTTATTTTCTCTATGGAAGAAAGGCATTTTTGGAGGGAAAATTAATCAAGAAGAATTAGGTAACAC  
ATACCTCAAAGAATTTATCACTCTCTACATTAGATATGGCGATATTTCTGTTGTGATAATCAGAATTATG  
TACGAGATTTCTAGCTGCGACATACAATAATTATCATAGATGATTGTTCTGTTGGCAGATAGACATCAT  
GACATATCATAGATAGTCAGCACACAACAAAATGTTTCATGACATATCATAACAGATGTTTATTCTTTTAAAA  
ATTGTTGTTTCATCATAACAGATGTTTTAGAAGATCTATATATACTGACGTTGATATTCTCGTTTACAGA  
ACTCAGAGCCCTTGATTTACAAACAGGTCATTTTAGACTTAGACAAATTAAGCTGCTACAAATAACTTT  
GATTCTGCCAACAAAATTGGTGAAGGAGGGTTTGGACCAGTTTACAAGGTATTAATTCTCTACCTATATC

TATCCGTA CTGAGTTT GCGTAAGGACAGCTT GCGGTTCTGTGGTGATGTTTCCTACTGGTTATCCTTCTGT  
CTGTAATATGATCGTTGTAAATTAATCCTGCTGTCTGTAGGGTGTCTCTCCGATGGGGCAGTCATAGCT  
GTTAAGCAGCTCTCTTCCAAGTCAAAGCAAGGAAATCGGGAATTTGTTAATGAGATAGGCATGATTTCA  
GCTCTACAACACCCAAACCTTGTCAAGCTCCACGGTTGTTGCATAGAAGGGAGCCAGTTACTGGTGATAT  
ACGAATACATGGAAAATAACTGTCTTGCACGAGCTCTCTTTGGTAATGCTTTGCAACAACATTTTGAAAA  
TCATTAATCATGCAGTGATAATTTTATGCTTAATACTCCTCTAATTCTCCTTTCTTAGGCCGTGACGACCAG  
AGGTTGAACCTTGACTGGGCAACCAGAAAAAGGATATGCTCAGGAATAGCAAAGGGTTAGCTTACCTT  
CATGAAGAATCAAGGTTGAAAATCGTCCACAGAGATATAAAGTGTACCAATGTGCTTCTTGATAAGGAT  
CTGAACGCTAAGATTTAGATTTTGGATTGGCTAAATTAGATGAAGAAGAGAGCACTCATATTAGCACC  
CGAATTGCTGGAACAGTGTGAGCCTTCTTATCATCACTGACTCTGTA CTATCATGTGATGAGAGAGTAGC  
AGTTCTACCCATTTGAATTTGTCGTCATACATTAACATGGTCAGTTTGAAGTATCTTACATTTCTTTTTCC  
TCTTTTGAAGAGGTTATATGGCTCCGGAGTATGCAACGAGAGGCTACTTGACAGATAAAGCTGATGTTT  
ATAGCTTCGGAGTAGTTGCTTTGGAGATTGTCAGTGGGAAAAGCAACACAAAATACAGGCCAAAAGAG  
GAATTTGTTTACCTTCTTGACTGGGTAAACTATCTTTTTACTCAACTGTCAATATTCCCAAATACTAATATC  
TTAAAAACTGCTGCAACATCATGTATTATAAGTCTTGCATGTACATGTTTAATTTAATTGCCCACTCTGA  
ATTATAAGCCAGAAAAAGCTTCTCTTGTTAGTGTTTTGTGCAAATATATACCCCATCAGTTTCAATTTGTTT  
GTCTTACTTTAGTTTATTTTTGTTTGTTCAAAAGGTCTCTTTGCTTTTTTGCAAACCTTTATTCTAACTTTC  
CACGTGACATATTTAAAACCACAAGATTTAAGGGTATTTTGGTACATTCTACATATCTTTAGTTTAAATTA  
AAACCAGACAAACAAAGTGAAACGAAGGGAGTATTTGCTATGATACCTCCAAAGAAAATATCAGAATCA  
GAGTTGTTTCATTAGTTCTGCTCACATTCTTATGGATGTCTTTTCTCCAATTTATCTTGCTTTGTATGTCAA  
TGTTTGTTTTAGGCTTACGTCCTACAAGAACAGGGAAATCTGTTAGAACTAGTGGATCCACGT

>M6-PGSC0003DMG401017953 M6 LRR-RLK

TCTCCGGGAAATTTTCATTTATCATAAGAGTTGTTGAGCCAGTATTGTGGTGATGGGAAAAGAAATGGG  
AGTTGAAAAGCTTCTGGTTTTTTTTTTGGTACTAATCTCAATCAGATATTCAGAGCAATTACAATCATCTC  
AAGTGCAAACACTTTTGAGAATCAACATCTTTGAACTATCCAACAGCTTTGAGTAGTTGGAATAATGA  
GACAGATTTCTGTAAGATTGAGCCAAGTTCAACTGTTACTGTTGTGTGCTACGACGAAAACATAACTCAG  
TTGCATATAATAGGGAGAAAAGGGACTTCCCATTACCTAGAAAAGTTCTCTATTCGTTCAATTTCTCAACGC  
GCTTGCCAAGCTTCTAGCTTGAAAGTCCTTAGATTAGTTTCTCTTGTTTATGGGGGCCGTTGCCTGAC  
AAACTTTCAAGACTTTCAGCTCTCGAGATACTTGACTTGAGTTCAAATTACTTTCACAGTGGCATACTGA

AGCAGTTTCATCCTTAACGGACCTCCAAACTTTAGTGTTAGATGGAAATAGGTTGACTGGCGGAATTCCA  
GATGGCCTTGGTTCACCTTCAGTTTTGGCAGTTTTGAGTTGAAGATCAATTCATTAGATGGACCTTTGCC  
AGATACTGCGTGATTTGAATAATCTTCGTGTACTTTCACCTTCGAAGAATAATTTTAGTGGTGATGTCC  
CTGATCTTAGCAGTTTACAAAATCTTCAAGTTTTAGAGTTAGAGGACAACCTTTTTGGTCCAAAGTTTCCT  
CAAACCTGGAAGTAAAATTGAAAGCATTGCTCTAAGGAATAACAAATTCACCTGCAAACATACCAGAGAAA  
GTTTCAGTCCTATTATCAGCTTGAACATTTTGATATTTCTCCAACAACCTTATGGGGCCATTTCTCCGTCG  
TTGCTATCTTTGTCATCCATCACATATCTGAATGTTGCAGGAAACAAGTTAACAGGAATGCTCTTTGAAG  
ATAATCCATGTAACACAGCATTAGATTTTGTGATCTGTCTGCTAATCTGTTGACAGGATCATTACCTAAT  
TGCTTCTGTCTAGTTCTAGGAACCGGATTGTGCATTTTTCCAATAACTGCTTAGCAACCGGAGATGGTA  
CTCAACATCCATTTTCATTTTGCCGGAATGAGGCTTTGGCTGTTGGTGTCTTACCTCAGCATCAAAGACAA  
AAACATGCTTCTAAAGTGATTCTTGCCTTGACCATATGTGGTAGCATCACCGGTGGAGTCATACTCGTAT  
GCCTGACCATCTTGATTGTCAAATCTTTTCTTGCAAAGAAGGCTTCTGCCCAAATACCCCAACCAGATTT  
ATTTGAGAAGATGCACCATCTTCATATACCTCCAAGTTATTCACAGATCCAAGTAAGGTTCTCTCAATAA  
CCAAATTAAGTGTAAAATAGAAGCTTAGGGCAAATGTATCTGCTCTCTGCGCCCTAGATGCCTGAAGGC  
GAGGGCTTTCTTCAATCCCAAGTGCCAAGTATACTAACTTGATACCTTTGTATTTCTTGTATAAGGATA  
CATACTCAAGCAATGAAGTTAGGAGCACTTAGTCTTCATCTTATAGAATATTCTCTCTAGAAGAACTTG  
AGGCGGCAACGAACAACCTTTGATACAACAACCTTTATGGGTGAAATTCCTAATGGCCAGGTATGGTATA  
TGAACCTATTATTCTTTCTGCTATAGCATTGAGGTCTTTGGGTGTTATACTTATGGCCATATTAGTAAT  
GTAGCTCACGTGGCAGATGTGGACAAGTCATTCCAAGAAAGGGAGTTTCAAGTATTTGAGGTAATAAT  
CCATGGAAATGGAGAGATTGATGATGATGTTAAACATCGTATTGGAATGAGGTGTATGAAATGGAAGC  
TTGCATCTAGTGTCTTGTGTGATAATAATGTGCCACCATGTTTTAAAGGCACGTTTTATAAAGTGGTGGT  
CAGACCAATCATGTTGTATAGGGCAGGTGTTGGCTGTTCAAGAACTCGCATGTCAAGAAGATGAGAGTA  
GCGGAAATGAAAATGGTGAGATGAATGTGCGGACACGCTAGGAGAGATATGATAAGGAATGAATCTAT  
TCGGTACAACGTGGGAGTGGCCAAGATGAGGGAGGCAATATTGAGATGGCTCGGGCAAGTGAAGAGA  
AGATGCACAGATGTTCCATTGAGGAGGTGCGAGAGGTTGGCTATAGTGGTATTAAGAGAGGTAGAGGT  
ATGCCAAAGAAATTTTGGGGAGAGGTGATTAGACATGACATGACTTGCGTGTAGCTCATCGAGGACAT  
GACCCTAGATAGGAAGATATGGAGGTGAGGATTAGGGTAGAAGGTTAGTAGGTCAAGAGTGTTGTCT  
GGTTTCCCTTTTAGTATTGTTACTACCCTTCTATGATCCTATTCTTCGATATTAGTTTTACTGGTTTTT  
TCCTTTGCTTCAGTTATCGTATTATTTGTTGTTGTTGCTACTAATCTTTTCTTCATTGTTTTCAGCATGAAT

TCTTCGACTATGTTTGCTTTACACACTTGTTTTCTATATGTTTTACTTGAGCCGAGTATCTTTCAAAACAAC  
CTCTTTACCTTCACAAGGAAGGGGTAAGTAAGGCTGCGTACACCCACCCACCCACTCTCCCCAGATC  
CCACTTGGGATTATACATAGTATGTATCAGTATGGGTGTTATATTAGAGAAGTGGTGTGGACTTGTAGTA  
GTAATGCCATCTGTTTGTTCTCTATCATTTTGGCACAAAAGGATGAGTTTGACTCTTGAAGAGTAAACCTA  
TTAATATTACCAGCTGTTCTCGAGGACTAAGGCTCACAAACGTTTTCTGTTTTGGATTGAGATGTACAGA  
GGGCAGATGAGAGATGGTTCCTACATTACGATTAGATGCCAGATAATGAAAAGAAGCAACACTAGGCA  
AAATTTTATGCATCACATAGAGTTGATATCCAAGCTCAGACATCAGCATTGGTCAGTGCTCTTGGACAC  
TGCTTTCAGTTTTACTCAGATGATTCAAGTGTGAGCAGAATTTTTCTCGTCTTTGAGTACGTACCTAATGG  
GACCCTAAGGAGATGGATTTCTGGTAATTACTTGACAAGCAGATATCTACCCCTCCCTATTGTTGGATA  
TAAATGTGCTTTAGTAATTTGATGCTCTCTGTTGCTTAATTGCAGATAAACATGCTAGACGTAAACTAACC  
TGGACACAACGTATAGCAGCTGCTACAGGGGTAGCAAAGGGACTACAGTTCTTGCATAATGGAATTATC  
CCTGGCCTCTTTTGAATAATTTGAAGATAACCGATATTTTGCTGGATCAGAACCTTGTGCCCCAAAATTAG  
CAGCTACAATCTGCCTGTTCTGTGCGGAGAATATCGGCAAGGTGTGAC

>M6-PGSC0003DMG401021514 M6 LRR-RLK

AACAATCTTTCTGGTCCCATTCCCTAGTGAGTTGGGGAATCTGAATAACCTCAATGATCTGGTTTTATCCGA  
AAATCAACTTACTGGTTCAGTTCCTACTACATTTGGCAATTTGAGAACTTGCAGACACTGCATCTCCATA  
CCAACAACTATCAGGTTCCATTCCAAAAGAACTTGCATATTTGGATAACTTGCAGAGTGCTGACAATGAC  
CAAAAATCAGTTATCAGGCCATTTACCGGACCAGCTTTGTCAAAATGGGAACTTGAGTTCTTCACTGTG  
GCTAGCAACAAGCTGACAGGGCCAATACCAAGAAGCTTGAGCAACTGCTCGAGTTTCAAATGGGTTGCG  
TTTAATAACAACAGTTTCATCGGAACTTATCTGAAGCTTTTGGAACTATCCAGAGCTTCTGTTTATTGA  
CTTGAACGACAATGATTTTTCATGGTATCTCGGCAGCAACTGGGGAAAATGCGAAAAATTGATTAATCT  
GCAGGTAGCCAGAAATAACATTAGTGGTAGCATACCACCAGAAATTGGAAACATCAAAGGGCTTCTTGG  
ACTTGATCTTTCATCGAATCATTGATTGGGAAGATTCCAAACGAATTTGGAAAATTAACCTCTCTGGTTA  
AGCTTTCTGTGAAAAACAACAATTTCTGGCAATATACCTGAGGAGCTTGGGTCACTGACAAAGTTAG  
AGTCGCTTGATTTATCAGACAACAGATTGAATGGATCAATCCCAACGTGGATAGGAGATTTTGTGCTGTT  
GTTTCAGTTGAATCTGAGCAACAACAAGTTTGGACAAAAGATTCCAAAGGAGATAGGGAGGATAACTCA  
TCTTACTGTACTTGATTTGAGCCATAATCTTCTTGATGGAGAAATACCTGCTGAGCTAGCCAGTTTGTGCTGG  
ACTTGTCAAACTTGAATCTTTCCACAATGGTCTATCTGGGCGCATTCTTAAAGAACTTGATAGTTTGACT  
GGTTTGCTGGATGTTGTATTGTCATACAATGATTTGGAAGGTCCAATCCCTAATAATAAAGCATTATGA

ATGCTTCGTTAGAAGGTAATAAAGATCTTTGCGGCAATGTAACAGGATTCCAGCCCTGCCAAAAGCCAT  
CTTCTATGGTGAAAAAGCACTCAATAGCAAAGGGAAGTAAACTCATCCTCATCTACTGTACTTCCTGTTAT  
GGGAGCACTAGTACTGCTCTGTGTTTTATTGGTGTCTCTTTATGTGTAATAAAAGAATGAGAGTTAAA  
GACGTTGAAAGAAGGGATGGTGATGGTTGGCTTTCGATATCCATGTTAGATGGAAAGGCATTGTACCG  
GGATATCTTAAACGCCACAGAGGAGTTTGATGCAAAATTTTGCATTGGGCAAGGAGGACATGGAAGTG  
TTACAAGGTAAACCTTCCATTATTTGGTGATATAGCTGTGAAGAGACTTCATTCTTCATTTTCAAGATA  
CATCCCAAAGCTTCATAAATGAAGTAAGGGCATTGACTGGGATTAAGCACCGGAACATTGTGAAACTC  
TACGGCTATTGTTCAAAGCACAACTCGCTCTTGGTTTACGAGTATGTAGAGAGGGGGAGTTTGTCT  
AGTATTCTGAGCAATGAAGTTGAGTCTAAGAAATTGGATTGGCTTAAAAGGATGAATATCATTAAAGGT  
GTTGCTTTTGCTTTATCTTACATGCACCAGGATTGCTCACCACCAATTGTTTCATCGAGACATATCAAGCAG  
TAATGTTTTGGTTGATTCTGAGTATGAAGCTCGTGTTTCAGATTTTGGCATAGCGAAGCTTCTCAAACCA  
AACTCATCCAATTGGACTGCACTTGCAGGAACATATGGCTATGTTGCACCTGGTAAGGTCTAAATTTAAT  
TTCGATTTTATTCAGACTTCGTGAATTATAGCCAAACACTCTATACTATTTTTATCTCACTTACACATATAA  
ATTGTTA

>M6-PGSC0003DMG401023552 M6 LRR-RLK

ATGTTGAAATATCTACAAGTGGGTTACAATCCATTGAATGGCGTTCTGCCCAATTCTATTGGGAATCTTTC  
ATCTACTATTCAAACCTTTGAAATAGGAAACACACACATCAATGGCCTCATCCCCACAAGTATAGGCAAC  
ATGACCGGTCTTACATCCTTAAGCCTTGGCGGAAACAACCTTGACAGGGAATATTCCTTCTGAGATTGGTA  
AGCTTAAACAACCTCAAGGACTCGATCTATCTAACAATAAATTGCAAGGACATATCCAGAAGTGGTATG  
CAATTTGTCTGATTTGGTTCAATTATATCTGTATGGTAATGAGCTCTCTGGATTAATTCCAGAATGCTTAG  
GAAATCTTACCATGCTTCAACAGCTTTATTTGGCTTCTAATAAATTTTCATCAAAAATTTCCATTGACCCTTT  
GGAAAATGAGTGGTCTTCTCTATCTAAACGTGTCACAGAATTCAATAGAGGGAGAACTTCCATCAGATA  
TTGGAGGACTGAAAGCCATTGTAGAACTATATCTTTCTGGTAACCACTTTTCAGGCATGATATCAACCAG  
ATTCGGGGAACTCCAAAATCTGCAGTATCTCGACCTATCGAAAAATTCATTTTTTGGCCGAATTCCATTAT  
CCTTTGCCAACTTGATAAATCTGGAATTCTTGAATTTGTCTTTAAATGCATTGTCAGGACTATTCTAAGT  
CTTTGGAAAACTCTCATACCTTAAAAGCATTAAATGTTTCATTTAATGATTTAGAAGGTGAAATACCGAG  
TGGTGGTGTGTTTGCAAATCCACTCTGCAATCATTTGTTGGGAACAAAGGTCTATGTGGAGTGCACATA  
TTAGAGATTCTGCTTGTGCTATCACTAATCCTGGAAAACAATCAAAGCTTAAGGAGGTTCTGCTAAAAA  
TTGTTACTCCAGTGGTTATTGCATCCTTTATGATATTCTTGTTCGTTTCAATTTGGATAATGAAACGACAG



AAGAAAGGGAAGTCCAAAGATGTGGACAAGATACTGGAGATGGGGACTCATCAATTAGTTTCTTATCAC  
GAGATTCAACGAGCAACAAATAATTTTGATGAATCCAATTTAATTGGTGAGGGAAGCTCTAGCTCTGTGT  
ACAAAGGCACATTGTTTGGCGGAACTGCAGTGGCCATTAAGGTTCTGGATTTGAAAAATGAGCAAGTAT  
GCAAGAGGTTTGATACCGAATGTGAAGTGATGAGAAATGTTAGACACAGAAATCTTGTTCCAGTGATTA  
CTACATGTTCTAGTGACTATATAAGAGCCTTTGTTCTGCAATTTATGCCCAATGGAAGTCTAGAAAATTG  
GCTGTACAAAGAAGATCACCACTTGAACCTTCATCAAAGGGTCACTGTAATGCTTGATGCAGCTATGGC  
AGTTGAATATCTACATCATGGTCATGTCACTCCAATAGTTCATTGCGACCTAAAGCCAGCCAACATTCTTT  
TGGATGAAGATATGGTGGCTCATGTTGGTGATTTTGAATCTCTAAAATTTTAGCCATAAGCAAGTCCAT  
GGCTTATACCGAGACATTGGGCACTCTTGATACATTGCACCAGGTATACTAGTCTCTTTCTATATATTTT  
CACAAAATCAGAATTTAGCCCTTCCAAAATCATAAAAGCAAGTGTCTGTTAGTACATAATTATGTTATAT  
TTAAATGAGTAATTTCTTTTTCATTTTCATTTTCATTCTTTTTTAAAGAATATGGCTCGGAGGGAATAGTGTC  
TTCTAGTGGTGATGTTTATAGCTATGGCATCATGGTGATGGAGGTCTTGACGAAACGAAGGCCAACAGA  
TGAAGAGATATGCAATGAAAATCTTGACTTGAGGAAATGGATCACACAATCATTTTCAGGGAGTATGAT  
GGACATCGTGGATGCCAATCTTTTTCGTGA

>M6-PGSC0003DMG401027271 M6 LRR-RLK

GTTTTCTTCATTTCTTGATATGGCTTCTTCTTAGATAGTACTCACTACTACTGTCTACTACATTTTATTTCT  
AAATTTAAGGGCTCCTAGCTTTTTGGTTATTTTCCATTTTCAAGATTCCTCAAATGGAATACTCCCTCACA  
TTTCTTGAGCATTTCAGACTCAATCTTTTTCACTCTAAACACCCTTTTGTCTTCTACACCCACCCCCACAA  
TCTCCAATTCTGCAGAAAGTTTCATGTGATGGATTCTTGATGGGAAAAGGAGGAAGAAGTTGAAGAAAA  
GGTGTCTTTCTTTGTAACAACCTCATAACCATTTCAAAGATTCGATCTTTTTCACTGTAAACCCCTTTTTTC  
ACCCCTTAATCTCATCAATGGATTCTTGATTGTTCTATCTGGTTGTTTTGGAGGGAAAAGGAGGAAGAA  
ATTGAAGAAAAGGTGTTTTCTTGAAAAAATAAATACTCAAGAATGGCAATTTTGAGGTTTCTGTAACT  
GTGTTTTTCTAGTTGGTTTGTTATCAAGATTCCAACCTGTGAATCCCAGTTGGTATTTTCATGATCAAGA  
TGTAGTGGAAGCAATTGGGAAAGAGCTATAAGTACCTGGATGGGGTGTGATGAACACAACCTGATTTCT  
GCTCTTGGCATGGAGTTATTTGCAGCTCAAACAGTTCAATGGTGGAAAGACTTGATCTTTCTGGTTTTAG  
ATTACAAGGTAATGTAACCTAATATCTGAGCTCAAAGGTTTAAAGTGGCTGGACCTTTCTAATAATAAC  
TTCCAAGGTTCTATTCCATTTGCATTTGGGAATTTATCTGAGCTTCAATATCTTGATTTGTCTTTAACAAA  
TTTGGAACTCAATACCTAGTGAATTAGGTAAGCTCAGAAGCCTAAAGGCATTGAACCTTTGAAAACT  
GGCTTACAGGAGCTATACCTGATGAGCTTGAGGGGTTAGAGAATTTGCAAGATTTTCAAATATTTACTAA

CAACTGAATGGTTCTATCCCAATGTGGATTGGTAATTTGACCAATCTTAAGGTTTTTGCTGCTTATGAGA  
ATGAATTTAGTGGTGGTGTTCCTGTTAACTTAGGATTGTACTCTGATCTTTCTTTGTTGAACCTTCACTCA  
AACCAGCTTGAAGGTAATTCCTGAGAGCATTGTGCTAATGGGAATCTGAATTTCTTGTCTAACTCA  
GAATAAGTTGACCGGAAAGATTCTGATTGATTGGGAATTGTAAAGGACTTTCTAGTATTAGAATTGG  
GAATAACAAGTTGATTGGAGGTATCCCTAAATCAATTGGGAATATCAGAAGTCTTACTTATTTGAAGCA  
GATAGTAATAGTTTGTCTGGTGAAATTGTCACCGAGTTCGCAAATGCTCAAATCTCACTCTACTTAATTT  
AGCTTCAAATAAGTTAATGGAATTCCTCCTGAGTTTGGTCAGCTTAACAGTTTGAAGAATTGATT  
GTTTCTGGTAATAACCTTTATGGAGAGATTCCAATATCAGTTCTTAAGTGAAGAATCTCAATAAGCTTG  
ACTTGAGCAACAACAAGTTCAATGGTACCATACCGGCAGATATCTGCAATACGTCCAGATTGCAATATTT  
GCTGTTGGGGGAGAAGTTCGATTGAGGGGAGATACCTCATGAGATAGGGAATTGTGTAAAGTTGCTTG  
AGTTGGAAATGGGGAGTAATGAACTTACTGGAAGTATCCCTCCTGAGATTGGTCATATGAAGAAGTTGC  
AGATTCGTTGAATTTGAGTCATAATCGTCTCCACGGAAAATTGCCTCAGGATTTAGGAAAAGTTGACAA  
GTTGGTTTCTTTAGATGTATCTGATAATCAGCTCTCGGGGAATATTCCGCCGGCATTGAAGGGCATGCAG  
AGTTTGATAGAGGTTGATTTTTCGAGCAACCAATTCCTGTTCCAATACCTACTTTTGCACCATTTGAGAA  
AAGTCCTAATTCAAGTTTTCTTGAAACAAAGATCTCTGTGGTGATCCTTTGAGTGTTGGTTGTGGGGAT  
TTAAATGGTTATGACCACAGCGTTTACGGTCACAAGGTCTCTTACCGAATCGTTTTGGCTGTTATCGGTTT  
TGGTTTGGCAGTTTTTGTATGTGTCACAGTGGTTGTTTTGCTGTTTATGATGAGGGAGAAAACAAGAGAA  
AGCTGCCAAGGAAGCAGCTGGAAAAACCATTGATGAAATTTCTAGCAAACAGTGATACTAGCGGGAA  
ACGTCTTTGTTGACAATCTAAAGCAAGCAATTGATTTTGTGAGTTGTAAAGGCAGTCATGAAAGACTC  
GAATAAGATTTGTGTTGGTACTTTGAGCACTGTCTATAAAGCAGACATGCCTTCCGGGATGATTTTGTG  
GTGAAAAAGCTAAAGTCAATGGACAAAAGTATAATTCATCACCAGAGTAAGATGATCAGAGAGCTTGAA  
AACTTAGTAAGCTCGTTTATGATAATCTTGCTCGTCCTATCGGATTTGGAATCTATGAAGATGTCGTTCT  
TCTGTTGCATGAATATTATGCCAAAGGAACGTTGACTCAATATCTTCATAACTCTAGCCAGAAACCTGAA  
TATAAGCCCGACTGGCCAACAAGACTTGCCATTGCCACTGGAGTTGCAGAAGGATTGGCATTCTTCATC  
ATGTTGCTATCATCCATCTTGACATTTCTCCGGGAATGTGCTTCTGATTCTAATTTGAGGCCTTTGGTTA  
GTGAAGTTGAAATCTCTAGGCTTCTCGATCCATCTAGAGGGACTGCAAGTATTAGTGCTGTTGCTGGTTC  
ATTCGGATATATTCTCCAGGTACATATCATTGAAACACATACTCCCTCTGTTTCAATTTGTTTGTGTTGA  
TTTTAACTTGACACAAAGTTAAGAAAGTAAAGAAAAGTCTTTGAATCTTGGTGTCTTAACTAAAGATAT  
GTAGAATGTACCAAATGCCCTTAATCTTGTGGTCTTAAACATGTCACGTGAAAAGTTTGAATTTAAAA

GTTGCCAAAAGAGGAAAAAGGCATTCTTTTTTAAGTATGGCAAACAAATTGAACTATTATCTTTCTCTTT  
TCGCGTTTGTAGAGATTATAAATCTGTAATTGACTTGTTTTTTTTTCTAACAGAGTATGCATATACAAT  
GCAAGTAACAGCTCCTGGAAATGTTTACAGCTATGGGGTTGTTTTGCTCGAGATCCTAACCACCCGACTA  
CCTGTTGATGAAGCTTTTGGTGAAGGAATAGATTTGGTTAAGTGGGTACATGGTGCACCTACAAGGGGG  
GAAACACCGGAGCAGATACTCGATGCAAAGCTCAGCACCATTTCATTTTCTTGGAGAAAGGAAATGTTA  
GCAGCACTAAAGGTTGCGTTGCTGTGCACTGACATGACACCAGCAAACGACCAAAGATGAAGAAGGT  
GGTAGAAATGCTGCAAGAAATCACGGAAAGCTAAACAAAGTTCGTATCATCAAATCTAAGTATGTGTTG  
ATCTCTGTCTTTCATATGTGAATGCTCCTGTAAAATACAAGTGTACGACATTCTAAGTCGAGAGGACA  
AAATGGTCGAACTCTTAAGGGTATGATGTGTCTTACTTCAATCATATGATCACCGATTCTTTTTCTCCAAA  
ACATGAAGATGGAGATGATGTAGATTAATTTCTCACAAGGAGAATATGTTTACAAATAGCATTATCTTTC  
ATTTTCCAGTCCCCTTTCTGGTACATTGCTTCAAATCAAGTATAGATTAATCATAGTGAAAGATTAAG  
GGAATGCTACTATTCAAC

>M6-PGSC0003DMG401029358 M6 LRR-RLK

CATTTCTTGGTTTTGTATTGATATTACTAGTTAGCAGGATTTGTATCTGTTGTGCTTCAGAGAGTGATGTT  
TATTGCTTGAAATCAATAAAAGAATCATTACATGACCCTTCAATTCTTTAAACTCTTGGAAATTTCAACCA  
AAACTCCATCTGTCTTTTTGAGGGAATTGACTGCTGGCAATCTGATGAGAATAAGGTAATGAGCATCACA  
CTTTCAAACTTTGGATTAATAGGTGAGTTTCCTCGTGGCATTGCAAATTGTACAAGCTTGACAGGTCTAA  
ATCTTTCTGGTAATCATTTGTATGGAACCATCCCTTCTGATATAGCAGTGATTCTTCCATTTGTTACAATAC  
TTGATCTCTCAAATAACACCTTTTCGGGCAATATAACACCTGGTATAGGTAATTGTCAATTCATAAATGTT  
CTAAAGTTGGACTATAATGATTTAGAAGGTGAAATTCCAAGTAGAATAGGCTATTTGCCTCGCCTTAAGA  
CGTTCAGCATAGCTAACAATTACTTGACTGGGCCAGTGCCATTGTTTTTTAGCAAGAATATCACGGCTGA  
GAGTTTTGCAAACAATCCAGAGCTTTGTGGGAAGCCCTGAAAGGATGTGAGGATTCTTGGATATGGAA  
ACATGTAGATCGTGCTTCGTTTCATCAAAGCGTTTGTGATTGGTTGGGTACTTTTGTTTACAATGGTTTTAG  
TCCTTTGCTTATTTAAATTTCTACCAAGGCTATCAACAAGATAGTCTCATTAAACATATGGAAGCTAAGG  
AAAAAGAAACATTTAACTTCAGGAAGTGAAGAGGAATTAAGCAGCCAACATAAGGTAAGATCTTGCTA  
AATTTGCTGCACTGCTTATAGTCTGCAAAGTTACCTTATCTTCTGTAGTTCCAATTTTGTGATTAGTCCTTG  
CTAGTCCATTATGTTATAAATTTCTTATTCGATCGATGATCAAACATGATAGCAATAAGGTTCTCAAGTTT  
CTTCTCTGTTTTGACTTCTGTGTATATTCAAATGATTTAACTTGCTGTTTTATTTACAGATATTAAGCTGG  
AGAAGTTTGTTATGAGAATGAGCTTCACGGAGCTTGAAAACGCGACTTCTGGTTTTAGTGAAGACTATCT

AGTAGGAAATGGAATGTTGGGCAAAGTGACAAGGCAATTCTTCCAATGGCTGGATACTTGCCATCAA  
GAAGCTCAATGACTGGGAGAATTTGGAGGACGAGTTTGTCTCGGAGATTACAACCTTTGGTGGTCTGAG  
GCATAGGAATCTATTGCCTCTAATAGGTTTCTGCGCCGAAAAGCAAGAAAGGCTTCTTGTTACAATAC  
ATGACTAATGGAAGTCTTGATGAATGGCTGCACTCGAATGAAGTTAAGGCCAATATTTTGGATTTCCCTC  
GGAGAGCTAAAATTGCACTTGGGATAGCGAAAGGCCTGGCTTGGCTTCATCATGGTTACGAATTGCACG  
TTACACATGGAAGCATAAGCACGCGATGTATCTTGCTAGATCAAATCTTGAACCAAAAATATCCAACCT  
TTGGGAAGCAAATTTTGGAGTAAGAATGATTCTGCATTAAGTTGGAGTCTTTTCCCAG

>M6-PGSC0003DMG401030114 M6 LRR-RLK

TGGATTGGCCAAAAAGATTGGAGGTTGCCATTGGAGCTGCTCAAGGACTTTGTTATATGCACCATGACT  
GCACTCCACCAATCATTTCATCGCGATGTAAAAACAAGCAATATCTTGTTGGATTCTGATTTACAGCCAA  
AATAGCTGATTTTGGGTTGGCCAAGATTTTAGAGAAGAAAGGAGAGCTTAACACCATGTCTGCTGTTGC  
GGGTTCCTTTGGTTACATAGCTCCAGGTAAAAGCAAATCCAAGCTTGAACCTTCGTATTACATCAATTC  
GTTAACATTATATCAAAGTATGACTAACTAATAATTTACTGTTTGGTTACAGAGTATGCTTATACAAC  
AAGTGAACGAGAAGATTGATATCTATAGCTTCGGGGTGGTGCTATTGGAGCTAGTGACTGGAAGACAA  
CCAAATTTTGGGGACGAGCATAACAAGCCTGGCAGAATGGGCATGGAAGCAGCACGGAGAAGGGAACA  
CTGCCATCGATAATATGTTAGATACAGATATCAAAGAAACATGTTACTTGGAAAGAAATGAAGACTGTGT  
CAGACTCGGGCTTATATGCACGAGCAACTTACCTGCAAGCAGGCCTTCATGAAAGAGATTCTGCAGAT  
ACTTCA

>M6-PGSC0003DMG402002925 M6 LRR-RLK

GTTCACTTCTCTTAGTTTTACTTCGATTTTTCTCCGGAGCTCCGGTGGTCGGAAAGTTGATCGGCGTGC  
GAAAACAAGTAGAATTATAAATTTATAATCACAATCGAGGTAAATTTGCTTTTTTCTCCGTAATTTGCC  
GTTGATCATTATTTTTCTGTGTTTAAATAAAAGTTTAGTTTTTTCTGTGATTTTGGAGTTAAAGTTGA  
AGCTTTTTTCTTAGGGAAGTAGTTTGAGTTGGAGATGAAAAATGGTGAACTTTTGGTTTACTTGAATT  
GAACCCCCACCCACCCACAATTGGAAGAAAATTGTAGGTGTAAGTTGAATTTGGAGTTTTTTGTGA  
TTTTGGAGTTGGTTTGAATGTGTATCTTCTGGTTTTATGTTTAAAGTTTGGAGTTTTTTGCTTAGGGA  
AGTAGTTTGGAGCTGGAGATGAAAACATGTTTTGTTTAAATTTAGAATTGAAACAGAAAAATTCGTCTTGT  
TGTTCCATTTTTGATAAGTTTAGATTATTTTTTCTGTGATGTTTGAAGTTTTTCTCTTAGGGAAGTTT  
CAGCTGGAGATTAGAATGATGACATTTTTGTTCTATCATAATTGGAAGAAAGAGGTAGATGTAGGGGTG  
AAAGTTGAATTTGGAGTTGTTTCATCTTTTCAATTTATTAGTTTTTTTTTTTTTTTTTTTTTTTTCTGTGG

TTTTGGGAAGTTTATCAAATTGGTATATGCTTAAAGTTTGGATTCTTTTGGCTTATGGTGATGTTTTGTTTT  
GCTTGGAATTA AAAACCCATATTTGGAAGAAAAATGTAGAGGGTGAAAGTTGAATTTGGAGTTTTTTT  
TCCTTTTTGTCTTATTAGTTCTATTTTTTGACAAGATTTTTTTTTCTGTGATGTTGGTGTGGTTGAAGGT  
TTATCTTGATGATTTATGTTTAGTGTGGAGCTTTTTCTCCCAAATTTTAAACATAAAACAAGGAAGATA  
AACTTTCAACCGACTCCAAAATTACAGAAAAAAGAGAAGCTAATCAAATATAGAAATAATAAGAAAAC  
TGAGAAAACAAAACCTCCAATTTCACTTTCACTACTACATTTTTCTCCAATTATAGGGGGTTCAATTC  
AAGAAGAACAAAAGGTCACCGTTCTTATCTTTGTGCTAGAGATAAGAATGGTGACTTTTGTTACTTGA  
AATTGACCCCTATAATTGGAAGAAAAATGTGGGGGTGACATCCATGAGGTCTCAGGTTGAATAAACAC  
TAGGTGATTTCTTTCCATTTGTCCTAGCCTTGTAGATAGAGTTGCTTGGTACTTGTGCTAGTGGAAGT  
GACATGTATCTTGTGGAATTAGTCGAGGTGCATGCAAGCTGGTCCAGACACCAAGGCTATATAAAAAAG  
AAGAGTTGAAAGTAGCTGACCCTGTCAGTCTACTTAGAAAATTGATTTTTGATGAACCTAACCTTTTACAT  
TTTTCATGTTTTGCAGTGTCTCTGGAGGTGTGGTTTGATTCTAGAAATCCTCGTGCAAAAATAATAAGTC  
GGATTGAACTTTTCTGCTGTAGCTGCTTTGTCAGAAAAATGATGGAGGCTCCAAAATCTGTTGGACTT  
ACAGGCTTGAATCAAACCTGTCGCAGAGCTTTTACCATAAGCTTGGCGAGGGGTCAAACATGTCTACA  
GAGAGTTATGGGATGAGCAATGCTGGAGGTTCTGTTGCAATGTCCGGTGGATAACAGCAGTAGTGGATC  
AAATGATTCTCACACTCATATTTTAAACCACCAGGACAACCACATCCACAATAACTATTCTGTTGCTGCTA  
GCGTATTTAGGGGGAGAGTTTCTAGGTTGAGCGATGATGCCCTCGCTCAAGCCTTGGTTGATCCTCAGT  
TCCCCACCATTGGGCTTGAGATTTATGATGAGTGGACAATTGACTTGAGGAGGCTTACCATTGGACAAG  
CTTTTGCTCAAGGATCTTTGGGAAACTGTATAAGGGAACCTATAATGGTGAAGATGTTGCCATCAAGCT  
TCTGGAGAGGCCAGAAAATGATCTTGATAGGGCTCATCTTATGGAGCAACAATTCAGCAGGAGGTCAT  
GATGTTGGCAAATTTGAAGCATCAAATATAGTACGATTTATTGGTGCATGCCGTAAACCCATGGTGTG  
GTGTATTGTGACTGAATATGCAAGAGGGGGATCAGTGCCTCAGTTCTCACAAGGCGGCAAAACCGAG  
CTGTGCCATTGAAGTTAGCAGTTAAGCAGGCTCTGCATGTGGCAAGGGGGATGGAGTATGTGCATGGC  
CTGAATCTGATTCACCGGGATCTGAAATCCGACAATCTACTGATTGCTGCTGACAAGTCAATCAAATTG  
CAGATTTTGGTGTGCTCGAATTGAGGTGCTGACTGAAGGAATGACACCAGAACTGGCACTTACCCT  
GGATGGCTCCGTAAGCATCTAGACTCTTTAGCAGTCTTGTTAAATCTGGTGTCTTGGTCCAGTTTGGGCT  
TATTGCCAAACCTATAATAGAGCTCTCTGTCTTCACTTTCTGAATTTTATTCTTTTTGAAAACCTC  
TTTGCTATGTGTTACTTGAGCCGAGCATCTTTCAAAAACAACCTATCTACCTCCACAAGGGAAGTGTAAAG  
GTCTGCTTTCTCTACCCAACCCAGACACCACTGAGTGGGATTTCACTGGGTATGTTGTTGTTGTAGCAT

GCTGGATTCCCTTTATGGAATAAACATTTTTAGAACTAAAGTGAAAAGCATGGAGGTTGATGGGTTCAA  
GCCCTGTATGTCCTTTTGATGGCACCTCACTGATAGTGATTATATTTTCTATTGTATATGTGCTGTTACTAA  
GAGGGAGAAATTATTTGTTCCAGTTAGCTTTTTAACATAGTTATGTGCCTGTTAATGAAGGTTTACGAGT  
TGATCGATTTTATTTTCTTTCAATTTCTTTCCCTCCTTTTCATCTTCCTTCTTGTCTGTGATTTGTAACCTG  
ATTC AAGTTAGTCACATCCAAGGGCGTGGCTTAGTTGTCAATGAAGTAGGTGCAAACCATGGAGATTAG  
GGTTCAATCACACCAAAGTGCTTTCTCCCATATGCCTAAGCCTTAAACCTTGGTGGGTATCTATTTATG  
TCTGTTTATTGATCCAAATAAATGGTAAAGTGCCTTAGTTGATAACTCCCAGCACCAGCCACGTCATATTC  
CATGAACTTATCAGCCCAAAGTGATTATTAACAGGAAAAGAACTAATCTTCAAAAAAATCAGTTCTTTTTC  
TGTTAATAATCACTTTGGGCTGATAAGGTTTCATGGAATATGACATGGCTGGTGTCTGGGAGTTATCAACTA  
AGGCACTTTACCATTTATTTGGATGCACTCCCCGATGAAGATGATAAGTTCTACATTGTGGTGGAAATTT  
TGGTCTTTTAGCAGGCATCTTAGAGAAGCATGGGAGACATTAGTTCAAATCCTAGAAGAGGCACAAAAA  
CACTAGGTGATTTACCTGATACTTATGTTAGTGGGGTATTGCAAGTACCTCATAAAATCATCGTCGGCA  
TGCACTAGTGATCTTCGAGGATTTCTCGATTATCAAAAAGAAAAATCTAAATAAGTTCTATTCTTAGACAT  
AATTAAGTTTCAACACTTTTATGCCTCCCAACTTTTTTATGCAGTTGTTATAATTGTTATATATAAGCGACT  
AATTAATGGATTCAAAAACAAAACTGGTTACACCATAACTCAAGTATGGCTCTTTTAGTTTCTTTGCTAG  
CTCTGAGTTGGAAAGAAGTTCGTTCTTCTTTGGCTGTTCCGAAAGGAATTCCAGGAGAGGCCTTACAAA  
AACTAGACTCTACAACGATAATGTGATTCTCCACTTACTACATAGACTTTTTCCAACATAAGACCATCTCA  
ATCTCTACGGAAAGGTAGAAGTGGAATATTTGGCTCAATCTTCCATGAATCTAAATCATTTGTTGGAACC  
TTCGGTCATTCTTTACGGAGAGACCTTTTTTAAAAGCATAAAAAGAGACTAGGTGATGTTTCTAGAATC  
TACAACGATTATGTGGATTCTCCATTGAGTTGCTACATAGACTTGTCCATCCATAAGATTATCTCAATCT  
CTATGGAAACGTAGAAGTGGAATACGTGGCTCAATCTTCTCATGACCCTAAATCATTAGTTGTAACCTCT  
GAGCATTCTTTCTGGAGAGAAGTCTTATTAAGCAAAGGTGATTCATGGAGTTTGAAGTGAAAAGCT  
AGGAGTGAAGCATAACAAGTTACGGGAAAGTAAAAAGAAGTACCAATCACATACAAATTTAGTCATCTTC  
TCATGAACCTGAATCATTTGTTAACCTCCAATTACTGAGAGTAGTGTTTTTGAATCGAGAAATGCAAAA  
GATGACAAGGTCCGTGATTTTGAAGCAAAAAGAGAGAAGTGAAGCGCACTAGCTATAAGAAGTAAGTA  
ATGCTAGACATAGAAGGATTTACTACAATAAAGATGCAATTAGAATAACTGATCTTTTCATCCAATTTAC  
GGTAATATTGATATTAGTCTAGCTCCTCTAAGTCGAGATTCAAAAAGTAGACCCTTCTCATTAGGATC  
GTTTTACATGTCATTGTTTAAAGTCCACACTTCTCTGAAATGCATGGCTTCAAGCGGTAATCCCTTACTCA  
AATTGCTTAAAGTAATGGCTTTGAATAACACTGCAGGAGAGATGTGATACATGAAGAAATCAATATCCG

GTTAAAAGAATGATAAGAATGCCTTATTTGGTATTTAGTCTTACAACACGTGTTGCTAGACCTGATTTAA  
CGAATGCCTTATATAAGTTGAAGTAGATCTTTTAGAAACAAAAGGAGCATTAAAACCCCTTAGTGATCAA  
TCAACATGAACAACCTTGTTAAGTCAGGGAGAGCCTACGTTAGGCCGGTTATGACTTAGTATTCCCGACGT  
CTTACTTTTTGTGCCTCACATACTATGTTACACCAGTCCTTTGCATTACACACCCGTTGAAATGGGTGGGT  
CGTGGCTGCGTGTACTCGTTAAAATACACAAAAAAATTAACAAAAAAGAAAAATGCACGTACTTATA  
ATGATACTTGCGTACAACCTGATAAAATTCATACTCACAAATGAGTCCATACTTAGAAGCGGATCTAGGAT  
ATGGAGTTTATGGGCTCCCAACGATCTCAAATTAATAATAAATTATTATAAGTGGTCAAAGGGAATC  
AGACCCTCAACGAGGAGGGCAACAAAGCATAAGCAAGTTCATTATGCCGCTGGGGAAAAAGCTTACTT  
TGTTGGTAGATCCCAACAAATAGTTTTATATATTTAATAGATTTTTTCAATATAAATACAAAAGTTAGTG  
GATTCCCCAAAGCCTACACCCGATACTCTAGGTCTGCCCATGTCCAACAACAACAATATACCCCGTG  
CAATCCACAAGTGGGATTTGGGGAGGGTAGAGTGTATGCAAATCTTACTTTTACCTTGTAGAGATAGA  
GAGGTTTCTGAAAGACCCCTGTTTTTAATAAACATGCCAAAATAGTTCAAAAGTGGGATAAAAATATGG  
GAGCAATCAGAACGACACGTAATGCAAATGGGAAGTGTACACGACAAACAAGAGAAAGAACGGTA  
ACGAAAACAAAATAATGCATAATCAATGCAGAAGAACTACACGAGTAGTGCTAATACTATTGGTAAGA  
ACACCATTGAAAGCCTATCTCGCAGGGGAAGTGAGAGAATGCTTAATTACCAACTAACCTTCTACCCTAAT  
ATGCGACCTCCATACTCTCCTATCTAACACCATGTCCTCAGTAAGATCCAGATGCACTCTATCTAATCACT  
TAATCCTAATACTTCTTCAGCCTGCCTTTACCTCTCTTGGCGTCTCCACTGCCAATTGCTCACACCTCCTC  
ACTAGAGCGTCTACACTCCTCTCTCTCATAATCACTCAGTCTCACTTCCCTCATTTTGTCCAACATGGAG  
GCCACTCCTATCTTGATCAGATAGCTCAATTCTTAATCTTGTCTCTCTTAGTATGCCACACATCTACCTC  
AACATCCTCATCTCAACGACTTTCTTCTTCTGAACATGAGATTTCTTAATAGGACAACACTCCGCCCCGTA  
AAACATGGTTCGGTCTAACGGCTACTTTGTAGAACTTGCCCGTCCATGCTCCATATAATATGGATCACATG  
TTACCTTTAGTTGCTGAAGAAGTATATTTGAACCATTTCAAATTTTGGATTCTCTACTAGAACTCATTAC  
CTCTAAGAATGATAGGAAAAACGAAGCATGGGTGTCCACATGGGCTTGATTGCCAAGTTTGTTTCGTAT  
GTATTATGAAACGCCAAATTAATTTTAGAAGTAATGCATAATTAGTATGTAAGAATATATTTTACAATTTG  
TTTTATGTATTACGGTGCATGTATAGGCTGACAATTGTATCAATTCATGCATTTGCGCCTGATTGTTTAA  
TGTTGAAAATTTTTGTTTTATTTGATATCTATCAGAAGATCTCCTTGGTTGGCACAATCTGACATAGAAG  
GTGCAAATAATGACAACGAAGATAATTAATTTCAATTTGCTTAGTTTATTGTTCCACTGATACATGGGGT  
TTTCTGTATTTAGAGTCTTATTTAAGAATGGGTATATTTAGTGAATCTTTCAAGAAATTTTTCTTATCATG  
ATTTTCTGGAGTCTTTAGGATTCTGCTCTTGGAAAGTTCAGTATTTGTTTCTCAGGCATATATGGCAGTT

AGAATTTAAACCTTGAATTAGATCATCATTTTCAGGATGAGAGAGAGAATGGTATAGATTAGTTGCTTTAT  
CCAGTTTATGAGTGTAGATTACTGATGATAGAACTGGCATTCTTGATTTCTTTTGTCTGGACAGAAGTA  
TCACCATTAGTTTCTGTTTGTAGTTTGTATCCTTACATAATGTTGGAGATGAAAGTATATTCTTTATAAGCTAA  
GCGAGTTGGAGATTAAGCTTTTGTATTTCTTGAGATAATGTGACAACTGAGAAGTTTCCATTTCTATTAG  
GACATTTCTTTCTGACTTGAATCAAAGTAAGTTTTTCATGTCTGCCTGAAATATTGTTGAAATGCTTGCGA  
TCAGAATAGGAGGTTGACCTTGTGAGTGGTGATAATTTTGGTGACCTAGTGCAGTCGTGAAACACCACA  
TCCCTGTGATGGTGGATGATGTAGCAGTGCAATATAGTTCTTCTGTGTGATAATAGGCTAGTATGCAT  
GTTAGACTTTCTTGGCGAAATAGACAGAAGAATCTGCTTGCATTTGTTCAATTTGATGTGATAATGAATG  
ATCTTGCCAAAAAAAATGATATTGAATGATCTTTGCCAAGACAGTTGGGGATCGGATCTCAATATCTG  
GTAAACTCGTATACGTGCAGCCAGTCTCAGACATTTGATTCTGATTAAGTACTGAGAAATGAAGTTACTTTT  
CAAGTTCACTCTTGAGAAATTAGTTATTCACATTCTGCAGATACTATCCTGTTTAACATTGTGATTTTTTTG  
GCTAGTGTGTCTGGTTTCTTCTTTTTCAGAAAAAGAAAAACGATGTTCAAAGTTGTTAGCATCTGTGTTT  
CGTTGTGGACCGCTAAGTATTTGACTTTGTTTTGTAGGGAGATGATCCAGCACCGGTCATACACCCAGAA  
AGTTGATGTTTATAGTTTTGGCATTGTTCTGTGGGAGCTCATAACTGGGTTGCTTCCCTTCCAGAACATGA  
CTGCTGTGCAGGCTGCTTTTGTGTTGTCAACAAAGGCGTCCGTCCAACAATCCCCATTGATTGTTTGCCT  
GTCTTATCTGATATCATGACCTTCTGCTGGGATTCTGACCCCGACAATAGGCCAACTTTCTCTCAGGTGGT  
CCAGATGCTTGAGGCAGCTGAGACAGAAATCATGACTAATATCAGAAAGGCACGTTTCAGGTGCTGCAT  
TCATCCTACGGCTACAGGTTGATTCGGGAAAGAGGAAACTGGAGGCCAAAAAATGTTGAATGGCAAAA  
CTGATTTTGTGAGTCTGCCATGTGTATCTATCAGGCACAATTTCTTTTCAGATAGAAAAAGGGTTATAGTTAT  
GAGAAAAAACTAAACATTTCTCTGTTGATTTTTGTTTCTTTTCTTTAAACTGTGGATTTAAGACAACGACT  
AGTTGTTAATACAGGTTATCTGATGTGCATCTATGCATTTTCAGATTTTGTCTCTGTGTTTGTGAAATTTGTT  
CAAAGTTATATCAGG

>M6-PGSC0003DMG402004902 M6 LRR-RLK

TCCTATTAATCTCCGATCCGCCATTAATCTAATCTTCAGTCAGCTTTACTGACCATATATTTATAGATC  
ATCCATTGGTATCATTGATCATGTACAAGAAGATTTGCAGATCGTCCATTTCTTTCTCTATTAATTTGTCA  
AGAGGATTACTCTTTTTTTCTAATAAAGCCTTGATTTTTTTTTTGTAGTTTCAGAGACATAGACGAATTTAG  
AATTTAAATTTGATGGATCAACCTTTAAGTTATGACTATTGAATCCATCTGATCACATAATGAGTTTCGAA  
ATTTAATGTTACAGTACTATTTGATAAAATCCGTATTAATAATTTGGGTTCAATTGAACGCGAAGAAGG  
TGGGGGCAGGATGAGCTTGGTGGTAAAGGTGGCCCTACTCTTCTTCAATTTGCATGGCTGCAGCTTCATC



AATGCAGACACAGATCCATCCGAAGGTTAGCTTAATTCTACGTGCTACGTAGCTGAATCATAAAGAAATT  
AATATATTCACGGCACTCATGATTAATTTGGAAGTTACTAACAAAGTTTCTCTGTAAATAAGAAAGAATT  
TCGTAGTTAACTTATGATAAGGCGTGGAACACTTGGTGTACTACTTTTCTTTTCCAGTATTCGATATCCGC  
TTTGTTGTCTCCAATTAATTCGGACTCATTACAGGGGAAGCACTTCTACATGTAATTTTTTATTCTCAA  
GCTCAAACCCGAGACTTTTTATAGCTAAGCTAGGTTGCTAATTTTCACTAAAAAGCACGACGATAAGCCA  
AAGAGTTCACAACATGCAAAAAAAGAAAAAATTGTTATAAATTTAGTAACAAAACAGTGGAGTTTGA  
TTTATTTATTTTTGGAGCTGTTCTTAGTCTCTGTGTGTGATTTATATGTTCTCAATAATTTGTTGGTGT  
GTGCAACTTTGATTATCAGGTTCTGCCCTGAAAGTGATGTATAGCTCCCTAAATTCACCGGGCAGCTTA  
CAAATGGAGCTCATCAGAAGGTGGTATCCTTGTGGAGAATCCTGGAAAGGAATTAATTGCTCGGGC  
AATAGAGTAACTGAAATGTAATTATGTTCTTCCACCATCCTCTATAGTTTTTCGATATACACTTTATTT  
TGGTAACTTCTCGTTAGTTAATTGATTTGGCAATTGCTGATTTTCAGTTTTCGTTTCATTTTCCTTCAGCCA  
GATATCCGGTTTAGGACTATCCGGATCAATGGGATACCAACTAATGAGTTAACATCAGTAACCAACTTG  
TAAGATGATCAATGGCTTCAACTACTATTTCCCTAATTCGTTCTGTTATTTGTATTTACATTGTAAGATGT  
GTAATTTGCAGTGACATAAGCAACAATAATCTCGAAACCAGATACCTTACCAGCTTCTCCAAATGTAA  
AGAGACTGTATGTGTTTTATGCCTAATTTCTTCTTTCTTGTCAATTCCAGGCTCTAGTGTTTTTTACAA  
AGTCACTTACAAAATCTTTCTGCCATTTGCCTCGTATTGCAGTAACCTTGCTGGTAATGGTTTTACCGGTG  
TCCTACCTTATTCAGTTTCACAAATAACTTCCCTTCAATACTTGTAAAGTGAATTTTTAAAAATTAATTTAC  
ATGTATAGTATTATTACACTCGTTGTTCTGATTTTCTCTCCGTTGTATGTGCCTGACTGTAGAAATGTCAG  
TCATAATCAAATTCAGGAGAATAATGACATGTTGGATCACTTTCTTCTCAACACATTGTAAGGCC  
TTGTCTCGATTTCTTCTTTTCTTATACAGATTGATATTACCCTGTGATGATTGAGATTTTCAATGTATCTT  
GTGCTATTCTCGATAGATAAATACAGTATCTTCTGTTTATCATGTGAACTATTGTCACGGAGTGAAAGT  
ATCTTTTCTTCTTGGTTGATTATATTATGTTATATCCCGGTTTCTTACTTTGATTGTTTACATTTATGC  
TTCAGAGATATCTTTTCAATTCATGACCGGTAAACTTCTCAAAGCTTTAAGTCACTGACTAGCATGAA  
GAAAATGTAAGACACGTATCTTCTGATTCATTATTGTAAGTATTGGTCGAGTGTGATTGAACTTTCTAGT  
ATTGTTGTGTAGTGCAGCTACCTGCAGAACACCAGTTCACTGGAAACATTGATGTCCTCGCCAATCTTC  
CTCTTGACGATCTGTGAGTTATGCAACATCTTTGTGTGTGTAATGTTATCGATCTCTGAATGTTCCATTT  
CAAGACTTTCTCAGTTACTATATTGTTGATTCCTTTGTGCTTTAGGAATATTGAAAACAATCAGTTTACTG  
GTGGGATTCAGAGAAGTTTAAAGGGATAATGCAGTGAGTGTTCAGTCTGCAAATTTTTTTCATCCTT  
GAATATTTGTAGAAAATAACTTTCTAACTGAATTCACGATTTGTGATACAATTGTAGAAAATCTAACAGT

AACACAGGGAGCTCAGGGCCTGCAGCCCCTGCGAACAAAGTCCACTCAAAGTCACAAATCAGGAGGCAA  
TGGCAATTCTCCAGCGGTGGAGGTAAAAGTGATAGTGGTGAGAAATCTGGTATCGGTGGTGGAGGCG  
TTGCAGGCATAGTTATATCAGTTTTAGTGATTGGAGCAGTTGCAGTAATCTGTATTATCAAGAAAAGACG  
CAGGAAGTCGTCAACAGACATAGAAAACTTGACGTTGAGCCATTTGTTCTGAGTCACATGAAGTACA  
AGGTATATAATTTTATGACTTCTTTTTGGGTCAGTTGAGAAACATAGCTGGTCAGTATACTTACCTCAAT  
ATCTCAACATATATACTCTTATGGTGGATAGGATCCTTTCTTGACATGTTATCTAATTTGAATATAGAA  
CTGAATTTATTGTGGTACACAAAGGGGAGCCCTGGTGTAACTAGTAAAGTTACTTCCATGTGACTAGGTT  
CGAACTGTGGAAACAACCTCTTGAGAAATGCAGGGTAAGGTTGCATACAATAGACCATTGTGGTTGCA  
CCCTTCTCGTATCCCGCATATAGCAGGAGCTGCTCCAGGCTGTCCTATTGCAAATGTAGTTTTCTTTATG  
TAAACACACTTTTAACTCTGGATGCAACTTGCAAGTTCCAGCAAAGGTAAGTGAATCACCTCAGGTGAATT  
TTGGAAAATCAGTTTTCTTTTGAAGTCTGTCGTCATCATTTTCAAGTGAGCATGTCTATAATGAT  
GAATTATCTTTCCTTTTGCAGCTTCATTTGTAACCTGGTATTTTATACATCTTAAGCCTTACCTCAATTGTT  
TTAAGTTCTGTAGCGTCATCCATCAGAGTTTCCAGCTAACATTTTCCCTTTTCTGGTTACTAGTATTATTGA  
TTTTAATCATGTGTTAGTTTTGGAACCTATATTTTTCTATTCATCACCTATTTTGGCTGCAGATACGAAAC  
TCAGTCAAGCTCCGTCACAGTAAACATGGAAGCTACTGAAACTCCCACTGTAGTATCTCTAAGACCTCC  
ACCTATTAATACTCATAAATCCATTGGTGGAGATGACATTTTCCAGAAAACTCATTGTTCCACAGAAGAAA  
ACTCGTACAGCTGAAAGAAAAGTTGTGCAATTTTCAATTGAAGACGTACAGATAGCTACTGACAGCTTC  
AGTGTAGAAAACCTTATTGGTGACGGATCTATTGGAAGTGTATATCGAGCTCACTTTGACAATGGCAA  
GTAATATCTATTAGTTCTGTTTGCATTTTAACTGTTTCTGTTGCGACTAACATTACCTATGCTGATGTAA  
GTGATTCTGATCGTTTAAAGTTCTTCCATAGGTTCTTGTGTCAAGAACTTTATTCATCTGAGCTCCG  
GAATCCTGAAGATTTTCTAAAGATGATTCCTGAAATATCCAGCTGGATCATCCAAATGTAACAGACCTA  
ATTGGTTATTGCTCAGAAGATGAGCAGCACCTGCTAGTTTATGAATTCCACAGAAATGGTTCTCTGCATG  
ATTTCTGCATCGAATGGATGAAGACAACCTCGCGACTAACATGGGATAGCAGAGTTTCCAGATTGCACTTG  
GCACAGCTAGAGCACTAGAGTGAGTTTATAATTTACAAAATTACTTTTATTATGCATCACATAAGATTA  
ATGCAGCTTGGAGAAAACTTTTGTGTGATTGGTTTCCAGATATTTTTTTTATGGTAACTACCTATCTATCA  
TAAATCTTCTAGTTTTCTTAAACATTGATGACTAGTAAGCATGTAAAAGTGTTCATAAATATTTTCGAA  
TAGAAAAGCAATTATATTATTTAAGTTGTAGAACACCGCGTATGTTGGCTTTCCACTAGATCTAATTAGA  
ATAAGTTTTCTATTTTGGTCGCGACCTCTCCAATTCTTATGAGTAGGTTTATTCTAGTAGCTAAATCTAAG  
CTTCTTTAATTTGCAGGTATCTACATGAAGCTTGTCTCCATCTTTAGTTCATAAAAATATAAAAATCTGAA

AATATTTTACTTGATGCTGATCTCAATCCTCATCTATCAGACAGTGGGTTAGCAAACCTTATGGCTGATGC  
AGATCAGGTAACACTTTATAAATTTGTTTTTGCCTTACTCTAGATTATAATTTCTAAAAATCCACATCAG  
TATCTTCTAAATGGCTTCAATTTGGACCTTTATTTTTCTCCCTACAGGGATTGAACCATAATATAGAGTC  
TGGATATGGCGCACCGGAGGCTGCTATATCTGGGAAGTGTACTACCAAGAGTGATGTATACAGCTTTGG  
AGTTGTTATGTTGGAACCTTTGTACTGGTTCGAAAACCTTTGATAGGTAATGTTAATTTAATGATTTTGAA  
CCCAAATCTGTTAAGACAAATAATAATATACGTGTGTTCTTCTTCTCCACTCAGCTCAAGACCAAGA  
TCTGAACAGTCTTTAGTTAGATGGGCAACCCACAGCTTCATGATATTGATGCCCTGGAAAAGATGGTTG  
ATCCAGCTCTATCTGGACTATATTCTGTCAAATCTCTTCCCGGTTTGCTGATGTTATTGCTCTCTGTGTT  
AGGTAATACTCTCGTTGTTTCAATTCATGTGACTAGACACAAAGTTTAAGATAGAAATGCAAACAATTGA  
AACGTGTGGTCTTAAACATGACATAACATCTCATTAGAGTAATCTGAGAAGTAGTTCATTCATTTTGTACT  
GAAAGCTGCTACATGCCATGTGTTCAATTTTCAATAGAGTACTACCCTAAATCGCGCTCACTATCACAAT  
GGTTTGTGTATGTTGTGTCAGCTTGAGCCTGAGTTCCGGCCACCTATGTCTGAAGTGGTTCAAGCATTAG  
TCCGGCTAGTGCAACGAGCAAATATGAGCAAGAGGTTACACAATAATGATCAGGACTGAAGAGATATG  
ATCAAGACCTGCTAATTGTTACACCAAATGGTTCTCTTAAACTGTTTGCTGCAATGGAGATCATCTGATGC  
TGATCAGCCCAGCAATATCTTCTTCGGTGCAGTTGTATTTGATTAATAACCATATGCTAAAATA

>M6-PGSC0003DMG402005482 M6 LRR-RLK

AAATGCCAAGTGAATAAATAGAGTACAAAGGATAAAAAGAAAAAAGAAAGGATTTTTTACACCAAAA  
AGCATAGAATAAACCAGCAAGCTACCTCATTCTTGAATACATTGTCTGTAACAAGTATGGTTTTTCTCTA  
GACTTCAAGTTTCAATGCTATTATGTTCTTTTGTCTTCTATCTAATTACCCTCCTTTCATTCATGTTCAATA  
TCTCACATGCCTTGAAGTTACAGAATGGTAATGAAACTGATATCCAAGCCTTACTTGCCATCAAAGAAAA  
GGTAACTCAAGATCCTCATGGTATTTTTACTTCATGGAATAATTCAGTGCATTTCTGCAGCTGGGAAGGT  
GTCACCTTGTTGCCATCTTCATCAAAGAGTCACTAAACTGCACTTAACATCACTTGTCTTAGTAGGTACTTT  
GTCACCTTTCATAGGAAATCTTACTTTTCTTACTAGTCTCAAACCTTGAGCTCAACAATTTCCATGGAAAAA  
TCCCACCACAGGTTGGTGGTTTGTAAAGGCTTAAGCATCTTAGTTTGACTAATAACTCATTTTCTGGAGA  
GATACCGATAAATCTTCTCGTTGTTTGAATCTTGTTATACTTGGTGTGGTTGGAATCAGTTGTCTGGAA  
AGATTCCATTTGAACTTGGTTCATTGCAAAAGCTTGAGAGATTGCAAGTTCATAACAACAACCTCAATGG  
ACCAATCCCGGAAACCTTAGGTAATCTTCCGCAATCAAATCACTTTCCTTATCGTTTAAACAATTTGGAAG  
GAACTATTCCAAGTTCTCTTAGTCAATTGAAGACATTGAATGTTCTTGGTTTGGGTATAAATAAGTTATCT  
GGTATTGTACCTGCTGAAATTTTTAATCTTTCATCTCTTGAGATATTCACAGTTTGTATAATCAGTTGTAT

GGAAC TTTGCCATCAGACTTTGGTTTAAGTCTTCTTAAGTTGAAAGTTCTTAAGATTGGTCATAACTGGTT  
TACTGGACCCCTTCCAAAGTCATTATCTAATGCTTCAAATCTAGTTGAACTTGATGCATATGGTAGCAATT  
TCACTGGCAAAGTGTCAATTGACTTTGGGGGGTTATCAGATCTTTGGTGGCTGATTCTTGCATCAAATTC  
CATTGGAACAGGAGAAGTTGATGACTTGAGTTTTTCAATTCTTTGAGTAGATGCAGAAACCTGAAAGTT  
CTGGATTTGAGTGATTGCAAATTTGGAGGTGAGCTACCTGATTCTATTGCAAATTTATCGACAACCTTTCT  
GTCATAAGATTGGGAGGTAATCAACTATTTGGTTGTATTCATTCAGGAATAGGGAATCTTGTTAACTTG  
ACTGAATTGCAACTGCAAAGAATGATTTTTCATGTAGCATTCTGAAGTCGTTGGCAATCTTCGTAGGC  
TTCAGTTAGTGGATTTGTCCGAAAACAAGTTTTAGGAAGTATTCCATCTTCTATGTCTAACATGACTCGA  
TTATATTCACTTCATTTGGAAAAGAATGAGTTAACTGGTAATATTCCCCTTAGTTTTGGCGATTTCCGGTA  
CTTGCAAGATTTAGACCTTTCTCAGAATCATCTTAGTGGTACCATAACCAGATGGATTTATGAGTTTGTCTT  
CCTTAACAAATTCTCTTAATCTTGCTGACAATCAATTGTCCGGTCCGCTATCAGTTGAAATTGGAGCTCTC  
AATAATCTTGGAAGATTGGATATTTCTAATAACATGTTGTCTGGGAAAATTCTAGTAGTATAGGGAGGT  
GTGTAGGTTTGAAAGCCTTGTTTTAGCTGGCAACTTATTTGAAGGTATAATTCCTTCATCCATTATTTCT  
TTGAAAGGTCTTGAAGAATTGGATCTTTCGCGCAACAATTTATCTGGGCAGATTCCAACATCCCTTCAAC  
TCATTTCTTAAAAAAGTGAACCTGTCTTTCAACCAGTTTGAAGGTCAGTTGCCAACTGAAGGTGTTTTC  
AGGAACGCAACTGCAATCTCCATATCAGGGAATAGGAACTTTGTGGGGGTATACCGGAACTGGAGTT  
GCCAATATGTCCGAACGCTGACCCTGATGGTTGTGATAAGTCCAGAAGCATTAAAGCTAATGATCCCTCTT  
CTTTCTGGACTTGTTGCACTGGTTTTCATCATGTCTTTAGTCATAATCATTCCGGTTAAGAAAGGCAACGGG  
AGAGCCTTCTTAAACATCTTCGCCGGTACTTATGAGAGCCTATATAGAGCGACAAATGGATTCTCTTCTG  
CCAATTTGATTGGAAATGGTAGCTTTAGTTCTGTTTACAAAGGGTACTTGATCCAGGTCAATGTATGGT  
TGCGGTGAAGGTGATAAACATTGACCAACAAGGGGATACTTCTACGAGCTTCATGGCTGAGTGTGAGG  
CCTTGAGAAACATAAGGCATCAAATCTTGTTAAGATCTAATGCCTGTTCAACTAGTGATTTTGAGGGTA  
ATCCATTTATAGCTTTAGTTTACGAATACATGCCTAATGGGAGCTTAGAAAGTTGGTTGCATCCTATTCCG  
GGAGCTGATGCCTCAACTAATGAGGTGAGGATACTAGGTCTAGTTGAAAGACTAAGAATTTCTATTGTT  
GTGGCTTGTGCACTGGAATATCTTCATAACCATTGCCATAATCCAATTGTGTTGTGTGATCTGAAGCCGG  
ACAACATTCTTCTCGACAATGACATGACTGCTCATGTAGCTGATTTTGGATTAACAATGTTTTTCTCAGAA  
ACCATGAGCAAATATAGTTCAATTGGATATGCTGCACCAGGTAACGTAGTTGATAGTCCCTGAATTTTA  
GACTCAAAGGCATCCTTGTTGAGAGCACTAACAGTCCTCCATGTTTACAGTATTGCTGCAGTTTTAGTCCG  
CCCTCAAACCTGTCTCTTTTTTTATTGGGATTGAGAGGTTCAAGTGTGTTAGATTTCTCGTGCAACAGTACA

AAATTTTCTTTCTTGCAACGTTATTTGTCTACAATAAACTGATATAGTTCGAAAAACAAAGGTAGATTCT  
TGGTTTAGCTGCAATGATGCTTGGACTAGTTGTACAGAACGAATAGCACATATGCTTCGTCTCACCTTCT  
CTCTCATGGTGTATTGTTTCTACTAAACATAAAGGATGATGACTGAACATATACACTAAATTATGGACA  
AAACCAATGTATTAATAGACGGACATTTGAGGGAGGACCAAAGTGCATGCACCAATATTGCAAACAT  
AGGGACTACAAGTACTCCGTGTGAAAAACAAGGATGACTTTTAAGTCTTAGTCCAAAGATAAGGGACT  
ATTTTGGGTCTTTTCTCGTGTCTTCTTGAGAAAGTTTTCATATTGATTTTACATGTTTTAAGTTGATTACAT  
GTTTTCTTTCTCTGTGGGCAGAGTACAGCATAGGAGGTAAGGCTTCCGAATTTGGTGACGTTTACAGCT  
ATGGGATCCTTCTACTAGAGATGTTTACTGGAAAGAGACCTACTGACAGCAGGTTTCGAAAATGGACGGA  
GTCTTCACAGTTTTGCTAAGACGGCTTTGCTTGATGAAATAGTAGACCCCATGCTTCTACCTAGCAACAG  
CAGAGAAAGACAAGAGGCTGAGGAAGAAGGAGTACTTATCAATCAAGATGATACTAGTATAAAACAAG  
CGCAGGAATGCTTGATCTCGATAATACAGATTGGAGTTGCATGTTTCACTGAATCCCCGAGAGAAAGGA  
TGGATATCGGGGATGTTGTCAAGGAACCTCAACTAATTAGAGACATTCTCCTTGCTTCTCATGCAATTCA  
CAGCTCAACCAGTGGGTAAATTCGCTCTACTAGCTTTGTTTTCAATCGTGATATTGAGTTCCTCTGCTAGA  
TATTGAGAACTTGTTTCTAAACACGTGTTGCACGTGTGTCCTGTGTAATTTCTTGATAGTCCATTAGAAC  
GATGGAAGTTCTACGTAGACATGAATGTGTTTCCCATGTAAATTTCTTCTTGTTGTTAATCGTTGTCTTTC  
TTTCTTGGTTTCAGGAGCTTGAGGTTGAAGGGTCTTCCAGTCGTTCTGTTACTAGTAATTGGCAAAT  
TCACATCATTTGTTTTGCCTTGATGTTTTTGTCTTATATAACAAATTACTTTAGCAGATTGAAGATGTTA  
ATCATCAATTCAATTATTGGTTCAGTTTGCCTAATGCTGGTTAGTTCAGTTGAGCTTAAGCAAATGGAATT  
GGAATTGTCTATGTATATGATGTTATGACTTGGCCAAACACATACACGACCCCTTAGCTCGTCTCGAAA  
TCTC

>M6-PGSC0003DMG402008032 M6 LRR-RLK

AAAAAAGTTCTCTTTCAATGCATTGCCTTCATTAATCCCACTACTCATTCTGGGTAGTCTCATTTTTT  
TTTTTCTCTGTATTTGTTTGCCATGAAAAATGCCGTCTTATGGAAAGCATTTTCACTATCTCAAGTTCTC  
AACACTCTTCTTCTTCTTCTACTACTGCTAGTACTACTTCTTCTCCGGCCGATTCACCGAATACCCGGC  
GGATTTACGGCGGCGGAAGGAAGCTTACTAGGCAGAGGAAGTTGAGACATGTTAGTGATGAGGATCTT  
GGTTTGGGAGACCTAATATTCAGGCACTGATTATTGATGAACGTTCAAAGTCTTTGCCGGGTTCTCCTG  
ATTCTTACGCTGATTTCCGGTCCGGTTCTAGGTCGTCTACCACCACCTCCGTCACTGTTCTAACTCCTCT  
GCTGTGCCACTGCCGTTGCCGCTCCCTGAGCTCAATTCTCTGCCTAAACAGAACTCGGTTGACTCTAATTT  
GCCGGGTAGAGTTGACAGGGAGCTTTAAGTCCTCCTTGGCAGGTTAGTCTTGAAAATTGAACCCATT

G TTCAGAATTTATACTTAATTTCAAATTTTAGTCTTACTTTTTGTTTTAGTCTGTTTCGAAATGAATGAGTC  
TTCCATTTTTGGCAACCTTTGATTGTAACCTTTACCTTACATATTTAAGAGATTAATGATATTTTGAT  
ATATTTTATGTATTTAGTTTAAGACCACGAGATTCAAAGTGGTTTTTACTTTGTTAAACTTCTTGCAAGT  
CATAACCAGTCAAACAAATTGACATGTTGGGTATGTTTATCAAACCTTTGAGTTTTTCTTACATGTATGT  
TTTGTGCTTTAAGTAAAAAAATGCTACCTTTCTGAGTGAAGTATTGTTTTGCCGATTCATACTGGTTTGG  
GATTGAGGGGTAGTTATTTTCGGTTTGATGATGAAAGCTTTTCACCATAGGTA ACTCTGTATGTAAAGGG  
ATTTAGTAGTAGTAGGTAGTTGGTTCTAATTTGAAGTAGTTTTTGGGGTGGTTTGATTGCAGTAACACTT  
TATAGGTCATTACCATAAAAGAACCATTTTTTCTTTTTTCGGTTGTGGATTA ACTGCAGTAACCTTTATAA  
GGTTCTTACCATAAAGGTAGGTTTGGAAATTGTGAAAGAGCATGTGGTTTGTAGTTGTTTCAAATGATGA  
TTTGTAGTGTGCTACTTTGTTTTTGGGGGAAAATGTTTGATTAGCTATGATGATTTTGTAAAGAACAAAA  
CCGAACGCGGAAATGTTAACCTGTTGCGAGTTGCAGGGAAACTTTTGGTCGAACTCCAGCTGAAGTGAA  
AAGTTCTCAGCATCCAAGATCATCTACTCCA ACTTATCTTCGTAGGGGGTTCCCTCAGGATCTGAATGCT  
GAGGGCGTTGAATTCAGGTTGAATGTTCTGTTAGAAGTGCCCCGAGTAGTGGTTTTACAAGCCCCGTC  
CTAAGCCCAAAAAGGTTTAGTACACAGGACCTTTTTCATCATCCCTTGCATCAGGCCTCATCATCACCTTC  
AGAGGCTTACTCTTTCCA ACTTTACCCACAAGGGTTATAAATAGCGCGGATCATTCTCCACTGAGTAGC  
CCAATTTTACCAAGTTCAGCTAACAGAATCAGGAACAGCAGAAGTGGTGCTGTGCATTACATCATAAAT  
CTCTTCCGGAAAGTTCTCTAGGTTGGAATGAAGCTAACAACAACAATGTGCATCCACTACCCCTTCCACC  
AGGAGTTCCACGACAACCAGAATCATGTATCATGCACAGCAATATGGATAAACCATGTGTATCACCAGC  
AAAGGGTCAATGGCTAAAGGGGATGCTTTTAGGTCGTGGTACATTTGGAAGTGTATATGAAGCTACTAA  
CTGGTAAGGGATAGAGCTTGCTTAGTAAGTAATTCGGTAGGAATGTAACATTTGCTTCTTTGTTTTCTT  
CCTTTTACAGTGAAACCGGTGCTTTATGTGCAATGAAAGAAGTTGATCTTACTCCTGATGATCCTAAATCT  
GCTGAATGTATAAAGCAGTTAGAACAGGTGACGTCCTCATGTCTTCTTAGGCTACATAATCAAATTTGT  
ATATAAACTGCAATTGTATGAGATACATGGTGAGAGAAAACATATTTTAAAGGCCAAATCTTTGTTAAGT  
GAAGTGA ACTTTAAACAAGTACTTACTAAGCATGTTATATAATATGTCCTGGTTGTCTAACTTGCATTAG  
CAAATTAGTCAACTTAAGTTATGTCCA ACTTTGAGCTAACTATCATGTGCCTGAAGATGCAAAAATCAA  
TATCGTATCCATGGAGCTAATTTTATTGATCATATTCTTTGACTTCATAAGCCTCCTTCATGTTTTGCATCA  
TTGAGAAAATATTTTCGGAATGTTGGTAACTGACTTGGGAAAAAAGTTTGAGGGTTTCATAATGTGGAG  
TTTTTTATTCTACTTGCTTATACATAGTTTGTGATGGATTGCAAAGACTATGACATGTTTTTCACTTGTTTA  
TGCTATTCTAAATCGATTCAGTTTCTTCTTACTTCTGTTGTAGGAAATAAGAGTTCTCCAGCAGTTAAAG



AGTCCTTATAGAATCATAGGAAAGGAAATTTCAAACCTCTGTATAAGATCATAAATGAATGGAGAGGGG  
GAAAACTCATGTACAGATCAGGAGAATTAGATACAGAGAACTTCAGTTGGATGATTAGTCATAATGTTG  
CCATATGTGGGAGAGATCTCAATTCCTGATGCATTCACATCTTCTGTGTAGTATTGATGTTTGTATTTGA  
AGGCAAACATATCTTTGTAACAGATTCATGAAGAACTGAAGATGATTCTGGAGTTAATAGTGTATTTAG  
ATTGAAAGCAAGATTTAGTGTTCAACAATTAATGATTTATGCTAAATCAATATGAGTATCTTTTTCCCTC  
ATTTTTACAACCAA

>M6-PGSC0003DMG402014186 M6 LRR-RLK

GAAACTTGTTAAGTGACTAAGAAGCTGTAATGAGCTGTATGCTGCAACTCTACTTTCTATTCACTACAATT  
TTTTAATTTACTAGGAAGCAAGGGGGCTGGCAGAACACCATTGAATTGGGAAATCAGGTCCAGTATTG  
CCCTCGGAATTGCACGTGGCATCAAATACCTTCACTCTCAAGGTCCTGATGTCTCCCATGGGAATATCAA  
ATCATCCAATGTTCTTCTCACCAAATCATAACGAAGCACGTGTCTCAGATTTTGGCCTGGCTAACTTGGTTG  
GATCGCCATCCTCCCCTACTCGAGTTGTTGGATATCGTGCTCCAGAGGTAAGTATCCTCGCAAGGTTTC  
CCAAAAGGCTGATGTCTATAGCTTTGGAGTATTACTCTTGGAGCTTCTTACTGGAAAAGCACCTAGTCAT  
GCCCTCTAAATGAAGAAGGTGTTGATTTGCCAAGGTGGGTTCAATCTGTCGTTTCGTGAAGAATGGCCTT  
CTGAAGTTTTTGATATTGAGCTCCTCAGGTACCAGACTGCTGAAGAAGAGATGGTCCAACCTTTGCAGCT  
AGCAATAAATTGTACAGTTCAATATCCTGATAAGCGACCTTCAATGGCTGAGATCTCTAACAGATTGAA  
GAGCTTCGACACCCAACCTCACATGATAAACAAGAAGTCTCTGATCTTGCCAATGCAACAGAGTGAAGT  
GGTATTATTAGTCCCCCTCGAGATGTGCAGTAATTAAGCTTAAACTCAGATTCATCACCAATCTTTTTTT  
AAGCATATTAACCTTGTTGTTTGGGGGAGGGGTGTCTCATCTTCTTTCTGTTGAATTAAGTATCAT  
GGCCCTTTTTCTCTATGTTTCTGTAGTAGTCTAGTGGTTACCCCTTTCATTTTCTTTAGATGAGGGGCCA  
AAGCCAATATCTGTACCATTTATTCTTGTGGATGTATAATGCTTTCTGTAATTATTACTGCTTCTGCTTTT  
ACTTCTGCTTT

>M6-PGSC0003DMG402015976 M6 LRR-RLK

ATTGCAACAACAGAAAGAATTTCACTACTATGAACTACTCCAAGCAACTGATTCGCTTAGCGACGGTAATC  
TAATTGGTTCTGGAAGTTTTGGCTCTGTTTACAAAGGTGTTCTCAGGAGTGGGACTGCCATTGCAGTTAA  
AGTGTTCAATCTGCAACTGGAAGCGGCATTCAAGAGTTTTGATATAGAATGTGAAGTTTTGCGTAGCCTT  
CGCCATAGGAATCTTGTGAAAGTCATCACTAGTTGTTCCAACCTTGATTTTAAGGCTTTAGTGCTCGAGT  
ATATGCCTAATGGAAGTCTTGACAAGTATTTGTATTCACACAAGTACTTCTAGACATTAGGCAGAGACT  
AAGCATTATGATAGATGTAGCATGCGCATTGGAATATCTTCATCATGGATGCTCCTCTCTGTGATTCATT



GTGACCTGAAGCCTAGTAACATCTTGCTGGATGAGGATATGGTTGCCACCTAAGTGACTTTGGTATTTT  
AAAAGTCTTGGTGAAGATGAGAGTGATTTATACACAAAAACCTTAGCAACATTTGGTTATATTGCACCA  
GGTACGTCTCTTTGTTTTGCTAATTTAAACATTGATTTTTGTCTTTTTATTCCAATCAATAAAGTATAT  
TGCATCTTTAAATCAATTGTTTACTGTAGAGTATGGACTGGATGGACTGGTGTCAATAAAATGTGATGT  
CTATAGTTACGGGATTATGTTGCTGGAAACATTTACTAGGAGAAAGCCTAGTGAGTTAAGGGAGATCT  
TAGCTTGAAGCAATGGGTGAGTTATTTACTCCCAGAGGCAGTAATGGACGTTATGGATGTCAACTTGGT  
TACACCAATGGATAATCGCTTACAGAAGGAGTTAGATATCGTGGCATCAATCATGAAAGTAGCATTAGA  
TTGTTGTGCTGAATCTCCGACAAGAAGGACAAACATGAAAGATGTTGTAGGGATGCTACAGAAGATCAA  
GATTCAACTTCTTGCATGCTGAGCATGTCCTCTGTATCTCTTGTCTGAATCGA

>M6-PGSC0003DMG402020263 M6 LRR-RLK

CTTTAGTGGCGTAGGGGTTAAGACGACCGGTGCCACAGTGCTTTTCTGAGACTCTGTGAAAAGAAAAC  
GTCACCATTAAAGCCAGAACTTGAATCGGTCCCCTGTTTTTCTCCTTGACTTGCTCTGCATGCAACACT  
AAATTCTCTCTTTTTGTCAACTACCCTCAATTTGCTCTCTGTTTTTTATTTCAATATTGTTCTTCTCCCA  
AGAAAAAAGAACATTCCTTTAATTTGCAATTACAGGTCAATTTATTCGCATTTTTAATGGGGTTTTATCA  
AGATTGTAGCAGCATTAACTGTTTGGTAGCTCAATCTTGACTTGCTGCACATTTAGACTTCAATGCTTTT  
CATTTTCACTGAACTAGAAAGGGTCCACCCATGTAATTTTCTTATTCATGATTAGCCAAGAACGTAAAAT  
GGGTTGCTTCAAGATTGTTGGAACTTGGCTCCATTTTGAAGTCACTGTTAAATGGGTTTCTTCAAGATT  
TTGTGATAGTGTTGGTTATTTGCGCTTTCTTTATAGCAAATACTTATCAGTTACAGTCCTATGAAATTCAA  
GCTCTTCTCAGTTGAGGAAGCACCTGGAATATCCAGTTCAGTTGGATGTTGGGAGAATTACCATGGA  
GATTTTTGCAGCTTGACTTCAACACTGCATATGAGCATTACCTGTCAAGATAACTCTGTTACTGAACTCAA  
AATCAAAGGAGATAAGTTAGTTAAGTTGAATGAATTTTATGATTGCAATTCCAAACCAAACATTATCT  
GAGGGTTTCTCCATTGATTCTTTTGTACCACATTGACAAGGCTAAGTAGCTTAAAGGTTCTTACTTTAGT  
TTCTCTTGGTATTTGGGGACCCCTTCTGATAAAATTCATAGGTTAGCTTCACTTGAACTTTTGGATATGA  
GTTCAAATTTTCTATTTGGTTCTGTTCTTTTTCAGATGTCAAGATTGATTAAGCTTCATACTTTGACATTAG  
ATGCCAATTTTTCAATGAACTTTCCCTGATTGGTTTATTCTTACACAATCTTACTATATTAAGCTTCA  
AGAACAACAGGTTGAAGGGTCAAGTTTCTTCTTCAATGTCTAAAATCACAACCCTCACTGACATTGTTCT  
GTCACACAATGTGCTTTCTGGTAAATTGCCCGATTTAACGGCCTTGTCTAAGTTGCTTTTGTGGATTTAA  
GGGAAAATCATTGATTCTGAATTGCCACCCTTGCCAAAAGGACTTACCACAGTTCTTCTTAGCAGTAA  
CGTTTTTACGGGTGAAATCCCAGTAGAATTTGGCACACTAAATCAACTTCAACACCTTGATCTGTGCAAC

AATTCTCTCAGTGGAAATGCTGCCTGCTGGCTTATTCTCTTTGTCTAGCATTAGTACTTGAATTTAGCGTCT  
AATGTTCTTAGTGGTTCACCTCCTAGCCATCTCAATTGTGGGGTGAACCTGGTTTTGTTGATATTTCTAA  
TAATAGATTAGTTGGTGGGCTTCCTTCTTGCTTGAACACTATTCAGATAAGCGAATTGTTAAGGTTGGT  
GGAAATTGCTTGTCTCTTGACACTCAATATCAGCATTGAGAGGGCTATTGTAAACAAGCTAATTCGGATA  
AGAAACAGATCACAGGAAAACAAATAGCATTGTTGGCAGGTGTTATTGGGGGAATTGTAATTGTTGTG  
GTGTTTCTGTTAGTTGTCCTTTTTCATCTCCGTAGAAAACGACATGCGCGTAACATGGTGGATAAGCACA  
TTCCTCCGAAAGTTGTGCAAATACACAGCCCGGGGTTCCCTCTGAACTCCTAGCAAACGCCAGTGAGTT  
GATGTTTTTCTGATTTCATTTTAATCTGTTAATTTATATGAAGGAAATGTTCTCCAGAAAAGCTTGATCT  
CAATCTTCGAATTCTCAGGAGTCATTTCTCAAGTGGCAAACACAGGATCACAAGGTGCCCCATCATATCG  
AGTGTCTCCATGGAAGAATTGCTAGAAGCAACAGAAAATTTTGATCAGTCAGCATTACTTGGTGAAGG  
GTCAGTTGGAAAAGTATGGCTTCAAACAATACTTATGGTTCTCATTGATAATATATATCTTGATGTTTTC  
CATTCAATGGTCACGCTGAATTTTGGCTCAAAGTATATACTTGCTGTAAAACCTGAATAAATGAAGCAG  
GACGTAGATTTTGTGCGTAGACCATGTCCAACAATGATAATGCAATGAATGCACTAGTTCACCAAAGTA  
CAAATGGATTTGGGTGTTGTTTTTTTTAAAAAAAGTGCTTGCCTATCATATTCTCATTCTACACGTGT  
ATCTGTGACTTCTTTTGATGATAAAAACCTGGTGTCAACAATAATGCTTTTTGTGCATTTGATTTTCATATCTAA  
TGAACACATGACAGTTCAACTAAATATATCGAATGCCCTTAAAGGCAAATTAGATAGTCTCACACGTTT  
GAGTGCCTATGCAGTGAGTTGATATCTCTGCTATTTTGATTGACATAAACAGGTGTTAGCCTTATTATGTC  
TTGCTTGAATAAGACAGTTACTTTAGTTATCAGCAATTCCTCAATATATATCTCCATTTAGATTTACAAG  
GGAAGATTAGAGAATGGAGCTTACATAGCTGTAAGGTCACTAAATGTGTACA

>M6-PGSC0003DMG402026747 M6 LRR-RLK

GACTTATCATCAAACAACACGGTTGGTTCTTTACCTCCGAAATTGGAAATCTAAAAGCTGTGATACAGA  
TGGATTTGTCGATGAATCAATTCTCAAATGGAATCCAAGAGAAATTGGAGGATTGCAAATCTGGTGC  
ATCTTTCTTTGAGACAAAACAAGTTGCAAGGATCTATACCTGACTCAATGAGCAACATGGTAGGTTTGA  
ATTCCTAGACCTTTCTCATACTAATATATCATGAATCATTCTATGCTTTGGAGAACGTCAAACCTGA  
AGTATTTCAATGTTTCTGATAACAAATTGCATGGCGAAATACCTCGGGAGGTCTTTCAAGAACCTCTC  
GAGTCTGTTTTTCATCAACAATGAAGCATTGTGTGGTTCTTCAAGATTTAGCGTCCCTCCATGCCCCACTT  
CATCAAACCATAGGTCAAATAGGAAAAACAATCTTGTTCTATCTCTTATGCTGGGAATTGCACTTGTATTT  
GTTCTATTACCCTTGTGTTTGTATGGATAAGGTATAGAAGAGGTAAAAGATCTCCTCAGCAAACCTGATT  
CATTGTCTATGGCAACAACGGAAAGAATTCATACTATGAACTGCTCCAAGCAACTGATTCGCTTAGCGA

GAGTAATCTGATTGGTTCTGGAAGTTTTGGCTCTGTTTACGAAGGCGTTCTCAGGAGTGGGACTGCCATT  
GCAGTTAAAGTGTTCAATCTGCAACTGGAAGCAGCATTCAAGAGTTTTGATACAGAATGTGAAGTTTTAC  
TCAGCCTTCGCCACAGGAATCTCGTGAAAGTCATCACTAGTTGCTCCAACCTTGATTTAAGGCTTTAGTG  
CTCAAGTATATGCCTAATGGAAGTCTTGACAAGTATTTGTATTCGCACA ACTACTTCTAGACATCAGGC  
AGAGACTAAGCATTATGTCTAGATGTGGCATGTGCGTTGGAATATTTCCATCATGGATGCTCCTCTCCTG  
TGATTCATTGTGATATAAAGCCTAGTAACGTCTTGCTAGATGAGGATATGGTTGCCACTTAAGCGACTT  
TGGTATTTCAA AACTGCTTGGTGAAGATGAGAGTGATATATACAGTAAAACCTTAGCAACATTTGGTTAT  
ATTGCAC

>M6-PGSC0003DMG402029358 M6 LRR-RLK

TACAAGAAAGTTGAGTTCCTTGCCTTACTAGTTTGACTGACCCCATTTGTTGCTAAAATAAATTCAAGATT  
TTGAAAGAAGTCTGTCAAGTATCAAAAAATGGAGAAAAAAATTTCAAACATTTCTTGGTTTTGTATTG  
ATATTACTAGTTAGCAGGATTTGTATCTGTTGTGCTTCAGAGAGTGATGTTTATTGCTTGAAATCAATAAA  
AGAATCATTACATGACCCTTCAATTCTTTAAACTCTTGGAAATTTCAACCAA AACTCCATCTGTCTTTTTGA  
GGGAATTGACTGCTGGCAATCTGATGAGAATAAGGTAATGAGCATCACACTTTCAA AACTTTGGATTAAT  
AGGTGAGTTTCTCGTGGCATTGCAAATTGTACAAGCTTGACAGGTCTAAATCTTTCTGGTAATCATTGT  
ATGGAACCATCCCTTCTGATATAGCAGTGATTCTTCCATTTGTTACAATACTTGATCTCTCAAATAACACCT  
TTTCGGGCAATATAACACCTGGTATAGGTAATTGTCAATTCATAAATGTTCTAAAGTTGGACTATAATGA  
TTTAGAAGGTGAAATTCCAAGTAGAATAGGCTATTTGCCTCGCCTTAAGACGTT CAGCATAGCTAACAAAT  
TACTTGACTGGGCCAGTGCCATTGTTTTTTAGCAAGAATATCACGGCTGAGAGTTTTGCAAACAATCCAG  
AGCTTTGTGGGAAGCCCTTGAAAGGATGTGAGGATTCTTGGATATGGAAACATGTAGATCGTGCTTCGT  
TCATCAAAGCGTTTGTGATTGGTTGGTACTTTTTGTTTACAATGGTTTTTAGTCCTTTGCTTATTTAAATTC  
CTACCAAGGCTATCAACAAGATAGTCTCATTAAACATATGGAAGCTAAGGAAAAAGAAACATTTAACTTC  
AGGAAGTGAAGAGGAATTAAGCAGCCAACATAAGGTAAAGATCTTGCTAAATTTGCTGCACTGCTTATA  
GTCTGCAAAGTTACCTTATCTTCTGTAGTTCCAATTTTGTGATTAGTCCTTGCTAGTCCATTATGTTATAAA  
TTCTTTATTCGATCGATGATCAAACATGATAGCAATAAGGTTCTCAAGTTTCTTTCCTGTTTTGACTTCTGT  
GTATATTCAAATGATTTAACTTGCTGTTTTATTTACAGATATTAAGCTGGAGAAGTTTGTATGAGAATG  
AGCTTCACGGAGCTTGAAAACGCGACTTCTGGTTTTAGTGAAGACTATCTAGTAGGAAATGGAATGTTG  
GGCAAAGTGTACAAGGCAATTCTTCAAATGGCTGGATACTTGCCATCAAGAAGCTCAATGACTGGGAG  
AATTTGGAGGACGAGTTTGTCTCGGAGATTACA AACTCTTGGTGGTCTGAGGCATAGGAATCTATTGCCTC

TAATAGGTTTCTGCGCCGAAAAGCAAGAAAGGCTTCTTGTTTACAAATACATGACTAATGGAAGTCTTGA  
TGAATGGCTGCACTCGAATGAAGTTAAGGCCAATATTTTGGATTTCCCTCGGAGAGCTAAAATTGCACTT  
GGGATAGCGAAAGGCCTGGCTTGGCTTCATCATGGTTACGAATTGCACGTTACACATGGAAGCATAAGC  
ACGCGATGTATCTTGCTAGATCAAATCTTGAACCAAAAATATCCAACCTTTGGGAAGCAAAATTTTGGGA  
GTAAGAATGATTCTGCATTAAGTTGGAGTCTTTTCCCAG

>M6-PGSC0003DMG402030114 M6 LRR-RLK

TTTCCCATGTGTTTAATACCTAAAACCTATGTCGTTTTGACCCCTATTTTAAGCCCTATATAGGTATTTTAA  
GTCCTAAAACCTACCCGTTCTAAACCGTTCCTAAAATCACAAATCCCTCCAAGTCTTTCCCAAAGTTC  
TCTCTAAAGCTAAAGAAGAAGAAGCTAGGGTTTTACTTCAAGATCTCCAATCCCATAGCTTTTGGGCC  
TTGATCACTTAGGTATGTTAGTATTCACCAATGGAGTCCTTTTCTCCATTGGGTGCCCAAAGATCCTAATT  
TTTACAAGTTCAATTCTCAATTCAAAGTTAGAGTTTTATTCAATTTTCATGGTATCTTTTCAATTATGATTC  
AATTAGCTATTTTCTATCTTCTATTGCATGACTTTAAGTAATTACATGTTTTTGGAGTTGAATTCATATGAAC  
CATGCATGATCCATGATTTTTTACTATGAACACAAGATGATGTTTATGAACTATGAATTATGAATTTATGA  
AGATATGCATACTTTTATGAAATTGATGTAAATGACTTGAGGATGCTTTAAGATGAAAGTATCAATGAGA  
TTGCGAAAGGTTTTCTTACATACTACTATGATCATGATTGTGAAAGGTTTTTTCACATAAGGATTCATAAG  
GTTGAAAGGTTTTCTCAACTAAGTCGAATAAAGATTTAAGGAGCTATTCTAAATGACTTTTAGCTTGGAT  
TGGTAGCTTAATTGTGCCTTTATATGGATAATGATATGAATATGATTAATGACTATTTTCGTGGGATTTTAC  
TTTGCACCAAGAGGATATTGAGATGGAGGCTTTTTATTAGTAGAGGTCAGGTCTCTAATAGTAATCTCC  
TTGTCCCTAACTACGTGCCCCCGTGGGATGTCTTAGCTAGTGGATCCACGTAAGCTATAAGTTTATGGTC  
CTTACCTTGGCAAGTAGGACATCTTTTTTGGTATGGGATACACATCGGATTCCATATTTTATCTTACATG  
GTCTATGTGGTCAATGGTAAACATCCCACAATAATGAACTAGGTTACTTTCAAAGTATCTCACAAAGTG  
TTTTAACATGTTAAGTTTGCATTGACCATAATTATGACTTGTGTTTTCTAACCTCTTATCTTATGTTTTAGTT  
TGGTCATTGCATGTCACGTAAAGTCCTTTTAGCATGATTCATATCGTATATGCATTGCTATCATACTTAG  
TACATTACATGTAATAATGCATATTTGTGCCTACATTGTTTCACTAATGTAGGGTCCGATGCTCCTACCTC  
GCATACTTGTGGCTAGTTGATCTCTCCTTGTGGATTTGAATATTGGTGAGTCCTCATGTTCCGAGGACCA  
AGACACTTTATAGCTTTTCATTATTTTAGTTTTCAAATATTGTATGTGGTGTATGTGTTACGTCCTAACCAA  
TTCTTTGATGTATTAGATGGCTTGTGAGACTATGTTAGACTTCCGCTTTGTCAATCTTCTTTATGATATGA  
GAATATTTCTTTTGAATATTTATTTCTATTATCTTGTATGATGTATAAGTGTCTTGTGTAGGGCCTTCCGG  
GGTTCGATACGCCATGTTACGCCTAAGGTATACTTTGGATCGTGACAACTTGGTATTCAGAGCACAAAG

ATTTAGAAAGGTCCTATGAAGTCTCACAAGCCACGTCAAGTAGAGTCTTGTTCAAGAGTGTGAAGTGCA  
CCACATTTATGAATGAGAGGCTACAAGATGTTTAGGAACTCCACTTCTTTCATTACTCTAAAGTCGTGC  
GCTAGAGTTTAACTCTATAAGGTCTCTCTCCTAAACCTTATTTCGATGCTTTACAGGATATGGCTACTCGAA  
GAGCTTATGCTAGAAGGAATGTGAGGGAGAATG

>M6-PGSC0003DMG400000386 M6 LRR-RLP

ATGGTGTGGAGAATGATAGAATCAAGAATGCTTATATTGCTTTACAAGCATGGAAACAAGCTATCATT  
CAGATCCCTTAAATATCACTCTCAATTGGGTTGGTCTAATGTATGCAGCTACACCGGAATCTTCTGTGCT  
CCGGCGTTGGATAACCCCAAATCCGTACAGTTGCCGGCATTGACCTTAACCATGGTGACATTGCAGGG  
TACCTCCCGGAAGAGCTTGGGCTTCTTACAGATCTTGGGATTTTCCATATCAATTCAAACCGTTTCTGTGG  
TACAATACCAAGAAAATTCAGCAAGTTGAAGATACTGTTTCGAGCTGGATCTGAGCAATAACAGGTTTGC  
TGGGAAGTTTCCTTATGTTGTTTTGAGTTTACCCAAGTTGATATTTTTGGATATTAGGTTCAATGAATTTG  
AAGTAATGTACCTTACAGCTTTTTGATAAGCCATTAGACGCCATTTTTATTAATCATAATCGGTTTGC  
TTTGTGTTGCCGGATAATTTGGGAATTCGCCGGTTTCTGTGATAGTTCTGGCGAGTAACAGTTTCCATG  
GGTGTCTCCGGCGAGTATTGGAAATATGAGTAATCTTAATGAGGCGATTTAATGAACAATGGGTTGC  
GTTCTTGTGGCCGGCGGAGATTGGGTTGTTGAAAAATCTGACTGTATTTGATGTGAGCTTTAATCAGTT  
GATGGGTCCGTTGCCGGAGAATTTGGTGATTTGGTGAATTTGGAGCAATTGAATGTGGCACATAATAT  
GCTTTCTGGAACAATTCGAAAAGAATTTGTCAGCTTCCTAAGCTTGAGAATTTTACGTATTCTTATAATT  
TCTTCACTGGTGAACCGCCGGTGTGTTTGGGGTTGCCGGAGTTTCATGATGAACGGAATTGTTTGCCCA  
ACAGACCGGTGCAACGCTCTCAGGGACAGTGTAAGGCCTTTTTGTCTAAAAAATTCATTGTAGTGCTTT  
CAGGTGTCATAAATTTGTTCTGTTTTGCCACCTCCTCCGCCACTTTCACCCCTTGCCTGCCCCCTCCGCC  
ACCTATTTATTCGCTCCGCCACCAGTTTATACTCCTCCACCTCCAGTTTATTCACCACCGCCACCACCACC  
CTCTCCACCTCCAGTTTATTCACCACCGCCACCACCACCCTCTCCACCTCCTCCATCACCTCCTCCGCTCC  
ACCACCAGTCTATTCACCTCCACCCCACTCCATCTCCTCCTCCACCATCACCTCCACCTCCACCCCACT  
ATCTCCACCTCCACCATCACCCCACTCCAGTTTATTCACCACCGCCACCACCGCCACCATCTCCCCCTCCACC  
ATCACCTCCACCTCCTCCCCACCCATTTATTCGCCACCACCATCTCCACCTCCTCCATCACCATTCCTTAT  
TGTGTACGCTCACCTCCACCTCCACCACCAATTCGCCACCTCCTAATTCTCCACCTCCACCGCTTGCTCAC  
TCGCTCCACCCCTTACCTTACTATTACAATTCACCACCACCTCCGCCCCAAATTCGCCGCTCCAGCA  
CCAAATTCGCTCCTCCTCCACCAGTATACATATACTCATCACCTCCGCCACCAATTCACCTCCTCCTCCA  
CCACCAACATACGTATATTCTTACCTCCTCCACCTCCTCCCCATTGCCTTGATAGAACCCCTCCACCA

CCTCCTCCTTGCATTGAACCACCCACCACCCTCCCCTCACCATCACCTCCTCCACCACCAGTTTATCAT  
TACAATTCTCCGCCCCACCATCTCTAGCACCTCCACCACCAGTTTATTTTTACAATTCTCCACCTCCACCA  
TCACCACCACCTACTCCAGTATATGAAGGGCCATTGCCACCAATAATAGGAGTTCAATATGCTTCACCAC  
CTCCACCACCCTTTTATTA

>M6-PGSC0003DMG400000819 M6 LRR-RLP

CTCTTTTTCTACCTTAGCTTTCTATAAACATTTTAAACAAGCACCTCCTTCTTTACTTCTTTGTTCCCTCCAT  
TTCCCTGTTTGATTGGATACTTTTACCATTTTCCACCCTGCCCAAAAAACAAAAAAGTACACAATTT  
TTTTTTTTATATTTATGAAATGAAAGCATTTTAAAGGTACCCCTCTGGAGTTTCTTCAATGTTATAAGTTCT  
ATTTGGCTTTAATTGACAAAGTTTATTACTTTCAAGATTTTGTCAACCTAACTCATTTCAGCTTTTTTG  
GCTTCAAAGAGTGATGGGGGTCTTCAAGAACATGTTTGTATGAAAAAGTTGTATTCTTTGAACACTTTGT  
GAACTCATTGTGTGATAAAGTGTATCTTTGAACACTTTGTGTACTCATTTCAGAAAATTTAGCTTCAA  
AAGAATGATGGGGTCTTCAAGAATTCTAACTAGTTTGTATGTGACAGAGTTTTAACTTTGAAGATT  
TTGTTATCTTTTTCAAGAAAATTTAGCTTCAAAGAATGATGGGGTCTTCAAGAATTCTAACTAGTTT  
GTTTATGTGACAGAGTTTTAACTTTGAAGATTTTGTGATCTCTTTTTCAAGAACTTTTTAAGCTACAAA  
AAGTGATGAAGGGTTTCAAGAATTCAAGATTGTGTGTGTTAGTTATCTTTTATCTCCTCCATTTTGGTGTC  
TGGTGCAATGGTGATACTGAAAACATGGGAGCTCAAATGGAGAAAAATGAGATAAATTCACTTTACTCA  
ACCATTCAAGGCTTTGTTGGTAAATGGTGGAATGGTTCAGATCTTTATCCAGATCCTTGTGGTTGGACTC  
CTATACAGGTAACACAAATTTTTATATAAATTTTCACTTTTTTAGTTACTTTTCTGCTTTATGGATTCTGTT  
TAGTAAAAGGTAAAAAATAAATAAATAAATAAATAAATAAATAAATAAATAAATAAATAAATAAATAAATAA  
TTGTGGTATACATGACAAGATATGACTTCTCATTGTATATAGATTGTTTGAAGCTTTAAGTGGAAATTTT  
ATACTATGACAGATAATCAAAGAAATTGATAAGTTCTTTTTTCAGATTTAGTATATTTGGAATGATAGCTA  
ATTAGCCATAGAAGTTTGATGAACCAAATCAATAATGAATATCAGTACATTCTGGCTTGTTTTGTTTA  
GCAGTTTTGACAGACCAACAGAGACAGAATATGTTTTAAACACAATGATAATACAGGACAGGACAGA  
GCTTATACGAAATATAATCAGTTCGTTTCAATTTGTTTGTCTGATTTTAACTTGACACGTAGTTAAAGAAT  
GCACCATAGTTTTCTTTAATCCTGTGGCTTTAAACATATCATGTAGAAAGTAAGACGAACAAATTGAAAC  
GGAAAGTAGTATAGTTGATGCATTATACTCATATTTCTGATTTGTTTTGTTTCTATTTCTCTGTCCAGGGT  
GTATCTTGTGACCTGTTTGATGGTTTTTGGTATGTTACTGACTTAAACATTGGACCTATACATGATAATTC  
TCTAAGTTGTGCATCAAATGTGGAATTCAGCTCCAATTTATTCACATTAAGCACCTAAAATCTCTCACAT  
TTTTCAATTGTTTCGTGTGCGCTCGCCATCATCCAATCAATCCCAACAGAGAGGTGGGAGTTTCTTGCT

AGTAGTTTGGAGTCACTCGAGTTTCGATCAAATCCCGGTCTCATTGGCCAAATCCCAAGTACATTTGGTA  
GACTCATAAAGCTCCAATCTTTAGTACTAGTAGAAAATGGACTCTCTGGTGAAATGCCACAAAGTCTTGG  
GAATTTAGTGAACCTGAAAAGACTAGTTCTTGCTGGAAACAACTCAACGGCGAAATCCCGGATACTTTT  
GGAAGGTTCACTCAACTTTTGATATGTGATTTAAGCAGAAACAACTATCTGGTGTCTTGCCTAAATCAT  
TATTTGGAGGGTTGATCTCACTTTTGAACTTGATTTGAGTTACAACAACCTTACAAGGCAAAATCCCACA  
AGAGATCTCACAAATGAAGAATTTAACACTTTTAGACCTTAGTAACAACAAGTTATCAAGTGGATTACCT  
AAGTCAATTCAAGAAATGACATGTTTGGAGGAGTTAGTCTTGTCAAACAACCCAATGGGTGGATTCTTG  
GATGTTCTTGATTGGTATAACATGATAAAGTTAACAACCTTTGGATTTATCAAACATGAATTTGACAGGTG  
AGATACCTAAGTCTATAGTAGAGTTAAAAAGTTAAGATTTTTGGGACTTAATGACAATAAACTCATTGG  
TAAATCCCAAAAAATCTTGAAAATTTGCCTAATGTAAGTGCTATTTACCTATATGGTAACAATCTGACAG  
GTGAACTTCAATTCTCTCAATGGTTTTATAGGAAAATGGGAAGGAGATTGGGGCATGGGGGAATCAAA  
ATTTATGTTACACTTTTGGTTTGGTGTCAAGTGATGTTCCATTTGGGGTAAAACAATGTCAACAAGAACT  
CAAGTTTGTATTGATGTTGAGATGAACTCAAGTTTTGTGGATTTTCAATCTTCAATGGGATATTTGAATG  
ATTGTGGGATTTGGAGATGTTTTGTAGTTGAACTATTTATGGTTATTCTACTAATGTTGAAATGAAAAGA  
AGGAATTTGACAATAGTGATTTACCTTTTTTTTTGATATTTTGTGTTGTTTTACTTGAAATGTACCACAC  
ATTTTGGTTTGTCTTTTAACATATGAATGAATGAATGTACATATTTTACC

>M6-PGSC0003DMG400000888 M6 LRR-RLP

TTATTGATTCAGTCTGTTGAAGACTGAGCAATATTTGTCTTGATTAATTCCATTGTGTACATATTCTGATG  
AAGTTTTCGTATACGGAGGGTGGAGGGGATTGATCTCTGAAGGAATTTCTAATACAGATGGTTCAAAG  
TAAACTCAATTACAATAATTCTAAACAATTGGAGTAGACATTAAGAAGCTTCACAGAATTTTCTACCTAT  
TACTTCTATCAATATATTCAATGAAAATATAAGTTGACTAGATCCAACAACAATTATTTATTCAACTGGAG  
TAAAGCGAATGTTCATAGAAGCTTTCATGTTTCAAGTTCTTCTTCTCTATATAACTAATTTGTTTCATCAA  
TTGATCTCATCCATACACTTAAGTTTTTCTTTTCAGACAATTAATTGAATCTATGGCATCATCTTCTTCTAT  
GCGAGTAATTCACAGTACTGTCCTCGATGGAAGTACGATGTCTTTCTAAGTTTTAGAGGTGAAGATACCC  
GGAGAAATTTTACGAGTCACTTGTACCAAGTTTTGGACAATAGAGGAATATTCACCTTTCTAGATGATAA  
AAGGCTAGAGGAGGGCGATTCCATCTCAGAAGAAGTCTGTAAGCAATAGAAGAGTCTCAAGTTGCCA  
TAATCGTTTTCTCAAAGAATTATGCTACGTCAGGGTGGTGCTTGAATGAACTGGTGAAGATTATGGAAT  
GCAAGGAGAAAGAAAATGGACAAACAGTCATACCGGTCTTTTGTATGTGGATCCATCACATGTTTCGAC  
ACCAAAGTGAGAGCTTTGCAGAAGCATTGTCAAACACGAATCGAGGTATAAGGATGATGTTGAGGGG

ATGCAGAAGGTGCAAGGATGGAGGAATGCCCTAACAGCTGCCGCAGATCTTAAAGGATATGATATCCG  
TGACGGGTGAGTTAAAACACATATTTGCTTTTTATGAAAAGGAAATGGGATAATTTCCAGTCAAATTAG  
GATGCTTTTGTGAAACCTAGACATATTCTACTATAGAACAAGAATCTATACCTCCAATATGAGTTAATTTA  
GTTGGAGAGAATACATAATAATCCTTCTAACTATTCAAGTTTTGCAACTTTCATAATTCAACTATAGAGT  
GTTCTATTACCCTGAACTACAATGTTTCCTATTTGATTAATGGTATGAGATACTCACAAATACTTCGACTT  
TCTCACATTTTCCGCTATCAATCTTCTTATTTATATAGGATCGAAGCAGAGTATATTCAGCAGATCGTCGA  
TCACATCTCTTCAAATTATGTAAGAGGGCTTATTCTTTATCTTCGTTGCAAGGTGTTGTGGGAATAAATG  
CTCATTTTGGGAACTAGAATCCCTACTTCAGATAGAAATCAATGATGTTCCGATTGTAGGGATCTGGG  
GAATAGGCGGAGTTGGTAAAACGACTATAGCAAAGCCATCTTTGATACTCTATCTTATCAATTTAAAGC  
TTCTTGTTTTCTTGCGAATGTCAAAGAAAATGCAAATTATAATCAACTGCATTCTTACAAAATACCCTTCT  
CTCTGAACTGTTAAGAAAAAAGATGATTACGTCAATAATAAGTATGATGGAAAGTACATGATTCAGAG  
TAGACTTTGTTCTAAGAAGGTGCTAATTGTTCTTGATGACATAGATCATGGTGATCATTGGAGTACTTA  
GCAGGTGATGTTGGTTGGTTTGGTAATGGCAGCAGAATTGTTGTAACAACTAGAAATAGACATTTGATA  
GAGAAGGATAATCCAATATATGAAGTGTCTACACTGCCTAATGAAGAAGCTGTTCAATTATTCAATCAAC  
ATGCTTTCAGAAAAGAAATTCCAGATGAACGTTTTATGAAGTTCTCATTGGAGGTAGTAAATCATGCTAA  
AGGCCTTCCTTTAGCCCTCAAGGTGTGGGGTTCTTTGTTGCATAAGAAAGACCTAACTCAGTGGAGAAG  
AACTATAGACCAAATAAAGAAAAACCCTAATTCAGAAATTGTTGAAAACTCAAATAAGTTATGATGG  
GTTGGAACGTGAAGAAAAAGAGATATTTCTAGATATCGCATGTTTCTTCCGTGGATTTGAAAGAAAAGA  
AGTCATGCAGATCCTTGAGAGCTGTGATTTTGGAGCTGAATGCGGATTGGATGTCCTAGTTGACAAATC  
TCTTGTTTCATCTCCAATATAATGTGATTGAAATGCATGACTTGATTCAAGATATGGGTAGATATGTG  
GTAAAAATGCAAAGGATTCGGGAGAACAAGCAGACTCTGGGATGTTGAAGATTTGAAAGATGTGAT  
GGTCAACAATACAGTAAGTAGGCTAAACAATGCTATAATATTCAGTTTTTAGTCTCCATCTTCTATTTTTT  
ATTTAAAAGATGAAAATTGTTGGTACCCTATCAATTACAACCTTCGTTCTTACAACATGAAAACTTTTC  
GATTGGACTTTAAGAAGTGTGAAAATTGTATTACTAGAAATTAGAAATATAGAATTAATTGCATAAA  
GTATTTCTCTTTAGCGACATTTTTCTTAACTAATATTGTACCTAATTTTATTTAATGGTCTCTTCAAATGCA  
ATAATAAATAATACAAAACATAACGAAATTTGGCATTGCAAACAGTTAGAAAGTAGTCATATTGGCATG  
CAAATTTTATACAGATATTTGAAGTTATACTTTGTAACTAATGAACCTTTTAAACAGGGGACCAAGGCAA  
TGGAAGCAATCTGGACACATGGTGTTCAAAATTATGCTTTAGCAAAAAAGCCATGAAAAACATGAAAA  
GGCTTAGATTATTATCCATCATTAGTTTTAGTACACATGATGACTCCATTGAGTACCTGCCCAACAACCTTG



CGTTGGTTTGTCTGTCATAGTTATCCTTGGGAGTCATTATTAGAAAATTTTGAACCTAAGAAGCTTGTTTG  
TCTTTATCTCCAGAGGAGTCCCTGCGTCAATTATGGACCGGAATAAAGGTACAATTGTTGAATTCAATT  
TTCATTATTTTTCTTTTTGTCAAATAC

>M6-PGSC0003DMG400001016 M6 LRR-RLP

CATACATTGACAGGTGAAATACCGAAAAAATTTAGCAATCAGATTGAGTTGTTTGATCTTAGTTTCAACA  
GGTTTACTGGTTCACTACCAATGGAGATTTTCAACATATCGGGTATGAGAGAGATTCAAGTTATTTTCAA  
TAATGTGACTGGAACTCTCCATTAAACATAGGTTCTACGTTACCCAACATTGAAGTTATTCATCTGAGAA  
ACTTAAATCTTTATGGGACTATACCTCATTCTCTCTCCAATTGTTCCAAACTCACTAGTCTAGACCTTTCTC  
TCAATAGACTAACAGGTTTGATTCCCAACTCTCTTGGAAAGTTTGACTCATCTACAGTCCCTAAGCTTGGCA  
ATTAACAATTTAATGGGCGATAGTAGGTTAAGCTTCTTGACTTCCTTGTCAAATTGTAGAGATTTAAAAA  
TTATTTTCTCTCTGCGAACCTCTATATGGTGTGCTTCCAGAATCCATAGGGAACCTTTCCAGTACTTCTC  
TTCTAAGGTTTAGAGCTATTGATTGTAAAATTAAGGGGGAAATTCCAAAAGGATTTGGGAACTTAAGCA  
GCTTATTAGAACTCGATCTTTCTAGAAACGGTTTCACTGGACCAATCCCACAACAATCAGCAACTTGAG  
ATTCTTCAGAGCTTGAAGTTGAGTGTCAACAACTTTCTGGATATATTGGAGATGATCTATGCAAATTA  
CAGAACTTGGGTTATTTAACTTGACTTTGAATCAACTTTCAGGATCTCTTCCGAATTGTTTGGGAACTT  
AACTTCCCTTAGGGAGATGATTCTAGGTTCCAACAAATTGCGTTCAATCATTCCAAAAGCTTAGGAAAC  
CTCATAAACCTCTTGAAGCTAGACTTATCCTCAAACAACCTGGGTGGCTCTATACCTCTGGAAATTGGAA  
ATCTAAAGGCTGCGATATATATGGATCTATCAATAAATACTCTCAAATGGAATTCCTAAAGAAATTGA  
TAGCTTGCAAATCTTATATACCTTTCTTTGAGAGACAACAAATTGCAAGGATCAATTCCTGGCTCAATG  
AGCAGCATTTTCAAGCTTTGGAATTTCTAGACCTTTCTCATAACAATGTTTCAGGATTGATTCCCAAGTCTTT  
GGAGAAGCTTCTATATCTCAAGTATTTCAACGTTTCATTCAACAAGTTGGTTGGTGAATCCCCTCGAAT  
GGTCCTTTCAAGAACCTCTCCGGTGAGTTTTTCATGTCTAATGAAGCATTGTGTGGATCTCCAAGATTTTG  
TGTTCCCCCATGCCACAGTAGCACATCAAAGCATAAATCCAAGAGGAAAAAAGTGATTGTTCTTGTCTA  
CCGGGTACACTTGTATTAGTCTCCATCGCCTTTGCCCTTTTATGGTTAAGGTATACAAGAGGTAAAAGAA  
CTGATCCTCAGCAAGCAGTTGATTCATCTTTGTCATCTCAACAAAAGGAAGAATTTCACTATGAACTA  
CTTCGAGCAACTGATTCATTAGTGAGATCAATTTAATTGGTTCTGGGAGTTTCGGCTCTGTTTACAAAG  
GCATCCTCAGAGATGGGACTTTCATTGCAGCTAAAGTGTTCACCCACAATTGCAAGTGGCATTTAGGA  
GTTTTGATACAGAATGTCAAGTTTTGCGCAACCTTCGTCATAGGAATCTCACCAAAGTCATCACCAGTTG  
TTCCAACCTTGAATTTAAGGCTTTAATACTCGAGTACATGCCCAATGGGAGCCTCAATAAGTGGTTGTAT

TCACACA ACTACTTCTTAGACATCAAACATAGGCTAAGTATAATGATAGATGTAGCATGTGCATTGGAAT  
ATCTACACCATGGATGCTCATTACCCGTGATTGATTGTGATTTGAAGCCTAGTAACGTCTTGTTGGATGA  
GGAAATGGTTGCCACCTAAGTGACTTTGGAATTTCAAAGTTGCTTTCTGAAGATGAGAGTTCTTTATAC  
ACTAAAACATTAGCAACGTTTGGTTATATTGCACCAGGTACGTGATCTCTTAATCAATTGCTTTTGATTAT  
TTCTCTTTCTTATTTTCCACTAGTAAATGTTGAATTTCAAATGATTGATTGCAGAGTATGGACTGGAG  
GGATTGGTGTCAATAAAATGTGATGTTTATAGTTAAGGGATCATGTTGATGGAAACATTTACTAGGAAA  
AATCCTAATGATGAAATGTTGATGGAGATTTTAGTTTGAAGCAATGGGTGAGAAATTTACTCCCACAA  
GCAGCAATGGAAATTGTTGATGCCAACTTAATATCGCCACATGATAATCAATTAATGAAAAAGCTAGATT  
GTGTGGTATCCATCATGAAAGTGGCAATAGATTGTTGTGTTGAATCTCCAAAAGGAAGGATTGACATGA  
AAGATGTTGTGGGGAGGTTAAAGACGATCAAGATTCAACTTCTTGCATGTTGAGGAAGATCTTATTAGA  
AACTTTTCTTCAAATCATCTCATTGTAACAAACATTTGCAATAATAGTTAGCTTCAAATAAGTTATAGCA  
TTATGCTTTTCATAACATAGAGAATTGATGGGCATGTATACTTCTTAGGTCTTGAATTTGTAAAGTGGTTT  
TGGCCTAATACCTCTACTTTTTTCCATCTT

>M6-PGSC0003DMG400001072 M6 LRR-RLP

ATCTCTTCTTCTCCACAAAACCTTCATCTCTCTCATCTCACATTTTGCTTAAAGATTCCATTTTTAAACCAAAA  
ATTAATAAAAAACTCCACAAACCCCATTTCTTAAATCCATTTTTCTTCATAGATCTTCACTTTTTTCATCTCAC  
ATTTGGTTAAAGATTCAATCTTTGAACAGAAAAAAGCAAAAAAACCAGCATTCTTGATTTTCAGATG  
ACTTATGTGAGATGAAGGAGAAAACCTCAAACACCCATTTGCTCTCTGTTTTTTCTTGTGCTCTGTTTTTG  
TGTTCAGTTTTTACTGAACACACAAATGCTGAGTTTACTGTCTCTGAAAATGGCCCTTAACTGATTCTGA  
AGCTCAGTTCATCAAACACAGGCAGCTTTTGTATTACAGAGATGAGTTTGGTGATAGAGGTGAAAATGT  
GAAAATTGATCCATCTATGGTGTGTTGAGAATGATAGAATCAAGAATGCTTATATTGCTTTACAAGCATGG  
AAACAAGCTATCATTTCAAGATCCCTTTAATATCACTCTCAATTGGGTGGTCCTAATGTATGCAGCTACAC  
TGGAATCTTCTGTGCTCCGGCGTTGGATAACCCCAAATCCGTACAGTTGCCGGCATTGACCTTAATCAT  
GGTGACATTGCAGGGTACCTCCCGGAAGAGCTTGGGCTTCTTACAGATCTTGGGATTTTCCATATCAATT  
CAAACCGTTTCTGTGGTACAATACCAAGAAAATTCAGCAAGTTGAAGATACTGTTGAGCTGGATCTGA  
GTAATAACAGGTTTGTGTTGTTTCTTATGTTGTTTTGAGTTTACCCAAGTTGATATTTTTGGATATT  
AGGTTCAATGAATTTGAAGTAATGTACCTTCACAGCTTTTTGATAAGCCATTAGACGCCATTTTTATTAA  
TCATAATCGTTTTGCGTTTGTGTTGCGGATAATTTGGGAATTCGCCGGTTTCTGTGATAGTTCTGGCG  
AGTAACAGTTTCCATGGGTGTCTCCGGCGAGTATTGGGAATATGAGTAATCTTAATGAAGCGATTTTAA

TGAATAATGGGTTGCGTTCCTTGTTTGCCGGCGGAGATTGGGTTGTTGAAAAATCTGACTGTATTTGATGT  
GAGCTTTAATCAGTTGATGGGTCCGTTGCCGGAGAATTTTGGTGATTTGGTGAGTTTGGAGCAATTGAA  
TGTGGCACATAATATGCTTTCTGGAACAATTCCGAAAAGTATTTGTCAGCTTCCTAAGCTTGAGAATTTTA  
CGTATTCTTATAATTTCTTCACTGGTGAACCGCCGGTGTGTTTGGGGTTGCCGGAGTTTCATGATGAACG  
GAATTGTTTGCCCAACAGACCGGTGCAACGCTCTCCGGGACAGTGTAAGGCCTTTTTGTCTAAAAAAATT  
CATTGTAGTGCTTTCAGGTGTCATAAATTTGTTCTGTTTTGCCACCTCCTCCGCCACTTTCACCGCCGTTG  
CCTGCCCTCCGCCACTATTTATTGCCTCCGCCACCAGTTTATACTCCTCCACCTCCAGTTTATTCACCA  
CCGCCACCACCACCTCTCCACCTCCAGTTTATTCACCACCGCCACCACCACCTCTCCACCTCCTCCATCA  
CCTCCTCCGCTCCACCACCAGTCTATTCACCTCCACCCCACTCCATCTCCTCCTCCACCATCACCTCCAC  
CTCCACCCCACTCCACCTCCACCATCACCCCACTCCATCTCCTCCTCCACCATCACCTCCAC  
CTCCCCCTCCACCATCACCTCCACCTCCTCCCACTTATTCGCCACCACCATCTCCACCTCCTCCATC  
ACCATTGCCTTATTGTGTACGCTCACCTCCACCTCCACCACCAATTCCCACTTAATTCTCCACCTCC  
ACCGCTTGCTCACTCGCCTCCACCCCTTACCTTACTATTACAATTCACCACCACCTCCGCCCCAAATTC  
GCCGCCTCCAGCACCAATTGCTCCTCCTCCACCAGTATACATATACTCATCACCTCCGCCACCAAATT  
CACCTCCTCCTCCACCACCAACATACGTATATTCTTACCTCCTCCACCTCCTTCCCATTGCCTTGTATAG  
AACCCCTCCACCACCTCCTCCTTGCATTGAACCTCCCACTCCCTCCCCTTACCATCTCCTCCTCCACC  
ACCTGTTTATCATTACAATTCTCCGCCCCACCATCTTAGCACCTCCACCACCAGTTTATTTTACAATTCT  
CCACCTCCACCATCACACCACCTACTCCAGTATACGAAGGGCCATTACCACCAGTAATAGGAGTTCAAT  
ATGCTTACCACCTCCACCACCTTTTATTAATTCTTTCAGAAATTTCACTAACTTTATCCTCAGAGCACA  
AAATAGTTCCTACAATTATTATTTCTCAACTCTTCAAGCCATCAACAAAATCGAGCTAATATGTGATCAC  
GAACCTTAAATGGTACGACAGAAAGAAAGATAAGAGGAAGGTAAAGAGGAGAAAGTTTCAATCTCCAA  
TGATTTTATTTTGAATTGTTATCAAATAGATTGAAGTTGTGGAGAGAATAAATTGGCAAAGTAAAGATT  
GAAACTTTGCTGGAAAATGTATGTATAGAGAGATCATAATCTTGAATTAGAAACCAGTTTACAGTGCTTG  
CTGCAACTGGTTTTATTTAATGATCATACTTTGATTTCTTTGTAATTTTTCTTTTTTTGGTTCTTCCAACT  
ATAGTATAAGATGAGCTTTTTATTTCTTTTAAAACCTGTATTGATTC

>M6-PGSC0003DMG400001252 M6 LRR-RLP

AATTTAGAGAGAGAAACAAAACAAAACCTCCTCAGGATGGGCAGCTTCATGTACATTGCGATCTTACTT  
CTTGCCATAATCTCAACCGTTCATTCTGCCCGCCATCAGATCGGGCAGCATTATTATCTTTCCGAGCTGC  
CCTAAATGAATCTTACTTAGGAATTTTCAACTCGTGGAAAGGGTACGACTGTTGCCATGAATGGTACGG

GGTGAGTTGTGATCCCACAACCTACCGCGTAGCAGACATAAACCTCCGTGGTGAATCCGAAGATCCACT  
CTTCGAAAAAGCTCATCGTACCGGTTACATGACCGGTACGATCTCTCCATCTATATGCAAATTAGAAAGA  
CTATCAAGTCTCACTATAGCTGATTGGAAAGGCATCACTGGACCTATACCATCATGTATTACGTCCTTACC  
CTTCCTTCGAATCATCGACTTAGTCGGAAACAAGCTCACCGGCTCAATCCCTTCAACTATAGGTCGATTAA  
GTCGACTCACAGTGTTAAACGTAGCTGAAAATCAACTTACTGGCTACATACCTCGATCATTAAACCACTT  
ATCATCTTTAATGCATTTAGATCTCCGAAACAACCTTATCTATGGAAACATCCCAACAAATTTCCGAAAAAT  
TACGGATGTTGAGTCGAGCTTTACTGAGTCGAAACAGGTTAACAGGTCATATACCGTATTTCGATTTTCGTA  
TATTTACAGGCTTTTACGATTTGGATCTGTCATTGAACAACTTTCTGGTAGCATACCTCCGTCTCTAGGTA  
AAATGCACGTACTIONTGAACGTTAAATCTTGATGGTAACAATATTACTGGTACTATACCACCTAGTTTGATT  
AATTCACGTATCAACATTTTGAATTTGAGCAAAAATACTATTGAAGGTTATATTCCTGATTCATTTGATGA  
AAGATCTTATTTTATGGTAATGGATTTATCTTACAACAAATTTAAAGGAAGGATTCCAAAATCGATATCG  
TCGGCGACGTTTATCGGTCACCTTGACGTTAGTCATAACCATCTTTGTGGCCAGATTCCGGAAGGTTCTC  
CCTTTGATCATCTTGAAGCTTCATCTTTTACTTACAATGATTGTCTATGTGGGAAGCCTCTTAAACCTTGTC  
ACTAAAGTGTGACTATTATTAGGTAAATTTAATTTTACTTTTCTTTTTTGGAGATTTTTATTAACACTATATAT  
TGGTGAATATGTTTGTATTATTATGTGATACTGAAAAGTAAAGTGTTTTTTTTTAGCATATATTTGTAATTT  
TAAATGTATAATTGTGCCTTGAGATATATGAAGGCTTTCTTA

>M6-PGSC0003DMG400001829 M6 LRR-RLP

TATATTTTTTTTTCCAGCAATCTCAGCTCACATATGCTGGGCAACATCTCTGTGCCTGCTATGACGCTTTTTA  
TTTGCTTCAATTTAAGAAAGGCCTCACAGTTGTTGATCAAATATACATGACTGTGACAATGAGACCCGA  
GCCAAGACTTTGTCCTGGAATGTTACAGGAGATTGTTGTCAATGGGATGGTGTAACCTGCAATGGATTT  
ACGGGTCATGTCATAGGCCTTGATCTTTCTTGCAGCATTCTTAACCAGACCATCAATGCTAACAGCAGCC  
TCACTAAACTTGGTCATCTCCAAAGACTCAACCTTGCCTTCAGCCAGTTTGATGACGACTTTCCACTTGGGA  
TTAAGTGAACCTCAGTAGTTTGACACATCTCAATCTTTGAAACTGGATTTAATGAAGGGGAGATACAGA  
TTCCACCAGGATTATCCAAGTTGTCTAAGTTGGTTTCACTTGACCTCTCCTCGAATGATTTCCAAGTTGGC  
CGAACAACCTCTAGAAGTTTGCTTCAGAACTTAACTAATTTGGAGGTTACTGTTGCTTGACAGCGTGGATG  
CACCATTTGAGTTACCTAAGAATTTTCTTCTTCCCTTAGGTACTTAATTCTTCAAGACACCAACATGTGTG  
GGAACATAAGTGAATCTCAGCTTTTTTCTATCTACCAAACCTTGAAGTGCTGAGAATGGGATGAAATCCTTT  
ATTAACAGGCACTTTGCCTAATTTCAATTGGAGTTTCAAGTACAAGTATTTTAGAGTTGGACTTTTTCTATA  
CTGATATTTTTGGTAAGGTACCTGATTCAATCGGCAACCTCCGTTCACTTTGGTAATTAGATCTCTCTTTA

AACCGTTTATCCGGCTTGATTCCAGTATCCATTGGCAACCTCAGTGGAATTAGAGTGTTGAGACTTTCAA  
GTAACAGCTTCACTGGTAATGTTCCCTCATCTATCTCAAAATTAACAAACTCTTTGATTTAGATCTCTCT  
TCAACGATTTTCAAGGCTTGATTCTAGAATCCATTGGTAACCTAACTGCAATCACAAAGTTGACACTTTCA  
GGTAACAACCTTACCGGAAATGTTCCCTCAACTTTCAAAAAGCTGAAAACACTTAACTACTTATCTCTCTC  
TTTCAATAATTTTCAAAGCTCAATTCCAGACAACCTTCGCCTACTTTTCAGAGCTATCTTTTTTATACTTGCA  
AACTAACAATTTCACTTGCCCACTTCCCTATTTGATTGCAACCTTGACTCGCCTTCAAGAATTAACCTTGCA  
AAACAATTTACTAACTGGTTCCTTCAATTTAAGCAGACTTCAAGAGTTAGAAACACTTGATTTTT  
CCTTCAATTATTTCACTGGCACAATACCCTCTTGGTTATTCCGTCTTCCATCCTTGGTTTTCTTATCTATTCA  
ATACAATGAATTAACGGGAAATTGCCAAATGAGCTCAAGAGCATTACGTTGGCAACGCTAGAATTGAT  
CTTCGGAACAACAAGCTGCATGGAGAAATCCCTGATTGGATATTATCTATGAGCATGTATATCCTGGATC  
TCTCTATAACTTGCTCACAGGCTTTGAAAAACAAGTATGACATTCAAAGAATTTGGTGTGGCTTAATTT  
GGAGAACAATTTTCTTCAAGGGACTTTGCATCAATCTATTTGTGACATGTTTAACTTGAAGTCCTCATT  
TGCTCGGAACAATTTCAAGTGGTCAATCCCAGGATGTTTGGGTAACCTCATTCTTGTTTTAGACTTGCGA  
ATGAACAATTTTTATGGAGAAATACCAAATTTCTTACCTATAGGGTTACAATATCTTGGTGTGTATGACA  
ATCAGTTGGGGGGGACAAGTCCCACGATCCTTGGTAACTGTACAAGCTTGAAGCTCTTGATTTGGGG  
AACACAATATAAATGACACGTTCCCGTATGGCTGGACAACTTCAAACCTACAAGTTCTGATTCTGTA  
ATCAAATCTCTTTCACGGTTCAGTTGGTGATTTGGATTCCGAGTTTCCATTTCTGAGTTACGGATCTTTG  
ACCTTTCGTTAATGGGTTCACTGGAACCTTTCCATCTAATATTTTCAAAGTTTCAGAGGTATGATGGAT  
GTGGATGAAGGAAAAACAGGAATTACTCTAGCTATTAATAGGACTCACAGAGATTACCTTTACCATGTTA  
GTTTGGTGATAAAAGTCAATGAATTTGATATGAGAATCACGTCAATTATGACGAGTGTTGATTTATCAAG  
CAACAGGTTTGAAGGAGATATTCAAATTCATTGGAAGTCTGAGCTCACTTGTGTTACTCAACCTGTCT  
CGCAACAACCTCCGTGGTCATATTCCTGCAGAAATTGCAAAGTTGCAGCAGCTCGAAGCATTATAGATCT  
CTCGTGGAACAGACTCATTGGAGAAGTTCCTGGTCAATTGTGAGTTTGACATTTCTTGAGGTCTTAAAC  
CTTTCATAACATCATCTGGCTTGGCGCATTCTATTGGGAAACAGTTCAATACATTTCCAGATGATTCATA  
TTGTGGAAATCTTGATTTATGTGGATTTCCACTATCAAAGAAATGTGGAAACAATAATAGGCCAGATGA  
GTCAACACTTGAACAAGATGATGAAGATTCATTTTTGCGAGCGGGTTCACATGGGAAGCTGTGGTAAT  
AGGTTATGGTATGATATTTGGATTGTTGATGGGAGGCCTCATGTTCTATTGGAAAAACCAAATGGTTT  
GTCAACTTTGCTGAAGATATTTCTCAACAAATTGCTGCTAAGAAGCGAAGAAATCAAAGAAGAGACGT  
CAAGGACGTGGTCTAAGAATGAATTAG

>M6-PGSC0003DMG400001831 M6 LRR-RLP

ATGGAGTACCAAAAATTGCTAATAGCTTTCTGCTTCTATTCACATTTTATACTTTTTGTCCATCAATCTCAG  
CTTACATATGCTGGGCAACATCTCTGTGCCCGCTATGAAGCTTTTTATTTGCTTCAATTTAGCAAGGCCT  
CACAGTTGATCTTATTGGTTATGACTGTGACTATGAGGCCCTAGCTAAGACTTTGTCTTTGAATGTTACAG  
GAGATTGTTGTCAATGGGATGGTGTACTTGTTCATGGATTTACTGGTCACGTTATAGGACTCGATCTTTC  
TTGCAGTTTTCTTAACGGAACCATTAATTCTAACAGCAGCCTCACAAACTTAGTCATCTTCAAAGACTCA  
ACCTTGCTTTCAACAAGTTGAGTAACTTTCCACTTGTGGATAGCATTAGTGAAGCTCGAAAGTTTGACATAT  
CTCAATCTTTCGCATTCAGTACATATGATAGGGGAGAAGCAGATACCACAAGTATTATCCAAGTTGTCTA  
AATTGGTTTCACTTGACCTCTCCTTGTATTACACTGAACTCAAAGTTGATTGAAAAACCTTCAGAAGTTTG  
CTTCAAGACTTGACCAATTTGGAGGTAAGTCTTCTTGACAAGCTCGTATGCATCATTGAGTTACCTAAGAA  
TTTTCTTCTTCTTCTTAGGTAAGTCTTGAAGGTATCGGCATGTTGGGATCATAAGTGAGTTTCAGT  
TATTTCAATTTATCAAAGTTGCAAGTGCTGAGATTTGGACAGAATCCTTTACTAACAGGCTCTTGGCCAAAT  
TTAATCGGAGTTCCAGTGAAAGTATTTTAGAGTTGAACTTCTTTTATACTGGTATTTCTGGGAAGGTACC  
CGATTCAATTGGTAATCTCCATTCTCTTGGTATTTGAATCTCCAGATTTGTCATTTATCTGGCTCGATTCC  
AGAATCCATTGGCAATCTCACTGCAATCAGAGAGTTGATACTTTCAGAAAACGTCTTCATTGTTAATGTTCC  
CCTCAACTTTCTCAAAGTTAAACAACTCGTTCGTTTAGATCTCTCTTCAAAGTATTTTCGAGGCTCAATTC  
TAGAATACATTGACAATCTCACTGCAATCACACAGTTGACAATTCCAGATAACAGCTTCACTGGAAATGT  
TCCCTCAACTATCGGAAAGTTGAACAACTTAACTACTTATCTCTCTTCCAATTATTTGAAGGCTCGAT  
TCCAGACATCTTGGCCAACTTTTCCAGATCTATTTGCTTATTTTTTGACACTAACAAATTTCACTGGTTCATT  
CCCTGTTCAATTGCAACCTTGATTTGCCTTGTGAATTTAGAGTTGCAAAACAATTTACTAACTGGTTCCT  
TCCCTCTAATAAGCTGATTTCAACTTCTACAATCACTTGATTTGTCCTTCAATTATTTCACTGGCACAAC  
ACCCCTTCGTTATTCCTTCTTCCAAGATTGGTTTCTTACATGTTCAACTCAATCAATTAACCGGGAAATT  
GCCAAATGTGCTCAAGATGAGTTATCTAGGATACGTACTATACCGTAGCATTGATCTTTCATACAACAAG  
CTGCAAGGTGAAATCCCAATGCGATGTTATCTATGAGCATGGGTAAGCTGGATCTCTCTCATAACTTCC  
TCACAGGCTTTGAAAAACAAGTATGGCACTCAGAGTACTTACTATACCTTAATTTGGAGAACAATTTTCTT  
CAAGGGCTTTTGCATCTATCCTTTTGTGACATGTATAGTCTTGTATTCTCCTCATTTTAGCTCGGAACAATTT  
AGTGGTTCAATCCCGGTATGTTTGGGTAAGTCCAGTATTTCCATTTCTTTTTAGACTTGCGAATGAACAA  
TTTGCATGGAGAGATACCAAGATTCTTATCTACAGGGTTTCAATATCTTGGTTTATATGGCAATCAATTG  
GGGGACAATTCCCGTGATCCTTGGTAACTGTACAAGCTTGGAAAGCTCTTGATTTGGGAACAACAAG

ATAAATGACACGTTTCCGATATGGCTGCAGAACTTCCAAACCTACAAGTTCTGATTCTGAAATCTAATCT  
CTTTCATGGTCCAATTGGTTATTTGGAGTCCGAGTTTCCATTTCTGAGTTACGAATCTTTGATCTTTCCTT  
CAATGGGTTCACTGGAACCTTTGCCATCTAATTTTTTCAAAGTTTTAGAGGTATGATGGATGTGGATGAA  
GAAAAACAGGAATTACTIONGCTCCTACAAAGGGTCGACCAGGCCTTGTACAAGCATAAATCGATGTGCGA  
AGAGATTACCTTTACCACTTTAGTTTGGTGATAAAAGGTAATGAGTTTGATATGAGAATCACGTCAATTA  
TGACGAGTGTTGATATATCAAGCAACAGGGTTGAAGGATATATTCCAAATTCCATTGGAAATCTGAGCT  
CACTTGTGTTACTCAACCTGTCTCACAACAGCTTCCGTGGTCATATTCTGCAGAATTTGCAAAGTTGCAA  
TAGCTCGAAGCATTAGATCTCTCACGGAACAGACTCATTGGAGATATTCCAGATCCATTGTCGAGTTTGA  
CATTTCTTGAGGTCTTAAACCTTCTACAATCATCTGGCTGGACGCATTCTCTTGGGAAACAGTTCAAT  
ACATTTCCAAATGATTCTTATTGTGGAAATCCTGATTTATGTGGATTTCCACTATCAAAGGAATGTGGAA  
ACAATAAAGAGTCACCACTTGAACACGATGATGGTGATGATGATGATTCATTTTTTCGAGTGGGTTAC  
ATGGCAAGCTGTGGTAATAGGTTATGGTTGTGGTCTGATATTTGGATTGTTGATGGGAGGTCTCATGTT  
CCTACTGGAAAAGCCAAAATGGTTTGTGAACTTTGCT

>M6-PGSC0003DMG400001832 M6 LRR-RLP

TTGGCAATCTCACTGCAATCAGAGAGTTGATACTTTCAGAAAACGTCTTCATTGTTAATGTTCCCTCAACT  
TTCTCAAAGTTAAACAAACTCGTTCGTTTAGATCTCTCTTCAAACCTATTTTCGAGGCTCAATTCTAGAATAC  
ATTGACAATCTCACTGCAATCACACAGTTGACAATTCCAGATAACAGCTTCACTGGAAATGTTCCCTCAAC  
TATCGGAAAGTTGAACAACTTAACTACTTATCTCTCTTCCAATTATTTTGAAGGCTCGATTCCAGACA  
TCTTTGCCAACTTTTCAGATCTATTTGCTTTATTTTTTGACACTAACAAATTTCACTGGTTCATTTCCCTGTT  
AATTGCAACCTTGATTTGCCTTGTGAATTTAGAGTTGCAAACAATTTACTAACTGGTTCATTTCCCTCTA  
ATATAAGCTGATTTCAACTTCTACAATCACTTGATTTGTCTTCAATTATTTCACTGGCACAACACCCCCTT  
CGTTATTCCTTCTTCCAAGATTGGTTTCTTTACATGTTCAACTCAATCAATTAACCGGGAATTGCCAAAT  
GTGCTCAAGATGAGTTATCTAGGATACGTACTIONTACCGTAGCATTGATCTTTCATACAACAAGCTGCAAG  
GTGAAATCCCCAATGCGATGTTATCTATGAGCATGGGTAAGCTGGATCTCTCTCATAACTTCCCTCACAGG  
CTTTGAAAAACAAGTATGGCACTCAGAGTACTTACTATACCTTAATTTGGAGAACAATTTTCTTCAAGGG  
CTTTTGCATCTATCCTTTTGTGACATGTATAGTCTTGTATTCTCATTTTAGCTCGGAACAATTTCAAGTT  
TCAATCCCGGTATGTTTGGGTAACCTCAGTATTTCCATTTCTTTTTTAGACTTGCGAATGAACAATTTGCA  
TGGAGAGATACCAAGATTCTTATCTACAGGGTTTCAATATCTTGGTTTATATGGCAATCAATTGGGGGGA  
CAATCCCCTGATCCTTGGTTAACTGTACAAGCTTGAAGCTCTTGATTTGGGGAACAACAAGATAAATG

ACACGTTCCGATATGGCTGCAGAACTTCCAAACCTACAAGTTCTGATTCTGAAATCTAATCTCTTTCAT  
GGTCCAATTGGTTATTTGGAGTCCGAGTTTCCATTTCTGAGTTACGAATCTTTGATCTTTCTTCAATGG  
GTTCACTGGAACCTTTGCCATCTAATTTTTTCAAAGTTTTAGAGGTATGATGGATGTGGATGAAGAAAA  
ACAGGAATTACTIONGCTCTACAAAGGGTCGACCAGGCCTGTACAAGCATAAATCGATGTGGAAGAGAT  
TACCTTTACCACTTTAGTTTGGTGATAAAAGGTAATGAGTTTGATATGAGAATCACGTCAATTATGACGA  
GTGTTGATATATCAAGCAACAGGGTTGAAGGATATATCCAAATTCCATTGGAAATCTGAGCTCACTTGT  
GTTACTCAACCTGTCTCACAAACAGCTTCCGTGGTCATATTCCTGCAGAATTTGCAAAGTTGCAATAGCTCG  
AAGCATTAGATCTCTCACGGAACAGACTCATTGGAGATATCCAGATCCATTGTCGAGTTTGACATTTCTT  
GAGGTCTTAAACCTTTCCTACAATCATCTGGCTGGACGCATTCTTGGGAAACAGTTCAATACATTTCC  
AAATGATTCTTATTGTGGAATCCTGATTTATGTGGATTTCCACTATCAAAGGAATGTGGAACAATAAA  
GAGTCACCACTTGAACACGATGATGGTGATGATGATGATTCATTTTTTTCGAGTGGGTTACATGGCAA  
GCTGTGGTAATAGGTTATGGTTGTGGTCTGATATTTGGATTGTTGATGGGAGGTCTCATGTTCTACTGG  
AAAAGCCAAAATGGTTTGTGAACCTTTGCTAAAGATATTGCTCAACAAATTGCTGCTAAGAAGCAAACAA  
GGCAAAGAAGAGACGCCAAAGACATGGTTTAAAGAAATGAAGTACTAGCAATATACCAGGTATGCATTA  
CCTTTAGTTTTGAATCAGGAACAACACTTCAGAGGTTGTTGGATAACTATATGTCAACTGTTTTTATTTTT  
TCCTAAATATTCAAACCTAATTTGTCTCTGCAGAGGTTGCTGGAGAGTTGGACAAGTTTATCAGCAAGT  
CAGTGCTGATGTTTGGCAAATAGCAATGGATGCATCTGTTTGTACTTTATGTCCATGGTTGCCAAATAC  
GTATGTAAATGTTACAGTTTAGTTCT

>M6-PGSC0003DMG400001870 M6 LRR-RLP

ACTTTCCACTTGGATTAAGTGAACCTCAGTAGTTTGACACATCTCAATCTTTTGAATACTGGATTTAATGAA  
GGGGAGATACAGATTCCACCAGGATTATCCAAGTTGTCTAAGTTGGTTTCACTTGACCTCTCCTCGAATG  
ATTTCCAAGTTGGCCGAACAACCTCTAGAAGTTTGCTTCAGAACTTAACTAATTTGGAGGTACTGTTGCTT  
GACAGCGTGGATGCACCATTTGAGTTACCTAAGAATTTTCTTCTTCCCTTAGGTACTTAATTCTTCAAGA  
CACCAACATGTGTGGGAACATAAGTGATTCTCAGCTTTTTTTCATCTACCAAACCTTGCAAGTGCTGAGAATG  
GGATGAAATCCTTTATTAACAGGCACCTTTGCCTAATTTCAATTGGAGTTTTCAGTACAAGTATTTTAGAGTT  
GGACTTTTTCTATACTGATATTTTTGGTAAGGTACCTGATTCAATCGGCAACCTCCGTTCACTTTGGTAAT  
TAGATCTCTCTTTAAACCGTTTATCCGGCTTGATTCCAGTATCCATTGGCAACCTCAGTGGAAATTAGAGTG  
TTGAGACTTTCAAGTAACAGCTTCACTGGTAATGTTCCCTCATCTATCTCAAATTAACAAACTCTTTGA  
TTTAGATCTCTTTCAACGATTTTCAAGGCTTGATTCTAGAATCCATTGGTAACCTAACTGCAATCACAA



AGTTGACACTTTTCAGGTAACAACCTTCACCGGAAATGTTCCCTCAACTTTCAAAAAGCTGAAAACACTTAA  
CTACTTATCTCTCTCTTTCAATAATTTTGAAAGCTCAATTCCAGACAACCTTCGCCTACTTTTCAGAGCTATC  
TTTTTATACTTGCAAACATAACAATTTCACTTGCCCACTTCCCTATTTGATTGCAACCTTGACTCGCCTCA  
AGAATTAACCTTGCAAACAATTTACTAACTGGTTCCTTCCCTCTAATTTAAGCAGACTTCAAGAGTTAG  
AAACACTTGATTTTTCTTCAATTATTTCACTGGCACAATACCCTCTTGGTTATTCCGTCTTCCATCCTTGG  
TTTCTTTATCTATTCAATACAATGAATTAACCTGGGAAATTGCCAAATGAGCTCAAGAGCATTAC

>M6-PGSC0003DMG400002118 M6 LRR-RLP

CAATCCTTCAGAGATGTCTGAAGATGAGGAGCGTCTTGTCTTCAGATCTCACCGGTGGCGCCACTGCA  
AAAGCAAGGAACTGTTGCTTTAACGCCGCCGTTACCGGTGGCGGAGGGGGGATTTTTAACTTTTCGCCA  
CACCCAGATCAAGTTCTTGA AAAATGTGCTGGAAAATGTTCTTTGCTTCTTAACTGATCGCCGTGACCGTA  
ACGCTGCATCTCTTGTAAAGCAAATCTTGGTATCGGGCTGAGGCTTTAACCAGATCCGAAGTGTTTATTGG  
CAACTGTTATGCTGTTTCGCCGACCCGGGTTACGACCCGTTTCAAATGGGTGACCTCTGTGGCCATTAAA  
GGGAAACCTAGGTTTGCTGATTTAGTTTGCTTCTCCAGATTGGGGTGCTCACTTTACTCCTTGGGCTTC  
TGTTTTGGGTGATTCTTATCGTGGGCTTGAGAAATTGTACCTCAAACGTATGTCCATATCTGATGATGAT  
CTAGGTTTGTTGGCGCGTTGTTTCCCAGTTTCAAAGAGCTTGTTCTTGTATGCTGTGACGGTTTTGGGA  
CTAGTGGACTTGCTATTGTAGCTCGTGATTGCAGGTTAGTATTGTTTTGTCCGGATATAGATCTGTTTATG  
TGATAACCCTTTTGGTAAAAAGTTTAGATTTTTAATTTCTAGAAGCTGAATTCTTCTTTCTGTAATGGGAA  
ATTAACAGCTTAACTAGTGTAGATATATTGTGTTATTTGAATTTGTGCTTCATGTGTGCTGGTGTGTTGAA  
TTAGTTATGTGATTGAGTTGTTCTTTAACTGTTTTATTCTGCATTTGAAACTTAATGATACTTTTGAGGAC  
ACTAGCATTGAAGTTGTAATATGTGGTGACTTGTTGTATTGGATTTGTGAGTTTGCAAGCTGTGAAATAT  
GGTTTGGTAGTGTGATTTTCTTGTGCATAATAGAAGGTTTTTACTGCAGGCAAATTAGAGTGCTTGATCT  
GATTGAGTCTGAGGTATCCGACGATGAAGTGGACTGGATTTCTACTTCCCTGAGAACAAAACGTGTTT  
GGAGTCTTTGACCTTTGATTGTGTTGAATGCCCTATTGACTTTGAGGCATTGGAGAAGCTAGTAATCAGG  
TCACCTAGTTTGAAGAGTCTAAGGTTGAATCGTTTTGTTTCTATTACTCAGCTGTACCGTTTGATGATTG  
AGCTCCACAGCTTACCAATCTGGGAACAGGCTTTTTGGCGCCTCAACGGTCATTGATGAACCAGATCCT  
GATTATGCTTACGATTTGCTGCCTGCAAATCCATTGTCTGTCTCTCTGGTTTCAAGGAAATTGCTCCTGA  
ATATCTGCCTGCAATCTATCCAGTTTGTGGCAATCTGACCTCTCTTAATTTAAGCTATGGTGCCAACATTA  
ATACTGAACAATTCAAGTCTGTCATCAGCCGTTGCCATAAGCTCCAAGTATTGTGGGTATGTGGTTTGAA  
TTTTCGCTATATGTTCTTTTAAAGAAAATTGACTCTGTAATAGCGTTATATTGAGTTCAATTTTGATGTTT

CAGGTATTTGATTCTGTATGTGACGAAGGACTTGAGGCAGTTGCTGCAACATGTAAGGATCTGCGGGAG  
ATTCGAGTTTTCCCTTTTGAAGCTCGGGAAGATGCAGATGCCCCAGTTTCTGAAGTAGGTCTCCTTGCGA  
TTTCTGAGGGTTGCAGTAACTTAAGTCCATCTTATATTTCTGCCAACGAATGACAAATGCGGCTGTTAT  
AGCTATGTCAAAGAACTGCCCAGACCTTGTGGTATTCCGACTATGCATTATGGGTTCGGCACTTGCCTGAC  
CATGTTACTAATGAACCAATGGATGAAGGCTTTGGGGCTATTGTCAAGAACTGTAAGAAGCTTACTAGA  
CTCGCTGTATCTGGTTTACTGACTGATAAGGCTTTTCAGTTACATTGGACAATATGGAAAAGTACTAGTCA  
CCTTATCAGTTGCTTTTCTGTTGGAACAGTGACTTGGCTCTGAAGTATGTGCTCGAGGGCTGCCCTAAGTT  
GCAGAAGTTGGAGATCAGGGATTGCCATTTGGAGATTTGTCTTTGCGTTCTGGTGTACACCACTATTAC  
AATATGAGGTTCCCTTTGGCTGTCATCTTGTAGAGTAACTCTACAAGGTTGTCAGGAGATTGCTGGCCAAT  
TGCCCCGTCTAGTAGTGGAAGTGATAAGTGGTGTAGGGAAGGGAGTGAGACTGGTGAGCATGTCAAT  
ACCTTGTACATGTACCGATCTCTTGATGGACCGAGGGCTGATGTACCATCATTGTGCAAATACTGTGAC  
CGACCTTTTTAGTAGATAGGAATTTTCTGCAGTAATTGATTGGGACCTTTGAGAAATGATTAATACTATTTTC  
TTGGGAAGAGATGCTCTCCAGAAATCTGTTGTGACCCATATGAAGGTGCAAGTTTCCTTCTTGAGAAAAC  
GAATGGTGCACCACTTGCAAAGGCAGTGAGTAATCTATAATGTATTCAATGCTGGTCTCCATGGATGTCA  
TTGTATATGGTTTCAAGTACAGAGATTGTTTTTTTCCAGCAAAGCAATCTAGAAGACAAATGGTTCTTTGTAT  
CAGTAATCTTTTCTATTCACTTTCTTTTCTTCATATTCATGGAGCCTTCAATTAGTAAGTGGAGTCATTGGT  
AAGGCCACAGCAAGGGTAGATGTTCCAACTGCACGGTGGCGGAGCTCAATGAGATTTCTCAAAGGCT  
TTCGGCAGAACCAACACTTGTGGAATACACCTGCATGCTCGGTCAGGGTACTGGCTCGTCAAGTAGTAT  
ATTTTCATACAATTGAGGCCCTTCTTATTTTTTTGTTTCATTGTTAGTTTAGAGTTGGAAGTTTTTTATTTT  
GTTGGTGTAGCCTAATGGTCAGAAGGATACCTACCGCTGTTGGATCTCTCCATCTCGCTTTCTAGAAAT  
ATTTGTTCTTTCCAGGATGTGTTGTTTCGTAGCACCTGACTGTTGAATTTATTATTGTTATTTTTAGAAGAA  
ATGTGAGATGGGTAATAAATGCCAAATATGCATGGACCAGATGATGCTCTAGTGTGTGTGTGTTTGTGT  
TTGTCTTTGCCTTTTCTTTATGTGGAATGATCAGCTTGATAGTGAAGACCCATAAATGATGTGTGGAAAG  
CCTTGTACAAGTACAAAATGCAGGACCCCTCCTCCTTCACTCACTCTCTTTGTGGGATCCATTTATGAG  
TCTTATCCTCTATTATCTTTCCAGCTGATGAATGGCCCTTCTGTCTCATCTCTTGTATCTGAAAGAAGAG  
CCAAGAGCAGGGAGTAGACTGTAGTTGTGGAAGTATAGATGGATAGTACAGCACACCCCTTATTTTTT  
AGCTGATGATGCCAACTTTATCATTATTCTTTTGGATAACAGTCTTGAGGAGCCTGCCTGTTGTGTTATCC  
TGTTTACTTTTCATATGCGGCTGCTGCTGCAGCATTCTTCATCTCTATCATTGACTACAACCTCAC

>M6-PGSC0003DMG400002426 M6 LRR-RLP

ATGGCATCTTCTTCTTCTTTGTGAGTGATTCACAAAATTGCCTCTATGGAAGTACGATGTCTTTCTAACT  
TTTAGAGGTAAAGATACCCGTAAAATATTTGCGAGTCACTTGTACGAAGGTCTGAGAAACAGGGGAATA  
TTCACCTTTCAAGATGATAAAAGGCTAGAGCAAGGCGATTCCATCTCACAAGAACTCTTGAAAGCTATCG  
AAGAGTCTCAAGTTGCACTCATCTTTTCTCAAGGAACTATGCTACATCGAGGTGGTGCTTGAATGAACC  
AGTGAAGATCATGGAATGCAAGGAGGAAGAAAATAGACAAACAGTCATACCGATCTTCTATGATGTGG  
ATCCATCACATGTTGACACCAAAGTGAGAGCTTTCAGAAAGCATTTCGCAAACATGAATCGAGGTATA  
AGGATGATATTGAGGGGATGCAGAAGGTATAAAGATGGAGAAGTCTTAACAGCTGCCGTAAATCTA  
AATGGATATGATATTGGTGACGGGTGAGTTGAAAACACATAATATGTTTCTATTACCCTAAGCTATAATG  
TTTCTATTTAATACGCTCTTGAACATTAATAATATGAAAATACTTTCTAATACTTGACTTTCTCACATTGC  
CAACAATCAATCTCTTATTTATGTAGGATTGAATCAGAGAAAATTCAGTAGATTGTCGACCACATCTCTC  
GAAATTTTGCAAGAGTGCTCGTTTTTTATCTTATTTGCAAGATGTTGTGGGAATAAATGCTCATTTAGAG  
GAACTAAAATCCCTACTTCAAATAGAAATCAATAATATCCGGACTGTAGGGATCTGGGGAATAGGCGGA  
GTTGGTAAGACGACGATAGCAAAAGCCATCTTTGATACTCTATCTCATCAATTTCAAGTAGCTTGTCTTCT  
TGCGGATGTTAAAGAAAATACAAGAAAGAATCAACTACATTCCTTACAAAATACCCTTCTCTCTAAATTG  
ATAAGAAAAAAGATAATTACGTCAACAATAAGTATGATGGGAAGTGCATGATTCCGAACAGACTTTCT  
TCAATGAAGGTGTTGATTGTGCTTGATGACATTGATGAAAGAGATCATTGGAGTATTTAGCAGGTGGT  
GTTGGTTGGTTTGGTAATGGCAGCAGAGTTGTTGTGACAAGTACAGAAACAGACAATTGATAGAGAAGGA  
TGCTGCAATATACGAAGTGCCTACACTACCTGACCATCATGCTATGCAATTGTTCAATAAGAATCTTTTA  
GAAAAGAGGTTCCAAATGAGTGTTTTATGAAGTTATCGTTGGAGGTAGTGAATCAGGCTAAAGGCCTTT  
CTTTAGCCCTCAAGGTGTGGGGTTCTTTGCTGCATAAGAAAGGCCTAACTCAATGGACAAGAAGTGTAG  
ACCAAATAAAGAAAAAGTCTAATTCAGAAATTGTTGAAAAACTCAAATAAGTTATGATGGGTTGGAGC  
CCGAAGAGCAAAGATATTTCTAGATATCGCATGTTTCTTCTGTGGGCATGAAAGAAAACAAGTCATGA  
AAATTGTTGATAGCTGTGATTTTGGAGCTGAATACGGATTAGATGTTCTAATTGAAAAACCCCTTGTGTT  
CATCTCTAAATATGATAGAACTGAAATGCATGACTTGATTGAAGACATGGGCAAATACATAGTGAAAAT  
GCAAACAGATTCCGGAAAACCTAGCAGAGTATGGAATGTTGAAGATTTGAAAGATGTGATGATGGACA  
ATATGGTAAGTTAGCTAAACAATGCAATAGTATTCATATTTCAAACATATATATATATACACTCTGTTCT  
CTAGCTTCATATTTCTTAAGAAATACTTAATAATATTTGTACCTTAAATTTTGTAAATGATGCTAACTCT  
TCAAGAAGTCTAAGTATAATAATAATAATATATAAAACATGACAAAATAGCATTGGGGATTGTACA  
TGACATGTGAAGTTATGATTTGTTGACTCATTACCTTTTTATAGGGGACCATGACAGTCGAGGCAATTTG

GTTTACATATTCGGAAAACTATGCTTTAACAAGAGGCAATGCAAAATATGCGAAGGCTTAGGATATT  
ATGCATGCAGACTTATTCATGGACTTCCCAAAGTGATTCAGAAGATGGCTCTATTGAGTACCTTCCAAC  
AACTTGTTGGTTTTGTCTGACATCATTATCCTTGGAAGTTATTGCCAGAAAATTTAATTCCAGAAGGCTT  
GTTAATCTTGATCTCCGATGGAGTTCATTGCATTATTTATGGAATGAAACAAAGGTACCATTCTATTTAG  
ATACTTTCTATTTTCTATTGTCCTAGAATTGTATATGATTCTTGTTTTAAATGAAATAAG

>M6-PGSC0003DMG400002478 M6 LRR-RLP

CTTCCACTTGATTTGAGACAATGCTTTGTGTATTCTGCAGTGTCCCAAAGGACACCAAATGGAAAAGG  
AAAATCTAATCTCTCTTTGGATGGCACATGGTTTTCTTTCATCGAAAGGAACTTGGAGCTAGAGGATGT  
GGGTAATGAAGTATGGAATGAATTATATTTGAGGTCTTCTTCCAAGAGATTGAAGTTAGATATGGTAA  
AACTTATTTCAAGATGCATGATCTCATCCATGATTTGGCTACATCTCTGTTTTAGCAAACACATCAAACA  
TCAATATCCGTGAAATAAATGCAGAAGTTTACTTCATTAGGGGGCACGGTAGTTTCATTGATGAGAAAG  
ATTATATACCTAGGAAGCCCATTGGTTTTGCTAAAGTTGTGTCTTCTATCTCTCCTTCACTCTTGAAACAGT  
TTGTCTCGTTGAGGGTACTCAATCTAAGTTACTTAGGACTTCAGCAGTTACCTTCTTCCATTGGAGATCTA  
GTACATTTAAGATATTTGAACCTGTCTCGCAATGCAATGCGTAGTCTCCAGAAAGGTTGTGCAATCTTC  
AAAATCTGCTGACTCTTGATCTACGGTTGTGCTCAAACCTTTGTTGTTTGCCAAAACAACAAGTAACTT  
GTTAGTCTCCGGAATCTAAAACCTTGATCACTGTTTATTGAAATATATGCCACCAAGGATAGGATCTTTGA  
CAGGCCTTAAGACTCTAAGTAACTTTGTTGTGGGCGAGAGGGAAGGTTGTCAACTTGGGGAAGTAGGA  
AGCCTAAATCTCTATGGCTCATTTGAAATCACAATCTTGAGAGAGTGAAGAATCATAAGGATGCAAAA  
GAAGCCAATTTATGTGCAAAAGGGAATCTGCATTCATTAAGCATGAGTTGGAACATGTCCGGACCACAT  
AGATATGAATCAGAAGAAGATAAAGTGCTTGAAGCCCTCAAACCACACCCCAATCTGAAATATTTAGAA  
ATCAATTGGTTCAGAGGAATCCGTCTCCAGAGTGGATGAATCACTCAGTATTGAAAAATATTGTCTCTA  
TTATAATTATCGAATGCACAACTGCTCGTGCTTACCACCCTTTGGTGAGCTGCCTTGTCTAGAAAGTCTA  
AAGCTATGGCACGGGTCTGTGGATGTGGAGTATGTTGAAGAAGTGGATATCGATGTTGATTCTGGATTC  
CCCACAAGAATAAGGTTTCCATCCTTGAGGAACTTGCTATATGGGACTTTCGTAATCTGAAAGGATTGC  
TGAAAAAGGAAGGAGAAGAGCAATTCCTGTGCTTGAAGAGATGGAGATTTGGTGGTGCCCTATGTTT  
GTTATTCCGACCCTTTCTTCTGTCAAGAAATTGGAATTGGATCCAACACCTTTAAGGTCCATGTCTAATCT  
TAGGAATCTTACACCTTTCAGGTCCATATCTAATCTTAGGAATCTTACTTCCCTCAACATTAGCTATAGCA  
ATAGCAATGAAGCAACTTCACTCCAGAAGAGATGTTCAAAAACCTTGCAATCTCAAATACTTGAATAT  
CTCTAAGTTCGAGAATCTCAAAGAGCTGCCTACCAGCCTGGCTAGTCTCAATGCTTTGGAGAGTCTGAAG

ATTGAATATTGTGGTGCCTAGAGAGTCTCCCCGAGGAAGGGGTGAAAGGTTTAACTTCACTCACAAAG  
TTATCTGTTTCATGATTGCAAGATGCTAAAATGTTTACCGGAGGGATTGCAGCACCTAACAGCCCTCACAA  
CTTTAACAAATTTGGGGATGTCGAGAAGTGTTCAAGCGGTGTGAGAAGGGAATAGGAGAAGACTGGCAC  
AAAATTGCTCACATTCCGTATCTGGGTATTCATTAATTAGTATTTATAATTGTTTCTTTGTTTGTGAGTC  
TTTTTGGTTCTTGCCATTGGATTGCATGTAATTTTTCTAGGGTTGTTTGTGTAAGTCTCTCATTGGATG  
TAATTTTATTTTGGAAACAAATTAACAATCTATTTGTATTATACGTTTTGAGAATCTACTTATTTGTAA  
TTGT

>M6-PGSC0003DMG400002618 M6 LRR-RLP

TAAAGTAAAATAATGGGGAAAGGAGCAATTTTGAAATTGAAAAAAAAAAAAAGAAAAACAAAAGTGAT  
CTCTTATTCCGGAAAAGCAAGGTGGGAAATCTTTACAAGACTCGTCTCTTTTTCTTATCAGAATCAGAA  
GAAGAAAGAAGAAGATTCGTCTCTCAGGTATGGTGTTCCTTACAATCAATCTATAATGCTTATGTTTG  
TTTATTTGAGAGGCCGATCCGCCACCCTCATGATGGATGGGTCAAACCTGTTTTTTTTTTTTCCATAAA  
AACAAACCAGATCTTTCCGTTTACCCTTTTGTGTTTTGACCATGAAAATCAATTTTGTGTTTTGACCCA  
TTGATGAAAATCAACATTAGGTTAGGGTAAGAAAAGGGAGTTTGATTGAATTATGCTGGAATATTCTGT  
CTTGTTAGCATGTGTATTTGTGAACAAGGTTACGCACGCGTTTACTTTGACCTTTTCCGTATTACATTGG  
GTCTTGTCTTCTAATTACGTAATTAATCTCGTGCGTTTTTGTGACAGCACAAAATTTGACAGCTATATAGT  
CTTTGCTTGTGGGGCTGTCATTATAGTTCATCTATATTGGCAGCCCAATTTCTGAGGTGTGTGTGTCTTCT  
TTCTCTTACCGGCAAAACAAATATATCATCATGGCTTACTTGTCTGGAATCCTCCAAGACCTATAGTTG  
CAGCATCTGCAGTTGCTATAGCTTCTGTATCTACTGATCTTCATGAAAAATTCTGGCCATCTAAGTCATTA  
CACAACAACAACAACAATCCCAAGAAAAGGAAAAGATAACATCTCACATATCTCTTCTAAGCTAC  
CCCATTTCTCCTCCTACCTACCACAATACCTGTTCCCCTGCCTATTCTAAATAACAGTACCACTTTTACTTC  
ACTTTCAATCCTCCTTTTCTACTTCTTCTGTGCTCAACTCTTATCAATCAGCAGCATTGCCCAACTCT  
GCTAATCCCTCCACATATACATATACTTCTTCTTACCTTCCGAGGTGTTGTATACATGGCACTTACCT  
GAGCCAAATGCATCACGGAATTCTGATTCTTACCCTAAAGTCTACCACTCTGGTAGTATTGTTGGGAT  
GGTTAGGTGCAAAGCAAAGCATCTAAAGAGATATGCAGAGTGGTATGCATCAAGAGGATATCATGTC  
ATTACATTTACTTTCCCAATGTCTGAGATTCTAAGCTATCAAGTCGGGGGAAAGGCAGAGCAAGATATTG  
AAATGCTTGTGAATCATCTAGCTGATTGGTTGGAAGAAGAGCATGGAAAGAACTTGGTCTTCCACACTTT  
CAGCAATACTGGATGGTTAACGTGAGTTCTTGATGATACTCATTAGTCTAAGATGAGAACAGAAACATA  
ACTATTTACATTTTCTTAATACTAGCTTGATAATTATTGATTGACTTCTTTTATTCTTTTGGCCTTACAGTT

ATGGTGCATTTTGGAAAAGTTTCAGAAACAAGATCATGCTTAAATGAGAAGGATTAAGGGTTGTATTG  
TTGATTCTGCCCTGTGCGAGCTCCTGATCCACAGGTATTGCTGACTCAAAAATTGTGATGTTAAGATATC  
ATTTTTATGTGCAAGTGTGAGAAGAGTGTTCCTTGAAAGTAGTCTTATTTATGAAAGTTAATGCAGAGC  
ACTTGTTTAGAGCTATACATTTCTATTGAAATCCAACCTTTTTCATGCTTTTATTGGACAACCTATTACAAGT  
GTCGTATATAGTCAGGTTTTAGCCATTCAGAATTGCACAGTTGTTTGGATTCTAATCAGGACCTGCTGTTT  
TCGTATTTTTATCCTGTTGCTTTTTTTTTATCTTAGGGCCTTAACCATGCAGCCTGCTTTTCGAAAACCTATTCT  
TATGCTTGATAACTTGAAAGAATCTTGAGAGTTTAGCTCTCTCTGACAACCTTTTTAACAGGAAGCATTCTA  
TGCAACTTTTGTTCACGGTTCAAGCTTTAAGCCTACTTTTTCTGGCTGAGAATAAGCCATCGAGGAATTT  
CCCCTTGGAGCTACTAACTGCACACGTCCCTGCGACTACTGGATCTCTCTAGTAACAACCTTTGGAGGAA  
TGCTTCCATGAGGCATCGACAGGCTAGAAAGTCTCACATCCTTTCAACAATAGCAACTTTACTGGAAAT  
ATACTGCCTCAAACAGGAAACTTGACGAACTTGAAGATTTGTACCTAATCCATAACATGCTCTCCGGAA  
GAATTCCAGTGAAATAGGAAAGCTTCAGAGGCTGTGTGAACTACCTCTATGGAAACCAGTTGTCAGTA  
ACTACCCCAAGAGAATTGACAAATAGCTTAGTACTCATTGATTTCTTCGCTAATCAATTTTCAGGCTCTAT  
TTCTGATGCCATTGGTAGGCTTAAGAATCTTGTTATCTTCAGCTAACTCAGAATGAGTTGTCTGGTCCAGT  
CCCATCAAGCTTAGGCTACTGCAGGAAGCATGAAAACTGGCCTTTGCTGATAACAACTTTTCAGGATA  
ATTGCCACCAACTTTAAGATTTCTATCAGAGCTGGACCTGACTACTCTTTACAACAATTGCTTTGAAGGTC  
CACTTCTGAATATCTTTCCCTTCTGAAAAATCTCAGCAAAGTTAACTTTTCTCACAATAAGTTCAGTGGA  
AACATTTCTCCGCTAGCTGGTTCAAATTCTCTGACAGTTGACATGACAACTACAGCTTCTCTGGTCCTAT  
CCCATCTGAGCTAGTGGTGTCCAAAATCTGACCCATCTTCACCTTTCTAACAATTTTTTCACTGGAAAAA  
CCCCTTCTGAATTTGGACAACCTGAAGATCTCAGATGTCTTGATTTATTGTTCAAAAATTTGACTGGAGAT  
CTAGCACCTTCCCTTGCTGGCCTGAAAACCTTGGCCGTTTTCTTCTTATATCTAATCAATTTTCGGGGAAA  
ATTTCCACATGGTTTGTGGAGGAATGGAAGGTCTTGGTGAGTTGATCTTTTATTCAACAACCTTCACTGG  
AACAGTTCCAGCAGAACTTGAAACTCTCCAAAATAACTCAAACTTTTTCTCAGTTACAACAGATTATTA  
GGTGCCATACCACCAGAATCAGGAAATCTCACAAGTTTAAATGTCTTGAATCTTCAATGAAACAATCTTT  
TTGGCTCCATTCCTTCAACTCTTCAAAAATACCAGAAGCTCTATGAGCTGAGGCTCTCTGAGAATAATATA  
AGTGGCTCAATCCCTTACGAAATTGGCTCTTTATCCGAATTACAGGTGATATTAGACCTGAGCAAAAATC  
ATTCTATTTTATGTGCAAGTGTGAGAATAGTGTATCTTCAAGCATAGTCTTATTTCTAAGGTTAATGCAG  
TGCAATTGTTAAGAGCCATACATTTCTATTGAAATCCAACCTTGTCACTTTTTATTGGATAAGTATTACA  
AGTGTATATATAGTCCGGGCTTAGCCATTTAGGAATTGCTCAGTTGCTTGTACTCTTATCAGGACCTGCT

GTTCTCTTATTTTCGATCATGTTTCTTTCTTCTATTTAGGCCTTAGACATGCAGCCTGCTTTTCAAATATATT  
CTTATACTTGATAATGTGGAAGTTTTTCATTCTTGATTTAGTCTTCAAGGGAAGGTGGATTTCTGGGGG  
TCAGCTGTGGACATTAGGAGGAGGGAGGGGAAGCTAGTACTTGTTTAGTTGCATGTAATAAATGTTAAT  
CTGTGCTTTGGTAAGGTAAACTAATTTTGTCAAGTCCCTTCTTTGTTTGTATCAAGGTCTGGGCTTCTG  
GATTCTCTGCTGCCTTTTTAAAGAAGAATAGTGTGCAACAAAACGCATCATGACTTTAAACGACAGAGA  
TGTGACAATAGAAGCCAAAACCTTCTGTTGAAACTAAGCCTGCAGTAACTGAAGCAGCGTTGCTATTAGT  
ACTGGAAAAGTCTTTGAGGTGGTTTTGAACCTCCACCGTAAATAGGTAAGGAGATGTCTTCCAGAAT  
CACCTTTTCTGCAAATGTTTATCAGCCTGCAGTATTTTTAAACAGAAGTACCAATATTAATCTACTTTTTG  
TCTTTGTACTCTACTCAATGTGCGAAGTAGACCTTGTTGATATCATGTCCATTCACCAATGGATTGTAATT  
ACATTTTCAAGTCATTAGTGTGTATAGCTAGTGCCAAAATAGTTTCGTGTTTGTACTTACATTGATGGTT  
GGATGAAATTGCAGGAGGCTTTCTGACGTTCTAGATCTATTGACATCCCGGCAACCAAGTTGCCCTCAAT  
TATACATATACAGCAGTGCCGACAGAGTCATTCCTGCAGTTTCGGTTGAGTCCTTTGTAGAAGAGCAACG  
AAGAATTGGTCGCGATGTTAGAGCTTGCAACTCGTTTTCTACACCTCACGTTGATCATTTTCAGAAATGAC  
CCAGAATTGTATACTTCACAGCTTACCCAATTTCTAGAGGACTACGTCCTAAGCTCTTGCAAACAGCCTTC  
TTGAATAATTCCTAATCACAACACATTGATTCTTTCTGCCCTTTTTTTCCCTCACTTTAACCAATACTTGGT  
AAAGCTTCTGTTTTCCAACTTTAAAGCAGATATACATTGATGTAGATTGTTACGTATACAGAGAATTAAG  
TTTTTTTTCTTTCCATTCTTATTTAATTTAGTTGTATCTATGGTCTCCAGCAACAGAATTGTTGCATTGT  
ACCCAAAATATACTCTACTTTACTACATATATATA

>M6-PGSC0003DMG400002885 M6 LRR-RLP

ATGTGGCCTCTCTTTTTCATTTATTCACTTTTCTGTTGTGATTTCTATGTATTTGTTCTTCTTTGAGCATC  
ATCTTTGCTCTCCAGTGAAGCTTCTGCTTTGCTTCAGTTTAAAGCAATCCTTTAATATATTGGACTTCTCCC  
AGTGTGATACGTCTTTCCAAAAACAGTTTCATGGAATGAGAGTAACGATTGCTGCACTTGGGACGGGG  
TCACTTGTGACATGTTAACCGGTCATGTTATCGGGTTGGATCTTAGTTGTAGTCAGCTTAATGGAACAT  
TTATCCCAACAGCAGCCTCATCCAATTCATCATCTTCAGACACTAAACCTTGCTAAGAACTATGTTTATC  
CTTCTACGATCCCAAAAGACTTTAGCCGGTTGAGGAATTTGAAGCATCTCAATCTTTCTGATGCTTACTTT  
CAAGGGGAAATCCCAACAGAAATCTCATACCTTTCCAATTTGGTTTCACTTGATCTTTCTGTTCTTCTTAT  
GTGAACGGATTACAATTTGATCAGAGAGCATTGAAGCAGTGCTTCAGAACTTGACAAATCTAGAGGTA  
CTTTCTCTTTTGGTGTCAACGTTTCATCTCCGATACCTATGAATTTGTCTTCTCCTTAAGGTATGTGCAT  
CTTAAGGTAACCAATTTGGAAGGTGTTCTCACGGAGAGCTTATTCCTTCTGCCAAAATTGGAAACACTCT

ATTTGAGTAATAACTATCTTCTCAAAGGAGTTTTACCAAAGATTCATCCAAGCAGCACTCTGTTGGAGTT  
GGATATTTTCATACACAGGAATCTCCGGTGAGCTGCCTGATTCAATTGGCACCTTGAGTTCCTTGACTCGC  
TTGTACCTCTATGGATGTCAATTCTCTGGTCGCATTCTGATTCCATTGGCAATCTTACACAAATTAGGTA  
TTTGAATTTTGGTAATAATCATTTCACCGGCAATATTCTTCCACAATCTCTAAATTGAAGCACCTCGCAG  
TTTTAGCTCTTTCATCTAACTCCTTTGGAGGTGAAATTCCTAATTTTTCTCTAACCTCCGAGAACTACGTT  
ATTTAAGTCTTCTAATTGCAGCTTCATCGGTCCGTTTCCTTCTCCACTTTTAAGCTTGACACAACCTGAAA  
CCTTAGACTTGTCGAGAAATTCCTATCAGGACTACTTCTAGAAATGCAAGCATGCTTCAAAGCTAGC  
CGAGCTGGATTTGTCTTACAACCTCACTGAATGGTACCATAACCATCTTGGGTGTTTAGCCTACCTTTGCTAT  
CTTCAGTGTGCTCCATCATAACCGGTTAAGTGGTCTTTTCTCAATCACCTGTGAATCTCACAAACCTTT  
CTACCTTGATCTTTCATCAAATAACATCACCTCGATGCGGGAATACAAATCACTTTACCTAGCCTAGAA  
ATTATGCAGTTATCATCTTGTGAACTGAAGGATTTCCACACTTCTTGAGAAATGTAAAGACACTTATGGT  
GTTGGATATTTCTAACAATAAGATTCGTGGTCAAATCCCTAATTGTTTAGCGGCATGAGGTGGGACTCC  
TTGTTGCACCTAAACCTTTCACATAACTCATTAAACAGGCAACCTACA

>M6-PGSC0003DMG400002886 M6 LRR-RLP

CAACTCCTTTTCAGGTGAAATTCCTGCTGTTTTCTCTAACCTCCAAGAGCTACGTACTTTACATCTTTCTTA  
TAACAGCTTCATCGGTTCAATTCCTCCGCTTCAATTTAAGTTTGACACATCTTCAATACTTAGGATTGTCGA  
GTAATTCCTATCTGGCCCACTGCCTAGCAACCAAAGCATGCTTCAAAGCTAACTTTTGTGGATTTGTCA  
TACAACCTCACTGAATGGTACCATAACCATCTTGGGTGTTTAGCCTACCTTTGCTATCTTCAGTGTGCTCCA  
ACATAACCAATTCAGAGGACTAGCCGATGAAGTGATCAAACAAACCAACATTAACAACACTGCATTT  
AAGCAATAATCAACTCAGTGGTCTTTTCTCAATCACTTGTGAATCTCACAAACCTTGAAACCTTGAA  
TTTCATCAAATAACATCACCTTGATGAGGGAATGAATATCACCTTTCTTAGCCTATCATCTTTATTCTTAT  
CATCTTGTGAACTGAAGGATTTTCCACACTTCTTGAGAAATGTAAAGACACTTGTCTACTTGGATATTTCT  
AACAAATAAGATATGTGGTCAAATCCCTAACTGGTTTAGCGGCATGAGGTGGGACTCGTTGCAGTTCCTA  
AACCTTTCTCATAATTCATTAACAGGCCACCTACCACAATTTCACTACTATAACCTACAGTATCTTGATCTG  
AAATGTAACCTCCCTTCAGGGTCCACTACCTTCATCCATTTGTAACATGAGTTCGCTTATCTTATTAGATTTA  
TCACGCAACAACCTTCAGTGACTCAGTTCACATTGCTTGGGAAGCATGGCTAGTCTAACGGTGCTAGACT  
TAAGAAGGAACAATTTACAGGGAGTCTTTCCCATTATGTGCACACAGCACTTCGTTGAGTACCATTGT  
CATAAATGGTAATCAATTTGAAGGACCTGTACCTGTGTCGTTGCTCAAGTGTGGTGGTCTAGAAGTACTT  
GATGTGGGGAACAATGCTATAAATGACAGGTTTCCATCTTGGCTCGGAACTCTCGAATACCTGCAGGTC



CTTATATTAAGTCGAACAAGTTCCATGGACCTATAAGTACGTGTCTGACTAAGTTTTGCTTTCCCAAGTT  
GCGAATTTTTGATCTTTCTCGTAATGATTTTCAGTGGCTCACTTCCTGCAAAAGTTTTTGAAACTTCAAGG  
CAATGATCAAATTAGATGGCGAAGACACAGGAAATATAAAGTACATGGACTCTGTGTTGTATTGCCAT  
TTGTCACATCGTATGAGGATTCAGTGAGTTTGGTAATCAAAGGGCAGGATATTGAGCTATAAAGAATCA  
GCACAATTACGACAACCATAGATCTCTCAAGCAACCATTTTGAAGGTGTCATTCCGAAAAC

>M6-PGSC0003DMG400002887 M6 LRR-RLP

AATTCCTGATGTTTTCTCTAACCTCAAAGAGCTAGTTGAATTGAATCTTTCTTTTAACTTCAACCGGTCC  
ATGCCCCTCTTCAATTTAAGCTTGACAAGTCTCAATACTTAGATTCTCTCACAACCTCACTGAATGGCAC  
AATACTCTTGGGTGTTTAGCCTCCCTTACGTGATTTGAAGCTCCATCATAACCAATTCAGTACAG  
TGGCTGATGAGATCAAAACAAACCAACATTAGTGACTTTGTATTTAAGTCATAATCAACTCAATGGTCC  
TTTTCTCTATCACTTGTGAATCTCACAACCTAGCCCTCCTTGACTTTTCATCAAGTAACATCACCGGCGA  
TGTGGGAATAAATATCACCTTTCTAGACTATCAGCTTTGTTCTTATCATCTTGTGAACTGAAGGATTTTC  
CACACTTCTGAGAAATTTAAAGACTTCAGTTCTTGGATCTTTCTAACAATAAGATTCGTGGTCAAATC  
CCTAACTGGTTTAGAGGCATGAGGTGGGACTCTTTGGAACAACCTTTACGTAATTTTTTGGCAG  
GCCATCTAGAACAATTCATCATTATAGACTAGAGTCTCTTGATCTTAAATTTAACTTCCTCAGGGTTCA  
CTACCTTCATCCATATGTAACCTAAGTAGCCTTAGAATTCTGGATTTATCACGCAACAACCTCAGTAACTC  
GATTCCAAATTGCTTGGGAAGCATGGCTAAGCTAACGGTGTGGACTTGAGAAGGAACAATTCAGTGG  
GAGTCTTCCACTGTTATGTACTCAAAGCACTTCATTGACGACCATTGTCTTGAATGGTAATCAATTTGAAG  
GATCTGTCCCTATGTCGTTGCTCAACTGTGTTGGTTTAAAAGTTCTTGATTTAGGGAATAACGCTATAAAT  
GACACATTTCCAGCTTGGCTTGGAACTCTTGAAGATCTGCAAGTCCTTATATTAAGTCGAACAAGTTCC  
ATGGACCTATAAGTTCTAGGAAGAAGTTTTGCTTTCCTAGGTTGCGGATTTTTGATCTCTCTCATAATGCG  
TTCAATGGCTCACTGCCTGCAGATTTTTTTAGAACTTCAAGGCAATGACAAAAAATGGCACAGACAAAA  
GTGACATTAGCTATATGGAAACACCAGTTTACAGATCATTCTTGAGTCAGTGAGCTCAGCCGTCATTCC  
TATATATAAGCTAGAAATGGCCATCAATGAAGTATAACAAGGATTCAGTGAGGTTGATGATCAAAGGAAA  
CAATATTGAGCTAGAAAGAATCAGCACAAATTGTTACAGCCATAGATCTCTCAAGCAACCATTTAGAAGGT  
GACATTCGAAATCACTAAAGGATCTCAGCTCACTTTGGCTACTCAATTTATCCATAACAATCTCAAAGG  
TGATATTCCAATGGAATTGGGGCAATTGAATACACTTGAAGCCTTAGATCTCTCTCGAATCGGCTCACT  
GGAAAGATTCCACAGGAATTGACAACAATGAACTTTCTGGAGTTCTTAAACCTCTCTCAAATCATCTCG  
TTGGACGCATTCTCAAGGTTTACAATTCAGCACATTTGAAAATGACTCGTATGGTGGCAACCTTGATTT

ATGTGGTCCTCCTTTGTCAAAGCAATGTGGAACGAGTGATCGCTCGCATGTTCTCAATCACTGGAGGAA  
GAAGCAGAAGAAAATGAGTCATATTTTTTTAGTGGATTTACCTGGGAATCAGTAGTAATAGGCTACTGTT  
TTGGACTAGTTGTTGGAACAATCATGTGGAGCCTCATGTTTAATTATCGTAAGCCAAAATGGTTTGTGGA  
ATTCTTTGACGGCATCATGCCCCACAAAAGGAGAA

>M6-PGSC0003DMG400002906 M6 LRR-RLP

AGTGTC AACCTTGTCAAGCCCACTACTAAAATGGAAAAACAACAATAGACCAGGCCCTTTCGTAA  
ACCTGATATTCTAAGATAGGATTTTCGCCGCTATCTCCGCCTCTTCGCCTTAGCTCTCTTCACTGCTTCTGT  
ACATGAACAACAATGTTGCCTCCATGTTACTGACCTTTATGCTTTTTTCCAGTTGTGTTCAAAGTTTCTC  
CTCTTGCTTTCTTTTCTTCTTTTCTCCCTCTCTTGTCTCTGATTCTCATCATTTTGCAGGTGATTTTGC  
GATGCAAGGGTAGTTCAATCCTCCATCTCCAGGTTAAAAGCTCCATCTTAGAATAACAATAGCATTTT  
CCCTATTTTGTGCTTTAACTTCTATGTAATTTTGTGTTTGTGGAAAAATATATGTTGTAGCCTTCCCTT  
GTCCCCTATCCCCTTAAGGATGATACTCTTAAATATGGGCATAGTAATTTGTCATTATTTATGAGTCTCT  
CGCAGGTGTCTTACTGTTAAAATTTGTGAATGTGCAGCTCCCTCGGTCAATATCAAAGTTTGCCACATGA  
TCTGCTAGCTTGTTCCTCCCCTTAGAATATGTTGGAAAATAACTTGTTTATCTTGTAGACATGATTGAAT  
CCCTAATAATAAAAAAAAAAAAAAATGGTTGAATCCCTGTCACCATTTCTGCAATTATCCATGGACATGCC  
ATTTCTTTCTAATACTTTGTACAAAAGCATTGAGTCAGTCTGTATGATTATTTGATTATGTTGTGACTTCT  
TGCAATGCTTGGACGCCTTCAGAATAGCTTTAGCTACCGCGACTGTATTAGTAGTATTTTCTATACTTGCT  
CCTTCCACGTATTCTACATCTCCTTTAGCATTCTTAAACGAAGGCATAGGAACTAAGACCCGGATTTC  
TCTAGAAGTTCCATTTGTATTGTATTTTACCCACCCATTCGGTGGGAATTCCATAACCCTTTTCACTTTCA  
TTTTAGGTTTGTAGCTTGTCCATTCTTAGAGCATATCCGGCCAGTTAACAGGACATGTCATAAAGGGTTT  
CCTGAGTCTTGCCAGCATATACATGTTCTGGTGATATTGTGAATGACTCTTGCTACTGATGTCTTTTTTC  
CTTCATGCTTCATCCTGTTTCTTTTCTCCACAATTCCCATATTATAAACTAGAGCTCTGTAAAAAGGTCT  
CATATTTGTCCCAATTTTTGTCCCCACCACAACATTATAACTTCTTACTTAGAGACCCTCCATGTTAAG  
ACCTGCAAAGAACA AAAATAGGACCAAGTCTGTTAGCTGAATCAGATTTT CAGAAACACATGGGCAAG  
TGCTCATGTTGAGGTCTTTCACAACACCAGCATTGGATGGGCCTTCAAGACCCCATCTTCTCATTATGT  
CATCAACGGGGATTTTAAATTTCCATAATCTCCACATTATGAAAGCCATTTTAAATGGTACACCACCTTA  
CTCCACATCCCTTTATAAATTTTGTCTTCTCCGCCTTATGTCTGATATAATGCCAAGCAGATTTAACTGAG  
AAACTCCCCTTGTCTCTGGCATCCAACAAGGTTTATCCATTGTTGCTTCTTCTTTTGGAGGATAGGTTTAT  
CCATTGTTGCTTCTTCTTTTGGAGGATGAATATTCTGCAGAATATGGTTCACCAATTCTGTGGGAGTATC

TCATGTAGTACCTCTGTATCCCCTCCCTTGTCTAGTTAAATCCCTAACTGTTTTATATGTATCATCACAT  
TGAAATTCTTCTCCAGTAATTGTGTACAAATCCCTTAGGCCCGTCCAGTTATCATGCCAGACTGATACTGA  
TCCTTTCTCCATTTTCCATAAAATTTGGTGTTC AATGAGATCTCTAGCTTGGAGCATTTTTT

>M6-PGSC0003DMG400002908 M6 LRR-RLP

ATGAAATTAGGACAATTGAGTATGCTTGAAGCTTTAGATCTCTCTTGAATCGGCTCACTGGAAAGATTC  
CACAGGAATTGACAAGAATAAACTTTCTCGCCTTCTTAAACCTCTCTCAAATCATCTCGTCGGACCAATT  
CCTCAAGGTCGGCAATTCAACACATTTGAAAATGACTCATATGGTGGCAACCTTGATTTATGTGGTGTTCC  
CTTTAACAAAGAAATGTGGAACGGGTGATTCATCGCATGTTCTCAACAATTGGAGTCCGAAGAAGAAG  
GCGAGTCATATTTTTTTAGTGGATTTACGTGGGAATCAGTAGTCATAGGCTACAGTTTTGGACTAGTTGT  
TGAACTGTCATGTGGAGTCTCATGTTTAAATATCGTAAGCCAAAATGGTTTGTGGAATTTTTTCGATGGA  
CTCATGCCTCACAAAAGAAGAAGGCCAAAGAAGAGAGCTCAGAGACGATGGACTTAA

>M6-PGSC0003DMG400002910 M6 LRR-RLP

AACCTACAGTATCTTGATCTGAAATGTAACCTCCCTCAGGGTCCACTACCTTCATCCATTTGTAACATGAG  
TTCGCTTATCTTATTAGATTTATCACGCAACAACCTCAGTGACTCAGTTCCACATTGCTTGGGAAGCATGG  
CTAGTCTAACGGTGCTAGACTTAAGAAGGAACAATTTACAGGGAGTCTTTCCCCATTATGTGCACACAG  
CACTTCGTTGAGTACCATTGTCATAAATGGTAATCAATTTGAAGGACCTGTACCTGTGTCGTTGCTCAAG  
TGTGGTGGTCTAGAAGTACTTGATGTGGGGAACAATGCTATAAATGACAGGTTTCCATCTTGGCTCGGA  
ACTCTCGAATACCTGCAGGTCTTATATTTAAAGTCGAACAAGTTCCATGGACCTATAAGTACGTGTCTGA  
CTAAGTTTTGCTTTCCCAAGTTGCGAATTTTTGATCTTCTCGTAATGATTTAGTGGCTCACTTCTGCAA  
AAGTTTTTGGAACTTCAAGGCAATGATCAAATTAGATGGCGAAGACACAGGAAATATAAAGTACATGG  
ACTCTGTGTTGTATTCGCCATTTGTCACATCGTATGAGGATTCAGTGAGTTTGGTAATCAAAGGGCAGGA  
TATTGAGCTATAAAGAATCAGCACAATTACGACAACCATAGATCTCTCAAGCAACCATTTTGAAGGTGTC  
ATTCGAAAACACTAAAGGATCTCATATCACTTTGGCTACTCAATTTATCTCATAACAATCTCAGAGGAGA  
TATTCCAATGAAATTAGGACAATTGAGTATGCTTGAAGCTTTAGATCTCTCTTGAATCGGCTCACTGGA  
AAGATTCCACAGGAATTGACAAGAATAAACTTTCTCACCTTCTTAAACCTCTCTCAAATCATCTCGTTGG  
ACCAATTCCTCAAGGTCGGCAATTCAACACATTTGAAAATGACTCATATGGTGGCAACCTTGATTTATGT  
GGTGTTCCTTTAACAAAGAAATGTGGAACGTGTGATTCATCGCATGTTCTCAACAATTGGAGTCCGAAG  
AAGAAGGCGAGTCATATTTTTTTAGTGGATTTACTTGGGAATCAGTAGTCATAGGCTACAGCTGTGGACT  
AGTTGTTGGAAGTGTGATGTGGAGTCTCATGTTTAAATATCGT

>M6-PGSC0003DMG400002914 M6 LRR-RLP

AAAAAAGAACCATTCTTTGTTTCTTCTCTCTAACCTCAAATCTTTCTCTCTCTATTTTTGCCTACTTTGT  
TGGGGTTCTTGAAAAAACTGGATTTTTGAGGGTTCTTGAAAAAATTGGATTTTTTCATCTGGAATGCA  
AATCTTGGTTAAAGATATAATCTGGGTTGTGTTTTCTTGGTTCAAATCTGATCTTTTTTGCTTTACAGTT  
TGGGATTTCTTCTGAAGAACAGACATGCCTACTCTTGTAATTACAGTGGTGAGTTTCAAAAACCTCATT  
CTTGGTATTTAAGTTATGGGGTTGTCATATTTCAATGAATTTGAAGTTCAGTTATAATCTTTTGTTTT  
TCATCATGAATTACTGAGATGGAGATGGATTTGTTATGTTTAGATTCATATTAGTTGTTTATCATAAATAA  
AGTTTATAACTTTGCATAGTTACATGATTGTTGAGATGAATAGGAGCAATAATTTATTGAGATGAAGATG  
AATTTTTTAAGGTTTAGATCCATGAATATAGTCTATAACTATGTATAGGTGCATGATTGTTGATAACTTGA  
GATAAATATGGTTTATTAATTTACTGAAATGAAGATGATCTTTTAGGTTAGATAACAATCATGTTTTTTTT  
TTTAAAGGAAGTTGGTTATGAGATAATAACTAAAAGTTGAGTGACTATCTAAGAAATTAACATATAAC  
TTTGTATAGGTGCATGATTGTTGAGGTGAATATGAGCATTAAATTTACTGAAATGGATAAAAAGGGAAAA  
AAGTTATGATAAGACTAGATCCTTTGGCTTTGAAGATTAATTTCTGTGTTTGATAGATCTTTTTTTGTCTTA  
TGTTCTGAATCTATATTAGAGATTGGTAATATATTGAAGAACTGTGGATTACTCTTTGGGGTTCTGTATC  
TAGAAACGTGTATCTATCTGATCTGATCTGAAGATGTATGTACATAATAGGTAGATCTAAAGGTTCAATT  
CACATGTGATAGTTGCTTATCTGTTATACTTGAAGTTGAAGTGAAAATTCATAAGAAATGGGCATATGGA  
TGAATACTTGTAAAAAAATTTATTAGACAAAATTTAGTATGCTTGCTTGTTGATTTAAGGGAAAATATA  
GCTGACAATGTATTTGCTCCTTGGATTTCAAGGTGATGATGAGTTCTATTCTGGTGGATCGTTTTGTTCTGC  
AGATTTGGGTCTCATGTTGTCTTTGGGTGATGCTGATGTTTACTGTCCTCCTAGGAAGAGGGCACGCATT  
AGTGGCCCGTTTGTGTCGAAGACCGGTCAAAGGATCCATCTCTTGAAATTTCTCCTGATGAATGCCTAT  
TTGAGATCCTCAGACGATTGCCTGGTGGCCGAGAAAGGGTGCAGCAGCTTGTGTTTCTAAGCGCTGGC  
TTACAGTGTTGAGTAGCGTGAGGAACTCTGAAATCTGCAGGAGCAAGAGCTATAACAATCTAAATGACA  
CAATAATGATCTCTAAAGATGAAGATCTTGAAGTTGAATGTGATGGATACCTTACTAGGTGTGTGGAAG  
GGAAGAAAGCTACTGATGTTAGACTTGCTGCAATTGCAGTTGGGACGTCTACCCGTGGTGGACTAGGAA  
AGCTTTCTATCCGAGGCAGTAACTCAGTTCGTGGTATTACTAATGTTGGTCTATCTGCTATTGCACATGG  
GTGCCCTTCTCTTAGGGTCTATCATTGTGGAATGTTCCCTTCTATTGGGGATGAAGGTCTCTTGGAGGTT  
GCAAGGGAATGCCGTTTATTAGAAAAGCTAGATCTGAGCCACTGTCGTTCAATCTCCAACAAGGGTCTT  
GTTGCAATAGCAGAGAATTGCCGAGCTTGACTTCATTGACCATTGAATCCTGTCCAAGATTGGAAAC  
GAAGGCTTGCAAGCTATTGGAAGATGCTGCACCAAACACTACAGTCCCTTACGATTAAGGACTGCCCACTT

GTTGGAGATCAGGGAGTTGCTAGTCTTCTGTCATCAGGTGCTTCAATGTTATCGAAAGTGAAACTACATG  
GTCTAAACATCACAGATTTCTCGCTTGCTGTCATTGGTCACTATGGCAAGCTGATTACCAGTCTTAATCTT  
TGTTCACTTCGTAACGTGAGTCAGAAGGGGTTTTGGGTCATGGGTAATGCTCAAGGCCTCCAGTCTCTG  
GTTTCTTTGACAATCACCTTGTGCCAGGGAGCCACAGATGTCGGTCTTGAAGCAGTGGGAAAGGGATGC  
CCAAATCTCAAACATATGTGCATTCGCAAGTGTGCTTTGTTTCTGACGGTGGACTTGTGCTTTTCGCTAA  
AGAGGCTGGATCTCTCGAGAGTTAATCTTGGAGGAGTGCAACAGAATTACCCAAGTAGGTATCCTTAA  
TGCAGTTTCAAACGCAGGAAGTTAAAGTCTCTTCCCTAGTGAAGTGCATGGGAATCAAGGATCTAGCT  
CTACAAACTCCATGCTGTCTCCATGTGAATCTCTTCGGTCTTGTCTATCCGAAGCTGTCCAGGATTCGG  
GAGCACTAGCTTAGCTATGGTCGGTAAGCTCTGCCCAAGCTGCATCAATTAGATCTCAGTGGGCTTTGT  
GGAATAACCGATGCTGGTCTTCTCCACTCTTGGAGAAGTGTGAAGGACTTGTTAAGGTAAATCTTAGCG  
ACTGCCTGAACTTGACAGACCAAGTGGTGTCTTTCATTGGCTTCGCGACATGGAGAGACCCTTGAATTGTT  
GAATCTCGATGGATGCAGGAAGTTACTGACGCAAGTTTAGTGGCAATTGCAGATTATTGCCATTACTT  
ATTGATCTTGATGTTTCTAAGTGTGCAATAACTGATTCTGGTGTAGCTGCTTTATCCCGTGGAGTGCAAG  
TGAATTTGCAGGTCCTTCTTTATCAGGTTGCTCCATGGTATCAAACAAGAGTGTCCCTTCTCTTAAAAAG  
TTGGGAGAGAATCTACTCGGCTTGAATCTCCAACATTGCTCCATTAGTTGCAGCTCAGTCGAGCTTCTTG  
TGGAGGATTTGTGGAGGTGTGACATCCTCTCCTAAACAAAAGGGCACAAGGAAATGCATCAAAATGG  
TCAAAAAGAATAAGCTGAAAGCTATAATGGTTCATTGAGCCTGGCAATTACAGAAGCAAACATGAGTGT  
TCTTTTTTTAGCCCGTATATTCGTGGCTATCTAATACTTCAGTGTCTCGGTTGTTTTCCAGGAGGCTATGG  
CATCACTTTTTTCTCCATTTTTTGCAGGCTTCGTCAAATCGAAGCCTGTTTCATCCATTTTTGGAGACAAC  
TCCATCATGCCATGGTTTCTGAGAATACAGTCACCTAGTACTGAGATTAATAATTTTCACTCATGTTGCTC  
CTTGAAAGAATCAGGCCGTTTGAATCATTCTCAGCTACAACATCGACGGACAATATCTATCGCGCATTG  
CCTCCTTGGTTAGCTACATTGCAGAAATCAGACAGTAGTACTGTAGTTTTTCATGTTTTAGTGTTCATTG  
TAAGTATTCTGTTGTGTGTCTTTTAGACTTTAGTTGCTTTGAGCAAATTTCTGTTGTTGTGGTGCCTGTTAT  
TCCAGGGGCTTGGCCATTACAACCTTATGTAGGTTGTTATTTTTTAACCAGTCCCTAGTTTTTTGATAGGA  
TTATCAATGTCCTATTTTTTACCAGGTTCCACATATTCAGATTTGTAATCTTGGCAACTATGTTTTATATAG  
ATGGAAGTACTAGTTTGTGTTTGA

>M6-PGSC0003DMG400002937 M6 LRR-RLP

GATTGATTTGTAAGAAGAGAACATCCATCCTGTTTTGGCTGAATACGAAAAAGAAAGATGAGACGTTT  
CTTTTTCTTTTATTCATTTCTCTGTTTTGTGTTGCTAATAAGTCGAAGTTTTTCTTCTTCTTTGAGCATCATC

TTTGCTCTCCCACTGAAGCTTCTGCTTTGCTTCAGTTAAGCAACACTTTGAGATTATATCCGACCCTTATT  
CCCGATGTCCTATTCATTTCCCAAGAACAATGTCTTGGAATGAGAGTAGGGATTGCTGCATTTGGAATGG  
AGTCACTTGTGATATGTTAACCGGTCGTGTTATCGCGTTGGACCTTAGTTGCAGTGAGCTTTGGGGAAGT  
ATTCATCCCAACAGCAGCCTCTTCCAACCTTCATCATCTCCACACACTAAACCTTGCTTACAATGACTTCAAT  
TATTCTTCAATCCCACATAACATTGGCCGATTGAGGAATTTGAGGCATCTCAACCTTTCTTGGTCTCGCTT  
TGATGGAAAAATCCCAATAGAATTCTCATATCTTTCCAATTTGGTTTCACTTGATCTTTCTGCGAATGGAT  
TACAACTTGATGAGAGAACATTTGAAACAATGCTTCAGAACTTCACAAATCTGGAGCTACTTTCTCTCTTT  
CAAGTCAACATCTCATCTCCGATACCTGTGAATATGTCTTTCTCCTTAAGGTACGTGGATCTTGGAAATCAC  
TAATCTGCGAGGTGTTGTCCAGAGAGTCTTTTCCTTCTGCCAACTTGGAACGCTCTATTTGAGTAATA  
ACTATCTTCTCAATGGAGTTTTACCAAAGATCCACCCGAGCAACACTCTGTTAATGGAGTTGGATATTTCA  
TACACAGGAATCTCTGGCTCCATTCTGATTCAATTGGCACCTTGAGTTCCTTGAATATCTTGATCCTCCA  
AGGATGTCAATTGTCGGGTTCCATTCTGATTCCATAGGCAACCTAACACAAATTACGGAGTTGATTTTA  
TCTTTTAATCATTTCACTGGCCATATTCCTTCAACAATCTCTAAATTGAAGCACCTCACACGTTTGGATCTT  
TCTGACAACTCCTTTTCAGGTGAAATTCCCAACGTTTTCTCTAACCTCCAAGAGCTACGTTATTTAAATCTT  
TATGATAACAGCCTCATCGGTTCAATTCCTTCTACAATTTCAAACCTTGACACATCTTGAAAGCTTAGCCTT  
GTCGAGTAATTCCCTGTCTGGCCACTTCCTAATAATGCGAGCATTCTTCAAAGCTAACCCACATGGAA  
TTGTATAACAACACTCACTGAATGGTACCATACCGCCTTGGGTGTTAACCTCCCTTTAGCATCTACATTGTG  
GCTCCATCATAATCAATTTAGTGGACTACCCGATGAAATCAAAACAAACCCAACATTAGAATACCTGTAT  
TTAAGCAATAATCAACTCAGTTTTTTACACCAATCACTTGCGAATCTCACAAACCTTTCTACCCTTGACCTT  
TCAACAAATAACATCACCGGTGATGCAGGAACAAATATCACCTTTCCTCGCCTACAAGTTTTGCAGTTAT  
CATCTTGTGAACTGAAGGGATTTCCACACTTCTTGAGAAATGTAAAGACACTTAAGGTGTTGGATATTTT  
TAACAATAAGATTCGTGGTCAAATCCCTAACTGGTTTAGTGGCATGAGGTGGGACTCCTTGTTGCACCTA  
AACCTTTCACATAACTCATTAAACAGGCCACCTACAGCAACTTCATTATAATAGTCTAGAGTCTCTTGATCT  
TAAATTTAACTTCTTGAGGGAGCACTACCTTCATCCATTTGTAACATGAGCAGTCTTAGCCTTTTGGATT  
TGTCAAACAACACTCACTCAGTGACTCGGTTCCACATTGTGTGGGCAGCATGGTTGGGCTATCTGTGCTAGA  
CTTGAGAAGAAATAATTTCACTGGGAGTCTTCCACCGTTTTGTGTGCAGAGCAATTCATTGAGAACCATT  
GTCTTGAATGGTAATCGTTTTGAAGGAACTGTCCCGATGTCGTTGCTCAAGTGTGATGGTCTAGAAGTCC  
TTGATGTGGGGAACAACGCTATAAATGACACGTTTCCAGCTTGGCTCGGAACTCTTCAAGAGCTGCAGG  
TACTTATATTAAAGTCCAACAAGTTCCATGGACCTATAAGTACTAGGCTGAAGTTTGGTTTCCCTGTGTTA

CGGATTTTTGATCTCTCTCATAATGAGTTTGGTGGCTCACTGCCTGCAGAAGTTTTTGAAAACCTCAAAG  
GAATGATCAAAACAGATGACAGAGACAAAGGTGAGATTGAATATATGCAACCACAGTCTTACAGCGGA  
TTAGTAACGTAATGTATGAGGTTTCAGTGAGGTTGGTGATCAAAAACCAGGAAATTCAGCTAGAAAA  
ATCACCACAATTATGACAACCATAGATCTCTCAGGCAACCATTTGAAGGTGTCATTCCGAAAACACTAA  
AGGATCTCAACTCACTTTGGCTACTCAATTTATCTCATAACAATCTTAAAGGAGATATTCCAATGGAAGT  
GTGAAATTGAATATGCTTGAAGCGTTAGATCTCTCTTGAATCGGCTCACTGGAAAGATTCCACAGGAA  
TTCACAAGAATGAACTTTCTGTCAATTCTTAAACCTCTCTCAAATCTCCTTGTTGGACGCATTCTCAAGT  
TCACAATTCAACACATTTGAAAATGACTCGTATAGTGGCAACCTTGATTTGTGCGGTCTTCTTTATCAA  
GAAATGTGGAACGAGTAATCCATCGCATGTTCTCAACCATTGGAGGAAGAAGAAGATGATGAGT  
CATATTTCTTAAGTGGATTTACGTGGGAATCTGTAGTCCTAGGCTACAGCTTTGGACTCGTTGTTGGAAC  
TGTCATGTGGAGCCTCATGTTTAAATATCGTAAGCCAAAATGGTTTGTCAAATTTTTGAAGGCATTTCC  
CCAAGAAAATGAGAAGGTCACAGAAGAGAATGCTGAGAC

>M6-PGSC0003DMG400002954 M6 LRR-RLP

TTTTCTAATAGATTCTAAAAGAGTTGATGCTGATATTGAAGATAGATTCAAGTGCTCTACCAATAAACCTTG  
TAGATGATATTCTAAGGCTCTTACCAGTTCACGACGCAGCAAGAAGTACTAGTATTTTGTCAAAAAATTGGAG  
ATATATTTGGGCCGCGCTTCCCAATTTAATGCTTGATAAGACCTTTTGCAGTAAATTAGCTGTAAAATCTC  
AATTTGTATTGAAAGAAACAATAGATATGATTCTTACAACATATTGGAGATATTGTGAAGTTTGATCTT  
GATGTTTCAGGAGTACAATTGTGTTTATATGCAGACATCGATAGATGGATGCTTTATGTCACGAGATATG  
GTGTCAAGGAATTAACCTTTTTCATGTCAAAGAATATTAACAGTACTTATAAAGTGCCTTCTTATATATTC  
AATTGTCAAACCCTGACACAATTGAAACTCTTCAATTGCATCTTCAAATTACCAAATTTCTTTCTTGGGTTT  
CAAACCTTACCATCCTTCAAGTTGAAAGAAGTAACCTTCGCGCCTGCAATAGAGTTTTATGCTATCAAAC  
GCCACTTCTTGTGCAATTAATCTTGACACATTGTGAGGGCACTCAATATCTTAACATTGAGTTCTCATCAG  
GATTGAAGTACTTGTGTTGTCGTGAGAGTCACTATAATCTTGATTTAAATAGCAATTACTTTAAGAACGTC  
AAAAAATTGACATACTTATACCTTGTGATTGATAATCCAATACGTGTTGATGAAAGATTAACCTTTGGAAA  
AGCTTCTTTTGTAGTTCGCTACACTTGAGACACTTACTTTGGGTTTTTATGTACTTGAGGTAAGAAGCTAA  
CATGTTGTTTACTTAGATATCTACGTTATCCTTCTGTTTGTATAATTTTTCGTTAAAGCTTTTGAATGCAG  
GTACAGTCCCAAAGGGGCTTCAATATACACTCAACTGCTTGTGGCATCTATAGTTAGGTGTAACCTTCAA  
CAAATTGGGTCAGACTTGTTACACTCTGGAGTTGATTAAGTTTCCCAATTTGAGTAACTTGAGATT  
TGGGTACGAAATAGCAAATATATATGTATGATCTTGTTCGTTTTTGCCTTGGCATACTTAAGTATGAGA

ACTAAAATGACGTTGTATTCTTTTAGGATAATGCTTTCGGTGACCCTGATGAAGCAGTTATGAAATATCT  
AGACGCACCATCATGTTTGGACCAAACACTCAACAAGCTTGAAGATGTTCCATCCATATTTTAGGCGA  
TCCAAAGTTGTACTATCTTTCATAAAGTTATTGTTTGCTCATGCTCCATCTTGTCAAGGATGAGCATTAA  
GCCGAAAAATGCTTCTAGTTCCAAAGAAGAATTGAATGTTGCTACAGAGTTGATGTGTTTCCCAGAGTA  
TCTCCTAAGGCAAAGCTATTCTATCATCCAACAGTTGGATTAA

>M6-PGSC0003DMG400002960 M6 LRR-RLP

ATACACAAGAGTAGTACATTATTTGATATCTTGAGTTACATCTAAAAATTATTTTTGTTGTAATTCCTCTCC  
ATATTGACTTGATGGCAGCTTATACTGCTGTAATTTCTCTTCTTCAAACCTTGATCAATCAAATATTTTCAG  
AACTCTTTCATGATCACAGTACTGAAATGCTCGATTCTCTTCGGGCTACAGCTGAATATTTTCAAGATGTT  
CTTGACAACAATAGCAATGAGAAAATCAAATCTTTTGAGGAAGATATTAGAGTTGTTGTTAGTGAGGCA  
GAGGATGTTGTTGAAATGAAGATTTCTGAAATCATCAAAGAAGAAAGCTGGACATTTGGAATTTTACAA  
CACCATGATATGCTACCAGTTGTTGAAAAAATGGATACGACAAAGAAACAAGTGATGGAGCTTCTTTCT  
CATGATGCTGATCAAATCTTGAATTAACCGCGGATTCCTTGATTGACGCTTCTTCTATGAGTGATCCAAT  
GCTGTCAGATCACTTGAAAGATCATATTGTGCAGGGACTTGATGGTGACTTGGAGATAATAGATAAGAG  
ATTGAGAGGACCAACGCCTTATCTAGACATTGTCACCATATCAGGTATGGGTGGCATTGGCAAACAAC  
ACTCGCTAAAAAAGCTTATGATCATCTTCCAATTAGGTATCACTTTGACATTTTTGTTGGGTTACAATAT  
CTCAAGAATTTTCGATATAGAAATGTATTGTTAGAAGCTTTACATTGCATTTCAAAGCAAAGAGTTATTGT  
GAACACAAAAGATTATGATAAGATGAATGACAGTGAGTTAGCTGATCTGGTGCAAAGAGTCTAAAGG  
GTCCTAGATACCTTGTTGTTGTTGATGATATTTGGAGTACGGATGCTTGGGATAGCATATCACAATTATT  
TCCTAATCGCAACAATGGGAGTCGAGTCTTATTGACTACTAGGGAAACCGATGTAGCGATGTATGCAAA  
TACTAGTAGCCCTCATAAGATGAACCTCTTGGATTTAGATAACAGTTGGAAGTTACTTCGTGATAAGGTG  
TTTGGACTAGAACACGATCACCCCTCCCGAGTTGGAAGAAATTGGAAAAACAATAGCAGGAAAATGCCAA  
GGACTTCCCTTAATAATTTTCAGTGATTGCAGGGCATCTCTCTAAAACGGTCCCCAAGACATTAAAAAGTT  
GGAAGTATGTTGCCAAAACCTTAAGTAAAATCATTGCTAGTCATCAAATAAATGCTTAGGAGTGCTCG  
GTTTGAGTTACCATCACTTGCCTAATCAAACCAACCATGCTTCTTCTATGGGTGATTTCCAGAGGAT  
TTTCAAGTTGATACTTGGAGATTGATCCAATTATGGATCGCAGAAGGTTTCATAAGGACGTCTTCTGGAA  
GTCATGAAAGCTTGGAAAGAAGTGGCTAAACATTATTTGGAGGATCTTATCAGCAGGAACTTGATAATGG  
CAGTAAAAAAAAGATTCAATGGTGAGGTAAAAGTATGCGGAATACATGATCTGCTGCGTGAGTTCTGTT  
TGATAGAAGCTGAAATGACAAAGTTTATGCATGTTGTGAGAAGTCCATTGTCACCAGCACAAAAGCCTA



ATTTTCGTCGCTTCAGTATTCAAGAGTAATATTCTGTTGAGGATTCTTATAAGCTCTTACCCCCTGTAGCC  
AGATCTATCTACTGCTTTTCTTACTTGGATCTACCTTATGAACCCCGTATTCTTCCCCCTGTATTGTCCATCT  
ACCATCATGATCCTATAATACATGGATTTTTCTGTTGTTTCAACCATCTCAGGGTATTGGCCATCTTTCCTT  
TCTCGTTCAGCTCATTCCACTTGTGATTACAAAGTTATTTCAATTTGAGATATCTCCAAGTTCGATGTCTTG  
GAAATATTCTGAATCAATCTCAAAGCTTCTGAATTTGCAAACCTAATTTGTGATGGTAATTCTTTAGAG  
ATAACTTTAACTAGGAAGATATGGATGTTGAAGAACTTGAGGTATATACGTGTAGGGGGAGTTACTTAT  
TTACCGAGTCCTAGAATAGATAACAATCTTGTGATAGGGATGCCAAATCTAGAGGAATTTTTTGGTCTTA  
GTTACTCTAGTTGTACAAATGAAGTCTTTTCTAGGATCCCCAATTTAAAGAGATTGATCATTCTGCACAT  
TTTAGCATACTAAACAATATTCTGTATCGTCCCTTCGATATGTCCAGCTTGACAAAACCTTGAGACATTCAA  
GTTTTACTGGAAAGATTATTTGGAAGACCCCATCAAGAAATTTGTTTTCCAGAATCACTTAGAAGAGTG  
TCTTTAACTTGGTGTGTAAGTTTATTTGGGAAGAGATATCATCAACTTTTATCATGTTGCCACATCTTGA  
AGAGCTCAAACCTAAATATTGTCGAGCCGAAGATGATGTATGGAGATTGAGTGACAAAGACATATTCAG  
AAGCTTGAAGTTGTTGTTACTGAGCGAGCTAAATCTTAAGGGTTGGGAAGCAAGCAGCGATAACTTCCC  
TAATCTAAAACGCCTTGTCTGAAGAAATGCAAGGACCTGCAAGAAATTCCAACAGATTTTGGGGAAAT  
TTGTACTTTGGAATCGATTGAGTTACATGATTGCAGCACTACTTCTGAGGAATCTGCCAGAAATATCGAA  
CAAGAACAAGAGGTCATGGGAAATAATATCCTTAAGGTCTACATC

>M6-PGSC0003DMG400002961 M6 LRR-RLP

ATGACAAAGTTTATGCATGTTGTGAGAACTCCATTTTCACCAGCACAAAAGCCTAATTTTCGTCGCTTCAG  
TATTCAGAAGGCATTTTCAGATGTGTATGCTTATAAAGTACTACCCCCTGTAGCCAGATCTATGTACTGCT  
TTTCATTCTTGATCTACCTATTGAACCCCATATTAAGCTTCTCCCTAGATTGCCATCTACCGTCATGATC  
CTATAATACATGGATTTTTCTCTTGTTCACCATCTCAGGGTATTGGTCATCTTCCCTACCTGGTTCGGCC  
CATTCCACTTGTGATTACAAAATTATTTCAATTTGAGATATCTCCAAGTTCGATATTTTGGAAATATTCCTG  
AATCAATCTCAGAGCTTCAAATTTGCAAACCTAATTTATGATTGTCATTCTTCACATATGACTTTACCCG  
GGAAGATATGGACGATGAAGAACTTGAGGTATATACATTTAGGGAAAGCTAGTAATTATATACCAAATC  
CTAGAATAGATAACAATCTTGTGACGGGGATGCCAAATCTAGGGGAATTTTTCAATATTTGTTACTCTAG  
TTGTACAAATGAAGTTTTTTCTAGAATTCCCAATCTAGAGAGATTGAGCATTTCGTGCATCTTCTAAAGTCA  
GAGAAAATTTTCTCTATCGTCTCTTGGATATGTCCAGCTTGAGAAAACCTTGAGGTATTCAAGCTTTCCTGG  
GACAATTATTCGAAAAGCCCATCAAGAGATTTGTTTTGCCAGCATCACTTAGGAAGTTGACTTTAGATT  
GCTGTAGTCATTTTATTTGGGAAGAGATATCGTCAACTTTTATCATGTTGCCAAATCTTGAAGAGCTCAA

ACTTAAAGATTGTGAATCCGAAGATGATGTATGGAGATTGAGTGACAAAGACATATTCAAAAGCTTGAA  
GTTGTTGTTACTGAGCTACCCAAATCTTAAGTGTGGGAAGCTAGCAGTGATAACTTCCCAAATCTAAAA  
CGTCTTGTCTGAAGAATTGCCAGGACCTGCAAGAAATTCCAACAGATTTTGGGGAAATTTGTACTTTGG  
AATCGATTGAGTTACATGATTGTAGCACTACTTCTGAGGATTCTGCCAGAAATATTGAACAAGAACAAGA  
GGACATGGGAAATAATATCCTTAAGGTCTACATCCATAACAGCCACAGTAAGTCATAA

>M6-PGSC0003DMG400002980 M6 LRR-RLP

AGTTGGTGGTGCATTTCTCTCTCAGCTTTGAATGTTCTGTTTGATAGGCTTGCTCCTCAGGGTGATCTGC  
TCAACATGTTTCGGAAGCATAACGGATCATGTTAAGCTCTTAAGAAGCTGGAGGACATTTTGCTTGGTCT  
TCAAATTGTGCTAAGTATGATGCAGAGAATAAGCAAGCATCAAATCAACATGTGAGCCAATGGCTTAATAA  
GCTCCAGAGTGCTGTGGATGGCGCTGAAAACATGATAGAAGAAGTCAATTATGAAGCTTTGAGGCATA  
AGGTGGAAGGCCAGCATCAAAATCTTGCAGAAACAAGCAACAAACAAGTAAGTGACCTCAACCTGTGCT  
TGACTGATGATTTTTCTTAACATAAAGGAAAAGTTGGAAGAAAACATTGAAACATTGGAGGTGTTGG  
AAAAGCAAATTGGTCGCCTTGGCTTAAAGGATCATTTTGGTTCAACTAAACAAGAACTAGAACACCTTC  
AACGTCTTTGGTTGATGATGCTGGTATCTTTGGAAGGCAGAATGAAATAGAGAATTTGATTGGCCGTTT  
GTTGTCTATGGATACACAGGGAAAAAATCTGGCTGTAGTTCCTATTGTTGGAATGGGCGGCCTGGGTAA  
GACAACACTTGCTAAAGCGGTTTACAATGATGAGAGAGTGCAGAAACATTTTGGTTTGAAAGCTTGGTT  
TTGTGTTTCTGAGGCATATGATGCTTTCAGAATAACAAAAGTTTACTTCATGAAATTGGCTCAACTGAC  
TTGAAGGTTGATGACAATCTTAATCAGCTACAAGTCAAATTGAAGGAAAAGCTGCATGGAAAAAAGTTT  
CTTGTTGTCCTTGATGACGTGTGGAATGATAACTATCCTGAGTGGGATGACTTGAGAAATCTTTTTCTAC  
AAGGAGATATAGGAAGTAAGATCATTGTGACGACACGGAAAGAGAGTGTTCCTTGATGATGGGTAGT  
GAGGCAATCAACATGGGAGTTCTGTCTAGTGAAGACTCTTGGGCTCTATTCCAACGACATTCCTAGAA  
AATAGAGATCCTGAGGAACATCCAGAATTTGAAGAGGTTGGAAAACAAATTGCAGACAAGTGCAAAGG  
GTTGCCTTTAGCTCTAAAAGCACTTGCTGGTGTTTTACGCGGCAAATCAGAGGTGGATGAGTGGAGAGA  
CATTTTAAGAAGTGAAATATGGGAGCTGTCAATTTGTTGGAATGGTATATTACCAGCGCTGATGTTGAGC  
TACAATGATCTTCTGCACATTTGAAGCAATGTTTTGCTTATTGTGCAGTATATCCCAAAGATTATCTATTT  
TGCAAAGACCAAGTTATTCACCTGTGGATTGCTAATGGTCTGGTACAGCAGTTTCATTGAGGTAACCAAT  
ACTTTCTCGAGTTGAGATCAAGATCGCTGTTGAAATGGTCTCGAAGTCTTCTGAACGAGACATAGAGA  
AATTCTTAATGCATGACCTTGTCAATGATTTGGCCCAAATTGCATCTTCAAATCTTTGTATAAGGTTGGAA  
GAGAACAAGGATCGCACATGTTGGAACAATGTCGGCACATGTCCTATTCAATAGGACAAGATGGTGAC

TTTGAGAAATTGCAATCACTCTTTAAATCAGAGCAGCTGAGGACATTACTTCCAATCAATATTCAGCTTCA  
GTACCAAATAAGCTAAGCAAGAGGGTGCTGCATAACATATTGCCAAGACTAACATCCTTAAGGGCATT  
ATCGTTGTTAGGCTATAAGATTAAGGAGTTGCCAGATGACTCGTTTGTCAAATTAAGCTCCTCAGATTT  
TTGGACCTTTCTAAGACAGAGATTA AAAAGTTGCCAGATTCAATTTGTGGATTGTATAACTTAAAGGCAC  
TTCTCCTGTCATCTTGTGCTGATCTTGAGGAGCTACCACTGCAGATGGAGAAGTTGATCAACTTACATTA  
CCTCGACATAAGCAACACTTTTCACTTGAAGGTTCCCCTACATCTGAGCAAGTTGAAAAGCCTGCAAGTG  
CTAATGGGAGCCAAGTTTGTCTCGGTGGTTTGAGAATGGAAGATTTGGGTGAAGCACAGA ACTTGTAT  
GGATCTGTATCAGTTGTAGAGTTGCAAAATGTAGTTGATAGAAGGGAAGCTGTGAAGGCAAAGATGAA  
GGAGAAGAATCATGTTAAGAAGTTATATTTGGAGTGGAGTGAAAGTAGTAGTGCCGACAATTCACAAA  
CAGAAAGAGACATACTTGATGAGCTATGCCACATAAAAACATAAAAAGAAGTCGAAATCATCGGATATA  
GAGGGACAACATTTCCGAATTGGTTAGCTGATCCTTTGTTTCTTAAGCTAGAACAGTTGTCTATTGCTAAC  
TGCAAGAACTGTTTTTTCTTGCCAGCACTAGGACAGCTTCCTTGTTTGAAAATCCTTTCCATTAGAGGGAT  
GCATGGAATAACAGGGGTGACGGAAGAATTCTATGGCAGTTTGTCTCTAAAAAGCCTTTTAATTGTCTT  
GAGAACCTTATATTTGAAGATATGCCGGAGTGGAAGCAATGGCACGTA TAGGAAGTGGAGAGTTCCC  
TATACTTGAGAAGCTTTTTATTA AAAAATTGCCCTGAACTCAGTTTGGAGACACCCATCCA ACTTTCAAATT  
TAAAAAGGTTTGAAGTTGGTGGTTCTCAAAGGTTGGAGTTGTTTTTGATGATACTGAGCTGTTTAGATC  
CCA ACTTGAGGGAATGAAGCAGATTGTTGAATTAGATATACATGATTGTA ACTCTCTTACCTTCTTTCCTT  
TTAGCATACTGCCCACTACCTTGAAGAGAATAGACATATCTGGTTGCCAGAAATTGAAATTGGATCCGCC  
AGTTGGTGAGATGAGTATGTTTCTGGAGTGTGGAGTCTGGCAAATGTGATTGTATAGATGATATATC  
ACCTGAGTCGCTCCCAAGAGCACGCAGATTGTATGTATCTGATTGCCACAACCTTACTAGGTTTTTGATT  
CTACTGCCACTGAAAGTCTCTGTATTTGGTATTGTGAGAATGTTGAAATACTCTCGGTGGCATGTGGGG  
GGACCCAGATGACGAAGTTGAATATTCAGGGCTGTAAGAAGCTGAAGTGGCTGCCAGAACGTATGCAG  
GAACTCCTTCCATCTCTTAAGGAACTGCATCTGATTAATTGTCCAGAAATAGAGTCCTTTCCTGAAGGAG  
GATTGCCCTTCAATTTACA ACTCCTTATGATCAGCGAGTGCAAGAACTGGTGAACAGCCGAAAGGAGT  
GGCGTTTACAGAGACTCCCCTGTCTTAGAGAGTTAACGATCGAACATGATGGCAGTGATGAAGAGATTG  
TTGGTGGTGAGAATTGGGAGTTGCCTTCTCTATTCAAACACTCTATATAAAGAATCTGAAAACATTAAG  
CAGCCAACATCTCAAACACCTCACCTCTCTCAATATCTAGACATTGCGGGTAATTTACCTCAAATTCAGT  
CAATGCTGGAACAAGGCCAGTTTTCGCATCTCACTTCGCTTCAATGTCTAGTAATCATGAATTTCCCTAAT  
CTCCAATCACTTTCCGAATCAGCACTGCCCTCCTCCCTCTCTCAGCTGACCATCAAGGATTGCCCTAATCTC

CAATCACTTCCTGAATCAGCACTGCCCTCCTCCCTCTCTCAGCTGGTGATCTCCTATTGCCCTAATCTCCAA  
TCACTTCCTGAATCAGCACTGCCCTCCTCCCTCTCT

>M6-PGSC0003DMG400003195 M6 LRR-RLP

GAGCTTTAAATACTTCTTAATTACAAGTTCTAGAAGGAGTCAGAGAAATTTATGAGCCATCCGGGATTGA  
ATCCTTATCTCTCATGCACTTTATCGACCACTAGACCAAATCACTGAGGTGACGGGTGTCTAGTCATTTAT  
ATATAAAGTCGCAACCATCTGAATTTTTCTGTTTGAATGTCAAAGATACTCATAGCACGATCAAACCTGTC  
AGTCAAACAAAAACAATAGAGTTGACATTTAACATATATGCACACAAAATTGCCTAACTATGATGCAAGC  
TGCATAATGATTTGACAATCAATGCGGCTGGATTTTAATTACTTGTCTAGAAGGAGTCAAGGAGATGTT  
CATGAGCAACCCAGGATTTGAATCCTGATCTGGCATGCACTTTATCGACCACTAGATCAAATCACTGGGG  
TGACGGATGTCTAGTCATTTATATATAGAGTCGCAATCATCTGAATTTATCAAGTTTGAATGTCAAAGAT  
ACTCCTAGCGCGATCAAACCGTCAGTCAAACAGAAAAAATAGAGTTGACATTTAACATATACAAACACA  
AAGTTGCCTAACTATGAATGCAAGCTGCGTAATGATTTGACGATCAATGATGCTGGATTTTGTACTTGT  
TCTAGAAGGAGTCAAGGAAGATATTTTCATACCTCAAGTATATAAAATCTTGTGAATTATTCCTTCATTCT  
CAAGTACTTATTATTTTTGTGCAGATCATGGGCTGTCTATTTCTTCTTCTTCTTCTTGTGTTGCAATATC  
CACTTGTATCTTTTCAAGTCATCTATGTGCGACGAGACGAGAGTTTGGTTTTGCAAAACCTGAAGCTTAA  
ACTGTCCATAGATGACTCTGCTTCTGCTGATTGTGAATCCAATGGTTACTTTCCCTATCCAAAGACACTTT  
CTTGAATAGAACCACTGATTGTTGTACTTGGGATGGTGTAAACATGTGATAAAGTTACAGGTGCAATAA  
CTCGTCTTGATCTTAGTTGTAGCCAACCTTCATGGAACAATTGACTCCAACAGCACCCCTCTTCCAACCTTCTC  
ATCTTCAAACCTTAATTTAGCTTACAATGATTTCTCACCTTCCCAAATTTCAAGCAAATTTGGATGGTTTT  
CGAGTTTGACACATCTAATCTATCTCGTTCTGGTTTTTTCAGGGACAGTACCTTTACAAGTCTCATATCTAT  
CTAAGTTGATATCACTTGATCTTTCTGCAGGTATTGAGGAGTTGAGAGTTGAACCTCACACTTTCAAAT  
GCTCCTTCAAACCTTAACTCAACTAAGGGAGCTTTACCTCACCTCAACATATATATCTTCATCACTTCCATC  
AAACTTGCCTCTTCTTGAAGAGCTGAATCTTGTGCGGAACGGAATTGTCTGGGAAAATCCCTGATGAC  
ATTTTCCATTTACCAAGATTGCAAATGCTTAACTTAGGGAGCAACTTGTATCTCACAGGGCATTGCCAAC  
AACTCAATGGAAGTGCAGCAACTCTTAAAGGGAATTAGATCTTTCTCCTCAGGCTTTTCGGGGAATATA  
CCAGATTCTATTGGTCATCTCAACTCTTAAAGGAAATTAGATATATCAGGCTGCTACTTCTCTGGTAACAT  
TCCTCCAACATCGGTGATCTCACCGAGCTCACGAGTTTGCAACTCTTCTCCAACAACCTCAATGGTCAAC  
TACCATCAACAATCTTAAACTGGTGCAACTTGTGAGTTTGTATCTCATCTAACAACCTTACAGGCAAC  
ATTCCAAATATTTTCGGTAACTTACCAAGCTCAAATCTTTATCCTTTTTCATATAACCTCTTTACGGGCCTT

TTCCATCCTCTGTTACAACTTAACAGAGCTAGAGAGTTAGACCTCTCAAATTGTTCTATAACTGGTCC  
TATTCCTTCTAGCGTCAGAACCGGATCCCTAACCTCATCTTGCTCTCCTACCATATAACTCCCTTAGCGG  
AGAAATACCATCTTGATATTAATCTTCCTCCTTAAATACTTAGTTTTGAGAGGCAATCAACTTACTG  
GTCAACTTAAGGAAGTTAGATACAACCTTGTTAGAAGTTGTTGATGTCGGTGACAATAAGCTGAATGGAC  
CTATTCCAACATCATTCTCTAACTAGTGAACCTGACAACACTTGATCTTTCTACAAACAACCTTTCTGGTG  
GTCTAGATATTGGATTGTTTTCAAATGCAAACAACCTTCGACGTCTTGGCCTTTCTTTTAAACAATCTGTCT  
GTATTTTCCAGTCAAAAAGATGCATCCTTGCCTAGTTCTCTTGGAAAGTTTGATGCATCTTCTTGCAACAT  
AAGGGAGTTAAATTTCTACGAGCTGCAAATACATTGGTAACTTAGATCTTTCCAACAACAACATGCAT  
GGAAAAATTCCTGATTGGGCATGGTCTAATTGGCAAGTCTCAGTGTCTTATTTGAATCTTTCTAGCAACTT  
TCTAACGGCTATTGACCTGCTTCATAACTTTGAGAGTCTTTACAATCTTGATATTGGATCTAACTTGATTC  
AAGGAGAATTACCTGCTCCACCTCCCTTATTGTTCTCTTCATAGCCTCGAACAATAACTTCACCGGGAAG  
TTACCTAATTCACCATTATGCAAATGAGTTCCTTTTGATTCTTGATTTGTCCAATAACAGCCTGAGTGG  
AGTAATTCAAAATGTTTAGTGAACATGAGCACAAGTCTCTCAGTGTGGACCTGCACAACAATCATTTT  
AGTGGGACAATTCAAATAACTTTGGTAAGGGAAAGTAGTCTGAGAAGTCTCAATTTGCGGAAAAATAAA  
CTAGAAGGAATGTTACCAAGAAAGCTTACCAATTGCAGAGGGCTCGAAGTAGTTGATCTCGGAGAAAA  
CTTGTTGAATGATACATTTCCCAAATGGTTAGGATCACTTCCTAGGCTGCAAGTTCTCAGTTTGAGATCCA  
ATAAATTACATGGCCCGATTACCATTTCAAGAAACCAAGTCTTATTCTCAAAGCTGAAAATCCTTGATCTC  
TCTTATAATGACTTCACTGGAAACCTGTCAGAAAGGTTTTTCAACAACCTGAAATCCATGATAATAGAAG  
ATCAAACGGGAATACCTTTAACGTATATTGGAGAAGTTCGATACCATGATTCCGTGACATTGTCTATAAA  
AGGACAGCAAATTGAACTTGTGAGGATTCTTTCTATCTTACAACCATTGATTTCTCAAATAACAGATTTA  
AAGGTAATGTACCAAACCTCATTGGAAATCTTGGTTCACTTCGCGGGTTGAATTTGTCACACAACAGCCT  
TATTGGACTTATACCTCAGTCTTTTGGAAATTTATCTGTTCTTGAGTCGTTAGACCTTTCATGGAACCAAC  
TTTCTGGGAACATTCTCAAGAAGTTGCTTCACTGAAATCTCTTGCTGTCATGAATCTCTCACAGAACCAC  
CTGATGGGACGCATACCTAGAGGTCCACAGCTTGATACATTTGAAAATGACTCATATTCAGGAAATGCT  
GGATTATGCGGATTTCCCTTGTCAAGAACTGCGGAGATAATGAGATGCCTCCTTCTACTGTGACTGATA  
TTGAAGACGAAGAAGATTAGGTTTTATGGATTGGAGAGCTGCGATAATAGGATGTGGTTGTGGATCA  
GTGTTTGGGATGTTTATAGTATATATCATTTTCTTAAACAGGGAGACCAAATGGTTTGTGAGAATTGTCA  
ACCAACAGATCAACAGGATCCTTTTAAAATTGAGGCAAAGAGAAGAATTGAGGCAAAAAGAGAAGA  
CGGCAGAAAAGAAGAAGGATGAAGTTTTAGTATATACTTCATGCATTATTGTCTTGCAACATACACAGTT

TCAGCTTACACCTTGTTTTGGC

>M6-PGSC0003DMG400003380 M6 LRR-RLP

TCCATAATAGTTCTAATTCTTGTGTCACAAGGATGAATTTCAACAATGAATTGTCTGATCTGAGAGTCCCG  
AAATACTCGGATGTTCCAAGGGATCGAATAGATTTCTTTATATGGGAGTTAAAATTCCTTAATTGTTTTCT  
CCATTTGCAGAAATCACTTTTGCAAGGGAATGTGGTATGCTAGATATCTCACAGAAAATGCTAGAAATT  
TGCAAGAGGTTGTGTCCATCACGTGACATAATGCATTTGCATACTGGAAGGAGGTAATTTGCAAGAGG  
CTGTGCGCTATTATCATCCGGCCAGATGATGGATTTGCATACTGGAAGAAAGTAATTTGGAAGACTAAG  
CAAGAATTCAGAGCTAAATACTCCTTTCCAAAAACACTACTTGCAAACAACAAGGTAGATGATGATGATA  
TTACTAATCCCAAATTTGTGATGGAATTCATCGATGCTGTTGTGGGGAATCTCAATGTTCTAGTCAAGAT  
CAATGATCCATTTTCATTGCTTTTTGTTCCAGGACCCAAGGAACAAATAGAACAAGTGTTAAAGGAGTTG  
AAGTTATTGAGATTTTTTGTCTGCTTTGTTTCAAACAATGTATAGAGCCTCAATACCAACATGCTACTTTT  
TATACTCACGCTTTAATTGAGGCTAGCCACATCGCAATGGTTGTGTGGTTGAATTTGCCAATCTATGGAA  
ACAGAAATCAAGACTTGGCTTCAAATGAAGTCAGTTGTTTGCTTTCTGATTTTCATGGAAATGAAGATTAA  
GTCCATTCAGCCAGGCATCAGCCGCAACAATATTTATATTGATGTCTTGAGGGCGTTGAAGTCAACCATA  
CCACATGCTCAAGATAAGCATGCAGCTGAGAGTGGTATTGTGGAGACTCCAACACACAATCTGATGGTT  
GGTTTGAGTGATCAAATGGCAAACCTTCAGGAGATGCTCTGCCTTCTAAGAGACAATCTCATTCTCTGC  
CAATACTAGATCTGGAATTTTCATCTACAAGATATGGATTCTGTTATTGTTGATGCAGGACTTCTTATTTAT  
TCATTATATGATATCAAGGGGCAGAAGGAAGACACATCATTGGAGGTTATCAACCAGGCACTTGGTTTT  
GATCTTCCGAGAAACATTGAGTCTATTAAGGCGATGGTCTACCTTGTCTATGCAAAGGCATTTTCATTGTA  
ACTTGCCAAGGGTTCATGGACTAGGCTATGTGATTTTCTGTTGAAAAACCTGAAGGATTTCCAAGGCCG  
TTATTCAGATTCACTCATTTTCTCAAGAATCACCTTCAAGTTATTCAAACGGAATTTGAGAGCTTGCAAC  
CTTTCTTGAAGGTTGTCGTAGAAGAGCCACACAATAAGCTCAAGACACTGAATGAAGATTGTGCTACAC  
AGATAATTAGGAAAGCATATGAGGTGGAATATGTAGTTGATGCTTGTATTAACAAAGAAGCTCCTCATT  
GGTGCCTCGAGCGTTGGCTCCTGGATATCATAGAGGAGATTACTTGTATCAAAGCACAGATTCAGGGAA  
AGATCACAGTTGAGGATTCAATGAAGAGTGTGCTGCTGCTACATCATCACAATTGGCAAGGACTCCAA  
GCATGAATGAAGAGATTGTTGGGTTTGGAGGATGTCATAGAAAATTTAAGAAAAAACTACTGAATGGA  
ACCAAAGGGCAAGTTATCATTTCATTCACGGCATGCCAGGTTTAGGTAAGACGACTTTAGCCAACAGA  
CTCTATTCTGACAGGTCAGTTGTTTCTCATTTTGATATTTGTGCACAATGTTGTGTGTCTCAAGTATATTCT  
TATAAGGACTTGTTATTGGCCTTGCTACGTGATGCTATTGGTGAGGGTTCTGTGCGTAGAGAACTTCATG

CCAATAAATTAGCTGATATGCTTCGCAAACTTTATTGCCCGAAGGTACCTTATCCTTGTTGATGACGTG  
TGGGAAAATAGTGTGGGATGATTTAAGAGGTTGTTCCAGATGTCAATAACAGCAGCAGAATCATT  
CTGACGACAAGACATCATGAAGTTGCCAAATATGCTAGTGTTTCATAGTGATCCCCTTCATCTTCGTATGTT  
TGACGAAGTTGAAAGTTGGAAGTTGCTTGAAAAGAAAGTGTGGTGAAGAAAGTTGCTCCCCTCACCT  
AAAAAGTGTGGGCAGAGAATAGCAAAAATGTGTGGACAACCTCCCTCTTCAATTGTTTTGGTGGCTGG  
TATTCTGTCAGAGATGGAAAAGGAAGTAGAATGTTGGGAACAAGTGGCCAACAATTTGGGTACCCACA  
TTCACAATGACTCAAGAGCCATTGTAGACCAAAGTTATCATGTTTTACCCTGTCATCTTAAGTCTTGCTTC  
CTTTATTTGGAGCATTTTTAGAGGATAGAGTGATTGACATTTCAAGGTTAATAAGGTTATGGATATCAG  
AATCATTTATAAAAAGTTGTGAAGGCAGGAGGTTGGAGGATATAGCAGAAGGTTACTTGGAGAATCTT  
ATTGGAAGAAATCTAGTAATGGTACTCAGAGGGCCGATTGAGATGGTAAGGTCACAGCATGTGCGCTT  
CATGATGTATTACTTGATTTCTGCAAGAAAAGAGCAGCTGAGGAGAATTTCTACTATGGATAAATAGGT  
AATATGATAAGTAATGGTAATTTCAATCAATCAAGTATTTGAAGTTATATCTGAAAATTAATGATATGCTT  
TTGCTAATTGATATATTCACAGGGATCAGATTACCAAACCTTCTTCTGTGTTACTCTACAAGCAGCAT  
GCTCACTTGGCCTTCACTGAAATGCATAATCTTGTAGAATGGAGTGGTCTTGGTCAATTTGTTGGCTCGG  
TAGTACTTTCCAAGAAATATGAGCCATACTTGGCTGGTCGTCCTTAACCTCTCGTGCTTTATCAATTTCA  
TGCATTTTATTAAATTTCAAGTTTCTAAAAGTATTGGATTTAGAGCACCGGGTTGTTATTGATTCTATTCC  
AACTGAGCTCTTTTACTTGAGGTATTTATCTGCACACATTGAACAGAATTCAATTCCTTCAAGCATATCCA  
ATCTTTGGAACCTTGAACTCTTATATTAAGAATACATCAGTTGGGAGAGATAACACGCTATTACTACC  
TAGTACAATTTGGGATATGGTTAAATTGAGACATCTGCATATTCCTAACTTCAGCCCAGAAAATGAAGAA  
GCATTACTGAAGAACTCTGCAAACTTTATGATTTGGAAACCTTCTCTCCATATTTCTCTCGTGTTGA  
GGATGCAGATTTGATGCTGAGAAAAACACCTAATCTTCGAAAACCTGGTATGTAAAGTCCAGTGCTTAGA  
ATACCCCATCAGCACCATCTTTTAAATTTCCAATACGGCTTGAAATACTAAAGCTTTATGGATCAGAAG  
CCTTTAAAACATCCCCTTTTGCATCTCTGCACCAAATCTCAAATGCTTGGAACTCTATGGCTTTTACCTGG  
ATTCTCAGTACTTATCAGAACTGCTGATCATCTGAAGAACCTTGAGGTACTCAAAGTCCAGTGTTGA  
ATTTGGTGATCATAGGGAATGGAAAGTGAGCAATGGCAAGTCCCTCAAAGTCAAATCTTGAACTAGA  
ATATTTGTCCTTGATGGAATGGATTGTAGCCGATGATGCCTTTCCTAACCTGAACAATTGGTTTTGCGTG  
GATGTCGAGATCTTATGGAGATCCCTTCTGTTTCATGGACATCCTTCTCTCAAGTACATCGAGTTAGGA  
AACTGCAATGAGTCGGTTGTCAAGTCAGCCATGAATATACAAGAAACACAAGTCGAAGATAATCAAAAT  
ACTAATTTCAAGCTCGTTCTCATCTAGGTACACTACTGAAAAAGCTTTATTCTGCATGATTTTGATGACT

CCGAAATAATGGCCTAAATTGTATGAACTGTTTTCTCTGTTATCTTTACCTGGTGGCCTCGTTTTACATTC  
GGGTTTTTCTCTTGGTTTTCTTGCAGAAAAAGACATACCCCAAGGCATTTAAAAGATTAGTTTTTCTTCC  
AGGTACTACTTATTATTTTTCTTTCTTTCTTTTTTTGAGTACACCAAATAGATAGATTCATCTTTTTTGTC  
TTTTCGATATGAAAGGGATATAATCAATTTCAACTGATATGAAAGAGAAGAACTTACTGTGACCAGAG  
ATGTGGATGCTGATGAAGTTCAATTAGTTGTGGAGAACTGAGAAAGTGTGGCATGCTCTAACAAAATG  
CTGAGCTCTGGTGAACCTCAACCATGATGGATTTTCAAATAATGACAGGGTTGTAGTCCCAACTTGCAAC  
ACAAATGTGCTATACTCATTTTGCTTACTGTAATACCATTTTATGACACACACACAAACATTAAGTGTAGT  
AAAGTTTTGATGGATCAGTAAATCTGAGTTCAACCCATTGTAATCCGTTCAAATTCAACTCAAAGGTATC  
CAGAGAGTGTAGCTGGAGCAATTTGGAATATCACATGTAATTTCTTTATGAGTTATTTGTTTTAATAAAG  
ATACTGTAAAACGTCCAACGGCTGTTGCATTCATTGTAACTAAATACATCTCACAAATGTAAGTATTTGAA  
CAATTTTTTCAATTAAGTCTTGAGGTTTGTAGTAAAGTCAATTAGATTTTAC

>M6-PGSC0003DMG400003543 M6 LRR-RLP

CTTTCTTTGTTTGTCCCTTCTTCGGACACTCAGAATATATGCTCACGCATCCATTTAAAACCAATCTTGA  
AGGCTCTTCTTCTTCAATTCATTACGATTAACAAAATAATATAACCACACATAAAAAAATCCAGA  
AAATGGGTTGTTTTCAATTTCTACTGTTCTGTTCTTTATAGTTCTCTGTGCTCTGTTCTTGCATGCGCATTC  
AACTACTCACTGGCAAGACATTGAAGTCTTGAAGCAGCTGAAAAATAGCGTCGACCCCAATTCAGTGTC  
ACCTGGCTCATGCCTGAATTCATGGGATTTCTCTGTAGACCCTTGTGATAATCTCGGGGGTGAAAAATTC  
ACTTGTGGTCTCCGTTGCGACCTTGTGTTTTCTCTGTTAGCCGAGTCACTGAACTCGCTCTAGACCAGTG  
GAATTACTCCGGTTCAATCACTTCCGTCTTGGAAATTTGCCTTATCTCCAAAACCTTAGACATCACTAATA  
ATGCCTTCTCCGGTTTAGTACCTGAGTCACTCTCGAATCTAACTCGGGTTCAACGAGTCCGGTTTATCAGGT  
AACTCGCTATCCGGGTCAATTCGAGTTCACTGGGTTCACTTTCAAACCTTGAAGAGCTTTACCTTGACAA  
TAATTTCTTGAGGGAGAAATCCCAAAGTTTCAACGGTCTCAAGAATTTGAAACGGCTCGAATTTCAA  
GGCAATCAGATTACTGGCGAGTTTCCCGAGTTGGATCAGTTAATTAATTTGAATTTATCGATGCTAGTG  
ATAATGCCATCTCCGGCGAACTCCCGGCGAGTTATCCGGCTTCTTATCGAGCTTACGATGAGAAACAA  
CAGCATAGAAGGTAACATTCGGGCGAGCCTCATCGGACTGAATTTCTGACAAGTTATCGATCTGAGTCA  
CAACAACTCAGTGGGTCAGTGCCAGCGAGTCTTCACTCACCCATCCCTCGAACAGCTCACCCATCA  
TACAATCAATTCGGGTCAGTTCAGGAACCCGGGATCTCGTTTCAGAATAGTCAGCTTATTGCAGCAGACT  
TAAGCAACAATGAGATCCGTGGGTTATTACCCGGGTTCTGGGTTAATGCCAGATTATCATCACTTTC  
ACTAGAGAACAACAAGTTATCGGGTATGATACCGACCCAATATGCATTGAAAATGGTGTTCGGGGTGA



AGGGGTGTCTCAATTTGAGAGGCTACTGTTAGGAGGAACTATCTATTCGGACCCATACCGGGTCCATT  
GTTGGATCTGAAAGCGGGTTCAGTCACAGTGAGATTAGGAGACAACTGTTTGTACCGGTGCCCGTTGAG  
ATTATTTTTATGTGAAGGTGGGGAACAGAAATCATTATCGGAGTGTCAGGCTTTTGGTCCCATCATTCT  
TGAGTAATGTGATAATGTCTTTACTTTGAGGTCCTCATTTTCATTTTGTACTAGTAATTATTGTGTTGTTTC  
AATTTTATCTGAAGGGACTAGTAAGTATTGTATAAATATATATTTTTTCTGCAACCTTACCCCATGTATG  
GGTTTTAGATATGATCTAGATGGATCTATGGTAGAGTTGTTATTGTTGTGAAGAGTGAGACAGAAATA  
TAAGATTTCTGACTTAATGTGTTGAAGTAGTAATTGTGGGACAGTTGAGGAAATTTTATTAGCGGAT

>M6-PGSC0003DMG400003544 M6 LRR-RLP

CAAATATGGGAATTTTGGGTAGGAAAAATCTTTCTTGTTTCATCTTATTTTACATATTTTTTCTGTTTTG  
TTCCAAGGCCATTAGAATGTTGTCATTTGGTTGATAAAACATCTTTGTTAGACTTTAAGCAAAAAGTCACT  
TCTGATCCTTCAAACCTTATTGCAAACATGGACACTTTCAACTGATTGTTGCAAATCTTGGGAAGGTATTGC  
TTGTAATTCCAATGGAAGGGTTGTTAACGTCTCTCGCCCCGGCCTTTCTTCAGGGGACGATTTTCATTATC  
GATACCTCAATATCTGGAACCTTTTCTCCTTCTCTTGCTAATCTTTCTTTTCTTGAATTGCTTGATCTTAGTA  
ATCTTAAGGACTTAACAGGGCCAATTCCACCTGAATTTGGCAAGTTATCGCGCTTGAGTTACCTCTTTCT  
GATACTAATAAGCTCTCAGGATCTATACCTGTCACATTTAAATATCTATACCAACTTAAGAAGCTTTATCT  
CAGTGATAATACTCTATCTGGTACTATCCCTTGGAGTATTTTCGAAAGCTTCTTTCACTCTCAGAACTTG  
GTTTATCAGCAAATCAACTTTCAAGTCCAATACCATCTTCAATTGGGAATTTAGTATCATTGACCAAGCTT  
GATATGAGTCGAAATAAGTTCTTTGGAAGCATTCCAGAGAGTATAGGAAGATTAATAAATCTTGCATAT  
GTTGATTTGTCTGAGAATCAGTTATCTGGAAAGATTCCAAACTCTATTGGAAACCTTTCCAAGTATCTCT  
AATGTATCTGAACCAAAACCAATTGAGAGGAAAAATTCCTTCATCAATATCTGGTCTTAGCTCATTGGTG  
TTCTGCCGTTTATCCGAAAACCAAGCTGAGTGGCAGTATTCCACCTTCTATTGGCAATCTTCCAAGATCGA  
AAGGCTGATATTTGAGAACAACAAGTTAAGTGGAAAACCTGCCTGCAACACTTGGACATCTTGTAACCTCTC  
ACTGATATGTACTTTTCCAATAATCTATTTACAGGGAAAAATCCCATCAAGTTTTGGTAATCTAAGGAATCT  
ACAGATACTAGATTTATCGAAAAATAAGCTCAGTGGTGAAATACCTCATCAGCTTGTGAAGTTAGTGAG  
TTTACAGACATTGGATCTGTCAATTAATCCTTTGGGGCTTTCAAGAATACCAAACCTGGTTCAAGAACTA  
AGACTGTTTCGTCTCCTTTTGGCGAAGACTGGGATCAGAGGGAACTCCCAAGTTGGTTGGCTTCATCGT  
CATTATCAACACTTGATTTATCAAACAATGGTTTGACAGGAAAATTACCTACATGGATTGTTAACATGAC  
CAACCTTTCACTCTTGAATTTATCAAACAACGCCTTGTATTCAATCCCTGATGAGTTCAAGAACCTGA  
CACTTTTGATGGATCTTGATCTTCACTCAAACAGATTTTCAGGCAACTTGAGAGCAATTTTCTCAAAGAAT

TTTCAAGACCCCCTTGGTCACTACAATTCTATTGATCTTGCATACAACATGTTCACTGGACCATTAGACGA  
AAACACCGGAAATGAACCTGTCATGGATTCTATTTTGTCACTAAGTTTGTCCCACAATCCATTGACAGGA  
CACATACCAAATCACTGGGAACTTGACAAGCTTGCAGGTAATTAACTAGCCGAAAATGGGCTAACA  
GGTGGAAATCCAACAGAAGTTGGGAATGCCAAGGAAGTAAAACAATTTACTTTCAAATAATAATTTG  
GAAGGTGCAATACCAGCACAAGTTCTGAATTTGAAAGACCTTCAAGAATTTGATGTATCGGGAAATCGA  
CTAAGCGGTAGTATCCCTCCTCATAAAGCTAATATCCCAAAGTCTGCATTTTTGGGAAATTATGGCTTGT  
GTGGAGCTCCACTTCTCCTGTAAAGCACACATAGTGGAAACCTTCAAACACAATATTTCCCTTTTCTTTA  
TTTATTTTTCATTTTCGACATGATTGTTTCGTCATAATGTATTGTATTTTCAAGTTGTAATCACTCAAATGTTATT  
AGTAGATACTGAACAAAGTTGATTTTTCAAAGCAACCTTGCCGAATTCTACATCAATATCCTCAATGGTT  
TAAAC

>M6-PGSC0003DMG400003710 M6 LRR-RLP

ATGAAAGTGCAGTTTTTCTTCATCTTTTTTCATTTTTTCATCTTCTTTGTATTATTAGCACAAATGCAAAACTC  
ATCCTATTGATATACAAGGACTTCAAATCTCAAAAATGGAATAAACCCAAAATCCATTAAACCCGGTTC  
ATGCTTAAACTCATGGAAGTTCTCTATAGACCCATGTGATCATATTTTACCCGACCGGTTACCTGCGGTT  
TCCGATGTGATCTCATCGTCTCCGGTTTTTATCGAGTCACTGAAATCAGCCTAGACCAAGCCGGTACTCC  
GGTTCATTGCCTAATTCATTCAACCTCCCTCATCTCGAGATTTTAGATATGTCATATAATTCCTCTCCGGT  
TCAATCCCGAATTCATTTTCAAATCTAACTCGGCTCCGGCGGCTCAGTCTTTCGAAAAACTCGTTCACCGG  
TCTAGTTACTTCTTCTATCGGTTCTCTATCCCGTTTACAGGAACTATTTCTCGATAACAACAAATTCACCGG  
TTCAATCCCGGAAAGTTTTAATGGTTAATCAATCTGAATCGATTTGAGCTTCAACAAAATAATATTTCCG  
GCGAGTTACCCGATTTGAATCAGCTCATAAATCTGATCTACTTAGATTTAAGCAATAACAGAATCGCCGG  
AAATTTCTTACGACAAATTTACCTGATTGATGATTGAACTCTCAATACGCAACAATTTTACACGGCG  
AGTTTCCGTTGAACTTCGAAGAGTTGAAGTTCCTACAGGTGTTAGATCTGAGCCATAATTTGTTTTCCGG  
GATGATTCCGGCGGCGCTATTTCACTCATCTCTTTCAGCAGCTTACACTTTCTTACAATAACTTTACGTT  
TTTGCAAGTGCCGGAAGATTTAGTGCTTCGAAGTAAGCTTATAGCTATTGATCTGAGTTACAACAATTTG  
CATGGCTTATTGCCGGCGTTTATGGCGTCGATGCCGGAGCTGTCCGGCTCTGAATTTGGAGCATAACAAG  
TTTACCGGCGTGATACCGATACAGTTTGCAGTAAAAGTTGTGGCTCCGAGGAATCATACGGCGTCGTTT  
GAGAGGTTATTGCTGGGTGGAAATTTTGTGTTGGGCCGATTCTGGGCCTTTAATGGGCCTAAAGCCT  
GGTTCTGGAAATGTTAGTTTGGTGGATAACTGTTTGTATATGTGTCCAGATTCGGAATACATTTGTCATG  
GTGGGTATCAGAAGTCTTTATTGGATTGTAAAAAGTTTGGGCCTAAGATTCCTTGA

>M6-PGSC0003DMG400003802 M6 LRR-RLP

ATGTTTGAATTCGCCCGGAAATTGCAGAAGCGAGGCGGAGAGTTGATTAGCGAGTTTTGCAGTGAAATT  
GGAGTCGAAAAATGGGGTTTTAAGGTACGGTTGCACAATAGGACACCTTCAATTGATATATTGTCGGAA  
TGTCTCATTCAAAAATACTCTGTTGTCTTAGTTTTAAAGAAGCAACGCGGATGAGCATTCTTCCAAAAC  
ATGGCTGCAAGCCTGGTCGACTCTTCCAACTTGGATTTACAGTTGATTTTTCTAAAGGCAACGATATG  
AAAATAGTGGATGATATAATGGAGAGATATAGGGACGGAAAAATCCCTATAGAAAAGTTTGAATTATCA  
GATGATCGTTTGTCTTTGAAAATCCTCATGGAGTTTTAGTTGTCCCTATGATTGATAAGTGGCTTGGCAT  
TGTAATAACAAATGGTGTAAAAGACCTTACCATATCATCATACCCCTGTTTATTTTCGCAATCTTGGCGG  
TAAAATCTGTGAGAAAATTGGTTCTGGAATCTTGATTCTTTGCCTAGTGTTGTTGTGAATTGCAATTCT  
TTGAGGAAACTTTCTCTATCTTATGTAAGATTAGATGAAAACATGCTTCAGGCTCTACTTAATAGCTGTCC  
GTTGATTGAATCTTTCATATTTGAGTATTGCAAGGGCTTGGAAACAATGAATCATCAAAGATTAAGTCG  
GTTTCCCTGAAGTTCTTGAAGATTCGGCATTGTGGGGGAATATGGGAGATTGATGCTCAAATTTGGTAT  
CACTTAAGTACACTTGGGAAGACATTCCTCAAATTAATTTGTGAGAGAGTCAAGACAAATGAAGTACT  
CAAGAATCATTCTTGAATGCTTAGACAGTGACAATGTAATGCTGCATGGTTTTGTAAGTTGAGGAAGTT  
TCTGTCAAATTCGATCTCTTGGTCTGAAGTTCGCATTGAATCTTATAGATGCAATGACATCAACATTCAAA  
ATTTGCAACTGGACCATAAAGATTCTAATCCCCACGTGGACGTTTTAAATGTCAACATTATATGGAAGAA  
TGGGGAGAGCTCAACATTTGTGGATGCTTTGGTATGGAGTTGTCAGCCTAGGAGACTCAACGTGCATTC  
AACAAAGAGAAAAGATCACATTTTTATTGATCATTGATGTATATGAAGAATTCGAGTCAGTCTACTTCTC  
ATGGAAGCACGCCTCTTCTTAGTCAATTAAGGAGTAAAAGCCTACAAATTTGATAGGAAGAAGGAGA  
GTTGGCATCCTGTGGAACACAAAAGTAGTGAGCTGGTAACAACAACTCTGAAATGTGGGATTGGTGT  
ATTTTTATTAGATTGGTGA

>M6-PGSC0003DMG400003814 M6 LRR-RLP

ACCCAATTGATTTCTTAGCTTTACAAGCGATTTCGAAAAGGCTTGGATGATTTGCCCGTTCCAACATTTT  
GCTTCCTGGGATTTCACTTCTGAGCCGTGCAACTTCGCCGGAGTTTACTGCGATGGAGATAAAGTGATCG  
CCTTGAATCTCGGTGATCCCAGAGCTGGATCACCGGGTTTGACCGGAACTTGGATCCTTCTATTGGGAA  
ACTCTCTGCTCTTGCTGAGTTCACGGTGGTTCGGGTTCGGATAACCGGTGCATTGCCGGAAAGTTTTTCT  
CAGTTGAAGAACCTGAGATTTCTAGGAGTTAGCCGGAACCTTCTCTCCGGTGATATTCCGGCGTCATTAG  
GCCTGCTCCGGGAGCTACAACTCTTGATCTTAGTTTCAATCAGCTGACTGGGAGTATCCCTTGGGCTAT  
TGGAGCTCTTCCGGCATTGTCCAACATTATACTCTGTACAATCATTGTCCGGTTCGATCCCACCATTTCG

TATCCCAAAGATTGACCCGTTTAGACCTTAAACACAACCTCACTTTCAGGTACCCTTTTGCCTAATTCACCTC  
CTTCATCGCTTCAATACTTGTCAATTGTCATGGAACCAGTTAACCGGTCCAGTAGATTATCAGTTGAGTCG  
GCTGAACCAGTTGAATTACCTCGATCTTAGCTTGAACCGGTTACCGGCTGCATTCCGGGAATCTTATTT  
ACTTTCCCACTCACAAATCTTCAGCTACAAAGGAATCTATTTTCGGGTCCGGTTTTACCCATTTTCAGAGGT  
GACAATTCCGACGGTGGACATTAGCTTTAACAGGTTTTTCGGGGAGATATCTCCATTGTTGTGTAATGTG  
GAGAATTTGTATCTGAACAATAACCGGTTACGGGTAAGGTGCCGGCGGTGTTGGTGGACCGGTTATTA  
TCTGCCGGAATACAAGTTTTATTTACAGCATAATTTTCTGACGGGGATTGAGATAAATCCGAGGGTGG  
AAATTCGGTGAGCAGTTCATTGTGTTGCAGTATAATTGCATGATTCCGCCGGTTGAGACGGCTTGCC  
GTTGAAAGCCGGGAAGCAGAAGAGTAGGCCTACAAATCAGTGTGTGGAGTGGAAGGGGCAAAGAGT  
GAAAAACAA

>M6-PGSC0003DMG400003822 M6 LRR-RLP

TTGAAAACCAAATATTACACATGACAACATTTCATACTACCTTAGTTTACATTTTGTATGTGCTACTTCTTT  
TTTCACTTCCATTAAGTATCACATCTTCAGCAAGAACAGAAGCTGAATCTCTTGTCAAATGGAAGAGAAA  
TTTACCTTCTACGTCTTTCTTGGACTCATGGTCCATTTGAAATCTCGAAAACCTTGTGCAATTGGACATTTAT  
TGTGTGTAATGATGGTGGAAACAATTTCTGAGATCAATCTTTCTGATGCAGCCCTCTCAGGCTCACTTGAT  
CACCTTGATTTCACTTCATTTCCGAGTCTCGTGAATTTCAATCTTAATGGAAATAACTTCAGTGGATCGAT  
ACCTTCGAGTATTGGCAATGCCTCATTGCTCACTTTCTTGGACCTGAGTAACAATATCTTGTGAGGTGCA  
TACCTGAAGAGATTGGAAAATTGAATCAACTTGAGTATCTAAGTTTTTATAACAACAATATCGAAGGTGT  
GATTCCGTATCAGATTAGCAATCTGCAGAAGGTAATGCACTTGGATCTTGGATCAAATTTCTTAGAACT  
CCTGATTGGTTGAAGATGAAAAATATGCCTGTGTTGACGTATCTAAGCTTTGGTTATAATGAACTGAGGT  
TAGAATCCCTGAATTCGTACTTCGTTGTCATAATCTAACATATCTTGATTTATCGATAAATCATTTCAATG  
GTTGATTCTGAAACAGTATTTACCAACTTGATCAACCTTGAAAGACTTAATCTTTTCATCTAATTCATTC  
AAGGTTCAATTGTCACCAAATTTTACCAAGTTGTCTAAGTTAAAAGAACTTCAGCTAGGTGTTAACATGTTT  
TCTGGTTTAATTCCTGATGAAATTGGCTTGATTACTAGTCTTGAAGTTCTTGTACTTTTCAACAATTCATTT  
GAAGGAAAGATTCCATCTTCTATAGGTAGACTCATAAATCTTCAACGGTTGGATCTTCGAAAGAACGATT  
TGAATTCAACTATTCCTTCTGAGCTTGGTTTTTGTACTAACTCACTTTCTTAGCTCTAGCAGAAAATGACC  
TGCAAGGGTCATTGCCTCCATCATTCTCCTCTTACTAAGTTATCTGATGTGGGGTTGTCTGATAATAGT  
CTTTCTGGTGAATCTCATCGAATTTATCACCAATTGGACTGAGTTGACATCTTTGCAGCTTCAAACAA  
TATGTTTACAGGGAAAATCCCACCCGAAACCAGTCAATTGACAAACCTTGTATATCTCTACCTCTTTCATA

ACAATTTCACTGGTTCCATTCCCTATCAGATTGGGAACTTGCAAACTTGTTGGAATTAGACTTTTCTGAT  
AACCAGCTTTCAGGCATAATACCTCCAACCATTGGAAATCTGACCAATCTGAAGACGTTGCAACTTTTTTC  
GCAACAATCTCAGTGGAACCATTCTCCTGAGATTGGAAAATTGATATCCCTTGTAACCATCGACATCAA  
CACCAACCGACTAAGTGGTGAGCTGCCGGACAGCATTCTGACCTCAGTGAGCTGAAGATTCTTTCTGTA  
TATACTAATGATTTCTCAGGCATTGTCCCTAAGGACTTTGGAAAGAACAGTCCTCAATTGTCAAGTGCCA  
GCTTTGCAAATAACAGCTTCACTGGTGAACCTGCTGGATTGTGTAGCCCGAATCTTGAGGAGTTGAC  
GATAAATGGGAACAAATTCAGTGGGAAGTTACCAGATTGCTTGAAGAACTGCACACTGCTAAGACGAGT  
ACGGCTTGAAGGCAACAATTTATCTGGTAATCTAGCTGATGCATTTGGAGTGCACCCGAATCTTGTTTAC  
CTTTCTCTTAGTGACAACCAACTTTCAGGTGAACTTTCACCTGACTGGGGGAAATGTGAAAATCTCACAA  
GTCTAAGAATGGATGGAAACAAATTTTCTGGTGTAAATCCCAAGTGAGCTAGGGAACCTGAGAGCGTTGC  
GCGTGTTAGCTTTGGAAGGAAATGAATTGACTGGTGAATTCCTTCTGAACTGGGGAGGTTAGACCTGC  
TGTACAATCTCAGCTTGAGCAAAAACAATCTTACTGGAGGCATCCCTCAGTCTGTTGGCAATTTAACTAA  
GCTCCAGTATCTTGATTTGTCAACAAATAAGTTAAGTGGTAACATACCAGTAGATCTTGGGAAGTGTGA  
GAGCCTGTTGAGCTTGAATCTTGGCAACAACCTCATTATCAGGTGGGATTCCATCTGACCTTGGAAATTTG  
ATGCAGTTGAGTATTCTTGTGGACCTAAGTAGCAATTCGCTAACGGGAACCATCCACAAAACCTTGGCCA  
AGCTCACCTCATTAAATGCATCTCAACCTCTCACATAACAACCTCTCAGGTAGAATTCCTCCAGCATTAGCT  
CAGATGATCAGTCTTCAGGAGATGGATTTTTCTACAATGAGTTTTCTGGTCCAATCCCAACCGACGGAG  
TATTTGAGGAGCATCCGCTAGTTCTTTTCTTGAAACTCTGGTTTGTGTGGAAATGTAGAAGGATTATC  
CTCATGTAATTTGGATACCCGAAATGACAAGTCCAGAAATAATAATCAAAAGATCCTCATTGGGGTACTT  
GTACCGGTGGTCAGCCTCATACTTTTGGCAATCCTGTTTGTTCATGTCTCGTGTCTCGAAGGAAGGCTA  
AGCAATATGATGAGGAGATCAAAGCTAGCCAGATACATGAAAATACAGAATCTCTGATTTGGGAAAGA  
GAAGGGAAGTTTACATTTGGTGACATAGTGAAAGCTACTGAAGATTTTCAGTGAAAGGAACTGCATTGG  
AAGAGGAGGCTTTGGAAGTGTCTATAAAGCTGTTTTGCCCTCTGGGCAGATTGTTGCAGTCAAAAGACT  
CAACATGTCAGACTCAAGTGACATTCCATTGACTAATCGTCGAAGCTTTGAGAATGAGATTAGAACCTTG  
ACAGAGGTGAGACACAGGAATATAATTAAGCTCTTTGGTTACTGTTCCAAGAATGGGTGCATGTACTTG  
GTTTATGAGTATATAGAAAGAGGTAGCCTCGGGAAAGTTCTATATGATAATGAGATGGGAATGGAACCT  
GGATGGGGTACAAGAGTGAAAATTGTGCAAGGAATAGCTCATGCACTCGCTTACTTGCACCATGACTGC  
TCTCCACCCATTGTGCACCGTGATGTATCATTGAACAACATTTTGCTTGAATCAGAATTCGAGCCACGACT  
CTCTGACTTTGGCACAGCAAAGTTGCTAGCTTCAGACTCATCAAATTGGACCACAGTTGCTGGTTCTTAT

GGCTATATGGCACCAGGTATGTTACATACTCATTACCTAATGCATCCATATTTCTGTTGATTAAGTAGTAT  
ATTCATTGGAAGGATACTTCAATAATAGTGTCTTTCTTCTTGTGCAGAGCTTGCACCTTACCATGCGTGTTA  
CAGAAAAGTGTGATGTCTATAGTTTTGGAGTCATAGCAATGGAGACTATGATGGGAAGGCATCCAGGG  
GAGCTTTTAACTTCATTATCAGCATCAACAACATTGTCTCCAGAAATACTTTTGAAGGATGTTCTTGACCA  
AAGACTTCCACCTCCCACCAGCCACTTGGCAGAGGCAGTGGTTTTTGTGATCACAATTGCCTTGGCATGT  
ACACGTACCACTCCTGAATCGCGACCAACCATGCGTTGTGTAGCACAAGAATTGTCTGTTCCAGACTTTGC  
CTTACCTTCCACAGCCATTGGGGACAATAGAAATGAGCAAATAACAAGTTTTTCCAGAAATAATGAGAAG  
ATAGAACCTCATGTACAGGTGTGAAATGTACAGACTGTAGAGTTTTAGTGTTGTAATGCAACTTCTCAA  
GATCTAAGGTCTATATAGTATCAAGGATGAAACCTTGGATCTATCCAAATTAATGTTTCTTTTGCACCTT  
TTCCCTAGAAAAAAGAAATAATATCATCCTGTTAATCATGAATGTTACAAAGTTGGTATATTCATTTGG  
ACTAGTATGAATGTTACAAAGTTGCACAATTCCCTTATCCTAGTCTTTACGTTATTGCTAGGCCAAAACACT  
AGCAGAAAAGATACAATGTGTTCACTTGAATAAAAATAGCAACCTAACAAAAATTTGGCAAAGAATACA  
TCACACAGATAACCAGGCATGGTACTTAGCATTCCACTCCACACTGCTTGAGTATAGGTCCCTTCTGCTTTG  
GTAGGAATGGGTCTATTTCGCACCCAAACAAGTGAGAAGATTGAAGCAAGAAGAATTGACCAGAGGACC  
ACAATGGTGGGAGTCCTGTTCTGCCTGCCCATCAATCCCTTTAGGAAAGGATAGAGATGCACAATAACC  
CAAAGGCGAAGAATAACTTTCCGAAGAGAGGACCCCATGAACCGTAACCATTGTTGATGGCATCCGAA  
ACACCAGCTACAACACCGACCATATTCAAGATGATCAGAGTGGTTGGTGGGATAAGAAGTGTGGTCCAT  
TTGAAGAGGTAAAGCTCCCCAAATTCAGCATCATCAGCTGCTTTTGTGTTACAGTAAAGTTTGTGTCTA  
CACCAGCAAGAACTTTAAGAAGGCCTTGGAAAACGCAAACAAATGTGCTGAAACACCACCGATGACCC  
AAAATTGCTCGTTACGCCACCAGGCCTCAATGCTTACTCCACTCCATCGCAGCTCGAGTACACTTGTGGC  
TATGATGGAGATAAAGAGAGCCATGAACCAAATGCTTGCAAAGTTGTTAAGCTACAAAACAAACATGGA  
TTTTGATTTATAAAATCTAAATCAAATCTTTATATTACCGAACCAAATGACTTCAGTTCACTTACTGTGGG  
GACGATAAATTTTCCAGTGAGAAGGCATACAGCTGGAAGGGTGCAGTAAGCTAGCAGAGCAATGGAAG  
TGAATGGGTAAACAATGGTGTTAATGTATGCTAGCCTTTCCAACCATTTGAGTTTTCCACCCAGGCATA  
CCAAAGGGGACAATGACGACTCATGAAGATCTCGACAGAACCAAGAGCCCATCTCAGGACTTGGTGCA  
ATCTATCTGATAGATTGATTGGGGCTGATCCCTTAAAAGCTGCTCTCTTCGGACAGCAATAAACTGATCT  
CCATCCTCTGCAGTGCATCTTAAATCCAGTCAAATGTCCTCTGTGACAGAACCATAAATCCATCCAATCT  
GTCAAAAAAAGAAAAATGAAAACCAATTTATTAGAAGTTAGCTAAGCGAACCCATAACTCATAATTTA  
TTCATGAAATATAATGCTAACCTCTTTGCCCCAGTCAGTTTTCTTTCATACCCACAGCTAATAACATGAAT

AGCTTCCTTTATGAGTGTTGTCGGGTTTGTCCCTTCAGGAAGCCCACCATCTTCCTTAAGTGTTGGAAGCT  
ATGAAAACGGGGGACTGCCCGAATCGTTTCTCAAAGTTCTTTTGGGACATGAGAGATGACTTCTCAAGC  
TCATCATATCCTTCAAGGCCTTCTTCAATTTCTCAAGATCAAAGACAGGTCCAGATGGCTTCTAGTGTA  
GTTCTTTCCATTCAATTGTTTTCTTTTTCTTGTTGTATAGTCCTCCAAGTCCAAGTAAGGCCTTGATGCTCTT  
TTCTTAGACTTGGACTTGGACTTTCTTGAACCACCACAACAGCAACTGGGCCAGCAATCACATGTCATCTT  
TTGACGCTTCTCAGAAACAGGTGGATCATAGCCGTATAACGCCTGCCTGTAAAGACAGTACCTGTTCCA  
ACATAAACTGGTCCTTGAATTCCATCCAGGCCTTTCATGTTGATCTGCCACCATGAAGGGAAAAAAGCAT  
ATTAATACCGGGAATAAATCCTTTGTCAACGCATTGCTGTATATATAGATCAACTTACATCAAAAAAGAC  
AACATTACGATTGGCATATCGATCGTGGCGATCAATACCATCAAATCTCTGGGGAAATTGGACATAGCA  
TAGCTTCTTTCCAATTTGTGGGTCCATTA AAAAGCACATGGCTTCTCTAACTGCCTTGCTGTTGTTAAGGT  
AGTGATCACAATCCAAGTTCAACATAAATGGTGCATTGGTCAGGACTGCAGCGACTCGAACCTATTTAG  
AAAAACAGCACAAATTACATAACATTAAGAAAAGGACTTAGCAGAATGTCGAGGAAGCAAGCCAGAAA  
CTAATACTAATAACTAACC AAAGCATTTCATGGCACCAGCTTTCTTGTTGTTGATAGCCCGGTCGTTT  
CTCACGAGAAACATAGACAAGGCGGGGAAGCTCCTTACCTTCAATGTCAAGTGCACCTTCACTACCAAG  
ATAAACTTGAATCATACCAGGATGGTCTCTGGTGTGTTACCGGGCCATGGAGTTCCATCTTGCATTACC  
CATCCCTCTTCTGGTTTTTTCTGAGCTTTTGCTACTAATGCATTAATTCTTACTTTGAATTCTTCATATTCTC  
TCTGCCACAAGAGAGTGAGTTTTCAATTTGCAGAAAAATCTTATTTCAAGCCAAAGAACTTAAGCCCC  
GATAAATGATACTCCTTCTATCCCAACTTCTATGACATTCTTATATTTTTGGGCACGTCCTAAAATGTTTGAC  
ATGATTCCTTCTACAACCTTACAATAAACTATTTGAATTTTAAACCTTGATAGGATTCACTCAACATTTTA  
GGCACTGCATCTCCTCTGATATAGTCGTATAAAATGAGACGAAATGAAGTAATAGATACATACCTTCATG  
GCCCTGCGATCCTTGACAAAGGTAGGCTGAACTTTATCTTTCAAGTAATCAATCTTTTCATTGAAGTAGA  
AATCGGGTGCTCTAGGCTCTACACTATATTTCTTACAAAATGGCACCCATCTCCTGGCAAATTCAGCTGTT  
TCTGCTAATGAATCGAACAACAGCATGGAAGCACCATCATCTGAAACATAACAGCTAACCTTCTCGACAG  
GATAATCAACAGCCAAGATTGACAGAACAGTGTTTGCAGTGATAATAGGAGGCTCCTTAAGAGGATCAA  
CAGTACTCACAACACATCCACTGGGGCTAATCGATTTGGCTCGCCTTACGTTCAAACCTCAATGTCAA  
TCGATCTAAATAAGTTTCACGGTTTATGGGTGACCATTTGGGGAAGTCAAGTATCCATGATAATGCA  
AACCATATTTACATATAACAGAGATAATCCATAATGGATAGGCATCATAGGCTGGTGTAAAGATCCGG  
AAATGGAAAAAGAATCCAAGAATTACAAGCCTGAGGATAATGACTATCCGATATGGACTGATTAGACTT  
GATGGAAGTGGAACTTTTCGCCAGAGTGGTTGCCGAGCTTCAGCCAAACTGCTTGGAATCAGTTAAGT

GGTTAGAATATTGAAATACTGCAAGTTTTATATGCTTAACTTGATCTGTTCAATTCATACACACTCATT  
CCATGTTGAAACATTATAGTATTTGATTAATTTTGTTAATAATATTGCATGTAECTATCTAACTTTTACAAT  
TATAAAGTGTTCAAATTATTTAATTATAACAGTCAGTCACTGAGTGATATATAACTACAAGTGACAGAGA  
CGATATATAACCGAAAATCCAATATTTAAAAGTTGTAAGGAGAATGAGGGGAAGGTGGAAACAAGACC  
AGATATAATTTGATCGCTATGAACAAATCCAAAGACCAGGTTGATTGATTTGTTAAAAATTTAAAGTATT  
TCTATAGGGGTCGTTTCCTGTTCTTCTATGCTGTTTTCTCGATAATTCCTCACATAAAACCTTCTCGTATT  
AGCAACGATATAACTTCAACAAGATCAAACCAGAGGCGGGAATTAGCTTGAATAATCATAATTTTCAATA  
TCTTCTTCCACTACTAAGAATATATGTCAAATAACATGTTAAATTCCCCTTCTAAGTCGAAGGTCTATCGA  
AAAAGCAAATCTAGTAGGGGTAAGGTGTGGTATATCATACCCTCCCAAACCTCACTTGTGGGATTACACT  
GGGTGGTGTATATAACATGTTAAATTTCCCTTCTAACTGAGTTGTTAAATTACCCTTCTACGCCGAGGGT  
CTATCAGAAATAGTAAATCTACCCACAAAGGTAGGCGTAAGATGTGGTAAATCACTATATCTTACCCTC  
CCAAACCTCACTCGTGGGATTACACTGAGGGTAAACAAAGAGAGTGAAAAGAAAGAGTACATACAGAT  
AATCATCATCTTCATCAGGTTGGTCATTTCCACCATTATTAACAAGACCTCTCTTTTCTTGACGATTCTTCC  
ATTTCTCAACTCTTCCCTTCCATTCTGCATCACCATAACTTTCTTTCTGCTCATCCTCCAATTCCTTCCCTGCA  
ACTGTAAGTGATTTTCCATTGAAATAAAACAAAATCATGACCTTGAGTGACACATATATATAAAGTGCAA  
CAATTAATCATTTTCGAAATTAATAATATAGCTGTACCGCTTCCAACAACCTGATTGATTAAAAGCAGCACC  
ACTATTGGTGTTGTGATTATACTCTCCATTCTCCTGCCAAACATACAACAACCTGCTTTCAGTTCAAATTAG  
>M6-PGSC0003DMG400003834 M6 LRR-RLP

ATGAGCATTCTCTCCAAAACATGGCTACAAGAATGGTCGAATCTTCCCAACTTGGAATTCATTAATTAATT  
GTTGGGAAGGCAATATAAATACAGCGAACACAACCATGGAGAGATATAGGAAGGGGAAAATCCCTATA  
CAAAGTTTGAATTATTAGAGACCTTTGCTAATTCTCATGAAGATTTCCCTCTCATTGATAAGTGGCTCGA  
CATTGCACTTCAGAATGGTGTAACATCTTTTTCTTAACTTTAAATCATACCCCATGCCTATTTAAGAAT  
CTTGGCAGCAAAATCTTTAAGAGAATTGGATGTGCAGGGTAGTATGCCTGATTGTTATCTAGTGGTGT  
GTGAATTGCAAATCATTGAGAAAGCTTTCTCTATCTCATCTAAGATTAGACGAAAACATGGTCCAGACTA  
TACTTACTAGTTGTCCCTTTATTGTCTCTTAACTTGAAGTATTGTACTGGGAAGCTTCAAAGATCAAG  
TCGGATTCCCTGAAGGTCTTGAAGATACATCATCGCGGGATAGAGGAGATCGATGCTCCAAATTTGGTA  
TCACTTGACTATATGGGGAGTCAAATCCCGAACTTAATAAAATTGCAAGAGACTCAAAAATCAGGCTTG  
GATGCATCAACAATTTAAATGCAGCATGGTTTTGTAAGTTGAGAAAGTTTCTATCAAATTCGTCCTCGTG  
GTCTCATGTTTCCCTTCAATTTATGAATTGCTGTGAGATCAAGATGAAAGATTTGCAAATGGACCACATA



GGTTCTACCCCTCGGGTGGACATTTTAAATGTCGATATTCAATGGATGAATCAGAATTTTGTGGATGCTT  
TGCTATGGAGTTGTCATCCAAGGAGACTCAACCTACTCTCAAATATTACTCCAACGATTACACATTTTCATT  
GATCGTTTAGTGTTTTTACGAATTCGAGTCATTCTACTTCTCATAAAAGCTTTCCTTGGCATAGTCAATT  
AAAAGAAATAAAAGCTTTTGGATGGAAAAACCAGTCGCTACAACCTCATAAATGGGGAGCTTGCAAAAA  
GGACCCTTATGGAGGGGGAGAAAGTTTATTTTTTATTAGATTGGTGATGTAGTTAATTTGTTTCTATTTCA  
AATTGAATGGACTTATTCTTTTCTGCATTGGTGTCAGAGGTATTAGATATTAATAAAACAGAACTAAGAG  
CATAATTTTAACTTGGATCTTATAGGCTTGCAAAAGCAAAAACAAAATTTTAAAGAAAGTAATGAGTAT  
GGCAAATTTCTCAAAGGAAAGAGACTTAATTTCTACATAATTACTAGTGTTCACGTAACACTACAAATG  
CCTTCGATGTCATACTTTCTCGGTAGCCCGTTGATTTCTAATTTTCTCAAACCTGTCTCGTGACATCATAA  
GAGAAACATAAAGTATCCGACATTAAGTCCAGGATGACTACAATCTCTTCATCACAGGACGTGCATGAT  
GATATAACTAAGGGTTTGTCTTCCACCACGTGGAAGGGAAGTCAATGATTTGAATTTTCCATTCTTCTTC  
TTTCTGAGTTTGTCTAAAATCCACAAGTTGAACTATCCATGTTGCCAATATTCATAATCCATGATCGCTA  
GTTTACCTTTCACCTCTAACAACCTCGTAATACCACCACGAGTTAGATGCATTATATAAACCAATATTTTTG  
AATTTTCGGTTTTAACATCAAATGCATCTATAGTAAGTCTGTCCTGGAAAACAAATTTATAGATAACTCTA  
TTGATGCAAACCCCGGGCTTGACAGAATAGGAGGGGTTATGCTTTGAGTCTCTCTCCATGATTCTGCTA  
CTCCTAAAGTGAAAATCCAATGTTTTATGTACCCTTATATAATATGCTTTGTTGTGAAAAGAACTTTGTAC  
TTCTTTTCTTCTGGGTCAAACCGAATGAACAGAACCACATGGAAGAACCATCATTTAGGTCAGGAAGA  
AATCTTACTTCTCTTGTACTAGGATTGAAAATTGCAGCAAAAATAATGGTTCCCAAATATAAAATAAAC  
CA

>M6-PGSC0003DMG400003835 M6 LRR-RLP

ATGGCTGACATGTTGCCTGAATGTTTCATTCAAAAATACTCTCTTCTCTTAGTTTTGATGAAGCAGCGCG  
GATGAGCATTCTTTCCAAAACATGGCTGCAAGCCTGGTCGACTCTTCCCGACTTGAATTTAATGTTAAG  
TTTTGCAAAGGCGATATAAAGATATTGGACACTATTATGGAGAGATATGGAAACGGAAAAATCCCTATA  
GAAAAGTTTGATTTATCAGAGCTTTAGGCGATTCTCATGAAGTTTTCCCTCTGATTGATAAGTGGCTTAA  
CATTGCACTTCAAATGGCGTAAACAATCTTGTCTTAACTATAAATCATACCCCGTGCCTTTTTTAACAA  
TCTTGGCAGCAAAATCTTTAAGAAAATTGGTTCTGAAGAGTTGACTCTTTTGCCTATTTCTTTATCTGGT  
GGTGTGGAATCACAATCTTTGAGTAAGCTTTCTCTATCTTATGTAAAATTATACGAAAACATGCTTCA  
GACTCTACTTAATAGTTGTCCTTTGATTGTCTCTTTTCTTTGAGTATTGTTCCGACTTGGAAACAATTGA  
GCTAGTGAATCTTCAAAGATCAAGTCGGTTTCCCTGAAGGTCTTGAAGATTCGGTTTAGTGGGAGCAT

ATGGGAGATTGATGCTCCAAATTTGGTGTCAATTTGAGTACACAGGGAATCAAATTCCTGAACTTCAAATT  
GTGAGAGAGTCAAAACAACTGAAGCACTCAAAAATCATTCTTCACCGCTTAGACAATATAAATGCTGACT  
GGTTTTGTAAGTTGAGGAAGTTTCTATCAAATTCGACCTCTTGGTCTCAAGTTTCCCTTTATTTTTATGAAT  
GCACGGAGATTAATGAAAGATCTGCAACAACACCACAGAGTTGCTACGCCCCAGGTGGACGTTTTAG  
ATGTCAACATTCTGTGGCAGAATCTCGAATACCCTTCATTTGTGGATGCTTTGGTATGGAGTTGTCAGCC  
TAGGAGACTCAACTTGCAATTAACAAGAGAAATGGTTACAGTTTTTCATTGATCGTTTGATGAATATGAAG  
AATTCGATTCAGTCTACTTCTCATGGAAGCAACCTTGGTATAGTCAATTAAGAAGTAAAAGTCCACA  
AATTTGATAGGAAGAAGGAGATTTGGTATCCTGTGGAACACAACTTGGGGAGCGGGCAACAATGAAC  
CTTGATAGATATTATATTTTTATTAGATTGGTAA

>M6-PGSC0003DMG400004056 M6 LRR-RLP

ATGTACAGAGGTGTAGCAGATGCTTCTATATCTCCAATGGAGAAACATGAGAAAGAGGCATTGTACTCT  
GCTATTCAAGGTTTTGTTGGAAATGAGTGAATGGTTCATTTCTTATCCTGATCCTTGTGGCTGGACATC  
AATTGAGGTACTAATCTTTTGCTCTCGATGTTCTTTTGCTAATTTTAATGCTAAATTAGATTACATTAATT  
TGATATTTTAACTAAACATTTATTTATTCAAAAATTATATAAAAAATACTATAAATTGTAATTTTTTGTAT  
TTAATATGATGAAATTGGTCAAAGTTACTCTAAAGAAAACAGGAAAACATGACAACTAAAAGGAACG  
AAGAGTATATGATTCATAATTTGCTAGTTGATTCTAGTCTTATGTTTTTTTACCATTATTGACTTTTCTTGC  
TGTAGTTCAAAATCAAGAAAACAGTAATGTCACAATGCCATGCATGGATGTCCTTAAATTTTTTATTTTAT  
TTAATATAAAGAAATGGATCTTGGGTCTTACTCAACCACATAAACTACATCATAGGAATTAGGATGAGT  
ATTGTTCAAGACATTTGAGATCAATTACCCATCCCATATTCGACTCTTGTGGGCAATATAATATGGAAGC  
ACAACATAGGTGAACAAAGAATTCGGATGAGCGGACTTTGGTAACATGATAAAAAAAAAAATGGATCTTG  
GCCTAACTCAAGACAAAAAATATCTCATAGGGTGAGGATTATTCAAGACCATATAGGAGATCAATTACC  
CATCTCATATCCGATGTGGGACTCTTAATAGATCAAACCTGTCCTCTCAATGGTTGTTAATTAAGTGAAA  
AAGACTTTCTCAAATCTTACTTTTTCTGTTCTGGATTTGCAAACAGTGTTATATGAGTGTGTGTAAGAGA  
GACATCACTAGTTAGGAGCTTTCCAATTTCTAACACACCTTTTCTGGTAGTACTAGTAAATATATATGTTA  
GTATTCTATTGGTAATTTGCAATATTTATCACTTTCTTATAGTGATTTAGGCTTTATTTTGATGTAATTCATT  
CCTAAAACCAAGTAGTTATATGCATTGAAATTATCGTTCTTGTATGTTAACTTGACTTAACAGTGTAAAAA  
TTCTTTACACCGTAACATAAACTCTTGTCTTAACACTTTAATCAACTCTGTGAACTCTTATTTTTACTATAAT  
TCACAGGGAGTATCATGTGATTTCTCCAATGGCTTCTGGCACGTTACGGATTTAACTATTGGAGACCTAT  
ATGACAATTCCTTCGTTGCTCCCAAGCTGCAGAGTTCACAGAACAACCTGTTTAACTCAAGCATCTAAAA

AGACTTTCCTTCTCAAATTGCTTCCTCTCAGATCAGCACAAATCAATCCCATTTCAAATTGGGATAGTCTC  
GCAAACAGCCTTGAATCGTTAGAGTTCCGATCAAATCCTGGTCTTATTGGGACAATTCCCACAAGTTTTG  
GCTACCTTAAGAATCTTCAATCTTTAGTACTGCTGGAAAATGGACTGAAAGGAGAAATACCAGAAGCTTT  
AGGCAATTTAACTAACTAAAGCGCCTCGTTTTGGCAGGCAACAATTTTATTGGTCCTATTCCAAGTAGTC  
TAGGAAGATTGACAAATCTTTTGATACTTGACACAATCAGGAATTTTCTATCTGGTGCATTACCTGTGACT  
ATTGGTGATTTATCTTCGCTCATAAAGCTTGACTTGAGCAACAATCGATTAGATGGAAAATTGCCTCGAG  
AAATTGGAGGACTAAAGAGTCTAACTACTTGATCTCAGCCACAACAATTTCTCTGATGGTTTGCCAGA  
GACATTTCAAGAAATGGACTCCTTAGAAGAACTTGTGTTATCTGACAATCCGATAGGCGATTATGTTACA  
AGAATTCAATGGAGGAACATGAAAACTTGGAAATGTTGGATCTTTCAAACATGGGATTGAAAGGTAAT  
ATACCAAATTCATGACAGAAATGAAGAACTGAGATTCCTCAGCCTTAGTAATAACATTCTTTCAGGAA  
TTATTCCGTCAAATTCGAGAAAATATCAACTATTAATGCTCTATACTTGGATGGAAATGATTTACAGG  
GAACTTGAATTTTCACAAAGTTTTATACAAAATTAAGGAGTCGTTTTCGAGCTTCAGGTAATGTGAAA  
CTCTGCTTGTCCCTCGAGTTAACGTCAACAAGTCATGTTCCAGAAGGTGTACAACAATGTGAACAAGAAA  
GCACAGTAGATAGTAAAGATTCAGACTCCAATTTAAGAACAATATTTGAGTCAGAATCCCACAATAT  
TATAGCTTCTTTGGGGCATTGAGGACATGTTGTTAGTCATTTTACATTTTGTATGTGCGCAAGAATAATAC  
TTATGTCTCTCCATGGATCGTATTTTTATAA

>M6-PGSC0003DMG400004190 M6 LRR-RLP

AATCCACCGACGCGCAGTGCAAGCTAAATAGCGCGTTGTATGAAAAAACTAATTTTGAGGAAAATTCC  
CAAAGTGAGGATTCATTTACACACAGATCTTCTTCCCTTCACTCCATCATCTATCTCAATCTCGACTATAG  
TAATGTACGTATAGCTCTGCGTTTGGATTCCGGTTGATTTAATAATTCTACTCCCCTGAAGGTGATTAACC  
CTATTCAAATGGCTCGCCATGGGCATCTACCTTCAGTATTTCTCCTGATCTTCTCGTTATCCTTGATCCAAA  
GCGCTCTCGTTCACTCTAAAACCCTCAAACGTGACGGTACACATTCGATCCATTTACTTTTTAAACCTAA  
TTTATTAGCAATTTAGGTGAGAAAATCAGTTGAATTTGATTGATAATAGTTTGGTTTTGTTATTTTGTAGA  
GTATGTATGCAGCTTCAAGTGAAATTAATTTGTAGTTACAGAGAAAATGTAACAATGTTGAACTTTGTA  
GATCTTATGTATTCTAGGTGCAAGGTTATAGTTTGTAGTGGAGTTTAATTGAATTTTAAAGTTTCGAGTGA  
AAATAGTTAGATTTTGTAGATTATATGCAGTTTGTGGTGAAATTTTGTAGTTTTCAGCGAAAACAATATT  
GAACGTTGTACATCTTATGCAATTTCTAGGTGTAAGCTTATGTGTGAGTGAAGTAATTGAATTTTATAG  
TTCGAGTTGTAGTAATTGGATATTATCCAGTTTTTATAGTAAAGCTTATAGTTTGTAGTGGAAAGTAGCTGG  
ATTTAATAGGTTATGTGCAGTTTGTGGTGGATTTATGGTTTCTGCGGAAACAATTGAATTTTGTGATTTT

ATGCAATTTCTAAGAGTAAGCTTATAGTTTGAGTGAAAGTAAGTGGATTTTATGTAGTCCTAGAGCAACT  
TTATAGTTTGAGTTGTAGTAATTGGATTTTATTGACTTTTTCCAGCTTCTAAGTGCAAATTTTATGTTGA  
GCTGAAATAATTGGATTTATTCTATAAATTATATGTGGTTTCGAAGTGCACATGTATAGTTGGAAATGAT  
TGGAATTTATAGATTAGATGAAGTTGTAAGTGCAAGTTTATAGTTTGAGCTAAAATAATTGGATTTTATG  
CATTCACTGCTTTCTGAGTGTATGTTTATGGTTTTCTGGAAGTAATTCGACTTTTTAGATTTTATGCAGCT  
TCTAAGCTCACGTTTATATATTTTGAGTGGAAAGATTTTATGTTGTTTCTAAGTTTTACTTATTGTGTTTCAT  
CTTTTCTTACTATAATTTCTTTTTCTGAATGTCTGTTTTCTGGTTAAGTAATTCAAGCTTGGCAATTTGT  
TGATTTTGTTGAGGAATAGCTATTCGTCTGATGTATAATCTTGATCTGTTCAATGCATTATCTATTATCTGC  
AATCAATAACTAAATCAGTGCCTTGGAGTGTCACTAACTATAAATGTTTTCCCTTTTTTGTCTCGTAGAA  
TTCTATTTTCTAGTTGTTACAGGTAATATAGCTATCCTTGGAAAGTTAAACCGATTTATCATTCAATCAAT  
GTCAATTAATAACTCTCCATGATTACATTGTATTAGTTAATTAAATTGTAGTATAAGTAAGTATATAATC  
GATCACGAGTAATTAATGCTTGTGAGAAATAAGAATGTCCACTGTAGGTCTTGAGCCCATGATCATAAG  
GTTAATAGCTTTGCTCTCTACACTTAATGTTGTTGGAAATGTTGTGGAGTTCCAATTATATCCACTCTTCT  
CTGTTAACATTTCAATAAAATGATTTACACAGTTTAAAGGCCATTGATTGCATTTATGAGAAAACCAAGGA  
GTTGTAGTACCTGAATGTATATGTTTACATGGACTAATTTGAACTTCTGGAATATGACTGTAGTGAAAGC  
TCTGAATGAAATTAAGGCATCTCTGGATGGAGAGTGGTGTATGCATGGGTTGGAGATGATCCTTGTGG  
TGATGGTGATTTACCTCCATGGTCTGGTGTACATGTTCAACGCAGGGTGATTATAGAGTAGTTACTGAA  
TTGTAAGTTTGCTTCACCAGCTCCAAGTAGCTTTTCTCTAACTAAGCTTCAAATCTGTATGAAGTTACTCA  
CAGAATTGAAATATCTTACTTGTCACTTTTTACAATGTTCTTTTCTGTTTTACCACTTGCAGGGAAGTTT  
ATGCTGTTTCAATTGTTGGCCATTTCTACTGCTGTCACTAATTTATTAGATCTTACTAGACTGTAAGATT  
CTTCTTCTCTTGGTCTTTGTAAGTCTAGTTTTTACAAAACCTCAGCTACTTCTTACAGATTTTTTAACC  
TCATACAAATTGAGAAGTTTCCCTAAGTTCCAATATGCATGTTTTTACACCCTCCAGTCTTAATTGTTTCATT  
AACCAACTTAAAGAATTGTTCTGCTTGGGTGTTGACTGTTACCCCAAAAATGTGGGCGTTAGCTATAAT  
GTGTGTAGTCATTATTTCAAATTTGATACTACTATTTAAGGCAATAGTTAGTGGACAATTGTGCCTGTAC  
TGTTGGATCTTTTGATTTTCACTCTGAACCTCCTAATCCATAATATTCTTTTATATGACAGGGATCTGCATA  
ATAACAAGCTGACCGGCCCTCTCCTTCTCAAATTGGGCGTTTGAAGCGTCTTAAAATATTGTATAATCCT  
TACTTGTATACTCCTATTGAAGTATCTATATTCAGTAGCAATTATGAAGTGATATTTATGTTTAGGGCTT  
ATGCTCTGTCTCCGAATAGCCTGTTTCTCCAGTTTCAGGATTAACATATGTTTCTCCATTAACACCTAGCTA  
GATGATGTTAATATGATTCAACTGTGTTGTACAAAGTGATTAAGTACATGGCTTTTTCATCGAGATGAAAT

GTGTTAATAACAAGGAAAAGCTTACCTGATTAATGATTAATCCCAAAGAAGGGAGTGAGAGGGAGTCT  
GCCTGATATAATGTGCACCGAAGAAGAAAGATAAATTTTCAACTGAGAGAATATATACTCGTAGGCTTA  
TATTCTAAAAAATAAAAAACAGAGTAGGTTTATTATCAAGGAAATGTCACTTAACTAAGAAAGCCTTCTAT  
ACTCTTTCTAGGATTGAATTAGATGTATATCTCAACATCTACTTTCTGTTGCACGTATTTTACCTTTAAGTT  
TTCCTTTGTCCATAGGAACCTCCACGTTGTCCAGAATGTAACTTTAAAAGTTACTTTTATTGCTTTTTTA  
CCCAACATACTAATATGAAATTATATCCTCTAGTTTCCTAGTGTGTTGTAATGTTGCATTATTGATTAGTTC  
CTTCTCCTGATTCTTTTTACCAGAAACGTAAGGTGGAATAAGCTGCAAGATGTCATTCCACCTGAAATAG  
GTGAACTAAAGCAGTTAACACATCTGTGAGTGCTTTTTGAGCTTCTCTAGGTGTGCTCTTTATCCATAGAT  
CTATTTTGCTGTTATAGACTAATAACTGATATGTATATTTTTCAGCTACCTAAGTTTTAATAATTTCAAAGG  
TGAAATACCTAAGGAGCTTGCTAATCTTCCTGAACTTCGTTATCTCCATCTGCATGAAAATCATTTTATTG  
GACGAATTCACCTGAACTGGGTTCTTACAGTATCTTCGACACCTGTATGATACCATCTTAACTTCTTCT  
CTTGTTTAAACATATGGAACCTGTGTCACACATGGATTTCACTTTGATCTCATGCAATTCCAGGGATGTTGG  
TAACAATCGTTTGGTTGGAACCTATAAGAGAACTCATACTGATTGAAGGATGTTTTCCGGTTCTCCGCAAC  
CTGTAAGTTGATTATTCTTGTTAATTGTCATATCGCATGAAGTTATCCTGCTGCAAGTGTTATGAATTCT  
ATGCTAATTCAAGGATAACACGTGCTGTAACCTGCAGATACTTAAACAATAATTATCTTACTGGAGGCAT  
TCCAGCGCAACTTGCAAATCTGACGAAGTTGGAGATCTTGTAAGTTTTGGGGAGAAAGTTTCTCCGCGA  
TTAATGCTCGTCTTTGGACAAATAACAGCTAATTTCTCCTGTAAGTTTATAAATATTATTATGCTTAATT  
TGATTGCTCTGGTTATTACAGGTATCTATCCTACAATAAGATGACAGGAGTTATACCATATAGCATTGCTC  
ATATTCCTAAGTTAACTTACTTGTAAGTCCTCCTCTATGCTCTTAGCTACTCATTTATTATACTGTATGTGG  
ACAGTTTGGACCGAGAAAATTCAGAATTTTTGAAAGCAAATACAAAACATCCTTAGCCTTAAGTTGAGA  
TCTCTTTCTTTGATAGCTTTTTGGTGCAACCTGGTCTTTGTGCATGATTTAGACGCCACATTAGATATGAT  
CAGGGACCTGCGTGTTATCATGCAGTAGTTAGTGCTGTTTTCTGTTATCAATAGATTGCTTTATTAAT  
ATAAAAATATTAGCATATTGGATGCGATGTCCAATGATTGTCTAGTGAGTGCAGTCTTTCAAGGATCTT  
TCTTTCTTAAAAGATGAATTTGAGGATTGTTCAACTTAAGGATGAACAAAACAACATACTACTTGGT  
GTAATCCTACAAGTGGGGTCTGGGGAGAGTAGTGTGTACCCAAACCTTACCCCTACCTAAAAAAGGTTG  
AGATGTTGTTTCCAATAGACCCTCTACTCAAACAGATGAACTCGGGACTAGTTGGCTAATGTGGTCTTG  
CAAGGGTCTCTTTCTTAAAGGAGATAAATTTGAGGATTGTGCAATTTATGGATGCTGTGACAAAACATT  
AGATGGACTTGAAGCTTGTGACGCTGACCTTATTGGACCTTATAGTAGTAATATATAGAAATTGCCTGGAG  
AATTAGATGCAAGAGTGTTCTCATCAATTTTTGCACAAAAACACAGTCCATCTCAATAGTAAAACCTTCTC

ATG TACTCAAGATTT CAGTTGAGTTATGTAGCAACTGCACTGGTACAGAGATGCATGAATGACGTGTTA  
AACTTTAATTAGAAGATTGTCTGTTAGAACATAATAGTTTTATTGGTATAACGTGTTAAAAAATTGCAT  
GTATAATTCAAAAAATATGAACACTGATGCATGCAAGTCTTTAAGCAATTAACAAAGCTGATTTTGCA  
CCTGGTTGTCAATATCCATTGCATTTCTACCCATTTTCTTCTTTCTTCCAAAATCCATGGTCTTTCAACACT  
TACATTCCCCTCCATCCCCAGATTAGAAGTCATTATTTGTACAAGTGAGAGGCTTGGATAATGCAGAAG  
GACCTGCATTTTGCTGGTCAAACAACCAAGAATGTCAAGAGACAAGTCTAATTGTGTCAGATACATATC  
CCTGCTCAAGATATGCTGTGTTGGAAATGGGAACCTTGTTTTGAAGCTTAACCCACATATTTCTTTGACA  
AAACCTTTTATCACAATATTTTCTTTAAAGTGTTGGTGTGGAGCTAAACCACACGAACTGAACTAGG  
GCCTTCTCCATTTAAGTGTTGTTAGTGTGTCAAAGTGATGCTTGAGCCATGAACTGAGGCTGTGCACA  
AGTTTACTCCAATGAAGGTGGTAACTGGTAAGGGATATTTCCCAAACCAGCCAAGCAACTTCTTTTCT  
GAAAATATTAGATTAATTTGTGAGGTCCATGGGTTTCTTCTTGATTGGGTTGCATTAACAACAAATAT  
TCAATAGATAGCATGCAAATCGATATGTCAGTTGTTAGCGAGACTGTACTGATGATCATTATTGATTACG  
AGCAAGAACTGTAAATTTATTGCAAGAAAGCTAACGACGAAGTCTGAATTAGAATATTAAGTAAGAT  
GTTCTTAAAGCTAGCCACTCAGATTCAAATGCAAAGTATGACCAATGATCCTTGCAAGTTGCAATA  
TCCTAGATGTTCCGTTAAAGCCCAAATGGTCCTTGCAAGTTGCATATGTGAGTGCTTTGTTCTTTTATGTA  
TTTATTTTTACGATCTTACCCTTGACAAATCAGATGTTACACATCATTCTTCGCTCTTCTTGATTATATAC  
TGGTAGCTTTTGCACCAAAAAGAAAAATAGTTCTGCATGAATTTGATAGTTGATGTCTGAAGCTGAATCT  
GATTT CAGGTATCTCGATCATAATCAATTTTCTGGGAGGATTCCAGATGCCTTCTACAAACACCCTTTCTT  
GAAGGAAATGTGAGTGTTCAATTTTTGCTACTGACCATTCTTTGGCTTTGTGCAAATCCTAATAATATGAT  
AAATTATGTCATAGGTACATTGAAGAGAACACGTTCCGGCCTGGTGAAAACCAATTGGCCTGCACAAA  
GTGCTAGAACTTTGACGACGAGATTTCTTGTGTTAGAAAAAGCCAACTCCTGTTATTTGTTTCATGAGCAA  
AGTGTACCTAGGTTGTCGAAAGAAGCAGCCGGTCCCTGTTCTGTCAAGTATCTATTCTTTAGTTGCCAGA  
TGAGAAAAAAGGTTCCATCTTTTTGTGCAAAGAAGTAATCAACCAAACCTAGTTGCGGTTGCTGTAGTT  
AAATAGTACCACGTTATGAATCATTATTAAGTAATTGCGACATACGTCTCAATCAGTTCTCACTTGCCTTG  
AATTCTTGCAATTTGGTTTTGATTATACATGATGCGATTT CAGAGTTAATATGAAAGGGTAGAGAATATG  
CTCTGATATGACAGGTTTTGGATAGGTTTTTCAATTTTTCGTTAAATGATACAAATACATACCTAAATTAT  
AGTATTATTTTTTGAGTTT CACACCCTAACTATAGTTATTATCAATGTGCAAAAACACTTCGCTGAGTAG  
CTGATGGTATGCATGCTTTATTAGGTGCCAAAGTGGCACTCCATGTGGATAAATATTTTCACTAGAA

>M6-PGSC0003DMG400004195 M6 LRR-RLP

CTAAACTCTTAACATAAATTGTTAAATATTTCTAACCTAAGTAGGTATTACCGAAAATCTTTAACACAGG  
GTGACATCGAGCTATTTAAGGAACATAAACAATTGGTAATTGCTTCACGCTATCTATTGCTCCTTTATTCA  
TGAATTCATGTATATACAATGTAATTTTCTGTTAGAGGGGATCGTTGCACCTATGTGGTTCTGCCCTGACA  
TCACTTATCTAGTTAAGCTCAACACTTTGAATATGTTCTTAAAAATGTGACTTTTAGAGGCTTCATAGGTC  
AATTTGTTGATAAAACAAAAATATTATAGAATGGGAACAGTGATATCCTCCATAAATGAAACTCAACTAA  
ACTATTTATAAGACTATGTTTGTGACTATAATAGTGGAGTAATAATAGTAGAAAGGCTTTCCATATTATTT  
GTCCTGACATTTTTACTAATTGTTTTGTGCTTAAATTGTTATGAATTGTTTTTCTTGAGCCGAATGTCTAC  
CAGAAACAATCATCTTATCTTTTTTACACAGATAGGGATAATGTATGCATATACATTATCCTCCTCAGATC  
CCACTTTATGAGATTAACTTCAGTAGTGATATTCTAAGCAATTACAAAAATATTTCCATAAAAACGAAA  
AATATACTAAGGAGAGACATAATATTGTGTTTTATAAAATGAAGTTGTAGTAATTTGTCTATTTGTTTACT  
TTCTTTAAAATTAACATGGCTTGTGAAAAAACTTGACAACATGAGATGCTTAATGTATCGAGCTAGCGA  
ATCTATTATTGACATAATCATCCCTTTTTTGGCAGGCCAAAATGACATCTCATCAATTTATTTGTTTCCTAG  
CAATGATATCTCTTATGATTATCAATATTAGTGCAACAAGGCATGCCACCCTGATGATCTCAAGGGTCT  
CAATGACTTCAAAGATGGCATACTTCTGATACTTCAGGCAGACTAAGCAAATGGATTGGGCAAGATTG  
TTGCAATTGGCCAGGCATTTCTTGTAECTCTACAACCTGACAGAGTTGTAGAAATCTATCTACCTGGTCACT  
ATGTATCTGGTGACGATGAATCTCCAACTTCGTGTCAAGCACAATGAGTGGTTCAATTTCTCCTTCAATT  
TCACTTCTCACTTCACTACAAGTTATTGATTTTAAACAACTAGTTGGACTAACAGGGCAAATTCCTGAGTC  
CATTGGGGTTCTCAAGAATCTCAAAGAACTCAACTTACAACTAATCAAATCTCTAGTACAATCCCAGAG  
TCAGTATTCACATTGACGTCTCTAACAACCTTTGAACCTTGAAAATAACCACTTGAAAGGGGAAATATCGG  
AGAATATTGGCAACTTACAAGCACTTCAAAGCTTTTCTTGTCAAACAATTCGTTCACTGGAAAAATCCCA  
GTTTCAATAACAAAACCTACATTCCATTTCCACTATCCACTTAGAAACAAATCAACTTGTTGGTGAATACA  
ATTGCCATTGAGTCCTGCCAATGGCCTTTAATTAACCTTTGGTTCTTGACAACAATAAACTTACTGGAG  
TTATACCTGATTCTATTGGTTATTTGACAACACTTTCATCACTCTCTATATCAAATAATCAACTCACAGGAT  
CTATTCCTTCTTGCTGGGAAACATAAAGCAATTGCAAATATTGAAGGTCAATAACAACAACCTTCTCTGTT  
GAGATGTTGCCAACGTGATTTGTGGACTTACTGAGCTAAGTGTGTTTGTATGTTTCTCAAACAAGATTC  
ATGGACCATTACCTGGATGTCTTTCATCATTCAAGTACTTACTAGATGTGATATACCGTTCAAACGTACA  
GTCACTTTCCTATGGGAGTACACAAACAATAAGTAACGGTGACGGAGCCAGAAATTATGAAGGAAATC  
CAAAAATGCCTCAATTTGAAATGTTATGTATGTCTACAACAACCAAAAAAAAAAACTTGTGTTTACTTAT  
TATCTCTATGTTATATGAGACTCCAACCTAGCCAGAATCATTGGCTAGTATGAAAAAATCTAATACATAA

AGTACTTTCTTTGTTTTATTTTTG

>M6-PGSC0003DMG400004284 M6 LRR-RLP

AACTTTTTTTCTTTTCATTACCTACCATTTTTCTTGCAAAATGAGTCTCTTGTTTCTACTTGCATCTTTCTTTCT  
TTGTGAACTTGTTTTGTCCTCATTGCAATATGCCCCAGAGATCAAAGTCTTGCCCTGTAGAATTCAACC  
AGTCTTTTGTTGTTGATGCATCTGCATCTTTTATTTGTGACAAGCAGTCTTATCCTAAAACGAGTTCATGG  
AACATGAACAAAGATTGTTGTCGTGGGATGGAATAATATGTGATGAGATGACCGGTCATGTGATTGAG  
CTTGACCTCAGTTGCAGCCAACCTGTTGGGAAGATTGATTCCAATAGCAGCCTATTCCAACCTCTCATCT  
CCAAAGGCTCAATCTTTCTAATAATGACTTTGACGGTTCTCATATCTCGCCTAAATTTGGTAGGTTAGCAA  
GCTTGACACATCTTGATCTTTCCAGGCAGACTTCTCAGGTCAAATTCCTTCTGAAATCTCTCATCTCTCCA  
AGTTACAGTCTGTTTTTTATCGTCTAACAGTGAGCTTAGACTCGTAGCTTACGATTTCAAGATGTCCCTT  
CAAAATTTGACTCAATTAAGAGAGCTTCATCTTAGTGGTGTGAACATCTTTCCACCATTCTCTGAATTT  
CTCTTCTCATTTAACGACGCTGGGGCTGACGAGTACAGGAGTGTATGGGATAATACCTGAGAGTATCTTT  
AACCTGCCCAACCTGGAAACACTTGACTTAAGTTCCAACGATCAGCTCAATGGTTATTTTCAAATACCAA  
ATGGAATAGCAGTGCATCTCTCATGGAGCTGAATCTCGCTGGGGTAAATTTTTCTGGTAATTTCTGCCT  
GAATGTCTTGGCTATCTAACTTCACTGCAGAGATTGGTACTTAGTTCCTGCAATTTATCGGGGCAGGTTT  
CGAAATCTCTTTGGAACCTCACCCATCTGGAGTATATGGACCTTGAAGATAACCGTCTTGAAGGACCGAT  
ATTTCTCAGTTTACAAGTGGACTGCAGGATCTGAACACACTTAAGCTATCAAATAACTCCCTGAATGGA  
GAAATACCGTCTGGATATTCTCCCTTCCACTGAGTGAAGTACTGAGTGAATAACCACTTTTCTGG  
TCAACTTAAGGAATTCAGTAACACTTCAGTACTAGTCGGTGTGATATAAGCGAGAATGAGTTGCAAGG  
ATGTCTTCCCAAATCAATTCAGAACCTTGTGAACCTAGTCTGGATTGATTTAGCAAATAACCACTTGAAT  
GTCCTCTTCCCAAGTCACTCCAGAACCTCAGAAATCTAAAATTACTTGATCTTTTGTCTAACAATTTTAGTG  
GGAGTGTAGATGTCAGTGTCTTTTCGAACCTCAAACAACCTTTGGTATCTTGATCTGTCATACAATAGTATT  
TCTCTGATCAATGAGAACAAAGTCAAGTCTACATTGCCCAATCTTGAATACTTATATTTGGCTGCTTG  
TCAAGTAAAAGAACTGGATTTTTTGAGATCAGCAAATAACTTTTATACCTTGGATCTTTCATATAACAACA  
TTCAAGGAACAATTCCTGATGTGGTATTGTCTAATTGGATGCATTCATAAAAAATCTTAATCTAGCCAC  
AACATGTTGACTAGTATTGACCACATTTTCATCATTTTCCCAACTGATCTCTATTAACCTTATTGTCCAATTCT  
CTTCAAGGGGACACTACCAATTCACCACCCTCTATAGAATTCTTCTTCATGTCAAATAATAATGTCAGTGG  
TAAGATCCCTTCTTCTATTTGCAATTTGACAACATTAATAATCCTAGATTTGTCAAATAACAATTTGAAGG  
GAGAAATCCACAATGTTTGGGTAACATGAGTGTCAACTCGAGGTTTTGGATATGCGACGCAATAGTC



TTTCTGGGAGTCTGCAAACAACCTTTTAGCTTGGGAAGTAAACTCAAAGTTTCAACTTGCATGGCAATAA  
TCTAGAGGGAAAACCTCCCAAGATCCTTGGCTAATTGCAAAGAGTTGGAAGTTCTTGACTTAGGAAACAA  
TCAACTCAATGACACATTCCTATGTGGTTGGGGACTCTTCCAAATCTACAAGTTTTAAGTTTGAGACTCA  
ATAATTTGCATGGACCAATTAGAACTTCAACTAGTTCGAAACTGTTTCCTCAGCTTCGGATGTTAGATCTC  
TCTCGCAATGCCTTTACAGCAGAACTGCCAACAATTCTTTTCAGAAATCTGAAAGCAATGAGGAGAATTG  
CCATTGATAAAACAATGAAGGCACTAGGTGATGAAGAAAAATCATATTACCAAGACTCGGTAACCTGTTG  
TAACAAAGGGAAACGGAGTTTGAAATTGTGAGAATCTTGTCTTTGTACACCACTATGGATCTCTCAAACAA  
CAAATTTGAAGGACATATTCCTAGTATGATGGGAGACCTCATTGCACTACGCGTGTTGAATTTATCTCAC  
AATGAGTTGCAGGGTCATATACCACCATCATTGGAAGTTATCTGTAGTCGAATCATTGGACCTTTTCAT  
CCAACAGGCTTTTCAGGAGAGATACCAAACAACCTGTTTCTTACATCTCTTGACGTTTTTAATCTCTCTC  
ACAATCATCTTGAAGGATGCATTCCAAAAGGGAATCAATTTGATACATTTGAGAACAATTCATATGAAGG  
AAATGATGGATTGCGTGGATTCCCAGTTTCAGGAGTTGTGGAAGTGATCGGATACCGGATACAAACA  
ACACAACATTTGTGCCAGATGAAGAAAATGATTCAACATTTCTAAGTGAGCTCAGTTGGAAAGTGGTTCT  
TATGGGATATGGTACTGGATTGATTATTGGATTCTCCATAGCATATTTGATGCTTTCTTCTCAAATCCAA  
ATTGGCTTTCTGGGATAGCTGAAGATTTAGAAAACAGAATCATTATGAGAAGGCGAAAGAAGCAGCGA  
GGTCAAATGCATTACAGAAGAAGAAGAATAATGGCATCTAGATGTAAGTTCAAATTTATGAGA  
GATGTAGTCATGTTAAGCTCTATACTGATTCTTTTTGTTTACTGTAACCTGGTATTAAGAATGAGATTAG  
TGTTCTGTATCTGACTCTTTCTTTTGTAACCTTTATGTAGGCAAAGGGTGTATCCAGTTGAAATATCAAGA  
AGATGATGCCTGCAACAACAATATATCTTCTTGAGGAAATTACTTGAGCAAGAGATGCTTTTGATATT  
TCCTGGAGGTTGCTACTCCTTTTCTTCATAAAAAATAAAATAAATTCTAGGATTGAAGTATGTTGCTTTAC  
TATAACAGTTGTCACAATGAAGTGTTTTGTTTTCCATCCAAGTGTTAGTAAAGAGAAAAAAGATATT  
TGCTGCAAATAATAGCTTTCTTTTGACATGTGTATTGACTTGGAATATTACATTTACCTGGAATACAGT  
TT

>M6-PGSC0003DMG400004384 M6 LRR-RLP

CAACCCTCTTCTCAGGGATGGTCGAAGAGAGGTTCCCTCTTCTGAGATCATCCTGAACACAGCAGTCAAC  
AAAAAATATTCAAAAAAAAATAAAATATTTTTTTTGGGATTTTAATTCTACATTTCAAAAAATCCCACA  
ATTTCCATTGGGTAAATTTCTGAATTTTTTTTTCTTTGATCTCTGTTTGCTTTTTCTGGTAAATCTTTTCAT  
CTTTACCCCACTTTTTGAATTTTTGTTTGATTTGCTTGAGAATATGGTTATCTTATGATGGGTTTTTTGTT  
TTTTCCAAAAAAGATTCAATTTTTATTAATTCTTGTTGTTTTATGTCTGCATTTTCAGCTAAAAATTGAAT

CTTGAATTTTTGAAGACTTGGGGTTTCTGCAATGATGGAGAAAACAGAGGTAATATAGCCTATATTATA  
GAAATGTTAAGAAAATGAGAGACCCCATGAAGGGGTGGAGCCAGGGGTAGGGCCGAGGGGTTCAAAA  
TTACGTTGTTTATACATAGTTAAAAGTTTTATATATATGTAGTACATGTTGAACCCCTTGCCTTGTAGAG  
GTGTTTACTTCTTTATATTTTGAACGTTGTTAGTGAAAATCCTGGCTCCGCAGTTGACCTCATTGTGGCTA  
ATATAGATAGATTTTGTGTGTAATCTTTTTTATTTTTTGTGTCTAGTGTAGAGTTGTGCAGATAAGCAACT  
GTGTGTTTCGTGTGTCGAGTGATTTTTGTTGCTCGGAGGAGAGTCATTTTCATATCAAAAAGCTGGCGATT  
TCGTGTGAGAATTTGTTGAGAATCCTGGCTGTTGGCAAGAAATGAGGCGTAGATGGAACATTTATGGAA  
TCAAGTTATTGCTTCTCACCATTTAATTCTTCTTTTGGAGGTTTCATGAATGTTGCACTCTGAATTCTGAAG  
GTAGTTACTATTCTCTAGTTTCTTTCTTTTCTTACTTCTGGAGGACCATAGTGTTCACAATTTGGGCCAGCT  
TGCATTAATTCGACTGCTCCACTGTATATCCTCTACCTCCAACCAACATAGGCATCAGTTACTATGCCCAT  
CGAGGCTGAGGCATATGATGTGTTAGGCGAACAAAGTTCTACATTGGTAGCTAAAAAGATTGGAAATCT  
ACAATTCTACATAAGGTGTAGGATCTCTTAACATGGTGTGAGGCCTTTTGTGAAAACCGTGCGGGCGTG  
CCCCAAGCGGACAACATTGCACCATGTTAAGAGTATTTTTGGGTTGACTTAGCCCAACAAGATGAAATT  
ACTTGCTCCCTCCATCTCATTTTATGTGGTCATGTTTTGTTGGACACAGTTAAAGAAACAAAGAATTTTGT  
AGCTTGTAGTCTAAAACAAGTTATAGACATTTGAGTATGGGTGTAATTTGAATATTAAGATTAATTGTT  
TCTAAAGTCTAAACATGATGTTATTCTTTTTGTGACAACTAAAAGGAAAGTGTGCTGCGAAAATTGAG  
ACAGAGGGAGTCGAGTTTTTGGTCTTAGCTGGGATATGAACCTTGATCTTTCATGGTTTTTTACTCACTTA  
GGGCTGTGTCTTCTGTCTCCCTGGGCCGTGGGCTATTCTCTAGTTTCTTTAGTCTATTCATGTTATTGGCTT  
ATTCTTTGTTTCGCTGATTACTGTTGATTTGAGAAACAGGATTGTCGTTGTTTGAATTCAAATTGAATGTG  
TATTCTGATCCAAATGGAGTTCTTGAAAACCTGGAATGCTGATCACTGTGACCCGTGCATGTGGTCTGGTG  
TCGAGTGCATGGATGGTAAAGTGTACATGTTGTAAGTCTCTTGTTATAGATACTCAAGTTTTCTAGTTAA  
GATTGTGTTAATAAACTTTCTCTAATGGTTAGTGTTTAGTGATTTGATTCTGGAACCAGTTTGTGAACTA  
ATAATGATAAACCAAATGCAACAGGGTGAAATTGTTTGTTCGACTCTTGTGATTCTTCTTATGTGCTTAA  
ATTAGTTGACCTATCTTCTTTTTTTCATTCTGTTTCAGAAATCTCCATGGATTTTCTTTGGAAGGAACACTAG  
CATCAGAGCTTGGAAATCTCACTTACTTGAGATCACTGTAAGCTTTAGCTATACTAATATGCCTTTTCTTT  
AGGCTCCTGCTCATTAAGTCTTAAATGGTATTTTTTACCTGAACCGTCATCCGTAGAAGGTTGTCATAATC  
TTTGAATAGTCTTCTATCTTCTTATGTAAATTCGAAAGAACGTAAGGGATTGTTTGGTGTATGATGGACA  
AGCATAGATAGTCCGGGATAAAAAATTAGTAAGGGATTATCCCTTGTTTGGTTATTAATCCTGGTATAAG  
TTATATCAGGATTAGTAATTAGTAGCGGTATAAGTTATCCTCATCAGAGGGTGGAAATAATAGTACTGGAT

TAGTTATCCTAGGATAAAATAGTGAAAATGACAAATATCCACGAAGTCCCTCAGACTCTTTTTCTACTAAA  
TAAGGTGGATGGTGTGTTTTGTAAAAGAACTTCTAAGAAATTTATGCAATGCATGTTATTTTTAATACAAC  
AAACCAAACAATCACTAAGCAATAATACATTACCAACATAACTAATCCCAACATAACTGTCTTCAAACATA  
AACGACCCCTAAGAGTTATGTTGGTCAAGTAAATTGGGAGGTAGAGACAAAGGTGGATAAGCTTTGGA  
TATCTACTAATCAGCTTTCATCATCTTGTATTCTGCATTTACATTGTTCTCTGCATAAGTTGTGTTTGAATCT  
TAACAGTATTTCTTCTTGCTGTCTGGTTGCTTTTACAGAATGCTCTCAGGGAATCATTTTTTCGGTGCTATT  
CCTAAAGAATTCGGAAGACTCGATATGCTTGAAGTGCTTGACTTGAGGGATAATAATTTGAGTGGAACA  
ATTCCAGCAGAAATAGGAGACCTGCAATCACTAAGAATCTTGTGAGTTAATGATTTTTTGTGTGCACGAT  
AAACGGTTTTGTTGTGTGGACGATAAACGGTTTTGTTGTGTGCAGATGTATATATACATATGCATACACATT  
CATTATGCGAAGTGATTTCAAATGCTCATCAATCGTGTTTATTTTCGTTTTTCCAGGTTGATTCATAACAA  
TAACTTTGAGGAGAGTGTTCCCTTTGGAAATTGGGAAGCTTCATTTAGTCACAGAATTACAATTCGACGAA  
AATCTCACTTCTGCTTTTGCTTCTGGAACCTCTGTATAAGAAAATTTTCGTCATTGGTAGGATTCTTTTATT  
TGTTTTAGTACCCTATCTTCATTTTCAGCTGGTTTTTGCATATCAGATGCTGGATAGTCTATCTTTGTGGC  
AACACACTATCTAATTGATCTAGCTCATTTCTCAATTTGATATTTTGCATGTCTTACAGCATCTGGCAAGG  
CAGCATGAAGCCATTCAAGACGATAACCTCCATTATTGAACCAATAAAATGTACACTTTTGCATTACCTCA  
GTTTCTTCCAAGTGAAGTAATTAATAGTTTTTACATCACGAGTCATCTAGTTAAGTTTTATTATTGAGA  
GACATTTTTTCTATTTCTTTAGGCCATCTCCTGGAACGGGCTTTATGGATGACCGGAAAGACTGCTCTGAC  
AACCTTCCAAGTGAGTAAACACGTCATATTTTTTAAAATAACTCTGAAGAACCGTTTACAAATAATAATTC  
TTCATTGTCTAGCAGGGTTATCCAGGCCTCACATCATCCACACTATACAGCACCAAGAGGAGATTGCACG  
CCGTAAGTTGGCTGAACAATCCAGTAACCTTGCTGCAGCTCCTGCCAATTTCAAAGGACCGTTGGGTCTT  
GTCATTCAAATGCCAAGAAGCAGTGGGTGTTTTCGTGCGGTGCCAATTTCAAATGGAGCACATCCTACA  
AACTTACCATCACCACTCCACAGCATGAATCTCAAGACAAATTACATCCTGTGGGACAGTCTGCAAGTG  
CTGTAAAACAGTCGCCTGCTGTGAAAAAGCCAACTAATAGCCAAGGCCCCCTGCTGGAAAATCGGAAA  
GTACTTGGAAAGTACGTAGTTGGGATTTGCATTGGAGTAATTTGCTCATTCTTGCTGCTTCTGTGTTCTTA  
ATCTGCCGAATCAGAGCAGCTAGAACAATTGGCCCTTGGAAAGACTGGATTGAGTGGACAGCTGCAAAA  
AGCATTGTTACAGGTACTIONTATATCATATTGTGCCAAAAAGTGATACTGCTAATATTCTGCTCCCCACCT  
GATAGTAGTTGCATTGCTAACAATATTCTTAGCATAGTGTTACCTTATCAAAAAAATATTCTTAGTGTAG  
TGTTGTTATAACAATTTAACTGGAGTAAAGGGAGGTACTGATATTCTTCGTCTTATGAGGAATTAGAGGA  
CTAATATTCTCAGTGTAGCATTGTTATATACCCTTTTTCACTATATGTTTGCTAGGACGAGAAGGTACAAA

TGGA ACTATTTCTTCTTTCTCATGAGAAGTGAATTAGCTGAGACATCAACTACTAACGCTTGAAGGCTGG  
AATCCTTCCCTTATACTTCTAAAATGTCGCTGATCTTCTCATA CATTGCTTTTGTCTAGCTTATATCCCC  
CCCACAAAGTTGCTTTTCAACGACAACCATAGGAACGTGCAATCCTTTATGTTAATCTATGATATTTTTCG  
TCTATTTTAATCCTTTTGCCCGTGAAAACATTGTTATAGGGGTTCCAAA ACTGAACAGATCCGAGCTTGA  
AACAGCATGCGAGGATTTTAGCAACATTATTACCAGCGGCGATT CATATATAGTATACAAGGGAACACT  
GTCTAGCGGAGTGGAGATTGCTGTTATCTCAACTACTATAAGTTCTCTGGAAGATTGGTCCATGCACTCG  
GAAACAGCCTTCCGGAAGAAGGTTAATCATTCTTTGCTTTTACAAATTAACCACTCC

>M6-PGSC0003DMG400004529 M6 LRR-RLP

TTTTGGCCTACGTGGCTGAGTCCGTGACTTACCTATGTTAGGCGCGTGGGTGCAATTTTTAGACAACAC  
TGACCAATAAAAATTGGCCACGTGTTAAAATAAACTTTATTGTTGTTTATTGTTCTTCATCTTTAACTAAGT  
TTTCTTCTTCTTTATTGTTCTTGATCTTTAGAAAAAAAACCTCCATTATCATTTCATTCAAGTTAAATTC  
TTCTTGCTTCGAAAAGGTAAAGTAAAATTTTAATATATTCTTTATATTTACACTTTTTTATTTTCGATTGTTA  
GTTCTGATTTTAAATTTCTTTACAATTTTTATGTATAAATATTAGGGTTATGACAAAATCCGAGTTGAAT  
AAGTTGTGTATGGAGCTAGGTGAAGGATGTCCCTTGCTGAGGGATATTGTGTTGTCTCACTGTCGTCAA  
ATAACAGATGTAGGGTTAAGTTATATTGCTAATAGGTGTACCTGTTGGGAACTAGCCACATGGTCTATT  
GCCCTGGTATCACCGCTGCTGGAGTAGCCACGGTGATTACGAGCTGCACAAATTTAAAGAAAGTCCTTG  
TAGAGAAGTGGAAGTGAGTCCAAGAACCAAAAAGGAGAGCAGGATCCATCATCTCCTATCTCTGTGTTG  
ATCTGTAGATCT

>M6-PGSC0003DMG400004561 M6 LRR-RLP

GTTTGATGTAAATTGTTTCTTCTGAGAAGTTGAAAGGAAGGATTTTTTTTTATTTTTTTTTATTTTTTAACTA  
CTTTGGCTTGATTAGTGAGAATAGAAAGAGGAAAAGAAAATGAAGGGCAAACAAAAGGGGTTCAATTCA  
CATAATTACATATTCTTGTAAGTAAGTTTGTTACTTTATGTA ACTTAGATGGTGAATATAATCTTTATAACC  
TATAAGAATTGATGATTTAATCTTTCTGCTATAAGTTAACTCTATGTACTAAATCATCTGCTATAGTTGAT  
AAATGTAAGGGGTTAAGAACTAGGAAAGTAAGAGCTTTTGTTTAGAGAGATAGCGCGTAAACAATGAG  
AGAGCTTAGTGCACCAGGAGGCTGTCATTTTTTGGTTTAAAGATTTGAGGTGTAACAGGACAAACATTTG  
GCTTCTCTATTAGGTTATTCTGGAGAAAGTCCTCTGCACTTGTGACAGTTGCTTGTGTA AAAATTAAGAGC  
TATCACATTTTCGAGAGTTTTACACCTCAACTATATTAGTCGTTCCCTTTTTCTATCTAAATTTGAAACAAC  
ATTTGCTCTTTTGGTAGGTGTCATCCGTTGACTTCGTGAGGACATTGTCAATCTTCTAGATTTCATAGAG  
ATGTTAAATAGTGGGCGTGTTCAA ACTTCTTTTGACATGGATCAAATTGAAAAGTTGACATTGGAGCTGA

CGTTTGTGTCCGCATTTTGTATCTTTATTACTTTCTTTTTGGAAAGTTGTAATGACGAAATGTCCTGCATA  
TCAAATGAGATTCATGATTTGGTTCGGTCACTGTTTCATCCAAGTGGAGAAGACATGCTGGTTAATATAA  
AGAATCATGACCTCTTGGAGAATATCAAAAGTTATATTAACCTCACATAGCTATGTTGAACCAAGTCGTGT  
AATCATGACCGAGGATCGTTTGGTTGAACTTTTAGATGCCATCCTCGTGTATCTCCAATGTCTACTCAACT  
GTAGTTCTGAATATATTTCCATTAGTGACTIONTGTGAGCTTCTTCAGAATGTATTTGGCAATTTAAGA  
GATTTCCATAGGTTGAAAGTAAATGGTTGTGTTGAGTATGAAACAATCGAATATGTCTTACCTCATCTTC  
AACTTATGGCTCTGAGAGTAGTAACTTCTGATTTACTCTTTGAATAGTCAACTGGACAAATTCGATGA  
ATCGGATGTCTTTCTGGTTAACTCCAAGCTAGCTAATACACTTGTGGAGGTTATTCCTGTTGAACTGGAG  
GATATGCACATATGTTGAACAAATTTGAAAGGTTCAAAGTCGGAAGAAGTTGAACGTTTCATCAAGCAG  
CTCGTAGAAGCCTCTCCGGACATTCTTAGAGTATCTCTGATTCATCTACAAGAGCACATGGCTAATGCTG  
GTATTCCTAGCGCATCTACGTGTAACATTCATGTCATGACAGAGTTCCTATTGATTATTCTTCCTGATGTG  
CCCAAGGACATTATTCGTCAAGACAAATTGTTTGTCTCTTGGCACGTGTTAGAGAACTTACCAAGGAGG  
TATTCGTTCTTGTTCGCAACTTAGAAGAGAATATGAATGACGCAAGTGATGCAAATCTAACTTGCTGGA  
AAATATTGAACTCCTGAAGGAAGATCTCAAGAATGTTTTCTTGAAAGCCCGTGCAGACTCATCTCGTCTT  
TGCTTCCCATGAGTGATGGACCGCTCTTCATGACTCTTCTGCTTACAACTTGAAAGACTTTGTGCGATTC  
CAATGCTTATTCAGTTACTTTGATAAAGAAGAAATTAAGCAGGTGAAAGAAGACCTGGAAATCATAAG  
ATCGTTCTTCGGGTATGCTGAGCAAGAGTTGAACAGAGATCTTTGGACTCATGTTCTAGATTTGGCATAT  
GAGGCGGAACATGCCATTAACCTCAATTCTTGCCCGGGATCATGGTCTATTATAGCTTATCTTCATACTTCC  
TGATACTGTAGAAAAGATCAAGCTTGTCAAAAAGAGGTACAAGAGAAGATCCCCAAGAGCAGCGGTA  
TTATTGTTGCAAATGCTCCCAACAAGCCGGTTGAAAGAACTCATCGAGTACAGTTGGTAAAATAATCGT  
AGTTTTTGAGGAGGAGACAGAGTGGATAATTAGGAAGCTCACCAAGTGGACCAGCAGAGATAGATGCCA  
TTCCATAGTCGGCATGCCAGGGCTTGAAAACTACTTTGGCATAACAGAGTGTATAATGATAAGTTCAT  
TGTTGATCATTTCGACGTTTGTGCTTGATGCACAGTCGACCAGGAACGTAATGCGAAAAAGTTGTGGCA  
GAAAATTTTCAATCAAGTTATTGGTTTGACAGAAAGATTCAGTGAGAATGACATAGATGATGACGTTGG  
TTATAAGCTGCGGAAACAACCTATTGCAAAACGGTACCTTATTGTCTTGATGACATGTGGGATACTG

>M6-PGSC0003DMG400004722 M6 LRR-RLP

TTCAAGAAAATGCTTACTGTAGATACCTCATTAGTTTGGTGTAGTTACTTTTACCACACACGAGTTCATGG  
AACATAAGCAGAGATTGCTGCTCTTCGGATGGAGTCGTATGTGATGACATGACTGGCCATGTCACTGAA  
CTTGACCTCAGTCTATTCAGGGACGAGAGCTTGAACCTGTCAAATTTTTGACCATTTACACCACTATTGTT

CTTTCAAGTAACAGATTTGAAGGACGTATTCCAAGTATCATGGGAGAACTCATTGCTCTTCGGGTGCTGA  
ATTTGTCTCATAATGAATTGCAAGGTAATAAACCATCATCACTTGGAAGTTTATGTGTGGTTCGAATCATT  
GGACCTTTCATCTAACCATCTTTCAGGAGAGATACCATAACAACCTGGCTTCTCTAACGTCACCTTGAATTCT  
TAAATCTCTCCACAATCATCTCGATGGATGCATCCCTCAAGTACCTCAATTCGCTACATTAAGAAATAT  
TCATATGAAGGCAATAATGGATTACGTGAATTTATGCATTGCCAAATTCATCATTGCATATGTTGGAGGA  
ATATCAGGGGCCATAAAAATTTTATGAGCTTAAGTTGGCTCGAACATCATAATTATTAAAAAAATGTCTA  
AAACCCGTTGACATACTAATGACAAGGTGATATATAGAGTTGAAACAAGTTAGATATTTTTTTCCTTTTGT  
TTTTCAGTAATCACCTCTTATTTGTTTTAATGTCATAAATTCAACTTTCTGATGCAATATAGTTGAAAGTAG  
TACCTATTAATTTGAAAGTACATAGATTCTGCTTATATGGGTGCAGCTAAAGTATTTATGTACAACCTATAC  
TTCCTTTCATGATTCATAAATGTACACAACAACCTCATGACCCACTGCAATAGATTATGAAGTACCTTCAC  
TGCAAATTGAATGAGTTGTAGCTTTCATTTCTAAGCGCGTGACTTTTTCTCTGATAACGAGTGACTTTTTCTG  
TTACATAACAATAAGGTGACTTTCAAAGATAATTATCAATAATTGAGTGACAATATGAGAAATCAACTC  
TTGATGTCAGCTATATGAAATCTCAGTAGTCATATAGCTTTACCTAAACTCATCTCGATCTAGTACAAAGT  
ATATTAGAGGTAATAATGTAGTCTAGAATTATTGTTCTATGACATAATTGTTGGATTGGTCCACTAATTTA  
AAGGTGAGATTGAGAACCAACATGTCCGCATCATGGCTGATAACACAACAAAACCTTTTTGGCTACTTG  
GTTAAGTCCTTAGCTGAATTACATATGTAACCCGTGGATAAAAATAAAAAGCAAAAAGACAAGGACAGA  
ACAACCAAAATTTGAATGGAGAATGAGAACACTTTCTCTGATAAATATGAACAGACAAAGAAGTGTGAA  
TAAGAGAGACAGAAGCCGAATTGGCAACATTTGGTGGCAGTCAAACATGTTTCGCTTTGATCTTTAATAT  
TATGCACTATATAAAATCCTACGAACTCTCTACAATTAGTTCATTGAAACACAAAATATGATGATGGTTAC  
CAAAATATCCTCTCTACTTCAGTTTTTCACTCTTTTATATCTCTTTACAGTTACTTTTTGCTTCCACTGAGGAA  
ACAACCTGCCCTCTTTAAATGGAAAGCGACTTTCAAGAACAAAATAAATTCCTTATTGGCATCATGGACAC  
CAAGTTCTGATGCATGCAGTGACTGGTATGGAGTTATATGCATTAATGGTAGGGTAAACACGTTGAATA  
TTACAAATGCTAGTATCATTGGTACACTCTATGCTTTTCCGTTTTTCATCCCTCCCTTTTCTCGAGTATCTTAA  
TCTTAGCAGGAACAATTTATTTGGCACCATCCCACCTGAGATTGGTTATCTAACTAATCTTGTCTATCTTG  
ACTTGCATATCAATCACATTTTCAGGCTCAATCCCACCACAAATCGGCTCACTAGCCAAACTTCAGATCATC  
CGTTTATTTGACAATCATTTAACTGGTCCTATTCCAGAAACAATAGGGTACCTAAGGTCTCTTACTAAGCT  
ATCATTGAGTATTAACCTCTCTTACTGGTTCTATTCCCTGCTTCATTGGGAACTTGACCAACTTGCTTTTTT  
GTTTCTTCATTTAATCACCTTTCTGGATCCATTCCCGAAGAAATAGGTTACCTAAGGTCTCTTGCTCGACT  
AGATTTGAGGAATAACTTTCTTATTGTTCTATTCCCTACTTCCCTTGGCAACTTGAAAAATTTGCAAGTTCT

GCTTCTCAATGACAACAATCTAATTGAGGAAATTCCTCCATCTATTTGCAATTTGACATCACTGGCAATCC  
TGTATTTGTCGAGAAACAACCTTGAAAGGAAAAATTCTGCAATGCTTAGGTAATATCAGTACCCTCCAGTT  
TGTGATGATGTCACATAATAATCTCAGTGGAGAACTCCCTTTGTCTATTTGCAATCTAACATCACTACAAG  
TTCTAAATTTGGGTAGAAACAATCTGAACGGAGCAATTCCGCAATGTTTTGGCAACATGAGTGGTCATCT  
TGAGATTCTTGATATGCAGCACAACAATCTTTCTGGTACTTTTCAAAGCACTTTTAGCATTGGAGGAGCA  
CTCAGAAGCTTCAATTTGCATGGCAATAAGCTAGAGGGGAAAATTCCACGATCCTTGGCAAATTGCCAA  
CGATTGGAAGTTCTTGATCTAGGAGCTAATCTCCTCAATGACACATCCCGATGTGGTTGGGGACTCTGC  
CAGAGCTACAAGTGTTAAGTTTGAGATCCAACAAATTGCATGGACCCATCAGAACTTCAAAGTTCATGAA  
GAACTTGTTTCCTAAGCTTCGAATCATAGACCTCGCTAGCAATGCATTTACAGCAGAGTTACCTGCAAAT  
CTTTTTCAAATTTTGAAGCCATGAAGAGAGTTGATCAAATGTGGAGGATTCAAGTAATAAAGAAGGC  
GGTATTACCAAGACTCCGTAAGTGTGTAACAAAGGGACTGGAGCTTGAAGTTGATTCAATCTTGTCTT  
TGTACATCACAATTGATTTTTCAAATAACAGATTTGAAGGACGCATTCCAAGTATTATGGGAAATCTCATT  
GCACTTCACATGTTGAATTTATCTCATAATGGATTGCAAGGTCATATACCGCCATCACTCGGAAAATTATC  
TTCAGTTGAATCATTGGACCTATCAGCTAATCATCTTGAAGGAGAGATACCTAAACAACCTTACATCTCTTA  
CATTTCTTGAATTCTTGAATCTCTCCACAATCAGCTCCAAGGATGCATCCCAACAGGACGCCAATTTGAT  
ACATTCGAGAAGAACTCATATGAAGGTAATGATAAGTTACGTGGATTTCTAGTTTGGAGGTTGTGGAA  
ACAGCAGGTTTCCCAAGACAAACAACACGACACATGAGCTGGAACAAGAAAGTGATTCTACATTTCTGA  
ATGAACTCAACTGGAAAGTGGTTCTTATGGGATATGTGTGTGGACTTATTATTGGATTCTCCATAACATA  
TTAATGCTTTCAGCTCGAAATCCCAATTGGCTTTCTAGGATTGCTGAAGAACTAGAATACAGAATCCTTA  
TGTGAAGGCGAAAGAAG

>M6-PGSC0003DMG400004725 M6 LRR-RLP

ATGGGGTCTGGCCAATTCTCATTTCTGCTCTTTCTCTGTTTGCTTTCTTTTTCTTCATCCATACCTCATCCAT  
GCCGCAAAGATCAAAGTATTTCCCTTCTAAAATTCAAGAAAACGTTTACTGTAAATTCCACAGCCTCTGAT  
TCTAATGTCTGTGAAATATTTTATGGTCAGAAGCCATATCCAAAAACGAGTTCATGGAACATGAGTATAG  
ATTGTTGTTTCTGAGGATGGAGTCATATGTGATGAGATGACTGGCCATGTCATTGAACTTGACCTCGGCT  
GCAGCTGTCTCGTAGGAAAGCTTGATTCCAATAGCAGCCTTTTCCAACTCTCTCATCTCCAAAGGCTCAAC  
CTTTCTGTTAATAACTTCTCTCGTGTGGATTCAATTCCTCTTCTCAGTCTCTAGATACTATTGATTTGCGGTCC  
AATTTGCTTCAAGGTTCACTACCTATTCCACCAATTTCCACGAGATTCTTCTCATAGCCCATAATAATCTC  
ACTGAAGAAATTCCTTCACATATTTGCAATTTGAAATCATTGGTAATGCTAGATTTGGCGAGAAACAAC

TGAAGGGAGCAATTCCGCAATGTTTGGGTAATATCAGAAGCCTCAAATTCTAGATATGCACAACAACA  
AACTTTCTGGGACTCTTCCAACAACCTTTCAGCAATGGAAGTTCACTTAGAAAACCTCAACTTGCCTGGAAA  
TAAACTAGAGGGGAAAATTCCCCGATCTTTGGCCAATTGCAAAGTGTTGCAAGTTCTTGATCTAGGAGA  
TAATCATATCATTGACACATTCCCTATGTGGGTTGGAACCTTCCAAAGCTTCATGTTTTAAGCTTGAGAT  
TGAATAAGTTGCATGGACCCATTAGAACCTTAAAAAATGAAAACATGTTTCCTGATCTTCGAATTATAGA  
TCTCTTTACAATGCCTTCACAGGAAATTTACCTACGAGTCTGTTTCGACATCTGAAAACCATGAGAACAA  
TTGATCCATCAAAGAAGAACTAACATACCTTGAAGACTATTATTACCAAGATTCTATTATAGTCATAAGC  
AAGGGATATGAGATTGAACTTATCAAAAATTTGACTGTTTACGCCTCTATTGATCTTTCAAGTAACAAATT  
TGAAGGACATATTCCAAGTATCATGGGAGAACTTACTGCACTTAAGGCGCTGAATTTCTCTCATAATAGA  
TTGCAAGGACGTATACCATCATCACTTGGAAATTTATCTTTGGTTGGATCATTGGACTTATCAGTTAACCA  
GCTTTCGGGAGAGATACCAAAACAACCTTGCTTCTCTTAAGTATCTTGAATACTTCTTCACATCAGAAAATA  
ATCTCACTGAAGAAATTCCTTCATCTATTTGCAATTTGACATCACTGGTAATACTAGATTTGGCGAGAAAC  
AATTTGAAGGGAGTAATTCCTCAATGTTTGGGTAATATTACTGGCCTCGTGGTTCTTGATATGCACAACA  
ACAATCTTTCTGGGACTCTTCCAACAATTTTCAGCAATGGGAGATCACTGAGGAGCCTCAACTTGCATGG  
CAATAAACTAGAGGGGAATATTCCCCGATCTTTGTCCAATTGCAAAGCGTTGCAGGTTCTTGATTTAGGA  
CATAATCATCTCAACGACACATTCCCCATGTGGTTGGGAACTCTTCCAGATCTACAAGTTCTAAGCTTGA  
GATCCAATAAATTGTATGGGTCCATTCCACCGTCAAGTGTTGGAAGTATGTTTCCTAAGCTTCGAATCAT  
AGATCTCTTTACAATGCCTTCTCAGGAAACCTACCTACGAGTTTGTTC AACATCTGAAAACCATGAGG  
ACAATTGATCCATCCAAGACGGCACTAATTGATGGTTATTATTACCAAGACTCAGTAGTTGTAGTTACAA  
AGGGATTGGAGCTTGAAGTTGAGAGAATCTTGTTTTGTACACCACTATGGATCTTTCAAACAACAATTT  
TGAAGGACATATTCCTGATGTTATAGGAGATCTCATTGCGCTTCGGATGCTTAATTTTTCTCATAACAGAT  
TGCAAGGTCATATTCCATCATCACTTGGAAATTTATTTGTAGTCGAATCATTGAACCTTTCAATTAACCAG  
CTTTCGGGAGAGATACCACAACAACCTCGCTTCTTACATCTCTTGCGGTCTTAAATCTCTCCCACAATCA  
TCTACAAGGATGCATCCCAAAGGACCTCAATTCAATACATTTGAGATCAATTCATATGAAGGTAACGAT  
GGATTATGTGGATACCCTTTTCTCAAGGTTGTGGAAGTAGCAGGATGCCAGAGACAGAAAACACAGCA  
TATGTTCTGGATGAAGAAAGCAATTCTACATTTCTGAGTGAATTTTGAATGGGATTCTCATGGGATATG  
GAAGTGGACTTATTATTGGATTCTCCATAGCATCTTTCATGCTTTCGAGTCGAAATTCCAATTGGCTTTCT  
AGGATTGCTGAAGAACTTGAATACAGAATCGTTATGAGAAGGCGAAAGAAGAAGCAAGGCCATCACAG  
AAGATGA



>M6-PGSC0003DMG400004727 M6 LRR-RLP

TTGGTCTTTCCTTCAATAATTTTAGTGGTTTTGTGGATGTCAGCCTCTTTCAAACCTTAAACAGCTTGGG  
GAACTTAGTCTTTCATATAATAATATCTCACTGACCAATGACAACAAAGTTAATGTTACTTTGCCCGAATC  
TCTTTATTTGTTAGAATTGGCCGCATGTGAAGTGAAAGAATTGGAGTTTCTAAGATCTGCAAACCAGCTT  
TTCGATTTGGATCTTTCAAATAATAAGATTCAAGGAAGAATTCCTGATTGGGCATGGTCTAACTGGATGT  
TTTCATTGCGAGATCTTAATATATCCCACAATATGCTAACGAGTATGGATTCAATTCCTCTTCAACATCATT  
TAACAATTGATTTGCGGTCAAATTTACTTCAAGGTTCACTACCTATTCCACCAAATTCACAAGATACTTC  
TTCATATCCCATAATAATCTCACTGGAGAAATTCCTTCATCTATTTGCAACTTGACATCACTGATAATGCT  
GGATTTGGCGACAAACAATTTGCGTGGAGAAATCTGCAGTGTTCGGAAATATCACTTCCCTCCAGGTT  
TTGGATATGCGCCACAACAATCTTCTGGGAATATTCCAACAATTTTCAGCAATGGAAGTTCACTGAGCA  
GCCTCAACTTGCATGGCAACAACTAGAGGGGAAAATCCCACAATCCTTGACCAATTGCAAACAATTTG  
AAGTTCTTGATTTAGGAGACAATCACCTCAACGACACATTCCCAGTGTGGTTGGGGATTCTACCAAAGCT  
GAAAGTTCTAAGCTTGCATTCAACAATTCATGGTCCCATCAGAACATCAAGGATTGAGAACATGTTT  
CCAGAGCTCCGAATCATAGATCTCTTGTCAATGCCTTCTCAGGAACTTACCTTCAAGTTTGTTCACA  
TTTGAAAGCCATGAGGACAATTCATCAAACGATGAACACACCAAGTTATGAAGGAAGTCGATATTACCA  
AGACTCGATAGCTGTCGTATCCAAGGGATATGAGCGTGAAATTGTGAGAATCTGTTTTTGTACACCACT  
ATCGATCTTTCAAACAACAAATTCGAAGGACATATTCCAATATTATGGGAGATCTCATCGCACTCCGTG  
TGCTGAATATATCTCATAATGGATTGGAAGTTCATATACCGTCATCACTTGGAAAGTTTATCTTTGGTTGA  
ATCACTGGACCTGTCAAGTAACCATCTGTAGGAGATATACCAGCACAAATTTGCTTCTCTTACTTCTCTTG  
CAGTCTTAAATCTTCTACAATCATCTCGAAGGGTGCATTCTCAAGGAAATCAATTCATACCTTTGAG  
AACAAATTCATATGAAGGCAATGATGGATTACGTGGTTTTCTGTTTCAATAAGTTGTGGCAATGATCATG  
TATCAGGTAAAAATTATGCCGTAGATGATGAAGAAAGCAATTCTGAATTTCTGAGTGACTTTCGGAAAG  
CTGCTCTTATGGGGTATGGAAGTGGACTATGTATTGGAATATCCATAGTATATTTTCATGATGTCAACTGG  
AAAACCGATATGGTTTGCAAGAATCATTGTAGAGCTGGAGCACAAAATAATGATGGGAAGGAGAAAGA  
AGCAGCGAAGTCAAAGGAATAACAGAAGAAGAAATAATCACTAATCATATTACTGTTATTTCTTTAAGG  
AAAAGATGTAATAAGTTGTAGACGCATTATCGTTAAATCCTGTTTGCATAAAGTGTGTAGCATCATTTGG  
CCATGAAAATTGAGGGTGAG

>M6-PGSC0003DMG400005171 M6 LRR-RLP

ATGATGAAGCTAAGGCATCTGAATATAATCAATTTGTGCTTCTTGTGGGAAGATAATGATCGAGCAATTT

TTGACGAATCTTCAACAACTATGCTAGAGAACTTGAAGACATTCTTCAGTATTCATATACGTGTAGATGA  
TACAACTCCAAGATTCTGGTGGAGGTTTCCAAATATTGAATAACTTAGCTGCCTCAGTGTTGACGATTTA  
CCTAGTTGTCCTTTGTTTCCCTCAGTGGAAGTTAATACTCGGCATCAATCTCTTGATCTGATGATAAGCTA  
TAAGGGATTCTGGGATTCAAGTTGGTTGGGAGAGCTACTTTGTCTTCCCTTCAAATCTTAGGCATCTGTCC  
CTCAGTGGTTGTTTTTGGACAGAAAAAATGGTTTCAAACATTGCAAGATTGAAGAACTTGAGAACTCT  
CATTAGTTGGGGGATTTCTTTGGGGAAAATAGAGAACCGTTGCTGGGACGTCACAAATGTGGAGTTCC  
CTGCACTAAAATACTTGGCATTACGCTTTATGAGGATGGAAGAATGGAAAGCTTCAGAGGAATCCTTTC  
CTGTGCTTGAGGAGCTAACTATTAGTGTGGTTACATCATGGAGATTCTCCTAGTTTTGCGGATATTTTA  
ACACTGCGACTTATTAACTGGACAAGCTCTCCAATCACTTGTGGTTTCAGCTTTGACTATTA AAAAGG  
AAATAGAAGAAAACACAGGATGTGACCGTCTCCAA

>M6-PGSC0003DMG400005172 M6 LRR-RLP

ATGGAAGTTGTTGAGACTTGTGGAAAAGGAACTCTTCTGCTGGAGAACCTTCCACCAAACATAATATTA  
CATCAATTTATGATGATGATGATGATGAAGTTGTGGGCTTTGAGAAAGATGCAGAAATTATAATGAAGA  
AAATGATACGAGGAACAAAGGAGCAGGATGTTATCTCCATCTATGGAATGCCTGGACTTGGTAAAACAA  
CTTTGGCAAGGAAGGTGTACAACAATCCCTCTATTATTAATTACTTTGATGTTAAAGCATGGTGTGCTTTG  
TCGCAAGCATATAATAGGAGGACATTATTGGTTGAGATTTTCAAACAAGCTACAAATGATAAGATCAAA  
ATCAAAGAGGACGACGATGTAGCTGACATGTTGCGCAGGGTTCTAATTGGCAAGAGATACCTCATCGTA  
TTAGATGACATTTGGGATGTCGAGGCATGGGAAGATTTGGGAATATGTTTCCCTCAAGGTGAATATGGA  
AGCAGAGTAATGGTCAACAACGAATTGAACAAGTGGCTAAGCATCTTCAGCACCACAGTGATCCTTAT  
TCTCTTAGCTTTCTAACGTCCGAAAAGAGTTGGGAATTATTGGAGAAGAAGGTATTTGAGGAGAGAGT  
TGTCTCCGGATCTACTGGAAGCAGGGTTACAAGTTGCCCTACACTGCAAGGGATTGCCTCTTGCGGTTG  
T

>M6-PGSC0003DMG400005226 M6 LRR-RLP

AATATTA AAAGACTTGATTTGTCTTCTAATAATTTTTCAGGATCGCTCATTTACCTAAATTTGGTGAGTTT  
TCTAGTTTGACGCATCTTGATTTGTCAAATTCAGGTTTTAGATTCGGACCTCACAATTTGAACTTCTTCTT  
AAGAACTTAACCCAATTAACAGAGCTTGACCTTTACGGTGTGAGCATCTCATCCACCTTTCTTTGAATTT  
CTCTTCTATTTAGCAACTCTACGACTTAGTGACACACAATTATGGGGGATACTGCCCGAAAGTGTTTTTC  
ACCTTTCCAACCTGGAAACACTTGATTTATCATACAATTCCCAACTCACAATTAGGTTTCCCACGACCAAA  
TGGAATAGCAGTACATCTCTCATGTACTTATCTCTACCTGAAGTGAATTTTATTGGTAAGATACCCGAATC

ATTTAGCTATCTAACTTCATTGCATTA CTTGGATATGAGTTCTTGTAGCCTCTCAGGTCCTATTATTA AACCTCTTTGGAATCTCTCCACATACAAAGTTTGAATCTCAGAAATAACCATCTTGAAGGACCAATTTCCCAATCTTTCAAATTTGGAAACCTCACTTGGAAATTAACA ACTTTGATGGCTAACTTGATTTTTTATCCTCCAACAG AAGTTGGACTCAACTTGAAGGGTTCGAAGTTTCTTCCAATTCCTTAGTTGGTCCAATTCCTCCGATGTAA GTGGTCTGCAAAGCCTACAATCATTCTTCTTGT CATCAAACCACTTGAATGGGACTATACCATCATGGAT ATTCTCCCTTCCTTCACTAGATGAATTATACTTGAATGATAACTATTT CAGAGGAGAAATTCAGGAGTTCAAGTCCAAAACATTGTGGGACGTTACTCTAAAACAAAATCAGTTGCAAGGTCCTATTCCGATGTCACTCCT AAACCAACAGAGCCTATCTTATCTTCTCCTTT CGAAAAATAATCTCAGTGGACAGATTTCTTCAGCTATCTGCAGTCTAAATGCCCTGAAAGTGCTAGATCTTGG AAGTAATAATTTGAAGGGAACAATCCCACAATGTT TGGGTGAGATGAGTGGACTTTGGGTTTTTGATCTAAGCAACAACGGTCTTAGTGGGGCAATTAATACAA CATTAGTATAGGAAACACGCTCAAAGTCATTA ACTTGCACGGGAATAAGCTAGAGGGGAAGTCCCACG ATCTTTGGTCAATTGCAAGAGTTTGGAAATTCTAGATTTAGGTAACAATGAGTTGAGTGACACATTTCCA AAATGGTTAGGAACCCTACCGAATTTGAAGATTTAAGCTTGAGATCAAATAAGTTCCACGGGCCCATTA AACTTCAAGGGCTGGAACTTGTTGTACATCTT CGAATAATTGATCTATCATCCAATGGATTTAGTGG GAATTTACCTATGAGCCTTTTTGAGAATTTGAAAGCTATGAAGATAATTGATGAGATCACGAAAATCCCA CGGTATGTGGGAGAAGACTTGTATTATTATAATTTTTCTGAAACAATTACAACAAAGGGGTTGGATC TTGAATTCGTGGAGTTTTGACTACAAACATAGTTATCAATCTCTCGAAGAATAGATTTGAAGTTGTATT CCAAGTTCATTGGAGATCTTATTGCACTTCGTA CTTTGAATTTATCTCATAATGGCTTGGAGGGTGCAT ACCAACATCGCTGCAGTACTTATCTGTACTTGAATCATTAGATCTCTCATTCAACAAAATAAGCGGAGAA ATTCCACAACA ACTTGCATCCCTCACATTTCTTGCTGTCTTAAATCTCTCTCACAATCATTTTGTGGATGT ATCCCTAGAGGAAAACAATTTGATACGTTTGAGAATAGTTCATACCAAGGGAATGATGGGTACGTGGA TTGCCAGTGTCAAAGATTGTGGTGGTGATGAAGGGGTACCACAAACAACA ACTCCATTTGGGCTTGATCAAGGAGAAGAAGGAGACTCAACAATGATCAGTTGGCAGGCAGTTCTCATGGGTTATGGTTGCGGTCT AATTATTGGATTATCCGTAATATACATAATGTTATCAACTCAAATCCAACATGGTTTTCGAGGATGGTTG AAGAATTGGACCACAAGATTATTACGAGAATGAAAAAATACAATAAAAGCTATTAGTGTGCAACCTAGC CAGGTATTCAACTTGATCTTTATCCTTCATAAGATTATTTTGTATATCTCAATGTATTATATATCTACCTCCT TCATCCTTAAAATTCTTGACTTCGATTCTTCATTTTTTAAAATTGCAGGATTCGAGCCTAATATGTTGTTGG TGATGCAAATATAAGCTTTTTATTTTTCACATTTTGTGATGTATCTAAGTATTTATCGCCCTACGAATAAAG ACATGAGCTTTCTTCTTTGAGCTTCGGCCATAATTTTTAG AATGTTTTTAAATAGAGATTGTTAGCTTGA

G TTCAGCCTCATAATTAGTTGAGTAATTAGGCTCAACTGCAAAGTCA

>M6-PGSC0003DMG400005395 M6 LRR-RLP

ATGGGCTGTTGTGTGAAAGCTAATGCCTCCAAGGAGATTAGAACCCGCAATCATAGACATGTAGGACTT  
GAAAAGATCTTTCGCCAAGTGCACGAACCTCTACTTTGCATTCTGGTGCCTTTGTGTATCTATTTCTAAGA  
TATCAAGATAGTTACCTATATAAACCAAGTTTCCATCGAAGTTTCCGGGTGCAGGTGTATCCTCAACCTA  
CTATAAACGGGCTTGCTAAATCCAGATTGAGGGAAATTCATGATTAATGTGTCTTTTAGTAAATATTAA  
CTGTGTTACTCTGTTGGAAATGCAAGGTTAAAGCAGTAACAATTTGTCCAAAATATAATGGCAAACACAA  
AATTAAGATATGCTGACAGCTTAACTTCAAAGGGAGATTTAAGCTATCGTAGGATAAGTCTTAGGAG  
GAAATAGCCCTGTGAAGGAGCTGTAATGAAAGTCAATTTTTTTGTCAACGAGGTAATATGTGGTGGGTA  
AAAAGCCCAAGTGTACACCCGAAATCCACGCTTATTGCTCAAAGTACTTCCATGCTTGTTCTAGTACGTT  
TAATCACTTTTGGACTTTAGTATCCTTGCTGGTCCCCACACTTCCAACCTTGATCTGATTTTTTCAAGGTTT  
GAATTTTCGGGGTCTTACACCAAGTATACTAGTGGTGTACAAGAAGTGGACCTACACCAACACATATTTT  
TGGTACTCCAAAATCTATTTAAAAAACA AAAAATCAGTTGTAATCTGTACAAGAGTCCCTCAAGACTCT  
ACTGGGATGAAAATCAGTTCTACCTGGGAAA ACTGAAAAGTGTCTGCTTCTCATTTATTCTTAAGGGACT  
CTTCATCTGGGTTTTTACGCTGAATACTATTGATATTGACATATTGTAGGGTGTATTCTCTTAAAAAGAAA  
ATTTTATAAAGAGTTTGTATATCTGATTCTATCCAAAAATTGAGTCTGATTATTTCTTTTCAGGTTTTGG  
CTGATAACCTTATTGAGAATCTCCCGGTGAACCTGGGATTGCTTAAGTCTTTGAAAGTTGCAACACTTGA  
TGGGAATCGAATCAGAGCATTGCCTGATGAATGTAATTTCCACCGTCCTAGATCATATGTGAAGTTAAG  
CAGGATTCTCTCTGCTATAGAGTATCACACTCTCTATTCTAACACATAATGTTCTCATATTCAGTGGGCC  
AGTTGGTGAAGCTTGAGCGTTTGTCTGTCTCAGCAA ACTTGTAATGAGCTTGCCTGAGACTATTGGGA  
GATTGCAGAATGTGAGTGATCCATTCTGATGGCTAATACGGTGCCATCTCCGCAATTCTAAAAAGTGTG  
CCAGTTAATATATTATTTCTTAGCTTGCTTTACTGCTTTGTTATTTTTTTTTTCCGAGTATAAAGGTGCTAA  
GGTGTCTAATGAAATGGTGTCAATCTTG TAGAAAATGTT CAGCATATTGATATCCATATTAATGGATCAT  
TTTGCTTACA ACTTTCTGTTCTTACA ACTAAAAGCCCTACTTTTTTTTCTCTATTTCTATAGTGATGCCGCTT  
CTTCATGAATTTCTATTATCTTCTGCTAGTTGATGATGTCTCTTTGCTCTCTTATGTTAGTATTTTGGATT  
GGAATAGGGTCTGCAGTCTCTGGGGGAGGGTGGTTGAATTTGGAGAATAAGTGGCTCTATTGCAGGT  
TGTCTTGAGGTCCACCACCTGAGTGCCGTCTGTTCTTCTTTTATTTCACTCTCTCCTTATATTGAATATT  
TTTCTTCTCAAGTTTTTTTTCTTCAATGTCATTGATGAACCAAGTGTGAGAAAGAAAGACTCGGAAAATACT  
TTCAATATACGTAACTACATTATTACACAAAGCATTGTTTATAGACAATACTACAATCCTTTTCCATGT

ATGGCACCATGTACAATCCTATTTGAGCACTCCCCCTCAAGCTGGTTCATGTAAGTCATATGTACCAAGCT  
TGGTACCTCCACTTGGATATATTGTGTCACCTCATTATCACTTGGGTAAATAAAAAATGGGCTAAGAAT  
CGATCCATGGTGTAAACCCCATCTCTACTAGGAAGTGTCTAAGTCTCCTCCCATTGTTCTCACTGGGTTTT  
GACTCCATCGTACATGTTATTAATCCCTCTAATGTATGCCACATGTACACCTCTGGGCTCCAAGCATCTCT  
ATAAAATCTTCCTAGGGACTGTCATATGCCTTTTTTAAGTCAATGAACATCATTGTAGGTTTCTCTCCTA  
TTTCTATACTCATCCAACAATCTCATTATAAAATGAATGACTTCCATAGTTGATCGCCCTGACATGAATCT  
GAATTGGTTCTCCAAAATAGACATATCCCTCTTCTTCTCATCGTCATCTCTACCACCCTCTCCCAATCCTT  
CATAGTGTGATTTAGTTGTTAATACCACTCTATAGTTGTTGTAATTTGAATATCATCCTTTTTCTGTAC  
AGCGGGATCATTGTCCTCCACCTCCATTCTTTGGGCAGTTAATTCATCCTAAAATGATATTAACAGCCTA  
GTTAGCCATTCAATGCCTACTTCCCCTGCGCTCTTCCAAAATCCATAGGCATCTCATCTAGTCTGTTGCT  
CTTCTGTTTTCATTTTACGAATTACCCCCTTGACCTCTCAAACCTTTTTACACCTACAATACCCAAAATCAC  
GATGTCTCTTGGAGTGTATAAATCACTCAACACAATAGTTCTAATTCATGCTCCCCTCTGCATTCAAGAG  
TACAAGTTCCATTTGACTGTTTTTTCTAAATTTAATTCTCTGCGCATTGACAAACAAAGACTCAGAAAA  
TATTATTAAGATACGTAATATCACACTGAGGTCTACTTATAGATAATACACTACAATCCTTTTCCATGTA  
GGACACCATGTACAACCTATTGTAACACCAAGAAGTATAGTGTTCACTTTTAGGTGTATATCTGATTCTCA  
TGGTTGCTGACATGGGATTATGAATTAAGTTTTTCAATCAAGTAACTAGCTCTATCCTCTAGTAGTGTT  
CATATCATTCTAAACACTTGCATATACTTTTACTCCAAATATGTTTTGATATTTGTGAGTTCAGTTCAATAT  
GATGATGCCGTTTTTTGTCTGTCAGAGATAGTCGTTGAGCCTATACTTAAAAGTATTCTTAATTCATCTTCT  
TTGGAAAATGAGGCCTTTGGAATTGACAGTAATGGTTTTTCACTGCGAGTTGGTGCTGTTGGACATTTCAA  
ACAATAAGTTAAAGTTTTTCTGAATCAATTGGAAGTTGCTTCTTTTGAAGAATTGCAAGCAAATGG  
TACCTTCAAATTTAGTGTCACCTCATCCATTCTTGCTATTTCTCTATTTCTTTTATTTTCTGGCACTGGAA  
CTCTGTATCAAATATCCATCGAGGAAAAAAAAACATGTTACCATCAACATAAAATTAAGTGAAATTTATG  
GCCGATGATAAAATTGGAGTGTGGGTGACCTAGAAAGCTAAAGGAAAATCTACAAATTTTCTCTGTTA  
AGCTTATAAGATAATATTCTTGGCACCATCCATTTGAACTGGTACATGATTTTACGTTCTGTTTCTTATTC  
CTCAGTGTGGCATAATGAGGTTTACTGTGTTTTTTGGCAATCTTGCCCTCGTGATAACAATATTTCTTTCT  
AGATAATTCATTGAAGAGCTTCTGCATCAGTTTGCAATCTTGTTCAACTAAAATCACTCTGCCTGAACA  
ATAACAATCTCAATCAGGTTAGTGTCTAATTTTACCTGTGTGTATGTGTGTGTGACCCTTGTTATTTGAG  
GTCATATCTAGTATTCAGAGTTTACCTCGATTTGGTACTGCTCTCGTGGCCTGCACTGATACAGTGCTTTA  
CCTCTACATGTGCAGTCAACTGCTGTGCATGTGTGTGTGTGTCTGTCTCTATCATCGTCACACATAAAAAAG

TGCAAAGAATAGTAAACCACGTGGATCAAAGCTTACCTGTTTGTACACCCGAAAAGCTGAACTTATTGT  
TGTATTGGTGATACTTGTATGTGCTCTCTCTCACCTTCTATCTTAATAATACTATTAAGCAGAGTTAGG  
AACTCTCTTCGCATGATCTGTAAGCCTAGTTCACCTCCCCGTGTATGAGTGTTAAAAGGAAACTCATACAT  
TAACCTTAAAACGTGCATCTAAAAGCTTTTCCTTTAATAAGACCTCATGAAGAAACGAAGATAATCAA  
CAACCAGTAGCATCTACATTGCAAACCGGCAATAAAGCCAAATACGCATAATGATCCACATTTGAGGTCA  
TTGGATTGAACCTCACGTATCTCCATTTAAAGCATCATCATCCAAGTTTTTGTACTTGTGCCTATCAAGTA  
TATGTTTTTACTAGATAGTCATGCTTCTTTTGGTAACTGGATTGTTCCAGATGCCTCTAAATTTGTTAAGA  
GAATGCAAGAGCTTGCAGACCATATCCCTGCATGGAAATCCGATTTCCATGGACCAATTTCAACAGGTTA  
CTCACTAATATTCTACTATTTAGTTCTGCAAGTACTAAAAAATCATTATGAAGAATTCTATTTGCCTTTT  
CTTTTCCAGATGGATGGCTTCAAGGACTTTGAAGCCC GCCGTAAACAGAAGTTTGATAAACAAATTGAT  
TCAAATGTGATAATCAGTTCTAAAGGGCTTGATGAGGGTGTTGACTTGTGATTCTCTCCGCAGGCGTTT  
TCTATAAGGCTCCGCGCAATCTTGTTAATCTCAGGTTTACTATTTTTTTGCTTCAATTCCCTGATGGAAAAT  
TTCCCTTATTTTATGTATGACCATGTAGTAGCCACACTACACAGTTGTGCTCCTCAGTTGCTGTCAAGC  
TTTTAGTATTTCTAGTGTCTGTAATGCCTAATTTGGACAATTCATTCTTGTTACTTCATGCATGTCTCCGT  
TGCTCTTAGCTCCCAGCCTGGCGTGCCTGCATAGTTGCCTCTTCTCATTTATGTTCCAGTCTTCTAGTTTGT  
ATTACTCTCCATTATACCCGTGCCCTAAGTGTATATAATTGTGGTAATTATTAGTAACACCAATTTCAA  
AGATTGAACACGAAAAAGCTTCTCATTTATGTTCCATGGAAGCAGGACCGTTTTGTCCATTTAGTTTCTG  
AATTTGATAGGTAGTAGCTAATCCAGTGGCCAAATTAGTTCAAAAAGAAATTGCACTCGTTTTTCTAAAC  
TTCCAGTCAACTGGTGCTATTGATGATACAATTTTTTTGAATAAATCATTATATCTTATTTACTGCAGGT  
TAAATTTGTTCCAGTTGGATGGAATTGCGACAGTTTTGACTTTGATGAAAGGTATTGCTTCTGCTTATTTG  
GCATGAGATATTTACACCTTTCTATAGTTTGTCAATTGATTGTAAGTTGTGACTTGTGCGTAATTGTATCT  
ATGCTGACTTGCTGAGTATGTTTGTGATTGTAATGACTCAACTCTAACAAATTCTGTACATTTAGCGAGC  
TGTATATCACTTTAAAATCAAATAACGATTTTTGTACCTAAAGATATTTGATTTTAATATGTTTGGATTGT  
AACGATCCTTTCAACGTATCCAAGAGTAGGGCCTGGTGGCCAATAAAGTGGCTGAAAATTGTGGCCACT  
TTTTATCTCCGTTTCGTCGTTTTAAAATTAATTGAACTAAGGGCGTGTATGATATTTTTCATGTTTGGTTG  
GTTAAATTTTTTGGAAAATATTTGCTCTAGTAAGTATTTATACGCGAGCCATCATCTAAAATCAATTCAT  
CGATATCAAGTCAGCAACACAAGCATTTATCTAGTGCTATATACTAGGAGTCAAGCTCACATAATCACAT  
TAATCAATTCAGGAAGAAAATCTCCAATTTTTTTCATATTCATGGCATTGGTACTCAAAGCATTTTCATATTCA  
TGGCATTGGTACTCATAGAAATGCTTGTTATCTCTTTTATAACCGGACCTCCATTATCCATTAACCTTTTATT

CAATTAATAAATACACTTTAACATTTTCATAAAAAGTTTCAACTTGCCTTAATTGGAATTCAAAAAGTTAAT  
GTGGATACCTAGGCACCCAAAGACAATGAAGGGTGTAGTAATCGACAAAATGCTTTAGGGAGTTGAAA  
ATAAGCATAGATTTGGAGATTCTCGAATAAGGTAACCTTTCAAATGCTATTGAATCCACGGGTAGGCA  
AGATACTAACGATTTGCTCTTCTTTATGCCTTGAACATTTCAATTTGGTCATAAATGTAATTTAGA  
TGAGTATACAAGTTCGTAGACACACAAATTGGCACATAATTGGCTCGAAAATTGAGTGAAAAAGTCAAC  
CTTGAGCCTTACTGTCAAATTTGAAAATTTGTTTACCCATAGGTGGGTCAAAAATCCGCTAAAATGGATT  
GTTAATCGGTCCCCAAATCGAAAGCTACATAAATCATTCTTTGGAGAATTA AAAACCAACCAAATCCCC  
AATTCAAAAACCCCAAATTAATATCTATGAGCTTGTATAGCAAGGTGAGACCCTCTCTTATTGGATT  
TAATTACTTTAAGTCACAAATAGTATTTTAGGATGAAAATTCATATCTTTTCGTCGGATTGTCATAGTACTT  
CTTGTTATTGATTGTTGAGTGAACCTATTGTTATAGTAATGTGGGGCTGTGGGAAAAAGTTATTGGATG  
GCAAAGAGTCAATGGAAAAAGGTATGATTAGGTTACTCTCTTCTTTTAGCATGTTTTCTTAAAAGGGTAA  
AGCTATATGTCAAGCGTACTTTGGATGAGCTACTCATAGCCATAAGTTTAGTGTGTTGGCTTCCTAGAGT  
TGTTATGTTTCGTCCTTGTGGGACTCCTATTATAATGATAGCGACCTCGTGCTTAGATACAACCTAGAGA  
TACTCATATAGGTTCGCTTATAGTTGGTTTGCTTGCCTTAGGGCCACTTGATTGATGTTGATGCCTTTGGG  
CCATATGTTGGTTGTTACTTCTTTGGGGGGGGGGGGGGGGGGGATTGTG

>M6-PGSC0003DMG400005538 M6 LRR-RLP

TTGACATTTTCTAGAAAGACTTTGTGCATTGATTTGAGAATGACAACATTTTGTGAATTGATTGATGAT  
TTGATATGGAGGCAGCAGTCCATACTTGACTTTTCCCCTTCTCTCTTTTGGATTAGAAAATTCGCAAGT  
AATTAATTTCAATATGAAGATTCAAAGTTGAAGGGATTTGTTTGATAAGTAGCTTTCATTGAAATTTTGC  
AGCAAGACTCATTGCAATTACTTGATAAGTCAAAGAACTGCACTAATACTTCTAGGTGCAAGAAAAAAG  
ATAATTGGAGGGACACTCTGTGCAAAAACCTGGTGTATTTCCCTCTTTGATAGGCCTTACACGCCGAGA  
ATTCAGATTATTCGGGATCCTAATCTGGATATCAAAAATCGAATAGAAAATCAATTTATTTTLAGAAAA  
GCCATTTCTCATTATAAATATTAGGTAAACAAGTCAATATCCTGTAATTATACAAAAAGACACTTTGGCA  
TATGACTTAGTCTTGTCTAATATTTGAGAATGACATTTCTACTTTCTTTTGAATTTTCATAGGAAGACT  
TGTGCATTGACTTAAGAATAACAAACATTAATTTCCCTATGCAATATGATTCTGGATTTGTTTTAATTTCT  
TTTTTGTTTAAGAAAGCCTTTCTCTTCTTTTGGAGTAGCTAGGAATGAACTTTGCCATTTAGAGCCA  
CTTTTATAACGAGGATATATGATATATATAAGCTCTGAATGAAAAAGTTAAGGGGTATATTAGACCCT  
TTTTCTGAATAAGAAAGTAAAACAACGTACAATTATTTTAAAGAAAAAAGATGATTCTCTACTCCTTT  
TTAAGCTTGTCTTTAGAGAAATAAAAACAACCCAACTTGACTTGTGTTGAACAATATAAATCCTAAG

TTAGTTCATTGAAACCCAAAATAATAAAATCAAATATGATGATGGTCCAGTAAAATATTTTCTCTACT  
TCAGTTTTTCACTCTTTTATATCTCCTTACAGTTACTTTTGCTTCGATCGAGGAAGCAACTCCCTCCTGAA  
ATGGAAATTAACCTTTCAAGAACCAGAACAACTCCTTATTCGCTTCATGGACACCAAGTTCTAACTCATGCA  
GGGACTGGTACGGAGTTATATGCTTAAATGGTAGGGTAAACACGTTGAATATTACAAATTCTAGTGTC  
TTGGTACCCTCTATGCTTTTCCGTTTTTCATCTCTCCCTTTTCTTGAATATTTTGAACCTAGCCTGAACAATTT  
TTCGGGAATCATTCCCCCTGAGATTGGTAATCTCACTACTCTTGTCTATCTTGACTTGTCCATGAATCAGA  
TTTCAGGCACAATTCGCCACAAATCGGCTCACTAGCCAAGCTTGAGACCTCCACATCTTTGCCAACCAT  
TTAAGTGGTTCCATTCCACAAGAAATAGGTTACCTAAGGTCTCTAACTGAGCTAGCTTTGTATACCAATTT  
TCTTAATGGTTCTATTCCTGCTTCATTGGGGAATTTGAACAACCTGTCCTATATGTATCTTTATGATAATCA  
CCTTTCTGGCTCTATTCCTAAAGAAATAGGAAAACCTGTCAATCTTGTTGGAGTTTCTTTTGATACAAACC  
AATTAACAGGTCATATCCCTCCAGAAATAGGCAACTTGACCAATGTAAAATTGTTCTATGCTCCCTTCAAT  
GAATTATCTGGTCCCATTCCCTGCAGAAATAGGGAAGATGAAGTCACTTCAGGAATTAATCTTACATACAA  
ACAATCTTTCTGGTCTAATTCGAAGAACTATAGGTGGCTTAACTGAGCATATCTACAACCTAATGATAATC  
AACTCTCTGGCCTAATTCCTAGAGAGATGGGGAATCTGAAAAACCTCAATGGTCTGGCATTATTCAATAA  
TCAACTTTTTGGCCTAATCCCTAGTGAGTTGGGGAATCTTAGTATCCACTATCATCTAACATTATCCAATA  
ATCAACTCACTGGTTCAATTCCTCCTCCTTTGGTAATTTGAGAACTTGCGAGTTCTGTATCTCCATGAC  
AACAATCTGATTGAGGAAATTCCTTCATCTATATGCAATTTGACATTCCTCATGTTCTGCATTTGTGAG  
AAACAACCTTGAAAGGAAAAATTCTGCAATGTTTGGGTAATATCAGTACTCTCCAGTTGGTGACACTGTCA  
CATAATAATCTCAGTGGAGAGCTCCCTTTGTCTATTTGCAATTTAGCATCACTACAAATTCTAAATTTGGG  
CAAAAACAATATAAAGGGAGTAATTCCGCAATGTTTTGGCAACATGAGTGGTTATCTTGAGGTTCTTGAT  
ATGCAGCACAAATCTTTCTGGGACTCTTCCAATGACTTTTAGAACTGGAACACTTAGAAGCTTCAACTT  
ACGTGGCAATAAACTAAAGGGGAAAATTCCTCAATCTTTGGCCAATTGCAAAGAGTTGCAAGTTCTTGA  
TTTAGGAGATAACCACCTGAATGACATCTTCTGATGTGGTTGGGAACTCTCCTAAGTTGAGAGTTTTA  
AGCTTGAGATCGAATAAGTTGCATGGACCCATTAGAACTTTAGGAAGTGAAAACATGTTTCTTGAGCTTC  
AAATATTGGATATCTCTTCCAATGCCTTCATGGAAAACCTTACCTATGGGCCTGTTTCAACATTTGAAAGCC  
ATGAGGACAATTGATCCATCAAAGAAGGCACCAAGTGATGGATTTTACCAAGACATGGTAGCTGTGCGTA  
ACAAAGGGATTTGAGCGTGAAATTGTGAGTATCTTGTATTTGTACACTGTTATCGACCTTTCAAGTAATA  
AATTTGGAGGGGAAATTCGAAGTATCATGGGGGATCTCATTGCAGTTCATACATTGAATTTATCACATAA  
TGGATTGCAAGGTCATATAACCACCATCATTTGGAGATTTATCTTCGGTTGAATCATTGGATCTATCAGGA



AACCAGCTTTCGGGAGAAATACCACAACAACCTGGCTTCTCTTACATCTCTTTCATTCTTAAATCTCTCCCAT  
AATCATCTCCAAGGATGCATCCCTCAAGGACCTCAATTTACACTTTTGAGAGCAATTCATATGAAGGCA  
ATGATGGATTACGTGGATTCCCTGTTTCAAAAAGTTGCAGCGATGCTCGGGTATTAGATACAAATGATAC  
TGTGTCTGGACTAGACGATGAAGAAAGCAATTCTGAATTTCTGAGTGATTTTTGGAAAGCTGCTCTTATG  
GGCTATGGAAGTGGACTATGTATCGGATTATCCATAATATATTTTCATGTTGTCAACTGGAAAACCGATAT  
GGCTAGCAAGAATCATTCTAGAGATGGAGCACAAAATTATGAGGGGAAGGAGAAAGAAGCAGCGAAG  
GCAAAGGCATTACAGAAGAAGAAGCAATCATTCTAGACAAGTTATAAGTTTTGATTTTCAGAACTTCAG  
GTAGTTCTAATCGATCCCCTATATACACTAATCATTTTTTTTCATTTCCAATAATTTCAAAGGCTCAGCCTC  
AGTTGATGTTTAACTAAGATATTTTGGATTACAGGGAGGAGCTAGTGTCTATGGAAGTGGAGAAAGCTG  
GGAAGAAGAAGTTATGGCAATGAATGGAAACGAATGCCAATCAGTTTTTAAGCAATAATAATTGTCTAA  
CTGAATATTTTCGTTGAACAGTCTTAGATGTGGC

>M6-PGSC0003DMG400005539 M6 LRR-RLP

ATTTGAAATGCTCCTTCAGAATTTGACCCAATTAAGAGTGCTTCATCTTAGTGGCATAAACATCTCTTCCA  
CCATTCTCTGAATTTTTCTTCTCATTTAACAACCTCTGATCCTGTCAGAAACAGGATTGTATGGGATAATA  
CCTGAGAGTATTTTTCACCTGCCCAACTTGGAACACTTGACTTATTCTTCAATAATCACCTCAGTGGTTA  
TTTTCAAAGACCAAATGGAACAGCAGTGCATCTCTCATACAATTAGATCTCAGTGACGTGAATTTTTCTT  
GTAATTTGCCTGAGTCTCTTGGCTATTATCTAACTTCGGTGC GTTATTTGTCTCTTCAAAGTTGCAACCTTA  
GAGGGCCTATTCCTGAATCTCTTTCAAATCTCACCCGCATTGAGTATTTATACCTTAATGGTAACTCCCTG  
AATGGAACAATACCACCAGGGATGTTATCCCTTCCATCACTAAAGGAAATAGGCGTGAGTTTTAATCACT  
TATCTGGTCCGCTTGAAGATTTCAAGTCCAATTCACTAATCTGGATAAGTTTAGAGGGCAATCAGCTGCA  
GGGTCATCTTCCCCACTCAATTCAAACCTTGTGAGCCTAACAGATCTTGATCTTTCTTTCAATAATTTAG  
TGGTCGTGTGGATGCCAGCCTTTTTCAAACCTTAAACAGCTTCGGTCTATTAGTCTTTTCATATAATAACA  
TCTCATTGACCAATGACAACAACGTTACTTTGCCGAATCTCTTACTAGGTTAGAATTGGCCTCTTGTGAA  
GTGAAAGAGTTGGAGTTTCTAAGATCCGCAAACCAGCTTTGGCAGTTGGATCTTTCAAATAATAAGATT  
GAAGGAAGAATTCCTGATTGGGCATGGTCTAACTGGATGTTTTTCATTGCAAGATCTTAATATATCCCACA  
ATATGCTGACGAGTGTGGATTCAATTCCTCTTCAGTTTGCAGATACTATTAATTTGCGGTCCAATTTGCTT  
CAAGGTTCACTACCTATTACATCAAATTCACAAATTAATCTTCTCATATCCCATAATAATCTCACTGGAGA  
AATTCCTTCATCTATATGCAAGTTGACATCACTGGTAATGCTGGATTTAGCGACAAACAATTTGCGTGGA  
GAAATTCCGAAGTGTTTCGGAAATATCACTTCCCTCCAGGTTTTGGATATGCGCCACAACAATCTTTCTG

GGAATATTCCAACAACTTTTCAGCAATGGAAGTTCACTGAGCAGCCTCAACTTGCATGGCAATAAACTAGA  
GGGGAAAATCCCACAATCCTTGACCAATTGCAAACAACTTGAAGTTCTTGATTTAGGAGACAATCACCTC  
AACGACACATTCCCCGTGTGGTTGGGGACTCTGCCAAAGCTGAAAGTTCTAAGCTTGCGATTCAACAAA  
TTGCATGGTCCCATCAGAACATCAAGGATTGAGAACATGTTTCCAGAGCTCCGAATCATAGATCTCTCTT  
ACAATGCCTTCTCAGGAACTTACCTTCGAGTTTGTTC AACATTTGAAAGCCATGGGGACAATTCATCA  
AAAATGAACACACCAAGTTATGAAGGAAGTCGATATTACCAAGACTCGATAGCTGTGCGTATCCAAGGGA  
TATGAGCGTGAAATTGTGAGAATCTTGTTTTGTACACCACTATCGATCTTCAAACAACAAATTGGAAG  
GACATATTCCAATATTATGGGAGATCTCATCGCACTCCGTGTGCTGAATATATCTCACAATGGATTGGA  
AGGTCATATAACCGTCATCACTTGGAAAGTTTATCTTTGTTGAATCACTGGACCTGTCAAGTAACCATCTTG  
TAGGAGAGATAACCAGCACAATTTGCTTCTCTTACTTCTCTTGCAAGTCTTCAATCTTTCCTACAATCATCTTG  
AAGGGTGCATTCTCAAGGAAATCAATTTACATACCTTTGAGAACAATTCATATGAAGGCAATGATGGATT  
ACGTGGTTTTCTGTTTTCAAAAAGTTGTGGGACAACCTATGCCGTATCTGGACAGCTAGACGGTGAAGA  
AAGCAATTCTGAATTTCTGAGTGATTTTCGGAAAGCTGCTCTTATGGGGTATGGAAGTGGACTATGCATT  
GGAATATCCATAGTATATTTTCATGATGTCAACTGGAAAACCGATATGGTTTGCAAGAATCATTGTAAAGC  
TGGAGCACAAAATAATGATGGGAAGGAGAAAGAAGCAACGAAGGCAAAGGAACTGCAGAAGAAGAA  
ATAATCACTAGTAATGTTACTGTTATTTCTTTAAGGAAAATATGTAATAAGTTGTAGACGTAATTTGTTA  
AATCCTGTTTGCTTAAAGTGTGTAGCATTATTTGACCATGAAAATTGAGGGTGAGATAATCTTTAATGAC  
AAGTTATATGCAATATAAAATCTTATGA

>M6-PGSC0003DMG400005542 M6 LRR-RLP

ATGGGGTATGCAGTTATTATGCTCTTAATTGTGTTTTCTGTCATGAAGTTTCTTCAATATCCATATTACCT  
CACAAACATCAAACCTTTCACTTTTAAAATTCAAGCAGTCCTTTACTATACATCCCACAGTAGAATCTTAT  
TATTGTCCGAAGCCTTATCCAAAACGAGTTCATGGAACACGAGTAGAGATTGCTGCTCATGGGATGGA  
GTCGTATGTGATGACATCACTGGGCATGTCATTGAACTTGACCTCAGTTGCAGTAATCTCACTGGAACCA  
TCGATTCCAATAGCAGCCTATTCCAACCTCTCGCATCTCAAAGGCTTGATCTTTCTTGGAAATAACTTCTCC  
AATTCTCATATCTCCCCTGAATTCAGCAAGTTTTCGAGCTTGATGCATCTTGATCTTTCTGGGTCCTATTT  
TCAGGTCAAATTCCTTCTGAAATCTCTCATCTTTCCAAGTTACTCTCTTCGTATCTCCACATTTTATTACT  
TTACAGTAACAACCTTTACAATAAAAAGCTAAGACTCACAACCCATGGTTTTAAATCGCTTCTTCAAAC  
TTGACCCAATTAAGAGAGCTTGATCTTAGTGGCATAAACATCTCTCCACCATTCTCTTAATTTTTCTTCT  
CATTTACGACTCTGAGCCTGTCAGAAACAGGATTGTAAGGGATAATACCTGAGAGTATATTTACCTGC

CCAAGTGGAAATACTTGACTTAGGGATCAATCATGAGCTCAATGGTAATTTTCCGAAGACCAAATGGA  
ACAGCAGTGCATCTCTCATTGAGTTAGATCTCCGTGGCGTGAATTTTCTGATAATTTGCCCGAGTCTCTT  
GGCTATCATCTAACTTCGCTGCTTTATTTGTCTCTTGAAAGTTGCAACCTTAGAGGGCCTATTCCTGAATC  
TCTTTCAAATCTCACCCGCATTGAGTATTTGCACCTTAATCGTAACTCCCTGAATGGAACAATACCACCAG  
GGATGTTATCCTTTCCATCACTACATAGAATAGACTTGAGTAATAATCACTTATCTGGTCCCTTTGAAGAT  
TTCAAGTCCAATTTGCTTCAAGGTTCACTACCCATTCTATCAAATCCACAGTACTCTTCTCATATCCCAT  
AATAATCTCACTGGAGAAATTCCTTCATCTATTTGCAACTTAACATCACTGATAATGCTGGATTTGGCGAC  
AAACAATTTGCGTGGAGAAATTCGCGAGTGTTCGGAAATATCACTTCCCTCCAGGTTTTGGATATGCGC  
CACAACAATCTTTCTGGGAATATTCCAACAATTTTCACTAATGGAAGTTCACTGAGGAGCCTCAACTTGC  
ATGGCAATAAACTAGAGGGGAAAATCCCACAATCCTTGACCAATTGCAAACAATTTGAAGTTCTTGATT  
AGGAGACAATCACCTCAACGACACATTCCCCGTGTGGTTGGGGACTCTGCCAAAGCTGAAAGTTCTAAG  
CTTGCGATTCAACAAATTGCATGGTCCCATCAGAACATCAAGGATTGAGAACATATTTTCAGAGCTCCGA  
ATCATTGATCTCTTACAATGCCTTCTCAGGAACTTACCTTCGAGTTTGTTC AACATCTGAAAGCCAT  
GAGGACAGCTGATCCATCAAAGGAACCATCAAAATATGGTGGAGATTCAATACCAAGACTCGATAGC  
TTTCGTATTCAAGGGATATGAGCGTGAAGTTGTGAGAATCTGTTTTGTATATCACTATCGATCTTTCAA  
ACAACAATTCGAAGGACATATTCCAATATTATGGGAGATCTCATTGCACTCCGTGTGCTGAATATATC  
TCATAATGGATTGGAAGGTCCTATACCGTCATCACTTGGAAAGTTTATCTTTGGTTGAATCACTGGACCTG  
TCAAGTAACCATCTTGTAGGAAAGATACCAGCACAATTTGCTTCTTACATCTCTTGAAGTCTTCAATCT  
TTCCTACAATCATCTCGAAGGGTGCATTCTCAGGGAAATCACTTACACCTTTGAGAACAATTCATAT  
GAAGGCAATGATGGATTACGTGGATTTCTGTTACAAAAAGTTGTGGGACAATTTATGCCGTATCTGGA  
CAGCAAGACGGTGAAGAAAGCAATTCTGAATTTCTGAGTGATTTTCGGAAAGCTGCTCTTATGGGGTAT  
GGAAGTGGACTATGCATTGGAATATCCATAGTATATTTTCATGATGTCAACTGGAAAACCGGTATGGTTT  
GCAAGAATCATTGTAAAGCTGGAGCACAAAATAATGATGAGAAGGAGAAAGAAGCAGCGAAGGCAAA  
GGAATTGCAGAAGAAGAAATAA

>M6-PGSC0003DMG400005590 M6 LRR-RLP

ACCTTAACACATCCTACAGAATAAAATACATCTCTACGGACTTTAGATTGAAAATTGTGGGATACAAATT  
AGATTTTAATAAGATCCAATCATTCTTATTTTAAAATGTATATGATTTATTTATTCACCATTTAACAG  
GTAACAAAAGAATGAGTTCTCTCGGAATTTACAATTGGGAAGTTCTACTCCAATTAAGCAGAGTCAT  
AGAATCCCTAAAATCATTCTTCTCTTAAATCACTTTCTTATGAATTTAGTGATCTCACTTCTCCAACCAT

AATTTACGGTAAGCTCAAATTCATATATACCTTAGCTTACTTCTATTGCCACTCTTTTCTTTTGATATGTAA  
ATTTAGTTTTCTTTATTTTTGGACTCTATGATATAAGCATTAAAGAAATTTGAGCACGGTGGAGCACCTA  
TACTTGGAGGGATGTTCTTTAAATGACAACCTTCTCCCAAACATTGGACAAATGACTTCTCTCTGGTGT  
CAGTATAGCATTGGTGACAATGACGGCACCTCCCTAATCAAGGTACCCTATTTTTCTCTTTTTCCCTAA  
TGCCCGCATTTTCATGTTGGAGGTCTGATTTTAGCATGTTGAGTTGATCAAACATTATAATATTTTTGTTT  
ATTACCAAACACAAGAAAATAAGTAACACAAGCCATCTAATTTTTCTAGAAAATATTTTCCTTCGTATCGA  
ACACATCCATAGACATAAAAAAATAATAAGATGTCACTCATCATAGATATTTGTTTTAGCTAAATGTTT  
CTTAATATATATATATAGGCTGGTGTGAACTCAAACACATTCAAGAGCTGGATTTCTCAGACAATAATTTT  
CGTGGAACACTGCCTTCATGTTTTGGAACTTGACATCACTTCGACGATTGAGTTTTTTGGGAATTA  
CATGGGAAATATAGCGTCACATTCTATTTGGAGGAGACTCACATCACTTGAGTACCTCAATATTGTGGAT  
AACCAATTTGATGTTCTCTGTCATTCAGCCAATTTCCAACCATACAAAATTGATCTACTTGGATGTTAG  
TTCTAATAACAATAATCCAGATACCGAATTCAAAATTGGATCCCAAATTTCCAGTTGGAGTTTTTTGCTA  
TCGAAGGATGTAAAAACCTTCAAAAATTGCCTTCTTCTTCACTACCAATATGACATGAGGATTCTTGCT  
ATAAATGGAAATCAATTGCCAAGAACTTTCCAACATGGTTGTTAGAAAATAACACCAGACTTGCAGGG  
ATTTATAGTAGAGATAATGCTTTCAGCGGACCATTCAAGTTGCCATCGAGTTGTCACCTCCATCTAGAGA  
CAATTGATGTTTCTAATAACAAATTAATGGGCATATTCCAGATAAAATGAATTCAGCATTCCCAAAGCTT  
ACTTATTTGAACATGTCACAAAATTATCTTGAAGGTCCTATACCTTCCAAGATTAGTGGCATTCAATTTACA  
TAATCTAGACCTATCTCACAATTTCTATTTGGAGGAGTTCCTAGTGATCTGGCAATTGTTCTCCAGTAT  
TAGCTTACCTTCGATGTCAAATTTTTCCAAGGATGTCAAACCAAGATGTTATTCTTTTTGTTCTTGAAT  
GGAAATAACTTTGAGGGACCACTACCTTGCAACATGTTTATCACATCCCTTATTGTATTGGACGCTAGCA  
ACAATAATTTCTCTGGAGAGATTCCGAGATGCATTAGGGATAATACAAGATTGTTACAACCTTGATTTGTC  
CAAGAATCATCTCGATGGTTCGATTCCAGTTGAGATTTCCAATTTAAAGCTCATTGAGTCTTAGCTATAT  
CCGAAAACAGGCTTTCAGGCTTATTCTTCTTGTGTGAATTTTTACCTCTTGAGCACATCCATCTACAG  
AAAAATCAATTGGGTGGTGAATTGGAACATGTACTTTTCACTTCTTCTCTGATAACTTTGGATCTTGG  
GTACAACAATTTTACAGGAAGTATCCCACACACCATAGGCTCACTTAATACTCTCAACTACCTTCTCCTTA  
GCAATAATCAATTCGAAGGAGAGATTCCAACCTCAGATTTGTATGCTGAACAAGTTATCTATCGTGGATTT  
ATCTTTCAATAAGCTTTATGGTTCCTTCTTCTTGTGTTGAGTTACTTAACACAAGCCAAAAGGATGCAG  
AGATAAGTAAGACCAATTATGCTACGACTTCTAGGCGTTCATGGATAACTTTTTGGCCTGGATGCGTTT  
GAAAAGGCACTACCACGATAGTCATGGATTTCTAAGTGACATATTTCTGATGGATGTGGAAACTCAGGT

CCAGTTTTCAACAAAAAGAACTCATACACTTATAAGGGAAGCATTCTAAAATATATGTTGGGTATTGAT  
CTCTCAAGTAACAGATTAAGTGGGGAAATCCCGTTGAGCTAGGGAACATGAGCAATATACATGCATTG  
AATCTATTGCACAACCATCTCATCGGAAGAATACCAAATACCTTCTCCAATCTACAGAAAATTGAGAGTTT  
AGACCTTTCCTACAACAACCTTGAATGGGAGCATTCTGTTGGTCGACTTGAGCTAAATTCTTTGGCAGTA  
TTCAGTGTGCATACAACAACCTTATCGGGTGCAGTGCCTGATTTTAAAGCTCAATTTGGAACCTTCAACA  
AAAGCAGCTACGAGGGAAATCCTTTTCTTTGCGGTTATCCATTAGACAACACGTGTGGCATTCTAAATT  
GTCAAATACCTCCAAGATTAATGGAGGTGAGGAATCATCAGACTTGAGGATATTCAGTGTTTTTACATT  
GGCTTTGTTGTGTCTTATGGAGCGATCTTGTGGGATTAGCTGCGGCACTCTGCTTCAATCGTTATTGGA  
GAAAAACATGGTTTAGGATGATAGAGGCATTGATGTTTTATTGTTACTATTCTCTCTTGACAACGTTGTT  
ACACCCATCAAGAATATATGGTACAGGAATGTTGGTTAATTCTAGGTTGTTGTTTTACAATATTGTTGTAT  
GTGTATCACCATTATTAATTATATTGTCATTCTGTTTTATCAATATTCAACAAATAGGATCTGTTTGGAGTA  
GTTACAACCTCATAATTTAATACCCCCTGCATAGCTTCATTAGTGTGCTATTTATGTAGCC

>M6-PGSC0003DMG400005600 M6 LRR-RLP

CCCTGAGACTTAGTTACCATCACCTTCCACTTGATTTGAGACAATGCTTTGCATATTGTGCAGTATTCCCA  
AAGGATACGAAATGGAAAAGAAAAATCTAATCTCTCTCTGGATGGCACATGGTTTTCTTTATCGAAAG  
GAACTTGGAGCTAGAGGATGTAGGTAATGAAGTATGGAATGAATTATACTTGAGGTCTTTCTTCCAAG  
AGATTGAAGTTAAATATGGTAGAACTTATTTCAAGATGCATGATCTCATTGATTGGCAACATTTCTA  
TTTTCAGCAAGCACATCAAGCAGCAATATCCGAGAAATAAATGTAAAAGGTGACCCTTACCCACATATGA  
TGTCGATTGGTTTCTCTGAATTGGTGCCTTCTACTCTCCTTCTCTTTGACAGGTTGTCTCATTGAGGG  
TGCTTAATCTTAGTAAATTAGGACTTAAGCATTTACCATCTCCATTGGAGATCTAGTACATTTAAGATAC  
CTAACTTGTCTGGCAATAGGAATATGCATAGTCTCCGAAGCAGTTATGCAAAGCTTCAAATCTGCA  
GACTCTTGATCTACATGATTGCTCCTCACTTTGTTGTTTGCCAAAACAACAAGTAACTTGGTAGTCTCC  
GAAATCTTTTACTTGAAAATTGCAAAGCATTGACTTGTATGCCACCAAGGATAGCTTCTTTGACATGCCTT  
AAGACTCTTGGTTGCTTTGCAGTGGGAAGGAAGAAAAGTTCTCAAATTGGTGAATTACGAAACCTGAAT  
CTCTATGGCTCAATTTCAATAACGCATCTTGAGAGAGTGAAGAATGATATGGATGCAAAGAAGCCAAT  
TTATCTGCAAAGAAAATCTGTATTCTTTAAGCATGATTTGGAGTAGGATAGGACCACATAGATATGAAT  
CAGAAGAAGTTGAAGTGCTTGAAGCCCTCAAACCACACTCCAATTTGACTTGTTTAACAATCAGTGGCTT  
CAGAGGAATCCGTCCCCCAGACTGGATGAATCACTCAGTTTTGAAAATGTTGTCTCTATTGTAATTGAA  
GTTTGCGAAAACCTGCTCATGCTTACCACCCTTTGGAGAGCTGCCTTGTCTAGAAGGTTTAGAGTTACACA

AGGGGTCTGTGGAGGTGGAGTATGTTGATTCTGGATTCCCTACAAGAAGAAGGTTTCCATCTCTGAGAA  
AACTTATTATAGGCGACTTTGATAATCTGAAAGGATTGCTGAAAAAGGAAGGAGAAGAGCAATTCCCTG  
TGCTTGAAGAGATGGAGATTTACTGGTGCCTATGTTTGTATTCCGACCCTTTCTTCTGTCAAGAAATTG  
GTAGTTCATGGGGAGAAGTCAGATGCAATAGGTTTCAGTTCCATATCTAATCTCAGGCCTCTTACTTCCC  
TCCAAATTAGCAAAAACGAAGAAGCTACTTCGCTCCCAGAAGAGATGTTACATGCCTTGCAAATCTCAA  
ATACTTGAATATCAATTCCTTCACGAATCTCAACGAGCTGCCTACCAGCCTGGCTAGTCTTAATGCTTTGA  
AGCATCTGGATATTATTGGGTGTGATGCACTCGAGAGTCTCCCCGAGGAAGGGGTGAAAGGTTAACTT  
CACTCACACAGTTATCCATAACATGCTGTGAGATGCTACAATGTTTACCGGAGGGATTGCAGCACCTAAC  
AGCCCTCACAAATTTATCAGTTAGGGAATGTCCAACACTGGCCAAGCGATGTGAGAAGGGAATAGGAG  
AAGACTGGTACAAA

>M6-PGSC0003DMG400005972 M6 LRR-RLP

TAAGAAAATACTGCGTATTGCCATTTAAGCACTTACAGAAGTTATTTAATACGAGCTTTTTTCAGCAACTC  
TGGATGCATCATGTCTGCAGCTGATATTAATCATTAAAGCCAAGACAACACATAAGGAGGGCGAGAAGA  
AAGAGGATAAGCTGCTGCGAGTAATGCTCCTAAAGGGACAACAGGTACATTGAGAGCTTGGGCAGGAT  
CAGCCTGCAGCCAAGGTAAATAAATATAAGAATATGCTGAAAGAGCTTTTTGCTGCACAATGAGAGTTG  
AAAGACATTTATTTTTGCTTACAAGGGGTAGGAGCAGTCTGAGTGCAGACTTCGAAGATGTGTAATCC  
AGTGATGAAGCCAAAGTTGCAATAGCAGTTAATCCAGGCTCTCTTCTTGCAATCCTTTCCAAGATAAAA  
CCAGAAACATATTTAAATTATCTCATATCTGTATGATTCCCGGATGTAGTGAGTTTGAAAATATTTTTTG  
AGACTGTGCCACTGCACATTAACAAGGAATCAGACAATGCTCCAAGTGACTTATCTGTTAGTTGCGAAA  
CCTTTTTACATCTAAAACCAGGTCAAATTCCTTCAAATCAAATTGTCCCTTACACACTGTAAAAACGTAT  
GGATAAAGTATAAAATCTTGCCTAGCTCCCTATAATCTCAATAAGGTCAAAGATGGCTCATTTTCAGCT  
CTGTATGAAAGACGCTAGTAAGCAGATAAGTCACACTGTTAACCAGATCCTGTTTACCTTGGTGCACCTT  
ATCATGGTATTTTTAAGTTAATAGGAGTACTGCACTTGGTGGCTATTACAACATACTCCCAAAGTTGTTG  
TGAACATAGCATCTTTCTTATTTTTCAGCAAAAAGCTTGTTGAAGTTGAGTCTGAAGATTTTGCTCCATG  
AATATTAGGAATTTAAAGAACATTAAGTCAAGAGGAGACCAGGTTAACTCAAAGTTGCACCAAGTGAA  
GTGGTAGCCTTTGGAATTTAATCCCAAGACTAAATCGTATGATACTCCAGCAGGTTTCATGGAATAAATTT  
CTGGAATTATACTGCCTTCTTTATTTAAATAAAATGTTTAAATATTACTGTTTTCTTATCAACTGCAACTAC  
AGAAAGGATTCTTTGTTACTTTTTCAAACCTTGCACATTAATTTACTAGTATCTTAAGTGGCTCATAAG  
TAGACCCGCCAGATCACGTAAGTGTAAACAACGTTAATTCCATATAAACAATGAATGAATCTTACCACACT

GTGATAGCCAAGCATAACAGTAATATTCTCCCATAGAATGTCCAATGGCAAGAAGTTTACCATCTTTTGG  
TGCAGTTTGGGCCTTAATGTATTCCATCTAGAATGAAAATAAAAATAATTAGACTAGTCAGAATAATAAAT  
AAGAGTGAAATTTCAACAAATTCTGAATTTCAATTTGGTTGTGTAATCTCAAGGACAATAATATCTTTATAT  
TCTACAACATGGGAATCTGTACCTCACCGCAGCAGGAACATCCTCTTCCAGGTAATGATCAAAGTCCCA  
ATCATACTTGACAATCAAGTCAAGCTGTTTCTGGAAATCTTCTATGGTAGTGGTTAGACGTTTCATGCAGA  
TCAACTAACGGAGAAACAGAACGTTGGCCTTCTCAATGATATTAAGTACTAGCTTTTGGCTAAGATCCTTTA  
CTTGGTCAACAACGGCAGAGTTTTGCCCTGTCTCCAGCAGACTTAACAACCTTCCCCTGTCTCGTTAAAG  
CGTTCATAAAGAAAGGAATCCTCTAATAATTTTGATATTTGATCAAATAGTTTAGCAGACATAATCCTTGA  
TTGGCTTTCATTGAGGAAGCCAGAGACTCTTTCTGACAAGCGCATAAATGTTTCCGTAAGCTCGTTTACT  
ACTCTTGATTCATCCACATTGTTGCAATAGCTGTGGATTCTTCTTTGACCACAGCTGTGTCAGACTCTTCT  
AAGGTACTCTGGGCATCTGTTGACTGCTGTGCTGCAGAAAGAACTTTGTCAGTAGCATTATCAGCGGCA  
GCTTCCATCTGTTCTGAGACTGCAATTGCAGTCTTCTCAATGTTTGTGGAATCTGACTCCTGCACACTCAA  
CCCAGCTCCACGAAGTTCAAGAACCCAAGTGTCAAATCCTTACCAGACATGTACCGGGCGAAAGATGA  
CTGCATAATTATTTTTAAAAGTAAAAACCGTGATTAAATAACTTTTTAGAAAGAATTTAAAAAAACCAGCC  
ATACTATGTAAAATTTCTTTGATAAGCAGGATGGACATGGTTGCCTGAAGTGATAAAGAATTCTAAACCT  
CCACTGAAGAGTAGGGTGCACATACTTGCCTCAAGTGATAAAAATGAACTTGAACGGATAGGAAGATG  
CATCAACAGAACTTTAAACAAAAAATAGACAAGAAATAATCCAAGTGAATCAAGTTGGCATTAGTTATT  
GCATTAACCAGCAGACATTTAGATTTATCTCACTAAAAAAAAAAGGATAGAAATCATCACTAGCAGCTA  
AGCAAAAAATCGTCATCACAATTCATATTTTAGAAATGTACAATCACAGAGAGTGCTAGCCACATGACTA  
CCATCAACACCTGATTGATGCAGGCATGCAGCCATAAAGCCTTATAAAAAAAGGAAGATGAAATAGAT  
AACAAAGCCAGTAATAAAAAAATCACACAAGTAACTTTTATACGCTTGAAATGCATAAAGTATGAGAAA  
AGGACGAAGTTTTTAACCGACCCACCATTTTGATCACCGCACCAACATGTGTGCAGAAGGAAGTAGATG  
CAGATGCACTAGGAACTAGTTACCCTAGGACCTTAAACAATCCATTTTGTATTATCCAGGGTCGGGATGT  
GACCCAACTACTTACAATGACCCACCCGTTGACACAGGTGGGGAACTACTAATGCTCTTGATCCCTAA  
TTATATAATATAATATAAGTATCCTTTTGATCAAAAAAAGTAGTAAGGATAATACAACATCAAAA  
CCAGGGTTAACTCTAAAAAATTTGAGCATGCCATAGAATTCTACCAGATTCAGAAACAAGAACCCTCCA  
CGAAATAAAGAGTGAACTTTAATGGAACCTGACATATCCACTAAGCACTGATAATATACACATTTGACA  
TCTGTCAATTATGATCTATTAATGTGGCTATCAATGAACGATCCATGAAGATCCCCTAGTTCTGTTACCT  
ATACAGGCATGAATTTGCAAATAAGAGTGTCCCGACTACTCTTTCACACAATACTGCACATACAACAAA

ACAGAAGAATGCACAAAGAACGGAGAGAAGGCAGACGAGTATCATACCCCAGGAGCAAGATCATATCC  
AATAGCATTAGTCCCCACGCCAGACAACAGAAGCAGGGGATGATTTCTCTTTGGAGCCTATCATCATCAA  
AAATCACACACCCCTTAATGCAAAGCTCAAATCCTTGAACAAAAAATCATGTAACAGAACTGTAAACCT  
TCCTAGTATCACTCCCTGTGTTTCATTTTATATAACAGTATTTGATAGAACACAAAATTTAAAATATTCAAT  
AGTTGAATTAGATAAAAATGGTGTCAAACCTTCTTAATGCCTTCATGTCTTATATATTGGGACCAATTCTA  
TATGACCACATTTACTTTAAGCCGAGTATCTATCACAAACAGTCTATCTACCTTCACAAGGTACGAATAAG  
GTTGCATTTGCTCCACCCTCCCCGGACCTCACCTCTGAGATTACGGGTTGTATTCTATATGACCACATTTA  
ATTGATCACAAAATTTAAAATTTGAACTTATATAGAAATGAAAGTGTCAAATATATTATTTTTTTTCAAAT  
TGTCATACAGTTAAGAGTAACAGTTCAAATTAACATAAAAAAATTGAACCTGAGGAGGAGGAATG  
TAGCGCCAGAGAGCAAGTTTCCAATCGGAATTATTAACAGATACGTAGTGGAGTTCATCGGCAGTGCAT  
AACGATGGCTTATTACAAACCTTCTGGGCTGTAGTATCGCCATCATTGGTGGTGAAAGCTCTGAGTTTAA  
AGGCGGAGTTCACCGCGAAGCAGTAGTTCGGGGAGTCCGGTATGAAATGACGGCGGGAGGAAGTCG  
CCGGCGGTGATTTGTTAAGTGGTGGTAATGGTTGTGGTGGCGGAAGACGGCAGCGATTTGAATCGCCG  
ATCGAATATCGGATTGAATTGGATAAACCATATTTTTTTGGGATTCGTGACAATTTGGATAAAGAAAATTG  
GTTTGATAAATCTTTTACTCTTTTGAAGTTTGGAGACGTAAACTTTTTTATT

>M6-PGSC0003DMG400006027 M6 LRR-RLP

TAGAGGCGTCTACTTGCTATTTAATTCAAATCAAATTCATTCATTCAACAACACATTTTTACATTGTG  
TGAAAAAAACTTCATTTTCTTCTTAGCTTGAAAATCTCTATCAAATTCAGCAATGCGGCCTCCTAGC  
CGCTGCGTATTTATCTCTTTTCTTGTTATCTCCATCTTGTCGTACCAGATCTCGAATGTGGTAGGACAAGA  
AGGTGATAGCGATATCGATTTAGATGATATTAAGGCTAATGCTAGTAAGTTTAGTTTCGAAAACCCAAA  
GATTCGCGATGCTTATATCGCGTTGCAATATTGAAAACAGCAATGTTTTCTGATCCTTTAACTTCACAG  
CTAATTGGACAGGACCTTATGTTTGTTCGTATGGTGGAGTGTGTTGTGCTCCTTCGTTAACGGATGATTC  
GATTAGAGTTGTAGCTGGCATTGATCTTAATCATGCTGACATTGCTGGTTCATTAGTTGCAGAACTTGGT  
CTTCTTACAGATCTGGTCTTTTCCATCTTAACTCGAATCGTTTTTGTGGAGTTGTACCGAAAACCTTTAGC  
CATTTGAAGCTTCTTAGGGAGCTTGATTTGAGTAACAACAGGTTTTGTTGGTGGGTTCCCTAAGGTAGTTC  
TTTCATTACCTTCTTTGAAGTTTCTGGATCTAAGGTTAATGATTTTGAAGGACCAGTTCCTTCCGAATTGT  
TCGATAAAGATTTGGATGCGTTGTTTCTGAATGACAATAGATTCCGTTTTGGCATCCCGGAGAACTTGGG  
TAACTCCCCTGTTTCTGTTCTTGTGTTTGTCTAATAACGATCTTGGAGGGTGTATTCCCGCGAGTATTGGGA  
AAATGGGGAAAACGTTGAATGAGTTGATATTGATGAATGATAACCTCACTGGGTGTTTGCCCATGGAGA



TTGGATTGTTGAATAAGTTGACAGTGTGGATGTTAGCTTCAACAAGATTCAAGGCTCATTGCCATTAAC  
TGTGAGCAAAATGAGGAGTGTGGAGGAACTCAATGTGGCTCACAACAAGCTTACTGGGGTTATACCAG  
CTAGCATTGCCAACTTCCAAGGTTGCAGAACTTTACGTATTCGTTCAATTACTTCACTGGGGAGGCTCC  
GGTTTGTGCTGCGACTAGATCTGGTGATGGTCAGGAGAACTGTATCGTTGGAAAGAAGAATCAAAGAT  
CTGCTAAAGAATGCTCTTCGGATGATGCAAAACCGTATGATTGTAAGAAATCGAAGTGTATAGCCCAT  
ATGCTACGTCTCCTTCGACGAAACCAAAGCCAACACCAAAACCAAGAGGACCACCACCACCTACTTGA  
AGTCTTCGGGTTTCGCATAACAAGCGATCTCCGCCACCACCTAAATCAACTCCTCTTCCTCCACCAGCACCT  
TACAAAAAGTCCCCAGTGTATCGACATAGAAGTCCACCACCACCTACTCACAAAATTTACCTGTAATC  
ATCATTACCTCCTCCACCTTCACCCGTATATTACCACCCATCTCCATCGTCCCCACCACCACCAGTTTATT  
ATTCTCCACCACCCCCGGTGTATCACGAGCCACCTACTTACAAGCCTAAATCACCACCACCACCAACACCCG  
TCATATGAACACCCAAAAACCCCATCATCACCACCACCAACACCATCATACGAACATCCAAAAACCCCAT  
CACCACCACCACCAACACCATCATACGAGCATCCTAAAACACCACCACCAACACCATCATACGAACATCC  
AAAAACACCATCACCACCACCACCAACACCATCATACGAACATCCAAAAACACCATCACCACCACCACCA  
ACACCATCATACGAGCATCCAAAACCCCAATCACCACCACCACCAACACCGTCATACGAGCATCCAAAAC  
CCCAATCACCACCACCACCAACACCATCATACGAACACCCAAAAACCCCATCACCACCACCACCAACACC  
ATCATACGAACACCCAAAAACCCCATCACACCCAACTCCACCTACCCACCTTGTAACGAACCACCACCTC  
CACCACCTAATTCACATTGGGAACCAAAACCATCCCCACCATACACCTACTCATCACCACCGCCTCCATCA  
CCATCTCCTCCTCCTCCCACTTACTACTACTCATCACCACCGCCACCATCACCATCACCATCACCTCCCCCA  
CCCCTTACTACTACTCATCACCGCCGCCACCACCACCATTTTACGAAAATATCCCTCTCCACCAGTAATC  
GGAGTCTCCTACGCATCTCCACCACCACCAGTCATTCCATATTACTGAACAAGGGTTATCAATTAGCCTTT  
GATTTTCCATTATCAAAAAAAAAAAGAATTCATTTTTTTTTATGAATTATGTATACTTTGTTATTTATTTTTG  
TAATATTTTTATTTGAGTTTGATTATATTTATGAAAATTGGGATTATGGGCGGGAGTTAGTGAGGGGTT  
TAACTATCAATATTTTAATATTGTTATAT

>M6-PGSC0003DMG400006076 M6 LRR-RLP

AATCCCCTTCAAGCCAAAAACATGGCCGCCACCGCTGACATATTCTCGGAATGTGTGATTCACAAAAT  
ACTCTGTTATCTTAGCTATGGCCAAGCATCCCGGATGAGAATTCTATCTAAAACATGGCTACAAGCTTGG  
TCTACTCTTCCCACTTGAATTCTTAGTTGAATATTTGAAGAAACAAAAATAGTGGACGCAATTATGG  
AGACATACAGGGAAAACAAAATCCCCATTGACAAGTTTGGATTTTCAAATTGTTGAAATTCAATCGTCCG  
TCATCAAGTTTTCCCTCTGATTGATAAGTGGCTTGACACAGCTCTTCAAATGGGCGCAAGAGATTTAGTC

TATGTAGATCTTCTCTACTCGGTACGATTATATCCTTTTCCTATTTCTAAAGTCTTGGCTGCAAATTCITTA  
AGAGAATTAGTTCTGAAAGGTTGTAACCTTATGCATGTTTCGTCATCTAGTGGGTTTCGCGAATTGTCATT  
CTTTGAGAAAGCTTTCTCTATCTTATATAATTTTAAGCAAAAATTTGCTTCAGACTTTACTTAATAGTTGTC  
CTTTCATTGTCTCTTTCAACCTTGATCATTGTTCCGGGTTGGTAAAGATTGAGCTTATGAATCTTCAAAG  
ATCAAGTCAGTTTCCGTATCAATAAATAGAAACCAACATGTGAAAATCCAAGCACCAACTCTTGAACACT  
TGTTTTATAATGGATATTTATCGGGAAATTTGGTTATCGTTGGATGTCTGAATCTAAAATCTTTAGAGCTA  
TCACATGTGAAGATATGTATTGGATTTCTCCATAACCTAATTTCTAGATCGCAATCCCTAGAAGTATTGAA  
GATTCAGTATTGTGTGGGCATAAGACAGATTGAAACTTCGAATTTGGTATCACTTGAGTATATAGGATAT  
CAAATTCCTGAAATTAATTTGCGAAAGCTTCAAGTCAATTGAAGCATTCAAAAATCGTTCTTCATGGCA  
ACAACAATTTAGATGCTGCATGGTTTAGTAAGTTGAGGAAGCTTCTATCGAATTCGGCCCCTTGGTCCCA  
AGTTCTCCTTTGTTTTCCCGAATACAATGAAATCAAGATTAAGATTTGCAGCAGAACCAAGGAGTTGCT  
AGCCCACAAATGGACGTTTTAAATGTCAACATTACAAGGTCATATGGGGAGTGACCAACATTTGTGGAT  
GCTTTGCTATGGAGTTGTAATCCTAGGAGACTCAACCTATCATCAACGGTTGAAATGATTACATGTTTCG  
TCAGTCGTTTGATGTATATGAAGAATCTGAGTCATTCTTCTCGGAAAGAAGCAACCCTTGGCATAAGTCA  
ATTGAAAGAAATAAAAGTTTTTGTATGGGAAAATCAAGAGCTGCAACTCGTAAGTGGGGAACTGGAGA  
TAAGCACCTTTTCGGAGGACAGGAAGGAAGTTTATTTTTTATTAGATTGGCAATGCAATTAATTTATCAC  
TATTTCAAACGAATGCACCTTGTTCACTTAACTTTATTAATCTGTTTTATGTCTAGCTTTAAATTCTTG  
CACTTTCTCACCATTGTATAAAATTGTGTTGAAGTTGAAGCATAAGATTCTTT

>M6-PGSC0003DMG400006095 M6 LRR-RLP

ATGGGGACAGCTGACATGTTGCCTATATGCCTCATTTCGAAAATACTCTGTTATCTTAGTTATGAAGAAG  
CATCTCGGATGAGAATTCTCTCCAAAACATGGCTACTAGCCTGGTTGGATCATCCCAACTTGAATTCAC  
AGTCTCGTCGGGCAAACCATACAATAGTGGATCATGTCATGGAGAGATATAATAACGGAAATATTCC  
TATTGACAAGTTTGAATTACACAACCTCTACATAGTCTGATCATATTTTTCTCTGATTGATAGGTGGCTCG  
GTATTGCTCTTCAAATGGTGTAAAGACATCTAGAGTACATAGATGTTGAACTTTCAACATCATATCCCTTC  
CCTATTTTTAAATTCTTGAAGCAAATTTTTTACGAGAAGTGGTCTTGATGGGTTGTGATCTGATGCATGT  
TTCGTTATCTAGTCTAGTCAAGCGGTGACGTGTCATTCTCTGAGAAATCTTTCTCTATCTCTTGTACACTT  
AGACAATAACATGCTTCAGACTATACTCAGTAGTTGTCCGTTCAATTGTTGATTTAATCATTGGGTATTGTA  
GTAGGCTGAAAATATTGAGATCCGGAATCTTCCAAATATCAGGTCTCTTGTCATTGGTAATGACCAACT  
CGTAAAATCCAAGCACCGTCTCTTGAACACTTGTATTATAGTAGTTCTTGTGTTGAATAAATTGAATATTG

TTGAACATAAGAATCTGAAAACCTTAGATATATCATGTACAGAGATATCTGATTTATATCTCAACCACCTT  
ATCTCCATACCTTACTGCCTGGAGAACTGATATTAGCAAACATTGCTTTTGGAAGATTTCGACATTTGCA  
GGAGTCAATCCCTAAAGGTGTTAAAGATTCATAATTGCAAGATCATAGGAGCAATTGATGCTCCAAATTT  
GGTTTTGCTTTAGTATAAAGGAAATGATATTCCTCAGCTTAAATTTGCTCAAGAATCAAGACAATTGAGG  
CAATCACAATGATTCTTTATCCCTTGTTCAATGTAGATTGGCATGGTTTTGTCAGTTGAGGAAATCTTT  
ATCAGATTTCGACGATCTCTGGTCTCAAGTTACCATTTACTTTCAAATGCGAGGAGATCAACATGATA  
GATTTGCTACTGCAACCTAGAGTTGCTATCCCCAAAGTGGACATTTTAGATGTAAATTTTTCAAGGCCGA  
ATTGGGAGTTTCCTACATTTGTGGATTCTTTGCTGTGGAGTTGTCATCCCAGGAACTTAACCTACAATCA  
ACAACTACAATTTTTACATGTTTCATGAATCGTTTCATGCAGATGAAGAATTTGCGTCGTGGTCAATTTAA  
AGAAGCAAATGCCTACAAATTTGATCAGAAAAGTCATAGTTGGCATCCTGTAGAACACAAAAGAGGAA  
GAGATTTCCATTAAGGACCAGTAGCAAGTCGAAGAAATATTTCTTCTTATTAGATTGGTGA

>M6-PGSC0003DMG400006226 M6 LRR-RLP

ATACAAAATTTCAAGAACACAATTACTCTTGATCCTTTTGGTGTCAAAAACTTGGACAGGCCCTGATA  
TTTGCAATTATAAAGGCTTTTATTGTGATAATCCACCTAATAATTCATCAGCAATTTCTCTTGCTTCTATAG  
ATTTCAATGGATTTCAACTTAGTGACCTACATTAGATGGTTTCATTGATCAACTCCCTGACTTAGCCATA  
TTTCATGCTAATACCAACAACCTTTTCAGGCATAATTTCTTCGAAAATTTCAAATCTTCCATATCTTTAAGAA  
CTTGATCTTAGTAACAACCAATTCATCGGTTCAATTTCCCATGTCAATTCTCAATATCAAGACTCTAACTTC  
TTGGATATTCGTTACAATCTCTTGACAGGAATAATCCCACCTCAAATTTTCGTACAATATCTTGATGCATTT  
TTTCTTAACAATAACAATTTCAATCAAAAACCTTCAGACAACATTGGATCCACCTCTGCTTTTTATTTAACC  
TTAGCCAACAACAATTCGTTGGTCCAATCCCACGTAGCATTGGACAAGCTCCGAATTTATTGGAAATTT  
TATTCTTGAACAACCTTGCTCACTGGTTGCATTCCTTATGAATTAGGCCTTTTGAAAAAGC

>M6-PGSC0003DMG400006255 M6 LRR-RLP

ATGAATGAAGCAAGACCATACCAAAGACGAACTTCATAAGTCAAAGTCTTCCACAAATGAACCAAAA  
AGGCTAACATCAAACGAGTAAAAGGAGTTAATTCAATCTGTACAAACGCGTAGTTTTTCTTTGACATTTT  
TCAATCACCTTCCCCTTATTAAGTTCCTTCTAACTGCATACTCAGTTATATTCAAGCTAACAAAGTTGCAA  
GAATATGACAACCTTTACTTTCTATGGCTTTTCTTGATTCCCTTGTTTCAAATCTTAGGAAATGACATTTT  
CTTGGTTTCCTCTCAATGTCTTGACAATCAAAGTCGTTGTTGCTGCAGTTGAAGGGCAGCCTTCAGTAT  
GATTCTAGTTTGTCAAATAAATTCGCAAATGGAACCAGAAGACAAGTGAATGTTGCAATTGGGATGGG  
GTTACATGTGATCTCTCTGGTCATGTGATTGCCTTGGAAGTGGATAATCAGACTATTTCTAGTGGAATTG

AGAATTCAACTGCTCTTTTCAGTCTTCAGTATCTTGAGAGGCTAAATTTGGCTTACAACATGTTCAATGTT  
GGCGTACCAGTTGGTATAGGCAACCTCACGAACTTGAAGTACCTGAATTTATCCAATGCTGGTTTTGTCTG  
GGCAAATTCCTATGATGTTATCAAGATTAACAAAGCTAGTTACTCTCGATCTCTCAACTCTTTCCCTTACT  
CTGACCAGACACTAAAACCTTGAGAATCCCAATTTGAGTCATTTTCATTGAGAATTCAACAGAGCTTACAGA  
GCTTTACCTTGATGGGGTTGATCTTTTCATCTCAGAGGACTGAGTGGTGTCAATCTTTATCTTCATATTTGC  
CTAACTTGACCGTCTTGAGTTTGCGTGCTTGTCAAATTTGAGGCCCTATTGATGAATCACTTTCTAAGTTT  
AAGATTCTCTATCATCCGTCTTGACCAGAACAATATCTCTACCACAGTTCCAGGATATTTTGCCAGTTT  
CACAACTTGACTACCTGTCCCTCGACTCTTGTAATCTGCAAGGAGCTTTTCTGAAAAGATCTTTTCAGG  
TACAAGTTTTAGAGATTTTGGACTTGTCAAATAACAAGTTGCTTAGTGGTAGTATTCCGAGTTTTCTCGA  
AATGGATCTTTGAGGACGATATCACTAAGCAACACCAACTTTTCGGGTTTCATTACCAGAGTCCATTTTGA  
ACCTTCAGAACCTGTCCAGGTTAGAGCTTTCCGATTGCAATTTCAATGGATCAATACCTTCCACGATAGC  
AAACCTTACAAATCTTGTTTATTTAGATTTTTCTTCAACAACCTTAACTGGTTCTATCCCATATTTTCAAAG  
ATGCAAGAACTCACCCACTTAGATCTCTCTCGTAATGGTTTAACTGGTCTCCTCTCCCCGGCTCATTTTG  
AAGGACTCTCAGAGCTTGTCTACATAAATTTAGGGAACAACCTTACTCAACGGGATCCTTCTGAATGTAT  
CTTTGAGCTTCCCTCCTTGCAGACGCTTTTACTTAACAGCAATCAATTTGTTGGCCAAGTCAACCATTTTCA  
CAATGCATCCTCCTTTCTCGATGAAATTGATTTGAGCAACAACCAACTAAATGGTTCAATTCCCAAGTCCA  
TGTTTGACGTTGGGAGGCTTAAGGTTCTCTCACTTTCTTCCAATTTCTTTAGCGGAACAGTACCCCTTGAC  
CTCATCGGGAAGCTGAGCAATCTTTCACGACTGGAGCTTTCTTACAATAACTTGACTGTTGATGCAAGTA  
GCAGTAATTCAGACGCTTTCACATTTCCCAGTTGAACATTTTGAACACTAGCTTCGTGTCGGCTGCAAAA  
GTTTCCTGATCTTAAAAATCAGTCAAGGATGATCCAATTAGACCTTTCTGACAACAAAATACTGGGGGCA  
ATACCAAATTGGATTTGGGGAATAGGTAACGGAGCTCTGACTCACCTGAATCTTTCTTTCAATCAGTTGG  
AGTACGTGGAACAGCCTTACAATGTTTCCAGATATCTTGTCGTCCTTGACTTGCATTCCAATAAGCTAAAA  
GGTGACCTACCAATTCCACCTTCTTTGCTGCATATTTGGACTACTCGAGCAATAATTTGAGCAATTCCAT  
CCCCTAGATATTGGCAATTATCTTGGTTTTGCCTTCTTTTTCTTGGTAGCAAACAATGGCATTACTGGAA  
GAATCCCGAATCCATATGCAATGTCAGCTACCTTCAAGTTCTTGATTTCTTAACAATTCCTTGAGTGGA  
ACAATACCACCATGTCTACTGGAATATGGTACAAATCTTGGAGTGCTGAATCTAGGGAACAATAAACTCA  
ATGGCGTTATAACCAGATTCATTTCCAATTGGTTGACTCTACAACTTTAGACCTCAGTGAGAATAAGTTA  
CAAGGTAGGCTGCCAAAATCTTGTGAACTGCAAGTTGTTGGAGGTCCTGAATGTTGGAAATAACAGA  
CTTGTTGATCATTTCCCATGCATATTGAGGAACTCAAACAGTCTGAGGGTCCTAGTCTTGC GTTCCAATCA

ATTTAATGGAAGTGTTTCAGTGTGATGCAACCAGGAATAACTGGAAAAATCTCCAGATCATAGATATAGC  
TTCCAACAACCTTCACTGGTGTGTTAAATGCAGAATTCTTTCAAATTGGAAAGGAATGATGGTTGCAGAT  
GATTACGTGGAGACAGGACTCAATCATATCCAGTACAAGTTCCTCCAATAAGTAACTTATACTATCAGG  
ACAAAGTGACAATAACCATCAAAGGGCTAGAGCTAGAGCTTGTGAAGATTCTCAGGGTATTCACATCTA  
TTGATTTCTCTTCAAATAGATTTCAAGGTGTGATACCAGATACGGTTGGGGATCTTAGCTCACTTTATGTT  
CTGAACCTATCACACAATGCCCTTGAAGGACCAATTCCAAAATCGATTGGGAAGCTACAAATGCTTGAAT  
CACTAGACCTGTCAACAAACCACCTGTCCGGGGAGATCCCATCAGAGCTTGCAAGTCTCACATTCTTAGC  
AGCTTTGAACTTATCGTTCAACAAATTGTTTGGCAAATCCCATCGACCAATCAGTTTCAAACATTCTCAG  
CAGATTCCTTTGGAGGAAACAGTGGCCTATGTGGGCTCCCTCTCAACAACAGTTGTCAAAGCAATGGCT  
CAGAGTCCCTGCCTCCACCAACTTCGCTACCAGACTCAGATGATGAATGGAAGTTCATTTTCGCAGCTGT  
TGGATACGTAGTAGGGGCAGCAAACACCATTTCACTTCTGTGGTTTTACGAGCCAGTGAAGAAATGGTT  
TGATAAGCATAACGGAGAAATGCATGCTTTGGTTTTCAAGAAAGTGATCCTTAAACCCGTAAATGATGAG  
TTTATTTAATCCTTGCTTTGTTATAATAAACATCAAGATCCAAATCTTATTTCCCTTGATGAATGTATAAA  
ATTTTCTACTATCAGAAACAGCACCCACTTTTGGATTGAATAGCTTCCCACATTGCCTGCAAC

>M6-PGSC0003DMG400006268 M6 LRR-RLP

ACTTTCTATGGCTTTTCTTGATTCCCTTGTTCAAATCTTATCAGGATATCACATTTTCTGGTTTCCTGTCA  
ATGTCTTACGATCAAAAGTCGTTGTTGCTGCAGTTGAAGGGCAGCCTTCAGTATGATTCTAGTTTTTCA  
AATAAATTAGCAAAATGGAATCAGAAGACAAGTGAATGTTGCAATTGGGATGGGGTTACATGCGATCTC  
TCTGGTCATGTGATTGCCTTGGAACTGGATTATGAGACAATTTCTGGTGGAAATTGAGAATTCAGTTCTC  
TTTTCAGTCTACAGTATCTTGAGAAGTTAAATTTGGCTTACAACAGGTTTCAGTGTGGCATAACAGTTGG  
TATAGGCAACCTCACGAACTTGAAGTACCTGAATTTATCCAATGCTGGTTTTGTCGGGCAAATTCCTATG  
TCGTTACCAAGATTA AAAAGGCGAGTACTCTTGATCTCTCAATCTTTCCCTGACTTTGATCAGCCACTT  
AAACTTGAGAATCCCAATTTGAGACAATTCATTGAGA ACTCAACAGAGCTTAGAGAGCTTTACCTTGATG  
GGGTTGATCTTTCATCTCAGAGGACTGAATGGTGTCAATCTTTATCTTCATATTTGCCTAAATTGACTATC  
TTGAGTTTGC GTGCTTGTC AAATTT CAGGCCCTATTGATGAATCACTTTCTAAGCTTCTCTTTCTCTTTCT  
ATCCGTCTTGAACGGAACAATCTCTCTACCACAGTTCCTGAATATTTTGCCATTTCTCGAACTTGACTAC  
CTTGGCCCTCGGCTCTTGTAATCTGCATGGAACATTTCTGAAAGAATCTTTCAGGTACCAGTTTTAGAG  
AGTTTGGACTTGTCAAATAACGAGTTGCTTCGAGGTAGTATTCCTGTTGTTCTTCAAATGGATCTCTGA  
GGAGATTATCACTAAGCTACACCAACTTTTCTGGCTCATTACCAGAGTCCATTTTGAACCTTCAGAACCTG

TCCAGGTTAGAGCTCTCCAATTGCAATTTCAATGGACCAATACCTTCCACAATGGCAAACCTTACAAATCT  
TGTTTATTTGGACTTCTCAAACAATTTCACTGGTTCTATCCCATATTTCCGACAGTCCAAGAACTCACCCA  
CTTAGACCTTTCATGTAATGGTCTAACTGGTCTCTTGTCTAGAGCTCATTTTGAAGGACTCTCAGATCTTG  
TATACATAAATTTAGGGAACAATATACTCAACGGGAACCTTCTGAATATATATTTGAGCTCCCCTCCTTG  
CAGCAGCTTTTTCTAACAGCAATCAATTTGTTGGCCAAGTCGACGAATTCTGCAATGCATCCTCCTCTCT  
GTTGTATACAATTGATTTGGCAAACAACCACCTGAATGGATCGATTCCAAAGTCCATGTTTGAAATTGGG  
AGGCTTAAGGAACTCTTACTTTCTTCCAACCTTTAGTGGGACAGTGACCCTTGATCTCATTGGGAAGCT  
GAGAAACCTTTCAAGCCTGGAGCTATCTTACAATAACATGACTGTTGAAGTAAGTAGCAGCAATTTAACC  
TCTTTCACATCTCCCCAGTTGAGCATATTGAAACTAGCTTCTTGTGCGGCTGCAAAGTTTCTGATCTTAA  
AAATCAGTCATGGATGATCCACTTAGACCTTTCTGACAACGAAATACTGGGGGCAATACCAAATTGGATT  
TGGGGAATTGGTGACGGAGCTCTGGCTCACCTGAATCTTTCCTTCAATCAGCTGGAGTACGTGGAACAG  
CCTTACAATGTGTCCAGCAATCTTTTTGTCTTGACTTGCATTCCAACCGTTTAAAAGGTGACTTACCAATT  
CCACCTTCTCTGCCATCTATGTGGACTATTCGAGCAATAATTTAAACAAATCCATCCCCTAGATATTGG  
AAATTCTCTTGCTCTTGCCTCCTTTTTCTCGGTAGCAAACAATGACATTACTGGAATAGTTCCTGAATCCAT  
ATGCAGTGTGAGCTACCTTCAAGTCTTGATTTCTTAACAATGCCTTGAGTGGAACAATTCCACGATGTC  
TACTGGAATATAGTACTACTCTTGGAGTGCTGAATCTAGGGAACAACAGACTCCATGGTGTATACCAG  
ATTCATTTCCAATTGGTTGTGCTCTAAAACTCTAGACCTCAGTGAGAATAAGTTACAAGGTAGCCTCCC  
AAAATCGCTTGTGAACTGCAAGTTGTTGGAGGTCCTGAATGTTGGAAATTACAGACTTGTTGATCATTTT  
CCGTGCATGTTGAGGAACTCAAACAGTCTGAGGGTCTAGTCTTGCCTTCAATCAATTCAGTGGAAATC  
TTCAGTGTGAAGTAACCATAAATAGCTGCCCAAATCTCCAGATCATAGATATAGCTTCCAACAACCTTCACT  
GGTGTGTTGAATGCCGAATTCTTTCAAATTGGAGAGGAATGATGGTTGCAGATGATTACGTGGAGACA  
GGGCGGAATCATATCCAGTACAAGTTCCTCCAACCTAAGTAACTTATACTATCAGGTCACAGTAACAATAA  
CCAACAAAGGGATGGAGATGAAGCTTGTGAAAATTCTCAGAGTCTACACATCTATTAATTTCTCTTCAA  
TAGATTTCAAGGAGTGATACCAGATACTATCGGGAATCTCAGCTCACTTTATGTTCTGAACCTGTCACAC  
AATGCCCTTGAAGGACCAATTCAAAATCGATTGGGAAGCTACAAATGCTTGAATCACTAGACCTGTCAA  
CAAACCACCTGTCCGGGGAGATCCCCTCAGAGCTTGAAGTCTCACATTCTTAGCAGCTTTGAACTTATC  
GTTCAACAAATTGTTTGGCAAATCCATTAATACTAATCAGTTTCAAACATTCTCAGCAGATTCTTTGAAG  
GAAACAGAGGCCTATGCGGGTTCCTCTCAACAACAATTGCGAAAGCAATGGCTTAGAGTCCCTCTCCCT  
GCTGCCACCAACTTTGGTACCAGACTCAGACTCAGATGATGAATGGAAGTTCATTTTTCGCGGCTGTTGGA

TACGTAGTAGGGGCAGCAAACACTATTTCACTTCTGTGGTTTTACGAGCCAGTGAAGAAATGGTTTGAT  
AAGCATATAGAGAAATGTTTACTTTGGTTTTCAAGA

>M6-PGSC0003DMG400006279 M6 LRR-RLP

CTTTTAGTTACGTTGATAGGTTTTCCAAGTGTTAAAGGTCCATCTTTGGATTTGCAAGCTAACCATGAA  
CACGTTGATATGTGTACAGTCATATAGTCCAAGTATTTTTATGTTATATCCAACAATGTGCATTTCAATTA  
TTAAGTATCCCATGTTTGCTTGTTTTGACATATTTTGGTTTGTCTGTTTTTGGTTTATCAGTGCCTGTCCAT  
CCTAGAGTTGAAAGGGTGGCGTCCACCATCAAGCCGAAATTTTAGAACTGAACCTAGCCGTAAT  
ACAATTGGACTTCCCTGGAATTTACAGCTTCTACAGAGCTCATCGGATCTTGAGACATTGATCATTGGTT  
GTTGGTACAATCACAATGAAAGAGTAAGTTTCCTTCGACCTTTATTTATATTACTTCATGTTATTCAAATC  
AAACAACTTTTAGTGGAGGAATAAGCTGATATATATCAACATATTTCTAATCTTAAGTACTTCAGGAAAG  
AAAATTTATTGAAGTTTTTTTTAATAGCAATCTCCTCAGTCACTTTACCATCCCAATTGTGCTTCCTCCAT  
GAGTTCTATTTTTGTTTTTTTCCAATTCATCGTTGCCTAGGAGATATTGCAGCTTCCCTAGCTTCATTTTTA  
AAATATTCATCCAGTGTGGCATCCTCCTCGCTTCTCTCAAAAATGTTTGCACCTCTAGAACTTCTTGGAGA  
AAAATCACTAGGTCTAACATGTAGTTGCTTACTAGTGTTAATAGGAGTAAGAGAATTCACTCTTCAATA  
TTCGAACTCATCAGTATATCAAGAAGCGCCATGTCTATAGTATTATTGATCTTCTGAACATCAGAAGTCTG  
GCGCAGAATTCTCAGGTGATGCATCTATCAAATTTGCAGATTTTTCAGCTACTTCAGTTTCTAGATCTGTC  
GGTTTCGAAATTGTATGACGTCCCTGTCTCCGGTGCATCTGTCTAGCACTTGAACCTGCAATTTCTTGTGA  
ACTTAACGCTCCATCTTTCATGATTTCAGGCGATCGCTGCCCCCAAGTGACAACCTTCATTCCCCTGAATAT  
TGCTTCTAATATCTTCTTGTCCAGCAGCCTTCTTTAACACCTGATTGCCTAAAATCGCCATGAATGGTC  
TTACCAACTCAGAACCTGTAGCATCTGATTTCTACCCAAATTTCGAACACTCTGTGCAGCTCGTCTTGC  
ATTAATAATTTCCCTAGCATTTCCTGATGCTTAATACCTTGCATATTAATCTGCATACTTAATCTCTGTGA  
CCTTGATGTTTGCATGTACGTATATGAAGGTTAATAATCATATGTTATTATTTGGTACACTATCAATTCATT  
CGACTTTGGCTCTAATGAGCAATCTCACACGTTCAAGCAAAGCAGCCAGTAAGTTGACTTCAACTTTAAC  
TCTTGCTGTGCTTGGCCTTGTGGATCTGTGGTTGCTCTATCAACAACCAAGGTCTGCCACTGCTGATG  
CTAACAAATATAATGCCTCTCGAACGAAAAATTGCACCAGTAAATTCTGAAACAATATCCAAGTCAAAGC  
AATGGATTCTTCTTCTTTGGGATTAACCAAGGGGTCCAACGAAAAAATTCTAAATTGATAGTCTTCTCTCC  
A

>M6-PGSC0003DMG400006422 M6 LRR-RLP

ATGGTCAAAGGAAAAAAGGAAGTGGGAGATGATGATGAGTTAAATTATTCTACTTTTTGGGAGTTTTG

AGAGAGAGTGCCATAGTGACGAATAAAGGCAACAGGTACCAGTATGACACCATTTTGGCGTTGTTTACA  
AGTATGGACATGTCTAGCAATAATCTCTCTGGGGATATTCCTATAAGTTTAACTTCTTGCAGGATTAA  
GATCATTTAATTTTTCTAAAAATAACCTAACTGGTAGGATTCCAAATGACATTGGTGACATGAAAGTTTT  
GGAATCTGTTGATCTTTCAGAAAATCAATTTTATGGTCAAATCCCACAAAGCTTTTCAAGTTTGTTACCT  
TGAGCTACTTGAATCTATCTGATAACAATTTGTCAGGTATGATACCATTGAGCACTCAACTTCAAAGCTTT  
GATCCCACGAGTTTTCAAGGAAACAACTCTGCGGGCTTCCACTCTCGCTGAATTGTAGTTCAAATGGTA  
ATATTCCAAATCATGAATATGAAGATGATGAGAGTGACGAAGATGAAGTGGATTGGTTTTACATTTCAA  
TGGCTATAGGATTTGCACTAAGCTTTTGGGGTGGTTGTGGTTCATTGCTTTTCAAGAGATCATGGAGACA  
TGCTTATTTTTGTTTTCTAGACCGTAGCTGGGAAATGTTGCTTGCAAAGTTATCAGTATGTTGA

>M6-PGSC0003DMG400006458 M6 LRR-RLP

TTTTCTCTCCATTCCTATAAGTGTGGTGTGTCACCACACACAAGTAACGACCCCTCAATTTGTCAATAAA  
CAAATAATAGGATTAGTTAATTAACAAAGGAAGAAGAAGATTATGGAATTTCAATGATGATTTGTGTTA  
GGATTAAGAGATCATGAAGATGAGGATGGAATTAGTTGAACCACGACGACGACAACAACAACGACAAG  
AAGAAAAAGGAGCCTTTGAGAGGAAGAGTAGTAGGGGAAAAAGTACAAGAAGAAAGATGACAATTAG  
TATTGTTGAAGAAGAAGAAGAAGAGAGCCCAAAGATTGTGGATCTAAGTGGCATGTCATTAGACTCTCT  
TCCTGTAAATCCTACAATCAATTTGGGAGCTATATCCAAATTACATATTTCCAACAATAATCTTCAGGTTA  
GTCAGTTTTCGTACACCTCAATTAATTTTTGTGAAATATTTGTTACCTTCTATCAGCAATAAGCAATATGTA  
CTAGATGACTCTGTTTCATAGAGGTTAGGATAGATGAATAAATTCACTTAGTTTTTTTTTTTTTTTGTCTTCG  
CTAGAATTAATTGAACAACCACTTCGATGATCACTATGTGCTATCGTGAATTATTTATTTATGAGAATTTT  
ATTCATGATAGAATATTTTAATCTTTGATTGGAATTAAGTGAATAATCTTCTTTTTGAAATAAGTGGT  
GGCTAAAGTATTTGATATGAAGATAAGATAATTATGAAGAAAAATGTTTTAGTCAAATCGAGTGAAAT  
TATTTTTTTCATTTGACTGGAGGCGAACTAGTTGATTGCTTTGAATTGTATCAGCAACACAAGGACACTA  
TTAAAAACTAGTTGATTGCTTTGAATTGTATCAGCAACACAAGGACACTATTAATAACTATTGCATT  
TCATAAATGTATGATTAATTATATATTAATTTATGTCGATATTAATAGGTGGATGTGCACTACCTATATAG  
GTGGATCTGCCTCTAATATAATTTTGACCAAAGAATATTTTCTAAAAATATTTTCTGACAAGCAGTCACG  
ACTAGTATTTTGGAAAACATTAATTTTTCAATCATACCAAATACAGTCGTTGCTTCCATTTTTAGTTGCTTT  
TGGTTCCTTGACTTTCACAAATATTTAGTTTTGTTAATTTCTTCCATATTTATGGAAAGATATATTTATCA  
TTTACCTTTCTTCTATTTTACGCAACAATAGTTATTATATGTTTCTAGTTTTCAATTTATTTATTCAGTGTT  
GAGTTGATATTGAGTTTCAAAGGTGGATAATTTTTTTATTGTTATAGTCCTAAACTAAAAATATGTAAAA



TGTATCAAATATTTTTAATTTTGTGGTTTTAAACATGTCTTGTGGAAAGTTAGAATTAAGAGGTGTCA  
AAATAAGAATTTAATGTACTACTATATTTTCTTAAAATATTCCCCTTACTTGATAATGAGTCGTTTATGTG  
GACTATACAGTATAATATTTTCAGGAATAAAATGCAGTACTATTTTATTCTGTGTTAATACAAAACAAAC  
AATATAAATTTAACGGATCAAATTAATCCAAATCAACCGTCCTAACGTCATATTTTGTGTCATCATT  
ATTGTAAATTGACCCAATAGTAAGGATAAAGTCTTGTATAAGTTTATTTTTACTTCATTGATATATTTAA  
AAAAATATAACAACCTGAAAGGTTTTCCAATTATTCGTATTAACGCAATAGTATATTTTTCTGGTTGTT  
ATATGTATGTGTGAATTGTGGATTTACTTAAATATAATTGACAAAATTTGACAAAACACGATAGTACATA  
ACGTAACAACATTTTCGTTAATTATATATCCCGTCTTTGTTTATAGTCTAATACAATGTATATGTCTCAT  
TGTGTTTTACAATGTGTATGTGTCTCACTCGTCTCTCTTCTTCTATGTATTTGTATTTTATAATGTATATGTG  
TCTCACAATTTCAATTATAAGTACCATACAAATATCTGATACACAGATACGTCGACGGTTTATATTTTTTTT  
TTATATCAATGTATCTATTTTATATATGTATCGATTTTAAAGTAGCATGAATTGTATCATAGATTAACACTTT  
ATCATTTTACTTTCTCTGTCCAACAATAGTTGTCCACTATTGACTTGGCATAACGGCATACCCCTTAAAAAA  
GAATAAATAATAGATATTACTATATTATCTTTTGACTTTATTAATTTAGTGTTTTGAGAAATGTGTTAGA  
TAATAAATAATATTTAACAGTAAGGGTAAAATAGATCTCTTGATTTTCTAAATTGGACAAGTATTATTGA  
ACAACTATTTTTAGTAGGAAAAATGACAAATATACCCTTGAACATCGTAAATGGTTTGGAGATACCCTT  
CGTCATACTTTTGGGACATTGGTGCCTTGTGCATCCAAAAGTAGAGCATATATACCCTTTATACTAACGG  
ACATACACGTGTCACAACCTCACAATCTTATCCACTGACCCACATTTATTAATATCGAATCGACAGATAAG  
ATTGCGCCACGTGTCTCTATTTAGTCTTCCGTTAGAGTGAAGGGCATATATGCTCTAGTTTTTGGATGGA  
AGGGGCACCAATGTCCAAAAGTATGACGGATGATATCTGCATACCATTTACGATAGTTCGGAGTATAT  
TTATCCTTTTTCCCTTTTTAGTATAGTGGACAACACTATTGTTGGACAGAGGAAGTACTAGACACAGGATT  
TTAGGGTAAGTCACATTCTTATTTGGTTGGACGATTTTCAATTATCATGTATCACTTGTGTATATAGATAC  
ATAAACACACATATGTATCTCTTCAAAGTTCCACTCATCTGCCATAGATACATAAATACATTGATACACAT  
ATATATCTCGTCAAAGCTAAGCACTCAATTATATTATATCATGGATGCACATTTACATATATACACAAATA  
CACACACACACATATATATATCTCTTAAAAAATTTCCACTCGTCTTTCATGGATACACAAATACACATC  
CATAGATACGCAATACACATATATATCTCCTCAAACACTACTCACTCATTTGCAATAGATGCACAAAAATAT  
AGATACACTTATACATTGATATACATATGTATCTCCTCAAAGTTGCACTCTAATTTGCCATAGATGCACAA  
ATACATATAGTCCCTCTGTAAATCGAGAGTGGAGAGAGGGAGGAGAGTGGCGAATTTTCTAGGAAAAA  
GGGAAATCTCATTGAGTTATGTAATTTTTTAAACTATAAATAGGTTGAGTAGATATATACTAGCTAT  
GCTTGATTAATTATGTAATTTTTTTCATGTATAATTCTCACTTCATTGTTTTTGTGATGTTTGGACAGAGTAT

ACCAGAGTCTTTAACAGCAAGACTACTTAACTTGGTTGAGTTAGATATGCATTCAAATCAGCTCAACTTC  
ATTCTAACTCAATAGGTTGCTTATCAAAGCTCAAACCTTCTCAACATTTCTGGGAATCTCCTTCTTTGCTC  
CCTAAAACCTATCGAGAATTGTAGGTTAGTCATCTAAACATTTCTAATCCATAACATTATCACTACAACAAA  
AGAGATATTTAGCAGCAATTGAGTTACTGTCATTGCATTCAAAGTCGCTAAAGCCTTTAGAACATAATAA  
GTATAACCTTTTCTCCTACTTGCAGATCATTGGAAGAGTTGAATGCCAACTTCAATATGCTTACTCATT  
ACCGGACACCATTGGATTTGAGCTCATAAATCTCAAGAAGCTATGCATAAATTCAAATAAAATAGCATA  
CTTCTTACTCCACCTCCACTTGACCAACCTTCGCGTGTTAGATGCTAGGCTAAACTGCCTTAGATCACT  
CCCCGATGATCTTGAGAACCTAATCAACCTTGAAATCCTTAACGTTAGTCAAAATTTCCAGTACCTCTCAA  
AGTTGCCGTATTCAGTAGGATTTCTCATTCTCTTCATGAACTAGATGTTAGTTACAACAAGATTACTGAA  
TTACCAGATTCCATCGGATGCTTGAAGAAGCTCCAAAAGCTGAGTGTAGAAGGCAACCGCCTTGTTTCTC  
CCCCACCGGAGGTAGTGGAGCAAGGGATACGTGCAGTTAAGCAATACTTGTGTGAAAAGATAAATGGA  
ATGCATGACAAGTCCCCTAAGAAGAAGTCATGGTTTGAAAGCTAGCAAGATGTAGCACATTTAGTGGT  
GCTAACATACCAAGAGATGATAGAGAGGACTTTGGTGTTCCAAGCAATCGTACTATCGATGCAATTGCC  
TCACCACGATTTATGGGAATGCTTTCTCCTCGTCGTCTTCTATCTCCAAAACCTACTTCTCCAAATAAGG  
GACATTGCAATTTGCTTGGTAGCTCTTAGCTTGTTTTCTTTACGTTTGAAATCGTGCAATGTGTGCTAGA  
TCAAGCTGTACATTATGTTCTGTAGATTTTGTTGTCTTTGAGATAGTACAGATTTTCATAGATGATTAGCC  
TCATGAGTCATGGGTATGTTTGAGAGGTAACAATGCGGTACAAATTTACCCGAACAGAGTGTTTATATC  
AAATCATATGAATAATTACATCGAATCAAATTTGTTATCATAACATGTCTTGTATTATATCACTTGTACA  
AAAACCTATTTTGATCATTAAATTATCAAACCTCAAAAAAAAAAAAAATTAATAATCTTACATAAACAGAAC  
CATTAAAAAAGCCCCAAAAAACAGAACAAAGACTCTTAGAAAGCAAACAGAACTAATGAAAACTTCCC  
AAAATCACAAATTATGAATTAGTTTCTTGCACTTGCGATTCATTTCTTTGCAAATCCGATTCACCTTCTCCTA  
TTAAACGACCATTCTCTAATGGTAGACAAAACCTGGCTTCCATGATCGCGATTTATTTGACCTTTCTCCAAA  
TTTGACGAAGTTGTGTTAGTTGCACCACTTTTAGCTATGCAACTGAGTTTTCTAGCTATTGGAACATAAT  
CCATTGGAGAAACACTTGATTGAAATAAGGATTTAGGCAATAAATAGTAAATATGACCTTGTTCTAACTT  
AGTATCAGGGTTGAGAGGCTTTGAAGCAGCAGATAAAAGTTGGGCATGAGTGAAGACAAAGTGTTTTT  
GAGATTTGGCCATGAGTTCATGTACACTAATAGGATGATCAAATCCTCTACATGACCATTCAAATGTAC  
AACTCTAATAGTCTTTAATATATCACATGATTTGGGAGAAAAACAACAATATGTTATTTTGATGTACATAT  
TGTTAATATTTTCTTATTTCTCTCTAGCTAGTGTGTAAAAGGGTCCCAAAGAAGATGTCCTTTTATATAA  
GGGGAAGATGGTGCTGAAACCGGGTTGTGGTGCGGTAGTGGAATTGCTCCACCCTTAACCAAAGATC

TCAGGTTGAGCTCTGGGTATGAAGAAAATCCTATTGGGAGTGTCATCCTGGATGGGCCTTGCAATGT  
GCAAATACAGATTTAGTCGGGGATGGGCCCTACAATGCACAATTCAGATTTAATCTAAGCTCGAATGCG  
GACTCCGGATATCGAGTAGAAACAAAAAAATGGTGGTGGGAAAGAGTTGTGGAGATAGATGATGGG  
AACACGCTATTTAAGTTAGGAATTTTTATCTACTTCACGGCTTAAGTGGCACTCTCAATAGGATTTTCTT  
CATACCAAGGCTCAAAGTGAGACTTGTGGTTAAGGATAGAGCAATTCAT

>M6-PGSC0003DMG400006486 M6 LRR-RLP

CTAAGTTACAGTGTTCGAGGGTATAAGCAAATGTCATATTTTTGGCTTAGTACATCTCAAGTATTTG  
ATGCTAGTTATTGCAAACCTCATAGTCTGATAGTCCAAGCTCCATCTCTTCAATGCTTTAGATATAGAGAA  
CCTACTGAACAGGGAAATCTTCATCCTTGCCAAATTGCTATTTTGGATGGTTACAATACTTTACAAACACT  
CGAGCTCGCTGGTGGCAGCATCACAGACCAACAGCTTCGAGATTTATCCTATAAGTTCCCAAACATTTCA  
GAATTGAATCTAACAAGATGCTATAACCTGAAAAATATAGAGATTCAGAGTGAAAACTCAAGAAATTC  
ACCTTATTAAAGTTGAAGAGTCTGGAAAACTCACGATTCAAGCTCCAAATTCATTGGAATTTGATTTTC  
ATGGTAGTAAATGGCCCTTCTCATATATGGATACTTCTCCCTAGAAAGAGTCCGACTCAATTCTTCTTGC  
CCGTCATAAACTTTGGATCAGTGGACAGCAGTTGGTACACGAGCCTTCATCACTTTGTTCAAAGTTCAA  
CTATTCTAAAGATTTCATATTAATAATATTTTGCCGCCAGGTAGTTTACATTCTTTTTATGCTTATGTCATTT  
ATTTATGCATTACTTGTGAATTTGGCTTAAAATATGGCATTGACTAAATTCTTGCAGACCAAAGCATCC  
TTATTTATGAAAATCCAAGAGAAATTGTTATTCCACCAAGCCACAAAATCGAGATATTCATTACATCCATG  
CTGCGTGTGAATCGATCATTGGAATGTTAATGGTCTACCGTCCCTATATCATGTCCATACTTCCATGTAC  
AGATAGCAAAGCACTACAGGTGATTTCTTGCTTACCTCAAAAACGTCTCTTGTGCTTGTATAAACTAAG  
ACATTAATTTGAGAAGAAAATTTGTTGTTAAATGTTGATTGGTCGTCTCATAAGCATTATTGTATAATATA  
TCTTATGTTTTTGTCTTAAATGCAGGCGATGTCTACACTAAAAGGGTGTACACAAAAGCAAAAATGTGGTA  
AAGAATGTCCATTCAATACCAAGTGGCATCGTAACTTAAAAGAAGTCATCAGTTGTAGTGGGACATCTG  
AAGAGGGAATGGCTGCCTCCATGTGGTATCTCTGGTTGAAATCCACATCTGTAATTGACCAAGTGAATA  
ATTTGCGTTAAAATGGAAAGATGAAGCCTAG

>M6-PGSC0003DMG400006487 M6 LRR-RLP

TATAAACCTAACAGCAAACGGCGGCACCTACCAAATCAGAAACCCTAATGGAAGAAAGTGTGATGG  
AGAAGACAGAATATCAGAATTGCCTGTGCATATCATTATCATCACATCTTATGTCGCACTAACCTCGACCTC  
AGAGAGGCGGCGATAACTTGTGTTTTATCCAAGAAATGGCAGTATTATTGGCTCTCAAGACCTTATTTGC  
TGTTCCGTCAATGTAAAGGCAACAATTGTATACCCTGGAAAATTTGTCAAGTTGATTGATCGACCCCT

ACGAATCCATGCTGAACAAAACCTTACATCTTGCAAATTCTTCCTTGCCATATCGGGATCGAGAATTGGAT  
CCTTATTTGGATCATTGGATTGAATCGGCTATTAAGTCAATGTTTCGGTGCTGGTGATTGCTCCGG  
ATATTGATTCGTCGTATTATAGCTTACCTGATGTTGTTTATGATGCGAAAAAGCTCAACACATTGTGGTTA  
AGCAGGTGCAAGTTTGAATTTGATATTAGCACCCTCATATAAGATTTTGTCTCTTGTGGCTCTTTTTT  
GTATAATGTTTCATATTTTCAGATGCCCAAATGCAAAGTGTTATAGATAAATGCCCATCCATCAGGAATATA  
AGAGTACTGGCTTGCAAAGGTATGAGCAAATTGTATGTTGTTGGACGGTTACATCTACACTCTTGGCTG  
TACTATTATGCAAACCTCGATAGTGTGATTGTGGAAGCTCCGAACTTGAATCCTTTAGTTATACAGAATG  
TATTGATCAGGGAAATTTTCATCCTTGCAAATTGATATTTTGGATGGTAACAATACTTTACAAACACTCG  
AGCTCACTGGCTCCAGCATCACAGACCAACAGTTTCGAGATGTATTCCACAAGTTCCCAAACATTTAGT  
GTTGCATCTAACAAGATGTTATAAGCTGAAACATATAGAGATTCAGAGTGAAAACTCAACAAAATCAC  
CTTATCGAAGTTGGAGAGTATAGAAAAATCATGATTCAAGCTCCAAATTTATCGCAATTTGATTTGAG  
GGTGATAAAATGCCCTTCTTATCTATGGATTCTTCTCCCTGGAAAGAGCCCGACTCAATTTCTTCTGCC  
GAGGACAGTAATATCAAACCTTTGGAGATGTGGATAGCAGTTGGTACACAAACCTTAATCACTTTGTTCAA  
AACTTCAACTATTCTAAAGGTTTGTATGTTAGTAATATTTTGCCGCAAGGTACTTTCCATTCTTTTTGTGCCA  
TTGATTTATGCATTACTTGTGAAATTTGGTTTTAAGCTATGTCATTGGCAAATTTCTGCAGACCAAAAAC  
ATCCTTATTTATGAAAATCCAAGAGAAATTCTTATTCCACCAAGTCAAATGTTGAGATATTCATTGTACC  
CATCCTGAGCATTGAATTGATCATTGGATCGATATTGCTCAACCGTCCCAGCATCATGTCCATACTTCCAT  
GTACAGATAGCAAAGTACTCCAGGTAATTTCTTGCTTACCTGGAAATCCTTTCAAAAAAACGTCCCTT  
GTGCTGTAGACACTAATGCAGTAGAGCTTAAGCATTATTGTATTCTCTATATCTTATGTTTTGTTTAAAT  
ACAGGTATTGCCTGCATTAGAGCGGTGTACACAAAATCAAATTTGTGGTAAAGAATGTCCATTGAGTAC  
CAGGTTTTTCCACAAGCATCGTATATTAGAAGAAATCATCAGTTGTAAGTGGGACATCTGAGGAGGAAAT  
GGCCTCCATTTGGTATACCTGGTTGAAATCTACGTCTCTAATTGGCAAAGTGAATAATTTTCATGTTCAAAT  
GGAAAGAACAAGCTTAGACCGAAGAATCTTGGGGAATTCAGCATATAGTGTATTATTAGTGTGTTGAGAA  
TAAAGTTCAGTTAACCCGCTTGTGGCTCTGTCAAATCCATGAAAGGTTCTTAACCTTGCTCTAGCTCTAA  
ATAAATTGTGCTCAAATCTGTGGTTTAAATTTCAATTTGTTGATTGTACGGAGTGAAGTTTAACTGTTAACA  
AACAGCATAAGAGGTCTTCATTTCAATTTTTTTTTCTGGCTCTGCCTCTTCTCACATTCCATTCAATTTCT  
CTCATGCTTAGACTACTTGGAGGTGATTTAAAAGAAGTGAGCACTTGAGGTAGAGAGATGTAATGATGG  
ATGCATATGCCTCCTACTTGTCTGAAATCTGGTATATATTCATGTCATACTTGAAATGTAATATGATTTT  
TCGTATAACTTTCTTTGTCA

>M6-PGSC0003DMG400006580 M6 LRR-RLP

TATAGAAACTTTAATTGTGAAGAATTCTCCTTACGTATGGTTACCAGGGTCTTTTTTGCAAATGGAAAAAT  
TAAGGCATGCTCATTGTTGTAAGGCTGTTTTGATAAGCAGGGGCTCTTTGAAGGATCCTCTAAATTGGA  
AAATTTGAGGATATTAAGAAAATTGAGAAATTTCCAATTGATAGGGCGGATGTGTTATCAAGGAGGTG  
TCCTAATCTTCAACAACCTTCATATCGAATTTGATGGACATTCTGCAGATTCTTTTTGTCTCACATTGGAGA  
ATCTTACCCAGCTTCAAATACTTCGCGTTTTCTTTGAGCGGCCCCACATCATTGTATCTGGATTGCAATTG  
CCTTCAAATTTAAACAAGTTGGTACTTAAAGGAATTCATATAGAAAGTGTTATCCCTTCATTGCGGGACT  
ACCAAGCCTGGAGTATCTCCAATTACAAGATGTGTGTTTTCTCAATCAAAGAGTGGTGCCTTGGAGAT  
ATCACGTTCCATAAACTTAAGTTGTTGAAACTGGTGCAGTTAGGTATCTCAAGGTGGGATGCCTCGGAG  
GAATCATTTCCTTGCTTGAAACACTAGTTATAAAAATGTGTGGTCACCTAGAGGAGATCCCAATTAGCT  
TTGCTGATATTCCATCATTGAAACAGATTAATTGATTGGGCCCTGGAAAGAATCTCTGGAGGATTGAGC  
TGTGAGAATTAAGGAAGAAATCGAAGAGATTGAAGGATGTGATCGTATACACCTCGTCAAAGAACCGA  
CAAATTGGGAGGCATATAGCAATTTGTGCAAGCTGTGCTTATACTGAAGTCTATTTGTAGCTAGCCCAT  
TCTCTTATATTGTAACACTACTACTGTTTGTATGTTTGTGTTGATTGATCAACTCTTTTTATGTATGGTTGG  
AGACAAATATATATCAGATGATCTTCACTGATTTTCATGTTTT

>M6-PGSC0003DMG400006625 M6 LRR-RLP

TATTGTTGTTTCATCCTGTATTCTATGATACATAGAACAACAAAACCTTTGAAGAAGTTGATAAGAAATAACAA  
AGTTTAAAGAGTATTTTCAAACACTAGAAAATTAACAAGTAGAGAAAATTGAATATTAGAAACAATAT  
ACAAAATATTTTTCTTAAAGAAGATCGAGCCCACTGAATGCATAGTGTCCCCTTAAAGAAAATTATCCTCT  
CAAGTACCGGAGGTTAATGGAATATACCTCCCAGGATAGAACGATCTTACTCACCAGTGTATCGGTACCT  
AAAATCACGGTGTGAGCGAACCACTCAACGGCAGTAAAGTACACTTAGAATACTAGATTTAGTAGTACG  
TAGTAGAAGAAGTCCAGAAAATTAATTCTAATAAAATGAGAGAAAATCCCTCAATTTACAGAAAACAAA  
GGGTAGTGTGAAAACGTTCTTATTGTGCCTTACCGAAAAGGTCACAACCATTTGGAAAAGTCACAATCTT  
TCAGAAAGGTCACAACCTTTCATAAAAGTCACAACCTTTCATAAAAGTCACAACCTTTCACAAAAGTCGC  
AACTTTTCATAAAAGTCACAACCTTTCATAAAAGTCGCAACTCTTCATTTTCATTTCACACATTTTAAACC  
CAACAATCCCCTGCATGAATGGGGAATGACTCCAAGACAAAGAAACGAACAAGTGTGTACTTTACAAGC  
AAGAATTAATTACATTTGGGTAAGTAGGTTTCTTTTGAACCTTCTGTAGTGAACATATGTCGGATATACT  
CGGTCAATCGGTAGATTTGATATCTTTGAACCGTCAAGCTTTGGTGTATACCTAGACAATCATATGTCAC  
ACAATCAACCCTTACCGTTTATGGTTCTTACGTTTATGTTTCGTTTCAGCCATGAACACCTCCTGGTTTCAT

GAGTGTATAGAGAGATGGGCTTTTGACAATCATCTTCTTTGAAGCGGCTTACACTTCACACTCACATAGG  
TGATTTCTAACCGTGTTATCGCGTAGATATGCTATTTGGTCAAATCTGCCAAACTTAGCAAATCATTAAAA  
ATATTAAGCTTCATTAACCTATTAACAAGCCTTAATGTTATATCCTTGTTCTGAACATTGTCTTCATCATG  
AGAATGGATTGAGTTGGTTGACAATGCCGAAACGTCAGTCACAACCTTTGTTTTCTCCTTGAACCTAGCT  
CTTGGGATATCCAGTCTGCTAGGTAGAGTTACCTCCATGATGACTTGTCTAAGCCGTAAACTTATCCCT  
TAGATGATCTTTCAACTTTCTCTCTAGTTAGGTCTTTTTGTAAGTGGATCCAACACATTATCCTTTGACTTT  
ACACAGTCAATTGTGATAATTTCACTAGAGAGTAGTTTTCTAACGATATTATGTCTATGTCTTATATGACG  
AGACTTCCGTTATACATCATGCTACATACCCTACCTATTGCATCTTGAATATTAAGTGTATGCATACTG  
ATGCCAAATGTTTGGGCAAAAAAGAATATCTATCAAGAAATTTTGAAGTCTTTCAACTTATTCACCGGCC  
TTACCTAGAGCACCTAGTTCGGAGATCATTGTAGAGCTAGCGATACATGTCTTTTTGGAAGATTTCCAAG  
AGATTGCTCCTCCACCAAGAGTAAATACATATCCACTCGTGGATTTTACTTCATTTGCTCCCGGTGATCCA  
ATTTGAATCACTATATCCTTTCAACTGCTGGATATTGTTATAATGCAAGACATAGTTTTGAGTATGTTTT  
AAATACCTCAAACTCTTTTCATTGTCTATCCAATGAGTTGATTGAGATCGCTCGTGAATCGAATCAGTTC  
ATTAATAGCACATGTTATATCTGATCGCGCACACTTCGTGATATACATCATACTTCCCAATACTCTAGCAC  
AATCCAATTGTGAGTCACTTTCGCCTTCACTCTTTGAAATGCAAAGCTCACATTTATTAGAGTCTTGACA  
ATAATGAATCAAATATTTCAACTAGTCAAGTACCTTTTCAATGCAATGAGATCGTGACAATGCTAAACAT  
TATGGAGTTCTAAGATTTTTATACCTAAGATCACATCAACAACCTCCAAGATCTTTCATATCAAACCTTGCTTT  
CTAGCATACGTTTAGTAGCATTATGTCATTAGTGTCTCTACTGATGATCAACATATCATCAATATACAAA  
CAAACAATGACCTTGTGATTTTAATGTAAACACATTTATCAGTTCCATCATTCTTAAATTCATTTGCCAACA  
TGGTTTGGTCAAATTTCTTATGTCATTGTTTGGGTGCTTGTTTTAGTCCATAAAGTGACTTAACAAGTTCCG  
CACACTTTTTTTTTATTTACCAGGAACCACAAAACCCTTGGGTTGTTCCATGTAATTTCTCCTCCAATTCT  
CCATTTAAGAGAGTTGTTTTACATTCATTTGATGAATTTAGAGATCATATACCGCAACTAATAATATTAA  
CATCCGAATGAATGTAATTCTAGTTACTGACGAGTATGTGTGACAATTTCAAGACCTTATTTTTGTCTAA  
AGCCTTTGACAAAAAGTTTTGCTTTATATTTGTCAACAATTCCATCGACTTTCATTTTCTTCTGAGGATTCA  
CTTTGAACCCAAAAGTTTATTTCTGGAGGAAGATCAACCAACTTCCAATAGGATTGCTCAATATTGAAC  
CAATCTCACTATTGGCACCATCTTTCTAAAAGGATGAGTCCACATAAGACATAGAAAATGTTACAAAATC  
AGATCCAAAGGTAGTAGAATGTCTTTGACATTTACTACACGTTTGAATCTCTTTATTAAGTACATTTCTTT  
GTTCTTTCCAAGGTCTTTTAGACCTTTTACTAGACTACTCAAGTCTAATTTTACAGTCCACAGTCTTAGGTC  
CTATTTAATCCTTTTAGGAATAGGAACTTGGACTTTGACTAGACACCTCCACATTTTAAAATATTTCAAG

TTGGATTCCTTTCTTTCCATTTCTCATATGAAATAGATTGTGTCCTGAACAATCAAACTTTTTTGTCTTC  
TTTCTGAAAAGACAACCTTTTTGTTGTTCCCTTTTGTGTAAGGATAGCTTCTCCACACAAGTTTTGTGGTA  
AACCTGAACTTATAAGTAATGTAGCCATCATTTTTCTTCAAAGTTGATTTTTTTTTCTTCTGCAATTCCATT  
AGATTGAGGTGAATAGGGCAATAGTGTGATGGATAAATGCACTTTCTAAACACATTTCTGCAAAAGGAG  
ATTTATACTCTCCATCCCTATTACTTCTTATCTTTTTTCCCAACTAATTTTCAATTTCAATATTATATT

>M6-PGSC0003DMG400006652 M6 LRR-RLP

AATAACAGCTTCATCGTTTTGTTTCCCGCTTCAATTTAAGTTTGACACATCTTGAATACTTAGGATTGTC  
GAGTAATTCCTATCTGGCCACTGCCTAGCAACCAAAGCATGCTTCAAAGCTAACTTCTGTGGATTG  
TCATACAACCTCACTGAATGGTACCGTACCATCTTGGGTGTTTAGCCTACCTTGTATCTTCAGTGTGCGCT  
CCAACATAACCGATTCAGAGGACTAGCCGATGAAGTGATCAAAACAAACCCAACATTAACAACACTGCA  
TTTAAGCAATAATCAACTCAGTGGTTCTTTTCTCAATCACTTGTGAATCTCACAAACCTTCAAACCTTG  
GAATTCATCAAATAACATCACCATTGATGAGGGAATGAATATCACCTTTCTTAGCCTATCATCTTTATTC  
TTATCATCTTGTCAACTGAAGGATTTCCACACTTCTTGAGAAATGTAAAGAACTTGTGTACTTGGATAT  
TTCTAACAATAAGATTTCGTGGTCAAATCCCTAACTGGTTTAGCGGCATGAGATGGGACTCGTTACAGTTC  
CTAAACCTTTCTCATAATTCATTGACAGGCCACCTACCACAATTTCACTACTATAACGTACAGTATCTTGAT  
CTGAAATTTAACTCCCTTCAGGGTCCACTACCTTCATCCATTTGTAACATGAGTTCGCTTATCTTATTAGAT  
TTATCACGCAACAACCTTCAGTGACTCAGTTCACATTGCTTGGGAAGCATGGCTAGTCTAATGGTGCTAG  
ACTTAAGAAGGAACAATTTACAGGGAGTCTTCCCCATTATGTGCACACAGCACTTCGTTGAGTACCAT  
TGTCATAAATGGTAATCAATTTGAAGGACCTGTACCTGTGTCATTGCTCAAGTGTGGTGATCTAGAAGTA  
CTTGATGTGGGGAACAATGCTATAAATGACAGGTTTCCATCTTGGCTCGGAACTCTTGAATACTTGCAGG  
TCCTTATATTAAAGTCGAACAAGTTCCATGGACCTATAAGTATGTGTCAGACTAAGTTTTGCTTTCCCAAG  
TTGCGAATTTTTGATCTTTCTCGTAATGATTTCAAGTGGCTCACTTCTGCAAAAGTTTTTGGAACTTCAA  
GGCAATGATCAAATTAGATAACGAAGACACAAGAGAGATAAAGTACATGAAATCTGTGTTGCATTGGCC  
GCCATTCGTCACATCGTATGAGGAGTCAGTGAAGTTTGGTAATCAAAGGGCAGGATATTGAGCTACAAAG  
AATCAGCACAATTACGACAACCATAGATCTCTCAAGCAACCATTTTGAAGGTGTGATTCCGAAAACACTA  
AAGGATCTCAGATCACTTTGGCTACTCAATTTATCTCATAACAATCTCAGAGGAGATATTCCAATGAAATT  
AGGACAATTGAGTATGCTTGAAGCTTTAGATCTCTTGGAAATCGGCTCACTGGAAAGATTCCACAGGA  
ATTGACAAGAATAAACTTTCTCGCCTTCTTAAACCTCTCTCAAATCATCTCGTCGGACCAATTCCTCAAG  
GTCGGCAATTCACACATTTGAAAATGACTCATATGGTGGCAACCTTGATTTATGTGGTGTTCCTTAAAC

AAAGAAATGTGGAACGGGTGATTCATCGCATGTTCTCAACAATTGGAGTCCGAAGAAGAAGGCGAGT  
CATATTTTTTTAGTGGATTTACGTGGGAATCAGTAGTCATAGGCTACAGTTTTGGACTAGTTGTTGGAAC  
TGTCATGTGGAGTCTCATGTTTAAATATCGTAAGCCAAAATGGTTTGTGGAATTTTTCGATGGACTCATG  
CCTCACAAAAGAAGAAGGCCAAAGAAGAGAGCTCAGAGACGA

>M6-PGSC0003DMG400006655 M6 LRR-RLP

GAAATTCCTGATGTTTTCTCTAACCTCCAAGAGCTACGTACTTTACATCTTTCTTATAACAGCTTCATCGGT  
TCGTTTTCCCGCTTCAATTTAAGTTTGACAAATCTTGAATACTTAGACATGTCGAGTAACTCCCTATCTGG  
CCCCTGCCTAGCAACCAAGCATGCTTCAAAGCTAACTTCTGTGGATTTGTCATACTCACTGAAT  
GGTACCATAACCATCTTGGGTGTTTAGCCTACCTTTCTATCTTCAGTGTTGCTCCAACATAACCGATTGAG  
AGGACTAGCCGATGAAGTGATCAAATAAACCCAACATTAAGAAGACTGCATTTAAGCAATAATCAACT  
CAGTGGTTCTTTCTCAATCACTTGTGAATCTCACAAATCTTTTTACCCTTGACATTTTCAATAACAT  
CACCATTGATGAGGGAATGAATATCACCTTTCTTAGCCTATCATCTTTATTCTTATCATCTTGTGAACTGA  
AGCATTTCCATACTTCTTGAGAAATGTAAAGACACTTGTGTACTTGGATATTTCTAACATAAGATTTGT  
GGTCAAATCCCTAACTGGTTTAGCGGCATGAGGTGGGACTCGTTGCTGTTCTAAACCTTTCTCATAATT  
CATTAAACAGGCCACCTACCACAATTGCATTTCCATAATCTAGGGTATCTTGATCTGAAATTTAACTCCCTT  
CAGGGTCCACTACCTTCATCCATTTGTAACATGAGCTCGCTTGAATTTCTTGATTTATCACGCAACA  
CAGTGAAGTCACTTACATTGTTTGGGAAGCATGGCTAGTCTAACGGTGCTAGACTTAAGAAGGAACAA  
TTTCACAGGGAGTCTTCTCCATTATGTGCACAGAGCACTTCAATTGAGTACCATTGTCGTAAATGGTAATC  
GATTTGAAGGACCTGTTCTGTGTCGTTGCTCAAATGTAATGGTCTACAAGTCCTTGATGTGGGGAACAA  
TGCTATAAATGACACGTTTCCAGCTTGGCTCGGAAGTCTTCAAGAGCTGCAGGTCCTTATATTAAGTGC  
AACAAAGTTCCATGGACCTATAAGTACGTGTCAGACTAAGTTTTGCTTTCCCAAGTTGCGAATTTTTGATCT  
TTCTCGTAATGATTTAGTGGCTCACTTCTGCAAAGTTTTTGGAACTTCAAGGCAATGATCAAATTAG  
ATGGTGAAGACACAGGAAATATCAAGTACATAAAATCTGTGTTGAATTCGTCATTTGACACATCGTATGA  
GGATTCAGTGAGTTTGGTAATCAAAGGGCACGATATTGAGCTACAAAGAATCAGCACAAATTATGACAAC  
CATAGATCTCTCAAGCAACCATTTTGAAGGTGTGATTCCGGAAACACTAAAGGACCTCAGCTCACTTAGG  
CTACTCAATTTATCCATAACAATCTCATAGGTCATATTCCAGTGGAATTGGGGCAATTGAATAAGCTGG  
AAGCTTTAGATCTCTCTTGAATCGGCTCACTGGAAAGATTCCGCAGGAATTGACAAGAATGAACTTTCT  
GGCAGTCTTAAACATCTCTCAAATCATCTCATCGGACCAATTCCTCACGGTCTACAGTTCAACACATTTG  
AAAATGACTCGTACGGTGGTAACCTTGATTTATGTGGTCTTCTTTAACAAAGAAATGTGGAACGAGTG



ATTCATCACATGTTCTCAACAATTGGAGTCCGAAGAAGAAGGCGAGTCATATTTTTTTAGTGGATTTAC  
ATGGGAATCAGTAGTCATAGGCTACAATTTGGACTAGTTGTTGGAAGTGTATGTGGAGTCTCATGTTT  
AAATATCGTAAGCCAAAATGGTTTGTGGAATTTTTCGATGGACTCATGCCTCACAAAAGAAGAAGGCCA  
AAGAAGAGAGCTCAGAGACGACGGACTTAA

>M6-PGSC0003DMG400006792 M6 LRR-RLP

CAACAACAACTATCCGGAAAGTCCCCTCGTGGATATCTGATGGTTTTCAAATCTTAGAATCCTCAGC  
TTAAGGTCAAATTCATTTTCCGGAGAAGTTCCTTTAGGAATGTCAAAGTGTGAGTTCATTGCAGGTGCTTG  
ATCTTGCAGAAAACAATACTGAGCGCCATTCCAACAACCATAGGAGACCTGAACGCCATGGTACAAG  
AGGAAAAAGTGAATGAATATCTGTTATATGGGAAGTATAGAGGGATTTACTATGAAGAAAGCTTGTA  
GTGAATTTGAAAAACCAGTTCAAAAGTACACCAAGACTCTATCACTTCTTACCTCAATAGACTTGTCGA  
GAAACAACCTCAACGGAGCATTTCCTGTGGAATTGACAACTTGCATGGCCTCATAGTTTTGAACTTGTC  
CGGAAACCAAATCAGTGGAAAAATACCAGAAAACATTTCAAGCTTACATCAGTTAGCATCGCTTGATCTC  
TCGAGTAATACTGTCTGGTGTGCATCCCATCAAGCATGGAATCAATGTCATTCTTGAGCTATATTAAGT  
CTCAAACAACAACCTTATCCGGTATGGTTCCTTATAAGGGACAGATGACAACTTTTACAGTGTCCGCGTTT  
GAGGGGAATCCCATCTTTGTGGAGCTCCACTTCTAGTACTATGTCAAATGGAACTCGGACAATAGA  
ACGGTACTAGAGAATGACAGCAGTGTGAATTTCTGATAAATGGTTTTATGTTAGTGTGATTGGGAT  
TTATTACAGGTATTCTTGTTCCTTACTATATCTTGCTCGTTCGAAAGCCATGGAGACGAGCATATTTTAGT  
TTCTTAGACACAGTCATCGACAGATTTGTCCCAGTCAGAAGCAACAGAACAACCAGCACAAAAGATCA  
GATACGGGCACCAGATATGGCAAAAAGAAGTGTTCATAGGTACTAGTCCTAGT

>M6-PGSC0003DMG400006880 M6 LRR-RLP

CACAGAAGAACTCTCTGTAAATAGAAAATAGAGAGTAATAGTACTGCATTTTGTAAATAGAGAGAG  
GAGAAATGGGTCTCACCGGAGTAACATTGTTGGTCACTCTCATGGTGGTGGCCGCCGTTACTTTGCCGG  
CAAATGCCTGCCTGCCGGCGGACCAAGCAGCACTGATGGATATCAAAGCAGCTCTTAAGGAGCCATATT  
TGGGCATTTTCAACACATGGACTGGCAGCAACTGTTGCCAGGGCTGGTATGGTGTAGCTGTGACCCGA  
CTACGCAACGAGTTGCAGACATTGTTCTTCGGGGAGAATCCGAAGATCCGATTTACGAGAAAGCCGGCC  
GGTCTGGTTACATGACCGGTTCACTCTCCCCTTCTCTCTGCAAAGCTCACTACACTCATCGTC  
GCCGACTGGAAAGATATCTCCGGCGAAATCCGGCTTGTGTCACTTCATTACCAGATCTCCGTATCCTTG  
AGCTCATCGGCAACAAAATCACCGGTCAAATCCCGGAAAACATCGGTGAGCTGAGTAACTCACTGTTCT  
AAACCTCGCCGATAATAAAATCTGCGGTTCAATCCCCGCTCCATTGTCAACCTCGGAAAACATAAGCAT

CTCGAACTCAGCAACAATCAACTCACCGGCGAAATCCCGTCCGATATCGGAAAACCTCGGCATGATGAGC  
CGAGCACTACTCAACAAGAACAACTCACAGGTTCAATCCCTAACTCAATCACTCAACTTCGCCGGTTAG  
CCGATCTAGATCTGTCAATGAATCAAATCACCGGTTCACTCCCGGCTCAGCTCGGTTCAATGCCGGTTCT  
CTCAACTCTAAACCTCGATTCCAACCAAATCTCCAGTTCAATCCCCACTAATCTACTTAGCAGCAGCGGAT  
TAAACATCTTAACTTAAGCAGAACTCATTAGAAGGAGAATTACCAGATGTATTTTGCTCAAAAACGTA  
TTTCACACATCTGGATTTATCATACAATAATCTTCGAGGTACAGTTCCAAAATCATTATCATCAGCTAAGT  
ACATTGGCCATTTGGATTTAAGCCATAATCACCTTTGTGGCCCGATTCCAAACGGGTCACCTTCGATCAT  
CTAGAAGCTTCTTCTTTCTCTAACAACGATTGTTTGTGTGGATCGCCATTACGTACTTGTTAATTCTTTTT  
GTTTACTTACTAAGTTTGTAAATTAATCGAAATTATCGGTTGATTACGCATAAATGGATGTGTAATTGTGTA  
TTATGTTATGATTAAAAAAATATTCTTATGTGTTAGCTTAATTATTATTATTATTGCTAAGCAATATGATG  
GATTATGCGGTTCTATCATGCATGCACGTGAAAATGCGTGACAGTTTACAAGAAAAATTATTGAAGAAA  
TTGTGTGCTATTATTATTAGTAAATTGTAATATAATAAATCCCAC

>M6-PGSC0003DMG400007033 M6 LRR-RLP

ATGGCCAGATTAGTTAACTCCATTTTCTTTACCTTCTGTACATAAGTTTCATATACACACTTTCACCTTAT  
GTCAATGCAACAACCTTCACCATCTGATATTCAAGTTCTAGTAGCCATCAAGACGTCGATAGACCCTTTTTTC  
AATAACCCCGGATTCCCTCCTTAGTAGTTGGGATTTCAACTTAGACCCTTGTGAGACAACTGGTGCAAGT  
TTCTTAGGCATTCTTGCACAGTTCCTGATCAGGTAGACACTAATGCCACGAGCCGGATAATTGAGATTG  
ATCTAGAAGGTGATGGACTAGAGGGGTTCTTGACATCGTCTATAGGGAACCTAACAGAACTTGTTTCTCT  
CAATCTAGGGAGGAACAAGTTCAGAGGACCAGTGCCAGAGAGTATTACTAATTTGAGGAACTCACAA  
GTCTTCAACTTTATGAGAATTTTTTCTCAGGTAGTCTTGTTGATGACATTGGTGTCTTACAAAACCTTGAA  
ACTCTTGATGTCTCGAATAACAGGCTATCTGGCTCAATCCCTTCCTCGATTACATCACTTAGAAGTTTAAAC  
GCGATTAGACCTGTCTAACAATGAATCACTGGAAAAATTCCTCAACTCAACGGATTATGGCAACTCTCT  
TCATTTGACATTTCAAATAACCAAATTTATGGGAATTTACCACAATTCCTATTGAAGATTAACAACTATC  
ACTAAGCCACAACCTTGTTATCAGGACACATTACCCAGTGCATAAACTTAGACATTTAAGCACATTAGAC  
CTTAGTGATAACAGATTTTCAGGAGGAATAAACAAGGGATCTTCATGTTACCTGAATTAAGTCACGTAA  
ACGTTTCAGTAAACCGTTTCACAGTGTGAGGTGGTAGAATTCTCTGATAAAAAATCACAGCTACACAC  
GTTAGACGTACATGCTAATCGTCTACATGGTCATTTGCCTGTGAACTTGGTTACTTACCCAACTTAACAG  
AGATAAACCTTGGACATAACCTGTTTTCGGGTGAGATTCCATCAGAGTATTGGTCAAGACTCGGATTTTC  
ATGGAGAAATCTCAACTTGGAATATAATAACCTGGAGGGATCGGTGCCTCGAGAGCTCAACAGGACTTT

AGAAGGGGTT CAGGGAAGTTTT GAACATAACTGTCTCATTGTCCAAAGGGATTGCAGCTATGTCATGG  
ACAGAGGACAGCTTCAGAATGTCATGGAGGAGACCATAATTAG

>M6-PGSC0003DMG400007281 M6 LRR-RLP

GCTCTACGCCGCCAAATTTCTACCCTCTCTACGGTTAATTTGAACAAAACGATCAACAGCTTCATTGGAAA  
CTGAAACCTCCAAGAAGCTCGTAAGCTCTTCGATCAAAGTTCCCACTTGACAAATGTCGTATCATGGAAT  
TCCCTTATCGCTGGTTACTTCAAACACAACCTCATCCAACAAGCAGAGTACCTGTTTGACAAAATGCCTCA  
CAGAGATGTCGTTTCTTGGAACACCATGTTCTCCGGATATCGCAACGTTAACAACCCAGAGAAAGTATAT  
AGATGTTTTCTAGATATGAACAGATGTGGAGATATGAGACCCAATGAGCTCACTTTTGCTGTGTCAATTA  
GCTCCTTCTTGCAATTTAGATTACAAGCATTGATCCCTCAGCTTCACGGTCTCGTGCTCTGTTTGGGGATA  
AGTCTCAATGTCTTTGTAGGGTCAGCATTGATGAGGGGTTATGTTGATTTGGATGATTACAGAGGTTTA  
GCTCGAGTTTTTTATGAGATTTTGGATAAAGATGTTACGCCGTGGAATGTGTTGATTTTGGGTTATATGA  
AATTTGGGTGCACAAGTGAGGCGCAGAGGGCTTTTGATATGATGCCTATGAGAAATCTTTTACTTGGA  
GTACTTTGATCAATGGGTATATTGAGAACAAGAAGCTTAATGAAGCTCGATTCTTTTTGATAAGATGAG  
TGAGAAAGATGTGGTTTCTTGGACAGCAATGATAAGAGGGTATGTGCAATATGGAGAGTTTATGAAGG  
CTTTGAAATTGTTAAGTTGATGTTGAACTCGGGTTCTCGTCCTAATCATTTTACGTTTTCAACTGTTTTAG  
ATGCCTGTGCAGGCTACTCTGCTGTTCTGGTAGGCAATCAAGTTCATGCGTGCATCTTGAAGTCTGGTTT  
CCCTCTTGATGTCGTCTTGTTGACCTCCCTTCTTGACATGTATGCTAAATGTGGAGACATTGAAGTTGCTT  
TCTGCATTTTTGAGTCTATCCCGGCAAGAAATTTGGTAGCTTGGAAATCAATCATTGGAGGTTATGCAAG  
ACATGGGCTTGACAGAGAGTGCAATGCAGGAGTTTGGAGAGGATGCTAAAGAGTGGTATCAGGCCTGATG  
AAATTACTTTTATTAATTTGGTATATGCATGTGGCCATGGTGGGCTAGTCGAGGAAGGTGAGAGAATTTT  
CAATTCTATGGTAACAGAGTATGGATTGAAAGCAGAGATGGAACACTATGCATGTATGGTGGACTTGTA  
TGGAAGGGCAGGTCAGCTTGAGAAAGCAGAAAACTAATCGATGGGATGCCTTTTAAGCCTGATGTGG  
TCGTCTGGGGGGCATTGCTAGGAGCATGTGGCTTGCACTCATGTCTAGAGCTTGGAGAGATTGCAGCAA  
ATGGAATCTACACATTGGAACACGACCATCCTGCAGTATTCTCGGTGCTTTCCAAAATCTATGGAGACAA  
AGGAGTCTGCAGTGACATAACTGGTTTGGATAAGTTGATGAAGAAATGG

>M6-PGSC0003DMG400007606 M6 LRR-RLP

ATGGACTTAACGCATGACAATTGGAAGAAGTTGAGGAAAATCTGAACTCATTCTTTGGTACGGTATCC  
GAACGATGCCAATCAATTCTTTCTTTGAGCTACAACACTTGCCCCAATATTTGAGGGCATGTTTTCTCTA  
CATTGGAGGTTTTCCAGAAGACAGAGAAATTAATGTTTCCAAGTTGATTAGGCTATGGATTGCAGAGCA

ATTTGTAAAGGCAAGAAACAATAAAAGATTAGAAGTGGTGGCAGAGGAGTATCTGCAAGAGTTAATTG  
ATAGAAGTCTAATTTTGATTGTTACGCGAAGCGATAATGGAAGGATAGAAAGTTGCAAAATTCATGATC  
TTCTTCGCCAACTCTGCCTAAGTGAAGGTCATACTGAAAACCTATGTCATGAATGGAAAAGTTCTCGAAGC  
CATAGATGGTCAACGTCGAGTGATCCTTCTATCTAAATATGAAGAGAAGTATGATTATTTTCTGCGACAT  
AGCAGTGGTATTGTCCGTACCTTTACTTCAATGGGTGTAGCTTTTCCAAAAGATATGTGTTCCATTATTTT  
AGAGTTCAAGTTGATTAAGGTGTTGGACGTGTTAGAAGTCCCGTACGATTTCTCTAGTGTAATACCTCAA  
CTTGACATTTGAGATATGTTTCTGCAAGAATTGATGAAGGTCTTTCACTAGCCAAATTGAGAAATCTAC  
AGACCATAATTCTTCAAAGTCTTCAAAGGGAAGAATTGGAGCAGCCAGTAGATATCTGGAGTATGACAG  
AGATAAGACATGTGGATATTGATCGGCCACTATATATATCAAATCCTGTTGAAGCAGAACAAGCTTTGTG  
CCTTCTGAATAACTTGCAAACACTATATCTCCGTAACCTCTCCTTTTGTGTTGGAAATCATAAGAAGAACTC  
CCAATCTAAAAGAGCTAAAGATTTTAGATAGTTCTGAGCGTTCTGATTGGGCTGTTATTCTTGATTCTCTC  
AGTATTTTACAGGATCTGGAGACACTACACATACAAAACATTGATCCGATGATTATCTCTGGAGATATTT  
CTCTTCTAATCTTAAGGATTTGACATTAACAATTACTCGTATACCATGGGAAGTTGTGAATTTGCTGGCT  
AATTTACCAATCTTGAGGCGCTCGTTGGGAATTGTGCATTCAATGGAACAGCTTGGAAGTAGATGAA  
GATGTTGTATTTACAAAATTAATAATCTACATCTATTTATGTGCAGAGATCTGGAAAGGTGGGAATTAG  
CAGCTGGTAGTGATAATTTTCCGATGCTTGAGAACTAATGATGCTTGGGTTGGAAAACTGGAGGAGA  
TTCCCGAGAGTATTGGAGAAATAATGACACTAAAATCCATCCGAATAGTTAATTGCGGCTCTGGTGTAG  
AGACAAGTGCAAAGCAAATTCAGGAAGAGCAAGAAAGCTTGGGAATTATGAGCTTCAACTTCAAAT  
>M6-PGSC0003DMG400007684 M6 LRR-RLP

ATGAAACTCATCAACTTAGCCCTTTTTGGCTTCTTGCTCATCATTTTCTTCTCATCAAACCCCTCATTTCAA  
GCTTCAATCAACTATGAACCAAACCCTAGACTTTTCGATGCTTACATAGCTCTACAAGCTTGGAACATGT  
CATGACTTCCGATCCAAGAACTTCACAAAAGATTGGTATGATTACAATGTTTGTAACCTACACCGGGGTT  
TATTGTGCTCCAGCTCCAGATAACCCTAATATTACCACTGTTGCTGGTATTGACCTCAACCATGCAAATAT  
CTCCGGATACTTACCTGAAAACTTGGTTTATTGACTGATTTAGCCGTCTTTCATATAAATTCCAATAGAT  
TTCAAGGCTCAATCCCGAAATCTTTTTCTAAGCTTCGAATTTTATTCGAACCTTGACGTGAGTAACAATCTT  
TTTTGTGGTGAGTTTCTTCCGTTGTGTTATCTCTTCTTCTTTGAAATTTCTTGATATTAGGTATAACCAA  
TTCGAAGGAAAAGTCCCTTCAACCCTTGGGATCGAACACTCGATGCTCTTTTCATAAACAACAACAAT  
TTCAATTTTCTTGGCCTAAAACTTAGGTAAATCACCCGTTTCTGCTTTGGTTATGGCAAATATTAATGTA  
ACGGGGTGTATACCATCAAGTATAGCAAAAATGTCGAAAACATTAATGAGATTATTCTCTCGAATTCGA

GTTTAAGTGGATGTTTACCACAAGAATTAGGGTATTGAAAAATGTTAGGGTCTTGATGTGAGTTTTAA  
CAAGCTTGTTGGTGAGTTGCCGGAATCAATTGGTGAATGAAGAAATTGGAACATCTTAACGTGGCACA  
TAACAAGTTTTCCGGTGAGATTCCGATGAGTATTTGTTCAATTACCAAAGTTGGAGAATTTCACTTACTCTT  
ATAATTATTTTTGTGGTGAACCAAAGATTTGTCTCAAGTTGAAGGATAGAAATGATAAGAAAAATTGTAT  
ACCATATCGACCATCACAACGTTTCAGAAAGTGAATGTAAGACATTTTATTACGAGGTCCGGTGGATTGT  
AGTTCATTTGGTTGTAGATCACCGCCACCGCCACCACCGCCACCTCCACCTCCA

>M6-PGSC0003DMG400007876 M6 LRR-RLP

ATGGAAGGTGTAGCTTTAGTACTTTCACCTTCCTTGTTGTTGTTAATTTAGATGGATTTTCTTGTTTAT  
TCAGGAAGTCATTGCATTGAGAGTGAAAAAATGCTCTTATTAAGTTCAGCCAAGGTTTCAAGAATCCGT  
CACGAAGCATGTTATCTTGGATGTTTGACGAAAATGCTGCAGCTGGAAAGGTGTTGAATGTGACAACA  
AAACCGGGCACGTGATCACTCTTGATCTACATAAGCAATTCTTGCAAGGTGAGTTCAGGATTTCTTACT  
TGGTTTGCCTTATTTAAGGCACTTAGACATGAGCCACATTGATTTCTCGGGGAACGGATTCCTGAGTTT  
ATTTCCAGTTTTAAGGACCTGGAGTATCTCAATTTGTCTAAAACGAATTTTAGGGGAATGATTCCTGAAC  
ATCTTGGGAATCTGTCGCGGTTGCAGTTTCTTGATCTGAGTGGTGAATTTTCACTCCGGGTTAATAACCTT  
GAATGGATTCACTCCCTCTTCTATGAAGATTCTTGATTTGAGTGGTGTTTACATGAGAAGCGCGGAAA  
ACTGGCTACATGACATCAATTTGTTAAGTTCTCTCTGTATTACGTTTGTCTGCTTGTGAGCTTACTTCAT  
TTCCTGAATTGCTTCCGACTTCTGTGAATTTACATCCCTTCGGATTCTTGATCTTTCAATAAACTATTTTA  
ATACTAGGATTCTAGCTGGTTGTTCAACACAAGCCATAATCTTGTTTACCTTAATCTTTGAGAAGTCAG  
CTGAGCGGTTCACTTCCAATGCCTTTGGCAACATGAGTTCAGTTCAGTTTCTTTCTTAATCTCTCAAGAAAC  
CTCTCCGAGGCAACCTTCCACATTCCTTTGAGAAAATGAGTTCAGTTTCTTTCTTAATCTCTCAAGAAAC  
TCGTTACGCGGCAATTTACCACCAACCCTGCCATCAAAGCTGAAATACTTGGATATTTCTGATAATAAAA  
TGGAGGGTCCTTTAGCAAGAAGCATCACACAACCTAAGCAATTAGTTGTCCTCAATGTTGCTCGGAACTC  
TTTCAAGGACTCGATTACAGAACATTTCTGAATTTAACTCATTTGAGAGTGTTAGACTTGTGATCCAACCT  
CATTTATTTTCAATGTAAGCGCAACTTGGATGCCTCGTTTTCACTTGAAGCTCTAAGCCTGCAGTCTTGC  
GGACTTGGTGCACAGTTTCCCAGTGGATTCAGACACAAAAGAGTTGTCATTTATTGATATCTCTCGCA  
CCAATATCTCAGGTGAAGTGCCTGATTGGTTCTGGAATTTTCTGCCAAGGTTTATCACATAGACCTTTCA  
GGAAACAATTTCAAGTGGAGAAATCCCTGAATTTACAGAAAGAGTTTGTCTTACAAAATTAGACCTGAGT  
GATAACAATTTTACGGTCTTTGCCACATTTTACCCAAGATGATGACATTGATTTTGGCAAGGAATTC  
GTTTAATGGTACCATTGCTCCTGTATGTGAATCACTTGTGATGAATAACTCTCTGAGTCTTCTAAACCTAT

CTTCAAATTTTCTATCAGGACAACCTTTCAGATTGTTGGAGATATGGGAAGAATCTGCAAGGATTGAATTT  
AGGCCATAATGATCTATCAGGGGAGATACCTCATTGATTGGAGATCTTACTAACCTTTTCTTTTTGCAAT  
TGCAGAACAACAGTTTCTCCAAAATCTTCTTCATCATTGAAGAACATAACTGGACTAAAAATCTTGAT  
GTTTCTGAAAATAGTTTATCTGGGAATATACCATTTTGGTTAGGGGAGAGTTTAAATGCTCTTGAGATTC  
TTATATTAAGCAGAAACAACCTATGATGGAATTATTCCCAGGGAGATTTGCCAGCTTA

>M6-PGSC0003DMG400007915 M6 LRR-RLP

ATGAGGTGGGACTCGTTGCAGTTCCTAACCTTTCTCATAATTCATTAACAGGCCACCTACCACAATTTCA  
TACTATAACCTACAGTATCTTGATCTGAAATGTAACCTCCCTTCAGGGTCCACTACCTTCATCCATTTGTAA  
CATGAGTTCGCTTATCTTATTAGATTTATCACGCAACAACCTTCAGTGACTCAGTTCACATTGCTTGGGAA  
GCATGGCTAGTCTAACGGTGCTAGACTTAAGAAGGAACAATTTACAGGGAGTCTTCCCATTTATGTGC  
ACACAGCACTTCGTTGAGTACCATTGTCATAAATGGTAATCAATTTGAAGGACCTGTACCTGTGTCGTTG  
CTCAAGTGTGGTGGTCTAGAAGTACTTGATGTGGGAACAATGCTATAAATGACAGGTTTCCATCTTGG  
CTCGGAACTCTCGAATACCTGCAGGTCCTTATATAAAGTCGAACAAGTTCCATGGACCTATAAGTACGT  
GTCTGACTAAGTTTTGCTTCCCAAGTTGCGAATTTTTGATCTTCTCGTAATGATTTTCAGTGGCTCACTTC  
CTGCAAAGTTTTTGGAACTTCAAGGCAATGATCAAATTAGATGGCGAAGACACAGGAAATATAAAGT  
ACATGGACTCTGTGTTGTATTGCCATTTGTCACATCGTATGAGGATTCAGTGAGTTTGGTAATCAAAGG  
GCAGGATATTGAGCTATAAAGAATCAGCACAATTACGACAACCATAGATCTCTCAAGCAACCATTTTGAA  
GGTGTCAATCCGAAAACACTAAAGGATCTCATATCACTTTGGCTACTCAATTTATCTCATAACAATCTCAG  
AGGAGATATCCAATGAAATTAGGACAATTGAGTATGCTTGAAGCTTTAGATCTCTCTTGGAAATCGGCTC  
ACTGGAAAGATTCCACAGGAATTGACAAGAATAAACTTTCTCACCTTCTTAAACCTCTCTCAAATCATCT  
CGTTGGACCAATTCCTCAAGGTCGGCAATTCAACACATTTGAAAATGACTCATATGGTGGCAACCTTGAT  
TTATGTGGTGTTCCTTTAACAAAGAAATGTGGAACGTGTGATTCATCGCATGTTCTCAACAATTGGAGT  
CCGAAGAAGAAGGCGAGTCATATTTTTTTAGTGGATTTACTTGGGAATCAGTAGTCATAGGCTACAGCT  
GTGGACTAGTTGTTGGAAGTGTGATGTGGAGTCTCATGTTTAAATATCGTAAGCCAAAATGGTTTGTGGA  
ATTTTTTATGAGTGGACTCATGCCTCAGAAAAGAAGAAGGCCAAAGAAGAGAGCTCAGAGACGAAGGACTT

>M6-PGSC0003DMG400007999 M6 LRR-RLP

CTCCAGTAGCATAATAACATCACTCAAACCTTCAACTTCTTCGAGCAGAATGTAAAATCAGTTTGAAGTC  
CCCAAACATGGCGGTGACGGACTTTTTCGTCGGCGAAATCACCACCGAACTCATAAAAAACCTTCTGCTA  
ATAGTTAAAAATCCACTTTATGCCGTTCAAGCGCCGAGAATCTCATCGACAGCATCAATGGTCTCCTTC

CAATCATCCAAGAAATCAAACAAACCGGTGTTGAACTTCCACAGATACGTCAAACCTCAGATCGACGATTT  
CTCCAAACTTCTCCGAGATGGTTACGAACTCGCCGAAAAGTTATCCACTCCGGCCGTTGGAACATGTAC  
AGGTGTCACCTTCTCATTTCGACTCTAATTACAGTGAATTGAACCTCTTCTGCTCTAATTAGGGTTATTGA  
ATTGTACGAATCTGTTAGAAATTAATTTATATTATGCCTTGATAACAGGAACCTACAGTTGGCTAG  
GAAAATGGAGAGGCTGGAGAAAAGAGTAGCGAGGTTTCATGCAAGTTACAATGCAAGCTCATGTACTAG  
CGGATGTTTCATCATGTTAGGTTTAGTATGGAGCAGAGATTTGACGTGCTTGAGCATAGGCTTAAAGCTA  
TAAAATCGGAGTTGACGATAGAAGTGGTGGTGGTGGAGGAGGAGGGTGTAGGGGAAGCTGT  
GAAAAGAATGGAAGAAGATGAGAAATGGTTTGAGGATAGTTTTGTAAATTTAGGTGCTGGGATTGAAT  
TGGGGAAGAGGAAAGTGAAGGAGATGCTGATGGGTGAACAGGATAGAGGTGTGTTTGAGATTTGTGG  
AATTGGGGGTAGTGGCAAACCTACCTTGGCTAAAGAGATTTGTAAAGATGATCAAGTTAAAAGTAAGTA  
ATTAATCCCAGAAAAGTTTCTCATGTAGAGTACTTTAGCTTTTTGCGGGGTTGATTTCTCGAAAGGTTAAT  
CAACTAATAGTTATTATCTATCACTTTTCGTTTTTGATTCTGATGCAAAGAAAGTGACTTTATTAGATATTA  
ACTATTAGTTGAGTGGACATCCGTGAAATCAACTCATATTTTGC GTTGCTGATGATCGAGTTATTAGAAG  
TTAATAATCACACAAAAGTTTCTCATTTTCATTTTGT TTTTACTCTTCTGTTGCGGATGAAACAGTGGATAA  
AAGTTGAAAACCTTATTGGCTATTATCTCTATTTTATCAGTTGAATTCTAATAGAGATCAATTTTGCATGTA  
AAGGACTCATCAAAGTTTTGATTGGAATACAGTTTAAATTGGTCTTAAAACCTTTTCTTTAAATAATGG  
TATGGTGTCTGGGCCATGTTGTTCCAGGTTATTTCAAGGACAAGATTTTCTTTTCACTGTTTCTCAATCTC  
CAAACGTGGAGCAATTAAGGAAAATGATTTGGGAAAAGATATCAGGGTGCAATCTCCATGGTTATGGA  
TACGGGGAGATGTTACCCAGTGGAACTACAGTACCAATGGAATACGAAATCTGCATCCCCAGTACTC  
TTGATTCTTGATGATGTGTGGTCTGCATCTGTGCTAGAGCCACTAATTGTCAAGATCCCCGGCTGCAAGA  
TCCTAGTTGTATCGCGTATCAAGTTTCTCCATCAATCATTGACTGTATTTATGATTTAGAGTTGTTAAGG  
GAAGATGAAGCTATGTCCTTATTATGCCATTTTGCATTTGGACACAATTCCTTTCCGCGTGGTTTCAGCCA  
AAAGCTTGTCAAAGAGGTATTAGTGTATGTTTTTGGCAGCATATTAGTTTTTCTTTGCAAAAACCTTCTTGT  
TATACTTGAGTTAAGCTAACAAAAGCTTCTTGGACTTTTTAGATTGTGGATGAATGTGAAGGGCTTCCTT  
TGGCTCTAAGGTCATTGGATCTTCATTAAAGGGAAAACCTGAGATGTTCTGGATAAGTGCAAAAAACA  
GATTATCACGATGCCAACCTGTCTGCGAGTCTCATGAACTGCAGTTGCTTGAGCGAATGAAATTGAGTAT  
TGA CTGTTTGCCTGAGAAGGTGAGAGAGTGTTCCTGGACTTGGGTGCTTTCCAGAAGACAAAAGGAT  
TCCTCTTGATGTTCTAATTAACATGTGGGTGGAGCTACATGATATTGATGAGGAGGAGGCTTTTCACATT  
CTTGTTGAACTTTTCAGACAAAATCTCCTAAATCTAGTCAAAGATGCACGGTAAGCGGTGGACTAAAATC

TCCTCAAACAATCTTTTAATTTTTGTTAGAAGGTGATTGTTTATGGAAAAATCAATATGTTGATAGTCTT  
CAATGTGGTCTTCATGTGGCAGAGCTGGAGACATGTATAACAAGTTACTATGAGATATCGGTATTTGAGC  
ATGATGTATTACGAGACCTAGCAATTCAGATGAGCAACCGTGATGATATAAATCAGAGAAAGCGATTGG  
TTATGCCACGAAGAGACGTAAGCTTTCCAAGAGAATGGGAAAGAAATGTGGACGAACCTTTCCATGCAC  
GAGTTATCTCTGTGCATACAGGTATTTTTAGATCCTTGGTTACTGCTGATTGATTAATAATGAAAAGTTTA  
TCATGTGATATAAACAGAAATATTTCTCTTTAATGCAGATGAAATGAGAGAAATAGACTGGTTCAGAATG  
GATTGCCCGAAAGCTGAAGTACTGATTCTCAATTTTGCCTCATCTGAGTACTTCTTGCCTCCTTTCTGGA  
GAATATGCCAAAGCTAAGGGCATTGATAATCATAAACTATAGTGCTGGCAATGCAGTTCTTCATAACATG  
TCTGTATTCAGTCATTTAACCAACTTGAGAAGCCTTTGGTTCGAGAAGATATCCATCACTCACTTATCTGA  
CTCCACAAATCCTCTCAATAACTTGCGGAAGATATCTCTAGTGCTTTGTGACATGAAAAACAGCTTAGAT  
GAGTCAGATGTGGACCTCCCTGGTTTGTCCACAGCTTTCTGAGTTCACAATGGATCATTGCATCAACTT  
CAATAAGCTGCCATCAAGTATTTGCCGGTTGCATAAGCTCAACAGCCTTAGTATCACTAATTGTGATAGT  
CTTTATGAACTTCCATCTGATTTAGGTGAATTACAACTCTACAAGTTTTAAGGATATATGCCTGTCCACA  
TCTGAAAAGGCTTCCCCCTGGAATAGGTCATCTGGTGAAGCTGAAGTATCTTGACATTTCAATGTGTT  
GGTTTGAGATGTCTCCCTGAAGCAATTGGTTGCTGTAGAACTTGGAGAAGATTGATATGAGGGAGTGC  
CCTCAAATTGACAGTTTGCCAAGCGCTCTATCCTTTCTTGAATCATTACGTTGTGTTATTTGTGACGATGA  
AGTTTTTTGTCAATGGAAAGATGTTGAGAAGGCTGTACCAGGTCTATGTGTACAGGTTGCCGAGGAGTG  
CTATACTCTTGACTGGCTATCTCAGTAATCAAGTTTTCAATTCCTTATCTTGGGTTTTCTTCGTGTAATG  
CTCAGTCAATTTTCCAGTTCTGATTTTCCCCTTACATGGGGTTCATTGTATCTCTTGTAATAATATATA  
GCAATATGTAATATGTAGATGGACTACATCTCAATAGCTGATCTTTCCTTTTACTTTAAAACCATAATGC  
TGGAAGCAAATTACCACAGGCAATCCAACACTAAGGCAAGTTATCTGCTATAACATGT

>M6-PGSC0003DMG400008036 M6 LRR-RLP

ATGAATAGTACTATCAAATTTCTAATATTTTTCTTCAGTGTTACAACAGCACAACCACTAAAGGGACAGA  
ACCAATTGATTTTTGCAGATCAAAGGCTTGCTATAGTATACCCATTATACAAAAATCAAGAATATCATC  
TCTGCTGATCCTCTAGGTATTACAAAACTTGGGTTGGTCCAAACATATGTAATTATACTGGTTTTTATTG  
TGAAAGTCCTCCAGACAACAATTCAGCAATTGCTCTTGCTTCTATTGATTTCAATGGTTTTCAACTTAGCG  
CGTTTACTCTTGATGGCTTCCTTGATCAGCTTCCTGATATAGCTATTTCCATGCTAATTCAAACAATTTG  
GTGGGACTCTGTCTCCAAAAATCGCGAATCTTCTTATCTCTATGAACTTGATATTAGTAACAACCAATTT  
TTCGGCCATTTCTAGTCCAATTTTGGGCATGAATAGCTTAAATATATTGGATATAAGATTCAATTTCTT



CACTGGATCAGTCCCACCTCAATTGTTCACTAAAGATCAATTAGACGCGCTCTTCATCAACAACAACAATT  
TCATGCAGATGCTTCCTGATAACATCGCGACCAGCCATGTTACATATCTTACTTTAGCTAACAACAGATT  
TTCGGTCCTATCCCACATAGTATTTCCAAAATCTTGTCGAGTTTGTCTGAGATTTTGCTGCTTAACAACCT  
GTTAAGTGGATGTCTTCCTTACGAGATAGGATTCTTAAACGAAGCAATAGTCTTCGATGCTGGCAATAAT  
AGACTCACCGGTCCACTTCCATTCTCATTAGGGTGTTTGGAAAATGTAGAAATGTTGAATTTTGCTTGAA  
ATCAGATGTATGGGATAGTGCCTGATGTGATTTGTGCCCTGGGGAATTTGGCAAATTTATCTTTTTCCGA  
TAACTATTTTACAGGATTTGGGCCAATTTGTTTGAGATTGATAGAAAATGGAGTGTTTGATTGAGGAAT  
AATTGTATTCTGGTTTTCCATTTCAAAGATCAATAGCTGAATGTGTTGCATTTTTTGCTTACCCAAGGTA  
CTGTCCTCATATGGCTACATATACTTATATTCCTTGTGGCTTTCAAATTTCAAACGCCTCCTCTGGATCT  
CCCTGAATTGGCTCCTTAGTAAGGGTAACACGGTGTACAAAGCATTCTGTGTTAGCATGGTTCGGGAAA  
AGATCATTAGAAAATTCTGGTATTTGATCATAAACATACATGTCCCCTTTTCGCGATCTTTTTTATTTAAT  
TAAATTAAGCTTGTAATTTCAATTGAATAGAGTGTGATATATCATAATAACTTGTGATCTCTGTTTATGGA  
GTATTGCTCAGTAGTAAATTTACGTTACTTTTTATGTTATGG

>M6-PGSC0003DMG400008185 M6 LRR-RLP

TATATTTGGCTTTTTAAAAATATATAAATAAATGTGTGTAAGCACTTTTAGCTTGCCACTTATGACCTAG  
TGTTTTGTTCCAATGGCTCCAACCTCTATCTGCAACAATGTTTGCAGGTTTTTTGTCCCAACCTGGAAGACC  
TATCCATCAACAGCCTTAAAAGCATAAGTGCTCTATGCTCTCACCAACTCCAACCTGACTACTCCCCAAA  
CTTCAAACATTGGAAGTATCATTTTTGTGGAAAATTGAGAACTTGATGTCTCCATCAGTGGCCACAGGTC  
TTTTGAATCTCCGAAAATTAAGAATACAAAATTGTGATTCAATGGAAGAAGTGATCACAAAAGAGGAAC  
AAGAAGGAGCAGGAATCATGACCTTATTTCCACTCTTAGAACAGCTGAAACTTAGTTTTCTGCCTAAGTT  
GAGGCATTTCTTTCTGACAGAGCATGCTCTTGAATTTCCATTTCTCACTGGCGTGTATATTGATGTCTGCC  
CTGAAATGAAGACGTTTGTCCAACAGGGAATATCTGTGAGTACACCCAGTCTCAAATTTATGATCTTCAA  
TTATAGGAGGCGGAAAGTAGATGATCTGAATAAGTCGATACAGCAGATGTTTAAACAAGGTATGTCTTAT  
TCCGCTAGCTACATATTCTAATTAGGTTCTACTGCTCTCTTTCCGTTTTCGATACTTATTTAAGTTCATCAA  
CTTTCTTTTACTTAATAATCTAGTCATCTCTCTCTTTTGCATTCTCTGTTTCTGCAGAAAACAAGAAGCTA  
GTGATGACGACGAAGCTAGTAGTGGCTATGTAATAATGATGCCGACGAATCTGAACCTAGTCATTCCAG  
AAGTTAGGAAGCGGGTAGGAAAACTCAATGAAATAATGCAAGTAAAACCTCGAACATCACCTGATACC  
TATGCTCGTGATGGAGGTAATTAACAAGCAGAGGCGGATCTACATTATTGTAACCTATTGGTTCATGTCA  
ACCTACTAGCTATTGGCTATAGATCTTGTCTATGTATTAGTAATATCTAAAAAATAAATGAT

>M6-PGSC0003DMG400008394 M6 LRR-RLP

CTTCCTTTGAGTACTCTACAAACAACCTACCAAACGAAGACTTACTTTGAGAAGACTTTGTTGCATACAGCT  
CAGGAAGAAGACTTTGGTGCAGATTGCAGAGGAAGAGGAAGCAAACACAACAATGGCCGATCCTGTAA  
TTGGTGCTACTGTTCAAGTTTTGCTTGAAAAGTTGATTTCTCTCACTATCGAGGAGGTCAACAGCTCAAG  
GGATTTCAACAAAGATCTCGAAATGTTGACACAAAATGTATCATTAAATCCAAGCTTTCATTCATGATGTT  
GAAACACCACAAGAGAAACAACAGTCTGTGCAACAATGGCTCAACAGGCTTGAGAGAGTTGCTGAAGA  
TGCTGAAAATGTGTTTGATCGATTGAGATATGAATCTCTCAAAAACAAAAGTGGTGAGGAGCCCATTGAA  
AAAGGTCGGTGGTTTTCTTTCTCATACTGCTTTAAGAGAAAAATGTCTCAAAAAATCAACAACATCAAT  
AAAGAGTTGACGGCTATCAATAAGGTAGCCAAAGACCTCGGTCTACAATCACTCATGGTACCTTCTCGG  
AAAATACTACCAATTCGAGAAACAGATTCCTTAGTAGTTGCTTCTGATATTGTGCGGTAGAGATTTGGATG  
TTGCTGAGATAAAGGAGAAGATTTTGAAGATGAGAGAGGAGGATATTGTTCTGTCCACCATTCCCATTG  
TAGGTATGGGAGGTTTAGGGAAAACAACCTGTGGCTAAGAGGATTTACAATGATGAACACATGAAGCAA  
ATCTTTAAAAGAGAATTTGGTTGTGTCTACCTGAAATGTCTGAAACGAAGAGCTTTCTTGAACAAATCC  
TCGAATCATTGATAGAGAGGAAAATTGAGGTTGAAAGGAGAGATATAATAGTCAAGAAGCTACAAGAT  
GAATTGGGAGGAAAAAATATTTGCTAGTCCTGGATGATTTGTGGCGTGTTGACTCTACATCGTGGCAT  
GAGTTCGTGACACCCTGAGAAGAATAAATACATCCAGAGGAACTGCATTCTTGTGACTACTCGTAGG  
AAGCAGGTGGCATCCACAGTAGCAACAGATCTTCATATCTTGGGGAAGTTAACAGAAGATCATTGTTGG  
TCTATTTTCAAACAAAAGCATTGTTGATGGCAGGGTTCCAGAGGAATTAGCGAGCATGGGCAACAAG  
ATTGTTAAAATGTGCCAAGGTCTACCGTTGGCTGCAAGTGCATTGGGAGGGCTCTTACACAACAAAGAA  
AAACATGAATGGCAAGCAATTCTTGATGGCAACCTCCTTGTACTGGTGAAGATGATAATGGAGAAAAT  
AGCATAAAGAAAATCCTAAAACCTCAGCTATGATTATCTACCATCTCCACATCTGAAAAAATGTTTTGCTTA  
CTTTGCAATGTTTCCAAAAGATTATATGTTTGAAAAGGACCAACTAATCCAACCTCTGGATGGCAGAAGG  
GTTTCTTCGTCCAAGTCAAGAGATCCCTGTGATGGAAGACGTTGGGCACAGGTTTTTTCAAATCTTGTTG  
CAGAATTCCTTGCTACAAGATGTTGTGTTAGATGAACACAACAATATAACACACTGTAAGATGCACGATC  
TTGTGCATGATTTGGCTGGAGATATCTTAAAATCTAGACTATTTGATCCGAAGGGCGACAATGGAGAAA  
AACTTTCTCAAGTTCGATACTTTGGATGTGAGTCACCAACGGATCAAATAGATAAGATATATGAGCCAGA  
ACGTTTGTGCACACTGTTTTGGAGAAGCAATTATACATCTAAAGATATGCTGTTGAAATATAAGTTCTTG  
AGAGTTTTAGATTTGTCCAGTTCAGGAATCAAGGAGTTGTCAACCAAAAATCGGGAAGCTGATATACTTG  
AGATATCTTGATCTCTCGAACACTGAGATCACAGCCTTGCCCAACTCCATTTGCGAGCTCTATAATTTGCA

AACATTTAGAGTCATCAACTGCTTTTCACTCCAGGAACTTCCATATGAGATGAGAAATATGATAAGTTTG  
AGACACATATATTACACTTCTGTTGACGAAACAAGTGGGCATTGGGGAGGATGGTGTCTTCACAATGAA  
CATTTTCAGATTCCACTTAATATGGGGCAATTGACTAGTCTTCAAACCCCTCAAGTTTTTCAAGGTAGGTTT  
AGAGAAAGGTCGTCAAATAGAAGAATTAGGTCATTTGAAAAACCTAAGAGGTGAATTGACGATCAATG  
GTCTCCAATTGGTCTGTGATAAAGAAGAGGCTCGAACAGCATATTTACACGATAAACCAAACATCTGCA  
AGCTGGCATATTTATGGTCCCACGATGAATCAGAAGGCTGTGAGATCAATGATGAGCATGTGTTGGATG  
GTCTTCAACCGCATCCTAACTTGAAAACCATAGCAGTAGTGGACTATTTAGGGACTAAATTTCTTCATG  
GTTCCGTGAAGAGTCGCTACCAAATTTGGTCAAGTTGAAATTAAGTGAAGCAAAGGTGCAAAGAAAT  
TCCATCCCTTGGCCAACTGAAATTCCTTCGGCATCTTGAGCTGATAGGATTCCATGAGTTGGAATGCATT  
GGACCTGCTTTTTATGGTGTGAGATTAGAAATATTGGATCAAACAGCATTATTCAAGTGTCCCGTCATT  
GAAAGAACTAGTATTGGAGGATATGCGTAGCCTTATTGAGTGAAGGGAGATGAAGTTGGAGTAAGAA  
TGCTCCCAGGCTTGAGAAGTTGCGGATTACAGACTGTCCATTGTTAAAAAGTATTCCGAATCAATTTGA  
AATCCTCCGTGAATTAGAAATTAGAGGAGTTGACAGTGAAATGCCATTGTTGAACTTGTGCAGCAACT  
GACATCTCTCGTGAATCTTAGTGTCTATGATATGAAAGAGCTCACTTGTCTTCCAGATGAGATACTACGT  
AACAACTTTCTCTTCAACAGATAACGATTTTCGAATGTGGAGAGTTTCGTGAATTGCCACAAAGCTTGT  
ACAATCTCCATTCTCTTTATAGATTAGACATTTACAACTGCACCAATTTAGTTCTCTTCTGTTCCCAAGG  
GAGACAACACTATTTGACTTCCCTCATATTCTTTTTCTTACATAATTGTAATGGATTGATCAGTATAACCAATTG  
GAATGCTAGATCAATGCCGGTCTCTAGAGTATTTGCATGTCAGCTGCTGTAACAACTTGGTTTCATTCCCT  
TTACATGTGTGGGAAATTCCTTCATTTTCAGTTTTGGAAATAACAGAATGTCCCAAATTGATTAGTGTACC  
CGAAGTGGGCCTTACCATCTCACCGGGTTATTGAGATTGGGAATTGGTCTTTCTCAGAGATGGTGGAA  
TTTTGATGCATTCCAATTGATTTTAATGGCATTGAGAAGTTGTTGTCTCTTCGTGATCTGGAGGTGTACG  
GACGTGGGCACTGGGATTCTCTGCCCTATCAGCTTATGCAACTCTCTAACCTAAGAAAGATCACAATAGC  
TGATTTCCGAATTGAGGCTCTTCTCCTAGACTTGACAACCTTACTTCTTTGAAAGTTTGACGCTAGAGA  
GGTGCAAACGGCTACAACATCTGAACTTCTCAGATGCCATGCCCAAATTACGGCATCTGTGGATAAGTG  
ATTGTCCATTGTTAGAAGCCCTGTCCGGATGGGCTCGGCAGCATTGTTTCTTTGGAAGAATTATATTTACA  
GGACTGCGAAAACTAGAGCATCTACCGTCCCAGATGCCATGCGACGCCTCACTAAATTATGGAACAT  
GAGAATTAAGGATGCCCAAAGTTAGAAGAAAGTTTACCAACTACTCCAGTGGTCCAAAATTTCCCAT  
ATTTCAAATATTGAATTAGGTGGGTGGAGAAGGACAACCATAAGTCTCGGTTTCTCTTCACTTTCTGAG  
TCGCTTGCATTTTTAATTAGAATATTATTTCCACGAGTTCCAAAAAAGAAGTTTTGTAAGTAATGTAATA

ATTTTTCTTGAAATTATTTTGACATAAAAAAAAAAAGCTAGATTATCAATCAATTGCATCTGTTGCTATGCT  
TTCAGGATTCTGCTTGTCCACTTGAAGTGAATTGCTGTTATTCTAAAAATTATGTTTCTTTTCCTTATAGGT  
AGCCATTATAGACGTCTCTGTGGTAAATCAAGCCAAATCATATGAGCAGCAGGCAATTACGTAAGGTAA  
ATTTTCATTTATAATTTATAGGCACCTTGTAACTACTTGTCTATCTTTCTTTTTGTTGGAAACCAATTTT  
CGGAGGTCTATGCTGATGAATACAACATTACCTTCTTAAAAAAAAGTTTAATCATGAAAATTTATGATTT  
CTGCTCATAGGTTACTAGGTACAAGGACATGGTAGAACGTCGTTGTGGTATATCTAGTCAAATCCATG  
GGCAGAATCATGTTAGGCATTTTTATTTAGTTGTTAGAGGAATGCTATAACAAGTTTGTAAGTTTCTTTT  
TTTTACTTTCTTTTCTCTCATGAAATAATTTTAATGTTTAAACGGGACGTCGTGTTTCACAGAGGAACCGC  
CACTGTTATTTGGATGAAGAACAATCTTCAACTGTAGACTCATTATGGGACACTTTCATGAGTATTTTCG  
GGGAACTACAGTCTACATATGAAACATCAAAAAGCTCAAAAGCGTATAGGGTGCTCAATGAGAAGCTACA  
CGGGGTCTATTCTCCATGTAAGTATTGATAACTCTCAAGGAACAATACCAAGTCTCATATATGGTAGAAA  
TCTATATAAGTTTCTTAATAAACTCATAAAGAATAATCTTTATGTCTTCTGCAGTTCTGGTTTTATTTCA  
TGCTTAAGACAGTACAGCTTTTATGAATATATGACACACTTCTCGTTCCTTTCACCTCACAGGACAATTC  
TCTGTTCAATAAACTTCCGCGAATGAAGGACTTCAACAAAGATAGTTGTGATGAATATTTTTGCAAAGG  
GTGACCCATTGGCTCTTAAATGTCCTTAGCAGTATACGTTTTCATCTTAAACAGGTTTTCTCTGTCTTTTT  
TAGTGGTTACTTGTAAATGATCCGCTTCTCCATTCTCCAAGGAGGAAACGTGTGCCAAAAGTACTTTTTAC  
CATTTCCCGTGTTTCAGATTCATGTTTGAAACTCCAGCATGGACCTTGTGCAAATGCTACTTGTGTTAGAC  
GTGTTTGAGTGTCATGATTGGCAAGGGAAATTGCATGTGGCGGAAATTGGAGTGGAATACTATTTACT  
TGTATGACTAAGATTGACAGCAGAGGCGCCTTTCTTTCACAGCATAACGTCCTTTTGGTACAAATAGAG  
TTCATTTCTCCAACAACATTTTGAACCTTTATACTTAGCTGCTGCATCATTGCCTAGTTGTTAGCTTCTGT  
AATGTACATCTGCTTTTCTCTTGAATTTCTCTTGGCTTTTGTTCGCAAGTATAAACAAAAAAGACAGGG  
CCTACCATTGTCATTGTTTAAATCCAACAATATGTATTCAAAGTCACAAGCAATGTGTGTTATTCCAAT  
TTCGTACAGGACTGCATTTTTGTGTCTATGTATAACATATCGCATTGCTCATTATTCTTTCAGATAGACCA  
GATTGCAC

>M6-PGSC0003DMG400008450 M6 LRR-RLP

TCCTTATGTTACACACCTCTTCTCTCTGAAGGTGTATGATGGGATTCATGATTGTCTTTCTACAACAGTC  
ACCTAAAACACTTGAGGCTTCTTAAAAGTTTGGATTTGAAGGGCCTAACATTGACAGATTCTTTGCTGAA  
TGAAATCGGTTTGCTTGTTCATTTGAAGTACTTAATCATTACAGACGAAGGCAAAAGCTCTCCCTCCGTTAT  
TTTCAAACCTCTGCAATCTAGAACTCTATCGGTGTATAACATTGAGAGATCATGCATGATACTATCGCCT

TGTTTTGGAGTCTTGCAAAGCTACAAGATGTGTGGATGATGGAATGTGCTCTCTTTGAACCAACTGTGT  
TAGACGAGGACTCAAGGTTAGAAAATTTGAGAACATTACAGCATCTCTCCCTCCCGGTTCAGAAGACAT  
GGAGGATATTTCAAAGGTTTCCTAATCTTCAAATCCTTAGTGTCTCTATCATAGCAGAGAAGATTTGTT  
TTCCAAGATTGGATGTCCTTAACGAACTTGAACAACTCAATTTATCTGCTTCTTGGGATTCATTCCATGAA  
TATACACACGGCTTCCCTTTGAGCTTGAAGAAAATGAGGTTGCAAGGGCTCGCTCTGACATCCGATTCAT  
TGCAAGAATTGCTAGACTACCCAACCTTCAAAAATAAGTCTAAAAACGCAATCATCGATGGGGGGC  
CAGGAGAATGGAACATGGAAGTTGTCACCTTCAAGAATCTCAAATATCTAAAATTGGATAGTGTGGAAT  
TTTCTGAATGGCAGGTTGATGCAGAGAAATCATTTCCCGTGCTCGAGATGTTAGATATAGTTACATGTGA  
GAAGCTTATGGACATCCCAGATAGTTTTGGAGATATTGCGTCATTAGAACTTATCAAAGTATGGTTTAGC  
CCTCAGCTTAAAGAGTCAATCTTCAATATTA

>M6-PGSC0003DMG400008492 M6 LRR-RLP

CTTTTTCTTGTTACTTGCTACTCTTCATAAAATGAAGGCCTCTCTATAGTTTCCATTCTTTCTTCTCAACT  
CTCTTGTTTCTTCTCAACTCTCTTCATCTGAAAGATGCCATCCAATGACAAAAAAGCCCTCCTAGAATTC  
AAAAAAGGTCTAGGCAATCCTGATGACTTGGGTAATTGGGATCCGAAAACGATTGTTGTAAGTATTGG  
TACGGACCTACTATCAAATGTGATGAAAAACCAATCGTATTAACGTCATCGACTTCACCAAAATGGATA  
TGGCCGATACCTCTCCCCGCCATCGGAGACCTTACATACCTTACAACATTCAGTATCCACAATGTACGT  
AATCTCACCGGTCCAATTCCATCAACAATCCTTAACTCACTCATCTCGAATTCTTCAGAATTAGTCAAAC  
AAACATTTCTGGACCTGTACCTGAAGTTCTTAGTAAATTGAAAAGCTTAACGTACATTAACCTTATCCTATA  
ATAAGCTTGTTGGAAGTATTCCACCTTCGCTATCTCAACTTCCACACTTGGAGTTTTTACGATTAGACAGG  
AACAACTTACTGGACCAATCCCGGAGTCTTTTAGCAAGTTAGCTCCAAATCTAACGTATCTTTACCTGG  
ACATAACCAACTTACAGGGATTGTCCCAACTTCATTTGCTGGCTGGAGTTTTGAGACAATTGACTTGTC  
AGGAACATGCTTGAAGGGGATATTTCATTTTGTTGGTAAAGATAAGAATACATTTGAAATGCTTTTGG  
ATCGGAATAAGTTTGAATTTGACATGTCAAAGTTGACGTTTGGGAAGAGATTATGGAGGTTGCATTTAA  
ATCATAACAAGATTTATGGGAGTCTTCCAAAAATCATGTCCAAGAATCCGTGGCAACTCTTGAATGTGAG  
TTATAATAGACTTTGTGGAAGATACCAAAGGGTGAGAATATGCAGAGATTTGAGATATATGAGATTTT  
CCACAACAATGCTTGTGTGGTGCTCCACTGCCGCCCTGTAAATGATCATCACTAGTATCCTGTCTGTCTG  
ATCTATCTATGTATTTCAACTTCTCTTTGAATGTTGATGAATAATTGAGTGAGTAACTCAAGGCATAAAC  
ATGACTTTAATTAATTTATGAATGTTATCCTTTTTTAGTAACTTCTCGATGGAT

>M6-PGSC0003DMG400008596 M6 LRR-RLP

CTTTATTTAGGTAAAGAAGACTTTGGTACAGAGAAAGAACATTTTGTGAAGGAGCAAACACAGTAATGG  
CCGATCCTGTAATTGGTGCTACTGCTCAAGTTTTGCTTGACAAGTTGCTTTCTCCCACTATTGAGGAGGTC  
AAAAGTTTAAGGAACTGCAAGAAAGATCTCGAAATGCTGATAAAAAATGTATCCTTGATCCAAGCTTCA  
TTCATGATGCTGAAAGACGACAAGTCGAAGATCAGGCTGTGGAAAAATGGCTCAAGATGCTTGAGAGA  
GTTGCTGAAAATGCTGATAAGGTGTTTGACGAATTCAGGTATGAGTCTCTCAAAGACAAGTGAAGATT  
CGAAACAATCCAATGAAAAAGGTCAGTGATTTCTTTCTCATAACAGCTTTTAAGAGCAAATGTCTCAA  
AAATCAACAACATCAATGAAGATTTGACGGCTATCAATAGGTTAGCCAAAGACCTTGGTCTCCAATCATT  
GATGGTTCCTCCTCGGCAAATACTACTAATTCGAGAAACAGATTCTGTAGTAGTTGCTTTGGATGTTGTT  
GGTAGAGACAAAGATGTTGCTGAAATAAAGGAGAAGATATTGACCATGAGAGAGGATGTTGTTCTGTC  
AACCATTCCAATAGTGGGTATGGGAGGTTTAGGGAAAACAACCTGTCGCAAAGAGAATTTACAATGACG  
AACACATCAAGCAAATCTTTGAAAAGAGAGTTTGGTTGTGTCTACCTGAAATGTCGGAGACTAAGAGCT  
TTCTCGAACTGATCCTCGAATCATTGACAGAGAGGAAAGTTAAGGTCCAGAGCAGAGATATAATTGTCA  
AGAAGCTCCGAGATGAACTGACAGGAAGGAAGTATTTGCTTGTCTGGATGATTTGTGGCGTGTGACT  
CTACATTGTGGAATGAGTTTGTGGATACCTTGAGAGGAATAAATACTTCCCGGGGAAACTTCATTCTCGT  
GACTACTCGTATGGAACAGGTGGCGTCCACAGTAGCAGCAGTAGGTCCTCATAAGTTGGAAAACTAGC  
AGAAGATCATTGTGCGTCCATTTTCAAACAAAGAGCGTTTGTGATGGGGAAATTCCACAGGAATTAGC  
AAGCATGGGCAACAGGATTGTTAAAATGTGCCAAGGTCTACCGTTGGCTGCAAGTGTATTGGGAGGCCT  
CTTACGCAGTAAGGAAAAACATGAATGGCAGGCAATTCTTGATGGAAAGCCCCTTGTTCAGGTGAAG  
ATGATAATGGAGAAAATAACATAAAGAAAATCCTAAAACCTCAGCTATGATTATCTACCATATCCACATCT  
GAAAAAATGCTTTGCTTACTTTGCAATGTTTCCAAAAGACCTTGAGTTTGAAAAGGACCAACTGATCCAA  
CTCTGGATGGCAGAAGGCTTTCTTCATCCATGTCAAGAGACCACCGTGATGGAGGACATCGGGAACAAG  
TTCTTTCAAATCTTGTTGCGGAATTCCTTGCTGCAAGATGTTAAGCTAGATGAGCATAACAATATAACAC  
ACTGTAAGATGCACGATCTTGTCATGATTTGGCTGGAGATATCTTAAAATCTAAACTAATTGATCCCAA  
GGGCGATGGTGGAGAAAATCTTTCTCATGCGCGATACTTTGGATGGGACTCACCAAGTGATCAAATAGA  
TAAGATATATGAGCCAGGACGTTTGTACACACTGTTCTGGAGAAGCAATCATATATCGGAAGCTATGCT  
GTTGAGCTTTAAGTTCTTGAGAGTTTTAAATTTGTCCAGTTCAGGAATCAAGGAGCTGCCAGCCAAAATC  
AGCAAGCTAATATACTTGAGATATCTTGATCTCTCCAACACTAAGATCACAGCCTTGCCCAACTCCATTTG  
CAAGCTCTACAATTTGCAAACATTTAGAGTCAATGACTGCTATTCACTCAAGGAACTTCCATATGAGATG  
GGAAATATGATAAGTTTGAGACACATTTACTGCTATTCTCGATCTCAGTTGCCACTTAACATGGGACAAT

TGACTTGTCTTCAGACCCTGCAGTATTTCAATGTGGGGTTAGAGAAAGGGCGTCGAATAGGAGAATTAG  
GTTGTTTGAAGAACCTTAGAGGTGAATTGACGATCAATGAGCTGGAATTGGTCTGTAGTATTGAAGAAG  
CTCGAACAGCATATTTACAAGAGAAATCGAATATCTACAAGCTGGCATATGTGTGGTCCACGATGAAC  
CAGAAGGCTGTGAAACCATTGTTGAGCATGTGTTGGATGGTCTTCAACCGCATACTAACTTGAAAACCTT  
AGAAGTCAAGAACTATTTAGGTACTAGATTTCTTCATGGTTCAGAGAAGAATCTCTACCAAATTTGGTC  
AAGTTGAAATTAAGTGGTTGCAAAGATGCAAAGAAATTCCATGGCTTGGCCAACTGAAATTGCTTCGG  
CATCTTGAGCTATTAGGGTTACATAAGGTTGAATGCATCGGAACTATTTTTTATGGTATTGATGGTAACA  
ATATTGGATCAAGCAGCAATGTCCAAGTGTCCCATCATTGACTGAACTAGTATTGAAGGATATGTCTAG  
CCTTATTGAGTGGAAAGGGAGATGAAATTGGAGTAAGAATGTTTCCTCTGCTTGAGAAGTTGAGGATTAG  
TAGCTGTCCATTGTTAAAAATTACTCCAAGTCAATTTGAAATCCTCCGTGAATTAAGAATTGAAAGAGTT  
GACAGTGAAATGCCATTGTTGAACTTGTGCAGTAAATTGACATCTCTCGTAAAGCTTAGTGTTTATGATG  
TGAAAGAGCTCACTTGTTTTCCAGATGAGATGCTACGCAACAAGGTTTCTTCAACACCTATTGGTCTCA  
GACTGTGGAGAGTTTCGTGAATTGCCACAAAGCTTATACAGTCTCCGTTCTCTTAAAAGCTTAAAGATTT  
ACCGCTGCACCAATTCAGTTCCTTCTGTTCCAGTGGAGAGAATTATTTGACTTCCCTCCAAAGTTTTC  
AGTTATGGAAGTGTGATGGATTGACCAGTGTACCAAGTGGGATGCTAGAGCATTGTCCGTCTCTGGAAT  
CTTTGATGGTCTGCTACTGTAACAACCTAGTTTCTTCCCTATATGTGTGGGGGAAATGCCTTTACTTTTT  
GATGTGTATCTATCAGAATGTCCCAAATTGATTAGTGTACCCGCAGGGGACCTTTACCGTCTCACTGGGT  
TACGGCATTGGAATTTGGTCTTTCTCAGAGATGGTGGATTTTGAGGCATTCCAATTGATTTTCAATGG  
CATTGAGCAGCTGTTGTCCCTTCGTTTTTGTGTGTGGTAGGACATTTGCACTGGGATTCTCTGCCCTATC  
AGCTTATGCAACTCTCTGACCTAACAGAGATCCAAATATATCGATTGGAATCGAGGCTCTTCTCATAA  
ATTTGACAACCTTGCTTCTTGAAGATTAACGTTAGTGAGGTGCAAACGGCTACAACATCTGGACTTC  
TCAGTTGCCATGCCCAAATTACGGCATCTCCAGATACAGGATTGTCCATTGTTAGAAACACTGTCGGATG  
GGCTCGGCAACCTTGTTTCTTGCAGGAGTTAGTTTTACAGAAATGCGAGAACTAGAGCATCTGCCATC  
TGGAGATGCCATGCAACGCCTCACCAAATTACGTTACCTGAAAATTGAAGGCTGCCCAAAGTTAGAAGA  
AAGTTGACCAATCGGATTGGCTCAAACCTCCAGTGGTCCAACATTTCCCATATTCCAAAAATTAAAGTA  
GGTGAAAGCATAATTCAGGACTTAAGTAAGTCTCTGTTCTTCTCAGTTTCTGAGTCGATTTTTTTGTTT  
TTTTTTTTCCACGAGTTGCTTCTTCTTTTTAACAAATTTTCCATTCCCCAACTAATACATGTTATGGTAC  
TTAAGAATTACAGAATTTTTTATCTCTCACTTGAACTAACTGTTCTTCTTATTTCGTCATCAAACAAGG  
AATAGATACATTCCCGTCTTTAATAATGTAAATATGTTCTTCTCATAGGTGCCTAGATCAAATGTCATG

CTGGAACGTTGCTAGCTGTGGTATATCAAGTCAAATTTACGGTTGGCAATCAGGTTGGCTAAAATTTTC  
ATTTAGACTTGGTAGAGGAATGCTATAACAAATTTATCGCTTCTTCCACAGGTCATTACTGTACTGTTTAA  
TTAGGTTGGTTATGTTCTGTATGAATGCAATGTAAGCTTGGTTGCGTTTCTAGCATCATGAGGGACGTGC  
ATCCATTTGGTTTAAGGATTCTCTACTCGCATTGGACCAAAAATCTTCATGTAAGCTTCTTCCCAGTTGTT  
AATCTCCTAGGTCCAATAGTTTGCTTTGTTTTAATTGTTTGTGTTTGCACGATTATCGTGCAACAAAAGAGC  
CTATCTCTCAATCCTCAAATATTATAATGCTCTTCGTTACAGGGTATAGTGTGTTAGCACGTTGGACAAAT  
TCCAATTAGCTGTACATATCTATGTAAGAACTCTAAATATTTATTGTAAGTATGGTGTCACTTGCTTCCAC  
ATGTAGGAGATATCAGGAATAACAGATATTTATTTAGGGGTGTAAATGACAACCTTAATTTAATGGAA  
GAACTTTAATATGAGAGCATTTCATTGCAAAATTTGACTCTGGATAAAGACAATTTCTCATTCTCTTTAG  
GAAAATGAAGTATTTGATTCACATAATATTGGCTTATCATGGTTGACAGTTACAATCAGTTTCTTTTGCAT  
AAGAGAAGGTGAAACATAGAGGGGGATAAACGACCTTCTGCAAGGCGACTTTATTATCGACTATCTAGT  
GAAATAGTATAGGTAACAAAGCCATTTTCATCATAAGCCTTGGATGCAAGACAGATTTCAATTTGGTAAAA  
CATGTGACTTCAATTGATAGAAGAGGCTTCTCCAAATTTTGTACCTGTCTTCACTTTTCAACAGTATTTCC  
TTAATTTTCATCAGACTTATCGGAACATTGTTTACATTGGTGCCTTTGGGGACGGTGATTGCACA

>M6-PGSC0003DMG400008925 M6 LRR-RLP

TGAGGTCCTCAAACACTTTCCCGAGCCTTTGAGGGCGTGCAATGGGACATGAAAGACCGAGAGTTCTT  
GAAACTAAAATCTTGAAGTTAGACTCTTTGAACATTGAACAATGGAACATCTCATCTGATTGCTTACCTT  
CCCTTGGGCATCTTGTCTGCAAAGTTGTAAGAACTTAAGGAGTTCCCTTCATGCTTAGGCAATGTTTCA  
ACGCTGCAGAGTGTTGAGCTACACTGGTGCAGCTGTTCTTCTGTGAACTCGATTATCTCAATTCAGAAG  
ATGAGGGGTTCAAGGTCCATGTATACCCTCGAGAATTCGATTCCTGA

>M6-PGSC0003DMG400009029 M6 LRR-RLP

GGTTATCCCTCGAGTAACAAGATAGTCGAATATAAAAACACTGTTCCACACAACACACACATTGTTTAC  
TTCACTTTTTTCAGTTGAGATTTTCTTCACTTGCACTCTCTCCGGCGGCGCGTCAACTCACACATTCTCCC  
TTGTTGTTTTCCGGTGAGTTACAACAGACACTCACTCCAACGATAATCAGAAAAATCCAAAAAGGTTTT  
TTCTTTTCTTGTATTCTAGGGTTTTGCGCTTATGCTCTGTACGAGTCTACATTTTTGGTCATGTGATT  
CACAGATCTGTGCTGGATTTTAGGTATTTTTCTGTTAATGTGCTTTCGTTTGTGGTTTTAGGTCGTTTT  
TTTTATGTTTATTATTTTGGGGTTTTGGTAGAGTAGGTTGCAATTAAGGAGGACTACAACTTCAC  
TATTAGGTATAAAGTTTTTTATTTTTCTCGTGAGGTTTGTGTTTGTAGGGATAAAGAAGGATTTTGT  
TTGTATTACAAGTTTCTGATGTTTTTAGCGGCTCTGTAATTGTATATATGCTGCTCTGCTCTGCTCATATT



ATTCTTTTGTAAATGTATTGTGGGGTATTTTTTCGTATCCAAGAAAGTTTTATGTGCTATAGTGTGGTG  
AAATGGAATACATCTGTTGAGTGTACCATTTTTGGTTTTGAGTGTTTTTACATTGTTGGAAATGAATATG  
GTGCATTGCAAGGTGGTTTATAAAAGAATAGAAAATCAATCTCGTTTTCAATGATGGATGATTGTAGAA  
ACTTTGCCATTCTTTGGACACCTGCTTGGTGTGGTGGTGGAACTACTGAGTTGTCAAACAATTATATCT  
GATTTCTATATGAGGAAGAATTTGAGCTCTTGAAATTTGGTTTCGATATATGTTAGGTTTTCTTACATGGA  
GTAGGTGTGCACGAACTCGTTCTTGCCTGGTACTTTGTTTTGGTTGTTATGTTCTTAACTGCCAGAGATG  
AGTCTGTAGTGGTTATATTTCTTGAAAGATAATCACTTCTATAGAACTGAGACATGATTCATATATTC  
CTTTGATTCTAGGTTTTCTTCCAATGGATGCCACAACAGCTAACTCTCAGCGCAGACCATTTCAATTTAA  
CTGTGGCCTCCAAGTGAGAACACAAGAAAAATGCTGGTGGAAAGAATGATGAATAATCTTTCTAGTCCA  
ACCATTTTCACCCGCAAGTACCGCAGTCTATCCAAGGAAGAGGCTGCCAAAATGCTGAAGAAATTGAA  
GATGCAGCTTTTACCATTGCTAATCAACATTATGAGAAGGAGCCTGATGGTGTGGAAGTTCTGCTGTG  
CAACTTTATGCCAGGGAATGCAGCAAGCTTATCCTGGAAATTCTAAAGAAGATACCCAAATCAGAGGAC  
AAGGAAATTTCAATTTCTGAAGTGGTTCCTACTGTTCAGGAGACCTTTTTTGATATCTCAAAGGTAAAA  
GGGCTTTTATCGAAGCGGAAGAGGCTCAAGAACTTTTAAAGCCATTTAAAGAGCCTGGAAATTCTTACA  
GCAAATTTGTTTTAGCAATAGAAGCTTCAGTATAGATGCAGCACGTATTGCAGGCCCTATCTTGGCAGC  
CTTGAAGGATCAATTGAAGGAAGTTGATTTGTCAGATTTTGTGCCGGAAGAAATGAGGCAGAAGCACT  
TGATGTGATGAATATATTCTCAGAAGCTCTGGAAGGTTCTAACTTGAAGTTTCTGAATCTCTCTGATAAT  
GCTCTGGGTGAGAAGGGAGTTAGGGCATTGGAAGCTCCTTCAGTCTCAAACCACTTGAAGAATTA  
TTTTGATGAATGATGGGATTTACAGGAAGCTGCAATGCTGTTAGCGAGCTAGTTCCTTCCACCGAGA  
AGCTTAAGGTTCTTTATTTTCATAATAATATGACAGGTGATGAAGGGGCTGTTGCGATTGCGGAAATTGT  
GAAGCGTTCTCCTTTATTGGAAGATTTAGGTGCTCTTCTACCAGGGTAGGCTCTGAAGGAGGGAGTGT  
CTTGTGTGAAGCACTTGGGATGTGCTCCCATTTGAAGAAGCTTGATTTGCGAGACAATATGTTTGGTCCA  
GAAGTTGGTCTTGTGTTGTGTAAGGCACTCAGCAAACATGAAAATCTTACGGAAATTTACCTGAGCTACC  
TTAATTTAGAGGATGAAGGAGCAATTGCAATAGCTAACGCTCTTAAAGATTCAGCTCCTTCACTTGCTGT  
CTTGGAGATGGCAGGTAATGATATAACTGCTGAAGCTGCTTCAGCAATAGCTTCTTGTATAGCTGCAAA  
GCAGCTTCTTGCCAAGTTAAGCTTGGGTGAGAATGAACTCAAGGATGAAGGTGCAATTCAGATTGCTAA  
GGCACTGGAAGGACACAGCCATCTGATTGAAGTTGATATGAGCAGCAATGCACTAAGGAGGGCTGGGG  
CTAGAGTGCTGGCTCAAACCTGTGCTGCGCAAAGATGAGTTTAAATTAATAATGTTAATGGGAATTTTCA  
CTCAGAAGAAGGCGTTGACGAGTTGAAAGAGATCTTCAAGAAATCTCCTGAAATGCTTGCATCCCTGGA



ATCCTAATACTCCCAGTTTCTTCAATTTTTCTTCAGTATGAAATGTGCTAGAACAGCACTGCAGCAAAGC  
GCCAAATTATATGGAAGAAAACCGAATAAGCCATTTCCAGAAAATAATAAAGTCAAGTGGAATTTAC  
CTCACAATTATACTTAAAGCTCCAAGCGGTGTCACAAGAACTGCTGGCGCATAAATGTAAGCCACAAAAT  
TTGCAAATTCTCCAACAATCACTGCAAGGATTATGGTGAACATTGCACTCTATATTAGAATAACAAATTCA  
GGAACATATTCTCTGACAAATAAGAAGCAATTCAAACCTTACTAGTTACCATCCCAATCCACCAAAGAGG  
CTCCCGTAGATAACCATATCCACCCGAGCCTTCAGCAAGAAACAAATATCTCATTGTCAAATAGACAGAG  
CAACAGAGTTCATATAATCAGCTTTTTAACTAAGTTCTATTAAATGTTGATACAGAAAAGCATCTTCTATA  
TATAAACTTTACAAGATGTGCCGATGTATCTACTTTAATGTGGAACTAGCTGATAAATTACAATGTCA  
AGGAAATTCATTCAGCTTATTACAGTGCAGAATGATTTAAAAATCCATTACACTGATCATTTTTCAGTTCT  
TAAAGTCAAGATCCATTTATTATGTCTTGAGCTCATTTCTTCTCTGTAATACATGTATTAGTACTACCCAAT  
ACAGCAGTCTGTTTATTTGGAATGATAGATCAAATAATTTGGAATTACCAACAACAATCATTTAGTGAA  
GCAGAATCATGAGTGCATATATTTAAATTGCTGACCCATTCTACAAGTGGTAACTATCAAAGTATCAAAG  
GTATTAAGTTTAAACAGGTGCTGCTGGAGTCACTCTGATTGCTAAAACAATGTCATTAATCCTAGATAAC  
TGCCACCAAATTTCTAGGCAGCTGACTGGTCAACATTCAGAAGAATATGAATTCATTTTCAAGAACCTCT  
CCAAGATTATTCAAGGACTACACTTACTTGCATGATAAGTGTGAAGTGTCAATTCCAATATAAGTAACTT  
GATATTCATTTCCATAAATGTACACCCAATACTTCCCTTTCGGAGAGAAGTGTGAATTCATTCCTTGA  
GTTCCAGAACAAGTTTTCTTATTCCCACACAGATAACTGCTTTGTAAGATGCAATATCACCTTTTATAAG  
CAGTCATTGTGTATTAGTAATACTCACTGTGACTCTACATTTGCTGGAAGAGTTACCCATTGCTCTTATT  
TTACAGTCGGGCACCTACAACATGGTGTACCAACAGAGGATAACATAGTCTTAGACTGTACTTAAGCAG  
AAAAAAAAATGAAGTAAGAATTTTCAGGTGTAAAACATTTGTTTCACCCGCAAACTAAAATGGGGACA  
GCAGAAAAGCAGGTACCACCATAACAGTATAAAAGAAACCAACATCATCAGTCTGTTGCCACTTGATAT  
TTCAAAGTAAGAAGTAAAGAACAATATATTCATCAAGCATAATCTCCAATTCATACATCTAGAAACAGC  
ATCTGATATACTATAAAATTTGATTACTATGCCTCTTGGCTGATGGTAAATTGGTAATGCAGTAAAATGG  
TTAGAAATATCAATCTTCAATTGACTAATTTTACTTGGTACTATATAATAGTCAGTGTGATCTATATGAGTC  
CACTATATCCATTCTACATATCTGGGCCTAAATCAATTTCAATACTACAAGAATTTTATATAAAGAAAAAC  
TGGGGGTTTTTTAGAGTTGAGAGATTCTCCAAATGTCACACTTCTTTTTGTACACTAACATACAAGGTTT  
TAACCTCATTCTCAATTAGCTAGCGTCATCTACAATAAATCATTTACTTTAACTGTGATTCTTACCTAAATT  
GCCTTAGTTGAGAGATTGTAGGGGTTTTGTGGTTATTGTTAGGATCTTCATTACCATGTGTCATGAAGAA  
GCTAATAAAGCAAACATTGGACTATGATAAATAATATAACAAAGAGACATATACCAATACAAAAAATTT

AACATGAGAAATTCACAAAGATAAAAAAAAAAAGAGTACAAACATATAAAGAGAATAACCCACAAAATT  
CACTCTTAAAGAAGTTTACTTTTGCCTAAACAAAACCTCTCTTGAGACTACATTGTGGATGCTCTAAATTG  
AGAAGGAAATCCTCAATTAATAGAAATTCAAACCTGTTCTTCCAAGAAAAGGATTAGCCAAATATGGA  
AACTTTATATTTTCTAATAAAATCTAGTTATCCTAAATGTTATATCCAATATGATAAATAAATTAGGGC  
AAACACCTACAACACTTGCATTTGTATAATTTAAGCAAGGTCAACCTTCCTAACCTTAGCAAGAAGTAA  
TGCATTGCAACACACACATATAAAGAAGTGAAGCATATTAACAACCTTCAGCAAACTACAAGGTAGAAG  
AAAACACACAAACATCGGCAAACCTGAATGGGAACACAACCTAACCTCCATGAATCCACCACTAGAAGCA  
TTGACAAAGTTCAAATCAACAAAAAGCAATAAATTATTGACAATTAGACCTAAAAACACTTAGCTATCA  
AGAAAATGAATTACTCACTGGCCCGAGTACCAGAGGCGCCTGCCCTCTGAAGACCCTTCTTCTTGATAAT  
GAAACTGGAACCAATAAAAGCTCTAGACGCCACAGCCAATCCAAAACCAGTCAAATTAGCACTGTACAT  
GATCCCAATATTATATCTAAACTATTGGGCAACAATTTTGAATTTAATTCTCATCTGAACTTCCCAAGAA  
CAAACCTTCAACACCCAAAAGGTTTCCCTGGATATACTCAACAAGACAACACTCAAGTAAGACTAAAAT  
ACAAGAAAAACGAAATGGGCAAGTTTGAAAACTTGAAACCACTGTAGCTTTACTCAATTACCCCAA  
ATTGTAGAGCTGAGAATGGAAAAACAGCAAGAAAAACGAAATGGGTATATGAGAAAATTGGCGAAAA  
CAGGTTTGAAATGGTGAGCTAACAGTGCAAGCTCGTTATAGACAATAATGGAGAATAGTATTACAATAA  
GCATAATTTTGTGCTGCTTTGATTCGTTGCTTTGGGTTGATTTGGCTATGGTATGTCTTCGACAATTGGGC  
ATAACTATGAATAAATC

>M6-PGSC0003DMG400009324 M6 LRR-RLP

AGGAGACCTAGTAAAAAAGAAAAGAAAAAACATGGCCGACAAATTCAGCCAGTCAACCAGAGGTAC  
GGAGAATTGTTGGTATATGCAGTTATCATGAAATATATAAAGTCCACACACTGCTCAACTGAGCAAACCA  
GACACTTCGAATTGGTCAATATTTCTTTACTGGATTCAATACATGGCGGAAGCTTTTCTTTATGTTCTGCT  
ATAAAATCTCTTTTCTTTCATTTGAGGGAACTTGTATTGTTTTTCGGTTTCGAAAAGGAATTTGAAAAGC  
TGTCGTGTGTGTTTTCCACAATTCAAGCTGTGCTTCAAGATGCTCATGAGAAGCAATTGAAGGACATTGC  
AATTGATAATTGGTTGCAGAACTAAATTCTGCTGCGTATGAAGTTGATGACATATTGGGCGAATGTAA  
AAATGAGGCAATAAGATTTGAGCAGTCTCGATTAGGGTTTTATCATCCAGGTATTATCAATTTCCGTCAC  
AAAATTGGGAAAATGATGAAAGAGATAATGGAGAACTAGATGCAATTGCTGAGGAAAGAAGGAAGT  
TTCATTTCTTGAAAAAATTACAGAGAGACAAGCTGCCGCTGCTACGCGTGAAACAGGTGTGAGTACTG  
AGTAATAGTAACTTAGTTTATGTTCAATTTGTTACCACATCGTGTGTTACCGTGATCTCTACAGTAGGAT  
GGCAATGGGGCGGGGCGGGGTTGGAGGTGTGCAGGTGTGGGGCACAACCCCAACTTTGAGTCTGCAC

AAGTAGGTATTTAAATTTGTATAGAGTTAAACAAGTACACACGCGTCTACTTGGTGTCTACATGGCTC  
TTATGTGTATTATGTCATATAAGACGCATGTGTCTACTTGTCAATTTTATACGAGTTTAAAGTTATACTTGT  
GCACACCCAAATGAAAGTTGGAGGGCGTTGATGTCAGTTGATACCAAGTTAAAAATTCATATTAATGAA  
TTATGCCTTTAAATTATGATTCAATTTTATATCAGTCTGTCCAAAAGATGTTCTAGTGAAAGTGTTAAACT  
TAGCCTGGATCTGCTATTAGAAGTGTGAATTTTTGTGGCACTAAACAATGCAATGGGTCTGGATTCATTT  
TTGCATTAACATTTGTTTAGACGATTTTCTTTATCGAATTTTACTGTCTAAAAAGGAAAAACAAAGAAAT  
AAGAAGTATACAGAGGCTGACTTCTTCATAGTATTTCTCATAAAAAAAACATTGATTTCTAGGATATG  
GGTATTTTAAATTACAAATTTGTGAGTTAAAACAGTTCTGTTGGGAAGGATTTAGATACACGTGGATAG  
TATCTAGAAGTTTTTTAAATAAAAAATTAGCAAATTATGTGGGCTGGGGCGGATTGAAAACAGCAA  
TTGCAAGGCAGGGCGGGTTGAAATCTTTGCAAGTTTGTGTGGGTTTGCCCTGCACCACCCCATCTGTCAT  
TCCTGTCTAAATGTTTGTCTATATAATTCTTGCTGACTCATTCTAATGAGCTCAATTGTAACAAATT  
CTTTGTGTCCACTCTACTTGGAACAGTTTTGTTTTAACTGAACCAAAGTCTACGGAAGGGATAAAGAG  
GAGGATGAGATAGTGAAAATCTTGATAAACAATTTAATTTTGCCGAAGAACTTCCAGTCTCCCTATAA  
TTGGTATGGGGGGACTAGGAAAGACGACACTTGCCCAAATGATCTTCAATGATGAGAGAGTGACTAAG  
CATTTCAATCCCAAATATGGGTTTGTGTCTCAGATGATTTTGATGAGAAGAGGTTAATTAAGACAATTT  
TAGGAAATATTGAAAGAAGTTCTCCTCATGTGCGAGGACTTGGCTTCATTTCAGAAGAAGCTCCATGAGTT  
ATTGAATGGAAATCGATACTTGCTTGTCTTAGATGATGTTTGAATGATGATCTAGATAAGTGGGCTAA  
GTTAAGAGCAGTCTTAAATGTTGGAGCAAGAGGTGCTTCTATTCTAGCTACTACTCGTCTTGAAAAGGTT  
GGATCAATTATGGGAACGTCGCGACCATATCATTTGTCAAATTTGTCTCCACATGATAGTTTACTGTTATT  
TATGCAACGCGCATTGGGCAACAAAGAGAAGCAAATCCTAATCTAGTGGCCATTGGAAAGGAGATTGT  
GAAGAAATGTGGTGGTGTGCCTTTAGCGGCCAAGACTCTTGGTGGTCTTTTACGCTTCAAGAGAGAAGA  
GAGTGAATGGGAACATGTGAGAGATAATGAGATTTGGAGTCTGCCTCAAGATGAAAGTTCTATTTTGCC  
TGCTCTAAGACTGAGTTATCATCACCTCCATTTGATTTGAGACAATGCTTTGCGTATTGTGCAGTATTCC  
CAAAGGACACCAAATGATAAAGGAAAATCTCATCACTCTCTGGATGGCCCATGGTTTTCTTTATCAAA  
GGGAAACTTGGAGCTAGAGTATGTGGGTAATGAAGTATGGAATGAATTATACTTGAGGTCTTTCTTCCA  
AGAGATTGAAGTTAAATCCGGTAATACTTATTTCAAGATACACGATCTCATCCATGATTTGGCTACATTT  
TGTTTTTGGCAAGCACATCAAGCAGCAATATCCGCGAAATAAATGTCAAAGATTATAAGCATATAATGTC  
CATTGGTTTCGCTGAAGTGGTGTCTTCTTACTCTCCTTCGCTCTTGAAAAGTTTGTCTCGTTAAGGGTGC  
TTAATCTAAGCTACTCAAACTTGAGCAATTACCCTCTTCCATTGGAGATTTATTACATTTAAGATACCTG

GACCTGTCTCGCAATAATTTCCGAAGTCTCCAGAGAGGTTGTGCAAGCTTCAAATCTTCAGACTCTTG  
ATGTTCATAATTGCTACTCACTTAATTGTTTGCCAAAACAAACAAGTAACTTAGTAGTCTCCGAAATCTT  
GTTCTTGATGGCTGTCCATTGACTTCTACTCCACCAAGGATAGGATTGTTGACATGCCTTAAGACTCTAG  
GTTTCTTTATTGTGGGAAGCAAGAAAGGTTATCAACTTGGTGAACACTACGAAATTTAAACCTCCGTGGTGC  
AATTTCAATCACACATCTTGAGAGAGTGAAAAACGATATGGAGGCAAAGAAGCCAATTTATCTGCAAA  
AGCAAATCTGCAATCTTTAAGCATGAGTTGGGATAACGATGGACCAAACAGATATGAATCTGAAGAAGT  
TAAAGTGCTTGAAGCCCTCAAACCACACCCCAATCTGAAATATTTAGAGATCATTGCCTTCGGAGGATTC  
CGTTTTCCAAGCTGGATAAATCACTCAGTTTTGGAGAAGGTCATCTCTATTAGAATTTAAAGCTGCAAAA  
ACTGCTTGTGCTTACCACCCTTTGGGGAGCTTCCTTGTCTAGAAAGTCTAGAGTTACAAAACGGGTCTGC  
GGAGGTGGAGTTTGTTGAAGAGGATGATGTTCACTTAGATTTTCCACAAGAAGAAGGTTTCCATCCCT  
GAAAAATCTTCGTATATGGTTCTTTGTAATTTGAAAGGTTTGGTGAAAGAGGAAGGAGAATATAAATT  
TCCCATGCTTGAAGAGATGGCGATTTTACATTGCCCTCTGTTTGTTCCTTCAACCCTTCTTCTGTCAAGAA  
ATTAGAAGTTCACGGCAACACAAAAGCAAGAGGTTTGGAGCTCCATATCTAATCTTAGCACTCTTACTTCC  
CTCCGCATTGGTGCTAACTACAGAGCGACTTCTCTCCAGAAGAGATGTTTACAAGTCTTACAAATCTCG  
AATACTTGAGCTTCTTTGACTTCAAGAATCTCAAAGAGCTGCCTACCAGCCTGACTAGTCTCAATGCTTTG  
AAGCGTCTCAAATTGAAAGTTGTGACTCACTAGAGAGCCTCCCTGAACAAGGGCTGGAAGGTTTAACT  
TCACTCACACAGTTATTCGTAAATACTGTAAGATGCTAGAATGTTTACCCGAGGGATTGCAGCACCTAA  
CTGCCCTCACAAATTTTGGAGTAACCGGTTGTCCAGAAGTGAAAAGCGCTGTGATAAGGAATTAGGAG  
AAGACTGGCACAAAATTGCTCACATTCCTAATTTGAGTATATATTAGTGAGTTATTTGTAATTGTTTCTTG  
GGTATTTTTTTTGTGAGTCTCCACACAGGTTATAATTCCTGCCATTGGATTATTATAGCAAAGTTTGACT  
GTATGAGGTAACATTTTTAAACAAAAAAGGTAAATCCGTTTAAACATGACTTTTTTTTACTGTTTAAATTTAA  
TATAAAAGGATTGACTAATTTTCTATTTGAAAAC

>M6-PGSC0003DMG400009532 M6 LRR-RLP

TGGATCGAATTTCTCAGTTACCGGCGGGAATGTTAGAGCACATCTTGTCTTTCCTTCCGTTTGAAGAAGC  
TGCACGAATGAGTAGAGTATCAACGACTTGGAAAAATGCATACAATCACTCCCCTGTTTAAATTTTGAG  
AGGTATTTTTTAAACAAGCCAATAGAAAACTTGTGAATGCTGTGGATCCAATTCTAACTTATCGGAAAA  
ATCAAAGATTTCTGTAGAAAAGTTTTGCTACACATAAATCAACAATGGAGTAGTCTGTTTTCCAATTG  
GATTGATACACTCGTAGATTGTAAGATCAAAGAGTTAAGCCTAGTTTTAAGATCAACCAGAACCGGATA  
CACGAAATTGCCTGAGGCAATTTTAAATGCCAAAGCACTAAAAGTGTGAAATTGAGTGAATTTTCATATT

GAATTGCCATCTAATAGTACTATTATGTTTTTCATCATCTTTGCGAGAGTTATACCTTCAATGTGTATATTTTC  
GACGAGGAGTTTATGCAAGCTTTATGCACAAGTTGTATCAATTTAGAGGTTTTTCATGGTGCGGGGCTTG  
AAAGGGCTTACTAGATTTCAAAGTACTTTACCTAAATTGAAAAAGCTACAGGTGACAGCGTATTATTCTA  
AATTACGATTTGTTGATATTAGATCACCTAATATTGAAGATCTTGACGTCTATGGCTCCAACCTCAGCTCC  
AACTACTTTAAGAATGAGAGTGATCTAAATGTAGTTATTACTAATTGTTGCAAATCCCTTAAGAGTTT  
GCAGCTCAATGGTGTGGCCATGACCCAAAATGGTTTGACGAAATTTTTACCTGCCTTCAGAATATAGAG  
AAGTTGGATTTAGGTGATTGCGACATGTTGAAGACTGTGAATATCTCAGGCGGCTCTCTCAAACAGCTG  
AGAGTGTATCATTGTGATAATGTGATTGCTATTGAATTAGACACTCCTAATTTGATAGAGTTCTCGTATG  
ATTGTTCTTCATTGCCGAATTTGAAACTAAAAGCTTCAGCTTCATTGGAAGCCAATATTGAATTCGACTCA  
GAAGGAGGAGAAACCCCTAACAGTGATTGGTACTCTAAGCTCGTGAAATTTCTTGATAACTTCAATCATT  
CCATGGCTCTTGAATTAACATGCAAAAAGTGAAAAGGTATGTCCAGAAATTTCTTAACTAGCTAGTTAAT  
ACTATATTGTTATGGATTTCTCAAAGTTGTTTCTTTTTGCTAATACAGGGGCTAGTTATAACCAAAGATG  
TGAGAGAACACTTGTTCCTCCCTTTATGGAACTAATCGCGTGAAAGTACGCATTCATAGTCCATTGAT  
AAGTTATTCAGTTGTAGATATTCTTGATGGTATTTTCTGGCTTCTCCTCAATTGGACACCCTATCTTATTC  
TAAATTCGACTTGAACACCCTTGAGGTAAATACTTTTATCTTTCAAAGGCACCGACT

>M6-PGSC0003DMG400009755 M6 LRR-RLP

ATGGAGGAACCAAGTTATGAAGGACGTGGATATTACCAAGACTCGGTAGTTGTTGTAACAAAGGGATT  
GAAGCTTGAAGTTGTGAGAATTTGTCTTTGTACACAGTTATCGATCTTTCAAGCAACAAATTCGAAGGA  
CATATTCCTAGTGTCTAGGAGGTCTCATTGCTCTTCGGGTGTTGAATATATCTCACAATGGATTGAAAG  
GCCATATAACCACCATCACTTGGACGTTTATCTGTAGTGGAATCATTGGACCTTTCATTTAACTGCCTTTCG  
GGAGAGATACCACAACAACCTTGCTTCTCTTACGTCTCTTGAATTCTTAAATCTCTCCACAATTATCTCCAA  
GGATGCATCCCTCAAGGACCCCAATTTACATACCTTTGAGAACAGTTCATTTGGTGGTAATGATGGATTAC  
GTGGATTCCCATTTCAAAAGGTTGTGGCAATGATCTTGTGTCAGAGACAAATTATACAGTATCTGCGCT  
AGACGATCAAGAAAGCAATTCTGAATTTCTCAATGATTTTTGGAAAGCTGCTCTGATGGGCTATGGCAGT  
GGATTATGTATTGGATTATCCATAATGTATTTTCATGATTTCAACTAGAAATCCGAAATGGCTTGCAAGAA  
TCATTGAAGAAATGGAACACAAAATTAACATGCGAAGGAGAAAGAAGCAGCAAGGTCAAAGGAATTAC  
AGAAGAAGAAATAATCGCTTATAGACAAGTTACCAATAAAGAAGAATTTGATTTCAGAACTTCAGGTAT  
TCAAGCTAAGCTCTACACTAATCTTTTTTAGTTCATTCTACTACTAATATGCTAGGTTTTATGCTTTTATGTT  
ATAACAACAACCTAATTAATGCTCGATACGAAGCATATTTTTCTTCCAACAACCTTAAAGAAGCTGAAGAT

TTGAAAAGGATTAGCCTTAGCTAATGTTATGGATGGTTAACAGTGAAAACTAATGCATAATTCGGTT  
TTAGCTATATGATTGAAATATAATTTACAATTGTTGACTCACTATCTTATTTTTCAGATTTTCAAATGCCA  
AGAATAAGAAGACGTTTCGCGTAACCGATTTGGTTCTTCTGCAGCTTATGATGTTTGATTTGATTTTAGT  
TTCTTTTTATCTTTATAAGTAAGCTTTTTCTTAACTTGAAAAATGTAATATTATGAATTTTGACAATATATC  
AAGTTTATGTAAG

>M6-PGSC0003DMG400009899 M6 LRR-RLP

ATTCTCTAATAAATTTCTCTTTGATTATTGAGCAAAATTTTGTACCAATGGAAGGTGTAAATTTACTACT  
AGTCCTTCTTCTTATAGCTAGTAGTACTATATTAGATGGATTGATATTATGCAGGGCTATGAATTCAGACA  
TTCTTTGTGATGAAAATGAAAAAATGCTCTTATCAAGTTCAGACAGGGTTTAAGGAATCCATCACAGTC  
AATGATCATGTCGTCTTGGATGCTCGAGGAAAATTGCTGCAACTGGAAAGGTGTTGAATGTGACAACAC  
AACCGGACATGTGATCACTCTTGACCTGCACCAGCAATTCTTGCAAGGTGAGTTTGGGACTTCCTTGCTT  
GGCTTGTCTCACTTAAGACACTTAGACTTGAGCCAAAATGATTTACTCAAGGCCTTGCTTCTGAGTTTAT  
TTGCAAATTAAGAGCCTAGAGTATCTCAATTTGCACAAAACCAACTTAGGGGATCAATCCCTGAGTGT  
CTTGAAATCGGTCGCGGTTGCAGTTACTTGATCTTGGTGATAGTTTTTCACTCCGGGTTGATAGTCTTC  
AATGGATTCAGCATCTTCCAATATGAGGATTCTTGACCTGAGTGGAGTTGACCTGAGCAATGCCAAAAC  
CTGGCTACATGACATCAATTTCTAAGGTCTCTCGTGGAATTACGTTTGTCTTCTGTCAACTTCCTAAATT  
ACTTCTGTTTTTGTAAATTTACATCCCTTCAGGTTCTTGACCTCTCGTTAAACTATCTGGATGTTCCATTT  
CCTAGCTGGTTAGTCAATACAAGCTCTCAGAGTCTTGTTTATCTTAATCTCAAAGAAGTCTGCTGCATG  
GTTTACTTCAAATACCGCCTTTGAAACATGACTCACTTAGAGTTCTTGATCTTCTGACAACCTATCC  
GAGGCAAGCTTCCGTCTTTTGAGAACATGACTTCAGTTACTTCTCTTGATATCTCAAGGAATTCTCTTGAA  
GGCAAATTACCACCAACCCTGCCTTCAAAGTTGAAACATTTGGATCTTTCATCCAATAATCTGGAGGGTA  
CTTTAGCAAGAAGCATCGCACAACCTTAGGCAATTAGTTGTCCTCAATGTTGCTTGGAACCTTTCAATGA  
CTCGATTACTGAACATTTCTGAATTTAGTGATTTGAGAGTGTTAGACTTGTCACTCAACTCAATTATCC  
TCAATATAACTGCAACTTGGATGCCTCCCTTCAACTTGACATTATTGGCCTGATGTCTTGCCAACTTGGT  
ACACAGTTTCCCAGTGGCTTCATACACAAAAGGATTTTCTCATTTATCGATATCTCATATGGTAACATCT  
CAGATAAAGTGCCTGATTGGTTCTGGAATCTCTCTCAAAGGTACAACACATGAACCTTTGCTTAACTA  
TTTCAGAGGGGAAGTACCTCAAGTTACATCAAGACTTACTAGTCTTGAAAACTAGACCTGAGCCAAA  
CAACTTTCATGGTCCTTTACCTCATTTTTCGTCCAAGATGAAGACGTTGATTTTGTCCCGGAATTCTTTAA  
TGCGCCATTTCCCTGTATGTGAATCACTTGTCAATGAATAATTCTCTTATGTTTCTTGACTTATCGTTCAA



TAATCTATCAGGAACACTTTTCAGACTGTTGGAGATATGGAAACAATCTGGCAGTATTAAGTTAGGCAA  
TAATAATCTGTCTGGTGAATACCTCATTCTTTTGGATATCTTGAAACTCTCAGGTATCTGCAACTGAGAA  
AGAACAGGTTGTCCAAAAATCTGCCTTCATCACTGAAGAACTTACAAGAACTAAAATTACTTGATCTTAG  
CAGAAATTGTTTATCTGGAACGATACCATCTTTCTTAGGGGAGACTTCACAGAAGCTAATGCTTCTTCGT  
TAGGAGAGAACAAGTTCGATGGAAACATTCCCCTACAGATTTGCCAGCTCAAAAACCTTGATTATTTTGA  
CCTTAGTTCCAATGCTCTATCAGGCACCATTCCAAAGTGTGTTAAAAATTCCTAACGATGGCCGGGGTA  
GAGGAGTTCCCTTCCTGGTTTATGGTCCCTATGAAGAATACAGGAAGGATGTGATGTTGATGCTGAAA  
GAGAGAGGCTATGATTATAGGTTTTTCTTGCGGCAATTTATCTATCAGATAACCATTTATCAGGGGAAA  
TTCCTGAGGAAATCACCACACTTGTTC AATTGCAGGTATTGAATTTATCAAGGAATAATTTAACTGGAGC  
AATTCCTGTGACATTAGTAAATTGCAATATTTGGAAGCACTTGATCTTTCCAGGAATTACCTGTCATCCT  
TTTTGCCTCCAGCATAGTGGAGCTTCCATGCTCGCGATCGCAAATTTTTCGTTCAATAGTTTGACAGGA  
AAAATTCCAATAGTTCGTCAATTTTTAACCTTCGATAATAGTTCTTATATTGGGAATCCAGAGTTGTGTGG  
CATGCCACTTTCCAAAAGCTGCTCGGGACATTTTCGTGAGGACGTTACTCACTGTAACACTCCCAAGAAA  
AAAGACGTGCAGGCCATTCATCAGCATGAGGAAGACAATTGGCTTGATGAATCATCATTCTATATCAGC  
ATGGTAATTGGTTTCATCACAAGTTTCTGGTTATTTTGGGCTACTCTATTGGTGAAAACATCTTGGAGACA  
TGCCTATATGAGGTATCTTAATAAAATGGGCAACAATTTTATGTGTTTGTAGCCATAAGATTACCAAT  
AAGCATAAACCATCAAAGATGAAAGACTGAAGTTATTTAGGGCTTTCTGAATAAGGTAATGAAGGTCT  
TATTTCTGGTGCAACTTTCTTTTTTGTGTTTTGATTTCTAGGAGCTCTTCTGGTTTTTTGTTTTGTAAAAT  
CTTCTAAGTACTATATTGTGTATGCTTAGTTGCATTGTTTCATCTCGTGGGATTGAACTAGGTATGTTGTT  
GTTGTCATAATTGATTCTATGATATGTTTTGTGGATATCTAAGTAACTTGAGAATACTATTACTAATGTT  
TT

>M6-PGSC0003DMG400010183 M6 LRR-RLP

TCATCTCTTGCTCCTTGACATTTTCCAGAATGGAAATTTTCTCAATGAGTATTAATCCCACACCTTACTGG  
CAACCCATGCTGTGTTTCTATTCTCATCTACTCTCAAATATGCTGCAGCAGCTACTATATACTTGGAAACG  
AAACTGACGAACTAGCCTTACTTGGATTCAAGTCCCAAATAACTGAGGATCCATCAAGAGTTTTCGCCTC  
TTGGAACCAATCTGTTCATTTATGTCAGTGGACTGGAGTAAAATGTGGCCAGACACAGGAAAGGGTCAT  
CAGTTTGAATCTAAAAGGGCTAAGTCTGGCAGGTACAATCTCAGATATCTTTCTTTGCTCAATTCTCTTGA  
CCTGGCAGAAAATTCATTCCATGACGAAATTCCTCAACAACCTCAGCAGGCTGTCAAGGCATCAAAACCTG  
AATTTGAGTTTAACTATCTAACAGGGGAAATTCAGTTAATCTATCACATTGTGTTAACCTCAAGAGCCT

TGTGCTGGACCACAACATTCTTGTGGGACAGATTCCCTTACCAAGTTGGATCTTTAACAAAGTTAGTGAGG  
TTGTATCTCAGAAATAACAACCTGACAGGAATCTTCCAATGTCTATTGGAAATCTTACATCTTTAGAAGA  
GTTGTATTTATCGTACAACAGTCTAGAGGGAGAAGTGCCAGCTTCTTTAGCTCGATTGACCAAGTTGAGA  
CTGCTTGGATTGTCAGTAAATAGCTTCTCCGGGGAGTTCCTCCTTCGTTGTACAATTTGTCATCCCTGGA  
ATTAATAGCACTTTCCTGGTAATCTCAGATCCGATTTAGGCCACTACTTCCCTAATCTCCAAAGACTTTACT  
TGGGGAAGTGTCAATTCCATGGCTCCATACAATCCTCTTTGGCCAATGCTTCAAATGCTACAGCTTGAT  
TTCCCTGTAAACAAATTCAGTGGAAATATACCAAGCGTTTTGATAACTTGTGGAATTTGTTGTGGCTCA  
ATGTTGGGAGTAACCATCTTGGATACGGTAAGAATGACGACCTTGACTTTGTAAATCTCTTACCAACTG  
CAGCAGCAGTCTACAAATGCTCCATTTTGGAGACAACCAGTTTGTAGGTACATTAACTCATTCAACAGTC  
AACCTTTCTAGTCAGTTACAACCTCTACTCTTCTTCGGGAACAGAATTGGTGGAAGCATACCCAGAGAGA  
TCTCAAACCTGGTGAATTTGAATCTACTCGACATGAGCAACAAAAATCTTACAGGTAGCATTCCAGATTC  
TATTGGAAGACTTGCAAACCTGGGAAGTCTTGACTTGCATAACAACCTCTTGACAGGGGTAATCCCTTCT  
TCAATAGGCAACCTCACTGAACTAGTCTATCTTTATTTAGGATTTAACAGGTTAGAGGGTAAAATACCTTT  
AAGGCTTTAA

>M6-PGSC0003DMG400010325 M6 LRR-RLP

ATGGTGGAACAAGAAGCAGTGTTCAATGTTCTTGAATCCATTAACTCTGATGTCTCTTGGCGTTCCTTTT  
CCCTGATGATCTCTGTTCTTCTTCCCCACATGGGGTTATTTGTGATTACTTTGTTTCCACTACAAACTCATT  
TACTCCTCATGTTACTGAGATTAGTCTTGGTTATGTTTCAGATTATGCTCCTAATCCACCTTGACTCCTAA  
TAGCACACTTAATGCTTCCCTTTTTGCCCTTTTTCTTATCTAAGAAAGATTTTTGTTTACAAATGTTTTACT  
GAAAATGAGGTTTTCTTTGATTGACTTTGGATCTTTCCTTCTTCTTTGGAGGAGGTGGTTTTCTTGGAGA  
ATCCAGGTCTTGTGTTCTTTAAGTGATAAAGTTGGAAACTTGATGAGTTTGGAGGAGGTGGTTTTGAG  
TGGGAGTGGTGTATGGGGAAATCCCAAATGGGGTTGGTGGTTTGGTCAATTTAGAGCAGCTGACTTT  
ATCAAGAAACAAAATTAGTGGTGAAATCCAGTGGGGTTGATGACATTGAAGAACTCAAGATTCTTGA  
TTTGAGTCAAATGAGCTTGAAAGTAGTGTCTTGAATCTATAGGGAACTTTACTCAACTTTTGAACTT  
GACTTGAGTTACAACAAGCTTACTGGGAAAATCCCTCAAAGTTTGAAGGGTTTGAAGAGTTTGGAGTTT  
TTGGACTTGAGTTACAATAACTTTTCCAATTCTGGGGTTCCATTGTTTTTGGCTGAGATGTCTAGTTTGAA  
GGAAGTCTACTTAAGTGGAACTATCTTGGAGGGGAAATCCAGAAATATGGGAGAATCTTGAGGGTA  
TTGTGGGGCTAGGATTATCAAAAACAGGACTAGTTGGGAACATTCCTGTTTCTATGGGGGTGACTTGA  
AAAACATATGTTATTTGGGGCTTGATAATAACAAGCTGGAAGGGGCATTGCCTGAAGAGTTTGGGGCAT

TGGAATATGTGAATGAGTTACATTTGGAGAACAATAATTTGAGTGGTAGACTTCCATTCTCTCCAAAATT  
TGTATCCAAAGTTGGAGAAAAGTTGAAGTTGGGAGGCAATCCTCAACTCTGTGTAGATGAAGGCTTGAG  
AATATCTAATGTTAGTGTTAGCTTGAGGCTACTAAAAATGTGCAACAATGCTATTAGTGCCAAATTTGTC  
CCATTCTCTGGGGCATCTTTAGTACTGGTGCCTGTTTCCCATGTTGTCTTTTTTCTTGGAATTTTGTTC  
CTGTGCTAG

>M6-PGSC0003DMG400010328 M6 LRR-RLP

TACAAACATTATCTTATGTAGAACCCATGGAGAAAAGACTGCGACTTTCCAACAAATTTGCTTTAAAAA  
GGTGTTTTTCTCAACCCCATATCTCTTTCTTCAGTCTCTTGTCACTTCTGTGGTTTGATCAATTTTTTGT  
TCTAGTGTCAAAGGAAGTCTGCATTGCACAAGAAGATCGTGTGAGTACCTGATGAAATTCTGG  
TATATATATTGTCTTTCTTACTGTTAAGGAAGCTGCAGATACAAGTCTCCTCTCAAGGCGTTGGCTAAAC  
TTATGGACATATATTGATCACCTTGATTTTGATGCTACAAAATACTTGGATCAAGTGTTCGTGCAACCCAA  
GCTACAAAAGGGCATATGGACAAGTATCTGACATGGGTCAACTCTGCTTTGCAAAGTTTAAAGGCCA  
GAGACTTGACCAATTCGTGTTACTTTGATTTAATCAAATTTGCTCAGCACGACATTGACAAATGGCTTG  
AACTGCCTTTCTAAGAAAGTTCAAAGACTAGAGTTAGACTTATTAAGGTGTGGATCATTCACTCGTAA  
TTTTGATTCTGTATACTTTCCGGAGCGGCTCCTTGGTCTTGGAGATTCTTCTTCATGCTCTAATAACCT  
CCAAATACTCTCACTTATCAACCAGAATTTCAAGTCTCTAAAAGTGCTTCTATTGAAATCTGTAAATGTGA  
CGGGCCAAGTTCTTGAGTTCTTTCTACGCAATTGTCCATTTCTGAAAGAATGCAAGTTCATGGATCAGG  
AACATTGAAAAATTTGGAAGTTGTTGGTCCATCCCTCAAGTTGAGACACTTGGAGATATATAGCTGCTTC  
AATGTAATACTCACTTAAAATTTGTGATACAAATCTTATATCATTAAAGACTTCAGCAGGAAAAGTATTAC  
TGCTTAAGAATGTCCCGATGCTGGTTGATGTAGAGATTTTGGGTATGCCATACACCCATTTATTGGATGA  
CATATCCTCTCGTCTTTTGTGCGTTCTCTCTCAGCTGGAGGTCCTTACAGTAGATGCTTGTATATCATTGG  
TTAGTGAACAAAGTTTGTGTCTATCTACTCTTGTTTACTAGCCTAGCACTAACTGGTGCCTTCTCTGTAG  
TTTGATTATCCGCACGAAGATTTGGAGCATTACAATTTTCTGAACTTACGAAGCTCAAGAAATTTGTTTT  
TATGACATTTGGAAATTCATAAGAGTGTGAGGCCAGAGTCTTCTAGGTTGCACGTCTATAATAAGGGCT  
GCCCCACAGTTGAAGGAATTTGAACTACAGGTAAGTATCATGCCTTTTCTCTTTGGTTTACAAAAGTCT  
GATTTATTCATATTAGCAATTCTGGTTCATGCAGTTATTGATGCTACTTCTTTAATAAACTTAGTTATTTAA  
GTCGTTGAGCTTGAGTTGAAACAATTGTGAAGAGCTAACTTGAATAAATGGTACTCTTGCATTTTAACT  
CATCTGACTGTGCCAATATAAAAGTCTGCCCTTACATAGGTGTCATTTTAGATAGGTAGTAGATAGCTC  
TGTCGTCTCTGAGCTTTGATTTATTATCTGTAACAAAGAGCTTAAAGTCTCATCATTTTCATCAAAGAGCTT

AGAGTCTCATCATTCCCTTCAGTTTCTTGAATATTTTTACTGAATTACTGCACTTGTTTAGCGTAATGGAAT  
GACCTCAGAGTGTTGGGATTGTGGTTTCAGTTGTCGATTGTGTTGCTCCAAAATCTTAGGTTCCACCTG  
TTTGTGCCAGTATATTATATGATGGAATTGGGAAGTACTATACAGTGATTATTATGTGTTTAATAAAACC  
ACTTTTTTGAGAAAAGGTAACCTTGTATTATAAACACAGGAATACTCATGACGTATTCCAGTAATACTTAC  
AATCAGAAATACAGAAGTGTTGTTGTTTTCTATAAACTCAAGAACTCTAAGATACTAGGGATATCCTCA  
TTTTCATGAGGATATTTTTTATTTTTTTTTGATAACCGAGAAATCCGTCAGTGACCCGCCCTTTGGACCA  
ATCATAGCCTTCTAAACTCGGTGGATAATGGGCCCGCCCTCTACCCTTCTCCACTTAAATACGGGGCTTC  
ATGAGGATATTTATGTTTACACCAAAAACAGAAAAGAGCTAAACATTTTCAGCTTCATCTTCTCCATAGAG  
CAGCTCTTATTCTCAAACATCTCTGATTCCTTTCCAGCCAAATAGTCCACCAATGCAGGCTGGGACAAT  
CTTCCATCTCTCCCTGTGCCCTGACTGATTTCCATCCCGATTCCAACATGCCAAAGTTTCTTTATGTTTCC  
TGGCATAGACCAACTGATGCCCTTTTATTGATGAAAATTTGCCGAAGTTTCAATGTCTCCTTAAAGTGTA  
AAAAGAGATGATTTATTGTCTCTGTCTCACATTCACAAAAAAACATCTAGAGCACAATCGAGGCCCTT  
CTTCATACGGTTATCCTGTGTGAGAACAACCTGTTTTGCTAAGAGCCAAGTAAACATGCCACCTGAAG  
GGCACCTTAACTCTCCAGATCATTTTCCCTCCAACCTGAGAATCTCTCCTGTGTATCTGGAGCCATAACAG  
TTTGTCTTCACTGTTACTGAGTTCCTTGTATCGTTCCAGGATATTTAGAAATTC AACATTCTATTCACCTC  
CCATTCAITTAAGGTCTTCTGAACCTTAAACCTACTTTCTTGTGATAATTATACTGGTTGGTTTCAAATGA  
GAACAACCAACTAAGAAAATTGAGAAGTAAGTTGTTGCCTAGCTAGGTAGATGGGTGAAGGAGGAATG  
CACTGGGGTAGAGGTTTCAGAGATGAGGGATTACAAAATGTTGTTAGAACCGAGGGGAACTTCAAAT  
TCTATAGTAGGATTCGAAGGTGGCATCCCGAATCCCAATCAAATGACTCCAGGCTCAAAGAGTCAGAAT  
CGAGCCTGGATGGTATTGTAGAGGAGGCTTAGGGCTTACATGGTATCTGATGTTTTCTCTCTTGAAT  
ATTTATTTTTTCAAAAATCAAGTAACGATTATATAAGGGAAAAGAGAAAAAATACCCGAACCTGTATCGG  
ATTTCTTGTTACACTTATTATTTGAAGTTGTTCTATGAATTATTTGTAGTAGAATAATACCATAGGAAGT  
GTTGATGTGGCTTTTACTTTGCACCTCCATATAGTGCATAAAAAGACAAATACAAGCTAAATGATAGAGG  
CTCTAGAGTCCAAAAGATATAATTTTTCTTACTTTTTAGGCCCTTTTCTAAATCTTGAGCGGTGATCCAC  
CACTTGTCACCAGGCCACCATCCATGCCCCCCACCCCATGTCTGAGCCAGGATTTTTTTTTTTTGTAG  
CTGAGTAGATACACAAATTATGTTTTTCTACTCATGAGTGGGTGCACGCACTTGGCAAAGTTGTGTGC  
ATAATATTTTCAATAAAAATCAAGCAATAAAAGTAAAAAATTTATCTAGGGTGTGTTTTGTATGGAGAA  
AAATGTTTATCTATTTTCATGATTGGTTAGTCAATATATTTTGTGAAATATTTTTTCTAGGAAAACAAGCTC  
CTTAAAAATGAGGAAATTTACTTTCTAATGGAAGTAGAAAACATAAGTTCCAAAGCAATTAATCATAT

TAGCATTTATAACTATAAAAAACAATCATATAAATCACTATAGACATAGAGAAGTTAATAAAAAATAATTT  
TAGTTACTAGTTAAATAAAAATAAAAAACAATACATATCACAATAAAAGTAATAAAATAATAATTTAAAATA  
AAAGAATTACCGCGAAACATTAGAAAAAAACTATTGATAATCTCAACCACAAAAAACTTTAAAGGAA  
AAACACGAGTACGGAGCCAAAAGGGCAAAAAAATTGACCAAAAATCCAAAAGGGTTTGAAATCAAAA  
GGGTAACATTTAAACGGTAGGGGAGATGCTGTTTAAATTAGGGTAGCAAGGCGCAACTCCCTATGCGCC  
TTACAAGGTGCAAGAAAACAGAGCCACCATCATTGTTTATTTTTCCATGTCAGTACTTACGGTGGTACTT  
TTTGCACTACAAAATAGTATAGGGGTGCTAGGGACATCACAAGAATAAGTGTGTAAGTGGAAAAGTGA  
GATAAGTCCATAGGGTTTTTATGCCTTTTCCACTGTGTTATTTAAAAAAGCACCAAGAGGGCTCCAACC  
TTTACAAGTAGAAGATTCTGTTGTTCTGTCAACCTCCCAGTCATGCAATCTCCTTCTTAATCTAATATTTAA  
AGATAGCCTTTCTCTGTATTCTTCAATCACATCTTTTATATGGATAGCTATGAGATCTAATTCTGAATAAGT  
TATTAAGCTTCTTGATCCGGCGTACATGAACTTTATCTTCTTCTGCAACTAAAAGCTTTCACAAGATT  
AAAAGAATCAATCCATAAGTTCTAATGTACTTTCAAAGTGTGACATCATCAGATGTATTGATTAGTTTTG  
CTTTTGAACATCTCATATCGTTGCCATGCTCTATGTTAACAGCTTAATCCATAAATTGTTTTGCTCTACTG  
TGTTTTATCTCCACAAACTAATTCGACAATAGACACTTTTTTTAATACCCAAAGTTTTTATCTATGAAGTAC  
TCTTCTTAGAGAATATAGCTCTATTTTTATGCTCTTTGAATCAACTTGCCACATCTTTCTCCTTGCATTATCG  
AACGGTCTTTGCACCTTAAAAAATGATAGATACAGTTTCTTGCAGGTTGCCAATCTTCTCAACCTTATGTA  
TCACTCTCTGCCATATTATTGCACTTCTATATCTGGCATTAGAGACTTGCTCATGTATGTCTCTGCCTGGA  
TTCTCAATTTAAATGCAGTCAAGTGTCTCAAAGTGTAAATAGTAGAGATCTGTGATGCATGATCTTCC  
GCTCCTCAAGTCCAAATAGAAATAGGGTATAGTCTGCATATCGTGTACATGAAAAATTTCCATATTTTCAT  
TTGTACAACCTTTCCCAACTTTTGACTCCTTTTATCCATACTATATTCATGGCATAATGTAGCATCTTACTG  
AATGTTTCCATTGCTTAGGAAGAGAATGGGATAATGGGGTTCTCCTATTTAACTGCATATCCTATTTATAT  
TTTTCCATTTGTTTGCAAACCGTGTGATTCAAAGCTTCAGTAATATTGCCAGTTTACATGATTGTTCCAC  
TGGGTCAAATCTTTGCTTGATCCTGTGTTGTCCCTAGTCTGAGGTGATAACTTGAGAATGAATCATTATC  
GGTGCTCTCATAGTAAAGAAGGCTTCACTCAAGGAGTGACAGATTTTGACGGAGTCTTGGCTTTGATGC  
TAAGGAGACAAGATCCATCGATCTGAATAAGTCTAGTAACCTTTCTCAAGTCCAGCTAACAAATAATTCT  
TCCTATTTTAAATCTATTTAAGGCTCCAAGAATTCATTTTCTAAGAACAAGTGGATCTGTAGTTTATCCTTCC  
CTTTACAAATACATGCATTTTTTTGACCTTGATATCTACTTGCCAATACTTGTTTCATCCTTGTTGTTAGGAC  
CCCGGGAGTAATCTCATCCTTTTACCTTGTTCTTAAGAACCAATGCTGTGAATATTTAGTCCCTGCCTCTT  
GTAAAAATTTCTGTCTCATGAAAGAAGTGCAATGCACTGATAATGTCCCTTTCCAAAAGTTCCTAGATTT

CTGGTAAGAAGACATTATCTGCCCATCTGGCCCTAAAGTTGTTATCACCCTAGACCATCTCCATTA  
TCCGAGAAAATTTCTTAGTAGCCAACACTCTTCTGTGATAATAGCTCAAGGTCATTGTA  
ACTGGAAGGC  
GCCATCATTGCTCGGTTTTACTAAATAACTTCTCATAGCATTACACTCATCTGATGACCTT  
GGATTGGT  
AGTTCGTCCATCTCTTACAAGTTAGTTTATATGGCTGTACTTTTTATTTGTATTGATCA  
ATTTACAGTAAAA  
CACTTAGTATTTTGTAGGGGTGTCAAAAATGAGCCACCTATAGGTAACCCGCCATAATTT  
TAAGGGTT  
GGGCTTAAGATAATTTGAATTAGGTTAATCTCAACCCCCATTTTAAGAGAATCCTCAAT  
TGAGCCCAAT  
TTAATTTTCAATTTCAACCCATTTTAAGACTCTTTATTTGTATTGATGTAATGTATGTT  
CTTAAATTGAAGG  
TATGAATTACTTTTGTATTTTATATTTTATAGGATTTATCTATCCATTTGTAACCTTT  
TTTTTGTAAATTTCTTAAGT  
TGAAATCTAAAATGTGGTTATAAACTTAAATAACAATATATTTAAACTATTGAGATTA  
AAGCGGGTAAA  
GACCCAACCATTTTAAAGCTCATTTTAGCCCAAAGTAACTTGGGCGGGTCAAGACTCG  
ACCTAATTTCT  
ATTTCAACCCATTTTAAATATCTCCAATTTCAACCAACCCGCCATTTGGCACCTCTAG  
TATGTTGTCTCATT  
CATTTAACCGAAACACCTCAATTGTTGTTCCAGGGTGTTTTTAGCATTGGTTATTTGTT  
CCAGTTCTAC  
TAAGTGGTTCCTTTAGGCTTTTCGTTTTCTATATCCGTTACCTTTTTCTGATCATACT  
TACCAATCCAGCA  
ATCTGATTATGTATAATTTTTCGACATGCATTGTTGTTTGAAGTCTGCCTTTTAAAG  
TTCAGTTTC  
CTTTCTATTAACCATAATCAGATTGCCAACACTATCATAAGATTGCTATTGCTGTTCC  
GCTAAATCAATGA  
ATCCCTCTATAGCTTTTTTTCATTTTCTCGAATTTGCATTAAGATTGCGCTATTCCCA  
AGTCTGCACTCTGAT  
GGAATGGGTGTATGATGTTGGTAATCATCATATGCTTTGAAAAGTGAATATCACATTCC  
AAAGAAATTG  
TACACAAAATTTCTGTGTATTCCACCTCATAAGTTTACTGTACATGCTATTGTATTTAT  
ACAAAAGT  
TCTAAATTCTGTACCAAAAATAAATGAATTAACAATGATTATTTTACACTTGGCACCT  
AATTATTGGACT  
ATTTTGTAACTCTAACAGCCATTTTGTCTTTCACGTGCCTTCCTGTGCCTAGGTTG  
AGAATCTTCTA  
GACCTTGTAACACTGGTTAGGTTGAGAATCTTCTAGACCTTCTGATTAGGTTTCTAG  
AACTTTTGTCTT  
TTTGGCATATGTTATTTTGGTCTTGAAAAGAAATGTTGGAGAAATTCATTTCGGTTAG  
CAAGTTGGGCA  
TGCAGCTCGAATATGTTTATATGATAAGTCACTTGTGTATTCTTTTGTTCCTAATTTCT  
CCAAGTTAAGAT  
TTTTCTCACAGAGAGTCTAGAACATGGATAATGAGTAGTGGTGATTGAATATTGTTGA  
ATTAGTCAACT  
GACTAGGAGGCATCTTACATGATAATGGGAAGTTTTTTCATTGATCGATCAAGGAACCC  
ATATATCCCGA  
ATCTTAAAATTTAGATCCACAACCGAGTCCGAGCAACTTAGTCTAAAATAAGTCGACCT  
AAACATGTTGA  
AAGAAGTTGCAATTCTCTCAGAAAATTGAGCACTCCACGTCTGTAATATTCTTGTCCAT  
ATTCCCCACTTT  
CCTTCTCCATGTGGTAATACTTTAGAATTTGTAGAAGAACAAGTAGAGTAGGAGAAGTCA  
AATGACA  
AGAGCGATTGATACAATCATGGTTCATCAGTGATTGGTACATAGTTTTATGTTATACTG  
ATTCCCCAAAG

TTTAATTCCTTTTCATTTAACTTGTGTCCCAAGAAAAAGGCCTGTTCAAATTTTCTTTTATTAGCTTTACTG  
ACTTATCTTATCATTATTTTTTATTTAAATTTTAATTGGTGTGTATATATTACGGCAGGTGATGTCAATC  
CCCTTCGAGGCCAAAGAAAGAGTGTAAGAAAGCAGCCATAAAATGCCCACTCCATCACCTCAAAGTGGTC  
AAATTTTTGGGGTTTTATACAGGCTTATTTCAACTGAACTCGTTAGGTACTTTTTGGAAAATGGTGTTC  
TCTTGAGAAAATCATTATTGATCCAGGTACTCCATTTTTTATCGTATCCCTCCGTGCCCTAGCGAAATCA  
AACACACGCAAGCTTCGAGAAATCTTGCTAAGCTCCAGCTTGAATGTGAAGTGCCTCCGGCTATTGAGTT  
GGTCATACTTTAATGAAAATAATAATGTTATTACGGTTAAATTTGTGATACATAACGGAGGTGAATTTTT  
ATTTCTTAGTAGATGTTCCCTCATGCTTTGTTTCATTATTGAGTGATATTTCACTTTTTGTGAGGTTTATATT  
GCTATATGAAATATGGGGGATTTTCAAATGAAAATGTCGCAGTTATTCCGCCA

>M6-PGSC0003DMG400010447 M6 LRR-RLP

CAACTTGCACCTTCCAAGTCTAAAAGCAGCCATCACATTTAACATTTATAATTTCAGAAGCCACCAAGAA  
TTTGTCATCCAAATGTATGTATATATTATGCCATTTTTTGGCACATTCTTTTCTTATAATTTCACAAAAATG  
AGAGGGCTGTACTACATAGTACTTGTCTGTTTACTATAAAGTTTTGTTCTTGCAGTGGAGTTTGCAAAG  
AAAATGAGAAAACAGCTTTGCTAAGGTTAAAGAAAGAAGCAAATGATCCCACAAATGTACTATCTTCTA  
GGGTTGATAAAGAAGATTGTTGTAAGTGGGAAGGAGTTTTGTGCCACAATGTGACTGGTTCTGTCATTG  
AGCTATCGATTAACGGATGAGATTGGTCAGAACTTAAAGGCCTAAAGATTGATGATTTCCAGTGGTTGT  
CAAGTCTTGAAAATCTTGATAGTTTGGACATGTCTGGTGTGGATTTAAGTGAAGCAACAACTGGACTG  
AGGTGATTAGCATGCTTCCTTTGGTTAATCTTCGTTTTTGAATTGTAGTCTTCATTCAATACCTCCTTTGT  
TTGATCACAACAGTTCTGATCTTGAAAATCTTGATCTTTCTTTGAATAACTTTGGCTCTCCGATTCCCGGG  
TGGGTTTTCAGTTTTGGTAGTCTTGTCTCTTAAATTCAGTGGTAGCAATTTCACTGGTTCATTTCTGAG  
GGTCCTTTTAACTTGACTTCTTTCACAACATTGAGAGCTTCTAGCAACTCCTTTGGTTCTGTTTTGCCTCAA  
TGGTTATTTGATCTTAGTAATCTTGAATATCTTGATTTGAGTTTTAGTGGTCTTGAGGGTCCAATACCAA  
TGGAGTTGGTGATTTTACCAAGCTTACATATCTTAGTCTTGCTTCCAATAATCTGAATTCCACTATACCAG  
ATTGGCTCTATGGATGCAAGAATCTTGAAACACTTGCCATGAAGGATAACAGTCTTGAGGGAACAGTTT  
CAGACTCGATTTCAAATCTGACATCTCTAACTAGTATCGATATGTCTGAAAATTTCTTTCTGGAAAGTTA  
CCGAGTGTAATTGGAAAGCTATGGAAATTAGAAGATCTTGATCTCTCAGAAAATTGATTTGAAGGAGAA  
GTATCCGAGATTTTCAATACTATGAATGATTGCCCTCCAATAGGCTCAGGAAATTGTTCTTCTTTGAGGAC  
CTTAAGACTAAATGACAACAACTGATTGAAAATCTTCAAAAAGTTTTGGGCAACTTTCTAATCTACAA  
TTCTGTTTCATATCCAATAATAGGTTGGAAGGGGTGTTAACAGAAGAACATTTACCAACTTGACAAATT

TGAAGTTTTCTCTGCATCTAAGAGTAATTTGACTTTAAGGGTGAGTTCAGATTGGATTCCATCATTCCAA  
GCTAGTGACATTGTAATGGGCGGTTGGCGCTTAGGCCCTGACTCCCTTTGTGGATCCAGACTCAACAAT  
CAATCATGAATTTGGACATATCAAATGCTGGTATAGTAGGTGAGGTTCTACTTGGTTCTGAACTTATC  
GTCTCAAATTCGTTTCTCAACATGTCTCACAACCAGCTCATTGGTGAGATTCCAACCTTCTCAATTTCTGA  
TAGCTCCATGGGAAGTGGAGGTCCTTGGTTGATATACTTGAGTTCCAACAACCTTCAGTGGTTTACTCCCT  
CATATTCCAACCATGGTAACAGAGTTAGACCTTTCAGATAACAACCTTCTCGGAAGGTTTAAACAAGCTTCT  
GTGTGATAAAAAGAATGAATCTTACATGTTGGAGATTCTACACCTGGGGGAAACCGTTTCTCCGAAGA  
AATTCCTGATTGTTGGATGAATTGGCCAGAGTTGAGAGTTGTCAACTGGGAGAGAATAAGCTTACCGG  
AGGAATCCCAAGATCCATTGGAGCTTTAAGCAATTTGAAATCTTGGACTTGAAAAGAAACAACTTCT  
GGTCCATTGCCTTCATCCTGAACAACCTGCACAAGATTGTGGAAAATAAACATGAATGAGAACGAGTTA  
GATGGAAATTTACCACCTTGGTTTGGTACACTTTCAAAGCTGATAGTCCTTAGTCTTCGGTCTAATAAATT  
CGATGGTGAAGTACTCCAGAACTTTGCCAGCTCAATGATCTTCAAATCTTGGATCTTGCCAACAACAAT  
TTGTTTGGAGCTATACCTCGGTGTGTTAATAATTTACAGCAATGGTGAATGGAAGGAAGGAAATTAGA  
GATGGAGACGGCGAAATGGATTATTCTTATTATGTTGGAGTTTTAGGGAAAGTGCAAGAGTAGCAACT  
AAGGGCAACATGTATCAGTATGATAACATTTTGTCTTGTACTAGCATGGATCTTCTAACAATAATCT  
TTCTGGAAACATTCTATGAGTCTTACAAGTCTTGTGGATTGAGATAATTAATTTCTCCCACAATCAGC  
TGACTAGTAGTATTCCAAGGGACATTGACAAGATGAAGGTATTAGAATCACTTGATATCTCAAATAATCA  
ACTCTCTGGTGAAATACCACAAAGCATTTCGAGTTTGTCTCTTTGAGCTACTTGAATGTATCTCACAACA  
ACTTATCAGGGCAGATTCTGTGAGCACTCAACTTCAAAGCTTTAGCCCTTTTACTGTTTACTGGAATAAA  
CTGTGTGGGCTTCCACTCGTGGAGCGTTGCAGTAAAAATCCCAAGGTTGAAAATGAAGAAGAAGAAGA  
AGAAGAAGAAGATGATAATGAAGTGAATGGTTCTATGTTTCCATGGCAATAGGATTCATTGTGGCCTT  
TTGGGGTGTAAGTGCTCCTTTGCTTTTCATAAGACCATGGAGACATGCCTATTATAGATTTTTAGATAGA  
ACATGGAAATCATGGCACACATAATTTGTAAAGACGTGACATTGAGGAGATCTCTATTCATGTATACTGG  
ATGAAATTTGTTTATATCTCAGGAAATCCATCACCATTGAGCGTTCTTCAAATTAAGACATTTTTATATTG  
TTGTCTCCATATATATGGGAAATTTGACAATTTGTTTTGGCAAGGTTTGGATTATGGAATGAACAAGGA  
AATTAACAGTTCCT

>M6-PGSC0003DMG400010519 M6 LRR-RLP

TCAGTTCAAGTCTCGAGAAATTTCAAATCAACATGTCTTGGATGACCGTCTGCAGCTAAACCATAACGA  
AAATAGTACGGTGCTCCAAACAGATTTTTGCCATTTCTATAGCCTACTTCTTCAAAGCCTTCAACAAGTGG



CTCCATATATGCTGTAATTTTCCTAAACATGTTAAAAGTAAGTACTACAAGGAATTTCTGGATGAGTTAT  
TGGCTGAAACAAACCAATTTCTTGAATCATACGTTACTAGTATGGCGTTGTATGATAACACCATACTGG  
CAACATATGACATTTTGATCAATCCAAGGCAAGTTTTTTTTCTTTTTGTAAATGGTATCAGGCTAACTTGT  
ATGTGCTTCAACTGGATAACAAGATTGTGCATTTTCAACTAAGAATAATAAATAATCTAGAAGGTGAT  
AGACAAGAGGGGTTCTTGACATCGTCTATCGGGAACGTAACAGAACTTGTCTCTCTGAATCTAGGCAGG  
AACAAAGTTTAGAGGACCAGTGCCAGAGAGTATTACTTATTTGAGGAACTTACAAGTCTTCAACTTTATG  
AGAATTTTTCTCTAGTAGTCTTGTTAATGACATTGGTGTCTTACAAACTTGAGATTCTTGATGTCGCG  
AATAATAAGCTATCTGGTTCAATCCCTTCATCGACTACATCACTTAGAAGTTTGACGCGATTAGACCTGTC  
TAACAATGAATTGACAGGGAAAATTCCTCAACTCAACGGTTTATGGAACTCCATTCATTTGACATTTCC  
AATAACCAATTTAAGGGAATTTGCCACAACCTCCATCGAAGATCAAGACATTGTCACTAAGCCACAAC  
TGCTATCAGGACACATTACCACAGTGCATAAACTAAGACAGCTAAGAACATTAGACCTTAGTGAAAACA  
GATTTTCAGGAGGAATAAACAAAGGATCTTCATGATACCTGCATCAAGTCACGTAAGCATTACAGTAA  
ACCGGTTACAGTGTGGAGGTGGTAGAATTCTCTGATAAAGAATCACAGCTTACACGTTAGACGTAA  
ATGCCAATCGTCTACATGGTCATTTTCCTGTGAACCTGGATACTTACCCAACTTAACAGAAATAAACCTT  
GGACATAACCTGTTTTCGGGTGAGATTCCATAGGAATATTGGTCAAGACTCAGGTTTTTCATGGAGAAGT  
CTCAACTTGGAATATAATAACCTGGAAGGATCGGTTCTCGAGAGCTCAACAAGACTTTAGAAGGGGTT  
CAGGGAAGTTTTGAACACAACCTGTCTCATTTGTCCAAAGGGCTTTCAGCTATGTCATGGACAGAGGACA  
GCTTCAGAATGTCATGGAAGAGACCATAATTAGCTGAGAATGTTTTGAAAATTACATTGCATTTTTTTTA  
ATGTTTTCCAGTTTCCAATATAGTTTATAAGTTGCATTTTTTTTTATGTTTTCTAGTTTCCAATATAGTA  
GAAGTTCCTTAAATTTGTCAATATATTTTATTTAGAACTCGAACTACAACATGTTTCCTATTAAGCACCT  
GACATGATGAACTGTGTTAGAGTTTTGCCCTGAATGTATGATATTATCAGTTATAGCAAAGTATATTTGC  
ATAACAATATTGAACAAGAGTATCAAATTTGGTTAAGTATACGACATGAGCAAGAGTATCAAATTAAC  
TACTGAAGCAACATGGCAGCCAACGTTTTAAGTGCGAGCTTGTTTAAGTTCAACTATAAGTGATCTTGT  
TTACTTTGTTGGTTCCAAGATTAGATAAATTCTCATAATTTATGGTGAAGCAAGGTTGCTGCAAAGAAAA  
GTGATTCACTCTCAACTACCTTACTAACATAAAGTCATTCTTTATTTCTTAACTCCATGTCAACTCAAAA  
TACATCAAAGAAATTTAAACGGAGGAAGCACCATACTAGTAGTAACTGGAAAAATCAAAAACAAGCTAT  
AATGAAAGTTGTCTTAATTGCTAAAGAAGCTCATGAAGACAATGACATTACAACCTATTTCTGTTGCCTA  
GTCTAATAAAAACAATATTTGCCACCTAAAGATATATTTTAGCAGAATTGCATGTCTAAGAACTTAAGTA  
CCTTTTTCAGGGGAAGAAGCTGGGAACAGTCCTTTACAAGCATCTGTATTCCACAAACATGAAATCAAAA

GAGCAAGTCAGGCCCGAGACTACAAGCTGCTGTATTTAAAAGCATCTCAATGGATTAGAGAAAAACCT  
GACACCCACGAGTGTTAAGCTAGTAATATTATAGCTATTGACAGAAGGCTTGAAAATTGCACTACTTGTG  
TAATGATATGTGTAATTCATTGTTATTTTATACTCGTTCATGAGTTTTTTGAAGTTGAGAAAGAGATTCTGA  
AAGTAACTAGTGACTGAAGATTTGAGAATAGCAATTCACACATTTTCTAAGAGTGGGAATTGTGTACAA  
AAATGTACTATTTCTTCTAAAGTAACGTCTGCATTTTGGAAAGAAAATCTCACCTCCTATATGTGTCCGAGT  
GTTCCTTTGCTGTCAAATGGGGGCATCCCATACAGAACTCAAAGCATAGGACACCAAGGCTCTAAATG  
TCCCACTTGCATCATGCTCCACACTTTCCACTGCAAGTTCAACAATTTACATATCAGAAAAAATGTAAAA  
ACAGATAACAAAATGTTAAAAGCTAAACTCTCATACACGCCCATGTGAAGGTAAAAAGCAATGTATAAC  
ATTCACACATAGTCCGCCTTAAATCAAAGGTATGCACTGACCACCCAAAGTCTGCCGTTTTGAGTTCAAC  
TTAAAAGAAGAAATATTAAGCTGTCATTTTACTGCAATGCATTGTATATACTGTTTAGCAATGCTAAGTT  
TATACCTCAATATCTTCTGTGTATTGTGTGATTCCCATGACAGTATATTGAAAGTTCGTAAGAATTGGG  
AAGAAGCAATGCAGAAGAGGCAACGACTAGTTACCAGGTCATAAAAGTAACCGTAAGTATTTCAACTTC  
ACGATGAAGCTGATGTTCAACCAGGGACTGTTTTAGCTGGCTCTTGAACAACACTTTTAATGCGACGATA  
TGATTGCTATGTTTCCAATAAACAATACTTAACTTAGTATTGGAATGTGATTGTAGAATGTTAAGTCTATCGA  
ATAGAATTCGAAAAATCTTTTAAGCCATGTCCACAAGATCCCACCAATCCATATCAAATATAACAAATAT  
GTTGAATGAGAGATTCTCACTCGCAATGCATAAATCCGAGGCATTGAAAAAGTAAGTAGTTTTATCAGC  
CATTCTTAACATGTAAAGTTTTAAAGGACTTACATACATGACCGAACTTTCTCTTCCAAGAGGCTTCCCA  
ATGTCGAAACCATGAAGTGTCCGCCTCTTTATATTAGCCTCTGATGAAGTCTGCAGAAGTTGAAAATTCT  
GTAGTCCATTTAAAAGATCAGTTAATTAATAAATAACAATAAATTCTTGTTGTTGTTGTGTACAGTATAACA  
GATCAGTTAATTAATAAATAACAATAACTTGTTCTTTTAATTTTCATGATAACATATGGTTATTTACATCAC  
AAAGTTGTACGATCCAGCTGAGCTTGATTCCATTTAGTGCGGGAAGAATACAATTTGCTTTACATGCACT  
GGTAGAAGATTATCTCAATTAAGTGAACCTTTGTTTCACTGTCTCTTACAGGACTTCATGAACAAGCAA  
TGAACCACAAGTGATCGCAACTAACATAAAAGCTTAAACTCAATCAACAAATTTAACTAACCTCAACAT  
TCATCCTTTAGCAAGGTGGTACACTTGTGAACTATCAAGTACAACCTCAACTCAATCTACATACTAATTTAT  
TATAACTTCAAAAATAACCAACACAGTGAGGTCAGATCATGTTACT

>M6-PGSC0003DMG400010523 M6 LRR-RLP

TTGATCTGTCAGATAATTTGCTGGATGGTGAATTCAG

>M6-PGSC0003DMG400010700 M6 LRR-RLP

ATGGGCATTGAAAACTTGCAATTGTTTCTGCTATACGCGTTTCTGTGTCAACTTGTTTTCTCCTCATCTTTA

CCTCATTGTGCCCCAATGATCAAGCCCTTGCTCTTCTTCAATTCAAAAACACGTTTACTATAAATCTTGAT  
GCTTCTTATAGTGTTATTATCCTAAAACAGTTAAATGGAATAAGAGCACAGATTGTTGTTTCATGGGTTG  
GAGTTAAGTGTTACGAGATGACAGGACAAGTGATTTAGCTTGATCTCAGTTGCAGCCAACCTTCTAGGTA  
AGTTTCATTCCAACCTGTAGTCTCTTCAACTCTCCAATCTCAAAGGCTTGATTTGTCTAATAATAATTTTT  
CAGGGTCGCTCATTTACCTAAATTTGGTGAGCTTTCTAGTTTGACTCATCTTGATTTGTCGTATTCAAGT  
TTACAGGTCTAATACCAGCAGAAATCTCTCATCTTTCTAAATTACACGTTCTTCAAATCGCGAGTGATAC  
AGATGAGCTTAGATTTCGGACCTCACAATTTTGAAGTCTCCTAAGAAGTTGACCCAATAAGAGAGCTC  
AACCTTAGGTTTGTGAACATCTTTCCACCATTCTCTGAATTTCTCTTCTTATTTAACTACTCTGGACCTC  
GGAAAACACAGTTATACGGAATATTGCCCGAAGGAGTTTTCCACCTTTCCAACCTTAGAATTTCTGGATTT  
ATCGGACAATCCCCAGCTCACTGTAAAGTTTCCACAACCAAATGGAATAGCAGTGCATCACTCATGGAG  
TTAGTTCTCTATAGTGTGAATGCTGCTGGTAGGATACCTGAATCATTGGTTCATCTAACTTCACTGCGTAC  
ATTGGACATAGCTTCTTGAATCTCTCAGGCTCTATTCTAAACCTCTATTGAATCTACCAACATAGAGG  
ATTTGTACCTTGGTTATAACCATCTTGAAGGACCAATTTCTGATTTCTTTAGATTTGGAAAGCTCAGGTGG  
TTATCACTTAGAAATAACAACCTTTGATGGCCAACCTTGAGTTCTTATCCTTTAACAGATGGACGCAACTTGT  
TGAGCTAGATATTTCAATTAATTCCCTAACAGGTTCAATTCCTTCTAATGTAAGTGGTATGCAAAACCTAC  
AATGTCTCAACTTGTTCATCAAACCACTTGAATGGGACTATACCTTCTGGATATTCTCCCTCCCTTCACTTG  
AATGGTTAGACTTGAGTGATAACCATTTAGTGGAACATTGAGGAGTTCAAGTCTAAAACATTGTATTC  
TGTTTTCTAAAACAAAATCAGCTGCAAGGTCTATTCCAAAGTCACTCTTAGATCTGCAGTACCTAGAA  
ATTCTTCTCCTTTTCGCACAATAATCTCAATGGAGAGATTGCTTACCCATATGCAATCTGAAAACACTACG  
AGTGCTAGATTTGGGCAGCAATAATTTGGAGGGAACAATCCCACTATGTTTGGGTGAGATGAGTGGACT  
TTGGGTTTTGGATTTAAGCAACAATAGTCTTAGTGGGACAATTAATACTACTTTTTAGTATAGGAAACTAA  
TTTATAGTCATTAATTTGATGGGAATAAGCTAGAGGGGAAAGTCCCGCAATCATTGATCAATTGCACAT  
ATTTGGAAGTTCTTGATTTAGGTAACAATGAGTTGAATGACACATTTCTAAATGGTTGAGAGCCCTACC  
GTATCTGAAGATTCTAAGACTGAGATCAAATAAGTTCTTTGGCCCTTTAAAAGATTCATCGACTTACAAG  
TTTGCTCAAATTCGAATCATAGATCTCTCATCCAATGGATTTAGTGGAGATTTACCAGTGAGCCTTTTTGA  
GTATTTTGAAGCCATGAAAATAATTAGTGAGAACAGTGGAAACCCGAGAGTATGTAGCAGATATGTCTTC  
ATTTTATTACACAAATTCCTTTATAGTGACAACAAAGGACTGGAGCTTGAACCTCCTCGAGTTTTGACTA  
CAGACATGATTATCGATCTCTCAAGGAATAGATTTGAAGGTCATATCCCAAGCATTATTGGAGATCTCAT  
TGGGCTTCGCACGTTGAACCTATCGCATAATCACTTGAAGGTATTATACCATCATCACTGCACCAGTTA

TCTGTA CTTGAATCATTGGATCTCTCATCCAACAAAATCAGCGGAGAAATTCCACAACAACCTTGCATCCCT  
CAAATCACTTGAAGTCTTAAATCTCTCTCACAAATCATCTTGTGGATGCATCCCCAAAGGAAAACAATTTG  
ATACATTTGAGAATAGTTCATACCAAGGGAATGATGGGTTACGTGGATTCCACTCTCAAAGGATTGTG  
GTGGTGATGATGGGGTAGCACAAACGACGAATCCAGTTGAGCTAGATGAAGAAGGAGGAGGAGATTC  
ATCAATGATCAGTTGGCAGGCGATTCTCATGGGTTACAGTTGTGGACTTGTATTGGACTGTCCATAATA  
TACATAATGTTGTCAACTCAATATCCAGCATGGTTTTCGAGGATGGATATAAAATTGGAACACAAAATTC  
TTACGAGAATGAGAAGGCACAAGAAAAGACATTAGTGTGTAACCTC

>M6-PGSC0003DMG400010940 M6 LRR-RLP

ATGAACTCGGTGGTGAATGTGGAAAGGGCCATGGTATGTACCCGAACTCAGAGTCTTGGATCTCACCA  
ACAATAACCTCACGGGTATGATCCCTCCTTCTGTTGGAAATGCCACAAAATGATGAACTTCAGTTTGTC  
TGGGAATAGAGTCAGCGGCAACATTCCAAAGGAGGTCGTAATCTGAGCCAACCTGCAGACTTGTCTT  
GACTGATAATCAATTAACAGGTTCCATTCTGTAGGACTATTTAATATCTCGTCGCTACTTGCCATAAATC  
TGCTATACAATAAACTTTCCGGTCTCTTGTAGATGAAGGAATTTTTTTGTCAAATCTGAAGTTTCTA  
AGGATATCTCGCAACCAGATTTTAGGATGCATTCCTTCCAACATATGCCAACTCAGAGAGCTCAAAGTTT  
TGTCCATATCTTTCAACAACATAATTGGAGACAAACCCAAAAATATTGATTGTTTATCCAATCTCCAGGAG  
TTTTATAATCGTCATAATTCAATAAAAGGGACTATCCCACTTCATTGGGAAATATTTCAACTCTGCAATA  
TCTTTATTCTGGAAACAATCTCATGGTGGGGCCAATTCCTCCAGAATTAGGGAAGCTATCAAATTTGAGG  
CAATTAATTTTTTCCAATAATTCTAATCTTATTGGTCAAATTCAGAGGCTATTTTCAACATATCTTCTTTG  
GAATTAATCAATTTCAAGTTTCAATACCCTGTCGGGTAGAATTCACCACTACAGGTCTTCATCTTCCGAA  
CCTTAAAGTACTTGACTTGGGAGTCAATCAGCTTGAAGGGGAAATTCATTGTTTATAACAAATGCTTCC  
AAGCTTCAGATACTGTCGCTAGAACATAACTCTCTCTCGGGAGCTATTCCTACTAATTTGGGAAATCTTCA  
TGAGCTGCAATCACTCTTACTACATACTAATCAACTTACCAATGAACCAAGAGAGCATGAGTTGAAATTC  
TTCAATTCGTTGGCGAACTGTAGGATGTTGAGATATCTAGAAGTGGGTAACAATCCGTTGAGTGGCGTT  
CTACCAAATTCTGTTGGGAATCTCTCATCTACTATTGAAAAGATTTATATAGGAGATGCACACATCAATG  
GCCTCATCCCCACAAGTATAGGCAACATGAGCGGTCTTACAGCCCTAAGCCTTGAGGAAACAACCTTGG  
CAGGGAATATTCCTTCTGAGATTGGTAAGCTTAAACAACCTCCAAGGGCTGGCTCTATATAACAATAAATT  
GCAGGGACGTATTCCAGAGGTGGTATGCCATTTATCGAATTTGGTTGGCTTATTACTGGATGGTAATGA  
GCTCTGTGGATTAATTCCAGAATGCTTTGGAAATCTTAGCATGCTACAAGCGCTTTATTTGGATTCTAATA  
AATTTTCATCAAATTTCCGTTGAGCCTTTGGAAGATGAGTGGTCTTCTCTATCTAAGTGTGTCACGAAAT

TCAATAGAGGGGAGAACTTCCATCAGATATTGGAGGACTGAAAGCCATTGTAGAACTATATCTTTACAATA  
ACCACTTTTCAGGTGTGATACCAACCAGATTGGGGGAACTCCAAAACCTGCAGCATCTTGACCTATCCAA  
CAATTCATTTTTTGGCCAAATCCATTATCCTTTGCCAACTTGATAAGCTTGGAAATCCTGAATTTGTCTTT  
AAATGCCTTGTCCGGTACTATTCTAAATCTTTGGAAAACTCTCATACTTAAAAGCATTAAATGTTTCAT  
TTAATGATTTAGAAGGTGAAATACCAAGTGGTGGCGTGTTTGCAACTTCCACTGTGCAATCATTCTTGG  
GAACAAAGGTCTTTGCGGAATGCACATATTGGAGATTCCTACTTGTGCTATCACTAATCATGGAAAACAA  
TCAAAGCTTAAGGAGGTTGTGCTAAAAATTGTTACTCCAGTGGTTATTGCATCCTTTCTGATATTCTTGGT  
CGTTTCAATTTGGATAATGAAACGACAGAAGAAAGGGAAGTCCAAAGATATTGAAAAGGTATTGGAGA  
TCGGGACTCATCAATTAGTTTCTTATCACGAGATTCAACAAGCAACAAATAATTTTGATGAATCCAATTTA  
ATTGGTGAGGGAAGCTCTGGCTCTGTGTACAAAGGCACATTGTTTGGTGGAACTGCAGTGGCCATTAAG  
GTTCTGGATTTGGAAAACGAGCAAGTATGCAAGAGGTTTGATACCGAATGTGAAGTGA

>M6-PGSC0003DMG400010950 M6 LRR-RLP

CATTTTTCTATTAATATTTGCACTAATGGAGAAAGCCTTCACATTTTTCTCTCAACAATACTCCTGTTGCT  
TCACTATGTTATGACCCAACCGAACATTACGACTGATCAATTAGTTCTTCTCTTTGAAATCCCAAATTA  
GTTCCGATCCTTTTCACTTGGATGAAAGTTGGTCTCCTGCTACTTATGTTTGCCATTGGGTAGGAGTC  
ACTTGTGACTATCGTCACCAGAGAGTGAAGTCCTTGAATCTTTCAACATGACTCTTACCGGCAAGATTC  
CCAGTGATTTTGGAAACCTCACATTTCTGTTTCTTGTACTTGAGAAAGAATAATTTCCATGGAAATTTG  
CCTCAAGAAATGGTACGCTTACGTCCGCTTAAGTTTCTTAAGTTAAGTTTCAACAAATTCAGAGGGGAAA  
TTCCTTCTTGGTTTGGGTTTTTAAAACAACCTCAAGTTTTAAATCTTAAGAATAATAGTTTCACTGGTTCCA  
TTCCTCTGTCACTCTCAAATGCCTCAAGGTTGGACACTTTAGTAATATCTGCCAATTTACTTGAAGGAAAC  
ATCCCGGAAGAGATTGGCAATCTTCACAACCTGAAATACTTGTACATAGAAGATAATCAGCTTACGGGTT  
CTATACCATTACAAATTTTCAATATTTCTAGTATCCAAGTCATTGCATTTACAGACAATAGCTTATCAGGA  
AATCTTCCAATGGTTTATGCAATGGTCTCCCGATACTCAAAGAGCTTTATCTATCAATAAACAAGCTTGA  
TGGTCATATGCCTACAAGCTTGTCAAATTGTTCACAACTTCAAATGTTGTATCTATCCAGAAATGAGTTTG  
ATGGACCAATACATAGTGAAATTGGAAGATTGAGTAACTTGCAGTTCTTGTATCTTGAAGTCCAACCATTT  
CACAGGTATGTGTTATCTTACTAGTTTCTGGACACGTGTGTGGTCATCTAAATTGACATAAATTGTTTCAA  
ATTATCATTGTATTAATAATAGATTTATAATTAATTACATGAATATCG

>M6-PGSC0003DMG400010952 M6 LRR-RLP

TTCAAAGTCTCAAACCCACAGGTTACTAGTACTAATATTTGCACTAATGGAGAAAGCCTTCACTATTTTAT

TCTTAACAATGCTCTTGTTGCCTCACTATGTTATGGCCCAAACCAATATTAACACTGATCAATTAGCTCTTC  
TCTCTTTTAAATCCCAAATTAGTTCGACCCCTTCACTTCTTGAATGAAAGTTGGTCTCCTGCTATTTCTG  
TTTGCCGTTGGGTTGGAGTCATTTGTGGTTCTCGTCACCAGCGAGTGAAGTCGTTGAAGCTTCCAACCT  
GGCTCTTACAGGCAGAATTCCCCGTGATTTTGGAAACCTCACATTTCTTGCTTCTCTTGACTTGGGAAGCA  
ACCATTTCCATGGAAATTTGCCTCAAGAAATGGCACATTTGCGTCGGCTTAAGTTTCTTGATTTAAGTTTA  
AACAGCTTACAGGGGAAATTCCTTCTTGGTTTGGGTTTTACACCAACTTCAAGTTGTAAACCTTAGGA  
GTAACAGTTTTACTGGTTCATTCTCCGTCCTCTCGAATGCCTCAAGGTTGGAGATTTAGTAATATCT  
ACCAATTTACTTGAAGGAAACACCCCGGAAGAGTTTGGCAATCTTCAACCTGAAATCGTTGTCCATAG  
AACAAAATCAGCTTACAGGTTCTATACCATTACAATATTCAATATTCGTAGAATTGAAGTCATTTCAAT  
TCATATAATAGCCTATCAGGAGATCTCCCAATGGTTTATGCAATGATCTCCCAATACTCAAAGAGCTTTA  
TCTATCCAGAAACAAGCTTGATGGTCATATGCCTACAAGCTTGTCAAATTGTTCA

>M6-PGSC0003DMG400010964 M6 LRR-RLP

AGGACAGAATCTATTAAGGCATAATGGTACCAATTGGCTCAGACCAACATATATGCAAGTGGAGCAAA  
GCTTTCAGAAACATGCCTTGTCTTAGGTTACTCATTGTCAAAGGGGAGGAGGTCTGGCATCATGACCTTA  
TTTGTGGCCATATTGAGTATCTCCCCAGTAACTTCAAATGGCTTGATTGGTCATACTACAGTTTTGAATCT  
TTACCAGCATATTATGAACCAGGAAACCTTGTTGGGCTCCACATGACTTTTAGTTCTCTTGTGAAGTTGT  
CAAGGAGCCGAAGGTATTATTTATCTCCTTTAGAAACAAATCATATATGAAGAAAATAAAATGATAGCTA  
AAGCTGAAGTTTCTATGCATTCTTTTTCTGAACAGGCATTTGATAAGTTGACAGTCCCTCAATTTAAGTT  
TTTCTAGAAATTTAATCCGAACACCCAATTTTTCCGAGATTCAAACCTGCAGAGGATTATACTGAAAAG  
TTGTGTAAGTTTGGTAGAAATTCATCCATCCATTGGCCAGCTCAGAAAGGTTATCTTTTTGAATATGGAA  
AACTGCAAAAATCTCAAATCTTTACCAAGCAGTATTCAAATGGAATCTCTTGAATCTTCAATCTCTCAGG  
TTGTGAGAAGTTAGAAAAATTTCCAGAAATTCAGGGAAATATGGAATTGCTATCAGAGCTCCTTTTGGC  
ACATACTGCAATATGGGAACTCCCTCATCAGTTGGACTGCTCAGTGGCATTATCTTGCTTGATTTGCATT  
CATGTAAAAGCCTTGTAAGACTCCCAGCCAGTGTCTCTGAGATGAGAAAACCTGAAAATTTTGAAGTGTGA  
AAGGCTGCTCAAGACTTGCAAAGTTTCTGAAAATCTAGGTGATCTAAACCAGATGGAGGAGCTCTATG  
CTGGTAACACTGCCATTTGGAAACTACCAGATTCTGTTAGAAACTTGAGCAAACCTTAAAGTCCTATCATT  
AAGAAGAGGCCGGAAGGTAAAGCGTCAAACCTGGTGACAGTTTGATGTTACCCTCTTCTGGGGGTTTCG  
TTGTTTGAAGTTATTGAAAAGCTTAGATCTCAGTGGATGCAACTTATCTGTTAACCAAACCTGCTGCTCTTA  
TGAAATTGCCTTCTTACTGGAAGTGAATCTGAGCAGAAACAAGTTTATTTTATTACCTGATTTTCATCAGT

CAACTTTCTCAGCTTCGATATCTCAACATAACACAGTGTGAGGAACTTAAGGAACTCCCAAACCTCCTTC  
GAGTATAGAGGAATTATATGCAGAAGATTTTTGGCCAAGCAAAGTATCGAAAAGCTACAAATATACCC  
GAGGTTGAATTTGGTGTCAATCACCAATTATAGTTTTGATCAACAATCTTATACAGAGGAGAGCAATGGT  
AGCTCAGTTTTGGATGAGATTCTCAGCTTGTTTCTCTCAGAAGATATGGATCATGTGGTCGAGCACTCTC  
TAACTCTGATCACAGGGTGACCTGTTCTATTGTCTTCCCTGAATGTGCGATTCCCAGGTGGTTTAAGCAT  
CAGAGTGTTGATGAAAAGATATTGTTCAAACCTGCCATGAATTGGTATAATGATAAGTTCAAGGGCTTT  
GCTATATGTTGTGCCACTCTCATGGGAGCAGGTGTGTTGAATCCTGATTCAGGGCTATCCAAGAAGTAT  
GATTATGCTTTCTCAAAGCTAAATTGATATGCAAAGATGATTTAGAAGACCTTAAAGTGCTAGAGAAAAG  
AATGTAAGTGGGAACAGCATCTAGAACATATGGCTTGTGTGTTTGCTTTGTCTACATACCATTGTATGC  
TTCACTGCAGGTGTCCGGCACAGATGTTGGAAATATTAACCAGTATAGCCTATTTGAGGCATCTATCCAT  
GGGCGCATTGTGAGACAGTGGGGAGTTCATTTGATCTATCAGGATGA

>M6-PGSC0003DMG400011045 M6 LRR-RLP

ATGGCCGATCTTGTAATTGGTGCTACTGTTAAAGTTGTGCTTGATAAGCTGCTTTCTCTCACAATTGAGG  
AGGCCAAAACCTTAAGGAACTGCAAGAAAAATCTAAGAATTCTGACAAAATATGTATCCATGATTCAAG  
CTCTCATTGATGCTGAAAAACGACAAGTTGATGATCAGGCTGTTGAACAATGGCTCAAGATGCTTG  
AGAGAGTTGCTGAAGATGCTGAAAACGTGTTTGACGAATTCAGATATGAATATCTCAAAGCACAAGTCA  
TGAACATCCGAACCAAACCTAATGGAAAAGGTCAGCAGCTTCTTTTCTCATACTGCTTTTAAGTACAAAAT  
GTCGCGAAAAATAAACAACATCAATGAAGAGTTGAAGGCTATCAATCAGTTAGCCAATGACCTCGGTCT  
CAAACCACTGATGGTTCCTTCTCAGAAAATACTTCCAATTCGAGAAACAGATTCCTTAGTTGTTGCTTCGG  
ATGTTGTTGGTAGAGACAATGATGTTGCTGAAATAAAAAGAGAAGATTTTGAACATGAGAAAGGATGTT  
GTTCTGTGCACCATTCCCATAGTGGGTATGGGGGGTTTAGGGAAAACAACCTGTGGCTAAGAGAATTTTC  
AATGACCAACACATCAAGCAGCAGTTCGAAAAGAGAGTTTGGTTGTGCCTACCTGAAATGGTAGAAACT  
AAGAGCTTTCTTGAACCTGATCCTCGAATCATTGACAAAGAGGAAAGTTGAGGTCCAAAGCAGAGATATA  
ATAGTCAAGACGCTACAAGATGCATTGGGAGAAAAAAGTATTTGCTTGTCTGGATGATTTGTGGCAT  
GTTGACTCTACATCATGGCATGAGTTCATGGACACCTTGAGAGGAATAAATACATTCAGAGGAAACTGC  
ATTCTCGTGACTACTCGTATCAAACAAGTGGCATCCACAGTAGCAGTAGATCTTCATATGTTGGGGAAAT  
TAACAGACTATCATTGTTGGTCCATTTTCAAACAAGAGTGTGTTGATGGGGAAGTTCCGGAGGAAA  
TACTGAGCATGGAGAACAAGATAGTTGAAATGTGTCAAGGTCTACCGTTGGCTACAAGTGTGTTGGGA  
GGCCTCTTATGCAACAAGGAAAAACATGAATGGCGGGCAGTTCCTTGATGAAATCCCCTTGTGTCAGGG

GAAGATGATAACGGGGAAAGTAGCATAAAGAAGATCCTTAAACTCAGCTATGATTATCTACCATCTCCA  
CATCTGAAAAAGTGTTTTGCTTACTTTGCCATTTTTCCAAAAGGATTTGAGTTTGAAAAGGACCAGCTTAT  
CCAACTCTGGATGGCAGAAGGTTTTCTCGGTCCATCTCAAGAGACCACTTTGATGGAAGACGTTGGGAA  
CAAGGCTTTTCAACTTTTGTTGCAAATTCCTTGCTGCAAGATGTTAAGCTAGATGATCTGAACAAAATA  
ACATACTGTAAGATGCATGATCTTGTGCATGATTTGGCTGGAGATATTTTAAAGTCTAAACTATTTGATC  
AAAAGAGTATTGGAGGAGAAAATCTTTCTCAAGTCCGATACTTTGGATGGGACTCACCAAGTGATCAAA  
TAGATAAGATAAACGAGTCAGGACGTTTGTGCACATTGTTCTGGAAAAGAATTATATCTGAAGAACTGT  
TGTTGAGCTTTCAGTTCTTGAGAGTTTTAAATTTGTCCAGGTCAGGCATCAAGGTATTGTCAGCCAAAAT  
CGGCAAGCTAATACTTGAGATATCTTGATCTCTCCAGCACTGAGATCAAAGCCTTGCCCAACTCCATTT  
GCAAGCTCTACAATTTGCAAACATTTAGAATCAATAGTTGTTACTCACTTAGGAAGCTCCCAGAAGAAAT  
GGCAAATATGATAAGTTTGAGACACATATATTGCGACTTTCATTACCAAACATATCTTGATTTTGCGGGTT  
GGAGATCAAGGTTTATAGGTAATTATCAGTTTCAGATGCCACTTAATATGGGGCAATTGACTAGTCTTCA  
GACGCTACAGTTTTTCTATGTAGGTTTAAAGACAGGTCGTGCAATAGAAGAATTAGGTCATTTGAAAAA  
CCTTAGAGGTGAATTGACGATCAAACATCTCCAATTAGTCGTAAATAAAGAAGAGGCTCGAACAGCATA  
TTACAGGAGAAACCAAATATCTACAAGCTGACATATTTATGGACCCATGATGAATCAGAAGGCTGTGA  
GATCAATGATGAGCATGTGTTGGATGGTCTTCAACCGCATCCGAACTTGAAAACCTTAGCAGTAGTGGA  
CTATTTTGGGACTAAATTTCTTCATGGTTCAGTGAAGGATTGCTACCAAATTTGGTCAAGTTGAAATTA  
GTCGCTGCAAAGGTGCAAAGAAATTCATCGCTTGGCCAACTGAAGTTCCTTCGGCATCTTGAGCTGAT  
AGGATTCCTTGAATTGGAATGCCTTGGATCTACATTTTATGGCGTTGATGTTAATGATAAAGGATCAAGC  
AGCAATAATGGCAATATCCAAGTGTTCCCATCACTGAAAGAACTAGTATTGCAGAATATGAATAGCCTTA  
TTGAGTGGAAGGGTGATGAAGTTGGAGTTAGAATGTTTTCTGCGCTTGAGAAGTTGAGGATCACAAAG  
TGTCCTACTGTTAAAAGGTACCCACGTCAATTGGAATCCTCCGTGAATTAAGCATTGAAGGAGTTGACA  
GTGAAATGCCATTGTTGACCTTGTGTAGCAACTTGACATCTCTGGTAAAGCTTATTGTGACTGATGTGGA  
AGAGCTCACTTGTCTTCTGATGAGATGCTACGCAATAACGTTTCTCTTCAACAACCTATTGGTCACACACT  
GCAGAGAGTTTCGTGAATTGCCCAAAGCCTGTACGATCTCCATTCTCTTGAGAGCTTACAAATACTCTTC  
TGCACCAATTTAGGTCTCTTCTGTTCCAGTGTAGAGAATCGTTTGACTTCCCTCCAAAGTCTTGATTT  
ATCACTGTGTATTGGATTGACCAGTTTACCAAGTGAATGCTAGAGCATTGTCGGTCTCTACAGACTTTG  
AAGCTCAGCTGTTGTCGCAACTTAGTTTCTTGCCTTTACACGTATGGGAAATGCCTTCAATTTATATTT  
GGGTTTATCAAATTGTCCCAAATTGGTTAGTGTACCCACAGGGGGCCTTCACAACCTCACAGGGTTAAA



GGTATTGGAAATTGGTCCTTTCTCAGATACGGTGGATTTTGAGGCATTCCAATTGATTTTTAATGGCATT  
AACAGCTATCATCCCTTCGTACATTGGAGGTGTATGGATGGATGCGTTGGGATTCTCTGCCTTATCAACT  
TATGCAACTCTCTGCCCTAACAAAGATCTGTATATATGATTTTGGAAATTGAGGCTCTTCCTCATAGACTTG  
ACAACCTTACTTCTCTTGTAACATTACATCTAATGGGGTGCCAAAGGCTACAACATGTGGACTTCTCAAAT  
ATCATGCCCAAATTACGGTATCTGGAGATCCATTATTGTCTATTGTTAGAAGGTCTGTCCGGATGGGCTTG  
GCAACCTTGTTTCTTTGGAAGAATTAAGTTTACGTAAGTACGAGAACTACAACATCTGCCATCCAGATA  
TGCCATGCTGCGCCTCACTAAATTATGGAAACTTCTAATTAAGGCTGCCCGCAGTTAGAAGAAAGTTGC  
ACCAATCAAAGTAGCCCAAACCTCCAGTGGTCCAACATTTCCCATATTCCAAAAATTGAAGTAGGTGGGA  
GGATAATTCAGAAGTTACGTAAGTCTCTGTTTCTTTCACTTTCTGATCAGTAAAATTTTGAATATTATT  
TTCCCCGAGTTCAGAAAAGAAGTTATGTATGTAG

>M6-PGSC0003DMG400011108 M6 LRR-RLP

ATGTTTCCAAAAGATTTTGAGTTTGAGAAGGACCAACTAATCCAACCTCTGGATGGCAGAAGGGTTTCTTC  
GTCCATGTCAAGAGACCACTGTGATGGAAGACGCCGGAACAAGTTTTTCCAACACTTGTTGCGAAATT  
CCTTGCTGCAAGATGTCAAGCTAGATGAGCACAACAATATAACACACTGTAAGATGCATGATCTTGTGC  
ATGATTTGGCCAGAGATATATTGAAATCTAAATTATTTGATCCAAAGAGAGTTGGAGGAGAAAATCTTTC  
TCAAGTCCGATACTTTGGATGGGACTCACCAAGTGATCAAATAGAGAGGATAAATGAGCCAGGACGTTT  
GTGCACATTGTTCTGGAAAAGAAATCTATCTGAAGATATGTTGTTGCGCTTTCAGTTCTTGAGAGTTTTA  
AATTTGTCCAGGTCAGACATCAAGGAGTTGTCAGCCTCAATCAGCAAGCTAATATACTTGAGATATCTTG  
ATCTCTCTACAATAAGATCAGAGCCTTGCCAGCTCCATTTGCAAGCTCTACAATTTGCAAACCTTTTAGA  
GTCAATAACTGTTTTTCACTCAGGAAGCTTCCAGTAGAAATGGCAAATATGATAAGTTTGAGACACATAT  
ATTGCAAGTATCATTACCAATCATGTACAGGTAAGGATCGGTTTCAGATGCCACTTAATATGGAGCAATT  
GACTAGTCTTCAGACGCTACAAGTTTTCTATGTAGGTTTAAAGAAAGGTAATCGAATAGAAGAATTAGG  
TTGTTTAAAAAACTTAGAGGTGAATTGACGATCGAACGTCTTCAATTAGTCGGAAATAAAGAAGAGGC  
TCGAACAGCATATTTACAGGAGAAACCAAATATCTACAAGCTGGTGTATTCATGGTCCCCTGATGAATCA  
GAAGGCTGTGAGATCAATCATGAGCATGTGCTGGATGGTCTTCAACCACATCCTAACTTAAAAACCTTAG  
CAGTTGTGAACTATTTAGGAACTAAATTTCTTCATGGTTCAGTGAAGAATTGCTACCAAATTTGGTCAT  
GTTGAAATTAAGTGGTTGCAAAGGTGCAAAGAAATTCATCGCTTGGCCAACTGAAGTTCCTTCAGCA  
TCTTGACCTGGTAGGATTCCTTGAATTGGAATGCATCGGACCTACATTTTATGGTGTGAGATAATGGAT  
AATGGATCAAGCAGCAATAATGGCAATATCCAAGTGTCCCGTCATTGAAAGAAGTATTGAAGAAT

ATGGCTAGCCTTATTGAGTGGAAGGGAGTTGAAGTTGGAGTAAGCTTGAGAAGTTGAGGATTAGTGAC  
TGTCCCTTGTTAGAAAAGTACTCCGAATCAATTTGAAATCCTATGTGAATTAGTGATTGTTGGAGTTGGCA  
GTGAAATGCCATTGTTGAACTTGTGCAGCAACTTGACATCTCTTGTGAATCTTGTGTTAGTAACGTGAA  
AGAGCTCATTTTTCTTCCCGATGAGATGCTACGCAACAATGTTTCTCTTCAACACCTATTGGTCTCACTCT  
GCGGAGAGTTTCGTGAATTGCCACAAAGCTTATACAATCTCCGTTCTCTTAAGAGCTTAGAGATTATCAG  
CTGCACCAATTTAGTTCTTTTCTGTTCCAGTGGAGAGAACTATTTGACTCCCTCCAAAATTTGAGTT  
ATCCAATTGTAATGGATTGACCAGTTTACCAAGTGAATGCTAGAGCAATGCCGGTCTCTAGAGATTTTG  
ACGGTCAGTTACTGTAACAACCTGGTTTCCTTGCCTTTACATGTGTGGGAAATGCCTTCTCTTTCGTATTT  
GTGTTTATCAGAATGTCCCAAATTGGTTAGTGTACCCGCAGGGGGTCTTACCACCTCACTGGGTTACAG  
AATTTGGAAATTGGTCCTTTCTCAGAGACGGTGAATTTGAGGCATTCCAATTGATTTTAATGGCATTCA  
GCAGCTATCGTCCCTTCGTACATTGGAGGTATACGGACGTACGGATTGGGATTCTCTGCCCCATCAGCTT  
ATGCAACTCTCTGCCCTAACAGAGATCGGAATAAATGATTTGGAATCGAGGCTCTTCCCTCATAGACTTG  
GCAACCTTACTTCTTGTAAACATTAGATCTGGTGAGATGCAAACGGCTACAACATGTGGACTTCTCAGA  
TGCCATGCCCAAATTACGGTATCTGAAGATCCGTGATTGTCCATTGTTAGAACTTTGTCCGATGGGCTC  
GGCAACCTTGTTTCTTTGGAAGAGATAAGTTTATGTAACCTGCGAAAACTGGAGCATCTGCCATGCAACT  
CCTCACTAAATTATGGAACCTGCGAATTAGTGTCTGCCACAGTTAG

>M6-PGSC0003DMG400011116 M6 LRR-RLP

ATGTTTCTGGGCTTGAGAAGTTGACGATTACAGAGTGTTCACTGTTAAAAAGTGCTCCAACCTCAATTGG  
AAACCCTGCGTGAATTAGAAATTGAAAGAGTTGACAGTGAAATGCCATTGTTGAACTTGTGCAGCAACT  
TAACATGTCTTGTGGATCTCGATGTCAGTGATGTGAAAGAGCTCACTTGTCTACCTGATGAGATGCTACA  
CAAGAACGTTTCTCTTCAACGCCTGTGGATCTCAGATTGCAGAGAGTTTTGTGAATTGCCACAGAGCTTG  
TACAATCTCCATTCCCTTAAGAGCTTACGAATATCCTTCTTCCCAATTTAGTTCTTTTCTGTTCCAGT  
GGAGAGAATTATTTAACTTCCCTCTGAAGGCTTCACTTACTTTATTGTGATGGATTGACCAGTTTACCAA  
TGGAATGCTAGAACAAATGCCCGTCTCTAAAGATTTTGAGGGTCAACAACCTGTAAGAACTTGGTTTCTTC  
CCTTACATGTGTGGGAAGTACCTTCACTTTCCATTTGGATATGTCAAATTGCCCAAATTGATTAGTCT  
ACCCACAGGAGGCCTTACCATCTCACTGGGTTATGACATTTGAAAATTGGTCCTTTCTCAGAGATTGTG  
GATTTTGAGGCATTCCAATTGATTTTAATGGCATTGAGCCGCTATTGTCCCTTCGTACGTTGTGGGTGTA  
CGGACATGGGCACTGGGATTCTCTGCCCTATCAGCTTATGTAACCTCTTCCCTAATTGAGATCAGATTAA  
GTGATTTCCGGTATCGAGGATCTTCCCTCATAGTCTTTGCAATCTTACTTCTTGAACATTACATCTAGTG

GGGTGCAAACGGCTACAACATGTGGACTTCAGAGATGCCATGCCCAAATTACATTTTCTTGAGATCTGTG  
GTTGTCCATTGTTAGAAGCTCTGTCCGATGGGCTCAGCAACCTGTTTGTGGAAACGTTAATTTTTTG  
GAACTGCGAAATACTGGAGTGTCTGCCATCCAGAGATGTCATGCGAAGCCTCACGAAATTACAGTTCTT  
GAAAATTAAGACTGCCACAGTTAGAAGAAAGTTGCACCAATTGGAGTAGCCCAAACCTCCAGTGGTC  
CAACATTTCCATAATCCAAAAATTAAGTAGGTGGGAGGATGATTCAGAACTTAA

>M6-PGSC0003DMG400011209 M6 LRR-RLP

CGACTACTAGGCGGCCACCATACTATGACTATAAATGACAAGAGATGTTCCCTTCTACTTCATTCACAAA  
CAAGCAAATATGAAGAACAATCACTTCAACTTATCTTTCTCATATTGTTATCTCAACTTTTCTATTTCACTT  
GCATAAACCATCACTTTGTTTCCTCTACTAACACCTCTTGCATTGAAACAGAGAAAAATGCACTTCTAAAC  
CTTAAAGAAAATCTTACAGATCCTTCAGGCAAGCTATCTTCTGGATTGATCAACAAGATTGTTGCCAAT  
GGCTTGGTGTAACATGTAACAACAAGACCGGGCACGTCGTAAAGATTGATCTTAGGAACAAATACTCAA  
CAGAACATGAATTGAGAGGTGTGATTAATCCATCTTTGCTCAAGTTACAACAATTGAGATACTTAGACTT  
AAGCATGAACAATTTGAAGGAATCAAAGTACCTGAATTCATCGGTGCGCTCAATGAACTAAGGTATCTC  
AATCTATCTGGTGCATCTTTACTGGTTTAGTCTCTTCATTCCTTGAAAACCTCTCAAATTTGCAAGTTCTT  
GATTTAGGAGGCTTAGATCTTAGTGAAGATGCTAATTCTTGGCTTCAAATAATCAATGATCATGTTCCCTC  
TCTGTTGGAGTTGCGTTTGCCTCGATGTCAACTTTTAAACATTCCTTCTTCTTTCCATTACTAAATCTTACT  
TCCCTTTTGGTACTTGATCTTTCCAACAATGCTTTTAACTCATGTACATTTCCCTCAATGGATATTCAAACCTT  
AGTAGCCTTGTGTATCTGGACTTAAGCTCCAACAATATGTGTAGTGAACCTGTTGATGAGTTTGCTAAGC  
TCACTTTCCTTGAACATCTTGATCTGTCTTGAACCACGGTATCAATGGGGCACTCAAGAGGAGCTTGGG  
GAAACTATGTAATTTGAAGAGTTTGATCCTGTCTTACAACAACATCAGTGGAGACATAATCGAGTTCATC  
GATGCGTTATCTGAATGCCAAAGCAATAGCTTGGAGACATTGGAGTTGAGTTTCAATAAATTGACAGGA  
AATCTTCTGATGCATTAGGCAACTTGAGGAACTGAAACATCTTCAGCTGAGGTATAATCACTGACAG  
GCACAATACCTGAAAGTATAGGGAACTTATTATCTTTGGAGACATTCTACCTCACATCAAACAAAATGAG  
TGGGAACATCACCACGAGTATCGGACAGCTCATGTCGTTGGTCTCGTTGGATATCTCGGAGAATATGTG  
GGATGGTATTGTCATTGAAGCTCATTTGGTGAATCTTTCCAACCTGCAAGAGTTTTCAGTTGGGATGAAA  
CTTAGTAAAAATATTACCTTGGCATTGATATCAGCCCGAATTGGAATCCTTCATTCAGGCTGACATTCTT  
GACTATTCAGTCATGCCAATTAGGTCCTGAATTCCACATTGGCTGAAGGATCAGAATGAGCTCACCAGC  
CTAATACTCAACACCGCGGGGATTTCTGATGCGGTACCTGATTGGTTTGTAGAGTTGGATTTGAAGCTTG  
ATAATCTAGACATGGCATAACAACAACCTTGAAGGGAAAGTTCCAAACAAATTCAAGTTCAACTTTCAAGC

CAATGTGGATTTAAGCACTAATCGCTTCGAGGGACCTCTCCCACTATGGTCTTCTAATGTTACAACATTGT  
ATCTGAGGGATAACTTGTTTTAGGACCTATTCTCTCAACATTTGTGAAGCACTTCTCAATATAGAAGAC  
TTGGATATCTCCAGGAACAATCTAAATGGCACAATTCCCTTATGCATAGGTGATATGAATCAGTAACTA  
CCTTAGCCCTCGATAACAACCAACTTATCGGCCAAGTTCCTGATTTCTGGGGTAAGTTACCATATCTTTAC  
TGGATAGATATGTCAGAGAATCGCCTATCCGGACAAATTCCACACTCACTAGGCTCTCTTGCTTATCTGA  
TGTTCTTAAGACTCTCAGGCAACAATCTCTCTGGAGAACTGCCTTTGAGTTTGAGAAATTGCACGAAAAT  
GATCAACATTGATCTTAGTAACAATCAGTTGTCAGGGCTAATCCCAGCTTGGTTAGCGGAAACAATGAG  
ATCACTGTTAATCCTTAGTGTAAGGAACAACAGGTTTTTCGGTCACATTCCTTTAAAAATCTGTAGCCTTT  
CAGGTCTTACATACTAGACCTTTAGGAAACAACCTTATCCGGTTCTGTCCCGTCTGTTTTGGAACTTG  
GAAGGGTTCAAGGTTGAGCTAACTGATGTAGAAGCTAAACAATATCAAGGTACATTGAAGCTTGAGGC  
AAAAGGAAGAACAACCTTTCTTATGATAAAATCCTTTATCTAGTAAACAGTATCGACCTCTCGAGAAACAGT  
TTGTCTGGTGAATCCCGGAAGAGTTAACAACTTACACAACTTGGAACCTTGAACCTTGTCTATGAACC  
ATTTGACAGGACATATACCAACAGATATCGGAAAGTTACGTTGGGTTGAAACGTTAGATCTTTCAATAAA  
TCAGTTATCAGGTACTATCCCACCAAGCTTAGCTACATTAGACTTTTTAAGTCATTTGAACCTTGTACATA  
ATAAGTTGACAGGAAGAATTCCTACTAGTACTCAGTTTCAAACCAAAGTTGATCCAACAATTTTCCAAGG  
AAATGTTGCACTTTGTGGTCCTCTTTGGAACAATGTGTTGGTGATAGGACTACGACGACGATAACATCA  
CAAAGTGGAGGAAATGATGAAGGGGAAACAGATGATGAAGATCAACTGAGAAAGTATGGTTCTTTGC  
TGTTGTTGGTTTGGGATATATAGTTGGTTTTTGGGCATTTTTTGGCAGTTTGATCTTCAAGAAAAGATGG  
AGAATTGCTTATTGCAGATTCATTGAGAGGTGATTTTTGGAGTTCTATGAAATGTCTTGTAGTTCTGTGA  
AAAAATTGTTAGGAATCTAATAAGCTATGTTGCTCAGACTCTTCAAAAATGTGCGAGGGGTGTGTGTGGG  
ATCCTCCAATATAGTATATTTGTGAAAGATACGACAACATTTTTAGAGAGTCTGAGAACTTAGCTAAT  
AAGTGGAACATAGGAGTTTGTCTCTGCAGTTCTGTTATATGTTATGTTTTAGTTTCAATATAGCACATAT  
TACTACTTTTTCTATATGTAAAATAATGCTACCTAAGTATTGACACTAATAGAAATGCCAGTGTTTTGGGT  
AGAGTTACGACATGTGAAGAGTGGTCAATTGAACACTTTTACGTAGGTCAAATAAATACTTCTTATATAT  
GTATACATGTTACAAGACTATTGTAGTACATATAATTAGGAAGTTGTTTAAATAGTATCTAAGACTATTC  
TTATACTATGCATGCATCTACTTGTATA

>M6-PGSC0003DMG400011353 M6 LRR-RLP

AATAAAACCTTATCTTCTCTGTAGAACAACACTCACACACACTCTCTCTCCTCTTTCTCTCTCTAAAACACAG  
CAAATCTAAGCTCGTTAATGTGCGATTGATCTGAGAGAAGAAGAAGAAGAAGGAAGAAAAAGGACTA

TTGTAAATCTCGAGTTCACCTGTGAAATTACACTTTTGCCCTTCCCCCTCCATTACAGTACAACAATGGCGT  
ACGCATTCCCGGAGGAAGTACTAGAACACGTCTTCTCCTTCTCACCTCCGACAAGGACCGTAACGCAGT  
ATCACTAGTCTGCAAATCATGGTACGAGATCGAACGGTGGTGTAGGAAGAGAATATTCGTTGGAACTG  
CTATGCTGTTAGCCCTAGGATCATGATCCGACGGTTCCGGAAGTCAGATCTGTTGAGCTTAAAGGGAA  
GCCTCATTTTGCTGACTTTAATCTTGTACCGGAAGGTTGGGGAGCTTATGTGTATCCTTGGATTTTGGCTA  
TGTCTAAATCTTATCCATGGCTTGAAGAAATTAAGCTTAAGAGGATGGTAATTAAGTATGATGAGTCGTTGGA  
GTTGATTTCTAAGTCGTTAAGAAGCTTTAAAGTGTGGTTTTGTCTTCATGTGATGGGTTTACTACTGATG  
GACTTGCTGCTATTGCTGCTAACTGCAGGTGAAATTTTTTTTCTTGCTTGACATTTCTCTTCTGTTTTGCTC  
ACTGTAAAGTGGCTAGTGGTGAGAGAAGTCTTAATCTGTAAAGTAATTAGATCTAATTTGGGTATTAGT  
TTGGACAGTGACTTTTATTGTTGTTAAAGCTTAAGCTTTTGGATGAATGCAGTATGCATGCATTTTGGGG  
GTTTGTATAATCCCTTGCTAAACACGAGAATGAAGAAGCACTTTTCTTGACGCTGTTTGTCTGTTTATA  
GGATATGTAATGTATTAGTGGAACGAAGTATCTACTGTAGATGAATTCGTAGTGTGTGAACTTGAAGA  
ACTGACATTTCTCAAGTGATTATGGTATTATTGGATACGTCTTGCTGCTACATTGCATCAGTCTGGTTCA  
TCTCACTTTAATACTTCAAAGATTAGAGCTTTTTGTTGTTTCTTTTAGCTTCTTTTTTTTTGGGGTGAATTC  
TGGGAATTAATTTTTCTTGATTGAATGAGCTGATGTCAATAATTTCTTGACTTCCTTCCCCAGATTTCTGC  
ATTTGCATTCTATCTTTACAGATCTCTAAGGCCTTATAACAGGAAATGCTAACTTGTGGGTTTTCTTAATT  
GTTATAGGATTTAAACAGTTGGACTTCCTTTTAGCATTAAATTTCTTGTTGATACACTGTGTAAACATGCC  
CTTTAGCTTTGCTTTGTTTTGAAGTTGTTGGAGATTTGAATGTTTTCTTAATTATCTGGAGATTTCCATACG  
TTTTGTTTCTTGTTCTCTGGTGGGATTAATTTGTTTTATCAGGAGGGAGTTTTGTAATGGAGTATAGTTGT  
AGTTCAATGTTGAAATGGCAAGTGGGTTAGGAATAGGAAATGGTGATTAATTGAAATTTCAATTGGAAG  
ATGTGCTACTCTGAGGCAAACATGATTCTAAATCTTTCTTATTTATCTTGTTTCATATCGTCTGTCATTTATT  
ATCATTGTTGTTTTCTGTTGAGTCTGTTGATTTGCTTCAATTTATCACAGAATGATTGTGTAGATGGGTA  
TTGTCATCTAACTCCCGTTTTGCTGCAGGAATCTGAGAAAAGTACTTGGGAGAGAGTGAAGTGGAGG  
ACCTTAGTGGGCATTGGTTAAGCCATTTCCCTGATAACTGCACGTCACCTGTTTCACTTAACATTGCCTGT  
TTGGCTTCTGAGGTCAGTCTGTTAGCTTTGGAGCGCCTGGTACTCGCTCTCCTAATTTGAGAAGTCTTCG  
GATAAATCGTGCTGTGCCCTTGAGAGGCTTCAAAGTCTGCTCCGCCGCACTTCCCAGTTGGTTCGAATTT  
GGTACAGGTGTTTTCTCTGCTGATGTGCGATCTGATTTTTTCTCAAACCTGACAGAAGCTTTTTCGAGCTG  
CAAGCAACTTAAATGCCTGTCTGGGTTTTGGGATGTTGTACCAGCTTACCTTCCAGCTTTATATCCAGTGT  
GCTCAAGACTCACCTCCTTGAATTTGAGCTATGCTACCTGTCAGAACCTGAGCTTGGCAAGCTCATAAG

TCAGTGTACAATTTGCAGCGTTTGTGGGTATGTTCTAAATGTTTTGAAGTTTTAATTGATGTTCTTGACA  
CTGCAACTGCAAACATGTTTTTTTTTTTTTTTTTAATAAAGAAGAAGAGGCAATGAGATTGTAACATCAT  
ACTTGCTGTGATGTCATTTAGCATATATTCTTAGTGAAGAATAAGAAAAGACCTAACTGCTACAGATCAA  
CGAATCCACCACAACCTAATCCCAATTTAGTTGGTCTCAGCTTTATGGGTCCTCTTAAACCATTTTGCTATA  
TTCAGGTCATTTTCATTCCGATGCTAAATTATTTGTCTTTACGCAATAATTGCCAAGGATAGGCAAAAAGT  
AATTCATTCTGTAGGTAACTTCACCTATGCTGGTTAGGAAGATTCCAGGCTACATATATTTGATATTATA  
TTGCTAAGCAGCTCACTTTTCTTGGAAAGTTGAAGCCAAGTGTTACATGCTTCATATTGTGATCTGGGTTTC  
AGTTTTTTAATACTTGTGCCTACCCAATGCACCTAAAAATCCATCTAAATGTGATGTTTCTATGCTGAAAA  
ATTGTATCTATTCTCCCTAGTGGCTTCCCCAACTGGTTCTGTAATATAAACTCCAGTATCATGTTTAAGT  
GCTGAATTGCTTTTCTTGAATATATGTGACTGCAGGTGCTAGACTACATCGAAGATACTGGTCTTGAGG  
AACTTGCTGCCAATTGTAAGGACCTTCAAGAGCTGCGGGTGTTTCCTTCTGACCCATTTGCTGCAGAACC  
AAATACAACCTTGACGGAGCAAGGCCTTGTAGCTGTCTCAGATGGCTGCCCAAAGCTCCAGTCTGTTTTA  
TACTTCTGCCGCCAAATGACTAATGCAGCTTTAGTTACTATTGCTAGGAATCGACCTAACATGATCCGTTT  
TCGCTTGTGTATCATTGAGCCTCGAACTCCTGATTATTTAACCTTGGTTCATTTGATACTGGTTTTGGGG  
CCATAGTAGAGAACTGTAAGGAATTGCGGCGCCTTCACTTGCTGGCCTCCTTACCGATCGTGTCTTCGA  
ATACATTGGCGCCCATGCTAAAAAGTTGGAGATGCTTTCATAGCTTTTGCTGGTGATAGCGATTTGGGA  
CTCCACCATGTTCTCTCTGGTTGTGATAGCCTTCGGAAGTTGGAGATCAGAGATTGTCCGTTTGGAGACA  
AGGCTCTTTTGGCTAATGCTGCAAAGCTCGAGACAATGCGATCCCTTTGGATGTCTTCTTGTTCAGTAAG  
TTTTGAAGCATGTAAGATGCTAGCTCAGAAGATGCCTAGGCTTAATGTGGAAGTCATAGATGAGAGGG  
GTCCTCCAGATACAAGGCCAGAAAGCTGTCCTGTGGAGAACTTTACATATATCGAACTGTGGCTGGAC  
GAAGATTTGACACACCTGGTTATGTTTGGACAATGGATGAAGATGCAGCTGTAAGGTTGACCTGAGCCA  
CACATCAAATGGAAAATTCCAGCAAGACTTCACATGGAAAGATGGACAGGTATTAGCGCTATGTTTATC  
CTCCTGCATTTGTTTGTACGCCTTATGTAGTTGCAGTGCCAGTTGAGGGTTGGAACCTTCACTGCTTTGAA  
GTAGAGGCTCCAGAGCTCATACGCCATCAATTTTATTCTTGGCTGAGAGCTACTTTACAGCAGGTAGTTT  
TTAATAAAGAGTTTGGACTCTGAGTTTCTGTGTATCATCTAGAGTAACAATTATTCGTTTTCTTTGGGTGG  
GATTTTGCTTGGGGGGTTTGGGGGCATATTTTTGCCATGTATGTGCTATTTCCAGACTTTGCTTCATTATG  
TAGTTCATTTATTTATTCTATTGACTTATTCTCTATGAAATGGAGTGTCT

>M6-PGSC0003DMG400011513 M6 LRR-RLP

ATAAATAACAAAACAAACACAAAATGAAAAGATAACTCCTCTTTCTTTCCAGTAAGATCAGAACCATAAA

CTTCTCCGATGGCCGGCGACGACTCTCATCTGCAAATGACGTCGTTTCAGTCCACTGTATAAACGACAG  
TCTCGGCGACGACGAGCTTCGGGCGTACTGTGCGAGGCTAGGAGACGACAAAGACAAGGAAGTTTTCG  
GGCTGGTATGTAAGCGGTGGCTTCGTATTCAAAGTACTGAAAGGAAGAAGCTTTGTGCTCGAGCCGGG  
CCTCACATGCTCAGAAGAATCGCGGCCCGATTCACTCGATTACATGAGCTTGATCTATCTCAATCGGTTTC  
TAGATCTTTCTATCCTGGTGTTACTGATTCTGATCTTTCAGTTATTGCTACTGCTTCTCTTGCTTACGAATT  
CTCAATCTTCAGAAGTGTAAAGTCCGTTTTTGTATTTTTTAAAAGTTATATAGTTTGAAATTTGTTGAATT  
TAAATGTTCAATTGCTGAAGTGAACCTGAGCTACTGCAGGAGTGGCCAAATGCACCAATGAGTTGTAGTA  
TGTGTAGTGATATTTACATTAATTACTGATTTAAAATCTTGAATTCGTCTTTGTGTGGGGTGGTGGAGCT  
GGGATTTTCACTAAGAGGGTTTTGAAATACATAAAACATAATTTTAACCATGTATAACCAGTTCGGATGA  
ACCCCTGGGCCCTTACTAGCTCAGCCCCAAAATATGTGGGGTGTATGGGTGTATTGTTACCAACTAGGAC  
ATAAAGGAAATTTGAGATTTTGAATAAAATCTATTGTTGAAATGTTAAAGTTTTGACCCGATATGGA  
GAAGACTGGCTCTCCTCTTTTCTATCTTGTAATAATGGTTTTTATGATAAAAAGGGCGTAATGGGGTTT  
ATGGAGGATTTTAGGTGAATTTATGGTTGGTTTTTTGAAGATTTGTAGGATTTTGTGTTTCTGTGTAAA  
GGTTATGTCTTTTTTGTATGTGGTTTTTGAAGTGGTAGCAAAGGGAGGATAGTGTAGTTATATCATAT  
GTATTCTAATTTCAAGAGAAAGTCTAACTTTGTTGCGAATCTAAGGCTCAGATTCTCCTTGACTTAACT  
TGCGCGTTTTTCTGGTCCAAATTTACAGGCATAACAGACAAAGGATTGACAGCGATTGGATCAAGTCTC  
TCTTCTTACAGTCCTTAGATGTATCCTACTGCAGAAAGATCACAGACAAGGGGCTTTCAGCTGTTGCTG  
AGGGGTGTCATGACTTGAGAACGTTGCATCTTGCTGGCTGTAGATTTGTCTCAGATTCATTAATGAAAGC  
TCTCTCAAGAATTGCCATTATGTAGAAGACCTAGGTTTGCAAGGATGCACCAACATTACCAACTCAGGT  
CTCTCTGTTTTGGTTGAAGGTTGCCGAAGGATAAAGTATTTGGACATTAACAAATGCAGCAATATTGGTG  
ATATTGGGATATCTAGCGTGTCTGAAGCTTGTTCACTTACACTTAGGGCATTGAAGTTGTTGGATTGCTA  
CAAAGTTGGTGATGACTCCATCTTATCCTTGGCCAACTAATGCAAAAATCTTGAGACTCGTTATTGGT  
GGTTGCCGTAACATATCAGATGAGCCTATGAAGACACTGGCAGCTTCTTGTAGTAATAGTCTGAGGAAA  
CTGAGGATGGATTGGTGTGTTGAATATACTGACTCTTCATTGGACTGCATCATTTCCAAATGCAGAGAGC  
TTGAGGTTCTTGACATTGGCTGCTGTGAGGAGTTAACTGATGCTGCATTTCAACAATTAGGAAGTGAAA  
ACTTTATGTTGGGGATGAAGATTTTGAAGGTCAGTAACTGTCCAAAGATAACTGTTGAAGGAATTAAGA  
AGCTTATGAAGTCATGTGAATATCTGAATATCTAGACGTACGGTCTTGTCCCCTAATCACTAAAGCAGG  
GTGTGAGGAGGCTGGAATTCAGTTTCCTGAATCCTGCAAATAAACTTCACTGGAAGCTTAGCAGAGCC  
AGATGTGTTACTTTGAGCAGTACTTGATTTAGCAATGTCTTTGAAGGACTGAAGGGGATCATGCAGTGA

AATCATCACATTCTTTGCCTAAGACCTAAAATATGACTTTGGAAGCTCCTGCTGTCAGTCCCTTGTTCCCA  
TTAATTTGCCTTTTGTTAAGCATCAAGTTTTTTGTTGTAGATTATTTCCCTGCTTTTCAGTTTGTTTTTTACC  
CCCTGCTTTTCAGTTATTTGATATCAAACCTCTGTATATCATCCTTGTAACCTACTAGTAGGCACCATTGTT  
TGCTGTAGGTGTTTCCAGATTGTGAATGAAATGAGTCCATTGCTGCTAGCTTGAATGTGAACTTATACCA  
ACAATGATGGTTTGATTGATTACATTTCTTGTACGAC

>M6-PGSC0003DMG400011610 M6 LRR-RLP

ATGGTTAATAGTATATCCCAACAAATTGATCAAACAGCGAAGGTACCGACATATCTTGGTAAATCTGGA  
GAGAGAGATTACAATGATTCTATAACAATTTCAACAAAGGGAATGGAGTATGAACTGGATAGAATTTTG  
ACAATTCTCAAGACTATTGATCTTTCAAGTAACAAATTTGAAGGACATATTCCAAGTAATCTCGGAGATC  
TCATTGCGCTCCGGGTGTTAAATTTGTCTCATAATAGATTGCAAGGTAATATACCGTCATCACTTGGAAG  
TTTATCTTTAGTTGAATCATTGGATCTTTCATTTAACCAGCTTTCGGGAGAGATACCACAACAACCTTGTTG  
CTCTTACATTTCTTTCATTCTTAAATCTCTCTCACAATCATCTCCAAGGATGCATTCCTCAAGGACATCAAT  
TTGATACATTTCAAATAATTCATATGAAGGTAATGATGGATTACAAGGATTCCTATTTGAAAGGTTG  
TGGAAGTAATTGGACACCGGAGACAAATAATAGGGATTATGAGTCAGATGATGAAGAAAGCAATTCTG  
AATTTCTAAATGATTTTTGGAAAGCTGCTCTTATGGGATATGGAAGTGGGCTATGCATTGGATTATCCAT  
AATATATTTTCATGATCTCAACTGGAAATCTGAAATGGCTTGCAAGAATCATTGAAGAGCTAGAACACAAA  
ATTATTATGCGACAGAGAAAGAAACAGCGAAGTCAAAGGCAAAAACAAAAGAAGACATAATCGTGTCTA  
G

>M6-PGSC0003DMG400011611 M6 LRR-RLP

GCAATTTGATGAACTTGCAATTGATGTATTTGGAGAGAAACAACCTCAGTGGAAAAATTCCTTAATGTCT  
AGTTAATATCAGTGGACTCGAGGTATTGAAAATAGAAGATAATAATCTCAGTGAAGATATCCCTTCGTCT  
ATTTGCAATCTAACATCACTAAGGATTTTAGATTTGGGTAGAAACAATTTGAAGGGAGCAATTCCACAAT  
GTTTTGGCAACATGGGTGGTCATCTTGAGGTTTTGGATATCCACCAAACAATCTTTATGGGACTCTTCC  
AGAAACTTTTAGCAATGGAAGTGTACTCAGAATCTTAGTCTTGCAATACAATGAATTAGAAGGAAAAATC  
CCCCGATCTTTAGTCAATTGTA AAAACTTGGA AATCTTGATTTAGGAGACAATCACTTCAACGACACATT  
TCCAATATGGTTTGAAACTTTGCCAAATCTGAAAGTTTTAAGCTTGAGATCGAACAAATTGCATGGACCA  
ATTAGA ACTTTAAGTAATGGAAACATGTTTTCTGAGCTTCGAATCATAGATCTTTCTTATAATGCTTTCAC  
AGGAAATTTGTGCGACTAGTCTATTTCAAAAATTGAAAGCCATGAGGACAATTGATCAAACAGCAAAGGT  
ACCAACATATCTTGGTAAATCTGGAGAGAGAGATTACAATGATTCTGTAACAGTTTCAACGAAGGGAAT



GGAGTATGAACTGGATAGAATTTTGACACTTTTCAAGACTATCGATCTTTCAAGTAACAAATTTGAAGGA  
CATATTCCAAGTAGTTTGGGAGATCTCATTGCACTTAAGGTGCTAAATTTGTCTCATAACAGATTGCAAG  
GTAATATACCATCATCACTTGAAAGTTTATATTTAGTCGAATCATTGGATCTTTCATTCAACCAGCTTTCA  
GGAGAGATACCACAACAACCTTGCTGCTCTTACATTTCTTTCATTCTTAAATCTCTCTCACAATCATCTCCAA  
GGATGCATTCTCAAGGACATCAATTTGATACATTTCAAATAATTCATATGAAGGTAATGATGGATTAC  
GAGGGTTCCCAGTTTCAAAGGTTGTGGAAGTAATTGGATACCAGAGACAAATAATAGAGATTATGAG  
CCAGATGATGAAGAAAGCAATTCTGAATTTCTAAATGATTTTTGGAAAGCTGCTTATGGGATATGGAA  
GTGGGCTATGTATTGGAGTATCCATTATATATATCATGATCTCAACTGGAAATCTAAATGGCTTGCAAA  
TATTTTTGAAAAGTTAGAAGAAAAAATTATTATGAGACAGATAAGGAAGAAGCGAAGTCAAAGGTAA  
>M6-PGSC0003DMG400011708 M6 LRR-RLP

TGTTGCATGTGATTTTGTCTTTAAGTCAGTAAAGTTGGTTCTTTGTATATGTGGTTGGGAAAAATTTATGT  
AGGAGATATTTATCTCAAGTTCACATTTCTACTTTTTGTGGGGCCATTGAATGGTAAGTGTGGATTG  
GAATCTCCCTAGTTTGATTTTCATCTTCTCTATCATTTCAAAAACTCAATATGGAGGATGAGACGGAACT  
GAAAAATCTCCGATTACTACTCGTGTGATACTTCTTTCCAAAAACAGTCTTATGGAATACGAGTAGAGA  
TTGTTGTACATGGGATGGATTACAACCTTGATTAGAGAACATTGGACACAACACTTCATAACTTCACAAAA  
ACCTGTGAATTTCCAAAAACAGTCTTATGGAATGCGAGTAGAGATTGCTGTACTTTCTCTCCCTGATGTC  
AACATCTCATCTCCAATACCTATGAATTTTTCTTCTCCTTAAGGTACGTGGATCTTGAATATACTAATATA  
CAAATTAGGTATTTGAATTTACCGGTCATATTTCTTTCACAATCTCTAAATTGAAGCAGCTCACAAGTTT  
AGATCTTTCATCTAACTCCTTTTCAGGTTAAATGCTCGACGTTTTCTCTAACCTCCAAGAGCTTACATCTTT  
CTGACAACATGAATTATGCGGTTCTAAACCTTTGCGATAATTCATTAACAAGCCACCTAGCTACCACAAG  
TTCATTACCACAATCTAGAGTATCTTGATCTTAAATTTAACTTCTTTCAGGGTCCACTACCTTCATCCATTT  
GTAACATGAGCTAGCTTGAATTTCTAGATTTATCACACAACAACCTTCAGTAACTCGATTACAAGTTGCTTG  
GGAAGCATGGCTACTCTAAGGTTGTTGGACTTAAGAAGGAACAATTTACAGGGAGTCTCCACCATTA  
TGTGCGCAGAGCACTTCATTGAGTACCATTTTCTTG

>M6-PGSC0003DMG400011864 M6 LRR-RLP  
AATAATCGCTAGATGTGTTGTGTGATTCATTTTGAAGTACTGCTATTTGATTTCTCTTGTCTACTCTGCCA  
AGCTTGTTTGCCAATTGATGGCTTATCAGATTATAGTCTTTCATGAATCTTTGCTTGTGTCATGAACTCAG  
TTTATTGAATTGTGATGTATCATGAATGCTAAATATGCACTGTATGTTATAGAACAATGTAGCTTGGTG  
ATGATAATTTATGCGGCTTTGGAAGTGTTAACCAATGATTTAGAAGGTAATGTGCAGATTAAGCTGGCC

AAGAAAGTATCATTATAAATAAAAATGCTAAGCCGTTTAGGAATTTCTCACTGATATCTTAACGAAGTCTA  
TGAGAATTGTGACATCCATGACAGAGGGGCACACCAACAAGGGTGGGTCAAGTAATGGCAGGCATTTAG  
CTTGGCAAGCTTCCGAAGAAGGGGTGCACATGACACCTTAAGGGAATTCACATCAGAATGGGAAAGAA  
GAACTTCGTGAGAATATTTTGCACAAGATTATTTTCACTCTCTATCCTCCGTAAGGGAGGAAAATTTTCAT  
GAGTTTGC GTT GCTCAACAAGTGCTGACATGTCTTAGGTTCAAACTAGACGATTTCTTCCCATCTGTATA  
AGCTTTAGTAGGCAAAGTTACCTGGTACGTGTGCTGGTGGGAGGGAGCAGGTCATTGGTGGGTATGCA  
CTAGCTTGCCCAGGCACCAACGTCATAAAAAGGAAAAAGCTAGTGCTGATGTGTCGTGAACTCAATGA  
TGATTTTTTTTTGAAATTGAACGGAAAATGACATTTACAGAACATTAATACTTAATATTATTAACATTT  
GCTAAGATTCTTACATTGTCTTAGTTAAATTTATCCCGTGTATTGTGCTTTCTCTACTTGGGAGATATACA  
AGTTCTGAAAAATGAGCCTGCTTATGCACTTGGCATGCTTCTGACCTTGAGTTTGTGAAAAGAAAAGAT  
ATTGCAGAGTCCAGCTTTTGAATCCTAATGAACACCTCTGCTTACATTCCGATGCATCTTCAGATGAATA  
ATTGAATGTTCTCTTATCATACTCATGCTGGAATACTCTAAGTTAGTGGAGGTTTTATGCTATAGAACATC  
TATCCATATTCTCTTGATATCTGTGCACCACTCAAGGATAGCATGACCAAAAAAATTGTGTTTTTAAGCAC  
CTTGGTGCTTTGTCTGATGTCCAGGTCTCAATTACATTTTCATGACCATCACAACATGCTCCTTTTGTCAATG  
TATAATATGGGAAAGTTCTTGTTTCATGTGATTGGAAGTCTTTCTTGACTTATGAAGTTACCACGACTTGG  
ATATGAGCTTAAATAGAGGGACATAGACAATGAAAATTCATATAGCTGGCCCCAACTGGCTTGAGATTA  
AGGTGTGGTAGTAGTTGTTGGTGCTGTAGTTTCCCACTGCTTTGGTACAGAACTTAAATTCCAGATGTAC  
CAAGTTTCCAGTGACTGACTGTATTTATGAAGTTGTTACATGTAATCTGTTTCTGTGTTCTGTTATTACATT  
CCATCTCTTTTTCTTCTCCGTTTTTGTGTTTTGTTTGTCTAGGGTTTTCTTATCGATCATAACAATAATGTGT  
GATCTTCTTATTAACAGATCACTAATGAATGCTTATCATCGATCTCGAACTGCAATATCTTGAAGATTT  
GGTTCTAGAAGGCTGTTATGGAATTGATGATTACAGCCTTGCATCCCTTGAGCAAGGCTGCAAGTCACT  
GGAGGTATGTACTTTGGAGGACTCTGTTTAAACAGACTTTGATTCTCATATTTGCCTGATTGCCTCTCCTTG  
AGATAAAATGAACAATAAAAAATGAAGCTAGTATTGATGTATGAAATTGCCAAAAGCTCCCAGGACGTA  
GCTCAATTGGCGAAGGTTGATAAACTTGTGACCTAGGTCATTAGTTTCGATCCCCATGTCAAGCGAATCTG  
ATATTTAAGTGGCGAAGGGAGAAGTGAGCCATCATCCCCGAGTTTTCGAAGGCTGCGGTTGGTCCTAAG  
GGTTGGCTCCTAATGGATTGCCAAAACCTTTGTCAAATTGTCTAGCTTCAAGCACTACTTTTAGATGTAC  
ATATATATGACTTTTTTTCCCTAATTGCCTAGTCAATAATTGGAGACCTACTGTGTGAATGCCACTATAAG  
TACTCTGAAATAGTTAAAGAACAAGGTAACCTCAGATTTTTTTTTTTGATAACCGAGAAATCCGTTTGTGAC  
CCGCCCTTTGGACCAATCACAGCCTTCTAACTCTGTGGATAATGGGCCCGCCCCTCTACCCTTCTCCACT

TAAATACCGGGCTTCGCTTTCATGGTGTGGGGCTTGAACCTGGGACTTAAGCCACAAATCCTCCACCTT  
TTGCCACTTGAGCTAGGCCTTGGGGCAAGGTAACCTCGGATTTTATGCACCCAGAATTCTACCTAATTGT  
CAGATGCCCAAAGAAGTGGACTATTGTGCAAGTCAAGTGTTGCCTTGCATGTATCATGCCTTTTGGTCC  
TTTTTTTCTCTTAAATAACTTTTTTCTTTACAAGGTAATGACTAATGTCAGTGTATGTATGTTGGCTCT  
TTTCAGAACTTGATATGTGCGAGCTGTCAGAATGTTAGTCATGTGGGTTTGCATCTCTTACCAGCTGTG  
CTGGATGTCTGCGGCAACTTGTATTGTCGATGGTTCTCCCGTAAGCCTTAACAACTTGAGCATCTTTCA  
GTAGTATGAGTTTTAATTTGATTGTTGATTTCAAATTACTGGTATTTTACAGTTACACCTGCTGTCGCAGAT  
AGCTTGCAGAAGCTTCCAGGTTGCAGTGCGTCAAAGTACTGATGGTTGCCAAGTTACATGTTCTGGACTG  
AAGGCTATTGGAAATTGGTGTGTCTCACTTAAAGAACTGAGCTTAAGTAAATGTGTGGGAGTGACAGAT  
GAAGGTCTCTGCTCCCTCGTAACAAAGCACAAAGACTTGGGGAAGCTTGACATTACTTGTGCGCAAG  
ATTACTTACGTATCAATTTCCCATATAACGAATTCTTGTGCCTCCCTTACTTCTCTTAGGATGGAGTCTTGT  
ACTCTAGTTCCAAGAGAAGCTTTTGTCTAATTGGACAGCGTTGCCAGTACCTTGAAGAGCTTGACCTTA  
CAGACAACGAAATTGATGATGAAGTCCACCTTTACCTTAAAGGTCTCAGGCTTCTGTTGTAATTTGA  
AAGTCCACCTTTATATCTGACGGTGCCTACATATGCAGGCTTGCAGACCATTTCCAAGTGTGCCAGCCT  
TTCCAGCTTAAAGCTAGGGATCTGTCTGAACATAACCGATCAGGGTCTTATCCACATTGGCATGTGCTGC  
TCAAATCTTAAAGGAGCTTGACTTATATAGGTATGTATTTTATAGTTTCAATTAATTGAGATAGTGTAAC  
TATATCTTGTGCAGTTTTTTTTTATATTCTTTTCTTTTGTGATGGATTGGCTAAACTCACTTTTTAACTAT  
GGAGTACAAGAGATTGAGTGTGCTGATTACTGGGTTATTCTTCTTGACAGGTCTGCTGGAATTTCCGACT  
TGGGAATATTAGCAATCTCTCGCGGTTGTAGTGGCCTTGAATGATCAATATTGCCTATTGCAATCGTAT  
TACTGATGGCTCATTATATCTATATCAAAGTGTCAAAGTTGAATACACTTGAAGTTCGAGGTTGTCCTC  
TTGTCACATCTTATAGGCTTGCAGCTGTTGCTGTGGGATGTAAGCAGCTTACAACACTAGACATCAAAAA  
TTGCCACAACATTGATGATGCCGGAATGATTCCACTTGCTCACTTCTCGACAAACCTCAAACAGGTAACC  
ACAGTTTCTTTTCGTCGACATAGACGAACTGGAGCATTGACATCTAATATGAGCTGGCCATCTGTCAAT  
TACACAGATAAATTTATCCTACACTTCAGTGACGGATGTGGGGCTGCTGTCTCTTGGCAGCATCAGCGGT  
CTACAGAACATGACAATCCTGCACCTCAAGGGTTTATCTCCTGGTGGGCTAGGAGCTGCACTGTTGGCTT  
GTGGCGGACTTACTAAAGTTAAGCTGCAGACATCATTTAAATCATTGCTACCACAAGCTCTCCTTCAACA  
TCTAGAATCCCGGGGTTGTGTTTTTTCAGTGGAGAGAGAAACCATTTTACAGGTATCTTTCTCATTATTTATCA  
TTACCTACTTTTTCTCTGAAAATATGTGAGGTAATCTATGGTTGTTGAAATATACCGTCGTATGAATCAA  
TTAGAATTACATATTTTAGCTAAACATGACATAGTTATTACTTGATCTTGAGGGTCAATGCAGTTTCAGAG

GCTTCTTGTTGGCATTTAATTGAGACAATAAAATTACAGTTTTGATTATCTTTGTTGTAATAATGAAAA  
TATCCTTTTTGCTTGATCTAGTCATTAATTATCTTTCTTTTATTGGTTAAACACAGGCTGAAGTAGATCCAA  
TATACTGGAAAATTCAGCTGGACAATTTAGACTGAAGATTTGAGCCCTCAGTTTGAGCCATTTATGCGAG  
TGTCTAAGATGGATAGTCGCCCCAGAACCTCCGGAGTCCTTACTTCATCTGTTAGCACTTCATCAGGCA  
AGGTGCATTGTTTATGGCAACTGTTTTGCCTGTTAAGTGTCTGCAACTGTTTCGTTTGTATCCTCTAAATA  
CAAACAGGGAAACTCAATGTCCATTCAGCATTGCCCTGGCATCAAATCAATTTTGTCAAAAATGTTATGA  
GATGGATTAACAGATCCAAATCATGTTTATTGTTTAGCAATCAATATCTGGGTTTGTGAATGTTTATTCC  
TCTTGACTAATGTGATTTTCGCATGAAGTACTTGAAATTTACTCTCAATTAACAGTTATTTG

>M6-PGSC0003DMG400011900 M6 LRR-RLP

TTTTAGGGAATTTGGAGAAAGAGCTATCATCTTACATCCATTTTAGAGAAGGAGCTATCATCCATTTTC  
AGATATGTCGTGCACCATGAACATAAAATTCCTAAAGATCTTCAGAGACGTACCATCAATTTGGCATATG  
AGGCTGAGGTAGCCATTGACTCTATTCTTGCTCAGTATAATGCTTTTTTGCATATTTTTTGTCACTTCCTA  
CAATTTTAAAAGAGATCATGCAAATTAATGCAGAGGTGACTGAGATGTGGTCAGATGACATTCCTCTTA  
ATCCTCACTACGTGGCTGCTCCATTTAAACATCTGCCAACTCGACATAGCAATCCTGTGACTGATGAGGA  
GGTAGTGGGTTTTGAGAATAAAGCAGAAGAACTAATTGCTTATCTGATTAGAGGTACAAATGAGCTAGA  
CGTCGTCCCAATTGTAGGCATGGGAGGACAAGGGAAAACGACAATTGCTAGAAAAGTTGTACAATAATG  
ACATCATTGTTTCTCGCTTTGATGTTTCGAGCATGGTGCATCATTTCTCAAACATATAATCGGAGAGAGCTA  
TTACAAGATATTTTTAGTCAAGTTACAGGTTCCAAAGATAAGGGAGATACGGTTGACGTTCTTGCCGATT  
TGTTGAGGAGAAAATTAATGGGAAAGAGATATCTCATTGTATTGGATGATATGTGGGATTGTATGGCAT  
GGGATGACTTAAGGCTTTCTTTCCAGATGTTGAAATGAGAAGCAGAATAGTCGTAACAACCTCGACTTG  
AAGAAGTGGGTAAGCAAGTCAAGTACCATACTGATCCTTATTCTCTTCCATTCCTCACAACAGAAGAGAG  
TTGCCAATTGTTGCAGAAAAAAGTGTTCAAAAGGAAGATTGCCCGCCTGAACTACAATATGTGAGTCA  
AGCAGTTGCAAAAAAATGCAAAGGACTGCCCTAGTGGTTGTCTTGGTAGCTGGAATAATCAAAAAAAG  
GAAAATGGAAGAATCTTGGTGGAAATGAGGTGAAAGATGCTTTATTTGACTATCTTGACAGTGAGTTCGA  
AGAATATAGTTTGGCTACTATGCAGTTGAGTTTTGATAACTTACCCGATTGTTTAAAGCCTTGTCTTCTTT  
ATATGGGGATGTTTTCGGAGGACGCAAGAATTCCAGCATCTAAATTGATAAATTTATGGATTGCTGAAG  
GATTCGTGGAGAACACTGAATCTGGGAGATTAATGGAAGAGGAAGCTGAAGGTTACTTGATGGATCTC  
ATTAGCAGTAACGTGGTAATAATTTCAAAAAAAGTTATAATGGTAAAGTCAAATAATGAAAGGTTCAA  
GATGTTGTGCATCACTTTTGCTTGGAAAAGAGTAGAGAAGAAAAGTTTATGCTTGCAGTGAAGGGCCAA

TATATCCAGTTTCAACCCTTGGATTGGAAGGGAAGTCGAGTGAGCTTCAGTTTCAGTGAAGAGCTTTCCA  
AGTTTGCATCTTTGGTTTCCAAAACACAGAAGCCTTCCACCAACACTTGAGGTCTCTAATAACGGCAA  
TGGTGGAGAATCTATTGATGTGATTCCCTTTTGTGAGATTAGTGAATTGCGACTTCTTAAAGTCTTGATT  
TGATTTCTTATACTGTGGAGTTTTTGTGCTTAGCTATATTCAAACCACTAAATCAGCTGAAGTACCTCGCA  
GTTTGGGCAGATAAATTCTATTTTGTGATCCAGGAACACATCTGCCCCATATAGAACTTTAATTGTGAAGA  
ATTCTCCTTACGTATGGTTACCAGGGTCTTTTTTGCAAATGGAAAATTAAGGCATGCTCATTTTGGTAAG  
GCTGTTTTTGATAAGCAGGGGCTCTTTGAAGGATCTCTAAATTGGAAAATTTGAGGATATTAAGAAA  
ATTGAGAAATTTCCAATTGATAGGGCGGATGTGTTATCAAGGAGGTGTCCTAATCTTCAACAACCTCATA  
TCGAATTTGATGGACATTCTGCAGATTCTTTTTGTCTCACATTGGAGAATCTTACCCAGCTTCAAATACTT  
CGCGTTTCCTTTGAGCGGCCCCACATCATTGTATCTGGATTGCAATTGCCTTCAAATTTAAACAAGTTGGT  
ACTTAAAGGAATTCATATAGAAAAGTGTTATTCCCTTCATTGCGGGACTACCAAGCCTGGAGTATCTCAA  
TTACAAGATGTGTGTTTTCTCAATCAAAGAGTGGTGCCTTGGAGATATCACGTTCCATAAACTTAAGT  
TGTTGAAACTGGTGCAGTTAGGTATCTCAAGGTGGGATGCCTCGGAGGAATCATTTCCTTGCTTGAAA  
CACTAGTTATAAAAATGTGTGGTCACCTAGAGGAGATCCCAATTAGCTTTGCTGATATTCCATCATTGAA  
ACAGATTAATTTGATTGGGCCCTGGAAAGAATCTCTGGAGGATTCAGCTGTGAGAATTAAGGAAGAAA  
TCGAAGAGATTGAAGGATGTGATCGTATACACCTCGTCAAAGAACCGACAAATTGGGAGGCATATAGC  
AATTTGTCGAAGCTGTGCTTATACTGAAGTCTATTTTGTAGCTAGCCATTCTTATATTGTAACACTACT  
ACTGTTTGTTATGTTTGTGTTTGTGATTGATCAACTCTTTTTATGTATGGTTGGAGACAAATATATATCAGATG  
ATCTTTCAC

>M6-PGSC0003DMG400013644 M6 LRR-RLP

TTTCCACATAACCGAACAAGACACATTTTCTGTCTTAGATAACTCATCCTTTCTCTTCCCTTCTTCTTCT  
CTCTGTTCTCCACATTTACGTACACTTTCAGAAACATTGTTGATTTACTTTGGACAGAAAAGCCACTAAA  
TAGTGTGAGTCAATTTCTTTCCTTAAATAATTGTTTGGAGTTTTGTTTAAATGGGAAGTTTTTTTTTTTTCAT  
TTTTATGAGTGTTTTTTCCGTGTTTTTGAAAACAGTTGTTTTCCATATAGGAAAATACGGCGAAAATAAG  
CTTACTTTGCATGCCTTCATGTGGGTAAAGTTTTGAATTTGCTGTCATCGTTGATTGGCGCTTTCTAGAA  
ACTTGTAGAAACAAAAAACTTAGCTGCGGTTTTCATTTTTCTTGATCTGCTGATTGGTTTAGATATAGCGG  
AATTCGTCTTTGTTTTTGTCTTTGAATAATACATACACAACGAGGAAAAGGGTAGTCTGAGTCTAATTTTT  
GTGGCCGGAGTTGTATTTATGTTGAATTAATTTATCTGGGTGTTTTTGTGTTTCGAGAAATTTTCAGCGG  
ATTATTGAAAATGGGGTTCGTCAGGAATGTGCGATTGATGAGATTGTGCAAGAAATTATGAGAATTCATGG

ATCTCTACCTACAAGGCCATCGATTGATGAGGTTGAAGCAGCAAGAGGTTTAATTGGAAATCTGGAGAA  
AGAAGATCAGTTGAAAATAGAAGCTATCATGAGGCAAATAAAAGGAAAGGTGTACCAGAAGAGCTGT  
TCAAATTTTGCAAGAGATGCAGAGGAACGCTGTTCTTTTTTCAGAGTAAAGAACAAAAGAGGGAGGCG  
TTGAAACTTTTAGATCTCGACAATATTCACAGTGTGTTTCGACGATTTGATTCAGAGAGCTACGAAATGTT  
TGCCTTCTAAATCTCACGATAATGACCCGCTTCTTCTTCAATTGAACCGAATGATTTATCTTTGGCAAACC  
AAGTTTCCTTCTCCGGCGGCGGCATTAATTCTCCGACAACACTACAGCTGCGGCTGCTTCTTCGTCGAGCTA  
TTATAACTCAAAGAGCCTATTAAGCGTCTGAACTGTATAGTAGAGATGACAGTTACTTGAATAAGGC  
AAAAGCCACGTTTCTTGTGGATGGAATTGGTGTGGGCTTCGATCTGGGGATGCTTATCAGGGCCTAA  
GATTGTTGATTCCACCTTAAAGCCGCGTCAATAAGTGGTATGTTACATCTATTTGCTGCACCGTATTTCT  
AGTGAATTTGATTATATAATTTGTTGTATTGTTGTGTTGACTCAAAGTTCGTATTTTTTTGATCAAGAAGA  
CACTGGTTTCTTTGTTTGTAGGTCAAGATGGTGAGAAATTAAGTTTGATTAAGCTTGCTAGTATGATTGA  
AGTGTATCCAAAAAAGGAAGTCGAGAACTTATCCTTCGGAATAAGTTGTCTGACCAAGTAGAATGGCT  
TCCAGATTCTATAGGGAAGCTATCAAGTTTGATCACTTTGGATCTGTCTGAGAATCGAATTACGGTCCTA  
CCCACCACCATAGGGGGGCTTTTATCATTGCAAAGCTAGATTTGCACTCAAACAAAATTGTTGAACTGC  
CTGATTGTATTGGAGATCTTCTTAACTTGGTCTATCTTGATCTCAGTGGAAATAACTTGAAGTTGTTGCC  
GCGAGTTTTGCTAGGTTAGCCACCTTCAAGAACTTGATTTGAGCTCTAACATGCTATCAGTACTCCCTGA  
GACAATTGGCTCCTTAGTAAGTCTTAAAGAAATTGATTGTGGAACTAATGACCTTGAGGAACTTCTCAC  
ACTATTGGCCAATGTACTTCGCTCAAAGAGCTTCGTGTGGACTATAATCATCTTAAAGCTCTTCTGAAGC  
AGTGGGACGAATTGAGTCTTTGGAGATTCTGACTGCGCGGTACAATAACATTAGGCTGTTGCCTACAAC  
TATGTCATCCCTTACAAGTTTGAAAGAGCTGAATGTTAGTTTCAATGAAATCGAATCAGTGCCTGAGAGC  
TTGTGTTTTGCTACTTCACTGGTAAAGCTGAACATAAGCAACAATTTTGCAGACCTGAGATCACTACCAA  
GGTCCATTGGTAACCTTGAGTTGCTTGAAGAATTGGACATGAGTAACAACCAGATACGCGTTCTTCCAG  
ATTCGTTTAGGATGCTCACAAATTTGCGGGTCTTAAAACCGATGGAAATCCTTTGGAAGTGCCACCAAG  
AAGCATCGTTGAGAAGGGAGCACAGGTTTAATTTGTTTCGTTTAACTATTATGCTTTCTGAGTTAGTGT  
AGTATTTAATTATCTTAGCTCTTCTCTTGGATATATCAATCACTATTGTTTTATTTGCTCGGATCCTCAGGC  
TGTTGTACAATATATGTCTGATCTGGTTGCCAATAGAGAGGTAAAGGCGCAACCCTTAAAGAAGAAGAA  
GAAATCATGGACTCATATATGCTGCTTTTCAAGTTCCAACAAACGTCAGCGCAATGGCAGTATGGACTAT  
GTTAATGCCTGATGTGTTCCACACAAATTTGGTATGATTATATATTTCTCCTTCTTACCAAGTTAGTCATTA  
TGGTACTGAACTTTCCATATTTTCGTAATTTTCGTGTTTCAGTCAAATTAGTCTAGTCTATGAGAGGTAGTTT

TAAATATATATATTGTTAATAAATGGGAATGGTGCATTATACATGGTGCTGATTAGTGTTAATTAGAATA  
ATGAAAATGAAGGGTTGTAAGGGTAACGGCTCACATGATGTCTGTGTTATCCGTTGTAGGGAAATGAGC  
TGTGATTTGGCTGGACGAAAGCTGCAAAATTTAGTTGAATTCGAACATTTTTGCCAGCGAGATTCAATC  
AACTTTCTTCTTGTCCAGATAAGCTCTAATCCACTGCCACGTGGTTTTTTATTCTCATTTTCATGTAATAAT  
TCTTTTAATGCTCTTCCCTGTATTTTCTCGATTATGATGTAAAATATCAAATGAGATGTAAAATCTTATC  
TTATTTTTTGACTTTCAATATATTCAATGAATTCCAGAATTC

>M6-PGSC0003DMG400013766 M6 LRR-RLP

TACAATTAGCAATTTGCCTTGTAATGTACTGGATGCTGTTCTTGGATGCTTGCCTTGAAAGATGCAGTG  
AGAACCAGTATCTTGTCAAAGACTGGAGGTACAAATGGGTAACACGTCAAGAACTTGATTTAATGAT  
GAGTTTTTCAAGTCTTCAAACAAGATGAAGAAGCCAAGAGAATCATTTACCAAGTCTATTAGTCCATT  
AAGGACCAATACTGAAGTTTAGACTCTGTAGGATTACGAGTTGTCCAGGAATTCACCCTTCATGTAAGCT  
TAGGAAACAAATATCATTACCTCATCATCTTTTTACATTCCAGCAACTAAGGTTTTTGGAACTTCAAGAT  
TGCTTGTCCACCCTCCACTCGTTTTCAAAGGGTTGAGAAGCTTATTAATCTCGATCTTGTACGTGTCAC  
TTTTGATCCATCAATATTTACTTATCTCATCTCTAAATGCTCGTTGCTTGAACGGTTGAGGTTGCGTTGCT  
GCACAACTTTGACATCCTTGAAATTGATGCCGCTAATCTCAAATTCTATGAGTTTATTGGAAAAACAAA  
ATCCATTTCTTCAAGAACGCTCCTATGCTTGAAAAGTTACTGTGGCTTTCCTTGGACGACAACCTTTGA  
CTGATACATCTCTTGTGTTGCTCTAATTTCCAAAGTTCTTCCATTACATGCCTTCACTGCTGGATATGGATA  
TATGCGGTACAATATTAGAGGTAAGGTACATTTGTGATATTACTATCATAACTAAATGATGAATCTGATT  
GGTGTCTTAAAGTAATTTTTGACTTTCTTGTAGTACTTGATCTAGGGAGGTTTACCAGAGAGTCCCCAA  
CTGCTCTGAACAATATCAAATCTCTCACTATTTCTGTCCTTTAAGAAACGCCGAGGTGGTTTTCAAGT  
GCAGTTTACTTGATTACAAGCTGTCCTAAATTACAAGATTTTACACTTGAATTTGTAAGCACTCTCTTTGTC  
TTTTTTTTTTCATTAAGGTGATTGAATATGGTTTTCTTATTCATCTGAACTCGCCTAACTAACCGTTCCTCAA  
ATATTCTTTAGTACCAAGTGTGGGTGGGGGATATTTATGAACCTGTTGTACAGTTGCTACGAGCCCAACC  
ATCCTCAAGCGGTGTTGTGAAGCTTCAAAGAGTTCAAGTGAACATGTTTACTGGTCTCGAGATGGAAAT  
GGAGATTATGAAGTTTATATTGGCATCTGCACCTATACTTGAGGAGATCTTCATTTGAAATTGTATGCGT  
TTCCTTTTTCGTTCGTGTAACAAATGATCGATGAGATGAAAGAATTCCGCAGAGCATCAACCAATGTTG  
AATTCACATTTGAAGAAAT

>M6-PGSC0003DMG400013898 M6 LRR-RLP

TATATATATATATGAGAACCCTTTAATGTAAAAGCTCAAAAAAGTTGTATTATTGTTCTTGAAACCAAGT

ACTCTACCTATTAGACATGACAACCTTCTTACAGTACCTTCCTTTACATTCTACTTGTGCTTCTTCTTTTTCA  
CTTCCACTCACAATCACATCATCAGCAACAACCTGAAGCTGAAGCTCTTGTCAAATGGAAGATGAACTTAC  
CTTCTACTTCTTTCTTGGATTTCATGGTCCATTTTGAATCTCGGAAACTTGTGCAATTGGACATCTATTGTCT  
GCAATGCTGGTGGAAACAATTTCCGAAATCAATCTTTCTGATGCAGGCCTCTCAGGCACTCTTGATCAGCT  
TGACTTCACTTCATTTCCGAGTCTCACAAGTTATTCTCTCAATGGCAACAACCTTCAGTGGATCGATACCAT  
CAAATATTGGTAATGCTTCTATGCTCACTTTCTTGGACCTGAGCAACAATATCTTGGAGGGTGCATACC  
AGAAGAAATTGGGAAGTTAACACAACCTTGAATATCTCAGTTTCTATAACAACAATATCATTGGTGTTATT  
CCCTACCAAATAAGTAATCTTCAGAAGGCATGGCACTTGGATCTTGGATCAAATTTTTAGAAACTCCTGA  
TTGGTCCAAATTGAGGAATATGCCTATGTTGACATATTTGAGCTTTGGTTACAATGAACTAACATTAGAA  
TTCCCTGAATTTGTA CTCTGTTGCCATAATCTGACTTACCTCGATTTGTCGATAAACCATTTGAATGGTTCA  
ATCCCAGAAACACTATTCACCAACTTGGATAAGCTTGAACACCTCAATCTTTCATCTAATTCATTTCAAGG  
TTCATTGTCACCAAATTTTACCAAGTTGACCAAGTTAAAAGA ACTTCAGCTTGGTTCCAACATGTTTTCGG  
GCTTAATTCCTGATGAAATTTCTCTGATCAGCAGTCTTGAAGTAGTTGTA CTTTTCAATAATTCACTTCAA  
GGAAAGATTCCATCTTCTATAGGTAGACTTAGAAAATCTTCAACAACCTTGATCTTCGAAAGAATCGCTTGA  
ATTCAACCATTCTTCTGAGCTAGGCCTTTGTA CTAACTCATTCTCTTGGCTCTATCAGGGAATGCCCTG  
CAAGGACCATTGCCTATATCCTTGTCTACAGTGACCAAGTTATCTGACTTGGGCTTGTCTGATAATTTCT  
TTCTGGTGAGGTTCAATCATATCTCATTACCAATTGGACTGAGCTGACATCTTTGCAGCTTCAAACAATT  
CATTTTCAGGGAAAATTCCACCTGAAATCAGCCAGTTGAAAAACCTTGTATATCTTTACCTCTATAGTAAC  
AATTTCACTGGTTCCATTCCCTATCAGATTGGTAAGTTGCAAAACTTGCTGGATCTAGATGTCTCTGAGAA  
CCAGCTTTCAGGCACAATACCTCCAACCATTGGAAACCTGACCAATCTAAGGACGTTGCAGCTTTTTCGG  
AACACATCAGTGGAACCATTCTTCTGAGATTGGCAAATTGACATCTCTTCAAACCCTTGACCTCAACAC  
TAACCGTTTTAGTGGTGAGCTGCCCCGACAGCATTCTAACCTCGGCAGTCTGAAGCTTCTGAGTTCCTT  
TCTCTTAGTAACAACCAGTTTTCAGGTGTGATCCCTTTGTCTATTTGCAATTCGACATCACTACAAACTCTA  
GTTTTACAAGAAACAATTTCAGGGGAGAGATTCCACAATGTTTGGGTAATATCAGTGGCCTCTCCATTT  
TGGATATGCGCTACAACAATCTTTCTGGGATTCTTCCAACAAGTTTTGATATTGGATGTTCACTTAGAACC  
TTCAACTTTCATGGAAATGAACTACAAGGGAAAATCCCTCGATCTTTAGCCAATTGTAAAGAGTTGAAAG  
TTCTTGATTTAGGAGACAATCACCTCAATGATACATTCCCCATGTGGTTGGGAACTCTATCAATGTTGCA  
GGTTTTAAGTTTGA GATTGAATAAATTGCATGGACCCATTAGA ACTTCAAGGATTGGAAACATGTTTCCT  
GGTCTTCGAATATTAGATCTCTCTGGCAATGCCTTCACAGGAAACTTGCCGACAAGTCTATTTCAACATTT



GAAAGCCATGAAGACA ACTAATCAAACAAGGAAGGCACCAATTGAAGGAAGCAACTATTACCAAGACT  
CGGTAGTTGTTGTAATGAAGGGACACATCTTTGAAGTTGTGAGAATCTTGTATTTATACACGAGTATGGA  
TCTTTCAAGTAACA AATTTGAAGGACTTATTCCAAGTATTATGGGAGATCTCATTGCACTTCGGGTGTTG  
AATTTGTCTAACAATGGGTTGCAAGGTCATATACCGCCATCACTTGGAAATTTAGCGGTTGTAGAATCAT  
TTGACCTTTCATTCAACCACCTTTCTGGAGAGATACCGGAACA ACTTGCTTCTATAACAAGTCTTGCAGTG  
TTAAATATCTCCTACAATCATCTTGAAGGATGCATTCTCAAGGACCTCAATTTGCTACATTTTCAGAACAA  
TTCATATGAAGGTAATGATAGATTACATGGATTCCAGTTTCACAAGGTTGTGGTAATGATCAGGTATCA  
GAGACAAATTATACCATATCTGCACTAGACGAACAAGAAAGCAATTCGGAGTTTCTGAATGATTTTTGGA  
AAGCTGTTCTTATGGGCTATGGAAGTGGACTATGTATTGGATTAGCCATAATATATTTTCATGATCTCAAC  
TTGAACTCCAATATGGCTAGCAAGAATCATGGAAGAGTTGGAACACAATTATTATGCAAAGTAGAAAGA  
AGCAATGAGGTA AAGGCATTACAGAAGAAGAAAATAATCGCTTCTAGACAAGTTACCAACTGAGTATT  
CAAGTTAAGGTCTGCTGATTTTTAGTATATAGTAATATATATTTATAGTTTCGTTACAACAACAGCTAATC  
GATACTTTATACTAAGTATATTTTTCTTTCCAATAATTT

>M6-PGSC0003DMG400013955 M6 LRR-RLP

TTGAATATATTATATTTTTGGAATTC AAAGAAAACAAAAATAAAAAATAAAAATAGATTTAAATTTTATT  
TTATTTAAAAAAAAGTGAAACACACGTGACAACGTGTGTAGTATAGTGCGTGTCACGTTTCGATTTTC  
TTCTAAAGAAAAGATTAAAATTTCTTCCATTTTGTGCTAATTAGTGAATGTGTGTTGTGTAACACAGACTT  
ATAAGGTTGACTCCTATTGACTTGCTCTTAACAATATAATGAAAATTTAGCAACAATTATTCTTTCTATTAT  
GACTTTTATTTTCGTTTTGTGAAACACAACCCAAATAATGTTTTTTTTCTTTTTGCTACTTATTTTCTCCTTTT  
AATCTGTTTTCACATTTTATTTGTTTTAGTGCTATATATATAGTGGAGTAACTTTGGTCACTGGAAATACA  
ACACACAAGTTAATATGGAGAAGCACATCTTCTTATTGATTCTTCTCTTTCTAATTCAATTTTCTATATCAC  
TTGCTTCCTCTAATGAGACTGACCAACAAGCTCTGTTAGCTTTCCAAAATCTTATTACAAGTCCTAATCATT  
TTTTGGCCAATAATTGGACCAAAAATACTTCTTTTTGCACTTGGTTTGGTGTCACTTGCCTCCAAAAGG  
CAAAGGGTTATGGCCTTGGCTCTTCTGATTTGCAACTTCAAGGCACAATTTCCCATCTTTGGCAAATTT  
GTCCTTTCTCAGTGTTCTCAATCTCCAGAACAACAGCTTCCACAGTGGCATCCCTTATGGACTTGGCCACA  
TGACTCGCTTGCAGTGATTGACGTTAAAAACAATCAGCTCAACGGAAGTATACCAACAAGTCTATTTCA  
AAACCGGAGAGTTCAAGTAATTTCAATGGCTTTCAATGAACTCGGTGGTGAATGTGGAGAGGCCCATG  
GTATGTACCAGAACTCAGAGTCTTAAATCTCGGGAACAATAGCCTCACGGGTATAATCCCTCCTTATGTT  
GGAAATGCCACAAAATTGATGAACATCAATTTGTCTGGGAATAGAATCAATGATAACATTCCAATGGAG

ATCAGTAATCTTAGCCAACCTGCATTTTTGCCTTGTTCAATAATCAATTAACAGGTTCCATTCTCCAACA  
CTGTTTAATATCTCGTCACTACTTGGCATATATCTGTCATTCAATGGCCTTTCTGGTCCTCTCTTGCTAGAT  
GAAGGGAATATTGTGTCAAATCTGAAGCATTAAAGTATGTCTAACAACCAAATTTCTGGTTGCATTCTT  
CCAACATATGCCAACTCACAGAGCTCAAACCTTTGTCCATATCTTTCAACAATATAACTGGAGACATACCT  
AGAAATATTGGTTGTTTATCCAAACTCGAAAGGTTTTATATTGGTGAAAATCCAATAGAAGGGACTATTC  
CCACTTCATTGGGAAATATTTCTACTCTGCAATATCTTGATTGTGTAGACAATTGGATGAAGGGGCAAAT  
TCCTCAAGAATTAGGGAAGCTATCAAATTTGAGGGAATTAAGCTTTGCCAATAATTCTAATCTTATTGGT  
CAAATTCAGAGGCTATTTTCAACATATCTTCTTTGGAAGTGATCAATTTTAGTTTGAATAACCTCTCGGG  
GAGAATTCCAACCACTACAGGTCTTCATCTTCCGAACCTTAAAGAACTTTACTTGGGAGACAATCAGCTT  
GAAGGGGAAATTCCATTGTTCATAACAAATGCTTCCAAGCTTCAGACACTGGCACTAAATGATAACTCTC  
TCAAAGGAACTATTCCTAACAATTTGGGGAATCTTCGTGAGCTGCAAATACTGCTCCTACACACTAATCA  
ACTTACCAATGAACCAGGAAAGCATGCGTTGAAATCTTCAATTCTTTGGCGAACTGTAGGATGTTGAGA  
TATCTAGAAGTGGGTAACAATCCGTTGAGTGGAGTTCTGCCAATTCTATTGGGAATCTCTCATCTACTA  
TTGAAAAAATTATTTAGCAGATGCACACATCAATGGCCTCATCCCCACAAGTATAGGCAACATGACCGG  
TCTTACATCCTTAAGCCTTGGCGGAAACAACCTTGACAGGGAATATTCCTTCTGAGATTGGTAAGCTTAAA  
CAACTCCAAGGACTCGATCTATCTAACAATAAATTGCAAGGACATATTCAGAAGTGGTATGCAATTTGT  
CTGATTTGGTTCAATTATATCTGTATGGTAATGAGCTCTCTGGATTAATTCCAGAATGCTTAGGAAATCTT  
ACCATGCTTCAACAACCTTTATTTGGCTTCTAATAAATTTTCATCAAATTTCCATTGACCCTTTGGAAAATG  
AGTGGTCTTCTCTATCTAAACGTGTACAGAATTCAATAGAGGGAGAACTTCCATCAGATATTGGAGGA  
CTGAAAGCCATTGTAGAACTATATCTTTCTGGTAACCACTTTTCAGGCATGATATCAACCAGATTTCGGGG  
AACTCCAAAATCTGCAGTATCTCGACCTATCGAAAAATTCATTTTTGGCCGAATTCATTATCCTTTGCC  
AACTTGATAAACTTGGAAATCTTGAATTTGTCTTTAAATGCATTGTCAGGTAATTCCTAAGTCTTTGGA  
AAAATCTCATACTTAAAAGCATTAAATGTTTCATTTAATGATTTAGAAGGTGAAATACCAAGTGGTGGT  
GTGTTTGCAAATTCCACTCTGCAATCATTTGTTGGGAACAAAGGTCTATGTGGAGTGCACATATTAGAGA  
TTCCTGCTTGTGCTATCACTAATCCTGGAAAACAATCAAAGCTTAAGGAGGTTATGCTAAAAATTGTTAC  
TCCAGTGGTTATTGCATCCTTTATGATATTCTTGTTGTTTCAATTTGGATAATGAAACGACAGAAGAAAG  
GGAAGTCCAAGATGTGGAAAAGATACCGGAGATGGGGACTCATCAATTAGTTTCTTATCACGAGATTC  
AACGAGCAACAATAATTTTGATGAATCCAATTTAATTGGTGAGGGAAGCTCTAGCTCTGTGTACAAAG  
GCACATTGTTTGGCGGAACTGCAGTGGCCATTAAGGTTCTGGATTTGAAAATGAGAAAGTATGCAAGA

GGTTTGATACCGAATGTGAAGTGATGAGAAATGTTAGACACAGAAATCTTGTTACAGTGATTACTACAT  
GTTCTAGTGACTATATAAGAGCCTTTGTTCTGCGATATATGCCCAATGGGAGTCTTGAGAATTGG

>M6-PGSC0003DMG400014463 M6 LRR-RLP

GCTAAAGATGGGGTAATGCAATTGTGCTCACTCTCGTCTTTTTCTGTCTTGAAGTTTCTTCATCCATATTA  
CCTCATCACTCTCACAAACATCAAATTCAAACCATTTCCCTTCTAAAATTCAAGAAGTCCTTTACTATAGAT  
CCCTCAGCCTCTTATTTTTGTCAAGACTTCGGTAAGAAGTTTTATCCAAAACGAGTTCATGGAACATGA  
GCAGAGATTGCTGCTCATGGGATGGAGTTGTATGCGATGACATGACTGGACATGTCATTGAGCTTGACC  
TCGGCTGCAGCGGTCTTGTTGGGACCATTGATTCCAATAGCAGCCTATTCCAACCTCTCTCATCTCCAAAG  
GCTTGATCTTTCTTTAAATAACTTCTCCAATTCTCACATCTCCCCTGAATTTGGCAGGTTTTCGAGCTTGAC  
ACATCTTGATCTTTCAGGCTCCTATTTTTCAGGTCAAATTCCTTTGAAATCTCTTATCTTTCCAAGTTACAC  
TCTTTTCGTCTCTCCACAAATATTGGGTTTGTGGCCTCCCCTCATATTTGGGCCATACAAAGACTCGC  
GGCCCATGATTTTAAATTGCTCCTTCAGAATTTGACCCAATTAAGAGAAGTTGATTTTAGTTTCATAAACA  
TCTCTTCAACCATTCTCCGAATTTTTCTTCTCATTTCAACTCTGAGTCTGGGATTAACAGGATTGTATG  
GGATAATACCTGAGCGTATTTTTCACCTCCCAACTTGAAAAAACTTGACTTATCCAGCAGTTATGAGCTC  
AGTGGTTATTTTCCAAGACCAAATGGAACAACAACACATCTCTTAGGAAATTAGAAGTCAAGTGGCGTG  
AATTTTTCTGATAATATACCTGAGTCTCTTGGCTATCATCTAACTTCGCTGAATTATTTTTCTTTTCGCATT  
GCAAGCTTTGGGGCCTATTCCTAAATCTCTTCCAATCTCACTCACATAGAGTATTTGTACCTTGATGGT  
AACTTGTTGAATGGAACAATACCATTAGGGATGTTCTCCCTTCTATCACTAATTTATTTAGAATTGAGTCA  
TAACCACTTTTCTGGTCAGCTTGAGGATTTCAAGTCAAATTCATTTCTATATTGGTTTAAGCAATAATC  
AGCTGGAAGGCCATCTTCCAAGTCAATTCAAACCTTGGAACCTGACAACCTTGGATCTTTCATCGAA  
TAATTTTAGTGGCAATGTGGATGTCAGCCTCTTTTCAAACCTCAAACAACCTTTCGTATCTTATTCTTTCATC  
GAATAATTTTAGTGGCAATGTGGATTTGAGCCTCTTTTCAAACCTCAAACAGCTTTCATATCTTATTCTTTC  
TTCCAATAATTTTATTGGAAATGTAGATGTCAGCCTTTTTTTCAGACCTCAAACAGCTTTCATATCTTAGTCT  
TTCACAAAATCATTCTCATTGACCAATGAAAACAAAGTTAAGGTTACTTTGCCAGGATCTCTTTATACGT  
TACAATTGGCTGCATGTGAAGTGAAAGAATTGGAGTTTCTAAAATCCACAAATCATCTGTTTTCTTGGA  
TCTGTCAAATAATAAGCTTCAAGGAAGAATCCCAGATTGGGCATGGTCTAAATGGATGTTTTATTGCAA  
TATCTAGATCTATCCTACAACATGTTGACAAGTGTGATTCAATTCCTCTTCAATCACTAGATACTATTGAT  
TTACGGTCCAATTTGCTTCAAGGTTCACTACCTGTTCCACCAAATTCACAATATTCTTCTTAATATCCCAA  
AATAATCTCACTGGAGAAATTCCTGCATCTATTTGCAATTTGATGTCCTCAAATTTTGGATTTGGCGAG

AAACAATTGAGAAATTCCACAATGTTTGGGAAATATGACTCCCCTCCGGGTTTTGGATATGCGCCACAAC  
AATCTTTCTGGGAATATTCCACCAACTTTTCAGTAATGAAAGTATATTGAGCAGCCTCAACTTGCATGGCA  
ATAATCTAGAGGGGAAAATTCCCCGATCTTTGGTCAGTTGCAAAGACTTGCAGCTTCTTGATTTAGGCAA  
TAATAACCTCAACGACACATTCCCTGTGTGGTTGGGAGCTCTTCCAGATCTGCTCATTTTAAGCTTGAGAT  
CAAACAATTGCATGGACCAATCAGAACATCAAGTTGGAGTGAGAACATGTTTCCTAAGCTTCGAATCAT  
AGATCTTTCCTACAATGCCTTCTCGGGAACTTACCTTCGAGTTTGTTC AACATCTTAAAACCATGAGGA  
CAATTGATCCATCAAGGGAAGCAGCAAGACATGGTGGAAATACATATTACCAAGATTCTATTATAGTTG  
CAATCAAGGGATCTGAGCGTGAAATTGTCAGAATCTTGTATTTGTACACCGTTATCGATCTTTCAAGTAA  
TAAATTTAGAGGGCAAATTCCAAGTATTATGGGGCATCTCAATGCAGTTCACATATTGAATTTATCTCAT  
AATGCATTGCAAGGTGATATACCGACATTATTCGGAGATTTATCTTCACTTGAATCATTGGACTTGTGAG  
GAAACAACTTTTCGGGAGAGATACCACAACAACCTGGCTTTTCTTACTTCTTGCATTCTTAAATCTCTCC  
CACAATCATCTCCAAGGATGCATTCCCTCAAGGACCTCAGTTTTACTTATGAGAACAATTCATATGAAG  
GCAATGATGGATTACGTGGATTTCTATTTCAAAGGCTGTGGCGATACTCATCGTCTCTAAAGAATCCA  
CGCCCTTTTTTTAGCGTTTAGGGCCGGGCGTCATGAAACAAGAATTCAGAATTTTCTAAGTGTTTCGTGT  
GTATCAATTCATGAATTTTTGGAAATATGACTGATCGAATATTTTTGCCCAAATATTTATTGAAATCATCT  
GTAATGACCTAGTGAAC

>M6-PGSC0003DMG400014717 M6 LRR-RLP

CGTACAAGGATATTGAGTAGACAGTTGATGTATCAGACTCGATACTTCAAAGAATGGAGGAGAAGAC  
GATCTGCAGCTGCAAGTGTGCATGAAGACAATATATGAAATAACTGAGCAAACATTCTTTGAAACAAC  
AGTTCACAATTCATATATCAGAAAAATAATTTCCAGCACGTCTAAAACAAGCAAAAATGGAAAAGAAA  
AACAAAACAGTCCCAAGGATAAATCTATATTGTCACAACCTTAAAAGATTTTAGCTCCTGTCTCACCACAC  
CAGCCCTCTGCAATGTCCACAACACACGAATCAGATCGATGCATAACCATCACAACGGTAAAAGATTAT  
GCAATCACACCTTGATCTTTGCCAACATGAGCTTAAACCTGTCAAATTTGTTGAGTGAGGCCCTCCTCTTC  
TGCACGATCAACTTCTTTCTTAGGAACTGGACTCCCACTTGGTCTTACATCTGCGAGGACATAAAGCA  
AATGAGAGTTAACCAAGTTCTTATGTAACCCTGCCGTTAGCCAAATGACTCAAATTTACCACTTCTGGCT  
GATGAAAACCGTTTTTCTAATCAAAAATTCAAATTTGAATACTGCAATTCACCAACGTACACGTATCTT  
GATCTCTAGCTCGGCCACTGTTTCCAGTGATATGTATTTTCTGAGGGGACTAATTAACGCATAGTCTAGT  
CACTTTAGTATTTAGTATTGTAACCTAGTGTTACAAAGTGTAAGTTTAGTAGTGACGATTCATGAGATTA  
ACCTCGAAATTTTGTGATGACTGAAAATCAGAGAAAGTAACACAAGATGCTGTTCTATATTATGAAAAA

GATTAGAAAGATGAAACTCTACTTCTTTTTAAGCTTTGTATTCTAATTGATGGAATTTCTTTTCCGTATGAT  
AGTTTTGTTTTACTTGGAAAAAGTGGGAGTAGATGTGTAACACATTGGATAAAGACAATAAAAAGGACAA  
AAGCACAACAACCCAAATTTGACTAAAGAATGACAACATTTTCTCTTATAAAAATTGAACAGACAAAAGTGT  
GAATAAGAGTTTAGAAAAAATGGGAGTAGATGTGTAACACATGGATAAAGACAATAAAAAGACAATA  
ATATTTGAGTGACTTTTCTCTTACAAAACAAAGAAAAGTGACTTTCTGAGATAATTATCTATAGTTCAATG  
ACCACATAAGAAATCAACTTTTGGCATCTACTACATATGAATTAGAGATAATGTAGTTTAGAAATTTATTA  
ATCTAAGACTGAAAATTGTTGAAACAAATATGTCAATGTGTGATAACAAAATTTTTGCCACTTCGGT  
TAAGTCCTTGTTAGAATTAGTGTGGTCTTTAATTATAATTTACGTAAAATATAAAAATCCCATGAACCCGA  
AATAATAAACTCAAATATGATGATGGTTTCCAGTAAAATATTCTCTTCACTTCAGTTTTTCACTCTTTTAT  
ATCTCCTTACAGTTACTTTTGCTTCCAATGAGGAAGCAACTGCCCTCTTGAAATGGAAAGCAACTTTCAA  
GAACCAGAATAATTCCTTATTGGCTTCATGGACGCCAAGTTCTAATGCATGCAGGGACTGGTATGGAGT  
TAAATGCTTTAATGGTAGGGTAAACACGTTGAATATTACAAGTACTAGTGTGAGTGTACTACTCTATGCT  
TTCCATTTTCATCTCTCCCTTCTTGAGAATCTAATCTTAGCATGAACAATTTCTCTGGCACCATTCCACC  
TGAGATTAGTAATCTACTAATTTTGTCTATCTTGACTTGAACCTCAATCAGATTTTCAGGAACAATCCCAC  
CACAAATCGGATCACTAGCCAAGCGTCAGATCCTCCGTATATATGGCAACCATTTAAATGGCTCTATTCC  
TGAAGAAATAGGTAACCTTAGGACTCTTACTAAGCTATCTTTGGGCAGGAATTTCTTAGTGGTTCTATTC  
CTGCTTCATTGGGGAATTTGAACAACCTGTCTTTTTTGTCTTTTATGAAAATCAACTTTCGGGCTCTATTC  
CCGAGGAAATAGGTTACCTAAGGTTTCTTAGTGTCTAGGTTTGGAGTAATAACTCTCTTAATGGTTCTATT  
CCTGCTTCATTGGGGAATTTGAACAACCTGTCTGATTTGTATCTTAATGATAATCACCTTTATGGATCTATT  
CATGAGGAAATAGGTAACCTAAGGTCTCTTATTGAGCTAGATTTGAGTACTAACTCTTTAAAAGGTTCTA  
TTCTGCTTCATTGGGGAATTTGAAAACTTGTCTATTTTGTCACTTCGTGAAAATCAACTTTCTGGCTCT  
ATTCCTCAAGAAATAGGATACCTAAGGTCTCTTACTGATCTTCGTTTGAACAATAACTTTCTTAATGGTTC  
AATTCCTCTGAAATAGGTTACCTAAGGTCTCTTAGTTTCTTAGATCTGAGTATTAATCTCTTAATGGTTC  
TATTCCTGCTTCATTGGGGAATTTAAGAAATGTGCAAAGAATGTTTCTTGATGAAAACAATCTCACTGAA  
GAAATTCCTTATCTCTGTGCAATTTAAAATCACTTGAATTTTGTATTTGCGGAGAAACAACCTGAAAGAG  
AAAAGTCCGCAATGTTTGGATAATATCAGTGGCCTCCAGGTTTTGACGATGTCACGTAATAATCTTAGT  
GGAGAGATCCCTTCATCCATTTCCAATTTAACTCACTACAAATTCTAGATTTGGGAAGAAATAGTCTGG  
AGGGAGCAATTCAGAATGCTTTGGCAATATTAATACCCTTCAGGCTTTTGATATGCAGAACAACAACT  
TTCTGGGACTCGTCCAACAATTTTAGCATTGGAAGTTCCTTAGAAGTTTCAATTTGCATGGCAATGAAC

TAGAGGGGGGAAATCCCTCGATCTTTGGCCAATTGCAAAAAGTTGCAAGTTCTTGATCTAGGAAATAAT  
CATTTCATGACACATTCCCATGTGGTTGGGAACTTTGCTAGAGCTGAGAGTTTTAAGATTGACATCGA  
ATAAATTGTATGGACCCATAAGATCTTCAGGGGCTGAAATCATGTTTCCTGATCTTCGAACCATAGATCT  
CTCTAACAAATACCTTCTCGAAAGACTTACCAACGAGTTTGTTC AACATTTGAAAGGCATGAGGACAATT  
GATCAAACAATGATGGTACCAAGTTATGAAGGAGATGGAGATTACAAAGACTCGATAGTTGTTGTATCA  
AAGGGATTGAAGCTTGAAGTTGTGAGAATTTTGTCTTTGTACACAGTTATCGACCTTCAAACAACAAT  
TTGAAGGACATATTCCTAGTGTTCTAGGAGATCTCATTGCTCTTCGGGTGTTGAATATATCTACAATGG  
ATTGAAAGGCCATATAACACCATCACTTGGACGTTTATCTGTAGTGGAATCATTGGACCTTTCATTTAACT  
GCCTTTCGGGAGAGATAACCACAACAACCTTGCTTCTTACGTCTCTTGAATTCTTAAATCTCTCCATAATT  
ATCTCCAAGGATGCATCCCTATGGACCCCAATTCATACCTTTGAAAACAGTTCATTTGATGGTAATGATG  
GATTACGTGGATTCCCATTTCAAAGGTTGTGGCAATGATCCTGTGTCAGAGACAAATTATATAGTATC  
TGCGCTAGCTGATCAAGAAAGCAATTCTAAATTTCTCAATGATTTTTTGAAAGCTGCTCTGATGGGCTAT  
GGAAGAGGATTATGTATTGGATTATCCATACTGTATTTTATGATCTCAACTAGAAATCCGAAATGGCTTG  
CAAGAATCATTGAAGAAATGGAACACAAAATTAACATGCAAAGGAGAAAGAAGCAGCGAGGTCAA

>M6-PGSC0003DMG400014718 M6 LRR-RLP

ATGATTCTCAACGATAACAATCTCATTGGGGAAATTCCTTCATCTATATGCAATTTGACATCACTTGAAT  
GTTTTATATGCCGAGAAACAACCTGAAGGGAAAAGTCCGCAATGTTTGGGTAATATAAGTGGCCTCCA  
GGTTCTAGTGATGTCACATAATGATCTCAGTGGAGAGATGCCTCCATCTATTTCCAATTTAACGTCACTAC  
AAATTCTAGATTTGGGCAGAAATAATCTAGAGGGAGCAATTCCACAATGTTTTGGCAATAATAGTAGCC  
TCCAGGCATTTGATATGCAGAATAACAACTTTCTGGGACTCTCCAACAATTTTAGCATTGGAAGTTC  
ACTTATAAGTCTCAACTTGCATGACAATGAACTAGAGGGGGAAATCCCTCGGTCTTTGGCCAATTGCAAA  
AAGCTGCAAGTTCTTGATCTAGGAGATAATCATCTCTATGACACATTCCCATGTGGTTGGGAACTTTAC  
CAGAGCTGAGAGTTCTAAGATTGACATCGAATAAACTGCATGGACCTATAAGATTTTCAGTGGCTGAAA  
TCATGTTTCCTGATCTTCGAATCATAGATCTCTCTAGCAATGCCTTTTCGAAAGACTTACCAAAGAGTCTG  
TTTCAAACAATTGAAAGGCATGAGGACTGTTGATCAAACAATGAAGACAACAAGTTATCTAGGAGGTAGA  
TATAACTACCAAGACTTGGTAGTTGTTGTAACGAAGGGATTGAAGCTTGAAGTTGTGAAAATTTTGTCTT  
TGACACAGTTATCGATCTTCAAACAACAATTTGAAGGACATATACCTAGTGTTCTAGGAGATCTTATT  
GCGATTCGGGTACTTAATTTATCTCATAATGGGTTGCAAGGCTATATATCACCATCACTTGGAAAGTTTATC  
TGTAAGGAAATCATTAGACCTTTCATTTAACCGCCTTTCGGGAGAGATAACCACAACAACCTTGCTTCTCTTA

CGTCTCTTGAATTCTTAAATCTCTCCCACAATTATCTCCAAGGATGCATCCCTCAAGGACCCCAATTCATA  
CCTTTGAGAACAGTTCATTTGATGGTAATGATGGATTACGTGGATTCCCCATTTCAAAGGTTGTGGCAA  
TGATCCTGTGTCAGAGACAACTATACAGTGTCTGCGCTAGAAGATCAAGAAAGAAATTCTGAATTTTTC  
AATGATTTTTGGAAAGCAGCTCTGATGGGCTATGGCAGTCGACTATGTATTGGCTTATCCATAATATATT  
TCTTGATCTCAACTGGAAATCTAAGATGGCTTGCAAGAATCATTGAAGAACTGGAACACAAAATCAT  
GCGAAGGAGAAAGAAGCAGCGAGGTCAAAGAATTACAGAAGAAGAAATAATCGCTTCTAG

>M6-PGSC0003DMG400014719 M6 LRR-RLP

CTTCATCTATATGCAATTTGACATCACTTGAAATGTTTTATATGCCGAGAAACAACCTGAAGGGAAAAGT  
TCCGCAATGTTTGGTAATATAAGTGGCCTCCAGGTTCTAGTGATGTCACATAATGATCTCAGTGGAGA  
GATGCCTCCATCTATTTCCAATTTAACGTCACTACAAATTCTAGATTTGGGCAGAAATAATCTAGAGGGA  
GCAATTCCACAATGTTTTGGCAATAATAGTAGCCTCCAGGCATTTGATATGCAGAATAACAACTTTCTG  
GGACTCTTCCAACAAATTTTAGCATTGGAAGTTCCTTATAAGTCTCAACTTGCATGACAATGAACTAGA  
GGGGGAAATCCCTCGGTCTTTGGCCAATTGCAAAAAGCTGCAAGTCTTGATCTAGGAGATAATCATCTC  
TATGACACATTCATGTTGGTGGAACTTTACCAGAGCTGAGAGTTCTAAGATTGACATCGAATAAAC  
TGCATGGACCTATAAGATTTTCAGTGGCTGAAATCATGTTTCTGATCTTGAATCATAGATCTCTCTAGC  
AATGCCTTTTCGAAAGACTTACCAAAGAGTCTGTTTCAACAATTGAAAGGCATGAGGACTGTTGATCAA  
CAATGAAGACAACAAGTTATCTAGGAGGTAGATATAACTACCAAGACTTGGTAGTTGTTGTAACGAAGG  
GATTGAAGCTTGAAGTTGTGAAAATTTGTCTTTGTACACAGTTATCGATCTTTCAAACAACAATTTGAA  
GGACATATACCTAGTGTCTAGGAGATCTTATTGCGATTCCGGTACTTAATTTATCTCATAATGGGTTGC  
AAGGCTATATATCACCATCACTTGAAGTTTATCTGTAAGTTCATTAGACCTTTCAATTAACCGCCTT  
TCGGGAGAGATACCACAACAATTGCTTCTTACGTCTCTTGAATTTCTTAAATCTCTCCCACAATTATCTC  
CAAGGATGCATCCCTCAAGGACCCCAATTTCATACCTTTGAGAACAGTTCATTTGATGGTAATGATGGAT  
TACGTGGATTCCCCATTTCAAAGGTTGTGGCAATGATCCTGTGTCAGAGACAACTATACAGTGTCTGC  
GCTAGAAGATCAAGAAAGAAATTCTGAATTTTTCAATGATTTTTGGAAAGCAGCTCTGATGGGCTATGG  
CAGTCGACTATGTATTGGCTTATCCATAATATATTTCTTGATCTCAACTGGAAATCTAAGATGGCTTGCAA  
GAATCATTGAAGAACTGGAACACAAAATCATGCGAAGGAGAAAGAAGCAGCGAGGTCAAAGAAT  
TACAGAAGAAGAAATAATCGCTTCTAGACAAGTTACCAGTAA

>M6-PGSC0003DMG400014736 M6 LRR-RLP

GGGGATATTCCTATAAGTTTAACTTCTTGCAGGATTAAGATCATTTAATTTTTCTAAAATAACCTAAC

TGGTAGGATTCCAAATGACATTGGTGACATGAAAGTTTTGGAATCTGTTGATCTTTCAGAAAATCAATTT  
TATGGTCAAATCCCACAAAGCTTTTCAAGTTTGTTACCTTGAGCTACTTGAATCTATCTGATAACAATTT  
GTCAGGTATGATACCATTGAGCACTCAACTTCAAAGCTTTGATCCCACGAGTTTTCAAGGAAACAAACTC  
TGCGGGCTTCCACTCTCGCTGAATTGTAGTTCAAATGGTAATATTCCAAATCATGAATATGAAGATGATG  
AGAGTGACGAAGATGAAGTGGATTGGTTTTACATTTCAATGGCTATAGGATTTGCACTAAGCTTTTGGG  
GTGTTTGTGGTTCATTGCTTTTCAAGAGATCATGGAGACATGCTTATTTTTGTTT

>M6-PGSC0003DMG400014738 M6 LRR-RLP

ATAGTGACGAATAAAGGCAACAGGTACCAGTATGACACCATTTTGGCGTTGTTTACAAGTATGGACATG  
TCTAGCAATAATCTCTCTGGGGATATTCCTATAAGTTTAACTTCTTGCAGGATTAAGATCATTTAATTTT  
TCTAAAATAACCTAACTGGTAGGATTCCAAATGACATTGGTGACATGAAAGTTTTGGAATCTGTTGATC  
TTTCAGAAAATCAATTTTATGGTCAAATCCCACAAAGCTTTTCAAGTTTGTTACCTTGAGCTACTTGAAT  
CTATCTGATAACAATTTGTCAGGTATGATACCATTGAGCACTCAACTTCAAAGCTTTGATCCCACGAGTTT  
TCAAGGAAACAAACTCTGCGGGCTTCCACTCTCGCTGAATTGTAGTTCAAATGGTAATATTCCAAATCAT  
GAATATGAAGATGATGAGAGTGACGAAGATGAAGTGGATTGGTTTTACATTTCAATGGCTATAGGATTT  
GCACTAAGCTTTTGGGGTGTGTTGTGGTTCATTGCTTTTCAAGAGATCATGGAGACATGCTTATTTTTGTTT  
TCTAGACCGTAGCTG

>M6-PGSC0003DMG400014739 M6 LRR-RLP

AGTCCAAAATATTACACACCATGAAAGTGTTAGCAATAAACTATGGGTTCTTGTTTTTTATTTTGAAA  
AATACCAAGTTTGTCAATTTGTGTAGGGATTTGTAGAGAAAATGAGCAACGAGCATTGGAGAGCTTGAAG  
AAAGAAGTAGATGATCCCTTGGATATTCCCTCTTCTGGGTTGTCGGAAAAGATTGTTGTGAATGGGAT  
GGAGTTGTGTGCAACAATCTAACTCGTCGTGTGATTGAACTACGCATAAGTTATCTAAGGATCGATAACC  
TAGAGTGGTTGTCAAGTCTTTTGTAGTCTTGAGAACCTGGAAATGTATCATGTGGATCTCCACAAAGCAAC  
TAACTGGCTACAGGTTATTAACATGCTTCCTTCTTGGTTGATCTAACGTTATCCAATTGTAGTCTTCATAA  
TATAACAAATCTACTTCATCACAATCTTTCTTCACTTGAAACCCTCGATCTTTCTAGTACTAAGTTTAATTC  
ACCTATTTCCAATTGGGTTTTCAACCTTTCCAATCTGTTTCTCTTAATTTGAGTGATTGTAATTTTACTGG  
CCCATTTCCCGACTTTCTGTTAACTTGACTTCTCTCACTACCTTCAAGGCTTTTGAACCTCTTTCAATTGT  
CTTTTACCCGAATGGTTGTTTGTGTTAAGTAATCTAGAACATCTTAACCTCCGTTCTAGTGGTATTAAGG  
TGCAATACCAAATAAGAGTGGAAACACAACAACACTTAAATATCTCGATCTTTTTGATAATAACCTTAACT  
CCACCATACCAAATTGGTTATATCAATGCAAAGATCTAGAATCACTTATCTTACTGAAAACCGTCTTGAG



GGAACAGTTTCAAGTCTGATTTCAAATTTGAGCTCAATAACTAATATTGACCTTTCTGGTAATATGCTTAC  
TGGAAAGTTACCAAATGTAATTGGAATTTTAGGGAAATTAGAATTTCTTTCTCTTTCAAAAAATCAATTTG  
AGGGACAAGTATCTGAATTATTCAAAGGTAGGAGTAATTTCTTTTCAAGGGGATTGGGAAATACTTCTTT  
GATGGAATTGAGACTAGATGGTAATAAACTTAATGGAECTTCCGAAAAGTCTTGGACAACCTTTCAAT  
GCTAGAATACTTTTTCAATTTCTAACAATAAGTTGGAAGGTGTTGTAACAGAGAGTCATTTCTCTAAATTA  
CGCAATTACAACCTTTCTCTGCATCTAGAAATAATCTGACTTTAAAAGTGAGTAGGAATTGGATTCCACCT  
TTTCAAGTCACAAACATTGCGATAGGCGGGTGAATATAGGCCCTTTGTTTCCAATGTGGCTCCGAACTC  
AGGAGATGATAATGAATGTTGACATATCAGATTGTGGAATACAAGGTGAGGTTCCAACCTGGTTTTGGA  
ACTTATCTTCTCAAATTGTTTTCTCAATCTTTCTCACAATCAATTTATTGGTGAGGTTCCAATCATCTCAAC  
AGCTTCGTGGTTAGTTGGATTGGGAGGTCCTTGGTTAATGTATTTAGGTTCCAACAATTTTAGTGGATCA  
CTACCACGTATTTCAACGAGTATAACTGAGTTAGGTCTCTCGAACAATTTTTTTTCAAAGGTTTATCCAA  
CTTCTTGTGTGAAGCAAAGAATGTATCTTATAATTTGGAGATCTTAAATCTCGGGGGAAATGATTTATCA  
GAAGAAATTCCTGATTGTTGGATGAATTGGCCTGAGTTGGAAGTTTTAATCTTGAGGGACAATAATTTG  
ATTGGAAGCTTACCAAGATCTATGGAGGTTTTGAGTAATTTGCTATCATTAGACTTACGAAGAAATAGAC  
TTAACGGTCCGTTTCCTTCATCCTTGAAAAATTGTACGAACTGCATAAAATAGATTTAGCCGAGAATGA  
GTTTGCTGGGGGACTACCATCTTAGTTGGGAATGAGGTTTTCAACCTTGATAGTATTTATCCTTCGGTCC  
AATAAATTCAATGGTGAATTGCCTCAAGAACTTTGTCAACTCAAAGATCTTCAGATCTTAGACCTTGCAA  
ACAATACATTTGTTGGAATCATAACCAAGGTGATTGGTAATTTTCAAGTCAATGGTCAAAGGAAAAAAGG  
AAGTGGGAGATGATGATGAGTTAAATTATCCTACTTTTTGGGAGTTTTGAGAGAGAGTGCCATAGTGA  
CGAATAAAGGCAACAGGTACCAGTATGACACCATTTGGCGTTGTTACAAGTATGGACATGTCTAGCA  
ATAATCTCTCTGGGGATATCCTATAAGTTTAACTTCTTGCAGGATTAAGATCATTTAATTTTTCTAAAA  
ATAACCTAACTGGTAGGATTCCAAATGACATTGGTGACATGAAAGTTTTGGAATCTGTTGATCTTTCAGA  
AAATCAATTTTATGGTCAAATCCCACAAAGCTTTTCAAGTTTGTTACCTTGAGCTACTTGAATCTATCTG  
ATAACAATTTGTCAGGTATGATACCATTGAGCACTCAACTCAAAGCTTTGATCCCACGAGTTTTCAAGG  
AAACAACTCTGCGGGCTTCACTCTCGCTGAATTGTAGTTCAAATGGTAATATTCCAAATCATGAATAT  
GAAGATGATGAGAGTGACGAAGATGAAGTGGATTGGTTTTACATTTCAATGGCTATAGGATTTGCACTA  
AGCTTTTGGGGTGTGTTGGTTCATTGCTTTTCAAGAGATCATGGAGACATGCTTATTTTTGTTTTCTAGA  
CCGTAGCTGGGAAATGTTGCTTGCAAAGTTATCAGTATGTTGAGAGATATCATTAAAGGATATTGCTATCA  
TCAAAGTTAGTTTGTGTGCTTACATTTCTCATGTTAGCAAACATGTTGTTTCATTTTGTATTCAAATGAAT

GTTTCTGAAGATGTTCAAACATTGTTGTTTCTTTCATAGTTCCAATTTTC

>M6-PGSC0003DMG400014740 M6 LRR-RLP

AGGCCCTTTGTTTCCAATGTGGCTCCGAACTCAGGAGATGATAATGAATGTTGACATATCAGATTGTGGA  
ATACAAGGTGAGGTTCCAACCTGGTTTTGGAACCTTATCTTCTCAAATTGTTTTCTCAATCTTCTCACAAT  
CAATTTATTGGTGAGGTTCCAATCATCTCAACAGCTTCGTGGTTAGTTGGATTGGGAGGTCCTTGGTTAA  
TGTATTTAGGTTCCAACAATTTTAGTGGATCACTACCACGTATTTCAACGAGTATAACTGAGTTAGGTCTC  
TCGAACAATTTTTTTTCAAAGGTTTATCCAACCTTCTGTGTGAAGCAAAGAATGTATCTTATAATTTGGA  
GATCTTAAATCTCGGGGGAAATGATTTATCAGAAGAAATTCCTGATTGTTGGATGAATTGGCCTGAGTT  
GGAAGTTTTAATCTTGAGGGACAATAATTTGATTGGAAGCTTACCAAGATCTATGGAGGTTTTGAGTAAT  
TTGCTATCATTAGACTTACGAAGAAATAGACTTAACGGTCCGTTTCCTTCATCCTTGAAAAATTGTACGAA  
ACTGCATAAAATAGATTTAGCCGAGAATGAGTTTGCTGGGGGACTACCATCTTAGTTGGGAATGAGGTT  
TTCAACCTTGATAGTATTTATCCTTCGGTCCAATAAATTCAATGGTGAATTGCCTCAAGAACTTTGTCAAC  
TCAAAGATCTTCAGATCTTAGACCTTGCAAACAATACATTTGTTGGAATCATACCAAGGTGTATTGGTAA  
TTTCAGTGCAATGGTCAAAGGAAAAAAGGAAGTGGGAGATGATGATGAGTTAAATTATTCCTACTTTTT  
GGGAGTTTTGAGAGAGAGTGCCATAGTGACGAATAAAGGCAACAGGTACCAGTATGACACCATTTTGG  
CGTTGTTTACAAGTATGGACATGTCTAGCAATAATCTCTCTGGGGATATTCCTATAAGTTTAACTTCTT  
GCAGGATTAAGATCATTTAATTTTTCTAAAAATAACCTAACTGGTAGGATTCCAAATGACATTGGTGACA  
TGAAAGTTTTGGAATCTGTTGATCTTTCAGAAAATCAATTTTATGGTCAAATCCCACAAAGCTTTTCAAGT  
TTGTTACCTTGAGCTACTTGAATCTATCTGATAACAATTTGTCAGGTATGATACCATTGAGCACTCAACT  
TCAAAGCTTTGATCCCACGAGTTTTCAAGGAAACAACTCTGCGGGCTTCCACTCTCGCTGAATTGTAGT  
TCAAATGGTAATATTCCAAATCATGAATATGAAGATGATGAGAGTGACGAAGATGAAGTGGATTGGTTT  
TACATTTCAATGGCTATAGGATTTGCACTAAGCTTTTGGGGTGTGTTGTGGTTTATTGCTTTTCAAGAGATC  
ATGGAGACATGCTTATTTTTGTTTTCTAGACCGTAGCTGGGAAATGTTGCTTGCAAAGTTATCAGTATGT  
TGAGAGATATCATTAAAGGATATTGCTATCATCAAAGTTAGTTTGTGTGCTTACATTTCTCATGTTAGCAA  
ACATGTTGTTTCATTTTGTATTCAAAT

>M6-PGSC0003DMG400014753 M6 LRR-RLP

AGTCCAAAATATTACACACCATGAAAGTGTTAGCAATAACACTATGGGTTCTTGTTTTTTATTTTGAAA  
AATACCAAGTTTGTCAATTTGTGTAGGGATTTGTAGAGAAAATGAGCAACGAGCATTGGAGAGCTTGAAG  
AAAGAAGTAGATGATCCCTTGGATATTCCCTCTTCTTGGGTTGTCGGAAAAGATTGTTGTGAATGGGAT

GGAGTTGTGTGCAACAATCTAACTCGTCGTGTGATTGAACTACGCATAAGTTATCTAAGGATCGATAACC  
TAGAGTGGTTGTCAAGTCTTTTGAGTCTTGAGAACCTGGAAATGTATCATGTGGATCTCCACAAAGCAAC  
TAACTGGCTACAGGTTATTAACATGCTTCCTTCTTTGGTTGATCTAACGTTATCCAATTGTAGTCTTCATAA  
TATAACAAATCTACTTCATCACAATCTTTCTTCACTTGAAACCCTCGATCTTTCTAGTACTAAGTTTAATTC  
ACCTATTCCCAATTGGGTTTTCAACCTTTCCAATCTTGTTTCTCTTAATTTGAGTGATTGTAATTTTACTGG  
CCCATTTCCCGACTTTCCTGTTAACTTGACTTCTCTCACTACCTTCAAGGCTTTTGAAAACCTTTCAATTGT  
CTTTTACCCGAATGGTTGTTGATTTAAGTAATCTAGAACATCTAACCTCCGTTCTAGTGGTATTAAAGG  
TGCAATACCAAATAAGAGTGGAAACACAACAACACTTAAATATCTCGATCTTTTTGATAATAACCTTAACT  
CCACCATACCAAATTGGTTATATCAATGCAAAGATCTAGAATCACTTTATCTTACTGAAAACCGTCTTGAG  
GGAACAGTTTCAAGTCTGATTTCAAATTTGAGCTCAATAACTAATATTGACCTTTCTGGTAATATGCTTAC  
TGGAAGTTACCAAATGTAATTGGAATTTTAGGGAAATTAGAATTTCTTTCTTTTCAAAAAATCAATTTG  
AGGGACAAGTATCTGAATTATTCAAAGGTAGGAGTAATTTCTTTTCAAGGGGATTGGGAAATACTTCTTT  
GATGGAATTGAGACTAGATGGTAATAAECTTAATGGAACTCTTCCGAAAAGTCTTGGACAACCTTTCAAT  
GCTAGAATACTTTTTTCAATTTCTAACAATAAGTTGGAAGGTGTTGTAACAGAGAGTCATTTCTCTAAATTA  
CGCAATTACAACCTTCTCTGCATCTAGAAATAATCTGACTTTAAAAGTGAGTAGGAATTGGATTCCACCT  
TTTCAAGTCACAAACATTGCGATAGGCGGGTGGAAATATAGGCCCTTTGTTTCCAATGTGGCTCCGAACTC  
AGGAGATGATAATGAATGTTGACATATCAGATTGTGGAATACAAGGTGAGGTTCCAACCTGGTTTTGGA  
ACTTATCTTCTCAAATTGTTTTTCTCAATCTTTCTCACAATCAATTTATTGGTGAGGTTCCAATCATCTCAAC  
AGCTTCGTGGTTAGTTGGATTGGGAGGTCCTTGGTTAATGTATTTAGGTTCCAACAATTTTAGTGGATCA  
CTACCACGTATTTCAACGAGTATAACTGAGTTAGGTCTCTCGAACAATTTTTTTTTCAAAGGTTTATCCAA  
CTTCTTGTGTGAAGCAAAGAATGTATCTTATAATTTGGAGATCTTAAATCTCGGGGGAAATGATTTATCA  
GAAGAAATTCCTGATTGTTGGATGAATTGGCCTGAGTTGGAAGTTTTAATCTTGAGGGACAATAATTTG  
ATTGGAAGCTTACCAAGATCTATGGAGGTTTTGAGTAATTTGCTATCATTAGACTTACGAAGAAATAGAC  
TTAACGGTCCGTTTCCTTCATCCTTGAAAAATTGTACGAACTGCATAAAATAGATTTAGCCGAGAATGA  
GTTTGCTGGGGGACTACCATCTTAGTTGGGAATGAGGTTTTCAACCTTGATAGTATTTATCCTTCGGTCC  
AATAAATTCATGGTGAATTGCCTCAAGAACTTTGTCAACTCAAAGATCTTCAGATCTTAGACCTTGCAA  
ACAATACATTTGTTGGAATCATAACCAAGGTGATTGGTAATTTCAAGTCAATGGTCAAAGGAAAAAAGG  
AAGTGGGAGATGATGATGAGTTAAATTATCCTACTTTTTGGGAGTTTTGAGAGAGAGTGCCATAGTGA  
CGAATAAAGGCAACAGGTACCAGTATGACACCATTTTGGCGTTGTTTACAAGTATGGACATGTCTAGCA

ATAATCTCTCTGGGGATATTCCTATAAGTTTAACTTCTTGCAGGATTAAGATCATTTAATTTTTCTAAAA  
ATAACCTAACTGGTAGGATTCCAAATGACATTGGTGACATGAAAGTTTTGGAATCTGTTGATCTTTCAGA  
AAATCAATTTTATGGTCAAATCCCACAAAGCTTTTCAAGTTTGTTACCTTGAGCTACTTGAATCTATCTG  
ATAACAATTTGTCAGGTATGATACCATTGAGCACTCAACTTCAAAGCTTTGATCCCACGAGTTTTCAAGG  
AAACAACTCTGCGGGCTTCCACTCTCGCTGAATTGTAGTTCAAATGGTAATATTCCAAATCATGAATAT  
GAAGATGATGAGAGTGACGAAGATGAAGTGGATTGGTTTTACATTTCAATGGCTATAGGATTTGCACTA  
AGCTTTTGGGGTGGTGGTTCATTGCTTTTCAAGAGATCATGGAGACATGCTATTTTTGTTTTCTAGA  
CCGTAGCTGGGAAATGTTGCTTGCAAAGTTATCAGTATGTTGAGAGATATCATTAAAGGATATTGCTATCA  
TCAAAGTTAGTTTGTGTGCTTACATTTCTCATGTTAGCAAACATGTTGTTTTCATTTTGTATTCAAAT

>M6-PGSC0003DMG400014829 M6 LRR-RLP

CAAATATCGAAATTTTCTAACTACTTTGCACGAAAAACAAGAGGAGGAGGAAGAAATAGTATTCCG  
TAGATTACATCTGAGCTTGACAACAAATTATGCAAGATTTTGAGTGAAACAACCAGACCTTTCATGGTGT  
TTCTTGTTGGCTGCTAAGAAAACAATGGCGTTTTTACCTGAAAAATCAAATTTGAGGTCACCATTGAAAG  
GGCCACCATCTCCTAGCTGGAATGATTTGTTGCTCAAGAACAAGAAAGCACTCAATCATGTCCTTTTAC  
TATGCATCTTCAATCCAGGTCCAATAAGCAAACCCCATCTTCATCCCCTTCTCCACAACCTTCGCAAATCCCT  
AGATTTCACTCTTCCCTCACTTGTATCCGATCCAATTTCTCTTCTTCTGATCAAATACTTCTTCCATTCTCT  
CTAAACTCCCTGATTCACAAAGAAATTGTAACCTCTTGTATCTAAACGTTGGCTCAATCTCCAAGGTCGT  
CTGGTACGGTCGATTAAGCTTCTTGATTGGGATTTCTTGTTCGGGTCGGTGTGTTGTTGCGGTTCCCTAA  
TCTTATCCATGTTGATTTGGTTAATGGGTCTCTCATTTACCGGGGAATGCAGGTGTTTTTGTCTAACC  
GGTTGCTTCTTCTCACGTGGATTGTAGCGCTGATGCGAAAGATTGGTTTCTTAAGGAAAGATTTGTGTT  
GCCTTCTGATGAGATTGATAAGGGGTTGAGAATACTAGCAAGTGGGTGTCCTAATTTGCGTAGATTGTT  
GGTGGTAAATGCTAGTGAATTGGGATTGTTGGGGTAGCTGAGGAATGTCCAACCTTTCGCAAGTGTGG  
AATTGCACAGATGTAATGATCAGGTTCTTCGTGGTATAGCGGCCTGTCAGAACTTGCAGATATTGAGATT  
GATTGGAAATGTTGATGGGTTTTATAAATCTTTGGTTACTGATATTGGATTGACTATTTTAGCTCAGGGG  
TGTAAGAGGTTGGTGAAGCTGGAGCTGAGTGGTTGTGAAGGGAGCTATGAAGGGATTAAGGCAATAG  
CACAATGTTGTCAAATGCTCGAAGAGTTGATTCTTCGTGATCATAGGATGGAGGGTGGTTGGTTGTCTG  
CTCTTCTTATTGTGAAAATTTGAACACCTTGAAGTTTATGTCTTGTAAAGAGTATTGATCATTGTGGATGG  
TTTGATGAAGATGTAGGATCTTGCCCAACACTTGAAGATTACATTTGAGAAATGTCAATTAAGAAATA  
AGGAGAGTTTGAAGAACGTTGTTTCTACTATGTCAAGAAGTTAGAGAGGTTATTTTCCACAACCTGTTGGG

GA CTGGATAATGAAATGTT CAGTCTATCCACTGGTCTAAGGTATTGGTTATATTATTCTGTTCTCGTTTAC  
TTTGCTTGCTGTTGCTGGAAAATTTCTGTGCTGGATTAGCATTTTGTATGCATTTGACATACATGAAC TTA  
TTGAGTTTAGGTTTTATGACCTTCAAATGTAGTTCCTTATTTTTGTTAAAAATGACTTTTTAGTGTTGCTGT  
AACCCCATCCCCACCCCTCGGGTATAATAGACGACCAAATGAAAGGATAGTTTGCTTGTAAATAGTGCA  
TTTTATTTTGGTCATAGTATAACCATTTGATCTTGT TTTCTTGGTAAAAGGATAAGTGTGATAAATTCCTTA  
GCTATTTGTGTTGGGGATAGATTGTTTTTTAAGGCCAGTTTGTAGATGCATTTGTAATCATGCACCGTCT  
TAGTGTTCAGTTATTAATGTTAAAATAGCCTTACCATTTCTCGAAGAGTATACACTTCCATCTTGCA TTA  
GAGAAAACACATAATGTTGATGGCATGACAATTATGTTTCAATTCATTATTGATGCTTGATTTATCAATAT  
CATGTGTGCTATCTTGGATTATAAAGAGTCCAGTTTTGAGTTTTATACATTGAACTTGCTTCAGTTCTGAC  
TGGCAATTTGGTATCATATTTTGT TTTGCATTCACCTGGAGCAACAGTAAAGTTGTTCCGTGTGACCTAT  
AGGTCACCAATTTGAGCCGTGGAAGTAGCCACTAATGCTTGCATTAGGAGGGTATCCCCTTGC GTGAAC  
AATGGATAATTTATGCACAAGGCTGCCCTTAAAGTTCAC TTGAGTAAAGGGCCTGTAATTA ACTAAATAT  
AACATTATGTTAGGAATTTGGGTTTCACAGCTTCATTTTGGTGT TATTTTCAACAGGAGAGTGAAGTCTCT  
TTGCCTAGAAAGCTGTTCACTGCTCACA ACTGAAGGCCTCGAATCTGCACTCCTTTCATGGAAGGAGATC  
CAGAGCCTCAAGGTGATATCATGTGGCAATATAAAGGATAGTGAATCAGTCCAGCACTTTCTACCTTGT  
TCTCCACGCTAAAAGATTTTCAGTGGAGACCAGACACAAAATCTCTTCTTTCAGCTGGTCTTGTGGGAAC  
TGGCATGCGAAAAAGAGGCAGTAAATTATTCAAGAAGACGTGCGACTGGAAGTCACTGCCTGGTGCAT  
AGACTGGCTTCCTCATCATGCATTCAGACAATAAATTATTCAAGAAGACATGCGACTGGAAGTCACTGCC  
TGGTGTATAGACTGGCTTTCTCATCATGCATTCAGACA ACTCTACTAGATTTTACCTCCTGATTTATGCAT  
ATGAGA ACTCTAACACATGAAAGAGGTCAGTGCGACACTTTGCTCCAATACTGTCAGCAATGAGGCCTT  
GATGTCATTATCCTGTATTTGTAGTCGCTTAAGTATGTAACGTAGGAACTATAGGATCGAAGATCGGCAC  
TTTCTCAGGGTAGAGATGGAGAAAGAGGCCTAAGTTAATGTATAGAGCTCGATGCTGTAACCTCATGAG  
CATT CAGCTAAAGCCATCTCGCTGTATCTTTGTCAAGAAGCTTAATGGTATTTCTGTATTTGGAACCCCAA  
AAACTCTAAAAGGGGTTTTCTATCTACGATGTTATAAAGAATTTTGGCACCTTTTATGCCATACTACTG  
CCTTCCACAATTGTGTGAAAGCATATTTGATATGAACTATACCAGCAAGCATGTCATTTGTGGAGGAGAC  
GAGAACCAGAATAATTTTCTACATCAATGGCATCTATGTC

>M6-PGSC0003DMG400015121 M6 LRR-RLP

TTTAATGTTTTGCATGATTGATGTGATAGTACCTTGAGAAATCGTGATATCGCAAATACCAATTGTTTCGGT  
CAACTCAACAACATAAGTGTGCTATAATACATTTGAAAAACAAATCAAGCTTTGAATCAATCATGAAGA

AAAACATTCTTATTGATTCTTCTCTTTCTAATTCAATTTTCTGTATCACTTTCTCCTCAAATGAGACTGA  
CCAACAAGCTCTACTGGCTTTCCAAAATCTTATTACAACCTCCAATCATTTTTTGCCAATAATTGGACCA  
AAAATACTTCTTTTTGCTCTTGGTTGGTGTCACTTGCAGTCCAAAAAGGCAAAGGGTTGTGGCCTTGGA  
TCTTCCTAATTTGCATCTTCAAGGCACAATCTCGACGTCTTTGGCCAATTTGTCCTCCTCAGTGTTTTCAA  
TCTCGAGAACAACAACCTTCAGCGGTGGCATCCCTTATGAACTTGGCCACTTGCCTCGCTTGGGAGTGATT  
GATATTCAAACAATCAGCTCAACGGAAGTATACCAACAAGTCTATTTCAACACCGGAGAGTTCAAGTA  
ATTTCAATTGGCTTTCAATGAACTCGGTGGTGAATGTGGAAAGGGCCATGGTATGTACCCGAACTCAGA  
GTCTTGGATCTCACCAACAATAACCTCACGGGTATGATCCCTCCTTCTGTTGGAAATGCCACAAAAATGA  
TGAACTTCAGTTTGTCTGGGAATAGAGTCAGCGGCAACATTCCAAAGGAGGTCGGTAATCTGAGCCAAC  
TTGCAGACTTGTCTTACTGATAATCAATTAACAGGTTCCATTCTGTAGGACTATTTAATATCTCGTCG  
CTACTTGCATAAATCTGCTATAACAATAAACTTTCCGGTCCTCTTGTAGATGAAGGAATTTTTTTGTCA  
AATCTGAAGTTTCTAAGGATATCTCGCAACCAGATTTTAGGATGCATTCTTCCAACATATGCCAACTCAG  
AGAGCTCAAAGTTTTGTCCATATCTTTCAACAACATAATTGGAGACAAACCCAAAAATATTGATTGTTTAT  
CCAATCTCCAGGAGTTTTATAATCGTCATAATTCATAAAAAGGGACTATTCCCACTTCATTGGGAAATATT  
TCAACTCTGCAATATCTTTATTCTGGAACAATCTCATGGTGGGGCCAATTCTCCAGAATTAGGGAAGC  
TATCAAATTTGAGGCAATTAATTTTTCCAATAATTCTAATCTTATTGGTCAAATTCCAGAGGCTATTTTCA  
ACATATCTTCTTTGGAATTAATCAATTTCAAGTTTCAATACCCTGTGGGTAGAAATCCAACCACTACAGGT  
CTTCATCTTCCGAACCTTAAAGTACTTACTTGGGAGTCAATCAGCTTGAAGGGGAAATTCATTGTTCA  
TAACAAATGCTTCCAAGCTTCAGATACTGTGCTAGAACATAACTCTCTCTCGGGAGCTATTCTACTAAT  
TTGGGAAATCTTCATGAGCTGCAATCACTCTTACTACATACTAATCAACTTACCAATGAACCAAGAGAGC  
ATGAGTTGAAATCTTCAATTCGTTGGCGAACTGTAGGATGTTGAGATATCTAGAAGTGGGTAACAATC  
CGTTGAGTGGCGTTCTACCAAATTCTGTTGGGAATCTCTCATCTACTATTGAAAAGATTTATATAGGAGA  
TGCACACATCAATGGCCTCATCCCCACAAGTATAGGCAACATGAGCGGTCTTACAGCCCTAAGCCTTGGA  
GGAAACAACCTTGGCAGGGAATATTCCTTCTGAGATTGGTAAGCTTAAACAACCTCAAGGGCTGGCTCTA  
TATAACAATAAATTGCAGGGACGTATTCCAGAGGTGGTATGCCATTTATCGAATTTGGTTGGCTTATTAC  
TGGATGGTAATGAGCTCTGTGGATTAATTCCAGAATGCTTTGGAAATCTTAGCATGCTACAAGCGCTTTA  
TTTGGATTCTAATAAATTTTCATCAAATTTCCGTTGAGCCTTTGGAAGATGAGTGGTCTTCTCTATCTAA  
GTGTGTCACGAAATTCAATAGAGGGGAGAACTTCCATCAGATATTGGAGGACTGAAAGCCATTGTAGAAC  
TATATCTTTACAATAACCACTTTTCAGGTGTGATACCAACCAGATTGGGGGAACTCCAAAACCTGCAGCA

TCTTGACCTATCCAACAATTCATTTTTGGCCAAATCCATTATCCTTTGCCAACTTGATAAGCTTGGAATT  
CTTGAATTTGTCTTTAAATGCCTTGTCCGGTACTATTCCTAAATCTTTGGAAAACTCTCATACCTTAAAAG  
CATTAAATGTTTCATTTAATGATTTAGAAGGTGAAATACCAAGTGGTGGCGTGTTTGCAACTTCCACTGTG  
CAATCATTCTTGGGAACAAAGGTCTTTGCGGAATGCACATATTGGAGATTCCTACTTGTGCTATCACTA  
ATCATGGAAAAACAATCAAAGCTTAAGGAGGTTGTGCTAAAAATTGTTACTCCAGTGGTTATTGCATCCTT  
TCTGATATTCTTGTTTCGTTTCAATTTGGATAATGAAACGACAGAAGAAAGGGAAGTCCAAAGATATTGA  
AAAGGTATTGGAGATCGGGACTCATCAATTAGTTTCTTATCACGAGATTCAACAAGCAACAAATAATTTT  
GATGAATCCAATTTAATTGGTGAGGGAAGCTCTGGCTCTGTGTACAAAGGCACATTGTTTGGTGGA  
GCAGTGGCCATTAAGGTTCTGGATTTGGAAAACGAGCAAGTATGCAAGAGGTTTGATACCGAATGTGA  
AGTGATGAGAAATGTTAGACACAGAAATCTTGTTTCAGTGATTACTACATGTTCTAGTACTATATAAGA  
GCCTTTGTTCTGCAATTTATGCCCAATGGAAGTCTTGAGAATTGGCTGTACAAAGAAGATCGACACTTGA  
ACCTTCATCAAAGAGTCACTGTAATGCTTGATGCAGCTATGGCAGTTGAATATCTACACCATGGTCATAA  
CACTCCAATAGTTCATTGCGACCTGAAGCCAGCCAACGTTCTTTTGGATGAAGATATGATGGCTCATGTT  
GGTGATTTTGGAAATATCTAAAATTTTAGCCATAAGCAAGTCCATGGCTTATACAGAGACATTGGGCACTC  
TTGGATATATTGCACCAGGTAAAAGAAAATCTACTCTCATTGATTTTCTTATCATAATTAAGCCTCTCC  
AAGTTGTAGAAGTAAAAGAGAATTATTGTTGTATTTCAATTGAATTAACTTTTTTTTAAATCCTTTTTTAA  
GAATATGGCTCGGATGGAATAGTGTCTGCTAGTGGCGATGTTTATAGTTACGGCATCATGTTGATGGAG  
GTTTTGACGAAAAGAAGGCCAACAGATGAAGAGATATGCAATGAAAATCTTGACTTGAGGAAATGGAT  
CACACAATCATTTTTCAGGGAGTATGATGGACGTTGTGGATGCCAATCTTTTCTCCGAGGAAGAACAGAT  
CACTTCAGAAAGTGAATCTGCATTGCGTCCATGATAGAATTGGGTTTACTGACACAAAGGAAATGCC  
AGAATCAAGAATAAGCATGAAAGAAGTAGTGAAGAGGCTTAACAAAATCAACAACACATTTCTGGAAA  
CATAGTAGTGATCAGTATCTATTCCGGTGGTGTCTTTTCTGAGCTGCAAATTAATATGATGCTTTTTGT  
TACTTAAT

>M6-PGSC0003DMG400015283 M6 LRR-RLP

ATGCACTCCAATACCAAACAACATTTACGAGAGGTATCGTCTTTTGCTTCTTGACATTTTCCAAAATGGA  
AGTTTTACAATGAGTTTTAATTTCCACACCTTTCTGGCTATCCGTGCTGTGTTTTTTGTGTTTCTATTGTC  
ATTTTCTCTCCAACATGCTGCATCAGCTGCTTTTCTTGGCAATGAACTGATAAACTTGCTTGCTTGCAAT  
CAAGACCCAAATAACCGAGGATCCATCAAGAGTTTTTGTCTCTTGGAAATGATTCTGTTCAATTTCTGTCAGT  
GGACTGGAGTAAAATGTGGCCTGAGACACGTAAGAGTCATCCGTTTGAATCTCAAAGGGCTGAGGCTG

GCAGGTAATCTCAGATCATCTTGGAAATCTCTTTTTCTCAATTCTCTTGACCTTGCAGAAAATGTCTTC  
CATGAAAAAATTCCTCAACAACCTCAGCAGGCTGCCAAGGCTTCAATACTTGAATTTGAGTTTTAACTATCT  
AACAGGAGAAATTCAGTTAATCTATCACATTGTGTTAACTCAAGAGCCTTGTCTGGACCACAACACT  
CTAGTGGGAAAGATTCTTACCAAGTTGGATCTTTAACGAAGTTAGTGAAATTGTATCTCGAAAATAACA  
ACCTGACAGGAAACATTCCAGGTTCTATTGGAAATCTTACATCTTTAGAGGAGCTGTATTTATCGTACAA  
CAATCTAGAGGGAGAAGTGCCAGCTTCTTTAGCTCGATTTACCAAGTTGAGGCTTCTTGGACTGTCAGTA  
AATAGCTTATCCGGGGATTTCCCTCCTCCGTTGTACAATTTGTCATCCCTGGAATAATATCACTTTCCCTT  
AACAACTTTTCTGGTAATCTCAGATCTGATTTAGGCAACTACTTCCCTTATCTCCAAATACTTTTCTTGCG  
AATTGTCAATTCATTGGTTCCATACCATCCTCTTTGGCCAATGCTTCAAAGTTGCGAGAGCTTGATTTTCC  
TTTAAACAATTTCACTGGAAATATACTAAGGGTTTTGGTAACTTGTGGAATTTGTTGTGGCTCAATGTTT  
GGAGTAACCATCTTGGATACGGTAAGCATGATGACCTTGACTTTGTAAATTCTTTACTAACTGCAGCAG  
CCTACAAATGCTCCATTTTGGAGGCAATCAGTTTGGAGGTACATTACCCCATTCAGTATGCAACCTTTCTA  
GTCAGTTGCAACGCCTACTCTTCTCGAAAATAGAATTGGTGGAAATCATAACCAAGAGAGATCTCAAACCT  
GGTGAATTTGAATCTACTCTACATTGTTCTAACAATTTTATAGGTAGTATTCCAGATTCTATTGGAAGAC  
TTACAACTTGGGAGCTCTCTTCTGTTTAAACAATCTCTTGACAGGTGTCATCCCTTTTTCAATAGGAAAC  
CTCACTGACTCTTCTATCTTTTTTTGGGACTTAACAGGTTAGAGGGTAACATACCTTCAACATTGGGAAA  
CTGTAACCAACTGCTAAAATTGGGATTTTCTGAAAACAACCTGACAGGAACTATAACCACAACAACCTTTT  
GGTCTCTCATCCCTCACAGATATTTATGCATCTTATAACTCTTTGACTGGTCCATTACCGGTGGATATTGG  
TAACTGGAATCATCTTACTTATCTTGATTTTTCTTACAACAATTTTTCGGGTATGATTCCACTAACTCTTGG  
AAAATGCTTGACCTTGTGGGAGATCTATATGAAGGGAAACTCCCTCCAAGGAACCATTCCCAATTTAGA  
AGATTTGCCGGATCTCCAATCCTTGGATCTTTCCCTAAACAACCTATCAGGGCCAATCCCTCACTTCATTG  
CAAATCTTACTTCTTACTACTTGAACCTTATCTTTTAAACAATCTAGAGGGTGAGGTTCTGTACCCGGA  
ATATTTTCTAATTTGAGTGCAGTTGTATTAAGCGGAAACTCCAAGCTTTGTGGTGGGATTCAAGAGCTTC  
ATTTACAACCTTGTATTTATCAAAGACACGGAAGAAGCATGTGCTTGCCCTCAAGTTTATTTTGATAATT  
GTTTTTGCTGCTTCATTTTCAATCCTGGCCTTGTTAGTAGTTTTCTTTGTTGGAGAAGAAATTTGAACAAT  
CAACCAGCACCAGAAGATAGTTCTAAATCTGCGCATTTCTACCCCAATATTTTCGTATGAAGAGCTCCGCA  
CTGCAACAGGTGGATTTTCTTCTGAAAATCTTATTGGCTCTGGCAGTTTTGGAACCTGTTTATAAGGGAAC  
TTTTCCCTCCAATGGAACGGTCGTTGCTGTGAAGGTAACCTCAACTCCAGCTTGAAGGTGCTTCAAAAAGC  
TTCTTAGCAGAATGCCAAGCATTGAGAAACACAAGGCACCGGAATCTTGTCAAGGTCATCAGTGTATGC



TCAAGTTCTGATTTCAAGGGAAATGACTTTAAAGCTTTAGTCTTTCAGTTCATGCCAAAAGGGAACTTGG  
ACGAATGGCTACATCCAGAAAAGGAGATGCATGAGAAGAGTAGCTTGACCACACTTTAGAGAATGAAT  
ATCATAATAGATGTGGCCTCTGCACTTCATTATCTTCACCATGAATGCCAAACACCCATGATTCACTCTGA  
TATAAAACCACAGAACATTCTTCTTGATGAAGATCTCACTGCTCATTGGGTGATTTTGGTTTGGTGAGA  
CTCGTTCCTGAATTCAGTAATGAATCGGATCTACATCAGTTTAGCTCACTTGGAGTTCTGGGAACCATTG  
GCTATGCAGCTCCAGGTAATTTTTATATATAAAACAAAACTATGAATATACCATATGGTTTCTCGTAACAT  
TAGTGGTTTATTTATAGGCTGATCAATTTGCTTGTGCAGAATACGGCATGGGTAGTAAGGTCTCCGTTG  
TAGGAGATATGTACAGTTTTGGGATCCTAATATTGGAGATATCACTGGAAGAAGACCCATGGACTCTTT  
GTTCCAAGCAAGCTCTACCCTCCACCACTTTGTAGAAACAGCATTGCCAGAGAAAGTTATGGAGATTCTA  
GACAAAACAGCTTTTCATGGTGAGATGAGTAAAGAAACCTGTGGCTAAGAATACTGGGGCAGTATCAA  
GAAAGAACAGATGGAATGCTTGGTTGGCATACTTGAGATTGGTGTTCATGTTTCAGCTGAATCCCCAAG  
TGACAGATTGACCATGACACAAGTTTACAGTAAGTTGACACTAATAAGAGAAAAATTCCTACTAAGGGG  
AGATTGAGGCCACAGGCTACAAGTGAAAGCATTGGATTTAATCTAA

>M6-PGSC0003DMG400015345 M6 LRR-RLP

TATTTCTAACAATAAGATTCGTGGCCAAATCCCAAACCTGGTTTAGCGGCATGAGGTGGGACAACCTTGTCC  
TACCTAAACCTTTTCGCATAACTCTTTAACAGGCCACCTACAACAATTTAATTTCCATAATCTAAGGTATCTT  
GATCTTAAATTTAACTCCCTTCAAGGTCCAATACCTTCATCCATTTGTAACATGAACAGGCTTGAATTTCT  
AGATTTATCACGCAACGACTTCAGTAACTCGATTCCAAGTTGCTTGGGAAGCATGTCTAGTCTAACAGTG  
TTGGACTTAAGAAGGAACAATTTCACTGGGAGTCTTCCATCGTTATGTGCGCAGAGCACTTCATTGAGAA  
CCATTGTCTTGAATGGTAATCAATTTAAAGGAACTCTCCCTGTGTCGTTGCTCAACTGTAGTGATTTAGAA  
GTTCTTGATATGGGAATAACGCTATAAATGACACATTTCCAGCTTGGCTAGGAACACTTCAACAACCTGC  
AGGTCTTAATATTAAGTCCAATGTGTTCCATGGACCAATTAGTACTTGTGCACTACATTTTGCTTTCCC  
AAGTTGCGGATTTTTGATCTTTTCGCATAACAAATTCAGTGGCTCTCTCCCTGCAAAGTTTTTGGAAACTT  
CAAGGGAATGATTAGATTAGACGGTGAAGACACACGAGAGATCATGTACATGCAACCATCTATAATGCC  
ATTTTACTCATCATATGAGGATTCTGTGAGTTTGGTGATCAAAGGCCTGGATATTGAGCTAGAAAGA  
ATCAGCACGATTATGACAACCATAGACCTCTCGAGCAACCACTTTGATGGTGTTCATTCCGAAAACACTAA  
AGGATCTCAGCTCACTTTGGCTACTCAATTTATCCATAACAATCTCATAGGTCATATTCCAATGGAATTG  
GGGAAATTGAATAAGCTTGAAGCATTAGATCTCTCTTGGAAATCGGCTCACTGGAAAGATTCCGCAGGAA  
TTGACAAGGCTAACATTTCTGGAAAAGTTAAACCTTTCTCAGAATGTTCTTGTGGACCAATTCCTCACGT

TCTACAATTCAACACATTTGAAAATGACTCGTATGGCGGTAACCTTGATCTATGTGGTCCTCCTTTATCAA  
AGCAATGTGGAACGAGTGATCTATCCCATGTTCTCAACCATTGGAGTCTGAAGACGAGTCATATTTTTT  
TAGTGGATTTACGTGGGAATCAATAGTCATTGGCTACAGCTGTGGACTAGTTGTTGGAAGTGTGTGTG  
GAGCCTCATGTTTAAATATCGTAAGCCAGAATGGTTTGTGCAATTTTTTGAAGGCATTTATCCCAAGAAA  
ATGAGAAGGTCAATGAAGAGAGCTCAGAGACGACGGACTTAATAGAAGATTGCAGGAG

>M6-PGSC0003DMG400015347 M6 LRR-RLP

GTTGGTAATTAGTGAAAGCTTTTCTTCTCCTCTGTGATGATGCATCATGTTTGCTCTCCCACTGAAGCTTT  
TGCTTTGCTTCACTTCAAACAATCCTTTCAAATCTCTGACCAACCTAGCTCTCGGGATGATACTGGTGTGC  
AATTTGTTGATGTCCCAAAAACGAAGTCTTGAATGAGAGTAGGGATTGCTGCAGTTGGGACGGGGTA  
ACTTGTGACATGTTAACCGGTCATGTTATCGGATTGGACCTTAGTTGCAGTCTGCTTAATGGAECTATTC  
ATCCCAATAGCAGCCTCTTCCAACCTCCATCATCTCCGGACACTAAACCTTGCTTACAATGACTTCTATTCTT  
CTTCAATCCCACATAACATTGGCCGATTGAGGAATTTGAGGCATCTCAACCTTTCTCATTCTTTGTTTGAA  
GGGGAAATCCCAACAGAAATCTCATACTTTCCAATTTGGTTTCACTGGAACCTTTTTTGTAAATGGATGTG  
AACTTGCTGAGAGAACATTGAAACAATTCTTCAAACCTTCACAAATCTAGAGGTACTATCTCTCTCTTAT  
GTCAACATCTCATCTCCATTACCTGTGAATATTTCTTCTCCTCGTTAAGGTACGTGGATCTTGAATTTACT  
AATCTGGGAGGTGTTCTCCAGAGAGTCTTTTCTTCTGCCAACTTGGAATGCTCTATTTGAATTACAA  
TGATCTTCTCGAAGGAGTTTTACCAAAGATCCACCCGAGCAACACTCTGTTGGAGTTGGATATTTCTAC  
ACAGGAATCTCCGGTGAGCTGCCTGATTCAATTGGCACCTTGAGTTCATTGAATCTCTTGAACCTCAAAA  
GATGTCAATTCTTAGTTCATTCTGATTCCATTGGCAATCTTACACAAATGCGGGGTTTGGATTTTGGT  
AATAATCATTTACCGGCTATATTCCTTCCATAATCTCTAAATTGAAGCACCTCACATCCCTAGATCTCTCG  
TCCAACCTTTTTAGGTGAAATTCCCGATATTTTTTCTAACCTCCAAGAGCTACGTTATTTATATCTTTCT  
GACAACAGCTTCATCGGTTTGCTTCTTCTACAATTGTAAGCTTGACACATCTTCAATACTTAGACTTGTC  
AAGTAATCCCTATCTGGCCCACTGCCTAATAATTTGAGCATGCTTCAAAGCTAACCCAACTAGATTTGT  
CGCACAACCTCACTGAATGGTACCATACCATCTTCGGTTTTTAGCCTCCCTTTGCTAGGTGAGTTGTGGCTC  
GATAATAATCGATTTAGTGGACTACCAATGAGCTCAAACAAACCCAACTTAGAAAGCCTGAGTTTAA  
GCCATAATCAACTCAGTGGTTCTTTGCTTCAATCACTTTTGAATCTCACAACCTTTCTACCCTTGACCTTT  
CATCAAATAACATCACCATCGATGAGGGAATACAAATCACTTTTCTAGCCTACAAGATTTGTTGTTATCA  
TCTTGTGAACTGAAGGATATTCACACTTCTTGACAAATGTAAAGAACTTCAGGTCTTGGATATTTCTAA  
CAATAAGATTCTGGCCAAATCCCAAACCTGTTTAGCGGCATGAGGTGGGACAACCTTGTCTACCTAAA

CCTTTCGCATAACTCTTTAACAGGCCACCTACAACAATTTAATTTCCATAATCTAAGGTATCTTGATCTTAA  
ATTTAACTCCCTTCAAGGTCCAATACCTTCATCCATTTGTAACATGAACAGGCTTGAATTTCTAGATTTATC  
ACGCAACGACTTCAGTAACTCGATTCCAAGTTGCTTGGGAAGCATGTCTAGTCTAACAGTGTTGGACTTA  
AGAAGGAACAATTTCACTGGGAGTCTCCATCGTTATGTGCGCAGAGCACTTCATTGAGAACCATTGTCT  
TGAATGGTAATCAATTTAAAGGAACTCTCCCTGTGTCGTTGCTCAACTGTAGTGATTTAGAAGTTCTTGAT  
ATGGGGAATAACGCTATAAATGACACATTTCCAGCTTGGCTAGGAACACTTCAACAACACTGCAGGTCTTA  
ATATTAAGTCCAATGTGTTCCATGGACCAATTAGTACTTGTGAGACTACATTTTGCTTTCCCAAGTTGCG  
GATTTTTGATCTTTCGCATAACAATTCAGTGGCTCTCTCCCTGCAAAGTTTTTGGAAACTTCAAGGGAA  
TGATTAGATTAGACGGTGAAGACACACGAGAGATCATGTACATGCAACCATCTATAATGCCATTTTACTC  
ATCATCATATGAGGATTCTGTGAGTTTGGTGATCAAAGGCCTGGATATTGAGCTAGAAAGAATCAGCAC  
GATTATGACAACCATAGACCTCTCGAGCAACCACTTTGATGGTGTGATTCCGAAAACACTAAAGGATCTC  
AGCTCACTTTGGCTACTCAATTTATCCATAACAATCTCATAGGTCATATTCCAATGGAATTGGGGAAATT  
GAATAAGCTTGAAGCATTAGATCTCTCTTGAATCGGCTCACTGGAAAGATTCCGCAGGAATTGACAAG  
GCTAACATTTCTGGAAAAGTTAAACCTTTCTCAGAATGTTCTTGTGGACCAATTCCTCACGTTCTACAAT  
TCAACACATTTGAAAATGACTCGTATGGCGGTAACCTTGATCTATGTGGTCCTCCTTTATCAAAGCAATGT  
GGAACGAGTGATCTATCCCATGTTCTCAACCATGGAGTCTGAAGACGAGTCATATTTTTTTAGTGGAT  
TTACGTGGGAATCAATAGTCATTGGCTACAGCTGTGGACTAGTTGTTGGAAGTGTGTGGAGCCTCA  
TGTTTAAATATCGTAAGCCAGAATGGTTTGTGCAATTTTTTGAAGGCATTTATCCCAAGAAAATGAGAAG  
GTCAATGAAGAGAGCTCAGAGACGACGGACTTAA

>M6-PGSC0003DMG400015348 M6 LRR-RLP

TGTCGTTGCTCAACTGTAGTGATTTAGAAGTTCTTGATATGGGGAATAACGCTATAAATGACACATTTCC  
AGCTTGGCTAGGAACACTTCAACAACACTGCAGGTCTTAATATTAAGTCCAATGTGTTCCATGGACCAATT  
AGTACTTGTGAGACTACATTTTGCTTTCCCAAGTTGCGGATTTTTGATCTTTCGCATAACAATTCAGTGG  
CTCTCTCCCTGCAAAGTTTTTGGAAACTTCAAGGGAATGATTAGATTAGACGGTGAAGACACACGAGA  
GATCATGTACATGCAACCATCTATAATGCCATTTTACTCATCATCATATGAGGATTCTGTGAGTTTGGTGA  
TCAAAGGCCTGGATATTGAGCTAGAAAGAATCAGCACGATTATGACAACCATAGACCTCTCGAGCAACC  
ACTTTGATGGTGTGATTCCGAAAACACTAAAGGATCTCAGCTCACTTTGGCTACTCAATTTATCCATAAC  
AATCTCATAGGTCATATTCCAATGGAATTGGGGAAATTGAATAAGCTTGAAGCATTAGATCTCTCTTGGGA  
ATCGGCTCACTGGAAAGATTCCGCAGGAATTGACAAGGCTAACATTTCTGGAAAAGTTAAACCTTTCTCA

GAATGTTCTTGTTGGACCAATTCCTCACGTTCTACAATTCAACACATTTGAAAATGACTCGTATGGCGGTA  
ACCTTGATCTATGTGGTCCTCCTTTATCAAAGCAATGTGGAACGAGTGATCTATCCCATGTTCTCAACCA  
TTGGAGTCTGAAGACGAGTCATATTTTTTTAGTGGATTTACGTGGGAATCAATAGTCATTGGCTACAGCT  
GTGGACTAGTTGTTGGAAGTGTGTGGAGCCTCATGTTTAAATATCGTAAGCCAGAATGGTTTGTCTGA  
ATTTTTTGAAGGCATTTATCCCAAGAAAATGAGAAGGTCAATGAAGAGAGCTCAGAGACGACGGACTTA  
A

>M6-PGSC0003DMG400015349 M6 LRR-RLP

ATGGTGAGTCTCTTTTTCTTTTATTCATTTCTCTGTTTGGTGTTACTGATAAGTCTATGCTTTTCTTCTTCT  
TTGATCATCATATTTGTTCTTCCAGTGAAGCTTCTGCTTTGCTTAAGTTCAAACAATCCTTTGAAATCACCG  
ACTACCTTAATTGTTGGGTTGAAGAAGACCAACATATTGATTACCCAAAAACAAAGTCTTGGAAATGAGA  
GTACGGATTGCTGCAGTTGGGATGGAGTCACTTGTGACTTATTAACGGTCATGTTATCGGGTTAGACC  
TTAGTTGTAGTCTTCTTTTTGGCACTTTTCATCCCAATAGTAGCCTCTTCCAACCTTCTCATCTCCACACACT  
AAACCTTTATGGCAATGCCTTCAATCATTCTTCAATCCCACATAACATTGGCCGATTGACGAATTTGAGGC  
ATCTCAACCTCTCTGGGTCTGGCTTAAGTGGGAAAATCCCAACAGAAATCTTAGACCTTTCCAATTTGGT  
GTCACTTCATCTTTCTGCTGGTCTGTATGGATTACAACCTTGATCAGAGAGCATTGAAACACTGCTTCAGA  
ACTTCACAAATCTGGAGCTACTTTCTCTCCCTGGTGTCAACATCTCATCTCCGATACCTGTGAATATTTCTT  
CCTCCTTAAGGTACGTGGATCTTGAATATACTAATCAGCGAGGTGTTCTCACAGAGAGCCTTTTCTTCTG  
CCCAACTTGAAACACTCTATTTGAGTAATAACTATCTTCTCAAAGGAGTTTTTCCAAGGTCCACCCGA  
GCAACACTCTGTTGGAGTTGGATATTTAGGCACAGGCATCTCTGGTGAGCTACCTGTTTCAATTGGCAA  
CTTCAGTTCCTGAATACCTTAATACTCGATGCATGTCAATTCTCGGGTCGCATTCTGATTCCATTGGAA  
ACCTGACACAAATTAGGGTGTGTTTTATCGCATAATCATTTCACTGGCAATATTCCTTTACAATCTCTA  
AAATGAATCAGCTCTTAAGTTTAGATCTTTCTGATAATAGCTTCATCGGTCCATTTCCCTCTTCAATTCCAA  
GTTTCACACATCTTCAGTACTTATACTTGATGAGTAATTCCCTATCTGGACCACTTCTATAAATGGAAGC  
ATGCTTCAAAGCTAACCGAACTGGATTTGTCTTACAACCTCACTGAATGGTACCATACCATCTTGGGTGT  
TTAGCTCCCTTTGCTATTTCAATCGGTTCTCCATAATAATCGATTTAGTGGACTACCCGATGAGCTCAA  
ATAAACCTACCATTAGTACACCTGGATTTAAGCCATAATCAACTCAGTGGTTCTTTTCTCAATCACTTGC  
GAATCTCACAAACCTTTATCCCTTGAACCTTTCATCAAATAACATCACCGGGGATATTGCGGGGAATCAAT  
ATCACTTTCCCTAGCCTAGGATTTTTGCAATTATCATCATGTGAACTGAAGGATTTTCCACACTTCTGAG  
AAATGTAACGACACTTCGGTACTTGGATATTTCTAACAATAAGATTTGTGGTCAAATCCCTAACTGGTTTA

GCGGCATGAAATGGAACCTCGTTGCAGTCCCTAATCCTTTCTCATAATTCATTAACAGGCCATCTACCACA  
ATTTATTATTATAAGCTAAAGTATCTTGATCTGAAATTTAACTCCCTCAGGGTCCACTACCTTCATCCAT  
TTGTAACATGAGTTCACCTTCCTTATTAGATTTATCACGCAACAACCTCAGTAACTCGGTTCCAAGTTGCTT  
GGGAA

>M6-PGSC0003DMG400015351 M6 LRR-RLP

ATGTTAACCGGTCATGTTATCGGATTGGACCTTAGTTGCAGTCTGCTTAATGGAACCTTTCATCCCAATA  
GCAGCCTCTTCCAACCTCATCTCCGGACACTAAACCTTGCTTACAATGACTTCTATTCTTCTTCAATCC  
CACATAACATTGGCCGATTGAGGAATTTGAGGCATCTCAACCTTTCTCATTCTTTGTTTGAAGGGGAAAT  
CCCAACAGAAATCTCATACCTTTCCAATTTGGTTTCACTGGAACCTTTTTGTAATGGATGTGAACTTGCTG  
AGAGAACATTCGAAACAATTCTTCAAACCTTCAAAATCTAGAGGTACTATCTCTCTTATGTCAACATC  
TCATCTCCATTACCTGTGAATATTTCTTCTCCTCGTTAAGGTACGTGGATCTTGAATTTACTAATCTGGGA  
GGTGTCTCCAGAGAGTCTTTTCTTCTGCCAACTTGGAATGCTCTATTTGAATTACAATGATCTTCT  
CGAAGGAGTTTTACCAAAGATCCACCCGAGCAACACTCTGTTGGAGTTGGATATTTCTACACAGGAATC  
TCCGGTGAGCTGCCTGATTCAATTGGCACCTTGAGTTCATTGAATCTTGAACCTCAAAGATGTCAATT  
CTCTAGTTCATTCTGATTCCATTGGCAATCTTACACAAATGCGGGGTTTGGATTTTGGTAATAATCATT  
TCACCGGCTATATTCCTTCCATAATCTCTAAATTGAAGCACCTCACATCCCTAGATCTCTCGTCCAACCTCT  
TTTCAGGTGAAATCCCGATATTTTTCTAACCTCCAAGAGCTACGTTATTTATATCTTTCTGACAACAGCT  
TCATCGGTTTGCTTCTTCTACAATTGTAAGCTTGACACATCTTCAACTTAGACTTGTCAAGTAATCCC  
TATCTGGCCCACTGCCTAATAATTTGAGCATGCTTCAAAGCTAACCCAACCTAGATTTGTCGCACAACCTCA  
CTGAATGGTACCATACCATCTTCGGTTTTAGCCTCCCTTTGCTAGGTGAGTTGTGGCTCGATAATAATCG  
ATTTAGTGGACTACCCAATGAGCTCAAACAAACCCAACATTAGAAAGCCTGAGTTTAAGCCATAATCAA  
CTCAGTGGTTCTTTGCTTCAATCACTTTTGAATCTCACAAACCTTTCTACCCTTGACCTTTCATCAAATAAC  
ATCACCATCGATGAGGGAATACAAATCACTTTTCTAGCCTACAAGATTTGTTGTTATCATCTTGTGAACT  
GAAGGATATTCACACTTCTTGACAAATGTAAAGAACTTCAGGTCTTGGATATTTCTAACAATAAGATT  
CGTGGCCAAATCCCAAACCTGGTTTAGCGGCATGAGGTGGGACAACCTTGTCTACCTAAACCTTTTCGCATA  
ACTCTTTAACAGGCCACCTACAACAATTTAATTTCCATAATCTAAGGTATCTTGATCTTAAATTTAACTCCC  
TTCAAGGTCCAATACCTTCATCCATTTGTAACATGAACAGGCTTGAATTTCTAGATTTATCACGCAACGAC  
TTCAGTAACTCGATTCCAAGTTGCTTGGGAAGCATGTCTAGTCTAACAGTGTGGACTTAAGAAGGAAC  
AATTTCACTGGGAGTCTTCCATCGTTATGTGCGCAGAGCACTTCATTGAGAACCATTGTCTTGAATGGTA

ATCAATTTAAAGGAACTCTCCCTGTGTCGTTGCTCAACTGTAGTGATTAGAAAGTTCTTGATATGGGGAA  
TAACGCTATAAATGACACATTTCCAGCTTGGCTAGGAACACTTCAACAACACTGCAGGTCTTAATATTAAG  
TCCAATGTGTTCCATGGACCAATTAGTACTTGTGACTACATTTTGCTTTCCCAAGTTGCGGATTTTTGA  
TCTTTCGCATAACAAATTCAGTGGCTCTCTCCCTGCAAAAGTTTTTGGAACTTCAAGGGAATGATTAGA  
TTAGACGGTGAAGACACACGAGAGATCATGTACATGCAACCATCTATAATGCCATTTTACTCATCATCAT  
ATGAGGATTCTGTGAGTTTGGTGATCAAAGGCCTGGATATTGAGCTAGAAAGAATCAGCACGATTATGA  
CAACCATAGACCTCTCGAGCAACCACTTTGATGGTGTGTCATTCCGAAAACACTAAAGGATCTCAGCTCACT  
TTGGCTACTCAATTTATCCATAACAATCTCATAGGTCATATTCCAATGGAATTGGGGAAATTGAATAAG  
CTTGAAGCATTAGATCTCTCTTGAATCGGCTCACTGGAAAGATTCCGCAGGAATTGACAAGGCTAACA  
TTTCTGGAAAAGTTAAACCTTTCTCAGAATGTTCTTGTGGACCAATTCCTCACGTTCTACAATTCAACAC  
ATTTGAAAATGACTCGTATGGCGGTAACCTTGATCTATGTGGTCCTCCTTTATCAAAGCAATGTGGAACG  
AGTGATCTATCCCATGTTCTCAACCATTGGAGTCTGAAGACGAGTCATATTTTTTTAGTGGATTTACGTG  
GGAATCAATAGTCATTGGCTACAGCTGTGGACTAGTTGTTGGAACGTGTGTGTGGAGCCTCATGTTTAAA  
TATCGTAAGCCAGAATGGTTTGTGAATTTTTTTGAAGGCATTTATCCCAAGAAAATGAGAAGGTCAATG  
AAGAGAGCTCAGAGACGACGGACTTAA

>M6-PGSC0003DMG400015352 M6 LRR-RLP

ACTTGTGACATGTTAACCGGTCATGTTATTGGATTGGACCTTAGATGCAGTCTGCTTAAAGGAACTATTC  
ATCCCAATAGCAGCCTCTTCCAACCTCCATCATCTCCATACTAAATCTTGCTTACAATTACTTCTATTCTTC  
TTCAATCCCACATAACATTGGCCGATTGAGGAATTTGAGGCATCTCAACCTTTCTGGTTCACTTTTGAAG  
GGGAAATCCCAACAGAAATATCATACTTTCCAATTTGGTTTCACTTGATCTTTCTTTTAGTGCTGTATG  
GATTACAACCTTGATCAGAGAACATTTGAAACAATGCTTCAGAACCTTACTAATCTGGAGGTAGTTTCTCT  
CCATGGTGTGACATCTTCTCTCCGATACCTGTGAATATGTCTTTTTCTCGTTAAGGTACGTGGATCTTG  
GATATACTAATCTGCGAGGTGTTATCACAGAGAGCTTTTTCTTCTGTGAGAATTGGAAAGGCTCTATTT  
GAGTGACAATGATCTTCTCAAAGGAGTTTTACCAAAGATCCACCAGCAACACTCTGTTGGAGTTGGATAT  
TTCTTACACAGGAATCTCTGGTGAAGCTGCCTGATTGAGTTGGCACCTTCAAGTTCTTGAATATATTGAACC  
TCAAAGGATGTCAATTCTCTGGTCCATTCTGATTCCATTGGCAATCTTACACAAATTTGGTATTTGGAT  
TTCAGTAATAATCATTTACCGGCCATATTCCTTCCACAATCTCTCAATTGAAGCAGCTCACATTTCTATAT  
CTTTCGTCCAACCTCTTTTCAAGGTGAAATTCCAGATATTTTTTCTAACCTCCAAGAGCTATGTTATTTATT  
CTTTATAGAAATAGTTTCATCGGTTGTTTCTTCTACAATTGTAAGCTTGACACATCTTCAACTTAGAC

TTGTCAAGTAATTCCCTATCTGGCCCACTGCCTAATAATTTTAGCATGCTTCAAAGCTAACCTGACTGGA  
TTTGTGGTACAACCTACTGAATGGTATCATACCATCTTCGGTGTTTAGCCTCCCTTTGCTAGGTCAGTTGT  
GGCTCGATAATAATCGATTTAGTGGACTACACGATGAGCTCAAACAAACCCAACATTAGAACGCTTGG  
GTTAAGCCAAAATCAACTCAGTGGTCTTTTCCTCATTCACTTGCTAGTCTCACAAACCTTTCTACCCTTG  
ACCTTTCATCAAATAACATCACCGTCGATGCAGGGATACAAATCACTTTTCCTAGCCTAATAAATTTGTTG  
TTATCATCTTGTAAGGATTTTCCACACTTCTTGACAAATGTAAAGAACTTCAGGTCTTGGATAT  
TTCTAACAATAAGATTCGTGGCCAAATCCCAAAGTGGTTAGCGGCACAAGGTGGGACAATTTGTACTAC  
CTAAATCTTTCGCATAATTCTTTACCAGGCCACCTACAATAATTTCACTTCCATCATCTAGGGTATCTTAAT  
CTTCAATTTAACTTCTTCAGGGTCCAATACCTTCATCCATTTGTAACATGAACAATCTTCAATTTCTACAT  
TTATCGCGCAACAACCTCAGTAACTCGATTCCAAGCTGCTTGGGAAGCATGTCTAGTCTAAAAGTGTTGG  
ACTTAAGAAGGAACAATTTACAGGGAGTCTTCCCCCATTATGTGCGTAGAGGACTTCATTGAGAACC  
ATTGCTTGAATGACAATCAATTTGAAGGAACTCTCCCTATGTGCTTGGCTCAACTGTATTGGTTTAGAAGT  
TCTTGATATGGGAATAACACTATAAATGACACATTTCTGCTTGGCTCGGAACACTTCAACAACCTGCAG  
GTCTTAATATTAAGTCCAATATGTTCCATGGACCAATTAGTACTTGTGCAACTATATTTTGTCTTCCCAA  
GTTGCGAATTTTTGATCTTTCCCGTAACGAATTCAGTGGCTCTCTCCCTGCAAAGTTTTTGGAACTTCA  
AGGCAATGATTAAATTAGACGATGAAGACTCAGGAGAGATCATGTACATGAAACCATCTATAATGCCAT  
TTACTCATCATCATATGAGGATTCTGTGAGTTTGGTGATCAAAGGCCTGGATATTGAGCTAGAAAGAAT  
CAGCACAATTATGACAACCATAGACCTCTCGAGCAACCACTTTGATGGTGTTCATTGGAAAACACTGAAG  
GATCTCAGCTCACTTTGGCTACTCAATTTATCCATAACAATCTCACAGGTGACATTCCAATGGAATTGGG  
GCAATTGAATACCCTTGAAGCATTAGATCTCTCTTGAATCGGCTCACTGGAAAGATTCCGCAGGAATTG  
ACAAGGCTAACATTTCTGGAAAAGTTAAACCTTTCTCAGAATGTCCTCGTTGGACCAATTCCTCACGGTC  
CACAATTCAACACATTTGAAAATGACTCCTATGGCGGAAACCTTGATTTATGTGGTCCTCCTTTATCAAAG  
CAATGTGGAACGAGTGATCCATCACATACTCCTCAACCATTGGACTCTGAAGAAGATGAAGATGAGTCA  
TATTTTTAAGTGGATTTATGTGGGAATCAGTAGTCATAGGCTACAGTTTTGGACTCGTTGTTGGAACCTG  
TTGTGTGGAGCCTTATGTTTAAATATCATAAACCAAATGGTTTGTGGAATTTTTTGTGATGGCATTTTCCCC  
AAGAAAATGAGAAGGTCAAAGAAGAGAAGGCCGGGACAGCGCATTTAA

>M6-PGSC0003DMG400015353 M6 LRR-RLP

TTGGATTCGGTAATAATCATTTACCGGCCATATTCCTTCCACAATCTCTAAATTGAAGCAGCTCACATA  
TCTAGACATTTTCGTCCAACCTCCTTACAGGTGAAATTCCAGATATTTTTTCTAACCTCCAAGAGCTACATTC

TTTATATCTTTGTAACAACAGCTTCATCGGTTTGTTCCTTCTACAATTGTAAGCTTGACACAACCTTCAACG  
CTTAGACTTGTCCAACAACACTCACTTAACGGTACCATACCATCTTCGGTGTTAGCCTCCCTTTGCTATTTTC  
ATTGTCGCTCCAACATAATCAATTTAGTGGAGTAGCCGATGAGTTCAAACATGCCAACATTAGCATAC  
CTAGATTTAAGCCATAATCAATTCAGTGGTACTTTTCTCAATCACTTGCGAGTCTCACAAACCTTTCTACC  
CTCGAGCTTTCAGCAAATAACATCACCGTCGATGAGGGAATACAAATCACTTTTCTAGCCTAGTAGTTT  
TACAGTTATCATCTTGTGAACTGAAGGATTTCCACACTTCTTGACAAATGTAAAGAACTTCAGGTCTTG  
GATATTTCTAACAATAAGATTCGTGGCCAAATCCCAAATGGTTTAGCGGCATGAGGTGGGACAGCTTG  
TGGTACCTAAACCTTTCGCATAATTTTAAACAGGCCACCTACAACAATTTCAATTTCCATAATCTAAGGTA  
TCTTGATATTAATTTAACTCCCTTCAGGGTCCACTCTCTTTGTCCATTTGTAACAGTAACACGCTTGAATT  
TCTAGATTTATCACGCAACAACCTTCAGTAACTCGATTCCAAGCTGCTTGGGAAGCATGTCTAGTCTAAAA  
GTGTTGGACTTAAGAAGGAACAATTTACAGGGAGTCTTTCTCCATTATGTGCGCAGAGCACTTCATTGA  
GAACCATTGTCTTGAATGACAATCAATTTGAAGGAACTCTCCCTATGTCGTTGCTCAACTGTATTGGTTTA  
GAAGTTCTTGATATGGGGAATAACGCTATAAATGACACATTTCCAGCTTGGCTAGGAAGACTTGAACAA  
CTGCAGGTCCTAATATTAAGTCCAATGTGTTCCATGGACCAATAAGTAATTGTCAGAGTACGTTTTGCT  
TTCCAAGTTGCGAATTTTTGATCTTTCTAGTAATGAATTCAGTGGCTCACTTCCAGCAAATTTTTCTTGGA  
AACTTCAAGGCAATGATTAATTAGATGGTGAAGAGACAGGAGAGATCAAGTACATGGAACCATCTGG  
GAAGTCATTGTACACATCGTATGAGGATTCTGTGAGTTTGGTGATCAAAGGCCAGGACATTGAGCTAGA  
AAGAATCAGCACAATTATGACAACCATAGACCTCTCAAGCAACCATTTTGAAGGTGTCATTCCGAAAACA  
CTAAAGGATCTCAGCTCACTTTGGCTACTCAATTTATCCATAACATTTTCATAGGTCATATTCCAATGGA  
ATTGGGACAATTGAATACGCTTGAAGCGTTAGATCTCTCTTGGAAATCGGCTCACTGGAAAGATTCCGCA  
GGAATTGACAAGAATGAATTTCTGGCCTTCTTAAACCTCTCTCATAATCTTCTTATTGGACCAATTCCTCA  
AGGTCCACAGTTCAACACATTTG

>M6-PGSC0003DMG400015449 M6 LRR-RLP

CTCATCCAACAACACTATATCTCCACAAAAAAGTGAAAAAATCAATCTTCATTTCTTATATGATGAGCATT  
TCTTATCTTGAATAATTGTTATTGTGTTAATAGATAGTTCTTTTGTATATCATCTTCCTTAGGGGCAGCCT  
TGGGGGTTGGTTCTTCCGAGGCAGCTTGTTAGTCGGAAATCCCTTAAAAAATGCAGGTGTATCGATG  
TTTTTTCAGTTTGTGCTGATCTCTGCTGTTCTGTTTTCTTCTCTTGTGCACTCTCTGATCATGAAGCATCA  
TTGCTTGCACGGCGACAACCTGTCAACACTTGCTGAAAATGGTAATTTACCCGATAACTATGAATTCGAGG  
TGAATGTAGAATACACATTTCTAATTCTAGGCTTAGACGTGCTTATATTGCGTTAAAGGCATGGAAAGA



AGCTATATATTCTGACCCTTCTGAATTCAGCAATTGGAAAGGTCCAGATGTTTGTAAC TACAAAGGC  
GTGTTCTGTTTCGCCTGCTTAGATGATCCTAATGTCACTGTTGTTGCTGGGATTGATATGAATCATGCAG  
ATATTGCAGGTTATTTTCCTGTAGAATTAGGATTATTGACAGATGTAGCTTTGTTTCACCTAAATTCCAAT  
AGATTTTGTGGAATTGTTCTGAGAGTTTTTCGAAGCTTACGTTGATGCATGAGTTTGATGTTAGTAATA  
ATCGTCTTGTTGGCCCTTCCCTAAGGTTGTTCTGAACATGTCTAGTCTTAAGTACTTGGATTTAAGGTTT  
AACAACTTTGAGGGAGAGTTGCCTCCACAGTTGTTTGACAAAGATCTTGATGCTTTGTTCTTGAATGATA  
ATCGATTCTGTCTACCATCCCTGAGACTCTTGTAACCTTTCAGCTTCTGTGATTGTGTTTGCTAATAAC  
AAGTTTCATGGTTGTATTCCCAGTAGCATTGGGAAGATGTGCAATTTGGATGAGATTGTGTTTATGAACA  
ATGATCTTGGTGGATGTTTGCCTGTTGAAGTTGGGTTGTTAAAGAATGTAACGGTGTTC AATGCTGCTG  
GGAATTTGCTTTCTGGGATATTGCCAAAGACACTTGATGGTCTTTCACATGTTGAGGAATTGGACATTT C  
ACATAATACCTTAACTGGGTTTGTCCGGAGAATCTATGTTTCATCGTTGAGTTTGAAGAAGTTTGTGTTTT  
CGTTTAATTACTTTAATGGAGAGGCTAATGGTTGTGAAGCGCGAACAAGGAAGGATATGAGTTTGGATG  
ATAGGAACAATTGTTTGCCTGGTAGAGCAAAGCAAAGTCTCAAAAAGAATGTCAACCTATTGTGAGTA  
AGCCAATTGATTGTAGTAAGGCTAAATGTGGAGGAACTTCAACAAAATCTCCTCCTAGTAAGAAAAATG  
AAGTGCCACCAAACCTCGACCTACCCCTAAGTCACCACCCACCCCAAAGAAGGTTTCTCCTCCACCAAC  
ACAAGTCGTTTCATCGCCACCTCTAGTACATTCTCCACCACCTCTAGTACATTCTCCACCACCACGTGTCCA  
TTCTCCTCCTGTTTCTCCTCCACCCTACCCGTCCACTCCCCTCCACCACCACATGTCCATTCTCCTCTTG  
TCCTCTCCACCTCGCGTCTACTCCCTACCACCACCTCACGTCCAATCTCCACCGCCACTCCCCGTCAACTCC  
CCTCCATCACCTATAGTATATTCTCCACCACCACATGTCCATTCTCCTCCTGTTTCTCCTCCACCACCACCA  
GTCTACTCCCCACCACCACCTCAAGTACATTCTCCACCACCACCCGTCCACTCTCCTCCTTCTCCTATTTCTT  
CCCCACCACCACCTATCCATTCCCCTCCACCACCTCTTATCCAATCTCCACCGCCGCTCTAGTACATTCTC  
CACCACCACCTGTCCACTCTCCTCCTCCACCTGTTTCTCCTCCACCGCCACCAGTCCATTCCCCTCCACCAC  
CACCGGTCCACTTCCCACCACCACCTCAAGTACATTCTCCACCACCACCCGTCCACTCTCCTCCACCACCAC  
CACCACCACCCGTCCACTCTCCTCCTCCTGTTTCTTCCCATCACCACCACCCGTCCACTCCCCACCACCAC  
CTCTAGTACATTCTCCACCACCTCCCATCCACTCACCACCACCACCTTTGCAACATGTTGTCCTTCCACCAA  
ATATTGGTTCAATTTACGCATCGCCACCCCAATCTTCCAAGGATATTAATTAAGCAATGAATGAAG  
CTTCGTCTCGTTTCCACCTTTTTAGTACGTAAAATATTTAGTACATGCAGAATTACATCATCATATCTCTTA  
ATGCAAGATTATTATCTAATATATGGTGTGTTTTTCTTTCTTTACACTGATACATATAATCTTGGAAAAG  
>M6-PGSC0003DMG400015603 M6 LRR-RLP

TTTTAAGTTATTTTTATATTTGCCAAACACTCCTAGAAAGTCAAAAAGTACTTAAAAGTAGGTTTGATCAA  
CTTTAAGTCGATTCAAATAGGCCCTAAGAATCCAAAAGATTAGGAAATAATCCTTATTATTGTAGGCTA  
AAACACCTATTTAGGAGTCTTCTTGTATGGTTGTAAGCATCAATTA AAAAGAAGTTGTTATTCCCTTTTCA  
GATGTTATAGATCTTGCTAATGACTTAAGTAACTTCTGCCTATCAGTGCACGGCATTATGCTACTACTTTT  
GGGTGGACTTCTCTTTCTTTTTTACGTTTTACTGATCACACTTCTTTTTTCTTCTGGTGGCACTGCAATTCT  
TTTTACTTCTTAAGTTACACTTTACCACCAATCCGAGCTATGTGGATGATGTCCAAGAGATTTAACTTAG  
CATATATCTTCCGGTGGTTGAATTATAGATTCCCTCTACATGTGTGAAAACACTTTCTTTCATTATTCAATT  
ACCAGTAACCTTTTAGAAGAAAAAATTTTCAACGCTGCTTTTCTTTTCCATGATCATTCACTACTAATTAGA  
CGATTCAGGTGACTGTTCTTGTCTAATTACTTTTCTAGTTATTTGACCATCTTGAATATGAAGGAGCATG  
CTTGACGTTAAGTGAATCGTTAAAAATATTGTGTAAATTATCATAATAATTATGTTTTATTAATTAAGAG  
AGCGGGAATTAGTAACTTTCCTTCTTAATTTAGTTCAGAATTTCTATATGAGTAGCTCCTTGAATGTGGT  
TAAACCTTTCATTACAAGAGCTCATTCTCTTCTTTTTTTACAATGTCAAATTCTAATAAACAGTTAATC  
AACCACTGGTATCGTTGCATCTAATTTATCTTAACATTCAAAGTCTTACATTTCCATCTCCAAAGATGTTG  
CTCCATACTTCTATTCTATATGATGCGATTGAATTCCTCTTTCATTGCCAATTACCTCTACTAATAACTTCTG  
AGCTCTTCTGCCAAAAAATTGAGGAGCTACTTAACTTGCATCTGCAGAAAGAATAAATGTCTTAGTTT  
TACCACAGTGTGCTCTGGTTCAGTCATTGACTATGGGCCCTGGCCATTTCTATTGCTGCACCCTTCCCAA  
TGAATCGTTGCAAGTTATATCCTTCCAACCTTTCGCTGGCATCCTTCTCACGGAGGTTGAATTTTGTGA  
GAATGTGGCTGCTAGACTGAAGATCTTCTTTTTATGAATTGTGACTCGAAATAGAAATCTTAAGTAGAAG  
GAAGATTCTCTATATCGTACTAATCTATGTGTTGACAGTTTTGTGGAAGCTGGTGGAGAAAGTTC  
TTCTACCCAAACCAGCCAAGACTACATCAGAAGAAAGCAAGTCTACTCAGGGATTGAAGTGGTCCATTG  
CCGCTGGGACAACTTGTTCCTGGTTTTGGTGCAAAGATTGAAAGAGAATCCAAGCTGAGGCTTAATG  
ACTTTGCTAAAGAGCTTAGATCTTTCAGCATTGTTGACATGTCAGGTAAAATTGCAGTCAGTTCTGGCTC  
AGCTGCTTCAGTATTAAAGTTGGTGGTCGTCTATGCTAAATGCTGTCATAATGAATATCTTCTTTTTTAT  
ACCTTTGATAAAAAACCTTCTATCATTTGTAGTTTTAGAAATGTGATCACGATGTTAAAATATTTGCCTT  
GACTTGTTAAATTCTTAAGTCCCACTTCTTTAGAAAGTTCAACATATAAAGACCAAAGCTTTACCGTGATT  
TATGATTA AAAAACATTTTCTGCATACTGATTGTGCCTGAAGGAAATTTCCAATCTTGTTCATTTATAA  
GCTTCCCCACCAAGTGC GCGACACACCAAACCAAAGTTTTGCTGCATCTTCTTGTATTGTGATTCTAC  
ATTCTTTGCATACTGATTAAGGATTA AAAATTGCAAGTCACAAGAGGTATTGGATTGAATGTTTTAGGCTT  
TGGCAGGTGTAACCTTTGGAGATGAGGGGCTTTTTTCTTAGCAGAGAGTTTAGCATATAATCAGGTAA

TGGCTTTTGCTCTCTACCCCCCTCCCTCTTCCTTTATCTGTGTAGAGTATGTCATTATTTATCATGGTCCA  
TCTTGTTAACCCAAGAGGATAAAGCCATAATCCTGTAATGTAGACAAATAACAATACAATCCTGGCTTAT  
TTTTTCTGGAATAATGTTTTGGGCAAGTTGGTTCTTTACCAATGTACACTGCATTTCTTTTCATGTGA  
TTCCAGACAGCCGAGGAAGTAACTTTGCTGCTAATGGAATAACTGCAGATGGATTGAAGGCCTTTGA  
TGGCATATTGCAATCAAATATTGCTCTAAAGACTCTTAACCTATCTGGAAATGCTATTGGGGATGAAGGA  
GCCAAGGTAATGCACAGATGATATAGGTGAAAATCCAAGCAGTGAGTTCTTGGAAACAGATGACTAA  
TAAGCAGATCCTAACTTTCCCTTGCCTTACTTAACTGTTATACCAATTTAACATGTGTATTTATGGTCAT  
GCTTTGTATTGTATTTCTCATCTCCGCCTTGGCACTTCACGATCAATCACGTCTATTTGGTGTTAATTTATG  
TTTGCAGTGTCTATGTGATATATTGGCAAATAACTCTGGTATTCAAAGCTCCAGCTGAACAGCACTGGC  
TTAGGAGATGAGGTCTTGAACATGCCTTGAGCATTAAATTGAAATGCTGTTGCTAACTTGCATGGTATT  
TTCTGCTTTCTGGTAAATTATTGCCTAAATTTCACTGCAATGGTTTGTCTGAATTTTGCAGGGAGCCAAAG  
CCATCGGTGAAATGTTGAAGAAAAATTCAACTTTGCGTGTCTTGAATAACAATAATCTGATTGACTA  
TACTGTATGTTATTAAGCAGAACTTGAATTTGTATTTCTAGTTATTAATTATCTCAATTTCTGAAGGAAA  
ACATGTTTGATTTGGATATGGAAATAGGGATTTTCAGGTCTTGCTGGATCACTTCTGAGAATAAACTT  
TACAATCCTTGCATCTCAAGTAAGCAAAATTTATTCTGCTGTCTTTCTGCGCCATCCTCATTGTGCGTATG  
TCAAATGTAGCAGTTAATTATTTATTTTCTTTATTGGTTTGGAGGGTGGGGGTGGGGGGAAAAGAAG  
TGGATTTAATTTGTGAGGGAAAGCATATCAATTCTTATTTCCCTTATATCTTTTAATTTATGTGCTTTAA  
TTAACTGTTTCAAGCAATTATGGTGGTGCTTTAGGGGCTGCAGCACTGGCTAAAGGCTTGGAGAGCAA  
TAAGTCCTTGGAGGTACATTTCTAATCAATTCCTTCCCTCCCACTGAGACCCTTCGCCTTTTGTCTTTTTTT  
GTTCTTGTAATTTGACTTGGCAAATAATTGAGCTTTTTGTCAGCCTTGATATCTTGCTTCTGCGTCATTGG  
ACTGTTTCTTAGTATTTAACTTCTGCACTCATGTTTCCCTTTTTTTTTTTTTTTGAAAACAACCTCTCTACCTC  
CACAAGGTATGAGTAAGGTCTGGGTACACTCTCCCCACCCCAACCCCATTTGTGGGATTACACTGGGTAT  
GTTGTTGTTGTTACTCATGTTTCCATTTGATTGTATAGAAGAGCTTCTTTTCAAATCTTCAATTTCTCT  
GTGACTGCTGCACTGGGATTAAGTGTTAAATGCACTAATGTTATTAGATAAACTTCTTCGGGGGGTTTC  
TTCATGTTCTCACCAACAATCCGAGGTTGAAGCTAGATCTGCTCCACCCAAAATGGAAATGGGCTACTG  
TTACATATTAAGTATATCATTAAACATACACTGTATAATCAAATGTGTTTAAAAGATTTTTTATGTGCA  
GGAATTTATTTGCAGGGGAACTCTGTTGGTGATGAAGGAGTACGGGCATTAATCTCTGGCCTATCTTT  
GCGTAAAGGTTTGTATTGGATATAATTAACCATTCTTTAAACATATATTGGCGTTGTTTCTGTGCA  
TCTTTTTGAAAGGTCACCATCATATGTCTGCAGGGAACTTGTCTTACTTGACCTTGCCAACAATTCAAT

TACTGCTAGAGGAGCATTTTCATGTTGCCGAATATGTCAAAAAAAGCAAAGCTTACTGTGGTTGAATCTC  
TATATGAATGACATCAAAGATGAGGTAATTGAACCACTTAGAACTTTTCACAGTTTTTTCCTTTGTAAATG  
TAGAAGACTCTTCTCAGCCTTGTCCTTCTCACTGCAATCAGTAGACTCTCTTGATCTATTTTATGGTTTTAT  
TTTATGTAACAGAAGCAAAGAATAAGAAAGCTTGAGTTTTTGTCAAGTTGAAACCACTAAAATAAGATA  
GAAAAGATTTTTGGGTAAGAGGGTCAGGATTGATTGTCGAGAAAAAACAAAAGAATTTGATTGGTTA  
GAGCTGAAGGTGATGGCTGAGTCGTTCTTGAACCAATCATAAGTTCAGATCACATGGTTAGGAAATTT  
TATAATGGTACTTACCATTAAAGAATATAATTTTGAGACTAGGTTTAATCACTTTGGGGATTCTTGCCAGA  
AGAAAATTAGAAGGATTGCATGGTGTGGATGAACTGAGGTCTTTTTAAATTTTGTGAGCAGTTTCAGAA  
AGATAAACTCAAATAATCCCAAATCTGTAGGGGTAGCTTTATTTTTCCCTTCAAATACATATGCATATG  
GACAGACATATTAECTATGTAAAAATGAATCCTTTTATAGTCCTGCACAACCTTTAACGTTAATATTTCAAC  
AGTGAGAAACCTAACTGTGCTCCTCTTGGATTATAGAAGTGTGTATCCACCATAATTAAGTGCCTTCA  
TTGGAGTCAAAGGAAAGCGTTGTGGTGAAGGGGAAAGATAAAAAATTGATGATTGGAGGAAATTG  
GTACGGATTAGTAACAGAAGGTTAAATCTGTTGTGAAGAGTTCAAGGGATTGGGGCTGCAAAGAAGG  
ATTTTTTTCAGAAATTTATGGGGGTGGGTTTGCATACGACAGGGTAGTTGCTCAGAAGCACAAATTAAT  
TCTGCTGGAGAAGAGCTCATGTGCTGGCAACATCAGATTGAAACATAAAGTCAAACCTTAACCATATCCT  
TGGTAGATTAGACCAAAGTCTAATGTTGATTACCCATTCCAGAACTTAAGGCTATGGTTTACAATGA  
CAGGGTACAGTGCCTACAAGCAACAAGTCTGCACAAGAAGTGGAAAGAACTCTCTAAGTTAGCTCGC  
AAAAAAATTTACTGCCTTCATTTGTGTCAATAAACTTCACATGTAATCAGTAGCCTCAAGTTTCCCACTT  
CTTCAATTCAACCCAGTTTCTTTTTGTTGGTATGCGATTTCTTGGTGTGAAGATTAAAGGCGAAGGCTT  
TTTGTAAAAAGAGAACACAAATCACATGCTTTTCACTTGAGAACTACCGTTAATATTTGACGTCAAAT  
TTGGGAAGGACCAAAGGTGTCCATTTTTGCAAAGACGAAGGATTTATTTATCCACAGTTATATTTGAA  
GGACAAAGTGTAACTGTCCCATAAATAAGGGATCATTGAGTTTTTACATTGCAGATCCAGACTCAAT  
CTCTTGATATGCATTGACTTTTCTTCTTTTTTTTTCCCCCATTTACATCAATATCCATCAGGGAGCTGAA  
AAGATTGCAGAAGCTTTGAAGGAGAACCGCTCGATAACTAACGTTGATCTTGTAAAGAGTTGTTTCTCTT  
TTCTATTTTATTCAACATTTCTGTTTTGTTTCATGGAGGAGTTGGGTTTCTTAATCTTATCAGAGCATAAT  
TTTCTATTTGCTCTGATGGCTGGAATTCTGCGAATTTTACAGGGGGCAATGACATACATGCTAAGGGTA  
TTAGTGCCATAGCAGAAGTTCTGAAAGATAATTCTGTCATTACCTCTGTAAGTTTTCATCAAATGTTAACT  
TTTACTGATTTATTGGACAAAATTAATACATTATACTTCAAATTTCTCACGAACAGTTAGAAGTTGGTTA  
CAACCCATTGGACCAGAGGGGGCAATGGCATTAGCAGAGGTACTCAAGTTTTCATGGAAGTGTAAG

ATCTCATGCTTGGGTGGTGTGTCAGGTAATGCATGGATTGTTTCATATATGCCCTCTTTAACTATCTTTTTTA  
GCATGTTCACTTAATTTTTTCCAGATCGGAGCCAAAGGTGCAGAATATTTTGCCGATATGTTGAAGTAC  
AATAGTACCATATCAACTCTAGACTTGGGAGCCAATGGACTTAGAGACGAGGTTTCATTCAAAGTTTATA  
GTTTTTCTATTCTGCCACAATTTCCCTCAAAGTACATAACCATTTCTTTTTTCAGGGTGCAATCTGCCTTGC  
TCGGAGTTTAAAAGTGGTCAATGAATCTTTGACGACACTCAATTTAGGGTTCAATGAAATTAGAGTATGC  
AACTCTTTTCCAGTACAAGTACAACCACCTGTCTTGATAAAGGTATCATCTTGTATTAACCTTAGTTTATGTT  
GCACACAGGATGAAGGAGCTTTTGCTATCGCTCAAGCACTTAAGGCAAATGAAGATGTTAGACTCACAT  
CTTTAAATCTTGCCAGTAACTTCTCACCAAATTAGGACAGGTAACATCAAATGATAATATTATTCTCTTA  
TTTTAGCTGTTTTACGCGATTTTTAGTTCCTTACAATATCCGGATGGATTCCAAATTTGAGACAGCTCTCAC  
AGATGCAAGAGACCATGTGTTTGAGATGACTGAGAAGGAGCTTGCTGTTATGTTCTAAAATATTACATTC  
CTTAGATCAGATATATTTTCTCCCTAGTTGGGGCAAGGTAGATGAGTATTTTTTTTTCTATTCTGGGGGA  
ATAGAATCGCAGCCTACCTTGATATTCTTAAGAGTCCCACCTTAGTTCCTTTTGTGACTGAAATCATTTT  
GAGTGGGGAAACAGTGGAAATTTTGATATCGAGATACACACTGATATTATAAAAAATGTTCTTTTCTGAA  
ACTTTTTTTGTGTCTGATAACGTTAGTGGCAAATACATAGAAATTACTTCTATTACCATTTTCTGATTATT  
CTCTGGTTTGAAACTCTTCTGAGTTGTTGTTCTTTCCCTATGGCCTTTTAAGCTTATTTTGGTGTGCAGGA  
CAG

>M6-PGSC0003DMG400015672 M6 LRR-RLP

CCTTTAGTTTGTTCATTTTGTGCACAATAGGATGTGACTTAGTGGTCGATGAAGTAGTAGGAGAATTGTG  
AGGTTAAGAAAATGCTAGGTAATTTCTATTTATCTGCCTAGGATTTGGTGGGCAGAGACGCAGAATTAC  
ATTATACATGTGTTGGTGGTAGGTACGACATATTTAGTGTAAATATTCGATGTGCACGCAAGATGGCTCG  
GACATCACGGTCGTTAAAGATAAGACACCGCTTAACTTAAGGGACTAATTTGATATTTTTTTTCTCCATAT  
TCTTCTAACAGATGGAACAAGATGTGTCATTGAAGGGGATAGTGAAGATAGAATCAGTGGTTTACCAAG  
AAATGTTATCGATCGTATCCTTGAGCTCATACCAGTTCAAGATGCAGCAAGAACTAGTATTTTGTCCCGA  
AACTGGAGATATACTTGGGCAACATTTCAAATCTGGTGTGGATTACTGCTTCCATTGTAATCTTGAAG  
GAAAGTTGTTATTCAACTTCAAAGAAGCGGTAGATTGTATCCTGTTACTGCATATGGGGGACATTGTGA  
AGTTTCTTCTGATACTAGAGGAATTTTTTCTGCAAATCTTCTATGCAATTATCGATAGATGGATTCTTT  
ATGTCACCAGAAATGGAGTCAAGATGCTAACCTTCGCACTTCAAATGATGATACCTATACTCTGCCCTC  
TTCTATCTTTAATTGCTCAACCTTGACATATTTGGAACCTCTCCAATGTGTCTTCAAACCACCCAATCCCTT  
TCTTGGTTTACAGAATCTTATTACCCTTCATCTGGAAGGGACAACCTTTGTGCCAGCCACATCATTTTGTG

TTATCAAGGCTCCCCTTCTTGCCAAATTGGATTTGATCTCGTGTCGTGGTACGCAATACCTAAACATTGTT  
TCACCAGGACTGGAGTGCTTGCAAGTCGTGACAGTCACTCATATCTTGTGCTAGATTGCTTTATGAACT  
GCAAGAATATAAGAATGCTAAAACCTGAATTTAACGGAGTGGTTGATGATCCAACAAACGATGAAATAT  
CAACTTTGGAGAAGCTTCTTGTTAGCTCTCCTGCACTTGAGGTACTIONCATTAGATTCACTTTTGTGAG  
GTAAGATATTGACTACTTGTCTCTTGATATCTTATAGTGATGGTAATTTCTTATGATTCTAATTATTGTG  
TTTTCTTCAAAGCTTTTGAGTGCACGCATTGTTCCGAATGGGCAACCTTCTACACTCAACTGCTTGTGGCA  
TCAATATTTAGGTGTAGACTTCAGCAAATGGGTCAGATTTCTAATGTTCTGCAGTTAATTAAGAGTTCC  
CCCAATTTGAGTAACTCCATATTTCCGTAAGAAAAGAAAATATATGCACGATCTGGTTCATTTTTGCACT  
TCATATTTGTGAACATGAGAATCTGAAATAGCTTGGTATTTTTCTTCATATACATTATTAGGTCCATCGCCA  
TGGTACCAGTGACAATGCCGAAGCAATCTTGAAGTATCT

>M6-PGSC0003DMG400015687 M6 LRR-RLP

TCCATTTATCATAAGAGTTAGTAACTATGACTATGTTCCAAAAAGGACTGAAGTAGTTATACATATCAGC  
AAGAATGTTAAATTCAAAATTTAATCTATTTGACTCGCGAAAACCTAAACTGTTTAGCATGTCTGATTTTAA  
GTTTCTTCGTGATTTGTTTACAGGTTTTGAGAACTGAGACAACCTAGAAATACTTGATTTGTCATCGAACT  
ACTTGAACCGCAGCATCTTTCAGTCTCTTAGTCAACTTTTCATCTCTCAAGTCGTTGTACCTCGCGGAAAAC  
AACATTGAATCAGGTGCTAACATTTGGTTCATCTGTTTTCCCTTTGCACTATTAGTCTTCTCTTTTTACA  
GAACTGTGCTAAAAATAATCCATCTCCTTCTAACATTTTCAGGTTCTGAGAGATTATCAGGGTTAGACAAG  
CTGGAAATCCTGGATTTGAGCTACAATGCACTAAATGATGAAAACGTTCTCTCTGTTCTAGGTAATTA  
CTTATAGTTTCTTTTGTAAGGCCGTTTTTCTCAGTAGCTTCTACATAATTATTCTGAATTCCTTGACA  
GAGCTAAATGTATCTAGAACGACGTTGAAGAAGCTTGATATAAGGTACAACAGATTCCGGAGTTTTATA  
CCAAATGGAGGTATATATAACAATTACTGAAGTTTTTCTTCTTTCAATTGATTTTATTCTACCTCCTTCTACA  
TCTTGCTATGTAAGTATATCTTATTGGTACCCAATCGAAATCACAAGCTTAAAAGAACTGAAAAGTCACA  
AATCATTTACAACTCCACAGGCTCCATTTGGATTTGATGAAATGTGTATAAATTCATAGACTTACATGCA  
AAGATGTTATTTAATAACTCTCTGTGTCAACATTTTGGTTAAAATATGACATTCCACCATTTTAGGTGT  
CATTTGCAAGTCGCTATTGCCATTTTAGTTCAAACATTTACAGTTTAAAGCGTACTTTTAAATGTTTCTTTG  
CATGTAAGAGTTGGGAGCTTTAAGAAATATCGAGTGGTACTGTTGGATGGAAACACATTGGATGAGA  
ACTTCTCAGGAGTACTGGTGAATGTCATCCCTTACAGTGTATCAGTAGCTAACTGCAACCTCAGTGG  
AGTCCACCTCTTCAAGGTAATTTAGGCATACGTAAATAGAACAGTGAATAGTTGAGAATAATGAATAA  
TTTCAGAACAAATCCATGTTTCTAATATTTTCTGCATAACAACCTATATAAGAACATGAATAACAATCATCTA

TTTGTTCAATTTATAGGCTTGTGTGATCTAAAATATCTTGAAGAACTAAGTCTCCGCCTAAACTACTTCATT  
GGAGAAGTCCCTGCATGTCTTGGAACTTAACATCTCTTCGGGTAATAGATCTCAGTCAAAAATTATTTTA  
CTGGAAATATTGCCGTATCTCCACTTCCAAGTCTCTTGTCCCTTGAATATCTCTTGTAGCAAACAACAAG  
TTTGAATACCAATTTCAATTCGAGCCATTTGCTAACCATTCAAACTTAAGTTTGTCAATTGCTGACCACAA  
CTCGATAATTGTACAAGCTTATTCTAAAAGCTGGACTCCAAAGTTCCAATTGGAAGCCTTGTCTTTATCCA  
ATTGCTCTCAAATGCCAAGTTTCCTTCAGTATCAACATCATTTACGGATTCTTTGTCTCTCGAAATGTAACA  
TTGGTGGAACTTCCCAAATTGGTTGTTAGAAAACAATCCCAGACTAGGAGAAGTTTATTTGGATGGAA  
ATGCATTCAATGGATCTCTTGAATTTCTGTTCCCTCCTAATCTGAAAGCTTTTGATATCTCCAGCAACAAA  
ATTCAAGGACAACCTCCTCCTAACATTGGGTCCATTTATCCGAATCTCATGATATTCAAAATGTCCAAAAA  
TATGCTTGAAGGCTTGTTCCTTCAAGTTTTGGTGACATGAAAGACCTTCAATGCTTGGATTTGTCGGGC  
AATAAGCTAACAGGTGATCTACCTATTGGATTGGCTCGTAAAGGATCCAAGTTAAATTTTCTGAGATTAT  
CGAATAACATGTTGAAAGGGGAAATATTTCCAGTTTTGACTAGCATCAACAATTTTGCATATTTGTTCTTG  
GATGGAAATAACTTCTCAGGCCCAATTCCGCAGGCGTTATCCACTGCCTTATTATTTTCACTGGATTTAAG  
TTACAATAATTTGTCAGGAACTTACCAGTGTGGCTTGGTGACATATCCTCCTTAGATTCCCTCGCACTGT  
CCGAAACCATCTAAGAGGTCATATTCCGCCTGATTTTTGTAGACTTGAAGGACTTCAGGTGTTAGATCT  
CTCTGAAAACAACCTTGTGGCACGATTCCATCATGTTTTAGTGCTTTACGAGCCTTAAGACGTGTGTATT  
TGAGCAAAAACATGTTACAAGGGGAATTTAACATGTTCTCGAATTCCCATCTACTAATGTTGGATCTTGG  
AGATAACAACCTCAGTGGTTCAATTCAAAATGGTTGGACGAACTTCTGAGTTAACTGCCTTACTCTTG  
AAAGGAAATCGTCTTCAAGGCACCATTCTCCACAGTTATGTCATGCAAGTTACTTAAGAATGTTGGATC  
TTTCTCACAATAATATCTCAGGACCTATACCTCATTGCTTGGGAAACATAATGCAGAATCCATGGGACAC  
AGATGTATACTACAGTCCATCATTTGGATATGGAGGATTCGAGATGTTTGGAGGAGATACCTTGATAGA  
TGATAGTACTCATTTCGAGACAACATCAACAATTTCAATTCCAAATAGCTTTGGCACGTGGGTTGGAGTA  
GAGTTCACAACCAAATATAATACTTATTCATATGAAGGTAGCATTCTTAGTTACATGTTTGGTGTGATTT  
ATCTTGCAACCAGTTAAGTGGTGAATACCCAATGAACTCGGTAATCTTACTGTCATTCATGCATTAACCT  
TGTCACATAACCACCTTACTGGAACAATACCATCAGAATTCTCAAATCTCCAGAATATTGAGAGTTTGA  
CATATCATAACAACACTTGACTGGGAGGCTTCTACTCAACTTCTAAAGTTGACAGCTCTAGAAGTTTTCA  
GCGTGGCACACAATAATTTAACAGGTATGACTCCACAGCGTACAGCGCAGTTTGCACCTTTGATGAAA  
ACAGTTATGAGGGAAATCCTTCTCTTGTGGTCCCTCATTGCACATCAGTTGCACAGAGGCTAAAGAGAT  
TCCAACATACCTTCTGCACCAAATTTCTCCGAAGACGATGCTTCTTTTTTAGATATGGAGTGGTTCTGTA

TTTCATTTCTTGTGGCATATGCAAATGTGGTGGTTGCAGTGGTTGTAGTACTTTGCGTAAACCCCTCCTG  
GAGAAATGTCTGGTTTTATTATATCGAGTCTTTCATGTATTTCATGTTACGATTACTTTACTTCCAAAAGTTC  
ATGACTTTCATAATTATGTAACATTTTCATTATGTAAATGTATGTGTGAGTTGTTCTTGAATGTTGGTGCC  
TATCAAGTTCATTAATACTAGTGAATGTTGTGTTGATTTGCTTGTGCCTTCTATAAGCATTGCCAGATTA  
ATTAATTATTTTCGAAATATAAAAATGTGTCATATTTTTTAGAACAGACGAATAGCCAAAATTCTTCAGTG  
CAATTATGGGTTTGAAAGATATGTATACTGCTCAATGAGCCATTTCTTCTATATGGTCCACTGAAATAAGT  
GATAAAGACTTGGTAAACTCCTAAAGTAGCTGAATTTTTTTGACATTAGCACACAAAATTATAACTAAA  
AAAAAAGAAAGAAGAAGAAAATGGCTAAGGAATTAATTTTTGTTGACTAGTCAAGCACAAATAATTATCA  
AAATTTACTCACCGTTTCAATTTGTTTGTCTTACTTTCTTTTTAGTCTGTTTCAAACGAATCTCTTTCCTT  
TTTTGCAACTCTTACATCAAACTTTTCACGTGACATGTTTAAGATCACATGATTCAAAGTCTTCTTACT  
TTCCTAAATTCCGTGTCAAGTCAAATCAGAAAACAAATTGAAACGGAGGGAGTATATAGCAAGAGAA  
GTGTTTGCATGAAACTTCCATACAAGTGATACTAGTGGGAAATTTTTCTCATGAGTAAGTGTCTCAAGT  
CAAGTCAATGATGGTGCTAGTCAACTCAAATCCAGCTCAAATTACAAGCAATGTTTTGATGAAAATAGAG  
TAAAATAAAGAAGTTGAAAGGGACATAACAAGAAAAGAAGTTGCACAAAATTCCACTCTAGTCTACATC  
AATTATGACACTATTTTCTAGGGGTACCTGCTACCTCTCACCAGCACAGATAACGAACAAGCTTCTTTTTT  
TTATATATAGTTTGGTTATATCTTATAGTGTGCAAATTGTAGGTAAAGAAACAAAATATGACTAATAG  
CAAGATAGTATATTGGTGGTTGTTGATTTTGTTCATGGCAAATGGATGGTTGTGTTGTTATTGTTGTTG  
AATGAAGAAAAGACTGCTCTGTTGCATCTCAAGGCAAGCATAAACTACAGTATAGGCAACGATTACTTG  
TCATCGTGGGAGGCTAATGAAACCTCAGATTGTTGTCAATGGGAGGGAATTGTTTGCAGCAACAACACC  
AGAAGAGTCGTAGAGTTGTCCATTATTGTTAAGAAAATTAGTCAAGAACAACCTTAGAACTCTTAATGGTA  
CAAATACTGATGATATTTTGAATAATTGGCTTTTTAATGCATCTCTATTTATTCCCTTCAAATCTCAAAG  
CTTTGAACATACCTGGACATTCATTGGCAGGCTGGGTGAAGAATGAAGGTATGTTCTCTCCATATACGCT  
CCCATAATATAGAACGAAAGAGATTATACTACTCCCTCCGTTTTATATTGTATGGTGATGTTTGACTAGGC  
ACAAAGGAATGATTTTTGGCACCTTGAAGCTTGTGGTTGTAAACATGTAATGATAATTCTATTGTGTTGT  
ACTTTTTTTAAACGGACTAAAACAGAAAGAATGTCATATAAAATGAAACAGATAGAGTACTACATATCTG  
AAAAATGGTTCTAAAGATCCATTTCTAAATACAAAAAGGTGTCATTCTTTTTAAGCGGAATAAAACAGAA  
A

>M6-PGSC0003DMG400015706 M6 LRR-RLP

ATGAGAAATGCTTCGACATCTGGTGTAGATACAATTAGCAATTTGCCTTGTAAATGTTCTCGATGTTATTCT



TGGGTGCTTGCCTTGGAAAGATGCAGTAAAGACCAGTATCTTGTCAAAAGACTGGAGGTACAAATGGG  
TAACACGTCAAGAAGCTTGATTTTAATGATGAGTTTTTCAAGTCTTTGAAACAAGATGAAGAAGCCAAGAT  
AATTGTTTACCAAGTCCTATTAGTCCATAAAGGACCAATGCTGTGTAGGATTACGAGTTGTCCTGATATT  
GATCATTGGATGCACTTCTTGTTGAAGAAAAATGTCCAGGAATTCACCCTTCATGTAAGATCAGAAAATC  
ATTTACCTCATCACCTTTTTACTTTCCAGCAACTAAGGTATTTGGAAGTTCAAGATTGCTTGTCCACCCTC  
CACTCGGTTTCAAAGGGTTTGAGAAGCTTGTTAATCTCGACCTTATGCATGTCACCTTTGATCCATCAATA  
TTAACAAATCTCATATCTAAAAGCCCGTTGCTTGAACAATTGAGGTTGTGTTTCATCACAACTTTGACAC  
CCTTGAAGTTGATGTTGCTAATCTCAAATTCTTTGAGTTTATTAGACAAACAAAACCATTTCTTCAAG  
AATGCTCCTATGCTTGAAAAAGTTACCGTGTGTTTCATTGGACATCGACTTTTGACTGATACATCTCATT  
TTTCTAATCTTACAAAGTTCTTTCATTACATGCCTTCACTACTGGAAGTGAATCTATTCGGTTCAATATT  
AGGGTAACGTACATTTGTGATATTACTATCATAACCAAATGATGAATCTGATTGGTATCTTAAAGTAATTT  
TTAACTTGCTTCTAGTACTTGATGGAGGGAGGTGAACCAGAGAGTTTCCCAACTGCTCTAGACAATATCA  
GATCTCTCAATTTTTTCATCCATGTCTTTAAGCAAATCGAGGAGGTTCCAGGTGTTGTTTACTTGATTACG  
AGTTGTCCTAAATTACAAGATCTTACAATTGAATTTGTAAGCACTCGTTTTTTTTTTCATTAAGTTGATTGAA  
TTAATATGATTTGTTCTTCATTTGGACTCGCCAAATTAAGTTCCTTGGAATTTCTTTTAGGACCTTGTTGG  
TTGTGGAGGATATTGTTGAACCTGTTGTAGAATTTCTACGATGCCAATCATTCTCATTAGGTGTTGAGAA  
GCTTTAAAGAGTTCATGTGAAGTTGTTTATGGGTCTTGAGATGGAAATGGAATTTATGAAGTTCATTTTG  
GCATTTGCACCTGTAAGGAGATTTCCATTTTGAATTTGCATATCTCCTTCATCGTTCGGATAAACA  
AATGATGGACGGGATGAAAGAAATTAGCAGAGCATCACTTAATGTTGAATTCATATTTGAATAAGTCGA  
GTTGGCAGATCGCAGTGAACCCCAAGAAGTCATGGAAGTGCCAT

>M6-PGSC0003DMG400015707 M6 LRR-RLP

TAGCTCCAATATTTTTCTAATATTAATACATGGATTCTATTTTTGTTGGACAAAATGTCCAGGAATCATC  
ACTTGCATTTCTTAAATGCTTTGCCTCCCTTCTCACCTATTCAAATTCAGGATCTAAAGCACCTGGAAGT  
TAATAGTTGTAAATTTACCCTCCTCCCAACTTTAAAGGTTTTTGAAGTCTTGTTACCCTTAACTTTAATT  
TGTAACCTTCAAGGCCATGCCATTTTAAAGTCTCCTTTAAAGTAGATCATTACTTGAGCGTGTATCGACAG  
TTTAGTGCAATAAGCTTAATAGCTTCAATTATTGATGCCCTAATCTAGAAATCTTTGAATTTAGCAATCGA  
GCAAATTCCTTTGCTTTAGAAAAACCCTCTACTTGAGGAAATTTTATTCGGAATGCCTTTTAAACATGTT  
GGCGGTAATCACCATCATTGAGATATATGTTTGTGACTACTGGATTTTGCTCGTAATTTAGATAATTT  
TGTCGCAGTTTGTGTTTAGTCCTTACAGTACCATAGCCTTAGTTGATACTAGACCACATCAAAAATTTTGAA

TTTCAAGAATTTTATCTTTTCTGAGGTTGAGTGGGTTGCATATGTGATTGACTTGATCAACCGCTACCCCA  
ACATAGAAAGGCTTCTAATTACGGTACGTCTCATTTCATCTTTTGATTGTAAATATGTTGATTTTTAGCA  
TCTTCTGTAGTTAATCTTCTTCCCTTCTCAAGTCTTATGCCTTTGAACTGTGTGCGTGTTTCGTGTACA  
CATCCCTTGCAATCCCAGGAAATGACAATGACACATATTGCAATGAAGTGGCTCAAAGCGTGGATATG  
ACCCTCATGTGGGTTAATAAAACTGAAATGGAATTCTTGAAGCATGTATTGGAATTTGCAATTGCACTTG  
AGAAAATATACATTGCAACTTCTGCAGAAATCCATAATAGGGGAATGAAAATGATGGAGAAGATGAA  
GCGGTTCCCTCGAGCATCACCTAATATAGAATTTATATATCATTGAGGATTGACCTATCTTTGTAGCAA  
AAACAATATCAATTATCTGAGATTCTTATTTTCTTTTAAATTTTCAATTGTGTTTTTGATCTCCTCATAAAGG  
AAAATAATTTATTTTTGGATGGATGTTCCCTCATAATTGAGTTTCTCAATGTAATAAAAAGGAACCTAATG  
GTTTTGTATATAGTTGAAATTATTAATTATAAGTCACGTAAGGGTATGCATACATACTTAAATATGTAT  
TCATGTAGATTTGAATATTGTCTTCTGTGCGAAATTCTCCCAAGAATATTGAATACTTTGAAAGTTGTAA  
GTGCATTTGCTTTGACTAATGGTTCAGTTTCTAATCTCAACTTTAAGAAGTTCTTGCAAACCTCTCGTCA  
GTACTGGACCACGAGGAGTACTAGGAGATATGGTATAGATACAATTAG

>M6-PGSC0003DMG400015824 M6 LRR-RLP

ATGGACTATGCAATTGTGCTCTTACTTGTTTTCTCTATCATGAAGTATTTACCGTTTTATCATCCAAATTA  
CCTCATCTCTCTCACAAACATCAAATCGGTTCACTTCTAAAATTCAGAACACACTTACTGTAGATACCTC  
AGCCTTATCTTTGTCAAGAGCCTTATCCAAAATGAGTTCATGGAACATGAGCAGAGATTGTTGCTCA  
TGGGATGGTGTATATGCGATGAGATGACTGACCATGTAATTGAACTGGACCTCAGCTGCAGCAATCTT  
GCTGGGACCATCGATTCCAATAGCAGCCTCTCCAACCTCACTCATCTCCAAAGGCTTGATTTTTCTCTGAA  
TAACTTCTCCAATTCTCACATCTCCCCTGAATTTGGCAAGTTTTCGAGCTTGACGCATCTTGATCTTTCTGA  
CTCCAATTTCTCTGGTCAAATTCCTTCTGAAATCTCTCATCTTTCCAAGTTGCAGTCTCTTCGTCTCTATGG  
TCGTCTACGACTCATAGCTCACGATTTTAAATTGCTCCTTCAGAACTTGACTCAATTATTAGAGCTAGATC  
TACTTCCATAAACATCTCTTCCACCATTCTCTGAATTTTTCTTCTCATTTAACAACCTTTAGGCTGGGAG  
ATACAACATTGTATAGGATAATACCTGAGACTATATTTACCTGCCAAACTGAAACACTTCACTTATGGG  
AAAATTTTCAACTCAGTGGTTATTTTCAAAGACCAAATAGAACAGCAGCACATCTCTCCAGAAGTTACA  
ACTCAGTTTTGTGAATTTTCTCATAATTTGCCGAGTCTATTGGCTATCTAACTTCACTGCGTTATTTGTA  
CTTCAAATTTGCAACCTTAGAGGGCCTATTCTGAATCTCTTTGAAAGCTCACTCGCATAGAGGATTTGTA  
CCTTCAATATAACTCCCTGAATGGAACAATACCATCAGGGATTTTCTCCCTCCATCACTAAGTCGTTTAG  
TCTTGAGCAATAACCACTTTTCTGGTCAGTTTGAGGATTTCAATTCCAATTCATAATCTTGATTGATTTAA

GCAATAATCAGTTGCAAGGCCATCTTCCCAACTCAATTCAAATCTTGTGAACCTAACAGATCTTGATCTT  
TCTTTCAATAATTTCCATGTGGATGTCAGCCTCTTTTCAGACCTCAAACAACCTTTCGTATCTTAGTCTTTCA  
TACAATACTGTTGATGAAAAGGAAGTTAATTCTACTTTGCCTGAGTCACTTGAGTACTTACTATTGGCCG  
CATGTGAAGTGAAAGAATTGGAGTTTCTAAGATTTGCAAAACAGCTTTCCTCAACTTGGATCTTTCAAATAA  
TAAGCTTCAAGGAAGAATTCCTGATTGGGCATGGTCTAACTGGATGTCGTTGATAACTCTTAATATATCC  
CACAATATGCTGACGAGTGTGGATACAACCTCCTCTTCAGATTGTATATACTATTGATTTACGGTCCAATTT  
GCTTCAAGGTTCACTACCTATTCCACCAAATTCACAACATTCTTCTTCATATCCTATAATTATCTCAGTGA  
AGAAATTCCTTCAGATATTTGCAATTTAACATCACTTGTAACTAGATTTGGCAAGAAACAATTTACGTG  
GAGAAATTCGCCATGTTTGGGAAAAATCACTGCCCTCCAAGTTTTGGAAATGCGCCACAACAATCTTTC  
TGGGAACATTCCAACGACTTTCAGCAATGGAAGTTCACTGAGCAGCCTTAACTTGCATGGAAATAAACT  
AGAAGGGAAAATTCCTCAATCTTTGGCCAATTGCAAAAACCTGCAGCTTCTTGATTTAGGCAATAATAAC  
CTCAACGGCACATTTCTGTGTGGTTGGGAGCTCTGCCAGATCTGCTAGTTTTAAGCTTGAGATCAAATA  
AATTGCATGAACCCATCAGAACATCAAGCATTGAGAACATGTTTCTGAGCTCCGAATCATAGATCTCTC  
TTATAATGCCTTTTCGGGAAACTTACCTTCGAGTTTGTTCACATCTGAAAGCCATGAGGACAATTGATC  
CATCAATGGGAACACCAAGATATCATGGAGATACATATTATGAAGATTCTATTACAGTTGCAACCAAGG  
GATTTTATCGTGAAATTGTGAGAATCTTGTATTTGTACACAGTTATCGATCTTTCAGTAATAAATTTAGG  
GGCAAATTCGAAGTATCATGGGGGATCTCATTGCAGTTCACATAATGAATTTATCTCATAATGGATTGC  
AAGGTTATATAACCGTCATCATTGGAGATTTATCTTCAGTTGAATCATTGGACCTATCAGGAAACCAGCT  
TTCGGGAGAGATACCACAACAACCTGGCTTCTCTTACGTATCTTTCATTCTTAAATCTCTCCACAATCATCT  
CCAAGGATGCATCCCTCAAGGACCTCAATTTCACACTTATGAGAGCAGCTCATATGAAGGCAATGATGG  
ATTACGTGGATTTCTATTTCAAAAAGTTGTGGCGATGCTCGGGTATTAGATACAAATGATACCGTATCT  
GGACTAGATGATGAAGAAAACAATTCTGACTTTCAGAGTGATTTTTGGAAAGGTGCTATTATGGGCTAT  
GGAAGTGGACTATGTATTGGATTATCCATAATATATTTTCATGATTTCAACTGAGACCGATATGGCTTGCA  
AGAATCATCATAGAGATGGAGCACAAAATAATTATGGGAAGGAGAAAGAAGCAGCGACGGCAAAGGA  
ATTACAGAAGAAGAACTTTAATCACTTCTAG

>M6-PGSC0003DMG400015853 M6 LRR-RLP

TATAGAAGGTGAGGGATCTCTTTAAGGTCCCTTGTGGTAGGGAAGCCACAGATGTTAGACTTGCTGC  
TATTGCTGTTGGAATCGCAAATCGTGGAGGTTTAGCAAAGCTATCTATTCGGGGAGACAATCCGTGTCG  
TGATGTGACAGATGCTGGTCTCAAGGCTATCGCTCGATGTTGCCCTACTCTGAGAGATCTTTCCTTGTGG

AATGTGTCTTTTGTGGTGATGAAGGCTTATCTAAGATTGCTCATGAATGCCATCTATTATAGAAGCTTG  
ATATTTTCCAATGTCCAACAATTACCGACAATTCTTTGTTGGCCGTTGCAAAGAAATGTAATCACCTGACC  
TCCTTGATCATAGATTCTTGTTCAAAGATTGGGAATAAGTCTCCCAAAGTTGTGGGTCAATACTGTCTGA  
ACCTGAAGCTCGTCATACTAAAAAATTGTCCACTCATTGGGGATAAAGGAATTGAAGATCTCTTTTATTC  
AGCCGGTACTGTTTTAACAGAAGTAGAGCTCCAGGCACTACACATTAGCGACATTTCTCTAAAAATTATT  
TCACATTATGGAAGTGTACTGACAAGTCTAGTTGTTGGTGAAGTTCGAAGAATAATAGCGAGGGATTTTT  
GGGTCATGGGCATTGGTCAATGTCTGCATAAGCTGAAGGCCCTTTCAATAAGCTCTTCCAATGGAGTCA  
ATGATTTGGGTCTTCACGTTATCTGTAAAGCTTGCCCAAATTTAAAGTTGTTTTGTGTCCGAAAAAGTGC  
ATCCTATCAGATAATGGATTGGTTGCTTGTGTCAAAGCTTCAGTCTCACTTCAGAACCTTCAGTTAGAGG  
AATGCCACTTGATTACCCAGGCTGGATTTTTTGGTATACTTCTGAACTGTGGTAAGAACTGAAGACTCT  
TTCCTTGGTGAAGTGCTTGGGTGTGATGGACTTAATTAATGTAGCTCCTTCGAAGGCTCTTTGTTGTAAC  
TCACTGGTATCATTGACTATTCACAAATGTCTTGGAGTAGGCAATGCTACCATTGTTGTAGTAGGTAGTC  
TATGTCACAACTAACTCATATAGAGCTGAGTGGGCTTCTTTGTATAACTGACGAGGGGCTCTTCCCTCT  
AGTTAATAACTGTGCAGCTAATTTGGTGGCGGTGAATCTAAGCGGGTGTGTCAATATTACAGACAAAGC  
AGTTTCAGCCATAGTTAAATTCAATGGGAGATCTCTGAAGTCTCTACTCGTAGATGGTTGCAGACATGAT  
ACTGATGCAACATTAGTAAAAATTTGGAAGCTTGTGCTGGATGCTTAATGTACTCGATGTTTCCAAGTGTG  
GAATCACCGATTGAGAGATTACAACCTTTGTCCAGTGCTATACAACCTTCATTTGCAGATCCTCTCACTGTCT  
GGTTGCCCTTTGGTGTGAGACAATAGCTTACCCCTCTTGCTCGATTTGGTTCAGAACCTTCAGGGCTTGA  
ACATACAGCAATG

>M6-PGSC0003DMG400015878 M6 LRR-RLP

TGAATCAATCTCAGAGCTTCTGAATTTGCAAACCTAATTTGTGATGCTTATCCATTTGATATAACTTTACC  
TCGGAAGATATGGATGATGAAGAACTTGAGGTATATACGTTTAAGGGAAGCCAGTTATTTACCAAGTCC  
TAGAATAGATAAGAATCTTGTGACAGGGATGCCAAATTTAGAGGAATTTTTTGGTCTTGGTTACTCTAGT  
TGTACAAATGAAGTCTTTTCTAGCATCCCCAATTTAAAGAGATTGACCATTACGGACATTTAAGAGTAG  
CAGACAATATTCCATATCTTCTTGGATATGTCGAGCTTGACAAAACCTTGAGGCATTCAAGCTTTCTGG  
AGATATATTGTTGTAAAGCCCATCAAGATATTTGGTTTTCCAAAATCACTTAGAAGAGTGTCTTTAACTAG  
GTGTTATAAGTTTATTTGGGAAGAGATATCATCAACTTTTATCAAGTTGCCACATCTTGAAGAGCTCAA  
CTTAAACGTTGTGGAGCCGAAGATGATGTATGGAGATTGAGTGACAAAGACATATTCAGAAGCTTGAA  
GTTGTTGTTACTGAGTGAGCTAAATCTTAAGGGTTGGGTAGCAAGCAGCGATAACTTCCCAAATCTAAA

ACGTCTTGTTCTGAAGAGTTGCAAGGACCTGCAAGAAATTCCAACGGATTCGTGGAAATTTGTA CTTTG  
GAATCGATTGAGTTACATGATTGCACCACTACTGCTGAGGATTCTGT CAGAAATATCGAACAAGAACGA  
GAGGACATGGGATATAATATCCTTAAGGTCTACATCCATAACAGCCACAGTAAGTTATAA

>M6-PGSC0003DMG400015957 M6 LRR-RLP

ATTCTTGAGTGCTACTGATGCCACCACTTTTAGGTGATTTGGTGAATTTGGAGCAATTGAATGTGGCAC  
ATAATATGCTTTCTAGAACAATTCCAAAAAGTATTTGTCAGCTTCCTAAGCTTCAGAATTTTACATATCCTT  
ATAATTTCTTCACTGGTGAACCACCGGTGTATTTAGGGTTGCCGGAGTTTCATGATGAACGGAATTGTTT  
GCCAAAATACCGGTGCAACGGTCTCCGGGACAGTATAAAGCGTTTTTGTCTAAAAAAATTCATTGTAGT  
GCTTTTAGGTGTCATAAATTTGTTCTTGTTTTGCCTTCTCCACCACCACTTTCACCGCCGTTGCCTGCCACT  
CCTCTGCCTGTTGTGGTGCTTATTTTTCTCCTCCTCCACCAATTTATACTCTTCCTTCACCTTCACCACCAC  
CTCCTCCACCTCCAGTTTATTCGCCACCACCACCCTTCCACCTCCTCCACCACCAGTCTATTCACTGCCAC  
TACCAACTCCATCTCCTTCACCACCAGTCTATTCACTGCCACTACCAACTCCATCTCCTCCTCCACCGCCAC  
CACCATCACCTCCACCACCCCCACCATCTCCACCTTCTCCATCACCATTGCCTTATTGTGTACGCTCACCTC  
CACCTGCCTTG CAGGCCTCCTCTTCTCCTCCTTCACATTTTTTCCGTCATCTAATGAAACCAACCAATCTAA  
TCGCTTCCTATGCTTTTTTTCTATTTTTCTGCTGGTCCTAAACTCGACGAAGCCCAATTCACTGTCTTCG  
GCCTCTCCTTCTTGATCTCACCAATCTAATTGCTTCCTA

>M6-PGSC0003DMG400016357 M6 LRR-RLP

CTGTTTCTCTAAAACAAAATCAGCTGCAAGGTCCTATTCCAAAGTCACTCTTAGATCTGCAGTACCTAGAA  
ATTCTTCTCCTTTTCGCACAATAATCTCAATGGAGAGATTGCTTCACCCATATGCAATCTGAAAACACTACG  
AGTGCTAGATTTGGGCAGCAATAATTTGGAGGGAACAATCCCACTATGTTTGGGTGAGATGAGTGGACT  
TTGGGTTTTGGATTTAAGCAACAATAGTCTTAGTGGGACAATTAATACTACTTTTAGTATAGGAAACTAA  
TTTATAGTCATTAATTTGATGGGAATAAGCTAGAGGGGAAAGTCCCGCAATCATTGATCAATTGCACAT  
ATTTGGAAGTTCTTGATTTAGGTAACAATGAGTTGAATGACACATTTCTAAATGGTTGAGAGCCCTACC  
GTATCTGAAGATTCTAAGACTGAGATCAAATAAGTTCTTTGGCCCTTTAAAAGATTCATCGACTTACAAG  
TTTGCTCAAATTCGAATCATAGATCTCTCATCCAATGGATTTAGTGGAGATTTACCAGTGAGCCTTTTTGA  
GTATTTGAAGCCATGAAAATAATTAGTGAGAACAGTGGAACCCGAGAGTATGTAGCAGATATGTCTTC  
ATTTTATTACACAAATTCCTTTATAGTGACAACAAAGGGACTGGAGCTTGAACCTCCTCGAGTTTTGACTA  
CAGACATGATTATCGATCTCTCAAGGAATAGATTTGAAGGTCATATCCCAAGCATTATTGGAGATCTCAT  
TGGGCTTCGCACGTTGAACCTATCGCATAATCACTTGAAGGTATTATACCATCATCACTGCACCAGTTA

TCTGTA CTTGAATCATTGGATCTCTCATCCAACAAAATCAGCGGAGAAATTCCACAACAACCTTGCATCCCT  
CAAATCACTTGAAGTCTTAAATCTCTCTCACAAATCATCTTGTTGGATGCATCCCCAAAGGAAAACAATTTG  
ATACATTTGAGAATAGTTCATACCAAGGGAATGATGGGTTACGTGGATTCCACTCTCAAAGGATTGTG  
GTGGTGATGATGGGGTAGCACAAACGACGAATCCAGTTGAGCTAGATGAAGAAGGAGGAGGAGATTC  
ATCAATGATCAGTTGGCAGGCGATTCTCATGGGTTACAGTTGTGGACTTGTATTGGACTGTCCATAATA  
TACATAATGTTGTCAACTCAATATCCAGCATGGTTTTCGAGGATGGATATAAAAATTGGAACACAAAATTC  
TTACGAGAATGAGAAGGCACAAGAAAAGACATTAGTGTGTAACCTCGAGGTATCAACTTAATCTCTATC  
CTTCAGAAGATTCCATTTTATATATCCATAAAATTTCTACCTCTTTCATCGTTAAAGCTTTTAACTTTAATTC  
TTCATTTTTGAAAATTGCAGGATTCAAGTCTACTGCATCGTTGGGATGTAAAATAGAAGCTTTTACTTTC  
ATAGTTTGTTAATTCTGTTGCAACTCAACAAAATTTGATTTCAATTTATCTGTAGTATGTAGAAATAAATTC  
AGCATTTTCAATTGTGAGGAAAAACAAGTTCATAAAATGCAAAGGGATCAAAGGGAAACACCAGTA  
GAGCAAAAAGTTTGAAATAACAGTAGAAAGCACATTCAAATTCCTAAAACAGTTCCAAATTCATCGATAT  
ATAATAACGACGACCACAATAGAGTTGGTGTAGCAGTTGAAAAGTTTGAGAAACAACCTTGGATACTAA  
GGTTTAAATCCTAGCAGAGATATCACATTTAGGAAGAAATCCAGCAGAACTGCTTAATTTGATGAGTCAT  
GACTTCATATCGACAATTTTACAAATTAACCTATATTAACCTAAAACCTGTGGGCTGGAACCTTGTGTATTCC  
AGCATCTAACATTGTTCTTTCCACCTCTCTGCGCCAATATAAATCTTTAGAGTTGCACATAACGCCCAA  
AATGATTCTGTTGCGACTCAAGCAATAGTTGTGCTACTTCATTTCCCAACTCAATAGCTCCACCAAGTCTA  
CAAGCACCCATCAGAGCCCCCAAGACAGTAGCATCATCTTCAAAGGCATCTTCTTTATGAAGTCCTAT  
GCTTCGTGCAGTAGATCAACCTCACAACCATAATGTTTCATCTTAGCTGCAAGTCCAAATTCATGTGACAT  
TGCTTCAAACAATTAGAACCCGAAATCGACAAGGTTGGCACACAGACAAGCTGATAGAAGTCCACGAA  
GGCAATCTCATTTGTTGCAGCCCCTTTTACTCTCATCTTTGTTGAGAATATAATGAAATAATAGCTTAAG  
CTTTTAGATGAAATGGTCACACACTTCAGCAATCTTGACATACATCGTTAATGCTAGGGAAGAAATCATA  
GCATTCCATGTGCAAACCTGCTCCATCGCATCAAATACCTGTGTTACAGCAAATGGTTAAAAATACATGC  
AAGGCCTCGTACTATAAAGAGCACGCAGTTTAAAATACATGTAAGGCCTGCTAACAAGCTTTCATTAAT  
GATAAGCACGAGCAAAAATTAAGACCATCGATTTGAGCGACAAAATCAAAGACCACCGAAATAGGGA  
CAATCCGTGCAAAAACCTTCTATCAATTTAGGACAGAAAATAAGACCTTTAAAATCACGAGAAGTGCAGA  
TCCAAACCAATTTACAGGCGAATTGTTAACATAGACATCAACTGCACAAAATTTCTAAACCAAGAAACAAT  
TAATATAGTGAATATTGTTGGCTTTGGGCAAAACATGCACAGTTTTCTTCAAATGTCTCCAATCATATT  
GCAATCAGTTTCGCTACAGCACCCGCTGCTCTAGCCTAATATGAGTATCACTTCACTTTATACACATCTTC

TTTTCTTAGGAGACAAAATGCATGTGTTATTACAAGTGTTGGGACTTTCATTTAAATCTTTCTTAAATTG  
ACTTGAGGATGTTATTTGACTTACAGTGCAATGACTTGAGAAAGATTAACAGTCTTTACATATTGTGTG  
ACACATTGAATGTGAATGTGTAATTGACAACCTCTAAAAGTACTGACTGAAAATGACTAGGTGACCTTCCTGGA  
ATTGATTATTTCAAAGCAAACCTTAAATGTGCTATATAGGATTTGTTATCTGACAATTTCCACCTGCATCA  
AACAGTCCAGAAGCTGTTGTGGATTGTCTGTTAAGTACTCCTTCAATTATTATTTTGTGCAAGGTTTA  
TACACCAATTATTCATAGTGGTAGGAAGCTCAAAGGAAAGTGTA AAAATATCCCAATAGATAGGGAATG  
GAACAAGCTTTAAGGATTTTCGACTGGCACGAAGAGTTTGATTCTTAACTCTAACTCTAAGGTCTTGAAT  
ACCTGGAGTTAAGAAATTATGTTCCATAACATTCAAGAAGTTGAATTATTCTGTGCTCATGGGAACTAAAT  
TAAGACATGGCATAACACCTTCTTTTGCTTAAAAAAGTCGACACTACTTAAATAAAAAGGACACTAATTATC  
AACTTGGGACAGAAAGTAAGACCTTAAAATCACAAAAAGTGCAGATCCAAACCAATTAATAAGACGAAT  
TGTGAAAATAGACCTACATCAATTGCACAAAATTCTTAAAATGGTGTGATTTGCAGATTTTAACTTGAG  
ATCAAATAAGCTTCATGGCCCTATAAATGATTCAAGGACTGAGAAGTTGTTTGCTAAAATTCTAGTAATA  
GATCTCTCATCCAATGGATTTAGTGGAGATTTACCTGTGAGCCTTTTTGAGAATTTTCAAGCCATGAAAAT  
GATTGGTGAGAATAGTGGAAACCCAGAGTATGTAGCAGAAACATATTCCACTTTATACACAAAATTCTTTG  
ATAGTGACAACAAAGGGACTGGATCTTGAACCTCCTCAAGTTTTGACTATGGACATAATTATCGATCTCT  
CAAGGAATAGATTTGAAGGTTTCTATCCCAAGTATTATTGGAGATCTAATTGAACCTCGTACGTTGAACT  
TCCCTCATAATAACTTGAAAGGTCATATACCAGCATCAATGCAACATTTATCTGTACTTGAATCATTGGAT  
CTCTCATTCAACAATATCGGCGGAGAAATTCCACAACAACCTGTATCCCTCACATCACTTGAAGCTTAA  
TCTCTCTCA

>M6-PGSC0003DMG400016424 M6 LRR-RLP

GTTTTTTGAACATTTTAGTGCAACAATGGGCTACGTAAACCTTGATTTTTTATGCTATTTCCCTTCCTCTG  
CCATCTTTCTTTCTCCTCATCCTTACCTCATTGTGCCCAAACATCAAGCTCTTGCTCTTCTACAATTCAAG  
CACATGTTTACAATAAGTTCTGTTGCTTTTGATAGACGTTGTTTACGATAACAGGCCAGTGGATTCAAGTC  
ATATCCAAAACCTTTTCGTGGAACAAGAGCACAGATTGTTGCTCATGGGATGGAGTTTATTGTGATGA  
GACGACAGGAGAAGTGATTGAGCTCAACCTCACTTGCAGCCGACTTCAAGGCAAGTTTCACTCCAACAG  
TAGCCTCTTTGAACTCTCCAATCTCAAAGGCTTGATTTGTCTAGTAATAATTTCTCTGGATCACTCATTTC  
ACCTAAATTTGGTGAGCTTTCTAGTTTACTCATCTTGATTTGTCGATTCAAGTTTTACAGGTCTAATACC  
AGCAGAAATCTCTCGTTTTTCTAAATTACAAGTTCTTAGTATCCACAGTTATCCACATGAGCTTAGATTCTG  
TACCTCACAATTTTGAAGTCTCCTTAAGAAGTTGACCCAATTAACAGAGCTCAACCTTAGGTCTGTGAAC

ATCTCTCCACCATTCTCTGAATTTCTCTTATTAACTACTCTACACCTTGGGAATACACAGTTATAC  
GGGATATTGCCGAAAGAGTTTTCCACCTTTCCAACCTAGAAATCTCTCATTATCAAAAAATCCCCAGCT  
CACTGTTAGGTTTTCCAAAACCAAATGGAACAGCAGTGCATCACTCATGGAGTTAGTTCTCAATGGTGTG  
AATGCTACTGGTAGGATACCTGAATCATTGGTCATCTAACTTCACTGCGTACATTGAGAATAGCTTCTTC  
TAATCTCTCAGGCTCTATTCTAAACCTCTATGGAATCTCACCAACATAGAGCTTTTGAACCTTGGTCATA  
ACCATCTGAAGGACCAATTTCTGATTTCTTTAGATTTGGAAAGCTCAGGGCGTTATCACTTGCAAAGAA  
CAACTTTGA

>M6-PGSC0003DMG400016653 M6 LRR-RLP

ATGCTTACCCAGGATTTGACATCCAAATCGAAAATTGACCCTGAGCTGATTCAGAACTCGAGAGTTGGG  
TCTCCCATCAAAGTTGTGAGTTTGGTGGCGAATTGAGAATTATTAGTCGGATTCCAATTAGTATCGGGAA  
TCGATAACCGAAATTTGATTTAGGGTGGAAAGTTTAGGTGTGAGGTTGAAAAAGAGTTTTCGAAAATGT  
TTTCCTTATTATTTTTGGGGTAAGTCATTTTCCTTGATTTTGAAGAAATTAATTTATTTGGAAAACATTT  
AAGTCAACCAAACATGAAAAATTTGAAATCATTTTCCAGAAAATATTTTCCTTCGAACTAAACACAAAAC  
TGTGTCTTTATCTCTTTTTTTCTCCCCCTTCAAATCATAGTTTATATAGGTTGGTGATAAGAAAACATG  
ATGGGTATATTATGTATATAAGTTTCTATTTTGATCTTTGTCTGATGTTTTATATCTTCTGATTTTCAGAAA  
ATGGTGCTTTTTTCAAAGCTTCATATCTAAGTTCAAGATAATCATCTTTGCTTTTATCACATGGGCAAAT  
AGGAATGTAAATTTTTCTCCTAGGAAGAGGATTTGTGTCACTACCGCTTCTAAAAATTTTGAGCAGAGGA  
ATCATCCTTCCATTGAAATCCTTCTTGATAAATGCCTCTTTGAGGTATTCAAACGTCTCCGAGTGGCCAA  
AAGAGAAGTGTATGTGCTTGTGTTTCCAAGCGCTGGCTTACACTTTTAAGCAGCATTACAAGGATGAG  
ATTGCAGAGTTTAATGGTATAGAAGGTGAGGGATCTCTTTTAAGGTCCCTTGTGGTAGGGAAGCCACA  
GATGTTAGACTTGCTGCTATTGCTGTTGGAATCGCAAATCGTGGAGGTTTAGCAAAGCTATCTATTCGGG  
GAGACAATCCGTGTCGTGATGTGACAGATGCTGGTCTCAAGGCTATCGCTCGATGTTGCCCTACTCTGA  
GAGATCTTTCCTTGTGGAATGTGTCTTTTGTGGTGATGAAGGCTTATCTAAGATTGCTCATGAATGCCA  
TCTATTATAGAAGCTTGATATTTTCCAATGTCCAACAATTACCGACAATTCTTTGTTGGCCGTTGCAAAGA  
AATGTAATCACCTGACCTCCTTGATCATAGATTCTTGTTCAAAGATTGGGAATAAGTCTCCCAAAGTTGT  
GGGTCAATACTGTCTGAACCTGAAGCTCGTCATACTAAAAAATTGTCCACTCATTGGGGATAAAGGAATT  
GAAGATCTCTTTTATTCAGCCGGTACTGTTTTAACAGAAGTAGAGCTCCAGGCACTACACATTAGCGACA  
TTTCTCTAAAAATTTTACATTATGGAAGTACTGACAAGTCTAGTTGTTGGTGAACCTCGAAGAATA  
ATAGCGAGGGATTTTTGGGTCATGGGCATTGGTCAATGTCTGCATAAGCTGAAGGCCCTTTCAATAAGC



TCTTCCAATGGAGTCAATGATTTGGGTCTTCACGTTATCTGTAAAGCTTGCCCAAATTTAAAGTTGTTTTG  
TGTCGAAAAAGTGTCATCCTATCAGATAATGGATTGGTTGCTTGTGTCAAAGCTTCAGTCTCACTTCAG  
AACCTTCAGTTAGAGGAATGCCACTTGATTACCCAGGCTGGATTTTTTGGTATACTTCTGAACTGTGGTA  
AGAAACTGAAGACTCTTTCCTTGGTGAAGTGCTTGGGTGTGATGGACTTAATTAATGTAGCTCCTTCGAA  
GGCTCTTTGTTGTAACACTACTGGTATCATTGACTATTCACAAATGTCTTGGAGTAGGCAATGCTACCATTG  
TTGTAGTAGGTAGTCTATGTCACAACTAACTCATATAGAGCTGAGTGGGCTTCTTTGTATAACTGACGA  
GGGGCTCTTCCCTCTAGTTAATAACTGTGCAGCTAATTTGGTGGCGGTGAATCTAAGCGGGTGTGTCAA  
TATTACAGACAAAGCAGTTTCAGCCATAGTTAAATTC AATGGGAGATCTCTGAAGTCTCTACTCGTAGAT  
GGTTGCAGACATGATACTGATGCAACATTAGTAAAAATTTGGA ACTCTTGCTGGATGCTTAATGTACTCG  
ATGTTTCCAAGTGTGGAATCACCGATT CAGAGATTACA ACTTTGTCCAGTGCTATACA ACTTCATTTGCAG  
ATCCTCTCACTGTCTGGTTGCCCTTGGTGT CAGACAATAGCTTACCCCTCTTGCTCGATTTGGTTCAGAA  
CCTTCAGGGCTTGAACATACAGCAATGTCCCAACATCAGCTTTAGAACTGTTGATGCACTTGTAGAGATA  
AATCCAGGTTGTAATATACTTTTCTAA

>M6-PGSC0003DMG400016808 M6 LRR-RLP

TAACTGAATTCATGGCATCAACTTCTTCTTCTTCTTGTCTGGGTGCTGTCCTCGATGGAAGTACGATGT  
CTTCTTAAGTTTTAGAGGTGAAGATACTCGTAAAACAATTATAGGTTACTTGTATGAACGTTTGACAAGG  
AAGGGAATAATTGCCTTTCAAGATGATAAAAGGCTAGAGCGTGGCGATTCAATCCCAGAAGAACTCTTG  
AAAGCTATCCAAGACTCTCAAGTTGCCCTCATCATTTTTCTCAGGGAATTATGCTACATCAAGGTGGTGCTT  
GGATGAACTAGTGAAGATCATGGAATGCACCAAGGAAGAAAATGAAAAAATAGTCATGCCGATATTCT  
ATGGTGTGGAACCATCACATGTTTCGAAACCAAAGTGACAGCTTTGCTGAAGCATTGCGCAACATGAAT  
CAAAGTATAAGGATGATGGTGAGGGGATGCAGAAGGTGAAAGGATGGAGGACTGCCCTAACTGCTGC  
CGCAAATCTAAAAGGATATGATTTGGTAATGGGTGAGTTAACTGAAATCAACGGAATAATTTATGAT  
GACTAGCTACACATAATTATATTTTACTATAGAACAAAGAATCTCTACTTCAAAAATGATAAACAAAATCA  
TAACTA ACTTATTCACATTTTCTGAAAATAGAATGATGGTTGATTATATATGTTTCTATCTGTAAGAGTTT  
GGTTTCCAAGCATAGTCCTTATTCTTAAAATCATAATTATGGACTCTACAATGCGAAATACTTCTTATTCTT  
GACTATTTTTATATGTACATATTAGCAATATTTTTTTTTGTAGGGTTGAATCTGACTATATTGAGTGTATTG  
TTGATGAAATTTCTGTTCAAATGCAAGAGTTCAGTATCTTATTTGCACAAAGTTGTGGGAATAGATGCTCA  
ATTAGAGAAAGTAGAATCCCTACTAAAGATGGAAATCAATGATGTTCCGATTGTGTGGATCTGGGGAAAT  
GGGGGGAGTTGGTAAAACGACAATAGCAAAGACTATTTTTTATAACCTCTCGTCCAAATTTAAAGATGG

CTGTTTCCTTGAGGATATCAAAGAAAACAAACATAGAATGCACTCTCTGCAAAATATCCTTCTCTCTAAAC  
TATTAGGGGAAAAAGAAAATTGTGTGAACAATAAGGAGGAGGGGAAGCACCTGCTGGCTCGTAGACTT  
CGGTTTAAGAAGGTTTTAATTGTGCTTGATGACTTAAATCACATAGACCAGTTGGATTACCTAGCAGGGG  
ATCTTGATTGGTTTGGCAATGGCAGTAGGATTATTGCAACCACTAGAGACAAGCGTTTGATAAGGAAGG  
ATGTAGTACATGAAGTGGAAACACTACTTGACTGTGATGCTATTAACCTGTTCAATCAATATGCTTTCAT  
GAAAGAAGTTCCTGATGAGTGTTTTAAGGATCTAATGTTGGAGATAGTAAGTCATGCTAAAGGCAATCC  
TTTAGCGTTGAAAGTGTGGGGTTCTTCATTACACGGGAAGGGTATAATTGTGTGGAGAAGTGCTCTAGA  
TCGAATGAAGAAAAACCTGGTTCAGAAATTATTGAAAACCTCAAAATAAGTTATGATGGGTTGGAGCC  
TGAAGAGCAAGAGATTTTTCTAGATATAGCATGTTTCTCCGAGGAAATGAAAAAAAAGAAGTCATGCA  
AATCCTTGAGAGTTGTGATTTTCCAGCTGAATATGGATTGAGCGTCCTTATTGACAAATCTCTCGTGTTCA  
TCTCTAGCCATAATAAAATTCAAATGCATGACTTAATACAAGATATGGGTAAATATGTAGTGAAAATGCA  
AAAGGATCCGGGCGAACATAGCAGATTATGGCTAGCTGAAGATTTGGAAGAAGTGATGGTCAATAATA  
CGGTAAGTAGGCTAAACAATGCAATACTATTCAATTTTTAGTTTTTCATATTCCAATACATATA

>M6-PGSC0003DMG400016882 M6 LRR-RLP

TGATAGAGTCCTAATTTGCTGTTTCCAGCAAGAAAATTGTAATCTTTTTCTTGCCCCATTGTGTTGAAGTTCC  
ATTTTAGGTTAATTTTGGTGTGATTTGAATCATTGATAGAGTCTATAAAACAAAGGGTGTGTTGTCGGTGA  
TGTTTTTTTGGAGTTCTTATTTGTGTTAATTTCAATTTCTAGGTTATTAGCCCTATAAAGTTTGTGTTTTTTGG  
GCTATTGATGTGTTTTGTAAGACATTGTTGAAAATTTATATGATTCTAATTTTTTTTTTCCAGAATTAATGA  
TGGTTAATTAGAGGGTTATAGCTTCTTATGTATAACTTGTTTCGTGATCCACAGCCATTTGTTCTGCCATTG  
CTCTATGTGAAGTGATTTAGGTGAGTCATAAGCAGATGTCTAAGTGCTACTCTTTCTTTTCATTGACTAAT  
TGCTACTGATTTACTGTCAGTCAGAAGCTGCGAGTTGCTTCATTTGCCTTGATCTTGCTGATTTGTTGTC  
ATATTATTCTTGCAATCCTGCTTCGATTACATTTTTTTGAGCTGGAGGCTTGTCGAAAACAGCCTCTCTAC  
CCTTACAAAGATAGGGGTAAGGTATGGTACATCGTACCTTCCCAGATTCGACTTGTGGTATTACAGTGG  
GTATGTTGTTGTTGTTGTTGTTATTTTACATAAATGATGATAAATTGAGTGGCACAATGTAAGTGGAAAGTA  
TTTTAGTGTCAAAATCAAATGATCCATTTGAAGATTGTGTTTCAATTAGTAGAATAACAAGCACAAACACC  
TATTACAACCTGAATAAAGAAAATTTAAGGCGTTTTGTTTTCTGAAGTCTTTTGGAAATCTTGCGAAGAA  
ATTTTCCAAAATTTGTGTTTCTTTGAATCTTCTGAAACGCTTTTTTTAAAAAATGTTTTTTTATGAAGTGT  
TTTTAGGGTGTCTCCCACTCACAGATCTTCAATAACCAACTATCCATAAACATTTAGTCTTTGCATGTTTTAA  
AAAGAAAGATTTTTTGGAGAAAACCTTTCCAAGATCATCTCTAAACATGCAAGCCGAATAGCTTCTATAA

ATTTCTGTAATGAAAACATTAACATAATTGATGAAATTAGTAATTAGAGCATCTCTTTTCAAACCAACATTT  
AAAGTGTTTGCATCTGTTGATGGATGAATTCAATATGCTAATGAATTCTAACTCAGCATTTTTGGAAGAT  
CAGCTTTCGTGGTGAAGGAATAAGCAGTTCTTTTGGAAAATAGTAAGGAGCTATGGCTTGAATGTTTAT  
GCGAAGCGAATGTGTACCTTCTGTTTACTCTATGGATGCTAAAAAATTCTGCTAGTTGCTAAACAGGAT  
GAGGGCTATGGGAAATAACTTATTTTGTGGATCCACTCATTCTTCTACCACTGCTCTCTGTAAAGTGAT  
TTAGGTGCACCACTTTATTATCCATGTTATAAGCATCTGTCTAGGTGCCCCATTATGTTTCTAGGATAAG  
TAGAAGTTCTTGCAATTGACTAGCTGCCACTGATTGATGGTAAATACTTACCCACATCGGGTGTTTATACT  
TAAATAAACAGTTAACCTTTAGAATTAGCAAATTAAGTGAAAATGCATATCACTTAACCGTGTTAAGT  
GTTACTAAGTGTATATGCAAGATATATGTGTATATTCATTGTCTTGGTGTAAGCACCCATTTCGGGTAAAG  
ATTTTACCTGATTTAGTGCCTCTCGGAAGCTTTTAATTGCGATTTATGTTAGGGATTATCCATAAATGTTG  
ATCAATTGAATGTCACAGTGGGATTTGAAGTACTTAAGTGCAAAATCAAATGATTCACTTGAAGACCGT  
GCATCAATTAGGAGAAGAACAAGCATAACACACTTATTACAATAAATAAAGAAATATCTAAGGTGTTT  
GTTGTGAAAGTTTCTTTGAGATCTTGAAGAAGTTTTGAAAATGTGTTTCTTTTGGAGTCTTCAGAAAA  
GCTATTTCTTGAGCAAGTTATTTTAGGGTGTCTCCATTACAAAATCTTCAAACCAACTATCCAAACACA  
TTTTCTGTTTGCATGGTTTTAAAGAAAGGATTTTTAGAAAATCTTTCAAAGTTATCCGTTCAACTCTT  
ATAAACTTTGCGATGAATATATTAGCTAATTGTTGAAGTTTGTATTAGACCATCTGTTTTCAAACCACA  
TTTAAAGTGTGGCTTCTGATGATGGGTGAGTTCAACATATTAACAAATTCTTACACAACATTTTTAGACC  
ATACGAGTTTGTGGTGAAGGAATGCACAGTTCTTATGGAAAATAATAAAGAGCACAGTTGAATGGATA  
TGCAAAGTGGCGGTGTGTCTTCTGTTACTCTATGGATGCTAAAAAGTTTTTCTACTTGGTGGCATATTGTT  
ACATTTGTCCCTTTTATATGAATCAGGTGGACCGGCAAAAATCCTCAAAAAGAGCCTTATTTGGACATTT  
GAGGCATGACATCTTTTACAATCTCATTACAAAAAATGAGTGTTATGGTAAGTCACGTGCTTCTTTCATA  
GTAAGTGTGTAATGTGATAAAATGAACCATTTAATCTACTTTCTTTCATTGTTTTCACTGATGTGTGCTTCT  
TTCGACATTTTCTGACGATAATTAGTCCCCTAGTTTTCAATTTATGTGCTACAGTGCTTGACAGAGTAAAG  
TACTGCATTTACCTTTTTCAGTTAATTTACTATATTTTCTGGCCCAATTTTAGTGGTCAACATCAAACACTCG  
GCCTTGATTGCATGATGACGTTGTGCAATGGGAAAATAATTGCAATAGCTAAATGGTGATGTGAAAGA  
TCAGCCATCCCTTAACTCTGTGTTTGTGGATGAAATCCTCTCTCAGAAGAGTTCGAATGGCCATTCTGCC  
CCTTGAGCATTACCAAGTAAATGACTACTTAAATCATAGACATTGCTCATAATTGGTCGAAAATTTGCCA  
GCATATCTGTAAGTATTCTCTTAACACAAATTATAGTAGCATCATTTAAAGAAAACAGAACTCTGAGTG  
CTCTTACCCTATGTCGTTCTTTGTGAGTAAACCACAGTGATAATTTCTCTCTTGGGTTGTACATTGACA

TCTTTGCATTTTTGTAAGCACTCTTGTATGCATGTATGTATTTAT

>M6-PGSC0003DMG400016899 M6 LRR-RLP

TTGCAATTGCAATTGCAATGCTGAGTGTATTAATATGTAGTGAAAACGAGAGTAGCAATAAACCTCTC  
ATTGAAGAAGCATCAACTAAACCCACATCGTCTCTCATCAATGCTACAATCACATTTTGTGCAACCTTGCA  
AAAAAACGAAACGCCTCTTGTGAGCAAAAATGGGGGAATTTGCTTTGTGGTTTTGCTCCTTCAAATC  
ATAGTTACTGAAGTTGTTGGTGCTGGTGTGGTGTGGTGTGGCGTTGGTGTGGACCTGGAGGTGTT  
TGGTTTGGTGGAGGGATCAACAGCCCAAGCCCAGGTGTTGTCCCAAGTCAAATTCGGCTTACACTGCT  
CTTCAAGCATGGAAATCTGCAATCACTGATGATCCAATGGGGATTTTGAAGAATTGGGTGGGTCCAAT  
GTGTGTACTIONACAGAGGAATTTCTGCACAACTCTCAAGATTACATGGGCAACCCAACAGACCCAGTTG  
TTACAGGTATAGATCTCAATCATGCAAATCTTCAAGGCACTCTTGTTAAAGAACTGTCTTACTTAACAGAT  
ATTTCTCTCATTACCTCAATACCAACAGATTTTCAGGTATAATTCCACAAACATTCAGAGATCTGTCTTCA  
CTCGTTGAATTAGACCTTAGTAACAACCATTTCTCTGGTCCATTTCTACTACAGTACTATTCATCCCAAAT  
CTTCTTTATTTAGATCTCAGATTCAACAGTTTCACAGGGCCAATTCCTGAGGATCTGTTCAACAGAAAAT  
TGATGCTATTTTTCTTAATAATAACCAGTTTGATGGTGAACCTCAGAGTTTAGGGAATTCCTGCTT  
CAGTGATTAATTTGCTAATAATAAGTTTAGTGGGAACATTCCTTTAGTTTAGGGTACATGGGTCCGAG  
AATTAAGGAGATTTTGTCTTAAACAACGACTTAAATGGTTGTATACCAGAAGGCGTAGGATTGTGGAC  
GGATTTGCAAGTTCTAGATGTGAGTTTCAATTCATAATGGGGCATTTCCTGATACCCTTTCTTGTGTTGA  
GTGGCATTGAGGTTCTCAACTTGGGACATAACAAGTTATCTGGAGATTTACCAGACTTGGTTTTGCTCACT  
AAGAAACCTTGGAATTTGACTCTTGCTTACAATTTCTTCTCTGAGTTGAGCCAGGATTGTGACAACTTC  
CTTTGAGAAATGTGGGTATTGATTTCTCATTGAACTGTATTCCAGGAAGACAAATGCAAAGGCCTCAACC  
TGAATGCTCTGTCATTCCAGGTGGAAGTCTCAGTTGCCTTAGAGTACCTGCAGTAAAGCCTCTTGTGTTGT  
GGATGAAAAAACTGCTACTGCCAGACTTAGTCGGACTCCAACGTGGGTATCAAACACCCGGTGGAAAAC  
CAAAAAAAAAAACTACTACTACTACTATTTTATTTATTTATGAGTGACAACAATTGAGCACTATCATCAA  
TGCACACGCAAGTTATGACTTGTACCTTCAAATTTATTTCTTCTTCTTATTTCTTTATGTTGCATTATGAAT  
TGTAATACTAGTATTAATTAGGACACTTATGGGTTTCACCCACCTTAGTAATCATAATTCCTCATCAG  
TAGTCGGGAATTCTCA

>M6-PGSC0003DMG400016982 M6 LRR-RLP

ATGGGAATGCCAAATTTGGAGTATTTGGATCTAGAGGAATGTATGAGTCTTGAAGAGGTTACCATTCT  
CTGAGATGTTCCAGAAAACCTATTGAGTTAAATTTGAATGAGTGTGGAAGCCTTAATAGGTTTCCATATG

TTAATGTGGAATCTCTTGAATATCTTAATCTAAGTTCCTGCTATAGTTTAGAGAAATCTCCGGAATTCCTT  
GGAATAATGAAGCCGGAGTTAATGATTATGATGTCATTCTTTGGAATAATGGAACCTCCATCATCTATTA  
TTGAGCACCAAGCTGGTCCAACAAGCCTAGATTTAAGTGAAATGAATAACCTTGAGCTCTTCCAAGCAG  
CATTTGTAGGATGAAAGGTTTGGTGAAGCTAATTGTGTGGGGTGCTCAAACTTGAAAGCTTGCCAGAA  
GAAAAAGGTGATTTAGAAAACCTGGAGGAGCTTGATGCCAGAGATACTCTAATCTCACGACCTCCGTCT  
TCCATAGTCCGATTGAACAAGCTTAAATTATTAACTTTTGAAAAAGAAAAACAGAAGACAAAGTGTACT  
TTGTGTTCCCTCAGGTGAATGAAGGGTTACCCTCATTGGTTGCTCTGAATCTCAGTGACTGCAATTTAATT  
GATGGAGGACTCCGGAAGACATTGGATCCTTATCCTCTTTGGAAACGTTGCATCTCAATGGAAATAATT  
TTGAGCGTTTGCCTCGAAGCATAGCCCAGCTTGGTGCTCTTCGATCCTTGGACTTATCAGATTGCAAGAG  
GCTTACACAGCTGCCAGAAGACATTGGATGCTTATCCTATTTAAAAAAGTTGAATCTCAGTGGAATAAT  
TTTGAGTATTTGCCTCGTAGCATAGCCCAGCTTGGTGCTCTTGAATACTTGCACTTATCAGATTGCAAGA  
GGCTTACACAGCTGCCAGAATTTCCACATAACAATAATGCAGATTGGAGCAATTCTTCGATCTGTAATTC  
ATTGTTTCAGAATATCTCATTATTGCACCCTGACACCTCTGATTCACATTCCTTGTCACTTAGAGTGTTTAC  
AAGTAGGCCGAAGAATATCCCAAGTTGGTTCCACCTTCGGGGAACCTGGTACAAGTGTATTAGTCAATTT  
GCCTATGAATTGGTATGTAACAGATAACTTCTTGGGATTTGCTGTATGTTACTCTGGCGAATTAATGAC  
AATACAGCTCATTTGATTCCCTTATGTGATGCTGGGATGTCGTTGATGACCCAAAACTTGCTTTATCCAA  
CCATGCAGAATATCTTGATGATATTAATTTTTTGTGGTACCTCTTGGTGGCTTATGGGATGCATCTAAAG  
CAAATGGAAAAACACCAAATGACTGA

>M6-PGSC0003DMG400016983 M6 LRR-RLP

ATGGCATCATCTTCTTCTGCGAGTAATTCACAATACTGTCCTCCATGGAAGTACGATGTCTTTCTAAGTTT  
CAGAGGAGATGATACCCGGAATAACTTTACAAGTCACTTGAACAAAGGTTTGGAAAATAGGGGAATAG  
CCACCTTTCTAGACGATGAAAGACTAGAGGATGGCGATTCCATCTCAGAAGAAGTTGTGCAAGCAATAG  
AAGAGTCTCAAGTTGCCGTAATCATTTTCTCAATGAATTATGCTAAGTCAAGTTGGTGCTTGAATGAAAT  
AGTGAAGATTATGGAATGCAAGGAGAAAGAAAACAGACAAACAGTTATTCCGATCTTCTATTATGTGGA  
TCCATCACATGTTGATACCAAAGTGAGAGCTTTGCGGAAGCATTGCCAAACATGAATCAAGGTATAA  
GGATGATGTTGAGGGGAAGCAGAAAGTGCAAGGGAGGAGAAATGCCCTAACAGCTGCCGCAAATCTA  
AAAGGACATGATATTCATGACCTGTGAGTTGGAAACAAATAATTGCTTTTGTGAAAAAAAATAACA  
GTATGTTTCTATATATTATCCTGAACTATAATGTTTCCAATTTAATACGGTCTTGAACATAAAAAATTATGA  
AAATACTCTCTAATACTTGACTTCCTCACATTGTCAACAATCAATCTCTAATTTATGTAGGATTAATCAATA

AATGAAAATTGATCAGATCGTCGACCACATCTCTTCCAACTTTGCAAGAGTGCTCGTTTTTTGTCTTATT  
TGCAAGATGTTGTGGGAATAAATTCTCATTTAGAGGAACTAAAATCCCTACTTCAAATAGAAATCCATAA  
TGTTCTGATTGTAGAAATCTGGGGAACAGGGGGAATTGGTAAAACGATGATAGCAAAAACCATCGTTG  
ATACTCTATCTCATCAATTTCAAGCAGCTTGTTTTCTTGTGGATGCTAAAGAAAATGCAAGAAAGAATCA  
ACTACATTTCTTACAAAATACCCTTCTCTCTGAATTGTTAAGAAAAAAGATAATTACGTCAATAATAAGT  
ATGATGGGAAGTGCATGATTCCAACAGACTTTCTTCAATGAAGTTGTTGATTGTGCTTGATGACATTGA  
TGAAAGAGATCATTTGGAGTATTTAGCAGGTGGTGTGGTTGGTTGGTTAAAGGCAGCAGAGTTATTGT  
AACAACTAGAAACAGACAATTGATAGAGAAGGATGTTGCAATATATTAAGTGCCTACACTACCTGATGA  
TGATACTATGCAATTGTTCAATCAACATGCTTTCAAAAAAGAAGTTCCAGATGAGTGTTTTAAGAAGTTC  
TCGTTGGAGGTAGTAAATCACGCTAAAGGCCTTCTTTAGCTCTCAAGGTGTGGGGTTGTTTGCTGCATA  
AGAAAGGCCTAACTCAGTGGACAAGAAGTGTAGACCAAATAAAGAAAACTCTAATTCAGAAATTGTTG  
AAAACTCAAATAAGTTATGATGGGTTGGAGCCGAAGAGCAAAGATATTTCTAGATATCGCATGTT  
TCTTCCATGGACATAAAAGAAAAGAAGTCATGCAAATTGTTGATAGCTGTGATTTTGGAGCTGAATACA  
GATTAGATGTTCTAATTGACAAATCCCTTGGATTCTCTAAATATGATAGAATTGAAATGCATGACTTG  
ATTGAAGATATGAGCAAATACATAGTGAAAATGCAAAAAGATTCCGGAAAACCTTAGCAGAATATTGAAG  
GTTGAATATTTGGAAGATGTGATGATGGACAATATGGTAAGTAAGCTAAACAATGCAATAGTATTCATA  
ATTCAAAGATATATATATATATATACCTTGAGTAAATTTTTATAAAATAAAATTAAGGAGGGCCAAAAC  
TAACCATACCAGTTCACTTGATCATTGATTAGTTTTTTTTTGAATTAAACTAGCATTTTATTACCAAATA  
TCAGATCTGTACATAGTCTAGAAAAGCTGTGATGGTATGGCATTACACAGCTGCAAACCAAACAATA  
GACATCAAAAACCTATGTGCTAGTGGTAAACTATAGCTAACTATGGGTAGAAATTAAGGCTATTTAGTCT  
TCTCGCAAGCTTCTTCTGAGTGATACTCCGTAGAATATGTCCTGCACAGTTCTCCTAACCACCATTTAG  
GTTCAACGTTTGGCCTGAAATATCTTCTGATTTCTCTCTATCCACACTTTGTATACTGCTGCAGCAAAT  
GTCATCCTTAATATAGTTGTTGTTGACCATTTCCATTGGCATAAGTGCATGCCAGTTAAGTTCATCTTT  
CCAATTCATGGCCACTCTATTGATGCCCTGCCTAGACCAGATTTCACTTGAGTAGTCACAGCTGAAGAAA  
AGGTGTTCAATAGTCTCATTCTCCTTGTGCATAACTCACATTGTTGTTTCATCAACTTCACCCATTGTAGC  
AATCTGTCTTTTATATGTAGTCTTCTAAGGGTAGCCAATCTAAGGATAAAAATCCATTTTGGAGAACCTG  
GATTGTTGCAAATAATTTTCTCCACTGTACTTTTTGGAACCTCACCCCTCATCAAGACATACATCTTCCTAA  
TGGAATAACTATGAATGTTTGACAAATCACTAACTTGTAACCAATGTCCTGTAGGCATAACTTCACCTTC  
AAAATCTTTTGTGTTGGGTTGGATTCCCATATTGGCCTTCTTTTATATAGTAACAATGCACCCATCTAAC

CCATAATGTACCTTTTTAGAGCACAGGTTCCAGAGCAATTTGCTAATGGCTGCTCTGTTCCACACTGTAA  
TATCAAGAATGTGTAGGCCACCAGCAGTTCTTGGTAACCACACCTTATCCCAGGCTTGCAAAGCCTTCTT  
TGTTACTTCTGTACCTCCCGTCCACAAGAACCTCTTACAAGTTGATTCTATAAGTTTGATCACCTTGGCGG  
GTAACACAAAAATTTGCGACCAATAAATATGGATAGAGAATAATACAGATTTAATTAGCTGCTCTCTGCC  
TGCGTAAGATAGAACTTTGTTGTCCAACATGTTATTCTCCTAGCATCTTGTCAATCAAGGGTTGGCATT  
GGGTGATTGATAGTCGTTTAGTACTTAGAGGCCCTAAGTATCTAAAAGGTATCTCACCTCTAGTAAATCC  
AAGAATATTCAAGATAGCTGTCTGATTTATGACATTCACCCCTCCAAAATATACAACATTTTTGTCTTTGTT  
TGCAATCAGACCAGAAGCATGAGAAAATTGTTGAAAATAATCAAACAACAGCTGTACAGACCTTATGTC  
ACCTTGCAAATAATAATAAGTCATCAGCAAATTTGAATAAGTTTTACCTTTGAGCACCTGGGGTGAAA  
CTTAAATTCAGGACAGGTCATTAGGCTCTTCAATAATCGTGAGAAGTACTCCATTGCTAAAACAAGAGA  
AAGGGGGACATAGGGTCCCCTTGTCTCAATCCTCTCTTAGCATCAAAGGTACAGAAGGCCAGCCATTG  
ATACAGATTGAGTAAGACACAGTTTGAAGGCACTCCATTATCTAGTGTATGAATTTGTAGGGAAATTC  
GATGTGTCATTACTTGCTTGACAAAGATCCATTCTAGTGAATCATATGCTTTTTGCATATCTACTTTAAGC  
ATACATCTAGGAGAGACCCCTTTCTCCATAGCCCTTAACCAGTTCATGACTTAAGATAATATTGACATG  
CAAATTTTATACAGACATTTGAAGTTATACTTTGTAGACTAATGAACCTTTTAAACAGGGAACCAAGACAA  
TGGAAGCAATCTGGGCGCATGGTGTTCAAAAATTATGCTTTAGCAAAGAAGCCATGGAAAACATGAAAA  
GGCTTAGATTATTATGCATCATGAGTTTTCGTACACATGATGACTCCATTGAGTACCTGCCCAACAATTG  
CGTTGGTTTGTCTGTCATCATTATCCTTGGGAGTCATTATTAGAAAATTTTGAACCTAAGAAGATTGTTTG  
TCTTGATCTCCAAAAGAGTTCCTGCGTCAATTATGGACCGGAATAAAAGGTACAATTGTTGAATTCAAT  
TTTCATTATTTTTCTTTTTGTCAAATACGTACATAGATAGACTCTCAAATTTTAAATAAATTTTGGTCTAAA  
GTTGTTGGGGTGGTCCAATTAGAGTCAAACCTGAGGGACCAGTTTCGTTGGCTATTTTGTATCGAGAATT  
TGAATTTGATGAAACGAATGAAAATTAGTTGTTGAGCTTATTAATTTTAAACAACATAAAAATACTTAGCTT  
AGTTGAAATAAAAAGATAATTTTATATAAATTGGGTTGGAGCAAATTTGATTCAATGAGAGTAAGATATTT  
TTTATTGGTCCACTAGCCAAATCTTAATTATCCTGGGCAGCATCCTAATTCTTCTGTGTTTTGAATAGCAG  
CATTGCCGTCTCTGCGAAAGCTAGATCTTAGAGATTCAGAAAGGCTGATTCAAACACCAGATTTACGCG  
TAATGACAAATTTGGAGTATTTGGATCTGCGTAACTGTAGTGATCTTGAAGAGGTTACCGTTCCTTGGA  
GTGTTGCAGAAAACCTCATTGTGTTAAATTTGCAGAGGTGTATACGCCTAAATAAGTTTCCATGTGTTAAC  
GTGGAATCTCTTGGATCTCTGCTTCTACTGCATTGCTCTAATTTAGAAAAATTTCCAGAAATCCTCGGAAG  
AATGAAGCCAGAGTTAGAGATCAAGATGAGCTGGTCTGGGCTAAGGGAAATACCATCATCTATTATTCA

GCAATACGCATGTCACCTTGCGGAGTTAAGTTTGAGTGATATGAAAAAAGTTGTAGCACTTCCAAGCAG  
CATTGTGTCAGTTGAAAGGTTTGGTGAAGCAGGATGTGTCATACTGCTCAAAAGTTGAAAGCTTGCTAGA  
AGAGATTGGTTATTTAGAAAAGTTGGGAGGGGCTTCATGCAAGCTTACTCTAATCTCACGACCTCCGTC  
TTCCATCATCCGCTTGAACAAGCTTAA

>M6-PGSC0003DMG400017062 M6 LRR-RLP

TATTATTTATAGTGAACAAAAATAACTACATCATAATAATAAGATTTCAAATACAATTCTTTGGTTTTTCC  
TATACATGAAAGTAATAATTACTTTTTTGAACTTTATAATACAAAATGCACATAAATTTTCATAAAGTTAA  
ATACTACTACATTAATTAAGTTATTCAAATTAATTTAGAGAAGGGGAAAAGGTTTAGTTAAGTATTTAGA  
TACATGTTTTTCATGTACCAAATAAATGCACATACTTTTATGGATTTTTTCATCTTTAATTTTTTATTTTATA  
CCTTTTCACTTGTAGTATTTATCATAATATTAATAATATAGTAATATGATTATTATTTAATATTTAATTAGTT  
TAATATTTATAATATTGGAATTAATGTAGGGGTAAAATGCTACTCTTCTCTTATTGTTCAAAAATCTCTT  
TGGTTTTTGC GGACTCCTACCGAGCTTGAATTTTATAACAATATTCTCATGTGAACATTACTTGTACCAGG  
TTCTGTATTAAGTAAAAACAAGTTTATGGAAGGGGCAAAGAGAAAGATGAGATAGTGAAAATCTTGAT  
AAACAATGCCCAAGAAGCTTTCAGTCCTCCAATACTTGGTTTGGGGGGACTAGGAAAGACAAGCTTCTGC  
ACAAATGGTCTACAATGATCCGAGAGTTACTGAGCATTTCATCCCAAAATATGGATTTGTGTCTCAGAT  
GAATTTGATGAGAAGAGGTTGATAAAGGCAATCGTAGAATCTATTGAAAGAAAGTCACTCAATGACATG  
GACTTGGATCCACTTCAAAGAAGCTTCAGAAGTTGCTGAATAGAGAAAGATACTTGCTTGTCTTAGAT  
GATGTTTGGAAATGAAGATCAACAGAAGTGGGATAATTTAAGAGCTGTCTTGAAGGTTGGAGCAACTGG  
CGCTTCTATTCTAACCCTACTCGTCTTCAAAGGTTTGTTC AATTATGCAAAGCTTGCACCCATATGAATT  
GTCAAATCTGTCTCAAGAAGATTGTTTGTGCGTTGTTCAACCAACGTGCATTTGAGCACCTAGAAGAAATA  
AATCCTAACCTTGAGGCTATCGGAAAGGAGATTGTGAAAAAATGTGGTGGTGTACCCCTAGCAGCCAAG  
ACTCTCGGAGGTATTTTGCCTTCAAGAGAGAAGAAAGAGAATGGAAACATGTGAGAGATAGCAAGAT  
TTGGAATTTGCCTCAAGATGAAAGTTCTATTCTGCCTGCCCTGAGACTGAGTTATCATCATCTTCCACTTG  
ATTTGAGACAATGCTTTGCATATTGTGCGGTGTTCCCAAAGGACACCAAAATGGTAAAGGAAAATCTAA  
TCTCTTTTGGATAGCGCACAGTTTTCTTTCATCGAAAGGAAAGTTGGAGCTAGAGGATGTGGGTAATGA  
AGTATGGAATGAATTATATTTGAGGTCTTCTTCCAAGAGATTGAAGTTGAATCTGGTAAAAGTTATTTT  
AAGATGCATGATCTCATCCATGATTTGGCTACATCTCTGTTTTT CAGAAAGAGCATCAAGCAGCAATATCC  
GTGAAATAAATGTAAAAAATACTCACATATAAAGTCCATTGGTTTTGTTAAAGTGGAGTCTTCTACTC  
TCATTTGCTCGTGGAGAAGCTTGTCTCGTTGAGGTTGCTTAATTTGAGTAACTTAGAACTCAATCAGTTAC



CGTCTTCCATTGGAGATCTAGTACATTTGAGATGCCTGGACTTGTCTGGCAATAGAGAAATGCGTAGTCT  
TCCAAAGCAGTTATGCAAGCTTCAAATCTGCAGACTCTTGATCTACATGACTGCTGGTCACTTTCTTGTT  
TGCCAAAACAACAAGTAACTTGGTAGTCTCCGAAATCTTTACTTGATAATTGCATTAATTGAAGTCT  
ACGCCACCAAGGATAGGATCTTTGACATGCCTTAAGACTCTAGGTCAATTTGTTGTTGGAAGGAAGAAA  
GGTTTTCAACTTGGGGAACCTACGAAACCTGAATCTCTATGGCTCAATTGAAATCAGACATCTTGAGAGA  
GTGAAGAATGATAAGGATGCAAAAGAAGCCAATATATCTGCAAAGAGAATCTGCAATCTTTAATCATA  
GAGTGGGATTGGCTTGAACGACGTAGATATGAATCAGAAGAAGTTAGAGTGATTGAAGCCCTCAAACC  
ACACCCCAATCTGACCTCTTAAACAATCAACGACTTCAGAGGATCCCGTTTCCCTGAGTGGATGAATCAC  
TCAGTTTTGAAAAATGTTGTCTCTATTGTAATTAAGAACTGCATAAACTGCTCGTGCTTACCACCTTTGG  
TGAGCTGCCTTGTCTAGAAAGTCTAGAGTTATGGAATGGTTGTGTGGAGTATGTTGATGTTGATTCTGG  
GAGGTTTCCATCCTTGAGGAACTTGTATAGTGCACCTTAATAATCTAAAAGGATTGCTGAAAAAGGAA  
GGAGAAAAGCAATTCCCTGTGCTTGAAGAGATGACAATCCGCCACTGCTCTATGTTTGTTATTCCGAACC  
TCCCTTTGAAAGTTTATGCGACAGATGCCTCAAGTTTGGGGTCCACATCTAATCTTAGTGCTCTTACTTCC  
CTCAACATAAGCCATAACTATGAAGCTACTTCACTCCCAGAAGAGATGTTCAAAGCCTTGCAAATCTCA  
AACACTTGAATATCTCTAGTTACAACAATCTCAAAGAGTTGCCTACCAGCCTGGCTAGTCTCAATGCTTTG  
AAGAGTCTGGATATTGAAAGTTGTCATGCACTAGAGAGTCTCCCCGAGGAAGGGGTGAAAGGTTTAAC  
TTCACTACCAAGTTGTCTGTCCGTTGCTGTAAGATGCTAAAATGTTTACCGGAGGGATTGCAGCACCTA  
ACAGCCCTCACAACCTTAATAATTACTCGATGTCCAACACTGGAAAAGCGGTGCGAGAAGGAAATAGGA  
GAAGACTGGCACAAAATTGCTCACATACC

>M6-PGSC0003DMG400017072 M6 LRR-RLP

TATGCCACCAAGGATAGGATCTTTGACATGCCTTAAGACTCTTGGTTGCTTTGTAGTGGGAAGGAAGAA  
AAGTTCTCAACTTGGTGAATTACGAAACCTGAATCTCTACGGTTCAATTGAAATCACGCATCTTGAGAGA  
GTGAAGAATGATATGGATGCAAAAGAAGCCAATTTATCTGCAAAGAAAATCTGCATTCTTTAAGCATG  
AGATGGGATGGCGATGAACGTCCACAAGGATATGAATCAGAAGAAGTTGAAGTGCTTGAAGCCCTCAA  
ACCACACTCCAATCTGACTTGTTTAAACAATCAGTGGCTTCAGAGGAATCCGTCTCCAGACAGGATGAAT  
CGCTCAGTTTTGAAAAATGTTGTCTCTATTGAAATCAGGGGTGCAAAAACCTGCTCATGCTTACCACCTT  
TGGTGAGCTGCCTTGTCTAAAAGTCTAGAGTTAAAGAACGGGTCTGCGGAATTGGAGTATGTTTATTC  
TGATTCCCTACAAGAAGAAGGTTTCCATCTCTGAGAAAACCTTATTATAGGCAAATTTGATAATCTGAAA  
GGATTGCTGAAAAAGGAAGGAGAAGAGCAATTCCTGTGCTTGAAGAGATGTGATTGAGTGGTGCCC

TATGTTTGTATTCCGACCTTTTCTTCTGTGAAGAAATTGGTAGCTTATGGGGACAAGTCAGATGCAATA  
GGTTTCAGTTCCATATCTAATCTCAGGGCTCTTACTTCCCTCTACATTCGCAATAACTATGAAGCTTCACTC  
CCAGAAGAGATGTTCAAAGCCTTGCGAATCTCAAATACTTGCAAATCTCTCTCTGCTGCAATCTTAAAG  
AGCTGCCTATCAGCCTGGCTAGTCTCAATGCTTTGAAGCATCTGGATATTTATTTATGTGTAGCACTAGA  
GAGTCTCCCAAGGAAGGGGTGAAAGGTTTAACTTCACTCACACAGTTATCCACAACAGACTGTGAGAT  
GCTACAATGTTTACCGGAGGGATTGCAGCACCTAACAGCCCTCACAAATTTATCAGTTACGTATTGTCCA  
ACACTGGCCAAGCGATGTGAGAAGGGAATAGGAGAAGACTGGTACAAAATTGCTCACATTCCTAATGT  
GTTTATCCGTTAAGTCTTATTCTAATTGGATGTAATTTTCTGATTTTCTTTTGAAACAAATCAACTAATT  
GTA

>M6-PGSC0003DMG400017081 M6 LRR-RLP

TAACGCATTATTGATCACACTGTATGTATATAAATATATGGGGTACAAGTTCCTAGCTAGTTAGATATATT  
CAATGGAGTACCAAAAATTGCTAATAGCTTTCTGCTTCTATTACATTTTATACTTTTTGTCCATCAATCTC  
AGCTTACATATGCTGGGCAACATCTCTGTGCCCGCTATGAAGCTTTTTATTTGCTTCAATTCAGCAAGGC  
CTCACAGTTGATCTTATTGGTTATGACTGTGACTATGAGGCCCTAGCTAAGACTTTGTCTTTGAATGTTAC  
AGGAGATTGTTGTCAATGGGATGGTGTACTTGTGATGGATTTACTGGTCACGTTATAGGACTCGATCTT  
TCTTGCAGTTTTCTTAACGGAACCATTAATTCTAACAGCAGCCTCACAAACTTAGTCATCTTCAAAGACT  
CAACCTTGCTTTCAACAAGTTGAGTAACTTTCCACTTGTGGATAGCATTAGTGAAGTTCGAAAGTTTGACA  
TATCTCAATCTTTCGCATTCAGTACATATGATAGGGGAGAAGCAGATACCACAAGTATTATCCAACCTTGT  
CTAAATTGGTTTCACTTGACCTCTCCTTGTATTACACTGAACTCAAAGTTGATTGAAAAACCTTCAGAAGT  
TTGCTTCAAGACTTGACCAATTTGGAGGACTGTTTCTTGACAACCTCGTATGCATCATTTGAGTTACCTAA  
GAATTTTTCTTCTTCTTCTTAGGTAAGTCTTGAAGGTATCGGCATGTTTGGGATCATAAGTGAGTTTC  
AGTTATTTCAATTTATCAAACCTTGCAAGTGCTGAGATTTGGACAGAATCCTTTACTAACAGGCTCTTTGCCA  
AATTTTAATCGGAGTTCAGTGAAAGTATTTTAGAGTTGAACTTCTTTTATACTGGTATTTCTGGGAAGGT  
ACCCGATTCAATTGGTAATCTCCATTCTCTTTGGTATTTGAATCTCCAGATTTGTCATTTATCTGGCTCGAT  
TCCAGAATCCATTGGCAATCTCACTGCAATCAGAGAGTTGATACTTTCAGAAAACGTCTTCATTGTTAAT  
GTTCCCTCAACTTTCTCAAAGTTAAACAAACTCGTTCGTTTAGATCTCTCTTCAAACCTATTTTCGAGGCTCA  
ATTCTAGAATACATTGACAATCTCACTGCAATCACACAGTTGACAATTCCAGATAACAGCTTCACTGGAA  
ATGTTCCCTCAACTATCGGAAAGTTGAACAACTTAACTACTTATCTCTCTTCCAATTTATTTGAAGGCT  
CGATTCCAGACATCTTTGCCAACTTTTCAGATCTATTTGCTTTATTTTTGACACTAACAAATTTCACTGGTT

CATTTCCCTGTTCAATTGCAACCTTGATTTGCCTTGTGAATTTAGAGTTGCAAAACAATTTACTAACTGGT  
TCACTTCCCTCTAATATAAGCTGATTTCAACTTCTACAATCACTTGATTTGCCTTCAATTATTTCACTGGC  
ACAACACCCCCTTCGTTATTCCTTCTTCCAAGATTGGTTTCTTTACATGTTCAACTCAATCAATTAACCGGG  
AAATTGCCAAATGTGCTCAAGATGAGTTATCTAGGATACGTACTATACCGTAGCATTGATCTTTCATACA  
ACAAGCTGCAAGGTGAAATCCCCAATGCGATGTTATCTATGAGCATGGGTAAGCTGGATCTCTCTCATA  
ACTTCTCACAGGCTTTGAAAAACAAGTATGGCACTCAGAGTACTTACTATAACCTTAATTTGGAGAACAA  
TTTTCTTCAAGGGCTTTTGCATCTATCCTTTTGTGACATGTATAGTCTTGTATTCCCTCATTTTAGCTCGAA  
CAATTCAGTGTTCAATCCCGGTATGTTTGGGTAECTCCAGTATTTCCATTTCTTTTTTAGACTTGCGAAT  
GAACAATTTGCATGGAGAGATACCAAGATTCTTATCTACAGGGTTTCAATATCTTGGTTTATATGGCAAT  
CAATTGGGGGGACAATTCCCGTGATCCTTGGTTAACTGTACAAGCTTGAAGCTCTTGATTTGGGGAAC  
AACAAGATAAATGACACGTTTCCGATATGGCTGCAGAACTTCCAAACCTACAAGTTCTGATTCTGAAAT  
CTAATCTCTTTCATGGTCCAATTGGTTATTTGGAGTCCGAGTTTCCATTTCTGAGTTACGAATCTTTGATC  
TTTCCTTCAATGGGTTCACTGGAACCTTTGCCATCTAATTTTTTCAAAGTTTTAGAGGTATGATGGATGTG  
GATGAAGAAAAACAGGAATTACTCGCTCCTACAAAGGGTCGACCAGGCCTTGTACAAGCATAAATCGA  
TGTCGAAGAGATTACCTTTACCACTTTAGTTTGGTGATAAAAGGTAATGAGTTTGATATGAGAATCACGT  
CAATTATGACGAGTGTTGATATATCAAGCAACAGGGTTGAAGGATATATTCCAAATTCCATTGGAAATCT  
GAGCTCACTTGTGTTACTCAACCTGTCTCACAACAGCTTCCGTGGTCATATTCCTGCAGAATTTGCAAAGT  
TGCAATAGCTCGAAGCATTAGATCTCTCACGGAACAGACTCATTGGAGATATTCCAGATCCATTGTGCGAG  
TTTGACATTTCTTGAGGTCTTAAACCTTTCTACAATCATCTGGCTGGACGCATTCCTCTTGGGAAACAGT  
TCAATACATTTCCAAATGATTCTTATTGTGAAATCCTGATTTATGTGGATTTCCACTATCAAAGGAATGT  
GGAAACAATAAAGAGTCACCACTTGAACACGATGATGGTGATGATGATGATTCATTTTTTTCGAGTGGG  
TTCACATGGCAAGCTGTGGTAATAGGTTATGGTTGTGGTCTGATATTTGGATTGTTGATGGGAGGTCTC  
ATGTTCCCTACTGGAAAAGCCAAAATGGTTTGTGAACTTTGCTAAAGATATTGCTCAACAAATTGCTGCTA  
AGAAGCAAACAAGGCAAAGAAGAGACGCCAAAGACATGGTTTAAGAATGAACTAGCAATATAACCAGG  
TATGCATTA AAC

>M6-PGSC0003DMG400017087 M6 LRR-RLP

TCTTGTGACAGGGATGCCAAATCTAGAGGAATTTTACAGTATTTCTTACAATAGTTGTACAAATGAAGTC  
TTTTCTAGCATCCCCAATTTAAAGAGATTGACCATTGCGACACCTTTCAGGATAAACAATGTTCCATCTCA  
TCCCTTGGATATGTGCGAGCTTGAGAAACTTGAGGCATTCAAGATTTCTGGAGATATGGTTTTGTAACG

CCCATCAAAGATTTGTTTTTCCAACCTTACTTAGGAAGTTGACTTTAGCTTTCTTTGGTCATTTTATTTGG  
GAAGATATATCATCAACTTTTATCATGTTGCCAAATCTTGAAGAGCTCAAACCTTAAACATTGTCAAGCCAA  
AGATAATGTATGGAGATTGAGTGACAAAGACATACTCAAAGCTTGAAGTTGTTGTTACTGTACTACAC  
AAATATTAAGTGTGGGAAGCTAGCAGTGATAACTTCCCAAATCTAAAACGTCTTGTTCTGAAGAGTTGC  
AAGGACCTGCAAGAAATCCAACAGATTCGTGGAAATTTGTACTTTGGAATCGATTGAGTTACATGATT  
GCACCACTACTGCTGAGGATTCTGTCAGAAATATCGAACAAGAACGAGAGGATATGGGATATAATATCC  
TTAAGGTCTACATCCATAACAGCCACAGTAAGTTATAATTCTCTCTGAAAAGTTCTTCGATTCTTCACATT  
ATTTAAAACCTCATTTTTTTTTAAATCATACTTCTTGAAATTAAGTTGATGACTTGTGCTTTTTATCTTGCAT  
ATGCAGGGAATTGAAGCATATTTGAGGGATCATCTAATGCTATCTTCCGAATTCAGAACCTTGTAGTTC  
ATATTTTTGTTTTTATATTCTGATCGTTTGTTAATTTTCATGTTTTAGGAATAAGCATGTTTAATACATGTCTC  
GGCCAATTGTGTTTTGTATTTGTGAACACTAACTAGTGATGTACTCATGTAACATCTATTTGTTTTATG  
TGATAGTTCGAAATAATTGAGGATGTTCAATCTAATATGCATTGCCTATGGAGTATAGTTTCACACTTTG  
AATCTGTTTTCTCTGTTAATGTATAATACATGTTTTTCGTTGATGGACGGTGCTTTATGTGATTGATATC  
GATAACATTTCTCATGGATGGTACTTGGTAGTAACAGTATGTAATGGTGGTCGGCAGTAGTAGTTGCTG  
TC

>M6-PGSC0003DMG400017283 M6 LRR-RLP

ATGCAGATGACCAGTCTGAGGTTTCTCAAATCCGGAATGCATATGTTTGTCTGGGACCTGAATTTCTTC  
CTGATGAGTTGAGGTGGCTTGATTGGCATGGATATCCTTCAAAAAGTCTGCCAAATAGCTTTAAGGGAG  
ACCAACTTGTTAGTTTGAAATTGAAAAAAGCCGCATCATACTTTGGAAAACCTCAAAGGATCTGG  
GAAAACCTGAAGTACATGAACCTTAGCCATTCACAGAAGCTAATAAGGATGCCAGATTTTTTCAGTTACGCC  
TAATCTTGAAAGGCTGGTTCTTGAAGAATGCACAAGTTTGGTAGAAATCAATTTTTCTATTGGAGATCTT  
GGAAAGCTAGTCTTGCTGAATCTGAAGAACTGCAGAAATTTGAAGACCCTACCAAAGAGAATTCGATTG  
GAAAAGCTTGAAATTCTCATTCTTTCAGGGTGCTCAAAGTTAAGAGCATTCCCAGAAATAGAAGAGAAA  
ATGAATAGTTTAGCAGAAGTGTATTTGGGCGCGACTGCTTTGAGTGAACCTACCTGCATCAGTTGAGAAC  
CTTTCAGGAGTTGGTGTATTAATATAAGTTACTGCAAGCATCTTGAGAGTCTACCTAGCAGTATTTCTA  
GGTTGAAATGTCTGAAAACACTCGATGTGTCCGGCTGCTCTAAACTTAAAAATTTACCAGATAATTTGGT  
ACTTTTAGTTGGTTTAGAGGAGCTCCACTGCACTCACACAGCCATCCAAACAATTCCGTCTTCTATATCTC  
TTCTTAAAACCTTAAGCACTTATCTCTCCGTGGATGTAGTGCTATGAGTTCACAAGTAAGTAGCTCAAG  
TCATGGCCAGAAGTCTATGGGTGTAAATTTTCAGAATTTGTCGGGTCTTTGTTTCATTGATCATGTTGGAT

CTTAGTGACTGCAACATTTTCAGATGGAGGCATTTTAAGTAATCTTGGGTTCTTACCTTCTTTGGAGGGAT  
TGATTCTCGATGGTAACAATTTTTCCAATATTCCAGCTGCAAGCATAAGTCGTCTCACTCGACTTAAAGCC  
CTTGCATTGGCTGGTTGTAGGAGGCTTGAGAGTTTACCAGAACTTCCTCCAGGTATAGAAAGGATATAT  
GCTGATGAATGCACATCTTTGATGAGCATTGATCAGCTAACCAATATCCAATGTTGCGTGGAGTTTCAT  
TTACAAAATGTCATCAACTTGTAATAAATAAACGGCATGCCTCTGTGGTTGATTCATTGTTGAAGCAGTT  
GCTCAAGGTAAGTATGCTTCCAAGCCACAACCTCTACTATATCCACATGAAAATATAAATGAACTTCTTTTT  
ATATAACTGGAAGGGCTTTTGTATTTGTAAGTCCAAATTAGCTAAGGTCGTTATGAATCTAGGTAAATAAC  
ATTCTTTTACGGTGCATGCAGAGACTATACATGAATGGCGCATTTTATATGTATCTCCCTGGTGTGGAG  
ATTCCTGAGTGGTTTACATACAAGAACTGGGGGACCGAATCCATCTCAGTGGCCCTGCCCCAAAATTGG  
TTCACACCCACATTCAGGGGGCTTACTGTTTGTGTTGTTTTGACATGATGACTCCTTTATTTTAGGGAA  
ATTAATGTCGAATGATCCCTTCAATTTTCATACTACCAAATGGCTAAAAATTTCCAACATTTTGGGATAT  
GGTCAAGGTTCAAGACATGATGGTTTGCAGCACGAATATAGAGTATGTGTGCGGCCAATAGGAAGT  
GAAAACCTGTTGGTTTAGGTAATACTTCTAGCCCATGTACCATTTGGAAGTTATTGCCTGCCCAAAA  
ATGACTTCATTCAGCTTGAGGTTGGTGTCTCTGAGCATTATCATAAGGATCTGGTGGTCAAAGGTTTGGG  
AGTGCATCTTGTGTATGAGAATTGA

>M6-PGSC0003DMG400017317 M6 LRR-RLP

TTTGTTGTGCATGGTTTTTATTAACTTCATTTAGATCTAACTGGGAAAGATAAACTCCTACTTTATTGA  
AATTTAGGCAAATACACACACACTTGTCTGAGATAATACTTATCCTTTGTGGTATGCAGACATGAAGCTA  
GAGTCATAGAGAAAATTGCGGAAGATATAATGGCTAGATTGGGTAGTCAGAGACATGCAAGCAATGCT  
AGAAATCTTGTTGGAATGGAGTTACACATGCACCAAGTATACAAAATGCTTGGTGTGCGGTCTGGTGGGA  
GTCCGCTTCTTGGAAATATTGGGAATGAGCGGAGTGGGGAAGACAACCTTGGCCAGAGTTATTTATGAT  
AACATTCGGAGTCAATTTCAAGGTGCATGTTTTCTTACGAAGTTAGAGACCGTTCAGCAAAAACAGGGA  
CTAGAGCGCTTGCAAGAGATACTTCTTTCTAAGATCCTTGATGTAAAAACCTAAGGATCAACGATTCTT  
TTGAAGGAGCTAATATGCTAAAACAAGACTATGGTACAAAAGGTTCTTCTTGTCTGGATGATGTTGA  
TCACATAGATCAGTTAGATGCATTAGCCAGGGAGCGTGAATGGTTTGGTACGGAAGTAGAATCATCAT  
AACAAACCAAGACAAACACTTGCTTGTTAAGTATGAGACTGAAAAGATATACAGAATGACAACCTTTAAA  
CAAATATGAAAGTTTACAACCTTTTAAACAACATGCTTTCAAGAAAAACCACCTACCAAAGAATTTGAG  
GATCTATCAGCTCAAGTATGAGGAGCATACTGGTGGACTTCCCCTAGCCCTGAAAGTCCTGGGAAGTTTCT  
TGAATGGAAGAGGTTTGGATGAATGGATAAGTGAAGTGGAGCGTCTGAAACAAATCCCAGAAAACGAA

ATTTTGAAAAAAGCTCGAACCAAGTTTCACTGATCTCCACAATATTGAGCAAAGATATTCTTAGACATTGC  
ATGCTTCTTTGCAGGGAAGAAGAAAGATTGAGTGACCAGAATACTTGAGAGTTTTCATTTTAGCCCTATC  
ATTGGGATAAAAAGTTCTCATGGAGAAATGTTTGATCACTATATTAAGGTTCGCGTTATAATACACCAAC  
TGATACAAGAAATGGGCTGGCACATTGTTGTCGAGAAAGCTTCTTACAATCCAAGAATATGTAGTAGGT  
TGTGGAAGCGTGAAGATATTTGTCCTGTACTAGAAAGAAATTTGGTACGTAGTTGTGAACTTATGACTTC  
TTACTTTATTTTGTCTTTTACATCCGCCTTAATACTCTTGCTTATTAGGGCACTGACAAGATTGAAGGCAT  
GTCGCTGCAGCTGACTAATGAAGAAGAAGTTAATTTTGGTGGCAAGGCCTTCATGCAGATGACCAGTCT  
GAGGTTTCTCAAATTCCGGAATGCATATGTTTGTCTGGGACCTGAATTTCTTCTGATGAGTTGAGGTGG  
CTTGATTGGCATGGATATCCTTCAAAAAGTCTGCCAAATAGCTTTAAGGGAGACCAACTTGTTAGTTTGA  
AATTGAAAAAAGCCGCATCATACACTTTGGAAAACCTCAAAGGATCTGGGAAAAGTGAAGTACATGA  
ACCTTAGCCATTACAGAAGCTAATAAGGATGCCAGATTTTTTTCAGTTACGCCTAATCTTGAAAGGCTGGT  
TCTTGAAGAATGCACAAGTTTGGTAGAAATCAATTTTTCTATTGGAGATCTTGAAAGCTAGTCTTGCTG  
AATCTGAAGAAGTGCAGAAATTTGAAGACCCTACCAAAGAGAATTCGATTGGAAAAGCTTGAAATTCTC  
ATTCTTTCAGGGTGCTCAAAGTTAAGAGCATTCCCAGAAATAGAAGAGAAAATGAATAGTTTAGCAGAA  
CTGTATTTGGGCGGACTGCTTTGAGTGAACCTGCATCAGTTGAGAACCTTTCAGGAGTTGGTGTAT  
TAAATATAAGTTACTGCAAGCATCTTGAGAGTCTACCTAGCAGTATTTCTAGGTTGAAATGTCTGAAAAC  
ACTCGATGTGTCCGGCTGCTCTAAACTTAAAAATTTACCAGATAATTTGGTACTTTTAGTTGGTTTAGAGG  
AGCTCCACTGCACTCACACAGCCATCCAAACAATTCCGTCTTCTATATCTTCTTAAAAACCTTAAGCACT  
TATCTCTCCGTGGATGTAGTGCTATGAGTTCACAAGTAAGTAGCTCAAGTCATGGCCAGAAGTCTATGG  
GTGTAATTTTTCAGAATTTGTCGGGTCTTTGTTTATTGATCATGTTGGATCTTAGTGACTGCAACATTTCA  
GATGGAGGCATTTTAAGTAATCTTGGGTTCTTACCTTCTTGGAGGGATTGATTCTCGATGGTAACAATT  
TTTCCAATATTCCAGCTGCAAGCATAAGTCGTCTCACTCGACTTAAAGCCCTTGCATTGGCTGGTTGTAG  
GAGGCTTGAGAGTTTACCAGAACTTCTCCAGGTATAGAAAGGATATATGCTGATGAATGCACATCTTT  
GATGAGCATTGATCAGCTAACCAATATCCAATGTTGCGTGGAGTTTCATTTACAAAATGTCATCAACTT  
GTAAAAAATAAACGGCATGCCTCTGTGGTTGATTGTTGTAAGCAGTTGCTCAAGGTAAGTATGCTTC  
CAAGCCACAACCTACTATATCCACATGAA

>M6-PGSC0003DMG400017337 M6 LRR-RLP

ATGACTTCACTCCAGACACTTGACTTATCTGGGAACTCTTCTGGAGGGTCAGTTGCATGAGCAACTGG  
GAAATCTGTGCAACCTAAGAGAATTGGATCTTCTCTAAACAATTTACAGGCGATATAACCAAATTCAT

CGATGGTCTTTCTAGGTGCAACGAAAGCAAGCTAGAGAGGCTGAACTTGGGATATAATGCTGGATTGG  
GTGGAACCTTTCCAGATTCTATCGGATTCTTGAAAAATCTCAAGTATATTGAGTTATGGAAGAATTCATTT  
GTTGGTATGATCCCTGATTGATTGAAATTTGTCATCATTGGAGTATTTGATCCTTGTATGGAACCAAAT  
GAGTGGACAAATCCAGTCACTTTAGGGAACTTTCAAAGTTGGTTGTCCTAGACCTTTTTGAAAATAAT  
TGGTGGGGTGTTCATCACAGAAGCTCACTTCACAACTTGACTAGTTTGAAGGAGTTGTATATATCCTCAA  
ACTCATTACCTCCTAGTCCCTTTGGTTGCAAACGTTGACACCGAGTGGATTCCCTCTTTTAGTCTCCAG  
TATCTCAAGTTCAGGTCATGTGATTTGGTCCTAAATTTCTATGTGGATCAGACATTTTACTGAATTGCA  
AACTTTAACATTGAGCGTGCTGGATTTTCAGATACTCTCCCTGATTGGTTGTGGGAAATGAACTGGGAA  
CTTGAAGAACTGGATTTTGGTTATAATCAGCTTAAGGGCAGAGTGCCAACTACTCTAAAATTTAAGCCTG  
GTTCCACTGTCTATTTAATGTCTAACCTTTTTGAAGGTCCAATTCATCTTGGTCTCAAATGTAGCCTCGA  
TAAGCCTGAGTAACAATTCATTTTCAGGACCTGTTCCCTTTGATATTGGCTACAGATATCCAGATTTGACT  
GACTTGGATCTTTCTCAAACTCTCTCAATGGAACCATTCCTTGTCCATTAGCAAATCACCAACTTGGT  
AACTTTGGTTCTCTCGAATAATCATCTTACCGGAGAAATCCCTGATTTTTGGGACGAAGTACCAATTTTGT  
ACACATTAGACCTGTCAAACAACAGTTTTATTGGCCGCGTCCCAAGCACCTTAAGTACTCTTAATTCCCTC  
AGATTCTTAATGCTAAGCAACAATCATCTTTCTGGGGAGTTCCTCTTGGTTTCCAAAATTTCTCTTCAAT  
GATCACTCTTGATCTTGGGAACAACCAATTTTCAGGAGAACTTCCTCCTGGATAGGAGAAAAGATGCCA  
GTGTTGTTGGCCTTGAGCCTTCGATTGAACATGTTCAAAGGAGAGATTCCAAGGGAATTCTGCAACATG  
ACATCACTTCATTTTATAGATGTTGGTTCCAACAATCTCTCTGGAAATATCCCGTCTTGTTTTGGGAATCT  
GAAGGGCATGACTTTGGATCCAGAATCTCAACGTTATGAAGGTCAATTGAACGTATTCTCCAAGGGGAG  
AGATCTCTTATAACAAGGATAATCTTTATCTTGTGAATGGCATAATCCTTTCAGGCAACCATTTAACTGGTG  
AGATACCAGAAGAATTGACAAATCTTTCCAGGATGAATACCCTGAATTTGTCCATGAATCATTGAGTGG  
AAAGATCCCTGAAGAAATTGAGAGGTTGAGACAATTGGAACTCTTGATCTCTCTAGGAATGAGATCCA  
TGGCACCATCCCAGCAGGCATGACAAGCTTAACATTGCTGACTCACTTGAATCTCTCGCACAATCACTTG  
TCAGGTAGAGTCCCACAGCTAACCAATTTAACACCTTCAATGACCCTTCGATATACACGGGCAATCCTG  
ATCTCTGTGGAGATCCATTGCAAAACAAATGCAAGGATGAAACAGAAGAAGAACTGATCTTCATCAGG  
ATCCTCCTTATCATTCTTCTCCTAGTGAATTTGGAGAAATGGGGTCTTTGTCAGTATCGGAGTAGGATTT  
GTTGTGGGATTCTGGGGAGTATGCGCAATTCTAATAATAAAAAGTTCATGGAGGCATGCCTATTTACAG  
TTTGTGGTTATTTGGGAGATAAGTTGTTTGTCAATTTTCACTTGCCTTGGGCTAGTTGGAGGAGATCCA  
GAAGCTAG

>M6-PGSC0003DMG400017666 M6 LRR-RLP

ATGTCTAAGCTCCCTATTTATAGAGAAAAAATAGGCTTGTTGATGTCATGGATGATGTCTTTGGAAGAT  
GCAAATATTCAACATCTCAATGTGAATATATCAAATATGGTGGCTTCCAAATCTTTGACAAATATAGTT  
GCCAAATCTTTGACAAATATTGCTACCAAATTTCCACATTTGTGGCTTCCAAATCTTTCACAAAAGAAAGA  
TAAAATAACTTTCTTTCATCAAACAAAAAGCCACATTACAACATTATGATTTGTTCTAGCAAATCAACT  
GCTACTGGGGAAAAATTGATCATTGAACACACTTTTGTGTACATGACATTAACATCTCTCATTTTCAGAT  
GTGAAGTTGGCATCCAAGAAGTTCCAAAAGATTCTGCATTGGCCGGGAAGATTAAGAGGAAGTGATAA  
TGTGGTATGTATTGTTCACTTTCACCTCCCATTTTGTGTTTCTTGGTCCCTCTTCTTCTGTTCCACTACT  
TTGTTTTCCATTGGGAATTTTCTTTAACTGCTATGGAGGTTCAACCATATCATACGCGTCGCCAATGTTT  
AAAGCCCTTTTGTGATGTCATTTAGTGTTGTGATGTCATTTAGTGTAGTGATGTATTACTTCATGCTGTGA  
TTTTAAAGAATTGCTTATCTTTTACCCATGCCTAGGCTGACGCCTTACTTTGTCTTTACTCTTTACGCATCA  
TCTAGTGTGCCCCTGAAAAATTTATGCAGTTAAGGTCTTTGATTCTACCTAATCATAAATGTATCCCTT  
GTACTTAGGAGGTCATACAATCAGTAAGATTAATGACTTGCTTTTGTGGAAGAATGACTATGATGATTGA  
ACGCTGCAATTCGTTTGTCTACAGGTGGAGATATACCGCCGTTGTTACGAGAAACAACCTTTGGTTATC  
CAAGGTGCTGGAGCAGGAAATGATACCACAGCAGCAGGTGTCCTAGCTGATATCCTTGACATTCAAGAT  
TTATCCCTTGACTGAGTATTATACACTGAGATACAAACATTCGATCCTCAAAGGACGAAAAATTGACTC  
TTCTTGTCCCTCCTGCTTCTAGATTGGAGATTGAAATCAGGCTAAGAAATCTCACGCATTTTTTTGAAAAA  
TTTCTCGATACACGAGAGTGCCTCGTCAGTTTACAGTAGATTATTACGCAATTTCTCTCCTGCATAGCGTT  
CAAATGGAACAGTTCAAACACTGAGTCATTTGCCTCAGTGCTGGACTAGTTTTTAGGATTTCACTTCAGCTTA  
TAATCAGTTTCCTTGTAATGACCATTTTCTTTATAATCTGAAAAACAGTTGATATTTCTTTTTAATATTTCTT  
TAGAAAACCTTATGATAGAACACCACAAAATTCACCTTTTCGGTATTTAATGTTTCTTTATGTTACATGTTT  
TTCTATTTTTCCCTCTTTTCTTTTATTTTTGAAGTTAATCATCAATTGGGACATGGACCCAGATAATCAAT  
AGGCTATGATCCCACATTCAGCAACTTGACCTATTCTTAGGACTATTAATAACAAAAACAAGGCAAGC  
GTTGTAATGAATAACCTACAGTTCCCTCCAACACTATCTTCATTTATCTTTATCCCCGGCAAATTTAGAA  
AGTAGAAAATGTAAAACAGAGAAAATGACATGGAAGAAAGTGTGAAGATTTACCAAATGTAAATTCA  
AAATTCAAGAATGATTTCTTTTTTTTATAAAGAACAAATTTGGAGTCCCCACCCCCACCCCCTCTCTTGCTT  
CAATTATTGAATTGCAAAGTAATAAACAGTCAAGAAACCAGACTCACAGACTCCATTATTTTTTTTCTAT  
GGCTGTGAGCTGCAGACTGTAGATAAAACATAGTTGTACCAATTACAAGCAAAGAGACATAAATCATT  
CTTGATTACTCATCACTCTTAGCTCTTAGCATTCAACAGGTAAAATAAAGTTGTTAGTAATTGAAGTTTGA



AACATTTATCTTCTTAAAATCATTTTGTGTTTCCTTGTTTTGCTTGCACATTTAGAAATGGAGGTTGGCTT  
AGCAGTTGGTGGTGCATTTCTCTTTCAGCTTTGAATGTTTTCTTTGATAGGCTTTCCTCATGGTGATCT  
GCTCAACATGTTTTGGAAGCATAAGGATCATGTTTCAGCTTTACAAAAGTTGGAGGACATTTTGCTTGGT  
CTTCAGATTGTGCTAAGTGATGCAGAGAATAAGCAAACATCAAATCGACACGTGAGCCAGTGGTTAAT  
AAGCTTCAGAGTGCTGTGGACGGCGCTGAAAACCTTGATAGAACAAGTCAATTATGAAGCTTTGAGGCTT  
AAGGTGGAAGGCCAGCATAAAAAATGGGCGGCCTGGGTAAGACAACACTTGCTAAAGCCGTTTACAAT  
GATGAGAAGGTGAAGGACCATTTTGGTTTGCAAGCTTGGTTTTGTGTTTCTGACGCATATGATGCTTTCA  
GAATAACAAAAGTTTTACTTCAAGAAGTTGGCTCATTTGACTTGAAGGCTGATGACAATCTTAATCAGCT  
AAAAGTCAAATTAAGGAAAGCTTAAAGGGGAAGAAGTTTCTTATTGTTCTGGATGATGTGTGGAATGA  
CAACTACAATGAGTGGGATGACTTGAGAAATGTTTTGTACAAGGAGATATAGGAAGTAAGATCATTGT  
GACGACACGTAAAGAGAGTGTTGCCTTGATGATGGGTAGTGAGGCAATCAACGTGGGGACTCTGTCTG  
ATGAAGCCTCTTGGGATCTATTCAAACGACATTCCTAGAAAACAGGGATCCTAAAGAACATCCATAACT  
TGAAGAAATTGGAAAACAAATTGCAGACAAGTGCAAAGGGTTGCCTTTAGCTCTAAAGGCACTTGCTGG  
TGTTTTATGCTGCAAATCAGAGGTGGATGAGTGGAGAGACATTTTAAGAAGTGACATATGGGAGCTGCC  
AAGTTGTTTGAATGGTATATTACCAGCGTTGATGTTGAGCTACAATGATCTTCATGCACATTTGAAGCAA  
TGTTTTGCTTATTGTGCAATATATCCCAAAGATTATCAATTTGCAAAGACCAAGTTATTCACCTTTGGAT  
TGCTAATGGTCTTGACATCAGTTGCATTCTGGTAACCAATACTTTCTCGAGTTGAGATCAAGATCACTGT  
TCAAATGGCCTCAGAGTCTTCTGAAAGAGATGTAGAGGAATTCTTAATGCATGACCTTGTCATGATTT  
GGCCCAAATTGCATCTTCAAATCTTTGTATAAGTTTGAAGAGAACAAGGATCGCACATGTTGGAACA  
ATGTCGGCACATGTCCTATTCAATAGGAAATAATGGTGAATTTGAGAAATTGAAATCACTCTTTAAATCA  
GAGCAGCTGAGGACATTAGTTCTAATCAATATCCAACCTCTATTATTACAACATTAAGCTAAGCAAGAGGG  
TGCTGCATAACATATTGCCAAGACTAACATCCTTAAGGGCATTATCATTGTCACACTATGAGATTGTTGA  
GTTGCCAAATGACTTGTTCAAAAATTAACCTCTTGAGATTTTTGGATATTTCTCGGACAAAGATTA  
GGTTGCCAGATTCCATTTGTGTGTTGTATAACCTAGAGACACTTCTCCTATCATCTTGTTGCTGATCTGGA  
GGAGCTACCGCTGTAGATGGAGAAGTTGATTAACCTGCGTCATCTTGACATAAGCAACACTTGTCGCTTG  
AAGATGCCGCTACATCTGAGCAAGTTGAAAAGTCTCCATGTGCTAGTGGGAGCCAAGCTTCTTGTAGGT  
GGTCGTGGTGGTTTGAGAATGGAAGATTTGGGTGAAGCACATAACTTGTATGGATCTGTATCAGTTGTA  
GAGTTGCAAATGTAGTTGATAGAAGGGAAGCTGTGAAGGCAAAGATGAGGGAGAAGAATCATGTTG  
ACAAGTTATCATTGGAGTGGGGTGAAAGTATTAGTGCTGACAATTCACAAACAGAAAGAGACATACTTG

ATGAGTTACGCCACATAAGAACATAAAAAGAAGTCAAATCACTGGATATAGAGTGACAACTTTCCCA  
ATTGGCTAGCTGATCCTTTGTTTCTTAAGCTAGTATTGTTGTCTATTAATAACTGCAAGAACTGCTATTCCCT  
TGCCAGCACTAGGACAACCTCCCTTGTTAAAACCTCTTTTCGATTAGAGGGATGCATGGAATAACAGAGG  
TAACGGAAGAATTCTATGGTAGTTTGTCTCCAAAAAGCCTTTTAACTCTCTTGTGGAGCTTAGATTTGAA  
GATATGCCGGAGTGGAAGCAATGACACCTACTAGGAAGTGGAGAGTTTCTACACTTGAGAACTTTTC  
ATTAATAATTGCCCTGAACTCAGTTTGGAGATACCCATCCAACCTTTCAAGTTTAAAAGTTTTGAAGTTAT  
TGGTTGTCCAAAGGTTGGAGTTCTTTTTTATGATGCTCAACTGTTTACCTCCCAACTTGAGGGAATGAAG  
GGGATTGAGGAATTAGCTATTTGGGATTGTAACCTCTGTTACCTCCTTACCTTTTAGCATACTGCCACTAC  
CTTGAAGACAATATGCATATCTGTTGCCAGATATTGAAATTAGATACCCAGTTGGTGAGATGAGTAT  
GTTTCTCGAGGTTTTGATAGTGAATGCATGTGATTAT

>M6-PGSC0003DMG400017716 M6 LRR-RLP

AATAACTCTAGGTGACTTAACTGAGCTCAAATTTTGTATCTTTATTCTAACCAACTTTCTGGTCCCATTCC  
TAGAGAGTTGGGGAATTTGAAAAACCTCAATGATTTGGATCTACAAGAAAATCAACTTACTGGTCCAATT  
CCTGCTTCCTTTGGCAATTTGAGAAAAGTTACAATTTTTGTATCTCCGTGCCAACAACTTTCTGGTTCTATT  
CCTAAAGAACTTGCATATATGGATAACTTGGTAGAGCTGATACTAAGTGAAAATCAGTTTTTCAGGCCATT  
TGCCTGAGCATCTTTGCCAAGGTGGGAACTTGAGAACTTACGGTGGCCAGTAACAAGTTAACAGGAC  
CAATACCAAGAACTTGAGCAATTGCTCCAGTTTTAAATGGGTCCGCTTTAACAACAACAGTTTCACTGG  
GAATTTATCTGAAGCTTTTGGTATCTATCCGAAGTTGCTGTTCAATTTGAGCGATAATGATTTTCATG  
GTGAACTCAGCAGCAAGTGGGGGAAATGCAAGAATTTGACTGATTTTCGGATTGCCAGAAATAACATTA  
GTGGTAGCATACCACCAGAGATTGGAAATGTCAAAGGCCTTTTAGGACTTGATCTTTCATCGAATCATT  
GATTGGGCAGATTCCAAAGGAATTTGAAAATTAACCTCTCTAGTTAATCTTTTTCTGCAAACAACCGA  
ATTTCTGGCAATATACCTGAGGATTTTGGGTCACTAACAAAGTTAGAGTCCCTCGATCTATCAGACAACA  
GATTGAATGGGTCAATCCCGATGTGTATAGTAGATTTTCGTACACTTGTTTCAGTTGAACCTGAGCAACAA  
CAAGTTTGGGCAGAAAATTCCAAAGGAGATAGGGAGGATAACTCAGCTTAATGTACTTGATTTGAGCTA  
TAATCTTCTGGTTGGAGATATACCCCTCAGTTAGCCAATTTGAAGGTCTTGGTAACTTAAATCTTTCCC  
ACAATGGCCTATCTGGGCACATTCCTACAGAAGTTGATACTTTGACTGGTTTGCAGGATGTCATATTGTC  
ATACAATGAGTTGGAAGGTCCAATCCCTAATAATAAGGCTTTTATCAATGCCTCATTGGAGGGTAATAAA  
GGTCTTTGCGGCAATGTAGCAGGACTCCATCCCTGCGAAATGCCGTCTTCTGTGGTGAAGAGGCACTCA  
ATGGCGAAGGGACGTAACTCATCCTCATCACTGTACTTCTGTTATGGGAGCATTAGTACTGCTCTGTG

TTTTATTGGTGTTCATTATGTGTAATAAAGAAGGAGAGTTAGAGATGTTGAAAGAAGGGATGGTG  
TTGGTTGGCTTTTCGATATCCATGTTAGATGGGAAGGCATTGTACAGGGACATCTTAAATGCCACAGAAG  
AGTTTGATGCAAAATTTTGCATCGGGCAAGGAGGACACGGAAGTGTTTACAAGGTAAACCTTCCATCAT  
TAGGGAATATAGCTGTGAAGAGACTTCATTCTTCATTTTCAAGATACACATCCCAAAGCTTCATGAATGA  
AGTAAGGGCATTGATTGGGATTAAGCACCGAACATTGTGAACCTCTATGGCTATTGTTGAAAGCACA  
ACATTCACTCTTGGTTTATGAGTATGTGGAGAGGGGGAGTTTGTCTAGTATTTTGAAGCAATGAAGTTGA  
GTCCAAGAAATTGGATTGGCTTAAAGGGTGAATATCATCAAGGGTGTGCTTTTGTCTTATCTTACATG  
CACCAAGACTGTTACCACCGATTGTTTCATCGAGACATATCAAGCAGTAATGTGTTGCTTGATTCTGAGT  
ATGAAGCTCGTGTGCAGATTTTGAATAGCAAAGATTCTCAAGCCAGACTCATCCAATCGCACTGCGCT  
TGCAGGCACATTTGGTTATGTCGCACCTGGTAAGTTTTAA

>M6-PGSC0003DMG400017718 M6 LRR-RLP

AATAATCTTACTGGTTCAATTCCAATTACTTTAGGTGACTTAACTGAGCTCAAAGTTTTGTACCTTTATTCT  
AACCAACTTTCTGGTCTCATTCTAGTGAGTTGGGGAATCTGAAAAACCTCACAGAGCTGGATATATACC  
ATAATCAACTTAGTGGTTCAATTCCAATAACTCTAGGTGACTTAACTGAGCTCAAATTTTGTATCTTTAT  
TCTAACCAACTTTCTGGTCCCATTCTAGAGAGTTGGGGAATTTGAAAAACCTCAATGATTTGGATCTAC  
AAGAAAATCAACTTACTGGTCCAATTCCTGCTTCCTTTGGCAATTTGAGAAAGTTACAATTTTGTATCTC  
CGTGCCAACAACTTTCTGGTTCTATTCTAAAGAACTTGCATATATGGATAACTTGGTAGAGCTGATAC  
TAAGTGAAAATCAGTTTTCAGGCCATTTGCCTGAGCATCTTTGCCAAGGTGGGAACTTGAGAACTTAC  
GGTGGCCAGTAACAAGTTAACAGGACCAATACCAAGAACTTGAAGCAATTGCTCCAGTTTTAAATGGGT  
CCGCTTTAACAACAACAGTTTCACTGGGAATTTATCTGAAGCTTTTGGTATCTATCCGAAGTTGCTGTTCA  
TTAATTTGAGCGATAATGATTTTTCATGGTGAACCTCAGCAGCAAGTGGGGGAAATGCAAGAATTTGACTG  
ATTTTCGGATTGCCAGAAATAACATTAGTGGTAGCATACCACCAGAGATTGGAAATGTCAAAGGCCTTTT  
AGGACTTGATCTTTCATCGAATCATTGATTGGGCAGATTCAAAGGAATTTGGAAAATTAACCTCTCTA  
GTTAATCTTTTTCTGCAAAACAACCGAATTTCTGGCAATATACCTGAGGATTTTGGGTCACTAACAAGTT  
AGAGTCCCTCGATCTATCAGACAACAGATTGAATGGGTCAATCCCGATGTGTATAGTAGATTTGATACAC  
TTGTTTCAGTTGAACCTGAGCAACAACAAGTTTGGGCAGAAAATTCAAAGGAGATAGGGAGGATAACT  
CAGCTTAATGTACTTGATTTGAGCTATAATCTTCTGGTTGGAGATATACCCCTCAGTTAGCCAATTTGAA  
GGTCTTGGTAACTTAAATCTTTCCACAATGGCCTATCTGGGCACATTCCTACAGAACTTGATACTTTGA  
CTGTTTGCAGGATGTCATATTGTCATACAATGAGTTGGAAGGTCCAATCCCTAATAATAAGGCTTTTAT

CAATGCCTCATTGGAGGGTAATAAAGGTCTTTGCGGCAATGTAGCAGGACTCCATCCCTGCGAAATGCC  
GTCTTCTGTGGTGAAGAGGCACTCAATGGCGAAGGGACGTAAACTCATCCTCATCACTGTACTTCCTGTT  
ATGGGAGCATTAGTACTGCTCTGTGTTTTATTGGTGTTCATTATGTGTAATAAAGAAGGAGAGTTA  
GAGATGTTGAAAGAAGGGATGGTGTGGTTGGCTTTCGATATCCATGTTAGATGGGAAGGCATTGTACA  
GGGACATCTTAAATGCCACAGAAGAGTTTGATGCAAAATTTGCATCGGGCAAGGAGGACACGGAAGT  
GTTTACAAGGTAAACCTTCCATCATTAGGGAATATAGCTGTGAAGAGACTTCATTCTTCATTTCAGAATA  
CACATCCCAAAGCTTCATGAATGAAGTAAGGGCATTGATTGGGATTAAGCACCGGAACATTGTGAACC  
TCTATGGCTATTGTTGAAAGCACAACTTCACTCTTGGTTTATGAGTATGTGGAGAGGGGGAGTTTGT  
TAGTATTTTGGAGCAATGAAGTTGAGTCCAAGAAATTGGATTGGCTTAAAAGGGTGAATATCATCAAGGG  
TGTTGCTTTTGTCTTATCTTACATGCACCAAGACTGTTACCACCGATTGTTTCATCGAGACATATCAAGCA  
GTAATGTGTTGCTTGATTCTGAGTATGAAGCTCGTGTGCAGATTTTGAATAGCAAAGATTCTCAAGCC  
AGACTCATCCAATCGCACTGCGCTTGCAGGCACATTTGGTTATGTCGCACCTGGTAAGTTTTAAATAGTT  
CATGAACTATAACCAAACACTCCATTGTTTTATCTCATTTACATGTTTAAATTCTTAATATTGTTCTGGAA  
ATTGTATTGTTGAGAGCTTGCATATAACAATGATGGTTACGGAAATGTGTGATGTGTATAGCTTTGGAGTA  
TTATCATTGGAGATAGTCAAAGGAAAGCATCTTGGGGAACACATTTCTGTTCTAGCAAATTCATCGACTA  
TAGATCCTGAGCAGCTTAGCGATTTGCTGGATGAGCGCCTTTCGTATCCTGAAGAAAGAGTAAAAGATG  
TTTTGGTTTTTATCATCAAGCTAGCATGCTCTTGTGTTGCTTGAATCTCCAAAATCAAGGCCAACAAATGCAC  
TTCATCTCTCATAAGTTATCATCAATGGATTCACGTCCACCTATTCATCAGAGAAACCCCATGTAAGGCG  
AGCAATATATAATCCTTGATATGTATGGAAATGCACTAGTGTGAAGTAAGTATTTCAATTGCTGGGACT  
AGTATTTTTAGGGTGCTCATTGTTGCTGTATTTAAGACCTTATATAGAAGTTTTATTGATTTCAAAG  
ATTTTACCTGTATGTATAGAAGCTAGTAAATGACCCTTCTGCTCAAGCTTTTTTCTAACTGAATAAATG  
GAGTTGTT

>M6-PGSC0003DMG400017941 M6 LRR-RLP

AAGGAGACAAGATCCATCGATCTGAATAAGTCTGGTACACCTTTCTCAAGTCCAGCTAACAAATAATTCT  
TGCTACTTTAATTCTATTTAAGTCTCCAAGAATTCATTTTCTAATAACACTAGATCTATAGTTTGTCTTCCC  
TTTACAAATACATGCATTTTTGACCTTGATATCTACTTGCCAATACTTGTTTCATCCTTGTTGTTAGGACT  
CCAGTAGTAATCTCATCCTTGACCTTGTTCTTAAGAACCAATGCTGTGAATATTGCAGTCCAGCCTCTTG  
TAAGAATTTCTGTCTCGTGAAAGAAGTGAATGCACTGATAATGTCCCTTCCAAAAGTTCTTAGATTTCC  
TGGTAAGAAGACATTATCTACCCATCTGGCCCTAAAGTTGTTATCACCACTAGACCATCCCGAGAAAATT

TCTTAGTAGCCAACACTCTTCCCGTGATAATAGCTCAAGGTCATTGTAGCTGGAAGGCGCCTTCATGCTC  
AGTTTTACTAAATAACTTGTACATAGCATTACACTCATCTGATGACCTTTGGATTGGTAGTTCGTCCATCTC  
TTACAAGTTAGTTTATATGGCTGTACTTTTTATTTGTATTGATCAATTTACAGTAAAACACTTAGTATTTTG  
TAGGGGTGTCAAAAATGAGCCCACCTATAGGTAACCCGCCAACCTGCCATAATTTTAAGGGTTGGGC  
TTAAGATAATTTGAATTAAGTTCAATCTCAACCCCCATTTTAAGAGAATCCTCAATTGAGCCCAATTTAAT  
TTTCAATTTCAACCCATTTTAAGACTCTTTATTTGCATTGATGTAATGTATGTTCTTATATTGAAGGTATGA  
ATTACTTTTGTTTTATATTTTTTAGGATTTATCTATCCATTTGGAACCTCTTTTGAATTTTCTTAAGTTGAA  
ATCTAAAATGTGGTTATAAACTTAAATAAACAATATATTTAAATTTATTGAGATTAAGTGGGTAAAGACC  
CAACCCATTTTAAAGCTCATTTGAGCCCAAAGTAACTTGGGCGGGTCAAGGCTCAACCCATTTTAATAT  
CTCCAATTTCAACCCATTTTAAGATCTCCAATTTCAACCAACCCACCCATTTGACACCTCTAGTATGTTGTC  
TCATTCATTTAACCAGAAACACCTCAATTGTTGTTTCCAATATGTTTTTTAGCATTGATTATTTGTTCCAGT  
TCTTCTACTAAGTGGTCTTTTAGGCTTTTCGTTTTTCTATATCCATCCACCCTTTTCTGATCATACTTACCA  
ATCCAGCAATCTGATTATGTATAATTCTTCGACATGCATTGTTGTTGAACTCAAAGTCTGCCTTTAAGTT  
CAGTTTCCTTCTATTAACCATAATCAGATTGCCTACACTATCATACGATTGCTATTGCTGTTCCGCTAAAT  
CAATGAATCCCTCTATAGCTTTTTTTCATTTTCTCGAATTTGCATTAAGATTCGCCCATTTCCAAGTCTGCAC  
TCTGCTGGAATGGATGTATGATTGGTAATCATCATATGCTTTGAAAACCTGAATATCACATTCCAAGAA  
ATTGTATACACAAATTTCTGTGTATTCCACCTCATAAGTTTACTGTACATTCTATTGTATTTATACAAAAC  
AAGTCTAAATTCTGTACCAAATAAATGAATTAACAAAGATTATTTATACACTTGGCACCTAATTATTGG  
ACTAATTTGTAACAAACACTAACAGCCATTTTGCTCTTCACGTGCCTTCTTGTGCCTAGGTTGAGAATCT  
TCTAGACCTTGTAACACTGGTTAGGTTGAGAATCTTCTAGACCTTCTGATTAGGTTTCTAGAACTTTTGT  
TCTTTTTGGCATATGTTATTTTGGCACAAATCTTTTGGTTCTTGAAAAGAAATGTTGGAGAAGGTTTCATT  
CGGTTTGCAAGTCCGGCATGCAGCTCGAATATGTCTATATGATAAGTCACTTATGTTTCTTTTGTTCCTA  
ATTTCTCCAAGTTAAGATTTTCTCACAGGGAGTCTAGTCTAGATCATGGATAATGAGTAGTGGTGATTG  
AATATTGTTGAATTAGTCAACTTAACTAGGAGGCATCTTACATGATAATGGGAAGTTTTTCATTCAGTCGA  
TCAAGGAACCCATATCCCGAATCTTAAAATTTAGATCCACAACCGATTCCGAGCAACTTAGTCTAAATTA  
AGTCGACCCAAACATGTTGAAAGAAGTTGCAATTCTCTCAGAAAATTGACTTTTTCATTTGCACTCCACGTC  
TGTAATATTCTGTCCATATTCCCCTTTCTTCTCCGTGTGGTAATACTTTAGGGAATTTGTAGAAGA  
ACAAAGTAGTAGGAGAAGTCAAATGACTTGAGCGATTGATACAATCATGGTTCATCAGTGATTGTTACA  
TAGTTTTATGTTTTACTGATTCCCCAAAGTTTAATTCTTTTCATTTAACCTGTGTCCTGTTCAAAATTTTCTT

TTATTAAC TTTACTGACTCATCTTATTATTTTTTTTATTTTAATTTTAATTTGTGCTGTATATATTTACGGCA  
GTTGATGTCAAGCCCCTTCAAGGCAAAGAAAGAGTGTAAGAAAGCAGCCATAAAATGCCACTCCATCA  
CCTCAAAGTGGTCAAATTTTCGGGGTTTTATATAGGCTTATTTCAACTTGAAC TCGTTAGGTACTTTTTGG  
AAAATGTTGTTGCTCTTGAGAAAATCATTATTGATCCAGG TACTCCATTTTTTTATCGTACCCCTCCGTGCC  
CTAGCGAAATCAAACACACGCAAAC TTTCAAGAAATCTTGCCAAGCTCCAGGTTGAACGTGAAGTGCCTC  
CGGCTATTGAGTTGGTCATACTTTAATGAAAATAATAATGTTATTAGGGTTAAATTTGTGATACATATCG  
GAGGTGAATTTTTATTTCTTAGTAGATGTTCTCATGCTTTGTTTCATAATTGGGTGATTTTCACTTTTTGT  
GAGGTTTATATTGCTATATGAAATATGGGGATTTTCAAATGAAAATGTCGCAGTTATTCCGCCA

>M6-PGSC0003DMG400017966 M6 LRR-RLP

AATTTGACCCTATTAAGAGTGCTTGATCTTAGTGGTGTAAGCATCTCTCCACCATTCTATTAATTTTTCT  
TCTCATTTTACAACGCTGGTGCTTGGGCATT CAGAGTTGTATGGTGTAAATACCGGAGAGTATTTTTACC  
TTCCCAAAC TAAAATACTTGACTTATCCATCAATTATCAGCTTAATGGTTATTTCCCAAAGACCAAATGG  
AACAGCAGCGCATCTCTCACAGATTTAAATCTCCAAGGAGTGAATTTTTCTGGTTATTTGCCTGAGTCTCT  
TGGTTATCTAACGTCACTGAATAATTTGTTTCTTATTTTCTGCAATATCTGGGGCCTATTCTGAATCTCT  
TTCTAATCTCACTCACATAGAGTATATGTTCCCTGCAGG TAACTTCTAAATGGAACAATACCATCATCGA  
TATTCTCCCTTCTTCACTAACTGATTTAGAATTGAGTAACAACCATTTTTCTGGTAAGCTTGAGGATATC  
AAGTCCAATTCAT TATTATCTATTGATCTAGGCAATAATCAGCTGCAAGGCCATCTTCCCGAGTCAATTCA  
AAACCTTGTGAACCTCACAAC TTTTGATCTTTCTTTCAATAATTTTAGTGGTAGTGTGGATGTCAGCTTCTT  
TTCAGACCTCAAACATCTTTCATCTCTTGGTATTT CATATAATAGTATTTTCAATCACAATGAAAACAAAGT  
TAATTTTACTTTGCCTGAATCACTTGTGTACTTACAGTTGGCTGCCTGTGAAGTGAAGAATTGGAGTTTC  
TAAGATCCGCCAAGAAGCTTGAGCACTTGGATCTTTCTAATAATAAGCTTCAAGGAAGATTTCCAGATTG  
GGCATCATCTAACTGGATGTTTTTATTGAACAGTCTTAATCTATCCCACAACATGCTGACAAGTGTGGAC  
TTAACTCCTTTTCAATCTCTAAAAACAATTAATTTGCGATCCAATTCTCTTCAAGGGTCCCTATCTATGCCA  
CCAAATTCACAACATACTTCTTCATATCAGAAAATAATCTTAGTGGAGAAATTCCTTCATCTATTTGCAA  
CTTCACATCATTGGTAATGCTAGATTTGGCGAGAAACAAC TTTGAAGGGAGCAATTCTGCAATGTTTGGG  
TAATATCAGTAGCCTCCAGGTTCTGGATATGAACCACAACAGTCTTACAGGGACTCTTCCAACAAC TTTT  
AGATTTGGAAGTTCTCTGAGAAGCCTCAACTTGACGGCAATAAACTAGATGGGAAAATTTCCCAATCTT  
TGGCCAATTGCAAAGAGTTGCAAGTTCTTGATTTAGGAGATAATCATCTCATTGATATATTTCCCGATGTG  
GTTGGGAAC TTTCCAAAGCTGCAAGTATTAAGCTTGAGATCCAATGAATTGCATGGGTCCATTAGAACT

CCAACGATTGAAAACATATTTCTAATCTTCGAATGTTAGATCTCTCTTCCAATGCCTTCACCGAAAACCT  
ACCAACGGGTTTGTTC AACATTTGAAAGCCATGAGGACAATTGATCAAACCTATGAATGCACCACATTAT  
GAAGGAACTGATGGATATTACCAAGACTCGGTAGCTGTTCGTATCCAAGGGATTTGAGCGTGAAATAGT  
GAGAATCTTGATTTGTACACCGTTATCGATCTTTCAAGTAATAAATTTGGAGGGCAGATTCCAAGTATC  
ATGGGGGAACTCATTGCAGTTCACATATTGAATATATCTCATAATGGATTGGAAGGTCATATACCGTCAT  
CACTTGGAAGTTTATCTTTGGTTGAATCATTGGACCTGTCAAGTAACCATCTTGTAGGAGAGATACCAGC  
ACAATTTGCTTCTTACATCTCTTGAAGTCTTCAATCTTTCTACAATCATCTTGAAGGGTGCATTCTCA  
AGGAAATCAATTCAGACCTTTGAGAACAATTCATATGAAGGTAATGATGGACTACGTGGATTCCCCTT  
TCAAAGGCTGTGGTACTGATTCAGTATCAGAGACAAATGATACCGTTTCTGGACTAAATGATGAAGAA  
AGCAATTCTGAATTTCTGAATGATTTTTGGAAAGGTGCTCTTATGGGCTATGGGAGTGGACTATGTATTG  
GATTATCCATTATATATTTTATGATTTCAACTGGAAAACCGATATGGCTTGCAAGAATCATTGTAGAGCT  
GTAGCACAAAATAATGATGGGAAGGAGAAAGAAGCAGGGAAAGGCAAAGGAATAACAGAAGAAGAAA  
TAATCACTTCTAG

>M6-PGSC0003DMG400017967 M6 LRR-RLP

AAGGTCTCTTACTGATCTGCGGTTGTACAATAACTCCCTTAATGGTTCTATTCCAACATCATTGGGGAATT  
TGAACAACCTTGACTATTCTGCGTCTTGATGATAATCACCTATTTGGCTTTATTCCTGAAGAAATAGGCTAC  
CTAAGGTCTCTTACTCATCTAGATTTGTGTTCTAACACTCTTGATGGTTCTATTCCAACCTCATTGGGAAAT  
TTGACCAGCTTGCCATTTTGTATCTTTATGATAATCACCTTTCTGGCCCTATTCCTGAAGAAATAGGTTAC  
CTGAGGTCTCTTACTGACCTGCGGTTGTACAATAACTCTCTTAATGGTTCTATTCTGCTTCATTGGGGAA  
TTTGAACAACCTGTCTGTCTTGATCTTGATGGTAATCACCTTTCTGGCCCTATCCCTGAAGAAATAGGTT  
ATCTAAGGTTTCTTACTGATCTACAGTTGTACAATAACTCTCTTAATGGTTCTATTCTGCTTCATTGGGG  
AATTTGAGAACTTGCAAGTTCTGTCTCTCCAACAAAACAATCTGATTGAGGAAATTCCTTCATCTATTTG  
CAATTTAACATCACTGACAATCCTGTATTTGTCGAGAAACAACCTTGAAAGGAAAAAATCTGCAATGCTTG  
GGTAATATCAGTGCCCTCCAGTATGTGATAATGTCACATAATAATCTCAGTGGAGAGCTCCATCCGTCTA  
TTTGCAATTTAACATCACTGCAAATTCTAGATTTGGGTAGAAACAATCTAAAGGGAGAAATTCGCAATG  
TTTTGGCAACATGAGTGGTCATCTGAGGTTCTGGATATGCAACACAACAATCTTTCTGGAACCTATTCCA  
ACGACTTTTAGAGCTGGAACACTTAGAAGCTTCAACTTGCATGGCAATAAACTTAAGGGGAAAATCCC  
CAATCTTTGGTCAATTGCAAAGAGATGCAAGTTTTTGATTTAGGAGATAATCACCTCAACGACACATTCC  
CGATGTGGTTGGGAACTCTCCTAAGTTGAGAATTTTAAGCTTGAGATCGAATAAGTTGCATGGACCGA

TTAGAACTTTAGGAAGTGAAAACATTTTTAATGAGCTTCGAATGTTGGATATCTCTTCCAATGCCTTCACG  
GAAAACCTACCGATGAGTCTGTTACAACATTTAAAAGCCATGAGGACAATTGATCAAACGATGAATGCA  
CCAAGTGATGAAGGAGGTGAATATTACCAAGACTCGGTAGCTGTCGTAACAAAGGGATTGGAGCTTGA  
AGTTGTGAGAATCTTGTTTTGTATACTACTATCGATTTTTAGACAATAAGTTTGAAGGACATATTCCAA  
GTATTATGGGAGATCTCATTGCACTTCGCATGCTTAATTTATCTCATAATGGATTGCAAGGTCATATACCG  
CCATCACTTGGAAGATTAACCTTTGGTTGAATCATTGGACCTGTCAAGTAACCCACCTGTAGGAGAGATAC  
CAGCACAATTTGCTTCTCTAACTTCTCTGCACTTAAATCTCTCTACAATCATCTCGAAGGGTGCATT  
CTCAAGGAAATCAATTTACATACCTTTGACAACAATTCATATGTAGGTAATGATGGATTACGTGGATTCCC  
ACATTTGAAAGGCTGTGGTACTGAAGTAATGATTCAGAATCAGAGAAAAGTATACCGGATCTGAGCT  
TGATGAAGAAAGCAACTCTGAATTTCTGAATGATTTTTGGAAAGCTGCTCTTATGGGCTATGGAAGTGG  
ACTCTGTATTGGATTATCCATTATATATATCATGATTTCAACTGGAAAAGTATATGGCTTGCAAGAATCA  
TTGTGGAGGTGGAGCATAAAATTATGATGGGAAGAAGAAAGCAGCGAAAGCAAAGGAGTTACAG  
AAGAAGCAAATAATCGCATGTAGAAGAGTTA

>M6-PGSC0003DMG400017968 M6 LRR-RLP

ATGTTCTCCCTTCCATCACTAAGTTATTTAAGCTTGGGTTTTAACCAATTTTCTGGTCAGCTTGAGGATTT  
AAGTCCAATACACTAGTCTGGATTCAGTTACAGGGCAATCGGCTGCAAGGCCATCTCCCAAGTCAATTC  
AAAACCTTGTGAACCTAAAATATCTTGATCTTTCTTTCAATAATTTTAGTGGTAGTGTGGATGTCAGCCTC  
TTTTAGACCTCAAACAGCTTTCGTATCTTAGTCTTTCATACAACAGTATCTCATTGACTAATGAAAAGGA  
AGTTAAATCTAGTTTGGCGGAGTCACTTGAGTACTTACGTTTGGCTGCATGTGATGTGAAAAGAATTGGA  
GTTTCTAAGATCCGCAAAGAAGCTATCTGACTTGGATCTTTCAAATAATAAGGTTCAAGGAAGAGTTCCT  
GATTGGGCATGGTCTACTTGGAAATTTTTAGTGTCAAATCTTAATCTATCCCACAATATGCTGACAAGCAT  
GACTCAATTCCTCTTCAATCTGGATATATTATTGATTTGCGGTCCAATTTTCTTAAAGGGTCACTACCTAT  
TCCAGGGAATTCACAGCATTTTTCTTCATATCAGAAAATAATCTTAGTGGGGAAATTCCTTCATCTATTTG  
CAATTTGAAATCAGTGCAACTTCTAGATTTGGCGAGAAACAACCTTGATGGGAGCAATTCCACAATGTTTC  
GGTAATATCAGTGGCCTCCTGGTTTTGGATATGTACAACAACAATCTTTCTGGGACTCTCTCAATGGCTTT  
TGGAATCGTAAGTGAACCTTAGAAGCCTCAACTTTTCATGGAAATGAACTAGAGGGGAAAATCCCTCGATC  
TTTGGCCAATTGTGAAGCGTTGCAAGTTCTTGATTTAGGCGATAATCACCTAAACGACACATTCCCATG  
TGGTTGGGAAGTCTGCCATATCTGCAAGTTTTAAGCCTGAGATCAAACAAGTTGCATGGATCTATTAGAA  
CTTCAAGGATAGAAAA



>M6-PGSC0003DMG400017969 M6 LRR-RLP

AACTTTTTGAATTGCTTAAACAATATGGGGCTCTCAGTTGTGTTCTTAATTTCTTTCTTTATCAGCTTTCTT  
GTTCTTCATCCATATTTCTGTGTCCCAAACATCAAAGCATTTCCCTTCTAAAATTCAAGGAAACATTTACTA  
TAAATCCCTATGCTTCTTAGATGTTATTTCCGCGGTCAGTAGCCTTATCCAAAACTAGTTCATGGAAC  
ATGAGCAGAGAATGTAGTTTATGGGATGGAGTCATATGCGATGAGATGACTGGCCATGTCATTGAACTT  
GACCTCGGCTGCAGCCGTCTTGTAGGAAAGATTGATTCCAATAGCAGCCTATTCCAACCTCTCATCTCC  
AAAGACTCAACCTTTCTTGAATGAATTCCACGGTTCATATCTCGCCTGAATTTGGCAAGTTCTCGAGC  
TTGACACATCTTGATCTTTACAACCTCAATTTCTCAGGTCAAATTCCTTCTGAAATCTCTCATCTTTTCAAG  
TTACACTCTCTTCGTCTCTCTGGTACTGGTCGTCTACGACTCGTAGCTCACGATTTTAAATTGCTTCTTCAG  
AACTTGACTCAATTAAGAGAGCTTGATCTTACTTTCATAAACATCTCTTCCACCATTCTCTGAATTTTTCT  
TCTAATTTAAACAACCTCTGAATCTGGGATTTTCAGGATTGTATGGGATAATACCGGAGAGTATTTTTCATCT  
TCCTAATCTGGAAACACTTGACTTAAGTTACAACATAAGCTCAATGGTTATTTTCCAAAACCAAATGGA  
ACAGCAGTGCATCCTCATATTGTTAGATCTCAGTCGCGTGAATTTTTCTGATAATTTGCCTAAGTCTATTG  
GCTATCTAACTTCGGTGCATTCTTTGTCTCTTCCAAATTGCAACCTTAGAGGGCCTATTCTGAATCTCTTT  
CGAATCTCACCCGCATAGAGCATTGTACCTTCAAGATAACTCCCTGAATGGAACAATACCATCAGGGAT  
GTTCTCCCGCTTCCATCACTAAGTCGTTTACACTTGAGTAATAACCACTTTTCTGGTGAGCTTGAGGATT  
TCAAGTCCAATTCACTAGAAGAGATTATTTTAGAAGGCAATCAGCTGCAAGGTCAAATCCCAAGTCAAT  
TCAAAACCTTGAGAACCTAAAAGGGCTTGATCTTTCCTTCAATAATTTTAGTGGCAATGTGGATATCAGC  
TTGTTTTCAAACCTCAAACAACCTTTTGGGTCTTAGTCTTTCATATAATAAGATATCATTGATCAATGAGAA  
CAAAATTAATTTTACATGGCCCAAATCTCTTAATGTGTTGCAATTTGCTGCATGTGAAGTGAAAGAATTG  
GAGTTTCTAAGATCCGCAAACCAGCTTTTGGTGTGGATCTTTCACATAATAAGATTCAAGGAAGAATTC  
CTGATTGGGCATGGTCAAACCTGGATGTCATTGATGACTCTTGATATATCCCACAACATGTTGACGAGTGT  
GGAGCCAATTCCTCTCAGACTGTAGATACTATTGATTTACGGTCCAATTTGCTTCAAGGTTCACTACCTA  
TTCCACCAATTTCCACAAGATACTTCTTAATATCCCAAATAATCTCACTGAAGAAATTCTCCATCTATTT  
GCAATTTGACATCACTGGTAATGCTAGATTTGGCGAGAAACAACCTTGAAGGGAGAAATTCCGCAATGTT  
TGGGTAATATTAGTGGCCTCGAGGTTCTGGATATGCACAACAACAACCTTTCTGGGAATATTCCAACAAT  
TTTCAGCAATGGAAGTTCACTGAGAAGCCTCAACTTGCATGGAAGTAACTTGAGGGGAAAATTCCCCG  
ATCTTTGGCCAATTGTGAAGACTTGCAGGTTCTTGATTTAGGAGACAATCATCTCATTGACACATTCCCCA  
TGTGGTTGGGAACTCTTCAAAGCTACAAGTTTTAAGCTTGAGATCATATACATTGCATGGGTCCATTAA

ACCTCCAAGGATTGAAACTATTTTTCCCGAGCTTCAAATCATAGATCTCTCTTACAATGCCTTCTCCGGAA  
ACTTACCTACGAGTTTGTTC AACATCTGAAAGCCATGAGGACAATCGATTCAATGGAAGCACCAAG  
ATATCGTGGAGATACATATTACCAAGATTCTATTACAGTTACAACCAAGGGATTTATGCGTGAAATTGTG  
AGAATCTTGTATTTGTACACCGTTATCGATCTTCAAGTAATAAATTTGGAGGGCAAATCCAAGTATCAT  
GGGAGATCTCATTGCAGTTCACACATTGAATTTATCTCATAATGGATTGCAAGGTCATATCCACAATCAT  
TCGGAGATTTATCTTCAGTTGAATCATTGGATCTGTCAGGAAACCAGCTTTCGGGAGATATACCACAACA  
ACTAGTTTCTCTTACATCGCTTTCATTCTTAAATCTCTCCTACAATCATCTCCAAGGATGCATTCTCAAGG  
AACTCAATTTCATACTTTTGAGAGCAATTCATGTGAAGGCAATGATGGACTACGTGGATTTCTGTTTCA  
AAAAGTTGTGGCGATGCTCGGGTATTAGATACAAATGATACCGTATCTGAACTAGATGATGATGAAAAC  
GATTCTGAATTTCTGAGTGATTTTTGGAAAGCTGCTCTTATGGGCTATGGAAGTGGACTATGTATTGGAT  
TATCCGTAATGTATTTTCAAGTGGAAACCCGAGATGGCTTGCAAGAATCATTGTAGAGATGG  
AACACAAAATAATGATGGGAAGGAAAAGAATCAGCGAAGGAAAAGAATTGCAGAAGAAGAAATAT  
GTAACATTTAATGTATTCAATGAAATGTATGCATTTCTGTTTCAGTGAAGTGTATAATTTACAAATGTA  
TGCAGTTTATTGCATCTTCTCAACAACATCGCGTAATTTTTCCATTTATCATCAAGTGAACAAGGTAGGAA  
CTCTTAAATCTTCTCATCAATGCATTCCTGCTGACACAACCTTTGACATCTCTGCTCTCCTGGAGCTAAAAAC  
AGGTCATTGTCTGTTCTATGAAGGGAGACGGATATGTTTTCCGTTAAACATTTAGTGACAATAAATTTTC  
CTTTCACAAAACATATAGCGGTAATTGAGTTAATGTCATTGCATTCTAAATATCATAGAACTGGTCTCT  
TTTGGTTGTCGCTGACTTCATTGACCATTAAACCGCACCTATAACTCTCATTATAGGCACAGTAGTATGTG  
AACATGTACACTTTCATTTCGAAATTTCCACTACAAGACTTTGAAAACAATACCAGTATTTAAGTTGTTAC  
TAGA

>M6-PGSC0003DMG400018045 M6 LRR-RLP

ATCTTGATCTGAAATTTAATCCCTTCAGGGTCCACTACCTTCGGCCATTTGTAACATGAGGAACTTATC  
TTATTAGATTTATCACACAACACTTTCAGTAACTCAGTTCCACATTGCTTGGGAAGCATGGCTTTACTAAC  
GGTGCTGGACTTAAGAAGGAACAATTTACAGGGAGTCTTCCCCATTATGTGCACACAGCACTTCATTG  
AGTACCATTGTCGTAAATGGTAATCAATTTGAAGGACATCTTCTGTGTCGTTGCTCAATTGTAATGGTCT  
ACAAGCCCTTGATGTGGGGAACAATGCTATAAATGACACGTTTCCAGCTTGGCTCGGAACCTCTACAAGA  
GCTGCAGGTCCTTATATTAAGTCGAACAAGTTTCATGGACCTATAAGTACGTGTCAAACCTAAGTTTTGG  
TTTCCCGAGTTGCGAATTTTTGATCTTCTCGTAATGATTTCAAGTGGCTCACTTCTGCAAAAGTTTTTCGA  
AACTTCAAGGCAATGATTAATTAGATGACGAAGACACAAGAGGGATCACGTACATGGAATCTAAGTCA

AATAATTTTTCATTTCAAACATCGTATGAGGATTCAGCGAGTTTGGTAATCAAAGGGCACGATATTGAGC  
TACAAAGAATCAGCACAATAATGACAACCATAGATCTCTCAAGCAACCATTTTGAAGGTGTCATTCCGGA  
AACACTAAAGGACCTCAGCTCACTTTGGCTACTCAATTTATCCCATAACAATCTCATAGGTCATATTCCAG  
TGGAATTGGGGCAATTGAATAAGCTGGAAGCTTTAGATCTCTTGGAAATCGGCTCACTGGAAAGATTC  
CGCAAGAATTGACAAGAATAAACTTTCTGGCAGTCTTAAACATCTCTCAAATCATCTCGTCGGACCAAT  
TCCTCAAGGTCCACAATTCAACACATTTGGAAATGACTCGTATGGCGGCAACCTTGATTTATGTGGTCTCT  
CCTTTATCAAACAATGTGGAACGAGTGATTCATCACATGTTCTCAACCAGAAGATGAAGGCGAGTCA  
TATTTTTTAAGTGGATTTACGTGGGAATCAGTAGTCATAGGCTACAGTTTTGGTCTAGTTGTTGGAACTTT  
CATGTGGAGTCTCATGTTTAAATATCGTAAGCCAAAATGGTTTGTGGAATTTTTTGATGGACTCATGCCT  
CACAAAAGAAGAAGGTCAAAGAAGAGAGCTCAGAGACGACGATCTTAA

>M6-PGSC0003DMG400018117 M6 LRR-RLP

AGTTATAGAGATATAAAAGAGAGAGGTAGAGGAGGAGAAAAAAAGGGAAAAAAAATATCGAGAT  
GCGATCTTAACGTGTAAATCAGTTATTCATGGATTAGTTCGTCAGCCTGCCTGGCCTGCTCTTATAGTTGA  
CGAAAAAGCTAGAGCTCACTGATCTTCACAACCTCAATAACCTCCCTCCCAATTTCAATTTGATAATCTCCA  
GTAGCCATGGATCCAAACCTACCAATTTCCAATTCTCTCCTACGTCATTTCCAAGCTACCCAGTATGGG  
CCGTAGAACCACCGCCACCGCCGATGAATTCGACATTGAACAGCCCCAGAACCACCTCAGCCTCCTCCA  
GAACCTCACTTCGACATCACCGAGCGTATGCCTCATCTCACTGACCCTAAGGTTGTCAACGCTATGCGAT  
CAGCCGTTGCTGACGTGTCACAGACCCGGTCAATGCTCAAACCTGGGTGAGCGGCCTTTTACGAGC  
TTGTTGATACTGCCAGGGTGAAGTTAGCTGAGATCGAGGTGGACATGTCCAAGCGTCTCGAGGAGATT  
GTTCTGTCTCCACGTCCGCCGGAGATGGAGAGGCAGGATTGGAGATTGGACATGGCGATTAAAGAGGA  
TGAGTGTGCGAAAGGGTGTGGAGAAGGAGAGAGAGGAGTATAAGGCGTTGATAGCTTTGGATGAATTT  
CACGAGGCGTATGAGAAGATGTTGAAGGATGCGGAACAGAGGTTGGAGAAGATTTATGAGACTGCTGT  
TGCTGGTGGTGATGTGGTATCAATTGGAGAGTCTTCTGGTGAGAAGAGTTCTGAGTTGAAAGAGGAAG  
TGAATGAGGAAGTGATCGGGATTTTGCAGGAGGCATCAGGTAAGAGTGTGGAAAGGGTTGATTTGTCA  
GGCAGGCAACTGAGGATGCTGCCTGAAGCTTTTGGGAAGATTCACTCCTTAATTGTGCTTAATTTGTCCA  
ACAACCAGCTTATGGTATGCCCTAGTTCAGATAATCTTTCATGGTTCTTGTCTTCGACTCGTTTTACTTGG  
ATTTGAACTTATGGTGTGTATTAATTTTCAACTGCATGATGTCTTGTTCATTTTCGTGCTACTTGATATAC  
GGTAAATTGAACTTCTAATGATACTTTTAGCCCTATATTGTTGGCACATCCATGTCAAATGCGTAGTTTGA  
TATTTCAATTCACATGTGGAAGTAGTAGAAGTTTGTGATGGAGATCATATTGTAGAGGAGCTATATAAACT

GTGGTGTTTCTTTTTCTTTTTTTTTCTCCTTTGGGGTGAGGGTTAGTTTCAACCTATGATTGGACTGTGA  
ACTGCCAAACTACAGGTCCTTTGGGTTTAATTAAGCGTATATTTTCATCTCAATGACTTGATGCATGGT  
AAAAGTTTGATAACTCTTTTCTGGTTGCTGCCAGCATAATTTGAGGTACCACAAATTTACTGTCACGTGCT  
GGGACAAGTTGCGCTTAGAGGTTCTGAACATGGAGTTTTGCACCTTTCCCATGCTTTACTCGGAGCACTC  
ATCTAAGTTATTTTATTTTTTCACAATCAGAAGCTTTTATCAAACTCTGTTACATTGTTTACTGCTTCTTAC  
TATTGTAACTGATCATCTTTTGGCTTTTTGAGATGCCTTTTCTTTATGAAACAAGACTCAAACCTCAAAA  
GAATGACTATCAGTACTGGGGAGTCGGTAGTTCTTTCTTACTTTCAAAGTTAGGAAATCAATATCCAT  
ATCCACAAAGAATCAAGTGCTGCACTGAGCTGGGTACTTTGAACCTCACCATGCTTGAAGTTGCAATTTT  
GTACCTTCACTATGATTTGATCATAGAACGGAACCCCAATGCATATGATTAAGGGGGTACTAGGTTTCT  
TTTACTTGTAAGGTGCAAGAACCTTCTGAACCTACTCTAATATCTGATTATGCTAAATGTTTATCGAGCA  
CCGGTTCCTCTTCTTGCCCTTTATCTCTTAGGAGAGGAACATTACTTGTTCGCATTATTTTCTCATTCTG  
GTTCCACTTCGTTTCTTGAATTATAACAGTGTTCTGCACTTTGCCTCCTGATAGCTGTCTCCAGGATCCA  
AAGTCTCCCAAATATAGTATTGACTTCCTCCATTCCAATTTATCTATCTATTTTTGCTTTCTGCTTATTGA  
TTGACCACTTCCAAAGTAAATCTGAAATTGATTAGTTTATATATGGAAAAATGTAAGTTAGCT

>M6-PGSC0003DMG400018163 M6 LRR-RLP

GTCAACTTAGGACTGTAACTTTTCTCCTATCTCTTAGCAAATTTTTAGCTTCATGCTACTCATAGT  
TTTCCATTTTAAGTAAAAACAGCACCACAAATTTCTTTCATAAATTATGCATTTGTCAATTTAAGTTCCAAG  
GTTGTGTTCCATTCACAAATATTAGCATGGGAAGTGTTCTTTTTCTTATCTGCTGTTTTTCTTGACAGTAG  
TTGATGTTGTTCTTGCTGTTTCTCAGCAGATGGTTCATCTGATTCGTATCGGCTTTGAGAATAAAGTCA  
GAACTTGTTGATCCATATGGAGTTCTTGAAACTGGTCTGAAGGGACTAACATGTGTACCTGGAATGGA  
GTGGCATGTTGAGATGATAAATCTCATATTGTGAGGCTCAATCTTACTAGTTCAGGACTAGGAGGTCAA  
TATCTCAAGAATTCGCGCATCTCACTTCTCTCGAGTGATTGATCTTTCGGATAATTTCTTAATGGAACA  
ATCCCTCCTGCATTAGGAGAGCTTCATAACTGGAGGAATTGCTTCTTTTCTAATTTTCTCACTGGTGA  
GATTCCTTCGGATATCGGTCATTTGAGAAAGCTGCAAGTTCTTAGAATTGGAGCCAACATGCTGACAGG  
ACAAGTGATACCAGAAATTGGTAACTTTCTGAGTTGAGAGTGTTGGCTGTTGCTTATTGACAATTCAGT  
GGAAAGATACCAAAGAGATTGGTAATTTGAAGCAGCTGATAAATCTAGACTTGCAGCAAACAGTCTT  
AGTGGCCCCATACCAGAAGCAATTGGCGGCTGCAAAAATCTTCAAATTTTGCAGCATCAAACAACAGG  
ATTGATGGAAAGATTCCTGCTTCAATTGGTCAGCTCGAATCACTCGAAATCTTGAACCTGGCAAACAACA  
GTTTTTCTGGTTCGATTCTGTTGAGCTGAGCCATCTTCCAATTTGAAGTACTTGAACCTGTTTGGCAAT

GAATTGGAAGGCGAAATTCCTTTTGAGCTTAACAAGTTGGTTCTGGTTGAAACATTGGATTTATCAAACA  
ACAACCTTTCAGGAACCATAAGGCTTCTCAACACTCAGCTGAAGAATCTTGAGACTTTATCACTCTCTGG  
CAACTTCTTAACAGGAAGCATCCCGAGTAATTTCTGTCTCCGTGATTCAAGCTTAAGCCTACTCATTCTGG  
CTGACAATAAGCTGTCTGGGAACTTCCCCTTGGAGTTACTGAACTGCACGTCCATACGACAACTGGATCT  
CTCCGGTAACAGCTTTGGAGGAATGCTGCCACGAGGCCTCGACAGGCTAGAAAGTCTCACAGACCTCTT  
GCTCAACAATAACAGCTTTACTGGAATAACCTCTGAAATAGGAACTTGACTAACTTGGAAAGATTTG  
TACCTGTTTCATAACATGCTCTCTGGGGGAATCCCAGTTGAAATAGGAAAGCTTCAAAGGCTGCGTGAC  
CTATACCTCTACGAAAACCAGTTGTCAGGAAGTATTCCAAGAGAGTTGACAACTGCTCCAGCATAACAA  
GCGTTGATTTCTTTGGTAACCAACTTTTTCAGGATCTATTCTGATAACATTGGGAGGCTTAAGAATCTTGTT  
ATTCTTCAGCTAAGGCAGAATGAGTTGTCAGGTCCGATTCCATCAAGCTTAGGCTACTGCAGGAAGCTTC  
AAAACTGGCTTTGGCTGATAACAACTTTTTCAGGATCATTGCCACCAACTTTTTCGATTCTCTCAGAGAT  
GGACCTGATTACTCTTTACAACAATTCCCTTGAAGGTCCACTTCTGAATCTCTTCCCTTCTGAAAAATCT  
CAGCAAAATTAACTTTTCTCACAAAAAGTTCAGTGGAATAATTTCCCCTTAGCTGGTTTAGATTCTCTGA  
CAGCTCTTGACTTAACAAACAACAGTTTCTCTGGTCTATTCCCTCTGAGTTAGGTTTGTCAAAAAATCTA  
ACCCGTCTTCGCCTTGCTAATAATTTTTTCACTGGAGAACTCCCTTCTGAATTCGGACAACCTTGAAGATCT  
CAGGTTTCTTGATTTATCATTCAACAATTTGACCGGAAATCTAGCACCTTCCCTTCTGCTGGTCTAAAAACC  
TTGGTCATTTTCTCCTTAGCTCTAACCAATTCTCGGGTGAAATCCCACATGGTTAGGAGGCATAGAAGA  
TCTTGGTGAACCTCGATCTTTCGTTCAACAACCTTCACTGGAACAGTTCCAACAGAAGTTGGAACTCTCCAA  
AATTGCTCAAACCTTCTCTCAGTTACAACAGATTATCAGGCCCCATACCACCAGAATTAGGCAATCTCACA  
AGTCTAAATGTCTTGAATCTTCGAAGAAACAATCTTTCTGGTTCCATCCCTTCAACTCTTCAAAAAATGCCA  
AAAGCTCTATGAGCTAAGGCTCTCTGAAAACAACCTTAACAGGCTCAATCCCTTACGAACTTGGTTCTTTAT  
CCGAATTACAAGTAATACTAGACCTCAGCAAGAATCACATTTTCAGGTGAAATCCCTTCTCACTTGGAAA  
CCTTGTAAGTTAGAAAGATTGAATCTTTCATTCAATCAACTTCAAGGAAAAGTCCCACCATCACTTGGAA  
AGGTTATCAAGTTTACATAGACTCAATCTTTCATATAATCATCTCCAAGGCCAAATCCCTTCCACATTTTCA  
GGATCCCCTAAGTTCTTTCATGGGAAACAATCATAACCTATGTGGCCACCATTACTATCTTGTTCTGA  
ATTAAGGAACATGAGAGAATATGGGAGTTGTCAAAGCAAGTGTGTAGGGATAACAGTGGCTATTG  
TGTTAACAGCAACAGTTATATGCATGGTTCTGCTTTATATCATGCTGAGGATTTGGTGCAATTGGAGAAA  
AGTTACAATTTCTTGCTCAGAGAATGGTGGAATTGAGAGTAAAAGTAGACAAGGGGAAAATTGGGTAT  
ATGGAGAAGAGATCAAAAAGTGGACAATATTGGAATACAACATCATTAGTTTCATCAAAAAGAGAAGCAA

ATATCTAAAGGGACTTGCATGTTTAATCTTAGTGTAAGTTCATCAGATAGCACAGAAAAACCTTTAGTTT  
AAATTAAGAGGTGTTTTGTTTTAATTTGTCTCTCTACTTTGTAAATTCCTTTGTCATGTGTTGAGATTAATT  
TGTTTATGTGGGGGTTTACATGTAAAGAACAATCACCTTATGAAAAATCTCATCAATTCAAGGGCGGTAC  
GCGTG

>M6-PGSC0003DMG400018308 M6 LRR-RLP

GTTGTTAGACTTTTCAGATTTTTCATTTGATCTTTGTCTGTACTTTGATCAATATTCTGAAGATGAGTGATC  
GAAAAAATTCATTCAACAGCTTATTGTGTTTGACATTTTCGTCGCGCTGTCAGTTACCTGTGGTGTGTG  
TCAGTTCAGGAGTTGTTGATGGGAATATCAAGTGCCTTCAAAGGAATTAGAAGCTCTTCTCAGTTTCAA  
ACGGGAGTTGTTAGATGTCCGTGGACGTCTTTCTTCATGGGGAAATGAAGGATTTAATCAAGATTGTTG  
CACATGGAGAGGTGTCCAGTGTGACAATCAAACCAGTAATGTCATTAGACTCGACCTTCGTGGTCCTTCT  
AGTCTCAATGCATCCGTTGCCATTGCGCCATTGATAGGTAAGATAAGTCCTGCCTTACAAGAATTGAAGC  
AATTAAGTATTTGGATCTTAGTTACAATCGAATTTACAGGAGGTATACAGGACTTTCTTGGTTCTCTAAGT  
AAGTTGGAATACCTAACTTATCTTGTGTTGGTGTATGATTTTACGACAGTTCCTCCTAATCTTGGCGATCT  
TTCTAGCTTAAACACCTTGATTTGAGCTATAATGATTTCTATCTGTGAATAACCTGAATGGATTTCGA  
GTCTTCATCAATTGAGATACCTAGCTATAGGTTATGCTAATAATCTGAATAATTCTGTATATACCTGGCTG  
TTAAGTTAAGCAATCTGACTCACCTTGATCTCTCTGGTAATACTTTATATGGTCAAATTCCTGATGCTTTT  
TGGAATATGAAATCCTTAAAACACTTTGATCTGTCTCGGAATGCGCTTGGAGGTGGCTTCCCTAGATGTC  
TTGGTAACAGTAGCAATTTGAAGTTGTTGCGACTGTCTCCAACAATCTAGATGGGCAGCTACCTGAGAT  
AATGAATAACTTGTGCATGCGTGTACATTCTCTCGAGTACCTGAACCTAGAAGAGAATCACATTGGTGGT  
TCACTGACTGATGTTGTAGCTAAGTTTGCATCTCTGAGAGAGCTGAGGCTCGGGCGTAACAAGTTGAAT  
GAATCCATCCCGGAGCTGTTGGAAAACCTACCAAGTCTTGTCTTTTGGATTTATCTTGGAACAGAATCA  
CGGGATCAGTCCCTGATCTTTTTCTGTTATCGTCGTTGAGGGAATTACATCTTTCTCATAATCAGTTAACT  
GGTGTAACGGAGAGTATTGGACGTCTTCCAACTTGAGAAGTTATACCTTGACTTCAATCAGCTTGAAG  
GCACAATATCTGAAGCTCATTTGTTCAAGCTCTCGAAATTACGTGAGCTGGACCTCTTATAAACTCAA  
CTACATATTCGAGTCAGTTCAGATTGGATCCCGCCTTTTCAGTTGGATTTTATTGTTTTACCCACTGCAA  
ATTGGGTCCTCAATTCCCAAACCTGGCTGAGGAATCAAACAACATTTCCGAGCTTGATTTTTAGCTTCTG  
GAATTCGGGTGACGTTCTAGTTGGTTCTGGGAGCAGTTGCCTGGATTGACCTTCTTAAACCTTTCTTAC  
AATGATATAGGAGGAAATGTACCAGATCTCTCAAAGAAGATGAGTGATCTTCTTGCATAGATTTGGCT  
ACAAACAAATTCATCGGTCCAGTACCACGTTTTCTACCAGTGTTATAACAGTTGATCTCTCCAACAACAT

GTTTTCCGGTACCATCTCCTTCATTTGTGACAATTTTGATTACTTGGGATATCTTAACCTCTCAGACAACAG  
ATTGTCTGGAGAGCTTCTCACTGCTGGACGCTTAGAAGTATCGTGCATCTTAACCTAGGGACTAATAAC  
TTCTTCGGGGAGATACCTGATTCGATAGGCTCATTGGAGACGATGGGAATGCTGCATCTTCAAACAAT  
CATTTGACAGGAGAACTACCTCAGTCCCTGGCAAATTGCAAAAAGTTGAGGGTTATAGACGTTCCGGTCT  
AATAACTTGTCTGGTGAAATCCAGAATGGATTGGGAGTAACATATCTGATATCATTATTGTTATCTTAA  
AATCCAACAGGTTTAGTGGAATCATACTTCAACCATATGCCAGCTAAAAGAACTTCAAATCTTGGACTT  
ATCTGAAAATAAGATATCCGGGATCATAACCAAATGTATCAACAACCTCACTGCAATGACGGATGAAGA  
GAGCACAATGCACCAAATCAAGAGTTGGTATTTTCAGGTCGATGATCAAGGTGATGTCAAATAAATGC  
CTCATAACGATGAACTGCAGTTTTGATGTGGAAGGGACGACAATTTGAATACAGCAGCATACTTGGTAT  
GGTAAAGAGCCTCGATCTTTCAAGCAACAACATGGTGGGAGAAATCCCGGTTGAAATTACATCTCTTGT  
AGGTTTGCACGGTTTGAACCTGTCGAGAAACAACCTTAACCGGCAGCATCCCTCTGAGGATTGGTGAAAT  
GAGGGCACTAAATTTCTTGACTTGAGCATAAATGATCTTACAGGGGAAATTCCTACTAGCGTTTCACAG  
TTAAGTCACCTGGGGGTCTTGAACCTGTCTTACAACAACCTGTCTGGTTCGAATCCCTTTAGGCGAACACTT  
ACTGACTTTCAACAACAGATCTTACATTGGAAATCATGGACTTTGCGGCTATCCACTAACAGAAGCTTGC  
TCTCTGGAGGAACTTCTCGAGACTCAACGTTGAGTGATGAGGACGAGTTTATAACTCCAGAATTTTATA  
TTAGTATGGGAATCAGCTTTATTTCTGCATTTTTGGGAGTCTCAGCTATGATGTTGAATAGAAGGTGGAC  
TTACGGATACTAGGAAATCAATAATGTAACATCACACAGTTAAATGTAGGTTTACTTAAATACCATGATA  
AGGAGCTATGTAATCTCGAGTTCTTGAACCTTGCACCTGCCTGAATTTTTATTCCATGTGCATTGTACAC  
CACACGAATCAGCTGAT

>M6-PGSC0003DMG400018385 M6 LRR-RLP

GGCGATCTTTCTAGCTTAAACACCCTTGATTTGAGCTATAATGATTTCTATCTGTGAATAACCTTGAATG  
GATTTGAGTCTTCATCAATTGAGATACCTAGCTATAGGTTATGCTAATAATCTGAATAATTCTGTATATA  
CCTGGCTGTTTAAGTTAAGCAATCTGACTCACCTTGATCTCTCTGGTAATACTTTATATGGTCAAATTCCT  
GATGCTTTTTGGAATATGAAATCCTTAAACACTTTGATCTGTCTCGGAATGCGCTTGGAGGTGGCTTCC  
CTAGATGTCTTGGTAACAGTAGCAATTTGAAGTTGTTGCGACTGTCCTCCAACAATCTAGATGGGCAGCT  
ACCTGAGATAATGAATAACTTGTGCATGCGTGTACATTCTCTCGAGTACCTGAACCTAGAAGAGAATCAC  
ATTGGTGGTTCACTGACTGATGTTGTAGCTAAGTTTGCATCTCTGAGAGAGCTGAGGCTCGGGCGTAAC  
AAGTTGAATGAATCCATCCCGGGAGCTGTTGGAAAACCTACCAAGTCTTGTTCTTTTGGATTTATCTTGG  
ACAGAATCACGGGATCAGTCCCTGATCTTTTTCTGTTATCGTCGTTGAGGGAATTACATCTTTCTCATAAT

CAGTAACTGGTGTAACGGAGAGTATTGGACGTCTTTCCAACTTGAGAAGTTATACCTTGACTTCAATC  
AGCTTGAAGGCACAATATCTGAAGCTCATTTGTTCAAGCTCTCGAAATTACGTGAGCTGGACCTCTCTTA  
TAACACTCAACTACATATTCGAGTCAGTTCAGATTGGATCCCGCCTTTTCAGTTGGATTTCATTCGTTTTAC  
CCACTGCAAATTGGGTCTCAATTCCCAAAGTGGCTGAGGAATCAAACAACATTTCCGAGCTTGATTTT  
TCAGCTTCTGGAATTCGGGTGACGTTCTAGTTGGTTCTGGGAGCAGTTGCCTGGATTGACCTTCTTAA  
ACCTTTCTTACAATGATATAGGAGGAAATGTACCAGATCTCTCAAAGAAGATGAGTGATCTTCTTGCAT  
AGATTTGGCTACAAACAATTCATCGGTCCAGTACCACGTTTTCTACCAGTGTTATAACAGTTGATCTCT  
CCAACAACATGTTTTCCGGTACCATCTCCTTCATTTGTGACAATTTGATTACTTGGGATATCTTAACTCT  
CAGACAACAGATTGTCTGGAGAGCTTCTCACTGCTGGACGCTTAGAAGTATCGTGCATCTTAACTTAGG  
GACTAATAACTTCTTCGGGGAGATACCTGATTCGATAGGCTCATTGGAGACGATGGGAATGCTGCATCT  
TCAAACAATCATTTGACAGGAGAACTACCTCAGTCCCTGGCAAATTGCAAAAAGTTGAGGGTTATAGA  
CGTTCGGTCTAATAACTTGTCTGGTGAAATCCAGAATGGATTGGGAGTAACATATCTGATATCATTATT  
GTTATCTTAAAATCCAACAGTTTTAGTGGAATCATACCTTCAACCATATGCCAGCTAAAAGAACTTCAA  
TCTTGGACTTATCTGAAAATAAGATATCCGGGATCATACCAAATGTATCAACAACCTCACTGCAATGAC  
GGATGAAGAGAGCACAATGCACCAAATCAAGAGTTGGTATTTTCAGGTCGATGATCAAGGTGATGTCA  
AAATAAATGCCTCATACGATGAAACTGCAGTTTTGATGTGGAAGGGACGACAATTTGAATACAGCAGCA  
TACTTGGTATGGTAAAGAGCCTCGATCTTTCAAGCAACAACATGGTGGGAGAAATCCCGGTTGAAATTA  
CATCTCTTGTAGGTTTGCACGGTTTGAACCTGTCGAGAAACAACCTTAACCGGCAGCATCCCTCTGAGGAT  
TGGTGAATGAGGGCACTAAATTTCTTGACTTGAGCATAAATGATCTTACAGGGGAAATTCCTACTAGC  
GTTTCACAGTTAAGTCACCTGGGGTCTTGAACCTGTCTTACAACAACCTGTCTGGTGAATCCCTTAGG  
CGAACACTTACTGACTTTCAACAACAGATCTTACATTGAAATCATGGACTTTGCGGCTATCCACTAACA  
GAAGCTTGCTCTCTGGAGGAACCTCCTCGAGACTCAACGTTGAGTGATGAGGACGAGTTTATAACTCCA  
GAATTTTATATTAGTATGGGAATCAGCTTTATTTCTGCATTTTTGGGAGTCTCAGCTATGATGTTGAATAG  
AAGGTGGACTTACGGATACTAGGAAATCAATAATGTAACATCACACAGTTAAATGTAGGTTTACTTAAAT  
ACCA

>M6-PGSC0003DMG400018574 M6 LRR-RLP

CCAAGTGGAGGAATGAAGCAGATTGTTGAATTAGATATACATGATTGTAAGTCTCTTACCTTCTTTCTT  
TTAGCATACTGCCACTACCTTGAAGAGAATAGACATATCTGGTTGCCAGAAATTGAAATTGGATCCGCC  
AGTTGGTGAGATGAGTATGTTTCTGGAGTGTGAGTCTGGCAAATGTGATTGTATAGATGATATATC



ACCTGAGTCGCTCCCAAGAGCACGCAGATTGTATGTATCTGATTGCCACAACCTTACTAGGTTTTTGGATTC  
CTACTGCCACTGAAAGTCTCTGTATTTGGTATTGTGAGAATGTTGAAATACTCTCGGTGGCATGTGGGG  
GGACCCAGATGACGAAGTTGAATATTCAGGGCTGTAAGAAGCTGAAGTGGCTGCCAGAACGTATGCAG  
GAACTCCTTCCATCTCTTAAGGAACTGCATCTGATTAATTGTCCAGAAATAGAGTCCTTTCCTGAAGGAG  
GATTGCCCTTCAATTTACAACCTCTTATGATCAGCGAGTGCAAGAACTGGTGAACAGCCGAAAGGAGT  
GGCGTTTACAGAGACTCCCCTGTCTTAGAGAGTTAACGATCGAACATGATGGCAGTGATGAAGAGATTG  
TTGGTGGTGAGAATTGGGAGTTGCCCTCCTTATTCAAACACTCTATATAAAGAATCTGAAAACATTAAG  
CAGCCAACATCTCAAACACCTCACCTCTCTTCAATATCTAGACATTGCGGGTAATTTACCTCAAATTCAGT  
CAATGCTGGAACAAGGCCAGTTTTCGCATCTCACTTCGCTTCAATGTCTAGTAATCATGAATTTCCCTAAT  
CTCCAATCACTTTCCGAATCAGCACTGCCCTCCTCCCTCTCTCAGCTGACCATCAAGGATTGCCCTAATCTC  
CAATCACTTCTGAATCAGCACTGCCCTCCTCCCTCTCTCAGCTGGTGATCTCCTATTGCCCTAATCTCCAA  
TCACTTCTGAATCAGCACTGCCCTCCTCCCTCTCTCAGCTGACCATCTATAATTGCCCTAAGCTCCAATCT  
CTTCCAGTAAAAGGGATGCCCTCTACCCTCTCTAAACTAGTTATTGACAACTGCCCATTTGCTCAGACCACT  
ACTAGAATTTGATAAGGGGGAATACTGGCCAGATATTGCTCTAATTCCCGTCATATATATTGATGATAAA  
TACCAGT

>M6-PGSC0003DMG400018577 M6 LRR-RLP

TTTCCCAATTGGCTAGCTGATCCTTTGTTTCTTAAGCTGGTCAAATTGTCTTTAGCAACTGCAAGGACTG  
TTATTCTTTGCCAGCACTAGGACAACCTCCTTGTGGAAAATCCTTTCCATTAAAGGGATGCATGGAATAA  
CAGAGGTGACAGAAGAATTCTATGGCAGTTTGTCTCCGAAAAGCCTTTTAACTGTCTTGAGAAGCTTGA  
ATTTGTAGATATGCCAGAGTGGAAGCAATGGCACGTAAGGAAATGGAGAGTTCCTACACTTGAGAA  
ACTTTTGATTAATAAATTGCCCTGAAGTCAGTTTGGAGACACCCATCCAACCTTTCAAGTTTAAAAGGTTT  
GTTGTTATTGGTTGTCCTAAGGTTGGAGATGCTCAAGTGTAAATCCCAACTTGAGGGAATGAAGCAG  
ATTGTTGAATTAGGTATTAGTAACTGTAACCTCTGTTACCTCCTTTCTTTTAGCATACTTCCCACTACCTTG  
AAGAGAATAACCATATCTAGTTGCCAGAAATTGAAATTGGAGGCGCCAGTTGGGGAGATGAGTTATTGT  
AACATATTTCTGGAGTATTTGAGATTGGAAGAATGTGATTGTATAGAACATGATTTGCTCCAAGAGCAC  
GCTCTTTGTCTGTAGCCAATTGGCACAACCATACTAGGTTTTTGGATTCTACTGCCACTGAAACTTTCAAT  
ATTAGGAATTGTGAGAATGTTGAAATACTTTCCGGTGGCATGTGGGGGGACCCAGATGACGTATTTGTAT  
ATTAGTGACTGCAAGAAGCTGAAGTGGCTGCCAGAACGTATGCAGGAACTCCTTCCATCTCTTAAGGAT  
CTGGATCTGCGTAATTGTCCAGAAATAGAGTCCTTTCCTGAAGGAGGATTGCCCTTCAATCTACAATTCC

TTTCAATCTGGAAGTCAAGAACTGGTGAACGGACGAAAGGAGTGGCATTACAGAGACTCCCCTGTC  
TCAGAGAATTAAGCATCTACCATAATGGCAGTGACGAAGAGATTGTTGGTGGTGAGAATTGGGAGTTTC  
CTTCTCTATTCAAACACTTTATATAGAGAATGTGAAAACATTAAGCAGCCAACATCTCAAAGCCTCACC  
TCTCTTCAACATCTTTGTATTGAGGGTAATTTACCTCAAATTCAGTCAATGCTGGAACAAGGCCAGTTTTC  
GCACCTCACTTCGCTTCAAAGTCTACAAATCAGGAATTTCCCTAATCTCCAATCACTACCTGAATCAGCAC  
TGCCCTCCTCCCTCTCTCAGCTGGAGATCTCCATTGCCCTAATCTTCAATCCCTTCCGGTAAAAGGGATG  
CCATCTTCCCTCTCTAAACTTTCTATTTTAGAATGTCCGTTGCTCACACCACTACTAGAATTTGACAAGGG  
GGAATACTGGCCAAAAATTACTAATATCTCCACCATAAAGATCGATCAGGAATGCATGTGATGATTA  
>M6-PGSC0003DMG400018694 M6 LRR-RLP

TAAGGAGTTGCCAAATGACTTGTTTATCGAATTAAGATCTTGAGATTTTTGGATATTTCTCAGACAGAG  
ATTAAGGTTGCCAGATTCCATTTGTGTGTTGTATAACTTAGAGACACTTCTCCTTTCATCTTGTGGTTA  
TCTCAAGGAGCTACCACTGCAGATGGAGAAGTTGATAAACCTGCGTCATCTTGACATAAGCAACACTTG  
GTGCTGAAGATGCCGCTACATCTGAGCAAGTTGAAAAGCCTCCAAGTGCTAGTGGGAGCCAAGTTTCT  
TCTCGGTGGTTTGAGAATGGAAGATTTGGGTGAAGCACAGAAGTTGTATGGATCTGTATCAGTTGTAGA  
GTTGCAAATGTAGTTGATAGAAGGGAAGCTGTGAAGGCAAAGATGAAGGAGAAGAATCATGTTGAG  
AAGTTATTTGGAGTGGAGTGAAAGTAGTAGTGCCGACAATTCACAAACAGAAAGAGACATACTTGAT  
GAGCTACGCCACATAAAAACATAAAAGAAGTCGAAATCATCGGATATAGAGGGACAACATTTCCGAAT  
TGGCTAGCTGATCCTTTGTTTCTTAAGCTAGAACAGTTGTCTATTGCTAACTGCAAGAACTGTTTTTCCTT  
GCCAGCACTAGGACAGCTTCTTGTGTTGAAAATCCTTTGGATTAGAGGGATGCATGGAATAACAGGGGT  
GACGGAAGAATTCTATGGCAGTTTGTCTCTAAAAGCCTTTTAACTGTCTTGAGGAACTTATATTTGAA  
GATATGCCGGAGTGAAGCAATGGCACGTAAGGAGTGGAGAGTTCCCTATACTTGAGAAGCTTAA  
AATTATAAATTGCCCTGAACTCAGTTTGGAGACAGTACCCATCCAACCTTTCAAGTTTAAAAGATTTGAA  
GTAATTGGTTCTCGCACGGTTGGAGTTGTTTTGAGGGAATGAAGCAGATTGAGGAATTATATATTGGT  
GATTGTAACCTCTTGCCTTCTTCTTTTAGCATACTGCCACTACCTTGAAGACAATAAGGATATCTGG  
TTGCCAGAAATTGAAATTGGATCCGCCAGTTGGTGAGATGAGTATGTTTCTCGAGGAATTGGAAGTCA  
TAAATGTGATTGTATAGATGATATATCACCTGAGTTACTCCAAGAGCACGCACATTGAATGTATTTAAT  
TGCCACAACCTTACTAGGTTTTGATTCTACTGCCACTGAAAGTCTCTTTATTCTGAATTGTGAGAATGT  
TGAAATACTTTCGGTGGCATGTGGGGGGACCCAGATGACGTATTTAAATATTCATGGCTGTGAGAAGCT  
GAAGTGGCTGCCAGAACGTATGCAGGAACTCCTCCATCTCTTAAGGATCTGTATCTGATTAATTGTCCA

GAAATAGAGTCCTTTCCTGAAGGAGGATTGCCCTTCAATTTACAACCTCCTTTGGATCAGTAATTGCAAGA  
AACTGGTGAATGGCCGAAAGGAGTGGCGTTTACAGAGACTCCCCTGTCTCACACAGTTAATCATCTCTCA  
TGATGGCAGTGACGAAGAGATTGTTGGTGGTGAGAATTGGGAGTTGCCTTCTCTATAACAAGACTTGA  
GGTATACAATCTGAAAACATTAAGCAGCCAACATCTCAAAGCCTCACCTCTCTTCAATATCTATCTATTG  
TGGAACAAGGCCAGTTTTCGCACCTCACTTCTCTTCAAAGTCTAGAAATCATGAATTTCCCTAATCTCCAA  
TCACTTCTGAATCAGCACTGCCCTCCTCCCTCTCTCAGCTGACCATCTATTTTTGCCCTAATCTCCAATCA  
CTTTCTGAATCATCACTGCCCTCCTCCCTCTCTCAGCTGACCATCTATTATTGCCCTAAGCTCCAATCACTTT  
CTGAATCAGCACTGCCCTCCTCCCTCTCTCAGCTAACCATCTATAATTGCCCTAAGCTCCAATCTCTCCAG  
TAAAAGGGATGCCCTCTTCCCTCTCTAAACTATCTATGTCCAAATGCCATTGCTCACACCACTACTAGAA  
TTTGACAAGGGGGAATACTGGCCAAATATTGCTCAATTTCCACCATAAAGATCGATGATGAATGCATGT  
GATGATTAACGAATGGCTCTTCAACTGATGTAAGCTATTCTTTCCCTTGAAGCTTTTTATTCCGTTT  
ACTTCACTTTGTTTTTTGTTAATTCTTTTCATTTTT

>M6-PGSC0003DMG400018722 M6 LRR-RLP

AACCAATACTTTCTTGAGTTGAGATCAAGATCATTGTTGAAAGGGTCCCCGAGTCTGAATGGAAACCG  
GAGGGATTCTTAATGCATGACCTTGTCATGATTTGGCCCAAATTGCATCTTCAAATCTTTGTATAAGGTT  
GGAAGAGAACAAAGCATCGCATATGTTGGAACAATGTCGGCACTTATCTTATTCAATGGGAGAACGTGA  
CTTTGAGAAATTGAAATCACTCTTTAAATCAGAGCAGCTGAGAACATTACTTGCAATCAATATCCTTAAG  
CACTATTATTACAACATTAAGCTAAGCAAGAGGGTGCTGCATAACATACTGCCAAGACTAAGATCCTTAA  
GGGCATTATCATTGTCAGTTATAGGATTAAGGAGTTGCCAAATGACTTGTTTATCAAATTAAGCTCCT  
CAGATTTTTGGACCTTCTTGGACAGAGATTA AAAAGTTGCCTGATTCTGTTTGTGGATTGTATAACTTG  
GAGACACTTCTCCTGTCATCTTGTGATTATCTTGAGGAACTACCGCTGCAGATGGAGAAGTTGATTAAC  
TGCATCTTGGACATAAGCAACACTTGTGCTTGAAGATGCCACTACATCTGTGCAAGTTGAAAAGCCT  
CCAAGTGCTAATGGGAGCCAAGTTTCTTCTAGGTGGTTGGAGAATGGAAGATTTGGGTGAAGCACAGA  
ATTTGTATGGATCTGTATCAGTTGTAGAGTTGCAAATGTGGTTGATAGAAGGGAAGCTGTGAAGGCAA  
AGATGATGGAGAAGATTCATGTTGACAAGCTATCTATGGAGTGGAGTGAAAGTAGTAGTGCAGACAAT  
TCACAAACTGAAAGAGACATACTTGATGAGCTACGCCACATAAAAACATAAAAACAACTCCAAATCACC  
GGATATAGAGGGACAAAATTTCCAATTGGCTAGCTGATCCTTTGTTTCTTAAGCTGGTGAAATTGTCTC  
TTAGCAACTGCAAGGACTGTTATTCTTTGCCAGCACTAGGACAACCTCCCTTGTGTTGAAAATCCTTTCCATT  
AAAGGGATGCATGGAATAACAGAGGTGACAGAAGAATTCTATGGCAGTTTGTCTCCGAAAAGCCTTTT

AACTGTCTTGAGAAGCTTGAATTTGTAGATATGCCAGAGTGGAAGCAATGGCACGTACTAGGAAATGG  
AGAGTTCCTACACTTGAGAACTTTTGATTA AAAAATTGCCCTGAAGTCAGTTTGGAGACACCCATCCAA  
CTTCAAGTTTAAAAGGTTTGTGTTATTGGTTGTCCTAAGGTTGGAGATGCTCAAGTGTTTAAATCCCA  
ACTTGAGGGAATGAAGCAGATTGTTGAATTAGGTATTAGTAACTGTA ACTCTGTTACCTCCTTTCCTTTTA  
GCATACTCCCCTACCTTGAAGAGAATAACCATATCTAGTTGCCAGAAATTGAAATTGGAGGCGCCAGT  
TGGGGAGATGAGTTATTGTAACATATTTCTGGAGTATTTGAGATTGGAAGAATGTGATTGTATAGAACA  
TGATTTGCTCCAAGAGCACGCTCTTGTCTGTAGCCAATTGGCACAACCATACTAGGTTTTTGATTCTTA  
CTGCCACTGAACTTTCAATATTAGGAATTGTGAGAATGTTGAAATACTTTCCGGTGGCATGTGGGGGGA  
CCCAGATGACGTATTTGTATATTAGTGACTGCAAGAAGCTGAAGTGGCTGCCAGAACGTATGCAGGAAC  
TCCTTCCATCTCTTAAGGATCTGGATCTGCGTAATTGTCCAGAAATAGAGTCCTTTCCTGAAGGAGGATT  
GCCCTTCAATCTACAATTCCTTCAATCTGGA ACTGCAAGAACTGGTGAACGGACGAAAGGAGTGGCA  
TTTACAGAGACTCCCCTGTCTCAGAGAATTAAGCATCTACCATAATGGCAGTGACGAAGAGATTGTTGGT  
GGTGAGAATTGGGAGTTTCTTCTCTATTCAAACACTTTATATAGAGAATGTGAAAACATTAAGCAGCC  
AACATCTCAAAGCCTCACCTCTCTTCAACATCTTTGTATTGAGGGTAATTTACCTCAAATTCAGTCAATG  
CTGGAACAAGGCCAGTTTTTCGCACCTCACTTCGCTTCAAAGTCTACAAATCAGGAATTTCCCTAATCTCCA  
ATCACTACCTGAATCAGCACTGCCCTCCTCCTCTCTCAGCTGGAGATCTCCATTGCCCTAATCTTCAATC  
CCTTCCGGTAAAAGGGATGCCATCTTCCCTCTCTAACTTTCTATTTTAGAATGTCCGTTGCTCACACCACT  
ACTAGAATTTGACAAGGGGGAATACTGGCCAAAATTACTAATATCTCCACCATAAAGATCGATCAGGA  
ATGCATGTGATGATTA AACGAATGGCTCTCCA ACTGATGTAAGTTATTCTTTTCCCTCGGAAGCTTTTTTA  
TTCCGTTTACTTCACTTTGCTTTTTTTGTTGATTCTTTTCATATTT

>M6-PGSC0003DMG400018806 M6 LRR-RLP

CATAGACAGACATATATAAGGTGAAAAGAAGTAGCTCCATTGTCTGTAGTATTATTTTTCCACAAATCT  
CCATTTGCCGATCTTTCAAAGCTCAATCCCAGAAAAGCGTCACCACTGCCAGCCTTCGATCCTTCGAAA  
GATCCGATCAGATCTCTTTGTCTTTCTCTCACTGCACTTCTCATTCTGTTTTCTTTCTCTACACACATAACC  
TTTTTCTGCAACTCCATTCTCCGGTTTGTGCAAGATTCTGGAACAAGAATTTGTTAGATTCTGTGAACTAT  
GTAATTTGTGTGCTTTCTTGTGAAAAGGAGTCGTTTTGGTGTAGTTTGTGTAAGTTAGGGTTTTTTTT  
TGGGGAAAGTTTTAGATCGTGAGCTAGGGTTTCTGAAGATCAGAAATTGATAAAATTTGGGGTTTATTC  
TTATTTTTCTTGGTGTGGTGTGAGTGAGTGTATGAGGATTTGGTGTGTTTATGTTTTGGAGAAGAAGA  
GGATAGTAAGAAGGGCTACAAGAGTATGAGGGACCCGATTTTGGGAATAACGGCGACGAATCTCCAG

ATGAAAATTCGGCATTGACTGGAGGAATGTTTTGAAGGTGTCAATGTTGCAGCAGTGGTGAGTCCAC  
AAGCGGGCGCTGCAGGTGATCTTGGTGTCCCAAGAATGAGGAGATTGATTTTGATAGCAACTGGTTAT  
CCAGTGAAGTGGAGGTGAAGAATGAAAATTATAGTGGTGAAGAAATGTTGGATGTTAATTTGAATTTG  
GGTTTGAGTGGAGAGGCTTCATCCTCAACAGTGCTGAAAGAGGATTCTGATCGTGATACCTGTAGTAAA  
AGGCCCAAAGTAACTCCTTTTCGCTGTAAGACCTGCTACTGCACCTTCATTTACAATATTTTTTTTCCAAT  
TAGTCAAATTCTATTGAATATTAGAGTGAAGTTGGCCATAGTAAAGAACTAATACAGAGTTCATTTAAGC  
AACCCAAGCCTAATTACAAGGATCAGTTGTTGTTATAGGGGCGGCTCACTAATTAATTAAGGACTCTTGA  
TTATTTCTCGTGTGTACAGTTTTACATGTGGTCAAGAGTGTTACACTACTCACTGAGTTTTGGAGAAAGTA  
CATTCTCACATAATTCTTTTAGAGAAAAGAACATAGTATATTAACATGGAGTAGAATTATTTCTAAAGCTA  
GTTATATTTGGAATTTCAAAGCTTGACCTAATATATAATGTTACTCTTTAATTTGATATAATCAAATTGTC  
TTTTGAGTTTTGAAGTAAGCCCTAAATGTAGGCCAACAACTCAAAAATGAAGACTGATTGATTAATATTC  
TTGCAGGGATTGGGACAACCACTTGTTGCAGGAAACCAGTTACCTATGTCCAATGAACGAGGGCGGTG  
GAGATATGAGTTTATCAAACCTACTTGGTGCAACAGATGCTGAGGGGAAAGATTCTAAAATGGAGGATT  
TAGATGTGCGGATGGATCTTACTGATGACTTGTTGCATATGGTATTTACTAGTTGCCACATCCGCTCCTTC  
TGAGTTGCTTAATCAATAAGTGTTTATACTAAGTTTCTGATTAAGGGAATATATGCCTCATCTGTTGCCAG  
GTGTTCTCCTTTTTGGACCATATTGATCTTTGTCGAGCTGCAAGTGTTTGTAGCCAGTGGAGAGCAGCTA  
GCTCTCACGAAGACTTTTTGGCGGTATCTGAATTTTGAGAACAAACAGATATCCTCAAACCAATGTGAGTA  
TCTTTTCCTCATATCCGTTCTTCCACACTACTATGATCACTTCACATAAAAATTCATGTTTCAATTAATTGCA  
ACTTTTTGTTTCATGTATGATGTAGTTGAGGACATGTGTCGGCGATACCCAAATGCAACAACAATCAACTT  
ATATGGAACCTCCTAATATTCACCCACTAGCAATGAAAGCTGTTTCTTCTTTAAGGTAATAGTTTTTTTTATG  
TTGTTGCTCACTACTCTAGGAATGAATCACTATAAGTGACTAATTTGATACATTTTCATTGTTGCCAGGAATC  
TTGAGACTCTGTCATTGGGCAGAGGTCAATTGGGGGAAACATTTTTTCAAGCCTTAACAGATTGCCATGT  
GTTGAGGAGTTTGACCATTAATGATGCCACTCTTGAAATGGCATTCAAGAGATACCAATTTCTCATGAT  
AGCTTGCGTCTTCTGCAGCTAGTGAAGTGTCGTGTGCTTCGAGTTTCTATCAGGTTGTATAATATTAGTC  
ACAATGTTAATTTGTTAAAGTAGTTAGCGTCCAATTGTGCTTAATTGTTTGTATTCTTGCAGATGTCCAC  
AACTGAAACGTTGCTACTTAAGCGCAGTAGCATGCCACATGCGGTGCTTAATTGCCCTCTTTTACATGA  
CCTTGATATTGCTTCATGTCACAACTTTCCGACGCTGCTATTGTTGCGGCTGCCACAGCATGCCCTCTTTT  
AGAGTCTTTGGATATGTCAAATTGTTTCATGTGTGTCAGTGATGAAACACTGCGTGATATAGCTCAAACCTGT  
GGAAATCTTCGAGTTTTGGATGCTTCATACTGCCCAAACATTTCTTTGAGGTATGTTCAATTAATAATTACC

TAGTACCTGAAATTGACATAGTTGGTTTATATACTAACACTTGTTACTTGTTGAAGTCTGTGAGGCTGGTT  
ATGTTGACTGTTCTCAAGCTTCATAGTTGTGAGGGCATAACATCAGCTTCCATGGCTGCCATAGCCCATA  
GCTATATGTTAGAGGTTTGAGTCTTTCCTCACCTTTTCATACTGGTAGCCATGCTGTAATCAGGAGTCCT  
TAAATCTCATATTGAACAGTGAATTTCACTTTTTTTCAGGTTCTGGAGCTTGATAATTGCAGTTTATTGAC  
ATCAGTGTCTTGGATCTTCTCGCTTCAGAGCATCAGACTAGTACATTGTCGCAAGTATGATACAGGC  
TTTATAGTTTCCATATCCTGTCTCAAGGGAACCTCTTCCATCCCTTGATTGCCGTCCTCTTTTGTGCAGT  
AACCTACTGTTTATATTGAAACAGGTTTATTGACCTTAACTTGCATTGTGGAATGTTATCGTCAATTACTG  
TTTCTAATTGCCATTGCTTCATCGAATCAATATAACTTCAAGTGCCTCAAAGTAAGTTTATTCTAGAT  
GTTATATATTGTCACCTTATTTTATTGACTAGAAATTATTCTATTCATTGGATAATAGTTCTCTCCTTTATTAT  
TCCACAGAAATTAGTTTTGCAGAAGCAGGAAAGCTTGACAACAATTGCATTACAGTGTCCGAATTTGCTA  
GAAGTAGACCTTACTGAGTGTGAATCGCTACCAATTCTATTTGTGAAGTTTTCAGTGATGGTGGTGGCT  
GTCCTGTGCTTAAATCCTTAGTTCTAGATAACTGTGAGGTTGGCAATTTTAGTTCCTCGTTGTTAACTTGT  
GCATTCTTGTTGTTAACTAGAGGATGTGTTGCTGAACATGATTTTTCTAAATCTAATTATGATATATATG  
ATCTCTTCTTAGTTTTGCTTGTCAACGGAAGGTGGTTCCTTAAATCTTGGCAGTTGATCCGTGCAGTGT  
ACATTTTTCATTAAGAGCTTGTTTTGTCCTCACGTATGTCAATGTGGTTATGGACCTATGATCATAGTGC  
CATTTTTGCTTTTCTTGTAACAGATACTTGTGATTCTTTTTATGCATGTTTCCAAGTAAATAAATCTAGTA  
CTGAATTCTGACAATCAATGATCAGGTATTTAATGAGTAATCATGAAAGATGATGAAAGGAAAAAGTA  
TGATCCAAGTGTACTGACTGTTGTGTCATCTGGTTGTGCTTCTTGTGTTGCCGTAAGCCTGGGAAGCTGT  
GCTACTGGGTGCTAAGGGCTTGTGTTGATACGAGGGATAAGAGATTACTGATCCAGGACTAGTTTTA  
GGATGAGTTTATCCCATGTTTGGTTGGGATAAAATCGTGGGATAACTTTCCCTGGATTGTAGTGTGTCATT  
CTTATCCCACATTGAGGGTGGGATAACAATCCCTGGATAACTTGTGCGAGAATCTCCTTCAATAACTCA  
GACAAGTTAAAAAATATTAATAATTGTTCAAGAGGTGAAGTGGGAAAGATGAAAAGTTCTAATTCCTTT  
GTTTTGGCATTAAAGGATAGTGATTATGTATTCTAGATTTACCAGTAGTATTTATTTTATACTCACATTTCC  
AAATTAAGTTGGAAGTATTTTTATCTTGTCAAAAATAACTATTAGGGAAAACGTCTTTCTTGGTATCATA  
AGCTCTAAGTTTCTTCAACATTTTATTAGATACATGGGAGTTCTTAAGGGGACGGTGTAAAGGCTTTAA  
GCTGAAGTAGAACATGAGAACTATTGCCAGATGGGAGAAGAAAATAGTTCACCTTTTTTTTCTGATT  
AATGCTAGAGCTGAAGTCGCGCCATTTAAAAAAAATGTCAAATCGGAATTTTCTTTTGAAGCTTGACG  
AAAATATGTACTCCTCTCCAATCAAGATTCCCTTTTATTGATTTGGTGATCAAGAAAAGCAAGGCTGAA  
TTAGGTTTGGGTTTGACATTTTTGAGAGATGTACAAAATAATGAACTAAATTTGTCAATATTGTGATAGA

CTATTGAAGAAATTCACAACAAATCAAGTATTATATTTTCGGTTACCCATTCTCCCTCCCCGTGCCCCCTCC  
CTCCTCCTGGGAAAAGGGGGGAGGGACCAGGTGAGAGAAAGAGTAATATATTCAAGTTGCACCCTCCC  
GGGGAAAAGGGGGCTGAGAGAGGGAAAGGTTTCCACTGTTTTAGAATGGGTCTGATTAGCATTGCC  
TTCTGTGTTCTCTTTTCTGCCAGATCTGTTTTAGGCTAACACCTATTCAGAAAAGTTTTTTTTTTTTAATAT  
TGGAAGTGAATAATGATATATTTCTGCCTATTCAACTTGAAAAATCCGGCTGTATCTATGTAACATTTGTA  
TGTGTTGTTATGGTCTAAATCTAATTACGGTCTTTTCTTTTTTTCAGAGCTTGACACTTGTGGCTTTCTGCA  
GCACTTCTTTGGTTTCTCTTTCACTTGGTGGTTGCCGTGCTTTAATTTCTTTCGCACTTAGGTGCCCATATC  
TTGAACAAGTCTCTTTAGATGGTTGTGATCATCTTGAAGTAGCATCATTTTCCCAGTAAGTGATCATCG  
GCTCCTTCCTCTTTTCTTACATCATCTCTGGGTTTGAGACTGGAGTTGTATGTTACCTGCTGATTTTATG  
ATTGTTAATTTGTTACACATGCATTTTTTTCTTTATTTATACCCAAATGGTTGATAAATGTGTTCTCTTATTC  
CAGGTTGGTCTTAGGTCACTTAATCTTGGTATATGCCCAAATGAATATGCTCCATATTGAAGCTCCAC  
AAATTGCTTCACTTGAGCTGAAGGGCTGTGGTGTGCTATCTGAAGCATCTATTAATTGCCCCCTGTTAAC  
CTCTTTTGATGCTTCACTTCTGCAGTTGCTTACTTTCTCTCGCTTGTACACGTGCATATTTGTTTTAGTTCT  
GTCACATCTCATTAAATTTCTTTCCATATATGCAGCCAACTCAAGGATGATTGTTTATCTGCCACGACTTCGT  
CGTGCCCCCTCATCGAGTCATTAGTATTAATGTCATGTCCATCTGTTGGCTGTGCTGGACTCCTCTCTTTG  
CAGTCCCTCCCAAATTTGACCTACCTTGATCTATCCTATACGTTTTTGGTTACCTTGCAACCTGTTTATGAA  
TCATGCTTGCAGTTAAAGGTAACCTTCTATCGCCTAAGCATATTATCACTTTCTCCATTACAGTGGGAAGCT  
AGATGAACTTGATTTAACATGCTCTATTTTGTGGAAAAAGTATGCCTATTTATCCAGTCTGGACTTGCAC  
CTTCTAGATATATGGGCCACTTTCTATCTTTTTTTTTATGGGTATCAAAGGGATGGGTTGGCTTAAGTT  
TGTGCTGGTCAAATACCTAACTACAAAATTTACTCTTGTTAAGATGGGATGAACACAGGGTCATAAGCC  
AATTACTTTAATCTCTCCTTTTCTTTTTCTGTTCTCCTTTTTTCCCCTTGACAGTAAAAGCTAAAACACCAG  
GATGCATTTAACAATTTGTGAATCAGTTCTGACTGATTGAAAGTTTACTTCAGTAGAACTGTGATTCTATT  
TTGACTATTACAAATTTAATAATCATTGTTTGTGGCCATATTTTTGGGGAAGTAAAGTGCTTTTTTTTTTC  
CTTCAGTTTTTTGGCAGTTAAGGTGTTTGACCATTCTTCTTGAAAAGAAATGTGATCTTTAGTACCATAA  
GCTGTTTCTCTGTTGTTGTGGCGAAGAAGTCAAATTTGAAGCTTTTCATTAAGCAGAACCAAAGTTAA  
TTTTCAATACAAAATACCATTATAATTTTCTTACCAAGTTATACCACAGTTCTGACAAGTGACAACCTGTAT  
TAATTTAAAGAGGGGAAGCCCGGTGCATTAAGCTTGCCTATGCGCTGGGTCCGGGGAAGGGCCGGATC  
ACTAGGGTCTATTATACGTAGCCTTACCAGCATTTCTGCAAGAGGTTGTTTCCCATTACATGGCAACA  
ACGTAATCGGTTATGCCAAGGCTCCCCTTCGACAACCTATATTGATTTATTATTGAAAAAGCATTTCTGTTT

TCAAAGTGAATCATCAGCTCTGTACAAAGAATAAGAAGTAAATTAAGCCAATGCATTAGATCAAGTGTA  
AGTGATAACACAGATTTAAAGTAACATCAGTAGAATAGAAAGCTGACAATCATGGATACCAGAAAGAG  
CTAGGAAACAGCTAAAAGCAAGCTTAGGCTTTAGCTTTTACCTGCTCTGGAGGATCTGGAGCAACAGAA  
ACTGTAAAGAGCAATCAGAAACTTGTAAGAGGTTCCATTTTGCATTGAAAAGAACTCTAGTCGAGGG  
CAAGGGAAAGAGAGTCAACAAAGTATAGAATAAGATTGTAGATTTGTTGGACTTCTAAAATCTACAATT  
ATATTAGGTGTTGATGGAGTAGGATATTCTAATGCCATTCCAGGACTGATGATGTTGTCTCTGTTCTCAA  
ATAGTTCTGTGCCACTTGTTGGGTTGTTTATAAATGCACTTGTTAAATATTACGAACTGTAGACTAGA  
ATTGCCACCTTAACTCTTTCATTATTGGCCCTCCTTTTTAGACCCTTGAAGATGGCCGGCGTGGAATTGTG  
GAGATCCAGTTACTTTAGGCATTCTGTCATTCTTTTTATTTTGGAGCGTAACATCTGAATATTTCTACTTT  
CCAACAGATGCTATAATTTTTGTTTCATATCCAATGTTTGCCATTGTCTTGCCCCAATTTGTTTCAGTGCAA  
GGGCATGAGTTCCTTGTATGCAGAATTTCTAGTGCTATATCTGAAATTTTCTGATGAGACTCTAGTTTAGT  
AACACAAGTGTGTTTCTTTCTCGCTGCACTAGGCACATCCTTATTGCGTTTGGGATAAACTTTTTGGAT  
CTGCATGATACATTGATGGGCTTTTTTGGCTTACTGCCCCCACCACCCTCCTCCTTTCTTTTTTTTA  
ACCCCTCTAAGCTTATATATATATGTTATGTTGTAGGTCCTAAAGTTGCAAGCATGCAAGTATCTCACT  
GATACATCTTTGGAACCCCTCTATAAAGAAAATGCTCTCCAGCCCTTGTGAGTTGGATTTGTGCGTATG  
GGACCTTATGCCAATCAGCCATTGAGGAATTGCTTGCTTACTGCACACATTTGAGTCATGTCAGCTTGAA  
TGGATGTATTAATATGCATGATTTAAATTGGGGATTTACTGGAGATCAACTGTCGCATATACCCAGTGTT  
AGTATACCTCATGGATCTTCCCTGGGAGAACAGCAGTTGCCAAATGAACAACCAAAGCGTTTGCTAGAG  
AACCTCAACTGTGTAGGCTGCCCAAATATAAAAAAGGTGTTTATTCCTATGGCACAAGGTTTCTTTTGTG  
ATCATTAAACCTTTCCCTGTCTGCGAATTTGAAGGAGGTTGATATAGCTTGTTACAACCTTGTCGTTCTCA  
ATTTGAGGTATTTTCTTTAGCAATATGATTTTCGTAGGTTAATGTTGTATCAATGGCTTTATTTTCATGATCA  
TAGTTGTTACTTAATTATATTCTCTTGTTTCAGCAATTGCTGTTTCATTGGAATCATTGCAACTGGAATGTCC  
AAGATTAAGTAGCCTCTTTCTTCAGGTATTTTTGTATCTTCAATTTGGCATTTTCTTTGCTGGCTTTTTAATT  
ATTGTAGTGGCAGCTTTGCTGCAAAGTGTCTTTCTAGTTGGTCTTTATCATTTCGCTTGTGCTTTTTTCC  
CCCTGTTGAGGTAGTATAGTTTTTTACCTTAGCACGAAGGATATGCAAAGTGTACAACCATTACAAATGT  
CAGTCCCCTTCTACCTTGTAGGGACTTTATGAGTTCTATCAATGATTCAACTTCATTTACAATTTCTTTT  
TACATCTAAGACTCATCCATTTAGGATAGGATGATCCTTGTTTGTCTGTTTTACAAAACATTCTCGTCTGC  
CTCTGGTTCAGTAGGTTGGTATGGAGAATATGCATACCCTTAAGCTTGATATTCTGTAGAGAGAACTTGA  
GCTCCTAATCAAGTCGCTAATGTGATTGTATTGTAAGATCTAATAGCTACCTGCATATTGTCTTAGGAGTA



CTCAAATTAACACAATGGTCTACTAAAATAACAAGTAATCCTAATACTCTTCATGGTCTTCCTAGGCATTC  
ATGTGGATAGATAATAAACATTTTTCAAATTTGGAAGTGTTAGAAGTCCTTAGGGATGGCATGTAGTTTG  
GGGGCATCGTGCCTATATTTTCGTGGAGCATGATGTACTTGGGCTAAAATTACTGAAATGAGAATTTGAA  
CTCTTAACTGGTGCTTATTTGCTTGAATATTGGAAGTCAAGTGAGAACTGAAGTCTTAGTTTTTTTTTTT  
TTTTAGAAGAAGTTTTTGCTTCTCTGAGCTGTTTTCCGTTGTTGCTTCTATCATTACACGCCTCAGGCTT  
ACCTCAAAGACATGCCACTTTCTAGTGTAGAGCTCGTGAAATTGATTGCCTTTCTTTCTATCATGTCTTGT  
AAAAAATACTTTGATGAACTCCCTTGAAAAATCGTTGGCACACCCAGAAGGTGCTTGTGCAATTGAAAT  
TCTTGTGACACAATTGTGATGTGGAGTTATTCTGTACTTGTCTTTGTTGTCCTACAGTCTGCAACATT  
GATGAGGAAGCTGTTGAAGCTGCCGTATCACGATGTACGATGCTTGAGACGCTTGACGTTTCGTTTTGT  
CCCAAGGTCAGGAGTACTTTTGTGTTAAGAATATGCCCTGTATTGATTTTTATGTATCATTATTGATA  
CAAGAGCTCTTTTGTGAATTTGCTGATAATCCTTTTTTCCACTTAACAGATTTGTCCACTGAACATGACGA  
GGTTGCGGGTTGCATGTCCCAGTTTGAACGCATCTTCAGCAGCCTAGTCCCATCGTGAGGCCAAAATGA  
AATATTTGATATGTTTGTGTAGGCTGGCTAGGGACATAATATTTGACTACAGAGGTTTCATATTTTATGTAT  
AGTTAGCTATTTATGTTGCTGTGATTGGTGAACGTACAGCGAGCTTCATACATGTAACACCTTAAATAT  
TTTGGTGTGGCTTTACATTTTATGATTTGGTTAGCGCACTTAATGCAACTTTATTTAGATCTCATGGAT  
GAAGAAAATAAACTAGAGCCTTGTAAGGGAAATATTAGTTAATAGTGGCCTGCTTGCCCTTTTCAGTTA  
ATGGAAAAAACGCAGGTTGTCAGGCTCGAGTGTGAATTTGGTTGCCCTAAAATAAGGTTACAAAA  
AATAGCCCAAAAATAGAGTAGTCAGTCGGCTTATGTCTTTGGGAT

>M6-PGSC0003DMG400018861 M6 LRR-RLP

ATGAGCATTCTCTCGAAAACATGGCTACAAGCGTGGTTGACTCTTCCCAACTTGAATTCTTTGTTAATTG  
TTGGCGAGGCTGGGAAGCGCATATAAATATAGTGGACACAACCATGGAGAGATATGGGAAGGGGAAA  
ATTCCTATACAAAAGTTTGAATTATCAGAGATTTTTGCTGATTCTCCCAACTCTCCCTCTAATTGATAAG  
TGGCTTCTCATTGCACTTCAGAATGGTGTAAAACAATTGTACTTCACTTTACAGCATAACCCGGCGCCTAT  
TTTAAACAATCTTGACAGCAAATCTTTAAGAGAATTGGTTCTGTACAATTGACTCTTATGCCTGTTTCATT  
ATCTAGTGGGGTTGTGAGTTGCAATTCTCTGAGAAAGATTTCTCTATCTTATGTAACATTAGATGAAAAC  
ATGCTTCAGACTCTACTTAATAGCTGTCCCTTATTGTCTCTTTCATACTTGAGTATTGTTTGGGGTTGACT  
ATGAAGCTTATAAAGATCAAGTCGGATTCCCTGAAGGTCTTGAAGATTCATCAATATTGCGGGATATGG  
GAGATTGATGCTCCAGATTTGGTATCACTTACTATACAGGGAATGAAATTCCTGAACTCAACATTGTAA  
GAGAGTCTAGCCAATTGGAGAACTCAAAAATTATTCTTCATTGCATCTCCAGATTAATACGTCATGGTT

TTGTAAGTTGAGGAAGTTTCTATCAAATTCATCCTCTTGGTCTGAAGTTAACCTTTGTTTATTCAAATGCG  
ATGAGATCAACATGACAGATTTGCAAATGGA

>M6-PGSC0003DMG400018865 M6 LRR-RLP

AGCTAAATATGGGCTATGCAGTTGTGCTCTCTTGTCTTTCTCTGTCATGAAGTATTTACTGTTTCTTCAT  
CCATACTACCTCATCTCTCTCAAAAACATCAAAACATTTCCCTTCTAAAATTCAAGCAGTCGCTTACTATAA  
ATACCTCAGCCTCTTATAGTTGTGAGAATCCTTATCCAAAACGAGTTCATGAAACATGAGCAGAGATTG  
CTGCTCATGGGATGGAGTCGTATGCAATAACATGACTGGAAATGTCATTGAGCTTAACCTCAGTTGCAG  
CGGGATTGTAGGAAAGATTGATTCCAATAGCAGCCTCTCCAACCTCTCTCATCTCCAAAGGCTTGATCTCT  
CTTATAATAACTTCTCTAAATCTCACATCTCACCTGAATTCGGTAGATTCTCAAACCTTAACAAATTTTGATC  
TTTCATAGGCAGATTTCTCAGGTCAAATTCCTTCTGAAATCTCTCATCTTTCCAAGTTACTCTCTCAGTC  
TCTACAATTCTATTGGTCTACGACTCGTAGCCCATGATTTTAAATTGCTCCTTCAAATTTGACTCAATTA  
GAGAGCTTGATCTTAGTAACATAACATCTCTTCCACCATTCTCTGAATTTTTCTTCTCATTGACAACCTC  
TGAGACTGATAGATACAGGATTGTATGGGATAATACCTGAGAGTATATTTACCTACCCAACCTGGAAA  
CACTGTACTTAGGTTTCAGTGATCTCCGTGGTTATTTTCAAAGACCAAATGGAACAGCAGTGCATCTCT  
AGTAGAGTTAGATCTCCTTGGAGTGAATTTTTCTGATAGTTTTCTGAGTCTAATGGCTATCTAACTTCGG  
TGCGTTCTTTGTCTCTTCAAAGTTGCAACCTTAGAGGGCCTATTCTGAATCTATTTCTAATCTCAATCATA  
TAGAATATTTGCACAATCAAATAACTCCCTGAATGGAACAATACCATCAGGGGTGTTCTCCCTTCCATC  
ACTAAGATATTTACTCTTGGGTAAGAACCACTTTTCTGGTCATCTTGACGATCTCAAGTCCAATTCATAA  
TCTGGATTAATTTAGGTGACAACCAATTGCAAGGCTATCTTCCAAGTCAATTCAAAACCTTGTGAACCTC  
ACAAGTCTTTATCTTTCCTTCAATAATTTTAGTGGTCGTGTGGATGTCAGCCTCTTTTCAAACCTGAAAAG  
GCTTTCGGATCTTACTCTTTCAAATAATAAGGTCTCATTGACCAATGAGAACAGAGTTACTTTGCCTGAAT  
CTCTTCAAACGTTATAATTAACCGCATGTGAAGTGAAAGAATTGGAGTTTCTAAGATCTGCAAAGCAGCT  
CGAGGTGTTGGATCTTTCAAATAATAAGATTCAAGGAAGAATTCCAGATTGGGCATGGTCTAACTGGAT  
TATTTCAATTGAAGAGTCTAATATATCCCACAATATGCTGACGAGTGTGGATTCAATTCCTCTCAGACTG  
TATACTATTGATTTACGGTCCAATTTGCTTCAAGGTTCACTACCTATGCCACCAAATTCACAAGATAC  
TTCTTCATCTCCCAAATAATCTCACTAAAGAAATTCCTTCATCTATTTGCAATTTGACATCACTGGTAATG  
CTAGATTTGGCAAGAAACAACCTTGACGGGAGAAATTCGCAATGTTTGGGTAATATTAGTGGTCTCAAG  
GTTCTTGATATGCAGCACAACAGGCTTATTGGTACTCTCCAACAATTTAAGCATTAAATGGAAGTTCAT  
GAAAAGCCTCAACTTGCATAGCAATAAATTAGAGGGGAGAATTCCTCGATCATTGGCCAATTGCAAAGA

GTTGCAGCTTCTTGATTTAGGTGATAATCATCTCACTGACACATTCCCGATGTGGTTGGGAACTCTTCCAA  
AGCTAAAAGTTTTAAGCTTGAGATCAAATACATTGCATGGGACCATTCAACCTCCAAGGATTGAAACTAT  
TTTTCCCGAGCTTCAAATCTTGATCTCTTACAATGCCTTCTCGGGAACTTACCTTCGAATCTATTTCA  
ACATCTAAAAGCTATGAGGACAAATGATCCATCAACGGAAGCACCAAGATATCCTGGAAGTACATATTA  
CGAAGATTGATTACAGTTACAACCAAGGGATTTGTGCGTGAAATTGTGAGAATCTTGTATCCTAGAAG  
TACATATTACAAAGATTGATTACAGTTACAACCAAGGGATTTGTACGTGAAATTGTGAGAATCTTGTAT  
CTGTACACTGTTATCGATTTTTCAAGTAATAAATTTGAAGGGCAAATTCCAAGTATCATGGGGGATCTCA  
TTGCAGTTCACACATTAAATTTATCTCGTAATGGATTAAGGTCATATACCACCATCATTAGGAGATTTA  
TCTTCAGTTGAATCATTGGATCTATCAGGAAACCAGCTTACGGGAGAGATACCAGAACAACCTGGCTTCTC  
TTACGTCTCTTTCATTCTTAAATCTCTCCACAATCATCTCCAAGGATGCATCCCTCAAGGATCTCAATTC  
ACACTTTTGAGAGCAATTCATATGAAGGGAATGATGGATTACGTGGATTTCTGTTTCAAAAATTGTGG  
AGATGCTGGGGTGTAGATAAAAATGATACCGTATCTGGACAAGATGATGAAGAAAGCGATTCTGAATT  
TCAGAGTGATTTTTGGAAAGCTGCTTTTTGGGCTATGGAAGTGGACTATGTATTGGATTATCCATAATA  
TATTTTATGATTTCAACTGGAAACCCAAAATGGCTTGCAAGAATCATTGTAGAGCTGGAGCACAAAATAA  
TAATGGGAAGGAGAAAGAAGCAGCGAAGGCAAAGGAACTATAGAAGAAGATAGTCAGATGAAGGTG  
GGGTGGAAGTGAAGTTATCAAAGATGCATCTGCTGTGAAAATGATAACATTTTGTAACCTTGAATTGA  
TATATAATTTAATTATTTTCTAATGAGATCTGGTGGGTTAGTGCTGGTATGATCGTATCCTATTTATGAAT  
GATTTGATATGAAGGC

>M6-PGSC0003DMG400018866 M6 LRR-RLP

ATGGCTGACATATTGCCGGGATGTCTCGTTCAAAAATACTCAGTTTTCTCCTAGTTATAATCAAGCATC  
CAAGATGAGTATTCTCTCCAAAACATGGCTGCAAGCGTGGTCGACTCTTCCCAACTTGAAATTCTTTTTAT  
TTTGCTGGGAAGGCTGGTAAAGCCGTACAAAGATAGTGGACACAATCATGGAGAGATATGGGAAGGG  
GAAAATTCCTATAGAAAAGTTTGAATTATCAGAGATTTTTGCTGATTCTCTCCAACCTTTCCCTGTGGTTG  
ATAAGTGGCTTCTGATTGCACTTCAGAATGGTGTAAAAGAACTTGTACTCCACTTTAAATCATACCCGGT  
GCCTATTTTAACAATCTTGGCAGCCAAATCTTTAAGAAAATTGGTTCTGCACGATTGTACTCTTATGTCTG  
TTTCATTATCTAGTGGGGTTGTGAATTGCAATCTTTGAGAAAGCTTTCTCTATCTAATGTAACATTAGAC  
GAAAACATGCTTCAGACTCTACTTAATAGCTGTCCCTTGATTGTCTCTTTCATCGTTGAGAATTGTTCCGGG  
ACTGAATGTTCTTAAGATCAAATCGGATTCATGAAGGTCTTGAAGATTATACAATATTGCAATATATGT  
AACATTGATGCTCCAAATTTGGTATCCCTTGACTATAAAGGGTATGAAATTCCTGAACTTAACATTGCAA

GAGAGTCAAAAATCATTCTTCATTGTCTCCTCAGTTTAAATACGGCATGGTTTTGTAAGTTGAGGAAGTT  
TCTATCAAATCCGTCCTCTTGGTCTGAAGTTAGCCTTTGTATATTTAAATGCGATGAGATCAACATGACA  
GATTTGCAAATGGACCACATAGGTTCTAGTGGAGGGGTGGACGTTTTAAATCTCAATATGCTACTGATG  
GATGAAATTATAGAGTGCCCAACTTTTGTGGATGCTTTGCTATGGAGTTGTCATCCTGGGAGACTTAACT  
TAATCTCAATTGATATTGAAACAGTTACACGTTTAATTGATCGGTTAATGTATATGAAGAATTCGAGTCAT  
TCTACATATTCTCATGGTTGGAATAATCAATTTAAAGAAATAAAAGCTTTTGTATGGAAAAATCAGTTGC  
TGCAACTAGGAAGTGAGGAGCTTGCAAAAAGATTATGGAGGGGAAGAAACCTTATTTTATATTAGATT  
GGTGATGGAGTTAAGTTGTCTCTATTTTGAATTGAATTTCAAAGTTTATTACTTCATTTGTTTTCCACATCT  
AGCTTTAAATTCTTGCAGTTCCGAAAATATGTTTCGCTGTTTTCTTCTTCTGAGTTTGAGGGATTTTTTCT  
TTCTCAATTATCCTACTAACAGCACAACCTTATATACCAGTTTTTAAATCAGAAAGAGGGACTCTGTACTTC  
CCTTTCAATACCATAGAAAAACAATCCCCCTCCCTACATGTGCATTAACCTCATACTGCCTGCTGCTGGTT  
GATACCAAATGAAATAAGAGTTTCCCATGAAATGGTTATTCATCTCTTACTTGGTGATGCATAACCATA  
GCACCTACGAATTCTGAAAAAGTTCCAAGTTAGTTGAAGAAGCCATGATGAACAAAATGTAACATAA  
TGAAAGATAAAGGAAAATCAACATTAAGACTGGATAGTATCTTACTTTAACTCCTATTCATAATCCCATA  
CTTCTTTTTTTTCCATATCATGTTTCACTATAAAGGTTGTGGTGCCTCAGCCACTTATAATCTTCATAAAC  
TTGATTCATCATTGGAGTAATTTTACGAGTATTACTTAAAATTTAAATACAATGTTATATTCAAGGAAAAT  
TTATGTGTCTGCCTTCATACATATGTACTTCTCCATGATTTTGGCTAAAAACATCCATATGTTATACTCATA  
ATCTAAAGTCTAAACTGCATCTTTAAAACTATTCATGTGAACATAACACATCCCTATATACAAGAAAACG  
TTAAGCTAGGAAAAGCAGTACGGCCAAGTTAATTACATGAACAATTTTACAATATAAAATTTGATGAAGA  
AGCAACGAATCACTTCCCAGTATCACATCACATGTGAATAGGGGTCTCAAATGGATGGTTTTGGATGATG  
AACTAGTCGGGTCCAAATGATCCGACTCAGTGACTCGCCCAAGAGCTACTTAGGCCAAATTGGATTGG  
GCTGAAATGAACTAAAAACGAATCATATTTCAACCCACTCAATTCTTACTAAGTTTTAATTTGCTTTAT  
ATAGAAACCATGACCCTCTCTTGTCAAACAGATAGTCGTCTTGCACATTAGCGAGCTAATATGTCAGGG  
TCTCCATGATGTAGCTCAAATTCTTGATAATGTGTTGGATTGATTGTTATCCACGGACAGTACATGTGATT  
GTTAAGAGTCAAACAACAAACAAGATCGTACATGTGTATCTCACAGTCTGGTGAACAATTTGATTCAG  
TACGACTTCATTGAGAGAATGA

>M6-PGSC0003DMG400018867 M6 LRR-RLP

ATGGCTGACATATTGCCGGGATGTCTCGTTCAAAAATACTCAGTTTTCTTCTAGTTATAATCAAGCATC  
CAAGATGAGTATTCTCTCCAAAACATGGCTGCAAGCGTGGTCGACTCTCCCAACTTGAAATCTTTTTAT

TTTGCTGGGAAGGCTGGTAAAGCCGTACAAAGATAGTGGACACAATCATGGAGAGATATGGGAAGGG  
GAAAATTCCTATAGAAAAGTTTGAATTATCAGAGATTTTTGCTGATTCTCTCCAACCTTTCCCTGTGGTTG  
ATAAGTGGCTTCTGATTGCACTTCAGAATGGTGTAAAAGAAGCTTGACTCCACTTTAAATCATACCCGGT  
GCCTATTTTAAACAATCTTGGCAGCCAAATCTTTAAGAAAATTGGTTCTGCACGATTGACTCTTATGTCTG  
TTTCATTATCTAGTGGGGTTGTGAATTGCAATTCTTTGAGAAAAGCTTTCTCTATCTAATGTAACATTAGAC  
GAAAACATGCTTCAGACTCTACTTAATAGCTGTCCCTTGATTGTCTCTTTTCATCGTTGAGAATTGTTCCGGG  
ACTGAATGTTCTTAAGATCAAATCGGATTCCTGAAGGCTTGAAGATTATACAATATTGCAATATATGT  
AACATTGATGCTCCAAATTTGGTATCCCTGACTATAAAGGGTATGAAATTCCTGAACTTAACATTGCAA  
GAGAGTCAAAAATCATTCTTCATTGTCTCCTCAGTTTAAATACGGCATGGTTTTGTAAGTTGAGGAAGTT  
TCTATCAAATCCGTCCTCTTGGTCTGAAGTTAGCCTTTGTATATTAATGCGATGAGATCAACATGACA  
GATTTGCAAATGGACCACATAGGTTCTAGTGGAGGGGTGGACGTTTTAAATCTCAATATGCTACTGATG  
GATGAAATTATAGAGTGCCCAACTTTTGTGGATGCTTTGCTATGGAGTTGTCATCCTGGGAGACTTAACT  
TAATCTCAATTGATATTGAAACAGTTACACGTTAATTGATCGGTTAATGTATATGAAGAATTCGAGTCAT  
TCTACATATTCTCATGGTTGGAATAATCAATTAAGAAATAAAAGCTTTTGTATGGAAAAAATCAGTTGC  
TGCAACTAGGAAGTGAGGAGCTTGCAAAAAGATTATGGAGGGGAAGAAACCTTATTTTATATTAGATT  
GGTGA

>M6-PGSC0003DMG400018900 M6 LRR-RLP

CTATTTTAAATGAGTTGAGTACCCAACACATTTTAAATGGGTTAATTTGTATAGGTTCTCATATAAATTA  
TCCATTCGGTCACCCCTAGGCGAAACTGCAATCTTGTAAACCAAGGGCTCACGTGAACCCAATAGTTTTT  
GCCTTGAGACTTTAATTTGTATTATTAATATCTAGTGATACCTTGATTATGAACGTGATTGTTATTGGATA  
ATATCCTGAGGATTTAGAGATATCTATAAATTTCAAATTCTGAATCTGCATCTCATCCTAAATACTTTATAT  
TTTGCTCTTCATTAGGATTAATAAGGTAAGACATATCCCTTGCTTGTACTTTTTCTTTTGAATTTTATTTT  
ATTATATACTAGTTTATGGACACTTGCACGTGTGTCCATAACAATGTTAAATAGATCCAGTCTATGAA  
AATACTTGCAATGAGTAATAATGAAACAATTACAATAAACTTGAAAAGTGTGACAAAAAAACACCA  
CATGATGATGATTTTAAATGTTTGAATTAATTCCTTTTAAACAGTTAACTATAAATTTGAATTTTGTTTA  
GTAGTTAACAACTTTCAATAAAGTCACAAATGGCTAACTTGAACCAATAAGAATACAGATTTACGATA  
GTAAGAAATTCATAGAAATTTACATTAATGAAGTCTAATAGAGAGAAAACACAAAAGGATAAACAATGA  
AGGAAAAAATACAACATGCACATCCTTCTTAAGACTTTAATCATAAAAATATAGATGAAAAAATATAAA  
ATAATTAATTTTTCGAGCTCTTGTGACACATCTTCCCTCTTAACCAATCAAATTCAGAGCCTTCT

TCATCAAGTCAAATTTAAAACATGAACCAAATAGTACAACAATAATGTAAGTGTTTCACTACTTTAACGA  
CATAATACATAAATGTGTCATTTAATTTGTATTCAATTGTATATATGCCCTCCAACGTTAGGTATGCACAA  
TTAGACACTTAAATTTGAATAAAATTGAACAAGTAGACACACACATTTTATGTGGCATAATACACGTAGG  
ATGTCATAGTATGCAAATTACCACGTAGGTGGGCCACATAAGACGTATGTATCTACTTGTTCAACTTTTG  
GATAGTTTAAGTGTCTACTTGTGCACACCCAAAATTGAAGGGCGTAGATGTCCAACCTGAATCCAAGTTAA  
AGGACACATTTATGTATTATGACGAACTTTAACTATAGAATGAAATGATAAGCTTGGGAAGGGGTTTCA  
TGAAAGTTGAAACCAAACAATATACGAATTCATATAGATAAAAATGGAGGAATACCAAAGAAATCT  
TAAAGTTTTAAATTAATAGTTGAAGGTTATGAATACAATAAGAATGAAAGTTACGGATATTAAGATTAG  
CAATATAAAAAGAAGGTATAATCCATAAATATGTCTTTAACTTGGCTTCAACTCACATTTATGCCCTTCA  
ACTTAGGTGTGCATAAGAAGACACTTAACTTGTATAAAGTTGAACAAATAGACGCATACGTCCTACGT  
GACATCTTACATGATAATTTGTGTCCTACGTAGCATCCTACGTGTATTATGTCATGTACGAATTATGTGTC  
TATTTGTTCAATTTATACAAGTTTAAGTGTTTACTTGTGCACACCCAAAATTGGAGGACATAAATGTGAA  
ATGAGACCAAGTTAAATGGCACATTTATGTATTATGCCTA

>M6-PGSC0003DMG400018901 M6 LRR-RLP

ATGTCTGCATCAGTGGCTAAAGGTTTTCTGAATCTCCGGAGACTAGACATTGAATACTGCCAATCAATGA  
AAGAAGTGATCACAGAAGAAGAACAACAAGGAGAAGGAATCATGACCTTATTTCCCCTGTTGGAAGAG  
CTGAAGCTTGATAAACTGCCTAACTTGGGGCATTCTTTCTGACGGAGCATACTCTTCAAGCTCTTCAAAT  
TCCATTTCTTAGAGAAGTGAAGATATCTGACTGCCCTGAAATGAAGACATTTGTCCAACAGGGAATATCT  
GTGAGTCTTGAAAGTGATGATGAGGTGAAAGTAATGTTCAATTCTAAGGTTTGTCTAGTAAATAGTAAT  
AGTTATTTCTGTTCCACTTCTGTTACCTTGACGTAAGATGATATATGGTTCATTTTTGGATTTCTACTTGA  
AGCTATATATATTCAATTTTCATACCTTCAACATTTGCAGGTTTCTTGTCCCAACTTGAAGAGCTATATAT  
CTTGGGGGCTAACAACATAAATGCTCTATGCTCTTACCAACTTCCAATTGCCTGCTTCAGCAAACCTTGAAA  
TATTACAAGTATATAATTGCGAAAAATTAAGAACTTGATGTCTCAATCAGTGGCTAAAGGTTTTCTGAA  
TCTCCAAAAACTAAAAATTGAAAATTGCCGATCAATGGAAGAAGTGATCACAGAAGAAGAACAAGGAG  
AAGGAATCATGACCTTATTTCCCCTGTTGGAAGAGCTGAAGCTTGATAGACTGCCTAACTTGGGGCATT  
CTTTCTGACGGAGCATGTTCTTCAA

>M6-PGSC0003DMG400018994 M6 LRR-RLP

AGGATAAAAATTGTTTGGCTTTAATTTCAATCATGGATACTTCATGATAGTTGAAAAATCATTCTATTTT  
ATTATGACTTTTTGAGATAATAACTAACTATTAGTTGAGTGAACATATGAGAAATCAAAGTCGTGATTGT

CTCTAGTCTCTCCAATAAGGTATGCAGAGGACCACAATTAACGCTAATTTTTGCCTTCCATTTTCGGCTA  
CTTAATTAGCACTATTATTCCACAGGACTTGACTTGACTTGACCTTCAAAATATTTGTCCTCATTTCAATTA  
CGCAAATAACAAGTTACTTGTAAGACAGTAGTGAAGCTGAATCATAAGGAGAAATATATGGTCCTCTGT  
TATGGGTTATCTTTCTATATAAACAGGCCAAATAACTAATGCTAGCAATATACAGTGCTTTAACTATAC  
CCATCGATCTCTATTAGTATAAGATCAACTAAAATGGCATGTTGGAAAATTTTAGTTGCTCTACTTGTTTT  
ATTTCTTCTTTCTTTCTCTACCTGTTTCAGTCAAAGCCATAAAAGCTGTATCTTTACCTCTCACAAACACT  
ACTGAAGCCAAAGTGAGATGTGTTAAAAGTGAGAGGAATGCTCTATTAAGATTCAAACAAGGTTTCACT  
GATCCCTCTGATCGACTGGCTTCTTGGGTTGGCAAAGAATGCTGCATCTGGAAAGGCATTTTTTGTGACG  
CTGGTTATAATGTCATCAGGCTTGATCTCAATGATAGAACAACAATTGCTATTGGAAGAAAGTGGGAT  
ACTTGATTCCAGGCAATTCAACATGCTTGGGTGGCAACATAAGTTTTGATTTACTCGATTTGCATCACTTG  
GAGTATTTAGACCTTGGTGGTAATGACTTCCAAGGACTTACCACTCCCAATTTCTTGTCTTCTCTAAAGAA  
ATTACAGTATCTTAACCTTTCTTTTTCATCTCTTATTGGTGTTCCTCCTTCACTTGGAAATCTATCAAATTTG  
CAGTATCTAAACTTCCGTGCGTGTTCCCTATCCTTCGATATTGTTGAAAGAAGTTGGGTCAAAGATTTTAA  
TTGGGTTTCCGGTCTGTCTTCTTGAAGTATCTTATCTTCTTATGTGAACCTTCTTCGGCAACACATTG  
GCTTGATTCTATTATTAAGCTGCCATCTTATGACTCTCAGTTTGCAAACACTGTAGTCTTCACTATCTTCC  
TTATTCCTTCCCAAACCTGGAATATGACTTCTCTTCTTATCTCTCCCTTTCACAGAATAAGTTTGTTAATTCT  
GAGTTGCCTAAATGGTTGTCTAATGCCACCACCATTGAGACACTTTATATGGTATACATCAACATCCAAG  
GCCAATATCAAATGTTGAATGGGGTAAACTCTGTAATTTGCAGAAGTTGTATCTAGTGTAGAACAACACT  
TAATGGAGATATAAGTCGAGTGGTGGAAAGGATTGTCCAACCTGCAGCAACCCTACGATAGAGGTATTATC  
TCTTGGCGAAAATGTGTTGACAGGGGAATTGCCAAATTCATTAGGACATCTGAAGAACTTAAGGATTCT  
TAGTATTTCTTTAATATGATCTCTGGTACTATTCCAGCATCTATTGAGCAACTTTACAATTGGAAATTTT  
GTACTIONGGAGAGAATCAACTGAAGGGAGCCTTGCCTGAGAGTATTTTTAATTTTTTCAGAATTAACCTGA  
GTTGCGGCTGACAACAAATGCTTTGGAAAGCAATCTTTCACAAAATCGCTTTGAAAGACTCCATCAACTG  
AAAGTTTTATCCCTATCTTGTGGAAGAAGTTTTTCAGTCAACTTGAGCAATGAATGGGTTCTCCATTTAG  
CCTCTATGCTATCGAGCTCAGAAGGTGCAGTTTGGGTCCCAAGTTTCCAACATGGCTAAAGATTCAAAG  
CAACTTCAGTGGGTCATTCTACCAATGGCTCCATTTCAGAACCTATACCTCCTTGGCTTTGGATGATGTG  
CTCACAATTTCAATTTGCTCGATCTATCAAATAATTAATTTGGTGGAAAGTCTACCGAGGATAGTAGATTTT  
CATCGACATAACAAATCTGGACGGTGGGTTTCTATTTTAGTTACTATTATGGTGTGCGTGGTGGACTTGAG  
TTCCAATCACTTCCATGGTTCGTTACCTCTTTGGCCAACCTGTGACACATTTGAATCTTGCTAACAACCTGGTT

TTCAGGATACATACCCTTAAACATTGGTCATGTGATGACAAAACCTCAAGTGTTAGATCTTTCTGGAAAT  
GCTTTTATAGGAACTATACCATATTCCATAACAAGAGTCAAGCAGCTATTGAGATTGGACCTTTCAGACA  
ATCATTGTCTGGGAAGATTCTGATTGGTGGTATGATTTGCAACAACCTCAAGTCATAGATTTGTCAGG  
GAATAATCTTTCAGGTACTATTCTCCTTCAGTTTGTTCAACCACTTTCACTTTTTTGGTTGAGATTATGCCG  
CAATAACCTTCTGGAGGGCTTCCAAAATCATTGAGGAATTGCAATAGCTTGCTTGCCCTTGATATTGGA  
GAGAACAAAATCACTGGCACCATAACCGGAGTGGTTCGGAGAAAGTCTTATCTCTGCAAAAAGCTCAGA  
ATGACAGGTAACATGATTCATGGACGCATTCCACCACAACCTATGCCAACTTCTAACCTCCAAATTCTCCA  
TCTTTCACATAACAATCTGACAGGTTCTATCCCTTCTGCCTGGGAACCTTGAGAGGTCTCAAGTTGGTGA  
AATTTTACAAGTGGTTTCCCAACTACCTTTATTTTCAGTTATGTTTTTACACCCAAGATGGAGTTGGTTGAG  
AAAGGAACAAAGCAGACTTACACTTTTACCTTAGATCAAGTGAATCTTATTGATCTTTCCTGCAACAATCT  
TCAGGGTGAAATCCCAAATGAGATAATAGCTCTGTCAGCCTTGAGCACTCTGAATTTATCTTGGAACCAA  
TTATCAGGAAGAATTCCAGAGGACATAGGGAGCATGCAACAATTGGAGACACTAGACCTTTCATCTAAC  
CATCTCTCAGGTCCTATCCATTAAGCATGGCATCCATCACTTCATTGAGTTATCTTAACTTGTCACATAAC  
AACCTTCATGGCCCTATCCCATCAACAAACCAATTTGGAACCTTACTGATCCTTCGTGTTTTCGAAGGTAA  
TCCAGAACTCTGTGGGAAACCATTGACCACCAATTGCTCCTTACCCAGGAAAAGAGAAATAGAAGAAGA  
AGATGATGATGAAATAAGGCTTTGTTTTTTGTGAGCGCGGGAGTGGGATTCGTTGCCATGTTTTTGGC  
GACATTTATAAGCTTGACGATAAAGAAGTCGTGGGGATACTGCTGCTTCCATTTTCATGGAGGAAGTTGG  
AGAAAGAATTATCAGGTGCTGTATGGGTTTCATGAATAGGATTTTCAGCGTCACAAGGAACTAATTTCCA  
TTGCATTATTGTTCTTTCTGTTTTGATACTGTTGCAGTGAAAATATGGCAATCTTTGAAATT

>M6-PGSC0003DMG400019071 M6 LRR-RLP

TAGGAGTAATTTCTTTTCAAGGGGATTGGGAAATACTTCTTTGATGGAATTGAGACTAGATGGTAATAA  
ACTTAATGGAACCTTCCGAAAAGTCTTGGACAACCTTCAATGCTAGAATACTTTTTCATTTCTAACAATA  
AGTTGGAAGGTGTTGTAACAGAGAGTCATTTCTCTAAATTAACGCAATTACAACCTTCTCTGCATCTAG  
AAATAATCTGACTTTAAAAGTGAGTAGGAATTGGATTCCACCTTTTCAAGTCACAAACATTGCGATAGGC  
GGGTGGAATATAGGCCCTTTGTTTCCAATGTGGCTCCGAACTCAGGAGATGATAATGAATGTTGACATA  
TCAGATTGTGGAATACAAGGTGAGGTTCCAACCTTGGTTTTGGAACCTTATCTTCTCAAATTGTTTTTCTCAA  
TCTTCTCACAAATCAATTTATTGGTGAGGTTCCAATCATCTCAACAGCTTCGTGGTTAGTTGGATTGGGAG  
GTCCTTGGTTAATGTATTTAGGTTCCAACAATTTTAGTGGATCACTACCACGTATTTCAACGAGTATAACT  
GAGTTAGGTCTCTCGAACAATTTTTTTTCAAAGGTTTATCCAACCTTCTGTGTGAAGCAAAGAATGTATC



TTATAATTTGGAGATCTTAAATCTCGGGGGAAATGATTTATCAGAAGAAATTCCTGATTGTTGGATGAAT  
TGGCCTGAGTTGGAAGTTTTAATCTTGAGGGACAATAATTTGATTGGAAGCTTACCAAGATCTATGGAG  
GTTTTGAGTAATTTGCTATCATTAGACTTACGAAGAAATAGACTTAACGGTCCGTTTCCTTCATCCTTGAA  
AAATTGTACGAAACTGCATAAAATAGATTTAGCCGAGAATGAGTTTGCTGGGGGACTACCATCTTAGTT  
GGGAATGAGGTTTTCAACCTTGATAGTATTTATCCTTCGGTCCAATAAATTCAATGGTGAATTGCCTCAA  
GAACTTTGTCAACTCAAAGATCTTCAGATCTTAGACCTTGCAAACAATACATTTGTTGGAATCATAACAA  
GGTGTATTGGTAATTTCAAGTCAATGGTCAAAGGAAAAAAGGAAGTGGGAGATGATGATGAGTTAAAT  
TATTCCTACTTTTTGGGAGTTTTGAGAGAGAGTGC

>M6-PGSC0003DMG400019072 M6 LRR-RLP

ATGAAAGTGTTAGCAATAACACTATGGGTTCTCTGTTTTTATTTTGAAAAATACCAAGTTTGTCATTTG  
TGTAGGGATTTGTAGAGAAAATGAGCAACGAGCATTGGAGAGCTTGAAGAAAGAAGTAGATGATCCCT  
TGGATATCCCTCTTCTTGGGTTGTTCGGAAAAGATTGTTGTGAATGGGATGGAGTTGTGTGCAACAATCT  
AACTCGTCGTGTGATTGAACTACGCATAAGTTATCTAAGGATCGATAACCTAGAGTGGTTGTCAAGTCTT  
TTGAGTCTTGAGAACCTGGAAATGTATCATGTGGATCTCCACAAAGCAACTAACTGGCTACAGGTTATTA  
ACATGCTTCCTTCTTTGGTTGATCTAACGTTATCCAATTGTAGTCTTCATAATATAACAAATCTACTTCATC  
ACAATCTTCTTCACTTGAAACCCTCGATCTTCTAGTACTAAGTTTAATTCACCTATTCCCAATTGGGTTT  
TCAACCTTCCAATCTTGTTTCTCTTAATTTGAGTGATTGTAATTTTACTGGCCCATTTCCCGACTTTCCTGT  
TAACTTGACTTCTCTCACTACCTTCAAGGCTTTTGAAAACCTTTTCAATTGTCTTTTACCCGAATGGTTGTT  
TGATTTAAGTAATCTAGAACATCTTAACCTCCGTTCTAGTGGTATTAAGGTGCAATACCAAATAAGAGT  
GGAAACACAACAACACTTAAATATCTCGATCTTTTTGATAATAACCTTAACTCCACCATAACCAAATTGGTT  
ATATCAATGCAAAGATCTAGAATCACTTTATCTTACTGAAAACCGTCTTGAGGGAACAGTTTCAAGTCTG  
ATTTCAAATTTGAGCTCAATAACTAATATTGACCTTCTGGTAATATGCTTACTGGAAAGTTACCAAATGT  
AATTGGAATTTTAGGGAAATTAGAATTTCTTCTCTTTCAAAAAATCAATTTGAGGGACAAGTATCTGAA  
TTATTCAAAGGTAGGAGTAATTTCTTTTCAAGGGGATTGGGAAATACTTCTTTGATGGAATTGAGACTAG  
ATGGTAATAAACTTAATGGAACCTTCCGAAAAGTCTTGGACAACCTTCAATGCTAGAATACTTTTTTCAAT  
TCTAACAATAAGTTGGAAGGTGTTGTAACAGAGAGTCAATTTCTCTAAATTAACGCAATTACAACCTTCTC  
TGCATCTAGAAATAATCTGACTTTAAAAGTGAGTAGGAATTGGATTCCACCTTTTCAAGTCACAAACATT  
GCGATAGGCGGGTGGAAATATAGGCCCTTTGTTTCCAATGTGGCTCCGAACTCAGGAGATGATAATGAAT  
GTTGACATATCAGATTGTGGAATACAAGGTGAGGTTCCAACCTGGTTTTGGAACCTATCTTCTCAAATG

TTTTCTCAATCTTTCTCACAATCAATTTATTGGTGAGGTTCCAATCATCTCAACAGCTTCGTGGTTAGTTG  
GATTGGGAGGTCCTTGGTTAATGTATTTAGGTTCCAACAATTTTAGTGGATCACTACCACGTATTTCAAC  
GAGTATAACTGAGTTAGGTCTCTCGAACAAATTTTTTTTCAAAGGTTTATCCAACCTTCTTGTGTGAAGCAA  
AGAATGTATCTTATAATTTGGAGATCTTAAATCTCGGGGGAAATGATTTATCAGAAGAAATTCCTGATTG  
TTGGATGAATTGGCCTGAGTTGGAAGTTTTAATCTTGAGGGACAATAATTTGATTGGAAGCTTACCAAG  
ATCTATGGAGGTTTTGAGTAATTTGCTATCATTAGACTTACGAAGAAATAGACTTAACGGTCCGTTTCCTT  
CATCCTTGAAAAATTGTACGAACTGCATAAAATAGATTTAGCCGAGAATGAGTTTGCTGGGGGACTAC  
CATCTTAGTTGGGAATGAGGTTTTCAACCTTGATAGTATTTATCCTTCGGTCCAATAAATTCAATGGTGAA  
TTGCCTCAAGAACTTTGTCAACTCAAAGATCTTCAGATCTTAGACCTTGCAAACAATACATTTGTTGGAAT  
CATACCAAGGTGTATTGGTAATTTCAAGTCAATGGTCAAAGGAAAAAAGGAAGTGGGAGATGATGATG  
AGTTAAATTATTCCTACTTTTTGGGAGTTTTGAGAGAGAGTGCCATAGTGACGAATAAAGGCAACAGGT  
ACCAGTATGACACCATTTTGGCGTTGTTTACAAGTATGGACATGTCTAGCAATAATCTCTCTGGGGATAT  
TCCTATAAGTTTAACTTCTTGCAGGATTAAGATCATTTAATTTTTCTAAAAATAACCTAACTGGTAGGA  
TTCCAAATGACATTGGTGACATGAAAGTTTTGGAATCTGTTGATCTTTCAGAAAATCAATTTTATGGTCAA  
ATCCACAAAGCTTTTCAAGTTTGTTACCTTGAGCTACTTGAATCTATCTGATAACAATTTGTCAGGTAT  
GATACCATTGAGCACTCAACTTCAAAGCTTTGATCCCACGAGTTTTCAAGGAAACAACTCTGCGGGCTT  
CCACTCTCGCTGAATTGTAGTTCAAATGGTAATATTCCAAATCATGAATATGAAGATGATGAGAGTGACG  
AAGATGAAGTGGATTGGTTTTACATTTCAATGGCTATAGGATTTGCACTAAGCTTTTGGGGTGTGTGG  
TTCATTGCTTTTCAAGAGATCATGGAGACATGCTTATTTTTGTTTTCTAGACCGTAGCTGGGAAATGTTGC  
TTGCAAAGTTATCAGTATGTTGA

>M6-PGSC0003DMG400019900 M6 LRR-RLP

TTAAATAAAAAATTAGCAAATTATGTGGGCTGGGGCGGATTGAAAACAGCAAACCTTTGCAAGGCAGGG  
CGGGTTGAAATCTTTGCAAGTTTGTGTGGGTTGCCCTGCACCACCCATCTGTCATTCCTGTCTAAATGT  
TTGTTTTGTCTATATAATTCTTGCTGACTCATTCTAATGAGCTCAATTGTAACAAATCTTTGTGTCCACTC  
TACTTGGAACAGGTTTTGTTTTAACTGAACCAAAAGTCTACGGAAGGGATAAAGAGGAGGATGAGATA  
GTGAAAATCTTGATAAACAATTTTAATTTGCCGAAGAACTTCCAGTCTTCCCTATAATTGGTATGGGGG  
GACTAGGAAAGACGACACTTGCCCAAATGATCTTCAATGATGAGAGAGTGACTAAGCATTTCATCCCA  
AAATATGGGTTTGTGTCTCAGATGATTTTGATGAGAAGAGGTTAATTAAGACAATTTTAGGAAATATTGA  
AAGAAGTTCTCCTCATGTGCGAGGACTTGGCTTCATTTCAGAAGAAGCTCCATGAGTTATTGAATGGAAAT

CGATACTTGCTTGTCTTAGATGATGTTTGGGAATGATGATCTAGATAAGTGGGCTAAGTTAAGAGCAGTCT  
TAAATGTTGGAGCAAGAGGTGCTTCTATTCTAGCTACTACTCGTCTTGAAAAGGTTGGATCAATTATGGG  
AACGTCGCGACCATATCATTGTCAAATTTGTCTCCACATGATAGTTTACTGTTATTTATGCAACGCGCAT  
TTGGGCAACAAAGAGAAGCAAATCCTAATCTAGTGGCCATTGGAAAGGAGATTGTGAAGAAATGTGGT  
GGTGTGCCTTTAGCGGCCAAGACTCTTGGTGGTCTTTTACGCTTCAAGAGAGAAGAGAGTGAATGGGAA  
CATGTGAGAGATAATGAGATTTGGAGTCTGCCTCAAGATGAAAGTTCTATTTTGCCTGCTCTAAGACTGA  
GTTATCATCACCTTCCATTTGATTTGAGACAATGCTTTGCGTATTGTGCAGTATCCCAAAGGACACCAAA  
ATGATAAAGGAAAATCTCATCACTCTCTGGATGGCCATGGTTTTCTTTTATCAAAGGGAAACTTGGAGC  
TAGAGTATGTGGGTAATGAAGTATGGAATGAATTATACTTGAGGTCTTTCTTCCAAGAGATTGAAGTTA  
AATCCGGTAATACTTATTTCAAGATACACGATCTCATCCATGATTTGGCTACATTTCTGTTTTTGGCAAGC  
ACATCAAGCAGCAATATCCGCGAAATAAATGTCAAAGATTATAAGCATATAATGTCCATTGGTTTCGCTG  
AAGTGGTGTCTTCTTACTCTCCTTCGCTCTTGAAAAAGTTTGTCTCGTTAAGGGTGCTTAATCTAAGCTAC  
TCAAACCTTGAGCAATTACCCTCTTCCATTGGAGATTTATTACATTTAAGATACCTGGACCTGTCTCGCAA  
TAATTTCCGAAGTCTTCCAGAGAGGTTGTGCAAGCTTCAAATCTTCCAGACTCTTGATGTTTCATAATTGCT  
ACTCACTTAATTGTTTGCCAAAACAAACAAGTAACTTAGTAGTCTCCGAAATCTTGTCTTGATGGCTGT  
CCATTGACTTCTACTCCACCAAGGATAGGATTGTTGACATGCCTTAAGACTCTAGGTTTCTTTATTGTGGG  
AAGCAAGAAAGGTTATCAACTTGGTGAACACTACGAAATTTAAACCTCCGTGGTGCAATTTCAATCACACAT  
CTTGAGAGAGTGAAAAACGATATGGAGGCAAAGAAGCCAATTTATCTGCAAAGCAAATCTGCAATCT  
TTAAGCATGAGTTGGGATAACGATGGACCAAACAGATATGAATCTGAAGAAGTTAAAGTGCTTGAAGCC  
CTCAAACCACACCCCAATCTGAAATATTTAGAGATCATTGCCTTCGGAGGATTCCGTTTTCCAAGCTGGA  
TAAATCACTCAGTTTTGGAGAAGGTCATCTCTATTAGAATTAAGCTGCAAAAACCTGCTTGTGCTTACC  
ACCCTTTGGGGAGCTTCTTGTCTAGAAAGTCTAGAGTTACAAAACGGGTCTGCGGAGGTGGAGTTTGT  
TGAAGAGGATGATGTTTCATTCTAGATTTTCCACAAGAAGAAGGTTTCCATCCCTGAAAAATCTTCGTATA  
TGGTTCTTTCGTAATTTGAAAGGTTTGGTGAAGAGGAAGGAGAATATAAATTTCCCATGCTTGAAGAG  
ATGGCGATTTTACATTGCCCTCTGTTTGTGTTTTCCAACCCTTCTTCTGTCAAGAAATTAGAAGTTCACGGC  
AACACAAAAGCAAGAGGTTTGGAGCTCCATATCTAATCTTAGCACTTCTTACTTCCCTCCGCATTGGTGCTAA  
CTACAGAGCGACTTCTCTCCAGAAGAGATGTTTACAAGTCTTACAAATCTCGAATACTTGAGCTTCTTTG  
ACTTCAAGAATCTCAAAGAGCTGCCTACCAGCCTGACTAGTCTCAATGCTTTGAAGCGTCTCCAAATTGA  
AAGTTGTGACTCACTAGAGAGCCTCCCTGAACAAGGGCTGGAAGGTTTAACTTCACTCACACAGTTATTC

GTAAATACTGTAAGATGCTAGAATGTTTACCCGAGGGATTGCAGCACCTAACTGCCCTCACAAATTTTG  
GAGTAACCGGTTGTCCAGAAGTGAAAAGCGCTGTGATAAGGAATTAGGAGAAGACTGGCACAAAATT  
GCTCACATTCCTAATTTGAGTATATATTAGTGAGTTATTTGTAATTGT

>M6-PGSC0003DMG400019970 M6 LRR-RLP

GTAGATGCTGCATCTTGTGCTTGTCTGGCAATTCCTTCACCAGATGCGTTTTCTGAGCATGGAGGAAA  
GCTGGACTCTTTTATGCGATAAGGTCTTTGGGAATGGTGGTTACCCTCCGGAATTGGAGAAAATTGGGA  
GGTACATTGGCCATCAGTGTCAAGGGTTACCACTTGCAGTTGTTGCAATTGGTGGACTACTTTCCAAGAT  
GAGCAAGGAAACAAGTTCTTGGGAGAACGTTGCAGAAAAAGTAGGATCACTTATGACCAGTGACACTA  
TGGATTGTTTGAACATACTTTCTTTGAGCTACAACCACTTGCCTCAGTACTTGAAAACATGCTTCCTTTATA  
TGGGAGTTTTTGCAGAAACTCGTGAGATTCCGGTCTGGAAGTTAATAAAATTATGGATTGCTGAGGGCT  
TCGTCAAGAAAGTTAATCATAAAAATCTAGAAGATGTGGCAGAGGAAAATTTGAGGGAGTTGGTTGAT  
AGAAGTTTGGTTTTGGTGGGGAAGCATACTTCCCTAGGAAAAATCAAGACTTATAAGATGCATGATCTC  
ATTCGAGATATATGTTTGAGAGAAGCCCAATATGAGAATTTTATACACTTCAAACAAGGTATGACTATG  
ATGATCTTCTAGAAAACAATAGTTGTCTACGTCGTGTAGCAGATTTCCATAAGTATACAAACAGTAGACT  
TTCTAAACTTAAACCACTCACACGTTTCTTCAAATATCCATACTTTAATTGATACCTCTCACAGTC  
GAGCTTTAGATTACTTAGGATATTAGATGTTTGCTTACTACTTCTTTGTTCTGTGAACAGTCCATATCAG  
AACTTGTCATTTGAGGTATCTTGCTTGTCTGTTCTTCGATGGTTTTGTGCAATCACTATGCAAGCTACAG  
AATATACAGAACTTAGTTATTCATGATTTAGATATGAGAACCCAGTTCCTACCATGGGAAGTTGTGAATA  
TGCCTCAACTAAGACATATCCATACAAAAAACTTTAATCTTTTCATACCCCCACCTACATCCCTAATTGCTG  
AGAGGGAGAATCACTTACAAACATTAACCGGATTGATTTCTCATCTTGTAATGAAGAGGTGTTTCTAAG  
AATTCCAAATTTGAAGAAGTTGGGAATTTAATTGTTGTTGATTCAGACACTATTCAGAAGTGTTATTGTC  
TTGATAATCTTGTACATTTAACTCAGCTTGAGAAGCTCAAAGTTAAGTTCTGCGATTATCTGCTAGGGTTA  
AGTTGGTTCTTAGAAGCTCAAAGCTTAGGTTGGGTGGACCTTTCTTGGCTACACATTCCACATTGTGACA  
ATTTCCACCAAACCTCAAGAAGTTAACATTGTGCAGAACAAACCTACAATGGGAAGACATGAACATTCT  
CAGAAAATTACCTAATCTTGAGGTGCTCAAACCTTAAACGTCGTGCCTTTGACGGACTAATTTGGAAACTA  
AGCGATGAAGACGAAGATGGATTCTTGAAGCTAAAGTTTTTACTTCTTGAGAACATGAATCTGATGCAA  
TGGGAAGCAACAAGTTATCATTTTCCAAGCCTTGAGCACTTAGTTTTAACAGATTGCGGGTACTTGAAAC  
AAATTCCTTTCGACTTTGCGGAGATTCAGACACTACAGCTGATTGAACTAGACAAATGTATGCGTTCTGT  
TCTTGTTCAGCAGAGCAAATACAAGCGGAGCAACAAAGCTTGGGAATGATGACCTCGTTATTCATGC

GAACTATATACGTGAGTAAACATTAATAAAAAAGGTATAGACTTCTTAAAAGCATAAAGAATTTTTATTA  
GATAGATTCGTTGAAATCTGAAAATGTTTTTATATTCATCATTTTCACTTATTTATACTATAAAAGGTGC  
TAATTACAATTGGTTTGTGCATTGCAGACGTAACGACTAGCTGATGGAGAGTACCATATACTCAAGCAA  
ATTTGCAGAAGTTCATGATCTTTCCTTCTCTGTATTTCAATTCCTTTTTGCAAATTCAGCGAAGTTAGT  
TAGTGAAATAGTCATGTTTCAACTGTTTAGGACTGAGACGTAGTTTAGTGAATCTGATATCTATATACAT  
TCATCAGAAAGAATGCATTACCTTTGGAACGTGTATATAGTTGAATAACTTCTCTTTTTATTGAAATTGAT  
TCTATAAATCAGTTCTCCTCAACAAAACCTTTTCGTCCATACCAAAC

>M6-PGSC0003DMG400020178 M6 LRR-RLP

AAGAAAGTGACCGTAGAACTATCTGCTACTCAATTCATCCATCTTCTTCTTCTCTCCTAAACCAT  
TAATTTGTTTCAGCCATAACCAAAAAAGCTTTTGCTTCTTGTGAAGATACCTTTTTTTTTGCCTTGCCTT  
TGCTTTTGGTTCCATTAAGACCCCATTTGATGACCTGTTGCTTCTCACGAAAAGAAAACCAAAAAAG  
TTCCATTTTTTTTTACCTTATATAAGCCAGCCTTTCTATCATTCTTCTTTCAGCTATACGGTAATTATGA  
TACCATTCTTGTATTCTTTTTCTTCTTCTGCAGAATAGTTTCGCCATTTTAGACCCAATTGATTTCTTAGC  
TTTACAAGCGATTGAAAAGGCTTGGATGATTTGCCGGTCCAACTATTTGCTTCTGGGATTTCACTT  
CTGAGCCGTGCAACTTCGCCGGAGTTTACTGCGATGGAGATAAAGTGATCGCCTTGAATCTCGGTGATC  
CCAGAGCTGGATCACCGGTTTGACCGGAACTTGGATCCTTCTATTGGGAACTCTCTGCTCTTGTCTGA  
GTTACGGTGGTTCCGGGTCGGATAACCGGTGCATTGCCGAAAGTTTTTCTCAGTTGAAGAACCTGAG  
ATTTCTAGGAGTTAGCCGGAACCTTCTCTCCGGTGATATTCCGGCGTCATTAGGCCTGCTCCGGGAGCTA  
CAAACCTTGTATCTTAGTTTCAATCAGCTGACTGGGAGTATCCCTTGGGCTATTGGAGCTTTCGGGCATT  
GTCCAACATTATACTCTGTCACAATCATTTGTCCGGTTCGATCCCACCATTTCGTATCCCAAAGATTGACCC  
GTTTAGACCTTAAACACAACCTCACTTTCAGGTACCTTTTGCCTAATTCATTCCTTCATCGCTTCAATACT  
TGTCATTGTCATGGAACCAAGTTAACCGGTCCAGTAGATTATCAGTTGAGTCGGCTGAACCAAGTTGAATTA  
CCTCGATCTTAGCTTGAACCGGTTACCGGCTGCATTCCGGGAATCTTATTTACTTTCCCACTCACAAATC  
TTCAGCTACAAAGGAATCTATTTTCGGGTCCGGTTTTACCCATTTTCAGAGGTGACAATTCCGACGGTGGAA  
CATTAGCTTAAACAGGTTTTTCGGGGAGATATCTCATTGTTGTGTAATGTGGAGAATTTGTATCTGAAC  
AATAACCGGTTACGGGTAAGGTGCCGGCGGTGTTGGTGGACCGGTTATTATCTGCCGGAATACAAGTT  
TTATATTTACAGCATAATTTTCTGACGGGGATTGAGATAAATCCGAGGGTGGAAATTCGGGTGAGCAGT  
TCATTGTGTTTGCAGTATAATTGCATGATTCCGCCGGTTGAGACGGCTTGTCCGTTGAAAGCCGGGAAG  
CAGAAGAGTAGGCCTACAAATCAGTGTGTGGAGTGGAAGGGGCAAAGAGTGAAAAACAAACAATA

ATAATATTACTACTAATATGGCTTAATTTTTCTAGATTCTTTCATTTTCATTTTCCTTCCTGATTATGGGCTGA  
TGGGCTAAGTAATAGTAGTAAAAAGAGTAAATGTGCATAATAAAGGAGAGAAAAATAGAGTTAAAAG  
GTGTACGAGTCATCCTCTATTGTTTTCTTTGTATTAAGCCAAAACAATTTTGGCATTCTTTTTGTAAT  
TAGGTACTACTAGTATAATATATTCAATTACTTGGATTTACGGATCTCAAGTTGAA

>M6-PGSC0003DMG400020330 M6 LRR-RLP

ATGACAACCTCTGTACTTTTTGTGGCTTTTCTTGATTCCCTGTTTCAAATCTTATCAGGATATCACATTTTCT  
TGGTCTCCTCTCAATGTCATCACGATCAAAGTCAACAGTTGCTGCAGTTGAAGAGCAGCCTCAGTATGA  
TTCTACTTTGTCAAATATTTGGCAAGATGGAACCATAACACAAGTGAATGTTGCAATTGGGATGGGGTTA  
CATGTAATCTCTCTGGTCATATGATTGCCTTGGAACTGGATAATCAGACTATTTCTAGTGGAATTGAGAA  
TTCAAGTGCTCTTTTCAGTCTTCAGTATCTTGAGAGGCTAAATTTGGCTTACAACAAGTTCAATGTTGGCA  
TACCACTTGGTATAGACAACCTCACGAATTTGAAGTACCTGAGTTTATCCAATGCTGGTTTTGTCTGGGCA  
AATTCCTATGATGTTATCAAGATTAACAAAGCTAGTACTCTCGATCTCTCAACTCTTTCCCTGACTTGAT  
AAGCCACTAAAACCTGAGAATCCCACTTTGAGTCATTTCAATTGAGAATCAACAGAGCTTAGAGAGCTTT  
ACCTTGATGGTGTGATCTTTTCAGCTCAGGGGACGGAGTGGTGTCAATCTTTATCTTCATATTTGCCTAAC  
TTGACCGTCTTGAGCTTGCCTGATTGTGCAATTTTCAGGCCATATTCATGAATCACTTTCTAAGCTTAACTT  
TCTCTCTTTCATCAATCTTGGCCGGAACAATCTCTCTACCACAGTTCCTGAATATTTTGCCAATTTCTCGAG  
CATGACTACCTTGAACCTTGCCTCTTGTAATTTGCAAGGAACATTTCTGAAAGAATATTTTCAGGTATCAG  
TTTTAGAGAGTTTGAACCTGTCAACTAACGAGTTGCTTCATGGTAGTATTCCGATTTTTCTTCGAAATAGA  
TCTTTCAGGAGGATATCACTAAGAAACACCAACTTTTCGGGTTCAATACCAGAGTCCATTTGCAACCTTCA  
GAACCTATCCAGGTTAGAGCTATCCAATTGCAATTTCACTGGACCAGTTCCTTCCACAATGGGAAACCTT  
ATCAATCTTGTTCAATTTGGACCTCTCTTTGAACAACCTTCACTGGTTCTATCCCATATTTCCAAGATCCAAG  
AAACTCGCCCACTTAGACCTCTCTCGTAATGGTTTAACTGGTCTCCTCTCCCCGACTCATTTTGAAGGACT  
CTCAGAGCATGTCTACATAAATTTAGGGAACAACCTTACTCAACGGGATACTTCTGAATGTATCTTTGAG  
CTCCCCCTCTGCAAACGCTTTTACTTAACAGCAATCAATTTGTTGGCCAAGTCAACGATTTTACAATGC  
ATCCTCCTCTCAATGAAATTGATTTGAGCAACAACCAACTGAATGGTTCAATTTCCAAGTCCATGTTTG  
AAGTTGGGAGGCTTAAGGTACTCTCACTTTCTTCCAACCTCTTTAGCGGGACAGTGACCCTTGATCTCATT  
AGGAGGCTGAGCAACCTTTCAAGACTGGAGCTTTCTTACAATAACTTGACTGTTGATGCAAGTAGCAGT  
AATTC AACCTCTTTCACATTTCCCAGTTGAACATATTGAAACTAGCTTCTTGTCGGCTGCAAAAAGTTTCCT  
GATCTTAAAAATCAGTCAAGGATGATCCAGTTAGACCTTTCTGACAACAAAATACAGGGGGCAATACCA

AATTGGATTTGGGGAATTGGTGACGGAGCTCTGACTCACCTGAATCTTTCCTTCAATCAGCTGGAGTACG  
TGGAACAGCCTTACAATGTTTCCAGATATCTTGTGCGTCCTTGACTTGCATTCCAATAAGCTAAAAGGTGA  
CCTACCAATTCCACCTTCCTTTGCTGCATATTTGGACTACTCGAGCAATAATTTTCAGCAATTCATCCCCT  
AGATATTGGCAATTATCTTGGTTTTGCCTCCTTTTTCTCGGTAGAAAACAATGGCATTACTGGAAGAATTC  
CCGAATCCATATGCAATGTCAGCTACCTTCAAGTTCTTGATTCTCTAACAATTCCTCGAGTGGAACAATA  
CCACCATGTCTACTGGAATATAGTACAAATCTTGGAGTGCTGAATCTAGGGAACAATAAACTCAATGGC  
GTTATACCAGATTCATTTCCAATTGGTTGTGCTCTACAACTTTAGACCTCAGTGAGAATAAGTTACAAG  
GTAGGCTGCCAAAATCGCTTGTGAACTGCGAGTTGTTGGAGGTCCTGAATGTTGGAATAACAACTTG  
TTGATCATTTCCTCATGCATGTTGAGGAACTCAAAGAGTCTGAGGGTCCTTGTCTTGCCTCCAATCAATTC  
AATGGAAATCTTACGTGTAATGTAACCATAAATAGCTGGCAGAATCTCCAGATCATAGATATAGCTTCCA  
ACAATTTTACTGGTATGTTGAATGCAGAATGCTTTATAACTTGGAGAGGAATGATGGTTGCAGATGACT  
ATGTAGAGACAGGACGTAATCGCATCCAGTATAAGTTCCTCCAATAAGTAACTTATACTATCAGGACAC  
AGTGACAATAACCAACAAAGGGATGGAGATGAAGCTTGTGAAAATTCTCAGTCTACACAGCTATTGATT  
TCTCTTCAAATAGATTTCAAGGCATGATACCAGATACTGTTGGGGATGTTAGCTCCCTTTATGTTCTGAAC  
CAGTCACACAATGCCCTTGAAGGACCAATTCCAAAATCAATTGGGATGCTACAAATGCTTGAATCACTAG  
ACCTGTCAACAAACCACCTGTCCGGAGAGATCCCCTCAGAGCTTGCAAGTCTCACATTCTTAGCAGCTTT  
GAACTTATCGTTCAACAAATTGTTTGGAAAAATCCCATCGATTAATCAATTTCTAACATTCTCAGCAGATT  
CCTTTGAAGGAAACAGAGGCCTATGCGGGTTCCTCTCAACAACAATTGTGAAAGCAATGGCTCAGAGT  
CCCTCTCCCTGCTGCCACCAACTTCGGTACCAGACTCAGACTCAGATTATGAATGGAAGTTCATTTTTGCG  
GCTGTTGGATACATAG

>M6-PGSC0003DMG400020520 M6 LRR-RLP

GGCTACTCCAATAACAAAAACCCCATCACCTGCCTGTACAAAAATCATAGAAGAAATCACAAGAATTTAC  
AAATCACTCCCACCAAGACCATCCATTTTAGAAATTGAAGCTTCAATTTCTGTAATAAAATCAGTAGAAAC  
AGAAGAAAAAATAGAACTTGATGAAATTTCCAAGAAAGTAGTGGAGATAGAAGAAAATGTTCCAGCTG  
AGCTTTTCTCTGTGTTACAACAAGTGAGAAAAGCTATGGTTTTGTTCAAAGCAAAGAACAGAGGAAAG  
AGGCTGTTCAAGTTAATTGAACTTGATAAGACTTATCAAGATTTTGTGTTGATTGAGGAAGCTACACA  
GTTGATTTCTGGAGATACCCAAATGGGAAAAATCAATTCCTTTGAGGACCAATTGGTGAATTTGGAAA  
AAAAGATGAGATTTTGTGAAAGGTTTGGTTACAAGTTGTGAATTGATTACTGTTTCTTCTCAGGTTTG  
GGTATTTGCTTCTCCTTTTTGCTTTTTTGTGTCCAAGATTTCAACTTTTTGCTTGTGAGTTGTGGAG

GTAGTGTGTTGTCTTTCTATCTGTCCATACTAATAGTTGTAGTATTGCTTATGTTACCATTTGTTGTTCCCTT  
GTA CTTCGATTATTTTATTATTTTGTG TAGCTAATGTT CAGAATGCTTTGTTATGCTTTCACTTCCGTTTAT  
TCTTTTTGTGTGTGCATCCAAGATTTCAACTTTTTGCTTGCTTGTGAGTTGTGGAGGTTGTGGAGAGCAT  
GGATTAGGCTAGAGGTTAGTAGGTA CTAGTAGTCCTAGTATTGCTTATCTGGTTTCTTGTCCTTCTGTTAC  
TTTGTGTTGTTGTAGTATGTAGTTTGATTATCGCATTATTTTATTGGAAATCTTAGAATAAAATATGTATC  
CAAACACA ACTTCAAAAATCGTTCAAGTTTCTAACTTCAGAATCTATGGCAAACGCTAGCTTAGATTGA  
TGGA AAAACATCATTATAGTTTCTCCTTTTGGTCTTTCTTGGA ACTTGAGCTCTAGTTTGCAAGATTCTTT  
TTCCTTTTTAGTGATGGCACTAGCTTGCTACGTATGTTGACTAATCTACTAGGTTTCCAGTTATAGGTCAG  
TATGTGTGGCAGTGGCGGAGCTATTGATAACCCTTTGTTTGGGATTGGGGCGTAGTTGTTGTTGGCCGT  
CAATGTTTAGATTGTGGAAAACATCATTAGAGTTTTTCTTTCGGGTGTCTCTCTTGGA ACTTAAATCGTA  
GTTAGCATTATTCGTTTTCTTTTTAGTGATGGCACTAGCTTGCTATGTACGTCAACTAATCTACTAGGTTT  
CCAGCATTTCGTT CAGTATGTGTGGATCCCTTCATCGGAAAATTATAATGTGCAAATAGGTCAATTTCTTTT  
TTATGTATAAATACTATATATGTTGTTTGGGACAGAGACATAGTTGTTGTTGTTGTATAAACTATATGTTT  
AATCCTGTAGCCTTCTTCGTGTGTTACTCTTTTCTATTTTAAATCCTCTTAGTAAAAGTCCTGGCTCGTTAC  
TGATATGGCATTCAACTATACTATATCTTAATTGTTGTGTAATTGCCTTTAGGGATCAAGCACAAAGAGA  
AATACAGTTTAATGAAAGTAGCTGCCCTAATTGAAAATGCTGCCAAA ACTCGAGCAAGAGTTGTCGATC  
TTCACAACAAGTTAATGGACAAGATTGAATGGCTTCCGTTGTCACTTGGGAAATTGGTGAATGTCACTGA  
GCTAAACGTTGCCGATAACCAAATTATGGCTCTTCCA ACTACAATTGGTAGCCTTAATGCCTTAACAAAG  
CTCGATCTTCACTCCAACCAAATTATAAACCTTCTGATTCTTTGGTGAGCTAATCAATTTGACTGATCTC  
GACCTCACGCGAACAGGTTGAAATCGCTGCCAGCTTCTTTCAGGAACTTAGTTAATCTGATTGATCTTG  
ATTTGGGTT CGAATAGGTT CGCTCATTTCCTGATTTTCGTTGGGAACTTAACTCCTTGAAGAGACTAAA  
CATGGAAACAAATCAGCTCGAGGAACTTCTTACACAATAGGATTTTGTCTTCCCTTGTAGA ACTGAGA  
TTGGATTTAATCAGCTTAAAGCTCTCCCCGAGGCAATGGGAATGCTCGAACACTTGGAGATTCTTACAC  
TGCACATCAACAGAGTTAAAGGATTACCAACGACAATGGGGAATCTTCTCACCTCAGGGA ACTTGATG  
TTAGCTTCAACGAAGTTGAGAACATACCCGAAACATTCTGTTTTGCTGT CAGCTTGGAAAAGCTTAATCT  
TGCAAACA ACTTTGCAGACTTGAAA ACTTTACCAAGATCAATCGGGAACCTTGAGAATCTTGAAGAGCTT  
GATATTAGCAACAGTCAAATAAGAACGTTGCCCGACTCCTTCAGGCTCTTGTC AAAGTTGAAA ACTTTTC  
GAGCTGATGAGACTCCACTAGAAGTACCACCAAGGCAAATTATAAAGCTAGGGGCTCAGGTGATTTTTA  
TGCTTACTGTGTTTCTGTCAATCAATCTTTAGACTTTATGGTAGTTTTT TAGAGTTGATAGTTAAAAACAT



ACTTGA ACTATCGCCTTTTCCCGAGTTTCACACCCTACACTATCAACTCTTCCCTTTTCTACATGAACTAT  
CAATATCTATGTATTAAGCACACCTCAACTATCACGTAGGAAAAGGAAAAAACAGACGGCTGAGCC  
GTTGAAGTGTGTTTTAATACATATATGGTGATAGTTCAAGCAGGAAAAGGGAAAAAGGGAACATCTGAT  
AGTTGAGGTGTGAAACTCGTAAAAACAATTGTTTGACCATAATCTCTACATTTTCTAACTTGTTTCGTTT  
TCTTCTTTTTTCTTGCCATCAGGTTGTTGTAGAGTACATGGCTGAATTCGTGCTAAGAACGAGCTTCAAT  
TGCAGCGGCCAAAGAGAAGGAGAGCTTTCTTTTCTCTGAGTTGCCTATTTCTAACACCGAGAGGAAGA  
GGCGGATCTAGAGCAGGTACTGTGGGTTGAACTGAACCTAATGCTCGCGGATCGAACTACTTGTACATC  
CTGCAAAAAACATTTGAAAACATATACATATTATAGGATCTCACTCATTCTGAATCCACTAACTCTAGATC  
CTGGATTCGCCTTGGTGAGAGGTGTCGGATACCTTCAGAATCCGTCAAAGCAATTATATATATATATA  
TGAAAAGTTGCTCCAAAC

>M6-PGSC0003DMG400020546 M6 LRR-RLP

TTTACGTTTCACCAAGGAATGATAAATAATTTTCGTCAAAGGAATAATTGTTGTTTGAATTCAGAGATCG  
GCGGCGAGTAAAGAGAAATGGAGAAAGAGGGAAAAAGCGACGCCGATAACCGGAGTACAATCACAGT  
GAATGTTAAGTTCAGTGGTCGATCGATACCGGTGAAATCTCCGACGAGTGCACTGTCAAACACCTCAA  
GTCTCTCCTTCAACCACTCACAAATGTCCTCTCTCGCGGCCAGAACTCATCTTCAAAGGTATTTTTTCTTT  
CAACTCTAACCTATCAGCATTATTTTCGTATACAATCGGAGCTCAAAGAACTGAATATCAATGAATTTGAT  
AGATGACATAATTTTTTTCATGAATAGGGAAAGTTTTGGTGGATGAAATAACATTGAAGTCATCGGAGG  
TTGGAAATGGTGCGAAGATCATGCTTATGGCTTCCAGGGCTTACATCAAGGGGTAATTCCTTATTTTCC  
TTTACATTATACTCTATTGAGCATAACTATTTGGGATTAGTACTTATATGTGTTACTATACTTAGTTTGTTT  
ATGGATTTGTACATAACTAGAAAATGGAGAGAACCTCTAGTATTGATAAGCTTCTCAGTTGTGTTAAAGG  
ATAACATATTGATTACTAGAATGAATTAAGGCTACGCAGAGTAGAATGTATATTTAGATATAGGAGACT  
ACAACTGATTTGGATTGAGGTGTAATTGATTGAGCCGTGCTTGTGACTTTCAAATTTTTGTAAAATAAA  
AAACCAGAAATCCACTGAATTTATCCAGTTAGGTCCTGAACTTCTGCTTTCTTAAAGCTTATTTGTGTA  
TATTGGATAGGATGGACCAATAAGAAAGGAAGCTTCCAATTGCCACAGCGAGGAGGATGCCTGAAG  
CTATGAGACCTAAAAGGGATGTTCTCAAGTTCCTGTTGTGAAGAGCCAACCTGAACGGTGGAAGGCCA  
CTGGGGTTGTTGCATTATCAGAATGCAATCTGAAGGTAAGACGAGAAGTAACTGACTTTGCTTTGTCCA  
ATGATTTAGA ACTTGTCTTACTGTGAACAATCGCTATTGACGGGACAAGAGATACAATTGTTGAACTGG  
AACTCACTTTGATCCAATCATATGCATATTGGAGTTGACCTAAAAATAGAATTGTTTGGTCTTTTCTTTT  
TCCTTCTAATTCATTTTTTTAATTTTATATCTAATGCATTTTCTGGCTCGAGTAGGTGAGATAGCCAAGCTA

TTTCCTTCTCTTTTCGTATAACAATATGGGAAAAACCACTAAAGAAAAGAATCCATAAATTTATAAAAAGTGG  
TCTAAGGGATTTGAACCTTTGATTGTTCTTCATTCTGGCTATAATATCAGTTTCAGTAATGGAGCTGTTAA  
CAACTCATCCATCTGTATGGAGACTAATTTTGCAGTTTTACTCCAAATAGAACATGGCCTTTGGAGTAGA  
TCCCCAGTATCTTTAGAAAAGATCTTAGGTGTGAGTTGTAECTCCACCAGTTGTGCAGTCTAAACAAAAAA  
CAAAATTCTATTTCCCCTCTACTATGAATAAACTGCCAAAAGAGAGGAGTATTGTCAAATAGATTCAAT  
ACATTTGGAATAAAACAAAATCCTCCCTGACATGTTTTATTCCAATTTAAACATTGGCTGATAGATAGG  
CTGAATATTGTTCAATTTTTGGGAAATTGGAGGACCAAGTGCATGACCTTCCTCATAGGCCATAGCTTGT  
GACAAAATGTTGTATCTCCATTTTGTTCATCTTTTGAAATTATTTATTGCATCACCAAAACCAAAATGACC  
ACCCAGTGTGTGAAAGGCGATAAGGCGAGGCGAGGCTGTTATGCCTATTTACAGTGAGGCGAGGCT  
AGATTAATAGGTGAGCTATGGCGGCAATATGGCAATGGCAATGGCGAGGCGTGGCGGCGCCTTTTTT  
ATTTTTATTTTTTAAAAGGCCGACTTAATAATATTAGTCAAAATTAGGGTTTCTGCAAACCTTCATTAG  
TCGCGACGTGTGACTTCTTCTATCGGAATCGTCGAGCACTCGAGCTTCTTCTACTCTTCTCCTTCGCGTGA  
GTTGCGTCTGCCAGGTATGTCTACGAAGACCTCTTCTTCTCAGTCAGTTCTTCTTCTTCTTCTTCTC  
TCTTCTTTTTCAGTTTTTCTACTTCAGTTTCTTCTTCTCAGTCTGTCTGCTCACTGCTCTGTTTTCGTGGA  
GTGAACTGCTCTGTTTTGCTCTGTTTTGTGCTCACTGGCCACTGCTGAGTGCTGACTGCTCACTGCTGTC  
TATATTTAAAAAAATAATTTGATCCTTCTATATTAATTTAGTTTTATACTAATTAATATAGTATTTATTTGT  
CAATTGTCTTTTGAATTATTGGGTCTTTAAAGTTCTAGATTTTATAGTATCTACTATTAGTTTTTGAATTGAA  
ATATTTGCTAATATATGTTACTGCTATTGAGATTTTGGATATATGCCATTAATGTTTTAATTTTTGGTAT  
TAATTAGCGCTCAATTCAAAAAGGCGAGCGCCTCGCTGCAAGGCAAGGCAGGCCCTTGTGAGCTTTTCG  
CCGTCCAAAACACTGGACCACCCAAAGTTTCTCATTGCAAGACTAAGTTTAAATTTAAGACCCAAAAA  
GATGCAGTCATGTAGAGAAAAGAAAAAAGAAAAAAATACTACTGTGCAGTTCAAACCTTATTGAATGAA  
TGTTGGGTTAGTCTGAGAGCACATTTAGCCTGCATTAATCAGATAAAATCCCTCTATATATCATTGTGCA  
TGTACATATTGTGTATCCAGTATGAGAGTATACTATGGTCAAATGGTAAATTCATCTTAGCCAAGTAGTA  
GGACCAAGTTTGATTCTTCTATCACCAAGAGTTATTTATCTACTTGTGTTAAATCGTAAATAGCATTAT  
GTACGTCCTGAACTACGTTTCGAGCCGATTCTTTTTGCTTTTTCTCCTCTTGAAGATATTGCTCTCATT  
CATATTGGAACCTTGATAGGTCTTGCCTGATGAAGTGTGACCTGCGGACCTCCGCTAGAGTCTGGATC  
TCAGCCACAACGCCATACAGCATCTCCAGCCGCAATTAATAGCTTGAGTTCTTTCAGGTCAGTAGAGT  
TGACTTCTTTATATTTCTTTGAAATTGCGATTTATCACTTGTGTTGAGGCAGAAATTTATTTTGGTATTGT  
TCTGCTTCCCAGAAATTGATCCTCAATGGGAATGAAATTATGGATAATTCCTTAAGCTGGGAAGAGCTAG

CTTCTATAAAGAGTCTTATGGTTATCTCACTGAACCAAACCAGTAAGTCCCCCTTCATCAGCATATTACT  
CTCCAAGCTGAATTGGATTACCAATATATTGCATCGTCTCTATTTAATTGAAGTAGAAACGTATTCTTTC  
CTGCACCATTAAATGATGGCTACACCAAACATGTATGTACATTTGAGTGTGAGGGACAATAATTGCAAT  
GTCATAGTTCTCATTTATTGTTTTCATAAAATTAATATGAAAACCTGAAGTATATCAATGAGTAATATAA  
GTTGTTGAATTTCTAGTATTCAAATGTTAAGTTGCATCATTGGAATGTTAGTCATTCCAAGTTTTCTTTG  
ACATACAGCTTGAAACTAAATTGAAAATTCCTCACAGTTTTCTGTCTTATATACTTGTTTTCTTGCCT  
TTTATGAGTATATATTTATTAAGTTACTTTTTCAGAATAGTCGAATACTTACAAAAACATAATTGAAAAAT  
TGTCAATTGTCATGGTCTCTCAAATGTTTGAATAGGTTGGCTTTTACATATCAGTTTATAGTTTATTTGAA  
CTAGTGATTGGGTATTGGCAATTTCTATGTTAACTCAATTTGTTCTTACAGAAATATTATAAAGCTTTTAA  
TCGGTTCTTTAGTTACTCAGTTTTAACTTGTAAGTGCCAAATTGGTTATCAGACAACCCATTTGCTAAAGT  
ATAAAAACCGTTCCAATGTATAAGATTCACATATAACTTAAGACAGTTGGACGATGGATATAAGCCCAA  
TACTGCTTTTGGCAGAGGGGAGAGACCAATTCTTCATGCTTGTAGTGTGTTGGTGGATTGTAAATTGTACC  
AAGGCAAGTCTAATCATAAAACAACATTATTTATTGACTGACCCCTCAAACATGCATGAAAACCTGAAAA  
TAAAGCTGTCTATCTTTTATTCAAAAATACATGGTATTAATTTTTTGGTCAGTGACATTGAGATGTCGTTT  
TGTGTTGCAATTTTATTTTCTGATACATCTTACTCTGTTTACCAACCTCAATCATTATCATATGCCATTATT  
TCGTATAAAGGTTTCTTGTATGATTGTATCAAGTAGTCTTCTTTGGTATGCAGCATAGCAACGCTGCCTCC  
TGAGGTCGGCATTGTTGACCGGTCTGAGACAACCTCATATTGCACATAACGAGTTAACAGGTCTCCCATCT  
GAGATAGGTCTGCTGACCAGCCTTGAGGTTCTGAAAGTTAACAACAACAGGTAATTTGAAGTACTGAAA  
CAAAAAAAGATATTTCAATGATATGAAATCATGAGGTGGAATCAGCGTGAAATTGCATGTCCAAACGCT  
GATTCCATCTCACGATTCCATATCGTGATATGGTATCGCATGGCCAAACACCTACTTAGTGTTTTACGTTA  
TTGTTCCCTCTCCTCCTTTTCTGGAGGTCATGGATGTTTCGGAGTCTGTTGATTTTCTTTTTATCTTTTATTT  
TTCTTTGAAGTGATAAGGACCTAAGTTAGGTTTGTAAAGCTTAACCTTTTAATTGCAGGATACGCTCTATTC  
CGGAAAGTATAGGGGGTTGTGTTTCTTATTGAGGTAAAAAAGGGCATATTTTCTCTACCCACTTGTC  
TTCTCTTCTTTTATTAACTGGAATCATGAAATCCAAAATATAGGCTGAAACCTGCAATAAGTTCCAGCG  
TTTATTGTTTCTTGTGATTTTATTACCTATATACAGATAACGTGATTCTATATGGTGTAGGTTGATCTTTCA  
TCTAATCTTTTGGTAGAGCTGCCAGAAACAATTAGCAAACCTAAAGGACTTAAAGGTCTGTCTTCATCTAT  
ACATTTTTCGTTTTCTTTTTGAAGTCATTCTTCAAATACCACTTCAGTTTACAGCTTTTTATATGCAATAT  
AAAAAAAATCTTTTTTTTTTATAAATGCCGTACAGAAAAGAACTTGCAAACGTTTTACGAAATTAGCT  
ATATATGCTCTAGTACTGGTTGTTAGACATTGGTAAAGAATGTAACATAGTTTTCTAAGATAGGGCATAG

CCTGGATGAACATTTATGTATCAGCTCTAGAACATTCAGCTATGACATTTTAAACCAAAGTAGAGGATTT  
AGTGCCATAATCTGCTGGACCGACACCATTTGCTTGGATAAAAGCACAGCACATGATAGGTAAAATTTA  
ATCATGGTTAAGCGAAAACTTGGTTTTATCAATTGGCGCTAGTAAGTTTATACTGCACATTATAGGGGC  
ATGTCACGAGTTTAAATGTTGCCACAGAAATATTCAAGTGGAGAAGGATAGATGGTAGTCCATTATCAC  
ATAGTGTGCGAACTGTGTGCCAAGTGCCAACCAACTCCGAAGGATCTCTCAGTTATCAAAAAGGGAAAAAA  
TGTTGTTTTCTTTGCAAGGCACGACACAAATTTCTTTAGTCAACAATGTTTTCTGAAACATCTAGCATCAT  
GTGATGGCCTCTTTTACCTGACAGTATGCTTTTGCCCAATTATTTGTGTGGTTCATGTCCGATTACTGGT  
GCAGGCACCTTTATCTTAGGAACAACGGACTCAAATCCCTTCCTAGCAGCATTTTTAAACAGTGCTGTCAA  
CTCTCTACACTAGATCTCCATGGAAGTAAATAACTATAGATGTTATCTGCCAGGTAGTAAATCATTACT  
ACTTAATAACAGTAACATGCCCTAGCTAGTCTGCCTCTTACGATTTTCAAACGATCACAGATTGAAGGAT  
GGGAGAATTTTGATGAGAGAAGACGGTGAAGCATCAGAAACAAGTGGACTTCAGAGTGAGCAGCTCT  
GGCAAATTTGACGAAGGAGCTGATCAAAGCTGATAAGGCCTGATACAACTACTCGGTAAGTCCGGTTTA  
TATACATCCTGAAATACATTTGCATAGTGATCCCTAGCAAAGTTCACAGAAGAATCTTGTAGTACCTGTTA  
AGATACATCAAGAAATTATAATGAGCATACTGCTCCACTGTGCACTCCCTAAAGATGATTAAATTTTCTG  
AAGGCTTACTATAAAGCTTTCTGCATCTTCTCAAAGTGTACATATATAGTTGAATGAAAATTCCTTTTA  
AGGATACATATTACAAATTGCTGTACCCCTA

>M6-PGSC0003DMG400020641 M6 LRR-RLP

TACTCTTATAAACTTATTTAAATTTAGGTGATGGTTTTATCACACAAAAGTCCGAAGACAAACCTCCC  
CATCATCCAAACCGCACATATCACTAAATTTGCATCACATCGAAACAAGGTGTTATAAATTCGATGCTG  
ATGTGAGTGATTAACAATAGTTTCAATTTCTTATCTTCGCCTCTCTCAGGTACGGCCTTCGGATTTTGATTT  
TTTTTTTTAAGTCTGGAAACACCTTTATCTTCCCGAATTTGATAAATTTTGTGGATTTTTTTGGTGAGATTT  
TGATGAAATTGTAGTTTTATAGAACCAGATTTGTTAGATGTAGCATGTCTACAATGAGTTCAATTGAAT  
CCTGTGTTTTTCGGCAGATAAATAGGTAAAAAATCACTAGAAGCTCAAAAAATATTGTTTTAGAATCTA  
TTATTTGTTTTTCTCTCGGAGTTTTCATGTGTAAGTTGAGGGTTGAAGAATCCAGAACAATTTTTTGTA  
GAGGGAAATGCTCTATATTTCACTTTGTTGAGCTAATCATTATACTGAGTTTTATGTAGTCTGTTTGAAA  
TTGTCAATGTGAAGAACAATTGCAAAGTGTAGGTGTACTGTATTATCTATTTGATTCAAATTATCTAAAAT  
CTACGATGTGTATTTTTAAGTGCTCACCCACGACTCAGGCCAGGGGCGGGGTCGTGGAGCTAGGTGGAT  
TCAAGAGGTTTCAAGTGAATCTCATTGTCAGATGATTATGATAGGTAAATAGGGGGGAAACAATGTTT  
TTGTGTATACGTCAAATGTTTATCTATCTCTATGAGGTAGATATAAGGTCTGCATACACTTTAACCTCCCG

AGATCCCACCTTGTTGGACTACACTGGGTATTATGTTGTTGTTGTTGTTTCATCATATCCATTGACATAGGTC  
TGCATACATTCTTGCATTTTTTTTTGAATACCTTTGTTAGAATCCCTTGCTCTGCCTCTGGTCATTCAAGCGT  
TGTTAAATACTCTTAGAATATCTAAACCCAAAATGCTGACTTATTGGAGCAAGGGGGACCTTAGAGCTAT  
CTGTAGTTTACAAAATATTTCAAGTTAGAATGGGAATAAAGGAACTCTTTTGGGTTTGTATTTGCTGCTCC  
TTATGTATTGAGCTTACTTCAAAGTTGATTTCTTTTTCGACCCCTAATCCAACCTCTTAGTGCCATTTGGT  
TCAACGAATTAGGTGGGCTATCCGAGAACAATTTTGTGATTAAATTTATCCCGTGTTTGGTTGGAGGTA  
TTAGCTAAAATTAGTATTATTTTTTACCAAATCTTAGTATGACTTATCCCATATAGAAGGTGGATTAATT  
ATAATCTTGAGATATTATGGTTTGAACCAATGACACACCCCTTAGGAGAGGTTTTTGTACAAGCTATTAT  
CAAGCGTGTTTGCAGAATAACTAGTGCTTTTGAAACTCATCTTCCAAGATGAATTGTACATCTATTCCTTA  
TGATACCATATACATATGTTTATGCCTGTGGATTATAATGTGGATCATTGGAAAGACAGAAATAGGAG  
GCTTTTGAAGGGGTGGAGATGAACTTCGCTCGATTGAGTAGTAGTCTTCAATCCCTGTAGTTTTTTTTGG  
TGCACCCGTGTAGTTCTTGTGTATAGAGGATTGGGTGGCTTTTAGAGAGAACCATATATTGTAGGTTT  
CTCCTTTTAGGTATATTTCTGTATATTGCCAAGTTGGCCTTGATATTACAATGAAATACTTTAACTGAGA  
AAAAATATTCCAAGTAACACTACTATCACAGTTGGGGATATTTTCAAGACTTCACCAAATGTAGGATACT  
TTTCTATATCCAGATAGTCCGGGCTCGAGATGAAGCTAAGCATAACATCAGTCTTGTAATATTTTTGTAT  
CCTCGCTAAGATGTGCATGGCATAATTCTGAGAAAATAGCTCCCGATGGTTTTATTGTCTAGCTACACCTT  
GGCATGCATAAAGTACAATTAAGTAGCTTTCATTAAGTTTTTTTTTTATTTCTTCTGTTTTTTCTTGCATC  
CTTTGACTTAGGTCGCTATAAATCTATCTATCTTATGAGTCTACCTAGTATGCATTAGTAGTACTGCAGAA  
ATTTGAGGTTATGTATTCATATTGAAGTGGACATATGCATGCACAAAGCATCTTATAATATATTGATGAG  
GTTACAATTTACCTTTATTAATTTTGTAAATGCTTGAAAACATTAATAATAGCCTCTCTACCTCATAAGATAT  
AGGTAAGGGCCGTGTATCCACCCTCCCAGATCCCACTTATGGGATTACACTGGGTATGTTGTTGTAGAG  
AAAATTTAATTATAAACAAAAGACAAGATATTCATGTATGGTATGCTCAATGCTGTATAATGTCAACTAA  
TATGTGGTTTTTTCTTATTCTTTGCAGTGTTGGTTTGTGTGGCTAACCTCTCAAGTTAACATCCTCCAATCAT  
TTCTTTTTGGTATTGGTACCAAAGACGGTAAGTATAGTTAAACTGACCATTGGGAACATTGACATTTT  
ACTCTGGTTGATAAGTAACTATCTTCTAGTTCCTACTTCTTAGGGGACTTCATAGTTCAAAAACCAGAT  
TTCTTTGCCATAAGTCAGTGATCTCATAGGTCATGCGTTTGGAGACTTGCTCTTTCTTTTTTCGAGTCGTCT  
ACCTCTTCTAAGACTCTAGCATGTCTTTAATAAAAATTATTGGGAAGTCCTAATAAAAAAAAAAAGTTTATT  
GTGAACTATAGAGCTTCACACCCTTGCTGGAGTGTTAACTTGGTAGAAATGGATAATCCATCAGATGACT  
TCTCTGGATATATCATGCAGCTTCTGACGATTGTTTACTCTTTATTTTCCAACACCTTGACTGTGGATCTG

ACCGTGAATCATTGGTTAACCTGTCGTCGCTGGCTTCAAATCAAATCTAAATAGAAGATCTTTACAG  
TTTCAATGCTCTTCTCTATGCTTAATTTTTTCATCGTTATCTCAAATAACACCCGAATCAGTACATTACACT  
TATATAGGCTTCTGAACCGTTTCCAGAACCTAGAATCATTGTCCTTGTCTGGATGCACCGAGCTTCCAGAT  
TTGGGGTTGTCTTTGTTACCACGTCATGGATCGAACTGCAAAGTCTTCATCTAGACTGCTGTTTTGGGA  
TAACTGATAGTGGTCTTTCCTGCGTGGCATCTGGCTGTTCTTTGTTGGTAATACTAAGTCTTACC GGGT  
AATGTTACAGATTATGGGTTAGAGGCCTTATCTAATTCTTGCCTAGCTTTAGAAGATCTGAATCTCTCGTA  
TTGCTCTCGAATCTCTGATTATGGTGTAAGAGCTATTTACAAAAGTGCCTGTCGCTTAGAGCAATCAGG  
ATATCCTACTGTAGAAATCTAACTGGTGCTGGCTTCAAGGATGTTCTCAAAGTCTGACTCATTGGAAG  
CCGATTACTGTAGGCTTGAAGTAACTGGAATACGGAGTATCCTAAGTGGAGGTGGTATTGAATACTTGA  
GTGTGTCTAACTTGATCTGGTGCACTCGTGTGAATGGTCTGGTGGCTATTAGCGTCCGATTTGCTGCAAA  
GTTAAGAGTGTGAATTTTCGTTCCAGCAGAACGATTGGCGATGATTGTATCATGACAATAGCAAAGGG  
TTGTCCGACACTTCAGGAATGGAAGTCTAGCAATATGTCATGAGGTCAAGATAGCAGGTTGGGAATCTAT  
CGCATCACATTGTCATAACTGAAAACACTACATGTGAATCGGTGTAGAAATCTTTGTGACCGTGGACTG  
CAGGCATTGAGAACCGGATGCAAACGTCTCTCAATTCTTTACATCACCAGAAGTTCTCAGATCAGTGGTG  
TAGCGTTGGAAATTTTTAACTTGCTAGAGGTAATGTAGAGGTCAAAGAAGAAGAAGTAATGTGTATTT  
GCCCTCATGGAGCCTTCAGGTTTTAATAGGTGGCAATAATCTTCAGTTCTTAAGCTGTCAGGTCTCAGTA  
GACATTCTGATTTTACAGACTCGTGAGGAGAACTGTCATCCCAGTCAATCCAATTCGGATCCCTGGAA  
CTGACGTGTTACTCACCCGTCCACCACTGGAAACATTGTTTCCTGTCCAAGTCTGATGGAAATGAACGACA  
GTTGAGCCCACTGCACACTAGTATCAAGCTGCGTATAATTTCTTGAATGTTTTCTTCCATAAGAAAAA  
AGTGATTCTAATAAATGCATGTACATAACAATGAAACAGTTGCTTGGTGCAAATTGCAGAACCCACACTCA  
GAGGTGTAGCTCTTCATGTGGCATGTAGGCCACAATGCAGAACAATTGTTTGATGCATGATAAATGGAA  
GGATTGGTATAGAAGAATAGTAGGGAA

>M6-PGSC0003DMG400020729 M6 LRR-RLP

CGGTCTTGAGGAGATCGCGTAAGGAAGTCAAGAGCTTAGGGTGTTCCTTCTGATCCATTTTCTCGAGG  
ACCGAATGTATCCTTGAGAGAGCAAGGCCTTGTAGCTGTCTCAGTGGGCTGCCATAAGCTTAAGTCAGT  
TTTATACTTCTGCTGCATAATGACAAATGACGCCTTAGTACTATTGGAAGGAACCGTCCCTAACATGATCC  
AATTTCAATTTGTGTATTATCAAGCCTCAAAGTCTGATTACTTAACCCTTGAACCACTTGTGCTGATCTTG  
GGGGCCATTGTGCAACACTGCAAGGAATTACGACGACTTTCTTTTTCTGGCCTCCTTACAGATCGTGTG  
TTTGAGTACATCGGGTTCATGCTAAGTAGTTAGAGATGATTTCTTAGCTTTTGTGGGGGATAGCAATC

TAGAAACGAAGCCTATCGCCACGCCGACCATCAAATATGCGAGTGCCTCCGTAAGTTGGAGATTGGAGA  
CTGCCCTTTGGTGATGAGGCTCTGTTGGCTAATGCTGCAAAGCTGGAGACAATGTGATCCCTTCAGATG  
TCTAATTGTTCAAGTAAATTTTGATACATGTAAGTTGCCAGGGCTTAATGTTGAAGTTATAGACGAGAGGG  
GTCATCTGGATACGAGACCAGAAAGTTGCCCTGTTGAGAACTTTATACATACAAGACAGTGTCAAGAA  
GGAGGTTGACACTCGTGGTTTTGTTGGATAATTGACGAAAATG

>M6-PGSC0003DMG400020918 M6 LRR-RLP

TATAATTGGCCACGGCGATGACCAGTCTTTCTTTACTTCTTCTACTACATATTTAAATCGTCCCCATTC  
TCTCTCTCAAAGCTCCATTAGAATCAGCTAGCAGCGCCGCCCTAACATCCCTATTTTTTACGGCGGCGTCT  
ACAATTCCGGTAGACCATTACGACGACGTTTACTAGTTTCCTTCATTCTAAATGGGCCAATCTTCTCAGC  
TCACGGCTTCTCCCCACCGATTCCAAGTATCCCCACCACCGTTGTTCCGGCACCAGCCATTCCCAATCGG  
AATTTTTCTACCCTACACTTTCCGAAGAAGACGATTTCCCTATTTACAACCCTGTGAAAACCGAGATTAC  
ACTGATGGTCTTCTGATGAATGTTTAGCCCTAATTTCCAGTCCTTAAGCTCCGGTGATCGGAAAAGAT  
CTTCCCTTGCTGCCGGAGATGGCTTCTGGTTGAAGGGATTAGCCGTCACCGGCTTTCTCTCAACGCAA  
AACTGAAATCATTCCGGATATACCCACCATCTTCTCTCGTTTCGATTCCGTCACCAAACCTCGCTCTCCGAT  
GTGACCGAAGATCGGTGAGCATCAACGATGAAGCTTTGATCCTCATCTCCCACCGGTGCGTTAACCTAAC  
GGGCCTAAAGCTTCGTGGTTGCCGAGATATCACCGATTTGGGAATGGCTTGTGGCAAAAAATTGTGA  
GAAATTGAAGAAATTCTTGTGGGTCTTGTATGTTGGCGCTGAAGGTATGAATGCTTTGCTTATTAAC  
AGCATTTCACTCGAAGAACTCTCTGTAAACGTTTACGGTGTATGAATCATACTGTATCTGTTGAACCGAT  
TAGCATTGGATCTAATGCTGCTTGTTCGCTTAAATCTATATGTTTGAAGAGCTTTATAATGGACAATGTT  
TTGGACCTTTGATCATGGGATCGAAGAATTTGAAGACGTTGAAATTGTTGCGATGTTGGGTGATTGGG  
ATAGAGTCTTGGAGACGATTGCAAGTAGGGAGAATCATTTAGTTGAGATTCATTTAGAGAGGGTTCAAG  
TGAGTGACATTGGACTCAGGGCGATATCCAAGTTTTCAGACTTGGAGATTCTTCATTTGGTGAAAGCTCC  
TGAATGTACAGATGCTGGAGTTGTTGATGTGGCTAGACATTGTAAGTTGTTGAGGAAGGTTACATTGA  
TGGATGGAGGACGAATCGAATAGGTGATGTTGGTTTGGGTGCCATCGGCGAATATAGTGTAACCTCA  
AGGAATTGGTAATTATGGGTTTGAATCCTACGGTGACTAGTTTATTAGCCATTGCTTCTAATTGTCAAAA  
GTTAGAAAGATTAGCACTTTGTGGTAGTGAGAGTATTGGGGATGCTGAAGTAACTTGATTGCTACAAA  
ATGTATGGCTTTGAAGAAGCTTTGTATCAAGGGATGTGAGGTAACAGATGAAGGGATTGTGTCTTTCCG  
GTGGGGATGTCCTAATTTGGTGAAAATTAAGGTTAAGAAGTGCAAGAACGTAACCTGGTGAAGTTGCAG  
ATTTGTTGAGATCAAGAAGGGGATCTTTGACGGTGAATCTTGATGTTGGGGAAGTTGATGTGGAGGTT

GTGGATGGTAGTGCTAGTGATGGTGGAGCATTAGAAGAAGGCATAGAGTTTCCACCGATTGCAAGAAC  
TGTTCCCATCCTTGGTGCTGGTGGTGTGCGTTGATATTGATACCCCATCGACCAGTAATTTTGGTTCGATCAC  
CAGCATCTACTTCAAGGATTGGCTTTCTTGGAGGAAGGGGCTTCGTTGCTTGCACTTTTCGTAGGTGGTC  
AAATGGTAACGCCAATGAGAACTTATGAAAATTGTGAACACAAGTTAGAACAGAGAAAACACTCTGTTC  
AACTTCATTTTTAATTGAATCAATAGAAAAGTGTGGATGTGCGACTTATCTCTCCTTCATTTGTGTGTTG  
ATATTTGCTTTTTGAAAATTTGATATGTAACCATAGATGCATTTAGAATCTTAGAAGTCACTTCTTGGATG  
ATGAAATCTATCCCTGCTCTATTGACAATTGCATTATAGAGTGCTGTCTTGAACCATGTATACTGTTGCTT  
CTGGTATGTGAATCAAATAGATATTGTTCCATCGACTAAATGTCATCAAGGACAGTGATCATTATGCATG  
TTCATTGTCATTTTGCTACAAGAATGGAGTAATACATGTCAAAGCACCTTTCTATATTACCAGGAATGCAC  
ATATTACCTCGACTCCTAGACCCTCCTCTTCCCTCTTTTTATTTTTCCGAGAAAAGATCGATCTCCAAGAT  
TC

>M6-PGSC0003DMG400021051 M6 LRR-RLP

AAATTATTGAATAGAGACACAAAGCAAGAATTGGAAAACCTAATACTTTTGATATATATTTTTGAGGCGCG  
AAATGGGCATTGGAAAACCTGCATTGTTTCTGCTATACGCGTTTCTCTGTGCGACTTATTTTCTCCTCATCTT  
TACCTCATTGTGCCCCAATGATCAAGCCCTTGCTCTTCTTCAATTCAACAACACGTTTACTATAAATCTTG  
ATGCTTCTTCTAGTGATTACGATCCTAAAACAGTTAAATGGAATAGGAGCACAGATTGTTGTTTCATGGGA  
TGGAGTCAAGTGTGACGAGACGACAAGACAAGTGATTGAGCTTGATCTCAGTAGCAGCCAACCTTCGAG  
GCAAGTTTCATTCCAACAGTAGCCTCTTTAAACTATCTAATCTCAAAAAGCTTGATTTGTCTTATAATGATT  
TTCCGGATCGCTCATTTCACCTAAATTTGGTGAGCTTTCTAGTTTGACGCATCTTGATTTGTGCTATTCAA  
GTTTTACAGGCCTAATCCCAGCAGAAATCTCTCGTCTTTCTAAATTACAAGTTCTTAGTATATAGAGTAGT  
CTATTAAGATTCGAAACCCACAATTTTGAAGTCTCCTTAAGAAGCTTGACCCGATTAAGAGAGCTCCACC  
TTAGATCTGTGAATATCTCTCCACCATTCTTTGAATTTCTCTTCTTATTTAACTAATCCAGAACTTTCAA  
CACGCAGATATACGGGATATTGCCCGAAGGAGTTTTCCACCTTTCCAACCTTGAATCTCTTGATTTATCG  
GACAATCCCCAGCTCACTGTTAGTTTTCCACATCCAAATGGAATAGCAGTGCATCACTAACGAAGTTAA  
ATCTCAGTAGTGTGAATGCTACTGGTAGGATACTGAATCATTGGTTCATCTAACTTCACTGCGTACATTG  
AGAATAGCTTCTTGAATCTCTCAGGCTCTATTCTAAACCTCTACGGAATCTCACTAACATAGAGGAATT  
GTTCTTGGAGATAACCATCTTGAAGGACCAATTTCTGATTTCTTTAGATTTGGAAAGCTCAGGTCGTTAT  
CACTTGGAAATAACAACCTTTGATGGCCAACCTGAGTTTTTATCCTTTAGCAGATGTCGCAACTGGAATCA  
TTAGTGTTCATTCAATTTCTAACTGGTCCGATTCCTTCTAATGTAAGTGGTATGCAAAACCTACAACG



TCTTTACTTGTCATCAAACCTCTTGAATGGGACTATACCTTCCTGGATATTCTCCCTCCCTTCACTTAAATG  
GTTAGACTTGAGTGATAACCATTTTCAGTGGAACATTTTGGAGTTCAAGTCTAAAACATTAGATCGAGTT  
GTTGTAAGACAAAATCACCTGCAAGGTCCTATTCCAAAGTCACTCCTAAACCAGCGTGATCTATATTATCT  
TCTCCTTTCTCACAATAATCTCAGTGGACAGATTGCTTCAACCATCTGCAATCTGAAAACATTACGAATGC  
TATATTTTCGGCAGCAATAATTTGGGGGGAACAATCCCACTATGTTTGGGTGAAATGAGTGAACCTTCAGT  
TTAGATTTAAGCAACAATAGTCTTAGCGGGACAATTAATACAAGTTTTAGTATAGGAAACCAACTTGAG  
GTCATTAAACTTGACGGGAATAAGCTAGAGGGGAAATTCCCGCAATCTTTGATCAATTGCAAAATTTAG  
AAGTCTTGATTTAGGTAACAATGAATTGAAAGACACATTTCTAAATGGTTGGGAGCCCTACCTTATTT  
GAAGATTTTGAACCTTGAGATCAAATAAGTTCTATGGCCCCATAAAAGATTCAAGGACTGACAACCTTGTT  
GCTCAAATTATAGTCATAGATCTCTCATCCAATAGATTTAGTGGAGATTTACCGGTGAGCCTTTGAGAAT  
CTTGAAGCCATGAAAATAATTGGTGAGAATAGTGGAACCCGAGAGTATGTAGGTGCTATAAATTCTTAT  
TATTACACAAATTCCTTGATAGTGACAACAAGGGACTGGAACCTTGAACCTCCTCAAGTTTTAACTACAA  
ACATAATCATAAATCTCTAACAACAGATTTGAAGGTCATACCACAAGCATTATTGGAGATCTCGTTGG  
GCTTCGCACGCTGAACTTATCTCATAATTGCTTGGAAAGGTGATATACCAGCATCACTGCACCAATTATAT  
GTACTTGAATCATTGTATCTCTCATCAAACAAAATCAGCGGAGGAATTCACAACAACCTTGCATTCCTCAC  
ATTTCTTGCACTTTAAATCTCTCTCACAATCATCTTGTTGGATGCATCCCCAAAGGAAAACAATTTGATA  
CGTTTGAGAATAGTTCATACCAAAGGAATGATGGGTTACGTGGATTGCCACTCTCAAATGATTGTGGTG  
GTGGTGATGGGGTACCACAAGCAACAACCTCTATTTGGGCTAGATCAAGAAGAAGAAGAAGAAGGAGAT  
TCAGCAATTATAAGTTGGAAGGCAGTTCTCATGGGTTATGGTTGTGGACTTGTTATTGGACTGTCCATAA  
TATACATAATGTTGTCAACTCAATATCCAGAATGGTTTTCGAGGATGGATGTAAAATTGGAACACATAAT  
TATTACAAGAATGAAAAAGCACAAGAAAAGATATTAGTTTGTACCTTCAGGTATTCAATTTGATCTTTA  
ATTATCAATGAATTTGCTCACCTCCTTCATCCTTAAAGCTCTTAACTTTAAATTCTTTCTTTTATGAAAATTG  
CAGGAT

>M6-PGSC0003DMG400021067 M6 LRR-RLP

GTTTGAAGCTAAAAATGGGGTATGCAGTTATTATTCTTAAATTGTGTTTCTCTGTCATGAAGTTTCTTCA  
ATATCCATATTACCTCACAAACATCAAACATTTTGTCTCTAAAATTCAAGAACACCCTTACTATAGATCC  
GTCAGCGTTTTATCCAAAAACGAGTTCATGGAACATGAGCAGAGATTGTTGCTCATGGGATGGAATCAT  
ATGCGATGACATCACTGGCCATGTCATTGAACTTGACCTCAGCCGCAGCGGACTGGATGGCACCATTGA  
TTCCAATAGCAGCTTATTCCAACCTCTCTCATCTCAAAGGCTCGATCTTTCTATGAATTAATTCTCCAATTC

TCATATCTCCCCTGAATTCAGCAAGTTTTCGAGCTTGACGCATCTTGATCTTTCTGACTCCTATTTCTCAGG  
TCAAATTCCTTCTGAAATCTCTCATCTTTCCAAGTTACAGTCTCTTCGTATCTCCACAACCTTTTTACTTTTAT  
GGTAGTAAGAAGCTAAGACTCACAACCCATGATTTTAAATCGCTTCTTCAGAACTTGACCCAATTAAGAG  
AGCTTGATCTTAGTCAAGTAAACATCTCTCCACCATTCTCTGAATTTTTCTTCTCATTTAACAACCTCTGA  
GTCTGACATATACAGGATTGTATGGGATAATACCTGAGAGTATATTTACCTGCCAACCTGGAAACACT  
TTACTTAGGGATCAATCATGAGCTCAATGGTTATTTTCCAAAACCAAATGGAACAGCAGTGCATCTCTC  
ATACAGTTAGATCTCAGTGGCATGAACTTTCTGATAATTTGCCTGAGTCTCTTGGCTATCATCTAACTTC  
ACTGCGTTCTTTGGACCTTGATATTGCAACCTTAGAGGGCCTATTCTGAATCTTTTTCAAATCTCACCC  
GCATTGAGTATTTGGACCTTTCATATAACTCCCTGAATGGAACAATACCACCAGGGATGTTATCCCTTCCA  
TCACTAAATACAATAGTCTTGAGTAATAATCACTTATCTGGTCCGCTTGAAGATTTCAAGTCGAATTCCT  
AATCTCGATAGATTTAGAGAGCAATCAGCTGCAGGGTCATCTTCCCCACTCAATCCAAAACCTTGTGAAC  
CTAACATCGCTTGGTCTTTCCTTCAATAATTTTAGTGGTTTTGTGGATGTCAGCCTCTTTTCAAACCTTAAA  
CAGCTTGGGGAACCTTAGTCTTTCATATAATAATATCTCACTGACCAATGACAACAAAGTTAATGTTACTTT  
GCCCCAATCTCTTTATTTGTTAGAATTGGCCGCATGTGAAGTGAAAGAATTGGAGTTTCTAAGATCTGCA  
AACCAGCTTTTCGATTTGGATCTTTCAAATAATAAGATTCAAGGAAGAATTCCTGATTGGGCATGGTCTA  
ACTGGATGTTTTATTGCGAGATCTTAATATATCCCACAATATGCTAACGAGTATGGATTCAATTCCTCTT  
CAACATCATTTAACAATTGATTTGCGGTCAAATTTACTTCAAGGTTCACTACCTATTCCACCAAATTCAC  
AAGATACTTCTTCATATCCCATAATAATCTCACTGGAGAAATTCCTTCATCTATTTGCAACTTGACATCACT  
GATAATGCTGGATTTGGCGACAACAATTTGCGTGGAGAAATTCGAGTGTTCGGAAATATCACTTCC  
CTCCAGGTTTTGGATATGCGCCACAACAATCTTCTGGGAATATTCCAACAACCTTTCAGCAATGGAAGTT  
CACTGAGCAGCCTCAACTTGCATGGCAACAACTAGAGGGGAAAATCCCACAATCCTTGACCAATTGCA  
AACAACTTGAAGTTCTTGATTTAGGAGACAATCACCTCAACGACACATTCCCAGTGTGGTTGGGGATTCT  
ACCAAAGCTGAAAGTTCTAAGCTTTCGATTCAACAATTCATGGTCCCATCAGAACATCAAGGATTGA  
GAACATGTTTCCAGAGCTCCGAATCATAGATCTCTCTTGCAATGCCTTCTCAGGAACTTACCTTCAAGTT  
TGTTTCAACATTTGAAAGCCATGAGGACAATTCATCAAACGATGAACACACCAAGTTATGAAGGAAGTC  
GATATTAC

>M6-PGSC0003DMG400021279 M6 LRR-RLP

TGATTCTATTCTCACTAAAGATCATGTCCCCACTCTCCCCACCCATCATATCAGTCACATCTCTAAGCCTA  
ACCCCCCCCCCTCAACCACCACTAAACCCTCCAAATAGTTCTTGCATAAAAATGATTCTTTTCTTAAAA

AATCAAAATAGAACTCCAACAATTGATCAGAAGAAACCTTTACAACAAATACAATGTATCCATTCAAAC  
CTTTTTATTTCTCTACTACTCATGTTTTCTATCTACCACCCCCCTTCTATCTCTCAACCAATGTAGCA  
AACATCAACAATCTCACACAACCAACATGAATCCTCATGAACTAGAACTCTTTACAAGATCATGGAAT  
CAATTTCCAGTGACCAAAGTTGGAGAAAATCATATCCAATCCATGCCAACAAAGTTCATCTTGGCTTGG  
AATTGAGTGCAAAAAAACACCAACAACATTTACCATGTCACTAGGCTTGATTTTGGGACATATCCAAAC  
CCCATTTGCAAGAAAACAGCAACATTCCCTTCACTCATTTTCCAACCTCCCAAATCTTGAATCTCTCTTT  
ATCCAATGCTTCACACACACAAAAACAACATCTCTATTCAAGAAAACAGAATTCTCCAACAACCTAGTAT  
AAGATCAAATCCATCATTAAATTGGCACAATCCCACCTCAAATTTTCTCTTAAATCACTTCAAATCCTCAC  
ATTGTCACAAAACAATCTTCTTGGACAAATCCCACCACAAATCTTCACTCAACTCACTTATTCATCTTGA  
TTTAAGCTACAACAACCTCACAGGCCAAATCCCAAACCAAATTGGCAATCTCATCAATCTTATAGGCTTA  
GACTTAAGCTACAATTCATTAACAAATCCAATCCCATCCACTATTGGCCTTCTCAAATCTCTTCAAAAACCT  
GACTTAAGCTCAAATTCATTAACAGGCCAAATCCCTCAAACAATAGAAAAGTTACAATCTTTAACTTCTT  
AGCACTTAGTAACAACAAGTTAAGTGGCAATTTCCCAAAGGGATACATAAACTTCAAGCACTTCAATAT  
TTTCTCATGGATGACAATCCAATGATGTTTATAACATTGCCTGATGAATTGAGTCAATTACATAAACTTCA  
AGAATTGAGCCTTTCAAGTTCAGGTTACTCAGGGGAAATACCATCAAGTTACTCACAACCTTGTGAACTTG  
ACTACGTTGTCTTTACAAAACAATCGATTAACAGGTGAGATACCGGTGGAATTTTCAAGATTATCACATA  
TGTATCACTTGAATTTGAGTAGAAATTTGTTAGATGGTGTGTGCCATTCAATTCAAGTTTTTTGAAAAGA  
CTTGAAGGAATTTGGACTTAAGTGGAAATCCAGGGCTATGTTTGATGAATCAACATGAAGGGGTTTAT  
GTTGGAGTTAATGTGTGTGGGAGTAGTAGTAATACTATAACTATGCCATTGAAGAAGAATAGATCA  
TGTGAAGCTTCATGTGGAGTTGTTAGATCATTGTTTCTGTTTGTATTTTGTGTGTTTTAGAATTGTTGTT  
TGTGTTTAGGAGTTTTTAGGCTTTTGGTTGTAT

>M6-PGSC0003DMG400021415 M6 LRR-RLP

AAATGTGCCTGCATTTAAAGTCAAATTATAATTAAGATAGACTGAACAAAGTCAGAATACTAAGGGGGT  
AAAATGACTGACACAGTAACAAAAGAAAAAGGTTCAATCTAGACAGCTCTGAATCTGCAGAAGAACT  
TAAACAATATAGAGAAAATTGAGAGCACGATGATGCAGGTGTAAACTTGTCTCTGTAAGATGTATTGC  
TCTACAGTAAAACAGACATAAAAAGGTAAAATTGAAATAGGATAGAAGGTCTACCTAATCTTGGAGCTG  
GATACCAAGGAAACACTTCTCTAGGCTAAAAGGCAAGTAATGGTAATAATCACTACATTAAGTAAAGCA  
TAGAGTGGCTAGTTGAAGAGCATTCTTTGAATAAGGAGCTTTTTAGATGAGCCAAATGCACCCAAACAA  
ATCAATAGCCAAATGGCCACTCGTTATTAGGATTGAGTGAGTGAGAAGGAGAAGGGGACACTTGCATAT

ATAGGTA CTCTTTGGTGCATAAATGAGTAATCACTCGTTGTTGATGTCAAATCCTCTGTTGTCGTTGGCA  
TAGGCCCCCACTACTCAAATAAGTCCCTGATTTGCTGTGACTGAAAAGGTGGTTCATATCCTCTATGT  
GCCTCTCACATTATGATCACCTACTACAGATGTTGACGCTCTTCTTTGGAGGTTCTCCTGGGTTAAACAAG  
CTCCATAAGGCACAGGTAAAGCAAAGCTCTTAAAGCATCCTACTTCCAGGGGAGCTTTGCTTTTCAAAT  
GCATTTCATAAGCCAAAATGTGCTACTGCCAGAAGATCTCCTAGATAGAGAATACTAGTCTTTGATCTTG  
ACGTTACCTACTGTGTTTGCTTTCCACAAAAGAGATTCAGCTCTGGAAGATAAAGGGGGGCAGCTATGC  
AGCTTATTTAAAAGTGAGGACCCGTTAAATTCACAATCATTTTTGCTGCACCAGAGACCAAAAACACAG  
TCCTGTT CAGACCACATTTCTGAAATTGTAGCATCTTGTGTTTGTGCAATACTGTAAATATATGGATACTG  
CATCTTCGGTGGTGTGTTGGACTAGCCAAGCATCCTCCCAGAACTTGTCTCCTTCCATTTCCA ACTTGAAG  
AGGTGATGGCGAAAAATAATTTTAGTGGACTCTAATATTCCTCCATATAACCATAGGGACTGTTGCTGAA  
CCTGTTTAGTTATCCAAGGGATCAGGCATGCATTTTTACCATAATGACACCTCCAAAGTGCCTTCTCTTCT  
TTACCACATCTTCATAACTACTTCTGCAGTGAGCTGTTGCTCTGCATCTTCAATTTCTCTACTCTTAAGTTC  
TCCCTGCCTTCAAATTTGTGGCGACTGATCCCATCTTACCAAGTTGAAGGTTCTGTGTTCTTTCTCTTG  
CATAAGCAATTCCTATGTAGTTTGTGTTGTTGTTGTTGTTGTTGTTGTTGTTGTTGTTGTTGTTGTTGTTG  
ATAGGGTATATGGGATATTATTCTGAACTTAAAACAGCTTTGGTTGGATGTTATCATCACACAGTAGCTT  
TGTA ACTGAATTCCTTGTTAACTATGTTTGTGTTTCTAATATATTATAGAACTATTGGGAAGTTCTGAGGC  
TAGAAAAAGATCAAATTAAGACCATAGTTTCAAGCATTCTCTTGTGCGGTGAAGGGGTGTGAAGGTTGA  
AACTTTAACCCATGAGTTTGGGATATTTTTAGGCCCTATAAAATTTGATATTGTGATACTTAATGTACTTA  
CCTTCTACTCTGCTTCTCTCTCCATTTAGATGATTTATGTGTCGGTGTAGAAAAGAAGAAAGATGTTCC  
ATTGCTGATGCTGAAGTGCAAACAGTTGACGATAAATCTTGGATTTCAAGAAATGCCATTCTCGGCATA  
GGTGTCTCTTAAAGTCAACTCCTTATCTGGAGAATTTGATGATACTTCATGAAGAGGTATGTTTTCAATT  
GATTCTTGCTTTGAGATACCTTTTATATTCTTTTTATTCTTTAATTTTTTCCCTTGTGTTTGTTCATTATCC  
TTTACATTTTCAGTATCACATTTTGGAGGCATAATATAGCCTTGGATGTCAAGCTGTTTTATGTATAGCGCC  
CTTTATTACTGAAATTGTTGCCCATCAGACCTACATTTTCTAATTTCTAAATATATGCGACCATAGTGTAC  
TGC ACTGAAGACTCTTCTCCTTTTACAATGAGTTATTAGCTTCTTGTCTTTTGTGTTGGCATAAAATATTACA  
TTCAATCGTCTATTGATCTCCTACGACATCAATGGGAAGTCTTCAACATTTTAGTACTTTCCACTAAATTAC  
TATCAGTGGTCTATCTCAATATTATACACCTTCTGACTAAAAGTATTTTCATCTGTTTGTCTATTGTTTGA  
CTACTATGTTGCTTATATCTCGTTTCGGATTCTTTTGTGTTGTTGTTGTTGTTGTTGTTGTTGTTGTTGTTG  
ATTCTAAAATCCAAACATTTACTTAAGTATCTTCTAGCTGTTACACTTACACTTAACCTGATTTGTGGTCT

TCTGTATCCGTAGGGAGATTTCTTTGTCTGGGATGAAGACTTGGAAGACGAAGAGTTTGATTGGTCAGG  
AGACAATTCCTCTCCTTGCATGAAAACATATTTAAAGGCTCCTTACAGAATTTGAAGCATGTTGAGGTTT  
CTTCAAAGTGTGTAGTTGTCAACACAAAGCTGACGCAACAGAGCGCCTTTCAGAATTTTTGAAGTCTTT  
GCTTGAGCATGCAAAAAATCTTGAGAACTGGTTATAGCGCCATGGCACAATGGATGCGATATCTCTTCT  
GCCAATATCTCAAAAGTGATTAAGAAGTCTGCTAGCTTTTCCAGGAGCTTCTAATATTGCAGTTGTTTCCTT  
AGGATCGGTCTCCGGTGTGACTTTTCAGGGGAGTAGAACTTTTATATTGACCTTGTTTGTCTAATATT  
TTGTTCAACTACTTTTGGAAGTCTTATATTTTTGTATGTCAGTGTAAAAAAATGTTGATCATCAAGTACTG  
TGTAAGTAAAGAGGAGATGTAATCTGCTATAATTGATTAAGTACTGTGGTATTATTCAAAGTTGTTTT  
GCATTATCAATGTATAATATGCCG

>M6-PGSC0003DMG400021962 M6 LRR-RLP

CCAATTCATATATTATGCCTTCTTTCAAACCCCTTACTTTGCTTGAGGAAACAATTCGAAATTAGATCCA  
ATTCCAATGACCGGAGTTGGAGAAACCCTAGAGGACCGTATCAGTTCGTTGCCGGATGAACTTCTGATC  
AAAATTCTGTCTTGTTTCGGCGACAAAGGATGCATACACAACATGTTTTCTCTAATAGGTGGCTTTATCT  
CTGGATTTCCATTCGTATCTTTAGTTTTGCTAATACAAATTACCGAGAAAATTTACATCTTTTGTTAACTA  
TATATTATCTCGTTCTGTTTCTCCAAAATACAAAATTCGAACTCGACTACAGTTATTGCGATGTTGAAA  
GCCGCTGGCAAATCACCGAATGGCTTAATTTTGCTGCTACTAGAAAAGTGGAACATCTTCTACTCTGGTC  
TACTGATTTTATCACTTCCCCTTTCCATTGCCTCAATCTTTCTGCGAATGTTTGTCATTGATAACATTAGC  
AATAGTTTTGGGTCGTTTTAACTTTGATGACACAGTCATTGCCTGGAAGTCTTTAAAGAGCCTAAAATTG  
GGGAATTTTCTTATAGATGATTACAAAATTGCAAAAATATTGTCAGGCTGTCCTGTATTGGAAGATATGG  
AATTACATGATTTAGTTGTGCTTAATGGTCCTCATCGCTTGGAAATTTATGTCTTCAAAGTTAAAGACACTG  
AAGCTGAATGGTCAATGGTTGATTAATGATGGAAGTCTTCGTTGTGTGGAAATTTTTGCTCCGTACATTC  
AGCATTGGAAATTTCAAGGAGTCTTTATGATCTCAAGTGTATTCTCGTAGATGTGTCTGCTGTGGTTAC  
TGCGAATCTTACTTTCAACATTATGTGTATCAAAGACATCAACGATGATTATGGTCTACATTTTGATCCTG  
AGGAAAACAGTTGTAGTGGCTATCATCAATTCTTTGGTCCCTCGTCCATGGTTACCTTCTAACGTTCCGT  
AATGTAAAGGAGTTAACCATGGAAGTGGTTAACAGAGGCTGTTTTTATCTCAGAGTACTTTTCCTTG  
GACAGTTGAGAATTAACCTTTGTACAAATTTCAAACTCAACTGGATGAGTTGCAGAACTTGTGGCTT  
TTTTGTGTTTTTTTTGTCAACTTTGCAATGTCGGGTATTTTTTTGTCATATCTGCAATACATGTATCTGAAAT  
CACGGATTCTTCTGTGTCGATTGTTGCTTAAAGTGTGTTAGATGATTAGGTTGCTACTTGAAGATAATAG  
AAAAAAGTGGATATCAGGCTCTCCTTGGGTGCGGTATATTACCATGGCTGGTGAATATGAGTTGAGAC

TTGCGTAAAACCACTCCGAGATGATGATCCAATCCAAATAAGTTTTGCTTGAGGCTCATATAACTCATCC  
AATGCTTTGAGCTCCTTGCAGGAGATGAACTGGTTAGCTCATAGATTTGAAGCAAATTGTTTTGTTGT  
GCCAATTTTTGTTATTATTGTATTTGACTTTTTTTCTTATATGTTACCCACATTTTCTTGTATAAAGATGTCT  
GCTGATTACTTTCGTGTTGCATATACTGTTAAAGAAATTCAATAGATTTGTCACACAACCTTATGTTGCCAT  
GGAGTTCTTTCTTTTTGTACTIONATTGCTTTCTCCATTCTTTATATTACTAGTTTCATTGGGATTATTGCAACA  
GGTTCTGTGCATGTTGCTGTTCAAAGGGACTGTACTIONCCAGAAATGAAATGCAAATATCTGATGCTGGA  
GTTGCATGTTAAGAGGTTTAATTTGTATGGAGTAGCTGGTCTTCTGCGAGCATCTAGTCATGTAGAGACA  
CTCAACATAAATATATATACGGAGGCACTAGACATAGAGGGACGCGACATAGATTTATCAACAAAATCT  
GTACTIONCTCTCTTTTAAATCCATTCATTTTATGAGTTTAATCACCCCTCTTTGAATTTTTCTTTTGT  
ATGGCAAAGCTTAACATTATTTGGTTGGTGTGTTGCTTTCTTTGAGGCAAATGAGGTCTGAAACGGAAA  
GGGTTGGGTGCCATCCACTCTTTGCTTGGTTTACGTAGGCCATGAATCTTTAAGATATGAACAATCATCA  
TAATCTGTTTAAAAGTACCAATAAGATTTGTTGGTTCTGAAATCATTTTTTCCCACTTTTGTGCAATATC  
CATGAGGCTAACTTGAATTTAGTCCTGATTAATTTCTTTTCTCCAGCTTGTAGATACCCACTGCCACTTT  
GAGTTATCATATTTGGTCAAAGGAGATGATATTGATTTGCAAATTTGGATTTTATTGGGTTTCCCAACCT  
CAAGAATGTTAAGATTATCAACTCCCCTGGAGAGCGGTGCTTTAAGGATCATTTCAAACAGGGCTTTGAC  
AAGCTTTTGAACCTTTCAGAATTTCTGTTAAACAATGCAACATTTTTGGAGAAGTTCGTGATATCAAAGG  
GAATAATGTGCAAGATATGTTCAACCAACTGTGTGTCCACATTTTTATTCAATTGGCTGAGAAATTGTTT  
TGTTGCCCAAGATCCTCTACAAATTGTGTGATTATCTACTAGTAGTGAGCTTGTAAATGATTAGACTGCAA  
GTAGTTTTCTATCTTAGGATACACGAGATGTTGCCATTATGAGTTTTTGGTGAATACTCATAAATCAT  
GACTTTAACTTGTCTATGCAACTAATTACTTATCTTGTGGCATAACCAATGTTATGATTTCTTAGTTTCT  
CATTCTTGAAGCTTTCAGTTCTGATGAATCATTATATTTAAGTCATATAAGAATGTATGGTTTGATCTCTTT  
TTTTGATTCGTCTGAAATATCCATTCTTCAGGCAAATTTAGATGACGATAAGGGGTTTCTAGAAATAGT  
TTCTGTTTTACCTTTGTTGCAATAG

>M6-PGSC0003DMG400021996 M6 LRR-RLP

CCCCTGTCTCACAAGTCTTCAAACCCACCTACCCCATCAACCCACCCACCCCATCTCCTCTTCTCAGC  
TCCCACACATCCCTCTCTAGTCTCCACAGATCTGAACTTTCACTACTCAAGATTTAAAGATTCTTGAAATT  
CTTGAAAAAATGTCAACTTTAGCACCCATTTTCGTACAGTAATGGTGAACCTCACTTCCCTTAGAAGTT  
CTTGAACACATCTTCTCCGACATAACTTCAGATAAGGACAGGAACTCAATATCCTTGGTTTGTAAATCTTG  
GTATGAAGCTGAGAGGTGTTGTAGGAAAAGTGTGTTTATTGGGAACTGTTATGCTGTAAGCCCTTCAAT

CTTGATTAGACGTTTCCCAGACCTCAGATCTGTAACGATTAAGGGAAGCCACATTTTGCTGATTTGAT  
CTTGACCTGAAGGTTGGGGTGCATATTTCTATCCATGGGCTGTTCAATGGCGAAAGCTTATCCATTTCT  
TGAGGAAATTAGGCTTAAGAGAATGGTTGTTTGTGATGAGTCATTGGAGCTGATTTCGAAGTCGTTTAA  
GAATTCAGAGTCTTGTTTTACAGTCTTGTGAAGGATTTACTACCGATGGACTTGCTGCCATTGCTGCT  
AACTGCAGGTTTATCTAGCATTTTTAGCTGTTTTCTGGGTAGATTACCTTTTCTGAGTAATGGTGAAAA  
AAGTCTTAATCTTTGCATCTGGGGTAACTGTGCTTGTGTTGTAGCTGAGGGGTTGAGGAAAGTTTTAATC  
TTTGCATCTGGGGTTACTGTATTTGTTTGTAAAGGGTGGTTGAGGAAATGGTATGTTTTTTAGAGCATTG  
TTGTCTGAGTACTCTAGTCGTTAATGGTGAAAAGAAGTCTTAACCTTTCGCTCTGGGGTAACTATACTT  
GTTTGTAACTGAGAGGTTGAGGAAAGTTTTAATCTTTGTATCTGGGGTAACTGTATTTGTTTGGTATTG  
AGGGGTTGAAGAATTGGTGTGTTTTGTAGAGTATTGTTGTCTGAGTACTTTATTTGTTAATGGTGAAAAG  
AAGTCTTACTCTTTGCATCTGGGGTTAGCTGTTCTTGTGTTGTAAGGTTGAGGGGTTGAGGAAAATTTAATCT  
TTGCATTTGGGGTTGACTGTATTTGTTTGTAAATTGAGGGTGGTTGAGGAAATGGCATGTTTTTTTTAGA  
GCATTGTTGTCTGAGTACTTTAGTCGTTAATGGTGAAAAGAAGTCTTAATCTTTGCATCTGGGGTTAGCT  
GTACTCGTTTGTAAATTGCGGGGTTGAGGAAATGGTATGTTTTGTAGAACATTGCTGTCTGAGTACTTTAG  
TCCTTATTGGTGGAAAAAGTCTTAATCTTTGCATCTGGGGTTACTGTACTTGTGTTGCAATTGAGGGGTT  
GATGAAAGTTTTAATCTTTGCATCTGGGGTTAAGTATTTGTTTGTAAATTGAGGGGCTGAGGAATTTAGTC  
TTAAGAGAATGGTTTTTTTTGTCATGAGTCATTGGAGCTGATCTCAAAGTCATTTATTCGAAGTCTTGTTT  
TACAGTCTTGTGAAGGACTTACTACTGATGGACTTGTTGCCATTTCTGCTAACTGCAGGTTTATCTAGCAC  
TTTTTAGCTGTGTTTTCTTGTAGATTACCTTTTCTGGTAATGGTGAAAAAATCTTTAATCTTTGCATTT  
GGGGTTAGCTGTACATTTTTGAACTGAGGGGTGAAGAAAGTTTTATTCTTTGCATCTGGGGTTGACTGT  
ATTTGTTTGGTAGTGTGGGGTTGAGGAAATGATATGTTTTTTGTAGAGCATTGATGTCAGAGTACTTTA  
GTTGTTAATGGTGAAAAGAAGTTTTAATCTTTGCATCTGGGGTAACTGTACTTGTGTTGTAAGTGGGTT  
TTGAGGAAAGTTTTAATCTTTGCATCTGGGGTAAATAACTGTATTTGCTTGTAAATTGAGGGGTTGAGGAA  
ATGGTAGGTTTTGTAGAGATTGTTGCTTGTAGTTCTTGTAGTCTTACTGGTGAAAAAGAGTTCAAATCTTT  
GCATCTGTGGGGTAACTGTTTCGAGGAAATACTAGAAGGTTTTGTTGAGCACTGTTGTCTAAGTACTTTA  
GCCCTACCGGTGACTTCATTAATTATTTCTAATCTGGGATTAAGTATTTGACGGAATAGTAGGTTTTG  
TGGAACATTGTTGTCAGAGTACTTCAGCCCTTACTGGTTAGGATAAGTTTTAATCTATGCATCTGAGAAA  
CTGTTCTTGTGTTGTAATTGAGGCATTGGGGAAGCAGTGGGATTTTGTGGAGCATTGTTGTCTGAGTACTT  
TATTCTTACTGGTGAGAAAAGTTCTAATCTTTGCATCTGGGGGTTGAATGTTTCTTGTGTTGTAATTGAGG

GCTTGAAGAAGCAGTAGGTTTTGTGAAGCATTCTCGTCTGAGTACTTTAGCCCTTGAGATATTCCTCCCA  
CATTGTGTGAACAATCTCTTCTCGTTGAGCATGCGTTCCCGATCAGCTGACCTACAAGATGAAGCAACA  
TTGTTAATCTCTCTCTCTGGTTGGTCGCTGATATTAAGTTGGGGTTGTTATTACAAAAAATTAGGGTAA  
AATTTGAAAATAAAATATAATTCCAACATTGAAAGAGAGTTGGAAAACATGTTATAAGTTGTTTTCAA  
ATTTGATTTACAACCTCAAGTAGGCTTTGAACTTTTCATGACCAAACACTGGTTTTCAAATAAAGTGAAAC  
ATAATTCCGGAAAAAAGTAAATAATGTTTATGGCCAAATGGGTCCTTAGTTATGTCTGTCAGTTCATTCT  
CTGTTTTGCTTGATTGGATGGTATTTACGGTAGTTGGTGGAAAGAGTAGCAAGAATACCATAGCGAAG  
AAATGCCTTATTACTTTGATCCGCTTACTGGGCAAAGATTCAAGAGCATATACTTTTATAACTTGGCTACA  
ACAAACGAAAGGGACGTAAGAGGGCACAATTTCGTCCACCTTTAGAA

>M6-PGSC0003DMG400022067 M6 LRR-RLP

ATGGCCTCGTTGCTTAAATTGAAGCATGAACTTACATTTGATTCTTCCATGCCAAAGAAAATAGTTAGGT  
GGAATAGAAACACTGATTGCTGCTTGTGGCCGGGTGTAAGTTGTGACGAAAAAGTCCAGTGCTTGTTCC  
TGGAGTTGGACAACGAAGCCATTTCTGGCGGAGTTGAGAACTCAAGCAGTCTCTTCAATCTTCAACATCT  
TGAGAAGCTCAATCTGGCTTATAACGACCTACGTTCTCTTCCAATACCAACAGATATTTATAAGCTTGCAA  
ACTTGACGTACCTGAATTTGTCACAAGCTGGTTTTGAAGGGCAGATTCCAGTGGAAATTGTCAAGATTGAC  
GAAGTTAGTAGTTCTTGACATTTCTACTTATAATGACATTGTAGGTTTTCTTACTCTTTATTAAGTCTAGA  
GAGCCCCGATTTGGGGACACTCGTTGGAAGTCTAGCAACTCTTAGAGAACTTTACCTTGATGGCGTGAA  
CGTTTCATTGAAGGGGAGTGAGTGGTGTGCTCGGCGTTATCTTCATCTCTACCTCAATTGAGAGTCTTGCA  
ATGAGATACTGTGAAATTTCAAGTTCAATTGATCCTGCTGCTGGTAAATCTTCTTTCTTTTCAGTTATTCAT  
CTCGATATGAATAACTGTCCACTATGGTTCCAGAATTTTTGGCAGATTTTACGAAATTGACAACCTTTAAG  
TGTTTCGATGGTGCAATTTGTTTGGTCCATTTCCAGTAAAATCTTTCAAGTACCAACTCTACAACAACCTG  
ATCTGTTAGGCAACGTAAACCTTACCGGCACTTTACCTGAATTTCCACATAAAAATGCATTTAGGGAGTT  
GAGGCTATCTGAGACGAGTTTCACAGGTTTGTCTCAAATTCATTGCTAACCTTCGAAGTTTGATTACA  
CTAGACTTATATGATTGCAATTTCAAGAGGACCTATTCCGTCAACAATGGGAAATTTAACGAACCTAGTTT  
CATTAGACTTGTCAAACAACAACCTTTACTGGCTCAATCCCCTGTTCCATGAGGCTAACAAGCTCAATTAC  
ATCGACATTTCTAATAACAATGGTCAACTTTCTTCTGCTCAAACCTCAATTAGCCGTTCTCCTTTCCCTCCCG  
TCATTGCAGTACCTTTTTCTTTATACTAGTCATTTGAGTGGAGAAATCCATGAATTTCAAATGCATCCTCC  
TCTGTTCTGGAAATACTTTATTTGAGCAATAACCATCTAAAAGGATCGATCCCCCGGTCTATCTTTAACT  
CAATAGGCTTTCACAACTCTCACTTTCTTCAAACCTCCTCAGTGGGACCATTATTATCGAAGCGGTAATG



GACTTCCTAGGCTAACCACCCTTGACCTTTCAGACAACAAAATTGAAGGGGAAATACCAAATTGGGTTTG  
GACAACTGCAAAGCTGAATCTTCTCACAATCTGCTGGAGTCTGTAGAAAAACCTTATTATATATCTACTA  
CTTCTATTGTCATTGACTTGAGTTTCAACAGGATCAAGGGCAATCCACCATTTCTACCAGATCGCTTTGCA  
AACTGGAAAAGTAGTATTACTTACTTTTCAATTGCCAATAATCAATTTACAGGATCAATATCCTCTTCCAT  
ATGCAGTCTAGATCAGCTTCAATTCCTTGATATGTCAAATAACTCCATAAGCGGAAAAATACCTCCCTGTC  
TAATCCAAATGCTGGCTACGAGTCTCGTAGTGTTGAATATAGCGAGAAACAATCTAAGTGGTACTATTCC  
TGATAAATTTCCGCTGAATTGTAGCTTGGAACTTTAGATCTCAGCAACAATATGTTAGAAGGGAAAGTT  
CCAAGCTCCCTGAAAACTGTCAACCTTTGCAAGTTTTGAATATTGGAAACAACAAGATCAAAGATACAT  
TCCCGTGCATGTTGAAGAAATTATACAGTTTTCATGTCCTAGTCATAAGGTGCAACAAGTTCTACGGGAA  
TCTCCAGTGTCTGTTGCTAATCAAACCTGGTCAAGGCTTCAAATTGTGGATCTTGCTTACAATAATTTCA  
GCGGTGCTCTGCTACCACAATACTTCTCGAGCTAGGAAGGCATGATGCAGGGCAACAATCCATACCCAT  
GGGAGCAGTACTTAATGCTGATAATCTGTATCAAGACAAGGTGACTTTAACTATCAAAGGTTTAAACAGT  
GGAATATGTGAAAATTCTGTAGTTTTAACTTCCATCGATTTCTCTTGCAACAACCTTTCAAGGGGAGATAC  
CTGAGACATTGGGAGATCTCAAATCACTAATCCATCTTAACTTCTCGCACAATGCTTTGACCGGAAAAAT  
ACCAAATGCCCTTGAAATTTGACTCAGCTTGAATCCTTAGATTTCTCAGTTAACCATTTACGTGGGAGG  
ATTCAGACGAGCTCGTGAGTCTCACATTTCTTGCTTTCTTGAACCTATCTTTTAACTAATCTGGTAG  
GATTCCAAGTGGTAACCAACTTCAGACGTTCTCAGCGAATTCCTTCGAAGGGAACACAGGGTTGTGCGA  
TTTACCTTTAAAGAAAACGTGCAGTGAAACCAAAGTGAATGGATCATCACAGTTACTTAGCAGCCATTCT  
GAACATGAAATTGAAGGGAAATATATAAGTTTTTCTTGGGATCTTCTGTTGGCTTTGGCATCATAATCT  
GGCTGCTTTTGCATAGTCAAAGATACAATGAGCTCCTTGATAGACTTCTTTTTCAGAATGTTGGATCGACA  
CAAAAAAAGGCACATGAATAAAATCTTTGAAGGTGTACAAGTATAGCTTTGATGTTTGGATCTTTTACGTT  
CTGTTTGAAGGAGTTCATAATACTAATGTTCACTTTGTTTTTCTTTGTTTTCTGTATGGTGAAGAGTGGT  
GTTTGAATTTTAAATGTAAGGAATAATTTTCATGATGATCTGTTTATCATTTTTCAATTATTTGGCTCTTTTA  
CTTATTTGCAAACATTACTGCTAGAGTCCTTATTTCTCCTCTATTGTTTACAATCATTTTTCCAACATCAA  
TACTCAAAACATCAAAACAAA

>M6-PGSC0003DMG400022068 M6 LRR-RLP

ATGAAAATATCACTCCTGCTACAGTTTTCTTTCATCACCATGCAGGTGCTTTTTTTGATTAATTCTCCAGTG  
TATGGTCATTGTTTAGGCGATCAAAGGCGTTGTTGCTTAACTCAAGAATGGCCTTACATTCGATTCAT  
CTTTGTCAACCAAACTGGTAAGATGGGATCAAACACTGACTGTTGCCAGTGGCCAGGTGTAAGTTGTG

ATCTGAAAGGTCATGTGCTTGTTTTGGAAGTGGACAACGAAACAATTTTCAGTGGACTTGAGAATCCAAC  
CAGTCTATTCGATCTTCAGTATCTTGAGAAGCTGAATTTGGCTTATAATCATTAAACTCTGTTCAAATAC  
CGAGAGAAGTTTATAAGCTCACAACTTAACATACCTGAATTTGTCATATGCTGGTTTTGGTGGGCAGAT  
TCCAATGGAATTGTCAAGATTGACGAAGTTAACGTTTCTTGACCTTTCTAATGTTCGCATTAAAGCTTGAG  
AGCGGAGATCTGAAGACACTGGTTAGAAACCTGCCAAATCTTAGAGAACTCCATCTTGATGAAGTGAAC  
ATATCATTAAAGGGGATTGAGTGGTGTCAACTTTATCTTCATCTCTGCCTCAGTTAAGAGTGTTAAGCAT  
GACAGATTGTGGCATTTCAGCCCTTTTGATCCTGTCTCTTAAATCTTCATTTCTTTTCAGTCATTCGTCT  
TGAGGCAACAACCTTGCCACTATAGTTCCTGAATTTCTAGCAAATTTTACAAAATTGACAACCCTCAGTCT  
CAGTAACTGCAACTTGAGAGGTGAATTTCCGAATAAGATCTTTCAGGTACCAACTCTACAGGAGCTTGAT  
TTATATGGTAATGAAAACTCACTGGCACTTTACCTGACTTTTCACAGAATGGTTCATTAAAGGGAGTTAG  
GTCTTGGCAGCACAAATTTACAGGTTCACTTCCGGATTCAATTGCTAACCTCACAACTTAACCAAGATT  
GACTTAAGTTCATGCAATTTCTTTGGACCTATATCATCAAAAATGGAAAATCTAAGAGATTTAGTTTATTT  
AGACTTTTCATCCAATAGCTTTACTGGCTCAATCCCACTATTTTATAAGGCAAATAAGCTCAATTACATTG  
ACCTTTCTCATAACAATCTTACAGGTCCACTTTCTTCTACTCATTTTGGAGGTCTTTCAGAGCTTGAGTATC  
TATACTTGGAAGACAATTCTATCGGTGGGACCCTTCCGACAGTTGTGTTTTCCATTCCATCATTGCAGGTG  
CTTGAACCTCAGAATAATCACTTCAGTGGAGAAGTCCATGAATTTGCTAGCGCGTCCTCCTTATTTGTA  
TAAACTTGACTTGAGCAATAACTATCTAAATGGATCGATCCCCGGTCTATCTTTAAACTCAATAGGCTTT  
TGCAACTCTTACTTTCTTCCAACCTTCAGTGGGACCATTAATATTGAAGCGATAAAGGGACTTCCTAGG  
CTCAAAAAGCTTGACCTTTCTTACAACAATTTGAGAATTGATGTACAAGGTAGTAATTCAACCTCGTTTCC  
CTTTCCCAAATGAGTGAAGTGAAGTGGCATCATGCCAGTTGCAAAGTCCCGGAACTCAAAAACCAG  
TCACTCATGATTGCATTAGACCTTTCATACAACAATTTTTCAGGACAAGTACCCAGCTGGATTTGGAGTA  
TTAGTTTAAGTTATCTGAATCTTTCTTGCAATTTCTCGAGGCTCTGGAAGAACCTTACGACACATCTTCA  
GAATTATGGAGTGTAAATTGACTTGCATAACAACAGGATCAAGGGCAATATAACCCATTGTACCTACTTCTC  
TTATCTACCTTTCAATTGCCAATAATAAACTTACGGGATCAATACCCTCTTCCATATGCAATCTATATCAGC  
TTCAATTTCTTGATATGTCAAACAATTCCATAAACATCAAACCTACCTCCATGTCTATTTCAAATGTTTGACT  
ATCTCTCAGTGTGAATCTAGGTAGAAACAGACTAAGTGGCATTATTCTTGATACATTTTTGTCAAACCTGC  
AGTTTGAAAACCTTTAGACCTCAGCAACAATAACTTAGAAGGAAAAGTACCAAGATCCCTGCAAAGATGT  
GCATTTATGGAGGTTTTGGACATTCGAAACAACAAGATTAGAGATACATTCCCATGTATGTTGAAAACAT  
TACCCAGTTTGCACATCCTAGTCTAAGGTGCAACAAGTTTTATGGAGATCTCCAGTGTGATAGCTAA

TCAAACATGGTCGAAGCTTCAAATTATAGATATTGCTTCCAACAATTTTCAGGGGAGCACTGCTACCCACAT  
TACTTCTCGAGCTTGGAAGGCATGATGAAGAGCAGAAATCCAGAGCCACGACTACACTACTTGGAAAGTT  
GAATTCATCAACTATGGCCTCTACTATCGAAACAGAGTGACTTTAACTCTCAAAGGTCAGGAGATGGAG  
ATTGAGAATATTCTTGAAGTTTTTACATCCATCGATTTCTCCTGCAACAACCTTTGAAGGAGAGATAACCAG  
AGGTATTGGGAGATCTCAAATTGCTTTACCTTCTTAACTTATCGCACAATGCTTTGACAGGAAGAATACC  
AAAGGCCCTCGGAAAGTTGACTCAGCTTGGATCCTTAGATCTTTTCGGTAAACCAGTTAAGTGGGAGAAT  
TCCAGACGAGCTCGCGAGTCTCACATTCCTTACTTTCTTGAACCTATCTTTTAATCAACTTTCCGGTAGGA  
TTCCAAGAGGAAACCAACTTCAGACATTCTCAGCAGAATCCTTTGAAGGGAACACAGGGCTGTGTGATT  
TTCCGCTGAAGAACTTTGCAGTGACACCAAATGAATGGATCGTCACAACCAAGAAGCCATTCTGACG  
ATGAAACAGTTGATGGGAAATATATAAGTTTTGCATTGGGATCTTCATTGTGTTTTGGTATCGTTACCTG  
GCTGTTTTTGCATAGCACAAGATAACAATGAGCTCGTTGACAGACTTCTTTTCAGAATTTTTGGTGAGCAC  
AAAAAGGCAGGCAGAAATAGAAACAGAAGGAGGTCAAGGTAA

>M6-PGSC0003DMG400022404 M6 LRR-RLP

CTTGAGAGTTTTCTTTGGCTCTTCTGGTGCACCAAAGAGTCCACATTTTTACCATTCTCAAGACTGAGGTA  
TGCAATAAAAATAAGAAAAAATGCCAACAGCTTTTTCAATTCTTGTTCAATTCCAGTTTGTTTTTTCTCT  
TACAACTCACGCTTTTCTCCCTGTTTTCTTGTAAATTGTTCTGAAATTTACTGATTCTTTTCTCTTTTTCT  
TTGTTTTTTCTGTGTGTTAAATTGATATAAGCATGGTTTTTCTGGGTCATTTTTTTATCTGCTTTTTCAGT  
AGCATTTCAGAAATTTCTCAGCCTTTTCTCTTTTAGAGTTTAGACCCATATCTCTTGCTCTGTTTTCTTGA  
AGCTCTAAAATGGAGTGTAGTACAACACTGATTGCAGATGATGTTTTCTTTTTGAAATTCAGGTGACTCAAG  
ATGGTTTTTTGTTTGTAACTTCTGAAAGCTAGTATTTTTTTTTTATAACCAGCAGAGTTGTTGACTA  
TGTTTATTCAACTGAGGGGGTTAAAGCTGGAATCTTGCTGTTGAAAATTTTGTGAGCGTGTGAAAAATA  
GGATAAAGATTTGAACTTTAGTTGTTTTGATTTCAATTCAGTTTTGTTGAGATGGAAATGAATCCGAGC  
TTGAAAAAACCGAGGGAATCTGTAGATTTATCGAACTCATCGGAGTTAACTCCGTCAGCATTCCAGATG  
AGGTGTTGGAGAAGGTGTTGTCTTTGTTTCAGTCTCATAAAGATAGAAATTCAGCATCACTGGTGTGCA  
AGGATTGGTATAATGCAGAGCGTTGGACAAGGACTAAGCTGTTTATTGGGAATTGCTATTCAGTTACTC  
CTGAGATTGTAGCAAGAAGATTCCCAAAGATTAAGAGTGTTACCCTTAAAGGGAAACCAAGATTTTCTG  
ACTTTAATTTGGTACCAGAGAATTGGGGTGCTGATATTCAGGCTTGGCTTGATGTTTTTGCCAAAGTTTA  
CCCCTTTCTTGAGGAGTTGAGATTGAAAAGAATGGCTGTTAGTGATGAGAGTTTGGAGTTTTTGGCAA  
ATCATTCTTGATTTAAGGCTCTGTCATTGTTGAGTTGTGATGGTTTTAGCACTGATGGGATCAGTAGC

ATTGCTGCTCACTGCAAGTAAGATGATCTTTTCACTCGTGTTAACTTTTGGTGGTTATTTTTAATATCAGTT  
AATGTTTCAGATATGGGTGTTGTTTTGATTGGATAAAAAATCTATCTTTTTTTCAAGAAATAGTTTTTATT  
GATTGTAACCTGGTATATTATCTAGCATCTGACTTCAAGATCTTAGCTTTCTGTTATGGTGGATTTAGAATT  
CTTTCAAGGCAGATTGAGGAAAAACAGTACTGTTTACAAGGTGGTCCATGCTAATTATTGTAGTAATGG  
AGGACAAAACAGTAGACCCATGTGTCTGGATGTGGAATGGTTAAGAACTTGTATTTTTCATTTGAAGT  
GGCCATGTGGGTGAAGAAATAAAAAAGTGACATGTTCTGGGCTGGGGACATGTTAGGCTGTTTATCTTG  
TTATCACCCACTTGTCTTACCACACATTA AAAAGAAAGAAGAAAAAGTATAAGTGAAATTGAAATGG  
TTCCACTTTATGAATTCTTTTTCTGTTCTTTTTTATGTTACTTTCATGATGTGACATTGACCTGTTAATGAG  
CATTAAATTGAGGGAATTCTTTGATGTCATTGTTAGGCATAAATAACTCTTCTTATTGGTCAAGAAAGAGTT  
TCTACATTAACCTGGATTGTGTAACAAATATTTGATCTCTGAACCTTTAATGTCTATTAGACCTGTTCAAT  
GTATGGAGCTTCAACTAGTATATCACTATGTATATGTTGTCAAATTGTTGTCTAGTTTTGCAGCACCCTA  
GGTTATTATGGTTCATGAGGCTTTCAGGTTGGTTGTTGTCTTGGCAAATAAGGAATACCATCACAAAGGT  
GTATAGGTGCGCATGCCAAGATTTTGCTGTGTAGTTTTAAACGTAGAAGTTGGCATCTTTGCAATTTAA  
GTTACGATAATCTGAACCAAAAAGAATGTGAGAATGTGGGATCTTTGGTTGTTCTGGTCCGCAATCGTTC  
CAAAGAAATGTAGTTTGAAGGATGGCTCTAATGTCATATCCACAATTCAACATACTACAGAAGTTGGACT  
TGTATATAACAAATGTCTTCATGTACTATCTAAATGATGCATACAAGGAGGTTCTATTTATGTTATGATAA  
CAAGATTTGTTTTGAGTAATATTCCAAGGTATAGAAAAGCAAACATGCTTTTCTTCATAGGCAGCAGAA  
ATGTCGGTTTTGTTTTGTGGCTCTTAATTGATGCTTATCAGCATGAAACCAAGTTATCTTAATTGCTATAACC  
AATCTAAATGTTGGTTTCTTCACAGGAACCTTGACAGAGCTGGACATTCAGGAGAATGGCATGGATGAT  
ATTTGTGGTAGTTGGCTAAGTTGTTTTCCGGATGACTTTACATCACTGGAGGTGCTTAACTTTGCCTGTAT  
GAACACTGAGATCAGTAAGGATGCTTTAGAGAGACTTGTCCGTAGATGCAAATCACTGAGGGTTCTGAA  
GGTTAACAAGAACGTCACCTTGCCTCAGTTGCAACGCCTGCTCGTCCGAGCTCCTCAGCTGATGGAGCTG  
GGTACAGGATGCTTTCTTCCAGATCAACTCACAAGTCGGCAGTATGCAGAACTTGAAAGTGCATTCAGC  
AACTGCAAGCATCTGCACTCTCTTTCAGGCTTTTGGGAAGCAAATCGTCGATATTTACCATCTCTTTATGC  
AGCCTGTGCTAGGCTGACTTTCCTCAACTTGAGCTATGAAGCCATTAGGAGTGGTGAATTTTGAAGCTT  
CTTGCTCATTGCCAAATTTAAGGCGCCTTTGGGTAAGAATCTACCTCAGGCTTTAACATTTACGTGATAA  
ATCCTTTCATGATGAGGTCTTAGGTATTGATCTCCTAACATTTGACATTTTGTGAGGAACTGAAAGTTAC  
CACTAATTCGTCTTTAAGTTTGAAGTCTCTATGGTTGTTTTCTCTAGGGATAAGTATTCAAGAGATGCT  
AATCACCTTTTTTTTCATATCATGGTAATCCATTTTTCTACTTTCAAGGTCTTCATGCCTAATCTTTCTGTTA

TAGGTCCTAGACACTGTCAAAGATAAGGGGTTAGAGGCTGTTGGAACCAGCTGCCATTGCTTGAAGAA  
TTGCGAGTCTTTCCTGCTGACCCATTTGAAGAGGATATGGACCATGGAGTGACTGAGTCAGGCTTTGTG  
GCTGTGTCTGCTGGTTGTCTAAGCTTCAATATGTTCTCTATTTCTGCCGGCAAATGACTAATGCTGCTGT  
TGCAACAATAGTGCGTAAGTGCCTAATTTACCCATTTTCGTCTCTGCATAATGAATCCTGGCCAGCCAG  
ATTACTTGACAAATGAACCCATGGATGAGGCATTTGGTGCAGTGGTCAAGACTTGTA AAAAGCTCCAGA  
GGCTTTCTGTTTCTGGACTGTTGACTGACCTTTGAGTATATTGGAAAGTATGCCAAAAACCTTGA  
GACTTTTCTGTTTCTGGACTGTTGACTGACCTTTGAGTATATTGGAAAGTATGCCAAAAACCTTGA  
GCTGAGGAAGCTGGAGATAAGGGATTCTCCATTTGGAAATGCAGCACTTCTTTCTGGAATGGGGAAGTA  
TGAATCAATGCGGTGTCTTTGGATGTCAGCTTGCAGGGTCACCATGAATGGTTGTAGAATACTTGCACA  
AGAGAGGCCTAGGTTGAATGTCGAGGTAATCAAAGATGAGCACAGCGATGATTATGCTGATAAATTAT  
ACGTCTATCGCTCTGTAGCAGGGCCACGAAAGGATGCCCCACCTTTTGTGTAAGTCTCTAGCACAAAGA  
AACAGGAACTTTGGTAAGCTCCTTCCCTTGTCTCCTCTGTCCTATGCTTGCCAAAATAGCGTGGAGTGG  
AAAGATGATATGCTGATAATGCTAAGTTTTATTTTATCTGTAGGTGTGCACTGGGATACCTTCTATTTT  
AGCTAGTTTTATCTGCTACATGCATGATGTTTCGTAAAGGTGAACGAGAGAAAGTAAGTAAATGAATACC  
TCTCCTTATGCTGCATTTACTATGTTTTACTTGGAGAAGCTTGAAATTTTCAAGGAAGATCAACAAAAGG  
GATGTTTGTGTGCGCTTCTACTGAACTAATGCATTATGAGAAAGAAACCATGCGAAGATTCTCTTACAGT  
TAGTGAGACCAAATGATCATCACTCGTGGAGAAGCAGGAACTGCAACGAATGATCACATGACGGAGTT  
GATTATGTCTCAGAAAACTATCAGCAGATGAAGAGTCCTGAATCTCACAAGAACAAGCAAGATGAAGA  
ACGCTGGTTTGTGATTGCGGAGTTTTTTCTTTTTCTTTTTCAAACAATAAGTAGCATAAACATAAAGA  
AAGAAAAATGAAATGAGTCTCATGTAAGTGAATGATGGTATTAGGTTTACAGACATAAGTTATTTG  
GCCAACTGGGAATGCAAAGAAAAAAGAAACCATGGTATTCTTTTTTTTACAATGTGATTGCTGTGCT  
TCATCAAATAATTTAGTGTGACATTTACTATGTTG

>M6-PGSC0003DMG400022452 M6 LRR-RLP

TCAGTGGTACCCTTCCCGAGCTTAAGACTAATTCAATAGAAATACTTGATTTGTCTCGTAATCAATTCTCT  
GGTCCCATACCTCAATCGCTTAGACATCTTCTCAACCTAACTGTTGTCTTTCTTGGACAAAATAAGTTGAG  
CGGCGAGATTGGAGCAGAAATGTTTTCAAGCATGACAAACCTCTTAATTCTTGATCTTTCTAATAGTGGT  
TTATCATGGAGTGGCAATATCAACACCACTTTTCCCCTTCTTTATTATTTAGCTTTACGCTCTTGTGCTGTG  
AAAGATTTCCAGATTTTCAATTTCAACTCTAAGAACTTATGGATTTTGGATCTCTCGGAGAATGAAATTCA  
CGGGCAGTTACCGAAATGGTTTGGGGGTTTGGGTGCATTGGCAAACCTTAACCTCTCTCACAACCTCCTT

ACAAGCTTAGACCATCTACCTTGGGAGACAATCATGGTACTTGATCTTCAATCAAATTCACCTCACAGGAC  
CTTTGCCATCCCCATTTGCACATCAACTTTCCTTTATATAATAAATTTGTCTTACAATAATTTGAGTGCCG  
AAATCCCAATTGCTTGTTACTTTTTCTCGCTCATGGTCTTAGACTTACGAGCTAATAACTCCAAGGAC  
CCATCCCAAACAAATTCCAAAAGAACAGTCAGCTAATTCATATTAGTTTGAGCAAAAATCAATTGGAAGG  
TCCCATCCCAACATCCCTAGCCAAGTACATCCTTAAGAGTCCTTGATTTGGGAAACAATAAAATCCATT  
CTACATTTCCCTCCTGGTTGGAAACATTGCAAGAGTTAGAGCTTCTCATACTGAAATCTAATAGATTTTAC  
GGACCCATCGTTTCTTCCAAACAAAATTGCCATTTCCAAATATGAGGATCTTTGACCTCTCCAACAATTC  
ATTTACCGGCTCTTTACCTATGGAGGTTCTAAAAGGTTTCAAAGCTATGATGTACATGGATGCACACAAA  
TCAGGAGTGGAGTACTATGTGCGAGGAAAATTTAAGAAGTTACTATGTGCGATAAGCTTTTGTATAGTGGA  
TTGTATGTGGAATCAGTGATATTGGTGATGAAAAATCAAGAGACTAAATTCAACAAAATCTTGAAGATG  
TTCCTACAATCGATTTATCAAGGAACAAGTTTGAGGGAGAAATCCCGAAGTTCATTGGGAATTTTAATT  
CACTTCTGCTGCTGAATTTATCTCACAACAACCTCACTGGGCATATTCCTATTGAAATGAAGAACATGAG  
CACTCTGAAGCTTTGGACCTTTCATTTAACCATCTTACCGGTAAAATTCCAGTGGAATTGGCAATTCTCA  
CATTTCTTGAGGTCCTAAATCTGTACACAACCATCTTGTTGGACCTATTCCTCAGAGTAATCAGTTCAAT  
ACATTTCCAAATGATTCCTATTTAGGAAACTCTGAATTGTGTGGATTTCCACTGTCAAATGAATGTGGGA  
AGCATAAGAGTGCATCAGTACCAGTTGAACAGGAAGAAGATGAACCAAGTTTTCTTAGCGAAATGACTT  
GGCAGTCTGTGCTAATTGGTTATGGTTGTGGCTTGTCTTTTGGTTTTGGCATAGTGTATCTCATATACCTC  
TTTGAATGGCCAAGATGGTTCATACACTCTTTTGAAACTATCACTCGTGACATGATATACATAGTACTGA  
GGGCACGTAAAAGGCGCAGGAGGAATTTTACAGAACAAGACACTGAAAATCTATG

>M6-PGSC0003DMG400022599 M6 LRR-RLP

ATGGCTTCTCAACTTCTTTGTTTTCTTGTATTGCTAACTCTCACAACCTATTTGTAAAAGTAAATCTTGTCAT  
CCAAATGATTTAAAAGGTCTTCAAGATTTCAAGTCTGGAATTCATTCAGACACTTCTGGTAGACTAAGTA  
AATGGATTGGCCGCGATTGTTGTAATGGGAAGGTATTTTTGTAGTAATGTAATAAAAGAGTTGTAA  
GTATAAGTCTACCAGGTCTCTATACTGCAGATGATGCACCAATTCATCTGCTATGGAAGGGGAATTGTC  
ACCTTCAATCACACTCATCAACTATCTTGAAGTTATCGATATAGGTGATCTCCTTGGTATAACGGGGAAA  
ATCCCCTTATCGATTGGTTTACATCTACCAAATCTCAGAAAATCAACTTTGTTAGAAACAAGTTTACTGG  
TGCATTACCAGAAAGCATTGTATGTTGTCTAAACTGGAAGAATTGTATCTCCAAGAAAATGGTTTTTCG  
GGTTTTATTCCCTCGTGTATAGGAGGTGTCAAGAATCTAAGAAGAATGGATGTACATTCAAATAAACTTT  
CTGGTGTAATTCCTGAGTCTATAACAAAGTTGAAAAAATTGGAAAGTTTGTGTCTTCAAGAGAATGTCTT

GACAGGGGATATACCAGAAAACATTGGTAATTTGCAAGAATTGAAAGAGGTTGATTTGTCTAATAACTT  
GTTAACGGGGATAATCCCTCGTTCTATTTCTAGACTAAAGTTTATGTCAGTTCTTTACCTGAACTCCAATC  
AGCTCGAGGGGGACATACCGTTGCCTTCAAACCTGGGAAATTGTCTTCTCTGAGCTTTGTAAGACTGCA  
GAACAATCGGCTTAGTGGAACGATACCTTCATCTATTGGCTACTTGACCTCCCTTCAGAGAGTTTCACTTG  
CAAACAATCAGCTAAAGGGTTCTATTCCTTCGAGTATAGGTAATTTGAAGTTATTGGAAATGTTATATCT  
CAGTTGCAACCAATTATCTGGTCAGTTGCCAAGATCAGTAGGCGGGATTTCAAAGCTTCTTTACCTGAGT  
ATAGCTCATAACATGATTGAAGGACCGTTGCCTCATGAAATTTCTCCCTTCAAATCTTCAATCGCTGGA  
TCTTTCATTCAACCGTTTGAATATGTCAACCATTCCCAAGTGGCTCATGCAGTTGCCATCACTATCACAAA  
TTTACTTGGCAGGATGTGAAATTCATGGTGAAATGCCAGATTACATACCCAAGTCATTGCTGGAAGTAGA  
CTTGTCGGCTAACCATCTTTCAGGAAGGATACCAGCTTGGATTGGCAGCTTTTCGCAGCTTTATTCTTTAA  
ACCTTTCTAAGAACAAGTTTGTGTCTGAGATTCCTTCAACTGTCACAAATCTCGGCATTCTGGGAGTGTTA  
GACCTTCACTCAAACAAGCTAGAAGGCAGTGTGAATGCAGTTTTCCAGATAAAGAGCAGGTTTGCAGAA  
GGATCATTGACATATCTTGATCTGTCTGATAACAATTTCTCAACTGGTGTGAGCAGATTGGCATAGGAG  
GACAAGAATATATCCAACACTTAAATTTATCGCATAACTTTCTCAAAGGTAGATTACCAACCTCTGTAGG  
AACATTGAAAACACTACAGACTTTGGATCTCAGTTACAATGGATTAGGAGCTAACCTGCCAACATCACTG  
GCCAACGTGACCATTCTGGAGAGACTGATGCTGCACAAAAATCAATTCACCGGCAGAATCCCTGAGGAG  
TTTTTGAAGCTGAATAAACTGAAAGAATTGAACCTTTCAGATAATCTTCTTGAAGGAAAAATACCTTATG  
GGAAGCCATTTCTTGATTTTCCGCAGAGCTCATTCTCTGGAACAGAGATTTATGTGGGAAACCCCTTCT  
TCCCTGTAAATCTTGA

>M6-PGSC0003DMG400022785 M6 LRR-RLP

CAAAATCTCACATTCAAGAGATACTTCCTCACTGCTCCCTTTGGATCAAAAAGATATAATCGTTGGACTG  
GATGAAGACTTGCTGAAGATAAAAGAACGACTCACCGTGCAATCGTCAAGACTCGAAGTTGTCCCATT  
ATAGGGATGGGTGGTATTGGCAAGACCACACTGGCTAGAAGAGTTTATGATGATTCCCTGATTGCATAC  
CATTTTTATGTCCGAGCATGGGCAAATGTATCTCAAGAATTTGACACTAGAGAAATTTTTCTTGGTATTCT  
TCGCTCCATTGGCATGGTCAACGATGAAGAAGAAAGAAACAGTACTACTGAGCAATTGGCTGAAAGAG  
AAAGAAACAGTACTACTGAGCAATTGGCTGAAAGAGTTTATCGAAATTTAAAAGGGAGGAAGTATCTTA  
TTGTCCTAGATGATATGTGGTCTATCAAGGCTTGGCAGCATGTGAGGAGATCATTTCCAGATGATCGTAA  
TGGAAGTCGAATCGTGTTGACCACAAGGCTTGTAGATGTTGCATCTTGTGTTTGCTCTGGCAATTCCTT  
CACCAGATGCGTTTTCTGAGCATGGAGGAAAGCTGGGATCTTTTAAGCGGTAAGGTCTTTGGGAATGGT

AGTTACCCTCCGGAATTGGAGAAAATTGGGAGGTACATTGGTCATCAGTGTCAAGGGTTGCCACTTGCA  
GTTGTTGCAATTGGTGGACTACTTTCCAAGACGAGCAAGGAAACAAGTTCTTGGGAGAATGTTGCAGAA  
AAGGTAGGATCACTTATGACAAGTGACACTATGGATTGCTTGAACATACTTTCTTTGAGCTACAACCACT  
TGCCTCAGTACTTGAAAACATGCTTCCTTTATATGGGAGTTTTTGCAGAAACTCGTGAGATCCCGGTCTG  
GAAGTTAATAAAGTTATGGATTGCTGAGGGCTTCGTCAAGAAAGTTAATCATAAAAATCTAGAAGATGT  
GGCAGAGGAAAATTTGAGGGAGTTGGTTGATAGAAGTTTGGTTTTGGTGGGGAAGCATACTTCACTAG  
GAAAATCAAGACTTGTAAGATGCATGATCTCGTTCGAGATATGTGTTTGAGAGAAGCCAAATATGAGA  
ATTTTATACACTTCGAAACAAGGTATAACCACGATGATCTTCTAGAAAACATTAATTGTCTACGCCGTGTA  
GTTGATTTCAATAAGTATAGATACAGTTTTGATATTCCTAACTTATGCCACTCACACGTTCTCTTTTCTTG  
AAATATCCATACTCTGTTTGTCCCTCTCACAGTCAAGCTTTAGATTACTTAGGATATTAGATGTTTGCTTT  
ACATCTCGTTTGTACCGTAGTATGTCCATAACAGAACTTGTTCAATTTGAGGTATCTTGCTTGCCATCCTTC  
AATGGTCTTGTGCAATCACTATGCAAGCTACGGAATATACAGAACTTAGTTATTCAGGATTTACGTTTAT  
CTGGTTTACATAGGAGAACCAGTTCCTACCATGGGAAGTTGTGAATATGCCTAAACTAAGACATATCCA  
TACAAAAAAGTTTAGTCTTTTCATACCCCTACATCACTAATTGCTGAGAGGGAGAATCATTTACAAACG  
TTAACCGGATTGATGCCCTCATCTTGTAAATGAAGAGGTGTTTCTAAGAATTCCAAATTTGAAGAAGTTGG  
GAATTTTAATTATTGATGATTCAGACACTATTCAGAAGTGTTATTGCCTTGATAATCTTGTACATTTAACTC  
AGCTTGAGAAGCTCAAAGTAGAGGTCAGAGAGAGTTGGCTAATTTTTAGGCCGACTATCAAAGGTTGG  
GTGGACATTCCACATTGTGACAATTTCCACCAAACCTTAAGAAGTTAACATTGTGCACAACACACCTAG  
AATGGGAAGACATGAACATTCTTAGTAAGTTACCTAACCTTGAGGTGCTCAAACCTTAAAGATCATGCCTT  
TCGCGGACATATTTGGAAACTAAGCGATGAAGACGAAGATGGATTCTTGAAGCTAAAGTTTTTACTTCTT  
GAGAGCTTGCATCTGATGCAATGGGAAGCAACAAGTTATCATTTTTCCAAGCCTTGAGCACTTAGTCCTAA  
CAAATTGCCGGTACTTGGAACAAATTCCTTTGACTTTGCGGAGATTCAGACACTACAGCTGATTGAACT  
ACACGAATGTATGCGTTCTGTTCTTGTTCAGCAGAGCAAATACAAGAGGAGCAACAAAGCTTTGGAAA  
TGATGACCTCATTATTCGTGTGAACTCTATCTATACTAGAGTAAACATTAATAAAAAAGGTATACACTTTT  
TTTAAAAGCATAAAAAAATTTGATTAGCTAGATTCCTTCGAAATCTGAAAATGATTTTTATATTCATCATT  
TTCACTTATTTATACTATAAAAGGTGCTAATTACAA

>M6-PGSC0003DMG400022977 M6 LRR-RLP

CTTTATTATATCTAAAGACTATTGACTTTCAAGTAATGAATCTGTTAGAGTCATTTTTGAAAAATAGCTAA  
GATAAGAGGATTGAAATCTTTGAATCTTTTATCTCAATGGAAGTGTCAATTAAGGAATTGGTCAAATGAA



GTTGTTAGAGTC

>M6-PGSC0003DMG400022978 M6 LRR-RLP

TTGAAAGGTAATATTACTCCTTCATTGCTTGAATTGCAGCATTGAAGTACTTGGACCTTAGTAACAATGA  
TTTTGGTACAAGTCAAATACCGGATTCATTGGTTCATTTCCAAGACTAGAATACCTTAATCT

>M6-PGSC0003DMG400022988 M6 LRR-RLP

CATGGGAGATGCATTAGTTCAATGGAAAAATAGTGAATTTGTGTACAATAAAACACTCGGATTGTTGAA  
GATCATTGATTTTTCAAGTAACAAATTAGTTGGAAGAGTTCCTGATGAAATCACACAATTAGATGGACTA  
CTTCACTAAACCTTTCACGAAACAACCTAACAGGACACATCATAACAAGGAATTGGGATGATGGAAATGT  
TAGAGTCTCTTGATCTGTCTCGAAATCAGTTAACAGGACGAATTCCAGCAAGTCTTGCTCGATTAAATTC  
CTAAGTGTTTTAGACTTATCGAGTAACAATTTGTCAGGGGAAATTCCTTCGAGCACTCAATTGCAAAGTT  
TTAATCCTTCGTCATATGCAGGCAACAATGAACTTTGTAGTCCACCACT

>M6-PGSC0003DMG400022989 M6 LRR-RLP

TTCTTGATGACATAGATCATGGTGATCATTGGAGTACTTAGCAGGTGATGTTGGTTGGTTTGGTAATGG  
CAGCAGAATTGTTGTAACAACACTAGAAATAGACATTTGATAGAGAAGGATAATCCAATATATGAAGTGTC  
TACACTGCCTAATGAAGAAGCTGTTCAATTATTCAATCAACATGCTTTCAGAAAAGAAATTCCAGATGAA  
CGTTTTATGAAGTTCTCATTGGAGGTAGTAAATCATGCTAAAGGCCTTCCTTAGCCCTCAAGGTGTGGG  
GTTCTTTGTTGCATAAGAAAGACCTAACTCAGTGGAGAAGAACTATAGACCAAATAAAGAAAAACCCTA  
ATTCAGAAATTGTTGAAAAACTCAAATAAGTTATGATGGGTTGGAACGTGAAGAAAAAGAGATATTC  
TAGATATCGCATGTTTCTCCGTGGATTGAAAGAAAAGAAGTCATGCAGATCCTTGAGAGCTGTGATT  
TGGAGCTGAATGCGGATTGGATGTCCTAGTTGACAAATCTCTTGTTTCATCTCCAAATATAATGTGATT  
GAAATGCATGACTTGATTCAAGATATGGGTAGATATGTGGTAAAAATGCAAAGGATTCGGGAGAACA  
AAGCAGACTCTGGGATGTTGAAGATTTGAAGATGTGATGGTCAACAATACAGTAAGTAGGCTAAACAA  
TGCTATAATATTCAGTTTTTAGTCTCCATCTTCTATTTTTATTTAAAAGATGAAAATTGTTGGTACCCTAT  
CAATTACAACCTTCGTTCTTACAACATGAAAACTTTTCGATTGGACTTTAAAGAAGTGTGAAAATTG  
TATTACTAGAAATTAGAAATATAGAATTAATTGCATAAAGTATTTCTTTAGCGACATTTTTCTTAAC  
ATATTGTACCTTAATTTTTATTTAATGGTCTCTTCAAATGCAATAATAAATAATACAAAACATAACGAAAT  
TGGCATTGCAAACAGTTAGAAAGTAGTCATATTGGCATGCAAATTTTATACAGATATTTGAAGTTATACT  
TTGTAAACTAATGAACCTTTAACAGGGGACCAAGGCAATGGAAGCAATCTGGACACATGGTGTTCAAA  
AATTATGCTTTAGCAAAAAAGCCATGAAAAACATGAAAAGGCTTAGATTATTATCCATCATTAGTTTTAG

TACACATGATGACTCCATTGAGTACCTGCCCAACAACCTGCGTTGGTTTGTCTGTCATAGTTATCCTTGGG  
AGTCATTATTAGAAAATTTGAACCTAAGAAGCTTGTGGTCTTTATCTCCAGAGGAGTTCCTGCGTCAA  
TTATGGACCGGAATAAAGGTACAATTGTTGAATTCAATTTTCATTATTTTTCTTTTTGTCAAATACGTACAT  
AGATAGACTCTCAAATTTAAATAAGTTTTGGTCTAAAATTGTTGGGGTGGTCCAATTAGAGTCAAACT  
GAGGGACCAGTTTCGTTGGCTATTTTGTATCAAGAATTCGAATTTGATGAAATAGTTGTTGAGCTTTTTA  
ATTTTAGCATAAAAATACTTAGTTTAGTTGACATAAAGGATAATTTTATATAAATTGGGTTAGAGCAAAT  
TTGATTCAATGACTATGAGAGTAAGATATTTTTATTGGTCTACTAGCCAAATCAAATTATCCTGGGCA  
GCATCCTAATTCTCATTCTTTCTGTGTTTTGAATAGCAGCATTGCGCTTTGCGAAAGCTAGATCTTAG  
AGATTCCGAAAGGCTGATTCAAACACCAGATTTACGCAAATGATAAATTTGGAGTATTTGGATCTGCGT  
AACTGTAGTGATCTTGAAGAGGTTACCGTTCCTTGGAGTGTTGCAGAAAACCTCATTGTGTTAAATTTGC  
AGAGGTGTAAACGCCTAAATAAGTTTCCATGTGTTAACGTGGAATCCCTTGGATCTCTGATTCTACTACA  
TTGCTCTAATTTGGAAAAATTTCCAGAAATCTTTGGAAGAATGAAGCCAGAGTTAGAGATCAAGATGAG  
CTGGTCTGGGCTAAGGGAAATACCATCATCTATTATTCAGCAATACGCATGTCATCTTACAGAGTTAAGT  
TTGAGTGATATGAAAAAATTTGTAGCACTTCCAAGCAGCATTGTCAGTTGAAAGGTTTGGTGAAGCTG  
GATGTGTCATACTGCTCAAACCTTGAAGCTTGCCAGAAGAGATTGGTTATTTAGAAAACCTTGGAGGAG  
CTTCATGCTAGCTTTACTCTAATCTCACGACCTCCGTCTTCCATCATCCGCTTGAACAAGCTTAA

>M6-PGSC0003DMG400022990 M6 LRR-RLP

ATGCATTAGTTCAATGGAAAAATAGTGAATTTGTGTACAATAAAACACTCGGATTGTTGAAGATCATTGA  
TTTTTCAAGTAACAAATTAGTTGGAAGAGTTCCTGATGAAATCACACAATTAGATGGACTACTTTCACTA  
AACCTTTCACGAAACAACCTAACAGGACACATCATAAAGGAATTGGGATGATGGAAATGTTAGAGTCT  
CTTGATCTGTCTCGAAATCAGTTAACAGGACGAATTCCAGCAAGTCTTGCTCGATTAAATTTCTAAGTGT  
TTTAGACTTATCGAGTAACAATTTGTCAGGGGAAATTCCTTCGAGCACTCAATTGCAAAGTTTTAATCCTT  
CGTCATATGCAGGCAACAATGAACTTTGTAGTCCACCACT

>M6-PGSC0003DMG400023018 M6 LRR-RLP

ATGATCTTGCGTAACAGAAAGCATTAGTTCCTAATCTTGAACCTAGATTCAAGGTGCTCTTTACTACAGTTT  
CTCGTACTTTCTGAATAAAAGAACTAGGTAACAAAGAGATACACACAAAATCCATTTCTACTTGTGAGTT  
CAATGAGGGAGAGTATGTATAAGTTGGAGTGTGCAGAGTCACAAGATATAAAACATGCCAAGTAAATC  
CAAAAATATTTTGTATTATACTTTCTATTCATACTAAGTAAAGGAAATTAAGGGAGAGAGCAGTGATAA  
ATGACAAATGGAAGAAATGAAAATGAATGAAGAGAAACGTAAGACTTTGACGATTTGGGAACTTAAAA

GAGTAAAATGCGGTATAATTAATGTGAAACTCCAAGAGCTCCTTTGGTCGTTACAAGACCTAAAGTTGT  
ATACCAAATCAGTCAATTGCCGGATGCTCTTCTCCTTTGCTCTTATATCGACTGATCAAACACTCGTAA  
TAACCGCTCTCTCAAAAACGTGGCACTATCTCTGGAATTGACTTGATACCTTTTGTTTTAGTACTTTTAATT  
ACCATGAGCGTTATGTATCCTATGTTCAATTATGTATTAGGTTATTATATTTCTTCCAAAATTA AAAAATCCT  
ACTTGATAGCCTTGAGTCGGATGCACACGGGTGGAAAATATGAAACTCCGATTAGTTTCTGAAGAAGAG  
GTTTGTGCCTTGCCTGAATGTTTATGCACTTGTTTCATCGTTTATAACACTAATTTTGGGATTTTGATGCTAA  
TGTGTCCATAGCATGAAAGTCTCTAAAACATAAAATTGAAGTGGATAGTGTTATCCAATGACCATATTG  
TGACTGTTGGATTGTCCTGCATTAGAAACTATGAAATTATCTTGTTTTAAAGGTTTTAGTTGCATGGAAAT  
TAGGTCTTCAAATTAAGAGACTGAATTTGATATCATACAATGAAGATGAAGAAATTGATCATTCCCTTG  
GAAATTGTTGCCCTTATCTTCATCATTGGGAATTTAGGAAGTTTTTCATGGTCTCAAGTGTAAGCTTGT  
AGACATATCCTCCATGGTTAATACTAATTAAGCTTACGTTTCGACATTACATGTATCAAAGACATGTAACAT  
GCGGTATAATATTGGATGTCTTTGATGGATGTAATGTGGAATATAAGCTTAGTACTAACCACATATGATA  
TGGCTACAAACCTACACTTAAAAAGATGATGACTTCTGAAATCTCTGAATAATGAATGTACTATAGGAG  
ACAACAATTTCCACAAAATGATCAATTTCTTCATCATCATTATATGATATCAAATTCCTCTTCAATTTGAA  
GACCTAATTTGGAAGCGACTAAAATCCTTAAAACGGAATGATTCCAGAGTTTCTAATGGAGAACAACCCA  
ACAATAAATTCGCAATATGGTCCTTAGATATTACCATCCACTTCAATTTTATACTATACGGAGATTTTGAA  
ATTATATCCACATGCACATCAAATCTCAAATTAGTATTATCAAATGAATGTGTATAAACATTACGGCAA  
TGCACAAATCTCTTTTTGAAACTGACCTGAGTTTCACATTTTCTTTGATCAAAGTTCTAAGTTGAATTTT  
TTAATTTGGGAGAGAAACAAAATTACCTAAGCCATAATCAACCTAGGATACATATCCTTTGTGATAATT  
AAAGTTACTAAAAGAGAAGATATCAAGTAAATTTCAAAGATAAAGCTACCTGTTTGAGAGAGCACTTGT  
TACGGATATCTGATTTGTTAGATAATAGAGAGACTGTGAAGAAAAGAGCTTACGGCAACTAACTGA  
TCGGTCTACCGTTGTTGTTTCTTCTGTCTTTTCGCCGGAATCCATGGTTGGTTTTTGGTTACAGCTATTGTT  
TCTTCTATTTTCTCAGCTGGAATCCATGGTTTGTGTTGGTCTACAACCTGTTGTTTCTTTTATCTTCTCGCCG  
GAATCCAAATGTTGTTTGTGCGAATCCGGCAACTGATTGGTCGATCCAGCAACTGATCGGTTCGATCCGG  
CAACTGATTGGTCGATCTACATCTGTTGTTTGTGGAATCCAGAAATGCTTAGAAGGTATCGCCCCCTTT  
CCCTTCAGTTTTAACTTAGGCACAAAATGAGCAAATTGAGTAATATATTGGCATAAATTTG

>M6-PGSC0003DMG400023198 M6 LRR-RLP

GCTAATAATACATCAACCTACCATTTCTAGCAACAACAGGTAACAGCTGTGGAGACTTTTTTTTTTTTTGT  
ATAAATAAATTGTAACCCCTTCGATGGATTTATGGTTGGATTTTCCATCAAACCAAAAACCTCTCCATTTTC

TCTCTCACACAACTCTTCTTATAGCTCCAGTTTCTTGTTAAAGAAAAAATGTCAGTGAATAGTATAAC  
TGAGTTCTGTTCTGAATCCTAAGTGGGGTTTGCTTTTCTCATCTTTTTTTTTTATGCTGCCCTGTTTCCTTA  
AACACTCGTTTTTCACTGTATAAAACACGAAAAACAAGTAAAGTTTTGTTCTTAACTACTATTATTTTGATT  
TGATTTGATTTGATTGGATTAACGTTTGTATTCTTGTCAATATTGATCGGCGCTTCTAGAAGTTGTACAGA  
AGAAGAACTCAATTATGGCTTTCTCAATATTTTTCGTTTTTTTGATCTAGGACTCTTGGAAGTAAACCCCC  
AAACAAAGTGTATTCAAATCTGGATACTGTGGGTGGTTTCTGTGTGTAGCTGTGTGTGTGTGTGTGTTTT  
CCGACGAAATTGAGGGTGAATGGGATCCTCCGCAATGTCTGTTGACGAGATTGTGGAAGAGATGATG  
AGGCTTAACAAATCTCTACCAATAAGGCCAGGGATAGATGAAGTGAAGCAGCAAAAAGTTTTAATTATG  
AATATGGAGAAGGAGGAACAAATGAAGTTAGAGACAATTGCGCGGCAAAACAAAAGAAAAGATGTAC  
CAGAAGAGGTATTCAAAATATTGCAAGAGATGCAGAGGAATTTAGTTTGTTCAGAGTAAAGAACAGA  
AGAGAGAGGCATTAAAATTGTTAGATCTCGAAAATGTTCAATTACCTGTTGATGAATTGATTCAAAGAGC  
TTCGAAATGCTTGTCATCTAATCCTCAAGCTAATAATACTTCTTCAGCTTCTTCAAGGAATTCCAGCAATTT  
GTCTCTGGCGAATTCATCTTCTTCAACGGTAGCAGTTTCAATTCTCCGGCAACTACTACGACTATGTCTT  
CGTCGAGCTTTTATAGTGAGAAAGAGCCTGTTAAAGTGTCTGAACTTGTTACAAGAGACGACAGTACTT  
GAAGAAGCCGACAACCTGCGTTTCAAATGGATGGAATCAGTGTTGGGCTTCGATCTGGGAACGCTTCTTC  
TGCTCCCCAGATTGTCGATACCACTTTGAAGCGTAGTACTGGTAAGTTTAATCTATTTCTGTAACATATT  
GCTTGTGACCAATGTGTTTTTTTTATACTTTGTTAGCTTAATTGGATAAATTTGTTTCTATAATATGAAA  
ATTATTAGTTTAATGGAGAAGCCATTTATCTGTAGGTCAAATGATGAAAAAATGAGCTTGATAAAGCTT  
GCTAGTTTGATAGAAGTTTCAGCCAAAAAAGGAACCAAGGAGCTAATTCTTGAAGAAAAGTGTGAGAC  
CAATTAGAATGGATTCCAGATTCCTTGGGAAGCTATCAAATTTGGTACTTTGGATTTGTCTGAGAATC  
GAATTGCTGTGCTGCCAACTACCATCGGGGGTCTTTCATCGTTGCAAAAAGTGGATTTGCATGGAAATAG  
AATTGTTGAACTTCTGATTCAATAGGAGATCTGCTTAACTTGGTCTATCTTGATCTAAATGGCAATAACC  
TGAAGACATTGCCTTTGACTTTAGCGAGGTTAACTCACCTTGAGGAAGTCGATCTAAGCTCTAACATGCT  
ATCTATACTCCCTGAGGCAGTGGGATCCCTTGTGAGTCTCAAAAAAGTATCGTTGAGACTAATGACCTA  
GAGGAAGTTCCTCACACTATTGGTCAATGTACTTCGCTGAAAGAGCTCCGTGCTGACTATAACCGTCTTA  
AAGCTCTTCTGAAGCCTTGGGGCGAATGGGTTCTTTGGAGATTCTATCCGTGCGGTACAATAACATCAG  
GCAATTGCCTACAACCTATGGCATCCTTAACAAGTTTGAAAGAGCTCAATGTTAGTTTCAATGAGCTTGAG  
TCAGTGCCTGAGAGCCTGTGCTTTGCCACTACACTCATAAAAGTGAACATTAGCAACAACCTTTGCGGACC  
TGCAATCACTCCCTAGATCCATAGGAAACCTTGAGATGCTTGAGGAGCTGGATATGAGTAACAACCCAGA

TACGAATTCTACCAGATTCATTTAGGATGCTTTCGCATTTGCGTGTACTAAAGACAGAAGGAAATCCTCT  
TGAAGTGCCACCAGGAAACATTATCGAGATGGGAGCACAGGTGTGTTGAGTTTTATTTTTACTATACTA  
TCATTATGCTCTCTGAATTTTTAATTGTTTGTGTTTAGTTTTGATATTTGACTCATGAACTTTATTTTGCTCA  
TCAGGCTGTTGTGCAGCATATGGCTGATCTTATTGAAAAGAGGGATGCGAAGCCACAGCCCGTTAAACA  
GAAGAAATCATGGGCTCAGATATGCTGCTTTTCAAGATCCAACAAACGTAAGCGCAATGGTATAGACTA  
TGTCGTCCAAGCGTGACACACTTAAAACTCTTGACCCTATATTTATCTGGTAAGTTTGTCTCTTACTAC  
CTCTGCTTCCAGCTATTAGTCTGTTGGCGAAAGAAAACAAGAAGTCTTTTATTAAGGGGAAACTGGAGG  
TAGTATCCAGTATCCAGCTGGTGATCCAGTATTCATGGCACTGATCCAGCAGACTGGTTGGATAGTTCTT  
AGCTCTTACACATTTGTTGTTTATTAATTATCCTCAATTCTTGCCTTTGATTTTGTGAGTTAATAAATGTAT  
ATGGCGCACGAGACATGTTTGCTGCATTAATTACAATAATAAAATGTTGGGTTGTAAGGGAATGGCTCA  
CATGCTTTTGTATCCCTCGTTCAGTGAAATTGAGCTGTGATTGTGCTGGAAGTGAGCTCTGCCATTCTTC  
TTCAATTCCAACTCTGCCAACAGAATTATCAGTATTTTTTTGTTACCACATGTTTCTTTTTGCCAGTTGGTT  
CTATTTATCATCTTCTTTGTAATATTTGCTTGTAAATTTATAATGTATGTTCTAAAATCAGTTGTA AAAATC  
GATATCACACGGTTATGAAGAGGGAGGAAATATCTGTTGTTGTCGAATTCCTCAATGTTAATGAATTAT  
TATGAGTTGACTTCAGA

>M6-PGSC0003DMG400023274 M6 LRR-RLP

GAGGGTTTCATACCCAGAGAACAAGAAAGAACGGAGGATGTCGCTGAAGGCTTCTTGAATGAACTGAC  
AAGACGAAGCTTGGTTCAAGTGGCTTATACATATTGGGATAGAGTTACTAAATGTAGGGTTCGTGATTT  
ACTCCGTGATCTTGCATAGAAAAGGCATTGGAGGTAAACTTCTTTAACATTTATGATCCAAGAAGCCAC  
TCCATATCCTCTTTATGTATCAGACATGTGATTCATAGTCAAGGAGAAAGGTACCTCTCACTTGATCTTTC  
TAACTTAAAGTTGAGGTCAATTATGTTCTTCGATCCCGATTTTCGTAAGATGAGTCATATAAACTTCAGGA  
GTGTGTTCCAACATCTACATGTGTTGTA CTGGATATGCATGTTGGGAATGTGTCTATAGTACCTGATGC  
CATAGGAAGTTTGTACCACCTCAAGCTGTTAAGATTGATCCATATCCGTGATGTTCTTCTTTTATTGGCA  
ACCTCAAGAATCTAAATACACTTGTGTCATGAGGGGGCATACTCTTGCAAACCTACCCCGGAGACAG  
CTGACCTGATAAATCTAAGACATTTAGTTGCTCGGTATACAAAACCTCTGGTACATATAAGAAAACCTCAC  
TAGTCTTCAAGTTGTTGATGGCATTGTTGTGATCAATGGAAAGATGTTGACCCTGTTGATTTAGTCAAT  
CTTCAAGAATTAAGCATGGATCATATGAATAAATCTTACTCTTAAACAACATTAGGAGCTTGAAAACCC  
TTAGCACTCTCAGATTGCTTTGTAAGTATGATGGATCATTTCATCGCTTGAATTTGTTAATTGTTGTGAA  
AAGCTCCAGAAATTGTGGTTAAGTGGGAGAATAGAGAAACTGCCTCATCTGTTTCAAATTCCATCACAA

TGATGCTTCTGAATTTCTCAGTACTGACAGAAGATCCGATGCCTATTTTGGGAATGTTGCCAAACCTAAG  
GAATCTCGACTTGGTTAGAGCTTATGAAGGAAAAGAAATAATGTGCAGTGATAACAGCTTCAGTCAACT  
GGAGTTCCTTCAACTTAGTGAAGCTGAGAAGCTAGAAAAGATGGCATTAGGCACAAGTGCCATGCCTCT  
GATTAAAGGTCTTCATATCCATGCCTGTCCAAATTTAAAGGAGATTCCAGAGAGAATGATAGACGTGGA  
GCTGTTGAAGAGGAATTATATGCGGTGAGCTTTTCAAGCATATATCATGTCTTCATAATCGTAGAGGTAT  
TGATGGGGGCATTTCTGCCAAGCACATTGGTTATTAATTTACAGGGCTGTCAATGAGAGTGGTTTGAAGA  
TAATTGTTTTTGC AAAAATGATTTTGTGATGTTTTAATTAATTGGTCTATTGTATGATCTCTTACCACATT  
TAAGACAATGCTTTATATGTTAAAATGAAATTA AAAATATTATATGGTACTCTCTC

>M6-PGSC0003DMG400023299 M6 LRR-RLP

ATGAAGCCAGAGTTAGAGATCAAGATGAGCTGGTCTGGGCTAAGGGAAATACCATCATCTATTATTCAG  
CAATACGCATGTCATCTTACAGAGTTAAGTTTGAGTGATATGAAAAACTTGTAGCACTTCCAAGCAGCA  
TTTGTGAGTTGAAAGGTTTGGTGAAGCTGGATGTGTCATACTGCTCAAACTTGAAAGCTTGCCAGAAG  
AGATTGGTTATTTAGAAACTTGGAGGAGCTTCATGCTAGCTTTACTCTAATCTCACGACCTCCGTCTTCC  
ATCATCCGCTTGAACAAGCTTAAAATCTTGAGTTTTAGATTAGACTTGAAACCTAACTCCTTTGCCACAAA  
AGAATCAAAATATAGAGTTTCCTTTGTGTTCCCTAGGGTGAATGAAGGGTTACGGTTGTTGGAAATTCTG  
GATCTCAGCTACTGCAATCTAACAGATGGAGGACTTCCAGAAGACATTGGATGTTTATCCTTTTTGAAAA  
AGTTGAATCTCAGGGGAAATAATTTTGAGCGTTTGCCTCAAAGCATAGCCCACTTGGTTCCCTTCGATC  
CTTGGACTTATCACAGTGCATGAGTCTTAAAGAGTTTGTAGGTGTTAACATGGCTGAAGGGTTATGGTC  
GTTGGAAATTCTGGATCTCAGCTACTGCAATCTAATAGATGGAGGACTTCTGGAAGCCATTGGATGTTTA  
TCCTCTTTAAAAGAGTTGAAGCTCAATAGAAAATAATTTTGAGCGTTTGCCTCAAAGCATAGCCCACTAG  
GTTCTCTTCGATTGTTGGACTTATCAGAGTGCATGAGGCTTAAAGAGTTTCTAGGTGTTAAGATGGCTGA  
AGGGTTACGGTCGTTGGAAATTCTGAATCTCAGCTACTGCAATCTAATAGATGGAGGACTTCTGGAAGA  
CATTGGATATTTATCCTCGTTGAAATTCTTGATCTCATTAGAAAATAATTTTGAGTGTTTGCCTCAAAGCAT  
AGCCCACTAGGTTCTCTTCAATTCTTGGACTTATCATATTGCAAGAGGCTCAAAGAGTTGCCAGGTTTC  
ACGGGGATGCAATACTTGGATACTTTGGATCTCAGTTTCTGCGATCTAACAGATGTAGGACTTCTGGAA  
GACATTGGATCCTTATCCTCTTTGAAACACTTGA AACTCAAAGGGAAATAATTTTGAGTATTTGCCTCATAG  
CATAGCCCACTTGGTGCTCTTCAAACCTTGGACTTATCAGATTGCAAGAGACTTAGACAGCTGCCAGGT  
TTCACA

>M6-PGSC0003DMG400023396 M6 LRR-RLP

ATGTGGTTAAAGAAAGATTTTCATTATATTTGCTACTCTATTTTACCATTTTTCGATCGTTTATAGCTGTCAT  
GAAACAGAAAGATCAGCTCTGTTAAGCTTCAAATCCTTGCTGACTGATCCATCTAATCGGTTAACTTCAT  
GGCAAGGGGGAAATTGTTGCAATTGGAAAGGAATCAAGTGCTCGAGTTCAGGTCATGTTGTAGTTGTC  
AACCTCCGGAATCCTAATCCCGTTGAAGTCATGATCACTATCAATAAGGAAGTTGTTTCAAATTTTAAAA  
ACACGTCTGATTTTTCTCTTAAAGGTACTATATCTCCATTGCTCTTTACTCTTGACCATATGCGACATCTCG  
ACCTGAGTTTCAACAACCTTCATGTACTIONAAAGTTACCTGTTGAGATATCGAACTTAACAAAGTTGACTTAT  
CTCAATCTGTGAATGCCATGTTTCAAGATTCCATAGCCACGCAATTCTCAAACCTTACATCTCTGAGGTC  
TCTTGATCTTTCGTGTGCTAATTTAGTACCTGATTTTTCTTCTGTTTCTGTTAGCTTGACATTTCCACTGAA  
GTTGGATTTTGGCTCATTGTTTTCTTTATAAGCTATGGTTATTTGTCTAGTCCAAATCTTAGGTGGTTACA  
AGGACTCCGACGTCTCAGATATCTAGTATTGACTGGTGTTGATCTTCAAAGGCGTCCGAATCATTTCATT  
GGGCTAAACCAATATCAAGCCTTCAAATCTCAAGTCACTTCATTTGTCCAGCTGCAGCATTTCAGGAAG  
AATTCCGGTAGGGCAGTTACTTAACCTTACTAATCTTGCTACTCTAGATATGAGTTCTAACGTTCTAACAT  
CCTCGATACCTGATCTTCTATCGAACCTCAGTACCCTCTCGGTTCTTGATTTTAGTAGCAATGATTTAGAT  
GGTCATGTCTCTTATATTCTCAACTCAAAGAACTTTCTGTTTCTGGCAATCCTGCTATGACCATAGATCTT  
GTTTCAATGTTTTCTGTTCCGTGGCCGAGTTGACATTTCTTGACATAAGCTTCGTTTCGTGTAGCTGGAAT  
GATTCCTCCTTCTTAAAGCAACTCATCTTCATTATCCTTTTTCCGAGCTGATGGATGTTTCGATCCAAGGGTC  
AATACCTTCTTCTGTCACAAAACCTAAGAAATTAAGTGTACTGATGCTGAATGACAACGATATCACAGGC  
CAACTTCCTGTATCCATGTCTAGTTTAGTAAGCCTTCAATACTTATCTATGTCTCAGAACAGATTAGAAGG  
TCACATACCCATTTCAATCTGTCAAATCGCCTCCCTCAAGTACCTGAATTTAGAATGGAACGATCTAACAG  
GACGTTTTCCGTTGTGCATACTTCAGCTCCGAAACTTTTCATCTCTTTATATTAGAGGAATAGACTGAAT  
GGTAATATGCCATTGTCTTTGTTCCGAAAGTCTAGATTAGATGAAATTAGTTTAGGAACTAGTGGATTGT  
CATTGGAAATCAATGATCAAGATCAACTCTTCGTGCAAACGTTCCAGCCCAAGATTTTGGATTTACATCT  
TGCAACATGAGAGGAGAAATCCCGGATTTCTTTTCGAATTTTACAAGCCTCGTGGTTTTGAATTCGCTA  
ACAACAGTCTATCGGGAGCCATACCACACTGGTTGTTCAATCTCCCTCCCTCTATACTATCTTTGCCTA  
TGAATAACTTCAGGGGAATTATACCTCCAATGATTCAGCTGAAATCTTCTCATTTCCAACAATAGTAAAT  
TTAGCCAGAAACAACTTCAAGGTCCTCTCCCTTCTCAGCTAGAGAATGTTAACGTCATCGATCTGTCACT  
TAACAATTTTGTAGGCTCGATTCCATCACGGATAGGAGAAGTTCCCGGTATCAGGTCCATATCTTTATCC  
GGAAACACAATTCATGGTCTAATACCTGAATCATTGTTGCCAAGCGACTAACGTTCTCCAGGTTCTTGATCT  
CTCTAATAATAGCTTGTGAGGCACCATTCAACGTAATATGGGAAACTGCAAGTCTCTCATTTACCTTAATC

TTGGACAAAACAAGCTCACTGGAAGTGTTCCAAAAGAACTTGAACGCGTTACAAGCCTTCGTTACCTTGA  
CCTGAATGGAAATAAGCTAGAAGGATCTTTTCCAAAATGATTGAAAACCTTCAAGATTTGGAGATTCTG  
ATCTTGGCAGGCAATTTATTTGAAGGACCGATACCAAACCTTCATCGGTGAGCTACACGGCCTCCGTATAC  
TCGTTCTTTCATCCAACATTTTCAATGAATCTATCCCAGAAGGGCTAATGAAGTTGGAAAATCTACAATAT  
ATCGGTTTGTCCAGGAACAATCTGTCCGGTCCCATTCTGAGAATCTCGATGGCTTGAAAATGATGACGA  
AAAGGAAAAATGAGGCAACCATCTTAGGTTATGTTTACTCCCTCAAGTTCACTGGTGCACAGCTAGAAAT  
AGTCACCAAAGGACAGATACATTGGCTTGAAACAGTATATTCCTACAACACTGGATTGACGTCTCGAG  
CAATGCTCTTACTGGTAAAATCCCTGAAAAAATTGGCCTTTTAAAGTGAATCCCATTCTGAATCTCTCAC  
ATAACAATCTGTTTGGACTGATCCCAAAGACAATCGGCGATATGATTTCACTCGAGTCGTTGGATCTTAG  
CTACAACCATTTAGAGGTGAAATCCAGTGACATTGGCATTGTTAGATTTTCTCCAACATCTCAACATGT  
CCTACAACAATTTGAGCGGACGGGTTCCAAGGAATCCACATTTGACACTTTGTATCAAGACGGAGCAG  
CATATATCGGAAACAAATACCTATGTGGTACTCCTGATGGGATGAACTGCAGTAGCAATGGTCCCTCTAT  
CATCACTGAAACTACAGAGAACGAATATGATCAAGAAAATGTCCTGTTTGTCTAGTTATATTTTTGGCT  
ATGTAACAGGCATTTCTGGATTGTTTTGCTCTTATATTTGATGAAGGACAATTGGAGGAACAAATACTG  
GAGGGCAATAGACAGAATTGTGTTAAAAATAGTAAAATAG

>M6-PGSC0003DMG400023498 M6 LRR-RLP

ATGTATTCAAAGTTACCTGTTGAGATATCTAACTTAACAAAGTTGACTTATCTCAATCTGTCAAATGCTAT  
GTTTCAAGATTCCATCACTACACAATTCTCAAACCTTACATCTCTAAGGTATCTTGATCTTTCGTGTGCTTA  
TTTAGTACCCGATTTGTCTTCTATTACTATTAGTTTGACATTACCACCAAAGTTGGATTTTGGCTCATTGTT  
ATCTTTTATAAGCTATGGTTATTTGTCTAGTCCAAATCTAAGGTGGTTAGAAGGACTTCGACGTCTAAGA  
TATCTAGTATTGACAGGTGTTGATCTATCAAAGGCCTCGGAATCATTTCAATTGGGCTAAACCAATATCAA  
GTCTTTCAAATCTCATGTCACTTGAATTGTCTAGCTGCAACATTTAGGAAGAATTCCATTAGAACAATTG  
CTAACCTTACTAGTCTTCTACTCTAGATATGCGTTCTAACGTTCTAACATCCATGATACCTGATATGATA  
TCGAATCTACAACCCTCTCAGTTGTTAATTTTCGTGGCAACAATTTAGATGGTCATATCCCTTACCTTCCA  
CAACTCGAAAGACTTTCTGTTTCTAGCAATCCTGCTATGACCATAGATCTTGTTTCAATGTTTTAGCCCC  
ATGGCCAAAGTTGGCATTCTTGACATAAGCTTCACTCGGGTAGGTGGACCGATTCCCTCCTTCTTAAAGC  
AACTCAACTTTATTATCCTTTTTCCGAGCTGATGGATGCTCGATCCAAGGGTCGATACCTTCTTCCATTAC  
AAAACCTCAGAAATTAAGTATATTGATGCTCAATAACAATGATATCACAGGTCAACTTCTGTTTCCATGT  
CCAGTTTAGTAAGCCTTCAATACTTATCTTTGTTCCAGAATAGCTTACAAGGGTATATTCCAAATTCGATT



TGTC AAGTCCCCTCCCTGGAGTACCTGAATTTACAATGGAACGATCTAACAGGACGTCTTCCCCTCGTGCA  
TACTTCAGCTTCCCTAAGCTTTCATTTCTTTATGTTTCAGATGAATAACCTTAATGGTAATATGCCACTGTCAT  
TGCTCCAGAAGTCTGGATTGGATCAAATCAGTTTCGGAGTTAGTGGATTGTCCGTGGAACCTCGATGATC  
AAGATCAATCCTTTGTGCAAACCTTCCAGCCACAGTTTTGGAATTTACATCTTGCAACATGAGAGGAGA  
AATCCCGGAGTTCTTTCAAATCTGACGAGTCTCGAGATTTTGATTTTGGCTAACACAGTCTATCAGGA  
GCCATACCATACTGGTTGTTCAATCTCCCATCCCTCTCTGTACTAGATTTGTCAATGAATAACTTCAAGGG  
AGTTATACCTCCAATGATTCAGATGAAATCTTCTGTTTTTCCAACGGTAGTAAATTTAGCCAGAAACAAAC  
TTGAAGGTCCTATCCCTACTCAGCTCGAGAATGTTAATGTCATCAATTTGTCATTTAACAATTTTGTAGGC  
TCAATTCCAACACAGATAGGGGAAGTTCATGGTATCAGGTCCATATCATTATCAGGAAACAAAATCCATG  
GTCCAATACCTGAATCATTTTGCCAAGCGACTAACGTTCTCCAGGTTCTTGATCTCTCTAATAACAGTTTG  
TCAGGCACCATTGACGTAATTTGGGAAACCGCAAGTCTCTCATTTACCTTGGTCTTGGAACAAAACAAGC  
TCAGTGGAAGTGTTCCAAAAGAAGTTGAACGCGTTACAAGCCTTCATTACCTTGACCTGAATGGAAATG  
AGTTTGAAGGTTCTTTTCCAACAGTGATTGGAAAGTTTAAAGATTTGGAGATTCTGAACTTGGCAGGCAA  
TAGATTTGAAGGAAGGATACCAAAGTTCATCGGTGAGCTACACAGCCTCCGTATACTCATGCTTGCATCA  
AACTCTTTCAATGAGTCTATACCGGAAGGGTAATGAAGTTGGAAAATCTACAATATATTGGTTTATCCA  
GGAACAATCTGTCCGGTCCCATTCCCGAGAATCTTGATGGCTTGAAAATGATGATGAAAACACAAAATC  
AAACAATATCTTAGGTTATGTTTACTCCCTCAAGTTCACTGGTGCTCAGATAGAAATTGTCACCAAAGG  
ACAGACACATTTTCTTGTCAGTGTATTCCTACAACAGTGGATTGACGTCTCAAGCAATGCTCTTACTG  
GTAAAATCCCTGAGAAAATTGGCCTTTTAAAGTGAATACCATTCTGAATCTCTCACATAATAATCTTACC  
GGGGTTATCCCAACGACTATTGGCGAAATGATTTCCCTCGAGTCGTTGGATCTCAGCTATAACCAACTAA  
CAGGTGAAATCCAGTGACATTGGCACCCCTGGATTTTCTTGCATATCTCAACTTGTCTTATAACAATTTG  
AGCGGACGGATTCCAAGAAATCCACATTTTGCACCTTATATCAAGACGGAACAGCATATATCGGAAAC  
AAATACTTATGTGGTACTCCTAATGGGATGAACTGCAGTAACAATGGTCCCTCTATCATCACTGAAACTA  
CAGAGAATGGATACGATCAAGAAAATGTCCTGTTTGTAGTTATATTCTTGGGATTTGTAACAGGAGT  
TGCTGGTGTATTTCTGCTGTTACATTTGATAGATGAGAATTGGAGGAACAGGTATTGGATTGCAGTAGA  
CAGAATTGTGTTGAAAATAGTGAAGTGAAGTGAAGTGAAGTGAAGTGAAGTGAAGTGAAGTGAAGTGAAGT

>M6-PGSC0003DMG400023549 M6 LRR-RLP

ATGGAGAAGCACATCTTCTTATTGATTCTTCTCTTCTAATTCAATTTTCTATATCACTTGCTTCTCTAATG  
AGACTGACCAACAAGCTCTGTTAGCTTTCCAAAATCTTATTACAAGTCCTAATCATTTTTTGGCCAATAAT

TGGACCAAAAATACTTCCTTTTGCACCTGGTTTGGTGTCACTTGCACCTCCAAAAAGGCAAAGGGTTATGG  
CCTTGGCTCTTCTGATTTGCAACTTCAAGGCACAATTTCCCATCTTTGGCAAATTTGCCTTTCTCAGTG  
TTCTCAATCTCCAGAACAACAGCTTCCACAGTGGCATCCCTTATGGACTTGGCCACATGACTCGCTTGCG  
AGTGATTGACGTAAAAACAATCAGCTCAACGGAAGTATACCAACAAGTCTATTTCAAACCGGAGAGT  
TCAAGTAATTTCAATGGCTTTCAATGAACTCGGTGGTGAATGTGGAGAGGCCCATGGTATGTACCAGA  
ACTCAGAGTCTTAAATCTCGGGAACAATAGCCTCACGGGTATAATCCCTCCTTATGTTGGAAATGCCACA  
AAATTGATGAACATCAATTTGTCTGGGAATAGAATCAATGATAACATTCCAATGGAGATCAGTAATCTTA  
GCCAACTTGCATTTTTGCCTTGTCAATAATCAATTAACAGGTTCCATTCTCCAACACTGTTTAATATCT  
CGTCACTACTTGGCATATATCTGTCATTCAATGGCCTTTCTGGTCTCTCTTGCTAGATGAAGGGAATATT  
GTGTCAAATCTGAAGCATTTAAGTATGTCTAACAAACCAATTTCTGGTTGCATTCTTCCAACATATGCCA  
ACTCACAGAGCTCAAACTTTTGTCCATATCTTTCAACAATATAACTGGAGACATACCTAGAAATATTGGTT  
GTTTATCCAAACTCGAAAGGTTTTATATTGGTGAAAATCCAATAGAAGGGACTATTCCCACTTCATTGGG  
AAATATTTCTACTCTGCAATATCTTGATTGTGTAGACAATTGGATGAAGGGGCAAATTCCTCAAGAATTA  
G

>M6-PGSC0003DMG400023551 M6 LRR-RLP

ATGGAGAAGCACATCTTCTTATTGATTCTTCTTTCTAATTCAATTTTCTATATCACTTGCCTTCTCTAATG  
AGACTGACCAACAAGCTCTGTTAGCTTTCCAAAATCTTATTACAAGTCCTAATCATTTTTTGGCCAATAAT  
TGGACCAAAAATACTTCCTTTTGCACCTGGTTTGGTGTCACTTGCACCTCCAAAAAGGCAAAGGGTTATGG  
CCTTGGCTCTTCTGATTTGCAACTTCAAGGCACAATTTCCCATCTTTGGCAAATTTGCCTTTCTCAGTG  
TTCTCAATCTCCAGAACAACAGCTTCCACAGTGGCATCCCTTATGGACTTGGCCACATGACTCGCTTGCG  
AGTGATTGACGTAAAAACAATCAGCTCAACGGAAGTATACCAACAAGTCTATTTCAAACCGGAGAGT  
TCAAGTAATTTCAATGGCTTTCAATGAACTCGGTGGTGAATGTGGAGAGGCCCATGGTATGTACCAGA  
ACTCAGAGTCTTAAATCTCGGGAACAATAGCCTCACGGGTATAATCCCTCCTTATGTTGGAAATGCCACA  
AAATTGATGAACATCAATTTGTCTGGGAATAGAATCAATGATAACATTCCAATGGAGATCAGTAATCTTA  
GCCAACTTGCATTTTTGCCTTGTCAATAATCAATTAACAGGTTCCATTCTCCAACACTGTTTAATATCT  
CGTCACTACTTGGCATATATCTGTCATTCAATGGCCTTTCTGGTCTCTCTTGCTAGATGAAGGGAATATT  
GTGTCAAATCTGAAGCATTTAAGTATGTCTAACAAACCAATTTCTGGTTGCATTCTTCCAACATATGCCA  
ACTCACAGAGCTCAAACTTTTGTCCATATCTTTCAACAATATAACTGGAGACATACCTAGAAATATTGGTT  
GTTTATCCAAACTCGAAAGGTTTTATATTGGTGAAAATCCAATAGAAGGGACTATTCCCACTTCATTGGG

AAATATTTCTACTCTGCAATATCTTGATTGTGTAGACAATTGGATGAAGGGGCAAATTCCTCAAGAATTA  
GGGAAGCTATCAAATTTGAGGGAATTAAGCTTTGCCAATAATTCTAATCTTATTGGTCAAATTCAGAGG  
CTATTTTCAACATATCTTCTTTGGAAGTGATCAATTTAGTTTGAATAACCTCTCGGGGAGAATTCCAACC  
ACTACAGGTCTTCATCTTCCGAACCTTAAAGAACTTTACTTGGGAGACAATCAGCTTGAAGGGGAAATTC  
CATTGTTCATAA

>M6-PGSC0003DMG400023599 M6 LRR-RLP

TATTGACTTGATGGCAGCTTATACTGCTGTAATTTCTTCTTCAAACCTTGATCAATCAAATATTTTCAGA  
ACTTTTTCATGATCACAGTACTGAAATGCTCGATTCTTTCGTGCTACAGCTGAATATTTTCAAGATGTTCT  
TGATAACATTATCAATGAGAAAATCAAATCTTTTGGAGGAAGATATTAGAGTTGTTGTTAGTGAGGCAGA  
GGATGTTGTTGAAATGAAGATTTCTGAAATCATCAAAGAAGAAAGCTGGACATTTGGAATTTTACAACA  
CCATGATATGCTACCAGTTGTTGAAAAAATGGATACGACAAAGAAACAAGTGATGGAGTTTCTTCTCAT  
GATGCTGATCAAATCTTGAATTAAGTGCAGGATTCCTTGATTGATGCTTCTTCTATGAGTGATCCAATGCT  
GTCAGATCACTTGAAAGATTATATTGTGCAGGGACTTGATGGTGACTTGGAGATAATAGATAAGAGATT  
GAGAGGACCAACGTCTTATCTAGACATTGTCACCATATCAGGTATGGGTGGCATTGGCAAAACAACACT  
CGCTAAAAAAGCTTATGATCATCTTCCAATCAGGTATCACTTTGACATTTTTGTTGGGTTACAATATCTC  
AAGAATTTGATATAGAAATGTATTGTTAGAAGCTTTACATTGCATTTCAAAGCAAAGAGTTATTGTGAA  
CACAAAAGATTATGTTAATATGAATGACAGTGAGTTAGCTGATCTGGTGCAAAGCGTCTAAAGGGTCC  
AAGATACCTTGTTGTTGTTGATGATATTTGGAGCAGGGATGTTTGGGATAGCATATCACAAATATTTCT  
AATCGCAACAATGGGAGTCGAGTTTTATTGACTACTAGGGAACTGATGTAGCAATATATGCAAATACT  
AGTAGCCCTCATAAGATGAACCTCTTGATTTAGATAATAGTTGGAAGTTACTCCGTGATAAGGTGTTT  
GACTAGAACACAATCATCCTCCTGAGTTGGAAGAAATTGGAAAAAAATAGCAGAAAAATGTCAAGGA  
CTTCCCTTAATAATTTAGTGATTGCAGGGCATCTCTCTAAAACGGTGCCCAAGACATTAGAAAGTTGGA  
AGTATGTTGCCAAAACCTTAAGTGAATCATTGCTAGTCATCAAATAAATGCTTAGGAGTGGTCCGTTT  
GAGTTACCATCACTTGCCTAATCGACTCAAGCCGTGCTTTCTTCTATGGGTGATTTCCAGAGGATTTTC  
AAGTTGATACTTGGAGATTGATCCAATTATGGATCGCAGAAGGTTTCATAAGGATGTCTTCTGGAAGTC  
ATGGAAGCTTGGGAAGAGTGGCTAAAGATTATTTGGAGGATCTTATCAGCAGGAACTTGATAATGGCTA  
GAAAAAAGAGATTCAATGGTGAGGTAAGCATGCGGAATACATGATCTGCTGCGTGAGTTCTGTTTGA  
TAGAAGCTGAAATGACAAAGTTTATGCATGTTGTGAGAACTCCATTGTCACCAGCACAAAAGCCTAATTT  
TCGTCGCTTCAGTATTCAAGAGTATTATTCTGTTGAGGATTCTATAAGCTCTTACCCGCTGTAGCCAGAT

CTATGTACTGCTTTTCTTACTTGGATCTACCTTTACAACCCCGTATTATGGTTCTCTCTATATTGCCCATCTA  
TTGTCATGATCCTATAATACATGGATTTTTCTCTTGTTCAACCATCTCAGGGTATTGGCCATCTTCCTTCC  
ATTGTTGAGCTCATTCCAGTTGTGATTACAAATTTATTTCAATTTGAGATATCTTTAAGTTGGATGTTTTGA  
CAACAATATTCCTGAATCAATCTCAGAGCTTCTGAATTTGCAAACCTCTAATTTGTGATGGTCATTCTTCAA  
AGACAACCTTTACCTAGGAAGATATGGATGATGAAGAAGTTGAAGTATATATCTTTAGGGGGTATCACTT  
ATTTACCAAGTCTAGAAATATAAGAATCTTGTGACAGGGATGCCAAATCTAGAGAAATTTTTGAGTCT  
TTGTTACTCTAGTTGTACAAATGAAGTCTTTCTAGCATTCCCAATCTAAAGATATTGACTATTAGTGCAT  
CTTTCAAAAAAATATTCCCAATCGTCTCTTGGATATGTGAGCTTGAGAAAACCTCAGGCATTAAAGAT  
TTCCTGGGACCGTTATTTGGAATACCCCTTCAAGAGATTTGTTTTTCCAACATCACTTAGGAGGTTGACTT  
TAACTTGGCATTCTGAGTTTATTTGGGAAGAGATATCATCAACTTTTATCATGTTGCCACATCTTGAAGAG  
CTCAAACCTTAAATATTGTCAAGCCGAAGATGATATATGGAGATTGACTGAAAAAGACATATTCAGAAGC  
TTGAAGTTGTTACTGAGGTACCCAAATCTTAAGGGTTGGGAAGCAAGCAGCGATAACTTCCCTAATC  
TAGAACGCCTTGTCTGAAGGAATGCAAGGACCTGCAAGAAATCCAACAGATTTCTGTTGAAATTTGTA  
CTTTGGAATCGATTGAGTTACATGATTGCACCACTACTGCTGAGGATTCTGTCAGAAATATCGAACAAGA  
ACGAGAGGACATGGGATATAATATCCTTAAGGTCTACATCCATAACAGCCACAGTAAGTTATAATTCTCT  
CTGAAAAGTTCTTCGATTCTTACATTATTTAAACCTCATTTTTATTAATCATACTTCTTTGAGATTAAG  
ATGATGACTTGTACTTTTTATCTTGCATATGCAGGTAATTGAAGCTTATTTTGAGGGATCATCTAATGCTA  
TCTTCCAATTCAGAACCTTGTACTTCATATTTTTGTTTTATATTCTGATCGTTTGTTAATTCATGTTTTA  
GGTATAAGCGTGTTTAATACA

>M6-PGSC0003DMG400023613 M6 LRR-RLP

ATTCTTCTATTTTTTATTCAATTTCTGTATCATTTGCTACCTCAAATGAGACAGACCAACAAGCTCTACTA  
GCTTTCCAAAATCTTATTACAACTCCCAATCATTTTTTGCCAATAATTGGACCAAAAATACTTCATTTTGC  
TTTTGGTTCGGCGTCACTTGCAGTCCAAAAGGCAAAGGGTTGTAGCCTTGACTCTTCCTAATTTGCAAC  
TTCAAGGCACAATTTCCCATCTTTGGCCAATTTGTCCTTCTCAGTGTTCTCAATCTCCAGAACAACAGCT  
TCCACGGTGGCATCCCTTATGGCATTGGCCACATGCCTCACTTGCAGTGATTGATGTTAAAAACAATCA  
GCTCAACGGAAGTATACCAACAAGTCTATTTCAACACCGTAGAATTCAAGTAATTTCAATTGGCTTTGAAT  
GAATTCAGTGGTGAAGATGTGGAGAGGGCCATGGTATGTACCCCAACTCAGAGTCTTAAATCTCAGGAAT  
AATAGCCTCACCGGTATAATCCCTCCTTCTGTTGGAAATGCCACGAAGTTGCTGAACTTCAAGTTGTATG  
GGAATAAAGTTGGTGGCAACATTCCAAAGGAAATTGGTAATCTGAGCCAGCTTGCATTTTTGTTCTTGT

CAATAATCAATTAACAGGTTTCATTCTGCAACATTGTTAATATTTTCATCACTTGTTGCCCTATCTCTTGG  
AACCAATAGCCTTTCCGGTCCTCTCTTGCTTGATAAAGGAAATAGTGTCTCAAATCTCAAATTTTTAAGTA  
TATATGACAACCAAATTTCTGGTTGCATTCTACCAACATATGCCAACTCGCAGAGCTCAAATTTTTGTCC  
ATATCTTTCAACAACATAACCGGAGACATACCCAAAATATTGATTGTTTATCTAAGCTCAAGGGGTTCT  
ATATTGGCGATAATCCAATAAAAGGGACTATTCCCATTGTTGGGAAATATTTCCACTCTGCAATATCTT  
TATTGTGGAAACAATCGCATAGTGGGGCAAATTCCTCCGCAATTAGGGAAGCTATCAAATTTGAGGCAA  
TTAGGCTTTGACCATAATTTAATCTTATTGGTCAAATTCAGAGGCTATTTTCAACATATCTTCTTTGAA  
AGGATTGATTTAGTTTCAATAACCTCTCGGGGAGAATTCCAACACTGCAGGTCTTCATCTTCCGAACCT  
TAAAGGACTTACCTTGGGATTCAATCAGCTCGAAGGAGAAATTCCATTGTTTATAACAAATGCTTCCAAG  
CTTGAGATACTGGGGCTAAATAATAACTTTCTCACAGGAACTATTCTACTAATTTGGGAAATCTTCATG  
AGCTGCGATATCTGTTCTACATGATAATCAACTTACCAATGAACCAAGAGAGCATGAGTTGCGATTCTT  
CAATCTTTGGCAGACTGTAGAATGTTGCGATATCTACAAGTGGGTAAACAATCCGTTGAATGGCACTCTG  
CCCAATTCATTGGGAATTTTTTCTACTATCGAAAACTTAATATAGTAGATGCACACATCAATGGCCT  
CATCCCCACAAGTATAGGCAACATGAGTGGTCTTACAGTCCTAAGCCTTGGAGGAAACAACCTTGATGGG  
AAATATTCCTCCTGAGATTGGTAAGCTTAAACAACCTCAAGGTCTGTATCTACGTTACAATAAATTGCAG  
GGACATATTTCTGAGGCAGTATGCAATTTATCTAATTTGGTTGAATTATATCTGGAACATAATGAGCTCA  
CTGGAGTGATCCCAGAATGTATAGGAGATCTAAGCATGCTACAACCTGCTTTATTTAAATTCTAATAGATT  
TTCATCAAATTTCCATTGAGCCTTTGGAAAATGAGTGGTCTTCTTACTAGATGTGTCACTAAATTCTA  
TAGAGGGAGAAGTTCCATCAGATATTGTAAGATTGAAAGCCATTGTAGAACTATATCTTTACGGTAACC  
ACTTTTCAGGCATGATACCGACCAGATTGGGGGAACTCCAAAACCTGTTGTCTCTTGACCTATCAAACAA  
TTCATTTTTTGGACAAATTCCATTATCCATTGTCAACTTGATAAGCTTGAAT

>M6-PGSC0003DMG400023641 M6 LRR-RLP

TGCATAGCAACATCATGGAGAAGCACATTTTCTTATTGATTCTTCTTTTTTAATTCAGTTTTCTATATCAA  
CTGCTTTCTCAAATGAGACTGACCAACAAGCTCTACTAGCTTTCCAAAATCTTATTACAAGTCCCAATCAT  
TTTTTGGCCAATAATTGGACCAAGACTGCGTCTTTTTGTTCTTGGTTCCGGTGTACGTGCAGTTCAAAAA  
GGCAAAGGGTTGTAGCCTTGACTCTTCTAATTTGCAACTTCAAGGCACAATTTCCACGTCTTTGGCTAAT  
TTGTCTTTCTCAGTGTCTCAATCTCGAGAATAACTCATTCCATGGTGGCATCCCTTATGGACTTGGCCA  
TTTGCCCTGCTTGCAGTGATTGATTTTCAAACAATCAGCTCCAAGGAAGTATACCAACAAGTCTATTTT  
AACACCGGAGAGTTCAAATCATTTCAATTGGCCTTCAATAAACTCGATGGTGAAATGTGGAAAGGCTCAT

GGTATGTACCCGAACTTAGAGTTTTAAATCTCAGGAACAATAGCCTCACAGGTATAATCCCTCCTTCTGTT  
GGAAATGCCACAAAGTTGATGAACTTTAGCTTGTCTTATAATAGAATAAACGGCAACATTCCTAAGGAG  
ATCGGTAATCTGAGCCAACTTGCAGTTTTGTCTTGGTTGATAATCAAGTAACAGGTTCCATTCTACATC  
AATTTTTAATATCTCGTCATTACGTTCCCTAACTCTGGGAAGGAATAGCCTTTCTGGTCCTCTCTTGCTTAA  
TGAGGGAATTTTTTATCAAATTTGGAGCGTTTGAGTTAACTCGCAACCAAATTTTTGGTCGCATTCCCT  
CCAACATCTGCCAACTCATACAACCTAAAATACTGTCCATATCTCCAACAACATAACTGGAGAAATACCC  
AAAAATATTGGTTGTTTATCGAAGCTCGAGGAGTTTTATATTGGTAATAATCCAATAACAGGGACTATTC  
CCACTTCATTGGGAAATATTTCCACTCTGCGAAATCTTTACTGTGAAACCAATAGCTTGGAGGGGCCGAT  
TCCTCCAGAATTGGGGAAGCTATCAAATTTGATAGAAATAGATTTTGAAGAAGTTTATAATCTCATAGGT  
CAGATTCCGGAGGCTATTTTTAATATATCTTCTTTGGAATACATTGCGTTAACTTCGAACAACTCTCAGG  
GAGAATTCCAACCTCTACTGGTCTTCATCTTCCAAACCTCTTAGAACTTCATTTGTCTGGCAATGAGCTTG  
AAGGGGAAATTCCTCCGCATATCACAAATGCTTCCAAGCTTGAAAGGTTGGGGCTAGCAACCAACTTCTT  
CAGTGGAAGTATCCAACCTAATTTGGGAAACCTTCGTGATCTGCGACTTCTTTTCTACATGAAAATCAAC  
TTACCAGTGAACATGAGTTGCCATTCTCCAATCTTTGGCAGACTGTAGGATGTTGCAATATCTAGATGT  
GGGTTACAATCCGTTGAATAGCATTTTGCCCAATTCAATAGGTAATCTTTCATCTACTATTGAATTCTTTG  
AAATGAGCAATGCTCACATCAATGGACTCATCCCCACAAGTATAGGCAACATGAGCGGTCTTATAACCTT  
ATTCTTTCAAGATAACAACCTTTATGGGAAATATTCTCTGAGTTTGGTAAGCTTAAACAACCTCAAGGG  
CTGTATCTAAATAACAATAAATTGCAGGGACATATTCCAGAGGCGGTATGCAATATATCTCATTGGGAC  
GATTAAATCTGGAAGGTAATAAGCTCTTTGGGTTAATTCCAGCATGTATAGGAAATCTTAGCATGCTACA  
ACATCTTTATTTGGGTTCTAATAAATTTTCATCAAATTTCCGTTGAGTCTTTGGAAAATGAGTGGTCTTC  
TCTTTCTAAACGTGTCACAAAATTCTTTAGAGGGAGAAGTTCCATCAGATATTGGAGAACTGAAAGCCAT  
TGTA AAACTAGATCTTTCAGGTAACCACTTCTCAGGCATGATACCAAGCAGATTGGGGGAACTCCAAAA  
CCTGCAGTCCCTTGACCTATCAAACAATTCATTTACAGGCTCAATTCCATTATCCTTTGCCAACTTGATAA  
GCTTAGAATTCTTGAATTTGTCTATAAATGCCTTGTGAGTACTATTCTAAGTCATTGGAAAACTCACC  
CTTAAAAGCATTAAATGTTTCATTTAATGAATTAGAAGGTGAAATACCCAATGGTGGTGTGTTTGTA AATT  
CAACTATGCAATCATTTCTCGGAAACAAAGGTCTATGTGGAATGAGCATATTGGAGGTTCTGCTTGCCC  
TATCAACAATAATGGAAAACAATCAAAGTCTAAGGAGCTAGTGCTGAAAATTGTTATTCCACTGGTTATT  
TCATCCTTTCTGATATTCTTGTTGGTGTCAACTTGGATAATAAAACGAAAGAAGAAAGGGAAGTCCAGA  
GATGTTGAAAAGGTTCCGGAGATAAGGACATATCAATTGATTTCTTATCATGAGATTCAACGAGCAACA

AATAATTTTGATGAATCAAATTTAATTGGTGTGGGAGGTTCTGGCTCTGTATACAAAGGCACATTATCTA  
GTGGAACTTTGGTGGCTATAAAAGTTCTGGATTTGCAAAGTGAGGAAGTATGCAAGAGGTTTGATACCG  
AATGTGAAGTGATGAGAAATATCAGGCACAGAAATCTTGTTCCGTAATTACTACTTGTCTAGTGACTA  
TATACGAGCCTTTGTTCTGCAATATATGCCCAACAGTAGTCTTGATAATTGGTTGTACAGAGAAGATCGC  
CACTTGAACCTTCTTCAAAGAGTCACCATAATGCTTGATGTGGCTATGGCAATTGAATATCTGCATCATG  
GTCATGATACTCCGATAGTTCATTGCGACCTAAAGCCAGCCAACGTTCTTTTGGATGAAGATATGGTGGC  
TCATGTTGGTGATTTTGGCATCTCTAAAATTTTAGCTACAAGCAAGTTCATGGCACATACCGAGACATTA  
GGCACTCTTGGATATATTGCACCAGGTATAATAGTCTCTTTCTATTTCACTTATATTGACTCTTTCTTTCT  
ATTTTCACAAATCATAATTTAGCCCTTCCAAAATCTAGAACTCAATAAAAGCAAGGTACATAATTATTGT  
TATATTTCAATTGAGTAATTTTTTTTATTTTCATTTCACTTTTCTAAGAATATGGCTTGGATGGAATAGTG  
TCCACTAGTGGTGATGTTTATAGTTACGGCATCATGATGATGGAGGTTTTGTCAAAAAGAAGACCAACC  
GATGAGGAGATATGAAATGAAAATCTTGACTTGAGGAAATTGATAACACAGGCATTTCTGGGGGACTAT  
GATGGACATTGTGGATGCCAATCTTTTTCTAAGAAAGAACAGATCACTTCCAAAAGTGAATGTGCATA  
GCCTCCATGATAGAATTGGCTTTAGACTGCACAAATGAAAAGCCAGAATTAAGGATAACCATGAAAGAA  
GTAGTCAAGCGGCTTGACAAAATGAAGAACACATTTCTGAACACATAGAAGTTAGCATCTCTTCCGGTG  
GTGTTCTTTCTCAGCTACAATTTAACATGTTGCTCTTGAATCATATATCAT

>M6-PGSC0003DMG400023863 M6 LRR-RLP

ATGGGAAATACAGGATTGTACGGGATAATACCTGAGAGTATTTTTCACCTTCCCAATCTGGAAACACTTG  
TCTTACAAAACAATAATCAGCTCAGTGGTTATTTTCCGAAGACTAAATGGAACAGCAGTGCATCTCTCAT  
AGAGTTAGATCTCAGTGGCGTGAATTTTTCTGACAATTTGCCTGAGTCTATTGGCTATCTAACTTCGGTG  
CATTCTTTGTCTCTTAAAAATTGCAATCTTAGAGGGACTATTCCTGAATCTCTTTTGAATCTCACTCACATA  
GAGGATTTGGACCTTCAATATAACTCCCTGAATGGAACAATACCATCAGGGATGTTTTCTCTTCCGTCACT  
AAGTCGTTTAGTCTTGAGTAATAACCACTTTTCTGGTCAGTTTGAGGATTTCAATCCAATCACTAATCT  
GGATTGATTTAAGTAATAATCAGCTGCAAGGCCATCTTCCAAGTCGATTCAAACCATGTGAACCTAAC  
AGGCCTTATTCTTTCTTTCAATAATTTTGGTGGCCATGTGGATGTCAGCTTCTTTGCTGACCTCAAACAAC  
TTTATTATCTTGATCTTTCATATAATCGTATCTCGTTGACCAATGAGAACAACATAATGTTACTTTGCCAG  
GATCTCTTATGAGCTTACAATTGGCCGCATGTGAAGTGAAAGAATTGGAGTTTCTAAGATCCGCTAAGCT  
TCTTTGGCAGTTGGATCTTTCCAATAATAAGATTCAAGGAAGAATCCCTGATTGGGCATGGACTAACTGG  
ATGTTCATATTGCAACGTCTTAATTTATCCACAACATGCTGGAAAGTGTTGAGTCAATTCCTCTTCTGTTT

ATAGAAGCTATTGATTTGCGGTCCAATTTGCTTCAAGGTTCACTACCTATTCCACCAATTTCCACAAGATT  
CTTCTTCATATCCCATAATAATCTCACTGAAGAAATTCCTTCAGATATTTGCAATTTGACATCACTGGTAAT  
GCTTGATTTGGCAAGAAACAACCTGAAGGGAGCAATTCGCAATGTTTGGGTAATATCAGTGGCCTCGA  
GGTTCTGGATATGCACCACAACAGTCTTTCAGGGACTCTTCCAACAACCTTTAGAAATTGGAAGTGCCTC  
AAAAGCTTCAACTTTCATGGCAATAAGCTGGAGGGGAAAATCCCACAATCCCTGACCAATTGCAAGCAA  
CTCGATGTTCTTGATTTAGGAGACAATCACCTCAATGACACATTCCCCGTGTGGTTGGGGACTCTGCCAA  
AGCTGAAAGTTCTAAGTTTGAGATCCAATAAATTGCATGGGTCCATTAGATCTCTACCGACTGGAAACAT  
GTTTCCTCAGCTTAGAATATTAGATCTCTCCTCCAATGCCTTCACAAAAGCTTACCAACGAGTCTATTTT  
AACATTTGAAAGCCATGAGGACAGTTGATCAAACGATGAACGCACCAAGTGATGAAGGGAATCGATAT  
TACCAAGACTCGGTAGCTCTCGTAACAAAGGGATTGGAGCTTGAAGTTGTGAGAATCTTGTTTTTGTACA  
CCACTGTTGATCTTTCAAACAACAAGTTTGAAGGATTTATTCCAAGTATTATGGGAGATCTTATTGCACTT  
CGTGTGCTGAATTTATCTCATAATGGATTACAAGTCAATACCGCCATCACTTGGAAAGTTTATCTTCAGT  
TGAATCATTGGACCTGTCAGGTAACCATCTTGTAGGAGAGATACCAGCACGATTTGCTTCTCTTACATCT  
CTTGAAGTCTTAAATCTCTCCTACAATCATCTCGAAGGGTGCATTCTCAAGGACCTCAATTCTATACATT  
TGAGAACAATTCATATGAAGGTAATGATAGATTACGTGGATTCCCACTTTCAAAAGGTTGTGGTAATGAT  
GGCAATGATTCGGAGACAAATGATACCACATCTGGACTTGACGATGAAGAAAACGACTCTGAATTTCTG  
AATGATTTTTGGAAAGCTGCTCTTATGGGGTATGGAAGTGGACTATGTATTGGATTATCGATAATATATT  
TCATGTTCTCAACTAGAAATCCGAAATGGCTTGCAAGAATCATTGTAGAACTGGAACACAAAATAATGAT  
AGGAAAGGGAAAGAAGCAGCAAAGGCAAAGGAGTTACAGAAGAAGAAATAATAGCTTAAACATGA

>M6-PGSC0003DMG400023864 M6 LRR-RLP

ACAATCCTGTATTTGTCGAGAAACAACCTGAAAGGAAAAAATCTGCAATGCTTGGGTAATATCAGTGCC  
CTCCAGTATGTGATAATGTCACATAATAATCTCAGTGGAGAGCTCCATCCGTCTATTTGCAATTTAACATC  
ACTGCAAATTCTAGATTTGGGTAGAAACAATCTAAAGGGAGAAATTCGCAATGTTTTGGCAACATGAG  
TGGTCATCTTGAGGTTCTGGATATGCAACACAACAATCTTCTGGAATTTCCAACGACTTTTAGAGCT  
GGAACACTTAGAAGCTTCAACTTGCATGGCAATAAACTTAAAGGGGAAAATTCCCAATCTTTGGTCAATT  
GCAAAGAGATGCAAGTTTTTGTATTTAGGAGATAATCACCTCAACGACACATTCCCGATGTGGTTGGGAA  
CTCTTCCTAAGTTGAGAATTTTAAAGCTTGAGATCGAATAAGTTGCATGGACCGATTAGAACTTTAGGAAG  
TGAAAACATTTTTAATGAGCTTCGAATGTTGGATATCTCTCCAATGCCTTCACGGAAAACCTTACCGATGA  
GTCTGTTACAACATTTAAAAGCCATGAGGACAATTGATCAAACGATGAATGCACCAAGTGATGAAGGAG



GTGAATATTACCAAGACTCGGTAGCTGTCGTAACAAAGGGATTGGAGCTTGAAGTTGTGAGAATCTTGT  
TTTTGTATAACCACTATCGATTTTTTCAGACAATAAGTTTGAAGGACATATTCCAAGTATTATGGGAGATCTC  
ATTGCACTTCGCATGCTTAATTTATCTCATAATGGATTGCAAGGTCATATACCGCCATCACTTGGAAGATT  
AACTTTGGTTGAATCATTGGACCTGTCAAGTAACCACCTTGTAGGAGAGATACCAGCACAATTTGCTTCT  
CTAACTTCTCTTGCAGTCTTAAATCTCTCCTACAATCATCTCGAAGGGTGCATTCCTCAAGGAAATCAATT  
TCATACCTTTGACAACAATTCATATGTAGGTAATGATGGATTACGTGGATTCCCACATTTGAAAGGCTGT  
GGTACTGAAGGTAATGATTGAGAATCAGAGAAAAGTATACCGGATCTGAGCTTGATGAAGAAAGCAA  
CTCTGAATTTCTGAATGATTTTTGGAAAGCTGCTTATGGGCTATGGAAGTGGACTCTGTATTGGATTAT  
CCATTATATATATCATGATTTCAACTGGAAAAGTATGATATGGCTTGCAAGAATCATTGTGGAGGTGGAGCA  
TAAAATTATGATGGGAAGAAGAAAGAAGCAGCGAAAGCAAAGGAGTTACAGAAGAAGCAAATAA

>M6-PGSC0003DMG400023867 M6 LRR-RLP

ATGTTTTCTTCCGTCACCTAAGTCGTTTAGTCTTGAGTAATAACCACTTTTCTGGTCAGTTTGAGGATTTCC  
AATTCCAATTCACCTAATCTGGATTGATTTAAGTAATAATCAGCTGCAAGGCCATCTTCCCAAGTCGATTCA  
AAACCATGTGAACCTAACAGGCCTTATTCTTTCTTTCAATAATTTTGGTGGCCATGTGGATGTCAGCTTCT  
TTGCTGACCTCAAACAACCTTTATTATCTTGATCTTTTCATATAATCGTATCTCGTTGACCAATGAGAACAAA  
CATAATGTTACTTTGCCAGGATCTTATGAGCTTACAATTGGCCGCATGTGAAGTGAAAGAATTGGAGT  
TTCTAAGATCCGCTAAGCTTCTTTGGCAGTTGGATCTTTCCAATAATAAGATTCAAGGAAGAATCCCTGA  
TTGGGCATGGACTAACTGGATGTTTCATATTGCAACGTCTTAATTTATCCCACAACATGCTGGAAAGTGTT  
GAGTCAATTCCTCTTCTGTTTATAGAAGCTATTGATTTGCGGTCCAATTTGCTTCAAGGTTCACTACCTATT  
CCACCAATTTCCACAAGATTCTTCTTCATATCCCATAATAATCTCACTGAAGAAATTCCTTCAGATATTTGC  
AATTTGACATCACTGGTAATGCTTGATTTGGCAAGAAACAACCTTGAAGGGAGCAATTCGCAATGTTTG  
GGTAATATCAGTGGCCTCGAGGTTCTGGATATGCACCACAACAGTCTTTCAGGGACTCTTCCAACAACCT  
TTAGAATTGGAAGTGCCTCAAAGCTTCAACTTTCATGGCAATAAGCTGGAGGGGAAAATCCCACAAT  
CCCTGACCAATTGCAAGCAACTCGATGTTCTTGATTTAGGAGACAATCACCTCAATGACACATTCCCCGT  
GTGGTTGGGGACTCTGCCAAAGCTGAAAGTTCTAAGTTTGGAGATCCAATAAATTGCATGGGTCCATTAG  
ATCTCTACCGACTGGAAACATGTTTCTCAGCTTAGAATATTAGATCTCTCTCCAATGCCTTCACAAAAA  
GCTTACCAACGAGTCTATTTCAACATTTGAAAGCCATGAGGACAGTTGATCAAACGATGAACGCACCAA  
GTGATGAAGGGAATCGATATTACCAAGACTCGGTAGCTCTCGTAACAAAGGGATTGGAGCTTGAAGTT  
GTGAGAATCTTGTTTTGTACACCACTGTTGATCTTTCAAACAACAAGTTTGAAGGATTTATTCCAAGTAT

TATGGGAGATCTTATTGCACTTCGTGTGCTGAATTTATCTCATAATGGATTACAAGGTCATATACCGCCAT  
CACTTGGAAGTTTATCTTCAGTTGAATCATTGGACCTGTCAGGTAACCATCTTGTAGGAGAGATACCAGC  
ACGATTTGCTTCTCTTACATCTCTTGAAGTCTTAAATCTCTCCTACAATCATCTCGAAGGGTGCATTCTCA  
AGGACCTCAATTCTATACATTTGAGAACAATTCATATGAAGGTAATGATAGATTACGTGGATTCCCACTT  
TCAAAAGGTTGTGGTAATGATGGCAATGATTCCGAGACAAATGATACCACATCTGGACTTGACGATGAA  
GAAAACGACTCTGAATTTCTGAATGATTTTTGGAAAGCTGCTCTTATGGGGTATGGAAGTGGACTATGT  
ATTGGATTATCGATAATATATTTTCATGTTCTCAACTAGAAATCCGAAATGGCTTGCAAGAATCATTGTAG  
AACTGGAACACAAAATAATGATAGGAAAGGGAAAGAAGCAGCAAAGGCAAAGGAGTTACAGAAGAAG  
AAATAATAGCTTAACATGA

>M6-PGSC0003DMG400023868 M6 LRR-RLP

ATGACTGGCTGTGTGATTGAACTTAATCTCAGTTGCAGCGGTCTTGTAGGAAAGATTGATTCCAATAGCA  
GTCTCTTCCAACCTCTCTCATCTCCAAAGGCTCGACCTTTCTTCTAATAACTTCTCTAATTCTCACATCTCGCC  
TGAATTTGGAAGTTCTCAAGCTTGACACTTCTTGATCTTTCTGACTCCTATTTCTCAGGTCATATACCTTC  
TGAAATCTCTCATCTTTCTCAATTACAGTCTCTTCGCCTCTCCCGTCATTTGAAACTATTCTAAGACTCAC  
TGCTCATGATTTGAAATTGCTCCTTCAGAATTTGACTCAATTAAGTGAGCTTGATCTTACTTCCATAAATA  
TCTCTTCCACCATTCTCCAAATTTTTCTTCTCATTTGACAACCTATGAGGATGGGAAATACAGGATTGTAC  
GGGATAATACCTGAGAGTATTTTTACCTTCCCAATCTGGAAACACTTGTCTTACAAAACAATAATCAGCT  
CAGTGGTTATTTTCCGAAGACTAAATGGAACAGCAGTGCAT

>M6-PGSC0003DMG400023869 M6 LRR-RLP

TGCAATGCTTGGGTAATATCAGTGCCCTCCAGTATGTGATAATGTCACATAATAATCTCAGTGGAGAGCT  
CCATCCGTCTATTTGCAATTTAACATCACTGCAAATTCTAGATTTGGGTAGAAACAATCTAAAGGGAGAA  
ATTCCGCAATGTTTTGGCAACATGAGTGGTCATCTTGAGGTTCTGGATATGCAACACAACAATCTTTCTG  
GAACTATTCCAACGACTTTTAGAGCTGGAACACTTAGAAGCTTCAACTTGCATGGCAATAAACTTAAGGG  
GAAAATTCCCAATCTTTGGTCAATTGCAAAGAGATGCAAGTTTTTGATTTAGGAGATAATCACCTCAAC  
GACACATTCCCGATGTGGTTGGGAACTCTCCTAAGTTGAGAATTTTAAGCTTGAGATCGAATAAGTTGC  
ATGGACCGATTAGAATTTAGGAAGTGAAAACATTTTTAATGAGCTTCGAATGTTGGATATCTCTTCCAA  
TGCTTACGGAAAACCTTACCGATGAGTCTGTTACAACATTTAAAAGCCATGAGGACAATTGATCAAACG  
ATGAATGCACCAAGTGATGAAGGAGGTGAATATTACCAAGACTCGGTAGCTGTCGTAACAAAGGGATT  
GGAGCTTGAAGTTGTGAGAATCTTGTTTTGTATACCACTATCGATTTTTTCAGACAATAAGTTTGAAGGA

CATATTCCAAGTATTATGGGAGATCTCATTGCACTTCGCATGCTTAATTTATCTCATAATGGATTGCAAGG  
TCATATAACCGCCATCACTTGGGAAGATTAACCTTTGGTTGAATCATTGGACCTGTCAAGTAACCACCTTGTA  
GGAGAGATAACCAGCACAATTTGCTTCTCTAACTTCTCTTGCAAGTCTTAAATCTCTCCTACAATCATCTCGA  
AGGGTGCATTCCCTCAAGGAAATCAATTTACATACCTTTGACAACAATTCATATGTAGGTAATGATGGATTA  
CGTGGATTCCCACATTTGAAAGGCTGTGGTACTGAAGGTAATGATTCAGAATCAGAGAAAAGTACTGATACC  
GGATCTGAGCTTGATGAAGAAAGCAACTCTGAATTTCTGAATGATTTTTGGAAAGCTGCTCTTATGGGCT  
ATGGAACTGGACTCTGTATTGGATTATCCATTATATATATCATGATTTCAACTGGAAAAGTACTGATATGGCTT  
GCAAGAATCATTGTGGAGGTGGAGCATAAAAATTATGATGGGAAGAAGAAAGAAGCAGCGAAAGCAAA  
GGAGTTACAGAAGAAGCAAATAATCGCATGTAGAAGAGTTAAAAAT

>M6-PGSC0003DMG400024033 M6 LRR-RLP

CATCCTCTTTCTCTTCCCTCTCCAGATCTGAACAACAATGTCTTCGTCGTCATTCCCTGAACAAGTGTGAA  
GCACCTCTTCTCCTTGTTAACCTCACACAAGGACCGTAACAGTATATCCTTAGTCTCTAAGTCGTGGTACG  
AGCTCGAGAGGGCGCTCTAGGAGGAGTGTCTTCATCGGCAACTGCTACGCCGTTAGCCCTGAGATTATGA  
TCACACGCTTCCCTCAACTCACATCTATCTATCTCAAAGGAAAGCCCCATTTTGCCGACTTTAATCTCGTTC  
CTGAGGGATGGGGTGCCTATCTTCAACCTTGGATTGCTGCAATGTCTCCCTCTTATCCTTGGCTTGAGGA  
AATTAGACTCAAGCGAATGGTTGTCACTGATGACTCCTTGGACTTGATTTCCACCTCATTTTCATCATTCA  
AGGTCTTGGTCTTGTGTCTTGTGAAGGCTTTACTACCGATGGACTTGCTGCCATTGCCGCTAACTGCAG  
GTCGGTCCCTTTTATTGCCTTACTTATTTGATTGCTGCTTAACATAATGGGCATCTACAGAAAGAATTGAA  
ATTGTTATTTGCACTTTTTTCTCATGCAGAAATCTCACTCAACTAGACTTGGGAGAAAGTGAAGTGGAG  
GACCTAAGTAGTGATTGGCTCAGTCATTTTCTGATGGTTGTACGTCCTGGTGTCACTTAACATTTCTTG  
TTTGGGTTCTGAGATCAGCTTATCACATCTGGAGAGTCTCATTGCACGTTCTCCTAATTTGAAGACACTTC  
GGCTCAGTCAAGCTGTCCCCCTTGAGAAACTCCACACATATTGTCTTGTGCTTCCCAATTGGTTGAATTT  
GGTACAGGTGCATACTCTTCTGAGGTACAGTTACAGTCTGATGTTTTCTCAAACCTCCAAGAAGCTTTTTTC  
AGGCTGCAAGATACTTGAAGGCTTGTCTGGATTTTGGGATGTCATGCCAGCTTACCTTCCAGCTGTATAT  
CCAGTTTGCTCCAGACTCACCTCATTGAATTTAAGCTATGCTACTATTCAAACCTCATCTTAACAAGCT  
CATAAGTCTGTGTCATAATTTGCAGAGATTGTGGGTATGTTTACTTTACTTTACTTGCCTATGTTTTAGTC  
ACAGCATTCTGATAACTTAAGAGCATGATATCTTGCCTTGAAGGCAAGGGGTTGTTTATAAGAGAAGCA  
CACAAAATTTTACCTGTTTATCGTCTTGTAATTCTGTTGACGGCAAGGATATCTAGGATAAAAATCATG  
ATATGCAGATACTTTCCACTCATAAGATTGGCTAAAATAATTCACCTTTACCTTAAGTTGAAGTTATAGAC

CTGTACATGAAGTAGGATCTAGAAGATACATTCTTTGGTTGTATAATTCTCATACGCAATGGCCATATGC  
AATATTTATCAATCTTAATGCTGAAGACTTTTTTACGAAATAGGTAACCTTAACCTTTTATGCTGAAGACTTTT  
TTATCTGTTCTCTTTTCCTGTGACATTCAAAGAATTTCTGCTAATGGTTCCTTAATCTTTCTTGCTACAAGC  
TTGGACTAGTTGCTTAGTGTTTAAGACATTCCACTTTGAATAAATGTGACTACAGGTAAGTACTAGACTACATT  
GAAGATACCGGTCTCCAGGCGCTTGCCGTTACCTGTAAAGACCTGCAAGAACTTAGGGTGTTTCCTTCTG  
ATCCCTTTGATCCAGAACCAAATGTTTCCCTGACAGAGCAGGGACTTGCTAGCTGTTTCAGATGGCTGCC  
TAAGCTCCAAACAGTTTTATACTTCTGCCGCCAAATGACAAATGCCGCTTTGATTACTATTGCTAGAAACA  
GTCCTAACATGGTTCGTTTTGCTTGTGTATTTTGGAACTCGAACTCCTGATTACTTGACTCTTGAACCG  
CTTGATGCTGGTTTTGGGGAAATTGTGGAACAATGCAAAGAGTTGCGGGGACTTTCTCTTTCTGGCCTTC  
TACTGACCGTGTGTTTGAGTACATTGGGACCCATGCTAAAAAGTTAGAGATGCTTTCCGTCGCCTTTGT  
TGGGGATAGTGATATGGGCCTCCACCATGTACTCTCTGGATGTGAGAGCCTCAGAAAAGTACTAGAGATCAG  
AGACTGCCCTTTGGTGACGACGCTTTTTGGCTAATGCTGCAAACTGGAGACAATGAGATCCCTTTGG  
ATGTCTTCTTGTTTCAGTAAGTTTTGGAGCCTGTAAGCTGCTAAGTCAGAAGATGCCGAGGCTTAATATTG  
AAGTTATAGATGAAACGGGTCTTCTGGACACGCAGCCAAGAAGCTGCCCTGTTGATAAACTTTACATAT  
ACCGAACAGTGGCTGGACCAAGTTTTGACCTGCCTGGTTTTGTTCCGATAATGAAAGAAGATGCTGCAC  
ATTAGCAATGGAAATTCACCCTCATGCTATTAATCCTCCTTTGTGTGGCAGGTTAAGCCATAAAGTGCTAT  
GTCGAAGACCTCACATGCCATCAACTATTACCTCTTGGCTAAGCTAATTTACTGCATCAGCTTATAAAGTG  
TTAAAAGTCTTGTGAGGTTTTGTTTGGTTTTGGAATGACAGACCCAAGTTCTGTAATTATATTAGTATCCTAA  
TCCCAGTAACCGACCCTATGTGTTGTTATGTATCATTGGGAATAAGAATTACTACTTTGTATTTTTGTTTT  
AGGGGGAAGGGGGTATGTTCAACAATGTACATGCTAGCGATTTGAAGACTTTGAGCATCGTTATGCAGC  
TAATTTTATAATTCTTTTCTATTGACTTGTTTTTCTGAAGAGATTATGCCATCATGTAATCATAAGTCAATA  
AAATTCATTGCATCCATGTAATAAGAATCTCTTCAGAAAATTATTTTTGGTAATCCCCATGTCAAAATTTG  
AACTCGAGTTCAATGGAAGGATTAATTTTGAATTCATCTTTACAAGACAATGAGAATTCAAGACTTTGAA  
ATACTAGTGACCTACCATAGAAGAGCATCACTGGTACTCCTATCTAAGAAAGCAAATAAATGATAGAAT  
AAGTAATGATGGAAGTTCAAACGACTTAATGAAAATATTAATTGGACAAGATGATAAACATACAGTTTTT  
TCTTTAACTTTTACATCCATACACACTTGTGTCTTTTGCAACTGCCTCTTTGATGTTACTGCTCGCTCATAT  
TCTTATACTTTTATCCTTTAAGTGTTCCTTCCAAAATATGTTCTATTCTGTAATTCATGACTGGTTGGCCTGAT  
TTGGTTTTCTTGAACATTTTCTCCCTTAGTTCTTTCTTCGAGATTCAGCTCTCTGCCTTTCTTCTTCTTGC  
TAGAATAGTGGCCTCTGTCTCCATCCTTGCCTTGTATCCTCCTCGCGTTTTCTCTCATATATTTCTCTTAG

GCTTCTAGCACTATTCTTCTTATTTCTTCTCCCTTCTTCATCCT

>M6-PGSC0003DMG400024206 M6 LRR-RLP

ATCAATCTTCTTATTCATATAGGATTGAATCAGAGAAGATTCAACAGATTGTGGACCACATTTCTACCAA  
ATTATGCAAGACTGTGTATTCTTTATCTTCTTTGCAAGATGTTGTGGGAATAAATGCTCATTAGAGAAAC  
TAAAATCCCGCTTCAGATAGAAATCAACGATGTTCCGATTGTAGGGATTTGGGGAATAGGAGGAGTC  
GGTAAAACAACAATAGCAAAAGCCATCTTTGATACCTTATCTAATCAATTTAAAGCTGCTTGTTTTCTTGC  
AGATGTTAAAGAAAATGCAAAAAGAATCAAATGCATTCTTTACAAAATATCCTTCTATCTGAACTGTTA  
AGAAAAAAGATGATTACGTTATTAATAAGTACGAAGGGAGGAGCATAATCCGAGCAGACTTTGTTC  
ATGAAGGTTCTAATTGTGCTTGATGACATAGATCATAGTGATCACTTGGAGTATTTAGCAGGTGATCTTC  
GTTGGTTTGGTAATGGGAGCAGAGTTGTTGTAACAAGTAGAAATAGACATTTGATAGAGAAGGATGAT  
GCAATATATGAAGTGCCTACATTACCTGATCATGAAGCTTTGCAATTGTTCAATCAACATGCTTTCAAAAA  
AGAAGTTCAGATGAGCGTTTTAAGAAGTTCTCGTTGGAGTTAGTAAATAATGCTAAAGGTCTTCCTTTA  
GCCCTCAAGGTGTGGGGTTCGTTGTTGCATAAGAAAGGCCTAACTCAGTGGGGAAGAAGTGTAGACCA  
AATAAAGAATAACTCGATTTTCAGAAATTGTTGAAAACTCAAATAAGTTATGATGGACTGGAGCCCGA  
AGAGCAAAAGATATTTCTAGATATGGCATGTTTCTCCGAGGATATGAAAAAAGAAGTCATTCAAATT  
CTTGGAAGTTGTGATTTTGGTGTGAATACGGATTGGATGTCCTAATCGACAAATCTTGTGTTTTCTTTC  
CAAAAATGATACGATTGAAATGCATGACTTGATTCAAGATATGGGTAGATATGTGGTGAAAATGCAAAA  
AGATTCGGGAGAACAGAGCAGACTATGGGCCGCTGAAGATTTGGAAGAAGTGATAGTCAACAATACAG  
TAAGTAGGCTAAACAATGCAATAATATTAATTTCTGGTTTTCATATTCCTAAGACATATAGGGCAATCA  
ACTCCAGTATTTGTTCTTCTTCTTGCATATTCTTGCAAGTACACCATTTTAGTTTTTACTTTAGTAGGAG  
AAGCAAAAGTAATATAAATTTTCATAACGTGGCTAGTTCATCATGTAGCCATTTTAATTAAGCATCCTAAT  
TCTTTTATCTTATGTTAGTAAGCCATGAATTAGTCTAGTAGCCGTTGAATATGTTTAACCCAATTTCAATT  
TTGGATTAACCTCAAATTTGTATGATATTTGGATTCAAAGCTATGCTTTGTAGACTAATGATCCTTATATC  
AGGGGACGAAAGCAGTGGAAGCAATCTGGCTACATTACATTCAAATCTATGCTTTAGCAAAAAAGTCA  
TGAAAAAGATGAAAAAGCTTAGAGTACTATACATCGGTCGTTTTCATACACATGATGACACAATTGAGTA  
CCTGCCCAACAACCTGCGTTGGTTTGGAGTGATTTGGTATCCTTGGAAATCATTGCCCGAAAATTTTGAAC  
CCAAAAGACTTGTTTCATCTTGATCTCCAGTACAGTTTGTGCGTTATTTATGGATTGGCACAGAGGTACA  
ATTGCTGAATTCAGTTTTAGTTTTCAAT

>M6-PGSC0003DMG400024263 M6 LRR-RLP

AGATGTTATCTATAATTATATTTGAAGTGATGGATTTTAAACCTAGCACTGAGATATGTTATCTCATCCTG  
GTTAAAGTGTA AAAAAGACATACATTTGCTAGCTAAAGATTACGAGTGTTATCATGTCAACAGTAAATAT  
TTGATCATCTTTGTCTGGTTGTTACATGTGAGGATGTGAGATAATCACGCGGAGAATCAGCATCATTTTC  
TATTGTA ACTGGATAAAGAGAACTATAAATGCAATCCCTCAAATTGCAGGTATTGTTGAAGAGTTTGCAA  
TGTTTTAAAAGAATTTCAAGTGGACAAAGAATGCGCTTTCAGGATTGAAGGTTCCCTCACTTTATGCCTGT  
AGCTTATTTGTACATTATGGCAGCCTGTGTCTACTATAGTTTTATTACAAAAGAGTATCACTGCAGGGATC  
TATGATCATTTGTCACCATTTAGTCGTGATGGTTGAAATCATTGGAGGTCATTAAGCCAATGGTTTTTCAT  
CTTAAAGTGTCCAGATTTAACTCTTTGATTGTGATGCTAAGTTGTGTAATACTCCCCTAAAGAAGGATG  
GAACTAAGGGTGAGAAGAACTTAAATGATTGGGTGTTAACTGCACTAACCGATCTTCTTTTGTTTCATG  
CAGGGTCATCGAGGTAACGCGGATGAAAGAGGTAAGAGTATGGTGGATTCTAGCAGTGATGGTGAAT  
TATCTGTGAGTTTGTA AAAAAGACGATTCATAAGGGAGGTGAAATTGTTGGCGAATAGCTAGAAAAACAA  
ATCTAGGACACTAAGGTGGCCTGTTTCACGTGGTTAGCATCCCGTCGATCTTGTTAACACATAAGGATT  
CGATTACTGGTATTTCTTAGTTCATTTGATCTAATCAATTGGAAGTTCCTTCTGTTTTATCTGTTCAATT  
TTCTGAAATTTCCATGTAGAAATTTGAATATTTGGTTGAAGCCTGATTGTATTCCCTTTTGTAAAGGACTT  
GGACATTTCCCTTTCTTTAAGTTGTTAAGGTAAGCTGTAGAAATTTGACTGTTATGTTCTGAAATTAGTCG  
ACTGATGCCGTTGTTTTCCCTGTAACAAAAAGGGTTCTCTGAATAACAGGGACTTAAACATTTTTCTCT  
CCTTCTGTTGGTTCAATCCAGATCAGCCTATTTGGTGTTAATTGGTTTAATTTCAACAACATTCTTGGTTTT  
ATCCCCACCCCCACCTTAATCTTACATTTGATTTTGTAGGTTAATCTTTTTAAACCTTTTGTTAAACT  
AGTTTTATGCGTTTCAGGTTGCTACTGTATTACTGGATTGTTGATAGAGAAGTTTGATCCAGATGGATAA  
TTTACCAGCTGAATTACTTCTGGAGATTTTAGGACGGATTA AAAAGAACTACTGATAGGAACTCTGTATCC  
CTAACTTGCAAACGCTTCCACAAATTGGATAATGGGCTGAAAATATCGATGCGCGTAGGGTGTGGTTTA  
CATCCTGTCTGTGATGCATTA ACTGCTCTATGCAACAGATTCCATAACTGGAGAAAGTGGA AATTATTT  
ACTCTGGTTGGATGTCTAAGTTAGGGAAGCAGTTGGATGATAACGGTCTTCTCATCCTTTCACGTTGTTG  
CCCTTTGCTCAAGGACCTCACATTAAGTTATTGTACTTTCATAACGGATGCTGGTCTTAGTACTTGGCTT  
CTTGTTGAAACTTACATCCTTGAAGTTGAACTTTGCTCCAGAATTACTGGTTGTGGCATCTTGTCTCTT  
GTTGTGGGCTGCAAAGCCCTCAGTGTGCTTCACCTGATTAGATGTCTTAGTGT CAGTAGTATGGAGTGG  
CTAGAATATCTCGGAAAACATGAAATGCTTGAAGATCTCTGCATCAAGAATTGTAGGGTGATTGGAGAA  
GGTGATTTGATTAAGCTTGGACCTACTTGGAGAAAATTGAAGAGACTGCAATTTGAGGTTGATGCCAAC  
TACAGATATATGAAGCTTTATGACCGTTTAGCAGTTGACCGATGGCAAAGCAATCGATCCCATGTGAG

AACATGCTTGAAC TTTGTTTAGTGA ACTGTGTTATCAGCCCCGGGAGAGGACTTGCATGTGTAATAGGG  
AAGTGCAAGAATTTGGAAAAGATTCACTTAGACATGTGTGTTGGGGTTAGGGACTGTGACATAGTATGT  
TTGGCCCAGAAATCAAGCAACCTTCGATCAATCTCTCTCCGAGTTCATCAGACTTCTCCCTTCCTCTGCT  
ACAAAACAATCCATTGCGGTTAACAGATGAAAGTCTAAAGGCAGTGGCTCAGAACTGCTCTCTGCTTGA  
TACGGTTAGGTTGTCTTTCTCTGATGGAGAGTTCCTTCATTTTCTCCTTACCTTAAATGGAATACTTAT  
GTTAATACAAATGTGTCCAATAAGAGAACTTGTCTTGACCATGTGTATTCTTTTGACGATACTGGAATG  
CAAGCTCTTCGTT CAGCACAATATCTCAAATCTTGGAACTTGTAAGGTGCCAAGAAATCACTGATGACG  
GAATGCAGCTTGCTAGCCAAATCCTCAATTATGTACATTACGGTTGAGGAAGTGCTTGGGAGTGACCG  
ATGATGGGTTAAAACCTCTCGTTGGGTCTTACAAGTTAGACTTGTGGTTGTAGAGGATTGTCCACAGAT  
ATCAGAAAGGGGTGTTCAAGGAGCTGCAAAGTTGGTCACCTTCAAGCAAGACTTGTCATGGATGTACTA  
AGCTTTCCATTTTACAAGTATTTTCCAGATGTTGTACAGGTTAGGTTGTTCCGTCTATACGACTTTTTGT  
ACAGTCATTCTGTTTTT CATAACAATTCTGTAATCTGCAACACAGAATTCCCTATGTCCACATGCATGTTG  
CATAATAAAGGTTAATTTGAGTGTGTGTTTCTATGCTTCGGCTACCATATTATTTGTTGTTGCTGTGTTTT  
TTC

>M6-PGSC0003DMG400024406 M6 LRR-RLP

AAACACAAAATATGATGATGGTTACCAAATATCCTCTCTACTTCAGTTTTTCACTCTTTTATATCTCTTTA  
CAGTTACTTTTGCTTCCACTGAGGAAACA ACTGCCCTCTTAAATGGAAAGCGACTTTC AAGAACAAAA  
TAATTCCTTATTGGCATCATGGACACCAAGTTCTGATGCATGCAGTGACTGGTATGGAGTTATATGCATT  
AATGGTAGGGTAAACACGTTGAATATTACAAATGCTAGTATCATTGGTACACTCTATGCTTTTCCGTTTTT  
ATCCCTCCCTTTTCTCGAGTATCTTAATCTTAGCAGGAACAATTTATTTGGCACCATCCCACCTGAGATTG  
GTTATCTAACTAATCTTGTCTATCTTGACTTGCATATCAATCACATTT CAGGCTCAATCCCACCACAAATCG  
GCTCACTAGCCAAACTTCAGATCATCCGTTTATTTGACAATCATTTAACTGGTCCTATTCCAGAAACAATA  
GGGTACCTAAGGTCTCTTACTAAGCTATCATTGAGTATTA ACTCTCTTACTGGTTCTATTCTGCTTCATTG  
GGAACTTGACCAACTTGTCTTTTTTGTTCCTTCAATTTAATCACCTTTCTGGATCCATTCCCGAAGAAATA  
GGTTACCTAAGGTCTCTTGCTCGACTAGATTTGAGGAATAACTTTCTTATTGGTTCTATTCTACTTCCCTT  
GGCAACTTGAAAAATTTGCAAGTTCTGCTTCTCAATGACAACAATCTAATTGAGGAAATTCCTCCATCTAT  
TTGCAATTTGACATCACTGGCAATCCTGTATTTGTGCGAGAAACA ACTTGAAAGGAAAAATTCCTGCAATGC  
TTAGGTAATATCAGTACCCTCCAGTTTGTGATGATGTCACATAATAATCTCAGTGGAGAACTCCCTTTGTC  
TATTTGCAATCTAACATCACTACAAGTTCTAAATTTGGGTAGAAACAATCTGAACGGAGCAATTCCGCAA

TGTTTTGGCAACATGAGTGGTCATCTTGAGATTCTTGATATGCAGCACAACAATCTTTCTGGTACTTTTCA  
AAGCACTTTTAGCATTGGAGGAGCACTCAGAAGCTTCAATTTGCATGGCAATAAGCTAGAGGGGAAAAT  
TCCACGATCCTTGGCAAATTGCCAACGATTGGAAGTTCTTGATCTAGGAGCTAATCTCCTCAATGACACA  
TTCCCGATGTGGTTGGGGACTCTGCCAGAGCTACAAGTGTTAAGTTTGAGATCCAACAAA

>M6-PGSC0003DMG400024437 M6 LRR-RLP

TCTCTAACCTCCAAGAGCTACGTACTIONTACATCTTTCTTATAACAGCTTCATCGGTTCAATTTCCCGCTTCAA  
TTTTAAGTTTGACACATCTTCAATACTTAGGATTGTGCGAGTAATCCCTATCTGGCCCACTGCCTAGCAAC  
CAAAGCATGCTTCAAAGCTAACTTTTGTGGATTTGTCATACAACTCACTGAATGGTACCATACCATCTTG  
GGTGTTAGCCTACCTTTGCTATCTTCAGTGTGCTCCAACATAACCAATTCAGAGGACTAGCCGATGAA  
GTGATCAAAACAAACCCAACATTAACAACACTGCATTTAAGCAATAATCAACTCAGTGGTCCTTTTCCTCA  
ATCACTTGTGAATCTCACAAACCTTGAAACCCTTGGAATTCATCAAATAACATCACCATTGATGAGGGA  
ATGAATATCACCTTTCTTAGCCTATCATCTTTATTCTTATCATCTTGTGAACTGAAGGATTTTCCACACTTC  
TTGAGAAATGTAAAGACACTTGTCTACTTGGATATTTCTAACAATAAGATATGTGGTCAAATCCCTAACT  
GGTTTAGCGGCATGAGGTGGGACTCGTTGCAGTTCCTAAACCTTTCTCATAATTCATTAACAGGCCACCT  
ACCACAATTTCACTACTATAACCTACAGTATCTTGATCTGAAATGTAACCTCCCTTCAGGGTCCACTACCTTC  
ATCCATTTGTAACATGAGTTCGCTTATCTTATTAGATTTATCACGCAACAACCTTCAGTGACTCAGTCCAC  
ATTGCTTGGGAAGCATGGCTAGTCTAACGGTGCTAGACTTAAGAAGGAACAATTTACAGGGAGTCTTT  
CCCCATTATGTGCACACAGCACTTCGTTGAGTACCATTGTCATAAATGGTAATCAATTTGAAGGACCTGT  
ACCTGTGTCGTTGCTCAAGTGTGGTGGTCTAGAAGTACTTGATGTGGGGAACAATGCTATAAATGACAG  
GTTTCCATCTTGGCTCGGAACCTCTCGAATACCTGCAGGTCCTTATATTAAAGTCGAACAAGTTCCATGGA  
CCTATAAGTACGTGTCTGACTAAGTTTTGCTTTCCAAGTTGCGAATTTTTGATCTTTCTCGTAATGATTC  
AGTGGCTCACTTCCTGCAAAGTTTTTGGAACTTCAAGGCAATGATCAAATTAGATGGCGAAGACACA  
GGAAATATAAAGTACATGGACTCTGTGTTGTATTCGCCATTTGTCACATCGTATGAGGATTCAGTGAGTT  
TGGTAATCAAAGGGCAGGATATTGAGCTATAAAGAATCAGCACAATTACGACAACCATAGATCTCTCAA  
GCAACCATTTTGAAGGTGTCATTCGAAAACACTAAAGGATCTCATATCACTTTGGCTACTCAATTTATCT  
CATAACAATCTCAGAGGAGATATTCCAATGAAATTAGGACAATTGAGTATGCTTGAAGCTTTAGATCTCT  
CTTGAATCGGCTCACTGGAAAGATTCCACAGGAATTGACAAGAATAAACTTTCTCACCTTCTTAAACCT  
CTCTCAAATCATCTCGTTGGACCAATTCCTCAAGGTCGGCAATTCACACATTTGAAAATGACTCATATG  
GTGGCAACCTTGATTTATGTGGTGTTCCTTTAACAAGAAATGTGGAACGTGTGATTCATCGCATGTTCC



TCAACAATTGGAGTCCGAAGAAGAAGGCGAGTCATATTTTTTTAGTGGATTTACTTGGGAATCAGTAGT  
CATAGGCTACAGCTGTGGACTAGTTGTTGGAAGTGTGCATGTGGAGTCTCATGTTTAAATATCGTAAGCCA  
AAATGGTTTGTGGAATTTTTTATGATGGACTCATGCCTCAGAAAAGAAGAAGGCCAAAGAAGAGAGCTCA  
GAGACGAAGGACTTGATGGAAGATTGAGAGGCCTAAATTGCCTTTGTTTGATTTTGTGGACTGATTAGT  
GAACTGTTCTGTTTTTGTCTTTTTTAATTTCTATTTGTT

>M6-PGSC0003DMG400024438 M6 LRR-RLP

CACTACAACAAATGTGATATATTGCTACGAAATAATTAGCTACAATATAAAAATTTGCTACTAATTGTTTCAT  
TTTTTCATGACGAAAGTTATATTTTGTATTTAAATACATGAGGAACATACTTTTAGTGACGAAACACAAATA  
TTTGTAGCTAAGTTTTGTCCACTATAATTTCCCTCCAAAGGATAAGTTGGCGCCATTTATTGAGTACTATT  
AGCTACAAATCTAAATTTATCAGTGACACATTATTTTGTCACTAAATGAAGTAGTACCCAATATATGACAA  
ATCATTTTTTATCCTAAAATTAATTAATTTTGGACATAAAATAGTTTCGTCACAAAAATTATGTTGATACA  
ATAGCAACGAATTATAAATCGTAGTTAATCATTGAAGAATTTAACCATAAAATTTATGCTTTAATTGTGAC  
CTTATTTTTTGTCACTAATAATTTGACAATTAGTGACAATTATATCATTGTCTCTATTTAACCTACAATTTA  
GCCAAAATAATTTTTGTCACAAAAAATAGAATTTTCAATTGACTACAACCTTTAATTTTCGTAGTTGATGAA  
TAGTGTAATTATTGGCTACGAAAAATATAGGAAAAACTGCATATCTAAGCAAACATAGCTTGTATATCTA  
CTCAACTAACCTATAGTTTTGGAAAGGAAAAACTACCTTATTAGATATACATCCATACCGCATATACTTAT  
TCTTCCAATACTTTCAAATAATTAGATATCTTACCACTAATTAAGAGTTTCCTACCATCTTTTGAGGAAGAT  
ATATACACCTATATATAGCGTTTCATCTACCAGATATACTAGAATAATAGTGAGTGAATCAAGCGAGATT  
GGAAGGGAGATACTCATGTATCCCAGATAAATAGGAGAGTGGCAAGTGAGATGGGAGGGAGACAAGC  
GGGATTCGTTTATGTATCCAAGATATATGTGAATCCACTTGGATACAGTGTATTTAGAATAAATTACACC  
AAATTGACCCAATGTATCCCAAGATCCATGTATATGGAAATATCTGGACGCACCAAAATCTTATAAGATT  
CGTAATATTATAAACTAGAGCGTATCTAAGTAATTAGCTCATAAACTAGTGAAATTTATGTAAGTTTTCCA  
TTAAAATGAATAATATGTGAAGGTTCTAAATTTCAATTAATTCCGGTAAGAAATCACAATCTCATCTTATA  
ATGAATGATTGAAATGTGTGAACTATTAAGAAAATGGTTAGTGTAGTTTATCCTATAAGAACCCCCGA  
TCCAATGATAGTAACATATCTGACTAATCATCAAGATATTATTCAACAATGTTCTTCAGAAATATTCGCCA  
CCTGATTCAAGAGATCGAATCAAATTTTTCTCTTTTGTATTTTCAATCTTTTGATTTTATTAATTGTTTCGT  
TTATCCATTAAATTATTATTTTCAAGTTCTTCGATTACATATTCAGGATTTTGGATAATATTAGTAATTTAGTT  
TGTTGGTTATTTGAACTTTTACCTTGTGTTGTGATAATTTGATTCTCCATCTCATAATCCCTTTCTTTACCCCA  
TCTTGAAGAAAAAAATTCAAAATTTTTATATCATTTGAATTAATTATGTTACTTTAAATCTCTTTCAATTA

AATTCATCTGATTCTCCGAATAAATAAATTTTACGCTAAACACTAATGTCACACCTAAGATTTTGAGGGAC  
GAGATTGACACTCATTATCTTAAACTTGGTTCATATTCGTTTTACCACACTCCAATTATTTTTCTGATTGCG  
CGAGTCTCACACACCTGAACTTATTTAATATTATCATTAAAAATTATTCAATTTCAAATATAAAAACTCGT  
GGACACTTACAATTAATATATAACAATTATTTAAATATTAAGTCCGTTTCATGTAGAAAATTATTTCTCAATG  
TGCTTCACATTTTGACCAAATAAAATTTATGAGGTAAGAAGTGTGAAATAATTCATAATACAAAAAAC  
AAAGATAAAAAATATAGTTTTAATATTCAATTGAAATTCATTAAGTGAAAGAAATTATAACTTTGAGAATA  
TATTTTATACGAAATTATTAGAGGGAAAAGAAAATAACAAATTTTACTTTCAATTAATTTTTCCCTCCACTT  
CAATGTGTAAATTCCCCCTCACGCCATTTCCATTTTCTATCCAGTAACCACGCATAACGGCACAAGGAA  
CTGCCCACTAACTTTCTTTTCATTTTATTTTTTAAAATAATCAAAATTTGCCCACTCTCTTTAACTATCCAA  
GTCCAACCTCAAATGCAATACATTTTTTCAAATAAAAGAGACTCCTCTGCATTTTCTCTCAATCTTCTTTT  
TCTATCTATTTTTAAAATGATGTCCATCCAACATTTACCATGCTCTATAAGAAACAAAATATTTTCTTTGGT  
TAGCATAAGGAACCATTATTCACGAAGTTATTATTCAACTCCTTACAAGGATTATCTTAATGGAAGAACT  
CTTGATATTATCTTGTAAGGAGATAAGTGTTTATAAATTGTGATAATCGAATAGTTAATGATTTTGTATA  
AAATTAECTAATTTTTTAATTCTAGTATTTGTTTCACTAATTAATGTTAATTTTAGAATTATATTTTGTTTAA  
ATTATGATTTCAAAAAGTATATACTAAATTATATTTTTTTTTCACACAGGTCCATAAAGGTGCAAAAATGAC  
TCAATGAGTGAAGATTTTAGATAAAAGAGCACGAATAGACGAGGAACTACATACTTTTATCTTTTTTAA  
ATTTATCATTGTTCCCGTACCTCATCTAGGTCTTTTTTTTTTTTTGAGTGATTTCCCTTGATTTACTCAATGA  
ATTTGTACTIONAATGTTATCCCTGAATAATTAGAAATGTAATTACTIONATATAGTTTCGTATGGATTTTTGGT  
ATTATGTTCCTTTTTTTTTTTTTTTTTTTTTTTATTTACAAAAGCTATGTACTTTTAAAAATTGAAGTATACAT  
GTAATTAATGGCAAACAGTTTAACTACATATTTAAATAATACTATTATAAAACATTAATAACATTCAATTT  
GTTATAAATAATTTTATCCTTGATATTTATATAATTTTAAAATCATATTTTGGTCGCAATGCAAAAATGG  
TATCTTTATCTATAAAAAGTAAATCATACTAATGTTTTAGTTGTCACAAATTAATTTTATTCAAGTGAT  
AAAATAATTTATTCCAAAATAGCCTTCAATATTGATAGCATAATTATATTTTTAGCAAAAAATTAECTTA  
AATGTATCTAATTGAGACAACATAGAGAGACAAATTATTCGTCAGTAATACCATATAGAGAGACAAATT  
ATTCATCACTAATACCATAAAGAGAGACAAATTATTCGTCATTAATATCGTTATATACTATATCACAACTA  
ATTTTACGCCACAAAATTAATATCTTTTAGTGACGTAATAACACTCTTTTAACTACAAATTATGCATAGCTT  
TAAAGACAATTTATATCGTCACTAATTAATTTATAATTAGGGACAAATAAAATTTGTCCGTATTAACAT  
ATTTTTAGTGACGATATGAGTTTCTAGCTACAAAATTTTACGTTTTTTAAGACGATCAAATTCGTCATAAA  
TGCTACATATTTGGAGACGAATTTTATTTTTGTAGTTAATAGAATCTTTTTAGCGACAAAACACTAAATTG

TCTTTGTAAACTTTTAGTGACCCACGTTTAGAGACGAAAGACTGACGAAATTTTTTTCATCATAAAAATTT  
TTTTGTGACAAAATATTATCTTTAAGTGACAAAATAATTTGTCACTGATAATCAAACCTTCTTGAGTG  
>M6-PGSC0003DMG400024768 M6 LRR-RLP  
GATCACTTATCAATGAAAATGCATCTCCAGCTCCATTCCACTTATCTTCCAATATCAACAATCCTTTCTTT  
CTCTCTCACACGCACATTACTTGTCTTCTTTGCCTATGGCACACCTGTCGTCATAGCACCTAGGAATTTCC  
GATACCCACCTGACAAACATCGCCGGAGAATCAGGCATCTACCATGATCATCTTTGTCTGCAAGACTCGT  
TTTGGTCTTTCTTGTACTCTTTCTTTTCCACCCTTCAACCCCTTCTCAACGCTCGTCTCTCTCTCTTTGT  
CCCGACATAATACAGTTACAACCTTTTCTTTTCTTGTAGTTTTTGGTGGGAAGAAGAAGATCCGAACAG  
AAAGTATTGACTAGTTGAGATTTTTTTTTTTTTTTTTTACAGAGTATTCAAGATTTGTATGTCAGCGTATTG  
AATGTTAAACGGATTCAAATGGGCTTAAATGAGTAGTTAGAATTCATTTAATCAACCCAAGAACTTGGA  
ATTGAGGTTTAGTACAAGTAGTTTTTGTGTTGTTGTTTCTTATAGTTTTCATGGATTCTGCTCTGTTTGT  
CTTAACGAGGATCTTCTTATCAGAATCTTTCCTTCATTACCCATGATTCCGACCGCAAAGCTTTCCGTTTG  
GTTTGTAAAGCATTCCCTCCGGGTTGACTCTTCCACCGTACCCATCTCCGGATCCTTCGTCCTGAGTTCAT  
TACAACCTTTTCTCAAATTCCCACGTATTTACTCCCTTGACCTTCCGTTTGCCCCAAATTAATGACGG  
AGCTGTTTCCATGCTGATGGGTTATGGGTTGCCGGATTGGAGTAGGAGCTTGAGGAGGCTGGTGCTGA  
GTAGAACCACTGGGTTGAAATCAGCCGGGTTAGAGATGCTTATGAAGTCTTGCCTGTTTTGGAGTCTAT  
TGACGTGTCTTACTGCTGGGGTTTTGGTGATAGGGAAGCTGCGGCTTTATCTTTGGTGGGTCTTTAAGG  
GATGTAAAGCTCGACAGGTGTTTGGGTCTTACTGATGTTGTTTGGCGAAAATAGCAATTGGGTGTCAA  
TGCCTAGAGAACTTAGCTTGATGTGGTGTATTGAAATACTGATCTTGGGATTGATTTTTGTCCAAGA  
AATGTACACAACCTGAAGCAGCTTGACATTTATATTTAAAGGTCTGTTTATCTTACTATCCTTCTTTTTGAT  
CGTAGCATATCAGGTGTATGTCTTACTGTGTTTGTGAAAATGTGGATTTGGTGTGTTTCAGGTTACTA  
GTGTGTCACTGCATTCTATAAGCAGTATGGAGAAGTTGGAGCTTTTGGCTATGGTTGGGTGCGGCATTG  
TGGACGATGAAGGACTACATTATCTTGGAAAAGGGTGTCTTCGCTTCAGGTGTTAACACGTTTGTCAA  
ACTATTGTGATCAATTGTAGAAAATATGAGATCATAGCTGTTTTTTGGAATTTGTTCTCCTCTCTTAAG  
GTGACCCTTACCATGTTGCTATCTGGTTTTTACCAATTTAAGACTGAAAATAAACCTTGTATGCAAACAC  
AATTGCTTCATAAATAAGCACATGTAATTTCATTTTCTTATAGCTTGTGGAATTATATTTGTTTATCAAATA  
GTGAAGATGGGCTTAAAGTTGTTTTGTAACTTAACTCTCTCAGTTCCAATTTATATGACGTAGTTCAA  
CTCGGGACCGAGTTAAAGAAGAAAATGGAACTTCTAACTTGTGGTCTTAATCATGCCATAATATTTGT  
ATTGCTATAAAAATTTTGGAACTTGTATCTTAAACATGCCATAACATCTATGCGGCTATAAAAAGCTTCTC

GTTGAGTATAGAATGAGAAGTTTTACGTTAAAGTTGGTTCAATTGGCAAAGGTTGAGGGACTTGTGTCT  
TTGGTCACAGATTCCCGAATGTCAAAGGCTGTGGTTGGCCAAAGGATTGACTCCATATGGATTTCTCAG  
TCACTAAAAAATTATATCCAAATATAGATATGTGTCATTTTTTTTGGGAATAGACAAATACGAAAGTATTG  
TCACATAAAAAGGAACAGCATGAATGACTCGTTTCAGGTGTCATGGATGGAATTTGAGACAGTTAGCGC  
ATATGACATTTTCCTGATGACCAAATTATGCAGTAAGCACATGAATCTGGAATAGAGGAAATACTTATTG  
GAAAATATGATTTATGGCTGGTGATATTTCTGGTATTCTGACTGTAGGCGAACAAATGCATCACTTGAT  
GCTGCATGATCTAGTTCTGATCCCTCTTTATCTATCTATCTATTTGTATTTTTTATGAATCCCACTTTAGCT  
TTTCTAGTGATCTTTAAGCATACCAGCTGCATTCGTATTTCTTCTTTTTTCAAGTTATAGTTATAGTGGAAA  
ACAATTTTCTATCCATGAATATCTGAAATTAGTATTCTAAAGCTCAAGCTTTAACATTTTATGTGGCTAATT  
TACCTCTTAGAAGAATTGGCCATGAAATTTTCGTCTGGTTAGTGAGCGTACATAAGTTTCTTGGGTTGCC  
ATAACTATTCAGAACTTGTATGTTTACAGGCGCTGGATGTATCAAGGTGTGACAGACTAAGCTCATCTG  
CCTTAGCTTTCTTGATTAATGGACATCCTTCAATGCTACAAGTCTACGCTAGTCACTGTTTCCATGTGAGT  
AAATTTGTTGTTAGAACCTGCATTTTGAATAATTCCTTGGGGAGTTTTTGTATGTTGGTTCTGCAATTTAGA  
TTGAGAATCTTGATGCACCAGGAGTTTCTACTAAAGTCATCCAAGGGCTGAAGGACCTAAAGAATCTG  
AAAAAGCTCATCCTTGATGGAGCACTGGTTTCTGAATCATTCTTCAAGATCATTAAATTTCAATTGCAAATA  
TTTGGTCGAAATAGGGCTTGGAAAATGCAAAGGAGTGACTGACAAGGGCATTCTCCAGCTGGTATCAG  
GGGGTGTTAATTTAAATATCTTGAATCTCACATGCTGTAGCGAACTTACCGATAATGCAATATCAGCTAT  
AACAGATTCTTGCCGGAGTGTTTTGTGCCTCAAGTTGGAGTGCTGCAACTTACTCACAGAGAAGAGCCT  
ATATCACCTGGGATTACATTGTTCTTACTTGAGGAGCTTGATCTTACTGATATTTTTGGAGTCAATGACA  
CTGGTGAGGCTCAAGCCATTGTTCTTTTGTATTTTATTAACGTATTTATTCTGTCACCATTAGATAAAGGT  
AAATTTCCATTTATTCTGAAGGACCCAGAGCAAGACATCTGATTTTCCCTCGTCTCATCTGGATTCTATTTT  
CATTTTTATATTCTTCAAGTTTTGGGCTTTTGGAGTTGGCTTCCCATTCCTTAAGAGCAAGACATCTAATTT  
CTTCTTCTTCTTTTTCTTTTTCTTCTTGTAAATGACATGTGAAGCTTTGTGCATTTGTGTCTCAAAGCTCCTC  
GTGTTAAGTCTTCGATGATATGGTTACTCCAAAATTGTGCAGTTGGTGACATACCTTTAAATTAAGCATT  
TCAAGCAAGGAATTCAGCTATGCTGTAGGTCTGCACTTTAATGTGTTGCATCTCATCTTCTGCAAGGACT  
TTATTACTTGTCTAAATGTACAAAGCTTATATGCCTAAAGTTGGGATTATGTACTAACATTACTGACAAGG  
GACTGTACTGTGTGGCTAGAAATTGCAGCGAGATTCGTGAACTTGATCTATACCGGTAAAGTGATTGCC  
CCATCTAACTTATCCTGTGAATTTGAAAATGTCTTCTTATATTGTATCTTGAAAACCATTTGCAGGTGCCA  
AGGAATTGGTGATGATGCACTCTATGCTTTATCAAGTGGTTGCAAAGAATGCAGAAGTTAACTTGTCT



TATTGAGGAAGCTTCACATTGATGGATGGAGGACAAATAGGATAGGGGATGAGGGTTTAGTAGCAATT  
GCTGAGAATAGCTCAAATCTCAAAGAATTGGTGCTTATTGGTCTGAATCCTACGTCGACTAGTCTATTGG  
CAATAGCTTCTAATTGTAAAAAGTTAGAAAGATTGGCTCTTTGTGGTAGTGACACTATTGGAGATCCTGA  
AGTATCTTGTATTGCCACAAAATGTATGGCCTTGAAGAAGCTGTGTATCAAGGGATGTGAAGTAACGGA  
TCAAGGGATTGAATCTTTCGCTTGGGGTTGCCCTAATTTGGTGAAAATCAAGGTGAAGAAGTGCAAGCA  
TGTGACGGGTGATGTTGCAGATAGGTTACGAGCTAGGAGGCAATCGCTAGCAGTGAATCTTGATGGTG  
GGGAAATTGATATTGAACCTGTGGATAGTAGTGCAAGTATGGTGGAGCAATAGAAGAAGCAGCAGA  
GTTTCAACATACTGCAGCTACACTGCCATAATTGGTGCTAGTGATATTCCATCTACGAGCAATGTAGGA  
CGATCATCAGCATCGAAGCCATGGTTTGGTTTTTCGGAGGAAGGGGCCTCGTTGCTTGCACCTCTCCGTA  
GGTGGTCAAATGGTAATGGTGAGAGCTTATGAATATTATGAAGACTAATGTTAAAATTGAGAAAACATA  
CTGTTAAATTTGTTTAGCTGTACTTGGTCCGTTTTCACTTTTCTCATTTCATCTTTTTTAGTTTTGAATTTGT  
CGTCTTGAATACATTGTGCAGATATACATCTCACTTCCCAATTTTGATGAGCTTTTGTAGATTTTGTCTTA  
TCTTTTGTCTGTACAAGATTTGGTGTAGCAATAACCTTGTTTCATGTTGGTTCTTGGATGATAAAAGTGTAT  
CTTGCAAAGCAAATTCTCCCTCAAACATGCAT

>M6-PGSC0003DMG400025295 M6 LRR-RLP

GTGATGAATAAACAAGAAAAACCCAATCTTCTCTTTTTCAATTTTTTATCATAAACTATACATACATAC  
ACCCTTTTGTCTTCCAAAGTCAAGATTTATTTTTTTTTCAAACCCCATTTCCCAAATGCATTTTCTGAT  
GCTGGTTTTCAAGATTTTGTTAATTTTCATCATTCTTTCATCTGTTCTCACTAGCCCAACAACCCCAAATTTG  
TGTTGAAACTGATAGTCTTGCTCTTCTTGGCTTCAAAGATAAGATTTTTAAGGATACTACTGATTTTCTGT  
CATCATGGACAGGTAAAGATTGTTGTGGAGGAGTTGGGAAGGTGTAGAATGTGATGTTTCTACAGGG  
AGAGTGAATAGATTGGTGTACAAACACCTTCTGAGAGAGACATTAGTGTTTACATGAAGGGTACTTTG  
TCATCATCTCTTGGTGATTTGGTTTTCTTGGAGACATTGATTATAAGTGAATGAAGCATATTGCTGGTG  
CTATACCGGAAAGTTTTTCGAAACTTTCAAGATTGAAGCAGTTGATCTTGGATGGTAATTCACTACAAGG  
AGATATACCTTCTGGTTTATCTCATTGGAATCACTTCAAACACTTTCACTTAGTGGTAATCATTGACAG  
GACATGTACCTTCTGTATTAGGAAATTTCAAGAATCTGCAGCAGTTGAGTTAACAGACAATATGCTAAT  
TGGGGTTATCCCAATTGGTTTCAAGAATCTTGTTAACTTGCAGTCCTTGGATCTGAGCCACAATTTACTAT  
CCGGGGTTGTTCCGAATTTTCTTGGACAGCTTCAAATTTGACATATATTGATCTTTCAAGTAATTAATTT  
TCAGGGGAGTTTCTGTTTCTTGTGTAGTTTGTCAAGCTGTCGTTTTTTTTCGATGGATCATAATCGAAT  
AACAGGGAGAATTCAACTCAAATTGGGAAGATGAAAGCACTTACTTCATTGTCATTGAGTTCTAACAA

GTTGACAGGTCATATCCCTGAGTCTATTGCAGGATTACCAAATCTTTGGAACCTTAGTTTGTCTAGAAAT  
GAACTTTTAGATCCTGTGCCTATTGCTTTCTCTAAAGGGCTTCCTTCACTTTTATCAATAGATTTGTCTTAT  
AACAAAGTTCAATCTTGGAATAGTACCTGAATGGATTAGGACTAGAGAGCTTTCTGATGTCAATTTAGCAG  
GCTGTAAGCTTCGTGGGACGCTTCCGAATTTCACTAGGCCTGATTCATTGAACTCTATTGACTTGTCCGA  
TAACGCCTTCACAGGTGGGATATCGAGTTTCTTTGCAAGAATGTCAAGCTTGCAAAGGGGAAGATATC  
AAACAACCAGTTGAAATCTGATGTTGCTGTGATCAAATTGCCTGATGGGATTTTATATCTTGATCTTCATT  
CAAACCAGCTTTTTCGGGTCTCTTTCTAGGATGTTAAGCAACAAGACAAGCAAGTTCTTGAAGCAATCGA  
CGTCTCAAACAACCAACTCTCTGGGAGCATCCCAGAGTTTGTCAAGTGGCTTAAACCTGAAAGTTCTCAAC  
ATAGGAAACAACAAGATTGCAGGTCAAATCCCAACTTCAATATCGAATCTTGATAAGCTTGAGAGGTTT  
GATATATCAAGAAACCAGATTACTGGTACAATTCCAGTAAGTCTAGGATCACTAGTGAAGTTGCATTGGT  
TAGACTTATCGATCAACAGACTTTTTCAGGGAAAATACCAGATAGCTTGTGGGGATTGAAGCATTGAAAC  
ATGCAAACCTCAGAGCCAACAGATTATGTGGTGAATACCACAAGGCAGACCATTCAATATCTTCCCTGG  
AGCTGCCTATGCCACAATTTATGCTTGTGTGGCAAGCCTTTGCTGCCTTGTAAAGGGAACGAAACAAGAT  
AAGTTGGGCCAGTAACTGCTGACTCCATTTATAGGAATTTATGTTTGTAAACAACAACAGTTTACTTTT  
CTTTTGTATTTTTGAATTCTAGTACTACTTGTACAACCTCTATCATCTAACATTGTTAGTCAGTGTTTACTTCA  
CATAAATTCAATATGAA

>M6-PGSC0003DMG400025383 M6 LRR-RLP

AAAAAAGAGGGAAAAGAAACATGTTGAAAGGTTATCTTTGGAGTGGAGCGGAAGTTTTGCTGACAATT  
CACAACTGAAAGAGACATACTTGATGAGCTACAACCAAATACAAACATAAAAGTACTCCAAATTACCG  
GATATAGAGGGACAAAATTTCAAATTGGCTAGCTGATCATTCAATTCATAAGCTAATGGAATTGTCTCT  
TAGCGATTGCAAGGACTGTGATTCCTTGCCAGCACTAGGACAACCTCCTTGTTTAAAATTCCTTACCATTA  
GAGGGATGCATCAAATAACAGAGGTGACTGAAGAGTTCTATGGTAGTTTGTCTCCAAAAAGCCATTTA  
ACTCCCTTGAGAACTTGACTTTGCAGAAATGCCGGATTGGAAGCAGTGGCATGTACTGGGGAAAGGA  
GAATCCCTATACTCGAGCAACTTCCAATTGAAGATTGCCCAAAGTTGATAGGAAAATTGCCTGAAAATC  
TTTCTTCTCTGACAAGATTGAGAATTTGGAAGTGCCTGAACTCAGTTTGGAGACACCTATCCAACCTCTCA  
AATTCAAAAGAGTTAAAAGTTGCTGGTTGCCCTAAGGTTGGAGTTCTTTTTGAGAATGCTCAACTGTTTA  
CATCTCAACTTGAAGGAATGAAACAATAAGTGAATTAGTAATTACTGATTGTAAGTCTTACCTCCTTA  
CCAATTAGCATTCTGCCGAGTACCTTGAAGAGAATAAGAATATCTGGTTGCGGGAAACTGAAATTGGAG  
GCGTCCATGAATGCTATGTTTCTCGAGGAACTGTCTTAAAAGGATGTGATTCACCTGAGTTTTTTCCAA

GAGCACCTATTTGAATTTAAGTAGTTGCCACAACCTTAATAGGCTTTTGGTTCTATTGCCACTGAACGA  
CTCAGTATTAGAGGTTTTATAATCTTGAGATACTTTAGTGGCATGTGGGACTCAGATGACATCATTGC  
ATATTCACGACTGCAAGATGTTGAAGTCGTTGCCAGAGCATATGCAGGAACTCCTTCCATCTCTTAAGGA  
ACTGCAACTATGGCGTTGTCCAGAACTAGAGTCCTTTCCTGAAGGAGGATTGCCCGTCAATTTACAAGTC  
CTTTGGATCAACAAGTGCAAGAACTGGTGAATGGCCGAAAGGAGTGGCATTACAGAGACTCCTCCTT  
CTCGAACAGTTAGAGATCAGCCATGATGGCAGTGATCTTGCTGGTGAAAAGTGGGAGTTGCCTTGCTCT  
ATTCAAAGTCTTACCATATCCAATCTGAAAACATTAAGCAGCCAACCTTCTCAAAGCCTCACCTCTCTAA  
ATATCTACGTACTTATAATTTATCTCAAATTCAGTCACTGCTGGATGAAGGGCTTCCCTCATCTCTTTGTG  
AGCTACATTTAACTAGCCATCATCATCTCCATTCCTACTACCAACCGAAGGTCTTCTGCATCTCACCTGGCTT  
CGACATCTACAGATCTGGAATTGCCCTAATCTCCAATCTCTTCCCAAATCTGGGATGCCCTCCTCCTCTCT  
GTGCTGCACATTTGGGATTGTCCTAATCTCCAATCTCTTCTGAATTGGGGATGCCCTCCTCTCTCTCA  
GCTGTACATTTTGAATTGTCTTAATCTCCGATCTCTTCCACTAAAAGGGATGCCCCCTTCCATCTCTAACT  
GTCTATTTACAAATGCCATTGCTCAAACCACTCTACAATTCGACAAGGGAGAATACTGGCCAAAATT  
GCTCAGATTTCCACCATAATTAGTAATGGAGAATTCCAATAATGATTAAAGGAAATGGTGCTTTGATA

>M6-PGSC0003DMG400025480 M6 LRR-RLP

ATGTTGAAATTGGCATCTGTATTTGATGCTAGTAAGAATAAATTAACAGGTCCGATCCCGCAATCTTTTCG  
GGTGCCTTGAGCAAATGGAAGTGATGGATCTGTCTTACAATCAATTGTATGGGGAAGTACCGGAAACAT  
TGTGCAAGATCAGTAGCTTGGAGGAACTCACTTTGAAATACAACCTATTTACACAGATTGGACCGGAAT  
GTCGGAAGTTGGTAAAGGAGAATGTACTTGATATTGGCATGAATTGCATTATTGATCTTGAGAACCAGA  
GAAAGCCGGAGGAATGCGAACTTTCTTTTTACAAAAGAGAAATTGCCGGGACATGAAGTCACTAAGCT  
ATGTACCTTGTAAGATTCATGACTTCTCTTCTAGGAACAGTTCTTCAGGTCGAGCTCATACCGGCGATGC  
AAGGACTCGTTCGACTACTTATGCTGCCCTCAAGAACTCACCCTCA

>M6-PGSC0003DMG400025546 M6 LRR-RLP

ACTACCTAGTACAGTTTGGGATATGGTTAAATTGAGATATCTGTATATTCCTAACTTCAGCCCTGAAAATA  
AAAAAGCATTACTCAAGAACTCTCCAAAACCTTGATGATTTGGAAACCCTTTCCAATTCATATTTGCTCGT  
GTTGAGGATGCAGAATTGATGCTGAGAAAAACACCTAATCTTCGAAAACCTGACATGTAAAGTCGAGTGC  
TTAGAATACCCCATCAGTACCATGCGTTGAATTTTCCAATACGGCTTGAATACTAGAGCTTTATGGATC  
AAAAGCCTTCAAACCATCCCTTTTACATCTTTGCACCAAATCTCAAATACCTGATACTCTGTGGCTTTTA  
CCTGGATTCTCAGTACTTATCAGAACTGTTGATCATCTCAAGCACCTTGAGGTACTCGAACTGTACCGC



GTTGAATTTGGTGATCATGGGGAATGGAAAGTGAGCAGTGGCAAGTTCCTAAACTCAAATCTTGAAA  
CTAGAATATGTGTCCATGATGAAATGGATTGTAGCTGATGATGCCTTTCCTGACCTGAACAATTGGTTT  
TGCT

>M6-PGSC0003DMG400025563 M6 LRR-RLP

TACTCCCTCTGTTTCAATTTGTTTGTTTGATTTAACTTGACACAAAGTTTAAGAAAGTAAAGAAAACCTTT  
GAATCTTGGTGTCTTAACTAAAGATATGTAGAATGTACCAAATGCCCTTTAATCTTGTGGTCTTAAAC  
ATGTCACGTGAAAA

>M6-PGSC0003DMG400025769 M6 LRR-RLP

TGAAATTCTGCAAATTGATTAAACTGCAACACCCCACAACATTCATATCAATCAAATATAGCATTCTCCA  
CCATCACCTCAGCCAGCCAAAAGGGAAACCTTTTTTTTCAAAGTTACCTAAAAGAAATTTGTGTGAAAGA  
GCTGACCATCAACTACAAAGGTGAGATATCAACCCAAAAAAAAAAAAAAAAAGGAAAAAACGAGCTGCAGTT  
ACTTAGGTGCTCAAAGTAACTAGATTAGAGTACAAATACTACGAGACAAGCATAATAAAGATTCTAAA  
TCAATAGCAAAGAGAACTCCTAGATTATGCACTGGCTCCATTGAAATGCTTGTGGATTACCAATCAAAA  
TGACCATGCCACTATTTCAATGCCAATCATATAAACCATTAATTCATCTGCCACAGACACTTCCACTAACA  
AAGGTCATCGATAACCATTACAAAAATAAGAAAAACACTAGTAAGTTCAGCCTTCTTTAAACTCTGCT  
TTGCAAGGCAATCAAACCTCATCCCAACGATGTTGGATGATGCAATCCTACAGGTCAACCTACAAATCAA  
TAAACAGATTTTCAAGAAAATTTTGAAGTGAAGTTTCGGTCATGAACACAGAATAATGCAGCTAGGCTA  
TCTGCTTTAATCTTACTCTACTTTCAAGGGGAAACAAAATTGAAATGGAAGAAAAACAGTTGTGCAATCA  
AGAAAAGGAGCAAATGGGACATATCCCTCTCATAGTTAGCAGAAGATCGAAGAAGATCGAAGGTGAG  
GGTGAAGCAAAAAGACCTGTACTTCTACAAGCTGCCTTTGGATGTTGAGTGAAGGAATATTTCAAGAA  
CTTAGTTCTCTATCTGGTTCATGTAATCATAGCTCTAAGCTAAAATCAGGACACGAGATAAGGATCTCA  
CTCCAAAAGTCATTAACAAGCTAATTGCCCGTTTCACGTTTCAAACCCACAGGTATCCCTTTGAATCCAAA  
CCCAGAACTTATATCAGCAATTATGAAGTAATCTAAAGGTTCTAAAAAATCCCAAATTAGTGTATCCTG  
TTAAATCTATTCTGACCAACTTGTTTAACTTTTGAAGTAAATTAAGAGAGTGAGCACACTGCAAGGGATT  
AACGGAAGCTTTTATGCGCACAAGGCTTACTTAGAAAATTAATCACAATTATAGAAGGAATAATTATGTA  
TAACTAATTCTTGGCATTAAAGAAAAATAAATTATATCATAAGTAAAAGCACTTTTACCTTGAACAAGTCT  
CCTTTATTTCCAGTTGTTCTAAGAAAAAATACTTTGCATTCCAAGAACCTTTTTATTTGTCTAGACCTAT  
CGCAGAAAACGTCTAGTAGTAGGGAAGTAAATTTGCCTCAACAGATGAACAATTGAAAATTGGATCC  
AAATGGCATAGAATGGATATTGATGATTCCTACTACCTAAAAAAACTAGTTTAGGAATGAGGTGCAGT

AACAGTATAGTGGTTGTTGCATGGTTATATCTATTCTATCCGTAAGTAAGTGGCCTATTTTATTTTTGAT  
AATAACAAGGTGATCTTTGACTATACCATCAGTGTATGAAGTCAGTAAACAAGAGAAAGGAACTCATA  
AATTTGCTAGATTTTCTAAAATAAAGTAACTAATTTTCGATGGGAAAAAATCAAAAAAATCTTTAGGTA  
ACTTTGAAAAGAAGGTAGCATGGGAAACGAGAAAGTGGAGTGGGGGAAAAAGTCAATAGGAGGTGG  
ACTATAATTACACCTCTCTTTTTGCTAACGTCCGCTACCAAAAACACAGATTCCCTCCCTTATTTTTCTAA  
AATATTAATAAAATATGAATACTTAACTTTTGGAGTCAGGAATTATTGAAGACTATCTTTCTATTTTATAAA  
GATAAAGATAAAATCTATGTATTTTTTATTCTTATTCAATTTCACTTATAAAAATATATTAATATTATATT  
GCTGTATAAATCTATAATAGAGGCTCATTGATGGTTTTAAATTTTCTAGGTTTAAATTTTAAAGATTATGCA  
TTGAATTCATTACATTATTAGAGTTCTTGGTTTGATAATATAGATAATTTTTTTAAGTGATCAGTATAATTT  
TAACTTGTTGTGAAAGGTTATTTGCCAGAGTTTTTTTGAACCTCAGGATAATCCGCAACCGTTACAACCT  
CAGCCGCAATCTTCGCTCTTCGAGTGAGCACTCTGTGCGCATTGGGTAAACCCCTCAGGTTACTAATT  
TACTTAATAATCATTAAAACTGACCTGATAGAGAAAAAATTTAACAATATCAGTACAAATAAGTTAT  
ATTTAGAACAAAATGAAGACAGAAACAAAGTACTTCAATATTAGCCATTCACCTTGTGTTTTCCCATACTTAC  
TCAAGTACCCTTTTGCTACTACTACTATATATCAATATCAAATTATCAATATTATCATCTATGTAGCAGAGT  
GAACCAGAACACTTTTCTTTTTCTTGCCTTACACTTCTACATCCCTTGCTGCCTTTTTGGTCACCAAACA  
ACTTCTCTAGTAGTTGGTTTACGTCTTCCTCTTTCTTCTTATGTATATAGGAGTATTATGCTGTAATCATAA  
ATAATCAGTTCAAGAAATGATGACAGACTCAGAGCAGTACTATTCTTTCTGGTCATTTGGGGTCTTTTTCT  
TTCTTTCTTTGTGTCCTTCGTTTGGTCTCAACATAGATGGAACCTCTTGTGTTGCTTTCAAATACTCTGTTCT  
TGAAGACCCTTTATCAATTATTGATAATTGGGACTATAATGATGCAACCCCATGTTTATGGACTGGTGTA  
ACTTGTACACCAGACATGTTTAGAGTCATTAGTTTCGTACTCCCTAATTCTAAGCTTATTGGTTCTATTCCA  
GAAGAAATAGGATTTATTCAACATCTTCATACTATTGATCTTTCAAATAATTTCTTGAATGGAACACTACC  
TGTTTCACTTCTCAATGCTTCTGAACTTCAAGTTCTTTCACTGTCAAACAATGCTATTTCTGGTGAGCTTAC  
TGAGTCTATTGGAGGGTTGAAGAGCTTAAAGGTTCTAAATCTTTCTGTCAATGCATTTGTAGGAAATCTC  
CCACAAAAGCTAAGTTTTT

>M6-PGSC0003DMG400025848 M6 LRR-RLP

GTGTTGTCAAAGTTTGGTAGTTGTCTTGTGTTTTCAAATAGTGTGAACAAGGCAATCAAAGAAGGTGGCC  
AGTCGAATCTAGTTGCTTTGAAGTATTATTTAATTGGTGTGTTTTCCAATTTGGGTTTTCAATTTGTTGTTTT  
GGAATAGTGCAGACTAAGGCAACGAAAGAAAGTGGCCAGTCAAGTTTAGTTTCTTTAAACAATCTGGA  
TCACAAATTAGAAAGCCTCCTCATCGCAAACTTCGCTCTGAATTGGTTCCCTCGCAAGAAAGTGGATT

CCTATTTGAAGAGGAAAATAAAAATGCTCCAGGTATATTTATATGCTTGAGCATTCTCTTTTTTATTGTCA  
ATAAGTAGTAGAAGTACTGATAGTGTTTTTGGCCTGTTGTGAAATCTCAGGAAGTGGATGGTATGAACT  
CAACTCTTGATGAGACTTTGGGGGATGCAAATCCCCACTATTGTAGAGTTTTGAGAGAAAAAATTGCAG  
TAAGAGAAGCTGCTCAAAGAGCTGTGGAAGCTCGGAAGGCTGCACTTGTTGAAGCATCATGGTGCCGA  
ATACTTCAAGCCTCAAGGTGAGCAATTTAACATTCATTTATCTGTATTTGTTGTTACATGCATTAGATCCG  
GTGTTTGTCTGGAGTTTTTTTTTTCTGCTCAGGAATTCATTTGCTAATTATGTGATATTGGATACATTAAT  
TTAGAGATAGTTAGTTACAGTTCAATGTCTTTTGGTGATCTAATTTACAAAATAGCTAGAAAATGTATA  
GGTTTGGTATATCTTAGTATAAATCTACATATAATACTCACAGCTGAGAACATGCTCTTATATATAGGA  
AGTTATGGAGGTGGAGAATTAGGGTAGAAGTTACTAGGTAGTCGAGTGTTGTTGTGCTGTAGTATGATT  
TAGGTATCGTTAGTTTCTCTAATGTATATTAATTTAATAGCTGTTGCTACACTTGTTTTGTACATTGTTATC  
TTGTTGTCTCTTTTTCTTACTTTCTTGCCTCAATTACATTTGTTTTGAGTCGAGAGTCTTATTGGAAACAAC  
CTGAAGGTGGAGAGGTAAAGGTCTGCATACATTTTACTCTCTCCAAACCCCACTTGTTGGGATTATACTGG  
GTATGTTTCGTTGTATACATAATATATGCGTAATCAGTGTTATATGTTTTGTAAGCAGCAACA  
TCGGCCGACATGCAAGAAATGGAAAAAATAGCCAATATTAGCTGTTTATGACAGAGACATTGTTGATT  
GATTGAATAGAGATTTGGTCATATGTTAGTCTAGAACTTACCTTTTTCTGTATCTGCCATACAGGATAGATT  
GTAAAGAAGCAGAACAATTGCTGATAAAGGCAGAAAAATATTCTGCAGATGCTTTTGAAGCAGCAACA  
GCTATTGGAGTAATCTTGTATGACATTCCTGATTGCTCACAGAAGCATTACAAAATAGAAAAGTCACCAG  
CAAAAGGAGGAGGACCCACCACTCATACTGTTAGAACATCTTTTGAACTGCATTTGAGGTAGATAAAC  
AAGTAGCAAGTGCAGTTAAGGCTGCCCTTCTTAAGCTTGCTAATTGCCCTTCTATGAACAAAGATGAAGT  
CAAGGAACTGCTGCACAGAATAAGCCAGAACCCTGAAACAGATGATAATCATCAAGAAATGTCTGAGTT  
CTCTTCAGAATGTGAATCAGATACTGCTTCCGAAGCCACAGAGTTAGAAAAAGAAAAGGAAAGGAAGT  
ATAAAAAGAAGCAGGCGTATGAAAAGTTAATATGCCAAATCTTGTGGAATGATGCTGGAAAGGCTTA  
GATGTTTGCAAGAAGATGAACTTGCATCTCTTGCTACTATAGTTGCAACGTGTGGGTTGAACGCTGCTCT  
AGCTGAAGCGGAAAACAGCAAAGTGAATGTTTCAGGGTCTGCTGCTGATGACAGATCAGAATTATCTGT  
AGGAGACGGAACAGTTAAGGGCGCTGAGGAATTTCCAAGCCTGGATAAGTTTCTAGTTAAGCGGTTAA  
CTAGACTTGAAAGGGAGGTATTAGAAGCCAAAAATGCTAGAAGTGAAGCTGGGGAAAGAAGTGAACA  
AAGTCAAAATGAATCTTATCATAAAGTGATTCATTCGAGATACCATACAAATTCAAGCCATGATCTGGCA  
AGTATTCTTAAGAAACCATCTTTTTCAAATTTGAGAAGGAAATTGAAGAGGCCAAGAACAACCTCCGAA  
ACTTTGGTAAGAACTAAGTGTAAGCTTCAGATAATTCATCTGAGGTTCCAAGCCTGGACAAGTTTTTGG

TGAAGCGATTAACGAGATTTGAAAGGGAGGTTTTAGAAGCCAAAATGCCAGGAGTGAAGCTGGGGA  
AAAATGTGAAAAACACGAGATAAGTCTAGTGATAAAGTGGTTCACGCAGACTACCCTACAGATACAGG  
CAATGATCTGGCAAGTATTCTCAAGAAGCGTCTTCAAATTTGAGAAGGAAATTGAAGAGGCCAAGAA  
CAACTCCGAGACGTTGTTAAAAACAAGTGTAAGCTTCAAATAGCAATGTGCATTCATTTGAGGTTCT  
GACTTAGGCAGCGTGTGGTTAAGCACTCTTCAAAGCTTGAGAAAGATATTGAAGAGGCTAAGAGGAA  
GAATGAAAACTTAGTGAAATAGAGGGCAAGAATTCGAATAGATTGGGTACTGTGGCAATTGGTCAA  
GAAAGAAACATGAAATGGATGTTCTAGTTTAGAAGATTATCTTGTGAAACATATGACCAAACCTGAAA  
AGGAAATTCAAGAAGCAAAAATAGGGAAAACGCTGCTGACCCTAATGCCAATGTGTCTGAGACTACCT  
CATTGGTAGGAAAAGAAAATGTTGACCACAATGTAAATTCTTGTAAATGGAGAACAACCATCAAAGCCAG  
CAGACACATTTGCATTTGAGGTTGAAAACAAAGAAGCTGTGGATAGTCTGGACAAGATTCTAGTAAAGC  
CAGTTCATCGTCTGCAAAGACTTAAAATGCAAGAATCATCAACAAGAAGAGACTATCGTGCACAGAGGA  
CTCAAAGAAAGATTGAAGCTAATAGTGCCACTGATAGCGAAGGTTTGGACAAGATTTTAGTGAAGCATG  
TTTCAAAGCTTGAAAAGAGAGAATGTCTTTTCATGCAAAGGAAGACAATTTGCTAAATGTAAAGAAAA  
GGGACACCATTGGTAAACAGTTGCAGAACAATGAAGGCAGTTTGGATCAGATTTTGGTGAAACACAAG  
TCGAGACTTGAGAGAGAAAAGATGGCTGCTATTCAGCCAGAGGATGATGATGATCAGGTAAGACATTC  
AATTACTCGGAAAGCTATAAGGGAGAGGGAGTTGCAAGAAGCTTGGGGAGGCTTAAGTCTTGGGAACT  
CTATGCGTCCTCGTATGTCTAGACTTCAGAGAGACAAGGCAAGTGCATTAACCTTATTCTTAAGCCATTTT  
ATATTGTTGTTCTTTTTCTACTTCTCACGACTTTTCTTGTTTTCTTGTAGTCTGCCTGGCTTAAAGCTG  
AAGAAGAGGAGAGGAAGGGAAACCGTGGAGGAGGCGTGAAATTATGAGAATATTAGATTCAAATAT  
CATAAATTCTTTGTTTTTCCCTCCCATGCTTCCGTTGGTCAACTTCATAACAATCAACTAACTTTTGAAT  
ACTTCTTCACTACTCATATAGTGATCTCGTGTGAGATGGATCTTTTTTTGGTTCTTTTTTGGAGTAAATAG  
AATTAGAATGCTATTTTTTTTCATTTTCGAATGTGTAAACTGAAGGTTGCAATGTAAAGAAGAGTGCTGC  
AAATTTGTACATATTGCTTGTCTATATATTCTTCTGTGTATATGAGTGAGCAACAAAATGTATCTGCAAT  
ATTAGAAAGAACTATATATTGTACAAATTAATATATAAATTAACAAAGTACTTGAAATAATTGCAAT  
TACCGGACATCCAAATTAACAAAGTACTTGAAGTAATGTAAGGATAAGATGAGAGAAAATAGCGAAG  
ATAATTTTGGCCATATTTTACCCAAGACATCCAAAATATATCATTCAATTAATACATTGTTGTTATTTACTA  
AAAATGAAGTAAATCTAAAATCATGTAGATGAAATTATCTCAAGCGACTTATAGCAATCTCTTGAATCA  
AACTGGATTTATCCAAGAAAATATATTCAATTACATGATAAAGCCGTTAAATCCAAAAAAAAAAAAAAAAAC  
ACAATCCACACCCCTCCCAACCCCAATTTTGTCTTAAGCTTACATAAATTTGAATGTAATTATTGAG



CTGGGTCACTCCCAAATTACCCCAAATCTACTAGAACTTGCAGCGAAGGCTAATTCGTTATCTGGGTC  
TCTTTTAAAATCGTCGTTTTATGGGTTAAATCAACTGGAAGTTGTGGAGCTTAGTGAAAATTCGTTATTTG  
GAACTATTGAACTTGGTTCTTTCAGTTACCTTCTTACAACAAATCGACATGGCGAACAAACAGCTTTACA  
CTCGTCAAGATTCCAAAGGTTGTTGATTTGAACAGCGACCTTGTGCGCGTTGATTTGGGTTTTCAACAAA  
TCGAAGGGTATTTACCGGTAAATTTGCGGATTTCCCTCGATTGTCGTCGTTGTCATTTAGGTATAACAAG  
TTCCGGGGACCGATTCCGTTGCAGTATAGCAAAAAGGCGACGTTGAAAAGGCTGTATCTTGACGGTAAT  
TTCTTGAATGGGTCTCCGCCGGCGGGATTTTTCGGCCGGGAACTTCAGTTACCGGCAGTTTAGGAGAT  
AATTGTTTACAAAATGTCCGATTTCTTCGCAACTTTGCTTCAAATCACAGAAATCTACGTCGATTTGTCA  
GCAAGCTTATGGTGGGAAACCAAAGTCTTAGTTGTGTCAGTCAATGTTTCTGAGATTTTTTTTTCATCTTG  
TTTTCATATTGTAATTGTAGGAGTATTATATTATATTCTTTAGATAAGAAATAACCCAATATAATATTTGCT  
CATCTGAATTATGCCCCCTTGTATAGAGTATAGTACTATATTCATACTAGAAAATTACGG

>M6-PGSC0003DMG400025921 M6 LRR-RLP

CTCCTACTCACTTGACTTTTTTATCCACTCTATAAAGAAAGCAAACAAAATTCCAAATCCCAACCTTTTT  
CCTCCCTTTCTTCCCACAGTCTCCGCCGTTCAATCTGCACACCTTTTTTATTGTCACACTCTGCGATTCTTCT  
TTATCCCCAACTTGAAGAAAACCTAACAACCTTTTTCTTCAAGGAAAAAAGTTCAGTTTTTGTAGTCATTC  
TGCAGAATTTTCTTGAACAAAATGAAGTTGAAGAAACCCCATCTGGGTTTTGTGTGTTTCTTGATATTCTT  
GTCGTTTGTGTCTCTGTATACTCTCAGGGTAGTGCAGCAACAGATGCAGTAGTGATGCAAGAGTTGAA  
GAAGGGAACCAGCCCACCGAGTTCACTCAGCTGGGACGATCCAGACCCCTGTAATTGGGGTAAAGTTA  
AGTGTGCTAAAGATGGTCGTGTAAGTCAAGTAGGGAATCAAGGGCTAAAAGGTTCTCTACCAC  
CAAACATGAATAACCTGACGGAAGTGCAGGTGTTGAGGTTCAACACAATGCACTTACTGGGGCGATTC  
CGAGTTTTGCTGGGATGAACTCGTTGCAGAGCATTCTTCTTAAACAACAATGGGTTCACTTCAATTCCTAG  
CGACTTTTTTGTAGGGTATGACTAATTTACAAAATGTTAACTTGGATTCCAATTCCTTTTCGCCATGGTCTA  
TACCAGAGAGTTTGAAGATGCCACTTCTCTTCAAAGTTTCTCTGCTAATTCTGCTAATATTACTGGTAAA  
ATCCCTGATTTCTTTGGTGGAGATACCTTTGTTAGTTTAAACAGATTTGCATCTAGCCTTTAATAATTTGA  
GGGTCCCCTGCCCTCGAATTTTTCGGGTCTTCTATCCAAACGTTGTGGTTAAATGGTCTCCATAGTAAGT  
TGAATGGTTCAATAGATGTGGTACAGAACATGACCGCATTAAACCAACTCTGGTTTTTTCAGGCAATAAGTT  
TACAGGCCCTTTGCCTGATTTTTCGGGATTGACTCAGTTGAGAGAGTGCAATTTGAGAGACAATAGCTTC  
ACTGGTCCAGTGCCAGACTCATTGGTTAATCTTCTTCGTTAAAGATGGTTAATTTGACAAACAACCTTTTT  
TCAAGGGCCTACGCCAAAATTTCCATCTTCAGTGCTAGTGGATATGTTGGATAATACCAATAGTTTTTGT

TGTCACAGCCGGGTCCTTGTGACTCACAAGTTAATACGCTGTTGGCTGTGGCTAAGGATGTGGGGTATC  
CCACGGTGTGGCTGAGAATTGGAAGGGGAATGATCCTTGTCTTGGATTGGCATAAATTGTGATGGTG  
GGAACATTACAGTGCTGAATTTTCAGAAAATGGGACTTACTGGGACAATCTCTCCCACTACTCGTCCAT  
TACATCATTACAGAAGTTGATCCTAGCAAACAATTTTCTTACAGGAACTATTCCAAATGAGCTCGCATTGC  
TGCCAAACCTAAAGGAATTCGATGTTTCTAACAATCAAATTTACGGAAAAATCCCACCATTTAAGAGCAA  
TGTATTGGTTAAATATGATGGCAATGTCAATATTGGGAAAGATAATCCACCTCCAGTTGCACCGTCCGGA  
AGAACTCCTAGTTCACCCGATGGGGGTGGAGGTGGACAAACTCATGGGAATGGTAATAAAAAATCTTC  
AACTGGAGTTGTTGTGGGCTCAGTGATAGGTGGTGTGGTGGTGCAGTTGCTGGATTATTTGT  
GTTTTGTCTTTACAGGAGTAAGCGCATGCGGTCCGGTAGAGTTCAGAGTCCACACACAGTGGTTATTCAT  
CCTCATCATTGAGGATCTGACCAAGATGTTGTTAAGATCACAGTTGCTGGTTCAAGTGTCAATGGAGGG  
ACAACCGAAACGTACAGTTGTGGAAGCAGTGCACCTGGGGACTTGCACATTGTTGAGGCTGGTAACAT  
GGTGATTTCCATCCAAGTTTTGAGGAATGTCACGAACAATTCAGCGAGGAGAATATATTGGGGAGAG  
GTGGATTTGGAAGTGTGTTACAAGGGGGAGTTACATGATGGAACAAAAATTGCTGTTAAGAGGATGGAA  
TCTGGAGTTATGAGCGAGAAGGGGTTGGATGAGTTCACGTCTGAGATTGCGGTGCTTACTAAGGTCCGC  
CACAGGCATTTGGTGGCACTGCTAGGATATTGCTTGGATGGAAACGAGAGGTTACTTGTATATGAATAT  
ATGCCACAAGGGACAGTCAGCAGGTATCTTTTCAACTGGAAGGAAGAAGGGATAAATCCCCTCGAATG  
GACAAGGAGGCTAATCATTGCACTGGATGTTGCAAGGGGTGTTGAATATCTTCATGGTTTAGCTCAACA  
GAGCTTCATTCATAGAGATCTGAAGCCATCTAACATTCTTTTGGGAGATGATATGAGGGCTAAAGTTGCA  
GATTTTGGACTTGTTCGCCTTGCTCCTGAGGGAAAACTTCATTGGTTACTAGGTTGGCTGGAACTTTTG  
GCTATCTTGCACCAGAGTATGCAGGTAACTTCATCATGTGACCTGTTAATTTTCTTATATTTTTGCATAT  
ATTTGCTTACATAAATGGACGTATGTTAGTGTATATAAGGCCAATAATATTAGATTAATAGGCTTAACAG  
GTGACAGTGGAAGTAGGAACTGCTCCTCTCTTGTGTTAGTTGTTTTGGTCTGCATCTACAGACCATCAGG  
GAAGCCTATTCTAGCTGGATCTTTTGGAAAGTTGATAT

>M6-PGSC0003DMG400025922 M6 LRR-RLP

ATGAATTTGAAAAAACCCCATTTGAGTTTTGTGTGTTTGTGATACTCTTGTCCAATGTTGTCTCTGTATA  
CTCTCAGGGAAGTGCTACTACAGATGCTGAAGTGTGCAAGAATTGAAGAAACAAATAATAAATCCGAA  
TTCACTTAACTGGAACGATCCAGATCCCTGTAAATGGGATAAAGTTCAATGTACTAAGGATGGTCGGGT  
AATTAGGATTCAAATAGGGGATCAAGGCCTAAAAGTTCTCTCCCATCAAACATTAATACCCTTTCTGAA  
TTGCAAGTTTTTGAAGTTCAAAGAAATACATTCCTGGCCGCTCCCGAGTTTTTCTGGATTGAACTCATT

GCAGAGCATTCTTCTTAATGGCAATGGGTTCACTTCAATTCCTAATGACTTTTTTCAAGGTATGACTAATT  
TGCAAAGTGTTTACTTAGATTCCAATCCCTTTTCGTCATGGACTGTACCAGAAAGTCTGAAAAGTGCTACT  
TCTCTTCAAATTTTCTCCGCTTATTATGCTAATATTACTGGTAAAATCCCTGATTTCTTTGGTGGAATACA  
TTTTCTAGTTTAACTTTGCATTTGTCGTTAATAATTTGGAGGGTCTCTGCCCTCGAGCTTTTCGGGT  
TCTTCTATCCAATCGTTGTGGTTAAATGGTATTGAAGGTAAGTTGAATGGCTCAATAGATGTGATACAGA  
ATATGACCAGATTAACACAACCTCTGGTTTTCAAGCAATGAGTTTACAGGCCCTTGCCTGATTTTTCGGG  
CTTAACTCAGTTGCAAGATTGTAATTTGAGAGATAATAGATTCACAGGTCCAGTGCCAGACTCTTTGGTT  
AATCTTCCTTCGTTAAAAGTGGTTAATTTGACAAACAACATTTTGAAGGGCCTACGCCACAATTTCCATC  
TTCAGTGCTAGTGGATATGTTGGATAATACCAATAGTTTTTGTGTTGTCACAGCCTGGTCTTGTGACTCAA  
GGGTTAGTACACTGTTGGATGTGGTTAAGGATGTAGGGTATCCCACGGAGTTAGCTGAGAATTGGACG  
GGGAATGATCCTTGTTCGCGTTGGCTGGGCATAACTTGTGATGGTGGAAACATTACAGTGCTGAATTTT  
CAGAAAAGTGGACTTACTGGGACAATCTCTCCAACCTGTCGTGATTACGTCAATACAGAGGTTGATCC  
TAGCAGACAATTCTTACAGGAACTATTCCAAATGAGCTCACATTACTGCCAACTTAACGGAATTGGA  
TGTTTCTAACAATCAACTTTACGGAAAAATCCCACAATTTAAGAGCAGTGTAGTGGTTAAAACCTGAAGGC  
AACGTCAATATTGGGAAAGATAAGCCACCTACATCTGCAGCTGGAAACACGTTCAAACAATGTAG  
>M6-PGSC0003DMG400025926 M6 LRR-RLP

CCATTTTGCTTTGAAGAATATATTACAATAAGCAGCCTTGGGCCTTACCCACAGGTGGACTTACAAACAT  
GGTGGCCTTGGGTTGCATTCTTTTTCTTGTATCTTTCTTCTTTTTCTCCATCATATTTTGCATTATCT  
GATATTGAAGCTGCTTCTATTGCCCGTCGCCAACTTTAGGTAACAATGGCGAGCTTCAAATACATACG  
AGTCTAAAATGACCATTAACATGAAATTCGAAAATGCCAGGTTGAAGAAAGCTTATGTTGCTCTTCAGGC  
ATGGAAGAAAGCTATTTACTCTGATCCAACAACTTCACAGCTAATTGGGAGGGTAATAATGTATGTGC  
CTATAATGGTGTCTTTTGTGACAATGCTCTTGATGATCCCAACATCTCTGTTGTTGCTGGGATTGATCTTA  
ACCATGCAGACATAGCTGGACATCTCCCTGTGGAGCTTGGCCTCTTGGCTGATGTGAGTCTCATCCACAT  
TAATTCTAACCGATTTTGTGGAATCATTCCAAGAGCATTAAAATCTTACGCTTTTGGATGAGATTGATT  
TCAGCAACAATCGTTTCGTGGGGCCATTCCCTGATGTTGTTCTTGAGTTGCCTAACTCAACTATCTTGAT  
CTTAGGTTCAACAACCTTGAAGGTCAAGTGCCCTCTGCGCTATTTGAGAAGAATCTTGATGCAATATTGA  
TCAACAATAACCGATTCCATTCCACCATCCCTGAAAGCTTGGGCAATTCCAATGCTTCCGTGGTGGTATT  
GGCAAATAACAAGTTCTATGGTTGCATCCCGAGCAGTATTGGTAAAATGGGCAACTCATTAGATGAGCT  
TGTATTCACCAACAATGCGCTCTCTGGTTGTTTGCCTGAAGAGATTACTAAGCTCACGAGCCTAACACTG



TTCGATATTAGTGGAAATAAGTTTGTGGATCGTTACCTCAGGATTTGAAATCGATGCAGAAAGTGGAA  
ATCTTTGACATTGCATCGAACAAGTTCATGGGAAATGTTCCAAAGAACCTTTGCAAGTTGCCTAGTTTGA  
CGAATTCACATTCTCTAAGAACTACTTTGAGAGCATGGATGAAACATGTACGCCATCACAGTCGAAACA  
AGTTAAGATAGATGGTAATGAGAATTGTTTGGGGGAAGATCAGAGCAGAGGACGGAGAAAGAGTGT  
TTCCCAGTAGTGAGCAAGCCTGTTGATTGCAGTAAAGGTCATTGCGGAGTTTCAAGGGAAGGGCAGAG  
TCCAAAAGATCCACCTAAAACCCTGACTCCTTCAAACCAGCAACACCAACCACTACAAAACCAAAGCCA  
TCTCCACCACCAGTAGCCTCACCTCCTCCACCACCAGTGGCCTCACCTCCACCTCCAGTCCATTC  
ACCACCGCCATCGGTAGCATCACCTCCACCTCCAGTCCACTCACCACCACCACCGGTCTACTCACCTCCAC  
CTCCAGTCCAATCACCACCACCAGCAACACCAACCACTACAAAACCAAAGCCATCTCCACCACCACC  
AGTAGCCTCACCTCCTCCACCACCAAAAACCTTACCTCCACCACCACCAGTGGCCTCACCTCCACCTCCAG  
TCCATTCACCACAGCCACCGGTAGCATCACCTCCACCTCTAGTCCACTCACCACCACCTCCACCTCCAGTC  
CACTCACCACCACCACCACCGGTAGCATCACCTCCACCTCCAGTCCACTCACCACCACCACCAGTCCA  
ATCACCACCACCATCGGTAGCATCTCCTCCACCTCCAGTCCACTCACCACCACCTCCAGTCCAATCACCAC  
CACCACCGGTAGCATCACCTCCACCTCCAGTCCACTCACCACCACCACCACCGGTAGCCTCACCTCCACCT  
CCAGTCCAATCACCACCACCACCGGTAGCCTCACCTCCACCTCCCGTCCACTCACCACCACCACCGGTGTC  
CTCACCTCCACCTCCCGTCCACTCACCACCACCACCACCGGTAGCCTCACCTCCACCTCCAGTCCAATCAC  
CACCACCACCGGTAGCCTCACCTCCACCTCCCGTCCACTCACCACCACCACC

>M6-PGSC0003DMG400025939 M6 LRR-RLP

ACTAAGTAACAAAAAAATTCCAATTCCATGAAGATCTTTTATTCCCTCATTATTTTTCAATTCTCAACAA  
TATTAATTGCCAATTACTACCACCTTTACCAGCACCAATTTAACCTTCATAGACCAAAGTCTAGCTCTAA  
TATTTCCAATAATAAAAATTTCAAGAACACAATTAATCTTGATCCTTTTGGTGTCACAAAACTTGGACA  
GGCCCTGATATTTGCAATTATAAAGGCTTTTATTGTGATAATCCACCTAATAATTCATCAGCAATTTCTCT  
GCTTCTATAGATTTCAATGGATTTCAACTTAGTGACCTACATTAGATGGTTTCATTGATCAACTCCCTGA  
CTTAGCCATATTTGCTAATACCAACAACCTTTTCAGGCATAATTTCTTCGAAAATTTCAAATCTTCCATA  
TCTTTAAGAACTTGATCTTAGTAACAACCAATTCATCGGTTCAATTTCCCATGTCAATTCTCAATATCAAGAC  
TCTAACTTTCTTGGATATTCGTTACAATCTCTTGACAGGAATAATCCCACCTCAAATTTTCGTACAATATCT  
TGATGCATTTTTTCTTAACAATAACAATTTCAATCAAAAACCTCCAGACAACATTGGATCCACCTCTGCTTT  
TTATTTAACCTTAGCCAACAACAATTCGTTGGTCCAATCCCACGTAGCATTGGACAAGCTCCGAATTTAT  
TGAAATTTTTATTCTTGAACAACCTTGCTCACTGGTTGCATTCCTTATGAATTAGGCCTTTTGAAAAAGCA

ATTGTGATCGACATTGGATTTAACACATTAACACTGGTCCATTACCACGTTTCATTAGGGTGTTTGGAAAGTG  
TGGAACAATTGAATTTTGCTGGAAATTTGTTATATGGACAAGTTACAGAAGTGATATGTTCACTAAAAAA  
TTTAGTGAATTTACTTTGTCATATAACTATTTTACAAAAGTAGGGCCACTATGTAGAGAATTGATCGAG  
AATGGAGTTCTTAATGTTGAAAAAATTGTATTAATGGTCTTCCTAATCAGAGATCAATATTGGAGTGTG  
TATTATTTAGGATGCAAATTAATTGTGTCCATTACAGAAGAGCTTGAGGATCATACCTTGTAATATTTCT  
AATTTTAGTCCCATAGACCACTTAGACCAGAAAGACATTTGATTTCACTCTGCTTTGTCAAAACATAC  
AAAATTGTATTAATGAAACCTTTGTTTTAGTGTCTTCTTGATTTTTATTTTATTTTCTATGTTTTCTACCTGG  
TGTCCG

>M6-PGSC0003DMG400026064 M6 LRR-RLP

AAGCTTAGATCTCAGTGGATGTAATTTATGTGATAGCCAAGCTGCTGCTCTTATGAACTTAACCTCTCTAT  
TGGAECTGAACCTGAGCAGAAATAAGTTTATTTATTTCCCTGATGTCTTCAGGCGACTTTCTCACCTTCGA  
TATCTCAATATTACACACTGTCAGGAACTTAAGAACTGCCCGTACTTCCTAAGAGTATAGAGGAATTAT  
ATGTAGAAGATTTTTTGGCAAAGAAAGTATTGCAAAGCTACGGATGCACCCAAGGTTGAATTTGGTAT  
CATTACCAATTATAGTTTTGATCAACAATCTTATACAGAGGAGAGCAATGGTAGCTCAATTTAGATGA  
GATTCTCAGTTTGTCTTATCAAACAATATGGATGATGTGATCTTCCCACTCTTAACTCTGATCATAGGG  
TAACCTGTTCCATTGTCTTCTGAACGTGCAATCCACATGGTTTATGCATCAGAGTGTTGAGGAAAA  
GATCTCGTTCAAACCTGCCATTAATTGGTATAATGATAAGTTCAAGGGCTTTGCTATATGTTGTGTGACTC  
TCATGGGAGCAGGTGTCTGCAGTCTGATTCTAGGCTATCTGGGAAGTATGATTATGCTTTTATCAATGC  
CAAATTGATATGCAATGATCATTGAAAGACCTTAAAGTGATAGAGAAAGAATGTAAAGTGGGCACAGC  
ATCTAGAACATATGGCTGGTGTGTTTGCTTCGCCTACATACCATTGTATTCTTCACTGCAGGTTGGAGAC  
ATTAATCAGTATTGCCTATTTGAGGCATCTATCCATGGATGCATTGTGAGACAGTGGGGAGTTCATTTGA  
TCTATCAGGATAAATGAATATCTTTGAAGCGCAGACTCAGAGAGATTGTATCGAGTACTCCTAAGCTGA  
AAAAGAGGCTAAATTATGCTGGGATATTAAGGGGATTACCAAGAAATAGTTTAAGGTAACCTCGAAATAC  
CTCTTCTTTGTTACTAGAGTTTCATAATTTGAATATGGTTAGATTAACAAGTTTAAACTATAAGTTCGATT  
AGAAAAATATAAAAATCAATCAGATAACTTAAACTTAAATAGATAAAAATGGTTGGCATCAAGCCAA  
GCCAATGTCCCTAGCATAAAGTTCTTATTTTCTGGAAAAATTACATAAATGAATCTCTTTTATTTAATAAT  
AATTACCACTTTTAAATATACTTTTATTTTATTTACTATTTTGTCAACTTTTAGCAATACTTACTTAAACAAT  
TCTTGAATAATTTGTTCTTTTATATATATAATTAAGAATTTTCAACTTAGCAAAAATTGTTGTACCTGA  
TCGGGAACATCGCTCATTCCCTCTTCTACTATTCTTCTGCTCTTCTCTTTGTTTTATTTTAGGGTTTTGCCA

TTCTTTCTTCTTCAATTTTCAGCACAGTATTCTAATGGAAGAAGGCAAACGAAAATCGCCTAGTAGAAGT  
CCGCAGATACTTAGTGATGTTGATACTTCAAATCAAAAAGTTTATAGAAGGAGTCGGATGAGGGGTCAA  
ATTTGAGCTTCTACTGCTACCGACGAAGTTAAGGATGATCCCAATTTTAATTTGGGAATTTACAAGTATC  
AAGTGAGCAGAACAAGGAGGAGAGAAATGCATGTTAGGTAAATAAATGAGTTAAAGAGGTGAAAAAT  
GTGAAAAAAGTGAAAAAAGATGCGTTGATTTTGCATCTACATCGAAGAAAATCGTGGACAACGATGAC  
GATTTTGAGGATTTATCTCCTAAATTTGAGTCAAAAAAATTGAAAAATAAAGTTGTGTCGGAGTAGAAGA  
AGCAGTGAAGGATGCAAAAACGCAGATTCGATTGGCCAAAAATGTCATTCTACCGGAGAGTAGAGATC  
AGGTATGTGA

>M6-PGSC0003DMG400026160 M6 LRR-RLP

ATGGAAACAAGATCCGTTAAGAAAAAAGGCTTCTTGATGAAATCTACGCGAGTTTTTCATGTGGTGAA  
GACCGCATCAGTGATCTTCTGATGCGGTCAATCACCAAATCTTTTCTTCTTCCAATCAAATCCATCGCC  
AAACTTAGTGTACTTTCTAAGCGATGGAAGCACATGTGGCACACTTTCCAGATCTCGATTTTACAACAA  
TCAATGTCCCATCATCATCAGGTTATAATAACTCAATCTCAAAGTCAGCTCAAACGTTTACAAAAAATTC  
CATGCAAATTGTACTAGTGCTGGAGGTGCTGATTTTCATAGATCAAGTGTTATCTTTTCGCGAAAAAATT  
TAGGGATCAGGGTCTCCGTTTTCTGTCGAAATTTGAGTTTTTTCACATCTAAACGCCCTGATTCGTGGCGC  
TGTTAAGCACAATGTACAAGAACTTGACGTTGAAGTAGCCACTAATGATTATTTCAATTTCCAAGAAGT  
GCTATAAATAGTGACTCTTTAAGAGTTTTTAAATTAAGTCAAAATATCCAGGATTTAGGTTACCTCCTTC  
ATCAATTATGAAAAATGGGTTCAAAAATTTGTTACATTGTCACTTTCTGTGCTTATTATGTACGAACAAC  
CTTCGTTACTTGATTTATTCACGGAGACATCTTTCCCGTTGCTTAAGAAATTGAGTCTTGATGGTTGTACG  
GGGTTAACTTACTTACATGTAAGTTGTCGTGACTAGAGATTTTAAATCTTGAAAATTGTTTTCAATTGGA  
GAATTTAGATATAACGTGTTTCGAAATTGGAGAAATTGAGTGTCAACAGCTGCTTCGATTCGTATTCTAGT  
GGTACTGAGGTTAAGATTGTTGGTCCGAGGCTAAAAAGTATTGTTTGGTCAATAATACTATAACGGAT  
CAAAGTTGTTTGGAGAATTTAACTGTTTGATTGAGGCTTTTGTGGGTTTTTTGTTCTTCTTGAGGATCT  
TGGTGCAATGAAGCTTCGAAGTGTCAATGATTTCTGTCTGGCCTCTCTCATTACATTCTTTAGTTCTTG  
AAAATCAAAGTGTTGAGGTATATTTTTTATTCATTTACCAAGTTTTATTTGATGTGTGACATTTAATTTTTG  
CCTCTTCTATGGATCTAGCTATATGTGTGACATTTAATGTTGTCTCATAACTTGGTGTGTTGTCAACGGAAT  
TGAGTAACTCGGCCATCAAGACTTAAGCTATTCAGATTTGAGTCTTGATTTTTTCATATGTTTTTAGTTCA  
GTTCAATTGACTACTAGATATTCTTGTAAATATTAGTAATTGATTATTGGACCAAATGTTGTTGTTACA  
TTTACCTTAGGACACGTTTTGTTCTCTACCATGATTTGAATTCTGATCTCCTTGTTATTTTGTAGCCATTAT

CCTATAAATATTTATTGATTATTAGACCAAATGTCCTTGTTACATTTACATTAGACCTCTTTTTGCTTTCTA  
CCAAGATTATATTTGAATTCTAATCTCCCGTGATCTCCTTATTTTGCTAGATATAATCCTATAAATATTTAT  
TGATTATTGAACCAAATTGTTCTAGTTACATTTACATTAGGCCATTTTGCTCTCCACAAGGATTGAATTC  
TAATCTCCCATGAT

>M6-PGSC0003DMG400026231 M6 LRR-RLP

TTCTCAAATTTTCAGTACCAACTCTTTTTTAATTCAAACATGGGCTACATGCAACTCTCAGCTGTGCTCT  
TAATTGTTTTCTCTGTCAAATTGCTTTTTCTTCATCTTGTGCCCTAAAGATCAAAGCATTTCCCTTCTAAA  
TTTCAAGAAATCACTTACTATTGATCCCTCATATGATATTTGTCATTACAATTTTCAAATGAGTTCATG  
GAATACGAGCAGTGATTGCTGCTTATGGGATGGGGTAACATGCGATGAGATGAGTGTCCATGTTATTGA  
GCTTGACATCAGTTGCAGTCAACTGTTGGAGTGATTGATTCCAATAGTAGCTTATTCCAACCTCTCATC  
TAAAAAGCTCATTCTTTCTATGAATGACTTCTTCTTCACACATTTACCTGCATTTGGAAGGTTTTCAA  
GGTTGACCCATCTTCATCTTTCTGACTCGCATTCTCAGGTAAAATTCCTTCTGAAATCTTTCCCTGTCAA  
ATCTCACTCGCATAGAGTCCTTATACCTTAGAGGAACTCCCTGAATGGAACAATACCATCAGGTATGTT  
CTCCCTCCATCACTAATAGAATTAGACTTGAGTAATAACCAATTTTCTGGTCATCTTGAGGATTTCAAGT  
CCAATCACTAAGATCTATTGATTTAAACAATAATCAGCTGCAAGGCCATCTTCCAAGTCAATTCAAAAC  
CTTGGAACCTAACGTGGCTTGATCTTTCATCAATAATTTTAGTGCGATGTGGATGTCAGCTTATTTTC  
AAACATAAAAAATCTTCAGGGTCTTGATCTTTCATATAATCGTTTCTCATTAAACCAATGAGAACAGGGCT  
AATTTTACTTTGCCAGAATCTTTTTAGTTTGCGATTGGCCGCATGTGAAGTAAAAGAATTGGAGTTTCT  
AAGACCAGTAAAGAACTTTGGGACTTGAATCTTTCGAATAATAAGATTCAGGGAAGAATTCCAGATTG  
GGCATGGCCTATATGGCTTAACTTGACCGTCTTAATTTGTCCCACAATATGTTGACAGATATGAACTCA  
ACAAATATAAACTCAATTTCTTATCCCTCTCTATATATCATTGATTTGCGGTCCAATTTTCTTCAAGGGCCA  
CTTCTATTCTACCAAATTCCACACAATACTTGTTTCATGTCAAACAATAATCTTAGTGAGGAAATTCCTTCA  
TCTATTTGCAATTTGAGATCACTAAAAGTCCTAGATTTGGCGAAAAACAACCTTGATGGGAGAGATACCAC  
AATGCTTGGGTAATGTCAGTAGTACCTCGAGGTTTTTGATATGCATCAGAACAATCTGTCTGGGACAAT  
TCCAACAACTTTTGGCATTGGAAGTTTACAAGTTAGGAGCCTCAACTGCATGACAATAAGCTACAGGG  
GAACTCCCACGATCTTAGCCAATTGCAAGGAGTTGCAAGTCTTGATCTAGGAAATAATCACCTCAAC  
GACACATTTCCAATGTGGTTGGCAACTCTACCAAAGCTGCAAGTTTTAAGTTTGAGATCAAACAGATTGC  
ATGGTCCCATCGGAACATCAAGGATGAGGAACTGTTTCCTGAGCTTCGAATCTTAGATGTCGCTTACAA  
TGCCTTAACAGAAACCTTGCCAACAAGTTTGTTC AACATTTGAAAGCCATGAGGACAATTAATCGAACA

ATGAAGGCACCGGTATACCTTGGAGACGAGTACTACCAAGATTCTGTAACAATTGTATCCAAGGGAATG  
ATGCTTGAACCTTGTTAGAATTTTGACGATTTACACAGCTATCGATCTTTCAAGTAATAAATTCAGAGGACC  
AATTCCAAGTGTTCATGGGAGATTTTCATTGCACTTCACGTGTTAACTTATCTCATAATGGATTGCAAGGT  
GAAATACCTCCATCACTCGGAGATTTATCTTCAGTTGAATCATTGGACCTATCAAGAAATCAACTTTCGG  
GAGAGATACCACAACAACTGGTTTCTTACGTCTCTTGC GTTCTTAAATCTCTCCCACAATCATCTCCAA  
GGATGCATCCCTCAAGGACCTCAAGTTCACACTTTTGAGAACAGTTCATTTGCAGGCAATGACGGATTAC  
GTGGATTACCAATTCGAAAGGCTGTGGTAATGATGGTGTAAATAGACACAAATTACACAACATCCTCTCC  
AGATGAAGAAAGCAATCCGAATTTCTGGATGATTTTTGGAAAGCTGCTCTTATGGGCTACGGAAGTGG  
ACTATGTATTGGATTATCCATAATATATTTTATAATTTCAACTGGAAAGCCGAAATGGCTTGCAAAAATC  
ATTTTAAAGTTGGAGCATAAACTTATGATGAGATGGAAAAAGATACAGCGATGGCATAGGAATCACAG  
AAGAAATAATCGCTTCTAAGATAAGTTAAGGTATTCAAGTTAACTTTACTGATCTTTTATTTTTTATA  
CTTTGTTATATAAACTACTAATCAATATGCTCTATCCTAAGCATATTTGATTTTGAATGGTTCTGCCTTT  
GTTGATGTCTCGAGCTTGA

>M6-PGSC0003DMG400026748 M6 LRR-RLP

GATTGGTAAGGTAAGGACTAGCCCCCTGTTTGTACTTATCCCTATTGAGATTTTTATTTCTAATAAAAG  
GCCGCTAGACACTTTGTCTAGTGGTAAATTTGCCAAAACAAATAAATCCTTGAAAGCATCGACTTATTAG  
AATGGCAACATAAAGCACATGTGTATTGGTGGATATGTTTGAAGTTGGCTTGAATACCGTTATAACAAT  
ACATAAATGTACCATTTAACTGGCATCTATGCCCTCCAAGTGAACAAGTAAACACTTAACTTGTGTAAA  
GTTGAACAAGTACATATACTGTACACATCTTATGTGGAGCTCTATGTAGCAATTTACATCCTACGTGGCA  
TCCTACGTGTATTATACCACATAGGACACGTATGTCTACTTGTTCATGTTATACAAGTTTATGTGTATAC  
TTGTGCACACCCAAAATTGAAGGGCGTAGATGCCAGCTGAGCCCAAGTTAAAGAACACATTTATGTATT  
ATGCCTTAAAAAAGTGTGATTACGTGTTTGAATAAAAGAATTGAAATTTATAATAAATATTTATGTATT  
GGTAAGATGTTGTATTTCGTAAATTGTTCTTTTATTAATAAATAACTAACTAAATAACCTTAAATTGTCTTTT  
TTAGAAAGTGTAATCTAAATGTAACTTGTAAAAAAAAGAGGAACACTATATATCTTAGTGAAGAG  
GAAGTTACGAGACTTATATTGAAAAAGTAGTTTTGAGAATTTAAAAAAAATGAAGGACAAAATAGTA  
AGAGACCGGGTCAAATCAAGAGTGTTAACCCAAAAATTAATAAGTTCGGAATAATCAACTTATGACTTTT  
GATTGGTCTTAGTGGTTTATAAGTACTTTGAATGTTTACTAATTAATATGTACGTAAGCTAAAAATATTGT  
TTATAAGTTAGTTTAAACGAGCCTATAAGCTTAGTCAAATACCTTCAAATATCTCACTTAATTTTGTACTTT  
TTATCTCTCAAGTGAGAAGCGATAATGATCAAGAACTCACAAGTGATTTTTTTTTTTTGTAAAGGTTCATAC

ATAAATTATCAGGTGTTTGTGTTTTCTATCTGAATTATCACTATCATTAACTCTTCTTTCTTTAAAGGGAAA  
AGACCCAACATATGTCATTGAACTTTGAGAAAAAACTCATAATCTATTCCATCCGTTTAGAAAATTAGTTT  
ATCTATGTCATTTTCATTTGAGAAAATGTTTCATCCATGTCATTGTTAGTTAATTAATAAATAGCTTTAATTTT  
GCTCAGTTATACAGCGTTTACTAGCTAGCTATTCATGTCTGAAATTAATACACAATTTGTTTTACAATTA  
AAAATCAACGTAACATAACTTGTATAAATTATGAAGAAATTTGTACATAATGTTATCTCAAATGGACTAT  
CAATGCAATTATAGAAAATATAATAACAAAAGGATAATGACATTTGAAAAAAGGTAATTAAGAAATGA  
TGCATAAATCAGAGGTCAAAAATATGATAGATACTAATAATAATAATGAGATATAACTATATTAGGAAA  
ACAAGTTTAGCAGAGGTCCTTTTCCAAGGTAGGTCCTACTTTTCATCACACAATTCTAGAGAATATGAAA  
GCAAGACTATTTACAAAGAATTAAGCACACAATAAATAAAGCAAACTTGGTTTACTTGCCATGTCTTAA  
TTGAGATGTGAAAGACTTGATTGAATGGAAAAATCTCCTAAAAAGAGATCTTATTGCTATTCAAAGTCTC  
AAAACCACAGGTTATTAGTACTAATCTTGCACTAATGGACAAAACCTTCACTATTTTATTCTTAACAACAC  
TCTTGTTGCTTCACTATGTTATGGCCCAAACCAACATTACGACTGATCAATTAGCTCTTCTCTTTTTAAAT  
CCCAAATTAGTTCCGACCCCTTTCCTTCTTGAATGAAAGTTGGTCTCCTGCTATTTCTGTTTGCCGTTGG  
GTTGGAGTCATTTGTGGTTCTCGTCACCAGCGAGTGAAGTCGTTGAAGCTTTCCAACCTTGGCTCTTACAG  
GCAGAATTCCTGTGATTTTGGAAACCTCACATTTCTTGTCTTCTTGACTTGGGAAGCAACCATTTCCAT  
GGAAATTTGCCTCAAGAAATGGCACATTTGCGTAGGCTTAAGTTTCTTGATTTAAGTTTAAACAGCTTCA  
GAGGGGAAATTCCTTCTTGGTTTGGGTTTTTACACCAACTTCAAGTTGTAAACCTTAGGAGTAACAGTTT  
TACTGGTTCCATTCTCCGTCCTCTCGAATGCCTCAAGGTTGGAGATTTTAGAAAATATCTACCAATTTAC  
TTGAGGGAAACATCCCGAAGAGTTTGGCAATCTTCACAACCTGAAATCGTTGTCCATAGAACAAAATC  
AGCTTACAGGTTCTATACCATTACAATATTCAATATTTCTAGAATTGAAGTCATTAGATTTTCAGATAAT  
AGCCTATCAGGAGATCTTCCAATGGTTTATGCAATGATCTCCAATACTCAAAGAGCTTTATCTATCCGG  
AAACAAGCTTGATGGTCATATGCCTACAAGCTTGTCAAATTGTTACGACTTCAAATACTGTCTCTATCCC  
AAAATGATTTTGTGACCAATACATAATGAAATTGGAAGATTGAGTAACTTGCAGACATTAGAAATCG  
GATACAACCATTTACAGGTATATATGTTTCATATTCTTATGAATGCTACTACTACTATATATTGTATCTAA  
TTACCTCACATCTTTCTTTATTACACATTGAATGCAGGTATAATTCCACAAGAAATTGGAAATCTTGTTAA  
TTTGGTGAATTAGACATGGGGGAAATCAGATTACTGGCTCTATCCCGATCTCTGTATTCAATAGCTCA  
TACTGCAATCATTGTTACTGTGGGGCAACAATCTTAGTGGATTCGTACCACAGGAGATTGGCAACTTAA  
CCAAGATGCAGTTCTTATATCTTAACCAAAATAGGCTTACTGGTACGTATTCAAAGTTATAGTGATCTGTA  
TTGAGCTAGTTAGTTAACTCATTCTTTCTTACGTGATGACAGGTGAAATACCCAAAGATACAAGAAAT

CTCGTTGAGTTAAAGGAATTTGATGTTGGGTTTAATAGTTTTAGTGGTTCACCTCCAACGGAGATGTTCA  
ACATATCAGCACTGAGAATAATGTCTCCTTCATTCAATAATATATCAGCAACTCTACCACCAAACACAGGT  
TCTACCTTATCCAACATTGAAGAGCTTTATATGGGTCACTTAACCAATCTTGTTGGGACTATTCCTCATTCT  
ATCTCCAATTGTTCAAAGCTTAGTAACTAGATATTTAGGTAACAACTCACTGGCTTGATTCCCAATTC  
TCTTGGATATTTGACTCATCTACACATCCTAAACATGGAGAGAAACAATTTAACCAGCGACTCCTCGTTA  
AGCTTCCTCACTTCCTTAACCAATTGCAGAAGATTAACAGTTCCTTCTCTATCTTTCAACCCTCTAAATGGC  
ATGCTGCCGGTCTCCGTAGGGAACCTTCTCAAATCTCTGTAACTTTATGCCGCTGCTTGCAAGATTAA  
CGGCCAGATTCCAAATGAAGTTGGAACTTAACCAATTTAATAGACCTTGATCTTTCTAATAATAACTTG  
ATTGGATCAATTCCTACCTCACTAGTAACTTAAGAACTCCAACGCTTGACTTGAACAAAAACAACT  
TACAGGATTTATTGGAGATCATATATGTAAATTGCAGCATTGGGTGTTATTTCTTGGGTCAAATCAA  
CTTTCAGGATCTCTTCTAATTGTTTAGGGAATGTTACTTCCCTTAGAGAGATACATATAAGTTCCAATAA  
ATTGAGTTCCAATATACCACCAAGCTTAGGAAATCTAAAGATCTAATGAAGCTTGACTTATCATCAAAC  
AACATGGTTGGCTTTTTACTTCCGAAATTGGAAATCTAAAAGCGGCGACATATATCGATCTGTCCATGA  
ATCAATTCAGAAAAGGAATTCCTACAGAAATTGGAGGGTTGCAAATCTAGTGCATCTTTCTTTGAGACA  
CAACAAGTTGCAAGGATCTATACCTGACTCAATCAGCAACATGGTAAGTTTGGAAATTTCTAGACATTTCT  
CATAATAATATCTTGGGAACTATTCCAATGTCTTTGGAGAACTACAATACCTGAGCGTTTCAATGTTTC  
ATTCACAAGTTGCACGGTGAAATACCCTCGGGGGTCTTTCAAGAACCTCTCGAGTCAATTTTTCATC  
AACAAATGAAGCATTGTGTGTTTGTCAAGGTTAATGTCCCACCATGCCCCACATCATCAATGCATAGAT  
CAAATAGGAAAAAATTGCTAGTTCTATTTCTTTGCTAGGAATAGCACTTGATTTGTTCTATCGCCTTT  
GTGTTCTATGGATAAGGTATAGAAGAGGTTAAAAGAACTCCTCAACAAGCTGATTCATTGCCTATGGCA  
ACAACGGAAAGAATTTCACTATGAACAGCTCCAAGCAACTGATTCCTTAGCGAGAGTACTAATCTGA  
TTGGTTCTGGAAGTTTTGGCTCTGTTTACAAAGGCGTTCTCAGGAGTGGGACTGTCATTGCAGTTAAAGT  
GTTCAATCTGCAACTGGAAGCAGCATTCAAGAGTTT

>M6-PGSC0003DMG400026750 M6 LRR-RLP

GTCTCTTTTTCACTATCTTCTGTACACAACAACTTCAATACACCTCTGCTCTGTAATTGCAAACCATTTTC  
CATTTTTCTTCAACCAAAAACAACAACAATGGCTTCTTCTTCTCCAGATCCATTTTTCTCCTCATATTTCTC  
ACTTTTTCTCACCATTCCACTTCAAACCTCACTTTCTTCTTCTCCCATCACCCCTTTCTTCTCCATCTCC  
AAAACCCTCTCCTATTTCAACTCCACGAACTCATTATCTTCTATCTATTCTTGACCCAAATCAGCTCAAAGC  
TCTACAATCACTCAACATCCCAACAGGCAAAACCCCATGTTCCCATCTCACAATACTACCACTATTTGTG

ATTCTTCAACCCCATTTAGTCACATTGTGTCATTAACTTCATTAAGTCTCAGATGATGTTGCATTATCAC  
TACTGCTTTGAAATCATTGTCTACAGTGAAGGATTTGGGGTTTTACAATTGCCCATTTACCTATTAGG  
TTACCTTCTCAGCTTGCTTTGAATCTGAAATCTTTTACTTGTGTTAGTAGTTTGAAGAAATTAAGTGGAGT  
TTGGCTTAGCAAATTGGTGAATGTTACTGATTTAACTGTTTCTCATGTTTCGATTGTTGCTAGTGGTCCAT  
CTATAATCATGAATAGTATAAAGAATTTGCACAGTGTACGATTTGGAATGCTAATCTTACTGGTACTTG  
CCTAACATTGGCATTGGAATCTTAGTTATGTTGATTTGCTGGTAATAAACTGAAAGGGAGAATACCCA  
GCTCGTTAACTGAGCTGGAGAATCTTGTTACCTCAATTTGTCTCGAATTCACCTAATGGAACGATCCCC  
GCTTCGTTTGGTGATTTGTCTTCTTGCAAATGTGTCTTTGGCTTCGAATTCGTTGTCTGGATCTGTTCCG  
GATTCGTTTGTGCTATTCCCGGATTAGTTCATCTTGATTTGGGGTCTAATCAGCTCAATGGGACTATTCC  
TAAGTTCATTTCTGATATGAAGGGATTGAAGTATTTGAATCTTGAGAGGAATAATTTTACGGGGTTTTA  
CCTTTAATGCTTCGTTTATAAAGAAATTGGCTGTGTTGAAGGTGGGAGGAAATTCGAATCTTTGTTATA  
ATCATTGACATTGTCTTCTAAAGTGAAGCTTGGGATTGCTCCTTGATGATAAACATGGGTTGCCTGTGTC  
ACCTCCAGCATCGAAGGATATAAGTTCGGATGATACCGATGATTCTGATGATTATGCTGATGATGAGAG  
TCAGCACCAGGAACATAGTCATGGACCAAGTAAGGTTGTTCTTGGTATTTCCATTGCACCTTTCCTCGATT  
GTATTCATAATTATTTTCTTGATTCTGTTGGCTAAATGTTGTAAATGAGCATAAAAATGAAATCTTGGTTC  
GTTTAGTTTAGGAAATTTCTTAATTGGATTATGAAATTTGTTTAGTTAATTATACATTTGTATCATGTTAGA  
AGTAGAAGAGGTGGCTACTTTATTTGGTGTGATTCTTTTGAACAAGTTAAATTGCTGGAGGAAGTAGGC  
GGCTAAATTGATCTTTAAGTGTATGATGGGAGAGATTGCCTATTAATGAAATTTTCTTTTATGTATGTATT  
TTCGATTGACGGATTGAGGTACATGGTTTTGATTTCTGATATATGGTGATATCTCAATTGCTTACGACAT  
TTTGTGTTTGGATTGAGCATTGCTTCATTCATTTGTTGATTGACAATATGAAAGATTCCTTTATTTTTCA  
TGTGTTGGTTACGAGTCATGTCTATGGATGAGATAATCTATGTCGTGTGGATCCTTCATTTGTCTTGATGT  
ACCCCGTGTCCAATGGGAATGTGGTAAGGGTTAGGGTACTTTGCTGGAAAAGGTTGATATACCCATACC  
GGGTGCTTCAAAGAACTGTACAGAACACATATCCGTAATAGAGTCCAAGCAACATAATGGCAAGATG  
AAGTATCTACCGAATTAGCTCAATAGTCTATCGTCCCAGTTTTAACTGCAAAGATCAGTGTTTTCGCTGTT  
ACTTGCATGATTTTTCGTAGTAAGTCTTTTGTCTTCTTTGTGCTCTACCGGACTTTCCAGTATTCCTCGTA  
TGCCCTGTGATGCCAGTGTTTTTATGAGATCTAACATAATGCTGTGAAAACAATATTCCATTGTAGACAA  
AAATGTTCAATTATCTGGCACTTCATTTCAATTTGACAGAAGAAGCTCAATTAGTCCCCTCCTTAGCTGTTTT  
GCTCAGATTCTTCATAAATATGTTGGGGTTATGTGTTGGATCCTCCAAAGCTATGCTTTTTTGGAGGATCT  
TACACGGGTGGGGCAACACTTTTGGAGGGTCCGAGTAACAAAGCTCCTTAGTCCCCTACCTGATCACCA



CAAAGGATAACTAGGGGGTGCTTCCACACTGGGTTTTCTTTTCATTTTTAAATGCTTATTGTGATAATAGA  
CTGGAGAATTCATATAGTCGATTCTAACTTGCTTGGGACAGAGGCACGAGTTATTTTTTTTATTGTCGTTT  
TAGTTATAACGTCTATTGTTTTGGCC

>M6-PGSC0003DMG400026840 M6 LRR-RLP

ATATACGTGTAGGGGGAGTTACTTATTTACCGAGTCCTAGAATAGATAACAATCTTGTGATAGGGATGC  
CAAATCTAGAGGAATTTTTGGTCTTAGTTACTCTAGTTGTACAAATGAAGTCTTTTCTAGGATCCCCAAT  
TTAAAGAGATTGATCATTCTGCACATTTTAGCATACTAAACAATATTCTGTATCGTCCCTTCGATATGTC  
CAGCTTGACAAACTTGAGACATTCAAGTTTTACTGGAAAGATTATTTGGAAGACCCCATCAAGAAATTT  
GTTTTTCCAGAATCACTTAGAAGAGTGTCTTTAACTTGGTGTGTAAGTTTATTTGGGAAGAGATATCATC  
AACTTTTATCATGTTGCCACATCTGAAGAGCTCAAATTAATATTGTCGAGCCGAAGATGATGTATGG  
AGATTGAGTGACAAAGACATATTCAGAAGCTTGAAGTTGTTGTTACTGAGCGAGCTAAATCTTAAGGGT  
TGGGAAGCAAGCAGCGATAACTTCCCTAATCTAAAACGCCTTGTTCTGAAGAAATGCAAGGACCTGCAA  
GAAATTCCAACAGATTTTTGGGGAAATTTGACTTTGGAATCGATTGAGTTACATGATTGCAGCACTACTT  
CTGAGGAATCTGCCAGAAATATCGAACAAGAACAAGAGGTCATGGGAAATAATATCCTTAAGGTCTACA  
TCCATAACAGCGACAGTATCCATAACAGCGACAGTAAGTTTAATTCTCTCTGAAAAGTTCTTCGATTCTTC  
ACATTATTTAAAACCTCGTTTTTATTAAATCATACTTCTTTGAAATTAAGATGATGACTTGTACTTTTTATCT  
TGCATATGCAGGTAATTGAAGCTTATTTTGAGGGATCATCTAATGCTATCTTCCGAATTCAGAACCTTGTA  
CTTCATATTTTTGTTTTTATATTCTGATGGTTTTTTAATTCATGTTTTAGGAATAAGCATGTTTAATACATG  
TATCGGCCAATTGTGTTTTTTTATTTATTTTTTAAACGGTAACTGTTGATGTA

>M6-PGSC0003DMG400027407 M6 LRR-RLP

ATGGATATTGGCTTAGCTGTTGGTGGTGCCTTTCTCTTTCAGCTTTGAATGTTCTTTGATAGGCTTGC  
TCCTAACGGTGAGCTGATGAAGATGTTTCAGAGGGACAAACATGATGTTCCGGCTTTTAAAGAAGCTGAG  
GATGACTTTGCTTGCTCTTCAGGCTGTGCTAAGTGATGCAGAGAACAAGCAGACATCAAATCCATATGT  
GAGTCAGTGGCTTAGTGAGTTTCGAGATGCTGTGGATGGTGCTGAAAATTAATAGAAGAAGTCAACTA  
TGAAGCTCTGAGACTTAAGGTGGAAGGTCAGCATCAAATCTCGCAGAAACAATCACCAAGCAAGTTAT  
TACCATAAAGGAGAAGTTGGAAGACACCATTGAAACATTGGAGGAGTTGCAAAGCAAATTGGTCTCCT  
TGATCTAACAAAGTATCTTGATTCAGGTAAACAAGAAAAAAGGACATTTTCACTTCTGTGGTTGATGAA  
TCTGATATCTTTGGTAGGCAGAATGAAATAGAGGAATTGATTGACCGTTTATTGTCAGAGGATGCAAAT  
GGAAAAAATCTTACTGTAGTTCCTATTGTAGGAATGGGGGGTGTGGCAAGACAACACTTGCTAAAGCT

GTTTACAATGATGAGAAAGTGAAAAACCATTTAATTTGAAAGCTTGGTTTTGTGTATCTGAACCATTTG  
ACGCTCTCAGAATAACAAAAGGGTACTTCAAGAAATTGGCTCATTTGACTCGAAGGCTGATAGCAATCT  
TAATCAGCTACATGTCAAATTGAAGGAAATCCTAAAGGGAAAAAGGTTTCTTATTGTCCTAGATGATATG  
TGGAATGATAACTATAATGAGTGGGATGACTTGAGAAATCTTTTTGTAAAAGGAGATGTAGGAAGTAA  
GATCATTGTGACAACACGTAAAGAAAGTGTTGCCTTGGTGATGGGTAAGGAGCAAATTAGCATGGGAA  
TTTTGTCTAGTGAAGTTTCTTGGTCTTTATTTAAAAGACATGCATTTGAATACATGGATCCTGAGGAACAA  
CGAGAACTTAAAAAGGTCGGAACAAATTGTAGCTAAGTGCAAAGGACTGCCTTTAGCTCTGAAGACG  
CTCGCTGGCATGTTACGCTCCAAATCAGAGGTTGAAGAGTGGAACGTATTTTGAGAAGTGAAATGTGG  
GAGCTGCCAGACAATGACATATTACCAGCGTTGATGTTGAGCTACAATGATCTTCCCGCACATTTAAAGC  
AATGTTTTTCTTATTGTGCAATCTTTCCCAAAGATTATCCATTTCCGAAAGAACAAGTCATTCAACTGTGG  
ATTGCTAATGGTCTATTAAAGGGGTTGCAAAAAGATGAAACAATTGAAGACTTAGGCAACCTATACTTTC  
TCGAGTTGAGATCAAGATCACTTTTCGAAAGGGTCCGGGAGTCTTCTAAAAGGAATGAAGAGGAATTCT  
TAATGCATGACCTTATCAATGATCTGGCCCAAGTTGCATCTTCAAACTTTGCATCAGGTTGGAAGATAA  
CGAAGGATCTCATATGTTGGAAAAATGTCGACACCTATCATATTCATTGGGAGATGGTGTCTTTGAGAA  
GTTGAAACCACTCTACAAATCAAAGCAGCTGAGGACATTGCTTCCAATCAATATCCAGTGTGGGTACTCA  
TTTCCTTTAAGCAAGAGGGTGTGTATAACATATTGCCAAGACTAACATCCTTAAGGGCTTTATCATTGTC  
TCATTATCGGATTAAGGAGTTGCCGAATGACTTGTTTATCACATTA AAACTCCTAAGAATTTTGGACCTT  
CTCAGACGGCGATAAGAAAGTTACCAGATTCCATATGTGCATTGTATAACTTGGAGATACTCCTCTTGTC  
TTCTTGATATATCTTGAGGAGTTACCGCAGCATATGGAAAAGTTGATCAACTTGCCTCACCTTGACT  
ACTGGCACTTCTCTCTTGAAGATGCCACTACATCCAAGCAAGTTGAAAAACCTCCATGTGCTAGTAGGAT  
TTAAGTTTATTCTAGGTGGCTGCAATGATTTGAGAATGGTAGATTTAGGTGAACTACGCAATTTGCATGG  
ATCTATATCAGTTCTAGAGTTGCAAAATGTGGTTGATAGAAGGGAAGCTCTGAACGCAAACATGATGAA  
AAAGGAACATGTTGAGATGTTGTCGTTGGAGTGGAGTGAGAGTATTGCTGACAGTTCTCAAACCTGAAG  
GAGACATACTCGATAAACTACAACCAAATACAACATAAAGGAACTGGAAATCGCTGGATATAGAGGG  
ACAAAATTTCCGAATTGGATGGCTGATCATTCTTCTTAAGCTGGTGGGAGTGTCTCTTAGCAATTGCA  
ACAACTGTGCTTCTTCCAGCACTAGGACAACCTCCTTCTTGA AATTCCTTACCGTTAGAGGGATGCAT  
CGAATAACAGAAGTGAGTGAAGAGTTCTACGGTACGTTGTCATCCAAAAAGCCATTTAACTCTCTTGAG  
AAGCTTGAATTTGCAGAGATGCCGGAGTGGAAAGCAGTGGCATGTACTGGGGAAGGGAGAGTTCCCTGC  
ACTTCATGACTTCTTAATTGAAGATTGCCCAAGCTGATTGGGAAGTTGCCTGAAAAACTTTGCTCTCTG

GGAGGATTGAGAATTTCAAATGTCCTGAACTCAGTCCGGAGGCACCTATCCAACCTTTCAAATTTGAAA  
GAGTTTAAAGTTGTAGGTTCTCCTAAAGTTGGAGTTCTTTTTGATGATGCTCAGCTGTTTACATCTCAACT  
TCAGGGAATGAAACAGATTGTTGAATTATGTATTCATGATTGTCACCTCTTACCTTCTTACCAATTAGCA  
TTCTTCCGAGTACCTTGAAGAAAATAGAGATATATCATTGCAGGAACTGAAATTGGAGGCGTCAATGA  
TTTCTAGAGGGGATTGTAACATGTTTCTGGAGAATTTGGTAATATATGGATGTGATTCTATAGATGATAT  
ATCACCAGAGTTTGTCCCAAGATCACACTATTTGAGTGTAACAGTTGCCCAACCTAACTAGGCTTTTG  
ATTCTACTGAGACTGAAAACTCTATATTTGGCATTGTAAGAATCTTGAATACTTTTTCAGTGGCATCTG  
GAACTCAGACAATGTTGCGTAATTTGAGTATTCGTGACTGTGAGAAGCTGAAGTGGCTGCCAGAATGTA  
TGCAGGAACTCATTCCATCTCTTAAGGAACTAGAACTATGGTTTTGTACAGAAATAGTGTCCTTTCCGGA  
AGGAGGATTGCCCTTCAATTTACAAGTCTTCGGATCCACTATTGTAAAAAACTGGTGAATGCGCGAAA  
GGGGTGGCATTACAGAGACTCCCCTGTCTCAGAGAGTTAACCATCTTACATGATGGCAGTGACCTTGCT  
GGTGAAAACTGGGAGTTGCCTTGCTCTATTCGAAGGCTTACCATATCCAATCTGAAAACATTAAGCAGCC  
AACTTTTCAAAGTCTTACCTCCCTTGAATATTTATCTACTGGTAACTCACTTCAAATTCAGTCACTGCTGG  
AAGAAGGGCTTCCCACCTCTCTTTCTCGTCTAACGTTATTTGGCAATCATGAGCTCCATTCCCTACCGATT  
GAAGGTCTACGACAACCTCACTTCACTTCGGGATCTATTCATCTCTTCTGTGATCAACTCCAATCTGTTCC  
AGAATCAGCACTGCCCTCCTCCCTCTCTGAGCTGACCATTGAGAATTGCCATAAACTCCAATACCTTCCGG  
TAAAAGGGATGCCACTTCAATCTTCACTATCTATTTACGACTGTCCATTGCTCAAACCACTCCTTGAA  
TTTGACAAAGGAGAATACTGGCCAAAAATTGCTCATATTTCCACCATAAATATTGATGGGGAATACCAAT  
AA

>M6-PGSC0003DMG400027410 M6 LRR-RLP

ATGCATCGAATAACAGAAGTGAGTGAAGAGTTCTACGGTACGTTGTCATCCAAAAAGCCATTTAACTCTC  
TTGAGAAGCTTGAATTTGCAGAGATGCCGGAGTGGAAGCAGTGGCATGTACTGGGGAAGGGAGAGTT  
CCCTGCACTTCATGACTTCTTAATTGAAGATTGCCCAAGCTGATTGGGAAGTTGCCTGAAAACTTTGC  
TCTCTGGGAGGATTGAGAATTTCAAATGTCCTGAACTCAGTCCGGAGGCACCTATCCAACCTTTCAAATT  
TGAAAGAGTTTAAAGTTGTAGGTTCTCCTAAAGTTGGAGTTCTTTTTGATGATGCTCAGCTGTTTACATCT  
CAACTTCAGGGAATGAAACAGATTGTTGAATTATGTATTCATGATTGTCACCTCTTACCTTCTTACCAAT  
TAGCATTCTTCCGAGTACCTTGAAGAAAATAGAGATATATCATTGCAGGAACTGAAATTGGAGGCGTC  
AATGATTTCTAGAGGGGATTGTAACATGTTTCTGGAGAATTTGGTAATATATGGATGTGATTCTATAGAT  
GATATATCACCAGAGTTTGTCCCAAGATCACACTATTTGAGTGTAACAGTTGCCCAACCTAACTAGGC

TTTTGATTCTACTGAGACTGAAAACTCTATATTTGGCATTGTAAGAATCTTGAAATACTTTTCAGTGGCA  
TCTGGAACCTCAGACAATGTTGCGTAATTTGAGTATTCGTGACTGTGAGAAGCTGAAGTGGCTGCCAGAA  
TGTATGCAGGAACTCATTCCATCTCTTAAGGAACTAGAACTATGGTTTTGTACAGAAATAGTGTCTTTCC  
GGAAGGAGGATTGCCCTTCAATTTACAAGTCCTTCGGATCCACTATTGTAAAAACTGGTGAATGCGCG  
AAAGGGGTGGCATTACAGAGACTCCCCTGTCTCAGAGAGTTAACCATCTTACATGATGGCAGTGACCT  
TGCTGGTGAAAACTGGGAGTTGCCTTGCTCTATTCGAAGGCTTACCATATCCAATCTGAAAACATTAAGC  
AGCCAACCTTTTCAAAGTCTTACCTCCCTTGAATATTTATCTACTGGTAACTCACTTCAAATTCAGTCACTG  
CTGGAAGAAGGGCTTCCCACCTCTCTTTCTCGTCTAACGTTATTTGGCAATCATGAGCTCCATTCCCTACC  
GATTGAAGGTCTACGACAACCTCACTTCACTTCGGGATCTATTCATCTCTTCCTGTGATCAACTCCAATCTG  
TTCCAGAATCAGCACTGCCCTCCTCCCTCTCTGAGCTGACCATTGAGAATTGCCATAAACTCCAATACCTT  
CCGGTAAAAGGGATGCCCACTTCAATCTCTTCACTATCTATTTACGACTGTCCATTGCTCAAACCACTCCT  
TGAATTTGACAAAGGAGAATACTGGCCAAAATTGCTCATATTTCCACCATAAATATTGATGGGGAATAC  
>M6-PGSC0003DMG400027469 M6 LRR-RLP

AAAGAAATTCCATTTCCACAATGTACAAATACAACATTCTTTACTTAGTACTACCATTTTTTGTAGTAGTTT  
GCAGTTTTTCTCTAATATGCAACGCGGTACAGAGTGACATAGATTGCTTGATGTCAATAAAAGATTCATT  
CGAAGATCCTTTAAATTTCTTGAATACTACGTGGAAGTTCGATGATCAGACAGAAGGTTTCATATGCAAA  
TTTGCAGGAATAACAATGCTGGCATCCTGATGAGAGCAGAGTTTTATCCATTAGTCTTCCAGACATGGGAC  
TAAAAGGTGAGTTTCCGCGAGGCATAAAAAATTGCACTTCTATAACTTCTCTAAATCTTTCAAGCAACGA  
GATATATGGAACCATCCCTTCGGATATATCAAGATTAATTGGATTTATTGTAACGGTTGATCTCTCGAGC  
AACAAATTTCTCAGGCTCGATCCCAATTAACATTGCAAATTGCTCTTTTCTTAATTCCTCAGATTAGACAAC  
AATAAACTACAAGGTCCAATCCCACCCGGAATTGGCTTGTTAGGTGCGACTCAAGAACTTTAATGTTGCCA  
ACAACATGTTGACAGGACCAGTGCCAAGGTTTATCAATGCCACTTTTCCACCTGAAAGTTATGCAAATAA  
TGCAGGACTTTGTGGTAGTCCTCTGAAAGCATGTGCTACAAAACGCGTCGGGTTCCATCATATTATGTTA  
AGTACTGTATTGAACCGTCGTGTACAGTTTGCTTGTTGTTTTGTGACTGGTTGGTCACTTTTTACTGTACT  
TGGTATATATCTTTTTTTCTTTGGTTTACCTGGCGTAAAGAAGATGCTTCTATTCATCAACAAGAGAACAA  
AGGTAATGGTGATTGATGGAATGAATGGCCTCAACGAGAAGAAGTCAACAACGATCCAAAGGTAAAC  
ATTACGCTTGCTTTCAACCGTTTTTTTTTCCCAATAAAGTGAAACATATTATGGGTAAACGCCTCCTTAAC  
TTATCATTTTACTCTTAGTTGCAAGTTTTTATAGGCATACAAGTGTATGGGACGTTTAAGACTACAACCT  
TAAAAATTGTCTTCTTTTGTCTTAATATTTGTGTCCAGTCAAACCTATATATGTCAGATAAATTGAGACAAA

AAGAGTACTACTTAATCAAACCTATTGCTAAATATGGTAGCTATGTTCTCTCCTCAGATTTTAAAGATGGA  
GAAGATTGTTACAAGAATGAGTTTTATGGAACCTATCAAAGCGACTTTGAATTTAGCCAAGACAATGA  
AATCGGGAACGGAATGCTAGGGAAAGTGACAAAGCACTGGTCCCAAATGGATGGACAGTTGCCATAA  
AGAGGTTACATGTTTCAGAGGATTTGGAGGAAGAGTTTGTTTCAGAGATCACAACCTCTGGGTAGTCTGA  
GGCAACCAAATTTGGTGCCTATAATAGGCTTTTGTCTGAGAGGAAAGAGCGAATTCTAATTTACAAATA  
CATGCCTAATGGAACTTACATGAGTGGTTGCATTCAACCGACGACAAGGCAAGACTCTTGGACTTTCT  
CTAAGGGTTAAAATTGTTTTAGGAGTCGAAAAGCCCTGACTTGGCTTCATGATGGTGGAAATTTCCATG  
TTGTGCATAGTAACATAAGCACACAGTGTATCTTGCTCGATGAAAATTTCAATCCTAAGTTATCCAATTT  
TGGGAGGCAACACTTGCAAAAACAAATGACATAGATTCAAACCTGAGTCTATTTCCAATAGTCGAGTGTT  
TAGACTTTACAACATATAAAAAAGATGTTTATCGATTTGGGGTTGTGCTTCTCGAGCTTTTAACGAGGAA  
AGAATCTTACATATTGAGCTGCTCGAGTCAAATTTGTCGAGCAGCTCTTTTGCCAGTCCTCTTGATGTG  
GATAAACTACTGTTAGGCCAAGGATATGATAATATGGTAATGCAACTACTTGAACCTGCAAGTAACTGCA  
TGAAATTCATTCCGGATCAAAGGCCAACGATGCAACAAGTGTGTCAGACTGTTGCTGCAATTGCTCGAG  
TCCATGACCAAACAGGGGACTATGAAATACAAGTGCACCTGGACTAGAAGCAGGGGAGGGGCCATCAA  
AGGTATCAGTAGACTTTG

>M6-PGSC0003DMG400027470 M6 LRR-RLP

ATGGGACTAAAAGGTGAGTTTTCCGCGAGGCATAAAAAATTGCACTTCTATAACTTCTCTAAATCTTTCAA  
GCAACGAGATATATGGAACCATCCCTTCGGATATATCAAGATTAATTGGATTTATTGTAACGGTTGATCT  
CTCGAGCAACAATTTCTCAGGCTCGATCCCAATTAACATTGCAAATTGCTCTTTTCTTAATTCCTCAGATT  
AGACAACAATAAACTACAAGGTCCAATCCCACCCGGAATTGGCTTGTTAGGTGCACTCAAGAACTTTAAT  
GTTGCCAACAACATGTTGACAGGACCAGTGCCAAGGTTTATCAATGCCACTTTTCCACCTGAAAGTTATG  
CAAATAATGCAGGACTTTGTGGTAGTCCTCTGAAAGCATGTGCTACAAAACGCGTCGGGTTCCATCATAT  
TATGTTAAGTACTGTATTGAACCGTCGTGTACAGTTTGCTTGTGGTTTTGTGACTGGTTGGTCACTTTTTA  
CTGTACTTGGTATATATCTTTTTTTCTTTGGTTTACCTGGCGTAAAGAAGATGCTTCTATTCATCAACAAG  
AGAACAAAGGTAATGGTGATTGATGGAAATGAATGGCCTCAACGAGAAGAAGTCAACAACGATCCAAA  
GGTAAACATTACGCTTGCTTTCAACCGTTTTTTTTTCCCAATAA

>M6-PGSC0003DMG400027966 M6 LRR-RLP

TGGTTCAATTCTAATTACTCTGGGTGACTTAACTAAGCTCAATATTTTGTACCTTTATGAAAACCAACTTTC  
TGGTCCCATTCTGCAGAAATAGGAAAGATGAAGTCACTCAAGTATTTATCCTTATGGAGTAATAATCTT

TTGGGCCAATTCCAGTAACTCTAGGTGACTTAACTGAGCTCAATGTTTTGTACCTTTATTCAAACCAACTT  
TCTGGTCCCCTTCCCGCAGAAATAGGAAAGATGAAGTCACACAAGTATTTATCCTTATGGGATAATAAAN  
CTCTGGGTGACTTAACTAAGCGCAATATTTTGTACCTTTATGAAAACCAACTTTCTGGTCCCCTTCTGCA  
GAAATAGGAAAGATGAAGTCACTCGAGTATTTATCCTTATGGAGTAATAATCTTTCTGGTCCAATTCCAG  
TAACTCTAGGTGACTTAACTGAGCTCAATGTTTTGTCCCTTTATTCAAACCAACTTTCTGGTCCCATTCTG  
CAGAAATAGGAAAGATGAAGTCACTTGAGTATTTATCCTTATGGAGTAATAATCTTTCCGGTCCAATTCC  
TAGTGAGTTGGGAAATTTGAAAACCTCTCTAGATTGGATTTATCCTATAATCAGCTTACTGGTCTTGTTT  
CTGTTTCCTTTGGCAATTTGAGAACTTGCAGACACTAAATCTCGCTGCGAACGAACTTTCTGGGTTCTATT  
CCAAAAGAATTTGCATATTTTGATAACTTGGTTTAGTTATCAATGAGTTTCAATCACTTTTCAGGCCATTT  
GCCAGAGTGGCTTTGCAAAGATGGGAACTTGAGATTTTCGTTGTGAATGGTAACAAGCTTACAGGGCA  
AATCCCAAGAAGCTTGAGCAAGTGCTCGAGTTTCAAAGGGTTCGCTTCAATAACAACAGCTTTACTGG  
GGATTTATCTGAACTTTTGGTATCTATCCAGAGCTTCTGTTCATTGATTTGAGCGACAATGATTTTCATG  
GTGAACTCAGCAGTAACTGGGGAAAATGCAAAAATTTAATTGATCTGTGTGTAGCCAGAAATAACATTA  
GTGGCAGCATACCACTAGAGATTGGAAATGTCAAAGGGCTTTTAGGACTTGATCTTTCATCGAATCATT  
GATTGGGCAGATTCCAAAGGAATTTGGAAAATTAACCTTTTGGTTAAGCTTTCTGTGCAGAACAACAAT  
ATCTCTGGATATATACCGGAGGAACTTGGGTCACTGACAAAGTTAGAGTCCCTCGATCTATCGTACAACA  
GATTGAATGGATCAATCCCGAAGTGTATAGGAGATTTCTGTCACTTGTTTCAGTTGAACCTGAGCAACA  
ACAAGTTTGGCCAGAATATTCCAAAGGATATAAGAAGGATAACTCAGCTTAATGTACTTGATTTGAGCTA  
TAATCTTCTCGTTGGAGATATACCCCTCAGTTAGCCAATTTGAAGGTGTTGGTAACTTAAATCTTTCCC  
ACAATGGCCTATCTGGACGCATTCCTAAAGAACTTGAAAGTTCATCTGGTTTGCATGATGTTGTTTTGTCA  
TACAATGAGTTGGAAGGTCTAATCCCTAATAATAAAGCTTTTATCAATGCCTCATTGGAGGGTAATAAAG  
GTCTTTGCGGAAATGTAGCAGGACTCCAGCCCTGTGAAAGGCCGTCTTCTATGGTGAAGAAGCACTCAA  
TGCGGAAGGGACGTAACTCATCCTCATCACTGTATTTCTGTTATGGGAGCACTAGTACTGCTCTGCTT  
TTTCATTGGTGTCTCTTTATGTGTAATAAAAGAAGGAGAGTTAGAGACTTTGAAAGAAGGGATGGTGA  
TGATTGGCTTTTCGATATCCATGTTAGATGGGAAGACATTGTACAGAGACATCTTAAACGCCACAGAAGA  
GTTTGATGCAAAAATTTGCATCGGGCAAGGAGGTCACGGAAGTGTTTACAAGGTGAACCTTCCATCATT  
AGGGAATATAGCTGTGAAGAGACTTCATTCTTCATTTCAGAATACTCATCCAAAAGCTTCATCAATGAA  
GTAAGGGCATTGACTGGGCTTAAGCATCGAAACATTGTGAACCTCTACGGCTATTGTTGAAAGCACAA  
CACTTGTTCTTGGTTTACTAGTATGTGGAGAGGGGGAGTTTGTCTAGTATTTTGTAGCAATGAAGTTGAGT

CCAAGAAATTGGATTGTCTTAAAAGGGTGAATATCATCAAGGGTGTGCTTTTGCTTTATCTTACATGCA  
CTTAGACTGTTACCACCGATTGTTTCATCGAGACATATCAAGCAGTAATGTGTTGCTTGATTCTGAGTAT  
GAAGCTCGTATTGCAGACTTTGGAATAGCAAAGATTCTCAAGCCGACTCATCCAATTGCACTGCGTTTG  
CAGGCACATATGGTTATGTGCGCACCTGGTAAGTTTTAAATAGTTTATGAACTATATCCAAACACTCTTGTT  
TTTATCTCATTTACATGTTTAAATTCTTAATATTGTTCTGGAAATTGTGTTGTTTCAGAGCTTGCATATACAA  
TGAAGGTTACACAAATGTGTGATGTGTATAGCTTTGGAGTATTATCCTTGGAGATAGTCAAAGGAAAGC  
ATCTTGGGGAATACATTTCTGTGCTAGCAAATTCATCGACTATAGATCCTGAGCAGCTTAGCAATTTGCT  
GGATGAACGCCTTCCATATCCTGATGATAGAGTAAAAGATGTTTTGGTTTTTATCATCAATCTAGCATGCT  
CTTGTTTGCTTAAAACCTCCAAAATCAAGGCCAACAAATGCACTTCATCTCTCAGAAGTTATCATCAATGGAT  
GCACTCCCACCTATTCATCAGAAAGCCCCATATAAGGCAAGCTATATAATCCCCTAACATATATGGAGA  
TGAATAACCTTTGTCGCTGAGTGGTTGTGAAGTAAGTACTGTTCAATTGCTTGGACTAGTGGTGGTCAT  
TTGGTTTACTCTATTAATATGTATATTGTAAGAGGTAATTATTTAATCATCTGCTTCTTTGGCGTTGAGTA  
AATATCAAGAATTC

>M6-PGSC0003DMG400027968 M6 LRR-RLP

ATAATAAGCTTAGTGGTTCAATTCCAATTAATCTAGGTGACTTAACAGAGCTCAAATTTTGTACCTTTTT  
TCTAACCAACTTTCTGGTCCCATTCCCTCGAGAATTGGGGAATTTGAATAACCTAAATGATCTGGAGCTAT  
CCCAAATAAGCTTACTGGTTCAATTCCAATTACTTTAGGTGACTTAACTGAGCTCAAATTTTGTACCTT  
TATTCTAACCAACTTTCTGGTCTCATTCCCTAGTGAGTTGGGGAATCTGAAAAACCTCAATGGACTAGATTT  
ATCTGATAATAAGCTTAGTGGTTCAATTCCAATTAATCTAGGTGACTTAACAGAGCTCAAATTTTGTACC  
TTTTTTCTAACCAACTTTCTGGTCCCATTCCCTCGAGAATTGGGGAATTTGAATAACCTAAATGATCTGGAG  
CTATCCCAAATAAGCTTACTGGTTCAATTCCAATTACTTTAGGTGACTTAACTGAGCTCAAATTTTGT  
CCTTTATTCTAACCAACTTTCTGGTCTCATTCCCTAGTGAGTTGGGGAATCTGAAAAACCTCAATGGACTAG  
ATTTATCTGATAATAAGCTTAGTGGTTCAATTCCAATTAATCTAGGTGACTTAACAGAGCTCAAATTTTG  
TACCTTTTTTCTAACCAACTTTCTGGTCCCATTCCCTCGAGAATTGGGGAATTTGAATAACCTAAATGATCT  
GGAGCTATCCCAAATAAGCTTACTGGTTCAATTCCAATTACTTTAGGTGACTTAACTGAGCTCAAATTT  
TGACCTTTATTCTAACCAACTTTCTGGTCTCATTCCCTAGTGAGTTGGGGAATCTGAAAAACCTCAATGGA  
CTAGATTTATCTGATAATAAGCTTAGTGGTTCAATTCCAATTAATCTAGGTGACTTAACAGAGCTCAAAT  
TTTGTACCTTTTTTCTAACCAACTTTCTGGTCCCATTCCCTCGAGAATTGGGGAATTTGAATAACCTAAATG  
ATCTGGAGCTATCCCAAATAAGCTTACTGGTTCAATTCCAATTACTTTAGGTGACTTAACTGAGCTCAA

ATTTTGTACCTTTATTCTAACCAACTTTCTGGTCTCATTCTAGTGAGTTGGGGAATCTGAAAAACCTCAA  
TGGACTAGATTTATCTGATAATAAGCTTAGTGGTTCAATTCCAATTAATCTAGGTGACTTAACAGAGCTC  
AAAATTTTGTACCTTTTTCTAACCAACTTTCTGGTCCCATTCTCGAGAATTGGGGAATTTGAATAACCT  
AAATGATCTGGAGCTATCCCAAATAAGCTTACTGGTTCAATTCCAATTACTTTAGGTGACTTAACTGAG  
CTCAAAATTTTGTACCTTTATTCTAACCAACTTTCTGGTCTCATTCTAGTGAGTTGGGGAATCTGAAAA  
CCTCAATGGACTAGATTTATCTGATAATAAGCTTAGTGGTTCAATTCCAATTAATCTAGGTGACTTAACAG  
AGCTCAAAATTTTGTACCTTTTTCTAACCAACTTTCTGGTCCCATTCTCGAGAATTGGGGAATTTGAAT  
AACCTAAATGATCTGGAGCTATCCCAAATAAGCTTACTGGTTCAATTCCAATTACTTTAGGTGACTTAACT  
TGAGCTCAAAATTTTGTACCTTTATTCTAACCAACTTTCTGGTCTCATTCTAGTGAGTTGGGGAATCTGA  
AAACCTCAATGAGATAGATTTATCTGATAATAAGCTTACTGGTTCAATTCCAATTACTTTAGGTGACTTA  
ACTGAGCTTGAAACTCTGTACCTTCATTCTAACCAACTTTCTGGTCCAATTCTGCTTCCTTTGGCAATTTG  
AGAAACTTGCAATTTTTGTATCTCCACACCAACAACTTTCTGGTTCTATTCCAAAAGAACTTGCAATTTTTG  
GATAACTGGTAGAGCTGATAATAAGTGAAAATCAGCTTTCAGGCCATTTGCCTGAGCATCTTTGCCAAG  
GTGGGAAACTTGAGAACTTCACGGTGAATAATAACAAGCTCACAGGGCCAATACCAAGCAGCTTAAGCA  
AGTGCTCGAGTTTCAAAGGCTGCGCTTCAATAATAACAGTTTTACTGGGAATTTATCTGAAGCTTTTGG  
CATCCATCCACACCTTCATTTCAATTGATTTGAGCGACAATGATTTTTATGGTGAACTCAGCAGCAACTGGG  
GGAAATGCGAAAATTTGATTGATCTGCGTGTAGCCAGAAATAACATTAGTGGTAGCATAACCACCAGAGA  
TTGGAAATGTCAAAGGGCTTTTAGGACTTGATCTTTCATCAAATTATTTGATTGGGCAAATTCCAAAGGA  
ATTTGGAAAATTAACCTCTCTGGTTAATCTTCTTTTGCACACAACCAATTTCTGGCAATATTCCTATGG  
AACTTGGGTTATTGACAAAGTTAGATTACCTTGATCTATCAGATAATAGATTGAATGGTTCGATCCCACC  
GTTTATAGGAGATTACCAGCACCTGTTTCACTTGAACCTGAGCAACAACAAATTTGGCCAAAAAATTCCA  
ATAGAGATTGGGAAGATAACTCAACTTAATGTACTGGATTTGAGCCGTAATCATCTTGTTGGAGAAATCC  
CCCCTCAGTTAGCCAATTTGAAGGTGTTGGTAACTTAAAT

>M6-PGSC0003DMG400028001 M6 LRR-RLP

GCAAAGAAGATTTGTGCAAAACTTTGGTGTAGAGGAAGAAGACGACTTTGTGTGAATTAAGGAGAA  
AAAATAACAATGGCCGACCCTGTAATTGGTGCTACTGTTTCAGGTTGTGCTTGAGAACTACTTTCTCTCA  
CAATTGAGGAGGCCAGAAATGTAAGGAACTGCAAGAAAAATCTCAGAATGCTGTCAAGATATGTAACC  
ATGATCCAAGCTTTCATTCATGATGCTGAAAGACGACAAGTCGAAGATAGGGCTGTGGAAGAATGGCTC  
AAGATGCTTGAGAGAATTGCTGAAGATGCTGAAAATGTGTTTGACAAATTCACATATGAATCTATCAAA



GCAAAAGTGATGAACAACCGAGCCAACTAATGGAAAAGGTCAGTCACTTCTTTTCTCATACTGCTTTCA  
AGTACAAAATGTCTCGAAAAATCAATAAGATCAATGAAGAGTTGAGGGATATCAATCAGTTAGCCAACA  
ACCTCGGTCTCCAATCACTGACAGATCCTTCTCGGAAAATATTACAAATCCGAGAAACAGATTCTGCAGT  
AGTTCCTTCAGATGTTGTTGGTAGAGACAAAGATGTTGCTGAAATAAAGGAGAAGATTTTGAACATGAG  
AAAGGATGCTGTTCTGTGCACCATTCCCATAGTCGGTATGGGGGGTTTAGGGAAAACACTCTGGCTAA  
GAGGATTTTCAATGACCAACACATCGAGAAACACTTTGAAAAAGAATTTGGTTGTGTCTACCTGAAATG  
TCTGAAATTAAGAATTTCTTGAAGTATCCTCGAATCATTGACAGAGAGGAAAGTTGAGGTCCAGAGC  
AGAGATATAATAGTCAAGAAGCTCCGAGATGCATTGGGAGAAAAACAGTATTTACTTGTCTGGATGAT  
TTGTGGCGTGATGACTATACTTAGTGGCACGAGTTCTTGGACACCTTGAGGGGAATAAATACATCCAGA  
GGAAACTGCATTCTCGTGACTACTCGTTCAAAGCAGGTGGCATCCATAGTAGCAGAAGATCTTCATAAG  
TTGGGGAAATTAACAGATGATCAATGTTGGTCCATTTTCAAACAACGAGCATTGTTGATGGGGAAAGTT  
CCGGAGGAAATACTGAGTGTGGAGAACAAGATTGTTGAAATGTGTCAAGGTCTACCTTTGGCTGCTAGT  
GTGTTGGGAGGCCTATTTTGTAAACAAGGAAAAACATGAATGGCAGGCAATTCTTGATGGCAGCTCCCTT  
GTTGCATCTGAAGATAGCATTAAAGAATATCCTAAAACACTCAGTTATGATTATCTACCATCTCCACATCTGAA  
GAAATGTTTTTCTTACTTTGCAATATTTCCAAAAGATTTTGAGTTTGAAAAGGACCAACTAATCCAACCTCT  
GGATGGCAGAAGGGTTTCTTCGTCCATGTCAAGAGACCACTGTGATGGAAGACGTTGGGAACAAGTTTT  
TCCAACCTTGTTACAATATTCCTTGCTGCAGGATGTTAATCTAGATAAGTACAACAATACAACACACTGT  
AAGATGCATGATCTTGTGCATGATTTGGCTGGAGATATTTTTAAGTCTAAACTATTTGATCAAAAGAGTG  
TCGGAGGAGAAAATCTTTCTCAAGTTCGATACTTTGGATGGGAATCACCAAGTGATCAATAGATAAGA  
TTTATGAGCCAGGACGTTTGTGCACATTGTTCTGGAAGAGCAATATATCTGATGATATGCTATTGAGCTT  
TCAGTTCTTGAGAGTTTTAAATTTGTCCGGGTCAGACATCAAGGAGTTGTCAGCCTCAATCGTCAAGCTA  
ATATACTTGAGATATCTTGATCTCTCCAATACTAAGATGAACGACGGATATCTTGATCTCTCCAATACTGA  
GATGAACGACCTTCCCAACTCCATATGCAAGCTCTACAATTTGCAAACCTTGAGATTCTATAGCAGCTGG  
TATCCACTCAGGAAGCTTCCAGAAGAAATGGCAAATATGATAAGTTTGAGACACATATGCTGCTACCATT  
TTTTCGAATCAGATTTTCAGATGCCACTTAATATGGGGCAATTGACTAGTCTTCAGACGCTGCCGTTTTTC  
TATGTAGGTTTCAGAGAAAGGTCGTGCAATAGAAGAAGTGGGTTGTTTAAAAATCTTAGAGGTGAATTG  
ACGATCGAACGTCTACAATTAGTCGGAAATAAAGAAGAGGCTCGAACAGCATATTTACAGGAGAAACC  
AAATATCTACAAGCTGGTGTATTCATGGTCCCATGATGAACCAGAAGGCTGTGAGATCAATCATGAGCA  
TGTGTTGGATGGTCTTCAACCACATCCGAACCTTAGAAGTTGTGGACTATTTAGGGACTAAA

TTTGCTTCATGGTTCAGTGAAAAATGCTAACAAATTTGGTCATGTTGAGATTAAGAGGTTGCAAAGGT  
GCAAAGAAATTCATCACTTGGCCAAGTAAATCCCTTCGGCATCTTAAGCTGATAGGATTCCTTGAATT  
GGAATGCATCGGACCTACATTTTATGGTGTGATGTTAATAATAATGGATCAAGCAGCAATATCCAAGTG  
TTCCCGTCATTGAAAGAACTAGAATTGAACAATATGTCTAGCCTTATTGAGTGGAAAGGAGATGAAGTT  
GGAGTAAGAATGTTTCCTAGGCTTGAGAAGTTGACGATTAGAACTGTCCATTGTAAAAAGAACTCCG  
AATCAATTTGAAATCCTCAGTGAATTAGAAATTGTCAAAGTTGACAGTGAAATGCCATTGTTGAACTTAT  
GCAGCAACTTGCCATCTCTCGTAGAGCTTGAAGTCGATGATATGAAAGAGCTCACTTGTTTGCCAGATGA  
GATGCTACGCAACAATGTTTCTCTTCAACACATATCGGTTTCCGACTGCAGAGAGTTTCATGAATTGCCA  
CAAAGCTTGTACAATCTCCATTCTCTTAAGACCTTAAAGATAACCAGGTGCGCCAATTTCAATTCCTTTCC  
TGTTCCAGTGGAGAGAATTATTTGACTTCCCTCCAAAACTTCAGTTAAAGGATTGTGAAGGATTGAGC  
AGTTTACCAAGTGAATGCTAGAGCATTGTCGGTCTCTGGAACTTTGAGTGTGAGCTGCTGTGACAATT  
TAGTTTCATTCCTTTACATGTGGGGGAAATGCCTTCACTTTCCTATTTGAATATATCACGATGTCCCAA  
TTGATTAGTTTACCCTCCGGGGGTATTGACCATCTCACTGAGTTAAGTGAAGTGAATTTGGTCCCTTCTC  
AGAGATGGTGGATTTTGAGGCATTCCAATTGATTTTTAATGGCATTGAGCAGCTGCTGTCCCTTCGTACA  
TTGACGGTGTATGGACATGGTCACTGGGATTCTCTGCCCTATCAGTTTATGCAACTCTCTGGCTTAACAG  
CGATCCATATATGTGGATTCGGAATCGAGGCTCTCCTCATAGATTTGGCAACCTTACTTCTTTGAAACA  
TTAATGCTACTGAGGTGCAAACGGCTACAGAACCTGGACTTCTCATATGTCATGCCCAAATTACAACATC  
TGTATGTTTATGAATGTCCATTGTTAGAAGCTCTGTGCGATGGGCTTGGCAACCTTGTTACTTTGGAAGT  
GTTACATTTAGAAAAGTGTGAGAACTAGAGTATCTGCCATCTAGAGATACCATGCGACACCTCAAGAA  
ATTACAGAGCCTGCAAATTAATGGCTGCCCAAAGTTAGAAGAAAGTTGCACCAATCGGAGTGGCCCAA  
CTCCAGTGGTCCAACATTTCCCATATTTCAAAGAATTGAAGTTGGTAGAATCCCCCTATATCAGTGCTTGA  
GTAAGTCTCTGTTTCTTTCAATTTCCGAGTCGCATTTTTTAATTATTATTTCCACGAGTTAGTCTTCTCC  
ATTCTCAAACATTTTTCTATTCCACTTGAAACAAATTTATGAATATCTATATTACTTTTAAGATATGGTTT  
AATCATGAATATTTATGTATTTTTACTCATAGGTTATTAGCTCGAAGGTCACACTAGAACGTTGTTGTGG  
CATTTTAAGCCAAAATCCATGGGCAGCAATTACATTAGGTGAAATTCATTTAGAATTCTGTAACAATTTT  
GTCAAGTTTTTCTTTGCACTCCCCTGTTTTTTCCCTCATGACACAATTTTATTGTTTAACAGGGTTAGTTA  
TGTTGATAGAGAGGAACCAACACGTTTGTGTTGTTGAAGAACAGAATCTGCAGCCGTAGACTCTTACAT  
GAGCATTGGTAAAGACTACTGACTACATAATCTCTCAACATTTACTCTTCATAACATGGATATATACCAA  
CAACTATTAAGTAAAAATAATTTAGTACACAGTCGATCATTGCCCCTAGTGAAACTATTCTTTTATGTATG

GGTGTCTTTTGATAATATATAACCTTTTTCTACGAGTTAATGAAAATAAAAAGACTAACAAGTAGTTTTG  
GGTAAATAATGAATGAGTAGTTCAACCAACCAACAAGTACCATGTTCTAGACTTCCCCTTTTGGATGTT  
ACTTGAAATCTATTTTTCTTCTTTCTATACAATAGAAGCGTAAACTCAATATCAGGTCAGGTACTTTGGT  
CAGGTAGTAAAGGGTATCCGTGGACCGAGCCATTGAATTCTGTTTCATGAACTATTCATAAGATGAAGTT  
AGGAGGTTGCTGTGCTACCAAACTGACTTTTTACCGTCTCCTATGTTTCAGATTCTTGAATGAAACAATG  
GCATGAACTTGTGCGAGATGGTATACTGAAGCAGACTTCTCTTAGATGTGTTAAGTGTCGTGATTAGAC  
AGGGAAATTACATTAGGCGGAACTGGAGAGGAGATATTATTAATTGTATGACTAAGATTTGACAGCAG  
AGGCCTTTCTTGACAGTGTTTCATTCTTTTTGTACAAATAGTTTTTTGTTCCAGCAAACATTTTCAACT  
AATACTTAGTTGCTGCATCATTGCCTAGTTCATATACATCTTCT

>M6-PGSC0003DMG400028072 M6 LRR-RLP

ATGGACAACCTATTGTAAGGACCTTACCTTGAAGAACTTAATTAGGGAATTCCTTATGTGCAAGAACCAG  
ATGTATCCTTGACGGAGAGAGGCCTTGTTGCTTTCTCAGCTGGCTCCACTCGGTTCTATTCTTTTGCCGCC  
ATGGTTGTGATTGCAAGGAACTGTTCTAAGTTGATCCAATTCGTTTTTGTACTCAAGCCTCCAACCTC  
TGATTACCTAACCCCTGAAAAGCTCAATGCTGGTTATGAGGCCATCATCCATCACTGCAAGGGATTACGG  
CGACTTCTCCTTTCTGGCGTCCTTATGGATCACGTGTTTCATTACATCTGGCCCATGCTAAAAGCTAAAG  
ATGCTCTCCAGTGGGGAATGTAATCTAGGCCTCCACTCTGGTTTTGAAAGCCATTGTAAGGTGGAGACC  
AGAGACAGCCCCTTCGGTGACGACAAGGCTCTGTTGGTCAGTGCTGCAAGGCTGGAGACGATGCAATA  
TCTTTGGATGTCTTCTTGTTCATAAGTAATGGTGCATGTGAGCTGCAAGATCAGGAGATTCCGCCTAGT  
TTCGGGGGTATTTGTTTCATTGAAAATTATCAAACCTGTAGAGAGCCCTCAACTTGAAGATTTCTCTATGA  
AGATTTAG

>M6-PGSC0003DMG400028081 M6 LRR-RLP

AGCAAGCATAGTAGATTTTGGATAAATTGTTTATACATATTAATGAATTTTAAACACAAATACATGAC  
AAAACCCGTAGACAGGGTTGTAGCTCTGCCCCTGATGCCCCAGTGAAGAACTTAATGAACTGTATACAC  
AAATAGCTAAACAACTATCTAAATCGCATTATCATCAACAACAATCCCCATTCTACATAAAACATAAA  
TCATTCCCAGTTATATTATGATTTTCGGATAAATAAAAAGACCTCCAGAATTCATAAAAAAATCATGACG  
ATATGCAGCAGCCACCACTATTCCCACCAGAATCTGTGTCCTGTCCGGGAGCAATTATCCTGGTTCCCTTT  
AAGGATTATGGCTTCCATAATCAGCTCCCGGAGCTGCAATAAGCGTATTCTTGCTAATGATTTTATAAA  
TTTCTGTTAAACTATCATGAATGCACCCTCGATGTTGTGGATTGAAGAGCTGATGTTTCCATAAAGAAA  
AGATTCTCCCTTTCTGCGAATTCTTGAGATTCTTCAACTGGTACAGCTCGAAGACTTCTAGATCACATTT

GTTTCATGATGAGCATAATAACTATGTTCTTGTCCGCATGACCTCTTAGTTCCTCCAGCCATCTAGCCATAT  
GATTGAATGATTGGCGTTTTGTTAAGTCATAGACTAGCATTGCGCCAGCTGCACCTCGATAATATGCACT  
ACTGCTTTATACCTGAGAGAGAAATGAGAGATGATTCATTGAGTTATAAAAATTACCAAATTGGCTATGC  
TGCTCTGACTCTTCGAAAGAGGGTCCTTTGAAAGTAGAGCGTTTTGGAGGAGCCGACACGGGTGCGGC  
GATATTTTTCTCGAGAGTCCAAGCAACATAGATTAACAAAAGGAAAATGTTAGTGTTACATACAAAAGT  
GGATCTAGGGAGGTAATATGTATGCAGACCTTACCTCTACCTTTGCGGGGTAGAGTCGTAGAGAGGTTG  
TTTCGATAGGCCCTCGACTCAAACAAGATGAATTGTAAGACAGGTAGATACCTTGTACAATGATAGAAA  
CAAAATCTCAAGAAGAAACATACATATGAAAGTCTGAATCGCGATATAAATTAACAACTCTTTAAGGA  
GATTTATCACAAAAACAAGAACGTCTCAAATATCTCAAACAAGTTGGGATCAACAATATGAATTCTAACT  
ATAACCATGTGCGCTGAATTT

>M6-PGSC0003DMG400028112 M6 LRR-RLP

AAAAGCGCAAAAAGCTCTAAGGTCCTGGGGACTTTAAGTGCAAAGCGCAAATAAAGCGTGGGCTTT  
AATGAAAAATGGCGCAAAGGGAGAAAAGAATACAAATATGTATGTTTAGTCCAAGACTAATAATTATAA  
ACATGAATGACAAATATATGACCAAAGAAATTGAAAAAAATTATGGTTAAGTGAAATATCAATTATTTA  
GTTTCACTTCTTCATAAAAGTCTCATTGGCAAGGAAAAGCTTGCCTTAGAACCTTGATGACGACACTGAA  
GCGCACATAAAGCGAGGCGAAGCGCTCAACACGTTTTGAGCCTCGCTTCCGGGCTTAAGCACGCTTAAA  
GCGCGCCTTTGATAAACTGCTT

>M6-PGSC0003DMG400028156 M6 LRR-RLP

GTTCCCTCGAAACTTTGACAAAAGGGTTTCCCTGAGAAAATATGAATCAAATTCGCAGTTACCGGCGGC  
AACTAATATGGATCGAATTTGCGCGGCGGCACGTAATTTGGATCGAATTTCTCAGTTACCGGCGGGAAT  
GTTAGAGCACATCTTGTCTTTCCTTCCGTTTGAAGAAGCTGCACGAATGAGTAGAGTATCAACGACTTGG  
AAAAATGCATACAATCACTCCCCTGTTTAAATTTTGAAGAGGATTTTTTAAACAAGCCAATAGAAAACT  
TGTGAATGCTGTGGATCCAATTCTAACTTATCGGAAAAATCAAAGATTTCTGTAGAAAAGTTTTCGCTA  
CACATAAATCAACAATGGAGTAGTCTGTTTTCCAATTGGATTGATACACTCGTAGATTGTAAGATCAAAG  
AGTTAAGCCTAGTTTTAAGATCAACCAGAACCGGATACACGAAATTGCCTGAGGCAATTTTTAATGCCAA  
AGCACTAAAAGTGTGAAATTGAGTGAATTTCAATTGAATTGCCATCTAATAGTACTATTATGTTTTCAT  
CATCTTTGCGAGAGTTATACCTTCAATGTGTATATTTGACGAGGAGTTTATGCAAGCTTTATGCACAAG  
TTGTATCAATTTAGAGGTTTTTATGGTGCGGGGCTTAAAGGGCTTACTAGATTTCAAAGTACTTTACCT  
AAATTGAAAAAGCTACAGGTGACAGCGTATTATTCTAAATTACGATTTGTTGATATTAGATCACCTAATA

TTGAAGATCTTGACGTCTATGGCTCCAACCTCAGCTCCAACACTTTAAGAATGAGAGTGATCTAAATGT  
AGTTATTACTAATTGTTGCAAATCCCTTAAGAGTTTGCAGCTCAATGGTGTGGCCATGACCCAAAAA  
TGGTTTGACGAAATTTTACCTGCCTTCAGAATATAGAGAAGTTGGATTTAGGTGATTGCGACATGTTGA  
AGACTGTGAATATCTCAGGCGGCTCTCTCAAACAGCTGAGAGTGTATCATTGTGATAATGTGATTGCTAT  
TGAATTAGACTCCTAATTTGATAGAGTTCTCGTATGATTGTTCTTCATTGCCGAATTTGAAACTAAAAG  
CTTCAGCTTCATTGGAAGCCAATATTGAATTCGACTCAGAAGGAGGAGAAACCCCTAACAGTGATTGGT  
ACTCTAAGCTCGTGAAATTTCTTGATAACTTCAATCATTCCATGGCTCTTGAATTAACATGCAAAAGTGAA  
AAGGTATGTCCAGAAATTTCTTAACTAGCTAGTTAATACTATATTGTTATGGATTTCTCAAAAGTTGTTT  
CTTTTTGCTAATACAGGGGCTAGTTATACCAAAGATGTGAGAGAACACTTGTTTCCTCCCTTTATGGA  
ACTAATCGCGTGAAAGTACGCATTCATAGTCCATTGATAAGTTATTCAGTTGTAGATATTCTTGATGGTAT  
TTTCTGGCTTTCTCCTCAATTGGACACCCTATCTTATTCTAAATTCGACTTGAACACCCTTGAGGTAAATAC  
TTTTATCTTTCAAAGGCACCGACTCCCTTAGTGGGATTTCACTGTGTATGTTGTTGTTGATGATGATGATG  
ATTGAAAATCATGCTTCGTAACCACTCAAACCTGAACTTCCTTTTGATCTGTTCCAGCACGCATATACACTG  
TTGATATCGAGCATTAAATTAACCCTCTCTAATATTGATTTTCGTGATTATTCTTCATGAAGACAGTTTTTATC  
TTTATTCTTCTTCAATAGTTACTGAGTTTTCTGGTTTTACAGTTTTCATATGAAGATGCATTAGGTGAAGG  
TGAGAAGTTTTGTTGTACATCTCAACCTTGAATTGTTGGAGGCATAAGTTAAAGCAAGTCAGAATACAC  
AACTTTAAACATAAGGAAGAAAAACAGAAGTTGAAAACTATTTTTCCACAAACACAGATATCTTAGAG  
ATAATTGAGGTTCCCCGACCTAGAATGCCCTGGGAACAAGTACATAACTAAATGTCCATGTCCCAATTG  
TTCCTCAGATTAATTTGTAGCATTACATGCTTGGTTTTGTATAGGGGATTTAATATCTAGTTCTGGCATT  
AGCTGGCTTAGGTTTTTCCCCCTTCCAGCAGAGCAATAAGCTAGGTTTTGTTTTAGGAAGATTTTATGT  
TAGACATTAACTCTTATCTCATAGCATGAAGAATTGTTTACTTCATTTGGAAGCTTTCTTATATTTCCGC  
GAACAGTGCCTTCTCAAACCTTAAATGCTGTTCTTCTACTTTTGTGGTGTTTACTTTTTTTGATATTGAA  
GCTCTCAGAGCAAACCAGTATTTAGAGGTTGTTTCC

>M6-PGSC0003DMG400028212 M6 LRR-RLP

CTTCTTGCTTTTATACTCCTTCGTTTCAATTTGTCTTGCTTTCCTTTTTAGTCTATAGAAAAATGTTTCTTTA  
CTTTTTTGCAACTCTTCAGTTTCAACTTTACGCATGACAAGTTTAAACCATGAGATTAACGCATTTTGG  
TACATTCTGCATATCCTTAGCTTAGTTAAAGACCAAAGATTCAGAAGTCGTTCTTTACTTTCTTGAACTC  
CGTGCAAAGTCAAACCAAGACAAGCAAATTGAAACGGATGAAAGTACACTTTCTTGAATTGTTATCATT  
TAATAACTATGGATACAGAGTTTGATGTTTGCTTACTGAAATTTCAATTCAGCTGAAGTAGTGAAGAAGT

GGCAACTAGAGTGTTTACAAGAAAGCTCAAAAAAGTGAAATTTCTCAGTTCTTTTTAGTCCTTTTTTGGT  
GATGGAAAAACATTTAAGACTTAAACTCTTTTAGTTTTGCTTGTTTTATTGCTCTCAATTAGCATCTCAG  
AGCAACTACAATCTTCTTCAAGCAAATATTTTATCGAGAATTCGAAATCTTCTGAACTATCCAAATGTT  
TTGAGTAATTGGAACAATGAAACTGATTTCTGTAACACTGAGCCAAGTTCATCTGTTACTGTTATCTGTTA  
TGAGGATAACATAACTCAGCTTCATATAATAGGGAGCAAAGGGGCTTCTCAATTACATAATTTCTCGATC  
GATTCGTTTGTCACTACACTTGTTGAGCTTCCAAGTTTGAAAGTTCTAAGATTAGTTTCTTTGGTTTATAT  
GGACCATTGCCTAGTAAACTTTCAAGACTTTTCATCATTAGAGATACTTGACCTTAGTTCAAATTTCTTTCAT  
AGTAACATACTCGAGAAATTTTCATCGTTAACGAGCCTCCAGAGTTTAATACTAGATGGAAATAAGTTCA  
CTGGAAGACTTCCAATGGACTTGGTTCACTTGTTGTTTTGGCAGTTTTGAGTGTAAGAACAATTCTTTA  
GATGGACATTTACCTGATATGCTCGGAAATTTGCATAATCTTCGTGTACTTTCACTTTGAGGAATAATTT  
TACTGGTGATGTACCTGATCTTAGTGGTGTGCGAAAACCTTCAAGTTCTAGACTTGGGAAGATAATTCTCTT  
GGACCGAAATTTCTCAAGTTAGCAGCAAATCCAAAGCATTGTGTTGAGGAACAATAAGTTCACTGCA  
GGAATTCGGAGAAAGTTCAATCTTACCATCAGCTTGAACATATGGATATTTCTTCAAACAGATTTATGG  
GGCATTTCCTCCGTCTTTGCTGTCCTTGCCATCGATCACTTATATTAACGTTGCAGGAAATAAGTTAACA  
GGAATGCTTTTTGATGATAATCAATGCAATGCCGGATTAGATTTTGTGGATCTATCGACTAACCTGTTGA  
GTGGAAGATTACCAATTGCCTTCTGACTGGTCCTAAGGACAGGATCGTGCGTTACTCTAACAATTGTTT  
AGCAACTGGAGACGGAACTCAACATCCATTTTCTTCTGTGCGAATGAGGCGTTGGCTGTTGGTATCTTA  
CCTCATCATATAACATATACCAGGTTCAAAGTGTTTCTTGCTTTGATCATTGTGGTAGCATCATTGG  
TGGAGTCGTGCTAGTTTGC GCGACTATTATAGTAGTAAGAAAATTTCTTGCAAAGATAGCTACACCGAG  
AAAAACAACAAGATCAATAGTAGAAAATGCAGCATCTACATATACATCAAAGTTATTTCACTGATGCAAGT  
AAGATTCCTCTCTTTACGTCTTAGCTTTGAAGTTTCAAGCATAGTACAATAATTTGGCTTACCTGTGC  
ACGAAATACACGATAGGAAGGCGAAAAAGCCCAAATATACGAAGTTTCTTTGATTCTAATTACTACT  
AATTTTCCATCTTGTGTGTTTCTTCTCCGTTTACAAGACTATGTTACTCGAACAATGAAGCTGGGATCACT  
TAGTCTTCCATCTTATCGGACCTTTTCATCCGAAGAGCTTAAGGTGGCAACAACAACCTTTGATGCAGCA  
ACTTTTATAGGCATGAGTTCTGATGATCAGGTGCATTTGAGAATCACCATGTACCTTACTTTTCTTCTT  
AACGTCATAATTGAGATCCTTAAACGTTTCGTTTAAAGAACATTTTCATGGTATTATCATCCTTCATTGTTTTGA  
CACCACAAATGAGTCAGAACCTTGCAGCCTATCAAACATATTCAGTTGCCTTAGAATTCTTAATCTATACC  
TTATCCCATTGAAGGTGTTTTAGAAGATCTTCTATCATGTTACTAGTCATTCATTTTCTTAGACGAGTGGA  
TATCAAACAGGTATGGTATGATAATCCTTCTTTCGTCAAGATCCATCTAGAGTTCATTAGTCCATAGAAAA

CAAATGTTGATACATACACTTCTGTGATACTCACGTCTGAGCGAATGTAACAACATAAAAGAGTAAACTGC  
ATATATTATATGACAGAATTAGTAAGTATGGATGTTAACTTACTGTTTTTTTTGGATTTCAGTTATACAGAG  
GTCAGCTGAAAGATGGTTCATACATAACCATAAGATGCCTGCAAACGAAACGAAAAAATAGCAGTCAA  
ATTTTATGTATCATGTAGAATTGATGTCAAACTCAGACATCATCATCTGATCAGCACTCTTGGACACTGC  
TTCGAGTGTTACTTGGATGATTCGAGTGTTAGCAGGATATTTCTCGTCTTTGAGTATGTATCAAATGGTA  
CCCTAAGAAGCTGGATCTCCGGTAATTATTCAACAAGCATTTATACTTATCGATCCCAAGATTGCAGTAC  
AACAGTAATGTGTTATCCGATTCTGCAGATAAACATGCTAAAGGAAGACTAACGTGGACACAACGTATA  
GCAGCTGCAATCGGAGTAGCAAGGGGAATGCAGTTTTTGCATACTGGAAATGTACCTGGTGTTTTTCA  
AATAACATAAAGATAACAGATATCTTGTGGATCAGAACTTTGTAGCCAAAATTTGCAGCTATAATTTAC  
CTATTCTGAATGAGAATGTAATGGAGCAGAAGAGTACAAGGTATGCCTAACTGTTCCAAATTCTAAGTT  
GCTCGGACTCTCCAAAACGTTGCCACACACATGTCGGATCCTTCAAAAATGCACCTCTTTGAAGGATCC  
AACATGCTCCCAATGACATGATTGTTAATATATTAGTTAATCATGTGTACTATGAAGATCAAATATTATGC  
TAATCTCTCTATGGTAGTAGACATAATTAATAATATATTAGGTACAAAAAAGTTGTATTAGTTTTCTTAC  
TTCTACTAATCCACAGGGCTAATTATGAAGAAAAATTGGTTGTATATGATTTTGGAGTAATATTATTGGA  
GATAATTAGTGGGAAGCAGATAAATACCAAGAATGAAGTGAGAGTTACACAAAATCAGGTATGATTTA  
ACACTTTTTTCCACTCTTCAACAACACTATGTCCAAGTCGAATGTAAGTTAGGATCAGCTATATGAATTCT  
CACCGACTCTTTTACTCTTCATATTATGTGCAGTTACAAGAGAGCATAATGTCTAATGCAATGTCAAGAA  
AGAATGTGGTTGATCCAGCAATTAGAAATTCGTGCTCGGATGAATCATTGAAGACGATGATAGAAATAT  
GTTGCAGGTGTTTGGAAACAAGATACAGAAGATATGCCCTCAGTTGAAGATGTAATATGGAATTTGCAGT  
TTGCTGCTCAAGTTGAGGATTCATGGAGAAAAGACTCTTCAAGTAGTGATGCCTCTCCAATTTACATCT  
CTACAGCTTCAAACCCAACCTGTGCGCAATAGCAATAGCTCGTTTGTGTGACAAGCTATTTCTAACGTG  
GATAACTAATCTCGATACTATTATCCATCCTGTGACAAGAATAACTAACTAACAATTTATGTAATAATT  
TTCTTTGCATAGCTTATACAAAAAAGTAAGTTTTTCATACAATCTTTTTCCTAACAAGCAGATGCCATAGCA  
ATTTCTTGTGTATATACCAACCCAACCTTAATAGTACCTAGATATTACAAGAGCAACATATAGTGCAGA  
AACCTATATTAGACGTGGACGATGAAAAACAAAAACAAAAGAATGCAAAGAGGGACTAGTTAATGGAA  
AAGGGAAGCATTGCAAATGATTTTTCGGACAGTAGAAACAGACTATCTATTCGTTTGCAGGAGGAGTT  
TCCATTTTCTGAACTTGAGGGGCTGTCACTGCCACTAAGCTAAGATCAGATGAGTTGCAATCTCCAGATC  
TTTACGGATCTCCCGTACTCCTGGCATATGGCACATAAGTGGCAGAAAAAGTGTGTGGCGAAGTCTC  
CACATGGAGCTTCTGCATATATATCAGGGCACACAAAATTGTTAAATGCAGAAATACTGATGTAAGCA

GTTTGCATCTTTCTATTTCAGGCATGGAACCATAGTATTTTCGTAGAACAGAAAAGGGGGCAGGAGCTAAT  
GGGAGGAGAGGAAGATGAAGAATTAAGAATTCACGGTAACTGGTTATAAATGCTGCAAACCTCATCCAA  
TAACAAACTCAAACTGAAATTTCTAACTCAGACATCATCTCAATGTAAACCAACAGAATAGGAAACTG  
AAGTCAGTTCTCTTTCTAGATGGAGTCCTAATTTTCCCGATCTGAAGTTGATAGTTTATCGAACTGAAGTC  
CACCCTACTAATTCAAATGAAGTATAATCATCTCTCCCGTGGAGTCGATTACACACTGTAACCTTTTAAAT  
CTTTTGTAACCTCTACAGATAACATCCAATTCAAAAGAATGTATGTGGAATTTTAAGACATTTCTGATTAA  
TTTTCTTTCTAATGAAAAG

>M6-PGSC0003DMG400028312 M6 LRR-RLP

ATTTCTGGTGATAAACAAAAGTACATGGACATAATCAACTTAAGTTTACCTAATCATTTGACAAATGGCT  
TTCTTTACTTTGGAAAACATTTTGAGGATGAGATTTTGGTTCGAGAGTTGATTCAGCTTTGGATCGCGGA  
AGAATTTGCAGTAGGTAACCAGTTCAAGAGTGCAGAAGATGTAGCAAAGGACTATGTGAAGGAATTAA  
TTGATAGTAATCTTGTAATGGTTGTTGCAAGGAATTTCTTTGGTGAGGTGAAAGCAATTGGTATGCATGA  
TCTGTTGCGTGAGTTCTGCTTGACTCGATGTAAGAGTTATAGGTAAGATCTCATTGAATCATCGATCAC  
AACTTTGTTACTTCCAGACTCTTTAACTGGTCTTACTATTTTATTTTCTTCTTTTGGTATTTTGTTTTCT  
TTGCAGATCAAGTAATTCAACAGCTGCTGAGCACGAACGTGGCATTTCACTTGATTTCCGTTATAATTAT  
AAAGAAGCTGAATATTTATATCCCCATTCTGCTATCTCCGAATACCCTATTCTGTTGACGATATACTTGA  
CCACAACAACCTTTCTCATCTTTGACTGCAAAAAGTTTGTGTTTCAAACCCAGAATTACATCACTGAGAGTGT  
TGGATTTGGTGTGTGTTACATCGAGCAATGCACCTTATATTCAATTCTTGATTAATTTAAGATACTTGTCC  
ATGAAGGGGAATTTTGAGGAAGATCCATCATGGTTATCCAACCTCAAGTACTTAAAAACATTGATACTCA  
GAGAATCGCGCAGATTAGATCTATCTTATGCAATATGGGGTATGGTGAGCTTAAAACATTTGGAAGTGA  
CTGGTAAACCAGCTGTCATCAGGTGCTATGTCCCAGAGTTCATGATGAACCGTCGTTTAAACAAAATTACA  
ATGTCTTTCTTTTGTACACTTACCTGAAGGCGGAGAGTTTCAAGAGTTCATGTCAAAAAGTACCCAATTTA  
GTAAAGATGAGGTGTTTGGTTGATGAGGCTGAGCCACAAGGTGATCAGACAATATGCATTAGGCTTCCA  
GGTTTAGACTCTTTGAATAAACTCGAATCACTTAAATTTAAGGTCTATTTTCTAAAACATGGTGCAAAGC  
GACTTGAGATCAACTTTCCTAGGAACCTCAAGAAGTTGACCTTGTTCATCATTTTCGATTACCATGGAGTGA  
AATTTCAACTATAGGAAGATTAGAAAACCTGGAGGTGCTCAAGTTGGAGTCCAATGCTTTTCGAGGGAGA  
TCAGCAATGGGATGTCGATAATGAGGAGTTCAAAACCTCAAGTTCTTGATGTTCTACAACATGAATATT  
CCACAATGGAACCTTTCTGATGATATGTTCTTTCCTAACCTTCAACATTTGATATTCAGAAATAGTCGACT  
GAAAACAATTCCTCGCGACTTTGAAAACCTTACTTTTTCTGCAGATGATTGAGGTGTCTTGGTGTAAATGC



AGCCGTGATGCCTTGAACACTGCTGAAGAGATTAAGAAAACCTCAAACCTGATATGGGAAATCATGAATTT  
AAGCTCATAATCAAATCTAGAGAGGATGATGATCATGAAGAAGAAGATGAAGAAGATGATCATGAGGA  
TGCACATCAAAGAA

>M6-PGSC0003DMG400028575 M6 LRR-RLP

AGTATTTAAAATAGGCAAAAAGAATTGATCTGTTAGCCAAAAATAAATACAAACGAATCCTGTTGTTT  
ATTTGCGAGGATTTTGCTATTTTATACGTTTCAGATCTGCAGAACTTGGAGTTTCTTTTTCTGTTGACA  
GTCCAAATGAGAAGTGAAATGTTTTCCAGCTTTTCTTGATCCTATTACTCTCCATCTGCTGTAAAATGAG  
TGATGCAGTGGCAGCTAATTCCAGTAAATGTCTTGAGGATCAGAAGATGTTGCTGCTGCAGCTGAGAAA  
TAACCTTACTTATGATTCTGAAATATCTACCAAGCTAGTGAAGTGGAACCAACGGATTGACTGCTGTCAA  
TGGGAGGGTGTCACTTGCAACGGTGAAGGCCAAGTTATTGGTCTTGACCTTAGCGCTGAATCATTCTCG  
GGCAGTATCACTCCGTTAGCTGATCTTAAGTTTCTCTCTAGTGTCCGTCTTGATGGGAACAATTTATCTGC  
ACCAATTCCAGAGTTCTTTGCGGAATTCACCAATTTAACTGTCTTGAGTCTGAGTTCCTGCAACTTGATAG  
GAGAGGCACCTCAGAAAATATTCCAGGTACCAACTCTGCAAACAATTGACTTATCAGGAAATAGGATTC  
TTGGGGTTCTTTACCTGAATTTCTTCAAAGGATCTCTACAAAACCTGGTTCTTAGTGATACGAAATTT  
TCAGGAAGTTTACCTGAGTCCATAGGGAACCTTAGGAAGTTGTCGCGTGTGAACTTAGAGCTTGTAATT  
TTACAGGTCCAATTCATCTTCTATGGAAAATCTAACCAGCTTGTTCTTCTGGATTTCAATTTCAATAGCT  
TCATGGGTTCAATTCATCTTTAAGCTGTCCAAAATCTCACTCATATATCCTCTGCTAGAAATCGTTTGA  
CAGGAATATCATCAAACCTGGGAAGGCTTTGAGAATCTTGAGTATCTTGACTTGAGCAGTAATTCATTTT  
TGGGCTCATTCCAGAATCATTTTTTACCTACCCTCACTTCAGTTTTAGTTCTGTCCAACAACAAGTTTT  
TGGCAAATAACTGAATTACAAAATGTGATTTCTCCACTAAAAAGTCTTGAGTTGAGTTCCAACAAATTG  
GAAGGGCCAATACCTGAGTTTTTATTTGAGCTGCGTGATCTTTATGGTCTTTCATTTCAATCAACAAGTT  
TAACGGTACTGTGCAGTTGAAGAAGTTTACAAACCTCAATAAACTTGTTAGTCTTGATCTGTCCCACAAC  
AGTTTATCAGTTGACACAACATAAGTGAATCGGACCTTGCCTTGCTACCCAGCTGAATAGTTTCATGTT  
AGCATCATGCAATCTGCAGAATATTTCTTCTCAAGAACCAATCAAAGTTGTCGATGTTAGATCTCTCAA  
ACAACCAGCTTACTGGTGAAATACCAAACCTGGTTGGTGGAATCAATGACGGACTTCTCCGTTTTCTGAA  
TCTTTCTTTCAATCAATTTACGCGCCTTCAAGAACCTTATACAATTGGCTTTCTCATGAATTTCTTGATCT  
GCATTCAAATCTGCTCACTGGGGTTATTCCATTACCACCACGTGCAGCTGCTTATATTGACTTCTCAGACA  
ATAACTTTTCTTCTTTCCACCTGACTTTGGCAAGTATCTAGTAACTGCTCGGTTCTCTCAATTGCAAACA  
ACAAAGTTATCAGTAGTATCCCTTCTTCGATATGCAAACCTCCAGCTATCTTGAAGTACTTGAGTTGTCAAAC

AACAGTTTGAATGGAATAATACCATCATGTTTAGCAGAAAAGAGCAGCACACTCAAAGTACTGAACCTG  
GGAAAGAACAATCTCATAGGAAATATACCTGAAAAGTTTTCTTATAATTGTGAGTTACAGAGCCTTGACC  
TCAGTCAGAATCACTTAACGGGTGTGCTTCCTCGTTCCTTGTCCAAGTGCACAAAGTTAAAGGTATTAAT  
ATTGAAACAACAAGATCAAGGATACTTCCCCTGCTGGTTGAAGAACATGTCAGATCTTCGTGACTTG  
TATTACGCTTCAATGGTTTCCATGGGAACATTGATTGCTCACGAGTGAGTTCCAAGTGGACCGCACTTCA  
AATCATGGATCTAGCTTCCAACAATTTAGGGGGTATTCTTCCACGAGGTTCACTTCTGGAGCTAAGAGCA  
ATGATGGCTGACCCATCTTTAACACATTACGCTCTGATATCTTGCACTTTGAGTCTTCTATTAGGCCGAT  
ATACTATCAGGACAGAGTCACTCTTCTCTTAAAGGACAAGATGTTACACAGACAAAGATCTTCTCTTCT  
TCACCTCCATTGACTTCTCAAGTAACAATTTTGTAGGGAACATAACCAGAGATAGTTGGAGATCTCAGATC  
ACTTTATCTTCTCAATATTTACACAACAATCTCACGGGTCAAATCCCTCCAGCAATTGGAAATTTGAAGC  
AATTGGAATCGCTGGACCTCTCATTCAACAAGTTAGGTGGCAATATCCAGAAAAGCTTGCTAGCCTCAC  
ATTTCTTCTCTTAAATTTATCAGCTAATGAATTGGTTGGAATGATTCCACGAGGCAACCAAATTCAAA  
CATTGGAGAAATTTCTTTTGAAGGAAACAAGGGGCTATGTGGGTTCCGCTGAACAGAACTTGCAAGA  
ATAATTCAGCAGATGCACCTTCTGAGCCAGAAGTTGAAGTGGACGAATTCATTTCAAGGACGGAGATTT  
ATGTAAGTGCTATATTGGGATTTGTTGTTGGTATTGGGATCATTTTCTACCACTTCTGTTCTCAAAAAGA  
TGGAACCAGTCGTACAACAGAATAATTGACAGATTAATTTAAGGATATTTTACAGCAGCAAGATCAAGAA  
AGGAGAACTAGTAGCAGTAGTGTAGCATCTTCGAAAAAGGCAGCAGGGAAATCAAGAGGCAGCCATTA  
ATTTACAGGATGTAACACTTCCTTGCAGCATGCACACTATTGGTACTTCTAATTGTTTCCACTATGAGTT  
ATCGGTGTTTGTACCTTTCATGTTTCATTTAGTGGCTTCTTATTAGAAAAGAAGACACAATGCAATCT  
TACATTCTGTTTTAGGTAACGGTCAGCGAATAGCCATAACAAA

>M6-PGSC0003DMG400028576 M6 LRR-RLP

AAAATAGGCAAAAAGAATTGATCTGTTAGCCAAAAAATAAATACAAACGAATCCTGTTGTTTATTTGCG  
AGGATTTTGCTATTTTATACGTTTCAGATCTGCAGAACTTGGAGTTTCTTTTTTCTGTTGACAGTCCAAA  
TGAGAAGTGAAATGTTTTCCAGCTTTTCTTGATCCTATTACTCTCCATCTGCTGTAAAATGAGTGATGCA  
GTGGCAGCTAATTCAGTAAATGTCTTGAGGATCAGAAGATGTTGCTGCTGCAGCTGAGAAATAACCTT  
ACTTATGATTCTGAAATATCTACCAAGCTAGTGAAGTGGAAACCAACGGATTGACTGCTGTCAATGGGAG  
GGTGTCACTTGAACGGTGAAGGCCAAGTTATTGGTCTTGACCTTAGCGCTGAATCATTCTCGGGCAGT  
ATCACTCCGTTAGCTGATCTTAAGTTTCTCTCTAGTGTCCGTCTTGATGGGAACAATTTATCTGCACCAAT  
TCCAGAGTTCTTTCGCGAATTCACCAATTTAACTGTCTTGAGTCTGAGTTCCTGCAACTTGATAGGAGAG

GCACCTCAGAAAATATTCCAGGTACCAACTCTGCAAACAATTGACTTATCAGGAAATAGGATTCTTGGG  
GGTTCTTTACCTGAATTTCTTCAAAGGATCTCTACAAAACCTGGTTCTTAGTGATACGAAATTTTCAGG  
AAGTTTACCTGAGTCCATAGGGAACCTTAGGAAGTTGTCGCGTGTTGAACTTAGAGCTTGTAAATTTTACA  
GGTCCAATTCCATCTTCTATGGAAAATCTAACCAGCTTGTTCTTCTGGATTTCAATTTCAATAGCTTCATG  
GGTTCATTTCCATCTTTTAAGCTGTCCAAAAATCTCACTCATATATCCTCTGCTAGAAAATCGTTTGACAGG  
AATATCATCAAACCTGGGAAGGCTTTGAGAATCTTGAGTATCTTGACTTGAGCAGTAATTCATTTCTGGG  
CTCATTCCAGAATCATTTTTTTACCTACCCTCACTTTTCTGTTTCTGTCCAACAACAAGTTTTCTGGC  
CAAATAACTGAATTACAAAATGTGATTTCTCCACTAAAAAGTCTTGAGTTGAGTTCCAACAAATTGGAAG  
GGCCAATACCTGAGTTTTTATTTGAGCTGCGTGATCTTTATGGTCTTTCACTTTTATTCAACAAGTTTAAAC  
GGTACTGTGCAGTTGAAGAAGTTTACAAACCTCAATAAACTTGTTAGTCTTGATCTGTCCACAACAGTT  
TATCAGTTGACACAACATAAGTGAATCGGACCTTGCCTTGCTACCCAGCTGAATAGTTTCATGTTAGC  
ATCATGCAATCTGCAGAATATTTCTTCTCAAGAACCAATCAAAGTTGTCGATGTTAGATCTCTCAAACA  
ACCAGCTTACTGGTGAAATACCAAACCTGGTTGGTGGAAATCAATGACGGACTTCTCCGTTTTCTGAATCT  
TTCTTTCAATCAATTTACGCGCCTTCAAGAACCTTATACAATTGGCTTTCTCATGAATTTCTTGATCTGCA  
TTCAAATCTGCTCACTGGGGTTATTCCATTACCACCACGTGCAGCTGCTTATATTGACTTCTCAGACAATA  
ACTTTTCTTCTTTTCCACCTGACTTTGGCAAGTATCTAGTAACTGCTCGGTTCTCTCAATTGCAAACAACA  
AAGTTATCAGTAGTATCCCTTCTCGATATGCAACTCCAGCTATCTTGAAGTACTTGAGTTGTCAAACAAC  
AGTTTGAATGGAATAATACCATCATGTTTAGCAGAAAAGAGCAGCACACTCAAAGTACTGAACCTGGGA  
AAGAACAATCTCATAGGAAATATACCTGAAAAGTTTTCTTATAATTGTGAGTTACAGAGCCTTGACCTCA  
GTCAGAATCACTTAACGGGTGTGCTTCTCGTTCTTTGTCCAACCTGCACAAAGTTAAAGGTATTAATATT  
GGAAACAACAAGATCAAGGATACTTTCCCTGCTGGTTGAAGAACATGTCAGATCTTCGTGTACTTGTAT  
TACGCTTCAATGGTTTCCATGGGAACATTGATTGCTCACGAGTGAGTTCCAACCTGGACCGCACTTCAAAT  
CATGGATCTAGCTTCCAACAATTTAGGGGGTATTCTTCCACGAGGTTTATTCTTGGAGCTAAGAGCAATG  
ATGGCTGACCCATCTTTAACACATTACGCTCTGATATCTTGCACTTTGAGTCTTCTATTAGGCCGATATA  
CTATCAGGACAGAGTCACTCTTTCTTAAAGGACAAGATGTTACACAGACAAAGATCTTTCTTCTTCA  
CCTCCATTGACTTCTCAAGTAACAATTTGTAGGGAACATACCAGAGATAGTTGGAGATCTCAGATCACT  
TTATCTTCTCAATATTTACACAACAATCTCACGGGTCAAATCCCTCCAGCAATTGGAAAATTTGAAGCAAT  
TGGAATCGCTGGACCTCTCATTCAACAAGTTAGGTGGCAATATCCAGAAAAGCTTGCTAGCCTCACATT  
TCTTTCTTCTTAAATTTATCAGCTAATGAATTGGTTGGAATGATTCCACGAGGCAACCAAATTCAAACAT

TTGGAGAAATTTCTTTTGAAGGAAACAAGGGGCTATGTGGGTTTCCGCTGAACAGAACTTGCAAGAATA  
ATTCAGCAGATGCACCTTCTGAGCCAGAAGTTGAAGTGGACGAATTCATTTCAAGGACGGAGATTTATG  
TAAGTGCTATATTGGGATTTGTTGTTGGTATTGGGATCATTTTCTACCACTTCTGTTCTCAAAAAGATGG  
AACCAGTCGTACAACAGAATAATTGACAGATTAATTTAAGGATATTTCAAGCAGCAAGATCAAGAAAGG  
AGAACTAGTAGCAGTAGTGTAGCATCTTCGAAAAGGCAGCAGGGAAATCAAGAGGCAGCCATTAATT  
TCACAGGATGTAACACTTCCTTGCAGCATGCACACTATTGGTACTTCTAATTGTTTCCACTATGAGTTATC  
GGTGTGTTTACCTTTTACCTTTTATGTTTCATTTTAGTGGCTTCTTATTAGAAAGAAGAACAATGCAATCTTAC  
ATTCTGTTTTAGGTAACGGTCAGCGAATAGCCATAACAAACCTAATAACAACCTCTCTTTTTTTGAAGAA  
ACAGAAGCCAACCTTTGCCATTTTCTAAGTACAAAATAGTTTATTCAAGTTCTCCCTTATTCTTCGAAGTCA  
GAGTCGCTCTGCGCAGACAGTAAGACTTCATCAAATTCCTTACTGAAGTCTTTATCGCCATCCTGCTCTTC  
AGCCACTTCTTGTTGGGAGAACTTA

>M6-PGSC0003DMG400028591 M6 LRR-RLP

TTCCAAAATTCATTTGGAACCTTTCACAAATCACCCAACCTGGACCTTTCAGACAACAATTTGGATGGCAAA  
ATTCCAGACGTTTTTTCCAACCTTGCAAATGCTTACATCCTTGTCACTGCAGAACAACAACCTTCACTGGCCG  
GTTCCCATCTTTTCTGTGGATTTGACAAACCTTCAAGTTTTAAGGTTGGGAAACAATTCCTCAGTGGTA  
CCCTTCCCGAGCTTAAGACTAATTCAATAGAAATACTTGATTTGTCTCGTAATCAATTCTCTGGTCCCATA  
CCTCAATCGCTTAGACATCTTCTCAACCTAACTGTTGTCTTTCTTGGACAAAATAAGTTGAGCGGCGAGAT  
TGGAGCAGAAATGTTTTCAAGCATGACAAACCTCTTAATTCTTGATCTTTCTAATAGTGGTTTATCATGGA  
GTGGCAATATCAACACCCTTTTCCCCTTCTTATTATTTAGCTTTACGCTCTTGTCTGTGAAAGATTTCC  
CAGATTTTCAATCAACTCTAAGAACTTATGGATTTTGGATCTCTCGGAGAATGAAATTCACGGGCAGTT  
ACCGAAATGGTTTGGGGGTTTGGGTGCATTGGCAAACCTTAACCTCTCTCACAACCTTCTTACAAGCTTA  
GACCATCTACCTTGGGAGACAATCATGGTACTTGATCTTCAATCAAATTCCTCACAGGACCTTTGCCATC  
CCCCATTTGCACATCAACTTTCCTTTATATAATAAATTTGTCTTACAATAATTTGAGTGCCGAAATTTCCAA  
TTGCTTGTTTACTTTTTCTCGCTCATGGTCTTAGACTTACGAGCTAATAACTTCCAAGGACCCATCCCCAA  
CAAATTCAAAAGAACAGTCAGCTAATTCATATTAGTTTGGAGCAAAAATCAATTGGAAGGTCCCATCCCCA  
ACATCCCTAGCCAACCTGTACATCCTTAAGAGTCCTTGATTTGGGAAACAATAAAAATCCATTCTACATTTCC  
CTCCTGGTTGGAAACATTGCAAGAGTTAGAGCTTCTCATACTGAAATCTAATAGATTTTACGGACCCATC  
GTTTCTTTCCAAACAAAATTGCCATTTCAAATATGAGGATCTTTGACCTCTCCAACAATTCATTTACCGG  
CTCTTTACCTATGGAGGTTCTAAAAGGTTTCAAAGCTATGATGTACATGGATGCACACAAATCAGGAGTG

GAGTACTATGTCGAGGAAAATTTAAGAAGTTACTATGTCGATAAGCTTTTGTATAGTGGATTGTATGTGG  
AATCAGTGATATTGGTGATGAAAAATCAAGAGACTAAATTCAACAAAATCTTGAAGATGTTCACTACAAT  
CGATTTATCAAGGAACAAGTTTGAGGGAGAAATCCCGAAGTTCATTGGGAATTTTAATTCACCTTCTGCTG  
CTGAATTTATCTCACAACAACCTCACTGGGCATATTCCTATTGAAATGAAGAACATGAGCACTCTTGAAG  
CTTTGGACCTTTCATTTAACCATCTTACCGGTAAAATTCCAGTGGAATTGGCAATTCTCACATTTCTTGAG  
GTCCTAAATCTGTCACACAACCATCTTGTTGGACCTATTCTCAGAGTAATCAGTTCAATACATTTCCAAA  
TGATTCCTATTTAGGAAACTCTGAATTGTGTGGATTTCCACTGTCAAATGAATGTGGGAAGCATAAGAGT  
GCATCAGTACCAGTTGAACAGGAAGAAGATGAACCAAGTTTTCTTAGCGAAATGACTTGGCAGTCTGTG  
CTAATTGGTTATGGTTGTGGCTTGTCTTTTGGTTTTGGCATAGTGTATCTCATATACCTCTTTGAATGGCC  
AAGATGGTTCATACACTCTTTTGAAACTATCACTCGTGACATGATATACATAGTACTGAGGGCACGTAAA  
AGGCGCAGGAGGAATTTTACAGAACAAGACACTGAAAATCTATGAGGTAATGACTAATTAATAGTCGC  
GTTAATTCATTATTTTCTTGTATGCATAATCAAACATATATTTTATTAGCAATACTTAAGGTCATGAAAAT  
ACAACATAATCCATTGATATTAATGGGAATTGGAACTTTGTTTTTGTACAAGCTCTAGTCCCAAAGA  
GTTTCTTAGATATTCAATACTTTAAACTTTATTTGTTTGTTTTTTTTTCAATAAAAAATCAAGGAAGTG  
TACACAATATCCTAATGTAACCTATTGTTTATCATTGCTATTGAGATGACAATCAGAAAGTATGAAGCAA  
GAGAGAGGTCCGAGTATGCCACTAGAGCATGGGCTTGGGAAAATAGTGATTTTATAATTTTAAATAAT  
GCAGATTGTTGTTTTTAGTATACTAGTTTCTGAACATGTGCGTTGTGCGTGTGTCCAATGTAATATTTTAT  
GAATTCGTCAGGATGATTAATAATTCAATGAAAATATGTGTGTAATGAGT

>M6-PGSC0003DMG400028627 M6 LRR-RLP

GTCATTGCCATAAATATTTATATTATGTCACCTTATAAACACCCCTACAAATACAACCAAGTTTGTCACTTC  
ATTCATAGTCCAAAATGGCCTTTTTTCTCTCAATACAAATAACACTACTACTATCTTTTTTCTTCTTCTCT  
AGGATTGTCATTCACCGTTATAATGTCGGATTCCGGTGCACCTTCAGCTCTAGTTGATGCTCCACAACT  
GGTTTCTCGATGAATAATAATCGTGCACGAACCGATCCTCGTGAGCAAGAAGCCGTTTACGACATTATG  
AGGGCTACGGGGAACGATTGGGCCACCGATATCCCTGATGTTTGTGCGTGGTCGATGGCATGGTATTGAG  
TGCATGCCGGATAATGACAATGTGTACCATGTTGTGTCACCTTCCCTTCGGCGCATTGTCTGATGACACAG  
CATTTCTACGTGTTACTCAAGTCATTGTTTCAATTCACCTTCAGTTAGGAACTTCCACACCTTCGGACTT  
TATTCTTCTATCGTTGCTTTAGTAACAATCCTCAGCCATTCCAGGATTTCTAGCCAATTAGGGCCCACTT  
TGCAAACTAGTTTTAAGGGAAAATGGGTTTACAGGGACCATTCTAATGAATTGGGTAACCTAACTC  
ATTTGAGAGTTCTAGATCTTCACAAAACAATCTTAATGGTTCAATACCGATCTCTCTGGGCCGGATCATC

GGTTTGAAGTCATTAGATTTGAGTGACAACAACTAACCGGTTCAATTCCAAGTTTAACTTCCCTCAGTT  
AAATATCTTGGACCTTAACCAAAATCACCTTACGGGTTCAATTCCATCCACACTCATGAGCTGTCATTGCG  
TTATAAAGCTAGACCTGAGCCGTAATCACCTCTCTGGTTCAATACCTGACTCGATCCACAACCTTAAACAAC  
CTCATCCTTTTGGATTTAAGCTACAATAGTCTAACAAGCCCATTCCAAACGTTACTCAAGAAATTGAATTC  
TCTACAAACCTTAGTCCTCAATGGAAATCCAATGGACTCAGCTACTCTATCGGATAACGTCTTCGATGGTT  
TCAACAACCTAATGATTTTAGGATTATCAAACATGAACCTTCAAGGTCCAATACCAAATTCACTAGGCCTA  
TTACCTATGCTACGAGTCCTTCATCTCGATGGGAACAAGTTAAATGGTTCGATCCCATCGAGTTTTGGTA  
ATTTAAATAACATAAGTGAGCTTAGGCTAAATAATAACATGTTGAGTGGTCCTATTCCATTTAAAAGAGA  
CATGGTTTGGAGAATGAGAAGGAAAATGAAGCTTTCAAATAATGAAGGGCTTTGTTACAATAAAGAAA  
ATGGGCTTGGAGATGATTTAGAGACATTGTTGGATTCAGGGATTGGACATTGTGGGGACTCTAAACAG  
AGCCAATAAAAACAGTACAACACATTTCAACACTCAACAGAGCAAGTTTTGTAAGATCAAATAGCTACAA  
ATTATTATCATCTCTTGGATGCTTGCTTTGGTCAGCTTTAGTTTTTGTGTAGTTTGTGTTGTGAGTGTT  
TAGAGATTTTGGTACAGTTTTTTTTCTCCTTTCTGTTTTAAATGTAAC

>M6-PGSC0003DMG400028630 M6 LRR-RLP

ATACAACACATTTAAAATCTTCAATTAGTACAAAATACATTAATAGTAAAAGCAGATCACTCTGGTTCT  
GCTCTCCGCCGTCGCCGGCAGTCTTCGTTGAGGTTTGATCGGTTCTCTTCTTTTTATTTTCATATAGAAGA  
ACAAATAAACCAAATCAAACATAAATTTGAGCTATTATTTATCACCGGGTTTTTTTTTTTAGGGGAAACT  
GAAATTCTTCATGAAACCCTAAATTAAGAAATGAATGGTTTTTTGATTGTATGGTAGAGATGGAATTTGC  
AACTAGAATAAGAAAATCTCATGCTTATATTATTCATGTACAAAGAGCTTGTGATTTGATCTGTATGTAAT  
TGTTGTTTGGTAGAGATGGACTTTGCAACTAGAATATAAAATGAATTCTATTTTTATTTTTTACGATCTG  
GTGTTTGGGCCAGCTTATGCACAACACTCAACTAATTGTAAGTGGATATGTGCTGCTCCACCAACAACATG  
TATTAGGTAACTTTTGTACCAAGACTTGGATCGTTGGAAAGAAAGACAGACCTAGTGTTTTTGGATTT  
GAAAATCATTTTCTAAAGAGCAAAATGTTTCTTAAGTTTTGAAGTGTGTTTGTGTTAGTTGAAGCAAGTAAT  
TTCTCTACAATGAAAGGCTTCACAGAGTGCCTGAAAGAGAAGATGTTTTCTATTTGTAATGAGCCTAT  
TATAAGAGACATTGTCATATTATTTGATTATGATTTTCATTAGTAGAATTCTTCGCGCTGTCTTCTTATG  
TTAGTTTTGATTTATATTTTTTTGTTCTATCAAGTGTGTTTTATGAGTTACCTATATATTAATACATAGTGTG  
ATTTGATGTTATCGGTTTGTCCAATTCGTTGAATTTTTTAAATTTCAAGCTTCAAAGCTTGAATGTCCTT  
GACCAAATTCATGGCGCCGCACTAGCTCAGGTTGTTTCGGTGGTTCAGGTTGTGTGTGACAATTTCAAGT  
CGAGGTCCTGATGCCGTAGCTCCTTTTCTGCTTTTTGGAGAACAATAATGTTTTTTTTTTGGTAAACCGT

GAAGAATTACCATTGACAGCCAAAAATTTACACCTATAGAGCACTTTAGGTAGAGGAGCCATCTTCCAG  
GAAGGGTACCCTTTCCTCTAAAGCCTCAAACAAAGACAAATCTAGTTACAAAATTTCTGAACCAAATATC  
TACATTTACTTGCTTTCCTACTATCCTTCAGGTAATCCACTCTTCCACTATCTCTTTCTTTATCTGTGTGAT  
TGTAATCTATGTATTTTTTTTTTGAAACTGGTAACTATATATTTTAAATTACACCATAACAGTGCAAAAGA  
CATTACAAAATCCCAACCAAGCTTAGGCTACTGCTTCACAAGGATCCTATCATATCAACTAGTGATTGAGC  
CTCCTCAGCATAGCTTTCTTTACACCAAAAATAAAACAAAATATACAATTCATCTTGATTTTCTCCACAAA  
ATTATATTTGTCTTCAAAGCTCTATAGTTCCTCTCCTTCCAAATGGTCCACCATATGCAAGCAGGGACAT  
GTTTCCACCATTTTTCTGACTAACTGCCCCATCATTCTGGTTC AACATTT CAGCAAATCAACACTTGTTG  
CTGGCATTGACCATCTGAGCCCTACCATATTCAAGAATAGTTGCCATAATTGTCCAGTGACGGGACAATG  
AATGAATAGATGACTATTATTTTCCCAGCAGCTCCACACAAAAGCATCTAGAACACAGTTGGAATCCC  
CTTCTTTGAAGTTTATCATGTGTGAGACAAGCATTCTTGCTACTAGCCAAGAAAAGCATACCACCTTAAA  
AGGAGCCTTCATCTTCAAATGGATCTCCATGGCCACTGATTAATTGACTGTCTGTGCCTAATCAAAATCT  
TATAAGCTGAGTTTACAGAATAAGTTACTTTTTTTTTTTTTTGAATAGGTAACCTTTAGTTTACAGAATAA  
GTTCCTTTACTAGTGGGCTTCCATATAAGTGAATCTTCAGTGTCTTTGAGCCCTTGGAAATGATTCCAAGGT  
CTTGAAAAATTCAACAACTCTTTCCAACCTCCAATCATGCAGTAGTCTTCTAAAAGTAATATTCCATCCAT  
GTA CTCTTTTGCTGATTCCAGGCTAATGTTTGGCATAGTGGCAATGCTAAAGAATTCAGGGAAGAGTTC  
CTTTAGAGGTCCATGTCCAAGCTAGTTATCACACCAAAAAAGGATTTTCTACCATTGCCACTCTTAGGC  
TAATTTTTCCAGCCATCAAAGACTAGATGGATCTGATTGCTTTCAGACTCCTACACCATGGGGGCTCAC  
AACCGCCTTTGAACACCACTGGTCTTCTTGACCATACTTGT CATGAATGACATTTCTCATAAAGCATATG  
TTTCAAGATTATACCTACATAACCACTTCATTAGCAAACCTTTGGTTGTGAGCATTTAGGTTCTGATGCCA  
AGGCCACCATCTCTTCTGGATTTGATAAGAACATCCCAATTAACCAGGTGGAGTGCTCTTTTTTCGTTGTT  
GCCTTGCCATATGAAATTCCTTCTGATCTTGTCAATTCTATTCTAACCTTGCTAGGTAAAGGAAAAAGAG  
ACATAACATAAGTAGGAAGGGCATCCAAAACACTATTGACTAGTATAACCCTACCACCTAGAGATAAGT  
ATTGTCCCTTCCATATTGCAAGCCTCTTTTACACCTTTCTATGACACCACTCCAAATCTGCAAGGCTTTAC  
TTTTAGCACCCAAAGTTAACCCCAAATAGGTAGTAGGTAGGGAACCCACCACACATCCCAGAATACCTGC  
AAGTGCTTGAATATTGCCACTTTATTAACCGGGAATAAACTGCTCTTATGCCAGTTGACATGAAGTCCG  
GAAACTGCCTCAAAAATCATGAGAATAGCTCTCAGATGTAATCTATGTATTTAGTATTGTCCCTCTGAATA  
GTTTCCAATTTCTTGCTCTCCAAGTGGATAGATTCTGGCTCCCATATAGCTGTAGCTATTTCTTCTTATA  
TTGCTTCCAGTGTCTTCTTTTATCCATTTTAGGCATTAGCACTTCCGTTTTTTGTATTTTAAATACACGACCA

AGTCTCCAGTGCTTCCTTCACTTTTGTGTCCAGGTATATTCTGCAAATAAATGTACTTGAGTCTCCAATTT  
GCTTTCTCCACATAGGCAACACTTGTCACTTCTATTGGCATTGTCAGTCTGATCATCTCTCTTTTCGTTAG  
CAGTTTTTCCTGATTTGCTAGCCATAAAATAAACCTGTGTCTAGGCAGCATGAGTGAGTTCCATATCAAG  
TCTGCTACAGGTAGTTTCAACTGCCTACCCAGTAATTGGTTGTAACTACAACCTCACATTATATGCTCCATT  
GGTCAATAGACAGTAGGTTCCATTAGTATAACCACATTCCCATGGTTAGTTTAATGGAGTTGAGCTTCCTC  
CAATACCAGCTGCTATCCTTAGAGGGTGTATGTGTCCAAAAATCTTGCTCGTCTTTCATATATAGTCCATG  
CACCCATCTTATCCATGGTGTATCTGCCTTGCTAGCAATCTGCCATATCAACTTACCAACTGATGCAATAT  
TCCATAACTGTCATCTCTTGATGTTCACTCCACCATTCTTCTTTGGCACACAAATCTTCTCCCACGATACAA  
GGACTACCTTCCTCTTGTTCTCCTTATTTCCCTCATAGATAATCCCTACATTTTATATCAACCTCTTTCAAAT  
ACTTTGAGGCAAGATGAAAACATTGCTCCAAAAGTTATAGAGCGAGAAGAGTGCAGCATTATGACCTG  
CAATCTGCCTGCACATGACAATGTTTTGAATATGCACCAGTAATCCTGTTGGTTATCTTGTTGATCAGTT  
GATGGCAATCTATCTTTGTCCATTTCTTTGATGATAATGGCAAGCCCAAATATCTGATAGGAAGATCACC  
TAGTGAAATCCTGTCAGCTGCAATATTTTTTCCTCATAACATCATCCACCCCAGCTACAAATATATTAG  
ACTTGTCCAGATTTGCCACAAGGCCTGTCACCCTACTGAAATGGTTCAACACCTCTATCATCCTTCTTATA  
GACTTAAGATCCCCTTTGCAAATAGCATCAAGTCATCTGCAAAAATCAGATGGTTTAGCTTGGTGCTAT  
GACACATTGGGTGAAACTTAAAGTCTGGTAGTTCTCCTACCTTCTGTAGTGCTCTAGATAGATACTCCAT  
GACCAACACAAATAGCAATGGTGACATTGGATCCCCCTGCCTCAATCCTCTCTTCCCTTTAAAATATCCAT  
AATTTTCGCCATTTACCTTGATGGAAAATTTTGTGAAGTCACACAGTTCATCACTGGTCTGGTGAAGCC  
GTGAAGGTTTCTGGAAAACCATATCCATGAAGTGCCTCCTCAATAAACTCCCAAGATACCATATCATATG  
CTTCCGAGAACAAAAATGTTGTTGTACAGGTTCTGGGGGTTTCAAGTAATATATTGAAGAACTTTCCATT  
TAGGGTCCATTTTCATTCTTTTTTTTTTTTTGTTTCTTTACTCATTTTCTTTTGTAAATTTTTGGTGAATTTGG  
CTTCGATTCCAAAAGTTTTAACATTTTCTATCATGGCCCCTTATGTTTTGGCTTCATAATAAGAGACAATTT  
TTTGACTCTTTTCGGGATACCATTGTATTTCTTAACTGTTTTGGGAGCTTAATTGAACAAAATAAAAAGAC  
ATCTACTATCATAATGTTCTCCTCTTTTCTTGTCACTGACAGATCAAGACGCCTCTTTCACAAATTCTACA  
CTATTGCTAGTAAGGTGGAAAAAATCAAATCAGAAAAAGAAAATCAAGCATGAATCAAGGCACCTTTC  
TCTTCCCCTTAATTTGTCTGATTCTTTCTGGATTACAACTTGAAGGCTTATTGAGATTTATCAACTTTTCT  
CTAACAGATAAAGGAAAAATTTAACCTTAATAAGATCATTTAAATTCTTCTTACAGATAGAGTAAGCA  
TTGCGGTTGAGGGGGACATAGAAGATAGAATTAGTGTCTACCAAGAAATGTTATTGATTGTATCCTTG  
AGTTCTTGCCTGTTAAGAAGCTGCAAAAATTTGTACATTGTCCAAAAGCTGGAGATACATTTGGAGCG



AGCTTCCAAAATGGTGCTGGATTACGAGTTTTGTGATGAGTTAATAGACGAGTCTGAATCCAAATTCA  
GAGAAGTAGTAGATGGGATTATGTTGCTGCATATGGGCAAGATTGTGAAGTTTGATCTTGACGTTAGAG  
TAGAAGATTTAGCTTCATATACAGCTATTGATAGATGGGTTCTTTATGTCACCAGAAACAGTGTCAAGAA  
GCTACACCTTAGAATTTCTAATATTGGTGATCGTACCTATACACTGCCTCCTTGATATTTCACTGTTCAAC  
CCTGACACAGTTGAAACTTGCTAGATGTTCTTTAAACCACCTGGTTCCTTTTCGTGGCTTTCCCAATCTTGT  
AACCTTCGGTTGGCATCAGTAACCTTTTCAGAGCATTGTGTTATCAAGGCCCTCTTCTTGCTAATTTGA  
CCTTGAAGTGTGTGATGGTATGCAATACCTAAACATTGTTTCACCAGTGTGAAGTCCTTGATGTTTGT  
TACCCTCACTCCTATATCGCACTAAATTGCTTCATGAACTGCAAGAATTTGAGAGATTTAGGACTTGTGTT  
TTCCAAAGTGGTTGATAATCCAAATCATGATCATAGATCAACGTTGGTGAAATTTCTGGTAGCTTGCCCT  
GCACTTGAGGTACTCCTGTTGGATTCACTTTTCATTGACGTAAGACATGAACTTGTTTTTTCATTTGAATA  
TCTCCTATAGTGATTTTCATTCAAGTGAGATTGTAATCATTGTATTTGCTCCAAAGCTTTTGAGTGCAGACG  
TAGTTCTATCAAGTGGTCCTCCTTTTATGCTCAACTGCTTGCGGAAGCTGTCCCTCTCTGTTGACTTTGGC  
AAATTGGGTCATATTTCTTGC GTTCTACAATTAATCGAGTGTTGCGCCAATTTGAATGAACTTGAGATTAC  
GGTAAGAAATGTTAAATATATCTGGTGGTTCCTTTTTTTGCTCTTCATATATTTGAAGTTGAAGATAATGG  
TGTTTGCTTATACCATTAGGTCAATGGTACCGATGATAATATTGAAGCATTGTGAAATGTCTGAAGATG  
GCTGACTGCTTGACGCTACCACTCAACAAGCTAGAGTATGTGAGTTTCTATGGTTTTGCAAGTCCAATCT  
GTGTAGAGGCTTTTGCTATGCTATTCATTATTCAGGCACGATCTTTGCTAAGGATCTTCATTGAACAACCG  
CTAGGAACTAAATCCAGTAAAGATTTGAGTGGTTTACCCAGAGCTTCTCCTAAGGCTGAGCTAGTTATAA  
GTTAAATCGATACATTATCTATTTGTTGTCGATAAGTTTATCTAATATGTCACAAATGTTGAACCAGTTTTC  
TTCCATATTTACTGTTGGGAAAGTATGACTGATATCTGAATCTTCATCTTTTGACAGTTGAGCTTATTTTG  
GTCTCTATATCTACATGAGGCCAACTAGTAAGATTAATTTGTGAATGTTGTTGTTGGGTTTGATATCCTAC  
TAGTTTTTGAGGATAAAAACATAAAATAAAATATACTA

>M6-PGSC0003DMG400029168 M6 LRR-RLP

CCTGAAAGTTGCAGTCAAGGGAAATGCAGACTTCCAGTAGACGTCCTTCTGGTCGATTGCTGGAGTTTG  
TTTTTAGAACAATGATTCTGGCCAAAGGTTCTGATATTCTGCATTGTACAGTTTGTGGTCAAACATAGC  
AGATGCTGTGAGTTTTAGGGTGTGAAAGAAAGGAGAGGAAGAGAACATTTACTGGCAAAAAATATTCT  
TCATACAAAGCCAACCGGGAACCTTTTTTTTGAAGTCTCAACACAAAAGAAAAGACGAAAGACGAGA  
ATCCGCCCTTTTACCAAGTGTACCAGATAGAAGATGATAAAGGGACAACAATCGTTGCCTTGACAAGA  
TGATGCCCTTTCACTTCGAGGTGTCGGCTCTGAAATGATGGAAGATTGAATCATTCTTCATTCTATTACA

ACTAGTGATGGCCGGGTATCATTTTTCCGGTAGGCCATGACTAAATTCGAGATTTCTCTGTTTATTCTAA  
AAAATGGAGAAGACACGATAATTGCTTCTTCTTTGTTGAGATCCCCCAGGCCTTTCTTCTTCTTCAGG  
TCCCTCCCCTCTTATTCATTTAAATTCCATGCCACCGACTTCTTTTTCATTTTTACAGTTAGTTCTGGTCCG  
AAAGTTTTTGCCATGTCAGCACTTAACTTAAGCTTATATGGTGTGGTCTTCAAGTTCTTTCATTATTTATT  
GGAAAATTTGAATGGTTATCAATTGGGATTGAATAAGAGTGGCAGAGTTGGCAGACCACTATTTTCAAT  
GGAGAATTGAACGAGGAACTACATGGAACAACCATTAGGTTTTGTTGTTAAAGACCAAGAAAAGAAA  
GTTTATAATTTAAAAGATCAATTGCTGGCCTAAAGCAATCTTCAAGGCAGTGGTACCTAAAATTTTATA  
AGGAGGTGATTTCAATTTGATTTACCATGATCGATGAAAAACCATTGCATCTACGTGGAAAAGTCCAATG  
GAAAGTTTGTAATTCCTTCTTTTTATTTAGATGATATTTTATTGGTTGGAAATAATTTGGAGTATGTGAAA  
ACTGTCAAGTCATGGCTTTCAAAGTCATTTGATATGAAAGATATGGGTGACACATACTATATATTGGGTG  
TTAAGATCCAGAGAAATTGTTCCAAGAAATTTTTGAGTTTATCTCAAAAAACATACATAAAGAAAATATT  
GAACGCTTTTGAATGAATAGTTGCAAATCCATGAAACTTTAAACCTTGAATGTGTTCAAAGACTGAAAA  
AGAAATGGAAGACATGTCTCGAGTTCCATATTCTAGTGCTGTCCGGAGTCTGATGTATGCTATGATGTG  
CACTCGTGTACTCGCTCAGACATTTGTTATGCCGTAGGTCTTAGCAAGTATTAATCATCCTGGAAGAGAT  
CACTTGAAAGCAGTAAAAAGAATATTTTGATACTTGAAGGGAAGTGCAGATTATTTCACTATGCTATAGTA  
GATCTAATTAATTCATAAGAGATTATACAAATGTTGATTGGGTGGTGACCGGTGTGATAGAAAAACAG  
CTTATGCTTTCTTACTTATTGATAGTGCTATTTTATGAAAAGTAAGAAACAACTTGCACAACCTTTTCA  
ACTATGGAATTTGAATTCGTAGCTTGTGCATCTACAGTACAAGAACTGTTTGGTTAAAGAGATTCTTTG  
AGCATTGGATATTGCAAAGAATTCTAAGGGACCTATGATTTTATATTGTGGAGAGTCATCACATATAGA  
AGGATCCTAAGTGTACAGCAAGACCAACACATTGATATCAAGTATAACTTTGTGAGAGACATAGTAG  
CAAGTGGAGAAATAAATTTACAATACATTCCTACACGTAAAATGATAACTAATCCTAATATCTAGAGACT  
TGTTTGAGAAACATGTTAATGCTCTAGGTTTGGTAGGATATGATAATATTTTGGTATTGTAAAATAACTT  
GATTGTTATATTGTTCTCATCAATATATGACTATTTTGAATTTATATTCATATTTTATATGCATGTAATAAT  
GTTTTAGAAATGAAGAGTGTTGGACAAGTCGCGAGATTGGCTCTTAACATGAACAATCGCCTCTTACGT  
TGGAGAACGTGAAGAGATGATTTCCGCTACCATGTTATGACTTTTTTTTATAAGCCAACTAAGTCTCTCT  
AAGAAGATGATATTAATGATCAATAATGAGAGAAACCGGGTTAAACATCTAGAGGTGTTTAGACCAAG  
GTTTGTACGATGTTGGATAATCGAAAGAATGAGACACATGCACCAGTATAAGGTGAAAACATCATAGCA  
CGGTTGCAACCCAAGTATTTAAGAACCTACTTTATCTGTTGATAATATCATTGATTAGAGCTCCGTGCA  
TCTAAGACTTGATACTTGTGCAACATAAGATGCACTCAGAAGCTTTGTCTGCCTAAATCCAATATGATGC

ACAACATGCACTTCATTGACTAGAAATTGCAATATGTCCTGTTACCTTATTGCAACTTTAATAGGAGCCTC  
ACCATGAGATACATCAAGCTAGTCGAATATGCTCTTCAAATATACATGCCAAATATACTGAGGTGTCGTT  
TGTGATGTTCCCCTCAAATATTTCAAGTGACGTTCCCCTCAAATATTTCAAATTCTTCCTTCGCTTTTCT  
TTTCTTCCTTTCTTTCTTTCAACTGATAAGTATAACTATCCAATTCGTATTTGCCCCTTTCTGCAGCTATGTA  
CATAAGTTGCACTTGCTTCTCATTATGCAAATCCTCTTAGCTTCATTTGATCCATACTCGTTCTGCTGAAGA  
TTTTTCTCATTGTATTGATATTTTATGCAGAATATTACAGACAAAAGTTTGCATCTGGTTGCTGACAATTAT  
CAAGAATTGGAATCGTTGAACATCACTAGGTTGGATATTTTCTCTCAGTCTGCACGAGATTAGTTAAAGG  
AAGAGTTGTTTTTAAATGTTCTGGATAACACATAGCATCTCTTGACATAAAGGATGCCCTTTCTTGCTTA  
GGCCTTTGTCTGTTGTAGGGGTGATGATAATATAAGCCCCCTTTCTCTAAGAAGGATACTTATAATCGA  
GTATCTTGAGAGTATTTCTAATTGTTTGGTCTTTATAACCTTTTTGAGAGGGAACAAATATGATTATGTTT  
TCTTGATTGTAAGTATTTTGTGATGTGACTAGGTGCATCAAGATGACGGATTCTGGTTTGCAGCGGAT  
ATTGCTGAACTGCTCTTCTACAGACTTTGAACCTTTATGCCCTTTCCACGTAACCGCTTGTTTCATTTTA  
TAATATATCTGTCAAAGATATGTTCCATTTATTGCATATCGTGTGAATGCACCTTTCTACCACTCAAT  
GGTATACTACAAAATGCATATGTTGGAGTTTCTACTCAGATAATCTGCTTCCTTTCTTTCTTGCAGTTAAC  
AGATGAAGCTTATAAGATGATATCTCGTCTGCCTCATCTTAGATTTCTGGATCTCTGTGGTGCTCAGGTAT  
AGTCTTCAGCATTTTCTTGGACTGCTTTTCATAGGTTATGCTATTGCTTGGTGCAATACCGAACTGTCTA  
AGTGACATTGCTATTAACCCAGTTGTCCTTCAGAATCTGACAGATGATGGGCTTTCTTGTATAGCGATG  
TGCAAAAACCTGGTGTCTCTCAATTTGACATGGTATGTATCCTAAGTATATTTCAATTTTATTGGGAGCAA  
AAGGAGATACAATTGTATATTATTGAACCGATATATATTACATTTACAGGTGTGTACAAGTCAGTGATG  
TTGGGGTCATAGCAATAGCTCAAGGCTGCAGGTCTCTTGAATTATTAAGGTGAGTGTGGACCTAGAATT  
ATCACTAAAATAGGAAGACCAAATGACCTATGCTATATTACTTCAGCACCTCCACAAAGTCGACAAATA  
TCTTATCTTGTGAACTAACTAGATAGAGATATCCTGTTTTTGAATACTCCAATGTTTGTGTAGTCATTGGG  
CCTCCGGCTTAAGCAATTATAAAATATAAAGTATAACCACTTCCTATTGACTACAGATTTATTTGCAATTT  
>M6-PGSC0003DMG400029415 M6 LRR-RLP

TAATTTTTAAGTAGTTTACAAATATATAAATGTCATTTTAAAGTCTGGATCAAATTTAGATTGTTTACTCTT  
GAAAAATGAAATGTCTACATAAATTGGGACAGAGGGAGTACTTTGTACTTAACCGAGACTGGGTTTCGAG  
TCCCCAAGTACAAAGTTCTTTTATTAGAAAGATGTGTACACTATGTAAGACTTCTTGACACAAATTTGGA  
TTTAGTCAACGGGATACCGGATAACGCGTGGAAAACCATAAGGCAATAAAGATACTACAATATAGTCTT  
TTAAGTTGTAAACATGTAATGACTTTTAGTTTTTGGTCAAGGACCAAGTTATAAGTCTTCTAATAAGGAA



ATAATTTAAGAAGCTCTTAGTATTTTGTGACTTCGTTATGTTGAGTTTTTTTTGACAAATAGATATATGTTCC  
TTTCCTTACAGAAAACAAAAAGGTTGAAAGCCTACGGATCCCAAATGGTTACCGGTTTGATGATGATC  
ATATCAATTATAACAAGGTATTCAAGAGAATGCAATGCTTACAGGTGTTGATACTTCATCGTAGAACTAT  
TTGCTCGGAAAACACTGTCACCTGTTTGCCTTCTAACCTGCGGTGGATTGAATGGCCGAACTATCCTTCA  
AGTTCATTGCCAGAGGGGTTTGAACCATCACAACCTCGTTGGGCTTTGTTTACGTGGAAGTTGTCTTGTTG  
AACTTTGGCCAATACCAAAGGTATAGTGATTTCTTTCTCTCCAAAACAATAGCTCCAGTTCATCACACGCT  
ATGGTTCAAATGCTATACCAAATTAATGCTTTTGTATAAGCAATTTACATCATGTAACAGAAATAGAATA  
GCATATGTCTATTAGGAGTACTACTTGAGCTAACTGGTAATTCGCAGGTACGTTATGTTTTAATATTTTGT  
TATTTTTATGAAAACAGAACTGTGCAACTTGAAGTATTTGAATCTAAGCGAGAGCCTTGGGTTAACGAA  
GACCCCTAATTTTGGTGATATGCCAAACTTGGAGACACTAAGTTTACGGGGGTGTGAGAATTTGGAAGT  
GGTTCATCCCTCTCTTGGACATTGCAAAATGCTTACTTATTTGAGTTTGACAGGTTGTGTCAAACCTAAGA  
AGCTTCCAAAATTTGTCTGCATGGAATCTCTCGAGATTCTTCTCCTTGATGAATGCACGCGCTTAAAAAG  
ATTTCCAAAATCTGTGGAGATATGCTGCGCTTATCAACTGTATGTAGAATCCCCCTGGATAAGAAAC  
TTACCCCATCTCTCAGCGGCCTTAGTCATTTGAAACTGAAAGGTTGTGAAGTTCTTGAAAGTATTCCAG  
ACTCTTTTCTAAATCTTGAAAGACTTCACATTTTCAAGTTGCAATAAACTTACAACCTTTGCCAAACAGCCTC  
TTTGAATCACAACAATGGATATTTCTTTATATATACCGATGTTCTGGATTGGTAGAGCTCCCCGTATCTCT  
TGGAGTTCAAAGAAGCTTGGTTTTTTATCCGTAGAAGAATGTGAGAACTTAACGAAGCTTCCAAGCTCT  
ATTCAGATGGAATCCCTTACAGAGCTCAAGATATCTAATTGCCAAAATTATATACATTTCCAGAAATAAT  
TGGAGATATGCATTGCTTGAAAAGTATGACTCTGGAGTCTACTGGGATTAGAGAAGTGCCTTTGTCCATT  
GGGAATCTGAGCGGCCTCGAATATCTCAATCTGAAAAGTTGTGAAGATCTTGTAAGTCTACCAAACAGT  
CTCTGTAAGTTGAAGAATCTTCAACGGCTTATTCTTCGTGGCTGCAAAAAGCTTCCAGGAAACGTTGGTG  
ATCTGCAAGAGTTTTGAGACACTTGA

>M6-PGSC0003DMG400029555 M6 LRR-RLP

ACTATAAGAATTATGAATAATATTTT

>M6-PGSC0003DMG400029556 M6 LRR-RLP

ATACTCCCGTTGTCCCAATTTAGGTGACACTTTTCATTTTTCGAGAGTCAAACAGTTTAAGTTTGACCGAG  
AATTTGCCCATGGTTCAATTTTTAATGAAATTATATATTTGTAAACTACGTAAAAAGTACTATAAGTCGCA  
ATAATTGATAATTCAAATGTTTTAAAAATATATGAAAAATTTACGATCAAAGATAGATTTGTTTGAATCT  
CAAAATTTGAAAAATGCCA

>M6-PGSC0003DMG400029572 M6 LRR-RLP

CAAGTTCCTAGCTAGTTAGATATATTCAATGGAGTACCAAAAATTGCTAATAGCTTTCTGCTTCTATTCAC  
ATTTTATACTTTTTGTCCATCAATCTCAGCTTACATATGCTGGGCAACATCTCTGTGCCCGCTATGAAGCTT  
TTTATTTGCTTCAATTCAGCAAGGCCTCACAGTTGATCTTATTGGTTATGACTGTGACTATGAGGCCCTA  
GCTAAGACTTTGTCTTTGAATGTTACAGGAGATTGTTGTCAATGGGATGGTGTACTTGTGCATGGATTTA  
CTGGTCACGTTATAGGACTCGATCTTTCTTGCAGTTTTCTTAACGGAACCATTAATTCTAACAGCAGCCTC  
ACAAACTTAGTCATCTTCAAAGACTCAACCTTGCTTTCAACAAGTTGAGTAACTTTCCACTTGTGGATAG  
CATTAGTGAAGCTCGAAAGTTTGACATATCTCAATCTTTCGCATTGAGTACATATGATAGGGGAGAAGCAG  
ATACCACAAGTATTATCCAACCTTGTCTAAATTGGTTTTCACTTGACCTCTCCTTGTATTACACTGAAGTCAA  
GTTGATTGAAAAACCTTCAGAAGTTTGCTTCAAGACTTGACCAATTTGGAGGACTGTTTCTTGACAACT  
CGTATGCATCATTTGAGTTACCTAAGAATTTTTCTTCTTCTTAGGTAAGTCTTGAAGGTATCGGC  
ATGTTTGGGATCATAAGTGAGTTTCAGTTATTTCAATTTATCAAACCTTGCAAGTGCTGAGATTTGGACAGA  
ATCCTTTACTAACAGGCTCTTTGCCAAATTTAATCGGAGTTCAGTGAAAGTATTTAGAGTTGAAGTTC  
TTTTATACTGGTATTTCTGGGAAGGTACCCGATTCAATTGGTAATCTCCATTCTCTTTGGTATTTGAATCTC  
CAGATTTGTCATTTATCTGGCTCGATTCCAGAATCCATTGGCAATCTCACTGCAATCAGAGAGTTGATACT  
TTCAGAAAACGTCTTCATTGTTAATGTTCCCTCAACTTTCTCAAAGTTAAACAAACTCGTTCGTTTAGATCT  
CTCTTCAAACATTTTTCGAGGCTCAATTCTAGAATACATTGACAATCTCACTGCAATCACACAGTTGACAA  
TTCCAGATAACAGCTTCACTGGAAATGTTCCCTCAACTATCGGAAAGTTGAACAAACTTAACTACTTATCT  
CTCTCTTCCAATTATTTGAAGGCTCGATTCCAGACATCTTTGCCAACTTTTCAGATCTATTTGCTTTATTTT  
TTGACACTAACAAATTTCACTGGTTCATTTCCCTGTTCAATTGCAACCTTGATTTGCCTTGTGAATTTAGAGT  
TGCAAAACAATTTACTAACTGGTTCCTTCAATATAAGCTGATTTCAACTTCTACAATCACTTGATT  
TGCCTTCAATTATTTCACTGGCACAACACCCCTTCGTTATTCCTTCTTCCAAGATTGGTTTCTTTACATGT  
TCAACTCAATCAATTAACCGGGAAATTGCCAAATGTGCTCAAGATGAGTTATCTAGGATACGTACTATAC  
CGTAGCATTGATCTTTCATACAACAAGCTGCAAGGTGAAATCCCAATGCGATGTTATCTATGAGCATGG  
GTAAGCTGGATCTCTCATAACTTCCACAGGCTTTGAAAAACAAGTATGGCACTCAGAGTACTTACT  
ATACCTAATTTGGAGAACAATTTCTTCAAGGGCTTTTGCACTATCCTTTTGTGACATGTATAGTCTTGT  
ATTCCTCATTTTAGCTCGGAACAATTTGAGTGGTTCATCCCGGTATGTTTGGGTAAGTCCAGTATTTCCA  
TTTCTTTTTTAGACTTGCGAATGAACAATTTGCATGGAGAGATACCAAGATTCTTATCTACAGGGTTTCAA  
TATCTTGGTTTATATGGCAATCAATTGGGGGACAATTCCCGTGATCCTTGGTAACTGTACAAGCTTGG

AAGCTCTTGATTTGGGGAACAACAAGATAAATGACACGTTTCCGATATGGCTGCAGAACTTCCAAACC  
TACAAGTTCTGATTCTGAAATCTAATCTCTTTCATGGTCCAATTGGTTATTTGGAGTCCGAGTTCCATTC  
CTGAGTTACGAATCTTTGATCTTTCCTTCAATGGGTTCACTGGAACCTTTGCCATCTAATTTTTTCAAAGTT  
TTAGAGGTATGATGGATGTGGATGAAGAAAAACAGGAATTACTCGCTCCTACAAAGGGTCGACCAGG  
CCTTGTACAAGCATAAATCGATGTGGAAGAGATTACCTTTACCACTTTAGTTTGGTGATAAAAGGTAATG  
AGTTTGATATGAGAATCACGTCAATTATGACGAGTGTTGATATATCAAGCAACAGGGTTGAAGGATATA  
TTCAAATTCATTGGAAATCTGAGCTCACTTGTGTTACTCAACCTGTCTCACAAACAGCTTCCGTGGTCAT  
ATTCCTGCAGAATTTGCAAAGTTGCAATAGCTCGAAGCATTAGATCTCTCACGGAACAGACTCATTGGAG  
ATATTCCAGATCCATTGTCGAGTTTGACATTTCTTGAGGTCTTAAACCTTTCTACAATCATCTGGCTGGA  
CGCATTCTCTTGGGAAACAGTTCAATACATTTCAAATGATTCTTATTGTGGAAATCCTGATTTATGTGG  
ATTTCCACTATCAAAGGAATGTGGAAACAATAAAGAGTCACCACTTGAACACGATGATGGTGATGATGA  
TGATTCATTTTTTTCGAGTGGGTTACATGGCAAGCTGTGGTAATAGGTTATGGTTGTGGTCTGATATTT  
GGATTGTTGATGGGAGGTCTCATGTTCTACTGGAAAAGCCAAAATGGTTTGTGAACTTTGCTAAAGAT  
ATTGCTCAACAAATTGCTGCTAAGAAGCAAACAAGGCAAAGAAGAGACGCCAAAGACATGGTTTAAG  
AATGAACTAGCAATATAACCAGGTATGCATTAACCTTTAGTTTTGAATCAGGAACAACACTTCAGAGGT  
TGTTGGATAACTATATGTCAACTGTTTTTATTTTTTCTAAATATTCAAACCTTAATTTGTCTCTGCAGAGG  
TTGCTGGAGAGTTGGACAAGTTTATCAGCAAGTCAGTGCTGATGTTTGGCAAATAGCAATGGATGCATC  
TGTTTGTTTACTTTATGTCCATGGTTGCCAAATACGTATGTAAATGTTACAGTTTAGTTCTGTTTGTATGGT  
TCTTACATGTTGTTTTGTAACGTATTGTATTATATTGTATTGTTAGTACAACAATATGAATCCTGTATTATT  
TACTAGATGAGTCAGATCCATGCTTAGCACGAGCTCAACATTTAGGTGATTGAAATCTCTTTT

>M6-PGSC0003DMG400029597 M6 LRR-RLP

AGGGAAAATTGTATAAAATAGCAAATTATTAATTCAAATTAATGTTATAACCACAGTTTGATTTAATTGT  
AACCCGTAGCAAATAGTTGTCATTCGCCTCTCTCCCTAAATTTCTCACTCGCCACTCTCGATTTCTCGCTGG  
GCAGTCTCTTCTCTCTCTCACTTTATACAAGCACAAATGTATAAAATGTGTTTGTGTTTGTATAAAGC  
GAGAGAAAAGTATATACATATCTTTTTGTTGCTCTCTCTCCAGAGAATCTCGCTCGCCACTCTCC  
CTCACCTCTCTCTTTTATACAAACACAAATGTATAAATTGTGTTTGTGTTTGTATAAAGCGAAAGAAAAT  
TGTATATACAAATACATATATTTTCATCCTATACACTTATAATTATACAAATATATATCTTCCCCTGCCAG  
TTTTCTTTTGTCTTTCTCTTTCTCGCTTTATACAAACACATACTATACAATTGATTCTTTTGTATATATAG  
TATACCGAAATATACATATTAATATTCATATCAAACATAAAGTTTGTATGGAGCGCAATTATACAAACTA

TAGTTATAATATACAAATATGATTTTTATGTTTGCTAAACCTATAATTTACT

>M6-PGSC0003DMG400030072 M6 LRR-RLP

CTAAGTCTCTTTTATCTACTAAAACCTGCATCACTGGAAATAGTATATAATTACACTACTATCTGTGGAAGT  
TAAACCATATATAATATGACTTATTTGTGAACTGTGAGTTCAATTGGAAAGAAAAGTAAAGTGACCGCTT  
TTTCCTCACGCTCAAATATTGAGGAACCTTGGCTAATGCGAGGAGGAAAATCCATATATAAGTTTTAAAT  
AGATTAGATGGGTGGAATATCGAGAAGAGTAATGAAACCTTTGTAGGAGTTAATGGGCTAGCTTTATCG  
ATACTAGTGGTGTAAAGTTCGCTGTCATCTATCTTCCAGTGGTGGAGCCACGTTTACTGAAGAGAGGG  
AGGGGGGGGGGTATAACTGAATACCATTTTGCCAAAAGATTATATTGTGTATATAGGGGAAATGTCAT  
TTTATGTGTAGATATATACTTGTGAATCCCCGCACACAAGAGAACATTTTTGTGAATCCCTCAATGAAA  
ATCTTGCCTTCACCACTATTGTCTTCAATTTATGTTCTTTCCCGTGCTCAATCATGTATCATTCTGTAATGAC  
GTTGAACCACTAGTTATTTTCAATACACTGAAATGTATTGGGATATTGCCTTCATCCCTGATTTTAATT  
TTCAGAGTTGCTGACATGCTTGTTTTGTTAGACCATGAGGAATGCTTGGACATCTGGTGTAGATAACAATT  
AGCAATTTGCCTTGTAAATGTACTGGATGCTGTTCTTGGATGCTTGCCTTGGAAAGATGCAGTGAGAACCA  
GTATCTTGTCAAAAGACTGGAGGTACAAATGGGTAACACGTCAAGAACTTGATTTTAATGATGAGTTTTT  
CAAGTCTTTCAAACAAGATGAAGAAGCCAAGAGAATCATTTACCAAGTCCTATTAGTCCATTAAGGACCA  
ATACTGAAGTTTACTCTGTAGGATTACGAGTTGTCCAGGAATTCACCCTTCATGTAAGCTTAGGAAAC  
AAATATCATTACCTCATCATCTTTTTACATTCCAGCAACTAAGGTTTTTGGAACTTCAAGATTGCTTGTC  
CACCTCCACTCGGTTTTCAAAGGGTTTGAGAAGCTTATTAATCTCGATCTTGTACGTGTCACCTTTTGATCC  
ATCAATATTTACTTATCTCATCTCTAAATGCTCGTTGCTTGAACGGTTGAGGTTGCGTTGCTGCACAACT  
TTGACATCCTTGAAATTGATGCCGCTAATCTCAAATTCTATGAGTTTATTGGAAAAACAAAATCCATTTCC  
TTCAAGAACGCTCCTATGCTTGA AAAAGTTACTGTGGCTTTCTTGGACGACAACCTTTGACTGATACATC  
TCTTGTGTTGCTCTAATTTCCCAAAGTTCTTCCATTACATGCCTTCACTGCTGGATATGGATATATGCGGTAC  
AATATTAGAGGTAAGGTACATTTGTGATATTACTATCATAACTAAATGATGAATCTGATTGGTGTCTTAA  
AGTAATTTTTGACTTTCTTGTAGTACTTGATCTAGGGAGGTTTACCAGAGAGTCCCCCACTGCTCTGAAC  
AATATCAAATCTCTCACTATTTTCGTCCGTGCTTTAAGAAACGCCGAGGTGGTTTCAAGTGCAGTTTACTT  
GATTACAAGCTGTCCTAAATTACAAGATTTTACACTTGAATTTGTAAGCACTCTCTTTGTCTTTTTTTTTTC  
ATTAAGGTGATTGAATATGGTTTCTTATTCATCTGAACTCGCCTAACTAACCGTTCCTCAAATATTCTTTAG  
TACCAAGTGTGGGTGGGGGATATTTATGAACCTGTTGTACAGTTGCTACGAGCCCAACCATCCTCAAGC  
GGTGTGTTGAAGCTTCAAAGAGTTCAAGTGAACATGTTTACTGGTCTCGAGATGGAAATGGAGATTATG



AAGTTTATATTGGCATCTGCACCTATACTTGAGGAGATCTTCATTTGAAATTGTATGCGTTTCCTTTTTTCGT  
TCGTGTAAACAAATGATCGATGAGATGAAAGAATTCCGCAGAGCATCAACCAATGTTGAATTCACATTT  
GAAGAAATCGATATGGAAGGTGGATATGAACATGAAGAAGTCATGGAAGTGCCATGATTTTGCTAACA  
TATTATTTT

>M6-PGSC0003DMG400030149 M6 LRR-RLP

TGTTAGGATATACTATTAACCATGCGTTTTGATATAGTATTATTATTGAACAATTGTTTATTCATTTATTCA  
ATTCAATAAAGTGTTACATTAATAGATCAATTTTCATATATGTGTCCTTAACTTATATAGTAGATGATTT  
AGTGTATAGAGTTTAAGCTTATACACAGAAGATTAATCATCGTTCTTATAAGTTAAAAGTTATAGTTC  
ATAATCGTAGATGGAAATTTTGGACAAAACCATCAGAAAGATTGTAGCACGAGATTAATGTAATCTAT  
CTTGATTATGAGAATGGTATAGTTCTAACTTCTCGTGCTAGTGCATTTTGTATGTATTGAACGGGACCAA  
GCAGAGATAGATGTTTTAGACTGACTGATAAAAACATATTCTCTAACTGTTAAATGTACTTATATTCTTA  
ATCTTGATATAACGATTATGATCTGTATATATTAATTATTGTTTTGATTTATTAAGGTGAGATTCTGAG  
ATGGGTCAATATGCCTGGTAGATTGGATGATAATAATATATATTGGTGAATAATTAGTTAGTTGATGG  
AATCCATGTCTCAGTATAGAGATTGATGATACACCTTTTTATGAGAACTTATAAGTTTTTCATGTGTAAAC  
CCGGCCGGTAGATTTATGAATCTGGCACATGAAATAAGTTAAGTGTGCTCTAAAGGAAATTAATCATTG  
AATTAATTCGTCAGTAATTTAATTTATTGATTAGTATCTGGAATCTTAACATGGGGAATTACATAAGTGT  
TTAATGGTGAATTTGAAATATAAATAGAGGAGTGCAATTACGAATTTTTAGTGGAAATGATTTGTAATTT  
ATTATGGTAAGAATAATTCAAATTAATTATTTGGAATTTTCCATAATAGGAAGCCTCAGTAATAAATTC  
TGTGGTCCCTCCAGTGCCCAATTTAACTAGAACTCAGAATCTATTTTCTAGTAGAAGAAGGAAAAGTAA  
CGTGTATATTTTCTCCAAGAAAGAAACGTGAGTTTTGGGGTTTTCTGAAGAATAAGGATTTATACTTTC  
TTCTCCTTTTTGGACTGGGAAGACATCTCTATAAGTAGGGATTCTTCTAACCTAGAAAGAGATTTTCAGTAT  
TCTATACGATACTTGCCACCCAAGTATTGAGAGAGTTCAATTGTTATTTGGGATCACTGTAGAAGACTG  
TAGAGCTGGAGTTGGATTTGCTTCAAGATATCTGCACACGCTTCAAGAGGTAATCCTGAGTTAATTTTCA  
GCATACCTTGTATGTGATACGTATTTGTGATTGTTGTCTATACTCATGCAAGATGTATGATTCTGGAATGC  
TTCCGCTGTGTATGCTATTTTCTAACAAT

>M6-PGSC0003DMG400030159 M6 LRR-RLP

ATATGGGCAACATTAAGTTTTTGTGTTAGCTTTTTTCTAATAGTAAATGTGGCGAATGGTTGTTGGGA  
GGAAGAGAGAAGTGCTCTTGGAGCTGCAAGCAAACATAATGAGTTTGAATGGTGAATTGGTTGTTG  
ATTGGGCAGGATATAATGCCAATGGTTTTATAAATTGTTGTTTTTGGAAAAAGTTAAATGCAGCTTAGC

AACAGGTCGAGTGATCGAACTCGATCTTGCAGCAAGGTTTGGATCAGGGGATGATTGGAGATTTAATGC  
CTCTCTCTTTCTACCGTTCAAGTCCCTCCAACCTCTTTTTTTGTCTTACAGAAATATTA

>M6-PGSC0003DMG400030239 M6 LRR-RLP

TTGCAAATTGCTCTAGCATTCAACAGGTAAATTCAATCTCTTAATTCCTAGCAAAAATAGACAACCATCTT  
TAATTTTTTCCATTCTTGTCCATTTTTTGATTCTTTGTTTTGTTTTTCAGATTTAGAAAATGGATATTGGCTT  
GGCAGTTGGTGGTGCATTTCTCTCTTCAGTCTGCAAGTCTATTTCGATAGGCTTGCTCCTCAGGGAGAG  
CTGCTGAATATGTTTCGAAGGGACAAGCACGATAATCGGATTTTAAAGAAGCTGAGAATGACTTTGCTC  
GGTCTTCAGGCTGTGCTAAGTGATGCACAGAATAAGCAGGCGTCAAATCCATATGTGAGCCAGTGGCTT  
AATGAGCTACAAGATGCTGTGGACAGTGCTGAGAACTTAATTGAAGAAGTCAATTATGAAGTTTTGAGA  
CTAAAGGTGGAAGGTCAGTGTCAAATCTAGGAGAAACAAGCAGGCCGCAGGTAAGTCACCTCAGCTT  
GTCCTTGAGTGATGATTTTTTTCTTAACATAAAGGATAAATTGGAAGAAAATATTGAAACACTGGAGGA  
GTTGCAAAAACAGATTGGTTGTCTTGACCTGAAATCGTGTCTTGATTCCGGTAAACAAGAACTAGAAG  
ACCTTCAACTTCTGTGGTTGATGAATCTGATATCTTTGGTAGGCAGAATGAAATAGAGGAATTGGTGGG  
CCGTTTATTATCTGTTGATGCAAATGGTAAAAGTTTGACTGTAATCCCTGTTGTTGGAATGGGGGGCGTG  
GGCAAGACAACACTTGCTAAAGCTGTTTACAATGATGAGAAGGTGAATGACCATTTTGATTTGAAAGCT  
TGGTTTTGTGTTTCTGAACAATATGATGCTTTCAGAATAGCAAAGGATTGCTTCAAGAGATTGGCTTAC  
AGGTTGATGATAATATAAATCAGATTCAGATCAAATTGAAGGAGAGCTTAAAGGGTAAAAAGTTTCTTA  
TTGTTCTAGATGATGTTTGAATGACCACTATAATGAGTGGGATGACTTGAGAAAATCTTTTTGTGCAAGG  
AGATCTCGGAAGTAAGATCATTGTGACAACACGTAAGGAGAGTGTTCCTTGATGATGGGTGGTGGGG  
CAATGAATGTGGGGATTCTGTCTAATGAAGTCTCTTGGGCTTTATTCAAACGACATTCATTAGAAAACAG  
GGATCCTGAGGAACATCTAGAACTTGAAGAGATAGGAAAGAAAATTGCAGAGAAATGCAAAGGGTTGC  
CTTTAGCTATAAAGACCCTTGCTGGGATGTTACGCTCAAATCAACGATTGAAGAGTGGAAACGCATTTT  
GAGAAGTGAAATATGGGAGCTGCCAGGCAATGGAATGTTACCAGCATTAAATGTTGAGCTACAATGAGC  
TTCCCCACATTTGAAGCGATGCTTTTCTATTGCGCAATATTTCCAAAAGATTATCAATTTTACAAAGAA  
CAAATCATTCAACTGTGGATCGCTAATGGTCTAGTACAGAAGTTGCAAAATGATGAAACGGTTGAAGAA  
CTAGGCAACCAGTACATTCTTGAGTTGAGATCAAGATCATTGTTAGACAGGGTCCCTGATTCTCTTAAAT  
GGAAGGGCATGGCATTCTTAAGAGAGGACTTAGACAAATATTTTCAAATGGATGGTGAGAAATCTTTA  
TGCATGACCTTGTCATGATCTTGCCCAAATTGCATCTTCAAACACTGTACCAGGTTGGAAGACATCGA  
AGGATCTCATATGTTGGAACGAACTCGACACTTGTGCTATTCCATGGGTGATGGTAACTTTCTGTCACTTT

CAGCAGGAGATGGTGATTTTGGTAAATTGAAAACCCTCTACAAATTGGAGCAATTAAGGACATTGCTTC  
CGATAAATATCCAGCTCCATTTGTTTTAGTTAATCTAAGCAAGAGGGTGCTGCATAACATACTTCCAAG  
GCTAACATTTTTAAGGGCATTGTCATTTTCTCGTTATGACATCAAGGAGTTACCAATTGTCTTATTTATCA  
AATTAAACTCCTAAGATTTTTGGACCTTTCTTGGACAAAGATAAAACAGTTACCAGATTCAATTTGTGTG  
TTGTACAACCTTAGAGACACTTATCGTGTCGTCTTGTGATTATCTTGAGGAGTTACCGCTGCAGATGGGAA  
ATTTGATCAACTTGCGTTACCTTGACATTAGGTGTTGTTCTCGGTTGAAGATGCCTCCACATCCTAGCAAG  
TTGAAAAGCCTCCAGGTGCTATTAGGAGTTAAATGTCTTCAAAGTGGTTTAAAACCTCAAGGATTTGGGT  
GAACTACACAACCTTGATGGATCTCTATCAATTGTAGAGTTGCAAAATGTGGTTGATAGAAGGGAAGCT  
TTGAAGGCAAACATGAGGGAAAAGGAACATATTGAGAGGTTATCATTGTCGTGGGGTACAAGTATTGC  
TGACAATTCACAACTGAAAGAGACATACTCGATGAACTACAACCACACACAAACATAAAAGAACTGGA  
AATCTCTGGATATAGAGGGACAAAATTTCCGAACTGGTTGGCTGATCATTCTTTCTTAAGCTAGTGAAG  
TTGTCTCTTAGCAACTGCAACTACTGTGATTCCTAGCCAGCACTAGGACAACCTTCTTCTTTGAAATCCCT  
CACCATTGGGTATATGGATCGAATAACAGAGGTGACCGAAGAATTCTATGGTAGCCCATCTTCAATAAA  
GCCATTTAACTCTCTGGAATGGCTTGCATTTAATCAGATGACTAGGTGGAAGGAATGGCACGTACTAGG  
AAGTGGAGAGTTCCTGCACTTCAGAACCTTTTAATTGAAGACTGTCCTGAGTTGATGGGGAAGTTGCCT  
GGAAATCTTTGTTCTTTAACAGGATTGAGAATTTCAAATTGTCCGAAATTCAATTTGGAGACACCAATTG  
AACTTTCAAGTCTAAAAGGGTTTGAAGTTGTTGGTTCTTTAAAGGTTGGAGTTCTTTTTGATCATGCTGA  
GCTATTTGCATCCCAACTTCAAGGAATGATGCAGTTAGAGTTCTTAATTATCAGAAGGTGTGACTCTCTT  
ACCTCCTTGCATATTAGCAGTCTGCCGAAAACCTTGAAGGAAATAGTGATATCTGATTGTGATCAATTGA  
AATTGGAGGCGTCAGCTAGTGAGATGTTTCTCGAGAGACTGGACCTAAGTGGATGTAATTCTATAAATG  
AGATATCACCTGAGCTGGTCCCCAGAGCACACTATTTGAGTGTAATAGTTGCCACAGCCTTACTAGGCT  
TTTGATTCTACTGGGACTGAAGATCTCTATATTTCTGGATGTGAAAATCTTGAATACTTTTGGTGGCAT  
CCAGGACTCCAACGTTGTTGCGAACTATGAAAATTCATATCTGCGAGAAGCTGAAGTCGCTGCCAGAAC  
ATATGCAGGAACTTCTCCATCTCTTAATCATCTCTACCTGTATGATTGTCCAGAAATAAAGTCCTTCCCTG  
AAGGAGGGTTGCCCTTCACTAGTAGTCTTGGATCTGGTATTGCAATAAACTACAGAATGATCGAA  
AGGAGTGGCATTACAGAGACTCCCTTGTCTCAGAGAACTTCAAATCTATCCCGGTTCTACTGACGAAGA  
GATTCAATGGGAGATGCCTTGCTCAATTCAAAACT

>M6-PGSC0003DMG400030240 M6 LRR-RLP

GTTGTCTCTTAACCACTGCAACAACCTGTGATTCCTTGCCAGCACTAGGACAACCTTCTTCTTTGAAAGTCC

TCACCATTGGGTATATGGATCGAATAACTGAGGTGACCGAAGAATTCTATGGTAGCCCATCTTCAATAAA  
GCCATTTAACTCTCTTGAATGGCTTGAATTTAATCGGATGAACGGGTGGAAGAAATGGCACGTACTAGG  
AAGTGGAGAATCCCTGCACTTCAGAACCTTTCAATTAAGACTGTCCCAAGTTGATGGGGAAATTGCCT  
GGAAATCTTTGTTCTTTGACAGGATTGACAATTTAGGTTGTCCGGAATTTATTTTGGAGACACCTGTCCA  
ACTTTCAAGTCTAAAATGGTTTGAAGTTGTCCGTTCTTTAAAGGTTGGAGTTCTTTTTGATCATGCTGATC  
TATTTGCATCCCAACTTCAAGGAATGATGCAGCTAGAGTCATTAATTATCAAAAGTTGTCACTCTCTTACC  
TCCTTGCATATTAGCAGTCTGTGAAAACCTTGAAGATAATAGAGATACATGATTGTGAGAAATTGAAAT  
TGGAGCCGTCAGCTAGTGAGATGTTTCTCGAGAGACTGGTACTAACTGAATGTAATTCTATAAATGATAT  
ATCACCTGAGCTGGTCCCAAGAGCACACGATGTGAGTGTAATAGGTGCCACAGCCTTACTAGGCTTTT  
GATTTCTACTGGGACTGAAGATCTCCATATTTCTGGATGTGAAAATCTTGAAATACTTTTGGTGGCATCC  
AGGACTCCAACGTTGTTGCGAACTATTAATAATTCGCAGCTGCAAGAAGCTGAGGTCGCTGCCAGAACAT  
ATGCAGGAACTTCTCCATCTCTTAATCATCTCTCCCTGGAAAGTTGTCCAGAAATAAAGTCCTTCCCTGA  
AGGAGGGTTGCCCTCAGTCTAGAAGTCCTGAGATCTTGTATTGCAATAAACTGGAGAATGATCGAAA  
GGAGTGGCATTACAGAGACTCCCCTGTCTCAGAGAACTTATAATCTTCCATTTGGGTAGTGACGAAGA  
GATTCATTGGGAGTTGCCTTGCTCAATTCAAAGACTTATCATAGACAATATGAAAACATTAAGCAGCCAA  
CTTCTCAAAGCCTCACCTCTCTTCAATATCTATTTCACTTATACTTTACCTCAAATCCAGTCACTGATCAA  
GAAGGGCTTCCCTCGTCTCTTTCTTCACTAACATTAACAACCATCATGAGCTCCATTTCACTGTCAACTGA  
AGGTCTTCGGGGCCTCACTTCTCTTAGGTGTCTAAAGATTGACTCCTGCAGTCAACTCCAATCTCTTCCAG  
AGTCAGCGCTGCCCTCCTCCCTCTCTGAGCTGACCATCCATTCTGTCTAACTTCAACATCTTCCAGTAA  
AAGGGATGCCCTCTGCCCTCTAAGCTATCTATTTCACTGTCCAATGCTCAATCCACGTCTAGAATTT  
ATGAAGGGGGAATACTGGCCAAATATTGCTCATATTTCACTATACAGATCAATGGGGAATACCTGTGA  
>M6-PGSC0003DMG400030496 M6 LRR-RLP

ACAAAACCTAGAGAGAGAAAATGGCCTATGCTTGTATTTCTCACTTATGCAAACCTCTGCAGCAACTCCT  
GCAAGCTAAATCACCTTTGATTTGTGAAAGTTCTATACAACAACATGTTGAATCTTCTTATCAAAGTCTAT  
GTTCTCTTCAGTTTTTTCTTGAGGATACCACAAATGAGGCCAATGATATTGAAAATCTCCAGATTTTAGA  
AAAAAAGATCAAAGATGTAGTCTACAAAGCAGAAGATAGAGTTGATTCATGCTTAACAAACATGATTCT  
AGCTGATAATGAAGACGACCGAGAAAAAGCTTGTAATTCTTCAATGAAGAATTACAACAAGTTGAAAC  
AGAATTTGATTCTCTCAGGAAAGAGGTGATGGTGATCGAGTTCAACAAGCGTGGAAAGCAAATCAACGG  
AGTTAGCAGCAGCAACAACCTTCTTCTCATCAATCGAGGAAACGACTTATGTTGGGATGAAAAAAGACT

ACAAAGCCATACTGAATTGCCTCAATGCCCAAACAAAAGAGCTAATAGTCATATCACTTGTTGGTATGGG  
CGGTATAGGTAAGACAACCTTGCTAGAAAAGTTTTGATAACTCAACTATTCGTGATCGATTTGAGAAA  
CATGCATGGGTCACCATATCTGAACACTATAATAAGAGACAAATGCTTCTTGAAGTTGCTTCTTCAATTA  
GTGGAGTCAACAATCAAGAAATGAGCAATGATGAATTGATGGTGATTGTGTATAGAAGTCTCAAGGGT  
AGGAGATTTCTAATTGTCATAGATGATCTTTGGAGTACTGATGCTTGGGACCAAATGCGAAGAATATTTT  
AAAATGATAACAATAAAAGCCGAATTATACTAACCCTCGTCTCAAACGTGTTGCTGATTATGCAAGCTC  
CCCTGATTTTCTCCTCATGATGTGTCTTTCTAAGTTTTAAAGATAGTTGGAACTATTTACCAAAAAGCT  
ATTCAAAAAGATTGTTGTCCTCCTCAACTACGAAAAATAGGGAAGCATATCATAGAACAATGTCAAGG  
ATTACCTCTCTCGATTATTGTCATTGCTGGACTTCTTGGTAAGATAGGCGTGACATATGATAATTGGAAG  
AAAATTGAGGAAAATTTGAAGTCATTTTCATGGTTCGGTTTTAGAACAGTGTCAAGCAATTCTTTCTTTGA  
GCTACGATTACTTGCCCCATACTTGAAGGCGTGCTTTCTCTATATTGGAGGTTTTCTGAAGATATGGA  
GTTTCGTGTATCGAAGATGATGAGCTCATGGATAGCTGAGCAATTCATAAAGGCAACAAGCGATAAAAAG  
GTTAGAAGTTGTGGCAGAGGAGTATGTGCAAGAGTTAATGGATAGGAGTCTAATTTTGGGTAAAACAC  
GAAAGCCTAATGGAAGATTCAAACTTGCAAATTCATGACCTTCTTAGGCAGTTGTGCATAAGAGAAG  
CTCAAATTCAAAATGTTGTGCATTTCCCTTACAGTGATCATGTTCTCACTTACTCAAATGACATAAATGAT  
CGTAGACGTGTGATGATTCCTTTCTGATTGAGGATTATTTTTGCGATCATCCAAGTCAAATGAGTGGTA  
AGATTACAACCCGCAGCTTGATCTTTATGGGAGCTGGTAAATCTTATCTAGTACCTGAAATAAATCACTG  
GCCTGATAGTATTTCAAACCTCAAGCTACTTAAGGTGTTGGATGCACGTGAAATTGGCTACGATTTCTCT  
CATATAATACCTCAACTTAACTTGACATTTGAGGTATATTGATGCAAGAATTGAGGATCCTTCTTACTA  
GCCAAATTGTTCAATCTACAAACCATAATTGTCTATTCAAGGAGAAATGTGCAGCTCCCCGCAGAGATTT  
GGACAATGTCACAGATAAAACATGTGGATATTGAACAAATCTATATGCCTAATCCTCTTAGTATTGAAGA  
GCAACAACCTTTGTTTCTGAATAACTTGCAAACACTTGCTCTCTATTCTCGCCTTTTTTGGCAGAAATCCT  
AAAGAGAACACCCAATGTAGATAAGCTAAAGATTAGAGCTGCTAATACACATAATGAGTGGTCTGATTT  
TGTTGATTGTCTCATTAACTACAGAGACTGGAAAAGCTAAGTATAACAACAACAGTAGACAACAGTCC  
GTGCATTCTGTCTAGTGCTTTTTGCGCGCCTAATCTAAAGCAAGTGAGATTAGCTTATACTTCATTGGCTT  
GGGAAGAAATGGATGTGCTTGCTAGTTTACCCAATCTTGAGGTGCTCAAAGCAGATAGTGCATTCAATG  
GAACAGATTGGACACTAAGTGAAGATGTTGTTTTTCATAAACTAAAATATCTACGAATTTGGAGCGCAG  
ATGATCTGGAAAGATGGGAAGCAACTAGTGATAATTTCCAATGCTTGAGCAACTAGTCCTTCACTTCT  
CGAAGAACTAGAGGAGATTCCACAAAGTTTTGGAGAAATAATGACATTAATAATTAGTCCAAGTGGATTA

TTGCAATCCTGCAGTCGACACTAGTGCAAGGAATATTCTAGAAGATCAACAAGGCTGGGGAAATTGTGA  
GCTTCAAATTCAAATTGTACCTTCGTTAAAATACTTAATTTAATAAATTCATGTGATGTTTTCAGTTTTGTG  
TCATTTCTTGTTTTCACCT

>M6-PGSC0003DMG400030497 M6 LRR-RLP

GAAAAGTAGCAAGTAGTAATTGATTTTATTTATGTGCTTCATTATTCATGCTTTCATCTACTTTTGACTAAC  
AAAACCTAGAGAGAGAAAATGGCCTATGCTTGTATTTCTCACTTATGCAAACCTCTGCAGCAACTCCTGC  
AAGCTAAATCACCTTTGATTTGTGAAAGTTCTATACAACAACATGTTGAATCTTCTTATCAAAGTCTATGT  
TCTCTTCAGGTTTTTCTTGAGGATACCACAAATGAGGCCAATGATATTGAAAATCTCCAGATTTTAGAAA  
AAAAGATCAAAGATGTAGTCTACAAAGCAGAAGATAGAGTTGATTCATGCTTAACAAACATGATTCTAG  
CTGATAATGAAGACGACCGAGAAAAAGCTTGTAATTCTTCAATGAAGAATTACAACAAGTTGAAACAG  
AATTTGATTCTCTCAGGAAAGAGGTGATGGTGATCGAGTTCAACAAGCGTGAAGCAAATCAACGGAG  
TTAGCAGCAGCAACAACCTTCTTCTCATCAATCGAGGAAACGACTTATGTTGGGATGAAAAAAGACTACA  
AAGCCATACTGAATTGCCTCAATGCCCAAACAAAAGAGCTAATAGTCATATCACTTGTTGGTATGGGCG  
GTATAGGTAAGACAACCTTGTCTAGAAAAGTTTTGATAACTCAACTATTCGTGATCGATTTGAGAAACA  
TGCATGGGTCACCATATCTGAACACTATAATAAGAGACAAATGCTTCTTGAAGTTGCTTCTTCAATTAGT  
GGAGTCAACAATCAAGAAATGAGCAATGATGAATTGATGGTGATTGTGTATAGAAGTCTCAAGGGTAG  
GAGATTTCTAATTGTCATAGATGATCTTTGGAGTACTGATGCTTGGGACCAAATGCGAAGAATATTTCAA  
AATGATAACAATAAAAGCCGAATTATACTAACCCTCGTCTCAAACGTGTTGCTGATTATGCAAGCTCCC  
CTGATTTTCTCCTCATGATGTGCTTTTTCTAAGTTTTAAAGATAGTTGGAACTATTTACCAAAAAGCTAT  
TCAAAAAGATTGTTGTCCTCCTCAACTACGAAAAATAGGGAAGCATATCATAGAACAATGTCAAGGAT  
TACCTCTCTCGATTATTGTCATTGCTGGACTTCTTGGTAAGATAGGCGTGACATATGATAATTGGAAGAA  
AATTGAGGAAAATTTGAAGTCATTTTCATGGTTCGTTTTAGAACAGTGTCAAGCAATCTTTCTTTGAGCT  
ACGATTACTTGCCCCATACTTGAAGGCGTGCTTCTCTATATTGGAGGTTTTCTGAAGATATGGAGTTT  
CGTGTATCGAAGATGATGAGCTCATGGATAGCTGAGCAATTCATAAAGGCAACAAGCGATAAAAAGGTT  
AGAAGTTGTGGCAGAGGAGTATGTGCAAGAGTTAATGGATAGGAGTCTAATTTTGGGTAAAACACGAA  
AGCCTAATGGAAGATTCAAACCTTGCAAATTCATGACCTTCTTAGGCAGTTGTGCATAAGAGAAGCTC  
AAATTCAAAATGTTGTGCATTTCCCTTACAGTGATCATGTTCTCACTTACTCAAATGACATAAATGATCGT  
AGACGTGTGATGATTCCTTTCTGATTGAGGATTATTTTTGCGATCATCCAAGTCAAATGAGTGGTAAGA  
TTACAACCCGCAGCTTGATCTTTATGGGAGCTGGTAAATCTTATCTAGTACCTGAAATAAATCACTGGCC

TGATAGTATTTCAAACCTCAAGCTACTTAAGGTGTTGGATGCACGTGAAATTGGCTACGATTTCTCTCATA  
TAATACCTCAACTTAACTTGTACATTTGAGGTATATTGATGCAAGAATTGAGGATCCTTCTTCACTAGCCA  
AATTGTTCAATCTACAAACCATAATTGTCTATTCAAGGAGAAATGTGCAGCTCCCCGCAGAGATTTGGAC  
AATGTCACAGATAAAACATGTGGATATTGAACAAATCTATATGCCTAATCCTCTTAGTATTGAAGAGCAA  
CAACCTTTGTTTCTGAATAACTTGCAAACACTTGCTCTCTATTCTCGCCTTTTTTGGCAGAAATCCTAAAG  
AGAACACCCAATGTAGATAAGCTAAAGATTAGAGCTGCTAATACACATAATGAGTGGTCTGATTTTGT  
GATTGTCTCATTAATCTACAGAGACTGGAAAAGCTAAGTATAACAACAACAGTAGACAACAGTCCGTGC  
ATTCTGTCTAGTGCTTTTTGCGCGCCTAATCTAAAGCAAGTGAGATTAGCTTATACTTCATTGGCTTGGGA  
AGAAATGGATGTGCTTGTAGTTTACCCAATCTTGAGGTGCTCAAAGCAGATAGTGCATTCAATGGAAC  
AGATTGGACACTAAGTGAAGATGTTGTTTTTCATAAACTAAAATATCTACGAATTTGGAGCGCAGATGAT  
CTGGAAAGATGGGAAGCAACTAGTGATAATTTCCAATGCTTGAGCAACTAGTCCTTCAGCTTCTCGAAG  
AACTAGAGGAGATTCCACAAAGTTTTGGAGAAATAATGACATTAAAATTAGTCCAAGTGGATTATTGCA  
ATCCTGCAGTCGACACTAGTGCAAGGAATATTCTAGAAGATCAACAAGGCTGGGGAAATTGTGAGCTTC  
AAATTCAAATTGTACCTTCGTTAAAATAC

>M6-PGSC0003DMG400030561 M6 LRR-RLP

TGAAGTTCTTAAAGCTAAAACCCCTCAAGAAAACAGAACAATAGCACTATACTCAAATTAATAAAAAATGA  
ACTACCATCCCTTTTTGATTCTGCTACTTCTTGTTTTTGTACCAATCTTGAAGTTGGTTTCACTAAAACCTC  
ATCATTCCAATACAACCTTGTCTGAAAATGACCAAAAAGCTCTGATTGAATTCAAGAATGGCCTAATCGA  
TAACTCGAATCGTTTGTGCATCATGGACAGGACAAAATTGTTGCAAATGGGATGGAGTTTTTTGTGATGAA  
AAAACAGGAAATGTTGTCAAATTTGATTTGCATTACAAGAATTATCTTCTAGATGGTGAATATCCACAAA  
GGGTGTTAGATAATCACACTAAAACCTTCTTGCAGGTTGAGTTAAGTCCTTCTTTGGTTAAATTGAAACA  
TTTGAGTTACTTAGACTTGAGTCACAACACTTCTCAAGTATCCAAATTCACCTTTTTTTGGATTGTTAAT  
GAACTTGAGATTTCTTAATCTTTCCTGTGCTGGTTTTGGTGGATATATTCCCAAAAATCTTGGGAATTTGT  
CGAGATTAGAACATCTTATCTTGGTGGATGTTATGGCTACGTTATCGGACCAGGAAATGATCTCAGAGT  
TGATAGTTTGAGTTGGATATCTAAGTTTTCTCTTTGAAAAGTTTTGATCTTTCTCAATTGGTTATTGAAG  
ATACTAAAGATCTTTGGAATTCATTAACATGTTGCCCTCATTACTTTCATTGAACTTAGAAGGTTGTAAC  
CTCAACATTTTGCCTTCTTTAGACAAGTTAATTTACATCTCTTAGTTCACTCAATATCCATGATAACGCG  
ATTGGAATGGGCTTTGAGAATTCCTCCATCATCCCTCCATGGTTTTCTAATCTTACAAGGCTTATGAATCT  
TGATCTTGGTCAAATAACTTTGATGATCCAACATAATGTTCTTGAGAAGCTTAGTTCACTAAGAGTATTA

GATGTTTCTAGTAATGGATTTGGCGATTGCTTGCTGAGTTCATTGAGTAAGTTGAACAACCTGGTTTATTT  
GGATTTGTTAGGGAATGGCATCCACTTCTCTAGTCTCCATTTACTTGGAATCTGACTTCACTTTCTGTAC  
TTAAGTTGAGATATAACGTGTTAAAAGGGCTGATCCCGGAGGGTTTAAACGAGCATTTTCTGTCAATTGA  
GTGTGCTTGATTTGTCAGACAATGAAATCAGTGGACTGCTTCCAACCTTTATAAGAGATCCATTGAGCTG  
TCTCGAGAATCATTGAAGGAGCTATACATAGGAAATACAAAATTCAGTGACTTCTTTCTGAAGGATTG  
ACAATGCACAAGAATCTTGAAGTTATTGACAGTACTAATAGCTTAATATATGGTGAATTCATATTCAA  
TAAGCAAGCTGTCAAATTTGAGGTTTCTAAGGATAGCAAACAAGTTGAATGGGAGCATTCCCTCGA  
GTATTGGACAGTTATCGAATCTTGAAGAGCTAGATATCTCGGAGAACTTATTCACCGGTATTGTTTCTGA  
ACTCCACTTTGTAAAATTAAGCAAATTGATGAAATTGCACTTGTCTAAAAACGAAAACCTGGTTTTTAATG  
TGAGTTCCAATTGGTATCCAACCTTTCCAAGTCAAAGAGATTGGGATGGCTTCAGTAAAAGTAGGGCCTG  
CTTTTCTCAATGGCTACAAAAGCAGTCAATTCTTGATACTCTTATTATGTCTGATGCTAACATTTCTGATA  
TGATCCCGAATTGGTTGAGCAATATAACGTTGTCATGACAACCTCTGGATCTCTGTTAACAAATTAGTC  
GGTGGTATAAGCGTGTGTGTGATGCTCAACTTTGAAATCGATTGATCTTTCAAAGAATCTGTTATCTG  
GACGAATCCCTTCATGTTTGAGTACTTGGGAAGAGTTGAGATCATTAAATTTGGCTGATAATAGTCTTGA  
AGGTGAAATCCCAAGTTCTTTAGGTGATTTGCCACTTAAGTTTTTGCAATTTGCAAAGAACAACCTTACAA  
GGTAAAATCCCTTTGTCTTTTCAAATTTGACATGGTTAGAAAGACTAGACTTAGGAGAAAACAAGTTGA  
AGATGTTTTTCTACATGGATTGGCGAAAAGCTACAGAGTTTGGAACTCTTGAGGCTAAATTCTAATCAA  
TTTTACGGTGTTATCCATTAGAACTATGTCAAATCTCATCTCTATGTTGGCTAAATCTTGCTGGTAATAA  
CTTGATGGAACCTATCCGAGTTGTTTTGGAACTTTTCGTGTGGTAATTTTCGTGGACCTGGCGAAGTA  
TTTGGACAAAGAGTTGAAAGTTTTATGAAAGGAATACCACTTGAGTATGTTGGTGAACAAATTTTGTTAC  
TTAGAATTTTGGATCTTTCTGAAAATAAACTTGTTGGAGGTATCCCAAGGAGTTAACAAAATTGGTATA  
CTTGCAATACTTGAATTTGTCTAGAAATAGTCTTAATGGGAGCATACCAAAAAAGATAGGTGATTTGAA  
GCAATTGGAGTCACTTGATTTGTACATAACAACTTTCTGGTTCAATTCCTCAAAGTTTAGCTTCTTTGA  
ATTATTTGAGCTACATGAACTTGTACATAACAGTTTTTCAGGTCCAATTCCTACTGGAAATCAGCTCCAA  
TCTTTGGATGATCAATCATTATGTTGGTAATCCTAGACTTTGTGGAATATTGATCAAGAAAAGTTGCAA  
TGGCAATGGAACATCTCATGTAAATGAACAACTCCTCAAGGTGATGATCATGATCAAGATGTTGATGA  
ACATAAGTGGTTTTATGCTGGAATTGCACCTGGTTTTTGTGTTGGCTTCTTGGGTGTCCTTTCATTTGT  
ACAAGACAAGGAATCGTGGCGTGGTGCACGTTTTCCAATGCTTGGCTCGACGTCTATGACAAGTCGTGT  
ATGTACTCCTATGAGAGGTTGTCTGGTTGACAGTTGACACACAAGTTTTGCAGAGATTAGAGTGTGAGA



ATTGTAATGCAGAACATTATAATGTAAAGATTGTAACATATATATATATTTTTTTTCGAACTTCATTGTTACTAA  
AAACATAAATATTTTTTCTATAATGGCAAGCTTGTGCATGAATGTACATCTGTCTCTCATCGAGTTGCTGA  
TCATGATCTCTCTAGACTCGAGAAGAGACTCATCATGACCTGAGATTTTGGATCTGTCAACAACCCAAA

>M6-PGSC0003DMG400030790 M6 LRR-RLP

TTAGAATAGGAATAGGTTTATACAATCCTATTAGAATAGGAATAGGAATAGAAATATAAATAGGAATAG  
TAAATAGTATCCTACTTGGTAAAGGATTGTATTCTAGTGTCTATAAATAGGGTCTCAATGTAATAATGTA  
AACGACAACAATTCAATAATATTCTTTTTCAATATTTCTCATACAATCTCGAATGCGAAAGAACAAAAGAA  
ACCCTATAATCTAAGAACAAGGAAGTAAATGATAGAAAGCTAGACACAAGAATGGAACGAATAGGCCAA  
CAAGGACTATATTAAGTCAAAACCTCCTATTAAGAATACCAAACAAGCACCTAAACTATAGAGACACCC  
TCAAGAGGAATGATCCTCAAAAAGCAATCCCATCAACATTTTCTAGCACCCTAACAAAAAAGTTTCA  
CATTTAGTGGTAATATAAGGGACTCCCGTATTTGTTAGGTTACAAGCGAATTTCTCTGCCTTCTGTTTG  
TGAGACTTGGGTTATGCTTTTTTCAAGTTTGTGATGCCAAAACAGTATTTTCTAAAGGTTTGTGTGTTATA  
TTATTTGTTAGGCTCACAAGTGAATTTCTGAGCTTGTACCGGGAAGCTACATTCATCTTGAAAGTTTAAAC  
TTATTGTTTCTTTTGTATACCCGTTGCAGGGAAGAAGGCGTGGCACTGATCATTCCGTGATTTTCAGCTCTC  
AAGATCCATTCCCTGGCTGAAACAAATGGCTCGGAAGACAATGAAACAGAATCTTACTGTTTGTGAGAT  
GCTGGGTTGGCTGCTGTTGCTGCTGGCTTCAGTAAGCTTGAAAAGCTGAGCTTAATATGGTGCTCCAAT  
GTGACACATGTGGGGCTGAGGTCTATAGCTGAAAAGTGTATATTTTTGAAGTCTTTGGATTTACAGGTA  
AATATCTAGTCATTTAGAACTTTGGTTTCTCATGGTTATTTTATTGCTCTGTTTCAAGCTGTTTTGGAATT  
GAACTATATGATGTGCATGTTATCAAAGGTCTGAGAAGCTTTAGTTTCTGTACCTCTTAAAGGGCTGTT  
ATGTTGGAGATCAAGGTCTAGCAGCTGTTGGGGAGTTCTCTAAGCAACTTGAAGATTTGAATTTGAGGT  
TCTGTGAAGGCCTAACTGATGCAGGCTTGATTAATTTGGTAGATGGTTCTGGGAAGACGTTGAAATCTA  
TTAGTTTGGCTGCCTGTGCAAAGTAACTGACACCTCCTTGGAAAGCTGTGGGATCTCATTGTAGATCTTT  
GGAGTCCTTGTCACTAGACTCAGAGTGTATCCATGATAAAGGTGTACTTGCTGTTGCCCAAGGATGCCCT  
CAGTTGAAGGTTCTGAAGCTACAATGCGTCAATGTTACAGATGGTGCTCTCCAAGGCGTTGGCACTTGCT  
GTTTGTGCTGAGGTTGTTGGCTCTTTACAGTTTCAAATATTTACGGACAAGTTAGTTGCTTATTCTGGT  
TGTCTTCCCTATTTGGATTTATTTGTTTTTAACTTACCAGCAGCATGATCGTAACTTCTATATTCATGTAAG  
CTTTTGAATGTACATCTACATTTTAGGCATGAATACAATTCCTCTTAACCAATAGCTTTTCCAGTGTTTCAG  
ATTACGCAATCTAAATACCTAATCTTTAAATTTTCAACTCCATCTTTGCTAACAAAAATAATTCCTGAATAT  
AGAGAACAGATAGTAACTTGATTCAAACCTATGTGTTGCTGTCTGTCTTTTTATGGCAATAATTGCAAGCA

AAAATTTAACAAAGCATGTGCTGGGATGATTGGTTTTCACAATCTGACCTATATCTTTATGCATATTTTT  
CAGGAGTCTGTATGCTATTGGTAAAGGGTGCAAACGGTTGAAGTCTTTACCTTGAATGATTGTAATTT  
TTAAGTGACAAAGGCTTGAAGCAGTTGCAGTTGGTTGCACTGGGCTCACGTATCTTGAGGTTAATGGC  
TGCCACAATATAGGGACATATGGACTGGAGTCTATTGCAAGATCTTGACGTACACTTTTTCTCCTCGTGC  
TTTTTTTTGAATTTCTTTCAACCTTTGTGTTGAATTTAGTTATTGAAGGCAAAAAGACCTAGTGCTTACT  
TTCCCTTTCTCCTTGTCTCTGAATTCAAGATGGATTCTTGTAAGTCTTATATTTTTAAGGTCGTATG  
CATGAGTGGTGGTGCATTTGAGGAGAGTATTTAGCTTGAGAAGCACTTATGTGAGTATCTAGTAAATGT  
TTAGAATTACATTTAGAGGCTTCAAAAAAAAAAAGCATTAAAAGAAGCAGCTCAAATTGGTGCAT  
AGAACTACTTTTGCACCTAAGATTTTAGGCGCCATGTTAAAGGAAAATATGCTATTCTATCAAATAGAAA  
TGCTTGCTTGAGTTTAATTTGTATAAATTAACAGAAAAAATGCTTCATAGAACAAGTATAGCAGATTAT  
GTAGGGAGTGCTTATATTAGATTTTAAACGTGATTTTCTTTGAACGCATTCTCTAGAAAAGTATTGACTC  
CCAAGTTAGACTAAATTGAGTTCTCTGTTATTCCAAGCTCATGTGACAATCATGTTATTCTATTTCTGTCA  
GTATTACCTCATGAAACAAAATGCTATACTTTTCAAACCTCCAGGGGATGGTTTCATCCATGTTTACAGCC  
AGATTTTTGAATCTATTGTGTTAGATAATTAATGCGGAATGCATATAAGTTCCACCCTTTCAAAGAGGC  
TTACAGTAGGATGTAGGCTGATCTAGTATTATAATTTGATAGATAGAAGTGTGAAACTACCTTTGAATAT  
AGGATAATATGTTGAATCAGAATGGTAAATTGCAGTTCTCTTATGTTTTATTTAATTGCAGATTTAATT  
TCATCATATATACTTCCTTTGAAAATGATGTTATTTCTTTCATGAAGATGTGGGCAGTAAAATTTATGTTT  
GTGTTTCATAGACGATTGGCAGTAATTTCAATTGCTTTAATGAAATCCTGTCTTTTTTTCATCGTTTAGTGCC  
TCCAATTTCTTTCATCTTTTTTCTTAAAAATGAAGACTGAAAACCTAATCTATTATGAGTTTATGACTAG  
CAAACCTGTTGAATGGTAGTTGATTGGTTTCACTGATAGATTGATTACTGCTATTTATGTTATGCTTGGCTC  
ATCTTATTAATAACTTATGAAATTCATGAATTATATCCATTGCTTGACCTGATAGTTTGTACCCCTCTAA  
AATTCTGTCCTGGTCCTATCTTGAGTTTTTTGTCTTCTTTTTCTAAGAAGTCAAAGGTCCTAATTTGAG  
TTTTGGCTTCATAATGTAGGCATCTGTCTGAGTTGGCCTTGCTGTATTGTCAAAGAATTGGTAATTTGCA  
TTGTCCGAGATTGGCAAAGGATGCAAGTTCTTGCAAGCTTACATTTGGTAGATTGTGCAAGTATTGGG  
GACGAAGCCATATGTTCTATAGCCAGAGGATGCTGCAACCTCAAAGGCTCCACATCCGTGATGTTAT  
GAGGTGCTTTAATAATTTCTCTCCCTCATTACTTAGGGATTTCTCTTGTCTCTAGTGATGTCAAAGTTA  
CAGGATATCTTTACATGCGGAGGTGTTGCATATTGCTGGAGGCCTATGCATTTTTTTTTATCAGTAAAGAT  
TCAAAGATATCATTAAATTACCAGCACCGAGATGGTGCTGCACATGTACGCTAGGGATCCAGAAACAACA  
GCAGAACTTTTCTAATACATCAGCTGACAAAAGCAAGAGCATTCTCCAGTTCTAGTGTTTTACTATGTAC

ACAAATCAGATACTCTATACCTGAAGGCACTGAATTTATCTAAGAGACTAACCTCATCTGATATGAATC  
ATTCTCCAAACATAAAACCTCATCCGACATGAATACGAGAGTAAAAGACAAATAGTTGTATTTGATTTTG  
CTAACAGATTCTGCTTTATTCGTGAAGCACCTTAAGTTCCTTTCCATATTGCCCATCTAGTGACGCG  
TGGTACTGTAGTTCGTACGCTTTTCTGTTTCTTATTGATGCCTCTTCCATTCCACTGAGTGGAAGCTCCCT  
GGTAGTTCCTGGCATTCTCCACAATCCACATAAGCTTAGAGATGTGCAGGAACATTACTATAGTTGTGAG  
AGTAATATGCAATGTAGAAAAATGTGACAGCTGTCTTCCATCTCTTTCTTACAAAGTTAGCACTTGCTGCA  
CAAGTTTATCTTCTTTTTTAACTAGCCTCATATGCTGCCACGCGAGTCAATCTTCCTTAACATTTGAAAT  
CTGCTTCCAAGGCCATCTCAGGTTATGTTCACTTCCCTGCCCTTAAAGTCCCTTAAATTGAACACATCACTGT  
TATGTGCCTTCTCTGTAGATTATGTTACCATAGCATTCAAGAGACCTGAATACTGAGTAGTCCATGGGAG  
GCCTAACAGCACTCCCTGTTTCCCCTTTTTCATTCTTCTGATCTATTGTTAGTGAAATCTGATTTGTGCTG  
TTTCTTTGCACTTTATGCCAAAACCTCAATTGTTTTACTTGATAATACTGCTCTTTTCATCTGATTTGAAG  
GTTGAAATAAGGGAATTATAGCTGTTGGCGAGAAGTGTAAATTTCTTACAGACCTTAGCCTCCGATTCT  
GCGATAGGTACGTGATTTTCTTTCTCAACTAGTATTGCCTTCTATTTTTTTTTTTGTTTCTCAATCATCAAG  
TCTCGGCTGATAAAATTGTCAGACAGTCTCTTCCCTGCTTGCATTACTTCCCTTCTATTGTCCTTAAATTTA  
TACTTGAATGCTCTTTGAGATGAACATTTATCTTTGCATCTCTTTTCTTTTTTGATATGGGAATTGTTGTGC  
TCCTTGTGGCGCCTCTGGTGCTGCAAGAGGTCGCTTGTCCATTTGAAGATGAAGATTGCCTAGGCACAAT  
TTTCATCTGCTTCTTAAAACCTTCTGGCCCATAGTCCGACGGAAAATGTTCTACACTGCGAGATCAACAA  
AAAATTGTGTCTAGATGGTATTTGCTTTAGTAACTTCTCTTTTATGCGTATTGTTGATTGCTTATATTTTG  
CATAGCATATACTTTGAACTGCTTCTTTATCAAAGCTTGCTACTTAACTACCGTATTACTGGTAATTTGGCT  
CTAATAAGTCTTAGCCTCTATTTGATTACCAGAGTAGGGGATGAAGCACTTGTGGCTATTGGTGAAGGTT  
GCTCTCTGCATCATTTAAATGTCAGTGGCTGCCACCAAATTGGGGATGCTGGAATAATTGCCATAGCAAG  
AGGATGCCCTGAACTCAGTACTTGGATGTGAGTGTACTCCAGGTGTGTCCACTTATACTTGCTCTTTTAA  
TAGTGGGATACACATTGTATATGATGCATAGACGGTATGAATATGCTTACCATACCAAGGTTATTAGATA  
ATTACATTAAGGTGATTACGTAACAACATTAAGTTATATTAGAACTACTTAGTGTAGGTAGAGCTTAAAA  
TGGTTGCTTCCCTGAATCCACCGGTTAACAAGTGCATTAGGAACCCCATATTATAAAGTCCCATATGC  
AACACACACACACGTATTGCTCCCATATACAAGATGTTTGACAGACCAAAAAATTGTATTTTTTATCTCCA  
TTCCGCACTGAATACTAGCACATCAATTTTTGACAGGATTTGGGAGATATGGCCATGGTGGAGCTAGGT  
GAAGGATGTCCCTTGTGAGGGATATTGTGTTGTCTCACTGTCGTCAAATAACAGATGTAGGTTTAAAGTT  
ATATTGCTAATAGGTGTACCTTGTGGAAACTAGCCACATGGTCTATTGCCCTGGTATCACCGCTGCTGG

AGTAGCCACGGTGATTACGAGCTGCACAAATATAAAGAAAGTTCTTGAGAGAAGTGGAAAGTGAGTC  
CAAGAACCAAAAGGAGAGCAGGATCCATCATCTCCTATCTCTGTGTTGATCTGTAGATCTCTGTACACGT  
GTTAGTGTTATCTATTCCTTGCAGCTCCAATCGAAAACAGCAAGGGTAAAACAGACTATCGTTGTGGATA  
GCCAGTTTAAGTTGCAAATTACCCCGACATAGAAAGAGGGGTGTCGTGAGAGCTTGTGTTGCACTTTTCT  
TTTATCTGCTATGTTCTTTCAGTGTTTTTTTTTGTCCAAATCTCACAGTAATTTACTAGTAGATCGACTTCAT  
TTTAGAAGGTGGGGTGTCTTGTATCCCTCCCGATATGCTCGTTGATTGTCTTTATTGGGGAAAGATAGCA  
AATAGCCAGTTCTTTTACCATCAGTTAAAGCTTTAGCCAGCATTTTCAAGATTATTCAAAGTTAACTGCTTT  
TTAAGGCGGAAATAAAAATTTGGACAAAAACTC

>M6-PGSC0003DMG400030856 M6 LRR-RLP

AGTATATTGAGCAAAAATATTCTCTATTTTCTGCTGTCTCCTAATGAGTTTGATGCAATAATATTCTCATGT  
GGATGTTGCTTGCACCAGGTTCTGTATTAACCGAACCCCAAGTTTATGGAAGAGACAAAGAGGAAGATG  
AGATAGTGAAAATCCTGATAACAATGTTAGTGATGCCAACACCTTTCAGTCCTCCCAATACTTGGTAT  
GGGGGGACTAGGAAAAACGACTCTTGCCCAAATGGTCTTCAATGACCAGAGAATTAAGGCAATCATAGAATCT  
TTCCAAAATATGGATTTGTGTCTCGGAAGATTTTATGAGAGAAGAGGTTACTAAAGGCAATCATAGAATCT  
ATTGAAGGAAGGCCACTACTTGGTGAGATGGACTTGGCTCCACTTCAAAGAAGCTTCAGGAGTTGCTG  
AATGGAAAAAGATACTTGCTTGTCTTAGATGATGTTTGAATGAAGATCAACAGAAGTGGGATAATTTA  
AGAGCAGTCCTGAAGGTTGGAGCAAGTGGTGCTTTTGTCTAGCCACTACTCGTCTTGAAAAGGTTGGA  
TCAATTATGGGAACTTTGCAACCATATGAATTGTCAAATCTGTCTCAAGAAGATTGTTGGTTGTTGTTTCAT  
ACAACGTGCATTTGGACACCAGGAAGAAATAAATCCTAACCTTGTGGCTATTGGAAAAGAGATTGTGAA  
AAAAAGTGGTGGTGTGCCTCTAGCAGCCAAGACTCTTGGAGGATTTTTGCGCTTCAAGAGAGAAGAAA  
GAGAATGGGAACATGTGAGAGATAGTGAGATTTGGAATTTACCTCAAGAGGAAAGGTCTATTTTGCCTG  
CCCTAAGGCTTAGTTATCATCATCTTCCACTTGATTTGAGACAATGCTTTGCATATTGTGCAGTATTCCCA  
AAGGACACCAAAATGGAAAAAGAAAAGGTAATCTCTCTCTGGATGGCACACGGCTTTCTTTTATTGGAA  
GGAAAATTAGAGCCAGAGGATGTGGGTAATGAAGTATGGAAAGAATTATGCTTGAGCTCTTTTTTCCAA  
GAGATTGAAGTTAAATCTGGTAAACTTATTTCAAGATGCATGATCTCATCCATGATTTGGCTACATCTCT  
GTTTTAGCAAGCACATCAAGCAGCAATATCCGCGAAATAAATGTAAAAGGTTACCCACATAAGATGAT  
GTCCATTGGTTTCACTGAAGTGGTGTCTTCTTACTCTCCCTCTCTGTGCGAAAAGTTTGTCTCGTTAAGAG  
TGCTTAATCTAAGTAACTTACACTTTGAGGAGTTATCCTCTTCCATTGGAGATCTAGTACATTTAAGATGC  
CTGGACTTGTCTGAGAATTCTGGAATTCATAGTCTCCGAAGCAGTTATGCAAGCTTCAAATCTGCAGA

CTCTTGATCTACATAATTGCTACTCTCTTTCTGTTTGCCAAAACAAACAAGTAAACTTGGTAGTCTCCGA  
AATCTTTTACTTCATGGTTGCGATGAATTGAATTCTATGCCACCAAGGATAGGATCTTTGACATTCCTTAA  
GACTCTAAGTGGATTTGCTGTGGGAATTCAGAAGAAAGGTTATCAACTTGGTAAACTACGAGATGTAAA  
TCTCTATGGCTCAATTGAAATCACACATCTTGAGAGAGTGAAGAATGTTATGGATGCAAAGAAGCCAA  
TTTATCAGCAAAGGGGAATCTGCACTCTTTAATCATGAATTGGAGTAGGAAAGGACCTCATAGATATGA  
ATCAGAAGAAGTTAGAGTGATTGAAGCCCTCAAACCACACCCCAATTTGACTTGTTTAAACAATCAGTGGC  
TTCAGAGGATTCCGTTTCCCTGAGTGGATGAATCACTCAGTTTTGAGAAATGTTGTCTCCATTACAATTA  
GGGTTGCACAACTGCTCATGCTTACCACCCTTTGGTGAGCTTCTTGTCTAGAAAGTCTAGAGTTGTTA  
ATGGGGTCTGCGGAGTATGTTGAAGAAGTGGATATTGATGTTTATTCTGGATTCCCTACAAGAAGAAGA  
TTCCATCTCTGAGAAAACTTTTATAGGTGAATTTTATAATCTGAAAGGATTGCTGAAAAAGGAAGGAG  
AAGAGAAATCCCTGTGCTTGAACGGATGACGATTTTTTATTGCCATATGTTTGTATAACAACCTTTCT  
T

>M6-PGSC0003DMG400030928 M6 LRR-RLP

ACAATACTTGTTCTTTTTTTCTTCTCTACTTTCAACTTTCCTTCTTTTTTTCCCTACTTAGATAGGGTTTCT  
GTTGAAATCTTGAACTTTTTCATGTGTAATGCAAATCTTGGTTGAAAATAAAATTTGGGGTTTGTGTTCT  
TGGTGCAAAGTTTGTTTTTTTAAATTTCTTTGGGGGGTTTGTGTTGAAGTGAAGCAACAACCATGTCT  
ACTCTTGTTAAATACAGTGGTGAGTTTTCTGGTTTGTTCATGTATTGGATTATGGGTTTTGAGTTTTA  
AGGAATTTGGCATTGGGGTATTTAGTTTTCATAGAATAGATTCATTTTTAGTGCTCCATGAATCTATTAA  
GGGTTCTTGATTGTTGATATGAATATGAAGGGTGTAGGAGTAACTAGAAGAAAAGATTGTTGGTTGG  
GAATTTTAGTAGCTCCATTTAGTTGGTTGGTTGGTTATCTGAACTTTCACCTTGTAATCCTTGCCCCATTT  
CCCCAATTTGAAAAAAGATTA AAAAGTTGTTGCTTTGGCTTTGAAGATGTTAATCTTGCTCCTATTTAAA  
CTTTGTTATGCTTTAGTAAGTTTTTGTGTGTGTGTTGTTTAGATTGATGTTAAAGATTGGCACTTTTTGAT  
AAAAGGTGTGAATAAGAAACATTTTTCTGGTATTTGTAGCTAAGAATTTGTTTGTGTTCAACTTTTGATC  
TGATTTGGTAGATCTTAGTTCTAAGTTTTTATGTAATGAGTTCTCTGACTTGAAATGAAGTTAAAGATAG  
GATTTTTGTAAGAAATGGGCATGAAATTATTATCTTGGGAATTTTAGTATGTTGATTTGGTGAAAAGAT  
AGTTGATGAAGTTCTTGATGTTTGTCTTCAGGTGATAATGAGTTCTATAGTGGAGGATCACTTTGTTCA  
GCTGATTTGGGTCTTATGTTGGCTCTTGACATGCTGATATATACTGTCCTGTTAGTAAGAGGGCACGAA  
TTAGTGGCCCGTTTGTGTTGAAGATAGGACTAAGAATCCATCCATTGAAGTACTTCCAACGAATGCCT  
ATTTGAGATCTTCAGAAGATTGGAAGGAGGCCGTGAAAGGAGTGCAGCAGCTTGC GTTTCTAAGCGTT

GGCTTATGCTCTTGAGTAATATGAGGAGCTCTGATATTCGCCATACTAATCATTTCAGCTGCTAATGGGGC  
TTCAGATGATACGAAAATGGCATCAGCTGATGAAGATCTTGAAATGGAGTGTGACGGATATCTTACTAG  
GTGTTTAGAAGGGAAGAAAGCTACAGACATTAGGCTCTCAGCTATAGCAGTTGGAACCTCTAGCCGTGG  
GGGTCTTGGAAAGCTCTCAGTTCGGGGGAGCAACTCTGTTTCGGGGTATTACTAATGTTGGTCTATCAGC  
AATCGCCCACGGTTGTCCGTCTCTTAGGGTTCTTTTCATTGTGGGATGTTTCAGGATGTCCGGAGATGAAGGT  
CTTATGGAGATTGCAAGAGGATGTCATTCATTAGAAAAGCTAGACTTAACTAAATGTCCTCAATTTCCA  
ACAAAGGTCTGGTTGCAATAGCAGAGAATTGCCCAAGTTTGACTTCTTTGACGATCGAATCTTGTA  
TATTGGAAATGAGGGCCTGCAAGCTATTGGAAGATGTTGTACCAAATTAGAGTCTCTTACTATTAAGAC  
TGCCCTCTTGATAGGTGATCAGGCAGTTGTTAGCCTTCTGTCGTCGGGCAATACAAGTTGAAGAAAGTG  
AACTTCATTCTCTAAACATTACGGATTTCTCCCTCGCTGTCATTGGTCACTATGGCAAGGAGATTATCGA  
TCTTAATCTGTGTAACCTTGGTCACGTAAGTCCGAGGGGGTTTTGGGTTATGGGTGCTGCTCAGGGTTT  
GCAATCACTGGCTTCTTTGACTGTCACCTTCGTGCATTGGACTGACGAATCCGAGTCTTGAAGCAGTGGGA  
AAGGGCTGCACAAATATTAAGCATGTGCCTTCGCGAGTGTAACGTGTTACTGATAGTGGACTTGTT  
GCGTTTGCTCAAGCTGCTGGATCTCTCGAGTATCTCTTGTGGAAGAGTGCGACAAGATCACCCAAACA  
GGCATACTAAATGCTGTTTCAATCTGCAGCAAGTTGAAGTCGCTTTCCCTGGTGAAGTGTTTCGGGAGTCA  
GGGATTTGCCTCAACAAGCTTCTTGTGCTCCCTGTGATTCTCTCCGATCGTTGTCCATCCGAAGCTGT  
GCAGGATTAGGTAGCAGAAGCTTAGCTATGGTGGGGAAGCTATGACCCCAGCTTCATCATTTGGATCTC  
AGAGGGCTTACTAGAATAACAGATGCTGGACTTCTCCACTTTTGGAGAGCTCCAAGGCAGGACTAGTC  
AAGGTTAATCTTACTCACTGCCTGAACGTGACCGATGAAGTGGTGTCTCATTAGCTAGGCTACACGGTG  
AGACTTTGGAATTGCTGAATCTTGATGGATGCAGGAGGGTTACCGATGCAAGCTTGGTGGCAATTGCTG  
ATAATTGTCTATTACTTAACGATCTTGATGTTTCAAAGTGTTCAATAACTGATTCGGGTGTAGCTGCTTTA  
TCCAAGGAGTGCAATTGAATTTGCAGGTTCTTTCACTCTCAGGTTGCTCCATGGTAACAAACAAGAGCT  
TTTCGTCTCTTAGAACATTGGGTGAGAGCTTAATTGGTTTAAATCTCCAGCACTGCAATGCCATCGGTAG  
CAGCAGAGTCGAGGCTCTTGTGAGGACTTGTGGAGGTGTGATATCCTCTCCTAAAAGCCAACTGGAGC  
ACAAGGCTATGCATCATCAAAGGTGTTTGAACACGAGTCGTAGCTATTTGGTTCATTAATCTTGGTGG  
GATAGAAGTAAACATGATTGTGGTTTTTGGCTAACTAATGGCCTTGTGATGCTCCAGTGGCTTGGTTGTT  
TTCCAGGAGGCTATGACAAACAACCTTTTCCATCCATTTTTTGCAGGCTTCATCTACTTAAAAGCTTGTTC  
ACATCGTTCAAACCTCCGGTGTACACACGGAGGCTGCCTCTTACACAACCATGGTATCCTGAGAATACAG  
TTACCTAAGTCCTGGTGCTAAAGTTTTCACTAGTGTTGCTCCTTGTCTCCCATCCGGGGATGAACTAATA

ATGCTTCTCTTAACTTATATAGATATCATGCATTAGCCTTGATAGTACTACTGCAGAATCAGACAGTT  
TTTTCTTAGTTCTAGTATGTTAGTTTTCGTATTAAGAAGTCGCCTCGTTGTTATAGTTGTTACTATAAGTG  
TTTTACTTTTCATCTTAGTCGTCTGTAGTTGAATCAAACGATTTCTGTAGCATGGTGTCTGTTAATCTGGG  
GCTTGGTCATGGCAACTAGTCCATCTAGGTTGTTTATCTAGTGTCCAAGTTCTAGTTTTTGATAGGATTGT  
AAAAAGTCCTTGATTGTACAGGTTCTTGTCTTTCAGATTTGTACATTGCAACTACTTTGTTATGTGTAAT  
AAACTCTGTTTAGTTTGTCTAAATTGTGC

>M6-PGSC0003DMG400031283 M6 LRR-RLP

AACAATAGTCTTAGTGGGACAGTTAATACAACCTTTTAGTATTGGAAACCAACTCCAATCATTAAACATGG  
ACGGGAATAAGCTAGAGGGGAAGGTCCCACCATCTTTGATCAATTGCAAATATTTGGGACAGCTTGATT  
TAGGTAATAATGAGTTGAATGACACATTCCCAAATGGTTGGGAGCACTATCTGATTTGCGGATTTTAAG  
TTTGAGATCAAATAAGTTGCATGGTCCCATAGAAGTTTCAAGGACCGAAACCATTTTTCTCAACTTCGA  
ATTATGGATCTCTCATCCAACAGATTTAGTGGGAAGTTACCAGCAAGTCTTTTTGATAGTTTTCAAGCCAT  
GAAGATAATTAATGAGAACATGACAACCTCATATTTGGGAGTTCAATATGATTCTTTGACTATTACAACA  
AAGGGATTGGATCTTCAATTTGTAAAGTTTTTGAAGCAAACATAGTTATCGATCTCTCTAACAATAGATT  
TGAAGGCTATATTCCACGTAATTTGGAGATCTCATTGGGCTTTGTACATTGAATTTGTCTCATAATAAAT  
TGAAAGGTCATATACCAACATCACTGCACCAATTATCTGTAGTTGAGTCATTGGATCTCTCATTTAATAAA  
ATCAGCGGAGAAATCCACAACAACCTCGCATCCCTCACATTTCTTGCAGTCTTAAATCTCTCTCACAATCA  
TCTTGTGGATGCATCCCCAAAGGAAAACAATTTGATACGTTTGAGAACAGTTCATACAAAGAGAATGAT  
AGACTATGTGGATTTCCACTCTCAAAGAATGTGTGGTGATGATGGGGTACCACAAGCGGCAACTCATT  
TTGGTCTTGATCAAGAAGAAGAAGGAGATTCATCAATTGTCAATTGGCAGGCAGTTCTTATGGGCTATG  
GTTGTGGATTAGTCATCGTATTGTTTGTAAATATACATAATGTTTGC AACACGATATCCATCATGGTTTTCG  
AGGTTGTTTGA

>M6-PGSC0003DMG400031284 M6 LRR-RLP

AACAATAGTCTTAGTGGGACAGTTAATACAACCTTTTAGTATTGGAAACCAACTCCAATCATTAAACATGG  
ACGGGAATAAGCTAGAGGGGAAGGTCCCACCATCTTTGATCAATTGCAAATATTTGGGACAGCTTGATT  
TAGGTAATAATGAGTTGAATGACACATTCCCAAATGGTTGGGAGCACTATCTGATTTGCGGATTTTAAG  
TTTGAGATCAAATAAGTTGCATGGTCCCATAGAAGTTTCAAGGACCGAAACCATTTTTCTCAACTTCGA  
ATTATGGATCTCTCATCCAACAGATTTAGTGGGAAGTTACCAGCAAGTCTTTTTGATAGTTTTCAAGCCAT  
GAAGATAATTAATGAGAACATGACAACCTCATATTTGGGAGTTCAATATGATTCTTTGACTATTACAACA

AAGGGATTGGATCTTCAATTTGTTAAAGTTTTTGAAGCAAACATAGTTATCGATCTCTCTAACAATAGATT  
TGAAGGCTATATTCCACGTACTATTGGAGATCTCATTGGGCTTTGTACATTGAATTTGTCTCATAATAAAT  
TGAAAGGTCATATACCAACATCACTGCACCAATTATCTGTAGTTGAGTCATTGGATCTCTCATTTAATAAAA  
ATCAGCGGAGAAATCCACAACAACCTCGCATCCCTCACATTTCTTGCAGTCTTAAATCTCTCTCACAATCA  
TCTTGTGGATGCATCCCCAAAGGAAAACAATTTGATACGTTTGAGAACAGTTCATACAAAGAGAATGAT  
AGACTATGTGGATTTCCACTCTCAAAGAATGTGTGGTGATGATGGGGTACCACAAGCGGCAACTCATT  
TTGGTCTTGATCAAGAAGAAGAAGGAGATTCATCAATTGTCAATTGGCAGGCAGTTCATTATGGGCTATG  
GTTGTGGATTAGTCATCGTATTGTTTGTAAATACATAATGTTTGCAACACGATATCCATCATGGTTTTCG  
AGGTTGTTTGAAGAATTGGAACACAAAATTATTACGAG

>M6-PGSC0003DMG400031320 M6 LRR-RLP

ATGGAATCTCTTGAAATCTTCAATCTCTCAGGTTGTGAGAAGTTAGAAAAATTTCCAGAAATTCAGGGAA  
ATATGGAATTGCTATCAGAGCTCCTTTTGGCACATACTGCAATATGGGAACTCCCTCATCAGTTGGACT  
GCTCAGTGGCATTATCTTGCTTGATTTGCATTCATGTAAAAGCCTTGTAAGACTCCCAGCCAGTGTCTCTG  
AGATGAGAAAAGTAAAATTTGAGTGTGAAAGGCTGCTCAAGACTTGCAAAGTTTCTGAAAATCTAG  
GTGATCTAAACCAGATGGAGGAGCTCTATGCTGGTAACTGCCATTTGGAACTACCAGATTCTGTTA  
GAACTTGAGCAAACCTTAAAGTCCTATCATTAAAGAAGAGGCCGGAAGGTAAAGCGTCAAACCTGGTGAC  
AGTTTGATGTTACCTCTTCTGGGGGTTTCGTTGTTTGGAGTTATTGAAAAGCTTAGATCTCAGTGGAT  
GCAACTTATCTGTTAACCAAACCTGCTGCTCTTATGAAATTGCCTTCTTTACTGGAAGTGAATCTGAGCAGA  
AACAAGTTTTATTTTATTACCTGATTTTCATCAGTCAACTTTCTCAGCTTCGATATCTCAACATAACACAGTGT  
CAGGAACTTAAGGAACTTCCCAAACCTTCTTCGAGTATAGAGGAATTATATGCAGAAGATTTTTTGGCCA  
AGCAAAGTATCGAAAAGCTACAAATATACCCGAGGTTGAATTTGGTGTCAATTCACCAATTATAGTTTTGA  
TCAACAATCTTATACAGAGGAGAGCAATGGTAGCTCAGTTTTGGATGAGATTCTCAGCTTGTTTCTCTCA  
GAAGATATGGATCATGTGGTTCGAGCACTCTTAACTCTGATCACAGGGTGACCTGTTCTATTGTCTTCC  
CTGAATGTGCGATTCCCAGGTGGTTTAAAGCATCAGAGTGTGATGAAAAGATATTGTTCAAACCTGCCCAT  
GAATTGGTATAATGATAAGTTCAAGGGCTTTGCTATATGTTGTGCCACTCTCATGGGAGCAGGTGTGTTG  
AATCCTGATTCAGGGCTATCCAAGAAGTATGATTATGCTTTCTTCAAAGCTAAATTGATATGCAAAGATG  
ATTTAGAAGACCTTAAAGTGCTAGAGAAAGAATGTAAAGTGGGAACAGCATCTAGAACATATGGCTTGT  
GTGTTTGCTTTGTCTACATACCATTGTATGCTTCACTGCAGGTGTCCGGCACAGATGTTGGAAATATTAAC  
CAGTATAGCCTATTTGAGGCATCTATCCATGGGCGCATTGTGA



>M6-PGSC0003DMG400031446 M6 LRR-RLP

ATGCCTTTTCGAAAGACTTACCAAAGAGTCTGTTTCAACAATTGAAAGGCATGAGGACTGTTGATCAAAC  
AATGAAGACAACAAGTTATCTAGGAGGTAGATATAACTACCAAAGACTTGGTAGTTGTTGTAACGAAGGG  
ATTGAAGCTTGAAGTTGTGAAAATTTTGTCTTTGTACACAGTTATCGATCTTTCAAACAACAAATTTGAAG  
GACATATACCTAGTGTCTAGGAGATCTTATTGCGATTCCGGTACTTAATTTATCTCATAATGGGTTGCAA  
GGCTATATATCACCATCACTTGGAAAGTTTATCTGTACTGGAATCATTAGACCTTTCATTTAACCGCCTTTC  
GGGAGAGATACCACAACAACCTTGCTTCTTACGTCTCTTGAATTCTTAAATCTCTCCCACAATTATCTCC  
AAGGATGCATCCCTCAAGGACCCCAATTTACATACCTTGTGAGAACAGTTCATTTGATGGTAATGATGGATT  
ACGTGGATTCCCCATTTCAAAGGTTGTGGCAATGATCCTGTGTGTCAGAGACAACTATACAGTGTCTGCG  
CTAGAAGATCAAGAAAGAAATTCTGAATTTTTCAATGATTTTTGGAAAGCAGCTCTGATGGGCTATGGC  
AGTCGACTATGTATTGGCTTATCCATAATATATTTCTTGATCTCAACTGGAAATCTAAGATGGCTTGCAAG  
AATCATTGAAGAACTGGAACACAAAACACTATCATGCGAAGGAGAAAGAAGCAGCGAGGTCAAAGAATT  
ACAGAAGAAGAAATAATCGCTTCTAGACAAGTTACCAGTAAAGAAGAATTTGATTTCAGAACTTCAGGT  
ATTCATGCTAAGCTTTACACTAATGTTTTTTAG

>M6-PGSC0003DMG400031451 M6 LRR-RLP

AATCTAGAGGGAGCAATTCCACAATGTTTTGGCAATAATAGTAGCCTCCAGGCATTTGATATGCAGAAT  
AACAAACTTTCTGGGACTCTTCCAACAAATTTTAGCATTGGAAGTCACTTATAAGTCTCAACTTGCATGA  
CAATGAACTAGAGGGGGAAATCCCTCGGTCTTTGGCCAATTGCAAAAAGCTGCAAGTTCTTGATCTAGG  
AGATAATCATCTCTATGACACATTCCCATGTGGTTGGGAACTTTACCAGAGCTGAGAGTTCTAAGATTG  
ACATCGAATAAACTGCATGGACCTATAAGATTTTCAGTGGCTGAAATCATGTTTCCTGATCTTCGAATCAT  
AGATCTCTCTAGCAATGCCTTTTCGAAAGACTTACCAAAGAGTCTGTTTCAACAATTGAAAGGCATGAGG  
ACTGTTGATCAAACAATGAAGACAACAAGTTATCTAGGAGGTAGATATAACTACCAAAGACTTGGTAGTT  
GTTGTAACGAAGGGATTGAAGCTTGAAGTTGTGAAAATTTTGTCTTTGTACACAGTTATCGATCTTTCAA  
ACAACAATTTGAAGGACATATACCTAGTGTCTAGGAGATCTTATTGCGATTCCGGTACTTAATTTATCT  
CATAATGGGTTGCAAGGCTATATATCACCATCACTTGGAAAGTTTATCTGTACTGGAATCATTAGACCTTTC  
ATTTAACCGCCTTTCGGGAGAGATACCACAACAACCTTGCTTCTTACGTCTCTTGAATTCTTAAATCTCTC  
CCACAATTATCTCCAAGGATGCATCCCTCAAGGACCCCAATTTACATACCTTGTGAGAACAGTTCATTTGATG  
GTAATGATGGATTACGTGGATTCCCCATTTCAAAGGTTGTGGCAATGATCCTGTGTGTCAGAGACAACT  
ATACAGTGTCTGCGCTAGAAGATCAAGAAAGAAATTCTGAATTTTTCAATGATTTTTGGAAAGCAGCTCT

GATGGGCTATGGCAGTCGACTATGTATTGGCTTATCCATAATATATTTCTTGATCTCAACTGGAAATCTAA  
GATGGCTTGCAAGAATCATTGAAGAACTGGAACACAAAACATCATGCGAAGGAGAAAGAAGCAGCGA  
GGTCAAAGAATTACAGAAGAAGAAATAATCGCTTCTAGACAAGTTACCAGTAAAGAAGAAT

>M6-PGSC0003DMG400031478 M6 LRR-RLP

AAGGTTTGGTGAAGCTATATGTGTCAAAGTGCTCAAACCTTGAAAGCTTACCAGCAGAGATAGGTGATT  
TAGAAAACCTTGAGTATCTTAATGCCAGCTATACTCTAATCTCACGTCCTCCGTCTTCCATCATCCACTTG  
AATAAGCTTAAATCATTGACTTTTGAAAAAGATAAATCAGAAGATAGAGTGAACCTTCGTGCTCCCTCCAG  
TGAGTGAAGGGTTACGCTCATTGGAATCTCTGTATCTCAGGTAAGTCAATCTAATAGATGGAGGACTTCC  
AGAAGACATTGGATGTTTATCCTCTTTGAAAGATTTGAAGCTCAAGGGAAATAATTTTGAGCATTGCT  
CAAAGCATATCCAACTTGGTGCTCTTGAATTCTTGACTTATCAGATTGCAAGAGGCTTACACAGCTGC  
CAGAAGACATTGGATGTTTATCCTCTTTGAAAGATTTGAAGCTCAACGGAAATAATTTTGAGCATTGCT  
TCAAAGCATATCCAACTTGGTGCTCTTGAATTCTTGACTTATCAGATTGCAAGAGGCTTACACAGCTG  
CCAGAAGACATTGGATGTTTATCCTCTTTGAAAGATTTGAAGCTCAACGGAAATAATTTTGAGCATTGCT  
CTCAAAGCATATCCAACTTGGTGCTCTTGAATTCTTGACTTATCAGATTGCAAGAGGCTTACACAGCT  
GCCAGAAGACATTGGATGTTTATCCTCTTTGAAAGATTTGAAGCTCAACGGAAATAATTTTGAGCATTGCT  
CCTCAAAGCATATCCAACTTGGTGCTCTTGAATTCTTGACTTATCAGATTGCAAGAGGCTTACACAGCT  
GCCAGAAGACATTGGATGTTTATCCTCTTTGAAAGATTTGAAGCTCAACGGAAATAATTTTGAGCATTGCT  
CCTCAAAGCATATCCAACTTGGTGCTCTTGAATTCTTGACTTATCAGATTGCAAGAGGCTTACACAGCT  
GCCAGAA

>M6-PGSC0003DMG400032130 M6 LRR-RLP

TGAAGATTTAAGCTTGAGATCAAATAAGTTTCATGGTCCCATTAAATCTTCAGGGAATACAACTTGTTT  
GCGCGGCTTCAAATTCTGGATCTATCATCTAATGGATTTAGTGGTAATTTACCCGAAAGTCTTTTTGGGA  
ATTTACAAGCCATGAAGAAAATTGATGAGAGTACAAGAACCCCAAGATATGTTTCTGATCAATATGCTG  
GTTATTATGCTTATTTGACGACAATTACGACAAAGGGACAAGATTATGATTCTATTCGAATTTTGATTCT  
AACATGATTATCGATCTCTCAAAGAACAGATTTGAAGGTCATATCCAAACATTATTGGAGATCTCGTTG  
GACTTCGTACGTTGAACTTATCTCATAATGTCTTGGAAGGTCATATACCTGCATCATTCCAAAATTTATCT  
ATGCTCGAATCATTGGATCTCTCATCTAATAAAATCAGCGGAGCAATTCACCACAACCTTGCATCCCTCAC  
ATTTCTTGCACTTAAATCTCTCTCACAATCAACTGTTGGATGCATCCCCAAAGGAAAACAATTTGATA  
CGTTTGAGAACAGTTCATACCAAGGGAATGATGGGTTACGTGGACTGCCACTCTCAAACATTGTGGTG

GTGATGGTAGGGTACCACAAGCGACAATTCCAGCTGAGCTAGATCAAGAAGAAGAAGAAGAAGA  
TTCACCAATGATCTGTTGGCAGGCGGTTCTCATGGGTTACGGTTGTGGTCTAGTTATTGGACTGTCTGTA  
ATATACATAATGTTGTCAACTCAATATCCAGCATGGTTTTCGAGGATGGTATTGAAATTGGAACACATAT  
TACTATGAGAATGAAAAAGCACAAGAAAAGATATTAGTGTGTAACCTCCAGGTATTCAAGTTTATCTCT  
ATCCTTAAAAGAATTACTTTTTATATATCGATGTATTTTTACCTATTTTCATCCTCAAAGCTCTTAGCTTAA  
TTCTTTACTTTTGAAAATTGCAGGATTCAAGTCTACTAAGTTGCTGGGAATGCAGATAAAAGCCTTCATCT  
TTCATAGTTTGTGATATTTCCGTGAAGTGTGTTATCTTATGAATAAAGATATGACTTTTTCTT

>M6-PGSC0003DMG400032286 M6 LRR-RLP

ATTTTCCATACTTCTTGAGAAATGTAAAGACACTTGTGTACTIONGGATATTTCTAACAATAAGATTTGTGGT  
CAAATCCCTAACTGGTTTAGCGGCATGAGGTGGGACTCGTTGCTGTTCTAAACCTTTCTCATAATTCATT  
AACAGGCCACCTACCACAATTGCATTTCCATAATCTAGGGTATCTTGATCTGAAATTTAACTCCCTTCAGG  
GTCCACTACCTTCATCCATTTGTAACATGAGCTCGCTTGAATTTCTTGATTTATCACGCAACAACCTTCAGT  
GACTCAGTTTCACATTGTTTGGGAAGCATGGCTAGTCTAACGGTGCTAGACTTAAGAAGGAACAATTTCT  
ACAGGGAGTCTTCTCCATTATGTGCACAGAGCACTTATTGAGTACCATTGTCGTAAATGGTAATCGAT  
TTGAAGGACCTGTTCTGTGTCGTTGCTCAAATGTAATGGTCTACAAGTCTTGATGTGGGGAACAATGC  
TATAAATGACACGTTTCCAGCTTGGCTCGGAAGTCTCAAGAGCTGCAGGTCCTTATATTAAGTCGAAC  
AAGTTCCATGGACCTATAAGTACGTGTCAGACTAAGTTTTGCTTTCCCAAGTTGCGAATTTTTGATCTTTC  
TCGTAATGATTTAGTGGCTCACTTCTGCAAAGTTTTTGAAACTTCAAGGCAATGATCAAATTAGAT  
GGTGAAGACACAGGAAATATCAAGTACATAAAATCTGTGTTGAATTCGTCATTTGACACATCGTATGAG  
GATTCAGTGAGTTTGGTAATCAAAGGGCACGATATTGAGCTACAAAGAATCAGCACAATTATGACAACC  
ATAGATCTCTCAAGCAACCATTTTGAAGGTGTGATTCCGGAAACACTAAAGGACCTCAGCTCACTTAGGC  
TACTCAATTTATCCATAACAATCTCATAGGTCATATTCCAGTGGAAATTGGGGCAATTGAATAAGCTGGA  
AGCTTTAGATCTCTTGGAAATCGGCTCACTGGAAAGATTCCGCAGGAATTGACAAGAATGAACTTTCTG  
GCAGTCTTAAACATCTCTCAAATCATCTCATCGGACCAATTCCTCACGGTCTACAGTTCAACACATTTGA  
AAATGACTCGTACGGTGGTAACCTTGATTTATGTGGTCTTCTTTAACAAAGAAATGTGGAACGAGTGAT  
TCATCACATGTTCTCAACAATTGGAGTCCGAAGAAGAAGGCGAGTCATATTTTTTTAGTGGATTTACAT  
GGGAATCAGTAGTCATAGGCTACAATTTTGGACTAGTTGTTGGAAGTGTGATGTGGAGTCTCATGTTTAA  
ATATCGTAAGCCAAAATGGTTTGTGGAATTTTTCGATGGACTCATGCCTCACAAAAGAAGAAGGCCAAA  
GAAGAGAGCTCAGAGACGACGGACTTAATGGAAGATTGAGAGGGCCAA

>M6-PGSC0003DMG400032572 M6 LRR-RLP

AAAATGGCTGATGCCTTTGTGTCATTTGCAGTTCAAAAATTGGGTGATTTCTCATACAACAAGTTCCCT  
GCGTAAAAATCTGAGAAAGGAAATTGAGTGGCTGAGAAATGAGTTACTCTTCATACAGTCTTTCCTCAA  
AGATGCAGAACTAAAGCAATGTGTAGATCATAGAGTTCAACAATGGGTGTTTGAAATCAATTCTGTTGC  
GAATGATGCTGTCGCTATACTCGAGACTTACAGCTTTGAGGCTGATAAAGGTGATGACGATGAATTTGC  
TAGTCGTCTCAAGGCTTGCCTTGCATATGTAGGAAAGAGAAGAAATTCTACAATGTCGCCGAGGAGAT  
TCAATCACTCAAGCAGCGAATCATAGATATCTCTCGCAAGCGAGAACTTATGGTATTACAAATATCAAT  
AGTAATGCTGGAGAAGGGCCAAGTAATCAGGTTAGAACATTGAGGAGAACTACCTCATATGTGGATGA  
CCAGGATTACATTTTTGTTGGACTTCAGGATGTTGTACAAACATTGCTATCTGAACTTCTCAAAGCAGTGC  
CTCGTCGAAGCGTCGTCTCCATTTATGGAATGGGCGGATTAGGCAAGACCGCTCTTGCAAGAAACCTCT  
ACAAAAATCCTAATATAGCCTCTAGCTTCTCTACACGCGCTTGGATATGTGTTTCTCAAGAGTACAACACA  
ATGGATCTTCTTAAGACTATCATAAAATCCATCCAAGGTCGCACCAAGGGAACCTCTAGGATTGTTAGAAA  
CTATGACAGAAGGAGATCTAGAAGTTCACCTTCGTGATCTATTGAAAGAACGCAAATACCTTGTGGTGG  
TTGATGATGTATGGCAGAGAGAAGCATGGGAAAGTTTGAAAAGAGCATTCCCGGATAGCAAGAATGGC  
AGCAGAGTTATTATTACCACGCGCAAAGAGGATGTCGCTGAAAGAGCAGACAACAGAGGTTTTGTCCAT  
AAACTTCGTTTCCTAAGCCAAGAAGAAAGTTGGGATCTCTTTTGTAGGAAACTAGTTGATGTTGAGCAA  
TGGTTCAGCAATGGAAAGTCTAGCTAAGGATATGGTGGAAAAGTGTAGAGGCTTACCTCTTGCAATTG  
TTGTATTGAGTGGACTACTTTTCGCATAGAGGGGGGGTGGACAAATGGCAAGAAGTGAAAGATCAACTT  
TGGAAGAGCATTATTGAAGATAAATTTATTGAAATCTCCTGCATTCTATCATTAAAGCTACAACGATTTGTC  
AACTGTGCTCAAGCAGTGTCTTCTATACTTTGGTATTTTTCCAGAAGATCAAGTTCTCGAGGCTGATAACA  
TAATAAGGTTGTGGATGGCTGAGGGTTTCGTACCAAATGGAGAAGAAAGAATGGAGGATGTCGCTGAA  
GGCTTCTGAATGAGCTGATAAGATGAAGCTTGGTTCAAGTGGTGCATACGTTTTGGGAAAAAGTTACT  
GAATGTAGGGTTCATGATTTACTCCGTGATCTTGCCATACAAAAGGCATCCGACACAAACCTCTTTGACA  
TTTATCATCCAAGAAAGCACTCCAATCCTCTTCATGTATCAGACTTGCCATTCATGGTCAAGGAGAAAG  
GTATCACTTACTTGATCTTTCTAATTTGAAGTTGAGGTCAATTATGTTCTTCGATCAGGATTTTCGTAATGT  
GTTCCAACATATAGATGTGTTTCGACATATATATGTGTTGTACTTGGATATTAAAGGCTGTGGTGTCTATA  
CCTGATGCCATAGGGAGTTTGTACCACCTAAAGTTGTTAAGCTTGAGAGGTATCCGTGGTCTTCCATCTT  
CCATTGGCAACCTCAAGAATCTACAGACACTTGCTGTCACTGACTTTGGATAACAATAATTGCCAACTACC  
CCGCGAAACAGCTGACCTGATAAATTTAAGACATTTAGTTGTTCCGTATTCAAACCTCTGGCACATATA

AGCAAACCTCACTAGTCTTCAAGTTCTTGAAAGAGTTTGTGTGATCAATGGAAAGATGTTGATCCTGTTG  
ATTTAGTCAATCTTCGAGAATTAAGCATGTTTCATATTAGCATATCTTACTCCCTAAACAACATTAGCAGC  
TTGAAAAACCTTAGCACTCTCACATTGTCTTGTCAAGATTATGATGGATCATTCCCATCCCTTGAATTTGTT  
AATTGTTGTGAAAAGCTCCAGAAATTGTTCTTATATGGGAGAATAGAGAAACTGCCTAATCTGTTTCCAA  
ATTCCATCACAATGATGGCTCTGAGGGACTCAAGACTGACAGAAGATCCGATGCCTATTTTGGGAATGT  
TGCCAAACCTAAGGAATCTCTATTTGGTTAGTGCTTATCTTGAAAAGAAATAATGTGCAGTGATAACAG  
CTTCAGTCAACTAGAGTTCCTTCATCTTTATCATCTTTGGAACCTAGAAACATGGCATTTAGGCACAAGTG  
CAATGCCTCTCATTAAAGGTCTTCATATCTATGAATGTCCAAACCTGAAGGAGATTCCAGAGAGAATAAA  
AGACGTGAAGC

>M6-PGSC0003DMG400032785 M6 LRR-RLP

TGTATAGTTCCTATATAAACATTTCGGTTAGGTAGCTAGCAAATTAGTTTGCCAGAAAAGAAAGTAGAGT  
AATAGTGGGGATGGGAAATATTAAGTTTTTGTGTTAGTGTTTTTCTTATAGTAATAATGGCGAATGGT  
TGTTGGGAGGAAGAGAGAAGTGCTCTCTGGATCTGCAAGCAAATATAATGAGTTCTAATGGCGAATTG  
TTGGTTGATTGGGAAGCTTATTATACGAATGGTTTTACAGATTGTTGTTTCTGGAAAAGGGTAAAATGCA  
GCTTAGCAACAGGTTCGAGTGATCAAACCTCGATCTCGAAACAAATTTTGGTACAGGGGATGGTTGGAGAT  
TTAATGCCTCTCTCTTCTCCATTCAAGTCACTACAAGTCTTTTATTGTCTTACGGAAATATTATAGGGT  
GGACAAAAAATGAAGGTATATATGGAGTATGGAGTATATTCATGACTCTTGAAAAATGAACTATATGG  
AGTATATAAATTAACATGTGTTTTTGGTCTAATTTTGTAAATCCAGGTTTCAGTAAACTAAAGCAGCT  
TCCCAACCTGAAAGTACTCGATTTGCAATTAATCATATCCATCCTAAAGATTTACTATCATCTTTACGTTG  
GATTCATCTCTTGAGGTTCTAAAACCTTGGTGCAGATGTTGATACCTCTTCAACGTACCGCCGACATATA  
ATAGCAGTATATTCTATATCCTCCTACTCTATAGTCCATAATTGGCCAATAATTTACTTAGAAGTTGTAATT  
TTTGGATGAAGGCACGAGTAAGAAATGTGGAGGGCTAACCAATTTAAGAGAACTCTGGTTTGAAGGTT  
ATGCAATCAATGACATCAATAGCCTTTCTGCATTGGGTAAGCTCCCTTAAACAAAGTAGCAAATAACAA  
ATTTACAAGAGAACAATTAACAACTAACACTAAGTATGGTCTCTTACGTATTTTTTTTTTTCATAAATCA  
AATGCAGGTGCAATTCTGGACTGAGGAATTTAGAGAAGCTCATTTTGAATGATAATAACTTCAATTCCA  
CCATCTTTTCATCACTCAAGATTTTTCCGTATCTCAAGCATCTCAATCTCGCCTCGAATGAAATAGATGGA  
AATATCGAAATGAATGGTTTGTACGCGCCTCTTCATATCCAAGTCTTCCCCACAAAATATCTCAATTTTA  
TTTCTTCACATATCAAATTATACTTTATTTTTTATTAACCTGTGTAGATATAATTGATTTGAGCACTTTGGA  
ATATCTAGATCTTTCGGATAACAATATAGAGAGCTTTGCGACTACCAAAGGTACACGAATCAATGCAGTT

GCTCTAATGTTGAATGTTCTATTTAACCTTAACACATCCTACAGAACAAAATACATCTTTATGGATTGGA  
ATAACCATGTGCCGTGGTATGTAAATTTTTGATTGAAAACCTGTGGGATACAAATTAGATTTTAATAAGA  
TTGAACTATTCATTCTTATTTAAAAATGTATACTATTATTTATTTATTCACCATTTAACAGGTAACAAAAGA  
ATGAGTTCTCTGCGGAATTTACTATTGGGAAGTTCCTACTCCAACCTCTAGCAGAGTCATACAGTCCCTAA  
AACCATTCTCATCTCTTAAGTCACTTTCTTATGAAGATAGTGATCTCACTTCTCCAACCATAATTTACGGTA  
CACTCAAATTCATATATACCTTAGCTTACTTCTATCGCCACTCTTTTCGTTTGAAATGTGAATATATTTTTCT  
TTTTTTTTTTTTGGACTCTATCATATAAGCATTAAAGAAATCTGAGCAGATGGAGTACCTATACTTGGAGG  
GATGTTCTTTAAATGACAACCTTTCTCCCAAACATTGGACAAATGACTTCTCTCTTGGTGTTGAGTATAGCT  
TTTGGTGACAATGATGGCACCTCCCTAATCAAGGTACCCAATTTTTCTCTTTTTTCCCTAATGCCCGCATT  
TTCATGTTGGAGGTCTGATTTTATCATGTTGAGTTGATCAAATATTATATTATTTTTGTTTATTACCAAAC  
ACAAGAAAATAAGTAACACAAGCCATCTAATTTTTCTAGAAAATATTTTCCTTCGTATCGAACACATCCAT  
AGACATAAAAAAATATAATAAAATGTCACTCATCATAGATATTTGTTTTAGCTAAATGTTTCTTAATATAT  
ATATATAGGCTGGTGTGAACTCAAACACATTCAAGAGCTGGATTTCTCAGACAATAATTTTCGTGGAAACA  
CTGCCTTCATGTTTTGGAAACTTGACATCACTTCGACGATTGAGTTTTTCTGGGAATTACTTCATGCGAAA  
TATAGCGTCACATTCTATTTGGAGGAGACTCACATCACTTGAGTACCTCGATATTGTGGATAACCAATTT  
GATGTTCTCTGTCACTCAGCCAATTTCCATCCATACAAAATTGATCTACTTGGATGTTAGTTCTAATACA  
ATAATTCCAGATACCGAATTCCAAAATTGGATCCCAAATTTCCAGTTGGAGTTTTTGTCTATCGAAGGAT  
GTAAAACCTTCAAAAATTGCCTTCTTTCTTCACTACCAATATGACTTGAGGATTCTTACTATTGAAGGA  
AATCAATTGTCAGGGATCTTTCCAACATGGTTGTTAGAAAATAACACCAGACTTGCAGGGATTTATAGTA  
GAGATAATGCTTTCAACGGACCATTCAAGTTGCCATCGAGTGTTACCTCCATCTAGAGGCGATTGATGT  
ATCTAATAACAACTAAATGGATATATTCCAGAAAATATGAGTTTAGCTTTCCAAAGCTTACTTATTTGA  
ACATGTCACAAAATTATCTTGAAGGTCCTATACCTTCTAAGATTAGTGGCATTCAATTTAGAATTTCTAGAT  
CTATCTGTCAATAACTTGTCCGGAGAAGTTCCTGGTGATCTGGCGATTGGTTCTCCAGCATTAGTTTACCT  
TCGATTGTCTACAACAAGTTAAAAGGCCAAATTTTTCCAAAGGATGTCAAACCAAGGATGTTATTGTTT  
TTGACTTGAATGGAAATAACTTTGAGGGACCACTACCTAGCAACATGTTTATCACATCCCTTTTTGACT  
AGACGCTAGCAACAATAATTTCTCTGGAGAGATTCCGAGATGTGTTAGGAATAATACAAGATTGTTACA  
GCTTGATTTGTCCAAGAATCATCTCAAAGGTTCAATTCCAGTTGAGATTTGCAATTTAAAGCTCATTGAGG  
TCTTAGCTATATCTGAAAACAGGCTTTCAGGCCTTATTCTTCTTGTGTGAATTTTACCTGTGCAACACA  
TCCATCTTGAGAAAATCAATTGGGTGGTGAATTGGGACATGTACTTTCACTTCTCTTCTGATAACT

TTGGATCTTGGGTACAACAATTTTACAGGAAATATCCCACACACCGTAGGTTGCTTAATAATCTGAACT  
ACCTTCTCCTTAGCAATAACAAATTGGAAGGGCAGATTCCAACCTCAGATTTGTATGCTGAATAAGTTATC  
TATTGTGGATTTATCTTTCAATAAGCTTTATGGTCCACTCCTTCTTGTGGTTACTTAACACAAGCCAA  
AAAGGATGCAGAGATAAGTAGGACCTACTACCCTATGACTTTTGGGCATTCATGGTTAAATTTGTGGCC  
TTGATACATTTGAAACAGAACTACCACGATAGTCAAGGACTTGTAAATTGACACATTTTTAATGGATGTGG  
AAAACCAGGTCCGATTTTCAACGAAAAGAACTCATACATTTATAAGGGAATCATTTTAAAATATATGTC  
GGGTATTGATCTCTCAAGTAATAGATTAAGTGGTGAATTTCCCGTTGAGCTAGGGAAGATGAGTACTAT  
ACATGCACTGAATCTATCACACAACCATCTCATCGGAAGAATACCAAATAGCTTCTCCAATCTACAGAAA  
ATTGAGAGTTTAGACCTTTCCTTCAACAACCTGAATGGGAGAATTCCTGTTGGTCTAATTGAGCTAAATTC  
TTTGAAGTATTCAATGTTTCATTCAATAACTTATCCGGTGCAGTGCCTGATTTTAAAGCTCAATTTGCAA  
CTTTGATAAAAAGCAGCTACGAGGGAAATCCTTTTCTTTCGGTGATCCATTAGACAACAAGTGTGGCAT  
GAGTCCTAAATTATCAAATACCTCCAAGGTTAATGGAGATGAGGAATCATCAGAATTGGAGGATATGGA  
GTGTTTTTACATTGGCTTTGTTGTGTCTTATGGAGCGATCTTGTGGGATTAGCTACAGCGCTCTGCTTCA  
ATTGTCATTGGAGAACCCATGGTTCAGGATGATAGAGTCATTGATGTTTTATTGTTACTATTTTGTGTTA  
GACAACATTGTTACACCCCTCAAGAGTAGATGGTGCAGGAAAGTTGGTTAATTAGGTAGTTGTTAAAA  
TTATTGTTGTATGTCTATCACAATTATTATGTTGTTATTC

>M6-PGSC0003DMG400032828 M6 LRR-RLP

TGCATTAAGTCAATTAACAAAATGGCTTCATTTTCTTTCCATTACCACTACTGCCTTTGTTATCTTGC  
TTCTAAGTCTTACCTCCAATGTGTTCAACAACCTCAGCAGCCAAACACAGCCATTCTCTCCGTTAAGGGC  
ATAAAAAACCCGAGGCTGCAAAAAGCCTACATTGCTCTCCAAGCTTGAAACGTGTTATCTACTCTGATC  
CTAACAACCTCACTTCTACTTGGGTTGGCCCTTCAGTCTGCAACTACACTGGCATATATTGCGCGCCATTC  
CCTAATAACACCAAACCTCCAAGATGTTGCTGGCATTGATCTGAACCATGCTGATATAGCCGTTTCTAC  
CTGAGGAACTCGGTCTTCTCAATGACTTAGCGTTGCTGCACCTAACAGCAATCGCTTCTGTGGAATCCT  
CCCCTCTCTTTATCCAACCTCACTCTCTTGCATGAGCTTGATCTCAGTAACAACAGATTTCGTAGGACCTTT  
TCCTAACGTTGTCCTCTCTACCTCCTTGAATATCTTGATCTTCGCTACAATGAGTTTGAAGGGCCATT  
GCCTCCTCACTCTTTAGCAAAGATCTCGATGCTATTTTAGTTAACAATAACCGTTTAACTAACGTGATCC  
CTTCAAATTTAGGATCAAGCTCTGCTTCTGTTGTGGTTTTTGTCTAATAACTACTTTGGAGGATGCTTACCA  
CCAAGCATAGCCAACTTTGCAAACCCATAGAAGAGTTGCTCCTTACTAATACTAGCTTATCAGGGTGT  
TGCTCCTGAAGTGGGATTTTTGTACAAGCTAAAAGTTCTTGATGTGAGCAACAACAAGTTAGCAGGGA

CAATACCTTATACTATTGCTGGTTAGCTCACTTGGAGCTACTAAATTTAGCACATAACATGTTTAGTGGA  
ACTGTACCAGAGGGAATATGTGTATTACCTAAGCTCTCAAACCTCACATTCTCTTATAACTATTTATGTGA  
GGAGCAAGGTATTTGCAGCAACTTGACATCAAAGGGCATAGTGTACGATGATCGTCGAAATTGTTTGCC  
AGAAAAGCCTCTTCAGAGAAGCAAGAAGGAATGTGATGCTGTGGATGAGCATCCCATTGACTGTTTAGC  
ATTTCAATTGTGGCACTTGATACTGTTTTCATGTGTTGGTTCTACTGAAAATGTGACAAATTAGTACTAGCT  
TGAGTTTTCTTGTACTTTTTTTTCAAATTTAGTAGCCAATGTGAAAAAAGAATAAAGTCAATAGTAATTC  
TGTAATATGGTGTGTGATGAAGTTTTCTTATGTTGGTTATTTAACTTTGATGCTGCTGCTATTATATGTT  
GTCCCAAACATGATTCTCATTCTTGAAAAATCTTAATCAAGTTGCTACCTACATAGTGAATTCTTCTGTA  
ATTCCATATTTTTCTTGTA CTGTATATTTCA TTAGA

>M6-PGSC0003DMG400033131 M6 LRR-RLP

GTCATTTTTTTAATTTCTATTACCATCAATTTAGGGCAACCCTTTGGAGCAATTGATCTCTGTTTGCCACAA  
TCAACAACGGAAGGTGAGATTTTTTTAAAATCTTTTTTCGCTTATAAAATCATGTAATTAATTCAAATATG  
TAACTAACTACTTCAAGTTGGTTTGTA AATTGTAGTACAACAAAAATTCAAATCATTGAACTTGGTTTGG  
GTGTTTTCTTCTCTAAATTATGAAATGATATTGTTTTCA TTTCTTTTATTAAAGGTGAAAGAGCAATTAAC  
TCAATCCATGGAAGTTGTTGAGACTTGTGCTAAAGGAACTCTTTCTTCTGGAGAGCCTTCAAACAAACCT  
GGTATACATCAATCTATGATGATGATGAAGTTGTGGGCTTTGAGAAAGAAGCAGAAATTATAATGATGA  
AATTGATACGAGGAACAAAGGAGCGGGATCTTATCTCCATCTATGGAATGGCAGGACTTGGTAAAAAA  
ACTTTGGCAAGAAAGGTATACAACAATCCCTATATTGTTAATCACTTTGATGTTAAAGCATGGTGTGCTTT  
GTCGCAAACATATAATAGGACGACGTTATTGATTGAGATTTTCAAACAAGCTACAAATGATGAGATAGA  
AATCAAAGAAGACGATGATGTAGCTGACATGTTGCGCAGGGTTCTAATAGGCAAGAGATACCTCATCGT  
ATTAGATGATATTTGGGATGTCGAGGCATGGGAAGATTTGGGTTTATGTTTCCCTCAAGGTAAATATGG  
AAGCAGAGTAATGGTTACAACAAGAATTGAACAAGTGGCTAAGTATCTTCAGCACCATAGTGATCCTTA  
TTCTCTTAGCTTTATAACATCCGAACAGAGTTGGAAATTATTGGAGAAGAAGGTATTTCAAGGAGAGAG  
TTGTCCCCTGAATCTACTTGAAGCAGGGTTACAAGTTGCCAACATTGCAAGGGATTGCCTCTTGTGGTT  
GTCCTGGTTGCTGGGTTTTATTGCGAAAATGAAAAGGGAAACGTCCTTGTGGCTCGAGGTTGCAAATAAC  
TTAAGTTCTCTTGCTTTGGGGGAGCAGAGTATGAAGGTAATACAATCAAGTTATGACCATTTAGAAGAC  
CATTTAAAGCCTTGCCTTCTATACATGGGATTGTTTCCAGAGGACCATAAGATTCCAGTGAACGATCTGC  
TGAAGTTGTGGATGGATGAAGAGTTTGTATTGAATGCCGAAACAGAGAACATGGAGGAAACATCTCGA  
GTTTGCTTGAGTGATTTGCTTAACAGAAGCCTAGTAATGGTCTCTGGAAAGAGAGTTAATCGTGATGTA



GTG TACTGCTCACTTCACGATGTAGTGCGTGAGTTCTGCTTGAGAAAAC TACAGAAGACAATTATATAC  
AGGTTGCAGTGCCATACAATCCGTATCAACATATGCATTCCACGGAATCACGGTTATGCATTTATATTCA  
GATGATCTTGTTAAACAATTAGATTATTCTAAATACCAAGTTGGATAAGATTCCAATGCTCGATTTCAAGG  
AAACAAATTCTTTGGAGTTCATTGCTCATCCAAAAC TCAATACATGGAATAACCAATATTCAAATCCATTA  
GATTTAGTTGTTAAATTCAGATTTATTCGGGCATTGTATTTGATGGATGTGGAATTGCCAAATTCATGGG  
CTGCTG TACTGCAATCGCTAACTCAGTTGAGGTACCTAGCACTTTATGTCAAACAATTTCAATTGAAGTG  
GATATCACACCTACACCATCTCCAAAAC TCGCAACTCAAACAAGGAAGAGGATATGGCTAAGGGCTT

>M6-PGSC0003DMG400033132 M6 LRR-RLP

CCAATTGACATGGATGTTGTTGAAACTTCTGGAGAGCCTTCCACCAAACCTAGTATTACATCAATTTATG  
ATGATGATGAAGTTGTCGGCTTTGAGAAAGATGAAGAAATTGACACGAGGAACAAAGGATCTATGGAA  
TGCGCGGACTAGGTAAATCAACTTTGGCAAGGAAGGTGTACAACAATCCCTATATTGTTAATTACTTTGA  
TGTTAAAATATGGTGTGCTGTGTCTCAAGCATATAGTAGGACGACTTTGTTGGTTGAGATTTTCAAACAA  
GCAACAAATGATAATAGCGAAATCAAAGAGGACGTTGACATAGCTGACAAGTTGCAGAAAGCTCTAAA  
AGGTAAGAGATACCTCATCGTATTGGATGATATATGGGAAGTCGAGGTTTATGTTCCCTAAGGGTGAA  
TATGGAAGTAGAGTAATGGTAACCATTGCAATTGAACAAGTGGCTACACATCTTCAACACTGCGGTGAA  
CCTTATTCTTTAGATTTCTAACTCCGGAAGAGAGTTGGGAATTATTGGAGAAGAAAATATTTCAAGGAG  
AGAGTTGTCCCTCGGACCTACTAGAAGCAGGTTTACAAGTTGCCAACACTGCAAGGGATTGCCTCTGT  
GATTGTCCTGATTGCTGGAATTATTAAGAAAATGGAAAGGCATCCGTCCATGTGGATGGAAGTTGCAAA  
TGATTTAAGTTCTCATGTTTTAGGAGAGCAGAGTACAAAGGTGATGCAGTCAAGTTATGACCATTTAGA  
AGGCCACTTAAAGTCTTGCCTTCTTTACATGGCATTGTTTCCAGAAGACTATAAGATTCCAGTGTCCAATT  
TGATGATGTGGTGGATTGCTGAGGAGTTTGTACTGAATGTTGACAACAAGAATATGGAGGATGCATCTA  
GAGTTTGCTTGAATGGTCTACTTAACAGAAGCCTAGTAAAGGTCTCTCAAGGTAGTTCTAATGGTGGCGT  
AACTTACTGCATACTTCATGATGTAGTGCGTGAGTTTTGCTTGAGAAAAC TTAAGAGGAAAAGTTTATG  
CAGTTAATAGTGCCATACAATCCATATCAACAGTTTTATTCCATGGAATCGCGGATAAGTGTATCTTCA  
TGATGATCTTGTTAAACAATTGGATGATTTTGAATATATCAGTTAGATAATATTCCAATGCTTGAGTCTAA  
GGGAAGTAGAAAGTGT TTTGGTAAATGTCCTAGGACTTTGGAGTTCATTGCTCATCCAAAATTCAACACA  
TGGATTAGATCATCAAATCCTTTAGTTTTACTTGAAAACTTAGACTTGTTGAGGTGTTGCATTTTCCGGA  
TGTGAATCTGCCAAGTTGTTGGCGTAGTGCTGTGCAATCGCTAACTCACTTGAGGTACCTTGAGATTTAT  
GTCGAAGAATTTGATTTTGAGTGGATATCTCACCTTCTCAATCTTCAAAC TCTAGTAGTTCGTTTCATCTAA

GTCTCTGAGGATATTATCGCCTGCAGCTATGTGGAAAATGATGAAGCTAAGGCATCTGAATATAATCAA  
TTTGTGCTTCTTGTGGGAAGATAATGATCGAGCAATTTTTGACGAATCTTCAACAACCTATGCTAGAGAAC  
TTGAAGACATTCTTCAGTATTCATATACGTGTAGATGATACAACCTCCAAGATTCTGGTGGAGGTTTCCAA  
ATATTGAATAACTTAGCTGCCTCAGTGTTGACGATTTACCTAGTTGTCCTTTGTTCCCTCAGTGGAAGTT  
AATACTCGGCATCAATCTCTTGATCTGATGATAAGCTATAAGGGATTCTGGGATTGAGTTGGTTGGGAG  
AGCTACTTTGTCTTCCCTTCAAATCTTAGGCATCTGTCCCTCAGTGGTTGTTTTTTGACAGAAAAAATGGT  
TTCAAACATTGCAAGATTGAAGAACTTGAGAACTCTCATTAGTTGGGGGATTTCCCTTGGGGAAAAT  
AGAGAACCGTTGCTGGGACGTCACAAATGTGGAGTTCCCTGCACTAAAATACTTGGCATTACGCTTTATG  
AGGATGGAAGAATGGAAAGCTTCAGAGGAATCCTTTCCTGTGCTTGAGGAGCTAACTATTAGTGTTGGT  
TACATCATGGAGATTCTCCTAGTTTTGCGGATATTTAACACTGCGACTTATTAACCTGGACAAGCTCTC  
CAATTCATTGTGGTTTCAGCTTTGACTATTA AAAAGGAAATAGAAGAAAACACAGGATGTGACCGTCTC  
C

>M6-PGSC0003DMG400033152 M6 LRR-RLP

GTGATATACGCTTGGATAATATGAATGCAAGGTTGTGGTGGAGGTTTCCGAATCTTGAAGAACTCTGCC  
TCAACGTTAAAGTTGTACCTGAGTTTCCGTTGTTTCCCATAGCGGAAGTTCATAGTCACCTTCATTTTCTT  
ACTCTGGAGTTCCCTTAATACAATTATTTGAATTAGTTGGATGGGAGAGGTATTGTGTGTTCCCTTCAA  
TCTTAGGCATTTGGACCTTGCCAACTGTTTCTTGACGGAAGAAATGGTTTTAACATTGCAAGACTGAAG  
AAGCTTGAGAGTCTTCAATTATCTATGGGATTTGCTTCTATGAGATATTGTTGGGATGTCACAAATGTGG  
AGTTTGATGCACTCAAATACTTGGGATTATTCTTTATGCAGATAGAAGAATGGAAAGCTTCAGAGGAAT  
CCTTTCCTGTGCTTGAGAAGCTAGTTATAAGTGGATGGCCCGTTTTCAAGGATATCAAGGAGATCCCCC  
AAGCTTTCGGATATTCTAACCTAAGACGTATTGAACTGTTTACTGACAGACTCTCTAGGGGTTTCA  
GCTTTGAATATCAAAGAGCGATTGAAGAAAACACAGGATGTGACAGTCTCCAAGTTTTTATACAAAAG  
TAACTAAAT

>M6-PGSC0003DMG400033153 M6 LRR-RLP

GTGGGCTTTGAGAAACATGCAGAAATTATAATGAATAAATTGATACGAGGAACAAAGGAGCGGGATCT  
TATCACCATCTATGGGATGCCTGGACTAGGTAAAACAACCTTTGGCAAAAAAGGTATACAACAATCCCTCT  
ATTGTTAATTACTTTGATGTTAAAGCATGGTGTACTGTGTACAAGCATATGATAGGCGGACGTTATTGG  
TTGAGATTTTCAAACAAGCTACAAATAATAAGATCATAATCGAAGAGGACGATGATGTAGCTGACATGT  
TGCGCAAGGTTCTAATAGGCAAGAGATACCTCATCGTATTAGATGACATTTGGGATATCAAGGCATGGG

AAGATTTGGAATATGTTTCCCTCAAGGTGAATGTGGAAGCAGAGTAATGGTCACGACACGAATTGAA  
GAAGTGACTAAGCATCACAGTGATCCTTATTCTCTTAGCTTTCTAACGTCCGAAGAGAGTTGGGAATTAT  
TGGAGAAGAAGATATTTTCGAGGAGAGAGTTGTCCCCGGATCTACTGGAAGCAGGGCTACAAGTTGCC  
CTACACTGTAAGGGATTGCCTCTTGTGGTTGTCTTGATTGCTGGAATTATAGCAAAAACGGAAAGGGAG  
GCGTCCTTGTGGCTCGAGGTTGCAAATGACTTAAGTTCCTTGCTTTAGGAGAGCAGAGTATGAAGGTG  
ATACAATCAAGTTATGACCATTTAGAAGAACACTTAAAGCCTTGCCTTCTTTACATGGAATTGTTTCCAGA  
AGACCATAAGATCCCAGTGGACCATCTGCTGAAGTTGTGGATGGCTGAAGAGTTTGTATTGAATGCCGG  
AAAAGAGAACATGGAGGAAGCATGTTCGAGTTTGCATGAGTGATTTGCTTAACAGAAGCCTAATAATGG  
TCTCCGGGATGAGATTTTATCGTGATGTACAATACTGCTCACTTCATGATGTAGTGCGTGAGTTCTGCTT  
GAGAAAACCTCACAGAAGACAAGTATATGCAGGCCACAGTGCCATTCAATCCGTATCAACATTTGCATTCC  
ACGGAATCACGGTTATGCATTTATATTCGTGATGATCTTGTTAAACAATTAGATCATTCCGACTACCAACT  
GGATAAGATTCCAATGCTAGATTTCAAGGAAACAATTCTTTGGAGTTCATTGCTCATCCAAAACCTCAAT  
ACATGGAATAACCAATATTCAAATCCTTTAGATTTACTTGTTAAATTAAGATTTGTTCCGGCATTGGATT  
GATGGATGTGGAATTGCCAGATTCATGGGCCACTGCAATTCAATCGCTAACTGAGTTGAGATACCTTGC  
ACTTTGTGTCAAACAATTTGAATTGAAGTGGATATCACACCTACACAATCTCCAAAACCTCTGCAGGTCAAG  
TCAAGTGAGAAGTTACACCTAAGGGCTACTACTTTATCAGAAATGACGAAGCTAAGGCATGTGAAAATA  
GACTGTTTTTTCATGATATGGGAAGACATTAATGACGAAGGAGGTTTTGAAACAAGTATGCTAGAGAAC  
ATGAAGAGTTTTTGAACCTTGCATATACGCTTGGATAATATGAATGCAAGGTTCTGGTGGAGGTTTCCG  
AATCTTGAAGAACTCGGCCTCAGCGTTAAAGATGTACCTGAGTTTCTTTGTTTCCCATAGCGGAAGTTC  
ATAGTCACCTTCATTTTCTTCTCTGGAGTTTTCTATAATGGAATTATTTAATTCAGTTGGATGGGAGAGG  
TATTTTGTGTTGCCTTCAAGTCTTAGGCATTTGGACCTTGCCGGCTGTTTCTTGACGGAAGAAATGTTTT  
AAACATTGCAAGATTGAAGAAGCTTGAGAGTCTCAAATTGCTTGTGGGATTTCTTTTGGGAGATCAGA  
GAGCTGTTGCTGGGATGTCACAAATGTGGAGTTTGTGCACTCAAATACTTGGGATTATTCTTTATGCAG  
ATAGAAGAATGGAAAGCTTCAGAGGAATCCTTTCCTGTGCTTGAGAAGCTAGTTATAAGTGGATGTTCC  
AATTTCCAGGAGATCCCCCAAGCTTTGCGGATATTCCAACACTAACACGTATTGAACTGACTAACTGCA  
TCGACTCTCTAGGGGTTTTAGCTATGAATATCAAAAAGAGAAATTGAAGAAAACACTGGATGTGACAGTC  
TCCAAGTTGTTATAGAAAAGTAAATAAATGTAATTAAGCACTTCATTGCTGCTCTGTTTCCACTTCCTA  
CTTCTATATTGTTGCATTATTATCTGTTTTTGTAGACATAATACATAAACATACCATTGAACTTTGATCTTGAG  
CTGACAGCTATGTCCTTTGACTTTGGATGCGCACAATTAATACTTAAGCTTGTATAAAAACCTTTTTATGTG

ACATAATACATGTAGGACACAAT

>M6-PGSC0003DMG400033154 M6 LRR-RLP

GTTGCAAATGATTTAAGTTCTCATGTTTTAGGAGAGCAGAGTACAAAGGTGATGCAGTCAAGTTATGAC  
CATTTAGAAGGCCACTTAAAGTCTTGCCTTCTTTACATGGCATTGTTTCCAGAAGACTATAAGATTCCAGT  
GTCCAATTTGATGATGTGGTGGATTGCTGAGGAGTTTGTACTGAATGTTGACAACAAGAATATGGAGGA  
TGCATCTAGAGTTTGCTTGAATGGTCTACTTAACAGAAGCCTAGTAAAGGTCTCTCAAGGTAGTTCTAAT  
GGTGGCGTAACTTACTGCATACTTCATGATGTAGTGCCTGAGTTTTGCTTGAGAAAACCTAAAGAGGAA  
AAGTTTATGCAGTTAATAGTGCCATACAATCCATATCAACAGTTTTATTCCATGGAATCGCGGATAAGTG  
TTTATCTTCATGATGATCTTGTTAAACAATTGGATGATTTTGAATATATCAGTTAGATAATATTCCAATGCT  
TGAGTCTAAGGGAAGTAGAAAGTGTTTTGGTAAATGTCCTAGGACTTTGGAGTTCATTGCTCATCCAAA  
ATTC AACACATGGATTAGATCATCAAATCCTTTAGTTTTACTTGAAAACTTAGACTTGTT CAGGTGTTGC  
ATTTTCCGGATGTGAATCTGCCAAGTTGTTGGCGTAGTGCTGTGCAATCGCTAACTCACTTGAGGTACCT  
TGAGATTTATGT CGAAGAATTTGATTTTGAGTGGATATCTCACCTTCTCAATCTTCAA ACTCTAGTAGTTC  
GTT CATCTAAGTCTCTGAGGATATTATCGCCTGCAGCTATGTGGAAAATGATGAAGCTAAGGCATCTGA  
ATATAATCAATTTGTGCTTCTTGTTGGGAAGATAATGATCGAGCAATTTTTGACGAATCTTCAACA ACTAT  
GCTAGAGAACTTGAAGACATTCTTCAGTATTCATATACGTGTAGATGATACAACTCCAAGATTCTGGTGG  
AGGTTTCAAATATTGAATAACTTAGCTGCCTCAGTGTTGACGATTTACCTAGTTGTCCTTTGTTCCCTC  
AGTGGAAGTTAATACTCGGCATCAATCTTGTATCTGATGATAAGCTATAAGGGATTCTGGGATTCAGTT  
GGTTGGGAGAGCTACTTTGTCTTCCCTTCAAATCTTAGGCATCTGTCCCTCAGTGGTTGTTTTTTGACAGA  
AAAAATGGTTTCAAACATTGCAAGATTGAAGAACTTGAGAACTCTCATTAGTTGGGGGATTTCCCTTG  
GGGAAAATAGAGAACCGTTGCTGGGACGTCACAAATGTGGAGTTCCTGCACTAAAATACTTGGCATT A  
CGCTTTATGAGGATGGAAGAATGGAAAGCTTCAGAGGAATCCTTTCCTGTGCTTGAGGAGCTAACTATT  
AGTGTGGTTACATCATGGAGATTCTCCTAGTTTTGCGGATATTTAACACTGCGACTTATTA AACTGGA  
CAAGCTCTCAATTCATTGTGGTTTCAGCTTTGACTATTA AAAAGGAAATAGAAGAAAACACAGGATGT  
GACCGTCTCC

>M6-PGSC0003DMG400033334 M6 LRR-RLP

ATCAAAGAAAACAAACACAAAATACACTCTCTCCAAAATATCCTTCTCTCTAAACTATTAGGGGAGAAAG  
AAAATTGTGTGGATAATAAGGAGGCGGGGAGGAGCATGTTGTCTAAGAGACTTCTGCTTAAGAAGGTT  
TTAATTGTGCTTGATGACATAGATCACATAGACCAGTTGGAATACCTAGCAAAGGATCTCAGTTGGTTTG

GCAAGGGTAGCAGGATTATTGCAACCACTAGAGACCATTTGATAGGGGAAAATGACGTAGTACATGAA  
ATGAATACACTACTTGACCGTGATGCTATTAACCTGTTCAATCAATATGCTTTCAAAGAAAAAGTTCCAA  
ATGAGTGTTTTAAAGATCTAACGTCGGAAATAGTAAGTCTTGCTAAAGGCCATCCTTTAGCCCTGAAAGT  
ATGGGGTTCTTCATTACACCGTATGGATATAACTAAGTGGGAAAGTTCCTTGGTCCGAATAAAGGAAAA  
CTCTGGTGTAGAAATTACTAAGAACCTCAAATAAGTTATGATGGGTTGGAGCCCAAAGATCAAAGAT  
ATTTCTTGATATAGCATGTTTCTCCGAGGAATTA AAAAAGAAAAAGTCATGCAAGTTCTTGAGAGCTGT  
TATTCTAGACCAGATTTGTGTGTTCTAGCTAATAAATCTCTTGTGTCCATTTCTGAAAATAATATGATTGA  
AATGCATGACTTAATTCAAGAAATGGGTAAATATATAGTGCAAATGCAAGAGCATCCGGGAGAACGTA  
GCAGATTATGGAATGTTGAAGATTTCAAAGAAGTTGTGGACAACAATATGTTAAGTAGGCTAAACAATG  
CAATAATATTCAATTTTACTTTTCATATTCCAAAGACTTATAGAATATATATATATAGTCAATTTCTTTAT  
TTATTCATCTTTCTTTATATTCTAGCGCGTATGTCATTTTAGTCATTTACTTTAAGGGAAAAGGGCTCG  
ATATACCCCTCAACTTTGTCATGTGGAGTTGATATGCCCTCGTTATGAAAGTGGCTCATATATACCCTTA  
CCATTATACAAATGGCTCACATATACTCCTACCGTTACAAAATGAGCTCACATATATTCTTCATTTAATGG  
GAGTGAAAAATTAATTTTAAATTTATATATTTAACTTTTTTTAAAAAAAATCATTAGGGTATATATGA  
TCCTTCTAGCAAATCAAGGTATATTTAATCTTTTTCATACATAAATTATTTTTGACTTATTTGACTATC  
ATTATTTGAGTTTCTTATTCTTATTTTATTTTTCTTTTATTCTTAATTTAAAGAAAAAATTA AAACTAT  
TTTTGTGGCTATATTATAATTTAAACTATTATTTT CAGCTATACTGTAATTTATATTTTGTATTTAGAAAA  
AATATTTGGGTCATCTATAATAAATTTTACAAGAATATTAGTGAAACATAAATAAATTTGACCATCAAAT  
AATAAATCTAAATTAGTCTTTGAAACAAAAAAAAGGTCAAAAAAATATATGTTTGAGGATGATTAT  
GTATATCCATATGGGATTATATTTTTATTA AAAACAAAATAAATTA AAAAATTA AATTAATTTTTTTAC  
TTCCGTTAGAGGAAAAGGGTATATGTGAGCCATTTATGTAACAATAGGGGTATATATTAGCACTTTCATA  
ACGAAGGGTATATCAACTCTAAATGTCAAAGTTGTGGGGTATATCAGACTCTTTTCTTTACTTTATTAAT  
AATAGAAGCAAAAATAATAGTAGTTGCCTAAGGTAGCTAATTCGTCAAGTATCGATTTTTAGTTAACGTT  
GCCTAATTCGTTTATGTTATG

>M6-PGSC0003DMG400033563 M6 LRR-RLP

CATCATGATTCCAGGTATAACAATTCTCTATTTTCTTTTTTTTTGTTTTAATTTTTCTTTTTGGATTATAAA  
ATTTTTAAGTTTAATTAAGCATTCAACTTTTTTCTAATAGATTCTAAAAGAGTTGATGCTGATATTGAA  
GATAGATTCAGTGCTCTACCAATAAACCTTGTAGATGATATTCTAAGGCTCTTACCAGTTCACGACGCAG  
CAAGAACTAGTATTTTGTCAAAAATTGGAGATATATTTGGGCCGCGCTCCCAATTTAATGCTTGATAA

GACCTTTTGCAGTAAATTAGCTGTAAAATCTCAATTTGTATTGAAAGAAACAATAGATATGATTCTCTTAC  
AACATATTGGAGATATTGTGAAGTTTGATCTTGATGTTTCAGGAGTACAATTGTGTTTCATATGCAGACAT  
CGATAGATGGATGCTTTATGTCACGAGATATGGTGTCAAGGAATTAACCCTTTTCATGTCAAAGAATATT  
AACAGTACTTATAAAGTGCCTTCTTATATATTCAATTGTCAAACCCTGACACAATTGAAACTCTTCAATTG  
CATCTTCAAATTACCAAATCTTTTCTTGGGTTTCAAACCTTACCATCCTTCAGTTGAAAGAAGTAACCTT  
CGCGCCTGCAATAGAGTTTTATGCTATCAAACGCCACTTCTTGTCGAATTAATCTTGACACATTGTGAG  
GGCACTCAATATCTTAACATTGAGTTCTCATCAGGATTGAAGTACTTGTGTTGTTGTTGAGAGTCACTATAA  
TCTTGATTTAAATAGCAATTACTTTAAGAACGTCAAAAAATTGACATACTTATACCTTGTGATTGATAATC  
CAATACGTGTTGATGAAAGATTAACCTTTGGAAAAGCTTCTTTTTAGTTCGCCTACACTTGAGACACTTACT  
TTGGGTTTTTATGTACTIONGAGGTAAGAAGCTAACATGTTGTTTTACTTAGATATCTACGTTATCCTTCTGTT  
TGTATAATTTTTCGTTAAAGCTTTTGAATGCAGGTACAGTCCCAAAGGGGCTTCATTATACACTCAACTGC  
TTGTGGCATCTATAGTTAGGTGTAACTTCAACAAATTGGGTGAGACTTGTACACTCTGGAGTTGATTA  
AAAGTTTCCCAATTTGAGTAACTTGAGATTTGGGTACGAA

>M6-PGSC0003DMG400033632 M6 LRR-RLP

TGAACAGTTTGATGCGAAAAATGGTCTACCGGCAATTCTCATTCTGTTCTTTTTCTGTTTCTGTCTGCTT  
CTTTTTCTTCATCCATACCTCATCGGTGCCACGAAGATGAAAGTATTTCCCTTCTAAAATTCAAGAAAACA  
CTTACTGTAGATCCTTCATTAGATAGGTGTATTTCTTACTTTTTATCCAAATATGAGTTCATGGAACATGAG  
CAGAGATTGTTGCTCATGGGATAGAGTCATATGCGATGAGATTACTGGCCATGTCATTGAACTTGACCTC  
GGCTGTAGCCGTCTGGTAGGATAGATTGATTCCAATAGCAGCCTATTCCGACTCTCTCATCTCCAAAGGC  
TTGATCTTTCTTGAATAACTTCTAAATTCTCACATCTCTCCTGAATTTGGCAGGTTCTCGAGCTTGACAC  
ATCTTAATCTTACCAACTCATTTTTCTCAGGCCAAATTCCTTCTGAAATCTCTCATCTTTCCAAGTTACAATC  
TCTTCATCTCTCAGACCTAAGAGTTGGACCTCACAATTTAAATTGCTCCTTCAGAATTTGACCCAATTA  
GAGAGCTTGATCTTACTTACGTGGACATCTATTCCACCATTCTCTGAATTTTTCTTCTCATTTCACAACCTC  
TGGGGCTGGAAGACACAGGATTGTATGGGATAATACCTGAGAGTATTTTTCACCTTCCCAACCTGGAAA  
TACTTGACTTATCCGGCAATTATCAGCTAAGTGGTTATTTTCAAAGACCAAATGGAACAGCAGTGCATC  
TCTCGTAGGGTTAGATCTCAGTGGCGTGAATTTTTCTGTAATTTGCCTGAGTCTCTTGGATATCTAACAT  
CGGTACATTCTTTGTCTCTTGGAAATTGCAACCTTAGAGGACCTATTCCTGAATCTATTTCGAATCTCACC  
CGCATAGAGTCTTTGTACCTTGATGGTAACTCCCTGAATGGAACAATACCATCAGGGATGTTCTCCCTTC  
CATCACTAAGTTATTTAAGCTTGGGTTTTAACCAATTTTCTGGTCAGCTTGAGGATTTCAAGTCCAATACA

CTAGTCTGGATTCAGTTACAGGGCAATCGGCTGCAAGGCCATCTTCCCAAGTCAATTCAAACCTTGTGA  
ACCTAAAATATCTTGATCTTTCTTTCAATAATTTTAGTGGTAGTGTGGATGTCAGCCTCTTTTCAGACCTCA  
AACAGCTTTTCGTATCTTAGTCTTTCATACAACAGTATCTCATTGACTAATGAAAAGGAAGTTAAATCTAGT  
TTGCCGGAGTCACTTGAGTACTTACGTTTGGCTGCATGTGATGTGAAAAGAATTGGAGTTTCTAAGATCC  
GCAAAGAAGCTATCTGACTTGGATCTTTCAAATAATAAGGTTCAAGGAAGAGTTCCTGATTGGGCATGG  
TCTACTTGGAATTTTTCAGTGTCAAATCTTAATCTATCCCACAATATGCTGACAAGCATGGACTCAATTCC  
TCTTCAATCTGGATATATTATTGATTTGCGGTCCAATTTTCTTAAAGGGTCACTACCTATTCCAGGGAATT  
CACAGCATTTTTCTTCATATCAGAAAATAATCTTAGTGGGGAAATTCCTTCATCTATTTGCAATTTGAAAT  
CAGTGCAACTTCTAGATTTGGCGAGAAACAACCTTGATGGGAGCAATTCCACAATGTTTCGGTAATATCA  
GTGGCCTCCTGGTTTTGGATATGTACAACAACAATCTTCTGGGACTCTCTCAATGGCTTTTTGGAATCGTA  
AGTGAACCTAGAAGCCTCAACTTTCATGGAAATGAACTAGAGGGGAAAATCCCTCGATCTTTGGCCAAT  
TGTGAAGCGTTGCAAGTTCTTGATTTAGGCGATAATCACCTAAACGACACATTCCCATGTGGTTGGGAA  
CTCTGCCATATCTGCAAGTTTTAAGCCTGAGATCAAACAAGTTGCATGGATCTATTAGAACTTCAAGGAT  
AGAAAACATGTTTCCCAGCTTCGCATCATCGATCTCTTACAATGCCTTCTCGGGAAACTTACCTACAA  
GTCTGTTTCAACATCTGAAAGCCATGAGGACAATTGACCAATCATTGAAGGCACCAAGATCATCTTACAT  
AGAATCATATTACCAAGATTCTATTACAATTGCAACCAAGGGAATGGATCGTGAAATTGTGAGAATCTTG  
TATTTGTACACCGCTCTTGATCTTTCAAATAATAAATTTAGTGGGAAAATTCCAAGTATTATTGGGGATCT  
CGTTGCACTTCATGTGCTGAGTTTATCTCATAATGGATTGCAAGGTCAGATACCATCATCACTCGGAAAT  
TTATCTTCAATTGAATCATTGGATCTATCCGTTAACCAACTTTCGGGTAAGATACCACCACAACCTGGCTTC  
TCTTACATCTCTTGCAATTCTTAAATCTCTCCCACAATCATCTCCAAGGATGCATCCCTCAAGGACCTCAATT  
TCATACATTCGAGAATAATTCATATGAAGGTAATGATGGATTACGCGGATTCCCCATTTCAAAGGTTGT  
GGCAATGATCAGGTGTCAGAGACAACTATACTGAATCTGCTCTAGACGATGAAGAAAGCGATTTTGAA  
TTTCTTAGTGACTTTTGGAAAGCTGCTCTTATGGGGTATGTAAGTGGACTATGTATTGGATTATCAATAA  
TATATTTTATGATTTCTAATGGAAAACCAATATGGCTTGCAAGAATCATTGTAGAGCTGGAGTACAAAAT  
AATGATGGGAAGGAGAAAGACGCAGC

>M6-PGSC0003DMG400033670 M6 LRR-RLP

CTTGATTAAATGTGCTGTGTTTCAATTAATCTGTTGGACCCATAACAATAATTCATGAAAACCTTTTCATATTT  
GTTGTCCTGTATAACAATAATGGTCCCAAATATCATCAATTTTATCTGTCCACACCCTTCTTATCTTTCTTCTC  
AAATTTCAACAATCAACCAATCGGATCCATGGCACCATCTTCTTCTTTTGTAAAGCAATTCACAGTACTGT

CCTCGATGGAAGTACGATGTCTTTCTGAGTTTTAGAGGTGAAGATACTCGTAAAACATTTACAGGTCACT  
TGTACGAAGGTTTGAACAACAGGGGAATATTCACCTTTCAAGATGATAAAAGGCTAGAGCATGGTGATT  
CGATTACAGAAGAAGCTTTGAAAGCTATCGAAGAGTCTCAAGTTGCCCTTGTAGTTTTTTTCAGAGAATTA  
TGCTACATCGAGGTGGTGCTTGAATGAACTAGTGAAAATTATGGAATGCAAGAAGGAAGAAAATAGAC  
AAATAGTCATACCGATATTCTATAATGTGGATCCAGCACATGTTTCGTCACCAAAGAGAGAAGCTTTGCAAA  
AGCATTGCCAAACATGAATCGAAGTATAAGGATGATGTCGAGGAAATGGAGAAGGTGCAAAGATGGA  
GGACTGCCTTAACTGCTGCCGAGATCTAGAAGGATATGACATCCGCCAAGGGTGAGTTAAAAAATGT  
GTAGTTTAGACGTTAGAAATGCTTATTTAAGTCTCTTTTTTTTATGAAAAAATGTTTCTAGACACTTTTTT  
TTTTAAATTTAATATATAATCACTTTATTTTTCAATTTTAGCACTTCAACTCAAACATCTGATGGTGCTTATTT  
ATTAACCAGCTCCCCACATGAAAAGTATTTCTCAGCACTAATAGTATGAAATACTTATAATACATTACT  
TTATTATGCTTATCCACAATTAATGTTCTTATTTATGTAGGGTTGAATCAGAGAACATTCAACAAATTGTT  
AACCAAATTTGTCCAAATTATGCAAGACTTCAGTATCTTATTTGCAAAATATTGTGGGAATAGATACTCA  
CTTAGAGGAAGTAAATCCCAACTAAAGCTTGAATCAATGATGTTTCGAATTGTGGGGATCTGGGGCAT  
GGGGGAATTGGTAAAACGACAGTAGCAAGGGCAATTTTTGACACACTCTCGTGTCAATTTGCAGATTC  
TAGTTTCATTGCGGATATTAAGAAAATAAATGTGGAATGCATTCTTTGCAAAATATCCTTCTCTCAGAAC  
TATTAAGGAAAAAGATAATTATGTGAATAATAAGGAGGACGGAAAGCACATGATAGCTCGTAGACTTC  
GTTTTAAGAAGGTTTTAGTTGTGCTTGTGACATAGATCACAGAGACCATTTGGATTACCTAGTAGGAAA  
TCTTGATTGGTATGGTGTGAGTAGAATTATTGTAACAAGTACAGAGACAAGCATTGATTGAGACGAA  
TGATGTAGTCTATGAAATGACTACACTAGCGGACCATCAAGCTATTAATTGTTCAATCAATATGCTTTCA  
TCAAAGAAGAAGTTCCAAACAAATGTTTTGAGAAGCTCTCAATGGAGGTTGTACATCATGCTAGAGGCC  
TTCTTTAGCCTTGAAAGTGTGGGGTTCTTTATTACATAAGAGGGACATAACCGAGTGGAGAAGTGCTA  
TCGAGGAAATGAAAAATAACTGTAATTCAGAAATTGTTGAAAAGCTTAGAATTAGCTATGATAGATTGA  
ATATCATACAACAAGATATATTTCTGGATATATCATGCTTCTTTGAGGGAAAGATAAAGATTATATCAT  
GCAAATTCTTGAGAGCTGTTATTCTGGAGCAAATATTGGATTGCGTATCTTAATGGACAAATCTCTTGTG  
TTTATCTCTAGAAATAATACTATTGAAATGCATGACTTAATACAAGAGATGGGTAATAACGTGGTGAAAA  
TGCAAAAAAATCGGGAGAACCTAGCAGAATATGGCACACTGAAGATTTCAAAGAAGTTATGGTCAAC  
AACACAGTAAGTAGGTTAAACAACGCAACATTATTCAATTTCCAGTTTTCATATATTGAAATAAATTTATC  
TTATGTTATTAAGCCATTATTTAGTCTAGTAGCCATTTAATATGCTTATCAAGCTTTCAAATCATTGAATTA  
ACTTGAAATTTGTATGATATTTTCATTTTACAAGATGACAGTTATTAGTACTTTTTTCATTTTACAAGATAAC



TTGAAATGTGGCACTTTTGTGAGATTCTTATCTGAACTATCATGTGTTTATCGTCTTATATATAGCCTTATG  
CAAATAGTGATATCGGTAAGTTTATTGTACACAACATTTGAAGTAATGATTTGTTAATTTATGATCTTTTT  
ACCAGGGAACCATGACAATAGAAGCAATTTGGTTAACTTGCTTTGAACAAATATGCTTTAATAAAGAGG  
CGATGAAAAATATGAAAAGGCTTAGGATATTATGCATAGCTGATGGTAGGCTAAACCGTTTCTCTTCGCC  
CCATTCTTCATTGATTCGAAATACATTCTCAACGGCTCCATTGAGTTTCTGTCCAACAACCTTGCAATGGG  
TTTACTGGGAGCAATATCCTTGGGTGTCATTGCCAGACAATTTTAAACCCCAAAGGCTTGTTTCATCTCTAT  
CTCGGGTGGAGTTTGTTCATGATTTATGGACAAAAGAAAGGTACCATTTTATTTGAGATACTTTCTAT  
TTGGTTTGCCTTGAATTATAATGTTTGTGATTAATGAAATTAAGATATTAGTTTCATAAACACCTTTATT  
TAGTTTCTGAACATTTATATAAATGAAAATTAACAATTTCTTTCTATGTTCTGATAGGAGCTTTTGCCGT  
GTCTACGATGGCTAGATCTCAGCTTCTCTGATAGGCTGATGCAAACACCAAATTTACGGGGATGCCAA  
ATTTGGAGTGTTTGAATCTGAAGAGATGTAGGAGTCTTAAAAGGTGCATCCTTCACTGGGAAATTGCA  
AAAACTCAATAAGTTAAGTTTGTATCGTTGTAAGCCTTGAGAGGTTTCCATGTGTTAATGTGGAGTC  
TCTTGAACATCTGGATCTAGAGGGCTGCTTAAAATTAGATAAATTTCCAAATTTCTTTGGGAGAATGAAG  
TTGGAGTTAGAGATTAAGGTAGAAGGCACTGGTATAAGGGAACTACCCTCATCTATTCAGTATCTAACTC  
ATATTACCAAGAAACATTTGCTAGGCATGAAAAACCTTGAAGCTCCTTTTACGGAGCTAGATTTGGCGG  
GCATGAAAAAATTATAGCTCTTCCGAGCAGCATTGGCATGTTGAAAGGTTTGGTGAAGCTAGATGTGT  
CATGGTGCTTAAAACCTTGAAGCTTGCCAGAAGAGATAGGTGATTTAGAGAACTTGGTGAATCTTGATG  
CGAGCTGCACTAGAATTTCAAACCTCCATCTTCCATCGTCCGCTTGAACAAGCTTAAATTCTTGAATTTT  
GCAGGACAATGTTTAGAAGATGGAGTGTACTTTGTGTTCCCTCAGGTGAATGAAGGGTTACGCTCATTG  
GAAATTCTGAATCTCAGTTCATGCAATTAATAGATGGAGGACTTCCAGAAGACATTGGATGCTTATCGT  
CTTTGAAAAAGTTGGATCTCAGTAAAACAATTTGAGCATTTCCTCGAAGCATAGCCCAACTTGGTGC  
TCTTGAAGCCTTGTACTTATCATATTGCAAGAGGCTTACACAGTTGCCAGAATTTCCGGAGCAGTTACAT  
AAAATAGATGCATATTGGAGCAATGATTCAATCTGTAATTCATTGTTTCAGAATATCTCTTATTGCAGCA  
GCATGACATCTCTGCTTCAGATTCCTTGTCTTAAGAGCGTTCGTTAGTTGGGAGGAGAATATCCCTAGT  
TGGTCCACCATCGAGGATTTGATAAAGCGTATCAGTCAATTTGCCTGAAAACCTGGTACCTTCGTGATA  
ACTTCTTGGGATTTGCTGTATGTTACAGTGGTGAATTAATTGACATGACAGCTCAGTTGATTTCTTATGT  
GATGATGGGACCTCGGGTATCACCCGGAAGCTTGCCTTATCCAACCATTGAGATTGGAATTCTAAGATT  
ATTTTTCTTGGTACCTTTTGTGGCTTATGGGATACATGCAAGGCAAATGGGAAAACACCAAATGACTA  
TGGGCTTATTACATTATGTTTCTCTGGAGAAATGAACAAGTATGGATTACGTTTGTGTATAAAGATGAT

CCTGAGTTTGACGCGAATTGCTCCTCTTCTACGAAACATTCTGATATTCTTGGGAGAGTGGTTAGTCTCTT  
CAGCTGCATTAATTGATCTCTGTTTTAATAATTTAATTACTTAAGCTCTTCTCATATATGGTTAGCACTGT  
TTTTGATTGCTTGTTTATCAACGTGTTGTGCGATGATAAAGAAATTAGTGGGTACTTTTTCTCTCCAGCTTC  
GTCTGTTTGTAGCACATATTTGTTTGTGGATCTTCTAATACAGTTCAAACAAAAATTTCTTAATA

>M6-PGSC0003DMG400034634 M6 LRR-RLP

ATGAGTTTAGTAGTGGAAGGTTGTGAAAACTTGAAAGGCTCCCACTAAGTTACAGTCTGAGTCTCTTG  
AAATTCTAAATTTTTCTGGATGTCGGAGTTTGATAAAAGTTCCAGAAGTTCAGCAAATGTGAATCGCTT  
ATCAGAATTCAAGAAGACATACTTCGTGTATCTACATCATCATTTGAACATGGCAATTCTCTGAGCTATA  
TAGATATGTGTGACTGCATTCACATTGAAATTCTCCCTACCAGCATTTGCAGGTTGAAGAATTTGAAGTTT  
CTTTACCTCATTCAAGTGTCTAAACTAAAAACCTTGCCGGAAAATATTGGTGATCTAGAAAACATTGAGG  
GGCTTGATGCAACTGGCACAGCAATCTGGCACACCCCAAATTCCTTCATAA

>M6-PGSC0003DMG400034987 M6 LRR-RLP

ATGTGTCTTGGTTTCCAAGTTCTAGTTCAAGACAGGGCAGGACGGGACTCACGGGGGTTGGGGGGAGC  
CTTCCCCCAGGGAAAGCCTAATAAGACTCATTCTAATACTTGAGTTCAAGCTCCTACTTCGAAGTAAGCC  
TATGGGTTGTTTTGAAGCTTAATAGCTAAAGCGTACTTGCGTGTTAAAGGGGGTATGCGGATTTGGGCT  
ACTAAGTGAACCCAGACCATTCAACTTGCCATTGCACTCTCCTAGGGTGCATCGTAGGAAGCTCTATT  
AGCGAATGCAATTCCCCGCCGATAAGACTGATCATGCCCTGCTGCTTGGCTTGGAAATCAAAGTGCCTA  
TCATGCCCTTTCTTCATTCTATATGGACCCATATTCCTATGTTCTTCCAATGTTTACTGTATTACTGGGATT  
CCTATTTACTGAACCATATCAAAGAAGCTACTTTCTTTCTGGCTTTTATACCCAGGTATAAAGGGATAGAC  
AGTCTAAGAGAGTGCCAAGAAAGAACACATACCTATTACTTTTGGAAAGGTTTGGAAACCCTCGATTATCC  
GATTCAAGGACAAAAGAGAACAAGATGGGGGGGCTTGCCTCCTCGTTCCCTTTTA

>M6-PGSC0003DMG400035141 M6 LRR-RLP

GTCTTTGGCCAATTTGTCCTCCTCAGTGTCTCAATCTCGAGAACAACAACCTCCGCGGTGGCATCCCTT  
ATGAACTTGGCCACTTGCGAGTGATTGATATCAAACAATCAGCTCAACGGAAGTATACCAACAAGTCT  
ATTTCAACACCAGAGAGTTCAAGTAATTTCAATTGAACTAGGTGGTGAATGTGGAAAAGGCCATGGTAT  
GTACCCGAACTCAGAGTCTTGGATCTTATCAATAATAACCTCACGGGTATGATCCCTCCTTCTGTTGGAA  
ATGCCACAAAATGATGAACTTCAGTTTGTCTGGGAATAGAATCAGCGACAACATTCCAAAGGAGGTCTG  
GTAATCTGTGCCAGCTTGCATTTTTGACTTGTTGATAATCAATTAACATGTTCCATTCCCGTAACACTGT  
TTAATATCTCGTCACTACTTGTCTATCTCTGGGAAATAATATCCTTTCTGGTCTCTCTTGGTAGATGAA

GGGAACATTGTCTCAAATATGAACGTTTTAAGTATATCTCTCAGTCAAATTTCTGGTTGCATTCTTCCAA  
CATATGCCAACTCATAGAGCTCAAACTTTTGTCCATATCATTCAACAACATAACTGGAGACATACCTAGA  
AATATTGATTGTTTATCCAACTCAAGATGTTTCTTGTGGAGATAATCGAATAAAAGGGACTATTCCCA  
CTTCATTGGGAAATATTTCCACTCTGCAATATCTTTATTGTGAAAACAATCGCATGGTTGGGCAAATTTCT  
CCAGAATTAGGGAAGCTATCAAATTTGAGGGAATTATTCTTTGACAATAATTATAATCTTATTGGTCAAA  
TTCCTAAGGCTATTTTCAACATATCTTATTTGGAAGTTATTGATTTCAACAACCTCTCGGGTAGA  
ATTCCAACCACTACAGGTCTTCATCTTCAAACATTAAGCAACTTATCTTGGGAGACAATCAGCTGGAAG  
GAGAAATTCCATTGTTTATAACAAATGCTTCCAAGCTTAGAATTCTTGGATTTGTCTTTAAATGTATTGTC  
AGTACTATTCCTAAGTCTTTGGAAAACTCTACTACCTTAAAAGCATTAAATGTTTCATTTAATGATTTAG  
AAGGTGAAATACCGAGTGGTGGAGTGTTTGCAAATTTCCACTCTGCAGTCATTTCTTCGGAACAAAGGTC  
TTTGCGGAATACACATATTGGAGATTCTGTTTGTGCTATCAATAATCCTGGAAAACAATCAAAGCTTAA  
GGAGGTTCTACTAAAATTGTTACTCCAGTGGTTATTGCATCCTTTTTGATATTCTTGTGGTTTTAATTTG  
GATAATGAATCAACAGAAGAAAGGAAAGTCCAAAGATGTTGAACAGGTACTGGAGATCTGGACTCTTC  
ATTTATTTTCTTATCATGAGATTCAACGAGCAACAAATAATTTTGATGAATCCAATTTAATTGGTGAGGGA  
AGCTCTGGCTCTGTGTACAAAGGCACATTATCTAGTGGAAGTGCAGTGGCCATTAAGGTTCTAGATTTGG  
AAAATGAGAAAGTATGCAAGAGGTTTGATACCGAATGTGAAGTGATGAGAAATGTTAGACACAGAAAT  
CTTGTTCAGTGATTACTACATGTTCTAATGACTATATAAGAGCCTTTGTTCTGCGATATACACCCAATGG  
GAGTCTTTGA

>M6-PGSC0003DMG400035333 M6 LRR-RLP

ATGGCTAAATCTACAATATTTTTTCTCCTTTTCTTTTCATTTTCAGTGTTGCTTACAATGTTACTGCATCAG  
ATGATATTAGGTGTTTGAAGGACTGAAGGACTCATTTAAGGATCCTAATGGAAATTTGAATTCTTGGAA  
CTTCTCAAACACTCCATGGGGTTTATCTGCAAGTTCATTGGTGTTCGGTTGCTGGAACGCCCTCGAGAAC  
CGGGTGCTCAGCCTCTCACTTCAAACATGAATCTCAGTGGACAGCTCTCAGATGCCTTCAAATATTGCT  
CCTCTTTGACTACTCTTGATCTCTCTGGTAACAGGTTCTCCGGTCCCATTCTTCGGAGATTTGTAGCTGG  
ACTCCTTTTTTAGTAATCCTCGACTGTCCAACAACGGTTTCTCCGGCTCTATACCTGCTGAACTTGAAAA  
CTGCACCTACCTGAACAAGTTGATGCTCAATAACAACAAACTCTCTGGAAATATTCCACCAGAAATCTCTC  
GATTAACGAGGCTTAAGGTGCTCTCCGTGGCCAACAATAATCTTTCTGGTAAAATACCACCATTTTCAGG  
ATTGTCTGATTTTGAATATGGAGGAAATAGACATCTTTGCGGTGGACCATTAGCCAAATGTGGTTGA

>M6-PGSC0003DMG400035513 M6 LRR-RLP

ATGAGTTTTAGCCCTCTAGGGTTTTGTCAAAAATTTCACTGAATCAAATCTCTAAGCACAAAGAGAAG  
TACAGTTTAGTGAAAGTAGGTTCCCTAATTAATAATGTTGCCAAAAGTAAAGAAAATGTTGATCTTCACA  
AGTTAATACACAAGATTGAATGGCTTCCATTGTCCTCTTGAATTGGTGAATGTCCTGCGCTAAACAT  
TGCCGATAACCAAATTATGGCTCTTCTAACTACCATTGGTAGCCTTAATGCCTTAACGAAGCTCAATACTC  
ACTCCAACCAAATTATAAACCTTCTGATTCATTTGGTAAGGTAATCAATTTGACCGATCTTGACCTTTAC  
GCGAACAGGTTGAAATCGATGCCAGCTACTTTCAGGAACTTAATAAATCTGATTGATCTTGATTCAGGTT  
CAAACGAGTTTGCTCATTTTCTGATTTCTTGGGAACTTAACCTCCTTGAAGTGA

>M6-PGSC0003DMG400035893 M6 LRR-RLP

ATTTTCAATTAACTGTGGCCTCCAAGTGAGAACACAAGAAAATGCTGGTGGAAAGAATGATGAATAA  
TCTTTCTAGTCCAACCATTTTCAACCGCAAGTACCGCAGTCTATCCAAGGAAGAGGCTGCCAAAATGCT  
GAAGAAATTGAAGATGCAGCTTTTACCATTGCTAATCAACATTATGAGAAGGAGCCTGATGGTGAATGA  
AGTTCTGCTGTGCAACTTTATGCCAGGGAATGCAGCAAGCTTATCCTGGAAATTCTAAGAAGATACCCA  
AATCAGAGGACAAGGAAATTTCAATTTCTGAAGTGGTTCCTACTGTTGAGGAGACCTTTTTTATGATATCTC  
AAAAGGTAAAAGGGCTTTTATCGAAGCGGAAGAGGCTCAAGAACTTTTAAAGCCATTAAGAGCCTG  
GAAATTCTTACAGCAAAATTTGTTTTAGCAATAGAAGCTTCAGTATAGATGCAGCACGTATTGCAGGCC  
TATCTTGGCAGCCTTGAAGGATCAATTGAAGGAAGTTGATTTGTCAGATTTTGTGCCGGAAGAAATGA  
GGCAGAAGCACTTGATGTGATGAATATATTCTCAGAAGCTCTGGAAGGTTCTAACTTGAAGTTTCTGAAT  
CTCTCTGATAATGCTCTGGGTGAGAAGGGAGTTAGGGCATTGGAAGCTCCTTCAGTCTCAAACCAAC  
TTGGAAGAATTATTTTTGATGAATGATGGGATTTACAGGAAGCTGCAAATGCTGTTAGCGAGCTAGTT  
CCTTCCACCGAGAAGCTTAAGGTTCTTTATTTTCATAATAATATGACAGGTGATGAAGGGGCTGTTGCGA  
TTGCGGAAATTGTGAAGCGTTCTCCTTTATTGGAAGATTTAGGTGCTCTTCTACCAGGGTAGGCTCTGA  
AGGAGGGAGTGTCTTGTGTGAAGCACTTGGGATGTGCTCCCATTTGAAGAAGCTTGATTTGCGAGACAA  
TATGTTTGGTCCAGAAGTTGGTCTTGTGTTGTGTAAGGCACTCAGCAAACATGAAAATCTTACGGAAATT  
TACCTGAGCTACCTTAATTTAGAGGATGAAGGAGCAATTGCAATAGCTAACGCTCTTAAAGATTCAGCTC  
CTTCACTTGCTGTCTTGGAGATGGCAGGTAATGATATAACTGCTGAAGCTGCTTCAGCAATAGCTTCTTG  
TATAGCTGCAAAGCAGCTTCTTGCCAAGTTAAGCTTGGGTGAGAATGAACTCAAGGATGAAGGTGCAAT  
TCAGATTGCTAAGGCACTGGAAGGACACAGCCATCTGATTGAAGTTGATATGAGCAGCAATGCACTAAG  
GAGGGCTGGGGCTAGAGTGCTGGCTCAAACCTGTGCTGCGCAAAGATGAGTTTAAATTAATAATGTTAA  
TGGAATTTTATCTCAGAAGAAGGCGTTGACGAGTTGAAAGAGATCTTCAAGAAATCTCCTGAAATGCT

TGCATCCCTGGAAGATAATGACCCGGAAGGAGAAGACGAGGATGATGAGGAGGATGAGGAG

>M6-PGSC0003DMG400035934 M6 LRR-RLP

TTCACAATTTTCAATATTTCTCGAATCAAAGTTGTTTCATTTGCAATCAATAGGTTATCAGGAAATCTTCAC  
AATGATTTATGCAATGGTCTCCAATACTCAAAGGCTTTATCTATCACGAAACAAGCTTGATGGTCATA  
TGCCTACAAGCTTGTCAAATTGTTCACAACTTCAAATATTGTTTCTATCCGAAAATGATTTTGATGGACCA  
ATACATAGTGAAATTGGAAGATTGAGTAACTTGCAGACATTGTATCTCGGATATAACCATTTACAGGTA  
TATATGTTTTATCTTATGAATACTAGTACTGTTGTATCTAATAACCTCATATCTTTTTATTACACATTAATG  
CAGGGATAATTCCACAAGAAATTGGAAATCTTGTTAATTTGGTGGAGTTAGCAATGGAGAAAAACCAGA  
TTACCGGCTCTATCCCGATCTCCATATTCAATATCTCCTCGTTGCGTTTTGTTTCACTATGGAGGAACAATC  
TCAAAGGATCCTTACCACGGGAGATTGGCAACTTAACCAAGATGCAAGTTTTATATCTTAACGAAAATAG  
GTTTGTGGTACGTATTCAAAGTGATAACAATCTGTATTGAACTAGCTAGTTAGTAACTCAAATCTTCT  
TTGTTGACAGGTGAAATACCCAAAGAGATAAGAAATTCGTTGAGTTGGAGAACTTGGTCTTCACTTTA  
ATAATTTTAGTGGTTCACTTGATATAGAGATCTTCAACATATCAGGGATGAGAGCAATTGATCTTTCAGC  
CAACAATCTATCAGGGACCATCCAACCAACATAGGTTCTATCTCACCCAACATTGAAGAGCTTAACCAA  
TCTCGTTGGGACTATTCCCTTATTCTATCTCCAATTGTTCAAAGCTTACTATTCTAGAGCTTTCATACAACAA  
ACTCACAGGATTGATTCCAATTCTTTGGATATTTGACTCATCTACACTTCTAACTTGGCTGAAAACA  
ATTTAACAGTGATTCATTTTAAGCTTCTCACTTCTTAACCAATTGCAAAAATTTAACATCTCTTTATCT  
ATCTTTCAACCCTCTAAATGGCATGCTTCCGGTCTCCGCAGGGAACTTCTCCATATCTCTTGTAATTTTTTA  
TGCCACTGCTTGCAAGATCAACGGCCAGATTCCAATGA

>M6-PGSC0003DMG400036109 M6 LRR-RLP

ATGAGTCCATGTACTAGAAGCAAGTCAGCTAGAGATTTGAGAAAGTCTATTATTTCTGAATTACCGATTG  
GTGCACTACATAGAATACTAGAACTTATGCCATTAAATATGCTGCAAGATCTAGCATCTTATCAAATAT  
TGGAGACAGTTATGGTCTACACAACCTTAATCTTGTGTTGATCCACTGTTTTTTCAGTATGTATCTAATAC  
TAAGGATTCTGCTGCAAGTGTAATTCATAAAATCTCTTTAAACATACTGGAGATATTCTGGGATTCCATC  
TCATCTCCGAGGCAAACACTTTAACACAGTCCGATGTGAATCAATTCATCATCTTTGTCTCGAATCATGGT  
ATCCAAAAGCTCACTCTAATAATGGCCAACGATGAAAAATATGTGTTGCCTGATCGCATATTTACATGT  
GCAACGTTGACACATTTGAAGCTCTCAAGGTGTATCTTTATGCTGCCGGATGGTACCCAATTTCCAATCT  
TATTAGCCTTCAGTTAGAACATTCTAAAATTGCCGGTCATCGAGGATTAGAAAACAACTTAATTTGCCA  
GTTCTAGAGACTATGGAGTTGAGATTTTGTGTTGATGTTGATTCTGTTTATTTGGTTTCTCCAAAACCTGA

GAACTTGTCTATCATTAGCAGCTATAACAATTACATTTCCGGTGTTTTAGTGTGAACCCAATCTTTACTATCAT  
TAAGCACCTCTGCTTGAATGGAACCTCCCTAGAGGTAAGAAAATAGTGTACTTTGTTTTTCATTTCGTAGA  
TGCTCTTACTAACACTCCATAACTTCATTTATTTGTCATTGGTTTTTTCAGAACTTTGCTCGGCGTATGTG  
GAAGTCAAGCTTTGTCAACCACTAAAATTGCAAAGCCTGAAAATTTGTAACTTAAGATTTCACTTGAAA  
GTATTGCTTGTGTAGTTTGCCTGCTTAGGAGTTCTCCCAACCTTTCTGAAATTGAAATAGATGAGGTTGT  
AAAGGTAATACATATCATGACTAATAAGGACAGTTCTATGTATATTTATTTGAAATCGTAAGAACTTCCA  
TATTGCCGTTAAGTTTAATTGTTACATTTTGTATCTTTAATTCTGGTAATGTAGATTGACTATCATGAGACT  
TTTTCTTCAGGTTGATGAGACATTGAATCAGAGAACGGAGATGTTATCTTCTTATTATTATCAACGAAAA  
AAGAGCATGTGAATGAAGCTTTGAGATTGATTCAAACAGTGAGGTTGCGGAAATTCAAGGGATCAAGA  
ACTGAAATGTGCTTAATAAGAGTCATATTTTCTCATTCTCCAAACCTAGAGAGGATGATCATTGAACAGT  
GCGAGAAATTAGGAAATGCAACAACTATAAGGAAAAATTGAGGGAACAACCTAAGCTGCATTACTCGA  
GCATCACCCAAAGCAATAGTTGTCAATTATTTACAACCTGTTTTCCAGTGGCGTATTACGATTTTTTTGTT  
TA

>M6-PGSC0003DMG400036410 M6 LRR-RLP

ATGGGAAAAACAATTGAGACTCAAATCACAAGGAAATAATGTTTGAATTCGCCCAAAGAGTTAGGCG  
GAAATTGCAGAAGCGAGGCGAAGAGTTGATTAGCGGAGTCGAAAAATGGGGTTTTAAGGTACGGTTGC  
ACAATAGGACACCTTCAATTGATATATTGTCAGAATGTCTCATTATAAAATACTCTGTTGTCTTAGTTTT  
AAAGAAGCAACGCGGATGAGCATTCTTTCCAAAACATGGTTGCAAGCCTGGTCAATCTTCCAACTTG  
GATTTACAGTTGATTATTCTAATTGCAACGATATGAAAATAGTGGATGATACCCTGGGGAGATATAGG  
GATGGAAAAATCCCTATAGAAAAGTTTGAATTATTAGATGATTGTTTGATAATGTTTCTAACTCTTTTGA  
AGTTTTAGATTTCCCTATGATTGATAAGTGGCTTGGCATTGTACTAACAAATGGTGTAAGACCTTACC  
ATATCATCATACCCCTTGTTTATTTTCGCAATCTTGGCGGTAAAATCTGTGAGAAAATTGGTTCTGAAATA  
TTGTACTCTTTTGCCTGTTTCGTTATCTAGCGTTGTTGTGAATTGCAATCTTTGAGAAAACCTTCTCTATC  
TTATGTAAGATTAGTAGACGAAAACATGCTTCAGACTCTACTTAATAGCTGTCTGTTGATTGAATCTTTCA  
CCTTTGAGTGTTGCAAGGGCTTGGAACAATGAATCCTCAAAGATTAAGTCGGTTTCCCTGAAGTTCTT  
GAAGATTCGGCATTGTGGGGTAATATGGGAGATTGATGCTCCAACTTGGTATCACTTAAGTTAACCTG  
GGAAGACATTCCTCAAATTAATTTGTGAGAGAGTCAAGACAACCTGAAGTACTCAAGAATCATTCTTGA  
ATGCTTAGACAGTGACAATGTAATGCTGCATGGTTTTGTAAGTTGAGGAAGTTTCTATCAAATTCGATC  
TCTTGGTCTGACGTTTGGATTGATTCTTATGAATGCAATAACATCAACATTCAAATTTGCAACTGGACCA

TAAAGATTCTAAGCCCCATGTGGACGTTTTAAATGTCACCATTATATGGAAGGACGGGGAGAGCCCAAC  
ATTTGTGGATGCTTTGGTATGGAGTTGTCAGCCTAGGAGACTCAACGTTTATTCAACAAGAGAAAATATT  
ACATTTTTTCATTGATCATTTGATGTATATGAAGAATTTGAGTCAGTCTACTTCTCATGAAAGCATGCCTCA  
ACTCAGTCAATTAAGACATAAAGCCTACAAATTTGATCCTAGATACTATAAGGAGGAGAGTTGGCT  
TCCTGTGGAACACAAAAGTGGGGAGCTGGCAACAACGAACTCTGAAAAGTGGGAATGGTGTATTTTTT  
ATTAGATTGGTGA

>M6-PGSC0003DMG400036835 M6 LRR-RLP

GCTCAGGTGGTTATCACTTAGAAATAACAACCTTGATGGCCAACCTGAGTTCTTATCCTTTAACAGATGG  
ACGCAACTTGTTGAGCTAGATATTTCAATTAATTCCCTAACAGGTTCAATTCCTTCTAATGTAAGTGGTAT  
GCAAAACCTACAATGTCTCAACTTGTCAATCAAAACCACTTGAATGGGACTATACCTTCTGGATATTCTCCC  
TCCCTTCACTTGAATGGTTAGACTTGAGTGATAACCATTTCAAGTGGAAACATT

>M6-PGSC0003DMG400036994 M6 LRR-RLP

AACTTGAGGAGTTCAAATCCAAAGAACTGTTTTGGATAGATCTAAAAAAAATTACTTGCAAAGTTCCAT  
TCCAAACTCACTCCTAAACCAGGAGAAGTTGATGTTTCTTAGCCTATCATCAAACAATTTCAAGTACAATC  
TAAATTTTAGCATGTTTTCAAACCTGAGTGGACTAGGCACACTTAATCTTTCATATAATAGTTTCTCATGG  
GCTGATAAGGATCAAGTCAAGTCTAATTTGCTCAACTTTCTTTATGACTTGGATTTGCACTCCAATTTGCT  
GCAAGGGTCACTACCTATTCCACCAAGTTCTATAGAGAACTTCTACATATCACATAATAAGCTTAGCGGA  
CATATCCCTTCGACTATATGCAAACCTAGAATTTCTGAGAGTTCTAGATTTGGCAAGTAATAGTTTGAAGG  
GAGCAATCCCACCTGTTTTGGTAACATGAGCGCAATTGAGTTTTAGATTTGCGCTACAATAATCTTAG  
TGGGACAATTCAAACAAACTTTAGTGTGGAAATCCACTCAGAAGCTTTAATTTGCGTGGAAATAAGTTA  
GAGGGGGAAATCCCACATTCTTTGATCATAGCAAGCGACTGGAAGTTCTTGATTTAGGAAACAATGAGT  
TGACTGACACATTTCCAATGTGGTTGGGAACTCTACCAAACCTGATGGTTTTGATCTTGAGATCAAATAA  
ATTGCATGGACCCATCAGAACATCAAAGACTAAGAGATTGTTTCTCAACTTCGAATTATAGACATCTCA  
TCCAATGGATTTTATGGGGATTTACCAACACATCTTTTGGAGAATTTTCAAGCCATGAAGAAAGTTGATG  
AAAACATGAAAACCCCAATGTATATTGGAGATTACTATTATAAAGATTCCATAACAATTTTCATCAAAAAGG  
AATGAACATAGAATTGGTTAGAATTTTTTCGATGTACACAACCATTGATCTTTCAAGCAATAGATTTGAA  
GGTAACATTCCAAGTGTATAGGATATCTCACTTCACTAGTTCTGTTGAACCTATCTCATAATAGTTTGGG  
AGGCCATATACCAACATCACTTGGAAAGTGATCAGCGCTTCAATCATTGGATCTCTCATTTAACAACTTG  
GTGGAGAGATACCAGTGCAACTTGCATCTCTGACATTTCTTGGATTGTAAGTGTCTCTCACAATCATCTC

GTTGGATGCATCCCTAGTGGAAACCAGTTTGCTATGTTTGAAAGTGGTTCATTTGAAGGGAATGATGAA  
TTGCGAGGCTTTCCAATTTCAAAGATTGTGGTGGAAAGTGGTCGTGGTCATGTACCACAATCAACGACTC  
CATCCACACTAGATGATCATGAAGAAGATTCTGGCTTTGAGATAAGTTGGGAAGCGGTTCTGATGGGCT  
ACGTTGTGGACTCATTATTGGAATATCCATAATATATATTATGTCATCAACTCACAACCGATACAGCTT  
TTCAGGATGATTGCAGAATGGGAACACAAAGTTATAACCATGAGAAAGAAAAAGAAAGTGGCCAGACA  
AGTCAGGTATTCAACTCTAACTCTACTACTAA

>M6-PGSC0003DMG400037069 M6 LRR-RLP

ATGAATAATCGTGGTACAGAAGTGATCGTTGATGAAAATGAGATAGACAGAATCTCTGATTTGCCCATG  
GATATCCTCGATGAAATATTCAAGGATATGTCATTTCAAGAATTGGTAAAAACATGTGTTTTGTCCAAGA  
AGTGGGTACAATTTTGGACTATGCATCCAATACTAATTCTAGATTGGGAGTTCTTTGAAGAGAAAAGTG  
GTACTATAGGATTGGTTGAAAATGGTTTTAGTAATATGATTGGCAACATTATCTTGCATCATGTTGGATC  
CATAGTCAAATTTTTCTTGATTTGTCAACTATTGATTGTAATGATAGGGACCTTGACCATTGGTTGTTAT  
GTGTAACAAGTAAACGCGTCAAAGAACTTACCCTAAAAAATCACAAACGCAAACGCTATACATTGCCTTT  
TTGTGATTTGATTGTCCAACCTCACATATCTAGATGTCACAAATTTCATAGCTAAACCACTTTCTCCCAA  
AGCATTATCCCAAATCTACTTGAATTGACCTTGAAGTTCATCAAATTTTGGCCAGACAAAGCAAATTATG  
TCTTGAATACCCCACTTTACTCTTTAACGTTTCATTGCTTGCAATGGCGTTCATTTCTCACCATATCTG  
CTCCTAGGATCCAGTTCTTGACTGTTTCATGATAGTCATGACATTCACGCAAGTTTTTTTTGATAACTTGTC  
AATGCTAGGGAGTTGTTTCATGGTATTAGATGTCTGTGAAGAATCTAAAAGTTATGAGCAAGAGAGGTT  
ATTACATGGTTCGCGTCTTCTTTATTTGTGCTCTAACCTGACAAGGCTTGTGTTTGGAGTAATTCTTGCATTA  
GGTGATTATAATATGATCACGACATATTTAAATATTCTTTATTATAATATTCTCAATAAGTGTTACTATGCT  
TATCATATATACTTAACCATTAATGCATTTTGCCTTTTTGTTTTCTTTTACTAAGCATTGTTGGGTGCAGAGA  
TCATTCCGAAAAGGTTTCAATCCAAACCCTACCATTGGAGCATGTAACATTGTGTGTGACATTTATGGA  
TTTAAACCAAGTCTCTGGTGTCTTTCTTGATTGCGAAGTTCTCCCAACTTACACTCACTGGAGATAGATG  
TAATGTTTCCTCACTTTCAATAATTTAAAATTGAGTTTAAAGTTTTATATACTGATTGTAGGTAACCTTAC  
ATGTTGTAGTAGGTAATATATCTTATTTTTAATATTACAAGTTTAACTTGTTACCAGTAGATACTTTTCG  
GTGAGTTAAGTACTTTACAGTTTTAGAGTTTAACTATATATGTACCGACAACGTAATGAATTTTATACAC  
TATCAATATCAGGTTATAAAAATTAATAAATATCTACAAGTAATATTTTATGGTTATGGAATTTTAAAAA  
AATACTAACCTTTTTTTTTGTCTTTTTGCACCATATGAATTTTATAGGTTGTTAATAACTTAAGTGAAGA  
AAACATAGATGAAGTTACACATTATTTGGAAGATCCAAATTGTGTTGACAAACAATTTGAGAAGCTTGAA



TTTGTAGAGCTAAGAGAGTTTGAGGGGACACAATTTGAACTCCTTTTCTTAAAGCTCATATTGGCATATT  
CCCCTTCACTTTCAAGGATGATTGTTGAACCTTCTGATGAACTTGATGTAGCTGAGGTATTGAATTTGTAC  
GAAGAATTGAGGATGTCCTTAAAAGCATCACCAAGAGCAAAAAGTCATCGTAGCACCTCATGGTGAAGAT  
GTGTAA

>M6-PGSC0003DMG400037098 M6 LRR-RLP

CTAAACTTTATCTTTTAGCTTGGCCAAAAGTTTTTCAGCCTTTTTCAGCGCCTTTGCTGGTTCTTCTTCTCA  
ATTTATTGAGCTTCGTGCATATCTTCACTAGTCTCACTACGCATTGAGGAGTCTGATTTTGCATAATGATT  
TAAATTTGAAAAAAGAGTCTTTTTTTACCTCTTCTAGGTAATCCAAGATCATTGATTTTGCCTTCTTCTC  
CATGATTAGAAATCCTTCGAGCCATATGTTTTACCGAAGTTGAGTCATCAGTTACAATTCCTTTATTAGGA  
ATCGATTTATATTCTTTAATAGTTATTGCAATTTGATCCAACAGTTCTTGTCCATATATTGACTTTGTTTGC  
GGATCCTTTTTTCATTAGTTTATCCCAGAAGTTATTATAATAAGTGCTATACAAACAGGGGATTTGTTCTTC  
AGTAAAATCCACCTCTGGAACCCATTTGTGGATCCATGGAATAGAAAATTTTATAAAGAAATATATCTGT  
TCAATTTGTTGCAAATAAGAAATGTGATCTTGATGATATAATCTATTAAGATCTGGGGAAATCTTCATCC  
ATTCTTTGTATAACTTAAGAAATGGTTCGAACAATATTTTTATTGTCGGCCCGTGGTATGACCACCAGTTC  
AAAAACCAATTAGGTATAGGATTAGCAAATATCTTTGCACATACCTTTATAAACCATGTATGTTTATGTCT  
TTCATTGTTGTAACAGAGGACTTTATCAAAGCCTGGATATAATCCCAATATGTGAAACTCACCTTCACAT  
TGTTAAGACTAACTTGTCTTTCTATCATTGACGAAATACCCCAATCATCAATGTGGATAATTTGTTTGATA  
ATCATTTTAGAGAAGTTATAAATATTCTCACCTGTATTGTATCCTGCGAAGTGTTGGAATTCAACACCAGT  
GCTTATCAGCAAAGTTTCATAATACTTTGAGTTTTGTATGACTCACCCGGGAAGTATAGTCCATTAAGTA  
AGCACCTTTGGAATATCTTCCAAGGTTCTTCTCTCCTCTGTATATCAGCATTTTCTAAGAGAAATATCATTT  
CTCTTTTTCTACCTTTTCATAGGTTTTCATATCATCAATAGTATCTTCTCTGGCTATTGAAGCAAAAAGTAT  
TACTTTGCGTTTGGGTTATATATTCTTGTAATTGAGCATATAACGGATTATTTTCTGGAATATCTTCCAGA  
TGTATTGATGAAGAGGTTTTCTTGTGTTTTGAATTTAGTTTAACTAAACTCATTCCCTCTCTGTATA  
ATAGGAGTGCTGGATGATGAAGAAGATCCATATGACGATCTTGATGAGACTGAGGATGATCTTCTCTG  
CCTCTGCCTCTACCCTTAGTCATCCAAGGGTGTTCATTCTGCAAATGAAACAATGAGTTTTAGACCCAGT  
ACGCGTCATAATAAGTGCTCGTTTCTTCTACTGATTGGAATAGATCTATCAACATTCCATTTATAATTTCC  
AGCAAATAAGTTCCTTTACATCTCGATTAAGAGGAAGGACCTTTAGAATAGTAATCAATCTTTTTTCAGTA  
AAAAACATAGAGATAGGAATATCATTATCTCTCTCTGAAAACTACTATATTCACTCATTTTGAATGTATT  
CTTTTGATAAGAAGTCTGGGAGAGAGTTATCACTTCCTTTTTTATAAAGAATCTCAAATCAAAGGTGC

TAATTGTGCTTGCCACCTTGCAAACATTAATTTTGACGCATCATGTTTAAAGTCTTTGTCAAACATATACTT  
GACTGATTGAGCATCTGTGTTTATTATGAATTTCTGATTGTATAGATCATCCTGAAATTTTAAAACACATT  
TTACGATAGTTAGCATTTCATGAGCTACCGTTGCATATTTTCGTTGAGCATCGCTCCATTTTTCTGAATGA  
AATCGAATAAGGTATTCATGCTTATCATGCGGGTTAATTTGTTTTAGAATTCCACCATAACCCATATTGGA  
CGCATCAGTCTCTACTGTCTTAGGCCAAGCAGGATTGGCAAGGGTTAAGCAAGGTAAAGACTTAACTCT  
TTCTTTGATTGTTTTAACAAGATTTGTGAGACTATCAGTCCACGATTTTTTATGCTCCTTTTTTCAGCCTGTC  
GTATAACAGAGCTAGATCGCGAGACAAGTTCTTGTAACGGGAGAAATATAATTTAACTTCCCAAAGA  
ACGCTGTAATTGCATCCTATCAGTAATTATATCAGGAAATTTTGATGTGAATTCAATAAATCGTTGAATG  
GGAGTAATCTTTCCCTGGCAAATTAGATGACCCAAGAACCTTACTTCAGTTTGAAAAAGACTCATTTTTG  
GTTTAGATATAACCAAACCATTTTTGAATAACTATTTTCTTTAAAATATACAGATGCTTGATATGCATTTCA  
AGAGTCTTTGAATAAACTAAAATATCATCAATATAAACTATAATGAAATCTAAATAAGGATTAATAATAT  
CATTGATGATCTTTTGAAATTCAGAAGGGGCGTTTTTTAAACCAAATGGCATTACATTCCATTTCGTATTGT  
CCGAACGGTAGATTAAGTAGTTTTATACGAATGTTCTTTAAATATTTGAATCTGCCAATATCCTGATTT  
TAGATCAAATTTTGAAAATATATTGGCGTCATATAATCTTGATAGTAAATCTCTTTTATTCGGAATAGGAT  
ATCTAATCCATTTTAAATATTTGTTTAAAGGTTTGTAATTTATAACTAACCTGGGGACACCACGTTCTTTCT  
CTGCTGCATTATTAACATAAAAGGCAGTACAAGATCAAGGTGACTTGGAAGGTTTTATCAAACCTTTTTG  
TAACAGATTATCAATCTCCTTTTTGCAGAATTCAACTAATTCGGAATTCATTTGGCAAGGACGAGATTCG  
TAGGAATATTTTCTTCAGAGAAATCATCTTCATATGGAAGAGTCACAATGTGCTTTTTTCGATTCCAAAA  
GCACTAGGATGATCGGCACAAATATCAATGGCCATTTGTTTCAGAGATTATTTAATCTTCTCCTGTACTTT  
AGTAGCTTTCAAAGTATCAAATATATTCATACTAAAAATTTCAAGTTGTATATAATTAATATGCTTTTGTTT  
CATTTCAATCAAAGCATTAAATATCACGAGATACAGGTTCAAGTATAAAAGTATAACTAATATTATGATCTT  
TATAAGTGGCTGAAAATCCTTTAGCATTATATTGGTAAAGGGATAAATAGCATTTATAAATGGAGTTCC  
TAAAATAATAGGAGGATATAACTGATTTTTTACGAAGAAGAAGAAGTGAGGAA

>M6-PGSC0003DMG400037551 M6 LRR-RLP

ATGATGATGGTTACCAAATATTTCTCCACTTCATTTTTTCACTCTCTTATATCTCTACACAATTACTTTTG  
CTTCTATTGAGGAAGCAACTTCTCTCCTAAAATGGAAATCATCTTTGCATTATAAGAAGGATTCAATTATG  
ACTTCATGGACACAAAATTCTAGTGAATGCAGGGATTGGAATGGAGTTAAATGTTCTAATGGAAGGGTA  
AACAGTTTGGATATTACAAATGCAAGTGTTATAGGCACACTCTATGATTTTCCATTTTCGACTCTCATTTTT  
CTTGAATATGTTAATCTTAGTATAAATTGTTTCTCCGGAATCATTCCACTTGAAATTGGTAAACTCACTAA

TCTTGTTTCGTCTTGATTTGTCCAACAATTATATTTTCAGGCACAATCCCATCACAAATCGACTCTCTAGCCAA  
GCTTGAAACCTTCTACATCTCTAAGAACCAGTTAAATAGTTTCGATTCCAAGAGAAATAGGTTATCTAAGG  
TCTCTTACTCGGCTAGCTTTAAATAATAACTTTCTTGAAGGTTCTATCCCTACTTCATTAGGGAATTTGAAC  
AACTTGACCTATTTGTGTCTTTATGGAAATCGCCTTTCTGGCTCCATTCTGTAGAAATAGGGAAACTCGT  
CAATCTTGTTGAAATTTATCTTGATTCAAATCAGTTAACAGGTCATATTCCTCCAGAAATAGGTAACCTGA  
TCAATGTAAGAGTGTTCTCTGCTTTCTCCAACGGAATTACTGATCCCATTCTGTAGAAATAGCAAAGAT  
GCAAATACTTGAGGCATTGGACCTATCAGTCAACATGCTTGAAGGAGAGATACAAGAACAACCTCGTTTC  
TCTTTCAAATCTTGTTTGGTTGAATCTCTCCTACAATCGTCTCACAGGATGCATACCTCAAGGACATCAAT  
TTTATACCTTTGGGGAAAGTTTCGTATGCATTCCAAGGTAATATTGGATTACAGGGATACCCAGTTACGAG  
ACGTTGTCATAATAAAGGGGTAGAAGAAGGAAATGATACATCATCGCTACAAGATAAAGCAATCGATT  
TCAATTTCTCATTGACTGGAAGGCGATTCTTTTGGGCTATGGATGTGGACTACGTATTGGATTTTCCATTG  
GATATTTTCATGATTTCTACTGGAAATCCAAAATGGCTTTCAAGATTCATTGAAGAATATGAACACATAATT  
ACTACGCGAAGGAGAAAAACAACGAGGTCAAAGGGACAACAAAAGAAGAAATAATCGCTTCTAA

>M6-PGSC0003DMG400037653 M6 LRR-RLP

ATGTCGACGAACGGAGCCCGTGAAGTTGAAAAACCTAGATCGTATCAGTAAGTTGCCGGACGCAGTT  
CTCATACAAATTCTCTCTTCTGCCGACGAAAGATGCCGTGCATCATGTGTTCTCTCAAAAAGGTGGC  
GTTATCTCTGTAATTCAATTGATAATTTCCATTTTCGATGGTTGTAGCTACTACAACAATGTAGAAAATTT  
GTATTTCTAGTGGATCATGTTTTATCTCATTGCACTTGTTCCAAAATCAAAAATCCAACCTCATTTTACCT  
TATAACTCTGAGTGGAACTTTGATTTGAGTATCAGCCGATGGATGAATTTTTCTGTGGAAAGAAAAGTG  
GAAGATGTTGTATTGTGTTTATGTGATGACAATTTCACTTTTGAATTGCCTTTATCTATCTGTACTTGTTC  
TCATTGATTACATTGGATTGGAGCTGTTGTGCGATTGATAAAGAATCGGTTATACAGTGGAAGTCGTTG  
AAGAGCCTAAAGTTGAACTATGTTTTATAGATAATGACGATCTCTCGAAGATTTTGTGAGGTTGTCCTG  
CTTTGGAAACTCTGGAGTTGTCTTTATTTGAAGGTTTTCGCCGTCTAGAAATCACTTCTTTGAATTTAAAG  
AGACTATCATTAGGAAGCTACTGGTGGTTTTATGGCAGAGCTGATGAACCTTTGGAAATTATTGCCCGT  
ATCTTCAGCATTGGAATTTGAGGAGACCTTGATTATCTCAAGTGTAAGCTAGTAAATGTCTCCTCTTTG  
GTTACTGCTACACTTACTTTTAAACATTACATGTATAACTGAGATCGAGGGGTTTGTGACGAAGATGGTT  
GTAGTGATTATCATCAAGGTTTTAGAAATCTCGTTCTGGACTATCTTCAAAAATAAGTTATGCAACTGA  
GCTAACAATTGGACGCTGGTTTGCAGAGGTTTGTTCATGTCAAAGACCTTATTCTCTATTTAAGTTCA  
AGTGAAAATTGCGGAATGTAACTTGTGAAAGAGAAGAGCCTTCAGAATCTAATAAAATTATGAACTTC

TGTATACATGAAAATTTTAGTGAGAATATTTTTGATCGATTAAGTGAATTTTTATCCATATAAATTGATC  
TTTCTCTTCGCCTTTTGTGGTCTTCCTATCTACTCTTGAAGTTGGATATTTTTAGAACTAGATTTTCTGC  
ATTGCTATTCATTAAGTGGTTAGATGGTTAGATTAACAATTATAAAGTACATAAATTTGTCATAGCACTA  
TTTTTTTTGTGGATTATTTTTCTTCCCAGCAATTTTTCTCTATCCTTTACTAATTTCTTTGAAATTATTC  
ACCAGGTCGTGTTTCATGTTGCGACTCGAAGGTGTGTCGCTACCAAATTGAGATGCAAGTGTCTAACTT  
AGAGATGTACGTGACAAAGAATAATTTGTATGGAGTAGCTAGCCTTTGCAGAACTCGCCTCTTTTGA  
GACTCAACATACCCTTGAGAGCTAGAGCTGTAATTTCTCTCAATTTATGCTTTGCTTTTAAATCTTTGAT  
TTTTAAGTTTTAAGAACTCCCCAGCCCCAACCTACCAGTTCAAACATTTTCTTAAGGAGGATGGAAATA  
TTAATTTAATTAACACTAAGAATTTTTTTTTGTCACTGTAGTTGCTTTCTATCTGGTAAATGTACTTAGAAAG  
CAATGGTGACAACTAAGCCTTGCTTGTTTTACTTTTCATCTACTGCTTGAGCATATCTGGTAGGGATAAG  
ATATTGTAATCAATTGCTGAGAACTGTTCAAGTTTGTGGCTTCTGAAAATTATTCTATATTTGACTATTG  
CAAATGCACTTCCTTTTTGTGTTACATGGTATATCCCATTTCTGTTGTGGATCTCCATTTGATTCTTATTAT  
ATTATCTACTACAGTTTAATGATTTCCGCTGCCAATTGAGCTACGTTATTTGGACAAAGGACGTCATATA  
ATCTTGACAGAGTTGGATTTCAAACGCTGTGTTTCCCAATCTCAAGAATGTTACGTTTGATGCCTGCATATA  
TGAATGTAGAAAAAGTGGTTTGGAGGGGGCAATGATAAGCTTTTCGAACTTTCAGTATTTCTACTAAA  
GAATGCAACGGCTTTGAAGAAGTTTGTCAATTGTATCAAAGAGGAGAATCTGCAGGGAATGTTGAGAGA  
GCTGTGTGTCCCAATATTTATCAGGATTGGCTAAGAAATTGTTAGACAGCCCAAGATCATCTAAGAAGCT  
TTTGATTATTTACCAAGAGTCTGCTTTGGATTGACTAGAGTAGAAGTTTTGTTTTGGTATACTAGAAATGT  
CACTGTATATTGTAGCTTTTGATTTACTGCAGATGTAAATTATTAACCTGTGGCATTCTAGTCGTTGCATA  
TATGTGTTTGAATTTTTCTTGCAAACTGTTGTTTTCTTGTAAGTGTGAGATCGGCAAACCTACAAGACA  
TGTTTATTTACTCAGACATAAGTTGGTATTTTGTCTTTTTAACTTCATCAAACCTCTGGCTTGAGGAACTCTC  
CTGCAACATTATTTCAATGTTATCTAGCCAGAAGAGATGTCAGCTGTAGATGATGTTTACTTCATTTTCCC  
TCTGTTTTCTTATCAGCTTATTCTGTCTTATTTCTTTGATTTGAAGGCAACCTTCACAGGGCACCTAGGAA  
TTATAACGAGGCAGGGCTGGTCTGTCTTTTTGTGTGTGGTGCGGGTTGAAGCAATTTTTTTGAAAATCAT  
AAGCGGGTGGGTTGGGTGGTATGTGCCT

>M6-PGSC0003DMG400037662 M6 LRR-RLP

ATGTTAACCGGTCATGTTATCGGATTGGACCTTAGTTGCAGTCTGCTTAATGGAACCTTTCATCCCAATA  
GCAGCCTCTTCCAACCTCCATCATCTCCGGACACTAAACCTTGCTTACAATGACTTCTATTCTTCTTCAATCC  
CACATAACATTGGCCGATTGAGGAATTTGAGGCATCTCAACCTTTCTCATTCTTTGTTTGAAGGGGAAAT

CCCAACAGAAATCTCATACCTTTCCAATTTGGTTTCACTGGAACCTTTTTGTAATGGATGTGAACTTGCTG  
AGAGAACATTGAAACAATTCTTCAAACCTTCACAAATCTAGAGGTACTATCTCTCTTATGTCAACATC  
TCATCTCCATTACCTGTGAATATTTCTTCTCCTCGTTAAGGTACGTGGATCTTGAATTTACTAATCTGGGA  
GGTGTCTCCCAGAGAGTCTTTTCTTCTGCCAACTTGGAATGCTCTATTTGAATTACAATGATCTTCT  
CGAAGGAGTTTTACCAAAGATCCACCCGAGCAACACTCTGTTGGAGTTGGATATTTCTACACAGGAATC  
TCCGGTGAGCTGCCTGATTCAATTGGCACCTTGAGTTCATTGAATCTTGAACCTCAAAGATGTCAATT  
CTCTAGTTCATTCTGATTCCATTGGCAATCTTACACAAATGCGGGGTTTGGATTTTGGTAATAATCATT  
TCACCGGCTATATTCCTTCCATAATCTCTAAATTGAAGCACCTCACATCCCTAGATCTCTCGTCCAACCTCT  
TTTCAGGTGAAATTCCCGATATTTTTCTAACCTCCAAGAGCTACGTTATTTATATCTTTCTGACAACAGCT  
TCATCGGTTTGCTTCTTCTACAATTGTAAGCTTGACACATCTTCAATACTTAGACTTGTCAAGTAATTCCC  
TATCTGGCCCACTGCCTAATAATTTGAGCATGCTTCAAAGCTAACCCAACTAGATTTGTCGCACAACCTCA  
CTGAATGGTACCATACCATCTTCGGTTTTTAGCCTCCCTTGTAGGTGAGTTGTGGCTCGATAATAATCG  
ATTTAGTGGACTACCCAATGAGCTCAAACAAACCCAACATTAGAAAGCCTGAGTTAAGCCATAATCAA  
CTCAGTGGTTCTTTGCTTCAATCACTTTTGAATCTCACAAACCTTTCTACCCTTGACCTTTCATCAAATAAC  
ATCACCATCGATGAGGGAATACAAATCACTTTTCTAGCCTACAAGATTTGTTGTTATCATCTTGTGAACT  
GAAGGATATTCCACACTTCTTGACAAATGTAAAGAACTTCAGGTCTTGGATATTTCTAACAATAAGATT  
CGTGGCCAAATCCCAAACCTGGTTTAG

>M6-PGSC0003DMG400037968 M6 LRR-RLP

ATGGCTGACCTATTGCCTGAATGTCTCATTATAAAATACTTTCTTACCTTAGTTTAAACAGAAGCAACTCG  
GTTGAGTATTCTCTCGAAAACATGGTTGCAAGCATGTTGACTCTTCCCAACTTGAATTCACAGTTAAG  
TATCGCAACAATTTGAAAATAGTGGATAATATCATGGAGAGATATCGGGATGAAAAATCCCTATTGAA  
AAGTTTGAATTATCAGACTTTAGTTATTTGCGTTTAGTTTTCCCTTGTGATAAATGGCTTGACATTGCA  
CTTCAGAACGGTGTAACATATTGTCTTTGGTGTTCCTTGCCATACGTCCTACCCCTTGCCTATTTTCAA  
ATCTTTGCATCAAATCTTTAAGAGAATTGGTTCTAAGTGGTAGTAATTTGAAGCATGTTTCATTATCTAG  
TGGTGTGGTGAAGTGAATTCGTTGAGAAAGCTTACTCTATCTGATGTAGTTTTAGATGAAAACATGCTT  
CAGACTCTACTAAGTAGTTGTCCGTTTATTGTCAGTTTCATCTTTGATAATTGTTACGGGTTGAAAAAGAT  
TAAGCTACTGAATAATCTTCAAAGATCAAGTCGGTTTTAATTTGGAAAGGTGGAAACCAGCTCGTTAAA  
ATTCAAGTACCAACTCTTGAACACTTGTCTTATGTTACTCAACCGGAACTTCTCCTAAGTTGGATATTGT  
TGATGCTCAAATTTGATGTCACCTTGTGTATGAGGGAAATCTAGTGCCACGATTTTCGTGGATGCTAAA

TTGCCATGGAGTTGTCATCCTAGGAGACTCCTCCTCGAGTCAAATGGTACAACGATTGCATATGTCATGG  
ACCGTTTAATGTACATGAAGAGTTCGAGTCAATTTAAAAGAAGTAAAAGTCTATAGATTTGATTGGGGAG  
AAGTGAGATGGCATTGTTGTGGAAGTCTCAGAAGGGGAAAGGAGGCAATAAGGTAAGTACTATAACCGAGAGGAA  
TAGATTTTCGTTTTTTATTAGATTGGTGA

>M6-PGSC0003DMG400038495 M6 LRR-RLP

ATGTGGGATGAAAACAGTATTGACTGTTGCCAGTGGTCAGGTGTAAGTTGTGATGAGGAAGGTCATGT  
GCTTACTCTGGAGTTGGACGACGAAGCCATTTCTGGCGGAATTGAGAAGTCAAGCAGTCTCTCCATCTT  
CGATATCTTGAGAAGCTCAATCTGGCTTATAATGGCCTATACCCTGTTCCAATACCAAGAGAAATTTATA  
AGCTGGCAAACCTTGATGTACCTGAATTTGTCTCATGCTAGTTTTAACGGGCAGATTCCATGGAATTGTC  
AAGATTGATCAAGTTAGAGATTCTTGACCTTTCTGGAGGGGAATTAAGCTTGAGAGGCCAGATCTGAA  
AACACTGGTAGGGAATCTTGCAAATCTTAGAGAACTTTACCTTGATAGGGTGAATATTTTCATTGAAGGG  
GAGTGAGTGGTGCTCGGCGTTATCTTCATCTCTGCCTCAATTGAGAGTCTTGTGATGAGAGACTGTAAA  
ATTTCCGGCCCTCTTGATCCTGTCCTTTAAATCTTCGTTTCCTTTCAGTCATTTCGCTCGATTATAACTACT  
TGTCCACTATGGTTCCAGATTTTCTGGCAGATTTTACAAAATTGACAATCCTAAGTGTGATGAGTGGTGTAC  
TTGTTTGGTCCATTTCCAGTAAAATCTTTCAGGTACCAACTCTACAGCAACTTGATTTATCTGGAAATGA  
AAACCTTACAGGCAATTTACCTGAATTTCCACATAAAAGTGCATTAAGGGAGGTAGTGCTTAGCTACACG  
GGATTCACCGGTTTCGCTTCCAGATTCAATTGCTAACCTTCGGAACCTTGACCCAGCTTGATTTAGGAAGTT  
GCAACTTCAGTGGAGAAATCCATCAAAAATGGGAAATCTCACAGAACTAGTTCATCTAGACTTGTCATT  
CAACAGTTTTACTGGCTCTATCCCCTCTTCCATAAGGCAAAAAGCTCAATCGCATTGACCTTTCTAATA  
ACAATGGTCCACTAGCTTCTGCTCAAACCTCAATTAGCGCTTCTTCTTTCGCTGCCATCATTGCAGTTCCTTA  
GTGTTCAGAACAGTCAATTAAGTGGAGAAATCCATGAATTTCTAATGCATCCTCCTCTGTTCTGGAAAC  
ACTTGATTTGAGAAATAACCATCTAAGTGGATCGATCCCCGGTCAATCTTTAACTCAATAGGCTTTTAC  
AACTCTTCTTTTCTCCAACCTCCTTCAGTGGAAACCATTGATATCGAAGCAGTAAAGGGACTTCTAGGCTT  
ACCACCCTTGACCTTTCAAACAACAAAATTGAAGGGGAAATACCAAGTTGGGTTTGGACAGTTGGAAAT  
CTGAATCTTCTCACAATCTTTTAGAGTCTCTAGGAAAACCTCACAATTTGTCTACTACTTCTATTGTCATT  
GATTTGAGTTCCAATAAGATCAAGGGCGATATACCCATTCTACCTACTTCTTACCTACTTTTCAATTGCC  
AATAATGAATTTACGGGATCAATACACTCTTCCATATACAGTCTAGATACGCTTCAAATCTTGATATGTC  
AAATAACAACTAACTGGCATTATCCTGACATATTTCCACTGAATTGGAATTTGAAAACCTTTAAACCTCA  
GCAGTAATATATTAGAAGGAAAAGTTCCAAGCTCTCTGGAAAAATGCTCATTCTGGAGGTTTTAGACAT

TGGAAACAACAAGATAAGAGATACGTTTCCGTGCATGTTGAATAAATTAGCCAATTTGCGTGCCTAGTC  
ATAAGATCAAACAAGTTCTACGGGAATCTCCAGTGTCTTAGAGCTGAACAAACCTGGCCAATGATTCATA  
TTATAGATATTGCTTCAAACAATTTTCACGAGGAGATACCTGAGACATTGGGAAATCTCAAATTAATA  
CCATCTTAACCTCTCACACAACGCTTTGACTGGAAGAATACCAAATGCCATTGGAAAGCTGACTCTGCTT  
GAATCTTTAGATTTGTCAGTTAACCAGTTAAGTGGGAGAATTCCAGACGAGCTTGCAGATTTTACATTCC  
TTTCTTTCTTGAACCTATCTTTAATCAACTTTCTGGTAGGATTCCAAGTGGCAACCAACTTCAGACATTCT  
CAGCAGATTCTTTGAAGGGAACACAAGGCTGTGCGATTTTCTTTAAAGAAAACGTGCAGTGACACCA  
AAGAACTGAACGTGAAATTGATGGGAAATATATAAGCTTTGCCTTGGGATCTTCTGTGGGTTTTGGCA  
TCATAACCTGGCTGATTTTGCTTAGCCGAAAATATAATGAGCTCGTCGATAGACTTCTTTTCAGAATTTTG  
GGTCGGAGTGGCAGGAATAAAAACCAGAGAAGGTCAAGGTAA

>M6-PGSC0003DMG400038990 M6 LRR-RLP

ATGTGGTTGGGAACTCTTCTAAGTTGAGAGTTTTAAGCTTGAGATCGAATAAGTTGCATGGACCGATTA  
GAACTTTAAGAAGTGAACATTTTTCTTGAGCTTCGAATGTTGGATATCTTCCAATGCCTTCACGGAA  
AACTTACCGATGAGTCTGTTTCAACATTTAAAAGCCATGAGGACAATTGATCAAACGATGAATGCAGCA  
AGTGAGGAAGGAGATGAATATTACCAAGACACGGTAACTCTTGTAACGAAGGGATTGGAGCTTGAAGT  
TGTGAAAATCCTTTTTTTGTACACCACTATTGATCTTTCAAACAATAAATTTGAAGGACATATTCCAAGTA  
TTATGGGAGATCTCATTGCACTCCGTGTGCTGAATTTATCTCATAATGGATTGGAAGGTCATATACCCTC  
ATCAGTTGGAAGTTTATCTTTGGTTGAATCATTGGACCTGTCAAGTAACCATCTTGTAGGAGAGATACCA  
GCACAATTTGCTTCTTACATCTTGAAGTCATCAATCTTCTACAATCATCTTGAAGGGTGCATTCTCT  
CAAGGAACTCAACTTCAGACCTTTGAGAGCAATGCATATGAAGGTAATGATGGATTACGTGGATTACCT  
GTTTCAAAGGCTGTGGTAGTTATGATAATGATTCAGAATCAGAGAAAATTGATACCGGATCTGAGCTA  
GATAAAGAAAGTGACTTTGAATTTCTGAATGATTTTTGGAAAGCTGCTCTTATGGGGTATGGAAGTGGA  
GTATGTATTGGATTATCGAT

>M6-PGSC0003DMG400039004 M6 LRR-RLP

TGCTTTTATCACATGGGCAAATAGGAATGTAAATTTTTCTCCTAGGAAGAGGATTTGTGCTCACTACCGC  
TTCTAAAATTTTGTAGCAGAGGAATCATCCTTCCATTGAAATCCTTCTTGATAAATGCCTCTTTGAGGTAT  
TCAAACGTCTTCCGAGTGGCCAAAAGAGAAGTGTATGTGCTTGTGTTTCCAAGCGCTGGCTTACACTTTT  
AAGCAGCATTACAAGGATGAGATTGCAGAGTTAATGGTATAGAAGGTGAGGGATCTCTTTAAGGTC  
CCTTGTGGTAGGGAAGCCACAGATGTTAGACTTGCTGCTATTGCTGTTGGAATCGCAAATCGTGGAGG

TTTAGCAAAGCTATCTATTCGGGGAGACAATCCGTGTCGTGATGTGACAGATGCTGGTCTCAAGGCTAT  
CGCTCGATGTTGCCCTACTCTGAGAGATCTTTCCTTGTTGGAATGTGTCTTTTGTGGTGATGAAGGCTTAT  
CTAAGATTGCTCATGAATGCCATCTATTATAGAAGCTTGATATTTTCCAATGTCCAACAATTACCGACAAT  
TCTTTGTTGGCCGTTGCAAAGAAATGTAATCACCTGACCTCCTTGATCATAGATTCTTGTTCAAAGATTGG  
GAATAAGTCTCCCAAAGTTGTGGGTCAATACTGTCTGAACCTGAAGCTCGTCATACTAAAAAATTGTCCA  
CTCATTGGGGATAAAGGAATTGAAGATCTCTTTTATTAGCCGGTACTGTTTTAACAGAAGTAGAGCTCC  
A

>M6-PGSC0003DMG400039455 M6 LRR-RLP

ATGGATTCTGGCGAAAACATAGAAGAAACAACAACAGCTGTAGACCGAATCAGTCAGTTGTCCGACGA  
TCTTCTCCTTACATTCTCTCTTATGCCGACCGAAGCCGCACTTGTGACAAGTGCTCTCTCAAAAAGGT  
GGCGCTATCTTTGGAAATCACTTGATAGTTTCTCTTTTAGTACATTTGGTAACTATGAGTGGTATGTATCC  
TATGTTGATTATGTATTAGGTCATTCAGTTTCTCCAAAATTAAGTTTCAACTCGATAGTAATGAGCC  
GGATGCATACAAGTCAGACATGGATCGATGGCTTAGTTTTGCTATTGAAAAGAAAGTGGAAAATTTGAA  
AATCCAGTCAGTCTCTGAAGAAGAGGTTTATGCATTGCCGGAATGTTTATACACCTGTTTCGTCGTTGATA  
ACACTAGTTTTGGGATTCTGTTCTTTTATGCTAATGTGGTTGTAGCATGGAAGTCTCTAAAGAGCATAA  
AATTGAAGTGGATGGTGTATCTAATGACCATATATTGAACTTATTGTCGGGATGTCCTATATTGGAAAC  
TATGGAATTATCTCGTTTTAAGGGTTTTAGTCGTTTGGAAATTAGGTCTTCAAATTGAAGAGACTAAAT  
TTGATAGCATAAATGATGATGAACTTGATCATTCTTGGAAATTGTTGCCCCCTATCTTCAGCATTGGA  
GATTTGTGAAAAGTCTTTATGGTTTCAAGTGTAGGCTTGTAGACGTATCCTCCTTGTTAATGCTAAGCTT  
ACGTTTGAGATTACATGTATCAAAGACATCCAATATTTGCTTGATGAAGAAATTGATGATGACGAAGATA  
GTTGTCGTGGCTATCATCAAGTTTTATGATTCTCGTGTGGGATTATCTTCAAAGCTGAGTAGTGCAAG  
CAAGATAACAGTTGGAACATGGTTCATAGAGGTTTGTTTTAACTCAAAGTCTTTATTTTCTCTCATTGA  
TTATTAGCAGACAGTTGCAGATAAACATTATACAATGGAGATTTGTATACACAATCCATTAAAGCAACTG  
GATTAATTGTAAAAAAGTGTGGAGAAGGGTAGAGGGTGGGCTTGTCTCCACTGACTTTCAAACCAT  
GGGCCTCTGACCCTAGCGGATTTCTTGATTAAGAAGTGTAGGTTAGAGAATTTTGTGGACCTTTATGCAA  
TCCGTTTGCCAATTTTGTGAAGTCGGGTATTTCTTTTATCATATCGCCAAAGTTATATCTAGACACCAGGA  
TTTTCGTACATTGATGTTGCTTAAAGTGTGTTAGATAGTTTATTTGTCACAACACTATATCTGTTGTGGAGT  
GCTTTCTATCTGTTGTTTTTGTGCTTTCTCCGTTTTTTTATTGGTAATACTGCACCAGGTCCTGTGCAT  
GTTGCAGTTCAAAGGGGTGCGAATTCCAGAATTGAAATGCAAGTATTTGACGCTGGAGTTGCATAAGAA



AGAGTTAAGTGTGTTTGGAGCAGCTGGCCTTTTGGCGAGCATCACCTCATGTTGAGTGTCTCAACATAGAC  
ATAAGAGCTATGCATGTAACCTTTCTGTTGCTTTGTATCTTCTTTTACATAATTTTATGAAGCTTTGCCTT  
TTACCTTTGTACATCATTTTACACAATAGAATAGAGTTAAGTGTGTTGGGAGCAGCTGGCCTTTTGGCCT  
ACCTCTCCCTCTTATAAGGCCACCACGGCCACCTCTCACTGGGGCATTGTCACATCTCCTCTACACTTGC  
ACGAACCATCTCAACACAAATATATCCTTAACTGTCATTAAGAGACTTTGCTTATGTCACCGTATAGCTTC  
GTGATTGCTTTCTTGTGAAAAATGTGTTATCAAGTTTTGGCTACCTACATCATGAGTCTCTTTATGAAAAG  
AATAGCCATTATAATCATTTTCAGGTATCATTAAATTTGTTGGCTCTGAAATTTATTTTACTGGAAATTC  
TACTTCAAAGTTTTCTTTTCAACTTTTCTGCAATTTCCATTAGGCTGCCATGTATTTGTCCCTGATCGTATT  
CTGTTTCCAGCCTGATGCTACCTTCTGCTGCTTTGGGTTACAAGATTTGGTCAAAGAAAATACTATCAATT  
TGCAGAGATGGATTTCAATCTTTGTGCTTCCCAACCTCAAGAATGTTAAGATTGTCATCTCCTCCCGGATA  
TGCTTGA

>M6-PGSC0003DMG400039627 M6 LRR-RLP

TGTATCTTTATAATAATCAGCTTTCTGGCTCTATTCCTGAAGAAATAGGTTACTTGAGTTCTCTTACTTATC  
TATATTTGGGTAATAGCTCTCTTAATAGATCTATTCCTGCTTCATTTGGCAATTTGAGAAATCTGAAAAC  
ATGATTCTCAACGATAACAATCTCATTGGGGAAATTCCTTCATCTATATGCAATTTGACATCACTTGAAT  
GTTTTATATGCCGAGAAACAACCTGAAGGGAAAAGTTCCGCAATGTTTGGGTAATATAAGTGGCCTCCA  
GGTTCTAGTGATGTCACATAATGATCTCAGTGGAGAGATGCCTCCATCTATTTCCAATTTAACGTCACTAC  
AAATTCTAGATTTGGGCAGAAATAATCTAGAGGGAGCAATTCCACAATGTTTTGGCAATAATAGTAGCC  
TCCAGGCATTTGATATGCAGAATAACAACTTTCTGGGACTCTTCCAACAAATTTAGCATTGGAAGTTC  
ACTTATAAGTCTCAACTTGCATGACAATGAACTAGAGGGGGAAATCCCTCGGTCTTTGGCCAATTGCAA  
AAGCTGCAAGTTCTTGATCTAGGAGATAATCATCTCTATGACACATTCCCATGTGGTTGGGAACCTTAC  
CAGAGCTGAGAGTTCTAAGATTGACATCGAATAAACTGCATGGACCTATAAGATTTTCAGTGGCTGAAA  
TCATGTTTCTGATCTTCGAATCATAGATCTCTCTAGCAATGCCTTTTCGAAAGACTTACCAAAGAGTCTG  
TTTCAACAATTGAAAGGCATGAGGACTGTTGATCAAACAATGAAGACAACAAGTTATCTAGGAGGTAGA  
TATAACTACCAAGACTTGGTAGTTGTTGTAACGAAGGGATTGAAGCTTGAAGTTGTGAAAATTTTGTCTT  
TGTACACAGTTATCGATCTTTCAAACAACAATTTGAAGGACATATACCTAGTGTCTAGGAGATCTTATT  
GCGATTCGGGTACTTAATTTATCTCATAATGGGTTGCAAGGCTATATATCACCATCACTTGGGAAGTTTATC  
TGTAAGTGAATCATTAGACCTTTCAATTAACCGCCTTTCCGGGAGAGATACCACAACAACCTTGCTTCTCTTA  
CGTCTCTGAATTCTTAAATCTCTCCACAATTATCTCCAAGGATGCATCCCTCAAGGACCCCAATTTTATA

CCTTTGAGAACAGTTCATTTGATGGTAATGATGGATTACGTGGATTCCCCATTTCAAAGGTTGTGGCAA  
TGATCCTGTGTCAGAGACAAACTATACAGTGTCTGCGCTAGAAGATCAAGAAAGAAATTCTGAATTTTT  
AATGATTTTTGGAAAGCAGCTCTGATGGGCTATGGCAGTCGACTATGTATTGGCTTATCCATAATATATT  
TCTTGATCTCAACTGGAAATCTAAGATGGCTTGCAAGAATCATTGAAGAACTGGAACACAAAATCAT  
GCGAAGGAGAAAGAAGCAGCGAGGTCAAAGAATTACAGAAGAAGAAATAATCGCTTCTAGACAAGTT  
ACCAAGTAAAGAAGAATTTGATTCAGAACTTCAGGTATTCATGCTAAGCTTTACACTAATGTTTTTTAGTT  
TATTCTAACAACTAATATATTAGGTTTTATGCTTTTTTGATATAAACAAAATACTTATTAACGCTTGATACG  
AATTGCTAGTAATCAGTTGGAACTGTGAGAACAGAGGCTAAAAATTTATAGTTGTGTGGCTCACTTTCT  
TATATTTTCCAGATGCCAAGAATAAGAAGACATTGGCGTAATGGATTTGGTTCTTCTATGTTGCAACTTAT  
GATGTTGGATTTGATTTTTAGTTTTATAAGCTTTCCATAACTCGGGAAAATGTAATATTATGAGTTTTGAT  
GATATAACAATAAATGTTGTGTGTATTGAATGATGTGTTGCATTTCTCGGATCAATATAACTCACCTTAAA  
GAATCTAAGAGAGCTGAAGAATTAATGGAGGAAGATATTTAACGTGTGTAGAAGAAAGAGAA

>M6-PGSC0003DMG400039637 M6 LRR-RLP

ATTTTCAAAAACCTTTATGAGGACCTCTGTAATGAGTTGGGG

>M6-PGSC0003DMG400040306 M6 LRR-RLP

ATGGCTGATTTATTGCCTCAATGTCTTATTCATAAAATACTGTGTCTGCATAGTTTTAAGAGAGCAGCCCA  
GTTGAGTATTCTTTCTAAAACATGGCTGCAAGCGTGGTTGACTATTCCCAACTTGAGTTATCACTTGGTT  
ATCTCGAGCACAAATATGAAAAAGTAATGGATAATATCATGGAGAGATATCGAGATGGAAAAATCCCTA  
TTGAAAAGTTAGATTTATCATACTCTGTTTATTCTAATGAAGTTTTTCCTTTGTTTAATAAGTGGCTTGATA  
TTGCACTTCAGAATGGTGTAAGATCTCGTCTTTTGAATTCCTAGCCACCTTACGTCATACCCGTTGCCT  
ATGTTAACAATCTTGGCAACAAAATCTTTAAGAGAATTAGTATTAACAGGTTGTGATTTGACTGTGTTTC  
ATTATCTAGTGGTGTGGTGAATTGCTATTCGTTGAGAAAGCTTTCTCTAACTCATGTAGGTTTAGGTGAT  
AACACGCTTCAGATTCTACTTAATAGTTGTCCCTTTATTGACAACCTAATTTTAGATTACTGTTCTTGGTTG  
AAAAAGATTGAGATACTGAATAATCTTCAAAGATTAAGTCGGTTTTTATTGGAATCTGGCACAGAGC  
TTGTTAAAATTCAAGCACCACCTTGAACACTTATCTTATTTTACTGGTGGGGAAGAGTTTGCTATGTTT  
GATATTGATGCTCCAAATTTGGTGTCTTGGAGTATAAGGGATTTAAATTTCTGCAACTTTTATGGATAC  
TAATTTGCAATGGAGTTGTTATCCTACGAGATTCGTCCTTGATTCAACTAGCGAAACAATTGCTAGTTTCA  
TGGACGTTTTAATGCATATGATGAGCTCGAGTCATTCTACTTCTCATGGAAGCAACAAGCCTTTGCATCG  
TCAATTAAGAAGCTAAAGCCGATAAATTTGATTGGGAAAATCAGAGATGGCATTGTGATCCTGTGGA

ACTTGGAAGTGAAAGGATGGCAATAAGGGACCTTAAGGATAAGTTTTGCTTTTTATTATATTGGTCATGC  
AATTAA

>M6-PGSC0003DMG400040620 M6 LRR-RLP

TGAGGGAATGAAACAGATTGAGGTATTATATATTAGGGATTGTAACCTCTGTTACCTCCTTACCTTTTAGC  
ATTCTGCCACTACCTTGAAGAGAATAGACATATCTGATTGTCAGAAATTGGAATTGGAGCAGCCAGTT  
GGTGAGATGTTTCTCGAGAATTTGTTTGTAAAGAGATGCCCAACTTTACGAGGTTTTTGATTCTACTG  
GACGTCTCATTATTTGGAATTGTGAGAATCTTGAAATACTTTCGGTGGCATGTGGGGGGACCCAGATGA  
CGTCACTGATTATTAGGTACTGTTCAAAGCTGAAGTGGCTGCCAGAACGTATGCAGGAACCTCCTCCATC  
TCTTACAAAACCTGACACTGTGGAATTGTCCAGAAATAGAGTCCTTTCCTGAAGGAGGATTGCCCTTCAAT  
TTACGAGTCCTTGAGATTGAAAATTGCAAGAACTGGTGAACAGACGAAAGGAGTGGTGTTTACAGAG  
ACTCCCCTGTCTCAGAGAGTTAGTGATAGAACATGATGGCAGTGACAAAGAGATTGTTGGTGGTGAGA  
ATTGGGAGTTGCCTTCTCTATTCAAACACTTGTTATATCCAATCTGAAAACATTAAGCAGCCAACCTTCTC  
AAAAGTCTCACCTCTCTTCAATATCTTTGTATTAAGGGTAATTTACCTCAAATTCAGTCAATGATGGAGCA  
AGGGCAGCTCCCTCCTCTCTTTTTGAGCTACATTTATATTACCATCATAAGGTCCATTCACTAGGTCTTTG  
GCACCTCACTTCCCTTCAAAGTCTACACATCATTGCGTAATCTCCAATCACTTTCCAAATCAGCACT  
GCCCTCCTCCCTCTCTGAGCTGGAGATCTCCGATTGCCCTAATCTGCAATCTCTCCAGTAAAAGGGATGC  
CATCTTCCCTCTCTAAACTATCTATTTCCAACCTGTCCATTGCTCACACCACTAGTAGAATTTGACAAGGGG  
GAATACTGGCCAAATATTGCTCAAATCCCACCATAGAGATCGATGGGGAA

>M6-PGSC0003DMG400040927 M6 LRR-RLP

TTTTTTTAGTACATGAAACTTATATATTTTTGTATCTTATTTTATTAGGAACTTTATGAACTTGGATGTCTG  
TAATATTATAGTGAGTGGGCTACCTCCAATTGGCTGTCTTCCAATTCAAATGACAGCAAAATCTCCACTG  
CATAGAACTTGCATTGAAAAAGAGAATTCAGATTCTCAATCTTATAATAAAAAACTTGAAGAAATATTGC  
CACATTTACAAGCACAACCTTAGAGGAAGCAAATACTTTATTCTGATATATACACTCCTTATCACATCTC  
ATCAATAATCCACATGAATATGGTAAGCTTTCAATTATGTTGTTTGGAGTTCTTCAAAAATATTACTGAATA  
TGTATCAATTTCTTATAAATTATATTTTCTTTAGAAAAAATGGTACAAATATAATATTTTTTGGAGAGT  
AAGAGCGACTTCTGTGCATTTTTCATATTACTTGACTTGATTCTGTATTAATTAGAAAATCTTTGTGTG  
AGTACATCATCAATCTATTTTATACTATCTTTGATTTATGTTATCAATCTAGTTAATAATGTTTTTCTTTTT  
TTTTAAAAAGAAGTATGATACAATGATTATTTTTAAATACATAGTTTTGTCTTAAATACCAAACAAACAA  
TCCTTTTTGACAAATGTGGGAACTATCATATTACAATTTCAACCAAGGCTCATTTCATGAAAATAATGTT

CAGATCAATTTACACATATTTTAGTTGTTTCATTGAGTATTTATTGTTTTATTAATATATATATTAGGTAAT  
TTTACTCATTAGTAGAGTGGCCACACAAAGTCATGAACCGTGGTTAGTTGAACATTCTTTATCAAAATCA  
TACTCATGACTATTACCATTTCAAAATATCCTTGAAATATAATTTGGGATAAATAGTTAATATATAGAGTG  
AAACAAAATGAAACGAGTAAATTAATAAATATTTTTTATCAAAATGAATAAATAAATAAATGAATGGT  
AAAGTACTTTACAAGCCTCCCTAAAATTAATTTTTTTTTCTTCTTATTAATCTAAATTAATTTCTTTTTATT  
TTATATTTATCTTTATTTTTTACATAATTATGACAGGATTTGAAGAAACAAAAGAGGTTGTTGTGGAAGT  
GGATTATTAGAAACAGGACCCTTATGTACAAAAAATCTCAAGTGTGTTACATACTTCACAATATGTTTT  
CTTTGATAGTATTCATCCAACCTGAAGCAGCTTATTACCAAATTTCTGAGTATTTTATGAAGGAGCTTCTCC  
CAAAATTCTCAACCATTGACAACCTTTAATTTATTACATTCAAATAAAATTTGTAAAAAAGATTTTTAAAA  
AAAAAGAAGGTGTTATTTGACTTCTGGTTAATTAAGAAGAGAGTATTTCATGTATTAATTAGGGTAGGT  
AAATATCATATGTGGTAACTTTCTAGTTTTTTGTATAAAAAATTCAGCATATCAACTATGATATGTAGTTT  
CTCATTTTATAATGAAAAAGTAATCTTAACGCAAATATTAGTTTCGTTTCTGAATTATTAGAGTATCATT  
ATCTACGTCTTTTTAAGTTTATTTCTTTTTCAAGGATTTTATGATAGTTTGTTTACTTAAAAAAGAAAATG  
TAAATGTGTAACACATGGATAAAATAAGAAGAGATAAAAAAGAAAAACATAACAACCTAAATTTAACT  
TGAGAATGACAATTTTCTCTGATAAAGTATGAACAGGCAAATTAGAAATAGTTT

>M6-PGSC0003DMG400041062 M6 LRR-RLP

ATGGAAGCTCCAACATGTTTTCTATTTCTTTTATGGTTTTGCTAAGCTTAGCAATATGCTCTGCCAGCCT  
ATTGATGTTACACAATTGAGTCTAAGGAAGTTGATCATCATCACAACCACAAAGCTCACACTTTGAGAA  
ATATCGACGTCCAAGGCTTTGGAGGAGGAGGCAGTGATGGCGGATCAGGCATTGTTCTGTGGTGGATTT  
GGCATTGGTGGTGGTGGAGGTGGATTTGGTGTGGTGGTGGCGTTGGCGTTGGTGGTGGTGGGGGTG  
GATTTGGCATTGGCATTGGTGGAGGTGTCCCTGGCTACAATGACCCTGGTTATGTTTTCCCTATCTATAT  
ACCTGGCTTTGATTTCCAGTCTATTCCCATGATTGTGGTTATGTGTGTCTTGCTAATAATCCTAGAGGAG  
AAATCACTGAATTCAAAATCTCAGGATTATCACACTTCACCAAACCATACAGATGCAGGCCAGGGCCTAA  
CATGCACGGAGACAAAGATTTAACCATGAACTTCTTCTAAACTTTGTTTCTACAATGCAGGACAAACAC  
GAGAACAACATGAACGTCTAAACTATGGAGGACACGGTGGAGATGTAGGCCTCCGAGTAGGAGGAG  
CTAGACGTTTAGGATTTGGTGGTACTGATACCTCTGATCAGTATGCTAATGAGGACCCTGGTTGGA  
GTATTGAGGGCTGTGGTTATGTATGTCCAGGCAACAGTCCTAGTGGAGGAATCACTGAATTCATATCTC  
AGGATTATCACATTTAGTGAACCTTACAGATGTAGCCAGATATGTGTGACACAGAAGAATGTGGTGA  
ATTTCTTCTACGCTTTGTTTCTCCAATGCATAACAACACGAGAACAACATGTTTCATCAGTCTGAGCAGC

AACACAAACACGAGAACAAACATGTTTCATCAGTCTGAGCAGCAACACAAACATGAGAACCAACATGGTC  
ATCAGTCAGAGCAGCAAGAGGAAGAAATCACAAACGATATCCCCGACCCACCCACACCCCAATCCTGA  
>M6-PGSC0003DMG400041336 M6 LRR-RLP  
ATGAAGGAAATTGACGATTCCGACGATGTTATCGATGTATTCGATGTCGGAGAGTTTGATTATTCTTCTA  
ATATTCCTGATGAGTGTTTAGCTTGCATTTTCCATTTCTTAGCTCAGGTGACCGGAAAAGTTCTTCCCTC  
GTCTGCCGCCGTTGGCTCCGTGTTGAAGGCCAGAGTCGTCACCGTCTCTCGCTTAATGCACAATCGGAAC  
TTGTCGCTGTGGTTCCTGTGATTTTTTCTAGGTTTGATTTCGGTAACGAACTCGCTTTGAAATGTGACCGT  
AGATCTGCGAGTATTGGGGACGAGGCGTTGGTGCTTATATCTTTAAGGTGCCGGAACCTAACTCGTTTG  
AAGCTCCGGTCATGCCGGGAGCTTACTGATACTGGAATGGAATCTTTTGCGAAAAATTGTAAGGGTTTG  
AAGAAGCTATCTTGTGGATCTTGTGCTTTTGGAGCTAAAGGGATGAACGCCGTGTTGAATAACTGCTCG  
GCTCTGGAAGAGTTGTCCGTGAAACGGCTGCGTGGTATCACAGATGGGGCTGCAGCTGAGCCCATTGG  
TCCTGGTGTTCAGGGGGTTCTCTGAGAGTATTTGCCTTAAGGAACTCTACAATGGTCAGTGTTTTGGA  
CCGTTGATTATTGGATCGAAGAGTTTGCAGGACGCTGAAGCTTTTCCGTTGTTCTGGAGATTGGGATAAG  
ATTCTGGAAGTGATTGCTGAACAAGTCAGTGAACCTTGTGAAATTCATCTTGAGAGGCTTCAGGTCAGT  
GATACTGGTCTTGCTGCTATATCTAAATGTTCCATTCTTGAATTCGACCTTGTGAAAACGCCTGAATG  
CACTAATAATGGTCTAAAGACTGTTGCTGAAAACCTGTAAGCTTCTAAGGAAGCTCCACATTGATGGGTG  
GAAGACTAACAGGATAAGTGATGATGGGTTAATTGCTGTGGCAAACATTGCCCTAATTTACAAGAATT  
GGTTTTAATAGGTGTGAATCCAACATGTGCTAGTTTGGAGAAGTTGGCTACGAATTGCTTGAATTTGGA  
GAGATTAGCTCTGTGTGGAAGTGAACCTGTTGGGGATCCAGAACTATCGTGCATAGCTGCGAAATGTAT  
TGCATTAAGAAAACCTTTGTATAAAGAGTTGCCAGTATCCGATCAGGGTATGGAAGCGCTTGCTAGTGG  
ATGCCCAAATTTGGTAAAAGTAAAGGTTAAGAAATGTAGATTGGTGACTTCTGGAAGTGCAGATTGGCT  
GCGGACAACCTAGGGGTTCTGTTGCTGTGAACTTGGATACACCTGAACCTGAAAATCCTGATGCAAGTGC  
CAGTGATGGAGGTGTGCCTGAATTTGGCAATGAAATTAGACAGGTGGCTGGCCAAGTAAGAGGTGTAA  
GTATTGCATCAAGCAGTACTGGGAGGTCAAATTCCTTTAAGGCCAGGCTAGGACTTACAACAGGAAGGA  
ATCTGGTGGCTTGCACATTCAGAAGGTGGTCGAGCTTTGGTGGGAGTTCCAGTTCCAGAAATAATTAGA  
AAAAAAGGAGTTGACTGAGATGCTCAAACATTCTGCTATTGAAGTTATTTGACTTTTATTACATTTATATA  
TTCTTGAATTTGCATGCTAGTTAATGCAACTACAGATTCAGCCTTCGTGGTTGGACCTTGTTCTGTGAGTTT  
CCGTTCTTTTTGTTTTGCTTATGTACAATCCCAGTGATGCTATTTTTGGGCTTGGTATGCTCCTTCAACGT  
GGAGTTCTTATCACTTCTCCTGGGAGAGGACTCAACATGCTATCTTCTGAAAAAGAAAGAAAGGAGAAG

GTTATAATCCAAGAAGTTGGTGATTTTGGAAATGTGTTTACCAGTTTATGTTTTGCTAAGTTTTTCTGTATA  
TATTCTCCGTACGAAAGATTCAATATCGTTAACACATTCTTCTTGACGCATTAGGGGTTTGAATGGAGAA  
CTGAGAAGAACCGAAGAACTAGAAAGTGTTCAATAATCATACTATTGCTTTCTTATACTAGGATAT  
GCACAATAAGCTAGTAGAAAGTCAAATTTTGGATTCTAAGTTCTAATCGTCCGTTACCTTTCTCAAACACA  
AAAAAGTTCAGATTCTGATTACATACCGCTACCTTTCTCAAACAGAAAAAAGTCCAGATTTTATTCACTCC  
CATGTTATTAATTACTGGATAGCATCATGGAAAGTCAAATTGATTTTGGAGTTCAAAGAAGATGTTTCCAG  
CTAATTAGGGGAATCCACATTTCTCCTTGAGTTGATTAGGGGCCCTACCCTCCATTCTCTCAAGTACC  
TCTCTGCTTGCTTTGGGATCAACTTCACTAACTTCTCTTATAAAAAATTTATGATACCTTTCTAAAAAAAT  
ACCTCTCATAAAGGTTTATTAGTCTTACAACCTGTTTGTCCACGGCTTTTACCAATTAACCTTTGTACATT  
TTTATATTAATCAGATGTGTTTGGGACGTGCCAGATCAGGAATCATTCTTGTATTTTTGGTGAATGTG  
GGGGGAAGTTAGCAATAGTGTGATTCACCTGGTAAATGAAGAACATTTGGTGAAAAGTCAAAGCTGCA  
CCCCTCATTGAAACAGGAAGTGTTCAGGCCTTGATATGCTACAATAAATGTTTAAATGCCATATAAGT  
CTGATTGTCTGAATCTTTCTATATCATTCTGTCAATGTGCTTATCTGATTTGGTTATCAAAAAAGAATAG  
TGCTTATTTGACTTGTATGACATTTAGGAAACATGTTGAGAAGTCTAGAGCGTGGATTTGTTTATGCTGAGA  
GCTGGAGTATAAATTGACTCTCTATTAGATCAAGAGATTGTTGAAGTCAAGGTATCGACCTCTAGATGTT  
GGGTTAATAAATAGTTACACCAAACCTTTCTGGTTCATTGGTGTGAGATGTGGATGTAATCTCCTAGAAG  
CTCTGCACTTCGCATAAGACACAACAACAGAGTTGTAAGTAAATCTCTGGGTTTGGGGCCACAAATTAG  
TATTTGTGTGATACCATGTTGACTTAATTGTTTCTGTTCTATTTAAGAACTTTTGTGACTTCTTGTAAATC  
AGAATATAATTATGTCAACCTTTGTCTTTCTAGTGTGGAGTCTTGAATAGGAATGGAGATCAAGGATGGT  
TATTGTAGTTATTTTTCGTACCAGTTCCTCTTGCGTTGTCCTTGAAGGCCAAATTTAGTCATACTCCCCTT  
GAGGCCATTGCCTGCAGTTATTTAGCTACATCGAATAAATAAATCAGCTAACTTTATCAGAAAAAGATGA  
CTGACCCTCATTTAATAGGGTAAACACAACCTTTATTTTTGCTCTTCTGCATGACTCTGAGGTCTGAACTG  
CATGCCTGATTTATTGGTGTGCATGTCCAGCTTATGTCCTTTAGTTGGTTTTGTATTAAGCCCTTCAGTTTAC  
TTATGCTTTGTGTCACTTTTACTGAATATTTTCTTTGAAAATCATATGAAGGCAATTGAAAAACCTTTGGA  
AAGTTGCATTGTGAGTGGTGGAGTTGAATATTGTGTTTGGAGAATTGTATTCTTAGAGAGTAGGTATAACT  
ATCAATACAAAGTTGCTCATTTAATTAGATGACGCCTGATGTTTGTGAACTGTATCTTGTGTTTTCTTCAT  
GCTTTGGTTAGTAGCAGGTATTGAATTGTTGCTTAAATTGTACGGTGTAAATTTGGATTCTTTACCATAG  
ACAGGCTATAACACTAATATTTGTTTCTTTGAGAATGAATCATCGAATTTTGTATCATCTTTTGTGGTG  
AGTTGGTCTAACAAGCAAATCCTAGTTCATCATTCTATATGGATCCAGTGGACCGAACAAGCATGTCCTT

TAGTTGATTTATGACTAACACAGTTAGAACTTCAGTTATGCTGCATGAACTGGTTATTGTATACACAGTCA  
GGGTTGTGGCAACTACTGTAGAATTATCCTTTCAGTTACTGAAGCATAACAATTATATGTTTCTCTTTTCT  
GAATGATGGGGTTGTGTAGATTTTGTCTCCACCAAATCCCAAACAATTGACACTGGCTATACCTGTGAG  
TTGCCATGATTGATGTTTTATGACTTGGAAACTCACTCTTATCAGACACTGGGTTTAAATTTTGGATTGG  
TAGTAAAAACACATACTGCTCATTTCGGTGTGTTGTTTTGGAAGGATTCTTTTGCTTCTTTTCTGTCTTGCT  
TGATGTAGTGATAATATTGTTGTTTTGAGAATTTTCTGTCTTGTACCGGTGATCAAAATTTCTTCAGTAG  
TTGTCGATCTTTTTGTGGTAATTCTGTTTTCTGGCTATGCATACTTCATCTGGTAAGTGGTGTATGGTG  
ATTGGTTTGTAAAGCTTTTGCTTGCTTGATAATGATTTTCTTATGTTTAAAGATGTCTCGATTCAAGCTTG  
AAACTGACAAAAGCTATGCTTCCGCGACGTCTGCAGGTTGTTTTGGCTTCATGTGATGGTTACTGATGA  
GTGTTTGCTTTGTTTGTCAAACCTTCCGTATACACTGAAATATTGTCAATCAAATTATGTCGATTAGTATT  
GGATCTGTTGACAATATTTTTGCCTTGAAGTGCATCCATTGAGTGTATCAATCTAAAATGTAACGCTAGAC  
GCTCATAGAACTTAAAGAGTCTGAACCAAGGGATACAGTTCGTCTTGCTGATCTGTAAGAATGTTTGTTT  
TAATCCCGCACCTATATGATGTAGTACAATGAAGTGGTAAAAATCATAGAACTAAAGTTCCCGTTTTGG  
TAGAGATGAATAATACTAGACGTCTTCTTTTCAAATATCTAACTTCGAGAGGATAGAGTCCCCTGATACC  
TAAGGTATTCAGTAAAATAGTTGAGTTGCACTTAAGTTGGCATGAATACCACTGTAACCTATAATATTCCA  
TATTTTATAACCTTCATATGTACACTATGGGTGCCATTATTACTCCTTTAACAACACTATTTCTATTACTAT  
GAACACCATATTTGAATTGGATTTCCGATCCATTGATTAGTAGCACTTTTCGATCGATTCAACCTTAGAAG  
AATCCCTGTTACATAAATTTGATAATCATACTCATTTCCTCTATGATTTCAAACCGGTAGATTGTTCTTCTG  
CTGATTTTGTGTTGCACTGGGTTCCAACATCACCTGGACAAATAGATAAATTTGGTTGCGGTGTATTTCTC  
AACATTTGGTTCTCTTAGGCATTTTCAGACAACAGGTTCTATGCATAGTGAGGGATCGAGAATGAAGTAG  
GAGGTTTGTCTTGTGTTGCTAGCTCGACTTGTAGAATTCCTCATTCAATCAGCTCAAGACCTTCAAGTTTC  
TCCGATCGTCAAATACTCAGCACTGTCAATTTTCGCCATCGATTCTACCCAGCTCTTACCGGGGAAGATA  
CTAAGGATGCTAAGAGCTGGCTCTTACGGCCTCTGAGTGAAAGCAATTTGCAGCTATTTTCGCTTGTTGC  
AATATGGATCTCAAGCAAATACACGATTCTCCTTCTCTAAGTGTTAAATCCTTCAAGTCTCTGGCTGACA  
TCACCATTAAAGAGCAGCATTTTACAACAAAGGATTTTCTGGAAGCTGAGCTAGTGTTAATTCAGGTATT  
GAAATTTGAGATTGGCATGTTAAGCATTCCCTTCCGATTCTTGAAGATCTACTTTTGAAGTTTCAAGTAA  
GTTGCTAGAGTTGGAAAGCAATTAAGCTTGGAAAGCTTGCATGGATATCATGGACCTGATATATGAAAAG  
GGGGATATTTTCAATTTGTTTCTTCTCATCATCTAGCCGCATCGATTGTTGTTGCTGCATATGCAATC  
ACAGTTCCATTGCAAAGAGTGAATTTCCCATTTCTGTATGGGTAAAGTTTGTCACTTCGTGCAGAGAGG

AGGATATTGTAGACTGTCAAAAATATTCTAATGCATGTGTTTGAAGCTTGA

>M6-PGSC0003DMG400041679 M6 LRR-RLP

TAGCTCCAATATTTTTCTAATATTAATACATGGATTCTATTTTTGTTGGACAAAATGTCCAGGAATCATC  
ACTTGCATTTCTTAAATGCTTTCGCCTCCCTTCTCACCTATTCAAATTCAGGATCTAAAGCACCTGGAAC  
TAATAGTTGTAAATTTACCCCTCCTCCCAACTTTAAAGGTTTTTGAAGTCTTGTTACCCTTAACTTTAATT  
TGTAACCTTCAAGGCCATGCCATTTTAAAGTCTCCTTTAAAGTAGATCATTACTTGAGCGTGTATCGACAG  
TTTAGTGCAATAAGCTTAATAGCTTCAATTATTGATGCCCTAATCTAGAAATCTTTGAATTTAGCAATCGA  
GCAAATCCCTTTGCTTTAGAAAAACCCTCTACTTGAGGAAATTTTATTCGGAATGCCTTTAACATGTT  
GGCGGTAATCACCATCATTGAGATATATGTTTGATGCACTACTGGATTTTGCTCGTAATTTAGATAATTT  
TGTCGCAGTTTGTTTTAGTCCTTACAGTACCATAGCCTTAGTTGATACTAGACCACATCAAAATTTTGAA  
TTTCAAGAATTTTATCTTTTCTGAGGTTGAGTGGGTTGCATATGTGATTGACTTGATCAACCGCTACCCCA  
ACATAGAAAGGCTTCTAATTACGGTACGTCTCATTTTTCATCTTTTGATTGTAAATATGTTGATTTTTAGCA  
TCTTCTGTAGTTAATCTTCTTCCCTTCTCAAGTCTTATGCCTTTGAACTGTGTGCGTGTTCGTGTACA  
CATCCCTTGCAATCCAGGAAATGACAATGACACATATTGCAATGAAGTGGCTCAAAAGCGTGGATATG  
ACCCTCATGTGGGTTAATAAAACTGAAATGGAATTTCTGAAGCATGTATTGGAATTTGCAATTGCACTTG  
AGAAAATATACATTGCAACTTCTGCAGAAATCCATAATAGGGGAATGAAAATGATGGAGAAGATGAA  
GCGGTTCCCTCGAGCATCACCTAATATAGAATTTATATATCATTGAGGA

>M6-PGSC0003DMG400042176 M6 LRR-RLP

ATGGATCTTGGTTACAATAATTTAGCGGAGAGATTCCAATGTGGTTCGGTTTCAATTCTGGTTTTATTT  
AAAGTTAGAACTCTGAGTGTGAGAAACAATCTCCTTCAAGGCAGTATCCCAAGGAGATTGGGAACCT  
TGAGAATCTTAAGGACTTGATTTTAGAATAAAATCAACTTACTGGCTCTATTCTACTCTCCGTTTCCAACA  
TTTCTCTATGGAACTTTAGGTCTCTCGGGTAATCAATTAACAGGGAGTCTTCTGTAGATATATGCCGC  
CGTCTTGGAAGAATAAAGAGAATATCATTAGTTTCAAACCATTTGAGTGGTTACATTCCATCAGGTTTGT  
CTAACTGCACAGAATTGTCCGAATTGTCATTGGCGTACAATAACTTCAGTGAAACATTCCGCCAGAAAT  
TGTCAACTTGGAGAGGCTTGAGCTTTTAAAGCCTCGGGGGAAACAACCTTGAAGGTA

>M6-PGSC0003DMG400042190 M6 LRR-RLP

GGAAGTATAACCAGCAAGTCTATTTCAACACCGGAGAGTTCAAGTAATTTATTAGCTTTCAATGAACTCG  
GTGGTAAAATGTGGAAAGGGCCATGGTATGTACCCGAACTCAGAGTCTTGGATCTCACCACAATAGCC  
TCATGGGTATGATCCCTCCTCCTGTTGGAAATGCCACAAAATGATGAACTTCAGTTTGTCTGGGAATAG



AGTCAGCGGCAACATTCCAAAGGAGATCAGTAATCTGAGCCAACTTGCAGACTTGTACTTGACTGATAA  
TCAATTAACAGGTTCCATTCCCGCAGCACTGTTAATATCTCGTCACTACTTTCCATACATCTGCGATAACA  
ATACACTTTCTGGTCCTCTTTTGCTTGATCAAGGGAATAATATTGTGTCAAATCTGAAGTTTTTAAGTATA  
TCTAACAAACCAATTTCTGGTTGCATTCTTCCAACATATGCCAACTCAAAGAGCTCAAATGGTTGTCTTT  
ATCTTTCAACAACATAACCGGAGACATTCCCAGAAATATTGATTGTTTATCTAAGCTTGAGGGGTTCTCTA  
TTGGCGATAATCCAATAAAAGGGACTATTCCCACTTCATTGGGAAATATTTCCACTCTGCATATTCTTCAT  
ATTAGTAACAATCACATAGTGGGGCA

>M6-PGSC0003DMG400042486 M6 LRR-RLP

ATGGCAAAAAGAGAAGACAGAACATCAGAATTGCATGTGCATATTATTCATCACATCTTATGCCGCACCA  
ACCTCGAAGTGAAAGAGGCGGCAGCAACTTATATGTTGTCCAAGAGATGGTACTATTGCTGGACTTCAA  
GACCTAATTTGATACTCCATCAATTTCAAGGCAACACATATATGCCCTGGAAAAGTTTGTCAAGTTGGT  
TGATCAATCCCTACGATTCCATGTTGAACACAACCTTACATCTAGAGAAATTAAACTTACATATAGTGATC  
GAGATTTGGATTCTAAAGTGGATCATTGGATTGAACTGGGGGTAAACTTAACTTAACTTAACTTAACTTAA  
TTTACCCTTCTTTTTAAGTAAATCATAACAGCTTACCTAATGTTATTTATGATGCTAAAAAGCTGAAAACAT  
TGTCGTTAAGTAGGTGCAAGTTTGAATTTGATATTAGCACCACTCACATAAGATTTTGTGTCTTGAGGA  
TCTTTATTTGATTATGTTTCATATTTCTGATGCTCAATTGCAAAGAGTTATCGATAGATGCCCGTTCATCAA  
GACTCTAGATCTAGTCTCTTGCCAGGGAATAAGCAAATTGCATGTTTTTGGCCTAGTTTATCTCAAGAATT  
TGACAGTAGTATTGTGCAAACCTAATAGAGTGATAGTCCAGGTCCAAAATCTTCAATTCTTTAGATATGT  
AGAAGTTCCTGATCATCCTTGCGAAATTGCTATTTGGATGGTTACAATACTTTACAAACACTCAAGCTCA  
CTGGTGCCAGTATCACAGACCAACAGTTTCGAGATGTTCCCAAACATTTCAGAATTGGATCTAACATTAT  
GCTTTAA

>M6-PGSC0003DMG400042529 M6 LRR-RLP

ATGGGGACTGCTGACATGTTGCCTGTATGCCTCATTGCAAAATACTCTGTTATCTTAGTTATCGAGAAG  
CATCCCGGATGAGAATTCTCTCCAAAACATGGCTACTAGCCTGGTTGGATCTTCCGAACCTTGAATTCTC  
GGGGAAAAGCATAGCAATAGTGGATAATATCATGGAGAGATATAGGGACGGAAATATTCCTATTGACA  
AGTTTGAATTTGACAACTCTAAAAGCCTGATCGTATTTCTGCTCTGATTGATAAATGGCTTGGCATTGCT  
CTTCAAATGGTGTAAGACATCTAGTGTATAGAGATGTTACACATTCAAAAATATAACCCCTTTCTATTTT  
TAAATTCTTGAAGCAAATTTTTTAGGAGAACTAGTCTGATGGGTTGTGATCTGATGCATGTTTCATTAT  
CTAATACTAGTCATGTGGTGATCTGTCATTCTTTGAGAAAGCTTTCTCTATCTCGTGTACGCTTAGATAAG

AACATGCTTCAGACTATACTCTCTAGTTGTCCCTTCATTGTTGATTTAATCATCAGGAATTGTA CT CGGT  
GAAAAATGTTGAGCTCCGGAATCTTCCTAAGATCAAGTCACTTGCCATTGATATTGACCATCCCATTAAA  
ATCGAAGCACCAACTCTTGAACACTTGTATTATTCTAGTTTTTTGTTTGAATAAATTGAATATTGATAAATA  
TAAGAATCTGAAATCTTTAGAGATATCATGTACGAAGATATCTGATATATATCTCAACCGCCTTATCTTCA  
GACCTTACTGCCTCGAGAAATTGGTATTAGCTAACATTTCTTTAGGAAGGTTTAAACGTTTGCAGGAGTCG  
ATCCCTAAAGGTCTTAAAGATTCATAATTGCAAGAAAATCGGAGCAATTTATGCTCCAAATTTGGTTTTG  
CTGGAGTATAAAGGACATGATATTCCTCAGCATAAATTTGCACAAGAATCAAGACAATTGAAGCAGTCA  
CAAATGATTCTTTATCCCTTGTTCAATGTAGACGCGGCATGGTTTTGTCAGCTGAGGCAATCTCTATCAGA  
TTCGATCTCTTGGTCTCAAGTTACCATTTATTTTACAAATACGAGGAGATCAACATGAATGATTTGCAGC  
TGCACTGTAGAGATGCTATCCCCAAAGTGGACGTTTTAGATGTAAATTTTTTAAGGCCTACTGGAGAGTG  
CTCGACGTTTGTGGATGCCTTGCTGTGGAGTTGTCGTCCAAGGAACTCAACCTACAATCAACAAGTGAC  
ATGTTTACATGTTTCATGGATCGTTTGATGCATATGAAGAGTTTGAGACGCGCTCTTACTCATGAAATGG  
GCTGTTTGATGCATATGAAGAATTGGAGACGCGCTCTTCTCATGAAAGGCATGGTCAATTAAGAGAGG  
CAAAAGTCTACAAATTTGATCAGAGAAATCAGAGTTGGCATCCTGTAGAACACAAAAGAGGAGAGCTCT  
CAATAAGGACCGTTAGCACGTTGGAGAAATATTTCTTTTTATTAGATTGGTGA

>M6-PGSC0003DMG400042787 M6 LRR-RLP

ATGACAAATGACGCCTTAGTTACTATTGGAAGGAACCGTCCTAACATGATCCAATTTCAATTTGTGTATTAT  
CAAGCCTCAAACCTCCTGATTACTTAACCCTTGAACCACTTGATGCTGATCTTGGGGGCCATTGTGCAACA  
CTGCAAGGAATTACGACGACTTTCTCTTTTCTGGCCTCCTTACAGATCGTGTGTTGAGTACATCGGGTTC  
CATGCTAAGTAGTTAGAGATGATTTCTTAGCTTTTGTGGGGGATAGCAATCTAGAAACGAAGCCTATC  
GCCACGCCGACCATCAAATATGCGAGTGCCTCCGTAAGTTGGAGATTGGAGACTGCCCTTTGGTGATG  
AGGCTCTGTTGGCTAATGCTGCAAAGCTGGAGACAATGTGATCCCTTCAGATGTCTAATTGTTTCAGTAAA  
TTTTG

>M6-PGSC0003DMG400042991 M6 LRR-RLP

TACTTAAAAAAAATAAAAATCTCAAGT

>M6-PGSC0003DMG400043061 M6 LRR-RLP

ATGGGTATTTGGAGCAACCTACTTGTGCTCCTTCTTATTTTCCCTTTTTGTACACCAGATCCAAACGATGA  
GATGTGCTTGACCCATCTCAGTCAATCTTTACAAGACCCTTTGAAGAATCTTCAAACCTGGACTAAATCTT  
CCTTCGCTAAACCTTGTGATGGGTTCACTTCATATCTACAAGGGGCAACTTGTAACAATGGCCGCATCTA

CAAATTGTCCTTTTGAATCTCTCGCTTAAAGGTACCATTTCTCCTTATCTCTCTAATTGCACCAATCTCCA  
AGCTCTTGACCTCTCTTCCAACGCAATCTCCGGCCCAATACCTCTGGAACCTCAGTTCCTAGTCAATCTGG  
CTGTTCTCAACCTCTCAGCTAATCAACTTTAGGCCCAATTCCTGAACAGCTCGCCATTTGCGCTTACCTC  
AACGTCATCGATCTTCATGATAATCAGCTTAATGGGCTTATCCCGCAGCAACTGGGCCTCCTTGACGGC  
TATCAGTTTTCGACGTATCAAACAATAGATTATCGGGTCCCATAACCAGCCTCACTGGGTAACCGGAGCGG  
AAATTTGCCCCGATTCAATGCCAGTTCGTTTGATGGGAATAAGGATCTTTACGGGTACCCATTGCCACCC  
AAAAGAGTAATGGGTTATCGTTTTGGCAATTGTAGGGATCGGATTGGGAAGTGGGTTCTTGAGTTTG  
GTGCTAAGTTTTACTGCTGTTTGCATATGGTTGAGAGTTACTGAGCAAAAATTGGATGCTGAAGAAGGA  
AAAATTAGTCATCTTATGCCTGATTATTGA

>M6-PGSC0003DMG400043237 M6 LRR-RLP

TAGAGAGGACAGAATATCAGAATTACCTGTGCATATTATTCATCAAATGTTATGCCGCACTAACCTCGAA  
GTGAAAGAGGCGGCCAGAAGTTGTATCTTGTCCAAGAGATGGTACTATTGTTGGTCTTCTAGACCTAAT  
CTCATATTCCATCAATTTCAAGGCAAAATATATATGCCCTCGAAAACCTATGTCAAGTTGGTTGATCAATC  
CCTGCAATCCCATGTGGAACAAAACCTTACATCTTGAACAATTTATCCTTGTGTATCAAGATCGAGAATTG  
GATTCTCACTTGGATCATTGGATTGAATTGGCAGTTAACTTAACGTCAGAGTGCTGGAGATTTATGCTT  
CCTTTTTAAGATCATATAGCTTACCTGATGTTATTTATGATGCTAAAAGCTGAAAACATTGTCGTTACGC  
AGGTGCAAGTTTGAATTTGATATTAGCACCACTAACATAAGATTTAGTTGTCTTGAGGATCTTTATTTGTA  
TTATGTTTCATATTTCTGATGCCCAATTGCAAAGAATTATCCATAGATCCCCGTTTCATCAGGACTCTAACCC  
TATTTGCGTGCAGAGGAATAAACAATTTGCAAGTTTGTGGCCAGTACATCTGGAGAATTTGATTGTTGT  
ATGCTGCGAATTCGATAGTGTGATACTCCAAGCCCCGAATCTTAAATACTTTGAATATGACGAGCATACT  
GATTGTCCTTGCAAAATTGCTGTTTTGGATGGTTACAATACTTTACAAACTCAAGCTCACCGGTGCCA  
GCATCACAGACCAATAGTTTCGAGATGTATCCTACAAGTTCCCAAACATTTCAGAATTGGATCTAAAATT  
CTGCTTTAAGCTGAAAAATATAGAGATTCAGAGTGAAAAACTCAAGAAATTCACCTTAGTAGGGTTGAA  
GAGTCTGGAAAAAGTCACGATTCAAGCTCAAATTTATTGGAATTTGATTATAATGGTGATAAAATGCCC  
TTCCCGTCTATGAATCCTTCTTCCCTGGAAAGATCCCAACTCAATTTCTTCTTGACAAGCACAAACTT

>M6-PGSC0003DMG400043334 M6 LRR-RLP

ATGGGTGAGGTAGCTAGTAAAGGAAGGAAGTCTACCACTATATATCGGTGACTTACCAAATGCCATACT  
ATATACAATACTAGAGTTTATGCCCATCCAAGACGCTGCAAGAACTAGCGTCTTATCGAAGAAATGGATA  
CCTATATGGTCCACATCTTGTGTTTGATCCCCGTTTTTTTCAAGTATGTATCTAATATTGGTGCTTCTGCTGC

AACCGTAATTTATAATATTCTAATGCAACACACTGGAAATATTATGGGGTTTCATCTTATCTCGAGTACGT  
GCAAACCTGCACAGTCAGATGTGGATCAATTCATCATTTTTGTCTCGAAGCATGGTATCCAAAAGCTCAC  
TCTTGATATGGCAAATGAAGAAAATTACATGTTGCCTCATAGAATATTTACTTGTGCAACATTGACACATT  
TGAAGCTCTCAAGGTGTTTCTTTAGGCTTCCGGATGGTACCCAATTTCCAATCTTATTAGCCTTCAGTTG  
GAACATTCTAAAATTGCTGGTCATCGAGGATCAGAAGACATGATTAATCTGCCAATGCTTGAAGCTTTGG  
AGTTGAGATTTTGTGTTGGTGTGATTCTGTTTATTTGGTTTGTCCAAAACCTTGACAACATGTATCTCATT  
AGCAGCTATAACAATTACATTTAGTGTTTAATGTGAACCCAATCTTTGCAATCATTA

>M6-PGSC0003DMG400043603 M6 LRR-RLP

ATGAAAACCTTGCAAATTCACGATCTTCTTCGCCAACTGTGCCTAAGTGAAGCTCATACTGAAAATGTTG  
TGCATGTCATGAATGGGAATGATCTCGAAGCCATAGATGATCAACGTCGAATGATCCTTCTGTCTGAAGT  
TGAAGAGAAGTATGATTATGGTCCACGAAATAGCAGTGGTATTGTCCGTACCTTTATTTCAATGGGTGTA  
GTAGCATTACCAAAGAGATGTGTTCCATTGTTTCAGAATTCAAGTTGCTTAAGGTGTTGGACGTATTAT  
CAGTACTCTGGTACGATTTCTCTAGTGAATACCTGAGCTTGACATTTGAGATATGTTTCTGCAAGAATT  
GAGGAAGCTCCTTCACTAGCCAAATTGAGAAGTCTACAGACCATAATTCTTCGAAGATATTTCTCTGGCA  
GTGTCAGACCAACAACGTTGGAGCTGCAGCCATTAGATATCTGGAGAATGTCAGAGATAAGACATATG  
GATATTGATTGGCCACTATATATATCAAACCTTGTTGAAGCAGAACAACATTGTTTCTGAATAACTTGC  
AAACACTTTATCTCTATAATTCTCCTTTTGTGTCAGAAATCATAAAAAGAACTCCCAATCTAAAAAAGCTA  
AAGATTTTATATAGATCTAAGCTTCTGATTCTCTGAGTATTTTACAGCATCTGGAGACACTACACATAGA  
AATAGAAGAAAACATTGATCCGATGATTATCTCTAGAGATATTTCTCTCCTAATCTCAAGAAGTTGAAA  
TTAAGAGGTACTCGTATACCATGGGAAGTTGTGAATTTGCTGGCTAATTTACCCAATCTTGAGGTGCTCG  
AGGGGAAATATGCCTTTGCTGGAGCAGATTGGAACTAAATGAAGATGTTGTGTTTCGCAAATTAATAA  
ATCTACGTCTATATAGGTGCAGAGATCTGGAAAGGTGGGAATTAGCAGCTGGTAGTGATAATTTCCGA  
TGCTTGAGAACTAACACTGTATGAATTGCCTAAACTGGAGGAGATTCCCGAGAGTATTGGAGAAATAA  
TGACACTAAAGTCAATCCGAATAGTTGATTGCAGCTCTGGTGTTAATACAAGTGCAAGGAAAATTCAAG  
AAGAGCAAGAAAGTTTGGGAAATTATGAGCTTCAACTGGAAATTGTTTTGGTATGTAA

>M6-PGSC0003DMG400043752 M6 LRR-RLP

GGAAGTTTTGAAGAATGTTCAACAACACTATGCTAGAGAACATGAAGACTTTTCACACTTACCATATATTGT  
TGGATAATAAGAATCCAAGTTCTGGTGGAGGTTTTCAAATCTCGAAGATCTCAGCCTCCACGTTAAATG  
TATACCTAAGTTTCTCTGTTTTCCATACCGAAAGTTCATACTAGCCTTCATTCTCTTTCTCTGGTTTTATCT

TTCACGGAATTCCGGGATTGAGTTGGCCGATGGGAGAGCTATTGTGTGTTCCCTCCAAATCTTAGGCATT  
TGCACCTTGCTGGCTGTTTCTTAACTGAACAAATGATATTAACATTGCAAGATTGGAGAATCTTGAGAG  
TCTGAAATTAGAGTTGGGAATTCCTTTGGGGAGATCAGAGAGCTATTGTTGGGACGTCACAAATGTGGA  
GTTCCCTTCACTCAAATACTTGACACTACTCCGTATGCAGATAGACGAATGGAAAGCTTCAGAGGAATCC  
TTTCCCGTGCTTGAGGTGCTATCTATAAAAGCTGGTTCCGATTTCTGGAGATCCCTCCTAGCTTTCAGGA  
CATTCCAGCACTGCGACTTATTGAACTGTTGACTGCAACGACTATCTTGTTGATTGAGCTTTGCAACTCA  
AAAAAGAAATTGAAGAAAACACAGGAAGTGACAGTCTCCAAGTTGTTA

>M6-PGSC0003DMG400044242 M6 LRR-RLP

TGTTTCTTTTGTCTTACCTTTTTTCCTTTTT

>M6-PGSC0003DMG400044365 M6 LRR-RLP

ATTGAAAACCTCACCTCTGAAAAAGCGAAGATTGAGATAGAATGTGAAGATAATGACAGAATTGATAG  
GATCAGTCAACTACCTGAAGCTCTTATTGTTCAAATTCTATCTCGATTGTCCATAACAGATGCGTTAAGAA  
CAACTATTCTCTCTAAATATTGGCAATACTTCTGGACTTGTATCGACAACATTGTTTATGAAGAGGATTAT  
AGTCGTTCAAATAGCTCGACAATGCACAAATTCATTTCTTAACAGATAATGTACTACCTCTGCTTAGCTG  
CTCAACCATTAAAAAGTTCAGTCTAACTTTGTGTTTCTGATATGATGATGGTGTGTCTTATTTTCCCAAAA  
TTGACAAATGGCTTGAATTTGCTGTGAATAAGAAAGTGGAGGATCTACACTTGAATATACGTTATACTGT  
TGATCCGACTGAGCATGACCAACCCTATAGCTTGCCAGTAGTTCTCTCTAATAGTTCATCGATTCTAAAC  
TAACTGCGAGAATTGCAGAATATAAGAAGATTGTGTAATAATTGGACATCTCTGAGGAGTTTAACT  
GAAAAATTTATTTCTACGGGATGAACACATTAAACAAATAATGTCAAATTGTCCTCAATTGGAATCTTTG  
AAGCTACAAGAATTTTGTGGTTTTAATCGTTTGCACATGACTTCTCCAAAATGTAGGCGGCTGCATTTGA  
TCCATCACGGTCATCCTTGTTGGGGATTGGTACTCATTGAAAGTGATATATGTTGCTTTGAAATTGTTGCT  
CCACATGTTGAACATTTAACGATTTCTGGGGTTTTTAATCATACAAAATTAAGCTCAGAGACTTGCATC  
TTTGAAACATGCCAATCTTGATCTCGTCTGTGATGAATTTAATGAAATGGATGAACACATAGTGAAAGAT  
CTTTTGGTAAGCGTTCGTTGTGCTAATGAGCTAATACTCTCATCCTGGTTTATCAAGGTCAGTTATTAGTC  
CCAAATATCTAAAGTCTTTTTATGTTGATTGTGAATAGAGCTCCTATTTTATATTCTGCCTCATTCTTCTATT  
TAGGTAATTTCCAATTTGATGTTAAAAGAAGAAGATGTCTCTTTACCGTTGCTGGAATGCAGATGGTTGA  
CAATAAGTTCTTGATTTTCAAACCTTTCAATCCCTCTACTAGACAACCTCTTAAGGTCAACTCGTAAATTG  
GAAAATTTGATGATATTTCTGATACTCCGGTATGTTTTCAATTCACGATATCTTTATATCAAATGCATATT  
AATCCCCTACAGCCTCAACAACCTTCAATTTCACTACTGTAGTTGTTAAGCTTACCACTTAACTTGATTTGTC

CTTGTTCTGTATTTTTAGTACCATCATTTTTTTGAGGACGAAGAGATAGATTTGTTGGAAGACAAGTACCT  
CTCCTTTGAAGAAAACATATTCAAAGTTTCCTTACAGAATTTGAAGAATGTCAAGGTTATGCCATTTTGT  
GTCGTACG

>M6-PGSC0003DMG400044406 M6 LRR-RLP

CTTTTAAGCAGCATTCAACAAGGATAAGATTGCAGAATCTAATGGTATAGAAGGTGAGGAATATCTTGTC  
AGGTCCCTTGTTAGTAGGGAGGCCACAGATGTCAGATTTGCTGCTATTGCCGTTAGAGCTGCAAATTAT  
GGAGGTTTGGCAACGCTATCTATTCGGGGAGACAATCCTTGTCATGGTATGAGTGATGGTGGTCTCAAG  
GCTATAGCTTGATGTTGCCCTACTCTGAGAGATCTTTCCTTGTCGAATGTGTCATTAGTTGGTGATAAAG  
GCTTATATGAGATTGCTCATGGGTGTCATCTGTTAGAGAAGCTTTATCTTTTCTAGTGCCCAAATTACCG  
ACAATTCTTTGTTGGACATTGCAAAGAATTGTAICTCACCTGACCTTCTTGACGGTAGATTCTTGTTCAAAT  
ATTGGGAATAAGTCGCCCAAAGTTGTGGGTCAATACTGTCTGAACCTGAAGCTCGTCATATTGAAAAATT  
GTCCACTCATTGGGGATCGAGGAATTAAGATTTCTTTTATTCAGCTGGTCATATTTAACAGAAGTAGA  
GCTCCAGGCACTACACATCAGCGACATTTCTCTA

>M6-PGSC0003DMG400044447 M6 LRR-RLP

AGATACTTAAAAAAAATAAAAAATCTCAAGT

>M6-PGSC0003DMG400044512 M6 LRR-RLP

ATGCCTATTTGTTTTCTAGCGAAGTGACGAATTGCAATCTTTGAGAAAGCTTTCTCTAACCCATGTCAA  
ATTAGATGAAAACATGCTACAACTCTACTTAATTGTTGTCCTTTGATTGTCAGTTTCATCTTTCATTATTG  
TTGGGGGTTCAAAAAGATTGAGTTGACGTTGAATCTTCAAAGATCAAGTCAGTTTCCATTAATCAAGA  
GAACAAAACGAACTTGTTAAAATCCAAGCACCAACTCTTGAACACCTGACTTATGACGGTATTTATGGG  
GAAAATTGGATATTGTTGAATGTCAGAATCTAAAATCTTTAGATATATCATATGTGAGAATATCTGATGA  
ATTTCTGCAGAACCTTAATTCTGGATCTCAATCCCTGAAGGACTTGAAGATTCGAAATTGTGAGGATATA  
GAGGAGATTGATTCTTCGAATTTGGAGTCACTTGAGTATATGGGATATAAAATTCCTAAACTAAAAATTG  
CAAGAAAATTGAAGCACTTGAAAATCAATCTTCAGTGCTTTAGCAGTTTAA

>M6-PGSC0003DMG400044624 M6 LRR-RLP

ATGAGTGAGGTAGCTAGAAATGCGAGGAAGTCTACCACTATATATCGGTGACTTACCAAATCGCATACT  
ACATACAATACTAGAGTTTATGCCAATCCAAGATGCTGCAAGAACTAGCGTCTTATCGAAGAAATGGAT  
ACCTATATGGTCCACACCTTGTGTTTGGTCCCCTATTTTTGAAGTATGTATCTAATATTATATTGGTGCTTC  
TGCTGCAGCTGTAATTCATAAGATTCTAATGCAACACACTGGAAATATTATGGGATTTTCATCTTATCTTGA

GTACGTGCAAAC TAGCACAGTCAGATGTGGATCAATGCATCATTTTTGTCTTATAGCCTGGTATCCAGAA  
GGTCACTCTCAATATGGCAAACGATGAAAATTACTTGTTGCCTGATAGAATATTTACTTGTGCAACATTG  
ACACATTTGAAGCTCTCAAGGTGTATCTTTAAGCTTCCGGATGGTACCAAATTTCCCAATCTTATTAGCCT  
TCAGTTAGAACATTCTGAAATTGTCAATCATCAAGGATCAGCACTCTATCTTTCAAAGCTTGAGACTTTAG  
AGTTGACATTTTGTGTTGATGTTGATTCTGTTAATATTGTTTCTCCAAAACCTTGGAACCTGTCTATCCTTA  
GCAGCTATACGGTAACATTTGAGTGTTTTAATGTGAACCCAATACTTGAGAGGATTAAGCACCTATGCTT  
GGATGGCTCATCCCTAAAGGTGAGAAAATGACTGACTTGCTTTCTTTCTTATTTGAAATATGAAGTACTA  
ACTATTTACTCTAATAATGTTTTTGCTGCCTCTCAGAACTTAGGGTCGGTTCCTGTTCCAGATATGCTTGA  
TGTATCACTAAACTTGCAAAGCCTGAGAATTTGTGACTTGAAGATTTCTGTTAAACGTATTTCTTGTGCAC  
TTTGCCTATTAAGGAATTCACCTAACCTTGCTGAACTTGACATAGATGAAGTTGTGAAGGTTAGACATAC  
CTTGACTCTTGTGTTAAGACTACAACACATTGATATGTGGATTAGGTGGAATGTCATGGGTTTGAACCTT  
GTGCCGCTGGCCCTCTGAATTTCTGTTTATAAAATGTGTATGTGTATATATAAGCTTTACTAATTTTTGA  
AAGATTGACTACCTTGTACAATATGATATTTTCTCAGGTTGATGAGACAATACGTCACACAGATGAACT  
GCTTGATTACTTGTCCGATGCAGTAAATGAAGTGATTGAAGCACTGAAGATGATTCCGGACAGTGAGGTT  
AAGGAAATTCAAAGGAACAACACTACTGAAATGTACTTGATAGAAGT

>M6-PGSC0003DMG400044936 M6 LRR-RLP

ATGGCCTCCACTTTTTCGCAATTTGCATAGCTACACCAATAGTAGTAGTACTGCATTATTACCAGATGA  
TATCCTTCACAAAATCCTCTGTTCTCTTAATCTCAGAAACAGAGCAATTGCTTCCCAGGTTTGTAAAACCT  
GGCATGACATTATATCATTGTGTAACATTAACGATAACATTATCAACGACCACGTATTACAAGCACAAGT  
TTCTAACCGCACATTCTGTGCATACTGCTGCTCTCGAATTGCCATCGAATCTGCTATCACAGTCTCTATCC  
TATAGTTGTCAAGTTTGTCTCCGACAACATCAATTTGAGGAATTATATTTGATTGCTACTGTTACCTCATT  
AGCATTGTCCCCCGCAATTTTTCAATCAAGAGTATTGTTAACCGTTTTATGTTTAAAAAACTGCAAATTTG  
AGGATGAAGCATTGATGATATTCAAGAGATGAATTTATTGAAGGAGATTTATTTTGTTCGGTTCAAAT  
CTCTCCATAAATTTGTA AAACTTATCAACAATTGCCTTCTATTGCTGATTTAACCTTGATCAATTGCTA  
CAACGAATTTGGAGTATTTCCCATCTTATTGCCTGATTTGAATCAACTTAAAAAGGTTTCATTTGAGTGGTA  
CTGGAATTTGGCCAATTGAAATAAAAGCTCGAAATTTACGAGAGTTTCACTTGTTAAGATCCTTAGCAGT  
GAACTTGATTTAAGTGCTTGTACTAAGCTACATGTTCTGAAAATTGATTGTGAGTATATTCCTATCGGAT  
TTCCTAATGATATTTCTCAGCATTCCCCTGTCTTAAATCGTTGTTTCTTCGTTTCGTGCAAAGGATTGAAAA  
TTTTCAAACCTTCGAGTCCTGAATTGGAGAATTTGACGTTAAGTAACATGGTTGATTTGAATGATGCTGT

CATTGTTACTCCCAATTTACGTTGTTCAAGATAGTAGATATGAAACAAGTCCCAAACCTCGTGTCCAATCG  
TTGGTTCGAGTCTCATGGAAGTCGAGATTGGATTTAAGTACGTTACCTCGATCAGTAGGTTGGTTCGGTA  
CTTGAGAGCTTTGGGAGAAAATTTGGGTGATAATTTGACCTTTTCTCTAACAACTGATGCAGCAACTGAA  
TCAAAGCTGATGCAGCAACTGAATCAAAGGTATTGA

>M6-PGSC0003DMG400045303 M6 LRR-RLP

ATGAATAATCGTGGTACAGAAGTGATCGTTGATGAAAATGAGATAGACAGAATCTCTGATTTGCCCATG  
GATATCCTCGATGAAATATTCAAGGATATGTCATTTCAAGAATTGGTAAAAACATGTGTTTTGTCCAAGA  
AGTGGGTACAATTTTGACTATGCATCCAATACTAATTCTAGATTGGGAGTTCTTTGAAGAGAAAAGTG  
GTAATATAGGATTGGTTGAAAATGGTTTTAGTAATATGATTGGCAACATTATCTTGCATCATGTTGGATC  
CATAGTCAAATTTTCTTGATTTGTCAACTATTGATTGTAATGATAGGGACCTTGACCATTGGTTGTTAT  
GTGTAACAAGTAAACGCGTCAAAGAACTTACCCTAAAAAATCACAAACGCAAACGCTATACATTGCCTTT  
TTGTGATTTGATTGTCCAACCTCTACATATCTAGATGTCACAAATTTATAGCTAAACCACTTTCTCCCAA  
AGCATTATCCCAAATCTACTTGAATTGACCTTGAAGTTCATCAAATTTTGCCAGACAAAGCAAATTATG  
TCTTGAATACCCCACTTTACTCTTTAACGTTTATTGCTTGAATGGCGTTCATTTCTCACCATATCTG  
CTCCTAGGATCCAGTTCCTGACTGTTTCATGATAGTCATGACATTCACGCAAGTTTTTTTTGATAACTTGTC  
AATGCTAGGGAGTTGTTTCATGGTATTAGATGTCTGTGAAGAATCTAAAAGTTATGAGCAAGAGAGGTT  
ATTACATGGTCGCGTCTTCTTTATTTGTGCTCTAACCTGACAAGGCTTGTGTTTGAAGTAATTCTTGCATTA  
GGTGATTATAATATGATCACGACATATTTAAATATTCTTTATTATAATATTCTCAATAAGTGTTACTATGCT  
TATCATATATACTTAACCATTAATGCATTTTGCCTTTTTGTTTTCTTTTACTAAGCATTGTTGGGTGCAGAGA  
TCATTCCGAAAAGGTTTCAATCCAAACCCTACCATTTGGAGCATGTAACATTGTGTGTGACATTTATGGA  
TTTAAACCAAGTCTCTGGTGTCTTTCTTGATTCGAAGTTCTCCCAACTIONACTCACTGGAGATAGATG  
TAATGTTTCTCACTTTCAATAATTTAAAATTGAGTTTAAAGTTTTATATACTGATTGTAGGTAACCTTAC  
ATGTTGTAGTAGGTAATATATCTTATTTTTAATATTACAAGTTTAACTTGGTTACCAGTAGATACTTT

>M6-PGSC0003DMG400045368 M6 LRR-RLP

ATGGTGGATTTTGGAGGCATTCCAATTGATATTTAATGGCATTACAGCAGCTGTCGTCCTTCGTACATTGG  
GGGTGTGGGGACACTTGCCTGGGATTCACTGCCCTATCAGCTTACGCAACTCTCTAATCTAACAGATAT  
AAAAATGTATGGATTCAGAATCGAGGCTCTTCTCATAGATTTGCCAGCCTTACTTCTTCTGAAAGATTAA  
CACTAGTGGGGTGCAAACGGCTATAACATATGGACTTCTCAGATGCCATGCCCAAATTACGATATTTGTG  
GATAAATGATTGTCCATTGTTAGAAGATCTATCGGATGGACTCAGCAACCTTGTGTTCTTTGCAAAAAGTTA



GTTTTACAGAAATGCGAGAACTAGAGCATCTTCCATCTAGGGATGCCATGCGA

>M6-PGSC0003DMG400045411 M6 LRR-RLP

ATGAGCAACCAAGACCAATTCTCTGGCAACTCAGAAAGTCTGCTTATTGAAAACCTCACCTCAAGAAAA  
GCAAAGATTGAGATAGAATGTGAAGATATTTATAGGATCAGTCAACTACCTGACGCTCTTATTGTTCAA  
TTCTATCTCGATTGTCCATAACATATGAGTTCAGAACAACCTATTCTCTCTAAGCATTGGCAATACTTCTGG  
ACTTGTGTGCGACAACATTATTTATGAAGAAAAGTATGGTCGTTAGATAACTTGACAGTGCACAAAATCA  
TTTCCTAACGGATAATGTACTACCTCTCCTTAGTTGTTCTAGCATTAAAAAGTTGAATCTAAACTTTGTGT  
TCATATATGATGATGGCCTGTCTTATTTTCCAAAATTGACAAGTGGCTTGAATTTGCTGTGAAAAAAA  
AAGTGGAGGATTTACGCATGAATATACGGTATATTGTTGATCCGAAGGAGCATGACCAACCTTATAGCT  
TACCAGAAGTTCTCTGTAGTAGTTCATCGATTCTAAAACCTCAACTGCGAAAATTGCAGAATATTAGAAGA  
TTGTGTACTAAATTGGACATCTATGAAGAGTTTAATGCTGGAAGATTTGTTTCTCCGAGATGAACACATT  
AAACAAATAATGTTAAACTGTCCTCAATTGGAATCTTTGAAGCTACATGACTTTTTGTGGTTTTAA

>M6-PGSC0003DMG400045777 M6 LRR-RLP

TGGGACTTCTTGAGGCACCTAAACCTTTCACATAATTCATTAACAGGCCACCTACCACAATTTTATTATTA  
TAGTCTAGAGTCTCTTGATCTAAAATTTAACTTCTTGAGGAGTCACTACCTTCATCGATTTGTAACATGA  
GTAATCTTAGACTTCTCACAGATGATATTTCCAATGGAACCTGGGACAGTTAAATACACTTGAAGCATTAGA  
TCTCTCTTGTAATCTGCTCACAGGAAAGATTCCGCGAGAATTGACAAGGCTAACCTTTCTGGAAATGTTT  
AACCTCTCTCAGAATCTTCTTGTCGGGCCACAACCTCAACACATTTGAAAATGACTCATATGGTGGGAAAC  
CTTGATTTATGCAGTCTCCTTTAACAAAACAATGTGGAACGAGTGATCCATAGCATGCTCCTCAACCATT  
GTAG

>M6-PGSC0003DMG400046138 M6 LRR-RLP

ATGACATACACCTCTACCTTAGATCTTATTGATCTTTCTTTCAACAATCTTCACGGTGAAATCCCGAATGA  
GATTACAGGTCTGTCAGCCTTGGGCACTCTGAATTTATCTTGGAACCAATTATCAGGAAGAATTCCAGAG  
GACATAGAGAGCATGCAGCAATTGGAGACACTAGACCTGTCATCTAACCATCTCTCTGGTTCTATCCCAT  
GGAGCATGACTTCAATCACTACACTAAGCTATCTTAACTTGTATATAACAACCTTGGTGGCCCTATCCCA  
TCAAAAACCAATTTGGAACCTTCACTAATCCTTCAAGTTTTGAATGTAATCCAGAAGCTCTGTGGGAAAC  
CATTGATTACAGATTGCTCTCCACCAAGAAAAAGAGATCTCAAGAAAATTGAAGAAGAAGATGATGATG  
ATGATGAAAGGCTGTGGTTTTAAATGAGTGCAAGAATAGGTTTTGTCATAA

>M6-PGSC0003DMG400046485 M6 LRR-RLP

ATGAGCAACCAAAAACAATTCTCTAGCAGTTGTGGTGATAATGGAACTCCGAAAGTCTGCTTATTGAA  
AACTCACCTCTGAAAAAGCGAAGATTGAGATAGAATGTGAAGATAATGACAGAATTGATAGGATCAG  
TCAACTACCTGAAGCTCTTATTGTTCAAATTCTATCTCGATTGTCCATAACAGATGCGTTAAGAACAATA  
TTCTCTCTAAATATTGGCAATACTTCTGGACTTGTATCGACAACATTGTTTATGAAGAGGATTATAGTCGT  
TCAAATAGCTCGACAATGCACAAATTCATTCCTTAACAGATAATGTACTACCTCTGCTTAGCTGCTCAAC  
CATTAAAAAGTTCAGTCTAAACTTTGTGTTTCAGATATGATGATGGTGTGTCTTATTTTCCAAAATTGACA  
AATGGCTTGAATTTGCTGTGAATAAGAAAGTGAGGATCTACACTTGAATATACGTTATACTGTTGATCC  
GACTGAGCATGACCAACCCTATAGCTTGCCAGTAGTTCTCTCTAATAGTTCATCGATTCTAAAACCTAACT  
GCGAGAATTGCAGAATATAAGAAGATTGTGTACTAAATTGGACATCTCTGAGGAGTTTAACTGAAAA  
ATTTATTTCTACGGGATGAACACATTAAACAAATAATGTCAAATTGTCCTCAATTGGAATCTTTGAAGCTA  
CAAGAATTTTGTGGTTTTAATCGTTTGCACATGACTTCTCCAAAATGTAGGCGGCTGCATTTGATCCATCA  
CGTTCATCCTTGTGGGGATTGGTACTCATTGAAAGTGATATATGTTGCTTTGAAATTGTTGCTCCACAT  
GTTGAACATTTAACGATTTCTGGGGTTTTTAATCATACAAAATTAAGCTCAGAGACTTGTTCATCTTTGAA  
ACATGCCAATCTTGATCTCGTCTGTGATGAATTTAATGAAATGGATGAACACATAGTGAAAGATCTTTTG  
GTAAGCGTTCGTTGTGCTAATGAGCTAATACTCTCATCCTGGTTTATCAAGGTCAGTTATTAGTCCCAAAT  
ATCTAAAGTCTTTTTATGTTGATTGTGAATAGAGCTCCTATTTTATATTCTGCCTCATTCTTCTATTTAGGT  
AATTTCCAATTTGATGTTAAAAGAAGAAGATGTCTCTTACC GTT GCTGGAATGCAGATGGTTGACAATA  
AGTTCTTGTATTTCAAACCTTTCATTCCTCTACTAGACAACCTCTTAAGGTCAACTCGTAAATTGAAAA  
TTTGATGATATTTCTGATACTCCGGTATGTTTTCAATTCACGATATCTTTATATCAAATGCATATTAATCC  
CCTACAGCCTCAACAACCTCAATTTTCATCACTGTAGTTGTTAAGCTTACCACTTAACTTGATTTGTCCTTGT  
TCTGTATTTTTAGTACCATCATTTTTTTGAGGACGAAGAGATAGATTTGTTGGAAGACAAGTACCTCTCCT  
TTGAAGAAAACATATTCAAAGTTTCCTTACAGAATTTGAAGAATGTCAAGGTTATGCCATTTTGTAGTCG  
TACGCG

>M6-PGSC0003DMG400046550 M6 LRR-RLP

ATGCAGGAACTCCTTCCATCTCTTAAGGAACTGGAAGTCTGGATTGTCCAGAAATAGAGTTCTTTCTG  
AAGGAGGAATGCCATTCAATTTACAACAACCTTCGAATTGGGAATTGCAAGAACTGGTGAACAGCCGAA  
AAGAGTGGAGTTTACATAGACTTCCCTGTCTCAGAAAGTTAGTGATCGAACATGATGGCAGTGACGAAG  
AGATCGAACATTGGGAGTTGCCTTGTCTATTCAAAGATTTGAGGTATCCAATCTGAAAACATTAAGCAC  
CCAACCTCTCAAAGCCTCACCTCTTGAAGATCTACGTATTGGTAATTTACCTCAAATTCAGTCAATGC

TGGAAGAAGGGCTTCCCTCCTCTCTTTCTCACCTCACTTCACTTCAAAGCCTAAGCATCTTCTCCTGCCATC  
AACTCCAGTCTCTTTCCCTTCCCTCCTCCCTCTCCGAGCTGAACATCGAAGATTGTCCTAATCTCCAATCAC  
TTCCGAATCAGCACTGCCTTCCCTCTATGAGCTGACCATCGCGCATTGCGCTAATCTCCAATCCCTTC  
CAGCAAAGGAATGCTCTTCCCTCTCTAACTAGATATTTCCAAGTCCATTCTCAAACCACTCCTA  
GAATTTGACAAGGGGAATACTGGCCAGAAATTGCTCATATCTCCATCATAGCGATCGATGAGGAATAC  
CTTTAA

>M6-PGSC0003DMG400047124 M6 LRR-RLP

ATGATTCTTACAACATATTGGAGATATTGTGAAGTTTGATCTTGATGTTTCAGGAGTACAATTGTGTTT  
ATATGCAGACATCGATAGATGGATGCTTTATGTCACGAGATATGGTGTCAAGGAATTAACCCTTTTTCATG  
TCAAAGAATATTAACAGTACTTATAAAGTGCCTTCTTATATATTCAATTGTCAAACCCTGACACAATTGAA  
ACTCTTCAATTGCATCTTCAAATTACCAAATCTTTTCTTGGGTTTCAAAGTCTTACCATCCTTCAGTTGAA  
AGAAGTAACCTTCGCGCCTGCAATAGAGTTTTATGCTATCAAACGCCACTTCTTGTCGAATTAATCTTGA  
CACATTGTGAGGGCACTCAATATCTTAACATTGAGTTCTCATCAGGATTGAAGTACTTGTTTGTTCGTGA  
GAGTCACTATAATCTTGATTTAAATAGCAATTACTTTAAGAACGTCAAAAAATTGACATACTTATACCTTG  
TGATTGATAATCCAATACGTGTTGATGAAAGATTAACCTTTGGAAAAGCTTCTTTTTAGTTCGCCTACACTT  
GAGACACTTACTTTGGGTTTTTATGTACTTGAGGTAAGAAGCTAACATGTTGTTTTACTTAGATATCTACG  
TTATCCTTCTGTTTGTATAATTTTTCGTTAAAGCTTTTGAATGCAGGTACAGTCCCAAAGGGGCTTCATTA  
TACACTCAACTGCTTGTGGCATCTATAGTTAGGTGTAACTTCAACAAATTGGGTCAGACTTGTTACACTC  
TGGAGTTGATTAAGTTTCCCAATTTGAGTAACTTGAGATTTGGGTACGAAATAGCAAATATATATG  
TATGATCTTGTTGTTTTTGCCTTGGCATACTTAAGTATGAGAACTAAAATGACGTTGTATTCTTTTAGG  
ATAATGCTTTCGGTGACCCTGATGAAGCAGTTATGAAATATCTAGACGCACCATCATGTTTGGACCAAC  
ACTCAACAAGCTTGAAGATGTTTCCATCCATATTTTTAGGCGATCCAAAGTTGACTATCTTTCATAAAGT  
TATTGTTTGCTCATGCTCCATCTTTGTCAAGGATGAGCATTAAAGCCGAAAAATGCTTCTAGTTCCAAAGA  
AGAATTGAATGTTGCTACAGAGTTGATGTGTTTCCCAGAGTATCTCCTAAGGCAAAGCTATTCTATCAT  
CCAACAGTTGGATTAAAGGCCGAATGA

>M6-PGSC0003DMG401000105 M6 LRR-RLP

CTTCTTCAACTTCTAAAGAATTTTTATGCGGAACTATACATACAGCTTCTGTATATATAATATTCGTGAG  
TTCAACAACCCTAAAAATGGTGAAGTTGTAGAGAGAGAGAAAGTGAGCTACAGCTTGGCGATGTTGGA  
GAGGTGGTGCGGAAATCGAGGTAAAGATTCCCGTCTTTGTAACCTTAACCCGGACCCGATTCCCAACATT

GA CTGTGCGAGAAATGCCTACGTACCTGAAGAAAACCCTAACTCTAAGGTTATGTCGGCGGCGGCGGC  
GGCGAAGAAACGGCGGTTCGAGCTTGTCCGATATATGGAATAACAAGGATACTCAGGCGTTGAAGCAAT  
TGGTGCTTCAAATGCGAGCTCAATCGGTTTCTAATCCACTACTCCACCGTCTGAGCCCGAATCTGATATT  
CAATCCCTAACCTAGATGACCCGGAGCAGACCCGTTTTAGTTCTGGACCAGATTATAACCGCCGTACTTT  
CTGATAAGTTGCTGTAAAGTGTGCTTTCGAAGCTCCGGAACAGCAACATACTTCTAATTCATTAGTTTGT  
CAGCGTTGGTGTAAGCTTAGTGGGAAGTTGGTTAGGTCTATTAAGCTGTTAGATTGGGAATTTTTAGAA  
TCTGGGAGGCTTAGTTATAGATTTCCGGGTTTAATTGACATTGACCTAGTTTCGAGCATGTGTGAAATCCC  
GGAGGAATTCGGGAATTGTGATGAGTCATAGGCTCGTTTCGGTGCATTTGGATTCGAACTCTATTTATG  
GAGGGTTTGTGGGAAAGAGGGCTTTTTGGCACAAGAGGTGGTTGATGGAGGGGTTAAGGTTTTAGTT  
GAGGGTTGTGCTAATTTAAGAAGAATACTATTGATGAATGCGAGTGTAGAGGGGCTGGGTTATTTGGG  
TGAAAAGTGTGAACTTTACAGGAGTTGGAATTGCATTTCTCTGATGACTTTGCATTGAAGGGGTTATTT  
GGCTGTAGGAATTTGCAGATACTGAAATTGGTTGGTTGTATTGATGGACTATATAATTCCATGGTTTTAG  
ATATAGGGTTGACCATTTTAGCTCAAGGGTGTCCGCGTTTACTGAAGCTTGAGCTGGTCCGATGTGAGG  
GAAGTTATGATGGGATCAAAGCAATTGGGCAGTGTCTGTCAGATGCTTGAGGAATTGATACTTTGTGATC  
ATAGGATGGATGGTGGGTGGTTGTCTGCTTTGTCATTTTGCAGCAACTTGAAAACCTTTGAAGCTTCAGTG  
TTGTAAGTTCTAGATTCAAGTCCTGGCCTTGATGAGCACTTGGGTTCTTGTCTACTCTCGAGGAGCTA  
CATTTACATCAGTGTCAATTACGGGATAAGCAAGGTGTGAGAGCATTGTTTCTGGTTTGTGGGACTGTCC  
GAGAGCTCGTCTTTGGGGACTGTTGGGGATTAGACAACACTATATTTGCTGCTGCAAGTGTGTTGTCGGT  
ACGAACACATATTTATTCTATTTATGTATTGTATATGCATTTCTAACTTTAACAGATGGGTCATCTGATAA  
ATTTGAAATTGATGTATGATATTGTTAACGAGTGCATGTAGAAATGGAAAACCTTGCTGAATGGATAAGG  
AAATTTTCATCTTTAACAATTGAATGACCAACTTTTTTGGTGAGAATTTATCTGTTTGC AAACATAGAAGA  
TAGGTGCATATTTTAAAAAGGAATTGTACCCAAGCTTCAGAAGAGACTTCCATAGTCCTTTGCTTATTAAT  
ATTCTGTGTTATTAATCTCTCAGAGAAAAAGGAGGTAAC TAACAATGTTGCGATGAGATAAATTACAACA  
ACAAACCCAACGTAATATCACAAATGGGATCAGGGAGGGTAGAGTGTACGCATACCTTAGCCCTACCTT  
GAGAAGGTAGAGAGGCTGCTTCTGGTAGACCCTTGGTGGGGTCTGAGAGGTAGATAGATTATCATCAT  
TAAATGCACAAAGTGTCCAAAGTCAGTTTGACACCTAAAATTTCTTTCTATAATATCTAATATTAATAAT  
TTGGGTGCTTTTCTTTAAAGAAAAAAACCAACTGCAGTCAAATTCGTCTTTTATGGCTAATTTGATGCAGT  
GCATTTCTTTTTTGAACAGAAGATTGCATCTAGCTCGTCCATGAACTCTATAAGTAGAAAACATAATAATT  
GTGCTGACACTTCCAAGATTAATGGGAACTTTTTTCTTTTCTAGGAGCTTGAGAAATCTCTCTTTGGAAGG

ATGCTCGTTGCTCACGACGGAAGGATTAGATTCGGTAGTTCAGTCATGGAAAGAGCTTGAAAGGCTTAA  
GGTAGTCTCATGTAACAATATAAAGGATAGTGAAATAACACCAGAAGCTAGCAACTTTATTTTCTGTTCTC  
AAAGAGCTAAAGTGGAGGCCAGATTCTCGATCTTTTCTATCATCAGGTCTTGAAGGGACTAGTATTGGC  
CAGAAAGGTGGTAGATCGTTGCGGAGGAAGTAGAGTGTGGACTGGTAAAGATTTCAATGTAAATGCAG  
TTCACCATGAAGGTGAAAGTCTGTCCTCACTCACTCCAGACAGTCCAGAAAACATTGGGCAGAGTGTTG  
TTGCCTCTAGTGTTGGCACTGATATTGCATCTGCAATTGAAAGTATTCAACCAGAAAAAGAAGCTTCTGG  
TACTTCTGAGCCAATTGTTGTGGAAGCGAGCTCCGGTGTGAAAGAAAGCAATGTTGCAGAACCCAGTAA  
TAATTTAAGACCTATACGAGTTCCTCAGGAAGATGCAGTCTCAAAGGATTCAAGACTTGGAAAAACCTTG  
ATTTCCAAGAATTTAGTTCAGCTGCGGAACTAGAGGTATGCATAATCTCTGATATAGTATAGTTGATTTT  
CATTGCTTAGTATATGTGTGTTGTTCAATACATATCATTAAAGCCTTTCTCTGTTTTCTGTAACAATTTGT  
CTCAACTGGTTGTAAATCAAATTGAAAATTACAGTGCTCAACTTTTCTGTTTGGCTAATTCTACAACCTGT  
TATAACCCCAACCTGCCCCACCACCTGCGCGTGCCCTTTCTGTTTTGGATAGCTCAAAGTTGCCAAT  
GACCGTGCAATTCGGTGATTGTTACTTGTTTACATGGCCTTTTCTGTGAGGTCAATATCAGTTTATAAATA  
AATTTTTTTTTGGGGGTGTGCCCTAGTGGCTAAGTAAGAGAGTCCCAACACTTCTATATCCTCCTGGCTGC  
ACTCCAGATAAACGTAAACTGTTGACATTGAAATCCTTGAGAGGGTTAATAAACACCTCATCTGTCATGG  
CCCATACTTTGTTTTAAATCATCTTTTAGCTAATGTCCGAGTTTAATTTGTTATTTTCTTCTGTTACTTTGCA  
TAGCTGATGGCACTGCTGCTTTTCTAATTTGTGTTTTATAGTGTGCCTTCAGTGATATTGCTTCAGTGAC  
TAGTAAAAACTCCTTTATGGCTTCAATGGGATGTTAACAAGTTGCTGGAAAATGATTCTTGAGAGAATT  
GCAGTAAATTAATAAATAAATAAGAAAGCAGGGAAGTCATTTTCTAGTATTGTTTGAAGAAATTGGAG  
TTTAAATGAGAAGTGAACAAGACCCTTTTTTCCCCTTACATTTGCAGGACTTTGGTGGAAATTTTTTCTG  
GGTGAAGTTTTTAAGTGCATTTCCATCAACTTTATTTTTTACTAAATGCATCAAAAAGTGTGAATAATTA  
ACTTTCTGATACTTGGGTTTCTTTCCACACAATCAAATGGTACCTATGTGTCCTTGCTGCGAGTAAACCG  
TGTTTTAGGGGGAAAAGGATGTGTGTCTTCTGTTTATTGGTCTTCCCTTCTGTTGGAAGTGTGGACTTCG  
GGCATTGCTTGGTTCATCTGCCACTGCTAAGTTTGTACTCTTCGTACAGATAACAGTATGGAAGCTTGA  
CATGAATACTTTAATATATGTGCTATTTTAAATTGGGACTATATACTACTATGATTTTGGCGTTGATATTG  
TTGTCTGGTCTCTATGTTTTCTCGTCACCAGTAAGCTTTTGTACTGTTTATTGGTGAATGCAGTAGTGTT  
TTGTCACCAATAATTCCCAACTGTATGTACTTTGATTTGGTTGTGTTAGGTCCTTGCCATGGAGAGGTAA  
AGTTAGAAGTCAAGTGCCTGGGTTGAAGTGTGGATGCACTCTGCCAAGAGCGTGCAGCCAGGCTTTTC  
TTGCTCAAACACACCTTTGGAGATGCTTCAAAGAAGTTGCTTGCTAAGAAGTAATTTTGTGCTCGTTT

GTTTTGCTATTGTAGCTAGTTGTAATTGTAACCTCATTTTTAAAGTGTCAGCTTATTCTCTATTTGACTTAG  
TACCCGTTTGGATTGGCTTATTTTAGGTGCTTTAAGCCAAAATAGCTTTTAAGCAGTTTTGAAGTATTTG  
GGTAAAGTTAAAAAGTGCTTATAAGCACTTATTTTCAAGTCAAATAACAAAAATAAGCCAAAAGTCATA  
AGTTAGAAATCCTAGCTTATGGCTTTTGGCTTTAAGTCATAAGCCAAAAGCCAATCTAACAGGCCCTT  
ACTTATGTAGATATGCGTATGTATTTTTCAATAAATTTCAACTACTTACAAGGACAAACAGCAGTAATTCA  
CT

>M6-PGSC0003DMG401000299 M6 LRR-RLP

ATGGAGAAGTTATACCTTTTGGTTTTAACCTTCATAACAGTTTGGTTGAGTTCAGTCAAGGGATTACAA  
ACATAGAAAAAGATGAATCTGCACTTATTGCCTTTAGAGCATATATACTTCAGACCATGATCATATCTT  
GTCCAAAACTGGATGCCATCCAGTAACAAATCCTCTATCTGTTACTGGATCGGCGTCTTTTGTAGTGGA  
GAAAACGAAAATCAAAGAGTGACATCTTTAAATGTCTCAGGATTCAGACTTTCAGGCACAATTGCTCCTG  
ATTTAGGAACTTGACATTTCTAACATCATTAGACATCAGTAACAACAACCTTCAGTGGCTTGATGCCTAAT  
GAGTTAGGTAATCTACAACGATTACAAGAGATAAACGTAGGATTCAACTATTTAAGAGGAGACATTCCA  
AGCTGGTTTGGAACTTACCACAGCTCGAGAGCATTTTTATGAACGATAACAAGTTTAGTGGTCCTATTC  
CACCGTTTTAGGCAACAACACAAAGCTGAAGAGATTGGTACTGTCATACAATTTGTTACATGGAAACA  
TACCTCAAGAGATAGGAAACCTTCCATGCTGATAATAGTTGACTCTAAGTATAATGTGCTGACAGGATC  
TATACCATCTGAATTATTCAACATCTCATCGTTGCAAAGCATCGATCTCACTGGTAATAGTCTAACAGGTG  
GACTAGCACCGGATATCTGCAGTAATCATCGTCTTGTTGAGCTTCAAGGAATATTTTTATCCGCGAATCA  
GCTTCATGGACTGATCCCATCGACGTTTCATCTTTGCAAGGAACTCCAGGATTTATCCTTGTCTACAATC  
AATTTAGTGGAAAAATCCCAGATGAAATTGGATATATAACCAAGCTCAAGACGTTATATCTGGGGATAA  
ACAATTCATAGGTATCATATTATATTTATTCAAGTTATATAGTAGTCAACACTCTTATTATATTGCTAGTG  
TAGTTAGTGATTGGAAGTGAAGTCAAGTTCTATAATTTTTACATAGAAAGATGACTGTTGAAATTGCATG  
TTCAAAGAATTATGTTTCTCCGAATAGTTGTGTTTTAGCAGATATCTAAGTAGGGGCAGAGCCAGGAAG  
GGCAAACTATATATAGCAATGTTGGACCCTTTGGCTTCTTCATGTGTTGACTTCTTCATATTTTGAACCC  
CCTTAGTGAAAATAGGGTCGGTGTTTAAATTCCTTGATGACGGAGATTCAGTCAAACCATCAGTTTTTC  
TGTTTCTCACAAGTTTATCTTCCCAACATATATGTATAGCAACTTCAACTTATCGAGGATATGACCTTAGA  
TAAGAGGTTGTGGAGTACATGGATTAGAGTAGAAGGTTAGTAGGTAGGAGTGCATTGTCTTGATGTCA  
GTCCATACTAGTAGTCGTAGTACTATTTTAGTTTCTTCTCCTCAATTTCTGCGACTATCTGTTGTTTCTT  
GTACTTCAACTATCGTAATAGTATTTTGTGTTAGTACTGTTTTGTTACTATCTGATGTTTTTTGTTACTTCCAT

TACTTATTTTTCTGCACTACTGCTGTCTGCTTTGGACTGTTTTTTTCTTGAGTCGAGAGTATATCGGAAACA  
ACCTATCTACCTCTGAGATAGGAGTAAGGTCTGCGTATACTCTACCTCCCTAGACCCTACTTTGTGGAAC  
TACACTGGGTATGCTGTTGTTGTTGTATATGTATAGCAACTAAATAAGAGTTAAGTGAGTTTAAATCAAC  
AAGAAATTCCTACTTACTACACCAATCGATCGAGGTGTTTTGCTATCTATATTTATCTAGCTTTGACAATCT  
TTTTGCAGGTGGAATTCCTGAAAATTTAGGCAATCTTACATATTTGGAGATGCTAAGCCTAAGAGGTGGT  
TCACTAACAGGTCAAATTCACACACTCTATTCAACATGTCCAGCTTAAAGCAACTCGATCTTTTGAACAA  
CAGCTTGTCCGGAAGCCTACCATCCGTGAGCAGTCAATGTAATCTTCCTCACATAACTGGTGAAATCCCA  
GCAAACACATTCAGATGCAAACGCCTTCAATTCATACAATTAGCAGACAATATGCTTACAGGCAGCATT  
CTAAAGATATTCGGAACCTTACTTTCTTCAGAATCTATATTTAGAAGACAACAACCTTACAGGTACGCAA  
CGCCAAATTGTTATTGCCCTGTAGTTTCTATTTATAGACATCAAAGTCCTAAATTTACCACATTAGATATT  
TCTACCTCATACTTTAACGACACCATGTAGCTTGTCTCAATGCACGTGTAAATTACATTCATGGTATTAGT  
TATAGTATATATTACATTCCTAATTCATTTGATACTTTGTCAGGGAGATTACCAGCTGAGATAGGTACCAT  
AAATCTGAAGGTCCTTAACGTCCATGGAAATCACTTGTGAGGTGTCATTCCATCTGAAGTATTCAACATA  
TCGATGTTGCAGATTCTAGACTTAAGCAGGAACCGGCTCACAGGAACTTCCCTCAGGCTTGGGCCATC  
AGTTTCCAAATCTGCAAGAGCTTTATTTAGGTGAGAATGAACTTACAGGATCAATCCCAAGTTCTATCTC  
AAATGCTTACAGCTTGCTATTATATCCATGACCTTCAACTCGTTCACTGGCTCGATACCCGACCTTGGCA  
ATTTAAGACTTTTGAAGAGGCTATTTCTAGCAGAGAATAATCTTACAGGGGAACTTCCAAAGGAGAAT  
TAAAATTTCTGTCCTATTTAACTAATTGTAGACATTTGGAAAAGATAGAAGTGCTTTAAATCAGTTAAAT  
GGTGTCTTCCAACTTCATTAGGGAATCTCTCTGCTAGCCTTCAAATTTTCTCAGCATTGGTAGCAAAT  
CAAGGGGACTATACCTGTGCGGAGTTGGAAACTTGACAAGCTTGACCGGTATGTACTTGGATAGCAATGA  
GTTGACTGGAGTTATCCCGAATACAATTGGAAAGTTAAAAAATCTCGAACGTATATATCTAGAATACAAT  
AGACTGGAAGGGTATATCCCAACTGATATTTGCCAGTTAAGTAAGCTGGGGGATATCTACATAAGTCAC  
AACATGATCCGTGGAGCCATACCATCATGTTTTGGTGAACCTCAAATCACTACAGAGAGTTTTCTTGATT  
CTAACAATTTGGCATCTACCATTCCATTGAACTTTTGGAACCTGAGTGACCTTGTAGTTTGAACCTTATCC  
ACAACTCTTCAAAGGCTATTTACCATCAGAGATCTCTAATCTGAAGGTTGCAACAGACGTGGACTTAT  
CGTGGAATCAATTTTTCAGGAGATATCCCAGCAGAATAGGCAGTGCCCAATCAATAGTTTACCTTTCTTT  
GGCACATAATAGATTGCAAGGTCCTATTCCTGAATCTTTGAGTAACTTGATAAGTTTAGAGACATTAGAT  
TTGTCGTCCAACAATTTGTCCGGAATGATTCAAAGTCTCTCGAGGCATTGAGGTATCTCCGACACTTCA  
ATGTCTCTGTGAATGAATTGGAAGGGGAAATTCATCAGGTGGATGTTTTTCAAATTTCAAGTGCTGAATC

TTTTAGGCAAATCATGAGCTATGTGGAGTAGCTCGGCTGCATGTTCTGCCCTGCCGGACAAAACATTCC  
AAGTCAAAAAGTGTTTCATCTTTGATTAAATATGTTGTTCCCCCTCTCTTGTCAACAATTCTCATGGTGACT  
GTTGTACTIONTATTGATAAGAAAACGGAACCAATACGTAAAGATGAAAATGGAGGAATCACAGCTTGCT  
GCAATTCTTTCACCTATTGCATACTTGAGAAATGTTTCATATCTTGAACCTGTACGAGCAACAAATTCTTTT  
TCTGAATCCAATCTACTAG

>M6-PGSC0003DMG401001040 M6 LRR-RLP

AAAAAAAAAAAAATACCAAATAAGGTCCATCCACGTATAGGTAGTAGGATTTGCCACGTGCCAATACAC  
GATTTGGGGATCATCTGACGAGCACGTGCTTCCATCATTGCAACTGAAAGGACTATTCACTTTTTACACA  
CACCAGTGAAAACAAAGAGTCGGGATTGTCGTGTTCACTACTTCTCCGATGATCAAATTCGCCCGGTAA  
CGGAGGTTATCGGTTATCGGTCGCCGTGGTTCCACATTTATTGTCTACTTTTGCTACCAAAGCTTCAGTT  
TCCGAGTTCTCATTCTTAAATGGCCACAATCGTCTCTAGTGAGCTCCTTTTCGCTTCTCTTTTAGTGTATC  
GCAACCTCTTTCGGTTTCCGTTTTGTGGTTATGGCTTCTGATGTTGTTGATGTATCAAACGTAGTTAATAT  
TTATCTTTTGGCATTGTGCACTTTATTCGATTTTTTGGGGTGAAAAGTCTCTTTAGCTATTATTATCCCTAG  
TTTTCATTGACACTTTTTTATTTTGGTTCTCTTTGTGTACATCTAGCTATCAGTAGTATTATCACTGTTCTC  
GTAGTTTTTTGTTATTATCTATTGTTTCTAGTGCTAAGGTTATTGCATTATTTGCTGTAGCTACTATTTAAT  
GTTTTGCATATTATCTGTCATGTCTTCTTACTTTGGTTATTTCTTTCCAAATGGCTTTGTTATGCGCTACT  
TGAGTCGAGGGTTTTTCAGAAACAATGCGCGGGTCTTTCAGAAATACACTTGCTATGTTGTTGTTGTTGG  
TATACATCTAATCTTTTGGTGGCTAAGATGACTACTGATTCAAAAAAAAGTTCCTAGGGCACCGGGCTTA  
GTTAGTTGTGTTGTGTAGTCGAATTACATTAATGATTCCCAAATTTGCAATGATCCACATGGGAAAG  
ACTACCCGTTGACTAGAAATGGACATTTGGCCTAACTCCGAAATCTAGCTTATAATGCGAGGATTGTTCA  
AGAAAAAATAATCATTCCCTCGATCAATGTGGATTGACTCTAACACCAACGCATACTCAAGTCCGAACG  
TATGGAGCATGGATAACATGGCATAGGATCGCAACAATAGGTAATTAAGAGTAGCGATGGGTCTAGC  
TCTGGTATCATGTAAAGAAAATGAACTTTAGGTCTAACTCAACCCTATAATTTTGTTCATTAGTAGACAAA  
AACCCATTTCTGAATCATCATGGGACTCTAATGGAGCTCTTAATGGTAAATACTAGCAAGTACAAGTTG  
GACCACTTTTATAGAAGCTAATTAATGATTTTACTCTGATTGGATGTTACGTATTGTTTCATAATATA  
TCGTACTIONTATAATTTTAATAAGTACAATGTTTGGATGGATCGTGTCAATTTCCGTCGTTATATAATGTCA  
CACATCAATAATTTGAAGGATAAACCTACAAAAAAAATATGGTACAAGGTAGAACTACTATAAAAAGT  
TAAGGTAAAGGATAACAAGATTATTAATAATAAGTAAAGACAAAATGAGAAGAAGAAATAAGGTAA  
TGATGTGATCACACCAAATCGGTCGTTGCACTAAATGGGACATTTCCCGTTACCTAACGATGGATTTAG



CAATACGATACGATAAACTTAATCAAACAAACCTTATATTTAACTAATAGTACAACATTACAATGGA  
TAACAACCATCCAAACAAGGAGTGAGGGCTTGAACCTTCAGGAAAGCTTTAAAAGATGTAAAACCTGGA  
TAGAACATGAAAGCATAATTGAACTAAAATAAACTACATTGAATTGGATTGACAAAAAAGGATAATAAG  
AGTTGTGGATGTGTTGTGTTGGATGCCTCGTTACCTACTGTAAAAGTGTCGATCATTTTATATATATATTG  
TAGATTTAGAAATGGAAATTAAGCTACCCTGACTATCTTTTTATTTTCTTCTAGACTTGCCCCTTAAGTTT  
TGTATAAGTGGATCATGTCCACATATTATGGGGATGGTTGATACTTATCGTATAAGTAACTGGTTTGTC  
CTTGCCCTCACTCCTTGGGAAGTTAGTTTCTAACTAGATCCTTTCCTATAAGTAAGTTAGTTTCTAACTA  
AATCCTTTCCTATAAGTTTCTTGGACTTGGTCAAACACAATAACTATTTCCATGGTAACTTGGACCTTG  
ATTGATTCTACGACGTAGCTACCTGGGCTTAGTTAGCTAAAGGTATGATCACAGTCATGCTAATCTAATT  
GATTCAGACCCGGTTAAAGCTTAACTTGTCGTTGTGAAGACTCAAATAATTATCTAGTTGATAGGCTTG  
CGTAAGGTGTAGAGGTGTTGTTTTCAACTCAGTTGAACTGGCCTTGTCTCATTGTTTGGGCTGACTTGC  
CCCTCGGCTCAGCTACACTGGCCTTGTCTGAACTGAAGTTTTGGATCGAATAAACTACCCCTAATCTCTG  
TCGAACAATGACCAAGTGGGTTTAAATTTAATGTCGATATTATCGCATATAAATCATGTTGTTTCCTTCTC  
TGTTTGGGGTCTTGGGGAAGAGGGTCAATTTAGTTGAAGGGCATGATTCATTCGTGAGGCTTCTAATG  
CATTAGGCTGATAATGAATATGTCTCATTCTAGGATTTGGATGGTTTACTAAGTTTTAAACTTTGATT  
GTCTCGCTTAGTAATTCATTGATGGTGTACAGATCCTAGTCTTCTTCTTAGTTTGATTTCCACACGTTAACTA  
ACGAGAATCTTATGCTTCAACTTGCATTTGTGTTTGCCATTTACTGCTAAGTCCATCTACTAACTGCTTT  
TTTATTGCCAGGGAGTAGGTGGCACACAATTAACAGCTTCAAACGGCATACTGCTTTGGAAGTGCAT  
AACCCCGAAGGCGGAGAAGATAAGATCAGCAATCTACATGATTCCATTCTTCTTACATTCTTTCATATCT  
TCCTACCAGAGAAGTTGTGGGCACATGTATACTTTCAACAAGGTGGAAGAATCTCTGGACTTGTGTTGA  
AAACATTGACTTTGATGACTCATTTCTCTACTCAAGTACGGTTTTTGGTTATCCGATGAAGGTCACTACTT  
TCATGCACTTTGTTACAGATTTCTTCAACTTCGAGAAGAATCAGACATAAAAAAGTTTCGCCTTCTCTGC  
CGTGTGCTTTCAGTGCCTCTCATGTTTGTTCATGGCTTTCATTGTTATTAGGCATAATGTTCAAGATCTT  
GATCTCTGTCTTTTGTAGAAGAACCCTTTATGTTGCCTCAATGTGTTTTAGTAGCAAGACTTACTTCT  
CTAAAACCTGAAATGAATTGTGTTCTTGAACCTACTACTAGTACTTGTTCCTTCTTAAAGACCTTGCAC  
CTATGTCTTGTACATTTCCGGATGATAGCTCAACCCAGAGGCTGTTATCTAGCTGCCCTATGCTTCGGG  
AGTTGGCTATATTAGATTGTGAATGGATGAACTTGAAGCTAGTTGCAATTTCAATCTCTTCAATTAAGAG  
TTTGATAATCGACGATTTGCCTTCTTGGCTCCACTGATGATCTAAATGGCTGCAAAATCAAGATTGATG  
CAGCAAGTCTTACTTTCCTTAAAGTACAGTGGTTATCTCTCAAATGAGATATGTTTGTATAATCTATCTTCT

CAGTCAATGCATCAATTCACATCCCCATTCTGTATGAGAAGAGAAAATCAAATTGCTTTTCGTGCTGTAA  
GCTCTTTAGAGGGCTACACAAGATTAGTGCTGCGAGAATATCTAGCAGGGCTATTGAGGTAATTACTAA  
CCAGACGGAAATTAGCTACAGAACATCACAGTCTAGAATGTTGAATGTCTAAATATGCAGTACTGATGTT  
TTTTCGTTTTTTCCTTTCTGTGATCCACCTTGTTGCTTGGCAAAGTCTCTTTCATCGCTGATATAGAGA  
AAGACCGACTTCCAATATTTTATAACTTGACGCATTTGGAGCTGAGTATGGAACCTGAAAATCATTCCAT  
TGGACCATTGAAGGAACTGCTCCAATGTCTTCCAAAGTTGCAATCGCTTCATTTTTCTGAGGTAGATACCT  
TTGGCATTGTGGACTTGTTTATAATTTTTTTCAATTCACATGAGTCTTTTTCTATTTTTCATACCATTGAGG  
GACTTGACCCCTGCATGCACCTTTGTGAAGATGACTGGAACCTGAGATCTGTACCACCCTGTTTCTTGTCT  
AGTCTCAAGACAGTGAAATACAGCAATTTTCATGGTAATGATACAGAGATTTCTTTTTTAAGAAATTTGC  
TGAAATTGCATTAGTTTTGGAGAAGCTGAACATAGTTTGTTGGAAGAAACCTTTGGGGACCTAAAGA  
AGCAAAGGAAGTTGAAGATCAACTGCGGAGTGGGCACGGAGGATCAGTGTCTTGTGCTATCAAGTTT  
ATGTAAACCTAAAAGAGCTTTTACATGTGAGTTCCTTTCCATCAAGAAGCTTGTTAGTTTTCTTGTCTATT  
TTTTCTTATGCAGAACTGTGGCATTGTTTTTTCTTCTGCTTTGGTTCATAATTCGATTTACTAGCTA  
AATATCTGAATCAGACTTCTCAGTGCAGTAATGAGTTTAAAAGCCCAGATTCTACCCCTTGAGATATGAA  
CTTGAGTTTTACTAAGAAAGCATGATGAGTTTCTCGTCATTTTCAGAAGGTCCGTCTTCGGTGGATTATAC  
ATGAGTTACTTTCAAGTTGCTAGGAGCTAGTTATAAGTTGGGAATACAAAAGAGGAAGGGTTATGAAT  
GTTTCAGAATAACATAGAAGTACATCTATCCAGAAATGAATTTTAGCTTAGTAGCTACTGCTTGAAAATC  
ACATTTTGCACATATGCTGTCCAGGTCAAATAAGATCTCTTGTCTATTTCTATTTTTGTGTATCTATGGTC  
CACCGAATGAAAAATATGTCTCTTTATGGTATAAAAAGATTTGCCTGTGCGTGCACCAAAGCTCACCGT  
GTTAATAAAGCTAATGTTTGACTGGACAATTATATTCAGACCCGATTGTTCCATCTTTCAGCAACTTAACT  
GAACTTCTGCACATGAGACTAATGTATCAAATTAGATAACCATTAAAAATAGATGGTGGGTAATCTCTTA  
TTGAATATCCGGTTTGTCTAGTTAGGAGTTAGGATTCACATTCACAGAGTTTCTATTTTTAAAAGGCAGT  
GTTGCGAAGAAATTCTTGAACCTCTTTGGACTTTTACGACTGGAAACATCAAAGAATTCTTCTTT  
CCTCAAGGAGTTGAGGCCAGAGTAAGTGCAATATGCATCGTTAATTATTATAATTACTGTTACATATTAA  
TCAAATAGTCTCATTCTTTTATAATGATGATAATTTTTGTGTATCTGTGGTCACCAGATGAAAATATGT  
CTCTTTATATAGTAGAAAAAGATTTGCATGTGCTTGCACCAAAGCTCACCATGTTAATAGAGTTGAGGT  
TTGACTGGAAAATTATATCCAGACCCGTTTGTTCATCTTTCGGCAACTTAACTGATATTCTGCACATGAG  
ACTGTGAAATTAGATTACCATTATAGATTGATTAATGGGAATCGCATTATGAAATCTGGTTTCTCTAGTTA  
GGATGTACATTCACCGAATTTCTTATTCTAAATAGCACAGTGCAGCGAGGAAATTGTTGAACTAGAACCT

CTTTGGACCCTTACGAGTGGAAACATCACAAGGATTTGAAAGCACGAGTAACTGCAATATGCAAATCTA  
CTTTTGGAGCCTGTGCGAAATTTGTTTTTCCAGTCTTTCAGCTAGCCAAGAAGCCGCCAATTTAACTAAAG  
TTATATATGTCATTATACTTGGACTTTGAAGAATTTTCATGTTGCACTTACACTTCTTGATGCAGCAAGTAA  
CTTCACCTAAATCGATATCAAACCTCATGTCTTGCACTGCAAGATTAGTGTGATTTTCTTTTTCATCTTTCAT  
GTGTCAAAAATATTCTGCTCGCTTAAAAATGAAATCAGTTGACAATTTTAGACACTTGGTAGTGCTGCAG  
TATTGCATTTTACAAGCCAGTGTCTGTTAAAGAGCATTAAAGATGGTGTGTAGATCTGATACTAACATTTT  
AAAGCTTATTAGCTTCTTATTGTATGTGTATGTGATGCAGTTTCCAACAAGCAGATATTTTGCAAGCATT  
GCTGTGGATCCAGCGCTACAATTTTTGGTTCCTTTTACAAGTGCAACACCATGCTTTAGTACACTTCTTGG  
ATCAGTTATTTTTGGTAATGAATTCTGCAGATTTGTGTAAATCAGTTGGAACCTTCTTTTGCATTTAGGTC  
ACAAGTCTTCTGAAGTAGTGAATCTGACTGTAGTGAACAGGTAAACAGTTAACTTAGCAATGGACC  
CTTTACCCCTTTTTTGTCAATTTATTTTGTGGGGGATAGGCATAGGTAGATGATTTTGTGATTGTTTTAATT  
CAAAAGGAATCAAGCATTGTAAATCTACTATCTGTGATATAGCTGACTCAGTCATATGAAACAACAAGG  
ATAGGGAAAATATTTTATAACAAGTTTGGGTTTTTTGGGAAAGAAAGTTACACATGCATTGATCAAGTTC  
CAATGTCTTGTTATTTTGTGTGTTTTACATGTGCGAAGTTTTATGCATTATGTCTTGTTTTACAATTGGAGAA  
ATTGAGTTTTATCTTTTTTTCATACCCTGCTGATATGTAGCAGTCAGAAAAATTAGAAGTAGAACTATCA  
GAGGGTTTAACTCTCTTGATAACCATCTTCAACTTAGTTTCGTAAGTGGAGTTTGGAGAATGTAGAAT  
GTATGCAAATTTTATGCTTATTTTACAGAGTAAAGAGACTGTTTTCGATAGATTTTCTTTGTATCAAGGG  
AGGAAAAGCATAAAGAAATGGAAAAGAATAATTGCTCCAAAAGCATTCTTTTCCATCTTGACTTATA  
AATGTTGTTGTGGAGGGTTGTTATTATACCCTTTGGATAAAAATGTCTTTTTATTCCAATAAAAAGCCACT  
TATAAGACTTGGTTCTGTCCCATAGAGAAAAACCAGACAAGGGGCAGAGAACAACCTGCAAAAAATTCT  
CAGATTTACACATTTATTAATGACACAGCATTTAAAATAATCTAACAGAATATGCCAATTCAGAGAAC  
TTTTTAAAAAATA

>M6-PGSC0003DMG401001828 M6 LRR-RLP

ATGAAGTACCAACAACCTGCTTATTGCTTTCTGCTTCTATTCAATTTGTTATATTTTTTTTCCAGCAATCTCAG  
CTCACATATGCTGGGCAACATCTCTGTGCCTGCTATGACGCTTTTTATTTGCTTCAATTTAAGAAAGGCC  
CACAGTTGTTGATCAAAATATACATGACTGTGACAATGAGACCCGAGCCAAGACTTTGTCCTGGAATGTT  
ACAGGAGATTGTTGTCAATGGGATGGTGTAACTTGAATGGATTACGGGTCATGTCATAGGCCTTGAT  
CTTTCTTGCAAGCATTCTTAACCAGACCATCAATGCTAACAGCAGCCTCACTAACTTGGTCATCTCCAAG  
ACTCAACCTTGCTTCAGCCAGTTTGTGACGACTTTCCACTTGGATTAAGTGAACCTCAGTAGTTTGTACAC

ATCTCAATCTTTCGAATACTGGATTTAATGAAGGGGAGATACAGATTCCACCAGGATTATCCAAGTTGTC  
TAAGTTGGTTTTCACTTGACCTCTCCTCGAATGATTTCCAAGTTGGCCGAACAACCTCTAGAAGTTTGCTC  
AGAACTTAACTAATTTGGAGGACTGTTGCTTGACAGCGTGGATGCACCATTTGAGTTACCTAAGAATTT  
TCCTTCTCCCTTAGGTACTTAATTCTTCAAGACACCAACATGTGTGGGAACATAAGTGATTCTCAGCTTT  
TTCATCTACCAAACCTTGCAAGTGCTGAGAATGGGATGAAATCCTTTATTAACAGGCACTTTGCCTAATTC  
AATTGGAGTTTCAGTACAAGTATTTAGAGTTGGACTTTTTCTATACTGATATTTTTGGTAAGGTACCTGA  
TTCAATCGGCAACCTCCGTTCACTTTGGTAATTAGATCTCTCTTTAAACCGTTTATCCGGCTTGATTCCAGT  
ATCCATTGGCAACCTCAGTGGAAATTAGAGTGTGAGACTTTCAAGTAACAGCTTCACTGGTAATGTTCCC  
TCATCTATCTCAAATTAACAAACTCTTTGATTTAGATCTCTCTTTCAACGATTTTCAAGGCTTGATTCTA  
GAATCCATTGGTAACCTAACTGCAATCACAAAGTTGACACTTTCAGGTAACAACCTCACCGGAAATGTTCC  
CCTCAACTTTCAAAAAGCTGAAAACACTTAACTACTTATCTCTCTCTTTCAATAATTTTGAAAGCTCAATTC  
CAGA

>M6-PGSC0003DMG401001979 M6 LRR-RLP

GGACAATGTCAGAGATTAGATACCTGGATATTAGATTGCCACTATATATATCAAATCCTCTTGAAGCAGA  
ACAGCCTTTGTTTCTCAATAACTTGACACACTTTTTCTCTATTACTCTCCTTTTGTGCGGAAATCATAAG  
AAGAACCCCAATCTAAAAAAGCTAAAGATTTAGATAGATCTGAGCATCCTGACTGGCCTCCTATTATG  
AATTCTCTCAGTCTTCTAGAGGGGCTGGAGACACTACATATAGCAACAGAACAACCACTTACTGGCCGG  
ATGATTTTCTCCGGATGTAATCTCCCGCCTAATCTCAAGCAACTGAAGTTATCAGGTAATTCTATACCATG  
GGAAGATATGAATTTGCTGGCTAATTTACCAATCTTGAGGTGCTCAAAGGGTCTCATGCATTCACTGGA  
ACAGTTTGAAAATAAATGAAGATGTTGTGTTTAGCAAATTAATAATCTACGACTGTATGCCTGTGGAG  
ATCTGCAAAGGTGGGAAGCTGGTAGTGATAATTTCCCGATGCTTGAGCAACTACTACTGCGTGATTTGG  
ATGAACTGGAGAAGATTCCGGAGAGTATTGGGGAAATAATGACACTAAAATTGATCCAAATAGATGATT  
GAAGCTCTTTTGTAGAGACTAGTGCGACACAAATTCAAGAAGAGCAAGAAAGCGTAGGAAATTATGAG  
CTTCAAGTTTGAATTAATAGGTATGTTTAAATTCCATCTTTGATTATTAGCCAATTCTCAATTAACATGTTCC  
TTGTGGTCTTTCTATTTTCTTTCAATTTTGTGTCACCTGCTAAAAGGCTGTGTAGATTAGTGTAACCTTG  
TTGAATACACCAAATTTAGCTGCAATAGCCTTAGCTTGGCAGGGAAAGCATCGCGAAGAATTGTATTGG  
AGAGTATAATTAATACTATACCAAGAGACTCTCTCGGAAGAGAATATAAGTATAAATATTATGATTTTTTTTC  
TTTCCAACCTGCGATGGCCATAATTTCTCTATGTCCATGCAGGACAAAGCTCAAGCGTCTCTTTCAGATAG  
ACAAACAATACTTGACAAAACCTTTCTCTCACGCACTATCCTTTTATTGCCGAAAAGATAAGAAGAACTTCC

AATCTAAAAGAGCTAAAGATTTTACATAAATCTAAGCATCCTGACTGGCCTGATATTCTCAATTCTCTCCG  
TCTTTTAGAGAACTGGAGACACTATACCTAGGAGCAGAACAAACCATCAATGACCAGATCATGATTTTC  
TAGGGGGATATTTTCTCCTAGTCTCAAGGAATTGAAATTAACACGTACTTTTATACCATGGGAAGCTA  
TGAATTTACTGGCTAATTTACCCAATCTTGAGGCGTTTATGGGGGTTGATGCATTTCGATGGAACAACTG  
GACACTAAATGAAGATATTGTATTTCCCAAATTAATAATCTACGAATTTTGTTCGGATGTCTGGCAAGG  
TGGGAAGCAGGTAGTAATAATTTCCGATGCTTGAGCAACTATTACTGGATGGATTGTATGAACTGGAG  
CAGATTTCCCGAGAGCATTGGAGATATAATAACACTAGAATTGATCAAAATAGACCGTTGTGGCTCTGGT  
GTGGAGACTAGTGCAAAGAAAATTCAACAAGAGCAACAAAGCCAGGGAAATTATGAGCTTCAAGTTCA  
AATTATTAGGTATGTTAAAAGTTCCATCATTGATATTAATCCAATTCTTATTAATATGTTTGTGTGGTCTTT  
TTTGTTTTGTTTTACCTGCTAAAAGGCTTGTAACCTTGGAACTATGATAAATATGAAAGAACA

>M6-PGSC0003DMG401002428 M6 LRR-RLP

ATAACAGCATTTGCCGTCTCTACGGACGCTAGTTCTTAGCTATTCTTATAACCTTATGCGAACACCAGATT  
TCACTGGGATGCCAAATTTGGAGGATTTGGATCTGATGGAATGTACGAGTCTTGAAGAGGTTCCGCCATT  
CCCTGGAGTATTGCGGAAAACCTCATTGATTAATTTGAACGAGTGTGTAAGCCTTGTGAAGTTTCCATG  
TGTTAACATGGAATCTCTGAATCTCTGGATCTAGATGGTTGCTCTGGTTTAGAGAAATTTCCAGAGATA  
GTTGGAAGAATGAAGCCGGAGTTAGATAAGCACCAAACCTCATAGTACCGTGCTGTATTTGACTGGTTTA  
AAAAGCCTTGTAGCTCTTCCAAGCTGCATTTGTAAGTTCAAAGGTTTGGTGAAGCTAAATGTGTGGGGG  
TGCTCAGAACCTTGAAAGTTTGCCAGAAGAGATAGGTGATTTAGAAAACCTTGGAGGAGCTTGTGCCAGC  
TATACTCTAATCTCACGACCTCCGTCTTCCATCGTCAAGTTGAACAAGCTTAAATCATTGACTTTTGAAAA  
AGATAAATTAGAATATATATAGAGTGAACCTCGTGTTCCCTCTGGTGAGTGAAGGATTACGCTCATTGGA  
AATTCTGGATCTCAGTTACTGCAATTTTATAGATGGAGGACTTCCGGAAGATATTGAATGCTTACACTCG  
TTGAAAGAGTTGAACCTCAGTGGAAATAATTTGAGCATTTCCTCGAAACATAGCCCAATTTGTTTTCTT  
AAAACCTTGGACTTATCACATTGCAACAGGCTTACACAGCTGCCAGAATTTCCACAACAATTAGATACAA  
TAAATGCAGATTGGAGCAATGATTGTTCTGTGATTCGTTGTTTCAGAATATCTCCTCATTGCAGCATGCC  
ATCTGTGCTTCCAGATTCTTTGTCACTAAGAGTGTTTATGAGTTGGGCGAGAATATCCCAGGTTGGTTCTT  
CCATCAGGGAATGGGTGCAAGTGATCAGTCGCATTGCCTGAGAATTGGTATGTATCGGATAACTTCTT  
GGGATTTGCTGTATGTTACTTGGGCAAATTAATTGACATCACAGCTCATTGATTCCCTTATGTGATGATG  
GGATGTCGTCGATGACCCAGGAATTTTCTTATCCAACCATTGAGAATATACTGATGAAGATACTTCTCAT  
TTTTGTTGGTACCTCTTGGTGGCTTGTGGGATGCATCTAAAGCAAATGGAAAAACACCAAATGACTATG

GGTGCATTAGGTTATATTCCCCTCAAGAAAGGAATGATTTTGGAGAAATAAATGATTTTGGAGTTCGTTT  
GTTGTATAAAGATGAAGCTGAGCTTCACATTGGGATAAGGAGGAGCAGATATGAAGAGGCCAGTCGCT  
CCTCTTCTAAGAAACAAAGGTCACAAGTACAAGTGCCACTCTTGCCGCTCTTTCCACAAGCCCGGGATT  
ATAGATTAATATAGGTATATACCTCATGAAATTGTGTTCTCT

>M6-PGSC0003DMG401002869 M6 LRR-RLP

TACTCTCTTCGTCTCAATTCATTTGGTCGTCTAAGACTCGTATCTCACGATTTTAAATTGCTTCTTCAA  
ACTTGACTCAATTAAGAGAGCTTGATCTTAATTTTGTAAACATCTCTTCCACCATTCTTTGAATTTTTCTT  
CTCATTTAACAACCTCTGAGTATGCAATCTACAACATTGTATGGGATAATACCTGAGAGTATATTTCACTTA  
CCCAACCTGGAAACACTTGATTTAAGTTACAGCTATCCACTAAGTGGTTATTTTCCAGAAACCAAATGGA  
ACAGTAGTGCATCTCTCATAGAGTTAGATCTTAGTGGCGTGAATTTTTCTGATAATTTGCCTGAGTCTCTT  
GGATATCTAACATCGGTACATTCTATTTCTCTTAGAAATTGTAATCTTAGAAGGCCTATTCCTGAATATCT  
TTTGAATCTCACACAAATAGAGGATTTGGACCTTTGGACTAACTTCTTGAATGGAACAATACCGTCATGG  
ATGTTCTCCCGCTTCCATCACTAAGTCGTTAATCTTGAGTAATAACCACTTATCTGGTCAGCTTGAGGA  
TCATTTCAAGTCCAATTCACTAGAAAAGATTAATTTAAGTATAATCAGCTTCAAGGCAATCTTCCCAACT  
CAATTCAAAACCTTGGAACCTAAAAATCTTTTATCTTGACTTCAATAATTTAATGGAAATGTGAATATT  
AGCTTATTTCAAACCTCAAACAACCTTTGGTTCTTAGTCTTTTATATAATAATATATCATTGATCAATGAG  
AACAAAGTCAAATCTACTTTGCCGAATCTCTTGAAAAGTTAGGATTGGCCAAATGTGATGTGAAAGAA  
GTGGAGTTTCTAAGATAAGCAAAGAATCTTGGGAAGTTGGATCTTTCAAATAATAAAATTCAAGGAAGA  
ATTCCTGATTGGGCATGGTCTAACTGGATGTTTTTATTGACAAATCTTAATATATCCACAATATGCTGAC  
GAGTAACGATTTGATTCCTCTTCAGACTGTACATACTATTGATTTACGGTCCAATTTTCTTCAAGGTTCACT  
ACCTATTCCACCAAATTCACAAAATACTTCTTCATATCTGATAATAATCTCACTGGAGAAATTTCTTCATC  
TATTTGCAATTTGACATCATTGGTAATGCTAGATTTGACAAGAAACAATTTGGGGGGAGGAATTCGCA  
ATGTTTGGGTAATATTAGTGGCCTCGAGGTTCTGGATATGAGTAACAACAACTTTCTGGGACTCTTCCA  
ACAATTTTCAACAATGGAAGTTCACTGAGAAGCCTCGACTTGCATGGCAATAAACTAGAGGGGGAAATT  
CCCCGATCTTTGGCCAATTGCAAAGAGTTGCAGGTTCTTGATTTTGGAAATAATCATCTCATTGACACATT  
CCCCATGTAGTTGGGAACCTTCCAAAGCTACAAGTTTTAAGTTTGGAGATCAAATAAATTGCATGGGTCC  
ATTCAACCTCTAAGGATTGAAACTATTTTTCCAGAGCTTCGAATCATAGATCTCTTACAATGCCTTCTC  
GGGAAACTTACCTTCGAGTCTGTTTCAACATCTGAAAGCTATGAGGAAATCTGATCCATCAATGGAAAG  
AGTACTATCTCCAGAAGACACATATTATGAAGATTCTATTACAGTTGCAACCAAGGGATTTGATCGTGAA

ATTGTGAGAATCTTGCATTTGTACACCGTTATCGATTTTTCAAGTAATAAATTTGGAGGGCAAATTCCGA  
GTATCATGGGGGATCTCATTGCAGTTCACATATTGAATTTATCACATAATGGATTGCGAGGTCATATACC  
ACCATCATTAGGAGATTTATCTTCAGTTGAATCATTGGACCTATCAGGAAACCAGCTTTCGGGAGAGATA  
CCACAACAACCTGGTTTCTTACGTCTCTTTCATTCTTAAATCTCTCCACAATCATCTCCAAGGATGCATC  
CCTCAGGGACCTCAATTCACACTTTTGAGAACAATTCATATGAAGGAAATGATGGTTTACGTGGATTTT  
CTGTTTCAAAAATTGTGGTGATACTCGGGCATTAGATACAAATGATACTGTATCTGCACTAGACGATGA  
AGAAAGCAATTCTGAATTTCTGAGTGATTTTTGGAAAGCTGCTCTTATGGGCTATGGAAGTGGACTATGT  
TTTGGATTATCCATAATATATTTTCATGATTTCAACTGGAAACCCGAAATGGCTTGCAAGAATCATTGTAG  
AGTTGGAGCACAAAATAATGATGGGAAGGAGAAAGAAGCATCGA

>M6-PGSC0003DMG401002888 M6 LRR-RLP

GGTTGTTCAAGTAAAGCATTCTGATGCTTAAACATACTAGACATTATAGCATCAATGGACACCTTCT  
GTACATTTATTCAAGCAGCTCGAAACATCTTGATCTTTTATGATTGCATGGATTACATCTTGACCTTTTAT  
GATTGTATAGATTCCACGAAAAAATTGCACAAAAAATTATTGCATTCGTCCAACCTGGTTTCACTTGATT  
AAAGTGTCCCCTCTTGCTACTATCTCATCCATGGACCACTAATTGGTTCAATAACTTCAAAATCCACACT  
CTATTATCAACTTAAAGCAGCACAAACACATCTTGACCTATTATGATAGTATAGATTCCATGAAAAAATTGC  
ACTAAAAATTTATTGCATTCATAGAAGTCGACACATCATGTCAATTTGACTTAGTCAATCAATAGTTTCTCT  
TTTTGAACATTCTTGTTGGGAAAACAAGAAAAATATGGCTGATAAGTTGGAAGTCAACAAAAGAGATATT  
GATGGGACAATAATAGCAGAGAGTTCAATTAGCTGTAAACAACCTCAAACAAAAAATATCGCTCTATTTAC  
ATAGTATAATTTTTCAACAAGAGGATTTAGTTGAACCCCTTGACATCTATGTCTCCGCCCTAATCAGAG  
AGTGGAGAAAGTAAGCCATTTAACTATATATATATGTGGATTATGATTGATTTTGTAAAGAACATTTTGT  
ATCTGCTAAAAATAACAATGGGACGTCTCGTTTTCTTTTATTCACTTCTCTGTTTTGTCTTCCTAAGTCAA  
ACCTTTTCTTCATCCTTTGTGCAGCATCTTTGTTCTCCAGTGAAGCTTTATCATTGCTTCAGTTCAAGCAA  
CACTTTGAAATGTCCAACAAGTACTCTAGACATTATAGTACTTCTCTCCAAAAGCATCGTCTTGGAATGA  
GAGTACGGATTGCTGCACTTGGGGCTGGATCACTTGTGACATGTTAACTGGTTATGTTATTGGCCTAGAC  
CTTAGTAATGCAAATATTAGCGGAACTATTCATCCCAACAGCAGCCTCTTCCAACCTCATCGTCTTCAGAC  
GCTAAACCTTGCTTACAATAACTTATCTGGTCTCATTCTGATTCCATTGGCAACATCACACAAATCAGAG  
AGTTGGATTTTGGTTCCAATCATTTCCTGAGGATTTCCCTTCAACAATCTCAAACTGAAACATCTCACA  
CGTCTAGATCTTTGTTTAACTCACTTGGAGGTAAAATCCCGATGTTTTTCTAACCTCCAAGAGCTAG  
TTACATTGTATCTTTCTTACAACAGCTTCATTGGTCCATTTCCCTCTTCGATTTTAACTTGACACGTCTTG

AAAACCTAGACTTGTTCGAGTAATTCCTTGTCTGGTCCATTGCCAAGCAATGTCAGCATGCTTCTAAAGCT  
AGTTGACCTGGATTTTTCTCACAACCTTGCTAAATGGAACAATACCATCTTGGGTGTTAGCCTCCCTTCTT  
TATATATGTTGGAGCTCCATCATAATCTATTCAATGGACTATCTGATGAGCTCAAAGTGAATCGAGCAGT  
AGGGCGTTTTGATTTGAGTTATAATCAACTCAGTATTCCTGTTCTTCTATCACTTCAAATCTCACTAACCT  
TGTAACCTTGACCTTTCATCAAACAACATCACCATTGATGGGGGAACACAAATCACTTTTCCTAGACTA  
GAAATTTTGCTGTTATCATCTTGTGAAGTGAAGGATTTCCACAGTTTCTAAGAAATTTAAAGACTTCG  
GGTCATAAATCTTTCTAACAATAAGATTCGTGGTCAAATCCCTAACTGGTTTAGCGGGTTGAGGTGGGAC  
TCGTTGTTTCACCTAAACCTTTCATATAATCACTCAATGGTCACATAGATCTATCTCATTCTATAGTCTA  
GTTTCTCTTGATCTTAAATTTAACTTCCTTCAGGGTCCACTACCTTCATCCATTTGTAACATGAGCATCATT  
AGCCTTCTGGATTTATCACACAACCTCAGTAACTCGATTCCAAGTTGCTTGGGTAACATGACTCAGCT  
AACGGTGTGGACTTAAGAAGGAACAATTTCACTGGTAGTCTTCCACCGTTATGTAGTCAACACACTTCA  
TCGACTACCAGTATCCTGAATGGTGTGTAATCAATTGACGACCATTATCTTGAATGGTAATCATTTTG  
AAGGACATGTCCCTGTGCATTACTCAACTGTGTTGGTTTAGAAATCTTGATATCGGGAAACAACGCTGT  
AAATGACTCATTTCAGCTTGGCTAGGAACTCTCAAGAGCTGCAAGTCCTTATATTAAGTGAACAAG  
TTCCATGGACCTATAAGTACTAGGTTGAGGTTTGGGTTTCCCAGGTTGCGGATTTTAGATCTCTCTCATA  
ATGAGTTCAGTGGCTCACTGCCTGCAGAAGTTTTTCAAACCTCAAAGGAATGATCAAATAGCTGACA  
GTGACAAAGGTAAGATTGAATATATGAAAACATCAGACTCATTTTTTGTTATGTACGATGATTCAGTGAG  
GTTGGTGTGATCAAAGGAAACGATATAGAGCTAGAAAGAATCACTACAATTATGACAGTCATAGATCTCTC  
AAGCAATCATTGGAAGGTGTGATTCCGAAAACACTAAAGGATCTCAGCTCACTTTGGCTACTCAATTTA  
TCTCATAACAATCTCAGAGGAGATATTCCTATGGAAGTGGAGGATTGAATATGCTTGAAGCGTTAGAT  
CTCTCTTGAATCGACTCACTGGAAAGATTCCGCAACAATTGACAAGGCTAACCTTTCTGGCATTCTTAA  
ACCTCTCTCAAATCACCTAGCTGGACGCATTCTCAAGGTTACAGTTCAACACATTTGAAAATGACTCA  
TATGGTGGCAACCTTGATTTATGTGGTCTTCCTTTATCAAAGCAATGTGGAACGGGTGATCCATTGCATA  
TTCTTCAACCATTAGAGGAAGAAGAAGAGGACGAGACATATTTTTTTAGTGGATTTACATGGGAATCAG  
TAGTCATGGGCTACAGTTTTGGACTTGTTGTTGGAAGTATTGCGTGGAACTCATGTTTAAAGCTGGTAA  
GCCAAAATGGTTTGTGGAATTTTTCCAAGGCATTATCCCCACAGAAAAAGAAGGCCAAAGAAGAGAGC  
TCAAAGAAGATGGACTTAATTAATTTTTGTTTGGTGTGTATATGTTTG

>M6-PGSC0003DMG401002909 M6 LRR-RLP

AAATATTTTAAAAAAATTGATGTTTCATCCATTAATTATTTTTTTTTAAGAAAAAGATATGACGTTAATTT



TTAAAATGAAAAAGTGAAAATGAAGAACATAAATAAGAATGAAGAAATCATAAATTTAGTATTTTTTGT  
TAAATTGTATATAAAATAGAGTTGAAGAATTTAAAATGGAACAAGACTAAGTTAGAGTGTCAAAATGAAA  
AATGGGGGCAAGTTAGATGAGTTGTGTATGTTTTAATTAATTTTATGCCAAGTCATGGTGTGTGAAAT  
AAGTACCTAAATGGAACATAAAAATTGGAGTTGAAGGGTTAAAATGGAATAAGGTTGAGTTGGAGTGC  
CAAAATGAAATAATTTAAGAACAAGTTTAAATGTCTGCATATGTGTTTGGCCGAAGTATTATTTTGTAA  
GTCTTCTTCGTGCTCTAAAAAGTCTTATGGAACACTACAAAATATGTGTAACAAGTTGTTAGAAGTGA  
TTGAGTCTTCTGGAAATTGACTTAACACTTGGGACAACTTTTTTGTACCACAAATTATTACCTCATTTT  
ATTTGTCTGGATGCGTTTCTTTCTTCGTTAATTTATACCTCATAGTCTCATGCATAGACAAGTCAACGAC  
GTTACTTTATCAAATAGTGTTTAGTTAACTGTTTACTTTATTTAATATGGAGGTCCTTGTAAATAATTA  
ATAAAATAGTGTTTAGATAATTATAACATTCTTCTTATATGACTACTTATTTTATTGACTTATTTATAT  
GAAGATCTACATGAACCCATATTATTATTTTACCTTTTTTATTCTATTACTATTTTATTTATTCATTATT  
AATATTCTAATGCCTACCAAACGGTAAAACCTTTTGCATTATACAAAATAAATTGTTGGGTGTCAAAAA  
AAGATCAAATTTGTTTTTGGTGTATTCTTTGAATTACAAGCACTGCAACAAACACTACAACAAAAACA  
ATTTAGCGGCAATAAATATACACATTAATAAAGTGTGTTAAAGATTTTACCGGTATTAGTTAAGTGTCAT  
TAGATCCAATGTCGCAAAAAGCTTTAGCGACATATGCAAAAAGTGTTAATTGCCGTTAAAACACTGCAT  
TAGCGGCCATTAACTTAATTAATTGCCGTTATAAATCATTTTTGATGTAGCGAAATCAATACCATTTTAA  
TATTATTATATCAACTTATCAAATTAAGCGCAATTATTTCAATACCATTGTATAATCTTCTTAATGTTTTGA  
GTAAGATTTGATTATTTAACTTAATATTATATTTTTTCATTGAAAATTTTTGTTGTTTGTATATCCTACCT  
CTTGAAACTTTACTTGTAGGATTACATTAATCAGTATGTTATAGGTATTCAATTTATGTATGACA  
ACTAGTATATATATATATGTGGATAATGCTGATTGATTTGTAAAAAGAGAACAACATCCTGTTATTTGC  
TGAAAACAACAACAACAAAAATGGGACGTTTCTTTTTCTTTTATTCAATTTTTGTGTTTTGTGTTGCTA  
GTGAATGCTTTTCTTCATCCTTTGATCATCATCTTTGCTCTCCCACTGAAGCTTCCGCTTTGGCTCAGT  
ACAATCCTTTCAAATTATGTCCAAAGAGTACTTTATTTATTACA  
ACTACTCCGAATGCTTTACTTCTTTCC  
CAAAAACAAGTTCTTGAATGAGAGTAGGGATTGCTGCAGTTGGGATGGAGTCACTTGTGACTTATTAA  
ACGGTCATGTTATCGGGTTAGACCTTAGTTGTAATCTGCTTCATGGAAGTATTCATCCCAATAGCAGCCT  
CTTCCA  
ACTTCATCATCTCCAACGCTAAACCTTGCTTACAATAACTTTTATCCTTCTTCGATCCCACATAA  
CATTGGCCGATTAAGGAATTTGAGGCATCTCGACCTTTCTGACTCGTCCTTTAGTGGGAAAGTCCAACA  
GAAATCTCATACTTTCCAATTTGGTTTCACTTGATCTTTCTTCTTTTTATGGTTATGGATTACA  
ACTTGAT  
GAGAGAACATTTGAAACAATGCTTCACA  
ACTTTACTGATCTGGAGTTACTAGCTCTCCCTCTTGGCGACA

TCTCATCACCGATACCTGTAAGTATT

>M6-PGSC0003DMG401002917 M6 LRR-RLP

GATAGATGTCTAGTTTTAGTTAGCAAAGAAGTGCAGATGGAAGAAAAATCAAGACACGTAGGATTCAT  
GATCTGGTCCATGAGTTATGCTTGAGAGAAGCACAAAGCCAAAACCTTTTTGTTTATTAGAAATGATAAAA  
CAGAATCCGTTCTCATGTGGGATGTTCGATGGATTAGCATAACAGAAATGTCGACAAAACCTGGTGTGAGT  
TTCAGGATGAGCATTGGTTTAGGTCCCTTACACATAAACTTTGCTGGTTGATTAGGACGCCTACTGATGA  
TGATAATAGTCCCTTGCGAAGAATTCGATCAATTTTCTGTTTGCTGCACCTTCTCTCAGTAATAATTCAA  
ATTTAGAGCTTGGTCATTTGAATGTAATCAGAGTCTTGACTTGAGTTCAATGTACTTCTCAAGCTTTCCC  
CTGCAGATACTTAGTCTCTTTTTGTTGAGGTACCTATCCTTTTCGACTCGTAACACTTTTGACATACTGGA  
GGACTTCGCAAATTACTGAATCTACAAACATTCATCATTTCGAGGGCCAGTTAGCTCATTATAGAGTTCC  
CGGAACTAATTTGGGAAACAACAATTAAGGCACCTGAAACTCAGGAACTTTTATTTGCCAGATCCTCC  
AAGTTCATCCATTGATGGAGAGACGAACTTGTTTTGGCCAAACATACAGTCTGTTTCGGGCTTGATTCT  
TATTGTTGCACTAAGAAGATCCTTTCAAGGTTTCAAACATTAAGAAATTATGTATTCGGGGGGACGTCT  
ATGACTATAGAGTGCACGAAGAAGACATGGACCTCCGTCATCTTGTTGATCTGCATCAGCTAGAAACATT  
GAGTGTTAAAGTTGATCGTTATCAGGTAAGTCACTGGAGTTCAAGATTCCATAAAACACCTGTTTACGTA  
CCAAGTGCAATACATTTTCCAATAAAGTTGAAGAAGTTAAACTGGTCGGAACCTCGTCTATCATGGGAG  
GAGTTGAACATCATAGGGCAATGGCCTAACCTTGAGGTGTTGAAGCTGAAACCAAATGCTTGTCGTGGC  
CTAGAATGGCGTCCAATTGAAGGAAGATTTCCACAGTTGAAGTTTTTGCTAATTGAAGGTACAAATCTGA  
AATGTTGGAAAGCCACAAATGATCATTCCCTGCTCTTGAGCATCTAGTGATCAGACATTGCTTTCATTTG  
GAGGAGATCCCTATTGAGTTTGCTGATATTTACTCGCTACAACCTAATCGAGTTACAGAACTGTACTGCGA  
AACTCTTGGCTTCTACTGTGCTTATTCAAGAAGAGCAAGAATCCCTAGGAAGCAAAGCTGTGGACGTTCC  
GTTCTTACAATGATCCAGGTTAGTACAATAATTTCTTCGAACTTAAAACAATTTTGAAGTTATATATTA  
AAGAGTTGATGGTCAAAAATGCACCTAAAGTATCCCCATTTTTCGAGTTTCATATATGAACTATTAGATAT  
GTGAGTTTCTACCTGAACTATCACCAACTATTTATCAAACACACAACCTTAACTATCCGTTGTTCTCTTTT  
CCTATATGAAACATCCCCATCATTAGGTTAGGAAACGGGAACAACCTGATAGTTTATAGTAGGAAACTCAC  
ACACCTGATAGTTCAGATATGAAATTCGAAAAACCAGATATTTAAGGTGTGTTTTTGACCCTTCGTCTAT  
ACTAAACACGAACCAAATTTGACTCAACTTTGTGTATATATCAAATGTATAGTTGACCATTTATGTTCTTT  
TTGCTACAGCTGAATGTGAACTAAATGGAAGTGATTCTGATTCAGACTGATGTTAGCTAAGGATTGAAG  
ACTTTCAGACTTTTGATTTGTTGATCATTGCTTATCTTATTCCATAATTGGAGTTTATCTGAATGAACATT

GGGGCAATTGCAGACCAACATTAAGTGTGCTAAGGCATTATCAGTGAGATATGAGATCGAGGAGAAG  
TAGTCGAGATATACACAAGTTGATCTGAACATCACAAGCTGATCGCCATTTCAATTTGTTTTCTTACTCT  
ACATTTTTTATTAGTCCCAAAAAGAATGTCTATTTCTTTTTGGGCAACTTCTTATTTAACTTTCCATAT  
GACTGATGGTATATTTAAGACTACAAG

>M6-PGSC0003DMG401004423 M6 LRR-RLP

CCTCAAATGTCAGAAACGAAGAGCTTTCTTCAACTAATCCTCGAATCCTTGACAAAGAGGAAAAGTGGAG  
GTCCAAAGCAGAGACATAATAGTCAAGACGCTACAAGAAGAACTGGCAGGAAGAAAGTATTTGCTTGT  
CCTGGATGATTTGTGGCGTGTGACTCTACATTGTGGGTAGAGTTTGTGACACCTTAGGAGGAATAAAT  
ACATCCCGAGGAACTTCATTCTTGTGACTACTCGTATGGAACAGGTGGCGTCCACAGTAGCAACAGTA  
GGTCCTCATAGGTTGGAAAAATTAGCAGAAGATCATTGTTGGTCCATTTTCAAACAAAGAGCGTTTGTG  
ATGGGGAAATTCCAGAGGAAATAGTGTGCATGGAGAACATGATTGTGGAAATGTGTCAAGGTCTACCG  
TTGGCTGCAAGTGTGTTGGGAGGCATCTTACGCAACAAGGAAAAACATGAATGGCAAGCAATTCCTGAT  
GGAAACCCCCTTGTTACAGGTGAAGATGATAACGAAGAAAATAGCGTTAAGAAAATCCTAAAAGTCTCAGC  
AATGATTATCTACCATCTCCACATCTGAAAAAATGCTTTGCTTACTTTGCAATGTTTCCAAAAGATTTTGA  
GTTTGAAAAGGACCAACTAATCCAAGTCTGGATGGCCGAAGACTTTCTTCATCCATGTCAAGAGACCACC  
GTAATGGAAGACATTGGGAACAAGTCTTTCAACTCTTGTGCGAAATTCCTTGCTGCAAGATGTTAAGT  
TAGATGAGCACAATAATATAACACACTATAAGAAGCACGATCTTGTGCATGATTTGGCTGGAGATATCTT  
AAAATCTAACTATATGATCCGAAGGGCGATGGTCCAGAAGATCTTCTCAAGTGGGATACTTTGGATG  
GGACTCACCAAGTGATCAAATAGTTAATATAAATGAGCCAGTACATTTGTGCACACTGTTTTGGAGAATC  
AATATATCGGAAGATATTCTGTTGAGATTTAAGTTCTTGAGAGTTTTAAATTTGTCCAGTTCATGAATCAA  
GGAGTTGTCAGCCAAAATCGGGAAGCTAATACACTTGAGATATCTTGATCTCTCGAACACTAAGATCATA  
GCCTTGCCCAACTCCATTTGCGAGCTCTATAATTTGCAAACATTTAGAGTTGATCGTTGCTATCCACTTCC  
ATATGAGATGGGAAATATGATAAGTTTGAGACACATATATTGCCATTCTCGGTGTCAGAGTCAGATGCC  
ACTTAACATGGGACAATTGACTTGTCTTCAAACCTACAATATTTCAATGTGGGTTTAGAGAAAGGTTGT  
TGAATAGAAGAATTAGGTCTTTTGAAGAACCTTAGAGGTGAATTGAGGATCAATCATCTCCAATTGGTCC  
GTAGCAGAGAAGAAGCTCGAACAACATATTTACAAGAGAAATCGAATATTTATAAGCTGTCATATGTGT  
GGTCCGTGATGAACCAGAAGGCTGTGAAACCATTGATGAGCATGTGTTGGATGGTCTTCAACCGCATC  
CTAACTGACAACCTTACTGGTGGAGGACTATTTGGGCACTAGATTTCTTCATGGTTCAGTGAAGAGTC  
GCTACCAAATTTGGTCAAGTTGACATTAAGTGGTTGCAAAGGTGCAAAGAAATTCATCGCTTGGCCA

ACTGAAGTTCCTTCGGCATCTTAAGCTGATAGGACTCCCTGAATTGGAATTCATCGGACCTACATTTTATG  
GTGTTGAGGTTAATGATAATGGATCATGCAGCAAAATCCAAGTGTCCCGTCACTGAAAGTACTTCTATT  
GGAGAATATGCATAGCCTTACTGAGTGGAAGGGAGTGAAATTGATACCAACAACAAGTGGGGTAAGAA  
TGTTTCCTGGGCTTGAGAAGTTGAGGATTAGTAACTGTCCAGTGTTAAAAAGTACTCCAAATCAATTTGA  
AATCCTACGTGAATTAGAGATTGTAGAAGTTGACAGTGAAATGCCATTGTTGAACTTGTGCAGCAACTT  
GGCATCTCTTGTAATGCTTAGTGTGTATGATGTGAAAGAGCTCACTTGTTTTCCAGATGAGATGCTACGT  
AACACGTTTCTCTTCAACACCTATCAGTCGCAGACTGCAGAGAGTTTCATGAATTGCCACAGAGCTTGT  
ATAATCTCCATTTTCTTAAGAGCTTAAGGATTAACCTCTGCACCAATTTAGTTCTTTCTGTTCCCACTG  
GAGAGAATTATTTGACTTCCCTCCAAAGTCTTCAGTTAATCTCTTGTGATGGATTGACCAGTTTACCAAGG  
GGGATGCTAGAGCATTGTCGGTCTTTGGAATCTTTGAAGGTCTTCAACTGTAACAACCTTAGTTTCTTCCC  
TTTACATGTCAGGGAAAAACCTTCACTTTCATATTTGAATATATCAAATGTCCCAAATTGATTAGTGTAC  
CCGCAGGTGGCCTTCGTCTCACTGGGTTACAGAATTTGGAATAGGTCCTTTCTTAGAAATGGTGGATTT  
TGAGGCATTCCAATTGATAATTGATGGCATTGAGTCTCTTCATACATTGGAGGTGTGGGGACACTTGCAC  
TGGGATTCTCTTCCCTATCAGCTTATGCAACTCTCTGACCTTATAGAGATCAAATATATGGATTTGGAAT  
CGAGGCTCTTCCCTCATAGATTTGGCAACCTTATTTCTCTTGAAAGATTAATGCTAATGGGGTGCAAACGG  
CTACAACATCTGGACTTCTCAGATGCCATGCCCAAATTACGTTATCTGTGCATAAATGATTGTCCATTGTT  
AGAAGCTATATCGGATGGGCTCGGTAACATTGTTTCTTTGCAAGAGTTATTTTTACAGAAATGCAAGAAA  
CTAGAGCATCTGCCATCTAGAGATGCCATGCGACGCCTCACCAAATTACGGAACCTTGAAATTAAGGC  
TGCCCAAAGTTAGAAGAAAGTTGCACAAATTGGAGCGGCTCAAACCTCCAATGGTCCAACATTTCCATA  
TTCCCAAATTTGAAGTAGGTGGAAGCATAATTCAGGACTTGCGTAAGTTTCTGTTTCTCTTTTAGTTTCTG  
AGTCGCATTTTTAATTATTTTTTCCACGAGTTACTCTCCTCCACTCTCCTTTATAGTTTTCCAAACATTTTTT  
TGTTCCACTTGAAACAAATTTATGAATATCTATTATTACCTTTAAGATATGGTTTAATCATGAATATTTATG  
TGTGCTTTTTCTCATTGGTTATTAGTTTAAAGGTCATGCTAGAACGTTGCTGTGGCATTTCAGTCAAAT  
CCATCTGCAGCAATTACATTAGGTAAACTTGCAATTAGACTGTTGTAACAAGTTTTTCTTTCGACTCCTTTT  
TTTCTCATGACACAATTTTACTGTTTAAACAGGATTGGTTATGTACGACAAAGGAACCACCACATTTGTTTT  
GTTGAAGAATAGAATCTTCAGCCGTAGACAGTTTCATGAGCATTGGAAAAGACTATATAATCTCTCAAC  
AGTAAGTTGAAGCTATTCATAAGATGAAGCTAGAAGGTTATTGTGATACAGAGACACAATATATGTCAA  
TTTCTAACTACACCTTACTTCTATGCCAGCCAAGACTTAAAAGCTATGTGGAAGTATAAGGTATGCCCAA  
GAACAATTTTCATCAATTTTACTTTTCAGCTCCTTTTTCTCGTTAAAATACTGAAACGTTTAAACAGGTATTAT

CTTTCAGCAATATAGTCCTTCTCTAAATCCTCAAATATTATTATACACTTCATTATATGGTATGATTCTGGT  
AAAGGAAATTGTTCTTCTCTTTGAGGAAAGTGAAGAATTTGATTGGCATAACATTGGCTTGTCATGATT  
GGTATACACAGGATTCTTAGATGCAAGACAGATTTCAATTTGAATTCCATTGATAGTAGACGCTTCTCCA  
AATTATGTTTCAGTCTTCAACATTATTTTAATTTTCAGGGGACAGATTGGAAGTTTGTGGACATTGGTGCT  
GCATTAGAGACTCTGGTTGCACAAAGCTAGAAAATTTAAGGTAAGTCAGTTTTTGTTCATAAAAGATTGC  
AAATGGTGCTTTAGATCAATTATAACGAGTTGCTTCTCCATTTGCAAGGATCAGACGAAATGTGTGCCA  
AAACTGACTTTTTACCATTTCTTATGTTTAAGATTATTGGTTGAAACAACGACATGCATGGACCTTGTTGA  
GATGGTAGAGTGGACCAGACTTCTCTTAGAGGTGTTCAAGTGTCTTGATTGGCAAGTGAAATTGCATTT  
GGCGGAAACTGGAGTGGAGATATTATTTACTTGTATGACTAAGATTTGATAGCAGAGGCCTTTAATTTCT  
TGCGCACAGAGTACATGCCTTTTTTCGTACAAATAGAGTTCCTTTGTTTCCAGCAAACATTTTGAECTTAAT  
ACTTATCTGCTGCATCCTTGCCTAGTTGATAGCTTCTTTAATGTAGCTCTGCTTTTCTCTTCAAATTTATCT  
ATAGGAATTGCACCATTTCAATCCACCTTTTTTCATTGGTTTTATAAAATGGATAAGTATTGTTGGACATTC  
CAGAATAGTATAGTGTATAAGTAAAGATGGACGAAGGCTACTCCAGCGTTAGACCATCATTGAATTCCT  
TCTACGGACACGTCTAAATAACTTTAAAATAACCAACACAAATACACCACATGTACCTAAGTTAACACAT  
AAAGTGGGAACCTCACACTCCTTTTTCTTCTCACACCTCATCTCTAAAACTACACACTCATCTTCTTTACTC  
CACTGGTA

>M6-PGSC0003DMG401004726 M6 LRR-RLP

ATGGGGTCTGGCCAATTCTCATTTCTGTTCTTTCTCTGTTTCTGTCAGCTTTCTTTTTCTTCATCCATACCTC  
ATTTGTGCCGTAAAGATCAAAGCTACGCTCTTCTAGAATTCAAGAGAACACTTATCGTAGATCCCTCATT  
AGTTACGAGTAGTTCCTACTCTTATACGAGTTCATGGAATATGAGCAGAGATTGTTGCTCATGGGATGG  
AGTCGTATGCAATGAGATGACTGGCCATGTCATTGAACTTGATCTCAGTTGCAACAGTCTTGTAGGAAA  
GGTTGATTCCAATAGCAGCCTCTTCCAACCTCTCTCATCTTCAAAGGCTCGACCTTTCTTCTAATAACTTCTC  
TAATTCTAACATCTCGCCTGAATTTGGCAGGTTCTCGAGCTTGACATATCTTGATCTTTCTGACTCCTATTT  
CTCAGGTCAAATCCTTCTGAAATCTCTCACCTTTCCAAGTTACAATCTCTTTATTTCTCAGGAGAAATGCT  
TAAATTTGGACCTCACGATTTTGAATGCTCCTCAGAATTTGACTCAATTAAGAGAGCTTCATCTTACTT  
CCATAAACATCTCTTCCACTATTCCTCTGAATTTTTCTTCTCATTTAACAACTCTGAGGCTGGGAAATACAG  
GATTGCACGGGTTAATACCCGAGAGTATTTTTCACCTCCCAATCTGGAAACACTTGTCTTACAAAATAAT  
GATCAGCTAAGTGGTTATTTTCAAAGACGAAATGGAACAGCAGTGCATCTCTCGTAGAGTTAGATCTC  
AGTGGCGTGAATTTTTCTTGAATTTGCCTGAGTCTATCGGTTATCTAACTTCACTGCATTCTTTGTCTCTT

AAAAATTGCAACCTTCGAGGGCCTATTCCTGAATCTCTTTTGAATCTCACACACATATTGGATTTGGACCT  
TTCAGATAACTCCCTAAATGGAACAATACCATCAGGGATGTTCTCTCTCCGTCACTAAGTCGTTTAGTCT  
TGAGTAATAACCACCTTTATGGTCAGTTTGAGGATTTCAATTCCAATTCAGTAATCTGGATTGATTTAAGC  
AATAATCAGCTGCAAGGTCATCTTCCCAAGTCGATTCAAACCTTGTGAACCTAACAGGCCTTGTTCTTTC  
TTTCAATAATTTAATGGTAGTGTGGATGTCAGCTTCTTTGCTGACCTCAAGCAACTTTATTATCTTGATCT  
TTCATATAATTGTATCTCATTGACCAATGAGAACAACATAATGTTACTTTGCCAGGATCTCTTATGAGCT  
TACGATTGGCTGCATGTGAAGTGAAAGAATTGGAGTTTCTAAGATCCGCAAAGCTTCTTTGGCATTGG  
ATCTTTCAAATAATAAGATTGAAGGAAGAATCCCAGATTGGGCATGGTCTAACTGGATTATTTCAATTGAA  
GAGTCTTAATATATCCCACAACATGCTGGCAAGTGTTGATTCAATTCCTCTTCAATCTGCAAATGCCATTG  
ATTTGCGGTCCAATTTTCTTCAAGGTTCACTACCTATTCCACCAATTTCCACAAGATTCTTCTTCATATCCC  
ATAATAATCTCAGTGGGGAGATCCCTTCGTCTATTTGCAATTTGACGTCACTGGTAATGCTAGATTTGGC  
AGGAAACAACCTTGAAGGGAGCAATTCCGCAATGTTTGAGTAATATCAGTGGCCTCGAAGTTCTGGATAT  
GCACCACAACAGTCTTTCAGGGACTCTTCCAACGACTTTTAGAATTGGAAGTGCCCTCAAAGCTTCAAC  
TTTCATGGCAATAAGCTGGAGGGGAAAATCCCACAATCCTTGATCAACTGCAAACCTACTCGAAGTTCTTG  
ATTTAGGAGACAATCATCTCAACGACACATTCCCCGTGTGGTTGGGAACTCTGCCAAAGCTGAAAGTTCT  
AAGCTTGAGATCCAATATATTGCATGGACCCATTAGAACTCTAACAACTGAAAACATGTTTCCTCAGCTT  
CAAATATTAGATCTCTCCTCCAATGCTTTCACAAAAACATACCACCGGTTTGTTC AACATTTGAAAGC  
CATGAGGACAATTCATCAAATGATGAACACACCAAGTGATGAAGGAAGTCGATATTACCAAGACTCGAT  
AGCTGTCGTATCCAAGGGATATGAGCGTGAAATTGTGAGAATCTGTTTTTGTACATCACTATCGATCTT  
TCAAACAACAAATTCGAAGGACATCTTCCAAGTATTATGGGAGATCTTATTGCACTCCGTGTGCTGAATA  
TATCTCATAATGGATTGGAAGGTCATATGCCCCATCACTTGAAGATTATGTTTCAGTTGAATCATTGGA  
CCTGTCAAGTAACCATCTTGTAGGAGAGATACCAGCACAATTTGCTTCTCTTACATCTCTTGAAGTCTTAA  
ATCTCTCCTACAATCATCTCGAAGGATGCATTCTCAAGGAAATCAATTCATACCTTTGAGAACAATTCA  
TATGAAGGCAATGATGGATTACGTGGATTTCCCTTTACAAAAGGTTGTGGCAATGATCGTGTATCAGGG  
ACAAATTATGCCATATCTGGACAGCTAGACGATGAAGAGAGCAATTCTGAATTTCTGCGTGATTTTTGGA  
AAGGTGCTCTTATGGGCTATGGAAGTGGACTATGTATTGGATTATCCATAATATATTTTCATGATTTCACT  
GGAAACCTGAAATGGCCTGCAAGAATCATTGAAGAGCTGGAGCACAAAATTATGATGGGAAGGAGAAA  
GACGCAGCGAAAGCAAAGGCTCTTCTGCATTTCCATTTGTTTTTCTTCTGTTTTTGGTCTAACATTGTGA  
>M6-PGSC0003DMG401005927 M6 LRR-RLP

ACCATTTTTCAGTTCATAGTTCTTGCTTAAACACATTATTTTATCCTATTATCTTCCTTATTCTCTTCAATGCT  
GCATCTACCACAAATCAAACATCTAATTATATTGACCATCCTTTCGGTGGGATCGCAATTGAAACAAGTA  
ACAGTAGAAAAGTTGTTGTCCTACAAAGGTGATGTTTTTGGCATCAATCCATCACTTTCTATTGAGAATTTT  
AGGTAAAGAATGCTTACATCGCGTTACAAGCTTGGAAAGAAGTAATTCTCTCTGATCCTCATAATATAA  
CACAGAATTGGGTAGGATCTAATGTGTGTAATTACACTGGAGTTTTTTGTTACCTTCACTTGATCAGCCC  
TCTGAACTTACAGTTTCTGGTATCGATATCAATCATGCCAATATAGCTGGTAACTTCCACATGAATTAGG  
TTTACTATTTGACATTGCATTGATTCATATAAATTCTAATAGGTTTTGTGGTACAATACCTGAGACTTTCTT  
GAATTTGAAGCTTCTTTTTGAGTTAGATCTTAGTAATAATCGATTGTTGGAAAGTCCCTGATGTGGTTG  
TTCAAATGCCTAACTTGAAGTTTCTTGATTTGAGGTTCAATGAGTTTGAAGGTGCATTGCCAAAGCAACT  
TTTTGAAAGGGATTTAGATGCTCTGTTCAATAACAACAACAGATTTTCTTTGAGTTGCCTGATAACTTTG  
GGAATTCGCCTGTTTCTGTTATGGTTTTGGCTAACAACAACCTTTGTGGGATGTGTACCTGTTAGTATAGG  
CAAATGGTTAGATTGAACGAGTTGCTTCTTAAATAACAAGTCCATTCATGTTTTCTAATGAGATTG  
GGATGCTGAAGAATGTGACTGTGTTGATATAAGTTATAATGAAATGATGGGTACTTTACCTGATAGTAT  
TGGAGGGATGATGAGCTTGGAGCAGTTGAATTTGGGTCATAATATGTTTTCTGGAATGATTTCTAGCAA  
CATATGTACACTTCCAAATTTGGAAAATTTGTCTATGAGCACAATTACTTTTCAGAAGAGAGTCCAGCTT  
GTCTAACTTGAATGCATTTGCTGATCAACAGAATTGTCTTAGAGGAAGGCCAATGCAGAGATCTGCATT  
AGATTGCCAAAGATTTTTGTCAAATGAAGTTGATTGTACCACTTTCAAATGTGCATTACCTCCACCGTCTC  
CACCACCTACCACCCCTCCACAAAACAACACTGTTGTATTTGTTTTCTCCACCATCACCATCTCCATTGCCAT  
CTACCGAGCCACCATCATCCCCACTACCACTACCTGCACCATCAGCATTGCCTTCTCCACCAAGCATATCA  
CCATCACCATCGCCTTCTTACCTCAGCCACCAGATTTGCCATCACTGTCACCATCACCTTCATTTGTAGAG  
CCTCCACTACCTTCTCCTCTACCGTGTGAAAATCAGAGAATACCATCAAGTCAAGATATGTCATCTCCTTC  
ACCTTGA

>M6-PGSC0003DMG401006653 M6 LRR-RLP

TCATTATATTTTAGGAGAGTCGGAGCAACATAACTCATCAGCATAACAAAACAGGAAAAGCAAAGCCG  
TAAACAAATTGATCAGTTTGGTTTATGATTGAAATCACTTGATATTAGAAAGTTTATATTTTTGAAAATTA  
ATGTAGAAGAGTACTCAAACTACAGAATTGGCTAATAATTTTGTGGTCTGCATCTTTCTAATGATAAA  
ACATCCTTAAAATGTTCTCTAACTCAGTTTCAACTCCGTGATTTTGTATTTGGTAGATTTTACATATATT  
TATACTTCATGACGAGTGTTATGTCTCACGTGATCCAACAACATAATTCATACTGCTTGATTATGAATGAGG  
GATTTTTTTTTGTTTTTGGGCGAAATGCTCTCTGGAATTGACTCACTGAAAAGATTCCAAGGGAACTGACA

AGACTAAAATTCCTGGCAGTCTAAAACTCTCTCTGAATGTTCTTATCAGACCGATTGCATGTTCTCGTC  
CATTGGAGTCCGAAGAAGAAGAAGAAGAAGAAGAAGAAGAAGAGTCGTATTTTGCTAGTGGATT  
ACGTGGAAATCAGAGGTCATAGTTGTGGATTAATTGTTGTAAGTGTGCATGTGGCACCTCATGTTTAAAGA  
TGGTATGCTAAACATGTGATCCTTCAGTACAATTAGTCTCTCAGTTTTCTTTGCTTGTGCATCATTTTTTA  
TTTGATCACTACACCTTTATCTTGAGTCGAGGGTCTACGGAAACAACCTATCTACTACTTTGGTTATTTCC  
ATCTCTTCATATTTGAACTGTATCATATAGATGGAATTTCCCTCATTAECTTAATGTGAAAAGCCTTTGGG  
AAAACAGCACAAAGAGACAATAATCGGAAATTTCTCTGCAGGTGGAAGGATCTTCACCAAGTTATTCAG  
AACATACTAATTAAGCAGGAAAACACACATCAAACAAAATTTTGTATAAAAATTCCACAAGGAGGAAATG  
AAGGACTTAAATCATGTCTTTAATTATTGTTTCATTTTTTCTCCTCACTTGACTTAGTCAAGCAATAGTTTCTA  
CCATTTGAAATTTCTAAGAAGTTCTGCAGAAATTTTTCTACATAATGGGACCAATTTACATTATCTTGC  
GTAACACACTGCAGAGATAGTTAATGACTTCGAAATGAACACAACATCTAGAGAAAAATAGGACATAGA  
GAGTATTATTTGTAAAGTCTCCCTGTCTCTAAAAAGTCTTGTGGAACACTACAAAATATGAGTAACAA  
GTTGTTAGAAGTGAGTACTACTCATCTTGTAAATTCAATTGTTTCATCGGTCCTCGATTTCATCATAATCTTTTT  
TTTTCTCTAGTCTGTGGAAATTGGCTTAAAGTCTTACAAGTTATCGTCCGCTAGTTACAATACTGTATCA  
CTTTTTCTTAGGTGGAATGGAATATTGATGGATTTTCCCTTATTTACTTAATGTGAAAATTATTGTGTAC  
CTAACAAGTTTGAAAATAGCATAAGAGACAATACTCACTCACTCGGATTGACCTTTTCTGATTGTATAG  
ATTTTCATGGAAAAATTGCACCAAAAATTTATTTAATCCTCAATTGACTTGGTCATGCAACAGTTTCTCTTG  
AAAAGTATTGAGGAAAACAGAAGAGATGTTGATGGAAAGTTGGACAAGGTTGACATAAAACAGGAGTT  
CAAATAACTATAAATTATGTATGGATTTTGTAAAAACAGAACATTCTGTAATTTGCTGTAAGCAAAAAGT  
AATTCCCGTGACCAGTTCAGTTCAGGTTCAAGGTTGGTCACGGGAGGGTTGGATAAAAAGTCACTTGAAAGTTGT  
AAGGGGTATTTAAATGTCCATGTAGTTTAAAGTCTAAAGTAAATTTAGCTGTCAAGTTTGAGGGTGATT  
TAGGATTTTTCTCAAAGTTAGCAGTCAAATTGAAAAAGTGTTCAAATAGGGAAAATATGTAAAAAGT  
GTTATTTTCCATCTCTTGCTATTTGAACTGTATCATATAGATGGAATTTCCCTCATTAECTTAATGTGAAAA  
GTCTTGAAAACAGCACAAAGAGACAATAATCGGAAATTTCTCTGCAGGTGGAAGGATCTTCACCAAGT  
TATTCAAAACATACTAATTAAGCAGGAAATGAAGGACTTAAATCATGTCTTTAATTATTGTTTCATTTTTTC  
CACTTGACTTAGTCAAGCAATAGTTTCTACCATTTGAAATTTCTAAGAAGTTCTGCAAAAAAATTTTCTAC  
ATAATGGAACCAATTTACATCATCTTGCGTAAACACAAGTCAAGATAGTTAATGACTTCGAAATGAAC  
ACAACATCTAGAGAAAATTAGGACATAGAGAGTATATATTACTTTGTTAAGTCTTCTCCGTCCTCTAACA  
AGTCTTGTGGAACACTACAAAATATGAGTAACAAGTTGTTAGAAGTGAGTAGTACTCGTCTTGTGATTCA



ATTGTTTCATCAGTCCCGATTTCATCATAATCTTTTATTTTTCTCTAGTCTTTGTGGAAATTGGCTCAAAGAC  
TTACAAGTCACCGTCTGCTAGTTACAATACTGTATCACTTTTTCTTAGGTGGAATGGAATATAGATGGA  
TTTTCCCTTATTAACCTAATGTGAAAATTATTGTGTACCTAACAAGTTTGAAAATAGCAGAAGAGACA  
AATCACTAACTCGGAATATTGACCTTTTACGATTGTATAAATTCCATGGAAAAATTGCATAAAAAGTTATT  
GCATTC

>M6-PGSC0003DMG401010943 M6 LRR-RLP

ATGGCCGATCCTGTATTTGCTGCTACTGTAAAGTTTTGCTTGACAAATTGATTTCTCTCACTATCAAGGA  
GATCAGCAGCTCAAGGGATTTCAATGAAGATCTCGAAATGTTGACACATAATGTATCCTTAATCCAAGCT  
TTCTTCATGATGTTGAAACACCACAAGTTGAGAAACAACAGTCTGTGCAACAATGGCTCAGGAGACTT  
GAAAGAGTTGCTGAAAATGCTGAAAATGTGTTTGATCGATTGAGATATGAATCTCTCAAAACAAAAGTG  
ATAAACATCCGAAACAGCCCAATGAAAAAGGTCAGTGGTTTTCTTTCTCATACTGCTTTTAAGAGCAAAA  
TGCTCGAAAAATCAACAGTATTAATAAAGAGTTGACTGCTATTAACAAGGTAGCTAAAGACCTTGGTCT  
CCACTCACTCATAGTTCCTTCTCGAAAAATACTACCGATTGAGAAACAGATTCCATAGTAGTTGCTTCAG  
ATGTTGTTGGTAGAGATTTGGATGTTGCTGAGATAAAGGAGAAAATTTGAAGATGAGAGAAGAGGAT  
GTTGTTATGTGCACCATTCCCATAGTGGGTATGGGGGTTTAGGGAAAACAACACTGTGGCTAAGAGGATT  
TACAATGATGAACACATCAAGCAAATCTTTGAAAGGAGAATTTGGTTGTGTCTACCTGAAATGTCTGAAA  
CAAAGAGCTTTCTTGAACAAATCCTTGAATCATTGACAGAGAGGAAAAGTTGAGGTTCAAAGGAGAGATA  
TAATAGTCAAGAAGCTACAAGATAAATTGGGAGGAAAAAACTATTTGCTAGTCCTGGATGATTTGTGGT  
GTGTTGACTCTACATCGTGGCATGAGTTCGTGGACACGTTGAGAGGAATAAATACAGCCAAAGGAAACT  
GCATTCTTGTGACAACCTCGTATGAAGAGAGTGGCATCCACAGTAGCAGCAGATCTTCATATGTTGGGAA  
AGTTAACAGAAGATCATTGTTGGTCTATTTTCGAACAAAAGCATTGTTGATGGCAGGGTTCCAGAAG  
AATTAGCGAGCATGGGCAACAAGATTGTTAAAATGTGTCATGGTCTACCATTGGCTGCAAGTGTGTTGG  
GAGGCCTATTACACAACAAGGAAAAACATGAATGGCAAGCAATTCTTGATGGCAGCCCCCTTGTTCAG  
GTGAAGATGATAATGGAGAAAATAGCATAAAGAAAATCCTAAAACCTCAGCTATGATTATCTACCATCTCC  
ACATCTAAAAAAATGCTTTGCTTACTTTGCAATGTTGCCAAAAGATCTTATGTTTGAAAAGGCCCAACTA  
ATCCAACCTCTGGATGGCAGAAGGCTTTCTTCATCCATGTCAAGAGACCACCGTGATGGAAGACATCGGG  
AACAACTTCTTCAACTCTTGTGAGAAATCCTTGCTACAAGATGTTGTGTTAGATGAGCATAACAATAT  
AAAATACTGTAAGATGCACGATCTTGTGCATGATTTGGCTGGAGATATCTTCAAATCTAAAATATTTGAT  
TCGAAGGGCAATGATGGAGAAAACTTTCTCAAGTGCGATACTTTGGATGGGACTCACCAAGTGATCAA

ATAGATAAGATAAATGAGCCAGGACGATTGTGCACGCTGTTCTGGAGAAACAATTATATTTTCGGAAGAT  
ATGCTGTTGAGCTTTAAGTTCTTGAGAGTTTTAAATTTGTCTAGATCAGGAATCAAGGAGTTGTCAGCTT  
CAATCGGGAAGCTAATATACTTGAGATATCTAGATATCTCGAGCACTGAGATCACAGCCTTGCCCCACTC  
CATTTGCAAGCTCTATAATTTGCAAACATTTAGAGCCAATTGCTGCTATTCCTCAAGGAGTTTCCATATG  
AGATGGGAAATATGATAAGTTTGAGACACATATATTTTTATTCTTCGTCTCAGATGCCACTTAACTTGGG  
ACAATTGACTTGTCTTCAGACCCTACAGTATTTCAATGTGGGTTTGGAGAAAGGCCATCGAATAGAAGA  
ATTAGGTTGTTGAATAACCTTAGAGGTGAATTGAGTATCAATGAACTGGAATTGGTCCGTAGTAGAGA  
AGATGCTCTAACAGCATATTTACAAGAGAAATCAAATATTTACAAGCTGACATATTTATGGTCCCATCAG  
GAATCAGAAGGATGTGAGATTAATGCTGAGCATGTGTTGGATGGTCTTCAACCACATCCTTACTTGAAA  
ACATTTGAAGTGGTGAGATATTTGGGTACTAGATTTCTTCATGGTTCAATGAAGAGTCGCTACCAAATT  
TGGTCAAGTTGAAATTAAGTAATTGCAGCAGTTGCAAAGAAATTCATCTCTTGCCAACTGAAATTCCT  
TCAGCATCTTGAAGTGGTAGGGTTCCATAAGCTGGAATGCATCGGAACTACATTTTATGGTATTGAGGTT  
AACAAATATGGGATCAAGCAGCAATAATGCCATTATCCAAGTGTTCTGTCAATAAAAGAACTAGTATTGG  
AGAATATGCGTAGCCTTATTGAGTGGAAGGGAGTGGAATTGATACCAACAACAAGTGGGGTAAAAATG  
TTTCTGTGCTTGAGAAGTTGAGGATTAGATACTGTCCATTGTTAAAAAGTACTCCGAAGCAATTGGAAA  
TCCTACGCGAATTGAGCATTGAAAGAGTTGACAGTGAAATGCCATTATTGAATTTGTGCAGCAACTTGAC  
ATCTCTCGTAAAGTTTAGTGTCTCTTTTGTGAAAGAGCTCACTTGTTTTCCAGATGAGATGATACGCAGCA  
ACGTTTCTCTTCAACACTTATCGGTCTATAACTGCAGAGAGTTTCGTGAATTGCCACAGAGCTTGTACAAT  
TTGCATTCTCTAAGAGCTTAATGATTGAGTACTGCACCAATTTAGTTTCTTTCTGTTTCTAGTGGAGA  
GAATTATTTGACTTCCCTACAAAATCTTCAGTTATGGAGTTGTGGTGGATTGGCCAGTTTACCAAGTGG  
ATGCTAGAGAAATGCCGTCTCTACAGAATTTGAGGGTCAACTATTGTAACAACCTTAGTTTCTTCCCTTT  
ACATGTGGGGGATATGCCTTCACTTTCTATTTGTCTATAGCACACTGTCCCAAATTGGATAGTGTACCCA  
CAGGGGGCCTTACCATCTCACCAGGTTAAGGGAATTGGAAATTGGTCTGTCTCAGATATGGTGGATT  
TTGAGGCATTCCAAGTACTTTAATGGCATTGAGCAGCTGTTGTCCTTCGTAAGTCTGCTTGTGTTCCGA  
CATTTGCACTGGGATTCTCTGCCCTATCAGCTTATGCAACTCTCTGCCCTAACACATATCCATATATGTGA  
TTTCGGAATCGAGGCTCTTCTCATAGACTTGACAACCTTACTTCTTCTTGAATATTACATTTAGTGAGGT  
GCAAATGGCTGCAACATGTGGACTTCTCAGATGCCATGCCCAAATTACGGTATCTAAGAATCTGCGATTG  
TCCATTGTTAGAAGCTCTGTGAGATGCTTTTTGCAACCTTGTCTTTTGGGAAGAATTAAGATTAGAGAACT  
GCGAAAACTAGAGCACCTGCCATCCAGAGAGGCAATGCGACGCCTCACTAAATTATGGTACCTAAAAA

TTAAAGGCTGCCCAAAGTTAGAAGAAAGTTGCAACAATCGGAGTGGCCCAAACACCCAGTGGTCCAACA  
TTTCCCATATTCCAAAAGTTAAAGTAGGTGGAAGCATAATTCAGGACTTGCATAAGTCACATTTTAAATT  
TTATTTTCTACGAATTCTAGAAAAGAAGTTCTGTATGAATATATCTCAAATTATTCAAACGTTTCGTTTGT  
TTGCACGTTTATCTTTCAATAAAGAGTTTTATCACTTAATCCTCGAATGTAGTACTCTTCATTACATAGTAT  
AATGGAAGTTATTGAGTAGTATGGTTCTTGAATAAGATAACTGTTCACTTCTTCAAGTATAGACAAGTA  
TTTTACTGGCATAACATTAGCTTGTCTATCTGGTATATTACAGTTTCTTTTTGCGTAAGAGGAGGTGAAA  
TGTAGAGAGGAAAAAGCTGACTAAAATTTGACTTCTATTGAATTTGCATCAGTGGTGCCTTTGGAGACTC  
TGATTGTATGTCGTTTGAGATTTTAAGGTAAGTTAGTTTTGTCCATAAAAAGTTTGCAAATTGTGGATT  
TAGATTGATACTTTGTTTTCTCTATGAATGGTTTTCTTTCCCTGAAATGCCGCTTTTAAATCTTCCTAC  
TTACCATTATCTCGTATACTGTTCTTAGTTAATTGAAAAGTCTCAAGGAACAATACCAAGTCTCATATATA  
GTAGAGGTCTATATAACTTTCTTAATAGTCACACTTCTCGTTACTTTCAATTCACAGTTTATTTTCTCTGTTG  
ATTAACAATCGCAATTGAAGGACTTGAACAAGAAGGAAATTTCAAAGGACTGCTATGTCTTGAACCT  
TACAGCAAAGAGTTCCTCCATTGACTCTTAACGTTCCAAAAGACAAGTGGCTTTTCTCAATATTAATTA  
TAAGCAATTTATGTTATTATATGCAAGTTTTAGAGTTCAATAGCTTAAATTGATTATTTGCTGGTATTTCT  
GTTTGGCATGTGGTTGAATTATGGATACAGTCTTCTGTTTGTGGATATCAATAAATCTTCAAGATTTGT  
TTCCTCAAATTCTCACCGATGGAGTGGTGCCTTTTATTATTATTGGGATATATTGCACAGAGACTTGATGG  
ATACAATAAGTGATTGCCTCACATCTCAGTTAGATTGAGGGAAGAAAAGAGTAGGAGTATCATAGATGT  
CACCAAAGACGAATGTACAAA

>M6-PGSC0003DMG401014048 M6 LRR-RLP

TCCACTATAAGACAATGTCCATTCTTCAAAAAATTTCCATAGGCTCGCATTCTTTGACTGCACTTCTCCCT  
AGTAACTCTACGTAATAGTCTACAAACAGCATGACTATTACTTCTGGATCAGTCTGCCAGTTCCTCAAAGT  
CATCCTTAAGTTGAGTTGTTGCTTGTGTTAGGCTTCGATATTTTATGACAGAGAAGAAATATTTGGTGT  
ATCGTCTCCAAGTTTTATCCATGTAGCTTTGCTCCTCTGTTGAAGATAAATTTATTCCTTGTAGGAGGTCT  
GTCTGAATTTTTGGTATTTTTCTTCTCATCTTCTGATAATCAACATTCATAGGATCCTGCTGTAATAGTT  
GTTGAGCCTTCAACATAGCTTCCCTATCCTCTTGACATTCAGAAACAATATTCCTGAAGTCCCGATTATTA  
AGCTCCTTAATCCATATTTATGATCTTTAGCTTTCTAACTACTTTTAGCATCTTACAACCTTCTACCTAAG  
TGTCCCATGCTTCTCTCACTTTCCCTTAAATCTGGGCTGAGTCACTCATACTACAAAATTGAAATGAC  
TTCCTGTTCTATGAGTCTGCATTAGTTAGTGTCACTTTAATTGGGCAATGATCATTTATTCTTTAAGGAAG  
GTACTTTACTACTGGAACGCAGTGTGCTTAGCCATACTGTTAATAAAGACCCTATCAATTTTTTTTA

AAAATCCTCTGATTATCACTTTTATCATTCCAAGTTTATCTTTGACCCTGGTAAGACATTTCTATGAAACCA  
CATGTTGCAATACAATTCTGAAAAATCTTCTATTTCTGACCACACCACAGGGTAGCCCCAATCCTGTCTT  
CAGTTGTTAGTACTGAGTTGAAATCGCCTAGGATCATCCAAGTTAATTGACAAACCACATTGTAAGCCAT  
AAGAGATTCCCATAACTCTTTTCTGCCTTCCTTTGTATTATAGGCATAAGCCATTGTCATGATAATTTGATA  
AATGAATGTTGCAGAGGAACACTTCTCTTTCACAAGTAATCAACTGAGATGTTGACTCTTTTGGTGTAA  
CTGTATAATAATCCGGCCTCCAAGTTATCCAATCCTACCATTGTAATGAGAAGCAAGATTGGTAATGAA  
TGGTCAGCCACCAACATCTTCTAAGCTATCAAATCGATCTTCGCTACTTTTATTTTTGTTTCCAGTAACCC  
TACTAGCCCAATTTTTTTCATTATTACAAAATAGTTTCACCTCCTTTTGCTTATTAGGTCCATTGAGCCCTCT  
CACATTCTGACAAAGACAACACTATACATTCCCAATTTTGGGATTAGGATGGCCTCCCACTGTTTCTTCACTG  
TACTGGTAGCCTTCTTATTCTTACCCCTTTGTTTCAGTACCTGAAAAGTGTCTTACTCTCTACATGTAGT  
TGTTGCTTAGCTTGAGACTTCAGTGTTTTTGGAGGTGTGACCCAGACAGTGGTTGCACCCTGCTTCTAAG  
ACTTGTCTGATCTGCCGACTTGTGAGGATCCAACACAATTGTTGGAGGTGAGTTAGTTTGGAGTTGTTG  
AGCAAAAACCATTAGAATGGTAGAGAGCTATTCAGATATAATTGTTTTGAGACACTTTCAAAGTGGTAT  
TCTAACGGAGAAGCAACCATACTAGTGACATGTTCAACTTCAACCCACATGATTAAAGCAGTTTTTCCAC  
TAATAAGGACATGTGAAATCGAATAGTAAGTTTAGATATTATTGAAAATATCGTTTTTATTGTTTCGAAAG  
TTGTTAACATACGATTGGCTTTTGTGATCTAAATTTTTATTTTTCTGCTTATCCTCTTCTATATGTTGTTTT  
ACACATCTTCTGATTGAGTTAATAATACATGCTTTGCTTCCATAGAAGATGAGAAATTGCAAAATTCCTTT  
ATGAATGTTTGCTAAGTTTCTGTACCTAATTCAGATTCCACTGGATTAATTTTTGACCCAAGATTATGCA  
TATGTTTGGTCTACCGTTGAAAAGGAAAACCTCGAATGATACCGGTATTTTTTTAAGAATACAAAGTTG  
CGATAAAGACTGAAATTTTGTGATGGCATTAAATTCGATATGGATCACCGTTGAGAACTTTTTCTGAGGTAT  
TATGTCCCATTTTCCCTGTTTAGAATTGTTTTCTGTAAC T

>M6-PGSC0003DMG401014605 M6 LRR-RLP

TATATTTCTAAAACCTGGTTGATCACTTTGCAGAAGAAAATGAAAATCGATAGATTTCTACAATTCATTGC  
TGCATTTTCACTGTTTCATAGGACTTGAAACAAGTTGGGGTAAAACATTATGCATTGAGAAGGAAAGAGA  
AGCTCTTGTCCAGTTAAGCAAGGTGTGATAGATGAGTACGATATCCTCTCATCGTGGGGGAGAGAAGA  
AGAGAAACAAGAATGTTGTCGTTGGAAAGGTGTAATAATGTAGCAACAAAACAGGTCATGTCGTGATGG  
TTGATATTCATATATAACCACAACCTTTTCTAGATGTGGATCAACACTTGAAAGGTAATATACTCCTTCA  
TTGCTTGAATTGCAGCATTTGAAGTACTTGGACCTTAGTAACAATGATTTTGGTACAAGTCAAATACCGG  
ATTTCAATTGGTTCATTTCCAAGACTAGAATACCTTAATCTTCAAGGTGCTAACTTATCAGGTGAAATTCCT

TACTCATTTAGTAACCTTACACATTTGAAGATTCTCGATTTATCTTCGAATCAAATTACAGGATTGTTTCCA  
AACTACTTAACAATGTTTTAGCTTTAAGAGAGTTGTATTTGAGCAATAACAAATTCAAAGGGAGGTTAC  
CTCAAAGTATTGAACAACCTTTCAAACCTCGAGATATTGAGAATCAATTCAAATTCCTTCGAAGGTCCAATC  
ACAGAACCACATCTTTCAAATCTTTCCAACCTAAAAGTGTTGGACTTGTCGTATAACTCATTCTCTCTTCAG  
TTGAGGCCTGATTGGATTCTCCTTTTCGAGTTACAAGTTATAGGACTCTCGCATTGTGAAATGGGGAATC  
GTTTCCCTCAATGGCTACGAACTCAGAAGACGTATTCATATCTTGATATCTTTTTGTTGGTATATCAGAT  
ATAGCTCCTAACTGGTTTTGGGATCTTTCTCCTGAAATGATGTACTTCAACATTTCTAATAACAAAATAAG  
TGGACAAGTTCCTGATTTGTCTTCCAAGTTTCTACCATCGAAGGAACTAATTATCCGATAATGGATTTTA  
GTTTGAATAACTTATCAGGTTTAGTCCCATCATTCTCATCAAACCTTGGAAACATTGAACCTTTGAAAAAC  
AAGTTTGTGGATCAATATCTTTCTTGTGCAAAATAGCCAACCCTTTGTTCCGTACCATTGTCCTCTCGCAT  
AACAAGCTTTCAGGAGAACTCCCACTAATTGTTTCATGAAATTCGAAGAAGTCCGTTCTTAATTTAGC  
TAACAACAAGCTATACGGTAAAATTCCTAGCTCTATTGGATATTTGATGGATATTCAATCTCTACAGTTGC  
GTAACAACAACCTTACTGGTCATCTTCCAACCTCTTTGAAAACTGTTTTATGTTGACAATCTTGGATGTT  
GGTGGAAATAATTTAATTGGAGAAATCCGTCATGGATTGGCTCAGATTTAACATTTTTGATTGTCTTGA  
GTTTGAGAGCCAATAAATTCGATGGAAATATCCTTCGAATTTGTGTCATCTGAATAAAATCCGTATTTTG  
GATCTTTCTCATAACATCTTATCAGGAGAAATCCCGCATTGTCTCAACAATATCACATCATTGCTTCAGAG  
TAATAGTTCAACCTCAAGCATTCTTTTTGATTTGGGAGAACAAAACGGAGATGGTTTTTATTCTTTGTTG  
AAGAATACATGGGAGATGCATTAGTTCAATGGAAAAATAGTGAATTTGTGTACAATAAAACACTCGGAT  
TGTTGAAGATCATTGATTTTTCAAGTAACAAATTAGTTGGAAGAGTTCCTGATGAAATCACACAATTAGA  
TGGACTACTTTCACTAAACCTTTACGAAACAACCTAACAGGACACATCATAACAAGGAATTGGGATGATG  
GAAATGTTAGAGTCTCTTGATCTGTCTCGAAATCAGTTAACAGGACGAATTCCAGCAAGTCTTGCTCGAT  
TAAATTTCTAAGTGTTTTAGACTTATCGAGTAACAATTTGTCAGGGGAAATTCCTTCGAGCACTCAATTG  
CAAAGTTTTAATCCTTCGTCATATGCAGGCAACAATGAACTTTGTAGTCCACCACTCGAAAAATGCCCTG  
TTCATGATGATCATAACAAGCAGAACCAACAATGTTGATGAAGACGATGATATGTTATTGTCGTTTGGGTT  
TTATGTATCTGTGTGAGTGGATTCATTGTTGGATTTTGGGGAGTGATATTTACTTTAGTCTTCAATAAAT  
CATGTAGAGATGCTTGCTTTTCATCTGTTTCATCAACGTCGCGAATTGGATCTTTGTCACAACAATTATGTGT  
CTACGCAGATTGAAGATGCTCTGGAGCTAGTTAATTAGCAAACAACAAGCTACATAATGTCATAAGTAA  
GTTTACAAGTCTAGATTCTTTCATAAAAGAATTACATGTTTGTAGTCACCAATGGTGTTATATAGTATGTG  
ATGTTTCTCATCTATAGTAATAAAATGTTACTATTAATGAAAATGTTTTGGGAGCAAATACATCTT

>M6-PGSC0003DMG401015009 M6 LRR-RLP

ATTGGGCTGCTGAAAAGAGGTAAACAGAATGCCCAAATTGGTCTCAAATGGGTTAGATTTGTAGTTA  
ATAAAAGGGCCATAGGGTTACAGACTTAACCAACTTAAGTTGAGAAGTTAGCCAAATTGAGTTTAATTA  
GCAAAGTCGACTAAACTTAAATAGGACAAATTAATATAATTAATTGATGAGCTTCTTACCTTTAACGAA  
CTAAAATAATTAATTTAATTATAAGCTAATAACTTAAAAATATAACTATAACTTAAAGTAAAATAATAAAA  
TATTTAACTAAAATGTAAAATCTTTTGTGATGATTTTCAAACATTTATATAATAACGTGATTGTAAAAATA  
TACATATTTATTATTTAAAATGACAAAATTACTTTTAAAAATAACTTGGAAGTATTTTGAATTTCTGAAA  
CTCATTAAATTCAAATTATAACCATCACTAATAAAATATAAAATCTTTTCGAGACGATTTTTGAATTTTCAT  
GAAATACATTAATTATGTAAAACATATATATATTTTTTAAAAATTATAAAAAAATGACGAACTATTTAA  
GATAACTTGCAAATATATTTATTTTATTTTGTGGAAATTTTTATAAACTAAATTTTTTAAATCATTGAA  
AATTGGAGAAGCTCAATGATTAATTTATATTGTGGAATGTCAAATTGAGTGTCAACAGTCTATATTAAT  
AGTCAGGATTAGTATAGTGGGCAGTGTGATTTGCTTAGGCTCAATTAAGTAATAGGTGATATTACTTA  
GTGTGGAGATTTAGTGTGGAGATTAGTAGGTTAATCTCAAATTGTAAATTGTGTTTTACTCTTGCTTGTG  
AAGATTAATGAAAGCAGTTTGAAAATCCCTGTGAGACAGGTCGTGGTTTTACTCCCTTGAACAAGGAAG  
TTTGACGTAAGTTGTGTGTACAATCTGTACTTTAGTATTTATTACATTCAGTATTTATCTGCTTTTGT  
CATTGTAAATCGTGCTAAGGACCTGGTCTATTGTAGCTGAGTGGACGCATATATTCCAACATTAATATT  
AGTAAATTTACACATAAACTTTGACTGTCTCAGTAACAAAAGGTCAAACGACATGATATTTGCTAATCT  
TATCTTAGACTGTGGAGACTTCCATTGACTTGGTTTTGGACCATAACAATATATATGATCCATATGTTTTTG  
TCTTTATAAAGTTGGTCAATGTGAGATGATGTTGCAATAAAAGTTTGTGGGAATGTTTAATATCTTCTCA  
AATCAATTAGTCAAACACAACTGATACTCTTTATAAATAAATACAAGTGGGGATGGATTTCTTACCTTTT  
AAACAAAACAGAACTTGAATGAGATAATCAAAGCATTTAGGCTTGGAAAAAGTTAAGGGTAAGAC  
TTCATATACTTGTGAGATTACTTCATAATACATTTGAAAAACAAAGGTATCAATCTGTTTCCAAGTGCATA  
GTAATATCATGAAGAAGAACATTGTCTTCTTGATTCTTCTCTTTCTAATTCAACTTTCTGTATCATTGCTT  
CCTCAAATGAGACTGACCTACAAGCTCTATTAGCTTTCCGAAATCTTGTTACAAGTCCCACTCATTTTTTG  
GCCAATAATTGGACCAAAAATACCTATTTTTGCTCTTGGTTTGGTGTCACTTGCCTCCAAAAAGCCAAA  
GGGTTGTGGCCTTGGCTCTTCCTAATTTGCAACTTCAAGGCACAATTTCCAGTCTTTGGCCAATTTGTCC  
TTCCTCAGTGTCTCAATCTCCAGAACAACAGCTTCTGCGGTGGCATCCCTTTTGGACTAGGCCAAATGCC  
TCGCTTGCAGTGATTGAAGTTAAAAACAATCAACTCAACGGAAGTATACCAACAAGTCTATTTCAAAC  
CGGAGAGTTCAAGTAATTTGTTGGCTTTCAATGAACTCAGTGGTAAAATGTGGAAAGGGCCATGGTAT

GTACCCGAACTCAAAGTCTTGGATCTCACCAACAATAGCCTCATGGGTATGATCCCTCCTTCAGTTGGAA  
ATGCCACAAAAATGATGAACTTCATTTTGTCTAGGAATAGAGTCAGCGGCAACATTCCAAAGGAGATCG  
GTAATCTGAGCCAACTTGCAGACTTGTCTTGTGGATAATCAATTAACAGGTTCCATTCCCAGTACTG  
TTAATATCTCGTCGCTACTTGGCGTATCTCTGTCATTCAATAGCCTTTCTGGTCCTCACTTGCTAGATGAA  
GGGAATATTGTGCTGAATCTGTACTTTTTAAGTATATATGACAACCAAATTTCTGGTTGCATTCCATCCAG  
CATATGCCAACTCACAGAGCTCAAAGTTTTGTCCGTATCTTCAACAATATAACTGGAGACATACCCAGA  
AATATTGGTTGTTTATCCAAGCTCGAGACGTTCTTGATTGGCGACAATCCAATAAAAGGGACTATTCCCA  
CTTCATTGGGAA

>M6-PGSC0003DMG401015877 M6 LRR-RLP

AAAATTATTTTTGTTGTAATTCCTCTCCATATTGACTTGATGGCAGCTTATACTGCTGTAATTTCTTCTTC  
AAACTCTTGATCAATCAAATATTTCAGAACTCTTTCATGATCACAGTACTGAAATGCTCGATTCTTTCGG  
GCTACAGCTGAATATTTCAAGATGTTCTTGACAACAATAGCAATGAGAAAATCAAATCTTTTGAGGAAG  
ATATTAGAGTTGTTGTTAGTGAGGCAGAGGATGTTGTTGAAATGAAGATTTCTGAAATCATCAAAGAAG  
AAAGCTGGACATTTGGAATTTTACAACACCATGATATGCTACCAGTTGTTGAAAAAATGGATACGACAA  
AGAAACAAGTGATGGAGCTTCTTCTCATGATGCTGATCAAATTCTTGAATTAACCGCGGATTCTTGAT  
TGACGCTTCTTCTATGAGTGATCCAATGCTGTCAGATCACTTGAAAGATCATATTGTGCAGGGACTTGAT  
GGTGACTTGGAGATAATAGATAAGAGATTGAGAGGACCAACGCCTTATCTAGACATTGTCACCATATCA  
GGTATGGGTGGCATTGGCAAAACAACACTCGCTAAAAAAGCTTATGATCATCTTCCAATTAGGTATCACT  
TTGACATTTTTGTTTGGGTTACAATATCTCAAGAATTTTCGATATAGAAATGTATTGTTAGAAGCTTTACAT  
TGCATTTCAAAGCAAAGAGTTATTGTGAACACAAAAGATTATGATAAGATGAATGACAGTGAGTTAGCT  
GATCTGGTGCAAAGAGTCTAAAGGGTCCTAGATACCTGTTGTTGTTGATGATATTTGGAGTACGGAT  
GCTTGGGATAGCATATCACAATTATTCCTAATCGCAACAATGGGAGTCGAGTCTTATTGACTACTAGGG  
AAACCGATGTAGCGATGTATGCAAATACTAGTAGCCCTCATAAGATGAACCTCTTGGATTTAGATAACA  
GTTGGAAGTTACTTCGTGATAAGGTGTTTGGACTAGAACACGATCACCTCCCGAGTTGGAAGAAATTG  
GAAAAACAATAGCAGGAAAATGCCAAGGACTTCCCTTAATAATTTTCAGTGATTGCAGGGCATCTCTCTAA  
AACGGTCCCCAAGACATTAATAAAGTTGGAAGTATGTTGCCAAAACCTTAAGTAAAATCATTGCTAGTCAT  
CCAAATAAATGCTTAGGAGTGCTCGGTTTGAGTTACCATCACTTGCCTAATCAACTCAAACCATGCTTCT  
TTCTATGGGTGATTTCCAGAGGATTTTCAAGTTGATACTTGGAGATTGATCCAATTATGGATCGCAGAA  
GGTTTCATAAGGACGTCTTCTGGAAGTCATGAAAGCTTGGGAAGAAGTGGCTAAACATTATTTGGAGGAT

CTTATCAGCAGGAACTTGATAATGGCAGTAAAAAAGATTCAATGGTGAGGTAAAAGTATGCGGAAT  
ACATGATCTGCTGCGTGAGTTCTGTTTGATAGAAGCTGAAATGACAAAGTTTATGCATGTTGTGAGAACT  
CCATTGTCACCAGCACAAAAGCCTAATTTTCGTGCTTCAGTATTCAAGAGTAATATTCTGTTGAGGATTC  
TTATAAGCTCTTACCCCCTGTAGCCAGATCTATCTACTGCTTTTCTTACTTGGATCTACCTTATGAACCCCG  
TATTCTTCCCCCTGTATTGTCCATCTACCATCATGATCCTATAATACATGGATTTTTCTGTTGTTTCAACCAT  
CTCAGGGTATTGGCCATCTTTCCTTTCGTTCAGCTCATTCCACTTGTGATTACAAAGTTATTTCAATTTG  
AGATATCTCCAAGTCGATGTCTTGAAATATTCTGAATCAATCTCAAAGCTTCTGAATTTGCAAACCTCT  
AATTTGTGATGGTAATTCTTTAGAGATAACTTTAACTAGGAAGATATGGATGTTGAAGAACTTGAGGTAT  
ATACGTGTAGGGGGAGTTACTTATTTACCGAGTCCTAGAATAGATAACAATCTTGTGATAGGGATGCCA  
AATCTAGAGGAATTTTTGGTCTTAGTTACTCTAGTTGTACAAATGAAGTCTTTTCTAGGATCCCCAATTT  
AAAGAGATTGATCATTCTGCACATTTTAGCATACTAAACAATATTCTGTATCGTCCCTTCGATATGTCCA  
GCTTGACAAAACCTTGAGACATTCAAGTTTTACTGGAAAGATTATTTGGAAGACCCCATCAAGAAATTTGT  
TTTTCCAGAATCACTTAGAAGAGTGTCTTAACTTGGTGTTGTAAGTTTATTTGGGAAGAGATATCATCA  
ACTTTTATCATGTTGCCACATCTTGAAGAGCTCAAACCTAAATATTGTGCGAGCCGAAGATGATGTATGGA  
GATTGAGTGACAAAGACATATTCAGAAGCTTGAAGTTGTTGTTACTGAGCGAGCTAAATCTTAAGGGTT  
GGGAAGCAAGCAGCGATAACTTCCCTAATCTAAAACGCCTTGTTCTGAAGAAATGCAAGGACCTGCAAG  
AAATTCCAACAGATTTTGGGGAAATTTGTACTTTGGAATCGATTGAGTTACATGATTGCAGCACTACTTC  
TGAGGAATCTGCCAGAAATATCGAACAAGAACAAGAGGTCATGGGAATAATATCCTTAAGGTCTACAT  
CCATAACAGCGACAGTATCCATAACAGCGACAGTAAGTTTAAATTCTCTCTGAAAAGTTCTTCGATTCTTCA  
CATTATTTAAACCTCGTTTTTATTAAATCATACTTCTTTGAAATTAAGATGATGACTTGTACTTTTTATCTT  
GCATATGCAGGTAATTGAAGCTTATTTGAGGGATCATCTAATGCTATCTTCCGAATTCAGAACCTTGTA  
CTTCATATTTTTGTTTTTATATTCTGATGGTTTTTAAATTCATGTTTTAGGAATAAGCATGTTTAATACATG  
TATCGGCCAATTGTGTTTTTTATTTATTTTTTAAACGGTAACTGTTGATGTACTCGTGTAACATCTATTTT  
G

>M6-PGSC0003DMG401015894 M6 LRR-RLP

ACATCTTGCACTCACCTCACAAACTCGACACGATCTCTAGAAATTCCAGTAATTTCTATATGCACATTATA  
GGATGTACAAATCTAATCCTGTAAAGTTTTGAACAATAGATGTATGACCTTATAACATGTTATAAATCAA  
ATGTCAATACTGTAGTTGTTTGTGGTGGAGAAGTTGGGCCTTGCCAACCATGTCTTTCTGGATCATATTT  
CTCTCCATCACCCCAAAGGGCATAGGCTTCTTCACCATGAACCGCGTCATCTCCAATCTTTAGCTGCTCAT



CCGACATCCTTAGTGGAATGACCAGCCTTATTGCAAGTAGGATTAACGTCGTTGCAACTATGTTCCAACC  
AATGATGAAGAGAGCTGCAACTATTTGCTTAAGGAAAAGAATTCCACCACCTCCACCATAAAATGCACCC  
TTTGTGTTGGTGACTGGAAGAACAATATTACAGAGAGATGGTTCTGCCAGAAGACCAGTTAATAAACCC  
CCTAGAAGTCCTGCCACAGCATGTGTGTGAAACACAGCCAGTGTATCATCCACCTGTTATTATAACAACAA  
GCAAGTCAGTTACAATCTAAGTCTAAAATGGGGGTTGGGGCCGTTCCGATTGGATATGAAAATTCAATT  
TTTAGATTGGATGATTTTTTAAGTTCGGGTTTGGATTAATCGGTTTGAGACACACAATAGCAATTAACAA  
CCTCGGTTACCTAATAGATTGTTACTTAAAATGTACTATAACTTTTTGCAGTTAACAAAGATTGAGGTCA  
TCCTGTCACACATGATGTGTAACCTTCATATTGGACTTAGTACTATAATGGGTAGTGTATAGAGTACTAA  
TCAATTGAACTTTGAAAATTCGACATACTAGCTAGCATTGGGCACACATGTTTCGGATATCCAATTTAA  
AATCCATATAATTTAAAAATGAAATAATCCAAAAATCCAAACCAAATATCCAAAAAGTTTGGATTTCCGG  
TTGACCCAAACTATGCTCACCTTAGCTAAAATATAACTAGAGATAACCATCCATAATAAGTTGAATTAAC  
AACTAAAAAAATAAGGCAGTTAACCTGCTACAAGAATTTACATATATTGACCGTGTAATACTTTTTTAC  
CCCAGTGTATAAGAGATAAATCCTATTATTTCTATAACATTGGCAAACACATTTTTCAAATGATTAGTCA  
AATACAAATTGTAATCTCCACAAATACTTTTTCGAAAAACACTTGAGATAAAAAAATTTTTAAAAATAAAC  
AGACTTTAGAAGATTGACCAAACGTGCTATAAGTCACCGATGTGGGAGTCAATATTAACCTATACATTTT  
GCTTGTGTACCTAACAAAAATAAAAAGGGCAAGTTGTTGAACTTTTTAGTGCTTACCTACTTTTCTCCTT  
CATTTGAGTATGACATTATAAGAGCCGTAGGGACAAGGGGAAGGTTGGATAGTTATAGCAACTTATTTT  
GACACACACACTATATTCAATTTCAACAATCATATATAAAGACAATTACCAAATACTCTATAGAACAAGTA  
ATATTCTTTACAAAAAATAAATGGAAGATTATTAAGTAAGTACAATTATCGTACCTGCTGTAGAAAA  
GTGGACTTTTTGTGGAGTATCATCATGGAATACCATGGAATGCTTCCAGCAAGAATTCCCATTACTATGG  
CTGCCAAGCTTGCAACTCTACATCAATAATTTAATTTTAGTATTACTCATTTTTCGATGACACAACCTG  
TTAGGTCCTTCCTCATTACGAGTCAGTTAAAATCACAAGACATGTAGAACTCTCACCGCCACTCATTTAAA  
AAGGAATGCTTTATATTTGTTACTTTGTCTTACTTGTCAAGTTTTTTTCTATAATATCTTAAATTACG  
TGTTCAATCAAATAGTTGTCACATAAAATTGGACTTCTCCATACAAAAAACAACCAATAAGAGAGCACA  
ATATTGTTTATTTTTCTGAAATATTTTTCAAGTAACCTCACATTGTTGACAGAATTTGACTCCTAAGTTTT  
CCTAATCTAGATGTTTTACACATATTCAACCACAATAAATCTTTACTTAATGGTCAACAAAAGAGGGATCA  
ATAATATTTTTGAACTTTAGATAATAGGAGCAATAAATAAGAGAACCAATTGCAAGTTTATTTCTTGTGG  
GAATTAAGGTATACAACAAAGTAAACATAAATCATAATATTAGTATAATTTAACATATTCTATCTAGTTA  
GTTTCTGTTTTATTAGGTTACCAATTAATATTTATAATCGAAATATACTTGTAAAGTATCATAGTGTAAC

TTTTCAACTGTCAGTATATAAACTTAACTACCTGCTCCAGGAGTTACACAAGCTAGGCCGGTCATCAT  
TCCTTGAATCGCTCCGATAACGGATGGCTTGCCAAAGTAAAAACATCTAGAGTTGTCCAAACAAGAAG  
ACTTGTAGCTGCTGAAATATTAGTGTTTAAAACAGCCAAAGGAGCAGCTACATTTGCAGCATTAGGTGCT  
CCTCCATTGAAACCTGACCAACCCATCCAAAGTAACCCTGCTCCTGCAAGCATCAACAACACGTTGTTTG  
GTGGAAACCTTTCCCTATCACTCTTCAATCTTGGCCCAACCTGCCATCAACATATCCAATCAACTCAATTA  
ATATATACCAAAAAATCGAGTTGAACAGAATCCACTACTTTTCAGTTCGAATCATGTAATATCCAATCGTG  
CTATGTGATCTAAAGGCTACTAAATCACTAAAAGTTGAAACGACATCAAAATTTTGATCACCTAATTGTA  
ATGAGTTTAGCTGTATAACCTAAAGGTTGAACACGTCAATTTTAAATCCTAAATTCACCTCTAAATCATA  
TGACTCCAAATAAACTAATTTGACTTTAAATTGCTCGGATCCAACACATAGCTGTGCAAATTTTTGAAGA  
GTCTGAACAACATAACTTTAAATTTTGGATTAACTTATCATAACAGAGTAAAACAGAGTTGAATGAATG  
AATGAACGAAAAGGGGAGAATTAGTTGGCTGTAATACCCAATAAGCAGCGGTGAATCCAGAAATTCCA  
GCAGAAAGATGAATAACATAGCCACCAGAATAATCAATGACACCCCAATGATAAAGAAATCCACCTCCC  
CAAAGGCTAAAAGCTCCAACAGTATAACAAAAATAAGCCAAAGAGGAACAAAAGCCATCCAAGCTTTG  
ATATTCATACGAGCAAGAACAGAACCAGCCAACAAAATCATGGTAATAGCAGCAAAAAGTGAAATGAAA  
ATAGACATGTGCAGCCATAGGATAAAAAGGTTTCATGCATAGGAGATTCTATAGTCATTCCATCGCTATAA  
TAATGCGTTGTCTCTGGCATTCTTGCTCGTCCTGTTAAGTATTTTTGGCCTAAAGCAGGGGCCCTTTTGC  
CCAAAAGGGCAAAGCTTATCGCCAAAGGCGATACGATAGCCTACTAATACCCAACATATGAGTACAGC  
TGCGAAAGCGTAAAGAGCCATGAAAGCAGAGTTAACTGCCATTTTTTTCTTGACAATGCTGGCGTAAAG  
GATGACAAGGCCTGGCATACTCTGCAGACCAACGAGGGTCGCTGCAGTCATTTGCCAGGCGTTGTGCGC  
TTTGTTTAGCCATGGTGGAAGTCTGGTAAGTCTGCTTGATATGCTCCTGCTGGTATGGACATGGCTAAT  
TATTTTTCAGAGCTTCTTGAAATTTATTTGATGAGATATATTATATGCTCTGTTTTGTTTAAATGGAGCTT  
GTTCAAGT

>M6-PGSC0003DMG401015976 M6 LRR-RLP

ATGCAGTTCTTATATCTTAACCAAATAGGCTTACTGGTACGTATTCAAAGTTATAGTGATCTGTATTGAG  
CTAGTTAGTTAACTCATTCTTTCTTCACGTGATGACAGGTGAAATACCCAAGATACAAGAAATCTCGT  
TGAGTTAAAGGAATTTGATGTTGGGTTTAAATAGTTTTAGTGGTTCACTTCCAACGGAGATGTTCAACATA  
TCAGCACTGAGAATAATGTCTCCTTCATTCAATAATATATCAGCAACTCTACCACCAAACACAGGTTCTAC  
CTTATCCAACATTGAAGAGCTTTATATGGGTCACTTAACCAATCTTGTTGGGACTATTCCTCATTCTATCTC  
CAATTGTTCAAAGCTTAGTAACTAGATATTTTCAGGTAACAACTCACTGGCTTGATTCCCAATTCTCTTG

GATATTTGACTCATCTACACATCCTAAACATGGAGAGAAACAATTTAACCAGCGACTCCTCGTTAAGCTT  
CCTCACTTCCTTAACCAATTGCAGAAGATTAACAGTTCTTTCTCTATCTTTCAACCCTCTAAATGGCATGCT  
GCCGGTCTCCGTAGGGAACCTTCTCCAATCTCTTGTAACCTTTTATGCCGCTGCTTGCAAGATTAACGGCC  
AGATTCCAAATGAAGTTGGAACTTAACCAATTTAATAGACCTTGATCTTTCTAATAATAACTTGATTGGA  
TCAATTCCTACCTCAACTAGTAACTTAAGAAACCTCCAACGCTTGTACTTGAACAAAAACAACTTACAG  
GATTTATTGGAGATCATATATGTAAATTGCAGCATTGGGGTGTATTTCTTGGGGTCAAATCAACTTTCA  
GGATCTCTCCTAATTGTTTAGGGAATGTTACTTCCCTTAGAGAGATACATATAAGTTCCAATAAATTGAG  
TTCCAATATACCACCAAGCTTAGGAAATCTTAAAGATCTAATGAAGCTTGACTTATCATCAAACAACATG  
GTTGGCTTTTTACTTCCGGAAATTGGAAATCTAAAAGCGGCGACATATATCGATCTGTCCATGAATCAAT  
TCAGAAAAGGAATTCCTACAGAAATTGGAGGGTTGCAAATCTAGTGCATCTTTCTTTGAGACACAACA  
AGTTGCAAGGATCTATACCTGACTCAATCAGCAACATGGTAAGTTTGAATTTCTAGACATTTCTCATAA  
TAATATCTTGGGAACTATTCCAATGTCTTTGGAGAACTACAATACCTTGAGCGTTTCAATGTTTCATTCA  
ACAAGTTGCACGGTGAATACCCTCGGGGGTCTTTCAAGAACCTCTCGAGTCAATTTTTCATCAACAA  
TGAAGCATTGTGTGGTTTGTCAAGGTTAATGTCCCACCATGCCCCACATCATCAATGCATAGATCAAAT  
AGGAAAAAATTGCTAGTTCTATTTCTTTTGTAGGAATAGCACTTGTATTTGTTTCTATCGCCTTTGTGTTT  
CTATGGATAAGGTATAGAAGAGGTAAAAGAACTCCTCAACAAGCTGATTCATTGCCTATGGCAACAACG  
GAAAGAATTTCATACTATGAACAGCTCCAAGCAACTGATTCACTTAGCGAGAGTACTAATCTGATTGGTT  
CTGGAAGTTTTGGCTCTGTTTACAAAGGCGTTCTCAGGAGTGGGACTGTCATTGCAGTTAAAGTGTTCAA  
TCTGCAACTGGAAGCAGCATTCAAGAGTTTCGATATAGAATGTGAAGTTTTGCGTAGCCTTTGCCATAGA  
AATCTTGTGAAAGTCATCACTAGTTGTTCCAACCTTGATTTTTAGGCTTTAGTGCTCGAGTATATGCCTAA  
TGGAAGTCTTGACAAGTATTTGTATTCGCACAACACTTCTTAAACATCAGGCAGAGACTAAGCATTATG  
ATAGATGTTGCATGTGCTTTGGAATATCTTCATCATGGATGCTCCTCTCCGGTGATTCACTGTGACCTGAA  
GCCTAGTAACGTCTTGTGGATGAGGATATGGTTTCCACCTAAGTGACTTTGGTATTTCAACACTGCTT  
GGTGAAGATGAGAGCGATTTATACACTAAAACGTTAGCAACATTTGGTTATATTGCACCGGGTACGTCT  
CTTTGTTTTTGCTAATTTGAACATTGATTTTTCGTCTTTTTTTTTTCAATCAAGAAAGTATATTGCATATTTA  
AATTAATTCTCTGACTGTAGAGTATGGACTGGATGGACTGGTGTCAATAAAATGTGATGTCTATAGTTAC  
GGGATCATGTTGCTGGAAACGTTTACTAGGAGAAAGCCTACTGAGTTTGAGGGAAATCTTAGCTTGAAG  
CAATGGGTGAGTTATTCCTCCCTGAGGCAGTAATGGACGTTGTAGATGCCAATTTGGTAACAGTACCA  
ATGGATAATTGCTTACAGAAGGAGCTAGAT

>M6-PGSC0003DMG401016557 M6 LRR-RLP

CTACATTGTTTGAATGGCCGCTAATACTCTTGCTGATTCCGATCAAATATTTTCCAAGTTACCAGAAGAC  
ATCATCGAGAAAATCCTCTCTTGTGTAACCTTTGAAACAGAGACCAACAGTTTCTCTTGTTCAAAAAATG  
GCAGCAAATAGTAAAATCATTCAATGAAGATCTCAATTTAGTCCACACATATTCTGCAAAGATAGCATGT  
GGATACTGTGGCTCTTTTCAATTGGACCGTCACGCGTCCTGTTTATGCTCGGACACTGATCTCTACCATGT  
CGATCCATTTATTAACCTTGCTGCAGATAACATCAGTTTCAAAGAGGTTTATTTGTTACATACCACCTAAAT  
TTAGTACTGTGCGTCTCTCGGAATTTTAGATTCAAATTTTTAACCATTCTCCATATAAAAGGAAATTGC  
AACATGAATATTATTCGAAAATTTAATGTAATGCCTTCATTGAAAGAGTTGTATTTTCATTCTGTTTGCATT  
TTTTCTCACACCTTCTCCAATTTTATACCCAAGTGTCTCTCCTTGTCTGTTAACTTTGATAAATTGTGACA  
ACCTTAATGAATTAGCAGTCCCCATCTCAATTATCTCGAAAAGCTTCATGTCAATACTCGCAAAAAAATT  
ACAAAAATTGAAGTAAAAGCTCAAATCTCCTCGAGTTTCACTTGTGTTGTCCAGCCTTACCAAATTGA  
TCTGTGCGCTTCTACTAAACTACAACCTCCATATAGATTCTACAAATGTTCCCGACTCATTTCTCATGA  
CATTTGCTCAACATTCCCATCTCTAAAATCCTTATGTCTTATATTATGTAGAGGATTGAAAAAATCAAAA  
TTGTGAGTCCTCTATTGGAGAGTTGACATTGAATAACATCATTGACTTGGACGAAGCATTTCATAGCTAC  
TCCTAATTTACAATTGTTCAACGTAATATATAGCTTTAAATTCAAACCCCGTGTCCCATAGTGGGATCAA  
GGCAAATGGAAGTTGAGATGGGTGCTCGTGCAACCAATAACTTGCTTGAGTTGAGAACTTTTGCTGAAA  
ATTTGGGTGAAAATATCACGTTGTCCTTGGAAACTGACACAACCTGGAGCAAAGGTATGTACTTACATCTT  
TAGTATTTTTCAATTCGATTTCTTTTCATGTTTGACAAGTAATTTTGTGTTGAATATTATTTTCATTGTCTA  
TGAAGGGAGTAACATTTAGCCTGGAACTTTGAACCACTTTGTATCAAGCGCATAAATTTGGTAATACA  
ATCTTCATTTAAACCAAGATATGAATCTTTCTTGCTGAATTTTTTGGTACTTCCATCCGCGGACCTTGGT  
GGTGACAGTAAATTCAGATGCGCGAAAACATGACTTTATACAGGTATTCTACAATATTATAATGACTTCA  
TTTTTACCTTAATAATTTCCCATCTTTACTTATGTTATGAATTTGTAGGTCCTAATGAATGAGTTGGAATG  
CTGGAACAGAGACGACACCAAACGTTACAAACGTAGTGAGTACATGTTTTGGTACATTGTATTGAAACG  
CTTTACAGTCCTCGGATCTACTGCATTTTCAAGACAAGAAAGGGAAGCCCAGTGTGATAAGTCCACGCTA  
TGTGCTGGGTGAGGGGAAGGGTCAAACCAGAAGGGGCTATCAGTAGACTTACCAACATTTCTACAATT  
AAAAACAAGAAAGGGAATCCCGAAATGGTAAGCGCCCGCTCTGTGCAGGATCTGAGGAAGGACGGG  
AACACAGTGCATATTTTTCTTAGCCTTACCAACCTTTCTACAATAACAAGAGAAGGCGCTCATCAAATT  
AACTTGGAGTTTGAGTGGTAA

>M6-PGSC0003DMG401016933 M6 LRR-RLP

CAGAAATGGAATTCTTAGCTATTTTTGTTGAAAACTCACTGATTGCTTAATCCAGCCAGTTGCGCGAGG  
GATTGGATATTTCTATTACTACAAGAGAAACATCACATCTCTGGATGAAGAATCTCAGAAGCTGGAGAAT  
CTCAGGAGTGGCGTGCAGGAAAGAGTGGAGGCTGCCAGGAGAACTTACAAGTCATTTACAAACTGT  
TGAGGATTGGTAACTAGTGTGATACTACTACTGCAGATGTGGCAGTTGTAATTCGACGAGGTAGAAA  
TGAGGTTGAAAGTGGTTGCTTCTATGGTTGCTGTCCAACTTGATGTCACGTTACTCGTTGAGCAGGAG  
AGCTAAGAAAATTACACTGAAGATGATTGAACTTAGAAATGAAGGCAACAAGTATGATGTTTTAGCTA  
TCATGTACGACATTTTGAAGCTGAATTTATTGTTAGTAACAGTGGTGAGGAGTTTTACTCCAGAAAATTG  
AAAGAGTATGAGGTCATCTTAGCTTTGAGAGATGACGGTGTCACTATGATTGGGATATGTGGTATGGGT  
GGTGTGGTAAGACAACGCTGGCTGAGAAAATCAGACAAAGGGCAAACCTAGAAAATTTGTTTGATGA  
TGTTGTCATGGTAACTGTCAGTCAGCAACCAGACTTTAAAAGAATTCAGGGTGAGATTGCAGAAGGAGT  
CGGGCTGACATTAGAAGGGGATAATTTTTGGAGTCGTGGAGATCGGCTTCGTTAAGGTTAAAGGGAC  
AGGACAGCATCCTTATAATCTTTGATGATGTTTGGGAGGTTCTTCATGATCTAGAGAACTTGGAATTCC  
TAGTGGTAGCAACCACAAACATCGGTGCAAAGTGACATTCACAACGCGTTTCCGACATGTTTGTGAAGC  
AATGGGAGCTCAGAAGATCATGGAAGTTGGAACCTTATCTGAGGAGGAAGCATGGATCCTTTTCAGGC  
AGAAAGTAGGTGACTCAGTCAACGATCCTTCCCTACTTGACATAGCAAAAGATGTCGCGTCGCAAAAGA  
GTGCAAGGGGTTGCCGCTTGCAATTATTACAGTTGCAGGAGCACTAAAGCTTAAACTAAGCCTTCATG  
GGAGGATGCCCTCAAACAATTATGCAATGCAGAAACAAGAAATATCCCTGTAGTTCACACAAAGGTGTA  
TAGACCTCTGAGGCTAAGCTATGATCACTTGAAAGTGAAGAAGCCAGGTATATCTTTTTGCTTTGTTCT  
TTGTTGAGGAAGATAGTGATATTTGACTGAAGAATTAAGTATGGAATGGGGCTTGGCATCTTTT  
TGAAATTAATAATATAGAAGGAGCAAGAAATAGAGTATGCCATCTGTTAGAAACTGAAAGATCGTT  
TCTTGTTATCCCAAGGTTCAAACATAAATTATGTCAAATGCATGATGTGGTTCGTGACGTGGCTATATA  
TATTGCTTCTGAGGGAAAGCATATATTTATTGTAAGTCATGATGTGAACTCAGAAGAGTTCCCAAGAAAA  
GACTCTTACGAGCAATATAGTCACATGTCCATTGTTGCAAATAAATTTGATGAGCATCCTAGTCCAATAA  
TTTGCCCAAATTTGAAGCTTCTAATGTTGAACTCTATTGTAAAGAGCCAATCAAATTACAAGACAATTTT  
TTTGATGGGATGAGTAACTCAATGTCTTAAGCCTGAGTGGATATGAGTACTCCATTTGGCCTTTTCCAG  
CATCCATTCAGAGGTTGTTGAATCTGAGGACGTTGTGTCTGAGTAATTTAAGGTTGGATGACATATCCAT  
TCTCGGTGAACTTGTCACTTTAGAAATTCAGCATAAGAGATTCTCAGTTAGAGGAGCTGCCCGTGGAG  
ATAGGAAAATTGAAGAATCTAATCATGTTAGAGTTGCGGAATGAGGAAAAAGCACTGGAATGATTTCA  
CCAGGGGTCTTATCAAGATTAGTTCGATTGGAAGAACTACATTTGGTGGGAGTAGAACATTGTAGTTAC

TCCAACCTGAGGGAGCTGGAATCGTTATCGAGATTGACTTCACTGACATTAAGTGAATGTTCCGGAGAT  
GTGATCTACAGTAACTGGGCCTTACCTCCAAGTTGACACGGTTTGCTCTTACAGTGGGTAAAGCTTACA  
GAGCTACTTCAATCATGGATGATTACGACAAGAATATTAGTTTAGAGGTCACCGAGACTGCCCCATTAG  
GTGATTGGATCCGCCACCTGTTGAGCAAGAGCGAACTTGACATTCAACCGGAGAGGGAACCAAGAAC  
GTGTTGGCCGAGTTGCAGCTGGATGAATTCAGAATGTGAAATATCTCTGCCTGAAATATTTTGATTCAT  
TGGCACATATCCAATGTCAGAATAATGTTTCATTTCCCAAACCTCGAAAGACTGGAGGTAAGAAAGTGTC  
ATTGTCTAAAGTATGTTTTTTTTGTGTCCTTGGATGGAGGAAGTTCAACAGTAGCTTTCCTTGATGATGA  
GGAAGCCGAGATCTCTCTGAGAACACATGAAATAATCAAGTTCCCAATTTATATGATTTGAACCTTCTA  
TCTCTCGAATGCCTCACTCACTTTTGCAATGACACTATTGATGGCATTGAGTTCCTCGGTTACGGAAAAT  
GAACTTCATGAACTTACCTGAGTTCAAAAATTTCTGGCCTACAACCAACAACCTTCATCACTGACTCAAATC  
CTCTTTTTGATGAAAAGGTCTGCTTCCACTGCTCTA

>M6-PGSC0003DMG401018044 M6 LRR-RLP

TCGTATGAGGATTCAGTGAGTTTGGTAATCAAGGGGAAGGATATTGAGCTACAAAGAATCAGCACAAAT  
ATGACAACCATAGATCTCTCAAGCAACCATTTTGAAGGTGTCATTCCGAAAACACTAAAGGACCTCAACT  
CACTTTGGCTACTAAATTTATCCATAACAATCTCATAGGTCATATTCCAATGAAATTGGGGCAATTGAAT  
ACACTTGAAGCTTTAGATCTCTCCTGGAATCGGCTCACTGGAAAGATTCCGCAGGAATTGGCAAGAATG  
AACTTTCTGGCCTTCTTAAACGTCTCTCAAAATCATCTCATCGGACCAATTCCTCAGGGTCTACAGTTCAA  
CACATTTGAAAATGACTCGTATGGCGGCAATCTTGATTTATGTGGTCCTCTTTATCAAAGAAATGTGAA  
ACAAGTGGTTAATCACATGTTTCTCAACCATTGGAGTTTGAAGAAGATGAAGGCAAGTCATATTTTTTTA  
GTGGATTTACATGGGAATCAGTAGTCATAGGCTACAGTTTTGGACTAGTTGTTGAAACTGTCATGTGGA  
GTCTCATGTTTAAATACCGTAAGCCAAAATGGTTTGTGGAATATTTGATGGACTCATGCCTCACAAGAA  
AAGAAGGCTAAAGAAGAGAGCTCAGAGACGAAGGACTTGATGGAAGATTGAGAGGGCTAAATTGACT  
TTGTTTAAATTTGTGGACTAATAAGTGAATTGTTCTGTTTTTGTCTTTTTTTAATTTCTATTTGTTGTTG  
TATATGTTAGAAACATAATTATTTGTGTGT

>M6-PGSC0003DMG401018576 M6 LRR-RLP

CTCTTAGCATTCAACAGGTAAAATAAAGTTGTTAGTAATTGAAGTTTGAACATTTATCTTCTTAAATCAT  
TTTGTGTTTCTTGTGTTTGTGCTTGCAGATTTAGAAATGGAGATTGGGTAAACAGTTGGTGGTGCATTTCTC  
TCTTCAGCTTTAAATGTTCTCTTTGATAGGCTTGCTCCTCACGGTGATCTTCTCAACATGTTTCGGAAGCA  
TAAGGATCATGTTTCAAGCTTTACACAAGCTGGACGACATTTTGTGTTGTTCTTCAAGATTGTGCTAAGTGAT

GCAGAGAATAAGCAAGCATCAAATCGACAAGTGAGCCAGTGGTTCAATAAGCTTCAGAATGCTGTGGA  
TGGCGCTGAAAACCTTGATAGAAGAAGTCAATTATGAAGCTTTGAGGCTTAAGGTGGAAGGCCAGCATC  
AAAATCTTGACAGACACAAGCAACAACAAGTGACCTCAACCTGTGCTTGACTGATGAATTTTTCTTAAC  
ATAAAGGAGAAGTTGGAAGAAACCATTGAAACATTGGAGGTGTTGGAAAAGCAAATTGGCCGCCTTGT  
CTTAAGGATCATTTTGGTTGACTAAACAAGAACTAGAACACCTTCAACTTCTTTGGTTGATGATTCTG  
ATATCTTTGGAAGGAAGAATGATATAGAGGATTTGATTGACCGTTTATTATCTGAAGATGCAAGTGGAA  
AAAAGCTTACTGTAGTTCCTATTGTTGGAATGGCGGCCTGGGTAAGACAACACTTGCTAAAGCGGTTT  
ACAATGATGAGAGAGTGAAGAAACATTTTGTGTTTAAAAGCTTGGTTTTGTGTTTCTGAGGCATATGATGC  
TTTCAGAATAACAAAAGGGTACTTCAAGAAATTGGCTCAACTGACTTGAACGTTGGTGACAATCTTAAC  
CAGCTACAAGTCAAATTGAAGGAAAGATTAAGGGAAAGAAGTTTCTTCTGTTCTGGATGATGTGTGG  
AATGACAACACTACAACGAGTGGGATGACTTGAGAAATGTTTTGTACAAGGAGATATAGGAAGTAAGATC  
ATTGTGACGACATGTAAAGAGCGTGTGCCTTGATGATGGGAAATGAGCAAATTAGCATGGACAATTTG  
TCTACTGAAGCCTCTTGGTCTTTATTCAAAGACATGCATTTGAAAACATGGATCCTATGGGACATCCGG  
AACTTGAAGAGGTTCGAAAACAAATTGCAGCTAAGTGCAAAGGACTGCCCTTAGCTCTGAAGACACTAG  
CTGGCATGTTACGCTCCAAATCAGAGGTTCAAGAGTGGAACGTATTCTGATAAGTGAATATGGGAGC  
TGCGAGACAAGGACATATTACCAGCGTTGATGTTGAGCTACAATGATCTTCCCGCACATTTAAAGCGAA  
GTTTTCTTTTTGTGCAATATTTCTAAAGATTATCCATTTAGGAAAGAACAAGTCATTCATCTGTGGATT  
GCCAATGGTCTCGTACCACTGGAAGATGAAATAATTGAAGATACAGGCAACCAATACTTTCTCGAGTTG  
AGGTCAAGATCATTATTCGAAAGGGTCCCAAATCTTTCTGAAGGCAACAAAGAGAATTTATTCTTAATGC  
ATGACCTTGTCACGATTTAGCCCAAATTGCATCTTCAAACCTTTGTATCAGGTTGGAAGAGAGCCAAGG  
ATCTCATATGTTGGAAAAAAGTCGGCACTTATCTTATTCCATGGGAAAAGATGGTGACTTTGAGAAATTG  
ACACCCCTCGACAAATTGGAGCAGCTGAGGACATTGCTCCGATATGTATTGGTGTCAATTATTATTATC  
TAAGCAAGAGGGTGCAGCTTAACATATTGCCAAGACTAACATCCTTAAGGGGATTATCGTTGTTAGGCT  
ATAAGATTCAGGAGTTGCCAGATGATTTGTTTGTCAAATTAAGCTCCTCAGATTTTTGGACCTTTCTGAG  
ACATGGATTACAAAGTTGCCAGATTCCATTTGTGCATTGTATAACTTAGAGACACTTCTCCTGTCATCTTG  
TGATTATCTTGAGGAGCTACCGCTGCAGATGGAGAAGTTGATTAACCTTGCATCTTGACATAAGCAAC  
ACTCATTGGTTGAAGATGCCGCTACATCTGAGCAAGTTGAAAAGCCTCCAATTGTTAGTGGGAGCCAAG  
TTTCTTCTAGGTGGTTGCGAGAATGGATGATTTGGGTGAAGCACAGAATTTGTATGGATCTCTATCAGTTG  
TAGAGTTGGAAAATGTGGTTGATAGAAGGGAAGCTGTGAAGGCAAAGATGAGGGAGAAGAATCATGT

TGACAAGTTATCACTGGAGTGGAGTGAAAGTAGTAGTGCCGACAATTCACAACTGAAAGAGACATACT  
TGATGAGCTACGCCACATAAAAACATAAAAAGTAGTCGAAATCATCGGATATAGAGGGACAGCATTTC  
GAATTGGCTAGCTGATCCTTTGTTTCTTAAGCTAGAGCAGTTGTCTATTGCTAACTGCAAGAACTGTTATT  
CCTTGCCAGCACTAGGAAAACCTCCATTTTTGAAATTCCTTTCCATTAGAGGGATGCATGGAATAACAGA  
GGTGACGGGAGAATTCTATGGCAGTTGGTCCTCCAAAAGCCTTTTAACTGTCTTGAGAAGCTTGAATTT  
AAAGATATGCCGGAGTGGAAGCAATGGCACGTAAGGTAGTGAGAGTTCCTATACTTGAGAAGCT  
TGAAATTAATAAATTGCCCTGAACTCAGTTTGGAGACACCCATCCAACCTTTCAAATTTAAAAGGTTTGAA  
GTTAGTGGTTCTCCAAAGGTTGGAGTTGTTTTGATGATACTGAGCTGTTTAGATCCCAACTTGAGGGAA  
TGAAGCAGATTGTTGAATTAGATATACGTGATTGTAACCTCTTACCTTCTTCTTTTAGCATACTGCCCA  
CTACCTGAAGAGAATAAGGATATCTGGTTGCCAGAAATTGAAATTGGATCTGCCAGTTGGTGAGATGA  
GTATGTTTCTGGAGGATTTGACACTGGGAAAATCTGATTGTATAGATGATATATCACCTGAGTTGCTCCC  
AAGAGCACGCAATTTGAATGTATCGGATTGCCACAACCTTACTAGGTTTTTGATTCTACTGCCACTGAA  
AGTCTCTATATTTATAATTGTGAGAATGTTGAAATACTTTCGGTGGCATGTGGGGGGACCCAGATGACG  
AAGTTGAGTATTCAGGGCTGTAAGAAGCTGAAGTGGCTGCCAGAACGTATGCAGGAACTCCTTCCATCT  
CTTAAGAACTGTATCTGCGTAATTGTCCAGAAATAGAGTCCTTTCCTGAAGGAGGATTGCCCTTCAATT  
TACGAGTCCTTTGGATCAAATATTGCAAGAACTGGTGAATGGACGAAAGGAGTGGCGTTTACAGAGA  
CTCCCCTGTCTCACAGAGTTATGGATCTGTCATGATGGCAGTGACGAAGAGATTGTTGGTGGTGAGAAT  
TGGGAGTTGCCTTCTCTATTCAAAGACTTGGAATATTCAATCTGAAAACATTAAGCAGCCAACATCTCA  
AAAGCCTCACCTCTTCAATATCTAGAAATTGCGGGTAATTTACCTCAAATTCAGTCAATGCTGGAACA  
AGGCCAGTTTTCGCACCTCACTTCACTTCAAAGTCTAGGAATCATGAATTTCCCTAATCTCCAATCACTTC  
CTGAATCAGCACTGCCCTCCGCCCTCTCT

>M6-PGSC0003DMG401019148 M6 LRR-RLP

GAGAGAAATTTGACTTTGGTAAAGAAGGAAGAAGACGACTGAGTGTAGAAGCAAACCCAACAATGGC  
AGATCCAGTAATTGGTGCTACAGTTCAAGTTGTGCTTGAGAACTGCTTTCTCTCACTATTGAGAAAGTC  
AGTAGCTCAAGGGACTGCAACAAACATCTCAGAATGCTCACACAAAATGTATCCATCATTCAAGCTTTCA  
TTAATGATGCTGAAAGACGACAAGTTGACGATCACGCTGTAGAAAAATGGCTGAAAATGCTTGAAAGA  
GTTGCTGAAAATGTGTTTCGACGAATTCACATATGAATCTCTCAAAGCACAAAGTATGCAGATCCGAAAT  
AGCCCTATGAGAAAGGTCAGTGATTTCACTTCTCATACAGCTTTTAAAGAGTAAAATGTCTCGAAAATCA  
AAAATATCAATGAAGAGTTGAGGGTTATCAATCAGTTAGCCAAAGACCTCGGTCTCCAATCACTAATTGT



TTCGTCTCAGCAAATACTACCGTTCCGAGAAACAGATTCCTTAGTAGTTGCTTCGGATGTCGTTGGTAGA  
GACAACGATGTTGCTGAAATAAAGGAGAAGATGTTGAACATGAGAGACGAAGTTGTTCTGTGCACCATT  
CCCGTAGTGGGGATGGGAGGTTTAGGGAAAACACTACTGTAGCTAAGAGAATTTTCAATGATGAAGAGAT  
CGAAAAACACTTTGAGAAGAGAGTGTGGTTGTGTCTACCTGAAATGTCAGAGACTAAGAGCTTTCTTGA  
ACAGATCCTCCAATCATTGACAGAGAGGAACTTGAGGTCCAGACCAGGGATATAATAGTCAAGAACT  
CCGAGATGAACTAGGTGGAAAAAGGTATTTGCTTGTCTTAGATGATTTGTGGTGTGTTACCTTCCGGTA  
TGGGATGAGTTCGTGGACAGCTTGAGAGTAGTAAACACTTCTAGAGGAAATTGCATTCTCGTAACTACT  
CGCATGAAACAAGTGGCATCCACTGTAGCGGTAGATGTTTCATGTGCTGGGAAAGTTAGCAGAAGATCAT  
TGTTGGTCCATTTTCAAACAAAGAGCATTGTTGATGGGGAGGTTCCAGAAGAAATGGTGAGCATGGAA  
AGCAGTATTGTTGAAATATGTCAAGGTTTACCGTTGGCTGCAAGTGTGTTGGGAGGCCTTTTACACAACA  
AGGAAAGACATGAATGGCAGGCAATCCTTTATGGCAACCCCTTATTGCAGGTGAAAATGATAATGGG  
GAAAATAGCTTAAGGAAAATCCTAAAACCTTAGCTATGATTATTTACCATTTCCACATCTGAAAAATGCTT  
TGCCTACTTTGCAATGTTTCCAAAAGATTTTGTGTTTGGAAAGGACCAACTAATCCAACCTCTGGATGGCG  
GAAGGCTTTCTTCGTCCATGTCAAGAGACCCCTGTGATGGAAGACGTTGGGAACAAGTATTTTCACTTT  
TGTTGCAATATTCCTTGCTGCAAGATGTTGAGCTAGATGAGCACAACAATATAAGATACTGTAAGATGCA  
TGATCCTGTGCATGATTTGGCTGGAGATATTTTAAAATCTAAACTATTTGATCAAAGAGTATTGGAGGA  
GAAAATCTTTCTCGAGGCCGATACTTTGGATGGGACTCACCAAGTGATCAAATTGATATGATAAATGAG  
CCAGGACGTATATGCACATTGTTCTCGAGAAACAATATATCCAAAGATGTTCTATTGAGCTTTCAGTTCTT  
GAGAGTTCTAAATTTTTCCAGGTCAGGCATCAAGGAGTTGACAGCCTCAATTGGCAAATAATACTTG  
AGATATCTTGATCTCTCCAATACTAATATCAAAGCCTTGCCTAACTCCATTTGCAAGCTCTACAATTTGCA  
AACATTTAGAGTAAGTAACTGCTTTTTACTCGAGGAGCTTCCACATGAAATGGCGAATATGATAAGTTTG  
AGACACATATATTACAGCAATGATTTGAGATCAGACTCTAGAAAATGGTGTTCGGCAATCAGAACTTTC  
AGATGCCACTTTAGATGGGACAATTGACTTGTCTTCAAACACTACAGTTTTTCAAGGTAGGTTGAGAGAA  
AGGTCGTCAAATAGAAGAATTAGGTTGTTTGAAGAACCTTAGAGGTGAATTGATGATCAGAGATCTTCA  
ATTGGTCTGTAATAGAGAAGAAGCTGTAAAAGCATGTCTACGGTAGAAACCAAATGTCTCCAAGTTGGC  
ATATTTATGGTCCCATGATGAATCAGAAGACTGTGAGGTCAATGATGAGTATGTTTTGGATGGTCTTCAA  
CCGCATACTAACTTGAAAAATTTAGTGGTAGTGAACATTTGGGGACTAGATTTCTTCATGGTTCAGTG  
AAGAATTGTTACCAAATTTGGTCAAGTTGAAATTAAGTGGTTGCAGAAAGTGCAAGGAAATTCATCGC  
TTGGCCAACTTAACTACTTCGGCATCTGAGCTGATAGGATTCCATGAGTTGGAATGTATTGGACCTAC

ATTTTATGGTGTGAAGTTGACAATAATGGATCAAGCAACAATAACACCAATATCCAAGTGTCCCGTTA  
CTCAAAGAAGTAGTATTGTGGAATATGCCTAGACTTACTGAGTGGAACGAAGTGCAGTTGTTATCAACA  
GGAAATGATGGTAGCGACAGATTTGGAGTAAGAATGTTTCCTGGGCTGGAGAAGTTGAGGATTATTAA  
CTGTCCACTGTAAAAAGTATACCGAATCAATTTGAAATGCTGCGTGAATTAAGCATCGATGGAAATCAA  
ATAATTGAATTTAGAATTGAGGTTCTTCTTGAACATTAATGCTAGTGAGCTGCAAATGACTACACCA  
TCTGGACTTTTAGATGCCATGCCAAATTACAGTATCTGAAGATCAAGGACTGTCGATTGCTAGGATTAA  
GCTATGTTGGATGGGCTCATGAACCTTGTTTCTTTAATTTGCAACAGTTATTTTCATCAAAGTGTGGAAAA  
CTAGAGCATCTTCCATCCAGATATTCCATGCGATGCCTCACCAAATTGCGGTACCTGGGAATTAAGGTT  
GTGCTCAGTTAGAATAAAGTTCTATCAATAATAGGAGTGCCGAAACTCCCAGTGGTCCAACATTTCTCA  
TATTTAGTAATTAACGTTGGGTTTCATGAAAATTCATGACTTGTGTAAGTCTCAATTTCTCCTTTTAGTTTT  
CCAAGCTTTTCATTCTCCCCTTTTAGTTTTCCAATCTTTTCATTCCCCAAACGAATACATCTTACTATAGTAC  
TGAAGAAGTTGAGGATTAGTAGCTGTCCACTGTGAAGAAGTACTCCAAATCAATTTGAAATCCTGCATGA  
GGTAGCAATTGAAAGAGTTAACAGTGAATGCCGTTGTTGAACTTGTGCAGCAACTTGACATCTCTCGT  
AGATCTTATTGTGGATGATGTGAAAGAGCTCACTTGTTTTCCAGATGAGATGCTACATAACAATGTTTCC  
CTTGAACATCTACTGGTCTTAAATTGCAGAGAGTTTCGCGAATTGCCACAAAGTTTATACAATCTCCGTTT  
TCTTAAGAGCTTAAGGATTGAGCGCTGCAACAATTTCAATTCCTTTCTGTTCCCAGCGGAGAGAATCAT  
TTTACTTCATTCCAAAGTCTTGAGTTGTCCAATTGTGATGGCTTAACCAGTTTACCAAGTGAATGCTAGA  
GCATTGTCGGTCCCTTGAATCTTTGAAGGTCAACAAATGTAACAACCTTAGTTTCTTCCCTTACATGTGT  
GGGAAATGCCTTCACTTTTCATATTTGAATATATCAAATTTGTCTCAAATTTGGATAGTGTACCTGCAGGGG  
CCTTACCCTCACTGGGTTACAGGAATTGTGCATTGGACCTTTCTCAGAGACGGTGGATTTTGAGGCA  
TTCCAATTGATATTTAATGGCATTACAGCAGCTATCATCCCTTCTAAATTAGAGGTGTATGGGAATAGGC  
AATGGGATTCTCTGCCCTATCAGCTTCTGCAACTTTCCGCCTAACAGAGATGGGAATAAATGATTTTGG  
AATCAAACTCTTCTGATAGATTTGAAATCTTACTTATCTTGAACATTAGAGCTAGTGAGGTGCAGA  
CGACTA

>M6-PGSC0003DMG401019681 M6 LRR-RLP

GAGCACTCAAAAAATGGCAGCTCTGTTTCCAAACCAATTTTCTCTCTCTACAATCCTCTCTTTCTCTCTT  
CATCTCCGTCTTCTTCTTACCCTATCTCATTGCGACGATTTCTCAGCTCTTTTAGCCTTCAAATCCCGAGC  
TGATACGTGAATTTTCTTACTTCATGGTCTAGAAATGCCCCCTGTTCTTTCATGGATAGGTGTAAAATGTC  
ATCCAATTAATCGTAGAGTCGTAAAAATTGACTCAATCACTTAAACCTCACCGGATCAATTCATCCATTG

ATTCATCTTACACAAATTCGTCATTTAAGTTTACATCACAATTCTCTCAGTTCGATTCCGAAATTCGATTTT  
TGGCCTAATCTCAAACATGTTTACCTCTCTCACAACAAGTTTTCCGGTGAATTTCCACCAGGAATTTACCA  
TTTGAAGCGACTCAGGCGACTTGATTTGTCGTTAATGAGTTCTCCGGTGAGATTCCGGTGAAGGAGTT  
GAATCAATTGCCGCATTTGATCACTCTGCGTCTCGAGTTTAATTCTCTTAGCGGATCACTTGGTGCTGATG  
AAAAAAGAGCTGTTGCTTCAGTTAAGGAATTCAATGTTTCTGGGAATAACTTTTCCGGCAAATCCCAA  
TTGGTTATCAAATTTCCAGTGGCAGCTTTTGCAGGTAAAGTGCGGGAAATGAGTGGATTGGATCAAAT  
TTGAACGGATCAAACGGATAAAGTTCATAAATGGCCATTTTTTAGTTCTGTGAATTGAGAATTAACCAT  
GGTCATAGAATATTGTCGTGGAGTTTCACTTGTGAAATTTGAAACGTTACCACAATGACTATTTTCTCAAT  
TACAAGATTGAAAAATGGCTAGGTGCAAACAGGTCAAATTAATAAACAGGTCTTGATTAAGTGTCAA  
AATTTGTTCCGGTCAAACGAGTGAAATATCAGGGAATTTGCACAATTGGCCTTAAAAGGTCACTATTTA  
GATTTTATCCCCCTATGCTAGTGAGCTAAAATTTGCATTCAACTTCTTCTGAATGCGAATTTTAGCTGA  
CTAAGCTAACGATTACAAAATTTACAAGAAATGATGATAATTCTATGTTGAAATAACGTTTACTAGCTACT  
TTTCGGTTTTGTCTTTGAAAATAAACTACTTTTCATGAAGTTTGAATTCAACAGCTAATGTATTTTTCTTAT  
AGGAAACGTTCTTTGTGGATATCCATTACGAACTATTTGCCCGAGTGAAACAGTGGATAGTAATCCA  
ACAGTGATGAGTACTCCTAATTCACAATTCAACTTTCTTAATCAAAGAAAGAAGAATTTGAGTGAAAACA  
TGTTTCTTTGATAGTCACACTTGATGCAATTGGCGTTATGATGACGGTTTTGGTAATAACATGGTGTGT  
TATTACAGAAAGAAGAATCAAGAGAGCGAAAATTACAAGTTGAGGAAGATGAATAGGAAGTATAATCA  
GGACACGAGTAGTTCAAGTCTGTATCATTCAATTTGAATATGGTATCAAGAAAACAAGTATCAATTTGCA  
ACAATGGTTTGTGTTGAAGGATGTAAAGGTTTCAATAAAGTTGATGATTTGTTGAAGGCCTCAGCTGAAA  
TGTTGGGAAAAGGGAGTGTGGAACAAGTTATAAAGTGGCTATTTTGGATAATGGAGATGTTGTTGTG  
GTTAAAAGAGTAATTGAAAAGTTGAAGAAAATGAAAGATGTTGATGGATTTTGGAGATTAATTGGTAAT  
TTGAGACATACAAATGTTGTGCCACTTAGAGCTTATTATTCATCAAAGAGGAATTGCTTCTTGCTATGA  
TTTTCTCCCAATGGAAGTCTACACAATCTCTTACATGGTAATTTTTCAATCCTTCTCTCAATTCCAA  
GTCCAAAACGGAAATTTATTGTCTGTTTGGTCAAACCTTCAAACCTGTTATTTTAAAAAGTGTTTTTTG  
TTAGAAAAGTATTTTGTGCTTTGAAATACACTTTTGAATATTAGAGCAACAATTTGTGGCTTGATCATG  
TCCACGGTAACCTGAAGTTGAGTCACTGAGTATGTTGTTATTGTTGAATTTCTGCTTGATCAAGGTTTCA  
AAAAGTGCTTCTAGGGCAAACCTGCTTACTTCTGTTACTACTCAAAGCACTTATATTTTCTTAAACTT  
TTGTGAAACACCTCAACTCTCTAAATTAAGCACTTTTTTAAACAATAAACACTTTGAGCTTCCCAAAAAA  
TAATCAAACCTGATTATTAATTAGGAATAAAATGGAAGGGTATTGAGAGTTCATATTGTTGATACCCATT

TATTTGAGATTGAAATATAATTGACTTACATGCATTATTATAAGTAAGTAACGTTATACTATCAGTGTAAT  
TTAACATGTTATAATAAGTTGTTTATCAGATAATAAGTTACACTTATCATAATCAATTACTTGTAGTTATCT  
TTTAGGTGATCTAATAGTATAAAAATTCCACAGGCAATCGTGGACCGGGAAGAACCATTGGATTGGG  
CAACAAGACTAAAATATGCATTAGGAGCAGCAAAAGGACTTAGGTTTTTACATAGCTACAACAAAACCA  
AGATTTGCCATGGGAATTTACAGCATCAAACATACTAATTGATCACAATGGCAATGCTTGTATCTCTGA  
TATATGTCTTCACTTTCTCTTACAAATGCCAATTTTATCAAACAATGGATACAAAGCACCGGAATTATCGA  
CACAAAACAATGTAAACACAAACCAAAATCCAAGAAGTTTTTCTCAAAGAGTGATGTTTATAGCTTTGG  
AGTGGTTTTACTAGAGATTTTACTGGGAAAATTGCAACAAGTGAAGGGGAAACAAGTTTGGCAAAT  
GGATACAAAGTGTGTTGTGAACAAAGAATGGACTTGGGATGTGTTTGAATTTGAACTTGAAGGTATAAAG  
AAAGGGAAGATGAAATGGTTGCACTTTTAAAGTGGCTATGGCTTGTGGTTTCATCTCCAAAAGATA  
GGCCAAAGATGATTGTAGTGGAGGAAATGATCGAAGACATTGCGAAAAAAGATAACAGATAAAGGGA  
CAAGTCCATTATCCATCAAATTTTGAATGTTACATTTACTAGTCCTTAGGAATTTCTCGATCATCGAAAG  
AGGAGAATAGAGTTCTTTACTACTAAATACTAATTAGTTATGATGATTTTTTTTTCGTTTTCAATTTTTACCT  
AGAAATAATTTGGTACAATTACTATATCATTCTTTACTTCTTTAATTCTTGTTTTCTT

>M6-PGSC0003DMG401020789 M6 LRR-RLP

CTATGGGACATCCAGAACTTGAAGAGGTCGGAAAACAAATTGCAGCTAAGTGCAAAGGACTGCCCTTA  
GCTCTGAAGACGCTCGCTGGCATGTTACGCTCCAAATCAGAGGTTGAAGAGTGGAACGTATTTTGAGA  
AGTGAAATATGGGAGCTGCCACACGATGACATATTACCAGCGTTGATGTTGAGCTACAATGATCTTCCT  
GCACATTTAAAGCGATGTTTTTCTATTGTGCAATATTTCTAAAGATTATCCATTTAGGAAAGAGCAAGT  
TATTCATCTGTGGATTGCCAATGGTCTCGTACCAAAGGAAGATGAAATAATTCAAGATTCAGGAAACCA  
ATACTTTCTCGAGTTGAGTTCAAGATCATTATTCGAAAGGGTCCCAAATCCTTCTAAAAGGAACATAGAG  
GAATCATTCTTAATGCATGACCTTGTCAATGATTTAGCCCAAATTACATCTTCAAACCTTTGTATCAGTT  
GGAAGAGAGCAAAGGATCTCATATGTTGGAAAAAAGTCTACACTTATCATATTCAATGGGATATGGTGG  
TGAGTTTGAGAAATTGACACCCCTCTACAAATTGGAGCAGCTGAGGACATTGCTTCCGACATGTATTAGT  
AGTTTTGCCATTTTTCACTGTCTAAGCAAGAGGGTGTGCATAACATACTGCCAAGACTAAGATCCTTGA  
GGGTACTGTCATTGTCTCATTACAAGATTAAGGAGTTGCCAAATGACTTGTATCAAATTAAGCTCCTC  
AGATTTTTGGACCTTTCTGAGACATGGATTAGAAAGTTGCCAGATTCATTTGTGCATTGTATAACTTAG  
AGACACTTCTTGTGCATCTTGAATTATCTTAAGGAGCTACCGCTGCAGATGGAGAAGTTGATTAECTT  
GCGTCATCTTGACATAAGCAACACTCGTGTCTTGAAGATGCCGTTACATCTGAGCAAGTTGAAAAGCCTC

CAAGTGTTAGTGGGAGCCAAATTTCTTCTAGGAAGTTGGGGAATGGAAGATTTGGGTGAAGTACATAA  
CTTGACAGATCTCTATCAGTTGTAGAGTTGCAAATGTGGTTGATAGTAGGGAAGCTGTGAAGGCAAA  
GATGAGGGAGAAGAATCATGTTGACAAGTTATCTTTGGAGTGGAGTGAAAGTAGCAGTGCCGACAATT  
CACAACTGAAAGAGACATTCTTGATGAGCTACGCCACATAAAAACATAAAAGAACTCCAAATCATCG  
GATATAGAGGGACAAAATTTCCAAATTGGCTAGCTGATCCTTTGTTTCTTAAGCTAGTACAGGTGTCTCT  
TAGAACTGCAAGAAGTATTCTTGCCAGCACTAGGAGAAGTCCCTTTTTTGAAAATCCTTTCCATTA  
AAGGGATGCATGGAATAACAGAGGTGACGGAAGAATTCTATGGCAGTTTGTCTCTAAAAAGCCTTTTA  
ACTGTCTTGAGGAAGTTAGATTTCAAGATATGCCAGAGTGGGAAGCAATGGCACGTACTAGGAAGTGG  
GAGTTCCTATACTTGAGGAGCTTTTAATTATAAATTGCCCTGAACTCAGTTTGGAGACAGTACCCATCC  
AACTTTCAAGTTTAAAAAGTTTTGAAGTAAATGGTTCTCCACGGTTGGAGTTGTTTTGAGGGAATTAA  
GCAGATTGAGAATTTACACATTGGTGATTGTAAGTCTCTTGCCTTCTTTCTTTTAGCATACTGCCACTAC  
CTTGAAGAGAATAATGATATCTCGTTGCCAGAAATTGAAATTGGATCCGCCAGTTGGTGAGATGAGTAT  
GTTTCTCGAGTATTTGAGTCTGGAAAATGTGATTGTATAGATGTTATATCACCTGAGTTACTCCCAAGA  
GCACGCAAATTGTGGGTAGAGGATTGCCACAACCTACTAGGTTTTTTGATTCTACTGCCACTGAAAGGC  
TCGATATTTGAATTGTGAGAATCTTGAATACTTTTCGGTGGCATGTGGGGGGATCCAGATGACGTCAC  
TGAATATTTATTCGTGTAAGAAGCTGAAGTGGCTGCCAGAACGTATGCAGGAACTCCTTCATCTCTTAA  
GGAAGTGCAGTGAATTGAATGTCCAGAAATAGAGTCCTTTCTGAAGGAGGATTGCCCTTCAATTTACAA  
GCCCTTCAGATCAATTATTGCAAGAACTGGTGAATGGCCGAAAGGAGTGGTGTTTACAGAGACTCCCC  
TGCTCACAGAGTTAAGCATCTCACATGACGGCAGTGACGAAGAGATTGTTGGTGGTGAGAATTGGGA  
GTTGCCTTCTCTATTCAAAGACTTGGCATATACAATCTGAAAACATTAAGCAGCCAACATCTCAAAGC  
CTCACCTCTCTTCAATATTTATATATTCATGGTAATTTACCTCAAATTCAGT

>M6-PGSC0003DMG401021043 M6 LRR-RLP

AAAAGATTACGGAGAACTAGATGCAATTGCAGCGGAACGAATTAAGTTTCATTTGGATGAAAGGACTA  
TAGAGAGACAAGTTGCTACACGCCAACAGGTGCTCATCTTTAAATATTTTTCTAAAAACAGCTTTATA  
TCATCAAATTCATGTGTGTTTTGGGATTTTGTCTAATCTAAATGTTCTTCTCAAGTCTAAGTAGATAAGT  
GGATCCAGATTTGGATTTATAATTGGGTTCAAATCTATTATCTAAATCTGTTTAGTGAAGTTTTTAACA  
TATATATATAACCTCAGATAAATCCATAGCTTACTCATAGGATTAGGATAGGCCCCCAAGTCTAAATGAC  
AGGATAAAGCCAGAGTTGTTTTAGATCTTATAATGTGAATTCAAAACGTGCATTTTTTTAATTTGAAATA  
TGCTGCTGCTTCTCAAGCTTATCATTGTCTCGTTATTGTGCAAATCTTCTTCGTTTTTTGCTGACTCCT

ACCGAGCTTGGACCAGGTTTTGTTTTAAATGAACCACAAGTTTATGGAAGGGACAAAGAAAAGGATGA  
GATTGTGAAAATCCTGATAAACAATGTTAGCGATGCCCAAATACTTTCAGTCCTCCAATACTTGGTATG  
GGGGGACTAGGAAAGACAACACTTGCCCAAATGGTCTTCAATGATCAGAGAGTAATTGAGCATTTCGT  
CCCAAATATGGATTTGTGTCTCAGAAGATTTTAATGAGAAGAGGTTGATAAAGGAAATTGTAGAATCT  
ATTGAAGAAAAGTCACTTGGTGACATGGACTTGGCTCCACTTCAAAGAAGCTTCAGGACTTGCTGAAT  
GGAAAAAATATTTGCTCATCTTAGATGATGTTTGAATGAAGATCAAGATAAGTGGGCTAGGTTAAGA  
CAAGTCTGAAGGTTGGAGCAAGTGGTGCTTTTGTCTAACCCTACTCGTCCTAAAAGGTTGGATCAA  
TTATGGGAACATTGCAACCATATGAATTGTCAAATTTGTCTCAAGAAGATTGTTGGTTGTTGTTTCATGCA  
ACGTGCATTTGGGTACCAAGAAGAAATAAATCTTAATCTTGTGGCTATCGGAAAGGAGATTGTGAAAA  
ATGTGGTGGTGTGCCTCTAGCAGCTAAACTCTTGGAGGTATTTTGCCTTCAAGAGAGAAGAAAGACA  
GTGGGAACATGTGAGAGATAGTGAGATTTGGAATTGCCTCAAGAAGAAAGCTCTATTCTGCCTGCCCT  
GAGACTTAGTTACCATCATCTTCCATTTGATTTGAGACAATGCTTTGCATATTGTGCAGTATCCCAAAGG  
ATACCGAAATGGAAAAGCAAATCTAATCTCTCTCTGGATGGCACACGGTTTTCTTTTATCAAAGGAAA  
CTTGGAGCTAGAGGATGTAGGAAATGAAGTATGGAATGAATTATACTTGAGGTCTTTCTTCCAAGAGAT  
TGAAGTTAAATCTGGTAAACTTATTTCAAGATGCATGATCTCATCCATGATCTGGCTACATCTCTGTTTT  
CGGCAAGCGCATCAAGCAGCAATATCCGTGAAATAAATGTAAATATTTCCACATATGATGTGCGATTG  
GTTTCGCAAAGTGGTGTCTTCTTACTCTCCTTCTCACTTGCAAAAGTTTGTCTCGTTGAGGGTGCTTAAT  
CTAACTAGATTAAGACTTGAGCATTACCGTCTTCCGTTGGAGATCTGGTACATTTAAGATACTTGAACCT  
CTCTATCAATGACATGCGCAGTCTACCAAAGCAGTTATGCAAGCTTCAAATCTGCAGACTCTTGATCTA  
CATGGTTGTCGTTCACTTGGTTGTTTGCCAAAACAAACAAGTAAACTTGGTAGTCTCCGAAATCTTTACT  
TGATGGCTGTCAATTGGCTTGTATGTCACCAAGGATAGGATCATTGACATGCCTTAAGACTCTAGATTAC  
TTTGCAGTGGGAGGGAAGAAAAGTTGTCAACTTGGTGAATTACGAAACCTGAATCTCTCTGGCTCAATT  
GAAATCACTCATCTTGAGAGAGTGAAGAATGATATAGATGCAAAGAAGCCAATTTATCTGCAAAGAA  
AATCTGCATTCTTTAAGCATGAAATGGGATAACGATGAACGTGCACATAGATATGAATCAGAAGAAGCT  
GAAGTGCTTGAAGCCCTGAAACCACACTCCAATCTGACTTGTTAACAATCAGTGGCTTCAGAGGAATCC  
GTTTCCAGACTGGATGAATCACTCTATTTTGAAAAATGTTGTCTCTATTGTAATCTTCCGTTGCAAAAAC  
TGCTCATGCTTACCACCTTTGGAGAGCTGCCTAGTCTAAAAGTCTAGAGTTAGAGAGTGGGTCTTCAG  
AAGTGAAGTATGTTGATTCTGGATTCCCACAAGAAGAAGGTTCCATCCCTGAGAAAACCTTAGTATAG  
AGAGATTTGTAATCTGAAAGGATTGCTGAAAAAGGAAGGAGAAGAGCAATTCCTTGTGCTTGAAGAG

ATGTCGATTGAGTGGTGCCTATGTTTGTTATTCCGACCCTTCTTCTGTGAAGAAATTGGTAGCTTATGG  
GGACAAGTCAGATGCAATAGGTTTCAGTTCCATATCTAATCTCAGGGCTTACTTCCCTCCAGATTAGA  
CATAACGAAGAAGCTACTTCACTCCCAGAAGAGATGTTCAAAGCCTTGCAAATCTCAAATACTTGAAAA  
TCTCTTCTTTAAGAATCTCAAAGAGCTGCCTACCAGCCTGGCTAGTCTCAATGCTTTGAAGCATCTGGAA  
ATTGGATATTGTTATGCACTAGAGAGTCTCCCCGAGGAAGGGGTGAAAGGTTTAACTTCACTTACGGAA  
TTATTTCTTGATGATTGTGAGATGCTACAATGTTTACCGGAGGGATTGCAGCATCTAACCTCCCTCACAA  
ATTTATCAGTTAGGGATTGTCCAACACTGGCCAAGCGATGTGAGAAGGGAATAGGACAAGACTGGTAC  
AAAATTGCTAACATTCCTGATGTGTTTATCCGTTAAGTCTTATTCTAATTGGATGTAATTTTCTGATTTTC  
TTTTGGAAACAAATCAACTATTTGTAACATACTTGATTTTTCTTGGGTCTGTAACAATAAATATTTGAATTT  
TTTCATATTAAGATTCAG

>M6-PGSC0003DMG401021049 M6 LRR-RLP

ATGTTTACAATAGATCCTAAAGTTTCTGATTATTGTATCGGCATAAGAGGCCAATGGATTCAGTCATATC  
AAAAACTCTTTCATGGACAAGAGCACAGATTGTTGCTCTTGGGATGGAGTTCATTGTGATGAGATGAC  
AGGACAAGTGATTGAGCTCAACCTCACTTGCAGCAAACCTCAAGGCAAGTTTCATTTCAATAGTAGCCTC  
TTTCAACTCTCCAATCTCAAAGGCTTGATTTGTCTTATAATGATTTTTCTGGGTCGCTCATTTACCTAAA  
TTTGGTGAGTTTTCTAGTTTGACGCATCTTGATTTGCTTCTTACAAGTTTTACAGGTCTAATCCCAGCAGA  
AATCTCTCACCTTTCTAAATTACGGATTCTTCGTATCCGGAGTGATTATGGGGTTAGATTCGGACCTAACA  
ATTTTGAATTGTTCTGAAAACTTAACCCAATTAAGAGAGCTCGACCTTAACTTTGTGAACATCTCTTCC  
ACCTTCTCTAAATTTCTTCTTATTTAACAACCTCTATGGCTCCATACACACAGTTACGTGGGATATTG  
CCAAAATAGTTTTCCACCTTCCAACCTAGAATCTCTGGATTTAACAACAATCCCCAGCTCACAGTTAG  
ATTTCCACGACCAAATGGAATACCAGTGCATCACTCATGGAGTTATATCTCAGTGGTGTGAATTTCACT  
GGTAAGATACCTGAATCATTTAGCCATCTAACTTCACTGCTTACTTAGTGATGAGTTCTTCCAATCTCTC  
GGGGCCATTCTTAATCCTTTATGGAATCTCACCAACATAGAGGTTTTGGACCTCATAATAATCATCTTG  
AAGGACCAATTTCTCCGTTCTTGAGATTTGGAAAGCTCAGGGAGTTCTCACTTAGAAATAACAACCTTTGA  
TCTCCAACCTGAGTACTTACCCTTTAACAGAAGCTGGACACAACCTGAAACGTTAGACTTTTTCGTCCAATT  
ACCTAACTGGTCCAATTCATCGGGTGTAGTGGACTGCAAAACCTACAATCACTCAGCTTGTCATCAAA  
CCACTTAAACGGGACTATACCATCCTGGATATTCTCCCTCCCTTCACTATTTGATTTAGACTTGAGTGATA  
ACCATTTCAGTGGAAAGATTCAGGAGTTCAAATCCCAAACATTGTTTTCCATTTCTGTAAAACAAAATCA  
GCTGGAAGGTCCTATTCAAAGTCATTCTAAACCAGCAGGGACTATATTATCTTATCCTTTCTCAAATA

ATCTCAGTGGACATATTGATTCAGCCATCTGCGATCTGAATTTGGGTGTGCTAAATTTGGGAAGTTGTAA  
TTTGGACGGAACAATACCACAATGTTTGGGTGAGATGAGTGAAC TTTGGGTTTTGGATTTAAGCAACAA  
CAGTCTTAGTGGGACAATTAATACAAC TTTTAGTTATGGGAACCAACTCAGAGTCATTA AAAATGGATGG  
GAATAAGCTAGAGGGGAAAGTCCCACGATCTTTGATCAATTGCAAATATTTGCAACTCTTTGATTTAGGT  
AATAATGAGTTGAATGACACATTTCCAAAATGGTTGGGAGCCCTACCTGATTTGCAGATTTTAAACTTGA  
GATCAAATAAGCTGCATGGCCCTATAAATGATTCAAGGACTGAGA ACTTGTTTGCTAAAATTCTAGTAAT  
AGATCTCTCATCCAATGGATTCAGTGGAGATTTACCTGTGAGCCTTTTTGAGAATTTTCAAGCCATGAAA  
ATGATTGGTGAGAATAGTGGAAACCCAGAGTATGTAGCAGAAACATATTCTACTTTATACACAAATTCTT  
TGATAGTGACAACAAAGGGACTGGATCTTGA ACTTCCTCAAGTTTTGACTACGGACATAATTATCGATCT  
CTCAATGAATAGATTTGAAGGTTCTATCCCAAGTATTATTGGAGATCTAATTGGACTTCGTACGTTGAAC  
TTGTCTCATAATAACTTGAAAGGTCATATACCAGCATCAATGCAACATTTATTTG TACTTGAATCATTGGA  
TCTCTCATCCAACAAAATCGGCGGAGAAATTCACAACA ACTTGCATCCCTCACATCACTTGAAGTCCTAA  
ATCTCTCTCACAATCATCTTGTTGGATGCATTCCGAAAGGAAAACAATTTGATACGTTTGAGAATAGTTC  
ATACCAAGGGAATGATGGGTTACGTGGATTGCCACTCTCAAAGATTGTGGCAGTGATGAAGGGGTAC  
CACAAGCAACA ACTCCATTTGGGCTAGATCAAGAAGAAGAAGAAGATGGAGATTCATCAATGATAAGTT  
GGCAGGCGGTTCTCATGGGTTACGGTTGTGGACTTGTTATTGGACTGTCCGTAATATACATAATGTTGTC  
AATTCGATATCCAGTGTGGTTTTCGAGGATGGATGTAGAATTGGAACACAAAATTCTTACGAGAATGAA  
GAAATACAAAAAAGGATATGTAACCTCCAGGTATTA ACTTGATCTTTTTCTTCAAAGATTAATTGTTAT  
ATAGCAATGAATTTTCTATTTCTTCATCCTTTAAGATCTTGAGTTTTAGTCTTCTTTTTTAAA AATTGCAG  
GATTCAAGCCTAA

>M6-PGSC0003DMG401022197 M6 LRR-RLP

TGATAATATAAGATTGTT CATAAACAAAAA AATGAATATGAACTTGTCACTTCTTG TAGTTATTTTTTC  
TTTGCTTTGCTTCTCCTTCACTATCAGTAAGATGCAATCCAAAAGACAAAAAAGTCCTTTTACAGATAAAG  
GAAGATTTGGGCAATCCTTACCATTTAGCTTCATGGGATCCAAACACAGATTGCTGTTACTGGTACGTCCG  
TTAAATGTGACCGGAAAACCAACCGGATAAATGCTCTCACTGTCTTCCAAGCCAATATCTCCGGTCAAAT  
TCCGGCAGCCGTCGGAGACCTTCCGTATCTCGAGACATTGCAATTCCATCATATACCAATCTCACCGGA  
ACAATTCAACCTGCAATTGCTAAGCTCACA AATCTCAAATGTTAAGGCTCAGCTTCACTAATCTTACAGG  
TCCAATCCCTGAATTCCTTAGTCAGCTGAAGAATTTGACATTGCTCGAGTTGAATTACAATCAATTAACCG  
GAACAATCCCTTCTTCACTCTCTCAGCTTCCGAATTTGTTAGCGATTTACTTAGATCGTAACAAACTCACC



GGAACAATACCGAATCGTTTGGGAAATTTAAAGGACCAAACATACCAGATCTGTACCTTTCACATAACA  
GCTTGACCGCAAAGTGCCGACATCTTTAGGTGATTTGAATTTTTCCAGGCTTGATTTCTCGAGGAATAA  
GCTTGAAGGAGATGTTTCGTTTTTGTGGGAAAGAATAAGACGAGTCAGATAATTGATTTATCGAGGAA  
TTCATTGGAGTTTGATATTTGAAATCGGAGTTTGCTGAGAGCTTGATATCATTGGATTTGAATCATAATC  
GAATTTTCAGTAGCTTACCACAAGGATTGAAAGATGTACCGTTACAGTTTTTCAATGTGAGTTATAATAG  
ACTTTGTGGACAGATTCCACAAGGTGGAACGTTGCAGAGCTTTGATGTTTACTCTTATTTGCATAACAAA  
TGCTCTGTGGCTCTCCCTTGCCGACTGTAAGTAGATATGGAGGTCGGGGATTTGGATAGCCGAATAT  
TGTGGGAGACGCATGAAGCTGGCCTCCCCTATATATTCTAATCATATTTGGGAATCACGTATTTTCAGT  
GTGATTTGTATTTGTTGCTTAATTAGCTTTGTATCCTTGAATATGTGTGTCGAGGGTCTATTGAATATA  
GTCTTTCTATCAATAAAAGTAGGGGATAAAATATGTCCTCTCTGAATTCCACTAATGAAATTTACGGATT  
AGGTTGTTGATCAATATTACTACCCTTGGTTCATTTCTTATCTTTTCTTTTGTCAAGTTGC

>M6-PGSC0003DMG401023640 M6 LRR-RLP

CTATATAATGCAGTAACATTGGCAACTACACAAATCAAGTGCATAGCAACATCATGGAGAAGCACATTTT  
CTTATTGATTCTTCTCTTTTAATTCAGTTTTCTATATCAACTGCTTTCTCAAATGAGACTGACCAACAAGC  
TCTACTAGCTTTCCAAAATCTTATTACAAGTCCCAATCATTTTTTGGCCAATAATTGGACCAAGACTGCGT  
CTTTTTGTTCTTGGTTCGGTGTACGTGCAGTTCAAAAGGCAAAGGGTTGTAGCCTTGACTCTTCTAAT  
TTGCAACTCAAGGCACAATTTCCACGTCTTTGGCTAATTTGTCCTTTCTCAGTGTCTCAATCTCGAGAAT  
AACTCATTCCATGGTGGCATCCCTTATGGACTTGGCCATTTGCCTCGCTTGCAGTATTGATTTTCAAAA  
CAATCAGCTCCAAGGAAGTATACCAACAAGTCTATTTCAACACCGGAGAGTTCAAATCATTTATTGGCC  
TTCAATAAACTCGATGGTGAATGTGGAAAGGCTCATGGTATGTACCCGAACCTAGAGTTTTAAATCTCA  
GGAACAATAGCCTCACAGGTATAATCCCTCCTTCTGTTGGAAATGCCACAAAGTTGATGAACTTTAGCTT  
GTCTTATAATAGAATAAACGGCAACATTCCTAAGGAGATCGGTAATCTGAGCCAACCTGCAGTTTTGTCC  
TTGGTTGATAATCAAGTAACAGGTTCCATTCTACATCAATTTTTAATATCTCGTCATTACGTTCCCTAACT  
CTGGGAAGGAATAGCCTTTCTGGTCTCTTCTGCTTAATGAGGGAATTTTTTATCAAATTTGGAGCGTTT  
GAGTTTAACTCGCAACCAATTTTTGGTTCGATTCTTCCAACATCTGCCAACTCATACAACTTAAATAC  
TGTCCATATCTTCCAACAACATAACTGGAGAAATACCCAAAAATATTGGTTGTTTATCGAAGCTCGAGGA  
GTTTTATATTGGTAATAATCCAATAACAGGGACTATTCCACTTCATTGGGAAATATTTCCACTCTGCGAA  
ATCTTTACTGTGAAACCAATAGCTTGGAGGGGCCGATTCTCCAGAATTGGGGAAGCTATCAAATTTGAT  
AGAAATAGATTTTGAAGAAGTTTATAATCTCATAGGTCAGATTCCGGAGGCTATTTTTAATATATCTTCTT

TGGAATACATTGCGTAACTTCGAACAACTCTCAGGGAGAATTCCAACCTCTACTGGTCTTCATCTTCCA  
AACCTCTTAGAACTTCATTTGTCTGGCAATGAGCTTGAAGGGGAAATTCCTCCGCATATCACAAATGCTT  
CCAAGCTTGAAAGGTTGGGGCTAGCAACCAACTTCTTCAGTGGAAAGTATTCCAATAATTTGGGAAACC  
TTCGTGATCTGCGACTTCTTTTCCTACATGAAAATCAACTTACCAGTGAACATGAGTTGCCATTCTTCCAA  
TCTTTGGCAGACTGTAGGATGTTGCAATATCTAGATGTGGGTTACAATCCGTTGAATAGCATTTTGCCCA  
ATTCAATAGGTAATCTTTCATCTACTATTGAATCTTTGAAATGAGCAATGCTCACATCAATGGACTCATC  
CCCACAAGTATAGGCAACATGAGCGGTCTTATAACCTTATTCTTTCAAGATAACAACCTTTATGGGAAATA  
TTCCTCCTGAGTTTGGTAAGCTTAAACAACCTCAAGGGCTGTATCTAAATAACAATAAATTGCAGGGACA  
TATTCCAGAGGGCGGTATGCAATATATCTCATTTGGGACGATTAATCTGGAAGGTAATAAGCTCTTTGGG  
TTAATTCCAGCATGTATAGGAAATCTTAGCATGCTACAACATCTTTATTTGGGTTCTAATAAATTTTCATC  
AAAATTTCCGTTGAGTCTTTGGAAAATGAGTGGTCTTCTCTTTCTAAACGTGTCACAAAATTCTTTAGAGG  
GAGAAGTTCCATCAGATATTGGAGAACTGAAAGCCATTGTAAAAGTACTGATCTTTGAGGTAACCACTTCTC  
AGGCATGATACCAAGCAGATTGGGGGAACTCCAAAACCTGCAGTCCCTTGACCTATCAAACAATTCATTT  
ACAGGCTCAATTCCATTATCCTTTGCCAACTTGATAAGCTTAGAATTCTTGAATTTGTCTATAAATGCCTT  
GTCAGGTAATTCCTAAGTCATTGGAAAACTCACCTTAAAAGCATTAAATGTTTCATTTAATGAATTAG  
AAGGTGAAATACCAATGGTGGTGTGTTGTAAATTCAACTATGCAATCATTCTCGGAAACAAAGGTCT  
ATGTGGAATGAGCATATTGGAGGTTCTGCTTG

>M6-PGSC0003DMG401023866 M6 LRR-RLP

TATTACTCCCTCCGTCCCATTTTATATGATGTACTTTGATTTGGCACAACTTTAAGAAAAATGGAAAGAC  
CCTACAATGTTCCGAAAATACCCTTATTAATAAATCTAAATTGTTAAATAAAAAAAAAAACTATATCTGAC  
TTTGAATAGAAAAGTTTATGACTTTTCTCTCTCATAAGTTAATGTCACATCAGACATTATCACAAATCC  
AAAAGAGTCCAATATATTTTTCTCTCTTCTTTCTTCTCCACTCTCCATTCTCCATTATTTACCCTTAATCT  
TTCAATGAAGAAGAAAGACTCAAAAATGATTAAGTTTTTGCCATTGCAGGTAAGGATTTTTTTTTCCAT  
GATTTTAATTATAGTTTCAAAAATTGATAACATAAAAAAAATGTGGGAAAAGATTAAAATTTTCAGTT  
TCTACCGCCAATTTTTTTGCCAAATTTTAAATATTATCTAATGAACTCCATATAAGTAGAGATACTTCATC  
TTTAATTTTTCAATTCTTCTTTTACAGTTTTTCCAATCAGTGATCTTAAAATGAGTGTGAAATTTTCAGAA  
GACCCAATTACCACAAAAGGCGATTGAATCTGAACAACCGTCGAGCAATTGCGGAGTGGCTTTTGAAA  
GAAAGTAAGAGTGGAAAACCTAAACATGGTTCTGTAAAGGAAGCAAGTATTTTGTTCACACATCAAGA  
AGTACCATTGATCGTATTTGGAGACAAGCTAGATTATGTGTTGCTAATGGTGACATGTTAAATGTTTCTA

CTAATCTTGCAGGCAGAGTTGGGAGAAAACGCATACAAGTCGATATCAACCAATTCAAAGAAATTCCAC  
TATGTCGTGCAACAAATATTCGATCTCTTTCTTTTGCATAAATATGGCAAAATCAACAGTTTTTCGACGT  
GTGAAAGAAGGTGAAATTAGGCCACATACCAATGCCATCAAACCTCATTTAACCGAAGAAAACAAAAAG  
GCGAGACTTCGATTTTGCCTCTCAATGATTGATCAGAGTACACTTCACTCAAATCCCATGTTTATAGACAT  
GTTTAATTATATCCATATCGATGAAAAATGGTTTTACTTATCGAAAAATCTGAAAGGTATTACCTTCTTC  
CCGAAGAAGAAGAGTCTAATCCGTATCGTTCTTGCAAAAGTAAACTTTTTATCACAAAAGTTATGTTTAT  
GGCAGCTGTTGCACGTCTAGATTTGATGTTAATGGAGTTGAGTTATTTTCGGGAAAGATAGGAATTTTT  
TCGTTTGTAGTTAAGGAACCAGCCAAACGGAATAGCAAAAATCGAACAGCAGGAACTATCGAAACAAA  
ACCGATTTTATCGGTGACTAAAGATATCACAAGAGCTTGTGTTGATAGAGAAAGTTCTTCCAGCCATTCGA  
TCAAAATGGCCAGCTTCAACGTCAAGTGCACCCATTTTAATCCAACAAGATAATGCAAGACCACATATTG  
GTGTTAATGATTTGGAATTCATGGAAGCCGCTCAACGAGATGGATTTGATATTAAGTTATGCTTTCAACC  
CCCTAATAGTCCTGATCTTAATGTTTTGGACCTTGGATTTTTTAGAGCAATTCAATCTCTTCAATATCAAAA  
TGCTCCTTCAAATGTTGATGAATTAGTGGAGGTTGTTGAAAAATCATTCAATGAAATGAAAATAGAACAA  
CTCAATCATGTATTTTTGACTTTGCAATGTTGTATGAATAAGGTGATGAAAGATAGTGATGACAATAACT  
ACAAAGTGCCTCATATGAACAAAGAAAGACTCGAAAGAGAAAATGATCTCCCACTTCAAGTTCGTTGTG  
ATGTTGATGTTGTTAATCAAGCTTTAACTCTACTTCAACAGTGATGAGATTACAAGTATTAACAACCTTG  
TATTTTTGTACATTTTGATGTTTATATTAGAACTTTGCAAATTTAATTTAATTTTTGGATAGTTTAATGTTA  
TGTTAAAATCTTGCAAAGTGTAATTTACTTTTTGGAATAGTTTAAAGTTTTGTTGGGACATTGTAAATTCAA  
CATGTTGAAGTAAAATTTTCATTTTGGTAAATGTAAGAAAATTTTACTTCTTGAAGTTTATATTTGAAAAT  
TTTCATTTTATTTTTATTGTAATCTTAACTACAAAAAATGAAGAAACATTCATCAAAAAAATTTTAAAGT  
TAGGACAACCTTTTGATCGTACATTCTTTAACTTTTAAAAATAAAATTACATTCACATGGAGTACTTCACAA  
TTCTATCAGTAGTGTAAGAAAGAATATGATAAAGTGGTGAAAATAAAGAATAGATTATGACAAAGTA  
TTGAAAAAAGGGTTAAAGTACTGTTGAGTGTTGACTATCAGTAAAAGGAGAAAAATAGTTGTACTTTAT  
TGCATTTTAATAACTTTTTCTTTAAATTAAGAGTGCAACTATTGAAATAATGAGATTCAAAAAGGGTA  
AAATAGGGATAATGTCATTAATATTTACCAATAAGGAAATGTGTCATTCTTTTTGGGACTGACTAAAA  
AGGAAAGTGAGTCATATAAATTGGGACAGAGGGAGTAACATATTTTCCAC

>M6-PGSC0003DMG401023870 M6 LRR-RLP

ATGCTAGATTTGGCGAGAAACAACCTGAAGGGAGCAATTCTGCAATGTTTGGGTAATATCAGTAGCCTC  
CAGGTTCTGGATATGTACCACAACAGTCTTACAGGGACTTTTCCAACAACCTTTTAGATTTGGAAGTTCTCT

GAGAAGCCTCAACTGCATGGCAATAAACTAGAGGGTAAAATTCCCAATCTTTGGCCAATTGCAAAGA  
GTTGCATGTTCTTGATTTAGGAGATAATCATCTCATTGATATATTCCCGATGTGGTTGGGAACTCTTCCAA  
AGCTGCAAGTTTTAAGCTTGAGATCCAATGAATTGCATGGGTCCATTAGAACTCCAACGATTGAAAACAT  
ATTTCTAATCTTCAAATGTTAGATCTCTCTTCCAATGCCTTCACCGAAAACCTACCAACGGGTTTGTTTCA  
ACATTTGAAAGCCATGAGGACAATTGATCAAACATGAACACACCACATTATGAAGGAACTGATGGATA  
TTACCAAGACTCGGTAGCTGTCGTATCCAAGGGATTTGCGTGAAATAGTGAGAATCTTGTATTTGTACAC  
CGTTATCGATCTTTCAAGTAATAAATTTGGAGGGCAGATTCCAAGTATCATGGGGGAACTCATTGCAGTT  
CACATATTGAATAATATCTCATAATGGATTGGAAGGTCATATACCGTCATCACTTGGAAAGTTTATCTTTGG  
TTGAATCATTGGACCTGTCAAGTAACCATCTTGTAGGACAGATACCAGCACAATTTGCTTCTCTTACATCT  
CTTGAAGTCTTCAATCTTTCTACAATCATCTCGAAGGGTGCATTCTCAAGGAAATCAATTTAGACCTT  
TGAGAACAATTCATATGAAAGTAATGATGGATTACGTGGATTCCCACTTTCAAAGGCTGTGGTGATGA  
TTCAGTATCAGAGACAAATGATACCGTTTCTGGACTAGACGATGAAGAAAGCAATTCTGAATTTCTGAAT  
GATTTTTGGAAAGGTGCTCTTATGGGCTACGGGAGTGGACTATGTATTGGACTATCCATAATATATTTCA  
TGATTTCAACTGGAAAACCTTATGTGGCTTGAAGAATCATTGTAGAGCTGGAGCACAAAATAATGATGG  
GAAGGAGAAAGAAGCAGCGAAGGCAAAGGAATTACAGAAAAAGAAATAATCAGTTATGATGTCACAG  
TGCGGAGATTGATAATGAACTATTTTATTCGGAATGGCAAGTAACTGGTGGCAATAAGCAACTGATAAT  
ATCGTTCAGGACTGTTTTATCTTTAAATACGTATGTGGGATGAGTTGATCGTTTCTTACCTATTCTTGT  
GTTGTTTCTGCACTTGTTTGTGATGGTTTTCTTTGAGAGTAATGGCTTCGTAATCTGTATTACCTATTGA  
GTACACTGTACTGAACTTCTGGAATGTGTTTCTTAAGTTGCATTTCTTGTGTAAGTTACATTTGCAGAATG  
GGATTTGCTGCTTACGCCATATGCCAGACGTCCGCTAGCTGAGGTTTGTACTAGACGTACATAAATCACA  
TACGACGTCAGGTAAGTGCACATTTTGGAGAAAAAAATCAAGATACCCATTCTTAAAAATGACATTA  
TTACTATTTGAGGGGTATAGGAATAGTTTAGGGGAAAAATCACCTTTTTACCTAAGCTCCGCCCTG  
GTTTCAGTGATTTGGTATTTTCAAGGGAATAACTCATAGTTTAAATGGTTTTATTGTTACAAAAACAGTTAC  
AAAGAGTATGTTTAAATAAATAGCTCGTATTGTTATGAAGAGTTAATTTAGAAATGACCATCGGTGATATT  
ATCCTCAAATTTTGTGATGAAGGTAATAAGAAAGTAACACAACATACAATTCTATTTTAAATAACAAA  
CTAAAACAGATGATTCTCTATCCTTTTAAAGTTTGTTCCTATTTAGGGAATTTATTTTCTGTATGATAGA  
TGTGTAACACATGCATAAGAATTTGAAAAAGACAAAAAGAAAACAACCCAAATTACATATGAACAGACA  
GAAATGGTTAAAGTGTGAATGAGAGAAAGAGCAGCCAACAACATTTGGAGAAAACACTTTTCTGTTTGG  
TCTTCAATGATAAGTTTCATACAATATAAAATTTGAAAACCCAAAATAATAAACTCAAATATGATGATG

ATTCCAAGCAAAATATTCTCTCTACTTCAGGTTTTCACTATTTTATATCTCCATATAGTTACTTTTTGCTTCCA  
TCGAAGAAGCAACTGCCCTCTGAAATGGAAAACAAGTTTCAAGAACCAGGATAATTTCTTATTGGCTTC  
GTGGAAGCCAAAGTCTAATGCATGCAGGGACTGGTACGGAGTTATATGCTTTAACGGTAAGGTAAACA  
AGTTGAATATTAGAAATACTAGTGTCATTGGTACACTTGATGATTTTCCATTCTCATCTCTCCCTTTTCTTG  
AGTATCTTGATCTTAGCATGAACCATTTCTCTGGCACCATTCCATCTGAAATTGGTAAACTCACTAATCTT  
ATCTATCTTGATTTGTGCGAGTAATCAGATTTAGGCACAGTACCACCACAAATCAGCTCACTAGCCAAGC  
TTCAGATCCTCCATATCATTGACAACCATTTAAATAGTTTTATTCTGAAGAATAGGTCCTCTAAAGTCTCT  
TACTGAGCTAGATTTGAGTTCTAACGCACCTTAGTGGTTCTATTCCAACCTCATTGGGAAATTTGAACAGCT  
TGTCTCGTTTGAATCTTTATAAAAATAACCTTTCTGGCTCCATTCTGCAGAAATAGGTTACCTAAGGTTT  
CTTACTGATCTATGTTTGAACCGTAACTCTGTAAAGGTTCTATTCTGCTTCATTAGGGAATTTGAACAG  
CTTGTCTGTTCTGCATCTTAGTAGTAATTACCTTACTGGCTCTATTCTGAAGAAATAGGTTACCTAAGGT  
TTCTTACTGATCTACGTTTGAACAATAACATTCTTAATGGTTCTATTCTGCTTCATTGGGGAATTTGAACA  
ACTTGTGCGTCTTGTATCTTGATGGTAATCACCTTTCTGGCCCTATCCCTGAAGAAATAGGTTATCTAAGG  
TTTCTTACTGATCTACAGTTGTACGATAACTCTCTTAATGGTTCTATTCTGCTTCATTGGGGCATTGAGA  
AACTTG

>M6-PGSC0003DMG401024548 M6 LRR-RLP

TGAACATTGCTATGCATGGTAGAGCTTGACACGGAGCTTGGACTCTATAGGCAGGAGTTTGTAGTTTAT  
ACACCAAGAGATGCTTTAAGTTAACCAGGATAGCAAAAGATAATCAAGCGTCTTTATAGAGGAGACTTT  
CCCATGCAAATCTTTATGTTGTTTCTTTTCTGATTTACGAGGAGGTTAAAGTGAACAAATGCAGATTGTG  
GGAAGTAGAGGCGGGATAGTAATTAATACTACTCCCTCCTCCCGATTTGAAACAAATCATTGTCAGAGGA  
GTTACTTTTTGCTTGTTTGTGTTTGTGTTTGTGTTTGTGTTTGTGTTTGTGTTTGTGTTTGTGTTTGTGTTT  
AGGCAACATATTTAGTCCATTGAAAAGGCCACATATTTGTGATTTCTGACTACCCTTTTTTTTGAACAGAC  
ATTTCTGATGAAGTTTTTGTGACTGGAAAGATCTGTACGTACCCTCGACTTAACACACAATAAAATGGGT  
ATTGTTCTCCAGCTTCTTGAGCTCCTAATTTGTCTTCTTATCACTTCAGAGTATAAAGACAAATTCTATTAG  
AAGATTATTTTTGTATACTTATCTTATTTTCTTAAAAAAGGTTGTTTTCTGGAAGCTAATTCTCACTCTTCT  
GCTGTGACAGTTGAAATTCCTATGGAGATCAACAAATTAACCAACTTACAACGTCTTGTAAGTATTGCAT  
CCTACACTTCTCTTCTTTTTTCTGATGTCTGTTAATGTATTAGGGCCTCATTAAATTAGAAAAAATCTATTA  
TATTTGGAAGAAAATACTGTTATTGGCGTCAGATCACATTATAAATGCTAGCTGTGCGAGAAGGTAT  
CAAACATATACTCGCAGCCAAAATGCATATAAAGCTAATGAAAATGATTTAGGGAGCAGAAATGGGG

CAGACAGTTATAGTGTTATTTGTTGTTGTTTATAGGAAAAATTTACTAGGGTAGAAAAAGTTTCTACAG  
AAGGCAATGTCAATAGAAATAGAAGAAAAACAATTCTTCATTCTGTCATAAAGACTTTGATAAGTGGA  
TACCATTAATACTCATGTTGAGCAAATACAATGGAAAAATGATCCTCCCTGAAAAGAAAACAACCTTAATA  
TGAGCTCTTGTAAGGGAACAGAGAAGAAGAGAGCAATATACCTGAAAATGTAATTGTAGGAACTGGA  
ATAGGCAACATTAATACTATATAGTTATCTGTTTTTATTCTTGATTGGGACCTAAGGAGGGTAGATAAA  
CTTTAAATGTAGCAAGATAACAAAAAATGTTTGTGAAGGGGAAGAAAGCTCTTGGTGATTTCTGATT  
ACTTGATTAGCCACTCCTAAATCTTGACCATAAATTTTGAATATAAAGCATAGAAAATAGCTGTTATAG  
CCGAGGGAGAACCACACCCTAAAAGCTAACTATTAGGTTGGGAGAACCCAAGGCTATAAATACCCAACA  
TCAGCACTTTGTAGTACCGATGTAGGACTTTGCAATGGAACATAATAATAACTCTTCTACTTGTCTGTTA  
CTTTTCTTGTTGAATAATTCTTTGTAGGATTTCTAAGGACTTTTATCAGAGAATTTTTCTTGTTCACTC  
ATAATGATATCATTAGTTTTTACTGTATTAATGGTGAACATATTTCTTAAGTTTATAATCTAATGCTAAGA  
GCAAAAACTTGTATCTCTAATTATATGTATTCAGATTTTAGCTGATAACATTATTGAGCGCCTCCCATG  
AATCTGGGATTGCTCCAGTCTTTGAAAGTGGCAACATTTGATGGGAATCGAATCACAAATTTGCCTGATG  
AATGTAAGTCTATATATGTTAGATCACTCAAGTTAAGTGGATTCTTTTTTCTTATATGAGCCAGGCTCTC  
TGTTCTAACTACAAAACTTCATGTATTCAGTGGGGCAGTTGGTGAACTTGAGCGTCTGTCTGTCTCAG  
CAAACCTGTTGACCAGCTTGCTGACACAATCGGGAGCTTGCGGAGTGTGAGTGATTGATTAACCTCTA  
TATGTTACTTGCTTTCTGTTCTATTTAATGTGCCTATAAAGATTTTACTCCTACATAGTTTTATTGTTGTT  
TAAAATATTTTTACCGTAAAGGTGTTTAGCTAACAAAAGAATTATTTTAGTTTTGATCTTGCCAATGCCTT  
TGATTGGAGAATTATTCTGTAATAGGAAAGAAACCCAATCAATTTATCAAGTTGTGCTATTAAGCCACC  
TAATTGTGACATTAATTTAGTTGTCACACCTCTTGCTTCATGTTTTAATTTGTTTCTGTATCTTTTTGTCA  
TCACTGTTAAACAGATAAAATACTGTATAGACTTGCAATTATAAGTTATTATTCAAATTCTAGTTGTTGTGT  
TTTGGGGGTTCTGAATCAAGTTCAATGGTTCTGTTGATTGTGGAAGTGTTTTACACTTGACATGCTATTA  
TAAAAGATTATCAGCTACTTGTGAGTTCTAGTATTCACGGTGATGCTGTTGAAGGAAGCTAGTACTCTT  
AGACAGGCATCTTAGCAGTTCCTTTTCACTGATAAGTTTTGAGCAGACGAATTGATAATATCTATTGGCA  
ATGCAGTTGGTTTTGTTGAATGTTTCAAACAACAAGTTAAAGGTTCTTCTGAATCAATTGGAAGTTGCT  
ACTCATTGGAAGAAGTCAAGCAAATGGTACCTTCATTCTTAGCTCATGATTCTTGTGATTCTTTCTGTTT  
CTCCTTTTCTTTGGTCTCCTGGGTGTCATAGCTTTGTATGCGTATCAAATTAACATTAGCAACTCTTACC  
TGTGAGATGACTAGTCTTTGTGGAATACATTTTTGAGTTGATATACAGTATCATTTTTCTACTTTTCTCTGA  
TCCACTGTTGGTACTTTTACTGACTTCAATGCCTTTATTGAAGTGATGAGCTTTGTTTCTCCTAAGGCTCAT

GATTGGAAGTTTCTGTTACAGATAACTCCATTGAAGAGCTTCTGGTTCAGTTTGCAATCTCATTGAGCTA  
AAATCACTCTGTTTGAACAATAATAATCTCAATCAGGTAATTTCCAAACTCCCTCGCTGTCTCTTTCTGTC  
TGTCTGTCTCTCTCTCTCTCATTACACACACACACACACACAGAGTCATGTATATATGTAAAGGCATGCT  
CAGCATTAGTAGATCTAAAGTTGTACGGTCTGTCTCACATAATGTAACAAAAAGCAATATTTACTTTGTTA  
AACTGATCTTTTCTTCCAACACTCTCACTCACGCCCCGCACACACACACACTCACTCTCTCTCTCTCTC  
TCTCTCACACACAC

>M6-PGSC0003DMG401024846 M6 LRR-RLP

AAAGTTTCAGAGGTATGATGGATGTGGATGAAGGAAAAACAGGAATTACTCTAGCTATTAATAGGACTC  
ACAGAGATTACCTTTACCATGTTAGTTTGGTGATAAAAGTCAATGAATTTGATATGAGAATCACGTCAAT  
TATGACGAGTGTTGATTTATCAAGCAACAGGTTTGAAGGAGATATTCCAAATTCATTGGAAGTCTGAG  
CTCACTTGTGTTACTCAACCTGTCTCGCAACAACCTCCGTGGTCATATTCTGCAGAAATTGCAAAGTTGC  
AGCAGCTCGAAGCATTATAGATCTCTCGTGAACAGACTCATTGGAGAAGTTCTGGTCAATTGTCGAG  
TTTGACATTTCTTGAGGTCTTAAACCTTTTATACAATCATCTGGCTTGGCGCATTCTATTGGGAAACAGT  
TCAATACATTTCCAGATGATTCATATTGTGGAATCTTGATTTATGTGGATTTCCACTATCAAAGAAATGT  
GGAAACAATAATAGGCCAGATGAGTCAACACTTGAACAAGATGATGAAGATTCATTTTTTTCGAGCGGG  
TTCACATGGGAAGCTGTGGTAATAGGTTATGGTATGATATTTGGATTGTTGATGGGAGGCCTCATGTTT  
CTATTGGAAAAACCAAATGGTTTGTCAACTTTGCTGAAGATATTTCTCAACAAATTGCTGCTAAGAAGC  
GAAGAAATCAAAGAAGAGACGTCAAGGACGTGGTCTAAGAATGAATTAGCAATATAACCAGGTATGCA  
TCAAACCTTTTTGTTTTGTATCAGGAACAACACTATTTCTGTAGCTGTTTATTGTATAACTATATGTCAATT  
GTTTATTTTTTCTAAATATTCAAAAACCTCAGAAAAGTCATTAAGTCCTTTAATTCTCAATTTGTCTCTGCA  
GAAAGGTTGCTGGAGAATTGGACACATTTATTAGCAAGTTAGTGTTGATGTTCTGGCAAATATCAATG  
GATGCATCTGTTTGTCACTTTATGTCCATGGTTGTCAAATACATACGTTACAGTTGATTTCTGTAGTTTTG  
TGAAAATAATTAGTTAGTTTTCAGAGATAGCAACCTCTATACTCTGTATGATGGTTGTGTCCTAATGTATC  
GTATTATTTTATATTGATGATTTTCTTTAAATTG

>M6-PGSC0003DMG401025507 M6 LRR-RLP

TATGATGATGGTTTCTAGCAAAATATTCTCTTCACTTCAGTTTTTCACTCTTTTCTACCTCTTTACAGTTGCA  
TTTGCTTCCACTGAGGAAGCAATTGCCCTCTTGAATGGAAAGCAACTTTCAAGAACCAGAATAATTCTT  
TATTGGCTTCATGGACGCCAAGTTCTAATGCATGCGAGGACTGGTATGGAGTTGTATGCTTTAATGGTA  
GGGTAACACGTTAGCTATTACAAATTCAGTGTCATTGGTACACTCTATGCTTTTCCGTTTTTCTCTGTC

CCTTTTCTTGAGCATCTTAATCTTAGCAAGAACAATTTCTCTGGCACCATTCCACCTGAGATTGGTAATCT  
CACTAATCTTGTCTATCTTGACTTGAACACCAATCAGATTTAGGAACAATCCCACCACAAATCGGATCAC  
TAGCCAAGCTTCAGATCCTCCGTATATTTGACAACCATTTAAATGGCTCTATTCCTGAAGAAATAGGTTAC  
CTAAGGTCTCTTACTAAGCTATCTTTGGGTAGGAACTTTCTTAGTGGTCTATTCTGCTTCATTGAGGAA  
TTTGAACAACCTTGTCTTTTTGTTCTTTATGAAAATCAACTTTCGGGCTCTATTCCTAAGGAAATAGGTTA  
CCTAAGGTCTCTTAGTGAAGTAAAGTAGTAACTCTCTAAATGGTTTTATTCTGCTTCATTGGGGA  
ATTTGTACAACCTGACTTATTTGTATCTTTCTGATAATCACATTTGGTCTCTATTCTGAGGAAATAGGTT  
ACCTACGGTCTCTTAGTGAAGTAAAGTAAACTCTCTAAATGGTCTATTCTGCTTCATTGGGG  
AATTTGAACAACCTGACTTTTTTGTATCTTTTTGAAAATCAACTT

>M6-PGSC0003DMG401026432 M6 LRR-RLP

ATGAATACTCAAGGAGAATCATCTTCTTCCAACCTTATGTTATGATGTGTTTCTCAGTTTCAGAGGTGA  
AGATACTCGCAAAAACCTTCATTGATCATCTTTATTTCCGATTATGTCAAGTCGGAGTTAATACTTTCATAG  
ATGATGAGGAATTGAGAAAGGGAGACGTCATTTCAAACAACTTGACAAAGCAATTGAACAATCTAGA  
ATTGCCATTGTTGTTTTCTCGAAAAATTATGCTTCGTCTAGTTGGTGTCTTGATGAACCTGTCAAATCTC  
GATTGCAAAGAGAGGTTAAATCAGGTAGTTTTGCCTATTTTCTATGATGTTGATCCTTCTCAAGTGCGAA  
GGCAAACCTGGATCCTTTGGCGAAGCTTTGTCAAACACAAGGAACGATTAGTTGGAGCTGAAAGAATG  
GAAAAGTGAAAGCTGCACTTACTGAAGCAGCAAATTTATCTGGATGGGATTTGAGAAATATTGCTGAT  
GGGTAAGACTTCTTAATTCAACTATTAAATTTGAATTTAAGCGCTTGCCTAAGCTTATAAGTTGGTTAAT  
TATGGAACATTGTAAAGTTATTTAATTTTTTAAATTTTCGTATCAAATCAAACCTGTGTCGATTGGGACAA  
GGAATAATCTCCATTCTATAAACTCTGTTATCTTTGGCTATTGGCTTTTATTTGTTCTCCATTCTATAAGT  
ATTTATTGTTGCAAAAACCTGTAGGCATGAATCAAAGTTTATTGAGAGTGTATAAAACAAGTTCTGCAAG  
AGGTTAACCAGACACCTCTAGATGTTGCTCATTACCAATTGGATTAGATTCTCCTATCAAACATATAGA  
GGTGTACTGCAAAGTGGATATGAGCATGAAGTTCGCATGATTGGTATATGTGGCATTGGTGGAAATTGG  
AAAAACAACCTTTGGCAAAAGCTATCTATAATCGAATATTTCAACAGTTTGATGGTAGTTGCTTCCTTTCTG  
ACATTAGATCAAAAACCTGAAGAATCGGGTCTAATCAAGCTTCAAGAGAACTACTTTATCAAATCCTCAA  
AACTAAGGAATTTGAAGTTGATAGTGTGCTGAAGGTGTTAATCTCATCAAAGCAAGACTTGGGTCTCA  
GAAGGTTCTAATTGTTCTTGATGACGTGGATCATAGAAGCCAATTAGAATCCTTAACAAGAGAAAGAAG  
TTGGTTTGGCTTAGGTAGTGTAATAATTATTACAACCCGAGATGAACATTTGCTATATGGGCTTACAACA  
AGTGAGATATAACCAGGCCAAACTTTTTAAATGACAAGGAAGCCCAACAACCTTTTTTCTTGTCATGCTTTTA



ACTGTTTTCTCCACCACAAGAATATGTTAACTGGCACAAGACATAATAAAATATTCAGGTGGGCTACC  
ATTAGCTCTGTGACATTGGGGTCACATTTGCAAGGGAGATCCGTTGAAGAATGGAGATACGAGTTCAA  
AAACTAAAAGCAATTCCTCATGGTGATATTCAAAAGATTCTCAAGATAAGTTTTGATGGACTTGACGCC  
AATACTCAGAGTGTTTTCTTGATATCGCATTTCCTTCCATGGTTGTGATGAGGATGAAGTTACCAAAA  
CATTAAATGCGTGTGGTTTTATTCTGAAAGTGCAATTTCAACCTTAGTACAAAGGAACTTGGTCCAAAG  
GAATAGGCCTCGTTGGTGATGCATGATCTAGTGCAGGAAATGGGAAGAGAAATCGTTCGCATGGAAT  
CTCATGACCCTGGAAAACGGAGTAGATTGTTCAACCCTCAAGAAGTCATTGATGTTCTACAAGGAAATA  
AAGTCAGTAAATTCATTATCTTTATCTTGTTATACTTCTTCTCCTTTTTTTCATTTATATTGATTTACATT  
TGCTTATAATTTATGCATTTGTGCTTAAATCTTCTCCGGCTAGTAAGTATCTCTAGAAGTTTGAACCATTCT  
GTACTTGAAATGAACATTTACTGAAGTCTAAACACTCAAATATCAAAGACAAAATTATCAAATAAATAT  
CCTTAGTTGGATATAATGTGTAGATTTATTTTTATTGGTAGATAATTTATTCTCTTTGTTTGACCTTTAATT  
TGTATAAAGCATTAAATTTCTCTTTCTAATTTGTCATACTTAAACATGGTCTTATAGTAATTTTATTTTTACT  
AAATTTAGGGTTCTAAAAAAGTAAAAATATTGGTGGTAGAACGACAAGCATTAAAGGGTGTGAAGCTA  
AGCACCAAAGCATTTCAGAAAATGATAAATCTTAAGATTCTTAAAATTGACGACTTACATATTAGTGGAG  
ATTTTGAGCTATTGTCCAAGGAGCTCAGATGGCTGTCTTGGAAAAGATGCCCTTTAAAATGTATACCGTC  
AAATTTCCATCTGAGAACTTGTATTTCTGAATATGAAAGGGAGCAATATCCAAGAATTTGGTTTGAAT  
TTGCAGGTCCGTTACTCAATTCTGCAATTTTATGTGTAATATTTAAGAGAAAGAAAATCTTAATTGAAACA  
ATATTTTGTACTTCTTAGTATTGTAGAAGTTTGAAGGAGCTGAATCTCTCTGATTGCAAGCGCCTCAGA  
AAACTCCAACTTCAACGGTTCACGAAGTCTCAAGACTTTGTGTCTTGAGAATTGCTCAAGTCTAAGG  
AGATCCATCCATCAATAGGAAATTTGGACAGACTAATTCATCTTCAACTGAATGGTTGCGAAAAGATTAC  
GGATCTCCGAGCAGCATATGCCAGCTAAAATCCCTTGAAGACTTGTACATTAATGACTGCTCATCTTTAC  
AAACTGCCAGTTGACATTGGAGATATGCAAAGCCTAAGATATCTTAATGCACGTGAAACAGGTATAA  
AAGAATTGCCTGGATCTGTTGAAATGCTAGGAAATCTTAGAAATTTGGAAATGGGAGGTCAATACTTAG  
AGACCAAAGGAGGTTTTCTCAAACAAGAGTACGCCCCATAGTGTCTTGTCAAATTTATTTTCGGTTTT  
ACGCTTCCATATTGTGGTTTCTCGGAGGTTGATGTTCTAGGGATATTGGGAGTTTATCCAACCTTACATC  
ATTTAGATTTGAGCGGCAACAGTTTCTCTATCTACCCTTTGATTTTCCAAGTTACCGTTGTTGAGCTACT  
TGTTTTTGAATGATTGTGAGAACCTTCAAACACTCCCGTCAATATCAAATTTAGAGTACCTTGAATTTCTT  
GAACTTCGGAATTGCAAAAACTGGTCAAGATTACAGGGTTTGACAACCTCCCTAGTATAAAGATGATC  
GACATGATTAATTGTACTTCACTGCAGAATCCATTCATTGAAGGCTTCTTAGTGCCAGGCTCTATCAAT

TTCATCTAGAAAACATTCAGTGTATGAGGTTAGTCCCTCTCTCTGATCTCTCTCGTATCACATTAATAATTA  
ATGATCTAATTGTGTCTTATTTGTCTCTGATGAAGCTGTTATTACAAATTTATCTCGAAAGCAATGAGATT  
CCAGATTGGTGCAGCAATAAAGTAACAGCTCCATCTATCTGTTTGACTATGCCACAGTACATAATAACA  
ACTTCTTAGGAATGGTTCTCTGGTTTGTTTGCCGCCTTTGCGATGTACATGAGCATAAACACTTCATTGTT  
ACTGTTGCCCATATAAAGCGTTCAGGTTTACCGTGGATTTGGTATTTTGATAGATCTGACAGTCACGAAG  
TATCATGTGTATATTACTTCTCTCCGCAAATGATACACCTTTTGAAGGCCTGAACATCAAAGGCGGGGA  
ACAGATAACAGTAGAGGATCGCACTGGCAGAGACGTTGTAAAGAAGATAGGGATCCATCTGTTATACTC  
GGACCAACACGGTAATGTTACATCTTTGCCGGGAGTTGTGGATCATTCTTATACTCCCTCCTACCCACAA  
AGACTTTCAGCAGGGCATATCAACTCAAACAACGACAACATATCCAATGAAATCCTACAAGTGAGGTCC  
GTATCAGTGGATATCAACAAGCAAAGTTCTGAGAATGTTTTATGTACCATAGAAAATCTGTTCCATAGAA  
ATAGGCAATGGACCTGGATCTACCAAATGATGACAATGCCTCTAAAATGTCTTTTTGGAAAATGTTTCTC  
CGGAGAATAAGTAGGTTTCTTACTTATTTTCTTGTGTTGTTATGTAAGAAAAAAGTTTGTTCTTAAAGTA  
TTTGTATAT

>M6-PGSC0003DMG401026447 M6 LRR-RLP

AAAATTTATGCATGTATTTCATTTTACCTTGAAAATTATCTCACTGTGTCTAATATGACACCGACTGCATA  
ATCAGATAATCTCCAATGCAGTGGTCATATGTGCGCTGAATATGCAATACAAGAATTTTTTTTTCAATAGT  
CTAAGCACCAAAAAAAAAAAAAAAAAACCACCAACGCTATAAAAATTGACTGAACATTCGAGCTGTAAGCA  
GAAAAGTTGTTTGATTTATCTTTTCCTGCTCGCATATAAAATAATTATCTCTGGAATGGCAACTGTGGAGT  
GAGGGGAAGACAGTCACGTTTTTAGATCCAAAGTTGAGTAACATATGATCAAAGAGTAAGTTATAAGAG  
GTATAAATATTGGTCTCTTGTGTGTTGAGGATTTTATTTAATGATAGAATGATTTTTGAAAATAAAAAATA  
ATAAGTTGAGTGATTTTGATATAAAAGAAAGTTCAATGACTTTTCTGCATAATTTCTAATAGTTCAGTGAT  
CTTTAAGCTATTAACCCTGATGGAGTATGAAAGTGAAACCCTTAAAAGAGGATATACAACGGCACCAA  
GAAATCAAACGAAGGAAGCAATATGGCAAAAAGAGAAGACAGAATATCAGAATTGCCTGTGCATATT  
ATTCATCAAATCTTATGCCGCACTGACCTCGGCGTCGAAGAGGCGGCGAGAAGTTGTATGTTGTCCAAG  
ACATGGTACTATTGCTGGACTTCAAGACCTAATTTGATATTCTATCAATTTGATATGACCTTGAAAATA  
TGTCAAGTTGGTTGATCAATCTCTGCGATTCCATGTGCAACAAAACCTTACATCTTGAACAATTCATCCTTA  
GATATCGTGATCCAGAAGTGGATTCTCACGTGGATACTTGGATTGAATTGGCGGTTAACTCAACGTCA  
CAGAGCTGGGAATTCACCGTTTGGGTTAACATCATATAACTTACCTGATGTTATTTATGATGCTAAAAA  
GCTGACAACATTGCAGTTAAGCAGGTGCAATTTTGAATTTGACAAAAGATTTTCTTGGCTCGAGTCTCTT

TCTTTGAATCATGTCCATATTTTCAGATGCCCAATTGCAAAGAGTTATCAACAGATGCCCATCTATCAGGAC  
TCTAAGGTTACAGTGTTGTGAGGGTATAAGCAAATGTCATATTTTTGGCTTAGTACATCTCAAGTATTTTC  
GATGCTAGTTATTGCAAACCTCCATAGTGTGATAGTCCAAGCTCCATATCTTCAATGCTTTAGATATACAGA  
ACCTACTGAACAGGGCAATCTTCATCCTTGCGAAATTGCTATTTTGGATGGTTACAGTACTTTACAAACAC  
TGGAGCTCACTGGTGCCACCATCACAGACCAACAGTTTCGAGATGTATCCTATAAGTTCCCAAATATTTTC  
AGAATTGAATCTAAGATTATGCTATAACCTGAAAAATATAGAGATTCAGAGTGAAAAACTCAAGAAATT  
CACCTTATTTGAGTTGAAGAGTCTGGAAAAACTCACGATTCAAGCTCCAAATTTATTGGAATTTGATTTTC  
ATGGTAGTAAAATGCCCGTCACATATATGGATACTTCTCCCTAGAAAAGTGCCCGACTGATATTAATAAT  
ATTTTGTGCGCCAGGTAGTTTACATTATTTTTGTGCTTAATTTATGCATTACTTGTTGAATTTGGTTTAACT  
ATGGGATTGACTAAATTCTTGACAGACCAAAAGCATCCTTATTTATGAAAATCTAAGAGAAATTGTTATTC  
CACCAAGTCACAAAGTCGAGATATTCATTGCATCCATGCTGAGTGTTGAATCGATCATTGGAATAATAAT  
GTTTCGGAAGTCCCTATATCATATCCATACTTCCATGTACAGATAGCAAAGCACTACAGGTAAAACGTCCC  
TTGTGCTTGATAATTTGAGAAGAAAATTTGTTGTTAAATGTTGATTGCTCGTCTCATAAGCATTATTATT  
GTATAATATATCTTATGTTTCTGCTTAAATGCAGGCGATGTCTACACTAAAAGGGTGTACACAAAAGCAA  
AATTGTGGTAAAGAATGTCCATTCAATACCAAGTGGCATCGTAACTTAAAAGATGTTATCAGTTGTA  
GGACACCTGAGGAGGGAATGGCCGCCTCCATGTGGTATCTCTGGTTGAAATCTACATCTGTAATTGACC  
AAGTGAATAATTTTCATGTTAAAATGGAAATAACAAGCTTAGACCAAAGAGTCTTGCGAATTCAGCATA  
TAGAGTTAATTAGTGTGTATGATTTATTACATAATTTAGCATTTTTTGGCTGTGTAAGACCTCCAACCTTG  
ATTACACATTTATACTTGCAATGAAATAGATTTTGCAGCAGTCTATCTTTAGTATCGATGGTTATGAATGTG  
TAGATGAATTGGAAAATATAATATTCTGGGCTGCAAAGATAGAGGTATTCGGAGTTGTATAAGCTTGTA  
GACAGATAGACGCACGCCTTCTTGTATGTAGAAATCAGGAAATTGAACATAACTTGAAAAATGGAAAG  
TAACACTCTGTTATGAACTCATGCAAATAACCTTAATAATGAAGCAGATGGATTGTGATCTGTAAACAAC  
AATAACTCATCTGAAGAGGACGGCTTCCACACTAGCATGTCGTTTTCGTTTTCCATTAAAAGATTTTGCA

>M6-PGSC0003DMG401026747 M6 LRR-RLP

ATATATATCTATATATATATGAGATGAGATGAGATGTGATATGATGAATGATAGTACTATTGTATCTAAT  
TACATTAGATCTTTTTTTATTACACATTAATGCAGGGATAATCCACAAGAAATTGGAAATCTTGTTAAT  
TTGTTGGAGTTAGGCGTGGAGAAAAACCAGATTACCAGCTCTATCCCGATCTCCATATTCAATATCTCAT  
CGTTGCAATTTGTTTCACTATGGAGGAACAATCTCAAGGGATCCTTACCACGCGAGATTGGCAACTTAAC  
CAAGATGCAAGTTTTAAATCTAGAGGAGAATAGGTTTACTGGTACGTATAACATTCAAATTAAGTGATAG

CAATCTGAACAGTTTAACCGAGTGATTCATTTTAGTTAAACTCATTCTTTCTTCAGGTGAAATACCCAAAGA  
GATAAGAAATCTCGTTGAGTTGGAGGAACTTGGTCTTGCGTTGAATAGTTTTAGTGGTTCACCTCCAATG  
GAGATCTTCAACATATCACGACTGACAATAATTTCTCTTTCAGCCAATAATCTATCAGCAACTCTACCACC  
AAACATAGGTTCTACCTTACCCAACATTGAAAGACTTTATCTGCATAGCTTAACCAATCTTGTTGGGACTA  
TTCCTCATTCTATCTCCAATTGTTCCAACTTACTAGACTAGAGCTTTCAGATAACAAACTCACAGGATTG  
ATTCCCAATTCTCTTGGATATTTGACTCATCTACAATTCCTAACTTGGCCACAAACAATTTAACCGTGA  
TTCATTTTTAAGCTTCCCTCACTTCTTATCCAATTGTAGAAATTTAATAGATCTTTCTCTATCTTTGAACCT  
CTAAATGCCATGCTTCCGGTCTCCGTAGGGAACTTCTCCATATCTCTTATAAAGTTTGGTGCCAGTGCTTG  
CAACATCAAAGGCAAGATTCCAAATGAAGTTGGAACTTAAGCAACTTATTAGACCTTGATCTTTCTAAT  
AATAACTTGATCGGATCAATTCCTACATCAATTCACAACTTGAGAAACCTTCAGCGCTTGACTTGAACAA  
CAACAACTTACAGGATTTATTGGAGATCATATCTGTAAATTGCAGCATTGGGTGATACTGATTTGGGT  
CAAAATCACTTTCAGGATCTTCTCTAATTGTTTAGGGAATGTTACTTCCCTTAGATTGATATATATGGA  
TTCCAATAAATTGAATTCCAATATACCAACAAGCTTAGGAAATCTTAAAGATCTAATGGAGCTTGACTTAT  
CGTCAAACAACATGGTTGGTCTTTACCTCCGGAAATTGGAAATCTAAAGACTGCGACATATATGGATCT  
ATCAATGAATCAATTCGCAAATGGTATTCTAGAGAAATTGGAGGATTGCAAAATTTGGAGTACCTTTCT  
TTGAGGCACAACAAGTTGCTAGGATCTATTCTGACTCAGTGAGCAACATGGTAGGTTTGGAAATCCTA  
GACATTTCTCATAATAATATATCAGGAACCATTCTATGTCTATGGAGAACTTCAAACTTGAAGTATTT  
CAATGTTTCTGACAACAAATTGTATGGTGAATACCCTCGGGGGGCCTTTCAAGAACCTCTCGAGTCAG  
TTTTTCATCAACAATGAAGCATTGTGTGGTTTGTCAAG

>M6-PGSC0003DMG401027811 M6 LRR-RLP

TATGCCTCTTTACATTTCTATATATGTTGATTAATAAAGTCCGTTGTAATAAAAGGTTTTCCATGAAGCAG  
GAATATTCATCTTTGCCTGCTTGACCAAAAATGAATTCAAATAATTTCACTATAATTATAGCAACATCTGC  
ACAATTTCACTACTAAAATGTAAAGCAACTTAAGAGACATTTTAAGTTAGTACTTTTCATGCCAAATATGT  
GCTAATCATCCTTGTTTTATGTTTATTACTGTTTGAAGTTGTGGTCTCAAGGGAGTTGAAATTTGTAG  
TATTTGTTTTTAACTATGCAACTTCTAGTTTCTGATTGATGTCTTTGCAACATAATGAACTGCAGAGATTT  
TCCGATAGACGAATAGAAGGTGGGATCCCTCAGAACATTGGAAACCTTAAATATTTGACTACTCTGTAA  
GGATACCTAAACAATATATTCTTTTTGTATTGTGCTTTTCGAAGGGGATCCTTGGGGTAGCTGGTAAAGT  
TGTTGCCATGTGACTAGAAGATCACACGTCCAAGCCATGGAAACAGTCTCTTGCAGAAATGCAAGGGAA  
GGCTGCGTACAGCTAGACCCTTGTGGTCTGCCCTTCCCCTGGAGCTTTAGTGCATCGGACTACCCTTTTT

TTAAATACTATGACCGGTAGGCATTTATATTTTAAGGCAGGAGTGGAAAAAATGGAATGCATGCCCCAA  
GAGATATGCATAAGTCGGAAAGCATTACAAAAAATAGTGCAATGTTCTTAAAGATGCTAATCACCTAG  
TGTTGCATATCAAAAACGACACTAGATTTAAACACATCATTACTTGAATAATAGCAGGGGAGCTCACAGC  
TAAAATCTTAACGTCTTAAGCACTCATATTTAGAAAGTGATCTTATCTCTTGGGGCTTGCATTCCACCTTT  
CCAGGTATACTAGTATAAATTACTAAATAAGAGGTTATCAAACCTCTAAAAAAAATCTCAATATTATAAAG  
TCTAAAACCTAAACTACTTCATAACCAAGATTCGATAATGTGCTATCCTTTATGAATCTATCTACTTTGGTTG  
GTCACAGTAATTTGGCTAGAAACAAGTTGAATGGACCAATTCCTGAATCATTTAAAGATCTGACGCGACT  
AACGCACATGTGAGTAGTTTCATAACTTCGACTGCAAACCTTTTCATTATATTCTCCATCCTTCACTGTGTCC  
ATTAGAAATTTACTCATCTATTTTTGAAGTCTTTCACTACTATGCATATGATGAAGCCAATTAAGGAATTC  
TTTTCTTTAATTACCTCTGATGCTTATAATGTTTTATCTGACAGTTCTCTCTGTGATAATTCATTAACGG  
AACCATTCCACTTTCCCTTGGTGAGATGAAGTCTTTACAAAAAATGTAAGTCATCGGCTTACCTAATTATG  
TCCTTATGTTGGTGTTTGTACCTATTTGGGTATGTAAGCTTTAAGAACCATTAGATTATTGGCGTTCCAAT  
AACGAAAATTGTGAGTGAAGAATATTTTATAATCTAATGGTGACAATTCTATTAGCCCCAATTTGATGTT  
AACACCAAGCTTAGATGGGTTTTCCCTCGTTTTAAGTATATCCAGATTATATACATGTCTGGTGACCTACA  
TGATTAAAATTAGCAATAGTTACGTATAAAAGTTTGTTTTAAAGCAAAGGTTGAGGTAATAATGTTGTT  
GTGATGGTGAATATTGGAAAAAAGAGATTTGTAGTGATGGCGGATATCGTGGAAATGAAGACCTAAG  
AACTATTTGGAATAGTAGTTTTACGCGTACTCTATAGACTAGTACTTAGGAAACTAAGGGGGCTTCAATC  
ACGACAATGAGCACCTTTAACTCTGCATTCTTACATGTCAACTGATGCAGAGTTAACATGGATCCGGCAT  
TTTAAAATTGGATTTTGAACCAATGAAGATGGCTCAACTAGAAAATTCACTCAGAATTCTATCTTGGGAT  
TGTATTAATCATTACAATCTAACCTTGGTTGATATTACAGATCTTTGTGCAAAAACCTTCTCAATGAAACA  
ATTCCTCCAAATTTGAAGTCTCTCAAATCTTTAGAATATTTGTAAGTCTAAAGCTGCATCTTATATTGCCT  
TTATATTGTGAAATAAATTACTAACTAGTCATCTTAGTTCATAATATATTTATTTTCTTCTTGTCTTTC  
AGAGATTTGAGCTATAATTTATTATCAGGGAACATATCTGAGCTGGGAGGAATTGGGACCCTCACCGAA  
TTGTAAACGCCTTGATAAGATCCATACTTGTACTTCCAATTGGTTTGGCTTAACTTTAATCCCCATCTAT  
TTTCCTTACAATTAGGAACCTGGCGGATAATCAACTCTCGGGTGAACCTCCCGGACAGTCTCACGAGTTT  
TGTGAATCTTGAGGAGTTGTAAGTATATTTTTGTTAGTTACTTTTGGGTGCATGTACCTAACGAAACAGG  
GATACTTATTATTACGTTGTAATGATTTTCAGGCAGTTGCAGAACAAATGAATTTGTTGGTGCCTTGCCATT  
GAGTTTCCATAGTTTGGTGAACCTGAAAACCTTTGTAAGTATCAACTCTCTTATCTTTCCACTACTAAGAAA  
ATCATTATTTTTCCATTGAAAAATGTTCCGGTGGCTACTCCCACAGATATTTTGATTGAAACAATGAGAAAA

GAATAACTAGTGTTTTCATATGGAAAAATTAGGAAGTTTTACACTAATTGTAATGAGAATTTGTTTCCC  
ATCTTGAGCTGGTTAGGTTGAAATGGGGTGGGAAATCATGTTTTGTAACACAAATTCCTATTAAGCCTC  
TGTTTTTTAGTAGTGTTCAATCTCATTAGCATAGAATTGGAACATGAAGAGAGAGAGAGATTAAGTTTTA  
AATCAATTGTTTATCTTCTTCTTGTAGCGATGTGCGAGGGAACAACCTCAATGGAACAATCCCAGATA  
TTTTTGGAGGGTGGGAAAAGCTGCTTATCATGTAAACTCACTAACTGTACACTTTTATACTATCTA  
TGCATGTTTTTAGCAAGACTACTGATTTATTTTTCTGCACATGTTGAGAAGGAATCTGATGGGGAATAC  
TTTTTCTGCATCATTCCCTCCCACTTTCTCAGAGCTGAAGAATCTACAACAAGTAAATCCTGTAGCTTT  
TCCGATATACGCATCCTTGAAAGGAGTTCTCCCAAATTTGAATTATTAAGGATTATGTAATATCTACTTT  
CAGGTATATCAGTGAAGTACTCAGTTGGAGAACAGTACTCATTTCAGATTTATCCACAATAGAATCTTTGACA  
ACTTTGTGAGTCCCGTGGCACCCAAAATTTTATGCTTATTGGAATAATAGTTTTTCTTTTGCTTTTCTCC  
TAAAATAGAATTCTATTTTCCAATTTTCTGTTTATCTAGGACATTGAGGAATTGCTCACTAAAAACCGGAA  
TCCCTGATTGGATATGGAAAATACCTCACTAGAGTATCTGTAAGAAAGCTTCTACATGCAGTAAATATC  
TCCATATTCGTTTACTTCACAGAGAAAAGGGCGTGCTTTTTGATAGGGGAAAGTCGATGCTTCAAATGTT  
CTCCTCTTTGACTGCTTTTTTCAAATGAAACTATTATATTATGAGGTTAATGAGAAAATAAGTCGTTTGT  
GATAAAAGAGTTCCGTCAGGCTAAGCTCTTAAAGTGTGCTATCTTTGTCTTCTCTTCAGTTTAAACATC  
ATACAGTAAAGTGCCTGGAACAAAGTGGAAAACTACTTGATTGCGTGTAACCTGTCACTAAATAGGC  
GATTACATGTTTCCTTAAACAAATATATAAAGTAATACTACTTTCTTTCTCCTGATGCAGGGACTTGAGTTT  
CAATAATTTGTCTGGTGTAATTCCAGAAACTGGTCCCAAATCACTGAAATTTATGTAAGTGATCTTGCTTC  
TCTAACTAATCATTAATATAAGTGATCTTATTTTTGTAATGAATTGTGGTTATAAAATTCATCACTGCAA  
GAAAAGCTTTTATACCTCTTCTTTTGGCTATATCTTCTTCTATGCATTTCTTGTCGAAGCTAGTAATAG  
TTTATACATCTCAAACTCAAGTTTTTTTTTCGATAACAGCTGATATGGATTTCTGTTACTATATGTTGTTT  
CTTGACATTGACTATTGCATTGTTTTGTTGTAGTTCCGTTCTGTTATTTGTTATTATCTGTTGTTTTTGTA  
CTTGATTACTTATTTTTCTTGACTTCTTCTGGATTTTTTTTTCTTAAGTCAAGGATTTATCGAAAAACCACT  
CTACCTCTGAGGTAGGAGTAAGGTTTGTGTATACTCTACCCTTCCGGACCCCACTTTGTGGGACTATAC  
CGGGTATGCTGTTGTTGTTGTATAACAGCTGAGGCGGATCTATAGATGGAAAGCTTTTGAAGTTAACATT  
GGTTTTCATACTAATTGCAACGTAACCTACGGTACTTGTGTATTAGATTGTGTGATTCTGGTGTTGTTTGA  
ATATCAGAAATTGTGTGATAGCTCGCATTGATGAATACTTGAGCTCTGTGATGTCGAAAAATTGATCTT  
TTATCACATTTTTTTCTTTTCTGTCTTGTTTAAGTGCATAATCCAATGCATTGTTTCCAGATTTCTAAGAA  
AAAATAAACTCACTGGGACAATTCCAGCTTGGGTCAAGGATTATCCATACGTGTAAGTACCTTTTGCATT

AATATCTTACTTTTTTGGTTGTAATTAGTCGAGGTGGGGAAAAGCTGGGTTGCACACACGGTTATCAAAA  
AAAGAAAAGAATGGAAAACACTTCATGTTTTGCAGAGTGACTTTTATTCTTAGTACTGTCCAAACCACAA  
CACGTGACGCTGAAAGATCACTGGAATCATAGCTGTAGTCAATGGAACAACGAAGATCCAAATGATTTT  
TTCTTATAATAACATATCTAAACTTTTCCTACTCAAGGCCTCTCAACCTGTAAATTGGGATGCAAAACATG  
TTTCTTAGTCATAGACACAATCTTCACTTTTCAAACAATTTGCAATCGCCAACCTCATTTGTTTCATGTCTCGC  
ACATTAGTTGATGGAACGGGTTGTTGTTGCCTCATATGGTTTTAGACAGTCCTCATCTCATGAGCTAGCT  
TTTGCGGATGAGTTCATCATTAGGCCCATTTTTGTTTTGGTCATTATCTCTTCCATTAACTACCATATAT  
TCTTAGGCCAATTATTTCTTTTTCCGTATTCTTGTTTTACTCTTCTATCCATTACTTGGATATAATTTTTGTT  
GGGGAACAATGAAAAATCACACTAATAGTAGTTGATTTAACATGATTTTTTGCCTCGGCTTTCTCTTTTCA  
TTAATGTCTACAACATATTATGCCACTCACTCGTCCAAGTTGAAGTGCAGGGATCTTTCTGAAAACCATT  
CAACTTAAGACAAATAAACAAGACAAATCCTAACTTGTAAGTGTGATTTTACATATCTAGAAAAAATCT  
TATTTATGTGCTTCTGAGTAGCTTTTCTATTCCCGAATCCAATTATTTCCCTTTACCAGGAATCTGTTCCG  
CG

>M6-PGSC0003DMG401028427 M6 LRR-RLP

ATGGCTCCATTCTTCTCTCCTTCACCCTTCTCCTCTTCTCCTCTCCACAAAATCATCTTCTCAATCCACTA  
ATCTTGACCCAAACCAACTCAAAGCTCTCAGATCACTAAATGTACCAACAGGAAAAGACCCTTGTTCTCC  
CCTTCACAATTCCACCATTTGTGACTCTTCAACTCCCTTTCACCATCTCATCTCCCTCAAACCTCATAAACTGT  
TCAAATGATGTTACATTATCCCAAACATCTCTCAAACCTCTCTCCACTCTCCAAGACTTACAATTCATCAAC  
TGCCCTGTTTCTCCTATTCATTTCCCTTCTGAACTTTCCTCCAATCTCCAATCCTTCACTTGCATCAACTCCC  
TCAAGAATCTCACTAGCCTTTGGCTAATTCAATTGCGCAATGTGACAAGTTTAATGGTGTACATGTTCTT  
GTTTCTGCTAGTGGCCCTTCTATAATCTTGAACAGTATCAAGAAGTTGAGAGTGTGACAATATCTCATG  
GAAATCTCAAAGGGGTTCTTCTTACAAAATGGCATATGAATCTTACTTATGTTGATTTATCTGGGAATCA  
ACTAAAAGGGAAAATACCAAGTTCTTTAACTGAACTTGAAAATCTTTTGCATTTGAATCTTTCTTCAAATT  
TACTCAATGGGACTATACCAAATTCATTTGGTAACTTACTTTCTTTAAAAAATGTGTCATTAGCTTCAAAT  
GCTCTGTCTGGAAGTATTCCGAAATCTATTGCTGCAATTCCTGAATTAGTCCATCTTGATCTTGATCAAA  
CCAATTGAATGGAACCTATTCCAAAGTTCATATCAGATATGAAAGGATTGCAATACCTGAATCTTGAAAGA  
AACAAATTCGAAGGTGTTTTGCCATTCAATGCTTCTTTCATCAAGAACTAGTTGTGTTCAAAGTGGGAG  
AAAATTCAAATCTTTGCTACAATCATTCCACATTGTCTTCAAACCTGAACTTGGCATTGCCCTTGTGAT  
AAACATGGATTGCCACTGTCTCCGCCGCTCCTAAGGAAGATTTCAAGTATGATACTGCCTAGGATGATA

GTCCACCACCTAAACATGAACATGGACCAAGCAGGGTTGTTTTGGTGTGGCTATTGGGCTTTCATCCAT  
TGTGTTTTGATTATTTATTGGTTTTATTGTCCAAATGTTGAAATGATCATGACTGTAAATTGTGACAA  
ATTCTTGGTCCAGTTAGAAATTTGAGTTTTGAAAACATGAATCGATTACTCTTTTGAAACTATGCATATGT  
TCATGATTTAGTATTTCTTGAAACTGATTCACAAACAAATGTATGAACTTTGTACGTCTTATTATTAATCTA  
GCTCAAATTGGACTCAAATATTTAAATGAACAAGCTTGCGTATACGTTTGAACCTATGTTTATATAATTAT  
ATATTCTGCGAGAGTATTTTATATACTCTATAGTCTAGTCAATCTTATAAGATCTGTTTCTGGTTTTTTAT  
ACTTAGTGATATTTGTTACTTGATGAATGATGATATGAGCTATGAGCTATAATTAAGATGTAATCATGG  
GTTCTTTGTTAGCATGAGTAATAAATAATGAAAAGATCAAATATGTCAGTTTTACTATGTTTCATGGTTGGT  
TTTTTATTCCAATCTTAGTACAAAGGGAACATGCCTCTCCTGATTCTTTTCAGATTATTTTTAATTTGACA  
AAACATAATGTCTCTTTAACTTCACAAAGGGCCAAGAAAAGTTTAAGACGACTTGGGACTCATATTTGAA  
CTGAGAAGAAGGATAAAAATGCTCCAATCTTTTTTATTTCAATTCATGTTACATAGAAATTTGTTTTCATCAA  
GATCTGACCATGTCCTTTTAGTACAAAATTTGATTATACATGTTGATAAAAGGATTCGTTTACTTTGCTTG  
TTTTTTTCATTTTCCTTTTACAAATGAACATTCAGAAAGGGTGACTGTAATAATTGGTGAAGAAACAAACA  
AAAATCAAATGGAGATTTTCAGGTTCAAGTACCTTGATATGAATGTCATTTTGTCTGGGAGCGTTTATCCT  
AATATGACATTTTCTGACGTGAATCCAAATTTAATCAAGCTCCATCATGACGCTCCAATATGAATACGGA  
ACAGCAGATTTTTTTTTTTTTAAAAAATAAATAATCCTTTTCTCATCCAAAACCACATTCTACTTGCAAAT  
AGCACGTGTGATAAGTGACGATGAGACACAAAAATGTGTACATGGCTTTTGTGGTCAGCCTGCATACAC  
GTCTACTATTTTTTGTGGTGTGAATGAATGTGTTTCACTAAAAATAAAGAGTCTACGGTATATGTAATCT  
TCATTAAGAATCGAAAATTAGTTTTTCGAAGAAAATATGGGTGCAACAGCAACTGCAGTTTTCTCTTCA  
AATTCTATATCTCAATTGCCCTCCTTCTCTGCTTTATGTAAACCCAATTGGGGATCCGAATACCAAAGG  
TACTTTTTTTTTAATTATTAAAATCTTCCATGAAATGAGTTGATTAAGTTGTGTTCTTATGAATTCTTGAAA  
TTAAAATTGGGAAGTTACTTGAAAATCTTGGGTTTTTTT

>M6-PGSC0003DMG401030236 M6 LRR-RLP

CAGATTCAGAAATGGATATTGGCTTGGCAGTTGGTGGTGCATTTCTCTCTTCAGTCCTGCAAGTCCTATT  
CGATAGGCTTGCTCCTCAGGGAGAGCTGCTGAATATGTTTTCGAAGGGACAAGCACGATAATCGGATTTT  
AAAGAAGCTGAGAATGACTTTGCTCGGTCTTCAGGCTGTGCTAAGTATGACACAGAATAAGCAGGCGTC  
AAATCCATATGTGAGCCAGTGGCTTAATGAGCTACAAGATGCTGTGGACAGTGCTGAGAACTTAATTGA  
AGAAGTCAATTATGAAGTTTTGAGACTAAAGGTGGAAGGTCAGTGTCAAATCTAGGAGAAACAAGCA  
GGCCGCAGGTAAGTCACCTCAGCTTGTCTTGAGTGATGATTTTTTTCTTAACATAAAGGATAAATTGGA



AGAAAATATTGAAACACTGGAGGAGTTGCAAAAACAGATTGGTTGTCTTGACCTGAAATCGTGTCTTGA  
TTCGGGTAAACAAGAACTAGAAAGACCTTCAACTTCTGTGGTTGATGAATCTGATATCTTTGGTAGGCAG  
AATGAAATAGAGGAATTGGTGGGCCGTTTATTATCTGTTGATGCAAATGGTAAAAGTTTGACTGTAATC  
CCTGTTGTTGGAATGGGGGGCGTGGGCAAGACAACACTTGCTAAAGCTGTTACAATGATGAGAAGGT  
GAATGACCATTTTGATTTGAAAGCTTGGTTTTGTGTTTCTGAACAATATGATGCTTTCAGAATAGCAAAA  
GGATTGCTTCAAGAGATTGGCTTACAGGTTGATGATAATAAATCAGATTCAGATCAAATTGAAGGAG  
AGCTTAAAGGGTAAAAGTTTCTTATTGTTCTAGATGATGTTTGAATGACCACTATAATGAGTGGGATG  
ACTTGAGAAATCTTTTTGTGCAAGGAGATCTCGGAAGTAAGATCATTGTGACAACACGTAAGGAGAGTG  
TTGCCTTGATGATGGGTGGTGGGGCAATGAATGTGGGGATTCTGTCTAATGAAGTCTCTTGGGCTTTAT  
TCAAACGACATTCATTAGAAAACAGGGATCCTGAGGAACATCTAGAACTTGAAGAGATAGGAAAGAAA  
ATTGCAGAGAAATGCAAAGGGTTGCCTTAGCTATAAAGACCCTTGCTGGGATGTTACGCTCAAATCA  
ACGATTGAAGAGTGGAAACGCATTTTGAGAAGTGAAATATGGGAGCTGCCAGGCAATGGAATGTTACC  
AGCATTAATGTTGAGCTACAATGAGCTTCCCCACATTTGAAGCGATGCTTTTCCTATTGCGCAATATTT  
CAAAAGATTATCAATTTTACAAAGAACAATCATTCAACTGTGGATCGCTAATGGTCTAGTACAGAAGTT  
GCAAATGATGAAACGGTTGAAGAACTAGGCAACCAGTACATTCTTGAGTTGAGATCAAGATCATTGTT  
AGACAGGGTCCCTGATTCTTTAAATGGAAGGGCATGGCATTCTTAAGAGAGGACTTAGACAAATATTT  
TCAAATGGATGGTGAGAAATCTTTATGCATGACCTTGTCAATGATCTTGCCCAAATTGCATCTTCAAAC  
ACTGTACCAGGTTGGAAGACATCGAAGGATCTCATATGTTGGAACGAACTCGACACTTGTGCTATTCCAT  
GGGTGATGGTAACTTTCTGTCACTTTCAGCAGGAGATGGTGATTTTGGTAAATTGAAAACCCTCTACAAA  
TTGGAGCAATTAAGGACATTGCTTCCGATAAATATCCAGCTCCATTTGTTTTAGTTAATCTAAGCAAGA  
GGGTGCTGCATAACATACTTCCAAGGCTAACATTTTTAAGGGCATTGTCATTTTCTCGTTATGACATCAAG  
GAGTTACCAATTGTCTTATTTATCAAATTAAACTCCTAAGATTTTTGGACCTTTCTTGGACAAAGATAAA  
ACAGTTACCAGATTCAATTTGTGTGTTGTACAACCTTAGAGACACTTATCGTGTGCTTGTGATTATCTTG  
AGGAGTTACCGCTGCAGATGGGAAATTTGATCAACTTGCATTACCTTGACATTAGGTGTTGTTCTCGGT  
GAAGATGCCTCCACATCCTAGCAAGTTGAAAAGCCTCCAGGTGCTATTAGGAGTTAAATGTCTTCAAAGT  
GGTTTGAACCTCAAGGATTTGGGTGAACTACACAACCTTGATGGATCTCTATCAATTGTAGAGTTGCAAA  
ATGTGGTTGATAGAAGGAAGCTTTGAAGGCAAACATGAGGGAAAAGGAACATATTGAGAGGTTATCA  
TTGTCGTGGGGTACAAGTATTGCTGACAATTCACAACTGAAAGAGACATACTCGATGAACTACAACCA  
CACACAAACATAAAAGAACTGGAAATCTCTGGATATAGAGGGACAAAATTTCCGAACTGGTTGGCTGAT

CATTCCTTTCTTAAGCTAGTGAAGTTGTCTCTTAGCAACTGCAACTACTGTGATTCCCTAGCCAGCACTAGG  
ACAACCTCCTTCTTTGAAATCCCTCACCATTGGGTATATGGATCGAATAACAGAGGTGACCGAAGAATTC  
TATGGTAGCCCATCTTCAATAAAGCCATTTAACTCTCTGGAATGGCTTGCATTTAATCAGATGACTAGGT  
GGAAGGAATGGCACGTACTAGGAAGTGGAGAGTTCCTGCACTTCAGAACCTTTTAATTGAAGACTGTC  
CTGAGTTGATGGGGAAGTTGCCTGGAAATCTTTGTTCTTTAACAGGATTGAGAATTTCAAATTGTCCGAA  
ATTCAAATTTGGAGACACCAATTGAACTTTCAAGTCTAAAAGGGTTTGAAGTTGTTGGTTCTTTAAAGGTT  
GGAGTTCTTTTTGATCATGCTGAGCTATTTGCATCCCAACTTCAAGGAATGATGCAGTTAGAGTTCTTAAT  
TATCAGAAGGTGTGACTCTTACCTCCTTGCATATTAGCAGTCTGCCGAAAACCTTGAAGGAAATAGTG  
ATATCTGATTGTGATCAATTGAAATTGGAGGCGTCAGCTAGTGAGATGTTTCTCGAGAGACTGGACCTA  
AGTGGATGTAATTCTATAAATGAGATATCACCTGAGCTGGTCCCAGAGCACACTATTTGAGTGTAATA  
GTTGCCACAGCCTTACTAGGCTTTTGATTCCACTGGGACTGAAGATCTCTATATTTCTGGATGTGAAAAT  
CTTGAAATACTTTTGGTGGCATCCAGGACTCCAACGTTGTTGCGAACTATGAAAATTCATATCTGCGAGA  
AGCTGAAGTCGCTGCCAGAACATATGCAGGAACTTCTCCATCTCTTAATCATCTCTACCTGTATGATTGT  
CCAGAAATAAAGTCCTTCCCTGAAGGAGGGTTGCCCTTCAGTCTAGTAGTCCTTGAGATCTGGTATTGCA  
ATAAACTACAGAATGATCGAAAGGAGTGGCATTACAGAGACTCCCTTGTCTCAGAGAACTTCAAATCTA  
TCCCGTTCTACTGACGAAGAGATTCAATGGGAGATGCCTTGCTCAATTCAAAAACCTTGACGTATCCAAC  
CTGAAAACATTAAGCAGCCAATTCTCAAAGCCTCACCTCTCTTGAGTACCTAGAGGCTAGGAATTTAC  
CTCAAATTCAGTCACTGATCGAAGAAGGGCTTCCCTCGTCTCTTTCTTCACTAACATTAAGAGACCATCAT  
GAGCTCCATTCCTGTCAGCTGAAGGTCTTCGGGGCCTCACTTCTCTTAGGCATCTACAGATTAGCTTCT  
GCTTTCAACTCCAATCTCTTCCGGAATCAGCGCTGCCCTCCTCCTCTCTGAGCTGACCATCAAATATTGT  
CCTAAGCTCCAACATCTTCCAGTAAAAGAGATGCCCTCTGCCCTCTCTAAACTATCTATTTAGACTGTCC  
ATTGCTCAATCCACGTCTAGAATTTATGAAGGGGGAATACTGGCCAAATATTGCTCATATTTCCACTATA  
CGGATCAATGAGGAATACCTGTGATGATCAAAACAAACAGTACTCTGACAGATGTAAGAACTCTTTTTTT  
TTCTCAGTAGCTTTTTATTGTTCACTTCTCTTTGCTTGTTTGGTATTTTTTCTTTGTTATATTG

>M6-PGSC0003DMG402000299 M6 LRR-RLP

CTTGGGTGCAAAAGAAGGATACTATTAATGCCTCTCATCTTCTTACAACCAAATGTGACATTCCATAATTG  
AGAATACATCAAATCCACATATGGAGAAGTTATACCTTTGGTTTTAACCTTCATAACAGTTTGGTTGA  
GTTCAAGTCAAGGGATTTACAAACATAGAAAAAGATGAATCTGCACTTATTGCCTTTAGAGCATATATAAC  
TTCAGACCATGATCATATCTTGTCCAAAACCTGGATGCCATCCAGTAACAAATCCTCTATCTGTTACTGGA

TCGGCGTCTTTTGTAGTGGAGAAAACGAAAATCAAAGAGTGACATCTTTAAATGTCTCAGGATTCAGAC  
TTTCAGGCACAATTGCTCCTGATTTAGGAAACTTGACATTTCTAACATCATTAGACATCAGTAACAACAAC  
TTCAGTGGCTTGATGCCTAATGAGTTAGGTAATCTACAACGATTACAAGAGATAAACGTAGGATTCAACT  
ATTTAAGAGGAGACATTCCAAGCTGGTTTGGAACTTACCACAGCTCGAGAGCATTITTTATGAACGATA  
ACAAGTTTAGTGGTCCTATTCCACCGGTTTTAGGCAACAACACAAAGCTGAAGAGATTGGTACTGTCATA  
CAATTTGTTACATGGAAACATACTCAAGAGATAGGAAACCTTCCATGCTGATAATAGTTGACTCTAAG  
TATAATGTGCTGACAGGATCTATACCATCTGAATTATTCAACATCTCATCGTTGCAAAGCATCGATCTCAC  
TGGTAATAGTCTAACAGGTGGACTAGCACCGGATATCTGCAGTAATCATCGTCTTGTTGAGCTTCAAGG  
AATATTTTTATCCGCGAATCAGCTTCATGGACTGATCCCATCGACGTTTCATCTTTGCAAGGAACTCCAGG  
ATTTATCCTTGTCTACAATCAATTTAGTGGAAAAATCCCAGATGAAATTGGATATATAACCAAGCTCAA  
GACGTTATATCTGGGGATAAACAATTTCATAGGTATCATATTATTTATTCAAGTTATATAGTAGTCAAC  
ACTCTTATTATATTGCTAGTGTAGTTAGTGATTGGAAGTGAAGTCAAGTTCTATAATTTTTACATAGAAAG  
ATGACTGTTGAAATTGCATGTTCAAAGAATTATGTTTCTCCGAATAGTTGTGTTTTAGCAGATATCTAAGT  
AGGGGCAGAGCCAGGAAGGGCAAACTATATATAGCAATGTTGGACCCTTTGGCTTCTTCATGTGTTGA  
CTTCTTCATATTTTTGAACCCCTTAGTGAAAATAGGGTCGGTGTTTAAATTCCTTGATGACGGAGATTCA  
GTCAAACCATCAGTTTTCTGTTTCTACAAGTTTATCTTCCCAACATATATGTATAGCAACTTCAACTTAT  
CGAGGATATGACCTTAGATAAGAGGTTGTGGAGTACATGGATTAGAGTAGAAGGTTAGTAGGTAGGAG  
TGCATTGTCTTGATGTCAGTCCATACTAGTAGTCGTAGTATTACTATTTTAGTTTCTTCTCCTCAATTTCTG  
CGACTATCTGTTGTTTCTGTACTTCAACTATCGTAATAGTATTTGTTGTAGTACTGTTTTGTTACTATCT  
GATGTTTTTTGTACTTCCATTACTTATTTTTCTGCACTACTGCTGTCTGCTTTGGACTGTTTTTTCTTGAGT  
CGAGAGTATATCGGAAACAACCTATCTACCTCTGAGATAGGAGTAAGGTCTGCGTATACTCTACCTCCC  
TAGACCCTACTTTGTGGAACACTACACTGGGTATGCTGTTGTTGTTGTATATGTATAGCAACTAAATAAGAG  
TTAAGTGAGTTTAAATCAACAAGAAATTCCTACTTACTACCAATCGATCGAGGTGTTTTGCTATCTATA  
TTTATCTAGCTTTGACAATCTTTTTGCAGGTGGAATTCCTGAAAATTTAGGCAATCTTACATATTTGGAGA  
TGCTAAGCCTAAGAGGTGGTTCATAACAGGTCAAATTCACACACTCTATTCAACATGTCCAGCTTAAA  
GCAACTCGATCTTTTGAACAACAGCTTGCCGGAAGCCTACCATCCGTGAGCAGTCAATGTAATCTTCTCT  
CACATAACTGGTGAAATCCCAGCAAACACATTCAGATGCAAACGCCTTCAATTCATACAATTAGCAGACA  
ATATGCTTACAGGCAGCATTCTAAAGATATTCGGAACCTTACTTTCCTTCAGAATCTATATTTAGAAGAC  
AACAACTTACAGGTACGCAACGCCAAATTGTTATTGCCCTTGTAGTTTCTATTTATAGACATCAAAGTCC

TAAATTTACCACATTAGATATTTCTACCTCATACTTTAACGACACCATGTAGCTTGTCTCAATGCACGTGT  
AAATTACATTCATGGTATTAGTTATAGTATATATTACATTCCTAATTCATTTGATACTTTGTCAGGGAGATT  
ACCAGCTGAGATAGGTACCATAAATCTGAAGGTCCTTAACGTCCATGGAAATCACTTGTGAGGTGTCATT  
CCATCTGAAGTATTCAACATATCGATGTTGCAGATTCTAGACTTAAGCAGGAACCGGCTCACAGGAACTC  
TTCCCTCAGGCTTGGGCCATCAGTTTCCAAATCTGCAAGAGCTTTATTTAGGTGAGAATGAACTTACAGG  
ATCAATCCCAAGTTCTATCTCAAATGCTTCACAGCTTGTATTATATCCATGACCTTCAACTCGTTCACTGG  
CTCGATACCCGACCTTGGCAATTTAAGACTTTTGAAGAGGCTATTTCTAGCAGAGAATAATCTTACAGGG  
GAACTTCCAAAGGAGAATTAATAATTTCTGTCCTATTTAACTAATTGTAGACATTTGGAAAAGATAGAAG  
TGTCTTTAAATCAGTTAAATGGTGTCTTCCAACCTCATTAGGGAATCTCTCTGCTAGCCTTCAAATTTTCT  
CAGCATTGGTAGCAAAATCAAGGGGACTATACCTGTCCGAGTTGGAACTTGACAAGCTTGACCGGTA  
TGTAATGGATAGCAATGAGTTGACTGGAGTTATCCCGAATACAATTGGAAAGTTAAAAAATCTCGAAC  
GTATATATCTAGAATAACAATAGACTGGAAGGGTATATCCCAACTGATATTTGCCAGTTAAGTAAGCTGG  
GGGATATCTACATAAGTCACAACATGATCCGTGGAGCCATACCATCATGTTTTGGTGAACCTCAAATCACT  
ACAGAGAGTTTTCTGGATTCTAACAATTTGGCATCTACCATTCCATTGAACTTTTGGAACTGAGTGACC  
TTGTAGGTTTGAACCTTATCCACAACTCTTTCAAAGGCTATTTACCATCAGAGATCTCTAATCTGAAGGT  
GCAACAGACGTGGACTTATCGTGGAATCAATTTTCAGGAGATATCCCCAGCAGAATAGGCAGTGCCCAA  
TCAATAGTTTACCTTTCTTTGGCACATAATAGATTGCAAGGTCCTATTCTGAATCTTTGAGTAACTTGAT  
AAGTTTAGAGACATTAGATTTGTCGTCCAACAATTTGTCCGGAATGATTCAAAGTCTCTCGAGGCATTG  
AGGTATCTCCGACACTTCAATGTCTCTGTGAATGAATTGGAAGGGGAAATTCATCAGGTGGATGTTTTT  
CAAATTCAGTGCTGAATCTTTTAGGCAAATCATGAGCTATGTGGAGTAGCTCGGCTGCATGTTCTGCC  
CTGCCGGACAAAACATTCCAAGTCAAAAAGTGTTCATCTTTGATTAATATGTTGTTCCCCCTCTCTTGT  
CAACAATTCTCATGGTGACTGTTGTAATTATTTGATAAGAAAACGGAACCAATACGTAAAGATGAAAAT  
GGAGGAATCACAGCTTGTGCAATCTTTACCTATTGCATACTTGAAGAAATGTTTCATATCTTGAACCTG  
TACGAGCAACAAATTCTTTTTCTGAATCCAATCTACTAGGAAAGGGAAGTTACGGTTCAGTTTATCGAGG  
GAACTCAACGATGGAACAGATGTAGCTGTAAAAGTTTTAACTCACTGACAGAAGAAGCAACCAAGA  
GTTTCTATGCTGAATGTAAGATATTGAGCAACATCCGTCAACCGAACCTTACAAAATCCTCAGTTGTTG  
TAGTACCACAGACTTCAAAGCTCTTGTATTAGACTACATGCCAAATGGTAATCTTGAGAGGTGGTTACAT  
TCCAAGATTATTGTTTAAAGTATGCTCCAGAGACTGAACATAGCAATAGATATTGCTTCAGCTTTGGAAT  
ATCTTCATTGTGGTCTAACAACCTCCTATTGTACACTGTGACCTGAAGCCTACCAATATCTTATTAGATGAA

GATATGACTGCACATCTTTGCGATTTTCGGGATCGCAAAAATTTTTGAGCAAGACATGCATATGGCTCAAA  
CCAAGACACTAGCCACCATTGGTTATATGGCACCAGGTGAACTAAATCCAAATCCTTCTTATTCTGCTTT  
CTTTAGTAGTAAATCATTTTTTTGGTACTTTGAAACATACTAACTATCAAAAATCATTACATAAGCTACATTG  
CTTGAATCTGTCAGGAGCAAGAACTCCATTTTCATTGATCACATATCCCATATTACCAAATCCTTTTCATG  
TCTATGACCTTTATTCGCCAGAAAATCTACATGTTTATCCACTTTCTTCATTCATCTCTTAAAGTTTTTCCGA  
AAACAGCATCTCCGTTTTGGATCTTCACACTACCATTAGTATATAGCTTAATTTTTCTTGACAAGGAGGA  
CCAAGCAATTAGTTTGACTTGTTTGGATATAGAGGTTTTGCATAGGGAAATACTTCAACAATTTCCATAG  
TGTAATTTATAATGTGTTTAGATATACATTTCTTTCTAGTACTCCCTCTCTTATAATTTGTTTGTCTTATTTT  
CCTTTTAGTCCGTCTCATAAAGACCACAAAACATGTTTTAAGACCACAAGATTAAGATATTTTGATACA  
TTCTAAGTTTTCTTCACTTTCTTAATTGAAATCCGTGTCAAGTCAAACCAGACAAACAAATTGAAACAG  
AGGGAGTGTAATATTAAGTAGATCTTATGCTATATATTTGCTTAAATTGTAATGTCATTGCAGAGTATGG  
AACTCATGGGATAGTTTCAACAAGTGGAGATATCTACAGCTATGGCATTATATTGTTGGAAATGTTTACA  
GGAAAAAACCAACTGATGATATGTTTCAGGGAAACAATGAACTTGAATGTTTCGTGGGCGAAAGCTTA  
CGTAGAAAATCTTAATGGAAGTTCTGGATTCTGATTTGATTAGAGATGTTGAACAGTTCTCTGAAGTAG  
TACAACAGTTTGTGTCATCTATCTTTTGTGGGATTGGAATGTCTGAAAGATTGCCTGAAGACAGAAT  
GAGCATTAGTAATATTGTGGATTGCCTTAGAAAAGCTAAAATTGAATATTTAGCAATTAGAGGAAAGGC  
AGAAAAGGTGGTGTAATTTTCTGATTGTGAAGACTGTTGTAATATTTTATTTTGTGGTATTAGTGGT  
TTACAATCTTTGGGAGTTCTTGTCAAATCTGTTTCTGAAAATACTTTTTCTTGGGCCGAAAACGATTGTTG  
AAAATAGCCTCTCTACCTCACACAAGATATAGCGGAAAGGTTTGTGTATTTGATTTCTTTTGGACCACAT  
AAGAATTCGTTGTCCAATTGAATATTCCTTTTCTGGAAGGTTTGTGTATTTGATTTCCATTGGACCATG  
TAAGAATTCGTCATCCGATTGAATATGTTTT

>M6-PGSC0003DMG402002888 M6 LRR-RLP

ATGTCCAACAAGTACTCTAGACATTATAGTACTTCTCTCCCAAAGCATCGTCTTGGAATGAGAGTACGG  
ATTGCTGCACTTGGGGCTGGATCACTTGTGACATGTTAACTGGTTATGTTATTGGCCTAGACCTTAGTAA  
TGCAAATATTAGCGGAACTATTCATCCCAACAGCAGCCTCTTCCAATTCATCGTCTTCAGACGCTAAACC  
TTGCTTACAATAACTTATCTGGTCTCATTCTGATTCCATTGGCAACATCACACAAATCAGAGAGTTGGAT  
TTTGGTTCCAATCATTTCACTGGCCATATTCCTTCAACAATCTCAAACTGAAACATCTCACACGTCTAGA  
TCTTTCGTTTAACTCACTTGGAGGTAAAATCCCGATGTTTTTCTTAACCTCCAAGAGCTAGTTACATTGT  
ATCTTCTTACAACAGCTTCATTGGTCCATTTCCCTCTTCGATTTTAACTTGACACGTCTTGAAAACCTTAG

ACTTGTCGAGTAATTCCTTGTCTGGTCCATTGCCAAGCAATGTCAGCATGCTTCTAAAGCTAGTTGACCTG  
GATTTTTCTCACAACCTTGCTAAATGGAACAATACCATCTTGGGTGTTAGCCTCCCTTCTTTATATATGTTG  
GAGCTCCATCATAATCTATTCAATGGACTATCTGATGAGCTCAAAGTGAATCGAGCAGTAGGGCGTTTTG  
ATTTGAGTTATAATCAACTCAGTATTCTGTTCTTCTATCACTTCAAATCTCACTAACCTTGTAACCTTG  
ACCTTTCATCAAACAACATCACCATTGATGGGGGAACACAAATCACTTTTCCTAGACTAGAAATTTTGCT  
GTTATCATCTTGTGAAGTGAAGGATTTCCACAGTTTCTAAGAAATTTAAAGACACTTCGGGTCATAAATC  
TTTCTAACATAAGATTCGTGGTCAAATCCCTAACTGGTTTAGCGGGTTGAGGTGGGACTCGTTGTTTCA  
CCTAAACCTTTCATATAATCACTCAATGGTCACATAGATCTATCTCATTCTATAGTCTAGTTTCTCTGA  
TCTTAAATTTAACTTCCTTCAGGGTCCACTACCTTCATCCATTTGTAACATGAGCATCATTAGCCTTCTGGA  
TTTATCACACAACACTACTTCAGTAACTCGATTCCAAGTTGCTTGGGTAACATGACTCAGCTAACGGTGTTG  
GACTTAAGAAGGAACAATTTCACTGGTAGTCTTCCACCGTTATGTAGTCAACACACTTCATCGACTACCA  
GTATCCTGAATGGTGTGTAATCAATTGACGACCATTATCTTGAATGGTAATCATTTTGAAGGACATGT  
CCCTGTGTCATTACTCAACTGTGTTGGTTTAGAAATCTTGATATCGGGAACAACGCTGTAAATGACTCAT  
TTCCAGCTTGGCTAGGAACTCTTCAAGAGCTGCAAGTCCTTATATTTAAAGTCGAACAAGTTCCATGGACC  
TATAAGTACTAGGTTGAGGTTTGGGTTTCCCAGGTTGCGGATTTTAGATCTCTCTCATAATGAGTTCAGT  
GGCTCACTGCCTGCAGAAGTTTTTCAAACCTTCAAAGGAATGATCAAATAGCTGACAGTGACAAAGGT  
AAGATTGAATATATGAAAACATCAGACTCATTTTTTGTATGTACGATGATTCAGTGAGGTTGGTGATCA  
AAGGAAACGATATAGAGCTAGAAAGAATCACTACAATTATGACAGTCATAGATCTCTCAAGCAATCATTT  
TGAAGGTGTGATTCCGAAAACACTAAAGGATCTCAGCTCACTTTGGCTACTCAATTTATCTCATAACAAT  
CTCAGAGGAGATATTCCTATGGAAGTACTAGGAGGATTGAATATGCTTGAAGCGTTAGATCTCTCTTGGAAAT  
CGACTCACTGGAAAGATTCCGCAACAATTGACAAGGCTAACCTTTCTGGCATTCTTAAACCTCTCTCAA  
ATCACCTAGCTGGACGCATTCTCAAGGTTACAGTTCAACACATTTGAAAATGACTCATATGGTGGCAA  
CCTTGATTTATGTGGTCTTCTTTATCAAAGCAATGTGGAACGGGTGATCCATTGCATATTCTTCAACCAT  
TAGAGGAAGAAGAAGAGGACGAGACATATTTTTTTAGTGGATTTACATGGGAATCAGTAGTCATGGGC  
TACAGTTTTGGACTTGTTGTTGGAACATTGCGTGGAACCTCATGTTTAAAGCTGGTAAGCCAAAATGGT  
TTGTGGAATTTTTCCAAGGCATTATTCCCCACAGAAAAAGAAGGCCAAAGAAGAGAGCTCAAAGAAGAT  
GGACTTAA

>M6-PGSC0003DMG402004423 M6 LRR-RLP

ACTATTGAGGAACTCAGTAGCTCAAGGGACTGCAAGAAAGATCTGGAAATGCTTACACAAAATGCATCC

TTGATCCAAGCTTTCATTCATGATGCTGAAAGACGACAAGTTGATGATCAGGCTGTGAAACTATGGCTCA  
AGATGCTTGAGAGAGCTGCTGAAAATGCTGAAAATATGTTTGACGAATTCAGATATGAATCTATCAAAA  
GACAAGTGAAGATCCAAAAGAACCCAATGAAAAAGGTCAGTGATTTCAATTCATACAACTTTTAAGA  
GCAAAATGTAACGAAAAATCAACAACATCAATGAAGAGTTGAGGGCTATCAATAAGTTAGCAAAACACC  
TCGGTCTCCAATCACTCATGGTTCCTCCTCGGCATATACTACCAATTCGAGAAACAGATTCTGTAGTAGTT  
GCTTCGGAGGTTGTTGGTAGAGACAACGATGTTGCAGAAATAAAGAGGAAGATGTTGAACATCAGAGA  
GGATGTTGTTCTGTGCACCATTCCCATAGCTGGTATGGGGGTTTAGGGAAAACAACATATGGCTAAGAG  
AATTTTCAACGATGAACAGATCGAGAAACACTTTGAAAAGAGAGTTTGGTTGTGTCTGCCTGAAATGTC  
AGAAACGAAGAGCTTTCTTCAACTAATCCTCGAATCCCTGACAAAGAGGAAAGTTGAGGTCCAAAGCAG  
AGACATAATAGTCAAGACGCTACAAGATGAACTGGCAGGAAGAAAGTACTTACTTGTCTGGATGATTT  
ATGGCGTGTTGACTCTACATTGTGGGTAGAGTTTGTGACACCTTACGAGGAATAAATACATCCCGAGG  
AACTTCATTCTTGTGACTACTCGTATGGAACAGGTGGCATCCACAGTAGCAGCAGTAGCTCCTCATAGG  
TTGGAAAAATTAGCAGAAGCTCATTGTTGGTCCATTTTCAAACAAGAGCGTTTGTGATGGGGAAATTC  
CAGAGGAAATAGTGTGCATGCAGAACAGGATTGTGAAATGTGTCAAGGTCTACCGTTGGCTGCAAGT  
GTGTTGGGAGGCCTTTACGCAACAAGGAAAAACATGAATGGCAGGCAATTCTTGATGGAAACCCCTT  
GTTGCAGGTGAAGATGATAACGGAGAAAATAGCATAAGGAAAATACTAAAACACTCAGCTATGATTATCTA  
CCATCTCCACATCTGAAAAAATGCTTTGCTTACTTTGCAATGTTTCCAAAAGATTTTGAGTTTGAAAAGGA  
CCAAATAATCCAACCTCTGGATGGCAGAAGGCTTTCTTCATCCATGTCAAGAGACCACCGTAATGGAAGA  
CATTGGGAATAGTTCTTTCAACTCTTGTGCGAAATTCCTTGCTGCAAGATGTTAAGTTAGATAAGCAC  
AACAAATAACACACTGTAAGATGCACGATCTTGTGCATGATTTGGCTGGGGATATCTTAAAATCTAAAC  
TATTTGATCCAAAGGACAATGGTGGAGAAAATCTTTCTCAAGTGCGATACTTTGGATGGGACTCACCAA  
GTGATCAAATAGATAAGATAACTGAGCCAGGACGTTTGTGCACTCTGTTTTGGAGAAGCATTATATATC  
GGAAGATATGTTGTTGAGCTTCAAGTTCTTGAGAGTTTTAAATTTGTCCAGTTCAGGAATCAAAGAGCTG  
TCAGCCAAAATTGGGAAGTGATACACTTGAGATATCTTGATCTCTCGAACACTGAGATCAGAGCCTTGC  
CCAACCTCATTGCGAGCTCTATAATTTGCAAACATTTAGAGTCAATGGTTGCTATTTACTCCATGAACTT  
CCATATGAGATGGGGAATATGATAAGTTTGAGACACATATATTGCTATTCTTGGTATCAGATGCCGCTTA  
ACATGGGACAATTGACTTGTCTTCAGACCCTACAATATTTAATGTGGGTTTGGAGAAAGGTCGTGCAAT  
AGAAGAATTAGGTTGTTTGAAGAAGCTTAGAGGTAATTGAGGATCAATGATCTCCATTTGGTCCGTAG  
TAGAGAAGAAGCTCGAACAAACATATTTACAAGAGAAATCAAATATTTACAAGCTGTCATATGGGTGGTT

ACGTGATGAACCAAAGGTTGTGAAACCATTGATGAGCATGTGTTGGATGGTCTTCAACCGCATCCTAA  
CTTGAAAATCTTACTGGTGAAGTACTATTTGGGTACTAGATTTCTTCATGGTTCAGTGAAGAGTCCCTAC  
CAAATTTGGTCAAGTTAAAATTAAGTGAATGCAATAGGTGCAAAGAAATTCCGTCGCTTGGCCAACTGA  
AGTTCCTTCGGCATCTTGAGCTGATAGGATTCCCTGAATTGGAATTCATCGGGCCTACATTTTATGGTGT  
GAGGTTAATGATAATGGATCATGCAGCAAATCCAAGTGTCCCGTCATTGAAAGAACTTCTATTGGAG  
AATATGCATAGCCTTATTGAGTGAAGGGAGTGAATTGATACCAACAACAAGTGGGGTAAAAATGTTT  
CCTGTGCTTGAGAAGTTGAGGATTAGTAACTGTCCAGTGTTAAAAAGTACTCCGAATCAATTTGAAATCC  
TACGTGAATTAGCGATTGTGGAAGTTGACAGTGAAATGCCATTGTTGAACTTGTGCAGCAACTTGACATC  
TCTTGTAATGCTTAGTGTGTATGATGTGAAAGAGCTCACTTGTTTTCCAGATGAGATGCTACGCAACAAC  
GTTTCTCTTCAACACCTATTGGTTGAAGAATGCGGAGAGTTTCATGAATTGCCAAAGAGCTTGACAATC  
TCCATTCTCTTAAGAGATTATGTATTAGAAGCTGCCCAATTCAGTTCCTTTCTGTTCTTAGTGAAGAG  
AATTATTTGACTTCCCTCAAAGTCTTGAGTTACAGAATTGTGATGGATTGACCAATTTACCAAGTGGAA  
TGCTAGAGCATTGTCGGTCTCTTGAATCCTTGAGTGTCTACAAATGTAACAACCTGGTTTCCTTCCCTTTA  
CATGTGGGGGAAATGCATTTCGCTTTTATATTTGAGTTTATCACACTGTCCCAAGTTGATTTGTGTACCCAC  
AAGCGGCCTTCACCGTCTCACTGGGTTACGTCATTTGGAATGGTTCCTTTCTCAGATATGGTGGATTTT  
GAGGCATTCCAATTGATATTTAATGGCATTACAGCAGCTGTCGTCCTTCGTACATTGGGGGTGTGGGGA  
CACTTGCCTGGGATTCACTGCCCTATCAGCTTACGCAACTCTCTAATCTAACAGATATAAAAATGTATG  
GATTCAGAATCGAGGCTCTTCTCATAGATTTGCCAGCCTTACTTCTTGAAGATTAACACTAGTGGG  
GTGCAAACGGCTATAACATATGGACTTCTCAGATGCCATGCCCAAATTACGATATTTGTGGATAAATGAT  
TGTCCATTGTTAGAAGATCTATCGGATGGACTCAGCAACCTTGTTTCTTTGCAAAGTTAGTTTTACAGAA  
ATGCGAGAACTAGAGCATCTTCCATCTAGGGATGCCATGCGACGCCTCACCAAATTAGGATATCTGAT  
GATCCATGATTGGCCATTGTTAGAAGCTCTGTGCGGATGGGCTTGGTGACCTTGTTTCTTTGCAAGAGTTA  
GTTTTACTGAATTGCGAGAATCTAAAGCATCTGCCATCCAGAGATGCCATGCGACGCCTCACCAAATTAC  
GGAACCTGGAAATTAAGGCTGCCCAAAGTTAGAAGAAAGTTGCACAAATCGGAGTGGCCCAAACCTCC  
CAATGGTCCAACATTTCCCATATTCCAATAATTAAGTAGGTGAAAGCAGAATTCAGACTTGGCGTAAG  
TCTCTGTTTCTTTTCTCAGTTTCTGAGTCACACTTCTAATTATTATTTTCCAAGAGGTACTCTCCTCCATTCCC  
ATTTTATAGTTTTCCAGACAAATTTATGAATATCTATCTTACTTTAAGATATGGTTTAATCATGAATATTT  
ATGTGTGTTTTTCTCATTGGTTATTAGTTTCTAGGTCATGCTAGAAGGTTTCTGAGGCATTTCAAGTCAA  
AATCCATGGCGCCAATTACATTAGGTAACTTTCAATTTAGAATGTTGTAACAAGTTTTTCTTGCCTCCTT



TTTTCTCATGACATAATTTTACTGTTTAAACATGGTTGGTTATGTACGACAGATGAACCACTTTGCACTCC  
ATTGTTTTGTTGAAGAATAAAATCTTCAGTATTTGGTAAAGACTACATAATCTCTCAACATTTTACTCTTCA  
TAACGGGGATAGCAACAACACTATTAAGTAATAATAATTGAGTTCACAGTCGCTCATTTGCCCAAGTGAAAC  
TATTCTTTTATGTACAGGTATGTTTTGACTCAGGTACTTTGGTCAAGGTAGTAAAGGGTATCCGTGGATC  
GAGCCATCAAATTGATCTGTTTCATGAGCTATTCATAAGATGAAGCTAGAAGGTTATTGTGATACAAAGA  
CAAATGTATGTCCACTACTAACTGCACCTTAAAGACTTAAAGCTATGCGGGGAGGTATGAGTTATGC  
CCAAGAACAATTTTCATCAATTTTACTTTTCAGCTCCTTTTTCTCATTAAAATACTGAAATATTTAACAGGTA  
TTATCGTTCAACAATATAGTGTCTTCTTAATCCTCAAATCTTATTATACACTTTATTATATGGTATGATAA  
AAGTCATAAAGTGGTAAGATTCTGGTAAAGGAAATTGTTCTTTCTCTTTGAAGAAAGTGAAGTATTTGAA  
TATTGGCATAACATTGGCTTGTTCATGATTGGTATACACAGAATTCTTAGATGCATGACAGATTTTCAATTTG  
GATTCCGTTGATAGTAGATGCTTCACCAAATTATGTTTCACAGTCTTCAACATTATTATATTTTGAGGGGAC  
ATACTAGAACGTAGTGGACATTGGTGCCGCGTTGGAGACTCTGGTTGCACAAAGCTAGAAAATTTAAGG  
TAAGTCAGTTTTTTGTTTCATAAAAGATTGCAAATGGTGCTTTAGATCAATTATAACGAGTTGCTTCTCCATT  
TCGCAAGGATCAGAGAAAATGTGTGTCAAACACTGACTATTAACCGTTTCCTATGTTTAAGATTCTTGTT  
GAAACAACGACATGCATGGACCTTGTGAGATGGCAGAATGTAGCAGACTTCTCTTAGATGTGTGTTCA  
AGTGTCATGATTGACTAGTGAAATTGTAATTTGGCGGAAACTGAAAGTGGAGATATTATTTACTTGTATG  
ACTAAGATTTGACAGCACAGGCCTTTAGTTTCTTGACACACAGAGTACATGCCGTTTTCGTACACTACAAA  
TAGAGTCCATCAAACATTTTGAACCTAATA

>M6-PGSC0003DMG402005927 M6 LRR-RLP

TGCATTAGATTGCCAAAGATTTTTGTCAAATGAAGTTGATTGTACCACTTTCAAATGTGCATTACCTCCAC  
CGTCTCCACCACCTACCACCCCTCCACAAAACAACACTGTTGTATTTGTTTTCTCCACCATCACCATCTCCAT  
TGCCATCTACCGAGCCACCATCATCCCCACTACCACTACCTGCACCATCAGCATTGCCTTCTCCACCAAGC  
ATATCACCATCACCATCGCCTTCTTACCTCAGCCACCAGATTTGCCATCACTGTCACCATCACCTTCATTT  
GTAGAGCCTCCACTACCTTCTCCTCTACCGTGTGAAAATCAGAGAATACCATCAAGTCAAGATATGTCAT  
CTCCTTACCTTGAAGTCGTTATGTAAGTTACTCTTCTTGGTATCATATTTCTCACTCAATGGAACCTTA  
AATCATTCTGGGAATACAGGACATCCGCAGAAGGAGCTGTGAATTGAGATGCAAGATGAAGG

>M6-PGSC0003DMG402006653 M6 LRR-RLP

ATGGCTTTACTAACGGTGCTGGACTTAAGAAGGAACAATTTACAGGGAGTCTTCCCCATTATGTGCAC  
ACAGCACTTCATTGAGTACCATTGTCGTAATGGTAATCAATTTGAAGGACATCTTCTGTGTGCTTGCTC

AATTGTAATGGTCTACAAGCCCTTGATGTGGGGAACAATGCTATAAATGACACGTTTCCAGCTTGGCTCG  
GAACTCTACAAGAGCTGCAGGTCCTTATATTAAAGTCGAACAAGTTTCATGGACCTATAAGTACGTGTCA  
AACTAAGTTTTGGTTTCCCGAGTTGCGAATTTTTGATCTTCTCGTAATGATTTTCAGTGGCTCACTTCCTGC  
AAAAGTTTTTCGAAACTTCAAGGCAATGATTAAATTAGATGACGAAGACACAAGAGGGATCACGTACAT  
GGAATCTAAGTCAAATAATTTTTCATTTCAAACATCGTATGAGGATTCAGCGAGTTTGGTAATCAAAGGG  
CACGATATTGAGCTACAAAGAATCAGCACAATAATGACAACCATAGATCTCTCAAGCAACCATTTTGAAG  
GTGTCATTCCGGAAACTAAAGGACCTCAGCTCACTTTGGCTACTCAATTTATCCCATAACAATCTCATA  
GGTCATATTCCAGTGAATTGGGGCAATTGAATAAGCTGGAAGCTTTAGATCTCTCTTGGGAATCGGCTC  
ACTGAAAGATTCCGCAAGAATTGACAAGAATAAACTTTCTGGCAGTCTTAAACATCTCTCAAATCATC  
TCGTCGGACCAATTCCTCAAGGTCCACAATTCAACACATTTGGAAATGACTCGTATGGCGGCAACCTTGA  
TTTATGTGGTCTCTTTTATCAAACAATGTGGAACGAGTGATTCATCACATGTTCTCAACCAGAAGAT  
GAAGGCGAGTCATATTTTTTAAGTGGATTTACGTGGGAATCAGTAGTCATAGGCTACAGTTTTGGTCTAG  
TTGTTGGAACCTTTCATGTGGAGTCTCATGTTTAA

>M6-PGSC0003DMG402009306 M6 LRR-RLP

GTGCTTGAAAAGATGACAATTCACAGGTGCCCTGTGTTTGTATTCCGACCCTCCCTTCATTGAAACTTTA  
TTTGACAGATCCCTCAAGTTTGAGGTCCACATCTAATCTTAGTGCTTCTACTTCCCTCAACATAGGCCATG  
ACGATGAAGCTACTTCACTCCCAGAAGAGATGTTCAAAGCCTAGCAAATCTCAAATACTTGAGAATCTC  
TTTCTTTCAGAATCTCAAAGAGCTGCCTACCAGCCTGGCTTGTCTCAATGCTTTGGAGAGTCTGCAAATTG  
AATATTGTAACGCACTAGAGAGTCTCCAGAGGAAGGGGTGGAAGTTTAACTTCACTCTCGGAATTAT  
CTGTTTATAACTGTGAGATGCTAAAATGTTTACCGGAGGGATTGCAGCACCTAACAGCCCTCACAAGTTT  
AACAGTTGGGGGATGCCCAACTGATCAAGCGGTGTGAGAAGGGAATAGGAGAAGACTGGCACAAA  
ATTGCTCACATTCCCTATCTGCATATTCATAACTATGAGTATTTATAATTGTTTCTTTGTTTGTGAATCTTT  
TGGTTCCTGCCATTGGATGTAATTGTTTGTAGGGTTGTTTGTGAGTCTCTCTCTCATTG

>M6-PGSC0003DMG402009338 M6 LRR-RLP

GCAACTTAAATTTTTTGGATCATGTTGCTAACTACTTGTACGCTTTTCAGGAATCTGTAACTTAGGAACC  
TGCAGGTTTTAAATCTTCAGGATAACCTTATAACAAGGTGGACTTGATCCATGCCTTGGTGAATGACTTC  
CTTGGTTTCTTTAGATCTTTCTTTCAATCATTTTGGAGGGACTATTTCTTCTTACATATTCAGCAACCTGAC  
TTTGCTTGAGACCCTTCGTCTTTCAGATTACAGGTTTGGACTTCTCTTGTGTTTGCATCATTTGCTAACCT  
CTCCAATCTGAAGCCATTGATCTTACAAATAATGAGTTTGAAGTTGACTGAAACTCCATCTTGGGTTT

CATCTTTTCAACTTTTGTCCCTTGACCTACGATATACTAGACTAAACCAGAACTATGGCCATGTAATTCCA  
ACGTTTCATCTCCAAACAACACAAGTTGAAGTCCCTGTCTTTGTCCTATAATGCCCTTCAAGGAAGCGTTCC  
GTCCTGGTTGTTGTATAATAATACTTCTTATGTTATCTTTGAGAAGCAACCATTTGTATGGTGGAAATC  
CTGCGTCTTCTCAGATTCAAGCATCAAGTCTTCTGATGCTTGATGTATCAGATAATTGCTTAGGCAGTACA  
CTTCACACTAACGTGCTCGAATCACTTCCAGACTTATTCTATCTTAACCTGTCAAATAACGCTCTCGAAGG  
CACCTTCCCTCATCTTTTGAACAATCTGCTAAAGTTAGAGGTTCTGGACCTTTCTCACAACCTTCTACAGG  
GAAAACCTTCTCCAGCTTTAAGACAGAATCACACTTCATTGGCACATTTAGTTCTTTCAAACAACAACCTTT  
CACGGGGAGGTTATGCCTCGATTTTCAAATATGCCAAATCTTGCATACTTGCATCTTCAAATGATGGAT  
TTATTGGAGTCTCCCTGCTGCTATGTTTAACTTCCCTGTTCTGAAGGTCATGGACATTAGTGGGAATAAT  
TTATCAGGGAATGTTCCAGATTATTTTCTCTTTCCACATCTAGCCATACTTATCTTGGCAAGAAACCAGT  
TTCATGGGATTATTCCAGTGTCTTTATGCCAGATGCAAAGCTTCATTTTTGGACATGTCTGCAAATTCAC  
TCTCTGGGGATTTACCTTCTTGCCTCGGCAACATAACCGCATGGATGAAAGAATCTCAAGTTCTACTCCC  
AGCCTTCATGTGGTTGTCTCCTTCATATACTAACTACAGGGTCAAAGTTCCTTTTAAACAACCAAGGGGAA  
TGCACTCTTATGAAGGCATTCTCTTTCTCAAATGACTACACTTGTCTATCTATGAACCATTTACACAA  
CGAAATTCCATCACAACCTAGGAGAACTCGCAGCTCTCCATTCATTAACCTCTCGCACAACGTCCTGTCTG  
GCCATATTCCAGAATCTTTCATGAACTTAAAGCAACTGGAGAGTTTGGATCTTTCTTCTAACCATCTAATT  
GGAAAAATCCCACATCAGATGACTCAACTTGATTCACTTTCAACTTTAAATTTGGCTTTCAACCATCTGTC  
AGGAAGAATCCCGTTTAAAACAATTTGTCACCTTTGAAGCATCTAGTTATAGAGGTAACAAGGAACT  
CTGTGGACCACCTCTGGAAAATGATTGTGTGTTCTCGAGCCCGCTCAGCAGCGTGAAGAAGAAGAAGA  
AGACGAGAAACAAGGAATTGGTGAGAGTGACTTCTTTTTCTTCTCATGCATAGCTGTTGCTTATGTTTTG  
GGATTTTGGAGTGTCATTGCTCCTCTTCTTCTTAGTAGGAACTGGCGCACGACATATTATGCTAAGGTTG  
ATAGCTGCATTGAACTGTGCAAGGAGAACTTCATCTGTCCTAATTTCCATGAAAACCTTTTATGCTACTT  
TTGATATTTAAGAGTCGTTTATAGGATGTATAAGAATAGTGTGAATAAAAAGTGTGTTTAGTAGTAAT  
GATGGTATTAGCTACGTTGACGCTATTTCTTATCCACTAGTTAAGTGTGTGGCATATTTCTACTTTCAACT  
TGTTTTGATGAAACATGATGGATAGTTGCAGA

>M6-PGSC0003DMG402010943 M6 LRR-RLP

GAGGTGCAAACGGCTACAACATCTGGACTTCTCAGATGCCATGCCCAAATTACGGTTGGTGGACATCCG  
CGATTGTCCATTGTTAGAATCTCTGTCTGGATGGGCTTGGCAACCTTGTTTCTTTGGAAGAGTTAGATTTAT  
GTAAGTGCAGAAAACCTAGAGCATCTGCCATCCCGAAATGCCATGCGACACCTCACGAAATTACAGAGCC

TGAACATTAAGGCTGCCCAAAGTTAGAAGAAAGTTGCAACAATCGGAGTGGCCCAAACCTCCAGTGGT  
CCAACATTTCCCATATTCCTAAAGTTAAAGTTGGTGAAGCATAATTCAAGACTTGCCTAAGTCTTTGTTT  
CTCTTTCCGTGTCCGAGTCACATTTTTAATTACTATTTTCTATGAGTTCTTGAAAAGATGTTCTGTATGTAA  
TTTAATACTACAATTTATCCTGCAATTGTTTTGACATAAAAAATGCAATATTATTAGACAATTGCATCTTAT  
CTATGCTTTCAGCATTCTGCTAGTTCACCTGAAACAAATTGTTCTTCTTAATTCTTCAAGTACAATATCT  
CTATATTACTTCTAAGATATGGTTTATTCATGAGATTTTATGTTTTTTTTTCTTATAGGTTGCTAGTTCCTA  
GGTCATGCTTGAACCTAGTTGAACATCACTGTGGTAAATCAAGTCAAAATCCACAAGTGGCAGGCAATT  
ACCTTAGGTAATTTTCATTTAGACCTGTCAGAGGAATGCACTTTTTTTTTTCACTACTTTTTTCTCATGACGC  
AATTCGTAATTTTAAACAGGGTTGGTTATGTTCCACCACCACATTTGTTTTGTTGAAGAACAAAATCTTC  
AGCGGTAGACAATACGGGACACTTTCATGAATAATTAGTTACGATAACATATCTGTCAACATTTTACTCTT  
CATAATGGGGGATACCAACAATTATTAAGTGAAACTATTTGTGTGTTTTTAAAACATGTGCAACAAAAAG  
TTTTAAAGTGATGTCTCTATACTTTTATCAAGCATAGGAAGTAGACTATCCAAATTCGTGCTGTGTAG  
GGCCCAATTCGAGGTAAAGCACTCCCCACCAAGGATTTTTCAATACCCAAGGCTCAAACCCGAGACATCT  
GGTTAAGGGAGGAACAGCCCATCAAGCACCTCATATTTTAAAGTTATCTGCTAAAGAATGCATCAAATGA  
TAAATATATCCTCTTTTGATACTTCAACTGCTTATGCAAATTATGTAGTGTCAACTAAACGTAGTTTCCCC  
GTTTCTTTGATGCAGCTGTTGTCCCTTTGTGATCTGGTGGTGTTCGGACGTTTGCCTGGGATTCTCTGCC  
CTCACCAAATCACAGAACCTGGAAATTAAGGCTGCCCAAAGTTAGAAGAAAGTTGCACCAATCGGAT  
TACCCCAAACCTCCAGTACTGGTCCAACCAACATTTCCCATATCCAAAAATCGAAGTAGGTGGAAG

>M6-PGSC0003DMG402011117 M6 LRR-RLP

ATGGACACCTTGAAAGGAATCAATACATCCAGAGGAAACTGCATTCTCGTGACTACTCGTATGAAGCAG  
GTGGCATCCATAGTAGCCACAGATCTTCATATGTTGGGAAATCTAACAGATGATCATTGTTTGTCCATTTT  
CAAACAAAGAGCATTGTTGATGGGGAAGTTCCGCAGGAAATACTGAGCATGGAGAAAAAGATAGTTG  
AACTGTGTCAAGGTCTACCGTTGGCTGCAAGTGTTTTGGGATGCCTCTTCTGCAGAAAGGAAAAACATG  
AATGGCAGGCAATTCTTGTTCAGGTGAAGATGATAATGGGGAAAATAGCTTAAAGAAAATCCTAAAAC  
TCAGCTATGATTATCTACCATCTCCACATCTGAAAAAGTGTGTTTGTCTTACTTTGCCATGTTTCCAAAAGATT  
ATAAGTTTGAAGGACCAACTAATCCAACCTCTGGATGGCAGAAGGGTTTCTTCGTCCAAGTCAAGAGA  
TCCCTGTGATGGAAGACGTAGGGAACAAGTTTTTCAACTCTTGTGCAATATTCCTTGTGCAAGATGT  
TGAGCTAGATGAGTACAACAATATTACACACTGTAAGATGCATGATCTTGTGCATGATTTGGCTGGAGA  
TAAATTA AAAACTAACTAATTGATAAAAAAAGTGTAGGAAGTGAATTTTTTCTCAAGTTCGATACTTT

GGATGGGACTCACAAAGTGATCAAATGGATGCGATAAATGAGGCAGGACGTTTGTGCACATTGTTCTG  
GAAAAGCAATATATCTGATGATATGCTATTGAGCTTTCAGTTCTTGAGAGTTTTAAATTTGTCCGGATCA  
GGCATTGAGGAGTTGTCAGCCAAAATCAGTAAGCTAATATACTTGAGATATCTTGATCTCTCCAACACTG  
AGATCGAAGACCTTCCCAACTCCATTTGCAAGCTCTACAATTTGCAAGCATTTAGAGTCAGTGGCTGTTT  
TTCCTCAGGAAGCTTCCAGAAGAAATGGCAAATATGATAAGTTTGAGACACATATATTTTGAATCAGCA  
ATTCATGGTCAGTTTCAGATGCCACTTAATATGGGGCAATTGACCAGTCTTCAGACGCTACAGTTTTTTTA  
CATAGTTTTAGAGAAAGGTCGTGCAATTGAAGAATTAGGTCGTTTGAAAACCTTAGAGGTACATTGAC  
GATCGACAGTCTCCAATTAGTCAGAAATAAAGAAGAGGCTCGAACAGCATGTTTACAGGAGAAACCCAA  
TATCTACAAGCTGGCATATTTATGGTCCCATGATGAATCAGAAGGCCATGAGATCAATGATGAGCATGT  
GTTGGATGGTCTTCAACCGCATCCTAACTTGAAAGCCTTATCAGTAGCAGACTATTTAGGGACTAAATTT  
CCTTCATGGTTCAGTGAAGAGTTGCTACCAAATTTGGTCAAGTTGAAACTAAGTGGTTGCACAAGGTGC  
AAGGAAATTCCATCCCTTGGCCAACTGAAATTCCTTCGGCATCTTGAGCTGGTAGGATTCGATGAGTTGG  
AATGCATTGGACCTGCTTTATATGGTGTGAGATTAGCAATATTGGATCAAGCAACATTATCCAAGTGT  
CCCGTCATTGAAAGAAGTATTGAAGGCTATGCGTAGTCTTATTGAGTGGAAGGGAGATGAAGTTGG  
AGTTAGAATGTTTCCTAGGCTTGAGAAGTTGACGATTTCAAGGTGTCGGCTGTTAAAAAGTACTCCAAGT  
CAATTTGAAATCCTGCGTGAATTATCAATTGATAGTGTTAACAGTGAAAAACCATTGTTGAACTTGTGCA  
GCAACTTGACATCTCTCGTAGAGCTTAGTGTCTATTTTGTGGAGGAGCTCACTTGTCTTCCCGATGAGAT  
GCTCCACAACAACGTTTCTCTTCAATACTTATTGGTCTCAGGCTGCAGAGAGTTTTCGTGAATTGCCACAA  
AGCTTGTACAATCTCCATTCTTTAAAGAGCTTAAGGATTGACAACCTGCCCAATTTAGTTCTTTTCTGTT  
CCCAGTGGAGAGAATTATTTGACTTCCCTCAAAGTCTTCAGTTATGGAATTGTGATGAATTGACCAGTT  
TACCAAGTGAATGCTAGAGCATTGTCTGTCTCTAGAATCTTTGATGGTCAAGCACTGTAACAACCTTAGT  
TTCCTTGCCTTACATGTGTGGGAAATGCCTTCACTTTCATATTTGGGTTTATTAGAATGTACCAAATTGA  
TTAGTGTAGCCGCAGGAGGACTTCACCGTCTCACCGGGTTACGGAAATTGCATATTGGTCCCTTCTCAGA  
GATGGTGGATTTGAGGCATTCCAATTGATTTTTAATGGCATTTCGGCAGCTGTTGTCCCTTCGTACATTG  
GGGGTGTCTGGGACACTTGCACTGGGATTCTCTGCCCTATCAGCTGATGCAACTCTCTGCCCTAATAGAGA  
TCCATATATCTGATTTCCGAATCGAGGCTCTTCCCTCATAGATTTGACAACCTTACTTCTCTTGAACATTAA  
CGCTAAAGAGGTGCAAACGGCTGCGATATGTGGACTTCTCAGATGCCATGCCCAAATTACAATATATGA  
GGATAACAAGATTGTCCATTGTTAGAAGCTTTGTCAGATGGGCTCGACAACCTTGTTTCTTTGGAAACGTT  
AAGTTTATCTAACTGCAAAAAACTAGAGCATCTTCATCCAGAGATATCATGCGACGCCTCACCAAATTA

TTGAACCTGCAAATTTATGCCTGCCCAAAGTTAGAAGAAAGTTGTAGCAATCTGAGTGGCCCAAACCTCCC  
AGTGGTCCAACATTTCCCATATTCCAAATATTGAATTAGGCAGGAGGATAATTCAGGATAGACGTAAGT  
GTCTGTTTCTCTTTCACCTTCTGAGTAGATTTTTTAAATGTTGTTTTCCGCGAGTTCAGAAAAAAGCTTT  
GTATGTAATTTAATATTTTTCTGCAATTATTTGACATTAATAAATGCAAAAATTATCAATCAATTGCAT  
CTGTGCCTATGCTTCTGCATTCTGCTTGTCCACTTTAATGGAAGTGTCTTCTTCTAATTCTTCAAGTATG  
GTATATCGTGATATGATTTAATCATGAACTTATGTTTTATTTTCCCTCTAGGTTACTAGTTCGAAGTTCAT  
ACTAGAACGTCAATGTGGTAAATCAAGCCAAATCCCATGAGCGGCAGGCAACTACGTTAGGTAAATTTT  
CATTAGAATTTATAGGCACCTTGTAACTACCTGTTTTATCTTTGTTTTTGTGGGAACCAATTTTCGGAG  
GTTTATGCTGATGAATACAACATTACCTTCTTAAAAGAAAGTTTAAATCATGAAAATTTATGATTCTTCTC  
ATAGGTTACTAGGTACAAGGTCATGGTAAATCGTCTTTGTGGTATATCAAGACAAAATCCATGGGCAGA  
ATCATGTAAAGTATTTTGAACCACCACTTTTATTTGTATATATGAAGAACAAAATCTTCAGCTCTAGAC  
TCATTATGGAACACTTTTATGAGTATTTGGATACTGAACAACCTTTTCGGGCAACTGAAGTCTACATATG  
AAGCATAAAAAAATTCAAAGTGTATAGAGTGCTCAATGAGAAGCTACACAGGTCTATCCTCTGTCTTTGC  
ATGGCCGTGTGTGCATCCTAATTGCATCAATCAACTATCCATGAAATCGTGTACCTGTTTGAATGTAAGC  
TGTTTGAAGAGACTACATTAGTTTCAGTTAATTTGGTGTCTTTCCATATAATTCTTCTTTCCTTTTTCT  
TTTGCCACAACCTTCAGTCCATATAATCCAGTGTTTTGCATTGATGATAGGGGTGACAAATTTAATCCTTGA  
GAAGGACACAAATGATTTGACCAGTTTGAGGCGTATCCATCCATTAGGCTGAAGGTTTCTCTACTTTGCT  
TATTGAACCAAGATTTCCATGTAAGGTATGCCTATGACACCGAAATAACAACCTTTCCACAGCATAAGTT  
TCTATGTTTGTATCATAATATCCCGTAAGTTATGAAGTAAATGTAACACCTCGGATTTTCGTGCCCATGAAT  
ATTCAGTATGTAGCATAGAAAACCAGATTGAAATTTAAGTTCCAGGTTCCCACGGAATGGTTCACGAGTT  
GTGAACCAGGCTTGTGGAACCACTAGCTCGTGGAAATCCATCCTAGTCCTCTAGGTTTGTACACCTCGAG  
CTTAGACCTTGGGCGGAACCGGCACTCGGTATCATTATAGGCCCGAGGGCGTACCCATAACATGACATT  
AGATATGAGCATAACATCTAGACATGAGTGGAAACATTAGTATAAACACATTTGAAAAGACAAGTCTTGT  
AAAAGAAACACTTGGCATAAATGTAAGTCATAGTACTAAAATCACTGACAAAGGACACAAAGGTCCAAA  
ATGAAGCATAACTAACTGTCTATATATCTATGACCTCTAGATATAACTGAGTAATGTCAAATGGGAGGTG  
CCCATTGAATTCTGTTTCATGAGTTTCAGCTCAAATAAATCTCACTGATTGTTTTTATGGATTTAGATAGG  
AGGTTGCTGTTGTACAAAGACAAATTGCATGAGCCACCTCACTCTCGTACTAGCCAAGTTTTAACTTGG  
GTTGAAGTATGCTCAAGAACTATTGTAGCAGTATCCGCTGCGAAGGACCTAGGACTTGAATGGATTGAC  
CAGTTGGAGGGACATCTGTCCATTAGGTTGAAGGATTCTTTTTCTGCTTATTGAACCAACATTTCCATGT

AAGCTTCTTCTAAAATTGTTA

>M6-PGSC0003DMG402012062 M6 LRR-RLP

GGAGCTTTTGCCGTGTCTACGATGCCTAGATCTGAGCTTCTCTAAAACACTGATGCAAACACCAATTTTC  
ACGGGATGCCAAATTTGGAGTGTTTGAATCTAGAGAAATGTAGTAGTCTTAAAAAGGTTCACTCTTCCTT  
GGGTGATTGCAAAAACTCATTAAGTTAAATTTGTATCATTGTGAAAACCTTCAGAGTTTTCCATGTGTTA  
ATGTGAAGTCTCTTGAACATTTGAATCTAGAGGGTTGTCAAAGTTTTGGAGATATTTCTAGAAATCATTG  
GAGGAATCAAGTGGGAGTTAGAGATAAAGGTGAAAGGCATTGGGATAAGTGAATACCATCATCTATT  
ATTCAGCACCAAGCTCATCTTACAAAGATAGATTTGTCAGTCATGGAAAAATTTGTAGCTCCTCCAAGTA  
GCATTGGCATGTTGAAAGGTTTGGTGAAGCTAGATGTGTTGTGATGCCCCAACTTGTAGCTCTTCCAAA  
TATATTTAAGCATGCATGATTATTTGTTCCAACCTTGAGGAGCTTGATGCTAGCTGCACTGGAATTTAACA  
ACCTCCCTCTTCATCGTCCAATTGAACAAGCTTAAATCCTTGAGTTTTTCAGGACAATGTTTAAAAGATG  
GAGTGTACATTGTGTTCCCTCAAGTGAATGAAGGGTTACACTCATTGGAAATTCTGAATTCAGTTTCTG  
CAATTTAATAGATAGAGGACTTCCGGAAGACATTGGATGCTTATCGTCTTTGAAAAAGTTGCATCTCAAT  
GGAAATAATTTTCTGCATTTGCCTGAAAGCATAGCCCAACTTGGTGATCTTGAAACCTTGTACTIONTATCAA  
TTGCAAGAGTCTACCACAGCTGCCAGAATTTTCAAAGCAATTGCATACAATATTTGCAGATTGGAGCCAT  
GATTTGATCTGTAATTCGTTGTTTCAGAATATCTCATCTGCTTCAGATTCCTTGCTACTAAGAGCGCTTAT  
GAGTTGGGGGATCAACATCCTAGGTTGGTTCCACCATCAGGAACTAGTACAAGTGTATCAGTCAATTT  
GCCTAAAATTGGTACGTACGTGAGAACTTCTGGGATTCGCTGTATGTTACTCTGGAAAATTGATTGAC  
ATAACAGCTCACTTGATCCCTTATGTGATGATGGGATGTCGGGTATCACCCAGAAACCAACCATTGAGA  
ATGTAATACTGAGATTTTATTTTTGTTGATACCTCTTCTGGCTTACGGGATACATCTAAGGCAAATGGGA  
GAACACCAAATGACTATGGGCTTTTTATGTAATGTTTCTATGGTGAATGAAGCATTATGCATTACGTTTG  
TTGTATAAAGTTGATCCTGAGCTTGACGCGAATTGCTCCTCTTGTAAGAAATATTCTAATATTCTGGGAT  
AGTCGTCAGTTTCTTTAGCTGCAAACCAAGGAATTTAGATTAATAAATATAGGTAATATTCTAATATTTG  
TG

>M6-PGSC0003DMG402015682 M6 LRR-RLP

AAACTTGGCGACTTTGAATCTGTCAAATTGTATGAATCTTGAAGAGGTTTCATCATTCCCTGGGATGTCTC  
AAAAATCTCTGTACATTAAAGTTGACTAATTGTAAGGCTCAAGAGGTTTACAGTTCTGTGCATTAATT  
CCCTTGAATATCTGAATCTAGAGGGGTGCTCTAGTTTAGAAATGTTTCCAGAAATCCTCGGAAGCATGGA  
TTTGAAGTTAAAGAGTGGGTTAAAGTGCCTAGACTTGAGAGGTTTAGAAAACCTTGTAACACTTCCGAG

AAGTATTTCTAAGTTGAAAAATTTGGTGGAGCTAAATGTGTCGGCATGCTCAAACTTAAAAGCTTACCA  
AAAGAGATAGGGGATTTAGAGAACTTGGAGTGGCTTGATGCCAAAAATACTCTAATTTTGCACCTCCG  
CCTTCCATTGTCTGTTTGAACAAGCTTCATTTCTTGCGGTTTCGAAAACAAAAATCAGAAGTAGGCCTCA  
AAGCTGGAGTGTTCTTTGTTTTCCCTGCGGTGTCTGACGGATTACGCTTGTTGGAGAATCTGAATCTCAG  
TACTGCAATGTAATAGATGTAGGTCTTCCGGAAGACATTGGATTCTTATCCTCTCTGAACGAGTTATATC  
TCTCTGGAAATAATTTTGAAGCATTTCCTCGAAGCATAGCCCAACTTGGTGCTCTTCGGTCTTTGGACCTA  
TCAGATTGCAAGAGGCTTAAAGAGTTGCCAGGTTTCGAAGGGATGCAAACTTGGCGACTTTGAATCTG  
TCAAATTGTATAATTCTTGAAGAGGTTTCATCATTCCCTGGGACGTCTCAAAAAGCTCTGTACATTAAAGTT  
GACTAATTGTAAAAAGCTCAAGAGGCTTCCAGTTCTGTGCATCGATTCCCTTGAATATCTGAATCTAGAG  
GGGTGCTCTAGTTTAGAAAAATTTCCGGAATCCTTGAAGCATGAATGTGAAGTCGGATATTCACATGT  
TAGATAGTGTGATGAGGGATCTAAATCCATGTATATCTCACTTCCACGTTCCCTTGTCTCAGGATATCGTT  
TCCTCGCCGAATGACATCTCTGCTTCAGATTCCCTGTACAAAGAGTGTACCATTGTGCATGATGAGA  
ATAAGATCCCAAGTTGGTTCCACCATCAAGGAAAGGATGAAAGTGTATCGATCAATTTGCCTGAAAATT  
GGTATGTATTGGATAACTTCTTGGGATTAGTTGTATGTTACTCTGGCAACCTAGTTGACACCACAGTTGA  
CTTGATTCCCTTATGTGATGATGGGATGACCCAGAACTAGAATTATCCTTCCCTTCCAAATTATGATACAG  
AATTATCCGACGATTCAGAATGTGATACTGAACCTACGATTCATTTTTCTTGGTATCTCTTACTGGCTTAT  
GGGAAACATCTAAGGCAAATGGAAAAACACCAAATGACTATGGGCTTATTACATTATCGTTCTCCGGAG  
AAACGAAGGAGTTTGGATTCCGTTTGTGTATAAAGATGAACCAACAGAACATTGCATTGGGACACCAT  
GATGAAGCCAGTTGCTCCTTCTAAGAAACAAAGCTCTTATTTCTAATATTCAATTGGAGCTGTCTTTGAG  
AATCTGCAGCAACAACCAGTCTCTTCAGAACTTTGCAGCTCTCTCCTCCAAGCCCAGAATTTTGGCTTAA  
ATATAGGTATTATAC

>M6-PGSC0003DMG402015894 M6 LRR-RLP

TATTATAATCTGTCCATCATGCTAACAAATTGGTCTATTTTTCTGTAAATTCTTAAGATGACTATAGATTAG  
TGATCTCTATTCGTTTCAGTAGATTAGTCTATAGCGGTCATTTCTTAGAGAGTAAACCACAAGATCCACCC  
TATGGAGCCTCCCTCAGAAAACACTCCGATTTTCATCTGGGGAAGGAAAACCAACTTAAGCTATAACACTA  
TACTTTAGGTTGACTTGCACAATATAAACGATTCAAGTCAACAGAAAACCTATCCACACGCAAAAGAATC  
AACTTTAATTTTTTAATTTTCTTAAGTGAAATTATTGACTTGGTCACTGATCATGGCACTCCTTAAATTCCT  
ACATATATTAGTGCATCAACTCTTATTCCACATGATCCACTCAAGTCAACAGAAAACCTGCAGAAAGAAAC  
CAAATTGTTGTAGAATAATTAAGACACCTCAATCACCCAAGACCTGGTTGACCACAATGACATTTTTGG



ACCAAACATTAACGAAGGGTATTGTGTTCAATTCACATAATTTAAAGACCCTTTTCTGTATACTTAAGT  
ACTATTTAAAGGCAACTTATTTTGCAGTTTCATTAGTATAATCACTATGAAAATATTACTCCTCCTTCAGGT  
TTCTTTCATCACTATCCTTGTGGTGTCTTCTAACTTTACTTCTGGCCAATGTTTGGAGGATCAAAAAGCCTT  
GTTGATTAATCAAGAACAACCTCACGTTTCGACTCTTCTGTGTCCACCAAAGTAGTCATGTGGGATGAA  
AACAGTATTGACTGTTGCCAGTGGTCAGGTGTAAGTTGTGATGAGGAAGGTCATGTGCTTACTCTGGAG  
TTGGACGACGAAGCCATTTCTGGCGGAATTGAGAAGTCAAGCAGTCTCTTCCATCTTCGATATCTTGAGA  
AGCTCAATCTGGCTTATAATGGCCTATACCCTGTTCCAATACCAAGAGAAATTTATAAGCTGGCAAACCT  
GATGTACCTGAATTTGTCTCATGCTAGTTTAAACGGGCAGATTCCATGGAATTGTCAAGATTGATCAAG  
TTAGAGATTCTTGACCTTTCTGGAGGGGAATTAAGCTTGAGAGGCCAGATCTGAAAACACTGGTAGGG  
AATCTTGCAAATCTTAGAGAACTTTACCTTGATAGGGTGAATATTTTATTGAAGGGGAGTGAGTGGTGC  
TCGGCGTTATCTTCATCTCTGCCTCAATTGAGAGTCTTGTGATGAGAGACTGTAAAATTTCCGGCCCTCT  
TGATCCTGTCTTTTAAATCTTCGTTTCCTTTCAGTCATTCGTCTCGATTATAACTACTTGTCCACTATGGTT  
CCAGATTTTCTGGCAGATTTTACAAAATTGACAATCCTAAGTGTGATGAGGTTACTTGTGGTCCATT  
TCCCAGTAAAATCTTTCAGGTACCAACTCTACAGCAACTTGATTTATCTGAAAATGAAAACCTTACAGGC  
AATTTACCTGAATTTCCACATAAAAGTGCATTAAGGGAGGTAGTGCTTAGCTACACGGGATTCACCGGT  
CGCTTCCAGATTCAATTGCTAACCTTCGGAACCTTGACCCAGCTTGATTTAGGAAGTTGCAACTTCAGTGG  
AGAAATCCATCAAAAATGGGAAATCTCACAGAAGTTCATCTAGACTTGTCAATTCAACAGTTTTACT  
GGCTCTATCCCACTCTTCCATAAGGCCAAAAAAGCTCAATCGCATTGACCTTTCTAATAACAATGGTCCACT  
AGCTTCTGCTCAAACCTCAATTAGCGCTTCTTCTTTCGCTGCCATCATTGCAGTTCCTTAGTGTTGAGAACA  
GTCAATTAAGTGGAGAAATCCATGAATTTCTAATGCATCCTCCTCTGTTCTGGAAACACTTGATTTGAG  
AAATAACCATCTAAGTGGATCGATCCCCGGTCAATCTTTAACTCAATAGGCTTTCACAACCTTCTCTTT  
TCTCCAACCTCCTCAGTGGAAACCATTGATATCGAAGCAGTAAAGGGACTTCTAGGCTTACCACCCTTGA  
CCTTTCAAACAACAAAATTGAAGGGGAAATACCAAGTTGGGTTTGGACAGTTGGAAATCTGAATCTTTCT  
CACAATCTTTTAGAGTCTCTAGGAAAACCTCACAAATTTGTCTACTACTTCTATTGTCATTGATTTGAGTCC  
AATAAGATCAAGGGCGATATACCCATTCTACCTACTTCTTACCTACTTTTCAATTGCCAATAATGAATTT  
ACGGGATCAATACACTCTTCCATATACAGTCTAGATACGCTTCAAATTCTTGATATGTCAAATAACAACT  
AACTGGCATTATTCTGACATATTTCCACTGAATTGGAATTTGAAAACCTTAAACCTCAGCAGTAATATAT  
TAGAAGGAAAAGTTCCAAGCTCTCTGGAAAAATGCTCATTCTGGAGGTTTTAGACATTGGAAACAACA  
AGATAAGAGATACGTTTCCGTGCATGTTGAATAAATTAGCCAATTTGCGTGTCTAGTCATAAGATCAAA

CAAGTTCTACGGGAATCTCCAGTGTCTTAGAGCTGAACAAACCTGGCCAATGATTCATATTATAGATATT  
GCTTCAAACAATTTTCACGAGGAGATACCTGAGACATTGGGAAATCTCAAATTAATAATCCATCTTAAC  
TCTCACACAACGCTTTGACTGGAAGAATACCAAATGCCATTGGAAAGCTGACTCTGCTTGAATCTTTAGA  
TTTGTGAGTTAACCAGTTAAGTGGGAGAATTCCAGACGAGCTTGGCAGTTTCACATTCCTTTCTTTCTTGA  
ACCTATCTTTAATCAACTTTCTGGTAGGATTCCAAGTGGCAACCAACTTCAGACATTCTCAGCAGATTCC  
TTTGAAGGGAACACAAGGCTGTGCGATTTTCCTTTAAAGAAAACGTGCAGTGACACCAAAGAACTGAA  
CGTGAAATTGATGGGAAATATATAAGCTTTGCCTGGGATCTTCTGTGGGTTTTGGCATCATAACCTGGC  
TGATTTTGCTTAGCCGAAAATATAATGAGCTCGTCGATAGACTTCTTTTCAGAATTTTGGGTCGGAGTGG  
CAGGAATAAAAACCAGAGAAGGTCAAGGTAAGTTGAGGTTTGTGTAGAACTAAAAGCTTTTAAGTTCA  
ATGTTTTACATTTTGTCTATAAGCGTGTGGTAATAAGTGTTCCGATATGTATTTATTTGGTTTTCTAAG  
ACAAGTGTGTTAGAAAGAACAGTGAATATATAACACTTGTTGAATATTTTCTGTTCAATAAATTAAGTGG  
CAAAGCAACCTGGATTGAAAGCACAGGGTATACATGAATTAGTAGCTCCTCTAATCAAATCACTGAGA  
ATTTTGTATTTTACGACTATTCAGGTATGCGGTATCAGGTTGATACTGCAGATTTTGTAGTTTCCACAA  
CAGATTAGCCTATCTTGTATCATATTTGGGTCAGGTCATTCTAGATGTGATGATTGAAAATTTGGGAG  
ACAAAAGGAATGATACTAGGCTAAGGGAATATGAATAATATAA

>M6-PGSC0003DMG402016933 M6 LRR-RLP

AATTGTATATTTGCAGGTTTCTTGTCCCAACCTGGAAGAGCTATATATCGATAGGGCTGACAGCATAACT  
GCTCTATGCTCTCACCAACTTCCAAGTGCCTACTTCAGCAAACCTTGTAATTTTCGGAGTAGATGGTTGCG  
GAAAATTGAGAACTTGATGTCTCCATCAGTGGCCAGAGGCTTCTGAATCTCCGAAACTAAAGATAG  
AAAATTGTGAGTCAATGGAAGAAGTGATCAGAGAAGAGGAACAACATGGAGAAGAAATCATGACTAAT  
GAGCCTTTATCCCCCTGTTGGAACAGTTGAACCTTTACTATCTGCCAAAGCTGGGGCATTCTTTCTAGC  
GAAGCATGCTCTTGAATTTCCATTTCTCAGGGAAGTGTGCATTCATGACTGCCCTGAAATGAAGACTTTT  
GTCCAACAGGGAATATATGTGAGTACACCGAGTCTCGAAAGTGTGAACAATGATGATGATGTGAAAGT  
GGTTGATCTCAATAAAGCGATGTTCAATTCTAAGGTATGTCTTGTGCCTCTAGTTGTATAACTAATTACTG  
CTCTCTTTCCCTTTAACTAGTAAATAGTAATAGTTATTTCTGTTTGTCACTTAAAGCAACTTTTTTTTATTT  
TACTTGCTGTTACTATGATGTAAGATGAGAATATGGTTCAATTTTGGATTTGTACTTTAAGCTATATTGAT  
TTTTCATCCCTTATATAAAACACAAGGCCTCAACATTCGCAGGTTTCTTGTCCCAGACTTGAAAAGCTACA  
ACTCATTTGTGCTCATAGTATAACTGCTCTATGCTCTCACCAACTTCCAATTGGCTACTTCAGCAAACCTTG  
AAGCATTATATGTATCGTTTTGTGGAAATCTGAGAACTTGATGTCTCCATTAGTGGCCAGAGGTGTTTT

GAATCTCCAAATACTAGATATAGGATATTGTGAGTTGATGGAAGAAGTGATCACAAAAGAGGAACAAG  
GAGAAGAAATTATGACAAATGAGCCCTTATTTCCCCTGTTGGAAGAGTTGAGGCTTCAAAGTCTGCCAA  
AGCTTGGGCATTTCTTTCTTGCTATGCGTGCTCTTGAATTTCCATTTCTCAGAGAAGTGTTGATTCATGAA  
TGCCCTGATATAAAGACGTTTGTCCAACAGGGATCTGTGAGTACACCGAGTCTCGAAAGTGGAACAAT  
GATGATGAGGTGAAAGTAGTTGATCTCAATAAAGTGATGTTCAATTTAAGGTTTGTCTTGTGCCGC  
>M6-PGSC0003DMG402016979 M6 LRR-RLP

GTTTTCTTTTCAGACAATTAATTGAATCTATGGCATCATCTTCTTCTTATGCGAGTAATTCACAGTACTGT  
CCTCGATGGAAGTACGATGTCTTTCTAAGTTTTAGAGGTGAAGATACCCGGAGAAATTTACGAGTCACT  
TGTACCAAGGTTTGGACAATAGAGGAATATTCACCTTTCTAGATGATAAAAGGCTAGAGGAGGGCGATT  
CCATCTCAGAAGAAGTCTGTAAGCAATAGAAGAGTCTCAAGTTGCCATAATCGTTTTCTCAAAGAATTA  
TGCTACGTCAGGGTGGTGCTTGAATGAACTGGTGAAGATTATGGAATGCAAGGAGAAAGAAAATGGAC  
AAACAGTCATACCGGTCTTTTGTATGTGGATCCATCACATGTTGACACCAAAGTGAGAGCTTTCGAGA  
AGCATTGTCAAACACGAATCGAGGTATAAGGATGATGTTGAGGGGATGCAGAAGGTGCAAGGATGG  
AGGAATGCCCTAACAGCTGCCGCAGATCTTAAAGGATATGATATCCGTGACGGGTGAGTTAAAACACAT  
ATTTGCTTTTTATGAAAAAGGAAATGGGATAATTTCCAGTCAAATTAGGATGCTTTTGTGAAACCTAGAC  
ATATTCTACTATAGAACAAGAATCTATACCTCCAATATGAGTTAATTTAGTTGGAGAGAATACATAATAA  
TCCTTCTAAACTATTCAAGTTTTGCAACTTTCATAATTCAACTATAGAGTGTTCTTATTACCCTGAACTACA  
ATGTTTCCTATTTGATTAATGGTATGAGATACTCACAATACTTCGACTTTCTCACATTTTCCGCTATCAAT  
CTTCTTATTTATATAGGATCGAAGCAGAGTATATTCAGCAGATCGTCGATCACATCTCTTCAAATTATGT  
AAGAGGGCTTATTCTTTATCTTCGTTGCAAGGTGTTGTGGGAATAAATGCTCATTTTGGGAAACTAGAAT  
CCCTACTTCAGATAGAAATCAATGATGTTCCGATTGTAGGGATCTGGGGAATAGGCGGAGTTGGTAAAA  
CGACTATAGCAAAAGCCATCTTTGATACTCTATCTTATCAATTTAAAGCTTCTTGTTTTCTTGCGAATGTCA  
AAGAAAATGCAAATTATAATCAACTGCATTCTTTACAAAATACCCTTCTCTCTGAACTGTTAAGAAAAAAA  
GATGATTACGTCAATAATAAGTATGATGGAAAGTACATGATTCAGAGTAGACTTTGTTCTAAGAAGGTG  
CTAATTGTTCTTGATGACATAGATCATGGTGATCATTGGAGTACTTAGCAGGTGATGTTGGTTGGTTTG  
GTAATGGCAGCAGAATTGTTGTAACAACTAGAAATAGACATTTGATAGAGAAGGATAATCCAATATATG  
AAGTGTCTACACTGCCTAATGAAGAAGCTGTTCAATTATTCAATCAACATGCTTTTCAGAAAAGAAATTC  
AGATGAACGTTTTATGAAGTTCTCATTGGAGGTAGTAAATCATGCTAAAGGCCTTCTTTAGCCCTCAAG  
GTGTGGGGTTCTTTGTTGCATAAGAAAGACCTAACTCAGTGGAGAAGAACTATAGACCAAATAAAGAAA

AACCCTAATTCAGAAATTGTTGAAAACTCAAATAAGTTATGATGGGTTGGAACGTGAAGAAAAAGAG  
ATATTTCTAGATATCGCATGTTTCTCCGTGGATTTGAAAGAAAAGAAGTCATGCAGATCCTTGAGAGCT  
GTGATTTTGGAGCTGAATGCGGATTGGATGTCCTAGTTGACAAATCTCTTGTGTTTCATCTCCAAATATAA  
TGTGATTGAAATGCATGACTTGATTCAAGATATGGGTAGATATGTGGTAAAAATGCAAAGGATTCCGGG  
AGAACAAGCAGACTCTGGGATGTTGAAGATTTGAAGATGTGATGGTCAACAATACAGTAAGTAGGC  
TAAACAATGCTATAATATTCAGTTTTAGTCTCCATCTTCTATTTTTATTTAAAAGATGAAAATTGTTGGT  
ACCTATCAATTACAACCTCGTTCTTACAACATGAAAACTTTTCGATTGGACTTTAAAGAACTAGTTG  
AAAATTGTATTACTAGAAATTAGAAATATAGAATTAATTGCATAAAGTATTTCTCTTTAGCGACATTTTTC  
TAACTAATATTGTACCTTAATTTTTATTTAATGGTCTCTTCAAATGCAATAATAATAATACAAAACATAAC  
GAAATTTGGCATTGCAAACAGTTAGAAAGTAGTCATATTGGCATGCAAATTTTATACAGATATTTGAAGT  
TATACTTTGTAACTAATGAACCTTTAACAGGGGACCAAGGCAATGGAAGCAATCTGGACACATGGTG  
TTCAAAAATTATGCTTTAGCAAAAAGCCATGAAAAACATGAAAAGGCTTAGATTATTATCCATCATTAG  
TTTTAGTACACATGATGACTCCATTGAGTACCTGCCCAACAACCTTGCCTTGGTTTGTCTGTCATAGTTATC  
CTTGGGAGTCATTATTAGAAAATTTGAACCTAAGAAGCTTGTGTTTATCTCCAGAGGAGTCCCTG  
CGTCAATTATGGACCGGAATAAAGGTACAATTGTTGAATTCAATTTTCATTATTTTTCTTTTTGTCAAATAC  
GTACATAGATAGACTCTCAAATTTAAATAAGTTTTGGTCTAAAATTGTTGGGGTGGTCCAATTAGAGTC  
AAAAGTGAAGGACCAGTTTCGTTGGCTATTTTGTATCAAGAATTCGAATTTGATGAAATAGTTGTTGAGC  
TTTTAATTTTAGCATAAAAATACTTAGTTTAGTTGACATAAAGGATAATTTTATATAAATTGGGTTAGAG  
CAAATTTGATTCAATGACTATGAGAGTAAGATATTTTTATTGGTCTACTAGCCAAATCAAATTTATCCTG  
GGCAGCATCCTAATTCTCATTCTTTCTGTGTTTTGAATAGCAGCATTGCGCTTTGCGAAAGCTAGATC  
TTAGAGATTCCGAAAGGCTGATTCAAACACCAGATTTACGCAAATGATAAATTTGGAGTATTTGGATCT  
GCGTAACTGTAGTGATCTTGAAGAGGTTACCGTTCCTTGGAGTGTTGCAGAAAACCTCATTGTGTTAAAT  
TTGCAGAGGTGTAAACGCCTAAATAAGTTTCCATGTGTTAACGTGGAATCCCTTGGATCTCTGATTCTAC  
TACATTGCTCTAATTTGGAAAAATTTCCAGAAATCTTTGGAAGAATGAAGCCAGAGTTAGAGATCAAGAT  
GAGCTGGTCTGGGCTAAGGGAAATACCATCATCTATTATTCAGCAATACGCATGTCATCTTACAGAGTTA  
AGTTTGAGTGATATGAAAAAATTGTAGCACTTCCAAGCAGCATTGTCAGTTGAAAGGTTTGGTGAAG  
CTGGATGTGTCATACTGCTCAAACCTTGAAGCTTGCCAGAAGAGATTGGTTATTTAGAAAACCTGGAG  
GAGCTTCATGCTAGCTTTACTCTAATCTCACGACCTCCGTCTTCCATCATCCGCTTGAACAAGCTTAAAT  
CTTGAGTTTTAGATTAGACTTGAAACCTAACTCCTTTGCCACAAAAGAATCAAATATAGAGTTTCCTTTG

TGTTCCCTAGGGTGAATGAAGGGTTACGGTTGTTGGAAATTCTGGATCTCAGCTACTGCAATCTAACAG  
ATGGAGGACTTCCAGAAGACATTGGATGTTTATCCTTTTTGAAAAAGTTGAATCTCAGGGGAAATAATTT  
TGAGCGTTTGCCTCAAAGCATAGCCCAACTTGGTTCCCTTCGATCCTTGGACTTATCACAGTGCATGAGT  
CTTAAAGAGTTTGTAGGTGTTAACATGGCTGAAGGGTTATGGTCGTTGGAAATTCTGGATCTCAGCTACT  
GCAATCTAATAGATGGAGGACTTCTGGAAGCCATTGGATGTTTATCCTCTTTAAAAGAGTTGAAGCTCAA  
TAGAAATAATTTTGAGCGTTTGCCTCAAAGCATAGCCCAACTAGGTTCTCTTCGATTGTTGGACTTATCAG  
AGTGCATGAGGCTTAAAGAGTTTCTAGGTGTTAAGATGGCTGAAGGGTTACGGTCGTTGGAAATTCTGA  
ATCTCAGCTACTGCAATCTAATAGATGGAGGACTTCTGGAAGACATTGGATATTTATCCTCGTTGAAATT  
CTTGATCTCATTAGAAATAATTTTGAGTGTTTGCCTCAAAGCATAGCCCAACTAGGTTCTCTTCAATTCTT  
GGACTTATCATATTGCAAGAGGCTCAAAGAGTTGCCAGGTTTCACGGGGATGCAATACTTGGATACTTT  
GGATCTCAGTTTCTGCGATCTAACAGATGTAGGACTTCTGGAAGACATTGGATCCTTATCCTCTTTGAAA  
CACTTGAAACTCAAGGGAAATAATTTTGAGTATTTGCCTCATAGCATAGCCCAACTTGGTGCTCTTCAA  
CCTTGGACTTATCAGATTGCAAGAGACTTAGACAGCTGCCAGGTTTCACAGGGATGCAATACTTGGATA  
CTTTGGATCTCAGTTTCTGCAATCTAACAGATGGAGGGCTTCCGGAAGACATTGGATGCTTATCCTTTTT  
GAAAAAGTTGAATCTCAGGGGAAATAATTTTGAGCGTTTGCCTGAAAGCATAGCCCAACTTGGTGCTCT  
TCGAATCTTGGACTTAATAGATTGCAAGAGGCTTACACAGCTGCCAGGATTTCCACAGCAATTAGATACA  
ATACGTGCAGATTGGAGTAATGATTGGATCTGTAATTCATTGTTCCAGAATTTCTCAGCATTGCAGCATG  
ACATCTCTGCTTCAGATTCATTGTCACTAAGAGTGTTACCCTCACAGGGAATATACCAATACCAAGATG  
GTTCCACCATCGGGAAGGTGGTAGAAGTATATCAGTCAAATTGCCTGAAAATTGGTATGTAAGTGACAA  
CTTCTTGGGATTTGCTGTATGTTACTCTGGCAAATTAATTGACGCAATAGCTCATTTGATTTGTTATGATG  
AGAGGCCAGTGACGCGTATCACCCAGAACTTGCCTTGTCCAATCATTAGTAGAAGTTCAGGAATCTCC  
TATTCATTTTTTCTTGGTACCTCTTACTGGCTTGTGGATAAATCTAAGGCAAATGGAAAAACACCAAATG  
ACTATGGGCGCATCAGGATATTTTCCACTGGAGAAATGAAGGAGTTTGGACTTCGTTTATTGTATAAAG  
ATAAACCTAAGATTGAGGCGAGTTGCTCATCTTCTCAGAAACAATGATGAACTAACAGCCATGATGATA  
GTGAACACCAAGATGAAGCTAGACTATCCGTTTTAAATGAGAATGATCATACACCAGAAGCAACTTTTT  
TTTTCTTCAAATTTTATAAGAATAATTTTTGTACAGAGCCACATTTTGTGTTTGTGGATGGTGAAATG  
GAGGTTTATTTTTCATGCTCAATCATT

>M6-PGSC0003DMG402016981 M6 LRR-RLP

ATGGCATCATCATCTTCTTCTGCGAGTAATTCACAGTATTGCCTCCATGGAAGTACGATGTCTTTCTAAG

TTTCAGAGGAGATGATACCCGGAATAACTTTACAAGTCACTTGAACAAAGGTTTGGAAAATAGGGGAAT  
AGCCACCTTTCTAGACGATGAAAGACTAGAGGATGGCGATTCCATCTCAGAAGAAGTCAAGCGAT  
AGAAGAGTCTCAAGTTGCCAGAATCGTTTTCTCAAAGAATTATGCTAAGTCAAGTTGGTGCTTGAATGAA  
ATAGTGAAGATTATGGAATGCAAGGAGAAAGAAAATAGACAAACAGTTATACCGATCTTCTATTATGTG  
AATCCATCACATGTTGATACCAAAGTGAGAGCTTTCAGAAAGCTTTTGCCAAACACGAATCGAGGTAT  
AAGGATGATGTTGAGGGGATGCAGAAGGTTCAAGGATGGAGGAATGCCCTAACTGCTGCTGCAGATCT  
AAAAGGACATGATATTCATGACGGGTGAGTTGGAACAAATAATTGCTTTTGATGAAAAAAAATAACA  
ATATGTTTCTATATATTATCCTGAACTATAATGTTTCCTATTTAATACGCTCTTGAACAATAAAATTATGAA  
ATTACTTTCTAATACTTGACTTCCTCACATTGTCAACAATCAATCTTTAATTTATGTAGGATTAATCAATCA  
AAGAAAATTGATCAGATCGTCGACCACATCTGTTCCAACTTTGCAAGAGTGCTCGTTTTTTTTCTGATTT  
GCAAGATGTTGTGGGAATAAATTCTCATTTAGAGGATCTAAAATCCCTACTTCAAATAGAAATCAATAAT  
GTTTCGGATTGTAGGAATCTGGGGAACAGGTGGAATCGGTAAAACAACAATAGCAAATGCCATCTTTGAT  
ACTCTATCCAATCAATTTGAAGCAGCTTGTTTTCTGCGAATGTTAAAGAAAATGCAAAAAAGAATCAAC  
TGCATTCTTTACAAAATACCCTTCTGTCTGTACTATTAAGAAAAAAGATGATTACGTTAGTAATGGTTAT  
GATGGGAAGCGCATGATTAAGAGCAGACTTTCTTCTATGAAGGTGTTGATTGTGCTTGTGACATAGAT  
CATGGTGATCATTGGAGTATTTAGCAGGTGATGTTGATTGGTTTGGTAATGGTAGCAAAGTTGTTGTA  
ACAAC TAGAAACAGAAAATTGATAGAGAATAATGATGCAATATATAAAGTGCCTACACTACCTGATGAT  
GAAGCTATGAAATTGTTCAATCAACATGCTTTCAAAAAAGAAGTTCCAGATGAGTGTTTTAAGAAGTTCT  
CATTGGAGGTAGTAAATCAGGCTAAAGGGCTTCCTTTAGCCCTCAAGGTGTGGGGTCTTTGCTGCATA  
AGAAAGGCATAGATAAGTGGAAAAGAATTGTAGACCAAATAAAGAAAAACTCTAATTCAGAAATTTTTG  
AAAACTCAAATAAGTTATGATGGATTGGAGCCCGAAGAGCAAACGATATTTCTAGATATCGCATGTT  
TCTTCCGAGGAGATGAAAGAAAAGAAGTCATGCAAATTGTTGAGAGCTATGATTCTAGAGTTGAATACA  
TATTGGATGTCCTAATTGACAAATCCTTTGTGTTTCATCTCTAAATATGATAGAATTGAAATGCATGACTTG  
ATTGAAGATATGGGCAAATACATAGTAAAATGCAAAAAGATTCCGGAAAACCTAGCAGAATATGGAA  
TGCTGAAGATTTGGAAGATGTGATGACTGACAATATGGTAAGTAAGCTAAACAATGCAATAGTATTCAC  
ATTTCAAAGATATATATATACTCTGTTCTCTAGCTTCATATACTGACGCACAAGTCATTTAAGTTGTTTCA  
AATCCACACTACCTAGTTTGTATCTCATGTTAATAAGTTATGAATAACCACTTAATATATTTAATCCTAT  
ATCACTCTTTGGATTAACCTGAAAGTTATACAATATTTAATTTGTTCACTAATTTAATCAATAATTTTT  
AAAAGCTAATATCACCCATTTATTTACCCCAAGTAATTTTTTATTAGTAAAAATTCAGAAATGAAAAATA

AAATTTAGGAGGGCCAAAACCTAATTACCTTACTAATTCACCTTGATCATTATTAATTTTATTTTCATTTATA  
AGATTACAGTTATTGACACTATTTTCAGTTACCATTTTTGTTTTATGAGAGCATGGAAAACTTTTAACTTTT  
GTCTAATAAACTTCTCCAAAAGGCCAAAATGTATCAGTAAAAAATAAAATTAGCTACGCAAAGCATTCT  
CTTAACTAATATTGTACCTTAAATTTTATTTGATGGTGCTGGCTCTTCAAGTACAATGACAAAAATTAGGG  
GTAGAGTAAGAAAACAATGATATTGATATGTGGATTGTACATGATAAGTTGATTCATGATCTTTTTATAG  
GGGACAAGGGCAATGGAAGCAATCTGGTTTAGTTATTCTGAAAACTATGCTTTAGCAAAGAGGGCAATG  
AAAAATATGCAAAGGCTTAGGATATTAAGCATATTTCTAAAGACGGATCTTATAGGACACCCTACTTCA  
TTAAAACCGACTCCAATTGCCCTGATGGCTCCATTGAGTACCTGCCCAACAACCTGCGTTGGTTGCTG  
GTTTGATTATCCTTGGAAGTTATTGCCAGAAAATTTAATTCCAGAAGGCTTGTTTCATCTTGATCTCCGAT  
GGAGTTCATTGCATTATTTATGGAATGAAACAAAGGTACCATTCTATTTTCAGATACTTCTATTTTTAATT  
GTCCTAGAATTATATATGATTCTTGCGTTTAAATAAAATATGTTATTTATTCCATACACTCAAATAATGTA  
TTTCATCATTCTTTCTGTGTTTTGAATAGCTGCCGCAATTTCTTCTCTACAAAGGATAGATCTATGTGGCT  
CTAAAAGTCTGAAGAGAACAGCAGATTTTGAGGGGATGCCAAATTTGGAGTATTTGGATCTTTGTGGAT  
GTTTCGAGTCTTGAAGAAGTTCATCCTTCCCTCAAGCATTGCAAAAACTTATCCAGTTAAATCTGTCTGAT  
TGTACAAAACCTTGAGAGGTTTCCATATGTTAATGTGGAATCTCTGACTCTAGAATACTGCTCTAGTTTAG  
AGAAATTTCCAGAAATCCTTGAATAAGGGAACTGCCATTATCTTTGAATGGCATGGAAAACCTTGATC  
TCTTCCAAGCAGCATTGTAAAGTCGAAAGGTTTGGTGAAACTATCTGTGTGCAATTGCTCAAAAACCTTGAA  
AGCTTGCCAGAAGAGATAGGTGATTTGGAAAACCTTAGAGTATCTTAATGCCGACTGTAATCTCAC  
AACCTCCGTCTTGATCGTCCGGTTGAACAAGCTTAAATCATTGACTTTTGAAAAGAAAATTCAGAAGA  
TACAGTGAACCTTCGTGTTCCCTCAGGTAAATGAAGGGTACTCTCATTGAAATATCTGGATCTCAGTTACT  
GCAATATAATAGATGGAGGACTTCCAGAAGACATTGGATCCTTATCCTCTTTGAAAGAGTTGAATCTCAG  
TGGAATAATTTTGAGCATTGCTTCAAAGCATATCTGAACTTGGTGCTCTTCGATGCTTGATCTTATCAG  
ATTGCGAGAAGCTTACACAGCTGCCAGAATTTCCACAGCAATTAGATACAATATATGCAGATTGGAGCA  
ACGATTGGATCTGTAATTCGTTGTTTCAGATTATGTCATCATTGCAGCATGACATCTGTTCTTCACATTCT  
TGCTACTAAGAGTGTGTTGTGAGTTGGGTGGTGGATATCCAAGTTGGTTCAAGTATCAGGGAATGGGCA  
CAAGTGTATCAGTCAATTTGCCTAAGAATTGGTATGTAAGTGATAACTTCTTGGGATTTGCTGTATGTTAT  
TTTGGCAAATAATTGATTGCATCACAGCTCATTGATTCCCTTATCATGTGATGATGGGATGTCGTCAAT  
GACCCACGAATTTGCCTTATCCAACAATTCACAATATTCTGATGAATGGAATATGAAATTTTTGTTGGTAC  
CTCTTGGTGGCTTATGGGATGCATCTAATGCAAATGAAAAACACCAAATGACTATGGGTGCATTAAGT

TAGATTTTATTGGAGAAAGAGATGATGATTTTGGAAAAGAAAAGAAAATTGGAGTTCGTTTGTGTATA  
AAAATGAATCTGAGCTTTCATTGGGATAATGAAGAGCAGATATGAAGAAGAGGCCACTTGCTCCTCTC  
CTAAGAAACTCTTGCAGCTCTTCCACAAGCCCGGATTATAG

>M6-PGSC0003DMG402019148 M6 LRR-RLP

ATGCCGTTGTTGAACTTGTGCAGCAACTTGACATCTCTCGTAGATCTTATTGTGGATGATGTGAAAGAGC  
TCACTTGTTTTCCAGATGAGATGCTACATAACAATGTTTCCCTTGAACATCTACTGGTCTTAAATTGCAGA  
GAGTTTCGCGAATTGCCACAAAGTTTATACAATCTCCGTTCTCTTAAGAGCTTAAGGATTGAGCGCTGCA  
ACAATTTCAATTCCTTCTGTTCCAGCGGAGAGAATCATTTACTTCATTCCAAAGTCTTGAGTTGTCCA  
ATTGTGATGGCTTAACCAGTTTACCAAGTGAAATGCTAGAGCATTGTCGGTCTTGAATCTTGAAGGT  
CAACAAATGTAACAACTTAGTTTCTTCCCTTACATGTGTGGGAAATGCCTTCACTTTCATATTTGAATAT  
ATCAAATTGTCTCAAATTGGATAGTGTACCTGCAGGGGGCCTTACC GCCTCACTGGGTTACAGGAATTG  
TGCATTGGACCTTCTCAGAGACGGTGGATTTTGAGGCATTCCAATTGATATTTAATGGCATTACAGCAGC  
TATCATCCCTTCTAAATTAGAGGTGTATGGGAATAGGCAATGGGATTCTCTGCCCTATCAGCTTCTGCA  
ACTTCCGCCTTAACAGAGATGGGAATAAATGATTTTGAATCAAACCTTCTCCTGATAGATTTGGAAAT  
CTTACTTATCTTGAAACATTAGAGCTAGTGAGGTGCAGACGACTA

>M6-PGSC0003DMG402019681 M6 LRR-RLP

GAGCACTCAAAAAATGGCAGCTCTGTTTCAAACCAATTTTCTCTCTCTACAATCCTCTCTTTCTCTCTCT  
CATCTCCGTCTTCTTCTTACCAGTATCTCATTGCGACGATTTCTCAGCTCTTTTAGCCTTCAAATCCCGAGC  
TGATACGTGCAATTTTCTTACTTCATGGTCTAGAAATGCCCCCTGTTCTTTCATGGATAGGTGAAAATGTC  
ATCCAATTACTCGTAGAGTCGTAAAAATTGACTCAATCACTTAAACCTCACCGGATCAATTCATCCATTG  
ATTCATCTTACACAAATTCGTCATTTAAGTTTACATCACAATTCTCTCAGTTCGATTCCGAAATTCGATTTT  
TGGCCTAATCTCAAACATGTTTACCTCTCTCACAACAAGTTTTCCGGTGAATTTCCACCAGGAATTTACCA  
TTTGAAGCGACTCAGGCGACTTGATTTGTCGTTAATGAGTTCTCCGGTGAATTTCCGGTGAAGGAGTT  
GAATCAATTGCCGATTTGATCACTCTGCGTCTCGAGTTTAAATTCTTCTTAGCGGATCACTTGGTGCTGATG  
AAAAAAGAGCTGTTGCTTCAGTTAAGGAATTCAATGTTTCTGGGAATAACTTTTCCGGCAAATCCCAAA  
TTGGTTATCAAATTTCCAGTGGCAGCTTTTGCAGGTAAAGTGCGGGAAATGAGTGGATTGGATCAAAT  
TTGAACGGATCAAACGGATAAAGTTCATAAATGGCCATTTTTTAGTTTCGTGTAATTGAGAATTAACCAT  
GGTCATAGAATATTGTCGTGGAGTTTCACTTGTGAAATTTGAAACGTTACCACAATGACTATTTTCTCAAT  
TACAAGATTGAAAAATGGCTAGGTGCGAAACAGGTCAAATTAATAAACAGGTCTTGATTAAACTGTTCAA



AATTTGTTCTGGGTCAAACGAGTGAAATATCAGGGAATTTGCACAATTGGCCTTAAAAGGTCACTATTTA  
GATTTTATCCCCCCTATGCTAGTGAGCTAAAATTTGCATTCAACTTCTTCTGAATGCGAATTTTAGCTGA  
CTAAGCTAACGATTACAAAATTTACAAGAAA

>M6-PGSC0003DMG402021049 M6 LRR-RLP

ATGGGCTACGTAAACCTTGTATTTTTATGCTATTTCCCTTCTCTGCCATCTTTCTTCTCCTCATCCTTAC  
CTCATTTGTGCCCCAACATCAAGCTCTTGCTCTTCTACAATTCAAGCACATGTTTACAATAAGTTCTGTTG  
CTTTTGATAGACGTTGTTTCACGATAACAGGCCAGTGGATTCAAGTCATATCCAAAACTCTTTCGTGGAA  
CAAGAGCACAGATTGTTGCTCATGGGATGGAGTTTATTGTGATGAGACGACAGGAGAAGTGATTGAGC  
TCAACCTCACTTGCAGCCGACTTCAAGGCAAGTTTCACTCCAACAGTAGCCTCTTTGAACTCTCCAATCTC  
AAAAGGCTTGATTTGTCTAGTAATAATTTCTCTGGATCACTCATTTACCTAAATTTGGTGAGCTTTCTAG  
TTTGACTCATCTTGATTTGTCGTATTCAAGTTTTACAGGTCTAATACCAGCAGAAATCTCTCGTTTTTCTAA  
ATTACAAGTTCTTAGTATCCACAGTTATCCACATGAGCTTAGATTTCGTACCTCACAATTTTGAAGTCTCC  
TTAAGAAGTTGACCCAATTAACAGAGCTCAACCTTAGGTCTGTGAACATCTCTCCACCATTCTCTGAAT  
TTCTCTTCTTATTTAACTACTCTACACCTTGGGAATACACAGTTATACGGGATATTGCCGAAAGAGTTTT  
CCACCTTTCCAAGTTAGAATCTCTTCATTTATCAAAAAATCCCCAGCTCACTGTTAGGTTTCCCAAACCAA  
ATGGAACAGCAGTGCATCACTCATGGAGTTAGTTCTCAATGGTGTGAATGCTACTGGTAGGATACCTGA  
ATCATTTGGTCATCTAACTTCACTGCGTACATTGAGAATAGCTTCTTCTAATCTCTCAGGCTCTATTCTTAA  
ACCTCTATGGAATCTCACCACATAGAGCTTTTGAACCTTGGTCATAACCATCTTGAAGGACCAATTTCTG  
ATTTCTTTAGATTTGGAAAGCTCAGGGCGTTATCACTTGCAAAGAACAATTTGATGGCCAAGTTGAGTT  
CTTATCCTTTAACAGAATCTGGACGCAACTTGAAGAGCTAGATTGTTTCAGTCAATTCTGTAACAGGTCCC  
ATTCCTTCTAATGTAAGTGGTATGCAAACCTTCAAGTTCTTATTGTCATCAAACCACTTGAATGGGAC  
TATACCTTCTGGATATTCTCTCTCCCTTCACTATTTATTTGCACTTGAATGATAACCATTTCAAGTGGAAA  
CATTCAAGGAGTTCAAGTCTAAAACATTGTTTTCTGTTTCTCTAAAACAAAATCAGCTGCAAGGTCCTATTC  
CAAAGTCGCTCCTAAACCAGCGTGAACATATTTTTCTTCTCCTTTGCACAATAATCTCAGTGGACAGATT  
GCTTCAACCATCTGCAATATGACAACACTGAATGTGCTAGATTTGGGCAGCAATAATTTGGAGGGAACA  
ATCCCACTATGTTTGGGTGAGATGAGTGACCTTCGGGTTTTGGATTTAAGCAACAATAGTCTTAGCGGG  
ACAATTAATACTACTTTTAGTATAGGAAACGAACTTGGAGTCATTAATTTGACGGGAATAAGCTAGAG  
GGGAAAGTCCCGCAATCTTTGATCAATATCACGAGTTTGGAAAGTTCTTGATTTAGGTAACAATGAGTTTA  
GTGACACATTTCTAAATGGTTGGGAGCCCTACTTGTGTTTGCAGATTTTGAAGTTGAGATCAAATAAGTT

CTTTGGCCCTATAAAAGTTTCTAGGACTGACAACTTATTTGCTCAAATTCGAGTCATAGATCTCTCATCTA  
ACGGATTTAGTGGACATTTACCCGTGAGCCTTTTCATGAAATTTGAATCCATGAAAATAACTAGTGAAAA  
CAGTGGAACCCGAGAGTATGTAGGAGATACAGATTTCAATTATTACACAATTTCTTGATAGTGACAACA  
AAGGGACTGGAGCTTGAACCTCCTCGAGTTTTGACTACAGAGATTATTATCAATCTCTCAAGGAATAAAT  
TTGAAGGTCATATCCCAAGCATTATTGGAGATCTCATTGGGCTTCGGACTTTGAACTTATCTCATAATCGC  
TTGGAAGGTGATATAACCAGCATCACTGCACCAATTATCTGTAATCATTGGATCTCTCATCCAACAA  
AATCAGCGGAGAAATCCACAACAGCTTGTATCCCTCACATCACTTGAAGTCTTAAATCTCTCTACAATC  
ATCTTGTTGGATGCATCCCCAAAGGAAGACAATTTGATACATTTGAGAATACTTCATACCAAGGGAATGA  
TGAGTTACGTGGATTGCCACTCTCAAAGATTGTGGAAGTGATGATGGGGTACCACAAGGGCTAGGCC  
AAGGAGAAGAAGGAGATTCATCAATGA

>M6-PGSC0003DMG402023866 M6 LRR-RLP

ATGCAAGTTCTTGATTTAGGAGATAATCACCTTAACGACATCTTCCCGGTGTGGTTGGGAACTCTTCCTA  
AGTTGAGAGTTTTAAGCTTGAGATTGAATAAGTTGCATGGACCCATTAGAACTTTAGGAAGTGAAAACA  
TGTTTCTTGAGCTTCAAATGTTGGATATCTCTTCCAATGCCTTCACGGAAAACCTACCGACGAGTCTATTT  
CAACATTTGAAAGCCATGAGGACAATTGATCCGTCAATGGTAGCACCAAGATATGGATATTACCAAGAT  
ACGGTAGCTGTCGTATCCAAGGATTGGAGCTTGAAGTTGTGAGAATCTTGTTTTTGTACACCACTATTG  
ATCTTTCAAACAACAAATTTGAAGGAAATATTCCAAGTATTATGGGAGATCTCATTGCACTTCGTGTGCT  
GAATTTATCTCATAATGGATTGCAATGTCATATAACGCCATCACTTGAAGATTATCTTTAGTTGAATCAT  
TGGACCTGTCAAGTAACCATCTTGTAGGAGAGATAACCAGACAATTTGCTTCTTACATCTCTTGAAGTC  
TTAAATCTCTCCTACAATCATCTCGAAGGGTGCATTCTCAAGGAAATCAATTTAGACCTTTGAGAACA  
ATTCGTATGTAGGTAATGATGGATTACGTGGATTTCCACTATCAAAGGCTGTGGTAGTGATGATAATG  
ATTCGGAGACAAATGATACCACATCTGGACTAGATGATGAAGAAAGCGACTCTGAATTTCTGAATGATT  
TTTGAAAGCTGCTCTTATGGGGTATGGAAGTGGACTATGTATTGGGTTATCGATAATATATTTTCATGTT  
CTCAACTGGAAATCCGATATGGCTTGCAAGAATCATTGTAGAATGGAACACAAAATAATGATGGGAAG  
GAGAAAGAAGCGCAGCAAAGGCAAAGGAGTAACAGAAGA

>M6-PGSC0003DMG402025507 M6 LRR-RLP

ATGGATCTATTCATGAGGAAATAGGTAACCTAAGGTCTCTTATTGAGCTAGATTTGAGTACTAACTCTTT  
AAAAGTTCTATTCCTGCTTCATTGGGGAATTTGAAAACCTGTCTATTTTGTCACTTCGTGAAAATCAAC  
TTTCTGGCTCTATTCCTCAAGAAATAGGATACCTAAGGTCTCTTACTGATCTTCGTTTGAACAATAACTTTC

TTAATGGTTCAATTCCTCTTGAAATAGGTTACCTAAGGTCTCTTAGTTTCTTAGATCTGAGTATTAECTCTC  
TTAATGGTTCTATTCTGCTTCATTGGGGAATTTAAGAAATGTGCAAAGAATGTTTCTTGATGAAAACAA  
TCTCACTGAAGAAATTCCTTTATCTCTGTGCAATTTAAAATCACTTGAAATTTTGTATTTGCGGAGAAACA  
ACTTGAAGAGAAAAGTTCCGCAATGTTTGGATAATATCAGTGGCCTCCAGGTTTTGACGATGTCACGTA  
ATAATCTTAGTGGAGAGATCCCTTCATCCATTTCCAATTTAACTCACTACAAATTCTAGATTTGGGAAGA  
AATAGTCTGGAGGGAGCAATTCCAGAATGCTTTGGCAATATTAATACCCTTCAGGCTTTTGATATGCAGA  
ACAACAACTTTCTGGGACTCGTCCAACAATTTTAGCATTGGAAGTTCCTTAGAAGTTTCAATTTGCATG  
GCAATGAAGTAGAGGGGGGAAATCCCTCGATCTTTGGCCAATTGCAAAAAGTTGCAAGTCTTGATCTA  
GGAAATAATCATTTCATGACACATTCCCATGTGGTTGGGAACTTTGCTAGAGCTGAGAGTTTTAAGAT  
TGACATCGAATAAATTGTATGGACCCATAAGATCTTCAGGGGCTGAAATCATGTTTCTGATCTTCGAAC  
CATAGATCTCTCTAACAATACCTTCTCGAAAGACTTACCAACGAGTTTGTTCACATTTGAAAGGCATGA  
GGACAATTGATCAAACAATGATGGTACCAAGTTATGAAGGAGATGGAGATTACAAAGACTCGATAGTT  
GTTGTATCAAAGGGATTGAAGCTTGAAGTTGTGAGAATTTTGTCTTTGTACACAGTTATCGACCTTTCAA  
ACAACAAATTTGAAGGACATATTCCTAGTGTCTAGGAGATCTCATTGCTCTTCGGGTGTTGAATATATCT  
CACAATGGATTGAAAGGCCATATAACACCATCACTTGGACGTTTATCTGTAGTGGAAATCATTGGACCTTT  
CATTTAACTGCCTTTCTGGGAGAGATACCACAACAACTTGCTTCTCTTACGTCTCTTGAATTCTTAAATCTCT  
CCCATAATTATCTCCAAGGATGCATCCCTATGGACCCCAATTTACATACCTTTGAAAACAGTTCATTTGATG  
GTAATGATGGATTACGTGGATTCCCATTTCAAAGGTTGTGGCAATGATCCTGTGTCAGAGACAAATTA  
TATAGTATCTGCGCTAGCTGATCAAGAAAGCAATTCTAAATTTCTCAATGATTTTTGGAAAGCTGCTCTG  
ATGGGCTATGGAAGAGGATTATGTATTGGATTATCCATACTGTATTTTATGATCTCAACTAGAAATCCGA  
AATGGCTTGCAAGAATCATTGAAGAAATGGAACACAAAATTAACATGCAAAGGAGAAAGAAGCAGCGA  
GGTCAAAGGAATTACAGAAGAAGAAATAATCTCTTCTAGACAAGTTTCCAATAAAGAAAAGGATCTGAT  
TTCAGA

>M6-PGSC0003DMG402026432 M6 LRR-RLP

TACAAAGACGAAAACCTTTGAACTAAACAAAAGTATATTGTACAATTAATCTATTCAATTAATACAATTCAA  
AAGTTAGAAACAAATGGTATTATCATGATTTTGGAGGAATATATAAATGGTATATATGCCATACAGTCATA  
CACCCTTTACAGTACTTTGTCATAAAATATTAAGATAATTTAATCTATAGAAAAATGGGACCCCTGGAA  
GATTTAAAACTGCATAAATAAATTACATTTAATTTTTTCCACAGTAAAGATAGAGCACAATATCAATAT  
TTGGTTGGCATTCTGATAATATTTAATTTCTATTCCCTTTTTTCCCTCCAAAAATACTATAAGAAAATGAAG

TTGGAGTAGAAGATATGGTTTGTTATTCCCTTGCCTTCTTTGAGTTCCAAATACTATGACTACTACTGGC  
ATTTCAATTTTACATTTATAGGTTCTGAATTTTATAAAAAGCATTACTGGTCGGATCGGGTTTCGGATAT  
TTTTTTTACACATAACAAACAAATTTCTTATCATAAATACAAAGTTCAATTTGGAACAAAATTACTGATTTT  
ACCTGCCACACTATAGAGAGGTTCTGTGGAECTCAATAGATTTTATTCATATTATTTATATGACTAAGAA  
AATCATTAAAGTAATTATTATAATTTGATTATGAACTCAATTATTATTGTTTCATAAATTTTAAATTTTTTTTAA  
TAAGAATTTATAAATTTTAAAGTTCTGAATTCGCCTCTATATAAGTATTGATAGGTATAGGATTAGGACCA  
ATGGTGCAATAAGAGTGATCCAATTAGTTTTATTAGTTGTTTAAATAGTTGCAATAGACTAGTAGTTAGTTT  
TATTACGACAAAGTTTCTAGTTTTTACTTTTTAATACAAAGTATTTTTCTTTTAAAAAATTATCGTTATAATT  
TATGTGATACTATTTGATTAGATAAAAAGAAAAAAAAGTTTAAATCCAACCTTGTGAATTGAGAACAAATC  
GATGTTTTCAATTCATTATTAAGATTATGACATCAAGCTTAACATCATCATATATAATTATGTGGAGA  
GGTGAACTTTTGAGTTTTTAAGGAAGAAAGAATCTTACTTTTTATCATTCAAGCCTTTAACAAATTAAGA  
TGAGACCAAAGGTAAAGAATCATTAAAAAATGTCCCAATTAACAAAATTTAATGAAGAATAATTGTAC  
AAAATTAATTAAGAATTTATAGCATTAGTTAAGTTACCAAGAAAAACCATAGCATGTGCATGGCATAT  
TATATATATAGCTATTCATTCTTCCATATATTAGTCATCAAATATGAATACTCAAGGAGAATCATCAACTA  
CTTCTTCCAACCTTCTTATGATGTGTTTCTGAGTTTCAGAGGTGAAGATACTCGAAAAACCTTCACAGGT  
CATCTTTATTCTAGATTATGTCAAGTCGGAATTAATACCTTCATAGACGATGAGGAATTAAGAAAAGGCA  
AGGTGATTTCAACAGAACTTGAGAAAGCAATTGAAGAGTCTAGAGTTTCCATTGTTGTTTTCTCGAAAA  
TTATGCTTCGTCTAGTTGGTGTCTTGATGAACTTGTTAAAATTCTCGAATGCAAAGACAAGTTAAAGCAA  
ATAGTTTTGCCTATTTTCTATGATGTTTCATCTTCTCATGTACGCAAGCAAACCGGATGCTTTGGTGAAGC  
TTTGGCTATGCTTATGGAACGATCATTGAGGTTGAGAGAATGAAAAAATGGACGGATACACTTACTCA  
GGCTGCAAATTTATCTGGATGGGATTTGCAAATGTTGTTGACGGTAATATTTATAAACTGGTCAAACCT  
GACTTATAAGTATTACTCATGTTATAGGTTACTTATCAGTCAAAGTCATAAGTTGGCCATCATTTTATTTT  
ATTTTTCAAATATCAAAGTTGTTTTTTTTTCTTCTAACTTTTGTGTTTTGCTAATATGCAGACATGAATCAA  
ATTTATTGAAAGTATTGTAACAAGTTCTACTAGAGGTAACCCAGACACCTCTAGATGTTGCTTGGCAC  
CCTGTTGGAGTAGATTCTCGTGTGCAAGATATAGAGTTGTTACTCCAAAAAGGATGTGTAGATGAAGTT  
CGTATGGTTGGTATATATGGCGTAGGTGGAATAGGGAAAACAACCCTGGCTAAAGCTATCTACAATCAA  
ATATTTGACAATTTGATAGTAGTTGCTTCTTTTCTAGATGTTAGATCAGAAGCTGAAGCATTGTTTGTAGT  
CAAGTTACAAGAGAACTACTAAATCAAATTCTCAAACCTAAGGACGTCAAAGTTAGCAGTGTTGCTGA  
AGGCGTCAATCTAATCAAAGCAAGACTTGGGTCAAAGAAGTTCTAATTATTCTTGATGACATGGATCAT

ATGAGCCAATTAGAATCCTTGACAAGAGAAAGAAGTTGGTTTGGTTCTGGTAGTTTAATAATTATTACAA  
CCCGAGACAATCATTGTTATCTCGGATTAGAGAAAATGAGAGATACAAGGCCAAAACCTTTTAAATCAAG  
ATGAAGCTCAACAACCTTTTTCTTGTCATGCTTTTAGTAGTCCTTCTCCGCCACAAGAATATGTTGAGCTT  
GCACAAAGCATAATCAAATATTCAGGTGGGCTACCGTTAGCTCTTGACATTGGGGTACATTTACAAG  
GGAGATCCGTAGAAGAATGGAGATACGAGTTCAAAAAACTAAGAGCAATTCCTCATTGTGATATTCAA  
AGATCCTCAAGATAAGCTTTGACGGACTTGATTGTGA

>M6-PGSC0003DMG402027402 M6 LRR-RLP

TTGAATCCAGACTGGCAGACTCCATAATTTTTGCTACTCTTTTTCTGTGGCTGTGAGCTGCATACTGT  
AGATAAACATAGTTATACCAATTACAAGCAAAGAGAGGGAGAGAAATCATTCTTGATTACATATCAC  
TCTTAGCTCTTAGCATTCAACAGGTAAAATAAAGTTGTTAGTAATTGAAGTTTGAACATTTATCTTCTTAA  
AATCATTTTGTGTTTCCTTGTTTTGCTTGCAGATTTAGAAATGGAGATTGGGTTAACAGTTGGTGGTGC  
ATTTCTCTTTCAGCTTTAAATGTTCTCTTTGATAGGCTTGCTCCTCACGGTGATCTTCTCAACATGTTTCG  
GAAGCATAAGGATCATGTTTCAGCTCTTACACAAGCTGGACGACATTTTGCTTGGTCTTCAGATTGTGCTA  
AGTGATGCAGAGAATAAGCAAGCATCAAATCGACAAGTGAGCCAGTGGTTCAATAAGCTTCAGAATGCT  
GTGGATGGCGCTGAAAACCTTGATAGAAGAAGTCAATTATGAAGCTTTGAGGCTTAAGGTGGAAGGCCA  
GCATCAAATCTTGCAGACACAAGCAACAAACAAGTGACCTCAACCTGTGCTTACTGATGAATTTTTCC  
TTAACATAAAGGAGAAGTTGGAAGAAACCATTGAAACATTGGAGGTGTTGGAAAAGCAAATTGGCCGC  
CTTGCTTAAAGGATCATTTTGGTTCGACTAAACAAGAACTAGAACACCTTCAACTTCTTTGGTTGATGA  
TTCTGATATCTTTGGAAGGAAGAATGATATAGAGGATTTGATTGACCGTTTATTATCTGAAGATGCAAGT  
GGAAAAAGCTTACTGTAGTTCCTATTGTTGGAATGGGCGGCCTGGGTAAGACAACACTTGCTAAAGCG  
GTTTACAATGATGAGAGAGTGAAGAAACATTTGTTTTGAAAGCTTGGTTTTGTGTTTCTGAGGCATATG  
ATGCTTTCAGAATAACAAAAGGGTTACTTCAAGAAATTGGCTCAACTGACTTGAACGTTGGTGACAATCT  
TAACCAGCTACAAGTCAAATTGAAGGAAAGATTAAGGGAAAGAAGTTTCTTCTGTTCTGGATGATGT  
GTGGAATGACAACTACAACGAGTGGGATGACTTGAGAAATGTTTTGTACAAGGAGATATAGGAAGTA  
AGATCATTGTGACGACATGTAAAGAGCGTGTTCCTTGATGATGGGAAATGAGCAAATTAGCATGGAC  
AATTTGTCTACTGAAGCCTCTTGGTCTTTATTCAAAGACATGCATTTGAAAACATGGATCCTATGGGAC  
ATCCGGAACCTGAAGAGGTCGGAAAACAAATTGCAGCTAAGTGCAAAGGACTGCCCTTAGCTCTGAAG  
ACACTAGCTGGCATGTTACGCTCCAAATCAGAGGTTCAAGAGTGGAAACGTATTCTGATAAGTGAATA  
TGGGAGCTGCGAGACAAGGACATATTACCAGCGTTGATGTTGAGCTACAATGATCTTCCCGCACATTTA

AAGCGAAGTTTTTCCTTTTGTGCAATATTTCTAAAGATTATCCATTTAGGAAAGAACAAGTCATTCATCT  
GTGGATTGCCAATGGTCTCGTACCACTGGAAGATGAAATAATTGAAGATACAGGCAACCAATACTTTCT  
CGAGTTGAGGTCAAGATCATTATTCGAAAGGGTCCCAAATCTTTCTGAAGGCAACAAAGAGAATTTATT  
CTTAATGCATGACCTTGTC AACGATTTAGCCCAAATTGCATCTTCAAACTTTGTATCAGGTTGGAAGAG  
AGCCAAGGATCTCATATGTTGGAAAAAAGTCGGCACTTATCTTATTCCATGGGAAAAGATGGTGACTTT  
GAGAAATTGACACCCCTCGACAAATTGGAGCAGCTGAGGACATTGCTTCCGATATGTATTGGTGTCAAT  
TATTATTATCTAAGCAAGAGGGTGCAGCTTAACATATTGCCAAGACTAACATCCTTAAGGGGATTATCGT  
TGTTAGGCTATAAGATTGAGGAGTTGCCAGATGATTTGTTTGTCAAATTAAGCTCCTCAGATTTTTGGA  
CCTTTCTGAGACATGGATTACAAAGTTGCCAGATTCCATTTGTGCATTGTATACTTAGAGACACTTCTCC  
TGTCATCTTGTGATTATCTTGAGGAGCTACCGCTGCAGATGGAGAAGTTGATTAAGTTGCGTCATCTTGA  
CATAAGCAACACTCATTGGTTGAAGATGCCGCTACATCTGAGCAAGTTGAAAAGCCTCCAATTGTTAGTG  
GGAGCCAAGTTTCTTCTAGGTGGTTCGAGAATGGATGATTTGGGTGAAGCACAGAATTTGTATGGATCT  
CTATCAGTTGTAGAGTTGGAAAATGTGGTTGATAGAAGGGAAGCTGTGAAGGCAAAGATGAGGGAGA  
AGAATCATGTTGACAAGTTATCACTGGAGTGGAGTGAAAGTAGTAGTGCCGACAATTCACAACTGAAA  
GAGACATACTTGATGAGCTACGCCACATAAAAACATAAAAAGTAGTCGAAATCATCGGATATAGAGGGA  
CAGCATTTCGAATTGGCTAGCTGATCCTTTGTTTCTTAAGCTAGAGCAGTTGTCTATTGCTAACTGCAAG  
AACTGTTATTCTTGCCAGCACTAGGAAAACCTCCATTTTTGAAATTCCTTTCCATTAGAGGGATGCATGG  
AATAACAGAGGTGACGGGAGAATTCTATGGCAGTTGGTCCTCCAAAAGCCTTTTAACTGTCTTGAGAA  
GCTTGAATTTAAAGATATGCCGGAGTGGAAGCAATGGCACGTACTAGGTAGTGAGAGTTCCCTATACT  
TGAGAAGCTTGAAATTA AAAATTGCCCTGAACTCAGTTTGGAGACACCCATCCAACCTTTCAAATTTAAAA  
AGTTTGAAGTTAGTGGTTCTCCAAAGTTGGAGTTGTTTTTGTATGATACTGAGCTGTTTAGATCCCAAC  
TTGAGGGAATGAAGCAGATTGTTGAATTAGATATACGTGATTGTAACCTCTTACCTTCTTTCTTTTAGC  
ATACTGCCCACTACCTTGAAGAGAATAAGGATATCTGGTTGCCAGAAATTGAAATTGGATCTGCCAGTT  
GGTGAGATGAGTATGTTTCTGGAGGATTTGACACTGGGAAAATCTGATTGTATAGATGATATATCACCT  
GAGTTGCTCCCAAGAGCACGCAATTTGAATGTATCGGATTGCCACAACCTTACTAGGTTTTTATTCTTA  
CTGCCACTGAAAGTCTCTATATTTATAATTGTGAGAATGTTGAAATACTTTCGGTGGCATGTGGGGGGAC  
CCAGATGACGAAGTTGAGTATTCAGGGCTGTAAGAAGCTGAAGTGGCTGCCAGAACGTATGCAGGAAC  
TCCTTCCATCTCTTAAGAACTGTATCTGCGTAATTGTCCAGAAATAGAGTCCTTTCTGAAGGAGGATT  
GCCCTTCAATTTACGAGTCCTTTGGATCAAATATTGCAAGAACTGGTGAATGGACGAAAGGAGTGGCG

TTTACAGAGACTCCCCTGTCTCACAGAGTTATGGATCTGTCATGATGGCAGTGACGAAGAGATTGTTGGT  
GGTGAGAATTGGGAGTTGCCTTCTCTATTCAAAGACTTGGAATATTCAATCTGAAAACATTAAGCAGCC  
AACATCTCAAAGCCTCACCTCTTTCAATATCTAGAAATTGCGGGTAATTTACCTCAAATTCAGTCAATG  
CTGGAACAAGGCCAGTTTTTCGCACCTCACTTCACTTCAAAGTCTAGGAATCATGAATTTCCCTAATCTCCA  
ATCACTTCTGAATCAGCACTGCCCTCCGCCCTCTCT

>M6-PGSC0003DMG402028427 M6 LRR-RLP

CTGGAAATTTAAACTGAGGTATTGATTTTTGATGCAGCTTGTTCAATTTGGCAGAGATTGCATATGGGGT  
TTCCTTGAGTACAAATCGTAGGGATTTTCATTGTTCAACACTCTCCACCATAAGAGCTGATGGGATCAGG  
CGACGGAAGTCTTCAAAGATGCTACACCAAGGAAAACATCCAAAGGAAGTGAGCTCAATATACAGCC  
ATCCCTCGACAGTAAATCGCCAAATTCATTAACCAGGAAGAGATCATTTCTTTTTCAAGAGAATACAA  
TCTTCAATTTCAAAGGTGATTCTACAAGTTCCAAGAAAAGAAGTACCAAGTCTGAAGAGAAGCCCCT  
ATTGATTCGGTCTTGAAATCCTTCGTCATTCAAAGACAGAACCAAAGGTAGTGATTTCTTTCAGTTTTA  
CCCAAGCCTGTTTCCAGTCTTTTCCCAAATTCATCCCAGTGCAAATGATGATACATACTCAGTTAGCAG  
CTAATATCTTTTTCTTTTGAAGGTAAGGATGACAAGGGTTTGACTCATCAAAAAGAACCGGAAAC  
AGACTATCCACCAACAGCAGATCCAAGATCAACACGCCTACGGTCAAGCTTTGTGAAAAGATCGCCTCTA  
CAATCCCCATTTAACTCAAAGAAAAAGTTGAGCTCAAGGCGGAGACATCACTGGAGAATCATGTTGAA  
AGTGAAGCAGTCAAATGAAGAAATGAAACTTCTCAGCTTAAAGAACTAGCAAATCTAGAGGACTT  
AAGGGTTATTCGAAACTGAAGAAAAGTGAAGTGAAGTGGAAATTGCTCATCAGTTGTTGAGACAATGCAAAG  
ATGATCAAGTTGTCCATCCAATGCTTTACATACTTGACGGTTAACTGCAGGACTAGTCTTTTTTTCGTATC  
TGCTTTCTTTTATGGAGAAACAAGATGAAAGGGCAGAGTACTGTGTGAGTTTTAACACATTCATTTGTTT  
GTTGGTTTGTAACATATGTTGTCTTTAAAGTCTAATTGCATTTATGATCACTTTCTCAAGTTGCTTACCTTC  
TCCTCTCCATCCCCAACAGTTTGCTTGCTTCAATGGTTGAAATAGGGGTTACTATTCTCCAATCTGCTA  
GTTGTTTTCTTACATATATCTGATGTGGTCTTTTAGCCTGGTGTGGAAGATCCTCACTCGCCAT

>M6-PGSC0003DMG402030236 M6 LRR-RLP

TAAGAAGTGAAATATGGGAGCTGCCACGTCATTCAAATGGAATCTTACCAGCATTGATGTTGAGCTACA  
ATGATCTTCATCCACATTTGAAGCAATGTTTTGCTTTTTGTGCAATATATCCAAAAGATCATCTGTTTAGC  
AAAGAACAAGTTATTCACCTGTGGATTGCTAATGGTCTTGACAGCAGTTGCATTCAGCTAACCAATACT  
TTCTCGAGTTGAGATCGAGATCATTGTTTAAAAGGTTTCGACAGTCTTCTGAATGGAATCCGGGGGAAT  
TCTTAATGCATGACCTTGTCAATGATTTGGCCCAAATTGCATCTTCAAATCTGTGTAACAGGTTGGAAGA

GAACCAAGGATCTCATATGTTGGAACAACTCGACACCTGTCATATTCAATGGGTGATGGTGATTTTGGT  
AAACTGAAAACCCTCAACAAATCGGAGCAATTGAGGACATTGCTTCCCATCAATATCCAGCTGCGTTGGT  
GCCATCTTAGCAAGAGGGTGTGCATGACATATTGCCAAGACTAACATCTTTGAGGGCACTATCATTGTC  
TCATTATAAGAATGAGGAGTTTCCAAATGACTTGTTTATTAATAAAGCACCTAAGGTTTTTGGACTTTT  
CTTGACAAATATAAAAAAGTTGCCAGATTCAATTTGTGTACTGTACAACCTTAGACACACTTCTCTTGCC  
TATTGTAGTTATCTTAAGGAGCTACCTCTGCATATGGAAAAATTGATCAACTTGCGTCACCTTGACATTAG  
CGAAGCTTATTTGACGACACCCCTACATCTAAGCAAGTTGAAAAGTCTCGATGTGCTAGTGGGAGCCAA  
GTTTCTTCTAAGTGGTCGTAGTGGTTCAAGAATGGAAGATTTGGGTAAACTGCATAACTTGATGGATCT  
CTATCAATTCTAGGGTTGCAACATGTGGTAGATAGAAGGGGATCTCTGAAGGCAAACATGAGGGAAAA  
GAAACATGTTGAAAGGTTATCTTTGGAGTGGAGCGGAAGTAATGCTGACAATTCACAACTGAAAGAG  
ACATACTTGATGAGCTACAACCAAATACAAACATAGAAGAACTCCGAATCACTGGCTATAGAGGAACAA  
AATTTCAAATTGGCTAGGTGATCCTTCATTTATAAGCTAATAGACTTGTCTCTTAGCAACAGCAAAGAC  
TGTGATTCCTTGCCAGCGCTAGGACAGCTTCCTTGTTTAAAATTCCTTACCATTAGAGGGATGCATCAAG  
TAACAGAGGTGACTGAAGAGTTCTATGGTAGTTCATCTCCACAAAGCCATTTAATTCTCTTGAGCAGCT  
TGAATTCGCAGAGATGCTGGAGTGAAGCAGTGGGGTGTACTGGGGAAGGGAGAGTTCCTGTACTTG  
AGGAGCTTTGATAGATGGTTGCCAAAGTTGATTGGGAAGTTGCCTGAAAGTCTTTCTCTCTGAGAA  
GATTGAGGATATCAAATGCCCTGAACTCAGTTTGGAGACACCTATCCAACCTTCAAATTTAAAAGAGTT  
TGAAGTTGCTAATTCTCCTAAGGTTGGAGTTGTTTTTGTATGATGTTCAATTGTTTACGTCTCAACTTGAGG  
GAATGAAACAGATTGTTAAATTAGATATTACTGATTGTAAGTCTCTTACCTCCTTACCTATTAGCATTCTG  
CCGAGTACCTTGAAGAGAATAACAATCTCTGGTTGTAGGGAACTGAAATTGGAGGGCGCCGATCAATGCT  
ATTTGTCTGAAGGAATTGTCTCTAGTAGGATGTGATTCACCTGAGTTTCTCCCAAGAGCACACTCTTTGA  
GTGTAAGAAGTTGCAACAACCTTACTAGGCTTTTGATTCTACTGCCACTGAAACAGTCAGTATTAGAGA  
TTGCGATAATCTTGAAATACTTTCAATGGCATGTGTGACTCAGATGACATCATTGCATATTTACAACCTGCG  
AGAAGCTGAAGTCGCTGCCAGAACATATGCAACAACCTCTTCCATCTCTTAAGGAACTGAACTGAATAA  
ATGTACAAAAATAGAGTCCTTCTGAAGGAGGATTGCCCTTCAATTTACAACAACCTTTGGATCTCCTGTT  
GTAAGAAATTGGTGAATGGCCGAAAAGAGTGGCATTACAGAGACTCCCCTGTCTCAGAGATTTGACTA  
TCCACCATGATGGTAGCGACGAAGTGGTTCTTGCTGATGAAAAATGGGAGTTGCCTTGCTCTATTGAA  
GGCTTAGCATATGGAATCTGAAAACATTAAGCAGCCAACCTTCTCAAAGCCTCACCTCTCTTGAGTACCT  
ATTTGCTAATAATTTACCTCAAATGCAGTCATTGCTGGAAGAAGGGCTTCCTTCTCTCTTTCTGAGCTAA



AATTATTTAGCAATCATGATCTTCATTCCTACTACCGACCGAAGGTCTTCAGCGTCTCACGTGGCTTCAACAT  
CTAGAGATTCGGGATTGCCATAGTCTCCAATCTCTCCCGAATCAGGGATGCCCTCTCCCTCTCTAAGTT  
GACCATCCAACATTGCTCTAATCTCCAATCTCTCCCGAATCGGGGTTGCCCTCTCCCTCTCTGAGCTGC  
GCATTTGGAATTGCTCTAATGTCCAATCTCTCCCAAATCGGGGATGCCCCCTTCTATGTCTAATCTATAT  
ATTTCCAAATGCCATTGCTCAAACCACTCCTAGACTTTAACAAGGGGGATTACTGGCCAAAAATTGCTC  
ATATTCCCACCATATATATTGATTTGGAATCCCAGTAATGATTAATAAAAAATGGTGCTCTGATA

>M6-PGSC0003DMG403000927 M6 LRR-RLP

TAAAGGAGGGGTTTTTGTATACATGTATTTTCCAATTCAAGTAGAATATTCATTTATTAGTTTCTGCATG  
ATTAGAAATAGAAAGGTCCAATTCATGACTAAATAGATAATAACTGATTTATAAATTTGTGTATTTGC  
AGGTTTCTTTTCCCAACCTGGAATATCTATATATCTATGATGCTAACAGCATAAGTGCTCTATGCTCTCAC  
CAACTTCCAACCTGCCTACTTCAGCAAACCTGAAACATTGTATATAATGAATTGTGGAAAATTGAGAACT  
TGATGTCTCCATCAGTGGCCAGAGGTCTTCTGAATCTCCGGAACTAGACATTACAGACTGTGATTCAAT  
GGAAGAAGTGATCACAAAAGAGGAACAAAAGGAGAAGGAATCATGACCTATTTCCCTGTTGAAAC  
ATCTGACGCTTCAAAGGCTGCCAAAGCTGGGGCATTCTTTCTGACGGAGTGTACTCTTGAAATCCAAT  
TCTCAGGTATGTGTTGATTGATTACTGCCCTGAAATGAAGTCATTTGTTCAACAGGGAATATCTGTGAGT  
ACACTGAGTCTCGAAAGTGTGAACAATGATGATGAGGTGAAAGTAGATGATCTGAATAAATGGACACA  
ACAGAGGTTCAATTCTAAGGTTTGTCTTGTGCCGCTAGCTGTATAACTAATTAACCTTGTGCTTTCTATT  
GCATACTTAATAGTAATAACCATATTCAAATATTAATCTATGTTTGTGAGAATAACAACCTCCTTTTACCT  
GCCCCAAATATTTTCAATTAGAAAATAAGCATCAGCATAGTCTTTTATCTTTAAGTACATGTTGTAC  
ATACTAAGCTAGTCATCTCTCTCTGATCCCAGGAACAAAGCACTGGTGATGGCAACGAAGTCGGACC  
TAGTTATGACAAGCTAGTGATGTCTATGAATCCAAAGCTAGCTAGGAAGGTAAAAAGTATTTGATGAAA  
CAGTCCGAGTTAGCTCGAACATAGCCTGATACCTATAGTGCTGTTTATTGATTTTTGAAAGAAGGGGCAG  
AGCTTGAAGAAACAGCGTGCGCCTAGAGTAGTAGCCTATTACATTTTGTGAGGCCCTTTGATATCTTAT  
TAATCAAGCACTAGCAACCCTGTAGCGTAAGATGCTCGTGATGGAGGTAACAAGCAGAGGCAGATCTAC  
ATTATAATTGCCAGTAAAATACACTAATAAAGTAAAAGTTGTTTACATTGCCAGTGTATACAAGTTAAATT  
CTTATTTGAAATTCCAACCTCAGAC

>M6-PGSC0003DMG403003025 M6 LRR-RLP

TGCAACAAAATAATAAAGTTTGCTACTTCATCCCTTCAACGTTTGCAGGTTTCTTGTCCAAGCCTGGAATA  
TCTATATATCGAGAAGGCTAACAGTATAAGTGCTCTATACTCTCATCAACATCCAACCTGCCACTTTAGCA

ACCTTGAAGCATTGGAACATATGGCATTATGGAAAATTGAGAACTTGATGTCTCCATCAGTGGCCAGAA  
GTCTTCTGAATCTCCGAATACTAAGTATATATGATTGTCAATCAATGGAAGAAGTGATCACAAAAGAGG  
AACAAACAAGGAGAACGAATCATGACCTTATTTCCCGGTTGAAAGACCTGAGGCTTAACAATCTGCCTA  
AGCTGGGGCATTCTTTCTGACGGAGCGTGCTCTTAAATTTCCATTTCTCAGAGAAGTGTGGATTGATGA  
CTGCCCAGCAATGAAGACGTTTGTCCAACAGGGGAATATCTGTGAGTACACCGAGTCTCGAATGCTTGAA  
TGATGATTATGAAGTGAAAGTAGATGATCTCAATAAATGGACACAACAGAGGTTCAATTCTAAGGTTTG  
TCTAGTGCCGTTAGCTGTATAACTAATTAAGTCTAGTGCTCTCTTCCGTCTTAACTTAATAGTAATATTCA  
GATACTTATTTATGTTTGT

>M6-PGSC0003DMG403010943 M6 LRR-RLP

TAGCCTTATTGAGTGGAAAGGAGATGAAGTTGGAGTAAGAATGTTTCCTAGGCTTGAGAAGTTGACGAT  
TAGAAACTGTCCATTGTTAAAAAGAACTCCGAATCAATTTGAAATCCTCAGTGAATTAGAAATTGTCAA  
GTTGACAGTGAAATGCCATTGTTGAACTTATGCAGCAACTTGCCATCTCTCGTAGAGCTTGAAGTCGATG  
ATATGAAAGAGCTCACTTGTTTGCCAGATGAGATGCTACGCAACAATGTTTCTCTTCAACACATATCGGT  
TTCCGACTGCAGAGAGTTTCATGAATTGCCACAAAGCTTGACAATCTCCATTCTCTTAAGACCTTAAAGA  
TAACCAGGTGCGCCAATTTCAATTCCTTTCCTGTTCCAGTGGAGAGAATTATTTGACTTCCCTCCAAAA  
CTTCAGTTAAAGGATTGTGAAGGATTGAGCAGTTTACCAAGTGAATGCTAGAGCATTGTGCGTCTCTG  
GAAACTTTGAGTGTGAGCTGCTGTGACAATTTAGTTTCATTCCCTTACATGTGGGGGAAATGCCTTCACT  
TTCTATTTGAATATATCACGATGTCCCAAATTGATTAGTTTACCCTCCGGGGTATTGACCATCTCACTG  
AGTTAAGTGAAGTGAATTTGGTCTTTCTCAGAGATGGTGGATTTTGAGGCATTCCAATTGATTTTTAA  
TGGCATTGAGCAGCTGCTGTCCCTTCGTACATTGACGGTGTATGGACATGGTCACTGGGATTCTCTGCCC  
TATCAGTTTATGCAACTCTCTGGCTTAACAGCGATCCATATATGTGGATTCGGAATCGAGGCTCTTCTCA  
TAGATTTGGCAACCTTACTTCTTGAACATTAATGCTACTGAGGTGCAAACGGCTACAGAACCTGGAC  
TTCTCATATGTCATGCCCAAATTACAACATCTGTATGTTTATGAATGTCCATTGTTAGAAGCTCTGTGCGA  
TGGGCTTGGCAACCTTGTACTTTGGAAGTGTACATTTAGAAAAGTGTGAGAACTAGAGTATCTGCCA  
TCTAGAGATACCATGCGACACCTCAAGAAATTACAGAGCCTGCAAATTAATGGCTGCCCAAAGTTAGAA  
GAAAGTTGCACCAATCGGAGTGGCCCAAAGTCCAGTGGTCCAACATTTCCCATATTCAAAGAATTGAA  
GTTGGTAGAATCCCCCTATATCAGTGCTTGAGTAAGTCTCTGTTTCTTTCAATTTCCGAGTCGCATTTT  
TAATTATTATTTCCACGAGTTAGTCTTCTCCATTCTCCAAACATTTTCTATTCCACTTGAAACAAATTTAT  
GAATATCTATATTACTTTTAAGATATGGTTTAATCATGAATATTTATGTATTTTTACTCATAGGTTATTAG

CTCGAAGGTCACACTAGAACGTTGTTGTGGCATTTTAAGCCAAAATCCATGGGCAGCAATTACATTAGGT  
GAAATTCATTTAGAATTCTGTAACAATTTTGTCAAGTTTTCTTTGCACTCCCCTTGTTTTTCCCTCATG  
ACACAATTTTATTGTTTAAACAGGGTTAGTTATGTTTCGATAGAGAGGAACCAACACGTTTGTGTTGTTGAA  
GAACAGAATCTGCAGCCGTAGACTCTTACATGAGCATTGGTAAAGACTACTGACTACATAATCTCTCAA  
CATTTACTCTTCATAACATGGATATATAACCAACAATAAAGTAAAAATAATTTAGTACACAGTCGATCA  
TTTGCCCTAGTGAAACTATTCTTTTATGTATGGGTGTCTTTTGATAATATAAACCTTTTTCTACGAGTTAA  
TGAAAATAAAAAGACTAACAAAGTAGTTTTGGGTAAATAATGAATGAGTAGTTCAACCAACCAACAAGTA  
CCATGTTCTAGACTTCCCCTTTGGATGTTCACTTGAAATCTATTTTTCTTTCTTATAACAATAGAAGC  
GTAAACTCAATATCAGGTCAGGTAAGTCTTTGGTCAGGTAGTAAAGGGTATCCGTGGACCGAGCCATTGAAT  
TCTGTTTCATGAACTATTCATAAGATGAAGTTAGGAGGTTGCTGTGCTACCAAACTGACTTTTTACCGTCT  
CCTATGTTTCAGATTCTTGAATGAAACAATGGCATGAACTTGTGCGAGATGGTATACTGAAGCAGACTTC  
TCTTAGATGTGTTTAAAGTGTGCGTATTAGACAGGGAAATTACATTAGGCGGAACTGGAGAGGAGATATT  
ATTTAATTGTATGACTAAGATTTGACAGCAGAGGCCTTTCTTGCACAGTGTTTCATTCCTTTTTGTACAAT  
AGTTTTTTGTTCCAGCAAACATTTTCAACTTAATACTTAGTTGCTGCATCATTGCC

>M6-PGSC0003DMG403015682 M6 LRR-RLP

GTATCTACGGACGCTAGATCTCAGCCGCTCCAGAGACCTGGCGCAAACACCAGATTTACGGAGATGTC  
AAATTTGGAGTATTTGGATTTGGGCAATTGTATTAATCTTGAAGAGGTTACCATTCCCTGGGATGTCGC  
ACAAAACCTCAAGAGGTTGAATTTGATATATTGTAGACGCCTCGAGAGGTTCCATATGTTAACGTGAAAT  
CTCTTGAATATCTGGATCTAAAGTTCTGCTCCCGTTTGGAGAAATTTCCAGAGATCTGCGGAAGACCGAG  
GCCGAACCTTAAATATTAAGATGTGTGACTCTGAGATAAGGGAACTGCCATCATATATTGTTCCGGTGCCTA  
ACTCTGAGACATTTGGATAATCTTGAAGCTCTTCCGAGAAGCATTGGCATGTTGAAAGGCTTGGTTACTC  
TAGATGTGTTGAATTGCTATAAACTTGAAAGCTTGCCAGAAGATCTAGGAGATTTAGTAACTTGGAGA  
AGCTTGATGCCACAGGGACTCTAATTTACGACCTCCGTCTTCCATCTTCCGCTTGAACAAGCTTACAATC  
ATGAGTTTTGCGAAACAAGATATAACATAAGCCTCAAAGAGGGAGTGTGCTTTGTGTTCCCTCAGGTG  
AATAAAGGGTTGCGCTCATTGGAAGATCTGGATCTCAGTTACTGCAATTTAATAGACGGAGGACTTCCG  
GAAGACATTGGATCCTTATCCTCTTTGAAAAGTTGAATCTCCAGGGAAATAATTTGATCATTTGCCTCA  
AAGCATATCCGAACCTGGTGCTCTTCAATCCTTGAACCTTATCAAATTGCAAGAGGCTTACACAGCTGCCA  
GACTTTACGGGGATGCCAACTTGATGACGCTGAATCTCAGTATAATTAACATTGAGCATTTCCTCAA  
GCATAGAACAACCTGGTGCTCTTCGATCCTTGGACTTGTGATATTGTGAGAGGCTTAAAGAGTTGCCAAG

CTTCATGGGAATGCAAAACTTGGAGACTTTGAATTTGTCAAATTGTATAAATCTTGAAAAGGTTGATCGT  
TCCCTGGGACTTCTCAAAAAGCTCTGTATATTA AAAATGACTAATTGTAAACAGCTTAAGAGGTTTCCAG  
TTCTGTGCATTGATTCTCTTGTCTATCTGTGTCTACGGGATTGCTCTAGTTT AGAAAAAATTCCAGAAATC  
CTCGGAAACATGAAAGCTGAGTTAGAGATTCACATGCTTGACAGTGT AATAAGGGATCTAGGTTTTAGA  
GGTTTTGAAAACCTTGCAACACTTCCGAGCAGCATTGTGTAAGTTGAAAAGTTTGGTCAGCCTAAATGTGT  
CGGATTGCTCTAAGCTTAAAAGCTTCCAGAAGAAATAGGAGATTTAAAAA ACTTGGAAAATCTTGATG  
CTAGAGGTA CTAAATTCACAACCTCCATCTCCATTGTCCAGTTGAAGAAGCTTAAATTTTTGAGTTTT  
GCAAAACAAAATTCTGGAGGAGGTCTCGTAGATGGAGTGTACTTTAGTTTCCCTGCGATGTCCGATGGA  
TTACGCTTGTTGGAGATTCTGAATCTCAGTTACTGCAATCTAATAGATGGAAGTCTCCGGAAGACATTG  
GATCCTTATCCTCTTTGAACGAGTTATATCTCTCTGGAATAATTTTGAGCATTTCCTCAAAGCATAGCC  
CAACTGGTGCTCTTCGGTCTTTGGACCTATCAGATTGCAAGAGGCTTAAAGAGTTGCCAGATTT CGAAG  
GGATGCAAACTTGGCGACTTTGAATCTGTCAAATTGTATGAATCTTGAAGAGGTT CATCATTCCCTGGG  
ATGTCTCAAAAATCTCTGTACATTAAGTTGACTAATTGTAAAAGGCTCAAGAGGTTTACAGTTCTGTGC  
ATTAATCCCTTGAATATCTGAATCTAGAGGGGTGCTCTAGTTT AGAAATGTTTCCAGAAATCCTCGGAA  
GCATGGATTTGAAGTTAAAGAGTGGGTTAAAGTGCCTAGACTTGAGAGGTTTAGAAAACCTTGTAACAC  
TTCCGAGAAGTATTTCTAAGTTGAAAAATTTGGTGGAGCTAAATGTGT CGGCATGCTCAAACTTAAAA  
GCTTACCAAAGAGATAGGGGATTTAGAGAACTTGGAGTGGCTTGATGCCAAAAATACTCTAATTTTGC  
AACCTCCGCCTTCCATTGTCTGTTTGAACAAGCTTCATTTCTTGCGTTTCGCAAAACAAAATCAGAAGTA  
GGCCTCAAAGCTGGAGTGTTCTTTGTTTTCCCTGCGGTGTCTGACGGATTACGCTTGTTGGAGAATCTGA  
ATCTCAGTTACTGCAATGTAATAGATGTAGGTCTCCGGAAGACATTGGATTCTTATCCTCTCTGAACGA  
GTTATATCTCTCTGGAATAATTTTGAGCATTTCCTCGAAGCATAGCCCAACTTGGTGCTCTTCGGTCTT  
TGGACCTATCAGATTGCAAGAGGCTTAAAGAGTTGCCAGGTTTCGAAGGGATGCAAACTTGGCGACTT  
TGAATCTGTCAAATTGTATAATTCTTGAAGAGGTT CATCATTCCCTGGGACGTCTCAAAAAGCTCTGTAC  
ATTAAGTTGACTAATTGTAAAAGCTCAAGAGGCTTCCAGTTCTGTGCATCGATTCCCTTGAATATCTG  
AATCTAGAGGGGTGCTCTAGTTT AGAAAAATTTCCGAAAATCCTTGAAGCATGAATGTGAAGTCGGAT  
ATTCACATGTTAGATAGTGTGATGAGGGATCTAAATTCATGTATATCTCACTTCCACGTTCTTGTCTCA  
GGATATCGTTTCCCTCGCCGAATGACATCTCTGCTTCAGATTCCTGT CACAAAGAGTGTTTACCATTGTGC  
ATGATGAGAATAAGATCCCAAGTTGGTTCACCATCAAGGAAAGGATGAAAGTGTATCGATCAATTTGC  
CTGAAAATTGGTATGTATTGGATAACTTCTTGGGATTAGTTGTATGTTACTCTGGCAACCTAGTTGACAC

CACAGTTGACTTGATTCCCTTATGTGATGATGGGATGACCCAGAACTAGAATTATCCTTCCTTCCAAATT  
ATGATACAGAATTATCCGACGATTGAGAAATGTGATACTGAACCTACGATTCATTTTTCTTGGTATCTCTT  
ACTGGCTTATGGGAAACATCTAAGGCAAATGGAAAAACACCAAATGACTATGGGCTTATTACATTATCG  
TTCTCCGGAGAAACGAAGGAGTTTGGATTCCGTTTGTGTATAAAGATGAACCAACAGAACATTGCATT  
GGGACACCATGATGAAGCCAGTTGCTCCTCTTCTAAGAAACAAAGCTCTTATTTCTAATATTCATTGGAG  
CTGTCTTTGAGAATCTGCAGCAACAACCAGTCTCTTCAGAACTTTGCAGCTCTCTCCTCCAAGCCCAGAA  
TTTTGGCTTAAATATAGGTATTATACCTCATGATTTGTTTTCCCTTAGTTGGTAGTGAAATTCTGTTCAAC  
TCTCTTTTTATGTAATTCTCTCCTATTAGCTACAAAGTCTTCTTCCAATTCTGTTAATAACTTTTTATCTCTT  
TTCTTTTTTTCTTCTTTATTCTTTCCCGTACTGACAGGAGCTCATCAATGGTGATGTATGTCTCAACAGTG  
AGTTTTGTTGATTGATTCTCCATCTTGTGTTAAGCCATGATTAACCATGTGAGTTAAAGGATGTGAGCAA  
GTTTTTTTTCGATACTCAAATCAGATCCTGGAATCATTCAACCTTCATAAATTCTTCCCTTAAAATGTGCTC  
ACAAGTGAATAGAATAATCCTGCATTTTATCCTGGTATTTTTATCACTTATCCCTCATACCAAACAACCCTT  
AGGGTCATTTGGTTGGGAGCAAGTTATCCTGGTTATAATTATCCTGGGATAAGTTATTCTACTATGTATA  
TGGAATAACTTATCCCATCAATATAGTATAAAATTATAAATGGTGGGATAAATAATTCAAAGACTACCTA  
ATACCTCCAACCAAACACATGATAAAATTATCCTGCATTTATCCCGAGAATATTATACCTTATACCTCACA  
CCAAACGACTCCATAGAGTATTGGAAACAAATTTCTCTTAAGTTCTATATTATACTCAATTTTGTTTTTCGA  
CTTGTTCAATTTGTGGTTCTTTTTACGATTCAATTGGCTCTAAAGTGATTTTCTGAAATCAAGTATTTTTGT  
TTCTTTAATTAGTTCACGCACCTTTTTCAGTGAGAATGAAGGACTAGGATTTATCCTTAGAATCAATTATC  
ATATTCATTTTGTAGTATCACTTCAGATGAATACTCAATTGCTATTTCCATTGTTCAAATTGGGTGATCCGC  
AATCGGAGTCTTTGATAAGGATGTATATCTAAACCTCTTTGGTTTGTGTGTGATGTTGAGCATCAATCC  
CCAACATTTGGAAAAAATGGAATAGTTCTCAACTAATCTGTAGATGCTTATATATCATATTACTTCCTCA  
AGTAAGGGAAACATTCTTTAGTTCTTCATTTAATTATGTGCTGTATTAATTACAGAACTAGTTTTCTCCTC  
ATGCAGTAAATTTAGTGGGGTTTTACGGCCTGTGCAGCTGCTGAGGAGTTTATGCGGCAGTTGCCACA  
GTTAACTAAGCAGGAGCAAGAGACTAACTCTGAAGATGTTGATGAAGTGAGCACTCTGAATTTCAATTT  
CTAGAACATAACTTGAATTTAATTTATAGAACTAACTTGAATGCCACAGATGCTTACTATTGTGATGGC  
TATCCAAC TAGAAAGAACTACTCTTGTATGCTCTTCATCAGAACTGAAGTTCACCATTTTACTTGGAAA  
ATATATTTCAATTTGGAAAAACCAGAAGTTTCTTAAACATTACATAACTTTAAAAGCTTTAGGTGGGACAC  
TCAGTTTGGCACTTAATCCCTCTATCCTAAATTGAACCTTCACATTTAACTTGTTACTAGGAGTGTTTATCA  
TCGAGCATCCTGAGAAGAAGATCCCAAGTTGGTTCCACCATCAGGGAATGGATAGCTTCTTGGGATTTG

CTGTATGTTACAGTGCTTTGTCAAGTTTGAAAACATGGTTTTGAAATTCAGTGTTTGCAAAGCCTTGAGG  
CCGCTTGACATATACGTCCTCCTTTAGAATCCATTCAGGAAGGCACTGTGCACATCCATTTGATGGAGTG  
TGAATCCATATAGGCAGCAACTGATGCCTTGTACAAATGAGAGAAAATAATGATGAACCAACAGAGC  
ATCTCGTTATGACGGGTACGAGCAGATACGGAAATTGTGAACACCATTACTCCGTGACCAATGAAGCCA  
GTTAAAATGTCAAATACTCAATAACATTAGAAACAAAGGACATATTTCTTAAATATAGGTAATATACCTC  
ATGATTTTCTTTTTCCAGTTTGTTCATGAAACTGTG

>M6-PGSC0003DMG403015877 M6 LRR-RLP

ATGTTGCCAAAACCTTAAGTGAAATCATTGCTAGTCATCCAAATAAATGCTTAGGAGTGCTCGGTTTGAG  
TTACCATCACTTGCCTAATCGACTCAAACCATGCTTCCTTTCCCTGGGTGATTTCCAGAGGATTTTCAAG  
TTGATACTCGGAGATTGATCCAATTATGGATCGCAGAAGGTTTCATAAGGACGTCTCCGGAAGTCGTG  
AAAGCTTGGAGGAAGTGGCTGAACATTATTTGGAGGATCTTATCAGCAGGAACCTTGATAATGGCTAGAA  
AAAAGAGATTCAATGGTGAGGTAAAAGTATGCGGAATACATGATCTGCTGCGTGAGTTCTGTTTGATAG  
AAGCTGAAATGACAAAGTTTATGCATGTTGTGAGAACTCCATTTTCACCAGCACAAAAGCCTAATTTTCA  
TCGCTTCAGTATTCAAAAGTATATTAAGATGCTTATAAGCTCTTACCCCTGTAGCCAGATCTATCTACT  
GCTTTTCTAACTTGGGTCTACCTGATGAACCCATTAATCTTCTCTATACTGTCCATCTACCGTAAAGATC  
CTATAATGCATGGATTTTTCTTGTGTTTCAACCATCTCAGGGTATTGGACATCTCCCTACCTGTTTCAGCA  
CATTTCCACTTGTGATTACAAAGTTATTTCAATTTGAGATATCTCCAAGTTCGATGTTTTGGAAATATTCCTG  
AATCAATCTCAGAGCTTCTGAATTTGCAAACCTAATTTGTGATGCTTATCCATTTGATATAACTTTACCTC  
GGAAGATATGGATGATGAAGAAGTGTGAGGTATATACGTTAAGGGAAGCCAGTTATTTACCAAGTCCTA  
GAATAGATAAGAATCTTGTGACAGGGATGCCAAATTTAGAGGAATTTT

>M6-PGSC0003DMG403018696 M6 LRR-RLP

ATGCAGGAACTCCTTCCATTTCTTAAGAACTATATCTGTTTGATTGTCCAGAAATAGAGTCCTTTCTGA  
AGGAGGATTGCCCTTCAATTTCCAACCTCCTTTGTATCCGAAATTGCAAGAACTGGTGAATGGCCGAAA  
GGAGTGGTGTACAGAGACTCCCCTGTCTCACAGAGTTATCCATGGTACATGATGGCAGTGACGAAGA  
GATTGTTGGTGCTGAGAGTTGGGAGTTGCCTTCTCTATTCAAAGCCTTAGCATAGAGAATCTGAAAACA  
TTAAGCAGCCAACCTCTCAAAGCCTCACCTCTCTTCAATATCTATGTATTAGGGTAATTTACCTCAAATT  
CAGTCCATGCTGGAACAAGGCCAGTTTTCTCCTTTTCCACACCTCACTTCGCTTCAAAGTCTAAAATCAG  
GAATTTCCCTAATCTGCAATCACTTCCCGAATCAGCACTGCCCTCCTCCCTCTCTCAGCTGGAAATCTCCC  
ATTGCCCTAATCTCCAATCCCTTCCACTAAAAGGGATGCCCTCCTCCCTCTCTAAACTATCTATTTGCAACT

GCCCATTGCTCAAACCACTACTAGAATTTGACAAGGGGGAATACTGGCCAGAAATTGCTCAAATCCCAC  
CATAGTGATCGATTGGGAATCCCT

>M6-PGSC0003DMG404010943 M6 LRR-RLP

GAGAAATCGAATATCTACAAGCTGGCATATGTGTGGTTCATGACGAACCAGAAGGAAGTGAGACCAA  
TGATGAGTATGTCTTGGATGGTCTTCAACCTCATCCTAACTTGAAAACCTTAGCAGTAGTGGACTATTTA  
GGGACTAAATTCCTTCATGGTTCGGTGAAAATTTGCTACCAAATTTGGTCAAGTTGAAATTAAGTGGTT  
GCAAAGATGCAAAGAAATTCATCACTTGGTCAACTGAAATTGCTTCGGCATCTTGAGCTGTTAGGATT  
CCACGAGGTGGAAAGCATCGGGCCTAGATTTTATGGTATTGATGGTAACAATAAGGGATGAAGCAGCA  
ATATCCAAGTGTTCCCGTCACTGAAAGAATAATATTGGAGGATATGTCTAGTCTTATTGAGTGGAGGG  
GAGATGAAATTGGGGTAAGATTGTTTCTGAGCTTGAGAAGTTGAGCATTAGTAACTGTCCATTGTAA  
AAAGTACTCCAAGTCAATTTGAAATCCTCCATAAATTAAGTATTGAAGGAGTTGACAGTGAAATGCCATT  
GTTGAACTTGTGCAGCAACTTGACATCTCTCGTAAAGCTTAGTATCATTGGTGTGAAAGAGCTCACTTGT  
TTCCAGATGAGATGCTACGCAACAACGTTTCTCTCAAACCTAACAGTCTCAGGCTGCAGAGAGTTTC  
GTA ACTTGCCACAAAGCTTGACAATCTCATTCTCTCAAGAGCTTACAAATACACTTCTGCCCAATTC  
AGTTCTTTTCTGTTCTTAGTGGAGAGAATTATTTGACTTCTCTCCAACTCTTGAGTTATGGGATTGTGA  
TGGATTGGCCAGTTTACCAAGTGGAATGCTAGAGCATTGTCGGTCTCTGGGATTTTTGATGGTCAGCTG  
CTGTAACAACCTAATTTCTTGCCTTACATGTGTGGGAAATGCCTTCACTTTTTTATTTGGGTTTATCAGA  
TTGTCCCAAATTCATTAGTATACCCGCAGGGGGCCTTACCGTCTCACCAGGTTAAGGGTATTGGA AATT  
GGTCTTTCCAGAGATGGTGGATTTTGAAGCATTCCAATTGATTTTTAATGGCATTGAGCAGCTGTTGT  
CCCTTCGTAATCTGGCGGTGACTGGACTTGGGCACTGGAATTCTGTGCCGTATCAGTTTATGCAACTCCC  
TTCCCTAATACATATCCATATATGTGATTTCCGAATCGAGGCTCTTCTCATAGACTTGACAACCTTATTTCT  
TCTTGAAACATTACATCTAGTGAGGTGCAAACGGCTACAACATCTGGACTTCTCAGATGCCATGCCAAA  
TTACGGTTGGTGGACATCCGCGATTGTCCATTGTTAGAATCTCTGTCCGATGGGCTTGGCAACCTTGTTT  
CTTTGGAAGAGTTAGATTTATGTA ACTGCGAAAACTAGAGCATCTGCCATCCCGAAATGCCATGCGAC  
ACCTCACGAAATTACAGAGCCTGAACATTAAGGCTGCCCAAAGTTAGAAGAAAGTTGCAACAATCGGA  
GTGGCCCAAACCTCCAGTGGTCCAACATTTCCCATATTCCTAAAGTTAAAGTTGGTCTGAAGCATAATTCA  
AGACTTGCCTAAGTCTTTGTTTCTTTCCGTGTCCGAGTCACATTTTTAATTACTATTTTCTATGAGTTCTT  
GAAAAGATGTTCTGTATGTAATTTAATACTACAATTTATCCTGCAATTGTTTTGACATAAAAAATGCAATA  
TTATTAGACAATTGCATCTTATCTATGCTTTCAGCATTCTGCTAGTTCCTTGAACAAATTTGTTCTTCTTC

TAA

>M6-PGSC0003DMG400002526 M6 LysM-RLK

TTTTCCCTTCTTGTTGATTTTGCAGTCTCACAGAGTAATATTAGTAGTAATAAGTTCCACTAAAAGACCT  
TGTTTTCAGCCATTACAGGACAATAACCCCCCATCCCCAAACCCACAAAATGTTCTGTTCTTGTTCT  
CTGCTATTCCTATTTCACTTTCTTTCTCTTAAGATTCAACTCTTTTGAATTTTTTTTCATGTTTTTCTTTAAG  
TTCCATGACCCGTTTCACAAAATCTATCAAAGATTCAATCTTTAATACAATGGATCATATACAATCAACA  
TTTCTTGCAATAATTTGTCTGTCAGCAATTTTCAAGATTATCCCTCTTTGTTTCATCATACCCTACTCCATCAA  
ACTGTACGGACTGGTGCCTTGTGCACCTTCTTCTTGCTTTTAAACCCAGCCCAGAACAGACCCTCCCA  
GTGATTCAAAGCATGTTTGATGTGTTACCTAATGACATAACTGTTGAAGGAAATGGTAAAGGTTATGTCT  
TTATCAGAAAGAACTGTTCTTGTGCTTATGGAATGAGAAAGTACTTGACAAAACTACATATACTGTCAG  
AAAGAACAATGGATCTGTGTATAATATGGTTGTTGATGCCTATGATGGGTTGGCTTATTTTCCAATAAT  
TTTACAAGGGAGGGGAAGAAAGGGCAGTGGTTTCACTGAAGCTCATATGTGGATGCTCAAGTGGGCT  
GTGGAATTACCTCATGAGTTATGTGATGACAGATGATGATACTGTTGGGTCTTTGTCCAGTAGGTTTGG  
GGTAGTATGGATAATATTGAGAATGTTAATGGAATTGCCAATCCTGATAATTTACAGCAGGATCTTTA  
TACTATGTGCCATTAATTCAGGCATGAGTTTCTTTCCCCTCTTATGATTTCTGATTTGTGTTTTTCCAAT  
TCCAATGTGTATCAGTATTTTGATTTAGGATGATTTAGGAGCTGTTTGATTAATCAAATTGTGTTAGTTG  
TAGTAAGTGTGATTAATGTTGGAATTTTTAGTTGCTGAGGAAGATTAGTCAGTTTTTTCTTTCTTTTT  
GTTTGTGTGAGTGAGGGGATGAACCTATGTTCTAGAGGGGCACACAATCCTCTCTCATTTGTCTATGGCA  
GGTTAAGATACCAATAATCCCTTGTTTCAATTTCTTTGTCTAGTTTTGACTTGACACGAGTTTAATAAA  
GCAAGTAAGACTTTTGAATCTTGGAGTCACAACTAAAGATATGTATAATGTACCAAAATGTCTTTTAAT  
GTTGTGGTCTTAAAGATCATGTGGAAAGTGGGAATTGAAGAGTTGCCAGAAAGAGAAAGAGACATTTT  
TTTTTAAACGAACTATAAAGGAAAGTAAGACAAACAAATTGAAACAAAGGGAATATGTGATTACTGTGG  
TTGGGAGAGGATCATGACTACCTAATGCTTTGTATCCAATAGTGAACATGAGAACAATGTTTCGAAAACA  
TCTAAAATCTCTACACTTTTTGCACTAAATAACGAAAAGTTGATTGAAGTGGATGTAATGGGAATTAGC  
TTGGCACCCTTGAGCATTGCCAAAATCAAGTGCCTTCGATCAGTTAGAGAGTTGGATTGCATGTATGA  
AGGGAAATTCGTATTTTGATGGATAACAGGTCCTGTAGAATACATCATATAATGTATTAGTTTCAACATC  
AGACTATATAGCACAATAATTATATCACACAACCTGTAAGTTTTAAAGAGGACCTGGTGTGAAGATGAG  
CATATGGGTACTCTTATTGTGCTGTTTTATCTGAACAAGAGATCTCATGAATTCACTAAATTATTGTATT  
AGCCAATCCTCAAAATTAAGTTTGCTAGGCTCAATAGTTAGCAACTTTGCCATGCTCAATAATTATCTTCA



TTTACTCATGGTCAATAGCTTTTCTAGTAAGCCTCTTTTGGTTAAAAGTACTTTACTTTAACGACTTTGTGT  
ACGTCCAGCTCCTGGCGAGCCTTATCCTGTAGAAAATCACACTGTTCTGCCCCTGCTCCATCACCTTCTG  
TTGCTGATATTTCAAGTATTCTCAATTCTCAATAGCTTACATGCATTCTTACTTTCTGTTGTTGAGATATG  
TGTTTTTCTTTATTAATATCACCCAAGAAAGACCAATAAATTTAACTTCTACTCATGGCTTGTCAAGTTTTT  
GTGTCCTCCTTTCTGTTAGTAGTTCCTTGCAGGGCAGTGTCTCCATAAATTTCTATCAGTGGAACGAGA  
GAACTTCCTTGACAAGCTAATCCAAGAGTTTGATTATCATTCTGCAAGTTATTATCTATTATTGCAATGAA  
AAATACAGACCTCTATCTGAATATATGGTTTCGTCTTAGCAGTCAACTGAATTTAACTCTATTCTATCACC  
AACTTTTGGCTGCGTAAAAATCTATTAGTCATTAGTTTTTTGCATACCCCTATGTTATATGGACAGTGC  
CAAGCAGAAGGTTAGCTGGGATTGTATTGCATCCTTTTATTTTTGGTGTAAGAGAAAGGTTTAGAGGA  
TGCAGAACAGATAGTAGAATTATTAGGACCCTTGTAAGTATTTTTTTTTCTCTTCTTTGTTGCGCTCTGT  
TTGCAGGTCACCAGCATCTCCTTAATGCTGAAGAATACACCAATACCATTTTCAAAAAAATAAAATATTT  
CTTTTTGAGAAAATCTGTCAGAAGAAAATGAACAATGTAAGGAGGACAAAGTTTCCCCTTAATTAGGTA  
TAACCTCAACTGTTTCTCTGATTTCTCTTAATTGATAGGTTTTAATTCTTTCATGGCACTGAGGAGTTTAT  
CTAACAAATCCACAATAAATTCATATATCCCTGACAGTCATATCCTCAATTCATCTATGCAGTAACCTTGT  
AATTCATTTAATAGTTCTCCTTTCAATGTTGGTTTGTGTTGCTACTGCTCCTTTCCAGTGAGTTTCATAC  
CTGATTTGATATGCTTTACTTTAGCCAATGGCCTATCAAGAACAACCTCTCTACCTTACAAGGTATAGGG  
GTAAGGGTGTGTGCACTCTACCCTCCCCAGACCCTACTTGTGGGATTATATTGGGTATGTTGTTGTTGTT  
GTTGTTGTCCTCCAATGTTGGTTTGCTAAGTTTTTTCATCCTATGGTAGTTCTCTTAATTAAGAAAGAT  
AATCCTCAGAAGTATTTCAAGACTCCATTTCTTAATGGAATTTTTCCCTGCATTAATGTGTTTTAGATAGCT  
ACCTTTGCGTTGAGGAGTAAAAACCTCCAATTTGACTATATCTGCAGGAGTTGAGGAGAATCATAA  
GAGTCATGCTATTTACTGGTGGATAATTGGGGGTTTGGGTGCTGGTCTTCTCATGATTGTCGTCATTCTT  
GCTTTTGTACCTGGAGGTCGTCAAGTTGTTTTCCAGAACTGAGAGAAGTCACACAGCAGGTTCAAATG  
AAAAGATTTCTCATAAGTTCCAGATACTTCGAAATACAAGTTTCTGTTGTGCATCAGGAAGGTACATTTG  
CGGTAGCTCAGGGGACCAGCAAGAACCGAAAGGAGAATCTACTGACCAACAGATTAATATTCCAAAAG  
GTCAGAACATAGACATGCATGCTTTTTATTGATATTACTGAAGGTCCTTCTGTTAATTTCTCCAAACTA  
TTATGCATGAGATCAAGTCATTTGCTTATATGTATTAATAATATGCGTGTGATCTAAAATCCATCAAAGCA  
AATCATAAGCCACACCTGTTATAGACTTATTGAACTCCTGCTAGAGAGGGGATGGGAAGTTAGGAAAAG  
CAAAAGGAGTTTGGTTCTATAATCATTATGTAAAAATATCCTTGAATGGAGTTTCAGATGGCTACATAAA  
ACTAAAATAAACTAAGTTATTCTATAATACTTCTGAAAATGACAGGCATGGTACTGATCAAGTTATCA

TAGTCAAATAGAAGCAAATCAGCCAAGATGTCAAATAAGCTCTCAAAATTAATAAATACTTCTTTTACCC  
ATCTTAAGGTATACATGTCATAAGCAAAGTGTATGTGAAGGTTACACATCAGGAACATCCCCTAAATT  
TCAAGTTGTGCCCTTGAACCTGAGTTTCACGAGAATGGATGTCTAAACAGTAACTTGATGTAGTTATAG  
CCGTCCTATGTTGCTCAGAATCTCCAAAATGTTGCAGCACCAGTGTGAATCCTCAAAAAACAACTACT  
TTTGAAGGATGTGACACGCACCTATCGACATTAATGAAGAGTCCGAACAAGATAATTAGCCGGGATTAG  
TTGAAATTGCCAAGCCTATGCTGGCATTAGTCCTTTACTCGCTTCTAATGGTGTGCCACAATGGTAAAAG  
GAGTATTTGAAAATGTTTCATAGAAGTCTTTCTCCTGTGCTCATCATGGGGGAAAATGTAGTTTCACTATCA  
TGCAGGATTTCTCAATATAATAATTGACTATTCTTTTTTTTTAAAAAAAAAAAAAAAAACAAACAAAACTGAC  
TATTTTGGGCTTCTTGCAGTTGTAGGTAAGTACTGATGTCTTTGACATGGAAAAACCTCTTGTTCGCCTATG  
AAGACATTCTATCTTCTACCGATGGATTTTCTGACTCCAATCTTCTTGGTCATGGAACCTATGGTTCTGTCT  
ATTACGCCATCCTCCGCAACCAGGTTACTTCTCTCAACTTTACCTATATTGATAGATTTCTGTCAACATGG  
CGTATTAAGTGTCTTTGGAACGTTAACCTTTTCAGGAAGTTGCAATCAAAGAATGACTGCTACT  
AAAACAAAAGAATTTACTGCTGAGATGAAAGTTCTATGTAAAGTTCATCATTTGAATTTGGTAATGAATA  
CTGAATTCGCTGCAGTATCCTGAGTTTTTATTTTTGGAGCTTGATGATAGTGCTACATCAATTCAAAGTT  
TTGACTCCTGTCTTGGTATTATTTTGTCAAGGTAGAATTGATCGGCTATGCAGTCAGTAATGATGAATTAT  
TCCTCGTTTATGAATATGCCAGAAGGGTTCTCTTAAGAGCCACTTGAATGATCCTCAGAACAAAGGTAC  
ACATCTTGAAGATAATCGTTAAGCTCAGAATTTGTGTAGTGTATATACATTTTTTCCAGTTGTTGATAT  
GGAAATGACCTGTCACTGCTGTATTTTGGTGAAAAAACTAGATGATCTGACCTCTTATTTTGGGTAGGC  
CACACCACTCTCTTGGATCATGAGGGTCCAAATTGCACTTGATGCTGCTAGAGGCTTGGAAATACATTC  
ACGAGCACACCAAGCCGATTATGTGCATCGAGATATAAAGACAAGTAACATCCTGCTTGATGATTCTTT  
TAGAGCAAAGGTTGTAGCTATTTTGGTGCCCAATTTTTCTCCTTTGTGGATGTCATTTTTCAAACCCAAAT  
TCTCATTGCCTATGTTTGAACAGATTTTCAGATTTTGGTTTGTCAAACTGATGGGGATAACTAATGATGC  
AGAAGCCTCTGCAACACGAGTTGTTGGAACCTATGGCTATGTAGCTCCAGAGTAAGCTAACCAACAATA  
AGCAAGAACATAAACTGAAACATCTCTCTGATTTTGTGTTTCTTCTTGTTCAGGTAAGTGGGGAT  
GGCCTGGCAACTAAAAGACTGATGTGTATGCATTTGGTGTGTTCTTTTTGAGATGCTGACAGGGAAA  
GAGGCCGTCACCCGGACTGAAGGCAATGTGATGAAAACGAGAAAGACGCTCCTTAGTGTCCATTGTA  
AGTCTTATTGCTCACAACTGTTCAAATTTGAAGGCATGCTTCTAATGGATTCTATTTGCCTGTGTTTCC  
ACTTCTATCTGTTATGTGATTAATAAAGATGAAAACATCGATTTTATCATACAATTGAGTAAGATCAAAT  
TCACGAAAGCTCTGAAAAATGTTTTTGCATTCATCAGACTTGGTCAATGTATGACTAGATTCCATTGCCTA

TCTGGCATCTTTATCAAATTGTGAAGTTTACTGTTCTCAGGTTTAGGATTAGTTCATCAACTTCCTAAATG  
CTTTACTTCAAAAAAAAAAATTGAAATCCCTTGCCTATTGTTATGTACCTACAGTGTTGTGCTGTGGCTATG  
TATAGGTATACTTATGCATAACATATATATATATATATATTTACACACTTATATGCACACTATGAATCAATTT  
TAGCAGTGCTTAATGCTACATAATTGCAGATGCTGGCAGCTCTGAGGAACTCACCAGACTCCACTAGTAT  
GACAAGCTTGAAGGACCAGCTGGATCCCAGTTTGATGGATTTGTACCCTTCTGACTGCGTTTTCAAGGTA  
AGTTGCAGCTTAACAATTATGTTTGTCAACTTTGAATCAGTTCAAGTTGTGCCTCATCTATAATAACGTGC  
ATAGAATTGGTAGGGCCACTGACTACCTCAGCTGGTTTAGTTAAAATAATAGACAGAAGAGATAGTTTA  
AGATTGGAAGTTCATATATAGTTATTATCAGCTGAGTGACATAGGTGGTTGATTTTCTAATGAAATTTCA  
CGACTTATTTCACTTCTGTCCACCATCATTGATGTGTTTACTATGGTAGGTGGCTATGCTGGCTAAGCAATG  
TGCAGATGATGATCCAATATTGAGACCGGACATGAAGCACGTAGTGATCACACTTTCACAGATAATGTT  
ATCCTCTGTGGAGTGGGAAGCAACTCTTGCTGGGAACAGTCAAGTGTTGAGTGGCATTGTGCAGGGAA  
GATAGGTCCATATGCTAGGTGTTGCGTTGCATCCTCATATATAATGTACATGGTACTCTTGTATTTTTGAA  
GCCAATCTTCTCCATTTTACCAGTCCAGTCACATTTTTCTATCATTCTTTATAATGTTATCTTTTTTATGCA  
CAGAGTAATCTTCATATAGCGGATTTTTCTCTTTTTCTTTTTCTTTTTGGGATACTGAGAGTTCAAGC  
>M6-PGSC0003DMG400006086 M6 LysM-RLK

ACAAACACACATCTCTCCTCCAACAAAAAACAAGCAAAAAAATGATAACAAAACAAATATTTGGTT  
TTTCACTTCTTCTTCTTATCATTATCAACCAAAACAAATGTTATGCACAAGATCCACCAAGCATAA  
CAGGATATACTTGTAAATCCCAACCAATTCAATCCATGTCAAACCTTATGTGTTATACAGAGCTAGAGGACC  
AGAGTTTCTTGATTTAGCCTCAATAGGTGATCTTTTTTTCAGTAAGTAGGGTAATGATTGCAAACCAAGT  
AATATTTCCAGCCCAAACACAACCTCTTGTTAATGATCAAACCTTTTTATCCCCATCACATGTTCTTGCAAT  
AACATCAACACAACCTTTTGGTAGCATATCTTATGCAGGCTTAAACTACAGTTTCAAACCAGGTGACACTA  
TGTATGATATGTCAATATCCAAATACCAAATCTTACTACTTATCAATCTGTTGAGGCTGTTAATCCCACA  
GTTGTAGCAACCAACATTGATGTAGGCCAGGCCATAAAATCCCAATTTTTTGTAAAGTGCCAAACACGA  
CACAAAATCAACCAAGACTACTCATAAGTTATGTTTTTCAACCTAATGATAACATTTCTTCTATCGCATCA  
AGATTGCGGATAACCCCAACATCCATAACACAAATTAATGGAAATAATACCAATATTCTTGATACCCTTTT  
CATCCCTCTTCTAATCTACCTAATCTTACACAGCCAGAATCTTCAAACACCCCAACCCCAACCCCAACCC  
AGCACCAGTAATTCAAGAAAATGACAGAAAAGGGACTGTGATAGGGTTAGCAATTGGTTTAGGGATTT  
GTGGGCTGCTGTTGGTTTTGGTTCTTGGTTTGTTTTACAAGGAGAAAACAGTAAAGAAAGAAAAGTATA  
GTGATGTAGAAAGGCAAAAAAGTTTGTATCTTGGATCAAAAAAGAAGTCTTTTGTGATAAAGATGTTG

AAGTGAATTTGTTGGCTGATTTATCAGAGTGTTTGGATAAGTATAAAATGTATAAAATGGTACAACCTTTG  
GGAAGCAACAAATGGATTTGATGAAGGGTGTGGATTCAAGGGTCTGTGTTAAAGGAACAATTGATGA  
AGAAGTGTGGCAATCAAAAAAATGAAATGGAATGCCCGTGAAGAACTCAAATCCTGCAAAAGGTAA  
AAAAAAAAAACGTTACGTAAAATTCTACATATATACGTATCCACTCAAGAATTGCTTCTGTGTACTAGTC  
CTAATTTATGTGACGTAAAAATCATTTTATTAAGGATAACATGAACACTTTAAAGTTAACTGTTACTGGA  
TAGAAGATATGTCATTCTTTTCACCTTTTTTGTGGTGTAGGTGAACCATGGGAATTTGGTGAAGCTAGA  
GGGTTTTTGCATAGACCCTAAAGAAGCAAATTGCTACTTAGTCTATGAGTATGTTGAAAATGGTTCACTA  
CATTCTTGGCTTACGGTGAAAAACCTGAAAAATTGAGCTGGAAAACAAGACTAAGAATTGCCACTGAT  
GTTGCAAATGGTCTCTTATACATCCATGAACATACAAGGCCAAGAGTTGTCCACAAAGACATCAAGAGT  
AGCAACATTCTCCTAGACTCCAACATGAGAGCCAAAGTTGCCAATTTTGGTCTAGCTAAATCAGGGTGCA  
ATGCTATAACAATGCACATTGTAGGTAAGTACTCAGGGGTACATCGCCCCTGAGTACCTAACCGATGGGATTG  
TATCCACTAAGATGGATGTTTTCTCATTGGGGTGTGTTGCTCGAGCTAGTGTGAGGGAAAGGAGGCTA  
TCGACGATGAAGGGAAAGTTTTGTGGGCAAAAAGTACTAGCGATTTTTCGGAAGGGAGTGAAGAGAGGAA  
GGTGAGGAAATTGCAAGAATGGATGGATGAAAGTCTTTGAGGGAAGAATTAACAATGGAGAGTGTTA  
TGAATGTGATGTCTGTGGCTATTTTCATGTTTGAATAAAGATCCTTCAAGAAGGCCAGGGATGATTGAAAT  
TGTGTATGCCTTATCTAAAAGTATTGATCTATTTTCTGATGTTTCAGAGGAAGGACAATCTCCAAGGCAA  
GTCACAGCAAGATAGACTACATAATAGTACTAGCATACTATGTAAAGTTGTTTTGAAGTGGAGTAGCATT  
TTGAGTTTTGAGGTTTCTACTTAACTTTAAAGTTTCTTCTATATATGTGTAATATTACTCCTATATTATCG  
TTTATAGTAGTAGTGGTAAATCCAATTTTCAATAAGAGCATGTTTAAAGGTTGTTCTAGTGGAATATATAT  
TAGTACCACATAAGACTCTCGTAATGAATTTATTTTTATGTTATGTTGCTTCGATTCTTCAAAAA

>M6-PGSC0003DMG400006087 M6 LysM-RLK

ACACACATCTCTCCTCCAACAAAAAACAAGCAAAAAAATGATAACAAAACAAATATTTGGTTTTTC  
ACTTCTTCTCTTCTTATCATTATCAACCAAAACAAATGTTATGCACAAGATCCACCAAGCATAACAG  
GATATACTTGTAAATCCAACCAATTCAATCCATGTCAAACCTTATGTGTTATACAGAGCTAGAGGACCAGA  
GTTTCTTGATTTAGCCTCAATAGGTGATCTTTTTTTCAGTAAGTAGGGTAATGATTGCAAACCAAGTAATA  
TTCCAGCCAAACACAACCTTGTTAATGATCAACTCCTTTTTATCCCCATCACATGTTCTTGAATAACA  
TCAACACAACCTTTGGTAGCATATCTTATGCAGGCTTAACTACAGTTTCAAACCAGGTGACACTATGTAT  
GATATGTCAATATCCAATACCAAAATCTTACTACTTATCAATCTGTTGAGGCTGTTAATCCCACAGTTGT  
AGCAACCAACATTGATGTAGGCCAGGCCATAAAATTTCCAATTTTTTGTAAAGTGTCCAAACACGACACAA

AATCAACCAAGACTACTCATAAGTTATGTTTTTCAACCTAATGATAACATTTCTTCTATCGCATCAAGATTC  
GGGATAACCCCAACAATCCATAACACAAATTAATGGAAATAATACCAATATTCTTGATACCCTTTTCATCCC  
TCTTTCTAATCTACCTAATCTTACACAGCCAGAATCTTCAAACACCCCACCCCCACCCCCACCACCAGCACC  
AGTAATTCAAGAAAATGACAGAAAAGGGACTGTGATAGGGTTAGCAATTGGTTTAGGGATTTGTGGGC  
TGCTGTTGGTTTTGGTTCTTGGTTTGTTTACAAGGAGAAAACAGTAAAGAAAGAAAAGTATAGTGATG  
TAGAAAGGCCAAAAAGTTTGTATCTTGGATCAAAAAAGAAGTCTTTTGTGATAAAGATGTTGAAGTGA  
ATTTGTTGGCTGATTTATCAGAGTGTGGATAAGTATAAAATGTATAAAATGGTACAACTTTGGGAAGC  
AACAAATGGATTTGATGAAGGGTGTGGATTCAAGGGTCTGTGTTAAAGGAACAATTGATGAAGAAGT  
GTTTGCAATCAAAAAAATGAAATGGAATGCCCGTGAAGAACTCAAATCCTGCAAAGGTAAAAAAA  
AAAAACGTTACGTAAAATTCTACATATATACGTATCCACTCAAGAATTGCTTCTGTGTACTAGTCCTAATT  
TATGTGACGTAAAAATCATTATTAAGGATAACATGAACACTTTAAAGTTAAACTGTTACTGGATAGAA  
GATATGTCATTCTTTTACCTTTTTTTGTTTGTGTAGGTGAACCATGGGAATTTGGTGAAGCTAGAGGGTT  
TTTGCATAGACCCTAAAGAAGCAAATTGCTACTTAGTCTATGAGTATGTTGAAAATGGTTCACTACATTCT  
TGGCTTACGGTGAAAAACCTGAAAAATTGAGCTGGAAAACAAGACTAAGAATTGCCACTGATGTTGCA  
AATGGTCTCTTATACATCCATGAACATACAAGGCCAAGAGTTGTCCACAAGACATCAAGAGTAGCAAC  
ATTCTCCTAGACTCCAACATGAGAGCCAAAGTTGCCAATTTTGGTCTAGCTAAATCAGGGTGCAATGCTA  
TAACAATGCACATTGTAGGTACTCAGGGGTACATCGCCCCTGAGTACCTAACCGATGGGATTGTATCCAC  
TAAGATGGATGTTTTCTATTTCGGGGTTGTGTTGCTCGAGCTAGTGTGAGGGAAGGAGGCTATCGACGA  
TGAAGGGAAAGTTTTGTGGGCAAAAAGTAGCGATTTTTCGGAAGGGAGTGAAGAGAGGAAGGTGAGG  
AAATTGCAAGAATGGATGGATGAAAGTCTTTTGAAGGAAGAATTAACAATGGAGAGTGTTATGAATGT  
GATGTCTGTGGCTATTTTATGTTTGAATAAAGATCCTTCAAGAAGGCCAGGGATGATTGAAATTGTGTAT  
GCCTTATCTAAAAGTATTGATCTATTTTCTGATGTTTCAGAGGAAGGACAATCTCCAAGGCAAGTCACAG  
CAAGATAGACTACATAATAGTACTAGCATACTATGTAAAGTTGTTTTGAAGTGGAGTAGCATTTTGAGTT  
TTGAGGTTTCTACTTAACTTTAAAGTTTGTCTTATATATGTGTAATTTACTCCTATATTATCGTTTATAG  
TAGTAGTGGTAAATCCAATTTTGAATAAGAGCATGTTTAAAGTTGTTCTAGTGGAATATATATTAGTACC  
ACATAAGACTCTCGTAATGAATTTATTTTTATGTTATGTTGCTTCGATTCTTCAAAA

>M6-PGSC0003DMG400006088 M6 LysM-RLK

AAGGAAATGAGGGAATTCACAATTAGAGGTACTATTTTTGTAGATTGATTGGTTTTGATTTGTTTCTATA  
ATTTGGTGTAGATTTTTTATTTTTTTAAGATATGAAGTGTCTGTATGCAATGTTTTCTGTTGTATATTTTA

GATTTAATAAGATCTTTTTAGTGTTTATGATTAAAATATTTATTATTTTTGTCAAATTTAATAAACATAAAT  
TATTAAGTATTGACGAAGATTAAAAATGTTAAACTTTTGATAAACTTAAAGAATCAAATTCAAAACGT  
TGATTACATATTTAAGGAACTATTTTGAACCTGTTGAGTCTCCACCTTAGAGGCTACTTTGGTCATT  
TTCTCAATTGATATTTTAGTAATGTTAAAATCCACTGCAGAATTGTTTTCTCCAATGGATCAGATTAA  
GTATTTAATTTAATAAAAATTTAACAATTTAAATTATTAGGTCTAGTGACCTGTCGTATTCTTGAGACAT  
TAGTACTTTATTTAAATATTTTAAGTGGACCATTATGGCCGTTGGGATTTGATAATTTATAATTTAAGCTA  
ATCAACATCATTTAATACTCAATTTATTTGTCCTCTGATGTCTATTTTCATTAATACTCCTTTTTGTTTCT  
CAATTATCACTTTTTGTTTTCTTTTTATTTTTGTCCCTAAGGAGACCCTCCCATATGTGCCATCGGAGTC  
GAGTGTATATCAAAAATAATTTTTATATATATTATCCTTTTCATAACTTACTTATAAAGATTTTACTAGATA  
TATTGTTGCTGTGATAAGAATTGAGATATTAATAAACAAGATGTCTAGAAAGATTTTTTTTTCTTTTT  
TTGCCATAGAAAAGAGCATCTTTTATTAATAATTTATTTTATCAAGACAAAGTTCAAATAAATTTTCTTCC  
TAAATGAAATTTCTTGCTGTGACCTCAATTTGTTAGTACCCTGCCTGCTTTCTCCAAAAAAGCGTCAT  
GCTTTTAGCTTGGTTGGCTGTACTCTTTTACTAGATTTATTAGTTGTCCTATTAATAAATAAAACGTC  
ATCAAGTCCTATTTTGCAGCCGTTACTATAATTAGTACTTCGCTACGAATAAATCAATAATTTTTTATTAAT  
CATGTATTATGACTATTCTATTCAATTTCAAATAATTATTGTTTAAATTGTCTATTGAAAATAGTATTTCT  
ACCTCTAAGGTAATGATAAGTTTTGTGTATATTTAACCTCTTCAGATCGTACTTTATGGAATTACATGAG  
TATGTTATTGTTATATTGTTCCAAATTAATTATGTCTACTTAATAATTTCCCCCTTTGTTTTGTGTAGGTGA  
ACCATGGGAATTTGGTGAAGCTAGAAGGTTTTTGCATAGACCCTAAAGAAGCAAATTGCTACTTAGTCT  
ATGAGTATGTTGAAAATGGTTCACTACATTCATGGATTCATGGTGAAAACCTGAAAATTGAGTTGGA  
AAACAAGACTAAGAATTGCAACTGATGTTGCAAATGGTCTATTATACATTCATGAACATACAAGGCCAA  
GAGTTGTCCAAAAGACATCAAACCTAGAAACATTCTCCTAGACTCCAACATGAGAGCCAAAGTTGCCA  
ATTTTGGTCTAGCTAAATCAGGATGCAATGCTATAACAATGCACATTGTAGGTACTIONCAGGGGTACATCGC  
CCCTGAGTACCTAACCGATGGGATTGTATCCACTAAGATGGATGTTTTCTCATTAGGAGTTGTGTTGCTC  
GAGCTAGTGTGAGGGAAGGAGGCTATAGAAGATGAAGGGAAAGTATTGTGGGCAAAAATAACGATT  
TTTCGGAAGGGAGTGAAGAGAGGAAGGTGAGGAAATTGCAAGAATGGATGGATGATAGTCTTTTGGAG  
GGAAGAGTTAACAATGGAGAGTGTGTTGAATGTGATGTCTGTGGCTATTTCTGTTTGAATAAAGATCC  
ATCAAGAAGGCCAGGGATGATTGAAATTGTGTATGCATTGTCTAAAAGTATTGATCTATTTACTGATGTC  
TCAGAGGAAGGACTATCTCCAAGGCAAGTCACAGCAAGATAGGGGACATATCTATTTAGCATATTATGT  
AAAAGTAGTTTTGAAGTGAGTAGTATTATTGTGTTTTGAGGTTTTTACTTTACTTTAAAGTTTGCTTCTAT

ATATGTGTAATATACTCCAATATTATCTTTTCTAGTAGTTGTGGAAAATCCAATTTCAAATAAGAGGATG  
TTTAAGGTTGGTCAAGTGAATATATATTATGTTGTAATGAGTGTTTTTATGTTATGTTGCTCGGATTCTT  
TAAAATTGTATAACTT

>M6-PGSC0003DMG400015422 M6 LysM-RLK

ATTGTTCAAAAATGTATCAAAGTACATTAATATGTCTATAATACAAAGCTAAACATTGGCATAATGCAA  
TCAGGATAATTAAGGAAACGGCAACAGAAAAGCTGAAAAGGTCCTTTTGAATCCAGATTTTCAGTCTT  
CCCCAGACAACAACCTAATACTTTCTCAAATTATACAGTCATAGAATTATTCTTCATAGCTAAAAATTA  
TAATAGACCTAAACTAAAGCTCACAAGAAACAGGTTAACAATCGCTTTGTTTACACTTTTGACAAACATC  
CAAGCTATAATATTTAAATATGGTGTGTACCATTTTCTTAAACGACACAAATTCATAGTCTGACCTAAACA  
ACCACGCAAACAATCGCTTAAACAATGCATATATAGTCTTATATTTTTGGAATGATCTTTTCCTAATATTCAT  
CAAATGGTAAAAAATATCCAAAACAACCTAAACAACAACAATCACAAGTAGATTTCTAATGAAGTTAAC  
ACATACTAACCAAAACAGTTTTCTGTTTTCATTTTATGTTCTTGAATTAATGAATCAGAATCTTACACGGAG  
AAAAACATTGGCCCCCAACTCTGCTAACAGTGAGGCTCCACAGCTGTCACACACTGCATGTACTCCTTT  
GTCGTCAAGATTGCCTCATGATAAACACGTAATCGGGAGTGTAACCCGATCCATAGAGAGCACTTGTG  
GGATGCAGGTTACAAGGCATTCTATTCTGCAATTAACATATTTCCCAATCCCCTTCAGCATAGCTGCATT  
ATGAAAGTATGCGGAACAGATTGTTTTCCGCACAACATCCCAATCAGGACCACAGTATGTGAGTGGAAT  
TTTGAGTGTCTTGAGGATGTCCAGTAATTGGGATCTTATCTCCCTAGCCTTGTACAGACCTTTGACCTGTA  
AAAAATGGTCATTACACCAGTCTCCTCTGTATTATTAGCTTCCCATTGCTGGTAAACATTAAGCAATGTA  
AGGTGATCAGATTCTGGCACAAAAAAGTTTTCCCTAGCAGCATCACTTTCCGCTTCCCTATCCTTAGGTCG  
AAAGAAAAGTACGGCACTGAAAGCATAGAAACAATTGTCAGAACCTCACTTAAGCATTCTAATTGTTCC  
CCCATCAGGAGCAATTTGGCAAGGGGAGGGTCCAATGGGAACTTCACCATTTTTCGTCCAAGGTCCGTT  
AAATCACCAACATCGTTCAGTGCACCTAGTAACCACAAGTCTGAAATTTGAGAGACTTGAGCAGCAAACCAT  
TCCAAGATTTGTCCGTTGAATCTCTGGCACTGAGCTTTGCAGCATTTTATTCTCATAAGCATTCTCTGTA  
TAAAGTCGGTAACAAGTCCCTGGGCCAGTTCTACCAGCTCGACCAGCACGTTGGTCTGCAGAAGCTCGA  
CTAATGGGGAACACTTGCAAAGCATTACATCCCATACGGGGATTGTACACCTTCATTTTACCATAGCCTG  
TATCAATAACATAGAAAATTCATCAATGGTCAGGGACGTCTCAGCGATATTAGTAGCAACAATGCATT  
GCGAGCCCCATCTTCAGCTTTCTGGAAAATTTTTGCTTGAAGATCAGCAGGCAGTTGAGAGTATATAGG  
AAGAATTAACAGCTTGAGTACTGGTTGCTCTGTTGATGAGATAAGTTGTTCCATCCTCTGTGAAAGTGCA

TAAACAGGTTGCTTCGATCTCATCCTGACCAGTCAAGAAGATGAGTATATCACCAGGGGAACCAGCAATA  
TGGATAGTCATGGCTTGCTTAACTGCAGCTTCGACATAGTCTTCACATGGGGTTTTACTATAACATATTTG  
AACTCGAAAAGTCCTTCCAGGTATGTGAAATATTGGTACGCCCCCAAAGAAGTTTGAGAACTTCTCACCA  
TTGAGAGTGGCAGAAGTGACAATAAGCTTAAAATCACGTGCGCTAGCCACAACCTTTCTTGAGAATGCCA  
AAAAGGACATCAGTGTCAAGTGATCTCTCATGGGCTTCATCCATTAATAACTATACTATATTTCTCAAGATC  
GGGATCCTTAAGAGTTTCCCTTAAGAGCACACCATCGGTCATGTACTTGATAACAGTACTTGGCCCAGTG  
GCATCTTCAAACGAATAGCATATCCAACCTTATCCCCGAGCTCAGTTTCCATTTCTCACTAACTCTTTGG  
GCAACACTCATCGCTGCCACACGTCTAGGTTGGGTGCAACCTATGATCCATTAACTGTATAGCCATATT  
CATAACAGGTATTGAGTTAGCTGTGTTGTTTTCCAGAACCAGTTTCTCCAATAATAACCACCACCTGATTT  
TCACGAACCACCTGCAATAACTCATCTCGCACAGAGAATATGGGCAAATTCTGTCGTTGCTGTGAAGTTG  
TTTTCGATTTTGTAATAACTGACAGCTAAGTGTGCGAGAATCTGGCTTTTCCCTTAAAATCAACTTCA  
CCATCCTCACCCACTACAACAGTATCTGCATCAATCTCATCAGCACTCTTCTCCACACCAAGAATATCTCC  
GAGTTTCGACCCAGCTAGCTCCCAAATCTTTGACGAGACTTATCCCTCTTTTGTTTTTCGTGTATCTCCCG  
AACAAAGAGCTGACCCTTTTCGTGAAATTAGTGCCATATCGGACATTGCATCCTTAATTGGCAATATCGGC  
TCAGTTTGCTCAGTGAAAATAACTCTCCCATCCAAAATGGAGGCAGCTTTATATCATGAACATGAAGAA  
TCACCTCCGTTCTCTTCATCATCATCAAACCTCCGTCTGCACCTTGTTACCTCTAACAGCTCCAGATCTCA  
AAAGCTGATGATCCTCCCAGTTTTTGCCAAGGAATTTTTTCTAGTTTCGTGAATAATCATTTGTAACCT  
ATTTTCAGAGATAACAATTTCTTTTAGTACTAAAATTGTAATTTTTTGCAGGATACTTAGAAGTTGAAGATCT  
TACCGATGCCCTAATTGGAATTGGAGAAGGAGCCACAATGTCCCACGGAGAAGCAGCAGTAACAGCAT  
ATGAGTGTTCTTCGCTACTGGTTCTCTTTCTCCTTCTCACTTCCATGGATTTGCTTCTTCTATCCCTCTCCGC  
CATCTATGTTTGTGTTGAATTTGAAGGAATGGAATATTGCTTCTCACTATTTGGTGTAGTTTTCAAATTAG

>M6-PGSC0003DMG400016433 M6 LysM-RLK

AAAATTCTTTGTCTCCCACTTAAAGTAATGCATAAATCAAAGCTAAAACCTTTTTGTTTCTTGGACTAGAC  
CATGTTAAAATGCTAAAAGTCAAAAAGTGAATCTGTCAAGTGTCAACTAACACAACCATAATTACATC  
CATTGGCATCTTTCAATTCAAGATTCTAAAAGAGTTCAAAAATCTCAAGCCATTTCTCACTAGTACAGAGT  
TGAAAATCAGATGATTTTTCAAGAAAATAGAAGCTTTGAGTTAGTTTTAGGCCTTTTATTGTTAAACATTT  
TGTGGGTGGGGGCTAAATCCCAGTGTAGTGATGATTGTGATGCATTAGCTTCATTTTATGTATGGAATG  
GTGCAAACCTCACTTTCATATCTAATACTTTTTCAACCACCATCAAGAATATTCTTAGTTATAATCCTCAGA  
TAACCAATCCAGATATTATTCAATTCAAAGCAGAGTTAATGTTCCCTTCTCATGTAGCTGTGTTGATGGG



AAATTCATGGGCCATCAATTTGATGTGCAGGTCAAGACTAGTACTACTTATCCGAGAATTGCTCGTCTTT  
ACTGTTCGAACCTTACAACAGTTGAAAAGTTGCAGGAGTCTAACAGTTATGATCCTAACAAATGTTCTGT  
AAATGCAATAGTAAAGTTACTGTCAACTGCTCTTGCGGGAATAGTCATGTGTCAAAAGATTATGGACT  
ATTTATAACTTATCCTCTTCGCCCTGGCGAGAATTTGGTTACAGTAGCCAATGATTTTAATCTACCACAGA  
AGTTGTTGGAAGACTATAATCCTGAAGCAAATTCAGCAGGGGTAGTGGTCTGGTTTTTCATTCTGGAA  
AAGGTAATTGATCTTTACCAAGGGTTCTGTACTCGTATTCTTTGCATATTTTAAGTACACAATCAGTCG  
AATTCAGATGAGTTTGCACACTACAATCATAGTGAATTTTCGGATGATTTGACTTGTATGACAAATAGGT  
TGGAAGCTCGGGATTGTCACCTGAATATCTGTTACTATATGCCAAAGTGTGGATGATATAGTTTTTCT  
TTTAAATCTCTGTTTCTGAAATGTATTGCAGATCAAATGGAECTTATCCACCATTAAGGACTTCTACAAG  
GTATTCTCCAACCCCAATGAGCTCCTAATCATTCTTGAATGCTATAATATTGGTAGCTAATTGTTGTTTCT  
TGCTTTTCACAGTTCAAAAGGTTGCCTTTACTGCTACAGTGGCATCTTTATCTACTTATCAAGTCTAAGG  
TATTAATAAGCTCTGAATGTGATTGTAATCTACTAAAACTATGTTATTGACAGGATTCTCAGGTGGAG  
CAATAACTGGCATATCAGTTGCAGCAGTCTTGTGGTTGCCCTTTTAGCGGTTTGCATATACATTACCTTT  
TATAGAGGCAGGAAAACGGAGGAAAATCTAACTTGGAACTTACAAACACAGTAGTAATAAGCATGTT  
CCTGGTAATTTTATTGTTTTGAATCTACTGATGTATGCTTAATTACCTGTCAAACCTCTATGGCGGAAATTC  
CTGTTAGTTGTTTCTCATTATCTTGCCTTAGGCATGAGGAATCATCATCATCATCATAATGACTTGT  
AAAGATATACTCTATTTTCAATTTGTTAATTAGATATAAGCTTCTGCAATCGATCCTGATTAATGATTAC  
TGTTCTGTGGAAGCAATGTTTTGGTTCATCCTTAGAATAAACCTTGTAGTTTCTTTAAATGACTCAGGTCA  
AGCAAATTTTGAGAGTTCTTTAGAAGGGGGATCTCTTAATAAGGGTGCTTCTCCAGAGGTCCCGAGGAT  
TGCTGTGGATAAATCTATAGAATTTTCATATGATGAACTTGCTAATGCCAGTGACAACCTTCAGCACAGCC  
TACAAGATTGGCCAAGGTGGTTTTGCATCTGTTTACTATGGAGAGTTAAGAGGCGAGGTTCTGTTACATT  
ATTCTTGTTAGATTGAAACGATTAGCAATTATCCGGATACTCAGATTGATCAGCGGTCTAGTTCTAGCTG  
CTTTATTATGTCACTGTTGCACCATTACATAATTGTCTAGACTCAGCATGCATTTCTTTCCATAGTCAAA  
ATTACTCATGCTGCTAATCTCCTTGTCTCAATAAAATGCAGAAAGCTGCTATCAAGAAGATGGATATGC  
AAGCAACAAAAGAGTTCCTTGTCTGAATTGAAGTTTTGACACATGTTCACTTGAACCTGGTAAATTC  
ATTACTCATACTGATATACTATCTTTTCTTACTTGATTATAACCTCTCTGTCAACTGATCTGAGTCTATGGG  
GAAAAAATCAACATCATGGACTCATGGTTGGTTGAACTTGCTCACTTCGGCGATCTTTGAACTTATTAGT  
AATGCAATTTACAGAAGTGGTCTGAGCCCCTTAGCTTGATAATGTGATACTTTTCATAGTGAAAGTCAGG  
ATTGGTGATTTAGTTCTGCCATACTTGAGATTTAGCAGATGATGAATCCTTTTACCTCATATGTCATAGAG

AATATGAGGTAATATTTCACTTGTTGAAACCTTTGCAGGTACGTTTGATAGGATATTGCATTGAAGGATC  
CTTGTTCTTAGTATATGAATACATTGAAAATGGGAACCTAAGCCAACATTTGCGCGGTTTTGGTTAGTTC  
AGTTCTTCTCATTGCGCGAAAAATTCATGTCTAACCAAATTTCAAATCTCTCATAGTTCCATATCCATTTT  
GTACTCTTCAGTTCAGGTAAGGTACCATTGCCATGGTCTACCAGGGTGAAAATTGCTCTGGATGCAGCT  
AGAGGCCTAGAGTACATCCATGAACACACTGTTCTGTTTACATCCATCGCGACATTA AACAGCCAACA  
TTTTGATCGACAAAACTTTCGTGCAAAGGTATGAGAGTTCCGAACTAGA ACTATGAAAACAAAAACC  
ATGTGTACTAATTCAAGATAATCTTTTTGCCTTGCAGGTTGCTGACTTTGGACTCACAAA CTGATTGAAA  
CTGAAGGTGGTTCGATGAACACTCGTCTCGTTGGTACTTTTTGGTTACATGGCCCCAGAGTAAGAATTTAT  
TTCCTTATGGTATTAGTACTTATTCTATATCTCTAAACAAGATCAAATTATCAATTCCTACTTGCCTTATGT  
GCAGGTATGGTCAATTTGGTGATGTTTCACCCAAAATTGATGTATATGCATTTGGGGTTGTGCTTTATCA  
ATTAATATCTGCTAAACAAGCTATTATCAAGACTAGTGAAATTGCTACTGAATCAA AAGGGCTTGTTGGA  
TTGGTACCTTTGAATCATTTCTTCACTCACCTCTAAACCACTAAAAAGAGTCTAAA ACTTAACTTTTAATTG  
GCAATATTTTTTGAGTTTGAGGATGTGCTTAATGAGGTTGATCCTAGAGAAGGGATATGCAAATTGGT  
AGATCCAAA ACTTGGTGATGATTATCCCCTGGATTCAGTGTGGAATGTAAGAAAACAATATATTTTTACA  
AGTGATTAATGTTAATGCGATTCATATAGCTAACCTCAGCTAGTTTGAAATTTACACG TACTCAGTGAAT  
TGATTGATTAATGCGATTCATATAGGTGGCTCTTCTTGCCAAGGCCTGCACACAGGAGAATCCACAATTG  
AGACCAAGTATGAGGTCAATAGTAGTAGCTTTAATGACAATATCATCCACAAGTGCAGATTGGAACCTT  
GGTGAATTTTATGAGAACCAGGGCCTAGCCCATCTCATTTTCAGGACGGTAATAAATTCCAATTGGAGTTA  
TATTGTGTTACTCACAATCAGGAAATTAGAAGCACAAGTTTACAGAAGTAACACTTGTACATTTGTTTAC  
ATCAACCATATGATACACTATAGGTACTTTGCCAAAAAAGGAACCCTGTATATCTCTCCTTTGAGTAGGC  
ACTTG

>M6-PGSC0003DMG400038314 M6 LysM-RLK

ATGAATTGGTTTCTGAATATTCTCTGCATACTGAACTTTCTAATTT CATGTACCAAAGCTCAACAAGAATA  
CTCAGGTAATTCAGTATTGAATTGCAAAAACGAATACGAAACGAATTACTCTTGCAATGGAAGAAATTCC  
ACTTGTCAAGCATTTCTCATATTCAAGGCCAGGGATCCTTACAATTCAGTACCTGGAATTGCTGCTCTCAT  
GTCTTCAAACATGTCTGAGATTGCTCGTATCAACAATGTCACGAGGTTTACAGTGTTCGCGCCAGAAAAG  
GAGGTTATAATTCCAGTGGACTGCTCTTGTT CAGGTTTGTATTATCAAGCCAAAACCATGTACTATATATC  
AGCTCTTATTGAAACATACTTTGTGATAGCAAATAACTTACCAAGGATTATCAACCTGTAATGCATTAG  
TACGTCAAATGAATATGATGAGTTCAGTTTGAGACCTGGTCTTGAGTTGCAAGTTCCTCTCAGGTGTGC

CTGTCCAACAGCAAAACAAGCTGCAAAAGGCTCAAAGTATTTGATGACTTATTCAATTGACGTTGGCGAT  
GACATCCTTAAAGTTGGCAAAAGATTTAATGTTAATGTAAGGAACATAGTCGAAGCAAATGGATTCTTG  
GATGAAAATTCTGTTTTATATCCTTTTACAACCATTCTAATCCCTGCCTTCTGAACCGTCAAATTTAGAT  
ACCGGAAATGAGAATTACAGAAAACCTATTAGGTCCTTTTACCTCCACCTGCAGCTAATGCTTCAAAGG  
GAAAATCAAAGAGAAATCTTACATAGGTAGTGGAGTTGCAACAGGCTTTGTTCTGTTACTGCTTGTGGT  
TTCTTGGGTCATCCTTCTTGCTTTGTTAAGAAAAGGGATAGAAAATTTCCGAGGAGGTCTTCAAGTCAT  
GAAGATATCCTCGTGGAGATCGCGAACATAGATCATGTCCCTAAAGTTTTCAAGTTCAAAGAATTGAAG  
CATGCTACACGAACTTTGACTCCAAGAACCGGATAAAGGGATCTGTATACTGGGGAGGGTTTTAAAGG  
GGAAATATTAGCAGTCAAATGGCGATCACGGATGTATCTAGAGAAGTGAACATGCTGCATAAGATCAA  
TCACTTCAATCTAATAAAGCTTTGTGGCTATTGTGAACATAAAGGATGCTTCTTTCTTGCTTTGAATACA  
TGAAAAATGGCTCTCTCAGGGAATGGCTGACCAGAACCAAGTCTCGAGATACCATAAGCTGGAAAAAA  
AGGATTCAGATTGCGTTGGATGTAGCTAATGGACTTCATTATCTTCACAGCTTTACCAAACCAGGCTACA  
TCCACAAGAACATCAACAGTAGAAACATTCTCCTCGACAGCAACATACGAGCAAAGATTGCAAACCTCA  
GTCTTGCTAAAGAAACAGATACATCAGGCACGACTTGGGAGCTTGTGGGGACAACAGGATACATGGCG  
CCTGAGTACGTTGAGAGAGGGTCAAGTACTTCAAAGATGGACATTTATGCCTTTGGAGTTGTTACTGTTG  
GAATTAGTCACCGGAAAAGACACGGTAATTGTAGAGGAAAGTAGAGAAATTCTGCTTTCTGCTGCAGTA  
GCTGCAATAATGGAAGGAGAAAATGCAGAAATCAAACCTGGATGGATTTCATCAAAGCAGACATGAGGGG  
AGATGATGATTTGGAATAGCATTTTTTGGTAGCCAACCTAAGCTTAAGATGCTTGACTCGAGAACCAAC  
AAATCGTCAAACATGGAAGAAATAGTATCATGTTTACTGAAGATTCAAGTTAATGCACATAAGGCAGA  
ACAAACCAGTCAGAATTAA

>M6-PGSC0003DMG400038918 M6 LysM-RLK

ATGAGTTGTAAAGGAACCAATGAAACAGGAACTACTGCTTCTTTTCTCTATTCTTGCAATGGTGAAAAGT  
CCTCTTGCCATCATTCTGATTTTTAGATCAGATTCTCCTTATAATTCTGTTTCTTCCATCTCAAAACTCCT  
ATCTTCGAACCCTGATGATATTGTCCACATCAACAATATCTCAAGGTCTAAAATATTGGATCAGAATCAA  
GAAGTTATAATTCCAGTAAATTGTTTCATGTTTCAGGTCATACTATCAGGCTGACACCTTATGTTATACC  
AAGCAAATTTGATACCTATTTTCGCATCGAAACAGCACGTATCAGGGGTTATCTACTTGCAGTGTCTT  
ATGCATGAAAATGTCTACAATGCACTGGATCTGTTTCCAGGTCTAAATTTGCGGGTACCACTCAGATGTG  
CCTGTCCTACAAGGGATCAGTCAAGAAATGGAGTGAATATCTGGTACTCATTGTTACATGGGGGT  
ACAACGTTTCTAGCATTAGCGCGCAGTTCAGTGTGAGTAGTCAAAGTACAGCATATGCAAATGTATTATC

TGAAAATTCAGTTCTTTATCCTTTCACAACAATACTGATTCTCTGCCAAAAGAACCTTCAAGCTCCCAA  
CAAGGACTATTAAGACAGCACACTGTAATATTTTACCCTTCTAGGCACAAAATATCATACCGCAGTCTT  
TTCATTGGGGTAGGATCTGGTGTATCCCTTGCAGTCCTCTGTTTTATCTTGTTTCATTGTCTTAAAATATAA  
GAAGGAAAACAAAAGAGGTGAAATACTTGGGAACCGAAGACAAGGGAAACAACAAGGAATTTGCCA  
GAACATGTCCTGGAAAGTATTGTTGGTGAAGGTCAAATGATTAAGTGTATGAATTCGAAGAACTGGTG  
GCTGCAACTGAAAACCTCAGCTCGCGAAAAAAATTGGTAATTGTGTTTATAAAGGGGTCTTCGAGGA  
AACTGATGGCCATCAAGGAGACGCGGACAGACATTTCAAAGGAGGTAAATTCCTTGCAAAGATCAAC  
CATTTCAATTAATTAGCCTCACTGGTGTCTGTAAGCATCACCAACTATCCTATCTTGTTTTGAGTTCATG  
GAAAATGGATCTTTAAATGAATGGCTTTTTCAAGGATGATAACCCCGAGGCTCAGAGCTGGAECTGCAGA  
ATTCGTATTGCCTTAGATATCGCTGATGGTCTAGATTATATTCATAACTTTACAGCTCCAGCTTATGTGCA  
CAATAACATTAGTAGTAACAGTATCTTACTTAACAGACATCTAAGGGCCAAGATTTCAAATTTTAGCCTG  
GCGCGGTCAGCAAACAATGAGGGAAAGGAAAGTTCATCTATGAAGTTCGTCAAGGGAAACAATGGCTA  
CTTGGCACCAGAGTACATTGAAACTGGCCAGGTTACTCCCAAGGTAGATATCTATGCATTTGGAATCGTT  
TTGTTGGAGATTATTACAGGAAAAGGGGCTGCTTTTTGAGCAGGATGGAAAAGAAGTACTCTTGTCAGA  
GACAGTGCTTGAAAGTATGGATAAAGAATCTAAAATTCAGAAGCTCGAAGATCCAAGGCTACAAATTAA  
GCACCCGCTTGGTTACATAATTTAACAACTGATCTCGTTCTTCGATTGGTGAATTATCTGCAGCATGCT  
TGACGATGGAACCTGAAAGAAGACCAAGTGCAACTGAAATAATATCTACCTTAATCAAATCCAGACAG  
ATATACAAAACCTAG

>M6-PGSC0003DMG400047346 M6 LysM-RLK

ATGAATTATTCTCATCTCATCTTTGTTTTACCATCATTCTTGCTTATTCCTCTGTTTCAATTCTTGACAAC  
AGTCTTACTTTGGAACAGGAACAAATGACTGCAACGCCCAAGATACCTCCACTTCTGCTTTTGGGTATTT  
ATGCAATGGCGCTAACCGTACTTGCCAATCTTATTTGACCTTCAGATCTCAACCCCTTTCAACACCGTGC  
CCTCAATCTCATCTCTATTGGGTGCTAACCTTCACAGCTCTCTCAGCTCAATTCAGTTTCTCAAATGCTA  
CCTTTAACACCAACCAAATGGTTCTTGTTCTGTCACTTGTTCTTGTTTCAGGTCAGTTTTATCAATCCAATG  
CATCTTATGTTATCAGAAGGGATGATACTTTCTTGAATATTGCAATTAATACCTTACAAGGATTGTCAACT  
TGTCATGCTATCAACGCGGAGAACAGTGAACAAGCTAATAATCTGGTTGTTGGTTCAAGAATTAATGTTT  
CTCTGCGATGTGCTTGTCTACGCAAACCAAACCTTATAATGGTACAAATTATCTCCTTACTTATTTGATT  
GCTTCTGGGGAAATTTGTTTCCTTATTAGTGATAAATTTGGGGTGGATTTTAGGGCAACTCTTGCTGCTA  
ATAGTATACCAGAAGATGCTCCTACTGTCTTTCAAATACTACTCTATTAGTTCCTTTATCGACCCACCTT

TGAGTCCCAAGTTGCTGGACCATCTCCACCACCGCCTCCTGCGACAACATCAACACCACCACCTGCTGT  
CCCTGTATCGGAGAGTAGCTCGGAGAAACTTGGATATATGTTGTGGCTGGTGTGTTGGAGGACTTGT  
TGCTTTGTGTATTCTGGGGGTTGTTGTTTTCTTTTTGTTTTTCAGGAAAAAGGAAAAGAAAGCTGATCCA  
CAGTTTGTCTGAAAGCTTTGAAGCTGTTGAGAACTGTCAAATAAGAAAATTGAAGAAGAATCAGAG  
GAGTTTTTGAAAGTTTATCCAGTATAGCTCAATCTGTTAAGGTTTACAAGTTTGAAGAGGTTAAAGCAG  
CCACAGAAAATTCAGTCCTACTTGTGTTGATTAAGGGATCTGTTTATCGGGGCACGATAAATGGAGATTT  
TGCTGCGATAAAGAAAATGAGTGGTGATGTATCAAAGGAAATTAATTTGTTGAGCAAAATCAATCATT  
TAATCTTATTAGTCTCTCGGGAATTTGTTTTCATGATGGTCACTGGTATCTTGTATATGAATATGCTGCCA  
ATGGACCATTAAGTGATTGGATATGTCACCATAATGGTGATCACAAGTCACTAAGTTGGGCACAGAGAG  
TACAGATTTCTTTTGATGTGGCTACAGGACTTAACTATCTCCATAGCTACACATCCCCTCCTCATGTTCA  
AGGATTTAAACAGTGATAATATTCTTCTTGATGGTGATTTAAGAGCCAAGATTGCAAACCTTTGGTCTAGC  
AAGGTCAGCAGATGGACAAGAAGGTGAGTTTGCGTTGACAAGGCACATAGTTGGGACCCAAGGCTACA  
TGCCACCTGAGTATTTGGAGAATGGGCTAGTCTCTCAAAGCTGGATGTCTATGCATTGGGAGTTCTGTT  
GCTGGAGATTCTCACTGGGAAAGAAGTTTCTGCTTTATATGAAGGCTCAAATACAACTTGTCTGAGGT  
GTTGATCCCGGTGCTTCATGATGAGGATGCAAAGGAGAATTTAAGCAACTTCATCGACCCTTCTCTGCAA  
GGGAAGTACCCTGCAGAACTTGCCCTTGCCATGGTCAGATTGATCGATAACTGCATAATGAAAGATCCTT  
CGCATCGCCCTAGTACGGATGAGATTGTGCAATCTGTTTCAAGAATTATGACAGCCACACACTCATGGG  
AAATGTCATTTAGCACTTCAGTGT

>M6-PGSC0003DMG401000674 M6 LysM-RLK

ATGTTGAACTTATCCCTTTTCTTTATACTAATTTACTTATCCTCTGCTCCATTACCAGTTAACTCTCAATGCA  
ACAGAGGTTGCGATTTAGCATTAGCTTCATTCTACGTATGGCGAGGAACAGATCTCACTTACATCGCAAA  
TTTATTCAATATCGAACTAGACAAGAACTCATGGATTACAACACCAGAGACACCATCCCAAATCTAGAC  
AGTGTAATCGCCGGAAGTAGAATTAACATACCTTTTCGCTGTGATTGCTTGGAGGACGGCGATTTTTTAG  
GTCATGATTTTCAATATGAGGCTAATTCAGGGGATACGTATAGTATAATTGTGTCGAATTACTCTAATTT  
GACGAGTGTTGATTTGTTGAGGAGGTTAATAGTAGATACCCGGAGAATAATATTCCGACTGGTGTGAA  
TTTGAGTGTGTAGTGAATTGTTCTTGTGGAGATAGAGATGTTTCTGAAGATTTTGGGGTTTTTGTGACG  
TATCCTTTGAGATCGGAGGAGAAGTTGACGTATGTGGCGGGCAGCAGCAATGTGAGTGCTGAGTTAAT  
ACGAAGGTATAATCCAGATATGGATGCTAAATTCAGTGCCGGAGAAGGGATCATCTATATTCCGGGAAG  
AGGTTGGTGTTTCATGCTCTTTTGTCTTATTTCTCTCGGATAATACATAAGCTTGTTTTTTAACTTTGCTTAG

CTAGTGTTTATATTCTTATTACTTTGAAGGTGCGTAATTAACATCTAAATTGGTATGAAATTGAATAAGT  
AACTAAACTAATTCTACATGATATAATATGCATCATACAGGAACCTTATCATTTTATTAGATATAGATTATT  
CGCATTGCTGAGGGCGCCTTTGGTCAAATATAGGTGCTAAACAAGACTTTAGAGACCTATAGTAGGTGC  
TATTGTTATGATAGTCAACAAGAATGGATGTGTTTTCAAAGGCGGGACAAGGCGTAGCAAAAACCCACC  
GAGGCATTGTGGGGGTAGGAGTGGATGGTGA

>M6-PGSC0003DMG402000674 M6 LysM-RLK

TTTTATTGTTTTACCAAAGTATTAATAAATCTGAACAATAATCATTATTACTAATTTTCAATCC  
AACTTTATCTATAACCCACTCAGTCAACGCTTCTCCAAAACCCAGCTCAAATTTCCAGAAAAATACGTT  
CTTGATCAATTTCTTCATACCCATTTCTATAAATTTCCAGAAAAATACATTCTTGTATCAATTTCTATAATA  
CCCATTTCCAGGAAATCCAGAAAAATACGTTCTTGAATCAATTTCCACATACCCATTTCCAGAAATTTTCAT  
TCTTTCTTCATGAAACAATGTTTGAATCCAGGCCAAGAAGTGTGGAGCTTAGGGGTTTTTGTATACTA  
GTTTACTTATCCTCTGTTCCATTACCAGTTAACTCCAATGTAATAGAGGCTGCGATTTAGCTTTAGCTTCA  
TTCTATGTCTGGCGAGGTTCAAATCTCACTTTAATCTCAGAGATGTTCTCCACCAGTATAACCAGATATCGT  
TTCTTACAACAACAGGGACAACATCCCTAATCAAGATAGTGTAAATCGCCGGGACAAGGATTAACATACT  
TTCCGTTGTGATTGCTTGAACGACGGGGAGGTATTGGGCCATGCTTTCCCGTACAGGGTTAAACTGGT  
GATACTTATGATCTTGTGGCGAGGAACTACTCTGATTTGACGACTGCACAGTGGATGATGAAGTTTAATA  
GTTATCCTGAGAATAATATCCCGGATACTGTGAATTTAAGTGTGTAGTGAATTGTTCTTGTGGGAATAG  
TGATGTTTCGAAGGATTTTGGGTTGTTTGTGACGTACCCTGTGCGGGCGGAGGATAACTTGACGTCAGT  
GGCTTCAGCATCCAATGTGAGTGAAGATATAATCCGAAGGTATAATCCTGCAGCGGAGTCCATATTAGA  
TATAGGGGAAGGAATCATCTATATACCGGGAAGAGGTTGGTGTTCGTGTCTTTATGTGTTTGTTTATTT  
CCTGTTAGAAGTTTTATGTCTTGCTTTAGACCTTTATGGGATTTTTTGTAGCTAGCTAGAGTTGTGCAGG  
TATTAGTAATGTAGGAATTAGTTATGGGCGACTCTGTGTATTATTTTCATGTAGATATTAGTTATGTAGGG  
ATTAGTCATACGAATCTGTCAAACGTCATATAAATTATATGAAAATTAATACTTAAATAACTTGTTCCTTA  
TCCAACACCAAATGACCCCTGAGGTTATAGTCCTAGTACTTCTTTTTTGGTTAATGTTTTAGTCTCTTGG  
GAAAAGGGGGGAAAATGCTCTCTTTTTTAATGATAAGGGAAACCCCGCCACTTGTATGCAATAGCTCAC  
AAACCACATAGGAGAGCAAACCACTCTAGGCAAGTCCTTTGTGACAAGCTCGGCCTAGAAGGCCAACCC  
CTGCTGTCACAGGCAAGGAGGCAAATGCATTTTTAAGGAAGGAAGTAGGCACTTTGTCAAAAAAAGA  
AGTTAGGAAGGAAGTAGGAATTAATTTAGGAAGCAACATGTTTTGTTAAGGGTGACATTGGATTGAAG  
TTTATTGTTTACTATAAACTGGAGTTTGTAGTTTGAATGTATAGAGTCAATGAGGATTGAATCATCAAGG

ATGGGTTTTGATGTGTCTAAATGCGCAACGGGAACTTGAAGCAGTGATACAGCACTAAGCATGGAACAT  
TAATGCAAATTTGTTGATGATACCTGTTTTCTTCTCTTTTTGGCGTGATGCACCGTGTAGCGCTGG  
ACCAATTGAACTTTAGCATTGTCATCTGTCTTTGTTCTAAAATTGTTCTTACATTGGACTAAAGGGGTTCCG  
AAGTACATGATTAACTTTAGTAGTGCTGAACTGCTCATATCGGGAAAATGTGACAATTTTCAAGCTTAAT  
AATCTTGTGTGAAATTCCTATGATTTACATAATGTTTTTGATTAGCGGAATTCTAGCTATAACCAACTGAGT  
TTATCGCTGGGCTCTGTAATGGCAACGCAAGGGGCAAGCAGTATTCACAAAAGAAGAAGCACAACCTG  
AGTGACTGTTCTCTGTGGCTTGGCTTCTTTGATCATTTCTTCAAAGTCCGACCTGCCTCAATTCCGGTCTT  
GAAAAACATTTTTATATATACCACATGGAATGCAAATGTGAAGATTAAGAGATACATTTACCCTCAAAG  
AGAATTAGATGAAATAAATGTAAAATAATCTTATCAAAAAGAATGATCTGTAATTTTGTAGTGATGGT  
AAAATATCTAGAGGTATACCCTTTTGGAAAGCACAACAAGCCCTTTCAAGTATTTTTCAATATCACTCTGT  
TTTCTGAAGATCAAACAGTAAGTACTGAACAAGAAGAATCACTTAAAGATCAAAGTTATGCTTTTGAGG  
ATCTTTGCCGTCCATAATGGCTCTCAACAGCTTCAGAATAAAAGCTATCTTCTATAGGTAAAAAAGGA  
AAAAGATATAAGGGCTTGAGAGATTCTATTTATTCTTGGTTCTTATTTTGGTACTTGGGAGGAGCAGGAG  
TGTAGTGCGGGCATGTTGCTTGTAGTCTTTCTTGAGCAAAGTCAAATGATATACAACAAATGCCAGG  
ATATTGTTGTGTTTTAAATAGAATGCTTTTATCGAACTAAAAGTACCTGACTCAAATCTGTGTCTTGTACA  
AATGCATTTTTGCCAAGACTGATATGCTCGTGTATCTTTCTGTTTCTCATCATCTTAGTGTCAGCCAGC  
AGGCTCCTTCTTTCAATCTATTTTCTAATAGAACAGTTTGAATAACTCTGTACTGTTATTTGTGCTGGGA  
AGATGTCATAGCTTGATGGTTAGCAAATGTCCTAAAAGAGCTTGCTTCTGACTTTGATATTCTCTACACCA  
TATTTTATTTGATCTTCCCTCTTTAATCCATTCCAATTCCTTGATCTGTTTCATATAATGCTAAATTTCTCAG  
TACCAGAAGTTCAAATTAAGAGACTGATACACTTCAAATTACTTTTAGCTTTGGTACAACATCTTTTTG  
ACAAATCCTTTAATCACGTGCTTTACTTATTAATGAATTAATATCTTTTACCGCTGACCAGCTTCCATATA  
TGATGCCTTTGATGTTTTTCTTTTCAATATCTTCATAGTCTAAGTTTGCCAACTAAAATTGGAGAGCGGT  
AACACATTTAGTACAAATACTTTGTCTGTTTTAGTGATTGTGCCTACTACGGTTCTTTCTTCTCGTGTCTT  
AATGTATAAACAGTGTTTGAACCATCATTTCTTTCATTATGCAGATAGAAATGGGAACTTTCCGCCGCTG  
CCAACAAGGTAACCTATTAATATTTGATGTTAAATCTGACTGTTGTTCTCTATTGATCTTCCATTAAGTAC  
ACATTGCTGACATTTATCATTGTATTGTTTCTCCCTGTAATTTGCAGCACAGATGGTTTGGATCTTTCCTC  
GTCTTCAGTGTTGGCTTATTTGTTATCCGTTTTAGACCATTTCATGATGATAAAGGAAGTCTTTATGCTA  
CCTACACTTACTATCGTTGCATACTTCTTAATAATTAGGTTTGTCTGGTGGCGCTAAAGCTGGGATATCTA  
TAGGAGCAATAGGAGTAGTCTTGCTGTTGGTTGGTTTGGTTTATGTAGGATGTTATAGGAACAAAACAC

AAAAGGTTTCGCTGCTCAGATCTGAAGACCACCTCCATCAGTATGGTCATGGTAGGTGTTGATCCCTGTT  
CTTTAGTTCTTATAAGTTATAACATTCATTTATTTGATGTACAACATTTCTTAAGGTGCTTATACTTGGATC  
ACTTTAAGGCTGAAAATGCAATTTAAAATAGCTAGTTTCTTTGTTGGAATTGAATATTTCTTTAGTTATG  
TTGCCAACTTTTAGCAAGAATCGGAGTAGTAGAAAACAATGTTTGTTAGTTAACTTATTTGTTAACCTTTT  
GTCTTGATTAGGCCAGAAGGCAGTACGACAGTTAAAGCTGCTGATTCCGGTCGCCTGGCTGATGGCAA  
TTCTCCAGTGCTTTCAGGCATAACTGTGGATAAATCTGTTGAGTTCACCTATGAAGAGCTTGCTACTGCA  
ACTAATGACTTCAGCATCGCTAACAAAATCGGACAAGGTGGTTTTGGTGCGGTTTATTATGCTGAGCTCA  
GAGGCGAGGTTTGAAC TATTCTTAAATCTTACTTCTGCGTATAACCTGTTGTATTATGAAAGAAGTCATTC  
TTTTTAGTTCAGATCTCATGAAGTAAGTGGGTAAACAGTAGTCCAGAGAAAGGAGGAATAAGTAATAAC  
AAAGAGCAGGGAAGACACATGCAGAAGTCAAATAAATGAATAGCTTAGTCATCTGGTGATGTTCCAGA  
CTTCCAGTGATGCATTGACATACATTATATCCTGTATATTTTGCACATATTAATCATAACCAACACTGAAT  
CATGATTTCACTTCTCCACTGGGTGGGATGTTCCGTGATTTTTCTGTGGTCGTACTTATTTTTAAAGTTTTA  
ACCATAACCAACTTAAAGAATTATTCAAGTGTCTTCATACCCAGTACTTTTTGTGCTGTAAACTATTTTCAG  
AAAGCAGCTATCAAGAAAATGGACATGGAAGCTACAAGGGAGTTTCTAGCTGAATTGAAGGTCTTGAC  
AAATGTTTCATCACCTGAACCTGGTAAAACTCTGCCACTAGATGCATATCTCTTTTGACACTATTTTGGTT  
TTCTCATTTGAGAATACATACATGATACATATATACAGGGTGGACCCACATGTAGCATTCTGGGTGCTCG  
AGCACCTATTGATCCACCCTGATCTACATATTCTTATACTGCACTTCTTAAAATTGGGATATAAGAGCTG  
AAGGCACCCATCAGTCAAACTTGGGGTGGGTGCTTTGGTTGAGAGCCAGATTTAAGGGGCATGGTCA  
TCTACGTTCACTGTTGATTCCCTGATAAAAATAATTTAAGAACTCCTGTTTTCTTTTTCTTACTCGACTTG  
CCTTCTTTTTCTCCATAAAACACTCTCTTATTTATACTTTCTTGTCTTCTTCTCTCTTTTTTTTACAAC  
TCTTTCTTTCATTTTTCATTTGGTTAATCACTTTTTTTAATGTTTCTTTGGTTGATTTTTTTAACTATCAGTG  
TTCAAATAATGTTGCTTATATTTTATGATTGCTAGCAATTTTATATTAAGGAATGTCAACACCCACGA  
CCTTAAAATCCTAAATCCACCACTGCATATATACACACACATAGAGAGAGAGGG

>M6-PGSC0003DMG400003659 M6 Other RLK with TM

CAAGACCTAGCTTAGAACGAGGAAGCATCGATGAAATAATAGATGCTAATCTCTTAATGGAGGAATGCA  
ACATGGAAATGATGCTGAAGATGGGACAAC TAGGACTGAAATGTGTGGTCAAAGTTCCCAAAGAAAGG  
CCTACCATGACTCAAGTGTGGCAAGAACTGGAGACTGCCTTCTTTCTGCAGAAAATATCATAGATAAAC  
AACCTTCAAATGGTTCCTTCAAATTGTCAAACCGATCACTCGTAAGGGGAAGCCATAGAATGAAACAAC  
TGATTATTCTCAAAGCTCAGTTAGCATAGACGGCATTAGATTGCAGAAATTTTACATGGACATAGATGGC



CTATCCTTTGGGAGTGCAAAGTTGAGATGCTTAGATACCCATAGTATAAGCTTTGAAGATGACTCATTG  
AACTGAGAGGAACTTCCGAGGAAACAAGCACAAGTGGAACGAGGAGCATAGGCTTAACATATAATAT  
CAGTTAAAGTTTGATTAATGTAAGTCGGCAAAGAACATATTTTAGGTTCTCTCTATTGGGAGTTTCTCCAT  
TCTCAAGCCTCAAACCCGAGACCTTTGGTTAAAAGGTTTATAAAAACGGTACCTACCTTCTTTGTATT  
>M6-PGSC0003DMG400003660 M6 Other RLK with TM  
CTTATCTACGCCTTCCACCACAGAATTCGGCCCCACCAAATGGATAGCATGTAACACTAACGAAATCCACAT  
TAGATACTGTCCTTCCCGTTTCCGTTTCATCCTAAATGCCGCCGTGTCTCTGCCTTCCCGCCACTCTCCCTCT  
CCCTTCCCAAACCTTCTCCTCTCCACGCGCCGCCGCTCCCCACTACTAAAACCGCCGTATGCTTCTCTCAA  
TATATCCGTTGACTCAACCTCTCATCCTAATACCACCGGGGTCATTGTCATTGGCGGCGGTTTAGCTGGC  
TTAGCAGCTTCCATTCCGGCTTCAAGCCGACAACATCCCATTTCTCCTTCTCGAATCTTCTGATGCCGTCGG  
CGGCCGTGTTTCGCTCTGATGTAGTTGACGGATATACCCTTGATCGTGGTTTCCAGATTTTCATTACTGGTT  
ACCCTGAAGCCCGAAAAATCCTTGATTATGACTCTTTAGACCTCAGAAAATTCTATTCGGGGGCGAGGGT  
TTACTATGGTGGTCGTTTCCACACCGTTGCTGATCCTCTCCGGCATTTCGCCGATGCTCTGCAATCTTTAA  
CCAACCAATTGGTTCAGTTGTGGATAAATTACTTATCGGATTGACTAGATTGAAAGTTTTGACGCAAGG  
AGATGATGAAATATTGAGTGCTGAAGAAGTTCCTACGATCGATTTATTGAAGAAGATCGGGTTTTCTGA  
TGCAATAGTGGAAGGTTCTTTCGACCCTTTTTTGGTGGAAATTTCTTCGATAGAGAGCTGGAAACAACG  
TCGCGGCTGTTTAATTTTCATCTTCAAATGCCTAGCTCTTGGTGACAACACACTTCCGGCGAAGGGCATTG  
CCGCCATTCCGGAACAATTGGCGGCAAAATTGCCGTCGAATTCAATATTGTTCAATACACGAGTTGTTTC  
CATTGATTCAGGATCGGATTCCAGCACAAAATAAGAGTGACATTACAAAATGGAGAAATGTTGGAAAG  
TGAATTTGGGGTAATATTGGCAGTTGAAGAACCTGAAGCTGTCAAGTTATTGGCGGGAGAAAAAACCG  
GTGAGGTTCCGCAACCGTTCCGGAGCACAGTATGTTTGTATTTTTAGCTGACCAAGGCAAAGTTCCGG  
TGCAGGATCCGGTCTTCTTCTTAACGGGTCGGGTAAAGGAATCGTCAATAACATGTTCTTCGCGACCAA  
TGTGGCTCCCTCTTATGCTCCGGTAGGGAAGGCACTGGTTTCTGTCACGCTTGTGGGGATTTATGGTGAC  
GTGGCAGATGAGGATTTGGTGGATCAGGTCGTGAAGGAGCTATCGGGTTGTTTGGGGAGTCGGTAGT  
TGGGTCATGGAGTTACTTGAGGATGTACAGGATCGGGTTGCCCAACCGAACCAATGCCACCCACTAA  
CTTGAAGAAGAACCCGAAAATAAAACCGGGCTTGTACATTTGTGGAGATTATGTGACTAGTGCTACTTTT  
GATGGAGCTTTGGTTTCTGGGAAAATAGCAGCAGAACTTTGCTACAAGATAGAGCTCTAGTTAATGTA  
TAGCTTAATTTGGTTGAGTTTTTTCCAGTTGTGTAAGTAAAGTTTTGAGTGTTCTTGATTAATTTGT  
ATATGGATTCATAAACGTTTCGAGATCATTTTGATGCAATAATTGCACTATCAAGAAAGAAGACAATATG

GTATGACTTGTTCTGTTGTTCC

>M6-PGSC0003DMG400006667 M6 Other RLK with TM

CTTTCACCTACACTGCTCTTATTTTGAGAAGATGTAGTTTTGAAGCATTTAATGCTCACTTTTCTCTCTCTA  
TTTCTCCTATGCTGTCTTTCACCACTTCATTCTTGAGGGCACCGATAACTTTGACACAAAAGGGGCTAAAA  
AAAATGTCATTATCTTCTCTTTTTTGTGTTTCTGAACTGAAATATGCAGCTTCTTGGCTACAAATTTTGTT  
TAATTGTATTGATAACGAGGGTATTATAATTATTTGGGATGAAGGAAAGTTGTGAATTTTGATCCCACCT  
ACCCACCCATGGTATGTTGAACTATTTTTTTTTCCGTGTGTTTCATAAATCAACTCAGCTAATATGGAGA  
AGGAGAGGTGTTATTTTGGTTTTATCAGAAGGATAAAGGTGAAAGAAAGCACTGACTTTTTGTTTGTGT  
ACTTTGTTTAATTTTAATTTGTGTAATGGACAGTTAAATAAGTGGTGTGTGGTGTGTTGGAAATGTAG  
ATACTTTGTAAGAGCTTTTATGCTCCTTGTGGTATTTTCAAAGTATCAGGGTTTGGATCAATGTCTTCAA  
TTGCTATTTTCAATATGGTGAATATGGTTCTGTTTTTGTGGGTTGAAGTCAGATGGATCTCATTGGTCACT  
TGCTATGGCTCTACTTCTTCTATAATATATTCAACTCCAGCTCATTCCCTTTTATTGGTCTTACTGCTGGA  
AATGGCTTTGTATGTGGACTTTTGTGATTCTTACCAGCCTTATTGTTGGGGGAAAAGTAATTTGTAC  
AAATGGGAGTGCCTCAGCCTATGATCAAAGGGTCTCAATACTTGGAAATATCTGCAGGTGAAAATCATT  
TGTGTGGACTAAGGCAACCTTAATGGGGAAGCATAGGAACACTTCACTTGTGATTGCTGGGGTTATA  
ACATGACTACAAACAATGAGTTTGAAGGTCAGATCCACTCTATTTTCACTGCTGGTTCTGAGTTTAATTGTGC  
TTTGTCTTCTGTCAATAAAAGTGTCTTATGTTGGGGGATGAACTAGTAGCCAGGTTATTACCCTAGCA  
CCAAAAGATTTGAGATTTATTAAGATTGCAGCTGGGGGATATCATGTTTGTGGGATCCTAGAAGGGGTG  
AATTCTCAAGTGTATTGCTGGGGAAGGAGCATGAACCTTGAAGAAGAATTCTCTGTTGCTCAACTCAAT  
GTTGAATTGGCAGCCCCTAGTGATCCAATTATATCTGTTGTTGGTGGTAAGTTTCATGCTTGTGGGATTA  
GGAGCTATGACCGTCATGTCGTTTGTGGGTTACAGAGTTGAGAAAAGCACACCACCTCCTAGTGGAG  
TTAGGCTTTATGAGATAGCAGCTGGTGACTACTTCACTTGTGGTATCCTTGCAGGAAATTTCAATTTTGCCT  
GTTTGTGGGGGTTTGGTTTTCCCTCATCGCTACCACTCGCTGTTTCTCCTGGAGTCTGCAAGCCTAGACC  
CTGTGCATCTGGCTTCTATGAGTTTAAACAACGGAAGTGCAACTTGAAGTCTCCTGATTCTCGCATTGACC  
TTCCCTGCACCAATGGCTGCCCTGCTGAAATGTATCAACAGGTTGAATGCACTTCATCTACGGACAGTCA  
GTGCACGTATAATTGTTCAAGTTGTATCTCTGTTGACTGCATAAACAGCTGTTCTACTGCTATTTCTGGAA  
AGAAGAACGCTAAATTTTGGTCACTCCAGTTACCAGTAATTGTTGCTGAGGTTGCATTTGCAGTATTCTT  
GGTGAGTGTGTTATCTCTAACTTCGATCGTATATGTTTCGCTACAAATTAAGGAACTGTAGATGTTTCAGGG  
AAAGGTCCTAGTCTAGGAAGAATGGTACTTTCCCAAAGGAAATTGCTAAAGATAGGGCTGATTTGGAT

GATCTTAAAATAAGGAGAGCTCAGATGTTTACTTATGAAGATCTTGAGAGAGCAACTGAGGGATTCAAA  
GAAGAATCACAAAGTTGGAAAGGGTAGCTTTTCGTGTGTGTTCAAGGGCGTTTTGAAGGACGGTACTGTG  
GTTGCTGTCAAGAGGGCTATAATGTCATCTGACATGAAGAAGAATTCAAAGGAGTTCCACAATGAGCTA  
GACTTGCTGTCCAGGTTGAATCATGCTCATTGCTCAATTTGCTAGGTTATTGTGAAGAAGGTGGAGAGA  
GACTTCTAGTTTATGAGTACATGGCTAATGGCACGTTGCATGAACATCTACACGGGAAAAAGAAGGAGC  
AATTGGATTGGATAAGAAGGGTAACCATTGCAGTCCAAGCTGCTCGGGGAATCGAATATTTGCATGGTT  
ATGCATGTCCACCTGTGATTCACAGAGACATCAAGTCCTCAAACATCCTTATAGATGAAGAACAATGC  
TCGAGTAGCTGATTTTGGGCTTTCCTTGCTTGGACCTGCTAATAGCAGTTCCCCATTAGCTGAGTTACCA  
GCAGGGACACTTGGGTACCTTGATCCCGAGTACTACAGACTACATTATCTTACAACCAAATCTGATGTCT  
ATAGCTTTGGTGTGTTTTGCTTTTGGAAATTCTCAGTGGTCGGAAAGCTATTGACATGCAATACGATGAAGG  
GAACATAGTGAATGGGCAGTCCCATTAATCAAAGCTGGTGAAATAGAAGCAATACTGGATCCAGTTTT  
GAAATCACCTTCTGATGGTGAAGCTCTTAGAAGAATCGCTAATATAGCCAGCAAATGCGTGAGGATGAG  
AGGGAAAGAGAGGCCGTCAATGGATAAAGTAACAACAGCTTTGGAGAGAGCACTTGCTCAATTGATGG  
GTAGTCCAAGCAATGACCAGCCTATCTTGCCAACAGAGGTTGTTCTAGGAAGCAGCAGAATGCACAAGA  
AGTCCTCATCAAATCGATCAACGTCAGAAACAACAGATGTTGCAGAACTGAGGATCAGAGGTATGTGCG  
AATTCAGAGCTCCTTCGTGGATTACATTCCCAAGTGTAGCATCATCTCAGAGAAGAAAGTCTTCAGTATC  
GGACGCAGATGTTGAAGCAAAGAATTTAGAAAGTAGGAACTGTGGAATGGAAGTATGGATTGAGAA  
GTTTGAAGAAGAAATTGGACCAGCTTCTCCTCATGAACATTTGTTCTTGAAACACAACCTTCTAATTAAC  
ATAACACTAAAAAGGAAATGCTCTGCAGGTTGATGCTTAATTTTGTAGTGGAAAGAAATGTATACAA  
GTAAAAGGTAAATGTTGTGAATTCTTGATAAATGTGATCAAGAATCCCCACTCAACCATTGGCGATGAG  
CTTAGCTAGATGTTTGATCCTGTAATTGTAACCTCAATCTTCTTCTTTTATGCATTCAATTCTGATC  
ATTTG

>M6-PGSC0003DMG400007389 M6 Other RLK with TM

TTGTTACATCCTCTGTTCTTCTCAAGAAGTTATAAATCTTTCATTCTTTTCGAGTGTGCACCTTTGATATGG  
AGGAGAGACAATTGTTGTTTGAAGAAGTATGAAATTGGGACATTATTAGGCAAAGGAACTTTTGCGAAA  
GTGTACTATGGTAAGGAACTCGAAACAGGGGAAAGTGTAGCCATTAAAGTGATAAAAAAAGATCAAGT  
TCAGAAAGAAGGAATGATGGAGCAAATCACAAGAGAAATCTCTGTGATGGGCCTTGTTTCGTCATCCAAA  
TATTGTTGAACTCAAAGAAGTCATGGCTACAAAGTCTAAAATCTTCTTTATAATGGAGTATGTTAAAGGG  
GGTGAGCTATTCGCAAATAGTATCCAAAGGCAAATTTAAAGAAGATACAGCAAGAAAGTACTTTCAA

CAATTGATAAGTGCTGTTGATTACTGTCATAGTCGAGGTGTTTATCATCGCGATTTGAAGCCTGAGAACC  
TACTCCTTGATGAGAATGAGGACTTGAAGATATCTGATTTTGGGTTATCGGCTTTCCTGATGAGCAGTT  
GAGTAGAAATGATGGTTTGCTTCATACACAGTGTGGGACACCAGCATATGTTGCTCCTGAGGTTTTAAG  
GAGGAAAGGTTATGATGGTGCAAAAGCTGATATTTGGTCATGTGGGGTTATTTTGTATGTGCTTCTAGC  
TGGTTACCTACCATTTCAAGATGAGAATGTGATGAACATGTACAAGAAGATTTTCAAGGCGTATTTTCGAG  
TTCCCTCCATGGTTTTCAATGGATTTCGAGGCGTTTGATATCTAACTTTTAATGGCTGATCCGGACAGGA  
GGATCACTATTCAAGGTATCATGAGGGTTCATGGTATAGGAAGGATTTTCGCGATGCCACGGGCTTTTT  
CAATCCAAGATTTTCAAAGTTAGAAAAGGAACAAGAAAATGATCATGTTGAAGAAGGAATGAGCAGC  
AAACAAGGAGGGATGATTAGGAAATCCCCTTCATCCCCTGCATTTTTCAATGCATTCGAGTTGATTTTCAT  
CGATGTCATCTGGTTTCGACTTGTCTAGCTTGTGGAGATCAAAGGGAAGGCATCATCCATGTTCACTTC  
AAGGAGCACTGCCCGGGATGTCATCCGTAAAATGGAGAAAATGGCTAAAGTTATGAGGTATAAGGTTT  
ATAGGGTAAAACCATTCAAGTTGAAGATGCAATGCCCCGAGGAAGGACGAAAAGGGCGGTTGTTGGTC  
ACCGCTGAGGTGTTAAGGTGGCCCCGGAAGTCACCGTGGTCGAGCTCTAAGTCCTCCGGTGACACG  
TTGGAGTATAACAAGTTTTGTGAAGAGGAAGTTAGGCCTGCATTGAAGGACATTGTTTGGACATGGCAA  
GGGACAGGTAAGTGGAAATGCTGATATTGATAACAAAAGAACTTGGAGCAATAAAAATTTGGTACATGTG  
CATCTTTCTCCCTCTCTTTTGTGTTTGTGTTTCGCTCCCCTGATCGGCTGATAGAAATAAATCAACCATCG  
GAGATATTCGTGTTACTTTGTCAATATTGATTTGTACATAAATTGTGTGTTATACTGACCACTGGGATTT  
GTATTGTTTGCATGTTGTGATTCACTTAATTTCTCTAGTTATTCAAGCACGGGGATCTTGTTCAAAAAGA  
TATATTTACCTCCCGGCACCCTTTATCTATTTGTAAGTTGCAAGTTGAAGTTGCAATATGGACATTTTGT  
TCAGA

>M6-PGSC0003DMG400007899 M6 Other RLK with TM

TCGCCGGCGGCAGGAATTGCCACCGGAAACACGTAGAAGACGGGTGAATCAATCACCCGTTTTTGTCTT  
CTCCGTTACCAAATCTCTTTTTATTAACAGATTCAAACACCCTTTTCAATCTTTAGTCTCTTTTTTCAATCA  
ATTTGGAACAAAACAAATGGCTCCGGAAGAGAAATGTGGAGCTTTGAACGGAAAATATGAACTTGGT  
CGGCTTTTAGGCCATGGAACATTCGCGAAAGTTTATCACGCACGAAACGTGCAGAATGGTAAAAATGTT  
GCCATGAAAGTAGTGGGAAAGAGAAAGTCATTAAGTCGGTATGATGGATCAGATCAAGCGAGAAAT  
ATCCGTAATGAAAATGGTGAAAACCCGAATATAGTTGAGCTCCACGAAGTCATGGCGAGTAAACTAA  
GATTTACTTCGCCATGGAGTTAGTTAGAGGAGGTGAGCTTTTCGCGAAGATCGCGAAAGGCAAGCTGA  
GAGAGGATGTTGCTAGAGGTTACTTCCAGCAACTGATCTCAGCTATCGAATTCTGTCATAGCAGAGGAG

TATTTTCATCGCGATTTGAAACCTGAGAACTTGTTATTAGATGAAGAAGGAAATCTCAAAGTGACTGATTT  
CGGGCTAAGTGCATTTACAGAACATTTAAGACAGGACGGATTGCTTCACACAACCTGTGGAACTCCGGC  
TTATGTTGCCCTGAAGTTATTGGTAAAAAAGGCTAAGATGGTTCAAAGCGGATATTTGGTCCTGTGG  
AGTGATCCTCTATGTTTTATTAGCCGGTTTTTTACCATTTCAAGAAGAAAACATCATGGCGATGTATAAGA  
AGATTTATAGGGGTGATTTCAAATGTCCACCTTGGTTTTCTTCAGAAGCTAGGAGGTTGATCACAAAGAT  
GTTGGATCCGAATCCCAATTCAAGAATCACACCTCGAAGATCATGGATTCGTCATGGTTCAAGAAATCA  
ATCCCAAGGACGTTAAGGAACAAAGATGAGGAAGAATTTGCATTTGCCTCAGATAAGGCTTGTAAGAA  
GTTGAGACAATGAACGCGTTTCATATCATTTTCGTTATCTGAAGGGTTTGATTTGTCACCATTGTTGGAAG  
AGAATAAGAGGAATGAGAAAGAACAGATGAGATTCGCAACTACTAGGTCAGCAAGTAGTGTGATATCT  
AAGCTTGAGGAGGTAGCAAAGACATCGAATTTGAGCGTAAAAAAGAGTGATTCATGTGTAAGGTTACA  
AGGACAAGTGACTGGGAGAAAAGGGAAATTGGGAATTGCTGCTGATATATTTGCTGTGACAAATTCATT  
TCTAGTTGTGGAAGTGAATAAAGCTAGTGGTGATACATTGGAGTATAATCAATTCTGCAGAAAAGAGCT  
TAGACCAGCACTTAAGGATATTGTTTGGACATCA

>M6-PGSC0003DMG400010503 M6 Other RLK with TM

ATGGTCCCATCATTCAATTTCCATTGACTCAGTCATCAACCAAACATTGTGGCTATGATCCTGGCTTT  
GAACTACACTGTAACAATAAAAAAGACACCATCCTTGAGCTTCCCTCCTCTGTTCACTTAGTTGTTGAAAA  
GATTGATTATGTCTCACAGCAAATTCACCTTCATGATCCTGAA

>M6-PGSC0003DMG400010504 M6 Other RLK with TM

CAAGTAGAAATGAAAGAGAGAGTCGAGTTAGACTTGAAAAGTTTTTGGAAAGACTACAAGGCCATCAGA  
CCGACACGATATGCTTATGCTGATATTAAGAAGATAACAGATGATTTAATGAAAAGTTAGGAGAAGGG  
AGTTATGGAAGTGTATACAAAGGCAGACTTTCCAGTGAAATCTATGTTGCAGTAAAAGTCCTACACGATT  
CCAAGGGTAAAGGGGAAGAATTTATCAATGAAATAGGTACAATTGGGAGAATCCACCATGTTAACGTG  
GTCCGATTGGTTGGTTTTTGTGCTGATGGATTCAGACGAGCTCTGATCTACGAATACCTACCAAATGATT  
CACTTGAAAGGTTTTATTTACCAGTGAGCTCAAGCCCGGTAGTGTCTCACTCATCAGCTGGAACAAGCT  
TCAACATATTGCTCTGGTACTGCAAGAGGGATTGAGTATCTTACCAGGGATGTGATCAGCAAATCCT  
ACATTTGATATCAAACCACAAAACATCCTTTTAGACCAGAAGTTGAACCCCAAAATATGTGATTTGCGCC  
TAGCCAAACTATGTTCTAAAGAAAAAAGTGCGGTCACTATGACAGCTGCTAGGGGAACCATTGGTTACA  
TTGCACCAGAAGTGTTATCAAGAACTTTGGTAAAGTTTCTATAAGTCTGATATTTATAGCTTTGGGAT  
GGTCTTGTTAGAAATGGTTGGTGGGAGGATAAAGATGGATCCTAAGATGAATAACCACAGCAAAGTGA

ATTCTTTGGAATGGATATATAGACATTTGGAGAAAGGGGAAGAATTGAAGATTCGGATAGAGGAAGAC  
GGAGATGGTACAATTGTGAGAAAGTTAGCTATTGTTGGACTTTGGTGCATACAGTGGCATCCCAATGAT  
AGGCCTTCAATAAAAGAAGTTATTCAGATGATGGAAGGAGATG

>M6-PGSC0003DMG400013928 M6 Other RLK with TM

TTTCATCTCACCATTCTATGGCCATTCTTGTTCAAAACTCACTTTTTCTTTCTTTAATTTTCATTTTTTC  
CCTTTCTTTCCAACCCATTCTTCACTTTCCACTATTGCCATTTCCAAACTTCTAATCAAACATTAGTTTGT  
GCATTGATTTCTCTTCTTATATCCCCAAGAATCATCTCTCAATTGTAAGTTCCCTCAGGGTATTCAA  
ATCCCTTTAAACCTTCTGTTTCTTTACTGGAATTGTGGGTGGAATGGTTTCCTTTGTGGGTAAACCTC  
TTCTTCTAATTCAATCATGGTGTGTTGGAGGTTTTAGATAATGGGACTGATTTGAATTATAAAAGGGTT  
TATATTGGCCATTGCTTACAAATCTTGATTCTGGAAATCCCATGTTTGTGGAATTGTTAATGGAACCAA  
TAGGCTTCAGTGTGGCAGTGGCATGAATTCAGTTCATCAAATAACAGTTTGATAACTTCAAATCTTGCT  
GTTGGAGAAGATTTGTTTGTGGGTTGTTGCCATCGGGTCAAATTCATGTCTAGGAAGCTTTAGAAATG  
CTATTGATGTTGTTCTTCCAGGGAATTACAGTGAAATGCAGCTGGTTCTCAATACGCTTGTGCCATCTCC  
ATGAATGGTAGTTTGGCTTGTGGGGAAATATGGTAGTAGAAAAGCCTGTTGACCAATTCAAGTCTCTT  
GCTTTAGGTGATACTAGGGGTTGTGGTTTGTGGGTTAATGGGAAAGTGGTTTGTGGGGTGAAAATGG  
TTTTAGTCTCCCTTCAACTTTGAGTGATATATCTTTTGAACATTAGAAGCAAACGAGATATTTTTTGTG  
GCATTGCCACCTCAAATTATTCATTGTTCTGTTGGGGAAATGAGATTTTCAATTCAAATCCAGTAGTCTTT  
GAAGAAGTTGTTCCAGGACCATGTACCATGTCATGTCCTTGTGCACCTTTAGATAACTATGCTAGGTTTT  
GTGCTCAAGAACTAATGATATGTGAACATTGTGTTTGGCCAGGATTTGGTCAGAATCCCCCAATTGTTAA  
CGGGTCAGGTCCTTCGCCACCGTCAGTATCCCCACAGCCAACGCCAATGCCATCTCAGTGGGAATACGAG  
AAATGTGGCATTCTAGTGGTAGGTTGTGTTGGGTCCTTAATGATGTTGAGTGTCTTGTATAATGTTTC  
TCAAGCATTGCAAGATTAGAGGATGCAGAGTACACGACTCTGGCCGCCTTGATGAGGTCGGGACACCTC  
CACAGCAAGGCAGCCAGGCATCTCAAGTTCAAGATCAATTAGGTCCTCAGCCATCAATCTTGGAAAAAA  
GACCAAGTAAATTCCTTAGCATGGGAAATGGGGTCACTTAGAAGAATTTTCTTGCAAGTGTTACTTCT  
AGTGACGAATAACTTCTCCGAAGAGCACAAAATCGGGACAGGAAGTTTTGGATCTGTTTATCATGCTAC  
ATTAGATGACGGTCGCGAAGTAGCCATAAAAAGGGCAGAGGCTTCAGCCTCATCTTCTATGCTGGTGG  
TTCAAAGTATAGACAAGAGGACAAAGACAGTGCATTCTCAATGAGCTAGACTTCTTGTACGACTCAAT  
CACAAGAACCTCGTTACGCTATTTGGCTATTGTGAAGATAACAACGAACGAGTCTTGGTTTTCGAGTACA  
TGAACAATGGCACCCCTCCATGACCATCTCCACAAGCTTGAGACCTCATCACTAATATCATGGACTGCTAG

GATCAAGGTAGCATTGGACGCAGCCCGTGAATCGAGTACCTCCACGAATACGCAGTCCCAGCTGTCAT  
CCACCGAGACATCAAGTCATCCAACATATTGCTCGACACCAATGGGAACGCCAAGGTGTCTGATTTTGG  
ACTGTCCCTAATGGGACCACAAGAGGACGAATCACACCTTCTTTGCGTGCAGCGGGGACGGTGGGTTA  
CATGGACCCTGAGTACTACAGATTGCAACAACACTGACAACAAAAGTGATGTGTATAGTTTTGGAGTAAT  
GATGCTAGAGTTGTTGTCAGGTTACAAGGCGATTACAAGAATGAGAATGGTGTACCAAGGAATGTGG  
TTGATTTTGTCTGCCATACATAGTACAAGATGAGATTCATAGAGTGTTGGATGGTAGAGTACCACCACC  
AACACCATTTGAGATAGAGGCAGTGTGCATATGTAGGTTATCTTGCAGCTGATTGTACTACATTAGAAGGT  
AGAGATCGACCAACAATGACTGAAATTGTAAATAACCTTGAAAGAGCCTTGCAAGCATGTTTGACATCTC  
CAAATTTCTCTCGATCCAACACCGATTTCATCCACATAATCATATCATTACTTGGCTTTGGATTGTGTATATT  
GTAATTACAACATTTTTCTTATTTGTATTTAATCATTTTCTCAAACCTTACACACCATTTCTTTCCTAAA

>M6-PGSC0003DMG400013989 M6 Other RLK with TM

TTGTTGATTCAAATGGAGAAAAAAGGAAATGTAAGTACTGATGCAAAAATATGATTTGAGGAGATTATTAGGT  
CAAGGCAACTTTGCTAAGGTTTATTACGGAAGGAATCTTGAAACGGGACAGAGTGTAGCCATTAAGGTA  
ATTGACAAAGAGAAGGTTCTTAAGGCCGGACTGATTGAACAAACGAAGAGAGAGATATCTGTTATGCC  
ACTAGTTGAACATCCAAATGTTCTACAGCTATACGAGGTCATGGCAACTAAATCTAAGATTTATTTAGTC  
ATTGAACATGCCAAAGGCGGTGAGCTTTTCAAAAAGTTGACAAAGGGGAGGCTCAAGGAAAAATTAGC  
TAGGAAGTACTTTCAGCAATTGATTAGCGCTGTTGAATGTTGCCACAGTCGAGATGTTTATCACCGTGAT  
CTGAAACCAGAAAATGTGCTTCTAGATGAGAATGGAAATCTTAAGGTATCAGACTTTGGATTAAGCGCC  
CTGGCTGAATCTAAGAGGCAGGATGGCTTACTCCACACAACATGTGGAACCCAGCTTACGTTGCACCT  
GAGGTGATCAGTCGAAAAGGATATGACGGTGCCAAAGCTGATATCTGGTCTTGTGGGGTGATCTTATTT  
GTTTTGCTAGCCGGTTATCTTCCATTCCAAGACTCAAATCTTATGGAGATTTATAGGAAGATAAAGCAAG  
CTGAGTTCAAATGTCCAAATTGGTTCCCACCAGAAGTGCGGAAATTACTTTCTAAAATCCTTGATCCAAA  
CCCTCGTACAAGGATTTCCATAGCAAAGATAAAGGAAAGCTCATGGTTCAAGAAAGGTTTGGAGTCTAG  
AAACGCGGTAACCAAAGTAGAAGAAAAGGAAAAGTTTAGCCTAGACGCCAACGCTACTATTCAAGATT  
GTACACATAACAGTATCTCTCCCTCTGAGTCAAAGCTAGAGTTGCTAAAACCGTCAAATCTAAATGCATT  
TGATATAATCTCTCTTTCAAGTGGATTTGACTTGTCGGTTTATTCATAACAAAGGATCAGAAGGAAGAC  
TTGCAATTCATTTCCGCGAAGCCTGCCTCTTCTATCATATCCAACTTGAGGAAGTTGGCAGGAATCTAA  
AGCTGGAAGTAATGAAGAAAGAAGCTGGATCTATGAGATTAGAGGGATCGGGTGAAGGTAGATACGG  
GACTTTGTCCATCGATACTGAAATATCTGAAATTACTCCGTCCTTCCACTTGGTTGAGCTGAAAAAGTCAT

ATGGTGATAAGGTAGAGTACCAAAGATGCTGAAACAAGTTATAAGACCTGCTCTGGAGGAAATTGTTT  
GGGCTTGGCAAGGCGAGCAGCC

>M6-PGSC0003DMG400015977 M6 Other RLK with TM

CATATATTTTTGTCCATTCCATTGGATTTAATTTCTCCCAACACAAACACACCTCCTCTAACCTGGCTAAT  
TTTCCCCTATGATTAGCCAGGGGAAATCACTAGGCGAATACACGATGATTCACCAATAATTTCAATTTCTT  
CGCGCGCTTGGATGCTCATCTATCCTCTTGCAGGATGATGAGCACAAAGAGCGCGAAAACGGAGAAAA  
AAGGGACAATTTTGATGCATAAATATGAGATTGGTAAATTGTTAGGCCAAGGTACATTTGCCAAAGTAT  
ATCATGCAAGGAACCTAAAACAGGACAATATGTAGCTGTTAAGGTAATTGACAAAGAAAAAGTCATGAA  
AGTTGGCCTAAAATCTAATTGACCAAATCAAACGTGAAATTTCTGTTATGAGATTAATTAGACATCCAAA  
TGTTGTTGAACTTTATGAAGTAATGGCTAGCAAAACAAAAATTTATTTTGAATGGAATATGTTAGAGGT  
GGTGAATTCCTCAATAAGGTTTCTAAAGGGAGGCTTAGGGAATCAGCAGCGCGAAAATACTTTCACCAA  
TTAATCGCTTCTGTTGATATCTGTCATAGTCGAGGGTATATCATAGGGACTTGAAACCTGAAAACATACT  
CCTGGATGAAACTGGAAACCTAAAGGTTTCTGATTTTGGGTTGAGTGCTCTTTTCGATATGAAAAGACAA  
GATGGACTCCTCCACACGATGTGTGGAACCTCAGCATATGTCGCGCCAGAGGTCATAAATAAGAGAGG  
ATATGATGGCAAAAAGGCGGATATTTGGTCATGTGGGGTGATTTTGTGTTGATTGTTAGCTGGTTATCTT  
CCATTTTCATGACACAAATTTAATGGAAATGTATAAGAAAATTAGTAAAGGGATATTTAAATGCCCTGAAT  
ATTTTCCATATGAAGTGCAAAAACTACTTCCAAGAATTCTTGATCCAAATCCATTTTCAAGAATCACATT  
AGCTAAGCTAATGGACAATAATTGGTTCAAGAAAGGATTCAAACAAATTGATAAACCACTAATTTTGGAT  
CAAGAACACGACGATGATTCACCTCGTAGTGTGTTTGGATATTGTGGATGATTCGGATGGAGAGTGTTCTT  
CAGGACACAAAGAACAGAGTTCATCAGCAATAATGAAGCGTACTTGTGTTAAATGCTTTTCGATATCATTTC  
TCTTCTCCTGGTTTTGATCTCCCTAGCTTGTTCGAGAAAGATAAGAGTCATAGGTCGGATGCTAGATTCA  
CGACACAAAAGTCTGCATCCACTATTGTCTCGAGGCTAGAGGAAGTAGCTTCAATGGGTAGTTTTAAGG  
TACGTATGACCCATACATAGTATAATATCGGTGAAAGAAGTTCATCTGACCACCGTTGAGCCTATATGTG  
ACTTTGCCTATAGGTTTCATCTCATCTAAAAGTTAATCTGATCACCTTTAGCTTATGACCATCTGAGCTAA  
AAGTTTAGTATTATAGAATGAACAGACTTTATTTACTTTATTATGTCTTCAACAGGTGAAGAAAAAAGAC  
GGGAAGGTGAAAATGCAAGGAAGCAAAGAAGGGAGAAAAGGGCAATTAGCAATTGATGTGGAGATAT  
TTGAGATTACTCCAGCTTTCATGTTGTACAAGTGACAAAAAATCAGGAGATACTGCAGAATACAGGA  
ACTTTTGTGATCAAGGATTAAGCCTTCATTAAGATATAGTTTGGACATGGCAGGGCAATGAGCAAC  
AACAAAGTGAAAATCAAGAAATCAAGACTTAAGAGGTAAAGATATGAAAAAAAAAAAAAAAAACAAGTT



GTGGGGCTAAAGTTGCCTCTGTGGGACCTATAGGTCATGATTTGAGTTGTGGATTGAGTCATTGATGTT  
TACGTGGAGGTAGTTTGCCTGCATTACGATTTGCAACCCTTGGATGAGAGCCTTCTCCATATTTGATGCAT  
CGAGCTGTTTCTGTTTTTTTTAAATCATGTAGGCATTATGATCATAGCATTTTTTGTCATTGCTCTTTTTGTT  
TGTTGTCTTGATGTTATATGTCCTCTTGGTGTTCATGTAAAACATTTACTATATTACTTGCCTATTTGT  
ATTCATATAGATAATTCCTCTTAACAATTTACAAAAAGATCATTCTGCTTCAAGATTTTCAAGAGGATCGA  
TTTAGTTTTAGTCATTCAATTTACTTGTCTACCATTTTGAACACTAATATTAAGAGGAAACAGTGACATT  
TATTGCAACCAACTAGCATTCTGAAAACAGATTCATGCACAAATCAAGTTCTAAAACAAAACAAAAAA  
GCATTATCTTCCATAAAAACAAACAAGTGATCGATTGACCAAGAGATACAGAGAACATGCTCAGCAT  
GCAAGAAGTTGAATCTTGATCTTCTGTAGCATCCCTACAACATCTTTCATGTTTGCCTTCTTGTGCGAGA  
TTCAACACAACAATCTAATGCTACTATCATGATTGATGCCACAATATCTAACTCCTTCTGTAAGCGATTAT  
CCATTGGTGTAAACCAAGTTGGCATCCATAACGTCCATTACTGCCTCTGGGAGTGAATAACTCACCCATTG  
CTTCAAGCTAAGATCTCCCTCAAACCTCAGTAGGCTTCTCCTAGTAAATGTTTCCAGCAACATAATCCCGT  
AACTATAGACATCACATTTTATTGACACCAGTCCATCCAGTCCATACTCT

>M6-PGSC0003DMG400016365 M6 Other RLK with TM

CTCTCTCTCTTTCTTTGTGAATGTGTAAAGTCTCCAATTGGGATATAATGGAATAGCAAAGAACACAGCA  
GCCCTATTTGGACCATCAAAGAAGAGAGTTGAGTTTTGAACTCAAACAAAGTAAAAACAAACAAAACA  
AGAAAATACCCCTTTTGTCTCTACCTCAAGCTCCATTTTTTTTTCTCTCCTTGTGGTTCAAAGGTTTGA  
TTTTTTCTTGTTTTTCCATTCATTCATCACTTTTGTCAAGTACCCTTTTCTTGTCTTGTCCATTTGTACTTT  
TGTGATGTTTTCTTTGATTTTGAAGCTTGATACAGATAGAAATGAACAATCTTGATGTAAAAAATTGTGT  
AGTTACATCATATATGTGAAAAGTCTTTTTTTTTTCTTTTTTGTGTTCTTTTTGAGTTTTAAGAAGATG  
GGTGTGTTGCAACTTTGTGTGATCTTTTTGTTTCTTGGGATTTGCTTACAAGCTCAATCTCAAATCCCCA  
GAACTTGATATGTAATCCAAAAGATTTTAAAGCTCTGGAGGGTTTTGTGAAGAGTTTAGAGACAGTTCTT  
GATTTCTGGTATTTGGGGAATTCTACAAATTGTTGTAATTTGGTAGGTGTTACTTGTGATTCTGGGAGGG  
TGGTGAAGTTGGAGCTTGGGAAAAGAAGGTTAAATGGGAACTTTCTGAATCTTTAGGTAATTTGGATG  
AGCTAAGAACCCTTAATCTGTCTCATAATTCCTCAAAGGACCTGTTCTTTTACTGTTGCATTTGTCTA  
AATTGGAAGTATTTGACTTGAGCAATAATGATTTCTTTGGATTGTTTCTTAGTAGCATGAACTTGCCTTTG  
CTTCATGTTTTCAATATATCTGATAATTCCTTTGAAGGACCAGTTCCTATGGGTATCTGTGAAAATTCAAC  
TAGAGTTTCTGTTATTAAGATGGGGGTTAATTATTTAATGGTAGTCTTCTGTAGGAATTGGGAATTGT  
GGTTCATTAGAGCTTTTTTGCCTAGGCTCTAACCTTCTTCTGGTAGTTTGCCTGATGAACTGTTTAAAGCT

ACCAAGATTGACTGTATTGTCTCTACAAGAGAATCGAATCTCGGGACAGCTTAGCAGTCAGATTGGTAA  
TCTGTCTAGTTTGGTTCATTTGGATATTTGTTCAAATGGATTTTCAGGAAACATTCCAGATGTGTTTGATA  
GATTAGGGAATTTAACATATTTGTCAGCTCATTCAAATAGGTTCTTTGGTAATATAACCAACTTCATTGGCA  
AATTCTGGGACTGTTAGTTCTTTAGTTTGAGAAATAATTCTTTAGGGGGTATCATAGAGCTTAATTGTTT  
GGCAATGGTTAGTCTTGTTTCGCTTGATCTGGCTACTAACGGGTTCCGTGGGTTAGTTCCTGATTATCTTC  
CTAACTGTCAAAGGTTGCAAACATCAATCTGGCTAGAACTCTTTCACTGGACAACCTGCCGAAAGTTT  
CAAGAATTTTCATAGTCTTTCATCCCTTTCAGTCTCGAACAACAGTATGCATAATATTGATGTGCTCTCA  
GAATTTTACAGCATTGCAAGAAGTGTCTACTTTGGTCTTACTCTGAATTTTCGGGATGAGGTTTTGCCT  
ACTGATCCTAGCCTGCAGTTTAGTGAGCTGAAAGCTCTCATTATTGCCAATTGCAGACTCACTGGAGTTG  
TTCCTCAGTGGTTGAGAAATAGCTCAAACTGCAACTGTTGGACTTGTCGTGGAACCATTTGACGGGAA  
CACTTCCACCTTGGATTGGAGATTTCCAGTTTCTATTCTATCTGGATTTTTCCAACAACCTTTTTACCGGGG  
AGATTCCAAAAGAAATTACCGGATTGAAGAGCCTAATCTATGGCCCTGTCTCAATGAATGAGCCATCACC  
AGACTTCCCTTTTTCTGAAAAGAAATGTAAGTGTTAGAGGGTTGCAGTATAATCAGATTTTTAGCTTCC  
CTCCAACACTGGAAC TAGGTAACAACCTTCTCACTGGAGCAATTTGCCGGAATTTGGGAATCTGAAAAG  
GTTACATGTTTTGGATCTAAAAGCAACAACCTTATCTGGGACAATACCAAGTAGCCTGTCTGGTATGGCG  
AGCATAGAGAATTTGGATCTATCCCACAACAATCTGATTGGCAACATACCCTCCTTTAGTCCAATGCA  
GCTTTATGTCAAAGTTCAGTGTGCTTATAACAAGCTCTCAGGGGAAATTCCTACTGGAGGTCAGTTCCC  
AACATTTCCAACATCAAGTTTCGAGGGAAACCAAGGACTCTGCGGTGAACATGGTACCCCTGTCAAAA  
TGGCAGCCAAGTTCCTCGTGACTTGGTCAAAGGAAAGAGGCGCAAAGGAACTGTCATTGGCATGGGTA  
TTGGTATTGGTCTTGGAACAATTTTTCTTCTTGCTCTCATGTACTTGATTGTTATACGGGCAAGCAGTCGA  
AAAGTAGTTGATCAGGAAAAGGAGTTGGATGCTTCTAACAGGGAACTGGAGGACTTAGGCTCAAGTCT  
GGTGATATTTTTCCATAACAAGGAGAATACTAAAGAGATGTGTCTTGATGACCTTTGAAATGTACAGAC  
AACTTTGATCAGTCAAATATTGTTGGATGTGGGGGCTTCGGCTTGGTCTACAAGGCCATTCTTCGTGATG  
GTAGGAAAGTTGCCATCAAGCGGCTTTCAGGTGACTACGGGCAGATGGAACGAGAATTCCAAGCTGAA  
GTTGAATCTTTCAAGAGCTCAGCATCCAAATCTTGTTTCATCTCCAAGGATATTGCAAGTACAGAAGT  
ACCGGCTTCTAATTTATTCTACATGGAGAATGGAAGCTTGGATTATTGGCTGCACGAGAAAGTTGACG  
GACCTGCTTTATTGGACTGGGATCTGAGGCTTCAGATTGCTCAAGGGGCTGCAAGAGGACTTGCATACT  
TGCACCTAGCGTGCGATCCTCATATCTTGACCGAGATATAAAGTCTAGTAACATTCTTCTTGACGAAAA  
TTTTGAAGCTCACTTAGCTGATTTCCGGTCTTGCAAGGATTATTCGGCCCTACGACACTCATGTGACCACTG

ATGTTGTCGGAACATTAGGCTATATACCTCCTGAATATGGTCAAGCTCCGTTGCTACCTATAAAGGGGA  
CGTGTATAGCTTTGGTGTGGTTCTTTGGAGCTTCTAACATGCAAAAGACCGATGGATCCGTGCAAGCCT  
AGAGCAAGCAGAGATTTAATCTCTTGGGTGATCCAAATGAAGAAACAGAAGAGGGAAACTGAAGTCTT  
TGATCCTCTGATATATGACAAGCAGCACGCGAAGGAAATGTTATTTGTCCTTGAAATTGCTTGCCTTTGTT  
TGCATGAATCTCCTAATATAAGGCCTTCTTCGCAGCAGTTATTTACTTGGCTCGACAACATAAACACACCA  
CCTGATGTTTCATGTGTTTTAGAGGAAAACCTGTTGTCGATAACTTATATTTTCAGCGGATGTCCTGCACAT  
ATAGCAGTGTATTCTGGTGTAAATGGTTGTATCTTATCCCTATTTTTATCTTCTGGAATTGAAGAATATA  
TACTATGTTTCTTCTCAAACATGTACAAATAACATTGTGAATTTGGATGTGACTTTATCTTACCTAATAGA  
TGAACGTCAGTTTATTCTTCTT

>M6-PGSC0003DMG400017836 M6 Other RLK with TM

AGGGTGTGTTGTGTTTTAGTTAAAAGCTTATTAGTTTAGCTTTAATAGTTTAATTGCTCACTCACATGCTA  
CCTGAAACGCCTGTGTATAGCATGTTAATCTCACAAACACACCTTCTTATGCTCCCTTTACACCCCATTTT  
TGGGCGTTTCTGCCTCTTCATTGCTTCTTTCTCAATTTTCTTTTTTTCTTTGTTATTGCTTCAACTTATCTA  
ATTTTATCTCCTTTTTTTTGGTACATATTTTCTGCTTTTATGTTGTGAGGTTTATGGGATGGGTGGAGTGA  
AGCTGCAACTTGTGTTTGGTGTGGAATTATGTGCCTTTGCTTTCTTAAGGGATCTGCAGGTAAATTC  
TTCTTTTCTCTACTTCTTCAACTACCTAATTATTTATTTATTTATGAGTTTTGTGCTCAGTAAGTCCAGTAT  
TGGTAATTTTGAGTTCTGAATTTTGGTCCCAGATTTGATAATTTGTAGCACTCAAATCAGATTGATGCAT  
CTGGTGTGTGTGAGAGGGAATGAGACTATTACATTCTGAATTTTGTACTCATGTTTTTATGCCAAAC  
TGAAATTTTTGCCTTGAGTTCTCTAGCTTGGTTTTGTTTTGCAATTTAACTGTTTCATTGATCACTGATTTT  
CCCTTTTAGAGTCCCTACTTATTTCAATTCTAATTAAGCTTCTTACCGGTTGGTTGCAAATTGATGCTGCAA  
TGAATATTAATCCGCCATGGGATAATTAGCCTGGTTTTATTTCAATGACGTGCCATCTTGTGGGATGT  
ATTGCCTTGTGATTTATTTGCAAATAAGTTACTCAGACATGTAATGTAAGACCATGGTAAAAAATGATA  
AACTGTTTCATGTTTCATCATCCCCTCCGTATACGCTTTATGATTGTAATTAATCTAAGTACGTTGAAAAGGA  
GGGAAATGATTTTGCTAATGTCTTTTTATCTGTGTTTCGACCTGTCATTTCCACTAAGTTTTTTGTGAAATG  
GAGAATCTTTTCTAATGAAGAACTGCATATCTAACCTAATATAATTTTTTTGGAATTCATTTTAGGCGTCA  
GTTTATTGCCCTCTCCGTCAGCATCCTCTGCAGTTCCTCCTGTTGAAGAGGGAATACCCTCTTTTGTCTCTC  
ATGGGAATGCATCCACAAGTAATGCACTTGCTCCTGGATTTGAGTTAAATGGTCAGACCGTGATTCTTGG  
CTTCAAATCTATTAACCAAATTTGATGCTTTATGTTATTCATCTTATGTTTTTTTTTTAACTCAGTAGCA  
TCTCCTCTGCAAATGTCTTTCCACCACTGACGTCCCCCCTGTCCCTCCACCGAGAGAAGTTCTTACACT

GTCTCTGCAACCAAGTGCTCCCATAATATTGCCACCACCTAGTTCAGCTCCACCCGCAATCAATTCAGCCC  
CACCACAAATTGTTTCTCTACCATCTCCTCCTCCTCCAATAGTGTGGAATGATCCCGCTCCAGTTCTGC  
CTCCGAGTGCTCCTAAGAGAGAGCATCGACATACTGAACAGCCTGTTGTTGTTCCAGAAGCTCCAGGTA  
TGTGGCTGACTGTAGTCATAATGTTGAAATGACTTGATTTCTGTTTAAGTTGATAATTTTTTTGGAGAGCA  
GCACCAGTCTCGTCACCTGGAAGGAAATCTACTGAAGATGCACCAACTAAAGCTCCACCTCTACCTGGAT  
CTATGCCACCCAGTGAGAGCAAGTCTCCAGAGGGTCTCTCCCCTCAATTGCCCGGGTAATAATTGGCT  
GACGATAATTATGGTTTTGACACAGTATCTTAAGATAGAAAATGATTTATCACATTATTTGTTTTGCTGT  
TATTTAACTCAGTCTGAATGCGCCTGCTCCAAGGGGAAAGCCGCGAAATTCAGTCCCACCTTCCCAAG  
AAATCCAGAAATTCACCATCCATTCCACCAGGTATCCTTGTCTTTTTCTAAAAGAAATTGTGACATTCAT  
GTTAGAATGAAGTTCAGAGTAAATTAGATCTGATCATGGATGCCATTAAATTTTGTACATTATTTGCTCA  
GTCCTGAATGCACCTTCTCCAAGGGGAAAGCCACAAAATCCTCTGCCACCCACCCAATCATTCCAGAAG  
TTTACCATCTATTCCACCAGTTTTTCACTATATTTATCTTGTACTCCCTCCGTTTTGTTTTATATGGTGG  
TGTTTGATTGGGCATAGAGGTTAAAAAGAAAGAAAGAAAGACTTCCAATGCATACCAAAGGTAGCCTTA  
GAATTTGTCTTCTTAAACATATGATGATATTTTTATGGCTATAGGAGCATGTCATGAAAGGGTAAAATGG  
AAGTTTTAAGGTTAAAGAGTTTTCTTAATATAAAAAGGTGTCATTCTTTTTAGAACAGACTAAGAAAGAAA  
GATTGTCATATAAAAACGGCACAAAGGAAGTATGTGATACTTCGTAAGGAAAAAATAAAGTGTAATA  
GATGTGATCATGAATGCATGAATTTTTACATTATAGAGCTTTCTCTCATTGCATTCAGTCCTTAATGCGCC  
TTCTCCAAGGGAAAAGCCGAAAATCCACTGCCCGCCCGCCAACCAATCCAAAAGTTTTACCATCTATT  
CCACCAGGTATATTTCTCCGTGTATTTGTGAGTGATATTTCTGCAAATAAATTGTTTGTAAACAAGATC  
TGATCATCTATGCGTTGAATTTGCAGCGACAGTTGCACCACCTCCGAGGAGGTTGCCTAACAAATTCACCA  
CCCAGCCATCCAAGACATCCTCTAAAACCTCCATCCGTTTACCAGGTAACAGTGCTTGCTAGTGTGCTC  
ATGTACATGTACTTTAATATTTCAACCAAATATTTTTGGCTTGATGCAATCTACACATATTCTTGGCAATT  
GTACCTCAAGTAGTCACCTCCTCAAGTAAAAAACCAATCAATAGAATCTTAACTAGAGGCTTGCTTGCT  
TCCAAATTGTTAATGATTTTCAATGTAGAACTAGCTAAGAAAAATGAACTGATGCCTACTGAATGTGTTC  
GAAGTTGAAATAGTCAGTGCTCCTCTTTTTGGATTGTCCTTACCTTCAGAAAGATATAAGAATGTGTTTTA  
TTTTGTTTTCCATTTTTCTGTAAATAGCTACTTGGTTTATAAAGTGGCATTGTTAGCATATTTAATTTG  
AGTCATTGTTATTACTGTAGTTAAGCATGATATATCCCCTGTATCAACTCCGTGGCCAAGCATCAACCGTA  
AAAGAGCAATTGCTCCAAGTGTGACCTACTAAGGGAATGAACCATCAGCATCCAGCAAAGGTATAT  
CAATATTTTTCTGCTATCATTTCTTTTCATCAGCAGCACGAGGAATGGCCAATTATGTCACCGAAGGATTT

CTTCTCCTCTTGTCGCTCATACTGAACACAAAGCCATGGGGTGCTCTACTAATGCTCCTCCTCATAAATTC  
CCTAACTCTCCCCCTGTGGAAGGATCATATCCTCCCTTATCTGCACCTTCAATCTCATTTTCAGAGGGATCA  
CTACCTAAAAGATAATATGACAGAAATCACTCCGTCATCCTATGAAGTTTATCCTCCTGGTTCAACTGAAC  
TAGGTTCTGTATCTTACTTGAGAAATGTCAGTTGATATCCTCATTCTGATATACGACACTAACCAGAATTC  
AGTCAATATTTAATGAAGGTCCATTGATTTCTCCATCTCCTTCGTTTCACTCAAAATCATATCCAAAGACTA  
ACCTTAGGCACAAGTCTCATTACCGTAACTGCAGGTTTGTGGTCATTCTAGTCATCCTCAGTTGACCAT  
CCGTTTGCCTCTCTGAAAGAAAAATGAATAGTGAAAAGTAAAAAGTGATTCTGATAACTCCTACTTTAC  
AGGATTGTCAGTACCACCGATGCTTGCGCCTTAACTTCTCCAGAAAGTCATGATTCTCCTGCAATATCAC  
CGTCTCCAAGTGCTTCATCTAGACCAACAAAAAGTAAGAGTAAGGCATATGTTCCCTTTTCATGCAATCC  
ATAGTCAAGGCATTAACCTTATATTTTATTTTCATTCTATACATAGTTAATGCTTATCTCTATATCATCTT  
GTCATTGCAAGAGCCATTTCTTTCCCTAAAATGTCTCCCTCTGGGTCTTACCAAGGCATCCAAAGATAC  
CGCATTCAATTCAGCACTACCACCTCCACCTCCTAATGAAGGTATGTTTTATCTGCCTCTGATTTCTCCTC  
TAAATGATATAGATTTTACTTGACACAAGTTGCCAGGTTTTGCCCCATTGACTATTCTATACATGACATTGA  
TGTTGCAGATTGCGCTTCATTGGCTTGTGTGGAGCCTTTCACAAATGGTCCACCCAAAGCACCTTGTGTT  
TGTGTCTTGCCCATGCGAATTGGACTACGCCTTAGTGTAGCACTCTACACATTCTTCCCTTTGGTTTCAGA  
GTTAGCTACAGAAGTTTCTGTTGGGGTATTTATGGATCCAAGTCAAGTTCGTATAATGGGAGCAAATTCA  
GCCAGCCAGTATCCAGAAAAGACCATTGTCCTTATTGATTTGGTACCCCTCGGAGAAAAATTTGATAACA  
CTACAGCATTGTGACATCACAAAGATTCTGGCACAACAAGTTGTTATAAAATCACTTTTTGGTGATTAT  
GATGTATTATATGTGCAATATCCAGGTATAGAATCATTCTAATGCCATTGTGTCATCTTGATGCCACATG  
CTATGTCCCGAGTAACTAAATAGAATTGTTATATGTACAGGTTTTCTCCCTCTCCACCTTCAGCAGCTTC  
AGACATTGATAACCATAGGTAGCCAACCATATCCTGGTGATAATAACGGAAGGACCATACAGCCCCTTGG  
AGTTGATGTGAGGGGGCAACAGCACAAAAGTGGGCCGAATCGGAGTGTCATAGCAGTAATTGTGTTGT  
CAGCCTCTGTGCGAGTTATTTTATGTTGTGCCATTGCATGGGTTTTGCTTTTCAGACATAGAGATCACGGA  
TATCAGTTAGAACCAACTCCACCAACTACATTACCATCCCTTGCAAAGTCATCAGGTGAAATCCTTCTCTT  
GACATTTAAATGATCTACTGCCATGTGGTTTGCCTAGTGTTTCGTATTCTCTGTGTTAGTTTTCTTCTTTCAT  
GCTGAAAAAGACATTCAAACAGTAACTTCAGAAGCCTAGCCTTTCATTATCGCCATGCCTTTGTAGCAT  
GCCAGGTAAATACTATGTTAGGGGAAAGTAAATCATATTGGAGTTTTGAATATGCTATATGTTGCTCAAC  
TCGGTACTTTTACTACTCATCCTGAGCATACAATGGAATGAAATGTCCAAAATTATGAAATGGAATATA  
GGAAAAGTTATCTGGTTAGTCGCATAATGTTAATATGGTGAGTCATCCAATATCTTTTACTGGAATATC

TTGAAGTATCAACTCTTAATGGGTGCATTGAGAACCTTTAACTTCACAAATTTATTAATATGCATCTAA  
AATGTGTACAAATATGTGATTCTCACGAGTCTTGTGTAATAAAGACTTAATACAATTTTTTTCTGATCTTT  
ATGCATGGTGTAGGGATTGCAGCCTCCATGATTGGGAGTAGGCCTAACTCTCCTACATTGTCCTTTAGTT  
CAAGCTTTGCTGCTTATACTGGTTCAGCTAGAACATTTTCTTCAAAGGAAATTGATAGAGCAACTGACAG  
CTTCAATGAAGCAAGAGTACTAGGTGAAGGGGGATTTGGTCGTGTTTATAGTGGTGTGCTTGATGATGG  
GATGAAAGTGGCAGTGAAAGTCCTGAAGAGAGATGACCAACAGGGTGGTCGTGAATTTTTGGCTGAAG  
TAGAGATGCTTAGCCGCTCCATCATAGGAACTTGGTCAAGTTGATAGGTATATGTCTTGAGGAGCGCA  
GTCGCTGTTTACTTTATGAGCTCATCCCAAATGGCAGCGTGGAATCTCACCTTCATGGTAATATTCAATTT  
AGATCACTCGTAACTTTTTGGTTGAAGTCATGTGTATTTAGATTTTCAGACTGGCTAAAAACCCATCTTTC  
AGGTGTTGACAAGGAAAGTTCTCCACTTGATTGGAATGCCGAATGAAAATAGCACTTGGTGCTGCCCCG  
AGGCCTGGCCTATTTACATGAAGATTCCAGTCCCCGTGTCATACACAGGGATTTAAGTCTAGTAACATC  
TTACTGGAACATGATTTACCCCCGAAAGTGTCTGATTTTGGTTTGGCTAGAGCTGCATTAGATGAAGGAG  
AAAGACACATATCCACTCGAGTCATGGGAACTTTTGGGTAAAATATTCATCTGACTTAATATTTGCATTTT  
CATTAGGCCAGCCTTCGTCTGTTTATGACTGACAAAGTCCCAAACCCCTTAAACAGATCAGCTGCTTCAT  
GCTGGTCTGCTTTCCTGGAGTATAATTTTTTTTCTTTTGAATGCCTTATTTATTTTTACTCGATTGTCCTCA  
ATCAATTGAAACTGACTATGCATAACAAAACCCATTCTCTTAACATTTTGTCTTCTGTTGTACACTTCTGA  
CTTTGTTATTTTACCAGGTACGTAGCTCCAGAATATGCTATGACAGGGCATCTACTTGTAAGAGTGATG  
TTTACAGCTATGGTGTGTCCTTCTTGAGCTGCTAACTGGAAAAAGCCAGTGGATATGTCTCAGCCACC  
AGGTCAAGAGAATTTAGTGGCTTGGGCACGCCACTCCTAACGAGTGAAGAAGGTCTGGAGTTGATTGT  
GGACCATAATTTGGGGCCTGATTTCCCTTTCGATGACATTGTAAGTAGCTGCTATTGCGTCAATGTGT  
GTTCAACCAGAGGTATCACACAGACCTTTTCATGGGTGAGGTTGTCCAGGCCTTAAAGCTGGTATGTAAC  
GAATGCGGACAGACAAAAGACGTAGTGTCTCGAAGTTGTAGCCAAGATAATCTGTCTATTGACATGGAT  
ACTAGGATTAGTACAACCTCAAGCCAAGTCCTGAACCTATAACAACCTCAATCCCCAGTTTCTAACTCTGA  
CAGTGAGCTGGATGTTGAGAGGGGACTTTCAATGTCAGATTTACTGAGTCCGTTAGCAAGATACGGAAG  
GCAAGAATCTGATTCATTTAGGAGGTATTCTAGCTCAGGTCCTCTGAGAAAAGGAAAAACCAGGAGGCT  
ATGGCAGAAAATGAGAAGATTATCTGGAGGTAGTTTGGAGCGAGCACGGCGTGATGTTTGGGTTACGGC  
CTGGATCCCCTAATTGAGGTTTTTCATCTTTGATTTTGATAAATGTTTCTGAAAAATGTCAATTTTCGCCAT  
CCATGCTGGATATACTAGATTGAGCATGGAATTGTACAGCACCTTCTTTATCAAGACATAGAATGAGGA  
AGCAAACACCAACACACTCAAATTGTCCTGAATGCTATCGCGTAATCCATGAGTATGATAAACCCCTCCGC

CAAAAGCTGGGAAGAACTGTGCGCGACAAGATATCTGAATAGAGATTCATCTTGTGTAAGAAGATTGT  
ATTTATTGTAACATGCTAATTGTTCAAAAAGGAATCATAGTTCTTTATCTTCTGGTATTGAGTTTGAACCT  
TGGAGGCCAAACGAGTGATCTGCTGCTAAGATCTCATCCTTTGAACTTTCTCTTCCACAGTGCCATTTTCA  
TTAAAAATCAGCATGGGTTTACTAGGCTTCACCCCATCCTTCAACTTATCATTACTCTTCTTATCACACACA  
ACATTTTTGTGTTTATTACCCACACCTTCAAGTACTTTTCCACTTCTAGTAACAAATGGCCATCATTCTAT  
GGATTAAGAAAAGTGTCTTCTATCTTTCATCCAATGATTCATTTGAGATGACAAGTGATTCATTTGTGCC  
TCAAGATGCTTGATTAATGCTGAATGGGAACCTCAAATAATGAGGGATATTTTAGGTATGAAACTCATAT  
TCTCAATAGTCTAAGTATGAAACTAAAAAA

>M6-PGSC0003DMG400019721 M6 Other RLK with TM

TCAATTATTGTAGGTGTAGTTTTAGGTACATCGCTTGTTTGCATTATTGTCTTCTCACTTTATCAGCTATAT  
TTGACAAGTACAAATGAAAGAGAGAGTTCGAGTTAGACTTGAAAAGTTTTTGGATGACTACAAGGCCATC  
AGACCAACACGATATTCTTATGCTGATATTAAGAAGATAACAGATGATTTTAATGAAAAGTTAGGAGAA  
GGGAGTTATGGAACTGTATACAAAGGCAGACTTTCCAGTGAAATCTATGTTGCAGTAAAAGTCCTACGC  
GATTCCAAGGGTAAAGGGGAAGAATTTATCAATGAAATTGGTACAATTGGGAGAATCCACCATGTTAAC  
GTGGTCCGCTTGTTGGTTTTTGTGCTGATGGATTCAGACGAGCTCTGATCTACGAATACCTACCAAATG  
ATCACTTGAAAGGTTTATTTTACCATTGAGCTCAAGCCTGGGTAGTGTCTCACTCATCAGCTGGAACAA  
GCTTCAACATATTGCTCTGGGTACTGCAAGAGGGATTGAGTATCTTACCAGGGATGTGATCAGCAAAT  
CCTACATTTGATATCAAACCACAAAACATCCTTTTAGACCAGAACTTGAACCCCAAAATATGTGATTTGC  
GCCTAGCCAAACTATGTTCTAAAGAAAAAAGTGCGGTCACTATGACAGCTGCTAGGGGAACCATTGGTT  
ACATTGCACCAGAAGTGTTATCAAGAACTTTGGTAAAGTTTCTCATAAGTCTGATATTTATAGCTTTGG  
GATGCTCTTGTTAGAAATGGTTGATGGGAGGATAAAGATGGATTCTAAGACAAATAATCACAGCAAAGT  
GAATCTTTGGAATGGATATATAGACATTTGGAGAAAGGGGAAGAATTAAAGATTCGTATAGAGGAAG  
AAGGAGATAATACAATTGTGAGAAAGTTAGCTATTGTTGGACTTTGGTGCATACAGTGGCATCCCAATG  
ATAGACCTTCAATAAAAGAAGTTACTCAGATGCTGGAAGGAGATGGAAGCCATCTCAACTTGTCCCCAA  
ATCCTTTTATGGCTACTAATACGCCTAAGTTAAATGCAAGTCCTCTCAGT

>M6-PGSC0003DMG400020016 M6 Other RLK with TM

CAAGTAGAAATGAAAGAGAGAGTTCGAGTTAGACTTGAAAAGTTTTTGGAAAGACTACAAGGCCATCAGA  
CCGACACGATATGCTTATGCTGATATTAAGAAGATAACAGATGATTTTAATGAAAAGTTAGGAGAAGGG  
AGTTATGGAACTGTATACAAAGGCAGACTTTCCAGTGAAATCTATGTTGCAGTAAAAGTCCTACACGATT

CCAAGGGTAAAGGGGAAGAATTTATCAATGAAATAGGTACAATTGGGAGAATCCACCATGTTAACGTG  
GTCCGATTGGTTGGTTTTTGTGCTGATGGATTGAGACGAGCTCTGATCTACGAATACCTACCAAATGATT  
CACTTGAAAGGTTTATTTTACCAGTGAGCTCAAGCCCGGGTAGTGTCTCACTCATCAGCTGGAACAAGCT  
TCAACATATTGCTCTGGGTAAGGACTGCAAGAGGGATTGAGTATCTTCACCAGGGATGTGATCAGCAAATCCT  
ACATTTGATATCAAACCACAAAACATCCTTTTAGACCAGAAGTTGAACCCCAAATATGTGATTTGCGCC  
TAGCCAAACTATGTTCTAAAGAAAAAGTGCGGTCACTATGACAGCTGCTAGGGGAACCATTGGTTACA  
TTGCACCAGAAGTGTATCAAGAACTTTGGTAAAGTTTCTATAAGTCTGATATTTATAGCTTTGGGAT  
GGTCTTGTAGAAATGGTTGGTGGGAGGATAAAGATGGATCCTAAGATGAATAACCACAGCAAAGTGA  
ATTCTTTGGAATGGATATATAGACATTTGGAGAAAGGGGAAGAATTGAAGATTCGGATAGAGGAAGAC  
GGAGATGGTACAATTGTGAGAAAGTTAGCTATTGTTGGACTTTGGTGCATACAGTGGCATCCCAATGAT  
AGGCCTTCAATAAAAGAAGTTATTCAGATGATGGAAGGAGATGGGAGCCATCTCAACT

>M6-PGSC0003DMG400021622 M6 Other RLK with TM

ATGGAGTTACTGAAGGCCCTACGAAATTCTTGTCTGAAAAGGGAGGTTATTCCCAGTTGGTTTGATA  
CAAAGACTCCATGCAATTGGACCGGCATAAAGTGTGAAGGTGAACGTGTCATCCAGATTAACCTTTCCAT  
GTACAGGATCACCGCTAAATGTACCATTTCTGAAATATTGGGAAATTTAGGTTCTCAAGCACCTGAA  
CCTCAGCCATTGTGCCCTCACTGGTACAATACCTACAGATGTTTGGAGTTTGGAGAAAATGGAGACACTA  
GACTTGACTGACAACAGGTTAACTGGCGAGCTGCCTCCAACCTATATCTAACCTGAGAAACCTGAGATATC  
TTGTAAGTACGACGATAATGGTTTCTCAGGCAGTTTACCATTAACAATTTGTGAGCTAAAGGAGCTCAGGGA  
ACTATCAGTTCATGCAAATCTTTTACTGGCAATCTTCTGGTGGAGATTGGAAACATGGAGAAGTTGCAG  
TCTCTTGATTTCAAGTTCAAATTTCTTCTCTGGTAATCTACCTTCCAGTCTAGGTAATTTGATGGAGCTTCTA  
TTTGTGATGCCAGTCAAACAACCTTGACTGGATTGATATTTCCAGAAATTGGAAAACCTAGGGATGCTTA  
GAATTCTCTCTCTCATCCAACATGTTGTCTGGACCTATACCTTCAACAATTGGCCATCTGAAGCAGCTG  
GAGGTACTTGATCTCCAAAACCTGCAAATCACTGGAAGTATTCCTGAAGAGATTTCTGAATTGAGTAATT  
TGAATTACTTGAATGTAGCACAGAATGAATTTGACGGAGAGCTTCCCTCAAGCATTGGAAAGCTAGAAA  
ATTTGCTTTACCTATTGCTTCAAATGCAGGATTGTCTGGAACAATCCCTTCAAGATTTAGGGAACTGCAA  
AAGGCTCAAATCAATAAATTTGTCCTTAACTCATTTTCAAGGGGCATTACCTGATGAACTTTCTGAGTTGG  
ATTCATTAATCACTTGTGCTTGAATCAAACCGCTTATCAGGCCCTGCCTATGTGGATTTCCAACCTGG  
ACGCAGGTAGAGTCAATAATGGTGTCAAAGAATTTCTAAGTGGACCTCTCCCAACTGTATCTCTCTT  
TGCTATCTGTTCTTGATGTCAGTGCTAACAGTCTATCTGGTGGAGTTGTCTTCAAGAGATATGTGGTGCCAA



ATCATTGAGCGTGCTGGTGTGTCGGATAACAATTTCACTGGTGACATCCAAAGTACTTTACGAACTGT  
TCATGCCTCACAGACTTGGTGTGTCGGAAACAATCTCTCAGGTAAACTGCCTTCTTATCTAGGGGAGC  
TTCAGCTCATTACTCTTGAGCTATCGAAAAACCAATTCTCTGGGATGGTACCAGATGAACTATGGGAGTC  
AAAAACATTAATGGGGATCTCACTCGGCAACAATATGCTTGAAGGTCCAATTCCAGCGACTATTGCAAA  
ACTTTCAACCCTCCAGAGATTGCAACTTGATAATAATCAGTTTGAAGGAAGCATACCGCGTACCATTGGT  
AACTTGAAGAACCTGACCAATCTCTCTTTCATGGTAACAAGTTAACTGGAGGTATTCCAATGGAGCTTT  
TTGAATGTACAAAGTTGGTATCTCTTGATCTTGGTGCAAACAGTCTTTCAGGTGAAATTCCAAGATCAAT  
AGCTAAGCTGAAATTGCTAGACAATTTGGTTCTGTCTAACAATCAGTTTTCTGGCCCTATACCTGAGGAA  
ATTTGTTCTGGGTTCCAGAATATGCCTTTACCAGACTCTGAGTTCACCCAGCATTATGGCATGCTTGATT  
GTCCAACAATGAACTAGCTGGGTCCATCCCACTCAATTAAGGATTGCATAGTTGTGACAGAACTACTT  
CTACAGGGAAATAAGCTCACGGGAAGCATTCTCCTGAAATTTCTCAGCTCGGTAATTTAACAATGCTTG  
ATCTATCTTTCAATCCTTGACAGGTCCAGTGTTTCCTCAGTTGTTTCCAATGTCAAGCCTCCAAGTCTCA  
TACTTTCTCATAACCAGATAAGTGGATCTATTCTGATAATCTCGACTCTATGATGCCAAGTTTAGTCAAG  
CTAGACCTTTCAAATAACTGGTTGAGTGGCTCATTGCCGCCTTCTGCATTTAGGCTCAAAAGTTTGACTTA  
CCTGGACATCAGCATGAATCCTTTCTCAGGCTCTCTGTCTTTTAAAGTTGGAACCTCCAGCTCTTTGTTGG  
TCTTAAATGCTAGCAACAACCAACTCTCTGGTGCTCTTGATGATTCTCTCTAATCTCACATCCTTGCCA  
AGCTAGATCTCCATAACAACCACTCAATCACAGACAACCTGCCACCATCACTTTCAGCTCTTGCTCCCTGATA  
TATCTTGACTTATCCAGCAACAGTTTTCAAAGTCCTTTCTTGATGATTTGTGACATAGAAGGCCTTGT  
TTTTTCCAATTTCTCTGGAAACAATTCATTGGCCTATCCCCTGATGTGTGCACTAAGGCTAGGAAATGCA  
TACCAAGTGAACCTGTTCTACCTCCAAGGGAAAACCTATCCATCTGCACCAGTTCTAAGCCATGCATCTGT  
CTTGGGCATTGCCTTGGGTGCATCAATCCTTTCTTGTGGTGCTAATTGTAGTTCTCAGATGGAGAATG  
CTGAGACAAGAAGCTGTACTTGTGACAGAGATAAAGGTAAGCAAGGAAAGAAAACCTGACCCACATC  
TACTGATGAGCTTTTGATTAAGAAGCCAAAGGAGCATCTGAGTATCAACATTGCAACCTTTGAGCAGTCT  
TTGTTACGGATTAACCCTACAGCTATTCTCTCAGCCACTGAGAACTTCAGCAAGAGTTACATCATTGGTG  
ATGGTGGTTTTGGTACTGTATACAAAGCCAACTTCTGAGGGCCAGAACATTGCTGTCAAGAGGCTGA  
ACGGAGGCCACATGCACGGTGATCGCGAGTTCTTTGCTGAAATGGAAACAATTGGTAAAGTAAAACAT  
GAAAATCTGGTGCCATTGCTTGGTTATTGTGTCTTTGCAGATGAGAGGTTCTTGATATATGAATACATGG  
AGAATGGAAGCCTTGATTTCTGGTTGAGAAACCAAGCAGATGCAGTAGAAGCACTTGACTGGCCAACTC  
GTTTCAAGATTTGTCTAGGGTCAGCTGTCCGACTTTCCTTTCTACACCATGGTTTTGTTCCACACATCATC

CACAGAGACATCAAGTCAAGCAACATACTCCTAGACAAGAACCTTTGAACCACGAGTCTCTGACTTTGGCC  
TGGCTCGAATAATTAGTGCTTGTGAGAGCCATGTTAGCACAATCCTTGCTGGTACATTCGGGTACATACC  
TCCCGAGTATGGACAAACCATGACGGCCACAACAAAGGGTGACATCTACAGCTTTGGAGTGGTGATGTT  
GGAAGTGGTAACAGGAAGGGCACCAACAGGACAGGCTGATGTTGAAGGAGGCAATCTTGTTGGCTGG  
GTGAGATGGATGGTTTTCAAATGGCAGGGAGATTGAAACGTTGGATCCATTTATTTCTGGTTCAGGATTA  
TTGAAGGATCAAATGCTGCGCGTTCTTGCCATTGCAAGGTTATGCACCAGAGATGAGCCATGGAAGCGA  
CCATCAATGCTTGAAGTGGTGAAGCTGTTGAAGGAGGCAAAGAACAATGGTGCTTGTGGAGTGTGA

>M6-PGSC0003DMG400025784 M6 Other RLK with TM

ATGTTGTCGAGACATGGGAAAAAATAGAAGGAAAATGTTAAAAAGTGGGGACTGTGGGGGGTCTATAC  
AAGGTCTTGAGTCAGTCAAAGCGGCAGTGGCTGCTCCTCCTGGGACTCTGCTCAGTTTCAATTGTTTCT  
AATTTTTCTCTAAAATAAGCTAAGGCAATTTACCACTCTTCAATCATATCTGCATCTGTTCTATATTGGTAT  
TGAGGTTCTGCCATGACATTGTACGGACAAGCCATCTTTCTGGGTTTCTTGATCTTTCTTGAAATGCACCT  
TTTATCAACAACAAGTATGCTTCAAGTATTACATCTTTGTGTTGTTGATTTCTTCAATTACATCTTGTT  
TTGGGAGCTTCCCATTTTGTGTTCAACAGTTTTGAGTTATATTCTATCTTGTGTTTGAGGTAAAGGAGAA  
AAAGATGACATTTTTAAAATTGTAATTTGGGCTTATTTATGAGTATTTGATGATAGAAGTTATAGTGAGC  
TTGAAGGCTGAAGCCGCTTTTATTTCTTGAAAATCTTATGGGTGTTTGTCTTGTACTTGGTTTTGATGTG  
TTTGGGGTTCATGAGTATTTAAGAGGGAAAGTGGAAGAAGTAAGGTATTTATGGAAATGTGATTAATGTG  
CCTGCATGACTATAAAGACCTACCAATTTTCAGTGACAATGTGCTTTTTGTTTTGTTGGAATTTGGAATG  
TGTATGAAAGCTTGCCAATGTCAGTGGTGAAGCTCATACTAATCCAATTTATGTTTGCTTGTAATTTTAT  
AACATTCAAATTCATACGACAGCTATTCGTAGTTCAGTTTTAATATTGCTATATGCATTACTTCATTTAAC  
GATGGTGTACTGCACGATGTAAGTACTGATGTTTCTTTTGGAGTTTTCAGCTATAACAATGACAGTGTAATAAT  
TTATATTTATCAGTGCAATTGATGGAATGTACAATCAAACACTACGACTTGTCTGTCTCAAGTCTAGTGGTC  
CAAGTTTTCATCTGTAGTCTAGGTGTACAAGATCAATGTGCGTATAATTCGATGTTAATTCTTATAATTGG  
AGATATTCGGGCTGATACCCCTCCCAAACACCAAACGTAATAGCTTTGAGCTCTTGCTTTCCACAAA  
ACTGAGATTATAACAATACAGGTACTTTTAAACATGTTGCATCTAAGTAGTTCTTCAAAGTCTTTTTATCTGT  
ATATTACTGCTAATATCATTGCTGTTGTAATCTATAAGTTGGTTGCTTCCCTTTTATTTTTCTCGGTGTG  
TGTGGTGTGGTGGGGTTCATTTAGGGAGTGTACTGTAAAAGGAAGTAGAACTGGAGTAATGCAGAAAC  
ATTTCTCAATGAATTGAGATCTGAACAATGACTATCTATTTTTCTTCTACACATGCAGTGTGCCCTTAG  
ACATGACTGGATCCAACATACTCTGACTGCCTCAATCTGCTCCAACAAAGAAGAAAGAGGAAAGTGT

GCCGCTACATTAATGCCTTGGTTGCAATTTCTGTTGCTCGATATGCAAATGCAACAAGCAACCTGGGGGT  
TAATGCTGACACATCACAGATTTGCCTAGACAAAATAGCAGAAATTTTCCAATTCATGGAGTCAACAGA  
AACGCAACAGTGTCTGTGGGTTTGGAAACAAAATTCCTGTCAACTATGATTGCCAAGGTCGAACAACT  
GTA ACTCAGATGATTCAATCTCCACAATTTTCAAGTGTTACTAAAACCTGCCAAGTCCCTCTCTCGGGG  
AAAGTGAATGCAGAAAATGCCTCAATGCTAGCATCTTGTATCTCCGCAATCTAGTTGGTACAGCTAATAA  
TATGACATTTAGTACTTGTAGAGATGCAACTTTTGTGCTCTTGCAAGCCAAGTTGACAATGCATCAGCT  
ATTGATCTTGCTCGCTGTTTCTTTGGGGTTATAGGCCTTATTATACCTCCAGGTACGTCTTAACAGGGTAG  
TGGTGGGATTCAATTATCACGGAAGCTTAGATAGAACAGTTACAGGAATTGTACCGAATGCTTTATGCATT  
GGAATATTGTTACCAACATTGAATCCTTTTCTTGAAATTCTGATGAGTTGCTTTCAGTTTTCCATATTCTTT  
ATAAGGTATTCCATTCAGGTCTAAGTGTGAGCTACATAAAATTGCACAACCATTCCGTGCAGAGCCTATT  
CTATAACTATCGAAATATAGGATAAAGAACAAAAGAAAGAAAAGGAGAAAGCAGAAAAAGAAACGT  
ACTTCTATTTGTTTTCTTTGCTCTGTCATAAGCCCTGAAGTAATTTCTTCTCTACACAACTGTATTCCAGTG  
TCTTTTATACCTTAATCATTA ACTTGCCCGGAATTAGTCATAAAATCCTTAAATCTTCTATTCTAGACTCG  
AACATTTTCAGCTTCTTTCCAGCAACATCCTCCATTGTGTCATATTAGCCTCACCTTACACTCGGAGCAAA  
CTGCTGTTGTGACCCTCATTTTGCACCTTTTTCTGGTCCCGTGTCTTTCTCTGGTATGTTTGCTAATGTTAA  
TGCTTAGGCAGGGAGTTGGTGTGTTTTGTACTTCTGCACATAAAACTATTTCCATGGATCATTTTA  
ATGATGTAATGCACTTTCAGCCATATGAAAAATTCTGACTTCCATTGTACGTCTAACCCTTTCAGGACCA  
TCTCCATCACA ACTTTCACCAGAGGTCTCTCAAACCCTCCTGTTGCTGCAAGTCCCGCTCAACTTTCCTTG  
AATACACCTGTGAAGGAAAATCACCATCCTTACCATCTTACATTAGTACCAGTTATTGGCATAGTAGTTAC  
AGTCATGGCTGTCCTGATGCTGTTTATCTTAATTGTTCTGATTTGGAGGAAAAGCAAAGAGCTGGAAGAT  
TCTGATGCAACTGATAAGATATCTTCAAATCCTTACACATCCACCAAAAAGATTCCAGGAAGGTAATT  
TATGGTCTTTTAGACTATTTGTGTTACTAATCGAAGACGACATTGCAAGATCTGTTCAATTTATTCTTAGG  
GTTCTTATCCTGTTTACTTATTATTATGCAAATAACACACAGGTACGGCTTCTATATTTACGAAATACAGC  
TATAAGGGGACAAAGAAAGCAACCAACA ACTTTCAGCACA ACTATTGGACAGGGAGGATTTGGCACAGT  
ATACAAAGCTGAATTTAAGGATGGTTCCATGGTAGCAGTGAAAAGAATGAACAAGGTTTCTGAGCAGG  
CTGAGGATGAGTTTTGCAGAGAAATAGAACTGCTTGCTCGACTGCATCATCGTCATCTTGTGCTCTAAG  
GGGCTTTTGC ACTGAAAGGCATGAGAGGTTTGGGAATCATACTTGCAAATTTCTCTGTTCAATTTTTCTAC  
CTCGTCTCTTTGTCCAGCTTTCAATGTAAGGTGACCTATTA ACTAGTTCACGTATTAATATCTTCTTTTCGA  
TACTGAACATTTATCATGGAGCAGGTTTCTCATGTATGAGTATATGCCAAGTGGAAGCTTAAAGGATCA

GCTTCACAGTATGCTCTTAATCTTCAAGTCTTATTTGCTGATTTTAATTTTAACAAAAAATTAGCCTTTAAC  
ATCAGTAACTGGTCTGTTATTTGTTGTTGACAAATACATAGTGCATCTTTGACTACTGTTCCATCTTAAAG  
TAGTTGTTGATTTGCTTGATTGTTCTCTAAATATATGTGAAGATCCAGGTACAGCTCCCCTCAGCTGGCG  
TACTAGAATTCAAGTAGCTATTGATGTTGCAAAGCTCTGGTACAATTTTTATTTACTCTGTCCAATTGTT  
ATAATTTTATAAGCTGCTTACCATTCAAGTGCCTTATTTCTTGTTACCTCCATGTAGGAATATCTTCATTTT  
TATTGTGATCCTCCACTGTGCCATAGGGACATCAAATCAAGCAATATTTTATTGGATGAAAACCTTAGTTG  
CAAAGGTAACCTTACATTAATTCAAGAGTGAACCTAGTTTCTTTTACTACAAGGACAAACGTCAAATCTTT  
CTTTTGTCTTGCCTACTGAATTGGTAAAAAATTAAGTCTAAAATATCCCTACTGCTTTGTAAGATCTGTT  
GACAGAGCAGATTATTCTTTTAACTCTTGTAATATGATAGGTTGCAGATTTTGGCCTTGACATGCTTCAA  
AGGATGGTTCTATTTGCTTTGAACCAGTAAACACAGAGATCAAGGGAACCTCCAGGTTGGGGAAAAGTCT  
ACTTATTTGAGTAAAATTCAAGCATCATTACCTTGATGATGTAGAGGGAACCTTGCTTTGTTATTTA  
GGTTATATGGATCCCGAGTATGTCATCACCCAAGAGCTTACAGAGAAAAGTGATGTATATAGTTATGGA  
GTAGTATTACTGGAATTAATCACAGGGAGACGGGCAATTCAAGATAACAAAAATTTGATAGAGTGGGCC  
GAAATGTTTCATGACATCAGAATCTAAGATAACTGAGCTTGTGATCCTAACATTGGAGATTCTTATGACT  
TTGATCAACTTCAGACCCTTTTAGCAATTGTTAGATGGTGTACTCAGAAAGAAGGACGGGCTCGTCCTTC  
AATCAAGCAGGTCCTTAGGCTTTTGTATGAGTGTGCAGACCCAATGCACAGTGGCTTTGTTGAATCCATG  
GACGATGAAGACTACGATGAAATTGAAGGAAAGGGAAGAACAAGTAGGTCTAGGCTGCACAAAGGTG  
AGGGAATATTTACAGTGGTGTGGAAGGTGTCTAGCTTCGTCGTCAGTACATCGAGGTCCTATTGTA  
GCAGGAGCTTCTAATTGAAACCAGCCCTCCCAGTCTCCACTCTAATGTACCAGTTATTTGAGACCACTA  
CTTTGACTGTAAAGTAACTTTCTTTTTTAATATCCGAGGAATCCCGATTGCCAGCTGATGCATGGTTCA  
AACTCGGTGGGTAATGGACCCACCCCTCCACCCTTTGACTGTAACTATCTCTTACGCAGATTTTAACTG  
TAATGCCATTACATATCAGAGTTTTAAGGTTACTGACTTCACCATCCTGACATTGATAAGTAGCGTGCAC  
ACGATCCAGAGGCTGTAATCCATAGGTCCATGAAGTTTGCTTCATTTCCACCAAACAACCTTTTTCTTGCA  
AAGAAGCCTGTGGCTATAAGAGTTGTATTCTTTTTCTCCATGAATTTTTTTTTGGAGAGGTAGTAACTAA  
CAATTTTAGTTTTCTGTTCTCTTTGGTTTGGTTTGGTTTGTGTTTAAACATTCTTTAGTAATTTCCAGG  
GCTGTTATTTCTGTAAGTTATTGGATTGTGAATTTGTTGACTTATGCTCTCTTTACCTGTATGTTTCCAAC  
ATTAGAAGAACTTGCTGCTTTTCGCGGCTAATCTGGAA

>M6-PGSC0003DMG400026743 M6 Other RLK with TM

TTTTTGTCATTCCATTGGATTTAATTTCTCCCAACACAAACACACCTCCTTAACCCTGGCTAATTTTCCCC

TATGATTAGCCAGGGGAAATCACTAGGCGAATACACGATGATTCACCAATAATTTCAATTTCTTCGCGCG  
CTTGGATGCTCATCTATCCTCTTGCAGGATGATGAGCACAAAGAGCGCGAAAACGGAGAAAAAAGGGA  
CAATTTTGATGCATAAATATGAGATTGGTAAATTGTTAGGCCAAGGTACATTTGCCAAAGTATATCATGC  
AAGGAACCTAAAACAGGACAATATGTAGCTGTTAAGGTAATTGACAAAGAAAAAGTCATGAAAGTTGG  
CCTAAAATCTAATTGACCAAATCAAACGTGAAATTTCTGTTATGAGATTAATTAGACATCCAAATGTTGTT  
GAACTTTATGAAGTAATGGCTAGCAAAACAAAATTTATTTTGCAATGGAATATGTTAGAGGTGGTGAA  
TTCTTCAATAAGGTTTCTAAAGGGAGGCTTAGGGAATCAGCAGCGCGAAAATACTTTCACCAATTAATCG  
CTTCTGTTGATATCTGTCATAGTCGAGGGTATATCATAGGGACTTGAAACCTGAAAACATACTCCTGGAT  
GAAACTGGAAACCTAAAGGTTTCTGATTTTGGGTTGAGTGCTCTTTTCGATATGAAAAGACAAGATGGA  
CTCCTCCACACGATGTGTGGAACCTCCAGCATATGTCGCGCCAGAGGTCATAAATAAGAGAGGATATGAT  
GGCAAAAAGGCGGATATTTGGTCATGTGGGGTGATTTTGTTTGTATTGTTAGCTGGTTATCTTCCATTTT  
ATGACACAAATTTAATGGAAATGTATAAGAAAATTAGTAAAGGGATATTTAATGCCCTGAATATTTTCC  
ATATGAAGTGCAAAAACTACTTCCAAGAATTCTTGATCCAAATCCATTTTCAAGAATCACATTAGCTAA  
GCTAATGGACAATAATTGGTTCAAGAAAGGATTCAAACAAATTGATAAACCACTAATTTTGGATCAAGA  
ACACGACGATGATTCACCTCGTAGTGTGTTTTGATATTGTGGATGATTCGGATGGAGAGTGTTCTTCAGGA  
CACAAAGAACAGAGTTCATCAGCAATAATGAAGCGTACTTGTTTAAATGCTTTCGATATCATTCTCTTTC  
TCCTGGTTTTGATCTCCCTAGCTTGTTTCGAGAAAGATAAGAGTCATAGGTCCGGATGCTAGATTCACGACA  
CAAAAGTCTGCATCCACTATTGTCTCGAGGCTAGAGGAAGTAGCTTCAATGGGTAGTTTTAAGGTACGT  
ATGACCATACATAGTATAATATCGGTGAAAGAAGTTCATCTGACCACCGTTGAGCCTATATGTGACTTT  
GCCTATAGGTTTCATCTCATCTAAAAGTTAATCTGATCACCTTAGCTTATGACCATCTGAGCTAAAAGTT  
TAGTATTATAGAATGAACAGACTTTATTTACTTTATTATGTCTTCAACAGGTGAAGAAAAAAGACGGGAA  
GGTGAATGCAAGGAAGCAAAGAAGGGAGAAAAGGGCAATTAGCAATTGATGTGGAGATATTTGAG  
ATTACTCCAGCTTTCCATGTTGTACAAGTGACAAAAAATCAGGAGATACTGCAGAATACAGGAACTTTT  
GTGATCAAGGATTAAGCCTTCATTAAGATATAGTTTGGACATGGCAGGGCAATGAGCAACAACAAG  
TGGAATCAAGAAATCAAGACTTAAGAGGTAAAGATATGAAAAAACAAGTTGTGGGG  
CTAAAGTTGCCTCTGTGGGACCTATAGGTCATGATTTTCGAGTTGTGGATTGAGTCATTGATGTTTACGTG  
GAGGTAGTTTGCCTGCATTACGATTTGCAACCCTGGATGAGAGCCTTCTCCATATTTTCATGCATCGAGC  
TGTTTCTGTTTTTTTTAAATCATGTAGGCATTATGATCATAGCATTTTTTGTCATTGCTTTTTGTTGTTG  
TCTTGATGTTATATGTCCTCTTGGTGTTCATGTAAAACATTTACTATATTACTTGCCT

>M6-PGSC0003DMG400027124 M6 Other RLK with TM

CTTAGCTACTGTTACACATATACAGTACAATCCACAATTGCTTCTTTTTTCGGTACAAATGAGAGAAAA  
TTTCTGATGACGTTACTCATCTCCGGCGCCGGCGCCGTTATCATCACCGCCGTTATCTCACTGATAATTC  
TGTTTTACTACCATTTTCTCATGCCCTCGGTAGTTCCGCCATCACTTTGGCCGTCGCTTACGGCGCCAACA  
TCACTATCTGCGGCATAGTAGCTTCTCAACCAATCCAAAGAATCCAATGCTGGTCAGAAAATCAGACAGC  
ACCGATCCCCATACCTCCTAACGTCTCCTTTAACTCCATCGTCGGCGGAGTTAACGGCTTTTCCGGCGTAG  
AAACCGGTGGGTTTTCCCTTCTCTTCTGGAACTCAAGTTTTCAACCCAAAAGACTTTTCTTCAGTTACTCA  
ACTTTGTTAACAACACTGTTACAATGGGAGATACTCAAATTTGCGGCTTAACAAACGGTACCCAAAATGTTA  
AATGTTGGAGAGATGACTCGAATTTGGCGAAACAACCAAATGGGTGCTCACAATTCATGTCAATTTTCATC  
TGGGTCGGGATTTTCTTGTGGAATTTGAAAAGTTCAAATAGAGTTGTATGCTGGGGAAACAATAGCGA  
TATTGCTTCAGCTATTCAATCTGGTTTTGGTAATATTACAGTAGTGAATATATTTGCCGGTGGAAAACATG  
CTTGTGGGATGAATTCTACAGTTTTTTAATTTGCAAAGGAGATAATGAAAATGGTCAATTAGATATTCC  
ATCTAATTTTGCTTATGAGTATAATGGATTAGCTTTAGGGGTTAATCATACTTGTGGGTTTCTTAGAATGA  
ATTATACAGTTGTTTGTGGGGTGGGAATGGTGAATTTTCGATGAATTTAACGAAAGGTCTTTCATTTGA  
ATCAATTGTTGCTGGTTTAGATTTTACTTGTGGATTAACAAGTGGGAATTTTTCTGTTATCTGCTGGGGAC  
CTGGTTGGAGTAGTAATATGTATCCTTCAGGTTCTGAGCTTCCTTTACCAATGATTCTTCCAGGTCCATGT  
GTTGAGAATGTATGTGATTGTGGTGTATATCCTCAATCGAAAACGTTGTGTTCTGGGAATGGTATTATTT  
GTAGGCCTTGTGATTTTTCGGTTGGAGTAGCTCCACCACCCTCACCACCGGTGTTTATTATGGTGCCATC  
GTCGCCTTCTAAGGGGTTGAGAAAGGGATTGTTAGCTTTTGTGATTGTTGGATCAGTTGGGGCTATTGC  
AGGGATTTGTAAGTTGTTTATTGTTTATGGACTGGTGTGTTTGGGAAGAAGAAAATTCATAATTCT  
GTTCAACCTACTATTAGTTCTAATAATGTTGCTCAACAATGTTATAGTAGTGGTCAAGTTTCAAGATCATC  
TACTCTTAGGCGCCAAGGGTCGAGGTTAATGAGGCGTCAGAGGAGTGGAACCTCATCTATACATGGTGA  
TAGGGCAGAGGAGTTTCAGTTTTCGGATCTTGTGTCAGCTACGGACAATTTCTCTTTAAAGAATAAGATT  
GGTGCTGGCAGCTTTGGGGTTGTTTACAAGGGAAAATTAGCTGATGGCCGTGAGGTTGCAATTAAGCGT  
GGTGAATGAGTCTGAAGATGAAGAAGTTCTTGGAGAAAGAGAGGGCTTTTGAATCAGAGTTGACGTT  
CTTGTCCCGACTACACCACAAACACTTGGTTAGATTGGTTGGTTATTGTGAAGAAATGGATGAAAGACTC  
TTGGTTTATGAGTTCATGAAAAATGGGGCGCTTATGATCATTTACACGATAAGAACAACGTGGAGAAG  
AGTAGTAGTGTAGTTAATTCTTGGAAAATGAGGATCAAGATTGCATTAGATGCTGCTCGTGGCATCGAA  
TACCTTCACAATTATGCAGTTCCACCTATAATTCACCGGGACATCAAGTCATCCAACATCTTGATCGATGC

AAATTGGATCGCAAGAGTGTGAGATTTTGGATTATCCTTAATGTGGCCGGAGACTGATGCCAGTTTCAGT  
CAGCCAATGAGGGCAGCAGGCACAGTTGGGTATATTGATCCAGAGTACTATGGCCTAAATGTCTTGACA  
GCAAAGAGTGATGTCTATGGACTTGGGGTTGTATTGTTAGAAGTTTGGACCGGAAAAAGAGCCTTATTC  
AATACTAGTGAAAACGGGGACATGCCAATGAGTGTTGTCGACTTTCAGTACCAGCAATTATGGCTGGA  
GAATTGAACAAGATTTTTGATCCCAGAGTTGGGCTGCCAGAGTTGACTGAAGCCGAGGGAGTAGAATT  
GGTGGCATATACTGCAATGCATTGTGTGCATTTGGAAGGAAAACATAGACCTACAATGACTGATATTGT  
TTCTAATTTAGAGAGAGCTTTGGCTGCATGTGATGATAGCCATGACAGCATCTCTAGTAGTCCAGACTCC  
ATTAATCAGATTGACATTCCACGCATATGTCTGCGAAAGACTCCTACCAGTATCACTAGACGATAAGTT  
TTGGTGATTAGAATAGTACGATTCGTGTAACAATTGTTGTTAGTGTATACTGTAAATTATCGATAGCCGG  
AATGAAGTTCTTTTTCTTCTTAGAAGGATAACAATCTTCACTATGTTGTGTTTAGCATCTTCTTGATAGGACT  
AATTGACTTGTGCCATTGTTCTTTGTGTGTTCTTTTTGTAAAGGTGCTTAATGCACAAAATTCCAATTG  
TTGAAATGACAATTCAAGAGTCATAGCAGCAAGCCACAAGGCAAGTTG

>M6-PGSC0003DMG400028073 M6 Other RLK with TM

CCGGTGGGTTTTCCCTTCTCTTCTGGAAGTCAAGTTTTCAACCCAAAAGACTTTTCTTCAGTTACTCAACT  
TGTTAACTGTTACAATGGGAGATACTCAAATTTGCGGCTTAACAAACGGTACCCAAAATGTTAAATG  
TTGGAGAGATGACTCGAATTTGGCGAAACAACCAAATGGGTCGTCACAATTCATGTCAATTCATCTGG  
GTCGGGATTTTCTTGTGGAATTTTAAAAGTTCAAATAGAGTTGTATGCTGGGGAAACAATAGCGATAT  
TGCTTCAGCTATTCAATCTGGTTTTGGTAATATTACAGTAGTGAATATATTTGCCGGTGGAACAATGCTT  
GTGGGATGAATTCTACAGTTTTTTAATTTGCAAAGGAGATAATGAAAATGGTCAATTAGATATTCCATC  
TAATTTGCTTATGAGTATAATGGATTAGCTTTAGGGGTTAATCATACTTGTGGGTTTCTTAGAATGAATT  
ATACAGTTGTTTGTGGGGTGGGAATGGTGAATTTTCGATGAATTTAACGAAAGGTCTTTCATTTGAATC  
AATTGTTGCTGGTTTAGATTTTACTTGTGGATTAACAAGTGGGAATTTTTCTGTTATCTGCTGGGGACCTG  
GTTGGAGTAGTAATATGTATCCTTCAGGTTCTGAGCTTCCTTTACCAATGATTCTTCCAGGTCCATGTGTT  
GAGAATGTATGTGATTGTGGTGTATATCCTCAATCGAAAACGTTGTGTTCTGGGAATGGTATTATTTGTA  
GGCCTTGTGATTTTTCGGTTGGAGTAGCTCCACCACCCTCACCACCGGTGTTTATTATGGTGCCATCGTC  
GCCTTCTAAGGGGTTGAGAAAGGGATTGTTAGCTTTTGTGATTGTTGGATCAGTTGGGGCTATTGCAGG  
GATTTGACTGTTGTTTATTGTTTATGGACTGGTGTGTTTGGGAAGAAGAAAATTCATAATTCTGTTC  
AACCTACTATTAGTTCTAATAATGTTGCTCAACAATGTTATAGTAGTGGTCAAGTTTCAAGATCATCTACT  
CTTAGGCGCCAAGGGTCGAGGTTAATGAGGCGTCAGAGGAGTGGAAGTTTCACTATACATGGTGATAG

GGCAGAGGAGTTTCAGTTTTCGGATCTTGTTGCAGCTACGGACAATTTCTCTTTAAAGAATAAGATTGGT  
GCTGGCAGCTTTGGGGTTGTTTACAAGGGAAAATTAGCTGATGGCCGTGAGGTTGCAATTAAGCGTGGT  
GAAATGAGTCTGAAGATGAAGAAGTTCTTGGAGAAAGAGAGGGCTTTTGAATCAGAGTTGACGTTCTT  
GTCCCGACTACACCACAAACACTTGGTTAGATTGGTTGGTTATTGTGAAGAAATGGATGAAAGACTCTT  
GGTTTATGAGTTCATGAAAAATGGGGCGCTTTATGATCATTTACACGATAAGAACAACGTGGAGAAGAG  
TAGTAGTGTAGTTAATTCTTGGAAAATGAGGATCAAGATTGCATTAGATGCTGCTCGTGGCATCGAATA  
CCTTACAATTATGCAGTTCACCTATAATTCACCGGGACATCAAGTCATCCAACATCTTGATCGATGCAA  
ATTGGATCGCAAGAGTGCAGATTTTGGATTATCCTTAATGTGGCCGGAGACTGATGCCAGTTTCAGTCA  
GCCAATGAGGGCAGCAGGCACAGTTGGGTATATTGATCCAGAGTACTATGGCCTAAATGTCTTGACAGC  
AAAGAGTGATGTCTATGGACTTGGGGTTGTATTGTTAGAACTTTTGACCGGAAAAAGAGCCTTATTCAAT  
ACTAGTGAAAACGGGGACATGCCAATGAGTGTTGTCGACTTTGCAGTACCAGCAATTATGGCTGGAGAA  
TTGAACAAGATTTTTGATCCCAGAGTTGGGCTGCCAGAGTTGACTGAAGCCGAGGGAGTAGAATTGGT  
GGCATATACTGCAATGCATTGTGTGCATTTGGAAGGAAAACATAGACCTACAATGACTGATATTGTTTCT  
AATTTAGAGAGAGCTTTGGCTGCATGTGATGATAGCCATGACAGCATCTCTAGTAGTCCAGACTCCATTA  
AATCAGATTGACATTCCAC

>M6-PGSC0003DMG400028561 M6 Other RLK with TM

ATGCCATCCAATGATATCCTTGACTGGAATACTCATATCACAAGCTCGTTTATCTTATCCGAATCCAGAGT  
TAACATACCCTTTGTTGTGATTGCCTTAATAATGGTGAGTTTTTGGGACATGTATTTTCGTATAATGTTA  
GTGCCAACGACACTTATGATCTCATCGCAACAAGGCTCTATTCAAGTTTGACGAATAAAGAGTTGTTGAT  
AAGGGATAATAGTTATCCGAAAAACAATATACCGCATCATGCAACCTTGAACGTGACTGTGAATTGCTC  
CTGTGGGAATAAAGATGTGTCAAAGGACTATGGATTGTTTATCACGTATCCGATGAGGCCAGGGGAAA  
ATTTGAGTTATATCGCGTTGGTGACTAATACTAGCTCAAGGCTGATAGAAATGTACAATCCAATGGTGAA  
TTTCAGTGCTGGCAGCGGGTTGTTGTACATTCCAGGCAAAGGTTAGTTCAGATTAAGAAAAGAAGAAG  
AGTATTTGGCAGATTAGCTTTTTCTTTTATATAATATTGGACTGAGACGGACTTACATGAAGTGACATGG  
TCTGTGAAGATTCATATAGCATGAATCGCAATGCAAACAGACTCTGCTGAAGTAAAATTTAGGCCAAAGC  
ATAGAAAATCCTGTATTTAATGATTTGTTTCTTTGTACAATGTTGCTGCTGTTGGGATGGATATTATATT  
TGTAATCCAGTTTTATCTATGTATATACTTGTTTTATGCAGATAAACTGGGGAATTATCCACCTATACCA  
ACCAGGTACAATTTTCAGATTTGAAGTAGTTATACATTGAGCACCTTATCTTAACACATGCTTGATATTC  
TTAACTTATTTGGTCATCCATGTTTCCCCTGGCTTGCAGAAAAGGTGGACTACCCTTTCTTCTCTTTATT



TTGTGTTGGATCGCTTCTAATTGCTCCCAAATCAAGTTGTTGATGGAAGTGTGTACAACATAAGCATATT  
GACTGTTCTGTATGAGTGTCTCATCAGGCTCATCAGGTAACAATAGCTGCATTAGCAGTAGCTGCACT  
AGCCGGAGTTTCATTATTGGTAGGCATCATTTATGTGGGAATTTATAGAAAGAAGGAACAAAAGGTTGC  
AGCAAACATCCCAGCATCTTCTGGTCAATACCATCCACCTAGTCCTGGTAATTGTAATTCCTTTTTCTTTTT  
CTACTTCTTTGCTCTTCCCAAATTTGAGTTCAAATCTCCTTCTGAATGAAGCCTCCAGTTGAAAATGTCTA  
TCATGGATGTTAAATTAAGCATTTTCGCGATTTCCAGCAAAAATTCTTTCAACCCTGTCCTTTAGGATAGC  
CAATATTCTAATTCATTATCAAATTTCAACTTCATGGAGGTATCTAATGCTAGATTTATTACTCCCAATGTG  
CTTGCAATATGTTTGATCCGTGTGAAGAACCACTAGAACTTGCTTAGTTTATTACTCCAAACATGTTCCAA  
TAAATGTGGCCTAAGGCACTGACCTTGTTGATGGTGCTTCAGCAGGTCTTTCGGGCATACATGTGGACA  
AATCAGTAGAGTTTTCATATGAAGAACTTGCTAAGTCAACTGATAACTTTAGCATTTCGAATAAGATTGG  
AGAAGGTGGCTTTGGAACCGTTTATTATGCTGAGCTGAGAGGCAAGGTCTGCAGTTCATGTTTTGTCTC  
CCCATGATGCAAAGTTTTGTTTATCTATTGTTAGAAATATATTGCAAAATCAGTAAGGAGAACACAATTC  
AATCATTCTTGCACTTGATTAAGTTAGATGTCTGAGTAGTCTCAACTAAAATAAACTGAAAAAGCTGTTA  
AAACAGTGTTATTAAGGGTAGCAATGTCTCTGCTAATTCTACATTTAAAACACTACAGAAAGCAGCAATAAA  
GCGAATGAATCGGGAAGGAAGAACAGAATTTCTTGCTGAACTTAAAATTTTGACGCGTGTCATCACCT  
GAACTTGGTATGATAAATATCTTCTGTCACCTGTTTCATTTTGCTTATAATTTTTTTTTTTGGTTTGTTTTGA  
CAGTATAATAAGTATTGAATGCCAGATATTGCAAGTTTAAGCAATATCTTTTAGAACTTCATTAGCATTCC  
CGTGCCTGGAATTCACATGTTTTGCTTATTTAGTTGATTGCTTTGAAGGAAATGTAAAGAGAGGGGAAAA  
GAAATTGATTTTCTACTCATAGCATGTCGTTTTACTAATTTTCACCCCTTTTATTTAATCATTCTACTCCA  
TAAACATTGAGCTCGTAAAGCTGCAAGTTTAGTTTATAGTATGAGGGTATTGATAGATCCTGTAGGAGTT  
TATTTTCAATTTACAAAGGGAACCGTATTTGAAAATATGTCCATGAAGAGAGCGCATGCCTAAGAATGT  
GAAGGATGTTTGCACTTTAAATTACAAGTATCGAAATGCATGTATATCATTTTATTGATCTGGTGCGGAA  
CTCAAATGTGATTGTATTATGCTTAATTTGTTTTCTCATTTGACTATTTTCATCTGATGCTGAGTTGCATGCA  
GGTGTCTTGATAGGGTATTGTGTTGAGAGGTCCCTCTTCTTGTATATGAATTCATTGAGAATGGTAAT  
CTAAGCCAACATCTTCGTGGTACGAGAACTCTACTAGCTATAGCAATATGATGGAATAGTTCATTCTTTAT  
GGTTTTCTTCTTATTTGTATTTGTGATGTTTATATGCTTACAGATTTATTAATTGTTTGGTAAATCTATTTAC  
AGGGAAAGACGTATTGACATGGTCAACAAGGGTGCAAATTGCAATGGATTCAGCCAGAGGTCTTGAGT  
ATATACACGAGCACACCATCCCCCTTTACATCCATCGTGATGTTAAATCAGCAAATATTCTGATAAACGAA  
AACTTTCATGCAAAGGTATCTTTAACGTCCTCTATTAATTCTCTGTGTTTCAACAACCTCTGTAGTCTTCTA

ACTGGTTAATCACTCACAGATTGGAGATTTTGGCTTATCAAACTTGTTGAAAGTGAAATCCAACCTCG  
AATACACGTTTTATGGGTACATTTGGATACATGCCACCAGAGTAAGTTTTTTTTTTTCACTGTATAAAGCG  
CGTCTAAAAGTATGTGTAGCTTCAGCTGTTCAAACCTTTTTACTTGAATAGAGAATCTGGCAATTAATACA  
AAATAGTAACAAATGCTAAAATGTGCAGGTATGGTCATTCAGGAGTTATCTCTCGTAAAGTAGATGTCTA  
CGCTTTTGGTGTGTCCTTTATGAATTGATTCGTCCAAGGACGCAGTAGTCAAGGAAGATGGTGTGAT  
GAAGCAAGAAGCCTTGTTGCTTTGGTAACTTTTTCTTCAAAGTTCTTCATTGAATGTTATTCATTGGCATT  
GAGATGACCTTGACATAAACTTTACTCCTCTGCATTTAAAATCTGACACTTTTAGTTTGAACCAGACGATG  
AGCTAATCATGATTGTTCTGTGATAATTGTAGTTTGTAGTGAAGCTTATAGTCATCCAAATCAAATTGAAGC  
CATTTCCAGATTGATAGACCCTAACTCCGCAATGACTACCCCCCGATTCACTCTACAAGGTACAATTAT  
ATCTCTTTAATTACTGCACTAGCTATGTACCCCTTTTCTTCTCTGCTTCCACTTGAAGCAACACATGGTT  
TGTCTATTGCAGATGGCACAGCTTGCTAAAGCTTGTACGGAGAAGAATCCTGAAATGAGACCGACTATG  
CAATCAGTAGTGGTTGCTCTTATGGCGCTCTCATGA

>M6-PGSC0003DMG400031486 M6 Other RLK with TM

ATTGTAGGTGTAGTTTTAGGTACAGCGCTTGTTGCATTATTGTCTTCTCACTTTATAAGCTTTATTTGACA  
AGTAGAAATGAAAGAGAGAGTCGAGTTAGACTTGAAAAGTTTTTGGAAAGACTACAAGGCCATCAGACC  
GACACGATATGCTTATGCTGATATTAAGAAGATAACAGATGATTTAATGAAAAGTTAGGAGAAGGGAG  
TTATGGAAGTGTATACAAAGGCAGACTTTCCAGTGAAATCTATGTTGCAGTAAAAGTCCTACACGATTCC  
AAGGGTAAAGGGGAAGAATTTATCAATGAAATAGGTACAATTGGGAGAATCCACCATGTTAACGTGGT  
CCGATTGGTTGGTTTTTGTGCTGATGGATTGAGACGAGCTCTGATCTACGAATACCTACCAAATGATTCA  
CTTGAAAGGTTTTATTTTACCAGTGAGCTCAAGCCCGGGTAGTGTCTCACTCATCAGCTGGAACAAGCTTC  
AACATATTGCTCTGGTACTGCAAGAGGGATTGAGTATCTTACCAGGGATGTGATCAGCAAATCCTAC  
ATTTGATATCAAACCACAAAACATCCTTTTAGACCAGAACTTGAACCCCAAATATGTGATTTCGGCCTA  
GCCAAACTATGTTCTAAAGAAAAAAGTGCGGTCACTATGACAGCTGCTAGGGGAACCATTGGTTACATT  
GCACCAGAAGTGTATCAAGAACTTTGGTAAAGTTTCTATAAGTCTGATATTTATAGCTTTGGGATGG  
TCTTGTTAGAAATGGTTGGTGGGAGGATAAAGATGGATCCTAAGATGAATAACCACAGCAAAGTGAATT  
CTTTGGAATGGATATATAGACATTTGGAGAAAGGGGAAGAATTGAAGATTCGGATAGAGGAAGACGGA  
GATGGTACAATTGTGAGAAAGTTAGCTATTGTTGGACTTTGGTGCATACAGTGGCATCCCAATGATAGG  
CCTTCAATAAAAGAAGTTATTCAGATGATGGAAGGAGATGGGAGCCATCTCAACT

>M6-PGSC0003DMG401002542 M6 Other RLK with TM

ACACATATATATATAATAACACACACACACACACATTTTTTTTATATATATATATATAATAACACATATATA  
TACGCACACAGATATGATGACCTACTACTGGTATTATTATTATTAGATCATCATTATAAACATCATCATTT  
ACATAATATGGTTTGTCTGCTTGTTCATGCTCAGATAATTTGTTTGGTGGTCAACATCATCACTGGCA  
ACAAAATGCTCCTCCCTCAGCAGAAAACATGGTGAGGAATCCAATAAATCCCTCCCTCCACCATCCATT  
ACATCAGTTTCACAAGAATCTGCAGCAGATGGATGTACTCCTCCACTGCCACCTTCCACTGGCAGTAACT  
TCAGTACTGACAAACCTTTTCAACAAACAAATCCTGATTCCAACCTTGAGTTTCCCGAGAACTACATTCACC  
TATCAAGAATTAGCATTGCTACCGATAATTTCTGTGCGCAACCTCCTTGGTCAAGGTGGTTTTGGATA  
TGTATACAAGGGAGTATTCCGTGATGGGAAGGAGGTTGCAATTAAGCAACTAAAAGCTGGAAGTGGGC  
AGGGGGAGCGTGAATTTCAAGCAGAGGTGGAGATTATTAGTCACGTTTCATCACAAGCATCTTGTTTCAT  
TGGTTGGACACTGCATTTTCAGGGGTGCAACGGTTGTTAGTTTATGAATTTGTCCCAAACAAAACCTTGGGA  
GTTCCACTTGCATGGTAAGTTCTCAGAATATCTAGATAGTTTGTCTTCTGCAATTTAGCATAGACTGCTGT  
CAATTGCCATACTTGCTTTTATTAGAGGTTCTTTGTAATCATTTAATGGTGCAGAAGTTGCCTCACCATA  
TGATCTAAATTTAAGCTTAATTAGAAGCATCAATTATTAAGGGTGGTTCAAAGAGAGGGATTTAAAGGG  
TAAGGGGCTGGGTGTTTCATATTCAGTATTTTCTTGCTTATTCGCGTATTCAAAGAATTTCTTGCTTTTA  
TTAGTATTTTAACTTTTTTCTGAAGCAGAAGAGTTGTGTACTGTCACGATCTAAAATTGAACTTACAA  
AAAGGACAAAACCTTTCTCGCAGATGTTTCAGGTGTTACAAATGACCATATTTTATGATGTGTGTAAGAGC  
ACTAATCATTTAGTCTTGTTCAAAGAGAGGGAGTTGAAGGATAAGGGGTACATGCTCTTTCTCCATTTTC  
AATGAGGTTGTGTGCCCTTTTTTTAGATTACCAGGGAGATACATTGATTTCTTGCCTTACGGGAAATTT  
TGTGCGGTGCACTTCTGTTGCCCTTTTACCCTAACCATGTTTTCTAAAGGAGAAAGAGAAGAATGGAAA  
AAAGTTGTTTTTAATGTTCTTCAAATTGACATGTGAGTCGAAGAAGAAATTGGCATATTCACACTAACA  
GTCCAGTCCCAAGCTACAACAAACAAGTCTAACTTTGTGATACCAATTCCTTTGAGTTTTAGCCTTATGT  
TAAATCTATTCGTTATTTTTAGAATGAGACTTGGAAGTATATATTCCAAGTTAGTCTGTTTCTTTCTTTC  
CCAAATCCTTGTTTTCTCTATTATGTTTTGGACACAGTTCCTGGAGAGGTATCTCTCATTGTAGAACTTA  
GTTGTCATTTGATCTTTTTAGGTATCCCTAGAAAATTCGGAGAGAACTGCGATTTTCTTGTTCTTTTCAA  
GTGTTAGTTCTAAGTAACTAGTAATCTTGATGCATTATTATACCCTTGGTTGTCAATCTTGCCATGGCTGT  
CACCCAAGAGTTGAATGTTTTCTTTATCACGAATGGTTGAATATGTTATTTTTACCTTTTTAATATTCCGAT  
ATTGATACTTCTTTTACCTGTTATTATAATAACAAATAAAAAGGAGATATAACTGCAGGCAAGGAGCATCC  
CCCACTAAGCTGGGAACTAGGATGAGAGTTACTTTATGCTCTGCGAGAGGATTGGCATATCTGCACGA  
AGAATGTATGTTTCATGAGTTGCAGAATTCTACTAATTAATATCACCTTTCTTGTTATAGTCGGCAGAATTC

ATGATTTTGCATTTGAATATGTTGAAATTTGTCTGTCTTGGCAGGTCATCCCAAGATCATAACATCGCGATA  
TCAAGGCGTCCAATATTCTTCTTGATGACAATTTTGATGCAAAGGTGAAATGGACAATTCTGTATCTCTGT  
GTGTATAGTGTGTGCATCAATCTGCAGTTGTTTTTTAGCATTCTGGTAAAGCATGCCCTTTTCATTTCC  
ACCATCATCTACTTTAGAAAGCAAGAGCTTTATTCATGTGGAGAATGACCGGGCTACTTATAAGAGACAC  
CCCTACAATAATAGAAGATAACAATTTGAGGTTTAGTGACGATTATTCCTTTTCTAACTGCATGAATGCAC  
AAGGCAACTGTGCCCTTAAATCCTTAATGCAATTTTATCCTGCCAGGGGGCAATCAAGGCTGAGCTTTTT  
CTCTCCTTCGTTTACCTTGGAACTTCGATTGACAACAGTGAAATAAGTCAAAAAGTCCAAAGTTACCAA  
GTTAAAAAAAACAGTCAAATAACTGCCACCAAGCTCTGTTATTACAGTAAGATGATATTATTAATGGTA  
GACTGATGGACATCATATGTGAGTTGACAGCTTCATAAATCTGGCATATGGTTCTCTTTTTTTTTTTGAGA  
AGGTAACGATTTGTATTATAAACCAGTACTTAAGTAGTGCTGAAAGCCTTATGGTTCTCTTTTTGAAACCT  
CAACGTTTTAATTGGGTGCATTATTAAAGTAAGAATTACAGCATTGACACAAAAGTTGGTGGGACCT  
GATATGAAGTGAAAGTATCTGACTATCTTCTATGGATTTGTTTTCTCAATCTAAAGTAAGAAACAGAAA  
CAAGCGTGCTTGTCTTTTTTCTTCAAATATTTCTTTGGACTTATATTCGCTGAATTTATTTTAGTAAGT  
TGTAATGATTTTCAAAAACCCAGGCCATCAAATATGATCTGAATTTCCGGTACTGCTGTGGTTTAGTGCTG  
ACTGAATGAACACCTTTTTTTTTTCTTTTACATATAAGTTGATTGCTAGATGCATTTGTTATATGTGATCC  
AGGTTGCTGATTTTGGGCTTGCAGGTTGAATTATGACTCTGATACTCACGTCTCCACACGAGTAATGGG  
AACTTTTGGGTAATACTCTTTTTATCATCTATTAAGACGTTTCTGTTTCCATCCTCATGCAGTATTATTCT  
GCAGTTGCTATAGCACATTGAATCAAGATTTAATCCCTATACATTTACGGTTTATGTTTATCTTTGAGCTCT  
CCATATCTTTTCTTCACTAACTTCTTACCTTTGACAGGTAAGTCTGAGTATGCTCTTACTGGGAAG  
CTGACTGAAAAATCTGATGTCTTCTTTTTGGAGTCATGCTTTTGGAGATTATAACTGGTAGACGACCAA  
TTGATAAAGCTCAACACTACCTTGACGATAACATTGTTGATTGGGTAAGTTTTTCTGTAAGTGGTGCAA  
TAATCTGGGACAACACTAGATGTGGTTCAGATTTTCATGTGCAAGTGCGTAGCATTATTATCATTTTCCCAAT  
ACTCATGAATAAGGACAGGAAGTTAATACTGTGGTTTCCAAGTTGTGAGTTTATGCATTCTTTCTTCTA  
TTATTTGTATGTAATTGCTAAGCTTCTGAGATGATCTAGAGCATCCATCTTCTTCTACTTCCCACTCCCCG  
CAAATAACCTATCCCCGAAAAAATAACACTTCTCTCATGAAATTAGGCGAGGCCTTTGCTTACCCAG  
GCTCTGGATAATGGCAACTTTGAGACTCTGGCTGATCCAAGATTGGACAAGAATTATGACTTGACTGAA  
ATGACCAGAATGGTCACTTGTGCTGCTGTGTGTGTGCGCCATCTAGCACGTCGCAGGCCTCGTATGAGT  
CAGGTACCTTCTACTTGTGAAAGCTCTATTTTATTCATACTGTAGCTGCATGATTACCTTTAGATTTGCA  
TGTGGAAGGAACTGTCTGAACTTAGAAAGTAAGGTTAAATTCCTCTTGTGACAAAAGGTTGTAATGAT

TTATATTAGAGTCTTTTTGCTTCTTTTCTTCCCGAAATAGTTATTAGTTGTACCCCTCTGACACCTAAACTG  
GTGTCTGATACCTGTGCGCTAAAGAAAATTTTTGTCTATTAATGTTTACTCACCAGTTCCTACTTCCTA  
CTACGTGTTCCAGGTGCCAATATTTGTTTCCTTGACAATTAGCATCTCAAATGTAGATTACTTATTACA  
AGGAGTTTATAGCGCATATTTGTAGTTTTACCTTCTTTTTTCCCTAGTCTAGGTCCTTTAGGAATATTCCT  
CAAATCCCCAAACCTTGTTCTTTATAAATTCTCGGGACAACACTGTGTACATTGTGTTCTTTATGGGTA  
CTAACAAATTACAGCAAGTCTACAAGAGATTTCTGAGAATGTCTCCTTGAGTTTCAGATGTTAAAATAAG  
AAAGCAATGTATCATTCTCGTGAAACTACTTGGAAGAAAGCAAATACCCCTTTTAGTAGCATACTC  
ACCTTTAACTGTCCTTCAAATGGAATAGAACAACCTGTTGAGTGCTGCTTCATCTTGCCTTAGCTCAGC  
AGAAGCTGGACTATACAATTGAAAATTTGAAATAACTTGGATCTATAATCACCTTCTCAACCCCAAGAT  
GGTTACACTATATTTGAGGATTTAGGAAGCATCTGAAATATACCAATTCTTCTTGTACTTTGTTTTTTGA  
GATCTCAAGTTGGAAACTTAGTCTCCCTCTCTAATCTCTCTTTTCTTCTTGAATGGCTTTAGCCTTTAA  
ATTCATGCTTACCCTTTTTATTTTTTCCCAGAATTCTATTACTGTCAAAGAAGACTTGTCTTGGCTTA  
ATAATCAGTGTTGGAACCTTTCTTATGCAGATTGTCAGAGCTTTAGAAGGAAATTTGCCGTTGGATGAGT  
TAAATGATGGACTTAGACCTGGACATAGTGGTATACATGAATCTTATGGGAGCTCGGATTTGATGCTG  
TTCAGTACAAAGAAGACCTTAAGAAATTTAGAAAGATGGCACTGGAAAGCCAGACACATAATTCTAGTG  
AATGCAGCGGGCCTACCAGCGAATTTGGCCCCATCCTCCGGTTCAAGTAGTGAAGGCCTAAGAACAA  
CTCAAGGTACACGCTCTAGTATTGAAGGTCATCGAGAAATTAGAATAGACTAGAAGGCAGTTAGGAAGC  
AGAAAAGAGTGATTTTTCAAATGAAAGGGAGCAATGTAATGAACTCTTCTCAGAAATTGTTGGATTTG  
GTAGTGTGTTTAGAGAATTGTTAAATTTGGCATACTTTCATATGCCACTCATCTTTGTAATTATCAATTG  
ATCTAGGTGCTGTTGCAGATTTTGTAGTGTCCCATATCTAGTTCCTCAAAGTTACATGTAAAGAAAGG  
ATTATCAAAAACATTGTATGAAAGCCATGAAGTTGGCTGTATTTTTTTATCCTTGAAACTGGTTAATACT  
TACCCACACCACGTGGACAGGTCATGTTTAATATGTTTGTGTGAAGATACATG

>M6-PGSC0003DMG400017293 M6 RLK with ANK repeat

CACAAAGTCAAATCAAGAACGACCATGCATCAAATAGTATAATTGATGGTTAAGTATCAACAAAGTA  
CTAAATACAAGGATGTTAACGACTTAACAAATCATGCATATTATTCATCATTAAAGCCATGGTTCTGTTT  
TGTTTGTGATCAAAGGAAATATCCCCATTATTTATGTCAACTAAATTCATTAAAGTCGTTGAGAAAGCC  
TTTGAAGTCCCTGCCGATCTAAAGTATACCGTTGATTCTGTTCTGTATGCAGGGAGATCTTCGTGCATTCC  
TGAAACGGAAAGGTGCATTAAAGCCAATAATGGCTGTGAAGTTTGCCTGGATATTGCAAGGTCAGTTT  
ACTGGCTGATGTCCTGAATTTCCAATTGAAAATCTTATTAGTATTACATGCATGCTGTTACCAGGTGCTT

GAATTTGTCTAAGGTGTCTGTTGATAAATGGCCATTAATACAGGAACACCAACTACAGTCTCTTCAGTTC  
TAAGTATAATTTAGAATTGTTACATTCATTTTGTATCTCTTCATACTTTATTGATCTCAACACAGTATAGTG  
CTGGCCTTTGGGGCTCCATGATGATTATAAATCTTCGTTAGAAAGCAAAGTAGTGGCACAGCTTCACGAT  
CAGTTGCAGAAGAAGCTGTGTACATAAATATGTTGAGAAATCTGAATTGGTCTTTCTTATAGTTGCGTCT  
ATGTGTCTCATATAGTCATATTTGTATACATTTTGCAGAGGAATAAACTACTTGCATGAGCATAAACCTG  
AAGCAATAATTCATCGAGACCTGGAGCCTGAGTATGTTATTATAGTCTTCTGACTGTTTCCCAGTTGCCA  
GTCACGTGCTTTGTTTGTCTTTAGTGGCTGAAGTTAGCCTGACAAATGTATGGAAAGCTTTTAATTTCTG  
AGTGAAATGACAGAAACATATTACGGGATGATTCTGGACTTCTGAAAGTTGCAGATTTTGGACTTAGTA  
AGCTGATGAAATTTACCAGAACTGTCAAGGAAGATAGACCATTGGCACGCCAAGAGGATTCATGTGAGT  
ATATCCCAGCATTTTAGGCTGTTGAAGAAATATATTCACACTAATGATTTGTTACTGTTACTTTGTTGTCAT  
TTTTTGTACTCTTCTATTTTGCTCCTTTTTCTTTATGCAAAGTGTGTATGAACAATGGCTTTAGGCTCAA  
AAGTCTCATGGTTCTACTTTTCCTTTAATTTTGATGAAACACATTTTCACCTCCAGTTTCTCTCTAAGATT  
CAGCATATGGTCCCTGAATCTTTTTTTTTTTGAAACTGAAAATGTTTATATGGTCCCTGTATCTTTTGCC  
AGCAAATACTAAACAGTTCACGTTTAGACACTTAAATGGCTGTGCTAGTGAATGAAACTCTAGGATTTGG  
AATAGAAGGAGTATCTTGATTTTTTTTGTTCATCAAAGAATTATTCTCTTGAACATTTGGCAATAGAATT  
TGAAGAAGGGTATTAATTAGTTATTTAGAAAAAATATGCATAAGCTGGTTGCCTCAAATTTAGTTGAT  
AACACTCCTATTTAATCATTGTAGACTATGGGTCTTTATATGCATGTTTTTAACAAGGCAATTGGTGTGAT  
ATAAAATTCTAATGTTTTAGTTTATGAGAATAACAAGTTGAATTGACCTCTTGGTTTACAGGGAGATATG  
TTGCTCCAGAAGTTCTTAAGCATGAGGAGTATGATACCAAGGTGGATGTTTTCTCATTTGCTTTGATATT  
GCAAGAGGTAAGCTCTTCTAATTCTAATACTTTCTCTCATGCATAAACTACTGAATAAGGCTCTCCAGT  
TGTGTCCTGTCTGGAAGAAAAAATGTTAGTTTGTTCGTGGGCAGCTGGCTATCACTTCTTGCTTCGTAGT  
TATTTTCAGTTTTTTTACTTCATGTAAGTAAATTTGATGTATAATGTGTGCTAATGGGCATGATATCAGT  
CTGATAGCCACCAACAGGTTGGTATTGTATGCGTTCTAGATCTCATCTCATGGAGGAAAAAGGCAACGG  
GGTCCCTCATATTTTGCAGTCAATGTTAGTTGGGCCTAAAAGATTGTATTGCCATCTACTGTCTCCTATT  
CTTATTTCTTGCAAATTATGCTTATTCTACTTTATTAATTCACTCGGAACATCTTGACTGTTCCAGCATGTTT  
GTAATTTCTTAATATTTAAGAAGGCCGTTGGGTTAGACATGTATACGCCTTAATGCTTTCCGTTCCACAG  
ATGATTGAAGGCCGTCACCATTTCCATGAAGCAGGAAATTGAGGTGGCCAAAGCATATGTTGCAAAT  
GAACGCCCTCCCTTAGTGCTTCACAAAAGTTGTATGCTCATGGATTGAGAGAGTAAGTAAGTCCATGTG  
TTTTTTTTAATTTCTTCAATTGTATTTAAAGTGATTATTTCAACAGGTTAATTGAGGATTGCTGGGAGGA

GCAACCATCAAAAAGACCAACTTTTCAGCGAATAATTATCAGGTTGGAAGAAATCAGCCGCATTCTTTTG  
CATAGAAGACGTTGGAAGGTACGAACCTCTCTCACCCGATCCCCTTCAGTTCGGTATTTCCAAAGTTCGG  
TCATGTATAGTAAATCAAGCTTCGGTACGGTAAATTCTGGTTCAGTAATTCGGTAATTACGTATTGAAGG  
TGGAGTTGGCATGGCCGTATAAATCTCGGAAAACAGTAAGTCCAAATTCAGCCCAAATTAAGATTGAG  
ATTCTTTTGCAATCCAAAAGCATGAAAAGTTTTAAAGACTAGATCTGAAACTCGATTACTAGGATGTAGG  
TAACTAGCTTTGACAATTGCTCCTAAATTGTTTGCCTGGAGCATGAGAAATTAATCTTGAGTTGTTTTCT  
GAAACACGGAATTCATTCATTAATATAATGACTTTACCCACTCCTCTTATATACTTTTAGGCGAAGTGTAT  
CATTAAAAAGTAGAAGGGAGGTAAGTGGTTAAAACATGTACCTTATTGTCAGTACTGGTGAATCTTGCTCA  
AAGGCTGATAAAGTTAGATACTTAGCTATTAGGTAGTACCGTTACCGAACTACCACACCGAGTACAAAA  
ATTCTGAAATTTACTCCTGAATATCGTACCGGCTACTGAATACAGGATTCCCGGTTTCAGCCTGGTAATTTG  
GCTCCGGTGATTTATTCCACCCTTAGCGGGGGTTATGTTTCTGTTTAATCAATGACCTCTTATAGCTGCA  
CCAAAAAAGCAAAGAAAAGAAAATAAAAAGAAAAGAAGCTTGGAGGAAAAAATACCCGCATATGTCT  
TTGGTTTTTATTAATTTATAGTAACATTATGGGAGGAACCTTGGGAACAAAAAGTGAGGAAAATTCCTGT  
TTACCATTCTCCATAGTCTCTCTAGGAAATTGATTATCAATACTTGCCTTATCTGTTTATTCTCACTGTC  
ATGTTTATTATTGGAACAAATGAGGAATGTTGTTACTGTTTGTACTGTCTTAAAGTATATATGAACAAAA  
GGATAGTCTCATGC

>M6-PGSC0003DMG400020370 M6 RLK with ANK repeat

ATAATATTTCTACCTCCTAAGGTAGGGGTAAGATGTGCATACACTTTACTCTTCTAGACCCCACTTGTGG  
GATTACACTGGGTATGTTGTTGTTGTAAGATCTCTACCTCCCAAAGTAGGGGTATAATATTTCTACCTCCT  
AAGGTAGGGGTAAGATGTGCATACACTTTACTCTTCTAGACCCCACTTGTGGGATTACACTGGGTATGT  
TGTTGTTGTAAGATCTCTACCTCCCAAAGTAGGGGTATAATATTTCTACCTCCTAAGGTAGGGGTAAGAT  
GTGCATACACTTTACTCTTCTAGACCCCACTTGTGGGATTACACTGGGTATGTTGTTGTTGTAAGATCTC  
TACCTCCCAAAGTAGGGGTATAAAAATAACATTTGATGATAGCTCAAGCATGAAACTCAAAAAATCGGA  
ATACTTTATGTGTGTTTTGACCCTCAACTCTAGTAGAAAATAAGCAGATAGGTTGGCCTCCCAAGT  
TAAACTCCTGAGAACTTTGTTGCATGAACTTGTTACTTATGAATAGGGTTAGAGAAAGAACAGATCACA  
AATATAAACGAGAAAGAAGTCTATAAATGGGAATAAGTCAATCTTGTAACCTTAGCGAGAAAGAAGTCTG  
GTAAAAATGAGGAAGCATTGTTTTGCTTTCTTCTCCTTTCTTCCATCATATCCAAATACTTTACAGTT  
GGATGCTCTTCTTTGAGAAAATATTTACATCCTGCTTGTTATTCTTATGATGAACAAGATTTTGTACGCGC  
ATTTCTTCTCATGTACAATCAGATTTAGATCCTTGAATGTGCAAATGCTATCATAAACTACGGACAAGA

AACCAACCACAAAAGTAATTAATGAGTCTGGCTTTAGTAGTAATGAATATCTAAATGTAAATCTTGATGT  
TGTATGCTCTCCGAACTCATTAGCTTAAGTAACTATGGTGCTTCCTTTCTTTTCTCTCCCTAAATGCACT  
ATTTTCTTTGTCTATTCCTTCTATATTCACAGAAATGGCCAATAAAGAAAAGAAAAGAAATTGCTGTTGT  
TTTAGTTAATTTTTGAATTAATGTAATTCATCAAAAAATTTAATTGAAATATAATGATAATTAGAGATT  
AAGGCCCTAACTGTATTTACAGCAGAAAATGTTAAAGCTTTTTCCCTTATCTTCAAACCTTTGACTGCTAT  
AAGAGGCTGTGACAGGCGGCAGCTGATGCCAAACACTATGGTAATGCTGAAATTTACGAAATGTTGAA  
GGCCCGTGGAGCCAAAGTCCCGGTAAGTAGGTAGAAAGTCCTAATTAGCCTGAGGTTCTTATGTTCTG  
ACACTCATAGATGTATATGTTATGTTGGTAGAAAGTCAGAAAGACGCCAATGGCTGTAGCAAATCTACG  
AGAAGTTCCAGAATATGAACTTAACCCTCTGGAGCTTCAAATCCGCAAAAGTGATGGAATCTCAAAGGC  
AAGTGTCTATGTTTTGTTACTCAGCACTGTGATGTTTCAATTATGATTGAGTGATGAAAGCACAATCGG  
CCTTAAATTGAAATACTTACCTTCCGCTTTAACCATTGATTTCTTTCTTAGCTTCCTGAATGAAGCCTGAG  
ACACCAGGCCCACTTTCATTTATGTGATGCTTTTGGGTGCCTAACTTTTTGAATTTATCCCAAGAATTT  
GTCTATAATTTTCTTTTAACTTTGACAGGGTTCATATCAAGTTGCCAATGGAATGGAACGAAAGTTT  
CGGTAAAAATACTTGACAAGGATAGCTATAAAGATCCTGAAAGCATGTATGTTTTAGCTGCTCTGCGACT  
CTCATTTACATGTGATGCTTATTGGCTTTTGTAGATACTCTGTATTTTTTCTTGTGTCCTGTATCATGAGG  
GGCCTCGTATCAAAATGTTTATTGGATTATGCAATCTACAAGGCAAAGCCCCTTCTGGCAATTTAATATG  
GACTTGTTATTTGGATCCTCTAACCTGGTTAAAGTCTGTTTGAATGTGGCCTTCCTTGGTTTACTTAAGCA  
GATGATTAATAATTTTTTCTCTTAACAAGTGTGTGCGAAATATATGGGTCCATAAATTAGACTTTGGAT  
TTAATATCTAACTTTGCGTTGTTTCCACGATTGCATGCAGAAACGCTTTCAAACATGAATTAACCTTTGCTA  
GAAAAAGTGCGGCATCCAAATATAGTTCAGTTTGTGGAGCAGTTACACAAAATATACCGATGATGATA  
GTCTCAGAGTATCATCCAAGGGTAGGCTCTGTCAATCTTTCCACACTGCCTGTCACACAGCAATGTAGCT  
TGTTACCTTTTTATCAATTCAACTTATGTTAATATTCCTTATTATAATGGACACTCAACATTGGTTAAAAA  
TTTAGCTAGCGTTGGCAATAGATTCAACTTCTTTGTTGTAGAGATCTTGATGCTTATGGATTTTGTATGTC  
GTTGGTCTCAATTCTTACCTTAGCCTTGCAATTATGAAATTTGGCATTAAATGCTTTGCAATTTTTCAGGG  
TGATCTAGGTAGCTATCTCAGAAAAAGGGACGTATATCTCCTTCTAAGGCGCTTAAATATGCTCTTGAT  
GTTGCTAGGCAAGTCGTTCTTTGTCATAAAAGTGAATGATCTCTCATGCTTGAATCTGTCCTTCGCCAAT  
TCCTCTACTCTTTGGTGACTTGTGATTGTTTCACTTCTTTTATCTAAACATATCTATGTTGTATCATGT  
TGGTTGATTTTCAGGGGTATGAACTACCTTACGAATGCAAACCAGACCCAATTATACATTGTAATCTAA  
ATCCAAAGTAAGACAACACTATATGCTTTAGTTCTCTAATGATGTTAACTGATCATTTTACTGACTCATTG



GGATTCCTAGTGTTTTAATATTCGGAATTTGGTAAGGTGCCAGAAATATTTTGCTTGACAATGGAGAT  
CACCTGAAAGTTGCCGGATTTGGTCTGATTAAATTGTCAAAAATTTACCTGACAAAGCAAAGTTGGTGC  
AGCCGGAGGGTTTTGATCGTTC AAGTAAGTTTTTCAAACCTTTGAGTAATAAACACTAAATCATAATATTC  
CTACTCTGAAAGAAATCAATTCTCATGTGGTACTAATTTTTGATAGATCAGAAGCTTCTGGTATGTTACCA  
GTTTCAAAAACAAAAAAAACCTTCTGGTGATGAGTTTGCCAATTGCATGAAAGGATTCACCTTTATGTG  
TTTATGTTTATTACGTTACTCATTTTTCTTTCACTTGTAGGTCCCTATGTGGCACCTGAGATTTATAAAGAT  
GAAATATTTGACCGGAATGCGGACATATATTCATTTGGCATTTTACTCTATGAGGTATGATTTCTTTTTGT  
CAGATACTTCATTTAATGCTGTAGCTTAATTCAAAAATAGTGTAGACTTCTGATTTCCATTTCCGGTGCA  
ATACTTTTCTAGAACTGGTAAATTTGTATTCCTCAGCATTGAGGACATGCTGGACACCATCAAAAAGTG  
TTAAAAACAAATAGAAAAAAAATACTTACCGAGATCTTAATAAATCTACAGAATGATCTATATCCTCT  
AAATCTACTTCTTACACCAAAAATAGAAAGATACTATAACAATTCCATTTAACTTTCTGAATGGAATTGGAT  
ATATCTTCAAAACACCTCCCATTTCTCTCTCTCCAACTGTCCAACCTCCACCAGATGCATTGTCGTATGATC  
CTCCACCACTTCATTTAACTTTTGCTACCTCTCTTTTCATCCAACGGCTAAGCAAATCTGTAGTATGCTTA  
GGCATAGTCCACCTGTCTTTGTTATGTTGAGAAATAGAGACCAAAGTTGTGCTGTAAAGGTGCAGTGT  
AAAAACAGATGACTATTTGTTTCATCTGTCTCATTGGTTGGAGCTGGACTCTTCCATAAGTTTCTCCATAT  
TTTTGGTTGCCCTCTGTAGTATACCCTTCTTCCATTCTATAAACCTTTTAATAGAGAATTGCGCATCAAT  
ACTTTATGATACTTGGATGATCTTATCTTCTTAATATGCAATTCTGTCCTCCATTTATCCTGTTTATCGGCCT  
ATCAGCATTCTAGAAGCGTGAATGATTTATGGCTCTTTTCTTTCTGCTCTATGCAATTTATTTTACTTTGTT  
GGGCTCAGATGCTGGAGGGAACACCACCTTTTAATACCAAGTCTCCTGAAGAGGCTACCAGATTGATGT  
GCTTAGAAGGCCAAAGACCAGCATTCAAATCGAAATCCAAATATCCTCCAGAGCTTAGAGAGTATGTTT  
GTTATCATTCTTGCGGGTATAATCATGTTGTGCAGTTCATATGCGCTTATGTATTAGCTACATATTTTGT  
CAGTTTAGCATGATGTTCTATTCTTTACTGCCAGCCATTGAAGTGCATCATGAATTTTTTTGAAATGCCT  
CAGAGATGATTTCCATTCTGCTTCTTTGGTTTTCTTTCTTAATAATACATGTATGCTTTCAATTTCTTCAGCT  
ATAGGCTTTTTCTGGCTTGGTGATTTAGTACAACTCTAGCCATGTGAAACCCAACCTGCATGTTGTTAA  
GCTCATGTTATTTCTACAATTTCTAGTACCCTTTTTTTTTTTTTTTTTTTTGGATAACCGAGAAATCTGTCTATGA  
CCCGCCCTTTGGACCAATCACAGCCTTCTAAACTCGGTGGATAATGGGCCCGCCCTCTACCCTTCTCCAC  
TTAAATACCGGGCTTCGCTTTGCGTGGTGTGGGGCTTGAACCTGCGACCTAAGCCACAAATCCTCCACCT  
TTTGCCACTTGAGCTAGGCCTTGGGGGCATTTCTAGTACCCTTTTT

>M6-PGSC0003DMG400025222 M6 RLK with ANK repeat

ATAGTATTTATGATGGCCCAAGTGCATCCTTGAACCTCCTTATTATTATGGCAGGCAGCAGCTGACGCGA  
AATACTATGGAAATAATGAAGTTTATAATATCTTAAAGGCCCGGGGGCCAAAGTCCCGGTAAGTGGG  
AAGATAATTTTCTAATTAAGTGATATTTATGATTTATGGGGCTGAGTATTTGTCACGTTGTTAGAACTC  
AGAAACACACCAATGACTGTTGCAAATCCTCGAGAAGTTCCAGAATATGAACTAAATCCACTGGAGCTTC  
AAATCCGAAAAAGGGATGGAATTTGAAGGTAAGGCCTTCTTTGATTTCAAATAAGCATTGGATGTTT  
CAATTTTGAGAAATGATGAAAGCATTAAAATGGCACCAGCATAAGCAAATTCAAAGTTATAATGGTT  
ATCTCTTTTATTTAACTAGGAAACTATACACTTTGAAGAACTTATATTCAAATGTCATCAACTATAATTC  
ACTTGAAAAAAGTTAAGATCAACAAAAATCATCATTACCTCATAGGAGGCCTAACCTCAAATTTCTAAC  
TTCTGCAAACCTTTGAACGTTTTTTTCCCTTCTTTCTTCTGAAGAAAGCCATGAGACATCTGCACTGACT  
TGCCTCTCCTCATGCAATTTGTGCTTGATTTGCATTGTTAATTTTTCAATCTTCTTAACAACCTTTGCTGA  
AACTCCTTTGCCTTTCAACAGGGTTTCGTATCAAGTTGCTAAATGGAATGGGACAAAAGTTTCTGTCAAGA  
TACTTGACAAGGATAGTTATGCAGACCCTGAAATTATGTATGTTGTCAACTTATTTTCTGCTAATCTCCTG  
ATCACTACCATAATGCACATTTCTATTATTGATTTGGAAATAAGCTTACCAAAGGGATATGCATATTTTG  
GACTTCAGCTAGTTACCATGTTGTCTGATTCTCTGTGACTAGCAAAGCTTTGGCATGATACATTAATTTGG  
ATATTAAATTAGTTGTGCAGCTTTGGCGGATGATTTATGCAGCTTTGGTTGGCTTGTCATATGTTGAAAC  
CATTATTTTCTATTTTCTTCACTTCCACTTGGGCATATTTTATGTATCCCTTGTAGACTTGTTTGCTTGTTG  
TG TAGTGAAGCCAGGCTGTTTATACAAATTTGAGGCTCATCGTTTGGATGAATCAGGCTGAGAAAAC  
TAGGAAAAGTTTTCTAGTGTTAGTCAACAATAATTTCCAGCGAAAGAAATCAGGACATATTGGAGTG  
CTTTTATGTTTGATTAAGCAGGATGTCCACTAAGTTGTGTTCTGTTATATTACAGTCTTGAGCAGCTT  
GATCACATCATTATGTGTGCTTACATACTAACCTTTGTTTACAGATTGTAGATAGTTCTTGTGTTTT  
TTACGCAAGGTAGATTGTGAACATGGTATTGAGATGGCTCTAATAGGTGCCTTATCAAGTTCTCATTAGA  
AAACCAAATCCCTGAAGCAGCTGGAAATACATTTGTCAAAAATATTGAAGTGTATATCCTTCTGATCATC  
AGGTCACACTGCTTCATGTGAATAGCAACTTCAACAGTCTTTATACATGAATCTGATCCTTTGAGCATTTA  
AAATAAGATAGAAAGATGAAAATATGCATCTCAAAGGAAATTCAGCCTTCTAGGTAAAATACTCTTTAT  
ATTCACATGTTTCCAAGATGCTGGCAGATTGATTTGACGATGGATCTGGATCTTTGATTTGTAGTAATAT  
GGAATAAGTTGAGGATCACACTTCGTCATTCTGGAGTCCTTTTTGTTAGGCACTTTTCAAGTTTCATACAA  
CCATTTCTCTAAAACCAACATTTTTTAAACAATTGTACAAGCTTCTTTGTAATTTTCTAATCCCTAGTTAAG  
GAGACTGGGATCCTCTACCTCGGTTTGTAGCATAATGCATAATAAGTTGATTCTCTCATCTGTTATTTGT  
GATAGCCACCTTATGCAGTTTACCTCGTTTTCATGCTAACCTTTCTCTGAAATTCAAACTTAGGATGCATAA

AGCCCAGCTTCTTTTCAGGGTTCATTGTAAGAAAACTGGTAGCTCTTATCCTTTTTCTGGTGTCTTTCTA  
AATCAAGAAAACTTATAATCTTCACTCTTGTGTGATTGCCACAAATTTCCCTCAGACATTGAAGTGATT  
CTGGGGAGATGCTTTATTTCCAAGTGTCTTGATTCATGAAAGGACAGAACTTTAGTTTTACTTCAACGTC  
ATTAGATCTTTTAAATTATCTTCTGAAAGTGTATCTTGGTCAAATGATAGATCCAGTTTTTGTATTATG  
GTTTTAGTTTCTCATTGAACAAATTATTTCAAGGTGTTATTTAAGATTGTCAAATCTTATTGTTTACC  
TAACTGTTTCTATTCTTGATGTTAAGGTCGCCTTAATTCCATTTCTTCACATGCAGAAATGCTTTTAAGCA  
TGAATTAACCTTTGTTGGAAAGAGTACGGCATCCTAATGTGGTTCAATTTGTTGGAGCTGTTACACAAAT  
ATACCAATGATGATAGTAATAGAGTATCATCCGAGGGTAAGTTCTCTCTATTTCTCTATCTCACACTGCAC  
CGCACAAAATCCCTTCTTCACTCTATCCACCTACACACTATATTGTGAATATTGTATGTTATTATGCATACA  
TTAATATTGAAAAATATTCAATCAGCTCTTACATCAAATGTGCATTCAATTTTGTGCTGTGATTTCTCTCCT  
GGTGTAATTTCACTTATCGATTTTATGCGCTGTACTTCTTGTCTTGGCTTAGTTTTCCAATGGGTA  
CATTGATGATTGTTGATTTTCAGGGTGACCTTGGTAGCTATCTTCAGAAGAAGGGACGTCTATCTCCTC  
TAAGGTTCTAAGATTGCTCTGGATATTGCCAGGCAAGTCTGTCCCTTTCCTATGTAAGAAAAATAATT  
CTGTTAGTACATCTGAGATATTTTATTTTATGCTGATAAGATGTTCTAATTTGTTGGTTGCATCCTGTT  
CCATCATATGATCTTATTTTCAGGGGCATGAATTATCTTCATGAATGTAAACCGGACCCAATCATCCATTG  
TCTTTAATGCCAAAGTAAGAAAACTAAAATGCTTTATGATTCTCATATATTAATGACCATTCTACTGT  
ACTCGTGTGATGATCTACTTCTTTAATGTTTGTAAATTTTGTAAAGGTGCCAGAAATATTTTGCAGGACA  
ATGGTGGTTTATTGAAAGTTGCGGGATTTGTTTTGATTAGATTGTCAAACATTTACCTGACAAAGCTAA  
GTCGCTGCAACCTCAAGCCATTGACCGTGCAAGTAAATACTTTAATTTGAGCACATATAGTTAAATTA  
ATACTCCTTATAAAAGGCAGAAAAAGAGCCTTCTAGTTTGATACTAGTGCCACTTTAAAACTTCAGGG  
GATGGACTTAAAGGTATTCTAATTTGACTGAAGGAGTTGTAATACTACAATAACTGCACTCTCTTTCTTG  
TTACTTGAGGTACCTATATAGCACCTGAGATTTATAAAGACGAAATATTCGATAGAAGTGTGGATGTAT  
ATGCTTTTGGAGTTTTACTTTATGAGGTACAGATTCAGTTTCAGATAATTTAACTTATGGCTGCCTTTTGT  
GTTACTACATAATTCTTTTAGCTAACTAGAATATCCGCGTTATGAAGTAGAATTTAACATTCTTCTTATCC  
TATGTGTTTTTGTATTTTTTAAAGAAGATCTAGTCAATTTACTCTGTCAAATACAAAGTATTGTAGAT  
TCCTTCTTTTTTCCCCTTTGCTGGATCATTTCATGATATGAATGATCTTGCTGTGCATATGCTAACTCTT  
TTTTTTCTTTTAACTTTTGGGGCATTCTTGAATCAGTCTTCTCAAATGTTTTTCAGCTCTTATCTTGC  
GCAGTATACGATTTTGTACTGTTGAATTTGGCTAACTTTGTTGGGTTTAGATGATGGAGGGATCACC  
ACCTTTTCATCCCAAGTCACCTGAAGAGGCTGCTAGATTGATGTGCAAAGAGGGTAAAAGACCATCATT

CAAGTCAAATCTAAGTATCCGCCGGACCTTAGAGAGTAAGCCCTGCTATTCATTTATTTTCATTAATTG  
GATGCAATCTAGTCTTTTGCCGTTTCGTATGCAGTTATATAGTAGAAACATGCTACTAAATATAGCAGATG  
TTCCATGTCATACTCCTAATCATTCAAATGGATATGACTTCTTTTGTGAAAAGATTGCAAAAAAGGATTGT  
TGTTTGCTGTTTCGCTTTACAGAAGTAATGTGTGATTTTCTTTGGCTTCTGCTATTTGGCTGCTTAGTCCAG  
CATTGTGTTGTCGTTTTACTTTAACTTGCATTCTTCGATTTCGATGTTCTTTTCTACCAGAGATCTTGGGC  
ATTTCTAAGTGGACAATGATATATTCTCATGTGTCCATCCATCTGATGATAAATATTCAACTGTACAGTGT  
GCATTACCTATTTTAGATTTCTTATATTTTACTGATCTTAAAGAATATAACAAACCAATTTTGCACAGTC  
ATGCCGCCTCCCCCACCATCATCTGGCAAGGCTCTGTCTCTCTAATATTCTTTTGTGATCTTATTGCTTA  
AGTATAAGTTCAGTGGCGATTTTCAAGTTCGTTGACAAAATTTGCTGAATGTCTAGGTTGATTGAAGAAT  
GTTGGAATCCAGATTCTTTTATACGGCCAACATTTTCGGAGATCATTGTGCGCATGAATAAAATTGTTGC  
AAACTGTTCAAACACGGATGGTTGAAAGATACACTAAAGCTTCCCTGGTAATGCTTCCACTATACTATT  
TTTGCATATTTTGGATCCTTTTTTTCAGTTGTTTACTATATTCAAAGGTCCTTGGACCAAGAAGAAAAGATTC  
AGCACAGTAGATAAATTCTACAAGAACTAAAATAGCTTCTATACAACGTTTCAAGCATTAGAATTTTTTACA  
TTATATTTTAATCTCATTAAATTGTAGCAACATATCCATGTGCAAAGCATAACTAACTTTAGTGGCGATAA  
CTGAGCTCTATAACAAGTTTGTGAAGCTGTAGATCAAAGTAGCTTTTAACTTTCAAGATACCTGACAACA  
TAAAGTTTGTGTTGGTATTTGAAATGTGTGATAATCTCATCTAAAAGTTTAAAGCTATTAGAGAAAGCACA  
CTTATATTTCTTAATTATGTCTCCAACACG

>M6-PGSC0003DMG400028346 M6 RLK with ANK repeat

GAGGAGGAGAGAGACTCAAACCTAACTCTGTACACACATTCAAAGAAACGGAACACACGAGTCTAT  
TGATCCATTATCAATCCAAATGAGTGCAAGTGAAGGGAGCTCCGGCTCATCGGCTGCCGCCCGCTCGA  
AGTACCGGTGGTATCAACGGAGAAGAAGAAGGAAAAGTCAAGAGTGAGCAAGACATCACAATACTGT  
GGCACGCTCATCATAACGATGCCGCTGCCGTACGGAAGCTACTAGAAGAAGATCGGACGCTTGTTCAAG  
CTAGAGATTACGATAATCGAACTCCACTCCACGTTGCAGCGTTACATGGCTGGATCGATGTTGCAAAGT  
GCTTGATTGACTATGGCGCCGATGTCAACGCTCAGGATCGTTGGAGAAACACGGTAAAAAATTGCATT  
TGCTTATTTCCAGTAAATCTTTATACAGTATAGGTTATGTGCCTAAGCTTGTTAGGTGTGTCTGTATATGA  
AACTGATAACTGGTAGTAGCATGGTAATTTGCTTATCTTATCCTGATTTTGGAGCAAACCTGTGATAGCT  
GTTGATCTCTTAAATCTTACTGAAGTTACCTCTTGTCTTGTATGAAATGAAAACATTAGGCATCAGGAAT  
TGGAATTTTAGTCTTCAGCTATTAAGTGATGTCTTGTGATCAATCAGGAGTCAAAAAGTGTGCGGGATGT  
TACCACTTACCAGTGAAATTCATGTGGCATAGGTTGATTAAGTGTGATAAAAAAATTAAGTGGATTTT

AGATTATTGAAAATACCAGTTTGCACATTTCTCTGGTTTTGCATATTTTCGTCCATGCTTTAATGTGCCTG  
TTGTGACACTGACTTTTCTATGCAATCCTTGATTCTTGAGTGAATTTACTAATCTGCTGCTTTGATCTAAG  
TTTTCAATTGTTTGTGACAGCCTCTAGCCGATGCAGAAGGTGCTAAGAAATCTGCCATGATTGAATTGTT  
AAAGACATATGGCGGGCTATCTTATGTGAGTTACATTCCTTTTCTTTTGATATATCTTATATATCATAACA  
GTCGTTTGCCATTTGCAAAAGCTTGTATTTATCAACATTTAATGCATCAACTTGTCTTAGTTAAAAGGTA  
TATTAGCTAGCATATTTATCAGGCTTCTAGCTCTGTTTCTGTACAGCCATCCAGGTCTTGATGAGCTAGCA  
AAGCTGTTTATTAATAATTAGTGAATGAAATGTCCCACATCGGTAAACGAATGGAATTCTGGGCTCCTT  
ATTAAGCTAGCTAGCATATTTATTAGGCTTCTAGATTGATGGCATGATTAGGAGATCATTTACCTGAGTTG  
GGCAAAAATCTTTTACTTTTAGCAAATAACTGATTGGAGCTATCGCCTAAATAATGAGCTAAATGGTTAC  
TGGTACTATAACAAGAAAATAATCTAACAGCGTTGGAAGCAGGATGTTCAATTCAATTCTCCCAAGTCA  
CTGAACAAGTGTTCCTTATGTCATGTTGTGCCACTTCAAGATTTTTCTTTACATAATTATTGAGAATTA  
CTTGATTTTTTCTGAATATGCGAACGGTGTCTTTGATTTCTTAGGATTGGTCTTTAAGAGCCTTTAATGTTT  
TAATATATGCTATAGGGACAAAATGGAAGCCATTTTGAACCAAGGCCTGTCGCCCCACCTCTACCAAAGA  
AGTGTGATTGGGAGATTGATCCTACTGAGCTGGACTTCTCAAATTCTGCAATCATTGGAAAGGTATGTTT  
TGCTATACTAGAAGTGCTGTTATTTAGCTTGTGGAGGTTAATTAAAGTCTGTTTAAGCTACCCTGTCCAG  
TATCTTTTCAAATGAATTGGCAACTGTAGTATACAAAGATAGCTACTCGTGTACCATTTTTTGTGTTTTTC  
AATAAAATCTTTCAATCCGTGCTGTATTAGTGCATGACTGAAAGTCTTTTGTGAAGAGGTTTCTCCCAAAT  
ATAAGCAATTGAAGCGAATTTATGATGATTAAGCTAACACTTGTCTATGGGGTGTGATGAATGAAAA  
ATCTCAACTAATCTAATTTTTAAATTTTTAAATGTGTGGATAGTTGTAGAGGAGTGAATCTGTTTAGCAC  
TGTGTTTAAACATTTTATTTCAATCCAAAATAGAAAGTGTCTCATAATCAGGAAAGCTGCACAATTATTGTG  
CTTGGAGCTGTCGTTCTTAGGTGTTTTTATTGACTCTTCCCTTTGGTATTTTTATTTTTGTCTATAGTTTA  
ATGACTGAGATGATTCTATTTCTTATTATGCGGTTACTATAATCCTAACCTACTTACAAGAAAGAAGA  
GGGACAGTCTCTGGTAACTGGCTGTCCATTTTGCTTCAACCCATTTATCTTTTAACTATTTAGTTTTGATA  
CTGTTGTGCTTGATTTCAAATTGCTTAATCTACTTTTCATCATTGATAAAAAATTGCCAGCGAGGTTGCCA  
TTTATGTATCTAATATGGAAGCTGATATTGATAGGGGTCTTTTGGTGAGATCTTAAAAGCTTGCTGGCGT  
GGAACACCTGTAGCTGTTAAACGCATCCTCCCAAACCTTTTCAAGATGATCGATTGGTGATGTAAGCTCTAT  
TGTGGGGTTAGCACTACAATATCCTGTATATATGATTCTGATATGTTGTGCTGTCTGCTGCTGTTATCAAG  
TTTACAGTTTTCTTTTTGGGTGGGTAGGTGTGAAGGGTGAGGTTAAGGAGGACAGGAGTCTAGCTTTG  
GTCTCCTCTGTTATATATTGACTTTTAAAGTATTCCACATCATTGACCAAAACTATAACAAGAAGATGCTG

CTTTTGCAAGCATGTCACATCCTCTAATTATCAATAAATCATATTCTATTTGTTAAGAATATTTACTCTGCT  
AATATTGTAAGAGGACCTGGAATTTAAGTGGGATCAAGAAGCTTCAGATGTTACCCAAGGCTGTCAGCA  
TTCTCAATTCACAATTGTCTCTTTAAGCTTGATGCAGATTTATATAATTATAAAAGTATGCTGTTAGTTAG  
ACCTTCTGCAGTAATTAATTTTTGATATTTTAATATGATACTGATCTTTTTTATTTTTTTGGGATAACCGA  
TAAATTTGTCTGTGACCCGCCCTTTGGAATATGATACTGATCTGCCTAATTTAATTCCTCTCATGCAGTCA  
AGATTCAGGCATGAGGTAAATTTGCTGGTGAAGCTCCGTCATCAAATATAGTGCAATTTCTGGAGCT  
GTTACTGAGAAAAACCTTAATGTTAATAACTGAATACTTGAGAGGGGTATGTGGTTTTATTTTTCTCT  
ATATTTTGATTGAACATTGAATTATTTCTCTTTATCATATGATGTACCTGTGCTGATTTGGTGCATATATAT  
GTTGTAGGGCGATCTGCATCAGCACCTCAAGGAAAAAGGTGCTCTTACACCATCTACAGCAATCAATTTT  
GCTATGGATATAGCAAGGTAGTATGAATAATTGTTAGCATTTCATACTTCATTTTCCTTGAAGAACTCAA  
ATTCTCTTGATTCGTCTGATTCTTGAACTCTTGTAAGCTATGTTTTGAGTTGCCTATTTACACCGACTGA  
TGTTTTTAAGCATCATTGATGGACTAAATGTGCTCAGCCTGTTGCTGTTTACTTTCTGTCCAAAACCTCATCT  
TCTTCACAGTAGCTGGTCTGTTGAATTAGCTGTAGGGAAAATACAAAAAATGTGCATCCAGAAGATGGT  
CTGCATAACGTGAACAAGTTACTATAACTCTCGGTAGATCTTTCTGATGCGGCATAGTTTCTGTCTGTTTT  
GCCTCAGCATAACATTTTATGAGATACTGTAGTTATCTGACAATTTACCCAACATTCCAATGCCTAGTTTT  
ACATTTTAAAAATTGCATTGCGTAGTTACTTATGCAATGTTTGATGTTTTGTGGGCAGAGGCATGACTTA  
TCTTCACAATGAGCCAAATGTTATAATCCACAGAGATCTAAAGCCCAGGTCTGTTTTCTCTCTTCATGGC  
TCTGCTATTGTTATGATTCAATTAACCTTTAATGCTGAATGTATCAATGTTTCTAGGAATGTTCTTCTAGTCA  
ATTCCAATGCAGACCATTTGAAAGTTGGAGATTTTGGTTTAAGCAAATAATCAGGGTTCAGAACTCCCA  
TGATGTTTATAAAATGACTGGGGAGACAGGGAGCTGTAAGTGACAATGCCATAATTCTCCCTCAATTGA  
TTAACATATTCTTCAAATGTAATTATTTGTTTGTGATATCTTTTTCTGTAATAAAAAAATAGACCGCTATA  
TGGCACCTGAAGTTTTCAAGCACCGGAAGTATGACAAGAAGGTTGATGTTTTCTCTTTCGCAATGATCTT  
ATATGAGGTAATTCTGACTTCTAGGCTCTGCCTATTAGGATTGGGAATAACATGATATGAAACAAATAAT  
GCATCAATGAATTTTCTATTGGTGCAGATGCTAGAGGGTATCCACCATTATCCCACTATGAACCATATG  
AAGCAGCCAAGTATGTGGCAGAAGGACACAGGCCTATGTTCCAGGGCAAAGGTTTTACCCAGAAATTG  
AAAGAGTAAGTCCAAACTGGATCTTGATGCTCCCTTCTTTTTAAGCATCATAACAATATAACAATATCTTTAG  
CTATGTATGGTGTGGGTTTTCAACATGGACAAATGTGGCACAGTTAGAAGATGAGCTATGAAAGCATTT  
TTACGTACTIONAGCTTGGAAAAGATTCAGGTAGGGGTATCTGGGATTTCCAAAAGTGAGATTACTTGCT  
GTGAAGGTCCTCTTTCAGTGAGCTGTAGCCTGTAGGCATCCTAGTTGCAGAAAAAATTGAAACATGATA

TATGCTTTTTTTCTTCCTCTTGCGACCTTAGGTTTTATATATGCACTGCAAAGTTTATTTCTTTTACTATT  
AGCCAACGCAAGAAGATGGTGGGCAGCGTTTTGTTTATGCTTTTCTAAAGACAAATCAATTTTTTGCAGG  
TTGGTAGAGGAATGCTGGGCACCAGATATGAACAAGAGACCCTCATTTTTGGATATTCTAAAAAGACTT  
GAAAAAATTAAGATGCTCTACCCTCGGAGCATCATTGGCACCTTTTCACTTCATGACATCAAATTCCAG  
AGCTGACCAGATATTCGTTGAATTCTCCCATCAAACGCACTATTTGAAATTGATATGTTTGTCCGATTGT  
GCATAGGATCAACTGGCAAAGGTCTGCAAAAAGTGTGCTGTACCAATTCTTTATGCCCCATTCAACATT  
CCAGCTATGCTTGATATTTTATCAAGATATTTCCACAAAATATCAAGTAGAACTGTGTGTGCGAGAGATT  
TGTAACAAATTTCTTACATTTGCTTCTTTTTTAAAATGTGATTCCCAGTGGTATTGAAGTGGCAACTGTAT  
TTTTAACCTTTATTATTCGTTTGTGTTTATGATAAATGCAATTCTCGCTTTTTATTTAAAAGGTTACAGACAT  
CTCCGGTCTAAA

>M6-PGSC0003DMG400028443 M6 RLK with ANK repeat

CTTTTTAATAGCCCCATTGATAGCTAAGTCTCATTTTTTTTTGAAGTAGGTTGTCTTTGAACTGTCTGGTT  
CAATTATTAATTTTCCAAAAAAGAAGAAGAAAATCTATTCTTTTCAAGTTTATTCACCTCTGATCC  
TAAATTTGGTTGAAATATTAAGTTTCAAGAATACCCTTTGCCATCTTTGGATTCTTGAAAAGCTTTAGTG  
TGAAGCATTAAAGTTTTGCTGACATCCTTTGCGAGATTTTATATTCTTGAAAAGCTTTGATCTTTTTTGTG  
TTTTGTGCTTCTGAAGCTGTATGTTCTTTGTTACTACTTTTTAAGTCAAATTTACGTTTTAGTAGTTTTTTA  
GGTAGAGTGGCTGCAGATCTTAAAAGGGTTCAAGTAAATTAGTTGTTGGAATCTTGATCTTGAAATGG  
AACCAGTAAGATTCTTGTGGGTAAGCAATCATCCCTTGCACCAGAAAAGGTGATTGCGGCAGTGGAGA  
TTGAGAGTGAAGATGGGGAGGAAGGGGATGTTATAGATATTGATCCAAGGATCAGGTTGATGTATTCA  
GCTAATGAGGGTGATATAGAGGGGATTAAGGAGCTTTTGGATTTGGGCACTGATGTGAACTTTGAGA  
CGATGATGAGAGGACTGCCCTACATGTTGCTGCTTGCCAAGGTTACAGTGATGTTGTGCGAGCTGTTGGT  
TGATAATGGGGCTGAAATTGATTCCGAAGATCGCTGGGGAAGCACGGTATATCTCATGAACTAGTTTT  
ATTATCATATAGTTTTTGTCTCCCTAATGATTGGTAATTTGGTATAAGTTAGATAACGCTTGATTATGATT  
CTATATTGTTAGTATCTTCACTTTTGGGTAGTTAGTTGGTATTGGAGAAAAGGTATAGACCCTTGCATTC  
TGTTTTTATCTATATATGTTAATCTTAATCAAATCCGAACCTGATTCATTTGGGTTAATGAGTTCATTTGTT  
AAAAAGTGTCTAAGAGGATTCTGTGGGACAAAATTCTAAATGGCATTATATGAATGGTTATAAATATGG  
TACTTTATAACCATTGTTCTTGTCTAGTATCAAGGTTGTTTTAAGTGTAAGCAGAAAATCTATCAGGTAA  
TAATCTCTGTAATTTCAAGGAGACCTGAGCATTGCAGCTCCCAGTTGTTTTACTTCCAACCCTCTTTGCA  
TTGAGGGAAGAGTAAGAAATGATAATAACATTGTCATGTATTACCACGCATTATTGACACAATGTTACCA

TCTAAAACATGAAGTATCCTGCTTTTCCTATTGATCAACATGTTCTGAGCAATCTGATCTTTGCTGAGCA  
GCCTTTAGGAGATGCAATACATTATAAAAATCATCATGTGATCAAGCTACTAGAGGAACATGGTGCCAA  
GCCTCCTGTAAGTTTTATTTCCATTCTATTTACTCATCAAGTGATTAATAACTGTAAGAAAGAAAACCT  
TTGTCTCCGTTGCACAAAAGATTGCTTGGCTTTATTGTTGTCTAAATTTGTTTTGGAAAAATAAAATTCT  
CATCCAGATGGCTCCCATGCATGTCAACAATTCACGTGAAGTCCAGAATATGAGATTGATGCTAAAGA  
ACTTGATTCACGAATAGCATTGAATTGGCCAAGGTAATTTCATATATAAAATGTGAACATTTACATTAAC  
TTGATTGGTAATTAGCTATTTCAATGGGCTAGGTATGCTGATTTTCCTTTCAAATACTTCCTTTTAACCT  
ACACTATCTTGGGAGGTTATAGTGAAGGTTAACACAATAAATTGAGTGGGATGCTAGGTTGGTAAGG  
ATAAGTTGATCTTCTTTGGTGGTTCTGTCATAAGAAGTCCTTATATTAGGGTGGTATGTTTGGAAAAAGC  
TGGGAAATATTCACCTGATCCTTTTCCTATTCCTCTAGTGTATTGCTTCAATCTACAACTTTTGCTTCTGT  
ATCTTTCTGATGATTCTGAECTATTATAGGGAACCTTTTCATATTGCCTCATGGCGTGGAATACAAGTTGC  
TGTGAAAAAGTTTGGAGATGATGAGATTGCTGATGAGGATAAAGTGTGAGTATAAGATACCAATATTG  
ATTCTGTGGAATCTTCTAATGAAAACAGAAAAAGCCATAAAGGGCTCTTCACATTGTTTAGCTCTCCTCATA  
TCTCACTTATTTATTATATATTCTTAATTTATGGATATTTGCAGGACGGCATTACAGAGACGAGCTTGCCT  
TCTCCAGAAGATTAGGCATCCAAATGTTGTCCAATTTCTTGGTGCTGTAACACAAAGTAGCCCGATGATG  
ATAGTGACAGAATACTTACCAAAGGTAGTCCCAAATTTACTCTTGTTTTTTCTTTATCTAAAATAGTTGT  
GGTGTGTATGGTTATATTTCACAACTTTCGGTAGGCCGTGAAGGTTTTAGTTATTCTACACATTTGTCTT  
AGTTGATTCCTTTCTCTATTTTGTCTTTTCTAGCAAAGCAACATCCTGATACTAAATGTCCTTTTCATGG  
CTATATTTTTCCAGGGCGATCTCCATGCATATTTGAAGAATGAAGAACCTCTTAGACCAACAAAAGCTAT  
CAGATTTGCAATAGACATCGCAAGGTTACAAGCCACTCTACACTATTAGCTAATGTTATAAACTCACTAC  
GTAATTACAAGACCAACACTTGTATAAATGTCTGGAACCTGGGGAACTTTGTGGAGTAACATTTAAATCC  
ACACAACCTGCATATCTTTTGGTTTTAAATTCTAAAATTAGCATCTGTGGGAGGCAGAGCAAGTAATCA  
CTCAGCTATTGATTATACTTCTGAGAATATTTATTGCTTAATTCATCTAGTAGTTTGTATGAATCTTTTAG  
TTAACATCTATTGTGTTTCTTAAAGATCCCATCTGGTGGTTTGCATATCCACTGGTAATATTAATAGAAAGA  
AGAAAAGAAAATAGAAGATCATACTTGTTAATGGATATGCCACTTTTTCTCAAATGCTAGGTTATCTGC  
TGACCTAGTATTCTAATGTCCTGCATATCACTTTAAGCTGACCCTAGGAATATGAAGTAGGATGCATTTA  
GTAAAGAAAAAGGAGAAAAACATATAGAGATGATGCAACACTAGTTGCTTTTTCCGTCAGTCAATACTG  
GAAGTTAATAAACATCATTTGATATTACTCTTTACTTCCCACTTTGTTTGATCTGCTTCCAAGCTAAAATTT  
ATGCCCTGTAGTACCCTGTATTATTTCAAATATAATGTGATATCTTTATACCCATTTCAAGTCTTCTACTA



TTAATATTATCATAAATAATTGGAATCATTCTCTTGAGCTCTGAGATAGTCAACACAGCTCAAATAAATT  
GGATTGGAGCATTAAAGGATCTCTTCAAAGTTATTTTTAATTCTATCAAATTTTCATTTCCAAATTTCACT  
TGAATTTCCACAGCTGCTTGGCATGTGAGACATTTGATTATATTTATTTTCTTTCGAATCAGCTTGTGTTTG  
CTATTTACTGAAATAATTTATCAAACATACTGTTACATTCATTTGGAGTTGAAGCTTTGTGTGATTCATG  
TTATTTCTGAATCATAATGTGCATAAGTAGAATTTTAAACACTATTGTATTTTATATGTTTGCAGGGGACT  
GAACTATCTACATGAAATTAGACCTGAAGCGATTATTCATCGTGACCTAGAGCCTTCGTAAGTTCTCTTCT  
TTTGTTAGGTTTCTTTGATGCCATTTGTGTAAGCAAATTTCCATCCAAGGTTTTGTTGACAAGCCTCAAT  
CTTTGAAGTTCTCTCTTTCAAATGAGTTTCTTCATCTTAATGTTTTAATATTTTACGTGACATAACAG  
AAATATTTTGAGGGATGATACGGGACACCTGAAAGTTGCTGATTTTGGAGTCAGCAAGCTATTGAAAGT  
TACCAACAGGGTCAAAGAAGATAAGCCTCTGACATGTGATAACACATCTTGTGAGTACTCCTTTCTTTTA  
GGTATCACAATGTTTCTTTCCAATGGAGAATTATGCTGACATTTGACACAGACTCGACAGTATTTGTGA  
CACTGTTGTTGCTGCTTGTGTTGGATGTAAAATTCCTGCCAGTCTAATTTTAAAAAATTGTTTCAGCATTGC  
ATGGTGCCACAATTGCTTCTACTGATCCATTTCTGTTGATTAATATTTGGAAATCTCTTAACCTGTTTCCTT  
TTGCCTTTTGTGTTGTTGGAAATATATAGGCCGATATGTAGCTCCAGAGTTTTCAAATGAGGAATAC  
GATACCAAAGTTGATGTCTTTTCTTTGCTTTAATTTGCAAGAGGTAA

>M6-PGSC0003DMG401030595 M6 RLK with ANK repeat

CGCAAATATACAAGAAACGTCGAAGAATAATACAAGAACTAAGCTAACTTCGTTAAAACCCAAAACCCC  
TTTCTTGGACTGAATCGCCCATCCATGGCGACAAGAAACGTTTATCTTTATGTTAATTTTCATCAGGCAGT  
TTTGAAGTTCCAATTGTTGAGATATGGAGATCAGTACAATATTGATGCGGCATAAAGATTCTTCATCTGG  
GCATTTTGACATGCAGATGATAGGCACTTTCTTGAGTTTCGCATCAAGGGGTGACAGAGTTGGTCTCAAT  
CAGATGCTGAGGCAGGGAATTTACCCAATGTACAGGACTATGACAAAAGAACTGCTCTACATCTTGCT  
GCTAGCGAAGGACACGCCTCTATTGTTGAACTTCTTTGGCTTACAAGGCTGATGTTAATCTCAGAGATA  
GGTGGCGCCGGACTGTAAGCCCCTTTTCATATACTATTACCCTTCTCTGCTCGTCTTTCTTCATACTGCATA  
CAACCCCATTCATTTATGTTACACATGGTTGTTACATATTGTTTTATAATGTATTATATTATACATGTTCT  
ATTGTTACATCGTTACATTATGTTAGATATCAGCAATTTGAAGAAAAAACAACAAGAAAAGTAGGG  
TTACGGAGTAGAGCTATCATAAAAAGGTAAGGAATGGTAAAAGATGAAATATGATTATTAGATAATAAC  
AAAGATAAAATGAGAAAAAATAATAAGGTAACAATGCGATTACACCAAATCAGTTGTTACATAAAATG  
GGAAATTTTGTGTTGCATAAGGATGGATTTAACGATACTATGCAATAAATTTTAGTAAAAATCAAACA  
CTGACAGTGCAATATCATGATGGTAGTTACCATTTTTATCAATTATAATTGATGCTTATTTTATAGATTAA

CCTGTAATTACCTTAGAAGTGACCTGATTGTATACATATGTTTTAACTTAACTCTCTGTTTTTAAATGCAT  
TCCTATGATGAGGAATTAACCATCATTATTTTCCTTCAATTGGTTGTTAAGCCCTAACAGATGCAAAGT  
TGTACGGGCACCGTGACATATGCAGGATCCTTGAGGTCTGTGGTGGCAAGGATTCCAACAGTGATCATC  
CTTTGGTAAGTGTTTCATCGCTAACAGTGATCATCCTTTGAAATTTGATGTTATGAATTACTTATATGGAAC  
AGATCTTATTAATTTTCATTTACTTAGTGTGAGCATCAAGTTCTTACCATTCAATAAGAATAGTATATATCA  
TATCATGTCATTCAGGTGCTTAAGATATTGACAATAGCTTCATTAACAAATAAACTCCATCTTATGAAT  
TCTGCACCTGAAAACACACTTGAGACATACATGGTAGACTTAACTTTGGTAGAGTGTAGCTCTAGCTTAA  
ATGTTGTTTACACAGACTGCTTGACAAAGTGAAGTCTGGTTGAACTTCTATCTTTGACATTGCAGTTTTAG  
TCACCTTTGTTGACAATTTACGGAAAAATATGAAGTCTTCCTTTATAAAGCTATGTCAAATGCACTTTC  
TATCTTACAAAATAAGCATAATACTCATTTTTGGTCCTATGTCATTGCTTTGGGATATAGCTAGCTTTCACC  
TGTTGCTTGTGAAACAAAGCACCAATCAATTACCTCACATAAACTTCTCAAGCCTTCATCCCTCCGAGAG  
CCATACAATTCTTTCTGCATTACCTTGTAAAGTCACTCCATTCTGGCAATGTGAATTTGGGGGATGATATG  
GAGAAGGGCTAAGGTAGCAGAATTTAAGAATGTAAGTCACTGAGCCCTGTCAGTTTCACTGTTGAAGGACTAA  
CTGCTTATTTTCCAGAGAGTAGATGAATAGAGGACCCCAACATTGGGGGATATACTTGAACCTACTTC  
CAAATACAAGGACACAAGCACATGTTAAGTCAAAAACCATAAGTTTTCACTCATAAAAGTTCCAAGCCTA  
TTAGTGCAGAATTTACTCATGACTGTGGTTTTCCGTTTACTCCTTTCTGTTTTTGCTAATCAATCTGAGTAA  
GAAAATGTCCGTTGATATGACAAGTTGAATTTTATGACATGCAGACTGTTCCGGCGTGAAGAGGATTCAA  
TTGAAGTGAATATTGACATATCTGAACTGAACTTGACAGCATTCTTCAATAATTGAGCAGGTATTAATATG  
GAAATCCAAAGGTTGGGATGTCATGGTGCTGAGTATATTCTAGGGCTTCTAGGGCTGTTTCTTTCTTTT  
ACTTAGCATTAACTTTCTAGGAACTCAGTCCTTTGTTATTTTTACAGGGCTTATTTGGGGAGTCTGAAAA  
GGTCAAATGGCGTGGAACATGGGTGGTTAAAACCGTAATCAAAGGCATTCAATTTATATGTCATTTTTA  
TACTATAATTATTTAACAAGGCTTTCTGGATTAATTCTTTCTTTTACTTTTTCCAACATACTTGATGCAGG  
GTTTTTTCTGCTAAGGTTAATACTTTACTGAGGGAACTTCGACATCCAAATATTTTACAGTTTCTTGGATC  
AATTGTGCATGGTGATGAAATGATCTTGATCACAGAGTATTTGCCGAAAGTATGTTGTTTCTTCCCTCACT  
AATATTGGCAGAAACAGTTTCAGATTTTTTTTTGTAGGACGGCACTCAATAATCATTTTGTGAGACATGATA  
CAGAAATAAATGCATTTTGTAGCCTTCACTATGCTGTACTATTAATAGATATTTTTTGCCAAAGTACTATC  
ACCTAATATTCCTGGGTGTTGATCTTCAAAAAATTTCTCAAAGATCTTTCAGTGATTGCTAAAATGGTTA  
AGGATAGTCCCTGAATATGATATACTTCTTATTATGTTTTCCCATATATTTCAAGGAACTTGCAAGATAT  
TTTGAGAAAGCGTCTTGACCCCCAACTGCATTGCGCTATGCACTTGACATAGCTAGGTACAACATTCCA

CTTATTTCTGTTTAGGTTGATTTCATTTTATTATGTGAAGAACAAATCACATTAGTGCTCACTTTGAACAC  
AGGGGAATGAATTACCTCCATCGGCACAAGCCCTTGCCTATTGTTACAATAACTTGCATCTGAAGTATG  
TCTATTCGTTTATCTTTATTAATAACATCTCACTGCAATTTTTTTATGTATATATTATCTTCTATACTTGGGA  
ATTGTAGTTGAGTCTGCTTACCAAAAATAGGATCAGGGAAAATAACTGACTTCTAGTTTAAGTCTTTCTTT  
TACTGAGTTATTATGATTATTCTAGTATCTGTATCTTGGTGTTAATCACTAATAGATAGTTGTTAGATA  
AAACCGAGTGCTTCTTTCTTTTCAGTTTGTCTGTCTATGATTTTCTGCAATGGATTCTAGAGAGTTCTTTTG  
TTTGTAACAGTATTGTCAAGCTGCAGGTCGTTTACATCTTTGTGTTATGTGCCTTGCCAATCTGACTTGAG  
ATTTCTATCCTTTTAAATGTTCAACTGTCTTACTTCTATAACTCAGAGCATTGGGTATGTTACGTTTT  
ATTGCCAGAATATTCATTATCAAAGACATGAAAATGCCTTTTATCTTAACTGATTCCAATTATCAATAGGA  
CTCTTGAGTCAACATGCAATTGGATGTCTAGGTTTCACTAACATATTGGTCATTTGAATGAATGGTGCA  
AGTATGCATTTGTTCAATATTTTTTAGTATGTTGATGTAGTGATGTCAAAGTGGTGGCGTATAAATG  
CATTTTAACCCACTTTTCCATGCTATTTCTATCTGTGTGACTTCTGACATGCCAGCAAAGTAATATACGAT  
GAAATGGACACTAATTTGTTTAGTTTATGAAGCAAATCTAAAATAATGAAGTTAAGCTATATAGCATAT  
GTCCTCCCGAACAAATTAGCTGTCATCTTCACTGAAGTCTTTTCTTAAATTTGGTCCAGGAACTTGTTACTAG  
ATGAATGTGGGCACTTAAAGATTGGTGAATATTGGGTTCAAATATTGGATAATCAAATATATGCAAGTC  
AGGACTGTTGTATGAAGACTTTTTGGTTCTTGCTTATTTGTTTGTTCATTTATTTGGGTCACATACTGCAG  
CTTATAATCAATCTCTTTCTTTTACAGGTCAATCAAACAACGGATGTAACCTAATCAGCCATCTGTGTCAT  
GACATTAGCAAAGATATTTATTCATTTGGCCTCATCTTTTACCAGGTAGATTCAAGGAGTTCTCTTATCAT  
ATATGTAATCAGCATATTGCAATAATCCTCCCTTTTCTTACTGCTTTTTGTTGGAGATTCAAGGAGTTCTC  
CAACAATTGAGCATAAACTGATCCAACCTTTGGATTAACCTGAGTTTGTGGACCTTCTTAAACTAATAA  
CAAAATTCACATAAAATGTTGATAGATTGATAAATTAATAAATGATCTGTGATTTTAGCTTACCTTTGG  
AATTCCACTCAGTTTGCTATTAGCACTAATGCTGCTACTTAATTCAGGCGATCTTTCATGATCTTTTACTAG  
TTTGATGAGCATCCTATAGAGTGCTAACTTGAAAAGCTACAAGAAAATTGAATATTATCCTATTAAGAAC  
TGGATGATCGTGATCTTTTTTTGTGTCATGAAAAGGGTAACTAGACTTCAACTTTAATTACATATTCTGA  
AGAAGGACTAGCTGGATGCACCCAATACCTAGGAATAGACAAAAGTTGAATTTATTTTTTTGGTCGGGTA  
ATCAAGAGGATGAGTTCAGATCCTCTCAATTCCAACTTTGGCATTAACTTTCTTTAGTTGAGTGCCAAA  
GTTGTTTCTCGTTAGATGGAAGTTCTTTCCCCACAGTGAATGCTCAAACCAATAGAAAAATAGTGACAAA  
ATGAGCATGATCTAAAGTTGTTTGGAGCATAAACTCAACATGATGTAGTCCACGTAGTAGTCAGTTGTAC  
TGGTAGAACTTTTTCTTTGGTTCATTGCCAGTGAAAAGTTGTTGTGTTATTAGAGTAAGTCATCTTTCTGT

TTACTTATTCTTACTTGACTATTATCACATGAGTTTCCATTAAGATTCAGTACTAACAACACTGGAAATGCTGC  
AGATGCTGGAAGGAAGACAAATAACTGACAGGAGTTTTGAGACCATGCATATCAAGTCTGTAGATTTGG  
AGAAAAAGCTTTATACAGGTCGATACCCGAGTAGAATTCTTCAGTAAGTCAATCACTCAATCTTGAAGCT  
TTAATTTAACTTCTCCAATACATGTCCCAACTCAGTATATTCTTCACTAAACCAGCTTCTAAGTAATTCATA  
CATAGACATCATGATCCATGTTGATAAGAGGTTTAGTGATACGAGACTATCTGGTTAGAGCAACTCAGT  
ATATGTTTAAATGATTATAATATCAGAAATACAGGCTACTAAGAACTCGAACATACATTGTAGCTCAAAT  
TATTTATTTAGATCCCAATCAACAACCTCAAAGGACCAAATCCCGTACCCGTAAGCTTCAATTGTTGGCT  
CTGCCTATGTTGATAACATATTGTTATTTTGTTCAGGTTAATTGAGGACTGCACGAGTACAGTTCCTTCTA  
CAAGGCCATCATTGCTACAGTAATAGAAATCCTAGAAGAAGTCTCTTTACTATCAAGAAAAACAGGTTG  
CCCGCCGTGTAATAAAAGCAAAAGCCCCAAGTAAATGAATTTAATTTGCTAGTGATGGATATGCTTTGAT  
ACACCATAAATTTGAAAAAGTCAGTGAAGAACTCATTCTGGTTCATGAATATGAGTTTGATATAATTCCC  
AAGTTGACTTTCTTGATTTGACTTTGTGTTACTATAATGTATATAGGAAATTTTACTTGCT

>M6-PGSC0003DMG400002045 M6 RLK with antifungi domain(GNK)

ATGTCTAGTTTGAATATCCCAATATACCTTGTGCTTTTCTTGATTAGCCAAAGTATTACCACAATATTAGCT  
CTTGATGACCTTTATTACTGCCCAAACACAACACTACTTATAACAATATAACAAACACCTCTTACAATTCCAA  
CCTCAATTTGCTACTTTCAAATCTTTCTTCTGCCTCTAGAGAACATCTTTTTTACAATTTCTCCATCGATGGC  
ACCGATAATTTGAAACAATTTACGGTCTTTTCATGTGTGCGAGGTGATATGTTAAGTGTAATTTGTCAAG  
ATTTTGTAACAAGAGCTGTTAAAAAATAATCTTGTTATGCCCGGTAGCAAACGGTTGTATTATGGCG  
GGATGATTGCATGTTACGTTACTCGAATCAATCAATATTCCCGATCCAAACTATAGATCAATAATTAACA  
ATCCATCTACACCTTTTGTGCATGCATAACATTATTACAATTACCAATAATGAACATGAACAAAGAAGGTT  
AAACGGAGTCTAGGGGCAATTATGGATGACGTAACGACTCGGGCTGCTAGTGATGATCGATCGTTAGA  
CAAGAAAATTGCAATTAGGGAAGCTAAGTTCAGTGTTGAGACAACAATTTATGCCTTAGCTCAATGCATT  
CCTCATATGTCTTCTAAAGATTGCCTAAATTGCCTTGAAAATGCCATCACAGTTTTAAACAAATGTTGTGA  
TGTATATAGAGGTGCTAGAGTTCAATTTCTAGTTGTTTTATGAGGCATGAAGTGTACCTCTTCTACAATA  
AAACAAACCTATCTACTTTGTACATAATCAAGGTACATATTACTACTCCCTCTGTCCCATTTTGTATAAGT  
TAGTTTGACTTGACACGGAATTTAAGAAAGAAAAACAGACTTTTGAACTTATGGTCTAAAATAAATGAT  
AGATGTTTATCTGACTATAAATCATTTTATTAAATGTGAAACAAACATGTTAAAGTTATGTTATTATTAG  
TATGAAAATGTATTCATTTTTGTTGGAAATTGACTAAAAAGAAAAGTGAGTCATATAAACTGAGACAGG  
AAGAGTAATATTTTGACCAATACAATACTGACTTTAATTTGTTGTAGATTTGTGTCACCATTTGTTTACGA

TAAGTTTTACTTTTAATTCCCCCGTCCCCGCCCGCCCCACAAATATGTAAGCATGCTATCTTTTCTT  
TTAATTGGATAAATGACGAAATGAAAGGTATTCAAAAAGATTTAAGTGTGTTCTTATCTTAAATTAAT  
ATAATTTTTATATTTGGTATAAGTCGACATTGTGCTATTATGGATTTATGTCCCATTGATACTGACCCAAA  
AAAAAGTACTTACCTAAAAAAGGTATGCGTAACATTCTATTAATTACTTTAATAATATTCTTCATCTATATT  
CCAATCATATGTCTTTTTGTATCAACAAATAAAATTCAGATGAATCCGTATTTATTATTTGACCCTGATAA  
TAATACGATGGTTGGAATATCACATCAAAAATTAATAGAATCATTAAATAGAATGAATTTAATCCTGAG  
TGGCATAGTTATAGTTGAACATTCTTCGTCGAAAAATTATATGAAGCAACTAAAAAATATTTTTTATATG  
TATATACTAAATCTTAAATATCATTAAACGAATTTTCTGACTTGCCACTGCAGGGCATGATGGAATCCCAA  
AATAGAACTACTAATTATTTGTGTAGTGGTTGCCATTGTAATTCTTGTGTTTCTACGATCTATTGGAGTCTT  
TCATTTGCTACAAAGGAGAAGAAGGATGAAAAGAAATAATAAACTCTTAAGGAGATGAATGGTAATT  
AATTAATCCCAATTATTTAATACAATTCAAGTCCATTTATTTCTTAATTACTAACTTTTTAAATTAATTAT  
TATATATGTGTTGCAGTTGATCTTAGTGGAATTTTAACAGCTGAATCATTGCAATATGACTTTAGTACAAT  
TGAATTTGCCACTAACTTCTTTTCTAAGGAAAACAAAATTGGTGTAGGTGGATTTGGTGTATGTCTATAAG  
GTAACATGTTCAAATTATACCATATAATAATTTTTTAGATATAAGTTATATATTCTGACAACGTAAATATTT  
TTACACGATCATTAGGGGGAACCTGGTAATGGACAAGAGATAGCTGTAAAGAGGCTATCAAGAAGGT  
CAAGTCAAGGAGTTGAAGAGTTTAAGAATGAAGTTGTACTTGTTGCTAAGCTTCAACATAGAAATTTAG  
TGAGACTCTTAGGTTTTTGTGTTGGAAGGAGAAGAAAAATACTCATCTACGAGTTCGTGTCCAACAAAA  
GCCTGGACTATTTCTTATTTGGTATGCTTGTTTATACGTCTCACTTTTCTTTTTGTAICTCATGTTATATATAA  
TATTTCTCTGATTTGATGTCTCACATGATATGATTAAGATACAAAGAAACAAGCAACGTTGGATTGGTC  
AGTACGTGATAAGATTATTAGAGGAATAGTACGAGGATTAATTTATCTTCATGAAGATTCTCGTCCTCGA  
ATCATAACATCGTGATCTCAAAGCAAGCAATATTTTGTAGACAAAGATATGAACCCTAAAATTTGAGATTT  
TGGCATGGCTAGAATATTTGGAGTTGACCAAATTGAAGGAAGCACTAACATAATTGTTGGAACATAGTA  
AGTGTGGTTTTTAAAAAAGAGACCTTTTTGTGAATCGGTTTGTATGGTATAGCAAAATGTTAATTA  
TTGTGATTTATTGTTCTTTGTTAGCGGCTACATGTCCCCGGAGTACGCAATGCATGGTCAATTCTCAGTGA  
AATCAGATGTATTTAGTTTTGGTGTGCTTCTTTGGAGATAATAAGTGGAAAAAGAAGAAATAATAAAG  
AAGATAAATTTGATGACCTTCTTATCCATGTAAGTGCAAGTTAATTTAATTAACAATATACAATATATTTA  
TCCTAATTAATTAACATGATTATAATTAATTGTGTTGATATTTATAGGCATGGAGGTTGTGGAAAGATAA  
TAGAGCAATGGAAATTGTTGATCCAACACTATTATTGGTGAICTCAAATTCATGTCGAAAATCATGAGATGT  
ATACATATTGGATTGTTATGTGTTCAAATTGATTTGGATGGAAGACCTACAACACTTTGATATCTCATT

TCTCAGTACTGATTTTGCTATTCTACCAGAGCCAAATCAACCAGCGTCTTTTAAGGATTATTCTAGATTAG  
GAAATATCGAGCAACTCACAAGTAATTCCATTCCGTCATCTAATTTTGGGGAATTAATTACAGAAATCTA  
CCCAAGATAG

>M6-PGSC0003DMG400006912 M6 RLK with antifungi domain(GNK)

AATTTAACGTGCAGACTTGAAACATTTTCAGGGAGAAAAGGGCATAGCGGATAATAGAAGATGCGAAT  
GAAGTGCTAAGGGTGGTTCAAATTGTGATGCTATGTAAGAGTCGCTATTATGCGTTCAGATATTT  
CAACAATTATAAATACTTACACAAGAAAAATTATATATATAGAAGTGACTGTTCTTCAAAGCCTCCTT  
TCATTGATATGGTTCCGAACAACATGGTTCTAGTCATCATCATCACCCATTTTCATCAT

>M6-PGSC0003DMG400013468 M6 RLK with antifungi domain(GNK)

CCCCCCCCCCCCCCCCCTTTTTTTTTTTTTTTTTTCTATGGAGTTCTACACCAAATCCATTTTTCAT  
TCTGCCATCATTGTTAGTTATCATTCTCCAACCTGAGACTCTGTAGTCTGTACTGGCTTTTCTTTTTCTTA  
GTCTTATCTATTTGATTTACTGTTGTCATATTTCTATGTCTGTTATCTTGAAGATTCTAGTGACAAAGGGT  
TTACCTAGTGTAGCATGATGATCACCTTAGAGTTCAATATTGAATTAGTAAGATTGTACTATTGGAATGG  
AAGCAGCAGTTGCCTGAGGCAAGTATGAGTAGATAAGGGATGTTCAATGGAGGAAAAGTGGAGGCTAGC  
CTCATCTGATCACATCTTAGACTGATCTGTGGCATATTGTTTCAGCTGCATAGGATTGCTTATCTTCTTCTT  
TGGAACCTTGGCTAACTATTTGTTGATTAGTGTGTACAATCTGATGCTTACAAGAATTGTGAGATGACTC  
ATCTAATTGTTTACTGAAGTGGCCTAGTATATCTTCTTCTCCAATATAGAATATTTTTCTCTACTCCTCTG  
CTGATAGGAGGTATGAGAGGTTGACTATGGATGGTTTCAGGAGAGGTAGAGGTAGGCCGAAAAAGTA  
TTGGAGAGAGGTGATTAGACACGACATGACACAGTCAGGCGTCAGCATAACCGCGGACATGGCCTTAGA  
TAGGAGGTTGTGGGGGACACGGATTAGAGTGGGAGGTTAGTAGGTAGTAGAGTGTGTCTCAATTATC  
TTCCATACTTGTAGTTGTTGTCTTACTCAAGGAGTTTTTGTCTTTGACGTTGTTTTATTACACTTCGATT  
ATTGTATTATTTGTTATAGTTATGTTTTTTTCAGAATGCTTTGACATGCTTTCTATGGTATTTTTCCATGAC  
TTCTCAATTTTTCCCCCTTCATTAAGCCGGGGTCTATCTGAAACAACCTCTCTACCTCTCAAGGTAGGGG  
TAAGGCTGCGTACATTCTACCCTCCCCAAACCCCACTCGTGAGATTACACTGGGTATGCTTTTGTGTTCT  
TCTCTGCTGATCCCAAAGATATTGTAGGGAACCTTCATATTGCCTCATGGCGTGGAATACAAGTTGCTG  
TAAAAAAGTTTGGGGAGGATGTGATTGCTGATGAGGATAAAGTGTGAGTAACCTTAAAAGTAATAGTGC  
TTCTATTTTTCTACTTACAAGGGGAAAACCCGTAGTTGCTACTTCACATTGTTTAGCTAGCATCTCTCATT  
ATTTTTGTGGATATTTACATTCCCTAACAGTATAGCTTCTGCAGGAGCGCATTTAGAGATGAGCTTGCCT  
TGCTCCAGAAGATGAGACATCCTAATGTGGTGCAATTTCTTGGTGCTGTAACACAAAGTAGTCCTATGAT

GATAGTGACGGAGTACTTACCAAAGGTCTTACTTATTAACCTTGACAGTTTGCAGAATTATATTTGACA  
ACATTTTTATACACTGTTTTCTCCCTTATAGTTCTATCCATTTTTTCAGTTTACATTCTCTTTCTCTTTTTG  
ACCATATGTTTGAAACTTTTCCAACAAACCTATCACTTTGAAATGACTTTTCCATGCCGTATGTTTCCAGG  
GTGATCTCCGTGAATATTTGAATAGAAAAGGAGCACTTAAACCAACTAAAGCTCTCAGATTTGCAATGG  
ACATCGCGAGGTTACATCCACTCTGTGCCACTGACCAATATCATTAACTCTTTATAAATTGCAAGATTAA  
TGGTTTAGATTTTTCTTAAAAAAAACAATTTTTTCATTATGCATTACTTATAAACTTTGAGTTAATGTTCA  
AAAATACACTTAAAAGTATTCGTTTTTTGAGTTTACCACCTGAACTATGCGAGTTTCTACCTAAACTAG  
CACCAACTATTTTTCAAATTCACCTCCTCGATCTGTTGTTCCCTTTTCCAACCTGAAATATAACCATCGT  
TCAGGTAAGAAAAGAGAAGAATTGATGTTGAATTGTGTTTTGATGAGTAGTTCTGGTAGAAAACCTCGTA  
CACTTGATAGCTCCGGTATGAAACTCGAAAACTGGAATACTTTAGGTGTGTTTTTGACCGTTCACTCTA  
AAGCTTTTTTTGGATGTAAAATATCAATGTCTTTTAGTCCTTTGATTGGAGCATTACTGCTGAGTATTA  
ATTCTCATATATAATATTTGGTTTTAGGGGAATGAATTACCTGCATGAACATAAAGAAGCAATTATTCATC  
GTGATCTTGAGCCTTCGTAAGTTTCACTTCGTCAGGTTACCTGAATTACATTTTGTCTATACTAACGCCT  
AGCCAAGTTTTCGAGTAGCATCAATGCTTTCATATTGTGATTTGAGACTCTTCATGTAATAATAGTTCACT  
TTTTTTGGAGTAAGATAACAGAAATATTTTGCTGGATGATACTGGACATCTGAAAGTTGCTGACTTTGG  
AGTAAGCAAGCTACTGAAAGTTACAAAAAGGGTCAAAGAAGATAAGCCTTTGACATACGAAGACAGTT  
ATCGTGAGTACTTCTCTTTTAGATATTCTAGTCCTCTATTCCTTCTCCATTGGAAAAGATATGGTAGCTTG  
TACTGTGGAAAATAATATATGCGTGAGTGTTCAGTTTACTTGATAGCTCCAAAAAAGCTTTCTTTA  
TTTGAGATGTTGTGATTTGATCCTGTTAATGATATTTGAGAACCGATATTTGGATTTCTTCTAATATTTT  
ATCATCTTTTTTTCTAAAAAAAACTTTTCAATTCTGTGCAACAAATAGGCCGATATGTAGCTCCAGAGG  
TTTTCAGGAATGAGGAATATGATACCAAAGTTGATGTCTTTTCATTTGCCTTGATTTTACAAGAGGTAAA  
ATTTTGTCTTATCAGATTCTTGTTTAACTTTGAGGAAGAACAGTTTGTTTGCCTCTTGTGGACCATATC  
TTTATTTTATGTTTAAGAGTGTGTGAATGCAAGGAGTATTATGTTCCGTGTTCTTAAAAGTGAAAGCGCA  
AAACTGGAAGTGAACACATACTTTTTTAAAATGAAATCGAAATGAGTGCTCAATCTGTAGAAAATCAGA  
GATCGTGATAACATATATGTATTTAATACTAATGGCATCAAATTACAAATAAATTACTAACTTAAGAATT  
CAATATATAATGATACCATATTATTCTTGCAATTCTGCTCAGAAACATTTCTTTTGATCCGAGGGTCAAT  
CGGAACAACCTCTATACCTCGCAAAGGTAGGGTATAGGGGTAAGGTCCGCATACATCCTACCCTCTCCA  
GACCCCACTTGTAGGATTACATTGGATATGTTGTAGATCAAATTTAACATGATATAAATATGTTTCAAAG  
GTCACAGAAATATACAGTGATTATCGTTTACTTGAATATTGATCTGATCTATTTATGTTGTATATCTGTGT

AAGTTTGAAAGTAACTCCGGTTTGATGAAATTTAGTGAGTCAAACATGTGTGTCTTTTGCAGTTTCTCTTT  
GCAGAAACAGGTGATATATTTATCTTTGTGTTGTGCTGTATTTTAGATGATTGAAGGCTATCCCCCTTCC  
ATGCGAAGGAAGAAAACGATGTACCTAAATTGTATGCTGCTAAAGAGCGCCCTCCTTTTAAAGCCCCGG  
CAAAGTTTTATGCCCATGGACTGAAAGAGTAAGTTCTATATTTTACATCAGTTGCTACTATAAGTCACGAT  
ATTTTATTTTAGTATAATAAACCATGCTATTCTAGGGTAAATATCGATTGTTATAATCTGAGAATATGAAA  
ACTCATGTCAATTAGGTGTGAGAGGAGAACCATGAGGTCTCAGGTTTAAATTCTAGTGGAGACGATAAA  
CACTAGGTGATTTCTTCCAATTCTAAATAGTTACCTGGTACTTGCAACTGTGGCATAGTAAACGTACTIONAA  
AAAGAACACAAAAAACTAATAAGAACTGAACAGACCTACAATTATAAAATCAACTIONTTCAGCATTGCG  
GATCCTTTCCTTCCGTATAGGTGGCAGCTTCTTCCACCTCTCTGTTGCACATAAAACACCTACACATCTAC  
GTATCATGATCCCCCTTTTCTGTAGGTTGTTTTGTGTAAGGAAAGCATCCCAGGGCAGCATGCTATACGAA  
AAAAGAGGGCTTTAGACTTACCAAAGCTGTTTCTATATCCCATTGGTAAAGCTGGTGGAGGGAGAAGCC  
CATATACGGGTTAAGCCGAGCCCAATAGCTTTTGCTCAAACAATGTATCTTTGTTAAGAGATTCATTA  
TATGTATACATATGAAATTTAGAACCTAATGCATGAAGTCGTCGTTCTAAAATTTACAATCCATAAAGTTG  
AAATCCTGGCTCTACCTTAGTTGGCTTTAATCTTGATTCTACTTATACATAGATTAGTAGGGTTATAACTG  
ATCAACTGGTGTCTTTACGTAGATGGTAGCATTTAAACAAACTGGGATCTTGAAAATGTCCTTATTTTC  
GTTTTATTATGTATAAATTTTACCATTTTATGATCATCAAGTTGTTGTTGTCTCCAAGATGGTACTCTCTCC  
GTTTCAATTTGTTTGTCTTACTTTCTTTTTTAGTTCGTTTCGAAAAGGATGTCTCTTTCCTTTTTTGACAACT  
CTTTGATTTCAATTTCCATATGACATGTTTAAAGATCACGAGATTAAGAATGTTTTGGTACATTTTACATA  
TTTTGTTTAAAGACCACAAGATTCAAAAGATCTTCTTTACTTTCTTAATGTGCCAAGTCAAATCAGACAAT  
TAAATTGAAACGGAAATAGTAATATTAGGGTTGCTTTTGGTGTTCAGATTGATCGAAGAGTGTTGGAAT  
GACAAGCCAACCGAGCGGCCAAGTTTCAAGCAAATTATCCCAAGGCTTGAGTTCATCTATAAAAAGTCT  
GACCACAACAAGCGCTGGAAGGTAAAATATCCATTAGTGGTTCTTGCACTTCAACTIONTTCGATTTGTTTT  
GATGTAGTGTCTGTTCTTTTTTAGTATGTCTTGTTATGCTTTCTTTAGCATTTTGTATTGGCTTCTTCTCTC  
CCATTTTTTTTTCCGAACTGCTTTTATTTGAGCCGAGGGTCTATTAGATACAATCTCTCTATCTCCCAAGG  
TAGGAGTAGGGGTAAGGTTTGCATACAAGCTACTCTCCTCTGACCCCACTTGTTGGGATAACAACGGGTA  
TGTTGTTATTGTTGTTGTTGATTGGTGTTTTTGATCTTTTACATTTTGGTCATCAATGAATCAACTIONT  
TGCCATTTGTTTTCATCGAATAGAGACATATTAGCTCTAAATCACTCGAATTTTATGCTTTTGTGAGATATT  
GACTTCTAGTGAAAAACAATATCCTGGCTCTGATTTGATAAGTAGCTCATCTGAGATACTATTAGTGGA  
CGAGTTAGTTATAATTAGCTCAGATGTAATTTCTTTGTTTCAGTGTTGGTACTTGACTCAATAATGTCCCT



TCAGTCCCAAACAAGTTGGGGTCTGACTATATGAATCTGAGCTAATCACCACGTTCCCATTTAATTTTCATCT  
CAGTCCAACATTATTACACAAAACCTTAATCTCGCCACGATCACTGCAGTTTAGCATAACATATTATTCAG  
TAGATACCTAAGTGCCTCTTTTTACCATGAATACTTTGCTACATGCAGGTAATTAGACCATTGAACTGCT  
TTCAGCATTTAGCGGCAATGTGGAAGAAAGATGGTTCAGGTTAAGTAGTCGGAATCGTTCATCTCGGT  
CTATGCGCCACATCTAAGTAAGTTTCTGGATAAAGTTTTCTACTTCTCCACATTGTCTGCAAAAATATTC  
AGTTGCTCTTAGTAGTATATAGGCTGTTGGATTATTTCTAGTTTCAA

>M6-PGSC0003DMG400013524 M6 RLK with antifungi domain(GNK)

TTTTTTTTTTCTTTCTTCTTTGTCACTGTCCTCTGTTCTTTATCAGAGTTCCTAAAGCATCTGCAATATAAAT  
TTCTACAGCCATCTTGCTCAACAAATCGATTTTTCGCGATCGAAAGGTAAGATTTTTGAGTTTTAAGTGTC  
TTTTGCTTTCACTTTTTTCTTTTATGTGTTTTTCAAAGAACTGCTCAAATTGAGAATTCTCTGTATTCAGC  
TCTGAGGCTTGTAATTTTTGATGCAATTAATATCTTAATTTCTTCTAATATGATTAAGATATATGAAA  
GATGAGTTTTTGAAGATGGGGAGTAAAGTTCTGAAAATTGGTCAATTGGGGGTATTTTAGTCTTTTTAAT  
TATTATTGTTATTATATTATCTAGCTTGTGCCAAGCTGTGATTGAGGTGGGGTCTTACTTTTTACATACTCC  
ATGAAAATCAATGTTAGTTGGTTTTTTTTGGTATAATCATCAATGCTGACCTCTTTTTGTTTCTAGATGTAT  
CACAATTCTCAACTTTCTGTCCTATTTTATACTACTATATACTTTTTCAAATTGATGAGTTTAGCTTTTATATA  
TTGAAAGTTAGATTATTAATAAAGTGGTATTTAGTAACATGGAAAAAAATCATTTTTTGGAAAGGGG  
GGAATTATATTGTTCAACATTCTGATTTAGAGTTGATATATTTTTTGTAAAAAAATGTCATATATATACTC  
TTGTCGTCTAACAAATAGAGCATTGTTTACCCTTGTTAACAAATTTATATTTACTGAATTAATAAAAAAAAA  
GTAATCCTAAAATTGGTCTTTTAATTTCTAAAATGTTATGCGACTTTAAAAAATTACCTCACTCATTTTTTT  
ACCTCTCCAATCCAATAAAAAAATGAGTGAAATTATTTTTTAAGGCTCGTGATATCTTTTTAAATTAATA  
AACCAATTTTAGATTATTTTTTTAATTAATAAATATGACTTTGTTAATGAAAAGTATAAATATGCTATATT  
TATTAGATGATGAAGATATATATATATGTCACTTTTTTAACAAGGATATATGAGCTATATATATTACAAAGTC  
AAAGAGTATATTATGCCCTTTTTTCTAATATTTTTTACATTTTCAGTGTGTACAAATCAATCTTAGTCTAA  
TATAGGATGCTGCAGTAGTTTCAACATTCAACCATGAATATTTCTGGTCCCTTTTTTACTTTTGTGACA  
ACATTTTGGTTTATGAAAATGAAGCTGCCTCATCATTTCTTCATTTTTTCCATATTATACAATAGTTCAATA  
ATGCTTTTAAATGCAGCGATTTGATGTTCTTATATTTGATTGATTTCACTTATTAGATCTTGCAGTCGCGTA  
ATGGAGAAAGCAGTGACATTAGTTGCATTTAGGCTATTTGTTGTTCTGTGATTTTACTTCTACCAAATGC  
ATCAGAGGCAGAACCAAGATCTCAGACGGTCCAGATCATATGTAGTACGCAATATGAGCATAATACAAC  
AGCTTTTGTCCCGAATTTTGTGCCACAATGGAAACAATAAGTGATCAAATGAGAACTCAAGGCTATGG

AATTGCACTCACCGGGAGTGGACCGGATGCTAACTATGGACTAGCACAGTGTTATGGGGATCTTTCTTT  
ACTTGACTGTGTCCTATGCTATGCTGAAGCTCGAACTGTCCTTCTCAATGTTTTCTTTCAATGGAGGTC  
GAATTTATCTAGATGGATGCTTTATGCGAGCTGAGAATTACACGTTTGATCACCAGTATTTAGGACCTGA  
GGACAGACATGTTTGTGGAAATAGAACCAGAAAGGATTCTTTGTTCCAACAAACGGCTAGGCGGGCTGT  
TCAGCAGGCGGTTACTAATGCACCAAACAATAATGGCTATGCCCGTGCTGAATTGGCAGTTCCTGGGGC  
AACGAACGAGACAGCTTATGTCCTAGCTGATTGCTGGAAAACACTGAGTGCTAACTCGTGCCGAGCTTG  
TTTGGAAAATGCATCTGCCTCCATGATGGGGTGCTTACCATGGTCAGAAGGACGAGCGTTGTACTACTGG  
ATGCTTCCTGAGGTACTCGGATGTTAATTTTTCTTAATGCCATTGCTAGCAGTGAAGACTCATGCCAAAT  
GGTAATCTTTACTTTGTCTCCTTCCTTTTTCTTTAAGTCAATCACCGAAACTGTTATCTAGACCATGTAGC  
TGATATATTGACGTATTTTCAGTGGTAGTGATTGTAATTGCTGTTGTTAGTGCTGTGGTCGTCTTCGTACT  
GGGAGCTATTATCGCCTTTTATATGTGGAAGAACAACAATAACAGAAGAAGAGAAAAGGTAAAACATT  
TTGGTGATATTTTACGCTAAGGCTTTAGCTTTGAATGTCTCCTAAAGCAACTAAGGAGTTCGAAATTTTCA  
GGTCCAATGATGTGGAGAAGTTAGTGAAGACCCTAACGACAGCAGCCTGAACTTCAAGTATTCAACT  
CTTGAGAAAGCCACCGCATCTTTTGATGAGGCGAACAAGCTCGGGCAAGGTGGATTTGGCACAGTTTAT  
AAGGTAGTGAGCTGAAAATGCTTAGCTCGTTAATATTATTACATAATCACATCAGAGTAAATCTATAAT  
ATGCTTATTATATTGTAGGGAGTTCTACAAGACGGGAGAGAGATAGCTGTCAAAGGCTGTTCTTCAAC  
AACAAACACAGAGCTGCAGATTTTTACAATGAAGTCAATATTATTAGTAGTGTTGAGCACAAAAATCTAG  
TAAGGTTATTAGGATGCAGCTGTTCTGGACCTGAAAGCCTTCTTGTATATGAGTTCCTCCCGAACAGAG  
TCTTGATCGGTTTATCTTTGGTATGTAGAAGACTTTGTGACTTTGACACACTCGATTCTTACTGGCATGAA  
ATTAATAGAATTCACCCTGTATGTTGAAATTGGCAGACGCTACCAAAGGCAAACATTGAATTGGGAGA  
AAAGATTTGACATCATTATAGGGACTGCAGAAGGCTTGGTGTACCTCCACGAAAACAATAGAACGAGGA  
TTATTCATAGAGATATAAAAGCCAGCAATATCCTGTTGGATTCGAGGCTCAGAGCAAAAATTGCTGATTT  
TGGGTTGGCCAGGTCTTTCCAAGAAGACAAGAGTCACATAAGCACCGCTATAGCTGGGACTTTGTTAGT  
GATTCCTTACTTTTACCATATAAATCATAGCTCAAACCTTATGTTTCGCGAAACATTAACAGCCAGCAGTGT  
AATTAGTTATCTCATATGGTTAATTTTCTGTTATTTCCCTTGCAGAGGTTATATGGCACCAGAATACTTAG  
CTCATGGTCAATTAAGTAAAAGGAGGATGTTTACAGCTTTGGTGTCTTTTATTGGAGATTGTTACCGG  
AAGGCAGAATAACAGAAGCAAAAACACTGAATACTCTGACAGTTTAGTTTCCATTGTAAGTTGTGAACC  
AATTCCTTAGTTACTTGAATCTATACAATTGCAGACAAGAATGTTTTTCTCATTGATTTAACTATTGCCG  
TGGATGAAACAGACGTGGCAGCATTTTTCAGCATGCGAGAGTAGAGGAACTGTTTGATCCAAATCTAATG

CTGCACAACACTATCACACAAACAATGTAAAAAAGGAGGTTTTAAGAGTGGTACATGTAGGACTTTTGTGC  
ACACAAGAGATTCCGGGATTAAGACCGTCTATGTCTAAGGCATTGCAGATGCTAGTAAAGAAAGA  
AGAGTTACCTGCACCAACTAATCCTCCCTTTGTAGATGAGAAAATATGGAGCTTCATGACCCTGGGAT  
ACCCCATCTCATCCCCATGGAGATGATTCAGCTTCAATTGCAAACATTTCTCACAGCTCATTCTACCCAG  
ATGATGTTTCAGTTTCCTCAAATAAGACATGATATAAATCTGCTAGAGAATGGATCTCGTGAATCTCAA  
GTATTATCTTGCCTCATGTTCTTTTTGTCATACTCTAGGAGCAGATGTTTGTTAGCAACAGGTTGCTTGG  
TCATTGTAATGGTGTATGTCTTGCACAAATCTTGCGGGAAGTTTATCATTGTAGGTAGATACACATTATA  
TCTTGTCAATTTGTAATGGTGAAGTAAGAGATTGTTGGACATACTATCGGTAAGATTGTAGTACAAGATTA  
AATATAGTTTATCTTGATTCCAAGAATGGTTTGATTCCAACAGTGTA AAAAGATCGCTTGGTCATTGATG  
TTTTGTATTTCTGTTATACAAATTGGTTACTGTAAAC

>M6-PGSC0003DMG400015170 M6 RLK with antifungi domain(GNK)

AAAATAAAAATATTAGCATTGTATATTATTCAATATATTCCACATTTTATTAACATGTATTATTATTTTGT  
AATAATATATATTAATAATTTACTACAAGTTTAATATAATAGTTAATAATTCATGTATTGTAATCTCTACAT  
AACTAAATAATACCTACATAACTAATATCCACATAGCTAATACCCACATAATTA AACCTGCATAACTAAA  
CTCTGCATAATTAATACCTGCATAACTAAACCCTGCATAACTAATACCTGCATAACTCTAACCAATAACCA  
AACGGCCCCATTATTGCTTCTATCCCCAGTACTGTTACTTTCCGTCCCGACTCCTTAGTCCAATTCTTCTTGG  
AAGTCAATGTTTTGTGGAAAAAAACTTCATCAA AATTGATTTTTCATGATCAGACTGTTGACTTCGTCGT  
CCTTG TAGTTTTGAGCAGATTCATCTTCTGCTCCATCATTTAGATTACTTTAGACATAATTCAGCAGCAACT  
TATTTTAGTCAAGAATGGCGTTGGTTATAGTTTTGTGTTTGTGCAGTATCCAAACAATTCTGATTTTGTGG  
CTCCATTCACTGCTTGTGGGCGTCAAAGCACAGATGCAGGCCTCACACTACACTTGTTC AATGATCAATA  
ATTATACAGAAGGAAGCATATTCCAATCAAATCTTAACCAATTGCTGTACAGTCCATTAACAATAATGG  
TAACAATTCCATCTATACAAAAGCCAGAGAAGGAGAAGACCCTGATAAAGTTTATGGAGTATTCCTCTGT  
AGAGGAGACGTTGTACCTAAAGACTGCAAAA ACTGCATTGACGTGGCAAGAGAGCGGATCCAACGTGA  
ATGTCCGCTCAAGAAGCAGGCAATTATATGGTTTGTATGAGTGTGGTCCGCTATTCTAATGTATCTTTC  
GTGTCCATGTTAGACGCCTCGATTTCTAAGATCCTGTATAGCGTAGAAAATGTTTCACAGCCAGAACAAT  
TTATGGGGAATTTGAGTGCAATATTTGATAATCTTACCGCTCAAGCTACTACCATCAATCTCAATCTGAAA  
TATGCTGACAATTCTGATGTAATTA ACTCGTTTGTATGGCAAATTGCATGCATTAGTGCAGTGTCTACCTG  
ATTTGTCAGCTGTAAATTGTGTC ACTTGCCTGAAA ACTGCTTTTTCTGGAATCCGTAGCCTCTCTGTGTCT  
ATTGCCAAGGTACCACGTGGAGTCAGAATACTACTTCTAGCTGCAATTTAAGGTATGAGCTATATCCAT

TCCTCTATGCCAGTGTACCGCCATCGACCAGACAGGGGAATGAAGACGAAGGTATGAGTTCATTACATA  
AAAAGCCAAATTTCCAGGAAATCTATTTGAAGGCACCTTTTCTCACTATTTTTCACATTAAGCTTTTA  
ATCATAATCATATACTACATGGTGTTCATGGTCAATATCGAATGTCGTTTAAATTTTGATGCACACCCTCAA  
AGAAAATCATTTACTAATAGGAGTTATGGCTGAATGATCATTGTGCATGTATCAAATATCATTTCTCCAAC  
TTGTAGAGAAGATAGTCACGCACACTTAAACACTTCACGAAGTAACGGTCTAATTCAGCTTTTAATTGAC  
CAACTATTTTTTTTTGCAGGCCAAAATACTTCAAAGACAAAGCTTATAAGTATCATTATAGGTGTTATACT  
AGCAATTTTAGCTGTTGTACTGGCAGGTAAGTCTTTTACCTGTAAAAAGAAGAAGACGAATAGAGAA  
GGGTAATTTTTCTTTTGGTATTATGCATTGAAAAGAAAATAATTGTAGTTTCAGCTAACCAATCAAAGTT  
GGATCTTTACAGGGAGGAATGAAAAGAGTCGAGAAATTCATTGCTTGACATGATAGGAGAAACGCTT  
GATGCGAATGATGATTTTGGCTCAGAAAAGCAGGGGAGATCCAGAGAATTTCCAGTTGTAAAAGTAGA  
CCTCATTGAGCTGCTACACAAAATTTTTCTGAAGAAAACAAGCTTGGAGAAGGTGGATTTGGTCCAGT  
GTACAAGGTAACGATTCTATCATTGTGATAACCAATTACCTAGGAAGTCCTTAAATCTTAGTCTAGAG  
ACTAGTGAATCTAAGTTGCTAGAGGGGGTCAATTTTTCATGATTTTTGGGTTATTTAGTGTTGTGTATAA  
CATTCCAGGGTACTTAGCCAATGGCATAGCAATTGCAATCAAGAGGCTGTCTAGAACATCCGGTCAGG  
GACTGAAAGAGTTCAAGAATGAAGTTGTCTTAATTGCCAGATTACAACACAGAAATCTCGTGAGGCTCT  
TGGGTTGCTGTTTAGAGGGAAATGAGGCACTGCTTATCTATGAGTTCATGCCAACAAAAGCCTGGACT  
TGTTCTTTTTGGTTGACGTTTACTTATTTGGCATATTAGTATATACCACAAAGAAGCAATTAATCACTA  
ACTTCAAACCTTTCTTTTTCTAGATTCAAGAGAAAATGAAATTCTGGAATGGAGACAACGTGTCCACATTA  
TTAAAGGAATAGCAAAGGGTATTTTGTATCTACACGAGGATTCTCGACTAAGAATCATTATAGGGACCT  
AAAAGCTAGCAATATTTTACTGGACAAAGATATGAACCCCAAGATATCTGACTTTGGAATGGCAAAGAT  
GTTTAGCGGAAATCAACGAGAAGCCAATACAAATAGAGTTGTTGGAACCTAGTAAGTTGATGAAAAAAT  
GAAAAAATCTGTTGGTACTATTTAAAACAACATTGTACTGTAAGATTGATGCTAAGAACCATTTTTTACTT  
TTGCCATTTTTACAGTGGATATATGGCTCCTGAGTATGCTATGGAGGGACTTTTTTCTACTAAATCAGATG  
TGTTGAGCTTCGGTGTCTGTTGCTTGAGATAGTAAGTGGAAGGAAGAACAATAGCTATGTTTCCGAATA  
TGGTCAGAGTCTCCTTAATTTTGTAAAGTATACTTCTTCTCCATTTTTATTTTTGCTTATGTCAATCTCAACT  
GCATAAAGCATCCTAAAACCTATCTTGAATAATAGGCGTGGAATTTGTGGCGTGAAGGGCATGGATTAG  
AGCTAATGGACCCTTGCTTATCGCAGTCTTGTGTGACAACCTGAGATAACAGAATGCATCCATATAGGACT  
ACTCTGAGTTCAACAAGATCCAGCAGATAGACCTACCATGACCTCTGTAGTTTTTATGCTGGAAAATGAC  
ACTAAAACACTTCCACAGCCATCACAACTGCATTTTCTATTGGGAGACTTGCCGTGAGATCAGCTGAGC

CTCAATCTAATGATCAGTTGTGTTCCATTAACGAGGTCAC TTTATCAATTCTATCACCCCGATGACCATTA  
ATATAGGGTCATCAAGGATCCGACTCATCTCCATTTTCCCAAGTTCTCCTTAGAGTGGTGACACATGA  
CATATGTTGAATTTAATGGTTACCATTTAATTGACCAAAGTAAATCCCTA

>M6-PGSC0003DMG400015171 M6 RLK with antifungi domain(GNK)

GTTTTGAGCAGATTCATCTTCTGCTCCATCATTTAGATTACTTTAGACATAATTCAGCAGCAACTTATTTTA  
GTCAAGAATGGCGTTGGTTATAGTTTTGTGTTTGTGCAGTATCCAAACAATTCTGATTTTGTGCTCCATT  
CACTGCTTGTGGGCGTCAAAGCACAGATGCAGGCCTCACACTACACTTGTTCAATGATCAATAATTATAC  
AGAAGGAAGCATATTCCAATCAAATCTTAACCAATTGCTGTACAGTCCATTAAACAATAATGGTAACAAT  
TCCATCTATACAAAAGCCAGAGAAGGAGAAGACCCTGATAAAGTTTATGGAGTATTCCTCTGTAGAGGA  
GACGTTGTACCTAAAGACTGCAAAAAGTGCATTGACGTGGCAAGAGAGCGGATCCAACGTGAATGTCC  
GCTCAAGAAGCAGGCAATTATATGGTTTGATGAGTGTGGTCCGCTATTCTAATGTATCTTTTCGTGTCC  
ATGTTAGACGCCTCGATTTCTAAGATCCTGTATAGCGTAGAAAATGTTTCACAGCCAGAACAATTTATGG  
GGAATTTGAGTGCAATATTTGATAATCTTACCGCTCAAGCTACTACCATCAATCTCAATCTGAAATATGCT  
GACAATTCTGATGTAATTAAGTTCGTTTGATGGCAAATTGCATGCATTAGTGCAGTGTCTACCTGATTTGTC  
AGCTGTAAATTGTGTCACCTGCCTGAAAAGTGC TTTTTCTGGAATCCGTAGCCTCTCTGTGTCTATTGCCA  
AGGTACCACGTGGAGTCAGAATACTACTTCTAGCTGCAATTTAAGGTATGAGCTATATCCATTCCTCTA  
TGCCAGTGTACCGCCATCGACCAGACAGGGGAATGAAGACGAAGGTATGAGTTCATTACATAAAAAGC  
CAAATTTCCAGGAAATCTATTTGAAGGCACCTTTTCTCACTATTTTTCACATTA AAAAGCTTTTAATCATAA  
TCATATACTACATGGTGTCATGGTCAATATCGAATGTCGTTTAAATTTTGATGCACACCCTCAAAGAAAAT  
CATTTACTAATAGGAGTTATGGCTGAATGATCATTGTGCATGTATCAAATATCATTCTCCAACCTGTAGA  
GAAGATAGTCACGCACACTTAAACACTTCACGAAGTAACGGTCTAATTCAGCTTTTAATTGACCAACTAT  
TTTTTTTTGCAGGCAAAAATACTTCAAAGACAAAGCTTATAAGTATCATTATAGGTGTTATACTAGCAATT  
TTAGCTGTTGTACTGGCAGGTACTTGCTTTTACCTTGTA AAAAGAAGAAGACGAATAGAGAAGGGTAAT  
TTTTCTTTTGGTATTATGCATTGAAAAGAAAATAATTGTAGTTTCAGCTAACCAATCAAAGTTGGATCTT  
TACAGGGAGGAATGAAAAGAGTCGAGAAATTC AATTGCTTGACATGATAGGAGAAACGCTTGATGCGA  
ATGATGATTTTGGCTCAGAAAAGCAGGGGAGATCCAGAGAATTTCCAGTTGTAAAAGTACCTCATT  
GAGCTGCTACACAAAATTTTTCTGAAGAAAACAAGCTTGGAGAAGGTGGATTTGGTCCAGTGTACAAGG  
TAACGATTCCTATCATTGTGCATAACCAATTACCTAGGAAGTCCTTAAATCTTAGTCTAGAGACTAGTGAA  
TCTAAGTTGCTAGAGGGGGTCAATTTTTCATGATTTTGGGTTATTTAGTGTGTGTATAACATTCCAGG

GTACTCTAGCCAATGGCATAGCAATTGCAATCAAGAGGCTGTCTAGAACATCCGGTCAGGGACTGAAAG  
AGTTCAAGAATGAAGTTGTCTTAATTGCCAGATTACAACACAGAAATCTCGTGAGGCTCTTGGGTTGCTG  
TTTAGAGGGGAAATGAGGCACTGCTTATCTATGAGTTCATGCCCAACAAAAGCCTGGACTTGTTCTTTTT  
GGTTTGACGTTTACTTATTTGGCATATTAGTATATACCACAAAGAAGCAATTAATCACTAACTCAA  
TTCTTTTTCTAGATTCAAGAGAAAATGAAATTCTGGAATGGAGACAACGTGTCCACATTATTAAAGGAAT  
AGCAAAGGGTATTTTGTATCTACACGAGGATTCTCGACTAAGAATCATTTCATAGGGACCTAAAAGCTAG  
CAATATTTTACTGGACAAAGATATGAACCCCAAGATATCTGACTTTGGAATGGCAAAGATGTTTAGCGG  
AAATCAACGAGAAGCCAATACAAATAGAGTTGTTGGAACCTAGTAAGTTGATGAAAAAATGAAAAAATC  
TGTTGGTACTATTTAAAACAACATTGTAAGATTGATGCTAAGAACCATTTTTTACTTTTGCCATTTT  
TACAGTGGATATATGGCTCCTGAGTATGCTATGGAGGGACTTTTTTCTACTAAATCAGATGTGTTGAGCT  
TCGGTGTCTGTTGCTTGAGATAGTAAGTGAAGGAAGAACAATAGCTATGTTCCGAATATGGTCAGA  
GTCTCCTTAATTTGTAAGTATACTTCTTCTCCATTTTTATTTTTGCTTATGTCAATCTCAACTGCATAAAG  
CATCCTAAAATCTTGAAAATATAGGCGTGGAAATTGTGGCGTGAAGGGCATGGATTAGAGCTAATG  
GACCCTGCTTATCGCAGTCTTGTGTGACAACCTGAGATAACAGAATGCATCCATATAGGACTACTCTGAG  
TTCAACAAGATCCAGCAGATAGACCTACCATGACCTCTGTAGTTTTTATGCTGGAAAATGACACTAAAC  
ACTTCCACAGCCATCACAACCTGCATTTTCTATTGGGAGACTTGCCGTGAGATCAGCTGAGCCTCAATCT  
AATGATCAGTTGTGTTCCATTAACGAGGTCACCTTATCAATTCTATCACCCCGATGACCATTAATATAGGG  
TCATCAAGGATCCGACTCATCTCCATTTTCCCAAGTTCCTCCTTAGAGTGGTGACACATGACATATGTTG  
AATTTAATGGTTACCATTTAATTGACCAAAGTAAATCCCTAACCATTTGTTGAGATATCAAGTACTGCATAT  
CAATTTAGTTCCAAACATTGTTATAATCCCACAATCTTAATTCTTCTGTCATAAATATAGTAAAAAAAT  
ATACATCTTCTACGCAAGATCTATATCCTTATTCTGCTACCTTGTGATAACTGGACCGTTAACTATCTTG  
ATAACCAATTAATCGTATTTTAACAATTTTATAACAGTTTAGCATGTCTATACCCTCAAACCTGAAACCAA  
TGATAAACATCCCTACTTGAAAGTCTTAATTATATGGAACACATAGTATCAATGTCAAGTCTTCTATAAC  
TCAAAAAGTTCATTTGGGAATTTTCACAAACACATAGTATACAACTTGTCAATTAGCATAATACTAAACAT  
ACAGATAACAAGTATTTGATCTAAATATATGAAAAAGAACCTGGCGATGATAGTTAGTTTAAATCCAGCC  
AAAAAGAAGCTCGGCGTCTTGTGCTTTGTTTTCTCCTTCTTCTGTGTTCTTTCTGTTGATTTTCAGAA  
AATCAATTTTTCTATAGTAAAAATATGAGGGGGTTATCACTTATCTCAGCATGTTTTTAAACATAATTTT  
GGAAAATTATTCATTCTCCTCTTAAATTAAGCTCCTACTTGCTATGATTTTCACTATAAT

>M6-PGSC0003DMG400016409 M6 RLK with antifungi domain(GNK)

ATGAGAACTAGAGGATATGGAGTAGCAGTTACCTGCACTGGACTAGATACCAACTATGCACTTGCCCAA  
TGCTATAGTAATCTTTCTTTAGTCGACTGCGTCTTATGCTTCTCTGAAGCGGAAACTCTCCTGCCCAATG  
CTACCCTTATAACGGACGGAGAATTTATCTTGATGGATGCTTTTTTCGAGTGGACAATTACATGTTCTATG  
ACCAGTATTTAGGTCCAGAAGACAGGCATGTATGCGGAAACAGGACGACAAAGGGTACATTGTTCCAA  
CAGAATGCTAGGCGAGCCGTGCAGCAAGCAGTTGCAAATGCACTGAGTAATGATAGTTATGCACGTGC  
CGAAGTGTCAGTACCCGGTCCTTCCAACGAGACAGCTTATGTTCTCGCTGATTGTTGGAAGACACTAAGC  
GCGAATTCCTGTGCAGCGTGTTTGTAATAATGCATCTGCATCTATGTTGGGATGCTTACCTTGGTCAGAAG  
GTAGAGCCCTTTACTGATGCTTCATGAGGTATTCTGATACAAATTTCTCAATGATACTTCTACCAGT  
GGAGGTTTCGTCATCAAGGGGTACGTTTTGCTCTTTTTTCGTCTGGTTTACCGGTTATTTATGAACTAATTT  
TTACTTTCAAATCAGCATAATGCAGGAAAAGTTGTAGTCATTGTCATAGTTGTTGTAATTAGTTCCGTTGT  
CGTTTTTGGAGCAGCTTCTTTCGTTGGTTTTGGTGTGGGAAGAACAACAAATCCAGAAGAAGAGAAA  
AGGTAAATACTTTTGTGCCAAAAATATCAATGATGTACATATTGCTGAGTATATATCTTGCGATTTGCACA  
CAACTGTACCGAGACAACCTTCAAGAATTAAGTGAAGCGTTATGGCCTACTCATGCTTTTCCTCGGAAA  
TTTGAAGTGTAGGTGCAAATGATGTTGAGAAATTGGTGAAGATCCTTCATCAAACAGCTTAAACTTC  
AAGTATTCGACACTTGAC

>M6-PGSC0003DMG400018101 M6 RLK with antifungi domain(GNK)

GCCGTTTATATTATTATCTCAACTCAACTCTCGAACAAAATCGAATCGAAAATCATTGACATTACTTTCAA  
TTTTCCCAAACGGGGTAGTCCCGTATTTTCTTCTCCCTCCTCTGCGAAAAAATTAATTTTTACAACA  
CATTTATGCATTCTCATGTGTGTTGCATAAAATAAAAAGAGAAAGGAAGAAGAAGAAAGGAAAGGTGG  
AGAAAATTGAAAATAAGTCCACTTTTAGATATTTTTCCATAACATATTTCAATCCTTTACAAATATGTTTTA  
TTTGTTACAGAAATACCAAATTGTTCAATTGTACAAATGGAAAATAGCTTAGGATCAATCTTTGTCCTGTT  
GTTTTGTTTAAAAAAAACGAAGAAAATTGAATTCTTATTTAATTTAATGCCTTATGCACCAAGATACC  
TTGAACATGTTACGTTTCATCTCTTAATTATCTTCATATTTATGATTTCTTCGTCTCTTTGTGATCCGAGAAC  
TTCTGTTGCTAATATTTCTTGCAAGTCTCGAGCAAATGTGGCGACTAATGTTGATTTAATACAAAATTTA  
CACAAGTTATGGAGACTCTCCATGATTTTATAATGGAAAATAAGTCTGCAACATATGAAATGAATACGAA  
TGCACCTGATATTTATGGAATGGCGAAATGCCATAATGATCTTTCTCAGGATGATTGCAAGCTCTGTTTT  
GAAGAAGCTAAAATTAAGCTAACAAAATGTATTCTGCTCCTGGTGGCTCTGTTTATCTAGACGGTTGTT  
TTCTCAGATATGAAGATTATAATTTTTTCGATGAGAGTATACTGAAGAATTCATCTATTTATGTTTGTGGT  
GCTCCACGGATATAACGAATGATCAGTACATGAAGAGGGATTTTGCTGCAAGAGTTGATCGTGCAATT

GTGAATGTTACAAGCATGTCGATAGTGAATGGTGGATTTGGGGCAACGATTGTGAAAAGTGGATTGCTT  
GCTATTTATGCATTAGGACAATGTTGGGTTTATTTGCAACCCGAAATATGCACTATGTGTTTGAATAATG  
CTGGAGATATGCTAAGGAAATGTTTGCCTGCTGCAGAGGGAAAAGCTATGAATGCTGGTTGCTATTTGA  
GATACTCTTCTAATAAATTCTTCGATGATGGAGCTCTAGTCCTCGCTGATAAAGGTAACGCCAAAGAATT  
TCTTGTTAATTAGTCTCTGGACGTCCCTGATACTAAGCTCCCACTATGCACGGTCTTACCTGCATTCT  
GCAAGAGGTTGTCTCCATGGCTTGTCTATTTCTAGCAAAGTATGAAGGAAATATTTGTTACTTAGTATAA  
ATATTTTTTAGCTAACATTTGGTCCGGTGTCAATATTTTTTTCAGGACCAACAAAGTGTAAGAATGTATG  
GATAATTGCAGCGATTGTATTATCGTCTATCTTGGGAGTATTTGCTATTTTAGGAGCTTTTTTAGGCTATA  
GAAGATATTCTCAGGATAAAGGAGGTATACTTTCAAATCTTGAATTCATAAATCAGTATCTGTTTGTTC  
TGTTCTGATGGATCTTCTGCTTATCGCGATATCTATATATATAGGTACAAATATGATTCATAAGATTCCAC  
TGGCTCTTGAGACGTCGAACTAAATTTCAAGTATGAAATGCTAGAACAAGCAACAGGGGGTTTTGATC  
CTTTAAACAAGTTAGGCCAAGGTGGATCTGGCTCAGTATACAAAGGGATTCTTCCTGATGGCAAAAAA  
TTGCTGTGAAAAGATTATTGTACAATACGCGTCAATGGGCAGAGGAGTTCTTCAATGATGTCAATTTGAT  
CAGTGGTATTCAGCACAAAAATGTTGTGAACTCTTGGGATGTAGCATAGAAGGACCAGAGAGTCTTCT  
GGTTTTCGATCATGTATCTAACAGGAACCTTGATCAATTGCTTTTCGGTAACTATTCTACAAGTTCAATCT  
AACTAGTAGTAGTAATTTACTATACTTTGTAGGGACGGATTCAAAAATTTGATTGCTTTTTCTGAAGTT  
AAGAACAACGTCAATTTTTAAGCTGGAAGGAGCGATTTGATATTATATTGGGAATAGCAGAAGGGATA  
GCACATCTTCATGAAGGAAGCAAAGCAAAGATCATCCATAGAGATATTA AAAACAGTAATATTCTAGTT  
GATGATGAACTCGTCCAAAAATTGCTGATTTTGGACTTGCTCGACGTTTTGCTCCCATAAAACTCATGT  
CAGCACCGGAGTTGCAGGAACGTTGTAAGTTATCAATGTTTTGAAATTGGTTTTTCTCCAAGAATACTTG  
TAGTCTATAATATGATTA ACTCTGTTGTAGGGGATATCTAGCTCCTGAATATCTTCTTCAAGGATGTTTAA  
CAGAGAAAGCAGATGTTTATTCATTTGGAGTGGTGGCCATAGAGGTTGCGTGTTGTATAAAGAACAACG  
TCTTTGTGAGTGATAACGGATCAGTTCTACAGTCTGTAAGTTTCAAACCATCCTTATTCAGTAACA ACTT  
AAGCTTTTAGACGATCAGTTGGTCATATAGTTTGTGCTTTTTTAACTCTTGTAATAGGTGTGGAGAAATTA  
CAAGTTGAATAAGATTACGGAGTCAATTGACAGTAGGCTGATGAGTGACTTTCAAGAAGAGGAGGCAT  
CGCGTGTGCTTCAGCTAGGACTATTGTGCACACAACTAGAAGATTTTCGCGACCATCTATGTCTCAAGT  
GGTAACAATCCTAAGAAACGAAGAAATTGAAATTTCAAACCAATGCAACCTCCTTTCCAGA ACTCAAGT  
TTACTAGCTCCTCCAGATACAAGCAGTTCATCCATAACTAAAGATAGTTTCTGCTCAGAATGGTATTCCAC  
AGATGGAATTTCTATTCTTCTGAGTTTGTAGCATTCTAGCTCTCAATCAGGTGATTTTTTGACGT



GTGAAAACAGTAGACTTTTGAAAATTGCTTGAGGATTTTGGTTGCTTGCCATTAGGTCTCTGAACCAAAG  
ATCAAATGATTTGGAAGTATCCTATTTGCACGTATGTAATAATTAATAGCAGAGTCATGACTTGTAAT  
CACGGCAGCATTGCTTTCGTTGGTGTAAGTATAACAATTCAAGAGGATGAAATAGATTGAATCG  
ATAGAGCTGTTTATGGAAATGTTACATTGCCAGTACTGGAAAATGTTATGCAGTTTCT

>M6-PGSC0003DMG400023814 M6 RLK with antifungi domain(GNK)

AAAAGTGCATAAGATTCAGACACAGACAATGAACCTAATATTTGACTCTGCCAGTGGCTCAAACCTT  
CAACTACAAGACTCCACAGATAGATCATCAATCATCAAAAACACTTTTTGGGCACATAATTTGGTGAACC  
ATAAAGAAAACCCCATTAATAATGGTTTCTTGAATTAATAAATCTCATTTTTTCTCTTTTCTTCTAAAGA  
AGTTAGGGATGAAGGGTGAATTTGTGGATTGTGTGTTTGTGATCTGTCTATTTTCTGGGTAGTTTCAAT  
TTCATCAGCTCAAAGAGCACTAACTTTTCTGCAACTTGCCTTAGATTTTGGGTATGTTCTGAGAGCCC  
CATGGTCTAGTTCTAACTGCAAAGTTCTAAATTCAACTCCTCAGCTTCCAATGGTTCTGCTATTCCCACAT  
CAAGCAAAGGCCAGTGATGCCAGAACCTTTGTCCCTCTTTGGTGTGCTATGGCACAACACCTTAAAGA  
AACTTCTTTTTCCAGCTACCCAATTTGGAACTTCTGCTTCTGCATCCAAGAATCCAATCCAAGCTTAA  
TTCTTTGTCTTTGCCTTCAAATCTTACCTCTTTCTGTTTTGACCCTATTCAGTTTGTCAATACACCATACATT  
TGTGCCTCAATTCAGACCATCCAAGATTGGGATAAAAAGCTGGGGAATTCAACTGTTTTGAATTCTGGTT  
GCAGGTCTGATCTTGAGGATTTAACTGCCTGTGATGGTTGTGTAGCTGCTGGCTTAGAGTTCAGCAACA  
GTTGATTGCAATTGATGGTAATGCATCTCATTCCACTGATTGTTTTACTTCACTATTTTGTATGCTGCTGG  
TATTGTCAATGAGTTTGGTCCTGAAAGTACTGGTGCCATGTCATGTATTTTTAGTATTGATTTGAAAAG  
GATAGTTCATCAAGCAAACGACATTTAGCGCTAATATTTGGGTTGGCTGGAGCTGGTATGGCAGTATTA  
TGCATGTCTTTAGTGTGGGATTGTATATCTGGTGGAACAAAAGGTGGAGGAAAATGATGATGTGGA  
AATAGAAAGTACGGTGTCTAGGCGAAGAATGAGGCCTAATACTTCTGTTTGGTTCAAATTTAGGAGCT  
TGAAAGGGCAACAGATAGTTTTTCCAAAAGAATTTATAGGGAGAGGTGGATTTGGAGTAGTTTATAA  
AGGAACTTTAGCAGATGGGACTAATGTTGCTGTCAAAAAGATTATAGAATCTGATTTTCAAGGAAATGA  
CGAGTTTTGCAATGAGGTTGACATTATTAGTAACTTGAAGCATCGTAATCTTGTATCACTTAGGGGGTGT  
TGTGTGACTGATGAAAATCGGATTGAAAGTGGGAGAGTGAAAGATTCCTTGTCTATGATTACATGCC  
AATGGGAATCTTGAGGATCATTTATTTGCTGTAAATCAAGGTGGAATACTGAAGCAACCGTTGACTTGG  
CCTCAGAGAAAAACATAATTTTGGATGTGGCAAAGGACTAGCTTATCTGCATTATGGGGTAAAGCCA  
GCAATTTATCACAGGGACATTAAAGCTACTAATATCCTATTAGATGAAGATATGAGAGCAAGAGTTGCT  
GACTTTGGGTTGGTTAAGCAAAGTAGAGAAGGACAGTCTCATCTTACCACCAGAGTGGCAGGAACACAT

GGATACTTAGCTCCTGAATATGCTCTCTATGGGCAATTGACTGAGAAGAGCGATGTTTATAGCTTTGGG  
GTGGTTGTTTTGGAAATAATGTGTGGAAGGAAGGTCCTTGATTTCTCTTCAGGATCACCTCATGCTTTTCT  
GATCACCGATTGGGCTTGGTCGAAGGTAAAAGCTGGAAAGATAAATGAAGTTTTGGATACCATCCTAGT  
AAAGACTGAAGATTCAGTAAGTGCAAATCCAAGGGCTATAATGGTGAGATTTCTCCTTGTTGGAATATT  
ATGTGCTCACGTCATGGTGGCCTTGAGGCCAACTATATTGGATGCACTGAAAATGTTAGAAGGAGATAT  
TGAGGTTCTGAAATTCCAGACAGACCAGCACCTCTGGACAACCTTCATTTTATAATGCTAGTGGTAAC  
ACATTCAGCATATCACCAGCCTTGAGTTGCTTGCGACTGCCTACTGGAGACATGCTCAGGTGACAATATG  
AGGTTTTACATATTACATCCTTTTCTTACTTATTGAGATTAGGAGAAAAGCTAATGAAATTTCTGCTAGAG  
TTGAACCTGGGAACCGAGTGACTTGGGATTTTTTTTTGATCAAATAATATTAGCTCTGAGAGTTCTGTTGT  
TTCCAGTTTCTGTCAATAGGGACCTACTTAGAAATCCTAAGTGTAGAAATAAAACAGAAACACCATCTA  
CTTGCCGTCCAATAAACAACCAAGAGGACATGGAGTTCAACTAGATTGTCAATTCCTTGGAAAGACATA  
GAGTTTCTTTGGCAGATGTAAGAGTTTCTTCTTTCTTTCAATCTTTCCAACAGCCTAGAACTTTTGACAATC  
TTTTGTTTAGGCAAACCTGCGGAGTTTCTTTGCTTTCTCAATAGGTTAATCAGATCTTGTA AAAAATT  
AGTAATAGCTGATACTCTCTGTAATATATCTAGCTTACTTCATTCAAGGCCATGGTTGCCTGTGATGTAT  
GTTGCAGTTTGTAATATCTATATTATTTATGTTTCAAAGTTCTCGAGACAATATTTCC

>M6-PGSC0003DMG400041974 M6 RLK with antifungi domain(GNK)

ATGCCTCCAATGTATGTTCCATACCTCTCTTCATTGCCTTCTTTCTGATTCCATTTGTGAATTCAGTGCCT  
TTCAAATATCTCGATTTGGACCGGACGTGACTGACATACTCTATGAAGGAGATGCAGTCGCGTCTGTAG  
GAGAGATCGAGTTTAAACAAGCGAACTATCTATGTCGCGTTGCTCATGCCATCTATAGAGAGAAAGTTC  
CACTTTGGGATCCTGATCATGACTCCACAAAGCTAGCTGATTTCTCCACACGTTTTTTCGTTCACTATAGAT  
ACTCAAATCGTTCCTCATATGGTCATGGTATTGCGTTTTTCTAGCTCCAGTTGGTTTTCGAATTCACCT  
AACTCAGATGGTGGTTTTCTTGGACTGTTCAATACAACCACTAGTGATTCAGCTCAAAGCCAAATTGTTTC  
TGTTGAGTTTGACTCATTTTCCAACGTGGAATGGGATCCTCCATTGAGCACGTTGGTATCAATAACAATT  
CAATTGCTTCATCTGTAACAGCTCCTTGGAAATGTTAGTTTACATAGTGGTGATCCTATTGAGACATGGATT  
ACTTACAATGCTACAACAATAATCTTAGTGTCATTTGGAACACTATGGAACAGGCCCGAATTCGAGCATGT  
TTACATAATAAACCTCAGAGATGTTCTGCCTCCATGGGTACAATCGGATTCTCTGCTGCAACAGGACA  
AAATGTCGAGAGACATACACTTGAATCGTGGGAATTCAGCTCGAGTCTTGATATAACAGAGTTAGGTGG  
AAATGATCGCGAAAAGATTGGACTGATTGCAGGGCTAACAACATTAGGTGGGATTTTGTGTTGTGATCGC  
GATTTTGGCTTTGGTAGTTTTGAGAAAATGTAGACGAAAGGTGAAGGGAAATCCAGAGACAATAAGCTT

AACATCATTCAATGATGATCTTGAAAAAGGGGCAGGGCCAAGAAAGTTTTTCGTACAAAGAGTTAGATAC  
TTCAACTAATCATTCTCAGAGGAACGAAAATTAGGCGAAGGAGGATTTGGAGAAGTTTACAAAGGGTA  
TTCATCGATCTTGACATAGCGGTTGCTGTAAAGAAGATCTCGAGAGGGTCTAAGCAGGGGAAGAAGG  
AATACATAACCGAGGTGAAGGTTATTAGTCGATTAAGGCATAGAAATCTTGTGCAACTAATCGGTTGGT  
GTCATGATCAAGGTGAGTTCTTACTTGTTTACGAATTCATGCCAAATGGTAGCTTAGATTTTCATTTGTTT  
GGTAAAAAGAATCCTCTTAGTTGGACTATGAGGTACAAGATTTCACTTGGTTTAGCATCCGCGTTGCTCT  
ATCTACACGAAGAATGGGAACAGTGTGTGATCCACAGAGACATAAAATCAAGCAACATAATGCTAGATT  
CAAGTTTTAATGTCAAGCTTGGTGATTTTGGCTAGCTAGACTAATGGACCATGAATTAGGTCCTCAGAC  
TACAGGACTAGCTGGAACTTTAGGTTATTTGGCTCCGGAATACATAAAAACAGGACGAGCAAGCAAAGA  
GTCGGATGTATACAGCTTCGGAATAGTTGCATTAGAAATTGCAACAGGAAGAAAATCAGTTGATCCAGG  
GACAGGGAAATGTGATGCAGGATTAGTAGAGTATGTTTGGGATTTTTATGAAAAAGGAAAACCTCTTTC  
TGTTGTTGATGAGAAATTAACATGGATTTTGAACAAGAACAAGTAGAACGATTGATGATTATCGCGTT  
GTGGTGTGCTCATCCAGAGAGCAATCTAAGGCCATCGATAAAACAAGCAATTCATGTTCTGAATTTTGA  
GGCATCGTTGCCTAATCTTCCAATGAAGATGCCTGTTCTGTGTACTATTCACCTAGGCCATGTGGTGAA  
CCAACAGTTAGCTCCGAGGAGCCTACGATGACTTACACAAGCATCGATGTGGGTCGATAA

>M6-PGSC0003DMG402000515 M6 RLK with antifungi domain(GNK)

TATTTCTTATTTTGAGATTTTTTATTTGTAAAAATTTACGAAAGAAACACAAATTTAAATTAACCTTATAAA  
AGAATACAAAATTAATTGACTTTTTGTGCACCTGTTTTGACTTTATCTTCTGCATTTTTGTAATGAAAATGCT  
GTTATTTTCAGGGTTAGCAAAGGGGTGATAGTAGCTATCGTTCTTGGAGTGACAGCTTTCACCATGCTT  
GCTCTCTCAGCTGCGTACACAGCTCGTAAAAGATCATTAAAGGCGAAAACGAGGTATTGAACAAAATAAA  
ATAGTTTCGTAACGGTACTGTTACTGTTACTACGTTCAATGACTATATATTTTACTACTACGTAAGCTTA  
GAAGTATAATAATTTTTTTGGTTGCATTGTTTCAGCACGCATTAATCTTGGCAAATATCGAATTCATACA  
ACAAGTCGAGCTTGAATTTTAAATATGAAAATCTTGAGAAGGCAACAACTACTTTGATCCTTCAACAAA  
AGTAGGTCAAGGAGGAAATGGTTCTGTATACAAAGGGACTCTGCCTAATGGAGATGTTATTGCAGTTAA  
GAGACTTTTTTTCAATACAAGACAATGGGTTGATGACTTCTTCAATGAGGTTAATCTCATCCATGGAATT  
GAACACAAAAATCTTGTCAAGTTGTTGGGTTGCAGCATTGAAGGCCCGAGAGCCTGCTCGTATACGAG  
TTTGTGACCAATAAGAGTCTAGATCAATACCTCTTTGGTAATTATCTTTCTTTCTTGTTCATACATAGAAA  
GGGAAAGTTAAGGAATCCAACGTCAAAGACGTCTTTTGGGTAAAACCCAATGTGACAAAAACGTGAG  
GCACCAAAGTTTGGGGCAGAGTGAAAAATAAATTGACAGTTGAACCTGGATTTTGCACAGCATTGTTT

CTACCTATATATTTCTAAGTTATATTGACAGTTGCAAACCTCTAATTGAGTTGTTGAATTTTTGTTGTAGAT  
AAGGACAAGGTAAAGATTCTAAGTTGGGAAGAACGTTTCCGTATTATAGTTGGAACAGCACAAGGCATT  
GATTTCCCTTCATGGAGGTTTCAGAGATCAGAATCATCCATAGGGACATCAAGAGCTCCAATGTACTTCTTG  
ATGAAAATCTTGAAGCAAAAATTGCTGATTTTGGACTTGCTCGGTGTTTTGGAGCTGACAAAACCTCATCT  
CAGTACTGGAATTGCTGGAACATTGTAAGTCAACAATTCACAAATACGTATCAATACAGTTCACAAACAC  
TTGTCCGTATCTTAACTTAATCTGTGATTTTCCGGTGTACAGAGGATATATGGCTCCTGAATACCTCGTAA  
AAGGACAGCTAACAGAGAAGGCTGATGTCTATAGCTATGGGGTGCTTGTCTTGAATCGTTAGTGGCA  
GAAAAAGTATTGCCTTTCAGAGGACTCTGGCTCTCTACTACAAACAGTAAGAATGCTATAGATTTCTCT  
TTATCATGGTCATTATATGAATATCATTGAACTTTAGTAGTAAAGTAAAAAAAACCTATTTTTATCATATA  
ACTCAGTATATTGTCATTTTGGTTTCAGGTGTGGAAGCTGTACACAACAAATCAGGTAACCTGAAGCATT  
GATCCTCTATTGAAAGGCGATTTTCCACCAGAAGAGGCATCAAAGGTAATAAAAGTGGGGTTGTTGTGC  
ACTCAAGCTTCTGTGCTTTAAGACCATCAATGAGTGAAGTTGTCCAATGCTAACGTGTGAGGGCTATC  
AAATCCAGAACCATGCCAACACCATTCTTAAATTCCAACCTATTAGTTGGCGGTTTCAGTCAAATCCAGT  
ATAAGAAGTTTAGTCTCAAATGCACTCTATAAACTTGATGAATCATCATCTTATGCCACCACCTGGGTC  
CTCAAGTATGCAAAGCTCATCAACTGGACCACACAAAAGTGACGAATTCCTTTTAAAAGAGTCTGAAAAT  
AGGAAATAATTGCAAAGACAAATATAGAAATGGAAATTTTGAGAGATTTTGGATCAGTACATTTTTGT  
CAGTAATAGAATTGCTGTAGTTGTGCATTTTTATGATTTTATTTTTGCATTTTTGGTGAGTGATGATA  
GAAAGTGTAGGGGTGGCAATTTTCAGCCCATATAAGTGAAATGAAACTATTTTGCCCATATTAATTAAT  
GGATCACTCATATT

>M6-PGSC0003DMG400000810 M6 RLK with malectin domain

GTTGCAATACCGAATTCCAGAGCATGATTAGAAGTGTAAGGAGTTGTTTGGAGCAGCTATTGCCTGAGT  
AAATCACCTATATCTCTGTTCTGAACAACGAAACATAGAATGAAAAATGCACAACCTGCTGCACGAGTAC  
CTGGGTCAAAAAGGTGTATGCTTCGCAGTTCTTTTGGTTATGACTTCTGACTAAATACTGTGGTGCTGTA  
CGGTCTTACCACAAAAAGACGTTTATAAACATCTGTGCGAATTATGCTTAAAACTCAATTCCAAGAAAG  
TTATCTTTGAAATTCCATGGCGATGCTGAGGCATTTGGGTTGGGGTGTCAATTCATCTTTCTGAAGCCAT  
GTAAAGAAGTGTCGTGGAATTAATGCACATTTTCAGATCTATTAGTACACGAGCTCTTATAAGCCACTGTA  
ACTGGACCATTAAAGACTAAAGTGTGAAATTTCCATTGCTCCAGCCTCTCTAAGACAGCATTCCCTCTTCA  
TATCCTACCGATCTCACTTCTAACTTGACAAATGATGTAATCTTTAATTTCAATTTGTGTGTCAAAGAAGG  
AAAGAACAGATCCTTTTTCTTAAACAAATATCCCTAGACTTTCTGTTGTTAATTCTAGTGATATCTAATGC

TGCACGTGATATCCTTCTTGATTCTTTAGTTCTTATCTTTTCAGAGATCTTGAAGCCAAGGCTTAAAGG  
GATATATCAGTGACCAAATTGGGCTGTTGTCTAATTTGGTAAGCTTGTAAGTATCTCTCAACAAATTCCT  
CTTAGATACTGGAATTCACACGTTAATCCTCCTGCATAATATCTGAATCTACTCACTTGGTAGTCCTTCA  
AAATAATTAAGAGGTGTTCAACAAAAATGGTACTGTATGAAAATATACTAGTATTTGCATATACTCA  
TTATGGTGCCTGATGAATAATTCTCTTGATTGGATCATTTAAGTTGCCCAATTTCTTTTATGCACTTCTA  
CTGTTTGTCAATCCTGCTAATTTGGCCTTCGCAAATAGTTATTCTACCTTCTCTACTTTTTTGCATTGCAG  
GAACTTAAGTTCTAATTTCTTGGGAGGTTCTCTACCGTGGGGATTGGGTCAGAAGTCTCTTGTGAAACTG  
TAAGTCCAGACATCAGCACTGTGTTATTGGTCATTTCTTTGTTTACTTGAAATTGTCTTCTGTTTTGCGTCT  
TAGAACTATGAGTTTTATGAAATCCACATACATAAATTGTTGAACGTTATTGGAGTCTGAATATTGATCC  
TGCCAGATTTTTCCGATCCACTCAGTTGCTACTAGCATAACTGATAACAACCTTACCTCTAGTAAATTCCTT  
TATTCCTAGGGCCTTTTTTTTTAAAGATATTATGTCTTATTGAAGTGCTTTTTGCTCAAATTTTCTAAAAC  
CTCCTCAATTATTGATATTCTTGTTAATTAATATGCGTAGAACCAAGTGCATAACTACTCTGTAGTTTAGG  
ATATGTTGGCGGCACCTTACCGTCTTTCTCTTTTTATGGGCTAACCCCTTTTGTCAAACCTGGTTTGGCGT  
CATGTTATTGGAACTGAAGCTTGCAATTCGTCATTTGAAGATCTTTTGTGCAGGGATTTATCAAATAAC  
AAGTTTACTGGACCCCTACCAGATGGTCTAGCTTCTTCACCCCTGCAGATTGTGTAAGCTCTATTCTTGTT  
CTCAAAAACTTTTATGGATTTGTCGTTGTATATTTCACTCTTTGTGAGGTACCAGTTGCTTATTTATGAT  
TGTTGTAGAAAGCAGGATAAGTATTTGGGTTATAAATCACTCGGATCTTTTCAGTCAAAGAAATTTATC  
TCGTTCTAGCTAATTTCTGCTTAGTTCTAAGAGTTACACTGTAATTTGCTCAGGTTTTTGAATGGTAATGC  
ACTAGAAGGCCAAGTGCCCGAGGAACTTCTTTCCATTGGGGTCCATGGTGGAGCTATTGAGTATGTCAT  
TCTCTATTTTCTGTCTAAAGTTTTTCTTCAGTACATTATGGTCTTCCTTAGTAGATTTTAATTTATGAATA  
TGTGCTTCAACTATAAAAAACAAGACTGATTCGGTGAAGAGTGCCTCTGCTACTCATGTTATTAGTGTAT  
GAATGAATTGTGATGCTTCCCTATGTTAAAACTAGTTAAGTTGTTAGAAATAATGGTTTATATTGGAG  
TTTGCCCTTTGTTTCATGGATAATAAAAGTAACTTTGCTGGGTCTTCTAGACTCTAAGCATCTTAACTG  
TTCGCAAAGCCTTTGGGATAAGTATCTTACAGAAATTAATGCAATCATGTGATAATGCAACTTTATAAC  
AACCATATTATACTGAACTGGATCGCCTCTGTGCCACAAGCTATTTTCATAGCTGAAATTGTGCACACAT  
AGTGCATCAACCACTAAGCATATGCCAATGCTGTAACCTTTGGCACACTAACACTCGTTAAGTCGAACCC  
GTGATGCATTACAGTAGAGCAGTACTACATGGCTACAACACTGGCAAATCACATATCCGGTGATGAAT  
CACAACCTAAGCAAATAATTGTAAGCTATCCCGTTAATGCTCAATCTGAATACCAATGCATCAAAAACCTGG  
TTTCATGCAAGTAAGTGTATCATACACAATGTATAGATCTAATAGAACTCAACAGATTTCAAATTTCA

TTTGCAAACATGGCTGCCTGAAACCTCTTCTTTTTTTTTGACGGTGGTGCTTGTGTTACCTCAGCCACT  
GGATATCTGCTACCTCCCATCAACACAAGTACCACGTAACCTCTGCGTCCCCACTAAGGCTTAGGCAAGGG  
CTGCCTAAAACCTCTTTTCAAAGCTTTATACAATTTCACTATCGTTCAACATGCCGTTTATCAAAGCGAG  
TACTTCAGGGGTAAGGTCTTCACTTATGTCCAATTTAAGCTAACTAGCACTGCTACAGTGCCAGACTCA  
ACCAAAGATTGCCAAGACATACAAAGAATGATTGAGCGGTGTTAAATACATCCTAACAACCTCATATCCAA  
ACTTGGACTTTGGTCAAATTCAAAGTCAATCTTTTGATTTAACATTGGTCAAACATTATCAAACAATGGG  
TCCAACCCAAACTTGAGAGTTCTCAATTTCAAGTGTGTTTTGGACCAAATCCATGCAATTCTATGGTTGAACC  
TTAATTCTGTGAAGGTAGAACTTGATGTACTATGTCTATATTAATCCAATCAATCCTATTAAAATATCAC  
CTCATACAAGTGCTAGTTTTACAATT

>M6-PGSC0003DMG400001368 M6 RLK with malectin domain

CCACAGATAAAAGAAGAGGAAATGCCTTGAGAGTCAACACTCAAGTCTTGCCAATGGTTGTGTATAATT  
GCTCCTTGGAACAATAATATCTCCTTACACAAACGCCCATGGCAACCATTACTTTACTTTTTCTTCTCTTC  
TTACAACCTATAACGGCCACTATTTCTACCACGCCGCCACCGTATAACGCCACTGTCTTTGTCTTGCTTAA  
CTGTGGCGCACAATCAGCCACCACCGATGAAACTGACCGTGCATGGGATACTGATACTCACTTTCCAAAT  
TTCTTACCTTCCAACCTTTTCAAGCATATCCACAACAGCCACAGCTTCTGAACAAGATCCTTCGGTCAATAG  
AGTTCCTTATACGACTGGTGCTCGTATTATGAGATCTCAATTCACCTACACTTTCCGTGTTACCCCTGGCA  
CAATATTCCTCCGTCTCTATTTCTACCCTGCCAATTACTCCGGCTTCAACAAAGCTGAATCTTTTTTCTCCG  
TCACAGCTAATCATTTAACCTCTTGAGTAACTTCAGTGCTTTCTCACAGTCTCCGCAAGTAGTAGTAAA  
AAAGTTCAAAAAGAATATGTCATCAATGTTGATGAAACTCAGATACTCAAATTAACCTTTCTCCTTACC  
AAACTCTTATGCTTTTGTTAATGGGATTGAGATACTTTCTATGCCAACTGATCTTTACATCCATGGAGACG  
TAAAATTGGCTGGGTATACTAATCCATATAACATCAATAACAGCACTGCTCTTGAACTTTGTACAGGCT  
GAACGTGGGAGGCAATTTAGTTGGTAGCACAGAGGATGCAGGGATGTATCGTGTATGGGATTCAGATG  
ATGCATTTGTTGTTGGATATGGCTATCAAACCTCCTATTTTGATGATGCCAACATCAATTACACTTCTGAA  
ACCCCGGCTTATTCTGCGCCAAGGATAGTTTACACAACCTCTAGGATTATGGCCAATCACAGCCAGAGCC  
TGGATTGGGAATTCCTCTAAACTCTGGCTTCTATTATCTTTTCAGGCTCCATTTCTGTGAGATTCAGCTG  
GAAGTTAAAGAAATAAACGATAGAAGTTTTTCCATTTCTATCGGAAACCAAAAAGCCGAGCGAGAGGCT  
GATGTAATACAATGGAGTGGAGGCTGGAGAATCCCTGTGTACAAAGACTATGTGGTTAATGTTAGAAAC  
CAAGATGGTGAGCAAAACGTGACGCTTGATTTGAGTCCTAACCCAGATTCTGCGTATCAAATGCTATCT  
TAAATGGCTTAGAAATTTTCAAGTTGAACGACTCAAATGGAAACCTCTCCGTGCCGAATCCTGAATTTTT

CTTTCCGAATAATTCACCACCAAACGACAATAATAAGAGATCATCATCACACATCATTGCTGTTATCACTG  
CAGTAGCTGTTATTAGCGGAATTGCTCTGCTTTCAATTCTCTGTTTCTTAATTTCCGGCGGTGGAAAAGG  
GGAAAAGAACTTCATACAAGCGTTACAAAGTCATCATGGATCCCTTTGTCAATTACATCGAACTCAACCC  
AAAGAACCGGCGGCTCAGGCTCATCAGCGCTACCATCCGATCTGTGCCGACACTTTTTACTAGAAGAGA  
TAAAAACAGCAACATGCAATTTTGATGAAAAATTTGTGATTGGCTATGGAGGTTTTGGTAATGTATACAA  
AGGGTACATAGACAACGGCGCAACCATAGTTGCAGTCAAGAGATTGAATCCTTCATCAAAGCAAGGAGT  
CCGCGAGTTCGAAACAGAGATTCACATGTTGTCAAAGCTAAGGCATGTGCATCTGGTGTCTTAATTGGT  
TATTGTGATGATAACAATGAGATGATCTTGGTTTATGATTACATGTCTCATGGAECTTTCGTGATCACTT  
GTACAAAAGTATAATGCTCCACTTCCATGGAAGAAACGCCTTGAGATTTGCATAGGCGCAGCAAAGG  
ATTGCATTATCTCCATACAGGTATACGGTCACTTAATTCTATACTTCTATTTGCTGTGGTACCATATTAAG  
TATGTATTGAGTAAATTAAGTGATTTACTGGTAAAAAAGATAAAGATTAATTATTTTAATATAATAAGTT  
ATTATTATCTATAGTAGATATGATCGTTAAATTTAATTTACAGGTAAAAGGATATCATTATTCATCGAG  
ATGTGAAGTCAACCAACATTTTATTGGATGATAAATGGGTTGCTAAGGTTTCAGATTTTGGGTTATCCAA  
AATCGGTCCACTTAGTGGATCAGGAAAAACCCATGTTAGCACTGTTGTGAAAGGAAGCTTTGGATATCT  
GGATCCTGAATACTATAAGCGACAACAATTGACAGAAAAATCTGATGTGTATTCTTTTGGGGTGGTGTCT  
ATTCGAAGTGTGTGCGCTAGACCAGCATTAAATCCTAACATGCCGAAAGGGCAAGTGAATTTGGCTGA  
TTGGGCTTGTAGGAGCTGTAAAAAAGGAAATCTTCAACAAATAATTGATCCGAATTTGGAAGGACAAAT  
TGCGCCAGAGTGCTTAAACAAGTTTGCAGAAGCAGCATATAATTGCTTGAAGGATCAAGGAGTCCAAAG  
GCCATCAATGAATGACGTTGTCTGGAATTTGGAATTTATATTAAGCTTCAAGATGCAGCTGATAATAGA  
GGTCACAAAATGGAATTGAACAGTTATCCGACTAGCCCGTCTTTCCCATGATTATGAATGGTCATACCA  
ATATATCTACAGACGAAGGATTCGAGGCATTTTCAGGTTACATGAAGTTGGAGGAAAATACACAAGCA  
GTGCTACATCCATGACCAGTAATAGTGATGACAAATTGAAGAGTGACACTATTTTCTCAGAGATTTTGAA  
TCCATCGGGTTCGATGAGATTGTTACAACACTAGTAAGATAAATTACATATTAGTTCTTCTGTTTTCTTTTC  
CTTTGTTGAATTTATGTCCTTATTATATATGCAGATGAATTGAAGCCATTATTCAGAAGTATATAAGCTAT  
GAAATAGTTTCACTATATTTTGTGGGTTCACTTT

>M6-PGSC0003DMG400001369 M6 RLK with malectin domain

AATTTAACAAAGAATCATCCAAATTCCAAAGAAAATAACCCACAACCTTTCTTTCAAGCATGTCTGACTAT  
TGCTCCAGTGGGACATAACAAAGATTATTATGAAAATGAAAGGCAGCATCCATGGCCTACAAGAAAAAG  
ATGTACACCCCAATTAACAACCTTTCTTTACCATTTCTATTTCTCTGTATTTTCTTGGGTACATATATG

GTCCCCTTCTTTAGTGCAGTAATCCTAATAGTAATTTCACTTATATTCTTCGATGAAGTCAACTCTTGCCTC  
ACTGATTTTTACTCCATTTATTTGGTGCACCTATAATAATTTACTTTTGGTATTTATTTTTGTACAAAACCT  
TAACAAAATGATGTCGGTTTTTTATACAGAAAATTAGAAATGACTTGATCTTCGAACATCTACTGTATATA  
TTTGACAACAAATAGCACGTACATAGTTTTTCAAGACAACGCCATGTTAGCCATTGCTCTAATTTCCCTT  
CTCTTCTTACAACCTATAACGGCCACTATTTCTACCACGCCGCCACCGTATAACGCCACTGTCTTTGTCTTG  
CTTAACTGTGGCGCACAAATCAGCCACCACCGATGAAACTGACCGTCGATGGGATACTGATACTCACTTTC  
CAAATTTCTTACCTTCCAACCTTTTCAAGCATATCTACAACAGCCACAGCTTCTGAACAAGATCCTTCGGTC  
GATAGAGTTCCTTATACGAATGGTGTCTCGTATCATGAAATCTCGATTCACTTACACTTTCCGTGTTTCTCC  
TGGCGCCAAATTCCTCCGTCTCTATTTTTACCCCGCTAATTACTCTGGCTTCAACAAAGCTGAATCTTTTTT  
CTCCGTACAGCTAATCATTAAACCCTCTTGAGTAACTTCAACGCTCTCGCTGCAGTTACCGATTCTAGTA  
AAGCTCTTCGAAAAGAATTTGTCATTAATGTTGATGAAACTCAGATTCTTAATGTGACCTTTTCTCCCTCG  
CCAACTCTTATGCTTTTGTAAATGGGATAGAGATACTTCCATGCCTACCAATCTCTACATCCGTGGAAA  
CCATCGCATTGAATTGGTGGGCCAGAATGATTTTTTTTTACATCAATAACAGCACTGCTCTTGAAACTTTGT  
ACAGGCTGAACGTGGGAGGCAATTTAGTTGGTAGCACAGAGGATACAGGGATGTATCGTGTATGGGAT  
TCAGATGATGCATTTGTTGTTGGATATGGCTATCAAACCTCCTATTTTGTATGTCAACATCACTTACACTTCT  
GAAACCCCGGCTTATTCTGCGCCAACCATAATTTACACAACCTCTAGGACCATGGTCAATTACAGCAAGG  
GCCTAGATTGGGAATTCCTCTAAACTCTGGTTTCTATTATCTTTTCAGGCTCCATTTTTGTGAGATTGAGC  
CGGAAGTTAAGGGAGTGAACCACAGATTTTTTCGACATATACATTGGAAACCAAATGGCAGAGCGAGCA  
GCGGATGTAGTTGAATGGAGTGGCGGCTGGAGATTCCCGGTTTACAGAGACTACGTGGTGAATGTGCC  
TAACCCAGACGACCGACGAAACAAGCAAATATTACGCTTGAATTGAGTCCTAACATGAACACAAAAGC  
TGTGTATGCTAATGGTACCTCAGAATTAGCGTATTCAAATGTTATCTTAAAAGGCTTAGAAAATTTTCAAAT  
TGGGTGATGCAAATGGGAGTCTGGCCCCGTCAATTCATGAATTGCCCTCAAAGCAAACGGAAATCCGG  
CCGCCTTACTCCTGAATTTGCCTCAGAAGCTCCGATCGCTTCATTAGCTTTTCTAACAACAAGAAGAAA  
AGAATATCATGGTATATCATTGTTGCTATCATCACAGGTGTGACTAGCGGTATTGCTTTTTTTTTCGATTCT  
GGGTTTCTTAATTTCCCGACGACGAAATGGGGGAAAAGATTCTGGTACAAGTGTACCAAGTCATCATC  
ACCACCATCCGATCTGTGCCGACACTTTTTAATAGCAGAGATAAAAAACGCTACCGACAATTTTGTATGAA  
AAATTTGTGATTGGATATGGAGGTTTTGGTAATGTTTATAAAGGGTACCTTGACAATGGTACAACCACA  
GTTGCAGTCAAGAGATCGAATCCTTCATCAAAGCAAGGGGTTTCGCGAGTTCCAAACAGAGATTGAGATG  
TTATCATCAAAGCTAAGGCATCGGCATCTAGTGTCTTAATTGGTTATTGTGATGATAAGAATGAGATGA



TCTTGGTTTATGATTACATGGCTAATGGAACCTTCGTGATCACTTGTACAATACTCGCAATGCTCCTCTT  
CCATGGAAGAAACGCCTTGACATTTGCATTGGTGCAGCTAAAGGATTATATTACCTTCATTGAGGTAAGT  
AATCAATAAATTGATAAACATGTCATGATCTAACTTGCACTATATTTGTTTGGTAAAAAACTATTGGGTC  
AGAATAGGTCAAATAACCATCAATGTCAAGTTGCACAGCATGACTCAACCTCCCAATTTGGTTTTTGTAT  
ATTCTATTTGCATTTTGACATGTTTTGATTCAATAGATTGATGGGTCATTTGAGTTAATCCATTAATGTG  
TCAAGCCAACAAGCAATTTACAATTAAGATCGTTTAAATTTGAGTGAATTGCTGAAAAGTGAGTTCATTT  
TGCTGTTATAGGTACCAAACATATGATCATTGATCGAGATGTCAAGTCAACTAACATCCTATTGGATGAT  
AAATGGGTCGCCAAGGTGTCTGATTTTGGGTTGTCCAAAGTAGGTCAGTAGGTGGGACAGATATTACC  
CATGTTAGCACTGCAGTGAAAGGAAGTTTTGGGTATGTAGATCCTGAATACTACAAGCGCCAACGATTG  
ACAGTAAAATCAGATGTTTATTCTTTGGGGTGGTCTATTTGAAGTGTTATGTGGTAGGCCAGCAATAA  
ATCCAAACTTGCCAAGTGGGCAAGTGAATTTGGCTGAATGGGCTGTAGGAGTTGTAAAAAGAGAGAA  
CTTGAAGAAATCATTGATCCTAACTTGAAAGGACAAATAGCCCCAGAATGCTTAAGGAAGTTTGCAGAA  
TTGGCATATCATTGTTTGAGAAAAGAAGGGGTTCAAAGGCCATCAATGGGTGATGTTGTAAAACTTTA  
GAATTTGCATTACAGGTTCAAGAGGGTGCAGATCATGAGGTGGAAGGATCCTCTTTTCCGTTGATTATTA  
ATGGTGATGCTATGAATGAAGATGAGATATTCTCAGATTTAAGTGAAGTTGAAAGAAATTTGACAAGCA  
TGTCGGTCAGTAGGAGTGCCAAAGTGAACAATGTTGCCCTTTTCTCTGAGATTGTCAATCCATTGGGTCG  
ATGAAATTGTTATGATCATAGTTGATACACTGAAATTACATGTATTTTGTTTTTCAGGCTCTTTTGTAAAT  
TTAATG

>M6-PGSC0003DMG400001732 M6 RLK with malectin domain

TACCTACTTTGATTTGTTGAACTCGAGCCGAGGGTCCTCCATAAAACAACCTCTCTACCTCCATGAGGTAG  
GAATAGGTTGGCATATACTCTACCCCCCCCCCCCCCTCACTTGTGGGATTTCACTGTGTATGTTGTTGAT  
GTTAAGAGAGATTAATAAGACATGAAGTAAAATTTCTGGGTGTTGCTAAAGGAGAAAGCAGTTCTCATT  
CTTTAATGAAGTTTTACCAATGGGTGTGAAAGTTGGTGGATATATATTCATTCTTTATGCACTGCTGATAA  
ATTTTAACTGTCAAACAGGTTTTGTAAGTTTAGATTGTGGAGGCAAAGACAACCTTCACAGATGAACTTG  
GTCTTAAATGGACCCCTGATACTCAAATGATTAGCGGAAATATAGCCAATATCTCTGTTGCAAATGAGAC  
GAGGACACAGTATATGGCCTTAAGATACTTTCCAGCCGATAACAGGAAGTATTGCTATACACTTGATGT  
GATTCCCCGAAACAGGTACCTTGTAAGAGCAACTTTTCTATATGGAACTTTGATAAGGACAATGTTTAC  
CCAAAGTTTGATATCTCACTTGGGGCAACTCATTGGGCTACAATAGTTATATCTGATGCTAATACAATGG  
AGTACCAAGAGGTAATATTTCTAGCCAAGGAACCTTCCGTAAGTGTCTGTTTATCCAATGCAACCACTGG

GCTGCCCTTCATTTCTACACTTGAGCTCCGACATTTTAATGGTTCAATATATATGACTGAATTTGAGAATG  
ATTTTTTCATGAGCGTCTCTGCTAGGATAAATTTTGGTGCACAGAGTGATGATCCTGTCAGGTATCTTTCA  
GTTCTTCTGTTACTGTGGCAGCTTCCAAATCTATGTTCTTGCACGTTCTTGTATATTTTTAGAATATGATAG  
CCATTGACATTTTTGAACTGAAACAAGCAGGCTTTGGCTCTGTCCCTAGCATGGTTTTCTTCTGACTTACT  
GTTTTTGTTGATTTCCAAAATTTAATCTTCCCTAATGTCCTTATTCTCCTAGGTACCCTGATGACCCATT  
CGATAGAATATGGGCATCTGACACCATAAAAAAGGCCAATTACCTTGTTGATGTGGCTGCTGGTACTGA  
AAGAGTTTCAACCAAATGCCAATTGATGTGAATACCTTAAATGGTGAGATGCCTCCTCAGAAAGCAAT  
GCAGACTGCTGTAGTAGGAAGAAATGGCTCGTTAACTTATCGTCTGAATCTCGATGGTTTCCCTGGTTTT  
GGTTGGGCATTTACTTATTTTGCTGAAATTGAGGATTTGAAACCTGGTGATAGTAGGAAATTCCGGTTGG  
TTCTCCCGGGAGCTCCTGATATCAGCAAGCTTGTTGTTAATATCCAAGAGAATGCCCATGGGAAATATCG  
TTTATATGAGCCCGGCTACTTCAACTTGTCGTTGCCCTTTGTATTATCTTTTCGTTTCGGAAAGACATCCG  
ATTCCACGATGGGGCCTCTCTTGAATGCTATGGAAGTAAACAGATATGTAAGAGAACTGATGGCTCTT  
TAGACGGTAAAACCATGTCTTTTTCTTTAACATTATTATATTGTGGTTCGTTGAAATGATTATCTGCAGTT  
TATTTCTTAGAAGGATTTTTCTGTTGTAATGAGTATCTTTGTTGTTAGTTTCAAATAGTAAGGCATG  
TCCCTTGCTCTTTGCATGTGTTTCAGGACCAGTTATTTCTAGTTTAGTCTCGCACTACTCTTCTGCCAATTT  
GATAAACGAAGGTGGTGACCCATGCTTACCAGTCCCATGGTCTGGATCCGTTGTGACTCAGATATCAG  
ACCAAGAATAACATCAATGTATAGTTCATCACTTTAGCTTCTTTATGCGTAGTTTCATGTGTTCCACTTTCT  
GCAATTCAGTTATGGAAGAATTAAGACTTTTCTAGTTTTCTTTATATTGTTCTCGCAACCTGAAGCA  
ATGGGCTATAATTCACAACCTGTTACTTTGGCAGTAAATTGTCTGGAAAAAATTTGACTGGAAATATTCCG  
TCGGAGTTGACAAAGTTGAGCGGCTTAGTTGAGCTGTAAGTCATAATATCATACTGTAAATGTTCCATG  
CATATGCTGTGGTTCCTTCTTTCTTTCTGCTGCTGTATAATCAATATGCACCCATGTTCCCTAATGCAGCT  
GGCTGGATGGGAATTCACTGACTGGTCCAATACCCGATTTTAGCGGATGTCCCAACTTACAGATAATGTA  
AATTGAGCTGCCTTTTTCAATTCAACTTTTTTAGATATTCTTAAAACACATTAAGTGGTGAATCTAATCA  
CTATGTTTCTTGACAGACATCTTGAGAACAATCAGTTGAGTGGACAGCTTCTTCAACCTTGGAAAGACCTA  
TCAAATTTGAAAGAACTGTAAGCAGCAGAATTATTTATTGACTAAATGTACAATTACTTGTAGAATTTACT  
CAAGCACGTTAGGCTGTAGATGCTATTCAACTATGAGTTCATGCATATGGCTGATAAGCTTAACTCTCAT  
ATTAAGCTTCTGCTCATCAGAATAAGAATCTAGCATAACCCTGGTTGAGCTGCAGATCATGATCACGTCC  
TTGGAACTTTTTGGCTCCACTTGTGTCCCTTTCTTATTTTAGCTTGCAGTCGTATGTACTGCCTCTAGT  
AAAGTTCTTCTCTTTCTTAATGAAAATGATGATTGCAGGTACGTGCAGAACAACATGCTAACTGGAAG

TGTGCCATCTGGTCTTCGTGATAACGGTGTGATTTTGAAGTGGGTATCATTCTGTGCTAAGTGTTTGTT  
CTGAGGCCTTGATCTTGTCATGCATTTATACTGTACTGCCATGGAACTGTTGAATTTACTTTTTTAGTG  
CTAGAGAACTAAATTCTTAAATGTTGGATTGAGGCGGGTCTAAGTAGCGTGATATGGATAGTGAGGAT  
TCATACCGACCCCACTAGCTTTTGGTTAAGGTATACTTGTTGATGCCTAAACCTTTTCATTTAGCTACC  
AAGGTATATCTATAGGGAGCTCATGGTAGAGACTCAATACTCCTTTCTTTATGAAAGCAGATGATCTTAA  
CATAAGTTGGCTTGTAAGATACTCATATGTTAAACCCTCCGCGCTTGGTTGTGGTTCTTATTTAGTTAC  
TTAATGGTTCTTACTGCACATTCAAAGTGTCTCAGTCTCTACTAAGCTTGACTAATTGCTTTACATTTTA  
TATGTCGAAATTACAAATCTTAAAGTTTCTCTGATAGTCATGCTGCATTTCTAAATTGTTGGCTTGTCTGTT  
TCCTTACTAAATCTGCTAAAACATTCTGTATTCTCCTCAGTTACACTGGAACTTTAATCTTCACGAAGGG  
GAAACCAGTCGCAGCCGCAAGAAAATCATTATTGGATCATCAGTTGGGGCTCCGCTCTTCTTCTTGCTA  
CTATTGCCTCTTGCACTACTGCAAAAAGGGAAAAAAGCTCTCCTAAGCAAGGTGTGGTGAATACTT  
AATTTTGTCAATTTTATTATACATAATTTTTTTTGGTGGGATTCACATTATCGTTCTGCTTCTGCTTTAGGCC  
ACCTCGAGATGAATTTACCTCCTCAAAGGTTTGTCTCTTCTTGGGAGATGCTGCAACAGAAGCAGCACA  
CTGCTTTACATTAGCTGAACTTGAAGAAGCGACCAAGAAGCTTTGAAAGAAAGGTTGGATCAGGGGGATT  
TGGAGTTGTATACTATGGGAAATTGAAGGACGGGAAGGAAATTGCTGTCAAACCTTCTTACAAATAATTC  
CTTTAGGGGAAGCGAGAGTTCTCAAATGAGGTAAATAGGTGGATGCTCCTATTATATTCTAGTAGCTT  
GTCATGATGCATAAGATGGTCTTAAATGTCGGGACTGATGCTGTGGCTAAAAACCCATTATTCATTTGTT  
TAACTTTGTGAGGAAGATCCAGATATAAGAGGCTTCACCATTACACTTCAATGTTTTTAGATTATCGAGG  
AATCCATTGTTTTACTTTTTGGAAGTCTGGGGATAATGGGCCACCCCTCTCCCTGTTTAACTTATATACCA  
AATTTGGTGAACAACCAGGTTTTGAAGTCATGACATGCACCTACCACACTCCTGCTCTGTACTACCTCTA  
CCTCTGATGTGCAACCAATTCCCGGAGGCTTCTTGGACTCACATTATTTTTGCTTTTCAAATCTGCATA  
ACATCTCAGTATAGAAAATGAAATTTGCGTAATTTAGAAAGGATTAATTTAACGCCAGAGGACACTTTCT  
CAGTGGTACTTTTTCACACTCATCAAATGTATATTGCATAGAAGGTCACGGGCTATAAAACCTCTAGACC  
AGCAATGTACTAGAACTTGATTAAGTTGTTACACAGTGCTGCAACTTTTCCCTCTACATTGTGCAATTTTG  
GATCTGATGCAAATTAGTACAACCATATCCAGTTTATATGTGACAAATTTACAATTT

>M6-PGSC0003DMG400002602 M6 RLK with malectin domain

AAATTAGTGGACCCAAATCATGTATTTTTGGGTCGAACAAATTTTAAATTCACCAATTTGTGAAACAAAT  
GAAGTCTCGAGGCATAAAATAAAATTATCACTTGTATATTAAGTATAATTTTTATGACATTCTTGTGTTTC  
TGTTAAAGGAACTTGTCAAGCAATCAGCTGACGGGAGAGGTGCCTGCCAATCTCTCACAACCTAGCCTTCT

TACAAGAGCTGTAATTTACTCTCCTATAACTCATTTAGTCTCAATTTATGCGGCACAGTTGCAATTAATAT  
GATTTTTATGACATTATTGTTGTGTTTCTGTTGAAGGGACTTGTCAAACAATCAGCTGACAGGAAAGGTC  
CCTGCCAATCTCGCACAACTACCCTTCTTAAAAAAGCTGTAATTTACGCACTCATGACCTATAAGTTTACA  
ATTACTACCTCTCTATCAATTTATGCGGCACAATCCAAATATGATTTTAAAATACTTTAAGTTGTTAATTA  
TTTTGATATATAGTAATTTTATGTTCAATTCATTATCAAAGTTTAGAATTTTGAATTGTGTCACATGAATTA  
GAACGAAGGGGTATTTATTTAATTAGAACACAGAGTAATTTGGTTATCTTTGTGACAGATACTTGAATGG  
AAACAGTTTCTCCGAAAAAATTCCTGAAGAATTGCTGGCAAATCAAAAAATGAATCACTCGATTTGAG  
GTTTCGTTCCACTCTCAGAATCCATGAATTAATTTATGAGTATACAAAAACATCTAAGATTGATTTAGAA  
AATTATCTCCCCTATGATCGATATTAATTTCTCATATAATTGGTCACAGGTTAATTTGTGTAATCAACTCAT  
CTAAAATTAAGTCTGATGTTATATTGAATTGTTATCAAGTCGTTAGATATTGAAGACACTTTTATTTACT  
TATAATTACATTTCAATTAATTTTTTGTGCATACAGGTATGATGAATTCATCCTCCGAAAGGTAGTAATAA  
CCTTAGTGCTGGTGCCTAGCAGGAATTATTGCATCCGTGGTGGTCTTGGGCATCTTGGCTTTACTACTA  
CTTCTTTGGTTTATAATTCGAAGGAAGAAAAACAAAAAAGGTGAGCAAATCATAAGATCGATCGATGAA  
TTGCCAGATGATTTGTCATTGAAGAAATTAATTTCTGTAACAGGGAAGATTACTGGGACAGAAAGAACA  
GTAGAGAGTCCAAACATTGCATTGGAGTTGAAAAACCGGCAGTTCACATACTCGCAGGTTTTGCACATG  
ACAAATAACTTCCAGAGAGTCCTTGAAAAGGAGGTTTTGGGACAGTTTATCTTGGCTATGTGCATAAC  
CGCGATGTAGCTGTTAAGATGCTGTCCCCTTCTTCAGTTCAAGGGTTCAAGGAATTCCGGGCTGAGGTA  
AACTGAAGAAGTATTTTATAGTACATAAGACATTATATTTAGTTAACACGAATTTGACTTGACAGGCTAG  
TCTCCTGATGAGCATAATCATAAGAATTGATTTCTATAGTTGGGTATTGTGTTGAAGGCACCCACATT  
GGTATTATTTACGAATACATGGCCAATCGAAGCTTAGACATGCAACTATCAGGTACCTGATTTATAGTCA  
AACAAATGTTCTTTTAGATCACACATTTACAAGTCTTTTCATCGTTGCGTGCAGATAGAAATCCAAATGCT  
TTAACATGGGAGGAAAGACTTCATATAGCATTGGATGCGGCACAAGGTATATATATACACCACTAGATG  
AAAATAATTTAGTTCGAGTTTTAGAAATGATTAATTATATATTTGACGTGTTTCTTTAATTTAACTGAAAA  
AATAATGAAGGATTGGAGTATCTACATCATGGTTGCCAGCCACCAATAATACACAGAGATATCAAGTCT  
AGTAATATTCTATTAGATGATAAATTCGAAGCAATCTTGCTGATTTTGGTTTGTCAAGGACTTTACCAAC  
TGGAGAGGGAAGTCATGTTACCACTATAATCGCGGGTAGTCCAGGCTATCTTGACCCTGAGTACGTGCT  
CTTCATTTTATTAGTCTGTCTCAAAAAGAATAACAACACTATGTATATCTAATTTTAACTCTCGATTGACCTGC  
AGTTACTACAGGACAAATAAGCTAACGGAGAAAAGTGATGTATACAGTTTCGGTGTGGTTCTTTTGGAA  
ATAATAACAGGACGGCATTACTAGGAAAACATGACAAGATTTATGTAATAACGTGGGTCAATGGTATG

ATTAATGATAACGGAGATGTTGCAAAGTAATTGATCCAAGATTAGGAGGAGAAGTTGATGTGAATTCA  
GCTAAGAGAATTGTGGCATTAGCAATGGCTTGTGTTTCTCTTGAACCAACAAATAGACCAGCTATATCTG  
TCGTTGTCACAATAATAAAGCAATGTTAAGGCAGATGATTGATAATTATGACTCTAATTGA

>M6-PGSC0003DMG400003406 M6 RLK with malectin domain

ATCTTTTTAAGGTTTGGGGTAAAATTATCAAAGGGTCTAAAAATGAAAACAAAACATAAGTTAACACCCC  
TACCCTTTACCCTTACCCTACCCTACCCTACCCTACCCTACCCTACCCTACCCTACCCTACCCTACCCT  
TATCACAAATTCATTTGTCATTGCTCAAGATGATGCTGTACCTGCAAATCATTTCTGTATTCACTCCAG  
AAGATAATTTCTCATTGATTGTGGTGCAACTTCATCGATCACGCTTCCGGGGAATAAAGTTTTTCAACCT  
GATCAAATGCCGCTAAATATCTTTCTTATAGTGGTAAAGATGTACAAGCCTGTGCTTCTGAGAAAATCA  
ACGTTCTTCAACGTTATATGTAAACGCCAAAGTCTTCACAACCTGAAGCTATTTACACGTTTCATGCCAGT  
ACTTCAGGGTTGCATTGGATCAGACTACATTTCTTTCCATTTAAATACGAAGAATATGATCTTAAACAGC  
TAAATTTTCTGTAAAACGGATAGTTTAGTCCTTCTACGTGATTTCCAAACTGGGAAAGATGAGGCTGTT  
GTCAAGGAGTTTGTGTTAATGTTACCTCAGAGCGTTTTGCTATAAAATTCGAGCCAGCTCAAGGATCTG  
TTGCATTGTTAATGCTATTGAGTTTGTACTGTACCTGCAAAAATGCTTGATTATTCTGTTCTGTTTTAT  
TCCCCGTGTCACAGAGATTTGATCTTTCTAAAATAATTTCCAGACAATGTATAGGCTTAATGTTGGTGGT  
CCTGCTTTGGATTCAACAAACGATACTCTTGAAGAAATTGGATGTCTGATAATCAATTTGAAACAATG  
CTACAGGTGCAGAGGTATCAACACAAGCCTCTGCTATTAATTATTTGATATCATCAGGAGGTTCTCCGTT  
GATCGCGCCACCAACAGTTTATAGTTCTGCTGTAAAGATGGCGGATTCAGAACTACAATTGCTAATTTT  
AACATATCATGGACTATGGATATTGATACTATATATCCTCATTGATTGCTTACATTTCTGCGATATTATT  
AGCAAAGCTCTTAATGAACTCTATTTCAATGTGTATATCAATGACAAGATGGCTATTTCCGGGCTAGATT  
TGTCATCATTGACAAATCATTGTCTACGGCTTTTTACAAGGATTTTGTGTTGGATTCTCCATGGTGTCT  
AACCCCTCGTTGTACGTGTTTCTCTGTGAATGATGCTCAAGGTTTTAGAAATGCGATTCTAAATGGCCT  
TGAGGTGTTTCGAATGAATAACTCTGTTGGTAGCTTAGATGGGGAATATGGCGTTGATGGACAAAACA  
AAGTGGTCCAAGTAAAACAGTGGCTTATGTTGGATTCGCGATGATGTTTGGAGCGTTTGTGGGGTTGGG  
TGCGATGGCAGTTAAATGGCAGAAGAGACCTCAAGATTGGCAAAGAGGAATAGTTTTTCTGTTGTT  
ACTTCCAGTTCATGCTGGTATTCAACATTTATGTCATCATCTTCGCGAAGCAAGAGCCAATTTTTCTCAT  
CAAAAACATGGGATTAGGTCAGTACTTTAGTTTTGCTGAATTGTCAGACGCCACGAGGAACTGGGAAC  
CTAGTGAAATAATCGGCGTTGGTGGCTTTGAAATGTATACTATGGAGAACTTGATGATGGTACAAAAG  
TTGCTGTCAAGAGAGGAAATCCACAATCAGAACAAGGTATAAATGAATTCAGACTGAAATTCAAATGT

TATCTAAGTTAAGGCATCGACATTTAGTGTCTGTTGATTGGGTATTGTGATGAAAGTGCTGAGATGATATT  
GGTTTATGAGTTTATGCAAATGGTCCATTGAGAGATCATCTCTATGGAAAGAACATGCCGCCTTTATCT  
TGGAAGCAACGATTAGATATCTGTATTGGTGCTGCTCGTGGGCTTCATTACCTCCACACTGGTGCATCTA  
CAGGGATCATACTAGGGATGTCAAGACCACCAACATTTTGCTTGATGAGAATTTTGTGCGGAAGATGG  
CTGATTTTGGGCTATCTAAAGATGGACCAACAACAGAACAGACTCATGTGAGCACGGCTGTGAAGGGA  
AGTTTTGGCTACTTAGATCCTGAATACTTTAGGAAGCAGCAGTTGACAGACAAATCTGATGTCTACTCAT  
TTGGGGTTGTA CTCTTGAAGCCTTATGCGCCCGTCTGCTATTAATCCATCATTACCAAGAGAGCAAGT  
GAATTTGGCAGAATGGGCAATGCAGTGGAAAAGAAAAGGGTTATTGGACAAGATAATTGATCCAACAC  
TTGTAGGACATATTGATCCAGAATCAATGAAGAAATTCGCGGAAGCAACAGAGAAGTGTTTGGCTGAAT  
ATGGTGTGACAGACCTACTATGGGTGATGTTTTATGGAATTTGGAGTACGCGTTGCATATGCAAGAAG  
CCTCGTTACAAGGAAAGACAGAAGATATCGATAACAAAGCAATTGTTGCACCAATTTCTCCTGCTACAGT  
TGCCCATGCTAATGTCACA ACTGATAACAAACATATTTCTTCACCAGAACAACATAAAAATCCTACTGAA  
GTTCAAGCCATAGATGACAAGTCAGTGGCTTTTGCTCAATTTGAGCCTATCAATGGACGATAAAACGAA  
CACTCAGCTTGTCTATAGACAAATCAAGAATCTACAATTAAGGTTATGAAATACATGTGTGTGTATAT  
GTATGTAGTAAAATTCAGCTTTTTATGGATGCCATTTTGCTGAAAAATGTAATTCAGAACAATGTAATGTT  
TCACATAATACTACTTTACTACATTG

>M6-PGSC0003DMG400007299 M6 RLK with malectin domain

CTTCATTGTAGGTTGTTTCCCAGCATCCTATAGTTGATTAGCTAAACACTTGTTTCATGGATGCCAAGAAA  
TGACCTGGTCTTTGTACCAAAGCAAAGAAACCTCCAAGTTTCTCTTTGTATTGCGTAGGCGTACAGGAT  
TGTTTATTGTCCTGTACGCCTTTTTCTTTGTTTGTCAACCATGTTAACAAAATTATCCACATTTTGTAC  
TAGTGATCTTATGTTACATCTCTTCTATTCCCTCGCTCGCTTCATGCTGCATTAATCAATGATCAAAACTCAT  
TGTTCTTAGCATGTGGTTCTCAAATGGTGGAGTTGATGAAGATATGATAAAATGGGAATCAGACACGA  
AGTATCTCGTGTCTGGTGATAAATCAGTCATGACACAACCTGAATCCCCTGACCCTTTGGCTCCATCTATT  
GTACCATATACAAATGCAAGAGTTTTTCAATCAGAATCTTCATATAATCTTCCTGTTACAAACCAAACAAC  
ACATGTTATGCTTAGGCTTCGTTTCAACCCAACGCCTTATCCTAATTTCAATATTTCTAAATCATTTATGAC  
TGTTTTTGTGTTAAAGTGACATTGTTAAATAATTTAAGCGCGTATATAACTGCAGAAGCCTTGTCACAA  
AGTTGCATTACCAAAGAGTACTTATTGTCTCCTGTGGGTTCTCCAATTTGGAGATCAAGATTAAGCCTTT  
TGGTGATTCATCATTTGCATTCATAAATGGAATTGAAATGATCACCACGCCAGATATATTTTATGGTCCG  
GATCCTTTGATGGTTGGATTGAGTACAAGTATTCAAATCTATTACTCAGCAAAGTATTTCTGTAAAGG

AAAACAATATGGAGTTAGCATATAGGCTCAATGTTGGTGGACAATACATTTCTCCAAAAACGATTCAG  
GTGGGTTAATAAGAAGTTGGTATGAAGATACTCCCTACTTATATGGTGCTTCAATAGGCATTACTATGAA  
GAGTAACAGGACAATTCAATACGATAACATACCAACATACGTTGCACCACTTGCTGTCTACGAGAGCTGT  
AGATCGATGGGTTATGATTCAAACCTCAACAAGAACTATAACCTCACTTGGGTTTTCAATGTTGATCCCA  
ATTTTATATATCTTGTGAGGCTTCACTGGTGTGATTTGAGCATCGATGCCACGAAATACAAATCCATGGTC  
TTAATGTATATATTAATGGACAAATTGCAGAAACAGAAGTCGATTTAGTTGCAATGAAAAGTGGAAAA  
AAGGAAGTTGCAATCGTAAAAGATTATGTGACTCGTGTTAATGATAAAGAAGGAGGTCAGCTTTGGGTA  
GCAGTGCATCCATTAGTGCATGCATTAGGAGTTGGAAGTGAGATAGCTAATGCTATTGTAAATGGAATA  
GAGATATTTAAGATTGGCGGTGGAGATACGAGCTTGGCTGGAAGGAATCCTACAATGTCAAAATTAATG  
CAAAAATATCAGGAAGAACATAGTAAAGAAGCTTCGGGGGCATTCTCTAATCAGGACAAATCACATAGT  
AAAACGTATAATCAGTGGTGCTGCTGGTGGAGTTGCTGCTGCATTTGGTCTAGCTGCTGTTTTGGTCT  
TTGTTGCTTTGAAGAGGAAAAAAGATCCCCGGGAGCTGAACCAGGCATAACTAGTTGGCTGCCGATTC  
ATGGGAACCTCTCATTCTTCTGGTAGCAGCAAGTCAGCTTCTCGAAGAAGTGATGGTAGCACAGCCATTC  
ATCAGATGCTGCTTCTAACTGCCGATATTTTTCACTAGCTGAGATCAAACAGGCCACTAAAACTTCGAC  
GAATCATATGTCATTGGAGTTGGTGGATTTGGAAAAGTGTAACAAGGAGTTATCGATGGTGACAC

>M6-PGSC0003DMG400007307 M6 RLK with malectin domain

TTGATTAAGCTAAAACCCTTTCAACAATGGATGCCTAGAAGGCAAGAAATGATCTCGTCTTCGCCATAAA  
TCAAACACAAAAGATCAATCTCTCATTTTTATTGTTTCATAGGCGTACAGAAAACATTGCTTTCCTGTACG  
CCTTTTTTTTTCTTTTTGTTAACACCATGTTAACAAAAATCGATTTTTGCTAATATTCATATGCCTTTCTTT  
ATTTTCACGATCATTACATGCTGCAGTAGGTGATCATACTCATTTTTTCATAGCATGTGGTTCTGAAAATG  
GTGGAACAGATGAAGATGCTAGAAAATGGGAATCGGACGCGAAGTATCTCATATCAGGTGATAAATCA  
GTCATGACACAACCTCAATCTCCTGACCCCTCTGTTCCATCTGTTGTACCATATGTAATGCAAGATTTTTT  
CAATCAGAATCTTCATATAACCTTCTGTTACAAATAGATCAGCTCATATTTTGCTTAGGCTTCATTTCTAC  
CCGACTTCTTATCCTAATTTCAACGTTTCCAATTCATACATCTCTTTTCTGCTGGTAAAGTTACGTTGTTA  
AATAATTTCAAGTGCATATATAACAGCACAAGCATGGTCACAAAATTACATTATTAAGAATACATTTTGT  
ATCCTATGGATTCTCCAACCTTGGAGATCAAATTAGTCCTGTTGGTAACTCATCACTTGCATTCATCAAT  
GGAATTGAAATGATCACCTCACCTGATTTGTTTTACGGCCCTGATCCTGTGATGGCTGGGTTTAGTACTG  
ATGAAGAACCGGATTCTTCTGGTGACGGAGATGTTGTTTCTCAGCAAATATATCTGTAAGGGAAAATA  
ATATGGAGCTGATGTTTAGGGTCAATGTAGGTGGACAATTTATTCTCCGAAAAATGATTCAGGAGGGT

TAATGAGGAGTTGGTATGAAGATACTCCCTACGTATATGGCGGTTTCAGGTGTTGGTATTGCTATGAGCA  
CCAATATGACAATTCGTTATGATGACTTACCATCATATGTTGCACCCCTTGATGTGTATGATAGTTGTAGA  
TCGATGGGTTTTGAGTCGAATATCAACATGAATTATAACCTTACTTGGGTTTTTCAGAGTTGATGCAA  
TTTCTACCTTGTGAGGTTTCACTGGTGTGATTTTCATTGTGCGATTCCACTAAGGTCAATTCGTTAGTCTTTA  
ATGTATATATAAACGGACAAATCGAAGAAAGTGGAGTCGATTTAGTTGCAATGCAACATGGGGAAAAG  
GCAATTCCTTTAGTGAAAGACTATGTGACTCATGTTGAAGATAAAGAAGGAGATGATCTGCTTTGGATA  
GCAGTGCATCCATCAGGAGATAATGCTGATTTAGCTAATGCTATTGTAAATGGACTAGAGATATTTAAG  
ATCAACGGTGGCCACACGAGCTTGGCAGGTCAGAATCCTGCAATGTCAGATTTAATGATGAAGTATCAG  
GAAGAACATAGTAAAGAAGAAGCTCAACGGGGATTCACTGATCAGGACAAATCACATAGTCATACTGTT  
ATAATCAGTGGTGCTGCTGGTGGAGTTGCTGCTGCATTTGGTCTAGCTGCTGTTTTAGTTTTTGTGCTTT  
GAAGAGGAAAAGAAAATCCCTAGGAGGTGAATCAGGCACGACTAGTTGGCTACCGATTTATGGCAACT  
CTCATTCTTCCTCTAGCAAATCAGCTTCCGGAAGAAGTGGTAGTGGTAGCACAATCATTTTCATCAGATGT  
TGCTAGTAACTGTCGATACTTTTCACTTGCTGAGATCAAACAAGCTACTAAAACTTTGACGAATCATAT  
GTCATTGGAGTTGGTGGATTTGGAAAGGTATACAAAGGAGTTATCGATGGTGACACGAAAGTTGCAAT  
CAAAAGATCAAATCCATCTTCAGAACAAGGAGTCAATGAATTCAGACAGAAATAGAGATGCTCTCAA  
GCTAAGGCATCGACATTTAGTGCCTTGATCGGATTTTGTGAAGAGAATAATGAAATGGTCCTTGTTTAT  
GACCACATGGCACATGGAACATTAAGGGAGCATCTTATAAAGGTAACAAAACATACTATCTTGGAAG  
CAAAGGTTGGAGATTTGTATTGGATCAGCCAGAGGACTTCATTACCTTCACACAGGAGCTAAATACACT  
ATTATACATAGAGATGTGAAAAGTACAAACATTTTGTAAATGACAAATGGGTTGCTAAGGTTTCAGATT  
TTGGACTTTCAAAAACAGGTCCAAACATGAACCAAGGACATGTTTCAACAGTCGTAAAGGGTAGCTTCG  
GGTACTTAGATCCTGAATACTTCAGAAGACAACAATTGACTGAAAAATCAGATGTGTA  
CTCATATGGTGT  
TGCCTGTTTGAAGTACTGTGTGCAAGGCCAGCACTTAACTCAAATCTTCCGAAAGAACAAGTTAGTCTT  
GCAGATTGGGCATTAGCTTGTCAAAGAAAAGGGAATTTAGAAGATATTATTGATCCACATTTGAAAGGC  
AAGATCAATCCTGAATGCTTGAAAAATTTGCAGAAACAGCTGAGAAATGCTTAGCTGACAATGGTATA  
AATCGTCCGTCCATGGGAGATGTGCTATGGAATCTTGAATATGCCCTTCAGATACAAGAAAATCCAGAT  
GGAGTTTTATCAACTCCGAGGCAACGAAACAAGTTGATCATGACAATGCTGATCAACACAGTTTGATA  
GCTATGCATAGAAGCACTTTAAGCCTTGAAAGTGAAAATGAAAATGCTAATGGTAATAAAGATGATGTC  
TTTTCAAAATTGTGAATCCAACAGGAAGGTAATAGAAAATATACACACATATATATAAGTAGTTGTTTC  
TTATGAATGGTTATAATAAGTATACAAAACGTACATTTCACTATATATATTATGTATCAACTATATATAT



ATATATATATATATATATATATATATAAAAGGAGTATAGCTAGCGCGCGGTTGATTCTTTGTGTCACA  
TTTATGTATTTG

>M6-PGSC0003DMG400009689 M6 RLK with malectin domain

AAAGAAACATCCTTTGCCTCTCTTTCTTTCTTTCTTTGTTCTTTCTTTCTAAAAGATACTCTTTACTACCC  
CTTCCCAAAAAAAAAAAAAAAAAAACTTGTGATTTGGCTTCTATTCACCCATTCCAAATCTGGGCAATCTCA  
TTCTTGGAGCATATTTAATCAAAAAGGTTCAATCTTTTTCTTCTTCAGCTGTAGTTATAATTGAAATTTTTT  
CCAATTCTTGGATTGTTGGGGTTTTGAAATGTTGTCATTACATAGTTTTTTGTTTGTATTGTTGTTGGGGT  
TTTTCTGTGTTTGTCTGGATTTGATCCTTCTGATGAGTACTTAATAGACTGTGGATCTTCAAAAGATACT  
AATTTTGGTAATAGGGTTTTTGTGTCTGATAAATCTGGTTCGAAGTTTCTGTCAGTTTCTCAAGATATATT  
AGCTGATAATAACAAGGTCTAGTGATTCACCCCTTATCAAACAGCTAGAGTATTTACTCAAACCTTCTAGTT  
ATAAATCCCTATTACTAAAGTTGGAAGGCATTGGATCCGTCCTTCATTTTTCCCAATTTGTGTACCAATCTT  
ATGATATGAGTTCAGCAACTTTCTCTGTTTCAACTCAACAAAATGTTCTCCTTGGAATTTTAGTCCTAAA  
AAAGATGTATCTGTTAAGGAGTTTTCTGTTAACGTAACGACGGGTGATCTTGTTATCACTTTTTCCCTTT  
GAGTGATTCATTTGCTTATATAAATGCTTTGGAAGTTGTCTCTGTACCTGATAGTCTTATAACTAATGATG  
CCTCGACGTTTGGTCCATCTGGAGTATTTAGTGGTATGTATGCACAAGCACTTGAACAGTTGCTAGAGT  
AAATATGGGTGGACCAGCTGTATCGTCTGAAAACGATACATTATGGAGGAGTTGGGTGCCTGATCGGG  
CTTTCTTGACACAGCCGGATTTTGCAAAGTCCTTGTCTAAGATTGGATCTGTAAAGTATTTAGCGGGTGG  
AGCAACATCGGATATAGCACCACCGAGTGTATGGTACTTGTACTAAGATGAATGTGGATGCTGCTGG  
TAATGATGCTAGTGCTAATTTAATGTGACGTGGGTGTTCAATGTGGATGTTGGTTTCCAGTATTTCTGTT  
GATTACATTTGTGTGATATTGTGAGTACAGCTGCTAATCAGCTGTTGTTAATATCTATGTTGATTCGTGCG  
AATATAGCTTCTGATTTTGTCTGAGTTCTAAAGTTCAGAGCAGATTGGCTACCGCGTATTACATGGATTT  
TGTGACACCACAAGCTAATAGCAACAACATTAGCATTAGTATTGGCCCATCTTCAAAGAGTGGTTTTCCA  
GATGCCTTTCTAAATGGAGTGGAAGTCTGAAGTTGAATAACTCTCAAGGCAGCCTTGCTGTTGTTTCTT  
CTGTTCTCCTCCTCGAGCTCGGGCTCGAAAAGAATATCGGAGTCATTGTGGGCGCGATTGTAGGTG  
TGACACTTGTGTTGCTCGTTGTTGGTTTTCTGTTTTGTATGCGCAGAAGAAGAAAGCAGGAACAACCTCGG  
CCTGTCGAAAACATGGATTCCTTTGTCTATTGGTGGTGGTGGCTTGTCTCATACTATGGGAAGCAAATAC  
TCGAACGGGACGACCTTAAGTGTCTTCTAACTTGAGTTATCGCATCCCTTTTGCAGCCATGCTAGCAG  
CAACCAAAAAGTTTGTGAGAGTTTGGTCATTGGGATAGGTGGCTTTGGTAAGGTATTCAAGGGCGTTT  
TAAACGATGGGACGAACGTAGCTATTAAGAGGGGTAATCATAGCTCCCAACAAGGTCTTAGAGAGTTCC

AAACTGAAATAGAGATGCTCTCTCAGTTCGTCATCGTCATCTTGTTTCATTGATTGGATATTGTGATGAA  
AAGAATGAGATGATTCTTGTGTACGAGTACATGGAAAATGGGACCCTCAAGAGCCATCTGTATGGTTCC  
GATATGCCTAGTATGAGCTGGAAACAGAGGCTGGAGATTTGCATTGGGGCAGCCAGAGGTCTACACTA  
CCTTCATACTAGCTATGCCAAAGCAGTTATACATCGTGATGTCAAATCAGCAAACATATTGCTTGATGAG  
AATATGATGGCAAAGTAGCTGATTTCCGACTTTCTAAGGCTGGACCTGAGCTCGATCAAACCTCATGTTA  
GCACGGCAGTGAAAGGAAGCTTCGGGTACCTAGATCCTGAATATTTAGGAGGCAGCAACTGACTGAA  
AAAAGTGATGTTTACTCTTTTGGTGTGTTCTGTTTGAAGTTCTTTGTGCTAGGCCTGTAATCGATCCGTC  
TCTTCCAAGGGAGATGGTTAATTTAGCTGAATGGGCGATGAAGTGGCAGAAGAAGGGACAACCTAGAGC  
AAATCATAGATCCCAATCTTGCTGGAAAAATAAGACCGGATTCCCTAAGGAAGTTCGGTGAAACAGCAG  
AGAAATGCTTGGCTGATTTTGGTGTGGACAGACCTTCAATGGGCGACGTGCTGTGGAACCTCGAGTATG  
CACTTCAACTACAAGAGGCAGTTATTCAAGTCGATCCTGACGAGAACAGTAGCAATCTCATCGGAGAAC  
TCTCTCCTCAGGTAAACGATTTAGTCACGTCGATGCCACTACTTCAGCAATGCAATTCGAAGGGTTCGAA  
TCTAGATGATCTATCTGGAGTTTCCATGAGTAAAGTTTTCTCACAATTGGTTAAGTCTGAAGGAAGATAA  
ATTTGGTGAAAGATTGTATAACAATTGACTCTTTTTTTTTCTTAGCTCCTCTTTAATTCCACTTTTTTTGTTCA  
TTAATCATTTGAAGAATGTACTTTTTATTTTTTAAACTATAGTTTTACATGTACTACTTTTTGTTATGAATAT  
AAAAATTATTCCAGCA

>M6-PGSC0003DMG400010120 M6 RLK with malectin domain

TATGCGGTTAACTTGAGACTTCGCGCTCTTATGCAAATATGATATTCAAGTTCCTAATGTACCTACATTT  
TTTCACTCTTATTCTTCTAGAAATTCGATGAACATTAACATAGGTATTGGTCTGCTCCATCTCATTTGCAC  
ACTGTACAACCTGTATTTACATAATGAGCAATTGTGAATAGAGGATATATATTCCAGAAGGACTAAGTA  
TCACTTTGCTTGAATCTTCTACACTTCTGTACGTTCTATTGATGTTACTTTGGACTTAGAAGACCAAAAATA  
CTGGGCATGAGTAACTTGATGTATCTCATATTATTATGGCTTGTATTTGTTTTGTATTCTAGTTCAATC  
TCGTTATGTGTCAATTGTTAATGTAATACCATTTTGTGTGGGTTTCATCATAAATCAATTAACCTCATGTTG  
GTTGTCAATCCATTGGATCCCTCATTCTTTATCCAAGCTATTTTCTGTTATTCTTAGTGTAATGTCTTATTT  
CTTTATCAACCAAAAGGGCTCTTAATAGAAGTCAAGTATGTTAAACGAGTGATTCTGTTTATTGAAAGAA  
TTGGATTATAAAGGATCCTAATGTAGGAATAATGTAATTTTATTGTTTCACTAGGTAAAGTGTTTTTAAGA  
GATCAAGATGGAGGGGTGTAATGTTAATGTCTTGATGGAGTATGTTGAATTCAGATTTTTTCGAGTCA  
GGGCAAGTGAACTAACTAAACTACCTGCTCTCTTTGTATATAGGTAGTTCTTTGATTGAAGGAATGAA  
GAGCAGACATGAGGATACATCACCATGATGAAGAACTTCCTTCAGGTTCAATTCGTAGTTACTTAGTGATC

TTCCAAATGTGTCAATTCAGAGCTCAATCTTAATATTCTCCTATACTGTGTTAATTACAGCATCACAAGTT  
GTTGTATCCGAGTTTGTATGATAGTGGGTGAGGTTGTATCTA

>M6-PGSC0003DMG400010577 M6 RLK with malectin domain

TTTGATGGTAGGCACACTATTCCGCTTCAAATGTTTGTATCGCACTTGTAATTCTAACAATCAATTGA  
ACATGTTTCTCTCTCAGTTATTCACTTCTTATTGTGTATTCAAAAATCATCATATCTACTGCAACTAACA  
TTCATGAAAACGTTGCCATATCATGTGGTGCCTCTGCTAATCCCCTGCACCAGATGGACGACTATGGAT  
TGGAGATTCTACTTCACTTCTCATTCTACACTTAACTGGAAAATCTATTAATTCAAGAGTACCTCACCA  
AGCTGCCTTGTCCGATCCAGTTCCTTATAACTCTGCTCGAACGTCTCGCCATCAGTTTACCTATCAATTTT  
AATGAAACCGGGACACAAGTTCATACGCCTGCACTTCAAACCAGCTTCATACAAAGGTTTCATCAAGTCC  
AAACCCATTTTTACTGTCAAAACTGATCAGCATACCCTGCTCAGTGACTTCATGCCTACCCTTGCTGCAGG  
CATCAACTATTTCAAAAAGGAATTTTGCATCAATGTAAAAGAAAGTGAAACATTAAGCATAACATTTCATA  
CCATCTCGAAAATCAGGCTTTTCAGAAGACACTTATGCTTTTGTAAATGCAATCGAGATTGTTTCCATATC  
GTCTGGTCTGTATTTACACCAGATGGCGATCAGGGAGTCCCTGTTGTTGGACGAAATTACAGATTCTAC  
ATTGACAATAGCACAGCACTGGAGACAATTCAGCGAATAAATGTTGGCGGAAACTCTATTTTCATCCTTG  
GAAGATGCAACCATGTTTCGGGACTGGGAAGATGACACTAATTACCTGATTCAAGTTGGTGCCTTTTCG  
ATCAACAGAGCCGTTGATATCAGATATGCATCCTCAGCAACTCACATTGCACCAAAGAGGTTTACCAA  
CGGCCAGGTCAGTGGGTGTTCACTGCCATTTCGAATTTCTGTAATCTCACATGGAACATTCCACTTGATTT  
GGGATTCAGATACCTTGTTAGGCTTCACTTTTGTGAAATTGAACCTACAATGATAAATGAAGGCCAAAG  
GAATTTCACTATTGTCATAAACAATCAGAATGCTGAAGATGATGCTGAAGGGATCAAATGGAGTGGGG  
GGCATGGAATTTCTGTATACAGGGACTATGTTGCCATTATGGAGGGTGATAGAAGGGAAGGGAAGCGT  
AACCTTACTATAGTTTTGCAGCCAAACTTTGCTTCAATCGGTAACATGCTAATGCCATCTTAAATGGGCT  
AGAAGTCTTCAAGATAAGCAACCCTGACAACAATCTTGGTAGTGTGAGCCCAGTGCATCCTGTGACAAG  
TTCAACACCAGAAAAATCAGAGGAAACTGTGCTGTTCTATACAAAGAATCAAATTGCAACTGCACTGATA  
TTTATAGTCACTTTGATTAACGTTGCTGTTTATTACATTAGGCGTAATGCAGAAATAAAGTCTGGCAAGA  
CATACAATGGAATATCTTCAGGAGTGCATCAGTGTGTCGTAATTTTCACTGGATGAGATGGAAAGATCAA  
CGAACAATTTTATCCTCAGCTTGTCAATTGGTAGCGGTGGATATGGTACAGTATACAAAGGGGATATTG  
ATGGTGGAGAGACCACTGTAGCAGTTAAGCGATCGAAACCAGGATCTAGCCAGGGGGAGAAAGAGTTT  
TGGACGGAAATCAATATGTTATCTACACACCGCCATGAGAACCTTCTCTCCCTAATTGGTTACTGCAATG  
AAGGTCAAGAGATGTTATTAGTTTATGATTATATGCCTCGAGGATCACTTGCTGACAAACTGTACAAAAT

GGACAAAAATAGCTCATCTCTCTTGGGAACGGAGACTCAAGATTGCTATGGGTGCTGCACGTGGACT  
GGATTCCTTCATACATCTCAAATAGGGTGATACATCGTGATATCAAAGCTCAAACATTCTATTGGAT  
GAAAACCTGGGAAAGTAAGATCTCAGATTTTGGGTGTCCAAAATGGGGCCTGGAAATGAATCAGCTACT  
CATGTTAGTACACAAGTCAAAGGCACATTTGGGTACCTCGATCCTGAGTACTTCTGACTAATAGATTGA  
CATGGAAAACCTGATGTATATGCTTTTGGAGTAGTACTATTTGAATTGCTCTCAGGAAGACCTGCAGTCGA  
TATGAGCCTGACTGAGGAACAACATGGACTTGTAGCATGGGCCAAACAATGCATCAAGGAAGGAGAAA  
TTAATAAGCTTATTGATCAGAATCTGTTGGGGTCCATCTCATCAACTTGTCTAAAGGCGTTTATAGGAATT  
TCTGCTAAATGCTTCGATGGTCCGCAAGAACGGCCTGCGATGTCTGAAGTGGTGAAGGAGCCTGGAA  
TTAGCATTAGTATTTTACGAGAACGAAGGTGAAGGTATCATTTTATTGATGACACATCAACGTCATCTC  
AGTTACAGATTGAAGGAGAGAGGGCATCCATTAAAGAGGATTGTAATGGCGGTGATACAACAGAAAGG  
AGTGCCATCTCAAGGGAAAAGGTAAAATCTGAGGATAAAAGTCCCTACACTGCTTCACCAAGATGGTGG  
GATGTTTCGTAGCCATTTTACAGAAAAGCACCACCAAAGCCAGGGAAATTTTGTATCCAGATAGCCAAATAT  
CACAGCACCCAAATTTAAGGATATTTTCTTCTCTGAACTCAAGGCCGCCACCAGAAAATTTAGCAAGGA  
CACGGTGCTGGGAGAAGGTGGTTTTGGTAAAGTTTACAAGGGTTACCTTGCTGAGTCGCTTTCTTCCAA  
GAGTGGCCGGACAGTAATTGCTGTCAAGCAATTGAGTTCTGAAAGATTTCAAGAGTGGCAGGTGATTCC  
TCTGTGCTAAATATGTGAACTTCTAGTTTAAAGTTTTCTAATTGAAGCTATTTCTAGTTTATGCCTGGCACTA  
GCTTGCTTCATTTAATGATGCTGCAATTGCTCTCTTCTTATTGTCTGTCTGCGAGAAATATAGATTTACG  
TAGAAGCACTTGAAATTGATTTTACTTAGTAGTAACACATTCTAGGTAAATGTTGGTTATATATCTCTT  
GCAAATTTTCAATTTTCAATTTGTTAATTATGCAGTCTGAGGTGAGCATTCTTGAAGACTTTCTCATCTAACC  
TCATCAAACCTTGGGTACTGCCAGGAAGATAAAAACTACTGCTTGTCTATGAGTTTATGCCAAAGGG  
CAGCTTGAACAACCATCTTTTTGGAAGTAAGAGATTATCTATACGTTCCGTCAATAATATATAACATATTG  
TAGATCAAAGCAGCAAGGAATGTGCCTAGCTACTTCATGCTCCACCTAAACATATTTGTTATCTTTGTTG  
CTTAGGGCACTCTGTTGCTTTGTCACTTACATGGAATGTAAGGGTTCAAATTATGATTGGCGCAGCTCGA  
GGCTTGGCATTCTACATGCATCAGAAAAGCAAGTCATTTACAGAGACTTCAAAGCCTCAAATATATTAC  
TTGATGGCGTATGTTCTCTTACTTCTCCCTAGGAATATACCTTTATTAGCGCAAGTAATAAAGGTATCAC  
AAGCCCTTTTCTTACTGGGCCCTTTTTGGTTTACACACACTGTTTTGCCTTAAGTTTTGGACCTATTTATC  
ACAGAGAGACAACACCAGACGTATAACAGTGAAAACATTAGAGAAAGGTTGTTATTAATAACTGTTC  
CATGACATTCTTTATTTCTTTAATGTTTCAGTCTTACAATGCGAAGATAGCAGATTTTGGCATTGCAAAC  
AAGGTATTTTCGGCTAGTCAATCACATGTGACAACACAGATACTTGGAACGTACGGTTATGCTGCTCCTGA

GTATATTGCAACAGGTAAACTTGGAGTCTGTTGGGCTTCTGCACTTGGAAATTCTACTTCTCTTGAATCAC  
ATGCATCTTGTGCTTACAAGTTTAAACATATAGTCAAGTGTATTATTTGTTTTCTACAGGATTTTTGTACTT  
GAAGAGCGATGTCTATGCTTTTGGTGTCTTTTTAGTGGAATGCTAACAGGTCTACGAGTAATAGACTTA  
AACCGTCCAAGCAACCAGCATAATCTAATTGACTGGATTAAGCCTCATTTATCTGACAGAAGGAAGTTGA  
AGGACAGAATCGATTACGGCTGGGAGGAAAATATCCATCCAGAGCTGCAGTACAAATAGCACAACTG  
GCACTATCATGTCTTGGAAATGAACCTAAAAGCAGACCATCGATGAAGGAAATAGTGGAGAACTAGA  
ACAGATTGAAGTTACCAATGAAAGATCCAAGGACCATGCTTCTCCTTCTAATCCAAGGAACCGGGCCTAT  
CCACTCCTTAGAAGAGCAGAGTGAATATGATACTACTTTTTACAATATGAAGAAGCTACTTGTTAAAATT  
TTCAACTGTGAGTACTGTCACTTTAGGCGAGATCGTGCCAGTTGGACGATCCGCCCTTTTGGTTAGGCGA  
TCAACAGTGTGGGTGGAGTTTACAGTTCTTCCATGTTTTGGCCTTTCTTCAAGTATTCATTCTTGCCTT  
GTCCCTTAGCCTACATAGCTGCAAATCATGAAAATATCATTAGAATAGAACATAATTAGGCATTGATGAC  
ACTAATTGTTGAACTAAGTAGGTCACAAATATGTGTAAATCTACCACTCATCAATGACATCCTCCATAGTT  
GAAACTCATTCTTTGTCTAGAAAATCCAAATCTTGGCAGAATTGTTTATCGGAGAATATTTGTGTCCCA  
TTTCTTCTATATTACTATAGCTCCTGTGGATCCTGGAAAGGTTTCATGACTGCTATAAATCAGTAATGAT  
GCCTTCTATGTAGTTCTATTAGTCTCTCAAAGAATTCTGAGAGTTAACAGACATAAAATTCTAGAATATG  
ATTTTTTTTTGCAATCATTGATCAATGGATCGGGTCTTATCTTTACTGCTCCTTGTTCTAACCTGAAGAGG  
GATCACAGATTTGCCTTTTCTGATCCTACTCTTCAAGTTATGTATGTGTCTAGGGCACAAAGTCCCCATCT  
TTGTTGATTTGATGAATATTCTCCTCCACACTATCATCCTTCTCCACATCCTTTCTCATTGTATATGTTTCT  
CTGTTGCTACTACATTGTTTTTGTGGTATCTCCTCTTGAAGTTTTGTTCTTCCGTGTCCTTCGGATATAGCT  
GTGGGTGTTCAACATAACATTCTCCTAGTTATGTCTCTAAATCATAACGTTTCACAATATTTGGGACAT  
TGTCAACTTGATTCAGATACACTTCTCAACTATCTCTCATTGTTGTTTCATCCTATGTTGATGCGCATT  
GGAAACTCGCCACCAGATCTACTTCAACTTCCAATCTGCATAGCTTGGTCTGTTCTGATTCTTGATGGT  
CATATTATCCTGTATGTAATGAATTATAAATCATTGTTGCTAGAGAAAACATTGTTTCTTCCAAAAAAT  
ATTTGGTGGAAGTGATGGAAAAGAAAT

>M6-PGSC0003DMG400010746 M6 RLK with malectin domain

CATGACTCAAATCTTTCCCAAAGCAAAGTGAAAAAGTTGAAGATGAAAGATGAAGTTGAATTCCATCT  
ACCTTTGGAAAAAGCAAATTTCAAATATTCAAAGAAAAACAACATAGGAATGTGAGTGAACATTAC  
ATAAAAACACCTCAATGACAAAAAGTTAAAGGTAAACCAACAAAAGATCAATTAAGATCCACTTTTAG  
AGAGTCTTGAACCTCACTAAATACTAAAATATTATACTTCAAGTTTATCAAACAAAACACAACCTTATCTTC

TTCTTCTTCTTTCATCTTCCATGGGTTTTGTTTTACAATCCTTTGTTGTA CTCTTTGCTTCACTCCAGCAATT  
GTGTGTCAAGTAACAGGTATGTGTTCTTTACATCTTTACCCTTACTATACCACATAATCTTGAAATAAAA  
AATCAATCTTGGCTTCAAATAACCTGAATTTCAATAGAATAAAAAAAAAAATTGCCACAGAGAGACATTTTC  
TACTTGATTTTCATTAGGTCAAGATAGAGGGTTTTTTTTATTTATTTTATATATATATATATATAGTGA ACTTCT  
AGTGTTCCTTCTTTTGGTATAATATTAGTGGGAGCTAGATGAGCTTAAATGACTAGACAGAGTTGCTCGG  
ATGAAAAGCACCTCATAATCCTTAGTGGTTGTTTGGTAGCTGATTTGAAAATGAGTTATGCAGGTGTTA  
AATCTTGCATAAGTACTACCATGTATGTATAAAATTATCATGATGTATGATTTGTAATTTAGAAATCCGC  
ATAACTAATACATGCATAAGCTACGAGGGAATTTATGTATAATTTAAGAATTATAGAAGGTAGAATAA  
GTCAGACAGGCATAACTAAATCGTGCATAAGACAATACATACATAGGTTTCCTCATAACTAATTTATGTA  
TTATTAATACCTGCATAACTCTAATCAGCTACCAATCGACCACTAAGGTTGTGGGTTTCGAGTCACCAAAG  
GGAGCAAAAAGGGTGGGAGCTCCTAGGGAGGGGTAAAAAAGAGAAGAGATGAGCTTAAACGGAAT  
GTTATGGTCAGTGAGGATTCATGTAGCTGATAGCCGATCCA ACTCGCTTGGGATTGAGGCATAGTTACA  
AGTAACTTGATTTTTATTAGGACAAGATAAATGAGTGGCAATCTTGTTTCATGAACTAAAGGTTTAAATAT  
GCAGAGTTTGTAAGTATAGACTGTGGAAGTGCAAGCAATTATACGGACACGAGTACAGGATTAGCATG  
GACTTCAGATGCTGGAATGATGGGGCAAGGAAAACCA GTTGTGGTAGTGAATGCAAATGTAAACTCAC  
AACAAATCAAAGGCGCAGAGACTTTCCAGCAGACAGCAACAAACTGTTATACTTTAAATACCAAGG  
AGAGAAGGCGATATCTTGTCCGAGCAACATTTCTATATGGAAGTCCTGCAGCAGAGGGAACATAACCCCA  
AATTTGAGCTCTACTTGGATGCAACTAAATGGGGAACTATAACCATTT CAGAATCTTCAAGGATATATGT  
GAACGAAATGATCATAAGAGCACCTTCAA ACTCTATCGATGTGTGCTTGTGTTGTGCAACAACAGAGTCC  
CCCTTCATATCTACTCTTGAGCTGAGACCTCTAAACTTGTCAATGTATGCCACAGACTATGAAGATAACTT  
TTATTTAAAAGTGGCAGCAAGAGTAGATTTTGGAGCTCAAAGCAAGGAACCTATAAGGTATAGTAAATT  
TTGAGAATATGCTTTAGTCATGCTTGTACGTTCTCTTTGGATCCTGCGTTTTTTAAGAGTCTTTTAGTCCTG  
TTAGTAATTTATATGCCAATAGAAAATATAGTGA ACTTATAGCATCTTTTTTTTTTTAATTGTAATATTGGT  
CTAATATGCACTTAAATGGAGCGACAATGATCAGTGAGGATTCATATAGCGTAACTTGCTTGGGAATGA  
GGCATAGTTGTTGCTGTTTGTGAGGTGATACAAAAGCAGATAAACTATATGTTTTGACTTTTTTCAGCTCTC  
ACAAGATCATAACATGAATAGATCTGTCTCACAGGTATCCTGATGATCCCTATGACCGTATATGGGATTC  
GGATCTTAAAAAAGGCCAAATTTTCTAGTAGATGTGGCGGCAGGCACAGAAAGAATCAACACAACAA  
AGTACATAGATACAAACTAGAGAATACCCGCCGTTAAAGTAATGCAGACTGCAGTAGTTGGGACTA  
AAGGAAAGCTCAGCTATAGGCTGAATCTTGATGACTTTCCAGCGAATGCACGAGCTTTTGCATACTTTGC

TGAGATTGAAGATTTGGGGATGAATGAGACCAGGAAGTTTAAAATGGAGCACCCCTTACGTTCCGGACTA  
CAGCAATGCTGTGGTGAATATAGCAGAGAATGCAAATGGAAGTTATACTTTGTATGAACCTAGCTACAT  
GAACATAACATTGGATTTTATACTGTCATTCTCCTTTGTGAAGACTCCTGACTCAACTCGAGGTCCACTAC  
TAAGTGCAATGGAAATATGTAGATACGTGCAAATTGCTACAAAGACCGATGAACAAGATGGTACAATGA  
CCATTCCTGTTTAGTCTAGTTATTTCTCTCTATCCATATATGGTAATTGTGCTACTTCTACGCATATTTTA  
CCAAAATAGCTAATTTATTTAAAGCTTCTACTTGGAAGTGAGTACTCTCAACGCCTTCCGCTCTATGTCA  
TTGGGAAGTGATTGGTCAGATGAAGACGGTGATCCTTGTGTACCTACACAATGGGAATGGGTGACTTGC  
AGCACAAGTACTCCACCAAGAATCACAAAATGTGAGTTATATTGCTACTATATGATATATGGATATAAT  
GCTAGTCACAGGAAGAAAACAAAAGGACATTATTTGCAACTACTACTACCCACTGTCCTGCTATAACCCG  
ACAGTCAGTTACAGATAAGAGATGATAAACTTTAACACAGCATTAGACAGAAATGGAAACTCAGGTCA  
GTGCTTAAAGTATAGTCTTTCCAGTCAATTTGATATTTTACTTTAATTTTCATCAGAACACTGTCAGGAAA  
GAATGTTACGGGTGAAATTCCTCGCGAGCTACAACATATGGAAGGACTGACAGAGTTGTAAGTTTGCTT  
ATAAAACAAGTCAAATTTAATCTTACTATTTTCAAGTTCCTCATATTTTCTACTCTTTAGGTGGTTGGATGGA  
AACTCCCTGACCGGACCAATCCCTGATATGAGCAATCTTGTTAATTTGAGAATTATGTAAGATCTTTTCTA  
GTGGATCACTATTACTACCACTTCAACAAGTAAATCTTTCTCTTTTCTGTTTTTCTTTTTAACTAGATTGTT  
GTATTTTGTCAACATGCAGACATCTTGAGAACAACAAGTTGACTGGTCCAATACCTTCATACCTTGGAGG  
TTTACCAAGCTTATTAGAAGTGTATGTTGTGATCTGGATAACAAAATCTTAACTTTCTTTAGCGTATAATG  
CTTCATAATTTGGCTACTCCAAATTTTGGAGTATCCAACATGGATAGTTGGCAGTCTTCTTTATATTTTTACT  
TGTCATAAAACACCTTGTATCAATTTTGGAAATTTTGTTCCTTTGTGGCAGAGATGTACAGAATAACAGCC  
TAACCGGAGAAATACCGTCATCTTTATTAACAGGAAAAGTAACTTTCAAGTAAGTATAACTTTAATTCTG  
TACTGGATTGTTGTACCCATAATACCATGAGAATATGTTAGCAACTAGATCAAAGTAGCTATTTTACTATA  
GACTGATTATATTCCTTAGTTTGGATTATCTATAGCATAAAACAAGTTTCATTTTTTATGTCACATTATGCT  
AGGAAGAGAGCAAATGAAATTCATGAATTTTCATAAATTTCTTGTAAAGTGAGAAGTAAAGTAAACATG  
TACATTTATCTTTGAACATAGTAAAAGAAAGAGAAATTTTCTTGCAACTTTCGGAGTACCACATGGATGT  
GTGTGCACTGATGGAAGATCTGTTACAATCAGGAAATGAACGTCCTTAAAATGTGTTCCATGTCTCAC  
AGGCATGAAGGAAATCCTGATCTAAGACCCGAGTCAAAGCATAGTACACGTTACAAAGTATACTAGGA  
GCTTCAATTGGAGGACTTGTGATTATATTGGTTCTATTTGCTGCCAGTATATTCTTTTTATGCCACTTCAG  
AACAAAAGTATCTCATCAAAAAGGTGATACAAATCCTTAAGTGTCTGATCTTAACTTTAATTCTATTGCT  
CCGACACCTTTTCATATAAATCATTTTCATCTGTACCTCCCAGGTGAATCTATGCGCACAAACACTAAACCG

TCAACAACCTGTTCAATGGCAAGAGGTGGATCCTTAATGGATGAAGGTGTGGCATACTATATCCCACAA  
TCCGAGATAGAAGAAGCAACTGAAAATTTTTCAAAGAAAATTGGAAAGGGAAGTTTTGGACCTGTTTAC  
TATGGAAGACTTAGGGATGGGAAAGAAGTTGCTGTCAAACTATGGCAGATTCATCAAGCCATGGAAC  
CAAACAGTTCGCTACAGAGGTATATTAAGGTTGCTATACTTTTGGTATCATCTGAATAAAACATATTAATT  
TTCTATTTGGAGTAGCTTATTTAAGCTGCTAATTGGCTTTAAGCCCAAATAATAGCAGCTGGCACAGCTA  
TGGTAATAAGGACTATGAAATTGTCTAAGCTAACACATTTGACACGGCGTAAACTGATCATAAGTCAG  
ACTTCATACATTATAAGACATGACTAAAGAAATTGTTCTGTTGCTTATTTTCATTCCTGTACAAATTAGAA  
AATTCACAACCTTGATATGATATTACTTTTGGTTGAAAATTTATACCGTTTGTGAAATAACATACTTGCAGG  
TGGCTCTCTGTCAAGGATCCATCACAGAACTTGGTTCCATTGATCGGATACTATGAGGATGACCATCA  
ACGTATGCTTGTCTATGAATACATGCATAATGGAACTTGAGAGATCATATAACTGGTCTGCCCTTTAT  
GTGTAATAAATTGCTTTACATTTTTCTGCATTATTTCTTCTTGAACATCACACCACATATTTGTG  
AACAGAATCCACTGATAAAAAGCATTGGACTGGCTAGCACGTCTTAATATTGCAGAAGATGCAGCCAA  
AGGTTACCAGAAATTTTTATTGTCAATAACTTAGAAGTATGTATTCTCCTAGTTAGTCCGGAATCACAA  
ATAATATTTTCAGCCTCCTTGTAGGCCTTGAGTACTTACATACTGGATGCAACCCCTCTATCATTATCGA  
GATGTGAAAACCTAGCAACATTCTCTTAGATATAAATATGCGAGCAAAAGTATCTGATTTTGGACTATCAA  
GGCAAGCTGAAGAAGATTTAACACATGTCTCAAGCGTGGCACGAGGAACTGTCCGGCTACCTTGATCCTG  
AGTAGGCCATAATCTATCATGAGACTGAATATTTTGTAGTGATTTTATTCTTTGTCTCATGTTTCTGCA  
TTTCCAACAGGTAATGCAATCAGCAATTGACAGAGAAAAGTGATGTATATAGCTTTGGGGTTGTCCT  
TTTGGAAATTGATCTCTGGAAGAAAGCCTTTTTCTTCTGAGGAATATGGTGCTGATTGGAGCATTGTTTAC  
TGGGTAAAGTTTATCATACTTTCTATATATTTTCAAGGATGCTATGCCATCCACTGTGATAATAACATATAG  
TTGAGCTTCAGCAGGGAAACATGGCCAGTGAGGATTCATATAGCGAACCCCACTTGTTTGAATTGAG  
GAATAGTTGTTGTAATATCACCCACCGGCATCACGTTTTTATAATGCATATAAAAAAATTCAGATATCTC  
TTCTACAAAAATCACAATAACTATCAAAGCCAAAGCCAGCTCAGTAGAAAAGTGCAGCAAAACACAAGAA  
ATCAATAAGAAGCTGATCAGGGGAATATAAATTTTCAAGGTGGATAGTTATTGTAGTGATATATAAAGG  
ATTCAGGAAATGAACATAAGAAAAGTTAATGATTTGAAATGCTGGTATAGTGGTGAATCACCACACATA  
AAGTTCTGTCTGTCTGAGAAAAAATCGAAAGACGAAAAACATGGTTCTTTTCTCTGGATAGAAGCAGAA  
GATACTCTATCAAGTTCTGGATGTGCTGTAGTATGCATGCAAATAAAATGTTGTGGAGTATTATGAAGTT  
GCTAATTAGAAAACTGAAATAAATTGAATACAATCTGCTGAAATAAATTCATTGTTAAGTTGTTAGATA  
GAACACACTTTATTAAGTTAATTATATTATGCTTCAACAGATCTGACTAACAAATATCTTGTAGGCAAGATC



ATTGATTCGCAAAGGAGATGTGATAAGTATCATGGATCCTGCACTAGTAGGACATGTCAAAGTTGAGTC  
AGTATGGAGAATAGCAGAAGTTGCAATACAATGTGTGGAAAGGCATGGCACATCCAGGCCAAGAATGC  
ATGAAATTCTATCAGCCATACAGGATGCAATCAAGATCGAAAAGGGGATTGATAAACTGTCTTCATCAG  
GAAGTTCAAAGGCTCAATCTTCCAGAAAGACACTCTTAACAAGCTTCCTCGACGTAGAAAGCCCTGACAT  
ATCCAATAGCTCACTTACCCCTTCTGCTAGGTGAACAAGTAACTAACAAGAACAATTGCCAATCACTAGT  
GTTTAACTTCTTGGTTTATGTCCTTGCTTCTTAATTTTTGGTTTTGGATGTACATTAGTACATAATGTCT  
ATTATTGTAAGTACATTAACACAGACATTAATAGGATGTTACACACTAACAAGTGAATCATATTTGGG  
GGCAATAGTCAGTACATTATGTCTCAACTCAGAACTACAGTATCTAACCATATACCTCTAAGTTGCAT  
GAAAGTAGCATCATTGAGCAATGTTTCATCCTCTATCTCTACTTCTTGTTGTAATTTGGACTAGTTTGGAG  
TTAAAATTTA

>M6-PGSC0003DMG400012816 M6 RLK with malectin domain

GCAAAAGGGAAATGTATTTGAGAAATTATAAGCAAATTGAAGAAAATTCAGAGCAGAAATTGGACTTA  
AAAATGCTCAAATTTCACTTTTTGTTGTTCTTCTTTGCTTTCAAGATTGCTTTTTGTCTACCTGGTTAGCTCC  
TTGTTATGGTTCTCTTTTTCTTTTTGTATAATGTGAATTTGATTAAGGGTTTTAAAGGGTGTCTATATTATG  
TAGTTATAATGTGTTTGAAGTAACTTTTTTTTTTTGATAACTGTGATGTTGGGTCAGTTTGTGTGCAGCTT  
GACTAATGGATGATGTAAAATTTGTGTTTGAATTCAATTTGTTTTGGTTGATTGGTTAATGTTAACTCAG  
AGCAGCATTGGACTCAAAATGCTCAAATCCACTTTTTGCTCTTCTTCTTTGCTTTCAGGATTGATTTTTG  
TCTACCTGGTTAGGTTCTTTTATGTTATTTTTCTTTTGTATGATGTGAATTTGATGAAGGACTTTAAAG  
GGTGTCTAAATTATGTAGTTTTAACGTGTTTTGAGTAACTTCTTCTTTGATATTCGTGATGTCTGGGCCA  
GTTTGC GCGCAACTCGACTAATGGATGATGCAAAATTTGTGTTTGAATTCGATTTGTTTGGTTTATTGTCT  
AATGTTAACTAATTGCAAGTACTTAGCTGTTTGTGGTTGGTTCTATGATTATGTTGTTGGATTTAGTCATG  
GACCTTATGGTGCCTAAATTTTCAATATTGGAATTGAAGCAAATTGAAGAAAACATAGCAGCATTCTC  
AAAAAAAAATCCAACTTTTGTTGTTCTTCTTTAACTCTCCCCGTCTCAGCTCCTTTTATGTTTTTATGCAAT  
GTGAATTTAGTTGTAATTATGTAGCTGTAATTGAGTCTGCATTAATGTTTTAGTTTTGATTTCACTAATC  
TTAACTTGTGTTGGAAGTGCAACAAGCATGTGAGATGTTGCGATTAGACTCTTTATATGGTCTTGGAAAA  
TAGTTAGCTCATGTGCTAGATTTTTGCAAGTACTTGGCTGGTTGTGGTTAATTCTATGAGTATGTTATTGG  
ATGTAAGATAGGATTCCTAATTATTCGTAACGTAATTGCACGTGCTCGTCAGTATAACCCTGTATATTGC  
AAAATTTCTAATCGCTTCACTCCATGATATGATGAAGTATCTTGAGTCTTGTTGTTAAAGAGGAAAAAGAA  
ATAAGTGAGGTGTCTTCACAACTTAATGAGCAGCTAGAAGTCTGGTTTTTTCATAAGAGATAAATTTTT

TTGGTGCAAACATACTAGGTGATTCTTCTCATATGTCCCCTGGAATTAGTCGAGGTGCACGAAAACCTCGC  
CTGGACACCATGGTCATCAATAAATAAATAAATTGTTACAACATTAGTGTAACTTTATAAGACGTTATTG  
CTTCCCTATATGTACTTTTTCTGCTGTTCTTTCCATTGCTAGCACTGTTACATGAAAAGAAAAAGGCTGCTC  
CTTTATTATTGATTTGCCTCTTTCAAGTTGCTCTTTTGTTACTAATCTAATTATCTATCCTGTTTATTCAGT  
CAGCACCATATGTAACGCGAATAAGCTGTGGAGCTCAAATGATGTTTCGTAGTTCCCAACAAATACCCT  
CTGGCATAAAGATTTTGGATATACAGGAGGCATACGTACGAAAGCAAACCGCCAAGTTACATAACACC  
TCCACTCGACACATTACGGTATTTCCCTCTATCAGAGGGTCTGATAATTGTTACAATATCGATAAAGTGC  
CACATGGCCACTATTCAGTGAGGATCTACTTTGGATTGGTTAAAGAACCAAGTTTTGATAACGAACCTCT  
ATTTGATGTTTCTGTTGAAGGGACCTTGGTTTATTCTTTGCCGTCTGGTTGGAGTAATCACGATGATGAA  
CAAGCATTGTTGAAACTCTTGATTTCTTGAGAATGGTACTACCTCACTTTGCTTCCACAGCACTGGTCA  
TGGAGATCCTGCTATACTCGCAATCGAGATTCAAGAAGTAGATGAGAAAGCATACTATTCTGGTCCTGG  
ATTTGGTCGAGGGACAATCTTTAGAAGTAGCAAAGATTGAGCTGTGGAGATCAGAATCCAAAGTTTGA  
CGTTGACTACGATGGGGACCGTTGGGGTGGGGATCGGTTCTGGAGCTCAATTATGACCTTTGGTCAGAA  
TTCTGATAAGCCTATATCTACTAAAAGCACCATAAAGTCAGCGTCTGTAGCTCCAACTTCTATCCACAAG  
CTCTTTACCAAAGTCTCTTGTAGTACCGACAACGATCCGGATTTAACGCACACAATAGAAGTCGATCC  
CAACAAAAGTACTCTGTCTGGTTACACTTTGCCGAAATTGATCCTTCAGTTACAGATGTGGGACAAAGG  
GTTATTGACATTTGATTAATGGTAACATTGTGTATCGAGATATTGACATTGTGAGAATAGCGGGGGGT  
GTTAACAGTGCTCTTGTACTGAACACAACCATTCCAGTCAGTGGCAGGATTTTGACAATCACATTACATC  
CAACAACGGGGACTCATGCCATCATTAGTGCCATTGAAATTTTTGAGGTTATACCAGTTGAATCTAAAAC  
ATTACCAGAGGAAGGTAAGTTAAATGTTTCACTTGTACTTCTTGGATGCTACATGTTTTTTCATCTCATA  
ACTTTACACACTGGAAAGGGGCCAAATGTAGTATGTTATTTTTCTTTGTTCCCTTGGTCAAGCTTGTGCC  
TTTCTAATTAAGATAATCTTTATCTTCTTTTCTTTTTCAGTAAAGGCTTTACAGTCACTGAACTTGCCTT  
GGACTTCCCCTTCGTTTTGGGTGGAATGGTGATCCATGTTTTCCGCAACATCCGTGGAGTGGAGTAGATT  
GTCAGTTTGACAACTCCAGCAATAAATGGGTCATCGATGGGCTGTACGTTCTTGACCTTGACCTTAGATA  
GAAAAGTTCCTCCATTCCACACACGTGCACAAGCACACACCTGTAACACTCATTGACATATATTCCTTCT  
ATTGATGTTCTGCACCCCAATTTAAAAGTTTTGCTGGACTATACTTGGCTTTCTTTCTATGTTATGTGATT  
TATTATTTTATCTTAATGTGCGTCCTCTTTATCTGTTTTTCTGTAAGCACAGTGACCTGGACAACCAAGGT  
TTACGAGGTTTCTTACCAGATGATGTTTCTCAATTGCGTCATCTCAGAGCATGTAAGTTAAATGCTGCT  
TTTTTTGAATATACTATTTGGATGAAAGATGTGTATCTTCCAACGGTCTTCTACTGCTTAAAATGGAGTTA

ATGATCAATATGAGTTTTAGCCAATATATTGACACTTTTTTCAAATTATTTGAACATAATTTGTCTGAAG  
GAATTCATACTAAACGGTTAAATAACTTCCAGTTTAAGAGGTTTTCAATATTTGAGCATCTTTGGAATG  
TGTTTTCGTTCATGTATATTGCAATGCTGGCGTCCACTTCTCAAACATGATCTTCTCTGACTTATGCTTTGC  
TTGTGTGCATTTTACAGAAATTTGAGTGGAACAACATTCACGGGCCTATTCCCTCAGCACTTGGAACAA  
TAACTAGTCTGGAGAAATTGTGAGTACATTTGTGGAGAGTTGTGCTTTTCTGTACTTGATATTAGATTTCT  
TAGCTGCCAGAGTAATAGTATATGAAAATATGGAAACAGAATAGTTTTGTTAACTACTTTGTGAGTATGT  
TAGGCATTCAATATATAATTATTGTTCAATTATCATCTATATGCGCCGCGAGATTAGTGAATGTGCATAATG  
TTCGTTGGTTGTTTATGTGATTAGATCCTCACTGTGTGATTACCTAACAAAAGTTGCTCAACAGGGATCTT  
TCATACAATTCCTTCAACAGGTCAATTCCTGAAAGCCTTGGGGAATTGACGTCGTTACTGACACTGTAAG  
ATACTTCAACAAGCTCAGTTGAGGACATTTGATGGATCAATAAAGAGCTCTAATTTACTACTTCATTTATT  
ACAGGAATCTCAACGGCAATTTGCTCTCCGAAAAATTCTGCAGCGTTAGGCGGAAGGCTCTTGCACA  
GAGCTAGCTTCAAGTATGTTCTCCTAATTGCACGTTCTTAGCATAAGGCTCCGCTTAGTGAAGCACCCCTT  
CAGAAATTGCATCGTAACTATAGATACATAACAATGCACCAAAATTGCTCTCTCTGTTTCAATTTGTTTGTCT  
TGGTTTTGACTTGACACATAGTTTAAAGAAAGTAAAAAACTTTTTGAATCTTATAGTCTTAACTAAAGAT  
ACGTAGAGAATGTACCAAAATGTCCTTTAATCTTGTGGTCTTTAACATGCCATGTGGAAAGTTGGAGTTA  
AAGAGTTTGACGAAATAGGAAAGAGTTATTCATTTTCAAATGGACTAAAAGGAAAGTAAAACAAATG  
CATTGAAACGGATAGAACATCACTTTCACGTAGTTTTTCTCGTGTCCAACTTTTTATCGTCAACAATACAT  
ACTACTTATGGTTCGATATTCAATTTCTAGATGCGTCGATGAAGTCTCCTTGTGCATCATTTTGTGTGGATG  
CTAACTGTGGAAAGAACAAGAAGTTTATAATCATAGCATTTGTTAAAACACACATACAATTATAAGTTA  
AGGTTAAACAAGTGTACTGTAAACTCCATTGATTTAGCATCCACTATTGGTGGTTAGGCCTAACACCAA  
CTTCCGCAATCCACTAGCTACTTCAATGGTTGGATGTTAACTATTACCACATAATCAACAAATGAAATATA  
CTAGGGTTCTTTCTGATAGCTAGGTAAACAGGGGTTAGCTAGGGTTCTTTCTGGGCCACATCACTATTCA  
TTCAGGCTATAACCAATTGACGTAAGTCCAAATTCTAACAGTAACATTTAGCATATTTCTCAAAGAAAT  
GCTGCGGTAAATAGGTGTCAATGTCATTTGTGTTAAGGCAGAGATGCTAATTAACCTTACCATTCATGT  
GTTGAAACTCATATGACAATTCATCGGTGTATTAECTCGAGGATCAGATAAAAAACCTGTGACTTTTTTT  
GTTCAATTAGTACTTGTGCTAAATACTTACTTTGGATGCTTTTCAGTTTTACTGATAATGCAGGCCTTTGTGG  
TATTCCTGGATTACCAACATGTGGACCACATCTTACTGTTGGTGCCAAAATCGGCATTGGCTTAGGGGCG  
TGTGTCGCTGTTGTAGTTATCGCTACATGCATAACATGTTGGTGGAAAAGGCGGCAAATATCCTCCGC  
GCTAAAAGAATGGCTGGTAAGAGTTTTTCAACATAACATGCTCTATATCCATAGTCAAATGTATTTCCCAT

CTCTTTCATGTGTACTGTTGTCAACATGGTGTTTTTGAGAAATGAATTTTCGAGTGAAGATGTATCTCTGCA  
CGATGAAATTAACGAGTTTCATGCTTTCATAGATGAATCACTGTTTTTTTTTCTCTTCATTTTTTATAC  
AGTGAGAGACGCTCCTTATGCCAAGAAAAGAACACATTTAAACCACATCCAAATGACAAGACACCATCA  
CAATGGTCATCATCACGAACATACTCGGACAGCTGTTGAGAATGGACCTCCTTTGCTTGTCTGAGTTCGA  
ACAATTTTTGAGTCAACTCACACTAGAACTTCTTTCACGTCAAGAGGATTCAACAATTTATACATATACC  
AACAAAAACATTGTTTCGTATCCTACTTACACAGTATAATTTTTTGACAAAGGAAGGATCATATGAATCTCA  
TCCGCAGACCTTGTAACCTCATCGCAAGCTTAGTGAGAAGATTTCCAGATACAATGCTGCTGTTTTGTGG  
CTAGAAAATGTGTATAGTGGTTATACAGATCAGGAATCAATTTTAAATGCCATAGATGTAATTCAGTGCA  
AGAGACCTATGTTGTTCCGACTCTTCAAAAATGTCGACGGGTGTGTGTCGGAACCTCTAAAAATAGTGT  
ATTTTTGAAGGATCCGACTCGGGTGTGGCAACATTTTTGGAGAGTCCGAGCAACTTAGCAAGAGACAGT  
GTGTTGTATATTTAACTATATAAATGTATTCTTGTCAATTAGTTTTGGAGCTTTTGGTTAAAGACACTCGT  
GTAAACTGTGAAATGGTGAATTACAATAGAACCACAGAATGTGATCGCATTATACGGTCTCAATTGAAC  
>M6-PGSC0003DMG400014875 M6 RLK with malectin domain

TTACTTCAACTGCATTCTGCCAAAAACATTAATGGTATTCTCCATCTACCATGACTATTCTCCTCTCATTCT  
CACTTTTTCTCTTCTCTTCTCCCATTTTTCCATTTTCGTCATCACCTAATTACACCTTCCCTGAAAAACACTTC  
ATCAATTGTGGTTCTGATTCTCCCATCGTACTCAACCGCGGCGGCGGCAGCACCCTTTTGCCGGCGACT  
TGAAATTCGACCCCAACCACAGTGATTCCGTTAAAGACCACACCACTACTACAGGTTTAGCTGGAATCTA  
TCAAACCGCCAGAAAGTTCACTAAATCTGGGTCATACAATCTTCGAATTGATGAAAATGGGGTTTACATG  
GTACGGCTTCATTTCTTTCCTTTCGTTTCTTATTTCGATGCGAAATTCAGTGTTCGCTTCTGGGTTTTTG  
CTATTGTCCAATTTTAGCATACCTAGAACTTAATAACTTCCCCTGTTATCAAAGAGTTTCTGGTTCCTGTA  
CTAAAAGGTCGTAATTTGGAAATCATTTTCATACCTGATTCTTCTTTTGCATTTGTTAATGCAATAGAAGC  
ATTTGTTACTCCTCAAAGTTTCATTCCTAACTCTAATGACACAACCCATGTCCTAGCAGCAAAATGGATT  
TATCCTCGAGTGTGTTTGAATGTTATTCATAGGATTAATGTTGGGGTTCTAATATTACCGACGATATGGA  
TACCATGAGGAGAAAATGGGTAGCTGATGATGATTACTTACTTATCAAAGATTAGCTATGAACCTTCCA  
ATGTATAGTAAAAGGCCTAACTATGGTCCAGTAGAAGGGGCTACTCAGTATGATGCTCCTGATTTGGTTT  
ATAAACTGCCAAAGAAATGAATAGTAGTCATGTTGAGACTCAAATGACAACCTCTTTAACATAACTTG  
GCGTTTTGAGGTGAAAAGGAATGCTACATTTTTGTACGTCTACACTTTTGTGACATTGTTAGTGATCAG  
CGGAATGGTACAGTTTTCAATGCCTATATATATGGTATGTTTGGTAAGCCAATTAGTCCATATGATAGAT  
TTGAACAATTTGCAGTTCCTTTTTATGTTGATTTTGTGGTGGATTGAGATGGTTCTGGTTTTATGAATATCT

CAGTTGGTCCTCGGAATGATTCAAAGTCTATAAATGCTTTTTGAATGGGGTGGAAATAATGGAGTTGAT  
TAATGATCGGGTTGAGTGTAGGGGAGAAAAGAATAACAATGTTTGGATAATTGTTGGTTCTGTTGTTGG  
TGGTGTGGTTCTCATTCTGTTTCTATTGTGGTGATCTTGTGTTGTTTGAACCAAGAAAAGCACAAACG  
GTTGAGAACTCGAGTTGGTGGCCAAGGATGAGTGTTAATGCTGGAAGTACAGAGGATAGGACTCCTGT  
AAGAACTCCAATTGGTAGCACTACTCCTGATATGAACCTTGGGTAAAGATATCTTTCGCAGAGATTTTG  
CATGCTACTAATAAGTTTGGATCCCAAATTTATGATTGGTGAGGGTGGTTTTGGGAAAGTTTACAAAGGA  
ACTTTACACAGTGGTGTAAAGTGGCTGTGAAAAGAAGCGAAGCTGGACATGGGCAGGGTCTTATGGA  
ATTTCAAACCTCAGATAATGCTCTTGTCCAAAATCCGCCATCAGCATCTTGTTTCATTGATTGGTTATTGTG  
ATGAACGAGATGAGATGATACTTGTATGAATTCATGGCGAAGGGAACCTTGAGAGAGCATTGTACA  
GTTCGAATGAAGATCTTGGTAAATCATCTTCACGGTCAAATTATCGTGGGATCAAAGGCTTCAAATTTG  
TATAGGTGCAGCTAATGGTCTACAGTACCTTCATGCCGGTTTACCTGAGCCAACCTTACACAGGGATATT  
AAGTCAACAACATACTTCTTGATGAAGATTATGTTGCTAAAGTTGCTGATTTTCGGTCTCTCCAAATCAG  
GTCAACCTGAAGAAACACACATTGTTACTGATGTTAAAGGTAGCTTCGGTTATCTTGATCCCGAGTACCT  
GAAATCAATGCAACTAACTCAAAGTCTGATGTCTATTCTTTGGAGTTGTACTTTTTGAAGTACTTTGTG  
CTAGACCAGCTGTTGATAATATGCTTCCAAGAAATCAAATGAACTTAGCTGAATGGGGACTTTCTTGGCT  
AAAAGAAAACCGATCGAAAAGATAATTGATCCATTTCTGTAGGTAAAATTAACCCAACTCTCTGAGG  
AAATTCGGAGAAATAGCAGAGAAGTGTCTGCAAGAGAATGGCACTGATAGGCCTAAGATGATGGATGT  
GTTGTGGGACTTGGATTACGCTCGACAGCTTCAACACCCTACAATGCCCAACAATCTCATGAGGATACC  
AACTCCGATGTTTCGTGGCAAGTGGCATTGCCTGGTATCAATCGCTTACCTTCTATAAATGTAAGCACAA  
GCTTTGTCAGTGTCACTGATAGCGAGGCTTTTTCAGAATTGAGGATCGATGAAACCAGATGATTTGTGG  
CCTCGTTGTTGTTAGCATTCTGATGATATGTAATTTCTATTCTACTTCATTCTGTCTAATGTAATT  
GTGTATCAAACAGTGTGTAATAGTCAGTGTTTCAGTTTTAATATAGGCAAATGCCTCTTGACAATGCATC  
TGTATTGATAGTATATAATATTTTGATAATAAAGTCTCGTGTCTATTCTCCCA

>M6-PGSC0003DMG400015547 M6 RLK with malectin domain

CATCTTTTCTCTCTCTTTACCCTCCATGAATGACCTGAACAACATAACTCCACTCCCCATACTCAGAA  
AGAGTCAACACCACAAAACCCTCAAAAAATGTTAATTCTTGGCACAAATATTTATACAAATGGCCCCTT  
TGACTTCATGAATTGCTAGTTCACATTCTAGAAAATGATGTTTTGGTTTCATTGAATTTAAAATTCTATTA  
ATTTGTTTGTATCTGAGGGAGGTGGGTTTTTCAGTTAAAGCATCAACCTGCCTGTTAATGTCCCAAATC  
CAAGATATCATTCTCTTTCTTTCTTTCTACCTGAAAAAAAACAAATATTTTCTGGTACCCCTCAAGAGTT

TTCTTCTGATTTATGTTCTGTTTGTTCATTATTGATTTGGGTTTCTCTTTTTTCTCAGTCGTGGAGCTCTTTT  
GAATGAAAAAGGTGACATCTTTACCCTTCTGTTGATGTTTCTTTAATGGGTATTTTCATATATTGTGCTTCT  
GTGGTGATGAAATAGTTGTTCTTTGTGTTACTGTTCTTTTCAAGAACTGCTTGTTTTAGCCTTTAAGGTC  
TAATTTTGTGTTCTTTTGGGATTTGAATGATGATGGAAGGTTTTGGATTGTTAGTGAAGAGTTTGTTTATA  
TTGGTGTTGGGAGTTTTGTGTGTTTCTGGTTTTGAACCTGCTGATAATTTCTTAGTAGATTGTGGATCATC  
TAAAGATACTAATGTTGGTAATAGGGTTTTTATGGCTGATAAATCAGCTTCAAAGTTTTTGTCAACTTCAA  
AAGATATATTGGCTGATACCCCTTCGAATTCAATTACAAAAGCTAATGATTCACCCCTTTATCAAAGTCT  
AGAATTTTACTCAGCAATCCAGCTATAAATTTCCAATTAGCCTAACGGGGAGGCATTGGATTGCGCTTT  
ATTTTTACCCGTTTGTTTACCAAGGTTATGATATGAGCACTGCAATGTTCTCTGTTTCCACTCAAAGAAT  
GTTCTTCTTGGCAATTTCTCTCCAAAAAATGCTTCTGTCAAGGAATTTTTCAGTAAATGTTACCTCCAATGA  
CCTTGATGTAACGTTCTCTCCTTCGAGCAATTCATTTGCTTATATAAATGCTATGGAAATTGTCTCTGTACC  
TGATGTCCTTATAACTGATGATGCCTCCACCATTAGTCCAGCTGGGACATTTAGTGGTATGTATGCACAG  
GCTCTCGAAACAGTTGCTAGGGTAAACATGGGTGGATCGTTGGTGTCGTTTGATAATGATACACTTTGG  
AGAAGTTGGGTTACTGATCAAAGTTTCTTGATTCAGCCGAGTTCAGCTAAGTCGGTTAGTAAGATTGGAT  
CCGTAATAATATCCAGCAGATGGAGCAACACCAGATTTTGCACCACCGTCAGTTTATGGTACTTGTAGTAA  
GATGAACGTGGCTGGTACTGGTGATGATCCTAATGCCAATTTTAAAGTGACCTGGACGTTTAAATGTGGA  
TCCTGGGTTTCAATATTTCAATTCGCTTACACTTCTGTGACATAGTGAGTATAGCTGCCAATCAGCTGCTGT  
TTAACATTTATGTTAACTCCTGGAACGTGGCTCATGATTTTGTATCCTGGTCAGAAAGCTCGGGGAATTTT  
GGCCACAGCTTATTACAATGATTATGTTACTCCAACCGCTAAAAGTAATAGGCTTAAACGTTAGTGTGGGC  
CCATCTCCAAGGAGTGCTTATCCTGATGCCTTCTAAATGGACTGGAAGTTCTGAAGTTGAATAATTCTCA  
CGGCAGCCTTAGTCAGGTAGATTCTGTTTCTACTAACCCGAGTTCAAAGGCAAAGAAGAATGTCGGAGT  
CATCGTGGGTGTGTGTATAGGTGTCCAGTTGTGTTGGTGATGGTTGGCATCTTATTTTGCATGCATAGA  
AGAAGAAAACAAGAAAAGCTTGCCAGTCAAAAATATGGATTCCTTTATCTATGAATGGTGGTACTTCAC  
ACACCATGGGAAGCAAGTATTCAAACGGAACAACCATAAGTGCTGCTTCAAACATGAGTTATCGCGTTC  
CTTTTGCAGCTTTGCTGGAAGCAACGAGCAACTTCGATGAGAGTTTGGTTATTGGAATAGGTGGCTTTG  
GGAAGGTATACAAGGGTGTGTTTGTATGATGGAACAAAGGTGGCTGTGAAAAGGGGTAATCCCAAGTCC  
CAACAAGGTCTTGCAGAGTCCGAACGGAATTTGAGATGCTTTCTCAGTTCCGCCACCGGCATCTGGTTT  
CATTGATGGGATACTGTGATGAAAAAATGAAATGATTCTAGTTTATGAATATATGGAGAATGGGACCC  
TCAAGAGCCATCTGTATGGGTCAGATCTACCCAGTATGAGCTGGAAGCAGAGGCTGGAGATATGCATTG

GGTCGGCCAGAGGTCTGCACTACCTTCATACTGGCTATGCTAAAGCAGTTATACATCGTGATGTCAAGTC  
CGCAAACATACTGCTTGATGAGAGTTTTATGTCAAAGTTGCTGATTTTGGACTATCCAAGACAGGGCCT  
GAACTTGATCAAACCTCATGTTAGCACTGCCGTGAAAGGAAGTTTTGGCTACCTAGATCCAGAATATTTTA  
GAAGGCAACAGCTGACAGAAAAATCTGATGTTTATTCTTTCCGGTGTTGTTTTATTCTGAAGTTCTTTGTGCT  
AGGCCTGTCATAGATCCATCTCTCCGAGAGAGATGGTCAACTTAGCTGAATGGGCAATGAAGTGGCAG  
AAGTTGGGACAACTGGAACAAATTATAGATTCCAATCTTGAGGGCAAATAAGACCAGATCCCTCAGG  
AAGTTTGCAGAAACAGCAGAGAAATGCTTAGCTGATTTTGGTGTAGACAGGCCATCAATGGGCGATGT  
GTTGTGGAATCTGGAGTATGCACTTCAACTTCAAGAAGCTGTCATTCAAGATGATCCTGAAGAAAACAG  
CACCATCCTTATTGGTGAGCTCTCTCCACAAGTTGATGATTTCAAGTTGATCCCGGTGCTTCTGCTG  
CTCATAACGGAACACCAAATTTGGATGATCTCTCTGGTGTTCATGAGTAAGGTTTTCTACAATTGCTC  
AAGTCTGAGGGTAGATAATTAAGTAAAAAGGCACATACAGTGTTTAGGTGTTGTTAATTCCACTTTTGT  
TTGTGGATCATATAAAGATTGATCTTTTCTTTCTTTTGTAAACAGTGATTGTACGAATTTCCGAGATTAA  
ATAGGAACGTTAACTTTGAAAATATGCATTGTTCTACCTGTGGATCTTCTTTTCATTTTCTGGGCATGC

>M6-PGSC0003DMG400017662 M6 RLK with malectin domain

CTAAACATGCACTTTTTTCTAATTCTAGGAACTGCAGCAGAAATGAAAACTGGAATGCTGCAAAGTAT  
TTTCATACAAAGAAATCAAAGCTGCTACAAACAACCTCAAAGAGGTTATTGGCCGTGGTAGTTTTGGATC  
TGTTTATCTTGGGAAGCTTCTGATGGTAAACAAGTTGCTGTTAAAGTTGATTTCGATAAAACTCAACTG  
GGTGCTGATTCTTTTATCAATGAGGTTTCGTCACTATACCCATGCTAGTTCAGTTCAGTCTACAAAGAAAA  
AAGAGATTCAAGAGCTCTCTTTATTATCTGTAGGTAACCCTTCTATCACAAATCAGTCATCCAACCTTTGT  
GTCGTTAGAAGGATTCTGCCATGAGTCAAAGCAACAAATTCTAGTTTATGAGTATTTACCTGGAGGATCA  
CTGGCTGATAACCTCTATGGTACGTCACGCGTGATCTCACCCATATTCACACTTTAAATCCATCATCCTCTT  
CTGTCACTTATCGTTTTCTAACTCTTAATAACTGTCTCAGGAGCAATGAGCAAGAAATTGACACTAAGCT  
GGGTGCGCAGACTGAAAATTGCAGTTGATGCTGCAAAGGTATGAGTAAAGAGAGGCATTATCATTAC  
TTAAGTTTTATATAGTTTTTAATGTTTGATTATATAACTTGTAAGGTTTGGATTACTTGACAATGGAAG  
TGAGCCAAGAATCATACACCGTGATGTGAAGAGCAGCAATATACTTCTGGATGCAGACATTAATGCTAA  
GGTATCTGATTTTGGCCTTTCTAAGCAAGTAACTCAATCAGATGCAACTCATGTTAGCACTGTTGTCAA  
GGCACTGCTGGCTATCTTGACCCTGAGTAAGCTTCAAGTCATTTATCATCCAGTTTAATATTTGGTCCTTC  
CTATCCTAATTCCTAAACCTCTTACTACCTGTCCTCAGATACTATTCCATTCGACAGCTCACAGAAAAG  
AGTGACATATACAGTTTTGGAGTCGTTCTTCTTGAACCTATTTGTGGCCGAGAACCACTTAGCCACTCGG

GGTCTCCAGATTCCCTCAATTTAGTTCTATGGGTAATAACTAGTCTTATAATGTTTTACACACAAAAGCAT  
TTCATTGACTTCCTATAATACTCACATGTTGTAACTAAATGTGAAAATTTAGGCAAAGCCGTAAGTTCGCA  
TGCTGGTGCATTTGAGATAGTAGATGAGAGCATAAAAGGAACATTTGACACAGAAAGCATGAGAAAAG  
CTGCTTTAATCGCCTCAAGGTCAGTGGAGAGGGATGCATTGCGAAGGCCGAGTATTGCAGAAGTATTAG  
CTGAGCTCAAAGATGCATACAGCATTCAACTTTCCTATTTAACATCTGAAGGACTAGCCAATTGATAAAT  
TAGACCTTCACTACTGCAGCTCACAATTTGCAAATATAAGGTTTCTCTAGTTGAATCAAATGTTACTGTAA  
CTTTATGACAACCTTTAAAATTTGAGCTCGGAAATGTTTTAAGTTATTGATATATATTACATTTAAAGGTCT  
CCTTTCCCTTGGGAAGATAGGGGAAGTCGTGGATGATTTTCAACAAATAATAACAATGTCCATCCAGGCT  
TGCATCAGTGCTCGCCTCTACATTCTTTACGACTTGTGAACCAATCATAAAAGTAATGAGTTGGCCTAACC  
AGAAAAGTGGCGCCGTAGATATAGGAATAATGCTGTAGAAGCAGCCACTGCATAGGGGAATATAGTCC  
AGATTCCCTGCACATTTATAGGAACCAGAATTGGATTCTTTGGTAATAAATGCAAATTTGGACAGAGCA  
AAAGAATTATGCTGTACCACTACAGTAGCAACTGTTGCAATGGCAAATACTGGACGCTCTCTTAGTAAAA  
ATCCAATTGTCAACTGCATTTTGGAGTAAAAGAAAAGGAGATAAGGCATGAACAGCAGGTAAACTTAAA  
ACTGGAAATCTGTTTCAAACACAATACTAGTAACCTGAATTGGAAGAGTTATCAAGCCGCCACAACAGA  
CACCAGCAAAGAAACACTCTGGTGATATATCCTGCAATATTTATGAGCAGAGAAATGATTGAAACAGTT  
ATAAATATCTGTTTACCGCGGGAGAATGCATTGAGTTGCTAACAATTTCTATATAGGGTTATAGCTACAA  
CATAACACCATCATAAGATTTATGCATATAGACATAAGGAAATTGGTTGCATTGCATTCTTAGTGATTGA  
ATTTCTAGTCAGAGTAGGCTCAGAATTAGCAAAGGAAAGTTGTAAGTACGACGAACGGGGTCTGTCTATC  
TTCTGTTTTATAGCAGGACTTCTACACTAAATATATCAATCGTTTCAAAGATGAAATGAAATTATCAGAAC  
TTCTAAGCATTGTTATTGACCATCCTAACATATCTGACACTTTTGTCTGTAGGTAACAGTATCATGCCTCA  
AACTTGTAGTACCCAAAAGAGGGAAACAAGAAAGTAGCAGAAGACAGTTAAGCTGATCGAACCCCTCAG  
CATGTTAAGAAGGAAAACAGAAAAAAATCACTCACCAGAGCCCCTGCAAGGAAAGCAGTGGGATTTT  
TTACTCCAAGAGAAAACCGTTCCACTGCATCAGCATAGGAAAATCCACCAGTAAGCAATTAAGAAGTC  
AAGGAACAAGAAGATCATATTTGTTAGAACAAGTATTTTCCAGAAATATGATAGCACACAAGAACAAT  
CAGCTTTTTTAGAATGTGAAGAAAAGTTCAGAGATTTAGGCATATAGACATAAGGATTAAGATGGACTA  
GAACTATGCAAACCTTACGATAGAGGATAAATTTTGGAGGTAGATCACTAATTTCAATCTGACATTTCCA  
GCAAATAGAGAATCTTAACAAATAATTAATTTGACTCCTCCAGTACCAACATAGATATGTGATAGTACT  
GATGCTACATTATGATCATAGTAATAAGTGTGCGCATATCCAATGAAGAGGGTTAAGAACCATGAGGTT  
TCAAGTTCAAATCCCAACGAAGCCAAAAACACTAGGTGATTGCTTCCCATCTGTCTAAGCCTTGGTGGAC



TGAGTTACCCGGTACTTGTGCTGGTGTGAGGTAGCAGGTACCCATGGAATTTAGTCAAGGTTCTGAAAA  
GCTAGCTCGAACACCACAGTTATATAAAAAAGAAAGAAAAGTGTGAGCATATCAGTGGAAGCAAGGGT  
TTCACAATGATTAAGTTTTTACAATGCAAGAGACATTGGATTAATTCAGCATCTTTGTTGCAACTCAC  
CAAAACCAATGAGATTCCCATGTTTTGTACAGCGTTTGTAAATATCTTGCCTTCTGATTTCCGATCCCTA  
ACTACAACCAATTGACTCTGAATTTCCAAAATCAAGTTCATATATTTTTAAGTAAGGCAAGGAGGCTGA  
ATATTTAACATGAATAATATGCTAGTAGCCAAAACAAACCTTTGAGCAAACATCATCGGATGCACCAGA  
TTGCTTAAAAAGCTTCCCAAGGTAAAAAGGTATCATATCGCTGATGCAAACACCCCTGAATATTCAGGAT  
CCACAACAATATTAACATTGTGGAAATCACTGTTTCTACATAATCAATTTTTACTGGCACTGAAGGTGCAT  
AAAATCTTTAATACAACAAAAGAAAAAGAAGGTTGTGTGTACTGCAGAATCATGAAAGGTTGGTCTGC  
ACGTGCATTCATCAAAATTAAGTCTCAGAGGACACAGTTTCAACTTACCAGTACACCCAAAGAATAGTGGATG  
TTATATATGGAGCATTCTGGAAAAGGAGTTCAGTAGTGATTGCCACGTCCCATCTAGAACAAGCAACC  
GTGCTATAGAGATTCCAACCTACACCATTCAATGAATTTGACTATAATAGTGAACATCATGAAGAAG  
GATAACAAGCCATTTTAGTGCCTACTTAAATGAATATAATAGTGAACATCATGAATAAGATAACAAGCCA  
ACTTAGTGCCTATTCAAATGACTATAATAGTGAACATCATGAAGAAGGATAACAAGCCAACCTTAGTGCCT  
ATTCATAGACACTAAATAACAGCATAGTTCTAGCTTTTAACTTTTTAGACAGGGTTCTAGCTTTTAACTTT  
TTAGACAGGGTTCTAGCTTTTAACTTTATAAAATTTGAAGCTTCTTCACAACCTTTTTCTCCACATGGC  
CTCTCACTTTTTCTCACATCACTAAAGAACAACCTCTAAAGTCACTAATTTTAAAAGCAATGTCAAATCAA  
AAGAAGAAAAATAATCGCAGGAAAACCTATACTATCTGCTACGTGGCCATCAATCAGAAGACCTGTTAGC  
AGGGTAGTTCATGAACAGAAGTACCAGCAAAGGAGACGGACCCATATATTCAAAGCCTCCTCACTGATA  
AAAAGTCCAAAACAGCTGCCATCAGAAGCCAAAAGTAGATCCATCTGAAGAATGAGAAGTACAAGGG  
CTTAATATCACATCCGAGTACGCTAATAGATAAGAGATCCAGGATATCAATTATATATTAAGCATCTATC  
ATAGTAGTCGAATAAAGTATAATAAACATAAGGTTGATCTTGTTTTCTTCTTAGATCATGGTGAAACCCCT  
GATGAATGAAAAGTCGCAAGGATAATTAGTTGCTTACCCTGGAGCATATTCTGGCAGCATGACTCTATA  
GCCAAAAGCTTTGAAAGAAAAACCAGGAGCAGGTGTAGAAATTGTGGAAGATGATGATCCATCAACCA  
GATATTGAATTCAAAATTTGATCCTTGATTAGGCTGCTTAAAGGCCTATGGATAGAAATGTAATAGTAGC  
AGCTATACCTAATGCTATTGCCAGTTTTGCCAAAATGAACTTCTGTGCGAACAGTTTTATCTTCCAGAC  
TACCAGTTAAGTCATCAGAAGCCTTGTGCACCATCTCCTCAGCATCCTCCGACTGTCCAGCTTCATAATTT  
TTAGCACTCACAAGCTGAAATCTTTGATCCTACACTTTGAATAGAGAATTTGCCATCATTTATACAAGGC  
CCCTTACAGTGCATAGATAAGCTCGGTACACTGAATGTCTTCATTAGCTGTTTAAAGGAGAGATCTCTTGA

ATTTCTAGGTGATACATAAATAATAATATAATCAAATAACAAATAGCATTAGATAAGACATCTCCTTGTAC  
ATTCAATTCACAAAATGTACAGGCGTCTATGATGTTGTATATGTTAGCACTAAGTTGGAAGCGAACATAA  
AAGGGGTTTACAATTCTACTCTAAGAATTTAAAGAGTATATATCAACTGCCCTAGGACTTCAGTCTAGT  
GGTAAGTGCAGCATGTAACGTGTAGGTTAGGCGCACATCACAAGTTTGACCTGCCACATACAAAAGTCT  
GATGATTAAGTGGAAAAGGATAGAGGGAGGACTCTTTAGTTATCCAACGAGTTTCAAACCGTGTGCCCC  
TCGAGGATCTCTCGTTATTAAAAAAAGTAGTTCAGATCTACCTTCTTTCATCTGATCTGCCACTGCTCTTT  
AGCATAGGTTTATTTACATAGCCATAGATGTTTTCAACATCTTTATGTTGGTGAACAAAGACTTGGGTG  
ACATTCCGACATTTTACATAGCCTCGAGGTAGTGGTAAGTTCTGCGTATATTTTACCCTCCCTAGACCTCA  
CTTGTAATTTCACTGGGTATGTTGTCGTCGTTGCTGGTTCCATGCTACGAAATTAGTGATGTCCTATAT  
GACAAAAAATGCTGCACTGCATATTACAAATAGAGATTTTAGGGACATCCAAGCAACCACCTACCCTAC  
CTTCCCTTCCCTCCCTCCCTTTGGAGTGATGACAAAAAATCAAATAACAGTTCATCAAATCCAAATTG  
GTAGGGTTCCATCCATAATATTCAAATAACAACAACATAGTCAGTATAGTCCCACAAGTGGGTCTTAGG  
AGGATTGGTTTTACAATGACCTTATCCCTATCTTTCTAGAGTAGAGAGGTTGTTTCTGAGACCCTCGACTC  
AGGAAAATCGTTTTTCAGAACAGGTTCCAAAGAAATGCAAATAAAAAACTTTACTTCTCCGTCCCAATT  
TATGTGACCTTTTGGATATCGAGATTCAAACAAGTCTATCTTTGATCATAATTTTTTTTATTTATCTTTAAA  
TATTTGGAATTGTCATTCATTGTGAGTTGTGACTTATAGTACTTCCCTACCTAGTTTCCAAATATATAAATT  
TGTTTCAAAAAAATTGAAGATTCTAGCCCGAATTCAGGCTCAAATTGTGACACAAATTGAGACAAAG  
AGAGTATGATGAAAATATTGAATAGAGAAAAGTAGTCATAGTAAAGATAACCAAATTAATGAAACAACA  
ACGAAATTTCAAACGACTAAATGAATCCATTTGTATCTATTCCACTCTATTAATGCAGTAGAATTCCGTAT  
CATCATAGTTAAACCATATTTACACATACAGCAACCATTCTCCTATGTAGGAAGTTAGATATTGAGTATAT  
TTTGAACTTACAGCAATACCTAGAGTATGAAGAGTAATTGTAAGTACTGCTGCTGCGGTGCACTACGGAGTTT  
CACCGTCTACGAGTAAAACCGGCGAGGTGGTTAAGTTCTCGTAGAGTTGCAGATTGAGATGAAGATTAT  
GAAAGAGATAGCAATATTTGATTATTACATAGAGTCACCATTATCTCTTCTCTAGCGGCGTTGTTGTGGT  
GGAAGTTGTTTGTACCGGGCGGAATATTGTTATTGGTTTGGTAAGGAGTATATGCTCCTCGGGATT  
GAAAATCTTCAAGTCTGTACAGTTGACACGTGTCAGATCTGATTAGATGTTTGTGGACCCAATGAATTG  
ATAGTCTTATAGTTGTATCCCTAGCGTTTG

>M6-PGSC0003DMG400021186 M6 RLK with malectin domain

CCCATCTTCCTTTATTATCTAAAAAAGTGAAGTCTTTTCCCTATAATCACCATTTTGGTGATCTG  
TTAAAGACTTAATTCTTACCATTCTGAAAATTTGAGTTTTTTTCTTCTTTTGTCTTACCATTGTCTCAA

GATTGGAGCTTTTGACCATTTTATTGGTCTCAGATCTGTTTGCTGATTTGCGGTTTTTCCTGCACTGAAGG  
TGTTCATTTTGAAGACATATTCTTGTTGGGTTTGGTTAATTTCTCATGTTGTTGAAGCTTTTTGAGTTGCCT  
ATGAGAGATAGATTTGTGAAGGTATTCTTTAATGTTTATGCTTCACTTTTGATGTTTCTTGAGATATATA  
GATTGTTTTTGGTTCTGGGGTAGAAAGTAAGGGGTTTTTCTTATTTGAGAATTTGTCTAGTTTTGAAACA  
ATTACTGGTGGGGTTTTGGGGTTTTTAGTTTTGTAATTGAATTTGGAAGAGTGTGTAGGTAGTATCAAAA  
AAAGGAAGAACTTTTGGGGGAGTTATTGCCTTATTGGGGGATAGTGAAGTTATGAAAGTCAAAGGGA  
GGGAGGTGTTGTGATAATTCCTCTTTTGGTATTAGTTGTGTTTGTGAAATTGGGGAAGCTCAAACAAA  
GACTTTGCTGGTAAATTGTGGTACAAATTCTAGTGTGAATGCAGATGGTAGCAAATGGATAGGTGATTC  
TGATCCTGGTAGTAATGTCACCTTTGAGTTCATCAGGTATTGAGGCATCTACTGACTCATTTAATGGTGATC  
CATCTTATGAGTCACTCTACAAAAGTCCAGATTTTTTTTCGGGAAGTTTTAACTATACTTTCAAAGGATCA  
CCTGGTAGTTATTTCTTAGGCTCCATTTCTATCCCTTACATTTGGGAATCGCGATGCGAATGAGTCATA  
TTTTGCTGTTGCTGCAAATGGTTTGAAGTTGGTTTCAGAGTTAATGTTGCTGGTGAGATTTTGCTCAAG  
AACTCGCTCTTGAAGGTTCTGGAGGCAATTCCAGTATCTTTTCATTGGTGAAGGAGTATTTTGTGACTT  
CTGATATCGATGTCTTTGTGCTCGAGTTTATTCCGAATAAGGATTCGTTTGGATTTGTTAATGCCATTGAG  
ATCATCCCTGTGACTGATAAGCTATTTGTTGACTCCATCAGTAAAGTTGGTGGCAATGGTGCTAACAGTT  
CTTTAAATTTGAGTAAACGAGGGATTCAGACTATGTACAGGTTGAACATTGGTGGTTCAGCAATTAATC  
CACTCAAGATTCAGGGTTCAGGAGGAAGTGGGAGGCGGATTCAAGCTATATGATCATTGCAGATGCAG  
GTTCAGAAGCTAAAAACCATTCCAACATTACTTATGCTTCCCCGAATGACACCTCTGTTGCTCCGCTTCTT  
GTGTATGAAACAGCAAGAATTATGAGCAACACAGATGTCATGGAGAAGCGGTTGAACATGTCATGGAA  
ATTGGATGTGGATCCAGATTTTGATTATGTAATCCGCTTACATTTCTGTGAGTTTGACTATAATAAACCAA  
ATCAAAGGATCTTCAAATTTATATAAATAACAAAAGTGCAGCAGACAAGTACGACATTTTCTCAAGAGC  
TGGGGGAATGAACAAGGCATACCATGAGGATTACTTTGATGCGATATCCTCGAAAAGCAGTAGTCTTTG  
GGTTCAACTTGGTCCAGATAACAACGACTGGTTCTGCAGGCACTGATGCTCTTTTGAATGGTTTGGAGGTT  
TTCAAGTTGAGTCGGAATGGTAATCTTGCCTATATACAGAAATATGAGGATGTTCCAGAAAAATCGACTT  
CGAAAAATTTAATCCTGTGGGTAGGAATTGGAGCAGGTGTTGCATCCATTATCTTTCTTGCAGGATTAGT  
CATGCTTATTATATGGCTATGTAGAAGGCGGAGTAGCAAAGATGACACAAAGAAAACCTCACCTGGATG  
GAGGCCTTTATTCCTTCATGCAGCCGCTGTGACCAATACTGGTAATGGTAAGGGATCTATACAATATCAA  
AATCTTGGAACTTTAAGATCTGGAAGGCGGTTTACTCTAGCAGAGATTAAAGGAGCTACAAACAACCTT  
GATGAAAGCTTAGTGATTGGAGTGGGAGGATTTGGTAAGGTTTTCAAAGCAGAACTCGATGATGGCAC

CCTTGCTGCAATCAAGCGAGCCAATCCTCAATCTCAGCAAGGACTGAAAGAATTTGAAACAGAAATCGA  
AATGCTTTCTAAGCTAAGGCATAGGCATTTGGTCTCCATGATAGGTTTCTGTGATGAACAGAATGAAATG  
ATTTTGGTCTATGAGTACATGGCCAATGGAECTCTCAGGAGTCATCTCTTTGGCAGTGATCTACCATCCCT  
AAGCTGGAAGCAAAGACTAGAGGCGTGCATTGGTTCAGCTCGTGGTCTGCATTACCTTCACACAGGGTC  
AGAGCGGGGAATTATCCATAGGGATATCAAGACAACCAACATATTGTTAGACGAGAATTTTGTGGCGAA  
AATGGCTGATTTTGGGCTGTCTAAAAGTGGCCCTTCTTTGGAGCATACTCATGTCAGTACAGCAGTGAAA  
GGAAGTTTTGGTTATCTGGATCCTGAGTATTTAGGCGGCAGCAGTTGACTGAGAAATCTGATGTTTACT  
CCTTTGGGGTTGTGCTGTTTGAAGTTATATGTGCACGCCCTGTTATAAATCCAAGCTTACCAAGAGATCA  
GATCAATCTTGCAGAATGGGCAATGCGGTTTCAACGAAAAAGATCTCTTGAACCATCATTGACGAACA  
ACTCGCAGGACAATATTCCACAGAATCGTTGATGAAATTTGGAGAAATTGCTGAGAAATGTCTGTCAGA  
CGAGGGAAAGTTGAGACCAACAATGGGAGAAGTCCTATGGCATCTGGAATATGTTTTGCAAATTCATGA  
GGCTTGGCTGCGGAAGAATGCAGGGGAAGACTCTGCTTCTGATATTCGTGTTCTAGAGACTGTTGAGGA  
GAGAGGAACTGAAACTTCTGAAGACCAGACTCATGTTGAATCAAAAAACAAGAAGAGGGTGAACCTG  
CAACAAGTACCAGTGGCACTACAGATGCCATGGCTAATGGAGTAGATGATTTTTTCACAATTTCTCGGTCA  
AAACGGAAGGTGAGATCCAAAACAACAGACAGTTGATTGTAATGTCTGGACCATTATAGGCCTGAATTC  
TTTCCATTTTTGTCACATGCGTCTGTGAGGACTTCACGATAACCTCAATCAGCTTTGACAGTGCTCATTAA  
GCATAAAGAGCTTAGAATGGAGAATGTGAAGATCTTGGTAATACCTTCATGCTGTATTCTTTTACTCAGA  
TTAGACTTAAATCTTTTTCTGCTGAATCCTTGTGCTCAGGATTTAGTGATTCTTTTATTATTGTATGTAC  
TTCATGTTTGATAGAATGCCACTAAGTTAATGAATTGGAATGTAATATATATTTCACTTCTATTTCAATGG  
AAATATGAAATCTTGTTT

>M6-PGSC0003DMG400021842 M6 RLK with malectin domain

TTTAACTTAATGGCTAATAAAATAGCCATTATATGAAAATATCTATTGCATGTACTTTGATAATCAACAA  
TGAAATTTTACACATTTTTGGTTATCATAACCACATTTTGTCCCTCTTAGGTAAGGTATATTCATTAACAA  
ATGTTACAAATTCTTATTCTTTTGTCTTGTGGAGCTACAAATAATGCTACAGATGCAGATGGAAGG  
ATTTGGAGTCCAGATTCTTCATATTTCCCTTCTTCTGTTAATTCAATCACATCTAAAGCTAAATATCAA  
GACCCTTCATTGATTTCTGATATTCCTTATATGACTGCTAGAAATTTCAAGAATCAAACCACCTATTCCTTC  
CCTGTTTCTCCGAAATCTCGTCATTGGATCAGACTTCATTTTTATCCTTCTTCTTATGACAATTTCAATTGCT  
CTAATTCATTCTTTTCTGTAACATCGCGGGTTTTACTCTTCTAAACAACCTTAGTGCTTCAATCACAGCAC  
AGGCACTAACACAGGCTTATATCATAAGAGAATTCCTTGTCCCTCTCCAACAGCTACACTTAACATA

ACATTTACCCCTTCTCCGCGTATAATGACTCATTTGCATTTATCAATGGGATTGAGATTGTTTCAATGCCT  
GAAATATTTGAACCCGCGCCTATGGTGGGGTTCTCAGATCAGACTACGGAAACACAAGCTTCTTCTATGC  
AAACTATGTTTCAAGTTAAATGTTGGTGGACAGTATATTCCAGCTAATAATGACTCAGGGCTGGGGAGAA  
TATGGTATGATGACGCGCCATATTTGTTGGTGCATCTTTTGGTATCACATCTGCAGCTAATAACAGTATG  
AAAATTTTCATATCCTTCTAATTTACCTAATTACATTGCTCCGGAGGATGTTTATAGGACAGCACGATCGAT  
GGGGCCAAATCCTGATGTTAATAGGAATTATAATCTCACTTGGATCTTTCAAGTTGATACAAATTTCACTT  
ATCTTGTGAGGTTACATTTTTGTGATTTTCAAATGAAAAGGATGAATCAGAGGGTGTTCAGATATTTCT  
TAATAATCAGACTGCTTTAGAAGAAGCTGATGTAATTGCGTGGTCTTCTGCTCAAATGTGCCAGCATAC  
AAGGACTTTGTAATATATCAAACCTGGTGGTGGTGGTGGTGGTGGTGGTGGTGGTGGTGGTGGTGGTGGT  
AAGACCGAGTTTTATGATGCAATCCTCAATGGATTAGAGATTTTTAAGATCAATGACACAACGGGGAAAT  
TTGGCAGGGCCTAATCCTGTACCATCACCACCCCTAACAGCTACAGACACTGATTCTCAGTCAAACCAG  
CATTTGCATCAAACAAAACCTAGTAAGAAAGGAATCATAGTTGGTTCGGTGGCAGGAATGACAGCTGGCC  
TTAGTATTGTTGTTGTCGTACTTACTTTTTGTCAAGCGAAGGAAGACTATAAACAATGGAGGGGAATAAGTC  
TAGCAGAGGTGGATGGTTACCTATTTATAGTTCTAGGAGTACAGAACTACAACAATCTCAGGTAA  
AAGCAGTGGCAGTAGTCACATTTCCAACATTGGTGGAGGCCTTTGTAGGTACTTCACCTTAGCTGAGATA  
AAACAAGGTACAAAGAATTTTGACGAGTCACGAGTTATTGGAGTTGGAGGATTTGGTAAAGTCTATAGA  
GGGGAGATTGATGGAGGGACTACGGTTGCTATTAAGAGAGCAAACCCTTCTTCTGAACAAGGTCTTCAT  
GAGTTCCAAACTGAGATAGAATTGCTTTCAAACCTTAGACATAGACACTTAGTCTCACTGATTGGGGCTT  
GTGAAGAGAATGATGAGATGATATTAGTCTATGATTACATGGCTAATGGGACATTGAGAGAGCACCTT  
ACAAGCACAAACAAGCCACCCTTATCATGGAAGCAAAGGTTGGAAATTTGTATTGGTGCAGCCAGAGGTC  
TTCATATCTTCACACTGGTGAAGTACACTATCATCCATAGGGATGTGAAAACCTACAACATTTTGGT  
CGATGACAAATGGGTGGCAAAGGTTTCTGATTTTCGGTCTCTCAAAAACGGGACCTAATCTCCAACAAC  
TCATGTTAGTACAATGGTAAAAGGAAGTTTTGGATACTTGGATCCAGAGTATTTCAGAAGACAGCAACT  
GACAGAAAAGTCTGATGTCTACTCTTTTGGGGTTGTCTATTTGAAGTACTGTCTGGAAGGCCAGCTCTA  
AATGCTAGTCTTCCAAGGAACAAGTCAGTCTAGCAGATTGGGCATTACACTGCCATAGGAAAAATACT  
ACCAAGGAAATTATGGATCCACATATTAAGGGGGAGATAATACAAGAATGTTTGAAGCAATTCATCGAT  
ACAGCAGTGAGTTGCTTGTCTGATCACGGAAGTATCGTCTTCAATGGGTTCAAGTGTGCTGTGGAATCTTG  
AGTACTGCCTTCAGTTGCAAAGTATCCTGATGAACCAAAAATGGTGGCGGAACGGAAAGCTAATGAT  
GCCTATGCTATGCATACAGAGTTGTTAACGGTTGCCGAAGAAGGTAAGGAGTCAGAGGAGCACAGCAC

GGACGCTGTCTTCTCACAAATTGTAAAACCACAAGGTAGATAGTTGCTTAGTTCTACCGTTGTTCTTTTGT  
TTTTGTTTAGATTTTTACTGTCAGGGTTAGCAATTATGAAGAGAGTTTATAATTGACAATGAGGCTTGCTT  
AGTTTGTAGCGCACCTCCATCTCCCACCGGTAGGTTGAGTGTTGAGTCATGTGGATGGTACATGGAAG  
TACTAATAATCCTGCTAGACTGGGGGTGAAAACAAATACACTTGTAGCATGTA CTCTGTCATTCTTAGT  
GCCTTCATTATTGCTTCCCCGCGAGTGAAGCAGGTTCAATGTTATAACTGCATTGCTTATGATTAGCACAA  
CTCTTATTTTCTGAGATTGAATCTATAATAGTCTGCGTTATTATTCAAGAAAAGGTAAACAGATCAACTAG  
TA

>M6-PGSC0003DMG400023419 M6 RLK with malectin domain

AAAAATTCATTACTACACACTCACTCACCTCAACAGACCTAAAAGTTCCAAAATCTTGAAAAACACAA  
AAACCCCATCTTCAAATCACACTCTCATTACCTTTTTCCCAAATTTACTTTTTGTTTCATCTTGACACA  
TCAGGTATGACCTTTTTGGCTTTGTTTCAGCTCAATTTGACAAGAAAATGAGTTTTTCCATATGGGATT  
TTTGTTTTCAGTCTTGAATGTTGTATTTTTGAGTAAAATGTGTTCTTGATAAAGGGTTGTTCTTGTTTTC  
TGCTAGCATTGTGCTGATTTCTGTTTTGGTCATTGGATTTTGTTCCTTTGTCTTGATTTCTGAGCTGT  
ATTTTTGAGTAAAATGTGTTCTTGAAAAGGGTTGTTCTTGTTTTCTGCTAGCTTTGTGTGATTTCTCAG  
TTTTGGTCATTGGATTTTGTTCCTTTGTCCCAATAGACTGTTTCTGAGTTGTATATTTGAATAAAAATGG  
TTCTTTAAAAGGGTTGTTGTTGTTTTCTGCTAGCATTGTGTTTTCTCAGTTTTTCATCATTGGGTTTTGC  
TTCTTTACCCCAATAGACTGTTTCTTGATTAGCTGTGGTGAAATAAATCTATACAAGTTGAAGATGGA  
AGGGTTTTGAATCTGATTTTGGGGATTCTGATGTGGTGTGCTACAAATCACTTATAACTGTGTCAA  
TAATGAAAATGGTTTGTGTTTTCTGAACTTCATAATTCTGCTAGATTGTTTACTAAAAGTTCAGTGTACTA  
TTAGTACAAAGCAGATTGGTAGACATTGGTTAAGGTTGCATTTTATCCTGTTAAGAATAATGAGCACAA  
CCTAAAATCAGCTGTTTTTCTGTTGTGGCTAATGGGATTACATTGCTCCATGAGTTTTCTTTTCAAGATT  
GGGGAAAAGGAACCTTTGTTGAAGGAATACGTAATCGAAATAGGTGGATCGAGTAGTTCGGGTGATT  
TAGTACTTACATTATCTCCAGTTAGTGGCTCAGTTGCATTTATCAATGGGATAGAGGTGGTCTCTATGCCT  
GAGGGTCAGTTTGATTTAGTGTGTTGCCAATTCCGAGGGGGCCAGGTTTTGTTGTTCCGTCCTCGGTTG  
CTTTAGAGACAGCTTATAGAGTGAATATGGGAGGTTCCAAAATTGACACCAAGAAATGACACTTTGTGGA  
GGATGTGGAATTCAGATCATACTTTCTGTTAATCCTGCTAGTGCTCGGAAGGTCAGTACGGATCCGAA  
ATCAGTCAAGTATCCAGCGGGTGAGTCGGTTGATATTGCACCGAATTGGGTGTATGCCACTGCACAAGA  
AATGGCAGATGCCAAAGTAATAGATCAAAGTTCAACATTACATGGACGTTTCCAGTCGAAGATGGATT  
TATTTACTTCGTTAGGATGCATTTCTGTGATTTTGTAGTCTCTCTTAAACAATTTGATCTTCGATGTGTA

CATCAATAACCAAAGCTGTGGAATCATTGGATATCTCAACAAAGACAATGGCTTTGTCAGCTGCTTAT  
TTTGTGGATTTTGTAGTGAATATGTCAACAGGCTCGAATAAAATTTTCGTTCAAGTTGGTCCTTCTAATTT  
GAGGATTACTCCATCCAATGCTATTCTAAATGGTTTGGAGATAATGAAAATGAGCAATCCCAGTAGCAG  
CCTCGATGGAAAATTTGTCGGATATTCCAGCAATTCCGAAAGATCAAATACTAAGAGACATGTAATGCTA  
GTAATTTTTGCTATCTTAGGAAGTTTAGCTGGTTTATTGCTCATTGCAGCGTCCTGTTTTCTCTGTTTCGTT  
TGTTTCCGTAAGCCAAAGATGGTGAACAAAATCTTTATCATGGTTATCTTTTCAAATCATATTGGAAT  
TTCAGAACTAAAATCTCAGCAGGTAGTTTTGCTTCAACAACACCTTCACGGACGTTGGGGCGTATCTTC  
GCATTCTCTGAGATTCGTGAAGCTACGAAGGACTTTGATGAGAGCTTGGTCATTGGTGTGGTGGCTTT  
GGCAAAGTTTATAAAGGAGTGCTAGAAAATGGGGTAATGGTTGCTGTAAAGAGGGGAAATAGCAAGTC  
TCAACAAGGACTTGTGAATTCAGGACAGAAATCGAGATGTTATCTAAGCTACGCCACAGACACCTGGT  
TTCTTTAATTGGCTACTGTGAGGAGCTAAATGAGATGATCCTTGTATATGAATTCATGGCAGGCGGACCG  
CTCAGAAAGCACTTATACGGATCAGATTTTCTCATCTTTCTTGAAACAAAGACTAGAAATTTGCATCG  
GAGCTGCGAAAGGATTGCATTATCTTCACACTGGTGCAGCTGAGTGCATCATCCACCGTGATGTCAAGA  
CTACCAACATTTTATTGGATGAGAATCTCACAGCAAAGTGGCTGATTTTGGTTTATCAAATTTGGCCC  
CGCGTTGGATCAAACCTCATGTGAGCACAGCCGTGAAGGGAAGTTTTGGTTACCTCGATCCAGAGTATTA  
TCGTAGACAGCAACTGACAGAGAAGTCTGATGTCTATTCATTTGGAGTAGTACTCATGGAAGTCCTATGT  
GCACGGTCAGCAATCAATCCTTCACTCCCACGAGAACAAGTAAACATAGCTGAGTGGGCAATGCATTGG  
CAAAGAAGGGACAATTGGAGCACATAATCGATCCTTATCTTGCAGGAAAAGTGAGCATTGATTCACTC  
AGGAAATATGGTGAACCGCGGAGAAGTGTGGCTGAGTATGGTGTGAAAGACCATCGATGGGGG  
ACGTTCTTTGGAATCTTGAATACGTTCTTAACTTGCAAGCAGCTGCCAGACAATCTTTAGAAGATGAAAA  
CAGCAATGCCATACCAGATATACCTTACTCAATTCCTCGTGTGAGTCAGGCGAGGCTGATGAAATCGAC  
ATTGTTAGCCATGGTGAATCAGATGTAACAACCTCATCTGGAGTGTCTCTCAGATAATGAATCCAAAAG  
GAAGGTAAAGAAGAAGCTTGTGTTTGTGAAGAAAAAAGATTGAAATTGTGGTTATAGTATTTTTTT  
TTCCATACTATAAGTAGATTTATACCTTATATTATCAATCTCAGGATGAAAATCCCTTGATGCATTTTTATG  
>M6-PGSC0003DMG400023508 M6 RLK with malectin domain

CAAATTGAACATAGAACCATTTTTCTCCATTCTTAAATTAGACTTCAAATCTTGAATGCTAAGTGCAAC  
ACAATTACACAAAGTTGACAACCTTTTTTTTTCTTTAAAGTTTAGTCCATTTGGTGAGTTGGGGTTGTTGAT  
ATCACATATTAAGTTCATTTCAAGATTTCAAAGTTTGTTTTTTTTTTAACTTTCTTGAAAGTTTAGTCCATT  
TGGTGTGTTGGGGTTCTAGTGAATCAAATTTAAGTATATTTCAAGATTGCATTTTTTGAACAATGACTT

AAAAATTGAGTCTTTTTTAGCTCCTCATTACAAGAAATGAAAACCATTATGGATTTTGCAACTTCATTT  
GTTTGTGGTATTGTCTGTCTTGTGTTTGATGATATGTGGCTTAGAGTTTGATCCTGTTGATAACTATCT  
CATAAACTGTGGTTCATTTAAAATACTACTATAGGTGATAGAGTTTTCTTAGCTGATAACTGAATTCCC  
CTCAAAGGGTATTTGTTAATACTACTAGAGTCTATTCCATCTAGTTATAGTTCAAATCTTTATCAA  
GCTAGAATTCTTAATGAGACCTCAAATTCACATTTTCAATCAAGAAACAAGGGCGCCATTGGATTGCGC  
TGATTTCTATCCGTTTTCGTATGGAAATTTCAATCTTAGTTCTGCTAAGTTCTCTGTTTCTATTCAGAACT  
CACTTTGATCAAGAGCTTTCAATCATTGAGTGGTCCTTTAGTAAAGAGTACACTTTGAACATTACTAGTA  
CTAGTCTTGTCTTACGTTTACGCCTTTTTCTAGCTCGTTTGCCTTGTAAACGCGTTGGAAATCATTTAC  
TTCCTGATGAGCTCATTCTGTTGGTATTGGAACCTCATAGTTTGAGGGAACAAGCTTTAGAAACAGTTGT  
GAGGGTGAATATGGGGAATGTTTCAGTGTTCCTCAAATGATACCTCGTGGCGATCTTGGGAATCTGA  
TGAAAGATACTTAACAAGCAGGAATGTTTTTCAGTTTGAATCGAGGATAACAAGCTGTGAATTACACACG  
AGGAGGGACTTCTAGGAATATTGCCCTCCATCGGTGTATGGGACCGCTACGAGGCTGCAAGTGGATG  
ATCCCACTGTTTCTGTAAACATCACGTGGTGTGTTGATGTTGATCCTGGCTTCGACTATTTATCAGGTT  
CACTTTTGTGACATAGTAACTGGCCACAATGATCCAAACAAAGTAGGTGGTGACCATGAACATTATTCA  
ATGTTTACATCAATTCCAATTTGCTTCGAGGGACCTTGATCTTAAAAACAAGACATCAAATGTCCTTGGT  
TCTCCGTATTACATGGATGTTTTTACAAGGTTAGAGAGCATTACAGCATTGGCATTAGCATTGGTCCAG  
CAGGTATACGTAATGCATATCCGGATGGCCTCCTGAATGGTCTCGAGATCATGAAAATAAGCAATGTCA  
AGGGAAGTCTTGATGCCTCAGATGCTGAGATTCAGTCCTCGGTGCCTACTTCAAAGAAGACTAAAACAT  
GGTTGATCATTGGATCAACTATTGGAGGATCGATCATTTGCATCGTTTTGGTTGTGGTGTCTATTCTCTT  
TGCAGAAGTAGAATACGGACAACCTGTTGATGATTCAACAGAGGAAAATCATAACAGCAGTTGGAGCTAA  
AGAAGCATCTCTCATTGCAAGTCTAATATGGGGTACCTGTTCCCTCTTGTAGCAGTTCAGGAAGCAACC  
GATCACTTCAGTGAAAGCATGATCATAGGCTTTGGTGGTTTTGGAAAAGTTTACAAGGGAATTTGAAG  
GATAACACAAAGGTGGCAGTGAAGAGAGGATTTATCAATCACAACAAGGTCTTGCCGAGTTCATGACT  
GAAGTCGAAATGCTGTCTCAGTTTAGACATCGCCATTTGGTCTCACTGATCGGTTACTGTAATGAAAAGA  
ATGAGATGATAATCATTTACGAGTACATGGAGAATGGAACCTTTAAGGATCATCTGTATGGTTCGGACC  
TTCCGAATTTGAATTGGACACAAAGGCTTGAAATTTGCATAGGATCAGCAAAGGACTTCACTATCTTCA  
TACTGGTTCTCAAAGGCAATCATAACCGAGATGTCAAGTCTCGAATATACTTCTAGATGAAAATCTC  
CAGGCTAAAGTTTCTGATTTTGGACTATCGAAAATTGGTCCAGAAATTGATCAAACACATGTTAGTACTG  
CAGTGAAGGAAGTTTTGGATATCTTGATCCAGAGTATTTGACAAGGCAACAACCTAACCGATAAATCTG



ATGTCTATTCCCTTTGGTGTGTTATGTTTGAAGTCCTCTGTGGAAGGCCCGTTATCGATCCCTCTCTCCCA  
GAGAATCAGTAACTTGGTTGAATATGTGATGAAATGTTAATGACAGGAGAATCGGAGGCAATCGTTG  
ATCCTAGGATTGCACACGAGATTACACCAGAATCTCTGATGAAGTTTGTAGAGACTGCTGAGAAATGCG  
TGGCTGAATATGGTGCAGACAGGCCGACTATGGGAGAAGTTTTGTGGAAGTTGGAATATGCATTGAAA  
CTTCAAGGGAAAGATGAAAAACAACACAAGAGAACGAGATATCGGATAATCAGTTGGGTAATAGTGT  
CTTAAGTACTGAATACAGCATGGGGAGTATGGCTGATCTTGCTGGTGTTCATGAGCAAAGTTTTTTGC  
CAAATGGTAAAATCTGAAAACAAGACTCATGTGATGTATGTTAGGATAAAATGCAGGTCCATCTAATG  
AACTCTGCCTTTGGATTGTAAATTTGATTCTCCTTTCTTAGATTTCTATGTTATAACAGATACTTGTGT  
GCTTCAATTGATTTGAAGCCGCGTTATACTATAACATAAGTTTTTCATTAGGGATTTTTTACCGAGTT  
GTTCACTAGCACGATAGAGCAAT

>M6-PGSC0003DMG400024665 M6 RLK with malectin domain

ATGTATAGATTTCTTGTTCCTTCAAACCAGGCAGGCATTGGGTGCGTTTGCACCTTTATCCTATTCAACATCC  
AAATTATAATCTAGCAAGTGCTATGTTTACTGTTACTTCTGATAATATTGTTTTACTTCATGATTTCTCAGT  
GAAAGATACTAGTAAAGTTGTGTTCAAAGAATACCTTATTAATATTACTTCATCTCAATCACTCTCAAT  
TTTACCTTTGAAGAGATCTTTTGCTTTTATCAATGCCATTGAGTTTGTGTCAGCACCAGATGATCTCATT  
CTGATTCAGCTGCTGCAGTTTCCCCTGTTGGTGATTTAATGGCCTGTCTCAATTCGCGTTTGAAGTAAGT  
TATCGGTTAAATGTTGGAGGGCCAATTGTCACACCAAAAAATGATACATTGTGGAGGACATGGTTGTCT  
GATAATAAGTACATGGCATTTCCTGAAGGGGCTCAGAATGTGTCGGTTCCTCTAACGACAATCGTTTATC  
CAGATGGAGGGGCGACACCTTTGATTGCCCAAGTTCAGTTTATGCTACGGCTGATATGATGGCAGATT  
CTGGGGTGCCCAACTCGAATTTCAAGCTAACGTGGGAGATGGACGTTGATTCAAGCTTTTCTACTTTAT  
CAGAATGCATTTCTGTGATATTGTGAGCAAAGGCCTAAATGAGTTGTACTTCAATGTCTATGTTAATGAG  
GTGGTGGGGTCTCTAGTCTTGACCTTTCAACACTGACTTCAGAGTTGGCCACCCCTTATTACAAAGACT  
TTGTGCTCAATGCCACAGCCATCACCAACGGTTCGATCATCGTGCAGGTGGGACCCGCGTCAAACGTCC  
AGTCTATCCTCCCAAATGCCATCCTCAATGGATTGGAGGTCATGAAGATGAGCAACATGGAGGGAAGCT  
TGGATGGGCTGTTCTCATCTGGTGGACGGCATGGTGTAAATGCCAAGATCACGCGGAATGAGAATTGCTG  
CAGCTTTTGGATTGGCAATGGGGTTTACAGCATTAGTATTGCTTTTATAGGCATTGTTTCGTTGGCGAAG  
GAAGCCAACAAAGGGTTGGGAGAAGCAGAAGACATTCTCTTCATGGCTTCTCTCAATGCTAGTTACTG  
CAGCTTCATGTCAAGCAAGAGCAAGACTAGTTGTTCAACAATCATATCCTCTGGCCTCAACTTTGGCCGC  
GTCTTTACTTTCAATGAAATCAAGAAAACAACAAAAAATTTGATGAAAAGCAGTCATTGGTGTGGA

GGCTTTGGAAAAGTGTATCTTGGTGTATCGGAAGATGGAACAAAAGCTAGCTATAAAGCGAGGAAATCC  
ATCATCCTCACAGGGCATCAACGAATTCCTAACAGAAATTGAGTTGCTATCCAAGCTTAGGCATCGACAT  
CTTGTTTCACTCATTGGTTATTGTGATGAACAATCAGAAATGATTCTAGTCTATGAGTACATGTCTAATGG  
TCCTTTGCGTGACCACATTTATGGTTCCACTTTGCCAACTCTGACATGGAAACAAAGGCTCGAAATCTGC  
ATAGGAGCTGCTCGAGGACTGCACTACCTTCACACTGGTTCAACTCAGGGAATAATACATCGAGATATA  
AAAAGTACAAACATCCTCCTTGATGAGGACTTTGTCGCAAAGATGGCTGATTTTGGCTTGCAAAAAGT  
GTCCTTCACTGGAGCAAACACATGTTAGCACAGCAGTGAAGGGTAGTTTTGGTTACCTTGATCCCGAATA  
CTTCAGAAGACAACAATAACAGAAAAATCTGATGTGTACTCATTGCGGGTAGTCTTTTTGAGGTAATA  
TGTGCAAGACCTGCTCTTGATCCTGCATTGCCAAGAGAACAAGTGAATTTGGCAGAGTGGGCAATGCAG  
CAACACAAAAAGGGCACTCTGGAGAAGATCATAGACCCTCATATTGCAGGAACCATTACCCCTGAGGCG  
TTAAGGAAATACGTGGAAGCTGCAGAGAAATGCTTAGCAGAATATGGGGTTGATAGGCCTGCAATGGG  
AGATGTTTTGTGGAAGTTAGAATATGCCTTGCAGCTTGAAAGTGCATCCCCGAGTAGTGTCCAGTGAA  
GAATGAGAATGAGAATGAAAATTCAGCAAGTTCTTCAGAACAGCCTGGAACGAATTCGAAGAGCA  
ATAAAGAAGCTCAGCTCATTGACATTAATGATGATTCTGGAGTGGTGGTTGGTTCTCCTATGTTCTTAGA  
AGTTTTCAAGGAAGATAA

>M6-PGSC0003DMG400025030 M6 RLK with malectin domain

TCTTGTTTCTTTCTTCCTTTTGGTTCACACCCATGTCAAAGATTCAATTTTTCATATCATAATGGAATTGC  
ACTAAAAGTTCTTGTTGATTGTGTTTGAATTTGGGTCTTTCTGTTTCTGCCTTTTGGTTCACACCCATGT  
CAAAGATCCAATTTTTCAAGGGGAAGTTGACTAGATAGCTCTTCTTGACTGTGTTTTATGGTGGATT  
GCACTAAATAGCTCTTCTTGATTGTGTTTTATTGTGGCATTGAGGTAACCTGACTTGGGTCTTGTTGTTT  
CTTCTTCTGGTTCACACCCTTTTCAAAGATCCAATTTTTCATGGTGGAGTTGCACTAAAAGCTGTTCTT  
GATTGCGTTTTCATGGTGGCATTGAGGTAACCTGAATTGGGTCCTCTTATTTCTTCTTTTGGTTCACATC  
CTTTCAAATATTCAATTTTTCATAGTGGAGTTGCACTAACAGCTCTTCTTGACTGTGTTTTATAGTGG  
ATTTGCACTAAAAGCTCTTCTTGATTGTGTTTTATGGTGGCATTGAGGTAATCTGAATTGGGTTTTGTT  
TCTTCTTCTTTTGGTTCACACCCTTTTCAAAGATTCAATTTTTCATAGTGTAGTTGCACTAAAAGCTG  
TTCTTGATTGTGTTTTCATGGTGGCATTGAGGTAACCTGACTTGGGACTTGTCTTTCTTCTTTTGGTTC  
ATACCCTTTCAAAGATTCAATTTTTATTGTGGAGTTGCACTAAAAGCTCTATTTGACTGTATTTTAT  
GGTGGCATTGAGGTAACCTTTCTTCTGGTGCACAGCTCGGAACTCGGTGGATAATTGTCACACCCCTGA  
CTCTTCTCACTTAAATACCAGGCTTTTTGTTACGTCCGCCTAACTCACACATCAGGCATAGACATTGCAC

TCTTACCACTGAACCAAAGCCTCTAGGAGCATTTC CAATCTGAAGTCTAGAGGAAAGTTGTTAGCTCAGA  
TCTTGTCTAAAAC TATTTTTTTGTTCTTTTGGTGT TAATCATAGTTTATTGGTAGTTTCCTGTGATTTTTTCAG  
TTAAGTTTTTTTTTTCTGTAGCAAGATTGCTCTAGATAGTTGAGAAAGATCTATAACTACAGTGTAGG  
TTCTTAGTATCATCTGGGAAATCAGACTTAGCTTATTCAGCTACTTTGATATCGAGATTGAGGCATAGTTA  
TTGTTGTTGTTGTTGTAACAGGAGGGGTCGTCTGAAAGAAGAAATTCAAAAAGTTGTCTTAAGAGTTTTA  
ATTTTTGTGGAGAATTGGAGTCCAGTATTTAGCAATAGGCTCTTTAGGACGATGGACTTGAGAGCAATG  
TCATGGATGCCTTTAGTTCTAGCAGTAGTTGTGTCCATCTTTTTGATTCAGGACTCGAATGCTGCCTTCGT  
TCCTGCTGATAACTACTTGCTCGCGTGTGGATCATC ACAAATGTGACCTATATCGGCCAGACATATGTT  
CCTGATTCGCTACACTCTTCAGCTGCTTTAGAAAATAAAGAAAATTCTATTGCTGCAACATCCAATTCTAG  
TGCTCCGTTTTTCGATCTATCAGTCAGCCAGAATTTCCATACTACGGCGTTTTACAAGTTTGATATTAAGC  
AAGAAGGCCACCATTGGATCCGTCTCTATTTCTACCCTCTCCAGGGCACAAC TTAACGTCTGCCTCAATG  
ACAGTGGTCACGGAAAATTTGTTCTGTTGAACAATTTCAGTTTCAAGAGCTATAATGGATCATAACTTTT  
TAAGGAATACACGATCAATGCCAATTCAGATAGTTTGATTCTTGCTTTGATCCCTTCAAACAAC TCCGTTG  
CATTTATCAGTGCCATTGAAGTTGTATCAGTACCTGATGAGTTGATCCCTGATCAAGCAGTGGCTGTATC  
TCCCGTAGCACCTTTCAGTGGCCTTTCTGGACTAGCCCTCGAAACTGTTTATCGTCTAAACATGGGTGGT  
CCTCATCTCACTGCTCTGAACGACACCTGGGAAGAACATGGGAGAATGATGTGAAGTACCTTCACGTC  
AACAGCTCTGCGGTGAGTGTTCAGTTAGCCCTTCAAGCATAAAGTATCCGGCTACTATGACTCCTGAAA  
TAGCACCAAATTGGGTTTACGCTACTGCTGAAACTATGGGAGATGCAAATGTACCTAATGTGAATTTCAA  
TATCACCTGGGTGTTCCCTGTTGATCCGAACTTCATG TACTTCATCCGAGTACATTTTTGTGATATTGTGA  
GTGAATCTTTGAATAGTCTTCTGTTCAACCTATATGTTAATGATGACGCTGCTCTATTGGACCTAGACTTG  
TCAAAC TTAGCTGGAAATTTGGACGTACCGTTATACAAGGATTTCTGTCTCCAATTCCTCAGTAAACTCAA  
GTATTCTGACAGTGAGTGTGGTCCAGATACGAGTGCGGATTGGATAAATGCAATTATGAATGGACTGG  
AAATCATGAAGATTAGCAATGAAGCTAGAAGCTTGAGTGGGGTTCAATCTGTTGAGACTCTCTTTGTGTT  
GCCTCACAAAAGAAAAGATAGTTTAATATTTGGTTCTGCCTTAGGAGCATCAGCTGTTTTGGCGCTT  
ATTGCATTGTGTTGTTGCTTTTTTATAGCTCGAAGATCAAAGACTTCCAACCAAGGACACTCATGGATTCC  
GTCCTTGATGGAAACTCTTTAACTTTGACGAAAACAACAGCTTCTCGGGGAACAGCAAGCTGCATCTCC  
TTGGCTTACCGAATGTTGGACGATTTTTTAGTTTCCAAGAAATAATGGATGCAACTAACAAATTCGACG  
AGAACTTGCTTCTTGGTGTGGTGGTTTTCGGTAGGGTCTATAAAGGAACAATGGAAGATGGAAC TAAAC  
TTGCTGTCAAAGAGGAAACACAGGATCTGAACAAGGTCTAGCCGAATTTCAAAC TGAAGATTGAAATGT

TGTCCAAACTTCGCCACCGTCACCTCGTGTCTTTGATTGGTTATTGCGATGAGAGGTCGGAAATGATTCT  
TGTTTATGAATACATGGCAAATGGTCCTCTCAGAAAGTCATCTTTATGGAACAGATCTCCACCTCTCAT  
GGAAGCAGCGTCTTGAGATTTGTATCGGTGCTGCAAGGGGGCTGCATTACCTCCATACAGGTGCAACTC  
AGAGCATCATTACCGCGATGTCAAACCACCAACATACTTTGGATGATAACTTTGTGGCTAAAGTTGC  
TGACTTTGGTCTTTCAAAGCCGGACCGGCTCTTGATCAGACACATGTAAGTACTGCTGTGAAGGGTAG  
CTTTGGGTACCTTGATCCTGAATACTTCCGGAGGCAGCAGCTCACGGAGAAATCAGATGTCTACTCATTT  
GGTGTGTCCTAATGGAAGTTCTCTGCACCAGACCAGCATTGAATCCGGTCCTTCCTCGTGAGCAAGTTA  
ATATAGCTGAGTGGGCTATGATTTGGCAAAGAAAGGCATGTTGGATCGGATAATGGACGAGAATCTC  
AAAGGGCAGGTTAACCCAGCCTCCCTGAAAAGTTCGGTGAGACAGCTGAAAAGTGTGGCTGAGTA  
CGGAGTTGATAGACCTTCAATGGGAGATGTGTTATGGAATCTAGAATACGCTCTTCAGCTTGAAGAAGC  
CTCATCAGCCTTGACAGAGCCTGATGATAACAGTACAAACCATATCCCTGGCATAACCATTAAACCAGTT  
GAGCCATTGACAACAGTGTTAGCAATATCCAAGGTATAGTTAACTCAGGAACAGATGATGATGCAGGG  
GATGCTGCTACTAGTTCGGTTTTCTCTCAGCTGGTAAATCCGCGGGGAAGATGAGAAGAAATACTCCCTC  
GTATACGTGCTTGAGTATAGTATTGAATCAAATTTCCCTACTAAAATGTTTGAGTGTGTATTGTATATGA  
TTGATGTACCTAACGAATACGATGAAATTCATCGTTCAAATACTGCAAGTTGTAGTATTATTTCCATTGTT  
AGGTGATACATTGGCCTCTTTATCTAATAGATAGTCATGGATATGTATTTGTAATAGCACTATAATTGTAT  
CCATTCATAGATAATAAATATTAAGCATATGTTGC

>M6-PGSC0003DMG400025799 M6 RLK with malectin domain

CTTTCTCCCTTTACCAGGAGCAACCAGGCCTCTGCCTTATTCTGCCAAATTATTATTTTCCCCAAAAA  
AATGTCCACTTCCATTTTCTCCTTTGGCTTGTTAGCATCCCTCTAACAATTCATGCCGCCATTAATGTTAA  
TCAACCTCAAGGTAAATTAATTAACATTGCTCGTGTCTGTGAATCAACTGAACCTATTAAAATGTATAC  
ATATAATAAGATGGCGCTCATTATATAAATGTTGTTTCAGGTTTCCTCTTAAATTGTGGTGGAATGAAA  
AAATCAAACAAGATTCATTACATATGGACCGGATGATAGGTTCAAAAAACAGGGAATAAAACAGAGA  
TCAAACAAGAAGGTTTAGTGCCATTATTGTCTCTGTTCGTTATTTCCCGGATGATGCTGAAGAGAAATT  
TTGTTATAATTTCCAGTGAACAAAGGGAGGAAATTGATTATCAAACCTATATATTATTATGGAGTTTT  
GATGGAGGCACAGAACCACCAATATTTGATCAAATCATTGATGGTACAAAGTGAATATTAATACATCG  
GCGGATTATGCAGATGGCCTTAGCTCTTATTATGAGGTTGTTATGGTTGCTCATAATAAGTTTTGAGTA  
TTTGTCTTGCTAAAATGAGCACACAACCTCCAATCCTTTTATCTCAGCAATTGAAGTGTGTATCTTGAT  
GATTCCCTTTATAATACTACTGATTTTGGGAAATATGCATTGGTTACTCTTGCTCGTCATAGCTTTGGATC

TCATGATAAACTAACGTATGTATGCCTTTTCTATCTATTTCTTTGGTATGAGTAAGATATGCATACATTCTA  
TCCTTCCAGACCCACCTGGGGATCATATTGGCTTTGTGATATATAGTTTTATTCTTCTTTAAATGTATTTT  
TGTTACGTGCATATTAAGTACATTTGATTGATGATGTTGAACTAGCTTTCCAGATGACAAATACAATCG  
ACATTGGGATCCATTAGTAGACGACAATCCAGTTGTAACAAGCCAAGCCTCGGTAAGTCTCTTGTGGT  
TGGAATATGCCACCAGAGAAGGTGTTTGAAAATTCAGTGACAGCCAGTAGAGGGAAGTCTCTTGTGGT  
AAATTGGCCAAATTTTCCACTTCTAAGACTTATTACTACCTTGCTTTGACTTCCAAGATAACAGAACCC  
CAAGTCCGTATAGCTGGAGAGTTTTTGTGCTTAGTGAATGGAGTGAAATTTCTTAGCAACCTTAATGC  
CACAACCAGTGGTGTAACTGTTTATAGCACAATTTGGCCTCTGAAGGGGAGACGAAGATCACATTGGT  
TCCAGCTAATACTAGTCTGTTGGTCCGGTAATTGCTGCTGGTGAAGTCTTCCAAGTCTTGCCTCTGCTG  
GAAGAACTCTCACTAGAGATGGTAATGGTCTTTTTCTGCAATATTTTCTAAGCAGTCTTAACTAGTCAGT  
GACGGATCCAAAATTCTAAGTTGATAGTCAGTAAGATAGTATGTCTAACTTATCTGTCAATTTAGGCGTT  
AGCTTCTCTAGTAACACATTTTTGTTGCACTTAAACAGTATCAGTGATGAACGATTTAACAAAAGCTTTA  
ACAAAAACCTCAAGATTGGCATGGTGATCCATGCCTTCCGAAGGACAAGTCATGGAGTGGAGTAATAT  
GTTCTTCTGGCATGAACACACGAATCATCTCCCTGTAAGTTTAATATTTCTGATTTGATCCACGGTTAATA  
TTAGATCAACGATATACCACTTTTTTGTGCAACATTTGTGCACTTGGTTATGTTTTTCAATAAAGGAATT  
TGACGAATGCTGGAATTTCTGGATCATTGCCACCAAGCATATCTAAATTAAGTCACTCAGTCATCTGTA  
AGCTATCCTTTATCATATTACATTGCTTGGTTTTGTTATCTATCGATGGAATATATATACTAATTGTGAA  
TGACTCTTAAAGGTGGCTTGAAGCAATGAACTGACAGGTCAAATACCTGATTTAAGCTCATTGCAGAA  
TTTAGAACTCTGTAAGTTCCATTTGTTGTTTTCTTCTACTCTCCTTTTCTAATGACCGAGAGAGTCAA  
CTAGCTCATTGTTCCGGTAGATAATGAGCCTGCCTCTCTACCCTTCTCCACTTAATAATCAATTTTTTTTTCT  
CGAAAAGGAAAAAAACACTAGATTTTTCTTCTCCTACTTTACTCTAATTCTTATCCTAATTTGTATTTCTA  
ACAAATATATTCATCTCCCCTGCAATGGAAAAGGCACTTGGAGAACAATCAGTTGGAAGGATCAATCCCT  
GAATCATTAGGAAAACCTAAACTTCGAGAAGTGTATGCTCCTTTGTTTTTTTTATCAACCTAACTCAG  
TTTTTGATTTTGTATATTTGATGTCAATAACTAAAATTTCTGGTTTTATAGGTTTCTCCAAAACAACCGTCT  
CAAAGGGAGTGTCCAGGAAGCCTAAGAAAACAAGAATGGCATAAACCTTAAGTAAGCAATCTGTAAACT  
TGAATTGAAACATGTCACTATTTCCGATTTGATACAACCTTCTGATCCTATTGATATTATACAAATATATGTT  
GTTTAGGGTGTGCTGCTGGAAATGAAGTATCAAGTTAGGGACTGGCGTAACAAGAGAATTAATGAAGA  
ACTACCAGAACTTGTACATACTTCTGAAAGTGGACAGAGTTATTCGGGACCTCACATGAGAAACACAA  
GTTATAAGATGAAATGAAGGGATTCAGAAGAAGAGCTTTTTAATCTTGCTGTACTTTGGTCTTTGTGTA

TAGCATATAAACATTATGACATCTACTACTTAAAAACAAAATAATTAGCAAAGTAAAGGTGATTTGTA  
CATCAGTCATGACTAGCAATCATTTAATAGAAGATATATGTAACCATGTTTTTTAATTTATTTATTCAAAT  
GAGATATGTATAAGCAATTCACAAAACAGTGTCAAATGCATGCAAGATTTGATTAAAAATTTTACATT  
TAGTAACAGAAGAAAATTTACAGCTACAGAGTAAGCATTACTGTGAAATTATATCGTTACACAGTAGTT  
TTGCAATAACACACATTAATTAGAAAAGTGAAATCAAGCAATACATAACAGCAACAGTCACTAAAGAAAA  
CAAAGAGAGGAGAGCCAGAATTGCTGCAAACCTGCATTTTCATATACAAACAGTGGATACCAAAGATCG  
ACCAGTTGATTAAGAAGTGTGGAACCTCAAACCTAGTTATATTTGATCTATTGTCAATTTAGACATCCACATA  
TCTTTTACATTGCATAGACAATCTCTCCACTGCTATCGATATCGAGGTCAGGATCACTCTCCAAATCTTCTT  
CCATGTCATCGTCAATGTCCAAGCTTCCAGTGAGGTAATGATTAAGGCTGTTGGTCCCAGCAGCAGGAA  
TGGTGGCCTCAGTTATTATCTGCATGATTTCTGCAATGCTCTGCATACGTTGATCTGGCTCCTCAAACCTGG  
TTGTTTGTAGTATTATCCATGAGATCTGCAGGTAGGTTCTTCAAGAACCACTCATGGTTCTTGATCTCGG  
GGATTGATATCCTCTGTGCAATGCAAAAATAAAGCATGATGAAAGAAAGAAACCTCACATAAGAACCG  
AAATGAAGGAGTTAATATCTTATAACGTTACTGAACTATGAGAAATTTTCTAACAAAAGTCATTGAACTC  
CAGAAACACTTGAGTATAAGATTTTTCTAACCAAGTCAGGATTGAAGTTCAAATAGTTATGAGCAATGCA  
ACACAGTGTTACAACACCACAACCGACAATTACTAGAAAGACCTTAAACATATTGAGACAGAAGATGAC  
CAAAGAAAATATGAAAAAGAACACTGAAATTATTTGTGGAAAAGATTACCTTTGCAGGATCTGCAACA  
AAAATCCTTGATATTAGATGACGACATTCAGGAGAGATATGTACATAATCAGGAATTGAATACTGTACGT  
TCAAGATTGCTGCATAACAGGAAATGATTTGAGTCAAATAAGACAGATTATGAGGATTTTGCCTAAC  
AATATGCATAAGAAGTTACCTGTATTGTCTTCCGAAAATTTTTAGGTTCTCTGGGTCTTCAAAGGGTAT  
GCACCCACCAGCATGACATACAAAGTCACTCCACAAGACCAGACATCTGCAATCTGC

>M6-PGSC0003DMG400026325 M6 RLK with malectin domain

AGAAAATGTGTTACGAGCCGCCACTTTTCTTTGTTTACACAGTATTTTGAACAGCTCTCCTTGACATTCA  
CATTTTGTGTTACTTGAAAAGAATTCCTCACATCTTGTTGTTAAAAAAAATAGTAGAGTACAATAATTC  
TCTATTCTTCTCCCATGAGAAGTTGTAAAGTTGTTGGTTTTTTCATCCCTTGTTTCTGTATCATCTATTTAT  
CAGGTGCTTTCTCCCCACAAGATAACTACTTGATAAACTGTGGTTCAAATACAGATGTCTTAGTTGATAA  
CAGACTCTTCTTGGTACTCTAATTCAGTTTATACCTCTCAAGGTAAGTCTATTGTCTTAGAAGAAAATA  
CAAACCCATCTTCCAATTTATCTTTCTTTATTCTAGTGCTAGGGTTTTCAATGATGCTTCAAAGTATGTGT  
TCAATATCAACAAGATTGGGACCCATTTCTTGC GACTTCATTTCTCTCCCTTCACTTCTCACAAATTATGATC  
TCAGAAAAGCAATTTTCAGTTTTTCTGCAAATGGGGTTTTGCTTTTTATTGTTAATACTACTATTACTAATA

CTGTGGTTAGAGAGTTCATATTGATGGTGGATAAGTTTGAACCTGAAATTAACCTCACACCTAATCCTTAT  
GAATCCAGTTTTGCTTTTGTAATGCAATTGAAGTGTTTCAGCTCCGGATGATTTCATAATTGGTGATG  
GGGCTAAATCAGTTGGTCCCAAAGGAATTCGGGAGTTTAATCAGAATATGACGTTACAAACATTAGAGA  
CTGTTTCATAGGATTAATGTTGGAGGGTTAAAGTAACTCCTTTTAATGATACTCTCTGGAGAAGTTGGAT  
TGCAGATGAAGATTTTCTCATTTTGAAATATGCTGCTAAAATTGCAAGAACTTCTCATGTTCCCAAGTATC  
AAAAGGGTGGTGTACAAGGGAAATTGCTCCTGATAGTGTCTATATGACAGCACAGCAGATGAATACG  
GATAATGTAACACAGATTTCAAATTAATATCACATGGAACCTTCTGTGCTATTAAGATGCTTCCCA  
CTTTGTTGCTTGCATTTCTGTGATATTGTTAGTTTGTACCTGGACAGTTGACTTTAATGTATATCTCAA  
TGGCTTACAGCATACAAAGACCTTGATTTATCTTCGCTTACATTCCGTGAGCTTGCTACACCATATTACA  
TAGATTTTGTGGTATACTCAGGTAGTTCAGGCGTTGTGCAAGTAAGCATCGATCCTTCTAACTTAAGTAG  
TTCAATGAGGAAGAATGCCATTCTGAATGGTGTGAGATTATGAAAATGGTTAATTTTGTGGCTTCCCGG  
ACAGGTTCTAACAAGAGAAATGTTTGGGTTATAGTGAGTTCTGTTCTTGAAGTTTTGTTCTGCTGACTG  
TGGTGATGATTCTTGCTGCTTTGCTATTCTTTGTCTGCAGAAAGAAAAGCCAAAACCAAAGCCCTCAGA  
AAGTGCTGGATGGACGCCTTACGTGATATGGAAGTAGTTCATGATACATTGTCTGATGGGACTTC  
GCCTGGACCAAATGGATATCTAGGCCAGAGGATCCCTTTGCCGAAATACAATTGGCTACTAATAATTTT  
GATAAGAGTTTGCTAGTCGTTCTGGTGGCTTTGGGATGGTATACAGAGGTATTCTTGGAGACAACAGA  
AAGTTTGTATAAAGAGAGGTGTGCCAGGTTCCAGGCAGGGCCTACCTGAATTTCAGACTGAAATCACT  
GTTCTTTCCAAGATTCGCCACCACCATCTTGTTCCTTGTAGGTTATTGTGAAGAACAGTCTGAGATGAT  
ACTTGTTCACGAGTATATGGAGAAGGGACCTCTTAAGAGGCATTTGTATGGTCAAGGCATATCACCTTA  
TCTTGAAGAAAAGGCTTGAGATATGCATAGGTGCAGCAAGAGGTCTCCACTACCTTCATACAGGTTTC  
GCTCAAGGAATCATCCATCGTGACATAAAGTCAACTAACATCCTCCTTGATGAAAATTGTGTTGCTAAGG  
TTGCTGATTTGCTCTCAAGGACAGGCCCTTGTCTTAATGAGACCCATGTCAGCACTGGTGTAAGG  
AAGTTTTGGCTACCTTGATCCGGAATATTTTCGGAGGCAGCAGCTTACTGACAAGTCAGATGTTTACTCG  
TTCGGAGTTGTTCTATTTGAAGTCTTATGTGCTAGACCTGCAATTGATCCTCTGCTTACACGAGAGCAAGT  
TAATTTGGCTGAATGGGCTATGCAGTGGCAGAAGGATGGACAACACTAGACAAGATTGTTGATCCCCATAT  
CAGGGGCCAGATAAAGCTAACTGTTTGAGGAAGTTCGGGGAGACTGCCGAGAAATGTTTGGCTGATT  
ATGGCATTGATAGGCCAACAAATGGGTGACGTATTGTGGAACCTGGAATATGCATTCCAGCTTCAAGAAT  
CTGGAACACTTGGAGAAGTGCCTGAGATTTCCAATGAGCTTCCAGTGCCATTGCCAGAGGGTCTCCACA  
ATGAGGTGTATAATGGTGATGGGGCTTCAGATATATCGACAAGCAAGGATTTTTCACAATTGATGACTA

ATGAAGGAAGATAACTAGTCTACAGTATAGTGTACCATCAAATCATTGTTCAACAGTTTGTATCAATGTT  
GATTTTGGTTCACTTTAACATTTTCTTTTACGTTTTTCTTAATTGGCAAAGCCATCATATACTCTTTGAACT  
AATATACTATAAAAGTGTGTATCATGCAATAACCTGTCCTATGATGTAATCCTTGTCATGTTTCATGCTCCT  
AACAAAGAAACATAGCGCTGGATTGATGAACATCTATAAGCAGAAATGTTCTTGCGTACCAAATCCATC  
ATAGTCTGTTTCATGCTTTCTATTACCTCAAATCCCCTAATGCCTATCAAATAAGGGTCTACCGATCAATG  
ACCATGGTGTCTTAGGTGTGATCTTGTACCCATAGTGCAGTACACTGAACAGCAATCCAAACTCCCTGCC  
CTCAGAAAAAATAAAAGACCCCCTTTGTATGATATTGGTCGGTTTCTATGCTTTTGGATGGTTTAGGAC  
AAATATATCCCCGAACTATCGTAAATGACATGCAGATACCATCTAATATACTTTTGGAACATTGGTGCCC  
CTGCCATTCAAAAAGTACAGCATATATGCCCTTCACTCTAACAGAAGACTAAATAGGGACACGTGACGCT  
ATCTTATCCGTCGATCCGATATTTAATAAATGTCGGGATGGTGGATAAGATTATGACACGTGAAAGTCCG  
TTAGTATAAAGAGTATATATGCTCTAGTTTTTAGACGGTAGAGGCATCAATGTCCCAAAGTATAATGGA  
GGGTATCTGCATACCATTACGATAGTTGGGGTTATATTTGTCCTTTTCCCTTTTAAATATTATAGATAT  
ATTTACTACATTTAAGGCCAAACACATACACAATCCCTCTAACTTGCTCTCATTTTTTATTTTGGCACTCCA  
TCTTAGCATTGTTCCATTTAACCGTTACACTCTATTTTTTACGTACCATTTTAAACACGAAATACTATTTTA  
TGATTTGTTTATTTTTATATATGTTCTTCAATTGCATTTTCTTATTTTAAAAATCCGGCATGTGTCAGTTAAT  
TTTAGTAAAAATTTAAATTAACGAACAAACATTGATTCTTTTTGAGAGTTTTTCTGTATATTTTGTGTG  
AAAAATAATCGACGAAATTGTGTTGGTTTTCTTTCTTAAAAAATTATCGACATCCCGACTCAGTCCAGTTT  
TAACATTTATTTAGTAGTGTATTAGCAAAGAACATGACTCTTTTTTACTCGTTTTGAAGATGGATTTTTT  
GTTATTCGTATTCAGTTATATTTAAATTAAGCGAGATTTGCATCAAATTCAAATAGCCTAAATGATA  
AGAAACAAATAAATATGTAGTATTATTTAATTTAATTGAATGTTTAAAGAAAGAAAATCAAAAAAAATG  
TCGATTTATTTCCATGCAAAAATATAAAGAAAAAATCTCAAAAAATAATTTTTTTTTCCAAAAAATCTA  
TGTTCAATTCGTTAATTTTTAATTTTTATTTACGAAAATTAGCAAACACGTCAAATTTTAAATAAAAAACT  
GCAATTGAAGAACAAAAATAATAATAAAAAAATTCATGTTTGAATGGTACATAAAAAATGTAATT  
TAAGGGTTAAATGGAACAAATTAAGTTGGAGTGTCAAATATAAATAAGGAAAAATTTGAGGGAT  
TGTGTATGTGTTTACGAGCATTAAACCATCATATTTTTACTCTTGTGCAGTCAACTCATTTAAGCAGTTC  
AGACCAAGAGTTGGTTTTACGATGAGTTGGGTCTAACTAAATTTACATTTACCTCCACTATATTATTTTC  
TTTGTAATTGTGGTATGAATATCTTAGCTTGTGACACTAGCGTAATATCTTAAGCGTAATATAAATCTTTA  
ACAAGGAAAAATGACCAAGAATATCCC

>M6-PGSC0003DMG400028407 M6 RLK with malectin domain



TCAATTAAGGAATGACAGTAGGTAGTTTTCTCTCACGTACGCAGATGATGAATTGTTTATCAACTGTG  
GTGGCAAGGAAGTTACTGTAAAGGGCAAACACTACTCTGCTGATCAGAACCCCAATGGATCATCAACAT  
TTTCTCGCAATGAGACAGGAGGTTGGGGTTATAGTAGCATGGGTCTTACCGAGAGTTTGGATAAGCGAC  
CTGAATCATTAAATAATCAAGGATACATGTGATCTTTCCGATACTACAGCAGTTCTGGTTGAAACAGCCCG  
TGTAGCCCTGATCTCTCTCAAGTACTATGGATTTTGTCTCCAATGGAACTACACAGTCAAATATATT  
TTGCTGAGATAGGCTCAAGTAAAAACATGCCTATCCCATCACACCTAAACGAGTTTTTGTATTTGACAT  
CCAGGTAATATCTAGGAATGACGCAAGTCATTTTCTATATAAAGTTTTCCATAAGAAAGCCATTAATTTT  
TTAAAAAGTTTTCCATGAGGAAGTCATTTCTAGAAAAATTTTCCAAGATCAATTTATGGTATTAGGTTA  
AATATCCAAAATGAAAAATTTATGGTGTGGTTACTAAAAAGGCTTAGTTATCAAGAAAAACAACAT  
TTCCATCAAAAGATAGAAAAAGACTTCCTTCACTTGTGGATGGAAGTCATTTTCTTATATAACTTTCTC  
AATTTTTACTTGCTTCAAGTAACACTTAGACATTATTGTTAAAAAATTTTACTCAAAGTTGCGTCAAAA  
CATTCCCCTATATATTATCATTGATCTATAAAGAATGTTCCGGTGTGGCAATTTTCCATTGAAAATAATTTCC  
TGAAAAATGTTTTCTGGTACAGGATTGGTGAGTGAAAAATGCTTTTTGGAAAAAATAATTATA  
TACAAAAATTGATTGAAACAGTAACAAATGGGAGAGTGTGGTATGAAAATTTGAGTACTAAAGATTA  
ATTAGGATGTGTAACCTATTGGAGCCAGTAATATTAAGTTAAAAAATTCTATAGAAAATTGACTTCTGTC  
CGTAAGTGAGGGAAGTCCTATTTCTCATTTTGAAGGGAAATGTTTTCTACCTTCTGGTTACCAAACA  
GAATCCGTCATATCAAACACACCCTAACATGTATATATTTTCCACTACAACCAAACACCATAAACCATTT  
TTCCAGAAAAATATTTGTCATGGAGAACGACTTCTGTTATACCAAATAGAATTGTAAAGGTATCATCTTT  
GTAGTTCTTTGAAAAGCTGTCATTGTAGGGGGAGAATGTACGGAAGAACTACAATATAGAAGCTGAAA  
AATTGAATGATGATGGGGATAAATTGGTGGAACATAATACTTCTATAAAATCCTATCTTGAAATTCACTT  
GTAAGTGGTCTGGTAATGGCTCGGACAACACTACGGTCCCCTCATTTCAGCTATTTCTGTAACCAAAGGTATG  
TTTTCTTTATCTGGTCTACTGTCAGTCATATTCTTCAGTGCCTTTCTAAGACAACAATACTTTGATGGTAG  
TTCGTGTACCACCACCACCAAACAGCATCCGAAACTGTCTCCTGCGCTTAAGGCTGTGATAGCAGTATC  
ATCACTGTTTTTCTTGCTCTACTTTTGTCTTTACTAAGGAAGTTGGGTTATCTTGGTGGAAAAAGATCAT  
CAAAGGAAGGTTAGACCGCAGTATATATGGAGTTTGGTTTGGTTATTATTACAATATAAATTTGTATAAC  
TCACTAAAATAAAATCTGTTTGATTCTTTGTGAAATGCTAACACATATCAAAGAAGTAAAAGCAACTG  
AATTGTTCCCAGGAGGAGTTTACACCTTCGTCAAATAAAAGATGCCACTCAGAAGTTCAATGTTGTGAA  
CAAATTAGGTGAAGGAGTTTTGGACCTGTTTATAAGGTTAGTTTTTGTGGATTTTGTAGCATTCTGTTA  
TTCATCAAATCATTCCCATGACCCTGGATTGAGCTGCTGCTTATGTACGCATATAGTTACGGCCTTGGTGC

TTTTTTCCTGAAGGGATTTTTGTACTTTATCTGTCACTGCTGCACATATAACATATGAAGAGCCCCTTAT  
CATGTTACGTTTTTCGAGCCAATTCTAAATAATGGGGGGTGTCTCTCATCAATACAGGGCATGCTCCCTG  
ATGGGACTACAATTGCAGTTAAACAGCTATCAGGAAAATCAAAGCAAGGAATACGTGAGTTTGTAAATG  
AAATTGGCACGATTCAGCTCTGCAACATCCGAATCTTGTGAAGTTAATGGGATGTTGTGCAGAAGACA  
ACGAGCTCCTACTCATTTACGAATACATGGAAAATAATTCTCTTGACCATGCATTATTCGGTAATGATAGC  
AAGGCTCATATGTTTTGACAAAAAATTCTGAAGTAGTTAATAAAATAATGAAATTTCTTTTGCAGGTCCA  
GAGGAAATTAATCGAGACTAAATTGGTCGACGAGGGTCAAATTATCCTCGGGATAGCCAAAGGATT  
AACTTATTTGCACGAAGAGTCCAAATTGAAGATTATCCACAGGGACATAAAGCCCACAAACATACTCTTG  
GACAAGGAGTTGAATGCAAAAATAACTGATTTTGGATACGCAAAGCTTAATGAAGGGGAACATACTCAT  
GTCATCACACGAATTGCTGGAACAACGTAATTTGATAATCCTGCTAATCCTCCTCCACCCTGTTACCTTAA  
AGCTTATGCTACACATATAGTTTCTTTCGGATAAGTGTATTTGTTCTCTCATTGGAAGTTCTTTTATAGAG  
GATATATGGCACCAGAATATGCAATGCGCGGCTACTTAACATCAAAGCAGACGTTTACAGCTTTGGGG  
TTGTTACACTTGAAATTGTGAGCGGGAGAAACAGTGCTAGTTGCAGGCCAAGTGATCAGACAGTTTACC  
TTCTTGATTTCGGTAAAGCCTCAAACAAGAAGTTTTCAATTTCAATTCATTGATGCACATGCCTAATAAACAG  
TTGCCATTGACTTTTTACTTGAATGAGTTTGTCTAATTTGATCGATGTCTGCTGGTTCGATTGCAGGCTTAC  
GTGTTGCAAGAGCAGGGAAATTTGATGGATCTAGTTGATCCAAAATTGGAACAGATTATTCTTGGACA  
GAAGCTAATTCATTCTGGAATTAGCAATGATGTGCACTAATCCATCACCAACTCTCAGGCCAACCATGT  
CTGAGGTAGTGAAAGTTATTGAAGGAAAAACTAAAATCAAGACCAAATCTTCAACAGTCCGGCGTTCAA  
CAGACGAGATTGCATTGACTAAGGCCATGGCTGCACTCTCTCAGACTTCTCCATCTGAAAGCTATTCTAC  
AGCAGGGCCATCAGAACTACTCCTCCCTTATCTAACAGCAACAATATTACCAATGAAATTTGAATCCAA  
CATCTCCCATTATGAATATTTCCAGATGATTACTGTACTTAGACAATGAAAATCAAGGAGGCAATGAT  
GCTTCAGCATGAGTTTGAACCTTTTTGTTCTTGTGTTTGAATAAGGAACTTTTGGTCTGACATATCAGTG  
TAAGATTTTCATTTTAGTAACCGTGTACATTGTCATCAAGATTGTACCAGATGATTGATTTATGCTTTACC  
ACTGAATTCATTG

>M6-PGSC0003DMG400028454 M6 RLK with malectin domain

CTCTTTATTCTATCCATTGAAATGTTTTAAACCAGGAATCTCGAGGCGAACCAGTTTTTCAGGCAGTGTCC  
TTCTGAACTAGGGAACTGATTAACCTGCAAACCCTGTAAGACCTTTCTTTTCTCTTCCACTTTGTTATCTT  
CTCCTAAAGCAACTTGAAGAATAATTGGCATTGTCACCTGAATGACTGATGCATAGACGAGTGGGTGA  
TTAATCTTTTTCTACTTTCAGGATTTTATCCTCCAACCAATTGGTGGGGAAGTTTCCAACCTCATTTCCAA

ACTCGTAAATTTAACGGATTTGTAAGAGCATACAATCTAGCCGAGCTCCTTTTAGCTCTTATCTTTCTCGG  
GGAATAGAATATCTCACAGTATAATTTTACTATACAGTAGGATAAATGACAACAATTTAGTGACAGAT  
TCCGGATTTTATACAGAACTGGAAACAACCTACCAAACCTGTACGATCTTTAGAAATACCTTCCAACTTCA  
AAATAATATTTTGGCAAGAGTTTCTAAACTTTTTCTTGACGATATATGAAGGGAGATGCATGCCACCGGA  
CTAGAGGGTCCCATTCCAACAAACATATCTCTTCTGAATAAATTAACAGATTTGTGAGTAGAGAACCTTT  
CAACATTATCTTAACTATTTTTATTAGGTTTTGTAGAGCATTACTCTTTGCAGTTCTCTCACGGTCAAT  
TTTGTATACAGGAGGATCAGTGACATAGGTGGACCAGCTCAGGCATTTCTTCACTGAGTGATATAATG  
GGATTCCATAACTTGTATGTCCAATTATACCGAAATGTGGAAAACATTGCACAGTTACAGTGTGCTATTA  
AGCATTCTAGCTTTCTTAAGCTAATAAAAATATGGATACAGGGTATTAAGAACTGCAGCCTTTCTGGAG  
AGCTTCTGTATATATTTGGGCGATGAAGGATCTGCAAACATTGTAAGTTATGGACTTATTCTTCTGCACC  
TAATGTTCAAACCTTCTCAGCTGCATTCAAATTACATGGTATTAATAGAGAGAGAGAGAGAGAGAGAGA  
GAGAGAGAGCTTTTACATGATTTTCTGTCCTTCTTCTGTCCTTCTTCTGTCCGTGACCTTTGGATT  
CTCTGAGTCACACTATTAAGTCTCTATTGGCGCCTTTTCAAGTAACTGCCTTCCCCAGTCAAAAA  
CAATTGAGAAATCATTCTTCTCTACCAAGAACTCCTGTAGAAATTAAGCCCTTTTAAATTTCTTGTGTTG  
GAAAGTTGAAATATTTACATCTAGTGTGCTCTCTGTGACTGTAAATTTTTTAGCATTTCAGTTTTAAAA  
GATAATTGAGGCTGTTGAGAAATAATGCGCTCGTTCTTAATTAGTATATGACACCTTAATATCAAAGG  
TTTCATGCTGCTCTTTGCTTTTCACTAACTTCTCATCCTTCTTCTTGTATCTCTCCAGTACATTATTTAG  
TCTAACATATAGAGTTGGCTCTTATACATTTTTCTTCTACAATATACATGTGGCGGTTGTAAGAGTTTGTG  
CACACAGATTCATCTGCTGTATCTCTTCTGAGAGTTCAAATGGTAATCATGATTTCTTTTTAATTTCTGC  
AGAGACGTTACCTTCAACAAGTTAGTCGGAGAAATCCCAAACAATATTAGTGCTAGAAGTATGCTAAAG  
TTTGTGTAAGTTGAATTGCAAAAAAGTGGATTCTCTCAAATGTGATGTCCTTTTTATTTTATTATTAGCAA  
GTTACATCAGTCTCTTCTCAATCTTCTTTGCTCATACCCGAACATCTTCGAGTATGAAGTGTATAACATGT  
GCTTGCACCTCCAGATTTGCTGTTGCCTTACTGCTTTATGTTCTCTGCATAGGTTTCTTACTGGCAACATGC  
TCAGTGGAGATATACCAGACTCAATTTGAAGACTGGAATAAATGTGTAAGTGTATATTTGTTAATATTC  
TAATTTCATAACAATTTCTGCTGGTGTATGATGGACTCAGTCTTTGCGGAACATGTCATAATTTTTATTC  
ATAAACATAATGGTCATACAGTGGCATGCCAAAGCAATTTTGATTCATTACGTTGGCATTAAATTTTTTC  
CATATATTGTCTTCATGTGGATCTCACAACCTGCTTAGTTCATAATAGGAAAGATGACATCTAACAGCGTC  
CGTTGCGCGCAGTGATCTTTCTACAATAATTTTACATGGCAAGGACCTGACCAATATGCTTGTGAGCAG  
AACATGTAAGAATAATTCCATTTTTGTTAATTCATGCTTTTACATTGTTTATTGGATAAGCATATATGGTTC

TGACAATTATTCATTCTACAGGAATCTGTATTTAACTTGTACAAGAGTTCTGCAGCAGTAAGCCCCTTGT  
AAGATGATTCCCTTATTATCCTGAAACATTAATAATTCTGATTTATGATGAAACTGAGAGAAAAAGGAAGT  
CAAAGCAGAAGTGGTTGCTTTACTATCTGATTTCGGATTTGGGTCTAACTGCTTTTGTGCTTTAACTTCTTC  
AGAATGAGAATTCATCCATGTACGAAGGATTTCACTTGTCTCAGTGTAAGTATGTTCTTTTCTTCTCTGG  
AAAGTTATACAATTTTCATATGGAATATGAATCCCATCAGTAGCAAGAATCTGAAACTTTATCTTTAGCCG  
CTTGGCCATCTTCTCCTTCACTCAAATAGCAAATTGCTCAACTATGCAAGAGACTGTAGCAATTTAGTTTC  
ATTTTTGATATTTAAACAAAGAGACATTCTAAGGGTGGATTGAGTCTTGGTGCCCGTTTGGATTGACTTATT  
TTAGGTGCTTTTAAGCCAAAATAGCTTTTAAGCAGTTTTGAAGTGTTGGGTAAAGTTAAAAAGTGCTTA  
TAAGCACTTATTTTAAAGCCAAAATAACAAAAATAAGCCAAAAGCCATAATTTAGAAATCTTAACTTATG  
GCTTTTGGCTTATAAGTCATAAGCCAAAAGTCAATCCAAACAGGTCCTTAACTCATGTATATAACAAGTA  
TTAGATGATTTGAGGACTCACAACCTAATCGTTGGAATATTTTCTGCTTGATCATTTTCCCAACTTATG  
AAAAATATTTTGAGCATTGACTTCTATTATTTTCATTGGCAGATGGGTGTTTATTACATGTTAATAGTGGC  
GGAAATGATTTTACTGTCAAGGAGAGCGATGGAGAAGTTCATTATGCAGGAGATGCAAGCGTTGATGG  
TGGTTCTGCTAGATATTTTACAGCAGTAGCAACAATTATTGGGGATTGAGTAGCACTGGGGACTTTATGGA  
TGATAATAACGACCCAAAATGCACGTTTTATTGAAAGTACATCATCAAAAAGCCTCTCTGAATTGTACAAT  
AATGCACGGATATCTCCCCTCTCACTCACTTACTTCCGTTATTGCTTGAGGAACGGGAGTTACAATGTCA  
GCTTGCACCTTTGCTGAGATAATTTTTACAAATGACAGCACCTATAGAAGTCTTGGAAAGGCGAGTATTTGA  
TATATACATCCAGGTTGGTATGTCCATTAGAAAACTTTCTATACGCTTAACTATGTTGGATGTGTGAA  
AATATGAGGAAAAAAGAGAGAACCTGTATTGTATTTGGTTGTAGATGATATAAAAGATGCCTCCACATA  
TAGAAGTTCAGGCAATTACAAATATGGTAAGCTAACCTAAATGAAATAAGAGAACTTATTAATTTAGGG  
AGACTACACATCCAGAATTAGAAAAAATGCTCTCTACTACTTACCTAGAATATATTTTAAACATCACTGC  
ATTAATTCTCCCACAACGCGCCTTCCAAACTCAAGGTGATACAGCAACTAGTGTGTTGCAAATCAAAGTG  
AAAAGTGATATGATACTACTTGGACAAAATAGAGTAGGAGTTATGATTGAATTTGAGGACATTCATGTC  
GTGAGCTTAACTAGATGGCTACAGAGAAGCAAGCACTGTACCAGATTGATTGGATAAATGACCATTCAT  
GGTGTTTAACTTGGTGACGATATAGTAACCATGCGTTGACTAGTACTAGTCTCAACTAAAAGTGTTCTCT  
AGAAAGCGACATGGTGCTGTCTGGATGGTGACACATCAGCTAGCTAGACAGCTATAGACTGTTTAACTT  
GACAGGTAAACAGGTATAGAGTGATGATAACAACCCAACGCGGACTGTCGATACATGGCACGTGCTGC  
CCAAAAGATGCTGGAACCTGGAAGAGAGAAGAAAAGAGTGATGCTGCTTTATCTGGAAAGAGACGAGC  
CTTATTATGAAAAAATGAAAACTTTGTGTGGCAGGCAGCGTTAGATTGAAGCTATTAGATCTATAACA

ACAAAGTAGTCTCTATATAGGAGTTAGACAACACTAGGATACAAAATTTTTCTTTCTTTATACTGAGATT  
TTTGAATAGGAAGAATTTAGTATACTATTAATCTAGACATATTCTAACATCTCGCTGAATAAGTTCCTGTG  
ACTTTCCACAAGATACCTACACAATATTCTTTCTACTTCAGGAGAAATTAGTTTGGAAAGACTTCAATATT  
GTGAATGAGGCTGGTGGAGTTCAAACACCTGTGGTTAGGCATTTTAACACCAGTGTAACAGATAATTTTT  
TGGAGATTGATTTTACTGGGCTGGCAAAGGAACTATCAGAATCCCATCTAGAGGGAAATACGGTCCAC  
TAATATCTGCAATCTCACTCAAACCAAGTAAGTTTCTTCAATCTTAATCATTATAAGGGGAATATCATAGT  
ATATCTGCTTTCACACTTCTCACTTCGTTTCCTTCAAGTATATTGTGTATTTAAGCATGTCTCAGTGAGAAC  
TAACACAAAAAGACATGTATCATTTTAAACTTTAAAGTCCCAAGAGATATTCTAGAGATTGTACATATCAT  
ATGAGAAGGTTCATAACATGATAAATTTAATTGTTTCTAGAAGAAATACTGCAATTGAATGCATGATTACA  
TGCATTGTTTGCTTAGTTGTGGGGTTGACATTGTTTATCAACTTCCGTTGTATAAGATAAAAATTGCTGCTA  
TCTAACATGATCCATGCTAATATTGTTGAAGTATGTGACCATCTCATCTGGTCTGATACCATGTTGAAGTG  
TGTGAACATCTCATTTAAAAGCTTAAGCTATTAGAGAGAGCACACTTTAACAGTTAATTATATTCTCAACA  
AATATGTGGAAGATTCTGATATTTTTTTGCCATTTCCACCGTTCTATTAGAACACCAGTTGGCGTCTGAA  
ATTGCAAAAGATAACTGGTTGGCTATCTCTCTCAACCGTTGATTTGCTTTGGTCTCTTTAGAGTTGCGACA  
TTTATCTAGAGATCAAGTAAACTATTATCAGCACCAAAAGCCAATCTGTGGCTTTAACTTAGCCTGCTCCG  
AATCATTGAAAGAGTAATTTTTCAATAACTTTCCTAATTTTTTACTGGGCAAACACTAGTTTTTTGAAACTAA  
GCTATTAAGTTCATAACATGGCTTGATATTCCTGTGGTTCTGTACCAACTATAAGTATTAGTATGTTACTG  
ATTTATAGTATAAACTTAGATGTTTACCAGGTGATAGAATATTTGTATTGTGGTTATTTCAACCAGGCTCT  
TCTTTTCAGCTTCCAATATATAGTTTTAAGCTCTAAATACTTTTCTATTGCTATTTTCTTTTCATCT  
AAAAAATAAGTAGGAGTTAAATCTCTTCTGGTATGTCCGATGTAGGTTTACATTTTAAAACCTGTTTTCTC  
TCCTTTTTTGGTTATTGATTCAAAGGGTCATTCTATATGGCCGAGGAAATCCATTTTCGTAATTTTGGTTG  
AATTAACAGACAGAAATTCTCAGCTTGAAGGAGTGTTGGATGAGTGCCACATATATTTCTTTGCTATTA  
TTTTCCCATGAATAATATGCATGTTGATATTCTATGTAATCAACTGGAATAATCTTATTTTCTATTGCCCT  
GCTGCTGCATACACATAACAATCTTGTCTTTATTTCTGTGCAGCTTTTGGATCTTGTTTCAGAGGAAGATAA  
AAAGAGTGTGACTGTTTATGTTATTGTGCGAGTAGTGGTTACATGCATTTCCCTGTTGGTAATGAGCACA  
CTTTGGTGGAAAGGATATCTTCAATGCAAAAAGAAACAGAGAAAAGGTGATCACTGAACAGGTGTTAG  
AATGAAGTAATTTTAACTAGCAAATTTTATGACTAGGCAGCCAGCTGATCCATGCATTAATGATTGAAA  
GAGCACATTCTACTGAAATGATAATCAAAGAAAACCTCATATCCAGAAGTCGTGACGTGTAATAGATG  
ACTAACAGTAAAGTCTCTCTATTTCCATGACAGATTTAGAGGGCATGGAGCTGCAGACCATTTCTTTTA

CTTTAAAGCAAATAAAGGCTGCCACTAATAACTTTGATGCTTCTAACAAGATAGGGGAAGGTGGTTTTG  
GTGCAGTTTTCAAGGTATCACTTTGGTAACAACAGTAATATAGTATCGTCTTTATCATTATTGTTTGTGAA  
CTCTGACCAAATAATTTATGTAGGGTCGGTTATCTGATGGTACGTTAGTTGCAGTGAAGCAGCTCTCGCG  
TCAATCAAGACAGGGGAACCGTGAATTTTTAAATGAGATTGGCATGATTCATGTTTGCAACACCCAAAT  
CTTGTTAAGCTGCATGGTTGTTGCATTGAAGGGACTGAATTACTGCTCGTATATGAATACTTGGAAAACA  
ATAGCCTCGCTCGCGCATTATTTGTAAGTTATTCAATCTCTTTTAAAAAAGTTCCTAAACTATTACTAACT  
CTCTATGAAATGTCAATTAATAATTTTAGCATGTTGGACAACCTTAGATTCCGAGAAAAGTCAATTGATAC  
TTGATTGGCCGACAAGGTTCAAGATTTGTGTTGGGATTGCTAAAGGTTTGGCTTTCCTTCATGAGGAATC  
AAGCCTTAAAATTGTACACAGAGACATTAAGCTACTAATGTACTGCTAGATAGAGATCTAAATCCCAAA  
ATTTCCGACTTCGGACTTGCTAACTTACTGAAGATGATAATACCCATATTAGCACTCGAGTTGCTGGAA  
CAATGTAAGTTGCAACGTAAAATTCAAAGTAGATCTTTCTTTTTTTTGGCGTTATCTTGTCAGCAGCGTGG  
TTAGGTAATAATTTGTAGCATAATTGTATGTTAATAACTGCAGAGGATACATGGCACCAGAGTATGCACTA  
TGGGGTTATTTGACTTACAAAGCAGATGTCTACAGCTTTGGAATTGTCTCCTCGAAATTGTTAGCGGCA  
AGCACAACATATGGCTATGTGCCTCCGACAATTCATTTGTCTTTTAGATTGGGTATCTTTCCTTTTCCTTT  
TTGTTAATGCACTTCAACAAAGCCTGACTAGTCTACAATTTATAAGATTGAGAATCCTTGAACTTTTTTAA  
CCTTGAACCTCCCTCACTCCCTTTGAAGTTGCTAGCTTATAAACTTTATTGCAGGCCTCTCACTTGCTGCA  
AAATGGAAAAATAGAGGAGCTGATTGATGATAAATTGGGTTCTCAGTTTAGCAAAGCAGAAGCAGAAA  
GGGTAATAAAAGTAGCACTATTATGCACTAGTGCGACGCCTTCACTCAGGCCTGTAATGTCTGAGGCTG  
TAGGCATGCTTGAAGGAAAAATTGATGCCCTGATAGTATCCCAGAAGCAAGTATGTATACTGACGATT  
TGAGATTTCAAGCCTTGAAGATTCCAACAAGAGAGGCAAAATCAAAGTGAGTCAAGTAATCAAGCTC  
AGTGTTCAAGCATCCAACTGCCTCTGATCTCTGTGAATACAACCCCGAATCAAGATCTGACTGACACTC  
TATTGTGTGTGATTCTTATTTAATCTCTTGCCGGTGTGCCTGTATCTTATGGCTCATGAGGGATTGCATT  
GGTTCAAAGCCACTCATCGAGGTATGATTGTTGCAAGTTGTAACATTTGTTCAATTTTTTGTGAGTAAG  
ATTTCTATAAAATGTACATAAATTACTATCCCAAGAAAAAGTGTGAGGAGTTATATTTCTCCAGCTCTGCA  
TTTTTACACCTCCTAGCTAGATTTCAAAGTTGTATAAAATTCTGCCCCATTGTGATATACCTGAAATGTAG  
ACTATAAGGTCCTTCTGTAAACAAAAAAGGATTCGTTGTTCTAATTGTGTCAG

>M6-PGSC0003DMG400029712 M6 RLK with malectin domain

TTTACCTGCACAGAACGTTTCCATTATCACTCCACTGATTATTGTGTGATAATTAGTGCCAGAAAACAA  
CAAGGGGAAGTACAAGATTTGAGTATGAAATCAATGAGTTTCTAGAAGAAAATAACAACAAATTGAAGCA

AATCTAAGTAGCATTGGAGCCGAAATGCTGAGATTCCACTGTTTTCTTGTTCTTTGCTTCTGCGTGG  
GTCTTCAGCTTGTCTGCTCTCGACATGGTCAGCCCTTTTTCTTTGGTTGTAATGTGAAATGGTTCAACT  
AATTTTACTGGGTTTCTTTAGTAGTGATAACTTAGTTTTGGGATCTACTTGTTTTATTTGCTAGTAGTA  
ACTTTTTATTAGCTATACTTTGCTTATGTAGATTTGTTTTAGATGTAGTAATGGAATGATGTTTCTCATT  
AATTGGGATTTTGCAATGGACTTGCTTTGATTTTGAATGATATTATGCTGATTTTAGCTAGTTCTGATGTT  
TTATTCCTGAGTTGAATACTGAGAAGTTCTTTTTATTATTTATTTGAGTAATGGATTTAGGGGCGAAGATT  
CGTACTACTAAAATTCGTACATATATGATAATCAATGTAGTTGGAATAATCGTATTGAATAGTTGCATTG  
ATAGTTATCTTCACTCTCAAATTTGTTAATTGTTTTCTATTTTTGAAGCTCTAGTGATCCTTAAAAGAAGTT  
AAGGTAGTATGTGGAGTGCTCGCAGAATGCAAGACAAGAAAATGAGTCTATAATTGCAGTTCAATCCCC  
CAAATCAGCTCGGATCAGTTGTGATTAGCTATATTGAATTGAATCTTCTATGTTTCACTTCACTTGG  
ACCTGTTTCAATCCAATACTAGAACTTATGCCTTTTAAAGTCAACTTAAGGAGTCTTTGAATGTCGCGCTTA  
TCCCTATGCGCATTACTGTTTTCTAAACAAGTAAACTTTTTGTAATGTTTTGTTGTTGCACACTTGCAGTT  
AGTTGTTTTAGGTCATGTTTTACTTTAGCTCTTTTTGGTTAAGGGGTGGAAGTGGAAAGTCGGGTTTGA  
GAGGGAGTGAGCATGCTTTTTCTGGTTGTGCTTTGATGAATCATAGGAGGAACAAATAAGAGTAGACTC  
AGAAATCTGCTGAGCCTCTTTAGGTCTACTTTTTGCCATTAAACGATAAGTTTTAAAGCGCATCAAATTA  
TGTAACATTAGTGAAAAATAAACTATTCCATCTCAAATATTCAAGTTGCTCCTGCTTCTGTCAAGTGT  
AGAGTTTGATAAACTTGTCAAGTACCTCTAGGACTACATTTTTTCAATAAAAAAAGCTTCAAGTGCATT  
CACGCAGTGTAACACTAGTGAAGGTTAAAGTTAGTTTACTGCTGATATTCAAGGTAGAGTCTACTGCTGA  
TATTCGAGGTGGACTTGCTTCTCTTTTGTGTACCTGTTCTGCTTTTCTGGATATCTAGTGCTTTTATTCCA  
TCATATTCGAAAATTTAATTCTTGGCTATTACTCATTAGTCTCCTAGTTGGCATTGTTGTGTTCACTCTACTG  
TTTACTCACCGCAGATCCATAAGTAATGCGAATAAGCTGTGGAGCTCGACATGATGTTTCACTGCCCCCT  
ACAAAGACTCTCTGGTATAAGGATTTTGCATATACAGGAGGGATACCTTCAATGGAACATCCCCAAGTT  
TCATTGCGCCTCAACTCACTACGCTGCGGTATTTCCCTTATCGGAGGGACCTGAGAATTGTTACAATATC  
AAGAGAGTCCCCATGGCCACTATTCAAGTGAGGATATTCTTTGGAATGGTTGTAGAACCAAGCTTTGATA  
ATGAACCACTATTTGATGTTTCTGTTGAAGGCACCTTGTTTATACTTTGCCATCTGGTTGGAGCAATCAT  
GACGATGAACAAGTATTTGTTGAAACACTTATTTTTCTTGATGATGGTACTGCCTCTCTTTGCTTCAAAG  
CACAGGTCATGGAGATCCAGCTATACTTGAATTGAAATCTCCAAGTAGATGACAGAGCATAACCATTTT  
GGTCTGACTTTGGTAAAGGGACAATTATCAGAACTGTCAAAGACTCAGCTGTGGTGTCTCAGGAATCA  
ATGTTTGATGATGACTACAGTGGTGATCATTGGGGTGGTGATCGGTTTTGGAGTTCAATCAAGACATTT

GGCCAGAATTCTGATCGCCGCATTTCTACCAAAAACAGTACAAAGTCAACTTCCAAAGCACCAAACTTTT  
ATCCAGGATCTATTTATCAAAGTCTCTTCTTAGCACTGACAATGAGCCAGAATTAACATACACAGTGGA  
TGTCGATACCAATAAAAAGTACTCTGTTTGGTTACACTTTGCGGAAATTGATCCTTCAGTTACATCTGAG  
GGACAGAGGGTTCATGGACATTTCAATCAATGGTGACTGTATTTCCAGATGTTGACATTGTGAAGATG  
GCTGGGGGTGTTAACAGTGCTCTTGTGCTGAACACAACAGTTCCAATCAGTGGCAGGACCTTGACAATC  
ACACTGCAGCCAAAAAATGGAAGTCTGCTATAATTAGTGCTATTGAAATTTTTGAGGTTATAATAGCTG  
AATCTAAAACGTTACTTGATGAAGGTACTTAAGTTTAAAAATTTACACCAACATTTCTTGATGCTTGTT  
AGAGTTTAAAGTGGGAAAGAAAGATAAAAAGTCAAAGTTTGTACAAGTTTACGCATGGTATAGGCGAT  
AGCTTACTCGCTTTGTTATGCTATAGAAAATGGCCATAAGTAGTAACGTGTTCTTTTTTTGACTAATGAGT  
CCAGCTTGTCATTATCATTCTACTGCTCTGATTATGGAAGATTGGAAGTTATCTGGACGATTATTGATA  
CAATTTTATCCTTCTTATATTCTGCAGTCAGGGGTTTGCAGTCGCTAAAGAATGCACTTGGACTTCCCCTT  
CGGCTTGGATGGAATGGTATCCATGTGTGCCCAACAACATCCCTGGAGTGGAGCAGATTGTCAGTTT  
GACAAAAGTCAATAAATGGGTCATCGACGGGATGTACGTCAATGAGCTTACTCTTAGATATAACAAGT  
TTCTATCTATATGTATGTTTGTGTGGTTCGGACATATGGTATATCCATGGGCATATTCAAAAATCACTTACA  
TACACCATCTATTTTACTTGTAATCTTCAGTCAAGCTCCCCACCTCAATATAGGTTTTGGTTGACAAGTTTC  
TGGACAAGTTGGTCTCCACTGTGTGTGAATTTTCTGATCAATCATGAATCAACCCAAGATAAATATCCTTT  
CCCCCTCTCAAAGGAAAACGGAAAAAATGGGCATCTTTGCAATCACTTTTCTCAATTAGAGAACCTTG  
CAGCTGTAAAAGTTTTCATCCTATAAATATATGCTCACGCACACATACTCAAACACCCGTTTGCTTTGT  
ATTCTTTCCCTAAGTTCCACACCTCAATCTAACAGGGCCCGGGTGGTAAGTTGTTCAACAAGTTGGCTTT  
TCTGCTTTGTGATTTCACTAATTAACACAGTTCATTACACATAAGTAGGGAAAACCAAGTTGAGTGTGA  
ATGTGAAATGCGGAATGAGGTGGAATATTGGGACTTTGAAGAGCAAAGGCCAGGGACTAGGGGGAGG  
CTGTGAAAGGGGAAAGTGAGAAAGAATGGTGGCAGTGGTCAGAAAGGGAAGTTGCGGCAATGAGGG  
AAGGGTTGGGTTTATGAAAGAAGGGAATGAGGAAGAGGACTGGGCTGATTCGTTGTGGAGATCAAGG  
ACACATTTATCTAACTAGACCAGAAAGCCCATGTGGAAGTGGGGAACAGGCAGTTAATTAGTTAGGAAC  
TTCTGGTTGCATAATATCGATTGCCAAAGTAACCAACCCCATCTCTCGTCATGGTCAAAATTTGTTATTTG  
AGTATCAAATAGTTTATGTATTGGGTCTTAAAATTAACCTTTAGTTTGTGATATAATGATAGTTGAAAGCT  
CTTAGTGACATTTTTTAATTTCAAAAAAATGAGATAAATTTGTTTGTATTACACCTTCAATGTTAAAA  
TTCTCACAATTCATATATTTCTGATCTCATTCTTTGTCCCACTAGGACAGTATAATTATGTATTTGTCA  
GCAAGATGCCTTTCCTGATTGGAATCCTCAATTTTCAAATCTGCATGTTAGCATGCCTACACTTTCATAT



TGTGTGGTTTTTACTTGCAAGCTTTGTGTAATGAATCTTTAGAGGAACTACATATCTGTCGCAGTAAAT  
CCTGTTATTAGAATAGCAAACATGGTGTCTCCATTTCTTCTGTTCTATAATGCATAACTTCTATAAGCTTG  
ATTGGTTCATAGTGATTTATTTTTTCTGAAAATGTGAATTATTGTTGTTGCTATTTGCTGTATAAACATGT  
TACCTCTTGATGTAAGTCTTCTGTCTGTTAATGTCCCTTTTATCTTTACATTCTTCAGTGCTGGTTTT  
TGACCAAATTTTATCATTTTCCTAAGGTCTATATTGCTTTTCTGACTGCGGTCTGCAGGAATGCTTTGAA  
TTTCGTTACATAATCATCTTTAACTATTTTTCTTTTTCCAAATGGTTTACCTGTAAGGTCAGTGGCTTGG  
ACAACCAAGGTTAAGAGGCTTCTTACCAAATGAAATTTCTCGATTGCGTCATCTTCAGAGCATGTAAGT  
TAGCTTGCAAATGCTTTTTGTTTTGGGAATACGTGTTGCCTAAGGCAAATACACCTTATGAAGAAATAC  
ATGACACTTCCCAGAAGTCAACCTTCTCAAATCTTCTAAGCATCCCTCTGGTCTTAATGCTCCATTCTTGC  
ATGTAGTAATGGAAACTGGAAACAACCATTTCAAATATGATATACTTTGACCATGCTTTCTTGTGTGC  
GTTTTTTTTTTTTTAACAGAAATCTAAGTGGGAACAGCATTTCATGGACCTATTCCCCGGCATTGGGAAC  
GGTAACTAGTCTGGAGACATTGTGAGTAAAGCTTTCAGGAACTTCATGTGCTTTTCAAATTAATTTAGA  
TTTTTCTGCCGGACAATCAATTTGAAATTAAGCGGTTTCTAACTATACTTTTTGAGGAGTGTTGAGT  
CATACAAGTGTCTATTTTCAATTAATATCATAGCCACTCTTCTTAAAAATTAGGTAGGAATAAAGAATAAG  
TAATGGAAGACTCTTGATTAATAAGCTTTATGGATTGTGAAATACAAGTCATATTGCCCATATGGATAT  
GATGGTAGTATATACACTGTTCTTTGAAATTTGGATACATCTTTATGTTTTGGTTGAAATTCATAGACCTA  
AATAGAGTAGGACAATTTATAAAGGATAGCGGATAATGCTCATACTGAGAAACATAACAATTCCTTATG  
GGTACAGCTCTTATTTTAGCGGGGTGAAAAGAATGTTATATATTTATTGTGTATTAGAACAACACTATT  
ACCTTAGTTCAATTAAGTGCTTCTCCAATTTCTCTGGACATCTTTTTAGTTAGAAATGATACAAGATG  
ATCTCATTCCCTATTTTAGCAAAATAGTGAAGGATATTCCACTAGTAAAAAAAAGGTGGATCTCACCTG  
GTGAGTGTCTAACAAAGATTTGCATTACAGGGATCTCTCATACAATTTCTTCAATGGATCGATTCTGAA  
AGCCTCGGGCAATTGACCTCATTACGGACGCTGTAAGATATTTAACTTTTGATCAGTTGAAGACAAAAG  
AATGATAGAACTATTTTTATTATTGTTTTGAGGGTAAAGAGTCTAAAAAATACTCCAACCTTGACTGAAAT  
TGTTGTTACGATACCAAACCTTTATGGAGGACCTTTTACCCCCTACACTATTTAATAGTGTATTTAATGGT  
ATATATGTGCCACGTGGACACACTTTTTATAATGATGCAATATTTATGATTTCCACGTGAACACATA  
TATACCTTTAAAATACATTATTAATAGTGCAGGGGTAAAAGGTCCTTTCAAAGTTCGGTATCGTTATA  
GCAATTCGGTCAAAGTTCGGATGAATATATTTAGACATTTTTCCCTTGTTTTGATAAAGAGAATTAAT  
TACTGTTTTGTTACAGGAATCTCAATGGCAACTCACTCTCTGGAAGGATTCCTGCTGCATTAGGTGGAAG  
GCTCTTGACAGGGCTAAATCAAGTATGTTTTCTATAATCATCATATTATTTGGCCTATGGCTTGTCTT

GGTGAAGCATCTTTAATATTCTATCTTTTATAGTTGCTCTTGTTTTTCGATTTTGTGGTGCCAAATAATTA  
TACTGCGTAGCATGATGATTCTTTATATGCCTTTAGAACATTGCTGTGCTTAGGAATTGTCTGACCATCTT  
CCGACTGCCGTTATCATGATTATGCTGTATTGACAAATCCTTGGCCTCGACTAATTTCCACTAGCATGTA  
CCAATTTTATCCAAAATATGATGCCCTCAATCTGGAGTTGTATGTACGCTGAGAAATTTAGAAAGTTGCA  
AATTTCTGGCATGTTGTTTCTGTAGTTTATGACGATAAAATGCTTACAGTGGATGGTTCAGTTTCACTGA  
TAATGCAGGTCTTTGTGGTATTCCGGGATTACCAACTTGCAGAACACATCTCACAGTTGGAGCAAAAATT  
GGGATCGGATTAGGGGCGTGTGATTTGTCCTGCTTATTGCTACCTGCATAACATGCTGGTGGAAAGAGA  
CGGCAGAATATCCTCCGTGTGCAAAGAATTGCTGGTAATATTCTCATTTCAAACATTTTGTGATACTAG  
ATTCCTGATTAATTCAACTGCTACCCATGCTTATGGTTACTCTTCTTAAACCACTATCTTTTTTTTTGTCCAG  
CGAGAGATGCTCCATATGCGAAGTCGAGAACTCAATCAATCGAGATGTACAAATGGCAAGAAGCTATA  
GTCACGAACATACGCGAACAGCTGCTGAGAATGGACCTCCCTTGCTTACCTGACTGATTACTAACAAAAC  
TGGCAGATGCTTTGTGACTGAAAAAATGTGTATATTGGGTGGGCATAGAAGATTAGTTGAAATGGTGT  
TTGCATAAATGTAGTATCTTATATACACAGAGATCTTGGAGGGAATAGAAAGAATGTTGTATATTACTCG  
CACTCTTTTTGTTAGTTTTGATTAACCGGCACCATGTACCATGTAAGTAAATTGATGAATGGAAAG  
GTGAACAAGTTTTTCTAGTCCCACATTTTGCTG

>M6-PGSC0003DMG400029885 M6 RLK with malectin domain

AATTAGTAGAGTTTTAATATCAAGCTCACAAGCAACTACCATCTTCCCTTCAATTTCACTTCTCCATTTTC  
TCTCTCTAAAACCTCAAACCCTGTTCTGTCTCTTCTTTCATCTTCAGCTCACTGCTGCATTCAATTTACTTC  
TTTTGGTGTTTGTCAACTCAGCAATGGCCTGAAGTTTGTGCTTTTGGATCTCTCTGTCTATTCTCATCTT  
TAAGGTATTCTTTTTTGTCTTCTCTACTTGTTTATGCTTTTGTGTTAGCTCCCAAGATTTTGTGTATGTAC  
ATATTCTTGCTTGTTTGTAGCTGGATCTTGATACTCTGGTTTCTTATTTTGGACTGAGTGCTTTCAGCCTT  
CATCATTTAGTTCTGAAGTTCCTTTTTATGCTACTTGTTGATGCTTCTACTGGGTTTTCTTATTTTGGACA  
GATTGCCTTTTATTTAGCTCTTAAAACCTTTATCTGTCTACTTTATGTCATCCCCTGCATCTTATACTGCATC  
GTGATGCTGGGTTTTTATTTATTTTGGACTTAGTGTTTTTGGTCTTCTAGATTCATTTGAAAAAAATATT  
TGAGGTTCCGATTTCCGTCAATTTGAGATTGTCTGTCTGTGCGGTCAAATTTGAGGGGAGGTCAAC  
AGATGGAACTGATTTTTCTTTTTGCAATTCTGTCTTTTTTTTTCTTTTGTCCAGTGATTTCTGCGGACAA  
CTATAGGCTTGTGCAGCATCAATGGCAGACGACAGTAAATTCTGTTTTTCTTGGTTTCGACATTTTTGTT  
GTTGGCTGTTGTGGTTAATGTGGCATTGGCTGCCAATTATGTGCCCGGTGATGATATTCTGTTGAACTGT  
GGAGGTCCTAACAAATCTCCAGATGCTGATGGTTCGAAATGGGGCACAGATATTGGGTCAAATATATG

TTGAGTAGTAAGTCATCAATCTCTGATGCTGATGATCAAAGCCCTCTGTCCCTCAAGTTCCTTTTATGTC  
TGCCCGTGTTTTCCAGTCTGAGTTCACCTATAGTTTCCCTGTAGCATCTGGTCGTAAGTTTGTCCGTCTGT  
ATTTCTATCCCTCGTCTTACAACAAGCTAAATGCTACTAATGCCATCTTCAATGTGGCCTCCGGACAATAT  
ACCTTACTTAGAAATTTAGTGCAGCACAACTGCTGAAGCCCTCAACTATGATTACTTGACCAAGGAAT  
TCTCAATAAATGTGCCATCTGAACTTTGAACATCACTTTCACACCCTCTCCAAATACTTCAAACCTTTG  
CGTTTGTCAATGGGATTGAGATTATTTACATCCTGATATCTATAATACAGAAGATGGAATTACCTTCATT  
GTGGGTCAGAAATCTTCTTTCATCATTGTCAATTCTACTGCCTTGGAAAATGTTTATCGCCTTAATGTGGG  
AGGCAATGTAATCTCACCATCAGGTGATACTGGTATGTTTAGGTCATGGGGTGATGACTCAAATTATATT  
TTTGGAGCAGCCACCGGAGTTACCAATACTGCCGATGATGAGAATGTCACAATAAGCTATGGTAATGGG  
CAGCCTACCTACGTTGCCCGCTTGATGTCTATAAGACAGCTAGGTCAATGGGTCCAACCTTTTCAAATTA  
ACCAGCAATTCAATTTAAGTTGGGTTTTCTCAGTTGATTCAGGGTCTCTTATCTTGTTAGGCTCCATTTCT  
GTGAAATCACTAAAAATATCACAAAAGTCAACCAGAGGGTGTTTGTCTACATGAATAATCAGACTGC  
AGAACCTGCAGCGGATGTCATTGCTTGGGCTGGTGGCAATGGAGTTCCTTTTACAAGGATTATGTGGT  
CTCTGTTCCCTCGTGGGGCTTACAGCAGGATCTTTGGCTTGCCTCCATCCAAACGTTGCTTCAAAATCCA  
ATTGGTATGATGCAATTTTGAATGGAATAGAGATTTTCAAAGTGAGTGACACCAATAATAACCTTGCTGG  
GCCTAATCCAGTTCAGTTGCAGAACCAGATCATATTGACCCTCTGCCGTCCAAAACAAGTGAATCAAAA  
AATAATAAATCAGCTATTGGTGGAGGCGTTGGAGGAGGAATTGCTGCTGTAGTTCTTATTGGTTTAGTT  
GTATGCCTTGTCTATGCGCCGCCGAAACGTGGGAAGGTCCAAAGTCCAAGTGATGGACCATCAGGCTG  
GCTCCCTCTTCTTTGTATGGAAATTCACATACTTCTGGTTCGCTAAGACAAACACTACTGGCAGTTATG  
CTTCGTCCCTCCCATCAAACCTTTGTCGTCACTTTTCATTTGCTGAGATCAAGGCAGCCACCAATAACTTT  
GATGAAGCACTGCTTCTTGGGTTGGTGGTTTTGGAAAAGTATATCAGGGAGAAATTGATGGTGGCAC  
AAAAGTTGCTATTAAACGTGGGAATCCTCTCTCCGAGCAAGGTGTTTCATGAATTCCAAACTGAAATTGAA  
ATGCTCTCAAACCTTCGCCATCGCCATCTTGTTCCTTGATTGGTTATTGTGAAGAGAACTGTGAAATGAT  
CCTAGTATATGACTACATGGCTCATGGTACCCTTCGTGAGCATCTCTATAAGACCCAGAAGCCTCCTTTAC  
CTTGGAAGCAGAGGCTTGGATTTGCATTGGTGTCTGCTCGTGGGTTGCACTATCTTCATACTGGTGCCAA  
GCATACTATTATCCACCGTGATGTGAAGACCACTAATATCCTCTTGATGAAAAGTGGGTGGCAAAGGT  
TTCTGATTTTGGTTTGTCTAAAACAGGTCCTACATTGGATCACACCCATGTCAGTACTGTGGTGAAGGGC  
AGTTTTGGATATCTGGATCCAGAATACTTCAGAAGGCAGCAACTGACAGACAAATCTGATGTTTACTCAT  
TTGGTGTAGTGCTGTTTGGAGATTTTGTGTGCTCGGCCAGCTCTGAACCCAACCTCTCCAAAGGAGCAAGT

AAGCTTGGCAGAGTGGGCTTCCATTGCTACAAGAAGGGGACTTTTGACCAGATAATCGACCCATATCT  
GAAAGGGAAGCTTGCACCAGAGTGCTTGAAGAAATTTACAGAAACAGCAGTGAAGTGTGTGTCTGATG  
TTGGTGTAGACAGGCCGTCGATGGGAGATGTGCTGTGGAACCTTGAGTTTGCTCTGCAACTTCAGGAGA  
GTGCAGAGGAGTGTGGGAAGGGTTTTGGGAAAATGGACATTGAAGAAGGGTTTGATGATGTTACATGC  
AAAGGAAAGAAGGATTTAAATGAATCCCCAGGTTATGATGCAAGCATGACTGATTCAAGAAGCAGCGG  
AATATCTATGAGCATTGGCGGCCGAGCCTTGCCAGCGAAGACTCAGATGGGCTAACACCTAGTGCTGT  
TTTCTCTCAAATCATGAATCCAAAAGGACGTTAAAATCTCCTCATGTCTTGAAAGCAGCAAATACACGCC  
AAGGCAATGTTCTTTAACAGAGAGCACAAGTCACTTTTTTTTTTTCTTCCATTTTTCTTTTCTACCTCGTA  
CTGCCTGCCTTATTCTTTTACTCACTATTTATTTTGTAAATTCATATGTTTTGTTTAAAGCTCGTTGTATCTACC  
AATACTCAAAAAGTGTGAAATTATCTTCTGTTGTAATACTGATCATAAAGAGGTTGTTCACTATGGC  
AGTCTGATCTCTTGCTAGTAATCAATTGTTCTGTATATTATTATATGTTCC

>M6-PGSC0003DMG400030658 M6 RLK with malectin domain

ATGTGGTTTTGAGCAGGATTTCTAAGTATTCAGTGCTGTGCTGCTGCAAACTTTACAGAGCCACGTACCA  
ACTTAAGTTGGATTTGAGATGGAACCTGGTTCCCTGAAAATCAGAGTTGCATATCAAGGCCAGTGTA  
GAGTGCACACTATGAACGAGCTCGATCTTTTAGCTTAGACATTGGCCATAAGTGGTGTACAGCTTGCCA  
ACCAGGAAAGATCATGACTATCTAGTAAGAGGTACATTTCTTCTGTCAAACAAGAGAAGACTCTACCAC  
ACAGTTCTTTGTTGTTTTGATTGGTGTACACCAATAGCCACAGTAAAGTCATCTGATGAACTTAAGGTT  
GAGGGAATTTTAGAGCTACTAGAAGCTATACCAACTTCTGCCTATTGAAAAAGAAGGGGAATCCTTAC  
ATTTCTAAGTTGAACTAAGACCGATAAATTCAGATTATCTGAAAAGGGAGCCTTCAGAAGTACTCAAAC  
TTGTACATAGAGTAGATGCTGGAAACAAGGTTGCGGAAATCAGGTATTCTTTCATCCTATCACAGAATTA  
TATTTTGGATTGGCAATACAGTATATTCTTTCATGGTAACAAATCAAGTATCATGAAGTGATAATGTGAA  
GACTTGTCAACTCAGGTACCCATATGACCAGTATGATAGAATTTGGAGACCAGACTCAAATCTAGAATCA  
CAAGTTACTCGAACGCAGCCATCCATTATTAAGCAGGTCATTGCAAGAAAACACAGTTTATTACCTCCTG  
CATTCTGATTACGAACAGCCCTCACCCATCCAGAGAGATTGGACTTCTTGCATGAAGACCTTGACACAGG  
ATATTATACTTACTCTCTTCTGTACTTTCTAGAGCCCAATGACTCAGTTCAAGCTGGAGAAAGGGTGT  
TCTGTATATACATTAACAACGAAAAGAGACTCAAGGTTGATATACTGGCTAGTGGTTCCAGATACCTGG  
ATGTAGTTATGAATTTGAGAGCAAATAGGTTTGTCAACCTGACGATGATCAAGGCCTCAAATCTATCCCA  
ATTGGGACCCATTTGTAATGGTTATGAGATTTTAAAGACTCTTCTTGGGTTAAAGAAACAGCCATGAAA  
GAAGGTAATTTTACTCAAGAATATGCATAGTAGCAGAATATAAGATGCCATAGTAGAAAAGCATTACAG

AGAAGTGCATTTATTATCTCTCTATATGTTTCAGTTGACATAATGGCGAATGTCAAGAAGGAATTATTGC  
AAAAAACAATGAAATATGGAAGAGTTGGTCAGGAGACCCTTGTCTTCCCCTTCCATGGCCGGGTCTAA  
CTTGTGATCGAGTTAATGGTACTTCAGTCATCACTCAGATGTAAGTTATCCCTCTCTATCAAATACTCAA  
AGCAGTTTGGTTTTCTGAAAATTATCAAATAATATGTCTACCATTTTTTCAACCTCATTTATCCGTAGCATA  
GTAAGCACGTTTGAGATAAGACGGATTACACTTCTGGTCATTTAATCCTTTTTCTTTATTCCCTACCACA  
GAGATCTCTCCTCAGGTGGCATTAGTGGACCTAGCCCTCCTAGCATCCAAAACTGATGCACCTGAGAA  
AACTGTATGTCCAAGCCTTTGTCATCAACACTAATATTTACCTGTTCATTTTCTTTTAAAACAAATTTACA  
ATCTGGTGTAGTTTTACTAAACAATCAAGTTATTTGCCAAGACAGGAATATCAGCAATAATGGCTCTAGT  
GGCACAAATTCACTCTTACATCATCCTTCACATACTCTACAAGGTAAATCTCCTAAGTTGGTTTCCACAT  
AAAATAATTGCACAATGTGAAGAAGTTAAATAATATCATACAGAGGATTAACCTCTGAAAAAAAATACC  
AAAGCTGTACAAAAGTTTTACTAGCAAGCTGCCTTCATGCTTCATATGTTACAATAAAAAAGTATGATG  
TGACACTAATATCTTTGTTTCCTTGTCCCTCCAGATACTTAAGCAGAAACATTCATATCAGCAACAAGCTT  
TCTACAAGCATCAAAGAATCTAATATTACAACAGAGTATGAGACCACTGCCCTGTCTTCAGAGAAAAAAA  
ACAATTTCTATGATTTTACGCTGTCCACTTTTTCTCCAGGGGTGGGGGAAAGCAATGGGATATCAGGAGC  
TGACAAAGAAAGAGAAATAAGCCTAATTTGTTTTCTTATTTACATTTTCAGCAAAGGGATAGCTAATGTT  
AAACAAAACCTCAAGTTCAACACATAAACTTGTGATAGGAGCAGCTGTAGGTACATCTCTCCTGGCGATCC  
TTGCAATTGTTATCTCTGTGGTCTGCCTCTTCAAAGACGAGTAATGGCAGGGCCAAAATTTCTTATGAG  
AAATTACTCGATCACAAGGAGTAAGTACACTCTCAGCACACTAGAAATAATCCTGCACGCATAATGCATG  
ACAATATATCATGATAATTTAAGAATTTTTCTTGTGCTTGAATAGCTTAAGATTGGACTCAGCAAGCA  
TAAATCATAAACTTTTCATGATTAAAAAAGCAGAACTGTAACCTATATCATCTGTTGCAAAGAAGCTTT  
TTTGACAGGAACTCAAGAAATTTGAAACAGAGTTAATATCCTTAACATTTGGTACTTATACTCAATGAAG  
CAATATGCTCAAAAAAAATTTCAAATGCAGATGCAGTATATTCAGTACCAAGCACGGATACTACCATGA  
TGAAATCAATATCCTCCAGGAACTTCAAACCTGGAATATATAGAAGCTATTACTCAGAACTACAAAATTT  
GATAGGTGAAGGAGGCTTTGGATCCGTTTACCGTGGTACCTTACCTGATGGTGTAGAAGTAGCTGTAAA  
GGTCAGGTCAGCCACTTCGACTCAGGGAATTCGAGAATTCATAACGAGGTAACAATCTAGAGTATTTG  
TAGACCAATTTCTCCCAACTTCCTTATTTGCATCAAACCAACAAAAAGATGTTACCTAAAATGTGAGAAA  
AGCATCAGCACATGGAGTGAGCAATGAATCTTCTATTTTCTATTGCTATTTACATAGGAAATAAACTAA  
CGATACGCTCCACAAAATTAATACTTTCTCACAGATCCGTGATGTTCTCTTCATAATTACTTCCGGCGAGC  
AGTGTTCCTCTGAAATGCCTTAGCTCTTCAGGAGCCATCTTTATAATAATGCATCTTATCCATGCATATA

TAGTTAACACATGCATAACAAATAACACAGCCTGCAAATTAACCACTGCTGTAATTTGTATTACAGCTGA  
ACCTTCTGTCAGCTATCACGCATGAGAACCTGGTCCCTCTTCTGGCTACTGCTGCGAGAATGAACAGCA  
GATTCTGGTTTATCCATTTATGTCAAACAGCTCCCTACAGGATCGGTTATATGGTACTGCATACATAAACA  
AATTCATGTCTATCACTTTTATCATAAGAACCAGCACTAATTTCTTGCTTGTTCCCTCATCCTATTTAGGAG  
CAGCAGCAAAAAGGAAGATTCTAGACTGGCCAACCAGACTTTCCATTGCGTTAGGAGCAGCGAGAGGC  
AAGTAACACAAAACCTCTGCTATTCATGCAACTCTTCAATGAAATAAGCCATATCAATGGACTTAAGCATG  
CGTAAATAAAAAGAGAACGTGTTTACCTGAGAGACAAAGATTGAAGGCATAATATGAATCTAATAGAGT  
TTAACAATCAATCATTCCCTATTACTTATTATCAAGGCACATTTGTAAACAGCAAATACCAAAGTTTGCCG  
TTTTATTATGATATTTCTTTTAACTTTCTTTCAGGTTTGCTGCACCTTCACACATTCTCGGACCGTTGTCTG  
ATCCATAGGGATGTCAAGTCAAGTAACATACTCTTGGATCAGAGCATGTGTGCCAAGGTTGCTGATTTTG  
GATTTTCAAATATGCATCTCAAGAAGGTGATAGTGGTACTTCTTTAGAAGTAAGGGGGACAGCTGGGT  
ACTTGGATCCAGAGTAAGTATTATCTTCTAGATTGTGTCGTCATTATGAAATTAGGACAAGAGATAAG  
TTTCTAAAGCACAGCCTAATGGACAGCTCTGCTACCTTAATATGGATTACGCGAAGTGATTATTATTTGA  
ATCATCCGCAGGAGATTCTATTAGTATATTTATTGACTTTATTTTCGTTATAATTCACCATAGCACAAATG  
GTTCAAAAATCTTTGGGGAAATCAAGCTCGTGTCTTTTCATGAATCTTTCTGCATAGGTACTIONACTCGAC  
CCAACGTCTGTCAGCAAAAAGTGATGTCTTCAGCTTTGGAGTTGTCCTACTGGAAATCCTCACAGGTGCA  
GAGCCTCTCAACATAAACAAGCCAAGAAATGAGTGGAGCTTGTTGAGTGGGTATGGCCCAACTTAGC  
AAGCTATTTCTTTAACTGAAATTATCCAGATACAAATTGCTACTATTACTGAATCCTCAGAACCACACAGT  
CTCTTCCATAATTTATTTGCAGCAAACCTACAGTGCCATGAAAAGACTGAAAGAGCTTCTTTTTCTCTTTT  
TTTTTAAACACAGAAAGAACTTCTGTTGTTACTACGACTTACGTGATAATTCACAGCTACTCAGATGATA  
AACTGATGTTGAGTGCTTAACTATATACTCTTTTGATTTGCATGTTAACATCTGATCACAAGCAAGTAT  
CCACTTTGAAATACAGGCGAAACCTCTAATAAGAAGCTCAAGAGTTGAAGAAATTGTGGATCCCCTAT  
CAAGGGAGGGTATCATGGTGAGGCACTGTGGAGAGTGGTAGAGGTGGCTTTGGCATGCACGGAGACA  
TACTCGACTTACAGACCATGCATGGCGGATATTGTAAGAGAGCTCGAGGATGCATTGATAATAGAAAAC  
AATGCATCAGAATACTTGAAGTCCCTAGACAGCTTTGGAGGATCAAATCGTTTCTCTATAGAAAGGTCCA  
TTGTCCTTCCACCTATTAATCTCAAACAGAGCCATCCTGTCTCCTCTCAAACCCAGCCCCTCCACAACCA  
AGGTAA

>M6-PGSC0003DMG400031802 M6 RLK with malectin domain

TTAATAGTGATATAGTCCTACCATAATACATTATCATATTCTTAACTCTTTTTCTCTCTTTCAATTTAGAA

ACAAAATTTAATAATCATTTTTTTAAGAAAAAGAATTAGCTACTCCGCAAATGGCAGCAAAGTGAAGCA  
GGCTGACCTGGTTCATTCCC GCGTCTCTCCTCCCAAAAAACAATGGCATTAAATCCAAC TTTGATTCTTTCC  
TCTTCACCAACTTCACCTCTCTTTCTCCAAATTTTCTATTCTTTTCTCCTTAACTCACCCAAACGACTCATT  
AACTCCACTCCACCTAAAATCAACCTTTTTTCTTCTCAAATCATCACATGACTCTCTGTTTCTTCAATCA  
TCATCATTAAACCATGTCTTTCTTCTATTTCTCCTCCTTCTCTCCCTTTTTATCTTCCCTTCTGTTTCTCAATCC  
TTAGAGGTAAACCCCTTTTCCCATTAAATCAACCCCTTTTCAAAAATTTGATCTTTTTTTCAAGATTTCAA  
CTTTTCTGTTTTTTTTTTTTCAGGTGTTTTGATTGATTGTGGTGCTGTAGTTGATTCTGTAGTTAATGAGTAG  
AATTGGGTGTCGGATTCTGGTTATGTATCAGCAGGAAAACCCAAGAATCTTACTGTTGATGTTCTTGATT  
ATACACTCTCTACTGTCCGTACATTTCCATTGAAGAACAATGTTTTCAAGAAGTTCTGTTATGAGGTTCT  
GTTTATCGTGGAGGGAAGTACTTGGTCAGGACGACTTATTTCTATGGTGGGGTTAATGGGAATTTGAAT  
CCTCCTGTTTTTGATCAGATTGTTGATGGGACTTTTTGGAGTCCAGTGAATACA ACTGAGGATTATTGGA  
AGGACTGTCTTCATATTATGAAGGGATTTTTAAGGCTGTTGGGAAGACTATGAGTGTGTGTTTGGCAG  
CTAATAGTTTAACGGATTCTGACCCTTTTATATCTGCTTTGGAAC TTGTTTTGGTGTCGGATTCTGTTGAT  
AATTCTACAGATTTTAATAATTTATGGATTGACTTTGATTACAAGGAGCAGTTTTGGGAACAATGGATCAA  
TTATCAAGTAAGTTTGTTCACCTATTTGGACCTAAAGTTGTTAGCTTTGACTAAAAAAGATTGCTTTTGAT  
TTGATTAAGTTGGTATTTTTAAGTTCTGATTATAATCCTGAATTTTGC GATGCAATTCAATACATTTACA  
GTTTATGTAGA ACTGAATCCCAATTCAGGTGTTGAAATGATTAGCAATTTATGTATTTCAATCCCTATTGA  
TCATCGACTTGTGCCTGAAC TTTAAGATTTTAGAAGTTCTTTCAACTTTCAATATAGAATCTGCTGTAATTT  
GGTTAACTAGTCTGAATAACTCTTTTGATCACAATGTGAATTGAAACCTTGGAGGCCAAAGTTCTTTCTA  
GTGCTCATTTGTAATAGGTTATGAACTGCAGCAGAATCTATCTTATTCTGTTTTCTCCTAAATTTATTACA  
AGGAAGATAGAAAAATGGCTAGGCATGATTTATGCTCTTTG TACTAACCAGATAACAGCCTTTGTGAGC  
ATATCTTTTTGAGCGTGTTCCTGAAAATTGTTCTCAAGCATATCTAAAGCAAGAAAATTACCACCTTAAT  
ATACATAGTTGCTAAGCTGTCTGAATGCAAATATACTCGACTCTATTTGGTTACCAGTTTTATAGTGGTTG  
TTAGATGAATTAGTATCTGATTATATCATCCATGTTTAAACAAACGTGTTTCTTTTGGTTATGTTTATCATA  
ACTTCAAGCATTTTAACCTGCCAGATATCCTGACGATGAATTTGATCGTTACTGGGAGCCCTATGGACAA  
CATTCTCCTGCAGAAAGTTTCAGTCATGTTTCTGTTTCTGGTATCTGGAATCACCCCCCGGCAAAGTATT  
TCGGACACGGTTAACAGTACCTAAGCCTGAAGCTATGGAGTTATTATGGCCTCCAGCACCTCTCCCAAAC  
GCAACGTATTACATAGCTCTTTACTTTGCTGATGATCAAATTCATTCTCAGGAAGAACTTTCAACATAAG  
CATAAATGATATATTGTTTTATCCCAACCTTAATGTTGCTCCGGCTGGCATGGTTGTGTTTGCAAGTCAGT

GGCCTCTGTCTGGTATTACAAAGATAACTTTAACTCCGGTGATTGGATCAAGTATTGGTCCGTTGATTAA  
TGCAGGAGAGGTTTTTGAAGTGTTGCCCTTGGAGGAAAACTCATACTCGAGACGGTAATCTGCTTTTC  
TTGCTTCTAATATAGTGCTTGGATTAGCATGAGCAGTCCTCTAGGATTTCTTTTACCTCATTTTCTGTTGA  
TTAATTACCTCTGCTACATCAATGTGATATATTTCTTACTGCAGTGATAGCTCTGGAAAAATTGATGGAGA  
GCTTCAAGAATCCTCCCCAGATTGGAATGGTGATCCATGTTTACCCCCTCAATACCAATGGACTGGAGT  
TACATGTGCTGGAGGATCACGAATTCGTGTTACTTCTTTGTGAGTTCAGATGTCTCTTACTCCATTAACCT  
CAAACCTCTCCCATGCCACCTGCCTCATGAATAAGAAAAATGGGAAAAATGAATACCTTACCTTACCCCAA  
CCCAAATTACGATTGGCCAACCTGTAACTTGTGTTCCTTTCTCCTTTGTCTGCAGAAACCTAACAAGCAT  
GGGTCTTTCTGGATCAATTTACCTAGCATTGCCAGATTGACAGCATTGAATGGCATGTAAGTGCATATT  
AGTTTCTTAGTGCTCATATATTGATGGATGCAAATAGATTTCTTATAAGTCTCCTACTTATCACAGATGGC  
TTGCGGATAATAATTTGACGGGATCTATCCAGATTTGAGCTCATTGAGTATCCTGGAGACTCTGTAAGT  
AAAACCTTTGGTTTCTTTTGTCTTCTTCAAATTGCTGTTGCAATAATGATCTTTCTAATTATAGCCCAAG  
CTTTTGTGAAAAAGTTGGGAAAAAAAAGTTGTGTAATTAAGTGTGTCTATTCCTAATACTCTCGTCTTT  
TATTTAGACACTTGGGAAGACAATCAGCTTAGTGAGAAATTCCGCCTTCTCTTGGAAACATTATGAGCC  
TTAATGAAATGTAAGTTCGTCTTTCCATAATAAAACAAAATGAGTAGATACATAATGGATTTTGGCCCC  
TAAGTTTGCATAGATTTCAATTAGTAATCTGCAACACTTCTGTTTTACACAATCATAGTTTCCCTATGATGT  
ATTATAAGTACACTTTTTCTCAAGTATAGTAGCCCTACGTCGCTAGCTAGTATAAGCACAGTTTCTATAAC  
CACCTCAACGGATTTGCTAGATCTTTTCTCTGTGCGAAAGTGGTGGTGGTGGTACACAGCGTCATTAG  
GCACATGCTAAGCAAGGGAATTAGGATAGCTGGATCAACAAACAGGTGGATGTGGCTATGCAGCACGG  
AATTAATAAGTACCTCAAATAGTGTCTCTTAAGTAGTTTTCTCTTGGTATAGAGATCATTTTCAAAAATG  
GTTGAAGCAGGTTTTAGGAAAATTTGTGTCAGATACTTAAATTGATGGATGGTAGAGCAGCCATTGATC  
TCTTTAGTGTGAGAATCCAACCTGTCAATTCGAGGTTTTTATCACTTACGAGTCATTACCTTGAGCACAACA  
AGCAAAAAGGTAAGTACTGCTTGGAAATATGTCTAGGCGCCGAGAAAGGACTACTATCCAAACTCATGGTTAA  
TGAGAGATGTAAGTACTAGTGACCTTTGTATTCTGCCACCTAGTTCTAATATTTAGACTACTGCAAAATTT  
ATGAGTACATGAGAAATAGGATCACAGAGTTTAAACCGATAGTAGTTCTAGTTTCGGGATGCAAGTGGTG  
AGGCTGTTAGGTTGAATGATAGTTGTTAAACAAAGAAAGCAATGAGCTAGCTTACCACAGCTGTACATA  
GCTCAAATTATTCTTGTTCGCTTCAGCAACAGGATCTCTATTGAGCGAAATCACCATTAGAGCCCACGCT  
ATAATACTCATTTAATAGAGCTTCCACTACAAATCACTCATTTGATCAGAGCTCATAGAAGCTATTGTATG  
AAAAGCTAATGTTCTAAAGTCATTACCTTGACTGCTTTAGACATAACTTTGCTCATAGAATTTCAATTCAC



AGGCACTCGTTCTGTTTTCTTTCTAAGAGACCAAATAGAGATATATTAATGATATCAAATGCGATCGA  
GGAACCTTCTTGATGTTGTATATGCTCATATGCTGAGGTAAAGTTAAATGACACATTATTATTTTTGTTGC  
AGCTTCTTGCAACAATAATTTATCTGGCCAGATACCAAGCAATCTTCTCGGAAAACCAACGTTGAATC  
TCAGGTAATGAATCATTATTAGCGATAATCTTTTCGTTGTTTTGCCTTTTGCTTTTGTTCGAATATTAA  
TCAAATTGCTCTGTTGCTTTAATTGTAGAACCACTCCTGGGAATCCATTGTTGTCACAGCCCCCTATATGA  
GGAGATTGTCCTTGCTACTTTGGACATTGAGAAGTATAAAATATGCAGTTTTCGACATTAGATTCAGAA  
CCTCCAGTTCATTTTTCTCAATATTTTTGAATTTTTGGTGAAAAGAAAATCTTCAAAGCTTACTATTTTTGG  
AACTCCGGAATACACTACCAAGACTAACTATTCAAATGGTTTGCCAGCACATTGTCTGCCAAGTAGT  
TTAGTAAAATGGAATTTTTGCTGTAATTTTTTTGTGTGTCCATAGCTGTATGTACAGTCATTCAAGGTAAC  
CAAAAAGTTGTGTTTTTGATTCATATATACAGAAACTCAATTGTATACACATGTTTGTAAGTTGTTTATT  
ATTGAAGTGATGCAAGAGCTTTTGTGTTGATTGTCG

>M6-PGSC0003DMG400035816 M6 RLK with malectin domain

ATGTTTCTCTCTTTTTATTTCATTCTTATTGTGTATTCAAACAATCATCATATCTACTGCAACTAACATTC  
ATGAAAACGTTGCCATATCATGTGGTGCCTCTGGCAATTACCCTGCACCAGATGGACGATTATGGATTG  
GAGATTCAACTTTCACTTCCTCATTCTACACTTAACTGGAAAATCTATTAATTCAAGAGTACCTCACCAA  
GCTGCCTTGCCGATCCAGTTCCTTATAACTCTGCTCGATCGTCTCGCCATCAGTTTACCTACAAATTTTCA  
GTGAAACCTGGACACAAGTTCATACGCCTGCACTTCAAACCAGCTTTATACAATGGTTTCTACAAGTCCA  
AAGCATTTTTACTGTCAAACTGATCAGCATAACCCTGCTCAGTGACTTCATACCTACCCTTGCTGCAGGT  
ATGAACTATTTCAAAAAGGAATTTTGCATCAATGTACAAGAAAGTGAAACATTAAGCATAACATTCATAC  
CATCTCGAAAATCAAGCTTTTTCAGAAGACACTTATGCTTTTGTAAATGCAATCGAGATTGTTTCCATGCCC  
ACTGGTCTGTATTTACACCTGATGGCAATCAGGGAGTCCCTGTTGTTTCGACGAAATTACAGATTCTACA  
TTGACAACAGCACAGCACTGGAGACAATTCAGCGAATAAATGTTGGCGGAACTCTATTTTCATCCTTGG  
AAGATGCAACCATGTTCCGGGAATGGGAAGATGACACTAATTACCTGATTCAAGTAGGAGCCTTTTCGA  
TCAACAGAGCCATTGATATCAGATATGCATCCTCAGCAACTCACGTTGCACCAAAGAAGTTTACCTGAC  
GGCCAGGTGAGTGGGTGCGCACTGCCATTTGAATTTCTGTAATCTCACATGGAACATTCCACTTGATTTG  
GGATTGAGATACCTGTTAGGCTTCACTTTTGTGAAATTGAACCTATGATCACATATGAAGGCCAAAGGA  
ATTTCACTATCGTTATAACAATCAGAATGCTGAAGATGATGCTAATGTGATCAAATGGAGTGGGGGGA  
ATGGAATTTCTGTATTCAGGGACTATGTTGCCGTTATGGAGGGTGATAGAAGGGAAGGGAAGCGTAAC  
CTTACTATAGTTTTGCAGCAAAGTTTCCTTCAATCAGTAAACATGCTAATGCCATCTTAAATGGGATAGA

AGTCTTCAAGATAAGCAATCCTGACAACAATCTTGGTAGTGTGAGCCCTGTGCATCCTGTTACAAGTTCA  
ACACCAGAAAAATCAGAGGAATCTGTGCTGTTCTATACAAAGAATCAAATTGCAATTGTTACTGACATTTA  
TGGTCACTTTGGTCAATGTTGTTGTTTATTACATTAGGTGTATTTAGAGATGAACTCTGGAAAGACGAA  
CAATAGAATATCTTCAGGAGAGCATCAGTGTGTCGTCATTCTCATTGGATGAGATGGAAAGATCAACGAA  
CAATTTTGATCCTCAGCTTGTGATTGGTAGCGGTGGATATGGCCCAGTATATAAAGGGGATATTGATGGT  
GGAAAAACCACTGTAGCAGTTAAGCGATTGAAACGAGGATCTAGCCAGGGGGAGAAAGAGTTTTGGAT  
GGAAATCAATATGTTATCTACGCACCGCCATGA

>M6-PGSC0003DMG400040066 M6 RLK with malectin domain

ATGGGGCTATGGGTGCATTTGGTTCTAGCTTTTATGCTGTCCTGTTTCTTGATTGAGGAGGCAAATGCTG  
CTTTTACTCCTGCTGATAAATATTTGATTGCTTGTGGATCTTCCAAAAATGTAACCTTTCTTGCCAGATTT  
TTGTTCTGACACACACCATTCTTCAGTTGTTTTGGAAAGTGAAGAAAATTCTATTTCTGCAACATCTAAT  
TCCACTGCTCCATTTTCAATTTACCAGTCTGCTAGAATTTTCCACACTACAACATCTTACGAATTTGATATT  
CATCAACAAGGGCGACATTGGGTTTCGCCTTTATTTCTATCCTCTCCCTGGTCATAACTTAACATCTGCCTC  
AATCACAGTTGTCACAGAAAATTTTGTCTGTTGAACAATTTAGTTTCAAGAGATATAAGGGTACTTATC  
TATTTAAGGAATACTCAATTAATGTCACCTCAGATAGCTTGACTATTGCTTTAATCCCTTCAAACAACCTCC  
GTCGCGTTTATTAATGCGATTGAAGTTGTATCAGCTCCTGATGAGTTGATTCCGGATCAAGCTGTGACTG  
CATCTCCACCAGCACCTTTCAATGGCCTTTCTGGGCTAGCCCTTGAAACTGTTTATCGGTAAACATGGGA  
GGTCCTTTGATTACTGCTCAGAATGATACTCTAGGGAGAACGTGGGAGAATGATGTTAAGTACCTGCAT  
GTTAATAGCTCTGCAGTGAATGTTTCAGTTATCCCTTCAAGCATAAAATATCCAGCCACCATTACTCCTGA  
AATAGCACCATATTGGGTTTATGCTACTGCTGAAACCATGGGAGATGCTAATACTGTGATGGGAATTTCC  
AATATCACCTGGGAGTTCCAGTTGATCCAACTTCATGTACCTCATCCGCGTACATTTTTGTGATATTGT  
GAGCGAGTCCTGAATACTCTACTTTTTAATCTGTACATAAATGATGACACTGCTTTACCGGACCTAGATT  
TGCTTTCAGTTGGCAATTTGGATGTGCCGTATTACAGAGATTTTGTCTCCAACCTCCACAACAAATTCAGGT  
GTTCTGACAGTCAGTGTGGTCCAGACACAGGAGCTGATTGGATCAATGCCCTTATGAATGGATTGGAA  
ATCATGAAGATTAGCAATGGAGCTAGAAGCTTGAGTGGGGTTACATCTGTGGAGACTCTATTTGTGAGG  
CCTCACAAAAGAACAACAAAAGGTATTATAATTGGTTCTGTTGTAGGAGGAGCATCAGCTGCATTAGCA  
ATTATTGGGTTGTGTTATTGCTTCTTGGTAGCCCTCAGATCAAAGGTCTCCCGCCAGGGGCAGCCATGGC  
TTCCTTCCCTGTATGGAACTCTTAACTTTGACAAAGATGTCCACAGTTTCTCAAAGAGTGGAACG  
GCAAGCTGTATCTCCTTAGCTTCAACCAATCTTGGTTCGATTCTCAGTTTCCAAGAAATAATGGATGCTAC

TAACAAGTTTGATGAAAACCTTGCTTCTTGGTGTGGTGGTTTTGGTAGAGTCTACAAGGGAACACTAGA  
AGATGGGACAAGGCTTGCTGTCAAAGAGGCAACCCGAGATCTGAACAAGGTCTAGCTGAATTCGAA  
CAGAAATTGAAATGTTGTCCAAGCTTCGCCACCGCCATCTTGTGTCTTTGATTGGTTATTGTGATGAAAG  
ATCAGAAATGATTTTGGTTTATGAATACATGGCAAATGGGCCTCTCCGAAGTCATCTTTATGGAACGGAT  
CTCCATCTCTTCGTGGAAGCAGCGTCTTGAGATTTGTATAGGTTCTGCTAGGGGGCTGCATTACCTCC  
ACACTGGTGCATCGCAGAGCATCATTACCGTGATGTGAAAACACTACAAACATACTCTTGATGAGAACTT  
TGTAGCTAAAGTTGCTGATTTTGGTCTTTCTAAAGCTGGACCAGCTATTGATCAGACCCATGTCAGCACT  
GCTGTAAAGGTAGCTTTGGTTACCTGGATCCCGAGTACTTTAGAAGACAGCAGCTTACTGAGAAATCA  
GATGTTTATTCATTTGGTGTTCCTAATGGAAGTGCTCTGCACCAGACCTGCATTGAATCCTGTCCTACC  
ACGGGATCAAGTCAATATAGCTGAGTGGGCCATGACTTGGCAAAGAAAGGCATGTTGGATCAGATAA  
TGGACCCAAATCTTACAGGGAAGGTGAATTCAGCCTCCCTCAAGAAGTTTGGGGAGACTGCGGAGAAG  
TGTTTGGCTGACCATGGAGTTGATAGACCTCCATGGGGGATGTTCTATGGAATCTAGAATATGCTCTTC  
AGCTTGAGGAAACCTCATCAGCTCTGGCAGATCCCGATGATAACAGCATGAACCATATACCCAGCATA  
CTTTGACACCATTTGACAATAGTGTGAGTATGATCGAAGGGATCAACTCTGGAACCTGATGATGATGCAG  
AGGATGCTGCCACTAGTGCTGTTTTCTCTCAACTGGTAAATCCGCGGGGAAGGTGA

>M6-PGSC0003DMG400041071 M6 RLK with malectin domain

ATGTTTCTCTCTCTTTTATTCATTCTTATTGTGTATTCAAACAATCATCATATCTACTGCAACTAACATTC  
ATGAAAACGTTGCCATATCATGTGGTGCCTCTGGCAATTACCCTGCACCAGATGGACGATTATGGATTG  
GAGATTCAACTTTCACTTCCTCATTCTACACTTAACTGGAAAATCTATTAATTCAAGAGTACCTACCAA  
GCTGCCTTGTCCGATCCAGTTCCTTATAACTCTGCTCGATCGTCTCGCCATCAGTTTACCTACAAATTTTCA  
GTGAAACCTGGACACAAGTTCATACGCCTGCACTTCAAACCAGCTTTATACAATGGTTTCTACAAGTCCA  
AAGCCATTTTTACTGTCAAAACTGATCAGCATAACCCTGCTCAGTGACTTCATACCTACCCTTGCTGCAGGT  
ATGAACTATTTCAAAAAGGAATTTTGCATCAATGTACAAGAAAGTGAAACATTAAGCATAACATTCATAC  
CATCTCGAAAATCAAGCTTTTCAGAAGACACTTATGCTTTTGTAAATGCAATCGAGATTGTTTCCATGCCC  
ACTGGTCTGTATTTACACCTGATGGCAATCAGGGAGTCCCTGTTGTTTCGACGAAATTACAGATTCTACA  
TTGACAACAGCACAGCACTGGAGACAATTCAGCGAATAAATGTTGGCGGAAACTCTATTTTCATCCTTGG  
AAGATGCAACCATGTTCCGGGAATGGGAAGATGACACTAATTACCTGATTCAAGTAGGAGCCTTTTCGA  
TCAACAGAGCCATTGATATCAGATATGCATCCTCAGCAACTCACGTTGCACCAAAGAAGTTTACCTGAC  
GGCCAGGTCAGTGGGTGCGCACTGCCATTTGAATTTCTGTAATCTCACATGGAACATTCCAATTGATTTG

GGATTCAGATACCTTGTTAGGCTTCACTTTTGTGAAATTGAACCTATGATCACATATGAAGGCCAAAGGA  
ATTTCACTATCGTTATAAACAATCAGAATGCTGAAGATGATGCTAATGTGATCAAATGGAGTGGGGGGA  
ATGGAATTTCTGTATTCAGGGACTATGTTGCCGTTATGGAGGGTGATAGAAGGGAAGGGAAGCGTAAC  
CTTACTATAGTTTTGCAGCCAAAGTTTCCTTCAATCAGTAAACATGCTAATGCCATCTTAAATGGGATAGA  
AGTCTTCAAGATAAGCAATCCTGACAACAATCTTGGTAGTGTGAGCCCTGTGCATCCTGTTACAAGTTCA  
ACACCAGAAAAATCAGAGGAATCTGTGCTGTTCTATACAAAGAATCAAATTGCAATTGTACTIONGACATTTA  
TGGTCACTTTGGTCAATGTTGTTGTTTATTACATTAGGTGATTTTCAGAGATGAACTCTGGAAAGACGAA  
CAATAGAATATCTTCAGGAGAGCATCAGTGTGTCGTCATTCTCATTGGATGAGATGGAAAGATCAACGAA  
CAATTTTGATCCTCAGCTTGTGATTGGTAGCGGTGGATATGGCCCAGTATATAAAGGGGATATTGATGGT  
GGAAAAACCACTGTAGCAGTTAAGCGATTGAAACGAGGATCTAGCCAGGGGGAGAAAGAGTTTTGGAT  
GGAAATCAATATGTTATCTACGCACCGCCATGAGAACCTTCTCTCCCTAATTGGTTACTGCACTGAAGGT  
CATGAGATGCTATTAGTTTATGATTATATGCCTCGGGGATCACTTGCTGACAACCTCTACAAAATGGACA  
GAAATGGCTCATCTCTCTCTTGGGAACGGAGACTCAAGATTGCTATAGGTGCTGCACGTGGACTGCATTT  
CCTTCATACATCTCAAAATAGGGTGATACATCGTGATATCAAAAGCTCAAAATATTCTGCTGGATGAAAAC  
TGGGAAAGTAAGATTTTCAGATTTTGGGTTGTCCAAAATGGGGCCTGGAAATGAATCAGCTACTCATGTT  
AGTACACAAGTCAAAGGCACAATTGGGTACCTCGATCCTGAGTACTTCCAGACTAATAGATTGACATGG  
AAAGCTGATGTGTATGCTTTTGATGTAGTACTATTTGAATTGCTCTCAGGAAGACCTGCAGTCGATATGG  
GCCTGCCTGAGGAGCAGCATGGACTTGTAGCATGGGCCAAGCAATGCATCAGGGAAGGAGAAGTTAAT  
AAGCTTATTGACCTGAATCTGGCAGGGCCTATCTCATCAACTGTTTGAAGGTGTTGCGTAGGAATTGCAG  
AAAAATGCTTGGATGATAATCCACGTGAACGGCCTCCAATGTCTAAAGTGGTGAAAAGTCTGGAATTAG  
CATTAGTATTTTCAGCAGAGTGCAGGTGAAGGCATCATTTTATTGATGACACATCAACATCTCTGTCAA  
GGCTGAAGCAGAAAGGGCATCCATCAAAGAGGGTTGTAATGGCATTGATACAGCAAAAAGGAGTGTC  
TTTCACTGAGATGGTGGGATTTTTTTGGTCTTTTTCCAAAAACACCACCAAAGCCAATAGCTTTACCAACA  
CCGCCACAAGTACTTTACCACTTCCCCCTCAATGAGATGCTAAAGGCTACAAAAGATTTCAATGAGAGCC  
TGAAAATAGTTTTTCTAGGATCGGACAATGCATACGTTGGCTTCATAAATGGTTCGACGTGTTGCCATCAG  
ACGTTACACACTGCAGAGTCAAGACTTACATGGTTAGTGAGTTGCAAGCTAAAAGAGAAATGAGTCC  
CTTGCTAGCCACATCAACGTGGTGTCACTGATTGGGTTTTGCAGAAATGTTACAGAGATGATCCTTGTG  
TATGATTATGCAGCTGGAGGGACCCTACATGATTATCTCCGTGACCCTGATAGGAATCCTCTCTCATGGA  
AGAAGAGGCTTGAGATCTGCATTGGTGTGCTGCAGAGGGTTTGAACATCTTCGGTCCATACTGAAGATAA

CAGTTCTCCATTGCATTTTCAACTCCTCCTATATTTTTTTGGATGAGAATTTGGTAGCCAAAGTTTCAGAA  
GTTAGCTGGTCAAAAACAAAAGGGATCAATACAGCGGGGGTAATTCATGAAGGGGGATATTTGGATTC  
AGACTACTTACGAGATAAAAAGTGTGACAGAAAAATCATACGCATACTCATTGGCTTGGTGTATTTGAG  
ATGCTATGTGCCAATGAAGCATTGAAACATTGGCTGAATCAGGGACAGGTCAGTCTAGCCAAATGGATT  
AAAACATGTTTTATGACTGTGACGTCCCATTGATTACCCATGCTTGGTTGGAAGAATATCACCTGACT  
GCTTTGAGCTGTTTGTAGATACTGCAATTAAGTGCCTGCACGATGAGGGCAACAAACGTCCATCAATGA  
ATGATATAATCACAAGTCTCAAGGAAGCACTCAAGCTGCAAGAGGCAGCTAATATTACATAG

>M6-PGSC0003DMG400043836 M6 RLK with malectin domain

ATGCCAAGAGGATCACCATCACACCACCACCACCATTGTCTACAATAATGGCTAATATCCTCGTGGCGT  
TTGTTTGCCTCATTTTCATCGGCCCTCGAGTGTAATTCAGTTTCTGCACAATCAGATTCTACTGCACCTG  
CAAAATCTTTCCAGCATTACACCTTCAGATAACTACCTTATTAATTGTGGATCTACTTCTCCTACTACTC  
TTCCAGGAAATCGCGCATTTCAACCAGATGAAACCACAGCTAAATATTTAGCCTATAGCGGACGTGACCT  
TCACATTTCTGCACCTGACAATAAAAATGTACCTTCACCTATGTACCTTAGCGCGAAAATTTTCGATAGTG  
AAGCTACTTATACATTTTCATGTAACCAGTCCAGGCTTGCATTGGATCCGTCTTTATTTTTACCCTTTACAAA  
ACAATGAATTTAATCTCCAAACAGCCAAATTCTCTGTTTCAGAGGATACATTAGTTCTCCTCCGAGACTAC  
CAAATGGAGAAAAACGAACCAGTTATGAAAGAGTTTCTTGAAATGTCACAACAGAGCGTTATGCCATC  
AAATTTGCACCTTCCAAGGCTCAATTGCATTGCGCAACGCCATTGAGTTTGTACTGCACCAGGCAAATT  
ACTCGACTATTCTGTCCCTCTCCTTTTCCCCGTTTCACAGAAATTTGATCTTTCCACTAGTAATTTGAAAC  
AACCTATAGGCTTAATGTTGGAGGTGCATACCTTGATGCAACAAATGACACTTTAGGGAGAAGTTGGTT  
ATCCGATGAACCATTCCGTAATAGTGCCACAGGACAGGTGGTTACTGTTACAGCCTTCTGTGATTAGTAT  
CCAACGGCAGGAGGGTGCCTTTAATTGCTCCTCCTACAGTTTACAGTTCAGCAGTGAAAATGGCTGATT  
CAGAAACTACCATTCCCAATTTCAACATATCATGGACGATGGATATTGATACCTCATATACATACCTCATT  
CGCCTTCACTTCTGTGATATCATTAGCAAATCGCTCAATGAACTGTATTTCAACGTGTACATTAATGATAA  
GATGGCAATTTCCGGGCTAGACTTGTGATCTTTGACACAGCGGTTGTCCACAGCTTTTTACAAGGACTTT  
GTGATAGATGCCTCTTCAGCATCTAATCCTCTTAGTGTAAGGTTTACCAGTGAACGATGTCCAAGGAT  
TCAAGAATGCAATCCTGAATGGGCTTGGGTTTTTCGGATGAATAATTCTATGGGTAGTCTTGATGGGC  
AATATGGTGTGATGGAACGAAGAGTAGTGGCCCAAGCAAACAGTGGCTTATGTTGGTTTTGCTATGA  
TGTTCCGGAGCATTTGTAGGATTGGGTGCTATAGTTTTCAAGTGGCAAAGAGGCCTCAAGATTGGCAAA  
AAAGGAACAGTTTCTCCTCTTGGTTGCTTCCACTTCATGCTGGAGATACAAGCTTTATGGCGGGAAGCAA

GGCTTCATTGTCGCGCAAGAGCCAATTTTTCTCTTCAAACATGGGGCTAGGCCGATATTTTTCATTTGCTG  
AGTTGTCAGACGCCACCAACAATTGGGAATCGACTGCCATAATTGGTGTGGTGGCTTTGGCAATGTCT  
ATTATGGAGAAATCGATGATGGAACAAAAGTAGCTGTCAAGAGAGGAAATCCACAATCTGAGCAAGGT  
ATCAATGAGTTCCAGACTGAAATTCAGATGTTATCTAAGCTCAGACATCGCCATCTGGTGTCTGTTGATTG  
GTTATTGTGATGAAAACACAGAGATGATACTGGTTTATGAGTTCATGCAAAATGGTCCTTTCAGAGATCA  
TCTCTATGGCAAGAACTTCCACCTTTGACATGGAAGCAGAGGCTAGAAATCTGCATTGGCTCAGCTCGT  
GGGCTTCATTACCTCCATACAGGTGCATCTACAGCAATTATCCACAGAGATGTCAAACCACCAACATTC  
TTCTTGATGAGAACTTGGTCGCTAAAATGGCTGACTTTGGGCTGTCAAAGATTGCCTTGCCAACGAGAC  
TCACGTAAGTACAGCTGTGAAGGGAAGTTTTGGGTACCTCGATCCTGAGTACTTCCGTAACAGCAGTT  
AACAGACAAGTCTGATGTGTACTCATTGGAGTGGTACTTCTAGAGGCCTTGTGCGCTCGTCCTGCCATT  
AATCCATCACTTCCAAGAGAGCAAGTGAATTTAGCAGAATGGGGAATGCAATGGAAGAAAAAAGGTTT  
GTTGGACAAGATCATTGATCCTACTCTTGTGGGACAAATTAACCCAGAGTCAATGAAGAAATTTGGTGA  
AGCAGCAGAAAAGTGTGGCAGAATATGGTGCTGATAGACCTAGCATGGGTGATGTGCTGTGGAAC  
TGGAATATGCTTTCAGCTACAAGAAGCCTCATTACAAGGGAAGGCTGAAGAAGAAAACAAAGCATCTT  
CTTCCCCAGTCTCTCCTGCTATAGTTACCCCTACTCCTGCCCCGTCCTGCTCCTTCGACTCCTGACAACA  
GACCAGTTTCTACACCTGAGCAGACAAGAAATCCTGCTGAACTTCAAACAATTGACGATCATTGAGGAAC  
AAAAATGTTTGATCAATTTGGTGCACCTAACGGGCGATGA

>M6-PGSC0003DMG401015527 M6 RLK with malectin domain

GCTTCATTATCTTCAATTCTATTCTTGAGTTCATTATTCTCAAGCCTCAGCAGCATGGCTAGTAGTCATTT  
TCTCCTACTTGTTTACTTCTTCTGTTTTCTGTTTCTGCTGATGGTAAGCTTCTTCATTTTCTATATTTA  
ATCATTTTCGTGTTAGAAACCTTTTTGTCTCGATTAATTTGAATTCATGTCAAAAACTACTTGTATACTAA  
TCCAAATTCGTGTTTGATCATATATATAGGCCATTACTAGAAACAAAGTTATTTCCATCGTAAATCAGTG  
GAAAACCTACTTGCCTAGCTAATCCGAATTCACACTAGCTAGGTCTACTAAGGGGGTAAATGTAGCTAT  
ACTGAATTGAAAAGTTTTCAATTCTCATAATTTAACTTGAGATCTCTGGTTAACCATAGAGGAATACTCT  
TGTTCTATATTATCTTGTATTTGATCTTGATTTATTTATTTATTTTGTACTTTTTATTTGTAGTG  
TTTGTGAGCCTAGATTGTGGATCATCAGAAGCATACTGATCATGAACTTCAATAGATTGGTTAGGA  
GATGCTGATTACGTAGCCAATGGAGAATCTTATGTTGTACAATCCAACAACCTCAATATCACACGTAATGG  
ACACTCTAAGAGTGTTCAACAACCAGGACTAAGAATTGTTTCCTAATCGATGAAATCGAAAAGGGTGGAA  
AAGTTCTAATTCGAGCTAGTTTTTACTATGGAAATTACGATGGGAAATCAAATCCACCATCATTGCACTT

CAATTTGATGGAAATCATTGGGCCAGTGTTACAACACTATGAGTGATCAACTTGTATATTATGAGACATTTT  
ATGTCGTTAAAGGCGATTACCTTACTGTGTGCTTGCTCAGACAGAGGATAATCAATTCCTTTTATTTCT  
GCACTTGAAGTTCGTGGCTTGGATTCTACTATGTATAGTCATGTTGATGATAATCATGCTTTGTTCTTGAG  
AAGAAGAGTTGCTTTTGGTTCCAACAAAACACTATCAGGTAAAATATTCTACATAGCTATAACATCAATGTTA  
TCTTGTTGCTTCTCTTTGTGTTAGTTAGAGTACTTCTATTTAGTGTTAGTCAGTGGTGAAGTTAGAAAATTT  
CGACTTGCTTTATTTGTCTAACTCAAGGAGGAAAGATCGTTCAAGTCCATATAAGAAAGTCCCCCTTGCA  
TCACTGATGTAGGATTGTATTACCTACGGTGTGGATCTATCTCGGGGGATCAAATCGGGGGTCTGATTT  
TGATACCTTGTTAAATAGATCTTGAACCTAACTTAACCCAACTGGACACTAGATCGTCCTAACTCAACTTC  
AAAAGTTAGCTCAAAGGGAGGCCGATGTGAGATTCTTTTCATTCATCAGTTGGACTCCCTTCTGATCAT  
GTAGATCCACACCAAATGCTAATAGAGACAAAATATATCTATATTTTTGGTTCTTTGTTTTATGATCATAT  
CATCATTCTGTTTTCCGGATTAGATAACAATAACTTGATATATTTGAATTTCTAGTACTGAAAATATCACT  
TTTTTAAGAAAAGTAAAATATTGGATTAACCGGACATAAATAAAGGGGCATGAATAGTGAAGATTCA  
TATATTCGATATATATATATATATATATGGACTTAGTTGCTACTTAACTTTTGAAGCTATACAACATTGGG  
GTTGTTGTTTTACTTCATTAACAAATTTCTTTTGAGACCCCATAAAGGTAAAATCTGTCTATGTTCTATC  
CTCTCCAGATCTTACTTGTGGATTACACTTAATATGTTGTTGTTGTCGTAACAAATTTCTTTTGATCAAAT  
GGACAGGAACACAGATGATCCCTATGACAGAATATGGACTCCTGGTTCTGGAAATTTAATAGAAACACT  
CACTAGTGATGCCACAACACTATTGACACTAGTCATGGAGATCAACCTCCACAACAAGTTTTACAAAATGCA  
ATTTCCACAACAATTCATTAATATCATATCATGGAACATGAATTTTCTTCTATTGATAATGTTATCTAC  
ATGAACATGTACTTCTCTGAAGTAACTCAACTTGATGTCAACCAACAAGATCATTTAGAATTTTTCAAGA  
CAATGAGTCTATCTCTGACCCAATTTTGCCACCTTATGAGGATTTTATTCTAATGTATGTTAGCAATCTCAC  
TGTTTCACCATCCTCTATTTTTTCTGTTGTGAGAACCACAAATTC AACACTTCTCCTCTTATCAATGCCTT  
GGAAATATTCACTATTGGTAATGCATTGACTGATGGAACAAACACCCAAGATGGTATGTACACCTTCTTA  
TATTTAATTTGTTGTAGCAGATAACTTATCTTATGTTACTTATAGTTATTTGATTGTGTAAATTCTTTAACA  
CACTTTCAACGTATAGAAATTAATCTCGATTTATGAGTTTGACTTTTATACTTTTAATAGTATAAAAGAAT  
ATATACACTTACCTAAAAGATTACCATATATAATTGTCCATAGACCGTAATAACTATTGATAACTTGAATA  
CAATATGCATTTATTTATATTATCAGTATATATAAGTTAAATACTTTATTTATTGATATTTCTAATATTATTG  
AATTATATATGGGATATTATACTTATTAAGTACTATGTTTTCATTTTTTAAATATATAGTGGAGACTTTAA  
TATCATTGCAAAGGAATTTGAAGTATTACAAGGTTGGATTGGTGATCCTTGTCTTCCATCACCTTTTACA  
TATGATTGGATCAATTGTAGCAGCAGTGATCCACCTCGCATTACAGCACTGTAAGTAAAATTTAATTCAT

TTAATATGTGTTTTACTTTTTAAGGACAGTCTGATGCACAAAGCATTCCGCGTAAGGTCTGCAAAAAG  
ACCTCACCAAGGGGTATAACACAAACAGTTTATACTAATGCAAGCATTAAATGATTGTTTTATGGTTCC  
AACATGTGATCTATAGGTCACACAAAGATAATTTATTGTTGTTTCAGGGCGCGTACCCCTTTATATAATT  
GTAATTTTTTTTTGTTGAAATAAAATTAATTTACAGGTACTTGAGTAAATTCAATCTATCAGGATCACTTCC  
AGATTTTAGTTCCATGGATGCCCTTGAGACAATGTAATGTTTCTGTTTTTTTTAATTTTTTTTATTAATTTA  
AATACATTTCTCCTAAATAGGGATATTTAATTTAATTAATTTCTAACTCTTGTTTTTTTGTGCTTCTTG  
GATTGCAGTGATTGAGTAACAACAATTTGGATGGACCGATTCTGATTTTTTTGGCACATTACCCAATCT  
TAAAGAAGTGTAGTATAAAAACATTATATTCTGATTGATTAATTAGTTTGGTCAATCTTTTCGAA  
AGCTAAAAGTATTTGAAGAAAAAATTGTTTATTTAGAAAATAAAGTTGTTT

>M6-PGSC0003DMG401017656 M6 RLK with malectin domain

CGTTAACACATTTTCAAAGACTATCAAATCACATCTTCCCCTTACTCAACTCTGTCAACAAAGCAACAG  
AAAAGAAAGTAGAAAAGGACTTGTTGTCTCTTCTTTTTTACTACTCACTTCCTCTCTTTTTTCTCCCC  
AGCAAATTCTCCTCTGCTTCAATGGAGCTGCATTGGTGTTACTATTCTTGGTTCCTCTATCTTCTATCTT  
CATCAAAGTTGCTTTTTGTGATCCTGAAGGTACACTTCAGAGGCAGATACAAGATTTAACTTACGAGTT  
CAACCTTTTAAACATTCTTATATTGACTTCTAAAATTATGACTACAAAATGTAATATATTTGTTAAAATCT  
TAGTGGTCTCTTGATTTTACTTCTTCAATCTCTTCTTTTCTCCCTTGTGTAAAGTTGAAGTTATATTTGCATG  
TATGTGTGTGTTTCAGCACATGTGAACTCATAAACTTTAAATCCTGGATCTTCTCTATCAGTATGTATTAC  
ATTGAAAGAAAATGGAAGGTTTTAAGATGAAATGTTGCTTATGTTGTGAAATGTGCAGGATTCTTGAGC  
TTGTCTTGTGGTGGAATACTACCTATGTTGATTCTCCAACATTACATGGACACCAGATGGTTCCTATAT  
CTCAGCTGGTAACATGACCACTGTTGATTTTCTAGAGGGTTCCTCTTCTACTCTCCAGTTAGGTTCT  
TTCCTGATTCGCCACGTAGAAAATGTTACAAGATTCCAGTGAAGAATGTGTCATCCCTGGTCTTGTGAG  
GACACAGTTTGTGTATAAGAATTATGATTGACATAATAAGCCACCTGCATTCTCTGTTTCTCTGGGAGG  
GCTATTACAACAAATGTCAATCTTACTCATATCGATCCGTGGATCGAAGAGTTCATATGGCCAGTTGATA  
AAGACATTCTGTCTTTATGTTTTCACTCTCTTCAAGATGGTGGATTTCCAGTCATTTTCATCCCTTGAACCTA  
GGCCACTTCCACAAGAAGCTTACAGCAATGCCTTGGGAGATTTTCTCAATAAGTTGCTGAGGAAAATGTTA  
TCGTATCAACTGTGGTTATAATTGGTCCCTGAGGTCAGAACAAACACTCACTTGTGCGATTATGTTATGTAT  
GACTTTATCGATTGTTTAGTCCTTAGTTTCTGTTTAGATTTGATGTTTTTCGTGCTATGTAAAAGGTACCCG  
ATTGATCAGTATGATAGAATTTGGGATGCTGATGAGGATTTTCAGCCATTTTCATGTGTCATCTGGTTTTG  
ATATTCAAGCCAATTTCAATATGTCAGTTCTGAAGGAGAGCCCTCCTGTAGCTGTTCTTCAAACCGGAAG



AGTTTTGGCACGGTGGAGTGATATGACATATAAATTTCTATTGATCACCAAGGAGATTACCACATTGTT  
CTCTACTTTGCTGGGATTCTGCCCCGTCTCCCCTTCATTGATGTATTGATAAATGGGCATGTTGTTGATC  
AAACTACACAGTTAATCGATGGGAAGTCAGTAGTCTTTTCTTTACAATGAAAGGAATCGAGAGCTTGAA  
CATCACATTGAAGACTGTTCACTACTATCCATATATCAATGCTCTTGAGGTTTATGAGATCCTAGACATTC  
CCTTAGAAACTTCTTCAACAACAGGTTCTAATACAGTTTTATTGTTTTTTTCGACCTTTGAAGGAGTCTGTTA  
GAACCAATCACACCAACTTTTGACATTTTTTATGCTTGCAGTTTCAGCCCTACAGGTTATTCATCAGTCAA  
CTGGTCTAGATCTTGATTGGGAAGATGATCCATGCTCTCCTAAATCATGGGAACACATAGAATGTGAAG  
CAAATCTCGTAACTTCATTGTATGTTAAAGCTTACACTAGAACTACATTTTCTTTCTTTACTTTCTCTTG  
TCTTATTTTTGTTAAGAGCAGTACATAATAAAGTTAAGACTTTATATAGGGATCTTTTTGATGTAACTTG  
AGGTCAATCAGCCCAACATTTGGTGACCTACTGGATCTCAAATCACTGTAAGAGTCATTAGTCTTAACAA  
CTTATCACTTAATAGCCATTGTTGGCTATCTTGACTTACTTATTTGAGGTTCTACTTGTTGCAGGGATTG  
CATAATACTTCACTTGCTGGAGAGATACAAAACATCGGCAGCCTGCAACATCTTAAGAAGCTGTAATACT  
TGATCTCGAGAAATTACCATGTTAAGTTAATGTACTTGAGAGAGCATTATCTAAAATAAGTTGTGCGCTC  
TCAACTTTGCAGGAACTTAAGTTTTAATCAACTTACAGCTTTTGGTTTCAGAGTTAGAAGACTTGATAAACC  
TTCAAATTTTGTAAGTCTCACTGCTTGCATTGATAGTGACTTCCTTCATTCTTCTTGCTAGTCTGTTT  
AACAGTCTTTACAATCAGTGTTTTCTGTTGAAGGGACTTGCATAACAATAGTTTTCAAGGAACAGTACCA  
GATAGCGTTGGAGAACTGAAGGACCTCCACTTTCTGTGAGTGAGGAAAATATACTGGCATTTTGAAC  
TTCTTAAAGTACTTACCTGATAAATTATTCTAATTTACCTCTCTGCAACATTCAGGAACCTAGAAAACAA  
TAAGCTGCAAGGCCCCCTGCCACAATCTTTGAACAGAGAGACTTACAAGTCTGTATGAAATCAGAAA  
GTCTTTTTGTTTTTGTCTTCTCATGTCAGTTTCTCGGCTTATTGTCTTTCCCAATTTGCAGATCATCAGGG  
AATCTGTGTCTTTCTTCACTATGTCTTTATGCAATGAATTCTCAAGAAATCCTACAATTGAGACACCACA  
AGTCACTGTCTTTGCACCTACAAAACACAAACGCCATAATCGATTCATAGTTATACTTGGTGCAGTTGGA  
GGAGCTGTGTTTGTCTATTTCGTTGTCTTTATAGCAGTATTATTGTACATGAGGCGAAGAAAAAGTGGAG  
ATACATATGCATCAAGTATGGAAAAAGTCAAACCTTTTCTTTAACATTTCTCAGAATATTGATCAATCTG  
CTTCTAAACATGCACTTTTTTCTAATTCTAGGAACTGCAGCAGAAATGAAAACTGGAATGCTGCAAAAG  
TATTTTCATACAAAGAAATCAAAGCTGCTACAAACAACCTCAAAGAGGTTATTGGCCGTGGTAGTTTTGG  
ATCTGTTTATCTTGGGAAGCTTCTGATGGTAAACAAGTTGCTGTAAAGTTTCGATTCGATAAACTCAA  
CTGGGTGCTGATTCTTTTATCAATGAGGTTTCGTCACTATACCCATGCTAGTTCAGTTCAGTCTACAAAGA  
AAAAAGAGATTCAAGAGCTCTCTTATTATCTGTAGGTAACCCTTCTATCACAATCAGTCATCCAACCTCT

TGTGTCGTTAGAAGGATTCTGCCATGAGTCAAAGCAACAAATTCTAGTTTATGAGTATTTACCTGGAGGA  
TCACTGGCTGATAACCTCTATGGTACGTCACGCGTGATCTCACCCATATTCACACTTTAAATCCATCATCC  
TCTTCTGTCACTTATCGTTTTCTAACTCTTAATAACTGTCTCAGGAGCAATGAGCAAGAAATTGACACTAA  
GCTGGGTGCGCAGACTGAAAATTGCAGTTGATGCTGCAAAGGTATGAGTAAAGAGAGGCATTATCAT  
TACTTAAGTTTTATATAGTTTTTAATGTTTGATTATATAACTTGTAAGGTTTGGATTACTTGACAATGG  
AAGTGAGCCAAGAATCATAACCGTGATGTGAAGAGCAGCAATATACTTCTGGATGCAGACATTAATGC  
TAAGGTATCTGATTTTGGCCTTTCTAAGCAAGTAACTCAATCAGATGCAACTCATGTTAGCACTGTTGTCA  
AAGGCACTGCTGGCTATCTTGACCCTGAGTAAGCTTCAAGTCATTTATCATCCAGTTTAATATTTGGTCCT  
TCCTATCCTAATCCTAAACCTCTCTTACTACCTGTCCTCAGATACTATTCCATTCGACAGCTCACAGAAAA  
GAGTGACATATAACAGTTTTGGAGTCGTTCTTCTTGAACCTATTTGTGGCCGAGAACCACTTAGCCACTCG  
GGGTCTCCAGATTCCTCAATTTAGTTCTATGGGTAATAACTAGTCTTATAATGTTTTACACACAAAAGCA  
TTTCATTGACTTCCTATAATACTCACATGTTGTAACTAAATGTGAAAATTTCAAGGCAAAGCCGTACTTGC  
ATGCTGGTGCAATTTGAGATAGTAGATGAGAGCATAAAAGGAACATTTGACACAGAAAGCATGAGAAAA  
GCTGCTTTAATCGCCTCAAGGTCAGTGGAGAGGGATGCATTGCGAAGGCCGAGTATTGCAGAAGTATTA  
GCTGAGCTCAAAGATGCATACAGCATTCAACTTTCCTATTTAACATCTGAAGGACTAGCCAATTGATAAA  
TTAGACCTTCACTACTGCAGCTCACAATTTGCAAATATAAGGTTTCTCTAGTTGAATCAAATGTTACTGTA  
ACTTTATGACAACTTTAAAATTTGAGCTCGGAAATGTTTTAAGTTATTGATATATATTACATTTAAAGGTC  
TCCTTTCCCTTGGAAGATAGGGGAAGTCGTGGATGATTTTCAACAAATAATAACAATGTCCATCCAGGC  
TTGCATCAGTGCTCGCCTCTACATTCTTTACGACTTGTGAACCAATCATAAAAGTAATGAGTTGGCCTAAC  
CAGAAAACCTGGCGCCGTAGATATAGGAATAATGCTGTAGAAGCAGCCACTGCATAGGGGAATATAGTC  
CAGATT

>M6-PGSC0003DMG402019252 M6 RLK with malectin domain

AAAACAGAGTCTGGCACAGATAGATAAATATTACATTTAATGTATCACTTACAGAAGCTTCATAGCTCTT  
TCTGAGATACTGAGGGTATCAAATCAAACCACAATGTCCATTGAAACACAGCTGGTGTAACTGTGGGG  
GTGCGGGGTGGGGGTTCTTTTGTGGGGTCTCCATTTCTCCCCTTTGCTATATCTTCTGTAAAATGACAG  
CCTAATCAACAGCCTGTAAAGAGCTGTTTTGGAACTTTGCTCTAAAAGCTCTACTTGATTGTGTTTTCA  
TGGTGGCATGGAGGTATCCCCTTCTGGGTTTTCTTTATTTCTTCTTTTTTCTGAATACCCATTTTTAATCTT  
TTAAGTTTTTTTAGCTCTAGGAATGAGGTAAGAGTAGTGAAAAAGATTCATTTTTTCTGTTTTATTCATT  
GCTTCTCTGCTACTCTTACATTGCTTCAGATTGATCTATTAATGGTTTGTAAAGATTAGTCTTTAGGTTTGCT

TGGGGAATTTGGAGTTTGTGTGCCACCAGGTGTTTGTAAAATGGGGCTATGGGTGCATTTGGTTCT  
AGCTTTTATGCTGTCCTGTTTCTTGATTGAGGAGGCAAATGCTGCTTTTACTCCTGCTGATAAATATTTGA  
TTGCTTGTGGATCTTCCAAAAATGTAACCTTTCTTGGCCAGATTTTTGTTCTGACACACACCATTCTTCAG  
TTGTTTTGGAAAGTGAAGAAAATTCTATTTCTGCAACATCTAATCCACTGCTCCATTTTCAATTTACCAGT  
CTGCTAGAATTTTCCACACTACAACATCTTACGAATTTGATATTCATCAACAAGGGCGACATTGGGTTCG  
CCTTTATTTCTATCCTCTCCCTGGTCATAACTTAACATCTGCCTCAATCACAGTTGTCACAGAAAATTTGT  
TCTGTTGAACAATTTCAGTTTCAAGAGATATAAGGGTACTTATCTATTTAAGGAATACTCAATTAATGTCA  
CTTCAGATAGCTTGACTATTGCTTTAATCCCTTCAAACAACCTCCGTCGCGTTTATTAATGCGATTGAAGTT  
GTATCAGCTCCTGATGAGTTGATTCCGGATCAAGCTGTGACTGCATCTCCACCAGCACCTTTCAATGGCC  
TTTCTGGGCTAGCCCTTGAAACTGTTTATCGGTTAAACATGGGAGGTCCCTTGATTACTGCTCAGAATGA  
TACTCTAGGGAGAACGTGGGAGAATGATGTTAAGTACCTGCATGTTAATAGCTCTGCAGTGAATGTTTC  
AGTTATCCCTTCAAGCATAAAATATCCAGCCACCATTACTCCTGAAATAGCACCATATTGGGTTTATGCTA  
CTGCTGAAACCATGGGAGATGCTAATACTGTGCATGGGAATTTCAATATCACCTGGGAGTTCCCAGTTG  
ATCCAAACTTCATGTACCTCATCCGCGTACATTTTTGTGATATTGTGAGCGAGTCCTTGAATACTCTACTTT  
TTAATCTGTACATAAATGATGACACTGCTTACCGGACCTAGATTTGTCTTCAGTTGGCAATTTGGATGTG  
CCGTATTACAGAGATTTTGTCTCCTCAACTCCACAACAAATTCAGGTGTTCTGACAGTCAGTGTGGTCCAG  
ACACAGGAGCTGATTGGATCAATGCCCTTATGAATGGATTGGAAATCATGAAGATTAGCAATGGAGCTA  
GAAGCTTGAGTGGGGTTACATCTGTGGAGACTCTATTTGTGAGGCCTCACAAAAAGAACAAAAAAGGT  
ATTATAATTGGTTCTGTTGTAGGAGGAGCATCAGCTGCATTAGCAATTATTGGGTTGTGTTATTGCTTCTT  
GGTAGCCCTCAGATCAAAGGTCTCCCGCCAGGGGCAGCCATGGCTTCTCTTCCCCTGTATGGAAACTCT  
TTAACTTTGACAAAGATGTCCACAGTTTCTCAAAGAGTGGAACGGCAAGCTGTATCTCCTTAGCTTCAC  
CCAATCTTGGTCGATTCTTCAGTTTCCAAGAAATAATGGATGCTACTAACAAGTTTGTGAAAATTTGCTT  
CTTGGTGTGGTGGTTTTGGTAGAGTCTACAAGGGAACACTAGAAGATGGGACAAGGCTTGTGTCAAA  
AGAGGCAACCCGAGATCTGAACAAGGTCTAGCTGAATTTGAAACAGAAATTGAAATGTTGTCCAAGCTT  
CGCCACCGCCATCTTGTGTCTTTGATTGGTTATTGTGATGAAAGATCAGAAATGATTTTGGTTTATGAATA  
CATGGCAAATGGGCCTCTCCGAAGTCATCTTTATGGAACGGATCTTCCATCTCTTTCGTGGAAGCAGCGT  
CTTGAGATTTGTATAGGTTCTGCTAGGGGGCTGCATTACCTCCACACTGGTGCATCGCAGAGCATCATT  
ACCGTGATGTGAAAATCAAAACATACTCTTGGATGAGAACTTTGTAGCTAAAGTTGCTGATTTTGGTCT  
TTCTAAAGCTGGACCAGCTATTGATCAGACCCATGTCAGCACTGCTGTTAAAGGTAGCTTTGGTTACCTG

GATCCCGAGTACTTTAGAAGACAGCAGCTTACTGAGAAATCAGATGTTTATTCATTTGGTGTGTCCTAA  
TGGAAGTGCTCTGCACCAGACCTGCATTGAATCCTGTCTACCACGGGATCAAGTCAATATAGCTGAGT  
GGGCCATGACTTGGCAAAGAAAGGCATGTTGGATCAGATAATGGACCCAAATCTTACAGGGAAGGTG  
AATTCAGCCTCCCTCAAGAAGTTTGGGGAGACTGCGGAGAAGTGTTGGCTGACCATGGAGTTGATAGA  
CCTTCCATGGGGGATGTTCTATGGAATCTAGAATATGCTCTTCAGCTTGAGGAAACCTCATCAGCTCTGG  
CAGATCCCGATGATAACAGCATGAACCATATACCCAGCATACTTTGACACCATTTGACAATAGTGTGAG  
TATGATCGAAGGGATCAACTCTGGAAGTATGATGATGCAGAGGATGCTGCCACTAGTGCTGTTTTCTCT  
CAACTGGTAAATCCGCGGGGAAGGTGAAAAGGAACAGTCTCTGGTGTATGTGACATCCATAATTTTTA  
TTTTGTGGCTTCAACAAAATATTAATGTGATTTAAAATCTTTTCATTCATAGTATTTGGGTCATTTTTCT  
AATAAATGCTCGGGTATGTAATGATTGGTGGAGCTGGGCATCCATTGAAATTTGTCTTTGTAAT  
ACTAAGAGTTGTAACCTTGTATGAACTATTACATAGGTGATAGAGTTGCCTCTTTTACTCATAGATGTCAT  
GACTATAAATTGTCAAAGCTTCGTAATCAGTGATGTAGAGAGAAACAATATTAATCAATTGTTGCAGCAC  
TTCTGCTGAATTATCTTCTGATGGTGGCTGAGTTTGTGATGCTGTTACTGCTGATTAACGATGCTCTCTTA  
AACTGATCGTTGTTGTGAGATAACCTCCATGTTGGAATCTGCTTCGACTATTATAGATGGAGCTGCTAT  
CTAAGTGGTTTGAAACAGTTCAGTTGAACCCAGATTTTCTGTTTTGCATACACTAATCCTCTATAAAAGTT  
GTGTCGCGG

>M6-PGSC0003DMG402027811 M6 RLK with malectin domain

TTGAATTTAGGGTTGCAAAGCAGGACCAAGTTGATTTACATTGTAAGAATGGAGCTCAGTTAGGTAAGT  
ATTAATTTAACAACCTTTACGCATGAAGTGATTTAGTATACGTCTTATGTTATGTTCTTATGACTAACTC  
ACACATAATTATTTCAATAGTTAAATGTGTTAGTATCATGACTCGTGATAAGATTGCTGTTTTTCTAGTTT  
GTCGTTTCCACACTAAAGTTGCTCGCATTCTGAGATCTCAAATGCACCATGTAATAAAATTTGTGTATCCA  
TTTGTAGATGACCATTTGTATATAAACTGCGGTGGTGGAGTCTGTATCAGTTAACGGAAATGTCTATGAAG  
CTGATGTACATGAAAATGGTGGATCAACTTTCTTCATGAGTAATAATTCAAATTTGGGGCTATAGTAGTAT  
GGGAACCTTCTTATGGGCAATACGTAACAGGTACACTATAAATGATGTATGCGAAGTTCATACTGGTGA  
TGCCGAATTGTATGGAACAGCACGTTTATCCTCAATCTCTTTGAAATATTATGGATTTTGTGTTGGTACCCG  
GTACGTACAAAGTGACTCTTCACTTTGCTGAAATATCTAGTAGAAAATATAGACTCTCGCATGGCAAAC  
AAGGCGAGTCTTTGATGTAGAAATCCAGGTAAGGTACCAAACACCTTGTGATCCGTACGCAAACAT  
ATAGAAGATCTTTACAGAATAGTTATGCAGGGAACAAAGGTGCTGACAAGCTTCAACATAGAAGCAGA  
AGCAGAACGACAAGCTGTGAATGAGCCTATAACAAGGGAATATTCCGCTGAAGTGCATAACAATCTCCT

CGAGATTCACCTTATACTGGTCTGGAAAAGGGTCAATCTTATACCCATCAGATAACTATGGGCCCTTATA  
TCTGCGATTACAGTAACTCTAGGTATTCACTTCTGTGTCCAAGTGTACTGTTTTACGAAGGGGAGCCTT  
GGAGCAACAGTAAAGTTGTCTGCGTGTGACCTATAGGTACGGGTTGAGCCGTGGAAGCAGACACTA  
ATGTTTCATATTAGGGGTAGGCTATGTACATCACACCCCTTTGGGTGCTGCTCTTCCCTCGGACCCTACGTG  
AACGCAGGATGCTTGTGCACCGAGCTACCCAGACTGTTACCATTTTACATGGTTTTTGCCCTATGTTG  
TGACTGATATTTTCATGGTAAACAATTTATGAATCAGATCAATCACATCTGTCCCATGGAGTGCTTGTGGA  
ATTTAGGATCTGCATTACTTTTTCTAATATTGTTTCATTGTTTTTCTGGATGTACCAAGACAAATTACGT  
CGGGAAGGTAACACTACTTTAATTATGGATTTTATTTGGTTTCCATTGGGATTTGAAGCGAAGCAATCT  
TTGAGGCGATCTCCAAAATCTGAAAATGTTATCTCTCCTCTTACTCGCCCTTACCATCCTGGAAAGGAG  
ACCCAAGATCCATTTCTTATCATGGCATCAGTATCAGATCTATCCCAATTTTAGTTTGCCCGATGTTAGG  
CCCCATATTATGTTTTCCACCCTCCCGTTGGTAAGCTTGGGCATAGGTTGGAGGGGTGTTAAGTTGTCC  
CACATTGGTCGTTAGCTTCTGGGGTTGAGTTAAGCCCAAGATACATTTTTATCTAGTTATCGGTTTTAATT  
ACCACCATATGAATCATAAGACACTTTATTTGTAGTAAGCTTCTTACTTTCTTTCTGTTTTCCACTCAACT  
GATATTTATTTACTAATAATGTGCTGATATAGAGTTAGAAGCTTATTGAATTCTACCCTGGAGGGCTTTACA  
ACTATCAGAAAATTAAGCTGCCACAAATAATTTTCATGATGGCCGCCGGCTTGGTGAGGGAGGTTTTG  
GGACCGTCTACGAGGTTAGCTAGAATCTTAACTCATTGCAGGTTATGATTTTTGTGTTCTTTGTGATAT  
GTCTTTGACAGTTTTAGTCCGCCTTTGTATTCTTCATTTCTTCCGAAAAGATATTCTCTCATGACAAAAG  
TTGCAGTACTAATATTGTGTAGCTGCACTATGCACAACCTTTCTCCGTTTGCTAGTTGGATGACCGGACAT  
CTAGATTTATACTCCCTCCATTTCAATTTATTTGGCCTATTTGTCTTAGCACGGAATTTAAGAAAGTAAA  
GAAGACTTTTGAATAATGTAATCTTAACTAAAGATATATAGAATGTACTGAAATCCCTTCAATCTTGTG  
GTCTTAAACATATCAGGTCGAAAGTTGGTTAGAATTTAAAAGTTACCAAAAAGGGAAGGCACATTCT  
TTTTGAAATAGACTAAAAAGTAAAGTAAGACAAACAAATTGAAACGGAAGGAGTAATTATTTGTTTCTC  
TGATTCACAATTTTCATCATCTAAAACACTTCACCAACATCCAGGGCACTCTTTGGATGGGACTGCCATTG  
CAGTTAAAAGCTTTGACAACAAAAGAAGGAATGAACGAGTTTGTGGAAAAGAGTCGTACAATTGCT  
GGCATGAAACATCCAAATCTTGTAACTAATGGGATGCTGTGCAGGAAAGAACCAACTTCTGCTTGTCT  
ATGAGTACATTGGAATAAATCTTGAAGATGCATTATTCGGTAACGTCTTCCATTTATGAAAAATTTCT  
TCATTAAGCCTCTGTAGTTGTAGTAAAGAATTCAGTTGTACAAATTAACGTCGAGCTTTGGTACTTACA  
GGTTCAGAGGAACTTAGAGCAAGCCTAGATTGGCCAACAAGATATAGAATTTGTCTTGGGCTAGCAGAA  
GGTTTAGCTTTTCTTACGAGGGGTCCAACTTGAATTTATACACGGGAATATTAGACCAGCGAACATTC

TTCTTGATGATGATCTGAATCCGAAGATATACGATTTTGGATTTGCAAAGCTTTATCACAAGCAAAAGTC  
AGAAGGAACAATGTAAGGAAACACACTAACAAATTATATTTCAAAAAGCGTTAATAGCCAAAAACACAT  
CTAAAATATCCTGGTTTTCTTAGTTTCATACCTGAACTACCAAGTGTGCGAGTTTCTACCTGAACTATCA  
CCA ACTATTTACCAAAACACACCTCAACTATTACCTTAAATATCACCATCATCATTAGGTAGGAAAATGG  
AAC AATTGATAGTTGTTGTGTGTTTTGATAAGTAGCTGGTGATCGTTCAGGTAGGAACTCGAAAACT  
GGATACTTTAGGTATTATTTGACCTTTCCTCTCTTTCAGATACAAATTAGTAATACTTTAGGTGTGTTAA  
AACTTTGTATACATTGGCTATTACAATTGCACTTCTCAGTAATGGAAGCCTTTTGCAGGTCATACACCGCG  
CCTGAAGTTAAAGATCGCGCCTTAGAAGCCAGCGCGGATGTGTATAGCTTTGGAGTTGTCATGCTTATA  
CTTGTCAGCGGAATGAAAATCAAGACCCCGAGGGCAGGTGGTGACACTGAATACCTCGTTGATGAGGT  
GAGTGAGACTCGATTA ACTGCAATAGTAATGTACATTAATTTAGGAAACAAAGTTATTGGTTTGTTCGA  
CTACTATAGGCACAAATAAGGAATCGGAGGGGAACTCTAATGGATTTAGTCGATCAA ACTCTGAATTAC  
GACTGGGAAGAAGCAGAGATGATTCTAAGATTAGCAATCCAATGTATAGATTCACCGCCATT CAGACCA  
ACGATGTCTACAATCGTGAAGATTTTAAGGAAAGAACGTTCAATCGAGACCATTTT GATCAAGCCCAAG  
GGTGATTA ACTACAACGTCTTGCGGAAAAAGGTTACAAAATCATGTCCTAGCTGATTGTTCTGCTGAAAA  
ATACCACTCAGATATTGAGAAGTGAAGGACTATCATATTTGCTTAAACAATGTGCTTGAGTAGGGGCGG  
AGCTAGAAGGCAACTTACGAGTTCAGCTGAATCAAGTAGTACGTCCGTACTAAATCTTGCATTAATGTAT  
TTGTGTTGCAATGTTTTCTAAATATGTGCAAATCTTAAATTAAGAGTTCAGTTATGAGCACTTGAAGTCGT  
TATTGTAAGATTCAGAACCTATTA AATTCAAATGCTACTAGTGTTAATGTTTTCTTTTTATGAAAACATCTG  
TATTTGGTATGAAGG

>M6-PGSC0003DMG400001269 M6 RLK with WAX or WAX-EGF domain

TTAGTTCAGGCAATGGGAAGAAATGATTCAACTTGTCCAAAGTCCTTTTCATGTGGAAATCTTACTGACC  
TGAGCTTTCCTTCTCTCTTCCACACAACCTGACTGTGGAATAATGTTCTTAGCTGGTTGTGATGCTAAA  
CTATATCCGAGAATCCA ACTGCTTCCTCGAGGAGATTCGTACTATGCTTTAGGAAATCCGTATAATTATAC  
AGTTGAGCTAGGGGACCCCAAGTTTCATGCCAAGTTGAGGCAACACAAGTGCCAGGCTTTTAAACAAAA  
CTTATCCTTGCCAGCCTCTCCTTCTATTTCTTTCGAAATTCTCCAGTGAATATTCTCAACTTCATCAAATGC  
AACAGCACTAGTAGTAGCACCCCAACATTACCATAAGATGAAAGATCATTTTGCTGGTTATAGAATGT  
ACAATGGCTGTAAAGGTTTTAGCATATACTACAAGCTTCGCTTAGGAGATGATGAAGACGTTTCGAGCAG  
GCAATCTTCCTGCCAACTGTTCACTTATCAGATTGCCTATCCGCTTGCTATCAGATGATGGTGGTTTGTT  
AATATGTTAAGCGCCGCTTTTCTAGTAGAATGGAACTGTCTGAGGACTGTTACAAATGTCACTATGGCG

GAGGTCAATGCCAGACTGATATAATCAACAAATTTTCATTGTA CTTATCCAAATAATCCACATGATCAAGG  
TCATCAAGAAAATAATCCACATGAACAAGGTT CAGTCACACAGTGCATCTTTCGTAGTGTCTTTCTTGTA  
TTCATATCACATATCTATAATATTTTCCCTTTTTTTTTCTTTAGATGCAAAAACAGCTAGAAGAAAGTT CGGA  
CCGACTCTGGGAGCAGGTAGTTAAATATCCTTTAACTGCAGTGTCTTTTCGATCTTTTCTATTACAGAATT  
TCCTTGCATATCGTTTGAATTACTTCTTCATTGTGGTAAAATCTCAAACATTTCTTAATGATAAGAGAG  
GTAAGTACTTTAGCTTACACAAAATGATTGGATAGTGGAGTTGAGAGGACACTTTCTTTTTCTTGTGAT  
GTTTTCTTTGTCTGAAAACCTCTGATTACTTATATTTTTTTCCAGTTTTTGGTGGATTAGGATTGGTGATG  
ATTTGTTTAGCTGTCTACTTTATCTGGTGTTGCAAGAGGAGGAAATTTAATCCGCCCACTTTCTCTCAAC  
AAGGAAATTGTCATATATATTTAAAAATGATGTTGAGGGAGGCAGTATATACTTTGGCATCCCAGTCTTC  
TCTTATTCAGAACTTGAAGAAGCCACAAATGATTTCAATTCCTCTCGAATCCTTGGAGATGGAGGTTTCG  
GAACTGTTTACTATGGTGAGAGACTTCCTAACCCAACTGAGCTATGCTTCACTTCTTTCTTCATGTGCCTA  
ATACTTGTTCATTAAATGTCTAGGGAACTTAAGGATGGACGAGAGGTTGCTGTGAAGCGCCTTTACGAG  
CACAACCTGCAAACGAATGGAGCAGTTCGTAAATGAAATTGAGATCCTTACTAGGCTAAGGCACAACAAT  
CTTGCACTCTCTATGGCTGCACTTCAAGGCGTAGCCGTGAACTACTCCTTGTCTATGAATATATTCCTAA  
TGGAACCTTTGCCGATCACCTCCATGGTGACAGAGTGAAGGACGGATCACTCACCTGGCTAGTCCGCAT  
GAACATTGCCATAGAACTGCTGGTGCATTGGCTTACCTGCATGCGTCTGACGTAATACACTGTGATGTG  
AAGACTAATAACATACTCCTTGATCACAACCTTTAATGTTAAAGTTGCAGATTTTGGGATATCACGGCTTTT  
CCCAAATGATGTCACTCATATTTCAACTGCACCCCGGGGGACCCCTGGCTATATCGATCCAAAGTATCAT  
GAATGTTACCAGCTGACTAGTAAAAGTGATGTTTATAGCTTCGGGGTGGTCCTTGTGCGAGCTCATTTTCA  
CAATGCCAGCTGTGGATATGACTAGGCATAGCCAAGAGATTAATTTGGCTAACTTTGCAATAAACAAGA  
TTGTAATAATGTGCATTTAATGAGTTGGTTGATCCATCCCTGGGGTTGACTCAGATACCAAGATTTTGGG  
GATGACTACTTCAGTGGCAGAGTTGGCTTTTCTATGCTTACAGACAGATAGGGACATGAGGCCTACTAT  
GGTTGAGGTTTTGGATACTCTAAAGGAGATT CAGATTAGTGAATTTGACAATGAGAAGAGAGCTGACTC  
TAATCTCAATGGAAATGAAGCTAAAATTGTTACAGCACCCCTTTGCTGAATCAGAAGATAAGTTTATG  
CTGAAACAAGTTAAATCACTACCTTCTCAAATTCTGTTACTGATAAATGGGTTACTT

>M6-PGSC0003DMG400001271 M6 RLK with WAX or WAX-EGF domain

TTAGTTCAGGCAATGGGCAGAAATGATTCAACTTGTCCAAAGTCCTTTTCATGTGGAGATTTTACTGACC  
TGAGCTTTCTTTCTCTTTCCACACAACCCGACTGTGGAATACTGCCATCTCTGGTTGTGATGCTAAA  
CCATATCCGAGAATCCAACCTGCTTCTGGAGGAGATTCTGACTATGCTTTAGGAAATCCGTATAATTATA

CAGTTGGGATAGGGGACCCCAAGTTTCATGCCAAGTTGAGGCAACACAAGTGCCAGGCATTTAACAAAA  
ACTTATCCTTGCCAGCCTCTCCTTCTATTTCTTTGAAATTCTCCCAGTGAATATTCACAACCTTCATCAAAT  
GCAACAGCACTAGTAGTAGCACCCCAAACATTACCCAGCAGATGAAAGATCATTTTGCTGGTTATAGAAT  
GTACAATGGCTGTAAAGACTTTAGCGTATACTACAAGCTTCGCCTAGGCGATGATGAAGACGTGCAAGC  
AGGCAATCTTCCTGCAAACCTGTTCACTTATCAGACTGCCGATCGGCTCGTTGTCAGATGATGGTGGTTTG  
TTCAATATGTTAAGTGCCACTTTTATAGTAGAATGGAACTGTCTGAGGACTGTAACAAATGTCACTATG  
GCGGAGGTCAATGCCAGACTGATATACTAACAATTTTCATTGTACATATCCAAATAATCCACATGATCA  
AGGTCATCAAGAAAATAACCTACTTGCTCAAGGTCTAGTGCATATTTATAAAGTCCTTTCTCGTTTTCGT  
ATCAAATATTGATAATATTTTCATAGAATCTTTCTCTTTTTTTAGATGCAAAAACAACCTAGAAGCAAGTGG  
GGACCGATTCTGGGAGCAGGTAGTTAAATATTCATTAACCTGCAAGGTTTCTTTCTTCGATCTTTAGATTTT  
CTTCTTCATTGTGGTAAAATCTCAAAAAATGGAAACACAAGTACTTTAGATTACATAACGTACCGATGGT  
GGAGTTGAGAGGACATTCTTTCTCCTGGCGATGTTTAATTTATATTCTCTGATGGTGCATGACTTCACCT  
GCTTTCCACAGGTGCAGTTTTGTGTACAGTTGGACTATTGGTTCTACTCTTCTTCTTCAGAGAAAATATTT  
TGCGGTATAAGTGCCTCAGGTTTTGGGAATCTATTGCTGAGGATCACCAAATATTGAAGCATTTTTGAA  
GAACTATGGGTCATATGCTCCAAAGAGATACAACCTACTCAGAGGTCAAAGGATGACCAGTTGCTTCAA  
AAACAACTAGGTCAAGGTGGATATGGTTCTGTATACAAAGGAACTCTGCAGAATGGAAATCATGTGGC  
TGTGAAGGTCCTGAATGGACTAAAAGGCAATGGTGAAGAATTCATTAACGAGGTGGCAAGTATTAGCA  
GGACATCACATGTTAATGTTGTGAGCCTTGAAGGATTTTGTTTTGAGGGTTGCAAAAGAGCTCTCATTTA  
TGAATTCATGTCAAATGGATCTCTTGAAAAATTTATATACGAGGAAAGATCCGACAGTGTTCCGCAATTG  
GATTGGCCAATACTGTACAAAATCGCACTAGGCATTGCTCGAGGATTGGAGTACTTGCATCGTGGTTGT  
ACCACTCGGATTTTGCATTTTGATATAAAGCCTCATAATATCCTGCTTGATGAAGATTTTTGTCCTAAGAT  
CTCTGACTTTGGACTAGCCAACTGTGCATGAAAAAGGAGAGCATTGTGTCAATGTTAGGTGCACGAGG  
GACTATCGGTTATATTGCTCCAGAAATTGTTTGCAGAACTTGGGAGGTGTCTCTCACAAGTCTGACGTC  
TATAGCTATGGAATGATGGTCCTAGAGATGGTTGGAGGAAGAAAAATGTTGATGTTGAGTTGATCG  
AACGAGTGAAATCTACTTTCCACATTGGCTCTATCAACGAATTGAACTGGATGAAGAGCTTCAACTAATC  
GGGCTAATGAATGAAGAGGAGAAAGAATGTGCAAGAAAGATGGGGATGGTGAGTTTATGGTGCATAC  
AGACTGATCCCTCAAATCGACCATCGATGAGCAAGGTTGTGGAAATGTTAGAAGGGAACTAGACTCTT  
TGCAAATGCCTCCCAAGCCTTACCTATATTCTCCCTCGAGATCAGAGGTAGATTCATTGGAAGTGGGTTT  
ATATCAATGTAGTAGATCAAACGTTTAAGTCAACTACCAGGAAAAGTTTCGTTCAATCAATGTAGTTGTA



ATAATCTATCTAGATCTTCAAAGAAACGATTATATTTAACGAAGATTCAAATTTGTGCTGCAATTATCTTT  
ATTCATCAGGGATGTAAAATTGTTACATGTAAAATGAAAGGTTCTAATGACTTTACATAGTCAAATGCA  
AAGTTTC

>M6-PGSC0003DMG400002038 M6 RLK with WAX or WAX-EGF domain

AAGAAGAATAAATTTACTATAAAAATCAATCAAATTCAACCCCCTTCTTCGTCTTCCAAAAAAAAAAAAA  
AAGTCATGGCTGCCCTGCTCCTCTGCTTCTGCTAATCTGCAGCACCCCTGCAGTACTTTCTGCTCGTCGT  
TGTGCTGATTGTGGATCTTCTCCTGTTCTTACCCACTCAGTACCGGCCCGATTGCGGTGACCAATCTTA  
CAAATACGGTGCAGTAGCAACATCCAACCCGAACCTTTCTTCGATACGCTGAACAATTCATATCCGATA  
AGTTCAATTTCTCCCGAATCACAAGACTTACTATCGAACCATCACCGTTTTTATCCAACACCTGCATCAC  
CCAGGACATTTCTACCGTAGGTGTTCAATTGAATTCTTCTCTTCTTCAACATTACGAGCAGCAACACAA  
TCATTTACCTAAACTGTACTGGGTCTTTGCTTTCGTCTCCGCTTAATTGCTCTTCGGAGAGTTTGTGTCATA  
CTTACGTGAATGGAAGTTCTGGAAATGGAGGTGGTGTGGCGCATGTAGGAACGCGCCGATTTGTTGTA  
CGTTTAGGGCTGGTGGATCGTCGACGTCGTATATGATTCGGGTTAGGGAATCGGGTTGTCGGGCTTACC  
GGAGTTTTGTGAATTTGGATCCGTCGTTACCGGTTAGTAGATGGCCGGAAGCCGGGATGGAATTGCAGT  
GGGTTTCACCACCGGAGCCGGTTTTGTACGGGTCAGTCCGATTGTGATTCTGATTGACCTGTGGACCCG  
ACCCGAATTTGAATGGAAGTGTTAACAGATGTTTTGTATTCCGGGTTTCATTGGGACCCAATTGCCGC  
GTTATGTGCCCAAGGTAAGTTATAAAGAGTACTTTTTATCTCGTAAAAATAAAGATCTTGGTTAAAAATG  
ACATAAAATAGGAAAAATTTAATTATAAAAAGGCTAGAAAATCATTCTCCGATTTGATTTGGATGTG  
ACTTTGTTTTACCTATTTCTGAATTCGATACGCAGATGTGACATGCCAAGATCGTGATGGTTGTGGTAGC  
GACCACACTGCACTCATAGCAGGTATTGTATAATGGGTCACATTTAGTTTAGTTACTCTGTTTTTATT  
TAAGTTGTTTCGGATTCTTATTTTTATGTCGAGAAGATGTGGGTGTGGGATTCATATTGGATTTGGTCAAT  
CAAATTTGGATACTTTTATCAATATTAACGGAGAAATGCGGGATATATAATGATTTTTGTGATAAAAA  
TAAAAGCTAAGGTGAAATTGAATAAATTTGAATTGACTTGTATAAAGAAATTTGTATGATAGGCCTTTTC  
CTTTTATCTCCTTGTAGGATTTTCTTTGTGATCAATATTTTTGCTTTGGAATAACTAAGTTTTCTACCTAATG  
TCTCATAAACATATAACTCTATTTTAAATACTTGAATTATTTGGAGAGAAGTATCAAACACTCCTAAA  
CATGGCGCAAGTTATTAGTTTTATCCCCGAACCTATTGACAGCATTAAAAACACCCCTCTACTATTGCAAGA  
TCGGGGGTGATTTAGCTTCAATTTGTTAAGTAAATGGGTGTTTTTAAGGCTGTCAATAGTTCGGGGATG  
AACTAATAATTTGCGTCAAGTTTAGAGGTGTTTTGTTACTTCTCTTATTAATTTTTACTGAATCTCCGTA  
CCTGTATTTGAATCCATATCCCAGAATCTTATACTTTAGATCAGGAAGGTTAGATCTCTGCACCTGTATCG

AACGCCCGCACAAATTTGTTTTTTACTCTATTTTGAGACTTCAAGGAACTTATAATAATTGAAATTATCTA  
GTTATTAAGATGGTTGATCAGTACTATTTTGGTTGTTGTGTTGATCAATACTTGAATGCTTCTTGATT  
GCAGGTTTGACATCAGGCCTGGGTGTGGCGGTGATTGCTGCTGTAATTGGTTTTTTCTGTACAGACGTC  
ACAAACGAATTAAGGAAGCACGAGATCGACTAACTCGCGAACGGGAAGATATTCTAAGCTCTGGTGGT  
GTTAAATCTGCGAAGCTATTTACAGGCAAAGAAATCAAGAAAGCAACAAACAATTTCTCTACGGACCGC  
CTTCTTGGTGCTGGGGTTATGGTGAAGTTACTATGGTAACTTGATGATGGTACCGTGGTTGCTGTTA  
AATGTGCCAAGCTAGGGAATACTAAGGGCATTGAGCAAGTTCTCAATGAGGTCAGAATACTCTGTCAGG  
TTAACCACAAGAACCTTGTCGCATTCTAGGTTGTTGTGTTGAGCTTGAACAGCCATTGCTGGTTTATGA  
GTACGTCCCAAATGGAAGTGTAAAGTGATCACTTGTATTTGCAACGCAAGCTTCTAACATGGGATTGCCGT  
CTCAGCATTGCTCATGCAACTGCAGAGGGACTTGCTTACTTGCATTTCTCTGCAGTTCCTCCTATTTACCA  
TCGAGATGTCAAGTCTAGCAACATTTTGTCTCGATGACCAGTTGAATGCTAAGGTCGCAGACTTTGGTCTT  
TCACGTTTGGCTCATAACAGACCTGAGTCATGTGTCCACCTGTGCTCAGGGTACCCTTGGTTATCTTGACCC  
TGAGTACTACAGGAACTACCAATTGACAGACAAGAGTGATGTGTACAGTTTCGGGGTTGTGTTGTTGGA  
ACTCTTGACATCCCAAAGGCAATAGACTTTGGTCGACCACAGGATGATGTAACTTGGCTATTTACGTG  
CAAAGGTTGGTAGAGGAAGAGAGAATAATGGATGCTGTTGATCCTGCATTAAAGGTGGGAGCAAGCA  
GCGTGGAGTTGGAGACAATGAAGGCAATCGTTTTCTGGCTGTCAGTTGCTTGGAGGAAAGAAGACAA  
AGCAGGCCTTCGATGAAAGAAGTAGCCGAGGAGATTGAGTACATAATCACTATTGCTACTGCAAAGCAA  
TAGAATGACATGTTTAAAATGGTAAATGCAGTAGTTCCTTATTGTGTAATTTTATAAGTTGTGAGTAAAA  
GCCAGAAAGTAAGGGACATAAGTATTAGTACTAATTTGATTGGATCTTCTTCTTTCAAAGCTTGTG  
TAGATACAACCTGGAGAGTGAGTTTATACATACATTGATAATCTTCAAAGCTTGGCCAAACAACCTATCTC  
TCTAGCACTTTTGGCTTCCCAAATGTTGCCGCACCAATATTAGATACAAAATGCATAATTTTTGAAGG  
ATCCGACACACAACAGAGCGGTATTTTTGAAGATTATGAGTGCTAGTTATTAAGTTGCGCTAGACACA  
AAGTTTGTGTCAGATCCACCAATTCTGTTTCATTTGATATTGGGACTCGTGGCGGAGGAAGAATACCA  
GCTACATGTTTCAAGTTGAATTTTGGTTCAAAAATTTACTTGTCTTCAAGATTCAATTGACCATGTACATAT  
TATTAACCTGGAACCAATAACTTTAAAACCTTCAATCCAAAACCTCACAAGCTTTAAATTATGGCTCTGCC  
TCTTAATTGGAATCCACGTCCAAAACCTTAGAAAATTTCAAATTTGGATCC

>M6-PGSC0003DMG400003343 M6 RLK with WAX or WAX-EGF domain

TTGGTGTGTTCTCATTACTTTATTTCTTCCCAATCCCCTTTTTCATTCATTCTTTATCAATTTACCAATTT  
CTTCTTTCTTTCTTTCTTCTTCTCCTCCTCCCCTGTTACATGTCCCCAAAACATGAATTTTCTCTCCAT

TTCAGAACAATTCTCTGTTTGTATTTTCAATTTTTCATCAAACATTGTTCTTGGATCAAACGTACCCATT  
CATGTGGAAACAGATTCTTCCATTTCTTTTGGGTTTTCTCATGGCTGCCCAATTCATCTCAACTGTACCT  
CAAATGAAGAATTTTTCATGAACGATTTCCAGTTCAATCAGTAACTTCAGATACCATTTTAATCAATCTT  
TTAGCAAATGCAGCCGACCATTTTCAGCAATTCACAATCTTTTTAGCCCAAATTACGCACCCACTTCAAG  
AAACGGAATACTTTTCCAGAATTGCAGTTCTTACAATCCAGCTGTTTGATTCTTCTACGATGATTCAAA  
CCCATTTTGACATTCTTGATTGTGGGAAAGAAAACATGAGCTGTTATTCTGAGCCGAATAGTGAGAACA  
ATTTTATCAATTTGAAGAATTTGTCGAAAACAGGGTGCGGCTCTCTGTTTTCTGCAATATCTGTGGAGTC  
AACTGTGAATAGCTCGGCGTTTTGTTGGATGTTCAAGTGGTTCAGTTGGGGTGGTGGGTTTCATGGACA  
TTGTCGGTGTCTTCTAATGCGAATTGTACTAAAATCTCGTCCCCATTAATGGAAAACGGGGATATCGG  
TGTCAGTGTTTTGAAGTTTTCATCGGAGATGGCTTCTTAGCCGGCTCCGGCTGCCGAAAGGTACGTCA  
GGCAGAACACAATTTTAATTACTTAATTAGGTGTCAAACACATTAATAATCTATCTAGTTATGAGTAAAT  
GAGATTTGAACTCGACATATTATGTTAAAATATGTGACAATTTCTTATAAAAATTTAAAATTTTATCCGTGG  
AGGGTCGTATTACCAAAAAAATTGCATTCAAATTTGAATCCTAAATCCGTCTGCATTGTAGGTAATTTTGC  
TTTAATTAGTTAACTATTTATTCAACAACTTTTTAAATAAAAACATGTTCTAGTTTTAAAGAAAGAAATAAT  
ATAATGAAAATAAGTTTGACTTTTTCAAATTAGAAATTTTAGTTTGCATATACAAAATGTGATATTTTAT  
ATATTCAACTTTCTTCAAGTCACCTAATTTGGTTATGAGTTGGGTGGTTTAACTAAATGAAATTGAAGTTT  
ATGAGTGGGAGTTTTGACCAAATTTGGTGAGAGGAGAACACCATAATTAGATTTTTTTAAAAAAAACAT  
GGGTCCAAGTACAAATATATTATTAAGATGGCATGCTTAGGCGGCCTAAAAGAAAAGTAACATATAA  
TTGATGGTAAAATTTTGAATTCAATTGATCGAATCTTCTTCAATAAAGTGAAAGTTTAGATAATCATTCAAT  
TAGAAATAATAATAATAAATATTTCTATACAAGTTCAATTTCTCCGATTATAGGGTCATGGAGTGCAT  
GTTAAGGAACTAGGAAGTCAATAGTGTATACTATTAATAAAATATAATAGAAGAAGAATTTTTTTTTTCT  
CATGTTCATACTAAGTAAAGGTAATCAAGAAAAAAAAGAAATTATAATTGTTTATTAGAGCAACTTGT  
GATTGTCGTTTTTCATAAATTAAGGTAATAATGGCAACATTAAGAAAGACAATCACGTATGCGTTTGCTT  
CATCAGCGGAACAACCTCGTGACTATCTAGGTAGGACCCAATAATAGTGATGGCTGTTGCCTTTAATGTCA  
CTTATCAATGCCAAAATTAAGGCAAATCTAAAATAGTTAGATCTCGTATAAGTTGAAGTTCACGTAAAA  
ATGACTAAATGTTTGTGCATATCTAAAGTTATTCTAAGTGGGTAGTCCTGTAAATGTTACACACTACGA  
GTATCACTTAAATTGTGCTTCTGAAATCGAGTGTGTTCAATCAGACATCTAAATCACAATTAATAAGTT  
TACGAAGACTTAACACCTTTTGCCCATACCCATACCCATACCCTATATGTGAACGAGTTATTATGGTATAT  
TAACTTGATATTGTTGCAAAAACCTCACAAAATTCAAATTTTGAATACTTTGATTGGTTGGTATAATGTCCT

TTCATGTTATTCCATTAAGATATCCTGCCAAAATTTGTTTCATCATTTGGTCAAGGAAGAGGCCTTTTTTTC  
CTTTGTTTTCTTCATTTTCTATCAAACCTCCATTTGGTTTTGAATTAACAATGGAAACAAAGTCACTATCATA  
TTACGTGAAGATAGTTACTCAACAATATCAATGGACCCTCCACATATAAGGTGAAAAGGAATATAAACG  
AATTCGTGATTACTTTTTTTTTTTGTTTCCATCCAATGTTTCAGTATCTGTATTGGAGTCTGAACTAGTTCAA  
TTCGCATCACCTATTA AAAAGAAACGGTCCCTATTCGGATTTTTTCCATAGCCAAGACTTGAACGCGATA  
CCTCAGGTCCCATCACAACACTTGAGTTGTATGTGTCCAATTACTAATTCCATTTTTTTTTTTTTTTGTGAAT  
GCAGATGAAACAACATGCAACCCTTCAAAGTACCTATCAGGCAAATGTGGAGGAACCACAAGAGTTGGT  
GTA CT TGTGGAGGTAATTCTACGTTGATTTAAGTTATATACGTTGACAGTGCAGAGTCTCAACATCTAG  
TACTAGTTGAAATGAAATTGTTTTCGTATTCCTTCTTATTTCAATTTTCGCTATACAAACACATTATTCTAA  
AGTGATCAAACTATATATATTTCTCCAGGTATTGTTGCAGGTGCTTCGTTAATGGTTAGTATAGGCCTA  
ATATGCTGCTTTATTCGACGAAGATTGAATTTTCAAACAGAACAAGAAGAAACCGCGAGTTATGTGAG  
ACTACAGGGATCAGCATCCCTGTTTATCAGTTCAAAGAAATGGAAAAGGCAACCGATTTCTTCTCTGAGA  
AACGGAGACTAGGAAATGGCGCGTATGGAACAGTTTATTCTGGAAAACCTCAAATGACAATTGGGTA  
GCTATCAAAGAATTAGACATAGAGATACTGATAGCATTGAACAATTCATCAATGAGATCAAGCTCCTTT  
CCTCTGTCAATCATCCGAACCTGGTTCGTCTCTTGGGCTGCTCAATCGAAAATGGTGAACAGATTCTTGTT  
TATGAGTACATGCCTAATGGAACCTTGT CACAACATATACAAAGAGAAAAAGGGAACGGGCTTCCATGG  
CCCGTTCGTCTTACAATTGGTGCAGAACTGCACAAGCTATTGCTTATCTGCATAATGCAACGCACCCTCC  
AATATATCACAGAGATGTTAAGTCAAGTAACATACTCTTGGATTACAATTACAAGTCAAAGTAGCAGAT  
TTCGGACTCTCAAGACTTGGTATGGTTGAATCGTCTCACATTTCTACTGCACCACAAGGAACCTCCAGTT  
ATCTTGATCCTCAGTATCATCAGA ACTTT CAGTTGTCTGATAAGAGCGACGTTTATAGTTTTGGTGTAGTT  
CTTGCTGAGATCATAACAGGACTAAAAGCAGTAGACTTTGCTCGTCTCAAGACGAAATAAACTTGGCT  
GCACTTGCTATTGACAGGATAGGAAAGGGAACTTAGATGAAATTATCGATCCATTTATCGAGCTACAT  
ATGGATGCTTGGACACTTT CATCTATT CACAAGGTAGCAGAGTTGGCATT CAGGTGTCTGGCATTTCATC  
GCGATATGAGGCCATCGATGATGGAAGTAGCGATTGAATTGGAACA ACTTAGGCTAAGTAGATGGACG  
AATTCGGAAGATAACATAACAGGTT CATCAGAGGGATCTTCAATTT CATCAACTCAGATGCAAGTGAAA  
AACCATTGAATCTTTCAATTAAGAAGCAAGAAATGGATATATTTTCGACAGATAGTAAAATAAAGGATTA  
TTCCCTGTATCAGTACAAGATCCATGGAGTAGTGAGCAAAGCTCTCCATCTTGTAGTAGTTTGCTTAATC  
ATATAGTTAAGTGATTATGTAAAGGATTA AATTTCTTCATTGTAATTTACTTACAAGAACATTTAGCAGTT  
GAAAATGTAGTATACTAGCAAATATTACTACTAGCAAGAATACTACACATGCCAAAATTTGGTCTGTACT

TCTAAATGTTCTTTTTATTTCTTTTATATCAATTAGTACTTTATC

>M6-PGSC0003DMG400004553 M6 RLK with WAX or WAX-EGF domain

ATCCAGATATCAGTAATTGGCTGCTTCTGTTTTTCATGTGTAAGCTCCTATATATCCCTTAGCAATCTATA  
TGTTATTTGGATGGACACAGATTAACATTTTCATTGATCATGTGTTTTATCATCTCTATGGTTCGTTATAACT  
TCTCAAACGTGCAGTGCATTTGGGAGCAAAATTTGTAATAGGCCTTCCACTGGTAATTGCATTTCTGGTG  
TACAAATTCAAAGGAGGCATTTATCAATGTACGATACGATTGAAGGCTTTTTGCAAACACAAAACAATT  
TCATGCCAATCAGATACAATTACTCCAACATAAAGAGAATGACAAGAGGATTCAAAGAGAAATTAGGAG  
AGGGGGGTTACGGAACTGTGTACAAAGGAAAGCTTCAAAGTAGAAGGGATGTAGCAGTGAAGATGTT  
GAGCAAGCCTAAAGCCGGTGGGCAAGATTTTCATGAATGAAGTAGCTACCATTGGAAGGATTCATCATGT  
CAACGTGGTTGGACTCGTGCGGTATTGCGTTGAGGGAACAAAGCTTGCTCTTGATACGACTTCATGCC  
AACGGATCACTTGATAAGTACATCAGCACGAGTCAAGAAGGAAGTCCTCCGTTAAGTTGGCAGAGGAA  
GTATGACATTATTCTTGGAGTGGCTCGAGGAATTGGGTATTTGCATCGAGGCTGTGATGTACGAATTTT  
GCATTTTGACATCAAACCACACAACATTTCTTTGGATGAGAATTTTCATTCAAAGATTTCTGACTTTGGGC  
TTGCGAAATTATATCCAACAGATAAGAGCATTGTGACTCTCACAGCTGCTCGTGGAACGATTGGATATGT  
TGCTCCAGAGTTGATCAGCAGAAGCATTGGAGCAATCTCGTACAAAGCTGATGTTTACAGCTTCGGAAT  
GCTGCTAATGGAAATGTTGGACTTGAAGAGAAATGAAGTTGCAAATGAAGAGAATTCCAGCCAATACTT  
TCCTTATAATATTTACGATAAGTTCAACCAGGGGAAAGAGATTGTGGTGGATGAAGGAGCGAATGATG  
ATGAAAAGAAGATGGCTAGAAAGCTGAGTTTAGTTGCATTATGGTGTATACAAACAAATCCGATTCAAC  
GCCCTTCAATGAGTAAAGTGGTAGAAATGCTTGAAGGTGAAGTTGGAGTGCTAGAAGTACCTCCTCAGC  
CTCTTCAATCTCAACCAATTGTTTCATCAGATCATGGGAAGTTCTACAACATTTTCGTCTGATTCAATAGCTT  
TGTTAGATAATCCCGTTGAGGTAGACATTTATGCTGATTGATTATAGTCGATGTAATGTTTATGTGAAAT  
AAACATAGCCAACCAATAATGTTTGGGACAAAGAATCGTGTTGTTATTGTTGTACTAGTTATATTATAG  
ACATAATACATAAAAATGCCCTTTAATTTGGCCTCTGCGTAGAACTTAAACATGTATAAAGTTGAACAA  
ATAGACATACACATCATACGTGGCATCCTACAAGGAAATTTGAATCCTACATGGTGTCTATGTTTTTCTC  
ATTATTTCAACCTCAATATATTTTGAAGACAAACAAAACACCTCACATACAATATTATTT

>M6-PGSC0003DMG400005730 M6 RLK with WAX or WAX-EGF domain

CCACCTAGTCTCTCTTTGATGAGTTCTCACAAATGCATGATCAAAGCTTACTTCTTCACTCCATAATCACC  
ATCCTATGCTTCGTGATCACGTCCTCGCCAGCCTATGGCCAAGAGGATAAACAGTACTCCACTTGTAATA  
GCTCCTACACCTGTGGGAATATTCAAATATCAGCTTCCCTTTCTGGGGTGGTGTGATCGACCTCAAGAATG

TGGTCTTCCACAATTCGAGCTTTCATGTGAAGCCAATCAGGATCCCCTTATACATATCAATGGTCATAATT  
TCCGCGTACTTGACATAAATGGAGACTATCAAACCATGAGAATTGCACGAAATGATCTTGAGGATGACA  
TTTGTCTGATAGATTTCGGTAACACTAGCTTAAATGATGCCCTTTCCGCTATGGTCCTAACTATGTGGTG  
CTCATCCTGTTCTATGCTTGTCTTTTCGATATACCTTCTGAATGGAAAAATTTACCTTTAGCTGCAATAAA  
ACTGGAGATTCCAGTCATGGTTTCTATCCAGATCAGTCATTTATATCATTCTGGGGACCAAAGTATGGGA  
ATTGTGAGCGTATTGTCATAGTTCCTGTGTTGTTAACGGCATTAAAGCGGTTCCAAGACCAAGGAAGTAC  
GAAAATATTGGAGCTATTGAAGCAAGTTTTGATGTGGTTTACAACAAAAGTGTATTATGTATGGCTTGT  
GAGAGGTCAGGGGGATTATGTTGGTCAGAAACAGATTTTGC GGAGTCATCTTGCCTTTGTCAGGATCGA  
ACTTATTCTTACAACACTGCGGTTATACATTACTGGCTCAAGGTGTGTTTAATTAATCTCCCTATTACCTAATC  
TAACTTAGTTCTGTTTACCAAATATTACTTGAATTCAATTGGCAGCTAAGAGTTTTGGTACTGAACTTCTG  
AAACCACTATTTTTTTTCTGTTCAAATATATACCATGATGAAATACAGGGTCGACCATAAAAGCCAATAA  
AGCAATGTCTTGGGGCGGAATTTTTTTGGGGCCTCTATTTTCTCTCAAAGATATCTATATTGTTAAAAAA  
ATTTCATGTATTGATAAATTTGAAAATAATTTTTGTATAGAAAATATAATTGAGAAATTGAATATTATTT  
AGTTGATTGTAGTGTCTTTTCTATATTCTTATGTGGCTAGTTAATTGTAGTATCCTTTCTAATTTTCGCATGT  
GGCTGTCTATTTTGTGCTAGGTCATTTATATTTTGACGATTAACATAAACCAACAATATTGTGTTTCGTA  
TACTTACTTTTCTTTATTCTCCTTTCACTATTTTTTATTCTTTTATTATTGAAAATTCTTAAGTCTCTCAAACG  
TTCAAACATTCTACATTATGTGATATCTATTGTTGTGTGTTTATAAAAAGATCAAATTTATTTTTGGTATCT  
TATTCATATTTCAAGCACTAAAATAATCAACACTATTTTAATATTATTTATTAACCTATCAAATTCATCGC  
CACACTATTTAATATCATCATATTTAGAGCCATCAATATGGGCTAGGCCGGGCCTAACCCCTTGATTTGAT  
AGGGCTGGGCTACGATTTTTGGAGCCCATTTAAGAAAAGGGCTTTTTAGTCTGGCCTGAATAAGCCTGC  
CAATTTGTGGGGCTTGAGAAATATTGATAGGGCCGCTCGTGGGCCAAATAAAAAATAATTTTAAAATA  
AAAATAAAATAGAGTTTTTAAAATAATAAGAGTCTAAACTCAAATCTGTTTAAAGTTTAAAATATTATA  
ATTTAAATACAAATTATGTTTATAAAATATGAAATATATAAAATAAAAATCCCTAAAATTTCTAGGGATT  
CACTACATAGGCCATAGCCTATGAAATATTCTCCTAGTTTTTGTGTATTTTTATGATCATTGAAAAACAAT  
TAGGTTAATATTTCTATTTAACTATTTATGATTTTACTTTGAAATCAAACCTAATAAATATTATAAAGATAA  
TTTTATTTGTGTATTTGATTAGCAAGTAATAACACTAACACCATGTAATATTGTCTTGTGATATTTATGAT  
AATATTTTTAAATTATAATTTAATTTATAAATTATAAAAAAAAATATTTTTAAGAAAAGAGGGCTGGCT  
CGGCAAAGCCCGTATCCCCGTA CTGTGGGCTGGGCCGACCATTTTCTGTCCACACAAAAAATGGGCT  
AGCTTGGTCTGACCCGTCAAATTTCAAAGCATGTATGGGTAAATCCGGATGGGGTGGGCCAGCCCATAT

TGATAGCTCTAATCATATTTTTAAAATTTTGAGTCATGTATTATTATCCGACTTTTTTTTTGGACTTCAG  
GATAACCCGCAATCACGACAACCTCTGCAATTTGGGTGAGCACTTTGTGCGCACTGTGTAACCCCTGT  
AATACCCTGCAAACCATAGAGGATGTAAACCGCACTAGGCAAGCCATATGCAACAGACTCGACTCAA  
AAGGCGTAGGATTACATTATAATTATTCAATTTATTTATCAACTAAAAAATAGGGTCTCTTTATAAT  
GTTTGGCTTAAGGCCTCCAACTTGTTGAGACGACCCTGATGAAATGTGTGATCATCTCAACTTAAACT  
TAATTATTAGAGAAAACACATTTTTACTAGTTAATTATATTCTCAACATTTTCTGCACTAGGGTCGAGATT  
ATGCCTGAATAACAGAGGGCACTGTGGTGCGGTTAATGAATCCAACCTCAAAGCAGAACATGTCGT  
ATGGTAAATCTAGAATCTAAAAGTCTTACACGTTTACTATAATTCCATTGGACTAAAACAAAATCTTCT  
CCTTCGTTATAGATGTTGATGATTTGTTATACTACCAGAAGATCCTTTATTATGGTTTTATATCAATTCATC  
ACTTGTTTATCTCTGCATTACAGGCAATAATAGACATATCTCGGTGAAGATAGCCCTAGGTAATTGTCTT  
TTGACCTTGTTTCATGTTATATTGTCCCCACAACATAGAGATGAGACTCTTTTACATCTGGTTAACAGTTA  
TCTCTGCTGCTGGGATTGGAATAGTATTAATCTGCTACATGATCTACTGGTTTGTCTTTAAGAAATTATCT  
GCTACTTGCCTTTTGTACCAAAGCAGAGGAGGGAACATCAGAATGTTGAGGCCTTCTCAAGCAATAT  
GGATCCCTTGCCCTAAGGTATACAGCTATTCAGACATTAGGAAAATGACAAATCACTTCAACAGAAAC  
TTGGACAAGGGGGTTATGGAGGGGTCTATAAAGGTTACCTTAACGGCCGTCCTGTTGCTGTAAAGATT  
TAAATTCTACCAAAGGGAATGGAGAAGACTTTATCAACGAAGTTGCAAGCATCAGTAGAACTTCACATG  
TGAACATAGTTACTCTGTTGGGATTCTGTTTCAATGGTCGAGAAAGAGCTCTTATTATGAATTCATGTCTG  
AATGGATCACTCGATCAACACATCTATGGTGAAGATTCTAAGTTGGGATGGGAAAAGTTGTACAAAATT  
GCACTTGAGATAGGTGAGGACTGGAGTATTTGCACCGAGGGTGCAATGCACGAATACTGCATTTTGT  
ATAAAACCTCACAACATCCTTCTTGATGAAGACTTTTGCCCAAGATATCTGATTTTGGCTTAGCTAACT  
ATGCCTTCAGAAAGAAAGCATGATATCAATGTTGGAAGCAAGAGGAACCATTGGTTACATTGCTCCGGA  
AGTATTCAGTAGAAATTTTGGAGGCGTCTCACACAAATCCGATGTTTACAGCTATGGAATGATGATTCT  
GAAATGGTTGGAGGAAGGAGGAACACTACAGTGCTGAAAGAAGTCATCATAGTGAATATACTTCCCGCG  
TTGGGCTTATCAACGCCTTGTGACAGATGAAGACTTGAATATACAATGCATCACGACCAAAGAAGACGA  
AGAAATTGCTAAGAAGATGATACTAGTAGGCTTGTGGTGCATTCAAACCTGATCCCTCACAAGGCCACC  
AATGAGAAAGGCAATTGAAATGCTTGAAGGTAACCTTAGAGGCCATCCAATTTCCACCAAAGCCTTTTATA  
TGTTCTCCCTCGCAATCAGAAGGATCATCGATGATCCCTTGGGGAAGCCAATAATGCCCTTTATATATTC  
TTCTTCGAGTTCAACACTTGATTCTACAGAACATTTGGTTATATAA

>M6-PGSC0003DMG400005975 M6 RLK with WAX or WAX-EGF domain

GAAAAA ACTATAGTATAGCATAACAATATTTTTTTGAGTATGGTATCATTAAATTCTTTGTCAATTCTCTTG  
ATTTTCGTATCAAATGGTGATGTTTGGTTCAAGTTGTAGCGCAGAATCAAATTCAAAATAATAGTAGTTGTG  
TGGATAAATTCAAATGTGGGAATCTTGGAAATGTGAGTTTTCCATTTTCTGTATCTTCACAACCTGATTGT  
GGATTGTACACTATAGATTGTGATGCTACTCCCAATCCAACAATTCATCTCGGAGAAAATGTTTATAGTG  
TTCTGAGACAACGCTTCTCTGATCGTTTTCGAGTTTCAGACCATAGACTTGAGTACTTATTGGCGAGAAA  
CAGTTGTGAAACTTTTTGATAGAAGTATATCGTTTTCAAATTCTCCTTCTATCTCGTTTAGAATCAATGAAC  
GAAATGTTACTTTGTTCCAGATGCAACAACAGTTTAGATATCAACAGGAGCATGAGTGATCATTATTTTCG  
CGAATATCTGAATTATACTAAATGTAGTGGTTTTACTATATACTACAAGTATCCTAGTAGAAGACGGGAA  
GATTCCTCCGATGCACCAGAGGGAGATATTCCTGATAACTGTTCCCGATTCAATTGCCAATTACATGGA  
ATTCAGGATCAAACGTTTCGAATAGTAGCTTGTTTGATCTCTTAGCTGTGAATTATACAATTCAGTGGAG  
TCTGTCTGAAGATTGTAGTAAATGTCACTATCAAGGAGGTCGATGTTTAACCGATAGCAACAATAGATTT  
CTTTGCTCCAGAGGTAATATTTTACTTGCAATATGCTTGTCATATACAATACTCTGACCTTTGTCTAATTCT  
ACTTCGAATAGTTGCTTCTAGTTTTTGTACTCTAGCTTCGAGATTGCCCATCTACACACCTCAACTTGGTCT  
CAACTGGACACTCCAACCTCGTCCCTAATGTGTCTCGTGGACACCTAATACTGACGTGGCATGTAAATATT  
GGAGGTGTGTAAGATGATCATTGTAAGTTGGAGTGTTCAACTGACAGGGAGGAGACGAGTTGAGGT  
GTCTAGATGTGCATACTCAAAGTTGGAGTGCTTACTTGCCAGCTGAGGCCAAGTTTGAGTGTCTGTTTTA  
TGTATTATGCTGATTGAAAATAATGAAACACAAATATTCTGCTTGTTCCATTGTGTAACGTGGGACAAA  
TCGCCTGCAGGATTTATGTCTGTAGCTTCTTCATAGTGATCTTGTTCTGAATTTAGTATAGCAGCATAAGC  
TTGTCATACTTAACTCTCAGTTCCTCCTCCGCGTGCAACAATTATCTAACTTTTTCGTGATTTGGTTTTCGTT  
GCAGTAACAAGAAAGTCGAGACGAGTTCTAATTGTAGGTAACAATCTATAACTTCAAATCTTTTTCATAT  
AACCACATGTTCTCAAGTATGTTCTTACTTTGAAATGCCAGCTTTCGTGCAATTCTGTCTACTTTTCTGTA  
GCCATTTTTCAAACAAATTCTGATTAGTTTCTCTGCATTTGCTTCAGTCTTACCTGTGGTGATTGGCTTGAC  
CTTTTCAATCTGTCTTGGTATTGTTATCTGGCATTTC AAGAAAGGAAAAGGCGGTCTTCTCACTCTTTCA  
CAAGAAATACATTTTCTGATCCTTCAAGAAAAGATCTGGAAGGGGATAGCAAGTACTTTGGGGTCCCAG  
TCTTCTCCTACTCTACTCTCGAAGAAGCCACCAATAATTTTGATCCCTCCAAGAGCTTGGAGATGGAGG  
TTTTGGAACTGTATACTATGGTAATAAGCCACGTAAATCAAGTCATGACATTTCAAATCATATTTGGAAA  
GCATTAGGCAGAGTTTTGCATTACTGTATTAAGAATGCAATAGTTTGGTAACATGATTCAGCAGCTAACA  
ATGCACTTCTTTTATTAGGTAAACTTCGTGATGGACGAGAAGTTGCAGTGAAACGCCTCTATGAGCAAA  
GTTCCAAGAGGATGGTGCAGTTTAAGAATGAAATTGAAATTCTTACTCGCTTAAGGCACCAGAATCTTGT



TATGCTCTATGGTTGCACGTCAAGGCATAGTCGTGAACTCCTCCTGGTTTATGAATACATCCCTAATGGA  
ACAGTTGCTGATCATCTCCATGGAGAGAAAGCTAAGAATGGAGCCCTTATATGGCCTATACGCATGAAG  
ATTGCCATAGAACTGCTAGTGCTTTAGCTTATCTCCATGCTTCTGACATAATACACCGGATGTCAAGAC  
TTGTAACATTCTACTTGACAACAATTTCTGTGTCAAAGTTGCAGATTTTGGGCTTTCGCGACTTTTTCCAA  
ATGATGTGACTCATATCTCAACTGCTCCACAGGGGACACCAGGATATGTTGATCCGGATTATCATGCTTG  
CTATCAGCTAACAAGTAAAAGTGATGTGTACAGCTTTGGAGTTGTCTTATTGAGCTCATATCGTCGCTC  
CTTGCTGTGGATATAAGAAGGCATAGGGATGAAATTAGTTTGGCTAACTTTGCAGTAAGTAAGATTTTG  
AAATGTGCATTGAGGAGCTGATTGATCCATCTCTTGGTTACGAGTCCAATGCTGAAGTTAGGAGAATG  
ACTACTTCAGTTGCAGAGCTAGCTTTTCAATGTCTCCAACCTCGAGAAGGAAATGAGACCAACAATGGAT  
GAAGTGTGGAAATTCTAAAGGCGATTCAGAGTGGTGAGTTTGAAAACCAGAAGAAAGAAGAGATTAA  
CGTCGTTGATAATGTAGAAGTCCCTCAGGACCCTGAATCAGAAAATGATGATGCACAATTGATGAAATC  
TAAATTACCTGTTTCGACAAATTCTGTGAATGATAAGTGGTTTAGTTGCTCTACCACAGTTAGTATTAGCG  
GGTGAATTCCTTCGATATTAAGCTAACTTCATTACTTTTTAGCTTTCACTCTCTTCTCATTCTTTTTTCGC  
TCTCTGCTTGTTTATGAGTTCAATACCTAATTGTATCAGAAAATGATTAATAAATAGAGATGCCTTTTTTGT  
AAGCAAGCCATCACCTTAACGATGTGGGGGGTTAGGCTTGACCCGTACCATGTCTATAAACATCCAAAA  
AGTTATCAAAG

>M6-PGSC0003DMG400006498 M6 RLK with WAX or WAX-EGF domain

TAAATCAGATGTATGCATTGTTCTTAGGAATTTCTTCCTTATGATTGCAACACAGTTTGGAAAGAAAATA  
AAGATGTTGAGGTCTGACAATGGTGGTGAATTTTTTAATACAAATTGCAGAAAATTGTTTGATGATCATG  
GAGTTATACACCAAATTTCTGTCCCTACACTCCACAACAAAATGGTGTGGTAGAGAGGAGGCACATAC  
ACATCCTTGAGACTGTTAGGGCTATTAGATTTCAAGGTTCTCTGCCTATTACATTTTGGGGTGAATGGGA  
TTTCGTTGCTGTGTATTTATTCAACAGAGTTCCATCCACAGTTTTGGGGAACAAGTCCCCCTATTTTATGT  
TATATCATGCACATGCTGATCTTCTCACATAAGGACTATAGGTTGTTTATGTTATGCCACCAACTTGATC  
AAGGGGGATAAGTTTGTAGTCTAGAGCCATTAATCAGTTATGATGGGGTATAGTGCAACTCAAAAAGG  
ATACAACTTTATGACTTGACAATAAATCTTCTTTGTGAGTATAGATGTACAGTTTTTGGAGCATATTT  
TTCTTTTCAAACCTGGTAATCCAAGTGTGAGTTCATAGTTAAGGATGAATTCTTGGTTCCTGACAATTAG  
ATTTTCCCCTTAATTGACCATGTTTGAATTCTACACATTTAGCAGATTTGTCTCCACAAGTAGCTGTTTCTG  
ATCATGTAATTGAACCTTTGATAGACTCACGCATTCCCACTCCAGTAGTTCCTACTGCAATGGTTCCTTCT  
GTGGAGATTTTATGCTGAGATCCCAGAATGTACTCCACAACCTGCGCATACGAATGATGATGTTGCAT

TTCCACTAGGAGAACCTCAGGCAAACACATTAACCTCCTATTTGGCAGAAAGACTTTGTGACTGCTAAT  
AGGGGTAGGTTTGCTCATTTCGTATTTATATGCTATTGCCAACATCATCAATTATAGTGGTTTTTCTAGTAC  
ATATCAAAGTTATGTGGCCCAATTCTCAATAGACATAGAACCAACCTTATATCATCAGAAAATACAGGAT  
CCAAGGTGGATACAAGCAATGAAAGATGAAATTCAAGCTCTTGAGTACAATGGAACCTGGGCAGTTGTA  
CCTTTACCAAATGGTAAGAAAGGCATTGGTTGTAATGGGTATACAAAATTAAGTACATGGTTCATGGA  
CAAGTGGAGAGATTCAAAGCTATACTTGTAGCTAAAGGGTTCAACCAAAGGAAAGGTCTTGACTATCAG  
GAAACCTTTTCCCCTGTTGTGAAGATGGTGACGGTAAGAACTATGATTTCTCTGGCTGCTATTAGAGGTT  
GGTTCGTTCAACAAATGGATGTTTACAATGCATTCCTATAAGGTGATTTAAATGAAGAAGTGTATATGTA  
ATTGTCACAGGGTTTTAAAAATGGGACATAAGATCTCAAGGTTTGCAAGTTTCTTAAGTCTCTTTATGGT  
CTAAAACAGGCTTCAAGGTAGTGAATGTGAAGCTTACATATGCCCTTGTCACGGCTGGATGTAAACAG  
AGTCATTTAGACTATTCTTTACTAACCAAAGGTCATCAGATGGGATTGTGATTGTCCTAATATATGTTGA  
TGACTTATTGATCACATGTAGTAGCACAACCCTGATAGATAATGGTAAACAAGTTTTGAGAGACAATTC  
AAAATTAAGGACCTAGGGGACCTTAGATATTTTCTTGGAATTGAATTTTCTAGATAGACAACCTAGCATT  
TCATGAATCAAAGAAAGTATGCACCTTAGCTCATTTCAGACTCAGGTTTAAAGTGGTTCCAAGACCATTGG  
CACACTTGTGAGCTAAATCAAAGTTGACAGCTTGTGAGTTTGATAATCATATTGATGGCCCTCCTGAT  
CTTGCTTAGCAGATCCAGGGAAGTATCAAAGACTTGTGGTTCGATTGTTATATTTGACTATTACCACACT  
GGACATTGCCTTTGCTGTCCAAAGTTTAAGCCAGTTCATGCATGCTCCTAAGCAATCCCCTAGGATGCT  
GCACTCAGGGTGGTTAAATACATCAAACAAGCTCCAGGTCTTGGGGTTTTATTGTCCTCTTCTAGCTCAA  
CTTCACTCCAAGGTTTTTGTGATGCTGATTGGGGGCTTGTATAAACTAGAAAGGTCTATTACTGGTTAT  
ATGATTAAGTTTGGAGAGTTTTTGTATCTCCTGGAGATCCAAGAAACAACCAACTATTTCTAAGAGCTCAG  
CTGAAGCTGAGTACAACAGTTTAGCCTCAGATGTTGCTGAAATTGTATGACTGTTTGGTTTGTCAAAGA  
ACTCAATGTTAAGTTGCACCTCCAAGTTTCTTGCCTGTGACAGTAAAGCTGATTTTTTATTGCTGCCA  
TTCCTGTCTTTCATGAGAGGACAAAACATATCGACATAAATTGCCATTTTCATCCGGAATAAAGGTTTAGA  
CTGGTCTGATTCACACAAAGTACTTAGCTACTGCTGAACAACCTGTTGACATATTAATAAGGGCCTTGG  
TCGTTTTAAACACACTGATCTACTTTCCAAGCTAGGGATGAAGAACATCTTCATACCACCTAGCTTGAAA  
GGGGTATTCAACATGTGAATGTGATGCAGGGTGACCTGTCATTTGCTGATTGGACTAGAAGTTAGTTAA  
TTAGATATTTTATCATTTTCAGTTAGTTAGGTTGTTAGAA

>M6-PGSC0003DMG400006729 M6 RLK with WAX or WAX-EGF domain

TTGTAACCTACCCTTTTCAACCTCCTCAGCTTTATCTCGGTGACACAACCTATTCAAATCACACGCATATCGT

CGCTGGGCAACTAACAGTCTTACAATTTATATCGAGAGATTGTTAAAAGTCCGGGATAAACACGGAGAA  
TAACACACCATGGATAGCATTACCACTGTCGTTTTCTGTGAATGACACCACAAATAAGTTCATCGCAATT  
GGCTGTGACACATATGTTATAGTTCAGGGTTATTATTCCAAGTTTGAAAGTAGTAAAATCGAGGATTATT  
ATTCCTACATAACAGGATGATGCATGTCCATGTGCAATAGTATTGATGATGATAAATGTTCTGGTGTGG  
TTGTTGCATGACATCCATCCCTAATGGGGCCTGGAATGTTACTATAACACTAAGGAGCTATTATAATCAT  
ACTTATGTGAAAGATAACCCTAGTTACGTTGTAGCTATGGTTTTGTAGTTGAAGAAGCTAATTTTAGTTAT  
TCTAAGAATTATCTAAGAAGTTTGCAGAATATGGAGGAGCTTCCTCTTGCTAGATTGGGTAATTGGTG  
AAGAAACATGTGAAATAGCTAAGAGAACTCGACTACATATGTATGTAAGAGTA

>M6-PGSC0003DMG400008482 M6 RLK with WAX or WAX-EGF domain

AATATCATAAGATCAATAAGGACATTTCAATACTTTCCTACATATTTTTAGCTTAAAACCAGGAAATTCAA  
TTATTACTTTTTTACTTTTTTAAATTTTGTGTCAATTCAAAATCATATAAACAAGGGGAAAAACTCAAATA  
TGCCACTGAATTCTAAGAAAAAGTTCATCTATGTCATCCGTTAAAAGTTTGCTCATTTATGCCATTTCTGTT  
TGAGAAAAGACTCATCTATGTCATTATTTGTTAACTGAAAATAGTTCTGATTTTGCGAACTATTTTTTAT  
AGGTGGTCAATTATGATTCGGTCACGTCATTAATTACATCATTTTTTAAAAGAGAAAAGGCTCAAATATGT  
CGCCGAACTTTGAGAAAAGGCTCATCTACGTCATCCGTTAAAAGTTTGGCTCATCTATGTAATTTTCAGTTA  
ATAATCAACGGCACGGATGAACCTTTCCTCAAATGGAAATGACACAGATGAGCCAAACATTTAATAAAT  
AGCACAATGAACGTTTTTTTTAAAGTTTGATACATATTTGAGTCTTTTCCCTATAAACCAATTGAAATGGA  
GGAATTAAAAAAGTAAGAGGTATAAATTGAAAATAAGAAAAGAAATACTTTAGTAGGTTGGGTGTCA  
AGAAGGGTAGGATATCAAATCATAGGGACATTTATTTTATTGTAGGATAGTGAGTGCCTTTTTAACAC  
CACACACTAGAAATTAATGAATCGAAGTACCTAATTATCTGCCTGATTGAAGCGTGGCCATAACGATAGA  
GGTGAAGTTGACTCCTCACTAAGGTTTTGCTCTCATCAAATTTGACTAATTCAAACACTTACCAATATAT  
AATAGTCACCCATCAACCTGACTTGTGGTATAGTGCGGAGGTAATTTCCAATTTTAATTAGAGATTTTA  
AGTTTCGAACTCTGAGTATAGAGAAAATTTGTTAGGAGCGTCACCTCAAATGGGCCTTGCAGTGCAT  
GATTTAGATTTAATCAGAGCTCCAATATAGAAACCGAATAACAAATTTAAGAAGATATTTTCTTTATCTTG  
TATTTAACTAAGTTAATACATGTAATTTTACTAAAAATATTTTGCCTTATATTTAACTTTTTTTTTCTTTC  
ATTTTCTTTAGGAAATATGGTTCAAAGACAATCTAGTTATAATCAAATTTATTATTACACACGCAAACCT  
TGCAAGAGTCCTATATCCCTTCTAAAATATTTTTTTTAACTATAATTAATCTACCTGAGTGCTTAGGTGAC  
AAAGAAAATCTAATACACTCTCTTTGAGAGAGTAAAAGCACGAAAAAATGCTAATTTTTTTTTATTTTGC  
ATAATATTAGTCGGAGACAAGTTTATATTGAGAAACATGGCCTAATTGTCCATCCTTTCTAAGTGTGATT

CTATGTTATGTATGGCCGTGCCTTGGGGCATATCGATTGAAGTAGATTCTGATTCATATGTTATGCTTAAT  
TAGATACTCATAGTTGCCATTAATGACAAAGTAATTAATCCTGGAATTTTCGTCGGGTGTAATCACAACCT  
GTGCTAGTTGTAAAACAAAGAAGATATAAAGACATAGCCAAAGGGATTAATTAATGTGGTATGTTTCT  
CTGTTTGGCATGTTAGATATTGATGAATGTCAAATTCAACTTCCAATAAGTGTGGACACAACAATTGTA  
TAAACACGTTGGGGAGTTACAAATGTTCTTGTGCGAAAAGGATACACTGATGATGGTGAAAACAATGGTC  
TTGTCTGTATTGCAACAAACTCCGAGTTCCCATGGATCAAGTTTTCCGTTGGTAAGTTTCTCAGATATATA  
TATATATATATATATATATATATATATATATATATATTGAAGTGATCATAGGAATTCACCTCCTGTTATTATAAACAC  
AGGTATGGGAGTTGGCTTTATATCCCTAGTGGTTGGGACAATCTTGCTCTATTTTTGTATCAACAAACGA  
AGACTCATTAAAAGTAGGGAGAAGTTCTTCCAACAAAATGGTGGTTTACTCTTGAAACAACAATCTCCT  
CTAAAAGGGTGGTGTGGAAGCAACCAAAATTTTTACAGCTGAGGAGTTGAAGAAGGCGACAAATAAC  
TATGCTAGTGATAGAATTCTTGGTCGCGGTGGAAGTTGCTATAAAGGTATTCTACCTGATAACC  
GTATAGTTGCTATTAAGAAATCTAAGATTGTGGATGAGAATCAAATTGAACAGTTCATCAATGAGGTACT  
TATTCTTACTCAAGTAAACCATAGAAACGTCGTGAGACTCTTTGGATGTTGTTTGGAAAGCTGAAGTGCCT  
TACTGGTTTACGAATACGTTTCTCATGGAAGTCTTTACGAGCATATCCACAATCAAAATGGGTTATCTTT  
GCAAAATCGGTTGAGAATTGCTTCAGAGACAGCAAGTTCACTTGCTTACCTTCATTCATCAGCATCGATG  
CCAATAATTCATAGAGACGTTAAATCTACTAATATATTATTGGATGATGGTTACACAGCAAAAGTGGCAG  
ATTTTGGAGCTTCAAGATTAGTCCCTCTTGACCAAACACGTGTTGCTACATTGGTTCAAGGAACGTTAGG  
GTACTTAGATCCTGAATATTTCCACACAGGTCAATTGACAGACAAAAGTGACGTTTATAGTTTTGGAGTA  
GTTCTTGCAGAACTTTTAAACAGGGATGAAACCTATTTTGGAGGACACAATTAGTGACAAGGACAAATGT  
TTGGTGGAGTACTTTGTCTCATCGATGAACAAGAATAGCTTATTTCAAATTGTTGATTGTAGAGTTGTAA  
GAGAAGGAGGTCTTGAGCAACTTCAAAGATAGCTGAGCTCATTAAAGAGTTGCCTTCACTTGCACGGAG  
AAGATAGGCCTACGATGAAGGAAGTGGCTATGGAAGTTGAGAGTTTAAAGAAAGTTCACTAGCCTTTGG  
ACTAATGGAAAGGAACATGAAGATGAGAAGGAAGTTGAATTAACAGATCTTTATACAATTCCAATTGAT  
TCTAATATAGGTATGGACAACCTTCTCTGGAAAATATCCTAGCTCCTACACAAATAGCAGCACCATCTTTTC  
TGGACAATATAGTTCGGATAGTTCTTCACTACTATAACAATAAAATTTACCGCGGTGATCGATCCAGAAT  
AAAAGGTCAATATATGAAGATTTTTCTCTGTTTTGTAAGTTCCTTTTTAGCCATCTTTCTTTCTTGTGAAT  
GTTGTTATGTATTTTTATTTGCTTCTGAATTAATCATCAATATATTGTTGATTGTATGATTGCCAAGAACT  
TTTAGATTGTATGATTGACAAGAACTTTTAGTACATCGAACTTTAGAAATTGTTTC

>M6-PGSC0003DMG400008499 M6 RLK with WAX or WAX-EGF domain

ATGCTAATTTTGACATTAGCCACTCCCCAAATTATCCCCTCTAACACCACTTCTCCTCCGCCACAAACACC  
ACATCTCCGCCAACACGACGATCACTAAAGCTGCGATCATTACAAAAGCAGGATGTCCGAAAAAGTGT  
GGGAACCTAACAGTTCATACCCTTTTGGGATTGGCTTAGGATCTGGTTGTGCCTTGGACCGGAATTTTG  
AAATCAATTGTGATACTAATACAACAGATTCTCCAACACCATACATAGGGAATATTCCAGTGTATGACAT  
CTCTGATGCTGAAATGCGCGTATCGACTAACATAAATCGGAGGTGTTATTCATCGACGGGCATGTTGCTT  
CGAAATGATCCTTCTTGGATGAATTTAGGAACCTCGAGTCCTTACAGTTTCTCTACCCTCAACAGGTACGT  
ACCTAATTATAAATTTTCTCTTGAAACCTTATAAACTTTAATTTTGAATTCACATATATATATACAGTT  
CACCGTTGTTGGTTGTGATGAAGCTGCTATAATATTGGAGGTGACTTTGCTAATGGCTGCCCCACGGTC  
TGTATTAGTACGAGTCAGGTAAGGAAGGTGTATGGGTAATGGTTGCTGCCAAATAACAATACCA  
AAAGGCTTGAAAATTTTCAACACAACGATGCAAAGTTTGAAAATCACACTGGAGTTTGGTCTTTCAATC  
CATGTGGCTATTCATTTCTTGGTGAAGCTACTCGATTGCAATTCATGGGTTTACAAGATCTACGCGATCTT  
AATTTTAAAAGAGGTCTTTGGATAATGTCCCTATTGTGCTAGATTGGGCTATTGGAACCTTAGTTGTG  
TTGAAGCACAGAAGAGTAGTAACGATTATGCTTGTTGAATAATAGCCAATGTGTTGATTCCAACACTGG  
CCTTGGTGGTTACAGGTGTGCCTGTAACCCGGGATATGAAGGCAATCCATATATCGGCCAGGTTGTCA  
AGGTAACCTTCATTTCTCTACTTCCCTCACATGTTTCAACTTCCTTTTATTTGTAAAATTTAGATATTTAAAA  
TTATATGATTAATGTAATTCTTCTCAAGTCAATACGATAAACAAGTTAAATTTAAATGTTTGTCAAAC  
TTCGCATGCATAATCTTAGTTATAAGACAAGAGAGAGTTATTGCAATGATAAGCACCTTAACTTTCAAC  
CTTAAGGTTGTGAGTTTGTGAGTCACCAAGAGAGCAAAGGTGAGAGCTCCTGGGGGAGGGAGAGAAAAA  
TAAAATTAATAAATTATTATAAATTGAAACAAAGAGAATAAACTATTTTATTGGGGGAAAAATAAC  
AATTTGAGTTGAGACTTTTTTGTGAGGTGAATCAGTCTAGCAGTGAGGTCGCTATTAACCTTATCATTTTTTT  
TAATATAGAAATGATTAATATTCAAAGTTGTACAAATATTAGTTAGCTTTTAAAATATTTAACATATGTGA  
TAATGAATATGGTTTAAATACTTGGAAAAAGAGCGACGCTAATTAATACTCCTACTTGCCATTAGTTAA  
CAAAACAATGTTGGACCGTACAACCTCACAAAGTAAATACGTAAAAAATAAAGATAAAAAAACAAGTGT  
CACAAATTAATTTATTTGATCCACCAGCCAACGTAATATATATTTATGTACGCTATGATTTTGACAGATAA  
AAAGAAATTAATCTAATGTCATGATTTTCATTCACCATATTGATCGATTAATCTTTCTTTAATTTTGGGT  
GACGCAACGTTTGGTTAATTGTACCAGATATTGATGAATGTGCTAATCCAAATACCAATTTGTGTGAACA  
AAATTGTATAAACATACCGGGGAGTTACAATTGTTTCATGTCCAAAAGGGTACACTGGTGATGGAAGAAA  
GAATGGTCGTGGTTGTATTGCACCAAACCTCGAACTCAGAGTTCCCATGGATTAAGTTTTCCGTTGGTAAG  
TTTCTCAGAAATTCGACTTGACTCTACTTGCATATAGATAAACGTAAGTATTGTATTTCAATTTATCTGTC

TTAGTTTGATTGGACACGAAATTTAAGAAAATAAATTTGTTGGATAAACACAGGTATGGGAGTTGGTTTT  
ATGTCCCTAGTAGTTGGGACAACCTGGCTCTATTTTCAGCATCAAGAAAAGAAAACCTATTAAACTTCGCG  
AGAAATTCTTCCAACAAAATGGTGGTTTTGCTGTTGAAACAACGATTATCTTCTAACGAGGGTGGTGTGG  
AAGCAACCAAAGTTTTTACAGCAGAAGAGTTGAAGAAGGCTACAAACAACCTATGCTAGTGATAGAATTC  
TTGGTCGTGGTGGAAATGGAATTGTCTATAAAGGTATACTACCCGATAATCTCATAGTTGCTATTAATA  
GTCTAAGTTTGTGGACGAGGATCAAATTGAACAGTTCATCAATGAGGTTCTTATTCTTACTCAAGTCAAC  
CATAGAAACGTGGTGGAGACTCTTTGGATGTTGTTTGAAGCCGAAGTTCCTTTACTAGTTTACGAATACA  
TTTCTAATGGTACTCTTTACGAGCATATCCACAACCAAATGGAGCACCTTGGTTATCATGGAAGAATCG  
GCTAAGAGTTGCTAGTGAGACAGCAAGTGCACCTTGCTTACCTTCATTCATCCGCGTCAATGCCTATAATT  
CATAGAGATGTCAAGTCTGCCAATTTATTGTTAGATGATGTTTACACCGCGAAAGTGGCAGATTTTGGAG  
CTTCAAGACTAATTCCTCTTGATCAAACACATATTGCTACATTGGTTCAAGGGACATTAGGATACCTAGAT  
CCTGAATATTTTCGTTTAAAGTAAATTGACCGAGAAAAGTGATGTTTATAGTTTTGGAGTAGTCCTTGCAG  
AACTTTTAAACAGGGATAAAACCTATTTTCGAGGGATAAAAATAATGAGGACAAGAATTTGGCAGAGTACT  
TCATTTTGTCCATGAGAAAGAATCAATTGTTTCAAATTCCTGATCGTAGAGTGGTAAGAGAAGGAAGCCT  
TGAACAACCTCCAAAAGGTGGCTGAGCTAGTGAAAAATTGTCTTAGATTGCACGGTGAACATAGGCCTAC  
GATGAAGGAAGTAGCAATGGAACCTGAGAGTTTGCGAAAGTTCACAAAAATAACCTTTGGGCTGATG  
GACACGGACATGAAGAGAACGAAGATGAATCAACAGATCTTTATACAATTCCAATTGACTCGAATACAG  
GTATCAACAAATTCTCTGGACAATACAGTTCCAACCTCAACACAAATAGCAGCATGTTTTCTTCATTGATA  
TATACTAGTACAAATATTCCGCGGTGA

>M6-PGSC0003DMG400009114 M6 RLK with WAX or WAX-EGF domain

CCACCTTTCCTCAGACTCCACTCGTGGGACTACACTGAGTATGTTGTTGCACTATGTTCAACTAGGAATAC  
CTTTTCGAATTATCTGTTTTAAGATGTGGTTTATTCAGATTGTAATGGTGGTAAAATTATTGAAATATGG  
TATTTTGATAACAGAAATATCTCCTTTCTGGCATCCGAGCAATTTAACTGTACTTCCAAGTTTCAAAGGTG  
TCATGATTTACAACAGATTAGGTTGTCAATCAAAGCAGGTCGAAGATGTGTCATGGTTCTTTCATTTATTA  
TATCCATTCTCTATGGGGTCTGTTCTTTGAAGTTATAAGAAAATTTGGATCTCTTTTGTATTCAACTCTCCC  
CTGGGCCCTCTCTTTATGCGTATCAGTTTCAATTCTCAGCAACTTATTTTGGAGATGTAGCATCTGTATTTTA  
CTCATATTCCTATATTTGGACAAATGCAGGTAGCATCCACTACTATGGCGGTACGTATTTGAGATACTGG  
AGTGCAATAACTTCATTACACTAAGCATTTTCATTGAAAGGAGATCGTTACAGCAATATGTTTACCATATCT  
AGAATCTGCGTTCATTGCACTATATAGCTGTAAGCTTTTTCTTCAAACCTTTAATGATTTTACATCCTCTAA

CTTTATGTTTCCTTTGTGATTTGCCTGTTTTGACAGTTCTTACTATATTGTACGGTGGAATAGTTATAGGTG  
AGTCTTCTTATCTTACTCAAGGATAAGCATTCTTCGCACACTCAGAATTCTGAAAAATAATTAGCTTTTGA  
AGCTTTTCTCAACCCATTTACCCCTATGAAAAAGATGTACTGGTTTTCTTGTGCGATGACTTCCATTTTTATT  
TTTGAAATCATGCAGTATCAATTCTATCGTTACGACTTCTCTTTGGATTGGTGTTCCTGACTGCATTAATA  
GTGTATAAATGGAGAAGACGACACTTATCTATGTATCAATCAATTGAAGACTTCCTGCAAGTCCAGAGC  
AACCTCTTGCCGATTAATACTCCTACTCTGAGATTA AAAAGATGACTAACAAATTC AAGGAAAACTAG  
GCGAAGGAGCCTATGGAAGTCTTTAAAGGAAAAGTGCCTAGTGGTCTTTTGTGCGAGTGAAGATGA  
TGCACCAATCTATGGCGAGTGGGCAAGAATTTATCAGTGAAGTTCCACAATTGGAAGGATTCACCATG  
TTAACATTGTGCAACTCGTTGGATTCTGTGTAGAGGGATCAAACGTGCTTTGGTTTATGAGTTCATGCT  
CAATGGTTCTTTAGACAAGTACATATCTCCCCGAGAAGGAACTGTTTCCTTGAGTTACAAGCAAATGTTC  
GACATATCTCTTGGAGTGGCCTCTGGCATAGACTACCTACATCGGGGCTGTGACATGCAGATCTTACATT  
TTGATATTAAGCCTCACAACATTCTTCTTGATGAAAATTTCAATCCCAAATATCTGACTTTGGGCTTGCG  
AAACTGTACTCCTCAGATGATAGTATTGTGAGTCTAACTGCAGCTAGAGGGACAATGGGTTACATGGCA  
CCAGAGCTGTTTTATAAAAATATTGGAGGAGTGTACACAAAGCCGATGTATATAGCTATGGCATGTTAT  
TGATGGAAATGGCAGGCAGAAGGAAGAACATGAACCCATTTGAGGACCACTTAAGCCAAATCTACTTTC  
CTACATGGATTTACGACCAATTTAATGAAGGAAATGATATAGAGATACAGGATGCAAGCGAGGAAGAT  
AGGAGACTTGTC AAGAAGATGATGATTGTGGCTTTGTGGTGCATACAAATGAAGCCTGCTGATCGCCCT  
GCCATGAACAAAGTAGTTGAAATGCTTGAAGGAAATGTTGAACTCCTACAGATGCCCCCAAGACCTTTT  
ATAGCTCCTCGTGAGATTGCTGGAGACAGTATTGAGACAATACAAATTTCCAGTGACGTATAGGTGCCG  
GTGGTTGGCTGCTTACTGTGCTGTGCAAACTACAGTCAA AATCACTTAATTTAGTTCACGGCATCCAAT  
ACTATCAGAAGAGCTCAATCTCAGGCCAACATTCCTTGAGATGTCACTGTGGATTA AAAGAGTTGAAC  
GAAAAGATGCCTATATCTTCGAGCAAGTAGTCATTTCTGTCCCATGGTGGTGACACTAGTTCCTCCTAGT  
TTTTTAGGTAAGAATTTGAATGTAATATGATAATTTAGTAAAGTGTA AATTAGTTTGCATGTTGGTGTGT  
AAATCTTGAAAAGGTA ACTATCAAGCATAGATGTATCAAACAAGGAAATGATTACACCTTCAATTTTT  
TGTGTTAAACTACCATTGATCGTCTTTATGGATTGAGAGCATCTTCTGTTTCT

>M6-PGSC0003DMG400010032 M6 RLK with WAX or WAX-EGF domain

TGGATATGCGCTGCGTGTGCGTAAAAGAAGCTTCTTCCCCGGTGTATTTTAAAGTCTACCTTCCTTGTGTTG  
TATCTCCGATTACTATTTGATAGCTTCATTGTTAGGAAATCCAGTTTTTGCAGAGCTGTTTTTGGAGTTGA  
GATATTTCAAATTTTGGACTCTTTAATTGCTACTATTTGCTTCCAATCAAAGAAAGGAAAATTTGCAGACG

AAGGAAGAGAGAGAAGTAAAAGCTAAGGTAGACATTAATACATGAAACCAGTCCACGGTACTCTTTACT  
CTCTACTTTCCCTTCTATGGAATTCGGAAAATAGCATTTATTGACAAACAATGAACTCCCCACCAACATCA  
ACTGCACCCCCTTAATTTCTCAATAAATGGTCTTCAACAAGTCAAACCTTTCAACTTTTTTCTTCCTTTTTC  
ATGGGTAAATTAGCTATCACTCATTTTTCATTTTTCTTTGCAGAAGCAGATGATTGTTCTTTGATTCAAT  
TTCGAGCCATGGGTTTTATCAGATCGTTATTATTAGATTCGTTTTCTCAATTTTATTGGGTTGGTTATCAT  
CGTCAGTTGAGGCTACTAATTCAACTAAGTGCAATCAGTACTGTGGAGCTGCTGGTTCTAATGGTCTGCG  
TGTTTTCTTATCCATTTGGTTTTCTCAGAGGGTTGTGGGATTCGTTTAGATTGTACTGAAAGTAGTGGAGAA  
ATCAGAATTGGGAATATATAATACAGAATGTAACCTCAGAGACTCTGATGGTGAACCTCCCGATGAAT  
TGCAGCCGTCCTATTGAGGATCTACAGGAATTTGATCGAACCAACTTTGGTATGACTTGGAGAAATGGA  
CTGCTTCTACACAATTGTAAAGTCCCGAGGAGTGAGTGTACCATACCATCGGAAATTTAAGCACGCGTT  
TGAATATACAGTCATGTGATTCGAAGAAAGAGAATGTCAGTTGTTATTCAGAGGCGAGGGCGGATTATT  
TAGATTACCAGAACTGAAGAATACAGGGTGTGGAACCTGTGGTTTTCGTCCATCTTGATTGGTATGGATA  
ATGATACAATGAAGAGTTCTGCCATGTTCTGGAGTTTCAGACGATGGAATTAGCGTGGGGATTGAAAG  
GGGATTGTGCATGTCATGACGATGCAAATTGTACCAACGTTTCTTCCGGGGAACCGAAAAGGTTTCC  
GATGCCGGTGTAAGATGGATTTCGTCGGTGATGGCTTCCGCGACGGTGATGGGTGCCGTAAAGGTTAG  
TTCTTTTTTTTTCAAGTGTTAAAATAGTTAATTTGCAACATTATTCACCTCCTTGTTGAATTGTGTGAATC  
ATCTTAATTTAAATGTTTAAATGTTAAAGATAATATATATATATATATATATATATATATATATATATAT  
AAAGATATGGGAAGTTCAAATGGAGATGTTAAATTTGACGTTCAAATTCAAATAAAATCTTAGTTTTAT  
TTTACATAACATATATTTGTTTTCAATGATATTAATTTCAATTGAACTCAAGAGTTCCATCTACACGTATTG  
GTAGATATTTTAAATTTAGTACTTGGAGATATATCATTAAATGGAAATGCCGTTGAACTCAAATGTCTAC  
TTAATTTGGTATATGGCTTTTCAATAGAGACAACGTTTATATTATATTAGGGGTAAAATTCAAAGTTAATT  
GCTAGATGGCCTAATTATTGTTTGACTATGGGCAAAAAGTGACGTGTGAGATGATAAGATGACCAGTAG  
TTTTTATATTTGGTTTGACCAGTAGCAACACGCCACGAAGAAGGGCTGTTGTTAATTTCAATGGAGATTT  
ACATGAATTGACTATGATTAACCTAATGATATTTTAGTGTGATTAAGTTATTTAGTAAATCCAAATATTCC  
ACAAGTTGTGTTAAAACCTAAAAGAGCACTGCATATGCGGCTGGTGTAGTCAATAAAGCCTTCTCTTGAT  
TTTGATATGGTCGAATTTGGGTTCTAAGCTGTGACTGTTGAAAGTCTCCTATATGACCTCCTCATGCGAC  
TTGGGTTGTGTTGATATTCTTTTACTCGAATTTATAGTCTTTAGCTAGTTTTTATTAAGATAAAAAA  
TTCTATTTACGAACAATCATGGGGTTTCAGCTTTATCTTATCATTCTAATAAAGTAATGAAATTCTAGTA  
ATTTATAAGTATGAAGAAAATAGGTATTTTATGATCATTACCAATGAGAATGTTTATATGATGCAAAAAT



ATAAAAATAAAAAAATTGAGTTTTCAAACGCAAATAACTTTAACAAAGGTATATTTAACCTTTTCAC  
ATTCCATCAAAAAAATTGGAAAAATAAATTTCTTTAAAAATGATAGTCTAGTCTACTGTGTTCTCCTCTC  
CCTTTCATATTCACCCATAGTTTTCCATTCCCATTACCCTACATATTAGTTTTAGATTATACGTCCAACAATAA  
TTGTTCACTGTTGATTTGGCACACTCCTTAAGAAACAATAAATAATAGGGGTAATATTACTATATTAACCT  
TTGACTTTATTAATTTATTGTTTTGAAAAATGTGTTACATGATAAATAATATTTAATAGCAAGGGTAAAA  
TTGATTCAGAAGGTAAATTATCTCTTAATTTTCTAAATTGGATAAGTATTGTTAGACAACAATTTTTAGAG  
TAGTAAAGAACTATTGTTGGAAGAATGGAGTACATAAATACTTCGATGGAAGTTTAATTTTTCCCAAATA  
TATCTTAATTTTTGGCCTAATTCTTCTTCTGATTCTGATGATCAATTTAACCTCTGATAAAAAGATATAATA  
TGAAAAATAATTTGCTTGGTACTAACATACCCTTGATCACTTTTTTTTTGGTCATGTGGGACATTGGGACT  
TGGTCTCACTAACTTTTTCCCACTAGGTTCTAACTTCAGCCTGCCACCATTTCGCGTATTAGGCTTTTA  
GGTATTACTCACAGTACCTTCCACTTTCCTTCTTCTTCTAGCTCCTGCACATGGACCCAAGACAAATAAT  
ATTATTCTTGTGAAGATATTTGATTCTATGAGAAGCATTTTAAAAAGTTTGTGATTTTAAATGCACATTTT  
GTGGATATAAAATAATGTTGTTAGCATTAAATATGGGGATTCTAATATCAGTTCTTTTTTTCAAGATGTGC  
ATTCTTCTTCCATTGACAAGAAAGGAAGAGTGTGACTTTGTAACATTGTTATAAAGTAGTTGTCGGTA  
CAATGATATTTCTATCACCAGTCACCAATGTGCCATCTCTGGTCTTCTTAATAAGATGAAGAAGGATCT  
GAGTCTTTATGAGACTGCCGATTCGCGGTGGTAATGTAACCTTATCAAAATGACAAGTTTGAGCTCGATAA  
CCGGAATTTTGTGAAATTGAGCTCTCAAATGAATTTTCTGTCTTGAAGAGTTGAACACTTCAATTAGTTA  
TCTTACCCAATTGCATATTACATGACACGTTCAAAGATCTTACTTTAAAATAAAATAAAATAAAGAAGCAT  
TTACTTGTGTTGTTCTATGACTCGAAGATGGTGAATGTGATTGATGATGAGGTTTGAATTACTCTATCCGT  
AGATTATCAATTGGACAATCCCAGGTCAATGATTTTCTTGCCTTTTTAAGTTTATTTTGAAGGGGGACAGC  
ACATGGTCACTTGATGTCCACATGTTTGAACGGGTGAAAGTCAGAGGATGAACAAGACCTGGATTGTTG  
AATAATTTCTTATTTTATTATTGAGTAAGCGTTATGATAAAAGGATCTGGAATCAATGCCCCGTCTTAAAC  
CAAACGTGTAATGAGACGGCTTATTATTATGCCAGTTTAAATTTTAAACAACCTTAGTACTTCACCTGAATCA  
ATGGCATAATTTGAAGGGATGAAAGTTGAAACTGATTCATCTTCATTTTTACCAGTACATTCCATGTCCA  
GGAACTATCTGTTAAGACAACATCTTGACTTTGGAGATTTAAACTTAACTGACTAGCACGTTTCCAGT  
GAATTGATTTCAATTTGTTGATCATGTGCTTGCTTCATGACTCTGGGCGGGCAAACATTTTCATTCTGACGA  
TGTTCTAAGATACTTTATCTATATATTCAATCAACTCTGGGAGGGCATAACATTTTCATTCTAACGATGTTCT  
AAGATACTTTGCCATATGCTCCTTCTTCTACATCTTCTCTATGATTATCTTCAGTATGTCGTCTTTATGCT  
AACTTCTTATATTTGTCTCTCAAATCAGTTTCAAGATGCAATCCTTCCAGATACCTCTCTGGCCGATGTG

GTGGA ACT ACCAGA ATTGGTGTGCTCGTTGGAGGTATATTTCTTTCTTTTTTTGGTTAACTTGTT CAGAAA  
ATGTTGGTAAATAGTA ACCATTACTTCTCAACTCGTTTAATGCACTAGTGTTCAATTCTGCATCTCCTGCTC  
CTCTGTTTCAATTTGGCAACACCTCAATTACCAAATGCGCACTCTTTAGTTTTCTATAAACGAGCTTGCAA  
GCCATCACAGATTGGTTTTGTGTTCTTCATATGTACGAGATTTTGCAAAGAGTTGCTGTAGTTGCTAATT  
GATCAGTCATCAGTAACTTCCGAGACTGCTTACTTTTACTGCCGTTTGATTTAATAACTAGTGAGTTT  
GATCTCTCCTGGTCTAATGAAATTTCAACCACCTACAGGGATTATTGCTGGAGCTGGTTTAATGGCTGC  
TTTAGCTGTTCTTTGCTACTGCATTCGAAGACGTTCTTCATCTCTCAAGAAAAGAATGAGCGCAAGACGC  
CTTCTCTCTGAAGCTGCAGGCAGCAACAGTGTTTCATGTATTTCAATACAAAGAAATTGAGAGGGCAACA  
AATAGTTTCTCTGAGAAACAGAGGCTTGAATAGGGGCTTATGGCACAGTTTATGCTGGAAAGCTCCAC  
AGTGATGAATGGGTTGCAATTAAGAACTAAGACACCGAGATCCGGATGGTGTGGAACAAGTAATGAA  
TGAGGTTAAGCTTTTGTCTTCTGTAAGTCATCCAACTTAGTCCGCCTCTTAGGTTGTTGTATAGAAAATG  
GTGAACAGATTCTTGTATGAATTTATGCCTAACGGAAGTGTAGCTCAGCATCTACAGAGAGAAAAGGG  
GTT CAGGACTTCCTTGGACAATACGTCTCACTATCGCAACAGAACTGCTCATGCAATTGCTCACCTT CAC  
TCAGCAATGAATCCACCAATATAACCACAGGGATATCAAATCAAGTAACATACTATTGGATTACA ACTTCA  
ACTCAAAGGTTGCAGACTTTGGTCTTTCCAGATTTGGCATGACAGATGATTCCCACATTTCTACAGCACC  
ACAAGGTACTCCAGGTTATGTGGATCCTCAGTACCATCAGAATTACCATCTTTCCGATAAGAGTGATGTG  
TACAGCTTCGGGGTGGTTCTTGTAGAAATCATCACAGCAATGAAAGTGGTTGATTTCTCTAGATCACACA  
GTGAGATTAATTTGGCTGCACTGGCAATAGACAGAATAGGTAAGGGTCGTGTGGATGAGATTATCGATC  
CATTTCTCGAGCCACACAGAGATGCATGGACTCTATCATCAGTTCATAGAGTTGCAGAGCTTGCTTT CAG  
ATGCCTTGCAATTTACAAGGATATGAGGCCTTCAATGACAGAAGTGGCAGATGAGCTAGAACAGGTCAG  
GCTCAGCAGTTGGGCATCATTGGAGGACAATGTATGCATGACATCATCAGTGAATTCCTCTTGCTCATCT  
CCCCGTAGTATGAGTGAGACATCTTTTCGTAGTACAACA ACTAAGAAAGGAGTAGGGAGTAGGAGGTT  
GATTGTTCCGCAGAAGATAGCGAATTCCTGGAATCATGGAGGAAATAAAAGACAGTTCCCCTGTTTC  
TGTGCAGGATCCTTGGTTTAGTGAAGAGAGTCCCCCTTCAACTAACCGATTATTAGGTAATTCTGGTCGA  
TGATGACTTGAAATAAAAGAAGTTTGCTCTAGGTAGAAAATTGAGGGGGATCACCTGTAATCTATTACC  
ACCTTTTCTTGCTTCTAATCTAGTGATAATATCAAAGAGTATTAGAGCACTTCTCTTTGTATCGAAATTTT  
ATTGCTTCATACGCAGAATTATACATCATGAAGAATGTGAAATAGTATTTGCAATGCCATGAATTTGAAT  
CGTCCTTGCGCAGTTGTGTTGTTATTTTTCTGTTATTTACAACAAGTGAATCCTACATCATA CATCATCT  
TCAAGAATTTGAGTTAAATAATTTATAAAGTCATATTATATAACAGAATTAATTGTTACACTAATAGAAAT

GCCCAAGCTTTGAATTTAGCAAATTC AATTTGCAAATAACAACAATGAAAAGCAAGAATCTTTTCAAGAT  
TTTTGAGGTT CAGGTCCTAAAATACCATTAACAACAGCTCCGGCAACCAAACTCCAACAAATTCAGCTC  
CGGCCACCGCTCCAGCTTGCGCCAACCCACCGAAACTCACTGTACTCTCGATCTTCTCCTCCGCTGCTTCA  
ATCCCCTTCTCAGCCGTC ACTAACCCTTTCTCCGCCGCTTCAATCCCTTCTCTGCCGCTGCGATTCCCTTG  
TCTGCCGCTCAAATCCCTCCTTCACTAATTCTTCTGCCTCCTCTTCTACTTTCTTAAGCTTCTTTCTCAGTC  
CGAAGAGGCCAATGTCCGCAGCCTTGGACGGCATATCCAGCACTTTCAGTACCGTTGTGCGCGTCACCA  
GAGAGATCAACTGCCTCCGCCCGGAGAGCCGCCGCCGCTGTTTGGTAGGAGGATTTGTGTTTGCAT  
TTAGCACACAACGGGATGTGAAAATCCTTACTGTAAGTGAAGTAGTGGTGAAGCCATGGATTTGCTCT  
CTGTGCAATCAAAATGAGGTTTGCAGTTTGCACA ACTCCCTTGACACCACAATCACAACAAGTGTGTGG  
ACTGATATTTTTTGAACGGACAAGAGAAAATACAAAAAATTACTCCTAAA ACTTGAACCAGAAA

>M6-PGSC0003DMG400010427 M6 RLK with WAX or WAX-EGF domain

TTCTAGCTTATTGGCTAACTCTTGTCACTCCTATCTCCACAGGTGTATTCATAAGTATCGGAGTACTGCTA  
CTACTGTTTGGGAGCTATTTATTGTACAAAACAATCAAGAAGAGAAGGAACAAACGACAGAAACAAAA  
GTTTTTCAAGCGAAATGGCGGCCTTATTACAACAGCAGCTATCATCCAATAATGAAGGTACTATTGAC  
AAAGGAAA ACTTTTTCACTGCTAAAGAGCTGGAGAAGGCAACAGACCACTTCAATGAAAATCGCATACTT  
GGTCGTGGAGGTCAAGGTACGGTATAACAAGGGCATGTTACTTGATGGAAAGATTGTAGCAGTGAAAAA  
GTCTAAGCTGGTAGACGAAAACCAGTTGGATCAGTTTATCAACGAGGTGGCTGTTCTTTACAAAATCAAT  
CACAGGAATGTGGTGAAGCTACTTGGCTGTTGTTTGGAAACAGAAGTTCTCTATTAGTATACGAGTTCA  
TAATTAATGGCACACTTTACAGCCTCATAATAATGAGAACAATGAGTTTCCCTTTACTTGGAGCACGCG  
TTTGAGAATTGCCACAGAGGTAGCTGGAGCATTGGCTTATCTACACTCAGCAACTTCTGTTCCAGTCTAT  
CATTGGGACATCAAATCAAGCAATATACTTTTAGACGAAAAATACCGTGCCAAGGTATCAGATTTCCGGCA  
CCTCAAGGTCTATTGCAATTGATCAA ACTCACCTAACGACCGGAGTCCAAGGGACATTTGGCTATTTAGA  
TCCTGAGTACTTCCAATCCAGCCAATATACTGAAAAAAGTGATGTCTATAGCTTCGGAGTTGTTCTTGCT  
GAACTCTTAACAGGAAAGAAAGCAATTTCAACCACAACAAACCAAGACAGAAGTTTAGCAACAACTTC  
CTTTTGGCAACAGATAGAAATCTCCTTGATACGATTATCTATACAAAATTTACACAAGAAGGTAGAAAAG  
AGGATATAATGGCGGCTGCTAATATAGCGTATCGTTGCATGAACTTGAATGGTAAGAAAAGGCCTACTA  
TGAAGGAAGTAACTACAGCATTGGAAGCCATCAGATCACA AATGCAATCTACAGCAGTAACAAATTTTC  
AACTGGATAAGGGTGT CACAGCAGAAAGAACTGTGATATCAGAAGTTAACTACACATGGACAAACACA  
AGTACCTCATCATCAGATATCCATCCATTGTTGTTTGA AACTAGTTAATTATTACTCCCTCTATCGGAGAA

AGAATGTGTGTGTCTGTTTGTTCGACTTTACAATAGTTTAAATGTCTACTTCTACA

>M6-PGSC0003DMG400010484 M6 RLK with WAX or WAX-EGF domain

GATTCATTCTATTTCCATGCATAGTTGTTGTTCTAATGACTGAGTTACAAAGAAGGCATTTGTTCGATTTAT  
GATGCAATTGAAAATTTCTTCACGGTGAGAACAATTTGCGGCCATTAGATATTCCAACCTCCAACATAA  
GAAAGATGACTAGGAACTTCAAAGAGAACTAGGCCAAGGAGGTTATGGTTCAATATATAAAGGTAAG  
CTTCAAAGTGGACCTAATGTAGCAGTGAAGATATTGAGCAAGCCCAAAGCTGATGGGCAAGACTTCATC  
AACGAGGTTGCCACAATCGGGAGGATTCATCATGTTAACATAGTACAACCTTATTGGCTATTGTGCTGAG  
AGATGTAAGCGTGCTCTCGTGTATGACTTCATGCCTAACAGATCACTTGAAAAGTACATCACACCTCAAG  
ATGGAGGAGCTGATCAACTGTTAAGTTGGGACAGAAAGTTTGAATTGCTCTTGGAGTTGCTCGAGGTA  
TTGAATACTTGCATCGAGGTTGTGACTTTTCAGATTCTACATTTTGACATCAAGCCACACAACATACTTTTG  
GATGAGAATTTTCATTCCAAAACCTATCTGATTTTGGTCTTGCAAATCATACCCGGCTGATAAGAGCATTG  
TACTCTAACACCAGCCAGGGGAACAATTGGTTATGCAGCTCCAGAGCTGATTAACAGAAGCATTGGTC  
CAATATATTATAAGGCATATGTCTATAGCTTATAAGGCATATGTCTATAGCTTTGGAATGTTACTCATTGA  
TATCGTAGGCTTGAAAACAACTCGGCAGCCAAAGAGGACATATCAAGCCAGTATTTCCCATATTGGAT  
TTATGATTAACCTCGACAAGGGAAAGGAGATTGAAGTACTAGACGAGACACATGAAGACGTAAAGAAGC  
TGACTTTAGTTGCTTTGTGGTGCATACAAATGAATCCACTCGATCGTCCCTCAATGACTAAAGTAGTGGA  
AATGCTTGAAGGAGAATTACAAGCACTGCAAATGCCTCCCAGGCCCTCTGAATTGCAGGAACCATGTTC  
GTTGGAATTCTATCTAATTAGTTCTTCAATAAGCTCAATAGAGTCTGTGAAGTTGCTTGAGAGTTGTTCTG  
ATTCTGCAAAAATAGATGTAGTTGTTGCTTGACATCACATATTGTGTACGTAATTCGTG

>M6-PGSC0003DMG400010701 M6 RLK with WAX or WAX-EGF domain

GATTCATTCTATTTCCATGCATAGTTGTTGTTCTAATGACTGAGTTACAAAGAAGGCATTTGTTCGATTTAT  
GATGCAATTGAAAATTTCTTCACGGTGAGAACAATTTGCGGCCATTAGATATTCCAACCTCCAACATAA  
GAAAGATGACTAGGAACTTCAAAGAGAACTAGGCCAAGGAGGTTATGGTTCAATATATAAAGGTAAG  
CTTCAAAGTGGACCTAATGTAGCAGTGAAGATATTGAGCAAGCCCAAAGCTGATGGGCAAGACTTCATC  
AACGAGGTTGCCACAATCGGGAGGATTCATCATGTTAACATAGTACAACCTTATTGGCTATTGTGCTGAG  
AGATGTAAGCGTGCTCTCGTGTATGACTTCATGCCTAACAGATCACTTGAAAAGTACATCACACCTCAAG  
ATGGAGGAGCTGATCAACTGTTAAGTTGGGACAGAAAGTTTGAATTGCTCTTGGAGTTGCTCGAGGTA  
TTGAATACTTGCATCGAGGTTGTGACTTTTCAGATTCTACATTTTGACATCAAGCCACACAACATACTTTTG  
GATGAGAATTTTCATTCCAAAACCTATCTGATTTTGGTCTTGCAAATCATACCCGGCTGATAAGAGCATTG

TTACTCTAACACCAGCCAGGGGAACAATTGGTTATGCAGCTCCAGAGCTGATTAACAGAAGCATTGGTC  
CAATATATTATAAGGCATATGTCTATAGCTTATAAGGCATATGTCTATAGCTTTGGAATGTTACTCATTGA  
TATCGTAGGCTTGAAAACAACTCGGCAGCCAAAGAGGACATATCAAGCCAGTATTTCCCATATTGGAT  
TTATGATTAECTCGACAAGGGAAAGGAGATTGAAGTACTAGACGAGACACATGAAGACGTAAAGAAGC  
TGACTTTAGTTGCTTTGTGGTGCATACAAATGAATCCACTCGATCGTCCCTCAATGACTAAAGTAGTGGA  
AATGCTTGAAGGAGAATTACAAGCACTGCAAATGCCTCCCAGGCCCTCTGAATTGCAGGAACCATGTTC  
GTTGGAATTCTATCTAATTAGTTCTTCAATAAGCTCAATAGAGTCTGTGAAGTTGCTTGAGAGTTGTTCTG  
ATTCTGCAAAAATAGATGTAGTTGTTGCTTGACATCACATATTGTGTACGTAATTCGTGTTGTTCTGAATA  
AAATATCAAGTTCATAATAAATTT

>M6-PGSC0003DMG400010963 M6 RLK with WAX or WAX-EGF domain

ATTCTCATATGTTACGCTTAATAAGACTCCCTTATAGGAATGACATGGAATCTCCAAGATCACAGGATTT  
AAAGTACTTTTAGGGATGTTTCAGTACAAAGATTAATAAAGCAGAGATTAGTAACTAGAGATCAATTGT  
GCAAGGATTATATTTTATCAAGTGTTTGGTTCATTGCTTCCCACCTACTTTTGTGTAAACCTTTACAAAA  
GCTTCTTTCCAATTGTAGCCTTGAATTATTATAGGATTTTCTATTTTCATGTAATTGGGTCAAGACTCAAGA  
GCCTTCTAACTAGCTAGGAAAAGAACAATTTTTTGTGGCCATGTTTGCTGTTTTCTCACTTGAATTATTG  
AGGGTAAATAATTGTCATCCTAATAAATTGATCACTCACAAAGCGTCATTTTTTTATTTAAAGAAGATAG  
ACCATCTACTTTCAAACCGAAAAGACGGTAAACAATAGTTAAATATCGAATAAACCATCTATTTTTACAC  
ATACAATTGCAAGTTATAGTTTTAATATGTATGCAATTTTATAAATTGTTCAAATACAAATAATCATAAA  
ACCACATATATCAATAAATAATACATTCAATTAAGATCACAAATATCATGTGGCCATATATTTGCCTTT  
TCAATTAGTAAATGTTGAACAACCTCACATTTCAAATATTGTATTGATTTAATGATTTGTATTATATTTATTT  
AGCAACAAACAACCTCTCTCTAAATAATAAAATTTGTAAGCTAATTTATTTAAATAAATTTACTAGTACAAA  
TATAAAACATAAAATCAAGAAAGTAAAAAAAATGATTAAGGATTTGACGGGTATTTTTGTCTTAACA  
TATATTGATCCATGGTATTAATCCTATGTATTATTAATACCACCAAATGGAAGGTATTAGTTATACACCC  
TATAATACCATATAACATGTATAACTAATACATGCATTAATTATATATAGGCCCAAATTTCCACCAAACA  
TAGTACTAAATAACTATACATAATACACGAACTATTTTTCTAATACAATCTACCAAACGACCCCTTAG  
TGTGTTATAGGCACCTTTTGTTTAATATCACAAGATCCAAATGTATTTTTATGTTTTTAAATTTCTGTGCAA  
AATCAAACCTAAGACATATAAAATGAAACAAAGAGAGTAACAATATAACAATATCCCCTGTGCCCTTTA  
TTTTAACTTGTTTTTAGCATGTAACATGTCTTATTTTCTAAGTTACTAATCTCAGTTTTTATGATGATTTCTT  
GTTAATTTCCACAGACATTGATGAGTGTGCAAGTCCAAAAAGGAATCGTTGTCCCAACAATACTCGCTGT

GTTAATACTCCTGGCACTTACCGTTGTGACTCAAATAATGTGAGACATATGCTAGCTAAACAACTCTCCAT  
CGGTATTGTATAACTCTCTTCTTTGTCTTCTTTTTCTCCTCTTGTTTCTTTGTTAGATTAAGCTTTCT  
ATAGATTTTTATTTGAGACAAATTACTCCTTTGAACTGTCCCAACAAATGATTCATAATCCTATTCATGTTT  
ATTCTAGCTAACTGCTCTTTAGAAAATTAGAAGCTCAACTTAATATATGCTTTAAAATTACAAAGGGGCCT  
GGATAAGCATTAAAGCTCTTTCTTTAAATTCTCAAATGAATTTATGCTTGTTTTAGATGAAATTGGTT  
TGCTCACAAGCAGGTATTGGAGCAGCAATTACTTTTGTGATCCTGGTAGCAGTTTGTCTTTGGCTACGCA  
AATGGCTCCGGAAGAGGGAAGAAAACAAAGCAAAGCAAAGTATTTCAAGAGGAATGGTGGATTGCTT  
TTGCGACAACGTATTTCTTAATTGGAGAAAGTAGTGGTGGCTCTTTGCCAAAGCTCTTTTTGAAAGAGG  
AGTTGGAGAAAGCAACAGACAATTTCAATGAAATTCGAATTCCTGGTAAAGGAGGGGCTGGGACTGTTT  
ACAAAGGAATGTTATCAGATGGGAGCATTGTAGCTGTGAAGAAGTCCAATGCAGTGGATAAAGATCAA  
ATTGAACAGTTTATAAATGAGATACTCATTCTCTCCAAATAAATCACAGACACATTGTCAAGGTACTGTT  
GATTTTTGTACTAGGCTCCTGCTACCATTTTATTATGAATGGAAGAAGAGAGTAACACAATTTGACGATA  
GAGAAATTTATAATGCCTAAAGAGGATTGAAGAGAGAACTTATAATATTAGAAAGACTCCTATACTCTTA  
CAATATAACACACTAGACTTACACACACGCGCAGTCGCACACACAGAGCTGCTACATCAACTAGTGCTCC  
TATTCACTTCAACCATAATAAACGAACAGTTTAGGATAACTCATTAGTCACTCATGAACCAAAGATAACTC  
AAAATTACAATTGAACCTAGCACTTGATCACACTTTTAACATTTAAGTTTACTGTTTACAACAGGTACTTG  
GTTGTTGCTTAGAAACTCAAGTCCCATTATTAGTGTATGAGTACATCTCGAATGGAACCTTGTCATCCCAT  
ATTCATGGAAAGCTCAGTCACAGTTCTAACCTACTGTCTCAAAGTCTGATTTGGATGATCAGATTCTTCC  
GCACCCAGCAATAATATTATCGTGGGATCATCGGGTGCGAATTGCTGCAGAAATAGCAGGGGCACTATC  
TTACATGCACTCATGTGCTTCTACTCCCATTCTTCACAGAGATATAAAATCAAGCAACATATTACTAGACG  
ATAATTTTAGAGCAGTGGTTTCTGATTTTGGACTATCGAGATTGTTGTCTGTTGACAAGACTCATTTAACA  
ACAATGGTAGGGGGTACATTTGGTTACATAGATCCAGAATACTTCCGCTCAGGTCAACTTACAGACAAA  
TGTGATGTCTATGCCTTCGGTGTAATCTTGCAGAGCTTCTAACAAGTCAAAGAGTTGTCACTTCTAACCA  
ACCAGAAGATCCAGGTTTGGCTTTCCGTTTACATTAGCATTGAAAGAAAATCGTATAATTGAGATTGTA  
GACCCTGAAATTGTAAGAAGTTGAGGATGAACATGTGATTCCTGCTGTGGCCAAACTTGCCAAGAGA  
TGCTTAAATTTAATGCAAGGAGAAGGCCATCCATGAAGGAGGTGGCAGCTGAACTTGAACATCAAGG  
AAAAATGAGGCAAGATATGCCTCATAATGAGAGTTTTCAAGATAACATTTACCAAAAAGTGAAAGTTC  
ATGTAGTCATACTTCTGATTGTACCGAAGAAGATTATCAGAAGTCAAGTGTCTCACAATGAAATGCATTAT  
GACAGAAAGGGGAAGTTTGTAACTTTTATAACTTCAACTTTTATCTTTTGTAAATTGTAATGTGCAAGTAATT

GCATGTATGGACACATAATCAAATGAAGATTAGCATGATTTGCATTAATATTTAAGTCGTATATATGAT

>M6-PGSC0003DMG400011304 M6 RLK with WAX or WAX-EGF domain

CCAGTTGCATCTTCTAGATGAGGACATGACCGTAAACTTTTTGGGTTAGAGCTCCCCACGAATGCAAA  
CACCGATAACAAAAGCATAGCGATGTTTACAACCTGGGGTTGGTTCTTTTGGAGGTTATTACAGGTAG  
CAGCTCAGATCATCTTCCATCAAAGATAGCTTTACAGAAGATAACAAGTGGGAAGCTAGAAGAGATAGT  
CGATCCACGTCTTTACTATCACGAGCAGCCTATTTTCCGGAGGGAACAAATAGAGATAGTTGCAGACCTT  
GCAACAAGATGCATAATATTTGGTTGCCAAAATGGGAAATTTACATTGGAGATGTTTCAAGAGAACTT  
GTTAACATAACAAAAGATGGAATTGATGGTAGAAGTAGGAGATGTCCATCAACTCATAATCTTGAAGAA  
ACTTTTTCCAATTCAAGCCTTCTTCAGATGATATCTATGTCTCCTGATTCAATACATGTCCCTGCAGCCAGA  
GGGTTCTCTTAAGCTATGCTATGTTGCCAATGTCAACGGCCGCTGTCAGTGCATTAATTAGTTGGAAA  
AAGAGGAAGGCTCTCACACTATTGACATGCTGTAATTATGTACAGTAATGATTAACCTACCTGCTGCTGT  
TATTTCCATCTTCTTATGCATAAGCAATCCTATTTTTGTTTCAATAAACTTCAAATCACATTGAAAAATGG  
TAATATATCCTGATAGTATTGCAGTTTGTAT

>M6-PGSC0003DMG400011792 M6 RLK with WAX or WAX-EGF domain

TTTGTTAAATTATTTGATTTGTTAGATAAGTTTTGAAAATTGAGTTTATTGAAAAGAAAATATTTTTTAA  
AATGCAAAGGGTATAGTTGGGTCTATTGTCAAGTTTAACTTGAATTCCTAAAATGACAATTATTTTTAGC  
ATACTCCCTCCGTCTAATAGTATTCTTGGTTTTAGCATGCTCTTTAAGAAATTACTCACCTCTATAAAGTAA  
GAAATGTTTTCACTAAATTACCGTTAGTTTAATATTAGTATCAATTTAATATAGTTTTTTGGTTATGTAAAA  
GTTCAATTGATCTAATAAAGATAAATTTGAAAAGAAAAAATGATAATTTTTTCTTATTTATGGAATTATA  
TACTTTGGATTGAATGTAAAGCTATAAACACTGTATAATTGAATGTAAAGCTAAAAACACTACTCCCTCT  
GTCTCAGTTTATATCATTCACTTTTTCTTTTTAGTCAGTATAAAAAAGAACAACACATTTTTACATTTAGTA  
AGAATTTAACTTTAAATGCTCATTTTTACCTTTAATGAAATGATTTATAACTGTACAAACATCTATAACTTA  
TTTTAAATCACAGGCTTCAAAGTCATTCCTTTTTTCTTAACTTCGTGCTCAGTTAAACTAAGTCATATAA  
ATTGGAACGGCGGAAGTATTTCTTAAAGATAATTTTAAAGACATGAAAGTTCATCTTAGATCATTTTTCAA  
AAGAGCTCTAACTTTGATTAGGCAAAGAAACAACCTTCAGTGAAAACATGTTTCTCTCAGTGAGTTCACC  
CCAATTAGCTAACTTGTTAGCCATCATATTGCCTTCCTTAAAGCAATGTTGGAATAATTTTCACCACTTGC  
CCAGAGGGATTGAGTTCCTTGTTGATCATGTTGATGATGATTTGAGAATCAGATTCAATAATGACTTGAT  
GGAAGTTATTGTACAAGCACCATGACATCCGTTATTGTTCTGAGATAATGATCATTAACTAGATTAGCTA  
GTGAACCTATATAAAGGCAAAGCGGAGGGATTAACGTGGTATATTTCTCTGTTTTGCATGTATCAGATA

TTAATGAATGTGCTCATTCAAGTACCAATATGTGTGAACACAATTGCATAGACACGCCAGGGAGTTACAC  
TTGTACTIONGTCTAGAAGGATTCAAGTGGTATGGCAGAAAGGATGATGGTGGTTGTATTGCACCAAATTT  
GAACTATGAGTTCCCATGGATCAAGTTTTCTATTGGTATGTTTCTCAAAAATTGAACTTAGCTTGTTTATT  
GAAGGAATTCATCTCCTTTAAATTTTTGTTGTTATAAACACAGGTATGGGAGTCGGCTTTATATCCCTCGT  
GGTTGGGACAATTTTGCTCTATTTTTGTATCAAGAAACGAAAACCTATTAATAAATAGGGAAAAGTTCTTC  
CAACAAAATGGTGGTTTACTCTTGAAACAACAAATCTCTTCTATAAAGGGTGGTGTGGAAGCAACCAA  
ATATTTACAGCTGACGAGTTGAAGAAGGCTACGAATAACTATGCCAGTGATAGAATTCTTGGTCGTGGT  
GGAAATGGAATTGTCTATAAAGGTATTCTACCTGATAATCGCATAGTTGCAATTAATAAATCTAAGTTTG  
TGGATGAGAATCAAGTTGAACAGTTCATCAATGAGGTACTTATTCTTACTCAAGTTAACCATAGAAATGT  
AGTGAGACTCTTCGGGTGTTGTTTGGAAAGATGAAGTGCCTTTACTGGTTTATGAATACGTTTCTCATGGA  
ACTCTTTACGAGCATATCCACAACCAAATGGAGTCCCATGGTTATCTTTGCAAAAATCGATTGAGAATTG  
CTTCAGAGACAGCAAGTTCACTTGCTTACCTTCATTCATCTGCATCCATGCCAATAATTCATAGAGACGTC  
AAATCCACTAATATATTATTGGATGATGTTTATACAGCAAAGTGGCGGATTTTGGAGCTTCAAGATTAG  
TCCCTCTTGACCAAACACATGTTGCTACATTGGTTCAAGGAACATTAGGGTACTTAGATCCTGAATATTT  
CACACAGGTGAATTGACAAATAAAAGTGACGTTTATAGTTTTGGAGTAGTTCTTGCCGAACTTTTAACAG  
GGATGACACCTATTTTTAGGGATACAAGTGACAAGTACAAATGTTTGGTGGAGCATTATCTCGTCGAT  
GAACAAGAATAACATATTTGAAATCTTGATTATAGAGTTGTAAGAGAAGGAGGTGTTGAGCAACTTCA  
AAAGATAGCTGAGCTCATTAAAGGGTTCCTTCAGTTGCATGGGGAAGATAGGCCTATGATGAAGGAAG  
TGGCTATGGAACCTGAGAGTTTAAAGAAAGTTCACTAGCCCATGGACTAATGAACACGGACATGAAGATC  
ATAATGAAGTTGAATTAAGATCGGTATATAATTCCAATTGATTCTAATACAGGTATCGACAACCTTCTCT  
GGACAATATCCCGGCTCTACACAATAACAACATCTTTTCTGGACAATATAGTTCGGATAAATCTTCATT  
ACTACCCAATAGAAATATCCCGCGGTGATCCAAAATAAAATATTAATATGATAATTAGTGACAATATAAT  
TTTCTGTGTTTTGTAAGTTTCTTTTCTGGCTATCTTTCTTTCATATTCAATGTATGTTGTTATGTATTTACTT  
GCTTTTGAATTAATCATCAATATATTGTTT

>M6-PGSC0003DMG400011793 M6 RLK with WAX or WAX-EGF domain

ATTACTGTTAGTTTAATATTAGTATCAATTTAATATAGTTTTTTTTGGTTATGTAAAATTTTATTGATCTAAA  
TAAGGATAAATTTGAAAAGAAAAAATTAATATTTTCTTCACTATTTATGGAATATTTACTTTGGATTGAA  
TGTAAGCTAAAAATACTATATAATTGAATGTAAAGCTAAAAACACTACATAATTGAATGTAAAGCTAAA  
AATACTATCCCTCACTCCAGTTTATATCGCTTGATCTTCTTGCTTTTACTACTAGCTGGAAAGTGATCCT



TCTTTTTGTTTTAATAGTAAAAACAAATGCTTTAATAGGTAGGGTCACAATAATTGGTAGGAATCAA  
ATTGTGATAAACATCATTGGGACACTAATCACTAGAAATTAECTCAATAGTGCCTAGTGCTTTATTGCCT  
TATTGGAGCATGGAGCCTAACACTCGAGGTGAAGTTGACTCATCACCTAACAGGTGGATCGAGTTAGA  
TATGGATTGATCGAAAATAAATCAGATGAAAATAAATAAATATTTGACTCAATCTATATTTAAGACAAG  
TAAAAATGAATAAATCCAAAAGATAATATAGATATTCATATTATCCATAAATTATCTGACCAACCAAATTA  
TTATTTTTCTTCTTTTAGGATGTGTTTGGTATGAAAAAATATTTTAACGTTTTCAGAGAAAATATTTATC  
TAATTAAGTAAAGTTTTGAAAAGAAATATTTTTTATGAGGAAATAATTTTTCTTGAATTAGAGGAAA  
ATAAGTCCAATTAATTTTTTTTTTCAAATATTTAAATCAACTGGCAACTATTTTTAAAAACATTTTTCT  
TCACACCAAACACATCCTTAATAAGTTACTTTTTTATAGGATGTTACACCCTTACGTACTTTAAGGGGAG  
TGCAATTGATAGATACTCATAATTTATTCATATTTTACGTGGATAGTATGTTGATCCATATTTGACAAATTT  
TTAAATGATTAATAACCAACCCATTTAAATGAAAGAAGAAAGTTGACGTTAAAGATTATTTGTTGGTA  
AAAATTGAAGGGAAAGTAAATTTAAAAAAGATTATCTAAGTTTAAGGCTGATGTGGTGTTTTTTAAC  
CTATCACTCATCTAAAAGAATTGAGATCACTTGCTATGATATGTGGCAAGCGAGGGGTGTTTTAAATTC  
AGTTAGTCAAGTAGAAAAATGTTTTAAGAATATCAATAGTTTATGGACAAAATTAATAATTCTCGCTAA  
GTTTGAAGGTGTTTTCAACTTCTCTTCTTCAAAGGACTAACTTTAGTGAAGAACATGTTTCTCCAGT  
GAGTTCACCCCAATTAGCTAACTTGTCACCACCATATTTCTTCTTTATGGCGATGTAGGAATATATAGT  
TCCCCTAGAAGTGAAGTTCATGTTGGTAGAAGAATTTTCATCACTTGCCAAAAGGGGTTGAGTTCCTT  
GTTGATCATGTGGATGATGATGCTAAATCTTCATATTTATCTTATAAATCCTAAGGTTTTCTACTAGTTCA  
TCAATCGTCATGATAGAGACGTCCTTAGCTTCTTCTTCTTTTTAAATGGTAGTGGCTTTTACATCCATTT  
AGTTTTGGAAAGGACTCTCAGAAATTTATCAATCTGTTCTCAGTAGTAAGAATCTTCTCCTAGTGATGATA  
ACTCATTGATTAAGTGGCGAGTCGAGTAATCATTCTAGCAGGCACTCACTCTTCTTCAATTTGAAAGTT  
ACATATTGAGTGAACAACATGGACACCCTAACTTCTGACCCGACTTGTTCTTCGTGGGCATTGATCA  
GTGCATCTCATATCTGTTTAGTTGAAGTACAATTTGAGACCCTATTGTGCTCATCTGGTCCTAAACCGCAC  
ACTAGAACATTTTTGGCCTTCACATTCTTTATGAGAGTTACAAGATTTTCATCAGTGAAATCTCTCCTTATT  
TTTGAACCTGTTCTCCTTGACAATTTTATTGGAATGGTTGGTCTTTTAGTTATCCGATCATGTAGTTCCG  
TATTCTTCTCAGCTTCCATGAAATCCTCCATGCAATGTGTGCCTTCCGGCAAGTAAAGTGAATAGATTGTTT  
CTTGTCTTCACTATGCCCAATTGGTGTGTTGAATTCATCATGATCTTATTTTAGGTATTTGCCTTACA  
AGATATTCTTGCTTTGATACCAATTGATATTCTACACTACCTTGAAACATGTTGCTTAACTGAACTTTTTTA  
GTTAAGTAAATGGGTTGCCTAACGTGTTTCAACGAAGTAGTAAAAGCAGTAAATTGAGAACAACACTAT

TTTACGTTGAAACACCTGGCTCACAAAAGATGTAAAAACCACAACCTGTAGAGTTCATAAACTCCACACA  
TGCACAAACCTTCCAAGGTATGTGTTTCCAAGTCTTAGAGTTGCTACCAAATTGAAAACATAATCCTACT  
TCAGTTACATCAACATTCAAACATAAAGAAGAAGTCTCTAGAACATAAACTCTGTAATAGGACCTGGTTCT  
TCAAAGTGTCTTCAATATTGAGCATTACAATGAAAGCCAATATGCCAATTGCCTTTTTGCTCTGTAATA  
AGTGTGTGAGTATTCTAAATCAATTCTCGTCTATTTAAGCATAACTCTTTCATAGAGTTGTTATTCACAACT  
AACTCCTCTTTCATTCAATTTCTTGTCTTTGAGTTATGATTCAAGTTGGACTCCGGCTTTAGTCAAACCT  
CTCACTTCATTGGTGTGTGTCATTGAGCACTGTTTTTGTGTTTACTTTAAGAGGTCGTTTGGTGTGATCG  
ATAAGAAAATATAATCCTGGGATAAGTTTTAGTACCCTTCAAATCTTAGCTCTATCCAAGATCGATTTATA  
TGCCAATAAACAATATACATAAATTCTAGTACTTAAAACCTTTGGTAATAATGTCAACTAGTGAGTTAAAA  
CTGAGAAATATTGCTACTGATGATTCATATGACCGATCGTGATTCGTAAGTCTAATGATTTAGTAGTTAT  
AATGCTTAATTAATACTCTTTGCTAGTTTCCATTAACAACCTTCTACAAATAAATATGTTAAAAGAAAAGA  
TATAAAGGCAACGCGCGAGGGATTAATGTGGTATATTTCTCTGTTTTGCATGTCAGATATTGATGAATGT  
GCTGATTCAAGTTCCAATATGTGTGAACACAATTGCATAAACACGCCCGGAAATTTCACTTGTTCTGCTT  
AAAAGGCTACACTGGCGATGGTAAAAAGAATGGTCGTGGTTGTATTGCACCAAACCTCGAACTATGAGTT  
CCCATGGATCAAGTTTTCTGTTGGTAAGTTTCTCAGAAATTCAACTGTTTCTACTTGCATTCTTCTCCCT  
AGGCCGGTACTTCACAGAAGTACTA

>M6-PGSC0003DMG400013884 M6 RLK with WAX or WAX-EGF domain

CAAAATTTGTGATAGGCCTTCCATTTGTAATTGTATTTCTGGTGATCAAATTCAAAAGGAGGCATTTGTC  
GATGTATGATAAGATTGAAGGCTTTTTACAAACACAAAATAATTTTCATGCCAATCAGATATAATTACTCCC  
ACATAAAGAGAATGACAAGAGGATTCAAAGAGAAATTAGGTGAGGGAGGTTATGGCAGTGTATACAAA  
GGAAAGCTTCAAAGTGGAAGGGATGTAGCAGTGAAGATGTTGAACAAGCCTAAAGCTGGTGGGCAAG  
ATTTTATGAATGAAGTAGCTACCATTGGAAGGATTCATCATGTCAATGTGGTTGGACTCGTGGGGTATTA  
TGTTGAGGGAACAAAGCGTGCTCTTGTATATGACTTCATGCCAACGGATCACTCGACAAGTATATCAGC  
ATCAGTCAAGAAGGAAGTCGTCTGTTAAGTTGGCAGAGGAAGTATGACATTATTCTTGGAGTGGCTCAA  
GGAATTGGGTATTTGCATCGAGGCTGTGATGTACAAATTTTGCATTTTGCATCAAACCACACAACATTC  
TTTTGGATGAGAATTTCAATCCAAGATTTCTGACTTTGGGCTTGCAGAAATTATATCCAACAGATAATAGC  
ATAGTACTCTCACAGCTGCTCGAGGAACAATTGGTTATGTAGCTCCAGAGTTGATCAGCAGAAGCATT  
GGAACAATCTCTTACAAAGCTGATGTTTACAGCTTTGGAATGCTGCTAATGGAAATGCTGGACTTGAAA  
AGACATGAAGTTGCAAATGAAGAGAATTCCAGCCAATATTTTCTTATTATATTTACGATAAGTTCAACA

AGGGGAAGGAGATTGTGGTGGATGAAGAAGCAAATGATGATGAAAAGAAGATGGTTAGAAAGCTGGC  
TTTAGTTGCGTTATGGTGCATACAAACAAATCCGATACAACGCCCTTCGATGAGTAGAGTATTAGAAATG  
CTTGAAGGTGAAGTTGAAGTGCTAGAAGTACCTCCTCAGCCTCTTCAATCTCAACCGATTGTTTCATCAGA  
TCATGGGAAGTTCTATGACATTTTCGTCTGATTCAATGGCTTTGTTAGAAAATTCTGCTGATAATCCCGTT  
GAACTAGACATTTGTTCTGATTGACTATAGTTGATGTAATGTTTATGTGAAACAAATATAGCCCACCCAA  
CAATGTTTGGGACTAAGGGTGTGTTGCTATTGTTGTAAGTTTAAAAACACACCTAGAAGCTAGCTGA  
CCAAGTGTTCGAATACAATAGCCAAAACGCTCGTGATTACTTAATTTGCCCGTAAAATTC

>M6-PGSC0003DMG400014060 M6 RLK with WAX or WAX-EGF domain

TAGAAATTTAACTCATCGTCGGACAACCTGGTTCATGGTGGCGACAGGTAACCTCATCTTCTTTTTCTTCT  
CTGTAACCTGGCACTGCAGTTTCGTAGATACCATTGCTCCCTTTTGCTCTTTGACTTGTATTTCTTGTCTC  
TGTACGTATCTTCTATATGAATTGTCCAAAACACAGACTGTTCCCAAATAGTTCATAGAAGTTCCAGACT  
GAATTTAATTTATATTCTCTGATGGTGCATGACTTCATTTTGCTTTCCACAGGTGCAGTTTTGTTTACAGTT  
GGACTGTTGGTTTTACTCTTCTGCTTCAGAGAGAAGATTTGTGGTACAAATGCCTCAGGTTTTGGGAAT  
CTAATGCTGAGGATCACCAAAAAGTTGAAGAATTCTTAAAGAAGTATGGATCATATGCTCTAAACAGATA  
CAATTATACAGACATCAAAAAAATCACCAGTCACTTCAGAAGCAAAGTGGCCAAGGAGGATTTGGTAA  
TGTATACAGAGGAAGTTTTCGTAACGGGAGTCAAGTGGCAGTGAAGATCCTGAATAAACTAAAAGGCA  
GTGGTGAAGATTTTATTAACGAGGTGGCAAGTATTAGCAGGACATCGCATGTTAACATCGTGAGCCTTG  
TGGGATTTTGTGTTGAGGGTCACAAAAGAGCTCTCATATATGAGTTCATGCCAAATGGATCTCTTGAAAA  
GTTTATCTATGAGGAAAGATCCAACAGTGTTCGCCAATTGGGTTGGCCAATACTGTACAAAATCACACTA  
GGCATTGCTCGAGGATTGGAGTACTTGCACCGTGGTTGTAACACTCGGATTTTGCATTTTGTATATAAAGC  
CTCATAATATCCTACTTGATGAAGATTTTTGTCCGAAGATCTCTGACTTTGGTCTAGCCAACTGTGCATG  
AAAAAGGAGAGCATTGTGTCAATGCTAGGTGCACGAGGAACAATCGGTTATATTGCTCCAGAAATTGTT  
TGCAGAACTTGGGAGGTATCTCTCATAAGTCTGACGTCTATAGCTACGGAATGATGGTCTTAGAGATG  
GTTGGAGGAAGAAAAAATGTTGATGTTGGAGTTGATCGCACAAGTGAATCTACTTTCCACATTGGCTC  
TATCAGCGAATTGAACTAAGTGAAGAGCTTCAACTCCCTGGAATAATGAATGAAGAGGAGAATGAATGT  
GCAAGAAAGATGGTTATAGCAAGTTTATGGTGCATACAGACTGATCCCTCAAATCGACCATCGATGAGC  
AAGGTTGTGGAATGTTAGAAGGGAACTAGACTCTTACAAATGCCTCCCAAGCCTTACCTATATTCTC  
CCTCAAGAAGTGGTAGATTCATCAGTACTAGAGCTGGCCTAGTCTTAA

>M6-PGSC0003DMG400014064 M6 RLK with WAX or WAX-EGF domain

AATGGTTGTGTTTCTGATATCAAGAACGTGCTCACTCGATCATAGTGCTTTAAGTTTGTCAAGGAATCAA  
GAATTTACTTTTTGTCAAAGTGTAAATGGATCGATATCTGAGGATCTTTTGAAGCACAGGATTGGTTTTGG  
TTGTGGTGGAGAAAATGGGAATGATTGGGGTCTTGCAATGTTTGCTGAGGATGAAAGCTTTGAGTCTGC  
ATTACAAATGTGTAAAAATCATGTAATGGTACCAGTAGAAATGCTTGGAATGAAGGGAGTAATCGAGT  
TATTGACTATCAAGTGCTACTGAGAAGGGGGTTTAGATTGAGCTGGATATCAAGTAACTGCAGTGACTG  
TGCAGAAAGTGGAGGACGTTGCGGATTTGATGTTAACAATTATCAATTCAAATGTTTCTGCACTGACAG  
GCCTCATGCTTCGAGTTGCCACCTACCAGTAAGGCCCTATCTAGCAGTTAATTTCCAGTATAATTATGC  
GGAACCTCATCTTATGATTAGGCACCGTGCTTTAGGTTCTTTTCTTGTGATTATCAAGCGCACAAAAAAGT  
ATCGTTTGATGATCTAGGCATCAAGATGCAGCTGCATTAAGCATTGGATTATGTGTTAACCACAAAATT  
TTGTGCAGCCAACCTTTTAAAAAAGAAGGTAAATATAAAAATTGGTGGTAGGGGAAGGGGAAATGCGG  
GAGGGGATTACAAGATGGGGGATCGAACACCAACAAGGTGAACTTCAGGTAGCCAACCAATTGAGGT  
ACGAAGATTTCCCTGTGCAGCCAAGTTAATATTCTCGTAGCAGCTAATTACTTCTCTGATGAATGGTGTC  
GTGTTCTGCTTAATTACCATGCATTTAGGGTTTGACCTCTTGTCTGTTAACCTGTGGTTATGCCAGCA  
GTATTTTCTGTTTGTATTTGTTGAAGTTTAGAGTTAGACCAATGACTGCAGCCTCCTTTTCTGCTATGTT  
TCTATGTTTCATCGGCATATCTTCAACTTAGTTCAATTAGAGAGTAAATCTTGTCCAAAAGAGTTTCGTTG  
TGGAAGAATTGGAACCATAAGTTATCTTTCCACCTCATGTTCTATTTGAGTAGACAACAATATTACTT  
TGTACATTCAAATGCACAAATAACAGTATGCGGATTGATAGTTATTTCAAAGTTATAAGAATACTCGA  
GTTGTGATGCCTTTAGCTTTTAGTGTCAATAACCAAGAATTGATCGAAGCCATAGTATTCAAGCTAGTGA  
TCTTCTGCAAATTCATCGTTCACCTCAGAACCAATTCTACTGATTTGTTTGTGATCTATTGACTCCTAGTT  
TCACATTAGATTGGGAATTGTCGTTAAATTATTCCAGCTGTCTTCATAGAGAAGGGCGATACCAAAGTGA  
CATCGAAAACAACCTCTTTACTCCAGAGGTATTGGATATAAGAAGCTTGTCTGTTGCTTGTGTATGTCTG  
GTTTCATTTTTGGAAAGGATTTAGATGTGTGTTGGTTGGTTCATTCCAAGATGTTTAATATGTCAACGTG  
AACGGAAGTGAATTGCTTTCCTTATTGTGACTAATTAATCTTTCATTTCTGTGTATTTGCAGAAGCAA  
AAAGAAATTTGGGACTGATACTAGGCACAGGTACATGTCTGTTATCTGTAATTAGACTTGCACAAAATCT  
CCTATTGCCTTGCAAATGTTGAAATTGTTGTGTTGCCTCAAACCAGGATCTTTCTGGAGCATGACTTTCC  
TTTTTCCCCACATTTGCAGTTTTCTTTCATCGGAGTCGTGATTTTGCTCTTCTGCTTGAGAAAAAAGA  
TTTTCTGGCACAAAATATCAGGTTTTGGGAATCTATAGCTGAGGATCACCGAAATATTGAAGCATTCT  
GAAGAACTTTGGGTCATATGCTCCAAAAGATACAGCTATACAGACATCAAGCGAATCACCAATCACTT  
AAAAACAACTAGGTCAAGGAGGATTTGGTAATGTATACAGAGGAAGTTTGTGTAACGGGAGTCAAGT

GGCAGTAAAGGTCCTGAATGAACTAAAAGGCAGTGGTGAGATTCATTAACGAAGTGGCAAGTATTAG  
CAGAACATCACATGTTAACATCGTGAGCCTTGTGGGATTTTGTGGGAGGGTCACAAAAGAGCTCTTTTA  
TATGAGTTCATGCCAAATGGATCTCTTGAAAAGTTTATTTATGAGGAAATATCTGACGGAGTTCGCCAAT  
TAGGCTGGCAAATATTGTATGAAATTGCATTAGGCATTGCTCGAGGATTGGAGTACTTGACCCGTGGTT  
GTAACACTCGGATTTTGCATTTTGTATATAAAGCCTCATAATATCCTACTTGATGAGGATTTTGTCCAAAG  
ATCTCCGACTTTGGTCTTGCCAAACTATGCATAAAAAAGGAGAGTATCGTGTCAATGTTAGGTCCACGAG  
GTACTIONAGGCTATATTGCTCCAGAAGTTGTTTGCAGAACTTGGGAGGTGTCTCTACAAGTCTGATGT  
CTATAGCTATGGAATGATGGTCCTAGAGATGGTTGGAGGAAGAAAGAATGTTGATGTTGGAGTTGATC  
GTACAAGTGAAATCTACTTTCCACATTGGCTCTATCGACGAATTGAACTAGACGAAGAGCTTCAACTAAT  
TGGGATAATGAATGAAGAGGAGAACGAATGTGCAAGAAAGATGGTGATAGCAAGTTTGTGGTGCATAC  
AGACTGATCCTGCAAATCAACCATCAATGAGCAAGGTTGTGGAAATGTTAGAAGGGAAACTAGACTCTT  
TGCAAATGCCTCCCAAGCCTTACCTATATTCTCCCTCAAGATCAGAGGTAGATTCATCAATAATAGAACT  
GACAACAACAACAACAACATACCCAGTATAGTCCCACAAGTGTGGCGTGAGAAGGGTAAAGTGCACGC  
AGGCCTCATCTCTACTTTTGTACTTTTGTGGGGTAGAGAGTTTTTTTTCGATAGACTCTCTATGCCATGGAA  
CAAAGCGATTAATTCGTCCATCATTCCCAAGAATGTCAACAATTTTGTACAATTTCTTCTGATTTCTTCT  
TCATCTCTTAGTTGAGTGTTTTATTGAGCATTGACATCAGAGCTTACTATATTGGTTCTGTCAAATGAAAA  
GTGTTCTCAGATACCTATTTTGAGATTC

>M6-PGSC0003DMG400014577 M6 RLK with WAX or WAX-EGF domain

ATGGATTTAGTTTCTTGGTTTTTCGTCTTCATTTTGTTCATCAGAGGTGTTTTGATTCTGTTCAAGGACAG  
AACACACCTTATTCAAACTGTCCTCAAGAATTCCAATGTGGAAGTTCAGAAATTCTGAGTTTTCTTTCTA  
TAAACCCGATCAACCTGATTGCGGATTATGTAAAGTTGATTGTGATACTGCTCCACATCCGATGATCGAA  
TTGGAAGGAGTAAAGTATCAAGTTCTTGAAAAACAGAATGTTTTTGTCAAATTAAGGATCCTGTTCTTG  
AAAATCTCTTAAAGAAAAACAGTTGTGATCTTTGAAAGAAATCTATCTCTCCCAATATCTCCTATAATC  
ACCTATAGTGTCAACCCTTCTCAACTTGTTTAAATGCAATACTAGTAATGATATCTCGTACGAGGGCTT  
TCAAAGTTACAATGGTTGCGAAAGTTTCACTTTATACTATAATCATTTCGTCCGTTTCTTCTATTGGATCTAA  
TCTTCTTAGTAAATGTTCAATTATTCAATTGCCTATGGTGTGAGGTTATGAATCAAATCGAACAATAGTA  
ACCTGTTGATATGTTGGCTGCTGATGTTTCTCTAGGATGGACAGTATCTCATAACATGTAATCAGTGTTAT  
TCGAGTGGAGGACGATGTCAAGTTGATAGTAACAACAATTTTCATTGTTCTGTTAGTGATCCAGGCAAA  
GGTATTCAAGAAGTAAATTATGCTTGATTCTTCATCTTAGTACTCTTATTTATTCGTTTTTCGATTGCA

GGAAAGCATCTTCGTAGAACATGGATCGTTGTTTTAGCCACAGGTA ACTCTTTTGTAGAAACAGTACTAG  
TTGCATTGTTCCGAATAGAGACTCTTCACGGTGTATGACTTCATTTTCTCCGTATAGTTGCAGTTTTCGG  
TTGCATTGGAATCTTGATTTTGCTGTTCTGCTTCAGAAAAAAGATTTTCTGGCATAAGTACCTCAGGTTTT  
GGGAATCAGAAGCTGAGGATCATCGAAATATTGAAGCGTTTCTGAAGAACTACGGGCCATATGCTCCAA  
TGAGATATAGTTATTCAGACATCAAAAGGATGACTAGTAGCTTCAAAAACAACTAGGCCAAGGAGGAT  
ATGGTTATGTATACAAAGGAAGTTTACATAATGGAAATCCTGTTGCTGTGAAGGTTTTGAATGGACTAA  
AAGGCAGTGGTGAAGAATTCATTAATGAGGTATCGAGTATTAGCAGGACATCACATGTTAACATCGTGA  
GCCTCGTGGGATTCTGTTTTGAGGGTTCGAAAAAGAGCTCTAGTTTACGAATTCATGCCAAATGGATCACT  
TGAAAAGTTTATCTATGAAGAAAGATCAGACACAGACAGAGTTCGTCAACTAGATTGGCAAGTACTGTA  
TAAAATTGCATTAGGCATTGCTCGTGGATTGGAGTATTTGCATCGTGGTTGTAACACTAGAATTCTACAT  
TTTGATATCAAGCCTCATAACTACTTGTATGAAGATTTCTGTCCTAAGATATCTGACTTTGGACTTGC  
TAAACTCTGCGTAAAAAAGGAAAGTATAGTGTCAATGTTAGGTGCACGAGGGACTATCGGTTACATTGC  
TCCTGAAATTGTTGTAGAACTTGGGAGGTGTCTCACACAAGTCTGATGTTTATAGCTATGGAATGATG  
GTGTTAGAGATGGTTGGAGGGAGGAAAAATGTTGTTGATCGAACGAGTGAAGTCTACTTTCCAGATTG  
GCTTTATCAACGAATTGAACTAGACGAAGAACTTCAATTAATTGGGATAATGAATGAAGAGGAGAAAGA  
ATGTGCGCGAAAAATGGTGATAGTGAGTCTATGGTGCATCCAACTGGTCCTTCAAATAGACCATCTAT  
GACTAAAGTTGTCGAAATGCTAGAAGGGA ACTTAAACTCTTTGCAAATCCTCCAACACCTTACCTATATT  
CTTCTCAAGGTCAGAAGTAAAATTGATCTCATCAGTAGAAGAATCGAGTTCCCGATCAACTCTCTCTAC  
CTCCACAAGGTAG

>M6-PGSC0003DMG400017105 M6 RLK with WAX or WAX-EGF domain

ATGTCCATGTGCAATAGTATTGATGATGATACATGTTCTGGGGTTGGTTGTTGCATAACATCCATCCCTA  
ATGAGTAATGGGGCATGGAATGTTACTATAACTAAGGAGCTATTATAATCATACTTATGTGAAAGAT  
AACCTAGTTGCAGCTATGCTTTTGTAGTTCAAGAAGCTAATTTTAGCTATTCTAAGAATTACCGTAGAA  
GTTTGGAGGACAAGGAGGAGCTTCTCTTGCTAGATTGCGTAATTGGTGAAGAAACATGTGAAATAG  
CTAAGACAACTCGACTACATATGGATGTAAGAGTAACAATAGTGATTGTCTTGATAATTCAATTGGTTA  
TCGATGTTCTTGCATGCAAGGATATGATGGGAATCCATAACTGAAAGACGGCTACCAAGGTATGTATAT  
GT

>M6-PGSC0003DMG400017728 M6 RLK with WAX or WAX-EGF domain

ATTTCTGAGAAGAATAGAACGGTCGGCATAAGAAAAAGACATTTCTATGAAATATTGGCTCAAGAGGAA

GTAACTTTATGACTTCTTAATCTTGCAGCGTATTCGAGCGCAAATTTGTAATAGGCCTTCCGTTGGTAA  
TTGCATTTCTGGTGATCAAATTCAAAAGGAGGCATTTGTCCATGTATGATGCCATTGAAGGCTTTTTGCA  
AACACAAAACAATTCATGCCAATCAGATATAACTACTCCACATAAAGAGAATGACCAGAGGATTCAA  
AGAGAAATTAGGTGAGGGAGGTTACGGCAGTGTATACAAAGGAAAGCTTCAAAGTGGAAGAGATGTA  
GCAGTGAAGATGTTGAACAAGACTAAAGCTGGTGGTCAAGACTTCATGAATGAAGTAGCTACCATTGG  
AAGGATTCATCATGTCAATGTGGTTGGACTCGTGGGGTATTGTGTTGAGGGAACAAAGCGTGCTCTTGT  
ATATGATTCATGCCAATGGATCACTCGAGAAGTACATCAGCACCAGTCAAGAAGGAAGTCCTCTGTTA  
AGTTGGCAGAGGAAGTTTGACATTATTCTTGGAGTGGCTCGAGGAATTGGGTATTTGCATCGAGGTTGT  
GATGTACGAATTTTGCATTTTGACATCAAGCCACACAACATTCTTTTGGATGAGAATTCATTCCAAAGAT  
TTCTGACTTTGGGCTTGCAAATTATATCCAACAGATAATAGCATTGTGAACCTCACAGCTGCTCGTGGA  
ACTATTGGATATGTAGCTCCAGAGTTGATCAGCAGAAGCATTGGGACAATCTCTTACAAAGCTGATGTTT  
ACAGCTTTGGAATGCTGCTAATGGAAATGCTGGACTTGAATAGACATGAAGTTGCAAATGAAGAGAATT  
CCAGCCAATATTTTCCTTATTATATTTACAATAAGTTCAACAAGGGGAAGGAGATTGTTGTGGATGAAGA  
AACAAATGATGATGAAAAGAAGATGGCTAGAAAGCTGACTTTAGTTGCGCTATGGTGCATACAAACAAA  
TCCGTTACAACGCCCTTCGATGAGTAGAGTATTAGAAATGCTTGAAGGTGAAGTTGAAGTGCTAGAAGT  
ACCTCCTCAGCCTCTTCAATCTCAACCGATTGTTTCATCAGATGATGGGAAGTTCCATGACATTTTCGTCTG  
ATTCAATAGCTTTGTTAGAAAATTCTGCAGATAATCCCGTTGAATTAGACATATGTTTTGATTGACTCATA  
GTTGATGTAATGTTTTTGTGTAGTAACAAATATAGCCCACCAATAATGTTCCGGGAATGAGGTGTTGTTA  
TTGTGGTACGTACTAGTTCTGCAA

>M6-PGSC0003DMG400019167 M6 RLK with WAX or WAX-EGF domain

TACACAGGTATAGGAGCTGTTGGCTTTATATCCCTAGTGGTTGTAACAATTTGGCTCTGTTTCAGAATAA  
GGAAAAGGAAATTGATTGAAGTCAGGGAGAAATTCTTCTACAAAATGGTGGTTTATTATTGAAACACA  
GAATCTCCACTAACGACGGTGGTGTGAAAGCAATAAAAATTTTACAGCTGAGGAGCTCAAGAAAGCTA  
CAGACAATTATGCACATGACAAAATTCTTGGTCGCGGTGGCAATGCGATTGTATATAGAGGTGTGCGAA  
GTGATAATCGCATAGTTGCAATTAATAAATCTAGAATTGTGGATGAGAGCCAAATTGAGCAGTTTATC  
AATGAGGTGCTTATTCTCACTCAAATCAACCATCGAAAAGTGGTGAAGCTCTTGGGTGTTGTTTGGAA  
ATGAAGTTCCTTTATTGGTTTATGAGTATGTATCTGAAGGAACTCTTACGAGCACATTCACAATCAACGT  
GGAGGGGGTTGGTTAAATTGGCAAATCGGTTGAGAATTGCCATAGAGACAGCCACTGCACTTGCTTAC  
CTTCATTCATTTGCCTCGATGCCTATAATTCATCGCGATGTCAAGTCTTCCAACATATTGTTAGATGAATTT

TCCACAGCTAAAGTGGCTGATTTTGGAGCTTCAAGGCTCATCCCTTTGGATCAAACACGTGTGGCTACAT  
TAGTTCAAGGTACATTTGGGTACTTGGATCCTGAATATTTTTTCAAAGTCAATTGACGGATAAAAGTGA  
TGTTTACAGCTTTGGAGTAGTTCTGGCATAACTTCTAACAGGGTTAAAGCCAGTTTCTGGAGATAGAAAC  
GATGATCAAAGAATTTGGCTGATTATTTGTTTCATCCATAGATAATAATCGCTTATTTCAAATCCTGA  
TCGTCGTGTTTTGCGAGAAGGAAATCTTGAGCAACTTCAACAGATGGCTGAGCTGGTGAAGAATTGTCT  
TCAATTGCAGGGAGAAGATAGGCCTACAATGAAGGAAGTGGCTATTCAACTTGAAGTTTGAGGAAGG  
TAACTGGAGTTTCTTGGTCTAATCAACATGTACACGAAGATAATGATTTATCAGATCTTACACAGTTCCA  
ATGGACGCCTATGGAAAAAACCCTCAATTCAAGATAGTTATCAATCATGCATCCTACTTACAATCTAAGTT  
GA

>M6-PGSC0003DMG400019170 M6 RLK with WAX or WAX-EGF domain

AGAAAATGTCTGGGAAGCTTGAAGTCTATTTCAAATTTTTTTGCTCACTGATAATTACTTTATTTATC  
CAAATTTGAATATTACATTTTTCTTATATAACAGTACATCATATCCGCACCACATAAGTGACAAAACA  
GTACTTTTGTTCACATATTCTTATGTATTTTTTTATTATGAATGTGGGAAAACCTCCAATATTTTCGTATAT  
ATGATTATTATGATCTATGACCAAGAACAACCTCAATTTTTATTTTTTACAGAAATCCAGATTCCAGACTATG  
TTTGAATAATACAGAAGTTGCTTTTCATATGTTTGAAAAGCCTCTAGGAACACCAATATGTTAGCATGTA  
AATTCAACAGTAAAATGGAAGTGTACAATCCTGAGCTTTTGTTTTAGCTTAGTTGAAATAGGCAATAAAT  
GTTGAACTCTTCTACTTACACAGGTAAGTGGGTTGGGTCAATCTCCCTAGTGGTTGTGATAACATTGCTCT  
ACTTTTGCATCAAGAAAAGAAAGTTGATTCAAGCCAGGGAGAAGTTTTTCCAACAAAACGGTGGTTTAC  
TATTGAAGGAAAGGATATCCACAAAAGAGGGCGCTGTGGAAGCAACAAGAATTTTTACAGCTGAGGAG  
CTCAAGAAAGCTACAAACAATTATGCCAATGACAGAATTCTTGGTCATGGTGGAAATGGGATTGTATAT  
AGAGGTGTGCTACGTGATACTCGCATAGTTGCCATTAAGAAATCTAGAACTGTGGATGAGAGTCAAATT  
GAGCAGTTTATCAATGAGGTGCTTATTCTCACTCAAATCAACCATCGAAATGTGGTGAAGTTCTTTGGGT  
GTTGTTTGAAGATGAAGTTCCTTTATTGGTTTATGAGTATGTCTCTGAAGGAAATCTGTACGAGCACAT  
TCACAACCAACGTGGAGCGGGTTGGTAACTTGGCAAACCGTTTGAGAATTGCAGCAGAGATAGCCAC  
TACACTTGCTTATCTTCATTCATTTGCGTCCATGCCTATCATTCATAGAGACGTTAAGTCTGCCAACATATT  
GTTGGATAATGTTTACACAGCTAAGGTGGCAGATTTTGGAGCATCAAGGTTAATTCCTCTAGATCAGACA  
CATGTGGCTACATTGGTTCTAGGGACATCAGGTTATTTGGATCCAGAATATTCTCGCACGAGTCAATTAA  
CGGAGAAAAGTGATGTTTACAGCTTTGGAGTAGTTCTGGCAGAACTTTTGACAGGGTTGAAACCTATTA  
TTAGAGCTAGAAGTGAAGAGAACAAGAATTTGGCCGATTTTTTTGTGTTGTCCATGAACTCGAATAGCTT



GTTTCATATTATTGATCATCGTGTTTTGCGGGAAGGGAGTCTTGAGCAACTCCAAAAGATGGCTGAGCT  
GGTGAAGAACTGCCTTCAGCCGCATGGAGAAGATAGGCCTACAATGAAGGATGTGTCTATTGAACTTGA  
AGGTTTGAGGAAGGTAACCGGAATCTCTTCATCTAGTCAACATGAACAGGAAGAATATGATCAGGATGA  
AAGTTCAGATCTGTACACAGTTCCCATTAACCTCCTATGAAAATACCCCAATTCAGATAGTTCTCGTATAA  
TGCATCCTACATACAG

>M6-PGSC0003DMG400019171 M6 RLK with WAX or WAX-EGF domain

TTCCAACAAATTTTCAGAATCAAGTCCGTATAGTTTCTCTGCGCTGAACAAGTTTACTGTAGTTGGTTGCG  
ATGACTACGGTTCATCTTGGGGCCTAACAACTTTGAGTATGGCTGCAATGTCAGCTGTACAAGCAAAG  
AGGATGTGATGAATGGAGGGGAGTGTATGGGAAAAGGCTGCTGCCAGAAACAGATACCCAAGGGCTT  
GAAATACTATAGCACAACCATGTCTAGCACGAGAAACCATACCGATGTTTTGTCCTTCAATTTATGTGGG  
TATGCGTTTCTGGGCGAGGCAGATAGCTTCCATTTCCGGGGCTTGCCAGATCTAGGTGATAATTATACTA  
TTGATATTTTTTTATGAGAGGTTTAAAGCCACTGTTCCATTGTGCTGGATTGGGCTATCAGGAATCTTAC  
TAGCGCGCAAGCTCTGAAAAGCGTGGATTATGCTTGCAGTAAAAATAGCCACTGTGTTGATTCAGATAC  
TGGTCTTGGTGGCTACCGCTGCAGCTGTAATACAGGTTATCATGGCAATCGTTATCTCAATCAAGGCTGC  
CAAGGTATATATATATATAAAGGATCATTTCCCAATGAAAGCTATTTTATGCCCATTTGATCAACTTAT  
CACAAGCTTTGATATAACGGTGTCTATTTATTTGTTTTTTTTTTCAGATATTGATGAATGTGCTGATCCAA  
GCACCAATTCGTGTGAAAAGATCTGCACAAACACCCAGGGAGTTTCTATTGTTCTTGCCCCGATGGATA  
TACCGATGATGGCAGCAAGGATGGTCGTAGTTGTATTCCCTCCAATAATCAGTTCCCATGGATCAAGTTC  
TCTCTAGGTAATATCTTGAAAACCATAACCACAAATATCCATTTTACGTGATTTTGTGTTGACGACCAAAA  
AAATCGTGGTCCAAAATATTACATTTGTGTAGCTTTAAATAATCTCATTAAAGGGTTAAATGATAAGTTTAA  
AGTTAAATTATTTTTGAATATATAATATGTCAGTCTTCATTTAGGATAACTAAAAAAGTTATCACCGAGA  
ATTATTGTTTTCTGTGCTAGAAATGACTGGAGTGGGGAGCTTGGAGTTATATTTCCAACCTATTTTTGCAA  
ACTTATTTCTTTATTTAACCAAGCTTTGAGAATTACTTTTGTTCCTCCATAATCTTTTGTTTTTTTTATTATGA  
ATTAAGAAGAACTCCAAATTTTGGTATTTATATGGATGATTATGGTCTAAGACCAAGATCAAACCTCAATTCT  
ATTTTCTTCTGAAATCCGGACTACGTTTGAATATGACATAATGTGTTGTGACTTAAAAGTTTTATTCCACT  
GATTATTCAGGTATCGGAATCGGCTTTATCTGCCTAGTGGTTGGGGTAACCTGGCTCTATTTTCATCATCA  
ATAAAGAAAATTGGTTAAAGTCAGAGAGAAGTTCTTCCAACAAAATGGTGGTTTATTATTGAAACACA  
GAATGTCTGCTAAAGAAAGCGGTGTGGAAGAAACAAAAATTTTACAGCTGAGGAGCTTGTGGCGGCA  
ATGGGATTGTGTATAAAGGTGTGCTACATGATACTCACGTAGTTGCCATTAATAAATCTAGAATTGTGG

ACGAGAGTCAAATTGACCAATTTATCAATGAGGTAGTCATTCTTACTCAAATCAACCATCGAAACGTGGT  
AAGACTCTTTGGATGTTGTTTGAAGATGAAGTTCCTTTATTGGTTTATGAGTATGTCTCTGAAGGAAAT  
CTTTTCGAGCACATTACAACCAACGTGGAGCGGCTTGGTAACTTGGCAAACCGTTTGAGAATTGCA  
GCAGAGATAGCCACTACACTTGCTTATCTTCATTCATTTGCGTCCATGTCCATGCCTATAATTCATAGGGA  
TGCAAGTCCGCCAATATATTGATAGATAATGTTTACACAGCTAAAGTGGCAGATTTTGGAGCTTCAAGA  
TTAATTCCTTTGGATCAAACACGTGTGGCTACTTTGGTTCTAGGGACAACAGGGTACTTGGATCCTGAAT  
ATTTTCGCACAAGTCAACTGACTGAGAAAAGTGATGTTTACAGCTTTGGAGTAGTCTTGCAGAACTTGT  
GACAGGGTTGAAACCTATATTTAAAGGCAGAAACGATGAGCAAAGAATTTGGCTGATTATTTTGTTC  
ATCTGTGAATAACAATTGCTTATTTCAAATCCTTGATCATGTTTTGCAAGAAGAGAATCTCGAGCAACTCC  
AAAAGATGGCTGAGCTGGTGAAGAACTGTCTTCTGCCGCTTGGAGAAGAAAGGCCTACAATCAAGGAA  
GTGGCTATTGAACTTGAAGTTTGAAGGTTAAGTTAAGTTAAGTTAAGTTAAGTTAAGTTAAGTTAAGTTA  
GATAATGATCAGGATGAACCAGTTACTTACACAGTTCCAATAGACTCCATACCCCCAAATTAG

>M6-PGSC0003DMG400019172 M6 RLK with WAX or WAX-EGF domain

GTATTTCTTATAGAGAATTAAGAAGAACTCCAAATTTTGGTATTTATACTGATGATTATGGTCTAAGACCAA  
GATCAAACCTCAACTCTTTTTCTTCTGAAATCTGGACTATGTTTGAATTATACATAATATGTTTGAAGCTAT  
GAAAGTTAAATTCCACTAATTATTCAGGTAGTGGAATCGGCTTTATCTCCTTAGTGGTTGGGATAACCTG  
GCTCTATTTACGCATCAAGAAAAGAAAATTGATTAGAGTCAGAGAGAAGTTCTTCCAACAAAATGGTGG  
TTTATTATTGAAACAGAGAATCTCCACTAAAGAGGGCGGTGTGGAAGCTACAAGAATATTTACAGCTGA  
GGAGCTCAAGAAAGCTACAAACAATTATGCCAATGATAGAATTCTTGGTCGTGGTGGTAATGGGATTGT  
ATATAAAGGTGTGCTACGTGACACTCGCATAGTTGCCATTAAGAAATCTAGAATTGTGGACGAGAGTCA  
AATTGACCAATTTATCAATGAAGTGGTCATTCTTACACAAATCAACCATCGAAATGTGGTAAGATTGTT  
GGGTGTTGTTTGAAGATGAAGTTCCTTACTGGTTTATGAGTATGTCTCTGAAGGAACTCTTACGAGC  
ACATTCACGACCAACGTGGAGCGGTTGGTAACTTGGCAAACCGTTTGAGAATTGCAGCAGAGATA  
GCCACTACACTTGCTTACCTTCACTCATTGCGTCCATGCCTATAATTCATAGGGATGTTAAGTCTGCCAA  
CATATTGTTAGATAATGTTTACACAGCTAAAGTGGCAGATTTTGGGGCTTCAAAGTTAATTCCTCTGGAT  
CAGTCACATGTGGCTACATCAGTTCTAGGGACATCAGGGTACTTGGATCCTGAATATTTTCGTACAAGTC  
AACTGACTGAGAAAAGTGATGTTTACAGCTTTGGAGTAGTCTTGGCAGAACTTTTGCAGGGTTGAAAC  
CTGTAATTAAGATGGAAACGATGAGCAAAGAATTTGGCTGATTATTTTGTTCATCCATGAATAAGAA  
TAGCTTATTTCAAATCCTTGATCGCCGTGTTTTGCAAGAAGGGAAATTTGAGCAACTTCAAAGATGGCT

GAGCTGGTGAAGAACTGTCTTCACTTGCAAGGAGAAGATAGGCCTACAATGAAGGAAGTGGCTATTGA  
ACTTGAAGGTTTGAGGACGTTTACTGGAATCTCTTTGTTAATCAACATGGACAGAGAGATAATAATCAG  
GATGAATTATCAGATCTTTACGCAGTTCGCTTAGACTCCATACCCCCAATTTAGATAGTTCTCACACAATG  
CATCCTACATACAGTCCAAGTTGATGTTATGTAGGCTCCTTTCTTTTTCTCTCAAATTTAGATTTTTCTTT  
AAGATACAATGTTGGAGATTTTTGCAGATATCATATATAGAACCTTTTGATGATAAG

>M6-PGSC0003DMG400019173 M6 RLK with WAX or WAX-EGF domain

AACTCCAAATTTTGGTATTTATACTGATGATTATGGTCTAAGACCAAGATCAAACCTCAACTCTTTTTCTTCT  
GAAATCTGGACTATGTTTGAATTATACATAATATGTTTGAAGCTATGAAAGTTAAATCCACTAATTATTC  
AGGTAGTGGAAATCGGCTTTATCTCCTTAGTGGTTGGGATAACCTGGCTCTATTTGAGCATCAAGAAAAGA  
AAATTGATTAGAGTCAGAGAGAAGTTCTTCCAACAAAATGGTGGTTTATTATTGAAACAGAGAATCTCCA  
CTAAAGAGGGCGGTGTGGAAGCTACAAGAATATTTACAGCTGAGGAGCTCAAGAAAGCTACAAACAAT  
TATGCCAATGATAGAATTCTTGGTCGTGGTGGTAATGGGATTGTATATAAAGGTGTGCTACGTGACACT  
CGCATAGTTGCCATTAAGAAATCTAGAATTGTGGACGAGAGTCAAATTGACCAATTTATCAATGAAGTG  
GTCATTCTTACACAAATCAACCATCGAAATGTGGTAAGATTCGTTGGGTGTTGTTTGGAAAGATGAAGTTC  
CTTTACTGGTTTATGAGTATGTCTCTGAAGGAACTCTTTACGAGCACATTCACGACCAACGTGGAGCGGG  
TTGGTAACTTGGCAAACCGTTTGAGAATTGCAGCAGAGATAGCCACTACACTTGCTTACCTTCACTCA  
TTTGCCTCATGCCTATAATTCATAGGGATGTTAAGTCTGCCAACATATTGTTAGATAATGTTTACACAGC  
TAAAGTGGCAGATTTTGGGGCTTCAAAGTTAATTCCTCTGGATCAGTCACATGTGGCTACATCAGTTCTA  
GGGACATCAGGGTACTTGGATCCTGAATATTTTCGTACAAGTCAACTGACTGAGAAAAGTGATGTTTAC  
AGCTTTGGAGTAGTTCTGGCAGAACTTTTGACAGGGTTGAAACCTGTAATTAAGATGGAAACGATGAG  
CAAAGAATTTGGCTGATTATTTTGTTCATCCATGAATAAGAATAGCTTATTTCAAATTCCTGATCGCCG  
TGTTTTGCAAGAAGGGAATTTGAGCAACTTCAAAGATGGCTGAGCTGGTGAAGAACTGTCTTCACTT  
GCAAGGAGAAGATAGGCCTACAATGAAGGAAGTGGCTATTGAACTTGAAGTTTGGAGACGTTTACTG  
GAATCTCTTTGTTAATCAACATGGACAGAGAGATAATAATCAGGATGAATTATCAGATCTTTACGCAGT  
TCGCTTAGACTCCATACCCCCAATTTAGATAGTTCTCACACAATGCATCCTACATACAGTCCAAGTTGA

>M6-PGSC0003DMG400019720 M6 RLK with WAX or WAX-EGF domain

ATCGGCCTCCGTTTGTAAATTGATTTCTGGTGTCAAAATCAAAGGAGGCATTTGTCCATGTATGATGC  
GATTGAAGGCTTTTTGCAAACACAAAACAATTTTCATGCCAATCAGATATAATTAATCCACATAAAAAGA  
ATGACCAGAGCATTCAAAGAGAAATTAGGTGAAGGAGGTTACAGCAGTGTATACAAAGGAAAGCTTCA

AAGTGGAAAGAGATGTAGCAGTGAAGATGTTGAACAAGCCTAAAGCTGGTTGTCAAGACTTCATGAATG  
AAGTGGCTACCATTGGAAGGATCCATCATGTCAATGTGGTCTGGGCTCGTGGGGTATTGTGTTGAGGGA  
ACAATACGTGCTCTTGTATACGACTTCATGCCAACGGATCACTCGATAAGTACATCAGCACCAGTCAAG  
AAGGAAGTCCTCTGTTAAGTTGGCAGAGGAAGTATGACATTATTCTTGGAGTGGCTCGAGGAATTGGAT  
ATTTGCATCGAGGCTGTGATGTACGAATTTTGCATTTTGCATCAAACCACACAACATTCTTTTGGATGA  
GAATTTCAATCCAAGATTTCTGACTTTGGGCTTGCAAATTATATACAACAGATAATAGCATTGTGAAC  
CTCACAGCTGCTCGTGGAAACAATTGGATATGTAGCTCCAGAGTTGATCAGCAGAAGAATTGGAGCAATC  
TCTTACAAAGCTGATGTTTACAGCTTTGGAATGCTGCTAATGGAAATGCTGGACTTGAATAGACATGAA  
GTTGCAAATGAAGAGAATTCCAGCCAATATTTTCTTATTATATTTACGATAAGTTCAACAAGGGGAAGG  
AGATTTTTGTGGATGAAGAAGCTATTGATGATGAAAAGAAGATGGCTACAAAGCTGAGTTTAGTTGCAT  
TATGGTGCATTCAAATGAATCCAATACAGCGCCCTTCAATGAGTAGAGTATTAGAAATGCTTGAAGGTG  
AAGTTGAAGTGCTAGAAGTACCTCCTCAGCCTCTTCAATCTCAACCGATTGTTTCATCAGATGATGGGAAG  
TTCTATGACATTTTCTGCTGATTCAATGGCTTTGTTAGAAAATTCTGCTGATAATTCCGTCAAAGTAGACA  
TTTTTTCTGATTGATTATAGTTGTATTGTTAATTTAAAATGACATATATGTGAGAAGGGCTTCACATTT  
TATGAAGGGTCGGGTCTGAGTTGGTCCGTCTCATTGTTGTTTACGCTGAACAAATACATATG

>M6-PGSC0003DMG400020023 M6 RLK with WAX or WAX-EGF domain

TTTAGCAACACCAAGATGAACTTGACTTGGAGCTTGCATAAACCTCGACAGTAGACTTGCCGCGAACAT  
GAGATCGGGTCTTGTTGCTGTCAAATACAGCAAACCTACCAATCAGACTTCTATAAACTCTTGGATCAGCC  
CTGTACCTCCTTCAAACCTTCGAAATTTTTTTCATTGTGAAGCAGTGGAGTCGGTACAGACTTGCATCTCTC  
CATCTTGAACCTTTTAAGAATATCCCATGCATATTTTCTCTGAGAAATAAAGGTTCCAGCAGTAGCTTGAT  
GAATCTCCATTCCAGAAAGTAACTCATTTACCCAAATCTGACATTTCAAACCTGGTCTCCATTTCTTGCA  
TGAAGTATTACCATTGCTTTATTGTTTCTGTTACCAGAAGATCATCAACATAGAGTGACACCACAAAC  
ACATCTCCTCCTTAGCCTTCTTACATATAAAGTGACTTCATTTTCACTTCTCTTGAAGCCACAATGAATG  
AGATGATCATCAATCTTACTGTACCATGCTCGAGGAGCCTGCTTTAATCCATACAATGCCTTATGAAGTC  
GGTAGACTTTATCCTCCATTCTGCAACTTGAAAGCCTTCTGGTTGATCAACATATATCTCCTCCTGCAAC  
AGTCCATTTAAGAATGCAGATTTACATCCAAATGATACAGCTTCCAATTTGATTGAGCTGCCAAAGCAA  
ATAGCAGCCTTATTGTATCATGTCTGCAACAGGTGCAAACGTGTCCCATAATCCAGACCTGCAACTTG  
CGCATAACCTTTACAACAAGCCTTGCTTTGTATTTATAAACTGAGCTATCTGGATTAAGTTTGGTTCTAT  
AAACCCACTTCACCCCGATCACATTTCTGTTTTTGGGTTTATCAACCAACTTCCAAGTATCATTCTTTTCTA

TCATACCAATCTCCTCCTTCATGGCTTCAATCCAACTTCATGTCTTGATGCTTCCTGATAGCTATTTGGTT  
CTGAGATTGCAACATTACATCTTTTCATAGATCTCGGAAAGAGATCTTGTCTTCAAATTGGCGAATCAAG  
TGAGGATTCCCC

>M6-PGSC0003DMG400020898 M6 RLK with WAX or WAX-EGF domain

AATTTTTGCACGTCTTTGTAGGTTTATTGGGTTTGATTTCCGGTGAGGACTCAAGGCTTTTATCTACATAT  
ACTTTTAATTCTCCATTGATTTCTCATTCTAAAATATTTGCACTTAACTATCCAGATATCAGTAATTGGCT  
GCTTCTGTTTTTCATGTGTAAGCTCCTATATATCCCTTTAGCAATCTATATGTTATTTGGATGGACACAGAT  
TAACATTTTCATTGATCATGTGTTTTATCATCTCTATGGTTCGTTATAACTTCTCAAACGTGCAGTGCATTTG  
GGAGCAAATTTGTAATAGGCCTTCCACTGGTAATTGCATTTCTGGTGTACAAATTCAAAGGAGGCATT  
TATCAATGTACGATACGATTGAAGGCTTTTTGCAAACACAAAACAATTTTCATGCCAATCAGATACAATTA  
CTCCAACATAAAGAGAATGACAAGAGGATTCAAAGAGAAATTAGGAGAGGGGGTTACGGAAGTGTGT  
ACAAAGGAAAGCTTCAAAGTAGAAGGGATGTAGCAGTGAAGATGTTGAGCAAGCCTAAAGCCGGTGG  
GCAAGATTTTCATGAATGAAGTAGCTACCATTGGAAGGATTCATCATGTCAACGTGGTTGGACTCGTGCG  
GTATTGCGTTGAGGGAACAAAGCTTGCTCTGTATACGACTTCATGCCAACGGATCACTTGATAAGTAC  
ATCAGCACGAGTCAAGAAGGAAGTCCCTCCGTTAAGTTGGCAGAGGAAGTATGACATTATTCTTGGAGTG  
GCTCGAGGAATTGGGTATTTGCATCGAGGCTGTGATGTACGAATTTGCATTTTGACATCAAACCACACA  
ACATTCTTTTGGATGAGAATTTTCATTCAAAGATTTCTGACTTTGGGCTTGCGAAATTATATCCAACAGAT  
AAGAGCATTGTGACTCTCACAGCTGCTCGTGGAACGATTGGATATGTTGCTCCAGAGTTGATCAGCAGA  
AGCATTGGAGCAATCTCGTACAAAGCTGATGTTTACAGCTTCGGAATGCTGCTAATGGAAATGTTGGAC  
TTGAAGAGAAATGAAGTTGCAAATGAAGAGAATTCCAGCCAATACTTTCTTATAATATTTACGATAAGT  
TCAACCAGGGGAAAGAGATTGTGGTGGATGAAGGAGCGAATGATGATGAAAAGAAGATGGCTAGAAA  
GCTGAGTTTGTGATTGATTATGGTGTATACAAACAAATCCGATTCAACGCCCTTCAATGAGTAAAGTGGTA  
GAAATGCTTGAAGGTGAAGTTGGAGTGCTAGAAGTACCTCCTCAGCCTCTTCAATCTCAACCAATTGTTT  
ATCAGATCATGGGAAGTTCTACAACATTTTCGTCTGATTCAATAGCTTTGTTAGATAATCCCGTTGAGG

>M6-PGSC0003DMG400020899 M6 RLK with WAX or WAX-EGF domain

TATAACTTCTCAAACGTGCAGTGCATTTGGGAGCAAATTTGTAATAGGCCTTCCACTGGTAATTGCATT  
TCTGGTGTACAAATTCAAAGGAGGCATTTATCAATGTACGATACGATTGAAGGCTTTTTGCAAACACAA  
AACAAATTTTCATGCCAATCAGATACAATTAATCAACATAAAGAGAATGACAAGAGGATTCAAAGAGAAA  
TTAGGAGAGGGGGTTACGGAAGTGTGTACAAAGGAAAGCTTCAAAGTAGAAGGGATGTAGCAGTGA

AGATGTTGAGCAAGCCTAAAGCCGGTGGGCAAGATTCATGAATGAAGTAGCTACCATTGGAAGGATT  
CATCATGTCAACGTGGTTGGACTCGTGCGGTATTGCGTTGAGGGAACAAAGCTTGCTCTTGATACGACT  
TCATGCCCAACGGATCACTTGATAAGTACATCAGCACGAGTCAAGAAGGAAGTCCTCCGTTAAGTTGGC  
AGAGGAAGTATGACATTATTCTTGGAGTGGCTCGAGGAATTGGGTATTTGCATCGAGGCTGTGATGTAC  
GAATTTTGCATTTTGCATCAAACCCACACAACATTCTTTTGGATGAGAATTCATTCCAAAGATTTCTGAC  
TTTGGGCTTGCGAAATTATATCCAACAGATAAGAGCATTGTGACTCTCACAGCTGCTCGTGGAACGATTG  
GATATGTTGCTCCAGAGTTGATCAGCAGAAGCATTGGAGCAATCTCGTACAAAGCTGATGTTTACAGCTT  
CGGAATGCTGCTAATGGAAATGTTGGACTTGAAGAGAAATGAAGTTGCAAATGAAGAGAATTCCAGCC  
AATACTTTCCTTATAATATTTACGATAAGTTCAACCAGGGGAAAGAGATTGTGGTGGATGAAGGAGCGA  
ATGATGATGAAAAGAAGATGGCTAGAAAGCTGAGTTTAGTTGCATTATGGTGTATACAAACAAATCCGA  
TTCAACGCCCTTCAATGAGTAAAGTGGTAGAAATGCTTGAAGGTGAAGTTGGAGTGCTAGAAGTACCTC  
CTCAGCCTCTTCAATCTCAACCAATTGTTTCATCAGATCATGGGAAGTTCTACAACATTTTCGTCTGATTCA  
ATAGCTTTGTTAGATAATCCCGTTGAGGTAGACATTTATGCTGATTGATTATAGTCGATGTAATGTTTATG  
TGAAATAAACATAGCCAACCCAATAATGTTTGGGACAAAGAATCGTGTGTTATTGTTGTACTAGTTATA  
TTATAGACATAATACATAAAAATGCC

>M6-PGSC0003DMG400025598 M6 RLK with WAX or WAX-EGF domain

TGATCGGCCTTCCGTTTGTAAATTGTATTTCTGGTGATCAAATTCAAAAGGAGGCATTTGTCCATGTATGAT  
GCGATTGAAGGCTTTTTGCAAACACAAAACAATTCATGCCAATCAGATATAATTACTCCACATAAAAA  
GAATGACCAGAGCATTCAAAGAGAAATTAGGTGAAGGAGGTTACAGCAGTGATACAAAGGAAAGCTT  
CAAAGTGGAAGAGATGTAGCAGTGAAGATGTTGAACAAGCCTAAAGCTGGTTGTCAAGACTTCATGAA  
TGAAGTGGCTACCATTGGAAGGATCCATCATGTCAATGTGGTCCGGGCTCGTGGGGTATTGTGTTGAGG  
GAACAATACGTGCTCTTGTATACGACTTCATGCCCAACGGATCACTCGATAAGTACATCAGCACCAGTCA  
AGAAGGAAGTCCTCTGTTAAGTTGGCAGAGGAAGTATGACATTATTCTTGGAGTGGCTCGAGGAATTG  
GATATTTGCATCGAGGCTGTGATGTACGAATTTTGCATTTTGCATCAAACCCACACAACATTCTTTTGGAT  
GAGAATTCATTCCAAAGATTTCTGACTTTGGGCTTGCAAATTATATACAACAGATAATAGCATTGTGA  
ACCTCACAGCTGCTCGTGGAACAATTGGATATGTAGCTCCAGAGTTGATCAGCAGAAGAATTGGAGCAA  
TCTCTTACAAAGCTGATGTTTACAGCTTTGGAATGCTGCTAATGGAAATGCTGGACTTGAATAGACATGA  
AGTTGCAAATGAAGAGAATTCCAGCCAATATTTTCTTATTATATTTACGATAAGTTCAACAAGGGGAAG  
GAGATTTTTGTGGATGAAGAAGCTATTGATGATGAAAAGAAGATGGCTACAAAGCTGAGTTTLAGTTGCA

TTATGGTGCATTCAAATGAATCCAATACAGCGCCCTTCAATGAGTAGAGTATTAGAAATGCTTGAAGGT  
GAAGTTGAAGTGCTAGAAGTACCTCCTCAGCCTCTTCAATCTCAACCGATTGTTTCATCAGATGATGGGAA  
GTTCTATGACATTTTCGTCTGATTCAATGGCTTTGTTAGAAAATTCTGCTGATAATTCCGTCAAAGTAGAC  
ATTTTTCTGATTGATTATAGTTGTGTATTGTTAATTTAAAATGACATATATGTGAGAAGGGCTTCACATT  
TTATGAAGGGTCGGGTCTGAGTTGGTCCGTCTCATTATTGTGTTACGCTGAACAAATACATATGGACA  
TAATTTAAAAGTCTATTTTCAATCTTACGACTTCATCACTCGATTTTGGGGCTTGGGATTATAGTTTGGG  
>M6-PGSC0003DMG400025668 M6 RLK with WAX or WAX-EGF domain

TCTCTTATATTTCTAATTCCAATAAATTCGTTTCGATAAACACAGGTATGGGAGTTGGTTTTATGTCCCTAG  
TAATTGGGACAACCTGGCTCTATTTCTGCATCAAGAAAAGAAAACCTCAGTAACTTCGCGAGAATTTCTT  
CCAACAAAATGGTGGTTTTGCTTATGAAACAACGAATGTCTTCTCACGAGGGTGGTGTGGAAGCAACCAA  
AATTTTCACAGCTGCGGAGCTGAAGAAGGCTACAAACAACATGCTAGTGATAGAATTCTTGGTCGTGG  
TGAAATGGCATTGTCTATAAAGGTATTCTACCTGATAACCGCATAGTTGCTATTAAGAAATCTAAGTTT  
ATGGACGAGGAACAGGTTGAACAGTTCATTAATGAGGTACTIONTACTTACTCAAGTTAACCATAGAAAT  
GTGGTGAGACTCTTTGGATGTTGTTTGGAAAGCTGAAGTTCCTTTACTTGTCTACGAATACATTTCTCATGG  
AACTCTTTACGAGCATATCCACAATCGAAATGGAGCACCTTGGTTATCTTGGGAAAATCGGCAAAGAGT  
TGCTAGCGAGACAGCAAGTGCACTTTCTTACCTTCATTCATCCGCTCAAATGCCTATAATTCATAGAGATG  
TCAAGTCTGCCAATTTATTGTTGGATGATGTTTACATCGCGAAAGTGGCAGATTTTGGTGCTTCAAGGTT  
AATCCCTGTTGATCAAACACATCTTGCTACAATGGTTCAAGGGACATTAGGATACCTAGATCCTGAATAT  
TTTCGCACAAGTCAATTGACCGAGAAAAGCGATGTTTATAGTTTTGGAGTAGTCTTGCCGAACCTATTGA  
CAGGGATGAAACCTATTTCCAAGGACAGAAATGAGGGGGAGAAGAATTTGGCAGAGTATTTGTTTTGT  
CTATAAGAAGGAATCAATTGTTTCAAATTCTTGATCGTAGAGTTGTAAGAGAAGGAAGCCTTGAGCAGC  
TCCAAAAGGTGGCTGAGCTAGTGAAGAGTTGTCTTAGTTTGCACGGAGAAGATAGGCCTACCATGAAA  
GAAGTAGCAAGTGAACCTGAAAATTTGAGAAAGTTCACCAAAAATAACCCCTGGGCTAATGGAAACGG  
ACATGAAGAGAACGGAGATGAATTATCAGATCTTTATACAATTCCAATCGACTCTAATACAGACATCGAC  
AATTTCTCTGGACAATATAGTTCGAATTCCAATACAAATAGCAGCAATTTTTCTGGACAATATAGTTTCA  
GTAGTACTTCTAACACAAATAGCCCATTGATCCACAACAGAAGGGCAATTTGATGATTGATAAAGATTAT  
GCGCTTTGATTTTTTTGATGTAATTTCTTGTGTTGTGATTCACTGATTTGTACTIONTACTTTCATGATTTTTGTTTACA  
TCGGA

>M6-PGSC0003DMG400026383 M6 RLK with WAX or WAX-EGF domain

ATGGAAGGCCTTTTCTCTTTTCGAATTCTAGCTTGCACAGTACTCTTCTTCATCATAATTCATCTTTCTCCTC  
TCTCTTCCGTCGAAAACAAGTTGTTTTCCAGCTGCGGCAAGTCCTTCAACTGCGCAAACATAACTGAAAT  
TACTTATCCTTTCTGGGGAAATGATCGACCGAAGGAATGCGGTTATCCTGGATTCGAGCTTCAATGTGAC  
GATCAGGAAAAGACTATAATACAGATTGCGAACATAAATTACCTTGTTCTGGATATTAATTTGGATGCTC  
AAATTATTACAGTTACTAGAAAAGATCTAGGTATAGATGGAATTTGTCAATTTAACTCAACTATAGATAA  
TTCCAATACATTGAGTATGCTTCGAGCTTAGTGAATTCACATTGATTACGCGTGCTCGCCTTGGATCG  
GATCGTTCAATTGTCCGATAAATGGAATGAATTATAAGAATAGTTTTACAATTGGAGGTGAAGAGGGAG  
CTGGGACATGTCATGCTAGTATAGTTGTACCAGGTGCGAAAGGAGTTACCGTCTGGAGGAATAATTCGAG  
ATTTGGGGGATTTGAAGCAGTTGCTGGAACAGGGGTTTGATGTGAAATGGAAAGTGGATACTAGTCAT  
TGTAAGGAATGTGAAAAGTTTGGGGGACGTTGTGGATTTGATGCCGGTGCTAATGAATTTAGGTGTTTG  
TGCCCTGATGATCAATCTTCTTCTTCTTCGTCGTCGTCGTCATCGTCCAATAATGCGTGCATCAATGG  
ACTTCCTTTCTCTGGAAGTAAAAGAGTAAACCGCTTTCATCCCTGGCTACACCGCCTGGTACGTTTTTCC  
GATTCCTTCTTAA

>M6-PGSC0003DMG400026384 M6 RLK with WAX or WAX-EGF domain

AATTTGTTGTTCTCTTCCAACTCCTTTCTCTGTCCCTTAAATCCTCATCTCCTTTCAGCTTAGCTCCTGAAT  
AAAGCTCTTTTGCCACCACTACCAGTAAGCGCCTCTCTTTCTAGGTGGTGCTAGTTCCCTTAATCAAACAG  
AAATGCATCCTTATTTTTGCTCTTCACTACCACAATCTTTATCTTGATCTATATACCGGGTCTTTCTGTC  
AAGATGACGAGCGATACAGGAGTTGTGGTGAGCCGTTTCAGTGCGGCAGCATGAATATAATTTACCCTT  
TTTGGGGAGGGAGAAAACCAGAGTATTGTGGTCATCCAAGTTTTGAGATCAAGTGCGAAAGTCGCATA  
CCCAAATTGCAATTGAATCAACAAGATACGAAGTGATAGATATCAACACCCCTAATCGAATTGTAACCC  
TGGCTCGGGATGATTTACTGAGTAGTATTTGTTTGGATAATCCCGAGAATGCCTCCTTTGATTTAAACT  
TTCAGCTATGTTTCGAGTGACCTGAATATTACTCTGTATTTCCGGCTGCACCGTCCGCCCTGGTTTGCAGTT  
ACCACCTTCGTCTCAAATAGGTTCAATTGCGATAGCAACATATTTGGTATATACACTCTGATCAACGTTT  
CATTGACCTTACTCTGGTAACATGCCAGGAAGAAATAATAGCTAGGGTCAATCAAACGAGTGCTGTGG  
CATTAGCCAGTCTACAGCTTCCGTGGAAGTTCTGAGAAGAGCCATTGCTGGCGGTTTTTTCAGTTAATTG  
GACGGCAGGTATTGATTCTAAGTGCCAACAATGCGACAGTTCAGGTGGAAGATGTGGATCCAATCCAG  
ATTCTGGAGACTTTGCTTGCCATTGTCTAAATGGTACTCATTCAAACGACTGCAACGACGGACAAAACCA  
AGCCGGCGGTAATCTTCTCTACTATTACTCATAATTTACTTCGTCCATTGTTTTCCAGATAAATACATGT  
CCGATCCAAACCATCATTCCAGTCCTTTCCCAAGAGATTTGAATTACATACGCTAACTTAGTAAAGATTCT



TTCGCAATCAGTGTAGTATCAAAAATCAGGATAACTTTGAAGGAAAAACCTAACCTTCTTAATTATTT  
GAAAAATATTTATTTTCGAACTAAATATAAAAACTAAAAACATTATATAATATGGACCAACGGAAGTACT  
TTTTGCATTGCTTACCTAGAATTAACCTCTCTATAAAATTTTGTACGGGTTTAATTTTGTCCAAATTCAT  
ATGAAACTCTGAATACTACAGCCTCTAGCCCTCTATCTACTTTGGTCCAGCCCCAATTCTTGAGCGTGTTA  
GTATAGCTCCTTTTTTCTTTTTTATATCAGCGTAAATAATTGTATATATTATATGCAAAGAATATTCGTA  
CACGAACTTCCTTATGTGAAATTTGAAATCTTTGAAAAATAAGATATGTTATTGCTACAACAAAATAAAA  
AACTCGGGACCTAATTTTAGACTTAGTACTGTGTCTGTGTTTCTGCCATTGTTGTATTGTTACTTCTCGTC  
GGCAATTCAACATTTGGCATTGTCAAAACACAAGAACTACTATTCTTAATCCGAGTAGAATAAGCCTCG  
GATTA AAAAATATTATAAATAATAGGAAAAGTACAATAATTCTCTAACTAACCAGAAAAAATACATATAT  
TTCATTGAACCTTTTTATTGACAAAGTAAACAAGGATACAGTTCTTTATTTGTAGTTCTTTTACTTTTAGTT  
AGTTCTGTGTTATAATTCAAACCTGGTTGGCGCTTGAATAAACGCGGGAACTGAAACGATTTTTTTAC  
TGTGAAATTATTGTATATACACGTTCTACTGCCTCTTTAAAAAACACAATTTGATTTTAGATAATTCTA  
TTCATTGATCAATGCATTAACATATATAAAAAAATAAAAAATTACAGTTGGTATTTTTTTTTCTTGTTT  
CTAGTGGAATTCACACTAAACCTTTTATGATTCAATTTTATTGAGGTTTGACCACACCAAGTTAGGTGCTA  
CTCCCCGATTTCATTTTACTTTAATTCATATCTACTTGACATAAATATTAAGACAGTTTTGGTTAAGAATA  
TTTTTATTGAATTAATTTTTATTAATAATATATTGAAACCTTAACTTTAATTATTGCTAACTAGTTTATGT  
AGTTATTTAATATTAAGATAGTAATATGGGTAAAATATAATTA AAAA ACTTAATTTATTA AAATGGACA  
AATAAAAATATCTGAAAATTAATTTATTA AAATGGATAAATAAAAATAGAAAGACCAAGTAAATGAA  
ACAAAGGGAGTAATACTCTTTTGGCCTTGGTTTATAAATTATATAGATCCTTAACATTCAATTTTTTGGCA  
TAATAAATAAATATCCTTTTTAACTAGACTTCATATATATGTCCTTCAATTTTTGATTTATACAAATTGTTGT  
CCACTATTCTATTTTTGGATGTTGTCCGTTATACTATTTTTGGAATATCTAACATTATCTATTCACTTTATGA  
AATCAATTGATAATTTTACAGTTAGTTCATAATTTACCCTTATCATTAAATAGTTATTTCTCTATTATATATT  
TTAAAATATTGTATTTATTATATTCAAAGATGATATAGTAACTTACCCTTCTATTTATAATAAATAGTTA  
TTTAAATTTATATAAAATTAACAAGCAGATATACGCATCTTATATCCCAATTCGTGTGAAATATCATGTA  
GATGCATATATCTACTTATTTTATTTTCATACAAAATTTAAATATACATTTTATGTATATCCAAAATTGAATGA  
TATAAATGTCATATTAGACCAAGTTAAAATGTATACTTAATGTCATATTAGACCAAGTTAAAATATATTAG  
ACCAAGTTAAAATGTTTCATTA AAAGTTAGGCGTCTTTCAAACCTCTTTCTTTTCATATTCAACGTGAGTA  
GTAATAATATTCAACTTTTCAAGTCAAATCCTTTTTGTCTCTCTCTTTCAAATGTAATCTCAGATTCTCACCATC  
TTCCAAATTCCTTTCAATAATAATATACAGATATGAATCTACAGACTACAAATAACTCTAGCTATGACTC

TCACTCACTCACTCATTCTCTCTTCGTATTCCAAATGACTCTCTCCTATCCTTCCACCACCACCAATGGCCG  
CGGCGGCGCCACCACCACAACACTCTCTTCTTCGCCACCTTTATTCTCACAACATCCTTCTCCTTCTCCTT  
CTCTGATGACAACGTCTCATTCCCAATTGTCATCTCACTTTCTCCTGTGGTTCCATCCGTAACATCACCTA  
CCCATTCAACGGCGGCGATCGCCCTAACTACTGTGGCCTCCCGGATTTCAAACCTCCGATGTGTTGACGAC  
AAACACACCGAGTTCACTCACCAATCACTTACTTACCGTGTTCTTTCTATTAATCAGTCATCAGAGACCAT  
GACCGTATCGAGAATCGACCTCTGGAAAAATCCTGCCCTTCGCAATTCATCAACACTACTTTTAATTCTA  
CTCGTTTCAACGTGACCGTAACGAAGACGATGAACTTTCGTTGAGCTACGGCTGCGATGTTTCTGCATT  
GGTTATCACGCCTCAGAATTTGTTCAACTGTAGTGTAGATGGTTTGAATTTACCGGCGCATTTTACTTAC  
TAGGTCCAATTCCAAGTGACCCTTTTCTGAATGTCATAACTTGTACAACATATGGTCACTGTTCCGATGTTT  
AGAACAGTGGGTAAAATGCTATATAGCAATGAGATTACTCTTGGGGAGGCATTGATGCAGGGGTTTAG  
TGTGAAATATGATACCCCTTATGATAGGCGCTGTTCTGAGTGCAAGAGTCTGGGTGGGAATTGCGGATT  
TATTGTGGGGTTGTCTCAGCTAATTTGTATTTGTGGAGAAATGCCTTGTACATTTCTTCGAGAACATTCTC  
ATGAAAGTTCCTCACAAGGTACTGACAACCTGAGAACTTTATCGTTAATTTTACTACTAATTAGGAGTTCT  
TATTATTAACATAGAAATCTACAGTTTGAATAGGGACTGAATGGATTTAGCTTAACAGTAACCCAGT  
TAGAGAATCGGTACATATAGGTGTGATTGTTCTAGTTGATGAATCCTGAGTTCATGGTCTAAGACATTG  
TTTGTCTACTCCGACATGATTACATTGCGGTTGATTGGTATATGTGTAGTGATGTATCCCGTGTAATCTT  
ACAAGTGTGGTCTAGGAAGGGTGGTGTGTGTGCAGTCTTCGCCTTACCTTGTGAAGATAGAGAGGTTGT  
TTCCAATTATAATTTCATACTTTTGCATTTATATTTGTTATGACCGTATGAGTAGTTGTTATCTTATAGCGC  
CTATTATATAGGTCTTTGATTCAAGGGAATACCTAAAAACACTATGCGACTTGCTAACACAAAAGTGAA  
CTTGAAACGAAGTGTAAATCCAATGTGATTTACTAGAATCTTCATGTTAGTTTTTAGATTTTCCATGGTATG  
TTCTCTCAGGTATCCCTAGGAATCTTGTTACAGTATGCTTCTTTCTTATAGTTTGTACTTTTCAGATCTAT  
TATTAGCGAATACACCCATTTTCTCTCGCCACATGAGTTTTGTTAGTTTCTCCTAATTACAGCCGGATATA  
CCTTATGTTTACCTGAGCATCAATTGTAGTTACCACTTAATTGACGACATTATGACTGTTTTGCAGATAAT  
CGAAAGAAAAATCAGACGCCACTTGCAGTAGGTATTGTCTTTGTTCTAATGTTATACGAGTACAACCTCAA  
TTGACACAGTCAATGCCTTGAGAAGATTGTAACTTTCTTCTTCGATTGCAGGCATTAGCGTGGGAGGT  
GCTGTACTTGCCGGCATTGGTGTGGGTGGCTAGTCTTCTTCTGCAGACAAAAGAGAAAGCAGATTGCA  
TCACAGGCTTCAGCTTCCCAAACCGAAAGGAAGGATCTTCCAATTTAAGTTCAAGCAATGGGCTGAGTT  
CCTCTTCTACTCCTTCTTCAACCACTTTACCAGAAGCATTCCCTCTTATCCCTCTTCAAATCTGAAGCTG  
ATTACGGGAGAGGAAGCTCCTACTTTGGGGCACATGTCTTCAGTTTTGCTGAACTTGAAGAAGCCACAA

ATAATTTTGATCCATCTAAAGAACTTGGGGATGGTGGTTTTGGTGTCTGTACTATGGTATGTGTATTCT  
CTTTCTTGCAATTATTACTTTGTGAGAGGGCTTCCTAACAAATTCCAAGTAATTTGTTATCAGGCAAGCT  
CCATGATGGTTCGCGTGGTTGCAGTCAAGCGCTTGTATGAGAACAATTTCAAGCGTGTGGAGCAGTTCAT  
GAATGAAGTAGAGATTTTAACTCGGCTCCGCCACAAGAACCTAGTGATGTTGTATGGGTGTACATCTAA  
ACGAAGCCGAGACTTACTGCTTGTATGAGTATATACCAAATGGGACAGTGGCAGATCATCTGCATGG  
TAAACGGGCCAAATCTGGCTTACTCTTGGCCTGTCCGAATGAACATAGCCATTGAGACTGCTGAAGCT  
CTGGCTTATCTCCACTCCTCAGTTATAATACACCGTGACGTCAAACCAACAACATTCTGTTAGACAATGA  
TTTCCATGTGAAAGTTGCTGATTTTGGGCTATCAAGACTGTTCCCAATTAATGTCACACATGTCTCTACTG  
CTCCACAGGGTACACCAGGCTACGTTGATCCTGAATACTACCAATGTTACCAGCTCACTGAAAAGAGTG  
ATGTCTATAGTTTTGGGGTGGTCTTGGTAGAGCTGATCTCATCATTAGAAGCTGTGGATACCAACAGGC  
ACCGCCATGATATTAATTTGTCTAATATGGCTGTCAACAAGATCCAAGGCCATTCAATTCATGAATTAGTT  
GATCCAAGTCTTGGATACTCAACAAACAGTTCGCTGAGGAGGATGACTACATTAGTTGCTGAGTTAGCTT  
TCCGATGTCTGCAACAAGATAGAGATCTGAGACCTTCAATGCAAGAAGTGCTGGAGACATTGAGAGGC  
ATCCAGAATGGAGAGTCGAAAGCACACAATGCTGAGGTAAGTGGATATTGTGGTAGATGATGTTGGGCT  
CCTAAAGGACTCCTTTTCTTCTCCGGATTGAGTTGCCACTGGCAAATGAGTTGACAGCTCCACACCACATT  
CTAGTGGATGAAATATGTTTTTCAGGTCGGTTGAATTCAATGCTAGATGGAGAAGCAACTACTATTTTGG  
CACTTGTGATCAGTGCATGTTTGGGCTAGTATCTCGCGTCTTCCATAGATAATTAATTTCTTATTTTGT  
TACATATAGTTATCTTGTATCGTCAATATTTTCTGTGGGAGATTATCTAAACTGCTTTTCGCATAAGGC  
AATGTATATAAATAGTGAATAGGGCTGCCAACATTCTAGTATACATATGCATCTTTTGTCTTTGTACATC  
AGGCATCAGGTTTTGTTTCTTACCGACCTTCTGTTACCTTAAAGTTCATTTACGCTGAGGACATGAAAAT  
CATATGCAACAACAATAATGCAGCAAAAATGCACTGCAGCAGAACATATTCTGAGGCTATTCGTAGCTT  
GGAGTGCTAGGTTTTGTCTAAGGAACATGCTCTGATATTAATTTGTAAAGAGAAAA

>M6-PGSC0003DMG400026388 M6 RLK with WAX or WAX-EGF domain

ATGATAAGTTCTTGGCACATATTGCAGGTAAAGTAAAGTTTGTGATTCCGACAGCTGTAATAGGTAAAG  
CATCCCTGTGTGTTGCTGTGTCATTCCCTCAATCTGCTTTTCTGGATTTGTACTTGATCTATTAACAATATC  
TATATGCAGTTGCCGAGTTTGTATCGCAGGGCTGGCCATAATATCAGTTCCAATCATCTATTGCCTCAG  
AAGTCGAGGGTCATCCTGTAAGTCACTGATTTGCTGGAAGATTGAATCACAAGATCACAAAATTGAAGA  
ATTTATGAGAAATTACGGATCTCATGCTCCAAAGATGTACAGCTATTCAGATCTAAAGAAAATAACATGC  
TCATTCAGCCATAAAAATAGGAAAGGGAGGATTTGGTCAAGTATACAAAGGAAAACCTGATGGTCTGT

GCAGTAGCTGTAAAGGTCCTGACAGAACTAATGGTGACGGAGAAGAATATATAAATGAGGTAGCCAG  
TATAAGTAGAACTTCCCATGTTAACATAGTAGGGCTTTTGGGATTTTGTATCAAAAGAATAGGAGAGCC  
TTAATCTATGAATATGTGTCCAATGGTTCCTGACTGGACAAATTTCTCAACAGTGGACCATCTAGCACAACTT  
GTTCCCTTGGAAATGGACAACATTGTACAGAATCGCAGTTGGGACTGCTCGAGGTTTGGAAATTTTACACC  
GAGGTTGTAACACAAGAATAGTGCACCTTTGACATAAAACCTCACAACTTCTCTTGGACGAGGATTTCTG  
CCCCAAAATATCTGACTTTGGCCTCTCTAGATTGTGCGAGAGAAAGGAGAGCATTCTATCAATGTTAGGT  
GCCAGGGGAAGTCTGGATACATTGCTCCAGAAGTGTCTCTAGAGCGTTTGGACACGTCTCTCACAAA  
TCAGATGTCTACAGCTACGGCATGCTTGTCTTGGAGATGGTTGGAGTGAGAAACAATGTTAACATGAGC  
CAAAGTGTGAAGTATACTTTCCAAATTGGATCTATGAACATCTCGAGCTGGGGAAGGATCTAAGTCTAC  
AAGGTATCATGAACGAAGAAGATGAAGAATTAGCAAAGAAGATGATTTTAGTGGGCTTGTGGTGCATT  
CAGACCAAGCCCTCAGATCGACCAGCAATAGAGAAGGCAGTTGAAATGCTGGAGGGAAGCCTTCACTC  
CCTACAAGTTCCACCAAATCCTGTCTTGTCTTCTCCAACAAGATCCATCCCAGAGTCATTTACATCAACATC  
CACAAACGACCTCGGAAAGGAGGTTCTGTTTCTGGAGCTAATATCACTTCCGAGTAAAAACAATTGATGC  
AAATTTATAAGTATATTCAAACGAAAGTGTGATTAATTTAGTGGTTATACTGTCCCGAGTTTGATCACCA  
CTGACTAAGTTTTGGAGCCATTAGTGTGTTGATAAAATTATTGCCAATTGGTAACAAGCAGAGAGAGAA  
CATAAATTTCTCATTTATGGTGGCCTCACCAAACATCCTAACTCATTGGTTAATCTAGCTGTGTCATACG  
ATGCTTGTGCCAACGTAAAATACCCAAGGCTGTCATCCAAATTATATATTGTGCTCTCCTGCTGTAAATGA  
GCAGCCACAACCTGACCACACTTGTCTTGGATAAATTACACTAACACCTATGTCGTAGTCTTGTGTTAAATG  
AAGGATAAAGCCATAGGTGCACTACACTCTGGATTGATGATCACTAAATAACAATGAATCCTCCTGGTAA  
CACCCGTCTCATGCTGCATCAGAACCATCTTTTACTGCAGAGTGGATTTGCCACTTCTCGATTAAGCTATA  
AAGAACTTAATTTTAAAAGTCAATGTGTGGTAAGAACAGGTCCTTGTAAATGCAATCTTCCATTGAGTGGT  
AACTATAAAACATTTCTGCAGTAGTTCAAACCTGGAATTGGCACAATATCACAAAGTTGCTGCACGAGAG  
GAGGAACAGTGTCTTAAATTCAGCAGTGCAATTAATGTTTACCCACTCCGTGCTGTATGGAACAAATCC  
CTGTAGTATGTTTATCTTCTCCCTCCTCAAATGTCTGTTTTATTGCTTTCAAGTGTAGAGGTGGGCCTACT  
TAATGCTTCGACAGATAATCCTGTAATACAGGTCATGGGACTTGAGGTCTTAGTCTGGAACCTAAATCA  
AAATAATCTTAAACCTTACCAGATCATGCAACAAGTATCAGTCCTTTGAAATATGTCTATTATGTAATGTT  
AGCAATGTTACTCTATCAATCCATTGCATCTGCAGTCCACCACCATCCTGCCACACAAGATACAGATAAG  
TGAACCTACATCATGGTTGAGAATTCGACTGTCCAGTTCTACAGCTATGGAAAAACCAATCAGAAGTATT  
AAAACCTAAACTGAAGC

>M6-PGSC0003DMG400027391 M6 RLK with WAX or WAX-EGF domain

ATGCTTCTTAACATGGCTTTACTCCACTTGATGATACTAATATGTAGCTTGTTTTAGTTTTGTCATTACAA  
TTCACAGCAAAATCCATTGCTAATGCTACTACCATAACCAAACCTGGCTGTGATAGCAAATGTGGGAGCT  
TAACTGTTCCATTTCTTTTGGTATTGGTAACGGAACAGGCTGCTCGATTGATCCTTCATTCGATATCACT  
TGCAACGTTTTCGTTCAATCCTCCAAAGGCTTTTCTTCTGGCAAAGATATTGAAGTGGTTGATTTACTAGA  
TGATCATATACTTGTTAAGAACAATGTTGGGAGCAGGTGTTATGATCAAGCAGGGGCGTTGATCAATGA  
TGACTCGATAAACTTTAGCTTGGGATCGACGTCTTCTCCTTCTCTGATCTCAATAGCTTGATGGTAATTG  
GCTGCGATGACTTAGCTCTCATTCAAGGCTATGAAGGGAGGAACTTTACTAGTGGATGCATTTCTCTGTG  
CACGAAAAAAGAGGATATAATTGATGGATATTGCTCGGGAAATTGGATGTTGCCAGACTTCAATCCCAAC  
AGGTTTGAAGAGTTTTGTGAGTCTAACAAGGAGTTTGAATAACCATACAAATGTGTCTTCTTTAACCCG  
TGTGGCTACGTGTTTCTTGGTGAGCCTGATAAGTTCATTTTCAAGAGCTCGGATTTGTCAAATTCGAGTTT  
CAGGAACAAGGTTATAGAGGAAGTCCCTGTGGTGATTGATTGGGTTATTGGCAATGGTAGTTGTACTGT  
GGCTAAGAAATCAGCAGATTATGCTTGTGGAGAAAATAGTGTTTGTGTAGATTCTAAGACAGGCCTCGG  
AGGTTATCGTTGCAGCTGCAAACCGGGATACCAGGGGAACCCTTATATCAGTCCAGGTTGCATAGGTAA  
GACTGAATTCATGATTTGAACTTTTTGTGTTCAAGTTTGAATTGTCCTAACTTGGTTAGGAATCTACGAT  
TTGTGCTTGTTTAGTAAGGTTTGTAGCCAAAGTACTGTGTTTCAATGATGTTATATGTGTTGGTTAGTGTT  
GCATTTGAGCCGAGAGTCTATCAGAAACAACCTCTTTACGTTCTGATGTTTGATTAATTGACAGATATAA  
ATGAATGCGAGAACGAGAATCCTTGTGATGGAATATGCAATAACTTTCTGGAGGCTACAGCTGCACCTT  
GTCCACATGGTCAGATTGGTGATGGCAAAAAGGACGGCCACGGTTGCATCCCTAAGAACTCTAAGTCAC  
CCATCCTTCAACTCTCACTCGGTACGTCTACTCTGTGTCCAGTCAAACACCTTCATATAAAATGAAAACGG  
TTAAGAGTATACTAAAGTTGCACTTTCATTGCAGGTTTATGCTTTGGCTTTCTGGCTTTGGTCATCAGTGC  
AACTTGGATATACTTAGGCATCAAAAGAAGACGACTCATAAGACTCAGGGAAACATTTTTTCAGAAAAA  
TGGTGGATTGATGCTCACGCAGAACTCCGATCAAATGAGGGTGGTATACAGTATGCAGCTAAGATATT  
TACAGCAGCAGAACTCGAGAAATCTACCAACAACCTATGCTGTTGATCGTATCCTAGGCCGAGGTGGTTA  
TGGTACTGTTTACAAAGGTTTCTTTCTGACAAACGTGTAGTTGCAATTA AAAAGTCTAGAACAATGGAC  
GTCAGCCAAATAGAATTGTTTCATCAATGAAGTGATCATTCTTTCAGAAGTCAATCATCGAAACGTGGTGA  
AACTCTTGGGGTGTGTTTGGAGTCTGAAGTGCCTCTACTAGTCTATGAATACATTTCCAAAGGTACTCT  
CTATTACCATATTCATGATGGTGGAGATCAAACGCGTTGGTTTTTCATGGGAAAATCGATTAAGAATAGCA  
TCTGAAGCTGCTGGTGCACCTCGCGTATCTTCATTCTGCAGCTTCTACACCTGTAATTCATTGAGATGTGAA

GTCTACAAACATTCTACTCGATGAGAATTACACTGCAAAAATATCAGATTTTGGGGCTTCTAGATTAGTG  
TCATTGGATCAAACCTCAAGTGACTACATTGGTTCAAGGAACTTTAGGTTACTTAGATCCTGAATACTTCCA  
CACAAGTCAATTGACAGAAAAGAGTGACGTTTATAGTTTTGGTGTGCGTTCTTGACAGAGCTCTTAACAGTG  
CGAATGCCACTAGATACTACAGCATCCGAACAAGAGAGAAATCTATCTGCATTTTTCGTTAGGTCTATTA  
AGGAAAATCGATTGTTTCAAGTACTTGAGACACGTGTGCTACGAGAAGGAAGTTTTGAGCAATGTCTTG  
GTGTTGCTGAGCTCGCGAAGAGATGTTTAAGGTTAACGAGTGATGAAAGGCCTACGATGAAAGAAGTA  
GCCATGGAGCTAGAAGGACTAAGGAAGTTCACAAAACATCCATGGTCTAAAACCTCAACAATGTCAAGAT  
GAGGAGAGTCTTGGACTAATAACAGAACAAACGTTGGACCTTTACGCGATCAATATGAACACGAACTTC  
ATGTCTAACGGAGAATTCTCCGGACAACAGAGCTTGGATAGTCGGATGATGTTACAAATTCATAGTCCC  
CGGTGA

>M6-PGSC0003DMG400027392 M6 RLK with WAX or WAX-EGF domain

AAAAATATTTACCACTTCACCATGATCCCTCGTTGCTAGATGAAAGAATGATTCAATCTTCCATCATTTC  
TAGCCAACCCCAACCACCCACACACACCCCTCTCAAATCCACCATTAAAAAATCTCAAATTTCTTCTTC  
CATTTGTACACACTCATCAAGATTCAATACAAATGTCTTCTTCAAATTTGAACCAAATGATGACATACTT  
GATTTTGTAAATCAAGAAAGCAAATGGACTAAAAGGCCTAGTAGACACAAACCTTGAAATTATCCCAAAT  
CAATGCATTCAACCAAAGAACATAGACTAGACATGTCCCAAATTGATAATCAAGAATCAATCCCAACAA  
TTGATTTATCAAATTTTGATGATTTAAATGTTGAAAAGTCAATTCAAGAAGCATCAAGCAAGTGGGGTTT  
CTTCAAATCATCAATCATGGGATCCCAATTGAAGTTCTTGAAGATTTGAAGGATGCTGCACACAAATTC  
TTTGAATTGCCAGCTGAAGAAAAAGTTAAGTATCATAAAGAAAACTTAGTCCTGGTGAATCTGTGTTTA  
TGTTTTGGAATGCTATTGGTGAGAAAGATGAGAAAGTTTTGGAGTGGAGGGATAGTATAAAACATGGT  
TGTAATCCACAAAATGATAGCAATCTTTGGCCTCCTCAAACAAGGTAACATTTTGGGGTTTTCTACTCTGT  
GTAATCAATAGGTCACGGGTTTTCAAGTAGTATTACTTTTTGGGAAGTGCTTGCATTTCTAAACTATCCAA  
CTATTTATCAAACATATTTAAAACTAACTAGATTAAGTGGTTGAATACAACCTTATCTCAAGATTTTATA  
ATGGTGTTTATAACTTAAATCAAAGTATATCGCATATGTAGGAGAAAAGTTATCATTTATACGATTACA  
TATCTAGTATAATCTCACAAGTAGAGTATGGAGAGGGTAGGATATACACAGATTTTACCTCTGTCTTAGC  
AGCATAAGGAGGTTGTTATTTTATAGACTCGAGAAACATTCTTAGTGAAATTCTTAACTTTGACATTATTA  
GAGAAAAATTTGACCTTCCATTAACTTTGAATGCTCGTGATAAAATTCCTGAGTTTGTTATTGATTTAT  
AGGAACCAAGTTTTGGAGTATCAAAGTGGGCTAAACCACTTGCTAAAAAATTGCTTGAGGTGCTATTG  
AAAGGTCTCAATGTCAGTGAAATTGACGAATCTTTAGAACCTCTCTTGATGGGAACCTATGTCTATAAACA

TCAACTATTATCCACCATGCCCAAATCCAAGTATCGCCATTGGTTTTCGTAGACACTGCGACATGGGCTG  
CATAACTTTGCTCCTCTAGGACGACACGGGAGGCCTATATATCCGAGGGACTAAAGGCAACTGGATTCA  
CGTAAATCCTATCAAAGGTGCCTTAGCGGTTAATATTGGTGACTCATTGCAGATCATGAGCAATGATCGA  
TACAAGAGTATCGAGCATTGTGTAGCAGTTGATTCGAGCAGGGCTCGAATATCTGTACCGCTATTAGTG  
AATCCTAGTTTTGATAGTGCATTGGTTCATTCCCACAAATGCTAAAAGATGGAGAAAAACCAGTGTACA  
AACATATTTTGTCTCTGATTATTGGGATCATTGCTTCATTAAGAGGCCTTCTGGTAAAGCATCACTAGAT  
TTTGCAAAAATTTGATGCTTTAATTTTCAAATTTCTTGTATGCTAATGTTTTTGTATTATAAATCTGTTATTG  
TAATGACGATAACTGTTATTTTATGTAACCTGCAATTTGGTGTGATCTTGCCGTTATTTATTTATTTTTCT  
TTATCTTGCCCTTCTTATTTAAGAACAATGTTGGGAGTAAGTGTATGATCAAGCAGGGGCGTTGATC  
AATGATGACTCAATAAACTTTAGCTTGGGATCGACGTCTTCTCCTTCTCTGATCTCAATAGTTTGATGGT  
ACTTGGCTGCGATGACTCAGCTCTCTATGAAGGGAGGAACCTTACTAGTGGATGCATTTCACTATGCGCG  
AAAAAAGAGGATATAATTGAAGGATATTGCTCAGGAATTGGATGTTGCCAGACTTCAATCCCAACAGGT  
TTGAAGAGTTTTGTGAGTCTAACAAGGAGTTTGAATAACCATACAAATGTGTCTTCTTTTAACCCTTGTG  
GCTACGTGTTTCTTGGTGAGCCTGATAAGTTCATTTTCAAGAGCTCGGATTTGTCAAATTCGAGTTTCAG  
GAACAAGGTTATAGAGGAAGTCCCTGTGGTGATTGATTGGGTTATTGGCAATGGTAGTTGTA CTGTGGC  
TAAGAAATCAGCAGATTATGCTTGTGGAGAAAATAGTGTGTTGTGTAGATTCTAAGACAGGCCTCGGAGG  
TTATCGTTGCAACTGCAAACCGGGATACCAGGGGAACCCTCATCAGTCCAGGTTGCATAGGTAAGACTG  
AATTCATGATTTGAACTTTTTGTGTTGAGTTTGA AATTGTCGTAACCTGGTTAGGAATCTACGATTTGTG  
CTTGTTAGTAAGGTTTGAGCCAAAGTTACTGTGTTGCAATGATGTTATATGTGTTGGTTAGTGTTCATT  
TGAGCCGAGGGTCTATCAGAAACAACCTCTTACGTTCTGATGTTTGATTAATTGACAGATATAAATGAA  
TGCGAGAACGAGAATCCTTGTGATGGGATATGCAATAACTTTCTGGAGGCTACAGCTGCACTTGTCCA  
CATGGTCAGATTGGTGATGGCAAAAAGGACAGCCACGGTTGCATCCCTAAGA ACTCTAAGTCACCCGTC  
CTTCAACTCTCACTCGGTACGTCTACTCTATGTCCAATCAAACACCTTCATATAAAATGAAAACGGTTAAG  
AGTATACTAAATTTGCACTTTCATTGCAGGTTTGTGCTTTGATTTTCTGGCTTTGGTCATCAGTGCAACTT  
GGATATACTTAGGCATCAAAGAAGACGACTCATAAGACTCAGGAAACGTTTTTTCAGAAAAATGGTGG  
ATTGATGCTCACGCAGAAACTCCGATCAAATGAGGGTGGTATACAGTATGCAGCTAAGATATTTACAGC  
AGCAGAACTCGAGAAATCCACCAACA ACTATGCTGTGGATCGTATCCTAGGCCGAGGTGGTTATGGTAC  
AGTTTACAAAGGTATCCTTGCGGACAAACGTGTAGTTGCAATTA AAAAGTCTAGAACAATGGACGTCAG  
CCAAATAGAATTGTTCAATGAAGTGATCATTCTTTCAGAAGTCAATCATCGAAACGTGGTGAAACTC

TTGGGGTGTTGTTTGGAGTCTGAAGTGCCTCTACTAGTCTATGAATACATTTCCAAAGGTACTCTATTA  
CCATATTCATGATGGTGAGATCAAACGCGTTGGTTTTTCATGGGAAAATCGATTAAGAATAGCATCTGAA  
GCTGCTGGTGCACTCGCGTAACTTCATTCTGCAGCTTCTACACCTGTAATTCATTGAGATGTGAAGTCTAC  
AAACATTCTACTCGATGAGAATTACTGCAAAAATATCAGATTTTGGGGCTTCTAGATTAGTGTCATTG  
GATCAAACCTCAAGTGACTACATTGGTTCAAGGAACTTTAGGTTACTTAGATCCTGAATACTTCCACACAA  
GTCAATTGACAGAAAAGAGTGACGTTTATAGTTTTGGTGTCGTTCTTGCAGAGCTCTTAACAGCGCGAAT  
GCCACTAGATACTACAGCATCCGAACAAGAGAGAAATCTATCTGCATTTTTTCGTTAGGTCTATTAAGGAA  
AACCGATTGTTTCAAGTACTTGAGACACGTGTGCTACGAGAAGGAAGTTTTGAGCAATGTCCAGGTGTT  
GCTGAGCTCGCGAAGAGATGTTTAAGGTTAACGAGTGATGAAAGGCCTACGATGAAAGAAGTAGCCAT  
GGAGCTAGAAGGACTAAGGAAGTTCACAAAACATCCATGGTCTAAAACCTCAACAATGTCAAGATGAGG  
AGAGTCTTGGACTAATAACAGAACAAACATTGGACCTTACGCGATTATTATGAACGCGAACATCATGTC  
TAACGGAGAATTCTCCGGACAACAGAGCTTGGATAGTCAGATGATGTTACAAATTCATAGTCCCCGGTG  
ATCGATTACTTGTGAATGGCCTGCATTTGTGTGTCCTAACTTGTATGTTACATGAAAATATGATTTCGTC  
ATCCGTCCAAGTTTGGCCTAGTCATTGGTTCTAGTATAATGATTCATCAAATCCGTCCAAGTTTGGCCTAG  
TCATTGGTTCGCTCTATTTACTAGCTCAACTCATTTCAACTCATTAAAAGACTAGGCTGATATGTTGCAGAA  
TGTAGTCCCCTTATTATTTTGTGTTTATAATTTAACTTGTATAAATTAGTGTATAATTCCACATTTCTTGA  
ATTTTGAGCATTGTCATTGTTGATTTTTTTTTGTATAATTTAACTTTTGACATTATCAAACACATTTATTTA  
GAGAGAGGCAAATACGTGCATTTTCTAGCAAATGAAGGACTAAACATTTGAATTTTTTAAGTGGTAG  
TGCTTTTAAAAGACTTTTTAAAGCTTTTTCTACTTAGTAAAAATATAATCCACATTTAATATATGTCTCC  
ATCAAATTTATAGCTATAAAAAGTTATACTATGAAAAGTAAATAAGAAAATTAATTATATCTATTTTTACT  
GATAATTTTTACGGATATAATATACAAAATTCATCATTTCATAACAACCGACAAAAAAGTTATGGATGTTAT  
CTACAAACCACAATTCATCTATGGACATCAAGAAGCCACCTCACCAATTTCAAATAGCTATTTTATGATA  
ATGATGTTTGATTAAATAAAAAATAAAAATTCAAATACTAGATAAAAAATCAATTCAAGAATTTTGTTT  
AGGTCATTAATATATCATCCACATACCCCATCCCTGCTCCCTTCAAATAATAGATTAATCATTTCGCTATTTG  
ATATTCATATTGAGTCCAAATAAAATTGAATTTGCACCGAAAAATCTTATATTGAAAAGTAAAAACAATCTC  
TAATAAGAGCAATATTGTATTTGGAAAAATTCGAATACAAGACATTTGATTAAAAATGAAAAATATTTAC  
CACTTCACCATAATCTCTCGTTGCTAGATGAAAGTATGATTCAATCTTCCATCATTTCATAGTCAGCCCCCT  
TTTGCCCCACCCTCACTTGAAATAATAGAAGAAGGAATAATTTTTTTTTATCATCGGAGGTTTGATATTC  
ATTTTGAGTCCAATGAAATTTGAATTCACACCAAAAAGTCTCATATTAAGAGGATGGTTTTTTAAACAAG



TCAATTTTGTATTTCAGGGAATTTGAATCTAAAACATCTGATTAAGACGAAAAAGTATTTACCACTTTATA  
ATAACCCATCGATGTTAAAGTAATGATTCAATCTTTCATCATTTCATAGTCCACTCCCCTTCTTCTCTCCC  
CCCATACACACCCCTCTCAAACCCACCGCTAAAAAACCCCCAAATTTCTTCTTGCATTAGTACACACTCA  
TCAAGATTCAACACAAATGCCTTCATCAAATTTGAACCAAATGATGACATACTTGATTTTGTAAATCAAGA  
AAACAAATGGACTAAAAGGCCTAGTAGACACAGGCCTTGAAAATATCCCAAATCAATGTATTCAACCAA  
AAGACCAAAGACTAGAAAAATCTCAAATTGACAATCAAGAATCAATCCCAACAATTGATTTATCAAATTT  
TGATGATTTAAGTGTGAAAAATCAATTCAAGATGCCGCAAGCAAGTGGGGTTTCTTCCAAATCATCAAT  
CATGGCATCCCAATTGAAGTTCTTGATGATTTAAAGGAAGCAGGGCACAATTTCTTAAATTGCCATCTG  
AAGAAAAAGTTAAGTATAACAAAGAGAGCTATAATGCTGGTGAATCTGTGTTGATGTTTTTGTAGTGTTA  
TTGGTGAGAAAGATGAAAAAGTTTTGGAGTGGAGGGATGGTATAAGACATGGTTGTAATCCACAAAAT  
GATAGCAATCTTTGGCCTCCTCAAACAAGGTAACTTTTTGGGGTTTTCTGCTCCATGTAATTTATAGGTCA  
CGAGTTTCCAAGTATTACTTTTTGCGAGTTTCATATCTTTTACTATAAGGTGTTTGTGTTTCTGAACTATCAC  
CAACTATTTATCAAACACATTCCAAAAGTACTGACTAGATCAAGTGTTTGAATACAGTGCGTCACAACCTAAT  
TTGCCCATAGAATTTTGTCCAAATGGCAAAGTAATTTTGTATGATAGTTCATATAGGAAAGGAAACTCGTG  
AAAACGTGATACTTTAGATGCGTTTTTTTTATCATTATCTCAAGACTTTTTTTATAACGGTGTATATATATCT  
TTTTTACAATTACATATCCACTATAATCTCACAAGTAGAGTATGGAGAGGGTAGGATATACATAAACTTT  
ACCTCTATCTTTGCTACATAAAGAAGTTGTTTTTATAGACTCGAAACATTCTTAGTAAAATTTATGACTTTG  
GCATTGAATCTTGAACATTATTAGCAAATTTCTTGACCTTGCCATTAATTTTGAACACTCTTGGTGAAAT  
TTCTGACTTTGATACTGTTTACAGGAATCAAGTCTTGAGTATCAAAGTGGGCTACACCACTTGCTAAA  
AAATTGCTTGAGGTGCTATTGAAAGGTCTCAATGTCAATGAAATTGATGAATCTTTAGAACCTCTCTTGA  
TGGGAACCTATGGCTATCAATATAAACTACTATCCACCTTGCCCAAATCCAAGTATCGCCATTGGTTTTCGT  
AGACTGCGACATGTCCTGTATAACTCTGCTCCTCCAGGACGACATGGGAGGCCTATATGTCCGAGGG  
ACTATAGGTGATAACTGGATTCACGTAATCCTATCAAAGGTGCCTTGGCGGTTAACATAGGTAACCTCAT  
TGCAGATCATGAGCAACGATTGATACAAGAGTATCGAGCATTGTGTAGCAGTTGATTCTAGCAGGGCTC  
GAATATCTGTACCGCTATTTGTGAATCCTAGCCCTGATAGTGTGATTGGTCCATTCCCACAAATACTCAA  
GATGGAGAAAAATTAGTGTACAAACATGTTTTGTTCTCCGATTATTGGGATCATTACTTCAGTAAGAGGC  
CCTCTGGTAATGCATCACTAGATTTTGTAAAATTTGATGTTTTAATTCACAAATTTCTTGTATGCAATG  
ACAAAAAGTATTTCTTATGTAACCGGTAGTTTGTGTGATTGTATTGTTATCTTATTTTGTCTAATGATTT  
CATAATCTTATTTTGCCTTCATCCTACATTTTGTATAAATAACTTTCCCCATATTTTTTTTTCAATGTAAT

AATGTCAGGGGTGGACCCACATGTTGAACCCACTCGGTTGGAAAATTT

>M6-PGSC0003DMG400030291 M6 RLK with WAX or WAX-EGF domain

GATTCATTCTATTTCCATGCATAGTTGTTGTTCTAATGACTGAGTTACAAAGAAGGCATTTGTCGATTTAT  
GATGCAATTGAAAATTTCTTCACGGTGAGAACAATTTGCGGCCATTAGATATTCCAACCTCCAACATAA  
GAAAGATGACTAGGAACTTCAAAGAGAACTAGGCCAAGGAGGTTATGGTTCAATATATAAAGGTAAG  
CTTCAAAGTGGACCTAATGTAGCAGTGAAGATATTGAGCAAGCCCAAAGCTGATGGGCAAGACTTCATC  
AACGAGGTTGCCACAATCGGGAGGATTCATCATGTTAACATAGTACAACCTTATTGGCTATTGTGCTGAG  
AGATGTAAGCGTGCTCTCGTGTATGACTTCATGCCTAACAGATCACTTGAAAAGTACATCACACCTCAAG  
ATGGAGGAGCTGATCAACTGTTAAGTTGGGACAGAAAGTTTGAAATTGCTCTTGGAGTTGCTCGAGGTA  
TTGAATACTTGCATCGAGGTTGTGACTTTCAGATTCTACATTTTGACATCAAGCCACACAACATACTTTTG  
GATGAGAATTTCAATCCAAAACCTATCTGATTTTGGTCTTGCAAATCATACCCGGCTGATAAGAGCATTG  
TACTCTAACACCAGCCAGGGGAACAATTGGTTATGCAGCTCCAGAGCTGATTAACAGAAGCATTGGTC  
CAATATATTATAAGGCATATGTCTATAGCTTATAAGGCATATGTCTATAGCTTTGGAATGTTACTCATTGA  
TATCGTAGGCTTGAAAACAACTCGGCAGCCAAAGAGGACATATCAAGCCAGTATTTCCCATATTGGAT  
TTATGATTAACCTCGACAAGGGAAAGGAGATTGAAGTACTAGACGAGACACATGAAGACGTAAAGAAGC  
TGACTTTAGTTGCTTTGTGGTGCATACAAATGAATCCACTCGATCGTCCCTCAATGACTAAAGTAGTGGA  
AATGCTTGAAGGAGAATTACAAGCACTGCAAATGCCTCCCAGGCCCTCTGAATTGCAGGAACCATGTTC  
GTTGGAATTCTATCTAATTAGTTCTTCAA

>M6-PGSC0003DMG400030292 M6 RLK with WAX or WAX-EGF domain

GATTCATTCTATTTCCATGCATAGTTGTTGTTCTAATGACTGAGTTACAAAGAAGGCATTTGTCGATTTAT  
GATGCAATTGAAAATTTCTTCACGGTGAGAACAATTTGCGGCCATTAGATATTCCAACCTCCAACATAA  
GAAAGATGACTAGGAACTTCAAAGAGAACTAGGCCAAGGAGGTTATGGTTCAATATATAAAGGTAAG  
CTTCAAAGTGGACCTAATGTAGCAGTGAAGATATTGAGCAAGCCCAAAGCTGATGGGCAAGACTTCATC  
AACGAGGTTGCCACAATCGGGAGGATTCATCATGTTAACATAGTACAACCTTATTGGCTATTGTGCTGAG  
AGATGTAAGCGTGCTCTCGTGTATGACTTCATGCCTAACAGATCACTTGAAAAGTACATCACACCTCAAG  
ATGGAGGAGCTGATCAACTGTTAAGTTGGGACAGAAAGTTTGAAATTGCTCTTGGAGTTGCTCGAGGTA  
TTGAATACTTGCATCGAGGTTGTGACTTTCAGATTCTACATTTTGACATCAAGCCACACAACATACTTTTG  
GATGAGAATTTCAATCCAAAACCTATCTGATTTTGGTCTTGCAAATCATACCCGGCTGATAAGAGCATTG  
TACTCTAACACCAGCCAGGGGAACAATTGGTTATGCAGCTCCAGAGCTGATTAACAGAAGCATTGGTC

CAATATATTATAAGGCATATGTCTATAGCTTATAAGGCATATGTCTATAGCTTTGGAATGTTACTCATTGA  
TATCGTAGGCTTGAAAACAACTCGGCAGCCAAAGAGGACATATCAAGCCAGTATTTCCCATATTGGAT  
TTATGATTAAGTTCGACAAGGGAAAGGAGATTGAAGTACTAGACGAGACACATGAAGACGTAAAGAAGC  
TGACTTTAGTTGCTTTGTGGTGCATACAAATGAATCCACTCGATCGTCCCTCAATGACTAAAGTAGTGGA  
AATGCTTGAAGGAGAATTACAAGCACTGCAAATGCCTCCCAGGCCCTCTGAATTGCAGGAACCATGTTC  
GTTGGAATTCTATCTAATTAGTTCTTCAATAAGCTCAATAGAGTCTGTGAAGTTGCTTGAGAGTTGTTCTG  
ATTCTGCAAAAATAGATGTAGTTGTTGCTTGACATCACATATTGTGTACGTAATTCGTGTTGTTCTGAATA  
AAATATCAAGTTCAT

>M6-PGSC0003DMG400030533 M6 RLK with WAX or WAX-EGF domain

TAGAGTCACAATTCACAAAGCTTCAGTTAGCTTTCCTCTCATTGCAGTTAGATTCAATATGGCTTTGGCTT  
CTTCTTTTATTTGTTTCCTTCTATCTCTACTTGTGATCTTAGTTCAGGCAAAGGGCAGAAATGTTTCAACT  
GTCCAAAGTCCTTTTCATGTGGAAATTTACTGACCTGAGCTTTCCTTTCTCTTTCCACACAACCCGATT  
GTGGAATGATGTCCATGTCTGGTTGTGATGCTAAACCATATCCAAGAATCCAAGTCTTGGAGGAG  
AATGGTACTATGCTTTAAAGATGCATAATTCATCAGTTTGGATTGGGGACACGAAGCTTCAAACAACCTT  
GACGCAACACAAGTGCCAGGCGTTTAACAAAAATTTCTCCCTTCCATACTCTCCTTTTATTTCTTTCAATAT  
GAATAATCTTATAAACATCTTCAAATGCATCAGTAGCAGTAATAATGTCCATAACATTACGCAGAAGAAG  
AACGATCATTGTTGGGTTATAATACGTACAGTGGCTGTGAAGGCTTTAGAATATACTACAAGCTTTCCG  
ATGAATACATAGGAGCAGACAATATTCCTACCAACTGTTCACTTGTGAGATTGCCGATTCAGTCAGGTGA  
TGGTGATTTGTTCAACAGTTAGGTCCTGAAATTCTAGTAGAATGGAACTGTCTGAGGAATGTAACGA  
ATGTCATTATGGTGGAGGTCAATGCCAGACTGATAAAACCAACAAATTTTCTTGTACAAAGGTAGGCA  
TCTCCAAAATGATCTATACTTTCAAGGCCAAGTTCATGCTTCTTAAGTCCCTTTCTTGTTCATGCCGCGTA  
AATAATATATTTGCTAGTATTGCCTCCTTCTGTAGATGCAAAAACACCTACAGGTAGTACCGATCAAAGA  
AAAGAAACAACCTGGAAGAAATGGAAGAAATATGGTGAGGCAGATTCTGGGAACAGGTAGTAAAATAT  
GTTTAATTGCTGCCATGTATTCTTATTACAGAATATTCATGCATATCATTTAAAATTTTCATTTTTGTATA  
AGCTCAAATCCTTTCTAGCAATAAAGGAACAGAAAGAAGAGACTTAAACACACAATGTATGGATGTG  
GAGTTAAGGGAGAATTCCTTCTCCATGCTATTTCTTTTTGCTTTTCAAAGAAATTGATTTCTAACTTCTC  
TTCCAGTCTTTGGCGGAGTAGGATCGGTGATGATAACTTCTTTAGTTGTATACATTATCTGGCGTTACAC  
GAAGAGGAAATTTAGTTCATCCCCTTCTTCTCGACAAGGAAATTGTCCGATATCCTTAATCATGATGTT  
GAGGGAGGCAGTATATACTTTGGTGTTTCAGTCTTCTTATTCAGAAGTGAAGAGGCCACAGATGATT

TCAATTCCTCTAGAGTACTTGGAGAAGGAGGTTATGGAAGTGTACTATGGTGAGAACTTCTTAACCT  
TGATATGCATCAACTGTTTCTTCTGTGGCTAATTCTTTCCATCGATGAACAGGAAAACCTTAAAGATGGA  
CGGGAGATTGCTGTAAAGCGCCTCTACGAGCACAACCTGCAAGCGAATGGAGCAGTTTGTGAATGAAAT  
TGATATCCTTACTAGACTAAGGCACAACAATCTTGTCACCCTCTATGGCTGCACTTCAAGACGAAGCCGT  
GAACTACTCCTTGTCTATGAATATATTCTAATGGTACTCTTGCTGATCACCTTCATGGTGACAGAGCAAA  
AGACGGATCACTTACCTGGCCAGTCCGCATGAACATTGCCGTAGAACTGCTAGTGCATTGGCTTACCTG  
CATGCTTCTGACGTAATACACTGCGATGTGAAGACTAATAACATACTCCTTGATCAAACTTTGGTGTTA  
AAGTTGCGGATTTTGGGATTTCAAGGCTCTCCCAAATGATGTCTCTCATATTTCAACTACACCCCGGGGT  
ACCCAGGCTATATTGATCCAAAGTATCACGAATGTTACCAGCTGACCATTAAAAGTGATGTCTATAGCT  
TCGGGGTGGTCCTTGTGAGCTCATTTCAATCAATGCCGGCAGTGGATATGAACAGGCATAGCCAAGAGA  
TCAATTTGGCCAACTATGCAATAAACAAGATCATAAAATCTGCAGTTAATGAGTTGATTGATCCATCCCT  
GGGGTTCGATTGAGATACCAAACTTGGGAAATGACTACTTCAGTGGCTGAGCTGGCTTTTCTGTGCTTG  
CAGACAGATAGGGACGTGAGGCCTACTATGCTTGAAGTTTTGGATACTCTAAAGGAGATTGAGACTAAT  
CTCAATGCCAATGAAGCTAAAATAGCAGTTGTTCCCTCTTTTCTGAATCAGAAGATATTTTCTTGTGAA  
GAAAGTTAAATCACTACCTTCTCAAATTCTGTGACTGATAAATGGACTACTTGCTCTGATATAACTTGTA  
CAAAATAGTTAAGATTTCTATACTCCGTTTCTTGTACTTTTATGTAAATTTTTGTAACTGCAAATGTA  
CTACTGTGAGAAGTTTCTTGAGCTATGACTATGAGT

>M6-PGSC0003DMG400030535 M6 RLK with WAX or WAX-EGF domain

ATGAGTTATCCTTTTTCAGAATTCAATAAACCATATTGTGGATTATCAAAGATTGATTGTAACAACACTTT  
TCAATATCCAAAAGTTGAGATTGAAGGTGTGACATACAATGCTTACAAGAAGTGGCTATGGGTTGATGG  
TATCGATCTTTCGGACTCGATTCTTGAAGGTTATTTGGATACTAAAAGTTGTAAATCCTTTGAAAGGAACT  
TATCTTTTCTAATACACCTTCTGTTTCATTTGGTGTATTCAACAATATCACTTTGTTCAAATGTATGAATG  
GTAGTACTAATGAGGAGATAGGTGGTTATTTTCGACGTTATGAGAAGTACTTGAATTGTGATGGATTTA  
ACTTGTACTATCATAAACCAAGAACAGATCATAGAACTATAGTATTCCAGTTGATGAGGATGATCTTCC  
TGCAAACCTGCTCGATTATTCGATTGCCTTTGAAGTATATCCAACTTCAGTACCAGTTCCATCTGATTTGTT  
TGAGTTGTTGAGTTCTAATTTACATTGGATTGGGAAGTGTCTAAAGATTGTTCTAAGTGTTTTTATAGA  
GAAGGACAATGTCAAAGTGACAGCAAAAATAACTTCTCTTGCTCCAAAGGTATTTGTTGCTTTCTTACT  
ATGTTAATGTGGATGAATGTGCATTTATTTCAATCTTATTGTGACTAATTGAACTGTCATTTGTGTGTTTT  
GCAGCAGCAAAAAAGAATTTGGGATTGATTCTAGGCTCAGGTACTTTACTATAGTCTATAATCAATAACT

TTTGGCATAACGTATAAATAAACACTCGAAACTTGATCTCAACCGACAAGTAAACATTCCAACCTTTGAGT  
ATATATGCACATCTAGACATCCAAACTTGTCTCCATTGTGGTAGCTGAACACTCCAACCTACAAAACGATC  
ATCTGAACACCTCCAAAATTTCTGTGTCACGTCAACATCGGGTGTCCATGAGGCATAGTGAGGATGAGTT  
TGGAGTGTTTAGTTGTTAGTTGAGACTAAGTTGAGGTGTCTAGATGTACACTCTCAAAGTCGGAGTGCTT  
ACTTGTTAGCTGAGGCCAATACCATGCCATAACTTTTATTTAACTCTATGTTGCTCGGACTCTTCAAAAA  
TGTTATCAGGTTTCATGGCGGATCCTCGAAAAGTAGTGAATTTTTGGAGGGTCTGACACGTGTACGAGAG  
CATTTTGGGAGAGTCTGAGCAACATTGAGTAAATGTAACCTGTTAATATCTCATCTGCTCTGCAGTGC  
TTGGTGGAATTTTTATAATAGCAATCAGCATAGTGATCAATATAATCTGCTGTTGCAAGAAGGGTAATAG  
AAGTTTTACTAATGTTCTTCCAAGAAGCATCCCTTCAGAGCCCTCAACACAAAGCTACGAATTAGACAGC  
GGGTTCTTTGGGGTCCCGTCTTCTTATGCTGAACTTCAACAAGCTACCATGAATTTGATTTCATCCAG  
AGAACTCGGAGATGGAGGATACGGAACAGTGTACTATGGTAAGAACTTTTGACAATGCAGATGTCTA  
GCCATCACTTTCTTCTTTTTCGTTGATTCTAATTCTTGTATGCTACAATACTAGGGAACTTCAGGATGGA  
AGAGAGGTAGCAGTAAAACGCCTCTACGACCACAATGCTAGGAGAAAGGAGCAGTTTGTAAGTGTAGAT  
CGAAATTCTAACAAGGTTAAGGCACAAAATCTTGTCACTCTTATGGTTGCACATCTAAACTCAGCGAT  
CAACTCTTACTTGTTTATGAGTATGTCCAAATGGAACGATTGCTGATCACTTACACGGTCATAAGGTGA  
AGGATGGTTCCTCACGTGGCCTATCCGCATGAAAATTGCTATTGAAGCTGCCACTGCTCTAGCATATCT  
GCATGCTTCTGATATAATCCACCGCGATGTGAAGAGTAACAACATACTACTTGATCAAACTTCTGTGTC  
AAAGTTGGAGATTTTGGACTTTCAAGACTTCATCCAACCTGATATTTCTCACATATCAACTGCACCTCAAGG  
TACCCCTGGATACGTCGATCCAAAGTACCACGAATGTTACCAGCTTACTGATAAAAGTGTATGTTTATAGC  
TTTGGGGTAGTCCTCGTTGAGCTGTTATCATCCATGCCTGCAGTAGACTTCAGTAGACGTAACGAAGAG  
ATCAACTTGTCTAACTATGCAATAAACAGGATTTTAAGGTGTGCATTCGATGAGTTGATAGACCCGTCCT  
TCGGTTTTAGTCTGATGCAGAAGTTAGGAGGATGACTACTTCAGTAGCCGAGATATCATTTCGATGCTT  
GCAACATGACAAGGACATGAGACCTACTATGGTTGAAGTACTAGAAACATTGCAAGAAATTCAGCATGG  
TGAGTTTAAACATGATAAGAAAATCGATTGTGACGGAAACACGAAAGAGAGTGTACAAGTCCCTCTTTC  
TCCTGAATCAGAAGTAGATGTATTATTGAAGAACTCAACAAGAAGTTTCCAACCTCACCAATTTAGTA  
ACTCAAGTGTGGATTAGTGACTCTAGCACAAGTACCACTAGTACATAA

>M6-PGSC0003DMG400030536 M6 RLK with WAX or WAX-EGF domain

TTTTAACTAACATTCTTGCTTATTCTTGTGTTTTTTAATCCAAAAGGGCTCATCATGGATATGTTCTCTT  
GTTTTTTCGTCTTCGTTTTGTTTCACTTTTGGTGCTTTGATTGAGCTCAAGGACAGAACACATCCTACCCAA

ACTGCACTAAAGAATTCCAGTGTGGGAACCTAAGAAATTTGAGTTTTCTTTCTACAAATCCACTGAACTT  
GATTGTGGATTGTCCAAAGTTTATTGTGAAGATACTGAAAATCCCATGATTGAATTAGAAGGGTGAAA  
TATCAAGCTCTTGAAAAATATGATGTTTTTATCAGACTTAAGGACACTAGTCTTGGAGAACTTTTGAAGA  
AGAACAGTTGTGAGATTTTTGATAAAAATATCTCGATCGCTATTTCTCCTTCAATAACATATAGATTTGAT  
CCCTTACTCACTTTGTTCAAATGCAACAGAAGCTAAAAGAGTACTCATGACGAATTTTTTCAACTCCAAAA  
GTTACAATGTCTGTGATAGTTTCATATTATACTATAACATCTCCATCCATTATTATCAAGTATATAATATTC  
CTAGTAACTGTTCAATTTATTAGTTGCCTTTGACATCAAATTCAGAAGCAAAAACAAATGGAAGTGGCTT  
ATTTCAATTTGTTAACTGATGAAGTTGTAGTAGGATGGACTGTGTCTGATGAGTGTAAATCAGTGTATTAT  
ACAGGAGGAAGGTGTCAAACAGATAATACTACTAACAACCTTTCTTTGTTCTAATGCCAATACCAACAATG  
GTAAAGAGAAGCTTTTTTCATGGTTCACATTAAGATATTAGTTCTTTTCTTTTCTTGGTTCATCTTACATT  
TTCATTTTTACTGTGATTGCAGCAGGTCATCATAAATATGCGAACTGATTGTTGCAGGTACCTATCTTTT  
TAACATTTTTGTCTGCAATTTTTGTTGTACATTACAAGATTTTAGCATTTAAAAGTTTATTTCTACAATGAGT  
ATGATATAACAAGAAGTAGTGTTCACCGCTTGAGCTTGTGATCTCCTTGGTCATATGAAGGAAACTC  
TTATTGTTGTATCAAGGCTACCCTTATCAATAACAAAGATATAAAGAATCTAAAATATTTAACTTTAGTCC  
ATGTTTAATGTTTCGTTGATTGGTTGTTGTTGTTTTTGTTCAGTTTCAGCATTATCGGTTCTGTTGTTGG  
ACTCTGTGCAATTGCCTGTGTTCTATGGTTTTACATGAGGAGGAGAAATGATTCTTCACAATTTATTTCAA  
GAAATACATCTGGTATTTCAATGATTCATCACGAGCTCGAGGAACGTTGTGAGTACCTAGGGATTCCGG  
TATTCTCCTATGAAGAACTTGAAGAAGCCACCAACAAATTCAGCTCTTCTAGAGAACTTGGTGATGGAG  
GTTATGGAAGTGTGACTATGGTAAGAAAACTTTTTTCATAGAAGTACTCCCTCCGTTTCAATTTGTTTTT  
CTGGTTTTGACTTGACACGGAGTTAAGAAAAGTAAAGAAGACTTGTGAATCTTGTGATGTAGAATGT  
ACCAAAACGTTCTTTGATCTTGTGGTCTTAAACATGTCATGTGAAAAGTTAGTATTAAAGAGCTGCCAAA  
AAAAGAAGATGCATTCTTTCTGACTAAAAGGAAAGTAAGACAAACAAATTGAAATGGAGGGAGTAAT  
AATCTAAAGACAATCCACAAAAGTCTTTTTTGTGTTTGTGTTTTGCTTTTTGAGGGGAAATGTACGTAGTAAGC  
ATCTTTTGATCTAACAGCTATTTCTGTATGTTTCGAAAATCAGGAAAGCTTAAAGATGGAAAAGAAGTTGC  
AGTTAAGAGCCTTTATGAGAACAATCACAGGCAAATGCAGCAATTTATCAATGAAATTGAAATTTCTCACT  
CGCCTTAGGCATCCAAATCTTGTTACCCTTTATGGATGTGCATCAAGACGTAGCCGTGAACTCTCCTTGT  
TTATGAGTACATTCTAATGGAACAATTGCTGATCACCTGAACGGACATAGAGCGAAGGATAAGTTACT  
AACATGGTCTATAAGGCTCAAATCGCCATTGAACTGCTAGCGCGTTGGCTTACCTTCATGCTTCTGAC  
ATCATAACCCGTGATGTCAAACAAATAACATTCTCCTGGACAATAAGTTTTGTGTCAAAGTAGCAGATT

TCGGGTTGTCAAATCCTTCCCTAATGATGTTACTCATATCTCAACCGCACCTCAGGGGACCCCGGGATA  
TGTTGATCCTCAGTATCATGAATGTTACCACCTTACTGATAAGAGTGATGTTTATAGCTTTGGGGTTGTCC  
TTGTTGAGCTCATATCATCAAAGCGAGCTGTAGATATGAACAGACATATGCATGAGATTAATTTGGCAA  
ACTACGCGATGAACAGGATACTAAAATCCGCATTTGATGAGGTGATTGATCCATCTCTTGGATTGAGAC  
AGATGCTGAAGTTAGGAGGATGACAACATCAGTGGCAGAAGCTCGCTTCCAGTGCTTGCAAGTTGTCAA  
GGACATGAGACCTACAATGGAAGAAGTACACGAAGCGTTGAAGCTTATCAAATACAGTGAATGGAAAA  
ATTATCAGAAAAAGGATATCAATAGCTGCAATACCAAGACAAGAACTGTAAAAGTTCATCGTCATCCTTC  
TGAAACGGATGATGCTGTGTTATTGAAGAAAAACATTCAGCTTACCTGATACTGTGATTGATACATGG  
GCTAGTAGTTCCACTACAAGTACTGGAGGGTGATATTCATAAACTCATTTCCTTCCCTTCATGCTAGA  
TACATATCATGATATCATTTTTATAGAGTTTTTTCAGCTTGTTTCAGCCTGTTTCATGAATATAGTAGATGAA  
GCTTTCCTAAAGTGTTAGTTATAGTCACATATGTATATGATTCCCCTTAGACTATGTTCCCTCGGATTCTCC  
TAAAATGTTGCTGCACGTGTGTCTGATCCTCCAAAATGCACTACTTCTAGAGGATCCGCACACACTTGT  
GAGCATTTTTGAAAATTCTCTATGGATTATCCTGGCTTTAAAATGTCTTCGCTACTTTTGGTGAATTATA  
AC

>M6-PGSC0003DMG400030578 M6 RLK with WAX or WAX-EGF domain

ATGTACAAATGGCTGTGAAGGCTTTAACATATACTACAAGCTTCCGAAGATGTTGATGAAAACATAGG  
AGCAGACAATCTTCTACCAACTGTTTACTTATCAGATTGCCAATTCATTCAAGTCGTGGTGATTTGTTAA  
ACCTGTTAGGTCCCGAAATTCTTGTAAGTGGAACTGTCTGATGAATGTGGCGAATGCCATTATGGTG  
GAGGTCGATGCCAGACTGATAAAACCAACAAATTTTCTTGTCACAAAGGTAGACATCTCCAAAATAATCT  
ATACTTTATAGGTCAAGTTCATGCTTCTTAAGTCCCTTCTTGTTTCATGCCGCATAGATAATATATTTTCGT  
ATTATTGCCCCCTTCTGTAGATGCATAAACACCTACAAGTAGTACTGATCAAAGAAAAGAAACAACCTTGA  
AGAAATGGAAGAAACATGGTGGAGCTGATTCTAGTCACAGGTACTAGAATATATTTAATTGCTTCCATG  
TTATTCTTATTACAGAATTTTCATGCATAACATTTGAATTCTCATCATTTTGTATAAGCTCAAAAACCTTCT  
CTAGTGATAAAGAAACAAAACAAGAGAATTAATAGTTTTCGGTACACAAAATGTATGGATGTGGAAT  
TGAGGGAAAAAATTTCTCTGATGGGGCATGATTTCAATTTTCCCACTGGTGCAAGTTTATCTATTGTTG  
GACTGTTGGCTTACTACTCTTTGCTTCAGAGAAAAAATTTGTGGTACAAACACCTCAGGTTTTGGGA  
ATCTAATGCTGAGGATCACCAAAAAGTTGAAGAATTCTTAAAGAACTATGGATCATATGCTCCAAACAG  
ATACAATTATACAGACATCAAAGAATCACTGGTCACTTCAGAAGCAAAGTCAAGGAGGATTTGG  
TAATGTGTATAGAGAAAGTTTGAAGTAATGGGAGTGAAGTAGCAGTAAAGGTCCTGAATGAACTAAAAG

GCAGTGGTGAAGATTTTATTAACGAAGTGGCAAGTATTAGCAGAACATCACATGTTAACATTGTGAGCC  
TTGTGGGATTTTGTGTTTGAAGGTCACAAAAGAGCTCTTGTATATGAGTTCATGCCAAATGGATCTCTTGA  
AAAGTTTATCTATGAGGAAAGATCCGACAGTGTTCGCCAATTAGGTTGGCCAATATTGTACAAAATCACA  
CTAGGCATTGCTCGAGGATTGGAGTACTTGCACCGTGGTTGTAATACTCGGATTTTGCATTTTGATATAA  
AGCCTCATAATATCCTTCTTGATGAAGATTTTTGTCCTAAGATCTCAGACTTTGGTCTTGCCAAACTGTGC  
ATGAAAAAGTAGAGTATCGTGTCAATGTTAGGTCCACGAGGGACTATCGGTTATATTGCTCCAGAAATT  
GTTTATAGAACTTGGGAGGTGTCTCTACAAGTCTGATGTCTATAGCTATGGAATGATGGTCCTAGAG  
ATGGTTTGAGGAAGAAAAAATGTTGATGAAGGAGTTGATCGCACGAGTGAAATCTACTTCCACATTGG  
CTTTATCAACGACTTGAAGTACTAGACGAAGAGCTTCAACTAATCGGGATAATAAATGAAGAGGAGAAAGAA  
TGTGAAAGAAAGATGGTGTGATGGTGTGAGTTTATGGTGCATACAGACTGATCCCTCAAATCGACCATCCATG  
AACAAGATTGTGGAAATGTTTGAAGGGAACCTAGACTCTTTGCAAATGCCTCCCAAGCCTTACCTATATT  
CTCCGTCAAGAACCGAGTAGATTCATCAGTAGTAGAACTGACCTAG

>M6-PGSC0003DMG400030579 M6 RLK with WAX or WAX-EGF domain

ATGGCTGCTGCCTGTTTTCTGCTATGTTCTTTATGTTTCATCTTTTTATCTTCAACTTAGTTAAAGTTGAG  
AGTAAATTATCTTGTCCAAAAGAGTTCAATTGTGGAAGACTTGGTACCATGAGTTATCCTTTTTCAGAATT  
CAACAAACCATATTGTGGATTATCCAAGATTGATTGTAACAACACTTTTCAATATCCAAAAGTTGAGATT  
GAAGGAGTGACATACAATGCTTACAAGAAGTGGCTATGGGTTAATGGTATCGATCTTTCGGACTCGATT  
CTTGAAAGTTATTTAGCTAATAGAAGTTGCAAATCTTTGAAAGGAAGTTATCTTTCCTGATACACCTTC  
TATTTCAATTTGGTGTATTCGACAATATCACTTTGTTCAAATGTATGAATGGTAGTACTAATGAGGAGATA  
GGTGGTTATTTTCGACGTTATGAGAAGTACTTGAATTGTGATGGATTTAACTTATACTACCATAAACCAA  
GAACAGATCATAGAACTATAGTATTCAGTTGATGATGATGATCTTCTGCAAATTGCTCGATTATTCG  
ATTGCCTTTAAAGTATATTTACCTTCAGTACCAGTTCCTCATGATTTGTTGAGTTGTTGAGTTCTAATTT  
CACATTGGATTGGGAAGTTTCTAAAGATTGTTCTAAGTGTATCCATACAGAAGGGCAATGCCAAAGTGA  
CAGCAAAAATGACTTCTTCTGCTCAAAGCCAAAGGTAATGCATAAATGATGCTTTGTCAGTTGCTTGT  
ATTGGTTGGTTCATTCATTTCAAGATGTTTAATATGTCAATGTGAATTGAAGTAAAAATTGCTTTTACTCT  
TATTGTGACTATTATTAATCATTCAATTTCTTGTCTTGCAGCAGCTAAAAGATATTTGGGACTGATTCTA  
GGCATAGGTACATGTCTAACTTTTATCTGTAATTAGACTTGATCAAATAAGAATTATTTTACTATATATG  
TTTTGCAAATGTTGTAATTGTTGTGTTGCCTCAAACCAGGTTCAATTTGCAGTTTTCACTTGCATCGGAAT  
TGTGAATTTGCTCTTCTGCTTCAGAGAAAAGATTTTGTGGTACAAGTGCCTCAGGTTTTGGGAATCTAAA



GCTGAGGATCACCGAAATATTGAAGCATTCTGAAGAACTCTGGGTCATATGCTCCAAAAGATAACAAC  
TATACAGACATCAAACGAATCACCAGTCACTTCAAATCAAAGTCCAAAGGAGGATTTGGTAATGTA  
TACAGAGGAAGTTTGCCTGACGGGAGTCAAGTGGCAGTCAAGGTCCTGAATGAACTAAATGGCAGTGG  
TGAAGATTTTATTAATGAGGTAGCAAGTAGTAGCAGGACATCACATGTTAACATTGTGAGACTTGTGGG  
ATTTTGTGTTTGGAGGTCACAAAAGAGCTCTTATTTATGAATTCATGCCAAATGGATCTCTGAAAAGTTTA  
TCTATGAGGAAAGATCTGACGGAGTTCGCCAATTAGGCTGGCCAATATTAATGAAATCTCACTAGGCA  
TCGCTCGAGGATTGGAGTACTTGCACCGTGGTTGTAACACTAGAAATTTGCATTTTGGATATAAAGCCTCA  
TAATATCCTACTGGATGAGGATTTTTGTCCAAAGCTCTCAGACTTTGGTCTTGCCAAACTATGCATAAAAA  
AGGAGAGTATCGTGTCAATGTTAGGCCACGAGGTACAATAGGCTATATTGCTCCGGAAGTTGTTTGCA  
GAACTTGGGAGGTGTCTCTCACAAGTCTGACGTCTATAGCTATGGAATGATGGTCTAGAGATGGTTG  
GAGGAAGAAAAATGTTGATGTTGGAGTTGATCGTACGAGTGAATCTACTTTCCACATTGGCTCTATC  
GACGAATTGAACTAGACGAAGAGCTTCAACTAATCGGGATAATGAATGAAGGGGAGAACGAATATGCA  
AGAAAGATGGTGATAGCAAGTTTGTGGTGCATACAGACTGATCCGGCAAATCGGCCATCGATGAGCAA  
GGTTGTGGAAATGTTAGAAGGGAAACTAGACTCTTGCAAATGCCTCCCAAGCCTTATCTATATTCTCCC  
TCAAGACCAGAGGTAGATTCATCAATAATAGAAGTGAACAACAACAACATACCCAGTATAGTCCAC  
AAGTGGGGTGTGACTTCATTTCTTAG

>M6-PGSC0003DMG400030581 M6 RLK with WAX or WAX-EGF domain

TTTCTGTTTGTATTGTTGAAGTTTAGAGTTAGACCAATGACTTTAGCCTCCTTTTCTGCTATGTTCTCTA  
TGTTTCATCGGCTTATCTTCAACTTAGTTCAATTAGAGAGTAAATCTTGCCAAAAGAGTTTCGTTGTGGA  
AGAATTGGAACCATAAGTTATCTTTCCACCTCATGTTCTATTTTGGAGTAGACAACAATATTACTTTGTA  
CATTCAAATGCACAAATAACAGTACGCGGATTGATAGTTATTTTCAAAGTTATAAGAATACTCGAGTTG  
TGATGACATCAGCTTATAGTGCATAAACCAAGAACAGATCAAAGACATAGTATTCCAGCTAGAGATCTT  
CCTGCAAATTCATTATTTTCTTCAGAACCAAATTTTACTGATTTGTTTGTATCTATTGACTCCTAGTTTCAC  
ATTAGATTGGGAATTGTCATTAATTATTCCAGCTGTCTTCATAGAGAAGGGCGATACCAAAGTGACATC  
GAAAACAACCTCTTTTGTCCAAAGGTATCGGATAGAAGAAGCTTGTCAGTTGCTTGTGTATGTCTGGTT  
TCATTTTTGGAAAAGATTTAGATGTGTGTTGGTTGGTTCAATCCAAGATGTTTAATATGTCAACGTGAAC  
GGAAGTGAATTGCTTCACTCTTATTGTGACTAATTAATCTTTCATTTCTGTGTATTTGCAGAAGCAAAA  
GAAATTTGGGACTGATACTAGGCACAGGTACATGTCTGTTATCTGTAATTAGACTTGACAAAATCTCCT  
ATTGCCTTGCAAATGTTGTAATTGTTGTGTTGCCTCAAACCAGGCTCTTCCGGTGCATGACTTTCTTT

TTCCCCCACATTTGCAGTTTTCTTGCATCGGAGTCGTGATTTTGCTCTTCTGCTTGAGAAAAAGATTT  
TCTGGCACAAAAATCTCAGGTTTTGGGAATCTATAGCTGAGGATCACCGAAATATTGAAGCATTCTGAA  
GAACTCTGGGTCATATGCTCCAAAAAGATACAACACTATACAGACATCAAACGAATCACCAGTCACTTTAAA  
AACAACTAGGCCAAGGAGGATTTGGTAATGTATACAGAGGAAGTTTGCCTAACGGGAGTCAAGTGGC  
AGTGAAGGTCCTGAATGAACTAAAAGGCAGTGGTGAAGATTTTATTAAATGAGGTAACAAGTATTAGCA  
GGACATCACATATTAACATTGTGAGGCTTGTGGGATTTTGTGTTTGGAGGTCACAAAAGAGCTCTTATTTA  
TGAATTCATGCCAAATGGATCTCTTGAAAAGTTTATCTATGATGAAAGATCTGACGGAGTTCGCCAATTA  
GGCTGGCCAATATTATATGAAATCTCACTAGGCATTGCTCGAGGATTGGAGTACTTGCACCGTGGTTGTA  
ACACTCGGATTTTGCATTTTGATATAAAGCCTCATAATATCCTACTAGATGAGGATTTTGTCCAAAGATC  
TCCGACTTTGGTCTTGCCAACTATGTATAAAAAAGGAGAGTATCGTGTCAATGTTAGGTCCACGAGGT  
ACTATAGGCTATATTGCTCCAGAAGTTGTTTGCAGAACTTGGGAGGTGTCTCTCACAAGTCTGACGTCT  
ATAGCTATGGAATGATGGTCTAGAGATGGTTGGAGGAAGAAAGAATGTTGATGTTGGAGTTGATCGT  
ACGAGTGAAATCTACTTTCCACATTGGCTCTATCGACGAATTGAACTAGACGAAGAGCTTCAACTAATCG  
GGATAATGAATGAAGAGGAGAATGAATGTGCAAGAAAGATGGTGATAGCGAGTTTATGTTGTATACAG  
ACTGATCCCGCAAATCGACCATCGATGAGCAAGGTTGTGGAAATGTTAGAAGGGAACTAGACTCTTTG  
CAAATGCCTCCCAAGCCTTATCTATATTCTCCCTCAAGATCAGAGGTAGATTCATCAATAATAGAAGTAC  
ATCAACAACAACAACAACGTATCCAGTATAGTCCACAAGTGGGGTGTGACTTCATTTCTTAG

>M6-PGSC0003DMG400030704 M6 RLK with WAX or WAX-EGF domain

AATCTACCAAACGACCCCTTAGTGTGTTATAGGCACCTTTTGTGTTAATATCACAAGATCCAAATGTATTTT  
TTATGTTTTTAAATTCGTGCAAAATCAAACCTAAGACATATAAAATGAAACAAGAGAGTAACAATATAA  
CAATATCCCACTGTGCCCTTTATTTAACTTGTTTTTAGCATGTAACATGTCTTATTTTCTAAGTTACTAAT  
CTCAGTTTTTATGATGATTTCTTGTTAATTTCCACAGACATTGATGAGTGTGCAAGTCCAAAAAGGAATC  
GTTGTCCCAACAATACTCGCTGTGTTAATACTCCTGGCACTTACCGTTGTGACTCAAATAATGTGAGACAT  
ATGCTAGCTAAACAACCTCCATCGGTATTGTATAACTCTCTTCTTTGTCTTCTTTTTCTCCTCTTGTTCT  
TTGTTAGATTAACCTAAGCTTTCTATAGATTTTTATTTGAGACAAATTAATCCTTTGAACTGTCCCAACAA  
TGATTCATAATCCTATTCATGTTTATTCTAGCTAACTGCTCTTTAGAAAATTAGAAGCTCAACTTAATATAT  
GCTTTAAAATTACAAAGGGGCCTGGATAAGCATTTAAAGCTCTTTCTTAAATTCTCAAATGAATTTAT  
GCTTGTTTTAGATGAAATTGGTTTGTCTCACAAGCAGGTATTGGAGCAGCAATTAATTTTGTGATCCTGGT  
AGCAGTTTGTCTTTGGCTACGCAAATGGCTCCGGAAGAGGGAAAGAAAACAAGCAAAGCAAAGTATT

TCAAGAGGAATGGTGGATTGCTTTTGCGACAACGTATTTCTTAATTGGAGAAAGTAGTGGTGGCTCTTT  
GCCAAAGCTCTTTTTGAAAGAGGAGTTGGAGAAAGCAACAGACAATTTCAATGAAATTCGAATCCTGG  
TAAAGGAGGGGCTGGGACTGTTTACAAAGGAATGTTATCAGATGGGAGCATTGTAGCTGTGAAGAAGT  
CCAATGCAGTGGATAAAGATCAAATTGAACAGTTTATAAATGAGATACTCATTCTCTCCCAAATAAATCA  
CAGACACATTGTCAAGGTACTGTTGATTTTTGTACTAGGCTCCTGCTACCATTTTATTATGAATGGAAGAA  
GAGAGTAACACAATTTGACGATAGAGAAATTTATAATGCCTAAAGAGGATTGAAGAGAGAACTTATAAT  
ATTAGAAAGACTCCTATACTCTTACAATATAACACACTAGACTTACACACACGCGCAGTCGCACACACAG  
AGCTGCTACATCAACTAGTGCTCCTATTCACTTCAACCATAATAAACGAACAGTTTAGGATAACTCATTAG  
TCACTCATGAACCAAAGATAACTCAAATTACAATTGAACCTAGCACTTGATCACACTTTTAACATTTAAG  
TTTACTGTTTACAACAGGTACTIONTGGTTGTTGCTTAGAACTCAAGTCCCATTATTAGTGTATGAGTACATC  
TCGAATGGAACCTTGTCATCCCATATTCATGGAAAGCTCAGTCACAGTTCTAACCCACTGTCTCAAAGTC  
TGATTTGGATGATCAGATTCTTCCGCACCCAGCAATAATATTATCGTGGGATCATCGGGTGCGAATTGCT  
GCAGAAATAGCAGGGGCACTATCTTACATGCACTCATGTGCTTCTACTCCCATTCTTCACAGAGATATAA  
AATCAAGCAACATATTACTAGACGATAATTTTAGAGCAGTGGTTTCTGATTTTGGACTATCGAGATTGTT  
GTCTGTTGACAAGACTCATTTAACAACAATGGTAGGGGGTACATTTGGTTACATAGATCCAGAATACTTC  
CGCTCAGGTCAACTTACAGACAAATGTGATGTCTATGCCTTCGGTGTAAATTCTTGCAGAGCTTCTAACA  
GTCAAAGAGTTGTCACCTTAACCAACCAGAAGATCCAGGTTTGGCTTTCCGTTTCACATTAGCATTGAA  
AGAAAATCGTATAATTGAGATTGTAGACCCTGAAATTGTAAGAAGTTGAGGATGAACATGTGATTCC  
TGCTGTGGCCAAACTTGCCAAGAGATGCTTAAATTTAATGCAAGGAGAAGGCCATCCATGAAGGAGGT  
GGCAGCTGAACTTGAACATCAAGGAAAAATGAGGCAAGATATGCCTCATAATGAGAGTTTTCAAGATAA  
CATTTACCAAAAAGTGAAAGTTCATGTAGTCATACTTCTGATTGTACCGAAGAAGATTATCAGAACTCA  
GTGTCTCACAA

>M6-PGSC0003DMG400030705 M6 RLK with WAX or WAX-EGF domain

ATGTGGTCATTTTTATTCTTCTGATGGGGCTTCTTTCTAAAGAAACAACACAAGTTTCAGCTATAAGAAT  
ATGGTCATCATCAGCAATATTATCTTACAAAGGCCTGGCTGCCAGAAAGATGTGGCAATGTAACCATT  
CCTTATCCATTTGGAATAGGAAAAGAGTGTTACTTCAATGAAGAATTTGAAGTGAGCTGCAATAACAAC  
ACTGTTTTTAGTCTTGGTACTGGTCATCCTGTTCAACACATATCAATGGACTCCATCACTGTTGATATTACT  
TTCAGTTCAAAGCACTACAACAAATCATCTGGAAAGAACATCTACGGTGATGAAATTCTTCAATCAACCA  
GGAGCGAGCATTTCAAGTATTTCTAACAAGAACAAAATAGTAGCCATTGGGTGTGATATTTATGCTTATGT

CAAAGATTTAGACTGGTAGTGGAGGCAGCATTGTAAGTGGATGCGCTTCTTTCTGTGGCAACTCCACT  
TATAATGTTTCATCCTCTTTAGCTTCATCATCTTATTGCACTGGGAATAACGGTTGTTGTCAGTCCGAATTT  
TCAAAAATACCAAGAGAATTCAGTGTGTCCATACAAACAATGAACACGGCGGAAACATCTCGGACATCT  
AGAGATTGCACCTATTTCTTAGTTGTGGAAAAGGGCAGCTCTGAGTCCGACTTCACTCAATTACTTGGTA  
AGTGCAAAGAATATGATGATTATGAAGAAAGGGTGGTGCTGGACTGGGTAATTGGCAATGTTAGCTGT  
GACAAAGCCATGAGAAGGCCAAAAGATTATGCATGTAGAAATAACAGTATGTGTGTCAATGACTACT  
AGACCTGCAGGGGGATACCGATGCAATTGCTCTTCTGGTTATCAAGGCAACCCTTACCTCCCTCATGGAT  
GCCAAGGTAATAATCCCCTTCCATTTCTCTTTTTTATTTTTGGGATTTAA

>M6-PGSC0003DMG400031485 M6 RLK with WAX or WAX-EGF domain

GATTCATTCTATTTCCATGCATAGTTGTTGTTCTAATGACTGAGTTACAAAGAAGGCATTTGTGCGATTTAT  
GATGCAATTGAAAATTTCTTCACGGTGAGAACAATTCGCGCCCATTAGATATTCCAACCTCCAACATAA  
GAAAGATGACTAGGAACTTCAAAGAGAACTAGGCCAAGGAGTTATGGTTCAATATATAAAGGTAAG  
CTTCAAAGTGGACCTAATGTAGCAGTGAAGATATTGAGCAAGCCCAAAGCTGATGGGCAAGACTTCATC  
AACGAGGTTGCCACAATCGGGAGGATTCATCATGTAAACATAGTACAACCTTATTGGCTATTGTGCTGAG  
AGATGTAAGCGTGCTCTCGTGTATGACTTCATGCCTAACAGATCACTTGAAAAGTACATCACACCTCAAG  
ATGGAGGAGCTGATCAACTGTTAAGTTGGGACAGAAAGTTTGAATTGCTCTTGGAGTTGCTCGAGGTA  
TTGAATACTTGCATCGAGGTTGTGACTTTCAGATTCTACATTTTGACATCAAGCCACACAACATACTTTTG  
GATGAGAATTTTATTCCAAAACATCTGATTTTGGTCTTGCAAATCATAACCCGGCTGATAAGAGCATTG  
TACTCTAACACCAGCCAGGGGAACAATTGGTTATGCAGCTCCAGAGCTGATTAACAGAAGCATTGGTC  
CAATATATTATAAGGCATATGTCTATAGCTTATAAGGCATATGTCTATAGCTTTGGAATGTTACTCATTGA  
TATCGTAGGCTTGAAAACAACTCGGCAGCCAAAGAGGACATATCAAGCCAGTATTTCCCATATTGGAT  
TTATGATTAACCTCGACAAGGGAAAGGAGATTGAAGTACTAGACGAGACACATGAAGACGTAAAGAAGC  
TGACTTTAGTTGCT

>M6-PGSC0003DMG400036044 M6 RLK with WAX or WAX-EGF domain

AAATAGCCCCGGAAACCACACTAATGTATGGTCCTTCAACCCTTGTAGCTACGCGTTCCTTGGCGATCAT  
GAAAAGTTCACATTTAGGGGTACATCAGACTTCATGGACCCAACTTTGTGAACAGAATAGTGAATGAT  
GTTCTATTGTGATTGACTGGGCAATTGGGACTAAAAATTGCAGTGTGGTTAGGAACTCAACAACCTTATT  
CATGTATGGAACATAGTCTATGTGTTGATTCTGAAAGTGAAGTGGAGGTTATCGTTGCATTTGTGAGG  
AAGGATATGACGGAAATCCTTATCTTAGTCCAGGCTGTCAAGGTTTGTGTGACCATCTCATCTAAAAGTT

TAAGCTGTTAGAAAGAGTCAAGCAGGTGCTTTCAGGATTTTTGTCTGCTCTGATACCATATTGAACTGTG  
TGACCATCTCATCTAAAAGCTTAAGCTGTCAGAGGTACATTAACTTTCTGATGAACTAATTTGAGCGTTCT  
TGTAACAGATATCGATGAGTGTGCAACGAGCCCTTGATGGAATTTGCAAAAACACTCCAGGAGGGTT  
TGAGTGTTTCGTGTCCGAAGGGATATTTTGACGATGGAAAGAAGGGACGTGGTTGCCAGAAGGAGCATG  
ATTTCCCATCTTAAAGTTATCTATTGGTATGTAAACACAATTACAATGGCATGAAGTTTCAATTTATCAA  
ACCATAGACATAAAAAATATAAACATTAGATGATTATAATGTAGTTAGAAATTATAGAACCAAGCACAA  
AATGATTTAGGTAGTTTTAGTCTTTAATTATCTTAGTCAATAAGCATATCACTATAATAGGGAGATTTTAC  
AATTACCAGTACATGTGGAGAGGAGACTCTCCAACTTATATATTCAACATAAACTATCTTTAACATAGG  
AAAAAACTCAAATATGTCATCAAACCTTTGAGAAAAGATTCATATATGTCGTCGGTTAAACGTTTGGCTCA  
TCTATGTCATTTCTGTTTGAGAAGAAGGTTTCATTCATGCCATTATTTGTTAACAGAAAACAGTTCCAATTT  
TGCAAAATTATTTTTTATACGTGGTCAATTATGATTTGGCCACGTCACTAATTAATCATTTTTTCAAACG  
GAAAAAGTTTAAATATGTCATCAAACCTTTGAGAAAAGGCACATCTATGTCATCAGTTAAAAATTTGGCTT  
ATCTATGTCATTTTCAGTTAACAGAGATAATGACATGGATGAGCCTTTCTCAAATGGAAATGACATAGATA  
AACCAAATTTTTAACAGAAGATATCGATATGTCTTTTCTCAAATTCGATGACGTATTTGAGTCTTTCTCA  
AAAAACAAAACCCTCTTTTGAGACACAATTCCTCGGTACACACTATGTTTCTCCTTATGACTTGAATGAAT  
AATATAAAGAAAAAATTACCTAAATACACAACCTATTTTTATCATATTTTTAAATTTTTTCCACCATTTGAAA  
AAATTACAAAATCCTTACTCCCTCTCCTCGGATATATCATGATGTATCGGTTGGATACATCACTTTACGT  
GATGCATCCATCGGATACATCATTTTACGCGATTGTATCGATCAGAAATCAAGACGCGATGTATTGAAAT  
ATTGAGTGATGTATTCGAAATTGGGACGTGATGTATATTGGGTACGTTTTGTAATTTGAAAAAGAGTAT  
GGATATGATGTAATTAGCTCTTAATACTATGTGATTTATGTAAAAATCCCTGAGACTTTGTCAAAAACAA  
ATATCCCAAGAAACATTGTCAAAAAAACAATATCCAATATTTTTTAATTTTTGACATTCTACTATATTG  
ATCAATTGCAGGTTTAGGTCTTGGATTGTTGTCAATACTGGTTAGTGTTACATGGATATATTTTCAAGTTAA  
AAAGAAGAAAAATTCTAAAATTACGAGAGAAATT

>M6-PGSC0003DMG400036882 M6 RLK with WAX or WAX-EGF domain

ATTAATGTTGTAATTAGTTATAGGTCCATATATTAATTCTGGACAACGTAGATTAATTAATAAATATAACT  
CGAAGCAAAAACAAATTTCTCAAGTGGACCACATATATATTTTTGGATTTCAAAAAGAAAGGAATTAAC  
ATTAGTTGTTCAATTAATTTGTTTATGTACTTTAGAAAACTTTGGTATAAAATTCATTGGCTATTGTTT  
GGATTTGTAGTAGATTTTGTATCCTTGCTCCTGCCAATCAAATTTACATTACATGGCTGCTGCCTAGTG  
AGGATTTAAGAATAATAATAAATTTAATAATAAATGAAATAATTATTTTATTATATTATTTCTAGTTAATT

ATTATTAAGATAAATCATATAAATATTAATAAATGATAGTAGTATTTAATTAACATAAATACAATATGTA  
TAAAATGATAAGCATATTTAGATAGTTGGATGTGATCAAATTTAATTAATAAATTTGACTTATAAACAGTTT  
AAGAAATTATCAATTATATAGATAAACACGAATTAATAAAAAAAAAAATTTAAGTCAATTTGACTAATTTTTAT  
TTCTTAATTCACGCAGAATGTCGACATGGCACAGCTTGCAAAATTCGAAGGAACAAAGCGCCTCTTATTG  
CAGGTTCTCTTTTTTATTTTTCTTATTTTTATCACTTATCCAATTACTCCCTCACTTGACTATCGGTTGTTTCA  
ATTGATCATTGAATATAATAATAAATATTTTTATTAGATACGTTATATTCAAATTTTGAAAAAAAAAAC  
TTGTGTGCTTCTCAAATACCTATTAGGTAGTTTATTTGACAACATAAATATGTCATCTCCTTAATTATA  
TGCATAAGTTTGAATTGAAACACGCCGGAGGTTTTATAGCTTGTGAGGTTAACACATATAATCAAAAGA  
GATAACATATTTTAACTGATTAACCTATTTACCTAATGGACTATCGAGAACACGAGCAATTTTTTTTTCAA  
AATTTGAATTAAGGTGTATACTTAGAAATTAGAAACATTTTATCATGTGTTCCAGACGTTCCATCATGAACC  
GGAACAAGCTGTAGTTGAGTGTATTATAATTAGTGCTAACATGTTGTGTATATTTTTTTGTTTTATTTTC  
AGTTGCTGTTATATCAGTGCTTCTCATGCTCTTAGGTGGATTTTTAGTCCACAGACGTTACCTAATAAAAA  
GAAGAACAATAAGGTTACTTGTAAGAAAGAGAAGAAATATTAAGTGCAAATACAAGTGGAATAATCA  
GCTAAAGTTTTCTCTGGCAAAGAAATAAAAAAAAAATCAACAAATAATTTTGCCAAAGAAAATCTTTTAGGCA  
CTGGTGGATTTGGTGAAGTATTTAAAGGCAATTTAGATGATGGTACTATAGTTGCAGTTAAAAGAGCGA  
AACCCGGTAACGCTAAGGGCACGTTACAAGTCCTAACGAAGTTCGAATTCTGTGCCAAGTGAACCATC  
GTGGTCTAGTGAGACTACTCGGTTGTTGTGTCGAGCTCGAGTTACCTCTTTAATTTACGAGTATGTACCT  
AATGGTACGCTTTTCGAACACCTCCACGTGTTTCGCTCCATGAGCGGGCCCCACTTACTTGGTTGAGGC  
GTCTAGTGATCGCTCAACAAACCGCGGACGGACTCGCGTACCTACACTCGTCGGCTGTTCCGCCGATTTA  
TCATCGCGATGTTAAATCAAGTAATATTTTACTAGACGATAAGCTCGATGCTAAGGTTTCAGACTTTGGA  
CTGTCGAGATTAGTCGAGCTGAGTGAAAGTGAGAACAACCTCATATCAACACATCTGCTCAGGGTACATTG  
GGGTACCTCGATCCTGAATACTATCTGAACCTTCAACTGACAGATAGGAGCGACGTTTATAGTTTTGGAG  
TTGTGCTTCTAGAAGTGTGACGTCTAAAAAGGCGATCGACTTCAATCGAGATGAGGAAAATGTGAATT  
TGTTGTGTACATGAAGAGGATCATGGATGGAGAAAATTGATGGATGTAATTGACCCTTTTATTAAG  
ATGGGGCAAGTAAAGTGAACCTGAGACAATTAAGGCTGTAGGGAACCTTAGCATCAGCTTGTTTAGAT  
GAAAGGAGGCCAAAATAGGCCATCAATGAAAGAAGTATCTGATGAACTTGAGTATGTTATTGGTATTGTT  
AGTGCCAGGCTTCAAAGAGTTAG

>M6-PGSC0003DMG400037856 M6 RLK with WAX or WAX-EGF domain

ATGTCCATGTGCAATAGTATTGATGATGATACATGTTCTGGGGTTGGTTGTTGCATAACATCCATCCCTA

ATGAGTAATGGGGCATGGAATGTTACTATAACACTAAGGAGCTATTATAATCATACTTATGTGAAAGAT  
AACCTAGTTGCAGCTATGCTTTTGTAGTTCAAGAAGCTAATTTTAGCTATTCTAAGAATTACCGTAGAA  
GTTTGGAGGACAAGGAGGAGCTTCCTCTTGCTAGATTGCGTAATTGGTGAAGAAACATGTGAAATAG  
CTAAGACAAACTCGACTACATATGGATGTAAGAGTAACAATAGTGATTGTCTTGATAATTCAATTGGTTA  
TCGATGTTCTTGCATGCAAGGATATGATGGGAATCCATAACTGAAAGACGGCTACCAAGGTATGTATAT  
GTGA

>M6-PGSC0003DMG401005729 M6 RLK with WAX or WAX-EGF domain

TTGATATTAGATACATAGATATATGAAATTATGAAACATGGATACAAAGAAGTAGAGGGATGAGGGAG  
GGAGAGAGGGCGAGATACATTCGCTAGATACAATGTATCTAGAGGAAATTACACGGTATCTAGAGAAGC  
AACTCGGACAAGATACGTAATTATTGAAACTATCGATGCGCTATGTAATTAGCATCTATAGTAGTATGTT  
TTATAAAAGTTTCTCAATTTATCAATATTAATTATCTTAAGCTCAATCCATAAAAAATATGGATAGATTGG  
GCGGATCCTTTTTTTTTAGGCTTAGTTTGACAACCCTAAGCTAACCCATTTTAACCTATCCAATTTAGGCA  
CACTGGCTCATTTGACACCCCTAGGGTATCCCATTTGTTTTAGGACAGATCCATGAAAATTAGGGAAG  
AAATTAGAAAAGATGACAACATTTGCGTTGGAACCTTACGCTTATGTGATGCAGTGCGAACCTATAACTCA  
AATCGCAGTTTCTCTCTTAAGCACGACCCAAAAGAACTTTTTATTTATATATATAAATAAATAATATATAC  
TCCATAAAAAGAAGCCTTGTTTGTAGACCAAATTCAGGTTTCTGAGTGTGATGGTCTAAAATAGCCTCTA  
CCCCTTTTTATTATTTATCTCCTGTAATATTCTGACTATCAGCTTCACAAAATGCCAATGAATATTTAAAAA  
CCTTAATAATATACACATTGTCAACAGGTGCAGTCAGGTTACGAATATGATGTGATTTTTGGAATTTTATA  
TTCCAGACAAAGAAAGAATTCTCAAACACACATGTCCTTTTCTTGTTTCAGGAGTTTCCGCCTTTTTCTTT  
CTTTCTTTGTTTTCTTTTCATCTAGACCTGTAATTTTTAGTCCGCGGAAAGTTTCAGCCTGTAAGGTTAATG  
AATGGAAGTTACCAATAAGATTGGTGTAAAATATTTATCCCTTTTTTATTCATTTGAAATTTCTCCTTCTAG  
TTGTGAACAATGAACTTATTTTCGTCCCACTCGTCTAAGTTGAAAAGTGAAATTTTCTATAGTAAAATAA  
TCACAGAAAAGTCTTATAAAACATGAGCAGCCATTTCTTTTTTCGTTTATAACAACTCTCAAGTTTGTGAT  
CTTTTGTTAGTCAAACCTGGATTAACTTTGACACTTGAACAACTCAATTGAATCATATATTTTGCCAACT  
CTTCTAATACATAGGTTCTCCAACCAACATAGTCTATCATTGATGAGTTCTCACAATGCATGCTCAAAC  
TTCCCTCTTCTCTGCTCCATTCCATCATCACCTTCTATGCTTCTTGATCACGTCTCGCCATCCTATGGCC  
AAGAGGATAAACAGTATTCCATTTGTAATAGCTCCTACACCTGTGGGAATATTCAAATATCAGCTTCCC  
TTTCTGGGGTGGCGATCGACCTCAAGAATGTGGTCTTCCACAATTCAAGCTTACATGTGAAGCCAATCAG  
GATCCCCTTATACATATCGATGGTCATAATTTTCGCGTACTTGACATCAATGGAGACAATCAAACCATGA

GAATTGCACGAAATGATCTTGAGGAAGACATTTGCCTGATAGATTTCGGTAACACAAGCTTTAATGATCC  
CCTATTACACTATGGTCCTGACTTTGGGATTCTCATCCTGTTCTATGCTTGCCTTTTCGATATACCTTCTGA  
ATGGAAAAATTTACCTTTAGCTGCAATAACACCGGAGAGTCCAGTCATGGTTTCTATCCAGATCAGTCA  
TTTATATCATTTTTGGGGACCGCAGTATGGGAGTTGTGAGCGTAATGTCATAGTTCCTGTGTTGTTAACGG  
CATTTAAGCGGTTCCAAGACCAAGGAAGTACGAAAATATTGGAGCTATTGAAGCAAGGGTTTGATGTG  
GTTTACAACAAAAGCCTAGTATGCATGGCTTGTGAGAGATCAGGGGGTTATGTTGGTCAGAAACAGAT  
TTTGCAGAGCCAACCTTGCCTTTGTCGGGACCGGACTTATTCTATTACTGCGGTTTTGTACAGGAACAAG  
GTGTGTTCCATCTCTAACTTATCTTTTTGCCAAAAATTAGTCGAACCTAACTGGTAGGTCAGAGTCTTCA  
ACTGTCAAATAAGACTGCCAGAGAAGAGAAAAAACCTATAGGCTGCCATGTTTTGGTGAAACTCCAA  
TTATTTTACACCTTCTATTTTATTCCATCCCTTGTAACATTTGTTGGGGCATTCTTTATCATGTTTATGAA  
GCCAGATAATAAAATATACTTACAGTTTGCCTAGCACAAGCCTTTTTGATGATGCCTATTCTAAGAATT  
TAGTAGTACTAGGCAGCAGCAAGTTTGTATGTGCTTCACCCAGCAAGATAGGTATATCAAATTTGTGAT  
CAATGGAGATAACAATGCATTTTTGAAAGATTAGTTCATTAGTTTAGCAACAGTTTAGCAATGGATTCT  
ATTTTCAAGGAATGAGAATTTCTAAGGGATTGGTTTTCAAGAATTAGCTGAGATATATGATAGAATGG  
ACATAAAAACACTTATGATATGTGATAGAATTTCCAGAAACCAATGATCCGAAGTGATCATCTCAAGATT  
CTTGAAAACCATAAATCTGTGAAAGGGAGAAATACAATACTTCTGTAAGACGAGAATTTTGCATTT  
GCAAGTCTCAGTCAGGGTATTCTTTGCTAGTCCCTATGGCGCATGTGGATGCTATGACAAAATAAAACA  
GCTTTTTCCCACTCTGTTTCCATGATTTTACTTCTACCAACCTAAGATTTGAATACTTCCCGAATTTCTTTAC  
CTTTCTAGTTCCTTGTCTAATACGTGATTGAAATCTCTATTTCTTTTCCCGCATCTAGAATCTTTTGACTC  
TCTTACCCAGTAGGTGTTGAAGGTGGACTTTAGATGTTAATAAGACTTACAAATTTTTTACCTAGTCG  
CCTGACTTCAGTATTCAGGCTTTTCAAATGTTGTTTTAACAGCAGTTATTTTCTTGTTCCTTCTCTTATC  
TGGTTTTTTTTGTTTTCTCATTGTAAGTGCAGCAATGCCACAGATTATTGTTTTGTGATTATTCATA  
CTGAGTTTCTAGTGCATAACTATGCAGTAGAATTATGCAAGAACCCTGTTTATGCAAAAATGAATTA  
CCAGAACTTCTGAAAAGGGAATGAGGCTAATATGTCAAGATTGCCTGAATAACAGAGGGGCACTATATG  
TTGTGCTTGAATAACAAATACAACCCTAAACAGAACACGTTTTTCATAGTAAATTCAGAACTTTAAGTC  
CAAATCCACGTTTACTGTGTTTACATAACAGACTAGAAAATAACCACATAATTCCTTTATAAATTAGAAAC  
AGTAAGAAGTTGTATTTATGTCTTTATGATACTACTGGAGATATTTTGTGCGTGGTTCTGTATCATCTCATC  
ACATGTTTTTGTCTGCATTACAGGTTCTAAAAGAGATATCAGAGTGAAGGTTGCCGTAGGTAACCTTCTCT  
TTGACCATGTTTCATCTTATGATATCCTTCTCTTTAACAATGATCAAGAACTTCTAGTCACATATTTCTCTCT



TTCAGGTGTAAGTGCAGCTGCATTCACTGCCATTGTGGCATGTGTAATTTCTTTCTCTATTATCGTCGAC  
AGAAGAAAAGTCATGCTGGTTCGTCTTTGATAACCAGAAGTATCCTTTCTATCCCTCCTCAAAAATGGA  
TCCTGAAAAATCTTCTCACTATTTGGGAGTTCATGTCTTCGATTACAATGAACTGGAAGAAGCCACAAAC  
AGTTTTGATTCCAGCAAAGAGCTAGGAGAAGGTGGATTTGGCACAGTATATAAAGGTAAGAGAAATTA  
TCCTGAAGTGGGCTTTCTCTCACTGCCAACCTGCTACTAAACCTAAACATTTGATTTGATTCATTAACCAT  
ATGATTGAACATGACATGTTATAGGTAACTTCGAGATGGGCGTGTTGTTGCTGTAAAGCGTTTATATGA  
GAACAACACAAAGAGGGTTGAGCAATTCCGAAATGAAATTGAAATCCTCACTCGTTTGCGCCATCGAAA  
TCTAGTTACCTTTACGGATGCACATCTCGCCATGGTCGTGAGCTTCTTCTGTGTATGAATATATTTCCA  
ATGGCACTGTTGCTGATCATCTTCATGGAGAATTCTCAAAGCCTGGATCACTTTCATGGAATACACGAAT  
GAGCATTTCATAGAAAACGGCAAGCGCGCTAGCCTTTCTCCATAATTCAGAGGTCATTCACCGAGATGTA  
AAAATAACAATATCCTCCTAGACAGTAATTTCTGCGTCAAAGTAGCTGATTTTGGGTTGTCTCGGCTTTT  
CCCTACTGATGTTACACATGTCTCAACAGCTCCACAGGGTACCCCTGGATATGTTGATCCCCAGTATCAC  
GAATGCTATCAACTCACCAGTAAAAGTGATGTTTATAGTTTCGGGGTGGTATTAATCGAGCTTATATCCT  
CTCTGCCAGCTGTTGATATCTGTAGGCATCGACAGGAAATAAATCTATCAAATATGGCAATTAACAAGAT  
TCAGAGCAACACGTTACATGAGCTGGTTGATTCAAATCTTGTTTTGACTCCAATAACTTGGTAAAGTTG  
ATGATCACTGCCGTGGCAGAGTTGGCTTTCCAGTGTCTTCAGAACGACAGGGATTTGAGACCATCCATG  
CCAGAGGTCTTGGAGGCTCTACTGGGAATTCAGAGTATGGATAAAACAGCAACAGAAATAGGGAAGCC  
AAGTCCCGGTGATGATGCTGGATTGTTGAGCAATCACGCATTATCTCTCACCCGATTCAGTTATTTCAA  
AATGGACTAGCAGTAGCAGTTCAACAACACATGCTTCCAGTATTGGCTAAGTTTTATGCCCTTAGTTTTGC  
TAGTTTGTGGTTTTCTTGATAGTGATTCTTCAGCCACCTGCTCTATTGGTCGCGGAAGGTGAATTTTAGTG  
TCTTTCCTTTGAGTACTTTGGACCTTTTTCTATCTTAAAGAGGTTGTACATATCTCGTATGCAGCAATTTAA  
ATTTAACGATACTAATTCAATTCATTTCTTAAATTTCTTAGTTAAATTGTGTAGATACTTGTTCATTTGATC  
ATCTTTGTCATAACAGATTTTGA

>M6-PGSC0003DMG401008483 M6 RLK with WAX or WAX-EGF domain

ATATTTGTAAAGGTTTTTATATATATTATCAGGATGATTTAATTAACATCTGTTCTACTAAGTGCAGGTAT  
GGGAGTTGGGTTTATGTCCCTAGTGCTTGAACAACCTGGCTCTATTTTAGCTTCAAGAAACGAAAATA  
ATGAAACTCAGGGAGAAGTTCTTCCAACAAAATGGCGGATTCCTCTTAAACAACGAATCTCCTCTAACG  
AGGGTGGTGTGGAAGCAACCAAAATTTTACAGCTGAAGAGTTGAAGAAGGCTACAAACAACACTACGCC  
AACGATAGGATTCTTGGTCGTGGTGGAAATGGTATTGTCTACAAAGGTATACTACCCGATAATCACATA

GTTGCAATTAAGAAATCTAAGTTTGTGGATGAGAATCAAATTGAACAGTTCATCAATGAGGTA CTTATTC  
T TACTCAAGTTA ACCATAGAAATGTAGTGAAACTGTTTGGGTGTTGTTTGGAAAGCTGAAGTCCCTTACT  
GGTTTACGAATACGTTTCTAATGGA ACTCTTTACGAGCATATCCACAACAAAAATGGAGCGCCTTGGTTA  
TCTTTGGAAAATCGGTTGAGAATTGCTGCAGAGACAGCAAGTTC ACTTGCTTACCTTCATTCATCCGCGT  
CAATGCCAATAATTCATAGAGATGTCAAGTCTGCCAATTTATTGTTGGATGATGTTTACACAGCCAAAGT  
GGCAGATTTTGGAGCTTCAAGATTAGTCCCTCTTGATCAAACACATGTTGCTACGATGGTTCAAGGAACG  
TTAGGGTACTTGGATCCCGAATATTTCCACTCAGGTCAATTGACAGAGAAAAGTGACGTTTATAGTTTTG  
GAGTAGTTCTTGCTGA ACTTTTTGACAGGGTTGAAACCTATTTTGAAGGACGAAAATGAGAAGGACAAAT  
GTTTGGTAGACTATTTCTGCTTGTCCATGAACACAAATAACTTATTT CAGATTCTTGATCGTAGAGTGGTA  
CGAGAAGGAAGTCTTGAGCAACTTCAGAAGACTGCTGAGCTTGTTAAGAGTTGCCTTAGTTTGCACGGA  
GAAGATAGACCTACTATGAAAGAAGTGGCAATGGA ACTTGAAAGTTTGAGAAAGTTCACAAAAAATAA  
CCCTTGGGCTAATGGACATGAAGACGAAGAGAATGAAGATGAAGTAAGAGATCTTTATACAATTGATCC  
AATCGACTCTAATACAGACAACGACTTTTTCTGGACAATATAGTTCGTATAGTCCTTCATTAATATTT CATA  
CAAATATCCCGCGGTGA

>M6-PGSC0003DMG401030531 M6 RLK with WAX or WAX-EGF domain

ATACATTACATATTATTTTACTTGAGCCGAGGGTCTATCGGAAACAACCTCTCTACCTTCTCAAGGTAGG  
GGTAAGGTCTGTGCACATACCACCATCCCCAGACCCCACTTGTGGGATTACACTGGTATGATGTTGTTGT  
ATACGTTACATATTATTCCTTCTTACTCATCACGTACCCTTTTTATATCTTAGATATAAATCCATGTTTATGT  
GGTTTTGGTTATTTACGCCACTTTACTAACTCCAGCAGTCACTAAATTACCAAAGTATCTCCTATGAG  
AGCCAATCATTTTGGTTAGTGAATGCTGGCATAGTGAGTTATTCGTGCATAGCTCTTCTGAGGTTTTTTGC  
TTTTGATCGATCTTCCTTCATGTTTGGCTCAACTATATTATAGTAAATCTTTAATTGTTTCAATAACTCTATT  
CCCATAAAGTGCTCCAAAAACCCAATTGCTTGTGCTTCAAATGATGTGAATCATCCCTATCCTGTTTTAG  
ACAGCGGGAAAAACCAAGTCGATTGTAGTGCAATGCCTTGAGAGTCATATGTTGTTGCACCAGTTAAAA  
TAGGAAAAAGAAAAGCAATAAGAAATGCCAATAGATAGACTATTTAAGGTTGTCAGAAAATGAATTAAT  
ACTACAATGATCTTGGAATAAGTTAGTGGCTGTGAAAGGACAGCAACCATTCTGGCTCTGAAAATGGTG  
AACCTGTTTGTATCGCTCTGTTAGGTTTTGCCAGAATCATTGCTGGATGGTAACTGCTACTTACCAAGCT  
GCTAATTTAAGATTCTAGGCATAAGATACTGATTATTTTCAGAGTTATAAAAAGCTAACAACGATCAACGA  
GGCTTTCATGTGCATCATAAACATCAAAA ACTCTTCTCTTATCTATTACACCTGCTGTCCCATGACTTGACA  
CAGAATTCTAGAAATAAAGGGAGACTATTGAATCTCATGGTCTTAAATCAAAGATGTGTGTAGTCCTTTT

AATCTTGTGGTCTTAAACTTGCCAGGTAGAATGTTGGAATTGGAAAATTTACTAAATATAGAAAGAGAC  
ACTCTTTTTTGGACATACCAAAAAGGAAAGTAATACATTTAAATTGAGACGGAGGGAGTAGTATAAACT  
GCATAATCTGATTTGGAGAGGATTATATTCTATTCTGTTCTTTTACTACCTGTTTGCGTTTAGTATAGTTTG  
GCAATAGTGAGATTATAGGTGAGTTTTCACTTATTCTACTCCCTTAATTCATGGTCATAGAGTGCTAACTT  
GTCTGAGATTGACCTATGAATTTTTCTCGTATGGTTATTTTCGGTGCTGTTCTAAATGTGGCATTAAAGAA  
AACCAATGTCTAAACGACAATCCTTGGACATTTCTAAAGATTGTATAGCACATCCAGAAGCAGTTGCCTA  
CTGGTCCAAAACCAATAATTATAAGTGCATGTCCCTGTATGTCCATTTCCATCCACTGAAACATTTTATAA  
GTTCTATTTCTTTCTTGTGTCAGATGCAGATCATTATTTTTCGATACTACCTCCTCCACGATTTGTCTGACATT  
ACTTCATTTTCAGGGAAAAATAATTTGGGGTTGATTCTTGGCTCAGGTAATCAGTACTGTATTATTATTA  
TCCCTGAATTTGACATTTCAACATAGATCCACATCTTGTTAACTTCATTTTTGTCTTTTTCAGTTTTAGGTG  
GAGCTGTGTTAATAATCCTTGTGGTCACTTTCATCGTTTGTGTTACAAGAAAGAACACAAAAGTTGTTT  
GTACTTCACCTCGAGAAAAAATCTTGTGATCGTTCCTAACACATGATTTTGACGGAAGTAGTAATTAC  
CATGGAGTCTCGGTCTTCTCCTATGTTGAACTTGAAGAAGCTACAAGTAACTTCGATTCCTCCAATGAACT  
AGGAGATGGAGGTTTTGGTGCTGTTTACTATGGTAAGTATCTTGAAGCAAATCAGATGTTCAAATGACA  
CGACTAGATAGCTAAATTTGTACTACCTTCTTACTAGGTAAGCTTAAGGATGGGAGAGAAGTTGCAGT  
GAAGCGACTTTACGAGCACAATTGCAAGAGAATGGAACAGTTTAAAAATGAAATTGAAATTCTCTCTCG  
CCTAAGGCATCGAAATCTTGTTACCCTTTATGGTTGCACATCGAAGCACAGCCGTGAACTCCTCCTTGTTT  
ATGAATACATTCCAATGGAACAGTGGCAGATCACCTTAATGGGGATAGAGCAAAGGACGGATTCCTCC  
CATGGCCTATCCGCATGAATATTGCTGTAGAACTGCTTGTGCATTGGCTTACCTCCATGCTTCTGACATA  
ATACATCGCGATGTGAAGACTAGCAACATACTCCTCGACAGCAATTGTTGTGTCAAAGTTGCAGATTTTG  
GGCTTTCGAGACTTTTTCCGAATGATGCTACTCATGTCTCAACTGCTCCTCAAGGGACTGCTGGATATGTT  
GATCCAGAGTATCATGAATGTTACCAGCTCACTGATAAAAGTGATGTTTATAGTTTTGGTGTTGTCCTTGT  
TGAATTATCTCATCAATGCCTGCTGTTGATATTACTAGGCGTCGACATGAGATCAATTTGGCCAACTTA  
GCGATAAACAGGATTCAGAGATGCGCATTGATGAGCTGATTGATCCATCTCTGGGATTTAAATCAGAT  
GCACAGATTATGAGAATGACTACTTCAGTAGCAGAGCTAGCATTTCATGCTTGCAGCTTGAAACGGAC  
TTGAGACCAAAAATGGATGAAGTACTAGAGACACTCAAACATATTCAAGGCACCTATACGGATCAAATC  
AAAGATGAGAAGACGAATGACTCAATTGTCGATAACACAGAATGTAATGGTGAAAAAGTCCCTACTTCT  
CCTACATCAGATAAAATAGTTTTATTAAGAAAATGCATTTGCCACCTTCACCTATTTCTGTAAGTGGAG  
GTGGGTTAGTAGCTGTGGCAGTAGTAATGTTAGCGGGTGAAATCTTACACTCTTTGCTTTCATTTCAAC

ATAAATGTTACAAATATGTAAGTCAATTGATAATCTGTAAAGGAATAAGTTGCTGGGACGTTCTTTTTATCT  
TTATTAGTTTTTACTCTTGTCTTTGTTTCGCCGTTTTCTGAACACAGTGGAGTGTAAGTATTGAATATGGAC  
ATGCTTTCTGCACTAACGAGCATGCATATTTTTCACTATCCTGGATTTGAGGTTACTTAAATGAAT

>M6-PGSC0003DMG401030532 M6 RLK with WAX or WAX-EGF domain

TCTAGGTAGAGTTATTACTGTATAATGAAAAACCTTCAGCTAGTTTTCTCTTCTTGAATATGGATTTT  
GCTTCTTCTTTATTTTGCTTCCTTCTATCTGTTTTCTGATGTTAGTTCAGGCAATGGGAAGAAATGATTCA  
ACTTGTCCAAAGTCTTTTCATGTGGAAATCTTACTGACCTGAGCTTTCTTTCTCTTTCCACACAACCT  
GACTGTGGAATAATGTTCTTAGCTGGTTGTGATGCTAACTATATCCGAGAATCCAAGTCTCCTCGAG  
GAGATTCGTAAGTATGCTTTAGGAAATCCGTATAATTATACAGTTGAGCTAGGGGACCCCAAGTTTCATGC  
CAAGTTGAGGCAACACAAGTGCCAGGCTTTTAACAAAACTTATCCTTGCCAGCCTCTCCTTCTATTTCTT  
TCGAAATTCTCCAGTGAATATTCTCAACTTCATCAAATGCAACAGCACTAGTAGTAGCACCCCAAACATT  
ACCCATAAGATGAAAGATCATTTTGCTGGTTATAGAATGTACAATGGCTGTAAAGTTTTAGCATATACT  
ACAAGCTTCGCTTAGGAGATGATGAAGACGTTTCGAGCAGGCAATCTTCTGCCAACTGTTCACTTATCAG  
ATTGCCTATCCGCTTGCTATCAGATGATGGTGGTTTGTTCATATGTTAAGCGCCGTTTTCTAGTAGAAT  
GGAAACTGTCTGAGGACTGTTACAAATGTCACTATGGCGGAGGTCAATGCCAGACTGATATAATCAACA  
AATTTCAATTGACTTATCCAAATAATCCACATGATCAAGGTCATCAAGAAAATAATCCACATGAACAAGG  
TTCAGTCACACAGTGCATCTTTGCTAGTGTCTTTCTTGTATTATCATATCACATATCTATAATATTTTCCCTT  
TTTTCTTTAGATGCAAAAACAGCTAGAAGAAAGTTCGGACCGACTCTGGGAGCAGGTAGTTAAATATC  
CTTTAACTGCAGTGTCTTTTCGATCTTTTCTATTACAGAATTTCTTGCATATCGTTTGAATTACTTCTTCAT  
TGTGGTAAAATCTCAAAACATTTCTTAATGATAAGAGAGGTAAGTACTTTAGCTTACACAAAATGATTG  
GATAGTGGAGTTGAGAGGACACTTTCTTTTTCTTGTGATGTTTTCTTTGTCTGAAAACCTCTGATTACT  
TATATTTTTTTCCAGTTTTTGGTGGATTAGGATTGGTGTGATGATTTGTTTAGCTGTCTACTTTATCTGGTGT  
GCAAGAGGAGGAAATTTAATCCGCCCCACTTTCTCTCAACAAGGAAATTGTCATATATATTTAAAAATGA  
TGTTGAGGGAGGCAGTATATACTTTGGCATCCAGTCTTCTTATTTCAGAACTTGAAGAAGCCACAAAT  
GATTTCAATTCCTCTCGAATCCTTGGAGATGGAGGTTTTCGGAACTGTTTACTATGGTGAGAGACTTCTTA  
ACCCAACTGAGCTATGCTTCACTTCTTTCTTTCATGTGCCTAATACTTGTTCAATTAATGTCTAGGGAACTTA  
AGGATGGACGAGAGGTTGCTGTGAAGCGCCTTACGAGCACAACCTGCAAACGAATGGAGCAGTTTCGTA  
AATGAAATTGAGATCCTTACTAGGCTAAGGCACAACAATCTTGTCACTCTCTATGGCTGCACTTCAAGGC  
GTAGCCGTGAACTACTCCTTGTCTATGAATATATTCTAATGGAACCTTGCCGATCACCTCCATGGTGAC

AGAGTGAAGGACGGATCACTCACCTGGCTAGTCCGCATGAACATTGCCATAGAACTGCTGGTGCATTG  
GCTTACCTGCATGCGTCTGACGTAATACACTGTGATGTGAAGACTAATAACATACTCCTTGATCACA  
TTAATGTTAAAGTTGCAGATTTTGGGATATCACGGCTTTTCCCAAATGATGTCACTCATATTTCAACTGCA  
CCCCGGGGGACCCCTGGCTATATCGATCCAAAGTATCATGAATGTTACCAGCTGACTAGTAAAAGTGAT  
GTTTATAGCTTCGGGGTGGTCCTTGTGCGAGCTCATTCATCAATGCCAGCTGTGGATATGACTAGGCATA  
GCCAAGAGATTAATTTGGCTAACTTTGCAATAACAAGATTGTAAAATGTGCATTTAATGAGTTGGTTGA  
TCCATCCCTGGGGTTCGACTCAGATACCAAGATTTTGGAGATGACTACTTCAGTGGCAGAGTTGGCTTTT  
CTATGCTTACAGACAGATAGGGACATGAGGCCTACTATGGTTGAGGTTTTGGATACTCTAAAGGAGATT  
CAGATTAGTGAATTTGACAATGAGAAGAGAGCTGACTCTAATCTCAATGGAAATGAAGCTAAAATTGTT  
ACAGCACCCCTTTTCGCTGAATCAGAAGATAAGTTTATGCTGAAACAAGTTAAATCACTACCTTCTTCAA  
TTCTGTTACTGATAAATGGGTTACTTGCTCTGATATACTACTACAAAGTAGTTAAGAGTTCTATACTCCC  
TTTCTTTGTTATTGATGTGAATTTTGGAGATTACGAATGTACAACTGTGAGAAGTTTCTTGAGCTATGTA  
CCTAGAGTGAAAGTGATTCAATATTTGATTTCAATTATATAAGAGCTGTC

>M6-PGSC0003DMG402005729 M6 RLK with WAX or WAX-EGF domain

CAAGTTTGTGATCTTTTGTAGTCAAACCTGGATTAACCTTTGACACTTGAACAACCTCAATTGAATCATATA  
TTTTGCCAACTCTTCTAATACATAGTTTCTCCAACCAACATAGTCTATCATTGATGAGTTCTCACAAATG  
CATGCTCAAACCTCCCTCTCCTCTGCTCCATTCCATCATCACCTTCTATGCTTCTTGATCACGTCCTCGC  
CATCCTATGGCCAAGAGGATAAACAGTATTCCATTTGTAATAGCTCCTACACCTGTGGGAATATTCAAAA  
TATCAGCTTCCCTTTCTGGGGTGGCGATCGACCTCAAGAATGTGGTCTTCCACAATTCAAGCTTACATGT  
GAAGCCAATCAGGATCCCCTTATACATATCGATGGTCATAATTTTCGCGTACTTGACATCAATGGAGACA  
ATCAAACCATGAGAATTGCACGAAATGATCTTGAGGAAGACATTTGTCCTGATAGATTCGGTAACACAA  
GCTTTAATGATCCCCTATTACACTATGGTCCTGACTTTGGGATTCTCATCCTGTTCTATGCTTGTCTTTTCG  
ATATACCTTCTGAATGGAAAAATTTACCTTTAGCTGCAATAACACCGGAGAGTCCAGTCATGGTTTCTA  
TCCAGATCAGTCATTTATATCATTTTGGGGACCGCAGTATGGGAGTTGTGAGCGTAATGTCATAGTTCCT  
GTGTTGTTAACGGCATTAAAGCGGTTCCAAGACCAAGGAAGTACGAAAATATTGGAGCTATTGAAGCAA  
GGGTTTGATGTGGTTTACAACAAAAGCCTAGTATGCATGGCTTGTGAGAGATCAGGGGGGTTATGTTGG  
TCAGAAACAGATTTTGCAGAGCCAACTTGCCTTTGTGCGGACCGGACTTATCCTATTACTGCGGTTTTGT  
ACAGGAACAAGGTGTGTTCCATCTCTAACTTATCTTTTTTGCAAAAATTAGTCGAACCTAACTGGTAGG  
TCAGAGTCTTCAACTGTCAAATAAGACTGCCAGAGAAGAGAAAAAACCTATAGGCTGCCATGTTTTGG

TGGAAACTCCAATTATTTTCACACCTTCTATTTTATTCCATCCCTTGTAACATTTGTTGGGGCATTCTTTAT  
CATGTTTATGAAGCCCAGATAATAAAATATACTTACAGTTTGCCTAGCACAAGCCCTTTTTGATGATGCCT  
ATTCTAAGAATTTAGTAGTACTAGGCAGCAGCAAGTTTGTATGTGCTTCACCCAGCAAGATAGGTATATC  
AAAATTTGTGATCAATGGAGATAACAATGCATTTTTTGAAGATTAGTTCATTAGTTTAGCAACAGTTTA  
GCAATGGATTCTATTTTCAAGGAATGAGAATTCCTAAGGGATTGGTTTTCAAGAATTAGCTGAGATATA  
TGATAGAATGGACATAAAAACACTTATGATATGTGATAGAATTTCCAGAAACCAATGATCCGAAGTGAT  
CATCTCAAGATTCTTGAAAACCATAAATCTGTGAAAGGGAGAAATACAATACTTCTGTACTGAAGACGA  
GAATTTTGCATTTGCAAGTCTCAGTCAGGGTATTCTTTGCTAGTCCCTATGGCGCATGTGGATGCTATGA  
CAAAATAAACAGCTTTTTCCCACTCTGTTTCCATGATTTTACTTCTACCAACCTAAGATTTGAATACTTCC  
CGAATTTCTTACCTTTCTAGTTCTTCTGTCTAATACGTGATTGAAATCTCTATTTCTTTTGCCGCATCTAG  
AATCTTTTGA CTCTTACCCAGTAGGTGTTGAAGGTGGACTTTAGATGTTAATAAGACTTACAAATTATT  
TTTACCTAGTCGCCTGACTTCAGTATTCAGGCTTTTCAAATGTTGTTTTAACAGCAGTTATTTTCCTTGT  
TTCCTTCTCTTATCTGGTTTTTTTTGTTTTCTCCATTTGTAACTGCGCCAGCAATGCCACAGATTATTGTTTT  
GTGATTATTCATACTGAGTTTCTAGTGCCTATAACTATGCAGTAGAATTATGCAAGAACCCTGTTTATGC  
AAAAATGAATTACCAGAACTTCTGCAAAGGGAATGAGGCTAATATGTCAAGATTGCCTGAATAACAGA  
GGGCACTATATGTTGTGCTTGAATAACAAATACAACCCTAACAGAACACGTTTTCATAGTAAATTCAG  
AACTTTAAGTCCAAATCCACGTTTGACTGTGTTTCATAACAGACTAGAAAATAACCACATAATTCCTTTA  
TAAATTAGAAACAGTAAGAAGTTGTATTTATGTCTTTATGATACTACTGGAGATATTTTGTGCGTGGTTCTG  
TATCATCTCATCACATGTTTTTGTCTGCATTACAGGTTCTAAAAGAGATATCAGAGTGAAGGTTGCCGTA  
GGTAACTTTCTTTGACCATGTTTCATCTTATGATATCCTTCTCTTTAACAAATGATCAAGAACTTCCTAGTCA  
CATATTTCTCTCTTTCAGGTGTA ACTGCAGCTGCATTCACTGCCATTGTGGCATGTGTAATTTTCTTTCTCT  
ATTATCGTCGACAGAAGAAAAGTCATGCTGGTTCGTCTTTGATAACCAGAAGTATCCTTTCTATCCCTCC  
TCAAAAATGGATCCTGAAAAATCTTCTCACTATTTGGGAGTTCATGTCTTCGATTACAATGAACTGGAAG  
AAGCCACAAACAGTTTTGATTCCAGCAAAGAGCTAGGAGAAGGTGGATTTGGCACAGTATATAAAGGT  
AAGAGAAATTATCCTGAAGTGGGCTTCTCTCACTGCCAACCTGCTACTAACCTAACATTTGATTTGAT  
TCATTAACCATATGATTGAACATGACATGTTATAGGTAACTTCGAGATGGGCGTGTTGTTGCTGTAAAG  
CGTTTATATGAGAACA ACTACAAGAGGGTTGAGCAATTCCGAAATGAAATTGAAATCCTCACTCGTTTGC  
GCCATCGAAATCTAGTTACCCTTTACGGATGCACATCTCGCCATGGTCGTGAGCTTCTTCTTGTGTATGAA  
TATATTTCCAATGGCACTGTTGCTGATCATCTTCATGGAGAATTCTCAAAGCCTGGATCACTTTTCATGGAA

TACACGAATGAGCATTTCATAGAAACGGCAAGCGCGCTAGCCTTTCTCCATAATTCAGAGGTCATTAC  
CGAGATGTAAAACTAACAATATCCTCCTAGACAGTAATTTCTGCGTCAAAGTAGCTGATTTTGGGTTGT  
CTCGGCTTTTCCCTACTGATGTTACACATGTCTCAACAGCTCCACAGGGTACCCCTGGATATGTTGATCCC  
CAGTATCACGAATGCTATCAACTCACCAGTAAAAGTGATGTTTATAGTTTCGGGGTGGTATTAATCGAGC  
TTATATCCTCTCTGCCAGCTGTTGATATCTGTAGGCATCGACAGGAAATAAATCTATCAAATATGGCAATT  
AACAAAGATTCAGAGCAACACGTTACATGAGCTGGTTGATTCAAATCTTGGTTTTGACTCCAATAACTTGG  
TAAAGTTGATGATCACTGCCGTGGCAGAGTTGGCTTTCCAGTGTCTTCAGAACGACAGGGATTGAGAC  
CATCCATGCCAGAGGTCTTGGAGGCTCTACTGGGAATTCAGAGTATGGATAAAACAGCAACAGAAATAG  
GGAAGCCAAGTCCCGGTGATGATGCTGGATTGTTGAGCAATCACGCATTATCTCTCTCACCCGATTCACT  
TATTTCAAATGGACTAGCAGTAGCAGTTCAACAACACATGCTTCCAGTATTGGCTAAGTTTATGCCCTT  
AGTTTGTCTAGTTTGTGGTTTTCTTGATAGTGATTCTTCAGCCACCTGCTCTATTGGTCGCGGAAGGTGAA  
TTTTAGTGTCTTTCCTTTGAGTACTTTGGACCTTTTTCTATCTTAAAGAGGTTGTACATATCTCGTATGCAG  
CAATTTAAATTTAACGATACTAATTCAATTCATTTCTTAAATCTTTAGTTAAATTGTGTAGATACTTGTTCC  
AATTGATCATCTTTGTCATAACAGATTTTGA

>M6-PGSC0003DMG402008483 M6 RLK with WAX or WAX-EGF domain

ATGGTAACCACAAAAATCATAGCTTAATTTGGTCGTTAATCCATGTGGATATTCGTTTCTTGGTGAAG  
CTAGTCGATTTGAGTTCAGGGTATAGAGGATCTCAGTGATGTTAATTTTGCAAAGAAGATTAAGAATA  
ATGTCCCTATTGTGCTAGATTGGGCCATTGGAAATCTTCTTGTGTTGAAGCACAAAAAGTAACGATTA  
TGCCTGCCTCGATAATAGCCAGTGTATTGATTCTGATACTGGCATTGGTGGCTATCGGTGTGGCTGTAA  
TCGGGATATATAGGCAATCCATACATTGGCTCTGGCTGCCAAGGTAATTTGGTCTCTCTGCTTTCTCACAT  
GTTTGGACTTTCTCTTGTATAAGAAGTTTGTCTTTTTTTCCCTCTGTTTCAATTTGTTTATTATACGTT  
CTCTTTTAGTCTGTTTAAAAATAATGTCAATTTATCTTTAATCCAACCTTTGATAGTAAGTATCTAAAAGA  
AACAAATAAAAAGGATTAATTTTCTCTGTTTTGCATGCCAGATATCGATGAATGTGCGGATCCAATTACC  
AATTCATGTGAAAAGATTTGCACAAACATACCTGGGAGTTACAATTGTTCTTGTCCAGAAGGATACACCG  
GTGATGGCAAAAAGAATGGTCGTGGTTGATTGCACCAAACCTCAAACCTCAGAGTTCATGGATCAAGT  
TTTCTGTTGGTAAGTTTCTAAGATATTTCAACTGTCTCTACTTTCCCTTCTTATATTTCTAATCCAATA  
AATTCGTTGATAAACACAGGTATGGGAGTTGGTTTTATGTCCTAGTAATTGGGACAACCTGGCTCTAT  
TTCTGCATCAAGAAAAGAAAACCTCAGTAACTTCGCGAGAATTTCTTCCAACAAAATGGTGGTTTGCTTA  
TGAAACAACGAATGTCTTCTCACGAGGGTGGTGTGGAAGCAACCAAAATTTTACAGCTGCGGAGCTGA

AGAAGGCTACAAACAACTATGCTAGTGATAGAATTCTTGGTCGTGGTGGAAATGGCATTGTCTATAAAG  
GTATTCTACCTGATAACCGCATAGTTGCTATTAAGAAATCTAAGTTTATGGACGAGGAACAGGTTGAACA  
GTTTCATTAATGAGGTACTIONATTCTTACTCAAGTTAACCATAGAAATGTGGTGAGACTCTTTGGATGTTGTT  
TGGAAGCTGAAGTTCCTTTACTTGTCTACGAATACATTTCTCATGGAACTCTTTACGAGCATATCCACAAT  
CGAAATGGAGCACCTTGGTTATCTTGGGAAAATCGGCAAAGAGTTGCTAGCGAGACAGCAAGTGCCT  
TTCTTACCTTCATTCATCCGCTCAAATGCCTATAATTCATAGAGATGTCAAGTCTGCCAATTTATTGTTGGA  
TGATGTTTACATCGCGAAAGTGGCAGATTTTGGTGCTTCAAGGTTAATCCCTGTTGATCAAACACATCTT  
GCTACAATGGTTCAAGGGACATTAGGATACCTAGATCCTGAATATTTTCGCACAAGTCAATTGACCGAG  
AAAAGCGATGTTTATAGTTTTGGAGTAGTTCTTGCCGAACTATTGACAGGGATGAAACCTATTTCCAAGG  
ACAGAAATGAGGGGGAGAAGAATTTGGCAGAGTATTTGTTTTGTCTATAAGAAGGAATCAATTGTTTC  
AAATTCTTGATCGTAGAGTTGTAAGAGAAGGAAGCCTTGAGCAGCTCCAAAAGGTGGCTGAGCTAGTG  
AAGAGTTGTCTTAGTTTGCACGGAGAAGATAGGCCTACCATGAAAGAAGTAGCAAGTGAACCTGAAAAT  
TTGAGAAAGTTCACCAAAAATAACCCCTGGGCTAATGGAAACGGACATGAAGAGAACGGAGATGAATT  
ATCAGATCTTTATACAATTCCAATCGACTCTAATACAGACATCGACAATTTCTCTGGACAATATAGTTCGA  
ATTCCAATACAAATAGCAGCAATTTTTCTGGACAATATAGTTCAGGTAGTACTTCTAACACAAATAGCCC  
ATTGATCCACAACAGAAGGGCAATTTGA

>M6-PGSC0003DMG402011794 M6 RLK with WAX or WAX-EGF domain

AGCAGAGTAGCCTCTAAACTGAACGTGTCTTATAGAGTCCCACAAAATTTTCATTGTCTACAAACTCATAC  
TTGATTTGCGGTTGTGACTGGTTTCTTTAACGTACATTTCAACTCGAATTAATAAATGCAGGCTTCGGATTT  
GGCTTCTTGTCATTAATAATTGGTTCGAGTTGGGTATACCTTATCTTCAAGAAGAGGAAGCTCATCAGGC  
TTAGGGAGAAATTCTTCCAACAAAATGGTGGCGTACTAATGAAACAACAAATCTCGTCAAATGAAGGTG  
GTGTAGAATCTGCCAAGATTTTCACGGCGCAGGAGCTAGAGAAAGCTACCAACAAGTATGCAGACGAT  
AGAATCCTTGGACGAGGTGGTTAAGGTACGGTTTACAAAGGATTTTTACCTGATAAATGCATTGTTGCA  
ATCAAAAAGTCGAGAATGATGGATGACAGTCAAATAGAACAATTCATTAATGAGGTGATTATTCTTACTC  
AAGTTAATCATCGACATGTGGTGAACCTTATAGGGTGTGTTTAGAAGCAGAAGTTCCTTTACTAGTATA  
CGAATACGTCTCTCATGGAACACTGTTCCAGCATATTTACAAGATAGATGGTGTACTTAGTAACTGGTTA  
TCGTGGGAGAATCGTTTAAGGATTGGTGCAGAAGCTGCTGGCGCGCTTGCATACCTTTATTCTGCTGCAT  
CAAAGCCTATTATACACAGGGACGTCAAGTCTGCTAACATACTGTTAGATGAATATTACACCGCGAAAAT  
ATCAGATTTTGGTTCATCGAGGCTAGTTCCATTAGATCAAACACAAGTCACAACCTTAGTCTAAGGTACG



TTAGGATATCTAGATCCTGAATATTTCCACACAAGTCAATTAAGTGAAGAAGAGCGACTTCTACAGCTTTG  
GAGTTGTCCTGGCAGAACTTCTAACCGGAAAAAACCACTTTGCATGGAAAGAACACAAGAAGAACGA  
AATTTGGCAACTTTATTTCTCATCGCTATGAAGGAGAATCGTCTGTTTAAAATTCTAGAGCCGAGATTATT  
GAGAGAGGGATCATTAGAACAACCTCAAGTTGCAGCTGAACTTGTCTAGAGATGCCTTCAATTGAATGG  
TGAGGAAAGACCTACGATGAAAGAAGTTGCAATTGAACTTGAACGTCTAAGGAAATTCAACAAAAATCC  
TTGGACACATGATCAACAATGACACGACGTGTCTGCTTGTAGTGGATGAAAATGAACCGTTGGATCTT  
TACAGCATTGATGAGTCATACACAATGCCAATGAAATTTGGAACAATTCAACTGGATAGTTCTA  
ATCTGATGATATTCCAGGAAATAGTCCACGATGATCAGAGAATTGCATCAATTATATCATAAAGAATT  
GACACCAAAATATTTGCTTTATTGTTCTTTTTATATTGATTCCTCCCTTATGTGAAAGCTTGGGATTGTT  
GATTTTGAATTTTGC GCG

>M6-PGSC0003DMG402012981 M6 RLK with WAX or WAX-EGF domain

GAGCTACGTGACTTACTTTTACTGTTTTGAGATGCCATCATGATTCTTATCCAATATCCTTACTTCTGT  
AGCCATATGGATTTGATGTTGGTCAATCAGAAAGGGGAACAGTCCTTAAAGGATTAGATCTCGGTGTT  
AAGGGATGCGAGTAGGAGGGCAGGTGAGACAATTACCTAATTGTACTTTCATCACATTCAGGATATTT  
CTCAATTGAACTGCATAACCTTCTAATGGAGTTTCTGAGGAGAGGAATATGCTAAAGCTTGTTTTTTAT  
ATATTTTATTTTTCTAATTTGAAGAGTCAACTTCATGCCCCGTGGAACCTCCTGCTCTAATTGTGTGATC  
AATATTCAACTGCTAAAGTTTTCTAAGCTTTTCAGTGTTAGCTTCTCAAATGAGAAAATGGGAACAATT  
TGAAATGAAAATCCAACACTATTGCTGAAGTCAGATCAAAGAAGAAGAAATAAATAGGATAGCTCAA  
ACTGAAGGAATGATACAGGACTTCTATGCAGTAAGAAGAGATCGGACAACTACAATTGAAGTTCCGTA  
GAGTAGTTCTAAGACAAGTAATGTTTTATGGGGTGAATTGGGCTTCTAATGTGCAACATATGCTTAAGAT  
GGGTGCCCTTGAAATGTAGATGTTAAATTTGATGTGCGATCATAAAGATTAGAAATTATAACATCTAA  
CAAATTTACACAAGTGGATATATATAGAAGATAACCTGAGAGAATGCTGCTAAGATGGTCTGGTTATGT  
CCTAAATAGACCTACAAATGCATAGATCCAATAGGTGCGACAATGTGATGATTGAATGTTTTTAAAGGA  
AATGTTGTAAACCTAAAGTCAACATTGGGGAAGTTAACTCAAGAGGCCTGCAGTCTCTAGATCTAGTGC  
AGTCTTAACTAAGAACTAAACACGATAAAAGAAAAAGATCTATATAGGTAATGCCAACTAGTTGAGAAT  
AAGACTTAGTTGTTATTATTACACTCACATTAGGTTTGACTTTTCCACAAGTCCCTTATCTAAATGATGA  
AGAATTGAATATCAGTATAAGAATAAATGTGAGATTTTAGAGAACCTCTAGTTGCAGAGAACTCTACTT  
GCCTTAAAAGAGAACTATTTAGTTATTGTAATGAAATGTGCCCGAATAGAGCATGGATATAGAGGATT  
CATATTAATGTATTGGAATTGAGGCATAATTGATTGAAAGTATAATTGTGGTCACATTAATGAGATCATC

CTG TACTT GATAGT CAGTGCACAAAACATTTAAGTATATGTAGGCTTTTCATCAGAATGTCCTTTAGGTTCTAGCTTTTCCCTGAGCTTAGAATAATGAACTACAACATAATTAAGTCATAATCAGGGTGTGATGCCGATGACTGATGAAATTTAACTCAGCATAGTTGCATCAATAATGATGGATTAATTACTTTACACGGAGGCGATAACATTTGAAAATGAAAATGTTATGTATTTGCAGCGCCTGCTCATCGTTCCTCCTGAGCTAGCTTATGGGAAAAGGCGTGCAGGAAATTCCTCCAAATGCAACAATTGAGGTATCATTTTGTGTTGCATTCATGTGCTTATACCGAAATTC AAGAAAGACTAATCTTGTTTATCAAATAGTTTCTGAAGGCCATTTGGATTCAACTGTTTGACCTATTGTGGTCTATTAACCTTTAAGTTGGTCTGTGGAATTCAAAATGCTGTCTTTACCTTTTCGTATGAAAGATCATCATCATCACTCTTTTAGAATAACTTATCAGAATCATCAAATATGTGGCTAGCAGAAAACCTTTCTAATGGGAGCCTTCACAGTGAACCAGAGATTTGTGTTGATAGAAATATCGTGTGGCATCTAACAGATGCAGAACATTCTTATCAACAGAAAAGTGTATTCTGCACGTATGGAATTTTATCTTTCTTGGGAAAAGTATGTGGGTGTGCAAAATACATCAGCCTCATAAAAGTGTAAACCTCCGAAAACAAGATGACATAATCTTTAAAATATTCTTTTTTATGTGGTCACTTGTTAGCTTTGTTCTTTGTAAAAAGAACGACCCCGAAGAAATGTTATATGAAAATCTTTTAAGTCCTTTCCAACTGAGTGACATGTGCTTGAGCTAAACCTTTTAGAGAAATGAAAAACATAAAATCTGCTACCTCCTACACATTCTCCCCCTTGTAATAATGTGTGTCATCATGTTTTATAATATGGCTACAAAGTGGTGATATTGCAGTAGCCTGATAAACTAGCAACTTTGTAGTTTGAACGAAACCTCAA CTGAGAACAAATGTAGAGAACTTCGATTAATTTGTGTCAAGACTGTAACGTTATACATAACCCCAACAATTAATAGCTGCACCTGGATCACAACATCATTTCTAACATCTAATAGGATCAGTTTTCTGCCAGTTCCGCGCAAGCTAGCCCAAACACCACCTCTACCCAAAAGAACGGAAATATCAGTTTTCCGCCACGCTTTTTGCAAGTTTCATCTCTCATAGTTTACTTATTCTCGAAATGGATGGTATTGTCTCTAACATTATATGTGGTCATTGTATCTTTACTTCTTTACCTACTGAATTTTAATCTACAGATGGATATTGAACTGCTGTCTATTAACAAAGCCCATTCGGGTGAGCAGCCAACCTTTTAGAATATTCAAAAATTAATGGACTTGTCTTTGATTTAGCTTCATTGTCCTCAGCATCTTATGTATTTACTGTAAATTCCTTTTTTTCTTTCCGGTGCA GAACTCCTGTCAAAATTGTTGAAGGATAACCACAGTGTTACCCACTTCATGTTATATTGATTCATCACCTGCAAAAGCACTCAGCCTATTGTATGAATTTGAGAATACTAAGAGATCTGCTTCTGATTTGGTATTTTACCAGGAAAATGTCCTAAATATGTTAATATTGTATAGTTCAA CTGTCATGTTATGAGATTCAAATTGCTTTGAGCATATAAAAGTGCTGTGAGGACTTGTTGATAATAACCCCAAAGAAATGCCAGTGAGAAAATT CAGATATAGATAACTGAATTAACCAGGGGTGAAGCAACTAGTTCCAGAGATATAAATAGTACAAAAGACATTAAGATTTAGTTTAGGACAAATTCAGCTCTGTAAGAGTCATTTAGGTGTCAAATTTACCGTCTTGGACAAAATTCTTAGCTTCTCATTGGCTAGATTATGACATTTATAGTGTCTACCAAGATGGCTTATACTTCTC

ATTATGGCTTGCGGCCTCTCTCTTTATAGATTTTAGTACTGAATTTTATATTGGCACAGTCGTTTACATA  
CTTCTTGCAGACTGCATTATTATATAGTGATGAAGTAATAGAGGACTGCTGCACATGTATATTTATTGAC  
AACTTGCAAAGTAATTATGTGGAAGTAAATCATCCTTAGAATTCGATTCTCTGTCATTATCCTCCTTTAG  
GCAAGTTCTTACCTTAATAAGCAAAGATTATATACCTCTTTCCAGAAAGTGGTAATTGAATTGCAGGTAT  
AATAAAAATATTCTGCAGGCAGAATTGAAGGGTAAGGTTGTGTACAATAGACCCTTATGGTCTGGCCCT  
TCCCCAGACACGCGCATAGCGGGAGCTTAGTGCACTGGGGTGCCCTTTTTGTGTTTGTACCTTCAGATA  
AGAATCCCTTTGCTCAATGATTGCCAAATCTTTTTGCTTTTACTAGATTCTTTTGAATACTTCTTTTCATT  
TTCATTCACCACTTTATTCTCTTTCTTTGCCTATATTCACCCCTTATGAAATCCTTTCTACCATAATATT  
TCAACCTCTTCTTTGCTCTCACAAAATGACCATGACTATTCTTTACAGGAGGAAAATAACCTGTATGTCT  
TACTGTTACTCCACTTATTTTGTACTCTTGTCCCAAAGACATGTCCAACTGTGGTTCTCTAGAGGTTT  
CATATCCCTTGAGCACGAATCCCAACTGTGGCAACCCTGACTATTCTATCCGTTGTGATCCTCACTCTCAC  
AAGCTCTATCTTGATACCCTTAATGGAAGCTCTTATGTCATCCTCAGAATTATGGCCTCGTTCCAGCGTAT  
GGTGGTGCAATCATCACCTGGATGCCTGGTACCTGTGTTACACAAGACATGTCAGTGAGTGAGGGACT  
GTGGTTGAACCAGACTCTTCCATTTAACGTTACTTCTTCTAACACTATCTTCTATTTAATTGTTCTCCTCGT  
CTTCTAGTATCCCCTTAAATTGCACACCTTCTAGCTTGTGCCATAAATATCTGCTTAGCTCTGGACATGTA  
GATGCTAAAAGGGAACCTCAGTGTGCAAGTGGTGTATCCATGTTGCACATTTATTGCTGGCGGTATGC  
CCTCAGCATAACAAGATACGCCTGCATATCTCGGGTTGCCAAGCATTTAGAAGCATTCTACACTTGGATGC  
TATGAAGCCAGCTAATGAATGGGAGGAGGGACTGGAAATCAATGGTCTCCTCCACCCGAGCCCACTG  
TAAATCACAATCTGATTGCTCTGGAGCTTCTACATGTTACCTTCTGGTAAAAACGGTGTCTTTCGCTGT  
TTTGCAATCGTGACTATTATTGGAACAGAAGTCAAGGAAATTGCATGAAGAAGAAACTCTGGTTTTG  
TATTAATATATCTATTGGGATTGCCTTGTTTTTGGCTTTTGTGTTGTGGTATTGCAGTGGCTTTGAAA  
AGATCAGGAAGAGTCTCAGCCAGGGCTAGGCTTGCTAAGGCAAGAGAAGACATTCTAAAATCAAACAA  
TGGTGGAAAACCGGCCAGGATGTTTTGTCTTAAGGAGATGAAGAAAGCTACAAATGGATTCTCAAAG  
ACAGAATCTTGGGCCATGGTGGTTTTCGGAGAAGTTTATAAAGGCGAGCTTCAGGATGGAACGATTGTA  
GCAGTAAAGTTAGCCAAAGTGGGAAATGTCAAGAGCACTCAACAAGTACTCAATGAAGTTGGGATCCTT  
TCTCAAGTAAATCACAGAAACCTGGTCAAGCTTTTAGGGTGCTGCATAGAAGCTGAACAGCCTTTGATG  
ATTTACGAATACATTTCCAACGGAACCCTCCAAGATCATCTTCATGGTAAGTACTCCACCTTTCTTGACTG  
GAAAACAAGGTTGAAAATTGCTTCACAACTGCAGAAGCATTGGCTTATCTTCACTCAGCTGCTTACCCT  
CCCATCTACCATAGAGATGTCAAATCTACAAACATACTCCTGGATAACGAATTCAATGCCAAAGTTTCCG

ACTTTGGGATATCAAGATTGGCTTGTCCAGGGTTGAGTCATGTGTCCACTTGTGCTCAGGGTACATTAGG  
TACTTAGACCCTGAATATTTTCGCAACTACCAGCTAACCGATAAAAGTGATGTTTACAGCTTTGGGGTT  
GTGTTACTAGAATTTCTTACTTCTCAGAAGGCAGTTGACTTCTCACGAGACGAAAATAGTGTCAACTTGG  
TCTCTTATGTCAATCAGCAAGAAAACCACGGTTCAGTTATGGATGTAGTGGACAGGCGCTTGCTTGGCG  
AGGAGCCTTTGACTAATGTAECTACTGGTATGGACTCGTTCCTGGCGCTTGCACTTTCGTGTTTAAGAGA  
AACGAAGACAGAGAGACCCTGCATGAAAGATGTAGTTCAGCAACTTCACTGCATAAGTGAAATAGTTGA  
TCAAGAAGAGCCTATTGAGGTTAGTTAGAAGTATCATAGTCCTAGAAGAAAAAATGTCACTGGTCT  
TGATCTTTTAAAATTCATATTAGTGTAAGAAGAATTTTATAAAAGGCATGGATCTTTTGTGTACTTTG  
AGGTTGGGATCAGATGCTTCTTTTTCTTACTGGAAAAGTTAAAGAAGGGACCGTTAGTAAAGTTGTT  
GTCATGCGGAAGGTTAAGGATTCGAGCTGCCGAAACATTCTATTGCAAAAATGCATGGTAACTTGTGGT  
TAGTGCATCGGGCTACCCTTTTTCCAA

>M6-PGSC0003DMG402015827 M6 RLK with WAX or WAX-EGF domain

TTCCTCTATATACAAATTATCCCTTTGTCTTTTCTTCTTGTGTTTGTAGACATCATATGAATCTTCAAAGCCTATT  
CATGGTAAAGAAATCTGTTTCTGTTCTTGTGTCGTCGCGATTCTTTTCTTACCTTAACAGATGACACTCTTTC  
TATATACCTCAATTCTAGTGCTTGC GTTACACAGAATTGTGGTGATGGAGTGAACATATCATACCCCTTTT  
GGATTCTGAGAAACAGCCATCCTACTGTGGCTTACCAGATTATAATGTCACTTGCAACAAACATAAACC  
ATTTGTTTATATTTCTGAAGAGGAGTTTATCATTAAAGGAAGTATATTACACAACTACTCGATTCTGCTAG  
CGAAAGCAGACGTGTTTGATGAAGAAAACAAATGTCCAGTACCAAGACATAATTTTAGCACAAGGGGTA  
CTTCATTTTCTTTGGGGCCTAACACTGCAGATCTCTTTTTCTTCTATGACTGCACTCAACCTTATGAAAGG  
GAGACATATGATGTCAATTGTGCCGTAATGCCACTCACCATTCTTTTGCGGTTTTTCTACTGAGCTTCT  
GGAGCACTATAACTATTAGTTCGAATCGTGTGTCAGGATCCTGTTTATGCCCTTGTGAGACTGATTCCATA  
GATAGATTGCTAAAAATGAATTACACACAAGTATTACAAAAGGGATTCTTTCTGCAGTGGGATGGGAGT  
AATTGTAGAGATTGTCGGAATAGTGGAGGGCGTTGTGGTGCTCAAAGTAATGAATTTTTGTGCATTTGC  
AAAGACCAAACCCAACCAAGAACATGCTTTCATGGTAAATTTAGAACTGTTATAAGTTTAAATCCATGT  
TTGACATTGAGTAGAGAATATCTCCTTAATTCCTTGATAAAAAAGGTAAACCATTCTGTTATTTATTGATC  
ATGTTAAGGGAATAACGTTTCCGATTGAGGTGATACTGATAGCAGCTAATTAGTTATGCTTTACTGTGAT  
ACATTACAATTGTTCCGTATCAGTTGATCACCTGTCATGTTTTTATTTCAGGAAGAAACAGAATCGGAGT  
AAAGATTGGCATAGGTGATTGTCCTTTGAATATGTTCCACCCTGATTTGTCTTATTATCCTCTTTTCTCAAG  
ATTACTGAAATTCCAATACACATTTCTTCTTGCAGGTTTTGGTACGGCTGCATTTACCGCTTTGATGGCAG

GTGTAATTTTCCTTATCCATCGTCGTAGACAGAACAGAAAAAGTTATGCTGGTTCATCATTGATCACCAG  
AAGCATTCTTTCCTATCCTTCTCCATGAAGGATCCTGAAAAGTCAAATATAGCTATGGGAGTTCACCTCT  
TTGACTACACTGAACTGGAAGAAGCCACTAACAATTTTGATTCCAAGAAAGAGCTTGGAGATGGTGGAT  
ATGGCACAGTATATAAAGGTAAGTAACTAATCTAAAATTGAAATTCTTACTGAAAATGTGTCACTCAAC  
TACTCAACTGATTGATTCATTAACATTTGGTTGAATATGATATGCTTATAGGTAACTTCGAGATGGAC  
GTGTCGTTGCTGTTAAACGTTTGTATGAAAACAACTGCAAGAGAGTAGAGCAATTCATGAATGAAATTG  
ATATCCTAACACGGTTGCATCATCCGAACCTTGCTACTCTTTACGGATGCACATCTCGCCATTCCCCTGAG  
CTTCTACTTGTATTATGAATACATTCCAAATGGCACAGTTGCTGATCATCTACACGGTGGAGATTCACGGC  
GTGGATTGCCTTCATGGAATACACGAATGAAAATTGCCATAGAAACAGCAAACGCACTTGCCTATCTCCA  
TGCTTCAGATGTCATCCACCGTGATGTAAAACTAATAATATCCTTCTAGACAACAATTTCTGTGTTAAAG  
TAGCAGATTTTGGCTTGTCTCGGCTTTTCCCAACGCATCTTACTCATGTCTCAACAGCTCCACAGGGCACT  
CCTGGATATGTTGATCCTGAGTACCACGAGTGCTATCAGCTCACTGACAAAAGTGATGTTTATAGTTTCG  
GAGTGGTATTAGTTGAGCTTATATCATCACTGCCTGCTGTTGATATCTGTAGGCATCGACATGAAATTA  
TTTGTCAAATATGGCCATCAACAAGATTCAAGAGCAATGCATTACATGAGTTGGTGGATCCGAATATCGG  
GTTTGACACTGATGATAAAATAAGGTCAATGATAACTGCAATGGCAGAGTTGGCATTCCAATGTCTACA  
GAATGATGGGGATATGAGGCCATCTATGCAGGAAGTTGTGGAGGCTCTGCTGAGAATTCAGAGAAAGA  
ATAAACTGGGAAAACAGACAAGGGTCATCCTGATGACGATGATGCAGGCTTGTGGAAGAATAACACA  
TCATTAATTTACCTAATTCGGTACTGCAAAATGGAGTAGCAGTTCAACAACACCCAATGGCAGTACCT  
AGCATTGGTTCTCTAAGGTGGTGCCTCAAACGCCTTCCATGTTGGTTTCCAAAACCTGAATTACATACA  
CTTTGATTAGCTTGGTTTTCTCTGTAAAGAGGATGTACATATGTCAGTGCAGCACGTTTAATGATTGAT  
TTGAACTTCTCAAGTCTTCTTTTATCTTTTCGATCTTCTCAAGTGATCTGCTGATTGTAGCAGTACGTGTTT  
CATTTAGTGCGTAGCAATGGAAGAATAGGATTAGTTTCAAGAGAACATTATCCGTATAGTGTAGTATGA  
CAACTGACTGATTTGGAATGTAACATAGAAGTTCAGTGCTCTTAAGCAAGAAAGATTGTAC

>M6-PGSC0003DMG402030531 M6 RLK with WAX or WAX-EGF domain

CCTCACTTGAGTCCTGTTTCTTTTTCCAAAGTCTTTGTAACAAAATTCCAAGTTCACATATAGAAAAATA  
AACCAAATAACAAGGTTAAATTCCAATTTCTTGCTGTGTGAGACCATATAGAGAACACAATATGGCTTC  
TACTTTCTGTTTTTCTGTTGTTAATGATCTTTAGCCTACATCAAGTACTAGGTAACCTCAAATCCAACCTG  
CACCGATGAATTCGAGTGTGGAGGCCTTGGAGCTATGAAGTTTCTTTCACAAATTCCTGCAACCCTGAG  
TGTGGATTATGCAGGTTTGATTGTCATACTAAACCATATCCTAAGATTGTAATTGGTGGACAAAAATATG

ATGCTTTAGTGAAGAAGGGTGATTTTTTCCTTATTTTCAGATCCTAAACTTCAAGAGTACTTAGATAGCAG  
AAGTTGCAAGTCTTTTTACAGAACTTCTCATTTCCAAATTCCCCTTGATTTCTTTCCAAATTGTTCCCAA  
CTTAACCTTGTACAGATGCAAACATAGTCATGACAACACCATCCAGAAGACAAATGATTCCTTTTTCAA  
GATTTTGATAGATATACTGAGTGTGAAGGTTTAATGTTTACTATCACCATCCCATGAAAGCAATATTGG  
GAAATACTAGTGCTAAGATAAGTGGCAAACCTTCCAAAGCACTGTTCACTTGTACAGTTGCCAATTCCATT  
GCCTACACCATCAAACCATATGCAGGTGGTTTGTGTTGAACTGTTGACTTCTAGTGCACCTTCTAAACTGG  
GAGTTGTCCAAAGATTGTCATCTGTGTCTTGACAAAGGAGGGAAATGCCAGATGATCGATGGACACGA  
GTTTCATTGTTCCATTAAGGTATATATAGTATTGTTAAGAAATAAATCTTGTCTGCTTGTGTTTTCTATTGA  
GGTTTATCTAAAAGATTTATCTTTTTTCCTTACTGCAGGACAAAATGGACAAAGTAATTCGAAAATGAT  
TATTATGGCCTCAGGTGATTATCTAGACAATGACCACATTTTTATAGTAGTAGGGGCTTCGGAGCAACGG  
TAAAGTTGTCTCGGGTTTTGAGCAGTGAATCAGCCACTGAAGCTTGCATCAGGGTAGGCTGTCTACAT  
GACACCCCTTGGGGTGTGCCATTCCCCGGCCAGGCTCCCTTTTTTTTGTGGTACACTTTCAAAGGATTA  
GATTTTGATTACTGTATCTTATGTTTTATAGTTTTAGGTGGAGTTGGTTTGATCCTACTATCTCCATTGTC  
GCCTTTTCTATCTGGTGTGCAAGAGAGGGAAGAATGGTTCGACACAATTTTCATCAGGATCTTGAGGTA  
GAGAGCAAATATTTTGGATTTTCAGGTTCCAGTTTTACCTATGCTGAACTTAAGGAAGCCACCAACAATT  
TTGATCCCTTGAATGAACTAGGAGATGGAGGTTTCGGAAGTGTATATTATGGTAAGTTTTTCTTTGAACC  
TAAGAATTATGTTAAAAAGACGGCAATTTCCAAAAGGTGAAAAGTAGCTAGTGTTTCATGATCAGTGGCG  
AAACCAAGAATTTGTTGAGGGTGTATAAACACTTTAACTTGGCTTAACTGACAAGTACTAGACTCCAAC  
TTTGAGTATGAACATCCAGGCACCTCAACCGTCTGTGTGTCAGTTGAATACTCCAAATTACAAAATGATCA  
TCTAGACACCTCCAAAATTTATGTGCCACGCCAACGTTGGATGTCTACGAGACACAGTGGGGACGAGTT  
GGAATGTCTAGTTGCCAGTTGACACTAAGTTGAGGTATCTAGATGTGCACTCTCAAATAGGAGTGCTT  
ACTTGCCGTCTAAGTCCAAGTTTGAGTGTCTGGTTATGTATTATGCCTTTAATATATATGTATATAAGATC  
CTTCTCAAAAAAATAAATGTATAAAATGTAACTTTTGACCTTTATAGTTGGTATAATTTTTCGGTATACAC  
TGTATAATTTGACGAAGGGTGTCAACTGATCACTTTTCACCATGTGTGCGAAAAGTCAAGTATCTCATTG  
TTATTTACATTATGAATTAGGAAAATATATGATGGAAGAGAAGTTGCAGTAAAATGCCTCTATGAGCA  
CAACTGCAAGAGAATGCAGCAGTTCACAACCGAAATCGAGATTCTTACTCGTTTTGAGGCACCAAAATCTT  
GTGTCCCTTTATGGCTGCACATCAAGACGCAGCCGTGAACTTCTCCTTGTGTTATGAATACATTCCACATGG  
AACAGTTGCTGATCATCTCCAAGGTGAAAGAGCAGCAGAGGGATCTCTCACGTGGCCCATCCGTATGAA  
CATTGCAGTTGAAACAGCCAGTGCATTGGCTTACCTCCATGCTTCTGATGTGATACATCGCGATGTCAAG

ACTAACAACATCCTTCTCGACAACAACCTTTCGTGTCAAAGTAGCAGATTTTGGACTCTCGAGACTTTTCCC  
CAACAACGTTTCTCACATATCAACAGCTCCTCAAGGAACGCTTGGGTACGTTGATCCTGAGTATCACGAA  
TGTTATCAGCTTACTGACAAAAGTGACGTTTACAGTTTCGGGGTTGTCTTATCGAGCTTGTATCATCAAT  
GCCAGCTGTTGACTTAAATAGGCACAAGAACGAGATCAATTTGGCTAACTTGGCGATAAACAGGATACA  
AAGATGTGCATTTGATGAACTGATTGATCCATCACTCGGGCTAAACTCAGATACGCTTGCTAAGAAAATG  
ACTATCTCTGTGCGGAGCTAGCTTTTCGATGCTTGCAACTTGATAAGGATATCAGGCCAACAAATGGATG  
AAGTATTGGACATTTAAGAAAGATTCAAGGTGGAGAGTTTCATCAAAATGAGAAGACATTTGACACTA  
GTGCTAGTTTTAATTTATCAAAGTCTAAGAGTGTTAATATCCCTCCATTTTCCCCTGAATCAGATCAAGTT  
GCACTGTAAAGAAAGTTAAGTTCCTAAGTTCATCAGATACTAATAGTGAGGTATGGATTAGTGGCTCTA  
CCACAACAAGCACTAGTGAGTGAGTGACTATCTATGTTGCTCGGACACTCAAAAAATGTTGCCGCACTCA  
TGTCAGATCCTTGAAAAATGCGTAGCTTTTAGAGGATCTGGCACACACCTGACGATATTTTTGAAGAATT  
CGAGCACCATAGGTGAATATCTTAGCTAATGTAGTTTTAGACTTCAGAATCTACTAACTCTTAGCTAAAG  
CATTTGAGCTTATATGAATGTACATATAATAAATTATGTTCTTGATGTTATGCTTCTTTTGCTTTTCAATT  
GTCA

>M6-PGSC0003DMG402030532 M6 RLK with WAX or WAX-EGF domain

TAGTATTTCTTTTGACAAGTTTTACCAGTAAGATGGAGACTATTAATAGCGAAAGTGTTTAGAAGTTAT  
GGTACTTCATCTTATTAGATACAAGTCTGGTGAGCTAGAGTTGCAATTCATTAACTTCAGCTAGCTTTGC  
TCTTCTTGCAGTAGGATTCACAATATGTCTTTGGCTTCTTCGTCTGTTTGCTTTATTCTATCTTCTTCTGA  
TGTTAGTTCAGGCAAAGGGGAGAAATGATTCAACTGTCCAAAGTCTTTCCATGTGGCAATCTTACTGA  
CCTGATCTTCCCTTCACTCTTCCACACAACCCGACTGCGGAATAGTTCCCATCTCTGGTTGTGATGCTA  
AACCATTTCCAAGAATCCAAGTCTTCCCTGGAGGAGAATGGTACTATGCTAAGGGAAATGAGCATAGTT  
ATACTATTTACTTGTGGACTTGAAGCTTCAAACCACGTTGACGCAACACAAGTGCCAGGCTTTTAATGA  
AAATATCTCCCTTTCAGGCTCTCCTTCTATTTCTTACACTGCAGTTAACCTTCAGAACTTCTACAAATGCAA  
CAGGACTAGTAGTAACAACCCATACACTAATCAGAAGATGAAAGATCATTTTGTGGTTATTGCTCATAT  
GATGGCTGTGATGGATTCACCATATACTACAAGTTCGATGGAGTTGATGATAAAGACATTCTAGCAGGC  
AATCATACTGCCAACTGTTCACTTATCAGATTGCCATATTTCAAACAGAACCTGGTAATAATTTGGTCAA  
CTTCTTGATCCTGAAATTCTAGTAGAATGGAAATTGTCTGATGACTGTAACGAATGTCACTATGATGGA  
GGTCGATGCCAGACTGATAAGAAGAACAATTTCTTTGTTACAAAGGTAGACATCTCAAATAATCTACA  
TGTTAAGGTCAAATGCATATTTCTTAGGGTCTTTCTTGTTCATATCACATCTCATAATTTCCCTCTTCT

TTTAGATGCAAAGCAAATAGAAGCAAGTTGGGACTGACTCTTGGAGCAGGTAGTTAAATATCCATTAA  
CCTCATCTTTCTTTCTATTCCAGAATTTCCATACATGTTCCCTTGAATTTCTTTTTTCATTGTGGTAAATGCTC  
AAAACATATCCATAATGACAAAGTGGAGTTGAGAGATTGCTATGTTTTGCTGTTTTTTTTTTTTTTTTTTG  
ATAACCTTCGATTTTTATTTATTTCCAGTTTTTGGTGGAGTATTGGTGATGATAACTTGTTAGCTGTCTA  
CTTTATCTGGTGTTACAAGAAGAGGAAATATAATCCACCCCACTTCCTCTCAACAAGGAAATTGTCATAT  
ATATTTAAAATGATGTTGAGGGAGGCAGTATATACTTTGGCATCCCAGTCTTTTCTTATTCAGAACTTGA  
AGAAGCCACAAATGATTTCAAATCCTCTCGAGTCCTTGAGATGGAGGTTTCGGAAGTGTACTATGGT  
GAGAGACTTCCTAATCTAACTGAGCTATGCTTCAGTTCTTTCTTCATGTGCCTAATACTTGTTCAATGA  
CTAGGACAACCTTAAGGATGGACGAGAGGTTGCTGTGAAGCGCCTTTACGAGCACAACTCCAAACGAAT  
GCAGCAGTTTGTAATGAAATTGAGATCCTTACTAGGCTAAGGCACACCAATCTTGTCACCCTTTATGGC  
TGCACTTCAAGGCGAAGCCGTGAACTAATCCTTGTCTATGAATACATTCTAATGGAAGTCTTGCTGATC  
ACCTCCATGGTGACAGAGCGAAGAACAGATCACTCACCTGGCCAGTCCGCTTGAACATTGCCATAGAAA  
CTGCTGGTGCATTGGCTTACCTTCATGCTTCTGACATAATACTGTGATGTCAAGACTAATAACATACTC  
CTTGATCAGAGTTTCAGTGTCAAAGTTGCAGATTCGGGATATCACGTCTCTTCCCAAATGATGTCTCTCA  
TATCTCAACTGCACCCCGGGGACCCCTGGCTATATCGATCCAAAGTATCACGAATGTTACCAGCTGACC  
ATAAAAAGTGATGTTTATAGCTTCGGGGTGGTCCTTGTTGAACTCATTTTCATCAATGCCAGCTGTGGATA  
TGATGAGGCATAGTCAAGAGATTAATTTAGCTAGCTTTGCTATAAACAAGATTGTGAAATGTGCATTCAA  
CGAGTTGATCGATCCATCCCTGGGATTCGATTCAGATACCAAGATTTGGGAAATGACTAGATCAGTTGC  
AGAGTTGGCATTCTATGCTTACAGACAGATAGGGAAATGAGGCCTACTATGACTGAAGTTTTGGATAC  
TCTAAAAGAGATTCAGACTAGTGAATTTGACAATGAGAAGAGAGCTAAGTTATTGCTGAATCAAGTTAA  
ATCACAACCTTCACCAAATTCTGTGACTGATAAATGGACTACTTGCTCTAGTACTATAGCTAATACAAAGT  
AGTAGCAGTGGTGTGCTACTGTGAGAAGTGTCTTGCTATGTTGTTGCTCCGACTTTTCGAAAATATCCT  
CTGGTGTGTCAGATACTCCAAAAGTAGTGAATTTTATCCAACACGGGTGCGACAAAATTTTTGGAGAGTT  
GAGCAACATAGGTAATAGGTTTCTTGAAGTATGTATCTTAGTATATCTAACTTTAATTCTAGCTTGTTATA  
CACATGTGTGTTATAAAC

>M6-PGSC0003DMG403005729 M6 RLK with WAX or WAX-EGF domain

CTTATCTGGTTTTTTTTGTTTTCTCATTGTAACTGCGCCAGCAATGCCACAGATTATTGTTTTGTGATTA  
TTCATACTGAGTTTCTAGTGCCTATAACTATGCAGTAGAATTATGCAAGAACCCTGTTTATGCAAAAAT  
GAATTACCAGAAGTCTGCAAAAAGGGAATGAGGCTAATATGTCAAGATTGCCTGAATAACAGAGGGCAC



TATATGTTGTGCTTGAATAACAAATACAACCCTAACAGAACAAACGTTTTTCATAGTAAATTCAGAACTTT  
AAGTCCAAATCCACGTTTGACTGTGTTTCATAACAGACTAGAAAATAACCACATAATTCCTTTATAAATTA  
GAAACAGTAAGAAGTTGTATTTATGTCTTTATGATACTACTGGAGATATTTTGTCTGGTTCTGTATCATC  
TCATCACATGTTTTTGTCTGCATTACAGGTTCTAAAAGAGATATCAGAGTGAAGGTTGCCGTAGGTAAC  
TTCCTTTGACCATGTTTCATCTTATGATATCCTTCTCTTTAACAAATGATCAAGAACTTCCTAGTCACATATTC  
TCTCTTTCAGGTGTAAGTGCAGCTGCATTCACTGCCATTGTGGCATGTGTAATTTTCTTCTCTATTATCGT  
CGACAGAAGAAAAGTCATGCTGGTTCGTCTTTGATAACCAGAAGTATCCTTTCCTATCCCTCCTCAAAAA  
TGGATCCTGAAAAATCTTCTCACTATTTGGGAGTTCATGTCTTCGATTACAATGAACTGGAAGAAGCCAC  
AAACAGTTTTGATTCCAGCAAAGAGCTAGGAGAAGGTGGATTTGGCACAGTATATAAAGGTAAGAGAA  
ATTATCCTGAAGTGGGCTTTCTCTCACTGCCAACCTGCTACTAAACCTAAACATTTGATTTGATTCATTA  
CCATATGATTGAACATGACATGTTATAGGTAAACTTCGAGATGGGCGTGTTGTTGCTGTAAAGCGTTTAT  
ATGAGAACAACACTACAAGAGGGTTGAGCAATTCCGAAATGAAATTGAAATCCTCACTCGTTTGCGCCATC  
GAAATCTAGTTACCTTTACGGATGCACATCTCGCCATGGTCGTGAGCTTCTTCTGTGTATGAATATATT  
TCCAATGGCACTGTTGCTGATCATCTTCATGGAGAATTCTCAAAGCCTGGATCACTTTCATGGAATACAC  
GAATGAGCATTTCATAGAAACGGCAAGCGCGCTAGCCTTTCTCCATAATTCAGAGGTCATTCACCGAG  
ATGTA AAAACTAACAAATATCCTCCTAGACAGTAATTTCTGCGTCAAAGTAGCTGATTTTGGGTTGTCTCG  
GCTTTTCCCTACTGATGTTACACATGTCTCAACAGCTCCACAGGGTACCCCTGGATATGTTGATCCCCAGT  
ATCACGAATGCTATCAACTCACCAGTAAAAGTGATGTTTATAGTTTCGGGGTGGTATTAATCGAGCTTAT  
ATCCTCTCTGCCAGCTGTTGATATCTGTAGGCATCGACAGGAAATAAATCTATCAAATATGGCAATTAAC  
AAGATTAGAGCAACACGTTACATGAGCTGGTTGATTCAAATCTTGGTTTTGACTCCAATAACTTGGTAA  
AGTTGATGATCACTGCCGTGGCAGAGTTGGCTTTCCAGTGTCTTCAGAACGACAGGGATTTGAGACCAT  
CCATGCCAGAGGTCTTGGAGGCTCTACTGGGAATTCAGAGTATGGATAAAACAGCAACAGAAATAGGG  
AAGCCAAGTCCCGGTGATGATGCTGGATTGTTGAGCAATCACGCATTATCTCTCTCACCCGATTAGTTA  
TTTCAAATGGACTAGCAGTAGCAGTTCAACAACACATGCTTCCAGTATTGGCTAAGTTTATGCCCTTAG  
TTTGTCTAGTTTGTGGTTTTCTTGATAGTGATTCTTCAGCCACCTGCTCTATTGGTCGCGGAAGGTGAATT  
TTAGTGCTTTTCTTTGAGTACTTTGGACCTTTTTCTATCTTAAAGAGGTTGTACATATCTCGTATGCAGCA  
ATTTAAATTTAACGATACTAATTCAATTCATTTCTTAAATCTTTAGTTAAATTGTGTAGATACTTGTTCAA  
TTGATCATCTTTGTCATAACAGATTTTGA

>M6-PGSC0003DMG403014059 M6 RLK with WAX or WAX-EGF domain

TTTTCAACAGGTACAGGTTTATTAAGTGTGGACTGTTGATTCTACTTTTCTACTTCAGAGAAAAGATTA  
TGCGGTACAAGTGCATCAGGTTTTCGGAATCTAATGCTGAGGATAACCAAAAAGTTGAAGCATTCTTAA  
AGAACTATAGTTCATACGCTCCAAACAGATACAATTATACAGACATCAAAGAATCACCGGTCACTTAAG  
AAGCAAAGTCCAGGAGGATTTGGTAATGTATACAGAGGAAGTTTGTGTAACGGGAGTCAAGTGG  
CAGTGAAGGTCCTGAATAAACTAAAAGGCAGTGGTGAAGATTTTATTAAATGAGGTAGCAAGTATTAGCA  
GAACATCGCATGTTAACATCGTGAGCCTTGTGGGATTTTGTGGTGGAGGTCACAAAAGAGCTCTCGTATA  
TGAGTTCATGCCAAATGGATCTCTTGAAAAATTTATCTATGAGGAAAGATCCGAAAGTGTAGTCGATTG  
GGTTGGCCAATACTGTACAAAATTGCACTAGGCATTGCTCGAGGATTGGAGTACTTGCATCGTGGTTGT  
ACCACTCGGATTTTGCATTTTGTATATAAAGCCTCATAATATCCTGCTTGATGAAGATTTTGTCCGAAAAT  
CTCTGACTTTGGTCTTGCCAACTGTGCATGAAACAGGAGAGTATCGTGTCAATGTTAGGTCCACGAGG  
AACTATAGGCTATATTGCTCCAGAAATTGTTTGTAGAACTTGGGAGGTGTCTCTCACAAGTCTGACGTC  
TATAGCTATGGAATGATGGTCCTAGAGATGGTTGGAGGAAGAAAAATGTTGACGTTGGAGTTGATCG  
CACTAGTGAATCTACTTTCCACATTGGATCTATCAACGAATTGAACTAGACAATGAGCTTCAACTAATT  
GGGATAATGAATGAAGAGGAGAAAGAATGTGCAAGAAAGATGGTGATGGTGAGTTTATGGTGTATAC  
AGACTGATCCCTCAAATCGACCATCTATGAGCAAGATTGTGGAATGTTAGAAGGGAAACTAGACTCTT  
TGCAAATGCCTCCCAAGCCTTATCTTTATTCTCCCTCAAGAACAGAGGTAGATTCATCAGTAGTAGAACT  
GGCCTAGCCTTTATGTGTTTATCTCAGCTAATATCACTGTAGTCACATTTTGTATGGAATTGTAGCAA  
AACTGGTACTGTTACAGTTCGGTTTTTTGATGTGTTTACGCTCCTTGAATGTAAGAAGCTGTAAATTC  
ATGCTTTT

>M6-PGSC0003DMG403030532 M6 RLK with WAX or WAX-EGF domain

GATCTTAGTTCAGGCAAAGGGAAAAAATGATTCAACTTGCCAAAGCTTTTTTTCATGTGGGAATCTTACT  
GACTTGAGCTTTCTTTCTCTTTCTCACGATCTGATTGCGGACTAATGACCATGTTTGGTTGTGATACT  
AAACCATATCCAAGAATCCAGCTGCTTCTGGAGGAGATTGGTACAATCCTATGGAAAAACCGGATAAT  
TTTACAGTTTGGCTCTTGGACCCGAAGCTTCATACCATGTTGAGGCAACACAAGTGCCAGACTTTTAGCA  
AAAGTTTCTCCCTCAAGACTCTCCTTCTATTTCTTTCACTACCCCTACGCTTACGACTTCTTCAAATGTAA  
CAGCACCAGTCGTAATGCCCCAAACTACCCAGAAGAAGAATGATCATTGCTGGTTATAAAATATAC  
AATGGTTGTAAAGACTTTAGCATATACTACAAGCTTTCTGGAGACGATGATGAAGACATTCGAGCAGGC  
AATCTTCTGCGAATTGTTCACTTATCAGATTGCCAATTGACACATTAGCATATGATAGAGATGTGTTCAA  
AATGTTAAGTCACGTTTTTCTGGTACAATGGGAACTGTCTTACGACTGTTACCAATGTCACCAAGGTGGA

GGTCATTGCCAGACTGATAAAACCAACAAATTTCAATGTACAGATGCTCAAGGTCTAGTGCATATTTCTT  
ACCTTTCTTATTTTCATCTCACATATCGTTAATATTCATAGTATTTTCGCTCTTATTTTAGATGCAAAAACA  
ACAAAAAGCAGGTTGGGAGTGACTCTGGGAGCAGGTGATTTAATATCCATTAAGTGCAGAGTTCTTTCC  
TATTTCAGAATTTACATGCATATCATTTAACTTTATCAGATAATGACAGAATGATAGGAAAAGACAAGT  
ACCTTAGGTTATGTAAATGTATGGATACTGGAGTTGAGGGACACTGACTTCTCTTTTCAGTTTTTGGT  
GGAGTAGGATTGGTGATGATAACTTTAGTTGTCTCCTTTATCTGGTGTTACAAGGAGAAGAAATTTAGTC  
CATCCCGCTTCTCACAACGAAGAAATTCTCGGACATTTTCAAACATGATGTTGAGGGAGGCAGTATATA  
CTTTGGTGTCCAGTCTTCTTATTTCAGAACTTGAAGAAGCCACAAATGATTTTCAGTTCTTCTAGAGTCC  
TTGGCGATGGAGGTTTTGGAACCGTTTACTATGGTGAGAGACTTCTAATCCAAGTGCAGTATGCTTCAA  
CTGTTTCTTCATGTACCTAACTCTTGTTTCATCAATGACCAGGAAAGCTTAAGGATGGAAGAGAGGTTGCT  
GTGAAGCGTCTTTATGAGCACAACTGCAGACGAATGCAGCAGTTTGTAATGAAATTGAGATCCTTACT  
AGGCTAAGGCACAACAATCTTGTTACCCTCTATGGTTGCACTTCAAGGCGAAGCCGTGAGCTACTCCTTG  
TCTATGAATATATTCCTAATGGAACCTCTTGCTGATCACCTCCATGGTAATAAAGCGAAGGATGGATCACT  
CACGTGGCTGATTCGCATGAACATTGCCATAGAACTGCTGGTGCATTGGCTTATCTACATGCTTCTGAT  
GTAATACACTGCGATGTCAAGACTAACAACTACTCCTTGATCATAACTTTAGTGTTAAAGTTGCAGATTT  
TGGGATTTCAAGGCTCTTCCCAAATGATGTCTCTCATATTTCAACTGCACCCCGGGGAACCCCTGGCTAT  
ATTGATCCAAAGTATCACGAATGTTACCAGCTGACTAGTAAAAGTGATGTTTATAGCTTCGGGGTGGTCC  
TTGTTGAGCTCATTTTCATCAATGCCAGCTGTGGATATGAATAGACATAGCCAAGAGATTAATTTGTCTAA  
CTTTGCAATAAACAAGATCGTAAAATGTGCATTTACGAGTTGATTGATCCATCCCTGGGGTTCGATTCA  
GATACCAAGATTTGGGAAATGACTACTTCAGTAGCAGAGCTGGCTTTTCTGTGCTTGCAGACAGATAGG  
GACATGAGGCCTACTATGGTTGAAGTTTTGGATACTCTAAACGAGATTCAGACTAGTGAATTTGGCAAT  
GAGAAGAGAACTGAGTCTAATCTCAATGCCAATGAAGCTAAAATAGTAGCAGCTTCTCCTTTCCCTGAAT  
CAGAAGATATGTCATCATTGAAACAAGTTAAATCACTGCCTTCTCCAAATTCTGTGACCGATAAATGGAT  
TACTTGCTCTGATATAACTAGAACAAAGTAGTTAAAATTTCTACACCCCATTTCTTTGTTATTGATGTAC

**Notes S3** 18 additional known RLP and RLK genes from Solanaceae species

>Cf-2.1

ATGATGATGGTTTCTAGAAAAGTAGTCTCTTCACTTCAGTTTTTCACTCTTTTCTACCTCTTTACAGTTGCA  
TTTGCTTCGACTGAGGAGGCAACTGCCCTCTTGAAATGGAAAGCAACTTTCAAGAACCAGAATAATTCCT  
TTTTGGCTTCATGGATTCCAAGTTCTAATGCATGCAAGGACTGGTATGGAGTTGTATGCTTTAATGGTAG  
GGTAAACACGTTGAATATTACAAATGCTAGTGTCAATTGGTACACTCTATGCTTTTCCATTTTCATCCCTCCC  
TTCTCTTGAAAATCTTGATCTTAGCAAGAACAATATCTATGGTACCATTCCACCTGAGATTGGTAATCTCA  
CAAATCTTGTCTATCTTGACTTGAACAACAATCAGATTTAGGAACAATACCACCACAAATCGGTTTACTA  
GCCAAGCTTCAGATCATCCGCATATTTACAATCAATTAATGGATTTATCCTAAAGAAATAGGTTACCT  
AAGGTCTCTTACTAAGCTATCTTTGGGTATCAACTTTCTTAGTGGTTCATTCTGCTTCAGTGGGGAATC  
TGAACAACCTTGCTTTTTTGTATCTTTACAATAATCAGCTTTCTGGCTCTATTCCTGAAGAAATAAGTTACC  
TAAGATCTCTTACTGAGCTAGATTTGAGTGATAATGCTCTTAATGGCTCTATTCCTGCTTCATTGGGGAAT  
ATGAACAACCTTGCTTTTTTGTCTTTTATGGAAATCAGCTTTCTGGCTCTATTCCTGAAGAAATATGTTAC  
CTAAGATCTCTTACTTACCTAGATTTGAGTGAGAATGCTCTTAATGGCTCTATTCCTGCTTCATTGGGGAA  
TTTGAACAACCTTGCTTTTTTGTCTTTTATGGAAATCAGCTTTCTGGCTCTATTCCTGAAGAAATAGGTTA  
CCTAAGATCTCTTAATGTCCTAGGTTTGAAGTGAAGAATGCTCTTAATGGCTCTATTCCTGCTTCATTGGGGA  
ATCTGAAAACCTTGCTAGGTTGAATCTTGTTAATAATCAGCTTTCTGGCTCTATTCCTGCTTCATTGGGG  
AATCTGAACAACCTTGCTATGTTGTATCTTTACAATAACCAGCTTTCTGGCTCTATTCCTGCTTCATTGGG  
GAATCTGAACAACCTTGCTATGTTGTATCTTTACAATAATCAGCTTTCTGGCTCTATTCCTGCTTCATTGGG  
GAATCTGAACAACCTTGCTAGGTTGTATCTCTACAATAATCAGCTTTCTGGCTCTATTCCTGAAGAAATAG  
GTTACTTGAGTTCTTACTTATCTAGATTTGAGTAATAACTCCATTAATGGATTTATTCCTGCTTCATTTG  
GCAATATGAGCAACTTGGCTTTTTTGTCTTTTATGAAAATCAGCTTGCTAGCTCTGTTCTGAAGAAATA  
GGTTACCTAAGGTCTCTTAATGTCCTTGATTTGAGTGAGAATGCTCTTAATGGCTCTATTCCTGCTTCATT  
CGGGAATTTGAACAACCTTGCTAGGTTGAATCTTGTTAATAATCAGCTTTCTGGCTCTATTCCTGAAGAAA  
TAGGTTACCTAAGGTCTCTTAATGTCCTTGATTTGAGTGAGAATGCTCTTAATGGCTCTATTCCTGCTTCA  
TTCGGGAATTTGAACAACCTTGCTAGGTTGAATCTTGTTAATAATCAGCTTTCTGGCTCTATTCCTGAAGA  
AATAGGTTACCTAAGATCTCTTAATGACCTAGGTTTGAAGTGAAGAATGCTCTTAATGGCTCTATTCCTGCTT  
CATTGGGGAATCTGAACAACCTTGCTATGTTGTATCTTTACAATAATCAGCTTTCTGGCTCTATTCCTGAA  
GAAATAGGTTACTTGAGTTCTTACTTATCTATCTTTGGGTAATAACTCTCTTAATGGACTTATTCCTGCT

TCATTTGGCAATATGAGAAATCTGCAAGCTCTGATTCTCAATGATAACAATCTCATTGGGGAAATTCCTTC  
ATCTGTGTGCAATTTGACATCACTGGAAGTGTGTATATGCCGAGAAACAATTTGAAGGGAAAAGTTCC  
GCAATGTTTGGGTAATATCAGTAACCTTCAGGTTTTGTGCGATGTCATCTAATAGTTTCAGTGGAGAGCTC  
CCTTCATCTATTTCCAATTTAACATCACTACAAATACTTGATTTTGGCAGAAACAATCTGGAGGGAGCAAT  
ACCACAATGTTTTGGCAATATTAGTAGCCTCGAGGTTTTTGATATGCAGAACAACAACCTTTCTGGGACT  
CTTCCAACAATTTTAGCATTGGATGTTCACTGATAAGTCTCAACTTGCATGGCAATGAACTAGAGGATG  
AAATCCCTCGGTCTTTGGACAATTGCAAAAAGCTGCAAGTCTTGATTTAGGAGACAATCAACTCAACGA  
CACATTTCCCATGTGGTTGGGAACCTTGCCAGAGCTGAGAGTTTTAAGGTTGACATCGAATAAATTGCAT  
GGACCTATAAGATCATCAAGGGCTGAAATCATGTTTCCTGATCTTGAATCATAGATCTCTCTCGCAATG  
CATTCTCGCAAGACTTACCAACGAGTCTATTTGAACATTTGAAAGGGATGAGGACAGTTGATAAAACAA  
TGGAGGAACCAAGTTATGAAAGCTATTACGATGACTCGGTGGTAGTTGTGACAAAGGGATTGGAGCTT  
GAAATTGTGAGAATTTTGTCTTTGTACACAGTTATCGATCTTCAAGCAACAATTTGAAGGACATATTCC  
TTCTGTCTGGGAGATCTCATTGCGATCCGTATACTTAATGTATCTCATAATGCATTGCAAGGCTATATAC  
CATCATCACTTGGAAAGTTTATCTATACTGGAATCACTAGACCTTTTCGTTTAACCAACTTTTCAGGAGAGATA  
CCACAACAACCTTGCTTCTTACGTTTCTTGAATTCTTAAATCTCTCCACAATTATCTCCAAGGATGCATC  
CCTCAAGGACCTCAATTCCGTACCTTTGAGAGCAATTCATATGAAGGTAATGATGGATTACGTGGATATC  
CAGTTTCAAAGGTTGTGGCAAAGATCCTGTGTCAGAGAAAACTATACAGTGTCTGCGCTAGAAGATC  
AAGAAAGCAATTCTGAATTTTTCAATGATTTTTGGAAAGCAGCTCTGATGGGCTATGGAAGTGGACTGT  
GTATTGGCATATCCATGATATATATCTTGATCTCGACTGGAAATCTAAGATGGCTTGAAGAATCATTGA  
AAAACCTGGAACACAAAATTATCATGCAAAGGAGAAAGAAGCAGCGAGGTCAAAGAAATTACAGAAGAA  
GAAATAATCACTTCTAG

>Cf-2.2\_

ATGATGATGGTTTCTAGAAAAGTAGTCTCTTCACTTCAGTTTTTCACTCTTTTCTACCTCTTTACAGTTGCA  
TTTGCTTCGACTGAGGAGGCAACTGCCCTCTTGAATGGAAAGCAACTTTCAAGAACCAGAATAATTCCT  
TTTTGGCTTCATGGATTCCAAGTTCTAATGCATGCAAGGACTGGTATGGAGTTGTATGCTTTAATGGTAG  
GGTAAACACGTTGAATATTACAAATGCTAGTGTGTCATTGGTACACTCTATGCTTTTCCATTTTCATCCCTCCC  
TTCTCTTGAAAATCTTGATCTTAGCAAGAACAATATCTATGGTACCATTCCACCTGAGATTGGTAATCTCA  
CAAATCTTGTCTATCTTGACTTGAACAACAATCAGATTTTCAGGAACAATACCACCACAAATCGGTTTACTA  
GCCAAGCTTCAGATCATCCGCATATTTACAATCAATTAATGGATTTATCCTAAAGAAATAGGTTACCT

AAGGTCTCTTACTAAGCTATCTTTGGGTATCAACTTTCTTAGTGGTTCCATTCTGCTTCAGTGGGGAATC  
TGAACAACCTTGCTTTTTTGTATCTTTACAATAATCAGCTTTCTGGCTCTATTCTGAAGAAATAAGTTACC  
TAAGATCTCTTACTGAGCTAGATTTGAGTGATAATGCTCTTAATGGCTCTATTCTGCTTCATTGGGGAAT  
ATGAACAACCTTGCTTTTTTGTCTTTTATGGAAATCAGCTTTCTGGCTCTATTCTGAAGAAATATGTTAC  
CTAAGATCTCTTACTTACCTAGATTTGAGTGAGAATGCTCTTAATGGCTCTATTCTGCTTCATTGGGGAA  
TTTGAACAACCTTGCTTTTTTGTCTTTTATGGAAATCAGCTTTCTGGCTCTATTCTGAAGAAATAGGTTA  
CCTAAGATCTCTTAATGTCCTAGGTTGAGTGAGAATGCTCTTAATGGCTCTATTCTGCTTCATTGGGGA  
ATCTGAAAAACCTTGCTAGGTTGAATCTTGTTAATAATCAGCTTTCTGGCTCTATTCTGCTTCATTGGGG  
AATCTGAACAACCTTGCTATGTTGTATCTTTACAATAACCAGCTTTCTGGCTCTATTCTGCTTCATTGGG  
GAATCTGAACAACCTTGCTATGTTGTATCTTTACAATAATCAGCTTTCTGGCTCTATTCTGCTTCATTGGG  
GAATCTGAACAACCTTGCTAGGTTGTATCTCTACAATAATCAGCTTTCTGGCTCTATTCTGAAGAAATAG  
GTTACTTGAGTTCTTACTTATCTAGATTTGAGTAATAACTCCATTAATGGATTTATTCTGCTTCATTTG  
GCAATATGAGCAACTTGGCTTTTTTGTCTTTTATGAAAATCAGCTTGCTAGCTCTGTTCTGAAGAAATA  
GGTTACCTAAGGTCTCTTAATGTCCTTGATTTGAGTGAGAATGCTCTTAATGGCTCTATTCTGCTTCATT  
CGGGAATTTGAACAACCTTGCTAGGTTGAATCTTGTTAATAATCAGCTTTCTGGCTCTATTCTGAAGAAA  
TAGGTTACCTAAGGTCTCTTAATGTCCTTGATTTGAGTGAGAATGCTCTTAATGGCTCTATTCTGCTTCA  
TTCGGGAATTTGAACAACCTTGCTAGGTTGAATCTTGTTAATAATCAGCTTTCTGGCTCTATTCTGAAGA  
AATAGGTTACCTAAGATCTCTTAATGACCTAGGTTTGTAGTGAGAATGCTCTTAATGGCTCTATTCTGCTT  
CATTGGGGAATCTGAACAACCTTGCTATGTTGTATCTTTACAATAATCAGCTTTCTGGCTCTATTCTGAA  
GAAATAGGTTACTTGAGTTCTTACTTATCTATCTTTGGGTAATAACTCTCTTAATGGACTTATTCTGCT  
TCATTTGGCAATATGAGAAATCTGCAAGCTCTGATTCTCAATGATAACAATCTCATTGGGGAAATTCCTTC  
ATCTGTGTGCAATTTGACATCACTGGAAGTGTTGTATATGCCGAGAAACAATTTGAAGGGAAAAGTTCC  
GCAATGTTTGGGTAATATCAGTAACCTTCAGGTTTTGTCGATGTCATCTAATAGTTTCAGTGGAGAGCTC  
CCTTCATCTATTTCCAATTTAACATCACTACAATACTTGATTTTGGCAGAAACAATCTGGAGGGAGCAAT  
ACCACAATGTTTTGGCAATATTAGTAGCCTCGAGGTTTTTGTATATGCAGAACAACTTTCTGGGACT  
CTTCCAACAAATTTTAGCATTGGATGTTCACTGATAAGTCTCAACTTGCATGGCAATGAACTAGAGGATG  
AAATCCCTCGGTCTTTGGACAATTGCAAAAAGCTGCAAGTTCTTGATTTAGGAGACAATCAACTCAACGA  
CACATTTCCCATGTGGTTGGGAACCTTTGCCAGAGCTGAGAGTTTTAAGGTTGACATCGAATAAATTGCAT  
GGACCTATAAGATCATCAAGGGCTGAAATCATGTTTCTGATCTTCGAATCATAGATCTCTCTCGCAATG

CATTCTCGCAAGACTTACCAACGAGTCTATTTGAACATTTGAAAGGGATGAGGACAGTTGATAAAACAA  
TGGAGGAACCAAGTTATGAAAGCTATTACGATGACTCGGTGGTAGTTGTGACAAAGGGATTGGAGCTT  
GAAATTGTGAGAATTTTGTCTTTGTACACAGTTATCGATCTTTCAAGCAACAAATTTGAAGGACATATTCC  
TTCTGTCCTGGGAGATCTCATTGCGATCCGTATACTTAATGTATCTCATAATGCATTGCAAGGCTATATAC  
CATCATCACTTGGAAAGTTTATCTATACTGGAATCACTAGACCTTTCTGTTTAAACCAACTTTCAGGAGAGATA  
CCACAACAACCTTGCTTCTTACGTTTCTTGAATTCTTAAATCTCTCCACAATTATCTCCAAGGATGCATC  
CCTCAAGGACCTCAATTCCGTACCTTTGAGAGCAATTCATATGAAGGTAATGATGGATTACGTGGATATC  
CAGTTTCAAAGGTTGTGGCAAAGATCCTGTGTCAGAGAAAACTATACAGTGTCTGCGCTAGAAGATC  
AAGAAAGCAATTCTGAATTTTTCAATGATTTTTGGAAAGCAGCTCTGATGGGCTATGGAAGTGGACTGT  
GTATTGGCATATCCATAATATATATCTTGATCTCGACTGGAAATCTAAGATGGCTTGCAAGAATCATTGA  
AGAACTGGAACACAAAATTATCATGCAAAGGAGAAAGAAGCAGCGAGGTCAAAGAAATTACAGAAGA  
AGAAATAATCGCTTCTAG

>Cf-4

ATGGGTTGTGTAACACTTGTGTTTTTCATGCTATATGTCTTTCTTTCAACTTGTTTCCTCGTCATCCTTAC  
CTCATTTGTGCCCCGAAGATCAAGCTCTTGCTCTTCTAGAATTCAAGAACATGTTTACCGTTAATCCTAAT  
GCTTCTGATTATTGTTACGACAGAAGAACTCTTTCTTGGAAACAAAAGCACAAAGTTGCTGCTCATGGGATG  
GCGTTCATTGTGACGAAACGACAGGACAAGTGATTGAGCTTGACCTCCGTTGCATCCAACCTTCAAGGCA  
AGTTTCATTCCAATAGTAGCCTCTTTCAACTCTCCAATCTCAAAGGCTTGATTTGTCTTATAATGATTTCA  
CTGGATCGCCCATTTACCTAAATTTGGTGAGTTTTAGATTTGACGCATCTCGATTTGTCGCATTCAAGT  
TTTAGGGGTGTAATCCCTTCTGAAATCTCTCATCTTTCTAAACTATACGTTCTTCGTATTAGTCTAAATGAG  
CTTACTTTTGGTCCTCACAATTTTGAATTGCTTCTTAAGAAGTTGACCCAATTAAGGTGCTCGACCTTGA  
ATCTATCAACATCTCTTCCACTATTCCTTTGAATTTCTTCTCATTTAACAAATCTATGGCTTCCATACACA  
GAGTTACGTGGGATATTGCCCGAAAGAGTTTTCCACCTTTCCGACTTAGAATTTCTCGATTTATCAAGCA  
ATCCCCAGCTCACGGTTAGGTTTCCACAACCAATGGAATAGCAGTGCATCACTCATGAAGTTATATCT  
CTATAATGTGAATATTGATGATAGGATACCTGAATCATTTAGCCATCTAACTTCACTTACATAAGTTGTACA  
TGAGTCGTTCTAATCTGTCAGGGCCTATTCTAAACCTCTATGGAATCTACCAACATAGTGTTTTTGGAC  
CTTAATAATAACCATCTTGAAGGACCAATTCATCCAACGTAAGCGGACTACGTAACCTACAAATACTTT  
GGTTGTCATCAAACAACCTTAAATGGGAGTATACCATCCTGGATATTCTCCCTTCCATCACTGATAGGGTT  
AGACTTGAGCAATAACACTTTTCAAGGAAAAATTCAAGAGTTCAAGTCCAAAACATTAAGTACCGTACT

CTAAAACAAAATAAGCTAAAAGGTCCTATTCCGAATTCCTCCTAAACCAGAAGAACCTACAATTCCTTCT  
CCTTTCACACAATAATATCAGTGGACATATTTCTTCAGCTATCTGCAATCTGAAAACATTGATATTGTTAG  
ACTTGGGAAGTAATAATTTGGAGGGAACAATCCCGCAATGCGTGGTTGAGAGGAACGAATACCTTTCGC  
ATTTGGATTTGAGCAACAACAGACTTAGTGGGACAATCAATACAACCTTTTAGTGTTGGAAACATTTTAAG  
GGTCATTAGCTTGCACGGGAATAAGCTAACGGGGAAAGTCCCACGATCTATGATCAATTGCAAGTATTT  
GACACTACTTGATCTAGGTAACAATATGTTGAATGACACATTTCCAAACTGGTTGGGATACCTATTTCAA  
TTGAAGATTTTAAGCTTGAGATCAAATAAGTTGCATGGTCCCATCAAATCTTCAGGGAATACAACTTGT  
TTATGGGTCTTCAAATCTTGATCTATCATCTAATGGATTTAGTGGGAATTTACCCGAAAGAATTTTGGG  
GAATTTGCAAACCATGAAGGAAATTGATGAGAGTACAGGATTCCCAGAGTATATTTCTGATCCATATGA  
TATTTATTACAATTATTTGACGACAATTTCTACAAAGGGACAAGATTATGATTCTGTTCGAATTTTGGATT  
CTAACATGATTATCAATCTCTCAAAGAACAGATTTGAAGGTCATATTCCAAGCATTATTGGAGATCTTGT  
GGACTTCGTACGTTGAACTTGTCTCACAATGTCTTGAAGGTCATATACCGGCATCATTTCAAATTTATC  
AGTACTCGAATCATTGGATCTCTCATCTAATAAAATCAGCGGAGAAATTCGCAGCAGCTTGCATCCCTC  
ACATTCCTGAAGTCTTAAATCTCTCTCACAATCATCTTGTGGATGCATCCCCAAAGGAAAACAATTTGA  
TTCGTTTCGGGAACACTTCGTACCAAGGGAATGATGGGTTACGCGGATTTCCACTCTCAAACCTTTGTGGT  
GGTGAAGATCAAGTGACAACCTCCAGCTGAGCTAGATCAAGAAGAGGAGGAAGAAGATTCACCAATGAT  
CAGTTGGCAGGGGGTTCTCGTGGGTTACGGTTGTGGACTTGTTATTGGACTGTCCGTAATATACATAAT  
GTGGTCAACTCAATATCCAGCATGGTTTTTCGAGGATGGATTTAAAGTTGGAACACATAATTACTACGAAA  
ATGAAAAAGCACAAGAAAAGATATTAG

>Cf-5

ATGATGATGGTTACTAGCAAAGTATTCTCTTCACTTCAGTTTTTCACTGTTTTCTACCTCTTTACAGTTGCA  
TTTGCTTCGACTGAGGAGGCAACTGCCCTCTTGAATGGAAAGCAACTTCAAGAACCAGAATAATTCCT  
TTTTGGCTTCATGGACGACAAGTTCTAATGCATGCAAGGACTGGTATGGAGTTGTATGCTTGAATGGTA  
GGGTAAACACGTTGAATATTACAAATGCCAGTGTCAATTGGTACACTTTATGCTTTTCCATTTTCATCCCTC  
CCTTTTCTCGAGAATCTTGATCTTAGCAACAACAATATCTCTGGTACCATTCCACCTGAGATTGGTAATCT  
CACAAATCTTGTCTATCTTGACTTGAACACCAATCAGATTTTCAGGAACAATTCCACCACAAATCGGTTTAC  
TAGCCAAGCTTCAGATCATCCGCATATTTAACAATCATTTAAATGGCTTTATTCTGAAGAAATAGGTTAC  
CTAAGGTCTCTTACTAAGCTATCTTTGGGTATCAACTTTCTTAGTGGTTCTATTCTGCTTCATTGGGCAAT  
ATGACCAACTTGTCTTTTTTATTTCTTTATGAAAATCAGCTTTCTGGCTTTATTCTGAAGAAATAGGTTAC



CTAAGGTCTCTTACTAAGCTATCTTTGGATATCAACTTTCTTAGTGGTTCCATTCTGCTTCATTGGGGAA  
TCTGAACAACCTTGCTTTTTTGTATCTTTACAATAATCAGCTTTCTGGCTCTATTCTGAAGAAATAGGT  
CCTAAGGTCACTTACTAAGCTATCTTTGGGTATCAACTTTCTTAGTGGTTCCATTCTGCTTCATTGGGGA  
ATCTAAACAACCTTGCTAGGTTGGATCTTTACAATAATAAGCTTTCTGGCTCTATTCTGAAGAAATAGGT  
TACCTAAGGTCTCTTACTTACCTAGATTTGGGTGAGAATGCTCTTAATGGCTCTATTCTTCTTCATTGGG  
GAATCTAAACAACCTTGCTAGGTTGGATCTTTACAATAATAAGCTTTCTGGCTCTATTCTGAAGAAATAG  
GTTACCTAAGGTCTCTTACTTACCTAGATTTGGGTGAGAATGCTCTTAATGGCTCTATTCTGCTTCATTG  
GGGAATCTGAACAACCTGTTTATGTTGTATCTTTACAATAATCAGCTTTCTGGCTCTATTCTGAAGAAAT  
AGGTTACCTGAGTTCTCTTACTGAACTATATTTGGGTAATAACTCTCTTAATGGCTCTATTCTGCTTCATT  
GGGAATCTGAACAACCTGTTTATGTTGTATCTTTACAATAATCAGCTTTCTGGCTCTATTCTGAAGAAA  
TAGGTTACCTGAGTTCTCTTACTGAACTATTTTTGGGTAATAACTCTCTTAATGGCTCTATTCTGCTTCAT  
TGGGAATCTAAACAACCTTGCTAGGTTGTATCTTTACAATAATCAGCTTTCTGGCTCTATTCTGCTTCA  
TTTTGGCAATATGAGAAATCTGCAAACCTGTTTTCTCAGTGATAACGATCTCATTGGGGAAATTCCTTCATT  
TGTGTGCAATTTGACATCACTGGAAGTGTTGTATATGTCGAGAAACAATTTGAAGGGAAAAGTTCCGCA  
ATGTTTGGGTAATATCAGTGACCTTCACATTTTGTGATGTCATCTAATAGTTTCAGAGGAGAGCTCCCTT  
CATCTATTTCCAATTTAACATCACTAAAAATACTTGATTTTGGCAGAAACAATCTGGAGGGAGCAATACC  
ACAATTTTTTGGCAATATTAGTAGCCTCCAGGTTTTTGTATGCAGAATAACAACTTTCTGGGACTCTTC  
CAACAAATTTTAGCATTGGATGTTCACTGATAAGTCTCAACTTGCATGGCAATGAACTAGCAGATGAAAT  
CCCTCGGTCTTTGGACAATTGCAAAAAGCTGCAAGTTCTTGATTTAGGAGACAATCAACTCAACGACACA  
TTCCCATGTGGTTGGGAACCTTGCCAGAGCTGAGAGTTTTAAGGTTGACATCGAATAAATTGCATGGAC  
CTATAAGATCATCAGGGGCTGAAATCATGTTTCTGATCTCCGAATCATAGATCTCTCTCGCAATGCATTC  
TCGCAAGACTTACCAACGAGTCTATTTGAACATTTGAAAGGGATGAGGACAGTTGATAAAACAATGGAG  
GAACCAAGTTATGAAAGCTATTACGATGACTCGGTGGTAGTTGTGACAAAGGGATTGGAGCTTGAAATT  
GTGAGAATTCTGTCTTTGTACACAATTATCGATCTTTCAAGCAACAATTTGAAGGACATATTCCTTCTGT  
CCTGGGAGATCTCATTGCGATCCGTGTACTTAATGTATCTCATAATGCATTGCAAGGCTATATACCATCAT  
CACTTGGAAGTTTATCTATACTGGAATCACTAGACCTTTCGTTTAAACCAACTTTCGGGAGAGATAACCACA  
ACAACCTGCTTCTCTTACGTTTCTTGAAGTCTTAAATCTCTCCACAATTATCTCCAAGGATGCATCCCTCA  
AGGACCTCAATTCGTACCTTTGAGAGCAATTCATATGAAGGTAATGATGGATTACGTGGATATCCAGTT  
TCAAAAGGTTGTGGCAAAGATCCTGTGTGTCAGAGAAAACTATACAGTGTCTGCGCTAGAAGATCAAGAA

AGCAATTCTGAATTTTTCAATGATTTTTGGAAAGCAGCTCTGATGGGCTATGGAAGTGGACTGTGTATTG  
GCATATCCATAATATATATCTTGATCTCGACTGGAAATCTAAGATGGCTTGCAAGAATCATTGAAGAACT  
GGAACACAAAATTATCGTGCAAAGGAGAAAGAAGCAGCGAGGTCAAAGAAATTACAGAAGAAGAAAT  
AATCGCTTCTAG

>Cf-9

ATGGATTGTGTAACACTTGTATTCCTTATGCTATATACCTTTCTCTGTCAACTTGCTTTATCCTCATCCTTG  
CCTCATTTGTGCCCGAAGATCAAGCTCTTCTCTTCTACAATTCAAGAACATGTTTACCATTAATCCTAAT  
GCTTCTGATTATTGTTACGACATAAGAACATACGTAGACATTCAGTCATATCCAAGAACTCTTCTTGAA  
CAAAGCACAAAGTTGCTGCTCATGGGATGGCGTTCATTGTGACGAGACGACAGGACAAGTGATTGCGC  
TTGACCTCCGTTGCAGCCAACTTCAAGGCAAGTTTCATTCCAATAGTAGCCTCTTCAACTCTCCAATCTC  
AAAAGGCTTGATTTGTCTTTAATAATTTCACTGGATCACTCATTTACCAAAAATTTGGTGAGTTTTCAA  
TTTGACGCATCTCGATTTGTGCGATTCTAGTTTTACAGGTCTAATTCCTTCTGAAATCTGTCACCTTTCTAA  
ACTACACGTTCTTCGTATATGTGATCAATATGGGCTTAGTCTGTACCTTACAATTTGAACTGTCCTTAA  
GAACTTGACCCAATTAAGAGAGCTCAACCTTGAATCTGTAAACATCTCTTCCACTATTCCTTCAAATTTCT  
CTTCTCATTTAACAACCTCTACAACCTTTCAGGCACAGAGTTACATGGGATATTGCCCGAAAGAGTTTTTCAC  
CTTTCAACTTACAATCCCTTCATTTATCAGTCAATCCCAGCTCACGGTTAGGTTTCCACAACCAAATG  
GAATAGCAGTGCATCACTCATGACGTTATACGTGATAGTGTGAATATTGCTGATAGGATACCTAAATCA  
TTTAGCCATCTAACTTCACTTCATGAGTTGTACATGGGTCGTTGTAATCTGTCAGGGCCTATTCCTAAACC  
TCTATGGAATCTACCAACATAGTGTTTTTGCACCTTGGTGATAACCATCTTGAAGGACCAATTTCCATT  
TCACGATATTTGAAAAGCTCAAGAGGTTATCACTTGTAATAACAACCTTTGATGGCGGACTTGAGTTCTT  
ATCCTTTAACACCCAACCTTGAACGGCTAGATTTATCATCCAATTCCTAACTGGTCCAATTCCATCCAACA  
TAAGCGGACTTCAAACCTAGAATGTCTCTACTTGTGATCAAACCACTTGAATGGGAGTATACCTTCTG  
GATATTCTCCCTTCTTCACTGGTTGAGTTAGACTTGAGCAATAACACTTTCAGTGGAAAAATTCAAGAG  
TTCAAGTCCAAAACATTAAGTGCCGTTACTCTAAAACAAAATAAGCTGAAAGGTCGTATTCCGAATTCAC  
TCCTAAACCAGAAGAACCTACAATTACTTCTCTTTCACACAATAATATCAGTGGACATATTTCTTCAGCT  
ATCTGCAATCTGAAAACATTGATATTGTTAGACTTGGGAAGTAATAATTTGGAGGGAACAATCCCACAAT  
GCGTGGTTGAGAGGAACGAATACCTTTCGCATTTGGATTTGAGCAAAAACAGACTTAGTGGGACAATCA  
ATACAACCTTTTAGTGTTGGAAACATTTAAGGGTCATTAGCTTGCACGGGAATAAGCTAACGGGGAAAG  
TCCCACGATCTATGATCAATTGCAAGTATTTGACACTACTTGATCTAGGTAACAATATGTTGAATGACAC

ATTTCCAAACTGGTTGGGATACCTATTTCAATTGAAGATTTTAAGCTTGAGATCAAATAAGTTGCATGGT  
CCCATCAAATCTTCAGGGAATACAAACTTGTTTATGGGTCTTCAAATTCTTGATCTATCATCTAATGGATT  
TAGTGGGAATTTACCCGAAAGAATTTTGGGGAATTTGCAAACCATGAAGGAAATTGATGAGAGTACAG  
GATTCCCAGAGTATATTTCTGATCCATATGATATTTATTACAATTATTTGACGACAATTTCTACAAAGGGA  
CAAGATTATGATTCTGTTCGAATTTTGGATTCTAACATGATTATCAATCTCTCAAAGAACAGATTTGAAGG  
TCATATTTCCAAGCATTATTGGAGATCTTGTTGGACTTCGTACGTTGAACTTGTCTCACAATGTCTTGGGAAG  
GTCATATACCGGCATCATTTCAAATTTATCAGTACTCGAATCTTTGGATCTCTCATCTAATAAAATCAGC  
GGAGAAATTCCGCAGCAGCTTGCATCCCTCACATTCCTTGAAGTCTTAAATCTCTCTCACAATCATCTTGT  
TGGATGCATCCCCAAAGGAAAACAATTTGATTCGTTCCGGGAACACTTCGTACCAAGGGAATGATGGGTT  
ACGCGGATTTCCACTCTCAAACCTTTGTGGTGGTGAAGATCAAGTGACAACTCCAGCTGAGCTAGATCA  
AGAAGAGGAGGAAGAAGATTCACCAATGATCAGTTGGCAGGGGGTTCTCGTGGGTTACGGTTGTGGAC  
TTGTTATTGGACTGTCCGTAATATACATAATGTGGTCAACTCAATATCCAGCATGGTTTTTCGAGGATGGA  
TTTAAAGTTGGAACACATAATTACTACGAAAATGAAAAAGCACAAGAAAAGATATTAG

>LeEix1

ATGGACAAATGGAAATATGCAAGATTAGCACAGTTCCTTTTCACTTTGTCTCTACTGTTCCCTAGAGACATC  
TTTTGGATTAGGTGGTAACAAGACCCTATGTTTAGATAAGGAGAGAGATGCTCTTCTTGAGTTCAAAG  
AGGTCTTACTGATTCTTTTGATCATTATCTACATGGGGTGATGAAGAAGATAAACAAGAATGCTGCAAA  
TGGAAGGGTATTGAATGTGACAGAAGAACAGGTCATGTAAGTATTGATCTACACAATAAGTTTACTT  
GTTCTGCTGGTGCCAGTGCTTGTGTTTGTCTCTAGATTGACAGGTAACTTAGCCCTTCTCTGCTTGAGTTG  
GAGTACTTGAATTAAGTGGACCTCAGTGTTAATGAATTTGAAAGAAGTGAATAACCAAGATTCATAGGCT  
CACTTAAGAGACTAGAGTACTTGAACCTGTCAGCTTCTTTTTTTCTGGTGTAAATCCAATACAGTTCCAG  
AATCTAACTTCTTTAAGGACTCTTGATCTTGGAGAAAATAATCTTATAGTAAAGGACCTTAGATGGCTTTC  
TCATCTGTCTTCTCTAGAGTTTTTGAGTCTGAGTTCTAGCAACTCCAAGTAAACAATTGGTTTCAAGAGA  
TAACTAAGGTCCCTTCATTGAAAGAACTGGACTTGAGTGGCTGTGGACTCTCTAAGTTGGCTCCATCTCA  
AGCTGATTTAGCCAATCTTCTTTTATATCTCTTTCTGTTCTTCATTTATGTTGTAATGAGTTTTCTTCTCAT  
CTGAATATAGCTGGGTATTCAATTTGACCACAAGCCTAACTAGCATTGACCTCCTTTATAATCAACTCAGC  
GGTCAAATTGATGATCGCTTTGGGACCTTGATGTATCTTGAACATCTTGATCTTGCTAATAACTTAAAGAT  
TGAAGGTGGGGTTCCAGTTCTTTGGGAAATTTGACACGTTTACGTCATCTGGACATGTCTAATACTCAG  
ACAGTCCAATGGCTTCTGAGTTGTTTCTCAGGTTATCAGGCAGTAGGAAATCACTTGAGGTTTTGGGGT

TGAACGAAAACCTCATTGTTTGGTTCAATTGTTAATGCAACAAGATTTTCATCCTTAAAGAAATTATACCTG  
CAGAAGAATATGCTGAATGGTTCTTTTATGGAAAGTGCGGGACAAGTTTCTACCCTTGAGTATCTGGATT  
TGTCTGAAAACCAAATGAGAGGGGCATTACCAGATTTAGCATTGTTTCCATCATTGAGAGAGTTGCATCT  
TGGCTCTAATCAATTTGAGGGGAGGATACCACAAGGTATCGGAAAACCTTTCACAGCTTAGAATTTTGGAT  
GTCTCGTCCAATAGACTGGAAGGACTACCAGAAAGTATGGGGCAACTATCTAATCTGGAAAGTTTTGAT  
GCCTCTTACAATGTCCTGAAGGGAACAATTAAGTACTGAGTCCCACCTTTCAAACCTCTCCAGTTTAGTGGATT  
GGACTTGTCACTCAACTCATTGGCTCTGAAGACGAGCTTCAATTGGCTTCTCCTTTTTCAGCTACAAGTTA  
TAAGCCTGCCGTCTTGCAATTTGGGACCTTCTTTCCAAAATGGCTTCAAATCAGAACAATACTACTGTT  
CTTGATATCTCTCTTGCGAGTATTTTCCAGACACGCTTCCAAGTTGGTTCTCTAGCTTCCCCCGATCTAAA  
GATTTTGAATCTCTCAAACAACCAAATCAGTGGAAAGAGTGTCTGACTTAATAGAGAATACATATGGGTAC  
AGGGTTATAGATTTAAGCTATAACAACCTTTTTCAGGGGCTTTGCCACTAGTCCCTACCAATGTCCAAATATT  
TTACCTGCATAAAAATCAGTTTTTTGGATCCATCTCTTCAATTTGTCGAAGTAGAACATCTCCCACTTCTCT  
AGACTTGTACACAATCAATTCTCAGGAGAACTTCCAGATTGTTGGATGAACATGACAAGTCTAGCTGTT  
CTTAATCTAGCTTATAACAATTTCTCTGGAGAAATTCCACATTCATTGGGTTCTTGACAAATTTGAAGGC  
GTTATACATACGCCAAAACAGTTTAAAGTGGAAATGTTGCCTTCTTTTTTACAATGTCAGGGGTTGCAAATC  
TTGGATCTTGGAGGGAATAAGTTGACAGGAAGTATCCCTGGATGGATAGGGACTGATCTACTCAACTTG  
CGAATTCTAAGCCTGCCGTTCAACAGATTGCATGGCAGCATACCATCCATAATCTGTCAGCTTCAATTTCT  
TCAGATACTGGACCTTTCAGCGAATGGATTATCAGGGAAAATTCCACATTGCTTCAACAATTTTACCTTAT  
TGTATCAAGATAATAATTCTGGTGAGCCAATGGAATTTATAGTTCAAGGTTTCTATGGTAAATTTCTCGT  
CGTACTTGTATATTGGTGACCTATTGGTTCAATGGAAAAATCAAGAGTCTGAGTACAAGAATCCTTTAT  
TATATCTGAAGACTATTGATCTTTCAAGTAATGAATTAATTGGAGGTGTTCTTAAAGAAATAGCTGATAT  
GAGAGGATTGAAATCTTTGAACCTCTCAAGAAATGAGCTGAATGGAAGTGTCAATTGAAGGAATAGGTCA  
AATGAGGATGTTGGAGTCTCTTGACATGTCAAGAAACCAGCTTTCTGGTGTGATACCGCAAGATCTTGCT  
AATTTGACTTTTCTTAGTGTGTTGGACTTGTGCAACAACCAGTTATCAGGGAGAATTCCATCAAGCACTC  
AACTGCAAAGTTTTGATAGATCATCCTACAGTGATAATGCTCAACTCTGTGGGCCTCCTCTTCAGGAGTG  
TCCTGGATATGCTCCTCCTAGCCCCCTTATTGATCATGGCAGCAACAACAATCCACAAGAATGATGAG  
GAGGAGGAGTTTCCATCTCTGGAGTTTTATATATCAATGGTGCTAAGCTTTTTTTGTTGCATTTTGGGGAA  
TTTTGGGCTGTTTAAATTGTCAATAGTTCTTGGAGGAATGCCTACTTCAAATTTCTTGACGGACACGACAAG  
TTGGCTCGATATGATATCAAGAGTCTGGTTTGAAGACTCAAGAAAAAGCTGAGGAGGGCCCGATGA

>LeEix2

ATGGGC AAAAGAACTAATCCAAGACATTCCTTGTTACTTGGTCTTTACTGCTCCTAGAGACAGCTTTTG  
GATTA ACTTCAAGAGAAGTTAACAAGACCCTTTGTATAGAAAAGGAGAGAGGGT GCCCTTCTTGAGTTTA  
AAAGAGGCCTTAACGACGATTTTGGTCGTTTATCTACCTGGGGTGATGAAGAAGAATGCTGCAATTGGA  
AGGGTATTGAATGTGACAAAAGAACAGGTCATGTTATTGTTCTTGATCTCCACAGTGAGGTTACTTGTCC  
AGGCCATGCTTGTTTTGCTCCAATATTGACAGGTAAAGTTAGTCCTTCTCTACTTGAGTTGGAGTATTTGA  
ATTTCTTGGACCTCAGTGTTAATGGATTGAAAATAGTGAGATACCAAGATTCATAGGCTCCCTTAAGAG  
ACTGGAGTACTTAAACCTTTCATCTTCTGATTTTTCTGGTGAAATCCAGCACAGTTCAGAATCTAACTT  
CTTTGAGGATTCTTGATCTCGGAAACAATAATCTTATAGTAAAGGACCTTGTGTGGCTTTCTCATCTCTCC  
TCTCTAGAATTCTTGCGCCTTGGTGGTAACGATTTCCAAGCAAGAACTGGTTTCGAGAGATAACTAAGG  
TCCCTTCATTGAAAGAATTGGACTTGAGTGTTTGTGGACTCTCTAAATTCGTTCCGTCTCCAGCTGATGTA  
GCTAATTCATCTTTGATCTCTCTTTCTGTTCTTCATTTATGTTGTAATGAGTTTTCTACTTCATCTGAATATA  
GCTGGTTATTCAATTTTAGCACAAAGCCTAACTAGCATAGACCTTTCTCATAATCAACTCAGTCGTCAAATT  
GATGATCGCTTTGGGAGCTTGATGTATCTTGAACATCTTAATCTTGCTAATAATTTTGGGGCTGAAGGTG  
GGGTTCCAAGTTCTTTTGGGAATTTGACACGTCTACATTATCTGGACATGTCTAACACTCAGACATACCA  
ATGGCTTCCTGAGTTGTTTCTCAGGTTATCAGGTAGTAGGAAATCACTTGAGGTTTTGGGATTGAACGAC  
AACTCGTTGTTTGGTTCAATTGTTAATGTGCCAAGATTTTCATCCTTGAAGAAATTATACCTGCAGAAGAA  
TATGCTGAATGGTTTTTTCATGGAAAGAGTGGGACAAGTTTTCGAGCCTCGAGTATCTAGACTTGTCTGAT  
AACCAAATGAGAGGGCCATTACCAGATTTAGCACTTTTTCCATCATTAAAGAGAGTTGCATCTTGGCTCTA  
ATCAATTTCAAGGGAGGATACCACAAGGTATTGGAAAACCTTTCACAGCTTAGAATTTTTGACGTCTCGTC  
CAATAGATTAGAGGGTTTACCAGAAAGTATGGGGCAACTATCAAACCTGGAAAGGTTTGATGCTTCTTA  
TAATGTCCTGAAGGGTACAATCACAGAGTCCCACTTTTCAAACCTCTCCAGTTTAGTAGACTTAGACCTAT  
CCTTCAACTTGTTGTCTTTGAACACGAGATTCGATTGGGTTCTCCTTTTCAACTACAATTTATAAGGCTTC  
CATCTTGCAATATGGGACCTTCTTTTCCGAAATGGCTACAACTCAGAATAACTACACTCTTCTTGATATT  
TCTCTTGCGAATATATCAGACATGCTACCAAGTTGGTCTCCAATCTTCTCCCGAGCTCAAGATTCTGAA  
TCTCTTAACAACCACATCAGTGGCAGAGTTTCGGAGTTCATAGTGAGTAAACAAGATTACATGATTATA  
GATTTAAGTTCTAACAACTTTTCAGGACATTTGCCACTAGTTCCTGCCAATATACAGATCTTTTACCTTCAT  
AAAAATCACTTCTCTGGATCCATTTCTTCATTTGTAGAAATACAATAGGAGCTGCCACTTCCATCGACTT  
GTCACGCAACCAATTTTCAGGAGAAGTTCCTGATTGTTGGATGAATATGAGTAATCTAGCTGTTCTAAAT

CTAGCCTACAACAATTTCTCCGGAAAAGTTCCACAATCATTAGGCTCCTTGACAAAATTTGGAGGCGTTAT  
ACATACGTCAGAACAGCTTTAGAGGAATGTTGCCTTCTTTTTACAATGTCAGCTGCTGCAAATCTTGGA  
TATTGGAGGGAATAAGTTGACTGGAAGAATCCCAGCATGGATAGGGACTGACCTACTCCAATTGCGCAT  
TCTAAGCCTACGTTCCAACAAATTCGATGGCAGCATTCCATCACTTATCTGCCAGCTTCAATTTCTTCAGA  
TACTGGACCTTTCAGAAAATGGATTATCTGGGAAAATTCCACAGTGCCTCAACAACTTTACCATATTGCG  
TCAAGAAAATGGCTCTGGTGAGTCAATGGATTTTAAAGTCCGTTATGACTATATTCCAGGATCTTACTTG  
TACATAGGTGATTTACTGATTCAATGGAAAACCAGGAGTCCGAGTACAAGAATGCTTTACTATATCTGA  
AGATCATTGATCTTTCAAGTAATAAATTAGTTGGAGGTATCCCTAAAGAGATAGCTGAAATGAGAGGAT  
TGAGATCATTGAACCTCTCGAGAAATGATCTTAATGGAAGTGTGCGTTGAAGGAATAGGTCAAATGAAGT  
TGTTGGAGTCCCTCGACTTGTCAAGAAACCAACTCTCTGGCATGATCCCTCAGGGCCTTTCTAACTTGACT  
TTTCTTAGTGTGTTGGACTTATCGAACAACCACTTATCAGGAAGAATTCCATCAAGCACTCAACTGCAGA  
GTTTCGATAGATCATCCTATAGTGGCAATGCTCAACTCTGCGGTCCTCCTTGAAGAGTGTCTGGATA  
TGCTCCCCCTATCGATCGTGGAAAGCAACCAATCCACAAGAACATGATGATGATGATGAGTTCTCATCT  
CTGGAGTTTTATGTATCAATGGTGCTAGGTTTCTTCGTCACGTTCTGGGGAATTTTAGGCTGTTTGATTGT  
CAACCGTTCGTGGAGGAATGCCTACTTCACATTCTTAACAGACATGAAGAGTTGGCTCCATATGACATCA  
AGAGTCTGCTTTGCAAGACTGAAGGGAAAGCTAAGGAACTGA

>MCD360-1

ATGGTCATGAGTCTGTTTTCTTTTATTCATTTCTATGTTTTGTGTTTTAATAAGTGGATGCTTTTCTTCAT  
CCTTTGATCATCATCTTTGCTCTCCCACTGAAGCTTCCTCTTTGCTTCAGTTTAAGCAATCCTTTCAAATATC  
TGATTACTCTACTCTTAAGTGTGATACTTCTTTCCAAAACTAAGTCTTGGAAATGAGAGTAGGGATTGCT  
GCAGTTGGGATGGAGTCACTTGTGACTTATTAACGGACATGTTATCGGGTTAGACCTTAGCTGCAGTC  
AGCTTCGTGGAAGTATTCATCCAATAGCAGCCTCTTCCAACCTTCATCATCTCCAACAGTAAACCTTGCT  
TACAATAACTTTTCAACTTCTTCAATCTCACATAACATTGGCCGATGGAGAAATTTGAGGCATCTCAACCT  
TTCTAATTCTTTCTTTAGTGGGAAAATCCCAACAGAAATCTCATTCTTTCCAATTTGGTTTCACTTGATCT  
TTCTTCTTCTTATGGATTACAACCTTGATGAGAGAACATTTGAAACAATGCTTCACAACCTTTACAAATCTGG  
AGGTACTAGCTCTCTTTCTTGGCAACATCTCATCACCGATACCTGTAAGTATTCATCCAATAGCAGCCTC  
TTCCAGCTTCATCATCTCCACACACTAAACCTTGTTAACAATTTCTTTTATCCTTCTTCAATCCCAAATGGC  
ATTGGCCGATTGAGGAATTTGAGGCATCTAAACTCTATGGCTTTCAAGGGAAAATCCCAACAGAAATC  
TCATACCTTTCCAATTTGGTTTCACTTGATCTTTCTTATAGTTATGAAAGATTACAACCTTGATGAGAGAAC

ATTTGAAGCAATGTTTCAGAACTTGACAAATCTGGAGCTACTTTCTCTCTATGGTGTCAACATCTCATCTC  
AGATACCTGTGAATATTTCTTCTCCTTAAGGTACCTGGATCTTGGTTATACTAATCTGCGAGGTGTTCTC  
ACAGAGAACTTTTTCTTCTGCCAACTTGGAATACTCAAATTGAGTGGGAATGATCTTGTCAAAGGAG  
TTTTTCAAAGATCCACTGGAGCAACACTCTGTTAATGGAGTTGGATATTTTCATCCACAGGCATCTCTGGT  
GAGGTGCCTGATTCAATTGGCACCTTCAGTTCCTTGAATATCTTGAACCTTGCAGGATGCCAATTCTCTG  
GTTCCATTCTGATTCCATTAGCAACCTAACACAAATTAGGGAGTTGATTTTATATCATAATCATTCTACT  
GGCCATATTCCTTCCACAATCTCTAAATTGAAGCACCTCACACGTTTGGATCTTCAATTAACACTTTTTCA  
GGTGAAATTCCTGATGTTTTCTCAAACCTCCAAGAGCTACGTACTTTACATCTTTCTTATAACAGCTTCATC  
GGTTCGTTTCCCGCTTCAATTTAAGTTTGACACATCTTGAATACTTAGGATTGTCGAGTAATCCCTATCT  
GGCCACTGCCTAGCAACCAAAGCATGCTTCAAAGCTAACCGAACTGAATTTGTCATACAACACTCACTGA  
ATGGTACCATAACCATCTTGGGTGTTAGCCTGCCTTTGCTATCTTCAGTGTGCTCCAACATAACCGATTA  
AGAGGACTAGCCGATGAAGTGATCAAACAAACCCAACATTAAACAACACTGTATTTAAGCAATAATCAA  
CTCAGTGGTTCTTTTCTCAATCACTTGTGAATCTCACAAACCTTGAAACCTTGGAATTTTCATCAAATAA  
CATCACCATTGATGAGGGAATGAATATCACCTTTCTTAGCCTATCATCTTTATTCTTATCATCTTGTCAACT  
GAAGGATTTTCCACACTTCTTGAGAAATATAAAGACACTTCGGTACTTGGATATTTCTAACAATAAGATTT  
GTGGTCAAATCCCTAACTGGTTTAGCGGCATGAGGTGGGACTCGTTGCAGTTCCTAAACCTTTCTCATAA  
TTCATTAACAGGCCACCTACCACAATTCGTTACGATAACCTACAGTATCTTGATCTGAAATTTAACTACC  
TTCAGGGTCCACTAGCTTTATTCAATTTGTAACATGAGGAACTTATCTTATTAGATTTATCACACAACACTAC  
TTCAGTGACTCAGTTCACATTGCTTGGGAAGCATGCCTAATCTAAGGGTGTGGACTTAAGAAGGAAC  
AATTTACAGGGAGTCTTCCCCATTATGTGCACAGAGCACTTCATTGAGTACCATTGTCGTAAATGGTA  
ATCGATTTGAAGGACCTGTTCTGTATCATTGCTCAATTGTAATGGTCTACAAGTCCTTGATGTGGGGAA  
CAATGCTATAAATGACACGTTTCCAGCTTGGCTCGGAACTCTTCAAGAGCTGCAGGTCTTATATTAAG  
TCGAACAAGTTCCATGGACCTATAAGTACGTGTCATACTAAGTTTTGCTTTCCAAGTTGCGAATTTTTGA  
TCTTTCTCGTAATGATTTTCAGTGGCTCACTTCTGCAAAAGTTTTTCGAACTTCAAGGCAATGATAAAAT  
TAGATGGCGAAGACACAGGAAATATCAAGTACATGGAATCGATGTGCAATTTGCCATTTGTCAGATCGT  
ATGAGGATTCAGTGAGTTTGGTAATCAAAGGGCAGGATATTGAGCTACAAAGAATCAGCACAATTATGA  
CAACCATAGATCTCTCAAACAACCATTTTGAAGGTGTCATTCCGAAAACACTAAAGGATCTCAGCTCACT  
TTGGCTACTCAATTTATCCATAACAATCTCCTAGGTCATATACCAATGGAATTGGGGCAATTGAATACG  
CTTGAAGCTTTAGATCTCTCCTGGAATTGGCTCACTGGAAAGATTCCGCAGGAATTGACAAGAATGAACT

TTCTTGCCGTCTTAAACCTCTCTCAAATCATCTCGTCGGACCAATTCCTCAAGGTCCACAATTCAACACA  
TTTGAAAATGACTCGTATTGTGGCAACCTTGATTTATGTGGTCCTCCTTTATCAAAGCAATGTGAAACTAG  
TGATTCATCGCATGTTCTCAACAATTGGAGTCCGAAGAAGAAGGCGAGTCATATTTTTTTAGTGGATTT  
ACTTGGGAATCAGTAGTCATAGGCTACAGTTTTGGACTAGTTGTTGGAAGTGTGATGTGGAGTCTCATGT  
TTAAATATCGTAAGCCAAAATGGTTTGTGGAATTTTTTGATGGACTCATGCCTCACAAAAGAAGAAGGCC  
AAAGAAGAGAGCTCAGAGACGAAGGACTTAA

>NbLRK1

ATGAAGTCAATTCCTACATATAGCAACATTCTTGATGGTTCATACTATTATTCTGTTCTTGCAGTAGTAAT  
AAGTCAATATTTGCTATAACTGAGTTTGACTTTGGAACACTAACTCTGAGTAATTTGAAGCTTCTTGGAG  
ATGCACATTTGGGTGACAACAACAGTGTTTCAGTTAACACGTGATCTTGCCGTGCCAAATCCGGTGCCG  
GAAAAGCTTTATATTCAAAGCCAGTAAGATTCCGGCAGCCGGGTCTTGATTTCCAGCGAGTTTCTCTAC  
ATTCTTTTCATTTTCAGTGAATAATTTGAACCCATCGTCTATTGGTGCCGGTCTTGCTTTTGTACTCACTCC  
TAATGATGAGTCAGTAGGTGATGCTGGTGGGTATATGGGAATCTTGATTCTAAAGGCACACAAAGTG  
GTACAATTTTAGTTGAATTTGACACCCTTATGGATGTTGAGTTTAAAGATATTAATGGAATCATGTTGG  
TTTGGATCTGAATTCATGGTTTCAACTCAAGTTGGTGATTTAGATTCTATTGGTGTTGATCTCAAGAGTG  
GTGATATAGTCAATTCTTGGATTGAATATTCTGGTTCTACTGGACAGTTGAATGTGTTTGTATCATACTCT  
AATTTAAAGCCAAAGGAACCATTTTTATCTGTTGTTCTGAATATTGCTGAGTATGTAAATGATTTCATGTT  
TGTTGGGTTTTCTGGTTCAACTCAAGGGAGTACTGAGATTCATAGCATTGAGTGGTGGAGTTTTAGTTCA  
TCATTTGATGCAAGTCCTAAGTCGGCGGCAGCGGCTGCGCCACCGCCACCAACGGCTAGTTTGATGAAC  
CCAACGGCGGATTCCGTCATGTCGCGGCCGCTTCTATGGCTCCTCAGAGTCTAATAGTAGTGCAAGTA  
TAATGCAAGATAAGAGCAGTGGGAAATGTCATAGCAATTTTTGTAAACAAGTCTGGAGCTGTTGTTG  
GGGTGGTAACTGCTAGTGCATTTTTTCTTGCAATTTGCTACATTAGTACTTATTTGGTTATACACCAAAAAG  
TTCAAGAAAGTGAAAAATTCTGAATTTTTGGCATCTGATGTTATCAAATGCCTAAGGAGTTTAGCTATA  
AAGAGCTTAAATTGGCTACAAAAGCCTTTGATTCGACGAGGATTATAGGCCACGGTGCATTTGGGACAG  
TTTACAAGGGCATTATCGGACAATGGTGGCATTGTGGCAGTGAAGAGATGTAGTCATAATGGACAGG  
GGAAAGCGGAGTTCTTATCTGAATTATCTATAATTGGAACACTTAGGCACAGAAATCTTGTTAGACTTCA  
AGGATGGTGCCATGAGAAAGGTGAAATTTTGTAGTCTATGATCTTATGCCTAATGGGAGTCTTGATAA  
GGCATTATTTGAATCAAGAATGATTCTACCTTGGCTACATAGGAGGAAAATTTTGCTAGGTGTTGCTTCA  
GCCTTGGCATATTTACATCAAGAATGTGAAAACCAGGTGATTCACAGGGATATAAAGAGTAGTAACATT



ATGTTGGATGAAGGGTTC AATGCAAGATTAGGTGATTTTGGATTAGCAAGACAAGTTGAACATGACAAG  
TCCCCGATGCAACGGTTGCAGCCGGGACAATGGGCTACTTGGCTCCTGAATACTTGTTAACCGGAAGA  
GCAACCGAAAAA ACTGATGTTTTAGCTATGGAGCAGTGGTTCTTGAAGTGGCAAGTGAAGGAGGCC  
AATTGAGAGGGAAACAACAAGAGTTGAGAAAGTTGGAGTGAATAGCAACTTAGTTGAATGGGTTTGGG  
GATTGCATAGAGAAGGGAATTTGCTAATGGCAGCTGATTCAAGACTTTATGGTGAGTTTGATGAAGGAG  
AAATGAGAAGGGTACTAATGGTTGGATTAGCTTGTTCAACCTGACCCTATGGTTAGACCAACAATGA  
GAAGTGTGGTCCAAATGCTAGTAGGTGAAGCTGAAGTACCTATTGTCCAAGAACTAAGCCTTCTATGA  
GTTTCAGCACATCACATCTTCTAATGACTTTGCAAGATAGTGTCTGATTTGAATGGTATGATCACACTT  
TCCACTTCATCATCTGAAAACAGTTTCACTGGTGTGCCCATGGGATGATGGACTTGGTCTAA

>NbRLK

ATGATTGCAGAACAAAGACTACATATTACTGTCCTCCTCACTTATTTCTCTTCTGTTTCGTCTCAGCTTGCT  
ATATCCCAAATTTCTGGAACGTAAACGCCAGTCTTTTGAATTCCACTGCCGGACTTTCCACTTTCTGGAC  
AAACAGGCCGACACTTTTAGTTAATTCCACCACCGACTTCTCTCGTTTGGCACCCATACTCCTGCAAAGAA  
ATGCCAGTCCACGATTCTCTGTGGCTTCTACTGCAATTACAATGCTACAAAATGCATTTTTGGTGTCTCTC  
TTGTTCCAGAACAGATCCGACATGCAGAATGATGTGATAAATTTCCCTCAGTTAGTTTGGTCAGCTAACA  
GGAACCATCCAGTGAAAACCAATGCAACCTTGCAACTAAGACAAGATGGCAACTTGATCTTGGCAGACT  
CTGATGGCACTCTCGTTTGGTCCACTAGTACTACTGGCAAATCCATTTAGGCTTAACTTGACAGAAAG  
AGGGAATCTCGCGCTCTTTGATAAGAGAAAACGCGTAATTTGGCAGTCTTTTGATCATCCAACGGATTCT  
TTGTTTCCGGGGCAGAGTTTGGTTCGCGGGCAGAAGCTCATAGCAAGTGTTCAGCATCCAATTGGAGT  
GAAGGTTTGCTTCTCTTACTGTTCTCAATGGAAGCTGGGCCACTTACATAGATTCTGACCCACCTCAGTT  
TACTACACTTCACTTATTTCTATAGTCCTTACTTCAGTTTTGACGGTCAAACCTTTGCTGCCTTACAATA  
CCCTACTACATCGAAAGCTCAATTCATGAAGCTTGGGCCTGATGGACATTTAAGGGTATACCAATGGGA  
CGAACCTGATTGGAAAGAGGCATCTGACATTTTGATGTCAGATGTAAGAACTATGGGTACCCAATGGT  
GTGTGGTAGATATAGCATTTCACCAATAACGGGCAATGTACTTGTCCGCCAGAGGAAAATTTATTCAG  
GCCATTTTCTGAGAGGAAACCAGATCTTGGATGCACAGAGCTGACATCTATTTCTTGTGATTCTCCACAG  
TATCATGGTCTTGTAGAGCTCAAGAATACAGCATATTTTGCATTTAGTTCAGTCATGAACCAAGTTCGA  
GTATATTTTGGCCAGAGGGGAAAAGTTGGAAGACTGCAAATGGCCTGTCTCAGTAACTGTTCTTGCA  
AAGTTGCAGCTTTTCAAATGATTTGGGTACAGATCCAAGAGGGAGTTGTTTGTACTGAATGAAGTCTT  
CTCTCTCGCAGACAATGAGGACGGAATGGACAAGAGAGTATTTCTTAAGGTGCAGAATTCCTCAAAGGC

ACAGAATCAGTCTGCAACCATTTTTGGAGGACGGAAATCAAGACCTTATAAAGTGATAATAGGATCTTCT  
CTTTCAGCATTGTTCCGGTATCATTTTGAGTATCACTACTTGCTTTGTTATTTTCAAAAAGAGGACGCATAA  
GTCCACAAGGCTGGGGATTTTCTGGATCTAGAACCAATCTTACCTGGAATGCTAACTCGATTCTGTTAC  
AATGAGTTGAAAATAATCACAAAAGATTTTCAGCACAAAGCTTGGGGAAGGAGGATTTGGCTCTGTATAT  
GAAGGAACACTGAGTAATGGAACCAAATAGTTGTGAAGCATCTGGATGGTGTAGGTCAAGTAAAGGA  
TACATTCTTAACTGAAGTAAACACAGTTGGTGGCATTACCCATGTCAATTTGGTAAAACCTATTGGATTTT  
GCGCCGAAAAAAGCTACAGGCTTCTAATCTACGAGTACATGGTAAATGGATCATTGGATAGGTGGATTT  
ACCATGAAAATGGGCTTACATGGCTTACAAGGCAAGGGATAATATCGGATATTGCTAAAGGGTTAGCTT  
ATTTACATGAGGATTGCAGCCAGAAGATAATTCATTTGGACATCAACCCACAAAATATCCTTCTGGATCA  
ACATCTCAATGTTAAGATATCTGATTTTGGGTTGTCAAACTAATCGAGAAAGACAAAAGCAAAGTGGT  
AACTAGAATGAGAGGAACACCAGGCTATCTTGCTCCTGAATGGTTGAGCTCGATAATCACTGAGAAAGT  
TGATGTGTATGCGTTTGGAAATTGTGCTCTTGAAATTCTCTGTGGGCGAAAGAATTTGGATTGGTCCCAG  
GCTGATGAAGAAGATGTCCATTTGCTTAGAGTTTTTAGGAGAAAAGCGGAAGAAGAGCAGCTCATGGA  
TATGGTTGACAAAACAATGAGGGTATGCAGCTCCATAAAGAAGAAGTTATGGAAATGATGAGCATTG  
CTGCGTGGTGTCTTCAGGGAGATTACACCAAGAGGCCTTCAATGACATGGGTGGTTAAGGCACTGGAA  
GGTTTGGTATCTATCGAATCCAACCTGGATTACAATTCACAAACGTACCTCTGGTTGGGGCAGACAACC  
AACAGATGGAAGCCACTATCAGTACGAAATTGGCTTCAGTTTTATCTGGACCAAGGTAA

>NsSOBIR1

ATGGCCTTCACTGCTTCACAAATCCACTTCTTTTTCTTCTCCCTTTTCGCCTTTTTACTGATTGCTGTTCAAG  
CAAGACTGAATCTTTATCCACGAGATCATGCTGCACTTTTGCTTGTCCAAAAGACCTGGGCATCCAAGG  
TCAACGCATTGCTCTACGCTGCAACTCTGCAACAATATCCTGTGAAAGGCGAAAGGCAAACAGAACACA  
ATTGTTGAGAGTCACCCGTATTGACTTCAGATCCAATGGATTGACTGGAACTTTATCTCCTGCCATTGGA  
AACTTTCTGAGCTCAAAGAACTCTCTCTTCAAACAACCAACTCTTTGACCAAATCCCAGTTCAGATTCT  
TGAATGCCGTAAACTGGAGGTCTTGACCTTGGAACAATCTGTTTTCTGGGAAAGTTCCATCTGAATTA  
TCATCTCTACTCCGCCTTGAATTCTTGATCTTTCTCAAATGAGTTGTCTGGGAATCTTAACTTCTTGAAG  
TATTTTCCCAACTTAGAAAACTCTCTTTAGCTGATAACATGTTCACTGGAAAAATACCCCTTCTTTGAA  
ATCTTTCAGAAATCTCCGTTTCCTAATATTTAGGAAACAGTTTTCTTGAAGGTCCTGTGCCTGCTATGA  
GTCAAGTTGAGCACTTGTGAGCAGATTTGGATCGGAACACCTTCGTTCCAAAACGTTACATTCTTGTGA  
AAATTCGACAAGCTCAAATCAGATATCAGCACTGGCACCTAATTCCAATTCAGGAAATGCCCCAGCTCCA

GCACCGAGTCATAGTGTGCTCCAATCCATAAAAAGTAATAACAGGAAGAAAAGGAAAGTCAGAGCGTG  
GTTTCTTGGTTTCTTTGCTGGTTCTTTCGCAGGAGCTATATCTGCGGTACTCTTATCAGTTCTCTTTAAGCT  
GGTAATGTTTTTCGTCCGAAAGGGAAAGACTGATGGAACCTTAAACAATATACAGTCCACTGATTAAGAA  
AGCCGAGGATTTGGCCTTCTTAGAGAAAGAAGATGGAGTAGCATCACTTGAAATGATTGGAAAAGGTG  
GATGTGGAGAAGTTTATAGAGCTGAGTTACCAGGAAGTAATGGGAAGATTATAGCTATAAAGAAGATT  
ATACAACCCCAATGGATGCTGCAGAACTCACCGAGGAAGATACCAAGGCTTTGAACAAGAAAATGCG  
ACAGGTAAAATCAGAAATCAAATCTTGGTCAAATCAGACACAGGAATCTGCTTCCCTTACTGGCACAT  
ATGCCTAGGCCAGACTGCCATTACTTGGTATATGAATATATGAAAAATGGGAGCTTACAAGATATCCTCC  
AGCAAGTCACAGAAGGGACAAGGGAATTAGATTGGTTGGGACGACACCGAATTGCAGTAGGGATAGCT  
GCTGGACTTGAGTATCTCCATATAAACCACAGTCAATGCATAATTCACAGAGATCTAAAGCCAGCAAATG  
TCCTTCTTGACGATGATATGGAAGCTCGAATTGCTGATTTTGGACTTGCAAAGCACTTCCAGATGCCCA  
TACACATATTACGACTTCAAATGTTGCAGGAACTGTGGGATATATAGCACCAGAATACCATCAGACACTG  
AAGTTTACAGATAAGTGTGATATATACAGCTTTGGTGTGGTGTGGCAGTGCTGGTTATAGGAAAGCTT  
CCATCAGATGAATTTTTCCAGCACACGCCTGAGATGAGTTTAGTGAAGTGGCTGAAAAATGTAATGACTT  
CTGAGGATCCAAAAGGGCAATTGATCCAAAGCTGATAGGAACTGGATTTGAGGAGCAAATGCTTTTG  
GTTCTCAAGATAGCTTGCTTTTGTACTCTGGAAAATCCAAAGGAGAGGCCTAACAGTAAGGATGTTAGG  
TGTATGTAACTCAGATCAAGCATTA

>Sotub06g029250\_(StSOBIR1)

ATGGCTTCAAATTTCCACTTTTTCTTATACCTTGTGACCCTTTTCCTTTTTGCTCAAGCAAGACTGAATC  
TTTATCCACAAGATCATGCTGCACTTTTGTCTGTTCAAAAAGACTTAGGCATCATTGCTCTTAAACAACCC  
TGACGCTCGCAGGAATATCCTGCGAGCGTAGACCGGGTAACAGAACACAAGTTCTGAGAGTTACCCGT  
ATTGTATTCAGATCCAATGGATTGAAGGGAACCTTGTCTTCTGCTATTGGCAAACCTCTCTGAGCTCAAAG  
AGCTTTCTCTTCCGACAATCAACTATCTGAACAAATCCCAATTCAGATTCTTGATTGTCGGAAATTAGAG  
ATTCTTGAACCTCAAAGAAACAGATTTTCTGGAAAGATTCCGTATGAATTGTCATCTTTAAACCGTTTAAG  
GGTAGTTGACTTTTCATCGAATGAGTTTTCTGGGAATCTTGATTTCTTGAATACTTTCTAATTTGGAAA  
AACTGTCTCTGGCTGATAATATGTTCACTGGAAAAATACCCTTTTCATTGAAATCTTTCAGGAATCTTCGT  
TTCCTCAACATTCAGGGAATAGTTTCTTGAAGGTCCAGTACCTGTCATGAGTCAAATTGAGCATTATC  
AGCAGATTTGAATCGAAACAATGCCGTTCCCAAACGTTACATTCTTGCTGAGAATTCAACAAGGTCAAAT  
CAGATATCTGCAATGGTGCCTGCTCCAGCTCCAGCACCGGTCAATCGTGTGTACCGGTGGTACATAAAC

GTAACAAGAAGAAAAGGAAGTTAAGATCTTGGTTTCTTGGTTTCCTAGCTGGAACCTTTTGCTGGGGGTA  
TATCTGCTGTGATCTTTTCGTTGCTATTCAAGCTCGTAATGTTCTTCGTAAGAAGGGGAAAGAACGATAG  
TTCAAGTTTAAACGATATTTAGTCCGTTGATCAAGAAAGCGGAGGACTTGGCTTTCTTAGAGATGGAAGA  
TGGAGTGGCATCACTTCAAATGATTGGAAAAGGTGGATGTGGAGAAGTTTATAGAGCCGAGTTACCGG  
GGAGTAATGGGAAGATTATAGCTATAAAGAAGATTATACAATCCCCAATGGATGCTGCAGAGATCACG  
GAGGAAGATACTAAGGCGTTGAACAAGAAAATGCGTCAAGTTAAATCAGAAATCAAATTGTAGGTCA  
AATCAGACACCGGAATCTGCTTCCATTACTGGCGCATATGCCAAGGCCAGACTGTCATTACTTGGTGTAT  
GAATATATGAAAAATGGGAGTTTACAGGATATCCTGCAGCAAGTCACAGAAGGCACAAGAGAATTAGA  
TTGGTTGGGACGACACAGAATTGCAGCGGGGGTAGCTGCTGGTCTTGAGTATCTCCATATAAACCATAC  
TCAACGCATAATTCACAGAGATCTAAAGCCAGCAAATATCCTACTTGATGATGACATGGAAGCTCGAATA  
GCTGATTTTGGGCTTGCAAAGGCAGTTCAGATGCTCATAACATATTACGACTTCAAATGTTGCAGGAA  
CTATGGGATATATTGCACCAGAATATTATCAGACACTGAAGTTTACAGACAAGTGTGATATATACAGCTT  
CGGTGTGGTGCTAGCTGTGTTGGTTATCGGAAAGGGTCCATCGGATGAATATTTCCAACATACTTCTGA  
GATGAGTTTGTAAAGTGGCTGAGAAATGTAATGACTTCTGATGATCCTAAAATAGCAATTGATCCTAAG  
CTGAGAGGGAATGGATATGAGGAGCAAATGCTTTTGGTTCTCAAGATAGCTTGCTTTTGTACTCTCGACA  
ATCCAAAGGAGAGGCCTAACAGTAAGGATGTTAGGTGCATGTTAACTCAGATCAAGCATTAG

>StSERK3

ATGGATCAGTCGGTGTGGCGATCTGGGTATTTCTCTACTTAATTGGGCTGCTTTTGAATTTGTCAATGG  
TCGCCGGTAACGCTGAAGGTGATGCCTTGAATGCTCTGAAGACAAATTTGGCTGATCCTAATAGTGTCT  
ACAGAGTTGGGATGCAACCCTTGTTAATCCTTGACTTGGTTCATGTAACATGCAACAATGAAAATAGT  
GTGACTAGAGTTGATCTAGGAAATGCAAATCTATCAGGTCAACTGGTACCACAGCTTGGCCAACCTCCAG  
AACTTGCAGTACTTGGAACTTTATAGTAATAACATAAGCGGAAGAATTCAAATGAACTGGGGAACTTG  
ACAGAGTTGGTTAGTTTGGATCTTACCTGAACAACCTAAATGGTCCTATCCCTCCCTCATTGGGCAAGCT  
TCAGAAACTACGCTTCTGAGGCTCAATAATAACAGTTTGAATGAAGGTATCCCGTGTCTCTAACCACC  
ATTGTTGCACTTCAAGTACTTGATCTCTCAAACAACCTTTGACAGGACCAGTTCAGTCAACGGTTCCTT  
TCACTTTTTACTCCTATAAGTTTTGCTAATAATCAGTTGGAAGTTCCTCCAGTTTCTCCACCTCCTCCCTT  
CCTCCTACGCCCTCATCGTCATCTCAGTGGGCAACAGCGCAACTGGAGCTATCGCTGGAGGAGTTGCT  
GCAGGCGCTGCCCTTCTATTTGCAGCTCCTGCAATTTTTATTGCTTGGTGGCGTCGGAGGAAACCGCAAG  
ACCACTTCTTTGATGTTCTGCTGAGGAGGACCCAGAAGTTCATCTGGGACAACCTCAAAGGTTTTCTT

GCGTGA ACTACAAGTTGCGTCGGATAATTTTAGCAACAGAAATATACTCGGTAGAGGCGGATTTGGTAA  
GGTTTATAAAGGCCGGTTAGCTGATGGCTCTTTAGTTGCAGTGGAAAGACTAAAAGAGGAACGTACTCA  
AGGTGGAGAGTTACAGTTTCAGACAGAAGTAGAAATGATCAGCATGGCTGTACACCGAAACCTACTTCG  
TTTACGGGGATTTTGCATGACACCCACTGAGCGGGTGCTTGTATCCGTACATGGAGAATGGAAGTGT  
TGCATCACGTTTAAGAGAGAGGCCTGAATCAGAGCCCCACTTGACTGGCCAAAAGGAAGCGTATTGC  
ACTTGGATCTGCAAGAGGCCTTGCTTACTTGCATGATCATTGTGATCCTAAAATTATTCATCGTGACGTCA  
AAGCCGCAAATATCTTGTTGGATGAGGAGTTTGAAGCAGTTGTTGGGGATTTTGGGTTAGCTAAACTCA  
TGGACTACAAGGATACTCATGTTACCACTGCTGTACGTGGTACAATTGGGCATATTGCCCTGAATATTT  
ATCTACTGGTAAATCTTCTGAGAAAAGTATGATGTGTTGGCTATGGGGTTATGCTTCTAGAGCTCATACT  
GGGCAAAGGGCTTTTGATCTTGCTCGACTTGCGAATGGTGATGATGTCATGCTGCTAGATTGGGTGAAG  
GGACTCCTGAAGGACAAGAAATATGAAACATTAGTTGATGCAGATCTTCAAGGTAATTACAATGAAGAA  
GAAGTGGAACAGCTTATTCAGGTAGCTCTACTTTGCACGCAGAGTACGCCTACGGAACGTCCAAAGATG  
TCAGAAGTTGTAAGAATGCTTGAAGGTGATGGCCTTGCTGAGAGGTGGGAGGAATGGCAAAGGAGG  
AGATGTTCCGGCAAGATTTCAACCATGTCCACCGCCACCATACTGATTGGATAATAGCTGACTCCACTTC  
AAATATCCGACCGGATGAGTTGTCAGGGCCAAGATGA

>Ve1

ATGAAAATGATGGCAACTCTGTACTTCCTATGGCTTCTCTTGATTCCCTCGTTTCAAATCTTATCAGGATA  
CCACATTTTCTTGTTTTCTCTCAATGCCTTGACGATCAAAGTCATTGTTGCTGCAGTTTAAGGGAAGCC  
TCCAATATGATTCTACTTTGTCAAAGAAATTGGCAAATGGAACGACATGACAAGTGAATGTTGCAATTG  
GAATGGGGTTACATGCAATCTCTTTGGTCATGTGATCGCTTTGGAAGTGGATGATGAGACTATTTCTAGT  
GGAATTGAGAATTCTAGTGCACTTTTAGTCTTCAATATCTTGAGAGCCTAAATTTGGCTGACAACATGTT  
CAATGTTGGCATAACAGTTGGTATAGCCAACCTCACAACTTGAAGTACCTGAATTTATCCAATGCTGGT  
TTTGTCCGGCAAATTCCTATAACATTATCAAGATTAACAAGGCTAGTTACTCTTGATCTCTCAACTATTCT  
CCCTTTTTTTGATCAGCCACTTAAACTTGAGAATCCCAATTTGAGTCATTTCAATTGAGAAGTCAACAGAGC  
TTAGAGAGCTTTACCTTGATGGGGTTGATCTTTGCTCTCAGAGGACTGAGTGGTGTCAATCTTTATCTTTA  
CATTTGCCTAACTTGACCGTTTTGAGCTTGCCTGATTGTCAAATTTAGGCCCTTTGGATGAATCACTTTC  
TAAGCTTCACTTTCTCTTTTTGTCCAACCTGACCAGAACAATCTCTCTAGCACAGTTCCTGAATATTTTGC  
CAATTTCTCGAACTTGACTACATTGACCCTGGGCTCTTGTAATCTACAGGGAACATTTCTGAAAGAATCT  
TTCAGGTATCAGTTTTAGAGAGTTTGGACTTGTCAATTAACAAGTTGCTTCGTGGTAGTATTCCAATTTTT

TTCCGAAATGGATCTCTGAGGAGGATATCACTAAGCTACACCAACTTTTCCGGTTCATTACCAGAGTCCA  
TTTCGAACCATCAAAATCTATCCAGGTTAGAGCTTTCTAATTGCAATTTCTATGGATCAATACCTTCCACA  
ATGGCAAACCTTAGAAATCTTGTTATTTGGATTTCTCCTTCAACAATTTCACTGGTTCATCCCATATTTT  
CGACTGTCCAAGAACTCACCTACTTAGACCTTTCACGTAATGGTCTAACTGGTCTCTTGTCTAGAGCTCA  
TTTTGAAGGACTCTCAGAGCTTGTCCACATTAATTTAGGGAAACAATTTACTCAGCGGGAGCCTTCTGCA  
TATATATTTGAGCTCCCCTCGTTGCAGCAGCTTTTTCTTTACAGAAATCAATTTGTTGGCCAAGTCGACGA  
ATTTGCAATGCATCCTCCTCTCCGTTGGATACAGTTGACTTGACAAACAACCACCTGAATGGATCGATT  
CGAAGTCCATGTTTGAATTGAAAGGCTTAAGGTGCTCTCACTTTCTCCAACCTCTTTAGAGGGACAGT  
GCCCCCTTGACCTCATTGGGAGGCTGAGCAACCTTTCAGACTGGAGCTTTCTTACAATAACTTGACTGTT  
GATGCAAGTAGCAGCAATTCAACCTCTTTCACATTTCCCAGTTGAACATATTGAAATTAGCGTCTTGTCG  
GCTGCAAAAGTTCCCCGATCTCAAGAATCAGTCATGGATGATGCACTTAGACCTTTCAGACAACCAAATA  
TTGGGGGCAATACCAAATTGGATCTGGGGAATTGGTGGTGGAGGTCTCACCCACCTGAATCTTTCATTC  
AATCAGCTGGAGTACGTGGAACAGCCTTACACTGCTTCCAGCAATCTTGTAGTCCTTGATTTGCATTCCA  
ACCGTTTAAAAGGTGACTTACTAATACCACCTTGCCTGCCATCTATGTGGACTACTCTAGCAATAATTTA  
AACAAATCCATCCCAACAGATATTGAAAGTCTCTTGGTTTTGCCTCCTTTTTCTCGGTAGCAAACAATGG  
CATTACTGGAATAATCCTGAATCCATATGCAACTGCAGCTACCTTCAAGTTCTTGATTTCTCTAACAATG  
CCTTGAGTGGAACAATACCACCATGTCTACTGGAATATAGTACAAAACCTGGAGTGCTGAATCTTGGGA  
ACAATAAACTCAATGGTGTATACCAGATTCATTTTCAATTGGTTGTGCTCTACAAACATTAGACCTCAGT  
GCGAATAACTTACAAGGCAGGCTGCCAAAATCGATTGTGAATTGTAAGTTGTTGGAGGTCCTGAATGTT  
GGAAATAACAGACTTGTTGATCATTTCATGCATGTTGAGGAACTCAAACAGTCTGAGGGTCTTAGTCT  
TGCGCTCCAATAAATTCTATGGAAATCTTATGTGTGATGTAACCAGAAATAGCTGGCAGAATCTCCAGAT  
CATAGATATAGCTTCCAACAACCTTCACTGGTGTGTTGAATGCAGAATTTTCAAATTGGAGAGGAATG  
ATGGTTGCAGATGATTACGTGGAGACAGGACGCAATCATATCCAGTATGAGTTCTTACAACCTAAGTAAA  
TTGTACTATCAGGACACAGTGACATTAACCATCAAAGGCATGGAGCTGGAGCTTGTGAAGATTCTCAGG  
GTCTTCACATCTATTGATTTCTTCCAATAGATTTCAAGGAGCGATACCAGATGCTATCGGGAATCTCAG  
CTCACTTTATGTTCTGAATCTGTACACAATGCCCTTGAGGGACCAATCCCAAATCGATTGGGAAGCTA  
CAAATGCTTGAATCACTAGACCTGTCAACAACCTGTCCGGGGAGATCCCATCAGAGCTTGCAAGT  
CTCACATTCTTAGCAGCTTTGAACTTATCGTTCAACAATTGTTTGGCAAAATCCATCAACTAATCAGTTT  
CAAACATTCTCAGCAGATTCCTTTGAAGGAAACAGTGGCCTATGCGGGCTCCCTCTCAACAACAGTTGTC

AAAGCAATGGCTCAGCCTCAGAGTCCCTGCCTCCACCAACTCCGCTACCAGACTCAGATGATGAATGGG  
AGTTCATTTTTGCAGCAGTTGGATACATAGTAGGGGCAGCAAATACTATTTTCAGTTGTGTGGTTTTACAA  
GCCAGTGAAGAAATGGTTTGATAAGCATATGGAGAAATGCTTGCTTTGGTTTTCAAGAAAGTGA

>Ve2

ATGAGATTTTTACTTTCTATGGATCTTCTTCATCATACCCTTTTTGCAAATTTTATTAGGTAATGAGATT  
TTATTGGTTTCCTCTCAATGTCTTGATGATCAAAAGTCATTGTTGCTGCAGTTGAAGGGCAGCTTCCAATA  
TGATTCTACTTTGTCAAATAAATTGGCAAGATGGAACCACAACAAGTGAATGTTGTAAGTGAATGG  
GGTTACATGTGACCTCTCTGGTCATGTGATTGCCTTGGAACTGGATGATGAGAAAATTTCTAGTGGAAAT  
GAGAATGCAAGTGCTCTTTTCAGTCTTCAGTATCTTGAGAGGCTAAATTTGGCTTACAACAAGTTCATG  
TTGGCATACCAGTTGGTATAGGCAACCTCACCAACTTGACGTACCTGAATTTATCCAATGCCGTTTTGT  
GGCAAATTCCTATGATGTTATCAAGGTTAACAAGGCTAGTACTCTTGATCTCTCAACTCTTTCCCTGA  
CTTTGCCAGCCACTAAAAGTGAAGTCCCAATTTGAGTCATTTTCATTGAGAACTCAACAGAGCTTAGA  
GAGCTTTACCTTGATGGGGTTGATCTCTCAGCTCAGAGGACTGAGTGGTGTCAATCTTTATCTTCATATT  
GCCTAACTTGACTGTCTTGAGCTTGCCTACTTGTGCAATTTTCAGGCCCTATTGATGAATCACTTTCTAAGC  
TTCACCTTTCTCTTTTCATCCGTCTTGACCAGAACAATCTCTCTACCACAGTTCCTGAATACTTTGCCAATTT  
CTCAAACCTTGACTACCTTGACCCTCTCTCTTGTAATCTGCAAGGAACATTTCTAAAAGAATCTTTCAGG  
TACCAGTCTTAGAGTTTTTGGACTTGCAACTAACAAATTGCTTAGTGGTAGTATTCCGATTTTTCTCAA  
ATTGGATCATTGAGGACGATATCACTAAGCTACACCAAGTTTTCTGGTTCATTACCAGACACCATTTCGA  
ACCTTCAAACCTATCCAGGTTAGAACTCTCAAACCTGCAATTTTCAGTGAACCAATACCTTCCACAATGGC  
GAACCTTACCAATCTTGTTTATTAGATTTCTCCTTCAACAATTTCACTGGTTCCTCCCATATTTCCAAGG  
GGCCAAGAACTCATCTACTTGGACCTTTACGTAATGGTCTAACTGGTCTCTTGCTAGAGCTCATTTTG  
AAGGACTCTCAGAACTTGCTACATTAATTTAGGGAACAATTCCTCAACGGGAGCCTTCTGCATATAT  
ATTTGAGCTCCCCTCGTTGAAGCAGCTTTTTCTTACAGCAATCAATTTGTTGGCCAAGTCGACGAATTC  
GCAATGCATCCTCCTCTCCGTTGGATACAGTTGACTTGAGAAACAACCACCTGAATGGATCGATTCCCAA  
GTCCATGTTTGAAGTTGGGAGGCTTAAGGTCCTCTCACTTTCTTCAAACCTCTTAGAGGGACAGTTCCTC  
TTGACCTCATTGGGAGGCTGAGCAACCTTTCAAGACTGGAGCTTTCTTACAATAACTTGACTGTTGATGC  
AAGTAGCAGCAATTCAACCTCTTTCACATTTCCCAGTTGAACATATTGAAATTAGCGTCTTGTCGGCTGC  
AAAAGTTCCCGATCTCAAGAATCAGTCAAGGATGATGCACTTAGACCTTTCAGACAACCAATATTGGG  
GGCAATACCAAATTGGATCTGGGGAATTGGTGGTGGAGGTCTCGCCACCTGAATCTTTCATTCAATCA

GCTGGAGTACGTGGAACAGCCTTACACTGTTTCCAGCAATCTTGCAGTCCTTGATTTGCATTCCAACCGTT  
TAAAAGGTGACTTACTAATACCACCTTCCACTGCCATCTATGTGGACTACTCGAGCAATAATTTAAACAAT  
TCCATCCCAACAGATATTGGAAGATCTCTTGGTTTTGCCTCCTTTTTCTCGGTAGCAAACAATAGCATCAC  
TGGAATAATTCCTGAATCCATATGCAACGTCAGCTACCTTCAAGTTCTTGATTTCTTAACAATGCCTTGA  
GTGGAACAATACCACCATGTCTACTGGAATATAGTCCAAAACCTGGAGTGCTGAATCTAGGGAACAATA  
GACTCCATGGTGTATACCAGATTCATTTCCAATTGGTTGTGCTCTAATAACTTTAGACCTCAGCAGGAAT  
ATCTTTGAAGGGAAGCTACCAAATCGCTTGTCAACTGCACGTTGTTGGAGGTCCTGAATGTTGAAAT  
AACAGTCTTGTTGATCGTTTCCCATGCATGTTGAGGAACTCAACCAGCCTGAAGTCTAGTCTTGCGCT  
CCAATAAATTCAATGGAATCTTACGTGTAATATAACCAAACATAGCTGGAAGAATCTCCAGATCATAGA  
TATAGCTTCCAACAATTTTACTGGTATGTTGAATGCAGAATGCTTTACAAATTGGAGAGGAATGATGGTT  
GCAAAGATTACGTGGAGACAGGACGCAATCATATCCAGTATGAGTTCTTACAATAAGTAACTTGTAC  
TATCAGGATACAGTGACATTAATCATCAAAGGCATGGAGCTGGAGCTTGTGAAGATTCTTAGGGTCTTC  
ACATCTATTGATTTCTTCCAATAGATTTCAAGGAAAGATACCAGATACTGTTGGGGATCTTAGCTCACT  
TTATGTTTTGAACCTGTCACACAATGCCCTCGAGGGACCAATTCCAAAATCAATTGGGAAGCTACAAATG  
CTTGAATCACTAGACCTGTCAACAAACCACCTGTCCGGGGAGATCCCCTCAGAGCTTTCAAGTCTCACAT  
TCTTAGCAGTTTTGAACTTATCGTTCAACAATTTGTTTGGAAAAATCCCGCAAAGTAATCAATTTGAAACA  
TTCCCAGCAGAATCCTTTGAAGGAAACAGAGGCCTATGCGGGCTTCTCTTAACGTCATTTGCAAAGCG  
ATACTTCAGAGTTGAAACCAGCACCAAGTTCTCAAGATGACTCTTATGATTGGCAGTTCATATTTACGGG  
TGTGGGATATGGAGTAGGGGCAGCAATCTCCATTGCACCTCTGTTGTTTTACAAGCAAGGAAACAATA  
CTTTGACAAACATTTGGAGAGAATGCTTAAACTGATGTTTCTAGATACTGGTTCAGTTACACCAGATTT  
GACCCTGGGAAGGTTGTGGCTGTGGAACACTATGAAGATGAGACCCAGATGACACCGAAGATGACGA  
TGAGGGGGGAAAAGAAGCATCTCTTGGGCGTTATTGTGTCTTCTGTAGTAACTTGATTTTCAGAAAAA  
TGAAGCAATGCATGATCCAAAATGCACTTGTGATATGTCATCATCCCCAATTCTTTTCTCTACGCCGT  
CCTCTTCTTACCTTTATTAGTCATATATCACAAAAGTTTTGA

>I3

ATGTTAGCAGAACAGAGACTGTATTTTCTATCCTTCTCTTCATTTATCTCCTCTTTTGTTCATCTCGATTTG  
CTATATCGCAATCTTCATGGGACTACAACGCCACTCTTTCAAATTCTATTGCAGGGTTTGTGGGCTTTCC  
TCTTTCTGGATCAACAGGCCGTCTCTTATTATTAATTCCACCACCGACAGCTTCTATGGTTGACAACACC  
CGTACTTCAGCGGGGAAATGCTGGCCACGATTCTCTGTGGCTTCTACTGCAGGTACAATGTCACAGA



ATGCCTTCTTGGTATCCTTTTGTACCACAACAAATACAACGAGCAGAACGGTATGATAGATAAACCCAG  
TTAGTTTGGTCTGCTAACAGGAACCGTCCAGTGAAATTCATGCAACCTTGGAAGTAGGCCAAGATGGC  
AACTTGGTCTTGACAGACTCTGATGGCACTCTTGTGGTCCACTGATACAATTGGGAAATCTGTTTCTG  
GCTTAACTTAACAGAAATGGGAAATCTGTGCTCTTGATAAGAGAAAGCGCACAATTTGGCAGTCTTT  
TGATCATCCTACAGATTCTTGCTCCAGGGCAGAGTTGGTTTCTGGCCGGAAGCTTGTAGCAAGCGTT  
TCAGCAACCAATCATAGTCAAGGTTTGCTTGCTCTTACTGTTCTCAACGGAAGTTGGGCTGCTTACATGG  
ATACTAATCCGCCTCAATATTACTACACTTCATACTATGCTGATAGTTCTTATTACAGTTTTAATGGTCAA  
CCTTTACTGTTTTACTATCCTACAAATTCGACAGCTCAATTCATGAAGATTGGGCCTGATGGACATATA  
AAGGTATTCCAATGGTCTGTAGTTGATTGGAATGAAGTATCTGACATTTTGTGCGCAAATGTAGATAACT  
GTGCGTACCCAATGGTATGTGGAAGTTATAGCATTGTACAAATAACGGGCAATGTACTTGTCCGTCACA  
GGAAAACCTTTCAGGCCATTTTCTGAGAGGAAACCAGATCTTGGATGTTACAGCTGACTTCCGTTAAC  
TGCAACTCTTCGCAGTATCATAGTTTCATAGAGCTCAAGAATACTACATATTTTTCATTTAACATTGATCA  
GGAATAAATTCGACTAAATTGTGGCTTGGGCAGAAAAGTTGGAAGATTGCAAAGGGCATGTCTGA  
GTCACTGTTCTTGCAAAGCTGCTGTTTTGAATATAATTGGAATGGGGATCGAAGAGGTAATTGTTTGT  
ACTGAATGAAGTTTTCTCTCTCAAAGACAGCGAAGAAGTAAGAGGCGAGACAGTATTTCTTAAGGTGCA  
GAATACCTCAAAGGCGCAGACGCAGTCTCTAATCATTCTGGAGGAAAGAAATCAAGACCTTCAAAGT  
GATAATAGGATCTACTCTTGCAGCTTTCTTGGGATAATTTAAGCATAGCTACTTGCTTTGTTATTTTCA  
GAAAGAGGACACATGAGTCCAGAAAGGCTGCGGATATTTGGATCTAGCACCATCTTACCGGGAATCC  
TAACTCGATTCTTTACAATGAGCTGAAAATAATTACAGATGATTTACAGCAGTAAGCTTGGGGAAGGAG  
GATTTGGCTGTGTTTATGAAGGAACACTGAGAAATGGAATAAATAGCTGTGAAGAATCTGGATGGT  
GTAGGTCAAGTAAAGGAATCATTCTTAACAGAAGTAAAGGCGGTCTGGTGGCATTACCATATCAATCTG  
GTAAAACCTATTGGATTTTGTGCTGAAAAACCCACAGGCTTCTAATCTATGAGTACATGGTGAATGGAT  
CGCTTGATAGGTGGATTACACATGAAAACCGAGAAAATGGGCTTACATGGAGCACAAGACAGAGGATA  
ATATCAGATATCGCCAAAGGTTAGCGTATCTACATGAGGATTGCAGCCAAAAGATAATTCATTTGGAC  
ATCAAACCACAAAACATCCTTCTGGATCAATATCTCAATGCTAAGATATCAGATTTTGGGTTGTGCAAGC  
TAATTGAGAAAGATAAAAGCAAAGTCGTGACTAGAATGAGAGGAACACGGGGTTATTTAGCCCCTGAA  
TGGTTGAGCTCGGTAATCACTGAGAAAGTTGATGTTTATGCTTTTGGAAATTGCCTCTTGGAAATTCTCT  
GTGGACGAAAGAATTTGGATTGGTCCCAACCTGATGAAGAAGATGTCCATTTGCTAAGTGTATTTAGGA  
GAAAAGCGGAACAAGAGCAGCTCATGGATATGGTTGACAAAACAACGAAGATATGCAGCTCCACAGG

GAAGCAGTGAAGTGAATGATGAGCCTAGCTGCATGGTGTCTACAGGGTGATTTTTCCAAGAGGCCTTCC  
ATGTCATTAGTGGTTAAGGCATTGGAAGGTTTGGTGACTGTTGAAACCAACTTGAATTATGATTTACAC  
ATGTACCTGAGGTTGGGGCAGGCAACCAAGAGAGGGAAGTCATTGTCAGTTCAATATTTCTTCAATTTT  
ATCGGGACCAAGGTAA

>CORE

CAACTATGTTGTATTGGTTGAAGTGTCTTCACTCGCATCCTCAGAAGATGAAGTTAACATAAATGAGA  
ATGCTTAAATGGATGTGTGGGCACATTAGAAGAGACAAGATTAGAAAGGAAGATATATGAGGTAAGGT  
GGGAGTAGCTTCATTGGTGGACAAGAAGCGGGAAACAAGGCGAAGATGGTTCGAGCATTCTGAAGAGG  
AGGAACACAAATGCCCTAGTGAAGAGGTGCAAGAGGTTGGCAGTGATAGTTTTGAGGAAAGGTAGAG  
GTAGATCGAGGAAGAATTGGGGGATGTGATTATACAATAGATGAAACATCTTCAACTAATAAGGACATG  
ACTTCAAATAGGGATCATGGAGGATCAGGGTAGACTGGTAGTAGGTGGTTGAGCATTTTCTCTCTTCTC  
GTGGTTGAGCAGTGTCCGGTCTGGAGTATCTATTGGTTTCCTTACCACTATTATCCAACCTTCCCAATTT  
GACACAGAGTTTAAGAAAAAGAAAAGGAAGACTTTAGAACTTGTGGTTTAAAACAATCCTTAGATATT  
TATTTGATGGTAAATCAATTTGTTAGGGGTAAAAGGGAAATTTTAAAGTTGTTATTTCTAATAATACAAA  
AGTGACATTTTTTTTTGAGGAAGCACTAAAAAGTCAAGTGTGTACATAAATTGGGACAAAGGGAGTGTT  
ATTTTGGTAGCATACCTGTTCTTCATTTTGTCTATTGTTGTTTCTTTTACTTTTGTATCTCTAATAATTT  
TATTGTCAATATTTTTCTTTTTCAATATTTTCATAATAGCATTGCATTTCTTCAAACCATGTTCTGAAAAT  
AGATTTTTCTTGGGAACCATGGATTTTTATCTGTAATTTGCAACCTTTGATGCAGTTAACAAATTCTCTCCA  
AGAGGCCACCTCAAGAAGCAACTTAGCATCTAGACAGCTAGCTTCTTCTGCTGGATCAAACACTTCAAAG  
TTCTAGTCTTCGAAGACCATCTTCTTCAGGTGGCTATGGTGAAAGGGAATGAAACAGACAAAATGTCAC  
TGCTAGCATTCAAGAATATGATCATTGATGACCCTTCAAGATCATGGACTCCTGGAATGAAACTATACA  
TTTCTGTGACTGGCCTGGGGTCTCATGTGGTAACCGTCATTGCCGAGTTACAGTTTTAAATCTTACTTCTC  
TGAAATTGAGGGGTTCTCTGTCCCAAGCATTGGTAACCTGAGCTTTCTTAATGTCCTTAAGCTTCAAAT  
AATAGTTTTTCAGGTGAAATCCCATCAGAGATTGGCTACTTACATAAGTTAAACGTTTTACGCCTTGATAA  
TAACTCGTTCACTGGTCATATTCCTTCAAACATTTCTGGTTGCTTCAATCTTGTTTCTGTTGGTCTTTCGAT  
AATATGATGGTAGGCGAAATCCAGCAGAATTAGGCACATTGTTGAGACTCAAACAACCTTTCTCTTGT  
CTAACTCTTTGACAGGAGGAATCCGCCTTCGTTTGGTAATCTTTCTTACTTGATACCTTTTCTGCAAGCA  
AGAATAATTTGTTAGGGAAAATACCTGATGAATTATGTCAATTAATCAACTTAAAGTACTTTGTAGTGAA  
TGAAAACAACCTGAGTAGTACCCTGCCTCCTTGTCTTTTCAATCTTTCCTCTATCGTGGCCATCGATGTTG

GAACAAACCATTTAGAAGGACAATTGCCTCCATTGCTTGGTATTACTCTTCCTAAGTTAGAGTTCCTTAGC  
ATTTATAGAAACAATGTAAGTGGAAATATTCCGGGGACATTGTCAAATGCTACAAATCTTCAGTCTCTTA  
TTGCTGGTAGAAATGGACTCACAGGAAAAGTACCACCCCTTGGAAATTTGCTGAAAATGAGGAGATTTT  
TAGTTGCTTTCAATGATCTTGGCAAGGAGGAGGCGGATGACCTTAGTTTTCTCTCCACATTGGTGAATGC  
CACCAACTTGGAGCTTGTGGAGCTCAATACAAATAATTTTGGTGGAGTCTTACCTGCATCTGTTAGTAAT  
CTTTGACTGAGCTTATAGAGCTTTTCGTTGTCTTATAATCAAGTTTCTGGAGAAATCCCAAGAGGGATAT  
CCAATCTCAAGAAGCTTCAGGCTTTCTTTGTAGCTTACAACAGATTTATCGGTGAAATTCCTTCTGAAATT  
GGTGATCTTATGTATTTGCAAGAGCTGGCTTTACTTGGAAATCAGTTCTCTGGCCAAATCCAATCTCATT  
GGGAAATTTAGCTTCTTTAACCAAACCTCACTTTAAGAGAAAACAATCTCCAGGGGAGAATTCCTTCCAGT  
TTAGGCAAATGCGACAAGTTGGAACCTGTTGGATCTTGGTTCAAATAACCTTAGTGGTTTCATACCATCAG  
AAATCTTGAACCTCATCATTGTTCGGAGGGCGTGGACCTATCTCAGAACCCTTAACCTGGTTTCCTTCCG  
ATGGGAATTGGGAAGTTGAGAAATCTAGGCTACTTAAACCTGTCTTATAACAAGTTGCAGGGCCAGATT  
CCTACCACTATAGGTACTTGTGTGAAACTGAAGCACTAGACTTAAACAACAACAACCTTTCAGGGTAGTA  
TTCTTCAACCATGAATAATTTGCGAGGCCTGGAATTTTTAGTCCTTTCTCACAACAATCTGTCAGGTGGA  
ATCCCGGATTCTTGAAGGACTTCAAATTTCTTCAGATTTTAAATCTGTCTAGCAATAATTTGGAAGGTGC  
TGTCCTCAACTGGAGGTATCTTTAGTAATGCTACTGCGGTTTCCATCATAGGAAATAAAAATCTCTGTGGG  
GGTGTACCGGAGTTGGACCTTCCGGTTTGCATTGTAGGAGTAAAGAAAGAAAGGAAATCAGGTTTTCCC  
TTGAAAAAAGTAATTCCTGTAGTTAGTGGGCTTATAGGATTGACATTGATAGTTTGTCTTGGCATAAC  
GACAGTTTAGTAGATTGAGAAAAACAACACCTACAGATATACCTGAAAACCTCAACCTTAAGAATATCTTA  
TCAGTGTCTACTTAGGGAAACTGATAGATTTTCTGCATCAAATTTGCTTGGCATGGGTGCTTTTGGGTCT  
GTATATAAAGGAATTTCTGAACATGATGGTACTGTTTTTGTCTGTTAAGGTACTGGACCTTTCACACCATG  
CAGCTTCCAGGAGTTTTTTAGCTGAATGTGAGGTTCTAAAGAACATCAGACATCGTAATCTTGTAAGGT  
TCTAAGTGCATGCTCAGGTATTGATTATGAAGGTAATGAGTTCAAAGCCATAGTTTATGAATACATGGAT  
AAGGGGAATCTACAGGACTGGTTGCATTTCACTCCTCAGGAGAACTCTGAGCCACAGGAGGAACACAA  
GAAGCTAGGGTTTATTCAAAGATTAACATTGCGATTGATGTTGCCTGTGCTCTGGATTATCTCCATAAT  
GATTGCCAACCCCTATAATTCACCGCATCTGAAGCCAAGCAATATTCTTCTAGATGAGAACATGACTG  
CACATGTTGGTGATTTTGGTTTGGCAAGATTTGTTCCACCAGAAATTCGAACTCATCAGAAAATTCAA  
AAGTCTTACAGGTGTAGGGGGGACAATTGGTTATACACCTCCAGAATTAGGTATGGGAAGCGACGCCTC  
AACCTATGGAGATGGATACAGCTTTGGCATACTGCTCTTGGAAATGTTTACCGGGAGGAAACCAACTGA

TGAAATGTTCAAAGATAATTTAAACCTTCATAACTACGCGAATGCTGCTTTGCCAGACAGAGTGATGCAT  
ATTACAGATCCAATTCTTCTACAGGAACGAGATGAACTTGAAATGGAATACAACTTCATGACAACACAA  
GCAGTGCTGGCGACATATTTCTGTCAATTCTTAATCAACGTGATTCAAATCGGAGTTTCCTGCTCCGCTGAA  
TCTCCAAAAGAAAGAAAGCGGATCAGTGATGTCGTTAGAGAACTCAATTCATTAAGGAAGTTGTTTTG  
GAGCAAGCATACCGGAAGAAAAAGTTATAAGCTTCAACCTGCATTGACAGATGATGACAGGCATAGGG  
TTAGTCCTTCTCATGGTTGGTGACATGAGGTTAATATGCACTGTGAAACAAATTCATGAATTTAAGGTTT  
GATTCTGCTCTTATAATTTGCAGTTATAAACTTGTATGTTCTAGTAAATGATAGCTCTTTGCACATTTCTT  
AGTTTAGATGCCTTATTTATTTTATTGAGATATCTATAGCTGCTAGACTAGTAGATCACTGAATTACACAA  
TTGATCTCAAGCTGCCACCTACATGTCCAAACATCATATTTGAAGTTTTTGAGACGT

>FLS3

TCATATAAATCAAATAGAAACACAAAACGACAACTTTTCGTCTTGTGAAATAACTCAAGTGGAGTCATT  
CATTCCAATATATCCTTTTTCCATTTCTTTCATATATTTCAACTTTCAAATGCTTAGTAACATCATGGAGA  
AACACATTTTCTTATTGATACTTGCTATCTTAGTTCAATTTACTTTGTTTCTTCTATATCAGCTACTATTTCT  
CTCAAATGAGACTGATCAAGAAGCTCTACTAGCTTTTCGAAACCTGTTACGAGTGATTCTAGTCATTTTT  
TAGCCAATAATTGGACAAAAAACAACCTTCATTTTGCTCTTGGTTTTGGTGCACTTGTAGTCCAAAAAGGCA  
AAGGGTTGTAGCCTTGACTCTTCCTAATTTGCAACTTCAAGGCACAATTCGCCGTCTTTGGCCAATCTAT  
CTTTTCTCATAGAGCTAAATCTCGCAAACAACAACCTTACACAGTGAAATCCCTGATGGCATTGGCCGCTT  
GCCTCGTCTACGAGTGATTGATATTCAGAACAATCAGCTGCATGGAAGTATTCCAACAAGTCTATTTCAA  
CACGGGAGTGTTCAAATCATTTTCATTGGCTTTCAATAAACTCGGTGGTGAAATGTGGAACGGTACATGG  
TATGTACCCGAACCTCAGAGTCTTAAATCTCAGGAACAATACCATTACAGGTGTGATCCCTCCTTCTATTGG  
AAATGCCACAAAGTTGATGAACTTCAAGTTTGAATGGGAATAGAATCAACGGCAACATTCCAATGGAGAT  
TGGTAATCTAAGCCAACCTGTTGAGTTGTCGTTGTCTCGTAATCAATTAACAGGTTCCATTCTTCAACAT  
TGTTTAATATCTCCTCCCTTCTCGTCGTGTCTCTGGCATAACAATAGCCTTTCAGGTCCTCTGTTTCCTGATG  
ATCGACGTAACGTTCTTTCATCAAACCTCGAGCATATAGGTGTATCATACAATCAAATCACTGGTCACATT  
CCTTCCAACATCTGTCAATTCACAGCTCTCAGAGTTCTGTCCATATCATACAACAACATAACTGGAGAAAT  
ACCGAGAAATATTGGTTGTTTAGCCAAGCTCGAAGAGTTTTATATCGGTTATAATGCAATAAATGGAACA  
ATTCCTGCTTCATTAGGCAATATTTCAACTCTTCAAATCTTCAATTCATTGCGGAAGCAATCACATGGAGGGAG  
AACTTCTCCAGAATTAGGAAAGCTATCAAACCTAAGACAAATCAATTCGAAGAAAATTATAATCTTATT  
GGTGAATTCGAATACTATTTTCAACATATCTTCTTTGGAGTTCATTGCTTTCACTTTCAACTACCTTTCA

GGTAGAATTCCGAATCTTCTTACCTTCCAAATCTTATACAACCTTCTCTTAGCAAACAATCAGCTCGAAGG  
TGAAATTCCTCGGTACATCACAAATGCTACGAATCTTGAGCTGTTAGAGCTATCAGATAACCTTCTCACA  
GGTACTATTCTAATGATTTAGGAAATCTTCGCGAGCTGCGAGATCTTTTCTACATCATAATCAACTTAC  
TGAGTTGGGATTCTTTGATTCTTTGGTGAAATGTAGGATGTTGAGATATGTACAAGTGGGATCGAATCC  
GTTGAATGATGTTCTGCCAAGTAGTATTGGCAATCTTTCATCTACTGTTGAATACTTTCATATTGGAGATG  
CACAAATCAATGGATTCATTCCCCTAGTACAGGCAACATGACCGGTCTTACAACGCTAGTTTTTCAAGA  
TAACAGTTTGACAGGAAACATTCCTCGTGAGATCCGTAAGCTTAAACAACCTCCAAGGTTTATTCTAGTT  
AACAAATGGACTACAGGGGGACATAGCAGAGGTAGTATGTGATTTATCGAATTTGGTTGATTAGCTCTG  
TCTGAAAATGAGCTCTCGGGGGTATTCCGGAATGTTTAGGAAATCTTACCATGCTACAACAACCTTTTTT  
TAGGTTCTAACAAGTTTGAATCAAAGCTACCTTTAAGCTTTTGGGAAGATGAGTAGTCTTCTATATTTAAAC  
ATGTCGCGTAATTCTATAAAGGGAGAAGTCCATCAGATATCGGAGAACCTTAAAGCTATTGTAGCAATC  
GATATCTCTGGTAACCATTTCTCGGGGTGATACCAAGCAATTTGGGGGAACCTTCAAACCTTGAAGTTAC  
TTTCTTATCGAACAATTCGTTTTTCAGGTCCAATTCATTTTCTTTTCAAACCTTAAAAGCTTGGAAATTCT  
TGGATTTGTCTTTGAATAACTTGTGAGTACTATTCTAAGTCTTTGAAAAGCTTTTGTACCTTACAAGC  
ATCAACGTCTCGTTTAATGTTTTAGAAGGTGAAATACCTAGTGGTGGTGTGTTTGCAAACCTCCACCCTGC  
AATCATTTAGTGGGAACAAAGGTCTATGTGGAAGGCAAATATTGGAGGTTCTGCTTGTGCTATCACTA  
CTCCTGAACAACAACAATCAAAATCGAAGAAGCTTGTGCTAAAAATTGCTACTCCGATGGTTATTTTATT  
CTTTCTGATATTCTTGTGGTTGTCTCGATTTGGATAATGAAACGAAAGAAGAAAGGGAAAGTCCAAAGA  
TGTTGAAAAGGTTCCGGAGATGAGGACTTATCAATTGATTTCTTATCATGAGATTCAACGAGCAACTAAC  
AATTTTGATGAATCCAATTTGATTGGCGTGGGAGGTTCTGGCTCTGTGTACAAAGCCACATTAGCTAGTG  
GAATTGTGGTTGCAATTAAGTACTGGATTTGGAAAATGAGGAAGTATGCAAAGGTTTGATACTGAAT  
GCGAAGTGATGAGAAATGTTAGACACAAAACCTTGTTCGGTGATCACTACGTGTTCTAGTGAACACA  
TAAGAGCCTTTGTTCTGCAGTATATGCCAACGGAAGTCTTGACAATTGGTTGTACAAAGAAGATCGCCA  
CTTAAAACCTTCGTCAAAGAGTCACCATAATGCTTGATGTAGCTATGGCAATTGAATATCTACATCATGGT  
AATGACACCCCAATAGTTCATTGTGACCTCAAGCCAGCCAACGTTCTTTTGGATGAAGATATGGTGGCGC  
GTGTTGGTGATTTTGGCATCTCAAAGATTTTAGCTGTAAGCAAATCCATGGCACATACAAAGACATTAGG  
CACTCTTGGATATATTGCACCAGAATATGGCTCGGAGGGAATAGTGTCCACTCGTGGTGATGTTTACAGT  
TATGGCATCATGCTGATGGAGGTTTTGGCAAAAAGAAGGCCAACAGGTGAAGAGATATTCAACGAAAA  
TCTTGGCTTGAGGGAGTGGATAACGCGAGCATTTCGAAGAATATGATGGAAGTTGTGGACGCGGATA

TGTTTCATGATGGAGAAAAAATTACTCCGAAAGTGAAATATGCATACTCTCCATGATAGAACTGGCTTT  
AGATTGCACAAAGGCAACACCAGAATCAAGGATAACCATGAAAGATGTAGTCAAGAGGCTTAACAAAA  
TAAAGAACACATTTGGAAACATAGAAGTAAATTAGAATCTCTTTGTGTTGTTTTTTTCTTTTAAGTTTGTA  
AGTTGATACTCAATCAATCTGTTTGCATACTTTTCATTTGTCTGTTTTTTTAAAAAATGCTTTCTTTTTT  
GGCATCTCTTAAAA

**Notes S4** The 2x bait library used in this study

>CORE\_1054

CATTCAAGAATATGATCATTGATGACCCTTTCAAGATCATGGACTCCTGGAATGAAACTATACATTTCTGT  
GACTGGCCTGGGGTCTCATGTGGTAACCGTCATTGCCGAGTTACAGTTT

>CORE\_1116

CATTTCTGTGACTGGCCTGGGGTCTCATGTGGTAACCGTCATTGCCGAGTTACAGTTTTAAATCTTACTTC  
TCTGAAATTGAGGGGTTCTCTGTCACCAAGCATTGGTAACCTGAGCTTT

>CORE\_1178

TCTTACTTCTCTGAAATTGAGGGGTTCTCTGTCACCAAGCATTGGTAACCTGAGCTTTCTTAATGTCCTTA  
AGCTTCAAATAATAGTTTTTCAGGTGAAATCCCATCAGAGATTGGCTA

>CORE\_1240

ATGTCCTTAAGCTTCAAATAATAGTTTTTCAGGTGAAATCCCATCAGAGATTGGCTACTTACATAAGTTA  
AACGTTTTACGCCTTGATAATAACTCGTTCACTGGTCATATTCCTTCAA

>CORE\_1302

CATAAGTTAAACGTTTTACGCCTTGATAATAACTCGTTCACTGGTCATATTCCTTCAAACATTTCTGGTTGC  
TTCAATCTTGTTTCTGTTGGTCTTTCTGATAATATGATGGTAGGCGAA

>CORE\_1364

TTCTGGTTGCTTCAATCTTGTTTCTGTTGGTCTTTCTGATAATATGATGGTAGGCGAAATTCCAGCAGAAT  
TAGGCACATTGTTGAGACTCAAACAACCTTTCTCTTGTTTCTAACTCTTT

>CORE\_1426

CAGCAGAATTAGGCACATTGTTGAGACTCAAACAACCTTTCTCTTGTTTCTAACTCTTTGACAGGAGGAAT  
TCCGCCTTCGTTTGGTAATCTTTCTTTACTTGATACCTTTTCTGCAAGCA

>CORE\_1488

GGAGGAATCCGCCTTCGTTTGGTAATCTTTCTTTACTTGATACCTTTTCTGCAAGCAAGAATAATTTGTT  
AGGGAAAATACCTGATGAATTATGTCAATACTCAACTTAAAGTACTTT

>CORE\_1550

TAATTTGTTAGGGAAAATACCTGATGAATTATGTCAATACTCAACTTAAAGTACTTTGTAGTGAATGAA  
AACAACTTGAGTAGTACCCTGCCTCCTTGCTTTTCAATCTTTCTCTAT

>CORE\_1674

GCCATCGATGTTGGAACAAACCATTTAGAAGGACAATTGCCTCCATTGCTTGGTATTACTCTTCCTAAGTT  
AGAGTTCCTTAGCATTATAGAAACAATGTAAGTGGAAATATTCCGGGG

>CORE\_1736

TCCTAAGTTAGAGTTCCTTAGCATTATAGAAACAATGTAAGTGGAAATATTCCGGGGACATTGTCAAAT  
GCTACAAATCTTCAGTCTCTTATTGCTGGTAGAAATGGACTCACAGGAAA

>CORE\_1798

TGTCAAATGCTACAAATCTTCAGTCTCTTATTGCTGGTAGAAATGGACTCACAGGAAAAGTACCACCCCT  
TGAAATTTGCTGAAAATGAGGAGATTTTAGTTGCTTTCAATGATCTTG

>CORE\_1860

CCACCCCTTGAAATTTGCTGAAAATGAGGAGATTTTAGTTGCTTTCAATGATCTTGGAAGGAGGAG  
GCGGATGACCTTAGTTTTCTCTCCACATTGGTGAATGCCACCAACTTGGAG

>CORE\_1922

GGAGGAGGCGGATGACCTTAGTTTTCTCTCCACATTGGTGAATGCCACCAACTTGGAGCTTGTGGAGCT  
CAATACAAATAATTTTGGTGGAGTCTTACCTGCATCTGTTAGTAATCTTTC

>CORE\_1984

TGGAGCTCAATACAAATAATTTTGGTGGAGTCTTACCTGCATCTGTTAGTAATCTTTCGACTGAGCTTATA  
GAGCTTTCGTTGTCTTATAATCAAGTTTCTGGAGAAATCCCAAGAGGGA

>CORE\_2046

GAGCTTATAGAGCTTTCGTTGTCTTATAATCAAGTTTCTGGAGAAATCCCAAGAGGGATATCCAATCTCA  
AGAAGCTTCAGGCTTCTTTGTAGCTTACAACAGATTTATCGGTGAAATT

>CORE\_2108

CAATCTCAAGAAGCTTCAGGCTTCTTTGTAGCTTACAACAGATTTATCGGTGAAATCCTTCTGAAATTG  
GTGATCTTATGTATTTGCAAGAGCTGGCTTTACTTGGAAATCAGTTCTC

>CORE\_2170

CTGAAATTGGTGATCTTATGTATTTGCAAGAGCTGGCTTTACTTGGAAATCAGTTCTCTGGCCAAATTCCA  
ATCTCATTGGGAAATTTAGCTTCTTTAACCAAACACTCACTTTAAGAGAAA

>CORE\_2232

CAAATCCAATCTCATTGGGAAATTTAGCTTCTTTAACCAAACACTCACTTTAAGAGAAAACAATCTCCAGGG  
GAGAATCCTTCCAGTTTAGGCAAATGCGACAAGTTGGAAGTGGAT



>CORE\_2294

TCTCCAGGGGAGAATTCCTTCCAGTTTAGGCAAATGCGACAAGTTGGAAGTGTGGATCTTGGTTCAAAT  
AACCTTAGTGGTTTCATACCATCAGAAATTCTTGAAGTCTCATCATTGTC

>CORE\_2480

AAATCTAGGCTACTTAAACCTGTCTTATAACAAGTTGCAGGGCCAGATTCTACCACTATAGGTACTTGT  
GTGAAACTTGAAGCACTAGACTTAAACAACAACAACCTTTCAGGGTAGTAT

>CORE\_2542

GTAAGTGTGTGAAACTTGAAGCACTAGACTTAAACAACAACAACCTTTCAGGGTAGTATTCCTTCAACCAT  
GAATAATTTGCGAGGCCTGGAATTTTTAGTCCTTCTCACAACAATCTGT

>CORE\_2604

TCAACCATGAATAATTTGCGAGGCCTGGAATTTTTAGTCCTTCTCACAACAATCTGTCAGGTGGAATCCC  
GGGATTCTTGAAGGACTTCAAATTTCTCAGATTTTAAATCTGTCTAGC

>CORE\_2666

TGGAATCCCAGGATTCTTGAAGGACTTCAAATTTCTCAGATTTTAAATCTGTCTAGCAATAATTTGGAA  
GGTGTCTGCCCAACTGGAGGTATCTTTAGTAATGCTACTGCGGTTTCCAT

>CORE\_2728

ATTTGGAAGGTGCTGTCCCAACTGGAGGTATCTTTAGTAATGCTACTGCGGTTTCCATCATAGGAAATAA  
AAATCTCTGTGGGGGTGTACCGGAGTTGGACCTTCCGTTTGCATTGTAG

>CORE\_2790

GGAAATAAAAATCTCTGTGGGGGTGTACCGGAGTTGGACCTTCCGTTTGCATTGTAGGAGTAAAGAA  
AGAAAGGAAATCAGGTTTTCCCTTGAAAAAAGTAATTCCTGTAGTTAGTGGG

>CORE\_2852

AAAGAAAGAAAGGAAATCAGGTTTTCCCTTGAAAAAAGTAATTCCTGTAGTTAGTGGGCTTATAGGATT  
GACATTGATAGTTTGTCTTGGCATAACGACAGTTTAGTAGATTGAGAAA

>CORE\_2914

TAGGATTGACATTGATAGTTTGTCTTGGCATAACGACAGTTTAGTAGATTGAGAAAAACAACACCTAC  
AGATATACCTGAAAACCTAACCTTAAGAATATCTTATCAGTGTCTACTTA

>CORE\_2976

ACACCTACAGATATACCTGAAAACCTAACCTTAAGAATATCTTATCAGTGTCTACTTAGGGAAACTGATA

GATTTTCTGCATCAAATTTGCTTGGCATGGGTGCTTTTGGGTCTGTATAT

>CORE\_3038

AACTGATAGATTTTCTGCATCAAATTTGCTTGGCATGGGTGCTTTTGGGTCTGTATATAAAGGAATTTCT  
GAACATGATGGTACTGTTTTGCTGTAAAGGACTGGACCTTTCACACCA

>CORE\_3100

GAATTTCTGAACATGATGGTACTGTTTTGCTGTAAAGGACTGGACCTTTCACACCATGCAGCTTCCAG  
GAGTTTTTTAGCTGAATGTGAGGTTCTAAAGAACATCAGACATCGTAATC

>CORE\_3162

GCTTCCAGGAGTTTTTTAGCTGAATGTGAGGTTCTAAAGAACATCAGACATCGTAATCTTGTAAGGTTT  
TAAGTGCATGCTCAGGTATTGATTATGAAGGTAATGAGTTCAAAGCCATA

>CORE\_3224

AAAGGTTCTAAGTGCATGCTCAGGTATTGATTATGAAGGTAATGAGTTCAAAGCCATAGTTTATGAATAC  
ATGGATAAGGGGAATCTACAGGACTGGTTGCATTTCACTCCTCAGGAGAA

>CORE\_3286

ATGAATACATGGATAAGGGGAATCTACAGGACTGGTTGCATTTCACTCCTCAGGAGAACTCTGAGCCAC  
AGGAGGAACACAAGAAGCTAGGGTTTATTCAAAGATTAACATTGCGATTG

>CORE\_3348

GAGCCACAGGAGGAACACAAGAAGCTAGGGTTTATTCAAAGATTAACATTGCGATTGATGTTGCCTGT  
GCTCTGGATTATCTCCATAATGATTGCCAACCCCTATAATTCACCGCGAT

>CORE\_3472

AGCCAAGCAATATTCTTCTAGATGAGAACATGACTGCACATGTTGGTGATTTTGGTTTGGCAAGATTTGT  
TCCACCAGAAATTCCGAACTCATCAGAAAATTCAAAAAGTCTTACAGGTG

>CORE\_3534

AGATTTGTTCCACCAGAAATTCCGAACTCATCAGAAAATTCAAAAAGTCTTACAGGTGTAGGGGGGACA  
ATTGGTTATACACTCCAGAATTAGGTATGGGAAGCGACGCCTCAACCTAT

>CORE\_3658

ATGGATACAGCTTTGGCATACTGCTCTTGAAATGTTTACCGGGAGGAAACCAACTGATGAAATGTTCA  
AAGATAATTTAAACCTTCATAACTACGCGAATGCTGCTTTGCCAGACAGAG

>CORE\_3720

ATGTTCAAAGATAATTTAAACCTTCATAACTACGCGAATGCTGCTTTGCCAGACAGAGTGATGCATATTA  
CAGATCCAATTCTTCTACAGGAACGAGATGAACTTGAAATGGAATACAAA

>CORE\_3782

GCATATTACAGATCCAATTCTTCTACAGGAACGAGATGAACTTGAAATGGAATACAACTTCATGACAAC  
ACAAGCAGTGCTGGCGACATATTTCTGTCATTCTTAATCAACGTGATTCA

>CORE\_3844

ATGACAACACAAGCAGTGCTGGCGACATATTTCTGTCATTCTTAATCAACGTGATTCAAATCGGAGTTTC  
CTGCTCCGCTGAATCTCCAAAAGAAAGAAAGCGGATCAGTGATGTCGTTA

>CORE\_3906

GGAGTTTCTGCTCCGCTGAATCTCCAAAAGAAAGAAAGCGGATCAGTGATGTCGTTAGAGAACTCAAT  
TCATTAAGGAAGTTGTTTTGGAGCAAGCATACCGGAAGAAAAAGTTATAA

>CORE\_3968

ACTCAATTCATTAAGGAAGTTGTTTTGGAGCAAGCATACCGGAAGAAAAAGTTATAAGCTTCAACCTGC  
ATTGACAGATGATGACAGGCATAGGGTTAGTCCTTCTCATGGTTGGTGAC

>CORE\_4092

GGTTAATATGCACTGTGAAACAAATTCATGAATTTAAGGTTTGATTCTGCTTTATAATTTGCAGTTATAA  
ACTTGTATGTTCTAGTAAATGATAGCTCTTGCACATTTCTTAGTTA

>CORE\_4154

CAGTTATAAACTTGTATGTTCTAGTAAATGATAGCTCTTGCACATTTCTTAGTTTAGATGCCTTATTTAT  
TTTATTGAGATATCTATAGCTGCTAGACTAGTAGATCACTGAATTACA

>CORE\_4214

TGCCTTATTTATTTTATTGAGATATCTATAGCTGCTAGACTAGTAGATCACTGAATTACACAATTGATCTC  
AAGCTGCCACCTACATGTCCAAACATCATATTTGAAGTTTTTGAGACGT

>CORE\_682

GGAGTGTTATTTTGGTAGCATACTTGTCTTCATTTTGTCTATTGTTGTTTCTTTACTTTTGTTATCTC  
TAATAATTTTATTGTCAATATTTTCTTTTTTCAATATTTTCATAAT

>CORE\_744

TTTGTTATCTCTAATAATTTTATTGTCAATATTTTCTTTTTTCAATATTTTCATAATAGCATTGCATTTCTTT  
CAAACCATGTTCTGAAAATAGATTTTTCTTGGGAACCATGGATTTT

>CORE\_806

TTGCATTTCTTTCAAACCATGTTCTGAAAATAGATTTTTCTTGGGAACCATGGATTTTTATCTGTAATTTGC  
AACCTTTGATGCAGTTAACAATTCTCTCCAAGAGGCCACCTCAAGAA

>CORE\_868

TGTAATTTGCAACCTTTGATGCAGTTAACAATTCTCTCCAAGAGGCCACCTCAAGAAGCAACTTAGCAT  
CTAGACAGCTAGCTTCTTCTGCTGGATCAAACACTTCAAAGTTCTAGTCT

>CORE\_930

CTTAGCATCTAGACAGCTAGCTTCTTCTGCTGGATCAAACACTTCAAAGTTCTAGTCTTCGAAGACCATCT  
TCTTCAGGTGGCTATGGTGAAAGGGAATGAAACAGACAAAATGTCACTG

>CORE\_992

AGACCATCTTCTTCAGGTGGCTATGGTGAAAGGGAATGAAACAGACAAAATGTCACTGCTAGCATTCAA  
GAATATGATCATTGATGACCCTTTCAAGATCATGGACTCCTGGAATGAAAC

>Cf-2.1\_0

ATGATGATGGTTTCTAGAAAAGTAGTCTCTTCACTTCAGTTTTTCACTCTTTTCTACCTCTTTACAGTTGCA  
TTTGCTTCGACTGAGGAGGCAACTGCCCTCTTGAAATGGAAAGCAACT

>Cf-2.1\_122

CAAGAACCAGAATAATTCCTTTTTGGCTTCATGGATTCCAAGTTCTAATGCATGCAAGGACTGGTATGGA  
GTTGTATGCTTTAATGGTAGGGTAAACACGTTGAATATTACAAATGCTAG

>Cf-2.1\_1281

GGTACTTGAGTTCTCTTACTTATCTAGATTTGAGTAATAACTCCATTAATGGATTTATTCCTGCTTCATTT  
GGCAATATGAGCAACTTGGCTTTTTTGTTCCTTATGAAAATCAGCTT

>Cf-2.1\_1891

GTAATAACTCTCTTAATGGACTTATTCTGCTTCATTTGGCAATATGAGAAATCTGCAAGCTCTGATTCTC  
AATGATAACAATCTCATTGGGGAAATTCCTTCATCTGTGTGCAATTTGA

>Cf-2.1\_2013

TCACTGGAAGTGTTGTATATGCCGAGAAACAATTTGAAGGGAAAAGTTCCGCAATGTTTGGGTAATATC  
AGTAACCTTCAGGTTTTGTGCGATGTCATCTAATAGTTTCAGTGGAGAGCTC

>Cf-2.1\_2074

GTAATATCAGTAACCTTCAGGTTTTGTGCGATGTCATCTAATAGTTTCAGTGGAGAGCTCCCTTCATCTATT

TCCAATTTAACATCACTACAAATACTTGATTTTGGCAGAAACAATCTGG

>Cf-2.1\_2196

GGAGCAATACCACAATGTTTTGGCAATATTAGTAGCCTCGAGGTTTTTGATATGCAGAACAACAACTTT  
CTGGGACTCTTCCAACAAATTTAGCATTGGATGTTCACTGATAAGTCTC

>Cf-2.1\_2257

ACAACTTTCTGGGACTCTTCCAACAAATTTAGCATTGGATGTTCACTGATAAGTCTCAACTTGCATGGC  
AATGAACTAGAGGATGAAATCCCTCGGTCTTTGGACAATTGCAAAAAGC

>Cf-2.1\_2440

TGCCAGAGCTGAGAGTTTTAAGGTTGACATCGAATAAATTGCATGGACCTATAAGATCATCAAGGGCTG  
AAATCATGTTTCCTGATCTTCGAATCATAGATCTCTCTCGCAATGCATTCT

>Cf-2.1\_2501

AAGGGCTGAAATCATGTTTCCTGATCTTCGAATCATAGATCTCTCTCGCAATGCATTCTCGCAAGACTTAC  
CAACGAGTCTATTTGAACATTTGAAAGGGATGAGGACAGTTGATAAAAC

>Cf-2.1\_2562

CAAGACTTACCAACGAGTCTATTTGAACATTTGAAAGGGATGAGGACAGTTGATAAAACAATGGAGGA  
ACCAAGTTATGAAAGCTATTACGATGACTCGGTGGTAGTTGTGACAAAGGGA

>Cf-2.1\_2623

TGGAGGAACCAAGTTATGAAAGCTATTACGATGACTCGGTGGTAGTTGTGACAAAGGGATTGGAGCTT  
GAAATTGTGAGAATTTGTCTTTGTACACAGTTATCGATCTTTCAAGCAACA

>Cf-2.1\_2745

TTTGAAGGACATATTCCTTCTGTCCTGGGAGATCTCATTGCGATCCGTATACTTAATGTATCTCATAATGC  
ATTGCAAGGCTATATACCATCATCACTTGGAAGTTTATCTATACTGGAA

>Cf-2.1\_305

TAGCAAGAACAATATCTATGGTACCATTCCACCTGAGATTGGTAATCTCACAAATCTTGTCTATCTTGACT  
TGAACAACAATCAGATTTTCAGGAACAATACCACCACAAATCGGTTTACT

>Cf-2.1\_3050

TTCAAAGGTTGTGGCAAAGATCCTGTGTCAGAGAAAACTATAACAGTGTCTGCGCTAGAAGATCAAGA  
AAGCAATTCTGAATTTTCAATGATTTTGGAAAGCAGCTCTGATGGGCTA

>Cf-2.1\_3219

ACTGGAAATCTAAGATGGCTTGCAAGAATCATTGAAAACTGGAACACAAAATTATCATGCAAAGGAGA  
AAGAAGCAGCGAGGTCAAAGAAATTACAGAAGAAGAAATAATCACTTCTAG

>Cf-2.1\_366

TATCTTGACTTGAACAACAATCAGATTTTCAGGAACAATACCACCACAAATCGGTTTACTAGCCAAGCTTC  
AGATCATCCGCATATTTACAATCAATTAAATGGATTTATTCCTAAAGAA

>Cf-2.1\_61

TTACAGTTGCATTTGCTTCGACTGAGGAGGCAACTGCCCTCTTGAAATGGAAAGCAACTTTCAAGAACCA  
GAATAATTCCTTTTTGGCTTCATGGATTCCAAGTTCTAATGCATGCAAGG

>Cf-4\_0

ATGGGTTGTGTAACAACTTGTGTTTTTCATGCTATATGTCTTTCTTTCAACTTGTTTCCTCGTCATCCTTAC  
CTCATTTGTGCCCCGAAGATCAAGCTCTTGCTCTTCTAGAATTCAAG

>Cf-4\_1008

AACTTAAATGGGAGTATACCATCCTGGATATTCTCCCTTCCATCACTGATAGGGTTAGACTTGAGCAATA  
ACACTTTCAGTGGAAAAATTCAAGAGTTCAAGTCCAAAACATTAAGTACC

>Cf-4\_1071

AGCAATAACACTTTCAGTGGAAAAATTCAAGAGTTCAAGTCCAAAACATTAAGTACCGTTACTCTAAAC  
AAAATAAGCTAAAAGGTCCTATTCCGAATTCCTCCTAAACCAGAAGAAC

>Cf-4\_1134

CTAAAACAAAATAAGCTAAAAGGTCCTATTCCGAATTCCTCCTAAACCAGAAGAACCTACAATTCCTTCT  
CCTTTCACACAATAATATCAGTGGACATATTTCTTCAGCTATCTGCAAT

>Cf-4\_1197

TTCCTTCTCCTTTCACACAATAATATCAGTGGACATATTTCTTCAGCTATCTGCAATCTGAAAACATTGATA  
TTGTTAGACTTGGGAAGTAATAATTTGGAGGGAACAATCCCGCAATGC

>Cf-4\_126

TTTACCGTTAATCCTAATGCTTCTGATTATTGTTACGACAGAAGAAGTCTTTCTTGGAACAAAAGCACAAAG  
TTGCTGCTCATGGGATGGCGTTCATTGTGACGAAACGACAGGACAAGTG

>Cf-4\_1260

ACATTGATATTGTTAGACTTGGGAAGTAATAATTTGGAGGGAACAATCCCGCAATGCGTGGTTGAGAGG  
AACGAATACCTTTCGCATTTGGATTTGAGCAACAACAGACTTAGTGGGACA

>Cf-4\_1323

GAGAGGAACGAATACCTTTCGCATTTGGATTGAGCAACAACAGACTTAGTGGGACAATCAATACAAC  
TTAGTGTGGAAACATTTAAGGGTCATTAGCTTGCACGGGAATAAGCTA

>Cf-4\_1386

ACAACCTTTAGTGTGGAAACATTTAAGGGTCATTAGCTTGCACGGGAATAAGCTAACGGGGAAAGTC  
CCACGATCTATGATCAATTGCAAGTATTTGACACTACTTGATCTAGGTAAC

>Cf-4\_1449

AAAGTCCCACGATCTATGATCAATTGCAAGTATTTGACACTACTTGATCTAGGTAACAATATGTTGAATG  
ACACATTTCCAACTGGTTGGGATACCTATTTCAATTGAAGATTTTAAGC

>Cf-4\_1512

TTGAATGACACATTTCCAACTGGTTGGGATACCTATTTCAATTGAAGATTTTAAGCTTGAGATCAAATA  
AGTTGCATGGTCCCATCAAATCTTCAGGGAATACAACTTGTTTATGGGT

>Cf-4\_1575

TCAAATAAGTTGCATGGTCCCATCAAATCTTCAGGGAATACAACTTGTTTATGGGTCTTCAAATCTTGA  
TCTATCATCTAATGGATTTAGTGGGAATTTACCCGAAAGAATTTTGGGG

>Cf-4\_1638

ATTCTTGATCTATCATCTAATGGATTTAGTGGGAATTTACCCGAAAGAATTTTGGGGAATTTGCAAACCA  
TGAAGGAAATTGATGAGAGTACAGGATTCCAGAGTATATTTCTGATCCA

>Cf-4\_1701

CAAACCATGAAGGAAATTGATGAGAGTACAGGATTCCAGAGTATATTTCTGATCCATATGATATTTATT  
ACAATTATTTGACGACAATTTCTACAAAGGGACAAGATTATGATTCTGTT

>Cf-4\_1764

ATTTATTACAATTATTTGACGACAATTTCTACAAAGGGACAAGATTATGATTCTGTTTGAATTTTGGATTC  
TAACATGATTATCAATCTCTCAAAGAACAGATTTGAAGGTCATATTCCA

>Cf-4\_1827

TTGGATTCTAACATGATTATCAATCTCTCAAAGAACAGATTTGAAGGTCATATTCCAAGCATTATTGGAG  
ATCTTGTTGGACTTCGTACGTTGAACTTGTCTCACAATGTCTTGGGAAGGT

>Cf-4\_189

AGCACAAGTTGCTGCTCATGGGATGGCGTTCATTGTGACGAAACGACAGGACAAGTGATTGAGCTTGAC

CTCCGTTGCATCCAACCTCAAGGCAAGTTTCATTCCAATAGTAGCCTCTTT

>Cf-4\_1890

ATTGGAGATCTTGTGGACTTCGTACGTTGAACTTGTCTACAATGTCTTGGGAAGGTCATATACCGGCAT  
CATTTCAAATTTATCAGTACTCGAATCATTGGATCTCTCATCTAATAAA

>Cf-4\_1953

CCGGCATCATTTCAAATTTATCAGTACTCGAATCATTGGATCTCTCATCTAATAAAATCAGCGGAGAAA  
TTCCGCAGCAGCTTGCATCCCTCACATTCCTTGAAGTCTTAAATCTCTCT

>Cf-4\_2079

CATCTTGTGGATGCATCCCCAAAGGAAAACAATTTGATTCGTTCCGGGAACACTTCGTACCAAGGGAAT  
GATGGGTTACGCGGATTTCCACTCTCAAACCTTTGTGGTGGTGAAGATCAA

>Cf-4\_2142

GGGAATGATGGGTTACGCGGATTTCCACTCTCAAACCTTTGTGGTGGTGAAGATCAAGTGACAACTCCA  
GCTGAGCTAGATCAAGAAGAGGAGGAAGAAGATTCACCAATGATCAGTTGG

>Cf-4\_2205

ACTCCAGCTGAGCTAGATCAAGAAGAGGAGGAAGAAGATTCACCAATGATCAGTTGGCAGGGGGTTCT  
CGTGGGTTACGGTTGTGGACTTGTTATTGGACTGTCCGTAATATACATAATG

>Cf-4\_2268

GTTCTCGTGGGTTACGGTTGTGGACTTGTTATTGGACTGTCCGTAATATACATAATGTGGTCAACTCAAT  
ATCCAGCATGGTTTTCGAGGATGGATTTAAAGTTGGAACACATAATTACT

>Cf-4\_2301

GGACTGTCCGTAATATACATAATGTGGTCAACTCAATATCCAGCATGGTTTTCGAGGATGGATTTAAAGT  
TGGAACACATAATTACTACGAAAATGAAAAAGCACAAAGAAAAGATATTAG

>Cf-4\_252

CTTGACCTCCGTTGCATCCAACCTCAAGGCAAGTTTCATTCCAATAGTAGCCTCTTTCAACTCTCCAATCTC  
AAAAGGCTTGATTTGTCTTATAATGATTTCACTGGATCGCCCATTTCA

>Cf-4\_315

TCCAATCTCAAAGGCTTGATTTGTCTTATAATGATTTCACTGGATCGCCATTTACCTAAATTTGGTGA  
GTTTTAGATTTGACGCATCTCGATTTGTCGCATTCAAGTTTTAGGGGT

>Cf-4\_378



TTTGGTGAGTTTTAGATTGACGCATCTCGATTTGTCGCATTCAAGTTTTAGGGGTGTAATCCCTTCTGA  
AATCTCTCATCTTTCTAAACTATACGTTCTTCGTATTAGTCTAAATGAG

>Cf-4\_441

CCTTCTGAAATCTCTCATCTTTCTAAACTATACGTTCTTCGTATTAGTCTAAATGAGCTTACTTTTGGTCCT  
CACAAATTTGAATTGCTTCTTAAGAAGTTGACCCAATTAAGTGTCTC

>Cf-4\_504

TTTGGTCCTCACAATTTGAATTGCTTCTTAAGAAGTTGACCCAATTAAGTGTCTCGACCTTGAATCTAT  
CAACATCTCTCCACTATTCTTTGAATTTCTTCTCATTAAACAAAT

>Cf-4\_567

GAATCTATCAACATCTCTCCACTATTCTTTGAATTTCTTCTCATTAAACAAATCTATGGCTTCCATACA  
CAGAGTTACGTGGGATATTGCCCGAAAGAGTTTTCCACCTTCCGAC

>Cf-4\_63

TCATCCTTACCTCATTGTGCCCCGAAGATCAAGCTCTTGCTCTTCTAGAATTCAAGAACATGTTTACCGTT  
AATCCTAATGCTTCTGATTATTGTTACGACAGAAGAACTCTTCTTGG

>Cf-4\_630

CTTCCATACACAGAGTTACGTGGGATATTGCCCGAAAGAGTTTTCCACCTTCCGACTTAGAATTTCTCGA  
TTTATCAAGCAATCCCCAGCTCACGGTTAGGTTTCCACAACCAAATGG

>Cf-4\_756

AGTGCATCACTCATGAAGTTATATCTCTATAATGTGAATATTGATGATAGGATACCTGAATCATTAGCC  
ATCTAACTTCACTTACATAAGTTGTACATGAGTCGTTCTAATCTGTCAGGG

>Cf-4\_819

TTTAGCCATCTAACTTCACTTACATAAGTTGTACATGAGTCGTTCTAATCTGTCAGGGCCTATTCTAAACCT  
CTATGGAATCTCACCAACATAGTGTTTTTGGACCTTAATAATAACCAT

>Cf-4\_882

CCTAAACCTCTATGGAATCTCACCAACATAGTGTTTTTGGACCTTAATAATAACCATCTTGAAGGACCAAT  
TCCATCCAACGTAAGCGGACTACGTAACCTACAAATACTTTGGTTGTCA

>Cf-4\_945

GGACCAATTCCATCCAACGTAAGCGGACTACGTAACCTACAAATACTTTGGTTGTCATCAACAACCTTAA  
ATGGGAGTATACCATCCTGGATATTCTCCCTTCCATCACTGATAGGGTTA

>Cf-5\_0

ATGATGATGGTTACTAGCAAAGTATTCTCTTCACTTCAGTTTTTCACTGTTTTCTACCTCTTTACAGTTGCA  
TTTGCTTCGACTGAGGAGGCAACTGCCCTCTTGAAATGGAAAGCAACT

>Cf-5\_124

AGAACCAGAATAATTCCTTTTTGGCTTCATGGACGACAAGTTCTAATGCATGCAAGGACTGGTATGGAG  
TTGTATGCTTGAATGGTAGGGTAAACACGTTGAATATTACAAATGCCAGTG

>Cf-5\_1426

GGAATCTAAACAACTTGTCTAGGTTGTATCTTTACAATAATCAGCTTTCTGGCTCTATTCTGCTTCATTTG  
GCAATATGAGAAATCTGCAAACTCTGTTTCTCAGTGATAACGATCTCA

>Cf-5\_1488

GCTTCATTTGGCAATATGAGAAATCTGCAAACTCTGTTTCTCAGTGATAACGATCTCATTGGGGAAATTC  
CTTCATTTGTGTGCAATTTGACATCACTGGAAGTGTGTATATGTGCGAGA

>Cf-5\_1612

ATTTGAAGGGAAAAGTTCCGCAATGTTTGGGTAATATCAGTGACCTTCACATTTTGTGCGATGTCATCTAA  
TAGTTTCAGAGGAGAGCTCCCTTCATCTATTTCCAATTTAACATCACTAA

>Cf-5\_1674

TCATCTAATAGTTTCAGAGGAGAGCTCCCTTCATCTATTTCCAATTTAACATCACTAAAAATACTTGATTTT  
GGCAGAAACAATCTGGAGGGAGCAATACCACAATTTTTTTGGCAATATT

>Cf-5\_1736

ACTTGATTTTGGCAGAAACAATCTGGAGGGAGCAATACCACAATTTTTTTGGCAATATTAGTAGCCTCCAG  
GTTTTTGATATGCAGAATAACAACTTTCTGGGACTCTTCCAACAAATTT

>Cf-5\_248

TGGTACACTTTATGCTTTTCCATTTTCATCCCTCCCTTTTCTCGAGAATCTTGATCTTAGCAACAACAATAT  
CTCTGGTACCATTCCACCTGAGATTGGTAATCTCACAAATCTTGTCTA

>Cf-5\_310

ACAACAATATCTCTGGTACCATTCCACCTGAGATTGGTAATCTCACAAATCTTGTCTATCTTGACTTGAAC  
ACCAATCAGATTTAGGAACAATTCACCACAAATCGGTTCACTAGCCA

>Cf-5\_372

GACTTGAACACCAATCAGATTTAGGAACAATTCACCACAAATCGGTTCACTAGCCAAGCTTCAGATCA

TCCGCATATTTAACAATCATTTAAATGGCTTTATTCTGAAGAAATAGGT

>Cf-9\_0

ATGGATTGTGTAACACTTGTATTCTTATGCTATATACCTTTCTCTGTCAACTTGCTTTATCCTCATCCTTG  
CCTCATTTGTGCCCCGAAGATCAAGCTCTTCTCTTCTACAATTCAAG

>Cf-9\_1116

GGTCCAATTCCATCCAACATAAGCGGACTTCAAACCTAGAATGTCTCTACTTGTGCATCAAACCACTTGAA  
TGGGAGTATACCTTCTGGATATTCTCCCTTCTTCACTGGTTGAGTTA

>Cf-9\_1178

CCACTTGAATGGGAGTATACCTTCTGGATATTCTCCCTTCTTCACTGGTTGAGTTAGACTTGAGCAATA  
ACACTTTCAGTGGAAAAATTCAAGAGTTCAAGTCCAAAACATTAAGTGC

>Cf-9\_124

TGTTTACCATTAATCCTAATGCTTCTGATTATTGTTACGACATAAGAACATACGTAGACATTCAGTCATAT  
CCAAGAACTCTTCTTGGAAACAAAAGCACAAGTTGCTGCTCATGGGATG

>Cf-9\_186

CAGTCATATCCAAGAACTCTTCTTGGAAACAAAAGCACAAGTTGCTGCTCATGGGATGGCGTTCATTGTG  
ACGAGACGACAGGACAAGTGATTGCGCTTGACCTCCGTTGCAGCCAACTT

>Cf-9\_248

TCATTGTGACGAGACGACAGGACAAGTGATTGCGCTTGACCTCCGTTGCAGCCAACTTCAAGGCAAGTT  
TCATTCCAATAGTAGCCTCTTCAACTCTCCAATCTCAAAGGCTTGATTT

>Cf-9\_310

GCAAGTTTCATTCCAATAGTAGCCTCTTCAACTCTCCAATCTCAAAGGCTTGATTTGTCTTTTAATAATT  
TCACTGGATCACTCATTTACCCAAAATTTGGTGAGTTTTCAAATTTGA

>Cf-9\_434

TCTCGATTTGTCGCATTCTAGTTTTACAGGTCTAATTCCTTCTGAAATCTGTCACCTTTCTAAACTACACGT  
TCTTCGTATATGTGATCAATATGGGCTTAGTCTTGTACCTTACAATTT

>Cf-9\_496

AACTACACGTTCTTCGTATATGTGATCAATATGGGCTTAGTCTTGTACCTTACAATTTGAACTGCTCCTTA  
AGAACTTGACCCAATTAAGAGAGCTCAACCTTGAATCTGTAAACATCT

>Cf-9\_62

CTCATCCTTGCCTCATTGTGCCCCGAAGATCAAGCTCTTTCTTCTTCTACAATTCAAGAACATGTTTACCAT  
TAATCCTAATGCTTCTGATTATTGTTACGACATAAGAACATACGTAGA

>Cf-9\_620

CACTATTCCTTCAAATTTCTTCTCATTTAACAACCTCTACAACCTTCAGGCACAGAGTTACATGGGATATT  
GCCCGAAAGAGTTTTTACCTTTCCAACCTACAATCCCTTCATTTATC

>Cf-9\_682

ATGGGATATTGCCCGAAAGAGTTTTTACCTTTCCAACCTACAATCCCTTCATTTATCAGTCAATCCCCAG  
CTCACGGTTAGGTTTCCACAACCAAATGGAATAGCAGTGCATCACTCA

>Cf-9\_806

GTTATACGTGATAGTGTGAATATTGCTGATAGGATACCTAAATCATTTAGCCATCTAACTTCACTTCATG  
AGTTGTACATGGGTCGTTGTAATCTGTCAGGGCCTATTCTAAACCTCT

>Cf-9\_868

CACTTCATGAGTTGTACATGGGTCGTTGTAATCTGTCAGGGCCTATTCTAAACCTCTATGGAATCTCACC  
AACATAGTGTTTTTGCACCTGGTGATAACCATCTTGAAGGACCAATTT

>Cf-9\_930

AATCTCACCAACATAGTGTTTTTGCACCTGGTGATAACCATCTTGAAGGACCAATTTCCATTTACAGAT  
ATTTGAAAAGCTCAAGAGGTTATCACTTGTAATAACAACCTTTGATGGC

>Cf-9\_992

TTTCACGATATTTGAAAAGCTCAAGAGGTTATCACTTGTAATAACAACCTTTGATGGCGGACTTGAGTTC  
TTATCCTTTAACACCCAACCTTGAACGGCTAGATTTATCATCCAATTCCT

>FLS3\_0

TCATATAAATCAAATAGAAACACAAAACGACAACCTTTTCGTCTTGTGAAATAACTCAAGTGGAGTCATT  
CATTCCAATATATCCTTTTTCCATTTCTTTCATATATTTCAACTTTCAA

>FLS3\_1054

GAGAAATACCGAGAAATATTGGTTGTTTAGCCAAGCTCGAAGAGTTTTATATCGGTTATAATGCAATAA  
ATGGAACAATTCCTGCTTCATTAGGCAATATTTCAACTCTTCAAATCTTC

>FLS3\_1178

CGGAAGCAATCACATGGAGGGGAGAACTTCCTCCAGAATTAGGAAAGCTATCAAACCTTAAGACAAATCAA  
TTTTGAAGAAAATTATAATCTTATTGGTGAAATTCGAATACTATTTTCAA

>FLS3\_124

TTAGTAACATCATGGAGAAACACATTTTCTTATTGATACTTGCTATCTTAGTTCAATTTTACTTTGTTTCTT  
CTATATCAGCTACTATTTTCTCAAATGAGACTGATCAAGAAGCTCTAC

>FLS3\_1302

TCTTCTTTGGAGTTCATTGCTTTCACTTTCAACTACCTTTTCAAGGTAGAAATCCGAATCTTCTTACCTTCCA  
AATCTTATACAACCTTCTCTTAGCAAACAATCAGCTCGAAGGTGAAATT

>FLS3\_1364

TCACCTCCAAATCTTATACAACCTTCTCTTAGCAAACAATCAGCTCGAAGGTGAAATTCCTCGGTACATCA  
CAAATGCTACGAATCTTGAGCTGTTAGAGCTATCAGATAACCTTCTCAC

>FLS3\_1426

GGTACATCACAAATGCTACGAATCTTGAGCTGTTAGAGCTATCAGATAACCTTCTCACAGGTACTATTCC  
TAATGATTTAGGAAATCTTCGCGAGCTGCGAGATCTTTTCTACATCATA

>FLS3\_1488

ACTATTCCTAATGATTTAGGAAATCTTCGCGAGCTGCGAGATCTTTTCTACATCATAATCAACTTACTGA  
GTTGGGATTCTTTGATTCTTTGGTGAATGTAGGATGTTGAGATATGTA

>FLS3\_1550

ACTTACTGAGTTGGGATTCTTTGATTCTTTGGTGAATGTAGGATGTTGAGATATGTACAAGTGGGATCG  
AATCCGTTGAATGATGTTCTGCCAAGTAGTATTGGCAATCTTTCATCTAC

>FLS3\_1612

TGGGATCGAATCCGTTGAATGATGTTCTGCCAAGTAGTATTGGCAATCTTTCATCTACTGTTGAATACTTT  
CATATTGGAGATGCACAAATCAATGGATTCATTCCCCTAGTACAGGCA

>FLS3\_1674

GAATACTTTCATATTGGAGATGCACAAATCAATGGATTCATTCCCCTAGTACAGGCAACATGACCGGTC  
TTACAACGCTAGTTTTTCAAGATAACAGTTTGACAGGAAACATTCCTCGT

>FLS3\_1736

GACCGGTCTTACAACGCTAGTTTTTCAAGATAACAGTTTGACAGGAAACATTCCTCGTGAGATCCGTAAG  
CTTAAACAACCTCAAGGTTTATTTCTAGTTAACAATGGACTACAGGGGGA

>FLS3\_1798

TCCGTAAGCTTAAACAACCTCAAGGTTTATTTCTAGTTAACAATGGACTACAGGGGGACATAGCAGAGG

TAGTATGTGATTTATCGAATTTGGTTCGATTAGCTCTGTCTGAAAATGAGC

>FLS3\_186

TTTGTTCCTTCTATATCAGCTACTATTTCTCAAATGAGACTGATCAAGAAGCTCTACTAGCTTTTCGAAAC  
CTTGTTACGAGTGATTCTAGTCATTTTTAGCCAATAATTGGACAAAA

>FLS3\_1860

GCAGAGGTAGTATGTGATTTATCGAATTTGGTTCGATTAGCTCTGTCTGAAAATGAGCTCTCGGGGGTG  
ATTCCGGAATGTTTAGGAAATCTTACCATGCTACAACAACCTTTTTTTAGGT

>FLS3\_1922

GGGGGTGATTCCGGAATGTTTAGGAAATCTTACCATGCTACAACAACCTTTTTTTAGGTTCTAACAAGTTT  
GAATCAAAGCTACCTTTAAGCTTTTGGAAGATGAGTAGTCTTCTATATTT

>FLS3\_2046

ATGTCGCGTAATTCTATAAAGGGAGAAGTTCCATCAGATATCGGAGAACTTAAAGCTATTGTAGCAATC  
GATATCTCTGGTAACCATTTCTCGGGGTCGATACCAAGCAATTTGGGGGAA

>FLS3\_2108

AGCAATCGATATCTCTGGTAACCATTTCTCGGGGTCGATACCAAGCAATTTGGGGGAACTTCAAACCTTG  
AAGTTACTTTCTTATCGAACAATTCGTTTTCAGGTCCAATTCCATTTTC

>FLS3\_2170

AAACCTTGAAGTTACTTTCTTATCGAACAATTCGTTTTCAGGTCCAATTCCATTTTCCTTTTCAAACCTGA  
AAAGCTTGAATTCTTGGATTTGTCTTTGAATAACTTGTGAGGTTACTA

>FLS3\_2232

TCAAACCTGAAAAGCTTGGAAATCTTGGATTTGTCTTTGAATAACTTGTGAGGTTACTATTCTAAGTCTTT  
CGAAAAGCTTTTGTACCTTACAAGCATCAACGTCTCGTTTAATGTTTTA

>FLS3\_2294

TAAGTCTTTCGAAAAGCTTTTGTACCTTACAAGCATCAACGTCTCGTTTAATGTTTTAGAAGGTGAAATAC  
CTAGTGGTGGTGTGTTTGCAAACCTCCACCCTGCAATCATTTAGTGGGAA

>FLS3\_2356

GTGAAATACCTAGTGGTGGTGTGTTTGCAAACCTCCACCCTGCAATCATTTAGTGGGAACAAAGGTCTAT  
GTGGAAGGCAAATATTGGAGGTTCTGCTTGTGCTATCACTACTCCTGAAC

>FLS3\_2418

GGTCTATGTGGAAGGCAAATATTGGAGGTTCTGCTTGTGCTATCACTACTCCTGAACAACAACAATCAA  
AATCGAAGAAGCTTGTGCTAAAAATTGCTACTCCGATGGTTATTTTCATTC

>FLS3\_248

TTTTCGAAACCTTGTTACGAGTGATTCTAGTCATTTTTAGCCAATAATTGGACAAAAAACACTTCATTTT  
GCTCTTGGTTTGGTGTCACTTGTAGTCCAAAAAGGCAAAGGGTTGTAGC

>FLS3\_2480

ACAATCAAATCGAAGAAGCTTGTGCTAAAAATTGCTACTCCGATGGTTATTTTCATTCTTTCTGATATTCT  
TGTTGGTTGTCTCGATTTGGATAATGAAACGAAAGAAGAAAGGGAAGTC

>FLS3\_2666

AGCAACTAACAAATTTTGATGAATCCAATTTGATTGGCGTGGGAGGTTCTGGCTCTGTGTACAAAGCCACA  
TTAGCTAGTGGAATTGTGGTTGCAATTAAGGTACTGGATTTGGAAAATGA

>FLS3\_2728

AAGCCACATTAGCTAGTGGAATTGTGGTTGCAATTAAGGTACTGGATTTGGAAAATGAGGAAGTATGCA  
AAAGGTTTGATACTGAATGCGAAGTGATGAGAAATGTTAGACACAAAAACC

>FLS3\_2852

TTCGGTGATCACTACGTGTTCTAGTGAACACATAAGAGCCTTTGTTCTGCAGTATATGCCCAACGGAAGT  
CTTGACAATTGGTTGTACAAAGAAGATCGCCACTTAAACTTCGTCAAAG

>FLS3\_2914

ACGGAAGTCTTGACAATTGGTTGTACAAAGAAGATCGCCACTTAAACTTCGTCAAAGAGTCACCATAAT  
GCTTGATGTAGCTATGGCAATTGAATATCTACATCATGGTAATGACACCC

>FLS3\_2976

ACCATAATGCTTGATGTAGCTATGGCAATTGAATATCTACATCATGGTAATGACACCCCAATAGTTCATT  
GTGACCTCAAGCCAGCCAACGTTCTTTTGGATGAAGATATGGTGGCGCGT

>FLS3\_3100

GTGATTTTGGCATCTCAAAGATTTTAGCTGTAAGCAAATCCATGGCACATACAAAGACATTAGGCACTCT  
TGGATATATTGCACCAGAATATGGCTCGGAGGGAATAGTGTCCACTCGTG

>FLS3\_3286

AGATATTCAACGAAAATCTTGGCTTGAGGGAGTGGATAACGCGAGCATTTCGAAGAACTATGATGGAA  
GTTGTGGACGCGGATATGTTTCATGATGGAGAAAAAATTACTTCCGAAAGTG

>FLS3\_3348

ATGGAAGTTGTGGACGCGGATATGTTTCATGATGGAGAAAAAATTACTTCCGAAAGTGAAATATGCATA  
CTCTCCATGATAGAACTGGCTTTAGATTGCACAAAGGCAACACCAGAATCA

>FLS3\_3534

GTAAATTAGAATCTCTTTGTGTTGTTTTTTCTTTTAAGTTTGTAAGTTGATACTCAATCAATCTGTTTGTC  
ATACTTTTCATTTGTCTGTTTTTTTAAAAAATGTCTTTCTTTTTGG

>FLS3\_372

ACTCTTCCTAATTTGCAACTTCAAGGCACAATTCGCCGTCTTTGGCCAATCTATCTTTTCTCATAGAGCTA  
AATCTCGCAAACAACAACCTTACACAGTGAAATCCCTGATGGCATTGGC

>FLS3\_434

CATAGAGCTAAATCTCGCAAACAACAACCTTACACAGTGAAATCCCTGATGGCATTGGCCGCTTGCCTCGT  
CTACGAGTGATTGATATTCAGAACAATCAGCTGCATGGAAGTATTCCAAC

>FLS3\_558

CTATTTCAACACGGGAGTGTTCAAATCATTTTCATTGGCTTTCAATAAACTCGGTGGTGAATGTGGAACG  
GTACATGGTATGTACCCGAACTCAGAGTCTTAAATCTCAGGAACAATACC

>FLS3\_62

GAGTCATTCATTCCAATATATCCTTTTTCCATTTCTCTTCATATATTTCAACTTTCAAATGCTTAGTAACATC  
ATGGAGAAACACATTTTCTTATTGATACTTGCTATCTTAGTTCAATT

>FLS3\_620

GTGGAACGGTACATGGTATGTACCCGAACTCAGAGTCTTAAATCTCAGGAACAATACCATTACAGGTGT  
GATCCCTCCTTCTATTGGAAATGCCACAAAGTTGATGAACTTCAGTTTGAA

>FLS3\_744

AATAGAATCAACGGCAACATTCCAATGGAGATTGGTAATCTAAGCCAACCTGTTGAGTTGTCGTTGTCTC  
GTAATCAATTAACAGGTTCCATTCTTCAACATTGTTTAATATCTCCTCC

>FLS3\_806

GTTGTCTCGTAATCAATTAACAGGTTCCATTCTTCAACATTGTTTAATATCTCCTCCCTTCTCGTCGTGTC  
TCTGGCATAACAATAGCCTTTCAGGTCCTCTGTTTCCTGATGATCGACG

>FLS3\_868

TCGTCGTGTCTCTGGCATAACAATAGCCTTTCAGGTCCTCTGTTTCCTGATGATCGACGTAACGTTCTTTCA



TCAAACCTCGAGCATATAGGTGTATCATACAATCAAATCACTGGTCACA

>FLS3\_930

GTTCTTTTCATCAAACCTCGAGCATATAGGTGTATCATACAATCAAATCACTGGTCACATTCCTTCCAACAT  
CTGTCAATTCACAGCTCTCAGAGTTCTGTCCATATCATACAACAACATA

>I3\_0

ATGTTAGCAGAACAGAGACTGTATTTTCTATCCTTCTTTCATTTATCTCCTCTTTTGTTTCATCTCGATTG  
CTATATCGCAATCTTCATGGGACTACAACGCCACTCTTCAAATTCT

>I3\_1054

ACTGCAACTCTTCGCAGTATCATAGTTTCATAGAGCTCAAGAATACTACATATTTTTCATTTAACATTGAT  
CAGGAACTAAATTCGACTAAATTGTGGCTTGGGCAGAAAAAGTTGGAAG

>I3\_1116

AACATTGATCAGGAACTAAATTCGACTAAATTGTGGCTTGGGCAGAAAAAGTTGGAAGATTGCAAAG  
GGCATGTCTGAGTCACTGTTCTTGCAAAGCTGCTGTTTTTGAATATAATTGG

>I3\_1178

CAAAGGGCATGTCTGAGTCACTGTTCTTGCAAAGCTGCTGTTTTTGAATATAATTGGAATGGGGATCG  
AAGAGGTAATTGTTTGTACTGAATGAAGTTTTCTCTCTCAAAGACAGCGA

>I3\_124

CAGGGTTTGCTGGGCTTTCCTCTTTCTGGATCAACAGGCCGTCTCTTATTATTAATTCCACCACCGACAGC  
TTCTATGGTTTCGACAACACCCGTACTTCAGCGGGGAAATGCTGGCCCAC

>I3\_1240

GGGATCGAAGAGGTAATTGTTTGTACTGAATGAAGTTTTCTCTCTCAAAGACAGCGAAGAAGTAAGAG  
GCGAGACAGTATTTCTTAAGGTGCAGAATACCTCAAAGGCGCAGACGCAGT

>I3\_1302

GTAAGAGGCGAGACAGTATTTCTTAAGGTGCAGAATACCTCAAAGGCGCAGACGCAGTCTCTAATCATT  
CCTGGAGGAAAGAAATCAAGACCTTCAAAGTGATAATAGGATCTACTCTT

>I3\_1364

AATCATTCTGGAGGAAAGAAATCAAGACCTTCAAAGTGATAATAGGATCTACTCTTGCAGCTTTCTTT  
GGGATAATTTAAGCATAGCTACTTGCTTTGTTATTTTCAGAAAGAGGAC

>I3\_1426

CTTCTTTGGGATAATTTTAAGCATAGCTACTTGCTTTGTTATTTTCAGAAAGAGGACACATGAGTCCAGA  
AAGGCTGCGGATATTTTGGATCTAGCACCAATCTTACCGGGAATCCTAA

>I3\_1488

GAGTCCAGAAAGGCTGCGGATATTTTGGATCTAGCACCAATCTTACCGGGAATCCTAACTCGATTCTCTT  
ACAATGAGCTGAAAATAATTACAGATGATTTTCAGCAGTAAGCTTGGGGAA

>I3\_1550

ATTCTTTACAATGAGCTGAAAATAATTACAGATGATTTTCAGCAGTAAGCTTGGGGAAGGAGGATTTGG  
CTGTGTTTATGAAGGAACACTGAGAAATGGAACATAAATAGCTGTGAAGAA

>I3\_1674

GATGGTGTAGGTCAAGTAAAGGAATCATTCTTAACAGAAGTAAAGGCGGTTCGGTGGCATTACCCATATC  
AATCTGGTAAAACACTATTGGATTTTGTGCTGAAAAAACCCACAGGCTTCTA

>I3\_1736

CCATATCAATCTGGTAAAACACTATTGGATTTTGTGCTGAAAAAACCCACAGGCTTCTAATCTATGAGTAC  
ATGGTGAATGGATCGCTTGATAGGTGGATTACACATGAAAACCGAGAAAA

>I3\_1798

ATGAGTACATGGTGAATGGATCGCTTGATAGGTGGATTACACATGAAAACCGAGAAAATGGGCTTACAT  
GGAGCACAAGACAGAGGATAATATCAGATATCGCCAAAGGGTTAGCGTATC

>I3\_186

ACCGACAGCTTCTATGGTTTCGACAACACCCGTAATTCAGCGGGGAAATGCTGGCCCACGATTCTCTGTG  
GCTTCTACTGCAGGTACAATGTCACAGAATGCCTTCTTGGTATCCTTTTG

>I3\_1860

CTTACATGGAGCACAAGACAGAGGATAATATCAGATATCGCCAAAGGGTTAGCGTATCTACATGAGGAT  
TGCAGCCAAAAGATAATTCATTTGGACATCAAACCACAAAACATCCTTCTG

>I3\_1922

TGAGGATTGCAGCCAAAAGATAATTCATTTGGACATCAAACCACAAAACATCCTTCTGGATCAATATCTC  
AATGCTAAGATATCAGATTTTGGGTTGTGCGAAGCTAATTGAGAAAGATAA

>I3\_1984

AATATCTCAATGCTAAGATATCAGATTTTGGGTTGTGCGAAGCTAATTGAGAAAGATAAAAGCAAAGTCG  
TGACTAGAATGAGAGGAACACGGGGTTATTTAGCCCCTGAATGGTTGAGCT

>I3\_2108

AATCACTGAGAAAGTTGATGTTTATGCTTTTGGAAATTGCCTCTTGAAATTCTCTGTGGACGAAAGAAT  
TTGGATTGGTCCCAACCTGATGAAGAAGATGTCCATTTGCTAAGTGTATT

>I3\_2170

GAAAGAATTTGGATTGGTCCCAACCTGATGAAGAAGATGTCCATTTGCTAAGTGTATTTAGGAGAAAAG  
CGGAACAAGAGCAGCTCATGGATATGGTTGACAAAACAACGAAGATATGC

>I3\_2406

ACTGTTGAAACCAACTTGAATTATGATTTACACATGTACCTGAGGTTGGGGCAGGCAACCAAGAGAGG  
GAAGTCATTGTCAGTTCAATATTTCTTCAATTTTATCGGGACCAAGGTAA

>I3\_248

CCTCTGTGGCTTCTACTGCAGGTACAATGTCACAGAATGCCTTCTTGGTATCCTTTTGTACCACAACAAAT  
ACAACGAGCAGAACGGTATGATAGATAAACCCAGTTAGTTTGGTCTGC

>I3\_310

ACAACAATACAACGAGCAGAACGGTATGATAGATAAACCCAGTTAGTTTGGTCTGCTAACAGGAACC  
GTCCAGTGAAATTCAATGCAACCTTGGAAGTGGCAACTTGG

>I3\_434

GACAGACTCTGATGGCACTCTGTTTGGTCCACTGATACAATTGGGAAATCTGTTTCTGGCTTAACTTA  
ACAGAAATGGGAAATCTTGTGCTCTTTGATAAGAGAAAGCGCACAATTTG

>I3\_496

TAAACTTAACAGAAATGGGAAATCTTGTGCTCTTTGATAAGAGAAAGCGCACAATTTGGCAGTCTTTTGA  
TCATCCTACAGATTCTTTGCTTCCAGGGCAGAGTTTGGTTTCTGGCCGGA

>I3\_558

TCTTTTGATCATCCTACAGATTCTTTGCTTCCAGGGCAGAGTTTGGTTTCTGGCCGGAAGCTTGTAGCAA  
GCGTTTCAGCAACCAATCATAGTCAAGGTTTGTGCTCTTACTGTTCTC

>I3\_62

ATCTCGATTTGCTATATCGCAATCTTCATGGGACTACAACGCCACTCTTCAAATTCTATTGCAGGGTTTG  
CTGGGCTTTCCTCTTTCTGGATCAACAGGCCGTCTCTTATTATTAATTC

>I3\_620

TGTAGCAAGCGTTTCAGCAACCAATCATAGTCAAGGTTTGTGCTTCTTACTGTTCTCAACGGAAGTTGG

GCTGCTTACATGGATACTAATCCGCCTCAATATTACTACACTTCATACTA

>I3\_682

GAAGTTGGGCTGCTTACATGGATACTAATCCGCCTCAATATTACTACACTTCATACTATGCTGATAGTTCT  
TATTACAGTTTTAATGGTCAAACCTTTACTGTTTTACTATCCTACAA

>I3\_744

GATAGTTCTTATTACAGTTTTAATGGTCAAACCTTTACTGTTTTACTATCCTACAAATTCGACAGCTCAA  
TTCATGAAGATTGGGCCTGATGGACATATAAAGGTATTCCAATGGTCT

>I3\_806

GACAGCTCAATTCATGAAGATTGGGCCTGATGGACATATAAAGGTATTCCAATGGTCTGTAGTTGATTG  
GAATGAAGTATCTGACATTTTGTGCGCAAATGTAGATAACTGTGCGTACCC

>I3\_868

TTGATTGGAATGAAGTATCTGACATTTTGTGCGCAAATGTAGATAACTGTGCGTACCCAATGGTATGTGG  
AAGTTATAGCATTGTACAATAACGGGCAATGTACTTGTCCGTCACAGG

>I3\_992

CTTCTTCAGGCCATTTTCTGAGAGGAAACCAGATCTTGGATGTTACAGCTGACTTCCGTTAACTGCAACT  
CTTCGCAGTATCATAGTTTCATAGAGCTCAAGAATACTACATATTTTC

>LeEix1\_0

ATGGACAAATGGAAATATGCAAGATTAGCACAGTTCCTTTTCACTTTGTCTCTACTGTTCTAGAGACATC  
TTTTGGATTAGGTGGTAACAAGACCCTATGTTTAGATAAGGAGAGAGAT

>LeEix1\_1037

GAAATCACTTGAGGTTTTGGGGTTGAACGAAAACCTCATTGTTTGGTTCAATTGTTAATGCAACAAGATTT  
TCATCCTTAAAGAAATTATACCTGCAGAAGAATATGCTGAATGGTTCTTT

>LeEix1\_1098

ACAAGATTTTCATCCTTAAAGAAATTATACCTGCAGAAGAATATGCTGAATGGTTCTTTTATGGAAAGTG  
CGGGACAAGTTTCTACCCTTGAGTATCTGGATTTGTCTGAAAACCAAATG

>LeEix1\_1159

TGGAAAGTGCGGGACAAGTTTCTACCCTTGAGTATCTGGATTTGTCTGAAAACCAAATGAGAGGGGCAT  
TACCAGATTTAGCATTGTTCCATCATTGAGAGAGTTGCATCTTGGCTCTA

>LeEix1\_122

TCTTCTTGAGTTCAAAGAGGTCTTACTGATTCTTTTGATCATTTATCTACATGGGGTGATGAAGAAGATA  
AACAAAGTATGCTGCAAATGGAAGGGTATTGAATGTGACAGAAGAACAGG

>LeEix1\_1220

AGGGGCATTACCAGATTTAGCATTGTTCCATCATTGAGAGAGTTGCATCTTGGCTCTAATCAATTCGA  
GGGAGGATACCACAAGGTATCGGAAAACCTTTCACAGCTTAGAATTTTGGGA

>LeEix1\_1281

CAATTCGAGGGAGGATACCACAAGGTATCGGAAAACCTTTCACAGCTTAGAATTTTGGATGTCTCGTCCA  
ATAGACTGGAAGGACTACCAGAAAGTATGGGGCAACTATCTAATCTGGAA

>LeEix1\_1342

TCTCGTCCAATAGACTGGAAGGACTACCAGAAAGTATGGGGCAACTATCTAATCTGGAAAGTTTTGATG  
CCTCTTACAATGTCCTGAAGGGAACAATTACTGAGTCCCACCTTTCAAACC

>LeEix1\_1403

TTTTGATGCCTCTTACAATGTCCTGAAGGGAACAATTACTGAGTCCCACCTTTCAAACCTCTCCAGTTTAG  
TGGATTTGGACTTGTCACTCAACTCATTGGCTCTGAAGACGAGCTTCAA

>LeEix1\_1464

TCCAGTTTAGTGGATTTGGACTTGTCACTCAACTCATTGGCTCTGAAGACGAGCTTCAATTGGCTTCCTCC  
TTTTCAGCTACAAGTTATAAGCCTGCCGTCTTGCAATTTGGGACCTTCT

>LeEix1\_1525

GGCTTCCTCCTTTTCAGCTACAAGTTATAAGCCTGCCGTCTTGCAATTTGGGACCTTCTTTCCAAAATGG  
CTTCAAATCAGAACAACCTATACTGTTCTTGATATCTCTCTTGCGAGTA

>LeEix1\_1586

CCCAAATGGCTTCAAATCAGAACAACCTATACTGTTCTTGATATCTCTCTTGCGAGTATTCAGACACGC  
TTCCAAGTTGGTTCTCTAGCTTCCCCCGATCTAAAGATTTTGAATCT

>LeEix1\_1647

TCAGACACGCTTCCAAGTTGGTTCTCTAGCTTCCCCCGATCTAAAGATTTTGAATCTCTCAAACAACCA  
AATCAGTGGAAAGAGTGTCTGACTTAATAGAGAATACATATGGGTACAGG

>LeEix1\_1708

CAAACAACCAAATCAGTGGAAAGAGTGTCTGACTTAATAGAGAATACATATGGGTACAGGGTTATAGATT  
TAAGCTATAACAACCTTTTCAGGGGCTTTGCCACTAGTCCCTACCAATGTCC

>LeEix1\_1769

TATAGATTTAAGCTATAACAACCTTTTCAGGGGCTTTGCCACTAGTCCCTACCAATGTCCAAATATTTTACC  
TGCATAAAAATCAGTTTTTTGGATCCATCTCTTCAATTTGTCTGAAGTAG

>LeEix1\_183

GAAGAAGATAAACAAGAATGCTGCAAATGGAAGGGTATTGAATGTGACAGAAGAACAGGTCATGTAAC  
TGTTATTGATCTACACAATAAGTTTACTTGTCTGCTGGTGCCAGTGCTTGT

>LeEix1\_1830

ATATTTTACCTGCATAAAAATCAGTTTTTTGGATCCATCTCTTCAATTTGTCTGAAGTAGAACATCTCCCACT  
TCTCTAGACTTGTACACAATCAATTCTCAGGAGAACTTCCAGATTGT

>LeEix1\_1891

CATCTCCCACTTCTCTAGACTTGTACACAATCAATTCTCAGGAGAACTTCCAGATTGTTGGATGAACATG  
ACAAGTCTAGCTGTTCTTAATCTAGCTTATAACAATTTCTCTGGAGAAA

>LeEix1\_1952

GATGAACATGACAAGTCTAGCTGTTCTTAATCTAGCTTATAACAATTTCTCTGGAGAAATTCCACATTCAT  
TGGGTTCCCTTGACAAATTTGAAGGCGTTATACATACGCCAAAACAGTTT

>LeEix1\_2013

CCACATTCATTGGGTTCCCTTGACAAATTTGAAGGCGTTATACATACGCCAAAACAGTTTAAGTGAATGT  
TGCCCTCTTTTTTACAATGTCAGGGGTTGCAAATCTTGGATCTTGGAGGG

>LeEix1\_2074

GTGGAATGTTGCCTTCTTTTTTACAATGTCAGGGGTTGCAAATCTTGGATCTTGGAGGGAATAAGTTGAC  
AGGAAGTATCCCTGGATGGATAGGGACTGATCTACTCAACTTGCGAATTC

>LeEix1\_2135

TAAGTTGACAGGAAGTATCCCTGGATGGATAGGGACTGATCTACTCAACTTGCGAATTCTAAGCCTGCG  
GTTCAACAGATTGCATGGCAGCATACCATCCATAATCTGTCAGCTTCAATT

>LeEix1\_2196

AGCCTGCGGTTCAACAGATTGCATGGCAGCATACCATCCATAATCTGTCAGCTTCAATTTCTTCAGATACT  
GGACCTTTCAGCGAATGGATTATCAGGGAAAATTCCACATTGCTTCAAC

>LeEix1\_2257

TTCAGATACTGGACCTTTCAGCGAATGGATTATCAGGGAAAATTCCACATTGCTTCAACAATTTACCTTA

TTGTATCAAGATAATAATTCTGGTGAGCCAATGGAATTTATAGTTCAAG

>LeEix1\_2318

TTTCACCTTATTGTATCAAGATAATAATTCTGGTGAGCCAATGGAATTTATAGTTCAAGGTTTCTATGGTA  
AATTCCTCGTCGTTACTTGTATATTGGTGACCTATTGGTTCAATGGAA

>LeEix1\_2379

TTCTATGGTAAATTCCTCGTCGTTACTTGTATATTGGTGACCTATTGGTTCAATGGAAAAATCAAGAGTC  
TGAGTACAAGAATCCTTTATTATATCTGAAGACTATTGATCTTTCAAGT

>LeEix1\_244

ATGTAAGTGTATTGATCTACACAATAAGTTTACTTGTCTGCTGGTGCCAGTGCTTGTTTTGCTCCTAGA  
TTGACAGGTAACTTAGCCCTTCTCTGCTTGAGTTGGAGTACTTGAATT

>LeEix1\_2440

ATCAAGAGTCTGAGTACAAGAATCCTTTATTATATCTGAAGACTATTGATCTTTCAAGTAATGAATTAATT  
GGAGGTGTTCTAAAGAAATAGCTGATATGAGAGGATTGAAATCTTTGA

>LeEix1\_2501

TGAATTAATTGGAGGTGTTCTAAAGAAATAGCTGATATGAGAGGATTGAAATCTTTGAACCTCTCAAG  
AAATGAGCTGAATGGAAGTGCATTGAAGGAATAGGTCAAATGAGGATGTT

>LeEix1\_2562

CTCTCAAGAAATGAGCTGAATGGAAGTGCATTGAAGGAATAGGTCAAATGAGGATGTTGGAGTCTCTT  
GACATGTCAAGAAACCAGCTTTCTGGTGTGATACCGCAAGATCTTGCTAAT

>LeEix1\_2623

AGTCTCTTGACATGTCAAGAAACCAGCTTTCTGGTGTGATACCGCAAGATCTTGCTAATTTGACTTTTCTT  
AGTGTGTTGGACTTGTGCAACAACCAGTTATCAGGGAGAATTCCATCAA

>LeEix1\_2684

GACTTTTCTTAGTGTGTTGGACTTGTGCAACAACCAGTTATCAGGGAGAATTCCATCAAGCACTCAACTG  
CAAAGTTTTGATAGATCATCCTACAGTGATAATGCTCAACTCTGTGGGCC

>LeEix1\_2745

ACTCAACTGCAAAGTTTTGATAGATCATCCTACAGTGATAATGCTCAACTCTGTGGGCCTCCTCTTCAGG  
AGTGTCTGGATATGCTCCTCCTAGCCCCCTTATTGATCATGGCAGCAAC

>LeEix1\_2806

CTCTTCAGGAGTGCCTGGATATGCTCCTCCTAGCCCCCTTATTGATCATGGCAGCAACAACAATCCACA  
AGAACATGATGAGGAGGAGGAGTTTCCATCTCTGGAGTTTTATATATCAA

>LeEix1\_2867

CAATCCACAAGAACATGATGAGGAGGAGGAGTTTCCATCTCTGGAGTTTTATATATCAATGGTGCTAAG  
CTTTTTGTTGCATTTTGGGGAATTTTGGGCTGTTTAATTGTCAATAGTTC

>LeEix1\_2928

GTGCTAAGCTTTTTGTTGCATTTTGGGGAATTTTGGGCTGTTTAATTGTCAATAGTTCTTGGAGGAATGC  
CTACTTCAAATTCTTGACGGACACGACAAGTTGGCTCGATATGATATCA

>LeEix1\_2976

GTCAATAGTTCTTGGAGGAATGCCTACTTCAAATTCTTGACGGACACGACAAGTTGGCTCGATATGATAT  
CAAGAGTCTGGTTTGAAGACTCAAGAAAAAGCTGAGGAGGGCCCGATGA

>LeEix1\_305

TGCTCCTAGATTGACAGGTAACTTAGCCCTTCTCTGCTTGAGTTGGAGTACTTGAATTACTTGGACCTCA  
GTGTTAATGAATTTGAAAGAAGTGAAATACCAAGATTCATAGGCTCACT

>LeEix1\_366

TTGGACCTCAGTGTTAATGAATTTGAAAGAAGTGAAATACCAAGATTCATAGGCTCACTTAAGAGACTA  
GAGTACTTGAACCTGTCAGCTTCTTTTTTTCTGGTGTAATCCAATACAG

>LeEix1\_427

AGAGACTAGAGTACTTGAACCTGTCAGCTTCTTTTTTTCTGGTGTAATCCAATACAGTTCCAGAATCTA  
ACTTCTTTAAGGACTCTTGATCTTGGAGAAAATAATCTTATAGTAAAGG

>LeEix1\_488

CCAGAATCTAACTTCTTTAAGGACTCTTGATCTTGGAGAAAATAATCTTATAGTAAAGGACCTTAGATGG  
CTTCTCATCTGTCTTCTCTAGAGTTTTTGAGTCTGAGTTCTAGCAACTT

>LeEix1\_549

CTTAGATGGCTTTCTCATCTGTCTTCTCTAGAGTTTTTGAGTCTGAGTTCTAGCAACTTCCAAGTAAACAA  
TTGGTTTCAAGAGATAACTAAGGTCCCTTCATTGAAAGAAGTGGACTTG

>LeEix1\_61

TAGAGACATCTTTGGATTAGGTGGTAACAAGACCCTATGTTTAGATAAGGAGAGAGATGCTCTTCTTG  
AGTTCAAAAGAGGTCTTACTGATTCTTTTATCTACATGGGGTG



>LeEix1\_610

AAGTAAACAATTGGTTTCAAGAGATAACTAAGGTCCCTTCATTGAAAGAACTGGACTTGAGTGGCTGTG  
GACTCTCTAAGTTGGCTCCATCTCAAGCTGATTTAGCCAATTCTTCTTTTA

>LeEix1\_671

TGGCTGTGGACTCTCTAAGTTGGCTCCATCTCAAGCTGATTTAGCCAATTCTTCTTTTATATCTCTTTCTGT  
TCTTCATTTATGTTGTAATGAGTTTTCTTCTTCATCTGAATATAGCTG

>LeEix1\_732

TCTCTTTCTGTTCTTCATTTATGTTGTAATGAGTTTTCTTCTTCATCTGAATATAGCTGGGTATTCAATTTGA  
CCACAAGCCTAACTAGCATTGACCTCCTTTATAATCAACTCAGCGGT

>LeEix1\_793

TATTCAATTTGACCACAAGCCTAACTAGCATTGACCTCCTTTATAATCAACTCAGCGGTCAAATTGATGAT  
CGCTTTGGGACCTTGATGTATCTTGAACATCTTGATCTTGCTAATAACT

>LeEix1\_854

AATTGATGATCGCTTTGGGACCTTGATGTATCTTGAACATCTTGATCTTGCTAATAACTTAAAGATTGAAG  
GTGGGGTTCCCAGTTCTTTTGGGAATTTGACACGTTTACGTCATCTGGA

>LeEix1\_915

AAGATTGAAGGTGGGGTTCCCAGTTCTTTTGGGAATTTGACACGTTTACGTCATCTGGACATGTCTAATA  
CTCAGACAGTCCAATGGCTTCTGAGTTGTTTCTCAGGTTATCAGGCAGT

>LeEix1\_976

TGTCTAATACTCAGACAGTCCAATGGCTTCTGAGTTGTTTCTCAGGTTATCAGGCAGTAGGAAATCACT  
TGAGGTTTTGGGGTTGAACGAAAACCTCATTGTTTGGTTCAATTGTTAATG

>LeEix2\_0

ATGGGCAAAAGAACTAATCCAAGACATTTCTTGTACTTGGTCTTTACTGCTCCTAGAGACAGCTTTTG  
GATTAACCTCAAGAGAAGTTAACAAGACCCTTTGTATAGAAAAGGAGAGA

>LeEix2\_1054

ACAACCTCGTTGTTTGGTTCAATTGTTAATGTGCCAAGATTTTCATCCTTGAAGAAATTATACCTGCAGAAG  
AATATGCTGAATGGTTTTTTCATGGAAAGAGTGGGACAAGTTTCGAGCC

>LeEix2\_1116

CTGCAGAAGAATATGCTGAATGGTTTTTTCATGGAAAGAGTGGGACAAGTTTCGAGCCTCGAGTATCTA

GACTTGTCTGATAACCAAATGAGAGGGCCATTACCAGATTTAGCACTTTTT

>LeEix2\_1178

GTATCTAGACTTGTCTGATAACCAAATGAGAGGGCCATTACCAGATTTAGCACTTTTTCCATCATTAAAGA  
GAGTTGCATCTTGGCTCTAATCAATTTCAAGGGAGGATACCACAAGGTAT

>LeEix2\_124

CCCTTCTTGAGTTTAAAAGAGGCCTTAACGACGATTTTGGTCGTTTATCTACCTGGGGTGATGAAGAAGA  
ATGCTGCAATTGGAAGGGTATTGAATGTGACAAAAGAACAGGTCATGTTA

>LeEix2\_1240

CATTAAGAGAGTTGCATCTTGGCTCTAATCAATTTCAAGGGAGGATACCACAAGGTATTGGAAAACTTTC  
ACAGCTTAGAATTTTTGACGTCTCGTCCAATAGATTAGAGGGTTTACCAG

>LeEix2\_1302

AAACTTTCACAGCTTAGAATTTTTGACGTCTCGTCCAATAGATTAGAGGGTTTACCAGAAAGTATGGGGC  
AACTATCAAACCTGGAAAGGTTTGATGCTTCTTATAATGTCCTGAAGGGT

>LeEix2\_1364

TATGGGGCAACTATCAAACCTGGAAAGGTTTGATGCTTCTTATAATGTCCTGAAGGGTACAATCACAGA  
GTCCCACTTTTCAAACCTCTCCAGTTTAGTAGACTTAGACCTATCCTTCAA

>LeEix2\_1426

TCACAGAGTCCCACTTTTCAAACCTCTCCAGTTTAGTAGACTTAGACCTATCCTTCAACTTGTTGCTTTGA  
ACACGAGATTTCGATTGGGTTCTCCTTTTCAACTACAATTTATAAGGC

>LeEix2\_1488

TTGTCTTTGAACACGAGATTCGATTGGGTTCTCCTTTTCAACTACAATTTATAAGGCTTCCATCTTGCAAT  
ATGGGACCTTCTTTTCCGAAATGGCTACAAACTCAGAATAACTACACT

>LeEix2\_1550

ATCTTGCAATATGGGACCTTCTTTTCCGAAATGGCTACAAACTCAGAATAACTACACTCTTCTTGATATTT  
CTCTTGCGAATATATCAGACATGCTACCAAGTTGGTTCTCCAATCTTCC

>LeEix2\_1612

TTGATATTTCTCTTGCGAATATATCAGACATGCTACCAAGTTGGTTCTCCAATCTTCTCCCGAGCTCAAG  
ATTCTGAATCTCTCTAACAACCACATCAGTGGCAGAGTTTCGGAGTTCA

>LeEix2\_1674

GAGCTCAAGATTCTGAATCTCTCTAACAACCACATCAGTGGCAGAGTTTCGGAGTTCATAGTGAGTAAAC  
AAGATTACATGATTATAGATTTAAGTTCTAACAACCTTTTCAGGACATTTG

>LeEix2\_1736

GAGTAAACAAGATTACATGATTATAGATTTAAGTTCTAACAACCTTTTCAGGACATTTGCCACTAGTTCCTG  
CCAATATACAGATCTTTTACCTTCATAAAAATCACTTCTCTGGATCCAT

>LeEix2\_1798

TAGTTCCTGCCAATATACAGATCTTTTACCTTCATAAAAATCACTTCTCTGGATCCATTTCTCCATTTGTA  
GAAATACAATAGGAGCTGCCACTTCCATCGACTTGTCACGCAACCAAT

>LeEix2\_186

GAAGAAGAATGCTGCAATTGGAAGGGTATTGAATGTGACAAAAGAACAGGTCATGTTATTGTTCTTGAT  
CTCCACAGTGAGGTTACTTGTCCAGGCCATGCTTGTTTTGCTCCAATATTG

>LeEix2\_1860

TCCATTTGTAGAAATACAATAGGAGCTGCCACTTCCATCGACTTGTCACGCAACCAATTTTCAGGAGAAG  
TTCCTGATTGTTGGATGAATATGAGTAATCTAGCTGTTCTAAATCTAGCC

>LeEix2\_1922

AGGAGAAGTTCCTGATTGTTGGATGAATATGAGTAATCTAGCTGTTCTAAATCTAGCCTACAACAATTC  
TCCGGAAAAGTTCACAATCATTAGGCTCCTTGACAAATTTGGAGGCGTT

>LeEix2\_1984

ACAATTTCTCCGAAAAGTTCACAATCATTAGGCTCCTTGACAAATTTGGAGGCGTTATACATACGTCA  
GAACAGCTTTAGAGGAATGTTGCCTTCTTTTTACAATGTCAGCTGCTGC

>LeEix2\_2046

ATACGTCAGAACAGCTTTAGAGGAATGTTGCCTTCTTTTTACAATGTCAGCTGCTGCAAATCTTGGATAT  
TGGAGGGAATAAGTTGACTGGAAGAATCCCAGCATGGATAGGGACTGAC

>LeEix2\_2108

CTTGGATATTGGAGGGAATAAGTTGACTGGAAGAATCCCAGCATGGATAGGGACTGACCTACTCCAATT  
GCGCATTCTAAGCCTACGTTCCAACAAATTCGATGGCAGCATTCCATCACT

>LeEix2\_2170

TCCAATTGCGCATTCTAAGCCTACGTTCCAACAAATTCGATGGCAGCATTCCATCACTTATCTGCCAGCTT  
CAATTTCTTCAGATACTGGACCTTTTCAGAAAATGGATTATCTGGGAAAA

>LeEix2\_2232

TGCCAGCTTCAATTTCTTCAGATACTGGACCTTTCAGAAAATGGATTATCTGGGAAAATTCCACAGTGCC  
TCAACAACCTTACCATATTGCGTCAAGAAAATGGCTCTGGTGAGTCAATG

>LeEix2\_2294

ACAGTGCCTCAACAACCTTACCATATTGCGTCAAGAAAATGGCTCTGGTGAGTCAATGGATTTTAAAGTC  
CGTTATGACTATATTCCAGGATCTTACTTGTACATAGGTGATTTACTGAT

>LeEix2\_2356

TTAAAGTCCGTTATGACTATATTCCAGGATCTTACTTGTACATAGGTGATTTACTGATTCAATGGAAAAAC  
CAGGAGTCCGAGTACAAGAATGCTTTACTATATCTGAAGATCATTGATC

>LeEix2\_2418

TGGAAAAACCAGGAGTCCGAGTACAAGAATGCTTTACTATATCTGAAGATCATTGATCTTCAAGTAATA  
AATTAGTTGGAGGTATCCCTAAAGAGATAGCTGAAATGAGAGGATTGAGA

>LeEix2\_248

TCTTGATCTCCACAGTGAGGTTACTTGTCCAGGCCATGCTTGTTTTGCTCCAATATTGACAGGTAAAGTTA  
GTCCTTCTCTACTTGAGTTGGAGTATTTGAATTTCTTGGACCTCAGTGT

>LeEix2\_2480

AAGTAATAAATTAGTTGGAGGTATCCCTAAAGAGATAGCTGAAATGAGAGGATTGAGATCATTGAACCT  
CTCGAGAAATGATCTTAATGGAAGTGTGTTGAAGGAATAGGTCAAATGAA

>LeEix2\_2542

TGAACCTCTCGAGAAATGATCTTAATGGAAGTGTGTTGAAGGAATAGGTCAAATGAAGTTGTTGGAGT  
CCCTCGACTTGTCAAGAAACCAACTCTCTGGCATGATCCCTCAGGGCCTTT

>LeEix2\_2604

TTGGAGTCCCTCGACTTGTCAAGAAACCAACTCTCTGGCATGATCCCTCAGGGCCTTTCTAACTTGACTTT  
TCTTAGTGTGTTGGACTTATCGAACAACCACTTATCAGGAAGAATTCCA

>LeEix2\_2666

CTTGACTTTTCTTAGTGTGTTGGACTTATCGAACAACCACTTATCAGGAAGAATTCCATCAAGCACTCAAC  
TGCAGAGTTTCGATAGATCATCCTATAGTGGCAATGCTCAACTCTGCGG

>LeEix2\_2728

GCACTCAACTGCAGAGTTTCGATAGATCATCCTATAGTGGCAATGCTCAACTCTGCGGTCCTCCTTGA

AGAGTGCCTGGATATGCTCCCCCTATCGATCGTGGAAGCAACACCAATC

>LeEix2\_2790

CCTCTTGAAGAGTGCCTGGATATGCTCCCCCTATCGATCGTGGAAGCAACACCAATCCACAAGAACATG  
ATGATGATGATGAGTTCTCATCTCTGGAGTTTTATGTATCAATGGTGCTA

>LeEix2\_2852

AGAACATGATGATGATGATGAGTTCTCATCTCTGGAGTTTTATGTATCAATGGTGCTAGGTTTCTTCGTC  
ACGTTCTGGGGAATTTTAGGCTGTTTGATTGTCAACCGTTCGTGGAGGAA

>LeEix2\_2914

TCTTCGTCACGTTCTGGGGAATTTTAGGCTGTTTGATTGTCAACCGTTCGTGGAGGAATGCCTACTTCAC  
ATTCTTAACAGACATGAAGAGTTGGCTCCATATGACATCAAGAGTCTGCT

>LeEix2\_2946

TTGATTGTCAACCGTTCGTGGAGGAATGCCTACTTCACATTCTTAACAGACATGAAGAGTTGGCTCCATA  
TGACATCAAGAGTCTGCTTTGCAAGACTGAAGGGAAAGCTAAGGAACTGA

>LeEix2\_310

GTAAAGTTAGTCCTTCTCTACTTGAGTTGGAGTATTTGAATTTCTTGGACCTCAGTGTTAATGGATTTGAA  
AATAGTGAGATACCAAGATTCATAGGCTCCCTTAAGAGACTGGAGTACT

>LeEix2\_372

GGATTTGAAAATAGTGAGATACCAAGATTCATAGGCTCCCTTAAGAGACTGGAGTACTTAAACCTTTCAT  
CTTCTGATTTTTCTGGTGAAATTCCAGCACAGTTCCAGAATCTAACTTCT

>LeEix2\_434

CCTTTCATCTTCTGATTTTTCTGGTGAAATTCCAGCACAGTTCCAGAATCTAACTTCTTTGAGGATTCTTGA  
TCTCGGAAACAATAATCTTATAGTAAAGGACCTTGTGTGGCTTTCTCA

>LeEix2\_496

GGATTCTTGATCTCGGAAACAATAATCTTATAGTAAAGGACCTTGTGTGGCTTTCTCATCTCTCCTCTCTA  
GAATTCTTGCCTTGGTGGTAACGATTTCCAAGCAAGAACTGGTTTC

>LeEix2\_558

TCCTCTCTAGAATTCTTGCCTTGGTGGTAACGATTTCCAAGCAAGAACTGGTTTCGAGAGATAACTA  
AGGTCCCTTCATTGAAAGAATTGGACTTGAGTGTGGACTCTCTAAA

>LeEix2\_62

AGCTTTTGGATTAACCTTCAAGAGAAGTTAACAAGACCCTTTGTATAGAAAAGGAGAGAGGTGCCCTTCT  
TGAGTTTAAAAGAGGCCTTAACGACGATTTTGGTCGTTTATCTACCTGGGG

>LeEix2\_620

GATAACTAAGGTCCTTCATTGAAAGAATTGGACTTGAGTGTTTGTGGACTCTCTAAATTCGTTCCGTCTC  
CAGCTGATGTAGCTAATTCATCTTTGATCTCTCTTTCTGTTCTTCATTT

>LeEix2\_682

TTCCGTCTCCAGCTGATGTAGCTAATTCATCTTTGATCTCTCTTTCTGTTCTTCATTTATGTTGTAATGAGTT  
TTCTACTTCATCTGAATATAGCTGGTTATTCAATTTTAGCACAAGCC

>LeEix2\_744

TGTAATGAGTTTTCTACTTCATCTGAATATAGCTGGTTATTCAATTTTAGCACAAGCCTAACTAGCATAGA  
CCTTTCTCATAATCAACTCAGTCGTCAAATTGATGATCGCTTTGGGAGC

>LeEix2\_806

TAGCATAGACCTTTCTCATAATCAACTCAGTCGTCAAATTGATGATCGCTTTGGGAGCTTGATGTATCTTG  
AACATCTTAATCTTGCTAATAATTTTGGGGCTGAAGGTGGGGTTCCAAG

>LeEix2\_868

TGTATCTTGAACATCTTAATCTTGCTAATAATTTTGGGGCTGAAGGTGGGGTTCCAAGTTCTTTTGGGAA  
TTTGACACGTCTACATTATCTGGACATGTCTAACACTCAGACATACCAAT

>LeEix2\_930

TTTGGGAATTTGACACGTCTACATTATCTGGACATGTCTAACACTCAGACATACCAATGGCTTCCTGAGTT  
GTTTCTCAGGTTATCAGGTAGTAGGAAATCACTTGAGGTTTTGGGATTG

>LeEix2\_992

TCCTGAGTTGTTTCTCAGGTTATCAGGTAGTAGGAAATCACTTGAGGTTTTGGGATTGAACGACAACTCG  
TTGTTTGGTTCAATTGTTAATGTGCCAAGATTTTCATCCTTGAAGAAATT

>M6-PGSC0003DMG400000179-(rev)M6G-LecRK\_0

CAAATATTCTCTGAGCTTTTCAATGTTTCCTTATAAACCAAATCTTTTTTCTTTAGCTAAAGCAAATTC  
ATCACCATGATTCCACAGAAAGCAATTCTCATTTTACTTTTCATCACA

>M6-PGSC0003DMG400000179-(rev)M6G-LecRK\_1037

TATGTGTAGTACTTATGGTCTTTGTGGGAATTTGGGGTTCTGTAATAGTAAGTCATTGAATCCATGTAAG  
TGTTTACCAGGGTTCACCCCTTTGGATGGTGATTTCATGGGATGCAGGGGA

>M6-PGSC0003DMG400000179-(rev)M6G-LecRK\_1098

CCATGTAAGTGTACCAGGGTTCACCCCTTTGGATGGTATTGATCATGGGATGCAGGGGATTTTTCGGGT  
GGCTGTCGCCATGAGAGTAATGAAGTTTGTGGTGAGAATGATAGGTTTGAA

>M6-PGSC0003DMG400000179-(rev)M6G-LecRK\_1159

TTTCGGGTGGCTGTCGCCATGAGAGTAATGAAGTTTGTGGTGAGAATGATAGGTTTGAAGAGGTTGGA  
ATGGCTAAATATGATGGAGCAAGGGTAGTTTCAGTTTCTGGAAGTAGAAATG

>M6-PGSC0003DMG400000179-(rev)M6G-LecRK\_122

TTCTATGGCATTGAGATCAGTTCAGAAACAGTAAAGTCAAGAATGCAAATGTAAACATGACCCATGT  
AGCTGAACTCACTAAAGAGTCTGTTTCAGCTGAAAGAAAGTTGGGATCTTT

>M6-PGSC0003DMG400000179-(rev)M6G-LecRK\_1220

GGTTGGAATGGCTAAATATGATGGAGCAAGGGTAGTTTCAGTTTCTGGAAGTAGAAATGAATGTGAGA  
GAGAATGTTTAGGTAATTGTTTCATGTATTGGTTTGTATCGCAATGAGAAGAC

>M6-PGSC0003DMG400000179-(rev)M6G-LecRK\_1281

TGTGAGAGAGAATGTTTAGGTAATTGTTTCATGTATTGGTTTGTATCGCAATGAGAAGACTAATTTGTGCA  
AGAGTTTATATGGGTCATTGCTCAATCTTAGGAATCTTACTTCTGATGGC

>M6-PGSC0003DMG400000179-(rev)M6G-LecRK\_1342

ATTTGTGCAAGAGTTTATATGGGTCATTGCTCAATCTTAGGAATCTTACTTCTGATGGCACTGTTGAGGA  
TAAGCTATATGTTAGAGTTCAAGGAGGAGGGAATACTCGAAAGAATCAGA

>M6-PGSC0003DMG400000179-(rev)M6G-LecRK\_1403

TGTTGAGGATAAGCTATATGTTAGAGTTCAAGGAGGAGGGAATACTCGAAAGAATCAGATTCAAGTCA  
GATTACTTGTGATCGAAATGATCTGTGGATTTGTGGTAATTCTGTTAGTTGG

>M6-PGSC0003DMG400000179-(rev)M6G-LecRK\_1464

CAAGTCAGATTACTTGTGATCGAAATGATCTGTGGATTTGTGGTAATTCTGTTAGTTGGAATTGGGGCTT  
TCTTGGTAGTTAGGAGGAGAAGAGTAAGGAGGAAGAAAAAAGATGAGGAA

>M6-PGSC0003DMG400000179-(rev)M6G-LecRK\_1525

TTGGGGCTTTCTTGGTAGTTAGGAGGAGAAGAGTAAGGAGGAAGAAAAAAGATGAGGAAGATGTATT  
TCCTATAATGAATTTGAAGGTATTTTCATACAAAGAGCTTAATGCTGCAACAA

>M6-PGSC0003DMG400000179-(rev)M6G-LecRK\_1586

TGTATTTCTATAATGAATTTGAAGGTATTTTCATACAAAGAGCTTAATGCTGCAACAAAGGGATTCTCG

GAGAAGCTTGGTCATGGTGGTTTTGGAACCGTGTCCTAGGGGAGCTATC

>M6-PGSC0003DMG400000179-(rev)M6G-LecRK\_1647

GGATTCTCGGAGAAGCTTGGTCATGGTGGTTTTGGAACCGTGTCCTAGGGGAGCTATCGGATTCTTCA

CTCGTAGCTGTGAAGAGACTTGAAAGACCTGGTGGTGGTGAAAAGGAATTT

>M6-PGSC0003DMG400000179-(rev)M6G-LecRK\_1708

ATTCTTCACTCGTAGCTGTGAAGAGACTTGAAAGACCTGGTGGTGGTGAAAAGGAATTTGAGCTGAGG

TATGCACAATAGGGAACATTCAGCATGTTAATTTAGTGAGATTGAGGGGAT

>M6-PGSC0003DMG400000179-(rev)M6G-LecRK\_1769

AGCTGAGGTATGCACAATAGGGAACATTCAGCATGTTAATTTAGTGAGATTGAGGGGATTTTGCACTGA

AAATTCTCATAGGCTTCTGGTTTATGAGTACATGTCAAAGGGTCCTCTTAG

>M6-PGSC0003DMG400000179-(rev)M6G-LecRK\_183

ACCCATGTAGCTGAACTCACTAAAGAGTCTGTTTCAGCTGAAAGAAAGTTGGGATCTTTAGAAGGGAGC

ATAAAGTTTGAATCTTTGAACAAATCTAGAGTTTTACTAAGTGGGAACTTC

>M6-PGSC0003DMG400000179-(rev)M6G-LecRK\_1830

TGCACTGAAAATTCTCATAGGCTTCTGGTTTATGAGTACATGTCAAAGGGTCCTCTTAGCGCATATTTAA

GGCAAGATGGTCAGAATCTAAGTTGGGATGTTAGATTCCGAATTGCTGTA

>M6-PGSC0003DMG400000179-(rev)M6G-LecRK\_1891

CATATTTAAGGCAAGATGGTCAGAATCTAAGTTGGGATGTTAGATTCCGAATTGCTGTAGGGACAGCAA

GAGGTATTGCTTATTACACGAAGAGTGTGCAATTGTATAATACATTGCG

>M6-PGSC0003DMG400000179-(rev)M6G-LecRK\_1952

GACAGCAAGAGGTATTGCTTATTACACGAAGAGTGTGCAATTGTATAATACATTGCGACATTAAACCA

GAGAATATTCTGCTACATGAAGATTTTTAGCAAAGGTTTCTGATTTTGG

>M6-PGSC0003DMG400000179-(rev)M6G-LecRK\_2013

ATTAAACCAGAGAATATTCTGCTACATGAAGATTTTTAGCAAAGGTTTCTGATTTTGGACTTGCAAAGC

TCCTTGGTAGGGACTTTAGTAGAGTGTGGCAACCATGAGGGGTACCTGG

>M6-PGSC0003DMG400000179-(rev)M6G-LecRK\_2074

TTGCAAAGCTCCTTGGTAGGGACTTTAGTAGAGTGTGGCAACCATGAGGGGTACCTGGGGCTATGTTG

CACCCGAGTGGATCTCTGGATTAGCGATCACAACGAAAGCTGATGTATATA

>M6-PGSC0003DMG400000179-(rev)M6G-LecRK\_2135



CTATGTTGCACCCGAGTGGATCTCTGGATTAGCGATCACAACGAAAGCTGATGTATATAGCTATGGCAT  
GACATTATTGGAAGTATAGGTGGTTCGACGCAATGTAGAGTCACCGCCTTC

>M6-PGSC0003DMG400000179-(rev)M6G-LecRK\_2196

TATGGCATGACATTATTGGAAGTATAGGTGGTTCGACGCAATGTAGAGTCACCGCCTTCAGCTAAAGGT  
GAAGAGGGCGGAACAGAGGAGAAGTGGTTTTTCCCACCGTGGGCAGCACGT

>M6-PGSC0003DMG400000179-(rev)M6G-LecRK\_2257

CTAAAGGTGAAGAGGGCGGAACAGAGGAGAAGTGGTTTTTCCCACCGTGGGCAGCACGTCAAATAGTC  
GAAGGAAACATTGCTGCAGTTATGGATGAAAGACTACATGGAACGTACAACC

>M6-PGSC0003DMG400000179-(rev)M6G-LecRK\_2318

AATAGTCGAAGGAAACATTGCTGCAGTTATGGATGAAAGACTACATGGAACGTACAACCTCACGGAGG  
CAGAACGTGTGGGATTGATAGCTATTTGGTGCATTACAGGACGATGAATCAAC

>M6-PGSC0003DMG400000179-(rev)M6G-LecRK\_2379

ACGGAGGCAGAACGTGTGGGATTGATAGCTATTTGGTGCATTACAGGACGATGAATCAACGAGGCCTTC  
CATGGGAATGGTGGTGAAAATGTTGGAAGGAGTTGTCGAGGTGACAATGCCT

>M6-PGSC0003DMG400000179-(rev)M6G-LecRK\_244

AAGGGAGCATAAAGTTTGAATCTTTGAACAAATCTAGAGTTTTACTAAGTGGGAACCTTCACTGTTTTGAG  
TGAAAACAAGACATTTGAAATGGGGTTTTTCAAGACTAATGATGAAAGTA

>M6-PGSC0003DMG400000179-(rev)M6G-LecRK\_2440

GGCCTTCCATGGGAATGGTGGTGAAAATGTTGGAAGGAGTTGTCGAGGTGACAATGCCTCAACCTCCG  
AAGCTGCTCCAAGCATTAGTATCTGGTGAATCATTCCATGGGGTAGGAATTG

>M6-PGSC0003DMG400000179-(rev)M6G-LecRK\_2501

ACCTCCGAAGCTGCTCCAAGCATTAGTATCTGGTGAATCATTCCATGGGGTAGGAATTGATTCAAGTAAC  
GGGACATCACGAGACGGAGGTTTCAGCTCGGGTTATAATCCTCAACGTTC

>M6-PGSC0003DMG400000179-(rev)M6G-LecRK\_2562

TCAAGTAACGGGACATCACGAGACGGAGGTTTCAGCTCGGGTTATAATCCTCAACGTTCAATATATTCAA  
AAGACTCTCAAGCTTCAAGTTAGGTCTGCTTCTCAACTAGTATGCAAGTT

>M6-PGSC0003DMG400000179-(rev)M6G-LecRK\_2623

TATATTCAAAGACTCTCAAGCTTCAAGTTAGGTCTGCTTCTCAACTAGTATGCAAGTTGATTTTTCCAG  
CTTCACTGAATGTAGAGTTCTTTTTTATTGTCTTCAAAAATCCCCTGA

>M6-PGSC0003DMG400000179-(rev)M6G-LecRK\_2684

TTTTCCCAGCTTCACTGAATGTAGAGTTCTTTTTATTGTCTTCAAAAATCCCCTGAGAATTAGTAGCAA  
AATGCTCATCTTGGTATTTTGTAATAATGTATCATGAATATAGAAAATC

>M6-PGSC0003DMG400000179-(rev)M6G-LecRK\_2745

ATTAGTAGCAAAATGCTCATCTTGGTATTTTGTAATAATGTATCATGAATATAGAAAATCTTGTTTACTTTG  
CTTAAAAATTGTCACCTTTTTTTTTTTTTGTAAAGTCCAAAGAACCAAA

>M6-PGSC0003DMG400000179-(rev)M6G-LecRK\_2806

GTTTACTTTGCTTAAAAATTGTCACCTTTTTTTTTTTTTGTAAAGTCCAAAGAACCAAAAGCAAAACAAAAC  
ATACATTTCACTTTGGATCAGAGGGTTGGGGCGGAGCTAGTACATTACA

>M6-PGSC0003DMG400000179-(rev)M6G-LecRK\_305

TGTTTTGAGTGAAAACAAGACATTTGAAATGGGGTTTTTCAAGACTAATGATGAAAGTAAATGGTATTTA  
GGGATTTGGTTTGCTTCAATTCCTACCCCTACTTTTGTGGGGTTGCTAA

>M6-PGSC0003DMG400000179-(rev)M6G-LecRK\_3050

ATTATAGGAGAGGGCTTCCTAACCTTAGAATGAGACAATAGTTGAAAATATCAAAAAGTTATAATAGCAG  
AATTATTTAATGGATATATCTTTATTGGTAGATATTTTCGTATAGTGAACCTT

>M6-PGSC0003DMG400000179-(rev)M6G-LecRK\_3111

AATAGCAGAATTATTTAATGGATATATCTTTATTGGTAGATATTTTCGTATAGTGAACCTTAAAATGAGATAT  
AGGTGTATAATATAAAGCATTAAAACATGTGTTTGGATTATACCAACCA

>M6-PGSC0003DMG400000179-(rev)M6G-LecRK\_3172

AATGAGATATAGGTGTATAATATAAAGCATTAAAACATGTGTTTGGATTATACCAACCAACATTATGCA  
AAATTTTATATTGAGATTATTTTGTTAATATGGTAAACCAATGACTAA

>M6-PGSC0003DMG400000179-(rev)M6G-LecRK\_3233

CATTATGCAAAATTTTATATTGAGATTATTTTGTTAATATGGTAAACCAATGACTAATAAGAATATAACC  
CTCTACCTAATTTAATGGGAGAGTTAATTTTATATTTTATAAATGAGTG

>M6-PGSC0003DMG400000179-(rev)M6G-LecRK\_3294

AGAATATACCCTCTACCTAATTTAATGGGAGAGTTAATTTTATATTTTATAAATGAGTGTAACGTTTGTAC  
CTGCCCAATTATAACCACACTTTACTTTCTAAGTTTAATTTACATAACT

>M6-PGSC0003DMG400000179-(rev)M6G-LecRK\_3355

ACGTTTGTACCTGCCCAATTATAACCACACTTTACTTTCTAAGTTTAATTTACATAACTGTCTTGACTACAA

CAATAACAATAACCACTTGTCAATAGTTTCCTCTTTGTAGCTAAAT

>M6-PGSC0003DMG400000179-(rev)M6G-LecRK\_3416

CTTGACTACAACAATAACAATAACCACTTGTCAATAGTTTCCTCTTTGTAGCTAAATAATATAACAGAA  
ATTGAAACAAGAAAGACCATATACTCTCACACAAACAAGCAAACAGAAA

>M6-PGSC0003DMG400000179-(rev)M6G-LecRK\_3477

TATAACAGAAATTGAAACAAGAAAGACCATATACTCTCACACAAACAAGCAAACAGAAAAAGGAGAAA  
TGTTTTCTAACTTGTCAACTTTAGTAACAAAATTTTCCCAAATTAATTTT

>M6-PGSC0003DMG400000179-(rev)M6G-LecRK\_3538

GGAGAAATGTTTTCTAACTTGTCAACTTTAGTAACAAAATTTTCCCAAATTAATTTTTTCAAAGAGTA  
AAGATTGAGGGGGTTAAAGAAAATGGTCAAAGGAGAGCAGAGGTAGACA

>M6-PGSC0003DMG400000179-(rev)M6G-LecRK\_3599

CAAAGAGTAAAGATTGAGGGGGTTAAAGAAAATGGTCAAAGGAGAGCAGAGGTAGACAACTCTGCA  
CTCTCACCAAAGAAGTTTGTTACCTTGGAATGGAGACACCTGGCAGTTCAGG

>M6-PGSC0003DMG400000179-(rev)M6G-LecRK\_366

TGGTATTTAGGGATTTGGTTTGCTTCAATTCCTACCCCTACTTTTGTGGGGTTGCTAATCGTGAGAAACC  
CATCAAGAATCCATTTTGTAGCTACTTTGGAGTTTAGTGAGGATGGGAGA

>M6-PGSC0003DMG400000179-(rev)M6G-LecRK\_3660

TCTGCACTCTACCAAAGAAGTTTGTTACCTTGGAATGGAGACACCTGGCAGTTCAGGTGGGGAGGTG  
CCGATATATGGGGGCTCCTCGTCTATGGAGCCGACTGAGTTACACTCGGCT

>M6-PGSC0003DMG400000179-(rev)M6G-LecRK\_3721

GGGAGGTGCCGATATATGGGGGCTCCTCGTCTATGGAGCCGACTGAGTTACACTCGGCTCCATCTACCA  
TGCTGGCGGATTATCCGCCAGTACAAGGCTTTCAAGATTTGAAGAACTTGG

>M6-PGSC0003DMG400000179-(rev)M6G-LecRK\_3782

ATCTACCATGCTGGCGGATTATCCGCCAGTACAAGGCTTTCAAGATTTGAAGAACTTGGTTAGCATGGA  
ATCTGGCAAGTTATGGACTATTGCAGGTCCCATAGCCTTTAATATTCTGTG

>M6-PGSC0003DMG400000179-(rev)M6G-LecRK\_3843

AGCATGGAATCTGGCAAGTTATGGACTATTGCAGGTCCCATAGCCTTTAATATTCTGTGTAATTATGGGA  
TTAATTCTTTCACAAGTATATTTGTTGGACATATTGGTGATGTAGAACTC

>M6-PGSC0003DMG400000179-(rev)M6G-LecRK\_3904

ATTATGGGATTAATTCTTTACAAAGTATATTTGTTGGACATATTGGTGATGTAGAACTCTCTGCCGTTGCC  
ATATCTTTATCGGTGATAGCAAATTTCTCATTCCGGATTCTTGGTTAGGT

>M6-PGSC0003DMG400000179-(rev)M6G-LecRK\_3965

TGCCGTTGCCATATCTTTATCGGTGATAGCAAATTTCTCATTCCGGATTCTTGGTTAGGTTCTTTTTTTGTTCT  
TTACTAATTCTCAAAGTTCTGTTCTTTTTTATATTATGTTATATGGGC

>M6-PGSC0003DMG400000179-(rev)M6G-LecRK\_4026

TTTTTTGTTCTTACTAATTCTCAAAGTTCTGTTCTTTTTTATATTATGTTATATGGGCATTGAGTATTCGTA  
TAGCCGACCCCAACTTGCTTGAAATAGCGGGATAGTTGTTGTTATTG

>M6-PGSC0003DMG400000179-(rev)M6G-LecRK\_4087

TGAGTATTCGTATAGCCGACCCCAACTTGCTTGAAATAGCGGGATAGTTGTTGTTATTGTTGTGATTGTT  
TGTA AAAATGTAATACATCGAAGATATGTTGGATTTTGT CAGACTCTTGA

>M6-PGSC0003DMG400000179-(rev)M6G-LecRK\_4148

GTGATTGTTTGTAAAATGTAATACATCGAAGATATGTTGGATTTTGT CAGACTCTTGTAGACTTATG  
ACTATAGATCACA AATAGTTTATTATGAAACAGAACTAGGATTTTGATTG

>M6-PGSC0003DMG400000179-(rev)M6G-LecRK\_4209

AGACTTATGACTATAGATCACA AATAGTTTATTATGAAACAGAACTAGGATTTTGATTGTCAAATGATAT  
AAAGTCTCAAAAAGGTTAGAATAAGCATTCTTTTAGGTTATTGGTTATGT

>M6-PGSC0003DMG400000179-(rev)M6G-LecRK\_427

GTGAGAAACCCATCAAGAATCCATTTTTAGCTACTTTGGAGTTTAGTGAGGATGGGAGATTAGTTTTGAA  
GGAAGATTCAAGAACCATTGTATGGGAAACAACCAATTTGGAGAAAGCTA

>M6-PGSC0003DMG400000179-(rev)M6G-LecRK\_4270

AAATGATATAAAGTCTCAAAAAGGTTAGAATAAGCATTCTTTTAGGTTATTGGTTATGTTAGTTTTCTAAT  
TCTTTATCTTATTTTTGATGGATTATCAGTTAGGCATGGGTAGTGC ACT

>M6-PGSC0003DMG400000179-(rev)M6G-LecRK\_4331

GTTTTCTAATTCTTTATCTTATTTTTGATGGATTATCAGTTAGGCATGGGTAGTGC ACTTGAGACACTTTG  
TGGACAAGCATTGTTGTCAGGCCAAATAGAATTGTTAGGAGTTTACTTG

>M6-PGSC0003DMG400000179-(rev)M6G-LecRK\_4392

AGACACTTTGTGGACAAGCATTGTTGTCAGGCCAAATAGAATTGTTAGGAGTTTACTTGCAGAGGTCAT  
GGATAATACTTGTGCTTCTTGCTTCTGCATAATGCCACTCTACATCTTCT

>M6-PGSC0003DMG400000179-(rev)M6G-LecRK\_4453

GAGGTCATGGATAATACTTGTTGCTTCTTGCTTCTGCATAATGCCACTCTACATCTTCTCCACGCCGATAC  
TGAAGTTATTAGGCCAAAGAGATGACATAGCAGAGTTAGCTGGAAAATT

>M6-PGSC0003DMG400000179-(rev)M6G-LecRK\_4514

ACGCCGATACTGAAGTTATTAGGCCAAAGAGATGACATAGCAGAGTTAGCTGGAAAATTTTCGATACAA  
ATCATACTCAAATGTTCTCCCTTGCTATCAACTCCCAACCCAAAAGTTC

>M6-PGSC0003DMG400000179-(rev)M6G-LecRK\_4575

CGATACAAATCATACTCAAATGTTCTCCCTTGCTATCAACTCCCAACCCAAAAGTTCTTGCAAGCACAA  
AGCAATGTTCGCGATCCTGGCATGGGTTGGGTTTCATGGCTTTAGCCATGC

>M6-PGSC0003DMG400000179-(rev)M6G-LecRK\_4636

GCAAGCACAAAGCAATGTCGCGATCCTGGCATGGGTTGGGTTTCATGGCTTTAGCCATGCATATCGGGGT  
GCTCTTTCTTTTTATCAAAGTTTTCCGATGGGGCGTACTGGTGCTGCTGC

>M6-PGSC0003DMG400000179-(rev)M6G-LecRK\_4697

ATCGGGGTGCTCTTTCTTTTTATCAAAGTTTTCCGATGGGGCGTACTGGTGCTGCTGCAGCCTATGATG  
TTTCTGCTTGGGCTATTGCTCTGGCTCAAGTGGTTTATATTGTTGGCTGG

>M6-PGSC0003DMG400000179-(rev)M6G-LecRK\_4758

CCTATGATGTTTCTGCTTGGGCTATTGCTCTGGCTCAAGTGGTTTATATTGTTGGCTGGTGCAAAGATAG  
TTGGAAGGGGTTGTCTTGGTTGGCCTTAAAGGAACTTTGGCCCTTCGTAA

>M6-PGSC0003DMG400000179-(rev)M6G-LecRK\_4819

CAAAGATAGTTGGAAGGGGTTGTCTTGGTTGGCCTTAAAGGAACTTTGGCCCTTCGTAAAGCTTTCTGTT  
GCATCAGCAGTGATGATTTGCTTGGAGATCTGGTATTTTATGACTATAAT

>M6-PGSC0003DMG400000179-(rev)M6G-LecRK\_488

AGTTTTGAAGGAAGATTCAAGAACCATTGTATGGGAAACAACCAATTTGGAGAAAGCTAGTGATGTGAA  
GCTTTTGGACCAAGGGAATTTGGTTCTTGTCTTAATAAAGGTGTTTTGGT

>M6-PGSC0003DMG400000179-(rev)M6G-LecRK\_4880

CTTTCTGTTGCATCAGCAGTGATGATTTGCTTGGAGATCTGGTATTTTATGACTATAATTGTTCTAACTGG  
TCATCTTGAGGACCCCGTCATCGCTGTTGGATCTCTTTCTATCTGGTAC

>M6-PGSC0003DMG400000179-(rev)M6G-LecRK\_4941

TTCTAACTGGTCATCTTGAGGACCCCGTCATCGCTGTTGGATCTCTTTCTATCTGGTACAATCTTGCAAAT

ATGCACTTAAAATTTATAATGTGTTTCATAATTGTTCTGTTTTTCAAGCT

>M6-PGSC0003DMG400000179-(rev)M6G-LecRK\_5002

TCTTGCAAATATGCACTTAAAATTTATAATGTGTTTCATAATTGTTCTGTTTTTCAAGCTTAGATTCTTTCTC  
TTCATTGTTTCAGTATGAACCTTAATGGATGGGAAGGCATGTTGTTT

>M6-PGSC0003DMG400000179-(rev)M6G-LecRK\_5063

GATTCTTTCTTCTTCATTGTTTCAGTATGAACCTTAATGGATGGGAAGGCATGTTGTTTATTGGAATTAAT  
GCAGCAATAAGGTATACTACTATACTAGTTATAGCAGGACATTGTCAGT

>M6-PGSC0003DMG400000179-(rev)M6G-LecRK\_5124

TGGAATTAATGCAGCAATAAGGTATACTACTATACTAGTTATAGCAGGACATTGTCAGTGCACAAAAGTT  
AAACTCTAACGAATAGTGTAAGTCTAACGGTTGTTTTTCAATTTGTTGATA

>M6-PGSC0003DMG400000179-(rev)M6G-LecRK\_5185

ACAAAAGTTAAACTCTAACGAATAGTGTAAGTCTAACGGTTGTTTTTCAATTTGTTGATATTTTCAGTGTTCG  
CGTTTCCAACGAGCTTGGATCAGGCCATCCTAGGGCTGCAAAGTATTCC

>M6-PGSC0003DMG400000179-(rev)M6G-LecRK\_5246

TCAGTGTTTCGCGTTTTCCAACGAGCTTGGATCAGGCCATCCTAGGGCTGCAAAGTATTCCGTCTTCGTAC  
AGTAGCTGAATCTCTCATGATTGGGATATTCTGCATGGTACTAATCATAT

>M6-PGSC0003DMG400000179-(rev)M6G-LecRK\_5307

CTTCGTACAGTAGCTGAATCTCTCATGATTGGGATATTCTGCATGGTACTAATCATATTAACAAAGGAC  
CATTTTGCATTGCTTTTACAAGCAGTGAGAAAATGCAAAAAGCTGTTTC

>M6-PGSC0003DMG400000179-(rev)M6G-LecRK\_5368

ACAAAGGACCATTTTGCATTGCTTTTACAAGCAGTGAGAAAATGCAAAAAGCTGTTTCTAAGTTGGCAT  
ATCTTCTTGCTGTTACAATGCTGCTTAATAGTGTTTCAGCCAGTTATATCA

>M6-PGSC0003DMG400000179-(rev)M6G-LecRK\_5429

AGTTGGCATATCTTCTTGCTGTTACAATGCTGCTTAATAGTGTTTCAGCCAGTTATATCAGGTACCAAATA  
TGTGTGTTTCTTACTTAAAACAGTTCTCCACACACACATCAGTTGATGT

>M6-PGSC0003DMG400000179-(rev)M6G-LecRK\_549

GATGTGAAGCTTTTGGACCAAGGGAATTTGGTTCTTGTCTTAATAAAGGTGTTTTGGTATGGGAAAGTT  
TTGATTTTCTACAGATACATGGCTTCTGGGATGAACTTGACTGCAACA

>M6-PGSC0003DMG400000179-(rev)M6G-LecRK\_5490

TACCAAATATGTGTGTTTCTTACTTAAACAGTTCTCCACACACACATCAGTTGATGTGCCAAACAAATA  
GTACTATTTGGTACAAATCTATGTTGCTCGGACTCGTCAAAAAATGTCA

>M6-PGSC0003DMG400000179-(rev)M6G-LecRK\_5612

GGGTGTGTGTCGGATTCTTGATAAGTAGAGTATTGTTGAAGAATCCGCGCAATCAAAAAGTTAAGAGTC  
TGCGCAACTTTAGGTACAAACTCAAAGAATAAATTAGATTGTTCTAATAT

>M6-PGSC0003DMG400000179-(rev)M6G-LecRK\_5673

TAAGAGTCTGCGCAACTTTAGGTACAAACTCAAAGAATAAATTAGATTGTTCTAATATTGAAGGTGTTG  
CTGTTGGAGGAGGATGGCAAGCTCTAGTAGCATACTAATTTGGCTTGC

>M6-PGSC0003DMG400000179-(rev)M6G-LecRK\_5734

AAGGTGTTGCTGTTGGAGGAGGATGGCAAGCTCTAGTAGCATACTAATTTGGCTTGCTACTATGTCAT  
TGGCCTCCCACTTGGATTCTCTTAGGCTATAAAACAAGTTTGGGAGTTC

>M6-PGSC0003DMG400000179-(rev)M6G-LecRK\_5795

CTATGTCATTGGCCTCCCACTTGGATTCTCTTAGGCTATAAAACAAGTTTGGGAGTTCAGGTAACAACA  
TAAATCTTTTTACTAGTATTAATTTAGCTCCGGTTTGATCATAGATTTTA

>M6-PGSC0003DMG400000179-(rev)M6G-LecRK\_61

AAGCAAATTCATCACCATGATTCCACAGAAAGCAATTCTCATTTTACTTTTCATCACAATTTCTATGGCA  
TTTGAGATCAGTTCAGAAACAGTAAAGTCAAGAATGCAAATGTAAACA

>M6-PGSC0003DMG400000179-(rev)M6G-LecRK\_610

GGGAAAGTTTTGATTTTCTACAGATACATGGCTTCTGGGATGAACTTGACTGCAACAAAATGGCTGAC  
ATCTTGAGAAGTACTAATGATCCATCACCTGGAAGGTACTCTTTAAGGC

>M6-PGSC0003DMG400000179-(rev)M6G-LecRK\_6283

TCATGAAATTTGGTCAGTTTTCTAAAAATATTCAATTGAGCTAAGTTTTTGGATGAAATTTACGTCTACT  
CACGAAACAAGTAAATGCATGTCCAAACATAACTTCATATTCCAAAAA

>M6-PGSC0003DMG400000179-(rev)M6G-LecRK\_6405

ATTGTTCAACACAACCTTCAAAAACACTTTTTCAAGTTTCAACTAAATCTATGGTCAAAAACAAACACT  
AGCTTGAGTTTGGAGTTTGGAGGGAACCTTGAATTAACGATAAAGTTA

>M6-PGSC0003DMG400000179-(rev)M6G-LecRK\_6466

CTCAAACACTAGCTTGAGTTTGGAGTTTGGAGGGAACCTTGAATTAACGATAAAGTTAATAAACTATTG  
ATGTTTGCCTCCGATAAATTGTCTACATTACACTAATTGTCACTTCATT

>M6-PGSC0003DMG400000179-(rev)M6G-LecRK\_6527

AAACTATTGATGTTTGCCTCCGGATAAATTGTCTACATTACACTAATTGTCACTTCATTTTTTTCTCTTTTC  
TGTAGGGAATATGGATGGGCATGATTTTTGGAACCTTTTTTGCAAACA

>M6-PGSC0003DMG400000179-(rev)M6G-LecRK\_6573

TTGTCACTTCATTTTTTTCTCTTTCTGTAGGGAATATGGATGGGCATGATTTTTGGAACCTTTTTTGCAA  
CAATAATTCTCTGTGTTATCGTATACAAAACCAATTGGAACGAAGAGG

>M6-PGSC0003DMG400000179-(rev)M6G-LecRK\_671

ATGGCTGACATCTTGGAGAAGTACTAATGATCCATCACCTGGAAGGTACTCTTTAAGGCTCCAGCCACAT  
AGTTATGGTGAGATAGTTCTTTTTATAATGGTACTTATCCATATTGGTC

>M6-PGSC0003DMG400000179-(rev)M6G-LecRK\_732

CAGCCACATAGTTATGGTGAGATAGTTCTTTTTATAATGGTACTTATCCATATTGGTCCACTGGGAAATG  
GAGTGAAAATGCATTTGTTGATGTACCAGAAATGACTGTTCTTACATT

>M6-PGSC0003DMG400000179-(rev)M6G-LecRK\_793

CTGGGAAATGGAGTGAAAATGCATTTGTTGATGTACCAGAAATGACTGTTCTTACATTTACAAGTTCAA  
TTTTGAATCACCTTTACCCCTATGGCATCATTTGGATACTCAGAGGTGA

>M6-PGSC0003DMG400000179-(rev)M6G-LecRK\_854

CAAGTTCAATTTGAATCACCTTTACCCCTATGGCATCATTTGGATACTCAGAGGTGACATTAGAGAAT  
GGAATGCCTCCTCTTAACTAGGTTTCATGGTTGATTTCACTGGACAGGT

>M6-PGSC0003DMG400000179-(rev)M6G-LecRK\_915

TTAGAGAATGGAATGCCTCCTCTTAACTAGGTTTCATGGTTGATTTCACTGGACAGGTAAACAGTTCA  
CTTGATCCAACAGGCGCAAAGTTGGAACATGTTTTGGTCACAGCCAGAG

>M6-PGSC0003DMG400000179-(rev)M6G-LecRK\_976

AACAGTTCACTTGGATCCAACAGGCGCAAAGTTGGAACATGTTTTGGTCACAGCCAGAGAATATGTGTA  
GTACTTATGGTCTTTGTGGGAATTTGGGGTTCTGTAATAGTAAGTCATTGA

>M6-PGSC0003DMG400000295M6LRR-RLK\_0

TTTGCCAAATGTTCATACAACTTAGAAAAAATCACCAAAAAAATGTCCAAAATTATTTTTCACTTTTC  
ATTTTTCTGTTTTTCATCATTTCTCATGGAAAATCCAAGAATCTCAA

>M6-PGSC0003DMG400000295M6LRR-RLK\_1037

TTATTTGTTAAGTTGTTTGGGAACAAGTTATCAGGTGAAATTCCACCTGATTTTGGTCGATTTTCGAAACT



TTTTGACTTCCAAGTTTCAGAAAATCAACTTGTTGGAAAGTTACCTGAG

>M6-PGSC0003DMG400000295M6LRR-RLK\_1098

TTTCGAAACTTTTTGACTTCCAAGTTTCAGAAAATCAACTTGTTGGAAAGTTACCTGAGGGTATTTGCAAT

AACAAGGCTTTAGCTAGGATGGTTGCTTTTGGCAACAATCTAACAGGTG

>M6-PGSC0003DMG400000295M6LRR-RLK\_1159

TATTTGCAATAACAAGGCTTTAGCTAGGATGGTTGCTTTTGGCAACAATCTAACAGGTGAACTGCCAAGT

TCACTTGGAAAGTTGTGACAGTCTGAGGTATCTTCGAGTCGAAAATAATCG

>M6-PGSC0003DMG400000295M6LRR-RLK\_122

CAAGAAAAGGCCATTTTACTCCAACATAAACAACACTGGTTTACTTCACCAAATGTCACAAAATGGATTT

CATCATCAAATCATTGTTCTTGGGATGGAATAATTTGTACCCAAAATTTA

>M6-PGSC0003DMG400000295M6LRR-RLK\_1220

CTGCCAAGTTCACTTGGAAAGTTGTGACAGTCTGAGGTATCTTCGAGTCGAAAATAATCGACTTTCTGGTG

AGGTTCTGATGGATTATGGACAGGTAAGAGTTTGTCAATGCTTTTAATG

>M6-PGSC0003DMG400000295M6LRR-RLK\_1281

TTTCTGGTGAGGTTCTGATGGATTATGGACAGGTAAGAGTTTGTCAATGCTTTTAATGAAGAATAACTT

GTTAACTGGTCAGCTTCCACATAGAGTGGCATCAAATTTGTCACAAGTTG

>M6-PGSC0003DMG400000295M6LRR-RLK\_1342

GAATAACTTGTTAACTGGTCAGCTTCCACATAGAGTGGCATCAAATTTGTCACAAGTTGATATCAGCAAT

AACAAGTTTTTCGGGGGAATTACCAGCTGGTATGGGTACTTGGCACAATCT

>M6-PGSC0003DMG400000295M6LRR-RLK\_1403

ATCAGCAATAACAAGTTTTTCGGGGGAATTACCAGCTGGTATGGGTACTTGGCACAATCTAAGTGAGTTC

AAGGCAAGTAATAATCTCTTAAGTGGTCAAATCCCTCAAGAATTGACTCTT

>M6-PGSC0003DMG400000295M6LRR-RLK\_1464

GTGAGTTCAAGGCAAGTAATAATCTCTTAAGTGGTCAAATCCCTCAAGAATTGACTCTTCTTCCAAGGAT

AACTAAACTTTTTCTTGATGGTAATCTACTATCTGGAAATTTTCCATCGA

>M6-PGSC0003DMG400000295M6LRR-RLK\_1525

TCCAAGGATAACTAACTTTTTCTTGATGGTAATCTACTATCTGGAAATTTTCCATCGAATATATCGTCGT

GGAAGACTCTTGTCACATTAATAGCAGAAAAAATCAGCTTTCAGGTCC

>M6-PGSC0003DMG400000295M6LRR-RLK\_1586

ATATCGTCGTGGAAGACTCTTGTACATTAATAGCAGAAAAATCAGCTTTCAGGTCCTATACCTTCTG  
CACTTGGTCTTTTACCAAATCTCATTGATTTGGACTTGTCAAGTAACCAA

>M6-PGSC0003DMG400000295M6LRR-RLK\_1647

TACCTTCTGCACTTGGTCTTTTACCAAATCTCATTGATTTGGACTTGTCAAGTAACCAATTTTCAGGTGTTA  
TTCCAACCTGAATTAGGTAACCTTGAGGTTAACTTCACTTAACCTGTCAT

>M6-PGSC0003DMG400000295M6LRR-RLK\_1708

TTCAGGTGTTATTCCAACCTGAATTAGGTAACCTTGAGGTTAACTTCACTTAACCTGTCATCCAATCGCCTGT  
CGGGTGAAATCCCATCTCAGTTGGAAAATGCAGCTTTTGGTAAGAGCTT

>M6-PGSC0003DMG400000295M6LRR-RLK\_1769

AATCGCCTGTGGGTGAAATCCCATCTCAGTTGGAAAATGCAGCTTTTGGTAAGAGCTTCTCGGATAATC  
CTGGTCTTTGTGCAAGTAATCCATCAGTAGAAGTCGCGTCTTGCAAGAGG

>M6-PGSC0003DMG400000295M6LRR-RLK\_183

AATGGATTTTCATCATCAAATCATTGTTCTTGGGATGGAATAATTTGTACCCAAAATTTAGTTTCTGGTATT  
CAAATCCCTTTTGGAAAATATCTCAAACCAATTCAAATTTTCATTTGTG

>M6-PGSC0003DMG400000295M6LRR-RLK\_1830

CGGATAATCCTGGTCTTTGTGCAAGTAATCCATCAGTAGAAGTCGCGTCTTGCAAGAGGGAAACTAAGT  
CAGATATGTTTCTGTTGGACTTGTGCTGCTCTTGCTAGTGTAGCAGCAG

>M6-PGSC0003DMG400000295M6LRR-RLK\_1891

AACTAAGTCAGATATGTTTCTGTTGGACTTGTGCTGCTCTTGCTAGTGTAGCAGCAGTTACTTTCTTG  
TGGCAGTTCTGTATGGTCTGTTTGTGTTGAGAAGTCATAGAAAAAGTAA

>M6-PGSC0003DMG400000295M6LRR-RLK\_1952

ACTTTCCTTGTGGCAGTTCTGTATGGTCTGTTTGTGTTGAGAAGTCATAGAAAAAGTAAACAAGAATCAG  
TTTCGACATGGAAACAAACATCATTTACAAATTAGACTTCACAGAATCA

>M6-PGSC0003DMG400000295M6LRR-RLK\_2013

AAGAATCAGTTTCGACATGGAAACAAACATCATTTACAAATTAGACTTCACAGAATCAGACATTGTATC  
CAATCTGACCGAAAACAACATAATTGGAAGTGGAGGATCTGGACAGGTTT

>M6-PGSC0003DMG400000295M6LRR-RLK\_2074

CATTGTATCCAATCTGACCGAAAACAACATAATTGGAAGTGGAGGATCTGGACAGGTTTACCTCGTGCC  
TTTAAGCCGATCAGGTGATTATGTTGCTGTCAAGAGGATTTGGAGAAACCA

>M6-PGSC0003DMG400000295M6LRR-RLK\_2135

CTCGTGCCTTTAAGCCGATCAGGTGATTATGTTGCTGTCAAGAGGATTTGGAGAAACCAAAGGTTGGAT  
CACAAGCATGAGAAACAGTTTCTTGCTGAAGTTCAGATATTAGGCACGATT

>M6-PGSC0003DMG400000295M6LRR-RLK\_2196

GGTTGGATCACAAGCATGAGAAACAGTTTCTTGCTGAAGTTCAGATATTAGGCACGATTCGACACTCCA  
ATATAGTGAAACTCCTCTGCTGCTTCTTCAGTGAAGAGTCGAAACTTCTTG

>M6-PGSC0003DMG400000295M6LRR-RLK\_2257

AACTCCAATATAGTGAAACTCCTCTGCTGCTTCTTCAGTGAAGAGTCGAAACTTCTTGCTCTACGAATATA  
TGGAGAACAGGAGCTTGGATATATGGCTTCACTCAAAGAATAGGTTGAA

>M6-PGSC0003DMG400000295M6LRR-RLK\_2318

TACGAATATATGGAGAACAGGAGCTTGGATATATGGCTTCACTCAAAGAATAGGTTGAACAATGCCTCA  
AGATCAACTCCACATCTGGTCTTGAATGGCCTAGGAGGCTGCAAATTGCT

>M6-PGSC0003DMG400000295M6LRR-RLK\_2379

ATGCCTCAAGATCAACTCCACATCTGGTCTTGAATGGCCTAGGAGGCTGCAAATTGCTATAGGAGCTG  
CTCGTGGTTTTTGTACATGCACCATGACTGCTCACCTCCTATTATTCATC

>M6-PGSC0003DMG400000295M6LRR-RLK\_244

TTCTGGTATTCAAATCCCTTTTGGAAATATCTCAAACCAATTCAAATTTCAATTTGTGATCTTAAAAATCT  
CATCTTTCTTGATTTTAACCATAATTTTCATCCCTGGAAACTTCCCTGA

>M6-PGSC0003DMG400000295M6LRR-RLK\_2440

AGGAGCTGCTCGTGGTTTTTGTACATGCACCATGACTGCTCACCTCCTATTATTCATCGCGATGTGAAGT  
CAAGCAACATCCTATTGGATTCTCAATTCAATGCAAAAATTGCAGATTT

>M6-PGSC0003DMG400000295M6LRR-RLK\_2501

GATGTGAAGTCAAGCAACATCCTATTGGATTCTCAATTCAATGCAAAAATTGCAGATTTTGGCCTTGCCA  
GGATGTTACTCAAGCCTGGAGATAACACAGTGACAGCAGTAGCTGGCTCT

>M6-PGSC0003DMG400000295M6LRR-RLK\_2562

GCCTTGCCAGGATGTTACTCAAGCCTGGAGATAACACAGTGACAGCAGTAGCTGGCTCTTTCGGATACA  
TTGCACCAGGTATAAGACCATCAACTTATCTATAACATCATTATAAAGTTT

>M6-PGSC0003DMG400000295M6LRR-RLK\_2623

CGGATACATTGCACCAGGTATAAGACCATCAACTTATCTATAACATCATTATAAAGTTTAGAAGTTGGTT

TAATCTCTTTCATGGAAAAAAGTTTCCTATGCTACACAATTCAATAACAT

>M6-PGSC0003DMG400000295M6LRR-RLK\_2684

AAGTTGGTTTAATCTCTTTCATGGAAAAAAGTTTCCTATGCTACACAATTCAATAACATATCAAGGGGTC

GTTTTGTTACGTACTAGTTATGCATGAGTTGTAACACGGGTTGTTTATG

>M6-PGSC0003DMG400000295M6LRR-RLK\_2745

CAAGGGGTCGTTTTGTTACGTACTAGTTATGCATGAGTTGTAACACGGGTTGTTTATGTAGTAAATAGT

AATGTAGATATTAGTACGCGAGTAGTTATTCTTAGTACACTAATTCTCGC

>M6-PGSC0003DMG400000295M6LRR-RLK\_2806

GTAAATAGTAATGTAGATATTAGTACGCGAGTAGTTATTCTTAGTACACTAATTCTCGCGTAACTCATATA

AATGCTAATATATTCATGATGGTATTTTCAGAGTATGCGCGAAAACTAG

>M6-PGSC0003DMG400000295M6LRR-RLK\_2867

AACTCATATAAATGCTAATATATTCATGATGGTATTTTCAGAGTATGCGCGAAAACTAGAGTGACAGAG

AAAATTGATGTGTATAGTTTTGGAGTCATACTATTGGAAGTGGTGACTGGA

>M6-PGSC0003DMG400000295M6LRR-RLK\_2928

TGACAGAGAAAATTGATGTGTATAGTTTTGGAGTCATACTATTGGAAGTGGTGACTGGAAAAGAAGCCA

ATCTTGGAGATGAAGATTCTTGTCTTGCAGACTGGGCATGGCGCCACCTC

>M6-PGSC0003DMG400000295M6LRR-RLK\_2989

AGAAGCCAATCTTGGAGATGAAGATTCTTGTCTTGCAGACTGGGCATGGCGCCACCTTCAAAAAGGGAA

ACCGATGGCTGATGCATTAGATGAGGACATCAAAGAAACGCGATACTTGA

>M6-PGSC0003DMG400000295M6LRR-RLK\_305

CTTAAAAATCTCATCTTTCTTGATTTTAACCATAATTTTCATCCCTGGAACTTCCCTGATATTTACAGTTGTT

CAAATCTGAATTCTTAGATCTTTCTTATAACTACATGGTTGGTAAT

>M6-PGSC0003DMG400000295M6LRR-RLK\_3050

AAAGGGAAACCGATGGCTGATGCATTAGATGAGGACATCAAAGAAACGCGATACTTGAAGAAATCTT

CGTTGTGTTAAGCTTGAATCTTTTGCACCAGCACATTTCTTCATCAAGG

>M6-PGSC0003DMG400000295M6LRR-RLK\_3111

AAATCTTCGTTGTGTTAAGCTTGAATCTTTTGCACCAGCACATTTCTTCATCAAGGCCAACAAATGAAG

GAAGTTCTGAAATCTTGATCCAATGTAGCAACAGTTCACCTACATCTG

>M6-PGSC0003DMG400000295M6LRR-RLK\_3172

AACAATGAAGGAAGTTCTGCAAATCTTGATCCAATGTAGCAACAGTTCACCTACATCTGGAGAAAAGAA  
AAATGAAACAGAACAGGATGTTTTGCCACTCCTCAAGAACTCAAGGAGTGA

>M6-PGSC0003DMG400000295M6LRR-RLK\_3233

GAAAAGAAAAATGAAACAGAACAGGATGTTTTGCCACTCCTCAAGAACTCAAGGAGTGAGAGGATTGA  
AGAAAATGATGATGTTGGTTAACATCAATTATTTGATGGCATTACAATATG

>M6-PGSC0003DMG400000295M6LRR-RLK\_3538

GCAAAGAATAAGACCAATAGATAATGTATCAGGTAGTGAAAAGTACATTGTACATACACTGTATTGGA  
TCCATAGTGTGCTTTGCATTGTTTTGCTACATAAATTTGCTTTTCCAAT

>M6-PGSC0003DMG400000295M6LRR-RLK\_3599

GTATTGGATCCATAGTGTGCTTTGCATTGTTTTGCTACATAAATTTGCTTTTCCAATGTTTTCTTACTCA  
TAAAATAACTGTCAAAAAGGTACATTAACCATAAACTATTGAATG

>M6-PGSC0003DMG400000295M6LRR-RLK\_366

TTTACAGTTGTTCAAATCTTGAATTCTTAGATCTTTCTTATAACTACATGGTTGGTAATCTCCCTGATGAGA  
TTAACCGTCTTTGAGTAATCTAAAATACCTAAACTTAACTGCCAACA

>M6-PGSC0003DMG400000295M6LRR-RLK\_3660

TTTCTTACTCATAAAATAACTGTCAAAAAGGTACATTAACCATAAACTATTGAATGGAGGATAGATT  
TCCTAAAAATCCAGAAAAATAGAAACAAGCTTGAACCTCAGTACTTT

>M6-PGSC0003DMG400000295M6LRR-RLK\_3721

GGATAGATTTCTAAAAATCCAGAAAAATAGAAACAAGCTTGAACCTCAGTACTTTAACTTTTGGCA  
ACCATAACAACATATCCGATGTAATCCCATGAGTCCCAAACCTTTGGC

>M6-PGSC0003DMG400000295M6LRR-RLK\_3965

AATAAATCTTGTAAGATCACACAAAAATGTGGCTACTAGAAGAACTTTATTTGTATCCTAGCTTTATTTT  
TGTCTAGTGAGGAAAAAATTTAAGTTTACACTGGGGATAAAGATGATCC

>M6-PGSC0003DMG400000295M6LRR-RLK\_4026

GCTTATTTCTGTCTAGTGAGGAAAAAATTTAAGTTTACACTGGGGATAAAGATGATCCTTAGAGGCACC  
AGGAGTGAAAAGGTGAGCATATTGATGTTTAGCTGAAGAGAGATGTGCTC

>M6-PGSC0003DMG400000295M6LRR-RLK\_4087

AGAGGCACCAGGAGTGAAAAGGTGAGCATATTGATGTTTAGCTGAAGAGAGATGTGCTCATTGGTAC  
ATTGAACTATGGCTCACTTCAAAGCTCACTCTTGCATGACGCGGTGCACAAG

>M6-PGSC0003DMG400000295M6LRR-RLK\_4148

TTGGTACATTGAACTATGGCTCACTTCAAAGCTCACTCTTGCATGACGCGGTGCACAAGGAAGCAAGAA  
ATATTTCAATCATCTTGGAGAAGAAAGTAAGAAGAGGGTTCTCTTTAGCAA

>M6-PGSC0003DMG400000295M6LRR-RLK\_4209

AGCAAGAAATATTTCAATCATCTTGGAGAAGAAAGTAAGAAGAGGGTTCTCTTTAGCAAGAAGAGGGG  
TGATTGTAAACGTACAACTTTGACTAGCTAGGCACTTTTGGTTGTGTCACT

>M6-PGSC0003DMG400000295M6LRR-RLK\_427

CCCTGATGAGATTAACCGTCTTTTCGAGTAATCTAAAATACCTAACTTAACTGCCAACAACTTCAATGGT  
GATATCCCTAAAGGAATTGGTGGATTGAGTCATCTCAAAGTACTTGATCT

>M6-PGSC0003DMG400000295M6LRR-RLK\_4270

AGAGGGGTGATTGTAAACGTACAACTTTGACTAGCTAGGCACTTTTGGTTGTGTCACTCTGACCATGAT  
CATGATTCCTCGAGATCTGTGTATTGGGAATGCGAGGCAGCCAAAAGTGC

>M6-PGSC0003DMG400000295M6LRR-RLK\_4331

GACCATGATCATGATTCCTCGAGATCTGTGTATTGGGAATGCGAGGCAGCCAAAAGTGCAGCTCCAACG  
CCTGAACCATCATTAGAAAAGCTCAATGACTATGCTGTCCGCAGCTTCTCCC

>M6-PGSC0003DMG400000295M6LRR-RLK\_4392

CTCCAACGCCTGAACCATCATTAGAAAAGCTCAATGACTATGCTGTCCGCAGCTTCTCCCAGTAACTCTTC  
ATAGTTTCCTCCAAGCAATTTCTGAACTTGGTGTAACGCTCAAACAATG

>M6-PGSC0003DMG400000295M6LRR-RLK\_4453

TAACTCTTTCATAGTTTCTCCAAGCAATTTCTGAACTTGGTGTAACGCTCAAACAATGCACCGTCCACAG  
CTATGACAGACCTCTGGTTCTCTCCGTCCTTCAAAGTGTCTTTTCCCAA

>M6-PGSC0003DMG400000295M6LRR-RLK\_4514

CCGTCCACAGCTATGACAGACCTCTGGTTCTCTCCGTCCTTCAAAGTGTCTTTTCCCAATTTCTTGAGGAT  
GCCACGATTCTGCTGCAGAAAGACGAGCTCCATGAGAGGTGATAATG

>M6-PGSC0003DMG400000295M6LRR-RLK\_4575

TCTTGAGGATGCCACGATTCTGCTGCAGAAAGACGAGCTCCATGAGAGGTGATAATGTCGCATAGCT  
CCACAACATTTTCTCATTTCCTCAAGGTAGAATTAGGTACCTGTGAAAAAA

>M6-PGSC0003DMG400000295M6LRR-RLK\_4636

GCATAGCTCCACAACATTTTCTCATTTCCTCAAGGTAGAATTAGGTACCTGTGAAAAAAATGTATATATA

GCAAATAGGATGAGAAAGACGTTCTCCACTTAATTAAGCCCAGCCAACAT

>M6-PGSC0003DMG400000295M6LRR-RLK\_4697

GTATATATAGCAAATAGGATGAGAAAGACGTTCTCCACTTAATTAAGCCCAGCCAACATTGTGATGTTCA

GACAGGAGCTAGGAATTTGAGTTTATGGGTTCCGGATAAATTATTTACAC

>M6-PGSC0003DMG400000295M6LRR-RLK\_4758

TGATGTTGACAGGAGCTAGGAATTTGAGTTTATGGGTTCCGGATAAATTATTTACACATATTAAGTGG

GTTTTTTAGTACAAATACAAAGCTACTGGTTTTTTGTCCTATCATATATA

>M6-PGSC0003DMG400000295M6LRR-RLK\_4819

ATTAAGTGGGTTTTTTAGTACAAATACAAAGCTACTGGTTTTTTGTCCTATCATATATAGGACAAAAAAG

ATGAGAACTTCAAAGACTAGTAATGTTTCACTTTAAGTCAAATGTTTGAT

>M6-PGSC0003DMG400000295M6LRR-RLK\_488

TTCAATGGTGATATCCCTAAAGGAATTGGTGGATTGAGTCATCTCAAAGTACTTGATCTGATGGTGAATT

TGTTTTATGGATCTTTTCCTGAAGAGATTGGTGAATTGTTGAATCTTGAA

>M6-PGSC0003DMG400000295M6LRR-RLK\_4880

ACAAAAAAGATGAGAACTTCAAAGACTAGTAATGTTTCACTTTAAGTCAAATGTTTGATCTTAATACCTCT

AAGATATCCTTCAGTTTATTGCCAACCCCTTGAGATCAGCCGACTCGT

>M6-PGSC0003DMG400000295M6LRR-RLK\_4941

TAATACCTCTAAGATATCCTTCAGTTTATTGCCAACCCCTTGAGATCAGCCGACTCGTCGTGATGCATAG

CAGCCATATCCGGAGTCCTGCATGTGTGGCAGTAAATAACCTTTTTTCAC

>M6-PGSC0003DMG400000295M6LRR-RLK\_5002

TGATGCATAGCAGCCATATCCGGAGTCCTGCATGTGTGGCAGTAAATAACCTTTTTCACAAATATTTGACA

ATTCAAAGCTTACATATGCTTAATAAACGTACACGAATCTAGTCCAACGA

>M6-PGSC0003DMG400000295M6LRR-RLK\_5063

TATTTGACAATTCAAAGCTTACATATGCTTAATAAACGTACACGAATCTAGTCCAACGAGAAGCATAACT

TACAGTGTAAGAGATTAGTGCAATTACATAAACCTTAAGTTGCACTAATT

>M6-PGSC0003DMG400000295M6LRR-RLK\_5124

AGCATAACTTACAGTGTAAGAGATTAGTGCAATTACATAAACCTTAAGTTGCACTAATTGCATGGAGAA

GAATAAGGTTAAAATTGATGAATGCAAATAGGGCCTGCCAAAAAATAAATT

>M6-PGSC0003DMG400000295M6LRR-RLK\_5185

ATGGAGAAGAATAAGGTAAAATTGATGAATGCAAATAGGGCCTGCCAAAAATAAATTACTGCCGTAA  
TAAATGTGTTGGTCAAAGCAATACCCTACCTCAATATGAAAGGAATTTTCA

>M6-PGSC0003DMG400000295M6LRR-RLK\_5246

TGCCGTAATAAATGTGTTGGTCAAAGCAATACCCTACCTCAATATGAAAGGAATTTTCAGTTTGGATGGG  
ACATAATCACCGAATAATGAAGCTTCTTTAGCCATTCTACACAATACTCT

>M6-PGSC0003DMG400000295M6LRR-RLK\_5307

TTGGATGGGACATAATCACCGAATAATGAAGCTTCTTTAGCCATTCTACACAATACTCTACGCAAAATTTT  
TCCAAGATACATCCCGGAGATCATCTTTTCATAAATCTGTGCAGTTTCC

>M6-PGSC0003DMG400000295M6LRR-RLK\_5368

GCAAAATTTCTCCAAGATACATCCCGGAGATCATCTTTTCATAAATCTGTGCAGTTTCCGAAAGTTCAACA  
ACAGATGTAAGATAGAAAATGTAGAAAGGAAGGGGATTGTCTTAGTTAC

>M6-PGSC0003DMG400000295M6LRR-RLK\_5429

AAGTTCAACAACAGATGTAAGATAGAAAATGTAGAAAGGAAGGGGATTGTCTTAGTTACCTGCTCCCCG  
GGGTTTAAACTCTCAACATCAAGATTTTGGTCATATTCTGTTACTGGAAGA

>M6-PGSC0003DMG400000295M6LRR-RLK\_549

TGGTGAATTTGTTTTATGGATCTTTTCTGAAGAGATTGGTGAATTGTTGAATCTTGAAGTACTTATGTTG  
AGCTTGAATGGTTTTGCTCCACATGCTATACCATCACTATTCACCTAAGT

>M6-PGSC0003DMG400000295M6LRR-RLK\_5490

GCTCCCCGGGGTTTAAACTCTCAACATCAAGATTTTGGTCATATTCTGTTACTGGAAGATGTGATGAGCG  
GAAATTACCCCATTCATGTTGATAACCTTTAAAGGCCAGTCAAATTAC

>M6-PGSC0003DMG400000295M6LRR-RLK\_5551

TGATGAGCGGAAATTACCCCATTCATGTTGATAACCTTTAAAGGCCAGTCAAATTACGTTTAAAGTAA  
CAAACGTGTATGAATCTACCAAGGAAAATATTTTTAGGAAATGAATTAGG

>M6-PGSC0003DMG400000295M6LRR-RLK\_5612

TTAAGTAAACAAACGTGTATGAATCTACCAAGGAAAATATTTTTAGGAAATGAATTAGGCACATATCAA  
GTCATGAAGGTGTTATGAAATGTCATAAGCATCTACCATCTCTCCGGATTT

>M6-PGSC0003DMG400000295M6LRR-RLK\_5673

CATATCAAGTCATGAAGGTGTTATGAAATGTCATAAGCATCTACCATCTCTCCGGATTTCCGCAACAGAC  
CATGCCATTTGGGAATCACATGAGCCCGTTCAACATATGCTGCATTGGTT



>M6-PGSC0003DMG400000295M6LRR-RLK\_5734

GCAACAGACCATGCCATTTGGGAATCACATGAGCCCGTTCAACATATGCTGCATTGGTTCCAGTACCCAA  
AATTACTGCAGCAATGACATCAGGATTATTGTACCGACCTCCTGCTAACG

>M6-PGSC0003DMG400000295M6LRR-RLK\_5795

AGTACCCAAAATTACTGCAGCAATGACATCAGGATTATTGTACCGACCTCCTGCTAACGTTCCAACAGTA  
TCATTGACCTAAACAACCAAGTCAACTAAGAAATTCAGGCTCAGGAATTG

>M6-PGSC0003DMG400000295M6LRR-RLK\_5856

CCAACAGTATCATTGACCTAAACAACCAAGTCAACTAAGAAATTCAGGCTCAGGAATTGCTTAAGATTAA  
AAATCAGAAATATCACACATACAAAAACCTAATACATGAAAATCATCAGC

>M6-PGSC0003DMG400000295M6LRR-RLK\_5917

TAAGATTA AAAATCAGAAATATCACACATACAAAAACCTAATACATGAAAATCATCAGCTTACTTATATTT  
TATCGAATTTGATTGGGAAAAAACTTACTAAAGCAGCCACACGCACAT

>M6-PGSC0003DMG400000295M6LRR-RLK\_5978

ACTTATATTTTATCGAATTTGATTGGGAAAAAACTTACTAAAGCAGCCACACGCACATCAAGGCCGGCC  
CTTCCATTGCTTTTGCTAATTCTCCAACCACATCTTGGCCAACCTATGT

>M6-PGSC0003DMG400000295M6LRR-RLK\_6039

AGGCCGGCCCTTCCATTGCTTTTGCTAATTCTCCAACCACATCTTGGCCAACCTATGTTAGATTCCATGA  
GGAGTAGTTCAGAATTGAAATACATTA AAACATTACAAAAGGAACTCTT

>M6-PGSC0003DMG400000295M6LRR-RLK\_61

TTCACTTTTTCATTTTTCTGTTTTTCATCATTTCTCATGGAAAATCCCAAGAATCTCCAAATCAAGAAAAGGC  
CATTTTACTCCA ACTAAAACAACACTGGTTTACTTCACCAAATGTCAC

>M6-PGSC0003DMG400000295M6LRR-RLK\_610

ACTTATGTTGAGCTTGAATGGTTTTGCTCCACATGCTATACCATCACTATTCACTAAGTTGAAAAATTTGA  
AAATTTTTTTGGATGACAGAAGCACATTTGATTGGAAATATCCCGGAAAA

>M6-PGSC0003DMG400000295M6LRR-RLK\_6100

GATTCCATGAGGAGTAGTTCAGAATTGAAATACATTA AAACATTACAAAAGGAACTCTTATAACGTACT  
TTAAATCAAATTGGTGAAAATGCAATGAAACAATGATCAACTTTGCTTGT

>M6-PGSC0003DMG400000295M6LRR-RLK\_6161

TAACGTACTTTAAATCAAATTGGTGAAAATGCAATGAAACAATGATCAACTTTGCTTGTATATAGTTGTA

TGCATTAAATCCTCATCAATGCCAACCTATTTTAGGCCATGAGGAGTAGT

>M6-PGSC0003DMG400000295M6LRR-RLK\_6222

ATAGTTGTATGCATTAAATCCTCATCAATGCCAACCTATTTTAGGCCATGAGGAGTAGTTCATCATTGAA

ATACAACATAACGTTGGAAAAGGAAATCCTACAACGTATTTTAAATCAAC

>M6-PGSC0003DMG400000295M6LRR-RLK\_6283

ATCATTGAAATACAACATAACGTTGGAAAAGGAAATCCTACAACGTATTTTAAATCAACTCAGTGAAAAA

GCAATGAAATATACGTTGTCGGACTCTCCAATAATATTGCCGCACCTTTG

>M6-PGSC0003DMG400000295M6LRR-RLK\_6405

AGATCCTTCAAATGTACTGCTTTTGAAGGATCCTACAAGCACCTGGCGAGTGGCGAAATTTTTGAAGA

GTCTGAGCAACATAGATGAAATAATCATCAACTTTGCATGCATAAAGTTGT

>M6-PGSC0003DMG400000295M6LRR-RLK\_6466

TTTGAAGAGTCTGAGCAACATAGATGAAATAATCATCAACTTTGCATGCATAAAGTTGTATGCATTAAAT

CATCATCAATGCAAACCATACATTGAAATGAATGGACTAAATCTAAGGT

>M6-PGSC0003DMG400000295M6LRR-RLK\_6527

GCATTAAATCATCATCAATGCAAACCATACATTGAAATGAATGGACTAAATCTAAGGTTGATTGTAGGC

ATGATCAATCGGAAGTGAAAATCAGAACTCTGTATGACTAACCACGTCT

>M6-PGSC0003DMG400000295M6LRR-RLK\_6588

ATTGTAGGCATGATCAATCGGAAGTGAAAATCAGAACTCTGTATGACTAACCACGTCTTCTATGGAGA

AGCCCTTTGTCCATTTAATAAGAGTTCCTGATGCAATTGACAATTGTTTCA

>M6-PGSC0003DMG400000295M6LRR-RLK\_6649

TATGGAGAAGCCCTTTGTCCATTTAATAAGAGTTCCTGATGCAATTGACAATTGTTTCACAGGGAAAGAG

AAGGTAAAGCCTAACTCCCTTTGTCTACCAGGTGGAAGATGAAAATCATC

>M6-PGSC0003DMG400000295M6LRR-RLK\_671

AAAAATTTGAAAATTTTTGGATGACAGAAGCACATTTGATTGGAAATATCCCGGAAAATATTGGTAATA

TGACAAGTCTTGAATTTTTGGATTTGTCGAATAATGGATTGAGTGGTAGT

>M6-PGSC0003DMG400000295M6LRR-RLK\_6710

GGGAAAGAGAAGGTAAAGCCTAACTCCCTTTGTCTACCAGGTGGAAGATGAAAATCATCACCTTCTGTA

GCTACAAATTCTGCAAGTGTGTGGCAATAAAATCAAATAACACCTGCAAT

>M6-PGSC0003DMG400000295M6LRR-RLK\_6771

CTTCTGTAGCTACAAATTCTGCAAGTGCTGTGGCAATAAAATCAAATAACACCTGCAATTAACAGTTTGA  
AGTTTAATAATGTGAGTACAACCTTGATTGGATTAATAAAAGTTGCAGGAT

>M6-PGSC0003DMG400000295M6LRR-RLK\_6832

ACAGTTTGAAGTTTAATAATGTGAGTACAACCTTGATTGGATTAATAAAAGTTGCAGGATGCATGGCTGA  
TACAGCATAAGACTTACTTCAGATGACGATCCAGCCATCACATTCTGTGGA

>M6-PGSC0003DMG400000295M6LRR-RLK\_6893

ATGGCTGATACAGCATAAGACTTACTTCAGATGACGATCCAGCCATCACATTCTGTGGAATTGAACTTC  
TTAACTTCATGTTAACTATAACGCTTTTCTTCCCACCCAAGTGCACAC

>M6-PGSC0003DMG400000295M6LRR-RLK\_6954

TGAAACTTCTTAACTTCATGTTAACTATAACGCTTTTCTTCCCACCCAAGTGCACACGCATCACACGAAA  
GTTTGTGCCGCCTAGATCCAATGCATAAAACAGACCTTCTTCGTCCCT

>M6-PGSC0003DMG400000295M6LRR-RLK\_7015

ATCACACGAAAGTTTGTGCCGCCTAGATCCAATGCATAAAACAGACCTTCTTCGTCCCTAAGATGAAGGA  
ATAAAAGTAATACCAGTCATTAACTGAAGATACAATCATAACATGGAAAA

>M6-PGSC0003DMG400000295M6LRR-RLK\_7076

GATGAAGGAATAAAAGTAATACCAGTCATTAACTGAAGATACAATCATAACATGGAAAACATACCCAC  
CCCTAATGCACTACAGAGGTCTATTGGCAGCAGCTTTTGAAAATTTGTGCGA

>M6-PGSC0003DMG400000295M6LRR-RLK\_7137

TACCCACCCCTAATGCACTACAGAGGTCTATTGGCAGCAGCTTTTGAAAATTTGTGCGATACATGTGAAT  
TTTTATACCCAATTTTAGTAAGTTTATCACAAGAACATGGAATTGTTACC

>M6-PGSC0003DMG400000295M6LRR-RLK\_7198

CATGTGAATTTTTATACCCAATTTTAGTAAGTTTATCACAAGAACATGGAATTGTTACCAAGTCCCTACCT  
CCGCCTACTACTATAGGTATGCCATTTTTAACTTTAGAGAATGTCAAA

>M6-PGSC0003DMG400000295M6LRR-RLK\_7259

GTCCCTACCTCCGCCTACTACTATAGGTATGCCATTTTTAACTTTAGAGAATGTCAAAGTATTTCATATG  
TCATATATTCTTTCTTATGGATCTAACTTCATTATGTTGATCACAGAG

>M6-PGSC0003DMG400000295M6LRR-RLK\_732

TTGGTAATATGACAAGTCTTGAATTTTTGGATTTGTGCAATAATGGATTGAGTGGTAGTATCCCTGATGG  
TTTGTTCATCTCAAGAATTTGAGTATTGTGTATTTATTTACTAACAAT

>M6-PGSC0003DMG400000295M6LRR-RLK\_7320

GATTCATATGTCATATATTCTTTTCTTATGGATCTAACTTCATTATGTTGATCACAGAGATGTCTGTGTAG  
ACAGCACAGTAACAAATAATGAGCAGACAGAAGAAGATGGAAGTAAAA

>M6-PGSC0003DMG400000295M6LRR-RLK\_7381

GTCTGTGTAGACAGCACAGTAACAAATAATGAGCAGACAGAAGAAGATGGAAGTAAAAATTTACACG  
CATGATAATTGTTAAAGAATGGAAGTGGCAATGTAAAATTCAAAAAAGGTGG

>M6-PGSC0003DMG400000295M6LRR-RLK\_7442

TTACACGCATGATAATTGTTAAAGAATGGAAGTGGCAATGTAAAATTCAAAAAAGGTGGTCAAGATACA  
AAACAGTAGAAGAGAATATAGAATAAACATCAAAGTCCAGGATCCATAGATA

>M6-PGSC0003DMG400000295M6LRR-RLK\_7503

AAGATACAAAACAGTAGAAGAGAATATAGAATAAACATCAAAGTCCAGGATCCATAGATAATGAGTGAC  
CTGATCACTTGTGAGTTAGAACTTCTTAGTGGACTCCAAGTTCAACAAATA

>M6-PGSC0003DMG400000295M6LRR-RLK\_7564

GAGTGACCTGATCACTTGTGAGTTAGAACTTCTTAGTGGACTCCAAGTTCAACAAATACTTCAAATAAT  
AGAGTTTCATTTCTGCTCTTTGTGATTTATAACGATGCTCAAGGTAATCA

>M6-PGSC0003DMG400000295M6LRR-RLK\_7625

TCAAATAATAGAGTTTCATTTCTGCTCTTTGTGATTTATAACGATGCTCAAGGTAATCACCTTAAGAACAT  
CAAAAGAATCATACTTTAGGACTAAATAATAATTTGAAAAGTACTTAAT

>M6-PGSC0003DMG400000295M6LRR-RLK\_7686

TTAAGAACATCAAAAGAATCATACTTTAGGACTAAATAATAATTTGAAAAGTACTTAATCAATTATCCAA  
ACATTACGAAAAGTAAAATCAATCTCCATGATCACAGCTTTATTCAAAAAA

>M6-PGSC0003DMG400000295M6LRR-RLK\_7747

ATTATCCAAACATTACGAAAAGTAAAATCAATCTCCATGATCACAGCTTTATTCAAAAAAGAGAAATTCTT  
GACACCCAAATTAGCAAAAATCAGTTTGTGCACATATACACACACAAATA

>M6-PGSC0003DMG400000295M6LRR-RLK\_7808

GAAATTCTTGACACCCAAATTAGCAAAAATCAGTTTGTGCACATATACACACACAAATACTCATCCAATG  
TGGAGGCTATCACTTAGCTAATAAGCATCTTTAGTTTGCCAATGAATCG

>M6-PGSC0003DMG400000295M6LRR-RLK\_7869

CATCCAATGTGGAGGCTATCACTTAGCTAATAAGCATCTTTAGTTTGCCAATGAATCGTTAGTAAAACA

CACAATCTGATATAACTCTCCACCCCATAAGCTAAAATCAAGAGACAACA

>M6-PGSC0003DMG400000295M6LRR-RLK\_793

CCCTGATGGTTTGTTCATCTCAAGAATTTGAGTATTGTGTATTTATTTACTAACAAATTGTCAGGGGAAA  
TACCACAGTCAGTTTCTTCAATGAATTTAGATGTTGTTGATTTGTGTAA

>M6-PGSC0003DMG400000295M6LRR-RLK\_7930

AGTAAAACACACAATCTGATATAACTCTCCACCCCATAAGCTAAAATCAAGAGACAACACTACCAAGATC  
ACAGCTTTATTGAAAAAAGAGACAAATTTCTTGACACCCAAATGAGCAAAA

>M6-PGSC0003DMG400000295M6LRR-RLK\_7991

ACCAAGATCACAGCTTTATTGAAAAAAGAGACAAATTTCTTGACACCCAAATGAGCAAAAATCAGTTTATA  
CACACAAAATACTCTCCCAGTCGGATGGTTATCAACTTAGGTAATAACC

>M6-PGSC0003DMG400000295M6LRR-RLK\_8052

CAGTTTATACACACAAAAATACTCTCCCAGTCGGATGGTTATCAACTTAGGTAATAACCATCTTGAGTAT  
GTCGATGAATCAATTGTAAAAACACAAAAAGAAGTACATAACTCCAAC

>M6-PGSC0003DMG400000295M6LRR-RLK\_8113

CTTGAGTATGTCGATGAATCAATTGTAAAAACACAAAAAGAAGTACATAACTCCAACCCAGAAGCTA  
AAATAAAGAGACAACACCTCCAACCGAGTTGGAGCTAGAATTTGATGTTTA

>M6-PGSC0003DMG400000295M6LRR-RLK\_8174

AGAAGCTAAAATAAAGAGACAACACCTCCAACCGAGTTGGAGCTAGAATTTGATGTTTATTGTTCTGA  
ACTTGTCGAGAAAAAACTATTAGTTTCATCCGAACCTGTATCTAATATGTA

>M6-PGSC0003DMG400000295M6LRR-RLK\_8235

GGTTCTGAACTTGTGAGAAAAAACTATTAGTTTCATCCGAACCTGTATCTAATATGTAGCTCCACCCCT  
GCCTCCAAAATCACAACCTTTACTGAAAAAGAGACAAATTTCTTGAACACCC

>M6-PGSC0003DMG400000295M6LRR-RLK\_8296

TCCACCCCTGCCTCCAAAATCACAACCTTTACTGAAAAAGAGACAAATTTCTTGAACACCCAAATAAGCAAA  
AGACAGTTTATGCACATTCTTTTTTTGAGAAGGAGTTTATGCACATTCTT

>M6-PGSC0003DMG400000295M6LRR-RLK\_8357

ATAAGCAAAAGACAGTTTATGCACATTCTTTTTTTGAGAAGGAGTTTATGCACATTCTTAAACACCCAAAT  
TAGCAAAAAACAGTTTATCCACATTCATAAACACCCAAATAAGCATAAA

>M6-PGSC0003DMG400000295M6LRR-RLK\_8418

ACACCCAAATTAGCAAAAAACAGTTTATCCACATTCATAAACACCCAAATAAGCATAAAAAACAGTTTATC  
CACATTCTCAAACACCCATATAAGCCCAAAAAAACAGTTTATGCACATT

>M6-PGSC0003DMG400000295M6LRR-RLK\_8479

CAGTTTATCCACATTCTCAAACACCCATATAAGCCCAAAAAAACAGTTTATGCACATTCTTGAACACCCA  
AATAAGCCAAAAACAGTTTATCCACACTCTTAAACACCCAAATAAGTAA

>M6-PGSC0003DMG400000295M6LRR-RLK\_854

TCAGGGGAAATACCACAGTCAGTTTCTTCAATGAATTTAGATGTTGTTGATTTGTGTAACAACAGTTTGA  
CAGGAAAAATACCAGAAGATTTTCGAAAAATTGACTAAAATGACTGGATTG

>M6-PGSC0003DMG400000295M6LRR-RLK\_915

ACAGTTTGACAGGAAAAATACCAGAAGATTTTCGAAAAATTGACTAAAATGACTGGATTGTCTTTGTTTT  
CAATCAATTATCAGGTGAAATACCATTGAGTATAGGCAAGTTATCATCAT

>M6-PGSC0003DMG400000295M6LRR-RLK\_976

TTTGTTTTTCAATCAATTATCAGGTGAAATACCATTGAGTATAGGCAAGTTATCATCATTGTTATTTGTTA  
AGTTGTTTGGGAACAAGTTATCAGGTGAAATTCCACCTGATTTTGGTCG

>M6-PGSC0003DMG400000386M6LRR-RLP\_0

ATGGTGTTTGAGAATGATAGAATCAAGAATGCTTATATTGCTTTACAAGCATGGAAACAAGCTATCATT  
CAGATCCCTTTAATATCACTCTCAATTGGGTTGGTCCTAATGTATGCAGC

>M6-PGSC0003DMG400000386M6LRR-RLP\_1008

CCACCTCCTCCGCCACTTTACCCCCCTTGCTGCCCTCCGCCACTATTTATTCGCCTCCGCCACCAGTT  
TATACTCCTCCACCTCCAGTTTATTCACCACCGCCACCACCACCTCT

>M6-PGSC0003DMG400000386M6LRR-RLP\_1260

CCCCACCATCTCCACCTCCACCATCACCCCACCACCAGTTTATTCACCACCACCACCGCCACCATCTCCC  
CCTCCACCATCACCTCCACCTCCTCCCCACCCATTTATTCGCCACCA

>M6-PGSC0003DMG400000386M6LRR-RLP\_1449

CCACCTCCTAATTCTCCACCTCCACCGCTTGCTCACTCGCCTCCACCCCCTTCACCTTACTATTACAATTCAC  
CACCACCTCCGCCCCAAATTCGCCGCCTCCAGCACCAAATTCGCCT

>M6-PGSC0003DMG400000386M6LRR-RLP\_1512

TACAATTCACCACCACCTCCGCCCCAAATTCGCCGCCTCCAGCACCAAATTCGCCTCCTCCTCCACCAGT  
ATACATATACTCATCACCTCCGCCACCAAATTCACCTCCTCCTCCACCA

>M6-PGSC0003DMG400000386M6LRR-RLP\_1575

CCACCAGTATACATATACTCATCACCTCCGCCACCAAATTCACCTCCTCCTCCACCACCAACATACGTATAT  
TCTTCACCTCCTCCACCTCCTTCCCCATTGCCTTGTATAGAACCCCT

>M6-PGSC0003DMG400000386M6LRR-RLP\_189

AACCATGGTGACATTGCAGGGTACCTCCCGGAAGAGCTTGGGCTTCTTACAGATCTTGGGATTTCCATA  
TCAATTCAAACCGTTTCTGTGGTACAATACCAAGAAAATTCAGCAAGTTG

>M6-PGSC0003DMG400000386M6LRR-RLP\_252

TTCCATATCAATTCAAACCGTTTCTGTGGTACAATACCAAGAAAATTCAGCAAGTTGAAGATACTGTTCCG  
AGCTGGATCTGAGCAATAACAGGTTTCTGGGAAGTTTCCTTATGTTGTT

>M6-PGSC0003DMG400000386M6LRR-RLP\_315

CTGTTGAGCTGGATCTGAGCAATAACAGGTTTCTGGGAAGTTTCCTTATGTTGTTTTGAGTTTACCCA  
AGTTGATATTTTTGGATATTAGGTTCAATGAATTTGAAGGTAATGTACCT

>M6-PGSC0003DMG400000386M6LRR-RLP\_378

TTACCCAAGTTGATATTTTTGGATATTAGGTTCAATGAATTTGAAGGTAATGTACCTCACAGCTTTTTGA  
TAAGCCATTAGACGCCATTTTTATTAATCATAATCGGTTTGCCTTTGAG

>M6-PGSC0003DMG400000386M6LRR-RLP\_441

CTTTTTGATAAGCCATTAGACGCCATTTTTATTAATCATAATCGGTTTGCCTTTGAGTTGCCGGATAATTT  
TGGGAATTCGCCGTTTCTGTGATAGTTCTGGCGAGTAACAGTTTCCAT

>M6-PGSC0003DMG400000386M6LRR-RLP\_504

GATAATTTTGGGAATTCGCCGTTTCTGTGATAGTTCTGGCGAGTAACAGTTTCCATGGGTGTCTTCCGG  
CGAGTATTGGAAATATGAGTAATCTTAATGAGGCGATTTAATGAACAAT

>M6-PGSC0003DMG400000386M6LRR-RLP\_567

CTTCCGGCGAGTATTGGAAATATGAGTAATCTTAATGAGGCGATTTAATGAACAATGGGTTGCGTTCTT  
GTTTCCGGCGGAGATTGGGTTGTTGAAAATCTGACTGTATTTGATGTG

>M6-PGSC0003DMG400000386M6LRR-RLP\_63

ATCATTTAGATCCCTTTAATATCACTCTCAATTGGGTTGGTCTAATGTATGCAGCTACACCGGAATCTT  
CTGTGCTCCGGCGTTGGATAACCCCAAAATCCGTACAGTTGCCGGCATT

>M6-PGSC0003DMG400000386M6LRR-RLP\_693

AATCAGTTGATGGGTCCGTTGCCGGAGAATTTGGTGATTTGGTGAATTTGGAGCAATTGAATGTGGCA

CATAATATGCTTTCTGGAACAATTCCGAAAAGAATTTGTCAGCTTCCTAAG

>M6-PGSC0003DMG400000386M6LRR-RLP\_756

GTGGCACATAATATGCTTTCTGGAACAATTCCGAAAAGAATTTGTCAGCTTCCTAAGCTTGAGAATTTTA  
CGTATTCTTATAATTTCTTCACTGGTGAACCGCCGGTGTGTTTGGGGTTG

>M6-PGSC0003DMG400000386M6LRR-RLP\_882

TTTCATGATGAACGGAATTGTTTGCCCAACAGACCGGTGCAACGCTCTCAGGGACAGTGTAAGGCCTTTT  
TGTCTAAAAAAATTCATTGTAGTGCTTTCAGGTGTCATAAATTTGTTCT

>M6-PGSC0003DMG400000386M6LRR-RLP\_945

GCCTTTTTGTCTAAAAAAATTCATTGTAGTGCTTTCAGGTGTCATAAATTTGTTCTGTTTTGCCACCTCCT  
CCGCCACTTTCACCCCCCTTGCCTGCCCTCCGCCACCTATTTATTTCG

>M6-PGSC0003DMG400000578M6L-LecRK\_0

CAATCATTAAGCATTAAAATTTACATTCCATCTGAATTAATATATTTTGTACTGAACTGAAATAGGA  
CAAAAAATTGCATTATGTACGTGAGGACTTTAAGTTCTCTTGTGTTTGG

>M6-PGSC0003DMG400000578M6L-LecRK\_1008

TATATGTTTGTGGATTTTCAGCTGCTACTGGTAACCATACACAAATCCACAACATTCTGTCATGGAATTT  
CACCTCAATTAGTCAAGCTTCGCTTCGAATTCCTTCAACAGAGACGTGC

>M6-PGSC0003DMG400000578M6L-LecRK\_1071

TGGAATTTACCTCAATTAGTCAAGCTTCGCTTCGAATTCCTTCAACAGAGACGTGCCAGAACAAAATCA  
TGCTTCAAATAGCACACAATCTGAAATTGATCATCGGAAAACCTCCTAAT

>M6-PGSC0003DMG400000578M6L-LecRK\_1134

AAAATCATGCTTCAAATAGCACACAATCTGAAATTGATCATCGGAAAACCTCCTAATAGTTTCTTTATTTT  
CCTTGCTGTTGTCATTCTTCTGGTTATCGTTCTTATTAACCTCTATTTT

>M6-PGSC0003DMG400000578M6L-LecRK\_1197

TTTATTTTCTTGCTGTTGTCATTCTTCTGGTTATCGTTCTTATTAACCTCTATTTTCTAGTAGCTACAAGAGA  
GATGACAATTCCGACGAAGCATTCACTCTGCCCCAGAAAAAGCAGAGA

>M6-PGSC0003DMG400000578M6L-LecRK\_126

GTGAAATGAAGTTATCTATAGACCACATCCTTATGTACAACCTTGACAATTGATAATTTGCTACTCAAAAA  
ATTCAAATCCCAAAAAACTTTATCACTAGCCAAGAATTAGCTCATCATG

>M6-PGSC0003DMG400000578M6L-LecRK\_1260



TACAAGAGAGATGACAATTCGACGAAGCATTCACTCTGCCCCAGAAAAGCAGAGACCGCGGCCACC  
AAACAAGGCACGTCGCTTCACAATAGCTGAGATCTCCATCGCAACAAGGAAT

>M6-PGSC0003DMG400000578M6L-LecRK\_1323

CCACCAAACAAGGCACGTCGCTTCACAATAGCTGAGATCTCCATCGCAACAAGGAATTCAGCGAGTTA  
CAAATATTAGGCAGTGATGAGAAGAGCATTACGTATAAGGCCACGATCCTG

>M6-PGSC0003DMG400000578M6L-LecRK\_1386

GAGTTACAAATATTAGGCAGTGATGAGAAGAGCATTACGTATAAGGCCACGATCCTGAACGGGTGCAA  
CGTTGTTGTAAAACGATTTTTAACTCAATTTTTCAACACACACGGGTTTGAA

>M6-PGSC0003DMG400000578M6L-LecRK\_1449

TGCAACGTTGTTGTAAAACGATTTTTAACTCAATTTTTCAACACACACGGGTTTGAAAAGCATCAATTTCA  
CAAGGAAATCAAGGCTATCACCAGAATTCGTCACCCGAATTTGGTCCCA

>M6-PGSC0003DMG400000578M6L-LecRK\_1512

CAATTTACAAGGAAATCAAGGCTATCACCAGAATTCGTCACCCGAATTTGGTCCCAATTAGAGGATGGT  
GCTATGACAACCAAGAAACAATAGTTGTGTACGATTTTCATCCCAATGGA

>M6-PGSC0003DMG400000578M6L-LecRK\_1575

GGATGGTGCTATGACAACCAAGAAACAATAGTTGTGTACGATTTTCATCCCAATGGAAGCCTCGATAAA  
TGGCTGTTGCGCGTTGGCGTCTTGCCTTGGACGAGACGTTTTAAGGTCGTT

>M6-PGSC0003DMG400000578M6L-LecRK\_1638

GATAAATGGCTGTTGCGCGTTGGCGTCTTGCCTTGGACGAGACGTTTTAAGGTCGTTAAAGATTTAGCA  
GATTCTCTTGTCTACCTTCATTCAAAGCAACTCGCTCACAAAAACGTTAAA

>M6-PGSC0003DMG400000578M6L-LecRK\_1701

TTAGCAGATTCTTGTCTACCTTCATTCAAAGCAACTCGCTCACAAAAACGTTAAAAGTAGCAGCGTGTT  
TCTTGACGTGAGATTCAGAGCAGTAGTGGGTGATTTGCGGTTTGTGCTT

>M6-PGSC0003DMG400000578M6L-LecRK\_1764

AGCGTGTTTCTTGACGTGAGATTCAGAGCAGTAGTGGGTGATTTGCGGTTTGTGCTTACTTCAGCCGGG  
TCAACCCGGTTTGAGGCCATGGTGAGTCAGACAGCTGATGTGTTTCAATTC

>M6-PGSC0003DMG400000578M6L-LecRK\_1827

GCCGGGTCAACCCGGTTTGAGGCCATGGTGAGTCAGACAGCTGATGTGTTTCAATTCGGAGTAGTCGT  
GCTAGAGATCATTGCGGGTCGGAGCAGAAAGTCCAACCCGGGAGAGCGAGAC

>M6-PGSC0003DMG400000578M6L-LecRK\_189

CTCAAAAAATTCAAATCCCAAAAAACTTTATCACTAGCCAAGAATTAGCTCATCATGGATTACTTCTTCTG  
GTTTTTCTTCTCGTTTGCCATACTAGTTAATAGTAATTTAGGTTTCGTCC

>M6-PGSC0003DMG400000578M6L-LecRK\_1890

GTCGTGCTAGAGATCATTGCGGGTCGGAGCAGAAAGTCCAACCCGGGAGAGCGAGACTTGTTGGATCT  
TGCATGGGCAATGCATGAGGTACAACAGAAGGAAACTCTAGTGGATCGAAGA

>M6-PGSC0003DMG400000578M6L-LecRK\_1953

GATCTTGCATGGGCAATGCATGAGGTACAACAGAAGGAAACTCTAGTGGATCGAAGAATGGGCGCAGT  
CGTGAACCTGGAGCAGGCGATTTCGGGCTTTGGATATCGGGTTGCTCTGCACG

>M6-PGSC0003DMG400000578M6L-LecRK\_2016

GCAGTCGTGAACCTGGAGCAGGCGATTTCGGGCTTTGGATATCGGGTTGCTCTGCACGTTGAACGAGAA  
CAAAGGAAGGCCTACTATGGAAGAAGTGGTGGAGTTCCTGAATATGGAGAAA

>M6-PGSC0003DMG400000578M6L-LecRK\_2079

GAGAACAAAGGAAGGCCTACTATGGAAGAAGTGGTGGAGTTCCTGAATATGGAGAAACCGATACCGG  
AGTTGCCATCGGGTCGACCCGTTTGTGTTCCCGTACAGCAGCACCACAGGC

>M6-PGSC0003DMG400000578M6L-LecRK\_2142

CCGGAGTTGCCATCGGGTCGACCCGTTTGTGTTCCCGTACAGCAGCACCACAGGCTTATGCAGTGGG  
TACGCTTGTACAGCATTCAAATGAAGTCATGTTTTTTGCTTGACCAATTGG

>M6-PGSC0003DMG400000578M6L-LecRK\_2205

AGTGGGTACGCTTGTACAGCATTCAAATGAAGTCATGTTTTTTGCTTGACCAATTGGTTCTTCGGCGTTCC  
ACGTAAGCAGCAATTATTCTTATCTGTTATACTACAAAATAATGACAGG

>M6-PGSC0003DMG400000578M6L-LecRK\_2268

GGCGTTCCACGTAAGCAGCAATTATTCTTATCTGTTATACTACAAAATAATGACAGGGAAGCACATGTAT  
ATGCTATGTGACGTTATTTTCATGACATAGACA ACTATTGTCTGATCTGT

>M6-PGSC0003DMG400000578M6L-LecRK\_2331

CATGTATATGCTATGTGACGTTATTTTCATGACATAGACA ACTATTGTCTGATCTGTGGTTCGGAGTTAAAT  
ATCACAAGAACTCCTAAAACGATTTGAAATTATTGTAAATTATGTACTG

>M6-PGSC0003DMG400000578M6L-LecRK\_252

TTCTTCTGGTTTTTCTTCTCGTTTGCCATACTAGTTAATAGTAATTTAGGTTTCGTCCGCGGACGGACCTCA

ATTAACGTGACGAAGCATATCTCTTTTCAAGATTTTCAGTTCTAGTAAT

>M6-PGSC0003DMG400000578M6L-LecRK\_315

GGACCTTCAATTAACGTGACGAAGCATATCTCTTTTCAAGATTTTCAGTTCTAGTAATCCCAGATTGAAGC  
AAGATCTTACACTTCTCGGTAGTGTTATCGTCTCGGATGAAAAAAAAATCC

>M6-PGSC0003DMG400000578M6L-LecRK\_378

TTGAAGCAAGATCTTACACTTCTCGGTAGTGTTATCGTCTCGGATGAAAAAAAAATCCGTTCAAATTCCTG  
ATCCTGAGCGAGAAGGTGATGATCTAAAGCATCTAGCAGGACGAGCTATT

>M6-PGSC0003DMG400000578M6L-LecRK\_441

ATTCCTGATCCTGAGCGAGAAGGTGATGATCTAAAGCATCTAGCAGGACGAGCTATTTATTCTTCACCTA  
TCCGTTTCTTTGATCCTCGGACTCAAACACCGGCTTCTTTTGAAACGACT

>M6-PGSC0003DMG400000578M6L-LecRK\_504

TCACCTATCCGTTTCTTTGATCCTCGGACTCAAACACCGGCTTCTTTTGAAACGACTTTCTCGTTTCAATTT  
CAAGTGAAGTCCAATTCAAGCAATGAGACGTCAGATCAGGGGAAATCT

>M6-PGSC0003DMG400000578M6L-LecRK\_567

TTTCAATTTCAAGTGAAGTCCAATTCAAGCAATGAGACGTCAGATCAGGGGAAATCTGTTGGTGGTAGT  
GGCCTTACTTTTATAATCGTTCCGGATGAATTGACTGTTGGCCGTGCTGGT

>M6-PGSC0003DMG400000578M6L-LecRK\_63

AAATAGGACAAAAAATTGCATTATGTACGTGAGGACTTTAAGTTCTTTGTGTTTGGAAAGAAAGTGAAA  
TGAAGTTATCTATAGACCACATCCTTATGTACAACCTTGACAATTGATAAT

>M6-PGSC0003DMG400000578M6L-LecRK\_630

GGTAGTGGCCTTACTTTTATAATCGTTCCGGATGAATTGACTGTTGGCCGTGCTGGTCCGTGGCTTGGGA  
TGCTGAACGATTTGTGCGATGAGGATTATAAAACAGTAGCTATTGAGTTT

>M6-PGSC0003DMG400000578M6L-LecRK\_693

CTTGGGATGCTGAACGATTTGTGCGATGAGGATTATAAAACAGTAGCTATTGAGTTTGATACTCGGCAG  
AACCTGAATTTGGTGACCCGAATGATAATCACTTGGGCATTAATTTGGGT

>M6-PGSC0003DMG400000578M6L-LecRK\_756

CGGCAGAACCCTGAATTTGGTGACCCGAATGATAATCACTTGGGCATTAATTTGGGTAGCATAGTATCA  
ACTGCAGCGATTAATGCTTCCGGATGCCGGAGTTCAATTGAATGATGGATCA

>M6-PGSC0003DMG400000578M6L-LecRK\_819

GTATCAACTGCAGCGATTAATGCTTCGGATGCCGGAGTTCAATTGAATGATGGATCAATTCACAGAGTA  
TGGATATCTTATGATGGGCGAAAGCGATTTGTTGAAATTCGTCTTGCTCCT

>M6-PGSC0003DMG400000578M6L-LecRK\_882

AGAGTATGGATATCTTATGATGGGCGAAAGCGATTTGTTGAAATTCGTCTTGCTCCTGATGGCAGAGGA  
TATCCTTCTAAACCAGTTTACTCTGGTTTACTTGATCTTTCACCTTACTTG

>M6-PGSC0003DMG400000578M6L-LecRK\_945

AGAGGATATCCTTCTAAACCAGTTTACTCTGGTTTACTTGATCTTTCACCTTACTTGAATGAGTATATGTTT  
GTTGGATTTTCAGCTGCTACTGGTAACCATACACAAATCCACAACATT

>M6-PGSC0003DMG400000728-(rev)M6LRR-RLK\_0

ATCAGTGTATTTTCGTGTCTCTGAATTAGGTGGGACAAGATTCCCATAAAAGGCTCTCAAATTTTCAACCA  
AAAATTCAGTGCAGCACAAACTATGCACGTAAAGGTGCTTTGCAACT

>M6-PGSC0003DMG400000728-(rev)M6LRR-RLK\_1037

ATAGACTAAAGCTTGGTATTTAAGTGGAGAAAGGTAGAAAGGCTGGGCCATTATCCACCGACTTTTGGG  
CCGTGCACCGAAAGAGCTGGGAGGATTTCTCAGTTACAAACAAAAGATCCT

>M6-PGSC0003DMG400000728-(rev)M6LRR-RLK\_1098

CTTTTGGACCGTGCACCGAAAGAGCTGGGAGGATTTCTCAGTTACAAACAAAAGATCCTTTTCATGGGGC  
ATCTAATAGACTTTCTTGAACCGAATATCCATTCCAGAAGGAGTTTCCAAA

>M6-PGSC0003DMG400000728-(rev)M6LRR-RLK\_1159

CATGGGGCATCTAATAGACTTTCTTGAACCGAATATCCATTCCAGAAGGAGTTTCCAAAGGAGATGCTTC  
TCTAAATGTCCGCATAGTTTTTCTGCTGCAGTTCACCATGAAATTCTCAA

>M6-PGSC0003DMG400000728-(rev)M6LRR-RLK\_122

ATGGATTGTGCCCATGTCTGGTTGACTAAAAATCATCTAAAGCCTATTTATAAATGATAATATTAGATGTC  
TGCTTCGCTCTTAGCTTCTCAGGATTTATAAAAGGAGGCAATGCATGGT

>M6-PGSC0003DMG400000728-(rev)M6LRR-RLK\_1220

AGATGCTTCTCTAAATGTCCGCATAGTTTTTCTGCTGCAGTTCACCATGAAATTCTCAATGATTTAATTGC  
ATGAATTAGTTTCTTGGATTCAACTCTTCCCTCAACAACCCACCCCCCA

>M6-PGSC0003DMG400000728-(rev)M6LRR-RLK\_1281

ATTTAATTGCATGAATTAGTTTCTTGGATTCAACTCTTCCCTCAACAACCCACCCCCACCCGCCAAAAA  
AAGAACTTTATTTCTGTCAGAAGTTTGCTAGTGCATCATGTAGTGACAT

>M6-PGSC0003DMG400000728-(rev)M6LRR-RLK\_1342

CGCCCAAAAAAAGAACTTTATTTCTGTCAGAAGTTGCTAGTGCATCATGTAGTGACATCTTCTTTTCCTA  
TGCTACTATTCTCACAGAGATGTTCAAGCAAGCAGCATACTTCTTGAT

>M6-PGSC0003DMG400000728-(rev)M6LRR-RLK\_1403

TCTTTTCTATGCCTACTATTCTCACAGAGATGTTCAAGCAAGCAGCATACTTCTTGATGATAAGTTTCGAA  
GTACGGCTAGGGAGTCTAAATGAAGCCTGTGCACAAGAAGGAGAGAGCC

>M6-PGSC0003DMG400000728-(rev)M6LRR-RLK\_1464

TAAGTTCGAAGTACGGCTAGGGAGTCTAAATGAAGCCTGTGCACAAGAAGGAGAGAGCCATCAAATC  
GAATTTCCAGGCTGCTTAGATTTCCACAGTAAGTACTTGTGGTAAATTCTG

>M6-PGSC0003DMG400000728-(rev)M6LRR-RLK\_1525

CAAATCGAATTTCCAGGCTGCTTAGATTTCCACAGTAAGTACTTGTGGTAAATTCTGTGTTCTAACCAT  
CCTTTTCTTTTCGAAGGCTAACCACTATTACTACTAGGTTGTTATGTAA

>M6-PGSC0003DMG400000728-(rev)M6LRR-RLK\_1586

TTCTAACCATCCTTTTCTTTTCGAAGGCTAACCACTATTACTACTAGGTTGTTATGTAATGTTCAATAATTT  
TGTTTCAATTTTTGTCTCCCATGATGGATCTTAAAATCAGGCAGTTTT

>M6-PGSC0003DMG400000728-(rev)M6LRR-RLK\_1647

TTCAATAATTTTGTTCATTTTTGTCTCCCATGATGGATCTTAAAATCAGGCAGTTTTATAGTTAATATGT  
CTGTATCTCCAATTTGATGTTATAGAACTACTTTGGCCTGGTTTCTA

>M6-PGSC0003DMG400000728-(rev)M6LRR-RLK\_1708

AGTTAATATGTCTGTATCTCCAATTTGATGTTATAGAACTACTTTGGCCTGGTTTCTAAATTGGATTTGA  
GTTCCACAGTTTTGCTGCCACTCAAGTCTTTCTGGTGTATATTTATTAG

>M6-PGSC0003DMG400000728-(rev)M6LRR-RLK\_1769

TTGGATTTGAGTTCCACAGTTTTGCTGCCACTCAAGTCTTTCTGGTGTATATTTATTAGCTCTGATATAAAT  
GAGAATCCTAACGTTTCATGCAGCAACCTTACTCTTAACCTTGTCATCT

>M6-PGSC0003DMG400000728-(rev)M6LRR-RLK\_183

ATTAGATGTCTGCTTCGCTCTTAGCTTCTCAGGATTTATAAAAGGAGGCAATGCATGGTTGATGGTTTTTC  
TGATTTGCTATCAGTTGGAGATCTGTAATGTTTATTGCCTCGTGAGACTA

>M6-PGSC0003DMG400000728-(rev)M6LRR-RLK\_1830

CTGATATAAATGAGAATCCTAACGTTTCATGCAGCAACCTTACTCTTAACCTTGTCATCTCGTTATCTGTGC

TTATACAAAAGGGCTTTAGCTTTGTTTCTAAATTAGAAAACTTGTAAT

>M6-PGSC0003DMG400000728-(rev)M6LRR-RLK\_1891

TTATCTGTGCTTATACAAAAGGGCTTTAGCTTTGTTTCTAAATTAGAAAACTTGTAATATAGGCTCTGAA  
TAGTTTAGTAGTCCTGATGATAGTTATCATGCAGTTGCATATAATCTTA

>M6-PGSC0003DMG400000728-(rev)M6LRR-RLK\_1952

AGGCTCTGAATAGTTTAGTAGTCCTGATGATAGTTATCATGCAGTTGCATATAATCTTATTTCTTCTCAGT  
ATTCAAGTTACAAGGAACACTGTAAAGAACAGTGGGTCTAGTCTGAAAG

>M6-PGSC0003DMG400000728-(rev)M6LRR-RLK\_2013

TCTTCTCAGTATTCAAGTTACAAGGAACACTGTAAAGAACAGTGGGTCTAGTCTGAAAGACCATCACCCA  
CTTGTTAATTACTTGTTTTATCCCTCAGTAAATTATTCCTTTTCTATGTT

>M6-PGSC0003DMG400000728-(rev)M6LRR-RLK\_2074

CATCACCCACTTGTTAATTACTTGTTTTATCCCTCAGTAAATTATTCCTTTTCTATGTTGTATGAATCTTTTT  
GCCTTGATTTACCTATGTCTAGCGGGTGTACATGGGTGTTGTTGTT

>M6-PGSC0003DMG400000728-(rev)M6LRR-RLK\_2135

ATGAATCTTTTTGCCTTGATTTACCTATGTCTAGCGGGTGTACATGGGTGTTGTTGTTTAAAGTAGAAATT  
AGCAAAAACTGTATGTACCCTTACTGGATACTTAAACTCATGTATGG

>M6-PGSC0003DMG400000728-(rev)M6LRR-RLK\_2196

AGTAGAAATTAGCAAAAACTGTATGTACCCTTACTGGATACTTAAACTCATGTATGGGATATGCATGC  
GTAGCCGAATCCATGAAACATAGTCCTTTGATGTACATGTTTTCACTTAA

>M6-PGSC0003DMG400000728-(rev)M6LRR-RLK\_2257

TATGCATGCGTAGCCGAATCCATGAAACATAGTCCTTTGATGTACATGTTTTCACTTAAGGAGAATTTGTT  
GGTTATGCTATTTGGTAGGGAATGCATAGTTCTCATTCTTTTAGCTTTC

>M6-PGSC0003DMG400000728-(rev)M6LRR-RLK\_2318

AGAATTTGTTGGTTATGCTATTTGGTAGGGAATGCATAGTTCTCATTCTTTTAGCTTTCATCCTGTGCTG  
AAGTAAGTTAACTATTTCTCACTCTCATTGTCTAGCTTTAACTATTAC

>M6-PGSC0003DMG400000728-(rev)M6LRR-RLK\_2379

TCCTGTGCTGAAGTAAGTTTAACTATTTCTCACTCTCATTGTCTAGCTTTAACTATTACCTATTCTCGTTAT  
GCCTACACATTGAATGCAGGAAATTATTAATTTTGTATTGTGGTACT

>M6-PGSC0003DMG400000728-(rev)M6LRR-RLK\_244

ATGGTTTTCTGATTTGCTATCAGTTGGAGATCTGTAATGTTTATTGCCTCGTGAGACTATCATTATACAGA  
GTTTCATCACATAAGGAATAGCCTCCACAATATCTTGGACCTGGAGCTTG

>M6-PGSC0003DMG400000728-(rev)M6LRR-RLK\_2440

ATTCTCGTTATGCCTACACATTGAATGCAGGAAATTATTAATTTTGTATTGTGGTACTAAATACTTCTGG  
AACGACCTAGATATAATGGCATGTGAAAAATTGGTTTGAAGTCCCATGT

>M6-PGSC0003DMG400000728-(rev)M6LRR-RLK\_2501

ATACTTCTGGAACGACCTAGATATAATGGCATGTGAAAAATTGGTTTGAAGTCCCATGTTAGATGCCAAA  
GATTTTAGGCCTTCTATTCTATTATTTAATCTTCATGGCTTCTGTAAA

>M6-PGSC0003DMG400000728-(rev)M6LRR-RLK\_2562

GATGCCAAAGATTTTAGGCCTTCTATTCTATTATTTAATCTTCATGGCTTCTGTAAAACCTTCCAGGTTT  
TCTTATTTTAGAAATTGAATTTACGACCACTGATCACAGTAATCCAGT

>M6-PGSC0003DMG400000728-(rev)M6LRR-RLK\_2623

TTTCCAGGTTCTTATTTTAGAAATTGAATTTACGACCACTGATCACAGTAATCCAGTAAGCTTTTGT  
ATAGTGAAAACCTTCCATATGTATTTCTGTCTTACAAATGGTTATC

>M6-PGSC0003DMG400000728-(rev)M6LRR-RLK\_2684

GCTTTTGTATATAGTGAAAACCTTCCATATGTATTTCTGTCTTACAAATGGTTATCACTGTTTTCCAG  
CTTTTCGTGCGAAGCTTGTTCATGATCTCAAAGTTTAGTTATATTCT

>M6-PGSC0003DMG400000728-(rev)M6LRR-RLK\_2745

TGTTTTCCAGCTTTTCGTGCGAAGCTTGTTCATGATCTCAAAGTTTAGTTATATTCTTTCAACCAGTAAC  
TGTTTAATAGTTTATACTGCTTATTGACATAGTTCTCCCTTCTTATT

>M6-PGSC0003DMG400000728-(rev)M6LRR-RLK\_2806

CAACCAGTAACTGTTAATAGTTTATACTGCTTATTGACATAGTTCTCCCTTCTTATTTGCAGGACGTCG  
GAACAAGGTGCATCAGGTATGTGCAATTTATTTAGTTCTACTTTCTTT

>M6-PGSC0003DMG400000728-(rev)M6LRR-RLK\_2867

CAGGACGTCGGAACAAGGTGCATCAGGTATGTGCAATTTATTTAGTTCTACTTTCTTTAAATAGAGTTT  
ACTTGATATTCTTAATATTTATTAATTTGGTGTAAGTAACTATTTAAAA

>M6-PGSC0003DMG400000728-(rev)M6LRR-RLK\_2928

ATAGAGTTTACTTGGATATTCTTAATATTTATTAATTTGGTGTAAGTAACTATTTAAATTTTGCATCAC  
ATTTCCAGTATTGTTTGTGGTGGGTAATAATTTCTTAATGTCTAGGC

>M6-PGSC0003DMG400000728-(rev)M6LRR-RLK\_2989

ATTTGCGTCACATTTCCAGTATTGTTTGGTGGGTAAAATTCCTTAATGTCTAGGCAACAAATCAAAA  
CTATAGATTCTCATTAGAAGTAAGAATAAGTGAGACTATTAGGTGGAAA

>M6-PGSC0003DMG400000728-(rev)M6LRR-RLK\_305

ATTATACAGAGTTCATCACATAAGGAATAGCCTCCACAATATCTTGGACCTGGAGCTTGACTCTATCAAC  
TTGAGGGCTTCACTTGCTATCTTTATGAGCTACACCTGCATGTAATAAAA

>M6-PGSC0003DMG400000728-(rev)M6LRR-RLK\_3050

CAAATCAAACCTATAGATTCTCATTAGAAGTAAGAATAAGTGAGACTATTAGGTGGAAATTTACGATATA  
AAGCTGATTCCAAAGAGTGTAAGGGCTGGACAACTGTATATTGAACTGT

>M6-PGSC0003DMG400000728-(rev)M6LRR-RLK\_3111

TACGATATAAAGCTGATTCCAAAGAGTGTAAGGGCTGGACAACTGTATATTGAACTGTACTGCCTAAA  
GAACTGGAGATTTTGATGGCGGTGTTTTGCTTTACTTTTTGTGGGATCTTT

>M6-PGSC0003DMG400000728-(rev)M6LRR-RLK\_3172

TGCCTAAAGAACTGGAGATTTTGATGGCGGTGTTTTGCTTTACTTTTTGTGGGATCTTTGTAGCTTGAAC  
ATCACTAGGGAATACTTCAAAGTCTACTCCTCTCGTCCTAATATTCTTT

>M6-PGSC0003DMG400000728-(rev)M6LRR-RLK\_3233

AGCTTGAACATCACTAGGGAATACTTCAAAGTCTACTCCTCTCGTCCTAATATTCTTTCTTACCTGAATG  
GACAGGTACACCTAGTGCCACTTGTGCGTATGATGTCTACTGTTTTGGA

>M6-PGSC0003DMG400000728-(rev)M6LRR-RLK\_3294

TACCTGAATGGACAGGTACACCTAGTGCCACTTGTGCGTATGATGTCTACTGTTTTGGAAAGGTTTTGCT  
CGAGCTAGTAACTGGCAAGCTAGGTATCAGTGCATCCAATGACGCCAGCA

>M6-PGSC0003DMG400000728-(rev)M6LRR-RLK\_3355

GGTTTTGCTCGAGCTAGTAACTGGCAAGCTAGGTATCAGTGCATCCAATGACGCCAGCATGAAGGAGTG  
GTTGGATGGTACACTTAAGTACATTAGTATATATGATAAAGAACTTGTCAC

>M6-PGSC0003DMG400000728-(rev)M6LRR-RLK\_3416

AAGGAGTGGTTGGATGGTACACTTAAGTACATTAGTATATATGATAAAGAACTTGTCACAAACATTGTG  
GATCCTTCCCTAATCATAGACGAAGATTTATTAGAGGAAGTATGGGCGATG

>M6-PGSC0003DMG400000728-(rev)M6LRR-RLK\_3477

ACATTGTGGATCCTTCCCTAATCATAGACGAAGATTTATTAGAGGAAGTATGGGCGATGGCTATTGTTGC



CAGATCCTGCCTCAATCCCAAACCGTCAAGGAGACCCTTAATGAGATACA

>M6-PGSC0003DMG400000728-(rev)M6LRR-RLK\_3538

TATTGTTGCCAGATCCTGCCTCAATCCCAAACCGTCAAGGAGACCCTTAATGAGATACATCCTTAAAGCT

TTGGAAAACCCCTTTGAAGGTAGTTAGGGAAGAACAACACTAGCTCAGCAAG

>M6-PGSC0003DMG400000728-(rev)M6LRR-RLK\_3599

CTTAAAGCTTTGGAAAACCCCTTTGAAGGTAGTTAGGGAAGAACAACACTAGCTCAGCAAGACTTAGAGCA

ACTTCATCGAGAAGTTCATGGAACGCTGCACTGTTTGGCAGCTGGCGTAGC

>M6-PGSC0003DMG400000728-(rev)M6LRR-RLK\_366

TCTATCAACTTGAGGGCTTCACTTGCTATCTTTATGAGCTACACCTGCATGTAATAAAAGTAAGAGTTTAG

GAAACCTAAACCTGTCCTTTTAGGGCTTAGCAATGTAACGTCAAGAGC

>M6-PGSC0003DMG400000728-(rev)M6LRR-RLK\_3660

TTAGAGCAACTTCATCGAGAAGTTCATGGAACGCTGCACTGTTTGGCAGCTGGCGTAGCTCCTCAGATG

TAGCAGCCGTACCTGCTGCAGCTTACAGCACATAAGTTGGAAGGAACAAGTA

>M6-PGSC0003DMG400000728-(rev)M6LRR-RLK\_3721

CTCAGATGTAGCAGCCGTACCTGCTGCAGCTTACAGCACATAAGTTGGAAGGAACAAGTAGTTTGAAGCA

ATCCGGAACAACAGGCTCTCAAGGAAGTGGTCCTAATGGGGACAACAACGG

>M6-PGSC0003DMG400000728-(rev)M6LRR-RLK\_3782

TTGAAGCAATCCGGAACAACAGGCTCTCAAGGAAGTGGTCCTAATGGGGACAACAACGGTCATTCTTCA

TCAACTAGACGACAGTCCAAAGAGATTTTCCCTGAGCCATTGGAGGAGCAC

>M6-PGSC0003DMG400000728-(rev)M6LRR-RLK\_3843

ATTCTTCATCAACTAGACGACAGTCCAAAGAGATTTTCCCTGAGCCATTGGAGGAGCACGATGTAGAGA

GAGGACCACTGGCGGAGTAGAAGGGAGGGTGATTGTCATTAATTCTTTGTT

>M6-PGSC0003DMG400000728-(rev)M6LRR-RLK\_3904

TGTAGAGAGAGGACCACTGGCGGAGTAGAAGGGAGGGTGATTGTCATTAATTCTTTGTTAATAATGCA

GCAGGATCTGCATTAAGGTTGCATTTTTGTTTGGGGACACCTTGTACATTCT

>M6-PGSC0003DMG400000728-(rev)M6LRR-RLK\_3965

TAATGCAGCAGGATCTGCATTAAGGTTGCATTTTTGTTTGGGGACACCTTGTACATTCTCCGTTTCCGGA

ATTCTTGAGTTTGCAAGCCATTGTCTTGCCCTGATCTTGAAAATGGAGAT

>M6-PGSC0003DMG400000728-(rev)M6LRR-RLK\_4026

GTTTCCGGAATTCTTGAGTTTGCAAGCCATTGTCTTGCCCTGATCTTGAAAATGGAGATGCATAGTTTACC  
TGGAGACAGCAAACATCAAATTGTTTATTGGGGTTTTGGGATTTTAAGT

>M6-PGSC0003DMG400000728-(rev)M6LRR-RLK\_4087

ATAGTTTACCTGGAGACAGCAAACATCAAATTGTTTATTGGGGTTTTGGGATTTTAAGTTCTTTTTCTTTT  
TCTGGGGATAGATTTGGAAAACAGGATTTAGTAGTGGTGGTGGTTCTTT

>M6-PGSC0003DMG400000728-(rev)M6LRR-RLK\_4148

TTTTTCTTTTTCTGGGGATAGATTTGGAAAACAGGATTTAGTAGTGGTGGTGGTTCTTTTTGTTAATTTTG  
TTTTTGGGGGGTTTATGTTTGCTTCAAATTCCAATTCTTTTCTTATAA

>M6-PGSC0003DMG400000728-(rev)M6LRR-RLK\_4209

GTTAATTTTGTTTTTGGGGGGTTTATGTTTGCTTCAAATTCCAATTCTTTTCTTATAATTCTTCTCTTTTAC  
TAGTCTCTCCATGGAATGTAAATTATACACAATCTTTTCATTTTCAA

>M6-PGSC0003DMG400000728-(rev)M6LRR-RLK\_4244

CAAATTCCAATTCTTTTCTTATAATTCTTCTTTTTACTAGTCTCTCCATGGAATGTAAATTATACACAATCT  
TTCATTTTCAAATTGGAGGAGAGGGAAAAAAGAAAAAGAGTATCCC

>M6-PGSC0003DMG400000728-(rev)M6LRR-RLK\_427

AAGAGTTTAGGAAACCTAAAACCTGTCCTTTTAGGGCTTAGCAATGTAACGTCAAGAGCCATGCACTTCT  
AAAATTGCTGTAAGCTCAGCTTCTATAGTTCCATGCATGGCTGCGATATC

>M6-PGSC0003DMG400000728-(rev)M6LRR-RLK\_488

TGCACTTCTAAAATTGCTGTAAGCTCAGCTTCTATAGTTCCATGCATGGCTGCGATATCTCTAATCTAGGC  
AGTTTCAATTGTTAGATTCGGTATGAGGGATGTGGCCTTAGAAGATCTT

>M6-PGSC0003DMG400000728-(rev)M6LRR-RLK\_549

TAATCTAGGCAGTTTCAATTGTTAGATTCGGTATGAGGGATGTGGCCTTAGAAGATCTTGATGACATTAT  
AGTTCTACTGTGCAGAGATATTGTGAATGCAGAAATAGAAAATTTCTCAA

>M6-PGSC0003DMG400000728-(rev)M6LRR-RLK\_61

TTTCAACCAAAAATTCAGTGCAGCACAAACACTATGCACGTTAAAGGTGCTTTGCAACTTTATGGATTGT  
GCCCATGTCTGGTTGACTAAAAATCATCTAAAGCCTATTTATAAATGATA

>M6-PGSC0003DMG400000728-(rev)M6LRR-RLK\_610

TGACATTATAGTTCTACTGTGCAGAGATATTGTGAATGCAGAAATAGAAAATTTCTCAAATAAGAACAG  
TTATGTTTTTTTTTAAAATTTTTTCTTTTCTTATTATTGAACCTTCTCCA

>M6-PGSC0003DMG400000728-(rev)M6LRR-RLK\_671

TAAGAACAGTTATGTTTTTTTTTAAAATTTTTCTTTTCTTATTATTGAACCTTCTCCATACATCAATCCTTTT  
TTTTTGTATAACCGTGGTGCCCGGGCTAGCTTGTGCACACCTTGAC

>M6-PGSC0003DMG400000728-(rev)M6LRR-RLK\_732

CATCAATCCTTTTTTTTTTGTATAACCGTGGTGCCCGGGCTAGCTTGTGCACACCTTGACACAATCCCATCA  
ATCTTAATCAACTAAAGGTAGTCTGCATATGACACTCCTCATCTTTTGT

>M6-PGSC0003DMG400000728-(rev)M6LRR-RLK\_793

AATCCCATCAATCTTAATCAACTAAAGGTAGTCTGCATATGACACTCCTCATCTTTTGTACCTTTTATCTCC  
ATGGAACCTAAGCCAGTCAGTGAACCTATCTAATTTCTCTAAAACCTTTT

>M6-PGSC0003DMG400000728-(rev)M6LRR-RLK\_854

CTTTTATCTCCATGGAACCTAAGCCAGTCAGTGAACCTATCTAATTTCTCTAAAACCTTTTCATCTGCATGTTT  
TGGGTTCAACCAATATTCTTTCACCGGGCAACCCCTAGGGATTGGGT

>M6-PGSC0003DMG400000728-(rev)M6LRR-RLK\_915

TCTGCATGTTTTGGGTTCAACCAATATTCTTTCACCGGGCAACCCCTAGGGATTGGGTTAGTGGCAAGA  
GCACAACTCATTATGTGTGGGTTAAGCTCACGTTATCAGTTTGAATCCTA

>M6-PGSC0003DMG400000728-(rev)M6LRR-RLK\_976

GTGGCAAGAGCACAACCTCATTATGTGTGGGTTAAGCTCACGTTATCAGTTTGAATCCTACCATAGACTAA  
AGCTTGGTATTTAAGTGGAGAAAGGTAGAAGGCTGGGCCATTATCCACC

>M6-PGSC0003DMG400000789-(rev)M6L-LecRK\_1054

AATCAGCTACAGAATGTTTTAATCATGAAAGGATAATCGGAGAAGGAGCATCTGCTGTTGTGTATGAAG  
GGGAAATTCCTTCTAGGGGATCTGTGGCTGTTAAGAGATTTGTCCAAGGGA

>M6-PGSC0003DMG400000789-(rev)M6L-LecRK\_1116

TATGAAGGGGAAATTCCTTCTAGGGGATCTGTGGCTGTTAAGAGATTTGTCCAAGGGAGTAGATTGGGT  
CCTTCACATATTCCTTTAATACTGAATTTGCTTCTATGGTTGGCTGTTTA

>M6-PGSC0003DMG400000789-(rev)M6L-LecRK\_1178

ATTGGGTCCTTCACATATTCCTTTAATACTGAATTTGCTTCTATGGTTGGCTGTTAAGACACAAGAATT  
TGATTCAGCTTCAAGGGTGGTGTGTGAGAGAAATGAATTGGTGTAGT

>M6-PGSC0003DMG400000789-(rev)M6L-LecRK\_124

TCACCGCAAATCAATCACCTCACCCAAGAACGCAACTGTTTCATCATCATCTTCAACACCTCCCATTCT

GGCATTGGAAGAGCTTTCTACACATACCCAGTTCGTTTTCTTGATTCTT

>M6-PGSC0003DMG400000789-(rev)M6L-LecRK\_1240

ACAAGAATTTGATTCAGCTTCAAGGGTGGTGTGTGAGAGAAATGAATTGGTGTAGTGTATGAATTCA  
TGCCTAATGGTAGCCTTGACAAAATCCTCCACGAGCGATCGCATTGACCA

>M6-PGSC0003DMG400000789-(rev)M6L-LecRK\_1302

GAATTCATGCCTAATGGTAGCCTTGACAAAATCCTCCACGAGCGATCGCATTGACCAAGTTTCTGACTT  
GGGAGAGAAGATTGAACATAGTTATTGGTGTGTCATCTGCTCTTATGTAT

>M6-PGSC0003DMG400000789-(rev)M6L-LecRK\_1364

TCTGACTTGGGAGAGAAGATTGAACATAGTTATTGGTGTGTCATCTGCTCTTATGTATCTTCATGAAGAG  
TGTGAGAATCATATAATCCACAGAGATGTTAAGAGTTGCAATATAATGCT

>M6-PGSC0003DMG400000789-(rev)M6L-LecRK\_1426

ATGAAGAGTGTGAGAATCATATAATCCACAGAGATGTTAAGAGTTGCAATATAATGCTTGATGCTGAGT  
TCAATGCCAAGCTTGGAGATTTTCGGTTTAGCAGAGGTGTTTGATAATTCTA

>M6-PGSC0003DMG400000789-(rev)M6L-LecRK\_1488

GCTGAGTTCAATGCCAAGCTTGGAGATTTTCGGTTTAGCAGAGGTGTTTGATAATTCTAAGACAAGGGAT  
GCTACTGTACCAGCTGGAACAATGGGATATTTTGCACCTGAGTATGTCTAT

>M6-PGSC0003DMG400000789-(rev)M6L-LecRK\_1550

AAGGGATGCTACTGTACCAGCTGGAACAATGGGATATTTTGCACCTGAGTATGTCTATACTGGTATTCCA  
ACTGTTAAAACAGATGTGTATAGCTTTGGTGTGTGGTACTGGAAGTGGC

>M6-PGSC0003DMG400000789-(rev)M6L-LecRK\_1612

GTATTCCAAGTGTAAAACAGATGTGTATAGCTTTGGTGTGTGGTACTGGAAGTGGCATCAGGTAGAA  
AGCCTATCGATGAAGGTGGAGGTTTGATTACTGATTGGGTGTGGGACTTGT

>M6-PGSC0003DMG400000789-(rev)M6L-LecRK\_1674

GGTAGAAAGCCTATCGATGAAGGTGGAGGTTTGATTACTGATTGGGTGTGGGACTTGTGGGAGAAAGG  
GAGGATAACTGAGGCTGCTGATCCTAACTAATGGGGCGGTTTCAGAAGAAC

>M6-PGSC0003DMG400000789-(rev)M6L-LecRK\_1736

GAAAGGGAGGATAACTGAGGCTGCTGATCCTAACTAATGGGGCGGTTTCAGAAGAACGAGATGGATA  
GAATGCTCATTGTGGGACTTTCTTGTGTGCATCCCGATCATGAGAAGAGACC

>M6-PGSC0003DMG400000789-(rev)M6L-LecRK\_1798

TGGATAGAATGCTCATTGTGGGACTTTCTTGTGTGCATCCCGATCATGAGAAGAGACCGCGAATAAGAG  
ATGTTTTCCGTATGTTTAAAGATGAAGCTCCACTTCTCATTTTACCTCAA

>M6-PGSC0003DMG400000789-(rev)M6L-LecRK\_186

CCCATTTCTGGCATTGGAAGAGCTTTCTACACATACCCAGTTCGTTTTCTTGATTCTTTAACCAATAACACT  
GCTTCTTTCTTGTGTACTTTCTTTTTACTATACTTCCAACCCCTTCT

>M6-PGSC0003DMG400000789-(rev)M6L-LecRK\_1860

ATAAGAGATGTTTTCCGTATGTTTAAAGATGAAGCTCCACTTCTCATTTTACCTCCAATGAAGCCCACTGT  
GAGAATTCAATCTGTTTACCAGAGAGCTGTGAAGAAATCATGAATTGG

>M6-PGSC0003DMG400000789-(rev)M6L-LecRK\_1920

AAGCCCACTGTGAGAATTCAATCTGTTTACCAGAGAGCTGTGAAGAAATCATGAATTGGGCTGCAAGA  
ATGGATGATACACCATGGTCCACTCCTAGAACTCATTTTAGCAAGAAGTAG

>M6-PGSC0003DMG400000789-(rev)M6L-LecRK\_248

CAATAAACTGCTTCTTTCTTGTGTACTTTCTTTTTACTATACTTCCAACCCCTTCTTGCCTTTTGGTGAT  
GGCATGGCGTTTTTGGTCACTTCTGATGTTGATTCTTTGAGCATCTC

>M6-PGSC0003DMG400000789-(rev)M6L-LecRK\_310

CTTTTGGTGATGGCATGGCGTTTTTGGTCACTTCTGATGTTGATTCTTTGAGCATCTCTGATGGGTATATG  
GGTCTCCGAATCCCGACTCGGAAGATTCGTTCTTGGCTGTGGAATTCA

>M6-PGSC0003DMG400000789-(rev)M6L-LecRK\_372

GGGTATATGGGTCTTCCGAATCCCGACTCGGAAGATTCGTTCTTGGCTGTGGAATTCAATGCCAATGATA  
ACCGTATTGGTGTTGATACTAAAGAAATTAGGTCTTTGGCTTCTACTAAT

>M6-PGSC0003DMG400000789-(rev)M6L-LecRK\_434

CAATGATAACCGTATTGGTGTTGATACTAAAGAAATTAGGTCTTTGGCTTCTACTAATGTTTATTCAGCTG  
GGATTGATTTGAAAAGTGGGAAAGAAATGGCGGGTCGGATTGAGTATAA

>M6-PGSC0003DMG400000789-(rev)M6L-LecRK\_496

ATTCAGCTGGGATTGATTTGAAAAGTGGGAAAGAAATGGCGGGTCGGATTGAGTATAAAGATTCAGAG  
AAAATGATCAGAGTTTGGATTGGGTATGAACTGCAAATTAGGCCTCCTAATC

>M6-PGSC0003DMG400000789-(rev)M6L-LecRK\_558

TCAGAGAAAATGATCAGAGTTTGGATTGGGTATGAACTGCAAATTAGGCCTCCTAATCCTGTTCTTTCTA  
CCAGAATTGATGTTTCCAATCAGTTGAAGGAGTTTATGAGGATTGGTTTC

>M6-PGSC0003DMG400000789-(rev)M6L-LecRK\_62

ACCTTCCCTTTCAGCTCCTTTCTTGCCATAAACAATGTAACCTTTTATGGTGATGCTTCATTCACCGCAA  
ATCAATCACCTCACCCAAGAACGCAACTGTTTCATCATCATCTTCAAC

>M6-PGSC0003DMG400000789-(rev)M6L-LecRK\_620

TCTTTCTACCAGAATTGATGTTTCCAATCAGTTGAAGGAGTTTATGAGGATTGGTTTCACTGCTAAAGGG  
TCTGCAGTTTATAGCTTTAGTCGTTGGCGATTTAGAACGTTTGGATTGAT

>M6-PGSC0003DMG400000789-(rev)M6L-LecRK\_682

CTAAAGGGTCTGCAGTTTATAGCTTTAGTCGTTGGCGATTTAGAACGTTTGGATTGATTTTCTCTCCAAT  
ATCATCGTCTTGGGATCAATCTGATGAAGGAACTGTTTGGATTGATTTTCTCTCCAAT

>M6-PGSC0003DMG400000789-(rev)M6L-LecRK\_744

TCTCCAATATCATCGTCTTGGGATCAATCTGATGAAGGAACTGTTTGGATTGATTTTCTCTCCAAT  
TTGGTGGGCATATTTCTGATTCTCATCATAGTAGTAGTAGTAGTGGTAGT

>M6-PGSC0003DMG400000789-(rev)M6L-LecRK\_806

GGAGGAAATTGGTGGGCATATTTCTGATTCTCATCATAGTAGTAGTAGTAGTGGTAGTAAAAGTTTACT  
GAAATTGACTTATGGAGGGTTAGCTGCAATTGTCACACTTGTGGTTGTGC

>M6-PGSC0003DMG400000789-(rev)M6L-LecRK\_868

GTTTACTGAAATTGACTTATGGAGGGTTAGCTGCAATTGTCACACTTGTGGTTGTGCTTTGTCTGTTGTG  
TTTGTCTTTCGTTGAGAAGGAAAAACGCGATAGAGTAGGGGAGACCA

>M6-PGSC0003DMG400000789-(rev)M6L-LecRK\_930

TCTGTTGTGTTTGTCTTTCGTTGAGAAGGAAAAACGCGATAGAGTAGGGGAGACCAATGAACGGCA  
AATGTGTAGATTACAAGGAAATAGAGTGCCTCAAAGATTGTCATTATCTGAA

>M6-PGSC0003DMG400000789-(rev)M6L-LecRK\_992

ACGGCAAATGTGTAGATTACAAGGAAATAGAGTGCCTCAAAGATTGTCATTATCTGAAATAAAATCAGC  
TACAGAATGTTTTAATCATGAAAGGATAATCGGAGAAGGAGCATCTGCTGT

>M6-PGSC0003DMG400000810M6RLKmalectin\_0

GTTGCAATACCGAATTCCAGAGCATGATTAGAAGTGTAAGGAGTTGTTTGGAGCAGCTATTGCCTGAGT  
AAATCACCTATATCTCTGTTCTGAACAACGAAACATAGAATGAAAAATGCA

>M6-PGSC0003DMG400000810M6RLKmalectin\_1037

TCTCTTACTTTTTTGCATTGCAGGAACTTAAGTTCTAATTCTTTGGGAGGTTCTCTACCGTGGGGATTGGG

TCAGAAGTCTCTTGTGAAACTGTAAGTCCAGACATCAGCACTGTGTTAT

>M6-PGSC0003DMG400000810M6RLKmalectin\_1098

GGGGATTGGGTCAGAAGTCTCTTGTGAAACTGTAAGTCCAGACATCAGCACTGTGTTATTGGTCATTCT  
TTGTTTACTTGAAATTGTCTTCTGTTTTGCGTCTTAGAACTATGAGTTTT

>M6-PGSC0003DMG400000810M6RLKmalectin\_1159

GTCATTTCTTTGTTTACTTGAAATTGTCTTCTGTTTTGCGTCTTAGAACTATGAGTTTTATGAAATCCACAT  
ACATAAATTGTTGAACGTTATTGGAGTCCTGAATATTGATCCTGCCAG

>M6-PGSC0003DMG400000810M6RLKmalectin\_122

ACTTGCTGCACGAGTACCTGGGTCAAAAAGGTGTATGCTTCGCAGTTCTTTTGGTTATGACTTCTGACTA  
AATACTGTGGTGCTGTACGGTCTTACCACAAAAAGACGTTTATAAACATC

>M6-PGSC0003DMG400000810M6RLKmalectin\_1220

GAAATCCACATACATAAATTGTTGAACGTTATTGGAGTCCTGAATATTGATCCTGCCAGATTTTTCCGATC  
CACTCAGTTGCTACTAGCATAACTGATAACAACCTTACCTCTAGTAAATT

>M6-PGSC0003DMG400000810M6RLKmalectin\_1281

TTTTCCGATCCACTCAGTTGCTACTAGCATAACTGATAACAACCTTACCTCTAGTAAATTCCTTTTATTCTA  
GGGCCTTTTTTTTAAAGATATTATGTCTTATTGAAGTGCTTTTTGCTC

>M6-PGSC0003DMG400000810M6RLKmalectin\_1342

TTTTATTCTAGGGCCTTTTTTTTAAAGATATTATGTCTTATTGAAGTGCTTTTTGCTCAAATTTTCTAAAA  
CTCTCTCAATTATTGATATTCTTGTTAATTAATATGCGTAGAACCA

>M6-PGSC0003DMG400000810M6RLKmalectin\_1403

ATTTTCTAAACTCTCCTCAATTATTGATATTCTTGTTAATTAATATGCGTAGAACCAAGTGCATAACTAC  
TCTGTAGTTTAGGATATGTTGGCGGCACTTTACCGTCTTTCTCTCTTT

>M6-PGSC0003DMG400000810M6RLKmalectin\_1464

TGCATAACTACTCTGTAGTTTAGGATATGTTGGCGGCACTTTACCGTCTTTCTCTTTTTATGGGCTAAC  
CCTTTTGTCAAAGTGGTTGCCGTCATGTTATTGGAACTTGAAGCTT

>M6-PGSC0003DMG400000810M6RLKmalectin\_1525

ATGGGCTAACCCCTTTTGTCAAAGTGGTTGCCGTCATGTTATTGGAACTTGAAGCTTGAATTCGTCAT  
TTGAAGATCTTTTGTGCAGGGATTTATCAAATAACAAGTTTACTGGACC

>M6-PGSC0003DMG400000810M6RLKmalectin\_1586

AATTCGTCATTTGAAGATCTTTTGTGCAGGGATTTATCAAATAACAAGTTTACTGGACCCCTACCAGATG  
GTCTAGCTTCTTACCCTTGCAGATTGTGTAAGCTCTATTCTTGTCTCA

>M6-PGSC0003DMG400000810M6RLKmalectin\_1647

TACCAGATGGTCTAGCTTCTTACCCTTGCAGATTGTGTAAGCTCTATTCTTGTCTCAAAAACCTTTTCATG  
GATTTGTCGTTGTATATTTCACTCTTTGTGAGGTACCAGTTGCTTATT

>M6-PGSC0003DMG400000810M6RLKmalectin\_1708

AACTTTTCATGGATTTGTCGTTGTATATTTCACTCTTTGTGAGGTACCAGTTGCTTATTTTCATGATTGTTGT  
AGAAAGCAGGATAAGTATTTGGGTTATAAATCACTCGGATTCTTTTCAG

>M6-PGSC0003DMG400000810M6RLKmalectin\_1769

ATGATTGTTGTAGAAAGCAGGATAAGTATTTGGGTTATAAATCACTCGGATTCTTTTCAGTCAAAGAAAT  
TTATCTCGTTCTAGCTAATTTCTGCTTAGTTCTAAGAGTTACTGTAAAT

>M6-PGSC0003DMG400000810M6RLKmalectin\_183

TTCTGACTAAATACTGTGGTGCTGTACGGTCTTACCACAAAAGACGTTTATAAACATCTGTGCGGAATTA  
TGCTTAAAAACTCAATTCCAAGAAAGTTATCTTTGAAATTCATGGCGAT

>M6-PGSC0003DMG400000810M6RLKmalectin\_1830

AAAAGAAATTTATCTCGTTCTAGCTAATTTCTGCTTAGTTCTAAGAGTTACTGTAAATTTGCTCAGGTTTT  
TGAATGGTAATGCACTAGAAAGCCAAGTGCCCGAGGAACTTCTTTCCA

>M6-PGSC0003DMG400000810M6RLKmalectin\_1891

GCTCAGGTTTTTGAATGGTAATGCACTAGAAAGCCAAGTGCCCGAGGAACTTCTTTCCATTGGGGTCCAT  
GGTGGAGCTATTGAGTATGTCATTCTCTATTTTCTGTCTAAAGTTTTTCC

>M6-PGSC0003DMG400000810M6RLKmalectin\_1952

GGGGTCCATGGTGGAGCTATTGAGTATGTCATTCTCTATTTTCTGTCTAAAGTTTTTCTTCAGTACATTA  
TGGTCTTCCTTAGTAGATTTAATTTATGAATATGTGCTTCAACTATA

>M6-PGSC0003DMG400000810M6RLKmalectin\_2013

CAGTACATTATGGTCTTCCTTAGTAGATTTAATTTATGAATATGTGCTTCAACTATAAAAAACAAGACT  
GATTCGGTGAAGAGTGCCTCTGCTACTCATGTTATTAGTGTATGAATGA

>M6-PGSC0003DMG400000810M6RLKmalectin\_2074

AAACAAGACTGATTCGGTGAAGAGTGCCTCTGCTACTCATGTTATTAGTGTATGAATGAATTGTGATGCT  
TCCCTATGTTAAAACTAGTTTAAAGTTGTTAGAAATAATGGTTTATATTG



>M6-PGSC0003DMG400000810M6RLKmalectin\_2135

TGTGATGCTTCCCTATGTAAAACTAGTTAAAGTTGTTAGAAATAATGGTTTATATTGGAGTTTGCCTT  
TGTTTCATGGATAATAAAAAGTAACTTTGCTGGGTCTTCTAGACTCTAAG

>M6-PGSC0003DMG400000810M6RLKmalectin\_2196

GTTTGCCTTTGTTTCATGGATAATAAAAAGTAACTTTGCTGGGTCTTCTAGACTCTAAGCATCTTAACT  
GTTTCGAAAAGCCTTTGGGATAAGTATCTTACAGAAATTAATGCAATCA

>M6-PGSC0003DMG400000810M6RLKmalectin\_2257

TCTTTAACCTGTTTCGAAAAGCCTTTGGGATAAGTATCTTACAGAAATTAATGCAATCATGTGATAATGC  
AACTTTATAACAACCATATTATACTGAACTGGATCGCCTCTGTGCCACA

>M6-PGSC0003DMG400000810M6RLKmalectin\_2318

TGATAATGCAACTTTATAACAACCATATTATACTGAACTGGATCGCCTCTGTGCCACAAGCTATTTATA  
GCTGAAATTGTGCACACATAGTGCATCAACCACTAAGCATATGCCAATG

>M6-PGSC0003DMG400000810M6RLKmalectin\_2379

CTATTTATAGCTGAAATTGTGCACACATAGTGCATCAACCACTAAGCATATGCCAATGCTGTAACCTTTG  
GCACACTAACACTCGTTAAGTCGAACCCGTGATGCATTACAGTAGAGCA

>M6-PGSC0003DMG400000810M6RLKmalectin\_244

TCGGAATTATGCTTAAAACTCAATTCCAAGAAAGTTATCTTTGAAATTCCATGGCGATGCTGAGGCATT  
TGGGTTGGGGTGTCAATTCATCTTTCTGAAGCCATGTAAAGAAGTGTCTG

>M6-PGSC0003DMG400000810M6RLKmalectin\_2440

GTAACCTTTGGCACACTAACACTCGTTAAGTCGAACCCGTGATGCATTACAGTAGAGCAGTACTACATGG  
CTACA ACTACTGGCAAATCACATATCCGGTGATGAATCACA ACTAAGCAA

>M6-PGSC0003DMG400000810M6RLKmalectin\_2501

ACTACATGGCTACA ACTACTGGCAAATCACATATCCGGTGATGAATCACA ACTAAGCAAAATAATTGTAA  
GCTATCCCGTTAATGCTCAATCTGAATACCAATGCATCAAACTGGTTTC

>M6-PGSC0003DMG400000810M6RLKmalectin\_2562

TAATTGTAAGCTATCCCGTTAATGCTCAATCTGAATACCAATGCATCAAACTGGTTTCATGCAAGTAAG  
TGATGTATCATAACAATGTATAGATCTAATAGAACTCAACAGATTTCAA

>M6-PGSC0003DMG400000810M6RLKmalectin\_2623

GCAAGTAAGTGTATCATACACAATGTATAGATCTAATAGAACTCAACAGATTTCAAATTTCAATTTGC

AAACATGGCTGCCTGAAACCTCTTCTTTTTTTTTTGACGGTGGTGCTTGT

>M6-PGSC0003DMG400000810M6RLKmalectin\_2806

CCCCACTAAGGCTTAGGCAAGGGCTGCCTAAACCTCTTTTCAAAGCTTTATACAATTTCACTATCGTTCA  
ACATGCCGTTTATCAAAGCGAGTACTTCAGGGGTAAGGTCTTCACTTA

>M6-PGSC0003DMG400000810M6RLKmalectin\_2867

CTATCGTTCAACATGCCGTTTATCAAAGCGAGTACTTCAGGGGTAAGGTCTTCACTTATGTCCAATTTAA  
GCTAACTAGCACTGCTACAGTGTCCAGACTCAACCAAAGATTGCCAAGA

>M6-PGSC0003DMG400000810M6RLKmalectin\_2928

TCCAATTTAAGCTAACTAGCACTGCTACAGTGTCCAGACTCAACCAAAGATTGCCAAGACATACAAAGAA  
TGATTCAGCGGTGTTAAATACATCCTAACAACCTCATATCCAAACTTGGAC

>M6-PGSC0003DMG400000810M6RLKmalectin\_2989

TACAAAGAATGATTCAGCGGTGTTAAATACATCCTAACAACCTCATATCCAAACTTGGACTTTGGTCAAAT  
TCAAAGTCAATCTTTTGATTTAACATTGGTCAAACATTATCAAACAATG

>M6-PGSC0003DMG400000810M6RLKmalectin\_305

TGAGGCATTTGGGTTGGGGTGTCAATTCATCTTTCTGAAGCCATGTAAAGAAGTGTCTGGAATTAATG  
CACATTTAGATCTATTAGTACACGAGCTCTTATAAGCCACTGTAAGTGA

>M6-PGSC0003DMG400000810M6RLKmalectin\_3050

TGGTCAAATTCAAAGTCAATCTTTTGATTTAACATTGGTCAAACATTATCAAACAATGGGTCCAACCCAA  
ACTTGAGAGTTCTCAATTTAGTGTCTTTGGACCAAATCCATGCAATTC

>M6-PGSC0003DMG400000810M6RLKmalectin\_3111

TCCAACCCAAACTTGAGAGTTCTCAATTTAGTGTCTTTGGACCAAATCCATGCAATTCTATGGTTGAACC  
TTAATTCTGTGAAGGTAGAACTTGATGTACTATGTCTATATTAATCCA

>M6-PGSC0003DMG400000810M6RLKmalectin\_3159

CCATGCAATTCTATGGTTGAACCTTAATTCTGTGAAGGTAGAACTTGATGTACTATGTCTATATTAATCC  
AATCAATCCTATTAATAATACACCTCATAAAGTGCTAGTTTTACAATT

>M6-PGSC0003DMG400000810M6RLKmalectin\_366

AATTAATGCACATTTAGATCTATTAGTACACGAGCTCTTATAAGCCACTGTAAGTGGACCATTAAAGAC  
TAAAGTGTGAAATTTCCATTGCTCCAGCCTCTTAAGACAGCATTCTCT

>M6-PGSC0003DMG400000810M6RLKmalectin\_427

ATTAAAGACTAAAGTGTGAAATTTCCATTGCTCCAGCCTCTCTAAGACAGCATTCCCTCTTTCATATCCTAC  
CGATCTCACTTCTAACTTGACAAATGATGTAATCTTTAATTTCAATTTG

>M6-PGSC0003DMG400000810M6RLKmalectin\_488

CATATCCTACCGATCTCACTTCTAACTTGACAAATGATGTAATCTTTAATTTCAATTTGTGTGTCAAAGAA  
GGAAAGAACAGATCCTTTTTCTTTAACAATATCCCTAGACTTTCTGTT

>M6-PGSC0003DMG400000810M6RLKmalectin\_549

TGTCAAAGAAGGAAAGAACAGATCCTTTTTCTTTAACAATATCCCTAGACTTTCTGTTGTTTAATTCTAG  
TGATATCTAATGCTGCACGTGTATATCCTTCTTGATTCTTTTAGTTCTT

>M6-PGSC0003DMG400000810M6RLKmalectin\_61

GCCTGAGTAAATCACCTATATCTCTGTTCTGAACAACGAAACATAGAATGAAAAATGCACAACCTTGCTGC  
ACGAGTACCTGGGTCAAAAAGGTGTATGCTTCGCAGTTCTTTGGTTATG

>M6-PGSC0003DMG400000810M6RLKmalectin\_610

TTAATTCTAGTGATATCTAATGCTGCACGTGTATATCCTTCTTGATTCTTTAGTTCTTATCTTTCAGAGAT  
CTTGGAAGCCAAGGCTTAAAGGGATATATCAGTGACCAAATTGGGCTG

>M6-PGSC0003DMG400000810M6RLKmalectin\_671

CTTTCAGAGATCTTGGAAGCCAAGGCTTAAAGGGATATATCAGTGACCAAATTGGGCTGTTGTCTAATTT  
GGTAAGCTTGTAAGTATCTCTCAACAAATTTCTCTTAGATACTGGAATT

>M6-PGSC0003DMG400000810M6RLKmalectin\_732

GTCTAATTTGGTAAGCTTGTAAGTATCTCTCAACAAATTTCTCTTAGATACTGGAATTTACACGTTAAT  
CCTCCTGCATAATATCTGAATCTACTCACTTGGTAGTCCTTCAAATAA

>M6-PGSC0003DMG400000810M6RLKmalectin\_793

ACACGTTAATCCTCCTGCATAATATCTGAATCTACTCACTTGGTAGTCCTTCAAATAATTAAGAGGGTGT  
TCAACAAAAAATGGTTACTGTATGAAAATATACTAGTATTTGCATATAC

>M6-PGSC0003DMG400000810M6RLKmalectin\_854

AAAGAGGTGTTCAACAAAAAATGGTTACTGTATGAAAATATACTAGTATTTGCATATACTCATTATGGTG  
CACTGATGAATAATTCTCTTGATTGGATCATTTAAGTTGCCCAATTTCT

>M6-PGSC0003DMG400000810M6RLKmalectin\_915

ATTATGGTGCACCTGATGAATAATTCTCTTGATTGGATCATTTAAGTTGCCCAATTTCTTTTATGCACTTCT  
ACTGTTTGTCAATCCTGCTAATTTGGCCTTCGCAAATAGTTATTCTAC

>M6-PGSC0003DMG400000810M6RLKmalectin\_976

TATGCACTTCTACTGTTTGTCAATCCTGCTAATTTGGCCTTCGCAAATAGTTATTCTACCTTCTCTACTTTT  
TTGCATTGCAGGAACTTAAGTTCTAATTCTTTGGGAGGTTCTCTACC

>M6-PGSC0003DMG400000819-(rev)M6LRR-RLP\_0

CTCTTTTTCTACCTTAGCTTTCTATAAACATTTTAAACAAGCACCTTCCTTCTTTACTTCTTTGTTCCCTCCAT  
TTCCCTGTTTGATTGGATACTTTTACCATTTTCCACCACTGCCCA

>M6-PGSC0003DMG400000819-(rev)M6LRR-RLP\_1054

AAGTGGAATTTTATACTATGACAGATAATCAAAGAAATTGATAAGTTCTTTTTTCAGATTTAGTATATTT  
GGAATGATAGCTAATTAGCCATAGAAGTTTGATGAACCAAACCTTCAATA

>M6-PGSC0003DMG400000819-(rev)M6LRR-RLP\_1116

AGTATATTTGGAATGATAGCTAATTAGCCATAGAAGTTTGATGAACCAAACCTTCAATAATGAATATCAGT  
ACATTCTTGGCTTGTTTTGTTTAGCAGTTTTGACAGACCAACAGAGACAG

>M6-PGSC0003DMG400000819-(rev)M6LRR-RLP\_1178

ATATCAGTACATTCTTGGCTTGTTTTGTTTAGCAGTTTTGACAGACCAACAGAGACAGAATATGTTTTAAA  
ACACAATGATAATACAGGACAGGACAGAGCTTATACGAAATATAATCAG

>M6-PGSC0003DMG400000819-(rev)M6LRR-RLP\_124

AACAAAAAAGTACACAATTTTTTTTTTATATTTATGAAATGAAAGCATTTTAAGGTACCCCTCTTGGAG  
TTTCTTCAATGTTATAAGTTCTATTTGGCTTTAATTGACAAAGTTTATT

>M6-PGSC0003DMG400000819-(rev)M6LRR-RLP\_1240

TGTTTTAAACACAATGATAATACAGGACAGGACAGAGCTTATACGAAATATAATCAGTTCGTTTCAATT  
TGTTTGTCTGATTTTAACTTGACACGTAGTTAAAGAATGCACCATAGTTT

>M6-PGSC0003DMG400000819-(rev)M6LRR-RLP\_1426

GTATAGTTGATGCATTATACTCATATTTCTGATTTGTTTTGTTTCTATTTCTCTGTCCAGGGTGTATCTTG  
TGACCTGTTTGATGGTTTTTGGTATGTTACTGACTTAAACATTGGACC

>M6-PGSC0003DMG400000819-(rev)M6LRR-RLP\_1488

GTGTATCTTGTGACCTGTTTGATGGTTTTTGGTATGTTACTGACTTAAACATTGGACCTATACATGATAAT  
TCTCTAAGTTGTGCATCAAATGTGGAATTCAGCTCCAATTTATTCACAT

>M6-PGSC0003DMG400000819-(rev)M6LRR-RLP\_1550

CATGATAATTCTCTAAGTTGTGCATCAAATGTGGAATTCAGCTCCAATTTATTCACATTAAAGCACCTAAA

ATCTCTCACATTTTTCAATTGTTTCGTGTCGCCTCGCCATCATCCAAC

>M6-PGSC0003DMG400000819-(rev)M6LRR-RLP\_1612

GCACCTAAAATCTCTCACATTTTTCAATTGTTTCGTGTCGCCTCGCCATCATCCAACCTCAATCCCAACAGA  
GAGGTGGGAGTTTCTTGCTAGTAGTTTGGAGTCACTCGAGTTTCGATC

>M6-PGSC0003DMG400000819-(rev)M6LRR-RLP\_1674

TCCCAACAGAGAGGTGGGAGTTTCTTGCTAGTAGTTTGGAGTCACTCGAGTTTCGATCAAATCCCGGTCT  
CATTGGCCAAATCCCAAGTACATTTGGTAGACTCATAAAGCTCCAATCTT

>M6-PGSC0003DMG400000819-(rev)M6LRR-RLP\_1736

CCCGTCTCATTGGCCAAATCCCAAGTACATTTGGTAGACTCATAAAGCTCCAATCTTTAGTACTAGTAG  
AAAATGGACTCTCTGGTGAAATGCCACAAAGTCTTGGGAATTTAGTGAAC

>M6-PGSC0003DMG400000819-(rev)M6LRR-RLP\_1798

ACTAGTAGAAAATGGACTCTCTGGTGAAATGCCACAAAGTCTTGGGAATTTAGTGAACCTTGAAAAGACT  
AGTTCTTGCTGGAAACAACTCAACGGCGAAATCCCGGATACTTTTGGAAG

>M6-PGSC0003DMG400000819-(rev)M6LRR-RLP\_186

CTCTTGAGTTTCTTCAATGTTATAAGTTCTATTTGGCTTTAATTGACAAAGTTTATTACTTTCAAGATTTT  
GTCAACCTAACTCATTTTCAAGCTTTTTTTGGCTTCAAAGAGTGATGG

>M6-PGSC0003DMG400000819-(rev)M6LRR-RLP\_1860

AAAGACTAGTTCTTGCTGGAAACAACTCAACGGCGAAATCCCGGATACTTTTGGAAGGTTCACTCAACT  
TTTGATATGTGATTTAAGCAGAAACAACTATCTGGTGTCTTGCCTAAAT

>M6-PGSC0003DMG400000819-(rev)M6LRR-RLP\_1922

ACTCAACTTTTGATATGTGATTTAAGCAGAAACAACTATCTGGTGTCTTGCCTAAATCATTATTTGGAGG  
GTTGATCTCACTTTTGAACTTGATTTGAGTTACAACAACCTTACAAGGC

>M6-PGSC0003DMG400000819-(rev)M6LRR-RLP\_1984

ATTTGGAGGGTTGATCTCACTTTTGAACTTGATTTGAGTTACAACAACCTTACAAGGCAAAATCCACAA  
GAGATCTCACAAATGAAGAATTTAACACTTTTAGACCTTAGTAACAACAA

>M6-PGSC0003DMG400000819-(rev)M6LRR-RLP\_2046

TCCCACAAGAGATCTCACAAATGAAGAATTTAACACTTTTAGACCTTAGTAACAACAAGTTATCAAGTGG  
ATTACCTAAGTCAATTCAAGAAATGACATGTTTGGAGGAGTTAGTCTTGT

>M6-PGSC0003DMG400000819-(rev)M6LRR-RLP\_2108

TCAAGTGGATTACCTAAGTCAATTCAAGAAATGACATGTTTGGAGGAGTTAGTCTTGTCAAACAACCCAA  
TGGGTGGATTCTTGGATGTTCTTGGATTGGTATAACATGATAAAGTTAACA

>M6-PGSC0003DMG400000819-(rev)M6LRR-RLP\_2170

CAACCCAATGGGTGGATTCTTGGATGTTCTTGGATTGGTATAACATGATAAAGTTAACAACCTTTGGATTTA  
TCAAACATGAATTTGACAGGTGAGATACCTAAGTCTATAGTAGAGTTAAA

>M6-PGSC0003DMG400000819-(rev)M6LRR-RLP\_2232

TGGATTTATCAAACATGAATTTGACAGGTGAGATACCTAAGTCTATAGTAGAGTTAAAAAAGTTAAGATT  
TTTGGGACTTAATGACAATAAACTCATTGGTAAAATCCCAAAAAATCTTG

>M6-PGSC0003DMG400000819-(rev)M6LRR-RLP\_2294

TTAAGATTTTTGGGACTTAATGACAATAAACTCATTGGTAAAATCCCAAAAAATCTTGAAAATTTGCCTAA  
TGTAAGTGCTATTTACCTATATGGTAACAATCTGACAGGTGAACTTCAA

>M6-PGSC0003DMG400000819-(rev)M6LRR-RLP\_2356

TTTGCTAATGTAAGTGCTATTTACCTATATGGTAACAATCTGACAGGTGAACTTCAATTCTCTCAATGGT  
TTTATAGGAAAATGGGAAGGAGATTTGGGGCATGGGGGAATCAAATTT

>M6-PGSC0003DMG400000819-(rev)M6LRR-RLP\_2418

CTCAATGGTTTTATAGGAAAATGGGAAGGAGATTTGGGGCATGGGGGAATCAAATTTATGTTACACTT  
TTGGTTTGGTGTCAAGTGATGTTCCATTTGGGGTAAAACAATGTCAACAAG

>M6-PGSC0003DMG400000819-(rev)M6LRR-RLP\_248

TCAAGATTTTGTCAACCTAACTCATTTTCAAGCTTTTTTGGCTTCAAAGAGTGATGGGGGTCTTCAAGAA  
CATGTTTGTATGAAAAAGTTGTATTCTTTGAACACTTTGTGAACTCATT

>M6-PGSC0003DMG400000819-(rev)M6LRR-RLP\_2480

TACACTTTTGGTTTGGTGTCAAGTGATGTTCCATTTGGGGTAAAACAATGTCAACAAGAACTCAAGTTTG  
TTATTGATGTTGAGATGAACTCAAGTTTTGTGGATTTTCAATCTTCAATG

>M6-PGSC0003DMG400000819-(rev)M6LRR-RLP\_2542

CAAGTTTGTATTGATGTTGAGATGAACTCAAGTTTTGTGGATTTTCAATCTTCAATGGGATATTTGAATG  
ATTGTGGGATTTGGAGATGTTTTGTAGTTGAACTATTTATGGTTATTCT

>M6-PGSC0003DMG400000819-(rev)M6LRR-RLP\_2604

ATTTGAATGATTGTGGGATTTGGAGATGTTTTGTAGTTGAACTATTTATGGTTATTCTACTAATGTTGAAA  
TGAAAAGAAGGAATTTGACAATAGTGATTTACCTTTTTTTTTTGGATATT

>M6-PGSC0003DMG400000819-(rev)M6LRR-RLP\_2666

ATGTTGAAATGAAAAGAAGGAATTTGACAATAGTGATTACCTTTTTTTTTTGATATTTTGTGTTGTTTT  
ACTTGAAATGTACCACACATTTTGGTTTGTCTTTAACATATGAATGAA

>M6-PGSC0003DMG400000819-(rev)M6LRR-RLP\_310

CTTCAAGAACATGTTTGTATGAAAAAGTTGTATTCTTTGAACACTTTGTGAACTCATTGTGTGATAAAGTG  
TTATCTTTGAACACTTTGTGTACTCATTTTCAAGAAAATTTAGCTTCAA

>M6-PGSC0003DMG400000819-(rev)M6LRR-RLP\_372

GATAAAGTGTTATCTTTGAACACTTTGTGTACTCATTTTCAAGAAAATTTAGCTTCAAAGAATGATGGG  
GTTCTTCAAGAATTCTAACTAGTTTGTATGTGACAGAGTTTTAACTT

>M6-PGSC0003DMG400000819-(rev)M6LRR-RLP\_434

ATGATGGGGTTCTTCAAGAATTCTAACTAGTTTGTATGTGACAGAGTTTTAACTTTGAAGATTTTGT  
ATCTCTTTTCAAGAAAATTTAGCTTCAAAGAATGATGGGGTTCTTCA

>M6-PGSC0003DMG400000819-(rev)M6LRR-RLP\_496

GATTTTGTATCTCTTTTCAAGAAAATTTAGCTTCAAAGAATGATGGGGTTCTTCAAGAATTCTAACTA  
GTTTGTATGTGACAGAGTTTTAACTTTGAAGATTTTGTGATCTCTT

>M6-PGSC0003DMG400000819-(rev)M6LRR-RLP\_558

TTCTAACTAGTTTGTATGTGACAGAGTTTTAACTTTGAAGATTTTGTGATCTCTTTTCAAGAACTTT  
TTAAGCTACAAAAGTGATGAAGGGTTTCAAGAATTCAAGATTGTGTG

>M6-PGSC0003DMG400000819-(rev)M6LRR-RLP\_62

TGTTCCCTCCATTTCCCTGTTTGGTACTTTTACCATTTTCCACCACTGCCCAAAAAACAAAAAA  
GTACACAATTTTTTTTTTATATTTATGAAATGAAAGCATTTTAAGGT

>M6-PGSC0003DMG400000819-(rev)M6LRR-RLP\_620

AAGAACTTTTAAAGCTACAAAAGTGATGAAGGGTTTCAAGAATTCAAGATTGTGTGTGTTAGTTATCT  
TTTATCTCCTCCATTTTGGTGTCTGGTGCAATGGTGATACTGAAAACATG

>M6-PGSC0003DMG400000819-(rev)M6LRR-RLP\_682

AGTTATCTTTATCTCCTCCATTTTGGTGTCTGGTGCAATGGTGATACTGAAAACATGGGAGCTCAAATG  
GAGAAAATGAGATAAATCACTTTACTCAACCATTCAAGGCTTTGTTGG

>M6-PGSC0003DMG400000819-(rev)M6LRR-RLP\_744

CTCAAATGGAGAAAATGAGATAAATCACTTTACTCAACCATTCAAGGCTTTGTTGGTAAATGGTGGAA





ATAGAATTAATTGCATAAAGTATTTCTCTTTAGCGACATTTTTCTTAACTAATATTGTACCTTAATTTTATTT  
AATGGTCTCTTCAAATGCAATAATAAATAATACAAAACATAACGAAA

>M6-PGSC0003DMG400000888M6LRR-RLP\_2562

TTAATTTTATTTAATGGTCTCTTCAAATGCAATAATAAATAATACAAAACATAACGAAATTTGGCATTGCA  
AACAGTTAGAAAAGTAGTCATATTGGCATGCAAATTTTATACAGATATTT

>M6-PGSC0003DMG400000888M6LRR-RLP\_61

TATTCTGATGAAGTTTTCGTATACGGAGGGTGGAGGGGATTGATCTCTGAAGGAATTTCTAATACAGA  
TGGTTCAAAGTAACTCAATTACAATAATTCTAAACAATTGGAGTAGACAT

>M6-PGSC0003DMG400000888M6LRR-RLP\_976

TAGGATGCTTTTGTGAAACCTAGACATATTCTACTATAGAACAAGAATCTATACCTCCAATATGAGTTAAT  
TTAGTTGGAGAGAATACATAATAATCCTTCTAACTATTCAAGTTTTGC

>M6-PGSC0003DMG400000915-M6G-LecRK\_0

ATGGAGTTAATCTTATTCTTTCTCATTTTATCTTTGTCCGGTATTCCTGTCTTTGGTTTTTTATCAAAGAAT  
TTGTCTATCCCAACTTTACTGCTTCCAATTTCCAATTTGTCGATAGC

>M6-PGSC0003DMG400000915-M6G-LecRK\_1037

AGGACTTGGCTTTGGTATGGACTACTTCACTACTGATTTTACCAAGCCCTTCAGGGATGGGGTAAATTTG  
TCCGTTTGTCAAATCTCTGCTCAGTAGACTGTTTCATGCTTGGGGATATT

>M6-PGSC0003DMG400000915-M6G-LecRK\_1098

GTAAATTTGTCCGTTTGTCAAATCTCTGCTCAGTAGACTGTTTCATGCTTGGGGATATTTTATGCAAACCTC  
GTCTGGTTCTTGTTACAACTTGAAGATGAAATAGGGTCAATTATGTTA

>M6-PGSC0003DMG400000915-M6G-LecRK\_1159

ATGCAAACCTCGTCTGGTTCTTGTTACAACTTGAAGATGAAATAGGGTCAATTATGTTAAGGACTAGTAG  
AAATGATGATCTGTTGGGATTTGTTAAGACCCTGGTAGGAGTTTCAACAA

>M6-PGSC0003DMG400000915-M6G-LecRK\_122

CGGAAGTTTCTTGGTTTCTCGCAATGGAACATTCAAAGCTTCTATCTTCAATCCCGGTCCTGAACAAGTTA  
ATTTCTATTTGTGTGTTATCCATGCTGAATCCAATACCATTATCTGGTC

>M6-PGSC0003DMG400000915-M6G-LecRK\_1220

GACTAGTAGAAATGATGATCTGTTGGGATTTGTTAAGACCCTGGTAGGAGTTTCAACAACCTTAGGAAA  
CAATGATAATTTTATGATCAGGAAGCTGCAGACTTTCCTTTAGTTGCAACAGT

>M6-PGSC0003DMG400000915-M6G-LecRK\_1281

TTAGGAAACAATGATAATTTTGATCAGGAAGCTGCAGACTTTCCTTTAGTTGCAACAGTGATCTTACCTTT  
CACAGGAATCTTCTACTCATGGCGCTGGGTTTCATTATGTGGAGAAGA

>M6-PGSC0003DMG400000915-M6G-LecRK\_1342

TCTTACCTTTACAGGAATCTTCTACTCATGGCGCTGGGTTTCATTATGTGGAGAAGATCTAGACCCCAA  
AGAACGGGAAAGATAGAATCCAAAAAGAGCCAACCCAATTCTCCTTTTT

>M6-PGSC0003DMG400000915-M6G-LecRK\_1403

TAGACCCCAAAGAACGGGAAAGATAGAATCCAAAAAGAGCCAACCCAATTCTCCTTTTTTCAGAGGACCT  
GGATGCCTTCTCCATCCCAGGATTACCTGTACGGTTTGAGTACAAACAGCT

>M6-PGSC0003DMG400000915-M6G-LecRK\_1464

GAGGACCTGGATGCCTTCTCCATCCCAGGATTACCTGTACGGTTTGAGTACAAACAGCTTAAGGCTGCA  
ACTGATAATTTCAAGACTCAGATCGGCACAGGAGGCTTTGGTGCTGTATAT

>M6-PGSC0003DMG400000915-M6G-LecRK\_1525

AGGCTGCAACTGATAATTTCAAGACTCAGATCGGCACAGGAGGCTTTGGTGCTGTATATAAGGGTGTGC  
TCCCTGACAACACTCTGGTTGCAGTAAAGAAGATAATAAATGTAGGCATTC

>M6-PGSC0003DMG400000915-M6G-LecRK\_1586

GGGTGTGCTCCCTGACAACACTCTGGTTGCAGTAAAGAAGATAATAAATGTAGGCATTCAAGGGCAGA  
GAGACTTTTGTACTGAGATTGCAATCATTGGCAATATTCACCACATAAACTT

>M6-PGSC0003DMG400000915-M6G-LecRK\_1647

GGGCAGAGAGACTTTTGTACTGAGATTGCAATCATTGGCAATATTCACCACATAAACTTGGTCAAGTTAA  
AAGGTTTCTGTGCTCAAGAGAGACAACGCCTATTGGTTTATGAATTTATG

>M6-PGSC0003DMG400000915-M6G-LecRK\_1708

TCAAGTTAAAAGGTTTCTGTGCTCAAGAGAGACAACGCCTATTGGTTTATGAATTTATGAACCGTGGATC  
GCTTGATCGCACTCTTTTTGGTCATGTACCTGTATTGGAATGGCAAGAAC

>M6-PGSC0003DMG400000915-M6G-LecRK\_1769

CCGTGGATCGCTTGATCGCACTCTTTTTGGTCATGTACCTGTATTGGAATGGCAAGAACGGGTTGAGATA  
GCTCTTGTTCTGCCCGCGGACTTGCATACTTGCACAGTGGCTGTGAACA

>M6-PGSC0003DMG400000915-M6G-LecRK\_183

GAACAAGTTAATTTCTATTTGTGTGTTATCCATGCTGAATCCAATACCATTATCTGGTCTGCAAATGGTGA

TGCACCTATTTCAACTTCAGGAATTATGAGGTTGACCAAGAATGGTATT

>M6-PGSC0003DMG400000915-M6G-LecRK\_1830

GTTGAGATAGCTCTTGGTTCTGCCCGCGGACTTGCATACTTGCACAGTGGCTGTGAACAAAAGATTGTCC  
ACTGTGATGTGAAGCCAGAGAACATTCTTGCACGATAATTTTCAGGCA

>M6-PGSC0003DMG400000915-M6G-LecRK\_1891

AGATTGTCCACTGTGATGTGAAGCCAGAGAACATTCTTGCACGATAATTTTCAGGCCAAAAATATCTGA  
TTTTGGCCTCTCCAAGCTGCTGAATCGTGAAGAATCCAGTCTATTCACAA

>M6-PGSC0003DMG400000915-M6G-LecRK\_1952

AATATCTGATTTTGGCCTCTCCAAGCTGCTGAATCGTGAAGAATCCAGTCTATTCACAACTATGAGGGGG  
ACTCGTGGCTACCTTGCTCCTGAATGGCTCACAAGTTCTGCAATCTCAGA

>M6-PGSC0003DMG400000915-M6G-LecRK\_2013

ATGAGGGGGACTCGTGGCTACCTTGCTCCTGAATGGCTCACAAGTTCTGCAATCTCAGACAAAACGGAT  
GTGTATAGCTTTGGAATGGTACTCCTTGAATTGTAAGTGGAAGGAAAAAC

>M6-PGSC0003DMG400000915-M6G-LecRK\_2074

AAACGGATGTGTATAGCTTTGGAATGGTACTCCTTGAATTGTAAGTGGAAGGAAAACTGCTCTTTAA  
GAACACAAAGTCACAGCCTTGATGATAGTGCTACTGGAGATCACTCATCAT

>M6-PGSC0003DMG400000915-M6G-LecRK\_2135

CTCTTTAAGAACACAAAGTCACAGCCTTGATGATAGTGCTACTGGAGATCACTCATCATCTTCATCTGCAC  
AGGGACTTGTTTATTTCCCTTTATTTGCATTAGAGATGCATGAGCAAGG

>M6-PGSC0003DMG400000915-M6G-LecRK\_2196

TCATCTGCACAGGGACTTGTTTATTTCCCTTTATTTGCATTAGAGATGCATGAGCAAGGAAGGTACCTTG  
AACTTGCTGACCCAAAACCTGAAGGGCGGGTCAGTGGTGGAGATATTGAG

>M6-PGSC0003DMG400000915-M6G-LecRK\_2257

GGTACCTTGAACCTTGCTGACCCAAAACCTGAAGGGCGGGTCAGTGGTGGAGATATTGAGAAGTTTGTGC  
GGGTAGCATTGTGCTGTGTCCATGAGGAGCCATGTCTCAGGCCAACTATGG

>M6-PGSC0003DMG400000915-M6G-LecRK\_2318

GTTTGTGCGGGTAGCATTGTGCTGTGTCCATGAGGAGCCATGTCTCAGGCCAACTATGGTTAGTGTGTT  
AGCATGTTAGAGGGTGAGATACCACCAACTGCGCCAAGAATGGAATCTCT

>M6-PGSC0003DMG400000915-M6G-LecRK\_2379

AGTGTTGTTAGCATGTTAGAGGGTGAGATACCACCAACTGCGCCAAGAATGGAATCTCTGAACTTTTTG  
CGCTTCTACGGGCGACGTTTTTCAGAGGCATCAAACATGGAAGAAGCTGGA

>M6-PGSC0003DMG400000915-M6G-LecRK\_244

CAAATGGTGATGCACCTATTTCAACTTCAGGAATTATGAGGTTGACCAAGAATGGTATTAGTATTACTGA  
AAAAGATGGCAGTTTTAAGTGGTCAACTCCACCATTAAAGTTAGCAGTAT

>M6-PGSC0003DMG400000915-M6G-LecRK\_2440

ACTTTTTGCGCTTCTACGGGCGACGTTTTTCAGAGGCATCAAACATGGAAGAAGCTGGAGGCCAGATTG  
ATGCCATGTTATATCCGCAGGCAAATACTTCTCATACAACCTCTCGGAGCG

>M6-PGSC0003DMG400000915-M6G-LecRK\_2495

TGGAGGCCAGATTGATGCCATGTTATATCCGCAGGCAAATACTTCTCATACAACCTCTCGGAGCGTCTCT  
AATGCTTACTTCTTATATTTTCGTCCCAACAAATCTCTGGTCCAAGATA

>M6-PGSC0003DMG400000915-M6G-LecRK\_305

TATTACTGAAAAAGATGGCAGTTTTAAGTGGTCAACTCCACCATTAAAGTTAGCAGTATACGCGATGCA  
GCTAACTGAGACTGGAAATCTCCTTCTCTTTGATCAGTTAATGGGACACT

>M6-PGSC0003DMG400000915-M6G-LecRK\_366

GCGATGCAGCTAACTGAGACTGGAAATCTCCTTCTCTTTGATCAGTTAATGGGACACTTTGGCAAAGCT  
TTGATCATCCGACAGATAACAATTGTAATTGGACAGAAGTTGCGTGTTGGC

>M6-PGSC0003DMG400000915-M6G-LecRK\_427

GGCAAAGCTTTGATCATCCGACAGATAACAATTGTAATTGGACAGAAGTTGCGTGTTGGCATGATGCTTTC  
AAGTGCAATAGCAGGTGATGACTTGTCAAAGGGTCATTACAGGCTTTCTT

>M6-PGSC0003DMG400000915-M6G-LecRK\_488

GATGCTTCAAGTGCAATAGCAGGTGATGACTTGTCAAAGGGTCATTACAGGCTTTCTTTGTCTGCTTCC  
GATGCTATGTTACAGTGGCAAGGTCTGACATACTGGAAATTGTCCATGGA

>M6-PGSC0003DMG400000915-M6G-LecRK\_549

TCTGCTCCGATGCTATGTTACAGTGGCAAGGTCTGACATACTGGAAATTGTCCATGGAAACCAAAGCTT  
ATACTAATTCAAATTATGCAGTGAATACATGTCTGTCAATCAAACAGGT

>M6-PGSC0003DMG400000915-M6G-LecRK\_61

TATCAAAGAATTTGTCTATCCCACTTTACTGCTTCCAATTTCCAATTTGTCGATAGCACCGGAAGTTTCT  
TGGTTTCTCGCAATGGAACATTCAAAGCTTCTATCTTCAATCCCGGTC

>M6-PGSC0003DMG400000915-M6G-LecRK\_610

CCAAAGCTTATACTAATTCAAATTATGCAGTGGAAATACATGTCTGTCAATCAAACAGGTCTTTATCTTTTT  
GGTCAAGGTGGTTCTGTAGTTGTGATAATGGTGAACCTGTTACAATCCA

>M6-PGSC0003DMG400000915-M6G-LecRK\_671

TTATCTTTTTGGTCAAGGTGGTTCTGTAGTTGTGATAATGGTGAACCTGTTACAATCCACTTTTAGAATTG  
CCAAATTGGATGGTTCAGGTCAGTTGATCGTTATTAGTTTTGTTGGTTC

>M6-PGSC0003DMG400000915-M6G-LecRK\_732

TTTAGAATTGCCAAATTGGATGGTTCAGGTCAGTTGATCGTTATTAGTTTTGTTGGTCTGACATCAAAC  
GAGATTTTGTGGGCCAGTGGATGGTGTAGAGTACCTTATGTTTGC GGA

>M6-PGSC0003DMG400000915-M6G-LecRK\_793

ACATCAAACGAGATTTTGTGGGCCAGTGGATGGTGTAGAGTACCTTATGTTTGC G GAGGGCTTGGTG  
TATGCACCTCTGATGTATTATCAGATAATCCTAAATGTTCTGTCCTGCTA

>M6-PGSC0003DMG400000915-M6G-LecRK\_854

GCTTGGTGTATGCACCTCTGATGTATTATCAGATAATCCTAAATGTTCTGTCCTGCTAACTTCAATCTTG  
GATCACATGATTCAAGAAGCTGTGTGCCTAGTGATAGTTCCTATTCTTT

>M6-PGSC0003DMG400000915-M6G-LecRK\_915

TTCAATCTTGGATCACATGATTCAAGAAGCTGTGTGCCTAGTGATAGTTCCTATTCTTTGCCAGTTTCTTG  
TAATCCACCAACCACAGTAATCTGTGCAATTCTTCTCCATGTCGTAC

>M6-PGSC0003DMG400000915-M6G-LecRK\_976

CAGTTTCTTGAATTCCACCAACCACAGTAATCTGTGCAATTCTTCTCCATGTCGTACATAGGACTTGGC  
TTTGGTATGGACTACTTCACTACTGATTTTACCAAGCCCTTCAGGGATG

>M6-PGSC0003DMG400000996-(rev)M6LRR-RLK\_0

GGCTGTTGTCTCTTTTTTGCCTTAAACCTGAACTTCTCCTGAATTTTTCTACTCTACATATTACTGCAGGC  
ATGAAGTCTTTAATGTTTTCATTTGTGTTATGCTTTCTTGCTTATTA

>M6-PGSC0003DMG400000996-(rev)M6LRR-RLK\_1037

GCATTTCAATAATCTTGAACCGGAAGAGAAGATGACATGGATTTCTTTCTTATTGGTTAACATTACC  
AGTTTTAAAGAACTGAGTTTGTGAGTGTGAATAATATAGCAGGCCAGCTGCC

>M6-PGSC0003DMG400000996-(rev)M6LRR-RLK\_1098

AACATTACCAGTTTTAAAGAACTGAGTTTGTGAGTGTGAATAATATAGCAGGCCAGCTGCCTAAGAATATT

GGCAACTTAACCAATTTCCGGTCTATTGGTTTTGCTAGGAACAAACTATTC

>M6-PGSC0003DMG400000996-(rev)M6LRR-RLK\_1159

AGAATATTGGCAACTTAACCAATTTCCGGTCTATTGGTTTTGCTAGGAACAAACTATTCGGACGAATACC

TGATGGATTTGTTGATCTCAGCAACATGGAAGTGGTAAGTTTGGAGTATA

>M6-PGSC0003DMG400000996-(rev)M6LRR-RLK\_122

TGTTCTTTCTGCAGATGCATCTTCCAGGCTTGCTGGAAATGAAACGGATCACTTAGCCCTCCTCAGTATTA

AAGCACAATAACATATGATCCTTCTGGTGTACAAATTCTTGAATGA

>M6-PGSC0003DMG400000996-(rev)M6LRR-RLK\_1220

ACGAATACCTGATGGATTTGTTGATCTCAGCAACATGGAAGTGGTAAGTTTGGAGTATAACCAATTGAC

TGAAGAAATTCCAGCTAGTCTTGGTAACTTCAAAACTCAAGTATTTCTA

>M6-PGSC0003DMG400000996-(rev)M6LRR-RLK\_1281

CAATTGACTGAAGAAATTCCAGCTAGTCTTGGTAACTTCAAAACTCAAGTATTTCTATGTTAACGGAA

ACAACTCTCGGGGGAAATCCCTTCTCTATTGGAAACATAACATCTTTA

>M6-PGSC0003DMG400000996-(rev)M6LRR-RLK\_1342

TTAACGGAAACAACTCTCGGGGGAAATCCCTTCTCTATTGGAAACATAACATCTTTATATGGACTTAA

TCTAGCTCAAACAACCTTAGAAGGGACTATTCCTTCAGTTCTTGGAACT

>M6-PGSC0003DMG400000996-(rev)M6LRR-RLK\_1403

TGGACTTAATCTAGCTCAAACAACCTTAGAAGGGACTATTCCTTCAGTTCTTGGAACTGTCAGTTGTTG

CAATGTTGTATCTTTCTCGAAACAGACTCAGTGGGACGATACCAAAGA

>M6-PGSC0003DMG400000996-(rev)M6LRR-RLK\_1464

CAGTTGTTGCAATGTTGTATCTTTCTCGAAACAGACTCAGTGGGACGATACCAAAGAGGTTCTTAGTA

TCTCATCCTTGTCTATCCAACCTAGACCTGTCTGGAAACCAGTTAAGTGGA

>M6-PGSC0003DMG400000996-(rev)M6LRR-RLK\_1525

TTCTTAGTATCTCATCCTTGTCTATCCAACCTAGACCTGTCTGGAAACCAGTTAAGTGGATCACTTCCCCTT

GAAGTAGGAAGTTTAGTCAATCTTGGGTTTCTTGATATCTCCGAGAACA

>M6-PGSC0003DMG400000996-(rev)M6LRR-RLK\_1586

ACTTCCCCTTGAAGTAGGAAGTTTAGTCAATCTTGGGTTTCTTGATATCTCCGAGAACAAGTTATCTGGA

AAACTCCGAGCACTTAAGCAGTTGCATCAAGTTGGAAAACCTCTACGT

>M6-PGSC0003DMG400000996-(rev)M6LRR-RLK\_1647

TTATCTGGAAAACCTCCGAGCACTTTAAGCAGTTGCATCAAGTTGGAAAACCTCTACGTTTCAGGAAAACA  
TGTTTGAAGGTGTGATCCCATCATCTTTAAGTTCTTTGAGAGGGATGGAA

>M6-PGSC0003DMG400000996-(rev)M6LRR-RLK\_1708

AGGAAAACATGTTTGAAGGTGTGATCCCATCATCTTTAAGTTCTTTGAGAGGGATGGAATATTTGGACTT  
GTCGCATAATAATTTCTCTGGTCTTATTCCAAAGTACTTTGAAAACCTTCA

>M6-PGSC0003DMG400000996-(rev)M6LRR-RLK\_1769

TTTGGACTTGTCGCATAATAATTTCTCTGGTCTTATTCCAAAGTACTTTGAAAACCTTCATATCATTGAAAAG  
CTTAAACCTGTCATTTAACAATTTGAGGGTGAAGTACCTCGAGAAGG

>M6-PGSC0003DMG400000996-(rev)M6LRR-RLK\_183

CTCAGTATTAAGCACAAATAACATATGATCCTTCTGGTGTACAAATTCTTGAATGATTCCTCCATCA  
TTGTAGTTGGCAAGGCGTTACATGTAGTGCTCGACATCAAAGGGTGACC

>M6-PGSC0003DMG400000996-(rev)M6LRR-RLK\_1830

TCATTGAAAAGCTTAAACCTGTCATTTAACAATTTGAGGGTGAAGTACCTCGAGAAGGAGTTTTTCAGTA  
ATGCAAGTGCAGCAATAGTCAACGGAAACAGAAATCTTTGTGGAGGTTCT

>M6-PGSC0003DMG400000996-(rev)M6LRR-RLK\_1891

TTTTCAGTAATGCAAGTGCAGCAATAGTCAACGGAAACAGAAATCTTTGTGGAGGTTCTCAAATGCTAA  
AGCTACCACAATGTAAGTTTCCAATGCCGAAAAAAGAAGATTGTCATCAA

>M6-PGSC0003DMG400000996-(rev)M6LRR-RLK\_1952

AATGCTAAAGCTACCACAATGTAAGTTTCCAATGCCGAAAAAAGAAGATTGTCATCAACCTTGAAGAT  
AACTATATCTGTTGCTAGTGCATTATTTGGAGTAGCACTTGTCTGATGCT

>M6-PGSC0003DMG400000996-(rev)M6LRR-RLK\_2013

TTGAAGATAACTATATCTGTTGCTAGTGCATTATTTGGAGTAGCACTTGTCTGATGCTCCTAATTTTGTG  
TTTCTTAAAGAGGAAACGTAGCCCTTCACTCGATTTATCAGATGATTCG

>M6-PGSC0003DMG400000996-(rev)M6LRR-RLK\_2074

TAATTTTGTGTTTCTTAAAGAGGAAACGTAGCCCTTCACTCGATTTATCAGATGATTCGTTCTTGAAAATC  
TCCTACAGGGAACTTCTGAAAGCAACTAATGGATTCTCCTCAGATTATT

>M6-PGSC0003DMG400000996-(rev)M6LRR-RLK\_2135

CTTGAAAATCTCCTACAGGGAACCTTCTGAAAGCAACTAATGGATTCTCCTCAGATTATTTAATTGGTAAG  
GGTGGTTTTGGTTCTGTATAACAAGGGAATTCTTGGTCCAGATGAAAAAAC

>M6-PGSC0003DMG400000996-(rev)M6LRR-RLK\_2196

ATTGGTAAGGGTGGTTTTGGTTCTGTATACAAGGGAATTCTTGGTCCAGATGAAAAAACTGTCGCGATC  
AAAGTACTCAATTTGCAGCATAAAGGAGCTTTGAAAAGCTTCATTGCAGAA

>M6-PGSC0003DMG400000996-(rev)M6LRR-RLK\_2257

TCGCGATCAAAGTACTCAATTTGCAGCATAAAGGAGCTTTGAAAAGCTTCATTGCAGAATGTGAAGTCA  
TAAAGAACCTCAGGCATAGAAATCTTGTCAAGTTAGTAACTGCATGCTCAG

>M6-PGSC0003DMG400000996-(rev)M6LRR-RLK\_2318

TGAAGTCATAAAGAACCTCAGGCATAGAAATCTTGTCAAGTTAGTAACTGCATGCTCAGGTTACTAACTTT  
CAAGGCAATGATTTTAAGGCCCTCATTTACAAGTTCATGGTTAATGGTAG

>M6-PGSC0003DMG400000996-(rev)M6LRR-RLK\_2379

ACTAACTTTCAAGGCAATGATTTTAAGGCCCTCATTTACAAGTTCATGGTTAATGGTAGCCTAGACGATT  
GGCTACATTCATTTTCTAATGATGGAAGTCTGCACGTTTCGATATCTAGAT

>M6-PGSC0003DMG400000996-(rev)M6LRR-RLK\_244

CCTTCCATCATTGTAGTTGGCAAGGCGTTACATGTAGTGCTCGACATCAAAGGGTGACCGTGCTGGATTT  
AAGCTCTAAGCAGGTTGTAGGAACATTAGTTCCTCAGATAGGAAATATGA

>M6-PGSC0003DMG400000996-(rev)M6LRR-RLK\_2440

TAGACGATTGGCTACATTCATTTTCTAATGATGGAAGTCTGCACGTTTCGATATCTAGATCTTTATCAGAGA  
GTAAACATTGCATCAGACATTGCTTTCGCGCTAGATTATCTTCATCATG

>M6-PGSC0003DMG400000996-(rev)M6LRR-RLK\_2501

TTATCAGAGAGTAAACATTGCATCAGACATTGCTTTCGCGCTAGATTATCTTCATCATGGAACCCAAACA  
CCAGTAGTTCATTGTGATTTGAAGCCAAGCAATATCCTTCTAGACAAGGA

>M6-PGSC0003DMG400000996-(rev)M6LRR-RLK\_2562

ACCCAAACACCAGTAGTTCATTGTGATTTGAAGCCAAGCAATATCCTTCTAGACAAGGACATGACTGCCC  
GTGTTGGCGATTTTGGTTTATCAAGATTCTCCAAGAAACATCTCAAAGG

>M6-PGSC0003DMG400000996-(rev)M6LRR-RLK\_2623

TGACTGCCCGTGTGGCGATTTTGGTTTATCAAGATTCTCCAAGAAACATCTCAAAGGGAAACTAGCAC  
TATTGGTAGTAAAGGATCAGTTGGCTATGCAGCTCCAGGTAAACATCTCT

>M6-PGSC0003DMG400000996-(rev)M6LRR-RLK\_2867

CAGACAAATATAAAATGGAGTGATTTTGGATATGGACTAACGATTTTTTTTTCTGCAGAATATGGAATGGTA



AGTGAAGTATCAACTTATGGTGACATATACAGCTATGGAATCATCATACT

>M6-PGSC0003DMG400000996-(rev)M6LRR-RLK\_2928

GGAATGGTAAGTGAAGTATCAACTTATGGTGACATATACAGCTATGGAATCATCATACTGGAGATGTTA

ACAGGGAAAAAACCGACAGACGACGCCTTTTCAAATGGAATGAACCTTCAC

>M6-PGSC0003DMG400000996-(rev)M6LRR-RLK\_2989

AGATGTTAACAGGGAAAAAACCGACAGACGACGCCTTTTCAAATGGAATGAACCTTCACAACCTATGCTA

AAATGGCTTATTCTACTGGTAGAGTCATGGAAATTGTTGATCAAATGGTTT

>M6-PGSC0003DMG400000996-(rev)M6LRR-RLK\_305

GCTGGATTTAAGCTCTAAGCAGGTTGTAGGAACATTAGTTCCTCAGATAGGAAATATGAGTTTTCTTAGA

GAACTAATTCTTCAAATAACACCTTCAATAGTGAGATACCACGCGAAAT

>M6-PGSC0003DMG400000996-(rev)M6LRR-RLK\_3050

CTATGCTAAAATGGCTTATTCTACTGGTAGAGTCATGGAAATTGTTGATCAAATGGTTTACCACAACCTTG

CAAGAAATGAAAACCAAAGATTACATTGAAGAGTGTTCAATTTGTATGTG

>M6-PGSC0003DMG400000996-(rev)M6LRR-RLK\_3111

CACAACCTGCAAGAAATGAAAACCAAAGATTACATTGAAGAGTGTTCAATTTGTATGTGTAAAATTGGG

ATTGCTTGCACTATAGATTCACCAAAGAAAGAATGAGAATTAGTGATGTT

>M6-PGSC0003DMG400000996-(rev)M6LRR-RLK\_3172

AAATTGGGATTGCTTGCACTATAGATTCACCAAAGAAAGAATGAGAATTAGTGATGTTATTAAGAGT

TGCAATTAGTCAAAGAACTTTATCTTAATGTGATAGAACACTATGATATT

>M6-PGSC0003DMG400000996-(rev)M6LRR-RLK\_3232

TTAAAGAGTTGCAATTAGTCAAAGAACTTTATCTTAATGTGATAGAACACTATGATATTAGAAGTAAAT

CATAAAACATTATCTTTTTTGTCTATATATTGTGAGTTGGTAAAATTC

>M6-PGSC0003DMG400000996-(rev)M6LRR-RLK\_366

TTTCTTAGAGAACTAATTCTTCAAATAACACCTTCAATAGTGAGATACCACGCGAAATCGGAAGGCTAT

TCAGGTTGAAGAATTTAGTGCTAAAGGACAACCTACTTTACTGGTGAAATT

>M6-PGSC0003DMG400000996-(rev)M6LRR-RLK\_427

GAAGGCTATTCAGGTTGAAGAATTTAGTGCTAAAGGACAACCTACTTTACTGGTGAAATTCCAGTGGAAC

TATCAAATTGCTCTAGACTCATTTATCTTGATTTGGATGGTAATTCCTGA

>M6-PGSC0003DMG400000996-(rev)M6LRR-RLK\_488

AGTGGA ACTATCAAATTGCTCTAGACTCATTTATCTTGATTTGGATGGTAATTCAGTACCACGGGAAAATC  
CCTGTGGAGCTTGGTTTGTCTTTGAGAAATCTTCAGGTACTTTTTCTTAG

>M6-PGSC0003DMG400000996-(rev)M6LRR-RLK\_549

GGGAAAATCCCTGTGGAGCTTGGTTTGTCTTTGAGAAATCTTCAGGTACTTTTTCTTAGATCAAACAATTT  
AACAGGTGAACTACCATACTCTTTGGGTAATCTTTCATCCCTTATTGCC

>M6-PGSC0003DMG400000996-(rev)M6LRR-RLK\_61

TTACTGCAGGCATGAAGTCTTTAATGTTTTCATTTGTGTTATGCTTTCTTGCTTATTATGTGTTCTTTCTGC  
AGATGCATCTTCCAGGCTTGCTGGAAATGAAACGGATCACTTAGCCC

>M6-PGSC0003DMG400000996-(rev)M6LRR-RLK\_610

CAAACAATTTAACAGGTGAACTACCATACTCTTTGGGTAATCTTTCATCCCTTATTGCCTTAGCAGCAACA  
GAGAATAGATTAGAAGGAAGTATACCGTATTCGTTAGGCCAGTTGACTA

>M6-PGSC0003DMG400000996-(rev)M6LRR-RLK\_671

AGCAGCAACAGAGAATAGATTAGAAGGAAGTATACCGTATTCGTTAGGCCAGTTGACTAACTTGAGTTA  
TATCTCTCTTGGTGGTAATATGCTTTCTGGTTCAATCCCATTTTCAGTTTT

>M6-PGSC0003DMG400000996-(rev)M6LRR-RLK\_732

TTGAGTTATATCTCTCTTGGTGGTAATATGCTTTCTGGTTCAATCCCATTTTCAGTTTTTAACTTATCCTCTC  
TGTATCATCTTGCTGCACCAGTTAACCAACTTAAAGGAAGTCTTCCC

>M6-PGSC0003DMG400000996-(rev)M6LRR-RLK\_793

ACTTATCCTCTCTGTATCATCTTGCTGCACCAGTTAACCAACTTAAAGGAAGTCTTCCCAGTATATTGGA  
TCCACACTCCGAGTCTTCGCATAGTTTTTTTTGTTCTCAAACCTATTAA

>M6-PGSC0003DMG400000996-(rev)M6LRR-RLK\_854

TGATATTGGATCCACACTTCCGAGTCTTCGCATAGTTTTTTTTGTTCTCAAACCTATTAAGTGGAGTGCTTC  
CAAGTTCCATTTCTAACTTAAACCAATCTTGAAATTCTCTCATTATCAAG

>M6-PGSC0003DMG400000996-(rev)M6LRR-RLK\_915

GGAGTGCTTCCAAGTTCCATTTCTAACTTAAACCAATCTTGAAATTCTCTCATTATCAAGAAACCAGTTGTC  
CGGGAAAATCCCTTCTCTGGAAAACTCCGTAATCTTCAAGGACTAGCT

>M6-PGSC0003DMG400000996-(rev)M6LRR-RLK\_976

ACCAGTTGTCCGGGAAAATCCCTTCTCTGGAAAACTCCGTAATCTTCAAGGACTAGCTATGCATTTCAA  
TAATCTTGGAACCGGAAGAGAAGATGACATGGATTTCTTTTCTTCATTGG

>M6-PGSC0003DMG400001016-(rev)M6LRR-RLP\_0

CATACATTGACAGGTGAAATACCGAAAAAATTTAGCAATCAGATTGAGTTGTTTGATCTTAGTTTCAACA  
GGTTTACTGGTTCACTACCAATGGAGATTTTCAACATATCGGGTATGAGA

>M6-PGSC0003DMG400001016-(rev)M6LRR-RLP\_1054

TGAGCAGCATTTTCAGCTTTGGAATTTCTAGACCTTTCTCATAACAATGTTTCAGGATTGATTCCCAAGTCT  
TTGGAGAAGCTTCTATATCTCAAGTATTTCAACGTTTCATTCAACAAGT

>M6-PGSC0003DMG400001016-(rev)M6LRR-RLP\_1178

TGGTCAAATCCCCTCGAATGGTCCTTTCAAGAACCTCTCCGGTGAGTTTTTTCATGTCTAATGAAGCATTGT  
GTGGATCTCCAAGATTTTGTGTTCCCCATGCCACAGTAGCACATCAA

>M6-PGSC0003DMG400001016-(rev)M6LRR-RLP\_124

TTCAAGTATTTTCAATAATGTGACTGGAACCTCTCCATTAAACATAGGTTCTACGTTACCCAACATTGAA  
GTTATTCATCTGAGAACTTAAATCTTTATGGGACTATACCTCATTCTC

>M6-PGSC0003DMG400001016-(rev)M6LRR-RLP\_1240

AAGCATTGTGTGGATCTCCAAGATTTTGTGTTCCCCATGCCACAGTAGCACATCAAAGCATAAATCCAA  
GAGGAAAAAAGTGATTGTTCTTGTCTACCGGGTACACTTGTATTAGTCT

>M6-PGSC0003DMG400001016-(rev)M6LRR-RLP\_1302

AAATCCAAGAGGAAAAAAGTGATTGTTCTTGTCTACCGGGTACACTTGTATTAGTCTCCATCGCCTTTG  
CCCTTTTATGGTTAAGGTATACAAGAGGTAAAAGAAGTATCCTCAGCAA

>M6-PGSC0003DMG400001016-(rev)M6LRR-RLP\_1364

CGCCTTTGCCCTTTTATGGTTAAGGTATACAAGAGGTAAAAGAAGTATCCTCAGCAAGCAGTTGATTCA  
TCCTTTGTCATCTCAACAAAAGGAAGAATTTCATACTATGAACTACTTCG

>M6-PGSC0003DMG400001016-(rev)M6LRR-RLP\_1426

TTGATTCATCCTTTGTCATCTCAACAAAAGGAAGAATTTCATACTATGAACTACTTCGAGCAACTGATTCA  
CTTAGTGAGATCAATTTAATTGGTTCTGGGAGTTTCGGCTCTGTTTACA

>M6-PGSC0003DMG400001016-(rev)M6LRR-RLP\_1488

ACTGATTCACCTTAGTGAGATCAATTTAATTGGTTCTGGGAGTTTCGGCTCTGTTTACAAAGGCATCCTCA  
GAGATGGGACTTTCATTGCAGCTAAAGTGTTCACCCACAATTGCAAGTG

>M6-PGSC0003DMG400001016-(rev)M6LRR-RLP\_1550

CATCCTCAGAGATGGGACTTTCATTGCAGCTAAAGTGTTCACCCACAATTGCAAGTGGCATTTAGGAGT

TTTGATACAGAATGTCAAGTTTTGCGCAACCTTCGTCATAGGAATCTCAC

>M6-PGSC0003DMG400001016-(rev)M6LRR-RLP\_1674

GTCATCACCAGTTGTTCCAACCTTGAATTTAAGGCTTTAATACTCGAGTACATGCCCAATGGGAGCCTCA

ATAAGTGGTTGTATTCACACAACACTACTTCTTAGACATCAAACATAGGCTA

>M6-PGSC0003DMG400001016-(rev)M6LRR-RLP\_1736

GAGCCTCAATAAGTGGTTGTATTCACACAACACTACTTCTTAGACATCAAACATAGGCTAAGTATAATGATA

GATGTAGCATGTGCATTGGAATATCTACACCATGGATGCTCATTACCCGT

>M6-PGSC0003DMG400001016-(rev)M6LRR-RLP\_1798

TAATGATAGATGTAGCATGTGCATTGGAATATCTACACCATGGATGCTCATTACCCGTGATTCATTGTGA

TTTGAAGCCTAGTAACGTCTTGTTGGATGAGGAAATGGTTGCCACCTAA

>M6-PGSC0003DMG400001016-(rev)M6LRR-RLP\_186

AACATTGAAGTTATTCATCTGAGAACTTAAATCTTTATGGGACTATACCTCATTCTCTCTCCAATTGTTCC

AAACTCACTAGTCTAGACCTTTCTCTCAATAGACTAACAGGTTTGATT

>M6-PGSC0003DMG400001016-(rev)M6LRR-RLP\_1860

CATTGTGATTTGAAGCCTAGTAACGTCTTGTTGGATGAGGAAATGGTTGCCACCTAAGTGACTTTGGAA

TTTCAAAGTTGCTTTCTGAAGATGAGAGTTCTTTATACACTAAAACATTA

>M6-PGSC0003DMG400001016-(rev)M6LRR-RLP\_1984

CGTTTGTTATATTGCACCAGGTACGTGATCTCTTAATCAATTGCTTTTGATTATTTCTCTTTCCTTATTTTC

CACTAGTAAATGTTGAATTTCAAATGATTGATTGCAGAGTATGGA

>M6-PGSC0003DMG400001016-(rev)M6LRR-RLP\_2046

TCCTTATTTTCCACTAGTAAATGTTGAATTTCAAATGATTGATTGCAGAGTATGGACTGGAGGGATTG

GTGTCAATAAAATGTGATGTTTATAGTTAAGGGATCATGTTGATGGAAAC

>M6-PGSC0003DMG400001016-(rev)M6LRR-RLP\_2170

ACTAGGAAAAATCCTAATGATGAAATGTTGATGGAGATTTTAGTTTGAAGCAATGGGTGAGAAATTCA

CTCCACAAGCAGCAATGGAAATTGTTGATGCCAACTTAATATCGCCACAT

>M6-PGSC0003DMG400001016-(rev)M6LRR-RLP\_2232

AAATTCCTCCACAAGCAGCAATGGAAATTGTTGATGCCAACTTAATATCGCCACATGATAATCAATTA

ATGAAAAAGCTAGATTGTGTGGTATCCATCATGAAAGTGGCAATAGATTG

>M6-PGSC0003DMG400001016-(rev)M6LRR-RLP\_2356

GTTGAATCTCCAAAAGGAAGGATTGACATGAAAGATGTTGTGGGGAGGTTAAAGACGATCAAGATTCA  
ACTTCTTGCATGTTGAGGAAGATCTTATTAGAACTTTTCTTCCAAATCATC

>M6-PGSC0003DMG400001016-(rev)M6LRR-RLP\_2418

GATTCAACTTCTTGCATGTTGAGGAAGATCTTATTAGAACTTTTCTTCCAAATCATCTCATTGTAACAAA  
CATTTGCAATAATAGTTAGCTTCAAATAAGTTATAGCATTATGTCTTTC

>M6-PGSC0003DMG400001016-(rev)M6LRR-RLP\_248

CAATTGTTCCAACTCACTAGTCTAGACCTTCTCTCAATAGACTAACAGGTTTGATTCCCAACTCTCTTG  
GAAGTTTGACTCATCTACAGTCCCTAAGCTTGGCAATTAACAATTTAAT

>M6-PGSC0003DMG400001016-(rev)M6LRR-RLP\_2480

TGTAACAAACATTTGCAATAATAGTTAGCTTCAAATAAGTTATAGCATTATGTCTTTCATAACATAGAGAA  
TTGATGGGCATGTATACTTCTTAGGTCTTGAATTTGTAAAGTGGTTTTG

>M6-PGSC0003DMG400001016-(rev)M6LRR-RLP\_310

ACTCTCTTGAAGTTTGACTCATCTACAGTCCCTAAGCTTGGCAATTAACAATTTAATGGGCGATAGTAG  
GTTAAGCTTCTTGACTTCCTTGTCAAATTGTAGAGATTTAAAAATTATTT

>M6-PGSC0003DMG400001016-(rev)M6LRR-RLP\_372

GATAGTAGGTTAAGCTTCTTGACTTCCTTGTCAAATTGTAGAGATTTAAAAATTATTTTCTCTCTGCGAA  
CCCTCTATATGGTGTGCTTCCAGAATCCATAGGGAACCTTTCAGTACT

>M6-PGSC0003DMG400001016-(rev)M6LRR-RLP\_434

CTCTGCGAACCTCTATATGGTGTGCTTCCAGAATCCATAGGGAACCTTTCAGTACTTCTCTTCTAAGGT  
TTAGAGCTATTGATTGTAAAATTAAGGGGGAAATTCCAAAAGGATTTGG

>M6-PGSC0003DMG400001016-(rev)M6LRR-RLP\_496

TTCTAAGGTTTAGAGCTATTGATTGTAAAATTAAGGGGGAAATTCCAAAAGGATTTGGGAACCTTAAGCA  
GCTTATTAGAACTCGATCTTCTAGAAACGGTTTCACTGGACCAATTCCCA

>M6-PGSC0003DMG400001016-(rev)M6LRR-RLP\_558

TTAAGCAGCTTATTAGAACTCGATCTTCTAGAAACGGTTTCACTGGACCAATTCCCACAACAATCAGCA  
ACTTGAGATTCCTTCAGAGCTTGAAGTTGAGTGTCAACAACTTTCTGGA

>M6-PGSC0003DMG400001016-(rev)M6LRR-RLP\_62

TTTCAACAGGTTTACTGGTTCCTACTACCAATGGAGATTTTCAACATATCGGGTATGAGAGAGATTCAAGTT  
ATTTTCAATAATGTGACTGGAACCTCTCCATTAAACATAGGTTCTACGTT

>M6-PGSC0003DMG400001016-(rev)M6LRR-RLP\_620

AATCAGCAACTTGAGATTCCTTCAGAGCTTGAAGTTGAGTGTCAACAACTTTCTGGATATATTGGAGAT  
GATCTATGCAAATTACAGAACTTGGGTTATTTAACTTGACTTTGAATCA

>M6-PGSC0003DMG400001016-(rev)M6LRR-RLP\_682

TTGGAGATGATCTATGCAAATTACAGAACTTGGGTTATTTAACTTGACTTTGAATCAACTTTCAGGATCT  
CTTCCGAATTGTTTGGGAACTTAACTTCCCTTAGGGAGATGATTCTAG

>M6-PGSC0003DMG400001016-(rev)M6LRR-RLP\_744

TCAGGATCTCTTCCGAATTGTTTGGGAACTTAACTTCCCTTAGGGAGATGATTCTAGGTTCCAACAAATT  
GCGTTCAATCATTCCAAAAAGCTTAGGAAACCTCATAAACCTCTTGAAG

>M6-PGSC0003DMG400001016-(rev)M6LRR-RLP\_806

CAACAAATTGCGTTCAATCATTCCAAAAAGCTTAGGAAACCTCATAAACCTCTTGAAGCTAGACTTATCCT  
CAAACAATTGGGTGGCTCTATACCTCTGGAAATTGGAAATCTAAAGGC

>M6-PGSC0003DMG400001016-(rev)M6LRR-RLP\_930

ATATATATGGATCTATCAATAAATACACTCTCAAATGGAATTCCTAAAGAAATTGATAGCTTGCAAAATCT  
TATATACCTTTCTTTGAGAGACAACAAATTGCAAGGATCAATTCCTGGC

>M6-PGSC0003DMG400001016-(rev)M6LRR-RLP\_992

GCAAAATCTTATATACCTTTCTTTGAGAGACAACAAATTGCAAGGATCAATTCCTGGCTCAATGAGCAGC  
ATTTAGCTTTGGAATTTCTAGACCTTTCTCATAACAATGTTTCAGGATT

>M6-PGSC0003DMG400001059M6G-LecRK\_0

AAAAATTTTATACTAGAACAATAGTTCTTTAATGGCATGTCTAAAAATCCTACTATTTTTCTCTTCATGAA  
CATTTCTTTTGCCCAAAAAACACAATTTTCAAGGCCAACACCTTAG

>M6-PGSC0003DMG400001059M6G-LecRK\_1037

AAAACCTGTTCTTGTGCTGCTTTTGCCTCTATCACAGCTAATGGAACCTGGTTGTGATATTTGGAGTAACGTA  
TCGATTTTGAACCTCACTTGAATCGGATGTTTTATTCTTGGTGATGAAA

>M6-PGSC0003DMG400001059M6G-LecRK\_1098

GAGTAACGTATCGATTTTGAACCTCACTTGAATCGGATGTTTTATTCTTGGTGATGAAAGAGGTATGTTC  
ATATTTATCTCAAATATCCTTTTTATGTTGTTGTCGTGTGACCAGGAGGT

>M6-PGSC0003DMG400001059M6G-LecRK\_122

TTGGAGAAAAATTGGAATCAGCAAACAAGGAATTCAGACTTGAGTTTTTTAGCCTTGATGCCAATAAAA

CACATTATATTGGCATATTCTACAATTTACCTTCTAACATGACCTTATTCC

>M6-PGSC0003DMG400001059M6G-LecRK\_1281

ACAGTTGACTCTTGTGGTCCAGGGAAGTGCCTATTTCTATTGTCTAGCAAGTAACTTGAGTTAGTAAAG

CGGACTCTAACGATGAATTGTGCAATGTGTATTCATAGATTTGGTGCCAA

>M6-PGSC0003DMG400001059M6G-LecRK\_1342

TTAGTAAAGCGGACTCTAACGATGAATTGTGCAATGTGTATTCATAGATTTGGTGCCAATAAGAAATCG

GAACAGCACAGATGTACCAAGCACAATCTCACTTCCTCCAGATTTAGCACC

>M6-PGSC0003DMG400001059M6G-LecRK\_1403

AGAAATCGGAACAGCACAGATGTACCAAGCACAATCTCACTTCCTCCAGATTTAGCACCAGAACCATCTC

CTTATTCAACGTCAGGATCATCTAAAGGAACTTGTATGTATTGTGTATAA

>M6-PGSC0003DMG400001059M6G-LecRK\_1464

AACCATCTCCTTATTCAACGTCAGGATCATCTAAAGGAACTTGTATGTATTGTGTATAATCTTGCTCTTGA

ATTATTGTATATGATTGAAGGTGAAAACCTTTTTTTGATTGTTTCCTCG

>M6-PGSC0003DMG400001059M6G-LecRK\_1647

ACACAATCTAGTCCTTGTTCGAGTATATCCAGAAAAAGATCATTTACATCATCTGTATTGATGTTGTTAC

TGCTCCTTTCCTGAATGTTCTACACTGTTTTCTTTTTACTTGTCATGT

>M6-PGSC0003DMG400001059M6G-LecRK\_1708

ATGTTGTTACTGCTCCTTTCCTGAATGTTCTACACTGTTTTCTTTTTACTTGTCATGTTTTCTGCACTGTGC

TTTTCTCCGTTTCCATAACTACTATGATTTGTTGCTCTTGAGCCAA

>M6-PGSC0003DMG400001059M6G-LecRK\_183

CAATAAAACACATTATATTGGCATATTCTACAATTTACCTTCTAACATGACCTTATTCCCCGATGATGATC

GCCCCGTTTGGGTTGCAAATCGCGATATTCCGATACAATATGCATCAGG

>M6-PGSC0003DMG400001059M6G-LecRK\_1952

GAAAATGGTGGGTATGGCTTATAGCTGCAAGCGTTTTGACACCATTTGTAGGATTTTTCGCCCTATGCTA

CTTTCTACACGGAAAAGGTGAGCGCTCAAAGAATTTATCTAGAAGCTTGC

>M6-PGSC0003DMG400001059M6G-LecRK\_2013

CCTATGCTACTTTCTACACGGAAAAGGTGAGCGCTCAAAGAATTTATCTAGAAGCTTGCACCAGTAAAC

TCAACTATGTTGCTCGGACTCTGCTAAAATGCTGCCACAGTACTCCTGTC

>M6-PGSC0003DMG400001059M6G-LecRK\_2074

CAGTAAACTCAACTATGTTGCTCGGACTCTGCTAAAATGCTGCCACAGTACTCCTGTCCGATCCTCAA  
AAAAAAACGCACTACTTTTGAAGGATCTAACACACACTAAACAACATTT

>M6-PGSC0003DMG400001059M6G-LecRK\_2135

ATCCTCAAAAAAAAAACGCACTACTTTTGAAGGATCTAACACACACTAAACAACATTTTTTAAAAGTCC  
GAGCAATATAGAAATGCTCTATACTATGGTTTCTGATCCCACAACCTCCT

>M6-PGSC0003DMG400001059M6G-LecRK\_2196

TAAAAGTCCGAGCAATATAGAAATGCTCTATACTATGGTTTCTGATCCCACAACCTCCTCTTCACTATCA  
GGGAAAGCAAAGCAACAGCTTTGCTATTGCTTAATCAAACAGCAAATA

>M6-PGSC0003DMG400001059M6G-LecRK\_2257

TTCACTATCAGGGAAAGCAAAGCAACAGCTTTGCTATTGCTTAATCAAACAGCAAATATATCTAAAAAG  
AGAAAATAGACAAGAAAATGAGCCATGAAGTGCAGTTATACAGCCTCGA

>M6-PGSC0003DMG400001059M6G-LecRK\_2318

TCTAAAAGAGAAAAATAGACAAGAAAATGAGCCATGAAGTGCAGTTATACAGCCTCGAGAGCCTAGC  
AATCGCCACAGACAATTTTTACCAGGAAATAAGCTCGGGGAAGGTGGATTC

>M6-PGSC0003DMG400001059M6G-LecRK\_2379

GCCTAGCAATCGCCACAGACAATTTTTACCAGGAAATAAGCTCGGGGAAGGTGGATTCGGACCAGTTT  
ACAAGGTAAACATGAAACCTTTTATATGAATATGATTCGCGTAAGCATAAA

>M6-PGSC0003DMG400001059M6G-LecRK\_244

GATGATGATCGCCCCGTTTGGGTTGCAAATCGCGATATCCGATACAATATGCATCAGGTAACACACTCA  
CATTGGATGATGATGGAAAGTTGAAAATTTTCTATGGAGAGGATAGTTTT

>M6-PGSC0003DMG400001059M6G-LecRK\_2440

ACCAGTTTACAAGGTAACATGAAACCTTTTATATGAATATGATTCGCGTAAGCATAAATACTTAAACGA  
GTCATTTTTTTTTCAGGGAGAAATGCCTGATGGGCAAGAAGTTGCCATAAA

>M6-PGSC0003DMG400001059M6G-LecRK\_2501

CTTAAACGAGTCATTTTTTTTTCAGGGAGAAATGCCTGATGGGCAAGAAGTTGCCATAAAAAGACTTTTCG  
ACTAGTTCAGGACAAGGCCTATTGGAGTTCAAGAATGAAATTCTATTGATT

>M6-PGSC0003DMG400001059M6G-LecRK\_2562

GACTTTCGACTAGTTCAGGACAAGGCCTATTGGAGTTCAAGAATGAAATTCTATTGATTGCAAACTTCA  
ACATACTAACCTTGTTAGGCTTCTAGGATACTGTACTCTACGCGAAGAAC



>M6-PGSC0003DMG400001059M6G-LecRK\_2623

AAAACCTCAACATACTAACCTTGTTAGGCTTCTAGGATACTGTACTCTACGCGAAGAACGGATTATAGTT  
TATGAATACATGCACAACAAAAGCCTAGACTTCTTCCTCTTTGGTAAACA

>M6-PGSC0003DMG400001059M6G-LecRK\_2684

ATTATAGTTTATGAATACATGCACAACAAAAGCCTAGACTTCTTCCTCTTTGGTAAACATCATGTTTTTCAT  
CTTCAACAATTAGAACAACCTTTGTCAAGAAATTTTCATCTTTTACAATG

>M6-PGSC0003DMG400001059M6G-LecRK\_2745

ATGTTTTTCATCTTCAACAATTAGAACAACCTTTGTCAAGAAATTTTCATCTTTTACAATGATATGAACAGAT  
AGTAACAAAAAGGAGCTACTAAATTGGGACACACGATTCAGAATCATCG

>M6-PGSC0003DMG400001059M6G-LecRK\_2806

ATGAACAGATAGTAACAAAAAGGAGCTACTAAATTGGGACACACGATTCAGAATCATCGAAGGGATTG  
CTCAGGGTATACTGTATCTGCATAAATATTCAAGGCTGAAAGTGATTCATAG

>M6-PGSC0003DMG400001059M6G-LecRK\_2867

GGGATTGCTCAGGGTATACTGTATCTGCATAAATATTCAAGGCTGAAAGTGATTCATAGAGATTTAAAA  
GCAAGCAACATCTTACTTGACGCGGAAATGAATCCAAAGATATCAGACTTT

>M6-PGSC0003DMG400001059M6G-LecRK\_2928

ATTTAAAAGCAAGCAACATCTTACTTGACGCGGAAATGAATCCAAAGATATCAGACTTTGGCATGGCGA  
GGATATTTGGAACACAAGAATCTGAAGCAAACACGAAAAGAATTGTTGGAA

>M6-PGSC0003DMG400001059M6G-LecRK\_2989

CATGGCGAGGATATTTGGAACACAAGAATCTGAAGCAAACACGAAAAGAATTGTTGGAACACAGTAAG  
TAAATAAGCAATGTTTTCATAAACAAGTTTTTATATAATATTACTTGAAGTT

>M6-PGSC0003DMG400001059M6G-LecRK\_305

ACCACTCACATTGGATGATGATGGAAAGTTGAAAATTTCTATGGAGAGGATAGTTTTTTTTATGTTAAG  
TTATTATAATGTAACAACAAGAAATACAAGTGCTACACTATTTGATAATG

>M6-PGSC0003DMG400001059M6G-LecRK\_3050

CAGTAAGTAAATAAGCAATGTTTTCATAAACAAGTTTTTATATAATATTACTTGAAGTTCTGAATACATTT  
TTCGGATACTACTTCAGTGGCTATATGTCTCCAGAGTATGCCTTGAGAG

>M6-PGSC0003DMG400001059M6G-LecRK\_3111

GAATACATTTTTCGGATACTACTTCAGTGGCTATATGTCTCCAGAGTATGCCTTGAGAGGCATTGTTTCAA

CGAAAACGGATGTATTCAGCTTTGGAGTTTTACTGTTAGAAATTGTTAG

>M6-PGSC0003DMG400001059M6G-LecRK\_3172

ATTGTTTCAACGAAAACGGATGTATTCAGCTTTGGAGTTTTACTGTTAGAAATTGTTAGTGGCAAGAAAA

ACAACAGCTGCTATGATTCCGAACATCCACTAAACCTCATAGGACTGGTA

>M6-PGSC0003DMG400001059M6G-LecRK\_3233

GCAAGAAAAACAACAGCTGCTATGATTCCGAACATCCACTAAACCTCATAGGACTGGTAAGTTTCTAGAT

TATATTATGAACATATCTCGCGAAATGGAGAAACATATAACTATTAGTAC

>M6-PGSC0003DMG400001059M6G-LecRK\_3294

TTTCTAGATTATATTATGAACATATCTCGCGAAATGGAGAAACATATAACTATTAGTACTATGTTTTTAGG

CATGGGAATTGTGGAGAGAAGAGAGAGCTTTGGAGCTAATAGATGCAAC

>M6-PGSC0003DMG400001059M6G-LecRK\_3355

TGTTTTTAGGCATGGGAATTGTGGAGAGAAGAGAGAGCTTTGGAGCTAATAGATGCAACATTAATTGAA

TCATGCTCGCGTGATGAAGTAATGAGATGCATACATGTGGGACTCCTTTGT

>M6-PGSC0003DMG400001059M6G-LecRK\_3416

TAATTGAATCATGCTCGCGTGATGAAGTAATGAGATGCATACATGTGGGACTCCTTTGTGTGCAAGATTA

TGCAAAAGATAGGCCTTCAATGTCAAATGTTGTTTCAATGCTTGTGAATG

>M6-PGSC0003DMG400001059M6G-LecRK\_3477

GCAAGATTATGCAAAAGATAGGCCTTCAATGTCAAATGTTGTTTCAATGCTTGTGAATGATACGAAACAA

CCACCACCACCACCAGAACGACCAGGATTTTTCATCGAGAGAGGGGATCA

>M6-PGSC0003DMG400001059M6G-LecRK\_3538

ACGAAACAACCACCACCACCACCAGAACGACCAGGATTTTTCATCGAGAGAGGGGATCAACGTGCAGA

GATCTCCGAAGAAGTAGTCAGATACTCGATAAACGGGCTATCAATATCAGAG

>M6-PGSC0003DMG400001059M6G-LecRK\_3599

GTGCAGAGATCTCCGAAGAAGTAGTCAGATACTCGATAAACGGGCTATCAATATCAGAGTTGAGAGCA

AGATAAGATAACAAGATGGTCAATTGGGAAGTAACTTATTTAACATTCTTTTG

>M6-PGSC0003DMG400001059M6G-LecRK\_366

TATGTTAAGTTATTATAATGTAACAACAAGAAATACAAGTGCTACACTATTTGATAATGGAAATTTTGTG

TTGGTGGAATTGAATACTAATGGTTCAGAGAATAAAACATTGTGGCAAAG

>M6-PGSC0003DMG400001059M6G-LecRK\_3660

GAGAGCAAGATAAGATACAAGATGGTCAATTGGGAAGTAACTTATTTAACATTCTTTTGATGAAGTGTA  
AAAAGTTACCAACTTCAAGTACATACTTATAGGACTAATTTGAGTCCTGT

>M6-PGSC0003DMG400001059M6G-LecRK\_3721

GAAGTGTA AAAAGTTACCAACTTCAAGTACATACTTATAGGACTAATTTGAGTCCTGTTTCTTTGATACT  
GTTGCATTATGATGCATTTTGTGAGTAGAATATTTGAGATGGATCCAGA

>M6-PGSC0003DMG400001059M6G-LecRK\_3782

CTTTGATACTGTTGCATTATGATGCATTTTGTGAGTAGAATATTTGAGATGGATCCAGAATTTAAGTCAA  
AGATGGTAAACGAGATAAGGCAAGGCGAAGTTATGGCAATGGAACTTCA

>M6-PGSC0003DMG400001059M6G-LecRK\_3843

TTAAGTCAAAGATGGTAAACGAGATAAGGCAAGGCGAAGTTATGGCAATGGAACTTCACCATTACCTT  
CCCCCTCCCGCCTGATAGCAACGTCACCAGTTACATTTAAAATGTTTTGAA

>M6-PGSC0003DMG400001059M6G-LecRK\_3904

ATTACCTTCCCCCTCCCGCCTGATAGCAACGTCACCAGTTACATTTAAAATGTTTTGAATACACTTGACAC  
TCATCGATTATATAAGTTGAAAGAGAATATGAGAGGAGTTTCTGAACTA

>M6-PGSC0003DMG400001059M6G-LecRK\_3965

CACTTGACACTCATCGATTATATAAGTTGAAAGAGAATATGAGAGGAGTTTCTGAACTATCAATATTTGT  
ATATTAGACAAAAGAGGTA ACTGAATGTACATATATTTTCTCATTCTGAG

>M6-PGSC0003DMG400001059M6G-LecRK\_4026

AATATTTGTATATTAGACAAAAGAGGTA ACTGAATGTACATATATTTTCTCATTCTGAGCTTTACATGTTC  
CACAAATGGGCTGTGAATTAGTTTACTCAATTCACTACAAAATAAA

>M6-PGSC0003DMG400001059M6G-LecRK\_4087

TTACATGTTCCACAAATGGGCTGTGAATTAGTTTACTCAATTCACTACAAAATAAAGAACAATTTTG  
GTTTTACCTAACTCACTACAATTCTGATGATTTAGCTTCATCAATATT

>M6-PGSC0003DMG400001059M6G-LecRK\_4148

ACAATTTTGTTTTACCTAACTCACTACAATTCTGATGATTTAGCTTCATCAATATTGTTATCTTTATCG  
CTAACAAA ACTAAACGATCACCATCTCTGATCAACTCAATTTGTCG

>M6-PGSC0003DMG400001059M6G-LecRK\_4209

TATCTTTATCGCTAACAAA ACTAAACGATCACCATCTCTGATCAACTCAATTTGTCGATTTAGCTCCAT  
CTTTGCTTACA ACTTTGGCCTGAGAGATACCATATCTACTAGAACCAA

>M6-PGSC0003DMG400001059M6G-LecRK\_427

AATTTTGTGTTGGTGAATTGAATACTAATGGTTCAGAGAATAAAACATTGTGGCAAAGTTTTGATTATC  
CTACTGATACACTATTACCTGGGATGAACTTGGGAGAAATGTTAAAACA

>M6-PGSC0003DMG400001059M6G-LecRK\_4270

TTCAGCTCCATCTTTGCTTACAACCTTGGCCTGAGAGATACCATATCTACTAGAACCAAGTTGAAGTAGCT  
CTTTAAAACCTCTGTGGGAGTAAAATGAGTTTCCCCCGTTGTCTCCTTT

>M6-PGSC0003DMG400001059M6G-LecRK\_4331

TGAAGTAGCTCTTTAAAACCTCTGTGGGAGTAAAATGAGTTTCCCCCGTTGTCTCCTTTCTCAGGGCAAC  
ACACTGTCACTCGGGGAGCATAAGTCTTGGTTGTCATGACACTTACATTA

>M6-PGSC0003DMG400001059M6G-LecRK\_4392

CAGGGCAACACACTGTCACTCGGGGAGCATAAGTCTTGGTTGTCATGACACTTACACTGTCTGTTTGC  
AGATAAAAGCACGTCATGCTCATTGGTCTGCTTTGCTGACATTATCCCGA

>M6-PGSC0003DMG400001059M6G-LecRK\_4453

GTCGTTTGCAGATAAAAGCACGTCATGCTCATTGGTCTGCTTTGCTGACATTATCCCGAATAATGAGTTG  
TGGAAGTTATTAGACCTACGTCTAGGACGCGAACGCCCTAATGATCCATC

>M6-PGSC0003DMG400001059M6G-LecRK\_4514

AATGAGTTGTGGAAGTTATTAGACCTACGTCTAGGACGCGAACGCCCTAATGATCCATCTAGTCCTAGA  
AATGAGACTCCATGGGATGCAGGGGTGATTGTTGGTTCACTTTTGAACCTC

>M6-PGSC0003DMG400001059M6G-LecRK\_4575

GTCCTAGAAATGAGACTCCATGGGATGCAGGGGTGATTGTTGGTTCACTTTTGAACCTCCCAAGAAATCT  
AACCCCTCGTTCCTCGGGGATAGGATCAACGGATCGAGTTCTCATCATT

>M6-PGSC0003DMG400001059M6G-LecRK\_4636

AAGAAATCTAACCCCTCGTTCCTCGGGGATAGGATCAACGGATCGAGTTCTCATCATTACCCTGGATTCCG  
AAGAGTTCTTTGATGTCTTCATGTCTTGTGCTCAGCAAGGTCCCGGGG

>M6-PGSC0003DMG400001059M6G-LecRK\_4697

CTGGATTCTGAAGAGTTCTTTGATGTCTTCATGTCTTGTGCTCAGCAAGGTCCCGGGGGTCCAATTAT  
GTTCTGCTGGTTGATCAACGTTAGCCCTCGATCCAAGAGGTACTIONTACT

>M6-PGSC0003DMG400001059M6G-LecRK\_4758

TCCAATTATGTTCTGCTGTTGATCAACGTTAGCCCTCGATCCAAGAGGTACTIONTACTATTCTATGTTA

TCTTCACAAACAGCAACATGGAGAGCTGATGAACCGTTGATCTTGGGAA

>M6-PGSC0003DMG400001059M6G-LecRK\_4819

TTCTATGTTATCTTCACAAACAGCAACATGGAGAGCTGATGAACCGTTGATCTTGGGAAGCGTGACATCC  
CCGCCATGACGGACAATCTCCTTGAGCAAATTCAAGTTGTTTTGTTCAAC

>M6-PGSC0003DMG400001059M6G-LecRK\_488

TTGATTATCCTACTGATACTATTACCTGGGATGAACTTGGGAGAAATGTAAAACAGGACAGATGT  
GGTCACTGGTTTTCTTGATAAGCAAAGATGTACCTGCCTCGGGGTCATTTA

>M6-PGSC0003DMG400001059M6G-LecRK\_4880

GTGACATCCCCGCCATGACGGACAATCTCCTTGAGCAAATTCAAGTTGTTTTGTTCAACAGCAACGCAGG  
CGAAATGTCCACATCACCAGCTGATAGTTTAGCACCGTTGTCAACGAGT

>M6-PGSC0003DMG400001059M6G-LecRK\_4941

CAACGCAGGCGAAATGTCCACATCACCAGCTGATAGTTTAGCACCGTTGTCAACGAGTAACTGGATAA  
CTGACTCGTGCTTCCCCATGATAGCTCCCAATGGCACATTGCCTTCTG

>M6-PGSC0003DMG400001059M6G-LecRK\_5002

CTGGATAACTGACTCGTGCTTCCCCATGATAGCTCCCAATGGCACATTGCCTTCTGAATCTGTGTATA  
CACAAGAAACAAAATCAAATTCTTATATCTGGCTTTGTGTCAGTGGACA

>M6-PGSC0003DMG400001059M6G-LecRK\_5063

TCTGTGTATACACAAGAAACAAAATCAAATTCTTATATCTGGCTTTGTGTCAGTGGACATGGTAGGAAAA  
GGAGACAACTGATAGTTAGAGTGTGAACTCGCAAAAAAAAAAACGATAG

>M6-PGSC0003DMG400001059M6G-LecRK\_5124

GTAGGAAAAGGAGACAACCTGATAGTTAGAGTGTGAACTCGCAAAAAAAAAAACGATAGTTGAGGTGT  
GTTTTGACTATAAACTCTCTAATGTTTGGACCAAACAACTTTTGGCAAC

>M6-PGSC0003DMG400001059M6G-LecRK\_5185

GAGGTGTGTTTTGACTATAAACTCTCTAATGTTTGGACCAAACAACTTTTGGCAACAACAGAATTTG  
AAAAAAGAAATGGAGCATACTCTACTATTGGGATCAGCCCCAAAATCGA

>M6-PGSC0003DMG400001059M6G-LecRK\_5229

CAAACCTTTTGGCAACAACAGAATTTGAAAAAAGAAATGGAGCATACTCTACTATTGGGATCAGCCCCA  
AAATCGAGCAGAAGAACCACACAGTTCTCAATGCCTTTAGACGCAGCGATA

>M6-PGSC0003DMG400001059M6G-LecRK\_549

ACAGATGTGGTCACTGGTTTCTTGGATAAGCAAAGATGTACCTGCCTCGGGGTCATTTACGCTTGGTATA  
GACATGAATGACATTGACCAATTGATAATATGGTGGATGGGAAGTGTGTT

>M6-PGSC0003DMG400001059M6G-LecRK\_61

CTCTTCATGAACATTTCTTTTGCCCAAAAAACACAATTTTCAAGGCCAACACCTTAGAGTTGGAGAAAA  
ATTGGAATCAGCAAACAAGGAATTCAGACTTGAGTTTTTTAGCCTTGAT

>M6-PGSC0003DMG400001059M6G-LecRK\_610

CTTGGTATAGACATGAATGACATTGACCAATTGATAATATGGTGGATGGGAAGTGTGTTTTGGACGAGT  
GGACGCTGGGGAAATGAGACGTTTGGCAATGTATCGCGAGTATCACACTAT

>M6-PGSC0003DMG400001059M6G-LecRK\_671

GGACGAGTGGACGCTGGGGAAATGAGACGTTTGGCAATGTATCGCGAGTATCACACTATGAGTATGTT  
AACTTGAGTTTTGTTTCGACAGAGGATGAGAAGTATGTGACTTATTCTGTCA

>M6-PGSC0003DMG400001059M6G-LecRK\_732

GTATGTAACTTGAGTTTTGTTTCGACAGAGGATGAGAAGTATGTGACTTATTCTGTCAGTGAGACTCGA  
ACTTTGTCTAGATATGTAATGGATACATTTGGTTTTATTAAGGAAAGAGG

>M6-PGSC0003DMG400001059M6G-LecRK\_793

GAGACTCGAACTTTGTCTAGATATGTAATGGATACATTTGGTTTTATTAAGGAAAGAGGAGCAGCAGGA  
CCTTTTGGGGTGTGTTTTTACAAGCCTAGTGCTGGTTGTGTGACAGAAGAA

>M6-PGSC0003DMG400001059M6G-LecRK\_854

CAGCAGGACCTTTTGGGGTGTGTTTTTACAAGCCTAGTGCTGGTTGTGTGACAGAAGAATCGATTGGGT  
GCTCGATCAGAAACGATTCGTGGTTCAAGAGGAGTCCAAATAGTGTCTCTG

>M6-PGSC0003DMG400001059M6G-LecRK\_915

GATTGGGTGCTCGATCAGAAACGATTCGTGGTTCAAGAGGAGTCCAAATAGTGTCTCTGGTAATAGGTT  
TAGGTTTGAAGACAACCACATGAGCTTATTTGATTGCAAGAGACAGTGTGA

>M6-PGSC0003DMG400001059M6G-LecRK\_976

AATAGTTTTAGGTTTGAAGACAACCACATGAGCTTATTTGATTGCAAGAGACAGTGTGAGAAAACTGT  
TCTTGTGCTGCTTTTGCCTCTATCACAGCTAATGGAACCTGGTTGTGATATT

>M6-PGSC0003DMG400001072-(rev)M6LRR-RLP\_0

ATCTCTTCTTCTCCACAAAACCTTCATCTCTCTCATCTCACATTTTGCTTAAAGATTCCATTTTTAAACAAAA  
ATTAATAAAAAACTCCACAAACCCCATTTCTTAAATCCATTTTTCTTC

>M6-PGSC0003DMG400001072-(rev)M6LRR-RLP\_1054

TTTAATGAATAATGGGTTGCGTTCCTGTTTGCCGGCGGAGATTGGGTTGTTGAAAAATCTGACTGTATTT  
GATGTGAGCTTTAATCAGTTGATGGGTCCGTTGCCGGAGAATTTTGGTGA

>M6-PGSC0003DMG400001072-(rev)M6LRR-RLP\_124

ATCTTCACTTTTTTCATCTCACATTTGGTTAAAGATTCAATCTTTGAACAGAAAAAAGCAAAAAAAAACCA  
AGCATTCTTGATTTTCAGATGACTTATGTGAGATGAAGGAGAAAACTCA

>M6-PGSC0003DMG400001072-(rev)M6LRR-RLP\_186

AAAAAACCAAGCATTCTTGATTTTCAGATGACTTATGTGAGATGAAGGAGAAAACTCAAACACCCATTTG  
CTCTCTGTTTTTCTTGCTCTGTTTTTGTGTTTCAGTTTTTACTGAAC

>M6-PGSC0003DMG400001072-(rev)M6LRR-RLP\_2108

CCTTCCCATTGCCTTGTATAGAACCCCTCCACCACCTCCTCCTTGCATTGAACCTCCCCACCTCCCTCC  
CCTTACCATCTCCTCCTCCACCACCTGTTTATCATTACAATTCTCCG

>M6-PGSC0003DMG400001072-(rev)M6LRR-RLP\_2170

ACCTCCCTCCCCTTACCATCTCCTCCTCCACCACCTGTTTATCATTACAATTCTCCGCCCCACCATCTCTA  
GCACCTCCACCACCAGTTTATTTTTACAATTCTCCACCTCCACCATC

>M6-PGSC0003DMG400001072-(rev)M6LRR-RLP\_2232

CACCATCTCTAGCACCTCCACCACCAGTTTATTTTTACAATTCTCCACCTCCACCATCACCACCACCTACTC  
CAGTATACGAAGGGCCATTACCACCAGTAATAGGAGTTCAATATGCTT

>M6-PGSC0003DMG400001072-(rev)M6LRR-RLP\_2294

CCACCTACTCCAGTATACGAAGGGCCATTACCACCAGTAATAGGAGTTCAATATGCTTACCACCTCCAC  
CACCTTTTTATTAATTCTTTCAGAAATTTCACTAACTCTTATCCTCAGAG

>M6-PGSC0003DMG400001072-(rev)M6LRR-RLP\_2356

ACCTCCACCACCCTTTTATTAATTCTTTCAGAAATTTCACTAACTCTTATCCTCAGAGCACAAAATAGTTCC  
TACAATTATTATTCCTCAACTCTTCAAGCCATCAACAAAATCGAGCT

>M6-PGSC0003DMG400001072-(rev)M6LRR-RLP\_2418

AAATAGTTCCTACAATTATTATTCCTCAACTCTTCAAGCCATCAACAAAATCGAGCTAATATGTGATCAC  
GAACCTTAAATGGTACGACAGAAAGAAAGATAAGAGGAAGGTAAGAGG

>M6-PGSC0003DMG400001072-(rev)M6LRR-RLP\_248

CCCATTTGCTCTCTGTTTTTCTTGCTCTGTTTTTGTGTTTCAGTTTTTACTGAACACACAAAATGCTGAGT

TACTGTCTCTGAAAATGGCCCTTTAACTGATTCTGAAGCTCAGTTC

>M6-PGSC0003DMG400001072-(rev)M6LRR-RLP\_2480

TGTGATCACGAACCTTAAATGGTACGACAGAAAGAAAGATAAGAGGAAGGTAAAGAGGAGAAAAGTTTC  
AATCTCCAATGATTTTATTTTTGAATTGTTATCAAATAGATTGAAGTTGTGG

>M6-PGSC0003DMG400001072-(rev)M6LRR-RLP\_2542

AGTTTCAATCTCCAATGATTTTATTTTTGAATTGTTATCAAATAGATTGAAGTTGTGGAGAGAATAAATTG  
GCAAAGTAAAGATTGAAACTTTGCTGGAAAATGTATGTATAGAGAGATC

>M6-PGSC0003DMG400001072-(rev)M6LRR-RLP\_2604

AATAAATTGGCAAAGTAAAGATTGAAACTTTGCTGGAAAATGTATGTATAGAGAGATCATAATCTTGAA  
TTAGAAACCAGTTTACAGTGCTTGCTGCAACTGGTTTTATTTAATGATCAT

>M6-PGSC0003DMG400001072-(rev)M6LRR-RLP\_2666

TCTTGAATTAGAAACCAGTTTACAGTGCTTGCTGCAACTGGTTTTATTTAATGATCATACTTTGATTTCTTT  
GTAATTTTTCTTTTTTTGGTTCTTCCAACTATAGTATAAGATGAG

>M6-PGSC0003DMG400001072-(rev)M6LRR-RLP\_2699

GCAACTGGTTTTATTTAATGATCATACTTTGATTTCTTTGTAATTTTTCTTTTTTTGGTTCTTCCAACTA  
TAGTATAAGATGAGCTTTTTATTTCTTTTAAACTTGATTGATTC

>M6-PGSC0003DMG400001072-(rev)M6LRR-RLP\_310

AAATGCTGAGTTTACTGTCTCTGAAAATGGCCCTTTAACTGATTCTGAAGCTCAGTTCATCAAACACAGG  
CAGCTTTTGTATTACAGAGATGAGTTTGGTGATAGAGGTGAAAATGTGAA

>M6-PGSC0003DMG400001072-(rev)M6LRR-RLP\_372

AACACAGGCAGCTTTTGTATTACAGAGATGAGTTTGGTGATAGAGGTGAAAATGTGAAAATTGATCCAT  
CTATGGTGTGAGAATGATAGAATCAAGAATGCTTATATTGCTTTACAAG

>M6-PGSC0003DMG400001072-(rev)M6LRR-RLP\_558

GCAGCTACACTGGAATCTTCTGTGCTCCGGCGTTGGATAACCCCAAATCCGTACAGTTGCCGGCATTGA  
CCTTAATCATGGTGACATTGCAGGGTACCTCCCGGAAGAGCTTGGGCTTC

>M6-PGSC0003DMG400001072-(rev)M6LRR-RLP\_62

TTAAACCAAAAATTAATAAAACTCCACAAACCCATTTCTTAAATCCATTTTTCTTCATAGATCTTCACTT  
TTTTCATCTCACATTTGGTTAAAGATTCAATCTTTGAACAGAAAAAAG

>M6-PGSC0003DMG400001185M6LRR-RLK\_0



TCAATGGTAGTTTCTCTTGTCTCCTTGTTTTACAACTTTTCTCTTTCTCATACTTTCGTCTCCAACCTAAC  
TGCTCAACCATCTAGCACAGACACAGACTTTTCATGCTCGTTAAC

>M6-PGSC0003DMG400001185M6LRR-RLK\_1054

CAATGAACGACCAAGTTGTAGCAGTCAAGAAAACAAAACAAGCCTCGGAGGAAATGACAATACTTCAA  
AAACTACATCATGCAAATCTAGTGAAACTAATGGGCTTTTCATCAGATTATC

>M6-PGSC0003DMG400001185M6LRR-RLK\_1116

CTTCAAAAACACTACATCATGCAAATCTAGTGAAACTAATGGGCTTTTCATCAGATTATCTTGGAATTCCTT  
TTTAGTTTATGAATATGCTGAAAATGGCTCACTGGATCAATGGCTGTTT

>M6-PGSC0003DMG400001185M6LRR-RLK\_1178

TAATTCCTTTTTAGTTTATGAATATGCTGAAAATGGCTCACTGGATCAATGGCTGTTTCCCGGATTATCAT  
CATCTTCTTCTGCCTCTGTCTTAGTGGCATCACTTGGTTGGAGTCGAAG

>M6-PGSC0003DMG400001185M6LRR-RLK\_124

CCTTTTCTTGATACTTTTATTTTCATATCGTGCCCGTCCACCAAATTATTTAGATGTCGGAAGTATATCTG  
ATCTTCTTGAAGTCAGTCGTTTAAGTATAGCTACGGCCACAGGTCTAG

>M6-PGSC0003DMG400001185M6LRR-RLK\_1240

GATTATCATCATCTTCTTCTGCCTCTGTCTTAGTGGCATCACTTGGTTGGAGTCGAAGATTACACATTGCC  
TTGGATGTTGCAAATGCTCTGCAATACCTGCATGAACATACTCAACCTA

>M6-PGSC0003DMG400001185M6LRR-RLK\_1302

CACATTGCCTTGGATGTTGCAAATGCTCTGCAATACCTGCATGAACATACTCAACCTAGTATAGTTCACG  
GGGACATCCTAACGTGTAGCATACTTCTTGATTCAAGGTTTAAAGCCAAA

>M6-PGSC0003DMG400001185M6LRR-RLK\_1364

AGTTCACGGGGACATCCTAACGTGTAGCATACTTCTTGATTCAAGGTTTAAAGCCAAAATTGCAGGTTTC  
TCTACAGCCAGACATGCCACCAACTCAATGATGCTGAAAGTTGACGTGTT

>M6-PGSC0003DMG400001185M6LRR-RLK\_1426

CAGGTTTCTCTACAGCCAGACATGCCACCAACTCAATGATGCTGAAAGTTGACGTGTTTGCTTTTGGGAT  
TGTGCTGTTGGAGTTGCTTTTCAGGGAAGAAAGCAATGGAATCAAAGATT

>M6-PGSC0003DMG400001185M6LRR-RLK\_1488

TTTGGGATTGTGCTGTTGGAGTTGCTTTTCAGGGAAGAAAGCAATGGAATCAAAGATTATAATGATGAG  
ACTCTGATCATGTGCAGAGAAATTAGTGAATCTTGAAGTTGAAGAGAAC

>M6-PGSC0003DMG400001185M6LRR-RLK\_1550

TGATGAGACTCTGATCATGTGCAGAGAAATTAGTGGAATCTTGGAAGTTGAAGAGAACAGAGAGGAGA  
AGTTTAGAAAATGGATGGATCCAAAGTTGAGCTTTTACCCTATTGATGATGC

>M6-PGSC0003DMG400001185M6LRR-RLK\_1612

AGGAGAAGTTTAGAAAATGGATGGATCCAAAGTTGAGCTTTTACCCTATTGATGATGCTCTAAACTTGG  
CTGCCTTGGCGACAGCATGCACATCGGAGCAATCAGCAGAGAGGCCTAAGA

>M6-PGSC0003DMG400001185M6LRR-RLK\_1674

AACTTGGCTGCCTTGGCGACAGCATGCACATCGGAGCAATCAGCAGAGAGGCCTAAGATGACAGATAT  
TGTCTTCAACCTCTGTTTTCTTGCTCAATCATCTTTTCAAATGTATGGACCG

>M6-PGSC0003DMG400001185M6LRR-RLK\_1736

AGATATTGTCTTCAACCTCTGTTTTCTTGCTCAATCATCTTTTCAAATGTATGGACCGTCTTGGACTTCAG  
GTGAAGCTGAGGAGATTGTCCAGATTGTTAGTCTGTAAATAGCACGTTG

>M6-PGSC0003DMG400001185M6LRR-RLK\_1798

GGACTTCAGGTGAAGCTGAGGAGATTGTCCAGATTGTTAGTCTGTAAATAGCACGTTGAGTTAAAGATG  
GAGCGTAAATATAGTTCAAGAACTTTTGTGAGTTCGTCTCAAATTTGTAAC

>M6-PGSC0003DMG400001185M6LRR-RLK\_186

AGTATATCTGATCTTCTTGAAGTCAGTCGTTTAAAGTATAGCTACGGCCACAGGTCTAGCCTCAGAGGATA  
CCGAGCTATTCCCTGACCAGCTTTTACTTGCACCTGTAAATGCTACTGC

>M6-PGSC0003DMG400001185M6LRR-RLK\_1860

AAAGATGGAGCGTAAATATAGTTCAAGAACTTTTGTGAGTTCGTCTCAAATTTGTAACATATTCTGGATT  
GTAAAGCCACAGGAACGATAAATAAGCTGATCTCCAGAATATATTGCAA

>M6-PGSC0003DMG400001185M6LRR-RLK\_1922

TCTGGATTGTAAAGCCACAGGAACGATAAATAAGCTGATCTCCAGAATATATTGCAAATTTGAGTTTTTT  
TGTCAGTTTTTCTTTGTATTTCTTTGCTGCTAATTTAGTTGCTATTGT

>M6-PGSC0003DMG400001185M6LRR-RLK\_1984

AGTTTTTTTGTCCAGTTTTTCTTTGTATTTCTTTGCTGCTAATTTAGTTGCTATTGTATATTCTTGATTGG  
ATTTTTTTCTCAACTTTGATATAAGTGGAGTGCAATTTGACCTGTAT

>M6-PGSC0003DMG400001185M6LRR-RLK\_2046

TCTTGTATTGGATGTTTTTCTCAACTTTGATATAAGTGGAGTGCAATTTGACCTGTATTTCTTTGTCCTCT

CAAAAGAAAAACAGAAAAATTAAGTTTCTGAAAAGACACGGCAAAC

>M6-PGSC0003DMG400001185M6LRR-RLK\_2091

ATTTGACCTGTATTTCTTTTCGTCTCTCAAAGAAAAACAGAAAAATTAAGTTTCTGAAAAGACACGGC  
AAACTCGTTCTTATTTATATTTATTTAAGATCCAGACGAGTACATGTTTA

>M6-PGSC0003DMG400001185M6LRR-RLK\_248

AGAGGATACCGAGCTATTCCTGACCAGCTTTTACTTGACCTGTAAATGCTACTGCAATAGTTCTCATT  
ATTTCTCCAATGTCACCTATCAGATCATGAAAGGCGACAGCTTTTATTC

>M6-PGSC0003DMG400001185M6LRR-RLK\_310

GTTCTCATTATTTCTCCAATGTCACCTATCAGATCATGAAAGGCGACAGCTTTTATTCAGTTTCAATAGGA  
GCTTTTGAGAACCTTACTAATTATCACGTGGTGCAAGATATGAATCCAA

>M6-PGSC0003DMG400001185M6LRR-RLK\_372

TCAATAGGAGCTTTTGAGAACCTTACTAATTATCACGTGGTGCAAGATATGAATCCAACACTAGATCCAA  
CCAACCTTGACAATTGGTGCAGAAGCTGTTTTTTCTTTGTTTTGTAAATGC

>M6-PGSC0003DMG400001185M6LRR-RLK\_434

AGATCCAACCAACTTGACAATTGGTGCAGAAGCTGTTTTTTCTTTGTTTTGTAAATGCCCCACACATTCTG  
ATCTCGAAAAGGGACTTCAGTACCTGGTCACTTATGTTTGGCAGCCTTG

>M6-PGSC0003DMG400001185M6LRR-RLK\_496

CACATTCTGATCTCGAAAAGGGACTTCAGTACCTGGTCACTTATGTTTGGCAGCCTTGGGATGATGTGTT  
GCCTGTAAGCTATATGTTTGGAGCATCTGCAGCTGACATTCTGGCTGCCA

>M6-PGSC0003DMG400001185M6LRR-RLK\_558

GATGTGTTGCCTGTAAGCTATATGTTTGGAGCATCTGCAGCTGACATTCTGGCTGCCAACAATTACAGAA  
ATTTCACTGCTGCAATATATTCTCCTGTCTTGATACCAATAAATCTTCCT

>M6-PGSC0003DMG400001185M6LRR-RLK\_62

CTCCAACCTTAACTGCTCAACCATCTAGCACAGACACAGACTTTTCATGCTCGTTTAACTCTTCCTTTTCTTG  
TGATACTTTTATTTTCATATCGTGCCCGTCCACCAAATTATTTAGATGT

>M6-PGSC0003DMG400001185M6LRR-RLK\_620

TTACAGAAATTTCACTGCTGCAATATATTCTCCTGTCTTGATACCAATAAATCTTCCTATTATTCTGCAATC  
TTACCCCTCTTCTGCAAGCAGTAGAAAATCCAAACACGGATGGATAGT

>M6-PGSC0003DMG400001185M6LRR-RLK\_682

TTCTGCAATCTTACCCCTCTTCTGCAAGCAGTAGAAAATCCAAACACGGATGGATAGTAATTAAGTGTTTTA  
AGTATTATGGGGTTGCTTGCAGTTTTTTCATTTTTCTTGATGGTATAACA

>M6-PGSC0003DMG400001185M6LRR-RLK\_744

ACTGTTTTAAGTATTATGGGGTTGCTTGCAGTTTTTTCATTTTTCTTGATGGTATAACATGCGTCATCTAGAC  
GAGAAGAGGAGGGCTAACTTAGCCATAACTCTTCTACTCTTGAAACT

>M6-PGSC0003DMG400001185M6LRR-RLK\_806

TCATCTAGACGAGAAGAGGAGGGCTAACTTAGCCATAACTCTTCTACTCTTGAAACTTCTGATCTCTTTC  
ATACCAAGAAAGCCTCAGAAGGTGAAATTACGGACCATAAGAACATTCA

>M6-PGSC0003DMG400001185M6LRR-RLK\_868

ATCTCTTTCATACCAAGAAAGCCTCAGAAGGTGAAATTACGGACCATAAGAACATTCAAGATAAGCTTCT  
TCCTGGAGTTTCTGGCTACATTGGAAAGCCAATAATATATGACCTGAAGA

>M6-PGSC0003DMG400001185M6LRR-RLK\_930

AAGCTTCTCCTGGAGTTTCTGGCTACATTGGAAAGCCAATAATATATGACCTGAAGATCATCATGGAGG  
CAACTGTCGACCTCAGTGAGAGATACAGGTTAGGAGGATCAGTGTACAAG

>M6-PGSC0003DMG400001185M6LRR-RLK\_992

CATGGAGGCAACTGTGACCTCAGTGAGAGATACAGGTTAGGAGGATCAGTGTACAAGGTTACAATGA  
ACGACCAAGTTGTAGCAGTCAAGAAAACAAAACAAGCCTCGGAGGAAATGAC

>M6-PGSC0003DMG400001252-(rev)M6LRR-RLP\_0

AATTCAGAGAGAGAAACAAAACAAAACCTCCTCAGGATGGGCAGCTTCATGTACATTGCGATCTTACTT  
CTTGCCATAATCTCAACCGTTCATTCTGCCCCCATCAGATCGGGCAGC

>M6-PGSC0003DMG400001252-(rev)M6LRR-RLP\_1008

TGACGTTAGTCATAACCATCTTTGTGGCCAGATCCGGAAGGTTCTCCCTTTGATCATCTTGAAGCTTCAT  
CTTTTACTTACAATGATTGTCTATGTGGGAAGCCTCTTAAACCTTGTC

>M6-PGSC0003DMG400001252-(rev)M6LRR-RLP\_1071

AGCTTCATCTTTTACTTACAATGATTGTCTATGTGGGAAGCCTCTTAAACCTTGTCACTAAAGTGTGACTA  
TTATTAGGTAAATTTAATTTTACTTTTCTTTTTTGAGATTTTTATTAAC

>M6-PGSC0003DMG400001252-(rev)M6LRR-RLP\_1134

TGTGACTATTATTAGGTAAATTTAATTTTACTTTTCTTTTTTGAGATTTTTATTAACACTATATATTGGTGA  
ATATGTTTGTATTATTATGTGATACTGAAAAGTAAAGTGTTTTTTTTT

>M6-PGSC0003DMG400001252-(rev)M6LRR-RLP\_1194

ATATATTGGTGAATATGTTTGTATTATTATGTGATACTGAAAAGTAAAGTGTTTTTTTTTAGCATATATTT  
GTAATTTTAAATGTATAATTGTGCCTTGAGATATATGAAGGCTTTCTTA

>M6-PGSC0003DMG400001252-(rev)M6LRR-RLP\_126

ATCTTTCCGAGCTGCCCTAAATGAATCTTACTTAGGAATTTTCAACTCGTGGAAGGGTACGACTGTTGC  
CATGAATGGTACGGGGTGAGTTGTGATCCCACAACCTACCGCGTAGCAGA

>M6-PGSC0003DMG400001252-(rev)M6LRR-RLP\_189

CTGTTGCCATGAATGGTACGGGGTGAGTTGTGATCCCACAACCTACCGCGTAGCAGACATAAACCTCCG  
TGGTGAATCCGAAGATCCACTCTTCGAAAAAGCTCATCGTACCGGTTACAT

>M6-PGSC0003DMG400001252-(rev)M6LRR-RLP\_252

CCTCCGTGGTGAATCCGAAGATCCACTCTTCGAAAAAGCTCATCGTACCGGTTACATGACCGGTACGATC  
TCTCCATCTATATGCAAATTAGAAAGACTATCAAGTCTCACTATAGCTGA

>M6-PGSC0003DMG400001252-(rev)M6LRR-RLP\_315

TACGATCTCTCCATCTATATGCAAATTAGAAAGACTATCAAGTCTCACTATAGCTGATTGGAAAGGCATC  
ACTGGACCTATAACCATCATGTATTACGTCCTTACCCTTCCTTCGAATCAT

>M6-PGSC0003DMG400001252-(rev)M6LRR-RLP\_378

AGGCATCACTGGACCTATAACCATCATGTATTACGTCCTTACCCTTCCTTCGAATCATCGACTTAGTCGGAA  
ACAAGCTCACCGGCTCAATCCCTTCAACTATAGGTCGATTAAGTCGACT

>M6-PGSC0003DMG400001252-(rev)M6LRR-RLP\_441

AGTCGGAAACAAGCTCACCGGCTCAATCCCTTCAACTATAGGTCGATTAAGTCGACTCACAGTGTTAAAC  
GTAGCTGAAAATCAACTTACTGGCTACATACCTCGATCATTAAACCAACTT

>M6-PGSC0003DMG400001252-(rev)M6LRR-RLP\_504

GTTAAACGTAGCTGAAAATCAACTTACTGGCTACATACCTCGATCATTAAACCAACTTATCATCTTTAATGC  
ATTTAGATCTCCGAAACAACCTTCTATGGAACATCCCAACAAATTT

>M6-PGSC0003DMG400001252-(rev)M6LRR-RLP\_567

TTTAATGCATTTAGATCTCCGAAACAACCTTCTATGGAACATCCCAACAAATTTTCGGAAAATTACGG  
ATGTTGAGTCGAGCTTACTGAGTCGAAACAGGTTAACAGGTCATATACC

>M6-PGSC0003DMG400001252-(rev)M6LRR-RLP\_63

CTTACTTCTTGCCATAATCTCAACCGTTCATTCTGCCCGCCATCAGATCGGGCAGCATTATTATCTTTCCG

AGCTGCCCTAAATGAATCTTACTTAGGAATTTTCAACTCGTGGAAGG

>M6-PGSC0003DMG400001252-(rev)M6LRR-RLP\_630

ATTACGGATGTTGAGTCGAGCTTACTGAGTCGAAACAGGTTAACAGGTCATATACCGTATTCGATTTCG  
TATATTTACAGGCTTTCAGATTTGGATCTGTCATTGAACAACTTTCTGG

>M6-PGSC0003DMG400001252-(rev)M6LRR-RLP\_693

GATTCGTATATTTACAGGCTTTCAGATTTGGATCTGTCATTGAACAACTTTCTGGTAGCATACTCCGT  
CTCTAGGTAAAATGCACGTA CTGCAACGTTAAATCTTGATGGTAACAA

>M6-PGSC0003DMG400001252-(rev)M6LRR-RLP\_756

ACCTCCGTCTCTAGGTAAAATGCACGTA CTGCAACGTTAAATCTTGATGGTAACAATATTACTGGTACT  
ATACCACCTAGTTTGATTAATTCACGTATCAACATTTTGAATTTGAGCAA

>M6-PGSC0003DMG400001252-(rev)M6LRR-RLP\_819

TGGTACTATACCACCTAGTTTGATTAATTCACGTATCAACATTTTGAATTTGAGCAAAAATACTATTGAAG  
GTTATATTCCTGATTCATTTGATGAAAGATCTTATTTTATGGTAATGGA

>M6-PGSC0003DMG400001252-(rev)M6LRR-RLP\_882

TATTGAAGGTTATATTCCTGATTCATTTGATGAAAGATCTTATTTTATGGTAATGGATTTATCTTACAACA  
AATAAAAGGAAGGATTCCAAAATCGATATCGTCGGCGACGTTTATCGG

>M6-PGSC0003DMG400001252-(rev)M6LRR-RLP\_945

TTACAACAAATTAAGGAAGGATTCCAAAATCGATATCGTCGGCGACGTTTATCGGTCACCTTGACGTT  
AGTCATAACCATCTTTGTGGCCAGATTCGGAAGGTTCTCCCTTTGATCA

>M6-PGSC0003DMG400001269-(rev)M6RLKWAX-EGF\_1037

ACACTTCTTTTTCTTGTGATGTTTTCTTTGTCTGAAAACCTCTGATTACTTATATTTTTTTCCAGTTTTTG  
GTGGATTAGGATTGGTGATGATTTGTTTAGCTGTCTACTTTATCTG

>M6-PGSC0003DMG400001269-(rev)M6RLKWAX-EGF\_1098

TTCCAGTTTTTGGTGGATTAGGATTGGTGATGATTTGTTTAGCTGTCTACTTTATCTGGTGTTGCAAGAG  
GAGGAAATTTAATCCGCCCACTTTCTCTCAACAAGGAAATTGTCATAT

>M6-PGSC0003DMG400001269-(rev)M6RLKWAX-EGF\_1159

GTTGCAAGAGGAGGAAATTTAATCCGCCCACTTTCTCTCAACAAGGAAATTGTCATATATATTTAAAAA  
TGATGTTGAGGGAGGCAGTATATACTTTGGCATCCCAGTCTTCTTATT

>M6-PGSC0003DMG400001269-(rev)M6RLKWAX-EGF\_122

AGCTGGTTGTGATGCTAAACTATATCCGAGAATCCAAGTCTCCTCGAGGAGATTCGTAATGCTTTA  
GGAAATCCGTATAATTATACAGTTGAGCTAGGGGACCCCAAGTTTCATGC

>M6-PGSC0003DMG400001269-(rev)M6RLKWAX-EGF\_1220

ATTTAAAAATGATGTTGAGGGAGGCAGTATATACTTTGGCATCCCAGTCTTCTTATTTCAGAACTTGAA  
GAAGCCACAAATGATTTCAATTCCTCTCGAATCCTTGGAGATGGAGGTTT

>M6-PGSC0003DMG400001269-(rev)M6RLKWAX-EGF\_1342

GAACTGTTTACTATGGTGAGAGACTTCCTAACCCAAGTCTGAGCTATGCTTCACTTCTTTCTTCATGTGCCTA  
ATACTTGTTTACTTAAATGTCTAGGGAACTTAAGGATGGACGAGAGGTTG

>M6-PGSC0003DMG400001269-(rev)M6RLKWAX-EGF\_1403

CATGTGCCTAATACTTGTTTACTTAAATGTCTAGGGAACTTAAGGATGGACGAGAGGTTGCTGTGAAGCG  
CCTTTACGAGCACAAGTCAAAACGAATGGAGCAGTTCGTAATGAAATTGA

>M6-PGSC0003DMG400001269-(rev)M6RLKWAX-EGF\_1525

TCCTTACTAGGCTAAGGCACAACAATCTTGCTACTCTCTATGGCTGCACTTCAAGGCGTAGCCGTGAACT  
ACTCCTTGCTATGAATATATTCCTAATGGAAGTCTTGCCGATCACCTCC

>M6-PGSC0003DMG400001269-(rev)M6RLKWAX-EGF\_1586

CCGTGAACTACTCCTTGCTATGAATATATTCCTAATGGAAGTCTTGCCGATCACCTCCATGGTGACAGAG  
TGAAGGACGGATCACTCACCTGGCTAGTCCGCATGAACATTGCCATAGA

>M6-PGSC0003DMG400001269-(rev)M6RLKWAX-EGF\_1708

CTGCTGGTGCATTGGCTTACCTGCATGCGTCTGACGTAATACTGTGATGTGAAGACTAATAACATACT  
CCTTGATCACAAGTTTAAATGTTAAAGTTGCAGATTTTGGGATATCACGGC

>M6-PGSC0003DMG400001269-(rev)M6RLKWAX-EGF\_1769

TAACATACTCCTTGATCACAAGTTTAAATGTTAAAGTTGCAGATTTTGGGATATCACGGCTTTTCCCAAATG  
ATGCACTCATATTTCAACTGCACCCCGGGGACCCCTGGCTATATCGA

>M6-PGSC0003DMG400001269-(rev)M6RLKWAX-EGF\_183

TATGCTTTAGGAAATCCGTATAATTATACAGTTGAGCTAGGGGACCCCAAGTTTCATGCCAAGTTGAGGC  
AACACAAGTGCCAGGCTTTTAAACAAAAGTTATCCTTGCCAGCCTCTCCT

>M6-PGSC0003DMG400001269-(rev)M6RLKWAX-EGF\_1830

TTCCCAAATGATGTCACTCATATTTCAACTGCACCCCGGGGACCCCTGGCTATATCGATCCAAAGTATC  
ATGAATGTTACCAGCTGACTAGTAAAAGTGATGTTTATAGCTTCGGGGTG

>M6-PGSC0003DMG400001269-(rev)M6RLKWAX-EGF\_1891  
CAAAGTATCATGAATGTTACCAGCTGACTAGTAAAAGTGATGTTTATAGCTTCGGGGTGGTCCTTGTCGA  
GCTCATTTTCATCAATGCCAGCTGTGGATATGACTAGGCATAGCCAAGAGA

>M6-PGSC0003DMG400001269-(rev)M6RLKWAX-EGF\_1952  
CCTTGTCGAGCTCATTTTCATCAATGCCAGCTGTGGATATGACTAGGCATAGCCAAGAGATTAATTTGGCT  
AACTTTGCAATAAACAAGATTGTAAAATGTGCATTTAATGAGTTGGTTGA

>M6-PGSC0003DMG400001269-(rev)M6RLKWAX-EGF\_2013  
AATTTGGCTAACTTTGCAATAAACAAGATTGTAAAATGTGCATTTAATGAGTTGGTTGATCCATCCCTGG  
GGTTCGACTCAGATACCAAGATTTTGGAGATGACTACTTCAGTGGCAGAG

>M6-PGSC0003DMG400001269-(rev)M6RLKWAX-EGF\_2135  
GGCTTTTCTATGCTTACAGACAGATAGGGACATGAGGCCTACTATGGTTGAGGTTTTGGATACTCTAAAG  
GAGATTCAGATTAGTGAATTTGACAATGAGAAGAGAGCTGACTCTAATCT

>M6-PGSC0003DMG400001269-(rev)M6RLKWAX-EGF\_2196  
ACTCTAAAGGAGATTCAGATTAGTGAATTTGACAATGAGAAGAGAGCTGACTCTAATCTCAATGGAAAT  
GAAGCTAAAATTGTTACAGCACCCCTTTTCGCTGAATCAGAAGATAAGTTT

>M6-PGSC0003DMG400001269-(rev)M6RLKWAX-EGF\_2257  
ATGGAAATGAAGCTAAAATTGTTACAGCACCCCTTTTCGCTGAATCAGAAGATAAGTTTATGCTGAAACA  
AGTTAAATCACTACCTTCTTCAAATTCTGTTACTGATAAATGGGTTACTT

>M6-PGSC0003DMG400001269-(rev)M6RLKWAX-EGF\_244  
AGTTGAGGCAACACAAGTGCCAGGCTTTTAAACAAAACCTTATCCTTGCCAGCCTCTCCTTCTATTTCTTTC  
GAAATTCTCCAGTGAATATTCTCAACTTCATCAAATGCAACAGCACTA

>M6-PGSC0003DMG400001269-(rev)M6RLKWAX-EGF\_305  
TATTTCTTTTCGAAATTCTCCAGTGAATATTCTCAACTTCATCAAATGCAACAGCACTAGTAGTAGCACCC  
CAAACATTACCCATAAGATGAAAGATCATTTTGGCTGGTTATAGAATGTA

>M6-PGSC0003DMG400001269-(rev)M6RLKWAX-EGF\_366  
AGTAGCACCCCAAACATTACCCATAAGATGAAAGATCATTTTGGCTGGTTATAGAATGTACAATGGCTGTA  
AAGGTTTTAGCATATACTACAAGCTTCGCTTAGGAGATGATGAAGACGTT

>M6-PGSC0003DMG400001269-(rev)M6RLKWAX-EGF\_488  
AGCAGGCAATCTTCTGCCAACTGTTCACTTATCAGATTGCCTATCCGCTTGCTATCAGATGATGGTGGTT



TGTTCAATATGTTAAGCGCCGCTTTTCTAGTAGAATGGAAACTGTCTGA

>M6-PGSC0003DMG400001269-(rev)M6RLKWAX-EGF\_549

GATGGTGGTTTGTTC AATATGTTAAGCGCCGCTTTTCTAGTAGAATGGAAACTGTCTGAGGACTGTTACA  
AATGTC ACTATGGCGGAGGTCAATGCCAGACTGATATAATCAACAAATTT

>M6-PGSC0003DMG400001269-(rev)M6RLKWAX-EGF\_61

TTACTGACCTGAGCTTTCCTTTCTCTTTCCACACAACCTGACTGTGGAATAATGTTCTTAGCTGGTTGTG  
ATGCTAAACTATATCCGAGAATCCAAGTCTTCTCGAGGAGATTCGT

>M6-PGSC0003DMG400001269-(rev)M6RLKWAX-EGF\_610

ACTGTTACAAATGTC ACTATGGCGGAGGTCAATGCCAGACTGATATAATCAACAAATTTTATTGACTTA  
TCCAAATAATCCACATGATCAAGGTCATCAAGAAAATAATCCACATGAAC

>M6-PGSC0003DMG400001269-(rev)M6RLKWAX-EGF\_671

TTGTACTTATCCAAATAATCCACATGATCAAGGTCATCAAGAAAATAATCCACATGAACAAGGTTTCAGTC  
ACACAGTGCATCTTTCGTAGTGTCTTTCTTGTATTTCATATCACATATCT

>M6-PGSC0003DMG400001269-(rev)M6RLKWAX-EGF\_732

GGTTCAGTCACACAGTGCATCTTTCGTAGTGTCTTTCTTGTATTTCATATCACATATCTATAATATTTTCCC  
TTTTTTTTCTTTAGATGCAAAAACAGCTAGAAGAAAGTTCGGACCGAC

>M6-PGSC0003DMG400001269-(rev)M6RLKWAX-EGF\_793

AATATTTTCCCTTTTTTTTTCTTTAGATGCAAAAACAGCTAGAAGAAAGTTCGGACCGACTCTGGGAGCAG  
GTAGTTAAATATCCTTTAACTGCAGTGTCTTTTCGATCTTTTCTATTACA

>M6-PGSC0003DMG400001269-(rev)M6RLKWAX-EGF\_854

TGGGAGCAGGTAGTTAAATATCCTTTAACTGCAGTGTCTTTTCGATCTTTTCTATTACAGAATTTCTTGC  
ATATCGTTTGAATTACTTCTTCATTGTGGTAAAATCTCAAACATTTCC

>M6-PGSC0003DMG400001269-(rev)M6RLKWAX-EGF\_915

ATTTCTTGCATATCGTTTGAATTACTTCTTCATTGTGGTAAAATCTCAAACATTTCTTAATGATAAGAG  
AGGTAAGTACTTTAGCTTACACAAAATGATTGGATAGTGGAGTTGAGA

>M6-PGSC0003DMG400001269-(rev)M6RLKWAX-EGF\_976

AATGATAAGAGAGGTAAGTACTTTAGCTTACACAAAATGATTGGATAGTGGAGTTGAGAGGACACTTTC  
TTTTCTTGTGATGTTTTCTTTGTCTGAAAACCTCTGATTACTTATATT

>M6-PGSC0003DMG400001271-(rev)M6RLKWAX-EGF\_0

TTAGTTCAGGCAATGGGCAGAAATGATTCAACTTGTCCAAAGTCCTTTTCATGTGGAGATTTTACTGACC  
TGAGCTTTCCTTCTCTCTTCCACACAACCCGACTGTGGAATACTGCCC

>M6-PGSC0003DMG400001271-(rev)M6RLKWAX-EGF\_1054

TGCTTCCACAGGTGCAGTTTTGTGTACAGTTGGACTATTGGTTCTACTCTTCTTCTTCAGAGAAAATATT  
TTGCGGTATAAGTGCCTCAGGTTTTGGGAATCTATTGCTGAGGATCACC

>M6-PGSC0003DMG400001271-(rev)M6RLKWAX-EGF\_1116

GAAAATATTTTGCAGGTATAAGTGCCTCAGGTTTTGGGAATCTATTGCTGAGGATCACCAAATATTGAAG  
CATTTTTGAAGAACTATGGGTTCATATGCTCCAAAGAGATACAATACTACTCA

>M6-PGSC0003DMG400001271-(rev)M6RLKWAX-EGF\_1178

TATTGAAGCATTTTTGAAGAACTATGGGTTCATATGCTCCAAAGAGATACAATACTACTCAGAGGTCAAAG  
GATGACCAGTTGCTTCAAAAACAACTAGGTCAAGGTGGATATGGTTCTGT

>M6-PGSC0003DMG400001271-(rev)M6RLKWAX-EGF\_124

CTGGTTGTGATGCTAAACCATATCCGAGAATCCAAGTCTTCTGAGGAGATTCGTAATGCTTTAGG  
AAATCCGTATAATTATACAGTTGGGATAGGGGACCCCAAGTTTCATGCCA

>M6-PGSC0003DMG400001271-(rev)M6RLKWAX-EGF\_1240

TCAAAGGATGACCAGTTGCTTCAAAAACAACTAGGTCAAGGTGGATATGGTTCTGTATACAAAGGAA  
CTCTGCAGAATGGAAATCATGTGGCTGTGAAGGTCCTGAATGGACTAAAAG

>M6-PGSC0003DMG400001271-(rev)M6RLKWAX-EGF\_1364

TGGTGAAGAATTCATTAACGAGGTGGCAAGTATTAGCAGGACATCACATGTTAATGTTGTGAGCCTTGA  
AGGATTTTGTGTTGAGGGTTGCAAAGAGCTCTCATTTATGAATTCATGTC

>M6-PGSC0003DMG400001271-(rev)M6RLKWAX-EGF\_1426

GCCTGAAGGATTTTGTGTTGAGGGTTGCAAAGAGCTCTCATTTATGAATTCATGTCAAATGGATCTCTT  
GAAAAATTTATATACGAGGAAAGATCCGACAGTTCGCCAATTGGATT

>M6-PGSC0003DMG400001271-(rev)M6RLKWAX-EGF\_1612

CCACTCGGATTTTGCATTTTATATAAAGCCTCATAATATCCTGCTTGATGAAGATTTTGTCTAAGATC  
TCTGACTTTGGACTAGCCAACTGTGCATGAAAAAGGAGAGCATTGTGT

>M6-PGSC0003DMG400001271-(rev)M6RLKWAX-EGF\_1860

AGAAAAATGTTGATGTTGAGTTGATCGAACGAGTGAAATCTACTTCCACATTGGCTCTATCAACGAA  
TTGAACTGGATGAAGAGCTTCAACTAATCGGGCTAATGAATGAAGAGGAG

>M6-PGSC0003DMG400001271-(rev)M6RLKWAX-EGF\_1922  
TCAACGAATTGAACTGGATGAAGAGCTTCAACTAATCGGGCTAATGAATGAAGAGGAGAAAGAATGTG  
CAAGAAAGATGGGGATGGTGAGTTTATGGTGCATACAGACTGATCCCTCAA  
>M6-PGSC0003DMG400001271-(rev)M6RLKWAX-EGF\_2108  
CAAGCCTTACCTATATTCTCCCTCGAGATCAGAGGTAGATTCAATGGAAGTGGGTTTCATATCAATGTAGT  
AGATCAAACGTTTAAGTCAACTACCAGGAAAAGTTTCGTTCAATCAATGT  
>M6-PGSC0003DMG400001271-(rev)M6RLKWAX-EGF\_2170  
AATGTAGTAGATCAAACGTTTAAGTCAACTACCAGGAAAAGTTTCGTTCAATCAATGTAGTTGTAATAAT  
CTATCTAGATCTTCAAAGAAACGATTATATTTAACGAAGATTCAAATTTG  
>M6-PGSC0003DMG400001271-(rev)M6RLKWAX-EGF\_2232  
GTAATAATCTATCTAGATCTTCAAAGAAACGATTATATTTAACGAAGATTCAAATTTGTGCTGCAATTATC  
TTTATTCATCAGGGATGTAAAATTGTTACATGTAAAATGAAAGGTTCTA  
>M6-PGSC0003DMG400001271-(rev)M6RLKWAX-EGF\_2263  
ATTATATTTAACGAAGATTCAAATTTGTGCTGCAATTATCTTTATTCATCAGGGATGTAAAATTGTTACAT  
GTAAAATGAAAGGTTCTAATGACTTTACATAGTCAAATGCAAAGTTTC  
>M6-PGSC0003DMG400001271-(rev)M6RLKWAX-EGF\_372  
ACCCCAAACATTACCCAGCAGATGAAAGATCATTTTGTGCTGTTATAGAATGTACAATGGCTGTAAAGACT  
TTAGCGTATACTACAAGCTTCGCCTAGGCGATGATGAAGACGTGCAAGCA  
>M6-PGSC0003DMG400001271-(rev)M6RLKWAX-EGF\_434  
TAAAGACTTTAGCGTATACTACAAGCTTCGCCTAGGCGATGATGAAGACGTGCAAGCAGGCAATCTTCC  
TGCAAACCTGTTCACTTATCAGACTGCCGATCGGCTCGTTGTCAGATGATGG  
>M6-PGSC0003DMG400001271-(rev)M6RLKWAX-EGF\_496  
ATCTTCCTGCAAACCTGTTCACTTATCAGACTGCCGATCGGCTCGTTGTCAGATGATGGTGGTTTGTTCAT  
ATGTTAAGTGCCACTTTTATAGTAGAATGGAACTGTCTGAGGACTGTA  
>M6-PGSC0003DMG400001271-(rev)M6RLKWAX-EGF\_558  
TTGTTCAATATGTTAAGTGCCACTTTTATAGTAGAATGGAACTGTCTGAGGACTGTAACAAATGTCCT  
ATGGCGGAGGTCAATGCCAGACTGATATAACTAACAAATTTTCATTGTACA  
>M6-PGSC0003DMG400001271-(rev)M6RLKWAX-EGF\_620  
ATGTCACTATGGCGGAGGTCAATGCCAGACTGATATAACTAACAAATTTTCATTGTACATATCCAAATAAT

CCACATGATCAAGGTCATCAAGAAAATAACCTACTTGCTCAAGGTCTAGT

>M6-PGSC0003DMG400001271-(rev)M6RLKWAX-EGF\_682

CAAATAATCCACATGATCAAGGTCATCAAGAAAATAACCTACTTGCTCAAGGTCTAGTGCATATTTTCATA  
AAGTCCTTTCTCGTTTTCTGATCAAATATTGATAATATTTTCATAGAATCT

>M6-PGSC0003DMG400001271-(rev)M6RLKWAX-EGF\_744

ATTTTCATAAAGTCCTTTCTCGTTTTCTGATCAAATATTGATAATATTTTCATAGAATCTTTCTCTTTTTTTAG  
ATGCAAAAACAACACTAGAAGCAAGTGGGGACCGATTCTGGGAGCAGGT

>M6-PGSC0003DMG400001271-(rev)M6RLKWAX-EGF\_806

TCTTTTTTTAGATGCAAAAACAACACTAGAAGCAAGTGGGGACCGATTCTGGGAGCAGGTAGTTAAATATT  
CATTAACTGCAAGGTTTCTTTCTTCGATCTTTAGATTTTCTTCTTCATTGT

>M6-PGSC0003DMG400001271-(rev)M6RLKWAX-EGF\_868

AAATATTCATTAAGTCAAGGTTTCTTTCTTCGATCTTTAGATTTTCTTCTTCATTGTGGTAAAATCTCAA  
AAATGGAAACACAAGTACTTTAGATTACATAACGTACCGATGGTGGAG

>M6-PGSC0003DMG400001271-(rev)M6RLKWAX-EGF\_930

AAATCTCAAAAATGGAAACACAAGTACTTTAGATTACATAACGTACCGATGGTGGAGTTGAGAGGACA  
TTCTTTCTCTGGCGATGTTTAATTTATATTCTCTGATGGTGCATGACTTC

>M6-PGSC0003DMG400001271-(rev)M6RLKWAX-EGF\_992

GAGGACATTCTTTCTCCTGGCGATGTTTAATTTATATTCTCTGATGGTGCATGACTTCACCTTGCTTTCCAC  
AGGTGCAGTTTTGTGTACAGTTGGACTATTGGTTCTACTCTTCTTCTT

>M6-PGSC0003DMG400001301-(rev)M6LRR-RLK\_0

TAATTTCTTAGTAGCTAGCTTCTAAAGGCACCACTCATATTTGTAAAATAACAGACTGGGTTTTTCATTTGT  
CAAGTCAAATGCCTCACCAGTCTTCATCTTCCTTCTCCTTGCTATTTCC

>M6-PGSC0003DMG400001301-(rev)M6LRR-RLK\_1054

CCGCTCGTCAAGGTAAATTAGCTGATTTGTTGATTGCCACAAATGGTTTCAGGACGGACAATGTTATCA  
ACTCAACTAGAATGGGTACTACTTATAATGCTGTGTTACGTGATGGTTCT

>M6-PGSC0003DMG400001301-(rev)M6LRR-RLK\_1116

TGTTATCAACTCAACTAGAATGGGTACTACTTATAATGCTGTGTTACGTGATGGTTCTGCACTTGCCATTA  
AGCGGCTTAATACTTGCAAAGTGGGAGCGAGAAGCACTTTCGTGATGAGAT

>M6-PGSC0003DMG400001301-(rev)M6LRR-RLK\_1178

TTGCCATTAAGCGGCTTAATACTTGCAAACCTGAGCGAGAAGCACTTTCGTGATGAGATGTATAGGCTAG  
GACAACTTAGGCATCCTAATTTGGTGCCACTGTTGGGGTTTTGTGTTGTGG

>M6-PGSC0003DMG400001301-(rev)M6LRR-RLK\_124

TATTTCTCTTGCGCATATTATCAAACACCTTGCCCAATTACCCAAAACCTGCTGTTGGATCCCTAAACCCC  
CCAGCTAACGATGGCTCGTTTCAGATTTCTCCTTTTTCTTCTGTTGATT

>M6-PGSC0003DMG400001301-(rev)M6LRR-RLK\_1240

AGGCTAGGACAACCTTAGGCATCCTAATTTGGTGCCACTGTTGGGGTTTTGTGTTGTGGAAGAGGAGAAG  
CTTTTGGTTTATAAACACCTATCAAATGGTACTTTGCACTCATTCTTGAAT

>M6-PGSC0003DMG400001301-(rev)M6LRR-RLK\_1302

GGAGAAGCTTTTGGTTTATAAACACCTATCAAATGGTACTTTGCACTCATTCTTGAATGGGAATGCAAGT  
GAACTGGATTGGCCTACTCGGTTTAGAATTGGTTTCGGTGCTGCTAGGGG

>M6-PGSC0003DMG400001301-(rev)M6LRR-RLK\_1364

ATGCAAGTGAACCTGGATTGGCCTACTCGGTTTAGAATTGGTTTCGGTGCTGCTAGGGGCCTTGCTTGTT  
ACATCATGGTGTCCACCCACCTATCTTGCACCAAACATATGTTCTAATG

>M6-PGSC0003DMG400001301-(rev)M6LRR-RLK\_1426

GCTTGGTTACATCATGGTGTCCACCCACCTATCTTGCACCAAACATATGTTCTAATGTTATTTTCCTCGAT  
GAAGACTTTGATGCTAGAGTAATGGATTTTGGGCTGGCAAGGTTGATG

>M6-PGSC0003DMG400001301-(rev)M6LRR-RLK\_1488

TTTCTCGATGAAGACTTTGATGCTAGAGTAATGGATTTTGGGCTGGCAAGGTTGATGACATCAGATGC  
AAAAGAGTCTAGTTATGTGAATGGGGAGTTGGGTGAATTTGGCTATGTAGC

>M6-PGSC0003DMG400001301-(rev)M6LRR-RLK\_1550

CAGATGCAAAGAGTCTAGTTATGTGAATGGGGAGTTGGGTGAATTTGGCTATGTAGCTCCAGAGTACT  
CTAGCACAATGGTGCCTTCACTGAAAGGGGATGCTTATAGTTTTGGGGTAG

>M6-PGSC0003DMG400001301-(rev)M6LRR-RLK\_1612

GAGTACTCTAGCACAATGGTGCCTTCACTGAAAGGGGATGCTTATAGTTTTGGGGTAGTGCTTTTGGAG  
TTGGCTACTGGGCAAAAACCTCTTGAAGTTATTGCTGGTGAAGAGGGATTC

>M6-PGSC0003DMG400001301-(rev)M6LRR-RLK\_1674

TTTGGAGTTGGCTACTGGGCAAAAACCTCTTGAAGTTATTGCTGGTGAAGAGGGATTCAAGGGTAATTT  
GGTAGACTGGGTGAATCAGCTCTCTGCTTCAGGTTCGCATTAAAGATGCAAT

>M6-PGSC0003DMG400001301-(rev)M6LRR-RLK\_1736

GTAATTTGGTAGACTGGGTGAATCAGCTCTCTGCTTCAGGTCGCATTAAGATGCAATTGACCAAAACAT  
GCGTGGGAAGGGGCATGATGAAGAGATTGTGCAATTCCTAAAAGTTGCTT

>M6-PGSC0003DMG400001301-(rev)M6LRR-RLK\_1798

CAAAACATGCGTGGGAAGGGGCATGATGAAGAGATTGTGCAATTCCTAAAAGTTGCTTGTAAATTCTGTG  
GTTTCTCGGCCCAATGATAGGTGGTCTATGTATCAGGTTTATGAAGCACTT

>M6-PGSC0003DMG400001301-(rev)M6LRR-RLK\_186

CTAAACCCCCAGCTAACGATGGCTCGTTTCAGATTTCTCCTTTTTCTTCTGTTGATTCTGATTTCTCTTGT  
CTTCCGTGCCTTGATGCTGCTGTAGTTGAAGATGATCTCAAGTGTTT

>M6-PGSC0003DMG400001301-(rev)M6LRR-RLK\_1860

TTCTGTGGTTTCTCGGCCCAATGATAGGTGGTCTATGTATCAGGTTTATGAAGCACTTCAGAGCATGGCT  
GAAAAACAGGGTTTCTCCGAACAGTATGACGAATTCCTGTTACTATTTGG

>M6-PGSC0003DMG400001301-(rev)M6LRR-RLK\_1922

GCATGGCTGAAAAACAGGGTTTCTCCGAACAGTATGACGAATTCCTGTTACTATTTGGCAAAGAAGGTG  
CTACTAGAAGTCCTGTTTGAAGCCGGAATTGCGAAATTACTAAATGTT

>M6-PGSC0003DMG400001301-(rev)M6LRR-RLK\_1984

GAAGGTGCTACTAGAAGTCCTGTTTGAAGCCGGAATTGCGAAATTACTAAATGTTCCACTCCAAATG  
AACATGATGCATCCTGTTGTAAGTTTTTCAGTTCCTATTGGTGTAAGTGCC

>M6-PGSC0003DMG400001301-(rev)M6LRR-RLK\_2046

TCCAAATGAACATGATGCATCCTGTTGTAAGTTTTTCAGTTCCTATTGGTGTAAGTGGCATGGCACTGTTTT  
GATTGGCTCAGAAGTACACCCTTTAAATATTTCTGTATTATATTTGCAA

>M6-PGSC0003DMG400001301-(rev)M6LRR-RLK\_2108

CACTGTTTTGATTGGCTCAGAAGTACACCCTTTAAATATTTCTGTATTATATTTGCAAATGCACAAATCA  
TTCTTAAGTATTTGCTTGCTTGATATTTGTAGTATAGGAAGCAACTGAT

>M6-PGSC0003DMG400001301-(rev)M6LRR-RLK\_2170

CACAAATCATTCTTAAGTATTTGCTTGCTTGATATTTGTAGTATAGGAAGCAACTGATAATTATTGTTT  
GTTTGTGATTACCCATTGCCTATAGCATTAGATGTTATGTATTCAAAGG

>M6-PGSC0003DMG400001301-(rev)M6LRR-RLK\_248

TTTCTTTGTTCTTCCGTGCCTTGATGCTGCTGTAGTTGAAGATGATCTCAAGTGTTTAGAAGGTTTCAAG

AAGTCTTTGGAAGATCCAGCTGGGAATCTGAATTCATGGAACCTTTAAAA

>M6-PGSC0003DMG400001301-(rev)M6LRR-RLK\_310

GGTTTCAAGAAGTCTTTGGAAGATCCAGCTGGGAATCTGAATTCATGGAACCTTTAAAAATACTACTATCG  
GAGCTATCTGTAAGTTTACGGGTGTTGATTGCTGGAATGACAACGAAAAT

>M6-PGSC0003DMG400001301-(rev)M6LRR-RLK\_372

TACTATCGGAGCTATCTGTAAGTTTACGGGTGTTGATTGCTGGAATGACAACGAAAATCGCATCATCAGC  
CTCATTCTTTGACTATGAACCTCGGAGGGAAGGTTACAGAGCCTGTACA

>M6-PGSC0003DMG400001301-(rev)M6LRR-RLK\_434

TCATCAGCCTCATTCTTTGACTATGAACCTCGGAGGGAAGGTTACAGAGCCTGTACAGTATTGTGCCAG  
CTTGACAACCCTTGATCTCTCTGGTAATCGCTTTTCTGGTCCAATTCCTT

>M6-PGSC0003DMG400001301-(rev)M6LRR-RLK\_496

TGTGCCAGCTTGACAACCCTTGATCTCTCTGGTAATCGCTTTTCTGGTCCAATTCCTTCTCAAATTTGTACT  
TGGCTACCTTTTTTGGTAACCCTAGACTTGTCCGGTAACGATTACTCC

>M6-PGSC0003DMG400001301-(rev)M6LRR-RLK\_558

AATTTGTAAGTGGCTACCTTTTTTGGTAACCCTAGACTTGTCCGGTAACGATTACTCCGGCCCTATCCCTG  
CTGATCTTGCTAAATGCACCTTTTTGAATAAATTATCGCTCAGTAATAA

>M6-PGSC0003DMG400001301-(rev)M6LRR-RLK\_62

TTCATTTGTCAAGTCAAATGCCTCACCAGTCTTCATCTTCTTCTCCTTGCTATTTCTACCTATTTCTCTTG  
CGCATATTATCAAACACCTTGTGCCAATTACCCAAAAGTCTGTTGG

>M6-PGSC0003DMG400001301-(rev)M6LRR-RLK\_620

CTATCCCTGCTGATCTTGCTAAATGCACCTTTTTGAATAAATTATCGCTCAGTAATAATAAGCTTACTGGA  
AATATTCCCCTGAATTTTCTAGTTTAGGTAGGCTTAAAAGTTTTTCTG

>M6-PGSC0003DMG400001301-(rev)M6LRR-RLK\_682

CTTACTGGAAATATTCCCCTGAATTTTCTAGTTTAGGTAGGCTTAAAAGTTTTTCTGTGGCAAATAATCA  
ACTCTCCGGTAGAATCCCGGCAGCTTTGATTCTTCTAACTTTAATTTT

>M6-PGSC0003DMG400001301-(rev)M6LRR-RLK\_744

AAATAATCAACTCTCCGGTAGAATCCCGGCAGCTTTGATTCTTCTAACTTTAATTTTGAAGGAAATAGTC  
TCTGTGGTGGACCTTTGGGGAAATGTGGAGGACTAAGTAAGAAAAGCTT

>M6-PGSC0003DMG400001301-(rev)M6LRR-RLK\_806

GAAATAGTCTCTGTGGTGGACCTTTGGGGAAATGTGGAGGACTAAGTAAGAAAAGCTTAGCTATTATTA  
TTGCAGCAGGAGTCTTTGGTGCTGCTGCTTCTATGTTGTTGGGTTTTGGTG

>M6-PGSC0003DMG400001301-(rev)M6LRR-RLK\_868

ATTATTATTGCAGCAGGAGTCTTTGGTGCTGCTGCTTCTATGTTGTTGGGTTTTGGTGCCTGGTATTGGTT  
TTTTACCAAGTCTGGAAAGAGGAAGAGAGGGTATGGAGTTGGGAGAGAC

>M6-PGSC0003DMG400001301-(rev)M6LRR-RLK\_930

GTATTGGTTTTTTACCAAGTCTGGAAAGAGGAAGAGAGGGTATGGAGTTGGGAGAGACGACTCTGATA  
GTTGGGCTGATAAGCTGAGGGCTCACAAGCTCACTCAGGTTATGTTGTTCCA

>M6-PGSC0003DMG400001301-(rev)M6LRR-RLK\_992

CTGATAGTTGGGCTGATAAGCTGAGGGCTCACAAGCTCACTCAGGTTATGTTGTTCCAGAAACCGCTCG  
TCAAGTTAAATTAGCTGATTTGTTGATTGCCACAAATGGTTTCAGGACGG

>M6-PGSC0003DMG400001368-(rev)M6RLKmalectin\_0

CCACAGATAAAAGAAGAGGAAATGCCTTGAGAGTCAACACTCAAGTCTTGCCAATGGTTGTGTATAATT  
GCTCCTTGGAACAATAATATCTCCTTACACAAACGCCCATGGCAACCATT

>M6-PGSC0003DMG400001368-(rev)M6RLKmalectin\_1054

AGCTGGAAGTTAAAGAAATAAACGATAGAAGTTTTTCCATTTCTATCGGAAACCAAAAAGCCGAGCGAG  
AGGCTGATGTAATACAATGGAGTGGAGGCTGGAGAATCCCTGTGTACAAAG

>M6-PGSC0003DMG400001368-(rev)M6RLKmalectin\_1116

GAGCGAGAGGCTGATGTAATACAATGGAGTGGAGGCTGGAGAATCCCTGTGTACAAAGACTATGTGGT  
TAATGTTAGAAACCAAGATGGTGAGCAAAACGTGACGCTTGATTTGAGTCCT

>M6-PGSC0003DMG400001368-(rev)M6RLKmalectin\_1178

TGTGGTTAATGTTAGAAACCAAGATGGTGAGCAAAACGTGACGCTTGATTTGAGTCCTAACCCAGATTC  
TGCGTATCAAATGCTATCTTAAATGGCTTAGAAATTTCAAGTTGAACGA

>M6-PGSC0003DMG400001368-(rev)M6RLKmalectin\_124

TACTTTTCTTTCTTTCTTACAACCTATAACGGCCACTATTTCTACCACGCCGCCACCGTATAACGCCACTG  
TCTTTGTCTTGCTTAAGTGGCGCACAAATCAGCCACCACCGATGAAA

>M6-PGSC0003DMG400001368-(rev)M6RLKmalectin\_1240

CAGATTCTGCGTATCAAATGCTATCTTAAATGGCTTAGAAATTTCAAGTTGAACGACTCAAATGGAAA  
CCTCTCCGTGCCGAATCCTGAATTTTTCTTTCCGAATAATTCACCACCAA



>M6-PGSC0003DMG400001368-(rev)M6RLKmalectin\_1302  
AATGGAAACCTCTCCGTGCCGAATCCTGAATTTTTCTTCCGAATAATTCACCACCAAACGACAATAATAA  
GAGATCATCATCACACATCATTGCTGTTATCACTGCAGTAGCTGTTATT

>M6-PGSC0003DMG400001368-(rev)M6RLKmalectin\_1364  
CAATAATAAGAGATCATCATCACACATCATTGCTGTTATCACTGCAGTAGCTGTTATTAGCGGAATTGCT  
CTGCTTTCAATTCTCTGTTTCTTAATTTTCCGGCGGTGGAAAAGGGGAAA

>M6-PGSC0003DMG400001368-(rev)M6RLKmalectin\_1426  
GAATTGCTCTGCTTTCAATTCTCTGTTTCTTAATTTTCCGGCGGTGGAAAAGGGGAAAAGAACTTCATAC  
AAGCGTTACAAAGTCATCATGGATCCCTTTGTCAATTACATCGAACTCAA

>M6-PGSC0003DMG400001368-(rev)M6RLKmalectin\_1488  
CTTCATACAAGCGTTACAAAGTCATCATGGATCCCTTTGTCAATTACATCGAACTCAACCCAAAGAACCG  
GCGGCTCAGGCTCATCAGCGCTACCATCCGATCTGTGCCGACACTTTTTTA

>M6-PGSC0003DMG400001368-(rev)M6RLKmalectin\_1550  
AAGAACCGGCGGCTCAGGCTCATCAGCGCTACCATCCGATCTGTGCCGACACTTTTTACTAGAAGAGAT  
AAAAACAGCAACATGCAATTTTGATGAAAAATTTGTGATTGGCTATGGAGG

>M6-PGSC0003DMG400001368-(rev)M6RLKmalectin\_1612  
AAGAGATAAAAACAGCAACATGCAATTTTGATGAAAAATTTGTGATTGGCTATGGAGGTTTTGGTAATG  
TATACAAAGGGTACATAGACAACGGCGCAACCATAGTTGCAGTCAAGAGAT

>M6-PGSC0003DMG400001368-(rev)M6RLKmalectin\_1674  
GGTAATGTATACAAAGGGTACATAGACAACGGCGCAACCATAGTTGCAGTCAAGAGATTGAATCCTTCA  
TCAAAGCAAGGAGTCCGCGAGTTCGAAACAGAGATTCACATGTTGTCAAAG

>M6-PGSC0003DMG400001368-(rev)M6RLKmalectin\_1736  
TCCTTCATCAAAGCAAGGAGTCCGCGAGTTCGAAACAGAGATTCACATGTTGTCAAAGCTAAGGCATGT  
GCATCTGGTGTCCCTTAATTGGTTATTGTGATGATAACAATGAGATGATCTT

>M6-PGSC0003DMG400001368-(rev)M6RLKmalectin\_1798  
GGCATGTGCATCTGGTGTCCCTTAATTGGTTATTGTGATGATAACAATGAGATGATCTTGGTTTATGATTA  
CATGTCTCATGGAACCTTCGTGATCACTTGTACAAAACACTGATAATGCTC

>M6-PGSC0003DMG400001368-(rev)M6RLKmalectin\_1860  
TATGATTACATGTCTCATGGAACCTTCGTGATCACTTGTACAAAACACTGATAATGCTCCACTTCCATGGAA

GAAACGCCTTGAGATTTGCATAGGCGCAGCAAAAGGATTGCATTATCTC

>M6-PGSC0003DMG400001368-(rev)M6RLKmalectin\_1922

TCCATGGAAGAAACGCCTTGAGATTTGCATAGGCGCAGCAAAAGGATTGCATTATCTCCATACAGGTAT

ACGGTCACTTAATTCTATACTTCTATTTGCTGTGGTACCATATTAAGTAT

>M6-PGSC0003DMG400001368-(rev)M6RLKmalectin\_1984

CAGGTATACGGTCACTTAATTCTATACTTCTATTTGCTGTGGTACCATATTAAGTATGTATTGAGTAAAT

TAAGTGATTTACTGGTAAAAAAGATAAAGATTAATTATTTTTAATATAA

>M6-PGSC0003DMG400001368-(rev)M6RLKmalectin\_2108

TTATTATTATCTATAGTAGATATGATCGTTAAATTTAATTTACAGGTAAAAAGGATATCATTATTCATCG

AGATGTGAAGTCAACCAACATTTTATTGGATGATAAATGGGTTGCTAAG

>M6-PGSC0003DMG400001368-(rev)M6RLKmalectin\_2170

TATTCATCGAGATGTGAAGTCAACCAACATTTTATTGGATGATAAATGGGTTGCTAAGGTTTCAGATTTT

GGGTTATCCAAAATCGGTCCACTTAGTGGATCAGGAAAAACCCATGTTAG

>M6-PGSC0003DMG400001368-(rev)M6RLKmalectin\_2232

CAGATTTTGGGTTATCCAAAATCGGTCCACTTAGTGGATCAGGAAAAACCCATGTTAGCACTGTTGTGAA

AGGAAGCTTTGGATATCTGGATCCTGAATACTATAAGCGACAACAATTGA

>M6-PGSC0003DMG400001368-(rev)M6RLKmalectin\_2294

GTTGTGAAAGGAAGCTTTGGATATCTGGATCCTGAATACTATAAGCGACAACAATTGACAGAAAAATCT

GATGTGTATTCTTTTGGGGTGGTGCTATTCGAAGTGTTGTGCGCTAGACCA

>M6-PGSC0003DMG400001368-(rev)M6RLKmalectin\_2356

AAAATCTGATGTGTATTCTTTTGGGGTGGTGCTATTCGAAGTGTTGTGCGCTAGACCAGCATTAAATCCT

AACATGCCGAAAGGGCAAGTGAATTTGGCTGATTGGGCTTGTAGGAGCTG

>M6-PGSC0003DMG400001368-(rev)M6RLKmalectin\_2418

TAATTCCTAACATGCCGAAAGGGCAAGTGAATTTGGCTGATTGGGCTTGTAGGAGCTGTAAAAAAGGA

AATCTTCAACAATAATTGATCCGAATTTGGAAGGACAAATTGCGCCAGAGT

>M6-PGSC0003DMG400001368-(rev)M6RLKmalectin\_248

CCGTCGATGGGATACTGATACTCACTTTCCAAATTTCTTACCTTCCAACCTTTCAAGCATATCCACAACAG

CCACAGCTTCTGAACAAGATCCTTCGGTCAATAGAGTTCCTTATACGAC

>M6-PGSC0003DMG400001368-(rev)M6RLKmalectin\_2480

AAAGGAAATCTTCAACAAATAATTGATCCGAATTTGGAAGGACAAATTGCGCCAGAGTGCTTAAACAAG  
TTTGCAGAAGCAGCATATAATTGCTTGAAGGATCAAGGAGTCCAAAGGCCA

>M6-PGSC0003DMG400001368-(rev)M6RLKmalectin\_2542

AAACAAGTTTGCAGAAGCAGCATATAATTGCTTGAAGGATCAAGGAGTCCAAAGGCCATCAATGAATGA  
CGTTGTCTGGAATTTGGAATTTATATTAAAGCTTCAAGATGCAGCTGATAA

>M6-PGSC0003DMG400001368-(rev)M6RLKmalectin\_2604

TGAATGACGTTGTCTGGAATTTGGAATTTATATTAAAGCTTCAAGATGCAGCTGATAATAGAGGTCACAA  
AATGGAATTGAACAGTTATCCGACTAGCCCGTCTTTCCCATGATTATGA

>M6-PGSC0003DMG400001368-(rev)M6RLKmalectin\_2666

GGTCACAAAATGGAATTGAACAGTTATCCGACTAGCCCGTCTTTCCCATGATTATGAATGGTCATACCA  
ATATATCTACAGACGAAGGATTCGAGGCATTTTCAGGTTACATGAAGTT

>M6-PGSC0003DMG400001368-(rev)M6RLKmalectin\_2728

TCATACCAATATATCTACAGACGAAGGATTCGAGGCATTTTCAGGTTACATGAAGTTGGAGGAAAATA  
CACAAGCAGTGCTACATCCATGACCAGTAATAGTGATGACAAATTGAAGAG

>M6-PGSC0003DMG400001368-(rev)M6RLKmalectin\_2790

GAAAATACACAAGCAGTGCTACATCCATGACCAGTAATAGTGATGACAAATTGAAGAGTGACTATTT  
TCTCAGAGATTTTGAATCCATCGGGTCGATGAGATTGTTACAAGTAGTAAG

>M6-PGSC0003DMG400001368-(rev)M6RLKmalectin\_2852

ACTATTTTCTCAGAGATTTTGAATCCATCGGGTCGATGAGATTGTTACAAGTAGTAAGATAAATTACATAT  
TAGTTCTTCTCTGTTTTCTTTTCTTTGTTGAATTTATGTCCTTATTA

>M6-PGSC0003DMG400001368-(rev)M6RLKmalectin\_2914

ATTACATATTAGTTCTTCTCTGTTTTCTTTTCTTTGTTGAATTTATGTCCTTATTATATATGCAGATGAAT  
TGAAGCCATTATTCAGAAGTATATAAGCTATGAAATAGTTTCACTAT

>M6-PGSC0003DMG400001368-(rev)M6RLKmalectin\_310

CCACAACAGCCACAGCTTCTGAACAAGATCCTTCGGTCAATAGAGTTCCTTATACGACTGGTGCTCGTAT  
TATGAGATCTCAATTCACCTACACTTTCCGTGTTACCCCTGGCACAATAT

>M6-PGSC0003DMG400001368-(rev)M6RLKmalectin\_372

GCTCGTATTATGAGATCTCAATTCACCTACACTTTCCGTGTTACCCCTGGCACAATATTCTCCGTCTCTAT  
TTCTACCCCTGCCAATTACTCCGGCTTCAACAAAGCTGAATCTTTTTTC

>M6-PGSC0003DMG400001368-(rev)M6RLKmalectin\_434

CCGTCTCTATTTCTACCCTGCCAATTACTCCGGCTTCAACAAAGCTGAATCTTTTTCTCCGTCACAGCTAA  
TCATTTAACCTCTTGAGTAACTTCAGTGCTTTCCTCACAGTCTCCGC

>M6-PGSC0003DMG400001368-(rev)M6RLKmalectin\_496

TCACAGCTAATCATTTAACCTCTTGAGTAACTTCAGTGCTTTCCTCACAGTCTCCGCAAGTAGTAGTAAA  
AAAGTTCAAAAAGAATATGTCATCAATGTTGATGAAACTCAGATACTCA

>M6-PGSC0003DMG400001368-(rev)M6RLKmalectin\_558

AGTAGTAAAAAAGTTCAAAAAGAATATGTCATCAATGTTGATGAAACTCAGATACTCAAATTAACCTTTT  
CTCCTTCACCAAACCTTTATGCTTTTGTTAATGGGATTGAGATACTTTCT

>M6-PGSC0003DMG400001368-(rev)M6RLKmalectin\_62

TATAATTGCTCCTTGGAACAATAATATCTCCTTACACAAACGCCCATGGCAACCATTACTTTACTTTTCTT  
TCTCTTCTTACAACCTATAACGGCCACTATTTCTACCACGCCGCCACC

>M6-PGSC0003DMG400001368-(rev)M6RLKmalectin\_620

AACCTTTTCTCCTTCACCAAACCTTTATGCTTTTGTTAATGGGATTGAGATACTTTCTATGCCAACTGATCT  
TTACATCCATGGAGACGTAAAATTGGCTGGGTATACTAATCCATATAA

>M6-PGSC0003DMG400001368-(rev)M6RLKmalectin\_682

CAACTGATCTTTACATCCATGGAGACGTAAAATTGGCTGGGTATACTAATCCATATAACATCAATAACAG  
CACTGCTCTTGAACTTTGTACAGGCTGAACGTGGGAGGCAATTTAGTTG

>M6-PGSC0003DMG400001368-(rev)M6RLKmalectin\_806

CACAGAGGATGCAGGGATGTATCGTGTATGGGATTCAGATGATGCATTTGTTGTTGGATATGGCTATCA  
AACTCCTCATTTTGATGATGCCAACATCAATTACACTTCTGAAACCCCGGC

>M6-PGSC0003DMG400001368-(rev)M6RLKmalectin\_868

GCTATCAAACCTCCTCATTTTGATGATGCCAACATCAATTACACTTCTGAAACCCCGGCTTATTCTGCGCCA  
AGGATAGTTTACACAACCTCTAGGATTATGGCCAATCACAGCCAGAGCC

>M6-PGSC0003DMG400001368-(rev)M6RLKmalectin\_930

TCTGCGCCAAGGATAGTTTACACAACCTCTAGGATTATGGCCAATCACAGCCAGAGCCTGGATTGGGAA  
TTCCCTCTAAACTCTGGCTTCTATTATCTTTTCAGGCTCCATTTCTGTGAG

>M6-PGSC0003DMG400001368-(rev)M6RLKmalectin\_992

TTGGGAATTCCTCTAAACTCTGGCTTCTATTATCTTTTCAGGCTCCATTTCTGTGAGATTCAGCTGGAAG

TTAAAGAAATAAACGATAGAAGTTTTCCATTTCTATCGGAAACCAAAA

>M6-PGSC0003DMG400001369-(rev)M6RLKmalectin\_0

AATTTAACAAAGAATCATCCAAATTCCAAAGAAAATAACCCACAACCTTTCCTTTCAAGCATGTCTGACTAT  
TGCTCCAGTGGGACATAACAAAGATTATTATGAAAATGAAAGGCAGCAT

>M6-PGSC0003DMG400001369-(rev)M6RLKmalectin\_1037

TCCATGCCTACCAATCTCTACATCCGTGGAAACCATCGCATTGAATTGGTGGGCCAGAATGATTTTTTTTA  
CATCAATAACAGCACTGCTCTTGAACTTTGTACAGGCTGAACGTGGGA

>M6-PGSC0003DMG400001369-(rev)M6RLKmalectin\_1098

ATTTTTTTTACATCAATAACAGCACTGCTCTTGAACTTTGTACAGGCTGAACGTGGGAGGCAATTTAGTT  
GGTAGCACAGAGGATACAGGGATGTATCGTGTATGGGATTCAGATGATG

>M6-PGSC0003DMG400001369-(rev)M6RLKmalectin\_122

ATGGCCTACAAGAAAAGATGTACACCCCAATTAACAACTTTTCTTTACCATTTCTATTTCTCTCTGTAT  
TTTCTTGGGTACATATATGGTCCCCTTCTTTAGTGCAGTAATCCTAAT

>M6-PGSC0003DMG400001369-(rev)M6RLKmalectin\_1220

TTTGTGTTGGATATGGCTATCAAACCTCCTATTTTGATGTCAACATCACTTACACTTCTGAAACCCCGGC  
TTATTCTGCGCCAACCATAATTTACACAACCTCTAGGACCATGGTCAAT

>M6-PGSC0003DMG400001369-(rev)M6RLKmalectin\_1281

AAACCCCGGCTTATTCTGCGCCAACCATAATTTACACAACCTCTAGGACCATGGTCAATTACAGCAAGGG  
CCTAGATTGGGAATTCCTCTAAACTCTGGTTTCTATTATCTTTTCAGGC

>M6-PGSC0003DMG400001369-(rev)M6RLKmalectin\_1342

CAGCAAGGGCCTAGATTGGGAATTCCTCTAAACTCTGGTTTCTATTATCTTTTCAGGCTCCATTTTTGTG  
AGATTCAGCCGGAAGTTAAGGGAGTGAACCACAGATTTTTTCGACATATA

>M6-PGSC0003DMG400001369-(rev)M6RLKmalectin\_1403

CATTTTTGTGAGATTCAGCCGGAAGTTAAGGGAGTGAACCACAGATTTTTTCGACATATACATTGGAAACC  
AAATGGCAGAGCGAGCAGCGGATGTAGTTGAATGGAGTGGCGGCTGGAGA

>M6-PGSC0003DMG400001369-(rev)M6RLKmalectin\_1464

TTGGAAACCAAATGGCAGAGCGAGCAGCGGATGTAGTTGAATGGAGTGGCGGCTGGAGATTCCCGGTT  
TACAGAGACTACGTGGTGAATGTGCCTAACCCAGACGACCGACGAAACAAGC

>M6-PGSC0003DMG400001369-(rev)M6RLKmalectin\_1525

CCCGGTTTACAGAGACTACGTGGTGAATGTGCCTAACCCAGACGACCGACGAAACAAGCAAATATTAC  
GCTTGAATTGAGTCCTAACATGAACACAAAAGCTGTGTATGCTAATGGTAC

>M6-PGSC0003DMG400001369-(rev)M6RLKmalectin\_1586

AATATTACGCTTGAATTGAGTCCTAACATGAACACAAAAGCTGTGTATGCTAATGGTACCTCAGAATTAG  
CGTATTCAAATGTTATCTTAAAAGGCTTAGAAATTTTCAAATTGGGTGAT

>M6-PGSC0003DMG400001369-(rev)M6RLKmalectin\_1647

CAGAATTAGCGTATTCAAATGTTATCTTAAAAGGCTTAGAAATTTTCAAATTGGGTGATGCAAATGGGA  
GTCTGGCCCCGTC AATTCATGAATTGCCCTCAAAGCAAACGGAAATCCGG

>M6-PGSC0003DMG400001369-(rev)M6RLKmalectin\_1708

AAATGGGAGTCTGGCCCCGTC AATTCATGAATTGCCCTCAAAGCAAACGGAAATCCGGCCGCTTGAC  
TCCTGAATTTGCCTCAGAAGCTCCGATCGCTTCATTAGCTTTTCCTAACAA

>M6-PGSC0003DMG400001369-(rev)M6RLKmalectin\_1769

GCCTTGACTCCTGAATTTGCCTCAGAAGCTCCGATCGCTTCATTAGCTTTTCCTAACACAAGAAGAAAA  
GAATATCATGGTATATCATTGTTGCTATCATCACAGGTGTGACTAGCGGT

>M6-PGSC0003DMG400001369-(rev)M6RLKmalectin\_183

TCTCTGTATTTTCTTGGGTACATATATGGTCCCCTTCTTTAGTGCAGTAATCCTAATAGTAATTTCACTT  
ATATTCTTCGATGAAGTCAACTCTTGCCTCACTGATTTTTACTCCATT

>M6-PGSC0003DMG400001369-(rev)M6RLKmalectin\_1830

AGAAGAAAAGAATATCATGGTATATCATTGTTGCTATCATCACAGGTGTGACTAGCGGTATTGCTTTTTT  
TTCGATTCTGGGTTTCTTAATTTCCCGACGACGAAATGGGGGAAAAGATT

>M6-PGSC0003DMG400001369-(rev)M6RLKmalectin\_1891

TGCTTTTTTTTCGATTCTGGGTTTCTTAATTTCCCGACGACGAAATGGGGGAAAAGATTCTGGTACAAGT  
GTTACCAAGTCATCATCACCACCATCCGATCTGTGCCGACACTTTTTAAT

>M6-PGSC0003DMG400001369-(rev)M6RLKmalectin\_1952

GGTACAAGTGTTACCAAGTCATCATCACCACCATCCGATCTGTGCCGACACTTTTTAATAGCAGAGATAA  
AAAACGCTACCGACAATTTTGATGAAAAATTTGTGATTGGATATGGAGGT

>M6-PGSC0003DMG400001369-(rev)M6RLKmalectin\_2013

CAGAGATAAAAAACGCTACCGACAATTTTGATGAAAAATTTGTGATTGGATATGGAGGTTTTGGTAATG  
TTTATAAAGGGTACCTTGACAATGGTACAACCACAGTTGCAGTCAAGAGAT

>M6-PGSC0003DMG400001369-(rev)M6RLKmalectin\_2074

TGGTAATGTTTATAAAGGGTACCTTGACAATGGTACAACCACAGTTGCAGTCAAGAGATCGAATCCTTCA  
TCAAAGCAAGGGGTTTCGCGAGTTCCAAACAGAGATTGAGATGTTATCATC

>M6-PGSC0003DMG400001369-(rev)M6RLKmalectin\_2135

AATCCTTCATCAAAGCAAGGGGTTTCGCGAGTTCCAAACAGAGATTGAGATGTTATCATCAAAGCTAAGG  
CATCGGCATCTAGTGTCTTAATTGGTTATTGTGATGATAAGAATGAGATG

>M6-PGSC0003DMG400001369-(rev)M6RLKmalectin\_2196

AGCTAAGGCATCGGCATCTAGTGTCTTAATTGGTTATTGTGATGATAAGAATGAGATGATCTTGGTTTA  
TGATTACATGGCTAATGGAACCTTCGTGATCACTTGTACAATACTCGCA

>M6-PGSC0003DMG400001369-(rev)M6RLKmalectin\_2257

CTTGGTTTATGATTACATGGCTAATGGAACCTTCGTGATCACTTGTACAATACTCGCAATGCTCCTCTTC  
CATGGAAGAAACGCCTTGACATTTGCATTGGTGCAGCTAAAGGATTATA

>M6-PGSC0003DMG400001369-(rev)M6RLKmalectin\_2318

GCTCCTCTCCATGGAAGAAACGCCTTGACATTTGCATTGGTGCAGCTAAAGGATTATATTACCTTCATTC  
AGGTAAGTAATCAATAAATTGATAAACATGTCATGATCTAACTTGCCT

>M6-PGSC0003DMG400001369-(rev)M6RLKmalectin\_2379

ACCTTCATTCAGGTAAGTAATCAATAAATTGATAAACATGTCATGATCTAACTTGCCTATATTTGTTTGG  
TAAAAAACTATTGGGTCAGAATAGGTCAAATAACCATCAATGTCAAGT

>M6-PGSC0003DMG400001369-(rev)M6RLKmalectin\_244

TAATTTCACTTATATTCTTCGATGAAGTCAACTCTGCCTCACTGATTTTTACTCCATTTATTTGGTGCCTT  
ATAATAATTTACTTTTGGTATTTATTTTTGTACAAACTTTAACA

>M6-PGSC0003DMG400001369-(rev)M6RLKmalectin\_2440

ATTTGTTTGGTAAAAAACTATTGGGTCAGAATAGGTCAAATAACCATCAATGTCAAGTTGCACAGCATG  
ACTCAACCTCCCAATTTGGTTTTGTATATTCTATTTGCATTTTGACATG

>M6-PGSC0003DMG400001369-(rev)M6RLKmalectin\_2501

CACAGCATGACTCAACCTCCAATTTGGTTTTGTATATTCTATTTGCATTTTGACATGTTTGGATTCAATA  
GATTGATGGGTCATTTTCGAGTTTAATCCATTAATGTGTCAAGCCAACA

>M6-PGSC0003DMG400001369-(rev)M6RLKmalectin\_2562

TTGATTCAATAGATTGATGGGTCATTTTCGAGTTTAATCCATTAATGTGTCAAGCCAACAAGCAATTTACA

ATTAAGATCGTTTAAATTTGAGTGAATTGCTGAAAAGTGAGTTCATTTTG

>M6-PGSC0003DMG400001369-(rev)M6RLKmalectin\_2623

CAATTTACAATTAAGATCGTTTAAATTTGAGTGAATTGCTGAAAAGTGAGTTCATTTTGCTGTTATAGGTA  
CCAAACATATGATCATTTCATCGAGATGTCAAGTCAACTAACATCCTATT

>M6-PGSC0003DMG400001369-(rev)M6RLKmalectin\_2684

GTTATAGGTACCAAACATATGATCATTTCATCGAGATGTCAAGTCAACTAACATCCTATTGGATGATAAAT  
GGGTCGCCAAGGTGTCTGATTTTGGGTTGTCCAAAGTAGGTTTCAGTAGGT

>M6-PGSC0003DMG400001369-(rev)M6RLKmalectin\_2745

ATGATAAATGGGTCGCCAAGGTGTCTGATTTTGGGTTGTCCAAAGTAGGTTTCAGTAGGTGGGACAGATA  
TTACCCATGTTAGCACTGCAGTGAAAGGAAGTTTTGGGTATGTAGATCCTG

>M6-PGSC0003DMG400001369-(rev)M6RLKmalectin\_2806

GACAGATATTACCCATGTTAGCACTGCAGTGAAAGGAAGTTTTGGGTATGTAGATCCTGAATACTACAA  
GCGCCAACGATTGACAGTAAAATCAGATGTTTATTCTTTTGGGGTGGTTCT

>M6-PGSC0003DMG400001369-(rev)M6RLKmalectin\_2867

TACTACAAGCGCCAACGATTGACAGTAAAATCAGATGTTTATTCTTTTGGGGTGGTTCTATTTGAAGTGT  
TATGTGGTAGGCCAGCAATAAATCCAACTTGCCAAGTGGGCAAGTGAAT

>M6-PGSC0003DMG400001369-(rev)M6RLKmalectin\_2928

TTGAAGTGTTATGTGGTAGGCCAGCAATAAATCCAACTTGCCAAGTGGGCAAGTGAATTTGGCTGAAT  
GGGCTTGTAGGAGTTGTAAAAAGAGAGAACTTGAAGAAATCATTGATCCTA

>M6-PGSC0003DMG400001369-(rev)M6RLKmalectin\_2989

GGCTGAATGGGCTTGTAGGAGTTGTAAAAAGAGAGAACTTGAAGAAATCATTGATCCTAACTTGAAAG  
GACAAATAGCCCCAGAATGCTTAAGGAAGTTTGCAGAATTGGCATATCATTG

>M6-PGSC0003DMG400001369-(rev)M6RLKmalectin\_305

TTTGGTGCACCTATAATAATTTACTTTTGGTATTTATTTTTTTGTACAAAACCTTAAACAAAATGATGTCGGTT  
TTTTATACAGAAAATTAGAAATGACTTGATCTTCGAACATCTACTGTA

>M6-PGSC0003DMG400001369-(rev)M6RLKmalectin\_3050

TTGAAAGGACAAATAGCCCCAGAATGCTTAAGGAAGTTTGCAGAATTGGCATATCATTGTTTGAGAAAA  
GAAGGGGTTCAAAGGCCATCAATGGGTGATGTTGTAAAACTTTAGAATTT

>M6-PGSC0003DMG400001369-(rev)M6RLKmalectin\_3111



TGAGAAAAGAAGGGGTTCAAAGGCCATCAATGGGTGATGTTGTAAAACTTTAGAATTTGCATTACAGG  
TTCAAGAGGGTGCAGATCATGAGGTGGAAGGATCCTCTTTTCCGTTGATTA

>M6-PGSC0003DMG400001369-(rev)M6RLKmalectin\_3172

ATTACAGGTTCAAGAGGGTGCAGATCATGAGGTGGAAGGATCCTCTTTTCCGTTGATTATTAATGGTGA  
TGCTATGAATGAAGATGAGATATTCTCAGATTTAAGTGAAGTTGAAAGAAA

>M6-PGSC0003DMG400001369-(rev)M6RLKmalectin\_3233

AATGGTGATGCTATGAATGAAGATGAGATATTCTCAGATTTAAGTGAAGTTGAAAGAAATTTGACAAGC  
ATGTCGGTCAGTAGGAGTGCCAAAGTGAACAATGTTGCCCTTTTCTCTGAG

>M6-PGSC0003DMG400001369-(rev)M6RLKmalectin\_3294

TGACAAGCATGTCGGTCAGTAGGAGTGCCAAAGTGAACAATGTTGCCCTTTTCTCTGAGATTGTCAATCC  
ATTGGGTCGATGAAATTGTTATGATCATAGTTGATACTGAAATTACA

>M6-PGSC0003DMG400001369-(rev)M6RLKmalectin\_3331

CAATGTTGCCCTTTTCTCTGAGATTGTCAATCCATTGGGTCGATGAAATTGTTATGATCATAGTTGATAC  
ACTGAAATTACATGTATTTTGTTCAGGCTCTTTTGTAAATTTAATG

>M6-PGSC0003DMG400001369-(rev)M6RLKmalectin\_366

TGATGTCGGTTTTTTATACAGAAAATTAGAAATGACTTGATCTTCGAACATCTACTGTATATATTTGCACA  
ACAAATAGCACGTACATAGTTTTTCAAGACAACGCCATGTTAGCCATTG

>M6-PGSC0003DMG400001369-(rev)M6RLKmalectin\_427

TATTTGCACAACAAATAGCACGTACATAGTTTTTCAAGACAACGCCATGTTAGCCATTGCTCTAATTTCT  
TTCTCTTCTTACAACCTATAACGGCCACTATTTCTACCACGCCGCCACC

>M6-PGSC0003DMG400001369-(rev)M6RLKmalectin\_61

TGTCGACTATTGCTCCAGTGGGACATAACAAAGATTATTATGAAAATGAAAGGCAGCATCCATGGCCTA  
CAAGAAAAAGATGTACACCCCAATTAACAACCTTTTCTTTACCATTTCTA

>M6-PGSC0003DMG400001369-(rev)M6RLKmalectin\_671

ATATCTACAACAGCCACAGCTTCTGAACAAGATCCTTCGGTCGATAGAGTTCCTTATACGAATGGTGCTC  
GTATCATGAAATCTCGATTCACTTACACTTTCCGTGTTTCTCTGGCGCC

>M6-PGSC0003DMG400001369-(rev)M6RLKmalectin\_732

ATGGTGCTCGTATCATGAAATCTCGATTCACTTACACTTTCCGTGTTTCTCTGGCGCCAAATTCCTCCGT  
CTCTATTTTTACCCCGCTAATACTCTGGCTTCAACAAAGCTGAATCTT

>M6-PGSC0003DMG400001369-(rev)M6RLKmalectin\_793

ATTCTCCGTCTCTATTTTTACCCCGCTAATTACTCTGGCTTCAACAAAGCTGAATCTTTTTCTCCGTCAC  
AGCTAATCATTTAACCTCTTGAGTAACTTCAACGCTCTCGCTGCAGT

>M6-PGSC0003DMG400001369-(rev)M6RLKmalectin\_854

TTCTCCGTCACAGCTAATCATTTAACCTCTTGAGTAACTTCAACGCTCTCGCTGCAGTTACCGATTCTAGT  
AAAGCTCTTCGAAAAGAATTTGTCATTAATGTTGATGAAACTCAGATT

>M6-PGSC0003DMG400001369-(rev)M6RLKmalectin\_915

CCGATTCTAGTAAAGCTCTTCGAAAAGAATTTGTCATTAATGTTGATGAAACTCAGATTCTTAATGTGACC  
TTTTCTCCCTCGCCAACTCTTATGCTTTTGTTAATGGGATAGAGATAC

>M6-PGSC0003DMG400001369-(rev)M6RLKmalectin\_976

TAATGTGACCTTTTCTCCCTCGCCAACTCTTATGCTTTTGTTAATGGGATAGAGATACTTTCCATGCCTAC  
CAATCTCTACATCCGTGGAACCATCGCATTGAATTGGTGGGCCAGAA

>M6-PGSC0003DMG400001732M6RLKmalectin\_1037

TAGGTACCCTGATGACCCATTTCGATAGAATATGGGCATCTGACACCATAAAAAAGGCCAATTACCTTGTT  
GATGTGGCTGCTGGTACTGAAAGAGTTTCAACCAAATGCCAATTGATGT

>M6-PGSC0003DMG400001732M6RLKmalectin\_1098

TACCTTGTTGATGTGGCTGCTGGTACTGAAAGAGTTTCAACCAAATGCCAATTGATGTGAATACCTTAA  
ATGGTGAGATGCCTCCTCAGAAAGCAATGCAGACTGCTGTAGTAGGAAGA

>M6-PGSC0003DMG400001732M6RLKmalectin\_1159

ATACCTTAAATGGTGAGATGCCTCCTCAGAAAGCAATGCAGACTGCTGTAGTAGGAAGAAATGGCTCGT  
TAACTTATCGTCTGAATCTCGATGGTTTCCCTGGTTTTGGTTGGGCATTTA

>M6-PGSC0003DMG400001732M6RLKmalectin\_122

CACTGTGTATGTTGTTGATGTTAAGAGAGATTAATAAGACATGAAGTAAAATTTCTGGGTGTTGCTAAA  
GGAGAAAGCAGTTCTCATTCTTTAATGAAGTTTTACCAATGGGTGTGAAAG

>M6-PGSC0003DMG400001732M6RLKmalectin\_1220

TGGCTCGTTAACTTATCGTCTGAATCTCGATGGTTTCCCTGGTTTTGGTTGGGCATTTACTTATTTTGCTG  
AAATTGAGGATTTGAAACCTGGTGATAGTAGGAAATCCGGTTGGTTCT

>M6-PGSC0003DMG400001732M6RLKmalectin\_1281

TATTTTGCTGAAATTGAGGATTTGAAACCTGGTGATAGTAGGAAATCCGGTTGGTTCTCCCGGGAGCTC

CTGATATCAGCAAGCTTGTTGTTAATATCCAAGAGAATGCCCATGGGAAA

>M6-PGSC0003DMG400001732M6RLKmalectin\_1342

CGGGAGCTCCTGATATCAGCAAGCTTGTTGTTAATATCCAAGAGAATGCCCATGGGAAATATCGTTTATA  
TGAGCCCGGCTACTTCAACTTGTCGTTGCCCTTGTATTATCTTTTCGTT

>M6-PGSC0003DMG400001732M6RLKmalectin\_1403

TCGTTTATATGAGCCCGGCTACTTCAACTTGTCGTTGCCCTTGTATTATCTTTTCGTTTCGGAAAGACATC  
CGATTCCACGATGGGGCCTCTCTTGAATGCTATGGAAGTAAACAGATA

>M6-PGSC0003DMG400001732M6RLKmalectin\_1464

GGAAAGACATCCGATTCCACGATGGGGCCTCTCTTGAATGCTATGGAAGTAAACAGATATGTAAAGAGA  
ACTGATGGCTCTTTAGACGGTAAAACCATGTCTTTTTCTTTAACATTATT

>M6-PGSC0003DMG400001732M6RLKmalectin\_1525

TAAAGAGAACTGATGGCTCTTTAGACGGTAAAACCATGTCTTTTTCTTTAACATTATTATATTGTGGTTC  
GTTGAAATGATTATCTGCAGTTTATTTCTTAGAAGGATTTTTCTGTT

>M6-PGSC0003DMG400001732M6RLKmalectin\_1586

ATTGTGGTTCGTTGAAATGATTATCTGCAGTTTATTTCTTAGAAGGATTTTTCTGTTGTAATGAGTATC  
TTTGTTGTTAGTTTCAAATAGTAAGGCATGTCCCTTGCTCTTTGCAT

>M6-PGSC0003DMG400001732M6RLKmalectin\_1647

AATGAGTATCTTTGTTTCGTTAGTTTCAAATAGTAAGGCATGTCCCTTGCTCTTTGCATGTGTTTCAGGAC  
CAGTTATTTCTAGTTTAGTCTCGCACTACTCTTCTGCCAATTTGATAAA

>M6-PGSC0003DMG400001732M6RLKmalectin\_1708

GTTTCAGGACCAGTTATTTCTAGTTTAGTCTCGCACTACTCTTCTGCCAATTTGATAAACGAAGGTGGTGA  
CCCATGCTTACCAGTCCCATGGTCCTGGATCCGTTGTGACTCAGATATC

>M6-PGSC0003DMG400001732M6RLKmalectin\_1769

AAGGTGGTGACCCATGCTTACCAGTCCCATGGTCCTGGATCCGTTGTGACTCAGATATCAGACCAAGAA  
TAACATCAATGTATAGTTCATCACTTTAGCTTCTTTATGCGTAGTTTCATG

>M6-PGSC0003DMG400001732M6RLKmalectin\_183

TTGCTAAAGGAGAAAGCAGTTCTCATTCTTTAATGAAGTTTTACCAATGGGTGTGAAAGTTGGTGGATAT  
ATATTCATTCTTTATGCACTGCTGATAAATTTAACTGTCAAACAGGTT

>M6-PGSC0003DMG400001732M6RLKmalectin\_1830

ACCAAGAATAACATCAATGTATAGTTCATCACTTTAGCTTCTTTATGCGTAGTTTCATGTGTTCCACTTTCT  
GCAATTCAGTTATGGAAGAATTAAGATTACTTTCTAGTTTTCTCTTTA

>M6-PGSC0003DMG400001732M6RLKmalectin\_1891

TTCCACTTTCTGCAATTCAGTTATGGAAGAATTAAGATTACTTTCTAGTTTTCTCTTTATATTGTTCTCGCA  
ACCTGAAGCAATGGGCTATAATTCACAAGTACTTTGGCAGTAAAT

>M6-PGSC0003DMG400001732M6RLKmalectin\_1952

TTGTTCTCGCAACCTGAAGCAATGGGCTATAATTCACAAGTACTTTGGCAGTAAATTGTCTGGAAAA  
AATTTGACTGGAAATATTCCGTCGGAGTTGACAAAGTTGAGCGGCTTAGT

>M6-PGSC0003DMG400001732M6RLKmalectin\_2013

TCTGGAAAAAATTTGACTGGAAATATTCCGTCGGAGTTGACAAAGTTGAGCGGCTTAGTTGAGCTGTAA  
GTCATAATATCATACTGTAAATGTTCCATGCATATGCTGTGGTTCCCTTC

>M6-PGSC0003DMG400001732M6RLKmalectin\_2074

AGCTGTAAGTCATAATATCATACTGTAAATGTTCCATGCATATGCTGTGGTTCCCTTCTTTCTTTTCTGCT  
GCTGTATAATCAATATGCACCCATGTTCCCTAATGCAGCTGGCTGGATG

>M6-PGSC0003DMG400001732M6RLKmalectin\_2135

TCTTTTCTGCTGCTGTATAATCAATATGCACCCATGTTCCCTAATGCAGCTGGCTGGATGGGAATTCACTGA  
CTGGTCCAATACCCGATTTTAGCGGATGTCCCAACTTACAGATAATGTA

>M6-PGSC0003DMG400001732M6RLKmalectin\_2196

AATTCAGTACTGGTCCAATACCCGATTTTAGCGGATGTCCCAACTTACAGATAATGTAAATTGAGCTGC  
CTTTTCAATTCAACTTTTTAGATATTCTCTTAAAACACATTAAGTGGT

>M6-PGSC0003DMG400001732M6RLKmalectin\_2257

TTGAGCTGCCTTTTCAATTCAACTTTTTAGATATTCTCTTAAAACACATTAAGTGGTGAATCTAATCACT  
ATGTTTCTTGACAGACATCTTGAGAACAATCAGTTGAGTGGACAGCTTC

>M6-PGSC0003DMG400001732M6RLKmalectin\_2318

ATCTAATCACTATGTTTCTTGACAGACATCTTGAGAACAATCAGTTGAGTGGACAGCTTCCTTCAACCTTGG  
AAGACCTATCAAATTTGAAAGAAGTGTAAAGCAGCAGAATTATTTATTGA

>M6-PGSC0003DMG400001732M6RLKmalectin\_2379

TCAACCTTGAAGACCTATCAAATTTGAAAGAAGTGTAAAGCAGCAGAATTATTTATTGACTAAATGTACA  
ATTACTTGTAGAATTTACTCAAGCACGTTAGGCTGTAGATGCTATTCAAC

>M6-PGSC0003DMG400001732M6RLKmalectin\_244

GGTGGATATATATTCATTCTTTATGCACTGCTGATAAATTTTAAACTGTCAAACAGGTTTTGTAAGTTTAG  
ATTGTGGAGGCAAAGACAACCTCACAGATGAACTTGGTCTTAAATGGAC

>M6-PGSC0003DMG400001732M6RLKmalectin\_2440

AAATGTACAATTACTTGTAGAATTTACTCAAGCACGTTAGGCTGTAGATGCTATTCAACTATGAGTTCAT  
GCATATGGCTGATAAGCTTAACTCTCATATTAAGCTTCTGCTCATCAGAA

>M6-PGSC0003DMG400001732M6RLKmalectin\_2501

TGAGTTCATGCATATGGCTGATAAGCTTAACTCTCATATTAAGCTTCTGCTCATCAGAATAAGAATCTAGC  
ATAACCCTGGTTGAGCTGCAGATCATGATCACGTCCTTGGAACTTTTTT

>M6-PGSC0003DMG400001732M6RLKmalectin\_2562

AGAATCTAGCATAACCCTGGTTGAGCTGCAGATCATGATCACGTCCTTGGAACTTTTTTGGCTCCACTTGT  
GTCCCTTTCTCTTATTTTAGCTTGCAGTCGTATGTACTGCCTCTAGTAA

>M6-PGSC0003DMG400001732M6RLKmalectin\_2623

CTCCACTTGTGTCCCTTTCTCTTATTTTAGCTTGCAGTCGTATGTACTGCCTCTAGTAAAGTTCTCTTCTCT  
TCTTAATGAAAATGATGATTGCAGGTACGTGCAGAACAACATGCTAA

>M6-PGSC0003DMG400001732M6RLKmalectin\_2684

TTCTCTTCTCTTTCTTAATGAAAATGATGATTGCAGGTACGTGCAGAACAACATGCTAACTGGAAGTGTG  
CCATCTGGTCTTCGTGATAACGGTGTGATTTTGAAGTGGGTATCATTCT

>M6-PGSC0003DMG400001732M6RLKmalectin\_2745

GGAAGTGTGCCATCTGGTCTTCGTGATAACGGTGTGATTTTGAAGTGGGTATCATTCTGTGCTAAGTGT  
TTGTTTCTGAGGCCTTGTATCTTGTCATGCATTTATACTGTACTGCCATG

>M6-PGSC0003DMG400001732M6RLKmalectin\_2806

GCTAAGTGTGTTGTTTCTGAGGCCTTGTATCTTGTCATGCATTTATACTGTACTGCCATGGAAACTGTTGAA  
TTACTTTTTTAGTGCTAGAGAACTAAATCTTAAATGTTGGATTGAG

>M6-PGSC0003DMG400001732M6RLKmalectin\_2867

AACTGTTGAATTTACTTTTTTAGTGCTAGAGAACTAAATCTTAAATGTTGGATTGAGGCGGGTCTAAG  
TAGCGTGATATGGATAGTGAGGATTCATACCGACCCCACTAGCTTTTGG

>M6-PGSC0003DMG400001732M6RLKmalectin\_2928

GGGTCTAAGTAGCGTGATATGGATAGTGAGGATTCATACCGACCCCACTAGCTTTTGGTTAAGGTATA

CTTGTTGATGCCTAAACCTTTTCATTTACAGCTACCAAGGTATATCTATAGG

>M6-PGSC0003DMG400001732M6RLKmalectin\_2989

AAGGTATACTTGTGTTGATGCCTAAACCTTTTCATTTACAGCTACCAAGGTATATCTATAGGGAGCTCATGGT

AGAGACTCAATACTCCTTTCTTTATGAAAGCAGATGATCTTAACATAAGT

>M6-PGSC0003DMG400001732M6RLKmalectin\_305

GTAAGTTTAGATTGTGGAGGCAAAGACAACCTTCACAGATGAACTTGGTCTTAAATGGACCCCTGATACT

CAAATGATTAGCGGAAATATAGCCAATATCTCTGTTGCAAATGAGACGAGG

>M6-PGSC0003DMG400001732M6RLKmalectin\_3050

GCTCATGGTAGAGACTCAATACTCCTTTCTTTATGAAAGCAGATGATCTTAACATAAGTTGGCTTGATAA

GATACTCATATGTTAAACCCTCCGCGCTTGGTTGTGGTTCTTATTTTCAGT

>M6-PGSC0003DMG400001732M6RLKmalectin\_3111

GCTTGTAAGATACTCATATGTTAAACCCTCCGCGCTTGGTTGTGGTTCTTATTTTCAGTTACTTTAATGGT

TCTTACTGCACATTCAAAGTGTCTTCAGTCTCTACTAAGCTTGACTAAT

>M6-PGSC0003DMG400001732M6RLKmalectin\_3172

CTTTAATGGTTCTTACTGCACATTCAAAGTGTCTTCAGTCTCTACTAAGCTTGACTAATTGCTTTACATTTT

ATATGTCGAAATTACAAATCTTAAGTTTCTCTGATAGTCATGCTGCAT

>M6-PGSC0003DMG400001732M6RLKmalectin\_3233

CTTTACATTTTATATGTCGAAATTACAAATCTTAAGTTTCTCTGATAGTCATGCTGCATTTCTAAATTGTTT

GGCTTGTCTGTTTCCTTACTAAATCTGCTAAAACATTCTGTATTCTCC

>M6-PGSC0003DMG400001732M6RLKmalectin\_3294

CTAAATTGTTTGGCTTGTCTGTTTCCTTACTAAATCTGCTAAAACATTCTGTATTCTCCTCAGTTACACTGG

AAACTTTAATCTTCACGAAGGGGAAACCAGTCGCAGCCGCAAGAAAAT

>M6-PGSC0003DMG400001732M6RLKmalectin\_3355

AGTTACTGGAACCTTTAATCTTCACGAAGGGGAAACCAGTCGCAGCCGCAAGAAAATCATTATTGGA

TCATCAGTTGGGGCTTCCGCTCTTCTTCTTGCTACTATTGCCTCTTGCATA

>M6-PGSC0003DMG400001732M6RLKmalectin\_3416

TTATTGGATCATCAGTTGGGGCTTCCGCTCTTCTTCTTGCTACTATTGCCTCTTGCATACTACTGCAAAAA

GGGAAAAAAAGCTCTCCTAAGCAAGGTGTGGTGCAATACTTAATTTTGT

>M6-PGSC0003DMG400001732M6RLKmalectin\_3477

ACTGCAAAAAGGGAAAAAAGCTCTCCTAAGCAAGGTGTGGTGCAATACTTAATTTTGTCATTTTCATTA  
TACATAATTTTTTTTGGTGGGATTACATTATCGTTCTGCTTCTGCTTTA

>M6-PGSC0003DMG400001732M6RLKmalectin\_3538

TTTTATTATAACATAATTTTTTTTGGTGGGATTACATTATCGTTCTGCTTCTGCTTTAGGCCACCTCGAGA  
TGAATTTACCTCCTCAAAGGTTTGTCTCTTCCTTGGGAGATGCTGCAA

>M6-PGSC0003DMG400001732M6RLKmalectin\_3599

CCACCTCGAGATGAATTTACCTCCTCAAAGGTTTGTCTCTTCCTTGGGAGATGCTGCAACAGAAGCAGCA  
CACTGCTTTACATTAGCTGAACCTGAAGAAGCGACCAAGAACCTTTGAAAG

>M6-PGSC0003DMG400001732M6RLKmalectin\_366

CTGATACTCAAATGATTAGCGGAAATATAGCCAATATCTCTGTTGCAAATGAGACGAGGACACAGTATA  
TGGCCTTAAGATACTTTCCAGCCGATAACAGGAAGTATTGCTATACACTTG

>M6-PGSC0003DMG400001732M6RLKmalectin\_3660

GAAGCAGCACACTGCTTTACATTAGCTGAACCTGAAGAAGCGACCAAGAACCTTTGAAAGAAAGGTTGGA  
TCAGGGGGATTGGAGTTGTATACTATGGGAAATTGAAGGACGGGAAGGAA

>M6-PGSC0003DMG400001732M6RLKmalectin\_3721

AGGTTGGATCAGGGGGATTTGGAGTTGTATACTATGGGAAATTGAAGGACGGGAAGGAAATTGCTGTC  
AAACTTCTTACAAATAATTCCTTTTCAGGGGAAGCGAGAGTTCTCAAATGAGG

>M6-PGSC0003DMG400001732M6RLKmalectin\_3782

TGCTGTCAAACCTTCTTACAAATAATTCCTTTTCAGGGGAAGCGAGAGTTCTCAAATGAGGTAATAGGTG  
GATGCTCCTATTATATTCTAGTAGCTTGTTCATGATGCATAAGATGGTCTTA

>M6-PGSC0003DMG400001732M6RLKmalectin\_3843

AATAGGTGGATGCTCCTATTATATTCTAGTAGCTTGTTCATGATGCATAAGATGGTCTTAAATGTCGGGAC  
TGATGCTGTGGCTAAAACCCATTATTCATTTGTTTAACTTTGTGAGGAA

>M6-PGSC0003DMG400001732M6RLKmalectin\_3904

TGTCGGGACTGATGCTGTGGCTAAAACCCATTATTCATTTGTTTAACTTTGTGAGGAAGATCCAGATAT  
AAGAGGCTTCACCATTACACTTCAATGTTTTTAGATTATCGAGGAATCCA

>M6-PGSC0003DMG400001732M6RLKmalectin\_3965

TCCAGATATAAGAGGCTTCACCATTACACTTCAATGTTTTTAGATTATCGAGGAATCCATTGTTTTACTTTT  
GGAACCTCGGGGATAATGGGCCACCCCTCTCCCTTGTTTAACTTATAT

>M6-PGSC0003DMG400001732M6RLKmalectin\_4026

GTTTTACTTTTGGAACTCGGGGATAATGGGCCACCCCTCTCCCTTGTTAACTTATATACCAAATTTGGT  
GCAACAACCAGGTTTTGAAGTCATGACATGCACCTACCACACTCCTGCT

>M6-PGSC0003DMG400001732M6RLKmalectin\_4087

CAAATTTGGTGCAACAACCAGGTTTTGAAGTCATGACATGCACCTACCACACTCCTGCTCTGTACTACCTC  
TACCTCTGATGTGGAACCAAATTCGAGGCTTCCTTGACACTCACAT

>M6-PGSC0003DMG400001732M6RLKmalectin\_4148

GTACTACCTCTACCTCTGATGTGGAACCAAATTCGAGGCTTCCTTGACACTCACATTATTTTTGCTTTT  
CAAATCTGCATAACATCTCAGTATAGAAAATGAAATTTGCGTAATTTA

>M6-PGSC0003DMG400001732M6RLKmalectin\_4209

TTTTTGCTTTTCAAATCTGCATAACATCTCAGTATAGAAAATGAAATTTGCGTAATTTAGAAAGGATTAAT  
TTAACGCCAGAGGACACTTTCTCAGTGGTACTTTTTCACACTCATCAA

>M6-PGSC0003DMG400001732M6RLKmalectin\_427

ACAGTATATGGCCTTAAGATACTTTCCAGCCGATAACAGGAAGTATTGCTATACACTTGATGTGATTCCC  
CGAAACAGGTACCTTGTAAGAGCAACTTTTCTATATGGAACTTTGATAA

>M6-PGSC0003DMG400001732M6RLKmalectin\_4270

AAGGATTAATTTAACGCCAGAGGACACTTTCTCAGTGGTACTTTTTCACACTCATCAAATGTATATTGCAT  
AGAAGGTCACGGGCTATAAAACCTCTAGACCAGCAATGTACTAGAACTT

>M6-PGSC0003DMG400001732M6RLKmalectin\_4331

TATATTGCATAGAAGGTCACGGGCTATAAAACCTCTAGACCAGCAATGTACTAGAACTTGATTAAGTTGT  
TACACAGTGCTGCAACTTTTCCCTCTACATTGTGCAATTTTGGATCTGAT

>M6-PGSC0003DMG400001732M6RLKmalectin\_4380

ACTAGAACTTGATTAAGTTGTTACACAGTGCTGCAACTTTTCCCTCTACATTGTGCAATTTTGGATCTGAT  
GCAAATTAGTACAACCATATCCAGTTTATATGTGACAAATTTACAATTT

>M6-PGSC0003DMG400001732M6RLKmalectin\_488

GTGATTCCCCGAAACAGGTACCTTGTAAGAGCAACTTTTCTATATGGAACTTTGATAAGGACAATGTTT  
ACCCAAAGTTTGATATCTCACTTGGGGCAACTCATTGGGCTACAATAGTT

>M6-PGSC0003DMG400001732M6RLKmalectin\_549

ACAATGTTTACCCAAAGTTTGATATCTCACTTGGGGCAACTCATTGGGCTACAATAGTTATATCTGATGCT



AATACAATGGAGTACCAAGAGGTAATATTTCTAGCCAAGGAACCTTCCG

>M6-PGSC0003DMG400001732M6RLKmalectin\_610

ATCTGATGCTAATACAATGGAGTACCAAGAGGTAATATTTCTAGCCAAGGAACCTTCCGTAAGTGTCTGT  
TTATCCAATGCAACCACTGGGCTGCCCTTCATTTCTACACTTGAGCTCCG

>M6-PGSC0003DMG400001732M6RLKmalectin\_671

AGTGTCTGTTTATCCAATGCAACCACTGGGCTGCCCTTCATTTCTACACTTGAGCTCCGACATTTTAATGG  
TTCAATATATATGACTGAATTTGAGAATGATTTTTTCATGAGCGTCTCT

>M6-PGSC0003DMG400001732M6RLKmalectin\_732

ATTTTAATGGTTCAATATATATGACTGAATTTGAGAATGATTTTTTCATGAGCGTCTCTGCTAGGATAAAT  
TTTGGTGACAGAGTGATGATCCTGTCAGGTATCTTTCAGTTCTTCTGT

>M6-PGSC0003DMG400001732M6RLKmalectin\_793

TAGGATAAATTTTGGTGACAGAGTGATGATCCTGTCAGGTATCTTTCAGTTCTTCTGTTACTGTGGCAG  
CTTCCAATCTATGTTCTTGACGTTCTTGATATTTTTAGAATATGATA

>M6-PGSC0003DMG400001732M6RLKmalectin\_854

CTGTGGCAGCTTCCAAATCTATGTTCTTGACGTTCTTGATATTTTTAGAATATGATAGCCATTGACATT  
TTGAACTGAAACAAGCAGGCTTTGGCTCTGTCCCTAGCATGGTTTTCT

>M6-PGSC0003DMG400001732M6RLKmalectin\_915

CATTGACATTTTTGAACTGAAACAAGCAGGCTTTGGCTCTGTCCCTAGCATGGTTTTCTTCTGACTTACTG  
TTTTTGTTGATTCCAAAATTTAATCTTCCCTAATGTCCTTATTCT

>M6-PGSC0003DMG400001732M6RLKmalectin\_976

TGACTTACTGTTTTGTTGATTCCAAAATTTAATCTTCCCTAATGTCCTTATTCTCCTAGGTACCCTGA  
TGACCCATTCGATAGAATATGGGCATCTGACACCATAAAAAAGGCCA

>M6-PGSC0003DMG400001773-(rev)M6L-LecRK\_0

CCAACGGCTAGTTTGATGAACCCACGGCGGATATAACTACATCTGCCACATCGCCCCCTCCGGAGCAAC  
AGATTGCTCCGAAGGAGGCTAATGGTACTGCAGTACAGAAAAACAGCAGC

>M6-PGSC0003DMG400001773-(rev)M6L-LecRK\_1040

ATTGAATCTGAATTTGATGAAAAAGAAATGACAAGAGTGTTGTTAGTTGGTTTGGCTTGTTACATCCT  
GACCCTATAGCTAGGCCAACAATGAGGGGGTGGTACAAATGTTAGTAGG

>M6-PGSC0003DMG400001773-(rev)M6L-LecRK\_1105

ATCCTGACCCTATAGCTAGGCCAACAAATGAGGGGGGTGGTACAAATGTTAGTAGGGTGAAGTA  
CCAATTGTACCAAGGGCTAAACCATCAATGAGTTTTAGCACATCTCATTGT

>M6-PGSC0003DMG400001773-(rev)M6L-LecRK\_1170

GTACCAATTGTACCAAGGGCTAAACCATCAATGAGTTTTAGCACATCTCATTGTTAATGACATTGCAAG  
ATAGTGTCTGACTTGAATGGTATGATCACACTTTCAACTTCTTCATCA

>M6-PGSC0003DMG400001773-(rev)M6L-LecRK\_1221

TTGTTAATGACATTGCAAGATAGTGTCTGACTTGAATGGTATGATCACACTTTCAACTTCTTCATCAGA  
AAACAGTTTCAATGGTGTGGTGGACATGATGGCATGGACCTAGTTAG

>M6-PGSC0003DMG400001773-(rev)M6L-LecRK\_130

ATAGTTTTTGTAAAGCAGGGTGCTGGTGCTGTTGTTGGGGTTGTTACTGCTGGAGCATTCTTCTAGCTTTT  
GCTACATTGGTACTTATTTGGTTGTATTCGAAAAAATTCAGAATGTGA

>M6-PGSC0003DMG400001773-(rev)M6L-LecRK\_195

GCTTTTGCTACATTGGTACTTATTTGGTTGTATTCGAAAAAATTCAGAATGTGAAGACTTCAGAGTCTAT  
GTTGCCTTCTGATATTATCAAATGCCAAAGGAATTTAGCTATAAGGAG

>M6-PGSC0003DMG400001773-(rev)M6L-LecRK\_260

GTCTATGTTGCCTTCTGATATTATCAAATGCCAAAGGAATTTAGCTATAAGGAGCTTAAATCGCGACG  
AAAGGGTTTGATTCTACTAGGATAATAGGGCATGGTGCATTTGGTACTGT

>M6-PGSC0003DMG400001773-(rev)M6L-LecRK\_325

CGACGAAAGGGTTTGATTCTACTAGGATAATAGGGCATGGTGCATTTGGTACTGTCTATAAAGGGATTT  
TGTCTGAGACTGGTATATTGTTGCGGTAAAGAGGTGTAGTCATAATGGAC

>M6-PGSC0003DMG400001773-(rev)M6L-LecRK\_390

ATTTTGTCTGAGACTGGTATATTGTTGCGGTAAAGAGGTGTAGTCATAATGGACAAGGGAAAGCTGA  
GTTCTTTTCTGAATTGTCGATAATCGGAACACTTAGACATAGAAATCTTGTT

>M6-PGSC0003DMG400001773-(rev)M6L-LecRK\_455

TGAGTTCTTTTCTGAATTGTCGATAATCGGAACACTTAGACATAGAAATCTTGTTAGGCTACAAGGATGG  
TGTCATGAGAAAGGTGAAATCTTGTTAGTTTATGATTTGATGCCAAATGG

>M6-PGSC0003DMG400001773-(rev)M6L-LecRK\_520

GATGGTGTGATGAGAAAGGTGAAATCTTGTTAGTTTATGATTTGATGCCAAATGGTAGTCTTGACAAGG  
CGTTATTCGAGTCCAGAATGATCCTCTCGTGGCAACACAGGCAAAAAATCT

>M6-PGSC0003DMG400001773-(rev)M6L-LecRK\_585

AAGGCGTTATTTCGAGTCCAGAATGATCCTCTCGTGGCAACACAGGCAAAAAATCTTGTTAGGTGTTGCTT  
CTGCATTAGCATATTTACATCAAGAATGTGAAAACCAGGTGATACATAGG

>M6-PGSC0003DMG400001773-(rev)M6L-LecRK\_65

GCAACAGATTGCTCCGAAGGAGGCTAATGGTACTGCAGTACAGAAAAACAGCAGCAAATGTCATAATA  
GTTTTTGTAAAGCAGGGTGCTGGTGTGTTGTTGGGGTTGTTACTGCTGGAGC

>M6-PGSC0003DMG400001773-(rev)M6L-LecRK\_650

TGCTTCTGCATTAGCATATTTACATCAAGAATGTGAAAACCAGGTGATACATAGGGATATCAAGAGTAG  
TAACATTATGTTGGATGAAGGGTTCAATGCAAAGTTAGGAGATTTTGGACT

>M6-PGSC0003DMG400001773-(rev)M6L-LecRK\_715

GTAGTAACATTATGTTGGATGAAGGGTTCAATGCAAAGTTAGGAGATTTTGGACTAGCACGACAAATCG  
AACACGACAAGTCCCCCGATGCAACGGTAGCAGCCGGTACAATGGGGTATT

>M6-PGSC0003DMG400001773-(rev)M6L-LecRK\_780

ATCGAACACGACAAGTCCCCCGATGCAACGGTAGCAGCCGGTACAATGGGGTATTTGGCACCAGAATAC  
TTGTTGACAGGTAGAGCAACTGAGAAAAGTATGATGTGTTTAGTTATGGGGCA

>M6-PGSC0003DMG400001773-(rev)M6L-LecRK\_845

ATACTTGTTGACAGGTAGAGCAACTGAGAAAAGTATGATGTGTTTAGTTATGGGGCAGTGGTTCTTGAAGT  
GGCAAGTGGGAGGAGGCCAATTGAGAAAGAAACAGCAACTAGTGGTGTGG

>M6-PGSC0003DMG400001773-(rev)M6L-LecRK\_910

AAGTGGCAAGTGGGAGGAGGCCAATTGAGAAAGAAACAGCAACTAGTGGTGTGGATTAACAGCAA  
TTTGGTTGAATGGGTGTGGGGATTACACAAAGATGGGAGTTTACTATCAGCAG

>M6-PGSC0003DMG400001773-(rev)M6L-LecRK\_975

AATTTGGTTGAATGGGTGTGGGGATTACACAAAGATGGGAGTTTACTATCAGCAGTTGATTCAAATTG  
AATCTTGAATTTGATGAAAAGAAATGACAAGAGTGTGTTAGTTGTTTG

>M6-PGSC0003DMG400001829-(rev)M6LRR-RLP\_0

TATATTTTTTTTCCAGCAATCTCAGCTCACATATGCTGGGCAACATCTCTGTGCCTGCTATGACGCTTTT  
TTTGCTTCAATTTAAGAAAGGCCTCACAGTTGTTGATCAAATATACA

>M6-PGSC0003DMG400001829-(rev)M6LRR-RLP\_1054

CTTTCAGGTAACAACTTCACCGGAAATGTTCCCTCAACTTTCAAAAAGCTGAAAACACTTAACTACTTATC

TCTCTCTTTCAATAATTTTGAAAGCTCAATTCCAGACAACTTCGCCTAC

>M6-PGSC0003DMG400001829-(rev)M6LRR-RLP\_1116

CTACTTATCTCTCTCTTTCAATAATTTTGAAAGCTCAATTCCAGACAACTTCGCCTACTTTTCAGAGCTATC

TTTTTATACTTGCAAATAACAATTTCACTTGCCCACTTCCCTATTT

>M6-PGSC0003DMG400001829-(rev)M6LRR-RLP\_1178

CAGAGCTATCTTTTTATACTTGCAAATAACAATTTCACTTGCCCACTTCCCTATTTGATTGCAACCTTGA

CTCGCCTTCAAGAATTAACCTTGCAAACAATTTACTAACTGGTTTAC

>M6-PGSC0003DMG400001829-(rev)M6LRR-RLP\_1240

GCAACCTTGACTCGCCTTCAAGAATTAACCTTGCAAACAATTTACTAACTGGTTCACTTCCCTCTAATTT

AAGCAGACTTCAAGAGTTAGAAACACTTGATTTTTCTTCAATTATTTT

>M6-PGSC0003DMG400001829-(rev)M6LRR-RLP\_1302

CTCTAATTTAAGCAGACTTCAAGAGTTAGAAACACTTGATTTTTCTTCAATTATTTCACTGGCACAATAC

CCTCTTGTTATTCCGTCTTCCATCCTTGGTTTCTTTATCTATTCAATA

>M6-PGSC0003DMG400001829-(rev)M6LRR-RLP\_1364

GCACAATACCCTCTTGTTATTCCGTCTTCCATCCTTGGTTTCTTTATCTATTCAATACAATGAATTAAC

GGAAATTGCCAAATGAGCTCAAGAGCATTACGTTGGCAACGCTAGAAAT

>M6-PGSC0003DMG400001829-(rev)M6LRR-RLP\_1426

GAATTAACCTGGGAAATTGCCAAATGAGCTCAAGAGCATTACGTTGGCAACGCTAGAAATTGATCTTCGGA

ACAACAAGCTGCATGGAGAAATCCCTGATTGGATATTATCTATGAGCATGT

>M6-PGSC0003DMG400001829-(rev)M6LRR-RLP\_1488

CTTCGGAACAACAAGCTGCATGGAGAAATCCCTGATTGGATATTATCTATGAGCATGTATATCCTGGATC

TCTCTCATAACTTGCTCACAGGCTTTGAAAAACAAGTATGACATTCAAAG

>M6-PGSC0003DMG400001829-(rev)M6LRR-RLP\_1550

CCTGGATCTCTCTCATAACTTGCTCACAGGCTTTGAAAAACAAGTATGACATTCAAAGAATTTGGTGTGG

CTTAATTTGGAGAACAATTTCTTCAAGGGACTTTGCATCAATCTATTTG

>M6-PGSC0003DMG400001829-(rev)M6LRR-RLP\_1612

TGGTGTGGCTTAATTTGGAGAACAATTTCTTCAAGGGACTTTGCATCAATCTATTTGTGACATGTTTAA

CCTGAAGTCCTCATTTTGTCTCGGAACAATTTCAAGTGGTTCAATCCCAG

>M6-PGSC0003DMG400001829-(rev)M6LRR-RLP\_1674

ATGTTTAACCTTGAAGTCCTCATTTTGTCTCGGAACAATTTTCAGTGGTTCAATCCCAGGATGTTTGGGTAA  
CTCCATTCTTGTTTTAGACTTGCGAATGAACAATTTTTATGGAGAAATA

>M6-PGSC0003DMG400001829-(rev)M6LRR-RLP\_1736

TTTGGGTAACCTCCATTCTTGTTTTAGACTTGCGAATGAACAATTTTTATGGAGAAATACCAAATTCTTAC  
CTATAGGGTTACAATATCTTGGTGTGTATGACAATCAGTTGGGGGGGAC

>M6-PGSC0003DMG400001829-(rev)M6LRR-RLP\_186

GGATGGTGTAACTTGAATGGATTTACGGGTCATGTCATAGGCCTTGATCTTTCTTGACAGCATTCTTAAC  
CAGACCATCAATGCTAACAGCAGCCTCACTAACTTGGTCATCTCCAAAG

>M6-PGSC0003DMG400001829-(rev)M6LRR-RLP\_1860

CCCACGATCCTTGGTAACTGTACAAGCTTGAAGCTCTTGATTTGGGGAACAACAATATAAATGACACG  
TTCCCGTATGGCTGGACAACTTCCAAACCTACAAGTTCTGATTCTGTAA

>M6-PGSC0003DMG400001829-(rev)M6LRR-RLP\_1922

ATGACACGTTCCCGTATGGCTGGACAACTTCCAAACCTACAAGTTCTGATTCTGTAATCAAATCTCTTTC  
ACGGTTCAGTTGGTGATTTGGATTCCGAGTTTCCATTTCTGAGTTACG

>M6-PGSC0003DMG400001829-(rev)M6LRR-RLP\_1984

ATCTCTTTCACGGTTCAGTTGGTGATTTGGATTCCGAGTTTCCATTTCTGAGTTACGGATCTTTGACCTT  
CCGTTAATGGGTTCACTGGAACCTTTCCATCTAATATTTTCAAAGTT

>M6-PGSC0003DMG400001829-(rev)M6LRR-RLP\_2046

TTTGACCTTCCGTTAATGGGTTCACTGGAACCTTTCCATCTAATATTTTCAAAGTTTCAGAGGTATGAT  
GGATGTGGATGAAGGAAAAACAGGAATTACTCTAGCTATTAATAGGACT

>M6-PGSC0003DMG400001829-(rev)M6LRR-RLP\_2108

AGGTATGATGGATGTGGATGAAGGAAAAACAGGAATTACTCTAGCTATTAATAGGACTCACAGAGATTA  
CCTTTACCATGTTAGTTTGGTGATAAAAGTCAATGAATTTGATATGAGAAT

>M6-PGSC0003DMG400001829-(rev)M6LRR-RLP\_2170

GAGATTACCTTTACCATGTTAGTTTGGTGATAAAAGTCAATGAATTTGATATGAGAATCACGTCAATTAT  
GACGAGTGTTGATTTATCAAGCAACAGGTTTCAAGGAGATATTCCAAATT

>M6-PGSC0003DMG400001829-(rev)M6LRR-RLP\_2294

TGGAAGTCTGAGCTCACTTGTGTTACTCAACCTGTCTCGCAACAACCTCCGTGGTCATATTCCTGCAGAA  
ATTGCAAAGTTGCAGCAGCTCGAAGCATTATAGATCTCTCGTGGAACAGA

>M6-PGSC0003DMG400001829-(rev)M6LRR-RLP\_2356

CTGCAGAAATTGCAAAGTTGCAGCAGCTCGAAGCATTATAGATCTCTCGTGGAACAGACTCATTGGAGA  
AGTTCCTGGTCAATTGTCGAGTTTGACATTTCTTGAGGTCTTAAACCTTTC

>M6-PGSC0003DMG400001829-(rev)M6LRR-RLP\_2418

TTGGAGAAGTTCCTGGTCAATTGTCGAGTTTGACATTTCTTGAGGTCTTAAACCTTTCATACAATCATCTG  
GCTTGGCGCATTCTATTGGGAAACAGTTCAATACATTTCCAGATGATT

>M6-PGSC0003DMG400001829-(rev)M6LRR-RLP\_248

TTCTTAACCAGACCATCAATGCTAACAGCAGCCTCACTAAACTTGGTCATCTCCAAAGACTCAACCTTGCC  
TTCAGCCAGTTTGATGACGACTTTCCACTTGGATTAAGTGAACCTCAGTA

>M6-PGSC0003DMG400001829-(rev)M6LRR-RLP\_2542

TTGTGGAAATCTTGATTTATGTGGATTTCCTACTATCAAAGAAATGTGGAAACAATAATAGGCCAGATGA  
GTCAACACTTGAACAAGATGATGAAGATTCATTTTTTTCGAGCGGGTTCAC

>M6-PGSC0003DMG400001829-(rev)M6LRR-RLP\_2604

CAGATGAGTCAACACTTGAACAAGATGATGAAGATTCATTTTTTTCGAGCGGGTTCACATGGGAAGCTG  
TGGTAATAGTTATGGTATGATATTTGGATTGTTGATGGGAGGCCTCATGT

>M6-PGSC0003DMG400001829-(rev)M6LRR-RLP\_2666

GAAGCTGTGGTAATAGGTTATGGTATGATATTTGGATTGTTGATGGGAGGCCTCATGTTCTATTGGAA  
AAACCAAATGGTTTGTCAACTTTGCTGAAGATATTTCTCAACAAATTGCT

>M6-PGSC0003DMG400001829-(rev)M6LRR-RLP\_2726

CTATTGGAAAAACCAAATGGTTTGTCAACTTTGCTGAAGATATTTCTCAACAAATTGCTGCTAAGAAGC  
GAAGAAATCAAAGAAGAGACGTCAAGGACGTGGTCTAAGAATGAATTAG

>M6-PGSC0003DMG400001829-(rev)M6LRR-RLP\_310

AACCTTGCCTTCAGCCAGTTTGATGACGACTTTCCACTTGGATTAAGTGAACCTCAGTAGTTTGACACATCT  
CAATCTTTCGAATACTGGATTTAATGAAGGGGAGATACAGATTCCACCA

>M6-PGSC0003DMG400001829-(rev)M6LRR-RLP\_372

GACACATCTCAATCTTTCGAATACTGGATTTAATGAAGGGGAGATACAGATTCCACCAGGATTATCCAAG  
TTGTCTAAGTTGGTTTCACTTGACCTCTCCTCGAATGATTTCCAAGTTGG

>M6-PGSC0003DMG400001829-(rev)M6LRR-RLP\_434

TATCCAAGTTGTCTAAGTTGGTTTCACTTGACCTCTCCTCGAATGATTTCCAAGTTGGCCGAACAACCTCT

AGAAGTTTGCTTCAGAACTTAACTAATTTGGAGGTAAGTGTGCTTGACA

>M6-PGSC0003DMG400001829-(rev)M6LRR-RLP\_496

ACAACCTCTAGAAGTTTGCTTCAGAACTTAACTAATTTGGAGGTAAGTGTGCTTGACAGCGTGGATGCAC  
CATTTGAGTTACCTAAGAATTTTCCTTCTTCCCTTAGGTAAGTACTTAATTCTT

>M6-PGSC0003DMG400001829-(rev)M6LRR-RLP\_558

GGATGCACCATTTGAGTTACCTAAGAATTTTCCTTCTTCCCTTAGGTAAGTACTTAATTCTTCAAGACACCAACA  
TGTGTGGGAACATAAGTGATTCTCAGCTTTTTTCATCTACCAAAGTGTGCA

>M6-PGSC0003DMG400001829-(rev)M6LRR-RLP\_62

ACGCTTTTTATTGCTTCAATTTAAGAAAGGCCTCACAGTTGTTGATCAAAAATATACATGACTGTGACAAT  
GAGACCCGAGCCAAGACTTTGTCCTGGAATGTTACAGGAGATTGTTGTC

>M6-PGSC0003DMG400001829-(rev)M6LRR-RLP\_620

ACACCAACATGTGTGGGAACATAAGTGATTCTCAGCTTTTTTCATCTACCAAAGTGTGCAAGTGTGAGAAT  
GGGATGAAATCCTTTATTAACAGGCACTTTGCCTAATTTCAATTGGAGTT

>M6-PGSC0003DMG400001829-(rev)M6LRR-RLP\_682

CTGAGAATGGGATGAAATCCTTTATTAACAGGCACTTTGCCTAATTTCAATTGGAGTTTCAGTACAAGTA  
TTTTAGAGTTGGACTTTTTCTATACTGATATTTTTGGTAAGGTACCTGAT

>M6-PGSC0003DMG400001829-(rev)M6LRR-RLP\_744

TACAAGTATTTTAGAGTTGGACTTTTTCTATACTGATATTTTTGGTAAGGTACCTGATTCAATCGGCAACC  
TCCGTTCACTTTGGTAATTAGATCTCTTTAAACCGTTTATCCGGCTT

>M6-PGSC0003DMG400001829-(rev)M6LRR-RLP\_806

TCCGCAACCTCCGTTCACTTTGGTAATTAGATCTCTTTAAACCGTTTATCCGGCTTGATTCCAGTATCCA  
TTGGCAACCTCAGTGGAATTAGAGTGTTGAGACTTTCAAGTAACAGCT

>M6-PGSC0003DMG400001829-(rev)M6LRR-RLP\_868

CCAGTATCCATTGGCAACCTCAGTGGAATTAGAGTGTTGAGACTTTCAAGTAACAGCTTCACTGGTAATG  
TTCCCTCATCTATCTCAAATTAACAAACTCTTTGATTTAGATCTCTCT

>M6-PGSC0003DMG400001829-(rev)M6LRR-RLP\_930

TGGTAATGTTCCCTCATCTATCTCAAATTAACAAACTCTTTGATTTAGATCTCTCTTTCAACGATTTTCA  
AGGCTTGATTCTAGAATCCATTGGTAACCTAACTGCAATCACAAAGTT

>M6-PGSC0003DMG400001829-(rev)M6LRR-RLP\_992

ACGATTTTCAAGGCTTGATTCTAGAATCCATTGGTAACCTAACTGCAATCACAAAGTTGACACTTTCAGG  
TAACAACCTTCACCGGAAATGTTCCCTCAACTTTCAAAAAGCTGAAAACAC

>M6-PGSC0003DMG400001831-(rev)M6LRR-RLP\_0

ATGGAGTACCAAAAATTGCTAATAGCTTTCTGCTTCTATTCACATTTTATACTTTTTGTCCATCAATCTCAG  
CTTACATATGCTGGGCAACATCTCTGTGCCCGCTATGAAGCTTTTTAT

>M6-PGSC0003DMG400001831-(rev)M6LRR-RLP\_1054

GAGGCTCAATTCTAGAATACATTGACAATCTCACTGCAATCACACAGTTGACAATTCCAGATAACAGCTT  
CACTGGAAATGTTCCCTCAACTATCGGAAAGTTGAACAACTTAACTACT

>M6-PGSC0003DMG400001831-(rev)M6LRR-RLP\_1116

AACAGCTTCACTGGAAATGTTCCCTCAACTATCGGAAAGTTGAACAACTTAACTACTTATCTCTCTCTTC  
CAATTATTTTGAAGGCTCGATTCCAGACATCTTTGCCAACTTTTCAGAT

>M6-PGSC0003DMG400001831-(rev)M6LRR-RLP\_1178

TCTCTTTCCAATTATTTTGAAGGCTCGATTCCAGACATCTTTGCCAACTTTTCAGATCTATTTGCTTTATTT  
TTTGACACTAACAATTTCACTGGTTCATTTCCCTGTTCAATTGCAAC

>M6-PGSC0003DMG400001831-(rev)M6LRR-RLP\_124

TTCAATTTAGCAAGGCCTCACAGTTGATCTTATTGGTTATGACTGTGACTATGAGGCCCTAGCTAAGAC  
TTTGTCTTTGAATGTTACAGGAGATTGTTGTCAATGGGATGGTGTACTT

>M6-PGSC0003DMG400001831-(rev)M6LRR-RLP\_1240

TTGCTTTATTTTTGACACTAACAATTTCACTGGTTCATTTCCCTGTTCAATTGCAACCTTGATTTGCCTTGT  
GAATTTAGAGTTGCAAAACAATTTACTAACTGGTTCACTTCCCTCTA

>M6-PGSC0003DMG400001831-(rev)M6LRR-RLP\_1302

ATTTGCCTTGTGAATTTAGAGTTGCAAAACAATTTACTAACTGGTTCACTTCCCTCTAATATAAGCTGATT  
TCAACTTCTACAATCACTTGATTTGCCTTCAATTATTTCACTGGCACA

>M6-PGSC0003DMG400001831-(rev)M6LRR-RLP\_1364

AAGCTGATTTCAACTTCTACAATCACTTGATTTGCCTTCAATTATTTCACTGGCACAACACCCCTTCGTT  
ATTCCTTCTTCCAAGATTGGTTTCTTTACATGTTCAACTCAATCAATT

>M6-PGSC0003DMG400001831-(rev)M6LRR-RLP\_1426

CCCCTTCGTTATTCCTTCTTCCAAGATTGGTTTCTTTACATGTTCAACTCAATCAATTAACCGGGAAATTGC  
CAAATGTGCTCAAGATGAGTTATCTAGGATACGTACTATAACCGTAGCA



>M6-PGSC0003DMG400001831-(rev)M6LRR-RLP\_1488

GGGAAATTGCCAAATGTGCTCAAGATGAGTTATCTAGGATACGTACTATACCGTAGCATTGATCTTTTCAT  
ACAACAAGCTGCAAGGTGAAATCCCCAATGCGATGTTATCTATGAGCATG

>M6-PGSC0003DMG400001831-(rev)M6LRR-RLP\_1550

TCTTTCATACAACAAGCTGCAAGGTGAAATCCCCAATGCGATGTTATCTATGAGCATGGGTAAGCTGGAT  
CTCTCTCATAACTTCCTCACAGGCTTTGAAAAACAAGTATGGCACTCAGA

>M6-PGSC0003DMG400001831-(rev)M6LRR-RLP\_1612

AGCTGGATCTCTCTCATAACTTCCTCACAGGCTTTGAAAAACAAGTATGGCACTCAGAGTACTTACTATA  
CCTTAATTTGGAGAACAATTTTCTTCAAGGGCTTTTGCATCTATCCTTTT

>M6-PGSC0003DMG400001831-(rev)M6LRR-RLP\_1674

TTACTATACCTTAATTTGGAGAACAATTTTCTTCAAGGGCTTTTGCATCTATCCTTTTGTGACATGTATAGT  
CTTGATTCCCTCATTTTAGCTCGGAACAATTTTCAAGTTCAATCCCCG

>M6-PGSC0003DMG400001831-(rev)M6LRR-RLP\_1736

CATGTATAGTCTTGTATTCCCTCATTTTAGCTCGGAACAATTTTCAAGTTCAATCCCCGGTATGTTTGGGTA  
ACTCCAGTATTTCCATTTCTTTTTTAGACTTGCGAATGAACAATTTGCA

>M6-PGSC0003DMG400001831-(rev)M6LRR-RLP\_1798

GTTTGGGTAACCTCCAGTATTTCCATTTCTTTTTTAGACTTGCGAATGAACAATTTGCATGGAGAGATACCA  
AGATTCTTATCTACAGGGTTTCAATATCTTGGTTTATATGGCAATCAAT

>M6-PGSC0003DMG400001831-(rev)M6LRR-RLP\_186

GCTAAGACTTTGTCTTTGAATGTTACAGGAGATTGTTGTCAATGGGATGGTGTACTTGTGATGGATTTA  
CTGGTCACGTTATAGGACTCGATCTTTCTTGCAGTTTTCTTAACGGAACC

>M6-PGSC0003DMG400001831-(rev)M6LRR-RLP\_1860

GAGATACCAAGATTCTTATCTACAGGGTTTCAATATCTTGGTTTATATGGCAATCAATTGGGGGGACAAT  
TCCCGTGATCCTTGGTTAACTGTACAAGCTTGAAGCTCTTGATTTGGGG

>M6-PGSC0003DMG400001831-(rev)M6LRR-RLP\_1984

ACAAGATAAATGACACGTTTCCGATATGGCTGCAGAACTTCCAAACCTACAAGTTCTGATTCTGAAATC  
TAATCTCTTTCATGGTCCAATTGGTTATTTGGAGTCCGAGTTTCCATTTT

>M6-PGSC0003DMG400001831-(rev)M6LRR-RLP\_2046

CTGAAATCTAATCTCTTTCATGGTCCAATTGGTTATTTGGAGTCCGAGTTTCCATTTCTGAGTTACGAAT

CTTTGATCTTTCCTTCAATGGGTTCACTGGAACCTTTGCCATCTAATTTT

>M6-PGSC0003DMG400001831-(rev)M6LRR-RLP\_2108

GTTACGAATCTTTGATCTTTCCTTCAATGGGTTCACTGGAACCTTTGCCATCTAATTTTTTCAAAGTTTTAG

AGGTATGATGGATGTGGATGAAGAAAAACAGGAATTACTCGCTCCTA

>M6-PGSC0003DMG400001831-(rev)M6LRR-RLP\_2170

AAAGTTTTAGAGGTATGATGGATGTGGATGAAGAAAAACAGGAATTACTCGCTCCTACAAAGGGTTCG

ACCAGGCCTTGTACAAGCATAAATCGATGTCTGAAGAGATTACCTTTACCACT

>M6-PGSC0003DMG400001831-(rev)M6LRR-RLP\_2232

GGGTCCGACCAGGCCTTGTACAAGCATAAATCGATGTCTGAAGAGATTACCTTTACCACTTTAGTTTTGGTGA

TAAAAGGTAATGAGTTTGATATGAGAATCACGTCAATTATGACGAGTGTT

>M6-PGSC0003DMG400001831-(rev)M6LRR-RLP\_2294

TTTGGTGATAAAAGGTAATGAGTTTGATATGAGAATCACGTCAATTATGACGAGTGTTGATATATCAAG

CAACAGGGTTGAAGGATATATTCCAAATTCATTGGAAATCTGAGCTCACT

>M6-PGSC0003DMG400001831-(rev)M6LRR-RLP\_2356

TATCAAGCAACAGGGTTGAAGGATATATTCCAAATTCATTGGAAATCTGAGCTCACTTGTGTTACTCAA

CCTGTCTCACAACAGCTTCCGTGGTCATATTCCTGCAGAATTTGCAAAGT

>M6-PGSC0003DMG400001831-(rev)M6LRR-RLP\_2418

TACTCAACCTGTCTCACAACAGCTTCCGTGGTCATATTCCTGCAGAATTTGCAAAGTTGCAATAGCTCGA

AGCATTAGATCTCTCACGGAACAGACTCATTGGAGATATTCCAGATCCA

>M6-PGSC0003DMG400001831-(rev)M6LRR-RLP\_248

TGGATTTACTGGTCACGTTATAGGACTCGATCTTCTTGCAGTTTTCTTAACGGAACCATTAATTCTAACA

GCAGCCTCACAAAACCTTAGTCATCTTCAAAGACTCAACCTTGCTTTCAA

>M6-PGSC0003DMG400001831-(rev)M6LRR-RLP\_2542

CGAGTTTGACATTTCTTGAGGTCTTAAACCTTTCCTACAATCATCTGGCTGGACGCATTCTCTTGGGAAA

CAGTTCAATACATTTCAAATGATTCTTATTGTGGAAATCCTGATTTAT

>M6-PGSC0003DMG400001831-(rev)M6LRR-RLP\_2604

CTTGGGAAACAGTTCAATACATTTCAAATGATTCTTATTGTGGAAATCCTGATTTATGTGGATTTCCACT

ATCAAAGGAATGTGGAAACAATAAAGAGTCACCACTTGAACACGATGAT

>M6-PGSC0003DMG400001831-(rev)M6LRR-RLP\_2666

ATTTCCACTATCAAAGGAATGTGGAAACAATAAAGAGTCACCACTTGAACACGATGATGGTGATGATGA  
TGATTCATTTTTTTCGAGTGGGTTACATGGCAAGCTGTGGTAATAGGTTA

>M6-PGSC0003DMG400001831-(rev)M6LRR-RLP\_2728

ATGATGATGATTCATTTTTTTCGAGTGGGTTACATGGCAAGCTGTGGTAATAGGTTATGGTTGTGGTCT  
GATATTTGGATTGTTGATGGGAGGTCTCATGTTCTACTGGAAAAGCCAA

>M6-PGSC0003DMG400001831-(rev)M6LRR-RLP\_310

ATTCTAACAGCAGCCTCACAAAACCTTAGTCATCTTCAAAGACTCAACCTTGCTTTCAACAAGTTGAGTAAC  
TTTCCACTTGTGGATAGCATTAGTGAACCTCGAAAGTTTGACATATCTCA

>M6-PGSC0003DMG400001831-(rev)M6LRR-RLP\_372

TTGAGTAACTTTCCACTTGTGGATAGCATTAGTGAACCTCGAAAGTTTGACATATCTCAATCTTTTCGCATTC  
AGTACATATGATAGGGGAGAAGCAGATACCACAAGTATTATCCAACCTTG

>M6-PGSC0003DMG400001831-(rev)M6LRR-RLP\_434

TTCGCATTCAGTACATATGATAGGGGAGAAGCAGATACCACAAGTATTATCCAACCTTGTCTAAATTGGTT  
TCACTTGACCTCTCCTTGTATTACACTGAACTCAAAGTTGATTGAAAAAC

>M6-PGSC0003DMG400001831-(rev)M6LRR-RLP\_496

AATTGGTTTCACTTGACCTCTCCTTGTATTACACTGAACTCAAAGTTGATTGAAAAACCTTCAGAAGTTTG  
CTTCAAGACTTGACCAATTTGGAGGTAAGTCTTCTTGACAACCTCGTATG

>M6-PGSC0003DMG400001831-(rev)M6LRR-RLP\_558

AGAAGTTTGCTTCAAGACTTGACCAATTTGGAGGTAAGTCTTCTTGACAACCTCGTATGCATCATTGAGTT  
ACCTAAGAATTTTTCTTCTTCTTCTTAGGTACTTAAGTCTTGAAGGTATC

>M6-PGSC0003DMG400001831-(rev)M6LRR-RLP\_62

TCAATCTCAGCTTACATATGCTGGGCAACATCTCTGTGCCCGCTATGAAGCTTTTTATTTGCTTCAATTTCA  
GCAAGGCCTCACAGTTGATCTTATTGGTTATGACTGTGACTATGAGGC

>M6-PGSC0003DMG400001831-(rev)M6LRR-RLP\_620

ATTTGAGTTACCTAAGAATTTTTCTTCTTCTTCTTAGGTACTTAAGTCTTGAAGGTATCGGCATGTTTGGGA  
TCATAAGTGAGTTTCAGTTATTTCAATTTATCAAACCTTGAAGTGCTGAG

>M6-PGSC0003DMG400001831-(rev)M6LRR-RLP\_682

TGTTTGGGATCATAAGTGAGTTTCAGTTATTTCAATTTATCAAACCTTGAAGTGCTGAGATTTGGACAGAA  
TCCTTTACTAACAGGCTCTTTGCCAAATTTAATCGGAGTTCCAGTGAAA

>M6-PGSC0003DMG400001831-(rev)M6LRR-RLP\_744

GGACAGAATCCTTTACTAACAGGCTCTTTGCCAAATTTAATCGGAGTTCAGTGAAAGTATTTTAGAGT  
TGAACCTCTTTTATACTGGTATTTCTGGGAAGGTACCCGATTCAATTGGT

>M6-PGSC0003DMG400001831-(rev)M6LRR-RLP\_806

TTTAGAGTTGAACTTCTTTTATACTGGTATTTCTGGGAAGGTACCCGATTCAATTGGTAATCTCCATTCTC  
TTTGGTATTTGAATCTCCAGATTTGTCATTTATCTGGCTCGATTCCAGA

>M6-PGSC0003DMG400001831-(rev)M6LRR-RLP\_868

TCCATTCTCTTTGGTATTTGAATCTCCAGATTTGTCATTTATCTGGCTCGATTCCAGAATCCATTGGCAATC  
TCACTGCAATCAGAGAGTTGATACTTTCAGAAAACGTCTTCATTGTTA

>M6-PGSC0003DMG400001831-(rev)M6LRR-RLP\_930

ATTGGCAATCTCACTGCAATCAGAGAGTTGATACTTTCAGAAAACGTCTTCATTGTTAATGTTCCCTCAAC  
TTTCTCAAAGTTAAACAAACTCGTTCGTTTAGATCTCTCTTCAAACAT

>M6-PGSC0003DMG400001831-(rev)M6LRR-RLP\_992

TCCCTCAACTTTCTCAAAGTTAAACAAACTCGTTCGTTTAGATCTCTCTTCAAACATTTTTCGAGGCTCAAT  
TCTAGAATACATTGACAATCTCACTGCAATCACACAGTTGACAATTCC

>M6-PGSC0003DMG400001832-(rev)M6LRR-RLP\_1550

TAGCTCGAAGCATTAGATCTCTCACGGAACAGACTCATTGGAGATATTCCAGATCCATTGTCGAGTTTGA  
CATTTCTTGAGGTCTTAAACCTTTCCTACAATCATCTGGCTGGACGCATT

>M6-PGSC0003DMG400001832-(rev)M6LRR-RLP\_1860

GTGGTCTGATATTTGGATTGTTGATGGGAGGTCTCATGTTCCCTACTGGAAAAGCCAAAATGGTTTGTGA  
ACTTTGCTAAAGATATTGCTCAACAAATTGCTGCTAAGAAGCAAACAAGGC

>M6-PGSC0003DMG400001832-(rev)M6LRR-RLP\_1922

TTTGTGAACTTTGCTAAAGATATTGCTCAACAAATTGCTGCTAAGAAGCAAACAAGGCCAAAAGAAGAGA  
CGCCAAAGACATGGTTTAAAGAATGAACTAGCAATATACCAGGTATGCATTA

>M6-PGSC0003DMG400001832-(rev)M6LRR-RLP\_1984

GAAGAGACGCCAAAGACATGGTTTAAAGAATGAACTAGCAATATACCAGGTATGCATTAACCTTTAGT  
TTTGAATCAGGAACAACACTTCAGAGGTTGTTGGATAACTATATGTCAACT

>M6-PGSC0003DMG400001832-(rev)M6LRR-RLP\_2046

CTTTAGTTTTGAATCAGGAACAACACTTCAGAGGTTGTTGGATAACTATATGTCAACTGTTTTTATTTTTT

CCTAAATATTCAAACCTTAATTTGTCTCTGCAGAGGTTGCTGGAGAGTT

>M6-PGSC0003DMG400001832-(rev)M6LRR-RLP\_2108

TTATTTTTTCTAAATATTCAAACCTTAATTTGTCTCTGCAGAGGTTGCTGGAGAGTTGGACAAGTTTATC

AGCAAGTCAGTGCTGATGTTTGGCAAATAGCAATGGATGCATCTGTTTG

>M6-PGSC0003DMG400001832-(rev)M6LRR-RLP\_2163

GTTGGACAAGTTTATCAGCAAGTCAGTGCTGATGTTTGGCAAATAGCAATGGATGCATCTGTTTGTTTAC

TTTATGTCCATGGTTGCCAAATACGTATGTAAATGTTACAGTTTAGTTCT

>M6-PGSC0003DMG400002012-(rev)M6LRR-RLK\_0

TGTAAGTAGTTAGTCAAATTGTGTCTAAATGAAAGTTTTTGGTGGTCTACTGTTTCTTCATTTATATAA

GGAAAGTTGGTTTGACTAAAATAACATCCCCTATTGACTTGCTTATGGT

>M6-PGSC0003DMG400002012-(rev)M6LRR-RLK\_1037

AATTGAAGTATCTGGATTTGCACTCTAATGCCTTCTCAATTGATATTATGCTTCTTCTGGCCTCATTGGGG

GATGTATAGTATGTAGACCTCAGTAGCAACAAGTTTGTGGATCACTTG

>M6-PGSC0003DMG400002012-(rev)M6LRR-RLK\_1098

CTCATTGGGGGATGTATAGTATGTAGACCTCAGTAGCAACAAGTTTGTGGATCACTTGACCTGCAAGTA

GGAAATTCGAGCTTTGTCTCGTCAATTCAGTATCTGAACATTAGTCATAA

>M6-PGSC0003DMG400002012-(rev)M6LRR-RLK\_1159

CTGCAAGTAGGAAATTCGAGCTTTGTCTCGTCAATTCAGTATCTGAACATTAGTCATAATAACCTGGATG

GAGAGCTATTTCTCACGATGGAATGCCATATTTTGACAGTTTAGAGGCT

>M6-PGSC0003DMG400002012-(rev)M6LRR-RLK\_122

AGGGAAATGTAGGGTCTCTTGCTTTTGATTTTGATGTATTGGTTATTGGTGAGTGAATTTAATGGTGTCA

ATTTGCATTTTGGGACATTATTGGTGTTGCTGTTGGACTTCAATGAATTT

>M6-PGSC0003DMG400002012-(rev)M6LRR-RLK\_1220

ACCTGGATGGAGAGCTATTTCTCACGATGGAATGCCATATTTTGACAGTTTAGAGGCTTTTGATGCAAG

TGACAATCAGCTTACTGGTACTATTCCGTCCTTCAATTTTGATGTCTCCC

>M6-PGSC0003DMG400002012-(rev)M6LRR-RLK\_1281

TGATGCAAGTGACAATCAGCTTACTGGTACTATTCCGTCCTTCAATTTTGATGTCTCCCTTCGAATTCTTA

GGCTCGGGAACAATCAGTTGTCTGGATCACTCCCCGAAGCTCTTCTAGA

>M6-PGSC0003DMG400002012-(rev)M6LRR-RLK\_1342

CGAATTCTTAGGCTCGGGAACAATCAGTTGTCTGGATCACTCCCCGAAGCTCTTCTAGAGGATAGCTCAA  
TGATTTTATCAGAATTGGACCTAAGCCAGAATCAGCTTGCAGGTGTGTTG

>M6-PGSC0003DMG400002012-(rev)M6LRR-RLK\_1403

ATAGCTCAATGATTTTATCAGAATTGGACCTAAGCCAGAATCAGCTTGCAGGTGTGTTGATCCTTTCTTCT  
TTAGTTAATTTGTTTGGTTGAAGTCAATCTAAGTAATTTATGGTTAATT

>M6-PGSC0003DMG400002012-(rev)M6LRR-RLK\_1769

AATTGGGACGGAGGGAGTACTATCTATGATCTTAGGTTGTTGTCAGTTAGATAACAAATGAATAATATTT  
AGATTGCTATCTGCTGGAAAGCATGCTTGTGTTTGGTTGCAATCAAATGTA

>M6-PGSC0003DMG400002012-(rev)M6LRR-RLK\_183

ATGGTGTCAATTTGCATTTTGGGACATTATTGGTGTGCTGTTGGACTTCAATGAATTTAGTACTGGTG  
TTGTTGCTGCTTGTCTTTTATCTAGGTTTATATACTCTTATTCTACT

>M6-PGSC0003DMG400002012-(rev)M6LRR-RLK\_1830

ATAATATTTAGATTGCTATCTGCTGGAAAGCATGCTTGTGTTTGGTTGCAATCAAATGTAATGTATAGAAC  
ACAATTCCTGAGCACTTCGGAATTGTGTTCTAGAGGAATGCTGTATAATT

>M6-PGSC0003DMG400002012-(rev)M6LRR-RLK\_1891

GTATAGAACACAATTCCTGAGCACTTCGGAATTGTGTTCTAGAGGAATGCTGTATAATTCTCTGCTTATG  
TGTAATTATCATAACATTGTTCCCAATTCTCCCTAGGTTAGAGATATT

>M6-PGSC0003DMG400002012-(rev)M6LRR-RLK\_1952

CTGCTTATGTGTAATTATCATAACATTGTTCCCAATTCTCCCTAGGTTAGAGATATTTACTACTTAGATT  
CAACTCTAAGGCAATTATTGCTGTAAACTTGCATTTTAATTAGTGGAA

>M6-PGSC0003DMG400002012-(rev)M6LRR-RLK\_2013

ATACTTAGATTCAACTCTAAGGCAATTATTGCTGTAAACTTGCATTTTAATTAGTGGAATGTTTCAGTGTC  
TTTTTGATTATTTTTTTTTGCTGCATTATTAATTTTCATCTCTCCTTGAG

>M6-PGSC0003DMG400002012-(rev)M6LRR-RLK\_2257

CGTTATAACAAGCTGCATAAAGATATTCTTCATGCGGTTGGAGTTCTGATGTATTTAAGTCTTTTGTG  
TTCTTTTAATTATTATATTTAGTTGTTCTTACCACAGGCCTAAACCAAG

>M6-PGSC0003DMG400002012-(rev)M6LRR-RLK\_2318

TCTTTTGTGTTCTTTTAATTATTATATTTAGTTGTTCTTACCACAGGCCTAAACCAAGCTACTTCTTTCCA  
AACTATTTTCATGAAGCCATTTGCTATTTTGGCAGGTCCCATTGGAGG

>M6-PGSC0003DMG400002012-(rev)M6LRR-RLK\_2379

ACTTCCTTTCCAAACTATTTTCATGAAGCCATTTGCTATTTTGGCAGGTCCCATTGGAGGTATAAGTGCTGT  
GAATCTCAAGCTTCTAAATTTATCATATAACCAGCTCTCAGGCCCTTG

>M6-PGSC0003DMG400002012-(rev)M6LRR-RLK\_244

TGACTGGTGTGTTGCTGCTTGTCTTTTATCTAGGTTTATATACTCTCTTATTTCACTTACATAATGATTA  
GTGATGATTGCAGTTTGTGTTTAAAAATTTTGCTAATTCATTTTCTGG

>M6-PGSC0003DMG400002012-(rev)M6LRR-RLK\_2440

TAAGTGCTGTGAATCTCAAGCTTCTAAATTTATCATATAACCAGCTCTCAGGCCCTTGCCTTTCAAGGTT  
GGGCGCTGTGCCATCATAGACCTGAGCAACAATCGGCTAACTGGAAATG

>M6-PGSC0003DMG400002012-(rev)M6LRR-RLK\_2501

TTTCAAGGTTGGGCGCTGTGCCATCATAGACCTGAGCAACAATCGGCTAACTGGAAATGTGTCCCGGAT  
CCAAGGTTGGGGAAATTATGTTGAAGTTATTGTGTTAAGCTCAAATGCATT

>M6-PGSC0003DMG400002012-(rev)M6LRR-RLK\_2562

TCCCGGATCCAAGGTTGGGGAAATTATGTTGAAGTTATTGTGTTAAGCTCAAATGCATTGACAGGAACC  
TTTCCCAACCAAACCTTCCCAGTTCTTGAGGCTTACTTCGTTAAAGATTTCA

>M6-PGSC0003DMG400002012-(rev)M6LRR-RLK\_2623

CAGGAACCTTTCCCAACCAAACCTTCCCAGTTCTTGAGGCTTACTTCGTTAAAGATTTCAAACAACCTCACTT  
GAAGGTTTGTACCAACTATGTTAGGTACATACCTCGAACTTAAAACAA

>M6-PGSC0003DMG400002012-(rev)M6LRR-RLK\_2684

CAACTCACTTGAAGGTTTGTACCAACTATGTTAGGTACATACCTCGAACTTAAAACAATTGATCTTAGCA  
TTAACCAACTTAGTGGTACTCTCCTTCCCAGCCTTTTCAACTCTACCAA

>M6-PGSC0003DMG400002012-(rev)M6LRR-RLK\_2745

GATCTTAGCATTAAACCAACTTAGTGGTACTCTCCTTCCCAGCCTTTTCAACTCTACCAAATTGACTGATATT  
AATGTTTCTTTCAACAAATTTACCGGTAGTGTACCTATCATGGCATT

>M6-PGSC0003DMG400002012-(rev)M6LRR-RLK\_2806

TGACTGATATTAATGTTTCTTTCAACAAATTTACCGGTAGTGTACCTATCATGGCATTAACTCAGAGAAT  
CTAAGCTTGATTTCTCTAGATGTTTACATAATGCATTAGCTGGTCCGT

>M6-PGSC0003DMG400002012-(rev)M6LRR-RLK\_2867

CTCAGAGAATCTAAGCTTGATTTCTCTAGATGTTTACATAATGCATTAGCTGGTCCGTACCTCCGGGGC

TGGACAAGTTCCCGGACATGGTAAATCTGGATCTCTCTGATAACAAATT

>M6-PGSC0003DMG400002012-(rev)M6LRR-RLK\_2928

CCTCCGGGGCTGGACAAGTTCCCGGACATGGTAAATCTGGATCTCTCTGATAACAAATTTGAAGGTGGC

CTTCCTAATGATCTCTCGGACAAATTGGAATTTTTTAATGTGGCTAATAAC

>M6-PGSC0003DMG400002012-(rev)M6LRR-RLK\_2989

AAGGTGGCCTTCCTAATGATCTCTCGGACAAATTGGAATTTTTTAATGTGGCTAATAACAATTTTTCTGGA

CCTGTGCCACAAAATTTATGGAGTTTCCTGACTCCTCATTCCATCCGG

>M6-PGSC0003DMG400002012-(rev)M6LRR-RLK\_305

CATAATGATTAGTGATGATTGCAGTTTGTGTTTAAAATTTTGCTAATTCATTTTCTGGGATTCTTGAAAT

GATTGTGCAATCTTGTCTTTCTACTTGGTGGGGTTTGTCTACTTTCTTG

>M6-PGSC0003DMG400002012-(rev)M6LRR-RLK\_3050

TTTTTCTGGACCTGTGCCACAAAATTTATGGAGTTTCCTGACTCCTCATTCCATCCGGGAAATCCCTTGC

TTGTACTTCAAAGCACGCCAAAGCTCCTCAGAGGGAGATTCAACTTT

>M6-PGSC0003DMG400002012-(rev)M6LRR-RLK\_3111

AATCCCTTGCTTGTACTTCAAAGCACGCCAAAGCTCCTCAGAGGGAGATTCAACTTTAAGCTTGAGAA

GTCATGGTTCTCGCATGAAATCTACCATCAGGGCTGCCCTCATTGCTGGG

>M6-PGSC0003DMG400002012-(rev)M6LRR-RLK\_3172

GCTTGAGAAGTCATGGTTCTCGCATGAAATCTACCATCAGGGCTGCCCTCATTGCTGGGCTGATCTGTGG

TGTATCTGTTATATCTTTGTTGACATTAATAATCTACCGCAAGGCCCATC

>M6-PGSC0003DMG400002012-(rev)M6LRR-RLK\_3233

GATCTGTGGTGTATCTGTTATATCTTTGTTGACATTAATAATCTACCGCAAGGCCCATCAGCGAGATGGC

GGGAAGGACGATATGAAAGGAACCAAGGAAAAGAAAGGTATGGAECTATT

>M6-PGSC0003DMG400002012-(rev)M6LRR-RLK\_3294

CGAGATGGCGGGAAGGACGATATGAAAGGAACCAAGGAAAAGAAAGGTATGGAECTATTCTTCTTCTA

ATAAGACAGGTGATCAGATCAACTGATACTAATGCCTTTTCATTTCCACAGG

>M6-PGSC0003DMG400002012-(rev)M6LRR-RLK\_3355

TCTTCTAATAAGACAGGTGATCAGATCAACTGATACTAATGCCTTTTCATTTCCACAGGTTTGTCTTTATCT

GATATAGAATGTGGACATGACTAGAGAACACAGCGTGCCAGTATCA

>M6-PGSC0003DMG400002012-(rev)M6LRR-RLK\_3416



TGCTTTATCTGATATAGAATGTGGACATGACACTAGAGAACACAGCGTGCCAGTATCAACAGTTCAAA  
ATGAGCCATTATCTTCACCTATATCTGTCATGTCATCCGCCAATCTCTCTC

>M6-PGSC0003DMG400002012-(rev)M6LRR-RLK\_3477

AGTTCAAAATGAGCCATTATCTTCACCTATATCTGTCATGTCATCCGCCAATCTCTCTCCTTCTAAGGTTCA  
AGATCAATCCAAAAGCCCAAACCTCTCTCAGGGTTTCTTCTCCTGATAA

>M6-PGSC0003DMG400002012-(rev)M6LRR-RLK\_3538

TCTAAGGTTCAAGATCAATCCAAAAGCCCAAACCTCTCTCAGGGTTTCTTCTCCTGATAAACTGGCTGGAG  
ATTTACATCTACTAGATAACGCCTTGAAGGTCACTGCTGAAGAATTATCG

>M6-PGSC0003DMG400002012-(rev)M6LRR-RLK\_3599

TGGCTGGAGATTTACATCTACTAGATAACGCCTTGAAGGTCACTGCTGAAGAATTATCGTGTGCTCCTGC  
CGAAGCTGTGGGCAGAAGTTGTCATGGAACATTGTACAAAGCTACGCTTG

>M6-PGSC0003DMG400002012-(rev)M6LRR-RLK\_366

TTCTTGAAATGATTGTGCAATCTTGTCTTTCTACTTGGTGGGGTTTGTCTACTTTCTTGGCCCATTCTGAAT  
TATTAGCTTTGTCAAATGCTGTCTTTTTTCTTTTTTAGTTTCAGTATT

>M6-PGSC0003DMG400002012-(rev)M6LRR-RLK\_3660

TGCTCCTGCCGAAGCTGTGGGCAGAAGTTGTCATGGAACATTGTACAAAGCTACGCTTGGTTCAGACCA  
AGTTCTTGCTGTCAAATGGCTTAAGGAAGGGATAGTGAAAGGCAAGAAGGA

>M6-PGSC0003DMG400002012-(rev)M6LRR-RLK\_3721

TCAGACCAAGTTCTTGCTGTCAAATGGCTTAAGGAAGGGATAGTGAAAGGCAAGAAGGAATTTGCTAG  
AGAAGCTAAGAACTGGGGAGTATTAGGCATCCTAATTTAGTTTCTCTACTG

>M6-PGSC0003DMG400002012-(rev)M6LRR-RLK\_3782

TTGCTAGAGAAGCTAAGAACTGGGGAGTATTAGGCATCCTAATTTAGTTTCTCTACTGGGTTACTACTG  
GGGTCCCAAGGAGCATGAGCGGCTTCTCATATCAAATTACACCGATGCAC

>M6-PGSC0003DMG400002012-(rev)M6LRR-RLK\_3843

TTACTACTGGGGTCCCAAGGAGCATGAGCGGCTTCTCATATCAAATTACACCGATGCACCATGTTTAGCT  
CTTTATCTTCTTCGTAAAGGTCAGTCTCCCCTTTTCTATCTATAGAGTAT

>M6-PGSC0003DMG400002012-(rev)M6LRR-RLK\_3904

TGTTTAGCTCTTTATCTTCTTCGTAAAGGTCAGTCTCCCCTTTTCTATCTATAGAGTATATCACCTGCATT  
ATTTCTGTAGCTTTTCTGATTTTTGTATGGTGCTGAAGTCGTGATCCA

>M6-PGSC0003DMG400002012-(rev)M6LRR-RLK\_3965

CACCTGCATTTATTTCTGTAGCTTTTCTGATTTTTGTATGGTGCTGAAGTCGTGATCCAGTTTTACCAAATA  
AATTAGTAGTACTCCTTCAATGAAATCAAACATAATGGACCGTGAATG

>M6-PGSC0003DMG400002012-(rev)M6LRR-RLK\_4026

TTTACCAAATAAATTAGTAGTACTCCTTCAATGAAATCAAACATAATGGACCGTGAATGCGCAATACCTT  
GAATGTGTATATTGTTATTGTAGTTGTCAAGATTGCTCATACCTGATATG

>M6-PGSC0003DMG400002012-(rev)M6LRR-RLK\_4087

CAATACCTTGAATGTGTATATTGTTATTGTAGTTGTCAAGATTGCTCATACCTGATATGCTGAAGTTTAAT  
CACCATCTTGCCACTTGATTTCCATTCCGGTGCCTCAAGTGTACTTTTC

>M6-PGSC0003DMG400002012-(rev)M6LRR-RLK\_4148

GAAGTTTAATCACCATCTTGCCACTTGATTTCCATTCCGGTGCCTCAAGTGTACTTTTCTTCCAAAAGATAT  
TCTAGCTTGCTGGTTGAATATGTATCTGAGACTATTAATACACATTTTC

>M6-PGSC0003DMG400002012-(rev)M6LRR-RLK\_4209

CCAAAAGATATTCTAGCTTGCTGGTTGAATATGTATCTGAGACTATTAATACACATTTACATAGCAACTT  
TCATGAAATTTATAAATGGAGCTATCTTCCAAAATCTGAACTTTTCAAT

>M6-PGSC0003DMG400002012-(rev)M6LRR-RLK\_427

CCATTCTGAATTATTAGCTTTGTCAAATGCTGTCTTTTTTCTTTTTAGTTCAGTATTATATGTAACCTCTCT  
GCTAGTGTACACGGGTTTTTCATTGGGAGGAAAATAAGAGGAGGAA

>M6-PGSC0003DMG400002012-(rev)M6LRR-RLK\_4270

ATAGCAACTTTTCATGAAATTTATAAATGGAGCTATCTTCCAAAATCTGAACTTTTCAATTCATATATATTA  
GCAATGTTAGAATTACACATAGCAGAAAAGATACACACCTGTTTTTTGC

>M6-PGSC0003DMG400002012-(rev)M6LRR-RLK\_4331

ATATATATTAGCAATGTTAGAATTACACATAGCAGAAAAGATACACACCTGTTTTTTGCTTTTCATGGTAAT  
ACTAAAAGGTAAAACAGTTCCACCTTCGCTAATTTTGCCTTGATGGTGA

>M6-PGSC0003DMG400002012-(rev)M6LRR-RLK\_4514

ATGAGAATTTTATCTCACGTGGCTCATTTTGTATTGACTTTGGTTGGGCTCGATTGATGTCATTTTGA  
TAAGGGCATCCCGGTGCACTAATTAGAGACTGCTACTTTGAATTCCGTT

>M6-PGSC0003DMG400002012-(rev)M6LRR-RLK\_4575

GTCATTTTGATAAGGGCATCCCGGTGCACTAATTAGAGACTGCTACTTTGAATTCCGTTTATTGCATATAG

CACTGTACTTTGTTTTCTAGTTTTGAGTGATGATATGGATGCCGGTTTC

>M6-PGSC0003DMG400002012-(rev)M6LRR-RLK\_4636

TTGCATATAGCACTGTACTTTGTTTTCTAGTTTTGAGTGATGATATGGATGCCGGTTTCATTCTTTGATGT  
ATGCAGATGCAGAACCCTGTAAGTTACATCCTTTATCTCTCGATGATCG

>M6-PGSC0003DMG400002012-(rev)M6LRR-RLK\_4697

TCTTTGATGTATGCAGATGCAGAACCCTGTAAGTTACATCCTTTATCTCTCGATGATCGACTCAAGATCTC  
TGTAGATGTTGCTCGTTGTCTAAACTACCTTCACCATGAAAGTGCCATA

>M6-PGSC0003DMG400002012-(rev)M6LRR-RLK\_4758

TCAAGATCTCTGTAGATGTTGCTCGTTGTCTAAACTACCTTCACCATGAAAGTGCCATACCTCATGGCAAC  
CTGAAATCCACAAATGTACTIONTATAGACACGTCTACCGTGAATGCCCTAC

>M6-PGSC0003DMG400002012-(rev)M6LRR-RLK\_4819

TCATGGCAACCTGAAATCCACAAATGTACTIONTATAGACACGTCTACCGTGAATGCCCTACTAACTGACTAT  
AGTCTTCATCGTTGATGACATCTGCTGGAACAGCTGAACAGGTTCTAAA

>M6-PGSC0003DMG400002012-(rev)M6LRR-RLK\_488

ATGTAACTCTCTGCTAGTGTCACACGGGTTTTTCATTGGGAGGAAAATAAGAGGAGGAAATGCAATCTA  
CCATTTGTTTAGTGCTGCTATTTTTAGTTGAGTTAGCTAAAGGAAGCTTAG

>M6-PGSC0003DMG400002012-(rev)M6LRR-RLK\_4880

ACTGACTATAGTCTTCATCGGTTGATGACATCTGCTGGAACAGCTGAACAGGTTCTAAATGCCAGTGTAC  
TCGGTTATCGTCCACCTGAATTCGCGAGTACAAGTAAACCTTGCCCGTCA

>M6-PGSC0003DMG400002012-(rev)M6LRR-RLK\_4941

CCAGTGTACTCGGTTATCGTCCACCTGAATTCGCGAGTACAAGTAAACCTTGCCCGTCATTGAAAAGTGA  
CGTCTATGCTTTTGGTGTATCTTGTGGAACTTTTGACTGGAAGAAGTT

>M6-PGSC0003DMG400002012-(rev)M6LRR-RLK\_5002

GAAAAGTGACGTCTATGCTTTTGGTGTATCTTGTGGAACTTTTGACTGGAAGAAGTTCTGCAGAAATT  
GTTCTGGGAACTCAGAAGTGCTGGATTTAACCGAATGGGCGAGATTATT

>M6-PGSC0003DMG400002012-(rev)M6LRR-RLK\_5063

GCAGAAATTGTTCTGGGAACTCAGAAGTGCTGGATTTAACCGAATGGGCGAGATTATTGGCTTTTCAA  
GACCGTTCAATCGAGTGCTTTGATCCATTCTTATTAGGAAAGCAAAGCAAC

>M6-PGSC0003DMG400002012-(rev)M6LRR-RLK\_5124

CTTTCAAGACCGTTCAATCGAGTGCTTTGATCCATTCTTATTAGGAAAGCAAAGCAACGACGAAGACAT  
GCATACGATTCTTGATAGCATGCTTCAGGTTGCACTAAGGTGCATTTTGC

>M6-PGSC0003DMG400002012-(rev)M6LRR-RLK\_5185

CGAAGACATGCATACGATTCTTGATAGCATGCTTCAGGTTGCACTAAGGTGCATTTTGCCAGCTGATGAA  
AGGCCTGATATGAAATTGGTTTTCGAGCAACTTTGCTCGATAGCGCAATA

>M6-PGSC0003DMG400002012-(rev)M6LRR-RLK\_5246

GCTGATGAAAGGCCTGATATGAAATTGGTTTTCGAGCAACTTTGCTCGATAGCGCAATAACACAAGTTG  
AGGGGAGAGGGGTAAATTTGAATACTATGTAGTTGTATATTTGTATCTTAA

>M6-PGSC0003DMG400002012-(rev)M6LRR-RLK\_5307

ACAAGTTGAGGGGAGAGGGGTAAATTTGAATACTATGTAGTTGTATATTTGTATCTTAAAAGTTGATATT  
TCATTCATGTTCCATTTTAATTCAATTGTTTTAGAAACAAATTCATTTG

>M6-PGSC0003DMG400002012-(rev)M6LRR-RLK\_5368

GTTGATATTTTCATTCATGTTCCATTTTAATTCAATTGTTTTAGAAACAAATTCATTTGTGAATTAGCACAT  
TAAGTGATGAATGAAGTTGTATTCTTCACATTTATTGACAAGAAATAA

>M6-PGSC0003DMG400002012-(rev)M6LRR-RLK\_549

GCAATCTACCATTTGTTTAGTGCTGCTATTTTTAGTTGAGTTAGCTAAAGGAAGCTTAGATTTGGATGCTC  
TTTTGGAGTTTAAGAAGGGAGTTTTGAAAGACCCTTCTGGGAAAGTCCT

>M6-PGSC0003DMG400002012-(rev)M6LRR-RLK\_61

ATTTATATAAGGAAAGTTGGTTGACTAAAATAACATCCCCTATTGACTTGCTTATGGTATAGGGAAATG  
TAGGGTCTCTTGCTTTTGATTTGATGTATTGGTTATTGGTGAGTGAATT

>M6-PGSC0003DMG400002012-(rev)M6LRR-RLK\_610

TTGGATGCTCTTTTGGAGTTTAAGAAGGGAGTTTTGAAAGACCCTTCTGGGAAAGTCCTTCTTCATGGG  
ATTCTAAGTCATTGGGACCAAATGGTTGCCCCAAAACCTGGTTCGGTATC

>M6-PGSC0003DMG400002012-(rev)M6LRR-RLK\_671

CTTCATGGGATTCTAAGTCATTGGGACCAAATGGTTGCCCCAAAACCTGGTTCGGTATCGGTTGCAGTGA  
TGGCCATATCACTTCAATTGAACTAAATGATGTAGGTCTGGTTGGAGTTT

>M6-PGSC0003DMG400002012-(rev)M6LRR-RLK\_732

TTGCAGTGATGGCCATATCACTTCAATTGAACTAAATGATGTAGGTCTGGTTGGAGTTTTGGATTTTGA  
GCTATTAGTGGCCTAAAATGCTGCAGAATTTGTCTGTTGCAAACAACCA

>M6-PGSC0003DMG400002012-(rev)M6LRR-RLK\_793

GATTTTGCAGCTATTAGTGGCCTAAAAATGCTGCAGAATTTGTCTGTTGCAAACAACCAGTTAAGTGGGA  
AAATTACTGAGGAAGTTGGGTTGATTATGTCATTAGAATTTTTGGATCTT

>M6-PGSC0003DMG400002012-(rev)M6LRR-RLK\_854

TAAGTGGGAAAATTACTGAGGAAGTTGGGTTGATTATGTCATTAGAATTTTTGGATCTTTCCAAGAACAT  
GTTTAGGGGTTTTATACCCTCTAAGCTGACTAGTTTAAAGAACTTAGTAT

>M6-PGSC0003DMG400002012-(rev)M6LRR-RLK\_915

CAAGAACATGTTTAGGGGTTTTATACCCTCTAAGCTGACTAGTTTAAAGAACTTAGTATCTCTTAATCTTT  
CTTTAAATAGTCTCGATGGAATGGTCCCACTGGTTTTGCTAGTCTTGA

>M6-PGSC0003DMG400002012-(rev)M6LRR-RLK\_976

CTTAATCTTTCTTTAAATAGTCTCGATGGAATGGTCCCACTGGTTTTGCTAGTCTTGAGAAATTGAAGTA  
TCTGGATTTGCACTCTAATGCCTTCTCAATTGATATTATGCTTCTTCTG

>M6-PGSC0003DMG400002017-(rev)M6G-LecRK\_0

AATTCTGCTCACTAAGGCTTAGGTAGTTGTGAAAGAACACCTATGATGGTTTTGCTTCCATTGGAATCTG  
AACTTGAACCTCATGTTTTGGGCTTCATGTATTAGTTTTTTTTCTTATCGA

>M6-PGSC0003DMG400002017-(rev)M6G-LecRK\_1008

AATCTGCATCGTGATTTCTGACTAAAAATCATTACAGAGATCTTAAGACGAGCAATATTCTGTTAGACG  
AAGATGTGAATCCCAAATCTCAGATTTTGGAAATGGCTAGGATTTACGGA

>M6-PGSC0003DMG400002017-(rev)M6G-LecRK\_1071

TTAGACGAAGATGTGAATCCCAAATCTCAGATTTTGGAAATGGCTAGGATTTACGGAGGGAATCAA  
AATAGCAAATACCAACAGGATTGCCGGTACCTAGTAGGTATTAATTGTTTCAT

>M6-PGSC0003DMG400002017-(rev)M6G-LecRK\_1134

CAAATATAGCAAATACCAACAGGATTGCCGGTACCTAGTAGGTATTAATTGTTTCATAGCAGTGAAATTG  
ATCCTAACTAAATTGTATAATTGCATATCAATGCAGTGGTTACATGTCTC

>M6-PGSC0003DMG400002017-(rev)M6G-LecRK\_1197

GAAATTGATCCTAACTAAATTGTATAATTGCATATCAATGCAGTGGTTACATGTCTCCTGCATATGCAATA  
CATGGAATTTTTCCGAGAAATTAGATGTCTTCAGTTTTGGTGTTCATAT

>M6-PGSC0003DMG400002017-(rev)M6G-LecRK\_126

TATTGTCATGTAGATAAGAGGAGGATGCTAACGGGAGCCCATATTGCAATTATTGTCTCCGCGACATTCA

GCCTGATTGTTATTGTTTGCCTATATATGTATTCAAGATCCTGAAAAAA

>M6-PGSC0003DMG400002017-(rev)M6G-LecRK\_1260

ATGCAATACATGGAATTTTTCCGAGAAATTAGATGTCTTCAGTTTTGGTGTGCATATTGTTAGAGATTATC

AGCAGTAAAAGAAACAACAACACTATTGTCCTCTGAAGACTCTCTCAACC

>M6-PGSC0003DMG400002017-(rev)M6G-LecRK\_1323

AGATTATCAGCAGTAAAAGAAACAACAACACTATTGTCCTCTGAAGACTCTCTCAACCTCCCGGACCAGGT

AAAAACTGAAAAACAGAAAGAATTTCTCATTCTCATATATAGTCAAAC

>M6-PGSC0003DMG400002017-(rev)M6G-LecRK\_1386

ACCAGGTAAAAACTGAAAAACAGAAAGAATTTCTCATTCTCATATATAGTCAAACCACTTTATAATAAC

GTTATCTATAGTGAAAATGTAGTATAGAGAACGTATAATATAACATAAT

>M6-PGSC0003DMG400002017-(rev)M6G-LecRK\_1449

ATAATAACGTTATCTATAGTGAAAATGTAGTATAGAGAACGTATAATATAACATAATATGGAAGTTCAAG

AAAACTTGTTGAGTATGATTGTTATCGATAGGTCTGAATGGAGTTGAA

>M6-PGSC0003DMG400002017-(rev)M6G-LecRK\_1512

GTTCAAGAAAACTTGTTGAGTATGATTGTTATCGATAGGTCTGAATGGAGTTGAATATTCTTCTATCC

TATACTACTACTATTTTCAAATGACAAAACACTATAATTGGATCTTAGG

>M6-PGSC0003DMG400002017-(rev)M6G-LecRK\_1575

TCTATCCTATACTACTACTATTTTCAAATGACAAAACACTATAATTGGATCTTAGGCATGTCAACTTTGG

AATGAAGGCAAGATACTCGAGTTTCAAATCAAATGTGTTTGTTCAC

>M6-PGSC0003DMG400002017-(rev)M6G-LecRK\_1638

AACTTTGGAATGAAGGCAAGATACTCGAGTTTCAAATCAAATGTGTTTGTTCCTTGAAACACCAAC

ACAAGTTGTTAGATGCATCATTCTGATTGGTGGGATTGCTTTGTGTGCAA

>M6-PGSC0003DMG400002017-(rev)M6G-LecRK\_1701

CACCAACACAAGTTGTTAGATGCATCATTCTGATTGGTGGGATTGCTTTGTGTGCAAGAACATGCAAGTT

ACAGGCCAAATACAGCTACAATTGTTTCCATGCTCTGCACTGACACAGTT

>M6-PGSC0003DMG400002017-(rev)M6G-LecRK\_1764

GCAAGTTACAGGCCAAATACAGCTACAATTGTTTCCATGCTCTGCACTGACACAGTTCTTCTTCGTCTAA

GCGATTGGCATATAGCAGCAAAGGCTCTTGTGATCCAAATATTTACCT

>M6-PGSC0003DMG400002017-(rev)M6G-LecRK\_1809

ACTGACACAGTTCTTCCTTCGTCTAAGCGATTGGCATATAGCAGCAAAGGCTCTTGTGATCCAAATATTTCC  
ACCTTGCTCTAGAAATTCATTTCTATTTCAAATGTTCAAGCATGTCAA

>M6-PGSC0003DMG400002017-(rev)M6G-LecRK\_189

ACATTCAGCCTGATTGTTATTGTTTGCCTATATATGTATTCAAGATCCTGAAAAAAGGTAAAAA  
AAGTCAATTTTTACAATTCTTAGAGGCACAACTTTTCGCTATCTTTTGGGA

>M6-PGSC0003DMG400002017-(rev)M6G-LecRK\_252

AAAAAAAAGTCAATTTTTACAATTCTTAGAGGCACAACTTTTCGCTATCTTTTGGAAAGACTTTAATTTT  
TACTAGATTTTATAAAGCATTGGGAGTTTAGTCCATTTTTGCATCGCTT

>M6-PGSC0003DMG400002017-(rev)M6G-LecRK\_315

TTAATTTTTACTAGATTTTATAAAGCATTGGGAGTTTAGTCCATTTTTGCATCGCTTCAAACACTCTTCCG  
CAACAAATTTGCTTCATAACAGGTTTACTCAAGGTAACAGTTTAGAAT

>M6-PGSC0003DMG400002017-(rev)M6G-LecRK\_378

ACTCTTCCGCAACAAATTTGCTTCATAACAGGTTTACTCAAGGTAACAGTTTAGAATTACCAGTTTTCCGC  
TTCAAGTGCATAGAACTGCTACTAAGAACTTCTGCTAACGAAATAAAC

>M6-PGSC0003DMG400002017-(rev)M6G-LecRK\_441

TTTTCCGCTTCAAGTGCATAGAACTGCTACTAAGAACTTCTGCTAACGAAATAAACTTGGAGAGGGGA  
GATTTGGACCTGTTTACAAGGTATATATATATCACTCGTGTGCTCTAATCT

>M6-PGSC0003DMG400002017-(rev)M6G-LecRK\_504

AGGGGAGATTTGGACCTGTTTACAAGGTATATATATATCACTCGTGTGCTCTAATCTTCGAACTTCACTA  
GAAAAAGTAGAGAAAATTTACATAGTTTATACTCATTTGATTATTAGTT

>M6-PGSC0003DMG400002017-(rev)M6G-LecRK\_567

TTCACTAGAAAAAGTAGAGAAAATTTACATAGTTTATACTCATTTGATTATTAGTTGAAGTCATGTGTAA  
TTCATATATAGGGGATATTAGCTGATGGACAAGAGGTTGCTATTAACA

>M6-PGSC0003DMG400002017-(rev)M6G-LecRK\_63

GAATCTGAACTTGAACCTCATGTTTTGGGCTTCATGTATTAGTTTTTTCTTATCGAGTTGCCTATTGTCAT  
GTAGATAAGAGGAGGATGCTAACGGGAGCCCATATTGCAATTATTGTC

>M6-PGSC0003DMG400002017-(rev)M6G-LecRK\_630

ATGTGTAATTCATATATAGGGGATATTAGCTGATGGACAAGAGGTTGCTATTAACAACCTTTGGAGGAG  
CTTAGGACAAGACATTGAAGTGTTCAAGAATGAGGTTACCTAATTTCCGA

>M6-PGSC0003DMG400002017-(rev)M6G-LecRK\_693

GAGGAGCTTAGGACAAGACATTGAAGTGTTC AAGAATGAGGTTACACTAATTTCCGAACTTCAACACAG  
AAACTTAGTCAAACCTGATGGGATTTTGCATTAACGGGGAGGAAAAGTTGAT

>M6-PGSC0003DMG400002017-(rev)M6G-LecRK\_756

ACACAGAAACTTAGTCAAACCTGATGGGATTTTGCATTAACGGGGAGGAAAAGTTGATGATCTATGAATA  
CATGTCCAACAGAAGCTTAGATGTTTTCATATTGGGTGAGCTAATTAAGAA

>M6-PGSC0003DMG400002017-(rev)M6G-LecRK\_819

TGAATACATGTCCAACAGAAGCTTAGATGTTTTCATATTGGGTGAGCTAATTAAGAAGAGTACTTAAACA  
GTACTTTTCTTGATGAATGATGGTTAAACTCTTTGTGCTTGGAAGGA

>M6-PGSC0003DMG400002017-(rev)M6G-LecRK\_882

TTAAACAGTACTTTTCTTGATGAATGATGGTTAAACTCTTTGTGCTTGGAAGGAGGATCAAGATCTA  
ATGATCAGGCGGCATTGAGTTGGAATATCGTTGAAGGGATAGCTAGAGGT

>M6-PGSC0003DMG400002017-(rev)M6G-LecRK\_945

AGATCTAATGATCAGGCGGCATTGAGTTGGAATATCGTTGAAGGGATAGCTAGAGGTCTTCTTAATCTG  
CATCGTGATTTCTGACTAAAAATCATTACAGAGATCTTAAGACGAGCAAT

>M6-PGSC0003DMG400002038M6RLKWAX-EGF\_0

AAGAAGAATAAATTTACTATAAAAATCAATCAAATTC AACCCCTTCTTCGTCTTCCAAAAAAAAAAAAAA  
AAGTCATGGCTGCCCTGCTCCTCTGCTTCTGCTAATCTGCAGCACCCCT

>M6-PGSC0003DMG400002038M6RLKWAX-EGF\_1054

CCCACTGCACTCATAGCAGGTATTGTATAATGGGTACATTTAGTTTAGTTATTACTCTGTTTTTATTTAA  
GTTGTTCCGATTCTTATTTTTATGTGCGAGAAGATGTGGGTGTGGGATT

>M6-PGSC0003DMG400002038M6RLKWAX-EGF\_1116

TTTTATTTAAGTTGTTCCGATTCTTATTTTTATGTGCGAGAAGATGTGGGTGTGGGATTCATATTGGATTG  
GTCAATCAAATTTGGATACTTTTATCAATATTAACGGAGAAATGCGGGA

>M6-PGSC0003DMG400002038M6RLKWAX-EGF\_124

TACTTTCTGCTCGTCGTTGTGCTGATTGTGGATCTTCTCCTGTTCTTACCCACTCAGTACCGGCCCGATT  
GCGGTGACCAATCTTACAAAATACGGTGCAGTAGCAACATCCAACCCG

>M6-PGSC0003DMG400002038M6RLKWAX-EGF\_1302

GTATAAAGAAATTTGTATGATAGGCCTTTTCCTTTTATCTCCTTGTAGGATTTTCTTTGTGATCAATATTTT



TGCTTTGGAATAACTAAGTTTTCTACCTAATGTCTCATAAACATATAA

>M6-PGSC0003DMG400002038M6RLKWAX-EGF\_1364

TCAATATTTTTGCTTTGGAATAACTAAGTTTTCTACCTAATGTCTCATAAACATATAACTCTATTTTTAAAT

ACTTGAATTATTTGGAGAGAAGTATCAAAACACTCCTAAACATGGCG

>M6-PGSC0003DMG400002038M6RLKWAX-EGF\_1488

TTATTAGTTTTATCCCCGAACTATTGACAGCATTAAAACACCCCTCTACTATTGCAAGATCGGGGGTGTA

TTTAGCTTCAATTTGTTAAGTAAATGGGTGTTTTTAAGGCTGTCAATAG

>M6-PGSC0003DMG400002038M6RLKWAX-EGF\_1612

GGGATGAAACTAATAATTTGCGTCAAGTTTAGAGGTGTTTTGTTACTTCTCTTATTAATTTTTACTGAAT

CTCCGTACCTGTATTTGAATCCATATCCCAGAATCTTATACTTTAGATC

>M6-PGSC0003DMG400002038M6RLKWAX-EGF\_1674

TTACTGAATCTCCGTACCTGTATTTGAATCCATATCCCAGAATCTTATACTTTAGATCAGGAAGGTTAGAT

CTCTGCACCTGTATCGAACGCCCGCACAAATTTGTTTTTTACTCTATTT

>M6-PGSC0003DMG400002038M6RLKWAX-EGF\_1736

AGGTTAGATCTCTGCACCTGTATCGAACGCCCGCACAAATTTGTTTTTTACTCTATTTTGAGACTTCAAGG

AACTTATAATAATTGAAATTATCTAGTTATTAAGATGGTTGATCAGTAC

>M6-PGSC0003DMG400002038M6RLKWAX-EGF\_1798

ACTTCAAGGAACTTATAATAATTGAAATTATCTAGTTATTAAGATGGTTGATCAGTACTATTTTTGGTTGT

TGTGTTGATCAATACTTGAATGCTTCTTGGATTTGCAGGTTTGACATCA

>M6-PGSC0003DMG400002038M6RLKWAX-EGF\_186

GGCCCCGATTGCGGTGACCAATCTTACAAAATACGGTGCAGTAGCAACATCCAACCCGAACTTTTCTTCG

ATACGCTGAACAATTCATATCCGATAAGTTCAATTTCTCCCGAATCACAA

>M6-PGSC0003DMG400002038M6RLKWAX-EGF\_1860

TTTGGTTGTTGTGTTGATCAATACTTGAATGCTTCTTGGATTTGCAGGTTTGACATCAGGCCTGGGTGTG

GCGGTGATTGCTGCTGTAATTGGTTTTTTCTGTACAGACGTCACAAACG

>M6-PGSC0003DMG400002038M6RLKWAX-EGF\_1922

TGGGTGTGGCGGTGATTGCTGCTGTAATTGGTTTTTTCTGTACAGACGTCACAAACGAATTAAGGAAG

CACGAGATCGACTAACTCGCGAACGGGAAGATATTCTAAGCTCTGGTGGTG

>M6-PGSC0003DMG400002038M6RLKWAX-EGF\_1984

AAGGAAGCACGAGATCGACTAACTCGCGAACGGGAAGATATTCTAAGCTCTGGTGGTGTAAATCTGC  
GAAGCTATTTACAGGCAAAGAAATCAAGAAAGCAACAAACAATTTCTCTACG

>M6-PGSC0003DMG400002038M6RLKWAX-EGF\_2046

ATCTGCGAAGCTATTTACAGGCAAAGAAATCAAGAAAGCAACAAACAATTTCTCTACGGACCGCCTTCT  
GGTGCTGGGGGTTATGGTGAAGTTACTATGGTAAACTTGATGATGGTAC

>M6-PGSC0003DMG400002038M6RLKWAX-EGF\_2108

GCCTTCTTGGTGCTGGGGGTTATGGTGAAGTTACTATGGTAAACTTGATGATGGTACCGTGGTTGCTGT  
TAAATGTGCCAAGCTAGGGAATACTAAGGGCATTGAGCAAGTTCTCAATG

>M6-PGSC0003DMG400002038M6RLKWAX-EGF\_2170

GTTGCTGTAAATGTGCCAAGCTAGGGAATACTAAGGGCATTGAGCAAGTTCTCAATGAGGTCAGAATA  
CTCTGTCAGGTTAACCACAAGAACCTTGTGCGCATTCTAGGTTGTTGTGTT

>M6-PGSC0003DMG400002038M6RLKWAX-EGF\_2232

CAGAATACTCTGTCAGGTTAACCACAAGAACCTTGTGCGCATTCTAGGTTGTTGTGTTGAGCTTGAACAG  
CCATTGCTGGTTTATGAGTACGTCCCAAATGGAAGTGTAAAGTGATCACTT

>M6-PGSC0003DMG400002038M6RLKWAX-EGF\_2294

TTGAACAGCCATTGCTGGTTTATGAGTACGTCCCAAATGGAAGTGTAAAGTGATCACTTGTATTTGCAACG  
CAAGCTTCTAACATGGGATTGCCGTCTCAGCATTGCTCATGCAACTGCAG

>M6-PGSC0003DMG400002038M6RLKWAX-EGF\_2356

TTGCAACGCAAGCTTCTAACATGGGATTGCCGTCTCAGCATTGCTCATGCAACTGCAGAGGGACTTGCTT  
ACTTGCAATTTCTCTGCAGTTCCTCCTATTTACCATCGAGATGTCAAGTCT

>M6-PGSC0003DMG400002038M6RLKWAX-EGF\_2418

ACTTGCTTACTTGCATTTCTCTGCAGTTCCTCCTATTTACCATCGAGATGTCAAGTCTAGCAACATTTTGCT  
CGATGACCAGTTGAATGCTAAGGTGCGCAGACTTTGGTCTTTCACGTTT

>M6-PGSC0003DMG400002038M6RLKWAX-EGF\_248

TTTCTTCGATACGCTGAACAATTCATATCCGATAAGTTCAATTTCTCCCGAATCACAAAGACTTACTATCG  
AACCATCACCGTTTTTATCCAACACCTGCATCACCCAGGACATTTCTAC

>M6-PGSC0003DMG400002038M6RLKWAX-EGF\_2480

ACATTTTGCTCGATGACCAGTTGAATGCTAAGGTGCGCAGACTTTGGTCTTTCACGTTTGGCTCATA CAGA  
CCTGAGTCATGTGTCCACCTGTGCTCAGGGTACCCTTGGTTATCTTGACC

>M6-PGSC0003DMG400002038M6RLKWAX-EGF\_2542

CATACAGACCTGAGTCATGTGTCCACCTGTGCTCAGGGTACCCTTGGTTATCTTGACCCTGAGTACTACA  
GGAACTACCAATTGACAGACAAGAGTGATGTGTACAGTTTCGGGGTTGTG

>M6-PGSC0003DMG400002038M6RLKWAX-EGF\_2604

GTACTACAGGAACTACCAATTGACAGACAAGAGTGATGTGTACAGTTTCGGGGTTGTGTTGTTGGA  
ACTTTGACATCCCAAAGGCAATAGACTTTGGTCGACCACAGGATGATGTAAA

>M6-PGSC0003DMG400002038M6RLKWAX-EGF\_2666

TGGAACTCTTGACATCCCAAAGGCAATAGACTTTGGTCGACCACAGGATGATGTAACTTGGCTATTTA  
CGTGCAAAGGTTGGTAGAGGAAGAGAGAATAATGGATGCTGTTGATCCTG

>M6-PGSC0003DMG400002038M6RLKWAX-EGF\_2728

GCTATTTACGTGCAAAGGTTGGTAGAGGAAGAGAGAATAATGGATGCTGTTGATCCTGCATTAAGGT  
GGGAGCAAGCAGCGTGGAGTTGGAGACAATGAAGGCAATCGGTTTTCTGGCT

>M6-PGSC0003DMG400002038M6RLKWAX-EGF\_2790

AAAGGTGGGAGCAAGCAGCGTGGAGTTGGAGACAATGAAGGCAATCGGTTTTCTGGCTGTCAGTTGCT  
TGGAGGAAAGAAGACAAAGCAGGCCTTCGATGAAAGAAGTAGCCGAGGAGAT

>M6-PGSC0003DMG400002038M6RLKWAX-EGF\_2852

GTTGCTTGGAGGAAAGAAGACAAAGCAGGCCTTCGATGAAAGAAGTAGCCGAGGAGATTGAGTACATA  
ATCACTATTGCTACTGCAAAGCAATAGAATGACATGTTTAAAATGGTAAATG

>M6-PGSC0003DMG400002038M6RLKWAX-EGF\_2914

TACATAATCACTATTGCTACTGCAAAGCAATAGAATGACATGTTTAAAATGGTAAATGCAGTAGTTCTTA  
TTGTGTAATTTTATAAGTTGTGAGTTAAAAGCCAGAAAGTAAGGGACATA

>M6-PGSC0003DMG400002038M6RLKWAX-EGF\_2976

AGTTCTTATTGTGTAATTTTATAAGTTGTGAGTTAAAAGCCAGAAAGTAAGGGACATAAGTATTAGTATT  
ACTAATTTGATTGGATCTTCTTCTTTCAAAGCTTGTTGTAGATACAACT

>M6-PGSC0003DMG400002038M6RLKWAX-EGF\_3038

TTAGTATTACTAATTTGATTGGATCTTCTTCTTTCAAAGCTTGTTGTAGATACAACTGGAGAGTGAGTTT  
ATACATACATTGATAATCTTCAAAGCTTGCCAAACAACCTATCTCTCT

>M6-PGSC0003DMG400002038M6RLKWAX-EGF\_310

TTACTATCGAACCATCACCGTTTTTATCCAACACCTGCATCACCCAGGACATTTCTACCGTAGGTGTTCAA

TTGAATTCTTCTCTTCTTCAACATTACGAGCAGCAACACAATCATT

>M6-PGSC0003DMG400002038M6RLKWAX-EGF\_3100

AGTGAGTTTATACATACATTGATAATCTTCAAAGCTTGCCAAACAACCTATCTCTCTAGCACTTTGGCT

TCCCAAAAATGTTGCCGCACCAATATTAGATACAAAATGCATAATTTTT

>M6-PGSC0003DMG400002038M6RLKWAX-EGF\_3162

CTTTTGGCTTCCCAAAAATGTTGCCGCACCAATATTAGATACAAAATGCATAATTTTTGAAGGATCCGAC

ACACAACAGAGCGGTATTTTTGAAGATTATGAGTGCTAGTTATTAAGTT

>M6-PGSC0003DMG400002038M6RLKWAX-EGF\_3224

GATCCGACACACAACAGAGCGGTATTTTTGAAGATTATGAGTGCTAGTTATTAAGTTGCGCTAGACAC

AAAGTTTGTGTCAGATCCACCCAATTCTTGTTTCATTTGATATTGGGACTC

>M6-PGSC0003DMG400002038M6RLKWAX-EGF\_3286

TAGACACAAAGTTTGTGTCAGATCCACCCAATTCTTGTTTCATTTGATATTGGGACTCGTGGCGGAGGAA

GAATACCAGCTACATGTTTCAGTTGAATTTTTGGTTCAAAAATTTACTTGT

>M6-PGSC0003DMG400002038M6RLKWAX-EGF\_3348

CGGAGGAAGAATACCAGCTACATGTTTCAGTTGAATTTTTGGTTCAAAAATTTACTTGTCTTCAAGATTCA

ATTGACCATGTACATATTATTA ACTTGGAAACCAATAACTTTAAAACTTC

>M6-PGSC0003DMG400002038M6RLKWAX-EGF\_3410

AAGATTCAATTGACCATGTACATATTATTA ACTTGGAAACCAATAACTTTAAAACTTCGAATCCAAAACCTC

ACAAGCTTTAAATTATGGCTCTGCCTCTTAATTGGAATCCCACGTCCAA

>M6-PGSC0003DMG400002038M6RLKWAX-EGF\_372

GGTGTTCAATTGAATTCTTCTTCTTCAACATTACGAGCAGCAACACAATCATTACCTAAACTGTACT

GGGTCTTTGCTTCGTCTCCGCTTAATTGCTCTTCGGAGAGTTTGTGT

>M6-PGSC0003DMG400002038M6RLKWAX-EGF\_434

AAACTGTACTGGGTCTTTGCTTTCGTCTCCGCTTAATTGCTCTTCGGAGAGTTTGTGTCATACTTACGTGA

ATGGAAGTTCTGGAAATGGAGGTGGTGTGGCGCATGTAGGAACGCGCC

>M6-PGSC0003DMG400002038M6RLKWAX-EGF\_496

CTTACGTGAATGGAAGTTCTGGAAATGGAGGTGGTGTGGCGCATGTAGGAACGCGCCGATTTGTTGTA

CGTTTAGGGCTGGTGGATCGTCGACGTCGTATATGATTCGGGTTAGGGAAT

>M6-PGSC0003DMG400002038M6RLKWAX-EGF\_558

TGTTGTACGTTTAGGGCTGGTGGATCGTCGACGTCGTATATGATTCGGGTTAGGGAATCGGGTTGTCGG  
GCTTACCGGAGTTTTGTGAATTTGGATCCGTCGTTACCGGTTAGTAGATGG

>M6-PGSC0003DMG400002038M6RLKWAX-EGF\_62

AAAAAAAAAAGTCATGGCTGCCCTGCTCCTCCTGCTTCTGCTAATCTGCAGCACCCCTGCAGTACTTTCTG  
CTCGTCGTTGTGCTGATTGTGGATCTTCTCCTGTTCTTACCCACTCAG

>M6-PGSC0003DMG400002038M6RLKWAX-EGF\_620

TTGTCGGGCTTACCGGAGTTTTGTGAATTTGGATCCGTCGTTACCGGTTAGTAGATGGCCGGAAGCCGG  
GATGGAATTGCAGTGGGTTTACCACCGGAGCCGGTTTGTACGGGTCAGTC

>M6-PGSC0003DMG400002038M6RLKWAX-EGF\_682

AAGCCGGGATGGAATTGCAGTGGGTTTACCACCGGAGCCGGTTTGTACGGGTCAGTCCGATTGTGATT  
CTGATTCGACCTGTGGACCCGACCCGAATTTGAATGGAAGTGTTAACAGAT

>M6-PGSC0003DMG400002038M6RLKWAX-EGF\_744

TGTGATTCTGATTCGACCTGTGGACCCGACCCGAATTTGAATGGAAGTGTTAACAGATGTTTTTGTGATT  
CCGGGTTTTCATTGGGACCCAATTGCCGCGTTATGTGCCCAAGGTAAGTTA

>M6-PGSC0003DMG400002038M6RLKWAX-EGF\_806

TTGTCATTCCGGGTTTTCATTGGGACCCAATTGCCGCGTTATGTGCCCAAGGTAAGTTATAAAGAGTACTT  
TTTATCTCGTAAAAATAAAGATCTTGGTAAAAATGACATAAAATAGGAA

>M6-PGSC0003DMG400002038M6RLKWAX-EGF\_868

GAGTACTTTTTATCTCGTAAAAATAAAGATCTTGGTAAAAATGACATAAAATAGGAAAAAATTTAATTA  
TAAAAAGGCTAGAAAATCATTCTCCGATTTGATTTGGATGTGACTTTG

>M6-PGSC0003DMG400002038M6RLKWAX-EGF\_930

TTTAATTATAAAAAGGCTAGAAAATCATTCTCCGATTTGATTTGGATGTGACTTTGTTTTACCTATTTCT  
GAATTCGATACGCAGATGTGACATGCCAAGATCGTGATGGTTGTGGTA

>M6-PGSC0003DMG400002038M6RLKWAX-EGF\_992

ACCTATTTCTGAATTCGATACGCAGATGTGACATGCCAAGATCGTGATGGTTGTGGTAGCGACCACACT  
GCACTCATAGCAGGTATTGTATAATGGGTCACATTTAGTTTAGTTATTACT

>M6-PGSC0003DMG400002045-(rev)M6RLKantifungi(GNK)\_0

ATGTCTAGTTTGAATATCCCAATATACCTTGTGCTTTTCTTGATTAGCCAAAGTATTACCACAATATTAGCT  
CTTGATGACCTTTATTACTGCCCAAACACAACACTACTTATAACAATATA

>M6-PGSC0003DMG400002045-(rev)M6RLKantifungi(GNK)\_1054

GACAGGAAGAGTAATATTTTGACCAATACAATACTGACTTTAATTTGTTGTAGATTTGTGTCACCATTTGT  
TTACGATAAGTTTTTACTTTTAATTCCCCCGTCCCCGCCCGCCCCGCCCC

>M6-PGSC0003DMG400002045-(rev)M6RLKantifungi(GNK)\_1116

ACCATTTGTTTACGATAAGTTTTTACTTTTAATTCCCCCGTCCCCGCCCGCCCCCACAATATGTAAGC  
ATGCTATCTTTTCTTTAATTGGATAAATGACGAAATGAAAGGTATTC

>M6-PGSC0003DMG400002045-(rev)M6RLKantifungi(GNK)\_1178

ATATGTAAGCATGCTATCTTTTCTTTAATTGGATAAATGACGAAATGAAAGGTATTCAAAAAGATTTTA  
AGTGTGTTCTTATCTTAAATTAATATAATTTTTATATTTGGTATAAGTC

>M6-PGSC0003DMG400002045-(rev)M6RLKantifungi(GNK)\_124

ACACCTCTTACAATTCCAACCTCAATTTGCTACTTTCAAATCTTTCTTCTGCCTCTAGAGAACATCTTTTTTA  
CAATTTCTCCATCGATGGCACCGATAATTTGAAACAATTTACGGTC

>M6-PGSC0003DMG400002045-(rev)M6RLKantifungi(GNK)\_1240

AGATTTTAAGTGTGTTCTTATCTTAAATTAATATAATTTTTATATTTGGTATAAGTCGACATTGTGCTATT  
ATGGATTTATGTCCCATTGATACTGACCCAAAAAAAAGTACTTACCTA

>M6-PGSC0003DMG400002045-(rev)M6RLKantifungi(GNK)\_1302

TTGTGCTATTATGGATTTATGTCCCATTGATACTGACCCAAAAAAAAGTACTTACCTAAAAAAGGTATGC  
GTAACATTCTATTAATAACTTTAATAATATTCTTCATCTATATTCCAATC

>M6-PGSC0003DMG400002045-(rev)M6RLKantifungi(GNK)\_1364

AGGTATGCGTAACATTCTATTAATAACTTTAATAATATTCTTCATCTATATTCCAATCATATGTCTTTTTTGT  
ATCAACAAATAAAAATTCAGATGAATCCGTATTTATTATTTGACCCTG

>M6-PGSC0003DMG400002045-(rev)M6RLKantifungi(GNK)\_1426

GTCTTTTTTGTATCAACAAATAAAAATTCAGATGAATCCGTATTTATTATTTGACCCTGATAATAATACGAT  
GGTTGGAATATCACATCAAAAATTAATAGAATCATTAAATAGAATGAAT

>M6-PGSC0003DMG400002045-(rev)M6RLKantifungi(GNK)\_1488

TAATACGATGGTTGGAATATCACATCAAAAATTAATAGAATCATTAAATAGAATGAATTTAATTCCTGAG  
TGGCATAGTTATAGTTGAACATTCTTCGTCGAAAAATTATATGAAGCAAC

>M6-PGSC0003DMG400002045-(rev)M6RLKantifungi(GNK)\_1550

TTCTGAGTGGCATAGTTATAGTTGAACATTCTTCGTCGAAAAATTATATGAAGCAACTAAAAAATATT

TTTTATATGTATATACTAAATCTTAAATATCATTAACGAATTTTCTGACT

>M6-PGSC0003DMG400002045-(rev)M6RLKantifungi(GNK)\_1612

AAAATATTTTTATATGTATATACTAAATCTTAAATATCATTAACGAATTTTCTGACTTGCCACTGCAGGG

CATGATGGAATCCCAAAAATAGAACTACTAATTATTTGTGTAGTGGTTG

>M6-PGSC0003DMG400002045-(rev)M6RLKantifungi(GNK)\_1674

ACTGCAGGGCATGATGGAATCCCAAAAATAGAACTACTAATTATTTGTGTAGTGGTTGCCATTGTAATTC

TCTTGTCTACGATCTATTGGAGTCTTTCATTTGCTACAAAGGAGAAGA

>M6-PGSC0003DMG400002045-(rev)M6RLKantifungi(GNK)\_1736

TGTAATTCTCTTGTCTACGATCTATTGGAGTCTTTCATTTGCTACAAAGGAGAAGAAGGATGAAAAGA

AATAATAAACTCTTAAGGAGATGAATGGTAATTAATTAATCCCAATTA

>M6-PGSC0003DMG400002045-(rev)M6RLKantifungi(GNK)\_186

CATCTTTTTTACAATTTCTCCATCGATGGCACCGATAATTTGAAACAATTTACGGTCTTTTCATGTGTCGA

GGTGATATGTTAAGTGTAATTGTCAAGATTTTGTAAACAAGAGCTGTT

>M6-PGSC0003DMG400002045-(rev)M6RLKantifungi(GNK)\_1922

GTTGCAGTTGATCTTAGTGGAAATTTAACAGCTGAATCATTGCAATATGACTTTAGTACAATTGAATTTGC

CACTAACTTCTTTCTAAGGAAAACAAAATTGGTGTAGGTGGATTTGGT

>M6-PGSC0003DMG400002045-(rev)M6RLKantifungi(GNK)\_1984

TGAATTTGCCACTAACTTCTTTCTAAGGAAAACAAAATTGGTGTAGGTGGATTTGGTGTATGTCTATAAG

GTAACATGTTCAAATTATACCATATAATAATTTTTTAGATATAAGTTATA

>M6-PGSC0003DMG400002045-(rev)M6RLKantifungi(GNK)\_2046

TCTATAAGGTAACATGTTCAAATTATACCATATAATAATTTTTTAGATATAAGTTATATATTCTGACAACG

TAAATATTTTTTACACGATCATTAGGGGGAAGTTGGTAATGGACAAGAG

>M6-PGSC0003DMG400002045-(rev)M6RLKantifungi(GNK)\_2108

CTGACAACGTAAATATTTTTTACACGATCATTAGGGGGAAGTTGGTAATGGACAAGAGATAGCTGTAAA

GAGGCTATCAAGAAGGTCAAGTCAAGGAGTTGAAGAGTTTAAGAATGAAGT

>M6-PGSC0003DMG400002045-(rev)M6RLKantifungi(GNK)\_2170

CTGTAAAGAGGCTATCAAGAAGGTCAAGTCAAGGAGTTGAAGAGTTTAAGAATGAAGTTGTAAGTTGTTG

CTAAGCTTCAACATAGAAATTTAGTGAGACTCTTAGGTTTTTGTGTTGGAAG

>M6-PGSC0003DMG400002045-(rev)M6RLKantifungi(GNK)\_2232

CTTGTTGCTAAGCTTCAACATAGAAATTTAGTGAGACTCTTAGGTTTTTGCTTGGAAGGAGAAGAAAAA  
TACTCATCTACGAGTTCGTGTCCAACAAAAGCCTGGACTATTTCTTATTT

>M6-PGSC0003DMG400002045-(rev)M6RLKantifungi(GNK)\_2294

AGAAAAAATACTCATCTACGAGTTCGTGTCCAACAAAAGCCTGGACTATTTCTTATTTGGTATGCTTGTT  
ATACGTCTCACTTTTCTTTTTGTACTCATGTTATATATAATATTTCTCT

>M6-PGSC0003DMG400002045-(rev)M6RLKantifungi(GNK)\_2356

TGCTTGTTTATACGTCTCACTTTTCTTTTTGTACTCATGTTATATATAATATTTCTCTGATTTTCGATGTCTCA  
CATGATATGATTAAGATACAAAGAAACAAGCAACGTTGGATTGGTCA

>M6-PGSC0003DMG400002045-(rev)M6RLKantifungi(GNK)\_2418

TCGATGTCTCACATGATATGATTAAGATACAAAGAAACAAGCAACGTTGGATTGGTCAGTACGTGATAA  
GATTATTAGAGGAATAGTACGAGGATTAATTTATCTTCATGAAGATTCTCG

>M6-PGSC0003DMG400002045-(rev)M6RLKantifungi(GNK)\_248

CATGTGTCGAGGTGATATGTTAAGTGTAATTGTCAAGATTTTGTAAACAAGAGCTGTAAAAAATAATC  
TTGTTATGCCCGGTAGCAAACGGTTGTATTATGGCGGGATGATTGCAT

>M6-PGSC0003DMG400002045-(rev)M6RLKantifungi(GNK)\_2480

GTGATAAGATTATTAGAGGAATAGTACGAGGATTAATTTATCTTCATGAAGATTCTCGTCCTCGAATCAT  
ACATCGTGATCTCAAAGCAAGCAATATTTTGTAGACAAAGATATGAACC

>M6-PGSC0003DMG400002045-(rev)M6RLKantifungi(GNK)\_2542

CGAATCATACATCGTGATCTCAAAGCAAGCAATATTTTGTAGACAAAGATATGAACCCTAAAATTTTCAG  
ATTTTGGCATGGCTAGAATATTTGGAGTTGACCAAATTGAAGGAAGCACT

>M6-PGSC0003DMG400002045-(rev)M6RLKantifungi(GNK)\_2604

AATTTTCAGATTTTGGCATGGCTAGAATATTTGGAGTTGACCAAATTGAAGGAAGCACTAACATAATTGTT  
GGAACATAGTAAGTGTGGTTTTTAAAAAAAAGAGACCTTTTTGTGAATC

>M6-PGSC0003DMG400002045-(rev)M6RLKantifungi(GNK)\_2666

TAATTGTTGGAACATAGTAAGTGTGGTTTTTAAAAAAAAGAGACCTTTTTGTGAATCGGTTTGTATGG  
TATAGCAAATGTTAATTATTGTGATTTATTGTTCTTTGTTAGCGGCTAC

>M6-PGSC0003DMG400002045-(rev)M6RLKantifungi(GNK)\_2728

TGTTATGGTATAGCAAATGTTAATTATTGTGATTTATTGTTCTTTGTTAGCGGCTACATGTCCCGGAGT  
ACGCAATGCATGGTCAATTCTCAGTGAAATCAGATGTATTTAGTTTTGG



>M6-PGSC0003DMG400002045-(rev)M6RLKantifungi(GNK)\_2790

CCCCGGAGTACGCAATGCATGGTCAATTCTCAGTGAAATCAGATGTATTTAGTTTTGGTGTGCTTCTTTT  
GGAGATAATAAGTGGAAAAAGAAGAAATAATAAAGAAGATAAATTTGATG

>M6-PGSC0003DMG400002045-(rev)M6RLKantifungi(GNK)\_2976

TTAACATGATTATAATTAATTGTGTTGATATTTATAGGCATGGAGGTTGTGGAAAGATAATAGAGCAATG  
GAAATTGTTGATCCAACACTATTATTGGTGACTCAAATTCATGTGCGAAAAT

>M6-PGSC0003DMG400002045-(rev)M6RLKantifungi(GNK)\_3038

GAGCAATGGAAATTGTTGATCCAACACTATTATTGGTGACTCAAATTCATGTGCGAAAATCATGAGATGTAT  
ACATATTGGATTGTTATGTGTTCAAATTGATTTGGATGGAAGACCTACAA

>M6-PGSC0003DMG400002045-(rev)M6RLKantifungi(GNK)\_310

AAATAATCTTGTTATGCCCGGTAGCAAACGGTTGTATTATGGCGGGATGATTGCATGTTACGTTACTC  
GAATCAATCAATATTCGCCGATCCAACACTATAGATCAATAATTAACAATC

>M6-PGSC0003DMG400002045-(rev)M6RLKantifungi(GNK)\_3100

AGATGTATACATATTGGATTGTTATGTGTTCAAATTGATTTGGATGGAAGACCTACAACACTACTTTGATATC  
TCATTTTCTCAGTACTGATTTTGCTATTCTACCAGAGCCAAATCAACCA

>M6-PGSC0003DMG400002045-(rev)M6RLKantifungi(GNK)\_3162

TTTGATATCTCATTTTCTCAGTACTGATTTTGCTATTCTACCAGAGCCAAATCAACCAGCGTCTTTTAAGGA  
TTATTCTAGATTAGGAAATATCGAGCAACTCACAAGTAATTCCATTCC

>M6-PGSC0003DMG400002045-(rev)M6RLKantifungi(GNK)\_3208

CCAAATCAACCAGCGTCTTTTAAGGATTATTCTAGATTAGGAAATATCGAGCAACTCACAAGTAATTCCA  
TTCCGTCATCTAATTTTGGGGAATTAATTACAGAAATCTACCCAAGATAG

>M6-PGSC0003DMG400002045-(rev)M6RLKantifungi(GNK)\_372

CGTACTCGAATCAATCAATATTCGCCGATCCAACACTATAGATCAATAATTAACAATCCATCTACACCTTTT  
GTCATGCATAACATTATTACAATTACCAATAATGAACATGAACAAAGA

>M6-PGSC0003DMG400002045-(rev)M6RLKantifungi(GNK)\_434

TACACCTTTTGTGCATGCATAACATTATTACAATTACCAATAATGAACATGAACAAAGAAGGTTCAAACGG  
AGTCTAGGGGCAATTATGGATGACGTAACGACTCGGGCTGCTAGTGATGA

>M6-PGSC0003DMG400002045-(rev)M6RLKantifungi(GNK)\_496

TCAAACGGAGTCTAGGGGCAATTATGGATGACGTAACGACTCGGGCTGCTAGTGATGATCGATCGTTAG

ACAAGAAAATTGCAATTAGGGAAGCTAAGTTCAGTGTTGAGACAACAATTT

>M6-PGSC0003DMG400002045-(rev)M6RLKantifungi(GNK)\_558

TCGTTAGACAAGAAAATTGCAATTAGGGAAGCTAAGTTCAGTGTTGAGACAACAATTTATGCCTTAGCTC  
AATGCATTCCTCATATGTCTTCTAAAGATTGCCTAAATTGCCTTGAAAAT

>M6-PGSC0003DMG400002045-(rev)M6RLKantifungi(GNK)\_62

AATATTAGCTCTTGATGACCTTTATTACTGCCCAAACACAACACTACTTATAACAATATAACAAACACCTCTT  
ACAATTCCAACCTCAATTTGCTACTTTCAAATCTTTCTTCTGCCTCTAG

>M6-PGSC0003DMG400002045-(rev)M6RLKantifungi(GNK)\_620

CTTAGCTCAATGCATTCCTCATATGTCTTCTAAAGATTGCCTAAATTGCCTTGAAAATGCCATCACAGTTTT  
AAACAAATGTTGTGATGTATATAGAGGTGCTAGAGTTCAATTTCTAG

>M6-PGSC0003DMG400002045-(rev)M6RLKantifungi(GNK)\_682

TCACAGTTTTAAACAAATGTTGTGATGTATATAGAGGTGCTAGAGTTCAATTTCTAGTTGTTTTATGAG  
GCATGAAGTGTACCTCTTCTACAATAAAACAAACCTATCTACTTTGTCAC

>M6-PGSC0003DMG400002118M6LRR-RLP\_0

CAATCCTTCAGAGATGTCTGAAGATGAGGAGCGTCCTTGTCTTCAGATCTCACCGGTGGCGCCACTGCA  
AAAGCAAGGAACTGTTGCTTTAACGCCGCCGTTACCGGTGGCGGAGGGGG

>M6-PGSC0003DMG400002118M6LRR-RLP\_1054

GGAGTCTTTGACCTTTGATTGTGTTGAATGCCCTATTGACTTTGAGGCATTGGAGAAGCTAGTAATCAGG  
TCACCTAGTTTGAAGAGTCTAAGGTTGAATCGGTTTGTCTATTACTCA

>M6-PGSC0003DMG400002118M6LRR-RLP\_1116

TAATCAGGTCACCTAGTTTGAAGAGTCTAAGGTTGAATCGGTTTGTCTATTACTCAGCTGTACCGTTTG  
ATGATTCGAGCTCCACAGCTTACCAATCTGGGAACAGGCTCTTTTGGCG

>M6-PGSC0003DMG400002118M6LRR-RLP\_1178

TACCGTTTGATGATTCGAGCTCCACAGCTTACCAATCTGGGAACAGGCTCTTTTGGCGCCTCAACGGTCA  
TTGATGAACCAGATCCTGATTATGCTTCAGCATTTGCTGCCTGCAAATCC

>M6-PGSC0003DMG400002118M6LRR-RLP\_124

TTTAACTTTTCGCCACACCCAGATCAAGTTCTTGAAAATGTGCTGGAAAATGTTCTTTGCTTCTTAACTGA  
TCGCCGTGACCGTAACGCTGCATCTTGTAAAGCAAATCTTGGTATCGG

>M6-PGSC0003DMG400002118M6LRR-RLP\_1240

AACGGTCATTGATGAACCAGATCCTGATTATGCTTCAGCATTTGCTGCCTGCAAATCCATTGTCTGTCTCT  
CTGGTTTCAAGGAAATTGCTCCTGAATATCTGCCTGCAATCTATCCAGT

>M6-PGSC0003DMG400002118M6LRR-RLP\_1302

TCTGTCTCTCTGGTTTCAAGGAAATTGCTCCTGAATATCTGCCTGCAATCTATCCAGTTTGTGGCAATCTG  
ACCTCTCTTAATTTAAGCTATGGTGCCAACATTAATACTGAACAATTCA

>M6-PGSC0003DMG400002118M6LRR-RLP\_1364

GGCAATCTGACCTCTCTTAATTTAAGCTATGGTGCCAACATTAATACTGAACAATTCAAGTCTGTCATCAG  
CCGTTGCCATAAGCTCCAAGTATTGTGGGTATGTGGTTTGAATTTTCGC

>M6-PGSC0003DMG400002118M6LRR-RLP\_1426

TGTCATCAGCCGTTGCCATAAGCTCCAAGTATTGTGGGTATGTGGTTTGAATTTTCGCTATATGTTCTTTT  
AAAGAAAATTGACTCTGTAATAGCGTTATATTGAGTTCAATTTTGATG

>M6-PGSC0003DMG400002118M6LRR-RLP\_1488

TGTTCTTTTAAAGAAAATTGACTCTGTAATAGCGTTATATTGAGTTCAATTTTGATGTTTCAGGTATTTG  
ATTCTGTATGTGACGAAGGACTTGAGGCAGTTGCTGCAACATGTAAGGA

>M6-PGSC0003DMG400002118M6LRR-RLP\_1550

AGGTATTTGATTCTGTATGTGACGAAGGACTTGAGGCAGTTGCTGCAACATGTAAGGATCTGCGGGAGA  
TTCGAGTTTTCCTTTTGAAGCTCGGGAAGATGCAGATGCCCCAGTTTCTG

>M6-PGSC0003DMG400002118M6LRR-RLP\_1612

CGGGAGATTCGAGTTTTCCTTTTGAAGCTCGGGAAGATGCAGATGCCCCAGTTTCTGAAGTAGGTCTCC  
TTGCGATTTCTGAGGGTTGCAGTAACTTAAGTCCATCTTATATTTCTGC

>M6-PGSC0003DMG400002118M6LRR-RLP\_1674

AGGTCTCCTTGCGATTTCTGAGGGTTGCAGTAACTTAAGTCCATCTTATATTTCTGCCAACGAATGACA  
AATGCGGCTGTTATAGCTATGTCAAAGAAGTCCCAGACCTTGTGGTATT

>M6-PGSC0003DMG400002118M6LRR-RLP\_1736

GAATGACAAATGCGGCTGTTATAGCTATGTCAAAGAAGTCCCAGACCTTGTGGTATTCCGACTATGCAT  
TATGGGTCGGCACTTGCTGACCATGTTACTAATGAACCAATGGATGAAG

>M6-PGSC0003DMG400002118M6LRR-RLP\_1798

CTATGCATTATGGGTCGGCACTTGCTGACCATGTTACTAATGAACCAATGGATGAAGGCTTTGGGGCT  
ATTGTCAAGAAGTGTAAAGAAGCTTACTAGACTCGCTGTATCTGGTTTACTG

>M6-PGSC0003DMG400002118M6LRR-RLP\_186

CTTAACTGATCGCCGTGACCGTAACGCTGCATCTCTTGTAAGCAAATCTTGGTATCGGGCTGAGGCTTTA  
ACCAGATCCGAAGTGTTTATTGGCAACTGTTATGCTGTTTCGCCGACCCG

>M6-PGSC0003DMG400002118M6LRR-RLP\_1860

TGGGGCTATTGTCAAGAACTGTAAGAAGCTTACTAGACTCGCTGTATCTGGTTTACTGACTGATAAGGCT  
TTCAGTTACATTGGACAATATGGAAAAGTATGTCAGAACCTTATCAGTTGC

>M6-PGSC0003DMG400002118M6LRR-RLP\_1922

ATAAGGCTTTCAGTTACATTGGACAATATGGAAAAGTATGTCAGAACCTTATCAGTTGCTTTTGCTGGAAA  
CAGTGACTTGGCTCTGAAGTATGTGCTCGAGGGCTGCCCTAAGTTGCAGA

>M6-PGSC0003DMG400002118M6LRR-RLP\_1984

GCTGGAAACAGTGACTTGGCTCTGAAGTATGTGCTCGAGGGCTGCCCTAAGTTGCAGAAGTTGGAGATC  
AGGGATTGCCATTTGGAGATTTGTCTTTGCGTTCTGGTGTACACCACTAT

>M6-PGSC0003DMG400002118M6LRR-RLP\_2046

GGAGATCAGGGATTGCCATTTGGAGATTTGTCTTTGCGTTCTGGTGTACACCACTATTACAATATGAGG  
TTCCTTTGGCTGTCATCTTGTAGAGTAACTCTACAAGTTGTCAGGAGAT

>M6-PGSC0003DMG400002118M6LRR-RLP\_2108

ATATGAGGTTCTTTGGCTGTCATCTTGTAGAGTAACTCTACAAGTTGTCAGGAGATTGCTGGCCAATT  
GCCCCGTCTAGTAGTGGAAGTGATAAGTGGTGATGAGGAAGGGAGTGAGA

>M6-PGSC0003DMG400002118M6LRR-RLP\_2170

GGCCAATTGCCCCGTCTAGTAGTGGAAGTGATAAGTGGTGATGAGGAAGGGAGTGAGACTGGTGAGC  
ATGTCAATACCTTGTACATGTACCGATCTCTTGATGGACCGAGGGCTGATGTA

>M6-PGSC0003DMG400002118M6LRR-RLP\_2232

TGAGCATGTCAATACCTTGTACATGTACCGATCTCTTGATGGACCGAGGGCTGATGTACCATCATTGTG  
CAAATACTGTGACCGACCTTTTTAGTAGATAGGAATTTTCTGCAGTAATT

>M6-PGSC0003DMG400002118M6LRR-RLP\_2294

CATTTGTGCAAATACTGTGACCGACCTTTTTAGTAGATAGGAATTTTCTGCAGTAATTGATTGGGACCTTT  
GAGAAATGATTAATACTATTTTCTTGGGAAGAGATGCTCTCCAGAAATCTG

>M6-PGSC0003DMG400002118M6LRR-RLP\_2356

GGGACCTTTGAGAAATGATTAATACTATTTTCTTGGGAAGAGATGCTCTCCAGAAATCTGTTGTGACCCATA

TGAAGGTGCAAGTTTCCTTCTTGAGAAAACGAATGGTGCACCACTTGCAA

>M6-PGSC0003DMG400002118M6LRR-RLP\_2418

GACCCATATGAAGGTGCAAGTTTCCTTCTTGAGAAAACGAATGGTGCACCACTTGCAAAGGCAGTGAGT  
AATCTATAATGTATTCAATGCTGGTCTCCATGGATGTCATTGTATATGGTT

>M6-PGSC0003DMG400002118M6LRR-RLP\_248

AGGCTTTAACCAGATCCGAAGTGTTTATTGGCAACTGTTATGCTGTTTCGCCGACCCGGGTTACGACCCG  
TTTCAAATGGGTGACCTCTGTGGCCATTAAAGGGAAACCTAGGTTTGCTG

>M6-PGSC0003DMG400002118M6LRR-RLP\_2480

AGTGAGTAATCTATAATGTATTCAATGCTGGTCTCCATGGATGTCATTGTATATGGTTCAGTACAGAGAT  
TGTTTTTTTCCAGCAAAGCAATCTAGAAGACAAATGGTTCTTTGTATCAG

>M6-PGSC0003DMG400002118M6LRR-RLP\_2542

ACAGAGATTGTTTTTTTCCAGCAAAGCAATCTAGAAGACAAATGGTTCTTTGTATCAGTAATCTTTTCTAT  
TCACTTTCTTTTCTTCATATTCATGGAGCCTTCAATTAGTAAGTGGAGT

>M6-PGSC0003DMG400002118M6LRR-RLP\_2604

CTTTTCTATTCACTTTCTTTTCTTCATATTCATGGAGCCTTCAATTAGTAAGTGGAGTCATTGGTAAGGCCA  
CAGCAAGGGTAGATGTTCCAAACTGCACGGTGGCGGAGCTCAATGAGA

>M6-PGSC0003DMG400002118M6LRR-RLP\_2666

GGTAAGGCCACAGCAAGGGTAGATGTTCCAAACTGCACGGTGGCGGAGCTCAATGAGATTTCTCAAAG  
GCTTTCGGCAGAACCAACACTTGTGGAATACACCTGCATGCTCGGTCAGGGT

>M6-PGSC0003DMG400002118M6LRR-RLP\_2728

TCAAAGGCTTTCGGCAGAACCAACACTTGTGGAATACACCTGCATGCTCGGTCAGGGTACTGGCTCGTC  
AAGTAGTATATTTTCATACAATTGAGGCCCTTCTTATTTTTGTTTCATTG

>M6-PGSC0003DMG400002118M6LRR-RLP\_2790

GCTCGTCAAGTAGTATATTTTCATACAATTGAGGCCCTTCTTATTTTTGTTTCATTGTTAGTTTAGAGTTG  
GAAGTTTTTTATTTTTAGTTGGTGATAGCCTAATGGTCAGAAGGATAC

>M6-PGSC0003DMG400002118M6LRR-RLP\_2852

TTTAGAGTTGGAAGTTTTTTATTTTTAGTTGGTGATAGCCTAATGGTCAGAAGGATACCTACCGCTGTTG  
GATCTCTCCATCTCGCTTCTAGAAATATTTGTTCTTTCCAGGATGTGTT

>M6-PGSC0003DMG400002118M6LRR-RLP\_2914

CGCTGTTGGATCTCTCCATCTCGCTTTCTAGAAATATTTGTTCTTTCCAGGATGTGTTGTTTCGTAGCACCT  
GACTGTTGAATTTATTATTGTTATTTTTAGAAGAAATGTGAGATGGGT

>M6-PGSC0003DMG400002118M6LRR-RLP\_2976

CGTAGCACCTGACTGTTGAATTTATTATTGTTATTTTTAGAAGAAATGTGAGATGGGTAATAAATGCCAA  
ATATGCATGGACCAGATGATGCTCTAGTGTGTGTGTGTTTGTGTTTGTCT

>M6-PGSC0003DMG400002118M6LRR-RLP\_310

ACGACCCGTTTCAAATGGGTGACCTCTGTGGCCATTAAAGGGAAACCTAGGTTTGCTGATTTTCAGTTTGC  
TTCCTCCAGATTGGGGTGCTCACTTTACTCCTTGGGCTTCTGTTTTGGGT

>M6-PGSC0003DMG400002118M6LRR-RLP\_3100

CTTTTCTTTATGTGGAATGATCAGCTTGATAGTGAAGACCCATAAATGATGTGTGGAAAGCCTTGTACAA  
GTACAAAATGCAGGACCCTCCTCCTTCACTCACTCTCTTTGTGGGAT

>M6-PGSC0003DMG400002118M6LRR-RLP\_3162

TTGTACAAGTACAAAATGCAGGACCCTCCTCCTTCACTCACTCTCTTTGTGGGATCCATTTATGAGTC  
TTATCCTCTATTATCTTTCCAGCTGATGAATGGCCCTTCTCTGTCTCAT

>M6-PGSC0003DMG400002118M6LRR-RLP\_3224

TTATGAGTCTTATCCTCTATTATCTTTCCAGCTGATGAATGGCCCTTCTCTGTCTCATCTTTGTATCTGAA  
AGAAGAGCCAAGAGCAGGGAGTAGACTGTAGTTGTGGAAAGTATAGAT

>M6-PGSC0003DMG400002118M6LRR-RLP\_3286

TGTATCTGAAAGAAGAGCCAAGAGCAGGGAGTAGACTGTAGTTGTGGAAAGTATAGATGGATAGTACA  
GCACACCCCTTATTTTTAGCTGATGATGCCAACTTTATCATTATTCTTTTG

>M6-PGSC0003DMG400002118M6LRR-RLP\_3348

AGTACAGCACACCCCTTATTTTTAGCTGATGATGCCAACTTTATCATTATTCTTTGGATAACAGTCTTGA  
GGAGCCTGCCTGTTGTGTTATCCTGTTACTTTTCATATGCGGCTGCT

>M6-PGSC0003DMG400002118M6LRR-RLP\_3388

TTTATCATTATTCTTTGGATAACAGTCTTGAGGAGCCTGCCTGTTGTGTTATCCTGTTACTTTTCATATG  
CGGCTGCTGCTGCAGCATTCTTCATCTCTATCATTGACTACAACCTCAC

>M6-PGSC0003DMG400002118M6LRR-RLP\_372

CAGTTTGCTTCTCCAGATTGGGGTGCTCACTTTACTCCTTGGGCTTCTGTTTTGGGTGATTCTTATCGTG  
GGCTTGAGAAATTGTACCTCAAACGTATGTCCATATCTGATGATGATCT

>M6-PGSC0003DMG400002118M6LRR-RLP\_434

CTTATCGTGGGCTTGAGAAATTGTACCTCAAACGTATGTCCATATCTGATGATGATCTAGGTTTGTGGC  
GCGTTGTTTCCCAGTTTCAAAGAGCTTGTTCTTGTATGCTGTGACGGTT

>M6-PGSC0003DMG400002118M6LRR-RLP\_496

TTGTTGGCGCGTTGTTTCCCAGTTTCAAAGAGCTTGTTCTTGTATGCTGTGACGGTTTTGGGACTAGTG  
GACTTGCTATTGTAGCTCGTGATTGCAGGTTAGTATTGTTTTGTCCGGAT

>M6-PGSC0003DMG400002118M6LRR-RLP\_558

GACTAGTGGACTTGCTATTGTAGCTCGTGATTGCAGGTTAGTATTGTTTTGTCCGGATATAGATCTGTTT  
ATGTGATAACCCTTTTGGTAAAAAGTTTAGATTTTTAATTTCTAGAAGCT

>M6-PGSC0003DMG400002118M6LRR-RLP\_62

CCACTGCAAAGCAAGGAAGTGTGCTTTAACGCCCGTTACCGGTGGCGGAGGGGGGATTTTTAACT  
TTTCGCCACACCAGATCAAGTTCTTGAAAATGTGCTGGAAAATGTTCTTT

>M6-PGSC0003DMG400002118M6LRR-RLP\_620

ATCTGTTTATGTGATAACCCTTTTGGTAAAAAGTTTAGATTTTTAATTTCTAGAAGCTGAATTCTTCTTCT  
GTAATGGGAAATTAACAGCTTAACTAGTGTAGATATATTGTGTTATT

>M6-PGSC0003DMG400002118M6LRR-RLP\_682

TCTTCTTCTGTAATGGGAAATTAACAGCTTAACTAGTGTAGATATATTGTGTTATTTGAATTTGTGCTT  
CATGTGTGCTGGTGTGTTGAATTAGTTATGTGATTGAGTTGTTCTTTAAC

>M6-PGSC0003DMG400002118M6LRR-RLP\_744

TTTGTGCTTCATGTGTGCTGGTGTGTTGAATTAGTTATGTGATTGAGTTGTTCTTTAACTGTTTTATTCTGCA  
TTTGAACTTAATGATACCTTTTGAGGACACTAGCATTGAAGTTGTAA

>M6-PGSC0003DMG400002118M6LRR-RLP\_806

TTATTCTGCATTTGAACTTAATGATACCTTTTGAGGACACTAGCATTGAAGTTGTAATATGTGGTGACTT  
GTTGTATTGGATTTGTGAGTTTGAAGCTGTGAAATATGGTTTGGTAGT

>M6-PGSC0003DMG400002118M6LRR-RLP\_868

TGGTGACTTGTTGTATTGGATTTGTGAGTTTGAAGCTGTGAAATATGGTTTGGTAGTGTGATTTTCTTG  
TGCATAATAGAAGGTTTTACTGCAGGCAAATTAGAGTGCTTGATCTGAT

>M6-PGSC0003DMG400002118M6LRR-RLP\_930

TTTTCTTGTGCATAATAGAAGGTTTTACTGCAGGCAAATTAGAGTGCTTGATCTGATTGAGTCTGAGGT

ATCCGACGATGAAGTGGACTGGATTTCTACTTCCCTGAGAACAAAACGT

>M6-PGSC0003DMG400002118M6LRR-RLP\_992

TCTGAGGTATCCGACGATGAAGTGGACTGGATTTCTACTTCCCTGAGAACAAAACGTGTTTGGAGTCTT

TGACCTTTGATTGTGTTGAATGCCCTATTGACTTTGAGGCATTGGAGAAG

>M6-PGSC0003DMG400002426M6LRR-RLP\_1764

AATAGTATTCATATTTCAAACATATATATATATACACTCTGTTCTCTAGCTTCATATTTCTTAAGAAATAC

TAACTAATATTTGTACCTTAAATTTGTTAATGATGCTAACTCTTC

>M6-PGSC0003DMG400002426M6LRR-RLP\_1827

AAGAAATACTTAACTAATATTTGTACCTTAAATTTGTTAATGATGCTAACTCTTCAAGAACTTCTAAGT

ATAATAATAATAATATATAAAACATGACAAAAATAGCATTGTTGGGGATT

>M6-PGSC0003DMG400002426M6LRR-RLP\_1890

TTCTAAGTATAATAATAATAATATATAAAACATGACAAAAATAGCATTGTTGGGGATTGTACATGACATGT

GAAGTTATGATTTGTTGACTCATTACCTTTTTATAGGGGACCATGACAGT

>M6-PGSC0003DMG400002478-(rev)M6LRR-RLP\_0

CTTCCACTTGATTTGAGACAATGCTTTGTGTATTCTGCAGTGTTCCCAAAGGACACCAAATGGAAAAGG

AAAATCTAATCTCTCTTTGGATGGCACATGGTTTTCTTCATCGAAAGGA

>M6-PGSC0003DMG400002478-(rev)M6LRR-RLP\_1178

TTCTGGATTCCCCACAAGAATAAGGTTTCCATCCTTGAGGAACTTGCTATATGGGACTTTCGTAATCTG

AAAGGATTGCTGAAAAGGAAGGAGAAGAGCAATCCCTGTGCTTGAAGA

>M6-PGSC0003DMG400002478-(rev)M6LRR-RLP\_124

TGGAGCTAGAGGATGTGGGTAATGAAGTATGGAATGAATTATTTGAGGTCTTTCTTCCAAGAGATTG

AAGTTAGATATGGTAAACTTATTTCAAGATGCATGATCTCATCCATGATT

>M6-PGSC0003DMG400002478-(rev)M6LRR-RLP\_1302

GAGATTTGGTGGTGCCTATGTTTGTATTCCGACCCTTTCTTCTGTCAAGAAATTGGAATTGGATCCAAC

ACCTTAAAGTCCATGTCTAATCTTAGGAATCTTACACCTTTCAGGTCC

>M6-PGSC0003DMG400002478-(rev)M6LRR-RLP\_1364

GGATCCAACACCTTTAAGGTCCATGTCTAATCTTAGGAATCTTACACCTTTCAGGTCCATATCTAATCTTA

GGAATCTTACTTCCCTCAACATTAGCTATAGCAATAGCAATGAAGCAAC

>M6-PGSC0003DMG400002478-(rev)M6LRR-RLP\_1426



CTAATCTTAGGAATCTTACTTCCCTCAACATTAGCTATAGCAATAGCAATGAAGCAACTTCACTCCCAGAA  
GAGATGTTCAAAAACCTTGCAAATCTCAAATACTTGAATATCTCTAAGT

>M6-PGSC0003DMG400002478-(rev)M6LRR-RLP\_1488

CTCCCAGAAGAGATGTTCAAAAACCTTGCAAATCTCAAATACTTGAATATCTCTAAGTTCGAGAATCTCA  
AAGAGCTGCCTACCAGCCTGGCTAGTCTCAATGCTTTGGAGAGTCTGAAG

>M6-PGSC0003DMG400002478-(rev)M6LRR-RLP\_1612

AATATTGTGGTGCCTAGAGAGTCTCCCCGAGGAAGGGGTGAAAGGTTTAACTTCACTCACAAAGTTAT  
CTGTTTATGATTGCAAGATGCTAAAATGTTTACCGGAGGGATTGCAGCACC

>M6-PGSC0003DMG400002478-(rev)M6LRR-RLP\_1798

TAGGAGAAGACTGGCACAAAATTGCTCACATTCCGTATCTGGGTATTCATTACTATTAGTATTTATAATTG  
TTTCTTTGTTTGTGAGTCTTTTTGGTTCTTGCCATTGGATTGCATGTAA

>M6-PGSC0003DMG400002478-(rev)M6LRR-RLP\_1860

TTATAATTGTTTCTTTGTTTGTGAGTCTTTTTGGTTCTTGCCATTGGATTGCATGTAATTTTTCTAGGGTT  
GTTTGTGTTGTAAGTCTCTCATTGGATGTAATTTTATTTTGGAAACAAA

>M6-PGSC0003DMG400002478-(rev)M6LRR-RLP\_1915

TAATTTTTCTAGGGTTGTTTGTGTTGTAAGTCTCTCATTGGATGTAATTTTATTTTGGAAACAAATTAACAA  
TCTATTTGTATTATACGTTTTGAGAATCTATTACTTATTTGTAATTGT

>M6-PGSC0003DMG400002478-(rev)M6LRR-RLP\_248

TACATCTCTGTTTTAGCAAACACATCAAACATCAATATCCGTGAAATAAATGCAGAAGTTTACTTCATTA  
GGGGGCACGGTAGTTTCATTGATGAGAAAGATTATATACCTAGGAAGCC

>M6-PGSC0003DMG400002478-(rev)M6LRR-RLP\_310

ACTTCATTAGGGGGCACGGTAGTTTCATTGATGAGAAAGATTATATACCTAGGAAGCCCATTGGTTTTGC  
TAAAGTTGTGTCTTCTATCTCTCCTTCACTCTTGAACAGTTTGTCTCGT

>M6-PGSC0003DMG400002478-(rev)M6LRR-RLP\_496

ATTTAAGATATTTGAACCTGTCTCGCAATGCAATGCGTAGTCTTCCAGAAAGGTTGTGCAATCTTCAAAA  
TCTGCTGACTCTTGATCTACGGTTGTGCTCAAACCTTTGTTGTTTGCCAA

>M6-PGSC0003DMG400002478-(rev)M6LRR-RLP\_62

GGAAAAGGAAAATCTAATCTCTCTTTGGATGGCACATGGTTTTCTTTCATCGAAAGGAACTTGGAGCTA  
GAGGATGTGGGTAATGAAGTATGGAATGAATTATTTGAGGTCTTTCTT

>M6-PGSC0003DMG400002478-(rev)M6LRR-RLP\_620

AACAAGTAAACTTGTTAGTCTCCGGAATCTAAAACCTTGATCACTGTTTCATTGAAATATATGCCACCAAGG  
ATAGGATCTTTGACAGGCCTTAAGACTCTAAGTAACTTTGTTGTGGGCGA

>M6-PGSC0003DMG400002478-(rev)M6LRR-RLP\_744

GAAGGTTGTCAACTTGGGGAAGCTAGGAAGCCTAAATCTCTATGGCTCATTGAAATCACAAATCTTGAG  
AGAGTGAAGAATCATAAGGATGCAAAAGAAGCCAATTTATGTGCAAAAGGG

>M6-PGSC0003DMG400002478-(rev)M6LRR-RLP\_806

TCTTGAGAGAGTGAAGAATCATAAGGATGCAAAAGAAGCCAATTTATGTGCAAAAGGGAATCTGCATTC  
ATTAAGCATGAGTTGGAACATGTCCGGACCACATAGATATGAATCAGAAGA

>M6-PGSC0003DMG400002478-(rev)M6LRR-RLP\_868

TGCATTCATTAAGCATGAGTTGGAACATGTCCGGACCACATAGATATGAATCAGAAGAAGATAAAGTGC  
TTGAAGCCCTCAAACCACACCCCAATCTGAAATATTTAGAAATCAATTGGT

>M6-PGSC0003DMG400002478-(rev)M6LRR-RLP\_930

AAAGTGCTTGAAGCCCTCAAACCACACCCCAATCTGAAATATTTAGAAATCAATTGGTTCAGAGGAATCC  
GTCTCCAGAGTGGATGAATCACTCAGTATTGAAAAATATTGTCTCTATT

>M6-PGSC0003DMG400002478-(rev)M6LRR-RLP\_992

AGGAATCCGTCTCCAGAGTGGATGAATCACTCAGTATTGAAAAATATTGTCTCTATTATAATTATCGAA  
TGCACAAACTGCTCGTGCTTACCACCCTTTGGTGAGCTGCCTTGTCTAGA

>M6-PGSC0003DMG400002526M6LysM-RLK\_0

TTTTCCCTTCTTGTTGATTTTGCAGTCTCACAGAGTAATATTAGTAGTAATAAGTTCCACTAAAAGACCT  
TGTTTTAGCCATTACAGGACAATAAACCCCATCCCCAAACCCAC

>M6-PGSC0003DMG400002526M6LysM-RLK\_1037

TTAGTCAGTTTTTTCTTCTTTTTGTTGTGTGAGTGAGGGGATGAACCTATGTTCTAGAGGGGCACAC  
AATCCTCTCTATTTGTCTATGGCAGGTTAAGATAACCAACTAATCCCTT

>M6-PGSC0003DMG400002526M6LysM-RLK\_122

AATGTTCTGTTCTTGTTCTCTGCTATTCCTATTTCACTTTCTTCTTAAAGATTCAACTCTTTTGCAATTT  
TTTTCATGTTTTTCTTAAAGTTTCCATGACCCGTTTCACAAAATCT

>M6-PGSC0003DMG400002526M6LysM-RLK\_1403

TACTGTGGTTGGGAGAGGATCATGACTACCTAATGCTTTGTATCCAATAGTGAACATGAGAACAATGTTC

GAAAACATCTAAAAATCTCTACACTTTTTGCACTAAATAACGAAAAGTTG

>M6-PGSC0003DMG400002526M6LysM-RLK\_1464

ACAATGTTGAAAACATCTAAAAATCTCTACACTTTTTGCACTAAATAACGAAAAGTTGATTGAAGTGGATGTAATGGGAATTAGCTTGGCACCCCTGGAGCATTGCCAAAATCAAGTGC

>M6-PGSC0003DMG400002526M6LysM-RLK\_1525

TGAAGTGGATGTAATGGGAATTAGCTTGGCACCCCTGGAGCATTGCCAAAATCAAGTGCCTTCGATCAGTTAGAGAGTTGGATTGCATGTATGAAGGGAAATTCGTATTTTGATGGATAA

>M6-PGSC0003DMG400002526M6LysM-RLK\_1586

TCGATCAGTTAGAGAGTTGGATTGCATGTATGAAGGGAAATTCGTATTTTGATGGATAACAGGTCCTGTAGAATACATCATATAATGTATTAGTTTCAACATCAGACTATATAGCACAAT

>M6-PGSC0003DMG400002526M6LysM-RLK\_1647

GGTCCTGTAGAATACATCATATAATGTATTAGTTTCAACATCAGACTATATAGCACAATAATTATATCACACAACCTGTAAGTTTTAAAGAGGACCTGGTGTGAAGATGAGCATATGGGT

>M6-PGSC0003DMG400002526M6LysM-RLK\_1708

TTATATCACACAACCTGTAAGTTTTAAAGAGGACCTGGTGTGAAGATGAGCATATGGGTACTCTTATTGTGCTGTTTTATCTGAACAAGAGATCTCATGAATTCAACTAAATTATTGTAT

>M6-PGSC0003DMG400002526M6LysM-RLK\_1769

TCTTATTGTGCTGTTTTATCTGAACAAGAGATCTCATGAATTCAACTAAATTATTGTATTAGCCAATCCTCAAATTAAGTTTGCTAGGCTCAATAGTTAGCAACTTTGCCATGCTCAAT

>M6-PGSC0003DMG400002526M6LysM-RLK\_183

CTTTTGCAATTTTTTTTCATGTTTTCTTTAAGTTTCCATGACCCGTTTCACAAAATCTATCAAAGATTCAATCTTTAATAACAATGGATCATATAACAATCAACATTTCTTGCAATAATTT

>M6-PGSC0003DMG400002526M6LysM-RLK\_1830

GCCAATCCTCAAATTAAGTTTGCTAGGCTCAATAGTTAGCAACTTTGCCATGCTCAATAATTATCTTCATTTACTCATGGTCAATAGCTTTTCTAGTAAGCCTTTTTGGTTAAAAGTA

>M6-PGSC0003DMG400002526M6LysM-RLK\_1891

TTATCTTCATTTACTCATGGTCAATAGCTTTTCTAGTAAGCCTTTTTGGTTAAAAGTACTTTACTTTAACGACTTTGTGTACGTCCAGCTCCTGGCGAGCCTTATCCTGTAGAAAATCA

>M6-PGSC0003DMG400002526M6LysM-RLK\_1952

T T A C T T T A A C G A C T T T G T G T A C G T C C A G C T C C T G G C G A G C C T T A T C C T G T A G A A A A T C A C A C T G T T C C T G C  
C C C T G C T C C A T C A C C T T C T G T T G C T G A T A T T T C A G G T A T T C T C A A T T C T

>M6-PGSC0003DMG400002526M6LysM-RLK\_2013

C T G T T C C T G C C C C T G C T C C A T C A C C T T C T G T T G C T G A T A T T T C A G G T A T T C T C A A T T C T C A A T A G C T T A C A T  
G C A T T C T T A C T T T C C T G T T G T T G A G A T A T G T G T T T T T C T T T A T T A A T A

>M6-PGSC0003DMG400002526M6LysM-RLK\_2074

A T A G C T T A C A T G C A T T C T T A C T T T C C T G T T G T T G A G A T A T G T G T T T T T C T T T A T T A A T A T C A C C C A A G A A A G  
A C C A A T A A A T T T A A C T T C T A C T C A T G G C T T G T C A A G T T T T T G T G T C C T

>M6-PGSC0003DMG400002526M6LysM-RLK\_2196

T T T C T G T T A G T A G T T C C T T G C G A G G G C A G T G T C C A T A A A T T T C T A T C A G T G G A A C G A G A G A A C T T C C T T  
G A C A A G C T A A T C C A A G A G T T T G A T T A T C A T T C T G C A A G T T A T T A T C T A T

>M6-PGSC0003DMG400002526M6LysM-RLK\_2257

G A A C T T C C T T G A C A A G C T A A T C C A A G A G T T T G A T T A T C A T T C T G C A A G T T A T T A T C T A T T A T T G C A A T G A A  
A A A T A C A G A C C T C T A T C T G A A T A T A T G G T T T C G T C T T A G C A G T C A A C T G

>M6-PGSC0003DMG400002526M6LysM-RLK\_2318

T T G C A A T G A A A A A T A C A G A C C T C T A T C T G A A T A T A T G G T T T C G T C T T A G C A G T C A A C T G A A T T T A A C T C T A  
T T C T A T C A C C A A C T T T T G G C T G C G T T A A A A A T C T A T T A G T C A T T C A G T T

>M6-PGSC0003DMG400002526M6LysM-RLK\_244

C A A G A T T C A A T C T T T A A T A C A A T G G A T C A T A T A C A A T C A A C A T T T C T T G C A A T A A T T T G T C T G T C A G C A A  
T T T T C A A G A T T A T C C C T C T T T G T T C A T C A T A C C C T A C T C C A T C A A A C T G

>M6-PGSC0003DMG400002526M6LysM-RLK\_2684

T T T T T G A G A A A A T C T G T C A G A A G A A A A T G A A C A A T G T A A G G A G G A C A A A G T T T C C C C T T A A T T A G G T A T  
A A C C T C A A C T G T T T C T C T G A T T T C C T C T T A A T T G A T A G G T T T T A A T T C T T T

>M6-PGSC0003DMG400002526M6LysM-RLK\_2745

T T A G G T A T A C C T C A A C T G T T T C T C T G A T T T C C T C T T A A T T G A T A G G T T T T A A T T C T T T C A T G G C A C T G A G G  
A G T T T A T C T A A C A A T C C A C A A T A A A T T C A T A T A T C C C T G A C A G T C A T

>M6-PGSC0003DMG400002526M6LysM-RLK\_2806

T G G C A C T G A G G A G T T T A T C T A A C A A T C C A C A A T A A A T T C A T A T A T C C C T G A C A G T C A T A T C C T C A A T T C A  
T C T A T G C A G T A A C C T T G T A A T T C A T T T A A T A G T T C T C T T T C A A T G T T G

>M6-PGSC0003DMG400002526M6LysM-RLK\_2867

CCTCAATTCATCTATGCAGTAACCTTGTAATTCATTTAATAGTTCTCCTTTCAATGTTGGTTTGTGTTGCT  
ACTGCTCCTTTCCAGTGAGTTTCATACCTGATTTGATATGCTTTACT

>M6-PGSC0003DMG400002526M6LysM-RLK\_305

CTGTCAGCAATTTTCAAGATTATCCCTCTTTGTTTCATCATACCCTACTCCATCAAACGTACGGACTGGT  
CGCTTGTGCACTTCTTCTTGGCTTTTAAACCCAGCCCAGAACAGACC

>M6-PGSC0003DMG400002526M6LysM-RLK\_3111

GTTGTCCTCCCAATGTTGGTTTGCTAAGTTTTTCATCCTATGGTAGTTCTCTTAATTAAGAAAGATAAT  
CCTCAGAAGTATTTTCAGGACTCCATTTCTTAATGGAATTTTTCCCTGCA

>M6-PGSC0003DMG400002526M6LysM-RLK\_3172

GAAAGATAATCCTCAGAAGTATTTTCAGGACTCCATTTCTTAATGGAATTTTTCCCTGCATTAATGTGTTTT  
AGATAGCTACCTTTTCGGTTGAGGAGTAAAAAACCTCCAATTTTCGACTA

>M6-PGSC0003DMG400002526M6LysM-RLK\_3233

AATGTGTTTTAGATAGCTACCTTTTCGGTTGAGGAGTAAAAAACCTCCAATTTTCGACTATATCTGCAGGA  
GTTGAGGAGAATCATAAGAGTCATGCTATTTACTGGTGGATAATTGGGGG

>M6-PGSC0003DMG400002526M6LysM-RLK\_3294

TCTGCAGGAGTTGAGGAGAATCATAAGAGTCATGCTATTTACTGGTGGATAATTGGGGGTTTGGGTGCT  
GGTCTTCTCATGATTGTCGTCATTCTTGCTTTTGTACCTGGAGGTCGTC

>M6-PGSC0003DMG400002526M6LysM-RLK\_3355

TGGGTGCTGGTCTTCTCATGATTGTCGTCATTCTTGCTTTTGTACCTGGAGGTCGTC AAGTTGTTTTTCC  
AGAACTGAGAGAAGTCACACAGCAGGTTCAAATGAAAAGATTTCTCATA

>M6-PGSC0003DMG400002526M6LysM-RLK\_3416

TTGTTTTTCCAGAACTGAGAGAAGTCACACAGCAGGTTCAAATGAAAAGATTTCTCATAAGTTCCAGATA  
CTTCGAAATACAAGTTTCTGTTGTGCATCAGGAAGGTACATTTGCGGTAG

>M6-PGSC0003DMG400002526M6LysM-RLK\_3477

TTCCAGATACTTCGAAATACAAGTTTCTGTTGTGCATCAGGAAGGTACATTTGCGGTAGCTCAGGGGACC  
AGCAAGAACCGAAAGGAGAATCTACTGACCAACAGATTAATATTCCAAAA

>M6-PGSC0003DMG400002526M6LysM-RLK\_3538

CAGGGGACCAGCAAGAACCGAAAGGAGAATCTACTGACCAACAGATTAATATTCCAAAAGGTCAGAAC

ATAGACATGCATGCTTTTTATTGATATTACTGAAGGTCCTTCCTGTTAATTT

>M6-PGSC0003DMG400002526M6LysM-RLK\_3599

TCAGAACATAGACATGCATGCTTTTTATTGATATTACTGAAGGTCCTTCCTGTTAATTTCTCCAAACTATT  
ATGCATGAGATCAAGTCATTTGCTTATATGTATTAATAATATGCGTGTG

>M6-PGSC0003DMG400002526M6LysM-RLK\_366

CGGACACTGGTCGCTTGTGCACTTCCTTCTGGCTTTTAAACCCAGCCCAGAACAGACCCTCCCAGTGATT  
CAAAGCATGTTTGATGTGTTACCTAATGACATAACTGTTGAAGGAAATG

>M6-PGSC0003DMG400002526M6LysM-RLK\_3660

TCCAAACTATTATGCATGAGATCAAGTCATTTGCTTATATGTATTAATAATATGCGTGTGATCTAAAATCCA  
TCAAAGCAAATCATAAGCCACACCTGTTATAGACTTATTGAACTCCTGC

>M6-PGSC0003DMG400002526M6LysM-RLK\_3721

CTAAAATCCATCAAAGCAAATCATAAGCCACACCTGTTATAGACTTATTGAACTCCTGCTAGAGAGGGGA  
TGGGAAGTTAGGAAAAGCAAAGGAGTTTGGTTCTATAATCATTATGTAA

>M6-PGSC0003DMG400002526M6LysM-RLK\_3782

GAGAGGGGATGGGAAGTTAGGAAAAGCAAAGGAGTTTGGTTCTATAATCATTATGTAAAAATATCCTT  
GAATGGAGTTTCAGATGGCTACATAAACTAAACTAAACTAAGTTATTC

>M6-PGSC0003DMG400002526M6LysM-RLK\_3843

ATATCCTTGAATGGAGTTTCAGATGGCTACATAAACTAAACTAAACTAAGTTATTCTATAATACTTCT  
GAAAATGACAGGCATGGTACTGATCAAGTTATCATAGTCAAATAGAAGC

>M6-PGSC0003DMG400002526M6LysM-RLK\_3904

TAATACTTCTGAAAATGACAGGCATGGTACTGATCAAGTTATCATAGTCAAATAGAAGCAAATCAGCCA  
AGATGTCAAATAAGCTCTCAAATTAATAATAACTTCTTTTACCCATCTTA

>M6-PGSC0003DMG400002526M6LysM-RLK\_3965

ATCAGCCAAGATGTCAAATAAGCTCTCAAATTAATAATAACTTCTTTTACCCATCTTAAGGTATACATGT  
CATAAGCAAAGTGTATGTGAAGTTACACATCAGGAACATCCCCTAA

>M6-PGSC0003DMG400002526M6LysM-RLK\_4026

GTATACATGTCATAAGCAAAGTGTATGTGAAGGTTACACATCAGGAACATCCCCTAAATTTCAAGTTG  
TGCCCTTGAAGTTGAGTTTCACGAGAATGGATGTCTAAACAGTAACTTG

>M6-PGSC0003DMG400002526M6LysM-RLK\_4087

TTCAAGTTGTGCCCTTGAACCTTGAGTTTCACGAGAATGGATGTCTAACAGTAACTTGATGTAGTTATA  
GCCGTCCTATGTTGCTCAGAATCTCCAAAATGTTGCAGCACCAAGTGTGA

>M6-PGSC0003DMG400002526M6LysM-RLK\_4209

CCTCAAAAACAACTACTTTTGAAGGATGTGACACGCACCTATCGACATTAATGAAGAGTCCGAACAA  
GATAATTAGCCGGGATTAGTTGAAATTGCCAAGCCTATGCTGGCATTAGTC

>M6-PGSC0003DMG400002526M6LysM-RLK\_427

CCCAGTGATTCAAAGCATGTTTGTATGTGTACCTAATGACATAACTGTTGAAGGAAATGGTAAAGGTTAT  
GTCTTTATCAGAAAGAACTGTTCTTGCTTATGGAATGAGAAAGTACTT

>M6-PGSC0003DMG400002526M6LysM-RLK\_4270

CCGAACAAGATAATTAGCCGGGATTAGTTGAAATTGCCAAGCCTATGCTGGCATTAGTCCTTTACTCGCT  
TCTAATGGTGTGCCACAATGGTAAAAGGAGTATTTGAAAATGTTTCATAGA

>M6-PGSC0003DMG400002526M6LysM-RLK\_4331

TTACTCGCTTCTAATGGTGTGCCACAATGGTAAAAGGAGTATTTGAAAATGTTTCATAGAACTTTTTCTCCT  
GTGCTCATCATGGGGGAAAATGTAGTTTCACTATCATGCAGGATTTCTC

>M6-PGSC0003DMG400002526M6LysM-RLK\_4392

TTTTTCTCCTGTGCTCATCATGGGGGAAAATGTAGTTTCACTATCATGCAGGATTTCTCAATATAATAATT  
GACTATTCTTTTTTTTTAAAAAACAACAAAAACTGACTAT

>M6-PGSC0003DMG400002526M6LysM-RLK\_4453

TATAATAATTGACTATTCTTTTTTTTTAAAAAACAACAAAAACTGACTATTTTGGGCTTCTCT  
TGCAGTTGTAGGTACTGATGTCTTTGACATGGAAAAACCTCTTGTTTTT

>M6-PGSC0003DMG400002526M6LysM-RLK\_4514

TGGGCTTCTTGCAGTTGTAGGTACTGATGTCTTTGACATGGAAAAACCTCTTGTTTTCGCCTATGAAGA  
CATTCTATCTTCTACCGATGGATTTTCTGACTCCAATCTTCTTGGTCATG

>M6-PGSC0003DMG400002526M6LysM-RLK\_4575

CTATGAAGACATTCTATCTTCTACCGATGGATTTTCTGACTCCAATCTTCTTGGTCATGGAACCTATGGTT  
CTGTCTATTACGCCATCCTCCGCAACCAGGTTACTTCTCTCAACTTTAC

>M6-PGSC0003DMG400002526M6LysM-RLK\_4636

ACCTATGGTTCTGTCTATTACGCCATCCTCCGCAACCAGGTTACTTCTCTCAACTTTACCTATATTGATAGA  
TTTCTGTCAACATGGCGTATTAACCTTGCTTATGTCTTTGGAACGTTA

>M6-PGSC0003DMG400002526M6LysM-RLK\_4697

ATATTGATAGATTTCTGTCAACATGGCGTATTAACCTTGCTTATGTCTTTGGAACGTTAACCTTTCAGGAA  
GTTGCAATCAAAGAATGACTGCTACTAAAACAAAAGAATTTACTGCTG

>M6-PGSC0003DMG400002526M6LysM-RLK\_4758

CTTTCAGGAAGTTGCAATCAAAGAATGACTGCTACTAAAACAAAAGAATTTACTGCTGAGATGAAAGT  
TCTATGTAAAGTTCATCATTGGAATTTGGTAATGAATACTGAATTTGCTG

>M6-PGSC0003DMG400002526M6LysM-RLK\_4819

ATGAAAGTTCTATGTAAAGTTCATCATTGGAATTTGGTAATGAATACTGAATTTGCTGAGTATCCTGA  
GTTTTATTTTTGGAGCTTGATGATAGTGCTACATCAATCAAAGTTTTG

>M6-PGSC0003DMG400002526M6LysM-RLK\_488

AAAGGTTATGTCTTTATCAGAAAGAACTGTTCTTGCTTATGGAATGAGAAAGTACTTGACAAAACTA  
CATATACTGTCAGAAAGAACAATGGATCTGTGTATAATATGGTTGTTGAT

>M6-PGSC0003DMG400002526M6LysM-RLK\_4880

GTATCCTGAGTTTTTATTTTTGGAGCTTGATGATAGTGCTACATCAATCAAAGTTTTGACTCCTGTCTTG  
GTATTATTTTGTCAAGGTAGAATTGATCGGCTATGCAGTCAGTAATGAT

>M6-PGSC0003DMG400002526M6LysM-RLK\_4941

TCCTGTCTTGGTATTATTTTGTCAAGGTAGAATTGATCGGCTATGCAGTCAGTAATGATGAATTATTCCTC  
GTTTATGAATATGCCAGAAGGGTTCTCTTAAGAGCCACTTGAATGATC

>M6-PGSC0003DMG400002526M6LysM-RLK\_5002

ATTATTCCTCGTTTATGAATATGCCAGAAGGGTTCTCTTAAGAGCCACTTGAATGATCCTCAGAACAAA  
GGTACACATCTTGAAGATAATCGTTAAGCTCAGAATTTGTGTAGTGTATA

>M6-PGSC0003DMG400002526M6LysM-RLK\_5063

CAGAACAAAGGTACACATCTTGAAGATAATCGTTAAGCTCAGAATTTGTGTAGTGTATATATACATTTTT  
TCCAGTTGTTGATATGGAAATGACCTGCTACTGCTGTATTTTGGTGAAAA

>M6-PGSC0003DMG400002526M6LysM-RLK\_5124

TACATTTTTTCCAGTTGTTGATATGGAAATGACCTGCTACTGCTGTATTTTGGTGAAAAAACTAGATGAT  
CTGACCTCTTATTTTGGGTAGGCCACACACCACTCTCTTGGATCATGAG

>M6-PGSC0003DMG400002526M6LysM-RLK\_5185

ACTAGATGATCTGACCTCTTATTTTGGGTAGGCCACACACCACTCTCTTGGATCATGAGGGTCCAAATTG



CACTTGATGCTGCTAGAGGCTTGGGAATACATTACGAGCACACCAAGCCG

>M6-PGSC0003DMG400002526M6LysM-RLK\_5246

TCCAAATTGCACTTGATGCTGCTAGAGGCTTGGGAATACATTACGAGCACACCAAGCCGCATTATGTGCA

TCGAGATATAAAGACAAGTAACATCCTGCTTGATGATTCTTTTAGAGCAA

>M6-PGSC0003DMG400002526M6LysM-RLK\_5307

TTATGTGCATCGAGATATAAAGACAAGTAACATCCTGCTTGATGATTCTTTTAGAGCAAAGGTTGTAGCT

ATTTTGGTGCCCAATTTTTCTCCTTTGTGGATGTCATTTTTCAAACCCAA

>M6-PGSC0003DMG400002526M6LysM-RLK\_5368

GTTGTAGCTATTTTGGTGCCCAATTTTTCTCCTTTGTGGATGTCATTTTTCAAACCCAAATTCTCATTGCCT

ATGTTTGCAACAGATTTTCAGATTTTGGTTTGTCAAACACTGATGGGGAT

>M6-PGSC0003DMG400002526M6LysM-RLK\_5429

TCTCATTGCCTATGTTTGAACAGATTTTCAGATTTTGGTTTGTCAAACACTGATGGGGATAACTAATGATGC

AGAAGCCTCTGCAACACGAGTTGTTGGAACCTATGGCTATGTAGCTCCA

>M6-PGSC0003DMG400002526M6LysM-RLK\_549

CAAAAACACTACATATACTGTCAGAAAGAACAATGGATCTGTGTATAATATGGTTGTTGATGCCTATGATGG

GTTGGCTTATTTTCCAACATAATTTTACAAGGGAGGGGAAGAAAGGGGCAG

>M6-PGSC0003DMG400002526M6LysM-RLK\_5490

CTAATGATGCAGAAGCCTCTGCAACACGAGTTGTTGGAACCTATGGCTATGTAGCTCCAGAGTAAGCTA

ACCAACAATAAGCAAGAACATAAACTGAAACATCTCTCTGATTTTGTGTTGT

>M6-PGSC0003DMG400002526M6LysM-RLK\_5551

GTAAGCTAACCAACAATAAGCAAGAACATAAACTGAAACATCTCTCTGATTTTGTGTTGTTTCTCTTGTCT

TGCAGGTACTTGAGGGATGGCCTGGCAACTAAAAAGACTGATGTGTATG

>M6-PGSC0003DMG400002526M6LysM-RLK\_5612

CTCTTGTTCTTGACAGGTACTTGAGGGATGGCCTGGCAACTAAAAAGACTGATGTGTATGCATTTGGTGT

GTTCTTTTTGAGATGCTGACAGGGAAAGAGGCCGTCACCCGGACTGAAGG

>M6-PGSC0003DMG400002526M6LysM-RLK\_5673

TTTGGTGTGTTCTTTTTGAGATGCTGACAGGGAAAGAGGCCGTCACCCGGACTGAAGGCAATGTGATG

AAAACACTGCAGAAAGACGCTCCTTAGTGTCCATTGTAAGTCTTATTGCTCAC

>M6-PGSC0003DMG400002526M6LysM-RLK\_5734

ATGTGATGAAAAGTGCAGAAAGACGCTCCTTAGTGTCCATTGTAAGTCTTATTGCTCACAAACTGTTCAA  
AATTGAAGGCATGCTTCCTAATGGATTCTATTTGCCTGTGTTTCCACTTC

>M6-PGSC0003DMG400002526M6LysM-RLK\_5795

ACTGTTCAAATTGAAGGCATGCTTCCTAATGGATTCTATTTGCCTGTGTTTCCACTTCTATCTGTTATGTG  
ATTAAAAAAGATGAAAAACATCGATTTTATCATACAATTGAGTAAGAT

>M6-PGSC0003DMG400002526M6LysM-RLK\_5856

TCTGTTATGTGATTAATAAAGATGAAAAACATCGATTTTATCATACAATTGAGTAAGATCAAATTCACGA  
AAGCTCTGAAAAATGTTTTGCATTCATCAGACTTGGTCAATGTATGACT

>M6-PGSC0003DMG400002526M6LysM-RLK\_5917

AATTCACGAAAGCTCTGAAAAATGTTTTGCATTCATCAGACTTGGTCAATGTATGACTAGATTCCATTGC  
CTATCTGGCATCTTTATCAAATTGTGAAGTTTACTGTTCTCAGGTTTAG

>M6-PGSC0003DMG400002526M6LysM-RLK\_5978

ATTCCATTGCCTATCTGGCATCTTTATCAAATTGTGAAGTTTACTGTTCTCAGGTTTAGGATTAGTTCATCA  
ACTTCCTAAATGCTTTACTTCAAAAAAATTGAAATTCCCTTGCCTA

>M6-PGSC0003DMG400002526M6LysM-RLK\_6039

TTAGTTCATCAACTTCCTAAATGCTTTACTTCAAAAAAATTGAAATTCCCTTGCCTATTGTTATGTACCT  
ACAGTGTGTGCTGTGGCTATGTATAGGTATACTTATGCATAACATAT

>M6-PGSC0003DMG400002526M6LysM-RLK\_61

TAAAAGACCTTGTTTTAGCCATTACAGGACAATAAACCCTTCCCTTGCCTATTGTTATGTACCT  
TCTTGGTTCTCTGCTATTCCTATTTCACTTTCTTTCTCTTAAGATTCAA

>M6-PGSC0003DMG400002526M6LysM-RLK\_610

CTATGATGGGTTGGCTTATTTTCCAATAATTTACAAGGGAGGGGAAGAAAGGGGCAGTGGTTTCACT  
GAAGCTCATATGTGGATGCTCAAGTGGGCTGTGGAATTACCTCATGAGTTA

>M6-PGSC0003DMG400002526M6LysM-RLK\_6161

ATATATATATTTACACACTTATATGCACACTATGAATCAATTTTATGAGTGGCTTAATGCTACATAATTGC  
AGATGCTGGCAGCTCTGAGGAACTCACCAGACTCCACTAGTATGACAAG

>M6-PGSC0003DMG400002526M6LysM-RLK\_6222

ACATAATTGCAGATGCTGGCAGCTCTGAGGAACTCACCAGACTCCACTAGTATGACAAGCTTGAAGGAC  
CAGCTGGATCCCAGTTTGATGGATTTGTACCCTTCTGACTGCGTTTTCAAG

>M6-PGSC0003DMG400002526M6LysM-RLK\_6283

TGAAGGACCAGCTGGATCCCAGTTTGTATGGATTTGTACCCTTCTGACTGCGTTTTCAAGGTAAGTTGCAG  
CTTAACAATTATGTTTGTCAACTTTGAATCAGTTCAAGTTGTGCCTCATC

>M6-PGSC0003DMG400002526M6LysM-RLK\_6344

AAGTTGCAGCTTAACAATTATGTTTGTCAACTTTGAATCAGTTCAAGTTGTGCCTCATCTATAATAACGTG  
CATAGAATTGGTAGGGCCACTGACTACCTCAGCTGGTTTAGTTAAAATA

>M6-PGSC0003DMG400002526M6LysM-RLK\_6405

TAATAACGTGCATAGAATTGGTAGGGCCACTGACTACCTCAGCTGGTTTAGTTAAAATAATAGACAGAA  
GAGATAGTTTAAGATTGGAAGTTCATATATAGTTATTATCAGCTGAGTGAC

>M6-PGSC0003DMG400002526M6LysM-RLK\_6466

AGACAGAAGAGATAGTTTAAGATTGGAAGTTCATATATAGTTATTATCAGCTGAGTGACATAGGTGGTT  
GATTTTCTAATGAAATTTACGACTTATTTCACTTCTGTCCACCATCATTGA

>M6-PGSC0003DMG400002526M6LysM-RLK\_6527

AGGTGGTTGATTTTCTAATGAAATTTACGACTTATTTCACTTCTGTCCACCATCATTGATGTGTTTACTATG  
GTAGGTGGCTATGCTGGCTAAGCAATGTGCAGATGATGATCCAATATT

>M6-PGSC0003DMG400002526M6LysM-RLK\_6588

TGTTTACTATGGTAGGTGGCTATGCTGGCTAAGCAATGTGCAGATGATGATCCAATATTGAGACCGGAC  
ATGAAGCACGTAGTGATCACACTTTACAGATAATGTTATCCTCTGTGGAG

>M6-PGSC0003DMG400002526M6LysM-RLK\_6649

GACCGGACATGAAGCACGTAGTGATCACACTTTACAGATAATGTTATCCTCTGTGGAGTGGGAAGCAA  
CTCTTGCTGGGAACAGTCAAGTGTTCAGTGGCATTGTGCAGGGAAGATAGG

>M6-PGSC0003DMG400002526M6LysM-RLK\_671

GTTTCACTGAAGCTCATATGTGGATGCTCAAGTGGGCTGTGGAATTACCTCATGAGTTATGTGATGACA  
GATGATGATACTGTTGGGTCTTTGTCCAGTAGGTTTGGGGTTAGTATGGAT

>M6-PGSC0003DMG400002526M6LysM-RLK\_6710

GGAAGCAACTCTTGCTGGGAACAGTCAAGTGTTCAGTGGCATTGTGCAGGGAAGATAGGTCCATATGCT  
AGGTGTTGCGTTGCATCCTCATATATAATGTACATGGTACTCTTGATTTTT

>M6-PGSC0003DMG400002526M6LysM-RLK\_6771

CATATGCTAGGTGTTGCGTTGCATCCTCATATATAATGTACATGGTACTCTTGATTTTTGAAGCCAATCT

TCTCCATTTTACCAGTCCAGTCACATTTTTCCTATCATTCTTTATAATG

>M6-PGSC0003DMG400002526M6LysM-RLK\_6832

AAGCCAATCTTCTCCATTTTACCAGTCCAGTCACATTTTTCCTATCATTCTTTATAATGTTATCTTTTTTATG

CACAGAGTAATCTTCATATAGCGGATTTTTCCTCTTTTTTCTTTTT

>M6-PGSC0003DMG400002526M6LysM-RLK\_732

TGATGACAGATGATGATACTGTTGGGTCTTTGTCCAGTAGGTTTGGGGTTAGTATGGATAATATTGAGA

ATGTTAATGGAATTGCCAATCCTGATAATTTACAGCAGGATCTTTATACT

>M6-PGSC0003DMG400002526M6LysM-RLK\_793

TATTGAGAATGTTAATGGAATTGCCAATCCTGATAATTTACAGCAGGATCTTTATACTATGTGCCATTAA

ATTCAGGCATGAGTTTCCTTTCCCCTCTTATGATTTCTGATTTGTGTTT

>M6-PGSC0003DMG400002526M6LysM-RLK\_854

GTGCCATTAAATTCAGGCATGAGTTTCCTTTCCCCTCTTATGATTTCTGATTTGTGTTTTTTCCAATTCCAA

ATGTGTATCAGTATTTTGATTTAGGATGATTTAGGAGCTGTTTGATTA

>M6-PGSC0003DMG400002526M6LysM-RLK\_915

TCCAATTCCAAATGTGTATCAGTATTTTGATTTAGGATGATTTAGGAGCTGTTTGATTAATCAAATTGTGT

TAGTTGTAGTAAGTGTGATTAATGTTGGAATTTTGTGCTGAGGAA

>M6-PGSC0003DMG400002526M6LysM-RLK\_976

CAAATTGTGTTAGTTGTAGTAAGTGTGATTAATGTTGGAATTTTGTGCTGAGGAAGATTAGTCAGT

TTTTTCTTCTCTTTTTGTTTGTGTGAGTGAGGGGATGAACCTATGTTCT

>M6-PGSC0003DMG400002602-(rev)M6RLKmalectin\_0

AAATTAGTGGACCCAAATCATGTATTTTGGGTGCAACAAATTTTAAATTCACCAATTTGTGAAACAAAT

GAAGTCTCGAGGCATAAAATAAAATTATCACTTGTATATTAAGTATAATT

>M6-PGSC0003DMG400002602-(rev)M6RLKmalectin\_1054

ACTACTACTTCTTTGGTTTATAATTCGAAGGAAGAAAAACAAAAAAGGTGAGCAAATCATAAGATCGAT

CGATGAATTGCCAGATGATTTGTCATTGAAGAAATTAATTTCTGTAACAGG

>M6-PGSC0003DMG400002602-(rev)M6RLKmalectin\_1116

GATCGATCGATGAATTGCCAGATGATTTGTCATTGAAGAAATTAATTTCTGTAACAGGGAAGACTACTG

GGACAGAAAGAACAGTAGAGAGTCCAAACATTGCATTGGAGTTGAAAAACC

>M6-PGSC0003DMG400002602-(rev)M6RLKmalectin\_1178

ATTACTGGGACAGAAAGAACAGTAGAGAGTCCAAACATTGCATTGGAGTTGAAAAACCGGCAGTTCAC  
ATACTCGCAGGTTTTGCACATGACAAATAACTTCCAGAGAGTCCTTGGAAAA

>M6-PGSC0003DMG400002602-(rev)M6RLKmalectin\_124

TGACATTCTTGTGTTTCTGTTAAAGGAACTTGTCAAGCAATCAGCTGACGGGAGAGGTGCCTGCCAATCT  
CTCACAAGTACTGCTTCTTACAAGAGCTGTAATTTACTCTCCTATAACTCA

>M6-PGSC0003DMG400002602-(rev)M6RLKmalectin\_1240

GTTACATACTCGCAGGTTTTGCACATGACAAATAACTTCCAGAGAGTCCTTGGAAAAGGAGGTTTTGG  
GACAGTTTATCTTGGCTATGTCGATAACCGCGATGTAGCTGTTAAGATGCT

>M6-PGSC0003DMG400002602-(rev)M6RLKmalectin\_1302

GTTTTGGGACAGTTTATCTTGGCTATGTCGATAACCGCGATGTAGCTGTTAAGATGCTGTCCCCTTCTTCA  
GTTCAAGGGTTCAAGGAATCCGGGCTGAGGTAACTGAAGAAGTATTT

>M6-PGSC0003DMG400002602-(rev)M6RLKmalectin\_1364

CCTTCTTCAGTTCAAGGGTTCAAGGAATCCGGGCTGAGGTAACTGAAGAAGTATTTTATAGTACATAA  
GACATTATATTTAGTTAACACGAATTTGACTTGACAGGCTAGTCTCCTGA

>M6-PGSC0003DMG400002602-(rev)M6RLKmalectin\_1426

GTACATAAGACATTATATTTAGTTAACACGAATTTGACTTGACAGGCTAGTCTCCTGATGAGCATAACATC  
ATAAGAAGTTGATTTCTATAGTTGGGTATTGTGTTGAAGGCACCCACATT

>M6-PGSC0003DMG400002602-(rev)M6RLKmalectin\_1488

CATACATCATAAGAACTTGATTTCTATAGTTGGGTATTGTGTTGAAGGCACCCACATTGGTATTATTTACG  
AATACATGGCCAATCGAAGCTTAGACATGCAACTATCAGGTACCTGATT

>M6-PGSC0003DMG400002602-(rev)M6RLKmalectin\_1550

TTATTTACGAATACATGGCCAATCGAAGCTTAGACATGCAACTATCAGGTACCTGATTTATAGTCAAACA  
AATGTTCTTTTAGATCACACATTTACAAGTCTTTCATCGTTGCGTGCAG

>M6-PGSC0003DMG400002602-(rev)M6RLKmalectin\_1612

GTCAAACAAATGTTCTTTTAGATCACACATTTACAAGTCTTTCATCGTTGCGTGCAGATAGAAATCCAAA  
TGCTTTAACATGGGAGGAAAGACTTCATATAGCATTGGATGCGGCACAA

>M6-PGSC0003DMG400002602-(rev)M6RLKmalectin\_1674

AAATCCAAATGCTTTAACATGGGAGGAAAGACTTCATATAGCATTGGATGCGGCACAAGGTATATATAT  
ACACCACTAGATGAAAATAATTTAGTTCGAGTTTTAGAATGATTAATTATA

>M6-PGSC0003DMG400002602-(rev)M6RLKmalectin\_1736

TATATATACACCACTAGATGAAAATAATTTTCAGTCGAGTTTTAGAAATGATTAATTATATATTTGACGTGTT  
TCTTTTAATTTTAACTGAAAAATAATGAAGGATTGGAGTATCTACATC

>M6-PGSC0003DMG400002602-(rev)M6RLKmalectin\_1798

TGACGTGTTTCTTTTAATTTTAACTGAAAAATAATGAAGGATTGGAGTATCTACATCATGGTTGCCAGC  
CACCAATAATACACAGAGATATCAAGTCTAGTAATATTCTATTAGATGAT

>M6-PGSC0003DMG400002602-(rev)M6RLKmalectin\_186

GCCAATCTCTCACAACCTAGCCTTCTTACAAGAGCTGTAATTTACTCTCCTATAACTCATTAGTCTCAATTT  
ATGCGGCACAGTTGCAATTAATATGATTTTTATGACATTATTGTTGTG

>M6-PGSC0003DMG400002602-(rev)M6RLKmalectin\_1860

TTGCCAGCCACCAATAATACACAGAGATATCAAGTCTAGTAATATTCTATTAGATGATAAATCCAAGCA  
AATCTTGCTGATTTTGGTTTGTCAAGGACTTTACCAACTGGAGAGGGAAG

>M6-PGSC0003DMG400002602-(rev)M6RLKmalectin\_1922

TCCAAGCAAATCTTGCTGATTTTGGTTTGTCAAGGACTTTACCAACTGGAGAGGGAAGTCATGTTACCAC  
TATAATCGCGGGTAGTCCAGGCTATCTTGACCCTGAGTACGTGCTCTTCA

>M6-PGSC0003DMG400002602-(rev)M6RLKmalectin\_1984

GTTACCACTATAATCGCGGGTAGTCCAGGCTATCTTGACCCTGAGTACGTGCTCTTCATTTTATTAGTCTG  
TCTCAAAAAGAATAACAACCTATGTATATCTAATTTTAACTCTCGATTGA

>M6-PGSC0003DMG400002602-(rev)M6RLKmalectin\_2046

ATTAGTCTGTCTCAAAAAGAATAACAACCTATGTATATCTAATTTTAACTCTCGATTGACCTGCAGTTACTA  
CAGGACAAATAAGCTAACGGAGAAAAGTGATGTATACAGTTTCGGTGTG

>M6-PGSC0003DMG400002602-(rev)M6RLKmalectin\_2108

CAGTTACTACAGGACAAATAAGCTAACGGAGAAAAGTGATGTATACAGTTTCGGTGTGGTTCTTTTGGGA  
AATAATAACAGGACGGCATTACTAGGAAAACATGACAAGATTTATGTAAT

>M6-PGSC0003DMG400002602-(rev)M6RLKmalectin\_2170

TTTTGGAAATAATAACAGGACGGCATTACTAGGAAAACATGACAAGATTTATGTAATAACGTGGGTCA  
ATGGTATGATTAATGATAACGGAGATGTTGCAAAAGTAATTGATCCAAGAT

>M6-PGSC0003DMG400002602-(rev)M6RLKmalectin\_2232

TGGGTCAATGGTATGATTAATGATAACGGAGATGTTGCAAAAGTAATTGATCCAAGATTAGGAGGAGA

AGTTGATGTGAATTCAGCTAAGAGAATTGTGGCATTAGCAATGGCTTGTGTT

>M6-PGSC0003DMG400002602-(rev)M6RLKmalectin\_2294

AGGAGAAGTTGATGTGAATTCAGCTAAGAGAATTGTGGCATTAGCAATGGCTTGTGTTTCTCTTGAACC

AACAAATAGACCAGCTATATCTGTCGTTGTCACAATAATAAAGCAATGTTT

>M6-PGSC0003DMG400002602-(rev)M6RLKmalectin\_2328

GTGGCATTAGCAATGGCTTGTGTTTCTCTTGAACCAACAATAGACCAGCTATATCTGTCGTTGTCACAA

TAATAAAGCAATGTTTAAGGCAGATGATTGATAATTATGACTCTAATTGA

>M6-PGSC0003DMG400002602-(rev)M6RLKmalectin\_248

GTCTCAATTTATGCGGCACAGTTGCAATTAATATGATTTTTATGACATTATTGTTGTGTTTCTGTTGAAGG

GACTTGTCAAACAATCAGCTGACAGGAAAGGTCCCTGCCAATCTCGCAC

>M6-PGSC0003DMG400002602-(rev)M6RLKmalectin\_310

TGTTGAAGGGACTTGTCAAACAATCAGCTGACAGGAAAGGTCCCTGCCAATCTCGCACAACCTACCCTTCT

TAAAAAAGCTGTAATTTACGCACTCATGACCTATAAGTTTACAATTA

>M6-PGSC0003DMG400002602-(rev)M6RLKmalectin\_372

ACCCTTCTTAAAAAAGCTGTAATTTACGCACTCATGACCTATAAGTTTACAATTA

TATGCGGCACAATCCAAATATGATTTTTAAATACTTTAAGTTGTTAA

>M6-PGSC0003DMG400002602-(rev)M6RLKmalectin\_434

TCTATCAATTTATGCGGCACAATCCAAATATGATTTTTAAATACTTTAAGTTGTTAATTATTTTGATATAT

AGTAATTTTATGTTCAATTCATTATCAAAGTTTAGAATTTTGAATTGT

>M6-PGSC0003DMG400002602-(rev)M6RLKmalectin\_496

TTTGATATATAGTAATTTTATGTTCAATTCATTATCAAAGTTTAGAATTTTGAATTGTGTCACATGAATTAG

AACGAAGGGGTATTTATTTAATTAGAACACAGAGTAATTTGGTTATCT

>M6-PGSC0003DMG400002602-(rev)M6RLKmalectin\_558

CATGAATTAGAACGAAGGGGTATTTATTTAATTAGAACACAGAGTAATTTGGTTATCTTTGTGACAGATA

CTTGAATGGAAACAGTTTCTCCGAAAAAATTCCTGAAGAATTGCTGGCAA

>M6-PGSC0003DMG400002602-(rev)M6RLKmalectin\_62

AAACAAATGAAGTCTCGAGGCATAAAATAAAATTATCACTTGTATATTAAGTATAATTTTTATGACATTCT

TGTGTTTCTGTTAAAGGAAGTTGTCAAGCAATCAGCTGACGGGAGAGGT

>M6-PGSC0003DMG400002602-(rev)M6RLKmalectin\_620

GACAGATACTTGAATGGAAACAGTTTCTCCGAAAAAATTCCTGAAGAATTGCTGGCAAATCAAAAAAT  
GAATCACTCGATTTGAGGTTTCGTTCCACTCTCAGAATCCATGAATTAATT

>M6-PGSC0003DMG400002602-(rev)M6RLKmalectin\_682

AAAAAATGAATCACTCGATTTGAGGTTTCGTTCCACTCTCAGAATCCATGAATTAATTTATGAGTATACAA  
AAAACATCTAAGATTGATTTAGAAAATTATCTCCCCTATGATCGATATT

>M6-PGSC0003DMG400002602-(rev)M6RLKmalectin\_744

AGTATACAAAAACATCTAAGATTGATTTAGAAAATTATCTCCCCTATGATCGATATTAATTTCTCATATA  
ATTGGTCACAGGTTAATTTGTGTAATCAACTCATCTAAAATTAAGTCT

>M6-PGSC0003DMG400002602-(rev)M6RLKmalectin\_806

TCTCATATAATTGGTCACAGGTTAATTTGTGTAATCAACTCATCTAAAATTAAGTCTGATGTTATATTGA  
ATTGTTATCAAGTCGTTAGATATTGAAGACACTTTTATTTACTTATAAT

>M6-PGSC0003DMG400002602-(rev)M6RLKmalectin\_868

TTATATTGAATTGTTATCAAGTCGTTAGATATTGAAGACACTTTTATTTACTTATAATTACATTTCAATTAA  
TTTTTTGTCATACAGGTATGATGAATTTATCCTCCGAAAGGTAGTAA

>M6-PGSC0003DMG400002602-(rev)M6RLKmalectin\_930

TTTCAATTAATTTTTGTCATACAGGTATGATGAATTTATCCTCCGAAAGGTAGTAATAACCTTAGTGCT  
GGTGCCTAGCAGGAATTATTGCATCCGTGGTGGTCTTGGGCATCTTGG

>M6-PGSC0003DMG400002602-(rev)M6RLKmalectin\_992

CTTAGTGCTGGTGCCTAGCAGGAATTATTGCATCCGTGGTGGTCTTGGGCATCTTGGCTTTACTACTAC  
TTCTTTGGTTTATAATTCGAAGGAAGAAAAACAAAAAAGGTGAGCAAATC

>M6-PGSC0003DMG400002618-(rev)M6LRR-RLP\_0

TAAAGTAAAATAATGGGGAAAGGAGCAATTTGAAATTGAAAAAAAAAAGAAAAACAAAAGTGAT  
CTCTTATTCCGAAAAGCAAGGTGGGAAATCTTTACAAGACTCGTCTCTTTT

>M6-PGSC0003DMG400002618-(rev)M6LRR-RLP\_1037

AGGTGTTGTATACATGGCACTTACCTGAGCCAAATGCATCACGGAATTCTGATTCTTCACTACTAAAGTC  
TACCACTCTGGTAGTATTGTTGGGATGGTTAGGTGCAAAGCAAAGCATC

>M6-PGSC0003DMG400002618-(rev)M6LRR-RLP\_1098

ACTAAAGTCTACCACTCTGGTAGTATTGTTGGGATGGTTAGGTGCAAAGCAAAGCATCTAAAGAGATA  
TGCAGAGTGGTATGCATCAAGAGGATATCATGTCATTACATTTACTTTCCC



>M6-PGSC0003DMG400002618-(rev)M6LRR-RLP\_122

CTTATCAGAATCAGAAGAAGAAGAAGATTTCGTCTCTCAGGTATGGTGTTCTCTTACAATCAATCT  
ATAATGCTTATGTTTGTATTTGAGAGGCCGATCCGCCACCCCTCATGA

>M6-PGSC0003DMG400002618-(rev)M6LRR-RLP\_1220

TGTCTGAGATTCTAAGCTATCAAGTCGGGGAAAGGCAGAGCAAGATATTGAAATGCTTGTGAATCATC  
TAGCTGATTGGTTGGAAGAAGAGCATGGAAAGAAGCTTGGTCTTCCACACTT

>M6-PGSC0003DMG400002618-(rev)M6LRR-RLP\_1281

GAATCATCTAGCTGATTGGTTGGAAGAAGAGCATGGAAAGAAGCTTGGTCTTCCACACTTTTCAAGCAATAC  
TGGATGGTTAACGTGAGTTCTTGATGATACTCATTAGTCTAAGATGAGAAC

>M6-PGSC0003DMG400002618-(rev)M6LRR-RLP\_1342

AGCAATACTGGATGGTTAACGTGAGTTCTTGATGATACTCATTAGTCTAAGATGAGAACAGAAACATAA  
CTATTTACATTTTCCTTAATACTAGCTTGATAATTATTGATTGACTTCTTT

>M6-PGSC0003DMG400002618-(rev)M6LRR-RLP\_1403

AAACATAACTATTTACATTTTCCTTAATACTAGCTTGATAATTATTGATTGACTTCTTTTATTCTTTTGGCCT  
TACAGTTATGGTGTCATTTTGGAAAAGTTTCAGAAACAAGATCATGC

>M6-PGSC0003DMG400002618-(rev)M6LRR-RLP\_1525

TAATGAGAAGGATTAAGGGTTGTATTGTTGATTCTGCCCTGTCGCAGCTCCTGATCCACAGGTATTGCT  
GACTCAAAAATTGTGATGTTAAGATATCATTTTTATGTGCAAGTGTGAGA

>M6-PGSC0003DMG400002618-(rev)M6LRR-RLP\_1586

GGTATTGCTGACTCAAAAATTGTGATGTTAAGATATCATTTTTATGTGCAAGTGTGAGAAGAGTGTCTTCT  
TGGAAAGTAGTCTTATTTATGAAAGTTAATGCAGAGCACTTGTTTAGAGC

>M6-PGSC0003DMG400002618-(rev)M6LRR-RLP\_1647

AGTGTTTCTTGAAAGTAGTCTTATTTATGAAAGTTAATGCAGAGCACTTGTTTAGAGCTATAACATTTCTA  
TTGAAATCCAACCTTTTTCATGCTTTTATTGGACAACCTATTACAAGTGT

>M6-PGSC0003DMG400002618-(rev)M6LRR-RLP\_1708

TACATTTCTATTGAAATCCAACCTTTTTCATGCTTTTATTGGACAACCTATTACAAGTGTGATATATAGTCAG  
GTTTTAGCCATTCAGAATTGCACAGTTGTTTGGATTCTAATCAGGACC

>M6-PGSC0003DMG400002618-(rev)M6LRR-RLP\_1769

TATATAGTCAGGTTTTAGCCATTCAGAATTGCACAGTTGTTTGGATTCTAATCAGGACCTGCTGTTCTCGT

ATTTTTATCCTGTTGCTTTTTTTTTATCTTAGGGCCTTAACCATGCAGCC

>M6-PGSC0003DMG400002618-(rev)M6LRR-RLP\_183

AATCAATCTATAATGCTTATGTTTGTATTTGAGAGGCCGATCCGCCACCCTCATGATGGATGGGTCA

AACCTGTTTTTTTTTTTTCCATAAAAACAAACCAGATCTTTTCCGTTTA

>M6-PGSC0003DMG400002618-(rev)M6LRR-RLP\_1830

CTGTTCTCGTATTTTTATCCTGTTGCTTTTTTTTTATCTTAGGGCCTTAACCATGCAGCCTGCTTTTCGAAAA

CTATTCTTATGCTTGATAACTTGAAAGAATCTTGAGAGTTTAGCTCTC

>M6-PGSC0003DMG400002618-(rev)M6LRR-RLP\_1891

CTTTTCGAAAACCTATTCTTATGCTTGATAACTTGAAAGAATCTTGAGAGTTTAGCTCTCTCTGACAACCTTT

TAACAGGAAGCATTCTATGCAACTTTTGTTCACGGTTCAAGCTTTAA

>M6-PGSC0003DMG400002618-(rev)M6LRR-RLP\_1952

TGACAACCTTTTAAACAGGAAGCATTCTATGCAACTTTTGTTCACGGTTCAAGCTTTAAGCCTACTTTTTCT

GGCTGAGAATAAGCCATCGAGGAATTTCCCCTTGAGCTACTAAACTG

>M6-PGSC0003DMG400002618-(rev)M6LRR-RLP\_2074

CACGTCCTGCGACTACTGGATCTCTCTAGTAACAACCTTGGAGGAATGCTTCCATGAGGCATCGACAGG

CTAGAAAGTCTCACATCCTTTTCAACAATAGCAACTTTACTGGAAATATA

>M6-PGSC0003DMG400002618-(rev)M6LRR-RLP\_2135

ATCGACAGGCTAGAAAGTCTCACATCCTTTTCAACAATAGCAACTTTACTGGAAATATACTGCCTCAAAC

AGGAAACTTGACGAACCTGGAAGATTTGTACCTAATCCATAACATGCTCT

>M6-PGSC0003DMG400002618-(rev)M6LRR-RLP\_2196

GCCTCAAACAGGAACTTGACGAACCTGGAAGATTTGTACCTAATCCATAACATGCTCTCCGGAAGAATT

CCAGTGGAAATAGGAAAGCTTCAGAGGCTGTGTGAACTACCTCTATGGAA

>M6-PGSC0003DMG400002618-(rev)M6LRR-RLP\_2257

GGAAGAATTCCAGTGGAAATAGGAAAGCTTCAGAGGCTGTGTGAACTACCTCTATGGAAACCAGTTGTC

AGTAACTACCCCAAGAGAATTGACAAATAGCTTAGTACTCATTGATTTCTT

>M6-PGSC0003DMG400002618-(rev)M6LRR-RLP\_2318

CAGTTGTCAGTAACTACCCCAAGAGAATTGACAAATAGCTTAGTACTCATTGATTTCTTCGCTAATCAATT

TTCAGGCTCTATTTCTGATGCCATTGGTAGGCTTAAGAATCTTGTTATC

>M6-PGSC0003DMG400002618-(rev)M6LRR-RLP\_2379

CTAATCAATTTTCAGGCTCTATTTCTGATGCCATTGGTAGGCTTAAGAATCTTGTTATCTTCAGCTAACTCA  
GAATGAGTTGTCTGGTCCAGTCCCATCAAGCTTAGGCTACTGCAGGAA

>M6-PGSC0003DMG400002618-(rev)M6LRR-RLP\_244

GATGGGTCAAACCTGTTTTTTTTTTTTCCATAAAAACAAACCAGATCTTTTCCGTTTACCCTTTTTGAGTT  
TTGACCATGAAAATCAATTTTTGAGTTTTGACCCATTGATGAAAATCA

>M6-PGSC0003DMG400002618-(rev)M6LRR-RLP\_2440

CAGCTAACTCAGAATGAGTTGTCTGGTCCAGTCCCATCAAGCTTAGGCTACTGCAGGAAGCATGAAAAA  
CTGGCCTTTGCTGATAACAACTTTTCAGGATAATTGCCACCAACTTTAAGA

>M6-PGSC0003DMG400002618-(rev)M6LRR-RLP\_2562

TCTATCAGAGCTGGACCTGACTACTCTTTACAACAATTGCTTTGAAGGTCCACTTCTGAATATCTTTCCCT  
TCTGAAAAATCTCAGCAAAGTTAACTTTTCTACAATAAGTTCAGTGG

>M6-PGSC0003DMG400002618-(rev)M6LRR-RLP\_2623

TATCTTTCCCTTCTGAAAAATCTCAGCAAAGTTAACTTTTCTACAATAAGTTCAGTGGAAACATTTCTCC  
GCTAGCTGGTTCAAATTCTCTGACAGTTGACATGACAAACTACAGCTTC

>M6-PGSC0003DMG400002618-(rev)M6LRR-RLP\_2684

ACATTTCTCCGCTAGCTGGTTCAAATTCTCTGACAGTTGACATGACAAACTACAGCTTCTCTGGTCCTATC  
CCATCTGAGCTAGTGGTGTCCAAAAATCTGACCCATCTTCACCTTTCTA

>M6-PGSC0003DMG400002618-(rev)M6LRR-RLP\_2745

TGGTCCTATCCCATCTGAGCTAGTGGTGTCCAAAAATCTGACCCATCTTCACCTTTCTAACAATTTTTTCAC  
TGAAAAAACCCCTTCTGAATTTGGACAACCTTGAAGATCTCAGATGTCT

>M6-PGSC0003DMG400002618-(rev)M6LRR-RLP\_2806

AATTTTTTCACTGGAAAAACCCCTTCTGAATTTGGACAACCTTGAAGATCTCAGATGTCTTGATTTATTGTT  
CAAAAATTTGACTGGAGATCTAGCACCTTCCCTTGCTGGCCTGAAAACC

>M6-PGSC0003DMG400002618-(rev)M6LRR-RLP\_2867

ATTTATTGTTCAAAAATTTGACTGGAGATCTAGCACCTTCCCTTGCTGGCCTGAAAACCTTGGCCGTTTTTC  
TTCTTATATCTAATCAATTTTCGGGGAAAATTTCCACATGGTTTGTGGA

>M6-PGSC0003DMG400002618-(rev)M6LRR-RLP\_2928

GGCCGTTTTCTTCTTATATCTAATCAATTTTCGGGGAAAATTTCCACATGGTTTGTGGAGGAATGGAAGG  
TCTTGGTGAGTTGATCTTTCATTCAACAACCTTCACTGGAACAGTTCCAG

>M6-PGSC0003DMG400002618-(rev)M6LRR-RLP\_2989

AATGGAAGGTCTTGGTGAGTTCGATCTTTCATTCAACAACCTTCACTGGAACAGTTCAGCAGAACTTGGA  
AACTCTCCAAAATAACTCAAACTTTTTCTCAGTTACAACAGATTATTAG

>M6-PGSC0003DMG400002618-(rev)M6LRR-RLP\_305

CTTTTTGAGTTTTGACCATGAAAATCAATTTTTGAGTTTTGACCCATTGATGAAAATCAACATTAGGTTAG  
GGTAAGAAAAGGGAGTTTGATTGAATTATGCTGGAATATTCTGTCTTGT

>M6-PGSC0003DMG400002618-(rev)M6LRR-RLP\_3050

GAACTTGGAACCTCTCCAAAATAACTCAAACTTTTTCTCAGTTACAACAGATTATTAGGTGCCATACCAC  
CAGAATCAGGAAATCTCACAAGTTTAAATGTCTTGAATCTTCAATGAAA

>M6-PGSC0003DMG400002618-(rev)M6LRR-RLP\_3111

GCCATACCACCAGAATCAGGAAATCTCACAAGTTTAAATGTCTTGAATCTTCAATGAAACAATCTTTTTG  
GCTCCATTCCTTCAACTCTTCAAAAATACCAGAAGCTCTATGAGCTGAGG

>M6-PGSC0003DMG400002618-(rev)M6LRR-RLP\_3172

ATCTTTTTGGCTCCATTCTTCAACTCTTCAAAAATACCAGAAGCTCTATGAGCTGAGGCTCTCTGAGAAT  
AATATAAGTGGCTCAATCCCTTACGAAATTGGCTCTTATCCGAATTAC

>M6-PGSC0003DMG400002618-(rev)M6LRR-RLP\_3233

CTCTGAGAATAATATAAGTGGCTCAATCCCTTACGAAATTGGCTCTTATCCGAATTACAGGTGATATTA  
GACCTGAGCAAAAATCATTCTATTTTATGTGCAAGTGTCAGAATAGTGTA

>M6-PGSC0003DMG400002618-(rev)M6LRR-RLP\_3294

GTGATATTAGACCTGAGCAAAAATCATTCTATTTTATGTGCAAGTGTCAGAATAGTGTATCTTCAAGCAT  
AGTCTTATTTCTAAGGTTAATGCAGTGCAATTGTTAAGAGCCATACATT

>M6-PGSC0003DMG400002618-(rev)M6LRR-RLP\_3355

TTCAAGCATAGTCTTATTTCTAAGGTTAATGCAGTGCAATTGTTAAGAGCCATACATTTCTATTGAAATC  
CAACCTTGTCATTCTTTTATTGGATAAGTATTACAAGTGTCATATATAG

>M6-PGSC0003DMG400002618-(rev)M6LRR-RLP\_3416

TATTGAAATCCAACCTTGTCATTCTTTTATTGGATAAGTATTACAAGTGTCATATATAGTCCGGGCTTAGC  
CATTTAGGAATTGCTCAGTTGCTTGTACTCTTATCAGGACCTGCTGTTC

>M6-PGSC0003DMG400002618-(rev)M6LRR-RLP\_3477

CGGGCTTAGCCATTTAGGAATTGCTCAGTTGCTTGTACTCTTATCAGGACCTGCTGTTCTTATTTTCGAT

CATGTTTCTTTCTTCTATTTAGGCCTTAGACATGCAGCCTGCTTTTCAA

>M6-PGSC0003DMG400002618-(rev)M6LRR-RLP\_3538

TTATTTGATCATGTTTCTTTCTTCTATTTAGGCCTTAGACATGCAGCCTGCTTTTCAAATATATTCTTATA  
CTTGATAATGTGGAAGTTTTTCATTCTTGATTTAGTCTTCAAGGGAA

>M6-PGSC0003DMG400002618-(rev)M6LRR-RLP\_3599

TATATTCTTATACTTGATAATGTGGAAGTTTTTCATTCTTGATTTAGTCTTCAAGGGAAGGTGGATTTCCT  
GGGGGTCAGCTGTGGACATTAGGAGGAGGGAGGGGAAGCTAGTACTTGT

>M6-PGSC0003DMG400002618-(rev)M6LRR-RLP\_366

ATTAGGTTAGGGTAAGAAAAGGGAGTTTGATTGAATTATGCTGGAATATTCTGTCTTGTTAGCATGTGTA  
TTTGTGAACAAGGTTACGCACGCGTTTACTTTGACCTTTTCCGTATTAC

>M6-PGSC0003DMG400002618-(rev)M6LRR-RLP\_3660

TGGATTTCTGGGGGTCAGCTGTGGACATTAGGAGGAGGGAGGGGAAGCTAGTACTTGTTTAGTTGCA  
TGTAATAAATGTTAATCTGTGCTTTGGTAAGGTTAAACTAATTTTGTCAAGT

>M6-PGSC0003DMG400002618-(rev)M6LRR-RLP\_3721

AGTTGCATGTAATAAATGTTAATCTGTGCTTTGGTAAGGTTAAACTAATTTTGTCAAGTCCCTTCTTTGT  
TTGTATCAAGGTCTGGGCTTCTGGATTCTCTGCTGCCTTTTTAAAGAAG

>M6-PGSC0003DMG400002618-(rev)M6LRR-RLP\_3782

CCTTCTTTGTTTGTATCAAGGTCTGGGCTTCTGGATTCTCTGCTGCCTTTTTAAAGAAGAATAGTGTGCA  
ACAAAACGCATCATGACTTTAAACGACAGAGATGTGACAATAGAAGCCA

>M6-PGSC0003DMG400002618-(rev)M6LRR-RLP\_3843

TAGTGTGCAACAAAACGCATCATGACTTTAAACGACAGAGATGTGACAATAGAAGCCAAAACCTTCTGT  
TGAAACTAAGCCTGCAGTAACTGAAGCAGCGTTGCTATTAGTACTGGAAAA

>M6-PGSC0003DMG400002618-(rev)M6LRR-RLP\_3965

TCTTTGAGGTGGTTTTGAACCTTCCACCGTAAATAGGTAAGGAGATGTCTTCCAGAATCACCTTTTCTGC  
AAATGTTTATCAGCCTGCAGTATTTTTAAACAGAAGTACCAATATTAAA

>M6-PGSC0003DMG400002618-(rev)M6LRR-RLP\_4026

CCTTTTCTGCAAATGTTTATCAGCCTGCAGTATTTTTAAACAGAAGTACCAATATTAATCTACTTTTTGTC  
TTTGTACTTACTCAATGTGCGAAGTAGACCTTGTGATATCATGTCC

>M6-PGSC0003DMG400002618-(rev)M6LRR-RLP\_4087

TACTTTTTGTCTTTGTACTCTACTCAATGTGCGAAGTAGACCTTGTTGATATCATGTCCATTCACCAATGG  
ATTGTAATTACATTTTCAAGTCATTAGTGTGTATAGCTAGTGCCAAAAA

>M6-PGSC0003DMG400002618-(rev)M6LRR-RLP\_4148

TCACCAATGGATTGTAATTACATTTTCAAGTCATTAGTGTGTATAGCTAGTGCCAAAAATAGTTTCGTGTT  
TGTAATTACATTGATGGTTGGATGAAATTGCAGGAGGCTTTCTGACGTT

>M6-PGSC0003DMG400002618-(rev)M6LRR-RLP\_4209

GTTTCGTGTTTGTACTTACATTGATGGTTGGATGAAATTGCAGGAGGCTTTCTGACGTTCTAGATCTATT  
GACATCCCGGCAACCAAGTTGCCCTCAATTATACATATACAGCAGTGCCG

>M6-PGSC0003DMG400002618-(rev)M6LRR-RLP\_427

GCATGTGTATTTGTGAACAAGGTTACGCACGCGTTTACTTTGACCTTTTCCGTATTACATTGGGTCTTGT  
CTTCTAATTACGTAATTAATCTCGTGCGTTTTTGTGACAGCACAAAATT

>M6-PGSC0003DMG400002618-(rev)M6LRR-RLP\_4270

AGATCTATTGACATCCCGGCAACCAAGTTGCCCTCAATTATACATATACAGCAGTGCCGACAGAGTCATT  
CCTGCAGTTTCGGTTGAGTCCTTTGTAGAAGAGCAACGAAGAATTGGTCCG

>M6-PGSC0003DMG400002618-(rev)M6LRR-RLP\_4392

ATGTTAGAGCTTGCAACTTCGTTTCTACACCTCACGTTGATCATTTTCAGAAATGACCCAGAATTGTATACT  
TCACAGCTTACCCAATTTCTAGAGGACTACGTCCTAAGCTCTTGCAAAC

>M6-PGSC0003DMG400002618-(rev)M6LRR-RLP\_4453

ATTGTATACTTCACAGCTTACCCAATTTCTAGAGGACTACGTCCTAAGCTCTTGCAAACAGCCTTCTTGAA  
TAATTCCTAATCACAACACATTGATTCTTTCTGCCCTTTTTTTCCCTCA

>M6-PGSC0003DMG400002618-(rev)M6LRR-RLP\_4514

CCTTCTTGAATAATTCCTAATCACAACACATTGATTCTTTCTGCCCTTTTTTTCCCTCACTTTAACCAAATAC  
TTGGTAAAGCTTCTGTTTTCCAACCTTAAAGCAGATATACATTGATG

>M6-PGSC0003DMG400002618-(rev)M6LRR-RLP\_4575

TAAACCAAATACTTGGTAAAGCTTCTGTTTTCCAACCTTAAAGCAGATATACATTGATGTAGATTGTTACG  
TATACAGAGAATTAAGTTTTTTTTCTTTCCATTCTTATTTAATTTAG

>M6-PGSC0003DMG400002618-(rev)M6LRR-RLP\_4636

GATTGTTACGTATACAGAGAATTAAGTTTTTTTTCTTTCCATTCTTATTTAATTTAGTTGTATCTATGGTC  
TCCCAGCAACAGAATTGTTGCATTGTACCCAAAATATACTCTACTTT

>M6-PGSC0003DMG400002618-(rev)M6LRR-RLP\_488

TGGGTCTTGTCTTCTAATTACGTAATTAATCTCGTGCGTTTTTGTGACAGCACAAAATTTGACAGCTATAT  
AGTCTTTGCTTGTGGGGCTGTCATTATAGTTCATCTATATTGGCAGCCC

>M6-PGSC0003DMG400002618-(rev)M6LRR-RLP\_549

ACAGCTATATAGTCTTTGCTTGTGGGGCTGTCATTATAGTTCATCTATATTGGCAGCCCAATTTCTGAGGT  
GTGTGTGTCTTCTTTCTCTTCACCGGCAAAACAAATATATCATCATGGC

>M6-PGSC0003DMG400002618-(rev)M6LRR-RLP\_61

AAGTGATCTCTTATTCCGGAAAAGCAAGGTGGGAAATCTTTACAAGACTCGTCTCTTTTTCTTATCAGA  
ATCAGAAGAAGAAAGAAGAAGATTCGTCTCTCAGGTATGGTGTTCTCTT

>M6-PGSC0003DMG400002618-(rev)M6LRR-RLP\_671

ACTTGTCTGGAATCCTCCAAAGACCTATAGTTGCAGCATCTGCAGTTGCTATAGCTTCTGTATCTACTGAT  
CTTCATGAAAAATTCTGGCCATCTAAGTCATTACACAACAACAACAACA

>M6-PGSC0003DMG400002618-(rev)M6LRR-RLP\_732

ATCTACTGATCTTCATGAAAAATTCTGGCCATCTAAGTCATTACACAACAACAACAACAACAATTCCCAAG  
AAAAGGAAAAGATAACATCTCACATATCTCTTTCTAAGCTACCCCATTT

>M6-PGSC0003DMG400002618-(rev)M6LRR-RLP\_793

AATTCCCAAGAAAAGGAAAAGATAACATCTCACATATCTCTTTCTAAGCTACCCCATTTCTCCTCCTACCT  
CACCACAATACCTGTTCCCCTGCCTATTCTAAATAACAGTACCACTTTT

>M6-PGSC0003DMG400002618-(rev)M6LRR-RLP\_854

CCTCCTACCTCACCACAATACCTGTTCCCCTGCCTATTCTAAATAACAGTACCACTTTTACTTCACTTTCAAT  
CCTTCCTTTTCTACTTCTTCTCTGTTGCTCAACTCTTATCAATCAG

>M6-PGSC0003DMG400002618-(rev)M6LRR-RLP\_915

TTCACCTTTCAATCCTTCCTTTTCTACTTCTTCTCTGTTGCTCAACTCTTATCAATCAGCAGCATTGCCAAC  
TCTGCTAATCCCTCCACATATACATATACACTTCCTTCTTCACCTT

>M6-PGSC0003DMG400002618-(rev)M6LRR-RLP\_976

GCATTGCCAACTCTGCTAATCCCTCCACATATAACATATACACTTCCTTCTTCACCTTCCGAGGTGTTGTAT  
ACATGGCACTTACCTGAGCCAAATGCATCACGGAATTCTGATTCTTCA

>M6-PGSC0003DMG400002689M6LRR-RLK\_0

TACACAAATTCAACTCTTTTGTTCCTTAAATTCAACTTGTGTTTTTTGTTCTCTTCCTAACTTCCCGCGCTT





TTCTGACGTTGTAATTCAAGATTGTCTTTTTTGGGGGTTGGTAAGGGTTATATTCCTTGGACTTTTCAAAA  
ATATCGATGGATGTGTGTTAGATTCTCCAAAAATCTCTAGAAATAGCGC

>M6-PGSC0003DMG400002689M6LRR-RLK\_1647

CTTTTCAAAAATATCGATGGATGTGTGTTAGATTCTCCAAAAATCTCTAGAAATAGCGCATTTTTGGAGA  
ATCTTACACGGGTATGACATGTTTTGTAATTCAAGATTGTCTTTTTTGGG

>M6-PGSC0003DMG400002689M6LRR-RLK\_1708

TTTTGGAGAATCTTACACGGGTATGACATGTTTTGTAATTCAAGATTGTCTTTTTTGGGGTGGTAAGGG  
TTATATTGCTCGGACTTCTCATAAATGTTGGCAGGTACATGTCGGATCCT

>M6-PGSC0003DMG400002689M6LRR-RLK\_1769

TGGTAAGGGTTATATTGCTCGGACTTCTCATAAATGTTGGCAGGTACATGTCGGATCCTCTCGAAATCTC  
CAGAAATAGTGATCTATGGAGGATCTGATGCGGGTATGGCAACATTTTT

>M6-PGSC0003DMG400002689M6LRR-RLK\_183

CTCCTCTTTCAGTCACAACTGACATCCACGGCACTCTCCTTCACAATTGGACTTCCGTTGAACTCCAC  
CACCGCTTGACAGCTCAATGGCTTGGTATAAAATGCATAAACAACCGT

>M6-PGSC0003DMG400002689M6LRR-RLK\_1830

CGAAATCTCCAGAAATAGTGATCTATGGAGGATCTGATGCGGGTATGGCAACATTTTTGGAGAGTCCG  
AGCAAGTTGTAGGTATGATACTAATATTGATGGGATTTTTTTTTCTTGATT

>M6-PGSC0003DMG400002689M6LRR-RLK\_1891

AGAGTCCGAGCAAGTTGTAGGTATGATACTAATATTGATGGGATTTTTTTTTCTTGATTGTAATAGGAAA  
CAGAGGACCAGGGAGAATTCCATTGGATTGGACAACAAGGATTAGCTTGG

>M6-PGSC0003DMG400002689M6LRR-RLK\_1952

AATAGGAAACAGAGGACCAGGGAGAATTCCATTGGATTGGACAACAAGGATTAGCTTGGTGCTAGGGG  
TAGCTAGAGGGCTTGCTCACATTCATGAAGAGTATGCAGATTCAAGAATCCC

>M6-PGSC0003DMG400002689M6LRR-RLK\_2013

CTAGGGGTAGCTAGAGGGCTTGCTCACATTCATGAAGAGTATGCAGATTCAAGAATCCCACATGGGAAT  
GTGAAATCATCTAATGTGTTGCTTGACAAAAATGGTGTGGCTTGTATATCT

>M6-PGSC0003DMG400002689M6LRR-RLK\_2074

ATGGGAATGTGAAATCATCTAATGTGTTGCTTGACAAAAATGGTGTGGCTTGTATATCTGATTTTGGGTT  
GTCATTGCTTTTGAATCCTGTTCATGCCATAGCTAGATTAGGAGGATACC

>M6-PGSC0003DMG400002689M6LRR-RLK\_2135

TTTTGGGTTGTCATTGCTTTTGAATCCTGTTTCATGCCATAGCTAGATTAGGAGGATACCAAGCGCCCGAA  
CAATCTGAAATCAAGAGGCTATCTCAAAAATCTGATGTTTATAGCTTTGG

>M6-PGSC0003DMG400002689M6LRR-RLK\_2196

GCGCCCGAACAAATCTGAAATCAAGAGGCTATCTCAAAAATCTGATGTTTATAGCTTTGGAGTACTGTTAT  
TAGAAGTTCTCACTGGTAGAGCTCCTTCAGAGTACCCTTCACCGACTAGG

>M6-PGSC0003DMG400002689M6LRR-RLK\_2257

TACTGTTATTAGAAGTTCTCACTGGTAGAGCTCCTTCAGAGTACCCTTCACCGACTAGGCCTCGCGATGA  
GGAGGAAGAATTGCCAGTGGATTTGCCTAAATGGGTTTCGATCAGTAGTGA

>M6-PGSC0003DMG400002689M6LRR-RLK\_2318

TCGCGATGAGGAGGAAGAATTGCCAGTGGATTTGCCTAAATGGGTTTCGATCAGTAGTGAGGGACGAGT  
GGACTGCTGAAGTGTTCGATCAAGAACTGTTGAGGTACAAAAACATTGAGGA

>M6-PGSC0003DMG400002689M6LRR-RLK\_2379

GACGAGTGGACTGCTGAAGTGTTCGATCAAGAACTGTTGAGGTACAAAAACATTGAGGAGGAATTGGT  
GTCAATGCTACATGTAGCCATGGCATGTGTAGTGCCACTACCTGAAAAAAGG

>M6-PGSC0003DMG400002689M6LRR-RLK\_244

TGAACTCCACCACCGCTTGCACAGCTCAATGGCTTGGTATAAAATGCATAAACAACCGTGTCTCCGCCGT  
AATCCTCCCGTCGTTCAATCTCCGGGGACCCATTACCGCTCTCTCTTCTT

>M6-PGSC0003DMG400002689M6LRR-RLK\_2440

AATTGGTGTCAATGCTACATGTAGCCATGGCATGTGTAGTGCCACTACCTGAAAAAAGGCCTACTATGG  
TTGAAGTTGTTAAGTTGATTGAGGAGATTAGAGTTGAACAATCTCCATTAG

>M6-PGSC0003DMG400002689M6LRR-RLK\_2501

TACTATGGTTGAAGTTGTTAAGTTGATTGAGGAGATTAGAGTTGAACAATCTCCATTAGGTGAAGATTAT  
GACGAATCGCGCAATTCTCTTTCCCCCTCCCTTGCCACCACTGAAGATGG

>M6-PGSC0003DMG400002689M6LRR-RLK\_2562

GAAGATTATGACGAATCGCGCAATTCTCTTTCCCCCTCCCTTGCCACCACTGAAGATGGACTCCCCGGTT  
ACTAATTTTCGATCATCGTGGCATTGATGTTTCATAGTCCTAGTAGTATA

>M6-PGSC0003DMG400002689M6LRR-RLK\_2623

TCCCCGGTTACTAATTTTCGATCATCGTGGCATTGATGTTTCATAGTCCTAGTAGTATATGTTCAAATTTG

CAGCATCTTACTGCAAATTGGGAAGTTCAAAGCTATGGACTTATGTTT

>M6-PGSC0003DMG400002689M6LRR-RLK\_2684

TTCAAATTTGCAGCATCTTACTGCAAATTGGGAAGTTCAAAGCTATGGACTTATGTTTAGTAGTTATTTG  
ATTGCTTTGTGTTATTCCAAATACTGCACTTTTGGAAAATCTGATGAT

>M6-PGSC0003DMG400002689M6LRR-RLK\_2745

TAGTTATTTGATTGCTTTGTGTTATTCCAAATACTGCACTTTTGGAAAATCTGATGATCCAACAAGCATA  
TAAGAAGTGCAGCAATCAGTCCATTATGTATTTTTTTAATGTAATGTT

>M6-PGSC0003DMG400002689M6LRR-RLK\_2794

ATCTGATGATCCAACAAGCATATAAGAAGTGCAGCAATCAGTCCATTATGTATTTTTTTAATGTAATGTT  
AATTCTTTGTATTTAATTCATTTTCAAGATTTGTGTTCTAAGGCAAAAC

>M6-PGSC0003DMG400002689M6LRR-RLK\_305

CTCCGCCGTAATCCTCCGTCGTTCAATCTCCGGGGACCCATTACCGCTCTCTCTTTACCTTTACTCAG  
CCTTCTCGACCTCCGTAACAATCGCCTTAACGGAACCCTCACACCCAT

>M6-PGSC0003DMG400002689M6LRR-RLK\_366

CCTTTACTCAGCCTTCTCGACCTCCGTAACAATCGCCTTAACGGAACCCTCACACCCATTACCCAATGTAC  
TAATCTTAAGCTCATTTACCTCTCCGGCAACGATTTTTCCGGCGAAATT

>M6-PGSC0003DMG400002689M6LRR-RLK\_427

CCCAATGTACTAATCTTAAGCTCATTTACCTCTCCGGCAACGATTTTTCCGGCGAAATTCCGCCGGAAATT  
TCTTCTCTCCGTCGTCTCTCCGCTTGACGTTTCAAATAACAACCTTG

>M6-PGSC0003DMG400002689M6LRR-RLK\_488

GCCGGAAATTTCTTCTCTCCGTCGTCTCTCCGCTTGACGTTTCAAATAACAACCTGAAGGTTCAATTC  
CGACCCAGATTGCGAATTTGACCCGATTGCTCACACTTCGTTTACAGAA

>M6-PGSC0003DMG400002689M6LRR-RLK\_549

GGTTCAATTCGGACCCAGATTGCGAATTTGACCCGATTGCTCACACTTCGTTTACAGAACAATGAACTTTC  
TGGAACAATCCCAAATCCCTAAATTCTCTTCAAATCTTAAAGAATTG

>M6-PGSC0003DMG400002689M6LRR-RLK\_61

CTTCCCGCGCTTATGCCTTAAACCCAAAAAATGAACCGTTTTTCTCTTCATTCTCTCCTCACACATC  
TCATCTCCGCCGTAACCGCCACCGGCGACGGCAACGACACCACCGCAC

>M6-PGSC0003DMG400002689M6LRR-RLK\_610



>M6-PGSC0003DMG400002870-(rev)M6LRR-RLK\_1240

AACAATAGTCTAACTGGAGCTATTCCTTTGGATTTGGCCAATATGACCCACCTCTCACTTATGTAATTTTC  
TAATAACATTTTCATGTTATGTTATGTTATATGTTCTTTATAACAACAT

>M6-PGSC0003DMG400002870-(rev)M6LRR-RLK\_1302

GTAATTTTCTAATAACATTTTCATGTTATGTTATGTTATATGTTCTTTATAACAACATTTTCGATATAGCAGC  
TAAAAAATATCCAGACAAATGAAGTACGCAGTTATAGAGAGGTTTGAC

>M6-PGSC0003DMG400002870-(rev)M6LRR-RLK\_1364

ATATAGCAGCTAAAAAATATCCAGACAAATGAAGTACGCAGTTATAGAGAGGTTTGACTGTATTTTTCAC  
TTATGGAGTTGACTGTTTTGCATGTTTAGGGACTTGTCTTTCAACAATC

>M6-PGSC0003DMG400002870-(rev)M6LRR-RLK\_1426

TTTTTCACTTATGGAGTTGACTGTTTTGCATGTTTAGGGACTTGTCTTTCAACAATCTCAGTGGTCCTGTA  
CCAAGGCTTCTAGCCAAAACATTCAAGTAAGGTTCTTGAAGAATTCTT

>M6-PGSC0003DMG400002870-(rev)M6LRR-RLK\_1488

TGGTCCTGTACCAAGGCTTCTAGCCAAAACATTCAAGTAAGGTTCTTGAAGAATTCTTTGTGTATCACTTT  
TTCCTTAATCAGTAAATGAAACCAATTTTTTTGTATTTATTTGTCTTTTT

>M6-PGSC0003DMG400002870-(rev)M6LRR-RLK\_1550

TATCACTTTTTCTTAATCAGTAAATGAAACCAATTTTTTTGTATTTATTTGTCTTTTTTTTAACTTATTGAC  
ACAGTATATTGGGAAATCCAATGATATGTGCAACTGGAAAAGAATCA

>M6-PGSC0003DMG400002870-(rev)M6LRR-RLK\_1612

ACCTTATTGACACAGTATATTGGGAAATCCAATGATATGTGCAACTGGAAAAGAATCAGAGTGCAATGG  
AACACACCAATGCCCTCTCCTTCTCTTCAAACAATCCACAGAGTAAGAA

>M6-PGSC0003DMG400002870-(rev)M6LRR-RLK\_1674

GCAATGGAACAACACCAATGCCCTCTCCTTCTCTTCAAACAATCCACAGAGTAAGAATAACCTTATTTT  
AACAGCCAAATGATAGTTTTTTTTTTTGTTTTTTTTTATGACCGTGGTG

>M6-PGSC0003DMG400002870-(rev)M6LRR-RLK\_2108

TGTTTTTACTAGTCATACAGATTTATGAAGTAAATATGCTTCACTGATTTTCTCTACTGATAGATTCAATAT  
TTATAGTTCATTCCCAGCTAAAAATATCCTGTGTTATCTCAGATGTTT

>M6-PGSC0003DMG400002870-(rev)M6LRR-RLK\_2170

GATTCAATATTTATAGTTCATTCCCAGCTAAAAATATCCTGTGTTATCTCAGATGTTTCAGCCTTCTGGAAA

ACCGAAGACTCACAAGGTTGCGTTAGCCTTTGGAACAAGTCTAGGATGC

>M6-PGSC0003DMG400002870-(rev)M6LRR-RLK\_2232

TTCTGGAAAACCGAAGACTCACAAGGTTGCGTTAGCCTTTGGAACAAGTCTAGGATGCATCTTCCTACTA  
ATTGTTGGGTTTGGATTCTTTCTATGGTGGAGACAAAAGCACAATAAGCA

>M6-PGSC0003DMG400002870-(rev)M6LRR-RLK\_2294

TCCTACTAATTGTTGGGTTTGGATTCTTTCTATGGTGGAGACAAAAGCACAATAAGCAAATTTTCTTTGAC  
AGTAATGGTGAGTATTGTTTGATCAGAACAATTTGAAGTTACGGTTTAG

>M6-PGSC0003DMG400002870-(rev)M6LRR-RLK\_2356

TTCTTTGACAGTAATGGTGAGTATTGTTTGATCAGAACAATTTGAAGTTACGGTTTAGCTCATCGATCCTC  
TCTTATAAACGTTATTGACATAAATTGCAGAACAACATATTGAAGAAGT

>M6-PGSC0003DMG400002870-(rev)M6LRR-RLK\_2418

TCGATCCTCTCTTATAAACGTTATTGACATAAATTGCAGAACAACATATTGAAGAAGTGTGCTTAGGCAA  
CTTAAGGAGGTTCCAATTCAAGGAACTTCAGTCTGCCACAAACAATTTCA

>M6-PGSC0003DMG400002870-(rev)M6LRR-RLK\_2480

TTAGGCAACTTAAGGAGGTTCCAATTCAAGGAACTTCAGTCTGCCACAAACAATTTCAGCAGCAAGAAC  
ATACTAGGGAAAGGTGGTTTTGGTAATGTTTATAAAGGACGTCTTAGTGAC

>M6-PGSC0003DMG400002870-(rev)M6LRR-RLK\_2542

CAAGAACATACTAGGGAAAGGTGGTTTTGGTAATGTTTATAAAGGACGTCTTAGTGACGGGATTATTGT  
AGCTGTGAAAAGGCTCAAAGATGGAAATGCAGTTGGAGGCAATCAACAATT

>M6-PGSC0003DMG400002870-(rev)M6LRR-RLK\_2604

TTATTGTAGCTGTGAAAAGGCTCAAAGATGGAAATGCAGTTGGAGGCAATCAACAATTTCAGACTGAAG  
TCGCGTTGATCAGTCTGGCAGTGCATCGGAATCTCCTCAGGTTGTATGGAT

>M6-PGSC0003DMG400002870-(rev)M6LRR-RLK\_2666

ACTGAAGTCGCGTTGATCAGTCTGGCAGTGCATCGGAATCTCCTCAGGTTGTATGGATTTTGTATGACAC  
CAACTGAAAGGTTGCTGGTGTACCCTTACATGTCTAATGGAAGTGTAGCT

>M6-PGSC0003DMG400002870-(rev)M6LRR-RLK\_2728

TATGACACCAACTGAAAGGTTGCTGGTGTACCCTTACATGTCTAATGGAAGTGTAGCTTCGCGTCTCAA  
GGTAAACATATCTAAAACTGTCTCCTTTGGCCTATAATTACATTGCCT

>M6-PGSC0003DMG400002870-(rev)M6LRR-RLK\_2790

GTCTCAAAGGTAAACATATCTAAAACTGTCTCCTTTGGCCTATAATTACATTGTCCTTATTTGCTCAGCTC  
ATAACGTATCATTTCTTGCAGCCAAACCAACCTTGGATTGGGGTACAA

>M6-PGSC0003DMG400002870-(rev)M6LRR-RLK\_2852

TGCTCAGCTCATAACGTATCATTTCTTGCAGCCAAACCAACCTTGGATTGGGGTACAAGAAAAGGAATA  
GCTTTGGGAGCTGCAAGGGGCTTATTATATCTACACGAACAATGTGATCCA

>M6-PGSC0003DMG400002870-(rev)M6LRR-RLK\_2914

AGGAATAGCTTTGGGAGCTGCAAGGGGCTTATTATATCTACACGAACAATGTGATCCAAAGATCATTCA  
TAGGGATGTGAAAGCTGCAAATATATTGCTTGATGATTACTGTGAAGCTGT

>M6-PGSC0003DMG400002870-(rev)M6LRR-RLK\_2976

TCATTCATAGGGATGTGAAAGCTGCAAATATATTGCTTGATGATTACTGTGAAGCTGTTGTTGGAGATT  
CGGATTAGCAAAGCTTTTGGATCATCACGATTCACATGTCACAACCGCGG

>M6-PGSC0003DMG400002870-(rev)M6LRR-RLK\_3038

GGAGATTTGGGATTAGCAAAGCTTTTGGATCATCACGATTCACATGTCACAACCGCGGTTAGAGGAACT  
GTAGGACATATAGCTCCAGAATATCTCTCCACAGGACAGTCCTCTGATAAG

>M6-PGSC0003DMG400002870-(rev)M6LRR-RLK\_3100

AGGAACTGTAGGACATATAGCTCCAGAATATCTCTCCACAGGACAGTCCTCTGATAAGACGGACGTCTTT  
GGTTTTGGTATTCTCTTGCTAGAATTAATCACTGGACAAAGAGCTCTGGA

>M6-PGSC0003DMG400002870-(rev)M6LRR-RLK\_3162

ACGTCTTTGGTTTTGGTATTCTCTTGCTAGAATTAATCACTGGACAAAGAGCTCTGGAATTTGGTAAAGC  
AGCAAACCAGAAAGGCGCTATGCTTGATTGGGTAAGTACGACAAATCCCT

>M6-PGSC0003DMG400002870-(rev)M6LRR-RLK\_3472

TAGGCGCACGTGCATTCACTATCTAAAATATGGACTCTATAGGTATTAAGAGATGCAACGAACAAAC  
CATCTTTAAATCCTGGATCCGTCCTTGTTATTTTTTCACTTGCAGGTAAGA

>M6-PGSC0003DMG400002870-(rev)M6LRR-RLK\_3534

AACAAACCATCTTTAAATCCTGGATCCGTCCTTGTTATTTTTTCACTTGCAGGTAAGAAAGATTCAACAGG  
AGAAAAAGCTAGACATGTTGGTGGACAAAGACATGAAAAACGAGTACGA

>M6-PGSC0003DMG400002870-(rev)M6LRR-RLK\_3596

TTCAACAGGAGAAAAAGCTAGACATGTTGGTGGACAAAGACATGAAAAACGAGTACGATAAGATAGAG  
TTAGAGGAAATGGTTCAAGTAGCATTACTATGCACTCAGTATCATCCAAGTC

>M6-PGSC0003DMG400002870-(rev)M6LRR-RLK\_3658

ATAGAGTTAGAGGAAATGGTTCAAGTAGCATTACTATGCACTCAGTATCATCCAAGTCATAGACCAAAA  
ATGTCTGAAGTTGTAAGAATGCTTGAAGGAGATGGACTAGCAGAGAAATGG

>M6-PGSC0003DMG400002870-(rev)M6LRR-RLK\_372

CTTTTTTCTTTGGCAGTGCAAGCTTTAATGGAGATGAAGAAGAATTTAGATGATCCACTTAATGTTTTAA  
ACTGGGATGGAGATGCTGTTGATCCTTGTAGCTGGAATATGGTCACTTG

>M6-PGSC0003DMG400002870-(rev)M6LRR-RLK\_3720

ACCAAAAATGTCTGAAGTTGTAAGAATGCTTGAAGGAGATGGACTAGCAGAGAAATGGGAAGCATCTC  
AAAGAGCAGAACCAACAAGATGCAGCAGAGCCAATGAATTTTCTCTTCAGA

>M6-PGSC0003DMG400002870-(rev)M6LRR-RLK\_3782

CATCTCAAAGAGCAGAACCAACAAGATGCAGCAGAGCCAATGAATTTTCTCTTCAGAAAGATACTCTG  
ATCTTACTGATGATTCTTCATTACTTGTACAAGCAATGGAECTATCTGGTC

>M6-PGSC0003DMG400002870-(rev)M6LRR-RLK\_3844

TACTCTGATCTTACTGATGATTCTTCATTACTTGTACAAGCAATGGAECTATCTGGTCCAAGATGATAATT  
GAATTAAGACACAATGTCACTTTTGCTGGTGGGAGGTGACAGGTCTCTC

>M6-PGSC0003DMG400002870-(rev)M6LRR-RLK\_4030

ATATTGAGCTTTGTTTATAGGTTTATACAGAAGCTGCAAATAGAATATCATACTTCTGATTGTAAAGGA  
CAATATAATAACTTTGTAAGGCTGAGAGTTGTTTTTCTGTTTTTCTTTTT

>M6-PGSC0003DMG400002870-(rev)M6LRR-RLK\_434

ATGTTTTAAACTGGGATGGAGATGCTGTTGATCCTTGTAGCTGGAATATGGTCACTTGTCAAATGATAA  
ATTTGTCACTAGCCTGTAAGTAGAACAATTTTCACTTATTCTAAAAATAG

>M6-PGSC0003DMG400002870-(rev)M6LRR-RLK\_496

AATGATAAATTTGTCACTAGCCTGTAAGTAGAACAATTTTCACTTATTCTAAAAATAGTATTCCTAACAAG  
ATTTCTTAAAATAGTTGTATTATTGATTATGCAGGGAGTGTCCCAGCCA

>M6-PGSC0003DMG400002870-(rev)M6LRR-RLK\_558

CCTAACAAGATTTCTTAAAATAGTTGTATTATTGATTATGCAGGGAGTGTCCCAGCCAAAATTTGTCTGG  
CAAAATATCACCATATATCCACAACCTTGACACACCTTGAECTTATGTGAG

>M6-PGSC0003DMG400002870-(rev)M6LRR-RLK\_930

TATCAAGACATTTGAGTTTTGATTCTTATTCTTAGATGTTAATATGAGTGTCTGTTTTTTACAGACTTCTA



CAGAGCAATAATATATCAGGATCACTTCCTATGGAGCTTGGAATGCTT

>M6-PGSC0003DMG400002870-(rev)M6LRR-RLK\_992

CAGACTTCTACAGAGCAATAATATATCAGGATCACTTCCTATGGAGCTTGGAATGCTTAAAAAACTTAAG

ACAATTGATCTTTCTGATAACAAGTTAACCGGCGAAATCCCGTCATCTTT

>M6-PGSC0003DMG400002885M6LRR-RLP\_0

ATGTGGCCTCTCTTTTTCAATTTACTTTTTCTGTTGTGTATTTCTATGTATTTGTTCTTCTTTGAGCATC

ATCTTTGCTCTCCAGTGAAGCTTCTGCTTTGCTTCAGTTTAAGCAA

>M6-PGSC0003DMG400002885M6LRR-RLP\_1054

AACTACGTTATTTAAGTCTTTCTAATTGCAGCTTCATCGGTCCGTTTCCTTCTCCACTTTTAAGCTTGACAC

AACTTGAAACCTTAGACTTGTGAGAAATCCCTATCAGGACTACTTC

>M6-PGSC0003DMG400002885M6LRR-RLP\_1116

AGCTTGACACAACCTTGAAACCTTAGACTTGTGAGAAATCCCTATCAGGACTACTTCCTAGAAATGCAA

GCATGCTTCAAAGCTAGCCGAGCTGGATTTGTCTTACAACCTCACTGAAT

>M6-PGSC0003DMG400002885M6LRR-RLP\_124

TTAATATATTGGACTTCTCCAGTGTGATACGTCTTTCCAAAAACAGTTTCATGGAATGAGAGTAACGA

TTGCTGCACTTGGGACGGGGTCACTTGTGACATGTTAACCGGTCATGTTA

>M6-PGSC0003DMG400002885M6LRR-RLP\_1240

CCATACCATCTTGGGTGTTTAGCCTACCTTTGCTATCTTCAGTGTGCTCCATCATAACCGGTTAAGTGGT

TCTTTTCTCAATCACCTGTGAATCTCACAAACCTTTCTACCCTTGATC

>M6-PGSC0003DMG400002885M6LRR-RLP\_1302

TTAAGTGGTTCTTTTCTCAATCACCTGTGAATCTCACAAACCTTTCTACCCTTGATCTTTCATCAAATAAC

ATCACCTCGATGCGGGAATACAAATCACTTTACCTAGCCTAGAAATT

>M6-PGSC0003DMG400002885M6LRR-RLP\_1364

ATCAAATAACATCACCTCGATGCGGGAATACAAATCACTTTACCTAGCCTAGAAATTATGCAGTTATCA

TCTTGGAAGTGAAGGATTTCCACACTTCTTGAGAAATGTAAAGACT

>M6-PGSC0003DMG400002885M6LRR-RLP\_1426

AGTTATCATCTTGTGAACTGAAGGATTTCCACACTTCTTGAGAAATGTAAAGACTTATGGTGTGGGA

TATTTCTAACAAATAAGATTCGTGGTCAAATCCCTAATTGGTTTAGCGGCA

>M6-PGSC0003DMG400002885M6LRR-RLP\_1487

GGTGTTGGATATTTCTAACAATAAGATTCGTGGTCAAATCCCTAATTGGTTTAGCGGCATGAGGTGGGA  
CTCCTTGTTGCACCTAACCTTTCACATAACTCATTAAACAGGCAACCTACA

>M6-PGSC0003DMG400002885M6LRR-RLP\_186

AGTAACGATTGCTGCACTTGGGACGGGGTCACTTGTGACATGTTAACCGGTCATGTTATCGGGTTGGAT  
CTTAGTTGTAGTCAGCTTAATGGAACTATTTATCCCAACAGCAGCCTCATC

>M6-PGSC0003DMG400002885M6LRR-RLP\_248

GTTGGATCTTAGTTGTAGTCAGCTTAATGGAACTATTTATCCCAACAGCAGCCTCATCCAACCTTCATCATC  
TTCAGACACTAACCTTGCTAAGAACTATGTTTATCCTTCTACGATCCC

>M6-PGSC0003DMG400002885M6LRR-RLP\_310

TTCATCATCTTCAGACACTAACCTTGCTAAGAACTATGTTTATCCTTCTACGATCCCAAAGACTTTAGC  
CGGTTGAGGAATTTGAAGCATCTCAATCTTTCTGATGCTTACTTTCAAG

>M6-PGSC0003DMG400002885M6LRR-RLP\_372

GACTTTAGCCGGTTGAGGAATTTGAAGCATCTCAATCTTTCTGATGCTTACTTTCAAGGGGAAATCCCAA  
CAGAAATCTCATACTTTCCAATTTGGTTTCACTTGATCTTTCTGTTCT

>M6-PGSC0003DMG400002885M6LRR-RLP\_434

AATCCCAACAGAAATCTCATACTTTCCAATTTGGTTTCACTTGATCTTTCTGTTCTTCTTATGTGAACGG  
ATTACAATTTGATCAGAGAGCATTTGAAGCAGTGCTTCAGAACTTGAC

>M6-PGSC0003DMG400002885M6LRR-RLP\_558

CTAGAGGTACTTTCTCTCTTTGGTGTCAACGTTTCATCTCCGATACCTATGAATTTGTCTTCCTCCTTAAGG  
TATGTCGATCTTAAGGTAACCAATTTGGAAGGTGTTCTCACGGAGAGC

>M6-PGSC0003DMG400002885M6LRR-RLP\_62

CTTTGAGCATCATCTTTGCTCTCCAGTGAAGCTTCTGCTTTGCTTCAGTTTAAGCAATCCTTTAATATATT  
GGACTTCTCCAGTGTGATACGTCTTTCCAAAAACAGTTTCATGGAA

>M6-PGSC0003DMG400002885M6LRR-RLP\_620

CTCCTTAAGGTATGTCGATCTTAAGGTAACCAATTTGGAAGGTGTTCTCACGGAGAGCTTATTCCTTCTG  
CCAAAATTGGAAACTCTATTTGAGTAATAACTATCTTCTCAAAGGAGT

>M6-PGSC0003DMG400002885M6LRR-RLP\_682

TCCTTCTGCCAAAATTGGAACACTCTATTTGAGTAATAACTATCTTCTCAAAGGAGTTTTACCAAAGATT  
CATCCAAGCAGCACTCTGTTGGAGTTGGATATTTCATAACAGGAATCT

>M6-PGSC0003DMG400002885M6LRR-RLP\_806

TGAGCTGCCTGATTCAATTGGCACCTTGAGTTCCTTGACTCGCTTGACCTCTATGGATGTCAATTCTCTG  
GTCGCATTCTGATTCCATTGGCAATCTTACACAAATTAGGTATTTGAA

>M6-PGSC0003DMG400002885M6LRR-RLP\_868

AATTCTCTGGTCGCATTCTGATTCCATTGGCAATCTTACACAAATTAGGTATTTGAATTTTGGTAATAAT  
CATTTACCGGCAATATTCCTTCCACAATCTCTAAATTGAAGCACCTCG

>M6-PGSC0003DMG400002885M6LRR-RLP\_930

GGTAATAATCATTTACCGGCAATATTCCTTCCACAATCTCTAAATTGAAGCACCTCGCAGTTTTAGCTCT  
TTCATCTAACTCCTTTGGAGGTGAAATTCCTAATTTTTTCTCTAACCTC

>M6-PGSC0003DMG400002886M6LRR-RLP\_0

CAACTCCTTTTCAGGTGAAATTCCTGCTGTTTTCTTAACCTCCAAGAGCTACGTACTTTACATCTTTCTTA  
TAACAGCTTCATCGGTTCAATTTCCCGCTTCAATTTTAAGTTTGACACA

>M6-PGSC0003DMG400002886M6LRR-RLP\_1040

CTCTCGAATACCTGCAGGTCCTTATATTAAAGTCGAACAAGTTCCATGGACCTATAAGTACGTGTCTGAC  
TAAGTTTTGCTTTCCAAGTTGCGAATTTTTGATCTTTCTCGTAATGATT

>M6-PGSC0003DMG400002886M6LRR-RLP\_1170

ACTTCCTGCAAAGTTTTTGGAACTTCAAGGCAATGATCAAATTAGATGGCGAAGACACAGGAAATAT  
AAAGTACATGGACTCTGTGTTGTATTGCCCATTTGTCACATCGTATGAGGA

>M6-PGSC0003DMG400002886M6LRR-RLP\_1235

ATATAAAGTACATGGACTCTGTGTTGTATTGCCCATTTGTCACATCGTATGAGGATTCAGTGAGTTTGGT  
AATCAAAGGGCAGGATATTGAGCTATAAAGAATCAGCACAAATTACGACAA

>M6-PGSC0003DMG400002886M6LRR-RLP\_260

CCTTGCTATCTTCAGTGTGCTCCAACATAACCAATTCAGAGGACTAGCCGATGAAGTGATCAAAACAAA  
CCCAACATTAACAACACTGCATTTAAGCAATAATCAACTCAGTGGTCCTT

>M6-PGSC0003DMG400002886M6LRR-RLP\_325

ACAAACCCAACATTAACAACACTGCATTTAAGCAATAATCAACTCAGTGGTCCTTTTCTCAATCACTTGT  
GAATCTCACAACCTTGAAACCCTTGGAATTTTCATCAAATAACATCACC

>M6-PGSC0003DMG400002886M6LRR-RLP\_390

ACTTGTGAATCTCACAACCTTGAAACCCTTGGAATTTTCATCAAATAACATCACCATTGATGAGGGAATG

AATATCACCTTTCTTAGCCTATCATCTTTATTCTTATCATCTTGTGAACT

>M6-PGSC0003DMG400002886M6LRR-RLP\_455

GAATGAATATCACCTTTCTTAGCCTATCATCTTTATTCTTATCATCTTGTGAACTGAAGGATTTTCCACACT  
TCTTGAGAAATGTAAAGACACTTGTCTACTTGGATATTTCTAACAATA

>M6-PGSC0003DMG400002886M6LRR-RLP\_65

TTTCTTATAACAGCTTCATCGGTTCAATTTCCCGCTTCAATTTAAGTTTGACACATCTTCAATACTTAGGAT  
TGTCGAGTAATTCCCTATCTGGCCCACTGCCTAGCAACCAAAGCATGC

>M6-PGSC0003DMG400002886M6LRR-RLP\_650

ATTCATTAACAGGCCACCTACCACAATTTCACTACTATAACCTACAGTATCTTGATCTGAAATGTAECTCC  
CTTCAGGGTCCACTACCTTCATCCATTTGTAACATGAGTTCGCTTATCT

>M6-PGSC0003DMG400002886M6LRR-RLP\_845

TAGACTTAAGAAGGAACAATTTACAGGGAGTCTTTCCCCATTATGTGCACACAGCACTTCGTTGAGTAC  
CATTGTCATAAATGGTAATCAATTTGAAGGACCTGTACCTGTGTCGTTGC

>M6-PGSC0003DMG400002886M6LRR-RLP\_910

AGTACCATTGTCATAAATGGTAATCAATTTGAAGGACCTGTACCTGTGTCGTTGCTCAAGTGTGGTGGTC  
TAGAAGTACTTGATGTGGGGAACAATGCTATAAATGACAGGTTTCCATCT

>M6-PGSC0003DMG400002886M6LRR-RLP\_975

TGGTCTAGAAGTACTTGATGTGGGGAACAATGCTATAAATGACAGGTTTCCATCTTGGCTCGGAACTCTC  
GAATACCTGCAGGTCCTTATATTAAGTCAACAAGTTCCATGGACCTAT

>M6-PGSC0003DMG400002887M6LRR-RLP\_0

AATTCCTGATGTTTTCTCTAACCTCAAAGAGCTAGTTGAATTGAATCTTTCTTTTAACAACTTCACCGGTCC  
ATGCCCTCTTCAATTTAAGCTTGACAAGTCTTCAATACTTAGATTT

>M6-PGSC0003DMG400002887M6LRR-RLP\_1071

CTCACTGCCTGCAGATTTTTTTAGAACTTCAAGGCAATGACAAAAAATGGCACAGACAAAAGTGACATT  
AGCTATATGGAAACACCAGTTTACAGATCATTCCCTTGAGTCAGTGAGCTC

>M6-PGSC0003DMG400002887M6LRR-RLP\_1134

TGACATTAGCTATATGGAAACACCAGTTTACAGATCATTCCCTTGAGTCAGTGAGCTCAGCCGTCATTCCCT  
ATATATAAGCTAGAAATGGCCATCAATGAAGTATAACAAGGATTCAGTGAG

>M6-PGSC0003DMG400002887M6LRR-RLP\_1197

CATTCTATATATAAGCTAGAAATGGCCATCAATGAAGTATACAAGGATTCAGTGAGGTTGATGATCAA  
AGGAAACAATATTGAGCTAGAAAGAATCAGCACAATTGTTACAGCCATAGA

>M6-PGSC0003DMG400002887M6LRR-RLP\_126

CAACTCACTGAATGGCACAATACACTCTTGGGTGTTTAGCCTCCCTTACGTGATTTGAAGCTCCATC  
ATAACCAATTCAGTACAGTGGCTGATGAGATCAAAACAAACCCAACATT

>M6-PGSC0003DMG400002887M6LRR-RLP\_1260

GATCAAAGGAAACAATATTGAGCTAGAAAGAATCAGCACAATTGTTACAGCCATAGATCTCTCAAGCAA  
CCATTTAGAAGGTGACATTCCGAAATCACTAAAGGATCTCAGCTCACTTTG

>M6-PGSC0003DMG400002887M6LRR-RLP\_1323

AAGCAACCATTTAGAAGGTGACATTCCGAAATCACTAAAGGATCTCAGCTCACTTTGGCTACTCAATTTA  
TCCATAACAATCTCAAAGGTGATATTCCAATGGAATTGGGGCAATTGAA

>M6-PGSC0003DMG400002887M6LRR-RLP\_1386

CAATTTATCCCATAACAATCTCAAAGGTGATATTCCAATGGAATTGGGGCAATTGAATACACTTGAAGCC  
TTAGATCTCTCTCGAATCGGCTCACTGGAAAGATTCCACAGGAATTGAC

>M6-PGSC0003DMG400002887M6LRR-RLP\_1512

GAACTTTCTGGAGTTCTTAAACCTCTCTCAAATCATCTCGTTGGACGCATTCCTCAAGGTTCAATTTCA  
GCACATTTGAAAATGACTCGTATGGTGGCAACCTTGATTTATGTGGTCC

>M6-PGSC0003DMG400002887M6LRR-RLP\_1575

ACAATTCAGCACATTTGAAAATGACTCGTATGGTGGCAACCTTGATTTATGTGGTCCTCCTTTGTCAAAG  
CAATGTGGAACGAGTGATCGCTCGCATGTTCTCAATCACTGGAGGAAGA

>M6-PGSC0003DMG400002887M6LRR-RLP\_189

GCTCCATCATAACCAATTCAGTACAGTGGCTGATGAGATCAAAACAAACCCAACATTAGTGACTTTGTAT  
TTAAGTCATAATCAACTCAATGGTCCTTTTCCTCTATCACTTGTGAATCT

>M6-PGSC0003DMG400002887M6LRR-RLP\_252

TTTGATTTAAGTCATAATCAACTCAATGGTCCTTTTCCTCTATCACTTGTGAATCTCACAAACCTAGCCCT  
CCTTGACTTTTCATCAAGTAACATCACCGGCGATGTGGGAATAAATAT

>M6-PGSC0003DMG400002887M6LRR-RLP\_315

CCTAGCCCTCCTTGACTTTTCATCAAGTAACATCACCGGCGATGTGGGAATAAATATCACCTTTCTAGAC  
TATCAGCTTTGTTCTTATCATCTTGTGAACTGAAGGATTTTCCCACTT

>M6-PGSC0003DMG400002887M6LRR-RLP\_378

TCCTAGACTATCAGCTTTGTTCTTATCATCTTGTGAAGGATTTCCACACTTCTTGAGAAATTTAAA  
GACACTTCAGTTCTTGATCTTTCTAACAAATAAGATTCGTGGTCAAAT

>M6-PGSC0003DMG400002887M6LRR-RLP\_441

AAATTTAAAGACACTTCAGTTCTTGATCTTTCTAACAAATAAGATTCGTGGTCAAATCCCTAACTGGTTTA  
GAGGCATGAGGTGGGACTCTTTGGAACAATAAACCTTTACGTAATTT

>M6-PGSC0003DMG400002887M6LRR-RLP\_504

CTGGTTTAGAGGCATGAGGTGGGACTCTTTGGAACAATAAACCTTTACGTAATTTTTTGGCAGGCCAT  
CTAGAACAATTTATCATTATAGACTAGAGTCTCTTGATCTTAAATTTAA

>M6-PGSC0003DMG400002887M6LRR-RLP\_567

AGGCCATCTAGAACAATTTATCATTATAGACTAGAGTCTCTTGATCTTAAATTTAACTTCCTTCAGGGTT  
CACTACCTTCATCCATATGTAACCTAAGTAGCCTTAGAATTCTGGATTT

>M6-PGSC0003DMG400002887M6LRR-RLP\_63

CACCGGTCCATGCCCTCTTCAATTTAAGCTTGACAAGTCTCAATACTTAGATTTCTCTCACAACCTCACT  
GAATGGCACAATACACTCTTGGGTGTTTAGCCTCCCTTCTTACGTGA

>M6-PGSC0003DMG400002887M6LRR-RLP\_630

TCAGGGTTCACTACCTTCATCCATATGTAACCTAAGTAGCCTTAGAATTCTGGATTTATCACGCAACAAC  
TCAGTAACTCGATTCCAAATTGCTTGGGAAGCATGGCTAAGCTAACGGT

>M6-PGSC0003DMG400002887M6LRR-RLP\_693

CAACAACCTTCAGTAACTCGATTCCAAATTGCTTGGGAAGCATGGCTAAGCTAACGGTGTGGACTTGAG  
AAGGAACAATTTAGTGGGAGTCTTCCACTGTTATGTAAGCAAGCACTTC

>M6-PGSC0003DMG400002887M6LRR-RLP\_756

CTTGAGAAGGAACAATTTAGTGGGAGTCTTCCACTGTTATGTAAGCAAGCACTTCATTGACGACCATT  
GTCTTGAATGGTAATCAATTTGAAGGATCTGTCCCTATGTCGTTGCTCAA

>M6-PGSC0003DMG400002887M6LRR-RLP\_819

GACCATTGTCTTGAATGGTAATCAATTTGAAGGATCTGTCCCTATGTCGTTGCTCAACTGTGTTGGTTTAA  
AAGTTCTTGATTTAGGAATAACGCTATAAATGACACATTTCCAGCTTG

>M6-PGSC0003DMG400002887M6LRR-RLP\_882

TGGTTTAAAAGTTCTTGATTTAGGAATAACGCTATAAATGACACATTTCCAGCTTGGCTTGGAACTCTT

GAAGATCTGCAAGTCCTTATATTAAGTCGAACAAGTTCCATGGACCTAT

>M6-PGSC0003DMG400002887M6LRR-RLP\_945

AACTCTTGAAGATCTGCAAGTCCTTATATTAAGTCGAACAAGTTCCATGGACCTATAAGTTCTAGGAAG

AAGTTTTGCTTTCCTAGGTTGCGGATTTTTGATCTCTCTCATAATGCGTT

>M6-PGSC0003DMG400002902M6LRR-RLK\_0

AGAAAAGAAACAGAGAAGCATTTCAGATTGTTTCTTTAAGGGGAAGGTGGACATGTCTAGTAACAAA

CATGGCCGCGTTCCCCTAATCCTTCATCTCCTTCCTCAAGCATCGTCTCCG

>M6-PGSC0003DMG400002902M6LRR-RLK\_1054

GAAGGGGAGGATCACAAGGTGGTAAGGCTATGGGAGATCTTGTGTTGGTGAACAACGAAAATGGTAC

ATTCGGATTGCCTGATTTGATGAAGGCAGCTGCTGAGGTACTCGGAAACGGAG

>M6-PGSC0003DMG400002902M6LRR-RLK\_1116

GGTACATTCGGATTGCCTGATTTGATGAAGGCAGCTGCTGAGGTACTCGGAAACGGAGTGTTAGGATCA

GCTTACAAGGCAAAAATGGGAAATGGAATGTCTGTTGTGGTTAAGAGATTG

>M6-PGSC0003DMG400002902M6LRR-RLK\_1178

AGGATCAGCTTACAAGGCAAAAATGGGAAATGGAATGTCTGTTGTGGTTAAGAGATTGAGAGAGATGA

ATAAAATGAATAGAGATGTGTTTGTATGCAGAAATGAGAAAATTGGAAAGTT

>M6-PGSC0003DMG400002902M6LRR-RLK\_124

AACACCATCTTTTCCTTATTCATATCTCCATTTTCTCCTCATTCTCTAGCTAATCCACAATTTTCTTTCTCC

ATTTCCGAGGACGATGCCTTGATCAAATTCAAAGAATCTTTAAAAA

>M6-PGSC0003DMG400002902M6LRR-RLK\_1240

AGATGAATAAAATGAATAGAGATGTGTTTGTATGCAGAAATGAGAAAATTGGAAAGTTAAGGCACAAA

AATTTACTTCAATTATTGGCATATCATTACAGAAAGGAAGAGAAATTGATGG

>M6-PGSC0003DMG400002902M6LRR-RLK\_1302

CACAAAATTTACTTCAATTATTGGCATATCATTACAGAAAGGAAGAGAAATTGATGGTATCTGAATATG

TTCCCAAAGGCAGCCTATTATATCTGTTACATGGTATGACAATTTCTTTC

>M6-PGSC0003DMG400002902M6LRR-RLK\_1364

TGAATATGTTCCCAAAGGCAGCCTATTATATCTGTTACATGGTATGACAATTTCTTTCATCTACAGTCAAA

CCTCTCTATAATAATGTCGTTTGTCTAGATAAGTTTTTGGCTGCTATAG

>M6-PGSC0003DMG400002902M6LRR-RLK\_1426

ACAGTCAAACCTCTCTATAATAATGTCGTTTGTCTAGATAAGTTTTGGCTGCTATAGCGAAATGTTGTTA  
TCTAGAACATAAGTTTCATATCTCAACTGTTACTCCCTTTGTATTGAAA

>M6-PGSC0003DMG400002902M6LRR-RLK\_1488

ATGTTGTTATCTAGAACATAAGTTTCATATCTCAACTGTTACTCCCTTTGTATTGAAACATACCTCGATGAT  
GAGTTGGCCTACACACGCCTGTTGTTGATTGAGAACAAATATTTGACC

>M6-PGSC0003DMG400002902M6LRR-RLK\_1612

CAACATCGAGGTGTGTTTTGATACAAATGGAGTGAATAGTTAAGGTAGGTTAAGAGAAAAATGGATAG  
TTAAAGTATGAAACTCGTGAAAAAAGGATAGTTTAGGTGTGTTTTTGACCAT

>M6-PGSC0003DMG400002902M6LRR-RLK\_1674

GGATAGTTAAAGTATGAAACTCGTGAAAAAAGGATAGTTTAGGTGTGTTTTTGACCATTATGGTAAAA  
TCAGTTCTGAAGAAAACCTGGTCACTATTATAGTGAAATGTTATTATAAAG

>M6-PGSC0003DMG400002902M6LRR-RLK\_1736

GTAAAAATCAGTTCTGAAGAAAACCTGGTCACTATTATAGTGAAATGTTATTATAAAGGATGATTGTTAT  
AGAGAGGTTTGACTGTATATCAAATCATTAAAGGTCTTCAACTTCTTTTCA

>M6-PGSC0003DMG400002902M6LRR-RLK\_1798

ATTGTTATAGAGAGGTTTGACTGTATATCAAATCATTAAAGGTCTTCAACTTCTTTTCAACATTTGCACGAG  
TAGATTTTATCCGATAATGTGATCCGATCTATACTTACCGGTCCCTTCC

>M6-PGSC0003DMG400002902M6LRR-RLK\_1848

TCTTTTCAACATTTGCACGAGTAGATTTTATCCGATAATGTGATCCGATCTATACTTACCGGTCCCTTCCAA  
GACATCCGGTCACAATTGGGACGATACAAAGAAGATTAGCATGATCCC

>M6-PGSC0003DMG400002902M6LRR-RLK\_186

TTTTCTTTCTCCATTTCCGAGGACGATGCCTTGATCAAATCAAAGAATCTTTAAAAAACACAACATCTTT  
AGATTCATCTTGGCTTAAAGGTACTAGTCCATGTGACAAAAACAAGAAA

>M6-PGSC0003DMG400002902M6LRR-RLK\_248

AACATCTTTAGATTCATCTTGGCTTAAAGGTACTAGTCCATGTGACAAAAACAAGAAATGGGATCGTATT  
CAATGCGAAGGGAACGTGGTTGAAGGCCTCCTTTTAGGTGAAGCTGGCTT

>M6-PGSC0003DMG400002902M6LRR-RLK\_310

ATCGTATTCAATGCGAAGGGAACGTGGTTGAAGGCCTCCTTTTAGGTGAAGCTGGCTTATCAGGAGAAC  
TAGATATTGATCCATTGGTTGCACTTCCAGGTCTCCGAGTTCTTGAAATTG



>M6-PGSC0003DMG400002902M6LRR-RLK\_372

GGAGAACTAGATATTGATCCATTGGTTGCACTTCCAGGTCTCCGAGTTCTTGAAATTGCGAATAATTCAT  
TTTCAGGCACAATCCCTGAATTCTTCTTGCTTGGTGCACCTAAATCTATA

>M6-PGSC0003DMG400002902M6LRR-RLK\_434

TAATTCATTTTCAGGCACAATCCCTGAATTCTTCTTGCTTGGTGCACCTAAATCTATATATATAGATGGAA  
ACCAATTCTCAGGTGAGATTCTAAAGATTTCTTTGCCAAAATGGGGTC

>M6-PGSC0003DMG400002902M6LRR-RLK\_496

TAGATGGAAACCAATTCTCAGGTGAGATTCTAAAGATTTCTTTGCCAAAATGGGGTCTCTAAGAAGAT  
TTGGTTTGCACGAAACAAATTCTCCGGTTCAATTCCTGAATCTTTAACCA

>M6-PGSC0003DMG400002902M6LRR-RLK\_558

AAGAAGATTTGGTTTGCACGAAACAAATTCTCCGGTTCAATTCCTGAATCTTTAACCAACTTGAAGTACT  
GATGGAACCTTCGTCTTGAAAGTAATGCATTTTCAGGACACGTTCCGTCA

>M6-PGSC0003DMG400002902M6LRR-RLK\_62

AACAAACATGGCCGCCGTTCCCTAATCCTTCATCTCCTTCTCAAGCATCGTCTCCGAAAAACACCATC  
TTTTCTTATTCATATCTCCATTTTCTCCTCATTCTCTAGCTAATCC

>M6-PGSC0003DMG400002902M6LRR-RLK\_620

GAAGTACTTGATGGAACCTTCGTCTTGAAAGTAATGCATTTTCAGGACACGTTCCGTCAATTATCACAAGTG  
AGTTTAACATCAATAGATCTTTGAATAACAAGTTGCAAGGCGAAATCCC

>M6-PGSC0003DMG400002902M6LRR-RLK\_682

CACAAGTGAGTTAACATCAATAGATCTTTGAATAACAAGTTGCAAGGCGAAATCCCTCAGGGGATGT  
CGAAATTTGGTGCTGATCCTTTTAAAGGAAATGCAGACTTATGTGGACAAC

>M6-PGSC0003DMG400002902M6LRR-RLK\_744

GGGATGTCGAAATTTGGTGCTGATCCTTTTAAAGGAAATGCAGACTTATGTGGACAACAATTAGGGAAA  
GAATGTAATAAGGGAATCAATAAGACTCAAGGTGCACCAATGTCAAATTG

>M6-PGSC0003DMG400002902M6LRR-RLK\_806

AGGGAAAGAATGTAATAAGGGAATCAATAAGACTCAAGGTGCACCAATGTCAAATTGAAATGGATCA  
TTCTTGGTATAGTAGTTAGTCTTTTATTGGTGACCATTCTTTTTCGCGTCAA

>M6-PGSC0003DMG400002902M6LRR-RLK\_868

GGATCATTCTTGGTATAGTAGTTAGTCTTTTATTGGTGACCATTCTTTTTCGCGTCAAGCGCAAGGAAGA

TCATTTGACAAGCTTGGGAAAGAGAATCTTGATGAGGGGTTGCACGTTG

>M6-PGSC0003DMG400002902M6LRR-RLK\_930

AAGGAAGATCATTTGACAAGCTTGGGAAAGAGAATCTTGATGAGGGGTTGCACGTTGGTAGCTCGAT  
TAGGAAGAGCACGAGCATTTCATAGCAAAGGAGGTGATTCTGTTTCGTGGATCA

>M6-PGSC0003DMG400002902M6LRR-RLK\_992

CTCGATTAGGAAGAGCACGAGCATTTCATAGCAAAGGAGGTGATTCTGTTTCGTGGATCAACACGAAGGG  
GAGGATCACAAAGGTGGTAAGGCTATGGGAGATCTTGTGTTGGTGAACAACGA

>M6-PGSC0003DMG400002906-(rev)M6LRR-RLP\_0

AGTGTCCAACCTTGTCAAGCCCACTACTAAAAATGGAAAAACAACAAATAGACCAGGCCCTTTCGTAA  
ACCTGATATTCTAAGATAGGATTTTCGCCGCTATCTCCGCCTCTTCGCCTT

>M6-PGSC0003DMG400002906-(rev)M6LRR-RLP\_1116

CTTGCTACTGATGTCTTTTTCTTCATGCTTCATCCTGTTTCTCTTTCTCCACAATTCCCATATTATAAAAC  
TAGAGCTCTGTAAAAGGTCTCATATTTGTCCCAATTTTGTCCCCC

>M6-PGSC0003DMG400002906-(rev)M6LRR-RLP\_1178

TATTATAAACTAGAGCTCTGTAAAAGGTCTCATATTTGTCCCAATTTTGTCCCCCACCACAACATTAT  
AACTTCTTACTTAGAGACCCTCCATGTTAAGACCTGCAAAAGAACAA

>M6-PGSC0003DMG400002906-(rev)M6LRR-RLP\_124

CTCTTCACTGCTTCTGTACATGAACAACAATGTTGCCTCCATGTTACTGACCTTTATGCTTTTTTCCAGTTG  
TGTTCAAAAGTTTCTTCTTCTGCTTTCTTTCTTTTCTCCCTCT

>M6-PGSC0003DMG400002906-(rev)M6LRR-RLP\_1240

CAACATTATAACTTCTTACTTAGAGACCCTCCATGTTAAGACCTGCAAAAGAACAATAATAGGACCAA  
GTCCTGTTAGCTGAATCAGATTTTCAGAAACACATGGGCAAGTGTCTCATG

>M6-PGSC0003DMG400002906-(rev)M6LRR-RLP\_1302

AGGACCAAGTCCTGTTAGCTGAATCAGATTTTCAGAAACACATGGGCAAGTGTCTCATGTTGAGGTCTTTC  
ACAACACCAGCATTTGGATGGGCCTTCAAGACCCCATCTTCTCATTATGT

>M6-PGSC0003DMG400002906-(rev)M6LRR-RLP\_1426

AACGGGGATTTTAAATTTCCATAATCTCCACATTATGAAAGCCATTTTAAATGGTACACCACCCTTACTCC  
ACATCCCTTATAAATTTTCTTCTCCGCCTTATGTCTGATATAATG

>M6-PGSC0003DMG400002906-(rev)M6LRR-RLP\_1488

CCTTACTCCACATCCCTTTATAAATTTTGCTTTCCTCCGCCTTATGTCTGATATAATGCCAAGCAGATTTAA  
CTGAGAAACTTCCCCTTGTCTCTGGCATCCAACAAGGTTTATCCATTG

>M6-PGSC0003DMG400002906-(rev)M6LRR-RLP\_1612

TTCTTCTTTTGGAGGATAGGTTTATCCATTGTTGCTTCTTCTTTTGGAGGATGAATATTCTGCAGAATATG  
GTTACCAATTCTGTGGGAGTATCTCATGTAGTACCTCTGTATCCCAC

>M6-PGSC0003DMG400002906-(rev)M6LRR-RLP\_1674

CAGAATATGGTTCACCAATTCCTGTGGGAGTATCTCATGTAGTACCTCTGTATCCCCTCCCTTGTCTAG  
TTAAATCCCTAACTGTTTTATATGTATCATCACATTGAAATTCTTCTCC

>M6-PGSC0003DMG400002906-(rev)M6LRR-RLP\_1736

CTTGTCTAGTTAAATCCCTAACTGTTTTATATGTATCATCACATTGAAATTCTTCTCCAGTAATTGTGTACA  
AATCCCTTAGGCCCGTCCAGTTATCATGCCAGACTGATACTGATCCTT

>M6-PGSC0003DMG400002906-(rev)M6LRR-RLP\_1793

CAGTAATTGTGTACAAATCCCTTAGGCCCGTCCAGTTATCATGCCAGACTGATACTGATCCTTTCTCCATT  
TTCCATAAAATTTGGTGTCAATGAGATCTCTAGCTTGGAGCATTTTTT

>M6-PGSC0003DMG400002906-(rev)M6LRR-RLP\_186

TTTCCAGTTGTGTTCAAAGTTTCTTCTCTTGTCTTCTTTCTTCTTTCTCCCTCTCTTGTCTCTGATTCT  
CATCATTTTGCAGGTGATTTTGCATGGAGTGCAAGGGTAGTTCAA

>M6-PGSC0003DMG400002906-(rev)M6LRR-RLP\_248

GTCTCTGATTCTCATCATTTTGCAGGTGATTTTGCATGGAGTGCAAGGGTAGTTCAATTCCTCCATCTCC  
AGGTTAAAAGCTCCATCTTAGAATAACAATAGCATTTTCCCTATTTTGT

>M6-PGSC0003DMG400002906-(rev)M6LRR-RLP\_310

TCCATCTCCAGGTTAAAAGCTCCATCTTAGAATAACAATAGCATTTTCCCTATTTTGTGCTTTAACTTCT  
ATGTAATTTTGTGTTTGTGGAAAAATATATGTTGTAGCCTTCCCTTG

>M6-PGSC0003DMG400002906-(rev)M6LRR-RLP\_372

TTTAACTTCTATGTAATTTTGTGTTTGTGGAAAAATATATGTTGTAGCCTTCCCTTGTCCCCTATCCCCT  
AAGGATGATACTCTTAAATATGGGCATAGTAATTTGTCATTATTTATG

>M6-PGSC0003DMG400002906-(rev)M6LRR-RLP\_434

CTATCCCCTTAAGGATGATACTCTTAAATATGGGCATAGTAATTTGTCATTATTTATGAGTCTCCTCGCAG  
GTGTCTTACTGTTAAAATTTGTGAATGTGCAGCTCCCTCGGTCAATATC

>M6-PGSC0003DMG400002906-(rev)M6LRR-RLP\_496

TCCTCGCAGGTGTCTTACTGTAAAATTTGTGAATGTGCAGCTCCCTCGGTCAATATCAAAGTTTGCCACA  
TGATCTGCTAGCTTGTTCCTCCCCTTAGAATATGTTGGAAAATAACTT

>M6-PGSC0003DMG400002906-(rev)M6LRR-RLP\_558

TTTGCCACATGATCTGCTAGCTTGTTCCTCCCCTTAGAATATGTTGGAAAATAACTTGTTTATCTTGTAG  
ACATGATTGAATCCCTAATAATAAAAAAAAAAAAAAATGGTTGAATCCCTG

>M6-PGSC0003DMG400002906-(rev)M6LRR-RLP\_62

TTCGTAAACCTGATATTCTAAGATAGGATTTTCGCCGCTATCTCCGCCTCTTCGCCTTAGCTCTCTTCACTG  
CTTCTGTACATGAACAACAATGTTGCCTCCATGTTACTGACCTTTATG

>M6-PGSC0003DMG400002906-(rev)M6LRR-RLP\_620

ATCTTGTAGACATGATTGAATCCCTAATAATAAAAAAAAAAAAAAATGGTTGAATCCCTGTCACCATTCTG  
CAATTATCCATGGACATGCCCATTTCTTTCTAATACTTTGTACAAAAGC

>M6-PGSC0003DMG400002906-(rev)M6LRR-RLP\_682

CATTTCTGCAATTATCCATGGACATGCCCATTTCTTTCTAATACTTTGTACAAAAGCATTGAGTCAGTCT  
GTATGATTATTTGATTATGTTGTGACTTCTTGCAATGCTTGGACGCCTT

>M6-PGSC0003DMG400002906-(rev)M6LRR-RLP\_744

AGTCAGTCTGTATGATTATTTGATTATGTTGTGACTTCTTGCAATGCTTGGACGCCTTCAGAATAGCTTTA  
GCTACCGCGACTGTATTAGTAGTATTTTCTATACTTGCTCCTTCCACGT

>M6-PGSC0003DMG400002906-(rev)M6LRR-RLP\_806

ATAGCTTTAGCTACCGCGACTGTATTAGTAGTATTTTCTATACTTGCTCCTTCCACGTATTCTACATCTCCT  
TTAGCATTCTTAAAACGAAGGCATAGGAACTAAGACCCGGATTTCCT

>M6-PGSC0003DMG400002906-(rev)M6LRR-RLP\_930

AAGTTCCATTTGTATTGTATTTTACCCACCCATTCGGTGGGAATCCATAACCCTTTTCACTTTCATTTTA  
GGTTTGTAGCTTGTCCATTCTTAGAGCATATCCGGCCAGTTAACAGGA

>M6-PGSC0003DMG400002906-(rev)M6LRR-RLP\_992

TTTCATTTTAGGTTTGTAGCTTGTCCATTCTTAGAGCATATCCGGCCAGTTAACAGGACATGTCATAAAGG  
GTTTCCTGAGTCTTGCCAGCATATACATGTTCTGGTGATATTGTGAAT

>M6-PGSC0003DMG400002908-(rev)M6LRR-RLP\_0

ATGAAATTAGGACAATTGAGTATGCTTGAAGCTTTAGATCTCTTGGAAATCGGCTCACTGGAAAGATTC

CACAGGAATTGACAAGAATAAACTTTCTCGCCTTCTTAAACCTCTCTCAA

>M6-PGSC0003DMG400002908-(rev)M6LRR-RLP\_60

GGAAAGATTCCACAGGAATTGACAAGAATAAACTTTCTCGCCTTCTTAAACCTCTCTCAAATCATCTCGT

CGGACCAATTCCTCAAGGTCGGCAATTCAACACATTTGAAAATGACTCA

>M6-PGSC0003DMG400002910-(rev)M6LRR-RLP\_0

AACCTACAGTATCTTGATCTGAAATGTAACCTCCCTTCAGGGTCCACTACCTTCATCCATTTGTAACATGAG

TTCGCTTATCTTATTAGATTTATCACGCAACAATTCAGTGACTCAGTT

>M6-PGSC0003DMG400002910-(rev)M6LRR-RLP\_1047

TCCGAAGAAGAAGGCGAGTCATATTTTTTTAGTGGATTTACTTGGGAATCAGTAGTCATAGGCTACAGCT

GTGGACTAGTTGTTGGAACGTGCATGTGGAGTCTCATGTTTAAATATCGT

>M6-PGSC0003DMG400002910-(rev)M6LRR-RLP\_660

ACGACAACCATAGATCTCTCAAGCAACCATTTTGAAGGTGTCATTCCGAAAACACTAAAGGATCTCATAT

CACCTTTGGCTACTCAATTTATCTCATAACAATCTCAGAGGAGATATTCCA

>M6-PGSC0003DMG400002910-(rev)M6LRR-RLP\_924

CAAGGTCGGCAATTCAACACATTTGAAAATGACTCATATGGTGGCAACCTTGATTTATGTGGTGTTCCTT

TAACAAAGAAATGTGGAACGTGTGATTCATCGCATGTTCTCAACAATTG

>M6-PGSC0003DMG400002914-(rev)M6LRR-RLP\_0

AAAAAAGAACCATTCTTTGTTTCTTCTCTCTAACCTCAAATCTTTCTCTCTCTATTTTTGCCCTACTTTGT

TGGGGTTCTTGAAAAAACTGGATTTTTGAGGGTTCTTGAAAAAAT

>M6-PGSC0003DMG400002914-(rev)M6LRR-RLP\_1037

AAAATTCATAAGAAATGGGCATATGGATGAATACTTGTAATAAAATTTTCATTAGACAAAATTTAGTATGC

TTGCTTGTTGATTTAAGGGAAAATATAGCTGACAATGTATTTGCTCCTTG

>M6-PGSC0003DMG400002914-(rev)M6LRR-RLP\_1098

TTAGTATGCTTGCTTGTTGATTTAAGGGAAAATATAGCTGACAATGTATTTGCTCCTTGATTTTCAGGTG

ATGATGAGTTCTATTCTGGTGGATCGTTTTGTTCTGCAGATTTGGGTCTC

>M6-PGSC0003DMG400002914-(rev)M6LRR-RLP\_1159

TTTCAGGTGATGATGAGTTCTATTCTGGTGGATCGTTTTGTTCTGCAGATTTGGGTCTCATGTTGTCTTTG

GGTCATGCTGATGTTTACTGTCCTCCTAGGAAGAGGGCACGCATTAGTG

>M6-PGSC0003DMG400002914-(rev)M6LRR-RLP\_122

GATTTTTTCATCTGGAATGCAAATCTTGGTTAAAGATATAATCTGGGTTGTGTTTTCTTGGTTCAAATC  
TGATCTTTTTTGCTTACAGTTTGGGATTTCTTCTGAAGAACAGACATG

>M6-PGSC0003DMG400002914-(rev)M6LRR-RLP\_1220

GTTGTCTTTGGGTCATGCTGATGTTTACTGTCCTCCTAGGAAGAGGGCACGCATTAGTGGCCCGTTTGT  
GTCGAAGACCGGTCAAAGGATCCATCTCTTCAAATTCTTCTGATGAATG

>M6-PGSC0003DMG400002914-(rev)M6LRR-RLP\_1281

CCGTTTGTGTGCGAAGACCGGTCAAAGGATCCATCTCTTCAAATTCTTCTGATGAATGCCTATTTGAGAT  
CCTCAGACGATTGCCTGGTGGCCGAGAAAGGGTGCAGCAGCTTGTGT

>M6-PGSC0003DMG400002914-(rev)M6LRR-RLP\_1342

TATTTGAGATCCTCAGACGATTGCCTGGTGGCCGAGAAAGGGTGCAGCAGCTTGTGTTTCTAAGCGCT  
GGCTTACAGTGTGAGTAGCGTGAGGAACTCTGAAATCTGCAGGAGCAAGA

>M6-PGSC0003DMG400002914-(rev)M6LRR-RLP\_1403

TAAGCGCTGGCTTACAGTGTGAGTAGCGTGAGGAACTCTGAAATCTGCAGGAGCAAGAGCTATAACA  
ATCTAAATGACACAATAATGATCTCTAAAGATGAAGATCTTGAAGTTGAATG

>M6-PGSC0003DMG400002914-(rev)M6LRR-RLP\_1464

TATAACAATCTAAATGACACAATAATGATCTCTAAAGATGAAGATCTTGAAGTTGAATGTGATGGATACC  
TTACTAGGTGTGTGGAAGGGAAGAAAGCTACTGATGTTAGACTTGCTGCA

>M6-PGSC0003DMG400002914-(rev)M6LRR-RLP\_1525

ATGGATACCTTACTAGGTGTGTGGAAGGGAAGAAAGCTACTGATGTTAGACTTGCTGCAATTGCAGTTG  
GGACGTCTACCCGTGGTGGACTAGGAAAGCTTTCTATCCGAGGCAGTAACT

>M6-PGSC0003DMG400002914-(rev)M6LRR-RLP\_1586

TGCAGTTGGGACGTCTACCCGTGGTGGACTAGGAAAGCTTTCTATCCGAGGCAGTAACTCAGTTCGTGG  
TATTACTAATGTTGGTCTATCTGCTATTGCACATGGGTGCCCTTCTCTTAG

>M6-PGSC0003DMG400002914-(rev)M6LRR-RLP\_1647

GTTCTGTTGTTACTAATGTTGGTCTATCTGCTATTGCACATGGGTGCCCTTCTCTTAGGGTCCTATCATT  
GTGGAATGTTCTTCTATTGGGGATGAAGGTCTTGGAGGTTGCAAGG

>M6-PGSC0003DMG400002914-(rev)M6LRR-RLP\_1708

TCCTATCATTGTGGAATGTTCTTCTATTGGGGATGAAGGTCTTGGAGGTTGCAAGGGAATGCCGTTCC  
ATTAGAAAAGCTAGATCTGAGCCACTGTCGTTCAATCTCCAACAAGGGTC

>M6-PGSC0003DMG400002914-(rev)M6LRR-RLP\_1769

ATGCCGTTTCATTAGAAAAGCTAGATCTGAGCCACTGTCGTTCAATCTCCAACAAGGGTCTTGTTGCAATA  
GCAGAGAATTGCCCGAGCTTGACTTCATTGACCATTGAATCCTGTCCAAA

>M6-PGSC0003DMG400002914-(rev)M6LRR-RLP\_183

GTTCAAAATCTGATCTTTTTTGCTTTACAGTTTGGGATTTCTTCTGAAGAACAGACATGCCTACTCTTGTTA  
ATTACAGTGGTGAGTTTCAAAAACCTCATTCTTGGTATTTTAAGTTA

>M6-PGSC0003DMG400002914-(rev)M6LRR-RLP\_1830

GTTGCAATAGCAGAGAATTGCCCGAGCTTGACTTCATTGACCATTGAATCCTGTCCAAAGATTGGAAAC  
GAAGGCTTGCAAGCTATTGGAAGATGCTGCACCAAACACTACAGTCCCTTACG

>M6-PGSC0003DMG400002914-(rev)M6LRR-RLP\_1891

TTGGAAACGAAGGCTTGCAAGCTATTGGAAGATGCTGCACCAAACACTACAGTCCCTTACGATTAAGGACT  
GCCCACTTGTTGGAGATCAGGGAGTTGCTAGTCTTCTGTCATCAGGTGCTT

>M6-PGSC0003DMG400002914-(rev)M6LRR-RLP\_1952

TAAGGACTGCCCACTTGTTGGAGATCAGGGAGTTGCTAGTCTTCTGTCATCAGGTGCTTCAATGTTATCG  
AAAGTGAAACTACATGGTCTAAACATCACAGATTTCTCGCTTGCTGTCAT

>M6-PGSC0003DMG400002914-(rev)M6LRR-RLP\_2013

ATGTTATCGAAAGTGAAACTACATGGTCTAAACATCACAGATTTCTCGCTTGCTGTCATTGGTCACTATG  
GCAAGCTGATTACCAGTCTTAATCTTTGTTCACTTCGTAACGTGAGTCAG

>M6-PGSC0003DMG400002914-(rev)M6LRR-RLP\_2074

GTCACTATGGCAAGCTGATTACCAGTCTTAATCTTTGTTCACTTCGTAACGTGAGTCAGAAGGGGTTTTG  
GGTCATGGGTAATGCTCAAGGCCTCCAGTCTCTGGTTTCTTTGACAATCA

>M6-PGSC0003DMG400002914-(rev)M6LRR-RLP\_2135

GGGGTTTTGGGTCATGGGTAATGCTCAAGGCCTCCAGTCTCTGGTTTCTTTGACAATCACCTTGTGCCAG  
GGAGCCACAGATGTCGGTCTTGAAGCAGTGGGAAAGGGATGCCCAAATCT

>M6-PGSC0003DMG400002914-(rev)M6LRR-RLP\_2196

TTGTGCCAGGGAGCCACAGATGTCGGTCTTGAAGCAGTGGGAAAGGGATGCCCAAATCTCAAACATAT  
GTGCATTCGCAAGTGTTGCTTTGTTTCTGACGGTGGACTTGTTGCTTTCGCT

>M6-PGSC0003DMG400002914-(rev)M6LRR-RLP\_2257

AACATATGTGCATTCGCAAGTGTTGCTTTGTTTCTGACGGTGGACTTGTTGCTTTCGCTAAAGAGGCTGG

ATCTCTCGAGAGTTTAATCTTGGAGGAGTGCAACAGAATTACCCAAGTAG

>M6-PGSC0003DMG400002914-(rev)M6LRR-RLP\_2318

AGAGGCTGGATCTCTCGAGAGTTTAATCTTGGAGGAGTGCAACAGAATTACCCAAGTAGGTATCCTTAA

TGCAGTTTCAAACCTGCAGGAAGTTAAAGTCTCTTTCCCTAGTGAAGTGCAT

>M6-PGSC0003DMG400002914-(rev)M6LRR-RLP\_2379

ATCCTTAATGCAGTTTCAAACCTGCAGGAAGTTAAAGTCTCTTTCCCTAGTGAAGTGCATGGGAATCAAGG

ATCTAGCTCTACAAACTTCCATGCTGTCTCCATGTGAATCTCTTCGGTCC

>M6-PGSC0003DMG400002914-(rev)M6LRR-RLP\_244

TACTCTTGTTAATTACAGTGGTGAGTTTCAAAAACCTTCATTTCTTGGTATTTTAAGTTATGGGGTTGTTCA

TATTTCAATGAATTTTGAAGTTCAGTTATAATCTTTTGTTTTTTCATCA

>M6-PGSC0003DMG400002914-(rev)M6LRR-RLP\_2440

GAATCAAGGATCTAGCTCTACAAACTTCCATGCTGTCTCCATGTGAATCTCTTCGGTCCTTGTCTATCCGA

AGCTGTCCAGGATTCGGGAGCACTAGCTTAGCTATGGTCGGTAAGCTCT

>M6-PGSC0003DMG400002914-(rev)M6LRR-RLP\_2501

GTCTATCCGAAGCTGTCCAGGATTCGGGAGCACTAGCTTAGCTATGGTCGGTAAGCTCTGCCCAAGCT

GCATCAATTAGATCTCAGTGGGCTTTGTGGAATAACCGATGCTGGTCTTCT

>M6-PGSC0003DMG400002914-(rev)M6LRR-RLP\_2562

CCCAAGCTGCATCAATTAGATCTCAGTGGGCTTTGTGGAATAACCGATGCTGGTCTTCTCCCACTCTTGG

AGAAGTGTGAAGGACTTGTTAAGGTAAATCTTAGCGACTGCCTGAACTTG

>M6-PGSC0003DMG400002914-(rev)M6LRR-RLP\_2623

CACTCTTGAGAACTGTGAAGGACTTGTTAAGGTAAATCTTAGCGACTGCCTGAACTTGACAGACCAAG

TGGTGCTTTCATTGGCTTCGCGACATGGAGAGACCCTTGAATTGTTGAATC

>M6-PGSC0003DMG400002914-(rev)M6LRR-RLP\_2684

AGACCAAGTGGTGCTTTCATTGGCTTCGCGACATGGAGAGACCCTTGAATTGTTGAATCTCGATGGATG

CAGGAAGGTTACTGACGCAAGTTTGTGGCAATTGCAGATTATTGCCATT

>M6-PGSC0003DMG400002914-(rev)M6LRR-RLP\_2745

GATGGATGCAGGAAGGTTACTGACGCAAGTTTGTGGCAATTGCAGATTATTGCCATTACTTATTGATC

TTGATGTTTCTAAGTGTGCAATAACTGATTCTGGTGTAGCTGCTTTATCC

>M6-PGSC0003DMG400002914-(rev)M6LRR-RLP\_2806



TTATTGATCTTGATGTTTCTAAGTGTGCAATAACTGATTCTGGTGTAGCTGCTTTATCCCGTGGAGTGCAA  
GTGAATTTGCAGGTCCTTTCTTTATCAGGTTGCTCCATGGTATCAAACA

>M6-PGSC0003DMG400002914-(rev)M6LRR-RLP\_2867

TGGAGTGCAAGTGAATTTGCAGGTCCTTTCTTTATCAGGTTGCTCCATGGTATCAAACAAGAGTGTCCTT  
TCTCTTAAAAAGTTGGGAGAGAATCTACTCGGCTTGAATCTCCAACATTG

>M6-PGSC0003DMG400002914-(rev)M6LRR-RLP\_2928

AGTGTCCCTTCTCTTAAAAAGTTGGGAGAGAATCTACTCGGCTTGAATCTCCAACATTGCTCCATTAGTTG  
CAGCTCAGTCGAGCTTCTTGTGGAGGATTTGTGGAGGTGTGACATCCTC

>M6-PGSC0003DMG400002914-(rev)M6LRR-RLP\_2989

CCATTAGTTGCAGCTCAGTCGAGCTTCTTGTGGAGGATTTGTGGAGGTGTGACATCCTCTCCTAAACCAA  
AAGGGCACAAGGAAATGCATCAAAAATGGTCAAAAAGAATAAGCTGAAAGC

>M6-PGSC0003DMG400002914-(rev)M6LRR-RLP\_305

GGGTTGTTTCATATTTCAATGAATTTTGAAGTTCAGTTATAATCTTTTGTTCATCATGAATTACTGAGA  
TGGAGATGGATTTGTTATGTTTAGATTCATATTAGTTGTTTATCATAA

>M6-PGSC0003DMG400002914-(rev)M6LRR-RLP\_3050

CTAAACCAAAGGGCACAAGGAAATGCATCAAAAATGGTCAAAAAGAATAAGCTGAAAGCTATAATGGT  
TCATTCAGCCTGGCAATTACAGAAGCAAACATGAGTGTCTTTTTTTAGCCC

>M6-PGSC0003DMG400002914-(rev)M6LRR-RLP\_3111

TAATGGTTCATTCAGCCTGGCAATTACAGAAGCAAACATGAGTGTCTTTTTTTAGCCCGTATATTCGTGG  
CTATCTAATACTTCAGTGTCTCGGTTGTTTTCCAGGAGGCTATGGCATC

>M6-PGSC0003DMG400002914-(rev)M6LRR-RLP\_3172

ATATTCGTGGCTATCTAATACTTCAGTGTCTCGGTTGTTTTCCAGGAGGCTATGGCATCACTTTTTTCCTCC  
ATTTTTTGCAGGCTTCGTCAAATCGAAGCCTGTTTCATCCATTTTTGG

>M6-PGSC0003DMG400002914-(rev)M6LRR-RLP\_3233

TTTTTCTCCATTTTTTGCAGGCTTCGTCAAATCGAAGCCTGTTTCATCCATTTTTGGAGACAACCTCCATC  
ATGCCATGGTTTCTGAGAATACAGTCACCTAGTACTGAGATTAATAAAT

>M6-PGSC0003DMG400002914-(rev)M6LRR-RLP\_3294

ACAACCTCCATCATGCCATGGTTTCTGAGAATACAGTCACCTAGTACTGAGATTAATAAATTTTCACTCATGT  
TGCTCCTTGAAAGAATCAGGCCGTTTGAATCATTCTCAGCTACAACATC

>M6-PGSC0003DMG400002914-(rev)M6LRR-RLP\_3355

TCACTCATGTTGCTCCTTGAAAGAATCAGGCCGTTGAATCATTCTCAGCTACAACATCGACGGACAATA  
TCTATCGCGCATTTCCTCCTTGGTTAGCTACATTGCAGAAATCAGACAG

>M6-PGSC0003DMG400002914-(rev)M6LRR-RLP\_3416

CGGACAATATCTATCGCGCATTTCCTCCTTGGTTAGCTACATTGCAGAAATCAGACAGTAGTACTGTAG  
TTTTTCATGTTTTAGTGTTTCATTGTAAGTATTCTGTTGTGTGTCTTTTA

>M6-PGSC0003DMG400002914-(rev)M6LRR-RLP\_3477

GTAAGTATTCTGTTGTGTGTCTTTTAGACTTTAGTTGCT  
TTGAGCAAATTTCTGTTGTTGTGGTGCCTGTTATTCCAGGGGCTTGGC

>M6-PGSC0003DMG400002914-(rev)M6LRR-RLP\_3538

CTTTAGTTGCTTTGAGCAAATTTCTGTTGTTGTGGTGCCTGTTATTCCAGGGGCTTGGCCATTACAACCTT  
ATGTAGGTTGTTATTTTTTAACCAGTCCCTAGTTTTTTGATAGGATTAT

>M6-PGSC0003DMG400002914-(rev)M6LRR-RLP\_3599

TTACAACCTTATGTAGGTTGTTATTTTTTAACCAGTCCCTAGTTTTTTGATAGGATTATCAATGTCCTATTT  
TTTACCAGGTTCCACATATTCAGATTTGACTCTTGCAACTATGTTTT

>M6-PGSC0003DMG400002914-(rev)M6LRR-RLP\_3630

CCAGTCCCTAGTTTTTTGATAGGATTATCAATGTCCTATTTTTTACCAGGTTCCACATATTCAGATTTGTAC  
TCTTGCAACTATGTTTTATATATGATGGAAGTACTAGTTTGTTTTGAA

>M6-PGSC0003DMG400002914-(rev)M6LRR-RLP\_366

AATTACTGAGATGGAGATGGATTTGTTATGTTTAGATTCATATTAGTTGTTTATCATAAATAAAGTTTATA  
ACTTTGCATAGTTACATGATTGTTGAGATGAATAGGAGCAATAATTTAT

>M6-PGSC0003DMG400002914-(rev)M6LRR-RLP\_427

AAAGTTTATAACTTTGCATAGTTACATGATTGTTGAGATGAATAGGAGCAATAATTTATTGAGATGAAGA  
TGAATTTTTTAAGGTTTAGATCCATGAATATAGTCTATAACTATGTATAG

>M6-PGSC0003DMG400002914-(rev)M6LRR-RLP\_488

AGATGAAGATGAATTTTTTAAGGTTTAGATCCATGAATATAGTCTATAACTATGTATAGGTGCATGATTG  
TTGATAACTTGAGATAAATATGGTTTATTAATTTACTGAAATGAAGATGA

>M6-PGSC0003DMG400002914-(rev)M6LRR-RLP\_549

GCATGATTGTTGATAACTTGAGATAAATATGGTTTATTAATTTACTGAAATGAAGATGATCTTTTAGGTTT

AGATAACAATCATGTTTTTTTTTTTTAAAGGAAGTTGGTTATGAGATAAT

>M6-PGSC0003DMG400002914-(rev)M6LRR-RLP\_61

GCCCTACTTTGTTGGGGTTCTTGAAAAAACTGGATTTTTGAGGGTTCTTGAAAAAAATTGGATTTTTTCA  
TCTGGAATGCAAATCTTGGTTAAAGATATAATCTGGGTTGTGTTTTTCT

>M6-PGSC0003DMG400002914-(rev)M6LRR-RLP\_610

TTTTAGGTTTAGATAACAATCATGTTTTTTTTTTTTAAAGGAAGTTGGTTATGAGATAATAACTAAAAGTTG  
AGTGACTATCTAAGAAATTAACATATAACTTTGTATAGGTGCATGAT

>M6-PGSC0003DMG400002914-(rev)M6LRR-RLP\_671

CTAAAAGTTGAGTGACTATCTAAGAAATTAACATATAACTTTGTATAGGTGCATGATTGTTGAGGTGA  
ATATGAGCATTAAATTTACTGAAATGGATAAAAAGGGAAAAAAGTTATGAT

>M6-PGSC0003DMG400002914-(rev)M6LRR-RLP\_732

TTGAGGTGAATATGAGCATTAAATTTACTGAAATGGATAAAAAGGGAAAAAAGTTATGATAAGACTAGAT  
CCTTTGGCTTTGAAGATTAATTTCTGTGTTTGATAGATCTTTTTTTGTCTT

>M6-PGSC0003DMG400002914-(rev)M6LRR-RLP\_793

GACTAGATCCTTTGGCTTTGAAGATTAATTTCTGTGTTTGATAGATCTTTTTTTGTCTTATGTTCTGAATCT  
ATATTAGAGATTGGTAATATATTGAAGAACTGTGGATTACTCTTTTG

>M6-PGSC0003DMG400002914-(rev)M6LRR-RLP\_854

GTTCTGAATCTATATTAGAGATTGGTAATATATTGAAGAACTGTGGATTACTCTTTTGGGTTCTGTATCT  
AGAAACGTGTATCTATCTGATCTGATCTGAAGATGTATGTACATAATAG

>M6-PGSC0003DMG400002914-(rev)M6LRR-RLP\_915

TTCTGTATCTAGAAACGTGTATCTATCTGATCTGATCTGAAGATGTATGTACATAATAGGTAGATCTAAA  
GGTTCAATTCACATGTGATAGTTGCTTATCTGTTATACTTGAAGTTGAAG

>M6-PGSC0003DMG400002914-(rev)M6LRR-RLP\_976

AGATCTAAAGTTCAATTCACATGTGATAGTTGCTTATCTGTTATACTTGAAGTTGAAGTGAATAATTCAT  
AAGAAATGGGCATATGGATGAATACTTGTAATAAAATTTTCATTAGACAAA

>M6-PGSC0003DMG400002937M6LRR-RLP\_0

GATTGATTTGTAAGAAGAGAACATCCATCCTGTTTTGGCTGAATACGAAAAAGAAAGATGAGACGTTT  
CTTTTTCTTTTATTCATTTCTCTGTTTTGTGTTGCTAATAAGTCGAAGTTT

>M6-PGSC0003DMG400002937M6LRR-RLP\_1054

CGTTTGGATCTTTCTGACAACTCCTTTTCAGGTGAAATCCCAACGTTTTCTCTAACCTCCAAGAGCTACG  
TTATTTAAATCTTTATGATAACAGCCTCATCGGTTCAATTCCTTCTACA

>M6-PGSC0003DMG400002937M6LRR-RLP\_1116

AGAGCTACGTTATTTAAATCTTTATGATAACAGCCTCATCGGTTCAATTCCTTCTACAATTTCAAACCTTGAC  
ACATCTTGAAAGCTTAGCCTTGTGCGAGTAATCCCTGTCTGGCCCACT

>M6-PGSC0003DMG400002937M6LRR-RLP\_1240

AATAATGCGAGCATTCTTCAAAGCTAACCCACATGGAATTGTATAACAACCTCACTGAATGGTACCATAC  
CGCCTTGGGTGTTAACTCCCTTTAGCATCTACATTGTGGCTCCATCAT

>M6-PGSC0003DMG400002937M6LRR-RLP\_1302

TACCATACCGCCTTGGGTGTTAACTCCCTTTAGCATCTACATTGTGGCTCCATCATAATCAATTTAGTG  
GACTACCCGATGAAATCAAACAAACCCAACATTAGAATACCTGTATTT

>M6-PGSC0003DMG400002937M6LRR-RLP\_1364

AATTTAGTGACTACCCGATGAAATCAAACAAACCCAACATTAGAATACCTGTATTTAAGCAATAATCA  
ACTCAGTTTTTTACACCAATCACTTGCGAATCTCACAACCTTTCTACCC

>M6-PGSC0003DMG400002937M6LRR-RLP\_1426

AATAATCAACTCAGTTTTTTACACCAATCACTTGCGAATCTCACAACCTTTCTACCCTTGACCTTTCAACA  
AATAACATCACCGGTGATGCAGGAACAAATATCACCTTTCTCGCCTA

>M6-PGSC0003DMG400002937M6LRR-RLP\_1488

CCTTTCAACAATAACATCACCGGTGATGCAGGAACAAATATCACCTTTCTCGCCTACAAGTTTTGCAGT  
TATCATCTTGGAAGTGAAGGGATTTCCACACTTCTTGAGAAATGTAAA

>M6-PGSC0003DMG400002937M6LRR-RLP\_1550

TTTTGCAGTTATCATCTTGGAAGTGAAGGGATTTCCACACTTCTTGAGAAATGTAAAGACTTAAGGT  
GTTGGATATTTCTAACAATAAGATTCGTGGTCAAATCCCTAACTGGTTTA

>M6-PGSC0003DMG400002937M6LRR-RLP\_1674

CATGAGGTGGGACTCCTTGTTGCACCTAACCTTTACATAACTCATTAAACAGGCCACCTACAGCAACTT  
CATTATAATAGTCTAGAGTCTCTTGATCTTAAATTTAACTTCTTGAGGG

>M6-PGSC0003DMG400002937M6LRR-RLP\_1736

AGCAACTTCATTATAATAGTCTAGAGTCTCTTGATCTTAAATTTAACTTCTTGAGGGAGCACTACCTTCA  
TCCATTTGTAACATGAGCAGTCTTAGCCTTTTGGATTTGTCAAACAACT

>M6-PGSC0003DMG400002937M6LRR-RLP\_1798

CTACCTTCATCCATTTGTAACATGAGCAGTCTTAGCCTTTTGGATTTGTCAAACAACACTTTCAGTGACTC  
GGTCCACATTGTGTGGGCAGCATGGTTGGGCTATCTGTGCTAGACTTG

>M6-PGSC0003DMG400002937M6LRR-RLP\_186

ACACTTTGAGATTATATCCGACCCTTATTCCCGATGTCCTATTCATTTCCAAGAACAATGTCTTGGAATG  
AGAGTAGGGATTGCTGCATTTGGAATGGAGTCACTTGTGATATGTTAAC

>M6-PGSC0003DMG400002937M6LRR-RLP\_1860

CAGTGACTCGGTTCCACATTGTGTGGGCAGCATGGTTGGGCTATCTGTGCTAGACTTGAGAAGAAATAA  
TTTCACTGGGAGTCTTCCACCGTTTTGTGTGCAGAGCAATTCATTGAGAAC

>M6-PGSC0003DMG400002937M6LRR-RLP\_1922

GAAATAATTTCACTGGGAGTCTTCCACCGTTTTGTGTGCAGAGCAATTCATTGAGAACCATTGTCTTGAA  
TGGTAATCGTTTTGAAGGAACTGTCCCGATGTCGTTGCTCAAGTGTGATG

>M6-PGSC0003DMG400002937M6LRR-RLP\_1984

GTCTTGAATGGTAATCGTTTTGAAGGAACTGTCCCGATGTCGTTGCTCAAGTGTGATGGTCTAGAAGTCC  
TTGATGTGGGGAACAACGCTATAAATGACACGTTTCCAGCTTGGCTCGGA

>M6-PGSC0003DMG400002937M6LRR-RLP\_2108

TTCAAGAGCTGCAGGTACTTATATTAAGTCCAACAAGTTCCATGGACCTATAAGTACTAGGCTGAAGTT  
TGTTTTCCCTGTGTTACGGATTTTTGATCTCTCTCATAATGAGTTTGGTG

>M6-PGSC0003DMG400002937M6LRR-RLP\_2170

CTGAAGTTTGGTTTCCCTGTGTTACGGATTTTTGATCTCTCTCATAATGAGTTTGGTGGCTCACTGCCTGC  
AGAAGTTTTTGAAAACCTCAAAGGAATGATCAAAACAGATGACAGAGAC

>M6-PGSC0003DMG400002937M6LRR-RLP\_2232

ACTGCCTGCAGAAGTTTTTGAAAACCTCAAAGGAATGATCAAAACAGATGACAGAGACAAAGGTGAGA  
TTGAATATATGCAACCACAGTCTTACAGCGGATTTAGTAACGTAATGTATGA

>M6-PGSC0003DMG400002937M6LRR-RLP\_2294

GTGAGATTGAATATATGCAACCACAGTCTTACAGCGGATTTAGTAACGTAATGTATGAGGTTTCAGTGA  
GGTTGGTGATCAAAAACAGGAAATTCAGCTAGAAAAAATCACCACAATTA

>M6-PGSC0003DMG400002937M6LRR-RLP\_2356

TCAGTGAGGTTGGTGATCAAAAACAGGAAATTCAGCTAGAAAAAATCACCACAATTATGACAACCATA

GATCTCTCAGGCAACCATTTTGAAGGTGTCATTCCGAAAACACTAAAGGAT

>M6-PGSC0003DMG400002937M6LRR-RLP\_2418

AACCATAGATCTCTCAGGCAACCATTTTGAAGGTGTCATTCCGAAAACACTAAAGGATCTCAACTCACTT  
TGGCTACTCAATTTATCTCATAACAATCTTAAAGGAGATATTCCAATGGA

>M6-PGSC0003DMG400002937M6LRR-RLP\_248

CTTGAATGAGAGTAGGGATTGCTGCATTTGGAATGGAGTCACTTGTGATATGTTAACCGGTCGTGTTA  
TCGCGTTGGACCTTAGTTGCAGTGAGCTTTGGGGAAGTATTCATCCCAACA

>M6-PGSC0003DMG400002937M6LRR-RLP\_2542

GTGAAATTGAATATGCTTGAAGCGTTAGATCTCTCTTGAATCGGCTCACTGGAAAGATTCCACAGGAA  
TTCACAAGAATGAACTTTCTGTCATTCTTAAACCTCTCTCAAAATCTCCTT

>M6-PGSC0003DMG400002937M6LRR-RLP\_2882

TTGTTGGAAGTGTGATGTGGAGCCTCATGTTTAAATATCGTAAGCCAAAATGGTTTGTCAAATTTTTTGA  
GGCATTTCCTCCCAAGAAAATGAGAAGGTCACAGAAGAGAATGCTGAGAC

>M6-PGSC0003DMG400002937M6LRR-RLP\_310

CGTGTTATCGCGTTGGACCTTAGTTGCAGTGAGCTTTGGGGAAGTATTCATCCCAACAGCAGCCTCTCC  
AACTTCATCATCTCCACACACTAAACCTTGCTTACAATGACTTCAATTAT

>M6-PGSC0003DMG400002937M6LRR-RLP\_372

CCTCTTCCAACCTTCATCATCTCCACACACTAAACCTTGCTTACAATGACTTCAATTATTCTTCAATCCCACAT  
AACATTGGCCGATTGAGGAATTTGAGGCATCTCAACCTTTCTTGGTC

>M6-PGSC0003DMG400002937M6LRR-RLP\_434

CAATCCCACATAACATTGGCCGATTGAGGAATTTGAGGCATCTCAACCTTTCTTGGTCTCGCTTTGATGG  
AAAAATCCCAATAGAATTCTCATATCTTCCAATTTGGTTTCACTTGATC

>M6-PGSC0003DMG400002937M6LRR-RLP\_496

TTTGATGGAAAAATCCCAATAGAATTCTCATATCTTCCAATTTGGTTTCACTTGATCTTTCTGCGAATGG  
ATTACAACCTTGATGAGAGAACATTTGAAACAATGCTTCAGAACTTCACA

>M6-PGSC0003DMG400002937M6LRR-RLP\_558

TGCGAATGGATTACAACCTTGATGAGAGAACATTTGAAACAATGCTTCAGAACTTCACAAATCTGGAGCT  
ACTTTCTCTTTCAAGTCAACATCTCATCTCCGATACCTGTGAATATGTC

>M6-PGSC0003DMG400002937M6LRR-RLP\_62

GACGTTTCTTTTTCTTTTATTCATTTCTCTGTTTTGTGTTGCTAATAAGTCGAAGTTTTTCTTCTTCCTTTGA  
GCATCATCTTTGCTCTCCCACTGAAGCTTCTGCTTTGCTTCAGTTTA

>M6-PGSC0003DMG400002937M6LRR-RLP\_682

TCCTTAAGGTACGTGGATCTTGAATCACTAATCTGCGAGGTGTTGTCCCAGAGAGTCTTTTCCTTCTGC  
CAAACCTGGAAACGCTCTATTTGAGTAATAACTATCTTCTCAATGGAGTT

>M6-PGSC0003DMG400002937M6LRR-RLP\_744

CCTTCTGCCAACTTGGAAACGCTCTATTTGAGTAATAACTATCTTCTCAATGGAGTTTTACCAAAGATCC  
ACCCGAGCAACACTCTGTTAATGGAGTTGGATATTTCATACACAGGAAT

>M6-PGSC0003DMG400002937M6LRR-RLP\_806

CAAAGATCCACCCGAGCAACACTCTGTTAATGGAGTTGGATATTTCATACACAGGAATCTCTGGCTCCAT  
TCCTGATTCAATTGGCACCTTGAGTTCCTTGAATATCTTGATCCTCCAAG

>M6-PGSC0003DMG400002937M6LRR-RLP\_868

GGCTCCATTCTGATTCAATTGGCACCTTGAGTTCCTTGAATATCTTGATCCTCCAAGGATGTCAATTGTC  
GGGTTCCATTCTGATTCCATAGGCAACCTAACACAAATTACGGAGTTG

>M6-PGSC0003DMG400002937M6LRR-RLP\_930

TCAATTGTCGGGTTCCATTCTGATTCCATAGGCAACCTAACACAAATTACGGAGTTGATTTTATCTTTTA  
ATCATTTCACTGGCCATATTCCTTCAACAATCTCTAAATTGAAGCACCT

>M6-PGSC0003DMG400002937M6LRR-RLP\_992

TATCTTTTAAATCATTTCACTGGCCATATTCCTTCAACAATCTCTAAATTGAAGCACCTCACACGTTTGGATC  
TTTCTGACAACTCCTTTTCAGGTGAAATTCCCAACGTTTTCTCTAACC

>M6-PGSC0003DMG400002954M6LRR-RLP\_0

TTTTCTAATAGATTCTAAAAGAGTTGATGCTGATATTGAAGATAGATTCAGTGCTCTACCAATAAACCTTG  
TAGATGATATTCTAAGGCTCTTACCAGTTCACGACGCAGCAAGAAGACTAG

>M6-PGSC0003DMG400002954M6LRR-RLP\_1024

TGATTAAGGTTTCCCAATTTGAGTAACTTGAGATTTGGGTACGAAATAGCAAATATATATGTATGAT  
CTTGTTTCGTTTTGCCCTTGGCATACTTAAGTATGAGAACTAAAATGACG

>M6-PGSC0003DMG400002954M6LRR-RLP\_1088

TATGATCTTGTTTCGTTTTGCCCTTGGCATACTTAAGTATGAGAACTAAAATGACGTTGTATTCTTTTAGG  
ATAATGCTTTCGGTGACCCTGATGAAGCAGTTATGAAATATCTAGACGC

>M6-PGSC0003DMG400002954M6LRR-RLP\_1152

TTTTAGGATAATGCTTTTCGGTGACCCTGATGAAGCAGTTATGAAATATCTAGACGCACCATCATGTTTGG  
ACCAAACACTCAACAAGCTTGAAGATGTTTCCATCCATATTTTTAGGCGA

>M6-PGSC0003DMG400002954M6LRR-RLP\_1216

GTTTGGACCAAACACTCAACAAGCTTGAAGATGTTTCCATCCATATTTTTAGGCGATCCAAAGTTGTACT  
ATCTTTCATAAAGTTATTGTTTGCTCATGCTCCATCTTTGTCAAGGATGA

>M6-PGSC0003DMG400002954M6LRR-RLP\_128

CAAAAAATTGGAGATATATTTGGGCCGCGCTTCCAATTTAATGCTTGATAAGACCTTTTGCAGTAAATT  
AGCTGTAAAATCTCAATTTGTATTGAAAGAAACAATAGATATGATTCTCT

>M6-PGSC0003DMG400002954M6LRR-RLP\_1280

TGTAATCTTTTCATAAAGTTATTGTTTGCTCATGCTCCATCTTTGTCAAGGATGAGCATTAAAGCCGAAAA  
ATGCTTCTAGTTCCAAAGAAGAATTGAATGTTGCTACAGAGTTGATGTG

>M6-PGSC0003DMG400002954M6LRR-RLP\_1336

GCATTAAGCCGAAAAATGCTTCTAGTTCCAAAGAAGAATTGAATGTTGCTACAGAGTTGATGTGTTTCCC  
CAGAGTATCTCCTAAGGCAAAGCTATTCTATCATCCAACAGTTGGATTAA

>M6-PGSC0003DMG400002954M6LRR-RLP\_192

TAAATTAGCTGTAAAATCTCAATTTGTATTGAAAGAAACAATAGATATGATTCTTACAACATATTGGA  
GATATTGTGAAGTTTGTATCTTGTATGTTTCAGGAGTACAATTGTGTTTCATA

>M6-PGSC0003DMG400002954M6LRR-RLP\_256

ATTGGAGATATTGTGAAGTTTGTATCTTGTATGTTTCAGGAGTACAATTGTGTTTCATATGCAGACATCGATA  
GATGGATGCTTTATGTCACGAGATATGGTGTCAAGGAATTAACCCTTTTC

>M6-PGSC0003DMG400002954M6LRR-RLP\_320

TCGATAGATGGATGCTTTATGTCACGAGATATGGTGTCAAGGAATTAACCCTTTTCATGTCAAAGAATAT  
TAACAGTACTTATAAAGTGCCTTCTTATATATTCAATTGTCAAACCCTGA

>M6-PGSC0003DMG400002954M6LRR-RLP\_384

GAATATTAACAGTACTTATAAAGTGCCTTCTTATATATTCAATTGTCAAACCCTGACACAATTGAACTCT  
TCAATTGCATCTTCAAATTACCAAATTCTTTTCTTGGGTTTCAAACCTCT

>M6-PGSC0003DMG400002954M6LRR-RLP\_448

AAACTCTTCAATTGCATCTTCAAATTACCAAATTCTTTTCTTGGGTTTCAAACCTTACCATCCTTCAGTTG



AAAGAAGTAACCTTCGCGCCTGCAATAGAGTTTTATGCTATCAAAACG

>M6-PGSC0003DMG400002954M6LRR-RLP\_512

TTCAGTTGAAAGAAGTAACCTTCGCGCCTGCAATAGAGTTTTATGCTATCAAAACGCCACTTCTTGTCGA  
ATTAATCTTGACACATTGTGAGGGCACTCAATATCTTAACATTGAGTTCT

>M6-PGSC0003DMG400002954M6LRR-RLP\_576

TGTCGAATTAATCTTGACACATTGTGAGGGCACTCAATATCTTAACATTGAGTTCTCATCAGGATTGAAG  
TACTTGTTTGTTCGTGAGAGTCACTATAATCTTGATTTAAATAGCAATTA

>M6-PGSC0003DMG400002954M6LRR-RLP\_64

AACCTTGTAGATGATATTCTAAGGCTCTTACCAGTTCACGACGCAGCAAGAACTAGTATTTTGTCAAAAA  
ATTGGAGATATATTTGGGCCGCGCTTCCCAATTTAATGCTTGATAAGACC

>M6-PGSC0003DMG400002954M6LRR-RLP\_640

TTGAAGTACTTGTTTGTTCGTGAGAGTCACTATAATCTTGATTTAAATAGCAATTACTTTAAGAACGTCAA  
AAAATTGACATACTTATACCTTGTGATTGATAATCCAATACGTGTTGAT

>M6-PGSC0003DMG400002954M6LRR-RLP\_704

ACGTCAAAAAATTGACATACTTATACCTTGTGATTGATAATCCAATACGTGTTGATGAAAGATTAACTTT  
GGAAAAGCTTCTTTTTAGTTCGCCTACACTTGAGACACTTACTTTGGGTT

>M6-PGSC0003DMG400002954M6LRR-RLP\_768

AACTTTGGAAAAGCTTCTTTTTAGTTCGCCTACACTTGAGACACTTACTTTGGGTTTTTATGTACTTGAGG  
TAAGAAGCTAACATGTTGTTTTACTTAGATATCTACGTTATCCTTCTGT

>M6-PGSC0003DMG400002954M6LRR-RLP\_832

CTTGAGGTAAGAAGCTAACATGTTGTTTTACTTAGATATCTACGTTATCCTTCTGTTTGTATAATTTTTCGT  
TAAAGCTTTTGAATGCAGGTACAGTCCCAAAGGGGCTTCATTATACAC

>M6-PGSC0003DMG400002954M6LRR-RLP\_896

TTTTTCGTTAAAGCTTTTGAATGCAGGTACAGTCCCAAAGGGGCTTCATTATACACTCAACTGCTTGTGGC  
ATCTATAGTTAGGTGTAAACTTCAACAAATTGGGTGAGACTTGTTACAC

>M6-PGSC0003DMG400002954M6LRR-RLP\_960

TTGTGGCATCTATAGTTAGGTGTAAACTTCAACAAATTGGGTGAGACTTGTTACACTCTGGAGTTGATTA  
AAAGTTTCCCAATTTGAGTAACTTGAGATTTGGGTACGAAATAGCAAA

>M6-PGSC0003DMG400002960M6LRR-RLP\_0

ATACACAAGAGTAGTACATTATTTGATATCTTGAGTTACATCTAAAAATTATTTTTGTTGTAATTCCTCTCC  
ATATTGACTTGATGGCAGCTTATACTGCTGTAATTTCTCTTCTTCAAA

>M6-PGSC0003DMG400002960M6LRR-RLP\_1054

ACTAGAACACGATCACCTCCCGAGTTGGAAGAAATTGGAAAAACAATAGCAGGAAAATGCCAAGGAC  
TTCCCTTAATAATTTCAAGTATTGCAGGGCATCTCTCTAAAACGGTCCCCAA

>M6-PGSC0003DMG400002960M6LRR-RLP\_1116

AAGGACTTCCCTTAATAATTTCAAGTATTGCAGGGCATCTCTCTAAAACGGTCCCAAGACATTA AAAAG  
TTGGAAGTATGTTGCCAAAACCTTAAGTAAAATCATTGCTAGTCATCCAA

>M6-PGSC0003DMG400002960M6LRR-RLP\_1178

TTAAAAAGTTGGAAGTATGTTGCCAAAACCTTAAGTAAAATCATTGCTAGTCATCCAAATAAATGCTTAG  
GAGTGCTCGGTTTGAGTTACCATCACTTGCCTAATCAACTCAAACCATGC

>M6-PGSC0003DMG400002960M6LRR-RLP\_124

TGATCAATCAAATATTTTCAGAACTCTTTCATGATCACAGTACTGAAATGCTCGATTCTCTTCGGGCTACAG  
CTGAATATTTTCAAGATGTTCTTGACAACAATAGCAATGAGAAAATCAA

>M6-PGSC0003DMG400002960M6LRR-RLP\_1426

ACATTATTTGGAGGATCTTATCAGCAGGAACCTTGATAATGGCAGTAAAAAAAGATTCAATGGTGAGGT  
AAAAGTATGCGGAATACATGATCTGCTGCGTGAGTTCTGTTTGATAGAAGC

>M6-PGSC0003DMG400002960M6LRR-RLP\_1550

ATGACAAAGTTTATGCATGTTGTGAGAACTCCATTGTCACCAGCACAAAAGCCTAATTTTCGTCGCTTCA  
GTATTCAAGAGTAATATTCTGTTGAGGATTCTTATAAGCTCTTACCCCT

>M6-PGSC0003DMG400002960M6LRR-RLP\_1612

TCGCTTCAGTATTCAAGAGTAATATTCTGTTGAGGATTCTTATAAGCTCTTACCCCTGTAGCCAGATCTA  
TCTACTGCTTTTCTTACTTGGATCTACCTTATGAACCCCGTATTCTTCC

>M6-PGSC0003DMG400002960M6LRR-RLP\_1674

CCAGATCTATCTACTGCTTTTCTTACTTGGATCTACCTTATGAACCCCGTATTCTTCCCCCTGTATTGTCCAT  
CTACCATCATGATCCTATAATACATGGATTTTTCTGTTGTTTCAACC

>M6-PGSC0003DMG400002960M6LRR-RLP\_1736

GTATTGTCCATCTACCATCATGATCCTATAATACATGGATTTTTCTGTTGTTTCAACCATCTCAGGGTATTG  
GCCATCTTTCCTTCTCGTTCAGCTCATTCCACTTGTGATTACAAAG

>M6-PGSC0003DMG400002960M6LRR-RLP\_1798

CAGGGTATTGCCATCTTTCCTTCTCGTTCAGCTCATTCCACTTGTGATTACAAAGTTATTTCAATTTGAG  
ATATCTCCAAGTTCGATGTCTTGGAAATATTCCTGAATCAATCTCAA

>M6-PGSC0003DMG400002960M6LRR-RLP\_186

GGGCTACAGCTGAATATTTTCAAGATGTTCTTGACAACAATAGCAATGAGAAAATCAAATCTTTTGAGGA  
AGATATTAGAGTTGTTGTTAGTGAGGCAGAGGATGTTGTTGAAATGAAGA

>M6-PGSC0003DMG400002960M6LRR-RLP\_1860

TTCATTTGAGATATCTCCAAGTTCGATGTCTTGGAAATATTCCTGAATCAATCTCAAAGCTTCTGAATTTG  
CAAATCTAATTTGTGATGGTAATTCTTTAGAGATAACTTTAACTAGGA

>M6-PGSC0003DMG400002960M6LRR-RLP\_1922

CTGAATTTGCAAATCTAATTTGTGATGGTAATTCTTTAGAGATAACTTTAACTAGGAAGATATGGATGT  
TGAAGAACTTGAGGTATATACGTGTAGGGGGAGTTACTTATTTACCGAGT

>M6-PGSC0003DMG400002960M6LRR-RLP\_1984

ATGGATGTTGAAGAACTTGAGGTATATACGTGTAGGGGGAGTTACTTATTTACCGAGTCCTAGAATAGA  
TAACAATCTTGTGATAGGGATGCCAAATCTAGAGGAATTTTTTGGTCTTAG

>M6-PGSC0003DMG400002960M6LRR-RLP\_2046

GAATAGATAACAATCTTGTGATAGGGATGCCAAATCTAGAGGAATTTTTTGGTCTTAGTACTCTAGTTG  
TACAAATGAAGTCTTTTCTAGGATCCCCAATTTAAAGAGATTGATCATT

>M6-PGSC0003DMG400002960M6LRR-RLP\_2108

TCTAGTTGTACAAATGAAGTCTTTTCTAGGATCCCCAATTTAAAGAGATTGATCATTCTGCACATTTTAG  
CATACTAAACAATATTCTGTATCGTCCCTTCGATATGTCCAGCTTGACA

>M6-PGSC0003DMG400002960M6LRR-RLP\_2170

ACATTTTAGCATACTAAACAATATTCTGTATCGTCCCTTCGATATGTCCAGCTTGACAAAATTTGAGACAT  
TCAAGTTTTACTGGAAAGATTATTTGGAAGACCCCATCAAGAAATTTGT

>M6-PGSC0003DMG400002960M6LRR-RLP\_2232

TTGAGACATTCAAGTTTTACTGGAAAGATTATTTGGAAGACCCCATCAAGAAATTTGTTTTTCCAGAATC  
ACTTAGAAGAGTGTCTTTAACTTGGTGTGTAAGTTTATTTGGGAAGAGA

>M6-PGSC0003DMG400002960M6LRR-RLP\_2294

CCAGAATCACTTAGAAGAGTGTCTTTAACTTGGTGTGTAAGTTTATTTGGGAAGAGATATCATCAACTT

TTATCATGTTGCCACATCTTGAAGAGCTCAAACCTTAAATATTGTCGAGCC

>M6-PGSC0003DMG400002960M6LRR-RLP\_2356

ATCAACTTTTATCATGTTGCCACATCTTGAAGAGCTCAAACCTTAAATATTGTCGAGCCGAAGATGATGTA  
TGGAGATTGAGTGACAAAGACATATTCAGAAGCTTGAAGTTGTTGTTACT

>M6-PGSC0003DMG400002960M6LRR-RLP\_2418

ATGATGTATGGAGATTGAGTGACAAAGACATATTCAGAAGCTTGAAGTTGTTGTTACTGAGCGAGCTAA  
ATCTTAAGGGTTGGGAAGCAAGCAGCGATAACTTCCCTAATCTAAAACGCC

>M6-PGSC0003DMG400002960M6LRR-RLP\_2542

TCTGAAGAAATGCAAGGACCTGCAAGAAATTCCAACAGATTTTGGGGAAATTTGTACTTTGGAATCGAT  
TGAGTTACATGATTGCAGCACTACTTCTGAGGAATCTGCCAGAAATATCGA

>M6-PGSC0003DMG400002960M6LRR-RLP\_2588

GAAATTTGTACTTTGGAATCGATTGAGTTACATGATTGCAGCACTACTTCTGAGGAATCTGCCAGAAATA  
TCGAACAAGAACAAGAGGTCATGGGAAATAATATCCTTAAGGTCTACATC

>M6-PGSC0003DMG400002960M6LRR-RLP\_310

TGAAATCATCAAAGAAGAAAGCTGGACATTTGGAATTTTACAACACCATGATATGCTACCAGTTGTTGAA  
AAAATGGATACGACAAAGAAACAAGTGATGGAGCTTCTTTCTCATGATGC

>M6-PGSC0003DMG400002960M6LRR-RLP\_372

TTGTTGAAAAAATGGATACGACAAAGAAACAAGTGATGGAGCTTCTTTCTCATGATGCTGATCAAATTCT  
TGAATTAACCGCGGATTCCTTGATTGACGCTTCTTCTATGAGTGATCCAA

>M6-PGSC0003DMG400002960M6LRR-RLP\_434

CAAATCTTGAATTAACCGCGGATTCCTTGATTGACGCTTCTTCTATGAGTGATCCAATGCTGTCAGATCA  
CTTGAAAGATCATATTGTGCAGGGACTTGATGGTGACTTGGAGATAATA

>M6-PGSC0003DMG400002960M6LRR-RLP\_496

GTCAGATCACTTGAAAGATCATATTGTGCAGGGACTTGATGGTGACTTGGAGATAATAGATAAGAGATT  
GAGAGGACCAACGCCTTATCTAGACATTGTCACCATATCAGGTATGGGTGG

>M6-PGSC0003DMG400002960M6LRR-RLP\_558

AGAGATTGAGAGGACCAACGCCTTATCTAGACATTGTCACCATATCAGGTATGGGTGGCATTGGCAAAA  
CAACTCGCTAAAAAAGCTTATGATCATCTTCCAATTAGGTATCACTTTG

>M6-PGSC0003DMG400002960M6LRR-RLP\_62

ATTCTCTCCATATTGACTTGATGGCAGCTTATACTGCTGTAATTTCTCTTCTTCAAACCTTTGATCAATCA  
AATATTTTCAGAACTCTTTCATGATCACAGTACTGAAATGCTCGATTCT

>M6-PGSC0003DMG400002960M6LRR-RLP\_620

GGCAAACAACACTCGCTAAAAAAGCTTATGATCATCTTCCAATTAGGTATCACTTTGACATTTTTGTTTG  
GGTTACAATATCTCAAGAATTTTCGATATAGAAATGTATTGTTAGAAGCT

>M6-PGSC0003DMG400002960M6LRR-RLP\_682

TTTTGTTTGGGTTACAATATCTCAAGAATTTTCGATATAGAAATGTATTGTTAGAAGCTTTACATTGCATT  
CAAAGCAAAGAGTTATTGTGAACACAAAAGATTATGATAAGATGAATGA

>M6-PGSC0003DMG400002960M6LRR-RLP\_744

ATTGCATTTCAAAGCAAAGAGTTATTGTGAACACAAAAGATTATGATAAGATGAATGACAGTGAGTTAG  
CTGATCTGGTGCAAAGAGTCTAAAGGGTCCTAGATACCTTGTTGTTGTTG

>M6-PGSC0003DMG400002960M6LRR-RLP\_806

GAGTTAGCTGATCTGGTGCAAAGAGTCTAAAGGGTCCTAGATACCTTGTTGTTGTTGATGATATTTGGA  
GTACGGATGCTTGGGATAGCATATCACAATTATTTCTAATCGCAACAAT

>M6-PGSC0003DMG400002960M6LRR-RLP\_868

TATTTGGAGTACGGATGCTTGGGATAGCATATCACAATTATTTCTAATCGCAACAATGGGAGTCGAGTC  
TTATTGACTACTAGGGAAACCGATGTAGCGATGTATGCAAATACTAGTAG

>M6-PGSC0003DMG400002960M6LRR-RLP\_930

GTCGAGTCTTATTGACTACTAGGGAAACCGATGTAGCGATGTATGCAAATACTAGTAGCCCTCATAAGA  
TGAACCTCTTGGATTTAGATAACAGTTGGAAGTTACTTCGTGATAAGGTGT

>M6-PGSC0003DMG400002960M6LRR-RLP\_992

CATAAGATGAACCTCTTGGATTTAGATAACAGTTGGAAGTTACTTCGTGATAAGGTGTTTGGACTAGAAC  
ACGATCACCTCCCGAGTTGGAAGAAATTGGAAAAACAATAGCAGGAAAA

>M6-PGSC0003DMG400002961M6LRR-RLP\_0

ATGACAAAGTTTATGCATGTTGTGAGAACTCCATTTTCACCAGCACAAAAGCCTAATTTTCGTGCTTCAG  
TATTCAGAAGGCATTTTCAGATGTGTATGCTTATAAAGTACTACCCCT

>M6-PGSC0003DMG400002961M6LRR-RLP\_1008

TGCCAGGACCTGCAAGAAATCCAACAGATTTTGGGGAAATTTGTAATTTGGAATCGATTGAGTTACATG  
ATTGTAGCACTACTTCTGAGGATTCTGCCAGAAATATTGAACAAGAACAA

>M6-PGSC0003DMG400002961M6LRR-RLP\_1068

GAGTTACATGATTGTAGCACTACTTCTGAGGATTCTGCCAGAAATATTGAACAAGAACAAGAGGACATG  
GGAAATAATATCCTTAAGGTCTACATCCATAACAGCCACAGTAAGTCATAA

>M6-PGSC0003DMG400002961M6LRR-RLP\_126

AGATCTATGTACTGCTTTTCATTCTTGATCTACCTATTGAACCCCATATTAAGCTTCTCCCTAGATTGCC  
ATCTACCGTCATGATCCTATAATACATGGATTTTTCTCTTGTTTCAAC

>M6-PGSC0003DMG400002961M6LRR-RLP\_189

AGATTGCCATCTACCGTCATGATCCTATAATACATGGATTTTTCTCTTGTTTCAACCATCTCAGGGTATTG  
GTCATCTTCCCTACCTGGTTCGGCCATTTCCACTTGTGATTACAAAA

>M6-PGSC0003DMG400002961M6LRR-RLP\_252

AGGGTATTGGTCATCTTCCCTACCTGGTTCGGCCATTTCCACTTGTGATTACAAAATTATTTCAATTTGAG  
ATATCTCCAAGTTTCGATATTTTGGAAATATTCCTGAATCAATCTCAGAG

>M6-PGSC0003DMG400002961M6LRR-RLP\_315

CATTTGAGATATCTCCAAGTTTCGATATTTTGGAAATATTCCTGAATCAATCTCAGAGCTTCAAATTTGCA  
AACTCTAATTTATGATTGTCATTCTTCACATATGACTTTACCCGGGAAG

>M6-PGSC0003DMG400002961M6LRR-RLP\_378

AATTTGCAAATCTAATTTATGATTGTCATTCTTCACATATGACTTTACCCGGGAAGATATGGACGATGAA  
GAACTTGAGGTATATACATTTAGGGAAAGCTAGTAATTATATACCAAAT

>M6-PGSC0003DMG400002961M6LRR-RLP\_441

ACGATGAAGAACTTGAGGTATATACATTTAGGGAAAGCTAGTAATTATATACCAAATCCTAGAATAGAT  
AACAACTTGTGACGGGGATGCCAAATCTAGGGGAATTTTTCAATATTTGT

>M6-PGSC0003DMG400002961M6LRR-RLP\_504

ATAGATAACAATCTTGTGACGGGGATGCCAAATCTAGGGGAATTTTTCAATATTTGTTACTCTAGTTGTA  
CAAATGAAGTTTTTTCTAGAATTCCCAATCTAGAGAGATTGAGCATTTCGT

>M6-PGSC0003DMG400002961M6LRR-RLP\_567

AGTTGTACAAATGAAGTTTTTTCTAGAATTCCCAATCTAGAGAGATTGAGCATTTCGTGCATCTTCTAAAGT  
CAGAGAAAATTTTCTCTATCGTCTCTTGATATGTCCAGCTTGAGAAAA

>M6-PGSC0003DMG400002961M6LRR-RLP\_63

CGCTTCAGTATTCAGAAGGCATTTTCAGATGTGTATGCTTATAAAGTACTACCCCTGTAGCCAGATCTAT

GTA CTGCTTTTCATTCTTGGATCTACCTATTGAACCCCATATTAAGCTT

>M6-PGSC0003DMG400002961M6LRR-RLP\_630

TCTAAAGTCAGAGAAAATTTCTCTATCGTCTCTTGGATATGTCCAGCTTGAGAAAAGTTGAGGTATTCA  
AGCTTTCCTGGGACAATTATTCGGAAAAGCCCATCAAGAGATTTGTTTTG

>M6-PGSC0003DMG400002961M6LRR-RLP\_693

GTATTCAAGCTTTCCTGGGACAATTATTCGGAAAAGCCCATCAAGAGATTTGTTTTGCCAGCATCACTTA  
GGAAGTTGACTTTAGATTGCTGTAGTCATTTTATTTGGGAAGAGATATCG

>M6-PGSC0003DMG400002961M6LRR-RLP\_756

TCACTTAGGAAGTTGACTTTAGATTGCTGTAGTCATTTTATTTGGGAAGAGATATCGTCAACTTTTATCAT  
GTTGCCAAATCTTGAAGAGCTCAAACCTTAAAGATTGTGAATCCGAAGAT

>M6-PGSC0003DMG400002961M6LRR-RLP\_819

TTTATCATGTTGCCAAATCTTGAAGAGCTCAAACCTTAAAGATTGTGAATCCGAAGATGATGTATGGAGAT  
TGAGTGACAAAGACATATTCAAAAGCTTGAAGTTGTTGTTACTGAGCTAC

>M6-PGSC0003DMG400002961M6LRR-RLP\_882

TGGAGATTGAGTGACAAAGACATATTCAAAAGCTTGAAGTTGTTGTTACTGAGCTACCCAAATCTTAAGT  
GTTGGGAAGCTAGCAGTGATAACTTCCCAAATCTAAAACGTCTTGTTCTG

>M6-PGSC0003DMG400002961M6LRR-RLP\_945

CTTAAGTGTTGGGAAGCTAGCAGTGATAACTTCCCAAATCTAAAACGTCTTGTTCTGAAGAATTGCCAGG  
ACCTGCAAGAAATCCAACAGATTTTGGGGAAATTTGTACTTTGGAATCG

>M6-PGSC0003DMG400002980-(rev)M6LRR-RLP\_1116

AGCTCTAAAAGCACTTGCTGGTGTTTTACGCGGCAAATCAGAGGTGGATGAGTGGAGAGACATTTTAAG  
AAGTGAAATATGGGAGCTGTCAATTTGTTGCAATGGTATATTACCAGCGCT

>M6-PGSC0003DMG400002980-(rev)M6LRR-RLP\_1178

TTTTAAGAAGTGAAATATGGGAGCTGTCAATTTGTTGCAATGGTATATTACCAGCGCTGATGTTGAGCTA  
CAATGATCTTCTGCACATTTGAAGCAATGTTTTGCTTATTGTGCAGTAT

>M6-PGSC0003DMG400002980-(rev)M6LRR-RLP\_124

GACATTTTGCTTGGTCTTCAAATTGTGCTAAGTGATGCAGAGAATAAGCAAGCATCAAATCAACATGTGA  
GCCAATGGCTTAATAAGCTCCAGAGTGCTGTGGATGGCGCTGAAAACATG

>M6-PGSC0003DMG400002980-(rev)M6LRR-RLP\_1240

TTGAGCTACAATGATCTTCCTGCACATTTGAAGCAATGTTTTGCTTATTGTGCAGTATATCCCAAAGATTA  
TCTATTTTGCAAAGACCAAGTTATTCACCTGTGGATTGCTAATGGTCTG

>M6-PGSC0003DMG400002980-(rev)M6LRR-RLP\_1302

CAAAGATTATCTATTTTGCAAAGACCAAGTTATTCACCTGTGGATTGCTAATGGTCTGGTACAGCAGTTT  
CATTCAAGGTAACCAATACTTTCTCGAGTTGAGATCAAGATCGCTGTTCTGA

>M6-PGSC0003DMG400002980-(rev)M6LRR-RLP\_1364

AGCAGTTTCATTCAAGGTAACCAATACTTTCTCGAGTTGAGATCAAGATCGCTGTTCTGAAATGGTCTCGAA  
GTCTTCTGAACGAGACATAGAGAAATTCTTAATGCATGACCTTGTCATG

>M6-PGSC0003DMG400002980-(rev)M6LRR-RLP\_1550

TGGAACAATGTCGGCACATGTCCTATTCAATAGGACAAGATGGTGACTTTGAGAAATTGCAATCACTCTT  
TAAATCAGAGCAGCTGAGGACATTACTTCCAATCAATATTCAGCTTCAGT

>M6-PGSC0003DMG400002980-(rev)M6LRR-RLP\_1612

TCACTCTTTAAATCAGAGCAGCTGAGGACATTACTTCCAATCAATATTCAGCTTCAGTACCAAATAAGCT  
AAGCAAGAGGGTGCTGCATAACATATTGCCAAGACTAACATCCTTAAGG

>M6-PGSC0003DMG400002980-(rev)M6LRR-RLP\_1674

AACTAAGCTAAGCAAGAGGGTGCTGCATAACATATTGCCAAGACTAACATCCTTAAGGGCATTATCGTT  
GTTAGGCTATAAGATTAAGGAGTTGCCAGATGACTCGTTTGTCAAATTA

>M6-PGSC0003DMG400002980-(rev)M6LRR-RLP\_186

ACATGTGAGCCAATGGCTTAATAAGCTCCAGAGTGCTGTGGATGGCGCTGAAAACATGATAGAAGAAG  
TCAATTATGAAGCTTTGAGGCATAAGGTGGAAGGCCAGCATCAAATCTTGC

>M6-PGSC0003DMG400002980-(rev)M6LRR-RLP\_1860

GTATAACTTAAAGGCACTTCTCCTGTCATCTTGTGCTGATCTTGAGGAGCTACCACTGCAGATGGAGAAG  
TTGATCAACTTACATTACCTCGACATAAGCAACACTTTTCACTTGAAGGT

>M6-PGSC0003DMG400002980-(rev)M6LRR-RLP\_1922

TGGAGAAGTTGATCAACTTACATTACCTCGACATAAGCAACACTTTTCACTTGAAGGTTCCCCTACATCTG  
AGCAAGTTGAAAAGCCTGCAAGTGCTAATGGGAGCCAAGTTTGTCTCG

>M6-PGSC0003DMG400002980-(rev)M6LRR-RLP\_1984

CTACATCTGAGCAAGTTGAAAAGCCTGCAAGTGCTAATGGGAGCCAAGTTTGTCTCGGTGGTTTGAGA  
ATGGAAGATTTGGGTGAAGCACAGAACTTGTATGGATCTGTATCAGTTGTA



>M6-PGSC0003DMG400002980-(rev)M6LRR-RLP\_2046

TTTGAGAATGGAAGATTTGGGTGAAGCACAGAAGCTGTATGGATCTGTATCAGTTGTAGAGTTGCAAAA  
TGTAGTTGATAGAAGGGAAGCTGTGAAGGCAAAGATGAAGGAGAAGAATCA

>M6-PGSC0003DMG400002980-(rev)M6LRR-RLP\_2108

TGCAAAATGTAGTTGATAGAAGGGAAGCTGTGAAGGCAAAGATGAAGGAGAAGAATCATGTTAAGAA  
GTTATATTTGGAGTGGAGTGAAAGTAGTAGTGCCGACAATTCACAAACAGAAA

>M6-PGSC0003DMG400002980-(rev)M6LRR-RLP\_2170

AAGAAGTTATATTTGGAGTGGAGTGAAAGTAGTAGTGCCGACAATTCACAAACAGAAAGAGACATACTT  
GATGAGCTATGCCACATAAAAACATAAAAAGAAGTCGAAATCATCGGATAT

>M6-PGSC0003DMG400002980-(rev)M6LRR-RLP\_2232

CATACTTGATGAGCTATGCCACATAAAAACATAAAAAGAAGTCGAAATCATCGGATATAGAGGGACAAC  
ATTTCCGAATTGGTTAGCTGATCCTTTGTTTCTTAAGCTAGAACAGTTGTC

>M6-PGSC0003DMG400002980-(rev)M6LRR-RLP\_2294

GGACAACATTTCCGAATTGGTTAGCTGATCCTTTGTTTCTTAAGCTAGAACAGTTGTCTATTGCTAACTGC  
AAGAAGTGTTTTTTCTTGCCAGCACTAGGACAGCTTCCTTGTTTGAAAA

>M6-PGSC0003DMG400002980-(rev)M6LRR-RLP\_2418

TTCCATTAGAGGGATGCATGGAATAACAGGGGTGACGGAAGAATTCTATGGCAGTTTGTCTCTAAAAA  
GCCTTTTAATTGTCTTGAGAACCTTATATTTGAAGATATGCCGGAGTGGAA

>M6-PGSC0003DMG400002980-(rev)M6LRR-RLP\_2542

TGGCACGTACTAGGAAGTGGAGAGTTCCTATACTTGAGAAGCTTTTTATTAATAAATTGCCCTGAACTCA  
GTTTGGAGACACCCATCCAACCTTCAAATTTAAAAGGTTTGAAGTTGGT

>M6-PGSC0003DMG400002980-(rev)M6LRR-RLP\_2604

TGAACTCAGTTTGGAGACACCCATCCAACCTTCAAATTTAAAAGGTTTGAAGTTGGTGGTTCTCAAAG  
GTTGGAGTTGTTTTTGATGATACTGAGCTGTTTAGATCCCAACTTGAGGG

>M6-PGSC0003DMG400002980-(rev)M6LRR-RLP\_2666

CTCAAAGGTTGGAGTTGTTTTGATGATACTGAGCTGTTTAGATCCCAACTTGAGGGAATGAAGCAGA  
TTGTTGAATTAGATATACATGATTGTAACCTCTTACCTTCTTTCCTTTA

>M6-PGSC0003DMG400002980-(rev)M6LRR-RLP\_2790

ACTGCCACTACCTTGAAGAGAATAGACATATCTGGTTGCCAGAAATTGAAATTGGATCCGCCAGTTGG

TGAGATGAGTATGTTTCTGGAGTGTTTGAGTCTGGCAAATGTGATTGTAT

>M6-PGSC0003DMG400002980-(rev)M6LRR-RLP\_2852

CAGTTGGTGAGATGAGTATGTTTCTGGAGTGTTTGAGTCTGGCAAATGTGATTGTATAGATGATATATC  
ACCTGAGTCGCTCCCAAGAGCACGCAGATTGTATGTATCTGATTGCCACA

>M6-PGSC0003DMG400002980-(rev)M6LRR-RLP\_2914

GATATATCACCTGAGTCGCTCCCAAGAGCACGCAGATTGTATGTATCTGATTGCCACAACCTTACTAGGT  
TTTTGATTCTACTGCCACTGAAAGTCTCTGTATTTGGTATTGTGAGAAT

>M6-PGSC0003DMG400002980-(rev)M6LRR-RLP\_2976

TACTAGGTTTTTGTATCCTACTGCCACTGAAAGTCTCTGTATTTGGTATTGTGAGAATGTTGAAATACTCT  
CGGTGGCATGTGGGGGGACCCAGATGACGAAGTTGAATATTCAGGGCTG

>M6-PGSC0003DMG400002980-(rev)M6LRR-RLP\_310

ACAAGCAACAAACAAGTAAGTGACCTCAACCTGTGCTTGAAGTATGATTTTTTCTTAACATAAAGGAAA  
AGTTGGAAGAAAACATTGAAACATTGGAGGTGTTGGAAAAGCAAATTGGT

>M6-PGSC0003DMG400002980-(rev)M6LRR-RLP\_3162

GATTAATTGTCCAGAAATAGAGTCCTTTCCTGAAGGAGGATTGCCCTTCAATTTACAACCTCCTTATGATCA  
GCGAGTGCAAGAACTGGTGAACAGCCGAAAGGAGTGGCGTTTACAGAG

>M6-PGSC0003DMG400002980-(rev)M6LRR-RLP\_3224

TTATGATCAGCGAGTGCAAGAACTGGTGAACAGCCGAAAGGAGTGGCGTTTACAGAGACTCCCCTGT  
CTTAGAGAGTTAACGATCGAACATGATGGCAGTGATGAAGAGATTGTTGGTG

>M6-PGSC0003DMG400002980-(rev)M6LRR-RLP\_3286

CCCTGTCTTAGAGAGTTAACGATCGAACATGATGGCAGTGATGAAGAGATTGTTGGTGGTGAGAATTG  
GGAGTTGCCTTCTCTATTCAAACACTCTATATAAAGAATCTGAAAACATTA

>M6-PGSC0003DMG400002980-(rev)M6LRR-RLP\_3410

GCCAACATCTCAAACACCTCACCTCTTCAATATCTAGACATTGCCGGTAATTTACCTCAAATTCAGTCA  
ATGCTGGAACAAGGCCAGTTTTCGCATCTCACTTCGCTTCAATGTCTAG

>M6-PGSC0003DMG400002980-(rev)M6LRR-RLP\_434

TTGGCTTAAAGGATCATTTTGGTTCAACTAAACAAGAACTAGAACACCTTCAACGTCTTTGGTTGATGA  
TGCTGGTATCTTTGGAAGGCAGAATGAAATAGAGAATTTGATTGGCCGTT

>M6-PGSC0003DMG400002980-(rev)M6LRR-RLP\_496

GTTGATGATGCTGGTATCTTTGGAAGGCAGAATGAAATAGAGAATTTGATTGGCCGTTTGTGTCTATG  
GATACACAGGGAAAAAATCTGGCTGTAGTTCCTATTGTTGGAATGGGCGGC

>M6-PGSC0003DMG400002980-(rev)M6LRR-RLP\_62

GTGATCTGCTCAACATGTTTCGGAAGCATAACGGATCATGTTAAGCTCTTAAAGAAGCTGGAGGACATTTT  
GCTTGGTCTTCAAATTGTGCTAAGTGATGCAGAGAATAAGCAAGCATCAA

>M6-PGSC0003DMG400002980-(rev)M6LRR-RLP\_620

GTAAGACAACACTTGCTAAAGCGTTTACAATGATGAGAGAGTGCAGAAACATTTTGGTTTGAAGCTT  
GGTTTTGTGTTTCTGAGGCATATGATGCTTTCAGAATAACAAAAGGTTTAC

>M6-PGSC0003DMG400002980-(rev)M6LRR-RLP\_682

AAAGCTTGGTTTTGTGTTTCTGAGGCATATGATGCTTTCAGAATAACAAAAGGTTTACTTCATGAAATTG  
GCTCAACTGACTTGAAGGTTGATGACAATCTTAATCAGCTACAAGTCAA

>M6-PGSC0003DMG400002980-(rev)M6LRR-RLP\_744

TGAAATTGGCTCAACTGACTTGAAGGTTGATGACAATCTTAATCAGCTACAAGTCAAATTGAAGGAAAA  
GCTGCATGGAAAAAAGTTTCTTGTGTCCTTGATGACGTGTGGAATGATAA

>M6-PGSC0003DMG400002980-(rev)M6LRR-RLP\_806

AGGAAAAGCTGCATGGAAAAAAGTTTCTTGTGTCCTTGATGACGTGTGGAATGATAACTATCCTGAGT  
GGGATGACTTGAGAAATCTTTTCTACAAGGAGATATAGGAAGTAAGATCA

>M6-PGSC0003DMG400002980-(rev)M6LRR-RLP\_868

CCTGAGTGGGATGACTTGAGAAATCTTTTCTACAAGGAGATATAGGAAGTAAGATCATTGTGACGACA  
CGGAAAGAGAGTGTGTCCTTGATGATGGGTAGTGAGGCAATCAACATGGGA

>M6-PGSC0003DMG400002980-(rev)M6LRR-RLP\_930

GACGACACGGAAAGAGAGTGTGTCCTTGATGATGGGTAGTGAGGCAATCAACATGGGAGTTCTGTCTA  
GTGAAGACTCTTGGGCTCTATTCCAACGACATTCAGTAAATAGAGATCC

>M6-PGSC0003DMG400002980-(rev)M6LRR-RLP\_992

TGTCTAGTGAAGACTCTTGGGCTCTATTCCAACGACATTCAGTAAATAGAGATCCTGAGGAACATCC  
AGAATTTGAAGAGGTTGGAAAACAAATTGCAGACAAGTGCAAAGGGTTGC

>M6-PGSC0003DMG400003002M6LRR-RLK\_0

ATGTTTGACACAATTGTATGTGATGAAACAGTGACCAGAGATGCATTGCTCAAGTTTCTTGCAGAGGTTT  
CTAACAATAATAGTACAATTCTTGGTACTAATTCGGGCTGGAACTCGACA

>M6-PGSC0003DMG400003002M6LRR-RLK\_1054

AGGCTCCAGCAGAGTTGCTTGAAGAGGGAAACATGGTAGTATGTACAAAGTGATGTGTGACAATCCC  
AAAATGACACTGGCTGTTAAGAGGATAAAAGATTGGTCAATAACTGGTAGTG

>M6-PGSC0003DMG400003002M6LRR-RLK\_1116

AATCCCAAATGACACTGGCTGTTAAGAGGATAAAAGATTGGTCAATAACTGGTAGTGAATTCAAAAAG  
AGAATGCAGAACTAGACAAAATCAGGCATCCAAATGTGTTGCCTGCTGTT

>M6-PGSC0003DMG400003002M6LRR-RLK\_1178

CAAAAAGAGAATGCAGAACTAGACAAAATCAGGCATCCAAATGTGTTGCCTGCTGTTGCCTTTTATTCT  
TCTAGACAAGAGAAGCTTTTGGTCTATGAGTACCAAGACAATGGCAGTCT

>M6-PGSC0003DMG400003002M6LRR-RLK\_124

ATCCTTGCAAGGACAAGTGGCTTGGTGTACATGTAACGCGAAGACTCTCTCTGTGGAGAAAATCATTCT  
TGATGGTTATGATTTTTTCATCTGGAACGTTTGATGCTACCACGATTTGTA

>M6-PGSC0003DMG400003002M6LRR-RLK\_1240

TTTATTCTTCTAGACAAGAGAAGCTTTTGGTCTATGAGTACCAAGACAATGGCAGTCTTCTCCTACTTCTA  
CAAGGTAATTGACTCTACTAGGCTATTCTTCTGTGTATTGAATTGTGCG

>M6-PGSC0003DMG400003002M6LRR-RLK\_1302

CTACTTCTACAAGGTAATTGACTCTACTAGGCTATTCTTCTGTGTATTGAATTGTGCGACCATTTCTACTA  
GGCATATAAACAGACACTCGAACTTTGCCTTAGCTGGCAAGTAAGCACT

>M6-PGSC0003DMG400003002M6LRR-RLK\_186

ATCATTCTTGATGGTTATGATTTTTTCATCTGGAACGTTTGATGCTACCACGATTTGTAATGTGGAGCCTAT  
CGCGGACACCCTTTTCCTCCTGAGTCTAAAAAATGACCTACTTCAGGGG

>M6-PGSC0003DMG400003002M6LRR-RLK\_248

GGAGCCTATCGCGGACACCCTTTTCCTCCTGAGTCTAAAAAATGACCTACTTCAGGGGAAAAACTTTGAT  
AGTATAGATAAATGTAAGCATCTAAGACATCTTGTCTTGGTGGAAACCG

>M6-PGSC0003DMG400003002M6LRR-RLK\_310

ACTTTGATAGTATAGATAAATGTAAGCATCTAAGACATCTTGTCTTGGTGGAAACCGTTCTCAGGTAG  
CATTCCACAGTCATTTTCAAGATTGAATAACTTGAAAAGCCTTGACATAT

>M6-PGSC0003DMG400003002M6LRR-RLK\_372

TCAGGTAGCATTCCACAGTCATTTTCAAGATTGAATAACTTGAAAAGCCTTGACATATCCAACAATAGAT

TATCAGGTGTTCTCCCTGATTTATCTAGGATTCAGGCTTGATTGAATTC

>M6-PGSC0003DMG400003002M6LRR-RLK\_434

CAATAGATTATCAGGTGTTCTCCCTGATTTATCTAGGATTCAGGCTTGATTGAATTCGAGGCTCAGAAT  
AACCAGCTATCAGGAGAGATACCTGAATTTGATTTCTCAAACCTTTGTTGC

>M6-PGSC0003DMG400003002M6LRR-RLK\_496

CTCAGAATAACCAGCTATCAGGAGAGATACCTGAATTTGATTTCTCAAACCTTTGTTGCATTTAATGTCTCT  
TTCAACAATTTAGTGGATCGATTCCGCCTGAGAGTGATAGTTTCCCTG

>M6-PGSC0003DMG400003002M6LRR-RLK\_558

AATGTCTCTTTCAACAATTTAGTGGATCGATTCCGCCTGAGAGTGATAGTTTCCCTGTTAGTAGATACTT  
GGAAAATCCTCTGTTGTGTGGCTCCCCGTTGGCTGGAAAATGCTCATCA

>M6-PGSC0003DMG400003002M6LRR-RLK\_62

AGAGGTTTCTAACAATAATAGTACAATTCTTGGTACTAATTCGGGCTGGAACCTCGACATCTGATCCTTGC  
AAGGACAAGTGGCTTGGTGTACATGTAACGCGAAGACTCTCTCTGTGGA

>M6-PGSC0003DMG400003002M6LRR-RLK\_620

TAGATACTTGGAAAATCCTCTGTTGTGTGGCTCCCCGTTGGCTGGAAAATGCTCATCACTGTCCGAAGAT  
TCAGAATCAGCTGATCATGACAAGCCAAAGAGCAGCTTGTCAAGAGATGA

>M6-PGSC0003DMG400003002M6LRR-RLK\_682

CCGAAGATTCAGAATCAGCTGATCATGACAAGCCAAAGAGCAGCTTGTCAAGAGATGAAATTCTCATGT  
TTTCAGGTTATTTCTCATAGGCCTGGCTCTGGTTCTTCTTATCCTACTAT

>M6-PGSC0003DMG400003002M6LRR-RLK\_868

AGGTTGCTACAGTTGATCATGACAGTACTACTACATCAATGGATCAATCAAAGAAAGGCGCGAGCAATT  
CAGATATCTCATCAGCTGTCATTTCTTCCGATGACAGCAACACCGCGGTTT

>M6-PGSC0003DMG400003002M6LRR-RLK\_930

AGCAATTCAGATATCTCATCAGCTGTCATTTCTTCCGATGACAGCAACACCGCGGTTTCACAGTCACTCGT  
GGTTCTTACGAGTCCTGAGGCGAATAACGGATTGAGATTTGAGGATTTG

>M6-PGSC0003DMG400003002M6LRR-RLK\_992

GTCACTCGTGGTTCTTACGAGTCCTGAGGCGAATAACGGATTGAGATTTGAGGATTTGCTTAAGGCTCC  
AGCAGAGTTGCTTGAAGAGGGAAACATGGTAGTATGTACAAAGTGATGTG

>M6-PGSC0003DMG400003175M6LRR-RLK\_0

ATGGGTGGTAGATGGAATACTTATGGATTCAAGTTATCATATCTTGCACTTCTGATTATTCTTTATGACGT  
TCACGGATGTAGCTCACTCAATTCTGAAGGTAATTCTATTCTATGTTTG

>M6-PGSC0003DMG400003175M6LRR-RLK\_1098

TAGTTTTTGGTAGTGAAAATTTGTGGGACAATGAAAGAGAGATTGTTGCTTGTCATGGTTGAAAATTGG  
TTTAAAATAGCCTTGAGCATTGAAAATAAGCACAGGTTGAAAATAACCCCT

>M6-PGSC0003DMG400003175M6LRR-RLK\_1159

AAAATTGGTTTTAAAATAGCCTTGAGCATTGAAAATAAGCACAGGTTGAAAATAACCCCTAATGAGTTCTA  
AAAAATAGATTGAAAATAGTCGTGGTGGGTTAAAATAGCCTTGACAAGT

>M6-PGSC0003DMG400003175M6LRR-RLK\_122

CTGTCCTACTGGTTTTGGTGTATGTCTTAGTTATATCTAGTTTGTTATGTCCATTTGAATATTGGATTGG  
TCTACTTTGCAAACAAGGATTGGCATTGTTCCGACTACGATCTAAAG

>M6-PGSC0003DMG400003175M6LRR-RLK\_1220

TGAGTTCTAAAAAATAGATTGAAAATAGTCGTGGTGGGTTAAAATAGCCTTGACAAGTTAAAATGGG  
TTGACAATAGTTCTTTAGAAGAACTCACATATCCCATAAGATCAATGGGGC

>M6-PGSC0003DMG400003175M6LRR-RLK\_1281

AAAATGGGTTGACAATAGTTCTTTAGAAGAACTCACATATCCCATAAGATCAATGGGGCTTTGGATACTA  
CTGTTGCTGTTTTTTTAAAGATGGTGCAGCTAAATAATGTTGAAAATGTC

>M6-PGSC0003DMG400003175M6LRR-RLK\_1342

TGGATACTACTGTTGCTGTTTTTTTAAAGATGGTGCAGCTAAATAATGTTGAAAATGTCTCTCAATTTTGA  
TTAAGCATTAGAGGGGTTTAAATAACAACCTGAAAACATAATTTGCAGA

>M6-PGSC0003DMG400003175M6LRR-RLK\_1403

TCAATTTTTATTAAGCATTAGAGGGGTTTAAATAACAACCTGAAAACATAATTTGCAGAAAATCTGCATA  
ACAAAAAGTAGTAGATTAGTAAATTGGGTGGAATAGACTAAAGATAATTA

>M6-PGSC0003DMG400003175M6LRR-RLK\_1464

ATCTGCATAACAAAAGTAGTAGATTAGTAAATTGGGTGGAATAGACTAAAGATAATTAGTTCCATGTCT  
AATAATCATAGTTTTTCATCATCTTGCATGTTGTATCTTCCTGTGTGTTGT

>M6-PGSC0003DMG400003175M6LRR-RLK\_1525

TCCATGTCTAATAATCATAGTTTTTCATCATCTTGCATGTTGTATCTTCCTGTGTGTTGTGTATGACTCCTTT  
TTAATCTTAACAATTTAAACGTTTTTTTCTCTATGATTGGCTCACAG

>M6-PGSC0003DMG400003175M6LRR-RLK\_1586

ATGACTCCTTTTTTAATCTTAACAATTTAAACGTTTTTTCTCTATGATTGGCTCACAGTGTGCTGTCAGAA  
AACAAATTTTTTGGTGCCATTCCAAAAGAATTTGGACGACTTCAAAGG

>M6-PGSC0003DMG400003175M6LRR-RLK\_1647

TGCTGTCAGAAAACAATTTTTTGGTGCCATTCCAAAAGAATTTGGACGACTTCAAAGGTTGGAAGTGCT  
TGACTTGACATATAATAATTTGAGTGGGAGAATTCCAGCAGAAATAGGAG

>M6-PGSC0003DMG400003175M6LRR-RLK\_1708

GGAAGTGCTTGACTTGACATATAATAATTTGAGTGGGAGAATTCCAGCAGAAATAGGAGACCTGCATGC  
GCTAAGAAGCTTGTGAGTTCATAATTTAATTTTTGTGCATGTGAAGATGCG

>M6-PGSC0003DMG400003175M6LRR-RLK\_1769

CTGCATGCGCTAAGAAGCTTGTGAGTTCATAATTTAATTTTTGTGCATGTGAAGATGCGTGCTGCCTATA  
TTAGTTTATATATGTGAGTATTCATGAGGAAGAACCATTAAAAATATTCT

>M6-PGSC0003DMG400003175M6LRR-RLK\_183

TATTGGATTGGTCTACTTTGCAAACAAGGATTGGCATTGTTCCGACTACGATCTAAAGTGGATTGTGAT  
CCATATGGAGTTCTTGCAAACCTGGAATCTTGATCATTGTGACCCATGTAT

>M6-PGSC0003DMG400003175M6LRR-RLK\_1830

CTGCCTATATTAGTTTATATATGTGAGTATTCATGAGGAAGAACCATTAAAAATATTCTTTTGAAGTGTG  
CTTATACCTTTTACAGGTTGATTCGTAACAACAACCTTGAAGGAAAAA

>M6-PGSC0003DMG400003175M6LRR-RLK\_1891

TGAACTGTGTCTTATACCTTTTACAGGTTGATTCGTAACAACAACCTTGAAGGAAAAAATTCCATTTGAA  
ATTGGGAAGCTTCGTTTGCTCTCCGAATTGCAATTTGACGAAGAACTCAT

>M6-PGSC0003DMG400003175M6LRR-RLK\_1952

CCATTTGAAATTGGGAAGCTTCGTTTGCTCTCCGAATTGCAATTTGACGAAGAACTCATCCCTGCTGCTG  
CTGGTGGAACATGCTGTTTAAATAGAAAATTTGTACACTGGTAAGGTTCT

>M6-PGSC0003DMG400003175M6LRR-RLK\_2013

CTGCTGCTGCTGGTGGAACATGCTGTTTAAATAGAAAATTTGTACACTGGTAAGGTTCTTTTGGTTTTATT  
GGACCTTTTATATCCGTGTTCTGGTTCTTGTTACATTTATGTAACCAAA

>M6-PGSC0003DMG400003175M6LRR-RLK\_2074

TGGTTTTATTGGACCTTTTATATCCGTGTTCTGGTTCTTGTTACATTTATGTAACCAAAATATCAACATGCAA

AGATGTCTGAAATGTATGAAATTTGTATTTAAGCCATTTTCAGGCTGCC

>M6-PGSC0003DMG400003175M6LRR-RLK\_2135

TCAACATGCAAAGATGTCTGAAATGTATGAAATTTGTATTTAAGCCATTTTCAGGCTGCCATTATTTTCAGA  
ATATGGTCATAATTCCTGTCATAAGGTTTTCTTGGTGGGAGTGAGGGGG

>M6-PGSC0003DMG400003175M6LRR-RLK\_2196

TATTTTCAGAATATGGTCATAATTCCTGTCATAAGGTTTTCTTGGTGGGAGTGAGGGGGTGGGTGAACA  
CAAGTTGATAAAGTTGAGTATTAATGACAACAAGGGATATTGTCGTTTATG

>M6-PGSC0003DMG400003175M6LRR-RLK\_2257

GGTGAACACAAGTTGATAAAGTTGAGTATTAATGACAACAAGGGATATTGTCGTTTATGTCAAATCAA  
TAAAGCCTGGGAAATAGGTGATTTTCATAGATGTGGCGATGCAATGACTTGT

>M6-PGSC0003DMG400003175M6LRR-RLK\_2318

AAATCAAATAAAGCCTGGGAAATAGGTGATTTTCATAGATGTGGCGATGCAATGACTTGTGTTGCTAATG  
CTTGAAATTTATTGTCTAGTTTGACATCTAGTAGTAGTACTTGACCATACA

>M6-PGSC0003DMG400003175M6LRR-RLK\_2379

TGCTAATGCTTGAAATTTATTGTCTAGTTTGACATCTAGTAGTAGTACTTGACCATACATCAACTCAAACA  
AAAAAGCTTTGTAACTACAAGGAGGTGATTGTCCAGTCATTGCATCCA

>M6-PGSC0003DMG400003175M6LRR-RLK\_244

GATTGTGATCCATATGGAGTTCTTGCAAACCTGGAATCTTGATCATTGTGACCCATGTATGTGGTTTGGAG  
TACAGTGTCTGGCAGGCAAAGTGCAAATGTTGTAAGTCCCTTGTTACATA

>M6-PGSC0003DMG400003175M6LRR-RLK\_2440

AACTCAAACAAAAAGCTTTGTAACTACAAGGAGGTGATTGTCCAGTCATTGCATCCATCCAAGGCTA  
GGGTTGAGGATGAGGGATGCAATATATTGGAGATCTTGGGATTGATCCTGG

>M6-PGSC0003DMG400003175M6LRR-RLK\_2501

CAAGGCTAGGGTTGAGGATGAGGGATGCAATATATTGGAGATCTTGGGATTGATCCTGGAATCAAGAG  
AGCATCAAGTTATCATATTGGTTCTAATTTATTTAATTTTTTTATCAAGAA

>M6-PGSC0003DMG400003175M6LRR-RLK\_2562

TCAAGAGAGCATCAAGTTATCATATTGGTTCTAATTTATTTAATTTTTTTATCAAGAACTCTTCTCAGAT  
ATCTTTAACTCTTACATAGAATACTGACTATCAAACTAATAGCATGG

>M6-PGSC0003DMG400003175M6LRR-RLK\_2623



TCTTCTCAGATATCTTTAACTCTTACATAGAATACTGACTATCAAACTAATAGCATGGTACTTTCAATAA  
CACTTCTCAATCAGATATTTTCATTTGCCTGCTTCTCTCTGGTAATTT

>M6-PGSC0003DMG400003175M6LRR-RLK\_2684

ACTTTCAATAACACTTCTCAATCAGATATTTTCATTTGCCTGCTTCTCTCTGGTAATTTGATGTCTGTTTCTG  
GCAGCATCTGTCATGGCAGTCTGATACCATTAAAGACCGTAGACTCC

>M6-PGSC0003DMG400003175M6LRR-RLK\_2745

TGTCTGTTTCTGGCAGCATCTGTCATGGCAGTCTGATACCATTAAAGACCGTAGACTCCTTTATCAAACCA  
CTTAAAGGGACACTTCTGCGTTATTTCACTATGTAAGTAACTAAATGGT

>M6-PGSC0003DMG400003175M6LRR-RLK\_2806

TATCAAACCACTTAAAGGGACACTTCTGCGTTATTTCACTATGTAAGTAACTAAATGGTTTTCAATCACCA  
TGTGTTTCTACTTACATTTTATCACTCTAGAAGCGTCTTTGTGTCAATA

>M6-PGSC0003DMG400003175M6LRR-RLK\_2867

TCAATCACCATGTGTTTCTACTTACATTTTATCACTCTAGAAGCGTCTTTGTGTCAATAAAGGTTCTCCAAA  
CAACTGGAAGTGGCTCATTGGATAATCAGACAGGGTATTCCTCTGAC

>M6-PGSC0003DMG400003175M6LRR-RLK\_2928

GGTTCTCCAAACAACCTTGAAGTGGCTCATTGGATAATCAGACAGGGTATTCCTCTGACAACCTACCAAG  
TGAGTGAAAAAGTTTTACCCACATCATTAGCAGGAATTATGTTGAAAGT

>M6-PGSC0003DMG400003175M6LRR-RLK\_2989

CCTACCAAGTGAGTGAAAAAGTTTTACCCACATCATTAGCAGGAATTATGTTGAAAGTGACAAAAAGA  
TTGTTTTCACTTTTCTTTTTTAGCAGGTTTCTAGGCCTCACATCATCCA

>M6-PGSC0003DMG400003175M6LRR-RLK\_305

GGTTTGGAGTACAGTGTCTGGCAGGCAAAGTGCAAATGTTGTAAGTCCCTTGTTACATACGATCATATCT  
GTTAATGAGTATTCAATTCATAAACTTACTTTATAATTGTAATGCTTT

>M6-PGSC0003DMG400003175M6LRR-RLK\_3050

ACAAAAGATTGTTTTCACTTTTCTTTTTTAGCAGGTTTCTAGGCCTCACATCATCCATACTATTCAGAAC  
CATGCGAATATCGCACGCCGCAAGTTAGTAGAACAATCCAGCAACCTT

>M6-PGSC0003DMG400003175M6LRR-RLK\_3111

CTATTCAGAACCATGCGAATATCGCACGCCGCAAGTTAGTAGAACAATCCAGCAACCTTGCTGCTGTTCC  
TGCCAATGCTGGGAAACCTTTGGGTCTATTGTTTCAGTGCCAAGCACCA

>M6-PGSC0003DMG400003175M6LRR-RLK\_3172

TGCTGTTCCTGCCAATGCTGGGAAACCTTTGGGTCCTATTGTTTCAGTGCCAAGCACCAGAAGTAGTGGG  
TCATTTTCATGTTGTGCCAAATACCCAAGAAACACCTCCTACACCCTTACC

>M6-PGSC0003DMG400003175M6LRR-RLK\_3233

AGTAGTGGGTCATTTTCATGTTGTGCCAAATACCCAAGAAACACCTCCTACACCCTTACCTGCCTCGCAAC  
GACAGCCTGAGTCTCAATCCAAACCAATCCAATGGGACGGTCAAGTAGT

>M6-PGSC0003DMG400003175M6LRR-RLK\_3294

CCTCGCAACGACAGCCTGAGTCTCAATCCAAACCAATCCAATGGGACGGTCAAGTAGTGTGTTAAAC  
AGCCAACTAATAGACAAGCTCCACCTGCCCAAAAATTTGGTGATACATGGA

>M6-PGSC0003DMG400003175M6LRR-RLK\_3355

TGTTAAACAGCCAACTAATAGACAAGCTCCACCTGCCCAAAAATTTGGTGATACATGGAAGTATATAGTT  
GGAGGTTTTGGGTTTTTTCTGCTCATTGCTGTTGTAGCCGTGTTCTTAGT

>M6-PGSC0003DMG400003175M6LRR-RLK\_3416

TATATAGTTGGAGGTTTTGGGTTTTTTCTGCTCATTGCTGTTGTAGCCGTGTTCTTAGTTTTACAGAAGAAG  
AGCTGCAAAAACAATAGGCCCTTGGAAGACTGGGTTGAGTGGACAGCTG

>M6-PGSC0003DMG400003175M6LRR-RLK\_3538

AAAAGCATTGTGACAGGTATTTCAATTTAAATTTGTGACAAGAATTACTGTTAATATTCTGTCCACATTC  
TGATATTCAATGACAAAATCATTGTTGGTTGATAATAGTCTTAAATCAC

>M6-PGSC0003DMG400003175M6LRR-RLK\_3599

GTCCACATTCTGATATTCAATGACAAAATCATTGTTGGTTGATAATAGTCTTAAATCACAGCCATGAAAG  
AAGGTATAATCCTGATGTTGATTGCAAAAATTTGTTTCTCATTGCAGGGG

>M6-PGSC0003DMG400003175M6LRR-RLK\_366

ATCATATCTGTTAATGAGTATTCAATTCATAAACTTACTTTATAATTGTAATGCTTTGTTTCTTTTTTAGT  
TAAGACCAAATCCGTTAGATTTATTTAATGACAACAAATGTGCAAA

>M6-PGSC0003DMG400003175M6LRR-RLK\_3660

CCATGAAAGAAGGTATAATCCTGATGTTGATTGCAAAAATTTGTTTCTCATTGCAGGGGTCCCTAAGCTT  
AACAGGTCTGAGCTTGAAACAGCATGTGAGGATTTTAGCAATATAATTAG

>M6-PGSC0003DMG400003175M6LRR-RLK\_3721

CCTAAGCTTAACAGGTCTGAGCTTGAAACAGCATGTGAGGATTTTAGCAATATAATTAGTAGTCATGATG

CATATATAATCTACAAGGGAAC TTTGTCTAGTGGAGTAGAGATTGTTGTT

>M6-PGSC0003DMG400003175M6LRR-RLK\_3782

GTCATGATGCATATATAATCTACAAGGGAAC TTTGTCTAGTGGAGTAGAGATTGTTGTTGCCTCGACTAC

TCTAACTTCTCTCGAAGATTGGTCTGATAGTTCAGAAATGGCCTTCAGGA

>M6-PGSC0003DMG400003175M6LRR-RLK\_3843

CTCGACTACTCTAACTTCTCTCGAAGATTGGTCTGATAGTTCAGAAATGGCCTTCAGGAAGAAGGTTTGT

TGTTTCCATTTACATCAAAAATAAAATATTATCTCTCCATAGATCTCACA

>M6-PGSC0003DMG400003175M6LRR-RLK\_3904

AAGGTTTGTGTTTCCATTTACATCAAAAATAAAATATTATCTCTCCATAGATCTCACAGTCTTACACTTCA

CATAATGACATTGTTGTTATCTCTTCATCCTTTTCGGTTGTAAAAGAC

>M6-PGSC0003DMG400003175M6LRR-RLK\_3965

CTTACACTTCACATAATGACATTGTTGTTATCTCTTCATCCTTTTCGGTTGTAAAAGACATGACATTTTGTG

GTTGTGCTACTGAACAGATTGATACACTTTCAAGAGTGAACCACAAAA

>M6-PGSC0003DMG400003175M6LRR-RLK\_4026

GACATTTTGTGGTTGTGCTACTGAACAGATTGATACACTTTCAAGAGTGAACCACAAAAATTTTGTTAAT

CTTATTGGATACTGTGAGGAGGATGAACCTTTCACTAGGATGATGGTCTT

>M6-PGSC0003DMG400003175M6LRR-RLK\_4087

TTTGTTAATCTTATTGGATACTGTGAGGAGGATGAACCTTTCACTAGGATGATGGTCTTTGAGTATGCTC

CAATGGAACCTTTCTGAGCATCTACACAGTAAGATTCTTTGTTGTCCA

>M6-PGSC0003DMG400003175M6LRR-RLK\_4148

AGTATGCTCCAAATGGAACCTTTCTGAGCATCTACACAGTAAGATTCTTTGTTGTCCACAGTTCAGCTTT

AATTACTACAATGATGGCTTGATTTAGTTCAGAATAACACTTCTTATT

>M6-PGSC0003DMG400003175M6LRR-RLK\_4209

GTTTCAGCTTTAATTACTACAATGATGGCTTGATTTAGTTCAGAATAACACTTCTTATTTTATTTTGAAAAA

AAAAAAGATGTTTCAGAATGACTTAAAATATAAGTTTAATTGTGTCAG

>M6-PGSC0003DMG400003175M6LRR-RLK\_427

TTCTTTTTAGTTAAGACCAAATCCGTTAGATTTATTTAATGACAACAAATGTGCAAAGATGAACTCAT

ATGTTTTGACTTTTGAGCTATCTCTCATGTTGTTAATTATTTTCTTTTT

>M6-PGSC0003DMG400003175M6LRR-RLK\_4270

ATTTTGAAAAAAAAAAGATGTTTCAGAATGACTTAAAATATAAGTTTAATTGTGTCAGTTGAAGAAACC  
GATCCTCTTGACTGGTCTGCAAGGATGAGAGCCATAATGGGGACAGCATA

>M6-PGSC0003DMG400003175M6LRR-RLK\_4331

GAAGAAACCGATCCTCTTGACTGGTCTGCAAGGATGAGAGCCATAATGGGGACAGCATATTGTCTTAAG  
TACATGCATGATCTGAATCCTCCAGTGCCCCATTCCAGCTTAGATTCAAAT

>M6-PGSC0003DMG400003175M6LRR-RLK\_4392

GTCTTAAGTACATGCATGATCTGAATCCTCCAGTGCCCCATTCCAGCTTAGATTCAAATGCCATATTTTG  
ACTGACGATTATGCTGCTAAGGTCTGCTCCGTCTTCTTCAATATGTATA

>M6-PGSC0003DMG400003175M6LRR-RLK\_4453

CATATTTTGGACTGACGATTATGCTGCTAAGGTCTGCTCCGTCTTCTTCAATATGTATATATAATTTATCTA  
CCATATTGAACTAAGAAACATTTTTCATTTGTATTTTCATATTGAAATA

>M6-PGSC0003DMG400003175M6LRR-RLK\_4514

TAATTTATCTACCATATTGAACTAAGAAACATTTTTCATTTGTATTTTCATATTGAAATAGAATTTTTTATATT  
TTCACAGATTACAGAGATTGGTTTCTGGTCAGAACTAATAGCCAAGT

>M6-PGSC0003DMG400003175M6LRR-RLK\_4575

ATTTTTATATTTTACAGATTACAGAGATTGGTTTCTGGTCAGAACTAATAGCCAAGTCTAAGGACTCTA  
GGGATGATTTAGAAAATTCTGAGCTGCCAGCACTTGCTGATCCTGAAAC

>M6-PGSC0003DMG400003175M6LRR-RLK\_4636

AAGGACTCTAGGGATGATTTAGAAAATTCTGAGCTGCCAGCACTTGCTGATCCTGAAACAAATATCTATA  
GTTTTGGGATTCTATTACTAGAAATAATTTCTGGAAAGTCACCTTATTCA

>M6-PGSC0003DMG400003175M6LRR-RLK\_4697

ATATCTATAGTTTTGGGATTCTATTACTAGAAATAATTTCTGGAAAGTCACCTTATTCAGAAGAACAAGG  
ATCTCTTCTGAACTGGGTAAATGTCCTTCATATGTTTCCCTTATTTTCTT

>M6-PGSC0003DMG400003175M6LRR-RLK\_4758

AGAACAAGGATCTCTTCTGAACTGGGTAAATGTCCTTCATATGTTTCCCTTATTTTCTTATACTTGATCGTT  
ACAATGCGTTCCCTAGTCTGCATGCATTTTCTTGTGTGAATGTATTTT

>M6-PGSC0003DMG400003175M6LRR-RLK\_4819

ACTTGATCGTTACAATGCGTTCCCTAGTCTGCATGCATTTTCTTGTGTGAATGTATTTTCTTTCAGACTTAT  
ACCAATGCAAAAGCATATTGATAACTATTATTTTATTTAGGCGGAGCA

>M6-PGSC0003DMG400003175M6LRR-RLK\_488

ATGAACTCATATGTTTTGACTTTTGAGCTATCTCTCATGTTGTTAATTATTTCTTTTTCTTCTCTGTTTAGG  
GATCTTCATGGACATTCTTTAGAAGGCACATTGGCACCAGAGCTTGG

>M6-PGSC0003DMG400003175M6LRR-RLK\_4880

TTCAGACTTATACCAATGCAAAGCATATTGATAACTATTATTTTATTTAGGCGGAGCAATACCTTAAAG  
ATAAGATGAATGTGAGCTCCTTGTTGATCCAACACTCAAGTCCTTCAA

>M6-PGSC0003DMG400003175M6LRR-RLK\_4941

ACCTTAAAGATAAGATGAATGTGAGCTCCTTGTTGATCCAACACTCAAGTCCTTCAAAAATAATGAGCT  
TATGGCTATCCGTGTGGTAATTAAGAATGCCTTCAAGAAAATATAAGGA

>M6-PGSC0003DMG400003175M6LRR-RLK\_5002

TAATGAGCTTATGGCTATCCGTGTGGTAATTAAGAATGCCTTCAAGAAAATATAAGGAAGAGACCAAC  
GATAACCGAAGTCATTGCAAATTAAGGGAAGCGATTGATATATCGCCTGA

>M6-PGSC0003DMG400003175M6LRR-RLK\_5063

AGACCAACGATAACCGAAGTCATTGCAAATTAAGGGAAGCGATTGATATATCGCCTGATGCTGCAGTT  
CCAAGGCTTTCTCCCCTTTGGTGGGCTGAACTCGAGCTCTTATCTTCTGAG

>M6-PGSC0003DMG400003175M6LRR-RLK\_549

TCTCTGTTTAGGGATCTTCATGGACATTCTTTAGAAGGCACATTGGCACCAGAGCTTGGGAATCTCACTC  
ACTTAAGATCAATGTAAGTTTTTACCTACGACAAAATGTTTTTTGCTTTT

>M6-PGSC0003DMG400003175M6LRR-RLK\_61

TTTATGACGTTACGGATGTAGCTCACTCAATTCTGAAGGTAATTCTATTCTATGTTTGGACTGTCCTACT  
GGTTTTGGTGTATGTCTTAGTTATATCTAGTTTGTATGTCCATTTG

>M6-PGSC0003DMG400003175M6LRR-RLK\_610

ATCTCACTCACTTAAGATCAATGTAAGTTTTTACCTACGACAAAATGTTTTTTGCTTTTTTAGTTCATAAGT  
GAAAATTTGTGGGGAATTAAGAGAGATTGTTGCTTGTCATGGTTGAA

>M6-PGSC0003DMG400003175M6LRR-RLK\_671

AGTTCATAAGTGAAAATTTGTGGGGAATTAAGAGAGATTGTTGCTTGTCATGGTTGAAAAGTATTAA  
AACTTAGTATTGGTTGAAAATAGCCTTGCGCATTGAAAATAAGCACGGGTT

>M6-PGSC0003DMG400003175M6LRR-RLK\_732

CTGATTAAGTATTAGTATTGGTTGAAAATAGCCTTGCGCATTGAAAATAAGCACGGGTTAAAATGACCC

TAATGAGTTAAATGGATTGAAATAGCCTGGCAGCTTAAAAATACCTCCTT

>M6-PGSC0003DMG400003175M6LRR-RLK\_793

AAATGACCCTAATGAGTTAAATGGATTGAAATAGCCTGGCAGCTTAAAAATACCTCCTTCTTTTGATTCT  
TTTTAACTTGCAATTTTTTAAAAAAAATTGATCCTCCTCTTCTTCT

>M6-PGSC0003DMG400003175M6LRR-RLK\_854

TTTGATTTCTTTTTTAACTTGCAATTTTTTAAAAAAAATTGATCCTCCTCTTCTTCTTTTGGTTTTTGGTT  
AAAAAACTCCCTAAATAATCTTGTCTTGTGTTGAAAGCTCTTTTGA

>M6-PGSC0003DMG400003175M6LRR-RLK\_915

TGGTTTTTGGTTAAAAAACTCCCTAAATAATCTTGTCTTGTGTTGAAAGCTCTTTTGAAGTGCTTGCCT  
CTCGACAATGATAGCATTGAAAGGAGTGTTTCTAAGGATCGTTCTTCC

>M6-PGSC0003DMG400003175M6LRR-RLK\_976

GTGCTTGCCTCTCGACAATGATAGCATTGAAAGGAGTGTTTCTAAGGATCGTTCTTCCGTTACAATATTC  
CATAAATCATAGGTTTCAAGATATGAATTCATTTTCACTGACCAAATCT

>M6-PGSC0003DMG400003195-(rev)M6LRR-RLP\_0

GAGCTTTAAATACTTCTTAATTACAAGTTCTAGAAGGAGTCAGAGAAATTTATGAGCCATCCGGGATTGA  
ATCCTTATCTCTCATGCACTTTATCGACCACTAGACCAAATCACTGAGGT

>M6-PGSC0003DMG400003195-(rev)M6LRR-RLP\_1037

CACCCTCTCCAACCTTCTCATCTTCAAACCTTAATTTAGCTTACAATGATTTCTCACCTTCCCAAATTTCA  
AGCAAATTTGGATGGTTTCCGAGTTTGACACATCTTAATCTATCTCG

>M6-PGSC0003DMG400003195-(rev)M6LRR-RLP\_1098

TCCCAAATTTCAAGCAAATTTGGATGGTTTCCGAGTTTGACACATCTTAATCTATCTCGTTCTGGTTTTTCA  
GGGACAGTACCTTTACAAGTCTCATATCTATCTAAGTTGATATCACTT

>M6-PGSC0003DMG400003195-(rev)M6LRR-RLP\_1159

CTGGTTTTTTCAGGGACAGTACCTTTACAAGTCTCATATCTATCTAAGTTGATATCACTTGATCTTTCTGCA  
GGTATTGAGGAGTTGAGAGTTGAACCTCACACTTTCAAATGCTCCTTC

>M6-PGSC0003DMG400003195-(rev)M6LRR-RLP\_122

CGGGTGTCTAGTCATTTATATATAAAGTCGCAACCATCTGAATTTTTCTGTTTGAATGTCAAAGATACTC  
ATAGCACGATCAAAGTGTGAGTCAAACAAAAACAATAGAGTTGACATTT

>M6-PGSC0003DMG400003195-(rev)M6LRR-RLP\_1220

TCTTTCTGCAGGTATTGAGGAGTTGAGAGTTGAACCTCACACTTTCAAATGCTCCTTCAAACCTTAACTC  
AACTAAGGGAGCTTTACCTCACCTCAACATATATATCTTCATCACTTCC

>M6-PGSC0003DMG400003195-(rev)M6LRR-RLP\_1281

AACTTAACTCAACTAAGGGAGCTTTACCTCACCTCAACATATATATCTTCATCACTTCCATCAAACCTTGTC  
TCTTCCTTGCAAGAGCTGAATCTTGTCGGAACGGAATTGTCTGGGAAA

>M6-PGSC0003DMG400003195-(rev)M6LRR-RLP\_1342

CAAACCTGTCTCTTCTTGCAAGAGCTGAATCTTGTCGGAACGGAATTGTCTGGGAAAATCCCTGATGA  
CATTTTCCATTTACCAAGATTGCAAATGCTTAACTTAGGGAGCAACTTGT

>M6-PGSC0003DMG400003195-(rev)M6LRR-RLP\_1403

CCCTGATGACATTTTCCATTTACCAAGATTGCAAATGCTTAACTTAGGGAGCAACTTGTATCTCACAGGG  
CATTTGCCAACAACTCAATGGAAGTGCAGCAACTCTTAAAGGGAATTAGA

>M6-PGSC0003DMG400003195-(rev)M6LRR-RLP\_1464

CTCACAGGGCATTGCCAACAACCTCAATGGAAGTGCAGCAACTCTTAAAGGGAATTAGATCTTTCTTCT  
CAGGCTTTTCGGGGAATATAACCAGATTCTATTGGTCATCTCAACTCTTAA

>M6-PGSC0003DMG400003195-(rev)M6LRR-RLP\_1525

TTTCTTCTCAGGCTTTTCGGGGAATATAACCAGATTCTATTGGTCATCTCAACTCTTAAAGGAAATTAGAT  
ATATCAGGCTGCTACTTCTCTGGTAACATTCCTCCAACCTATCGGTGATC

>M6-PGSC0003DMG400003195-(rev)M6LRR-RLP\_1586

GAAATTAGATATATCAGGCTGCTACTTCTCTGGTAACATTCCTCCAACCTATCGGTGATCTCACCGAGCTCA  
CGAGTTTGCAACTCTTCTCCAACAACCTCAATGGTCAACTACCATCAAC

>M6-PGSC0003DMG400003195-(rev)M6LRR-RLP\_1647

ACCGAGCTCACGAGTTTGCAACTCTTCTCCAACAACCTCAATGGTCAACTACCATCAACAATCTTAAACT  
GGTGCAACTTGTTGAGTTTGATATCTCATCTAACAACCTTACAGGCAAC

>M6-PGSC0003DMG400003195-(rev)M6LRR-RLP\_1708

TCTTAAACTGGTGCAACTTGTTGAGTTTGATATCTCATCTAACAACCTTACAGGCAACATTCCAAATATT  
TTCGGTAACTTCACCAAGCTCAAATCTTTATCCTTTTCATATAACCTCT

>M6-PGSC0003DMG400003195-(rev)M6LRR-RLP\_1769

TCCAAATATTTTCGGTAACTTCACCAAGCTCAAATCTTTATCCTTTTCATATAACCTCTTTACGGGCCTTTT  
CCATCCTCTGTTACAAACTTAACAGAGCTAGAGAGTTTAGACCTCTC

>M6-PGSC0003DMG400003195-(rev)M6LRR-RLP\_183

AAAGATACTCATAGCACGATCAAAGTGTGAGTCAAACAAAAACAATAGAGTTGACATTTAACATATATGC  
ACACAAAATTGCCTAACTATGATGCAAGCTGCATAATGATTTGACAATCA

>M6-PGSC0003DMG400003195-(rev)M6LRR-RLP\_1830

ACGGGCCTTTTTCCATCCTCTGTTACAACTTAACAGAGCTAGAGAGTTTAGACCTCTCAAATTGTTCTAT  
AACTGGTCTATTCTTCTAGCGTCAGAACCGGATTCCTAACCTCATC

>M6-PGSC0003DMG400003195-(rev)M6LRR-RLP\_1891

ATTGTTCTATAACTGGTCTATTCTTCTAGCGTCAGAACCGGATTCCTAACCTCATCTTGCTCTTCTCTAC  
CATATAACTCCCTTAGCGGAGAAATACCATCTTGGATATTAATCTTC

>M6-PGSC0003DMG400003195-(rev)M6LRR-RLP\_1952

GCTCTTCTACCATATAACTCCCTTAGCGGAGAAATACCATCTTGGATATTAATCTTCTTCTTAAAATA  
CTTAGTTTTGAGAGGCAATCAACTTACTGGTCAACTTAAGGAAGTTAG

>M6-PGSC0003DMG400003195-(rev)M6LRR-RLP\_2013

TCCTTAAAATACTTAGTTTTGAGAGGCAATCAACTTACTGGTCAACTTAAGGAAGTTAGATACAACCTGT  
TAGAAGTTGTTGATGTCGGTGACAATAAGCTGAATGGACCTATTCCAACA

>M6-PGSC0003DMG400003195-(rev)M6LRR-RLP\_2074

ACAACCTGTTAGAAGTTGTTGATGTCGGTGACAATAAGCTGAATGGACCTATTCCAACATCATTCTCTAA  
ACTAGTGAACCTGACAACACTTGATCTTTCTACAACAACCTTTCTGGTG

>M6-PGSC0003DMG400003195-(rev)M6LRR-RLP\_2135

ATTCTCTAAACTAGTGAACCTGACAACACTTGATCTTTCTACAACAACCTTTCTGGTGGTCTAGATATTG  
GATTGTTTTCAAATGCAAACAACCTTCGACGTCTTGGCCTTTCTTTTAA

>M6-PGSC0003DMG400003195-(rev)M6LRR-RLP\_2196

CTAGATATTGGATTGTTTTCAAATGCAAACAACCTTCGACGTCTTGGCCTTTCTTTTAAACATCTGTCTGT  
ATTTTCCAGTCAAAAAGATGCATCCTTGCCTAGTTCTCTTGGAAAGTTTG

>M6-PGSC0003DMG400003195-(rev)M6LRR-RLP\_2257

ATCTGTCTGTATTTTCCAGTCAAAAAGATGCATCCTTGCCTAGTTCTCTTGGAAAGTTTGTATGCATCTTCTT  
GCAACATAAGGGAGTTAAATTTCTACGAGCTGCAAATACATTGGTA

>M6-PGSC0003DMG400003195-(rev)M6LRR-RLP\_2318

TGCATCTTCTTGCAACATAAGGGAGTTAAATTTCTACGAGCTGCAAATACATTGGTAACTTAGATCTTT



CCAACAACAACATGCATGGAAAAATTCCTGATTGGGCATGGTCTAATTG

>M6-PGSC0003DMG400003195-(rev)M6LRR-RLP\_2379

TTAGATCTTTCCAACAACAACATGCATGGAAAAATTCCTGATTGGGCATGGTCTAATTGGCAAGTCTCAG

TGTCTTATTTGAATCTTTCTAGCAACTTTCTAACGGCTATTGACCTGCTT

>M6-PGSC0003DMG400003195-(rev)M6LRR-RLP\_244

CATATATGCACACAAAATTGCCTAACTATGATGCAAGCTGCATAATGATTTGACAATCAATGCGGCTGGA

TTTTAATTACTTGTCTAGAAAGGAGTCAAGGAGATGTTTATGAGCAACCC

>M6-PGSC0003DMG400003195-(rev)M6LRR-RLP\_2440

AAGTCTCAGTGTCTTATTTGAATCTTTCTAGCAACTTTCTAACGGCTATTGACCTGCTTCATAACTTTGAGA

GTCTTTACAATCTTGATATTGGATCTAACTTGATTCAAGGAGAATTAC

>M6-PGSC0003DMG400003195-(rev)M6LRR-RLP\_2501

TAACCTTGAGAGTCTTTACAATCTTGATATTGGATCTAACTTGATTCAAGGAGAATTACCTGCTCCACCTC

CCTTATTGTTCTCTCATAGCCTCGAACAATAACTTCACCGGGAAGTT

>M6-PGSC0003DMG400003195-(rev)M6LRR-RLP\_2562

GCTCCACCTCCCTTATTGTTCTCTCATAGCCTCGAACAATAACTTCACCGGGAAGTTACCTAATTCACC

ATTATGCAAAATGAGTTCCTTTTATTCTTGATTGTCCAATAACAGC

>M6-PGSC0003DMG400003195-(rev)M6LRR-RLP\_2623

CTAATTCACCATTATGCAAAATGAGTTCCTTTTATTCTTGATTGTCCAATAACAGCCTGAGTGGAGTA

ATTCCAAAATGTTTAGTGAACATGAGCACAAGTCTCTCAGTGTGGACC

>M6-PGSC0003DMG400003195-(rev)M6LRR-RLP\_2684

GAGTGGAGTAATTCAAAATGTTTAGTGAACATGAGCACAAGTCTCTCAGTGTGGACCTGCACAACAA

TCATTTTAGTGGGACAATTCAAAATAACTTTGGTAAGGGAAGTAGTCTGAG

>M6-PGSC0003DMG400003195-(rev)M6LRR-RLP\_2745

CACAACAATCATTTTAGTGGGACAATTCAAAATAACTTTGGTAAGGGAAGTAGTCTGAGAAGTCTCAATT

TGCGGAAAAATAAACTAGAAAGGAATGTTACCAAGAAAGCTTACCAATTGC

>M6-PGSC0003DMG400003195-(rev)M6LRR-RLP\_2806

GTCTCAATTTGCGGAAAAATAAACTAGAAAGGAATGTTACCAAGAAAGCTTACCAATTGCAGAGGGCTCG

AAGTAGTTGATCTCGGAGAAAATTTGTTGAATGATACATTTCCCAAATGGT

>M6-PGSC0003DMG400003195-(rev)M6LRR-RLP\_2867

AGGGCTCGAAGTAGTTGATCTCGGAGAAAACCTGTTGAATGATACATTTCCCAAATGGTTAGGATCACTT  
CCTAGGCTGCAAGTTCTCAGTTTGAGATCCAATAAATTACATGGCCCGAT

>M6-PGSC0003DMG400003195-(rev)M6LRR-RLP\_2928

GGATCACTTCCTAGGCTGCAAGTTCTCAGTTTGAGATCCAATAAATTACATGGCCCGATTACCATTTCAA  
GAAACCAAGTCTTATTCTCAAAGCTGAAAATCCTTGATCTCTCTTATAAT

>M6-PGSC0003DMG400003195-(rev)M6LRR-RLP\_2989

CCATTTCAAGAAACCAAGTCTTATTCTCAAAGCTGAAAATCCTTGATCTCTCTTATAATGACTTCACTGGA  
AACCTGTCAGAAAGGTTTTTCAACAACCTGAAATCCATGATAATAGAAG

>M6-PGSC0003DMG400003195-(rev)M6LRR-RLP\_305

GCGGCTGGATTTTAATTACTTGTTCTAGAAGGAGTCAAGGAGATGTTTCATGAGCAACCCAGGATTTGAA  
TCCTGATCTGGCATGCACTTTATCGACCACTAGATCAAATCACTGGGGTGA

>M6-PGSC0003DMG400003195-(rev)M6LRR-RLP\_3050

CTTCACTGGAAACCTGTCAGAAAGGTTTTTCAACAACCTGAAATCCATGATAATAGAAGATCAAACGGG  
AATACCTTTAACGTATATTGGAGAAGTTTCGATACCATGATTCCGTGACATT

>M6-PGSC0003DMG400003195-(rev)M6LRR-RLP\_3111

CAAACGGGAATACCTTTAACGTATATTGGAGAAGTTTCGATACCATGATTCCGTGACATTGTCTATAAAAG  
GACAGCAAATTGAACTTGTGAGGATTCTTTCTATCTTCACAACCATTGAT

>M6-PGSC0003DMG400003195-(rev)M6LRR-RLP\_3172

CTATAAAAGGACAGCAAATTGAACTTGTGAGGATTCTTTCTATCTTCACAACCATTGATTTCTCAAATAAC  
AGATTTAAAGGTAATGTACCAAACCTCCATTGAAATCTTGGTTCACTTC

>M6-PGSC0003DMG400003195-(rev)M6LRR-RLP\_3233

CTCAAATAACAGATTTAAAGGTAATGTACCAAACCTCCATTGAAATCTTGGTTCACTTCGCGGGTTGAAT  
TTGTCACACAACAGCCTTATTGGACTTATACCTCAGTCTTTTGGAAATTT

>M6-PGSC0003DMG400003195-(rev)M6LRR-RLP\_3294

GGGTTGAATTTGTCACACAACAGCCTTATTGGACTTATACCTCAGTCTTTTGGAAATTTATCTGTTCTTGA  
GTCGTTAGACCTTTTCATGGAACCAACTTTCTGGGAACATTCTCAAGAA

>M6-PGSC0003DMG400003195-(rev)M6LRR-RLP\_3355

CTGTTCTTGAGTCGTTAGACCTTTTCATGGAACCAACTTTCTGGGAACATTCTCAAGAAGTTGCTTCACTG  
AAATCTCTTGCTGTCATGAATCTCTCACAGAACCACCTGATGGGACGCA

>M6-PGSC0003DMG400003195-(rev)M6LRR-RLP\_3416

TGCTTCACTGAAATCTCTTGCTGTCATGAATCTCTCACAGAACCACCTGATGGGACGCATACCTAGAGGT  
CCACAGCTTGATACATTTGAAAATGACTCATATTCAGGAAATGCTGGATT

>M6-PGSC0003DMG400003195-(rev)M6LRR-RLP\_3477

CCTAGAGGTCCACAGCTTGATACATTTGAAAATGACTCATATTCAGGAAATGCTGGATTATGCGGATTTCC  
CCTTGTCAAGAACTGCGGAGATAATGAGATGCCTCCTTCTACTGTGACT

>M6-PGSC0003DMG400003195-(rev)M6LRR-RLP\_3538

GCGGATTTCCCTTGTCAAGAACTGCGGAGATAATGAGATGCCTCCTTCTACTGTGACTGATATTGAAGA  
CGAAGAAGATTCAGGTTTTATGGATTGGAGAGCTGCGATAATAGGATGTG

>M6-PGSC0003DMG400003195-(rev)M6LRR-RLP\_3599

TATTGAAGACGAAGAAGATTCAGGTTTTATGGATTGGAGAGCTGCGATAATAGGATGTGGTTGTGGATC  
AGTGTGGGATGTTTATAGTATATATCATTTTTCTAACAGGGAGACCAA

>M6-PGSC0003DMG400003195-(rev)M6LRR-RLP\_366

GATTTGAATCCTGATCTGGCATGCACCTTATCGACCACTAGATCAAATCACTGGGGTGACGGATGTCTAG  
TCATTTATATATAGAGTCGCAATCATCTGAATTTATCAAGTTTGAATGTC

>M6-PGSC0003DMG400003195-(rev)M6LRR-RLP\_3660

TGTGGATCAGTGTGGGATGTTTATAGTATATATCATTTTTCTAACAGGGAGACCAAATGGTTTGTGA  
GAATTGTCAACCAACAGATCAACAGGATCCTTTTGAAAATTGAGGCAAAG

>M6-PGSC0003DMG400003195-(rev)M6LRR-RLP\_3721

GGTTTGTGAGAATTGTCAACCAACAGATCAACAGGATCCTTTTGAAAATTGAGGCAAAGAGAAGAATTG  
AGGCAAAAAGAGAAGACGGCAGAAAAGAAGAAGGATGAAGTTTTAGTATA

>M6-PGSC0003DMG400003195-(rev)M6LRR-RLP\_3779

GAGAAGAATTGAGGCAAAAAGAGAAGACGGCAGAAAAGAAGAAGGATGAAGTTTTAGTATATACTT  
CATGCATTATTGTCTTGCAACATACACAGTTTCAGCTTACACCTTGTGGC

>M6-PGSC0003DMG400003195-(rev)M6LRR-RLP\_427

GATGTCTAGTCATTTATATATAGAGTCGCAATCATCTGAATTTATCAAGTTTGAATGTCAAAGATACTCCT  
AGCGCGATCAAACCGTCAGTCAAACAGAAAAAATAGAGTTGACATTTAA

>M6-PGSC0003DMG400003195-(rev)M6LRR-RLP\_488

AGATACTCCTAGCGCGATCAAACCGTCAGTCAAACAGAAAAAATAGAGTTGACATTTAACATATACAAA

CACAAAGTTGCCTAACTATGAATGCAAGCTGCGTAATGATTTGACGATCAA

>M6-PGSC0003DMG400003195-(rev)M6LRR-RLP\_549

TATACAAACACAAAGTTGCCTAACTATGAATGCAAGCTGCGTAATGATTTGACGATCAATGATGCTGGAT  
TTTGTTACTTGTCTAGAAAGGAGTCAAGGAAGATATTTTCATACCTCAAGT

>M6-PGSC0003DMG400003195-(rev)M6LRR-RLP\_61

CGGGATTGAATCCTTATCTCTCATGCACTTTATCGACCACTAGACCAAATCACTGAGGTGACGGGTGTCT  
AGTCATTTATATATAAAGTCGCAACCATCTGAATTTTTCTGTTTGAATG

>M6-PGSC0003DMG400003195-(rev)M6LRR-RLP\_610

ATGCTGGATTTTGTACTTGTCTAGAAAGGAGTCAAGGAAGATATTTTCATACCTCAAGTATATAAAATCTT  
GTGAATTATTCCTTCATTCTCAAGTACTTATTATTTTTGTGCAGATCA

>M6-PGSC0003DMG400003195-(rev)M6LRR-RLP\_671

ATAAAATCTTGTGAATTATTCCTTCATTCTCAAGTACTTATTATTTTTGTGCAGATCATGGGCTGTCTATT  
TCTTCTTCTTCTTCTTCTTGTGTTGCAATATCCACTTGTTATCTTTTC

>M6-PGSC0003DMG400003195-(rev)M6LRR-RLP\_732

GGCTGTCTATTTCTTCTTCTTCTTCTTGTGTTGCAATATCCACTTGTTATCTTTTCAAGTCATCTATGTC  
GACGAGACGAGAGTTTGGTTTTGCAAAACCTGAAGCTTAAACTGTCC

>M6-PGSC0003DMG400003195-(rev)M6LRR-RLP\_793

GTCATCTATGTCGACGAGACGAGAGTTTGGTTTTGCAAAACCTGAAGCTTAAACTGTCCATAGATGACTC  
TGCTTCTGCTGATTGTGAATCCAATGGTACTTTCCCTATCCAAAGACAC

>M6-PGSC0003DMG400003195-(rev)M6LRR-RLP\_854

AGATGACTCTGCTTCTGCTGATTGTGAATCCAATGGTACTTTCCCTATCCAAAGACACTTTCTTGGGAATA  
GAACCACTGATTGTTGTAAGTGGGATGGTGAACATGTGATAAAGTTAC

>M6-PGSC0003DMG400003195-(rev)M6LRR-RLP\_915

TCTTGAATAGAACCACTGATTGTTGTAAGTGGGATGGTGAACATGTGATAAAGTTACAGGTCGAATA  
ACTCGTCTTGATCTTAGTTGTAGCCAACCTCATGGAACAATTGACTCCAAC

>M6-PGSC0003DMG400003195-(rev)M6LRR-RLP\_976

GTCGAATAACTCGTCTTGATCTTAGTTGTAGCCAACCTCATGGAACAATTGACTCCAACAGCACCCTCTTC  
CAACTTTCTCATCTTCAAACCTTAATTTAGCTTACAATGATTTCTCAC

>M6-PGSC0003DMG400003210-(rev)M6LRR-RLK\_0

TCGCAGTATGGATCTAAAAACGTGCTGTATTATACTATTAAAAAAACTGAGAGAGACTGGCTCCCTCAT  
TAAGAATTATTGAACAACCAGCCAAACCAAAGCATTAAATATTCTCCTAT

>M6-PGSC0003DMG400003210-(rev)M6LRR-RLK\_1054

TCAAATCTTGAATTTCTCTATTTAGATGATAACAACCTTGAAGGGGAAATTCCTGAGACCTTATGGAATG  
GGAGCTTACAAGAGTTAGCTCTTTCCTTGAATAAATTCAATGGTAGTATA

>M6-PGSC0003DMG400003210-(rev)M6LRR-RLK\_1116

ATGGAATGGGAGCTTACAAGAGTTAGCTCTTTCCTTGAATAAATTCAATGGTAGTATATCAGAAAAGATT  
GGTGGTTCTCATCAGATAAATTACATTGATTTATCAGTTAACAATAAC

>M6-PGSC0003DMG400003210-(rev)M6LRR-RLK\_1178

AAAAGATTGGTGGTTCTCATCAGATAAATTACATTGATTTATCAGTTAACAATAACTGGTCAGCTTCCA  
AGATCAGTTGGACGTCTAAAGAATCTGAACAAGCTTTTTCTGTATGATA

>M6-PGSC0003DMG400003210-(rev)M6LRR-RLK\_124

GTTGTTTCCTAACTCATTACCAAATACCACACTAATTAAGCATATGATTAGCTGAGGACACATATTA  
TGAAACAACATTCTCAGGCGCCTCAGCCCAAAAATTAGTTCTTGAACATA

>M6-PGSC0003DMG400003210-(rev)M6LRR-RLK\_1240

CAGCTTCCAAGATCAGTTGGACGTCTAAAGAATCTGAACAAGCTTTTTCTGTATGATAACATGTTTAGTG  
GTTTATTACCAGCAGAACTTGGGAACTGCACTTCTCTTGTGCGATAAGT

>M6-PGSC0003DMG400003210-(rev)M6LRR-RLK\_1302

GTTTAGTGGTTCATTACCAGCAGAACTTGGGAACTGCACTTCTCTTGTGCGATAAGTCTCGTCACTAACT  
TCATTGGTGGGGAAATTCCTCTAGAGCTCTGCAACCTTCACTCCCTAAT

>M6-PGSC0003DMG400003210-(rev)M6LRR-RLK\_1364

TCACTAACTTCATTGGTGGGGAAATTCCTCTAGAGCTCTGCAACCTTCACTCCCTAATAAAAATTTCAAGTG  
TACGGAAATCAAATTCAGGGCCAAATTCAGAATGCATTGGCAGAATAA

>M6-PGSC0003DMG400003210-(rev)M6LRR-RLK\_1426

TTTCAAGTGTACGGAAATCAAATTCAGGGCCAAATTCAGAATGCATTGGCAGAATAAGTGGACTGGAG  
GAGCTAGATCTTAGTGAGAACCGATTGATCGGCAAGATACCACCTGGAATC

>M6-PGSC0003DMG400003210-(rev)M6LRR-RLK\_1488

ACTGGAGGAGCTAGATCTTAGTGAGAACCGATTGATCGGCAAGATACCACCTGGAATCACAAATATGAC  
GAAACTTGTGTTACTCTTTGGCTCATAATAATCTTACAGGGGAGGTACC

>M6-PGSC0003DMG400003210-(rev)M6LRR-RLK\_1550

ATATGACGAAACTTGTGTTACTCTCTTTGGCTCATAATAATCTTACAGGGGAGGTACCACCTAATCTTGG  
AAAAACAATTTTCCTGGCTTATTTAAGGTTGATTTAGGTTATAATATCT

>M6-PGSC0003DMG400003210-(rev)M6LRR-RLK\_1612

AATCTTGAAAAACAATTTTCCTGGCTTATTTAAGGTTGATTTAGGTTATAATATCTTCAGCGGACCTAT  
TCCTTCTGAACTATGTAATGGTAACAGTCTTGGAGTCCTGGTTCTTGAA

>M6-PGSC0003DMG400003210-(rev)M6LRR-RLK\_1674

CGGACCTATTCCTTCTGAACTATGTAATGGTAACAGTCTTGGAGTCCTGGTTCTTGAAAACAACAGTTTTA  
ATGGCAGCTTCCCAACATATCTAGCAAATGTGAATCCCTCTATAGGGT

>M6-PGSC0003DMG400003210-(rev)M6LRR-RLK\_1736

ACAGTTTTAATGGCAGCTTCCCAACATATCTAGCAAATGTGAATCCCTCTATAGGGTAAACTCCCCAA  
CAACAATCTGCAGGGGAGTATTCCTGACTACATTGAAAAGAATGAGAAGA

>M6-PGSC0003DMG400003210-(rev)M6LRR-RLK\_1798

CTCCCCAACAACAATCTGCAGGGGAGTATTCCTGACTACATTGAAAAGAATGAGAAGATTTCTTACTTGA  
ATGTTTCGAGGAAATATGCTTGCAGGAAGGATTCCAGCAGCATTGTTAT

>M6-PGSC0003DMG400003210-(rev)M6LRR-RLK\_186

CACATATTATGAAACAACATTCTCAGGCGCTCAGCCCCAAAATTAGTTCTTGAAGTACAGCTCAGTGT  
TTAAGAGGTCAGAGATGTTCTTGTCTGGTTAATTGCCTTCTCTCTT

>M6-PGSC0003DMG400003210-(rev)M6LRR-RLK\_1860

TACTTGAATGTTTCGAGGAAATATGCTTGCAGGAAGGATTCCAGCAGCATTGTTATTGGACCAATCTT  
TCAACAATTGATCTTTCAGAGAATATGTTTTCTGGTTCCATACCTGCCGA

>M6-PGSC0003DMG400003210-(rev)M6LRR-RLK\_1922

CCAATCTTCAACAATTGATCTTTCAGAGAATATGTTTTCTGGTTCCATACCTGCCGAAATGGGGAAGCT  
GCAAATCTTGTAAAGATTGAACATTTCTTCAAACAGACTGACAGGAAAAA

>M6-PGSC0003DMG400003210-(rev)M6LRR-RLK\_1984

GGGAAGCTGCAAATCTTGTAAAGATTGAACATTTCTTCAAACAGACTGACAGGAAAAATTCTCTTCAGT  
TGAGTACTCTGCAAACACTGGCAGAGTTGGATCTCAGCAACAACAATCTT

>M6-PGSC0003DMG400003210-(rev)M6LRR-RLK\_2046

TCTTCAGTTGAGTACTCTGCAAACACTGGCAGAGTTGGATCTCAGCAACAACAATCTTTCGGGTAGAATT

CCGAAAGAAATTGCATCATCTTTAGTACTGACAAATCTTCTACTCCAGGA

>M6-PGSC0003DMG400003210-(rev)M6LRR-RLK\_2108

GTAGAATTCCGAAAGAAATTGCATCATCTTTAGTACTGACAAATCTTCTACTCCAGGACAACAACTTTCT

GGTGCTCTCCAGACACTTTCTCCTCCTCACAAAAGCTTGTAAGCTGC

>M6-PGSC0003DMG400003210-(rev)M6LRR-RLK\_2170

AACTTTCTGGTGCTCTCCAGACACTTTCTCCTCCTCACAAAAGCTTGTAAGCTGCAGCTCGGGGACA

ACTTGCTGAAGGCTCAATTCCATGCAGCCTCAGTAACTTAGGGAACCT

>M6-PGSC0003DMG400003210-(rev)M6LRR-RLK\_2232

CGGGGACAACTTGCTTGAAGGCTCAATTCCATGCAGCCTCAGTAACTTAGGGAACCTAATGTTGCACT

GAATCTGAGCATGAATAAGTTTAGTGGTCAAATTCCTAGGTGTCTGAGCAA

>M6-PGSC0003DMG400003210-(rev)M6LRR-RLK\_2294

TTGCACTGAATCTGAGCATGAATAAGTTTAGTGGTCAAATTCCTAGGTGTCTGAGCAATCTAGACAATTT

AGAAATCCTTGATATATCAAGCAACAACCTTGCTGGCGCAATACCTTCAG

>M6-PGSC0003DMG400003210-(rev)M6LRR-RLK\_2356

GACAATTTAGAAATCCTTGATATATCAAGCAACAACCTTGCTGGCGCAATACCTTCAGAAATGGACAAGA

TGAGGTCCCTTTCGTTTCTCAACATATCATTTAATAACTTTTCAGGGGAG

>M6-PGSC0003DMG400003210-(rev)M6LRR-RLK\_2418

GGACAAGATGAGGTCCCTTTCGTTTCTCAACATATCATTTAATAACTTTTCAGGGGAGGTACCCATTTTGT

GGGGAAAACCTATTAAGTTCACATCCAGGAACTTCCCAGGGAAATCCAGG

>M6-PGSC0003DMG400003210-(rev)M6LRR-RLK\_248

CTCAGTGTTTTAAGAGGTCAGAGATGTTCTTGTCTGTTAATTGCCTTCTCTTCTTGCTAATTTATTTG

CAGTCTTTTCGATCTCATGGCCTCAAGATTCTGTTCATCTACTTGGGT

>M6-PGSC0003DMG400003210-(rev)M6LRR-RLK\_2480

CCATTTTGTGGGGAAAACCTATTAAGTTCACATCCAGGAACTTCCCAGGGAAATCCAGGACTCTGCTTATC

AGACACTGAAAGTAGCAGCTGCAAGCATGTGAAAAAATCACAAAGAACT

>M6-PGSC0003DMG400003210-(rev)M6LRR-RLK\_2542

TGCTTATCAGACACTGAAAGTAGCAGCTGCAAGCATGTGAAAAAATCACAAAGAACTGGAGGACCTTG

GCTGGTGTAATTAGTGGTGTGTTTTCCGTGGCAGTCATAGCTGCGGCAATA

>M6-PGSC0003DMG400003210-(rev)M6LRR-RLK\_2604

GACCTTGGCTGGTGTAAATTAGTGGTGTGTTTTCCGTGGCAGTCATAGCTGCGGCAATATACTTGCTAGTG  
ACTCGGATTCAGCACCTTCCCTGCTGAATAAGCATCGGCTCGTCAAGTA

>M6-PGSC0003DMG400003210-(rev)M6LRR-RLK\_2666

TGCTAGTGAICTCGGATTCAGCACCTTCCCTGCTGAATAAGCATCGGCTCGTCAAGTATCAGGCAGAATT  
TGAAGATCTGCCAGATCGTATAAATTTGAGGACATTGTACGTGCAACAG

>M6-PGSC0003DMG400003210-(rev)M6LRR-RLK\_2728

GCAGAATTTGAAGATCTGCCAGATCGTATAAATTTGAGGACATTGTACGTGCAACAGAAGGCTGGAGT  
GAAAAATATGTAATTGGAAGAGGCAAGCATGGAAGTGTATAAGATGGAA

>M6-PGSC0003DMG400003210-(rev)M6LRR-RLK\_2790

CTGGAGTGAAAAATATGTAATTGGAAGAGGCAAGCATGGAAGTGTATAAGATGGAATCTGCGAAAT  
CCAAAAGCTTTGGGCTGTCAAGAAGGTTGACTTAGCTCAGAGAGCATTGAG

>M6-PGSC0003DMG400003210-(rev)M6LRR-RLK\_2852

CGAAATCCAAAAGCTTTGGGCTGTCAAGAAGGTTGACTTAGCTCAGAGAGCATTGCAATGAAATGA  
GAAGCCTCAATTCTGTCAGACACCGCAATTTGGTAAGATTGGGAGGACT

>M6-PGSC0003DMG400003210-(rev)M6LRR-RLK\_2914

GAAATGAGAAGCCTCAATTCTGTCAGACACCGCAATTTGGTAAGATTGGGAGGACTGCACCAGACAT  
GGATATGGCTTCATTCTAACAGAGTTTATCCCTGGAGGAACTCTTCATGAT

>M6-PGSC0003DMG400003210-(rev)M6LRR-RLK\_3038

TTCACCAGAGAAAACCACTGTAGTCTGGACTGGGAGTCCCGCCATCGTATTGCTCTTGGTGTGCTCA  
AGGTCTGTCTTACCTTCATCATGATTCTGTCCCTCAAATCATTACAGAG

>M6-PGSC0003DMG400003210-(rev)M6LRR-RLK\_3100

GTTGCTCAAGGTCTGTCTTACCTTCATCATGATTCTGTCCCTCAAATCATTACAGAGATCTCAAATCAGA  
TAATGTAATGCTGGATACTGAGATGGAGCCAAAGATTGGAGACTTCGGG

>M6-PGSC0003DMG400003210-(rev)M6LRR-RLK\_3162

CAAATCAGATAATGTAATGCTGGATACTGAGATGGAGCCAAAGATTGGAGACTTCGGGATTGCTAAAAC  
AGTATCAGACTCTGATGAAAACCTGACAAACTCCAAAATTGTTGGGACT

>M6-PGSC0003DMG400003210-(rev)M6LRR-RLK\_3224

CTAAAACAGTATCAGACTCTGATGAAAACCTGACAAACTCCAAAATTGTTGGGACTAGGATACATTGC  
TCCAGGTTAGCCACACGTTACTATGCTAGTCTTCAGTAATAATTTAGTTG



>M6-PGSC0003DMG400003210-(rev)M6LRR-RLK\_3286

TACATTGCTCCAGGTTAGCCACACGTTACTATGCTAGTCTTCAGTAATAATTTAGTTGGCAGATTACTTTT  
GATGATTTACTAAATTTTATTACTTTCTCCCCCGGTCCCCCTCCTTCT

>M6-PGSC0003DMG400003210-(rev)M6LRR-RLK\_3348

ATTACTTTTGATGATTTACTAAATTTTATTACTTTCTCCCCCGGTCCCCCTCCTTCTCCTTGTCTGTCCATC  
AATTCAGAGAATGCGTACTCAGTTCAATTGACAGAGAAAAGTGATGT

>M6-PGSC0003DMG400003210-(rev)M6LRR-RLK\_3410

GTCTGTCCATCAATTCAGAGAATGCGTACTCAGTTCAATTGACAGAGAAAAGTGATGTCTATAGCTATGG  
AGTTCTTCTACTGGAGCTCTTCTGCAGAAAATGCCAGTAGACCCAGCT

>M6-PGSC0003DMG400003210-(rev)M6LRR-RLK\_3472

AGCTATGGAGTTCTTCTACTGGAGCTCTTCTGCAGAAAATGCCAGTAGACCCAGCTTTGAAGAAGGA  
TTAGACATTGTTTCTGGGTGAGGAAAATGACAGAAAGTGACAACAAT

>M6-PGSC0003DMG400003210-(rev)M6LRR-RLK\_3534

AGAAGGATTAGACATTGTTTCTGGGTGAGGAAAATGACAGAAAGTGACAACAATTTCTTCACTT  
GCTTGATGAAGAAATTAGTTTTTGGTACATAGAAGAACAATGGAAGGCCCT

>M6-PGSC0003DMG400003210-(rev)M6LRR-RLK\_3596

TTCACTTGCTTGATGAAGAAATTAGTTTTTGGTACATAGAAGAACAATGGAAGGCCCTGAAAATGGTGT  
ATCTAGCGCTTCAATGTGCTGAACTCGAGGCAAGCACCAGGCCTGCAATGA

>M6-PGSC0003DMG400003210-(rev)M6LRR-RLK\_372

GAGCAATCTTCCAGAGCTCTCTCAACAATTGCTCCCTTGAATCAGTCTGTCTCACACTGCCAATGGAAA  
GGTGTTCCTGCTATTCCAGACATAACTTCTCATGTCAAATCATTGATTCT

>M6-PGSC0003DMG400003210-(rev)M6LRR-RLK\_3720

TGTAGTAAGGTCTCTTGTCTGAGTTAAATCATAGATGTAAAAGAGAAGAAATGAACTTTGAATAGTGAA  
AGCCATAATCAACTTTTCAAATTCAAAATCTTTTTTTCTTTGCTTACA

>M6-PGSC0003DMG400003210-(rev)M6LRR-RLK\_3782

TAGTGAAAGCCATAATCAACTTTTCAAATTCAAAATCTTTTTTTCTTTGCTTACATAAAAATTGAACCA  
TTTCTCGATTTGTGTGTGTCATCCTTTCATTCAAGGGCTAAATTCTAA

>M6-PGSC0003DMG400003210-(rev)M6LRR-RLK\_3844

AATTGAACCATTCTCGATTTGTGTGTGTCATCCTTTCATTCAAGGGCTAAATTCTAACATAATCGATCCT

GGGTGTTTCTGTTTAACTTTGTGACATCCACTGCAATAATATAGACTAA

>M6-PGSC0003DMG400003210-(rev)M6LRR-RLK\_3906

ATCGATCCTGGGTGTTTCTGTTTAACTTTGTGACATCCACTGCAATAATATAGACTAAGAAAATGCATGG  
CGTTTCAAATCAATATATGGTAAAAGCAGTTTTCTCGTTCTAGCCATAGC

>M6-PGSC0003DMG400003210-(rev)M6LRR-RLK\_3968

ATGCATGGCGTTTCAAATCAATATATGGTAAAAGCAGTTTTCTCGTTCTAGCCATAGCTCTTTTCATAATG  
GGCCACTGTCCTTATCAACTTTTGCTTGTTACTTTCTCCAGCTGCTCGA

>M6-PGSC0003DMG400003210-(rev)M6LRR-RLK\_434

AATGGAAAGGTGTTTCTGCTATTCAGACATAACTTCTCATGTCAAATCATTGATTCTAACAGACTTATTG  
CTACCTGGAACCTTGGACAAGGCCTTACCTAATCTCTGCCTTCTTCCTC

>M6-PGSC0003DMG400003210-(rev)M6LRR-RLK\_496

GACTTATTGCTACCTGGAACCTTGGACAAGGCCTTACCTAATCTCTGCCTTCTTCCTCGCTTGGTCTCTCT  
GATCTCAGTGGCAACCATTTCACTGGTGGCATCCCTGATATGCTCGCA

>M6-PGSC0003DMG400003210-(rev)M6LRR-RLK\_62

TCCCTCATTAGAATTATTGAACAACCAGCCAAACCAAAGCATTAAATATTCTCCTATTTTGGTTGTTTCCT  
AACTCATTACCAAAATACCACACTAATTAAGCATATGATTAGCTG

>M6-PGSC0003DMG400003210-(rev)M6LRR-RLK\_620

GCAGCCAACTTGACACGATTCTACTCAACGACAACAGATTTTCAGGATCCATCCCACCAGAGATTTTCAA  
ATCAAGCAAATCATAAAAATTGATTTGGGTTTAAATCAGCTCACTGGCA

>M6-PGSC0003DMG400003210-(rev)M6LRR-RLK\_682

ATTTTCAAATCAAGCAAATCATAAAAATTGATTTGGGTTTAAATCAGCTCACTGGCACTATTCCCTCTGA  
GGTAATCCTTTCTACAAACCTTCAACATCTCGGGCTGTGGAACAATTC

>M6-PGSC0003DMG400003210-(rev)M6LRR-RLK\_744

TCCCTCTGAGGTAATCCTTTCTACAAACCTTCAACATCTCGGGCTGTGGAACAATTCCTCAGTGGAAATA  
TTCCAAAAGAGCTATTCAATTTGCCAACTTGACACATCTCCACCTCAA

>M6-PGSC0003DMG400003210-(rev)M6LRR-RLK\_806

GTGGAAATATTCCAAAAGAGCTATTCAATTTGCCAACTTGACACATCTCCACCTCAACACAAATGA  
GACTGGACCTCTACCTGACTTCCCATCCTCGTGCTCACTTTCCGAGTTTT

>M6-PGSC0003DMG400003210-(rev)M6LRR-RLK\_868

AATGAACTGACTGGACCTCTACCTGACTTCCCATCCTCGTGCTCACTTTCCGAGTTTTTTATTTATGAGAA  
CCGTTTGTGTCAGGTTCTTTGCCAATTACCCTAGGCAATTGTCACAACCTT

>M6-PGSC0003DMG400003210-(rev)M6LRR-RLK\_930

TTATGAGAACCGTTTGTGTCAGGTTCTTTGCCAATTACCCTAGGCAATTGTCACAACCTTACTTCATTCTCTGC  
ATCATCTGCTCATCTTGGAGGAGTTATTTCCCAGAGGTTTTAAGGGA

>M6-PGSC0003DMG400003210-(rev)M6LRR-RLK\_992

CATTCTCTGCATCATCTGCTCATCTTGGAGGAGTTATTTCCCAGAGGTTTTAAGGGACCTTTCAAATCTT  
GAATTTCTCTATTTAGATGATAACAACCTTTGAAGGGGAAATTCCTGAGA

>M6-PGSC0003DMG400003211-(rev)M6LRR-RLK\_0

TAAAATAATCTCCTATATTCATTGTTCCCTCGGACAGTCGTTGCCTACTACCCCCACACGTATCTTTAAAAA  
ACAGGCTGACCTCAACTTAAACCTAAATAATAGTCTCAGGTTCCAGC

>M6-PGSC0003DMG400003211-(rev)M6LRR-RLK\_1037

TTATGGAATGGGAAATTACAAGAGTTGGTCTTTCCATAAATAATTTAATGGAAGTATATCAGAAAAGA  
TTGGTGTGGCCATCAGATGACTTACATTGATTTGTCAGCTAACAAATTA

>M6-PGSC0003DMG400003211-(rev)M6LRR-RLK\_1098

CAGAAAAGATTGGTGTGGCCATCAGATGACTTACATTGATTTGTCAGCTAACAAATTAAGTGGTCAGAT  
TCCCAAGTCAGTTGGACGTCTGAAGAATTTGTACAAGCTTCTTCTGTATG

>M6-PGSC0003DMG400003211-(rev)M6LRR-RLK\_1159

TGGTCAGATTCCCAAGTCAGTTGGACGTCTGAAGAATTTGTACAAGCTTCTTCTGTATGATAACATGTTT  
AGTGGTTCATTGCCAGCAGAAGTTGGGAACTGCACTTCTTCTGCTGAGAT

>M6-PGSC0003DMG400003211-(rev)M6LRR-RLK\_122

AAAAATTAGTTTTTGAAGTAGCTCCTTATTGGATGCAGCTTCTTTAAGAAGTGTTGAAGAGTTCAGAAA  
TGTTCTTGTTGATCTTGTTCACTGTTTTATTTCTTTGCCAGCATTGTA

>M6-PGSC0003DMG400003211-(rev)M6LRR-RLK\_1220

AACATGTTTAGTGGTTCATTGCCAGCAGAAGTTGGGAACTGCACTTCTTCTGCTGAGATAAGTCTCGTCA  
GTAACCTCATCAGTGGGGAAATTCCTTCAGAAATTTGCAGCCTTCAAAC

>M6-PGSC0003DMG400003211-(rev)M6LRR-RLK\_1281

GTCTCGTCAGTAACTTCATCAGTGGGGAAATTCCTTCAGAAATTTGCAGCCTTCAAACCTAGAAACATT  
TAATGCATTCTAAAATAAAATTCAGGGCCAAATTCAGAATGCATTGGAA

>M6-PGSC0003DMG400003211-(rev)M6LRR-RLK\_1342

AGAAACATTTAATGCATTCTAAAATAAAATTCAGGGCCAAATCCAGAATGCATTGGAAGAATAAGCGG  
GCTGCAGGAGCTAGCTCTTTATGAGAACCGATTGACCGGCAAGTTACCGCT

>M6-PGSC0003DMG400003211-(rev)M6LRR-RLK\_1403

ATAAGCGGGCTGCAGGAGCTAGCTCTTTATGAGAACCGATTGACCGGCAAGTTACCGCTTGAATTACA  
AATATGACGAACTTTCATTTCTGTCGTTGGCTCATAATAACCTTACGGGG

>M6-PGSC0003DMG400003211-(rev)M6LRR-RLK\_1464

GAATTACAAATATGACGAACTTTCATTTCTGTCGTTGGCTCATAATAACCTTACGGGGGAGGTACCACC  
TGATCTTGAAAAGATAATATTCCTGGCATAGTTAAGGTTGATTTAGGTT

>M6-PGSC0003DMG400003211-(rev)M6LRR-RLK\_1525

GGTACCACCTGATCTTGAAAAGATAATATTCCTGGCATAGTTAAGGTTGATTTAGGTTATAAACTTC  
AGTGGACAGATTCCTTCTAACTGTGTAATGGCAACAGGCTTGCAGTCCT

>M6-PGSC0003DMG400003211-(rev)M6LRR-RLK\_1586

AATAACTTCAGTGGACAGATTCCTTCTAACTGTGTAATGGCAACAGGCTTGCAGTCCTGGCTCTTGAAA  
ACAACAGGTTTAAATGGCAGCTTCCCAACCTATCTAGCAAACCTGCAAATCT

>M6-PGSC0003DMG400003211-(rev)M6LRR-RLK\_1647

CTCTTGAAAACAACAGGTTTAAATGGCAGCTTCCCAACCTATCTAGCAAACCTGCAAATCTCTCTATAGGGT  
AAAACCTTCCAACAACAATCTGCAGGGGAGTATTCCAGACGACATTGAAA

>M6-PGSC0003DMG400003211-(rev)M6LRR-RLK\_1708

CTATAGGGTAAAACCTTCCAACAACAATCTGCAGGGGAGTATTCCAGACGACATTGAAAAGAATGAGAA  
TATTTCTTACTTGATGTTAGACAGAATATGCTTGTAGGAAGGATTCCAGC

>M6-PGSC0003DMG400003211-(rev)M6LRR-RLK\_1769

AATGAGAATATTTCTTACTTGATGTTAGACAGAATATGCTTGTAGGAAGGATTCCAGCTGCATTTGGTT  
ACTGGACCAATCTTCAATGATTGATCTTTCAGAAAATATGTTTAAATGGC

>M6-PGSC0003DMG400003211-(rev)M6LRR-RLK\_183

G TTCAGAAATGTTCTTGTGTTGATCTTGTCACTGTTTTATTTCTTGGCCAGCATTGTAGCGGTTTTTTTCGG  
CATCATTGCCTCAAGATTCTGTTTACTTACTTGGGTTTCGAAGCAATC

>M6-PGSC0003DMG400003211-(rev)M6LRR-RLK\_1830

CATTTGGTACTGGACCAATCTTCAATGATTGATCTTTCAGAAAATATGTTTAAATGGCTCCATACCCACA

GAAGCTTGGAAAGCTTCAGAATCTTGTA AAACTGAGCATTCTTCAAACA

>M6-PGSC0003DMG400003211-(rev)M6LRR-RLK\_1891

CATACCCACAGAACTTGGAAAGCTTCAGAATCTTGTA AAACTGAGCATTCTTCAAACAGACTGACCGGA

CAAATCCCTTTCAGTTGAGTCACTTTGAAAACTGGAGGAGTTGGATCT

>M6-PGSC0003DMG400003211-(rev)M6LRR-RLK\_1952

CTGACCGGACAAATCCCTTTCAGTTGAGTCACTTTGAAAACTGGAGGAGTTGGATCTCAGCAACAAC

AATCTTTCAGGAAGAATTCCTAAAGAAATTGCATCATCTTCAGTATTGACA

>M6-PGSC0003DMG400003211-(rev)M6LRR-RLK\_2013

GCAACAACAATCTTTCAGGAAGAATTCCTAAAGAAATTGCATCATCTTCAGTATTGACAAATCTTCTACTC

CAGGACAACAACTTTCTGGTGCTCTCCAGACACTTTCTCCTCTTCAC

>M6-PGSC0003DMG400003211-(rev)M6LRR-RLK\_2074

TCTTCTACTCCAGGACAACAACTTTCTGGTGCTCTCCAGACACTTTCTCCTCTTCACAAATGCTTGTA AA

GCTGCAGCTGGGAAACAACCTTGCTCGAAGGCCCAATCCATGCAGTCT

>M6-PGSC0003DMG400003211-(rev)M6LRR-RLK\_2135

ATGCTTGTAAGCTGCAGCTGGGAAACAACCTTGCTCGAAGGCCCAATCCATGCAGTCTGAGTAAGCTT

ATGCAACCTGTTTTTTCATAAATCTGAGCATGAATAAGTTTACTGGTGAA

>M6-PGSC0003DMG400003211-(rev)M6LRR-RLK\_2196

GTAAGCTTATGCAACCTGTTTTTTCATAAATCTGAGCATGAATAAGTTTACTGGTGAAATTCCTAGGTGC

CTAGGCAATCTTGACAAATTGGAGGTCCTTGATATATCAAGCAACAACC

>M6-PGSC0003DMG400003211-(rev)M6LRR-RLK\_2257

TCCTAGGTGCCTAGGCAATCTTGACAAATTGGAGGTCCTTGATATATCAAGCAACAACCTGTCTGGTGCA

ATACCATCAGAAATGGAAAAGATGAGTTCCTTTTCGTTTCTCAACATATC

>M6-PGSC0003DMG400003211-(rev)M6LRR-RLK\_2318

TCTGGTGCAATACCATCAGAAATGGAAAAGATGAGTTCCTTTTCGTTTCTCAACATATCATTTAATAGCTT

GTCAGGGAAGGTACCCAATACATGGGAAAACTATTAAGTTCACGTCCA

>M6-PGSC0003DMG400003211-(rev)M6LRR-RLK\_2379

TTAATAGCTTGTGAGGGAAGGTACCCAATACATGGGAAAACTATTAAGTTCACGTCCAGGATCTGCCTT

GGGAAATCCAGGACTTTGCTTAATAGACACGGATGGTAGCAACTGCAAGC

>M6-PGSC0003DMG400003211-(rev)M6LRR-RLK\_244

GGTTTTTTCGGCATCATTGCCTCAAGATTCTGTTTCATCTACTTGGGTTTCGAAGCAATCTTCCAGAGCCCT  
CTCAACAATTGCTCCCTTGAATCAATCTGTCTCACACTGTAAATGGAA

>M6-PGSC0003DMG400003211-(rev)M6LRR-RLK\_2440

ATCTGCCTTGGGAAATCCAGGACTTTGCTTAATAGACACGGATGGTAGCAACTGCAAGCATGTGAAAAA  
ATCACAAGTAAAATGGAAGACTTTGGCTGGTGTAAATTAGTGGATGTGTGCT

>M6-PGSC0003DMG400003211-(rev)M6LRR-RLK\_2501

GTGAAAAAATCACAAGTAAAATGGAAGACTTTGGCTGGTGTAAATTAGTGGATGTGTGCTTCCATGGCA  
ATCATAGTTGCTGCAATGTACTTACTAGTGACTCGGATTTGGCACCCATCC

>M6-PGSC0003DMG400003211-(rev)M6LRR-RLK\_2562

CCATGGCAATCATAGTTGCTGCAATGTACTTACTAGTGACTCGGATTTGGCACCCATCCCTGCTGAATAA  
GCATCGGCTCGTCAAGTGTCAATCAGGAATTGAAGATCTACCTGATGGTA

>M6-PGSC0003DMG400003211-(rev)M6LRR-RLK\_2623

GCTGAATAAGCATCGGCTCGTCAAGTGTCAATCAGGAATTGAAGATCTACCTGATGGTATAACTTTTGA  
GGACATTGTACATGCAACAGAAGGCTGGAGTGAAAATATGTTATCGGAAG

>M6-PGSC0003DMG400003211-(rev)M6LRR-RLK\_2684

ACTTTTGAGGACATTGTACATGCAACAGAAGGCTGGAGTGAAAATATGTTATCGGAAGAGGCACGCAT  
GGAAGTGTATAAGTTGGAATCTGCCAAATCCAATAAACTTTGGGCTGTC

>M6-PGSC0003DMG400003211-(rev)M6LRR-RLK\_2745

GCACGCATGGAAGTGTATAAGTTGGAATCTGCCAAATCCAATAAACTTTGGGCTGTCAAGAAGGTAG  
ACTTAGCTCAGAGAGCATTCAATGATGAAATGAGAAGCCTAAATTCTGTCA

>M6-PGSC0003DMG400003211-(rev)M6LRR-RLK\_2806

GAAGGTAGACTTAGCTCAGAGAGCATTCAATGATGAAATGAGAAGCCTAAATTCTGTCAGACACCGCAA  
TTTGGTAAGATTGGGAGGATATTGCATGATACATGGATATGGCTTCATTCT

>M6-PGSC0003DMG400003211-(rev)M6LRR-RLK\_2867

CACCGCAATTTGGTAAGATTGGGAGGATATTGCATGATACATGGATATGGCTTCATTCTAACAGAATTTA  
TACCTGGAGGGACTCTTCATGATGTCCTTCACCAGAGAAAACCCACCTGTA

>M6-PGSC0003DMG400003211-(rev)M6LRR-RLK\_2989

CTTGGACTGGAAGTCCCGCCATCGTATTGCTCTTGGTATTGCTCAAGGTCTATCATACCTTCACCACGATT  
CGGTGCCTCAAATCATTACAGAGATCTCAAATCAGATAATGTAATGCT

>M6-PGSC0003DMG400003211-(rev)M6LRR-RLK\_305

CCAGAGCCCTCTCAACAATTGCTCCCTTGGGAATCAATCTGTCTCACACTGTAAATGGAAAGGTGTTACCT  
GCTATTCAGACAAAACCTTCACAAGTCAAATCATTGGATTCAGAGACTTC

>M6-PGSC0003DMG400003211-(rev)M6LRR-RLK\_3050

CACCACGATTCGGTGCCTCAAATCATTACAGAGATCTCAAATCAGATAATGTAATGCTGGATTCTGAGA  
TGGTGCCAAAGATTGGCGATTCGGGATTGCTAAAATGGTATCAGATGAA

>M6-PGSC0003DMG400003211-(rev)M6LRR-RLK\_3111

ATTCTGAGATGGTGCCAAAGATTGGCGATTCGGGATTGCTAAAATGGTATCAGATGAAGAAAATTCTGA  
CGAACTCCAATATTGTTGGGACTCTAGGATACATTGCTCCAGGTTAGCCAC

>M6-PGSC0003DMG400003211-(rev)M6LRR-RLK\_3172

AAATTCGACGAACTCCAATATTGTTGGGACTCTAGGATACATTGCTCCAGGTTAGCCACACGTTACTATG  
CTAATTTTCAGTATAATTCAGTTGGCAGATTACTTTGATAAACTAATAAC

>M6-PGSC0003DMG400003211-(rev)M6LRR-RLK\_3233

GTTACTATGCTAATTTTCAGTATAATTCAGTTGGCAGATTACTTTGATAAACTAATAACTTTTACTACTTTC  
TTCCCTGGCCCCCTTTCTCTTTTTGTCACTCCATCTATTCAGAGAACG

>M6-PGSC0003DMG400003211-(rev)M6LRR-RLK\_3294

TTACTACTTTCTTCCCTGGCCCCCTTTCTCTTTTTGTCACTCCATCTATTCAGAGAACGCATACTCAGTTCAA  
CTGACAGAGAAAAGTGATGTCTATAGCTACGGAATTCTTCTTTTAGA

>M6-PGSC0003DMG400003211-(rev)M6LRR-RLK\_3355

TACTCAGTTCAACTGACAGAGAAAAGTGATGTCTATAGCTACGGAATTCTTCTTTTAGAGCTTTTCTGCA  
GAAAATGCCAGTAGATCCCAGCTTTGAAGAAGGATTAGACATTGTTTTC

>M6-PGSC0003DMG400003211-(rev)M6LRR-RLK\_3416

TTTTCTGCAGAAAAATGCCAGTAGATCCCAGCTTTGAAGAAGGATTAGACATTGTTTTCTGGGTGAGGA  
AAAACCTGCAGAGAAGCAACAATTCCTTAGTTTTCTTGATGAAGAAATTA

>M6-PGSC0003DMG400003211-(rev)M6LRR-RLK\_3477

GGTGAGGAAAAACTTGCAGAGAAGCAACAATTCCTTAGTTTTCTTGATGAAGAAATTAGGCTCTGGAA  
TGTAGAAGAACAATGGAAGGCCCTGAAAATAGTGGATTTGGCGCTTCAATG

>M6-PGSC0003DMG400003211-(rev)M6LRR-RLK\_366

GTGTTACCTGCTATTCAGACAAAACCTTCACAAGTCAAATCATTGGATTCAGAGACTTCCTTCTATCTGGA

ATCTTGGACAAGGCCTTTCCAAATCTTTGCCATCTTCCTCGTTTGATCT

>M6-PGSC0003DMG400003211-(rev)M6LRR-RLK\_3782

TACTAGACTCTATGGCCTCTTTGTAAGTTTTGTTTGAGGCTGTATCTGTAGATATAATATAACCAGGTCTT

TATTAGGGTGCTGATGAATATAACATGTTACCAAATTCAAAAAGAGAAT

>M6-PGSC0003DMG400003211-(rev)M6LRR-RLK\_3843

ACCAGGTCTTTATTAGGGTGCTGATGAATATAACATGTTACCAAATTCAAAAAGAGAATAGATGTAAAG

ATAAGTAATGAAACTTTTAGTAGTGAAACCTGTGATCAACTTTCCAAATTC

>M6-PGSC0003DMG400003211-(rev)M6LRR-RLK\_3904

ATGTAAAGATAAGTAATGAAACTTTTAGTAGTGAAACCTGTGATCAACTTTCCAAATTCCAACATCTCATT

TTTTCTTTTTTTGCTTACATAAAAAAATTGGACAAAGAAAATACATGA

>M6-PGSC0003DMG400003211-(rev)M6LRR-RLK\_3965

ACATCTCATTTTTTTCTTTTTTTGCTTACATAAAAAAATTGGACAAAGAAAATACATGATGTTTCAGTTTAA

CAAATCGTGATCTTGGGTTTTTCAGTTTAACTTTGTGACATCCAATG

>M6-PGSC0003DMG400003211-(rev)M6LRR-RLK\_4026

TTTCAGTTTAAACAAAATCGTGATCTTGGGTTTTTCAGTTTAACTTTGTGACATCCAATGTAGCAACATAGA

CTAAGAAAATGCATGATGTTTCAAATCAATTTTTGGTAAAAGCAATTTT

>M6-PGSC0003DMG400003211-(rev)M6LRR-RLK\_4087

GCAACATAGACTAAGAAAATGCATGATGTTTCAAATCAATTTTTGGTAAAAGCAATTTTCACCTTCTAGC

CATAGCTCTTTTCATCATGGATCACTGTCCGTAATCAGTTTTTGTCTTATT

>M6-PGSC0003DMG400003211-(rev)M6LRR-RLK\_4148

CCTTCTAGCCATAGCTCTTTTCATCATGGATCACTGTCCGTAATCAGTTTTTGTCTTATTACTTTCTCCAGCTT

CTCCAAAATCTGAACAGTTTTTCAGGTATCACAATTAATAATGAGAGTG

>M6-PGSC0003DMG400003211-(rev)M6LRR-RLK\_4209

TTTCTCCAGCTTCTCCAAAATCTGAACAGTTTTTCAGGTATCACAATTAATAATGAGAGTGTGAAGGAACAA

GGCTTTGCTACAAGCTAGTCCTTATCTTATGGACTATAACATTCCGGTTT

>M6-PGSC0003DMG400003211-(rev)M6LRR-RLK\_427

TCTATCTGGAATCTTGGACAAGGCCTTTCCAAATCTTTGCCATCTTCCTCGTTTGATCTCCCTTGATCTCAG

TGGCAACCATCTCACTGGTGGCATCCCTGCTATGCTTGCTAACTGCAG

>M6-PGSC0003DMG400003211-(rev)M6LRR-RLK\_4270



AAGGAACAAGGCTTTGCTACAAGCTAGTCCTTATCTTATGGACTATAACATTCCGGTTTATAAAAGAAAT  
CAAAAGAACAACCCCAACCCAAAAAGATAAGCTTTTGTGGAATTTGGTTG

>M6-PGSC0003DMG400003211-(rev)M6LRR-RLK\_4331

AAAAGAAATCAAAGAACAACCCCAACCCAAAAAGATAAGCTTTTGTGGAATTTGGTTGTTACTAATGATG  
GTTCTGCGAAAGAGTGCAGAAGACCTCCGCCTTACCGGTCTTTCTTTGT

>M6-PGSC0003DMG400003211-(rev)M6LRR-RLK\_4392

CTAATGATGGTTCCTGCGAAAGAGTGCAGAAGACCTCCGCCTTACCGGTCTTTCTTTGTGTTCCAACTT  
GCAGTAGCAGAATTATTTGCAGAAAATATAGATATGATGAATAGAAATGG

>M6-PGSC0003DMG400003211-(rev)M6LRR-RLK\_4453

TCCAACTTGCAGTAGCAGAATTATTTGCAGAAAATATAGATATGATGAATAGAAATGGCTTGTGGACA  
ATCATTGTATTTCAAACAAATACAGATATTCAAATAAGGTAGATATAACTC

>M6-PGSC0003DMG400003211-(rev)M6LRR-RLK\_4514

TGTGGACAATCATTGTATTTCAAACAAATACAGATATTCAAATAAGGTAGATATAACTCAGATATGAGTT  
ACCAACAGGACTTCTAACAAGACTTAACAGACGAATGGCAAATACATAGG

>M6-PGSC0003DMG400003211-(rev)M6LRR-RLK\_4575

ATATGAGTTACCAACAGGACTTCTAACAAGACTTAACAGACGAATGGCAAATACATAGGAATATCAGAT  
CAGGAGAGGAAAATAATAGTCCTTGAAGAATTGATCAGAATTCAGTAGAAA

>M6-PGSC0003DMG400003211-(rev)M6LRR-RLK\_4636

TATCAGATCAGGAGAGGAAAATAATAGTCCTTGAAGAATTGATCAGAATTCAGTAGAAAGGAAATATG  
AAAGAAGTGCAAGAATAAACTGGAAGAAATACTCTGCAGGTGACAAATAGAT

>M6-PGSC0003DMG400003211-(rev)M6LRR-RLK\_4697

AAATATGAAAGAAGTGCAAGAATAAACTGGAAGAAATACTCTGCAGGTGACAAATAGATGAAAGACAT  
ACCTCAGTTACGAAAACCTGCAACACCCTAGCACAATACGATGCGCACCTAAA

>M6-PGSC0003DMG400003211-(rev)M6LRR-RLK\_4758

AAGACATACCTCAGTTACGAAAACCTGCAACACCCTAGCACAATACGATGCGCACCTAAATAATCATCCAA  
GTAGGAGAAGCCCAACTTAAATGTCCCAGATTCTTTTTTCATATTTTTTA

>M6-PGSC0003DMG400003211-(rev)M6LRR-RLK\_4819

ATCATCCAAGTAGGAGAAGCCCAACTTAAATGTCCCAGATTCTTTTTTCATATTTTTTATGTAGTTGACTT  
GGATGTGCATTACAAGACAACCTGTCACAAGATTTTGAGAATTTTTTCATG

>M6-PGSC0003DMG400003211-(rev)M6LRR-RLK\_4880

TAGTTGACTTGGATGTGCATTACAAGACAAGTGCACAAGATTTTGAGAATTTTTCATGTTAAAATATCCA  
CCAGAATTTGCATTGGATATATTCACATGGCACCACATATGCTGACAAA

>M6-PGSC0003DMG400003211-(rev)M6LRR-RLK\_4941

AAAATATCCACCAGAATTTGCATTGGATATATTCACATGGCACCACATATGCTGACAAATCTCAGACTTCT  
AATAATAGAGATTCCATTCTGAGACAGATCCACTAAATTCCCAAGTTTC

>M6-PGSC0003DMG400003211-(rev)M6LRR-RLK\_5002

TCAGACTTCTAATAATAGAGATTCCATTCTGAGACAGATCCACTAAATTCCCAAGTTTCTGCTCTTAGCAA  
GTGCAGCACTATCACATATGATGATAAGTCTAGGACCTCTAGTAATAAAA

>M6-PGSC0003DMG400003211-(rev)M6LRR-RLK\_5063

CTCTTAGCAAGTGCAGCACTATCACATATGATGATAAGTCTAGGACCTCTAGTAATAAAGCTTCCCTTCT  
GAGCCAAATCCACTAAATTCCCTAGCTTCTGCTCTTAGCAAGTGCACCTT

>M6-PGSC0003DMG400003211-(rev)M6LRR-RLK\_5124

TTCCCTTCTGAGCCAAATCCACTAAATTCCCTAGCTTCTGCTCTTAGCAAGTGCACCTTTGTGCAAGACGA  
TTAGAGACAAACTCCAGGAATTTGGTGCTTGCTCTAATACCAAAGTTAC

>M6-PGSC0003DMG400003211-(rev)M6LRR-RLK\_5185

TGCAAGACGATTAGAGACAAACTCCAGGAATTTGGTGCTTGCTCTAATACCAAAGTTACAAGCAGCTCA  
AAAGAGAAAATATAAAACACTAAACCACATTAAGAAAAGCTAGGAAGCTA

>M6-PGSC0003DMG400003211-(rev)M6LRR-RLK\_5246

GCAGCTCAAAAGAGAAAATATAAAACACTAAACCACATTAAGAAAAGCTAGGAAGCTAAAACCAAAA  
TTGAAGAAGAAAAGTTCCACACTGTTTCTCTTAACAGAACAGGTGAAATTT

>M6-PGSC0003DMG400003211-(rev)M6LRR-RLK\_5307

ACCAAAATTGAAGAAGAAAAGTTCCACACTGTTTCTCTTAACAGAACAGGTGAAATTTCTCATAAAGAG  
CTGATCATATCCTACATCCAATCACTTTACTGAAGTTAGAGTACAGATAA

>M6-PGSC0003DMG400003211-(rev)M6LRR-RLK\_5368

CATAAAGAGCTGATCATATCCTACATCCAATCACTTTACTGAAGTTAGAGTACAGATAAATGTTTGAAAA  
CCCTAGTGTCCAAAGATAGGGACAATAGAAATATGAAGCTGTAAAATGCT

>M6-PGSC0003DMG400003211-(rev)M6LRR-RLK\_5429

GTTTGAAAACCCTAGTGTCCAAAGATAGGGACAATAGAAATATGAAGCTGTAAAATGCTCCAAGAAAAA

ATAATTAAATTTCTGAGAGGATTTCCAAAATAGCCTCGAGGTAAAATATTT

>M6-PGSC0003DMG400003211-(rev)M6LRR-RLK\_549

AACTTGACACGATTTTCTCAACGACAACAGGTTTTTCAGGATCCATCCCACCAGAGATTTTCAAATCCAAA  
AGGCTTGATACCTTGAGTTGGGTTACAATCAGCTCAATGGCACCATTC

>M6-PGSC0003DMG400003211-(rev)M6LRR-RLK\_5490

AAGAAAAATAATTAATTTCTGAGAGGATTTCCAAAATAGCCTCGAGGTAAAATATTTATACAAGGTTA  
AACTTGTCTGCTTCTCAGTCCAATAAAGCAGAGTTCAGGAGTTTTACTT

>M6-PGSC0003DMG400003211-(rev)M6LRR-RLK\_5551

ACAAGGTTAACTTGTCTGCTTCTCAGTCCAATAAAGCAGAGTTCAGGAGTTTTACTTTGAAGAGACCG  
AACAAATTTAGAGAACTACTCCATTACTGGCTATGTAACCTATGGCTAAC

>M6-PGSC0003DMG400003211-(rev)M6LRR-RLK\_5612

AAGAGACCGAACAAATTTAGAGAACTACTCCATTACTGGCTATGTAACCTATGGCTAACTAGATTAAATT  
AGAAGCTCAATGTGCATAGACGTGGTGTCTTGGGTTATACTTAAGACCA

>M6-PGSC0003DMG400003211-(rev)M6LRR-RLK\_5673

GATTAAATTAGAAGCTCAATGTGCATAGACGTGGTGTCTTGGGTTATACTTAAGACCAGCTAACTTGAA  
GAAGAATTCATTAGTATACATGGTTACGGACTGAGGCACAGTGCAACAGG

>M6-PGSC0003DMG400003211-(rev)M6LRR-RLK\_5734

TAACTTGAAGAAGAATTCATTAGTATACATGGTTACGGACTGAGGCACAGTGCAACAGGATAATATTTT  
CAACTTAAGTAAGAAATTACCATTATAAAGATAGGATGTCCTTGATCACAT

>M6-PGSC0003DMG400003211-(rev)M6LRR-RLK\_5795

AATATTTTCAACTTAAGTAAGAAATTACCATTATAAAGATAGGATGTCCTTGATCACATCATAACAGAATTA  
GATACCTAATGGAGCTTGCATGTCTGTTTAATTAACACTAAACAATGTT

>M6-PGSC0003DMG400003211-(rev)M6LRR-RLK\_5856

TACAGAATTAGATACCTAATGGAGCTTGCATGTCTGTTTAATTAACACTAAACAATGTTAACTATTGCAA  
AATGCTCAAGTTCACAATTTTATTTATATCCTCTCCACTTGAATATTTTC

>M6-PGSC0003DMG400003211-(rev)M6LRR-RLK\_5917

CTATTGCAAATGCTCAAGTTCACAATTTTATTTATATCCTCTCCACTTGAATATTTTCATGCAACATATTTT  
TGTCATTTGGATATATATATGTTGAATGAAATTAAGGAACCTAAAAG

>M6-PGSC0003DMG400003211-(rev)M6LRR-RLK\_5978

GCAACATATTTTTGTCATTTGGATATATATATGTTGAATGAAATTAAGGAACCTAAAAGTCAGTTCACCA  
GACAATCTATAATCAGTTATGTACCACATCTTTTTACCTAATACATTTTT

>M6-PGSC0003DMG400003211-(rev)M6LRR-RLK\_6039

AGTTCACCAGACAATCTATAATCAGTTATGTACCACATCTTTTTACCTAATACATTTTTTTGTGAATCAACAC  
CACTATTTATACCCTATTCTACATATCAAAGGGACAAGATGAAGTTTG

>M6-PGSC0003DMG400003211-(rev)M6LRR-RLK\_61

ATCTTTAAAAACAGGCTGACCTCAACTTAAACCTAAATAATAGTCTCAGGTTCCAGCCCAAAAATTAG  
TTTTTGAAGTAGCTCCTTATTGGATGCAGCTTCTTTAAAGAAGTGTTGAA

>M6-PGSC0003DMG400003211-(rev)M6LRR-RLK\_610

CAAATCCAAAAGGCTTGTATACCTTGAGTTGGGTTACAATCAGCTCAATGGCACCATTCTTCTGAGGTG  
GGCCTTTCGACAAGCCTTCAATATCTTGGGCTGTGGAACAATTCCTTAG

>M6-PGSC0003DMG400003211-(rev)M6LRR-RLK\_6100

TGAATCAACACCACTATTTATACCCTATTCTACATATCAAAGGGACAAGATGAAGTTTGCAAGGATCAAT  
GCCTAGTTTATACTCAGCATACAAATAAAGCTCATATAAGATACAAAACCT

>M6-PGSC0003DMG400003211-(rev)M6LRR-RLK\_6161

AGGATCAATGCCTAGTTTATACTCAGCATACAAATAAAGCTCATATAAGATACAAAACCTAACTAACCTC  
TTTTCATCTCCCAAATATAGTTTGAGCAATAAAATAGAGAGATGGAAAAG

>M6-PGSC0003DMG400003211-(rev)M6LRR-RLK\_6222

CTAAACCTCTTTTCATCTCCCAAATATAGTTTGAGCAATAAAATAGAGAGATGGAAAAGTATTATTTGAT  
CGCGAAATTATTAACCACAATAGATTGTGGCAGCAACACCAGACCTCAGT

>M6-PGSC0003DMG400003211-(rev)M6LRR-RLK\_6283

TTATTTGATCGCGAAATTATTAACCACAATAGATTGTGGCAGCAACACCAGACCTCAGTCACAGTCATAC  
TAAGTCATCTACTTTGTTGTTTTTACATACTTTTCCGCTTCAATTTTAA

>M6-PGSC0003DMG400003211-(rev)M6LRR-RLK\_6344

CAGTCATACTAAGTCATCTACTTTGTTGTTTTTACATACTTTTCCGCTTCAATTTTAATCAAAGCCGAAT  
GCTGATAGCCTGATATGCATTCAACTACAGATCCTTTTTTTATTTTTG

>M6-PGSC0003DMG400003211-(rev)M6LRR-RLK\_671

TCTGAGGTGGGCCTTTCGACAAGCCTTCAATATCTTGGGCTGTGGAACAATTCCTTAGTGGAATATTC  
CAAAGAGCTATTTGGTTTGCCAACTTGACAGATCTCTACATCCACACA

>M6-PGSC0003DMG400003211-(rev)M6LRR-RLK\_6771

GGATCCTTTTCACCTAGATATTCAACATCAAGGCATCTCAGAATTCTCAAAGCAATTTACTCCTGGCAAC  
TTCTAATTTTCAAATCCCTAAGTTCATAAAGGGGCTGTGCCCAAGCATT

>M6-PGSC0003DMG400003211-(rev)M6LRR-RLK\_6832

TCCTGGCAACTTCTAATTTTCAAATCCCTAAGTTCATAAAGGGGCTGTGCCCAAGCATTAGAAAAGTAGC  
ATTGCCTTCGAAGGTCAAATTATCGATTTAATTAATGGTACAGAGGGCTT

>M6-PGSC0003DMG400003211-(rev)M6LRR-RLK\_6893

AAAAGTAGCATTGCCTTCGAAGGTCAAATTATCGATTTAATTAATGGTACAGAGGGCTTTAGAAAGCGG  
AGAAATTGGGAACAGCATTGTACCTGTTAATTGTTGATGGAGTCATCGGAA

>M6-PGSC0003DMG400003211-(rev)M6LRR-RLK\_6954

AGAAGCGGAGAAATTGGGAACAGCATTGTACCTGTTAATTGTTGATGGAGTCATCGGAATCAAAGTA  
ACTCAAATTAACGAAGACAAATAAATAAAAATCTCATTCTCAACTCAA

>M6-PGSC0003DMG400003211-(rev)M6LRR-RLK\_7008

CGGAATCAAAGTAAGTCAAATTAACGAAGACAAATAAATAAAAATCTCATTCTCAACTCAAATATAT  
TGGATGGGCATAAATTTGTGGAACCCATTAAGCTTTTTCTCCA

>M6-PGSC0003DMG400003211-(rev)M6LRR-RLK\_732

GAAATATTCCAAAAGAGCTATTTGGTTTGCCAACTTGACAGATCTCTACATCCACACAAATAATCTAAC  
GGGACCTCTCCCTGACTTCCCGTCCTCATGCTCACTTTCCAGCTTCTTA

>M6-PGSC0003DMG400003211-(rev)M6LRR-RLK\_793

TAATCTAACGGGACCTCTCCCTGACTTCCCGTCCTCATGCTCACTTTCCAGCTTCTTATTCATCAGAATCG  
CTTCTCAGGTTCTTTGCCAATTTCCCTAGGTAATTGTCACAACCTTTC

>M6-PGSC0003DMG400003211-(rev)M6LRR-RLK\_854

CATCAGAATCGCTTCTCAGGTTCTTTGCCAATTTCCCTAGGTAATTGTCACAACCTTTCTGCATTCTATGCA  
ACATCTGCTCATCTTGGAGGAGTATTTTGCCAGAGGTTTTAGGGGC

>M6-PGSC0003DMG400003211-(rev)M6LRR-RLK\_915

CATTCTATGCAACATCTGCTCATCTTGGAGGAGTATTTTGCCAGAGGTTTTAGGGGCCTTTCAAATCTC  
GAATTAATCTATTTAGATGACAACAACCTTTGAAGGGGAAATTCCTGAGA

>M6-PGSC0003DMG400003211-(rev)M6LRR-RLK\_976

TTCAAATCTCGAATTAATCTATTTAGATGACAACAACCTTTGAAGGGGAAATTCCTGAGACCTTATGGAAT

GGGAAATTACAAGAGTTGGTCTTTCCATAAATAATTTAATGGAAGTAT

>M6-PGSC0003DMG400003280-(rev)M6LRR-RLK\_0

TTTCAGGTGATCGAGGGATATCACACGGTGAGCTAAACTGGCCTACTCGTCTAAGGATCATCCAGGGAG

TTGCTGGTGAATGTGTTATCTTCATTCCGAGTTTGCATCGTATGCAGTGC

>M6-PGSC0003DMG400003280-(rev)M6LRR-RLK\_128

AACCTCAAGTCTAGCAACATTCTACTCAATGAAAAATACGAGCCACTTCTATCAGATTACGCCTTCTATCC

ACTGATCAACAACACGCAAATTGTTCAATCCCTTTTCGCGTATAAAGCA

>M6-PGSC0003DMG400003280-(rev)M6LRR-RLK\_192

TCTATCCACTGATCAACAACACGCAAATTGTTCAATCCCTTTTCGCGTATAAAGCACCCAGAAGCCATACAA

CATCAACATCTCACTCCAAAATGTGACATATATTGTCTTGAATCATAA

>M6-PGSC0003DMG400003280-(rev)M6LRR-RLK\_256

CATACAACATCAACATCTCACTCCAAAATGTGACATATATTGTCTTGAATCATAATACTTGAAATCCTTA

CAGGGAAATTCCTTCTCAGTATCTCAACAATCAAAAAGGTGGAACGGA

>M6-PGSC0003DMG400003280-(rev)M6LRR-RLK\_320

ATCCTTACAGGGAAATTCCTTCTCAGTATCTCAACAATCAAAAAGGTGGAACGGACGTTGTTCAATGGG

TGCAATCAGCTATAGCTGACCAAAGAGAATCCGAATTGATTGATCCAGAG

>M6-PGSC0003DMG400003280-(rev)M6LRR-RLK\_384

AATGGGTGCAATCAGCTATAGCTGACCAAAGAGAATCCGAATTGATTGATCCAGAGATAGCGTCTGCAA

CAGATTCGTTGAACAAATGGTGAAACTCCTTCATGTAGGAGCTGCTTGTA

>M6-PGSC0003DMG400003280-(rev)M6LRR-RLK\_447

CTGCAACAGATTCCGTTGAACAAATGGTGAAACTCCTTCATGTAGGAGCTGCTTGTACTATAAGCGATCC

GGATAAGAGGATTGATATGAAGGAAGCATTAAAGGAGGATAGAAGAGATAA

>M6-PGSC0003DMG400003280-(rev)M6LRR-RLK\_64

GGGAGTTGCTGGTGAATGTGTTATCTTCATTCCGAGTTTGCATCGTATGCAGTGCCTCATGGAAACCTC

AAGTCTAGCAACATTCTACTCAATGAAAAATACGAGCCACTTCTATCAGA

>M6-PGSC0003DMG400003313M6G-LecRK\_0

TTCAAATTACATATTCCGAACTTTTGTACGAATTTTGATTTCACTATAACATGAATATAAAATTTTCA

ATTCTTCTTTTACCTTTGCTTGTGTTTCATCTTATTGTTCAACAATC

>M6-PGSC0003DMG400003313M6G-LecRK\_1054

CAAAGAAGATTCAGCCTTGA CT TAGATGGAAACCTTCGATTGTACAGCCTAGATAAGCTGAGCAACATTT  
GGAAAGTTTCTTGGCAGTTATTTCCAGCAGCCTGCAGGATTCATGGAGTT

>M6-PGSC0003DMG400003313M6G-LecRK\_1116

CAACATTTGGAAAGTTTCTTGGCAGTTATTTCCAGCAGCCTGCAGGATTCATGGAGTTTGTGGATTGAAC  
AGTTTATGTTCTATGATCCTGTCTCTGGCAGAAAATGTTCTTGTGTACC

>M6-PGSC0003DMG400003313M6G-LecRK\_1178

GATTGAACAGTTTATGTTCTATGATCCTGTCTCTGGCAGAAAATGTTCTTGTGTACCAGGATACAGGAT  
GAAAATCCTAAAGATTGGTCCTATGGTTGTGAACCAGAATTCGATATCT

>M6-PGSC0003DMG400003313M6G-LecRK\_124

GTTTATCATCTGAAGGTTCACTTTCTGCTCCACAAGATTTAATTTCTGCTTGAATGGAAAATTCCTGCT  
GGTTTCTACTCTGTTGGTGATAATGCTTATATCTTTGCTATATGGTTTA

>M6-PGSC0003DMG400003313M6G-LecRK\_1240

TACAGGATGAAAATCCTAAAGATTGGTCCTATGGTTGTGAACCAGAATTCGATATCTCTTGCAACGATA  
CAAGCTCGTTGGACTTCATTCCACTTCGCCATGTTGAGTTTTACGGGTAT

>M6-PGSC0003DMG400003313M6G-LecRK\_1302

CAACGATACAAGCTCGTTGGACTTCATTCCACTTCGCCATGTTGAGTTTTACGGGTATGATATTGCATATT  
TTCGCAATAAAACATTGCAAGAATGTAAAGATTTGTGCTTGAAACATTG

>M6-PGSC0003DMG400003313M6G-LecRK\_1364

TTGCATATTTTCGCAATAAAACATTGCAAGAATGTAAAGATTTGTGCTTGAAACATTGTGATTGTAAAGG  
TTTTGAATACAAGTATGTTGAGGGTAATGGCACCTATGGTTGTTACCCGA

>M6-PGSC0003DMG400003313M6G-LecRK\_1426

TGTAAAGGTTTTGAATACAAGTATGTTGAGGGTAATGGCACCTATGGTTGTTACCCGAAAACACTTCTGT  
TCAATGGCTATGTTCAAGCTAGTTGGCCTGATTTTGTTTACCTTAAAGTG

>M6-PGSC0003DMG400003313M6G-LecRK\_1488

ACTTCTGTTCAATGGCTATGTTCAAGCTAGTTGGCCTGATTTTGTTTACCTTAAAGTGCCTAAAGCACGAC  
GTTCTTGGCAGGAGCAGTATGAAGGAAATCTTCAATGTGACGATAAAAA

>M6-PGSC0003DMG400003313M6G-LecRK\_1550

AAGCACGACGTTCTTGGCAGGAGCAGTATGAAGGAAATCTTCAATGTGACGATAAAAAGGTGATGTTG  
GATAGAGCTTATAGAAGGAAAGAACATGGTGGATGGATGAAGCCATTCATTT

>M6-PGSC0003DMG400003313M6G-LecRK\_1612

ATGTTGGATAGAGCTTATAGAAGGAAAGAACATGGTGGATGGATGAAGCCATTCATTTGGTCAGTTGTT  
GTAGGTGGAGTCTTTGAAATTCTCTGTGTTCTCACTTACTTTATTAACG

>M6-PGSC0003DMG400003313M6G-LecRK\_1674

AGTTGTTGTAGGTGGAGTCTTTGAAATTCTCTGTGTTCTCACTTACTTTATTAACGAGAAAAAGCTCG  
AATGAAACCACACAAGGCTACCTTCATCTTTGACAAGATTCAAGAAATT

>M6-PGSC0003DMG400003313M6G-LecRK\_1736

AAAGCTCGAATGAAACCACACAAGGCTACCTTCATCTTTGACAAGATTCAAGAAATTCACCTATGCTGA  
GCTTAAAAAGGCCACTTCCAATTTAGTGAAGAGATAGGTGCGAGGAGGTG

>M6-PGSC0003DMG400003313M6G-LecRK\_1798

TATGCTGAGCTTAAAAAGGCCACTTCCAATTTAGTGAAGAGATAGGTGCGAGGAGGTGGTGGTATTGTG  
TACAAAGGGAAGTTGTCTGATGACAGAGTTGCAGCTATAAAGTCTCTCTAT

>M6-PGSC0003DMG400003313M6G-LecRK\_186

TTCCTGCTGGTTTCTACTCTGTTGGTGATAATGCTTATATCTTTGCTATATGGTTTACTAATTCATTGGCT  
GATGGAACCAACACAATTGTTTGGATGGCTAATCGTGATCAACCGATA

>M6-PGSC0003DMG400003313M6G-LecRK\_1860

TATTGTGTACAAAGGGAAGTTGTCTGATGACAGAGTTGCAGCTATAAAGTCTCTCTATGGAGCTAACTAT  
CAAGGAGAAGCAGAATTTCTAGCTGAAGTGAGCACTATAGGCAACGTTAA

>M6-PGSC0003DMG400003313M6G-LecRK\_1922

CTAACTATCAAGGAGAAGCAGAATTTCTAGCTGAAGTGAGCACTATAGGCAACGTTAATCACATGAATT  
TGATCGAAATTTGGGGATATTGTGCTGAGGGAAAGCACAGGCTTTTAGTTT

>M6-PGSC0003DMG400003313M6G-LecRK\_1984

ATGAATTTGATCGAAATTTGGGGATATTGTGCTGAGGGAAAGCACAGGCTTTTAGTTTATGAGTACATG  
GAGTATGGTTCTTTGTCAGATAATTTGAATGCCAACAATCTTGATTGGGAA

>M6-PGSC0003DMG400003313M6G-LecRK\_2046

GTACATGGAGTATGGTTCTTTGTCAGATAATTTGAATGCCAACAATCTTGATTGGGAAAAATGGTTTGAA  
ATCGCGTTGGGAACGGCTAAAGGACTTGCATACTTGCATGAAGAATGCTT

>M6-PGSC0003DMG400003313M6G-LecRK\_2108

GGTTTGAATCGCGTTGGGAACGGCTAAAGGACTTGCATACTTGCATGAAGAATGCTTAGAATGGGTTT



TGCATTGTGATGTAAAGCCTCAGAACATACTTTTAGATTCCAATTACAAGC

>M6-PGSC0003DMG400003313M6G-LecRK\_2170

TGGGTTTTGCATTGTGATGTAAAGCCTCAGAACATACTTTTAGATTCCAATTACAAGCCAAAAGTTGCTG

ACTTTGGGCTTTCAAAGATATTTAACAGAGGTGGCTTGGATCATTCAAAC

>M6-PGSC0003DMG400003313M6G-LecRK\_2232

AGTTGCTGACTTTGGGCTTTCAAAGATATTTAACAGAGGTGGCTTGGATCATTCAAACCTTTTCAACGATA

AGGGGGACGAGAGGATACATGGCTCCAGAATGGGTATTCAAGATGCCTAT

>M6-PGSC0003DMG400003313M6G-LecRK\_2294

CAACGATAAGGGGGACGAGAGGATACATGGCTCCAGAATGGGTATTCAAGATGCCTATTACATCCAAA

GTCGATGTCTATAGTTATGGCATTGTTTTATTAGAGATGATCACAGGTAAGA

>M6-PGSC0003DMG400003313M6G-LecRK\_2356

TCCAAAGTCGATGTCTATAGTTATGGCATTGTTTTATTAGAGATGATCACAGGTAAGAGTCCAGAAGTTT

GTGCTGATGGTGGCTCGGGGGATGATGATTCTATGGGACTAGGATTGTTG

>M6-PGSC0003DMG400003313M6G-LecRK\_2418

AGAAGTTTGTGCTGATGGTGGCTCGGGGGATGATGATTCTATGGGACTAGGATTGTTGGTCACTTGGAT

TAGAGAAAAAATGCGCGAAAACAGTGAAAGAAAATCATGGATTCAACAAAT

>M6-PGSC0003DMG400003313M6G-LecRK\_248

TTCATTGGCTGATGGAACCAACACAATTGTTTGGATGGCTAATCGTGATCAACCGATAAACGGACAAAA

ATCACATCTGCTGCTGTTAAATCAGGCAATCTTGTACTGATTGACGCGAA

>M6-PGSC0003DMG400003313M6G-LecRK\_2480

CTTGGATTAGAGAAAAAATGCGCGAAAACAGTGAAAGAAAATCATGGATTCAACAAATTGTGGATCCTG

CATTGAATGGTAAATTCGATTTGAAAAAATGGAGATCTTATTAGAGTTAG

>M6-PGSC0003DMG400003313M6G-LecRK\_2542

GATCCTGCATTGAATGGTAAATTCGATTTGAAAAAATGGAGATCTTATTAGAGTTAGCTTTGCAATGTT

CGGAAGAAGATAGAGATGCAAGACCTACCATGTGTGAGGTGGTGGATAAA

>M6-PGSC0003DMG400003313M6G-LecRK\_2604

GCAATGTTCCGAAGAAGATAGAGATGCAAGACCTACCATGTGTGAGGTGGTGGATAAAATGCTTCATC

CAGAAAATTTCAAGTTAAAATTAGACATGTTAATGTAGTTTCTCAAGATGTA

>M6-PGSC0003DMG400003313M6G-LecRK\_2666

TTCATCCAGAAAATTTCAAGTTAAAATTAGACATGTTAATGTAGTTTCTCAAGATGTAAAATCTTGCCAAA  
GGTGATATAGTACAAGCTTATATGTAATGTGTCTTGAGTAGCAAGTACT

>M6-PGSC0003DMG400003313M6G-LecRK\_2728

CTTGCCAAAGGTGATATAGTACAAGCTTATATGTAATGTGTCTTGAGTAGCAAGTACTTTTGAATTCCAA  
AATGTAAATCCTTATAGAATGACATAGTTTCTTAACAAAATTGTGCATTA

>M6-PGSC0003DMG400003313M6G-LecRK\_2785

TTTTGAATTCCAAATGTAAATCCTTATAGAATGACATAGTTTCTTAACAAAATTGTGCATTATAGCAACT  
GTTATGGTCTTGTGCATCAGTGATAGATGGAAAGTGTGTATGAGTACAT

>M6-PGSC0003DMG400003313M6G-LecRK\_310

GACAAAATCACATCTGTCGCTGTTAAATCAGGCAATCTTGACTGATTGACGCGAATCAGATCAATGT  
TTGGGAATCTGGTACACAATCATCAACTTCTTCTGTTGAGTTAAGATTGT

>M6-PGSC0003DMG400003313M6G-LecRK\_372

ATCAATGTTTGGGAATCTGGTACACAATCATCAACTTCTTCTGTTGAGTTAAGATTGTTGGATAATGGAA  
ATCTTGTTCTTGTAACCTTATGAAGGTCAAAGATTATGGCAAAGCTTTGAT

>M6-PGSC0003DMG400003313M6G-LecRK\_434

TAATGGAAATCTTGTTCTTGTAACCTTATGAAGGTCAAAGATTATGGCAAAGCTTTGATTCACCAACAGAT  
ACACTTCTCCTGAACAACCACTTACGAAAACCTCAAAGCTTGTATCGCG

>M6-PGSC0003DMG400003313M6G-LecRK\_496

CAACAGATACACTTCTCCTGAACAACCACTTACGAAAACCTCAAAGCTTGTATCGCGTAGAAGCTTGAA  
TAATTTCTCCTCTGGATTCTATCAGTTACATTTTAATGAAGATAATGTCC

>M6-PGSC0003DMG400003313M6G-LecRK\_558

AGCTTGAATAATTTCTCCTCTGGATTCTATCAGTTACATTTTAATGAAGATAATGTCCTGCATCTTGTCTT  
GATGGAATAGAGATGACAAGTGTGTTTTGGCCAAGCCCGTGGTTAATC

>M6-PGSC0003DMG400003313M6G-LecRK\_62

AAAATTTTCAATTCTTCTTTTACCTTTGCTTGTTGTTTCATCTTATTGTTCAACAATCTTTAGTTTATCATCTG  
AAGTTCACTTTCTGCTCCACAAGATTTAATTTCTGCTTGAATGG

>M6-PGSC0003DMG400003313M6G-LecRK\_620

TCTTGTCTTTGATGGAATAGAGATGACAAGTGTGTTTTGGCCAAGCCCGTGGTTAATCGTTTGGGATGCA  
GGTTAGTAGAGACGGATTCAGAATTTAAATTTGATTCGTTAAATCCTTAG

>M6-PGSC0003DMG400003313M6G-LecRK\_682

GGGATGCAGGTTAGTAGAGACGGATTGAGAATTTAAATTTGATTCGTTAAATCCTTAGTTTGTGTCCT  
CAACTCACATATATTATTTTTGCATGAAAAATACTAGTTTTAGTTGAACT

>M6-PGSC0003DMG400003313M6G-LecRK\_744

TTGTCCTCAACTCACATATATTATTTTTGCATGAAAAATACTAGTTTTAGTTGAACTCATTATATGGTTCA  
TTTGAGTGTATTGGTTAGGAAAGACGGATTGAGGATTTAAATTTGTT

>M6-PGSC0003DMG400003313M6G-LecRK\_806

ATATGGTTCATTTGAGTGTATTGGTTAGGAAAGACGGATTGAGGATTTAAATTTGTTGGTTCAATATTT  
AGTACAACCTCATTTTTGAAGTTTTCGGTTTTAACTGAACTCATTGCTGAT

>M6-PGSC0003DMG400003313M6G-LecRK\_868

CAATATTTAGTACAACCTCATTTTTGAAGTTTTCGGTTTTAACTGAACTCATTGCTGATATACTCCATCCATT  
TCTGCAGGTCGATCCACTTATAATGACAGCAAAACAGCAGTTCTTGAT

>M6-PGSC0003DMG400003313M6G-LecRK\_930

TCCATCCATTTCTGCAGGTCGATCCACTTATAATGACAGCAAAACAGCAGTTCTTGATCGTTTTGGGAATT  
TTACATCGAGTGATCGATTTGGATTCCAATCTGCTGATTATGGTTTTGGA

>M6-PGSC0003DMG400003313M6G-LecRK\_992

TTGGGAATTTTACATCGAGTGATCGATTTGGATTCCAATCTGCTGATTATGGTTTTGGAATTGCAAAGAAG  
ATTCAGCCTTGACTTAGATGGAAACCTTCGATTGTACAGCCTAGATAAGC

>M6-PGSC0003DMG400003343M6RLKWAX-EGF\_0

TTGGTGTGTTCTCATTACTTTATTTCTTCCCAATCCCCTTTTTTCACTTCTTTATCAATTTACCAATTTT  
CTTTCTTTCTTTCTTTCTTCTCCTCCTCCCCTGTTACATGT

>M6-PGSC0003DMG400003343M6RLKWAX-EGF\_1054

AGGTAATTTTGCTTTAATTAGTTAACTATTTATTCAACAACCTTTTTAAATAAAAACATGTTCTAGTTTAAAG  
AAAGAAATAATATAATGAAAATAAGTTTGACTTTTCAAATTAGAAAT

>M6-PGSC0003DMG400003343M6RLKWAX-EGF\_1116

TAGTTTAAAGAAAGAAATAATATAATGAAAATAAGTTTGACTTTTCAAATTAGAAATTTTAGTTTGCAT  
ATACAAAATGTGATATTTTATATATTCAACTTTCTTCAAGTCACCTAAT

>M6-PGSC0003DMG400003343M6RLKWAX-EGF\_1178

GTTTGCATATACAAAATGTGATATTTTATATATTCAACTTTCTTCAAGTCACCTAATTTGGTTATGAGTTG

GGTGGTTTAACTAAATGAAATTGAAGTTTATGAGTGGGAGTTTTGACC

>M6-PGSC0003DMG400003343M6RLKWAX-EGF\_124

CAAAACATGAATTTTCCTCTCCATTTTCAGAACAATTCTCTGTTTGTATTTTCAATTTTTCATCAAACATTG  
TTCTTGGATCAAACGTACCCATTCATGTGGAAACAGATTCCTTCCA

>M6-PGSC0003DMG400003343M6RLKWAX-EGF\_1240

TTATGAGTTGGGTGGTTTAACTAAATGAAATTGAAGTTTATGAGTGGGAGTTTTGACCAAATTTGGTGA  
GAGGAGAACACCATAATTAGATTTTTTTAAAAAAAACATGGGTCCAAGTAC

>M6-PGSC0003DMG400003343M6RLKWAX-EGF\_1302

TTGGTGAGAGGAGAACCACATAATTAGATTTTTTTAAAAAAAACATGGGTCCAAGTACAAATATATTATT  
AAAAGATGGCATGCTTAGGCGGCCTAAAAGAAAAGTAACATATAATTGAT

>M6-PGSC0003DMG400003343M6RLKWAX-EGF\_1364

ATATTATTAAGATGGCATGCTTAGGCGGCCTAAAAGAAAAGTAACATATAATTGATGGTAAAATTTT  
GATTCAATTGATCGAATCTTCTTCAATAAAGTGAAAGTTTAGATAATCATT

>M6-PGSC0003DMG400003343M6RLKWAX-EGF\_1426

AAATTTTGATTCAATTGATCGAATCTTCTTCAATAAAGTGAAAGTTTAGATAATCATTCAATTAGAAATAA  
TAATAATAAAATATTTCTATACAAGTTCAATTTTCTCCGATTATAGGGT

>M6-PGSC0003DMG400003343M6RLKWAX-EGF\_1488

TAGAAATAATAATAATAAAATATTTCTATACAAGTTCAATTTTCTCCGATTATAGGGTCATGGAGTGCAT  
GTTAAGGAACTAGGAAGTCAATAGTGTATACTATTAATAAAATATAATAG

>M6-PGSC0003DMG400003343M6RLKWAX-EGF\_1550

GAGTGCATGTTAAGGAACTAGGAAGTCAATAGTGTATACTATTAATAAAATATAATAGAAGAAGAATTT  
TTTTTTTCTCATGTTCACTAAGTAAAGGTAAAATCAAGAAAAAAAAGAA

>M6-PGSC0003DMG400003343M6RLKWAX-EGF\_1612

AGAATTTTTTTTTTCTCATGTTCACTAAGTAAAGGTAAAATCAAGAAAAAAAAGAAATTATAATTGTTT  
ATTAGAGCAACTTGTGATTGTCGTTTTTTCATAAATTAAGGTAATAATGG

>M6-PGSC0003DMG400003343M6RLKWAX-EGF\_1674

TAATTGTTTATTAGAGCAACTTGTGATTGTCGTTTTTTCATAAATTAAGGTAATAATGGCAACATTAAGAAA  
GACAATCACGTATGCGTTTGCTTCATCAGCGGAACAACTCGTGACTATC

>M6-PGSC0003DMG400003343M6RLKWAX-EGF\_1736

ATTAAGAAAGACAATCACGTATGCGTTTGCTTCATCAGCGGAACAACCTCGTGACTATCTAGGTAGGACC  
CAATAATAGTGATGGCTGTTGCCTTTAATGTCACCTTATCAATGCCAAAATT

>M6-PGSC0003DMG400003343M6RLKWAX-EGF\_1798

TAGGACCCAATAATAGTGATGGCTGTTGCCTTTAATGTCACCTTATCAATGCCAAAATTAAGGCAAATCT  
AAAATAGTTAGATCTCGTATAAGTTGAAGTTCACGTAAAAATGACTAAAT

>M6-PGSC0003DMG400003343M6RLKWAX-EGF\_186

ATCAAACATTGTTCTTGGATCAAACGTACCCATTCATGTGGAAACAGATTCCCTCCATTTCTTTTGGGT  
TTTCTCATGGCTGCCCAATTCATCTCAACTGTACCTCAAATGAAGAATT

>M6-PGSC0003DMG400003343M6RLKWAX-EGF\_1860

GCAAATCTAAAATAGTTAGATCTCGTATAAGTTGAAGTTCACGTAAAAATGACTAAATGTTTGTGCATAT  
CTAAAGTTATTCTAAGTGGGTAGTCCTGTAAATGTTACACACTACGAGT

>M6-PGSC0003DMG400003343M6RLKWAX-EGF\_1922

GTGCATATCTAAAGTTATTCTAAGTGGGTAGTCCTGTAAATGTTACACACTACGAGTATCACTTAAATT  
GTGCTTCTGAAATCGAGTGTGTTTCAATCAGACATCTAAATCACAATTA

>M6-PGSC0003DMG400003343M6RLKWAX-EGF\_1984

CTTAAATTGTGCTTCTGAAATCGAGTGTGTTTCAATCAGACATCTAAATCACAATTAATAAGTTTACGAA  
GACTTAACACCTTTTGCCCATACCCATACCCATACCCATATATGTGAACG

>M6-PGSC0003DMG400003343M6RLKWAX-EGF\_2046

GTTTACGAAGACTTAACACCTTTTGCCCATACCCATACCCATACCCATATATGTGAACGAGTTATTATGGTA  
TATTAACCTGATATTGTTGCAAAAACCTCACAAAATTCAAATTTTGAATA

>M6-PGSC0003DMG400003343M6RLKWAX-EGF\_2108

ATTATGGTATATTAACCTTGATATTGTTGCAAAAACCTCACAAAATTCAAATTTTGAATACTTTGATTGGTTG  
GTATAATGTCCTTTTCATGTTATTCCATTAAGATATCCTGCCAAAATTTG

>M6-PGSC0003DMG400003343M6RLKWAX-EGF\_2170

GATTGGTTGGTATAATGTCCTTTTCATGTTATTCCATTAAGATATCCTGCCAAAATTTGTTTCATCATTGGT  
CAAGGAAGAGGCCTTTTTTCTTTGTTTTCTTCATTTTCTATCAAAC

>M6-PGSC0003DMG400003343M6RLKWAX-EGF\_2232

ATCATTTGGTCAAGGAAGAGGCCTTTTTTCTTTGTTTTCTTCATTTTCTATCAAACCTCATTGGTTTTG  
AATTAACAATGGAAACAAAGTCACTATCATATTACGTGAAGATAGTTA

>M6-PGSC0003DMG400003343M6RLKWAX-EGF\_2294

TTTGGTTTTGAATTAACAATGGAAACAAAGTCACTATCATATTACGTGAAGATAGTTACTCAACAATATC  
AATGGACCCTCCACATATAAGGTGAAAAGGAATATAAACGAATTCGTGAT

>M6-PGSC0003DMG400003343M6RLKWAX-EGF\_2356

ACAATATCAATGGACCCTCCACATATAAGGTGAAAAGGAATATAAACGAATTCGTGATTACTTTTTTTTTT  
GTTTCCATCCAATGTTTCAGTATCTGTATTGGAGTCTGAACTAGTTCAAA

>M6-PGSC0003DMG400003343M6RLKWAX-EGF\_2418

TTTTTTTTGTTTCCATCCAATGTTTCAGTATCTGTATTGGAGTCTGAACTAGTTCAAATTCGCATCACCTAT  
TAAAAGAAACGGTCCCTATTCGGATTTTTTCCATAGCCAAGACTTGA

>M6-PGSC0003DMG400003343M6RLKWAX-EGF\_248

CTTTGGGTTTTCTCATGGCTGCCAATTCATCTCAACTGTACCTCAAATGAAGAATTTTTTCATGAACGAT  
TTCCCAGTTCAATCAGTAACTTCAGATACCATTTAATCAATCTTTTAG

>M6-PGSC0003DMG400003343M6RLKWAX-EGF\_2480

CATCACCTATTA AAAAGAAACGGTCCCTATTCGGATTTTTTCCATAGCCAAGACTTGAACGCGATACCTC  
AGTCCCATCACAACACTTGAGTTGTATGTGTCCAATTACTAATTCCATT

>M6-PGSC0003DMG400003343M6RLKWAX-EGF\_2542

GATACCTCAGGTCCCATCACAACACTTGAGTTGTATGTGTCCAATTACTAATTCCATTTTTTTTTTTTTTGT  
GAATGCAGATGAAACAACATGCAACCCTTCAAAGTACCTATCAGGCAA

>M6-PGSC0003DMG400003343M6RLKWAX-EGF\_2604

TTTTTTTTGTGAATGCAGATGAAACAACATGCAACCCTTCAAAGTACCTATCAGGCAAATGTGGAGGAAC  
CACAAGAGTTGGTGTACTTGTGGAGGTAATTCTACGTTGATTTAAGTTA

>M6-PGSC0003DMG400003343M6RLKWAX-EGF\_2666

GGAGGAACCACAAGAGTTGGTGTACTTGTGGAGGTAATTCTACGTTGATTTAAGTTATATACGTTGAC  
AGTGCAGAGTCTCAACATCTAGTACTAGTTGAAATGAAATTGTTTTCGTAT

>M6-PGSC0003DMG400003343M6RLKWAX-EGF\_2728

CGTTGACAGTGCAGAGTCTCAACATCTAGTACTAGTTGAAATGAAATTGTTTTCGTATTCCTTCTTATTT  
CAATTCGCTATACAAACACATTATTCTAAAGTGATCAAACTATATAT

>M6-PGSC0003DMG400003343M6RLKWAX-EGF\_2790

TTCTTATTTCAATTCGCTATACAAACACATTATTCTAAAGTGATCAAACTATATATATTTCTCCAGGTAT

TGTTGCAGGTGCTTCGTTAATGGTTAGTATAGGCCTAATATGCTGCTT

>M6-PGSC0003DMG400003343M6RLKWAX-EGF\_2852

CTCCAGGTATTGTTGCAGGTGCTTCGTTAATGGTTAGTATAGGCCTAATATGCTGCTTTATTCGACGAAG

ATTGAATTTTCAAACAGAACAAGAAGAAACCGCGAGTTATGTGAGACTA

>M6-PGSC0003DMG400003343M6RLKWAX-EGF\_2914

CGACGAAGATTGAATTTTCAAACAGAACAAGAAGAAACCGCGAGTTATGTGAGACTACAGGGATCAG

CATCCCTGTTTATCAGTTCAAAGAAATGGAAAAGGCAACCGATTTCTTCTCT

>M6-PGSC0003DMG400003343M6RLKWAX-EGF\_2976

GATCAGCATCCCTGTTTATCAGTTCAAAGAAATGGAAAAGGCAACCGATTTCTTCTCTGAGAAACGGAG

ACTAGGAAATGGCGCGTATGGAACAGTTTATTCTGGAAAACCTTCAAATGA

>M6-PGSC0003DMG400003343M6RLKWAX-EGF\_3038

AACGGAGACTAGGAAATGGCGCGTATGGAACAGTTTATTCTGGAAAACCTTCAAATGACAATTGGGTA

GCTATCAAAGAATTAGACATAGAGATACTGATAGCATTGAACAATTCATCA

>M6-PGSC0003DMG400003343M6RLKWAX-EGF\_310

ATGAACGATTTCCAGTTCAATCAGTAACTTCAGATACCATTTTAATCAATCTTTTAGCAAATGCAGCCG

ACCATTTTCAGCAATTCACAATCTTTTTAGCCCAAATTACGCACCCACT

>M6-PGSC0003DMG400003343M6RLKWAX-EGF\_3100

TGGGTAGCTATCAAAGAATTAGACATAGAGATACTGATAGCATTGAACAATTCATCAATGAGATCAAG

CTCCTTTCTCTGTCAATCATCCGAACCTGGTTCGTCTCTTGGGCTGCTCA

>M6-PGSC0003DMG400003343M6RLKWAX-EGF\_3162

GATCAAGCTCCTTTCTCTGTCAATCATCCGAACCTGGTTCGTCTCTTGGGCTGCTCAATCGAAAATGGTG

AACAGATTCTTGTTTATGAGTACATGCCTAATGGAACCTTTGTCACAACA

>M6-PGSC0003DMG400003343M6RLKWAX-EGF\_3224

AAAATGGTGAACAGATTCTTGTTTATGAGTACATGCCTAATGGAACCTTTGTCACAACATATACAAAGAGA

AAAAGGGAACGGGCTCCATGGCCCGTTCGTCTTACAATTGGTGCAGAAA

>M6-PGSC0003DMG400003343M6RLKWAX-EGF\_3286

CAAAGAGAAAAAGGGAACGGGCTTCATGGCCCGTTCGTCTTACAATTGGTGCAGAACTGCACAAGCT

ATTGCTTATCTGCATAATGCAACGCACCCTCCAATATATCACAGAGATGTT

>M6-PGSC0003DMG400003343M6RLKWAX-EGF\_3348

ACAAGCTATTGCTTATCTGCATAATGCAACGCACCCTCCAATATATCACAGAGATGTTAAGTCAAGTAAC  
ATACTCTTGGATTACAATTACAAGTCAAAGTAGCAGATTTTCGGACTCTC

>M6-PGSC0003DMG400003343M6RLKWAX-EGF\_3410

CAAGTAACATACTCTTGGATTACAATTACAAGTCAAAGTAGCAGATTTTCGGACTCTCAAGACTTGGTAT  
GGTTGAATCGTCTCACATTTCTACTGCACCACAAGGAACTCCAGGTTATC

>M6-PGSC0003DMG400003343M6RLKWAX-EGF\_3472

CTTGGTATGGTTGAATCGTCTCACATTTCTACTGCACCACAAGGAACTCCAGGTTATCTTGATCCTCAGTA  
TCATCAGAACTTTTCAGTTGTCTGATAAGAGCGACGTTTATAGTTTTGGT

>M6-PGSC0003DMG400003343M6RLKWAX-EGF\_3534

TCCTCAGTATCATCAGAACTTTTCAGTTGTCTGATAAGAGCGACGTTTATAGTTTTGGTGTAGTTCTTGCTG  
AGATCATAACAGGACTAAAAGCAGTAGACTTTGCTCGTCCTCAAGACGA

>M6-PGSC0003DMG400003343M6RLKWAX-EGF\_3596

TTCTTGCTGAGATCATAACAGGACTAAAAGCAGTAGACTTTGCTCGTCCTCAAGACGAAATAAACTTGGC  
TGCCTTGCTATTGACAGGATAGGAAAGGGAACTTAGATGAAATTATCG

>M6-PGSC0003DMG400003343M6RLKWAX-EGF\_3658

AACTTGGCTGCACTTGCTATTGACAGGATAGGAAAGGGAACTTAGATGAAATTATCGATCCATTTATC  
GAGCTACATATGGATGCTTGGACACTTTTCATCTATTCACAAGGTAGCAGAG

>M6-PGSC0003DMG400003343M6RLKWAX-EGF\_372

ATGCAGCCGACCATTTTCAGCAATTCACAATCTTTTTAGCCCAAATTACGCACCCACTTCAAGAAACGGA  
ATACTTTTCCAGAATTGCAGTTCTTACAATCCAGCTGTTTGATTCTTC

>M6-PGSC0003DMG400003343M6RLKWAX-EGF\_3720

ATTTATCGAGCTACATATGGATGCTTGGACACTTTTCATCTATTCACAAGGTAGCAGAGTTGGCATTTCAGG  
TGTCTGGCATTTCATCGCGATATGAGGCCATCGATGATGGAAGTAGCGAT

>M6-PGSC0003DMG400003343M6RLKWAX-EGF\_3782

CATTCAGGTGTCTGGCATTTCATCGCGATATGAGGCCATCGATGATGGAAGTAGCGATTGAATTGGAAC  
AACTTAGGCTAAGTAGATGGACGAATTCGGAAGATAACATAACAGGTTTCAT

>M6-PGSC0003DMG400003343M6RLKWAX-EGF\_3844

TTGGAACAACCTTAGGCTAAGTAGATGGACGAATTCGGAAGATAACATAACAGGTTTCATCAGAGGGATCT  
TCAATTTTCATCAACTTCAGATGCAAGTGAAAAACCATTGAATCTTTCAATT



>M6-PGSC0003DMG400003343M6RLKWAX-EGF\_3906

GGGATCTTCAATTTCACTCACTTCAGATGCAAGTGAAAAACCATTGAATCTTTCAATTAAGAAGCAAGAA  
ATGGATATATTTTCGACAGATAGTAAAATAAAGGATTATTCCCCTGTATC

>M6-PGSC0003DMG400003343M6RLKWAX-EGF\_3968

AGCAAGAAATGGATATATTTTCGACAGATAGTAAAATAAAGGATTATTCCCCTGTATCAGTACAAGATCC  
ATGGAGTAGTGAGCAAAGCTCTCCATCTTGTAGTAGTTTGCTTAATCATA

>M6-PGSC0003DMG400003343M6RLKWAX-EGF\_4030

CAAGATCCATGGAGTAGTGAGCAAAGCTCTCCATCTTGTAGTAGTTTGCTTAATCATATAGTTAAGTGAT  
TATGTAAAGGATTAATTTCTTCATTGTAATTTACTTACAAGAACATTTA

>M6-PGSC0003DMG400003343M6RLKWAX-EGF\_4092

TAAGTGATTATGTAAAGGATTAATTTCTTCATTGTAATTTACTTACAAGAACATTTAGCAGTTGAAAATG  
TAGTATACTAGCAAAATATTACTACTAGCAAGAATACTACACATGCCAA

>M6-PGSC0003DMG400003343M6RLKWAX-EGF\_4151

CAGTTGAAAATGTAGTATACTAGCAAAATATTACTACTAGCAAGAATACTACACATGCCAAATTTGGTCT  
GTACTTCTAAATGTTCTTTTTATTTCTTTTATATCAATTAGTACTTTATC

>M6-PGSC0003DMG400003343M6RLKWAX-EGF\_434

GAAACGGAATACTTTCCAGAATTGCAGTTCTTCACAATCCAGCTGTTTGATTCTTCTACGATGATTCAA  
ACCCATTTTGACATTCTTGATTGTGGGAAAGAAAACATGAGCTGTTATT

>M6-PGSC0003DMG400003343M6RLKWAX-EGF\_496

ATGATTCAAACCCATTTTGACATTCTTGATTGTGGGAAAGAAAACATGAGCTGTTATTCTGAGCCGAATA  
GTGAGAACAATTTTATCAATTTGAAGAATTTGTCGAAAACAGGGTGCGGC

>M6-PGSC0003DMG400003343M6RLKWAX-EGF\_558

GCCGAATAGTGAGAACAATTTTATCAATTTGAAGAATTTGTCGAAAACAGGGTGCGGCTCTCTGTTTTCT  
GCAATATCTGTGGAGTCAACTGTGAATAGCTCGGCGGTTTCGTTGGATGT

>M6-PGSC0003DMG400003343M6RLKWAX-EGF\_62

TTTACCAATTTTCTTTCTTTCTTTCTTTCTTTCTTCTCCTCCTCCCCTGTTACATGTCCCCAAAACATGAAT  
TTTCTCTCCATTTGAGAACAATTTCTCTGTTTGTTTATTTTCAATT

>M6-PGSC0003DMG400003343M6RLKWAX-EGF\_620

TGTTTTCTGCAATATCTGTGGAGTCAACTGTGAATAGCTCGGCGGTTTCGTTGGATGTTTCAGGTGGTTCA

GTTGGGGTGGTGGGTTTCATGGACATTGTCGGTGTCTTCTAATGCGAATT

>M6-PGSC0003DMG400003343M6RLKWAX-EGF\_682

GTGGTTCAGTTGGGGTGGTGGGTTTCATGGACATTGTCGGTGTCTTCTAATGCGAATTGTAATAAAATCT  
CGTCCCCCATTAAATGGAAAACGGGGATATCGGTGTCAGTGTTTTGAAGGT

>M6-PGSC0003DMG400003343M6RLKWAX-EGF\_744

TAAAATCTCGTCCCCCATTAAATGGAAAACGGGGATATCGGTGTCAGTGTTTTGAAGGTTTCATCGGAGAT  
GGCTTCTTAGCCGGCTCCGGCTGCCGAAAGGTACGTCAGGCAGAACACA

>M6-PGSC0003DMG400003343M6RLKWAX-EGF\_806

TCCGAGATGGCTTCTTAGCCGGCTCCGGCTGCCGAAAGGTACGTCAGGCAGAACACAATTTTAATTAC  
TTAATTAGGTGTCAAACACATTAATAATCTATCTAGTTATGAGTAACAATGA

>M6-PGSC0003DMG400003343M6RLKWAX-EGF\_868

TAATTAATTAATTAGGTGTCAAACACATTAATAATCTATCTAGTTATGAGTAACAATGAGATTTGAACTCG  
ACATATTATGTTAAAATATGTGACAATTTCTTATAAAAATTTAAAATTTTA

>M6-PGSC0003DMG400003343M6RLKWAX-EGF\_930

TGAACTCGACATATTATGTTAAAATATGTGACAATTTCTTATAAAAATTTAAAATTTTATCCGTGGAGGGTC  
GTATTACCAAAAAAATTGCATTCAAATTTGAATCCTAAATCCGTCTGCA

>M6-PGSC0003DMG400003343M6RLKWAX-EGF\_992

TGGAGGGTCGTATTACCAAAAAAATTGCATTCAAATTTGAATCCTAAATCCGTCTGCATTGTAGGTAATT  
TTGCTTTAATTAGTTAACTATTTATTCAACAATTTTTAAATAAAAAACAT

>M6-PGSC0003DMG400003380M6LRR-RLP\_0

TCCATAATAGTTCTAATTCTTGTGTCACAAGGATGAATTTCAACAATGAATTGTCTGATCTGAGAGTCCCG  
AAATACTCGGATGTTCCAAGGGATCGAATAGATTTCTTTATATGGGAGT

>M6-PGSC0003DMG400003380M6LRR-RLP\_1037

GGACTTCTATTTATTCAATTATATGATATCAAGGGGCAGAAGGAAGACACATCATTGGAGGTTATCAACC  
AGGCACTTGGTTTTGATCTCCGAGAAACATTGAGTCTATTAAGGCGATG

>M6-PGSC0003DMG400003380M6LRR-RLP\_1098

TTATCAACCAGGCACTTGGTTTTGATCTCCGAGAAACATTGAGTCTATTAAGGCGATGGTCTACCTTGTC  
ATGCAAAAGGCATTTCAATTGTAAGTTGCCAAGGGTTCATGGACTAGGCT

>M6-PGSC0003DMG400003380M6LRR-RLP\_1159

CTACCTTGTCATGCAAAAGGCATTTTCATTGTAACCTTGCCAAGGGTTCATGGACTAGGCTATGTCGATTTTC  
TGTTGAAAAACCTGAAGGATTTCCAAGGCCGTTATTCAGATTCACTCAT

>M6-PGSC0003DMG400003380M6LRR-RLP\_122

AAATTCCTTAATTGTTTTCTCCATTTGCAGAAATTCACTTTTGCAAGGGAATGTGGTATGCTAGATATCTC  
ACAGAAAATGCTAGAAATTTGCAAGAGGTTGTGTCCATCACGTGACAT

>M6-PGSC0003DMG400003380M6LRR-RLP\_1220

GTCGATTTTCTGTTGAAAAACCTGAAGGATTTCCAAGGCCGTTATTCAGATTCACTCATTTTCTCAAGAA  
TCACCTTCAAGTTATTCAAACGGAATTTGAGAGCTTGCAACCTTTCTTG

>M6-PGSC0003DMG400003380M6LRR-RLP\_1342

GGTTGTCGTAGAAGAGCCACACAATAAGCTCAAGACACTGAATGAAGATTGTGCTACACAGATAATTAG  
GAAAGCATATGAGGTGGAATATGTAGTTGATGCTTGATTAACAAAGAAGC

>M6-PGSC0003DMG400003380M6LRR-RLP\_1403

ATAATTAGGAAAGCATATGAGGTGGAATATGTAGTTGATGCTTGATTAACAAAGAAGCTCCTCATTGG  
TGCCTCGAGCGTTGGCTCCTGGATATCATAGAGGAGATTACTTGTATCAAA

>M6-PGSC0003DMG400003380M6LRR-RLP\_1464

CTCATTGGTGCCTCGAGCGTTGGCTCCTGGATATCATAGAGGAGATTACTTGTATCAAAGCACAGATTCA  
GGGAAAGATCACAGTTGAGGATTCAATGAAGAGTGTGATTGCTCGTACAT

>M6-PGSC0003DMG400003380M6LRR-RLP\_1525

ACAGATTCAGGGAAAGATCACAGTTGAGGATTCAATGAAGAGTGTGATTGCTCGTACATCATCACAATT  
GGCAAGGACTCCAAGCATGAATGAAGAGATTGTTGGGTTTGAGGATGTCAT

>M6-PGSC0003DMG400003380M6LRR-RLP\_1586

TCACAATTGGCAAGGACTCCAAGCATGAATGAAGAGATTGTTGGGTTTGAGGATGTCATAGAAAATTTA  
AGAAAAAACTACTGAATGGAACCAAAGGGCAAGTTATCATTTCATTAC

>M6-PGSC0003DMG400003380M6LRR-RLP\_1708

CATGCCAGGTTTAGGTAAGACGACTTTAGCCAACAGACTCTATTCTGACAGGTCAGTTGTTTCTCATTTTG  
ATATTTGTGCACAATGTTGTGTGTCTCAAGTATATTCTTATAAGGACTT

>M6-PGSC0003DMG400003380M6LRR-RLP\_1769

TCTCATTTTGATATTTGTGCACAATGTTGTGTGTCTCAAGTATATTCTTATAAGGACTTGTATTGGCCTTG  
CTACGTGATGCTATTGGTGAGGGTTCTGTGCGTAGAGAACTTCATGCC

>M6-PGSC0003DMG400003380M6LRR-RLP\_183

TAGATATCTCACAGAAAATGCTAGAAATTTGCAAGAGGTTGTGTCCATCACGTGCACATAATGCATTTGC  
ATACTGGAAGGAGGTAATTTGCAAGAGGCTGTGCGCTATTATCATCCGGC

>M6-PGSC0003DMG400003380M6LRR-RLP\_1891

TAAATTAGCTGATATGCTTCGCAAACTTTATTGCCCGAAGGTACCTTATCCTTGTTGATGACGTGTGG  
GAAAATAGTGTGGGATGATTTAAGAGGTTGTTTCCAGATGTCAATAA

>M6-PGSC0003DMG400003380M6LRR-RLP\_1952

GACGTGTGGGAAAATAGTGTGGGATGATTTAAGAGGTTGTTTCCAGATGTCAATAACAGCAGCAGA  
ATCATTCTGACGACAAGACATCATGAAGTTGCCAAATATGCTAGTGTTTTCAT

>M6-PGSC0003DMG400003380M6LRR-RLP\_2074

TGATCCCCTTCATCTTCGTATGTTTGACGAAGTTGAAAGTTGGAAGTTGCTTGAAAAGAAAGTGTGGT  
GAAGAAAGTTGCTCCCCTCACCTAAAAGTGTGGGCAGAGAATAGCAAAA

>M6-PGSC0003DMG400003380M6LRR-RLP\_2135

GTGTTTGGTGAAGAAAGTTGCTCCCCTCACCTAAAAGTGTGGGCAGAGAATAGCAAAAATGTGTGGA  
CAACTCCCTCTTCAATTGTTTTGGTGGCTGGTATTCTGTCAGAGATGGAA

>M6-PGSC0003DMG400003380M6LRR-RLP\_2318

AGAGCCATTGTAGACCAAAGTTATCATGTTTTACCCTGTCATCTTAAGTCTTGCTTCCTTTATTTTGGAGC  
ATTTTTAGAGGATAGAGTGATTGACATTTCAAGGTTAATAAGGTTATGG

>M6-PGSC0003DMG400003380M6LRR-RLP\_2379

ATTTTGGAGCATTTTTAGAGGATAGAGTGATTGACATTTCAAGGTTAATAAGGTTATGGATATCAGAATC  
ATTTATAAAAAGTTGTGAAGGCAGGAGGTTGGAGGATATAGCAGAAGGTT

>M6-PGSC0003DMG400003380M6LRR-RLP\_244

TGCATTTGCATACTGGAAGGAGGTAATTTGCAAGAGGCTGTGCGCTATTATCATCCGGCCAGATGATGG  
ATTTGCATACTGGAAGAAAGTAATTTGGAAGACTAAGCAAGAATTCAGAGC

>M6-PGSC0003DMG400003380M6LRR-RLP\_2440

ATCAGAATCATTTATAAAAAGTTGTGAAGGCAGGAGGTTGGAGGATATAGCAGAAGGTTACTTGGAGA  
ATCTTATTGGAAGAAATCTAGTAATGGTTACTCAGAGGGCCGATTCAGATGG

>M6-PGSC0003DMG400003380M6LRR-RLP\_2501

TTGGAGAATCTTATTGGAAGAAATCTAGTAATGGTTACTCAGAGGGCCGATTCAGATGGTAAGGTCACA

GCATGTCGCCTTCATGATGTATTACTTGATTTCTGCAAGAAAAGAGCAGCT

>M6-PGSC0003DMG400003380M6LRR-RLP\_2562

AGGTCACAGCATGTCGCCTTCATGATGTATTACTTGATTTCTGCAAGAAAAGAGCAGCTGAGGAGAATT

TTCTACTATGGATAAATAGGTAATATGATAAGTAATGGTAATTTCAATCAA

>M6-PGSC0003DMG400003380M6LRR-RLP\_2623

GGAGAATTTTCTACTATGGATAAATAGGTAATATGATAAGTAATGGTAATTTCAATCAATCAAGTATTTG

AAGTTATATCTGAAAATTAATGATATGCTTTTGCTAATTGATATATTCAC

>M6-PGSC0003DMG400003380M6LRR-RLP\_2684

AAGTATTTGAAGTTATATCTGAAAATTAATGATATGCTTTTGCTAATTGATATATTCACAGGGATCAGATT

ACCAAACCTTCTTCTGTGTTTACTCTCACAAGCAGCATGCTCACTTGG

>M6-PGSC0003DMG400003380M6LRR-RLP\_2745

GGATCAGATTACCAAACCTTCTTCTGTGTTTACTCTCACAAGCAGCATGCTCACTTGGCCTTCACTGAAA

TGCATAATCTTGTAGAATGGAGTGCGTCTTGCTCATTTGTTGGCTCGGT

>M6-PGSC0003DMG400003380M6LRR-RLP\_2806

TTCACTGAAATGCATAATCTTGTAGAATGGAGTGCGTCTTGCTCATTTGTTGGCTCGGTAGTACTTTCCAA

GAAATATGAGCCATACTTGGCTGGTCGTCCCTTAACCTCTCGTGCTTTA

>M6-PGSC0003DMG400003380M6LRR-RLP\_2867

TACTTTCCAAGAAATATGAGCCATACTTGGCTGGTCGTCCCTTAACCTCTCGTGCTTTATCAATTCATGC

ATTTTATTAATTTCAAGTTTCTAAAAGTATTGGATTTAGAGCACCGGG

>M6-PGSC0003DMG400003380M6LRR-RLP\_2928

AATTTTCATGCATTTTATTAATTTCAAGTTTCTAAAAGTATTGGATTTAGAGCACCGGGTTGTTATTGATT

CTATTCCAAGTACTGAGCTCTTTTACTTGAGGTATTTATCTGCACACATTGA

>M6-PGSC0003DMG400003380M6LRR-RLP\_2989

GTTATTGATTCTATTCCAAGTACTGAGCTCTTTTACTTGAGGTATTTATCTGCACACATTGAACAGAATTCATT

CCTTCAAGCATATCCAATCTTTGGAACCTTGAACTCTTATATTAAG

>M6-PGSC0003DMG400003380M6LRR-RLP\_305

GATGATGGATTTGCATACTGGAAGAAAGTAATTTGGAAGACTAAGCAAGAATTCAGAGCTAAATACTCC

TTTCCAAAAACTACTTGCAAACAACAAGGTAGATGATGATGATATTACT

>M6-PGSC0003DMG400003380M6LRR-RLP\_3050

AGAATTCAATTCCTTCAAGCATATCCAATCTTTGGAACCTTGAAACTCTTATATTAAGAATACATCAGTT  
GGGAGAGATAACACGCTATTACTACCTAGTACAATTTGGGATATGGTTA

>M6-PGSC0003DMG400003380M6LRR-RLP\_3111

TACATCAGTTGGGAGAGATAACACGCTATTACTACCTAGTACAATTTGGGATATGGTTAAATTGAGACAT  
CTGCATATTCCTAACTTCAGCCCAGAAAATGAAGAAGCATTACTGAAGAA

>M6-PGSC0003DMG400003380M6LRR-RLP\_3172

TTGAGACATCTGCATATTCCTAACTTCAGCCCAGAAAATGAAGAAGCATTACTGAAGAACTCTGCAAAAC  
TTTATGATTTGGAAACCCTTCTCTCCATATTTCTCTCGTGTTGAGGAT

>M6-PGSC0003DMG400003380M6LRR-RLP\_3294

AGATTTGATGCTGAGAAAAACACCTAATCTTCGAAAACCTGGTATGTAAAGTCCAGTGCTTAGAATACCCC  
CATCAGCACCATCTTTTTAATTTTCCAATACGGCTTGAATACTAAAGCT

>M6-PGSC0003DMG400003380M6LRR-RLP\_3355

GAATACCCCATCAGCACCATCTTTTTAATTTTCCAATACGGCTTGAATACTAAAGCTTTATGGATCAGA  
AGCCTTTAAAAACATCCCCTTTTGCATCTCTGCACCAAATCTCAAATGC

>M6-PGSC0003DMG400003380M6LRR-RLP\_3416

ATGGATCAGAAGCCTTTAAAAACATCCCCTTTTGCATCTCTGCACCAAATCTCAAATGCTTGAACTCTAT  
GGCTTTTACCTGGATTCTCAGTACTTATCAGAACTGCTGATCATCTGA

>M6-PGSC0003DMG400003380M6LRR-RLP\_3477

GGAActCTATGGCTTTTACCTGGATTCTCAGTACTTATCAGAACTGCTGATCATCTGAAGAACCTTGAG  
GTACTCAAActGTCCAGTGTGAATTTGGTGTATAGGGAATGGAAAGT

>M6-PGSC0003DMG400003380M6LRR-RLP\_3538

AACCTTGAGGTACTCAAActGTCCAGTGTGAATTTGGTGTATAGGGAATGGAAAGTGAGCAATGGC  
AAGTCCCTCAAActCAAActCTTGAAActAGAAATTTGTCCTTGATGGAA

>M6-PGSC0003DMG400003380M6LRR-RLP\_3599

GCAATGGCAAGTTCCTCAAActCAAActCTTGAAActAGAAATTTGTCCTTGATGGAAATGGATTGTAGC  
CGATGATGCCTTTCTAACCTTGAACAATTGGTTTTGCGTGGATGTGAG

>M6-PGSC0003DMG400003380M6LRR-RLP\_366

AATACTCCTTTCCAAAAActACTTGCAAACAACAAGGTAGATGATGATGATATTACTAATCCCAAATTT  
GTGATGGAAATTCATCGATGCTGTTGTGGGGAATCTCAATGTTCTAGTCA

>M6-PGSC0003DMG400003380M6LRR-RLP\_3721

CTTATGGAGATCCCTTCTTGTTTCATGGACATCCTTTCTCTCAAGTACATCGAGTTAGGAACTGCAATGA  
GTCGGTTGTCAAGTCAGCCATGAATATACAAGAAACACAAGTCGAAGAT

>M6-PGSC0003DMG400003380M6LRR-RLP\_3782

ACTGCAATGAGTCGGTTGTCAAGTCAGCCATGAATATACAAGAAACACAAGTCGAAGATAATCAAATA  
CTAATTTCAAGCTCGTTCTCATCTAGGTACTACTGAAAAAAGCTTTATT

>M6-PGSC0003DMG400003380M6LRR-RLP\_3843

TCAAATACTAATTTCAAGCTCGTTCTCATCTAGGTACTACTGAAAAAAGCTTTATTCTGCATGATTTT  
GATGACTCCGAAATAATGGCCTAAATTGTATGAACTGTTTTCTCTGTTA

>M6-PGSC0003DMG400003380M6LRR-RLP\_3904

GCATGATTTTGATGACTCCGAAATAATGGCCTAAATTGTATGAACTGTTTTCTCTGTTATCTTTACCTGGT  
GGCCTCGTTTTACATTCGGGTTTTTCTTTGGTTTTCTTGCAGAAAAAG

>M6-PGSC0003DMG400003380M6LRR-RLP\_3965

TTTACCTGGTGGCCTCGTTTTACATTCGGGTTTTTCTTTGGTTTTCTTGCAGAAAAAGACATACCCCCAA  
GGCATTAAAAGATTAGTTTTTCTTCCAGGTACTACTTATTATTTTTTC

>M6-PGSC0003DMG400003380M6LRR-RLP\_4026

ATACCCCAAGGCATTTAAAAGATTAGTTTTTCTTCCAGGTACTACTTATTATTTTTCTTTCTTTCTTTTT  
TTGAGTACACCAAATAGATAGATTCATCTTTTTTGTCTTTTCGATAT

>M6-PGSC0003DMG400003380M6LRR-RLP\_4087

TCTTTCTTTTTTTGAGTACACCAAATAGATAGATTCATCTTTTTTGTCTTTTCGATATGAAAGGGATATAA  
TCAATTTCAACTGATATGAAAGAGAAGAACTTACTGTGACCAGAGAT

>M6-PGSC0003DMG400003380M6LRR-RLP\_4148

AAGGGATATAATCAATTTCAACTGATATGAAAGAGAAGAACTTACTGTGACCAGAGATGTGGATGCTG  
ATGAAGTTCAATTAGTTGTGGAGAACTGAGAAAGTGTGGCATGCTCTAAC

>M6-PGSC0003DMG400003380M6LRR-RLP\_4209

GGATGCTGATGAAGTTCAATTAGTTGTGGAGAACTGAGAAAGTGTGGCATGCTCTAACAAAATGCTGA  
GCTCTGGTGAACCAACCATGATGGATTTTCAAATAATGACAGGGTTGTAG

>M6-PGSC0003DMG400003380M6LRR-RLP\_427

TCCCAAATTTGTGATGGAATTCATCGATGCTGTTGTGGGAATCTCAATGTTCTAGTCAAGATCAATGAT

CCATTTTCATTGCTTTTTGTTCCAGGACCCAAGGAACAAATAGAACAAGT

>M6-PGSC0003DMG400003380M6LRR-RLP\_4331

CCAACCTTGTC AACACAAATGTGCTATACTCATTTTGCTTACTGTAATACCATTTTCATGACACACACACAAA

CATTAACCTGTAGTAAAGTTTTGATGGATCAGTAAATCTGAGTTCAACCC

>M6-PGSC0003DMG400003380M6LRR-RLP\_4392

CACACACAAACATTAACCTGTAGTAAAGTTTTGATGGATCAGTAAATCTGAGTTCAACCCATTGTAATCCG

TTCAAATTCAACTCAAAGGTATCCAGAGAGTGTAGCTGGAGCAATTTGGA

>M6-PGSC0003DMG400003380M6LRR-RLP\_4453

TGTAATCCGTTCAAATTCAACTCAAAGGTATCCAGAGAGTGTAGCTGGAGCAATTTGGAATATCACATGT

AATTTCTTTATGAGTTATTTGTTTTAATAAAGATACTGTAAAACGTCCAA

>M6-PGSC0003DMG400003380M6LRR-RLP\_4514

ATCACATGTAATTTCTTTATGAGTTATTTGTTTTAATAAAGATACTGTAAAACGTCCAACGGCTGTTGCAT

TCATTGTAAACTAAATACATCTCACAATGTAACCTATTTGAACAATTTTT

>M6-PGSC0003DMG400003380M6LRR-RLP\_4557

ACTGTAAAACGTCCAACGGCTGTTGCATTCATTGTAAACTAAATACATCTCACAATGTAACCTATTTGAACA

ATTTTTTCATTTAACTCCTTGAGGTTTGATGTAAGTCATTAGATTTTAC

>M6-PGSC0003DMG400003380M6LRR-RLP\_488

ATCAATGATCCATTTTCATTGCTTTTTGTTCCAGGACCCAAGGAACAAATAGAACAAGTGTTAAAGGAGT

TGAAGTTATTGAGATTTTTGTCTGCTTTGTTTCAAACAAATGTATAGAG

>M6-PGSC0003DMG400003380M6LRR-RLP\_549

TAAAGGAGTTGAAGTTATTGAGATTTTTGTCTGCTTTGTTTCAAACAAATGTATAGAGCCTCAATACCAA

CATGCTACTTTTTATACTCACGCTTTAATTGAGGCTAGCCACATCGCAA

>M6-PGSC0003DMG400003380M6LRR-RLP\_61

GAGAGTCCCGAAATACTCGGATGTTCCAAGGGATCGAATAGATTTCTTTATATGGGAGTTAAAATTCCTT

AATTGTTTTCTCATTGTCAGAAATCACTTTTGCAAGGGAATGTGGTAT

>M6-PGSC0003DMG400003380M6LRR-RLP\_610

TCAATACCAACATGCTACTTTTTATACTCACGCTTTAATTGAGGCTAGCCACATCGCAATGGTTGTGTGGT

TGAATTTGCCAATCTATGGAAACAGAAATCAAGACTTGGCTTCAAATGA

>M6-PGSC0003DMG400003380M6LRR-RLP\_671



GTTGTGTGGTTGAATTTGCCAATCTATGGAAACAGAAATCAAGACTTGGCTTCAAATGAAGTCAGTTGTT  
TGCTTTCTGATTTTCATGGAAATGAAGATTAAGTCCATTCAGCCAGGCATC

>M6-PGSC0003DMG400003380M6LRR-RLP\_732

TCAGTTGTTTGCTTTCTGATTTTCATGGAAATGAAGATTAAGTCCATTCAGCCAGGCATCAGCCGCAACAA  
TATTTATATTGATGTCTTGAGGGCGTTGAAGTCAACCATACCACATGCTC

>M6-PGSC0003DMG400003380M6LRR-RLP\_793

CCGCAACAATATTTATATTGATGTCTTGAGGGCGTTGAAGTCAACCATACCACATGCTCAAGATAAGCAT  
GCAGCTGAGAGTGGTATTGTGGAGACTCCAACACACAATCTGATGGTTGG

>M6-PGSC0003DMG400003380M6LRR-RLP\_854

GATAAGCATGCAGCTGAGAGTGGTATTGTGGAGACTCCAACACACAATCTGATGGTTGGTTTGAGTGAT  
CAAATGGCAAACCTTCAGGAGATGCTCTGCCTTCTAAGAGACAATCTCATT

>M6-PGSC0003DMG400003380M6LRR-RLP\_915

TGAGTGATCAAATGGCAAACCTTCAGGAGATGCTCTGCCTTCTAAGAGACAATCTCATTTCATCTGCCAAT  
ACTAGATCTGGAATTTTCATCTACAAGATATGGATTCTGTTATTGTTGATG

>M6-PGSC0003DMG400003380M6LRR-RLP\_976

TCTGCCAATACTAGATCTGGAATTTTCATCTACAAGATATGGATTCTGTTATTGTTGATGCAGGACTTCTTA  
TTTATTCATTATATGATATCAAGGGGCAGAAGGAAGACACATCATTGGA

>M6-PGSC0003DMG400003406-(rev)M6RLKmalectin\_1054

ATATTATTAGCAAAGCTCTTAATGAACTCTATTTCAATGTGTATATCAATGACAAGATGGCTATTTCCGGG  
CTAGATTTGTCATCATTGACAAATCATTTGTCTACGGCTTTTTACAAGG

>M6-PGSC0003DMG400003406-(rev)M6RLKmalectin\_1116

ATTTCCGGGCTAGATTTGTCATCATTGACAAATCATTTGTCTACGGCTTTTTACAAGGATTTTGTGTGGA  
TTCCTCCATGGTGTCTAACCCCTCGTTGTACGTGTTTCTCCTGTGAAT

>M6-PGSC0003DMG400003406-(rev)M6RLKmalectin\_1178

TGTTGTGGATTCTCCATGGTGTCTAACCCCTCGTTGTACGTGTTTCTCCTGTGAATGATGCTCAAGGTT  
TTAGAAATGCGATTCTAAATGGCCTTGAGGTGTTTCAATGAATAACTC

>M6-PGSC0003DMG400003406-(rev)M6RLKmalectin\_124

TGATATGTTTCATTTTTCTATCACAAATTCATTTGTCATTGCTCAAGATGATGCTGTACCTGCAAATCAT  
TTCCTGTATTCACTCCAGAAGATAATTTCTCATTGATTGTGGTGCAA

>M6-PGSC0003DMG400003406-(rev)M6RLKmalectin\_1240

CTCAAGGTTTTAGAAATGCGATTCTAAATGGCCTTGAGGTGTTTCGAATGAATAACTCTGTTGGTAGCTT  
AGATGGGGAATATGGCGTTGATGGACAAAAACAAAGTGGTCCAAGTAAAA

>M6-PGSC0003DMG400003406-(rev)M6RLKmalectin\_1302

GGTAGCTTAGATGGGGAATATGGCGTTGATGGACAAAAACAAAGTGGTCCAAGTAAAACAGTGGCTTA  
TGTTGGATTCGCGATGATGTTTGGAGCGTTTGTGGGGTTGGGTGCGATGGCA

>M6-PGSC0003DMG400003406-(rev)M6RLKmalectin\_1364

GGCTTATGTTGGATTCGCGATGATGTTTGGAGCGTTTGTGGGGTGGGTGCGATGGCAGTTAAATGGCA  
GAAGAGACCTCAAGATTGGCAAAAGAGGAATAGTTTTTCGTCTTGTTACT

>M6-PGSC0003DMG400003406-(rev)M6RLKmalectin\_1426

AATGGCAGAAGAGACCTCAAGATTGGCAAAAGAGGAATAGTTTTTCGTCTTGTTACTTCCAGTTCATG  
CTGGTGATTCAACATTTATGTCATCATCTTCGCGAAGCAAGAGCCAATTTT

>M6-PGSC0003DMG400003406-(rev)M6RLKmalectin\_1488

GTTTCATGCTGGTGATTCAACATTTATGTCATCATCTTCGCGAAGCAAGAGCCAATTTTTCTCATCAAAAA  
CATGGGATTAGGTCAGTACTTTAGTTTTGCTGAATTGTCAGACGCCACG

>M6-PGSC0003DMG400003406-(rev)M6RLKmalectin\_1550

ATCAAAAAACATGGGATTAGGTCAGTACTTTAGTTTTGCTGAATTGTCAGACGCCACGAGGAACTGGGA  
ACCTAGTGAAATAATCGGCGTTGGTGGCTTTGGAAATGTATACTATGGAGA

>M6-PGSC0003DMG400003406-(rev)M6RLKmalectin\_1612

ACTGGGAACCTAGTGAAATAATCGGCGTTGGTGGCTTTGGAAATGTATACTATGGAGAACTTGATGATG  
GTACAAAAGTTGCTGTCAAGAGAGGAAATCCACAATCAGAACAAGGTATAA

>M6-PGSC0003DMG400003406-(rev)M6RLKmalectin\_1674

GATGATGGTACAAAAGTTGCTGTCAAGAGAGGAAATCCACAATCAGAACAAGGTATAAATGAATTCCA  
GACTGAAATTCAAATGTTATCTAAGTTAAGGCATCGACATTTAGTGTCGTTG

>M6-PGSC0003DMG400003406-(rev)M6RLKmalectin\_1736

ATTCCAGACTGAAATTCAAATGTTATCTAAGTTAAGGCATCGACATTTAGTGTCGTTGATTGGGTATTGT  
GATGAAAGTGCTGAGATGATATTGGTTTATGAGTTTATGCAAATGGTCC

>M6-PGSC0003DMG400003406-(rev)M6RLKmalectin\_1798

GGTATTGTGATGAAAGTGCTGAGATGATATTGGTTTATGAGTTTATGCAAATGGTCCATTGAGAGATC

ATCTCTATGGAAAGAACATGCCGCCTTTATCTTGGAAGCAACGATTAGATA

>M6-PGSC0003DMG400003406-(rev)M6RLKmalectin\_186

GCAAATCATTTCCTGTATTCCTCCAGAAGATAATTTCTCATTGATTGTGGTGCAACTTCATCGATCAC  
GCTTCCGGGGAATAAAGTTTTTCAACCTGATCAAATGCCGCTAAATAT

>M6-PGSC0003DMG400003406-(rev)M6RLKmalectin\_1860

AGAGATCATCTCTATGGAAAGAACATGCCGCCTTTATCTTGGAAGCAACGATTAGATATCTGTATTGGTG  
CTGCTCGTGGGCTTCATTACCTCCACACTGGTGCATCTACAGGGATCATA

>M6-PGSC0003DMG400003406-(rev)M6RLKmalectin\_1922

TATTGGTGCTGCTCGTGGGCTTCATTACCTCCACACTGGTGCATCTACAGGGATCATACATAGGGATGTC  
AAGACCACCAACATTTTGCTTGATGAGAATTTTGTGCGGAAGATGGCTGA

>M6-PGSC0003DMG400003406-(rev)M6RLKmalectin\_1984

GGGATGTCAAGACCACCAACATTTTGCTTGATGAGAATTTTGTGCGGAAGATGGCTGATTTTGGGCTATC  
TAAAGATGGACCAACAACAGAACAGACTCATGTGAGCACGGCTGTGAAGG

>M6-PGSC0003DMG400003406-(rev)M6RLKmalectin\_2046

GGGCTATCTAAAGATGGACCAACAACAGAACAGACTCATGTGAGCACGGCTGTGAAGGGAAGTTTTGG  
CTACTTAGATCCTGAATACTTTAGGAAGCAGCAGTTGACAGACAAATCTGAT

>M6-PGSC0003DMG400003406-(rev)M6RLKmalectin\_2108

TTTTGGCTACTTAGATCCTGAATACTTTAGGAAGCAGCAGTTGACAGACAAATCTGATGTCTACTCATTT  
GGGGTTGTACTTCTGAAGCCTTATGCGCCCGTCCTGCTATTAATCCATC

>M6-PGSC0003DMG400003406-(rev)M6RLKmalectin\_2170

ACTCATTTGGGGTTGTACTTCTGAAGCCTTATGCGCCCGTCCTGCTATTAATCCATCATTACCAAGAGAG  
CAAGTGAATTTGGCAGAATGGGCAATGCAGTGGAAAAGAAAAGGGTTAT

>M6-PGSC0003DMG400003406-(rev)M6RLKmalectin\_2232

CCAAGAGAGCAAGTGAATTTGGCAGAATGGGCAATGCAGTGGAAAAGAAAAGGGTTATTGGACAAGA  
TAATTGATCCAACACTTGTAGGACATATTGATCCAGAATCAATGAAGAAATTC

>M6-PGSC0003DMG400003406-(rev)M6RLKmalectin\_2294

CAAGATAATTGATCCAACACTTGTAGGACATATTGATCCAGAATCAATGAAGAAATTCGCGGAAGCAAC  
AGAGAAGTGTTTGGCTGAATATGGTGTGACAGACCTACTATGGGTGATGT

>M6-PGSC0003DMG400003406-(rev)M6RLKmalectin\_2356

AAGCAACAGAGAAGTGTTTGGCTGAATATGGTGTGACAGACCTACTATGGGTGATGTTTTATGGAATT  
TGGAGTACGCGTTGCATATGCAAGAAGCCTCGTTACAAGGAAAGACAGAAG

>M6-PGSC0003DMG400003406-(rev)M6RLKmalectin\_2418

TGGAATTTGGAGTACGCGTTGCATATGCAAGAAGCCTCGTTACAAGGAAAGACAGAAGATATCGATAAC  
AAAGCAATTGTTGCACCAATTTCTCCTGCTACAGTTGCCCATGCTAATGTC

>M6-PGSC0003DMG400003406-(rev)M6RLKmalectin\_248

ATCGATCACGCTTCCGGGGAATAAAGTTTTTCAACCTGATCAAAATGCCGCTAAATATCTTTCTTATAGTG  
GTAAAGATGTACAAGCCTGTGCTTCTGAGAAAATCAACGTTCCCTTCAAC

>M6-PGSC0003DMG400003406-(rev)M6RLKmalectin\_2480

CGATAACAAAGCAATTGTTGCACCAATTTCTCCTGCTACAGTTGCCCATGCTAATGTCACAACACTGATAAC  
AAACATATTTCTTACCAGAACAACATAAAAATCCTACTGAAGTTCAAGC

>M6-PGSC0003DMG400003406-(rev)M6RLKmalectin\_2542

CTGATAACAAACATATTTCTTACCAGAACAACATAAAAATCCTACTGAAGTTCAAGCCATAGATGACAA  
GTCAGTGGCTTTTGCTCAATTTGAGCCTATCAATGGACGATAAAAACGAAC

>M6-PGSC0003DMG400003406-(rev)M6RLKmalectin\_2604

GATGACAAGTCAGTGGCTTTTGCTCAATTTGAGCCTATCAATGGACGATAAAAACGAACACTCAGCTTGT  
CTATAGACAAATCAAGAATCTACAATTAAGGTTATGAAATACATGTGTG

>M6-PGSC0003DMG400003406-(rev)M6RLKmalectin\_2666

AGCTTGTCTATAGACAAATCAAGAATCTACAATTAAGGTTATGAAATACATGTGTGTGTATATGTATG  
TAGTAAAATTCAGCTTTTTATGGATGCCATTTTGCTGAAAAATGTAATTC

>M6-PGSC0003DMG400003406-(rev)M6RLKmalectin\_2710

GAAATACATGTGTGTGTATATGTATGTAGTAAAATTCAGCTTTTTATGGATGCCATTTTGCTGAAAAATG  
TAATTCAGAACAATGTAATGTTTCACATAATACTACTTTACTACATTG

>M6-PGSC0003DMG400003406-(rev)M6RLKmalectin\_310

CTTATAGTGGTAAAGATGTACAAGCCTGTGCTTCTGAGAAAATCAACGTTCCCTTCAACGTTATATGTAAA  
CGCCAAAGTCTTCACAACTGAAGCTATTTACACGTTTCATGCCAGTACTT

>M6-PGSC0003DMG400003406-(rev)M6RLKmalectin\_372

TATGTAAACGCCAAAGTCTTCACAACTGAAGCTATTTACACGTTTCATGCCAGTACTTCAGGGTTGCATT  
GGATCAGACTACATTTCTTTCCATTTAAATACGAAGAATATGATCTTAAA

>M6-PGSC0003DMG400003406-(rev)M6RLKmalectin\_434

GTTGCATTGGATCAGACTACATTTCTTTCCATTTAAATACGAAGAATATGATCTTAAACAGCTAAATTTT  
CTGTTAAACGGATAGTTTAGTCCTTCTACGTGATTTCCAAACTGGGAA

>M6-PGSC0003DMG400003406-(rev)M6RLKmalectin\_496

CTAAATTTTCTGTTAAACGGATAGTTTAGTCCTTCTACGTGATTTCCAAACTGGGAAAGATGAGGCTGT  
TGTC AAGGAGTTTGTGTTAATGTTACCTCAGAGCGTTTTGCTATAAAAT

>M6-PGSC0003DMG400003406-(rev)M6RLKmalectin\_558

GAGGCTGTTGTCAAGGAGTTTGTGTTAATGTTACCTCAGAGCGTTTTGCTATAAAATTCGAGCCAGCTC  
AAGGATCTGTTGCATTCGTTAATGCTATTGAGTTTGTACTGTACCTGCA

>M6-PGSC0003DMG400003406-(rev)M6RLKmalectin\_620

GCCAGCTCAAGGATCTGTTGCATTCGTTAATGCTATTGAGTTTGTACTGTACCTGCAAAAATGCTTGATT  
ATTCTGTTCCCTGTTTTATTCCCGTGTACAGAGATTTGATCTTTCTAA

>M6-PGSC0003DMG400003406-(rev)M6RLKmalectin\_682

TGCTTGATTATTCTGTTCTGTTTTATTCCCGTGTACAGAGATTTGATCTTTCTAAACTAATTTCCAGA  
CAATGTATAGGCTTAATGTTGGTGGTCCTGCTTTGGATTCAACAAACG

>M6-PGSC0003DMG400003406-(rev)M6RLKmalectin\_744

AATTTCCAGACAATGTATAGGCTTAATGTTGGTGGTCCTGCTTTGGATTCAACAAACGATACTCTTGAA  
GAAATTGGATGTCTGATAATCAATTTCGAAACAATGCTACAGGTGCAGAG

>M6-PGSC0003DMG400003406-(rev)M6RLKmalectin\_806

TCTTGGAAGAAATTGGATGTCTGATAATCAATTTCGAAACAATGCTACAGGTGCAGAGGTATCAACACA  
AGCCTCTGCTATTAATTATTTGATATCATCAGGAGTTCTCCGTTGATCGC

>M6-PGSC0003DMG400003406-(rev)M6RLKmalectin\_868

CAACACAAGCCTCTGCTATTAATTATTTGATATCATCAGGAGTTCTCCGTTGATCGCGCCACCAACAGTT  
TATAGTTCTGCTGTAAAGATGGCGGATTCAGAACTACAATTGCTAATT

>M6-PGSC0003DMG400003406-(rev)M6RLKmalectin\_930

CCAACAGTTTATAGTTCTGCTGTAAAGATGGCGGATTCAGAACTACAATTGCTAATTTTAACATATCAT  
GGACTATGGATATTGATACTATATATCCTCATTTGATTCGCTTACATTTT

>M6-PGSC0003DMG400003406-(rev)M6RLKmalectin\_992

CATATCATGGACTATGGATATTGATACTATATATCCTCATTTGATTCGCTTACATTTCTGCGATATTATTAG

CAAAGCTCTTAATGAACTCTATTTCAATGTGTATATCAATGACAAGAT

>M6-PGSC0003DMG400003429-(rev)M6LRR-RLK\_0

AAGCAACACGTCCACACTTCCAAACCACAAAAAATAATGTCTTCTAGTCATTTTCTTTTCATTCTT  
TTTCCTTTCTCTTCTAATTTCCGGGATCTTTTCGGACCTTAACGCGGAT

>M6-PGSC0003DMG400003429-(rev)M6LRR-RLK\_1054

TGGAGGATTTATTGATGGCGTCCGCGGAGGTTTTGGGGAAAGGGTAACTGGAACACTTATAAAGCAT  
ATTTAGATAGAGATGTTGAAGTTGTTGTGAAGAGGTTGAGAAATGTTTGTG

>M6-PGSC0003DMG400003429-(rev)M6LRR-RLK\_1116

AAAGCATATTTAGATAGAGATGTTGAAGTTGTTGTGAAGAGGTTGAGAAATGTTTGTGTTTCAGAAGAG  
GAGTTTAGGGGAAAAGTGGAGGAATTGGGAGGAATTAGTCATGGGAATTTG

>M6-PGSC0003DMG400003429-(rev)M6LRR-RLK\_1178

AGAAGAGGAGTTTAGGGGAAAAGTGGAGGAATTGGGAGGAATTAGTCATGGGAATTTGGTGCCTCTTA  
GAGCATATTATTATGGAAGAGATGAAAAGCTTCTTGTTTATGATTCTATGCC

>M6-PGSC0003DMG400003429-(rev)M6LRR-RLK\_124

CCGCTCTACTCCACCTGAGTGCGGCCTCAAAGGCCGCACTCTTGGGTGGAACACAACCAATTCAACCCC  
ATGTTTCATGGCAAGGTGTCAAATGTGATACTACAATCAACCGTGTAAATTG

>M6-PGSC0003DMG400003429-(rev)M6LRR-RLK\_1240

CTCTTAGAGCATATTATTATGGAAGAGATGAAAAGCTTCTTGTTTATGATTCTATGCCTACAAGTTTGTAT  
GCTATTTTGCATGGTAAGTATCTTATTTCTAATAAACTTTAGCTTTTGT

>M6-PGSC0003DMG400003429-(rev)M6LRR-RLK\_1302

AGTTTGTATGCTATTTTGCATGGTAAGTATCTTATTTCTAATAAACTTTAGCTTTTGTGTTTAAATAATA  
TATTTGCTACTTGCTTCTTTTTGGTAGTTCTAATTGGTTTGTCTC

>M6-PGSC0003DMG400003429-(rev)M6LRR-RLK\_1364

TTAATAATAATATTTGCTACTTGCTTCTTTTTGGTAGTTCTAATTGGTTTGTCTCTGGTTTTGGTTTGG  
GAGTCGATCAACCTAATTAATAATTCTTAGCTTAGATTAGATTAGCTTC

>M6-PGSC0003DMG400003429-(rev)M6LRR-RLK\_1426

TTTGGTTTGGGAGTCGATCAACCTAATTAATAATTCTTAGCTTAGATTAGATTAGCTTCTAGTTAATTGTTT  
TTTAGCTTTAGCTATGAAAAGTAAATTATGTGGAAGAGATGGTATGAA

>M6-PGSC0003DMG400003429-(rev)M6LRR-RLK\_1488

TAATTGTTTTTTAGCTTTAGCTATGAAAACGAAATTATGTGGAAGAGATGGTATGAAAACAGGGGAAA  
GGAAGAAGATCATTGGTAGTTCTCTTTACATTAGTTAATTGTCATCAGA

>M6-PGSC0003DMG400003429-(rev)M6LRR-RLK\_1736

TAAAGATAATTTTTGATGTTGTGTATACTGATGTTACATCACAATAATGAAGGACCCATGTAATATTAT  
TAGAGAGAGAGGGACGTACAACAAGAACTTTCTGTGTAGAGGGAAAGCC

>M6-PGSC0003DMG400003429-(rev)M6LRR-RLK\_1798

TAATATTATTAGAGAGAGAGGGACGTACAACAAGAACTTTCTGTGTAGAGGGAAAGCCTCCTTAATTAG  
TATTTAGTTGAATAGGCCTTCTATCAACTCACATTCTATTAATGTTATGA

>M6-PGSC0003DMG400003429-(rev)M6LRR-RLK\_186

TCAACCCCATGTTTCATGGCAAGGTGTCAAATGTGATACTACAATCAACCGTGTAAATTGACCTCCGTCTCC  
CCGGATATGGTCTATCCGGTGAGATGCCCTTAAATTCCATCGGAAACTTA

>M6-PGSC0003DMG400003429-(rev)M6LRR-RLK\_1860

TAATTAGTATTTAGTTGAATAGGCCTTCTATCAACTCACATTCTATTAATGTTATGAAAACGAACTATAG  
AATTTTACTAGTATTAATTATTTTCGTATTCTAACCAATTACTATTACTA

>M6-PGSC0003DMG400003429-(rev)M6LRR-RLK\_1922

GAACTATAGAATTTTACTAGTATTAATTATTTTCGTATTCTAACCAATTACTATTACTATGAGTTAGTTTTAA  
CCTTTCTGATTTTGTTAGGCGAAGGAAAAGAAGCATTGACATGGGTAA

>M6-PGSC0003DMG400003429-(rev)M6LRR-RLK\_1984

TTAGTTTTAACCTTTCTGATTTTGTTAGGCGAAGGAAAAGAAGCATTGACATGGGTAATAAGGAGCAGA  
ATTGCATTAGGAGTTGCCAATGGTATCGAATATCTCCATTCACTAGGCGCT

>M6-PGSC0003DMG400003429-(rev)M6LRR-RLK\_2046

GAGCAGAATTGCATTAGGAGTTGCCAATGGTATCGAATATCTCCATTCACTAGGCGCTAAAGTCACTCAT  
GGCAACATCAAGTCATCTAACATCCTCCTCACACTACTACGATGCATG

>M6-PGSC0003DMG400003429-(rev)M6LRR-RLK\_2108

TCACTCATGGCAACATCAAGTCATCTAACATCCTCCTCACACTACTACGATGCATGTCTATCTGAATTT  
GGCATAACACAGTTGATTTCTCAACATTGAACTCCAAAATGACCGGAT

>M6-PGSC0003DMG400003429-(rev)M6LRR-RLK\_2170

TCTGAATTTGGCATAACACAGTTGATTTCTCAACATTGAACTCCAAAATGACCGGATACTACGCGCCTG  
AGGTGACAGATATTCGAAATGTTTCCAGAAAGCTGATGTCTATAGCTTT

>M6-PGSC0003DMG400003429-(rev)M6LRR-RLK\_2232

CGCGCCTGAGGTGACAGATATTCGAAATGTTTCCAGAAAGCTGATGTCTATAGCTTTGGCACGATTCTG  
TTGGAACCTCCTAACGGGTAAAAATCCTAGTAGTGTCATCAATGACGAGGG

>M6-PGSC0003DMG400003429-(rev)M6LRR-RLK\_2294

CGATTCTGTTGGAACCTCCTAACGGGTAAAAATCCTAGTAGTGTCATCAATGACGAGGGAATTGACCTGC  
CTAAATGGGTGAAATGTATAGTTGAAGAGAGGGGGACAACACAAGTGTTTG

>M6-PGSC0003DMG400003429-(rev)M6LRR-RLK\_2356

GACCTGCCTAAATGGGTGAAATGTATAGTTGAAGAGAGGGGGACAACACAAGTGTTTGATCCTGAGTT  
GATTAGTTTTCAGAATTGTGATGAAGAGCAAATGGTTTCATTGCTGCATCTT

>M6-PGSC0003DMG400003429-(rev)M6LRR-RLK\_2418

TGAGTTGATTAGTTTTCAGAATTGTGATGAAGAGCAAATGGTTTCATTGCTGCATCTTGCTATTTCTTGTA  
CATCCCACCACCCCGAAAGGCGGCCCTATGGCTGACACTACCAGGAG

>M6-PGSC0003DMG400003429-(rev)M6LRR-RLK\_248

CCGTCTCCCCGGATATGGTCTATCCGGTGAGATGCCCTTAAATTCATCGGAAACTTAACTGAACTCCGT  
ACTCTCAGCCTTCGGAGTAACTCTTTATCCGGTCTTCTTCTTCTGACAT

>M6-PGSC0003DMG400003429-(rev)M6LRR-RLK\_2480

TTTCTTGATACATCCCACCACCCCGAAAGGCGGCCCTATGGCTGACACTACCAGGAGGATCAAAGAAA  
TTGTTATGTGAGTTTTGTTAATGTTTGATCTTTCCCCCTCATTCTTGTCCA

>M6-PGSC0003DMG400003429-(rev)M6LRR-RLK\_2542

AAAGAAATTGTTATGTGAGTTTTGTTAATGTTTGATCTTTCCCCCTCATTCTTGTCCAAATGAAGGTGAAA  
ATCATGGTTTTATTCTTTCTTGGTTCTACAAGAGGGGTGAATTCATAC

>M6-PGSC0003DMG400003429-(rev)M6LRR-RLK\_2604

AAGGTGAAAATCATGGTTTTATTCTTTCTTGGTTCTACAAGAGGGGTGAATTCATACCTTAAAAATTGG  
GCACATGAATATGTGATCTCTATAAACTAGATATTTTATGTATATAT

>M6-PGSC0003DMG400003429-(rev)M6LRR-RLK\_2637

TTCTACAAGAGGGGTGAATTCATACCTTAAAAATTGGGCACATGAATATGTGATCTCTCTATAAACTAG  
ATATTTTATGTATATATATTTTGAATTAATATAATATTATTTATTGCCTC

>M6-PGSC0003DMG400003429-(rev)M6LRR-RLK\_310

AACTCCGTA CTCTCAGCCTTCGGAGTAACTCTTTATCCGGTCTTCTTCTTCTGACATAGGATCATGTACA



GAGCTACGCATACTTAATTTGGAAAACAACGACTTCTCCGGTTCAATTC

>M6-PGSC0003DMG400003429-(rev)M6LRR-RLK\_372

TCATGTACAGAGCTACGCATACTTAATTTGGAAAACAACGACTTCTCCGGTTCAATTCACGACTTTTTT  
CAATCTGAACAATCTTATACGTGTGAGTTTTTCAGGGAACAGATTCTCC

>M6-PGSC0003DMG400003429-(rev)M6LRR-RLK\_434

GACTTTTTTCAATCTGAACAATCTTATACGTGTGAGTTTTTCAGGGAACAGATTCTCCGGTGAGATATCG  
GACGCATTTAACAATCTGACTAGGATGAGAACTCTGTATTTGGAGAATAA

>M6-PGSC0003DMG400003429-(rev)M6LRR-RLK\_496

AGATATCGGACGCATTTAACAATCTGACTAGGATGAGAACTCTGTATTTGGAGAATAACAACCTTCTCTGG  
CTCACTTCTGATTTGAAAAACCTCTCACAGCTTAATGAATTCAATGTGT

>M6-PGSC0003DMG400003429-(rev)M6LRR-RLK\_558

TTCTCTGGCTCACTTCTGATTTGAAAAACCTCTCACAGCTTAATGAATTCAATGTGTCTTTCAATAGATTA  
ACCGGTTTCGATCCCTTCAAGTTTAGGTCAATTCGTAGCTTCTTCATTT

>M6-PGSC0003DMG400003429-(rev)M6LRR-RLK\_62

TTCATTCCTTTTCTTTCTCTTCTAATTTCCGGGATCTTTTCGGACCTTAACGCGGATAGAGCCGCTCTACT  
CCACCTGAGTGCGGCCTTCAAAGGCCGCACTCTTGGGTGGAACACAAC

>M6-PGSC0003DMG400003429-(rev)M6LRR-RLK\_620

CAATAGATTAACCGTTTCGATCCCTTCAAGTTTAGGTCAATTCGTAGCTTCTTCATTTCTCGGAAATTCAC  
TCTGTGGCTCTGCTTTCTCTTAGTCCTTGTCTGAAAACAATAATAT

>M6-PGSC0003DMG400003429-(rev)M6LRR-RLK\_682

GAAATTCCTCTGTGGCTCTGCTTTCTCTTAGTCCTTGTCTGAAAACAATAATATCACCAATCAATCG  
GATAAACTTTCCGGTGGAGCAATAGCTGGAATAGTAATTGGCTCGATTA

>M6-PGSC0003DMG400003429-(rev)M6LRR-RLK\_744

AATCAATCGGATAAACTTTCCGGTGGAGCAATAGCTGGAATAGTAATTGGCTCGATTATCGGATTCTTCA  
TACTACTATTAGTTTTGTTTATGTTAGTGAGATCAATTTATAGGAGTAAA

>M6-PGSC0003DMG400003429-(rev)M6LRR-RLK\_806

ATTCTTCATACTACTATTAGTTTTGTTTATGTTAGTGAGATCAATTTATAGGAGTAAAAAAGTTTCCGTC  
AAGTGAACGTCTCTCCTACGCCAAATCAAGTACTTTCGAGTCCTCGTGA

>M6-PGSC0003DMG400003429-(rev)M6LRR-RLK\_868

GTTTCCGTCAAGTGAACGTCTCTCCTACGCCAAATCAAGTACTTTTCGAGTCCTCGTGATTCAATGGTGAC  
AGAAAATCATGATATCGAAAATGTGTATTCGGAGAGGAAAGATAGCAAGA

>M6-PGSC0003DMG400003429-(rev)M6LRR-RLK\_930

ATGGTGACAGAAAATCATGATATCGAAAATGTGTATTCGGAGAGGAAAGATAGCAAGAGGAAAGTTTG  
TGATGATAGGACAAAAGGGATGGTGTTTTTTGGGGAAAGTTTTGAGCTTTTT

>M6-PGSC0003DMG400003429-(rev)M6LRR-RLK\_992

AGTTTGTGATGATAGGACAAAAGGGATGGTGTTTTTTGGGGAAAGTTTTGAGCTTTTTAGTTTGGAGGA  
TTTATTGATGGCGTCCGCGGAGGTTTTGGGGAAAGGGTAACTGGAECTAC

>M6-PGSC0003DMG400003543M6LRR-RLP\_0

CTTTCTTTGTTTGTCCCTTCTTCGGACACTCAGAATATATGCTCACGCATCCATTTAAAAACCAATCTTGA  
AGGCTCTTCTTTCATCAATTCTCATTACGATTAACAAAATAATAT

>M6-PGSC0003DMG400003543M6LRR-RLP\_1008

TCAGGAACCCGGGATCTCGTTTCAGAATAGTCAGCTTATTGCAGCAGACTTAAGCAACAATGAGATCCG  
TGGGTTATTACCCGGGTTCTGGGTTTAATGCCAGATTATCATCACTTTC

>M6-PGSC0003DMG400003543M6LRR-RLP\_1071

GATCCGTGGGTTATTACCCGGGTTCTGGGTTTAATGCCAGATTATCATCACTTTCCTAGAGAACAAC  
AAGTTATCGGGTATGATACCGACCCAATATGCATTGAAAATGGTGTTTCC

>M6-PGSC0003DMG400003543M6LRR-RLP\_1134

GAACAACAAGTTATCGGGTATGATACCGACCCAATATGCATTGAAAATGGTGTTTCCGGGTGAAGGGGT  
GTCTCAATTTGAGAGGCTACTGTTAGGAGGAACTATCTATTCGGACCCAT

>M6-PGSC0003DMG400003543M6LRR-RLP\_1197

AGGGGTGTCTCAATTTGAGAGGCTACTGTTAGGAGGAACTATCTATTCGGACCCATACCGGGTCCATT  
GTTGGATCTGAAAGCGGGTTCAGTCACAGTGAGATTAGGAGACAACACTGTTT

>M6-PGSC0003DMG400003543M6LRR-RLP\_126

ACATAAAAAAATCCAGAAAATGGGTTGTTTTCAATTTCTACTGTTCTGTTCTTTATAGTTCTCTGTGCTCT  
GTTCTTGCATGCGCATTCACTACTCACTGGCAAGACATTGAAGTCTT

>M6-PGSC0003DMG400003543M6LRR-RLP\_1260

TCCATTGTTGGATCTGAAAGCGGGTTCAGTCACAGTGAGATTAGGAGACAACACTGTTTGTACCGGTGCC  
GTTGAGATTATTTTTATGTGAAGGTGGGGAACAGAAAATCATTATCGGAGTG

>M6-PGSC0003DMG400003543M6LRR-RLP\_1323

GTGCCCGTTGAGATTATTTTTATGTGAAGGTGGGGAACAGAAATCATTATCGGAGTGTCAGGCTTTGG  
TCCCATCATTCTTGAGTAATGTGATAATGTCTTTACTTTGAGGTCCTCAT

>M6-PGSC0003DMG400003543M6LRR-RLP\_1386

TTTTGGTCCCATCATTCTTGAGTAATGTGATAATGTCTTTACTTTGAGGTCCTCATTTTCATTTTGTACTA  
GTAATTATTGTGTTGTTTCAATTTTATCTGAAGGGACTAGTAAGTATT

>M6-PGSC0003DMG400003543M6LRR-RLP\_1449

TTTGTACTAGTAATTATTGTGTTGTTTCAATTTTATCTGAAGGGACTAGTAAGTATTGTATAAATATATAT  
TTTTCTGCAACCTTACCCCATGTATGGGGTTTTAGATATGATCTAGA

>M6-PGSC0003DMG400003543M6LRR-RLP\_1512

ATATATATTTTTCTGCAACCTTACCCCATGTATGGGGTTTTAGATATGATCTAGATGGATCTATGGTAG  
AGTTGTTATTGTTGTGAAGAGTGAGACAGAAATATAAGATTTCTGACTT

>M6-PGSC0003DMG400003543M6LRR-RLP\_1564

CTAGATGGATCTATGGTAGAGTTGTTATTGTTGTGAAGAGTGAGACAGAAATATAAGATTTCTGACTTA  
ATGTGTTGAAGTAGTAATTGTGGGACAGTTGAGGAAATTTTATTAGCGGAT

>M6-PGSC0003DMG400003543M6LRR-RLP\_189

CTGTGCTCTGTTCTTGCATGCGCATTCAACTACTCACTGGCAAGACATTGAAGTCTTGAAGCAGCTGAAA  
AATAGCGTCGACCCCAATTCAGTGTCACCTGGCTCATGCCTGAATTCATG

>M6-PGSC0003DMG400003543M6LRR-RLP\_252

GCTGAAAAATAGCGTCGACCCCAATTCAGTGTCACCTGGCTCATGCCTGAATTCATGGGATTTCTCTGTA  
GACCCTTGTGATAATCTCGGGGGTGAAAAATTCACTTGTGGTCTCCGTTG

>M6-PGSC0003DMG400003543M6LRR-RLP\_315

CTCTGTAGACCCTTGTGATAATCTCGGGGGTGAAAAATTCACTTGTGGTCTCCGTTGCGACCTTGTGCTT  
TCCTCTGTTAGCCGAGTCACTGAACTCGCTCTAGACCAGTGAATTACTC

>M6-PGSC0003DMG400003543M6LRR-RLP\_378

TGTCGTTTCTCTGTTAGCCGAGTCACTGAACTCGCTCTAGACCAGTGAATTACTCCGGTTCAATCACTT  
CCGTCTCTTGAATTTGCCTTATCTCCAAAACCTTAGACATCACTAATAA

>M6-PGSC0003DMG400003543M6LRR-RLP\_441

AATCACTTCCGTCTCTTGAATTTGCCTTATCTCCAAAACCTTAGACATCACTAATAATGCCTTCTCCGTTT

AGTACCTGAGTCACTCTCGAATCTAACTCGGGTTCAACGAGTCGGTTT

>M6-PGSC0003DMG400003543M6LRR-RLP\_504

CTCCGGTTTAGTACCTGAGTCACTCTCGAATCTAACTCGGGTTCAACGAGTCGGTTTATCAGGTAACCTCG

CTATCCGGGTCAATTCCGAGTTCACTGGGTTCACCTTCAAACCTTGAAGA

>M6-PGSC0003DMG400003543M6LRR-RLP\_567

TAACTCGCTATCCGGGTCAATTCCGAGTTCACTGGGTTCACCTTCAAACCTTGAAGAGCTTTACCTTGACA

ATAATTTCTTGAGGGAGAAATCCCAAAGTTTCAACGGTCTCAAGAA

>M6-PGSC0003DMG400003543M6LRR-RLP\_63

CAATCTGAAGGCTCTTCTTCTCATCAATTCTATTACGATTAACAAAATAATATAACCACACATAAAA

AAATCCAGAAAATGGGTGTTTTTCAATTTCTACTGTTCTGTTCTTTAT

>M6-PGSC0003DMG400003543M6LRR-RLP\_630

CCTTGACAATAATTTCTTGAGGGAGAAATCCCAAAGTTTCAACGGTCTCAAGAATTTGAAACGGCTC

GAATTTCAAGGCAATCAGATTACTGGCGAGTTTCCCGAGTTGGATCAGTT

>M6-PGSC0003DMG400003543M6LRR-RLP\_693

ACGGCTCGAATTTCAAGGCAATCAGATTACTGGCGAGTTTCCCGAGTTGGATCAGTTAATTAATTTGAAT

TTCATCGATGCTAGTGATAATGCCATCTCCGGCGAACTCCCGGCGAGTTA

>M6-PGSC0003DMG400003543M6LRR-RLP\_756

TTTGAATTTTCATCGATGCTAGTGATAATGCCATCTCCGGCGAACTCCCGGCGAGTTATCCGGCTTCTCTTA

TCGAGCTTACGATGAGAAACAACAGCATAGAAGGTAACATTCCGGCGAG

>M6-PGSC0003DMG400003543M6LRR-RLP\_819

TTCTTTATCGAGCTTACGATGAGAAACAACAGCATAGAAGGTAACATTCCGGCGAGCCTCATCGGACT

GAATTTTCGTACAAGTTATCGATCTGAGTCACAACAACTCAGTGGGTTCAGT

>M6-PGSC0003DMG400003543M6LRR-RLP\_882

CGGACTGAATTTTCGTACAAGTTATCGATCTGAGTCACAACAACTCAGTGGGTTCAGTGCCAGCGAGTCT

CTTCACTACCCATCCCTCGAACAGCTCACCTATCATAACAATCAATTCGG

>M6-PGSC0003DMG400003543M6LRR-RLP\_945

GAGTCTTCACTACCCATCCCTCGAACAGCTCACCTATCATAACAATCAATTCGGGTTCAGTTCAGGAAC

CCGGGATCTCGTTTCAGAATAGTCAGCTTATTGCAGCAGACTTAAGCAA

>M6-PGSC0003DMG400003544M6LRR-RLP\_0

CAAATATGGGAATTTTGGGTAGGAAAAATCTTTCTTGTCATCTTATTTTACATATTTTTTCTGTTTTG  
TTCCAAGGCCATTAGAATGTTGTCATTTGGTTGATAAAACATCTTTGT

>M6-PGSC0003DMG400003544M6LRR-RLP\_1008

CCAATAATCTATTTACAGGGAAAATCCCATCAAGTTTTGGTAATCTAAGGAATCTACAGATACTAGATT  
ATCGAAAAATAAGCTCAGTGGTGAAATACCTCATCAGCTTGTGAAGTTAG

>M6-PGSC0003DMG400003544M6LRR-RLP\_1071

TAGATTTATCGAAAAATAAGCTCAGTGGTGAAATACCTCATCAGCTTGTGAAGTTAGTGAGTTTACAGAC  
ATTGGATCTGTCATTTAATCCTTTGGGGCTTTCAAGAATACCAAACCTGGT

>M6-PGSC0003DMG400003544M6LRR-RLP\_1134

TACAGACATTGGATCTGTCATTTAATCCTTTGGGGCTTTCAAGAATACCAAACCTGGTTCAAGAACTAAG  
ACTGTTTCGTCTCCTTTTGGCGAAGACTGGGATCAGAGGGAACCTCCCAA

>M6-PGSC0003DMG400003544M6LRR-RLP\_1197

AACTAAGACTGTTTCGTCTCCTTTTGGCGAAGACTGGGATCAGAGGGAACCTCCCAAGTTGGTTGGCTTC  
ATCGTCATTATCAACACTTGATTTATCAAACAATGGTTTGACAGGAAAAT

>M6-PGSC0003DMG400003544M6LRR-RLP\_126

TTAAGCAAAAAGTCACTTCTGATCCTTCAAACCTTATTGCAAACATGGACTTTCAACTGATTGTTGCAAA  
TCTTGGGAAGGTATTGCTTGTAATCCAATGGAAGGGTTGTTAACGTCT

>M6-PGSC0003DMG400003544M6LRR-RLP\_1260

TGGCTTCATCGTCATTATCAACACTTGATTTATCAAACAATGGTTTGACAGGAAAATTACCTACATGGATT  
GTTAACATGACCAACCTTTCACTCTTGAATTTATCAAACAACGCCTTGT

>M6-PGSC0003DMG400003544M6LRR-RLP\_1323

CATGGATTGTTAACATGACCAACCTTTCACTCTTGAATTTATCAAACAACGCCTTGTATTATCAATCCCT  
GATGAGTTCAAGAACCTGACACTTTTGATGGATCTTGATCTTCACTCAA

>M6-PGSC0003DMG400003544M6LRR-RLP\_1386

CAATCCCTGATGAGTTCAAGAACCTGACACTTTTGATGGATCTTGATCTTCACTCAAACAGATTTTCAGGC  
AACTTGAGAGCAATTTTCTCAAAGAATTTTCAAGACCCCTTGGTCACT

>M6-PGSC0003DMG400003544M6LRR-RLP\_1449

TTTCAGGCAACTTGAGAGCAATTTTCTCAAAGAATTTTCAAGACCCCTTGGTCACTACAATTCTATTGAT  
CTTGATACAACATGTTCACTGGACCATTAGACGAAAACACCGGAAATG

>M6-PGSC0003DMG400003544M6LRR-RLP\_1512

CTATTGATCTTGATACAACATGTTCACTGGACCATTAGACGAAAACACCGGAAATGAACCTGTCATGGA  
TTCTATTTTGTCACTAAGTTTGTCCCACAATCCATTGACAGGACACATAC

>M6-PGSC0003DMG400003544M6LRR-RLP\_1575

TCATGGATTCTATTTTGTCACTAAGTTTGTCCCACAATCCATTGACAGGACACATACCAAATCACTGGGA  
AACTTGACAAGCTTGACAGGTAATTAAGTAGCCGAAAATGGGCTAACAG

>M6-PGSC0003DMG400003544M6LRR-RLP\_1638

CACTGGGAAACTTGACAAGCTTGACAGGTAATTAAGTAGCCGAAAATGGGCTAACAGGTGGAATCCAA  
CAGAAGCTGGGAATGCCAAGGAACTGAAAACAATTTTACTTTCAAATAATA

>M6-PGSC0003DMG400003544M6LRR-RLP\_1701

TTCCAACAGAAGCTGGGAATGCCAAGGAACTGAAAACAATTTTACTTTCAAATAATAATTTGGAAGGTGC  
AATACCAGCACAAAGTTCTGAATTTGAAAGACCTTCAAGAATTTGATGTAT

>M6-PGSC0003DMG400003544M6LRR-RLP\_1764

AAGGTGCAATACCAGCACAAAGTTCTGAATTTGAAAGACCTTCAAGAATTTGATGTATCGGGAAATCGAC  
TAAGCGGTAGTATCCCTCCTCATAAAGCTAATATCCCAAAGTCTGCATTTT

>M6-PGSC0003DMG400003544M6LRR-RLP\_1827

ATCGACTAAGCGGTAGTATCCCTCCTCATAAAGCTAATATCCCAAAGTCTGCATTTTGGGAAATTATGG  
CTTGTGTGGAGCTCCACTTCCTCCTTGTAAAGCACACATAGTGGAAACCTT

>M6-PGSC0003DMG400003544M6LRR-RLP\_189

GTTGCAAATCTTGGGAAGGTATTGCTTGTAAATCCAATGGAAGGGTTGTTAACGTCTCTCGCCCCGGCCT  
TTCTTCAGGGGACGATTTCAATTATCGATACCTCAATATCTGGAAGCTCTT

>M6-PGSC0003DMG400003544M6LRR-RLP\_1890

ATTATGGCTTGTGTGGAGCTCCACTTCCTCCTTGTAAAGCACACATAGTGGAAACCTTCAAACACAATATT  
CCCTTTTCTTTATTTATTTTTCATTTTCGACATGATTGTTTCGTCATAAT

>M6-PGSC0003DMG400003544M6LRR-RLP\_1953

CAATATTTCCCTTTTCTTTATTTATTTTTCATTTTCGACATGATTGTTTCGTCATAATGTATTGTATTTCAAGT  
GTAATCACTCAAATGTTATTAGTAGATACTGAACAAAGTTGATTTTT

>M6-PGSC0003DMG400003544M6LRR-RLP\_2002

GTCATAATGTATTGTATTTCAAGTTGTAATCACTCAAATGTTATTAGTAGATACTGAACAAAGTTGATTTTT

CAAAAGCAACCTTGCCGAATTCTACATCAATATCCTCAATGGTTTAAAC

>M6-PGSC0003DMG400003544M6LRR-RLP\_252

CCGGCCTTTCTTCAGGGGACGATTCATTATCGATACCTCAATATCTGGAACCTTTCTCCTTCTCTTGCTA  
ATCTTTCTTTTCTTGAATTGCTTGATCTTAGTAATCTTAAGGACTTAA

>M6-PGSC0003DMG400003544M6LRR-RLP\_315

CTCTTGCTAATCTTTCTTTTCTTGAATTGCTTGATCTTAGTAATCTTAAGGACTTAACAGGGCCAATTCCAC  
CTGAATTTGGCAAGTTATCGCGCTTGAGTTACCTCTTTCTTGATACTA

>M6-PGSC0003DMG400003544M6LRR-RLP\_378

CAATTCCACCTGAATTTGGCAAGTTATCGCGCTTGAGTTACCTCTTTCTTGATACTAATAAGCTCTCAGGA  
TCTATACCTGTCACATTTAAATATCTATACCAACTTAAGAAGCTTTATC

>M6-PGSC0003DMG400003544M6LRR-RLP\_441

TCTCAGGATCTATACCTGTCACATTTAAATATCTATACCAACTTAAGAAGCTTTATCTCAGTGATAAATACT  
CTATCTGGTACTATCCCTTGGAGTATTTTCGAAAGCTTCCTTTCACTCT

>M6-PGSC0003DMG400003544M6LRR-RLP\_504

ATAATACTCTATCTGGTACTATCCCTTGGAGTATTTTCGAAAGCTTCCTTTCACTCTCAGAACTTGTTTTAT  
CAGCAAATCAACTTTCAGGTCCAATACCATCTTCAATTGGGAATTTAG

>M6-PGSC0003DMG400003544M6LRR-RLP\_567

TTGGTTTATCAGCAAATCAACTTTCAGGTCCAATACCATCTTCAATTGGGAATTTAGTATCATTGACCAAG  
CTTGATATGAGTCGAAATAAGTTCTTTGGAAGCATTCCAGAGAGTATAG

>M6-PGSC0003DMG400003544M6LRR-RLP\_63

CTGTTTTTGTCCAAGGCCATTAGAATGTTGTCATTTGGTTGATAAAACATCTTTGTTAGACTTTAAGCAA  
AAAGTCACTTCTGATCCTTCAAACCTATTGCAAACATGGACACTTTCAA

>M6-PGSC0003DMG400003544M6LRR-RLP\_630

TGACCAAGCTTGATATGAGTCGAAATAAGTTCTTTGGAAGCATTCCAGAGAGTATAGGAAGATTAATAAAA  
ATCTTGATATGTTGATTTGTCTGAGAATCAGTTATCTGGAAAGATTCCAA

>M6-PGSC0003DMG400003544M6LRR-RLP\_693

TAAAAAATCTTGCATATGTTGATTTGTCTGAGAATCAGTTATCTGGAAAGATTCCAAACTCTATTGGAAA  
CCTTTCCAAGTATCTCTAATGTATCTGAACCAAACCAATTGAGAGGAA

>M6-PGSC0003DMG400003544M6LRR-RLP\_756

TTGGAAACCTTTCCCAAGTATCTCTAATGTATCTGAACCAAACCAATTGAGAGGAAAAATTCCTTCATCA  
ATATCTGGTCTTAGCTCATTGGTGTCTGCCGTTTATCCGAAAACCAGC

>M6-PGSC0003DMG400003544M6LRR-RLP\_819

CTTCATCAATATCTGGTCTTAGCTCATTGGTGTCTGCCGTTTATCCGAAAACCAGCTGAGTGGCAGTATT  
CCACCTTCTATTGGCAATCTTCAAAGATCGAAAGGCTGATATTTGAGA

>M6-PGSC0003DMG400003544M6LRR-RLP\_882

GCAGTATCCACCTTCTATTGGCAATCTTCAAAGATCGAAAGGCTGATATTTGAGAACAACAAGTTAAG  
TGAAAACTGCCTGCAACACTTGGACATCTTGAACTCTCACTGATATGT

>M6-PGSC0003DMG400003544M6LRR-RLP\_945

AGTTAAGTGGAAAACCTGCCTGCAACACTTGGACATCTTGAACTCTCACTGATATGTACTTTTCCAATAAT  
CTATTTACAGGGAAAATCCCATCAAGTTTTGGTAATCTAAGGAATCTAC

>M6-PGSC0003DMG400003551M6LRR-RLK\_0

GTTAAAAAGTGCTGGCCCTTGTTTTGAAAAGTGTTCAATTTGCACATTCTCCACTTCTCCCTCACTCTTCTT  
CTCTGTGCTACTCTGTGCCTCTGTGCAAAGTGAGGGGGCGTCTGCCAT

>M6-PGSC0003DMG400003551M6LRR-RLK\_1054

GTTCTGCAATGTTTCCATTTATCCTCCCTCACTTAGGATTGTTTCAGTTGGGTTTCAATGCATTCACGAATAT  
TGTC AAGCAAGAGTCTTCTAAATGTTTTAGTTCTTTGCAAATTTTGGA

>M6-PGSC0003DMG400003551M6LRR-RLK\_1116

TCACGAATATTGTCAAGCAAGAGTCTTCTAAATGTTTTAGTTCTTTGCAAATTTGGATCTTCAACACAAC  
CAAATACATGGTGAATTTCTTTGATTTTGACGAACATTTCTGCATTGA

>M6-PGSC0003DMG400003551M6LRR-RLK\_1178

CAACACAACCAAATACATGGTGAATTTCTTTGATTTTGACGAACATTTCTGCATTGACGTCGCTGGATGT  
GTCATGGAATTTGTTCTCTGGAAAAATCCCAAGTGCCATTGGGAACTTG

>M6-PGSC0003DMG400003551M6LRR-RLK\_124

ATTAACACTCATTTTCTCCCTTTATCATGCACCCATTTTAACTTCACTATAAACCAAGCCAACCTCTTTT  
CTTATGTTCTTGATTTCTTCTTTTTCATGGCTGCTTATCTACTTCT

>M6-PGSC0003DMG400003551M6LRR-RLK\_1240

GCTGGATGTGTCATGGAATTTGTTCTCTGGAAAAATCCCAAGTGCCATTGGGAACTTGTGGAGATTGGA  
GGAAGTGAAGTGAACAATAACTCATTTGAAGGTGCTCTTCCGTTTGAGAT



>M6-PGSC0003DMG400003551M6LRR-RLK\_1302

GATTGGAGGAACTGAGAATGACAAATAACTCATTGAAGGTGCTCTCCGTTTGAGATTACGAACTGCA  
GTGACTTGAAAGTTCTTGATCTTGAAGGGAATCGAATGACGGGTGACATTC

>M6-PGSC0003DMG400003551M6LRR-RLK\_1364

AACTGCAGTGACTTGAAAGTTCTTGATCTTGAAGGGAATCGAATGACGGGTGACATTCCAATGTTTTAG  
GTGATCTTAGAAGCTTGAAGACATTGTCCTGGGAAGAAATCAGTTTTCG

>M6-PGSC0003DMG400003551M6LRR-RLK\_1426

GTTTTAGGTGATCTTAGAAGCTTGAAGACATTGTCCTGGGAAGAAATCAGTTTTCGGGTCCATTCT  
TCTAGTTTTAGAAATTTGAGTAATCTCGAAAATCTCAACTGGGAGGAAA

>M6-PGSC0003DMG400003551M6LRR-RLK\_1488

CCATTCTTAGTTTTAGAAATTTGAGTAATCTCGAAAATCTCAACTGGGAGGAAATGGTCTCAATGG  
AAGCTTGCCCGAGGAGGTAATGGGTTTGAGCAATTTAAGCACACTGAATC

>M6-PGSC0003DMG400003551M6LRR-RLK\_1550

CTCAATGGAAGCTTGCCCGAGGAGGTAATGGGTTTGAGCAATTTAAGCACACTGAATCTCAGTGGAAAC  
AAGTTTTCTGGCAGTATGCCAGTTGATATTGGGAATCTTCAGCAGCTCTCG

>M6-PGSC0003DMG400003551M6LRR-RLK\_1612

TGGAAACAAGTTTTCTGGCAGTATGCCAGTTGATATTGGGAATCTTCAGCAGCTCTCGGTTCTGAATCTG  
AGTAAAAATGGCTTTTCAGGCACTATTCCTTCTAGCATTGGGACTTTGTA

>M6-PGSC0003DMG400003551M6LRR-RLK\_1674

TGAATCTGAGTAAAAATGGCTTTTCAGGCACTATTCCTTCTAGCATTGGGACTTTGTATAAGCTAACGGT  
TGTTGATTTGAGCGGACAGAATTTCTCAGGTGAAATACCATTTGATCTTG

>M6-PGSC0003DMG400003551M6LRR-RLK\_1736

CTAACGGTTGTTGATTTGAGCGGACAGAATTTCTCAGGTGAAATACCATTTGATCTTGCTGGTTTGCCTA  
ATCTACAGGTTATAGCTTTGCAAGAAAACAAGTTGTCTGGTAATGTTCT

>M6-PGSC0003DMG400003551M6LRR-RLK\_1798

TTTGCCTAATCTACAGGTTATAGCTTTGCAAGAAAACAAGTTGTCTGGTAATGTTCTGAAGGTTTCAGT  
AGCTTATTAGGCATGCAATATTTGAATCTTTCTCCAATTCCTTTCTGG

>M6-PGSC0003DMG400003551M6LRR-RLK\_186

AACTCCTTTTTCTTATGTTCTTGATTTCTTCTTTTCATGGCTGCTTATCTACTTCTGTTTCTGTTTTCTCT

CTACATTATGCTCTGCTCAGAGAACTCACAAACCCTTTTGGGAAG

>M6-PGSC0003DMG400003551M6LRR-RLK\_1860

GTTTCAGTAGCTTATTAGGCATGCAATATTTGAATCTTTCTTCCAATTCCTTTTCTGGCCATATACCATCTA  
CATTTGGGTTCTTGACCTCATTAGTTGTACTTTCTTTGTCTAACAACC

>M6-PGSC0003DMG400003551M6LRR-RLK\_1922

ATACCATCTACATTTGGGTTCTTGACCTCATTAGTTGTACTTTCTTTGTCTAACAACCACATAAATGGTTCG  
ATTCTCCCGACTTGGGCAACTGCTCTGCTCTGGAGAATTTGAATCTT

>M6-PGSC0003DMG400003551M6LRR-RLK\_1984

AAATGGTTTCGATTCCTCCCGACTTGGGCAACTGCTCTGCTCTGGAGAATTTGAATCTTCACTCAAATTCAT  
TGAGTGGCCAAATACCTGCTGATCTCGGGCGTCTTTCCCACTTGAGTGT

>M6-PGSC0003DMG400003551M6LRR-RLK\_2046

CAAATTCATTGAGTGGCCAAATACCTGCTGATCTCGGGCGTCTTTCCCACTTGAGTGTGCTAGATTTGGG  
TAGAAACAACCTTAACAGGTGAAGTCCCAGTGGATATTTCCAATTGTTTCAT

>M6-PGSC0003DMG400003551M6LRR-RLK\_2108

GATTTGGGTAGAAACAACCTTAACAGGTGAAGTCCCAGTGGATATTTCCAATTGTTTCATCCTTGACATCAC  
TCGTA CTGACTTGAACCATCTTT CAGGGAACATAACCAGAGTCACTATCC

>M6-PGSC0003DMG400003551M6LRR-RLK\_2170

GACATCACTCGTACTCGACTTGAACCATCTTTCAGGGAACATAACCAGAGTCACTATCCAGGTTATCAAAC  
CTAACTGTCCTTGACCTCTCTACTAACAACCTTCACTGGAGAAATCCCAGC

>M6-PGSC0003DMG400003551M6LRR-RLK\_2232

TATCAAACCTAACTGTCCTTGACCTCTCTACTAACAACCTTCACTGGAGAAATCCCAGCTAATCTTACCATG  
CTCTCTAGCTTGGTGAGTTTCAATGTGTCAAACAATAATTTGGGCGGCC

>M6-PGSC0003DMG400003551M6LRR-RLK\_2294

CTTACCATGCTCTCTAGCTTGGTGAGTTTCAATGTGTCAAACAATAATTTGGGCGGCCAGATTCCGGAGA  
TGTTGGGCTCCCGTTTTAATAACTCATTGGATTATGCTGGCAACCAAGGT

>M6-PGSC0003DMG400003551M6LRR-RLK\_2356

TCCGGAGATGTTGGGCTCCCGTTTTAATAACTCATTGGATTATGCTGGCAACCAAGGTTTGTGTGGGGA  
GCCATTGGAAAGAAGATGTGAGACATCTGGTGATGGTGGGAATAAATTGAT

>M6-PGSC0003DMG400003551M6LRR-RLK\_2418

GTGGGGAGCCATTGGAAAGAAGATGTGAGACATCTGGTGATGGTGGGAATAAATTGATTATGTTTCATT  
GCTGTGGCTGCCAGTGGAGCTCTTCTCCTTTTATCATGCTGCTGCTTATATA

>M6-PGSC0003DMG400003551M6LRR-RLK\_248

CTTGTTTTCTCTCTACATTATGCTCTGCTCAGAGAACTCACAAACCCTTTTGGAAAGTTCAAGCGCTTACT  
TCTTTTAACTTAGTATTCATGATCCACTCGGTGCACTCACTGACTGG

>M6-PGSC0003DMG400003551M6LRR-RLK\_2480

TTCATTGCTGTGGCTGCCAGTGGAGCTCTTCTCCTTTTATCATGCTGCTGCTTATATACTTACAACCTTCTTG  
AGGTGGCGCAGGAAGCTCAAAGAGAAAGCAGCTGGAGAAAAGAAGCAT

>M6-PGSC0003DMG400003551M6LRR-RLK\_2542

CAACTTCTTGAGGTGGCGCAGGAAGCTCAAAGAGAAAGCAGCTGGAGAAAAGAAGCATAGTCCTGCAA  
GGGCTAGTTCAAGGACCAGTGGTGGTCGTGGCAGTGGTGAGAATGGTGGACC

>M6-PGSC0003DMG400003551M6LRR-RLK\_2604

CTGCAAGGGCTAGTTCAAGGACCAGTGGTGGTCGTGGCAGTGGTGAGAATGGTGGACCCAACTTGTT  
ATGTTCAATAACAAAATCACACTCGCTGAAACAATTGAAGCAACTAGAGAAT

>M6-PGSC0003DMG400003551M6LRR-RLK\_2666

CTTGTTATGTTCAATAACAAAATCACACTCGCTGAAACAATTGAAGCAACTAGAGAATTTGACGAGGAAC  
ATGTGCTAAGCAGAACACATTATGGGGTGGTCTACAAGGCCTGTTACAAT

>M6-PGSC0003DMG400003551M6LRR-RLK\_2728

CGAGGAACATGTGCTAAGCAGAACACATTATGGGGTGGTCTACAAGGCCTGTTACAATGATGGAATGG  
TGCTCTCAATTCGTAGACTTTCAAATGGAACACTAGGTGAGAACATGTTTCAG

>M6-PGSC0003DMG400003551M6LRR-RLK\_2790

GAATGGTGCTCTCAATTCGTAGACTTTCAAATGGAACACTAGGTGAGAACATGTTTCAGAAAAGAGGCAG  
AATCACTTGGCAGGGTGAACACAGGAACCTAACAGTTCTGCGTGGGTACT

>M6-PGSC0003DMG400003551M6LRR-RLK\_2852

GAGGCAGAATCACTTGGCAGGGTGAACACAGGAACCTAACAGTTCTGCGTGGGTACTATGCTGGCCC  
GCCTAACCTCAGACTACTTGTCCATGATTACATGCCTAACGGGAACCTTGCA

>M6-PGSC0003DMG400003551M6LRR-RLK\_2914

TGCCCCGCTAACCTCAGACTACTTGTCCATGATTACATGCCTAACGGGAACCTTGCAACACTGCTCCAA  
GAAGCATCCCACCAAGATGGTCATGTCCTCAACTGGCCAATGCGCCACCT

>M6-PGSC0003DMG400003551M6LRR-RLK\_2976

TGCTCCAAGAAGCATCCCACCAAGATGGTCATGTCCTCAACTGGCCAATGCGCCACCTCATTGCACTTGG  
CATTGCTCGTGGCCTGGCTTTCCTTCACTCATCCTCAATGGTCCACGGAG

>M6-PGSC0003DMG400003551M6LRR-RLK\_3038

GCACTTGGCATTGCTCGTGGCCTGGCTTTCCTTCACTCATCCTCAATGGTCCACGGAGATGTTAAGCCGC  
AGAATGTCCTATTTGATGCAGACTTTGAAGCCCATCTTTCAGAGTTTGGC

>M6-PGSC0003DMG400003551M6LRR-RLK\_310

AGCGCTTACTTCTTTTAACTTAGTATTCATGATCCACTCGGTGCACTCACTGACTGGGATTCTTCTTCCCC  
TTTTGCTCCCTGTGATTGGCGAGGTGTTTTCTGCGTCAATGGCCGGGT

>M6-PGSC0003DMG400003551M6LRR-RLK\_3100

TAAGCCGCAGAATGTCCTATTTGATGCAGACTTTGAAGCCCATCTTTCAGAGTTTGGCCTAGGCAAGCTT  
GTAGTAGCCACACCAACCGAGCCCTCCACATCAACTTCAGTTGGTACCCT

>M6-PGSC0003DMG400003551M6LRR-RLK\_3162

GCAAGCTTGTAGTAGCCACACCAACCGAGCCCTCCACATCAACTTCAGTTGGTACCCTAGGCTATATATC  
TCCAGAAGTAGCATTAAACCGGAGAAACCACAAGAGAATCAGATGCTTATA

>M6-PGSC0003DMG400003551M6LRR-RLK\_3224

TATATATCTCCAGAAGTAGCATTAAACCGGAGAAACCACAAGAGAATCAGATGCTTATAGCTTTGGCATT  
GTTTTGCTGGAAGTACTAACAGGCAAAAGACCCTTAATGTTACACACAAGAT

>M6-PGSC0003DMG400003551M6LRR-RLK\_3286

TGGCATTGTTTTGCTGGAAGTACTAACAGGCAAAAGACCCTTAATGTTACACACAAGATGAGGACATAGT  
GAAATGGGTGAAGAGGCAATTGCAAAGAGGGCAAATTTCCGAACTATTAGA

>M6-PGSC0003DMG400003551M6LRR-RLK\_3348

ACATAGTGAAATGGGTGAAGAGGCAATTGCAAAGAGGGCAAATTTCCGAACTATTAGAGCCAGGATTG  
CTCGAACTGGACCCTGAATCATCAGAATGGGAAGAGTTCTTGCTAGGAATTA

>M6-PGSC0003DMG400003551M6LRR-RLK\_3410

GGATTGCTCGAACTGGACCCTGAATCATCAGAATGGGAAGAGTTCTTGCTAGGAATTAAGTAGGCTTG  
CTATGCACAGCACCTGACCCACTTGATCGTCCCACCATGGCCGACATTGTG

>M6-PGSC0003DMG400003551M6LRR-RLK\_3534

TGCTCGAAGGCTGTCGTGTGGGACCTGATATCGCGTCTTCAGCTGATCCCACATGCCAACCTTCACCCGC

CTGAATCCCCCGAGGTTCAATTCTTTTCCCTTTTTTATTATTAGC

>M6-PGSC0003DMG400003551M6LRR-RLK\_3596

TCACCCGCCTGAATCCCCCGAGGTTCAATTCTTTTCCCTTTTTTATTATTAGCTCTGTATAAGTTGT  
GAGAGTAAATTTGCAATGCAATGCAACGCAGCAGTAGCTAGCTAGCTA

>M6-PGSC0003DMG400003551M6LRR-RLK\_3658

TATAAGTTGTGAGAGTAAATTTGCAATGCAATGCAACGCAGCAGTAGCTAGCTAGCTAGCAACTTAGTT  
CGTTCAATTTTCATGATTTTTTTTTTTCTTGATGATTTTATCAAGGTAAAAGA

>M6-PGSC0003DMG400003551M6LRR-RLK\_372

CTTCTTCCCTTTTTGCTCCCTGTGATTGGCGAGGTGTTTTCTGCGTCAATGGCCGGGTCGGTGAACCTTCGT  
CTCCCTCATTTGCAACTCAGTGGGCCACTCACTACCCAAATTGGTAACC

>M6-PGSC0003DMG400003551M6LRR-RLK\_3720

CTTAGTTCGTTCAATTTTCATGATTTTTTTTTTTCTTGATGATTTTATCAAGGTAAAAGAGAAACAATATTTCT  
CTTTTATTGATTCTGTTTTATGCTATTATTCAAACACCTCACTCCCC

>M6-PGSC0003DMG400003551M6LRR-RLK\_3782

CAATATTTCTCTTTTATTGATTCTTGTTTTATGCTATTATTCAAACACCTCACTCCCCATGGTGCCGGGATT  
TTTCTCCTTTGGCGTGGGGACCAAAATGTAGTGCTATCAATAAGTCAA

>M6-PGSC0003DMG400003551M6LRR-RLK\_434

GAACTTCGTCTCCCTCATTTGCAACTCAGTGGGCCACTCACTACCCAAATTGGTAACCTGCGCATGCTGC  
GCAAGTTAAGCCTCCGGTCCAACCTCTTTAATGGCACTGTTCCAGCTTCG

>M6-PGSC0003DMG400003551M6LRR-RLK\_496

CATGCTGCGCAAGTTAAGCCTCCGGTCCAACCTCTTTAATGGCACTGTTCCAGCTTCGTTATCCAAATGTA  
CCTTTTGCATTCTGTTTTTTTACAGGGTAACGCATTTTCCGGTAATCT

>M6-PGSC0003DMG400003551M6LRR-RLK\_558

CCAAATGTACCCTTTTGCATTCTGTTTTTTTACAGGGTAACGCATTTTCCGGTAATCTTCCACCGGAAATAT  
TCAACCTTACTGATTTACAAATCTTTAAAGTTGCCGAAATCAGTTGT

>M6-PGSC0003DMG400003551M6LRR-RLK\_62

CACTCTTCTCTCTGTGTCCTCTGTGCCTCTGTGCAAAGTGAGGGGGCGTCTGCCATGGCCATTAACAC  
TCATTTTCTCCCTTTATCATGCACCCATTTTAACTTCACTATAAACCA

>M6-PGSC0003DMG400003551M6LRR-RLK\_620

CCGGAAATATTCAACCTTACTGATTTACAAATCTTTAAAGTTGCCGGAAATCAGTTGTCTGGTGAAATCC  
CCGGAGAGCTTCCTCAGAGTCTACGATACTTTGATCTTTCGTCAAACCTTG

>M6-PGSC0003DMG400003551M6LRR-RLK\_682

TGAAATCCCCGGAGAGCTTCCTCAGAGTCTACGATACTTTGATCTTTCGTCAAACCTGTTTTTCAGGAGAC  
ATTCCGAGGAAATTTTCTGACCGGTCTCAGTTACTTCTGATTAATCTTTC

>M6-PGSC0003DMG400003551M6LRR-RLK\_744

CAGGAGACATTCCGAGGAAATTTTCTGACCGGTCTCAGTTACTTCTGATTAATCTTTCCTATAATCGCTTT  
TCCGGCGAAATTCGGCGAGTCTCGGCCGGCTTCAACAGCTTCAGTACC

>M6-PGSC0003DMG400003551M6LRR-RLK\_806

AATCGCTTTTCCGGCGAAATTCGGCGAGTCTCGGCCGGCTTCAACAGCTTCAGTACCTGTGGCTTGCCT  
ACAACAATTGGTAGGAACTTTGCCCTCTGCAATTGCTAACTGTTTCATCG

>M6-PGSC0003DMG400003551M6LRR-RLK\_868

GCTTGCGTACAACAATTGGTAGGAACTTTGCCCTCTGCAATTGCTAACTGTTTCATCGTTGGTTCACTTGA  
GTGCTGAAGGAAATGCTATAGGGGGTCTTATTCCGGCAGCAATTGCTGC

>M6-PGSC0003DMG400003551M6LRR-RLK\_930

TTCACTTGAGTGCTGAAGGAAATGCTATAGGGGGTCTTATTCCGGCAGCAATTGCTGCTTTACCGAAGCT  
TCAGGTGATATCTTTATCACATAATAATCTCTCTGGTTCCTTACCAGCTT

>M6-PGSC0003DMG400003551M6LRR-RLK\_992

CCGAAGCTTCAGGTGATATCTTTATCACATAATAATCTCTCTGGTTCCTTACCAGCTTCATTGTTCTGCAAT  
GTTTCCATTTATCCTCCCTCACTTAGGATTGTTTCAGTTGGGTTTCAAT

>M6-PGSC0003DMG400003659-(rev)M6OtherRLKTM\_0

CAAGACCTAGCTTAGAACGAGGAAGCATCGATGAAATAATAGATGCTAATCTCTTAATGGAGGAATGCA  
ACATGGAAATGATGCTGAAGATGGGACAACCTAGGACTGAAATGTGTGGTCA

>M6-PGSC0003DMG400003659-(rev)M6OtherRLKTM\_126

CCAAAGAAAGGCCTACCATGACTCAAGTGTGGCAAGAACTGGAGACTGCCTTCTTTTCTGCAGAAAATA  
TCATAGATAAACAACCTTCAAATGGTTCCTTCAAATTGTCAAACCGATCAC

>M6-PGSC0003DMG400003659-(rev)M6OtherRLKTM\_189

AAAATATCATAGATAAACAACCTTCAAATGGTTCCTTCAAATTGTCAAACCGATCACTCGTAAGGGGAAG  
CCATAGAATGAAACAACCTTGATTATTCTCAAAGCTCAGTTAGCATAGACG

>M6-PGSC0003DMG400003659-(rev)M6OtherRLKTM\_252

GGGGAAGCCATAGAATGAAACAACCTTGATTATTCTCAAAGCTCAGTTAGCATAGACGGCATTAGATTGC  
AGAAATTTTACATGGACATAGATGGCCTATCCTTTGGGAGTGCAAAGTTGA

>M6-PGSC0003DMG400003659-(rev)M6OtherRLKTM\_315

GATTGCAGAAATTTTACATGGACATAGATGGCCTATCCTTTGGGAGTGCAAAGTTGAGATGCTTAGATA  
CCCATAGTATAAGCTTTGAAGATGACTCATTGAACTGAGAGGAACTTCCG

>M6-PGSC0003DMG400003659-(rev)M6OtherRLKTM\_378

TAGATACCCATAGTATAAGCTTTGAAGATGACTCATTGAACTGAGAGGAACTTCCGAGGAAACAAGCA  
CAAGTGGAAACGAGGAGCATAGGCTTAACATATAATATCAGTTAAAGTTTG

>M6-PGSC0003DMG400003659-(rev)M6OtherRLKTM\_441

CAAGCACAAGTGAAACGAGGAGCATAGGCTTAACATATAATATCAGTTAAAGTTTGATTAATGTAAGT  
CGGCAAAGAACATATTTTAGGTTCTCTCTATTGGGAGTTTCTCCATTCTCA

>M6-PGSC0003DMG400003659-(rev)M6OtherRLKTM\_504

GTAAGTCGGCAAAGAACATATTTTAGGTTCTCTCTATTGGGAGTTTCTCCATTCTCAAGCCTCAAACCCGA  
GACCTTTGGTTAAAAGGTTTATAAAAACGGTACCTACCTTCTTTGTATT

>M6-PGSC0003DMG400003659-(rev)M6OtherRLKTM\_63

AATGCAACATGGAAATGATGCTGAAGATGGGACAACCTAGGACTGAAATGTGTGGTCAAAGTTCCCAA  
GAAAGGCCTACCATGACTCAAGTGTGGCAAGAACTGGAGACTGCCTTCTTTT

>M6-PGSC0003DMG400003660-(rev)M6OtherRLKTM\_0

CTTATCTACGCCTTCCACCACAGAATTCGGCCCCACCAAATGGATAGCATGTAACCTAACGAAATCCACAT  
TAGATACTGTCCTTCCCGTTTCCGTTTCATCCTAAATGCCGCCGTGTCTCT

>M6-PGSC0003DMG400003660-(rev)M6OtherRLKTM\_1024

TGTCAAGTTATTGGCGGGAGAAAAACCGGTGAGGTTCCGGCAACCGGTTCCGGAGCACAGTATGTTTGT  
ATTTTTAGCTGACCAAGGCAAAGTTCCGGTGCAGGATCCGGTTCTTCTTCT

>M6-PGSC0003DMG400003660-(rev)M6OtherRLKTM\_1088

TTGTATTTTTAGCTGACCAAGGCAAAGTTCCGGTGCAGGATCCGGTTCTTCTTCTTAACGGGTCGGGTA  
AAGGAATCGTCAATAACATGTTCTTCGCGACCAATGTGGCTCCCTCTTAT

>M6-PGSC0003DMG400003660-(rev)M6OtherRLKTM\_1152

CGGGTAAAGGAATCGTCAATAACATGTTCTTCGCGACCAATGTGGCTCCCTCTTATGCTCCGGTAGGGA

AGGCACTGGTTTCTGTCACGCTTGTGGGGATTTATGGTGACGTGGCAGATG

>M6-PGSC0003DMG400003660-(rev)M6OtherRLKTM\_1216

AGGGAAGGCACTGGTTTCTGTCACGCTTGTGGGGATTTATGGTGACGTGGCAGATGAGGATTTGGTGG

ATCAGGTCGTGAAGGAGCTATCGGGTTGGTTTGGGGAGTCGGTAGTTGGGTC

>M6-PGSC0003DMG400003660-(rev)M6OtherRLKTM\_128

GCCACTCTCCCTCTCCCTTCCCAAACCTCTTCTCCTCTCCACGCGCCGCCGCTCCCCACTACTAAAACCGCCG

TATGCTTCCCTCAAATATATCCGTTGACTCAACCTCTCATCCTAATACC

>M6-PGSC0003DMG400003660-(rev)M6OtherRLKTM\_1280

GTGGATCAGGTCGTGAAGGAGCTATCGGGTTGGTTTGGGGAGTCGGTAGTTGGGTCATGGAGTTACTT

GAGGATGTACAGGATCGGGTTTGCCCAACCGAACCAATGCCACCCACTAAC

>M6-PGSC0003DMG400003660-(rev)M6OtherRLKTM\_1344

ACTTGAGGATGTACAGGATCGGGTTTGCCCAACCGAACCAATGCCACCCACTAACTTGAAGAAGAACC

CGAAAATAAAACCGGGCTTGTACATTTGTGGAGATTATGTGACTAGTGCTA

>M6-PGSC0003DMG400003660-(rev)M6OtherRLKTM\_1408

GAACCCGAAAATAAAACCGGGCTTGTACATTTGTGGAGATTATGTGACTAGTGCTACTTTTGATGGAGC

TTTGGTTTCTGGGAAAATAGCAGCAGAACTTTGCTACAAGATAGAGCTCT

>M6-PGSC0003DMG400003660-(rev)M6OtherRLKTM\_1472

GGAGCTTTGGTTTCTGGGAAAATAGCAGCAGAACTTTGCTACAAGATAGAGCTCTAGTTAATGTATAG

CCTAATTTTGGTTGAGTTTTTTTCCAGTTGTGTAAGTAAAGTTTTGAG

>M6-PGSC0003DMG400003660-(rev)M6OtherRLKTM\_1536

TATAGCTTAATTTTGGTTGAGTTTTTTTCCAGTTGTGTAAGTAAAGTTTTGAGTGTTCTTGATTAATTT

GTATATGGATTCATAAACGTTTCGAGATCATTGATGCAATAATTGC

>M6-PGSC0003DMG400003660-(rev)M6OtherRLKTM\_1582

AAGTTTTGAGTGTTCTTGATTAATTTGTATATGGATTCATAAACGTTTCGAGATCATTGATGCAATAAT

TGCACTATCAAGAAAGAAGACAATATGGTATGACTTGTCTGTTGTTCC

>M6-PGSC0003DMG400003660-(rev)M6OtherRLKTM\_192

AACCGCCGTATGCTTCCCTCAAATATATCCGTTGACTCAACCTCTCATCCTAATACCACCGGGGTCATTGTC

ATTGGCGGCGGTTTAGCTGGCTTAGCAGCTTCCATTCGGCTTCAAGCCG

>M6-PGSC0003DMG400003660-(rev)M6OtherRLKTM\_256



CATTGTCATTGGCGGCGGTTTAGCTGGCTTAGCAGCTTCCATTTCGGCTTCAAGCCGACAACATCCCATT  
CTCCTTCTCGAATCTTCTGATGCCGTGCGCGGCCGTGTTTCGCTCTGATGT

>M6-PGSC0003DMG400003660-(rev)M6OtherRLKTM\_320

CCATTTCTCCTTCTCGAATCTTCTGATGCCGTGCGCGGCCGTGTTTCGCTCTGATGTAGTTGACGGATATAC  
CCTTGATCGTGGTTTCCAGATTTTCATTACTGGTTACCCTGAAGCCCGA

>M6-PGSC0003DMG400003660-(rev)M6OtherRLKTM\_384

GATATACCCTTGATCGTGGTTTCCAGATTTTCATTACTGGTTACCCTGAAGCCCGAAAAATCCTTGATTAT  
GACTCTTTAGACCTCAGAAAATTCTATTCGGGGGCGAGGGTTTACTATG

>M6-PGSC0003DMG400003660-(rev)M6OtherRLKTM\_448

TGATTATGACTCTTTAGACCTCAGAAAATTCTATTCGGGGGCGAGGGTTTACTATGGTGGTCGTTTCCAC  
ACCGTTGCTGATCCTCTCCGGCATTTCGCCGATGCTCTGCAATCTTTAAC

>M6-PGSC0003DMG400003660-(rev)M6OtherRLKTM\_512

TTCCACACCGTTGCTGATCCTCTCCGGCATTTCGCCGATGCTCTGCAATCTTTAACCAACCCAATTGGTTC  
AGTTGTGGATAAATTACTTATCGGATTGACTAGATTGAAAGTTTTGACG

>M6-PGSC0003DMG400003660-(rev)M6OtherRLKTM\_576

TTGGTTCAGTTGTGGATAAATTACTTATCGGATTGACTAGATTGAAAGTTTTGACGCAAGGAGATGATG  
AAATATTGAGTGCTGAAGAAGTTCCTACGATCGATTTATTGAAGAAGATCG

>M6-PGSC0003DMG400003660-(rev)M6OtherRLKTM\_64

CCACATTAGATACTGTCCTTCCCGTTTCCGTTTCATCCTAAATGCCGCCGTGTCTCTGCCTTCCCGCCACTCT  
CCCTCTCCCTTCCCAAATCTTCTCCTCTCCACGCGCCGCCGCTCCCC

>M6-PGSC0003DMG400003660-(rev)M6OtherRLKTM\_640

TGATGAAATATTGAGTGCTGAAGAAGTTCCTACGATCGATTTATTGAAGAAGATCGGGTTTTCTGATGCA  
ATAGTGAAAGGTTCTTTTCGACCCTTTTTTGGTGAATTTTCTTCGATAG

>M6-PGSC0003DMG400003660-(rev)M6OtherRLKTM\_704

GATGCAATAGTGAAAGGTTCTTTTCGACCCTTTTTTGGTGAATTTTCTTCGATAGAGAGCTGGAAACAA  
CGTCGCGGCTGTTAATTTTCATCTTCAAATGCCTAGCTCTTGGTGACAAC

>M6-PGSC0003DMG400003660-(rev)M6OtherRLKTM\_768

AAACAACGTCGCGGCTGTTAATTTTCATCTTCAAATGCCTAGCTCTTGGTGACAACACACTTCCGGCGAA  
GGGCATTGCCGCCATTCCGGAACAATTGGCGGCAAAATTGCCGTCAATT

>M6-PGSC0003DMG400003660-(rev)M6OtherRLKTM\_832

GGCGAAGGGCATTGCCGCCATTCCGGAACAATTGGCGGCAAATTGCCGTCGAATTCAATATTGTTCAA  
TACACGAGTTGTTTCCATTGATTCAAGGATCGGATTCCAGCACAAAAATAAG

>M6-PGSC0003DMG400003660-(rev)M6OtherRLKTM\_896

TTCAATACACGAGTTGTTTCCATTGATTCAAGGATCGGATTCCAGCACAAAAATAAGAGTGACATTACAAA  
ATGGAGAAATGTTGGAAAGTGAATTTGGGGTAATATTGGCAGTTGAAGAA

>M6-PGSC0003DMG400003660-(rev)M6OtherRLKTM\_960

TACAAAATGGAGAAATGTTGGAAAGTGAATTTGGGGTAATATTGGCAGTTGAAGAACCCTGAAGCTGTC  
AAGTTATTGGCGGGAGAAAAAACCGGTGAGGTTCCGGCAACCGGTTCCGGAGCA

>M6-PGSC0003DMG400003710M6LRR-RLP\_0

ATGAAAGTGCAGTTTTTCTTCATCTTTTTTCATTTTTCATCTTCTTTGTATTATTAGCACAAATGCAAAACTC  
ATCCTATTGATATAACAAGGACTTCAAATCTCAAAAATGGAATAAAC

>M6-PGSC0003DMG400003710M6LRR-RLP\_1024

TAAAAGTTGTGGCTCCGAGGAATCATACGGCGTCGTTTGAGAGGTTATTGCTGGGTGGAAATTATTTGT  
TTGGGCCGATTCTGGGCCTTTAATGGGCCTAAAGCCTGGTTCTGGAAATG

>M6-PGSC0003DMG400003710M6LRR-RLP\_1088

TTTGTGGGCCGATTCTGGGCCTTTAATGGGCCTAAAGCCTGGTTCTGGAAATGTTAGTTTGGTGGAT  
AACTGTTTGTATATGTGTCCAGATTCCGAATACATTTGTTCATGGTGGGTA

>M6-PGSC0003DMG400003710M6LRR-RLP\_1137

GGAAATGTTAGTTTGGTGGATAACTGTTTGTATATGTGTCCAGATTCCGAATACATTTGTTCATGGTGGGT  
ATCAGAAGTCTTTATTGGATTGTAAAAAGTTTGGGCCTAAGATTCCTTGA

>M6-PGSC0003DMG400003710M6LRR-RLP\_128

CATTAAACCCGGTTCATGCTTAAACTCATGGAACCTCTCTATAGACCCATGTGATCATATTTTCACCGACC  
GGTTCACCTGCGGTTTCCGATGTGATCTCATCGTCTCCGGTTTTTATCG

>M6-PGSC0003DMG400003710M6LRR-RLP\_192

ACCGACCGGTTACCTGCGGTTTCCGATGTGATCTCATCGTCTCCGGTTTTTATCGAGTCACTGAAATCA  
GCCTAGACCAAGCCGGTTACTCCGGTTCATTGCCTAATTCATTCAACCTC

>M6-PGSC0003DMG400003710M6LRR-RLP\_256

AAATCAGCCTAGACCAAGCCGGTTACTCCGGTTCATTGCCTAATTCATTCAACCTCCCTCATCTCGAGATT

TTAGATATGTCATATAAATCCCTCTCCGGTTCAATCCCGAATTCATTTT

>M6-PGSC0003DMG400003710M6LRR-RLP\_320

CGAGATTTTAGATATGTCATATAAATCCCTCTCCGGTTCAATCCCGAATTCATTTTCAAATCTAACTCGGCT  
CCGGCGGCTCAGTCTTTCGAAAACTCGTTCACCGGTCTAGTTACTTC

>M6-PGSC0003DMG400003710M6LRR-RLP\_384

ACTCGGCTCCGGCGGCTCAGTCTTTCGAAAACTCGTTCACCGGTCTAGTTACTTCTTCTATCGGTTCTCT  
ATCCCGTTTACAGGAACTATTTCTCGATAACAACAAATTCACCGGTTCA

>M6-PGSC0003DMG400003710M6LRR-RLP\_448

GTTCTCTATCCCGTTTACAGGAACTATTTCTCGATAACAACAAATTCACCGGTTCAATCCCGGAAAGTTTT  
AATGGTTTAATCAATCTGAATCGATTTGAGCTTCAACAAAATAATATTT

>M6-PGSC0003DMG400003710M6LRR-RLP\_512

AAGTTTTAATGGTTTAATCAATCTGAATCGATTTGAGCTTCAACAAAATAATATTTCCGGCGAGTTACCCG  
ATTTGAATCAGCTCATAAATCTGATCTACTTAGATTTAAGCAATAACAG

>M6-PGSC0003DMG400003710M6LRR-RLP\_576

TTACCCGATTTGAATCAGCTCATAAATCTGATCTACTTAGATTTAAGCAATAACAGAATCGCCGGAAATTT  
CTTACGACAAATTTACCTGATTCGATGATTGAACTCTCAATACGCAAC

>M6-PGSC0003DMG400003710M6LRR-RLP\_64

GCAAACTCATCCTATTGATATAACAAGGACTTCAAATCTCAAAAATGGAATAAACCCAAAATCCATTAA  
ACCCGGTTCATGCTTAACTCATGGAACTTCTCTATAGACCCATGTGATC

>M6-PGSC0003DMG400003710M6LRR-RLP\_640

GAAATTTCTTACGACAAATTTACCTGATTCGATGATTGAACTCTCAATACGCAACAATTATTTACACGGC  
GAGTTTCCGTTGAACTTCGAAGAGTTGAAGTTCCTACAGGTGTTAGATC

>M6-PGSC0003DMG400003710M6LRR-RLP\_704

ACACGGCGAGTTTCCGTTGAACTTCGAAGAGTTGAAGTTCCTACAGGTGTTAGATCTGAGCCATAATTTG  
TTTTCCGGGATGATTCCGGCGGCGCTATTTCACTCATCTCTTCAGCA

>M6-PGSC0003DMG400003710M6LRR-RLP\_768

AATTTGTTTTCCGGGATGATTCCGGCGGCGCTATTTCACTCATCTCTTCAGCAGCTTACACTTTCTTAC  
AATAACTTTACGTTTTTGAAGTGCCGGAAGATTTAGTGCTTCGAAGT

>M6-PGSC0003DMG400003710M6LRR-RLP\_832



>M6-PGSC0003DMG400003714M6LRR-RLK\_1342

ACTGGTGATATTCCTTCTAGTATTGTGAACCTTGGTTCATTGGGGTACTTGATTTAGGTGGAAATCGGT  
TTTCTGGATTGATTCCACAGTTCTTGGGTAAATTGACAGGGTTGAGAATG

>M6-PGSC0003DMG400003714M6LRR-RLK\_1403

GAAATCGGTTTTCTGGATTGATTCCACAGTTCTTGGGTAAATTGACAGGGTTGAGAATGCTGTCTCTTAT  
TGGAATCGCTTTTCTGGTTCGATTCCGTATAGTTTGGGTAGTCTTTATC

>M6-PGSC0003DMG400003714M6LRR-RLK\_1464

GTCTCTTATTGGGAATCGCTTTTCTGGTTCGATTCCGTATAGTTTGGGTAGTCTTTATCAGCTTGAGTTTTT  
TGATTTGAGCATGAATGTTTTGAATGGGAGTTTGCCTCAAACCTTAT

>M6-PGSC0003DMG400003714M6LRR-RLK\_1525

CTTGAGTTTTTTGATTTGAGCATGAATGTTTTGAATGGGAGTTTGCCTCAAACCTTATGTTGCTTAGCAA  
TTTGACTAGTTTGAATTTGTCCAGCAACTTGTTTTATGGTGAAATTCCA

>M6-PGSC0003DMG400003714M6LRR-RLK\_1586

TGCTTAGCAATTTGACTAGTTTGAATTTGTCCAGCAACTGTTTTATGGTGAAATTCCAAGAGGGATTGG  
AAGTTTGCATGGGTTAGAGGTTTTAAATGTTAGCAATTGTGGGTTCTCAG

>M6-PGSC0003DMG400003714M6LRR-RLK\_1647

AGGGATTGGAAGTTTGCATGGGTTAGAGGTTTTAAATGTTAGCAATTGTGGGTTCTCAGGGAACATTCC  
GACTAGTATCGGAAGTTTGTGAGGTTGACAACTCTTGATGTGAGCAAGCA

>M6-PGSC0003DMG400003714M6LRR-RLK\_1708

AACATTCGACTAGTATCGGAAGTTTGTGAGGTTGACAACTCTTGATGTGAGCAAGCAAACCTATCTG  
GTGAATTACCCTTTGACATTTTCGGGTTGCCAAGTCTACAAGTTGTGGCT

>M6-PGSC0003DMG400003714M6LRR-RLK\_1769

ACCTATCTGGTGAATTACCCTTTGACATTTTCGGGTTGCCAAGTCTACAAGTTGTGGCTTTACAAGAGAA  
CATGTTAACTGGGGATGGTCTTGAAGTTTTAGCAGTTTATCTTGTCTGG

>M6-PGSC0003DMG400003714M6LRR-RLK\_183

TTACCCACCACCACTCTTCTCATGTCAACGGCTACTTTTCTTCTCTCTCCGCCATTGGTGGTGGTGGCACT  
TACATTGCTATTTATCAGTGTCTTCTCCATGGCTGAAAACGTTACAGA

>M6-PGSC0003DMG400003714M6LRR-RLK\_1830

ACAAGAGAACATGTTAACTGGGGATGGTCTTGAAGTTTTAGCAGTTTATCTTGTCTGGAATATTTGAAT

CTGTCATCTAATGCCTTTTATGGGCAAGTTCCGAAGACATATGGTTTCCT

>M6-PGSC0003DMG400003714M6LRR-RLK\_1891

TATTTGAATCTGTCATCTAATGCCTTTTATGGGCAAGTTCCGAAGACATATGGTTTCCTTACATCCTTGAA

AGTTCTTTCTATGTCTAAAAGTGGCATTAAATGGCTCAATCCAGCAGAG

>M6-PGSC0003DMG400003714M6LRR-RLK\_1952

CATCCTTGAAAGTTCTTTCTATGTCTAAAAGTGGCATTAAATGGCTCAATCCAGCAGAGTTGGGTAAGT

TTCCGGCCTTCAAGTGCTTGAGCTTCGAGGAAATAAGTTAACAGGTCAA

>M6-PGSC0003DMG400003714M6LRR-RLK\_2013

GGGTAAGTGTCCGGCCTTCAAGTGCTTGAGCTTCGAGGAAATAAGTTAACAGGTCAAATCCGAAGGA

TTTCTCACATTTATCTCATCTAAGGATACTTGATTTGGGCCACAATGGGTT

>M6-PGSC0003DMG400003714M6LRR-RLK\_2074

CCGAAGGATTTCTCACATTTATCTCATCTAAGGATACTTGATTTGGGCCACAATGGGTTAACCGGGGAAA

TCCCTGAAAACATCTCTAATTGTTTGTCTTTGGCTACTCTCTTGTTGGAT

>M6-PGSC0003DMG400003714M6LRR-RLK\_2135

CCGGGGAAATCCCTGAAAACATCTCTAATTGTTTGTCTTTGGCTACTCTCTTGTTGGATTCTAATAATATC

TCAGGTCACATACCAGAGTCGTTGTGCGAAATTATCAAACCTTGGAATGC

>M6-PGSC0003DMG400003714M6LRR-RLK\_2196

TAATAATATCTCAGGTCACATACCAGAGTCGTTGTGCGAAATTATCAAACCTTGGAATGCTGGATCTCTCC

TCAAATAATTTGAATGGATCAATTCCTTCAAGTCTGTCCCTGATTTCCAG

>M6-PGSC0003DMG400003714M6LRR-RLK\_2257

GATCTCTCCTCAAATAATTTGAATGGATCAATTCCTTCAAGTCTGTCCCTGATTTCCAGTCTGAAGTATTT

GAATATTTCCATAATCATCTCGAGGGTGAGATTCCAGAGGCGTTGGGT

>M6-PGSC0003DMG400003714M6LRR-RLK\_2318

TGAAGTATTTGAATATTTCCATAATCATCTCGAGGGTGAGATTCCAGAGGCGTTGGGTTTTCGGTTCAA

GGACCCTTCTTTGTTTGTGCTGCGAATAATGCTTTGTGTGGAAAGCCATTGA

>M6-PGSC0003DMG400003714M6LRR-RLK\_2379

TCGGTTCAAGGACCCTTCTTTGTTTGTGCTGCGAATAATGCTTTGTGTGGAAAGCCATTGAAGGAGTGCAAT

GACGGTAAAAGGAAAAGAAAGAAGTTGATCTTATTCATTGTTTTGGCTGC

>M6-PGSC0003DMG400003714M6LRR-RLK\_244

GTGGTGGCACTTACATTGCTATTTATCAGTGTTTTCTCCATGGCTGAAAACGTTACAGAGACGGAAATGG  
CAGCTTTAATGTCGTTCAAAGGAATTTGGAAGACCCACTTGGGGTATTA

>M6-PGSC0003DMG400003714M6LRR-RLK\_2440

GAGTGCAATGACGGTAAAAGGAAAAGAAAGAAGTTGATCTTATTCATTGTTTTGGCTGCTGTAGGGGCC  
TTTTTCGTTGCAGCGTGTGTTGTGGGTACATCTACAGCCTTATACTTTGG

>M6-PGSC0003DMG400003714M6LRR-RLK\_2501

TAGGGGCCTTTTTCGTTGCAGCGTGTGTTGTGGGTACATCTACAGCCTTATACTTTGGCACAAAAAGTT  
AAGAGGTTTCATCTGAAGGGAAGAAGCGAAGCCCAGGCCGTGCGAGTTCAG

>M6-PGSC0003DMG400003714M6LRR-RLK\_2562

CAAAAAGTTAAGAGGTTTCATCTGAAGGGAAGAAGCGAAGCCCAGGCCGTGCGAGTTCAGGAGGAGAA  
GGGGTTCGTGGAAGCGGAGAGAATGGAGGTCCAAAGCTTGTTATGTTTAAACA

>M6-PGSC0003DMG400003714M6LRR-RLK\_2623

GGAGAAGGGGTTTCGTGGAAGCGGAGAGAATGGAGGTCCAAAGCTTGTTATGTTTAAACAACAAGATCAC  
TTATGCAGATACTTTAGAAGCGACACGACAATTTGACGAGGAAAATGTGTTA

>M6-PGSC0003DMG400003714M6LRR-RLK\_2684

AGATCACTTATGCAGATACTTTAGAAGCGACACGACAATTTGACGAGGAAAATGTGTTAAGCCGTGGAA  
AGTATGGCCTAGTATTCAAAGCCACTTTTGCAGATGGAATGGTCTTGGCTA

>M6-PGSC0003DMG400003714M6LRR-RLK\_2745

CCGTGGAAAGTATGGCCTAGTATTCAAAGCCACTTTTGCAGATGGAATGGTCTTGGCTATCCGCCGCCTT  
CCTGATACATCAATCGAAGTGAACACATTCCGCAAGGAAGCTGAATCCCT

>M6-PGSC0003DMG400003714M6LRR-RLK\_2806

CGCCGCCTTCCTGATACATCAATCGAAGTGAACACATTCCGCAAGGAAGCTGAATCCCTCGGCAAGGTG  
AAACATCGCAATCTGACTGTTGTTTCGTGGATACTATGCAGGACCTCCACCT

>M6-PGSC0003DMG400003714M6LRR-RLK\_2867

GCAAGGTGAAACATCGCAATCTGACTGTTGTTTCGTGGATACTATGCAGGACCTCCACCTGATGTTTCGATT  
TGTTGTGTACGATTACATGCCTAATGGAAATCTTGCCACACTTTTACAAG

>M6-PGSC0003DMG400003714M6LRR-RLK\_2928

TGTTTCGATTTGTTGTGTACGATTACATGCCTAATGGAAATCTTGCCACACTTTTACAAGAGGCATCTCATC  
AGGATGGCCATGTGCTCAATTGGCCAATGCGCCACCTGATTGCTCTTGG

>M6-PGSC0003DMG400003714M6LRR-RLK\_2989

GCATCTCATCAGGATGGCCATGTGCTCAATTGGCCAATGCGCCACCTGATTGCTCTTGGCATTGCTCGTG  
GCTTAGCTTACCTTCATTAGTTTCATTGATTCATGGGGATGTAAAGCCA

>M6-PGSC0003DMG400003714M6LRR-RLK\_305

CGGAAATGGCAGCTTTAATGTCGTTCAAAGGAATTTGGAAGACCCACTTGGGGTATTAGACGGTTGGG  
ATTTTTCTACCACATTAGCTCCGTGTGATTGGCGTGGGGTTCTGTGTGATG

>M6-PGSC0003DMG400003714M6LRR-RLK\_3050

TTGCTCGTGGCTTAGCTTACCTTCATTAGTTTCATTGATTCATGGGGATGTAAAGCCACAAAATGTATTG  
TTTGATGCAGATTTTGAAGCTCATCTTTCGGATTTTGGTTTAGATAAAC

>M6-PGSC0003DMG400003714M6LRR-RLK\_3111

AAATGTATTGTTTATGATGCAGATTTTGAAGCTCATCTTTCGGATTTTGGTTTAGATAAACTAAGCCTAGTAG  
CAACCCAGCAGAGACTTCAACATCTCCATCCCAGTTGGAAGCTTAGG

>M6-PGSC0003DMG400003714M6LRR-RLK\_3172

AGCCTAGTAGCAACCCAGCAGAGACTTCAACATCTCCATCCCAGTTGGAAGCTTAGGCTACATAGCAC  
CTGAAGTGGCATTAACTGGACATCCACAAAAGAAGCTGATGTATACAGT

>M6-PGSC0003DMG400003714M6LRR-RLK\_3233

ACATAGCACCTGAAGTGGCATTAACTGGACATCCACAAAAGAAGCTGATGTATACAGTTTTGGGATTG  
TATTGTTAGAGATACTAACAGGAAGAAAGCCAGTAATGTTCAATGGGGACG

>M6-PGSC0003DMG400003714M6LRR-RLK\_3294

TGGGATTGTATTGTTAGAGATACTAACAGGAAGAAAGCCAGTAATGTTCAATGGGGACGAGGACATTG  
TCAAGTGGGTGAAGAGACAACCTCAAAGAGGCCAAATTTCAGAATTGCTCGA

>M6-PGSC0003DMG400003714M6LRR-RLK\_3355

GACATTGTCAAGTGGGTGAAGAGACAACCTCAAAGAGGCCAAATTTCAGAATTGCTCGAGCCGGGGTT  
GCTTGAAGTGGATCCTGAATCATCAGAATGGGAAGAGTTCTTGTGGGAATC

>M6-PGSC0003DMG400003714M6LRR-RLK\_3416

CGGGGTTGCTTGAAGTGGATCCTGAATCATCAGAATGGGAAGAGTTCTTGTGGGAATCAAAGTTGGTT  
TGCTTTGCACCATGCCTGATCCTCTTGAAAGACCATCGATGACCGATATTG

>M6-PGSC0003DMG400003714M6LRR-RLK\_3477

AGTTGGTTTGTCTTGCACCATGCCTGATCCTCTTGAAAGACCATCGATGACCGATATTGTATTGCTCG



AAGGCTGCAGAGTTGGTCCTGACATTCTTCTTCAGCTGATCCTACAAC

>M6-PGSC0003DMG400003714M6LRR-RLK\_3538

TTCATGCTCGAAGGCTGCAGAGTTGGTCCTGACATTCTTCTTCAGCTGATCCTACAACCTTCCTTCACC

TATGTGATATGAAAATTCAATTCTTTGCAATGAAATCAATTTGCAAGAA

>M6-PGSC0003DMG400003714M6LRR-RLK\_3599

TTCTTCACCTATGTGATATGAAAATTCAATTCTTTGCAATGAAATCAATTTGCAAGAAAATGTCCTTCAT

TTTTCTCAGTTCAATGTTGTTTCATGCATCTCTTCAATGTATTGTTACTC

>M6-PGSC0003DMG400003714M6LRR-RLK\_3656

AAAATGTCCTTCATTTTTCTCAGTTCAATGTTGTTTCATGCATCTCTTCAATGTATTGTTACTCCATTCAATAT

CATTTTGCTTGACATTGTTCAATCAAGAGTTGGTTGGTTTTGTGCA

>M6-PGSC0003DMG400003714M6LRR-RLK\_366

CGGTTGGGATTTTTCTACCACATTAGCTCCGTGTGATTGGCGTGGGGTTCTGTGTGATGCCGGCAGAGTT

CGTGAACCTCCGCCTACCTGGTTTGCAGCTGAGTGGACGGCTAACTGACCA

>M6-PGSC0003DMG400003714M6LRR-RLK\_427

GGCAGAGTTCGTGAACTCCGCCTACCTGGTTTGCAGCTGAGTGGACGGCTAACTGACCAGGTTGGTAAT

TTACGCCAGCTACGGAGGTTAAGCTTACATTCTAACAACCTTAATGGCTCT

>M6-PGSC0003DMG400003714M6LRR-RLK\_488

TTGGTAATTTACGCCAGCTACGGAGGTTAAGCTTACATTCTAACAACCTTAATGGCTCTGTCCCACGCTCT

TTAGCTCAATGTGCTTTGCTACGCGCTGTTTACTTCCATTACAACCTCTT

>M6-PGSC0003DMG400003714M6LRR-RLK\_549

CCCACGCTCTTTAGCTCAATGTGCTTTGCTACGCGCTGTTTACTTCCATTACAACCTCTTTTTCCGGTGAAC

CCCGCCGGCTATCTCGAACCTCACTAATCTTCAAGTTTTAAACCTTGC

>M6-PGSC0003DMG400003714M6LRR-RLK\_61

CTTTTTTTTTTTTTCATCTCATAAGCTCCTCTCTTCCCCACTTCCATAACAACCTCCATTGACACTCACCATTCT

TGATTCTTCCCCATTTGATCTTCTTCTTCTTCTTCTTCTCTCTAC

>M6-PGSC0003DMG400003714M6LRR-RLK\_610

TCCGGTGAACCTCCCGCCGGCTATCTCGAACCTCACTAATCTTCAAGTTTTAAACCTTGCTCACAACCTTCT

CTCCGGTCATGTCTCTGGTAATGTTCCAGCAAGTCTTCGGTTTCTCGAT

>M6-PGSC0003DMG400003714M6LRR-RLK\_671

ACAACCTCCTCTCCGGTCATGTCTCTGGTAATGTTCCAGCAAGTCTTCGGTTTCTCGATCTTTCTTCTCGAATC  
TCCTCTCCGGTGGCATTCCGGGTAACCTTTTCAGCTGGTTCTCAGCTCG

>M6-PGSC0003DMG400003714M6LRR-RLK\_732

TTCTTCTCGAATCTCCTCTCCGGTGGCATTCCGGGTAACCTTTTCAGCTGGTTCTCAGCTCGAACTGTAAACT  
TGTCGTTAAACCGGTTCTCCGGTGAAATCCGGCGAGTATCGGAGCTTT

>M6-PGSC0003DMG400003714M6LRR-RLK\_793

CTGTAAACTTGTCGTTAAACCGGTTCTCCGGTGAAATCCGGCGAGTATCGGAGCTTTACAGAAGTTAG  
AGTATCTCTGGCTTGATTCTAACCAACTTTACGGCACTATACCTTCAGCA

>M6-PGSC0003DMG400003714M6LRR-RLK\_854

AGAAGTTAGAGTATCTCTGGCTTGATTCTAACCAACTTTACGGCACTATACCTTCAGCAATCTCTAACATT  
TCCACATTAATACTTTGAGCACTAGTGATAATCATCTTCAAGGACTAA

>M6-PGSC0003DMG400003714M6LRR-RLK\_915

CTCTAACATTTCCACATTAATACTTTGAGCACTAGTGATAATCATCTTCAAGGACTAATCCCAGCAACAA  
TCGGTTCACTTTCCAGTTTACAGGTAATCTCATTGTCGCAAAATCAACT

>M6-PGSC0003DMG400003714M6LRR-RLK\_976

CCAGCAACAATCGGTTCACTTTCCAGTTTACAGGTAATCTCATTGTCGCAAAATCAACTATCTGGTGTGGT  
CCCTGCATCGTTTTTCTGTAATGGGTCAGTAAATGCTCATGCTATTAGG

>M6-PGSC0003DMG400003790M6LRR-RLK\_0

TTGAAAACCAAATATTACACATGACAACATTTACTACTACCTTAGTTTACATTTTGTATGTGCTACTTCTTT  
TTTCACTTCCATTAAGTATCACATCTTCAGCAAGAACAGAAAGCTGAAT

>M6-PGSC0003DMG400003790M6LRR-RLK\_1037

ACTTTCTTAGCTCTAGCAGAAAATGACCTGCAAGGGTCATTGCCTCCATCATTCTCCTCTTACTAAGTT  
ATCTGATGTGGGGTTGTCTGATAATAGTCTTTCTGGTGAAATCTCATCG

>M6-PGSC0003DMG400003790M6LRR-RLK\_1098

TTACTAAGTTATCTGATGTGGGGTTGTCTGATAATAGTCTTTCTGGTGAAATCTCATCGAATTTATCACC  
AATTGGACTGAGTTGACATCTTTGCAGCTTCAAACAATATGTTTACAG

>M6-PGSC0003DMG400003790M6LRR-RLK\_1159

TTTCATCACCATTGGACTGAGTTGACATCTTTGCAGCTTCAAACAATATGTTTACAGGGAAAATCCCA  
CCCGAAACCAGTCAATTGACAAACCTTGTATATCTCTACCTCTTTCATAA

>M6-PGSC0003DMG400003790M6LRR-RLK\_122

CTTGTCAAATGGAAGAGAAATTTACCTTCTACGTCTTTCTTGGACTCATGGTCCATTTCGAATCTCGAAAA  
CTTGTGCAATTGGACATTTATTGTGTGTAATGATGGTGGAAACAATTTCT

>M6-PGSC0003DMG400003790M6LRR-RLK\_1220

AAAATCCCACCCGAAACCAGTCAATTGACAAACCTTGTATATCTCTACCTCTTTCATAACAATTTCACTGG  
TTCCATTCCCTATCAGATTGGGAACTTGCAAACTTGTTGGAATTAGAC

>M6-PGSC0003DMG400003790M6LRR-RLK\_1281

ATTTCACTGGTTCCATTCCCTATCAGATTGGGAACTTGCAAACTTGTTGGAATTAGACTTTTCTGATAAC  
CAGCTTTCAGGCATAATACCTCCAACCATTGGAAATCTGACCAATCTGA

>M6-PGSC0003DMG400003790M6LRR-RLK\_1342

TTCTGATAACCAGCTTTCAGGCATAATACCTCCAACCATTGGAAATCTGACCAATCTGAAGACGTTGCAA  
CTTTTTCGCAACAATCTCAGTGGAACTTCCCTCCTGAGATTGGAAAATT

>M6-PGSC0003DMG400003790M6LRR-RLK\_1403

ACGTTGCAACTTTTTCGCAACAATCTCAGTGGAACTTCCCTCCTGAGATTGGAAAATTGATATCCCTTGT  
AACCATCGACATCAACACCAACCGACTAAGTGGTGAGCTGCCGGACAGC

>M6-PGSC0003DMG400003790M6LRR-RLK\_1464

TATCCCTTGTAACCATCGACATCAACACCAACCGACTAAGTGGTGAGCTGCCGGACAGCATTCTGACCT  
CAGTGAGCTGAAGATTCTTCTGTATATACTAATGATTTCTCAGGCATTG

>M6-PGSC0003DMG400003790M6LRR-RLK\_1525

TTCTGACCTCAGTGAGCTGAAGATTCTTCTGTATATACTAATGATTTCTCAGGCATTGTCCCTAAGGACT  
TTGGAAAGAACAGTCTCAATTGTCAAGTGCCAGCTTTGCAAATAACAG

>M6-PGSC0003DMG400003790M6LRR-RLK\_1586

CCTAAGGACTTTGGAAAGAACAGTCTCAATTGTCAAGTGCCAGCTTTGCAAATAACAGCTTCACTGGTG  
AACTACCTGCTGGATTGTGTAGCCCGAATCTTGAGGAGTTGACGATAAAT

>M6-PGSC0003DMG400003790M6LRR-RLK\_1647

TCACTGGTGAACCTACCTGCTGGATTGTGTAGCCCGAATCTTGAGGAGTTGACGATAAATGGGAACAAAT  
TCAGTGGGAAGTTACCAGATTGCTTGAAGAACTGCACACTGCTAAGACGAG

>M6-PGSC0003DMG400003790M6LRR-RLK\_1708

GAACAAATTCAGTGGGAAGTTACCAGATTGCTTGAAGAACTGCACACTGCTAAGACGAGTACGGCTTGA

AGGCAACAATTTATCTGGTAATCTAGCTGATGCATTTGGAGTGCACCCGAA

>M6-PGSC0003DMG400003790M6LRR-RLK\_1769

CGGCTTGAAGGCAACAATTTATCTGGTAATCTAGCTGATGCATTTGGAGTGCACCCGAATCTTGTTTACC

TTTCTCTTAGTGACAACCAACTTTCAGGTGAACTTTCACCTGACTGGGGG

>M6-PGSC0003DMG400003790M6LRR-RLK\_183

ATCTCGAAAACCTTGTGCAATTGGACATTTATTGTGTGTAATGATGGTGGAAACAATTTCTGAGATCAATCT

TTCTGATGCAGCCCTCTCAGGCTCACTTGATCACCTTGATTTCACTTCAT

>M6-PGSC0003DMG400003790M6LRR-RLK\_1830

TTGTTTACCTTTCTCTTAGTGACAACCAACTTTCAGGTGAACTTTCACCTGACTGGGGGAAATGTGAAAAT

CTCACAAGTCTAAGAATGGATGGAAACAAATTTTCTGGTGTAAATCCCAA

>M6-PGSC0003DMG400003790M6LRR-RLK\_1891

ATGTGAAAATCTCACAAGTCTAAGAATGGATGGAAACAAATTTTCTGGTGTAAATCCCAAGTGAGCTAGG

GAACCTGAGAGCGTTGCGCGTGTTAGCTTTGGAAGGAAATGAATTGACTGG

>M6-PGSC0003DMG400003790M6LRR-RLK\_1952

GAGCTAGGGAACCTGAGAGCGTTGCGCGTGTTAGCTTTGGAAGGAAATGAATTGACTGGTGAATTC

TTCTGAACTGGGGAGGTTAGACCTGCTGTACAATCTCAGCTTGAGCAAAAAC

>M6-PGSC0003DMG400003790M6LRR-RLK\_2013

AAATTCCTTCTGAACTGGGGAGGTTAGACCTGCTGTACAATCTCAGCTTGAGCAAAAACAATCTTACTGG

AGGCATCCCTCAGTCTGTTGGCAATTTAACTAAGCTCCAGTATCTTGATT

>M6-PGSC0003DMG400003790M6LRR-RLK\_2074

TCTTACTGGAGGCATCCCTCAGTCTGTTGGCAATTTAACTAAGCTCCAGTATCTTGATTTGTCAACAAATA

AGTTAAGTGGTAACATAACCAGTAGATCTTGGGAAGTGTGAGAGCCTGTT

>M6-PGSC0003DMG400003790M6LRR-RLK\_2135

TCAACAAATAAGTTAAGTGGTAACATAACCAGTAGATCTTGGGAAGTGTGAGAGCCTGTTGAGCTTGAAT

CTTGGCAACAACCTCATTATCAGGTGGGATTCCATCTGACCTTGGAATTTG

>M6-PGSC0003DMG400003790M6LRR-RLK\_2196

GCTTGAATCTTGGCAACAACCTCATTATCAGGTGGGATTCCATCTGACCTTGGAATTTGATGCAGTTGAG

TATTCTTGTGGACCTAAGTAGCAATTCGCTAACGGGAACCATTCACAAA

>M6-PGSC0003DMG400003790M6LRR-RLK\_2257

GCAGTTGAGTATTCTTGTGGACCTAAGTAGCAATTCGCTAACGGGAACCATTCCACAAAACCTTGGCCAA  
GCTCACCTCATTAAATGCATCTCAACCTCTCACATAACAACCTCTCAGGTAG

>M6-PGSC0003DMG400003790M6LRR-RLK\_2318

TTGGCCAAGCTCACCTCATTAAATGCATCTCAACCTCTCACATAACAACCTCTCAGGTAGAATTCCTCCAGC  
ATTAGCTCAGATGATCAGTCTTCAGGAGATGGATTTTTCTACAATGAG

>M6-PGSC0003DMG400003790M6LRR-RLK\_2379

TTCCTCCAGCATTAGCTCAGATGATCAGTCTTCAGGAGATGGATTTTTCTACAATGAGTTTTCTGGTCCA  
ATCCCAACCGACGGAGTATTCGAGGAGCATCCGCTAGTTCTTTTCTTG

>M6-PGSC0003DMG400003790M6LRR-RLK\_244

GATCAATCTTTCTGATGCAGCCCTCTCAGGCTCACTTGATCACCTTGATTTCACTTCATTTCCGAGTCTCGT  
GAATTTCAATCTTAATGGAAATAACTTCAGTGGATCGATACCTTCGAG

>M6-PGSC0003DMG400003790M6LRR-RLK\_2440

TTCTGGTCCAATCCCAACCGACGGAGTATTCGAGGAGCATCCGCTAGTTCTTTTCTTGAAACTCTGGTT  
TGTGTGGAAATGTAGAAGGATTATCCTCATGTAATTTGGATACCCGAAA

>M6-PGSC0003DMG400003790M6LRR-RLK\_2501

AACTCTGGTTTGTGTGGAAATGTAGAAGGATTATCCTCATGTAATTTGGATACCCGAAATGACAAGTCCA  
GAAATAATAATCAAAAGATCCTCATTGGGGTACTTGTACCGGTGGTCAGC

>M6-PGSC0003DMG400003790M6LRR-RLK\_2562

ACAAGTCCAGAAATAATAATCAAAAGATCCTCATTGGGGTACTTGTACCGGTGGTCAGCCTCATACTTTT  
GGCAATCCTGTTTGTTCATGTCTCGTGTCTCGAAGGAAGGCTAAGCAAT

>M6-PGSC0003DMG400003790M6LRR-RLK\_2623

CATACTTTTGGCAATCCTGTTTGTTCATGTCTCGTGTCTCGAAGGAAGGCTAAGCAATATGATGAGGAG  
ATCAAAGCTAGCCAGATACATGAAAATACAGAATCTCTGATTTGGGAAAG

>M6-PGSC0003DMG400003790M6LRR-RLK\_2684

GATGAGGAGATCAAAGCTAGCCAGATACATGAAAATACAGAATCTCTGATTTGGGAAAGAGAAGGGAA  
GTTTACATTTGGTGACATAGTGAAAGCTACTGAAGATTTTCAGTGAAAGGAAC

>M6-PGSC0003DMG400003790M6LRR-RLK\_2745

AAGGGAAGTTTACATTTGGTGACATAGTGAAAGCTACTGAAGATTTTCAGTGAAAGGAAGTGCATTGGAA  
GAGGAGGCTTTGGAAGTGTCTATAAAGCTGTTTTGCCCTCTGGGCAGATTG

>M6-PGSC0003DMG400003790M6LRR-RLK\_2806

CATTGGAAGAGGAGGCTTTGGAAGTGTCTATAAAGCTGTTTTGCCCTCTGGGCAGATTGTTGCAGTCAA  
AAGACTCAACATGTCAGACTCAAGTGACATTCCATTGACTAATCGTCTGAAG

>M6-PGSC0003DMG400003790M6LRR-RLK\_2867

GCAGTCAAAAGACTCAACATGTCAGACTCAAGTGACATTCCATTGACTAATCGTCTGAAGCTTTGAGAAT  
GAGATTAGAACTTTGACAGAGGTGAGACACAGGAATATAATTAAGCTCTTT

>M6-PGSC0003DMG400003790M6LRR-RLK\_2928

TTGAGAATGAGATTAGAACTTTGACAGAGGTGAGACACAGGAATATAATTAAGCTCTTTGGTTACTGTT  
CCAAGAATGGGTGCATGTACTTGGTTTATGAGTATATAGAAAGAGGTAGCC

>M6-PGSC0003DMG400003790M6LRR-RLK\_2989

TTACTGTTCCAAGAATGGGTGCATGTACTTGGTTTATGAGTATATAGAAAGAGGTAGCCTCGGGAAAGT  
TCTATATGATAATGAGATGGGAATGGAACCTGGATGGGGTACAAGAGTGAA

>M6-PGSC0003DMG400003790M6LRR-RLK\_305

CCGAGTCTCGTGAATTTCAATCTTAATGGAAATAACTTCAGTGGATCGATACCTTCGAGTATTGGCAATG  
CCTCATTGCTCACTTTCTTGGACCTGAGTAACAATATCTTGTCAGGTGTC

>M6-PGSC0003DMG400003790M6LRR-RLK\_3050

GGGAAAGTTCTATATGATAATGAGATGGGAATGGAACCTGGATGGGGTACAAGAGTGAAAATTGTGCA  
AGGAATAGCTCATGCACTCGCTTACTTGCACCATGACTGCTCTCCACCCATT

>M6-PGSC0003DMG400003790M6LRR-RLK\_3111

TTGTGCAAGGAATAGCTCATGCACTCGCTTACTTGCACCATGACTGCTCTCCACCCATTGTGCACCGTGAT  
GTATCATTGAACAACATTTTGTCTGAATCAGAATTCGAGCCACGACTCT

>M6-PGSC0003DMG400003790M6LRR-RLK\_3172

GCACCGTGATGTATCATTGAACAACATTTTGTCTGAATCAGAATTCGAGCCACGACTCTCTGACTTTGGC  
ACAGCAAAGTTGCTAGCTTCAGACTCATCAAATTGGACCACAGTTGCTGG

>M6-PGSC0003DMG400003790M6LRR-RLK\_3233

GACTTTGGCACAGCAAAGTTGCTAGCTTCAGACTCATCAAATTGGACCACAGTTGCTGGTTCTTATGGCT  
ATATGGCACCAGGTATGTTACATACTCATTACCTAATGCATCCATATTTT

>M6-PGSC0003DMG400003790M6LRR-RLK\_3294

CTTATGGCTATATGGCACCAGGTATGTTACATACTCATTACCTAATGCATCCATATTTCTGTTGATTAAGT

AGTATATTCATTGGAAGGATACTTCAATAATAGTGTCTTTCTTCTTG

>M6-PGSC0003DMG400003790M6LRR-RLK\_3355

TTGATTAAGTAGTATATTCATTGGAAGGATACTTCAATAATAGTGTCTTTCTTCTTGTCAGAGCTTGCAC

TTACCATGCGTGTTACAGAAAAGTGTGATGTCTATAGTTTTGGAGTCAT

>M6-PGSC0003DMG400003790M6LRR-RLK\_3416

GAGCTTGCACTTACCATGCGTGTTACAGAAAAGTGTGATGTCTATAGTTTTGGAGTCATAGCAATGGAG

ACTATGATGGGAAGGCATCCAGGGGAGCTTTTAACTTCATTATCAGCATCA

>M6-PGSC0003DMG400003790M6LRR-RLK\_3477

CAATGGAGACTATGATGGGAAGGCATCCAGGGGAGCTTTTAACTTCATTATCAGCATCAACAACATTGT

CTCCAGAAATACTTTTGAAGGATGTTCTTGACCAAAGACTTCCACCTCCCA

>M6-PGSC0003DMG400003790M6LRR-RLK\_3538

AACATTGTCTCCAGAAATACTTTTGAAGGATGTTCTTGACCAAAGACTTCCACCTCCCACCAGCCACTTGG

CAGAGGCAGTGGTTTTTGTGATCACAATTGCCTTGGCATGTACACGTAC

>M6-PGSC0003DMG400003790M6LRR-RLK\_3599

AGCCACTTGGCAGAGGCAGTGGTTTTTGTGATCACAATTGCCTTGGCATGTACACGTACCACTCCTGAAT

CGCGACCAACCATGCGTTGTGTAGCACAAGAATTGTCTGTTTCAGACTTTG

>M6-PGSC0003DMG400003790M6LRR-RLK\_366

TTGGCAATGCCTCATTGCTCACTTTCTTGGACCTGAGTAACAATATCTTGTTCAGGTGTCATACCTGAAGA

GATTGGAAAATTGAATCAACTTGAGTATCTAAGTTTTTATAACAACAATA

>M6-PGSC0003DMG400003790M6LRR-RLK\_3660

CTCCTGAATCGCGACCAACCATGCGTTGTGTAGCACAAGAATTGTCTGTTTCAGACTTTGCCTTACCTTCCA

CAGCCATTGGGGACAATAGAAATGAGCAAATAACAAGTTTTTCAGAAAT

>M6-PGSC0003DMG400003790M6LRR-RLK\_3721

TTACCTTCCACAGCCATTGGGGACAATAGAAATGAGCAAATAACAAGTTTTTCAGAAATAATGAGAAGA

TAGAACCTCATGTACAGGTGTGAAATGTACAGACTGTAGAGTTTTAGTGTT

>M6-PGSC0003DMG400003790M6LRR-RLK\_3782

TGAGAAGATAGAACCTCATGTACAGGTGTGAAATGTACAGACTGTAGAGTTTTAGTGTTGTAATGCAAC

TTCCTCAAGATCTAAGGTCTATATAGTATCAAGGATGAAACCTTGGATCTA

>M6-PGSC0003DMG400003790M6LRR-RLK\_3843

AATGCAACTTCCTCAAGATCTAAGGTCTATATAGTATCAAGGATGAAACCTTGGATCTATCCAAATTACT  
ATGTTTCTTTTGCACCTTTCCCTAGAAAAAAGAAATAATATCATCCTGT

>M6-PGSC0003DMG400003790M6LRR-RLK\_3904

CAAATTACTATGTTTCTTTTGCACCTTTCCCTAGAAAAAAGAAATAATATCATCCTGTTAATCATGAATG  
TTACAAAGTTGGTATATTCATTTGGACTAGTATGAATGTTACAAAGTTG

>M6-PGSC0003DMG400003790M6LRR-RLK\_3965

ATCATGAATGTTACAAAGTTGGTATATTCATTTGGACTAGTATGAATGTTACAAAGTTGCACAATCCCTT  
ATCCTAGTCTTTACGTTATTGCTAGGCCAAAACACTAGCAGAAAGATACA

>M6-PGSC0003DMG400003790M6LRR-RLK\_4026

CAATTCCTTATCCTAGTCTTTACGTTATTGCTAGGCCAAAACACTAGCAGAAAGATACAATGTGTTCACTT  
GCAATAAAAATAGCAACCTAACAAAAATTTGGCAAAGAATACATCACAC

>M6-PGSC0003DMG400003790M6LRR-RLK\_4087

GTGTTCACTTGCAATAAAAATAGCAACCTAACAAAAATTTGGCAAAGAATACATCACACAGATACCAGG  
CATGGTACTTAGCATTCCACTCCACACTGCTTGAGTATAGGTCCCTTCTGC

>M6-PGSC0003DMG400003790M6LRR-RLK\_4148

ATACCAGGCATGGTACTTAGCATTCCACTCCACACTGCTTGAGTATAGGTCCCTTCTGCTTTGGTAGGAA  
TGGGTCTATTGCACCCAAACAAGTGAGAAGATTGAAGCAAGAAGAATTG

>M6-PGSC0003DMG400003790M6LRR-RLK\_4209

TGGTAGGAATGGGTCTATTGCACCCAAACAAGTGAGAAGATTGAAGCAAGAAGAATTGACCAGAGGA  
CCACAATGGTGGGAGTCCTGTTCTGCCTGCCATCAATCCCTTTAGGAAAGG

>M6-PGSC0003DMG400003790M6LRR-RLK\_427

ACCTGAAGAGATTGGAAAATTGAATCAACTTGAGTATCTAAGTTTTTATAACAACAATATCGAAGGTGTG  
ATTCCGTATCAGATTAGCAATCTGCAGAAGGTAATGCACTTGGATCTTGG

>M6-PGSC0003DMG400003790M6LRR-RLK\_4270

CAGAGGACCACAATGGTGGGAGTCCTGTTCTGCCTGCCATCAATCCCTTTAGGAAAGGATAGAGATGC  
ACAATAACCCAAAAGGCGAAGAATAACTTTCCGAAGAGAGGACCCCATGAA

>M6-PGSC0003DMG400003790M6LRR-RLK\_4331

AGAGATGCACAATAACCCAAAAGGCGAAGAATAACTTTCCGAAGAGAGGACCCCATGAACCGTAACCA  
TTGTTGATGGCATCCGAAACACCAGCTACAACACCGACCATATTCAAGATGA



>M6-PGSC0003DMG400003790M6LRR-RLK\_4392

GTAACCATTGTTGATGGCATCCGAAACACCAGCTACAACACCGACCATATTCAAGATGATCAGAGTGGT  
TGGTGGGATAAGAAGTGTGGTCCATTTGAAGAGGTAAAGCTCCCCAAATTC

>M6-PGSC0003DMG400003790M6LRR-RLK\_4453

AGAGTGGTTGGTGGGATAAGAAGTGTGGTCCATTTGAAGAGGTAAAGCTCCCCAAATTCAGCATCATCA  
GCTGCTTTTGTATGTTACAGTAAAGTTTGTGTCTACACCAGCAAGAACTTTA

>M6-PGSC0003DMG400003790M6LRR-RLK\_4514

CATCATCAGCTGCTTTTGTATGTTACAGTAAAGTTTGTGTCTACACCAGCAAGAACTTTAAGAAGGCCTTG  
GAAAACCTGCAAACAAATGTGCTGAAACACCACCGATGACCCAAAATTGCT

>M6-PGSC0003DMG400003790M6LRR-RLK\_4575

AAGGCCTTGAAAACCTGCAAACAAATGTGCTGAAACACCACCGATGACCCAAAATTGCTCGTTACGCCA  
CCAGGCCTCAATGCTTACTCCACTCCATCGCAGCTCGAGTACACTTGTGGC

>M6-PGSC0003DMG400003790M6LRR-RLK\_4636

TTACGCCACCAGGCCTCAATGCTTACTCCACTCCATCGCAGCTCGAGTACACTTGTGGCTATGATGGAGA  
TAAAGAGAGCCATGAACCAAATGCTTGCAAAGTTGTTAAGCTACAAAACA

>M6-PGSC0003DMG400003790M6LRR-RLK\_4697

TGATGGAGATAAAGAGAGCCATGAACCAAATGCTTGCAAAGTTGTTAAGCTACAAAACAAACATGGATT  
TTGATTTATAAAATCTAAATCAAATCTTTATATTACCGAACCAAATGACTT

>M6-PGSC0003DMG400003790M6LRR-RLK\_4758

CATGGATTTTGTATTTATAAAATCTAAATCAAATCTTTATATTACCGAACCAAATGACTTCAGTTCACTTACT  
GTGGGGACGATAAATTTTCCAGTGAGAAGGCATACAGCTGGAAGGGTG

>M6-PGSC0003DMG400003790M6LRR-RLK\_4819

GTTCACTTACTGTGGGGACGATAAATTTTCCAGTGAGAAGGCATACAGCTGGAAGGGTGCAGTAAGCTA  
GCAGAGCAATGGAAGTGAATGGGTAAACAATGGTGTTAATGTATGCTAGCC

>M6-PGSC0003DMG400003790M6LRR-RLK\_488

GAAGGTGTGATTCCGTATCAGATTAGCAATCTGCAGAAGGTAATGCACTTGGATCTTGGATCAAATTTCT  
TAGAAACTCCTGATTGGTTGAAGATGAAAAATATGCCTGTGTTGACGTAT

>M6-PGSC0003DMG400003790M6LRR-RLK\_4880

GTAAGCTAGCAGAGCAATGGAAGTGAATGGGTAAACAATGGTGTTAATGTATGCTAGCCTTTCCAACCA

TTTGAGTTTTCCACCCCAGGCATACCAAAGGGGACAATGACGACTCATGAA

>M6-PGSC0003DMG400003790M6LRR-RLK\_4941

TCCAACCATTTGAGTTTTCCACCCCAGGCATACCAAAGGGGACAATGACGACTCATGAAGATCTCGACA  
GAACCAAGAGCCCATCTCAGGACTTGGTGCAATCTATCTGATAGATTGATT

>M6-PGSC0003DMG400003790M6LRR-RLK\_5002

TCTCGACAGAACCAAGAGCCCATCTCAGGACTTGGTGCAATCTATCTGATAGATTGATTGGGGCTGATCC  
CTTAAAAGCTGCTCTCTTCGGACAGCAATAAACTGATCTCCATCCTCTGC

>M6-PGSC0003DMG400003790M6LRR-RLK\_5059

TTGGGGCTGATCCCTTAAAAGCTGCTCTCTTCGGACAGCAATAAACTGATCTCCATCCTCTGCAGTGCAT  
CTTAAATCCAGTCAAATGTCTCTGTGACAGAACCATAAATCCATCCAA

>M6-PGSC0003DMG400003790M6LRR-RLK\_549

CAAATTTCTTAGAAACTCCTGATTGGTTGAAGATGAAAAATATGCCTGTGTTGACGTATCTAAGCTTTGG  
TTATAATGAACTGAGGTTAGAATCCCTGAATTCGTAATTCGTTGTCATA

>M6-PGSC0003DMG400003790M6LRR-RLK\_61

GCTACTTCTTTTTTCACTTCCATTAAGTATCACATCTTCAGCAAGAACAGAAGCTGAATCTCTTGTCAAAT  
GGAAGAGAAATTTACCTTCTACGTCTTTCTTGACTCATGGTCCATTTT

>M6-PGSC0003DMG400003790M6LRR-RLK\_610

AAGCTTTGGTTATAATGAACTGAGGTTAGAATCCCTGAATTCGTAATTCGTTGTCATAATCTAACATATC  
TTGATTTATCGATAAATCATTCAATGGTTCGATTCCTGAAACAGTATT

>M6-PGSC0003DMG400003790M6LRR-RLK\_671

CTAACATATCTTGATTTATCGATAAATCATTTCATGGTTCGATTCCTGAAACAGTATTTACCAACTTGATC  
AACCTTGAAAGACTTAATCTTTCATCTAATTCATTTCAAGGTTTCATTG

>M6-PGSC0003DMG400003790M6LRR-RLK\_732

CCAACCTTGATCAACCTTGAAAGACTTAATCTTTCATCTAATTCATTTCAAGGTTTCATTGTCACCAAATTTTA  
CCAAGTTGTCTAAGTTAAAAGAATTCAGCTAGGTGTTAACATGTTTT

>M6-PGSC0003DMG400003790M6LRR-RLK\_793

ACCAAATTTTACCAAGTTGTCTAAGTTAAAAGAATTCAGCTAGGTGTTAACATGTTTTCTGGTTTAATTC  
CTGATGAAATTGGCTTGATTACTAGTCTTGAAGTTCTTGTACTTTTCAA

>M6-PGSC0003DMG400003790M6LRR-RLK\_854

GGTTTAATTCCTGATGAAATTGGCTTGACTAGTCTTGAAGTTCTTGACTTTTCAACAATTCATTTGA  
AGGAAAGATTCCATCTTCTATAGGTAGACTCATAAATCTTCAACGGTTG

>M6-PGSC0003DMG400003790M6LRR-RLK\_915

ATTCATTTGAAGGAAAGATTCCATCTTCTATAGGTAGACTCATAAATCTTCAACGGTTGGATCTTCGAAA  
GAACGATTTGAATTCAACTATTCCTTCTGAGCTTGGTTTTTGTACTAAAC

>M6-PGSC0003DMG400003790M6LRR-RLK\_976

TCTTCGAAAGAACGATTTGAATTCAACTATTCCTTCTGAGCTTGGTTTTTGTACTAAACTCACTTTCTTAGC  
TCTAGCAGAAAATGACCTGCAAGGGTCATTGCCTCCATCATTCTCCTC

>M6-PGSC0003DMG400003802M6LRR-RLP\_0

ATGTTTGAATTCGCCCCGAAATTGCAGAAGCGAGGCGGAGAGTTGATTAGCGAGTTTTGCAGTGAAATT  
GGAGTCGAAAAATGGGGTTTTAAGGTACGGTTGCACAATAGGACACCTTCA

>M6-PGSC0003DMG400003802M6LRR-RLP\_1054

GGGAGAGCTCAACATTTGTGGATGCTTTGGTATGGAGTTGTCAGCCTAGGAGACTCAACGTGCATTCAA  
CAAGAGAAAAGATCACATTTTTTCATTGATCATTTGATGTATATGAAGAATT

>M6-PGSC0003DMG400003802M6LRR-RLP\_1178

TCAGTCTACTTCTCATGGAAGCACGCCTCTTCTTAGTCAATTAAGGAGTAAAGCCTACAAATTTGAT  
AGGAAGAAGGAGAGTTGGCATCCTGTGGAACACAAAAGTAGTGAGCTGGT

>M6-PGSC0003DMG400003802M6LRR-RLP\_1230

AAAGCCTACAAATTTGATAGGAAGAAGGAGAGTTGGCATCCTGTGGAACACAAAAGTAGTGAGCTGGT  
AACAACTCTGAAATGTGGGATTGGTGTATTTTTTATTAGATTGGTGA

>M6-PGSC0003DMG400003802M6LRR-RLP\_186

CGGATGAGCATTCTTCCAAAACATGGCTGCAAGCCTGGTCGACTCTTCCAACTTGGATTTACAGTTG  
ATTTTTCTAAAGGCAACGATATGAAAATAGTGGATGATATAATGGAGAGA

>M6-PGSC0003DMG400003802M6LRR-RLP\_248

CACAGTTGATTTTTCTAAAGGCAACGATATGAAAATAGTGGATGATATAATGGAGAGATATAGGGACG  
GAAAATCCCTATAGAAAAGTTTGAATTATCAGATGATCGTTTGTCTTTGA

>M6-PGSC0003DMG400003802M6LRR-RLP\_310

GGGACGGAAAAATCCCTATAGAAAAGTTTGAATTATCAGATGATCGTTTGTCTTTGAAAATCCTCATGG  
AGTTTTAGTTGTCCCTATGATTGATAAGTGGCTTGGCATTGTACTAACAA

>M6-PGSC0003DMG400003802M6LRR-RLP\_372

CCTCATGGAGTTTTAGTTGTCCCTATGATTGATAAGTGGCTTGGCATTGTACTAACAAATGGTGATAAAG  
ACCTTACCATATCATCATAACCCTTGTTATTTTCGCAATCTTGGCGGTA

>M6-PGSC0003DMG400003802M6LRR-RLP\_434

TGTAAAAGACCTTACCATATCATCATAACCCTTGTTATTTTCGCAATCTTGGCGGTAAAATCTGTGAGAA  
AATTGGTTCTGGAATCTTGTATTCTTTGCCTAGTGTTGTTGTGAATTG

>M6-PGSC0003DMG400003802M6LRR-RLP\_496

CTGTGAGAAAATTGGTTCTGGAATCTTGTATTCTTTGCCTAGTGTTGTTGTGAATTGCAATTCTTTGAGG  
AACTTTCTCTATCTTATGTAAGATTAGATGAAAACATGCTTCAGGCTC

>M6-PGSC0003DMG400003802M6LRR-RLP\_558

TCTTTGAGGAACTTTCTCTATCTTATGTAAGATTAGATGAAAACATGCTTCAGGCTCTACTTAATAGCTG  
TCCGTTGATTGAATCTTTCATATTTGAGTATTGCAAGGGCTTGGAAACA

>M6-PGSC0003DMG400003802M6LRR-RLP\_62

TGAAATTGGAGTCGAAAAATGGGGTTTTAAAGGTACGGTTCACAATAGGACACCTTCAATTGATATATT  
GTCGGAATGTCTCATTCAAAAATACTCTGTTGTCTTAGTTTTAAAGAAGC

>M6-PGSC0003DMG400003802M6LRR-RLP\_620

TAATAGCTGTCCGTTGATTGAATCTTTCATATTTGAGTATTGCAAGGGCTTGGAAACAATGAATCATCAA  
AAGATTAAGTCGTTTTCCCTGAAGTTCTTGAAGATTCGGCATTGTGGGGG

>M6-PGSC0003DMG400003802M6LRR-RLP\_744

TGGGAGATTGATGCTCCAAATTTGGTATCACTTAAGTACACTTGGGAAGACATTCTCAAATTTAAATTG  
TGAGAGAGTCAAGACAAATGAAGTACTCAAGAATCATTCTTGAATGCTTA

>M6-PGSC0003DMG400003802M6LRR-RLP\_806

TAAAATTGTGAGAGAGTCAAGACAAATGAAGTACTCAAGAATCATTCTTGAATGCTTAGACAGTGACAA  
TGTAATGCTGCATGGTTTTGTAAGTTGAGGAAGTTTCTGTCAAATTCGAT

>M6-PGSC0003DMG400003802M6LRR-RLP\_868

GTGACAATGTAAATGCTGCATGGTTTTGTAAGTTGAGGAAGTTTCTGTCAAATTCGATCTCTTGGTCTGA  
AGTTCGCATTGAATCTTATAGATGCAATGACATCAACATTCAAATTTGC

>M6-PGSC0003DMG400003802M6LRR-RLP\_930

TGGTCTGAAGTTCGCATTGAATCTTATAGATGCAATGACATCAACATTCAAATTTGCAACTGGACCATA

AAGATTCTAATCCCCACGTGGACGTTTTAAATGTCAACATTATATGGAAG

>M6-PGSC0003DMG400003802M6LRR-RLP\_992

GGACCATAAAGATTCTAATCCCCACGTGGACGTTTTAAATGTCAACATTATATGGAAGAATGGGGAGAG  
CTCAACATTTGTGGATGCTTTGGTATGGAGTTGTCAGCCTAGGAGACTCAA

>M6-PGSC0003DMG400003814M6LRR-RLP\_0

ACCCAATTGATTTCTTAGCTTTACAAGCGATTTCGAAAAGGCTTGGATGATTTGCCCGGTTCCAACATTTT  
GCTTCTGGGATTTCACTTCTGAGCCGTGCAACTTCGCCGGAGTTTACT

>M6-PGSC0003DMG400003814M6LRR-RLP\_1011

TGCAGTATAATTGCATGATTCCGCCGGTTGAGACGGCTTGTCCGTTGAAAGCCGGGAAGCAGAAGAGT  
AGGCCTACAAATCAGTGTGTGGAGTGGAAGGGGCAAAAGAGTGAAAAACAA

>M6-PGSC0003DMG400003814M6LRR-RLP\_128

GATAAAGTGATCGCCTTGAATCTCGGTGATCCCAGAGCTGGATCACCGGGTTTGACCGGAACTTGGAT  
CCTTCTATTGGGAACTCTCTGCTCTTGCTGAGTTCACGGTGGTTCCGGGT

>M6-PGSC0003DMG400003814M6LRR-RLP\_192

TGGATCCTTCTATTGGGAACTCTCTGCTCTTGCTGAGTTCACGGTGGTTCCGGGTCCGATAACCGGTGC  
ATTGCCGAAAGTTTTTCTCAGTTGAAGAACCTGAGATTTCTAGGAGTTA

>M6-PGSC0003DMG400003814M6LRR-RLP\_256

CGGTGCATTGCCGAAAGTTTTTCTCAGTTGAAGAACCTGAGATTTCTAGGAGTTAGCCGGAACCTTCTC  
TCCGGTGATATTCCGGCGTCATTAGGCCTGCTCCGGGAGCTACAACTCT

>M6-PGSC0003DMG400003814M6LRR-RLP\_320

TTTCTCTCCGGTGATATTCCGGCGTCATTAGGCCTGCTCCGGGAGCTACAACTCTTGATCTTAGTTTCAA  
TCAGCTGACTGGGAGTATCCCTGGGCTATTGGAGCTCTTCCGGCATTG

>M6-PGSC0003DMG400003814M6LRR-RLP\_384

GTTTCAATCAGCTGACTGGGAGTATCCCTGGGCTATTGGAGCTCTTCCGGCATTGTCCAACATTATACTC  
TGTCACAATCATTTGTCCGGTTCGATCCCACCATTCGTATCCCAAAGAT

>M6-PGSC0003DMG400003814M6LRR-RLP\_448

TATACTCTGTCACAATCATTTGTCCGGTTCGATCCCACCATTCGTATCCCAAAGATTGACCCGTTTAGACC  
TTAAACACAACCTCACTTTCAGGTACCCTTTTGCCTAATCACTTCCTTC

>M6-PGSC0003DMG400003814M6LRR-RLP\_512

TTAGACCTTAAACACAACACTCACTTTCAGGTACCCTTTTGCCTAATTCACCTTCCTTCATCGCTTCAATACTTG  
TCATTGTCATGGAACCAGTTAACCGGTCCAGTAGATTATCAGTTGAGT

>M6-PGSC0003DMG400003814M6LRR-RLP\_576

AATACTTGTCATTGTCATGGAACCAGTTAACCGGTCCAGTAGATTATCAGTTGAGTCGGCTGAACCAGTT  
GAATTACCTCGATCTTAGCTTGAACCGGTTACCGGCTGCATTCCGGGAA

>M6-PGSC0003DMG400003814M6LRR-RLP\_64

CTATTTTGCTTCCTGGGATTTCACTTCTGAGCCGTGCAACTTCGCCGGAGTTTACTGCGATGGAGATAAA  
GTGATCGCCTTGAATCTCGGTGATCCCAGAGCTGGATCACCGGGTTTGAC

>M6-PGSC0003DMG400003814M6LRR-RLP\_640

CCAGTTGAATTACCTCGATCTTAGCTTGAACCGGTTACCGGCTGCATTCCGGGAATCTTATTTACTTTCC  
CACTCACAATCTTCAGCTACAAAGGAATCTATTTTCGGGTCCGGTTTT

>M6-PGSC0003DMG400003814M6LRR-RLP\_704

ACTTTCCCACTCACAATCTTCAGCTACAAAGGAATCTATTTTCGGGTCCGGTTTTACCCATTTTCAGAGGT  
GACAATCCGACGGTGGACATTAGCTTTAACAGGTTTTTCGGGGAGATA

>M6-PGSC0003DMG400003814M6LRR-RLP\_768

CAGAGGTGACAATCCGACGGTGGACATTAGCTTTAACAGGTTTTTCGGGGAGATATCTCCATTGTTGTG  
TAATGTGGAGAATTTGTATCTGAACAATAACCGGTTACCGGTAAGGTGC

>M6-PGSC0003DMG400003814M6LRR-RLP\_832

GTTGTGTAATGTGGAGAATTTGTATCTGAACAATAACCGGTTACCGGTAAGGTGCCGGCGGTGTTGGT  
GGACCGGTTATTATCTGCCGGAATACAAGTTTTATTTACAGCATAATTT

>M6-PGSC0003DMG400003814M6LRR-RLP\_896

TTGGTGGACCGGTTATTATCTGCCGGAATACAAGTTTTATTTACAGCATAATTTCTGACGGGGATTG  
AGATAAATCCGAGGGTGGAAATCCGGTGAGCAGTTCATTGTGTTTGCAG

>M6-PGSC0003DMG400003814M6LRR-RLP\_960

GGATTGAGATAAATCCGAGGGTGGAAATCCGGTGAGCAGTTCATTGTGTTTGCAGTATAATTGCATGA  
TTCCGCCGGTTGAGACGGCTTGCCGTTGAAAGCCGGGAAGCAGAAGAGTA

>M6-PGSC0003DMG400003822M6LRR-RLP\_5124

TGCATCTTAAATCCAGTCAAATGTCCTCTGTGACAGAACCATAAATCCATCCAATCTGTCAAAAAAAGA  
AAAATGAAAACCAATTTATTAGAAGTTAGCTAAGCGAACACCCATAACTC

>M6-PGSC0003DMG400003822M6LRR-RLP\_5185

AAAAAAGAAAAATGAAAACCAATTTATTAGAAGTTAGCTAAGCGAACACCCATAACTCATAATTTATTC  
ATGAAATATAATGCTAACCTCTTTGCCCCAGTCAGTTTTCTCTTCATACC

>M6-PGSC0003DMG400003822M6LRR-RLP\_5246

AATTTATTCATGAAATATAATGCTAACCTCTTTGCCCCAGTCAGTTTTCTCTTCATACCCACAGCTAATAAC  
ATGAATAGCTTCCTTTATGAGTGTTGTCGGGTTTGTCCCTTCAGGAAG

>M6-PGSC0003DMG400003822M6LRR-RLP\_5307

CAGCTAATAACATGAATAGCTTCCTTTATGAGTGTTGTCGGGTTTGTCCCTTCAGGAAGCCCACCATCTTC  
CTTAAGTGTGGAAGCTATGAAAACGGGGGACTGCCCGAATCGTTTCTCA

>M6-PGSC0003DMG400003822M6LRR-RLP\_5368

CACCATCTTCCTTAAGTGTGGAAGCTATGAAAACGGGGGACTGCCCGAATCGTTTCTCAAAGTTCTTTTG  
GGACATGAGAGATGACTTCTCAAGCTCATCATATCCTTCAAGGCCTTCTT

>M6-PGSC0003DMG400003822M6LRR-RLP\_5429

GTTCTTTTGGGACATGAGAGATGACTTCTCAAGCTCATCATATCCTTCAAGGCCTTCTTCAATTCCTCAA  
GATCAAAGACAGGTCCAGATGGCTTCCTAGTGTAGTTCTTTCCATTCAT

>M6-PGSC0003DMG400003822M6LRR-RLP\_5490

ATTTCTCAAGATCAAAGACAGGTCCAGATGGCTTCCTAGTGTAGTTCTTTCCATTCATTGTTTTCTTTTTC  
TTGTTGTATAGTCCTCCAAGTCCAAGTAAGGCCTTGATGCTCTTCTTC

>M6-PGSC0003DMG400003822M6LRR-RLP\_5551

TTTTCTTTTTCTTGTTGTATAGTCCTCCAAGTCCAAGTAAGGCCTTGATGCTCTTCTTCTTAGACTTGGACT  
TGGACTTTCTTGAACCACCACAACAGCAACTGGGCCAGCAATCACATG

>M6-PGSC0003DMG400003822M6LRR-RLP\_5612

AGACTTGGACTTGGACTTTCTTGAACCACCACAACAGCAACTGGGCCAGCAATCACATGTCATCTTTTGA  
CGCTTCTCAGAAACAGGTGGATCATAGCCGTATAACGCCTGCCTGTTAAA

>M6-PGSC0003DMG400003822M6LRR-RLP\_5673

ATCTTTTGACGCTTCTCAGAAACAGGTGGATCATAGCCGTATAACGCCTGCCTGTTAAAGACAGTACCTG  
TTCCAACATAAACTGGTCCTTGAATTCCATCCAGGCCTTTCATGTTGATC

>M6-PGSC0003DMG400003822M6LRR-RLP\_5734

CAGTACCTGTTCCAACATAAACTGGTCCTTGAATTCCATCCAGGCCTTTCATGTTGATCTGCCACCATGAA

GGGAAAAAAGCATATTAATACCGGAATAAATCCTTTGTCAACGCATTG

>M6-PGSC0003DMG400003822M6LRR-RLP\_5795

CCACCATGAAGGGAAAAAAGCATATTAATACCGGAATAAATCCTTTGTCAACGCATTGCTGTATATATA  
GATCAACTTACATCAAAAAAGACAACATTACGATTGGCATATCGATCGTG

>M6-PGSC0003DMG400003822M6LRR-RLP\_5856

GTATATATAGATCAACTTACATCAAAAAAGACAACATTACGATTGGCATATCGATCGTGGCGATCAATAC  
CATCAAATCTCTGGGGAAATTGGACATAGCATAGCTTCTTTCCAATTTGT

>M6-PGSC0003DMG400003822M6LRR-RLP\_5917

GATCAATACCATCAAATCTCTGGGGAAATTGGACATAGCATAGCTTCTTTCCAATTTGTGGGTCCATTAA  
AAAGCACATGGCTTCTCTAACTGCCTTGCTGTTGTTAAGGTAGTGATCAC

>M6-PGSC0003DMG400003822M6LRR-RLP\_5978

GTCCATTA AAAAGCACATGGCTTCTCTAACTGCCTTGCTGTTGTTAAGGTAGTGATCACAATCCAAGTTC  
AACATAAATGGTGCATTGGTCAGGACTGCAGCGACTCGAACCTATTTAGA

>M6-PGSC0003DMG400003822M6LRR-RLP\_6039

TCCAAGTTCAACATAAATGGTGCATTGGTCAGGACTGCAGCGACTCGAACCTATTTAGAAAAACAGCAC  
AAATTACATAACATTAAGAAAAGGACTTAGCAGAATGTCGAGGAAGCAAGC

>M6-PGSC0003DMG400003822M6LRR-RLP\_6100

AACAGCACA AATTACATAACATTAAGAAAAGGACTTAGCAGAATGTCGAGGAAGCAAGCCAGAAACTA  
ATATACTAATTACTAACCAAAGCATTTCATGGCACCAGCTTTCTTGTGGTGTT

>M6-PGSC0003DMG400003822M6LRR-RLP\_6161

GAAACTAATATACTAATTACTAACCAAAGCATTTCATGGCACCAGCTTTCTTGTGGTGTTGATAGCCCGGT  
CGTTTCTCACGAGAAACATAGACAAGGCGGGGAAGCTCCTTACCTTCAAT

>M6-PGSC0003DMG400003822M6LRR-RLP\_6222

TAGCCCGGTCTGTTTCTCACGAGAAACATAGACAAGGCGGGGAAGCTCCTTACCTTCAATGTCAAGTGCA  
CCTTCACTACCAAGATAAACTTGAATCATACCAGGATGGTCTCTGGTGTTG

>M6-PGSC0003DMG400003822M6LRR-RLP\_6283

CAAGTGACCTTCACTACCAAGATAAACTTGAATCATACCAGGATGGTCTCTGGTGTTGTTACCGGGCCA  
TGGAGTTCCATCTTGCATTACCCATCCCTCTTCTGGTTTTTTCTGAGCTT

>M6-PGSC0003DMG400003822M6LRR-RLP\_6344



ACCGGGCCATGGAGTTCATCTTGCATTACCCATCCCTCTTCTGGTTTTTCTGAGCTTTTGCTACTAATGC  
ATTAATTCTTACTTTGAATTCTTCATATTCTCTCTGCCACAAGAGAGT

>M6-PGSC0003DMG400003822M6LRR-RLP\_6405

GCTACTAATGCATTAATTCTTACTTTGAATTCTTCATATTCTCTCTGCCACAAGAGAGTGAGTTTTCAATTT  
GCAGAAAAATCTTATTTCAAGCCAAAGAACTTAAGCCCCGATAAAT

>M6-PGSC0003DMG400003822M6LRR-RLP\_6466

GTTTTCAATTTGCAGAAAAATCTTATTTCAAGCCAAAGAACTTAAGCCCCGATAAATGATACTCCTTCT  
ATCCCAACTTCTATGACATTCTTATATTTTGGGCACGTCCTAAAATGTT

>M6-PGSC0003DMG400003822M6LRR-RLP\_6527

TACTCCTTCTATCCCAACTTCTATGACATTCTTATATTTTGGGCACGTCCTAAAATGTTTGACATGATTCT  
TCTACAACCTTCACAATAAACTATTTGAATTTTAAACCTTGATAGGAT

>M6-PGSC0003DMG400003822M6LRR-RLP\_6588

ACATGATTCCTTCTACAACCTTCACAATAAACTATTTGAATTTTAAACCTTGATAGGATTCAGTCAACATTT  
TAGGCACTGCATCTCCTCTGATATAGTCGTATAAAATGAGACGAAATG

>M6-PGSC0003DMG400003822M6LRR-RLP\_6649

AGTCAACATTTTAGGCACTGCATCTCCTCTGATATAGTCGTATAAAATGAGACGAAATGAAGTAATAGAT  
ACATACCTTCATGGCCCTGCGATCCTTGACAAAGGTAGGCTGAACTTTAT

>M6-PGSC0003DMG400003822M6LRR-RLP\_6710

GTAATAGATACATACCTTCATGGCCCTGCGATCCTTGACAAAGGTAGGCTGAACTTTATCTTTCAAGTAA  
TCAATCTTTTCATTGAAGTAGAAATCGGGTGCTCTAGGCTCTACACTATA

>M6-PGSC0003DMG400003822M6LRR-RLP\_6771

TTCAAGTAATCAATCTTTTCATTGAAGTAGAAATCGGGTGCTCTAGGCTCTACACTATATTTCTTACAAAA  
TGGCACCCATCTCCTGGCAAATTCAGCTGTTTCTGCTAATGAATCGAAC

>M6-PGSC0003DMG400003822M6LRR-RLP\_6832

TCTTACAAAATGGCACCCATCTCCTGGCAAATTCAGCTGTTTCTGCTAATGAATCGAACAACAGCATGGA  
AGCACCATCATCTGAAACATAACAGCTAACCTTCTCGACAGGATAATCAA

>M6-PGSC0003DMG400003822M6LRR-RLP\_6893

CAGCATGGAAGCACCATCATCTGAAACATAACAGCTAACCTTCTCGACAGGATAATCAACAGCCAAGAT  
TGACAGAACAGTGTTTGCAGTGATAATAGGAGGCTCCTTAAGAGGATCAAC

>M6-PGSC0003DMG400003822M6LRR-RLP\_6954

GCCAAGATTGACAGAACAGTGTTTGCAGTGATAATAGGAGGCTCCTTAAGAGGATCAACAGTACTCACA  
AACACATCCACTGGGGCTAATCGATTTGGCTCGCCTTCACGTTCAAACCTC

>M6-PGSC0003DMG400003822M6LRR-RLP\_7015

TACTCACAAACACATCCACTGGGGCTAATCGATTTGGCTCGCCTTCACGTTCAAACCTCAATGTCAATCG  
ATCTAAATAAGTTTCACGTTTTATGGGTGACCATTTGGGGAAGTCAATGATCAA

>M6-PGSC0003DMG400003822M6LRR-RLP\_7076

TGTCAATCGATCTAAATAAGTTTCACGTTTTATGGGTGACCATTTGGGGAAGTCAAGTATCCATGAT  
AATGCAAACCATATTTACATATAACAGAGATAATCCATAATGGATAGGC

>M6-PGSC0003DMG400003822M6LRR-RLP\_7137

ATCCATGATAATGCAAACCATATTTACATATAACAGAGATAATCCATAATGGATAGGCATCATAGGCTG  
GTGTTAAGATCCGGAAATGGAAAAAGAATCCAAGAATTACAAGCCTGAGG

>M6-PGSC0003DMG400003822M6LRR-RLP\_7198

CATAGGCTGGTGTAAAGATCCGGAAATGGAAAAAGAATCCAAGAATTACAAGCCTGAGGATAATGACT  
ATCCGATATGGACTGATTAGACTTGATGGAAGTGGAACTTTTCGCCAGAGTG

>M6-PGSC0003DMG400003822M6LRR-RLP\_7259

AATGACTATCCGATATGGACTGATTAGACTTGATGGAAGTGGAACTTTTCGCCAGAGTGGTTGCCGAGC  
TTCAGCCAAACTGCTTGAAATCAGTTAAGTGGTTAGAATATTGAAATACT

>M6-PGSC0003DMG400003822M6LRR-RLP\_7320

TGCCGAGCTTCAGCCAAACTGCTTGAAATCAGTTAAGTGGTTAGAATATTGAAATACTGCAAGTTTTAT  
ATGCTTAACTTGATCTGTTTCAATTCATACACACTCATTCCATGTTGAA

>M6-PGSC0003DMG400003822M6LRR-RLP\_7381

AAGTTTTATATGCTTAACTTGATCTGTTTCAATTCATACACACTCATTCCATGTTGAAACATTATAGTATT  
TGATTAATTTGTTAATAATATTGCATGTAAGTATCTAACTTTACAA

>M6-PGSC0003DMG400003822M6LRR-RLP\_7442

ATTATAGTATTTGATTAATTTGTTAATAATATTGCATGTAAGTATCTAACTTTACAAATTATAAAGTGTT  
AAATTATTTAATTATAACCAGTCAGTCACTGAGTGATATATAACTACAA

>M6-PGSC0003DMG400003822M6LRR-RLP\_7503

ATAAAGTGTTCAAATTATTTAATTATAACCAGTCAGTCACTGAGTGATATATAACTACAAGTGACAGAGAC

GATATATAACCGAAAATCCAATATTTAAAAGTTGTAAGGAGAATGAGGGG

>M6-PGSC0003DMG400003822M6LRR-RLP\_7564

GACAGAGACGATATATAACCGAAAATCCAATATTTAAAAGTTGTAAGGAGAATGAGGGGAAGGTGGAA  
ACAAGACCAGATATAATTTGATCGCTATGAACAAATCCAAAGACCAGGTTGA

>M6-PGSC0003DMG400003822M6LRR-RLP\_7686

GATTTGTAAAAATTTAAAGTATTTCTATAGGGGTCGTTTCCTGTTCTTCTATGCTGTTTTCTCGATAATT  
CCTCACATAAAACCTTCTCGTATTAGCAACGATATAACTTCAACAAGA

>M6-PGSC0003DMG400003822M6LRR-RLP\_7747

TCTCGATAATTCCTCACATAAAACCTTCTCGTATTAGCAACGATATAACTTCAACAAGATCAAACCAGAG  
GCGGGAATTAGCTTGAATAATCATAATTTCAATATCTTCTTCCACTACT

>M6-PGSC0003DMG400003822M6LRR-RLP\_7808

AAACCAGAGGCGGGAATTAGCTTGAATAATCATAATTTCAATATCTTCTTCCACTACTAAGAATATATGT  
CAAATAACATGTTAAATCCCCTTCTAAGTCGAAGGTCTATCGAAAAAG

>M6-PGSC0003DMG400003822M6LRR-RLP\_8174

AGAGTGAAAAGAAAGAGTACATACAGATAATCATCATCTTCATCAGGTTGGTCATTTCCACCATTATTA  
CAAGACCTCTTTTTCTTGACGATTCTTCCATTTCTCAACTCTTTCCTTC

>M6-PGSC0003DMG400003822M6LRR-RLP\_8235

CATTATTAACAAGACCTCTTTTTCTTGACGATTCTTCCATTTCTCAACTCTTTCCTTCCATTCTGCATCACC  
ATAACTTTCTTCTGCTCATCCTCCAATTCCTTCCCTGCAACTGTAA

>M6-PGSC0003DMG400003822M6LRR-RLP\_8296

TTCTGCATCACCATAACTTTCTTCTGCTCATCCTCCAATTCCTTCCCTGCAACTGTAAGTGATTTTCCATTG  
AAATAAAACAAAATCATGACCTTGAGTGACACATATATATAAAGTGC

>M6-PGSC0003DMG400003822M6LRR-RLP\_8357

GATTTTCCATTGAAATAAAACAAAATCATGACCTTGAGTGACACATATATATAAAGTGCAACAATTAATC  
ATTCGAAATTAATAATATAGCTGTACCGCTTCCAACAACACTGATTGATT

>M6-PGSC0003DMG400003822M6LRR-RLP\_8418

CAATTAATCATTTGAAATTAATAATATAGCTGTACCGCTTCCAACAACACTGATTGATTAAGCAGCACC  
ACTATTGGTGTGTGATTATACTCTCCATTCTCCTGCCAAACATACAAC

>M6-PGSC0003DMG400003834-(rev)M6LRR-RLP\_0

ATGAGCATTCTCTCCAAAACATGGCTACAAGAATGGTCGAATCTCCCAACTTGGAATTCACTATTAATT  
GTTGGGAAGGCAATATAAATACAGCGAACACAACCATGGAGAGATATAGG

>M6-PGSC0003DMG400003834-(rev)M6LRR-RLP\_1054

CCCTTATGGAGGGGGAGAAAGTTTATTTTTTATTAGATTGGTGATGTAGTTAATTTGTTTCTATTTCAAAT  
TGAATGGACTTATTCTTTTCTGCATTGGTGTCAGAGGTATTAGATATTA

>M6-PGSC0003DMG400003834-(rev)M6LRR-RLP\_1116

ATTTCAAATTGAATGGACTTATTCTTTTCTGCATTGGTGTCAGAGGTATTAGATATTAATAAAACAGAACT  
AAGAGCATAATTTTAACTTGGATCTTATAGGCTTGCAAAGCAAAAAC

>M6-PGSC0003DMG400003834-(rev)M6LRR-RLP\_1178

AACAGAACTAAGAGCATAATTTTAACTTGGATCTTATAGGCTTGCAAAGCAAAAACAAAATTTTTAAG  
AAAGTAATGAGTATGGCAAATTTCTCAAAGGAAAGAGACTTAATTTCTA

>M6-PGSC0003DMG400003834-(rev)M6LRR-RLP\_124

GGAAAATCCCTATACAAAAGTTTGAATTATTAGAGACCTTTGCTAATTCTCATGAAGATTTCCCTCTCATT  
GATAAGTGGCTCGACATTGCACTTCAGAATGGTGTAACATCTTTTTT

>M6-PGSC0003DMG400003834-(rev)M6LRR-RLP\_1240

TTTTAAGAAAGTAATGAGTATGGCAAATTTCTCAAAGGAAAGAGACTTAATTTCTACATAATTACTAG  
TGTTTCAACGTAACATAAATGCCTTCGATGTCATACTTTCTCGGTAGCC

>M6-PGSC0003DMG400003834-(rev)M6LRR-RLP\_1302

ATTACTAGTGTTC AACGTAACATAAATGCCTTCGATGTCATACTTTCTCGGTAGCCCGTTGATTTCTAA  
TTTTCTCAAACCTGTCTCGTGACATCATAAGAGAAACATAAAGTATCC

>M6-PGSC0003DMG400003834-(rev)M6LRR-RLP\_1364

GATTTCTAATTTTCTCAAACCTGTCTCGTGACATCATAAGAGAAACATAAAGTATCCGACATTAAGTCCA  
GGATGACTACAATCTCTTCATCACAGGACGTGCATGATGATATAACTAA

>M6-PGSC0003DMG400003834-(rev)M6LRR-RLP\_1426

TTAAGTCCAGGATGACTACAATCTCTTCATCACAGGACGTGCATGATGATATAACTAAGGGTTTGCCTT  
CCACCACGTGGAAGGGAAGTCAATGATTTGAATTTTCCATTCTTCTTCTT

>M6-PGSC0003DMG400003834-(rev)M6LRR-RLP\_1488

TTGTCCTTCCACCACGTGGAAGGGAAGTCAATGATTTGAATTTTCCATTCTTCTTCTTCTGAGTTTGTCT  
AAAATCCACAAGTTGAACTATCCATGTTGCCAATATTCATAATCCATG

>M6-PGSC0003DMG400003834-(rev)M6LRR-RLP\_1550

AGTTTGTCTAAAATCCACAAGTTGAACTATCCATGTTGCCAATATTCATAATCCATGATCGCTAGTTTAC  
CTTTCACCTCTAACAACCTCGTAATACCACCACGAGTTAGATGCATTATA

>M6-PGSC0003DMG400003834-(rev)M6LRR-RLP\_1612

CTAGTTTACCTTTCACCTCTAACAACCTCGTAATACCACCACGAGTTAGATGCATTATATAAACCAATATTTT  
TTGAATTTTCGGTTTTAACATCAAATGCATCTATAGTAAGTCTGTCCT

>M6-PGSC0003DMG400003834-(rev)M6LRR-RLP\_1674

CCAATATTTTTGAATTTTCGGTTTTAACATCAAATGCATCTATAGTAAGTCTGTCCTGGAAAACAAATTT  
ATAGATAACTCTATTGATGCAAACCCCGGGCTTGACAGAATAGGAGGG

>M6-PGSC0003DMG400003834-(rev)M6LRR-RLP\_1736

AACAAATTTATAGATAACTCTATTGATGCAAACCCCGGGCTTGACAGAATAGGAGGGGTTATGCTTTG  
AGTCTCTCTCCATGATTCGTCTACTCCTAAAGTGAAAATCCAATGTTTTAT

>M6-PGSC0003DMG400003834-(rev)M6LRR-RLP\_1798

TGCTTTGAGTCTCTCTCCATGATTCGTCTACTCCTAAAGTGAAAATCCAATGTTTTATGTACCCTTATATAA  
TATGCTTTGTTGTGAAAAGAACTTTGACTTCTTTTCTTCTGGGTCAA

>M6-PGSC0003DMG400003834-(rev)M6LRR-RLP\_186

CCTCTCATTGATAAGTGGCTCGACATTGCACTTCAGAATGGTGAAAACATCTTTTTCTTAACCTTAAATC  
ATACCCCATGCCTATTTAAGAATCTTGGCAGCAAAATCTTTAAGAGAA

>M6-PGSC0003DMG400003834-(rev)M6LRR-RLP\_1860

CCTTATATAATATGCTTTGTTGTGAAAAGAACTTTGACTTCTTTTCTTCTGGGTCAAACCGAATGAACA  
GAACCACATGGAAGAACCATCATTTAGGTCAGGAAGAAATCTTACTTCT

>M6-PGSC0003DMG400003834-(rev)M6LRR-RLP\_1920

CCGAATGAACAGAACCACATGGAAGAACCATCATTTAGGTCAGGAAGAAATCTTACTTCTTGTACTAG  
GATTGAAAATTGCAGCAAAAATAATGGTCCCAAATATAAAATAAACCA

>M6-PGSC0003DMG400003834-(rev)M6LRR-RLP\_248

CTTTAAATCATACCCCATGCCTATTTAAGAATCTTGGCAGCAAAATCTTTAAGAGAATTGGATGTGCAG  
GGTAGTATGCCTGATTCGTTATCTAGTGGTGTGGAATTGCAAATCATT

>M6-PGSC0003DMG400003834-(rev)M6LRR-RLP\_372

AAGCTTTCTCTATCTCATCTAAGATTAGACGAAAACATGGTCCAGACTATACTTACTAGTTGTCCCTTTAT

TGTCTCTTTAATCCTTGAGTATTGTACTGGGAAGCTTCAAAGATCAAG

>M6-PGSC0003DMG400003834-(rev)M6LRR-RLP\_434

TCCCTTTATTGTCTCTTTAATCCTTGAGTATTGTACTGGGAAGCTTCAAAGATCAAGTCGGATTCCTTGA  
AGGTCTTGAAGATACATCATCGCGGGATAGAGGAGATCGATGCTCCAAA

>M6-PGSC0003DMG400003834-(rev)M6LRR-RLP\_496

ATTCCTTGAAGGTCTTGAAGATACATCATCGCGGGATAGAGGAGATCGATGCTCCAAATTTGGTATCACT  
TGACTATATGGGGAGTCAAATTCCTGAACCTTAATAAAATTGCAAGAGACT

>M6-PGSC0003DMG400003834-(rev)M6LRR-RLP\_558

GTATCACTTGACTATATGGGGAGTCAAATTCCTGAACCTTAATAAAATTGCAAGAGACTCAAAAATCAGG  
CTTGATGCATCAACAATTTAAATGCAGCATGGTTTTGTAAGTTGAGAAAAG

>M6-PGSC0003DMG400003834-(rev)M6LRR-RLP\_62

TATTAATTGTTGGGAAGGCAATATAAATACAGCGAACACAACCATGGAGAGATATAGGAAGGGGAAAA  
TCCCTATACAAAAGTTTGAATTATTAGAGACCTTTGCTAATTCTCATGAAGA

>M6-PGSC0003DMG400003834-(rev)M6LRR-RLP\_620

AATCAGGCTTGGATGCATCAACAATTTAAATGCAGCATGGTTTTGTAAGTTGAGAAAAGTTTCTATCAAAAT  
TCGTCTCGTGGTCTCATGTTTCCCTTCAATTTATGAATTGCTGTGAGAT

>M6-PGSC0003DMG400003834-(rev)M6LRR-RLP\_682

TATCAAATTCGTCTCGTGGTCTCATGTTTCCCTTCAATTTATGAATTGCTGTGAGATCAAGATGAAAGAT  
TTGCAAATGGACCACATAGGTTCTACCCCTCGGGTGGACATTTTAAATG

>M6-PGSC0003DMG400003834-(rev)M6LRR-RLP\_744

ATGAAAGATTTGCAAATGGACCACATAGGTTCTACCCCTCGGGTGGACATTTTAAATGTCGATATTCAAT  
GGATGAATCAGAATTTTGTGGATGCTTTGCTATGGAGTTGTCATCCAAGG

>M6-PGSC0003DMG400003834-(rev)M6LRR-RLP\_806

TATTC AATGGATGAATCAGAATTTTGTGGATGCTTTGCTATGGAGTTGTCATCCAAGGAGACTCAACCTA  
CTCTCAAATATTACTCCAACGATTACACATTTTATTGATCGTTTAGTGTT

>M6-PGSC0003DMG400003834-(rev)M6LRR-RLP\_868

TCAACCTACTCTCAAATATTACTCCAACGATTACACATTTTATTGATCGTTTAGTGTTTTTACGAATTCGA  
GTCATTCTACTTCTCATAAAAGCTTTCTTGGCATAGTCAATTTAAAG

>M6-PGSC0003DMG400003834-(rev)M6LRR-RLP\_930

ACGAATTCGAGTCATTCTACTTCTCATAAAAGCTTTCCTTGGCATAGTCAATTTAAAGAAATAAAAGCTTT  
TGATGGAAAAAACAGTCGCTACAACCTCATAAATGGGGAGCTTGCAAAA

>M6-PGSC0003DMG400003834-(rev)M6LRR-RLP\_992

AAAAGCTTTTGATGGAAAAAACAGTCGCTACAACCTCATAAATGGGGAGCTTGCAAAAAGGACCCTTAT  
GGAGGGGGAGAAAGTTTATTTTTTATTAGATTGGTGATGTAGTTAATTTGT

>M6-PGSC0003DMG400003835-(rev)M6LRR-RLP\_0

ATGGCTGACATGTTGCCTGAATGTTTCATTCAAAAATACTCTTCTCTTAGTTTTGATGAAGCAGCGCG  
GATGAGCATTCTTCCAAAACATGGCTGCAAGCCTGGTCGACTCTTCCC

>M6-PGSC0003DMG400003835-(rev)M6LRR-RLP\_1056

AATTCGATTCAGTCTACTTCTCATGGAAGCAACCCTTGGTATAGTCAATTTAAAGAAGTAAAAGTCCACA  
AATTTGATAGGAAGAAGGAGATTTGGTATCCTGTGGAACACAACTTGGG

>M6-PGSC0003DMG400003835-(rev)M6LRR-RLP\_1107

AAAGAAGTAAAAGTCCACAAATTTGATAGGAAGAAGGAGATTTGGTATCCTGTGGAACACAACTTGG  
GGAGCGGGCAACAATGAACCTTGATAGATATTATTTTTATTAGATTGGTAA

>M6-PGSC0003DMG400003835-(rev)M6LRR-RLP\_132

AATGTTAAGTTTTGCAAAGGCGATATAAAGATATTGGACACTATTATGGAGAGATATGGAAACGGAAAA  
ATCCCTATAGAAAAGTTTGATTTATCAGAGCTCTTAGGCGATTCTCATGAA

>M6-PGSC0003DMG400003835-(rev)M6LRR-RLP\_198

AAAATCCCTATAGAAAAGTTTGATTTATCAGAGCTCTTAGGCGATTCTCATGAAGTTTTCCCTCTGATTGA  
TAAGTGGCTTAACATTGCACTTCAAATGGCGTAAACAATCTTGCCTT

>M6-PGSC0003DMG400003835-(rev)M6LRR-RLP\_264

ATTGATAAGTGGCTTAACATTGCACTTCAAATGGCGTAAACAATCTTGCCTTAACATAAATCATACCC  
CGTGCCTTTTTTAACAATCTTGGCAGCAAAATCTTTAAGAAAATTGGTT

>M6-PGSC0003DMG400003835-(rev)M6LRR-RLP\_330

TACCCCGTGCCTTTTTTAACAATCTTGGCAGCAAAATCTTTAAGAAAATTGGTTCTGAAGAGTTGTACTCT  
TTTGCCTATTTCTTTATCTGGTGGTGTGTGAATCACAATCTTTGAGT

>M6-PGSC0003DMG400003835-(rev)M6LRR-RLP\_396

ACTCTTTTGCCTATTTCTTTATCTGGTGGTGTGTGAATCACAATCTTTGAGTAAGCTTTCTCTATCTTAT  
GTAAAATTATACGAAAACATGCTTCAGACTCTACTTAATAGTTGCCT

>M6-PGSC0003DMG400003835-(rev)M6LRR-RLP\_462

TCTTATGTAAAATTATACGAAAACATGCTTCAGACTCTACTTAATAGTTGTCCTTTGATTGTCTCTTTTCATC  
TTTGAGTATTGTTCCGACTTGGAAACAATTGAGCTAGTGAATCTTCAA

>M6-PGSC0003DMG400003835-(rev)M6LRR-RLP\_528

TTCATCTTTGAGTATTGTTCCGACTTGGAAACAATTGAGCTAGTGAATCTTCAAAGATCAAGTCGGTTT  
CCCTGAAGGTCTTGAAGATTCGGTTTAGTGGGAGCATATGGGAGATTGAT

>M6-PGSC0003DMG400003835-(rev)M6LRR-RLP\_594

GTTTCCCTGAAGGTCTTGAAGATTCGGTTTAGTGGGAGCATATGGGAGATTGATGCTCCAAATTTGGTG  
TCATTTGAGTACACAGGGAATCAAATTCCTGAACTTCAAATTGTGAGAGAG

>M6-PGSC0003DMG400003835-(rev)M6LRR-RLP\_66

GCGCGGATGAGCATTCTTTCCAAAACATGGCTGCAAGCCTGGTCGACTCTTCCCGACTTGGAAATTTAATG  
TTAAGTTTTGCAAAGGCGATATAAAGATATTGGACACTATTATGGAGAGA

>M6-PGSC0003DMG400003835-(rev)M6LRR-RLP\_660

GTGTCATTTGAGTACACAGGGAATCAAATTCCTGAACTTCAAATTGTGAGAGAGTCAAACAACACTGAAG  
CACTCAAATCATTCTTCACCGCTTAGACAATATAAATGCTGACTGGTTT

>M6-PGSC0003DMG400003835-(rev)M6LRR-RLP\_792

AAGTTTCTATCAAATTCGACCTCTTGGTCTCAAGTTTCCCTTTATTTTTATGAATGCACGGAGATTAAAAT  
GAAAGATCTGCAACAACACCACAGAGTTGCTACGCCCCAGGTGGACGTT

>M6-PGSC0003DMG400003835-(rev)M6LRR-RLP\_858

AAAATGAAAGATCTGCAACAACACCACAGAGTTGCTACGCCCCAGGTGGACGTTTTAGATGTCAACATT  
CTGTGGCAGAATCTCGAATACCCTTCATTTGTGGATGCTTTGGTATGGAGT

>M6-PGSC0003DMG400003835-(rev)M6LRR-RLP\_924

ATTCTGTGGCAGAATCTCGAATACCCTTCATTTGTGGATGCTTTGGTATGGAGTTGTCAGCCTAGGAGAC  
TCAACTTGCAATTAACAAGAGAAATGGTTACAGTTTTTCATTGATCGTTTG

>M6-PGSC0003DMG400003835-(rev)M6LRR-RLP\_990

AGACTCAACTTGCAATTAACAAGAGAAATGGTTACAGTTTTTCATTGATCGTTTGATGAATATGAAGAATT  
CGATTCAGTCTACTTCTCATGGAAGCAACCCTTGGTATAGTCAATTAATA

>M6-PGSC0003DMG400003918-(rev)M6LRR-RLK\_0

TCTATCTGGGAATCTTTTAGTAGGAGAAATACCACAAAACCTGTACAACCTTGTAACCTTGATATCTTG



ACTTACATCATAACCAACTGAATGGAAGTATTCCATCAACCATTGGAAA

>M6-PGSC0003DMG400003918-(rev)M6LRR-RLK\_1037

TCCTGGATACAAACTACGAAGCCAAATTGACTGATTATGGCCTGAGTAGGTTCCCTCCCTGCTGGATAA  
CTATGGACTAACCAAGTTTCACAATGCAGTTGGTTATGTTGCACCAGAGT

>M6-PGSC0003DMG400003918-(rev)M6LRR-RLK\_1098

GCTGGATAACTATGGACTAACCAAGTTTCACAATGCAGTTGGTTATGTTGCACCAGAGTTGGCGCAAAG  
TCTGAGACTAAGTGATAAATGTGACGTTTACAGTTTTGGGGTGATTCTGCT

>M6-PGSC0003DMG400003918-(rev)M6LRR-RLK\_1159

GCGCAAAGTCTGAGACTAAGTGATAAATGTGACGTTTACAGTTTTGGGGTGATTCTGCTGGAGTTGGTC  
ACTGGGAGGAAACCAGTAGAGAGCCCAGTAGCAAATGAAGTGGTGGTCTTG

>M6-PGSC0003DMG400003918-(rev)M6LRR-RLK\_122

TGTCTAACTTGCACTTTTTGGATTTATCACAAAATCTGCTATCTGGGTCAATCCCTGTTGCTCTTGGGGAT  
TTGCAAAATTTAACTCATTTTAATGTATCTTACAACCTTTTATCTGGTG

>M6-PGSC0003DMG400003918-(rev)M6LRR-RLK\_1220

AGTTGGTCACTGGGAGGAAACCAGTAGAGAGCCCAGTAGCAAATGAAGTGGTGGTCTTGTGTGAATAT  
GTTAGAGGATTGATAGAAAGGGGTGCTGCTTCAGACTGTTTCGATAGAAGTT

>M6-PGSC0003DMG400003918-(rev)M6LRR-RLK\_1281

TGAATATGTTAGAGGATTGATAGAAAGGGGTGCTGCTTCAGACTGTTTCGATAGAAGTTTGAGGGGCTT  
TGCAGAAAATGAGCTGATTTCAGGTAATGAAGTTAGGCTTGATTTGTACTTC

>M6-PGSC0003DMG400003918-(rev)M6LRR-RLK\_1342

AGGGGCTTTGCAGAAAATGAGCTGATTTCAGGTAATGAAGTTAGGCTTGATTTGTACTTCTGAAATATCCT  
CAAGGAGACCTAGCATGGCTGAGGTAGTGCAGGTTCTTGAGTCCATCAGG

>M6-PGSC0003DMG400003918-(rev)M6LRR-RLK\_1403

AAATATCCTCAAGGAGACCTAGCATGGCTGAGGTAGTGCAGGTTCTTGAGTCCATCAGGAATGGCTTGG  
GATCATAGTAAAGAATCAGTAGAGCCATAAGACTATTTGAAACAGCAGCTG

>M6-PGSC0003DMG400003918-(rev)M6LRR-RLK\_1464

TGGCTTGGGATCATAGTAAAGAATCAGTAGAGCCATAAGACTATTTGAAACAGCAGCTGTTTCATAGAAT  
GAGAAGAAAGCAGTCTAGCTGTTGTGCTAGACTCGCTTCTCATGAGATTTCG

>M6-PGSC0003DMG400003918-(rev)M6LRR-RLK\_1525

CATAGAATGAGAAGAAAGCAGTCTAGCTGTTGTGCTAGACTCGCTTCTCATGAGATTCGATGAGGGAAT  
CAGAAAGGGTCTCAAATAAGAGAGACGCGCAGACCAATTAATAGTATCAGT

>M6-PGSC0003DMG400003918-(rev)M6LRR-RLK\_1586

GAGGGAATCAGAAAGGGTCTCAAATAAGAGAGACGCGCAGACCAATTAATAGTATCAGTCATATTCTTG  
GATTTGGAATCAGAGTGATTAGGAGGTGACAGCTTTTGGTACAGAGAGAAG

>M6-PGSC0003DMG400003918-(rev)M6LRR-RLK\_1647

TATTCTTGGATTTGGAATCAGAGTGATTAGGAGGTGACAGCTTTTGGTACAGAGAGAAGATTCTTTAGT  
ATTTGATTTGTGATTCTTTAATCAATTGGTCATTGTAAGTTTACAATAAA

>M6-PGSC0003DMG400003918-(rev)M6LRR-RLK\_1708

TCTTTAGTATTTGATTTGTGATTCTTTAATCAATTGGTCATTGTAAGTTTACAATAAAGCAATTCTTTTCC  
TGTAAGATGCAAAGGTATTTGATGTCTCATATGCAGCTTGGCAACTG

>M6-PGSC0003DMG400003918-(rev)M6LRR-RLK\_1769

AATTCTTTTCTGTAAAGATGCAAAGGTATTTGATGTCTCATATGCAGCTTGGCAACTGCTTTTTATAACC  
ATTCAATATTGCTCTTCATTTACTGTAAAGAATTACCTTTGACATGCAT

>M6-PGSC0003DMG400003918-(rev)M6LRR-RLK\_183

TCTTGGGGATTTGCAAATTTAACTCATTTAATGTATCTTACAACCTTTTATCTGGTGCTATTCCCTCAAT  
TGAGAGCATCAAGAAGTTTGGACCCTCTGCCTTTTTTTCATAATAGTGG

>M6-PGSC0003DMG400003918-(rev)M6LRR-RLK\_1830

TTTTATAACCATTCAATATTGCTCTTCATTTACTGTTAAGAATTACCTTTGACATGCATATATCAACAACCT  
TTGAAGGGATGAAAGAAATCGATTCAATTTCTCGAATTACATATCTAGT

>M6-PGSC0003DMG400003918-(rev)M6LRR-RLK\_1891

ATCAACAACCTTTGAAGGGATGAAAGAAATCGATTCAATTTCTCGAATTACATATCTAGTGCTAACACAAG  
AATGAATGTGAATAAATAATGAGTCCATACATCTACCTGTAACCTATACAA

>M6-PGSC0003DMG400003918-(rev)M6LRR-RLK\_1952

TAACACAAGAATGAATGTGAATAAATAATGAGTCCATACATCTACCTGTAACCTATAACAACATGAGATAA  
TAAGAAAATATCAAGATTTAAGACCTTACTTATTGACACAAAGAATTTGG

>M6-PGSC0003DMG400003918-(rev)M6LRR-RLK\_2013

ATGAGATAATAAGAAAATATCAAGATTTAAGACCTTACTTATTGACACAAAGAATTTGGAAATGGATTTTC  
ATTTGGAGCCATTTCTACATGCTATATGTTTTTCTTGCATCAACTTTGA

>M6-PGSC0003DMG400003918-(rev)M6LRR-RLK\_2074

ATGGATTTCAATTTGGAGCCATTTCTACATGCTATATGTTTTTCTTGCATCAACTTTGACTGCTAATTTAGC  
TATCTTCAAAATCCATAAACTGGGAGCTGGAATGCATTTGTGAAAATG

>M6-PGSC0003DMG400003918-(rev)M6LRR-RLK\_2135

GCTAATTTAGCTATCTTCAAAATCCATAAACTGGGAGCTGGAATGCATTTGTGAAAATGACAGTTGGAG  
AGGACCAAGAACACACTTCTGGAATCATCTGCATACAATCTGGCCTTTTTT

>M6-PGSC0003DMG400003918-(rev)M6LRR-RLK\_2196

AGTTGGAGAGGACCAAGAACACACTTCTGGAATCATCTGCATACAATCTGGCCTTTTTTTGTTTGTCTTCT  
CTGCATGTAGTTCTCAGTGCTGCTGCATTCTGATCTCATTATCCGAACA

>M6-PGSC0003DMG400003918-(rev)M6LRR-RLK\_2257

TTTGTCTTCTCTGCATGTAGTTCTCAGTGCTGCTGCATTCTGATCTCATTATCCGAACATTGATAACTTATG  
GATCCATTAATCACATAACACACGACCCTTAAAATCTCTGCAGAAGT

>M6-PGSC0003DMG400003918-(rev)M6LRR-RLK\_2318

GATAACTTATGGATCCATTAATCACATAACACACGACCCTTAAAATCTCTGCAGAAGTTTTGGACCTTTG  
GTTACGGTTTACTGTAAGGGATCATATCATTAACTCAGAGACTTACGTA

>M6-PGSC0003DMG400003918-(rev)M6LRR-RLK\_2379

TGGACCTTTGGTTACGTTTACTGTAAGGGATCATATCATTAACTCAGAGACTTACGTAACCTCCAAAAC  
TTCTGGATACGCTGCATAACTGTGGAATGTCCTTCTCACTTAATGTGCGA

>M6-PGSC0003DMG400003918-(rev)M6LRR-RLK\_244

ATTCCCTCAATTGAGAGCATCAAGAAGTTTGGACCCTCTGCCTTTTTTCATAATAGTGGTCTTTGTGGTGA  
TCCTTTAGAAGTTTCATGCTCTGCCAGTGGCACTACTCCTGCAAAGGG

>M6-PGSC0003DMG400003918-(rev)M6LRR-RLK\_2440

TCCAAAACCTTCTGGATACGCTGCATAACTGTGGAATGTCCTTCTCACTTAATGTGCGAAAAACATAACCT  
GAACCACCCAGGTTCAACACAGTGGCAGGAAGAACCAGGAGTTGCATTG

>M6-PGSC0003DMG400003918-(rev)M6LRR-RLK\_2501

AACATAACCTGAACCACCCAGGTTCAACACAGTGGCAGGAAGAACCAGGAGTTGCATTGATCTTAGCTA  
CATTTAGTAGATTATCCCAAAGCTCAATCTCACCTTCTCATTATACGACC

>M6-PGSC0003DMG400003918-(rev)M6LRR-RLK\_2562

CTTAGCTACATTTAGTAGATTATCCCAAAGCTCAATCTCACCTTCTCATTATACGACCGAATTAACCTGCT

CATGTCAGCCCAACAATAGAAACCCCACTACTTTTGGTGCACTCAAT

>M6-PGSC0003DMG400003918-(rev)M6LRR-RLK\_2623

ATTAACCTGCTCATGTCAGCCCAACAATAGAAACCCCACTACTTTTGGTGCACTCAATCCCAGCTGCTT

CAATCCACTGACAAATAGAGAAGACATCCTTCTTAGCCTCTCTCTGTTC

>M6-PGSC0003DMG400003918-(rev)M6LRR-RLK\_2684

CCAGCTGCTTCAATCCACTGACAAATAGAGAAGACATCCTTCTTAGCCTCTCTCTGTTCTTTTTGATAAATT

GTTGTACAAACTTTGCATCTGATAGCATCTGGATGATTAATGCTGTG

>M6-PGSC0003DMG400003918-(rev)M6LRR-RLK\_2745

TTTGATAAATTGTTGTACAAACTTTGCATCTGATAGCATCTGGATGATTAATGCTGTGTTGGGGCTGAA

ATGGATGAGAATCTTGTCAACTTTTTTCGCAGCAGCTAGAACATTTTCATT

>M6-PGSC0003DMG400003918-(rev)M6LRR-RLK\_2806

GGGGCTGAAATGGATGAGAATCTTGTCAACTTTTTTCGCAGCAGCTAGAACATTTTCATTGCAAGAATAG

ATGACCCCAACCCTGAAACCAGGAAGAGAAAGGTCCTTAGAGAGACCATAC

>M6-PGSC0003DMG400003918-(rev)M6LRR-RLK\_2867

AAGAATAGATGACCCCAACCCTGAAACCAGGAAGAGAAAGGTCCTTAGAGAGACCATACACAATGTGT

ACCCTGCTCCTGTCAAAATCTTCAGAATCAATTATCTCTGCTATGCTGACAA

>M6-PGSC0003DMG400003918-(rev)M6LRR-RLK\_2928

AATGTGTACCCTGCTCCTGTCAAAATCTTCAGAATCAATTATCTCTGCTATGCTGACAAATCTTCACGTC

CATAAGTTGACCCTGCCAAGATTTTCATTGGATATTACATGGATGTTCTT

>M6-PGSC0003DMG400003918-(rev)M6LRR-RLK\_2989

TCTTCACGTCCATAAGTTGACCCTGCCAAGATTTTCATTGGATATTACATGGATGTTCTTCTCAGTTGCAAA

GTCTAAGAGGTTATAAAGTGTCTCCCTAGAGAAAATATTTCCACAGGA

>M6-PGSC0003DMG400003918-(rev)M6LRR-RLK\_305

TTTGTGGTGATCCTTTAGAAGTTTCATGCTCTGCCAGTGGCACTACTCCTGCAAAAGGGAAACCAAATT

GAGTGTCTCAGCTATTGTTGCTATTGTCGCTGCTTCAATAATCCTTACAG

>M6-PGSC0003DMG400003918-(rev)M6LRR-RLK\_3050

CAGTTGCAAAGTCTAAGAGGTTATAAAGTGTCTCCCTAGAGAAAATATTTCCACAGGATTTGAGGGGT

TAGAAATGATAATCCCTCGTACTTTAAGACCACGTTTCTTAGCTTGGTTAA

>M6-PGSC0003DMG400003918-(rev)M6LRR-RLK\_3111

TGAGGGGTTAGAAATGATAATCCCTCGTACTTTAAGACCACGTTTCTTAGCTTGGTTAAAAGCTCGGTCA  
AGAGCATCAATGCTCAAGTTAAAGTTGTCTGCACTGCGGCAAGGAACAGG

>M6-PGSC0003DMG400003918-(rev)M6LRR-RLK\_3172

GCTCGGTCAAGAGCATCAATGCTCAAGTTAAAGTTGTCTGCACTGCGGCAAGGAACAGGTATAATCTCC  
ACTCCAGTTCTCATTGACATCCCTATCAAGACTGCAAACGCATTGAGCT

>M6-PGSC0003DMG400003918-(rev)M6LRR-RLK\_3233

TAATCTCCACTCCAGTTCTCATTGACATCCCTATCAAGACTGCAAACGCATTGAGCTCATTTTATACACT  
ATATACGTAAAGATGACCAAAGATTGAAATTTATTTGGGAAGGAGAA

>M6-PGSC0003DMG400003918-(rev)M6LRR-RLK\_3294

TTTTATACACTATATACGTAAAGATGACCAAAGATTGAAATTTATTTGGGAAGGAGAATAAACTCACT  
CAGGATAATATGGTGAGGGAACAAGAAAAGCATTTCAGGATCAGCTAGG

>M6-PGSC0003DMG400003918-(rev)M6LRR-RLK\_3355

AAACTCACTCAGGATAATATGGTGAGGGAACAAGAAAAGCATTTCAGGATCAGCTAGGCAGAAGCTC  
AGTATCTCAAGCGCAGGAGCGGCACCACCAGTTAGAACCATCTGCGAGGGGC

>M6-PGSC0003DMG400003918-(rev)M6LRR-RLK\_3416

GAAGCTCAGTATCTCAAGCGCAGGAGCGGCACCACCAGTTAGAACCATCTGCGAGGGGCTGAAGGACA  
CTGATCTCTCAGAGCTTGAGACATAAATTCTCCACAGCCTGCATACAGGT

>M6-PGSC0003DMG400003918-(rev)M6LRR-RLK\_3477

AAGGACACTGATCTCTCAGAGCTTGAGACATAAATTCTCCACAGCCTGCATACAGGTGAGGAAACAT  
GAAAAGCAATTCAAAGAGATACCATAAATAATGTAGAATCACACAAAACAC

>M6-PGSC0003DMG400003918-(rev)M6LRR-RLK\_3538

GGAAACATGAAAAGCAATTCAAAGAGATACCATAAATAATGTAGAATCACACAAAACACCTAATTGTTT  
TTATGAATCGATCTTCATAGTGGCTCAAGGATGATTCATATATTGCTGTT

>M6-PGSC0003DMG400003918-(rev)M6LRR-RLK\_3599

AATTGTTTTATGAATCGATCTTCATAGTGGCTCAAGGATGATTCATATATTGCTGTTATACAATTCTCA  
AACCCACAATTTAAAAGGTAATCCATCAGATCATCTCCACCCTAGG

>M6-PGSC0003DMG400003918-(rev)M6LRR-RLK\_366

ACCAAACCTTGAGTGTCTCAGCTATTGTTGCTATTGTCGCTGCTTCAATAATCCTTACAGGCGTTTGTCTGA  
TAACCATCATCAATATGAAGGCTCGACGGAGAAGGAGGAGAGAAGATGA

>M6-PGSC0003DMG400003918-(rev)M6LRR-RLK\_3660

ACAATTCTCAAACCCACAATTTAAAAGGTAAATCCATCAGATCATCTCCCACCCTAGGATACCCAATGA  
CAAAGGTAGCCACTCATATTTCAAAGAGGCCAAAATTGCCTTCCATCTTC

>M6-PGSC0003DMG400003918-(rev)M6LRR-RLK\_3721

ACCCAATGACAAAGGTAGCCACTCATATTTCAAAGAGGCCAAAATTGCCTTCCATCTTCAACAGATACTG  
CAAATCTAGCAATAGATCCTTCAACAGGTTACACAATGATGAGTATTGAG

>M6-PGSC0003DMG400003918-(rev)M6LRR-RLK\_3782

CAGATACTGCAAATCTAGCAATAGATCCTTCAACAGGTTACACAATGATGAGTATTGAGGTGAGTATCT  
GTCAAGGAAATGATAGACCACCTCTCAGAACTACTGAGTCCATTATTCGCT

>M6-PGSC0003DMG400003918-(rev)M6LRR-RLK\_3843

GAGTATCTGTCAAGGAAATGATAGACCACCTCTCAGAACTACTGAGTCCATTATTCGCTATTAACCTTGCTT  
ATAACGAAAACCATGCAAAGTAAAGCAGGTTAACTATTCTCTTATGTG

>M6-PGSC0003DMG400003918-(rev)M6LRR-RLK\_3904

TAACTTGCTTATAACGAAAACCATGCAAAGTAAAGCAGGTTAACTATTCTCTTATGTGCTCAAACCTAGA  
TTTTTATCATATCACACTGCAAGGGATCCTATTGTTCCGGTCAGGACAA

>M6-PGSC0003DMG400003918-(rev)M6LRR-RLK\_3965

CAAACCTAGATTTTTTATCATATCACACTGCAAGGGATCCTATTGTTCCGGTCAGGACAAACATCACCACA  
GAAAATCATCAAATGCTGAAACAGCATAAATGACTGAGCTAGATCAACAA

>M6-PGSC0003DMG400003918-(rev)M6LRR-RLK\_4026

ATCACCACAGAAAATCATCAAATGCTGAAACAGCATAAATGACTGAGCTAGATCAACAATAATTATGAA  
TTTCCAACCTCAAGTTTTACCAATGTAACGCTCAAGTAGGAGAAGATATTTA

>M6-PGSC0003DMG400003918-(rev)M6LRR-RLK\_4087

ATTATGAATTTCCAACCTCAAGTTTTACCAATGTAACGCTCAAGTAGGAGAAGATATTTACCACAAAAAAA  
CACCCCATCCCTCTGGATACTGTTTCAATGCTTTGGCTGGTCAAACACA

>M6-PGSC0003DMG400003918-(rev)M6LRR-RLK\_4148

ACAAAAAACACCCCATCCCTCTGGATACTGTTTCAATGCTTTGGCTGGTCAAACACATTTTCAGGTTTC  
AAAATTTTCCTATCATTCTCTTTTGTATTTAACCTCCTTTATTA

>M6-PGSC0003DMG400003918-(rev)M6LRR-RLK\_4209

TTCAGGTTTCAAATTTTCCTATCATTCTCTTTTGTATTTAACCTCCTTTATTAGACAGTCATGGGCT

CCAAAAGCTCAAGAAAAAATCAAACATTCAGAACCGTGTTTATTT

>M6-PGSC0003DMG400003918-(rev)M6LRR-RLK\_427

GTTTGTCTGATAACCATCATCAATATGAAGGCTCGACGGAGAAGGAGGAGAGAAGATGAAACATTCGT  
TGTAGAGAGCACGCCACTGGCTTCAACAGATTCAAATGTCATTATAGGAAAG

>M6-PGSC0003DMG400003918-(rev)M6LRR-RLK\_4270

CAGTCATGGGCTCCAAAAGCTCAAGAAAAAATCAAACATTCAGAACCGTGTTTATTTTTCAAAGTGTT  
GCTTAGTGTGATAGCGTAGAAGTTAGAGAATTGATGAACTTTTCAGAAG

>M6-PGSC0003DMG400003918-(rev)M6LRR-RLK\_4331

CAAAGTGTTGCTTAGTGTGATAGCGTAGAAGTTAGAGAATTGATGAACTTTTCAGAAGTTAATTGGCA  
CTGTAAAATGAACGTGAAGCTTATTCAATGCTTTTCCTTATGTTTGTTGCA

>M6-PGSC0003DMG400003918-(rev)M6LRR-RLK\_4392

AATTGGCACTGTAAAATGAACGTGAAGCTTATTCAATGCTTTTCCTTATGTTTGTTGCACTTTATAGACTT  
AGAAAGCTAAAGACGGGACATACTAAAACCTTGTATACAATAGGTAATT

>M6-PGSC0003DMG400003918-(rev)M6LRR-RLK\_4453

TTATAGACTTAGAAAAGCTAAAGACGGGACATACTAAAACCTTGTATACAATAGGTAATTTTGGGATTGTC  
AAATGCCATAACCAATCCCGCATCCAGGGGTTACATTTCAAATTAACC

>M6-PGSC0003DMG400003918-(rev)M6LRR-RLK\_4514

GGGATTGTCAAATGCCATAACCAATCCCGCATCCAGGGGTTACATTTCAAATTAACCAGCTATAAAGC  
ACACTGGACTAGCGGATGGGTGACTGATATGGAGTAACTGTTACACAAGC

>M6-PGSC0003DMG400003918-(rev)M6LRR-RLK\_4575

CTATAAAGCACACTGGACTAGCGGATGGGTGACTGATATGGAGTAACTGTTACACAAGCATATGAACAT  
AACATTTTTGAAATTATATGGGCATGACATGAGCCCATCCTAGGTTACAAC

>M6-PGSC0003DMG400003918-(rev)M6LRR-RLK\_4636

ATGAACATAACATTTTTGAAATTATATGGGCATGACATGAGCCCATCCTAGGTTACAACATAAACTAAT  
ACCACCAAATAGGTATCTCGTTGATTTAATCCTATAGTCTAAACTCAA

>M6-PGSC0003DMG400003918-(rev)M6LRR-RLK\_4697

TAAACTAATACCACCAAATAGGTATCTCGTTGATTTAATCCTATAGTCTAAACTCAAAGTAGCAACTTTA  
AATAATACGTACAACTTTTTCAAGTAAATTTTTGTTCAATTTCTTC

>M6-PGSC0003DMG400003918-(rev)M6LRR-RLK\_4758

AGCAACTTTAAATAATACGTACAACTTTTTCAAGTAAATTTTTGTTCAATTCCTTCTCTAGCCTGTAAA  
AACTATAGCCATATGAACAACACTAGTACTTTATTAGTTCAAGAAGA

>M6-PGSC0003DMG400003918-(rev)M6LRR-RLK\_4819

TAGCCTGTAAAACTATAGCCATATGAACAACACTAGTACTTTATTAGTTCAAGAAGAACATATTATATC  
CAATACATGTCAACATTATATCAACAAACAAGTCACTAGTAGTGTGCAA

>M6-PGSC0003DMG400003918-(rev)M6LRR-RLK\_488

CATTCGTTGTAGAGAGCAGCCACTGGCTTCAACAGATTCAAATGTCATTATAGGAAAGTTGGTTCTTTT  
CAGCAAGACTTTGCCTTCAAATATGAGGACTGGGAGGCTGGCACAAG

>M6-PGSC0003DMG400003918-(rev)M6LRR-RLK\_4880

ATATTATATCCAATACATGTCAACATTATATCAACAAACAAGTCACTAGTAGTGTGCAAGGAAAAATCAA  
AAAGCTTACCACTTTCACTCCAACAACCCATCAAATGGCTGATAAGTAG

>M6-PGSC0003DMG400003918-(rev)M6LRR-RLK\_4941

AAAAATCAAAAAGCTTACCACTTTCACTCCAACAACCCATCAAATGGCTGATAAGTAGCTATTCCGGTT  
ATACTCGAATCTTGAGTCATCCATCTTGACACATTTTCTGCTAGCCATTC

>M6-PGSC0003DMG400003918-(rev)M6LRR-RLK\_5002

ATTCCGGTTATACTCGAATCTTGAGTCATCCATCTTGACACATTTTCTGCTAGCCATTCTTGAATAAATCC  
AATGACAACATAACCATACAAATAGAGACAAAATTCAAATCATTGA

>M6-PGSC0003DMG400003918-(rev)M6LRR-RLK\_5063

GAACTAAATCCAATGACAACATAACCATACAAATAGAGACAAAATTCAAATCATTGAAACAACAAAC  
AAAAGTAGATTCCCAACAAGAAATGTACTGCATTTGGTACATTTCTCTAG

>M6-PGSC0003DMG400003918-(rev)M6LRR-RLK\_5124

CAACAAACAAAAGTAGATTCCCAACAAGAAATGTACTGCATTTGGTACATTTCTCTAGAAAATGATTCA  
ATATATCCAAACATTCAAATATTAGTACCTGTTTTCTGCTAATCCTA

>M6-PGSC0003DMG400003918-(rev)M6LRR-RLK\_5185

AATGATTCAATATATCCAAACATTCAAATATTAGTACCTGTTTTCTGCTAATCCTAGCTGAATAACAC  
CATCTGGATTACTTGACTCATCATAAGGGTCTTCAGAAGCTCTTTTCAA

>M6-PGSC0003DMG400003918-(rev)M6LRR-RLK\_5246

TGAATAACACCATCTGGATTACTTGACTCATCATAAGGGTCTTCAGAAGCTCTTTTCAATCCAACATAGAA  
AGGGCTACTATCAATTTGTTTTGAAATAATCGAATTAGCTCTAGCAGAT



>M6-PGSC0003DMG400003918-(rev)M6LRR-RLK\_5307

CAACATAGAAAGGGCTACTATCAATTTGTTTTGAAATAATCGAATTAGCTCTAGCAGATACCTGAGATTG  
CCCAGTAGTTCCCTTCGGTGACAGTAAACACGTGAGTGAACCTTTGTA

>M6-PGSC0003DMG400003918-(rev)M6LRR-RLK\_5368

CTGAGATTGCCAGTAGTTCCCTTCGGTGACAGTAAACACGTGAGTGAACCTTTGTAACCCAGACCCA  
GAAGACACTTCCGGTAAATGGGTGACGACGTTGACCTCGCCGGAGCCGT

>M6-PGSC0003DMG400003918-(rev)M6LRR-RLK\_5429

CCAGACCCAGAAGACACTTCCGGTAAATGGGTGACGACGTTGACCTCGCCGGAGCCGTAGATTGCGCCG  
TTATTGTCACCACCGGAGGAACGATTTGTTTTAGGTAGAGTTGCCAAAAA

>M6-PGSC0003DMG400003918-(rev)M6LRR-RLK\_549

GGTTCTTTTCAGCAAGACTTTGCCTTCAAATATGAGGACTGGGAGGCTGGCACAAAAGCCTTGCTAGA  
CAAGGAGTCTTTGATTGGTGGGGGACAATTGGATCAGTTTACAGAACTTC

>M6-PGSC0003DMG400003918-(rev)M6LRR-RLK\_5490

ATTCGCCGTTATTGTCACCACCGGAGGAACGATTTGTTTTAGGTAGAGTTGCCAAAAATAGAAAAGAG  
CACAGGGTATAACTGAACCTAAGAAAAGACCACCCCGACCTTGAACCTACAC

>M6-PGSC0003DMG400003918-(rev)M6LRR-RLK\_5551

GAAAAGAGCACAGGGTATAACTGAACCTAAGAAAAGACCACCCCGACCTTGAACCTACACCTTGTAAGG  
GTACTATACCCTCATCGCCGTCGTGGCTCCTCCTCCGTCTCTGCCGCCGGC

>M6-PGSC0003DMG400003918-(rev)M6LRR-RLK\_5612

TGTAAGGGTACTATACCCTCATCGCCGTCGTGGCTCCTCCTCCGTCTCTGCCGCCGGCGCCAGTTG  
AAATGGTTGTTGTTGTTGTTCTAGTTGGTGAACGGTCTCGTGACCTTGTC

>M6-PGSC0003DMG400003918-(rev)M6LRR-RLK\_5673

CGCCAGTTGAAATGGTTGTTGTTGTTGTTCTAGTTGGTGAACGGTCTCGTGACCTTGTCATAACTGTGAC  
ATATTGGGGGCAGAATTAAGACGTCACCTTATCGGAGTATGACGTCAGTC

>M6-PGSC0003DMG400003918-(rev)M6LRR-RLK\_5734

AACTGTGACATATTGGGGGCAGAATTAAGACGTCACCTTATCGGAGTATGACGTCAGTCAGCTATCTGG  
CCGGCGAGACGGTTGACGGAGAGTACGAAGGGGGGTGAGTGATGGAGAAGA

>M6-PGSC0003DMG400003918-(rev)M6LRR-RLK\_5795

CTATCTGGCCGGCGAGACGGTTGACGGAGAGTACGAAGGGGGGTGAGTGATGGAGAAGAGATTTGGA

GAAAATGGTGGCAAATAGTTGGTCGAATTATTATTTATCTTTTTGTCCGCCTA

>M6-PGSC0003DMG400003918-(rev)M6LRR-RLK\_61

GTATATCTTGACTTACATCATAACCAACTGAATGGAAGTATTCCATCAACCATTGGAAATTTGTCTAACTT

GCACTTTTTGGATTTATCACAAAATCTGCTATCTGGGTCAATCCCTGTT

>M6-PGSC0003DMG400003918-(rev)M6LRR-RLK\_610

TTGCTAGACAAGGAGTCTTTGATTGGTGGGGGACAATTGGATCAGTTTACAGAACTTCCTTTGAAGGT

GGTGTATCAATTGCAGTGAAAAAGCTCGAGACATTGGGGAGAATCAGAAAT

>M6-PGSC0003DMG400003918-(rev)M6LRR-RLK\_671

TTGAAGGTGGTGTATCAATTGCAGTGAAAAAGCTCGAGACATTGGGGAGAATCAGAAATCAAGATGAA

TTTGAGCATGAAGTTGGCCGGTTAGGGACCCTTCAGCACCCCAATCTTGTTG

>M6-PGSC0003DMG400003918-(rev)M6LRR-RLK\_732

AGATGAATTTGAGCATGAAGTTGGCCGGTTAGGGACCCTTCAGCACCCCAATCTTGTTGCTTTACAAGG

GTACTACTGGTCTCTAGCATGCAGTTAATATTGTCGGAGTTTGTTCGGAA

>M6-PGSC0003DMG400003918-(rev)M6LRR-RLK\_793

TTACAAGGGTACTACTGGTCTCTAGCATGCAGTTAATATTGTCGGAGTTTGTTCGGAATGGAAACCTAT

ACGACAATTTACATGGACTTAGTTATCCTGGAACCAGCACTGGTGCTGGT

>M6-PGSC0003DMG400003918-(rev)M6LRR-RLK\_854

GAAACCTATACGACAATTTACATGGACTTAGTTATCCTGGAACCAGCACTGGTGCTGGTAACCCAGAATT

GAATTGGCCAAGAAGGTTTCAGATAGCAGTTGGAACAGCTCGAGCACTCA

>M6-PGSC0003DMG400003918-(rev)M6LRR-RLK\_915

CCCAGAATTGAATTGGCCAAGAAGGTTTCAGATAGCAGTTGGAACAGCTCGAGCACTCACATATCTTCA

CCATGATTGCAAACCTCCAGTCCTTCATCTTAATGTCAAGTCCACTAATAT

>M6-PGSC0003DMG400003918-(rev)M6LRR-RLK\_976

TATCTTCACCATGATTGCAAACCTCCAGTCCTTCATCTTAATGTCAAGTCCACTAATACTCCTGGATACA

AACTACGAAGCCAAATTGACTGATTATGGCCTGAGTAGGTTCCCTTCCC

>M6-PGSC0003DMG400003945-(rev)M6LRR-RLK\_1037

TTTGTTAGGTGGGACAATCCCAACGGAGCTTGGTAGTATCGAATGGCTTGCAGTTTTGGACCTCCATAAT

CTCACCTATTTGGTGAAATCCCATATGAGATAAGCAACTGCAAGCTTCT

>M6-PGSC0003DMG400003945-(rev)M6LRR-RLK\_1098

CTCCATAATCTCACCTATTTGGTGAAATCCCATATGAGATAAGCAACTGCAAGCTTCTTCTCAACTGTG  
AGTGTATCACCATCTTAGTTAATTTGTTTTATTTTCATCATTGCTCTGA

>M6-PGSC0003DMG400003945-(rev)M6LRR-RLK\_1159

TTCAACTGTGAGTGTATCACCATCTTAGTTAATTTGTTTTATTTTCATCATTGCTCTGATCTGGAATTGAAC  
CGTCTAATATTTGCTGCAGGGATCTATCTGGGAATCTTTTAGTAGGAG

>M6-PGSC0003DMG400003945-(rev)M6LRR-RLK\_122

TTCTAGTGACCCTTTAATAGTTTAGCTTCTTGGGATCCTAATGGAACACCTTGCTTAGACTTTAGTGGTG  
TTTTCTGCAATTCTGTTGGAAATGTGGTGAAGATTGTGTTGTGGAATAC

>M6-PGSC0003DMG400003945-(rev)M6LRR-RLK\_1220

TGGAATTGAACCGTCTAATATTTGCTGCAGGGATCTATCTGGGAATCTTTAGTAGGAGAAATACCACAA  
AACCTGTACAACCTGTCAAACCTTGATATCTTGACTTACATCATAACCA

>M6-PGSC0003DMG400003945-(rev)M6LRR-RLK\_183

TTTAGTGGTGTTTTCTGCAATTCTGTTGGAAATGTGGTGAAGATTGTGTTGTGGAATACTAGTCTTGGTG  
GGGTTCTCTCCCCTGCCTTAGCAGAACTTAAGTCTTTGCGCATCCTTACC

>M6-PGSC0003DMG400003945-(rev)M6LRR-RLK\_244

GTCTTGGTGGGGTTCTCTCCCCTGCCTTAGCAGAACTTAAGTCTTTGCGCATCCTTACCTTGTTGGGAAC  
CAATTTACTGGCAATATCCTGCAGAGTATGGGGGGATTGATTCATTGT

>M6-PGSC0003DMG400003945-(rev)M6LRR-RLK\_305

GTTTGGGAACCAATTTACTGGCAATATCCTGCAGAGTATGGGGGGATTGATTCATTGTGGAAGATTAA  
CTTCAGCTCTAATGCCTTTTTTGGTTCAATTCCTGAATTTCTTGGGGATTT

>M6-PGSC0003DMG400003945-(rev)M6LRR-RLK\_366

AAGATTAACCTCAGCTCTAATGCCTTTTTTGGTTCAATTCCTGAATTTCTTGGGGATTTACCTAATAAAG  
GTTCTTGATTTGTCAAGAAATGTGTATAGTGGTGAATTCCTGTGTCT

>M6-PGSC0003DMG400003945-(rev)M6LRR-RLK\_427

CTAATAAAGGTTCTTGATTTGTCAAGAAATGTGTATAGTGGTGAATTCCTGTGTCTTTGTTTATGAAT  
TGTAACAAAACAAGGTTCAATTCCTTGTCCTAACAATCTTTCAGGTC

>M6-PGSC0003DMG400003945-(rev)M6LRR-RLK\_488

GTTTATGAATTGTAACAAAACAAGGTTCAATTCCTTGTCCTAACAATCTTTCAGGTCCAATTCCAGCAT  
CAATTGGAAACTGTCAGAGTCTGAAGGAATAGACTTGTCTTTAATGG

>M6-PGSC0003DMG400003945-(rev)M6LRR-RLK\_549

ATTCCAGCATCAATTGGAACTGTCAGAGTCTTGAAGGAATAGACTTGTCTTTAATGGTCTTAGTGGAA  
GTTTACCTTCGCAAATTTGTGACATTCCAGGATTAGTGTACTTGTCTGTG

>M6-PGSC0003DMG400003945-(rev)M6LRR-RLK\_61

AATTGGAATTGGTATCTCCCATCACTGAAAAGGAGATCCTTCTTCAATTCAAGGGTAACATTTCTAGTGA  
CCCTTTAATAGTTTAGCTTCTTGGGATCCTAATGGAACACCTTGCTTAG

>M6-PGSC0003DMG400003945-(rev)M6LRR-RLK\_610

TTAGTGGAAGTTTACCTTCGCAAATTTGTGACATTCCAGGATTAGTGTACTTGTCTGTGAGGAGCAATGC  
ACTATCAGGACTTGTTCAGAACAGGTTTCTCCATGTCAAAGGTTGGAGC

>M6-PGSC0003DMG400003945-(rev)M6LRR-RLK\_671

GAGCAATGCACTATCAGGACTTGTTCAGAACAGGTTTCTCCATGTCAAAGGTTGGAGCTTTTGGATCTT  
GGTAGCAATGACTTCTCTGGTTTGGCTCCTTTTGGGGTTCTTGAGCTGGT

>M6-PGSC0003DMG400003945-(rev)M6LRR-RLK\_732

TTGGATCTTGGTAGCAATGACTTCTCTGGTTTGGCTCCTTTTGGGGTTCTTGAGCTGGTGAATCTTACATA  
TTTCAATGTTTCAAGTAATGGTTTTGAAGGGGAGATTGTAACTCTGGG

>M6-PGSC0003DMG400003945-(rev)M6LRR-RLK\_793

ATCTTACATATTTCAATGTTTCAAGTAATGGTTTTGAAGGGGAGATTGTAACTCTGGGACTTGTAGTCA  
GCGACTGGAAGTGTTGGATGTTTCAAGGAATATTTTTTTTGGTGAAATTC

>M6-PGSC0003DMG400003945-(rev)M6LRR-RLK\_854

TTGTAGTCAGCGACTGGAAGTGTTGGATGTTTCAAGGAATATTTTTTTTGGTGAAATTCCTTGAGCATC  
TCGAAATGCAGCGCGTTGAAGTACTTGGACATGGCATATAACAGAATTAA

>M6-PGSC0003DMG400003945-(rev)M6LRR-RLK\_915

TTGAGCATCTCGAAATGCAGCGCGTTGAAGTACTTGGACATGGCATATAACAGAATTAATGGAAGTATC  
CCTATTGAGCTTGCAGATTTGAATAGCCTTTCCGTTATGCGATTGGGTGAT

>M6-PGSC0003DMG400003945-(rev)M6LRR-RLK\_976

GAAGTATCCCTATTGAGCTTGCAGATTTGAATAGCCTTTCCGTTATGCGATTGGGTGATAATTTGTTAGG  
TGGGACAATCCCAACGGAGCTTGGTAGTATCGAATGGCTTGCAGTTTTGG

>M6-PGSC0003DMG400003958-(rev)M6LRR-RLK\_0

TATTTTCTAACTAACTCTCTTTTCTCCTTTGACAATTCACACCAATAAACTCCCCATTTTTCTTCTCTACT

GTGAAGCACCATTGAAAATCCAATGCAAAAGCTCACTAGTACTTCA

>M6-PGSC0003DMG400003958-(rev)M6LRR-RLK\_1037

AAAGGTAGGACTTTGTGGGGATTGATGGTTTACTCGGTTTTTTGAATTCCTTCATCCATAAATTAACAGT

GCAAGTTTGAGAGAAAATAAAGTGTTACTAGTATATATATGAATTGTTGA

>M6-PGSC0003DMG400003958-(rev)M6LRR-RLK\_1098

ATTAACAGTGCAAGTTTGAGAGAAAATAAAGTGTTACTAGTATATATATGAATTGTTGAATTCCTAACA

TAAGGAAAGCTTTAAGTACAACAGTAGAAGTGGCTCAAATGCTTTAAG

>M6-PGSC0003DMG400003958-(rev)M6LRR-RLK\_1159

TTCCTAACATAAGGAAAGCTTTAAGTACAACAGTAGAAGTGGCTCAAATGCTTTAAGTAGCAGATTTG

AATTCCAAGTATCCCGTGTTAGAATTTCTACTCCGCCACTGTTGCACCC

>M6-PGSC0003DMG400003958-(rev)M6LRR-RLK\_122

AAAACTCAACTTTTCACTCAAATCTGAAAGTTCACAAAGTTCAGAGAAATGGGGGTTAATTATTTCTCCTC

TTAACTTTCATTTTGCTCTGTTTGTCTTGAATTTCTTGCATAGAACC

>M6-PGSC0003DMG400003958-(rev)M6LRR-RLK\_1220

GCAGATTTGAATTCCAAGTATCCCGTGTTAGAATTTCTACTCCGCCACTGTTGCACCCACACCCCCTTTTC

TGGTCTTTATTCTTTCTTGTTAATTATATTTTTGGTCTGAACAGCATA

>M6-PGSC0003DMG400003958-(rev)M6LRR-RLK\_1281

ACCCCCTTTTCTGGTCTTTATTCTTTCTTGTTAATTATATTTTTGGTCTGAACAGCATACTGAAATTTCTTTT

CCAAATAAGGTGATGAAAGAAATGCAAGAACTTCTTTTTTTTTCCCT

>M6-PGSC0003DMG400003958-(rev)M6LRR-RLK\_1342

GAAATTTCTTTTCAAATAAGGTGATGAAAGAAATGCAAGAACTTCTTTTTTTTTCCCTTTCTACAATGAT

ATGTGCTCTGAGATGATTTGTGCATTTTGTGGTTCCACAGTGCTGGACT

>M6-PGSC0003DMG400003958-(rev)M6LRR-RLK\_1403

CTACAATGATATGTGCTCTGAGATGATTTGTGCATTTTGTGGTTCCACAGTGCTGGACTTGAGTTGTAAC

CAGTTGACAGGGAGCATACCAACAGAGATTTGGTTCTTGAAGAAGTTGAG

>M6-PGSC0003DMG400003958-(rev)M6LRR-RLK\_1464

AGTTGTAACCAGTTGACAGGGAGCATACCAACAGAGATTTGGTTCTTGAAGAAGTTGAGTGTCTCGAA

TTGCAACGTAACAGGCTGACAGGTAATCCAGAGAACGTAGGAGTCCTC

>M6-PGSC0003DMG400003958-(rev)M6LRR-RLK\_1525

TTCTCGAATTGCAACGTAACAGGCTGACAGGTAAAATTCCAGAGAACGTAGGAGTCCTCGGGACGTTGA  
AAAAGCTATATTTGGGATTCAATCAGCTATCTGGTCCGATTCCATTAAACT

>M6-PGSC0003DMG400003958-(rev)M6LRR-RLK\_1586

GACGTTGAAAAAGCTATATTTGGGATTCAATCAGCTATCTGGTCCGATTCCATTAAACTTAGCTGCTGCT  
CCCCAGTTGGAGGTTCTAGAAGTACAAAATAACACCCTCTCTGGAGTTGT

>M6-PGSC0003DMG400003958-(rev)M6LRR-RLK\_1647

GCTGCTGCTCCCCAGTTGGAGGTTCTAGAAGTACAAAATAACACCCTCTCTGGAGTTGTTCCCTCCAGGTT  
AGTTTCCCTTTTTGAGTTCTTAACTTTTTATAAATCTTTTTTTCCTAGCT

>M6-PGSC0003DMG400003958-(rev)M6LRR-RLK\_1708

CTCCAGGTTAGTTTCCCTTTTTGAGTTCTTAACTTTTTATAAATCTTTTTTTCCTAGCTTGAAGTTATATCTT  
TTGATTTCTGATTTTAAACCTCTTTTTTCTCCTTTTTATCTGGACTG

>M6-PGSC0003DMG400003958-(rev)M6LRR-RLK\_1769

AAGTTATATCTTTTGATTTCTGATTTTAAACCTCTTTTTTCTCCTTTTTATCTGGACTGATTTGTAGCTCTAA  
GGAGATTAATGAAAAATTCAATCATGAAAGCAATCCTGGTTTATGT

>M6-PGSC0003DMG400003958-(rev)M6LRR-RLK\_183

TATTTCTCTTAACTTTCATTTTTGCTCTGTTTGTCTTGAATTTTCTTGCATAGAACCTGTTTGTGGAAATG  
CTGAGGTGAGAGCTTTAATGGAGATTAACAGCTTTGGACCCAGAA

>M6-PGSC0003DMG400003958-(rev)M6LRR-RLK\_1830

TTGTAGCTCTAAGGAGATTAATGAAAAATTCAATCATGAAAGCAATCCTGGTTTATGTGGTACTGGATT  
TACTTCATTGAGAGTTTGCCTGGGATCATGTCAATGTGAATCAAG

>M6-PGSC0003DMG400003958-(rev)M6LRR-RLK\_1891

TACTGGATTTACTTCATTGAGAGTTTGCCTGGGATCATGTCAATGTGAATCAAGTTGGTTCTGAT  
GTACCTGATTCCAATAATAACGGCATCCCTATAGATGTCCCAGGAGCTGC

>M6-PGSC0003DMG400003958-(rev)M6LRR-RLK\_1952

GGTTCTGATGTACCTGATTCCAATAATAACGGCATCCCTATAGATGTCCCAGGAGCTGCTCATATTAGTC  
CGTTGCCTTGTAATCAAACCTCATTGTTCAAGATCATCAAATTTCTCAA

>M6-PGSC0003DMG400003958-(rev)M6LRR-RLK\_2013

ATATTAGTCCGTTGCCTTGTAATCAAACCTCATTGTTCAAGATCATCAAATTTCTCAAGCAATTATCGTT  
GCTTCTGTGATTACAGTCACTGTAACCTTGGTAGTAGCTGTTGTTTTCG

>M6-PGSC0003DMG400003958-(rev)M6LRR-RLK\_2074

AATTATCGTTGCTTCTGTGATTACAGTCACTGTAACCTTTGGTAGTAGCTGTTGTTTTCGGTATATTTAGAC  
GAAGAAGGCTAAAACAAAGAGTAGGGAACACAAGTGATGCATCTGATGA

>M6-PGSC0003DMG400003958-(rev)M6LRR-RLK\_2135

ATATTTAGACGAAGAAGGCTAAAACAAAGAGTAGGGAACACAAGTGATGCATCTGATGATAGGCTTAG  
CACTGATCAGGCAAAGGAAATATACAAGAGAAGCCCTTCTCCACTACTTACT

>M6-PGSC0003DMG400003958-(rev)M6LRR-RLK\_2196

GGCTTAGCACTGATCAGGCAAAGGAAATATACAAGAGAAGCCCTTCTCCACTACTTACTGTTGAGTACTC  
AAATCGTTGGGACCCTATGACCCCTGAAAAGAGTTGCAATAGCATGTTCA

>M6-PGSC0003DMG400003958-(rev)M6LRR-RLK\_2257

TGAGTACTCAAATCGTTGGGACCCTATGACCCCTGAAAAGAGTTGCAATAGCATGTTCAATGAGTTCTTA  
AATGGATTCAAGTTCAATTTGGAAGAGGTTGAGTCTGCAACTCAGCATTT

>M6-PGSC0003DMG400003958-(rev)M6LRR-RLK\_2318

GAGTTCTTAAATGGATTCAAGTTCAATTTGGAAGAGGTTGAGTCTGCAACTCAGCATTTTACAGAGACAA  
ATCTATTGGGACGGAGTAATTTCTCTGCCGTCTATAAAGGAATTTTAAAA

>M6-PGSC0003DMG400003958-(rev)M6LRR-RLK\_2379

CAGAGACAAATCTATTGGGACGGAGTAATTTCTCTGCCGTCTATAAAGGAATTTTAAAAGATGGATCTAC  
GGTAGCTGTAAAAGCATCAGCGTGACAAGCTGTAAGTCGGAGGAGACGG

>M6-PGSC0003DMG400003958-(rev)M6LRR-RLK\_244

TTTGTGAAATGCTGAGGTGAGAGCTTTAATGGAGATTAACAGCTTTGGACCCAGAAAGCAAGAAA  
CTTTCTTCATGGACAAGTGATGGTGATCCATGTAGTGGTTCTTTTCTTGGTG

>M6-PGSC0003DMG400003958-(rev)M6LRR-RLK\_2440

TGGATCTACGGTAGCTGTAAAAGCATCAGCGTGACAAGCTGTAAGTCGGAGGAGACGGAGTTCATGG  
AAGGATTGAGCTTATTAACCTCCCTGAAGCATGAAAACCTTGTCAGCTAAG

>M6-PGSC0003DMG400003958-(rev)M6LRR-RLK\_2501

TTCATGGAAGGATTGAGCTTATTAACCTCCCTGAAGCATGAAAACCTTGTCAGCTAAGAGGTTTCTGTT  
GTTCAAAGGGAAGAGGCGAGTGCTTTTTAATCTATGATTTGGCCTCTAAA

>M6-PGSC0003DMG400003958-(rev)M6LRR-RLK\_2562

GTTTCTGTTGTTCAAAGGGAAGAGGCGAGTGCTTTTTAATCTATGATTTGGCCTCTAAAGGGAACCTTTC

TCAGTATCTTGATGTTGAAGTAAACAGCAACCATGTTCTTGACTGGTCCA

>M6-PGSC0003DMG400003958-(rev)M6LRR-RLK\_2623

GAACCTTTCTCAGTATCTTGATGTTGAAGTAAACAGCAACCATGTTCTTGACTGGTCCAAAAGAGTTTCG

ATCATCAAGGGGATTGCAAAAGGTTGGTCTTCTTTGCTTTTGTTTCATCAT

>M6-PGSC0003DMG400003958-(rev)M6LRR-RLK\_2684

AGAGTTTCGATCATCAAGGGGATTGCAAAAGGTTGGTCTTCTTTGCTTTTGTTTCATCATTACATCTTCAAC

ATTCTCTACAAATTTCTCAGAATATTTTAAAGTTCGGAAATATTATGGC

>M6-PGSC0003DMG400003958-(rev)M6LRR-RLK\_2745

CATCTTCAACATTCTCTACAAATTTCTCAGAATATTTTAAAGTTCGGAAATATTATGGCTGTATAATATTTT

CCCCATAATGTGGAGTCTTCTAGGAGTTCCATTGCATAGGCAGTCTAT

>M6-PGSC0003DMG400003958-(rev)M6LRR-RLK\_2806

TATAATATTTTCCCATAATGTGGAGTCTTCTAGGAGTTCCATTGCATAGGCAGTCTATTACCACTAAAGT

GCTTCTCACAGGATTCAGGAACAGGATGTGACTGTAGATTCATTTGCAT

>M6-PGSC0003DMG400003958-(rev)M6LRR-RLK\_305

CAAGAACTTTCTTCATGGACAAGTGATGGTGATCCATGTAGTGGTCTTTTCTTGGTGTGATTTGTAAT

GAACATCATAAAGTAACAAATATTACTCTGACAGATAAAGGACTTACTGG

>M6-PGSC0003DMG400003958-(rev)M6LRR-RLK\_3050

AAACAACGTAAATTTTCTGCCGACCACCTCGGCCTACCTAGCTCCACCCCTGTGGTTAATATATTATCAAAT

TACTCTCCATCCCAAATAAGTGTGCTTTAGTTCATTTACGCCCAT

>M6-PGSC0003DMG400003958-(rev)M6LRR-RLK\_3111

ATTATCAAATTACTCCTCCATCCCAAATAAGTGTGCTTTAGTTCATTTACGCCCATTAAGAAAGGTAA

TAAATGCAAGGCATAGTTTACTAAGTCACCCCTAGTTATTAGATGAAGA

>M6-PGSC0003DMG400003958-(rev)M6LRR-RLK\_3172

AGAAAGGTAATAAATGCAAGGCATAGTTTACTAAGTCACCCCTAGTTATTAGATGAAGAGGAGTAGTTC

TTAATATAAAGGTATAGTTGGAACCAAGAAGTACTATTTTTTGTCTTGAC

>M6-PGSC0003DMG400003958-(rev)M6LRR-RLK\_3233

AGTAGTCTTTAATATAAAGGTATAGTTGGAACCAAGAAGTACTATTTTTTGTCTTGACTTCTAAATAGGC

AATTATTTTGGGATCAACTTTTATGCTAAAGCGACACTTATTTGGGACG

>M6-PGSC0003DMG400003958-(rev)M6LRR-RLK\_3273



TACTATTTTTGTCTTGACTTCTAAATAGGCAATTATTTTTGGGATCAACTTTTATGCTAAAGCGACACTTAT  
TTGGGACGGAGGGAGTAATATGAATACAGAGAGAGACTGGAATTATTG

>M6-PGSC0003DMG400003958-(rev)M6LRR-RLK\_366

ATTTGTAATGAACATCATAAAGTAACAAATATTACTCTGACAGATAAAGGACTTACTGGAAAGTTGTCAC  
CAGCAATTGCCGAGCTGAAGTGTCTGTCTGGTCTGTTCTTGCATTATAAT

>M6-PGSC0003DMG400003958-(rev)M6LRR-RLK\_427

AGTTGTCACCAGCAATTGCCGAGCTGAAGTGTCTGTCTGGTCTGTTCTTGCATTATAATTCTTTAACAGG  
GGAAATACCAAAGGAACTTGGGAATTTGACTGAGTTGAATGATCTTTATC

>M6-PGSC0003DMG400003958-(rev)M6LRR-RLK\_488

TTTAACAGGGGAAATACCAAAGGAACTTGGGAATTTGACTGAGTTGAATGATCTTTATCTCAATGAGAA  
CAATCTTCTGGGATTATACCACCAGAACTTGGAAACATGGCAAGTTTACA

>M6-PGSC0003DMG400003958-(rev)M6LRR-RLK\_549

AATGAGAACAATCTTCTGGGATTATACCACCAGAACTTGGAAACATGGCAAGTTTACAAGGTTTGTAG  
CCTTTGTAAACATCTTCTGTTTAATTTGTGGGAGATTGTTTCTCTTCTT

>M6-PGSC0003DMG400003958-(rev)M6LRR-RLK\_61

CCTTCTCTCTACTGTGAAGCACCATTGAAAATCCAATGCAAAGCTCACTAGTACTTCATAAAAACTCAA  
CTTTTCACTCAAATCTGAAAGTTCACAAAGTTCAGAGAAATGGGGGTTA

>M6-PGSC0003DMG400003958-(rev)M6LRR-RLK\_610

GTTTGTAGCCTTTGTAAACATCTTCTGTTTAATTTGTGGGAGATTGTTTCTTCTTTTCTTAGCTCCCAC  
CTTTTTGCTGCTTTGGTGACTIONCTTAAATTATCTGTTGTGATTT

>M6-PGSC0003DMG400003958-(rev)M6LRR-RLK\_671

CTTAGCTCCCACCTTTTTGCTGCTTTGGTGACTIONCTTAAATTATCTGTTGTGATTTCTAAGAAATAGTT  
GTATTAAATGATTTGTCATTTTAGAAGTTTTAAGATAAAATAATTATC

>M6-PGSC0003DMG400003958-(rev)M6LRR-RLK\_732

AAGAAATAGTTGTATTAATGATTTGTCATTTTAGAAGTTTTAAGATAAAATAATTATCCTTTTCTCATTCT  
ACTTTTAATAGTAATTGTTCTTGAAGATCCTGTTTTGGTGACTIONCGAAC

>M6-PGSC0003DMG400003958-(rev)M6LRR-RLK\_793

TTTCTCATTCTACTTTAATAGTAATTGTTCTTGAAGATCCTGTTTTGGTGACTIONCGAACCGACAACCGTTG  
GAGGTAGAGAGTGCTTACACTIONTGACTIONCCTGCTATCAGGGAAATT

>M6-PGSC0003DMG400003958-(rev)M6LRR-RLK\_854

ACAACCGTTGGAGGTAGAGAGTGCTTACAACCTGAGCAGCCCCTGCTATCAGGGAAATTGCTTGCTGTT  
TCATTCTACTGTTTTTTGTGTGTATTAGTGAATAATGAGTCTACGTGAATT

>M6-PGSC0003DMG400003958-(rev)M6LRR-RLK\_915

TTGCTGTTTCATTCTACTGTTTTTTGTGTGTATTAGTGAATAATGAGTCTACGTGAATTTAGGTGACAGAG  
TAGACAAGTTGCAAAATTTCTTAGAGATCTATGCAGATTTTTTTGGTTCT

>M6-PGSC0003DMG400003958-(rev)M6LRR-RLK\_976

GGTGACAGAGTAGACAAGTTGCAAAATTTCTTAGAGATCTATGCAGATTTTTTTGGTTCTGTAAAGGTAG  
GACTTTGTGGGGATTGATGGTTTACTCGGTTTTTTGAATTCCTTCATCCAT

>M6-PGSC0003DMG400003982-(rev)M6G-LecRK\_0

GAGCTAAACAGGCAACGGATGGTTTCAAAGAGGAATTAGGAAAGGGTGCTTTTGGAGCAGTATATAA  
AGGGAGCTTTGACAAAGGTAAAACCTTGTGGCAGTGAAGAGGCTAGAGAAG

>M6-PGSC0003DMG400003982-(rev)M6G-LecRK\_124

TGGAAGAAGGTGAAAGGGAGTTCAGAGCAGAAATGAAGGTCATTGGTAGAACTCGACACAGAACTT  
GATTCGTTTGCTAGGATATTGTGCTGAAGGATCAAAAAGAGCTCTTGTTTATG

>M6-PGSC0003DMG400003982-(rev)M6G-LecRK\_186

AACTTGATTCGTTTGCTAGGATATTGTGCTGAAGGATCAAAAAGAGCTCTTGTTTATGAATATATGAGCA  
ATGGTTGCCTAGCAAATCTGTTGTTCCGAGGAGCTACTCGGCCGGATTGG

>M6-PGSC0003DMG400003982-(rev)M6G-LecRK\_248

TATGAGCAATGGTTGCCTAGCAAATCTGTTGTTCCGAGGAGCTACTCGGCCGGATTGGAATCTAAGAGT  
AAATATTGCACTAGATGTGGCCAGGGGAATCCTCTACCTCCATGAAGAATG

>M6-PGSC0003DMG400003982-(rev)M6G-LecRK\_310

TAAGAGTAAATATTGCACTAGATGTGGCCAGGGGAATCCTCTACCTCCATGAAGAATGTGAAGCTCCAA  
TTATCCACTGTGATATAAAGCCACAAAACATCTTACTCGACGAGTTGTTGA

>M6-PGSC0003DMG400003982-(rev)M6G-LecRK\_372

GCTCCAATTATCCACTGTGATATAAAGCCACAAAACATCTTACTCGACGAGTTGTTGACAGCTAAAATCT  
CAGATTTTGGTCTGGCCAAGCTGCTAATGCCTGATCAAACAAGAACATTC

>M6-PGSC0003DMG400003982-(rev)M6G-LecRK\_434

TAAAATCTCAGATTTTGGTCTGGCCAAGCTGCTAATGCCTGATCAAACAAGAACATTCCTGGTGTGAAGA

GGGACTAGAGGGTATTTAGCACCAGAGTGGCAAACAAATGCCCCCATCTC

>M6-PGSC0003DMG400003982-(rev)M6G-LecRK\_496

GTGTAAGAGGGACTAGAGGGTATTTAGCACCAGAGTGGCAAACAAATGCCCCCATCTCTGTCAAGGTTG  
ATGTCTTCAGCTATGGTATTGTATTGCTAGAAATCATTTGCTGCAGAAGAA

>M6-PGSC0003DMG400003982-(rev)M6G-LecRK\_558

AAGGTTGATGTCTTCAGCTATGGTATTGTATTGCTAGAAATCATTTGCTGCAGAAGAAACATTGAAGTCT  
GTGTGACTAAAATAGAAGAAATCCAGCTTTCTATATGGGCATATAGTTGC

>M6-PGSC0003DMG400003982-(rev)M6G-LecRK\_62

ATATAAAGGGAGCTTTGACAAAGGTAAAAACCTTGTGGCAGTGAAGAGGCTAGAGAAGGTAGTGAA  
GAAGGTGAAAGGGAGTTCAGAGCAGAAATGAAGGTCATTGGTAGAACTCGACA

>M6-PGSC0003DMG400003982-(rev)M6G-LecRK\_620

TGAAGTCTGTGTGACTAAAATAGAAGAAATCCAGCTTTCTATATGGGCATATAGTTGCCTTGTGAAGGT  
GAAGTAGACAAGCTTGTGGAAGTGAAGAAGTAGACAAGAAAACCTTGGA

>M6-PGSC0003DMG400003982-(rev)M6G-LecRK\_682

TTGAAGGTGAAGTAGACAAGCTTGTGGAAGTGAAGAAGTAGACAAGAAAACCTTGGAAGGAATGATC  
TCTGTAGCGATTTGGTGCATTCAGGACGAACCAGCTCTTCGTCCTTCCATGA

>M6-PGSC0003DMG400003982-(rev)M6G-LecRK\_737

GGAAGGAATGATCTCTGTAGCGATTTGGTGCATTCAGGACGAACCAGCTCTTCGTCCTTCCATGAAAAA  
AGTATTACACATGTTGCAGGGAATTATTGATATTCCAATTCCTCCATGTCC

>M6-PGSC0003DMG400004056M6LRR-RLP\_0

ATGTACAGAGGTGTAGCAGATGCTTCTATATCTCCAATGGAGAAACATGAGAAAGAGGCATTGTACTCT  
GCTATTCAAGGTTTTGTTGAAATGAGTGGAATGGTTCATTTCTTTATCCT

>M6-PGSC0003DMG400004056M6LRR-RLP\_1037

CTTTATTTTGATGTAATTCATTCTAAAACCAAGTAGTTATATGCATTGAAATTATCGTTCTTGTATGTTAA  
CTTGACTTAACAGTGTAATAATTCTTTACACCGTAACATAAACTCTTG

>M6-PGSC0003DMG400004056M6LRR-RLP\_1098

TTGTATGTTAACTTGACTTAACAGTGTAATAATTCTTTACACCGTAACATAAACTCTTGTCTTAACACTTAA  
ATCAACTCTGTGAACTCTTATTTTTACTATAATTCACAGGGAGTATCA

>M6-PGSC0003DMG400004056M6LRR-RLP\_1159

TTAACTTTAATCAACTCTGTGAACTCTTATTTTTACTATAATTCACAGGGAGTATCATGTGATTTCTCCA  
ATGGCTTCTGGCACGTTACGGATTAACTATTGGAGACCTATATGACA

>M6-PGSC0003DMG400004056M6LRR-RLP\_1220

TGATTTCTCCAATGGCTTCTGGCACGTTACGGATTAACTATTGGAGACCTATATGACAATTCCTTCGTT  
GCTCCCAAGCTGCAGAGTTCACAGAACAACCTGTTTAACTCAAGCATCT

>M6-PGSC0003DMG400004056M6LRR-RLP\_1281

TCCCTTCGTTGCTCCCAAGCTGCAGAGTTCACAGAACAACCTGTTTAACTCAAGCATCTAAAAGACTTTC  
CTTCTCAAATTGCTTCTCTCAGATCAGCACAAATCAATTCCCATTCA

>M6-PGSC0003DMG400004056M6LRR-RLP\_1342

AAAGACTTTCCTTCTCAAATTGCTTCTCTCAGATCAGCACAAATCAATTCCCATTTCAAATTGGGATAGT  
CTCGCAAACAGCCTTGAATCGTTAGAGTTCCGATCAAATCCTGGTCTTA

>M6-PGSC0003DMG400004056M6LRR-RLP\_1403

TTGGGATAGTCTCGCAAACAGCCTTGAATCGTTAGAGTTCCGATCAAATCCTGGTCTTATTGGGACAATT  
CCCACAAGTTTTGGCTACCTTAAGAATCTTCAATCTTTAGTACTGCTGGA

>M6-PGSC0003DMG400004056M6LRR-RLP\_1464

GGGACAATTCCCACAAGTTTTGGCTACCTTAAGAATCTTCAATCTTTAGTACTGCTGGAAAATGGACTGA  
AAGGAGAAATACCAGAAGCTTTAGGCAATTTAACTAAACTAAAGCGCCTC

>M6-PGSC0003DMG400004056M6LRR-RLP\_1525

ATGGACTGAAAGGAGAAATACCAGAAGCTTTAGGCAATTTAACTAAACTAAAGCGCCTCGTTTTGGCAG  
GCAACAATTTTATTGGTCCTATTCCAAGTCTAGGAAGATTGACAAATC

>M6-PGSC0003DMG400004056M6LRR-RLP\_1586

TTTGGCAGGCAACAATTTTATTGGTCCTATTCCAAGTCTAGGAAGATTGACAAATCTTTGATACTTG  
ACACAATCAGGAATTTTCTATCTGGTGCATTACCTGTGACTATTGGTGA

>M6-PGSC0003DMG400004056M6LRR-RLP\_1647

TTGATACTTGACACAATCAGGAATTTTCTATCTGGTGCATTACCTGTGACTATTGGTGATTTATCTTCGCT  
CATAAAGCTTGACTTGAGCAACAATCGATTAGATGGAAAATTGCCTCGA

>M6-PGSC0003DMG400004056M6LRR-RLP\_1708

TATCTTCGCTCATAAAGCTTGACTTGAGCAACAATCGATTAGATGGAAAATTGCCTCGAGAAATTGGAG  
GACTAAAGAGTCTAACTACTTGATCTCAGCCACAACAATTTCTCTGATG

>M6-PGSC0003DMG400004056M6LRR-RLP\_1769

AATTGGAGGACTAAAGAGTCTAACACTACTTGATCTCAGCCACAACAATTTCTCTGATGGTTTGCCAGAG  
ACATTTCAAGAAATGGACTCCTTAGAAGAAGCTTGTGTTATCTGACAATCC

>M6-PGSC0003DMG400004056M6LRR-RLP\_1830

TTGCCAGAGACATTTCAAGAAATGGACTCCTTAGAAGAAGCTTGTGTTATCTGACAATCCGATAGGCGATT  
ATGTTACAAGAATTCAATGGAGGAACATGAAAACTTGGAATGTTGGAT

>M6-PGSC0003DMG400004056M6LRR-RLP\_1891

TAGGCGATTATGTTACAAGAATTCAATGGAGGAACATGAAAACTTGGAATGTTGGATCTTTCAAACA  
TGGGATTGAAAGGTAATATACCAAATTCATGACAGAAATGAAGAACTGA

>M6-PGSC0003DMG400004056M6LRR-RLP\_1952

TTCAAACATGGGATTGAAAGGTAATATACCAAATTCATGACAGAAATGAAGAACTGAGATTCCTCAG  
CCTTAGTAATAACATTCTTTCAGGAATTATTCCGTCAAATTCGAGAAAAT

>M6-PGSC0003DMG400004056M6LRR-RLP\_2013

TTCTCAGCCTTAGTAATAACATTCTTTCAGGAATTATTCCGTCAAATTCGAGAAAATATCAACTATTAA  
TGCTCTATACTTGGATGGAATGATTCACAGGGAACTTGAATTTTCA

>M6-PGSC0003DMG400004056M6LRR-RLP\_2074

CAACTATTAATGCTCTATACTTGGATGGAATGATTCACAGGGAACTTGAATTTTCACAAAGGTTTTAT  
ACAAAATTAAGGAGTCGTTTTCGAGCTTCAGGTAATGTGAACTCTGCT

>M6-PGSC0003DMG400004056M6LRR-RLP\_2135

AAGGTTTTATACAAAATTAAGGAGTCGTTTTCGAGCTTCAGGTAATGTGAACTCTGCTTGTCCCTCGAG  
TTAACGTCAACAAGTCATGTTCCAGAAGGTGTACAACAATGTGAACAAGA

>M6-PGSC0003DMG400004056M6LRR-RLP\_2196

TCCCTCGAGTTAACGTCAACAAGTCATGTTCCAGAAGGTGTACAACAATGTGAACAAGAAAGCACAGTA  
GATAGTAAAGATTCAGACTCCAATTTAAAGAACAATATTTGAGTCAGAAT

>M6-PGSC0003DMG400004056M6LRR-RLP\_2257

GCACAGTAGATAGTAAAGATTCAGACTCCAATTTAAAGAACAATATTTGAGTCAGAATCCCACAATAT  
TATAGCTTCTTTGGGGCATTGAGGACATGTTGTTAGTCATTTTACATTTT

>M6-PGSC0003DMG400004056M6LRR-RLP\_2310

CAGAATCCCACAATATTATAGCTTCTTTGGGGCATTGAGGACATGTTGTTAGTCATTTTACATTTTGTTA

TGTCGCAAGAATAATACTTATGTCTCTTCCATGGATCGTATTTTTATAA

>M6-PGSC0003DMG400004056M6LRR-RLP\_366

TTCATAATTTGCTAGTTGATTCTAGTCTTATGTTTTTTTACCATTATTGACTTTTCTTGCTGTAGTTCAAAAT  
CAAGAAAACAGTAATGTCACAATGCCATGCATGGATGTCCTTAAATT

>M6-PGSC0003DMG400004056M6LRR-RLP\_427

GTAGTTCAAAATCAAGAAAACAGTAATGTCACAATGCCATGCATGGATGTCCTTAAATTTTTTATTTTATT  
TTAATATAAAGAAATGGATCTTGGGTCTTACTCAACCACATAAACTACA

>M6-PGSC0003DMG400004056M6LRR-RLP\_488

TTATTTTATTTTAATATAAAGAAATGGATCTTGGGTCTTACTCAACCACATAAACTACATCATAGGAATTA  
GGATGAGTATTGTTCAAGACATTTGAGATCAATTACCCATCCCATATTC

>M6-PGSC0003DMG400004056M6LRR-RLP\_549

ATAGGAATTAGGATGAGTATTGTTCAAGACATTTGAGATCAATTACCCATCCCATATTCGACTCTTGTGG  
GCAATATAATATGGAAGCACACATAGGTGAACAAAGAATTCGGATGAGC

>M6-PGSC0003DMG400004056M6LRR-RLP\_61

TGTACTCTGCTATTCAAGGTTTTGTTGGAAATGAGTGGAATGGTTCATTTCTTTATCCTGATCCTTGTGGC  
TGGACATCAATTGAGGTAATACTTTTGCTCTCGATGTTCTTTTGCTA

>M6-PGSC0003DMG400004056M6LRR-RLP\_793

GACTCTTAATAGATCAAACACTGTCCTCTCAATGGTTGTTAATTAAGTGAAAAGACTTTCTCAAATTCCTA  
CTTTTTCTGTTCTGGATTTGCAAACAGTGTTATATGAGTGTGTGTAAGA

>M6-PGSC0003DMG400004056M6LRR-RLP\_854

CAAATTCCTACTTTTTCTGTTCTGGATTTGCAAACAGTGTTATATGAGTGTGTGTAAGAGAGACATCACTA  
GTTAGGAGCTTTCCAATTTCTAACACACCTTTTCTGGTAGTACTAGTAA

>M6-PGSC0003DMG400004056M6LRR-RLP\_915

GACATCACTAGTTAGGAGCTTTCCAATTTCTAACACACCTTTTCTGGTAGTACTAGTAAATATATATGTTA  
GTATTCTATTGGTAATTTGCAATATTTATCACTTTCTTATAGTGATTTA

>M6-PGSC0003DMG400004056M6LRR-RLP\_976

ATATATGTTAGTATTCTATTGGTAATTTGCAATATTTATCACTTTCTTATAGTGATTTAGGCTTTATTTTGA  
TGTAATTCATTCCTAAAACCAAGTAGTTATATGCATTGAAATTATCGT

>M6-PGSC0003DMG400004146-(rev)M6LRR-RLK\_0

CAAACCATGAAACAAATTCATCTGTTTTGCTTGTTATTTTTGAGTGGTTTTTTCTTTGTTTCATCAAATAAG  
GATGAAGTTTCTATATTGTTAGCAATAAAGTCTAGTCTTGTTGATCCA

>M6-PGSC0003DMG400004146-(rev)M6LRR-RLK\_1054

TGAATCTTGGGAAAAAATCTCCCTTGCAATGGTTAGACGTTTCTTCGAATATCTTGACAGGTGAGATCCC  
TCCTGGCTTGTGTGATTCTGGCAATCTAACAAAGCTCATTCTGTTTAATA

>M6-PGSC0003DMG400004146-(rev)M6LRR-RLK\_1116

GAGATCCCTCTGGCTTGTGTGATTCTGGCAATCTAACAAAGCTCATTCTGTTTAATAATTCCTTCTCTGG  
ATCAATCCCATTAGGCCTCTCTAACTGTTCTTCACTTGTTTCGAGTTAGA

>M6-PGSC0003DMG400004146-(rev)M6LRR-RLK\_1178

CTTCTCTGGATCAATCCCATTAGGCCTCTCTAACTGTTCTTCACTTGTTTCGAGTTAGAATCCAAAATAATCT  
GCTTTCAGGAATGATTCCGGTTGGGTTTGAACACTTCCTATGCTCCA

>M6-PGSC0003DMG400004146-(rev)M6LRR-RLK\_124

ATCATCTCAAAGATTGGAACCTTTTCAAACAATGAAAGTTCTATTCATTGTAAATGGAATGGTGTGTTTTGC  
AACTCAAAAAGCTATGTAGAGAAGCTTGATTTGTCAAACATGAATCTAA

>M6-PGSC0003DMG400004146-(rev)M6LRR-RLK\_1240

AAAATAATCTGCTTTCAGGAATGATTCCGGTTGGGTTTGAACACTTCCTATGCTCCAAAGATTGGAATT  
GGCTAAAAACAATCTCACTGGTGAAATTCCTGTGGATTTCACTCTCTCCA

>M6-PGSC0003DMG400004146-(rev)M6LRR-RLK\_1302

TTGGAATTGGCTAAAAACAATCTCACTGGTGAAATTCCTGTGGATTTCACTCTCTCCACCACTCTTTCTTTT  
ATCGATGTCTCTTCAAACCATCTTGAATCATCTTTGCCTTCTAGCATT

>M6-PGSC0003DMG400004146-(rev)M6LRR-RLK\_1364

TCTTTCTTTTATCGATGTCTCTTCAAACCATCTTGAATCATCTTTGCCTTCTAGCATTGTTCCATTCTAGC  
CTGCAAACCTTCATAGTCTCCAATAACAATCTTAAAGGCAACATTCC

>M6-PGSC0003DMG400004146-(rev)M6LRR-RLK\_1426

CCATTCCTAGCCTGCAAACCTTCATAGTCTCCAATAACAATCTTAAAGGCAACATTCTGACCAATTCCAA  
GATTGTCCTTCCCTTTCTTTGCTTGATCTTTCAAGCAACCATTTCTCGG

>M6-PGSC0003DMG400004146-(rev)M6LRR-RLK\_1488

CAATTCCAAGATTGTCCTTCCCTTTCTTTGCTTGATCTTTCAAGCAACCATTTCTCGGGGAAAATTCTCAG  
AGTATTGCTTCATGTGAAAAGCTGGTGAAGCTTAATCTAAGAAACAAC

>M6-PGSC0003DMG400004146-(rev)M6LRR-RLK\_1550

AATTCCTCAGAGTATTGCTTCATGTGAAAAGCTGGTGAAGCTTAATCTAAGAAACAACCAATTCAGTGGT  
GAAATTCCAACTCACATTGCCACATTGCCAACTTTATCTATTCTTGATCT

>M6-PGSC0003DMG400004146-(rev)M6LRR-RLK\_1612

TCAGTGGTGAAATTCCAACTCACATTGCCACATTGCCAACTTTATCTATTCTTGATCTATCAAACAACCTCG  
TTAGTTGGAAAAATACCAATGGACTTTGGTAGCTCTCCAGCTCTAGAAA

>M6-PGSC0003DMG400004146-(rev)M6LRR-RLK\_1674

AACAACCTCGTTAGTTGGAAAAATACCAATGGACTTTGGTAGCTCTCCAGCTCTAGAAATGCTTAATCTTT  
CCTACAACAAGCTTGATGGTCCAGTTCCAAGAAATGGGATACTCATGACT

>M6-PGSC0003DMG400004146-(rev)M6LRR-RLK\_1736

TAATCTTTCTACAACAAGCTTGATGGTCCAGTTCCAAGAAATGGGATACTCATGACTATTAATCCCAAT  
GATCTGATAGGAAATGCTGGTCTTTGTGGTGGCATACTCCACCGTGTC

>M6-PGSC0003DMG400004146-(rev)M6LRR-RLK\_1798

ATCCCAATGATCTGATAGGAAATGCTGGTCTTTGTGGTGGCATACTCCACCGTGTCTCAAAGTCTCAC  
CATAACTTCAAATGCGAGAAAGAATCGTGTCAATCACATAATCGTGGGAT

>M6-PGSC0003DMG400004146-(rev)M6LRR-RLK\_186

GTGTTTTGCAACTCAAAAAGCTATGTAGAGAAGCTTGATTTGTCAAACATGAATCTAAGTGGCAGAGTTT  
CAGATCAAATTCAAGGACTTCAGAGTCTATCTTTGCTTAATCTTTGTTGC

>M6-PGSC0003DMG400004146-(rev)M6LRR-RLK\_1860

AGTCTACCATAAATTCAAATGCGAGAAAGAATCGTGTCAATCACATAATCGTGGGATTCATTGTTGGAA  
TCTCAGTTATCTTAGCTGTTGGGATCATGGTTCTAGCAGGGAGATGGATG

>M6-PGSC0003DMG400004146-(rev)M6LRR-RLK\_1922

TGTTGGAATCTCAGTTATCTTAGCTGTTGGGATCATGGTTCTAGCAGGGAGATGGATGTACAATAGATG  
GTACTTGTGCAACAGCTTTTTCAAGGAATTTGCGTTCAACAAGAACAACCTC

>M6-PGSC0003DMG400004146-(rev)M6LRR-RLK\_1984

ATAGATGGTACTTGTGCAACAGCTTTTTCAAGGAATTTGCGTTCAACAAGAACAACCTCAGAATGGCCTTG  
GAGGCTTGTAGCATTCCAGAGGCTTAACTTCACAAGTACTGATATTCTGG

>M6-PGSC0003DMG400004146-(rev)M6LRR-RLK\_2046

TGGCCTTGGAGGCTTGTAGCATTCCAGAGGCTTAACTTCACAAGTACTGATATTCTGGCTTGCCTAAAGG



AGTCAAATGTGATAGGCATTGGTGGCAATGGAATTGTCTACAAGGCTGAG

>M6-PGSC0003DMG400004146-(rev)M6LRR-RLK\_2108

CCTAAAGGAGTCAAATGTGATAGGCATTGGTGGCAATGGAATTGTCTACAAGGCTGAGGTTCTGAGGC

CACATTCTGTTGTAGCAGTTAAAAAGTTGTGGAGATCAGATGGAGACATTGA

>M6-PGSC0003DMG400004146-(rev)M6LRR-RLK\_2170

TGAGGCCACATTCTGTTGTAGCAGTTAAAAAGTTGTGGAGATCAGATGGAGACATTGAAGCAGGAGAT

GATCTCGTTGCAGAGGTTGATCTTTTAGGGAAGCTTCGTCACAGGAACATAG

>M6-PGSC0003DMG400004146-(rev)M6LRR-RLK\_2232

GGAGATGATCTCGTTGCAGAGGTTGATCTTTTAGGGAAGCTTCGTCACAGGAACATAGTTAGGTTACTA

GGCTATCTTACAATGAGACTGATATCATGATGTTATCTGAATACATGCCT

>M6-PGSC0003DMG400004146-(rev)M6LRR-RLK\_2294

GTTACTAGGCTATCTTACAATGAGACTGATATCATGATGTTATCTGAATACATGCCTAATGGAAATCTT

GGAGCTGCTTTACATGGAAAAGAAGCTGGAAAAATGCTCGTAGATTGGTT

>M6-PGSC0003DMG400004146-(rev)M6LRR-RLK\_2356

GAAATCTGGAGCTGCTTTACATGGAAAAGAAGCTGGAAAAATGCTCGTAGATTGGTTGTCGAGGTACA

ACGTTGCCCTTGGTATTGCTCATGGACTCGCTTATCTTACCATGATTGTC

>M6-PGSC0003DMG400004146-(rev)M6LRR-RLK\_2418

AGGTACAACGTTGCCCTTGGTATTGCTCATGGACTCGCTTATCTTACCATGATTGTCATCCACCAGTCAT

ACATCGCGATGTCAAGTCAAACAACATTCTCCTAGATTCAGATTTTGAG

>M6-PGSC0003DMG400004146-(rev)M6LRR-RLK\_248

CAGAGTTTCAGATCAAATCAAGGACTTCAGAGTCTATCTTTGCTTAATCTTTGTTGCAATGACTTCTCCA

CTTCATTGCCAAAGTCATTAGCTAATCTGACATCTTTGAAGAGCATTGA

>M6-PGSC0003DMG400004146-(rev)M6LRR-RLK\_2480

ACCAGTCATACATCGCGATGTCAAGTCAAACAACATTCTCCTAGATTCAGATTTTGAGGCAAGAATTGCA

GATTTTGGCTTGGCAAGGATGATGCTTACAAGAATGAGACTGTTTCTAT

>M6-PGSC0003DMG400004146-(rev)M6LRR-RLK\_2542

GAATTGCAGATTTTGGCTTGGCAAGGATGATGCTTACAAGAATGAGACTGTTTCTATGATAGCAGGAT

CATATGGCTATATAGCACCAGGTTAGTTACATTTCTGATAATGCCACTAA

>M6-PGSC0003DMG400004146-(rev)M6LRR-RLK\_2604

GCAGGATCATATGGCTATATAGCACCAGGTTAGTTACATTTCTGATAATGCCACTAACAAAGAAAATTCA  
TTTCATTTTATATAGTCTCATTTCCTTTCTCTGTTGTTTTGGCAGAAT

>M6-PGSC0003DMG400004146-(rev)M6LRR-RLK\_2666

AAAATTCATTTTATATAGTCTCATTTCCTTTCTCTGTTGTTTTGGCAGAATATGGATACACATTG  
AAGGTTGATGAGAAGAGTGACATATACAGCTATGGGGTGGTGCTTTTG

>M6-PGSC0003DMG400004146-(rev)M6LRR-RLK\_2728

ATACACATTGAAGGTTGATGAGAAGAGTGACATATACAGCTATGGGGTGGTGCTTTTGGAGCTTGTAAC  
AGGAAAAATGCCATTAGACTCTTTGTTCCGGAGAGTCGATTGACATTGTAGA

>M6-PGSC0003DMG400004146-(rev)M6LRR-RLK\_2790

TTGTAACAGGAAAAATGCCATTAGACTCTTTGTTCCGGAGAGTCGATTGACATTGTAGAATGGGTTAGAA  
GGAAAGTAAAGAACAAGGCATCAGAAGAAGCATTAGATGCTGATGTAGCTG

>M6-PGSC0003DMG400004146-(rev)M6LRR-RLK\_2852

GTTAGAAGGAAAGTAAAGAACAAGGCATCAGAAGAAGCATTAGATGCTGATGTAGCTGGCCAATGTAA  
ACATGTCCATGAAGAGATGCTTCTTGTCTAAAAATTGCACTTCTTTGCACT

>M6-PGSC0003DMG400004146-(rev)M6LRR-RLK\_2914

ATGTAAACATGTCCATGAAGAGATGCTTCTTGTCTAAAAATTGCACTTCTTTGCACTGCCAAGCTTCCCA  
AAGAAAGACCATCAATGAGAGACATTATAACCATGCTTGGAGAGGCAAA

>M6-PGSC0003DMG400004146-(rev)M6LRR-RLK\_2976

AGCTTCCCAAAGAAAGACCATCAATGAGAGACATTATAACCATGCTTGGAGAGGCAAAACCAAGAAGG  
AAAAGTATTTGCCAGAATTGGGGTTATAGTACTAGTGCTAACAAAGACAAGT

>M6-PGSC0003DMG400004146-(rev)M6LRR-RLK\_3038

AGAAGGAAAAGTATTTGCCAGAATTGGGGTTATAGTACTAGTGCTAACAAAGACAAGTTAATCTTTGCT  
CATTACCAGTTATAGGCCTTCTATAAGTACCAAAACCTTTTTTTTTCCAC

>M6-PGSC0003DMG400004146-(rev)M6LRR-RLK\_3082

TAACAAAGACAAGTTAATCTTTGCTCATTACCAGTTATAGGCCTTCTATAAGTACCAAAACCTTTTTTTTT  
CCACTTCAATATCTAGTATATCTTCATTTTCATTAGTTCATATGTAAA

>M6-PGSC0003DMG400004146-(rev)M6LRR-RLK\_310

ACTTCTCCACTTCATTGCCAAAGTCATTAGCTAATCTGACATCTTTGAAGAGCATTGATGTGAGCCAGAA  
CAACTTTGTTGGCGAATCCCTGATGGTATTGGAATGTGCAATCCTGGTT

>M6-PGSC0003DMG400004146-(rev)M6LRR-RLK\_372

AGCCAGAACAACCTTTGTTGGCGAATTCCTGATGGTATTGGAATGTCGAATCCTGGTTTCAAATATGTCA  
ATGTTTCAAGTAATAACTTCGAGGGGTTTCTCCCTGAGGATCTTGGAAT

>M6-PGSC0003DMG400004146-(rev)M6LRR-RLK\_434

ATATGTCAATGTTTCAAGTAATAACTTCGAGGGGTTTCTCCCTGAGGATCTTGGAATGCTATGTTGCTC  
GAAGTCATGGATTTTCGAGGGAGTTTCTTTGAAGGTTCAATCCCTGGATG

>M6-PGSC0003DMG400004146-(rev)M6LRR-RLK\_496

TGTTGCTCGAAGTCATGGATTTTCGAGGGAGTTTCTTTGAAGGTTCAATCCCTGGATGTTACAAGAATCT  
GAAGAATTTGAAGTTTCTTGCTTATCAGGGAATAATCTTTCCGGAGAGA

>M6-PGSC0003DMG400004146-(rev)M6LRR-RLK\_558

AAGAATCTGAAGAATTTGAAGTTTCTTGCTTATCAGGGAATAATCTTTCCGGAGAGATCCCTCGTGAGC  
TTGGTGAATTGAAGGCTATGGAGACTATGATTCTTGATATAATCAGTTT

>M6-PGSC0003DMG400004146-(rev)M6LRR-RLK\_62

ATCAAATAAGGATGAAGTTTCTATATTGTTAGCAATAAAGTCTAGTCTTGTTGATCCAATGGATCATCTCA  
AAGATTGGAACCTTTCAAACAATGAAAGTTCTATTCATTGTAAATGGAA

>M6-PGSC0003DMG400004146-(rev)M6LRR-RLK\_620

TCGTGAGCTTGGTGAATTGAAGGCTATGGAGACTATGATTCTTGATATAATCAGTTTGGAGGTTCAAT  
ACCAGCTGAGTTTGGTAATATGAGTAGCCTTAAGTATCTTGACTTGGCTGT

>M6-PGSC0003DMG400004146-(rev)M6LRR-RLK\_682

GTTCAATACCAGCTGAGTTTGGTAATATGAGTAGCCTTAAGTATCTTGACTTGGCTGTTGGCACGTTAAG  
TGGACAAATTCCAGCTGAGTTAGGTAAGTTGAAGAACCTGACTACAGTGT

>M6-PGSC0003DMG400004146-(rev)M6LRR-RLK\_744

ACGTAAAGTGGACAAATTCCAGCTGAGTTAGGTAAGTTGAAGAACCTGACTACAGTGTACTTGTATCAA  
AACAGTTTTGAAGGTAAGATTCCAGCTGAAATTGGAAATATAACATCTTTA

>M6-PGSC0003DMG400004146-(rev)M6LRR-RLK\_806

GTATCAAACAGTTTTGAAGGTAAGATTCCAGCTGAAATTGGAAATATAACATCTTTAGTTTACTTGGAT  
CTTTCTGATAACAAGATCACTGGGGAGATTCCGAATGAGATAGCAGATTT

>M6-PGSC0003DMG400004146-(rev)M6LRR-RLK\_868

ACTTGGATCTTTCTGATAACAAGATCACTGGGGAGATTCCGAATGAGATAGCAGATTTGAAGAATTTGC

AGCTGCTAAATCTCATGTGCAATAACTTAACTGGTCCTATTCTACCAAAC

>M6-PGSC0003DMG400004146-(rev)M6LRR-RLK\_930

AATTTGCAGCTGCTAAATCTCATGTGCAATAACTTAACTGGTCCTATTCTACCAAACCTGGTGAGTTAGA

AAATCTTGAGATACTTGAACATGGAAAAATTCATTAATGGCTCTTTG

>M6-PGSC0003DMG400004146-(rev)M6LRR-RLK\_992

TGAGTTAGAAAATCTTGAGATACTTGAACATGGAAAAATTCATTAATGGCTCTTTGCCAATGAATCTT

GGGAAAAATCTCCCTTGCAATGGTTAGACGTTTCTTCGAATATCTTGAC

>M6-PGSC0003DMG400004190M6LRR-RLP\_0

AATCCACCGACGCGCAGTGCAAGCTAAATAGCGCGTTGTATGAAAAAACTAATTTTGAGGAAAATTCC

CAAAGTGAGGATTCATTTACACACAGATCTTCTTCCTTCACTTCCATCAT

>M6-PGSC0003DMG400004190M6LRR-RLP\_1037

CACATGTATAGTTGGAAATGATTGGAATTTATAGATTAGATGAAGTTGTAAGTGCAAGTTTATAGTTTGA

GCTAAAATAATTGGATTTTATGCATTCCTGCTTTCTGAGTGTATGTTTA

>M6-PGSC0003DMG400004190M6LRR-RLP\_1098

ATAGTTTGAGCTAAAATAATTGGATTTTATGCATTCCTGCTTTCTGAGTGTATGTTTATGGTTTTCTGG

AAGTAATTCGACTTTTTAGATTTTATGCAGCTTCTAAGCTCACGTTTAT

>M6-PGSC0003DMG400004190M6LRR-RLP\_1159

GTTTTCTGGAAGTAATTCGACTTTTTAGATTTTATGCAGCTTCTAAGCTCACGTTTATATATTTTGAGTG

GAAGATTTTATGTTGTTTCTAAGTTTTACTTATTGTGTTTCATCTTTTC

>M6-PGSC0003DMG400004190M6LRR-RLP\_122

ATCTCAATCTCGACTATAGTAATGTACGTATAGCTCTGCGTTTGGATTCCGGTTGATTTAATAATTCTACT

CCCCTGAAGGTGATTAACCCTATTCAAATGGCTCGCCATGGGCATCTAC

>M6-PGSC0003DMG400004190M6LRR-RLP\_1220

ATTTTGAGTGGAAGATTTTATGTTGTTTCTAAGTTTTACTTATTGTGTTTCATCTTTTCTTACTATAATTTCC

TTTTCTGAATGTCTGTTTCTTGGTTAAGTAATTCAAGCTTTGCA

>M6-PGSC0003DMG400004190M6LRR-RLP\_1281

ACTATAATTTCTTTTTCTGAATGTCTGTTTTCTTGGTTAAGTAATTCAAGCTTTGCAATTTGTTGATTTTG

TTGAGGAATAGCTATTCGTCTGATGTATAATCTTGATCTGTTCAATG

>M6-PGSC0003DMG400004190M6LRR-RLP\_1342

TTGTTGATTTTGTGAGGAATAGCTATTCGTCTGATGTATAATCTTGATCTGTTCAATGCATTATCTATTAT  
CTGCAATCAATAACTAAATCAGTGCCTTGGAGTGTCAATTAATACTATAAA

>M6-PGSC0003DMG400004190M6LRR-RLP\_1403

TTATCTATTATCTGCAATCAATAACTAAATCAGTGCCTTGGAGTGTCAATTAATACTATAAATGTTTTCCCCTT  
TTTTGCTCGTAGAATTCTATTTTCTAGTTGTTACAGGTAATATAGCT

>M6-PGSC0003DMG400004190M6LRR-RLP\_1464

TTTTCCCCTTTTTTGTCTCGTAGAATTCTATTTTCTAGTTGTTACAGGTAATATAGCTATCCTTGGAAAGT  
TAAACCGATTTATCATTCAATCAATGTCAATTAATAACTCTCCATGA

>M6-PGSC0003DMG400004190M6LRR-RLP\_1525

CCTTGGAAAGTTAAACCGATTTATCATTCAATCAATGTCAATTAATAACTCTCCATGATTACATTGTATTA  
GTTAATTAATTGTAGTATAAGTAAGTATATAATCGATCACGAGTAAT

>M6-PGSC0003DMG400004190M6LRR-RLP\_1586

ACATTGTATTAGTTAATTAATTGTAGTATAAGTAAGTATATAATCGATCACGAGTAATTTAATGCTTGTC  
AGAAATAAGAATGTCCACTGTAGGTCTTGAGCCCATGATCATAAGGTTA

>M6-PGSC0003DMG400004190M6LRR-RLP\_1647

AATGCTTGTCAGAAATAAGAATGTCCACTGTAGGTCTTGAGCCCATGATCATAAGGTTAATAGCTTTGCT  
CTCTACACTTAATGTTGTTGGAAATGTTGTGGAGTTCCAATTATATCCAC

>M6-PGSC0003DMG400004190M6LRR-RLP\_1708

AGCTTTGCTCTCTACACTTAATGTTGTTGGAAATGTTGTGGAGTTCCAATTATATCCACTCTTTCTCTGTTA  
ACATTTCAATAAAATGATTTACACAGTTTAAGGCCATTGATTGCATTT

>M6-PGSC0003DMG400004190M6LRR-RLP\_1769

TTTCTCTGTTAACATTTCAATAAAATGATTTACACAGTTTAAGGCCATTGATTGCATTTATGAGAAAACCA  
AGGAGTTGTAGTACCTGAATGTATATGTTTACATGGACTAATTTGAACT

>M6-PGSC0003DMG400004190M6LRR-RLP\_183

TAATTCTACTCCCCTGAAGGTGATTAACCCTATTCAAATGGCTCGCCATGGGCATCTACCTTCAGTATTTT  
TCCTGATCTTCTCGTTATCCTTGATCCAAAGCGCTCTCGTTCACTCTAA

>M6-PGSC0003DMG400004190M6LRR-RLP\_1830

GAGAAAACCAAGGAGTTGTAGTACCTGAATGTATATGTTTACATGGACTAATTTGAACTTCTGGAATATG  
ACTGTAGTGAAAGCTCTGAATGAAATTAAGGCATCTCTTGGATGGAGAGT

>M6-PGSC0003DMG400004190M6LRR-RLP\_1891

TGGAATATGACTGTAGTGAAAGCTCTGAATGAAATTAAGGCATCTCTTGGATGGAGAGTGGTGTATGCA  
TGGGTTGGAGATGATCCTTGTGGTGTGGTGAATTTACCTCCATGGTCTGGT

>M6-PGSC0003DMG400004190M6LRR-RLP\_1952

TGTATGCATGGGTTGGAGATGATCCTTGTGGTGTGGTGAATTTACCTCCATGGTCTGGTGTACATGTT  
AACGCAGGGTGATTATAGAGTAGTACTGAATTGTAAGTTTGCTTCACCA

>M6-PGSC0003DMG400004190M6LRR-RLP\_2013

TACATGTTCAACGCAGGGTGATTATAGAGTAGTACTGAATTGTAAGTTTGCTTCACCAGCTCCAAGTAG  
CTTTTCTCTAACTAAGCTTCAAATCTGTATGAAGTTACTCACAGAATTGA

>M6-PGSC0003DMG400004190M6LRR-RLP\_2074

TCCAAGTAGCTTTTCTCTAACTAAGCTTCAAATCTGTATGAAGTTACTCACAGAATTGAAATATCTTTACT  
GTCACTTTTTCACAATGTTCTTTTCTGTTTTACCACTTGCAGGGAAGT

>M6-PGSC0003DMG400004190M6LRR-RLP\_2135

TATCTTTACTTGTCACTTTTTACAATGTTCTTTTCTGTTTTACCACTTGCAGGGAAGTTTATGCTGTTCAA  
TTGTTGGCCATTTCTACTGCTGTCACTAATTTATTAGATCTTACT

>M6-PGSC0003DMG400004190M6LRR-RLP\_2196

ATGCTGTTTCAATTGTTGGCCATTTCTACTGCTGTCACTAATTTATTAGATCTTACTAGACTGTAAGATT  
CTTCTTCTTTGGTCTTTGTACTGGAATCTAGTTTTTACAAAACCTTCA

>M6-PGSC0003DMG400004190M6LRR-RLP\_2257

ACTGTAAGATTCTTCTTCTTGGTCTTTGTACTGGAATCTAGTTTTTACAAAACCTTCAAGTACTTCTTACA  
GATTTTTTAACCTCATACAAATTGAGAAGTTTCCCTAAGTTCCAATAT

>M6-PGSC0003DMG400004190M6LRR-RLP\_2318

TACTTCTTACAGATTTTTTAACCTCATACAAATTGAGAAGTTTCCCTAAGTTCCAATATGCATGTTTTTACA  
CCCTCCAGTCTTAATTGTTCAATTAACCAACTTAAAGAATTGTTCTGCT

>M6-PGSC0003DMG400004190M6LRR-RLP\_2379

ATGTTTTTACACCCTCCAGTCTTAATTGTTCAATTAACCAACTTAAAGAATTGTTCTGCTTGGGTGTTGACT  
GTTACCCCAAAAAATGTGGGCGTTAGCTATAATGTGTGTAGTCATTATT

>M6-PGSC0003DMG400004190M6LRR-RLP\_2440

GGTGTGACTGTTACCCCAAAAAATGTGGGCGTTAGCTATAATGTGTGTAGTCATTATTTCAAATTTGA

TACTACTATTTAAGGCAATAGTTAGTGGACAATTGTGCCTGTACTGTTGG

>M6-PGSC0003DMG400004190M6LRR-RLP\_2501

CAAATTTGATACTACTATTTAAGGCAATAGTTAGTGGACAATTGTGCCTGTACTGTTGGATCTTTTGATT  
TCATTCTGAACTTCCTAATCCATAATATTCTTTCATATGACAGGGATCT

>M6-PGSC0003DMG400004190M6LRR-RLP\_2562

CTTTTGATTTTCATTCTGAACTTCCTAATCCATAATATTCTTTCATATGACAGGGATCTGCATAATAACAAG  
CTGACCGGCCCTCTCCTTCTCAAATTGGGCGTTTGAAGCGTCTTAAA

>M6-PGSC0003DMG400004190M6LRR-RLP\_2623

ATAATAACAAGCTGACCGGCCCTCTCCTTCTCAAATTGGGCGTTTGAAGCGTCTTAAAATATTGTATAAT  
CCTTTACTTGTATACTCCTATTGAAGTATCTATATTCAGTAGCAATTAT

>M6-PGSC0003DMG400004190M6LRR-RLP\_2684

ATTGTATAATCCTTTACTTGTATACTCCTATTGAAGTATCTATATTCAGTAGCAATTATGAAGTGATATTTA  
TGTTTAGGGCTTATGCTCTGTCTCCGAATAGCCTGTTTCTCCAGTTTC

>M6-PGSC0003DMG400004190M6LRR-RLP\_2745

AGTGATATTTATGTTTAGGGCTTATGCTCTGTCTCCGAATAGCCTGTTTCTCCAGTTTCAGGATTAACATA  
TGTTTCTCCATTAACACCTAGCTAGATGATGTTAATATGATTCAACTGT

>M6-PGSC0003DMG400004190M6LRR-RLP\_2806

GATTAACATATGTTTCTCCATTAACACCTAGCTAGATGATGTTAATATGATTCAACTGTGTTGTACAAAGT  
GATTAAGTACATGGCTTTTCATCGAGATGAAATGTGTTAATAACAAGGA

>M6-PGSC0003DMG400004190M6LRR-RLP\_2867

TGTACAAAGTGATTAAGTACATGGCTTTTCATCGAGATGAAATGTGTTAATAACAAGGAAAAGCTTACCT  
GATTAATGATTAATCCCAAAGAAGGGAGTGAGAGGGAGTCTGCCTGATAT

>M6-PGSC0003DMG400004190M6LRR-RLP\_2928

AGCTTACCTGATTAATGATTAATCCCAAAGAAGGGAGTGAGAGGGAGTCTGCCTGATATAATGTGCACC  
GAAGAAGAAAGATAAATTTCAACTGAGAGAATATATACTCGTAGGCTTAT

>M6-PGSC0003DMG400004190M6LRR-RLP\_2989

TGTGCACCGAAGAAGAAAGATAAATTTCAACTGAGAGAATATATACTCGTAGGCTTATATTCTAAAAAA  
TAAAAACAGAGTAGGTTTATTATCAAGGAAATGTCACTTAACTAAGAAAG

>M6-PGSC0003DMG400004190M6LRR-RLP\_305

CCCTCAAACGTGACGGTACACATTTGATCCATTTACTTTTTAAACCTAATTTATTAGCAATTTAGGTGAG  
AAAATCAGTTGAATTTGATTGATAATAGTTTGGTTTTGTTATTTTGTAG

>M6-PGSC0003DMG400004190M6LRR-RLP\_3050

TCTAAAAAATAAAAACAGAGTAGGTTTATTATCAAGGAAATGTCACTTAACTAAGAAAGCCTTCTATACT  
CTTTCTAGGATTGAATTAGATGTATATCTCAACATCTACTTTCTGTTGCA

>M6-PGSC0003DMG400004190M6LRR-RLP\_3111

TTCTATACTCTTTCTAGGATTGAATTAGATGTATATCTCAACATCTACTTTCTGTTGCACGTATTTTACCTTT  
AAGTTTTCTTTGTCCATAGGAACCTCCACGTTGTCCAGAATGTTA

>M6-PGSC0003DMG400004190M6LRR-RLP\_3172

TATTTTACCTTTAAGTTTTCTTTGTCCATAGGAACCTCCACGTTGTCCAGAATGTAACTTTAAAAGTTA  
CTTTTATTGCTTTTTTACCCAACATACTAATATGAAATTATATCCTCT

>M6-PGSC0003DMG400004190M6LRR-RLP\_3233

TTTAAAAGTTACTTTTATTGCTTTTTTACCCAACATACTAATATGAAATTATATCCTCTAGTTTCCTAGTGT  
GTTGTAATGTTGCATTATTGATTAGTTCCTTCTCCTGATTCTTTTTAC

>M6-PGSC0003DMG400004190M6LRR-RLP\_3294

TTTCCTAGTGTGTTGTAATGTTGCATTATTGATTAGTTCCTTCTCCTGATTCTTTTTACCAGAAACGTAAGG  
TGGAATAAGCTGCAAGATGTCATTCCACCTGAAATAGGTGAACTAAAG

>M6-PGSC0003DMG400004190M6LRR-RLP\_3355

GAAACGTAAGGTGGAATAAGCTGCAAGATGTCATTCCACCTGAAATAGGTGAACTAAAGCAGTTAACAC  
ATCTGTGAGTGCTTTTTGAGCTTCTCTAGGTGTGCTCTTTATCCATAGATC

>M6-PGSC0003DMG400004190M6LRR-RLP\_3416

GTTAACACATCTGTGAGTGCTTTTTGAGCTTCTCTAGGTGTGCTCTTTATCCATAGATCTATTTTGCTGTTA  
TAGACTAATAACTGATATGTATATTTTTCAGCTACCTAAGTTTTAATA

>M6-PGSC0003DMG400004190M6LRR-RLP\_3477

TTTTGCTGTTATAGACTAATAACTGATATGTATATTTTTCAGCTACCTAAGTTTTAATAATTTCAAAGGTGA  
AATACCTAAGGAGCTTGCTAATCTCCTGAACTTCGTTATCTCCATCT

>M6-PGSC0003DMG400004190M6LRR-RLP\_3538

TTCAAAGGTGAAATACCTAAGGAGCTTGCTAATCTCCTGAACTTCGTTATCTCCATCTGCATGAAAATCA  
TTTTATTGGACGAATTCACCTGAACTGGGTTCTTACAGTATCTTCGA



>M6-PGSC0003DMG400004190M6LRR-RLP\_3599

ATGAAAATCATTTTATTGGACGAATTCCACCTGAACTGGGTTCCCTTACAGTATCTTCGACACCTGTATGAT  
ACCATCTTAACTTCTTCTCTTGTTTAACATATGGAACCTGTGTCACACA

>M6-PGSC0003DMG400004190M6LRR-RLP\_366

TTTAGGTGAGAAAATCAGTTGAATTTGATTGATAATAGTTTGGTTTTGTTATTTTGTAGAGTATGTATGCA  
GCTTCAAGTGAAATTAATTTTGTAGTTACAGAGAAAATGTAACAATGTT

>M6-PGSC0003DMG400004190M6LRR-RLP\_3660

CCTGTATGATACCATCTTAACTTCTTCTCTTGTTTAACATATGGAACCTGTGTCACACATGGATTTCACTTT  
GATCTCATGCAATTCCAGGGATGTTGGTAACAATCGTTTGGTTGGAAC

>M6-PGSC0003DMG400004190M6LRR-RLP\_3721

GATTTCACTTTGATCTCATGCAATTCCAGGGATGTTGGTAACAATCGTTTGGTTGGAACATAAGAGAAC  
TCATACGTATTGAAGGATGTTTTCCGGTTCTCCGCAACCTGTAAGTTGAT

>M6-PGSC0003DMG400004190M6LRR-RLP\_3782

TAAGAGAACTCATACGTATTGAAGGATGTTTTCCGGTTCTCCGCAACCTGTAAGTTGATTATTCTTGTTTA  
ATTGTCATATCGCATGAAGTTATCCTGCTGCAAGTGTTATGAATTCTAT

>M6-PGSC0003DMG400004190M6LRR-RLP\_3843

TTCTTGTTTAATTGTCATATCGCATGAAGTTATCCTGCTGCAAGTGTTATGAATTCTATGCTAATTCAAGG  
ATAACACGTGCTGTAACCTGCAGATACTTAAACAATAATTATCTTACTG

>M6-PGSC0003DMG400004190M6LRR-RLP\_3904

TAATTCAAGGATAACACGTGCTGTAACCTGCAGATACTTAAACAATAATTATCTTACTGGAGGCATTCCA  
GCGCAACTTGCAAATCTGACGAAGTTGGAGATCTTGTAAGTTTTGGGGAG

>M6-PGSC0003DMG400004190M6LRR-RLP\_3965

GGCATTCCAGCGCAACTTGCAAATCTGACGAAGTTGGAGATCTTGTAAGTTTTGGGGAGAAAGTTTCTC  
CGCGATTAATGCTCGTCTTTGGACAAATAACAGCTAATTTCTCCTGTACTG

>M6-PGSC0003DMG400004190M6LRR-RLP\_4026

AGTTTCTCCGCGATTAATGCTCGTCTTTGGACAAATAACAGCTAATTTCTCCTGTACTGGTTTATAAATAT  
TATTATGCTTAATTTGATTGCTCTGGTTATTACAGGTATCTATCCTACA

>M6-PGSC0003DMG400004190M6LRR-RLP\_4087

TTATAAATATTATTATGCTTAATTTGATTGCTCTGGTTATTACAGGTATCTATCCTACAATAAGATGACAG

GAGTTATACCATATAGCATTGCTCATATTCCTAAGTTAACTTACTTGTA

>M6-PGSC0003DMG400004190M6LRR-RLP\_4148

AAGATGACAGGAGTTATACCATATAGCATTGCTCATATTCCTAAGTTAACTTACTTGTAAGTCCTCCTCTA  
TGCTCTTAGCTACTCATTTATTATACTGTATGTGGACAGTTTGGACCGA

>M6-PGSC0003DMG400004190M6LRR-RLP\_4209

TCCTCCTCTATGCTCTTAGCTACTCATTTATTATACTGTATGTGGACAGTTTGGACCGAGAAAATTCAGAA  
TTTTTGAAAGCAAATACAAAACATCCTTAGCCTTAAGTTGAGATCTCT

>M6-PGSC0003DMG400004190M6LRR-RLP\_427

TATGTATGCAGCTTCAAGTGAAATTAATTTTGTAGTTACAGAGAAAATGTAACAATGTTGAACTTTGTAG  
ATCTTATGTATTCTAGGTGCAAGGTTATAGTTTGTAGTGGAGTTTAATTGA

>M6-PGSC0003DMG400004190M6LRR-RLP\_4270

AAATTCAGAATTTTTGAAAGCAAATACAAAACATCCTTAGCCTTAAGTTGAGATCTCTTTCTTTGATAGC  
TTTTTGGTGCAACCTGGTCTTTGTGCATGATTTAGACGCCACATTAGAT

>M6-PGSC0003DMG400004190M6LRR-RLP\_4331

CTTTGATAGCTTTTTGGTGCAACCTGGTCTTTGTGCATGATTTAGACGCCACATTAGATATGATCAGGGA  
CCTGCGTGTATCATGCAGTAGTTTAGTGCTGTTTTCTGTTATCAATAGA

>M6-PGSC0003DMG400004190M6LRR-RLP\_4392

GATCAGGGACCTGCGTGTATCATGCAGTAGTTTAGTGCTGTTTTCTGTTATCAATAGATTGCTTTATTAA  
ATTATAAAAATATTAGCATATTGGATGCGATGTCCCAATGATTGTCTAG

>M6-PGSC0003DMG400004190M6LRR-RLP\_4453

GCTTTATTAAATTATAAAAATATTAGCATATTGGATGCGATGTCCCAATGATTGTCTAGTGAGTGCAGTC  
TTTCAAGGATCTTTCTTTCTTAAAAAGATGAATTTTGTAGGATTGTTCAAC

>M6-PGSC0003DMG400004190M6LRR-RLP\_4697

TCTACTCAAACAGATGAACTCGGGACTAGTTGGCTAATGTGGTCTTGCAAGGGTCTCTTTCTTAAGGAG  
ATAAATTTTGTAGGATTGTGCAATTTATGGATGCTGTGACAAAAACATTAG

>M6-PGSC0003DMG400004190M6LRR-RLP\_4758

CTTAAGGAGATAAATTTTGTAGGATTGTGCAATTTATGGATGCTGTGACAAAAACATTAGATGGACTTGA  
AGCTTGTCAGCTGACCTTATTGGACCTTATAGTAGTAATATATAGAAATTG

>M6-PGSC0003DMG400004190M6LRR-RLP\_4819

GGACTTGAAGCTTGTGTCAGCTGACCTTATTGGACCTTATAGTAGTAATATATAGAAATTGCCTGGAGAATT  
AGATGCAAGAGTGTTCTCATCAATTTTTGCACAAAAACACAGTCCATCT

>M6-PGSC0003DMG400004190M6LRR-RLP\_488

ACTTTGTAGATCTTATGTATTCTAGGTGCAAGGTTATAGTTTGAGTGGAGTTTAATTGAATTTTAAAAGTT  
CGAGTGAAAATAGTTAGATTTTGTAGATTATATGCAGTTTGTGGTGAAA

>M6-PGSC0003DMG400004190M6LRR-RLP\_4880

TGGAGAATTAGATGCAAGAGTGTTCTCATCAATTTTTGCACAAAAACACAGTCCATCTCAATAGTAAAA  
CTTCTCATGTACTCAAGATTTCAAGTTGAGTTATGTAGCAACTGCACTGGT

>M6-PGSC0003DMG400004190M6LRR-RLP\_4941

ATAGTAAAACCTTCTCATGTACTCAAGATTTCAAGTTGAGTTATGTAGCAACTGCACTGGTACAGAGATGCA  
TGAATGACGTGTTAACTTTAATTAGAAGATTGTCTGTTAGAACATAATA

>M6-PGSC0003DMG400004190M6LRR-RLP\_5002

AGAGATGCATGAATGACGTGTTAACTTTAATTAGAAGATTGTCTGTTAGAACATAATAGTTTTATTGGT  
ATAACGTGTTAAAAAATTGCATGTATAATTCAAAAAATATGAACACTG

>M6-PGSC0003DMG400004190M6LRR-RLP\_5063

TTTATTGGTATAACGTGTTAAAAAATTGCATGTATAATTCAAAAAATATGAACACTGATGCATGCAAG  
TCTTTAAGCAATTAACAAAGCTGATTTTGCACCTGGTTGTCAATATCCA

>M6-PGSC0003DMG400004190M6LRR-RLP\_5124

GCATGCAAGTCTTTAAGCAATTAACAAAGCTGATTTTGCACCTGGTTGTCAATATCCATTGCATTTCTTA  
CCCATTTTCTTCTTTCTTCCAAAATCCATGGTCTTTCAACACTTACATT

>M6-PGSC0003DMG400004190M6LRR-RLP\_5185

GCATTTCTACCCATTTTCTTCTTTCTTCCAAAATCCATGGTCTTTCAACACTTACATTCCCCTCCATCCCC  
AGATTAGAAGTCATTATTTGTACAAGTGAGAGGCTTGGATAATGCAG

>M6-PGSC0003DMG400004190M6LRR-RLP\_5246

CCTCCATCCCCAGATTAGAAGTCATTATTTGTACAAGTGAGAGGCTTGGATAATGCAGAAGGACCTGC  
ATTTTGCTGGTCAAACAACCAAGAATGTCAAGAGACAAGTCTAATTGTGT

>M6-PGSC0003DMG400004190M6LRR-RLP\_5307

GGACCTGCATTTTGTGCTGGTCAAACAACCAAGAATGTCAAGAGACAAGTCTAATTGTGTCAGATACATA  
TCCCTGCTCAAGATATGCTGTGTTGGAAATGGGAACCTTGTGTTGAAGCTT

>M6-PGSC0003DMG400004190M6LRR-RLP\_5368

GATACATATCCCTGCTCAAGATATGCTGTGTTGGAAATGGGAACCTTGTTTTGAAGCTTAACCCACATAT  
TTCCTTTGACAAAACCTTTTATCACAATATTTTCCTTTAAAGTGTGGTG

>M6-PGSC0003DMG400004190M6LRR-RLP\_5429

CCCACATATTTCTTTGACAAAACCTTTTATCACAATATTTTCCTTTAAAGTGTGGTGTGGAGCTAAACC  
ACACGAACTGAAACTAGGGCCTTCTCCATTTAAGTGGTTGTTAGTGTT

>M6-PGSC0003DMG400004190M6LRR-RLP\_549

TTTAAAAGTTCGAGTGAAAATAGTTAGATTTTGTAGATTATATGCAGTTTGTGGTGAAATTTTTGTAGTTT  
CAGCGAAAACAATATTGAACGTTGTACATCTTATGCAATTTCTAGGTGT

>M6-PGSC0003DMG400004190M6LRR-RLP\_5490

GGAGCTAAACCACACGAACTGAAACTAGGGCCTTCTCCATTTAAGTGGTTGTTAGTGTTGTCAAAGTGAT  
GCTTGAGCCATGAACTGAGGCTGTGCACAAGTTTACTCCAATGAAGGTGG

>M6-PGSC0003DMG400004190M6LRR-RLP\_5551

CAAAGTGATGCTTGAGCCATGAACTGAGGCTGTGCACAAGTTTACTCCAATGAAGGTGGTAACTGGTAA  
GGGATATTTTCCCAAACCAGCCAAGCAACTTCTTTTCTGAAAATATTAGA

>M6-PGSC0003DMG400004190M6LRR-RLP\_5612

ACTGGTAAGGGATATTTTCCCAAACCAGCCAAGCAACTTCTTTTCTGAAAATATTAGATTAATTTGTGA  
GGTCCATGGGTTTCTTCTGGATTGGGTTGCATTAAACAACAAATATTCA

>M6-PGSC0003DMG400004190M6LRR-RLP\_5673

AATTTGTGAGGTCCATGGGTTTCTTCTGGATTGGGTTGCATTAAACAACAAATATTCAATAGATAGCAT  
GCAAATCGATATGTCAGTTGTTAGCGAGACTGTACTGATGATCATTATTG

>M6-PGSC0003DMG400004190M6LRR-RLP\_5734

AGATAGCATGCAAATCGATATGTCAGTTGTTAGCGAGACTGTACTGATGATCATTATTGATTACGAGCAA  
GAAACTGTAAATTTATTGCAAGAAAGCTAACGACGAAGTCTGAATTAGAA

>M6-PGSC0003DMG400004190M6LRR-RLP\_5795

TACGAGCAAGAACTGTAAATTTATTGCAAGAAAGCTAACGACGAAGTCTGAATTAGAATATTAAGTA  
AGATGTTCTTAAAGCTAGCCACTCAGATTCAAATGCAAACCTAGATGACC

>M6-PGSC0003DMG400004190M6LRR-RLP\_5856

TTAAAGTAAGATGTTCTTAAAGCTAGCCACTCAGATTCAAATGCAAACCTAGATGACCAATGATCCTTG

CAAGTTGCAATATCCTAGATGTTCCGTTAAAGCCCAAATGGTCCTTGCAAG

>M6-PGSC0003DMG400004190M6LRR-RLP\_5917

TGATCCTTGCAAGTTGCAATATCCTAGATGTTCCGTTAAAGCCCAAATGGTCCTTGCAAGTTGCATATGTG  
AGTGCTTTGTTCTTTTATGTATTTATTTTACGATCTTCACCCTTGACA

>M6-PGSC0003DMG400004190M6LRR-RLP\_5978

GCATATGTGAGTGCTTTGTTCTTTTATGTATTTATTTTACGATCTTCACCCTTGACAAATCAGATGTTAC  
ACATCATTCTTCGCTCTTCTTGATTATATACTGGTAGCTTTTGCACC

>M6-PGSC0003DMG400004190M6LRR-RLP\_6039

TCAGATGTTACACATCATTCTTCGCTCTTCTTGATTATATACTGGTAGCTTTTGCACCAAAAAGAAAAAT  
AGTTCTGCATGAATTTGATAGTTGATGTCTGAAGCTGAATCTGATTCA

>M6-PGSC0003DMG400004190M6LRR-RLP\_61

AAAATCCCAAAGTGAGGATTCATTTACACACAGATCTTCTTCCTTCACTTCCATCATCTATCTCAATCTC  
GACTATAGTAATGTACGTATAGCTCTGCGTTTGGATTCCGGTTGATT

>M6-PGSC0003DMG400004190M6LRR-RLP\_610

TTTGTAGTTTCAGCGAAAACAATATTGAACGTTGTACATCTTATGCAATTTCTAGGTGTAAGCTTATGTGT  
GAGTGGAAGTAATTGAATTTTATAGTTGAGTTGTAGTAATTGGATATT

>M6-PGSC0003DMG400004190M6LRR-RLP\_6100

AAAGAAAAATAGTTCTGCATGAATTTGATAGTTGATGTCTGAAGCTGAATCTGATTTTCAGGTATCTCGAT  
CATAATCAATTTTCTGGGAGGATTCCAGATGCCTTCTACAAACACCCTTT

>M6-PGSC0003DMG400004190M6LRR-RLP\_6161

TATCTCGATCATAATCAATTTTCTGGGAGGATTCCAGATGCCTTCTACAAACACCCTTTCTTGAAGGAAAT  
GTGAGTGTTCAATTTTTGCTACTGACCATTCTTGGCTTTGTGCAAATC

>M6-PGSC0003DMG400004190M6LRR-RLP\_6222

TGAAGGAAATGTGAGTGTTCAATTTTTGCTACTGACCATTCTTGGCTTTGTGCAAATCCTAATAATATGA  
TAAATTATGTCATAGGTACATTGAAGAGAACACGTTCCGGCCTGGTGTA

>M6-PGSC0003DMG400004190M6LRR-RLP\_6283

AATAATATGATAAATTATGTCATAGGTACATTGAAGAGAACACGTTCCGGCCTGGTGTAACCAATTG  
GCCTGCACAAAGTGCTAGAACTTTCCGACGCAGATTTCTTGTGTTAGAAAA

>M6-PGSC0003DMG400004190M6LRR-RLP\_6344

ACCAATTGGCCTGCACAAAGTGCTAGAACTTTCGGACGCAGATTTCTTGTTTAGAAAAAGCCAACTCCT  
GTTATTTGTTTCATGAGCAAAGTGACCTAGGTTGTCGAAAGAAGCAGCCG

>M6-PGSC0003DMG400004190M6LRR-RLP\_6405

CCAACTCCTGTTATTTGTTTCATGAGCAAAGTGACCTAGGTTGTCGAAAGAAGCAGCCGGTCCCTGTTCT  
GTCAAGTATCTATTCTTTAGTTGCCAGATGAGAAAAAAGGTTCCATCTTT

>M6-PGSC0003DMG400004190M6LRR-RLP\_6466

CCCTGTTCTGTCAAGTATCTATTCTTTAGTTGCCAGATGAGAAAAAAGGTTCCATCTTTTTGTGCAAAGA  
AGTAATCAACCAAACCTTAGTTGCGGTTGCTGTAGTTAAATAGTACCACG

>M6-PGSC0003DMG400004190M6LRR-RLP\_6527

TGTGCAAAGAAGTAATCAACCAAACCTTAGTTGCGGTTGCTGTAGTTAAATAGTACCACGTTATGAATCAT  
TATTAAGTAATTGCGACATACGTCTCAATCAGTTCTCACTTGCCTTGAAT

>M6-PGSC0003DMG400004190M6LRR-RLP\_6588

ATGAATCATTATTAAGTAATTGCGACATACGTCTCAATCAGTTCTCACTTGCCTTGAATTCTTGCAATTTGG  
TTTTTGATTATACATGATGCGATTTTCAGAGTTAATATGAAAGGGTAGAG

>M6-PGSC0003DMG400004190M6LRR-RLP\_6649

TTGCATTTGGTTTTTGATTATACATGATGCGATTTTCAGAGTTAATATGAAAGGGTAGAGAATATGCTCTG  
ATATGACAGGTTTTGGATAGGTTTTTCATTTTTTCGTTAAATGATACAAA

>M6-PGSC0003DMG400004190M6LRR-RLP\_671

GCTTATGTGTGAGTGGAAGTAATTGAATTTTATAGTTTCGAGTTGTAGTAATTGGATATTATCCAGTTTTTA  
GATGAAAGCTTATAGTTTGAGTGGAAGTAGCTGGATTTAATAGGTTATG

>M6-PGSC0003DMG400004190M6LRR-RLP\_6710

TATGCTCTGATATGACAGGTTTTGGATAGGTTTTTCATTTTTTCGTTAAATGATACAAATACATACCTAAA  
TTATAGTATTATTTTTTTGAGTTTCACACCCTAACTATAGTTATTATCA

>M6-PGSC0003DMG400004190M6LRR-RLP\_6771

CATACCTAAATTATAGTATTATTTTTTTGAGTTTCACACCCTAACTATAGTTATTATCAATGTGCAAAAACA  
CTTCGCTGAGTAGCTGATGGTATGCATGCTTTATTAGGTGCCAAAGTG

>M6-PGSC0003DMG400004190M6LRR-RLP\_6803

TTCACACCCTAACTATAGTTATTATCAATGTGCAAAAACACTTCGCTGAGTAGCTGATGGTATGCATGCTT  
TATTAGGTGCCAAAGTGCACTCCATGTGGATAAATATTTTCACTAGAA

>M6-PGSC0003DMG400004190M6LRR-RLP\_732

CCAGTTTTAGATGAAAGCTTATAGTTTGAGTGGAAGTAGCTGGATTTAATAGGTTATGTGCAGTTTGTG  
GTGGATTTATGGTTTCTGCGGAAACAATTGAATTTTGTGATTTTATGCA

>M6-PGSC0003DMG400004190M6LRR-RLP\_793

CAGTTTGTGGTGGATTTATGGTTTCTGCGGAAACAATTGAATTTTGTGATTTTATGCAATTTCTAAGAGT  
AAGCTTATAGTTTGAGTGAAAGTAAGTGGATTTTATGTAGTCCTAGAGC

>M6-PGSC0003DMG400004190M6LRR-RLP\_854

TTCTAAGAGTAAGCTTATAGTTTGAGTGAAAGTAAGTGGATTTTATGTAGTCCTAGAGCAACTTTATAGT  
TTGAGTTGTAGTAATTGGATTTTATTGACTTTTTCCAGCTTCTAAGTGC

>M6-PGSC0003DMG400004190M6LRR-RLP\_915

CTTTATAGTTTGAGTTGTAGTAATTGGATTTTATTGACTTTTTCCAGCTTCTAAGTGCAAATTTTTAGTTT  
GAGCTGAAATAATTGGATTTATTCTATAAATTATATGTGGTTTCGAAG

>M6-PGSC0003DMG400004190M6LRR-RLP\_976

ATTTTTAGTTTGAGCTGAAATAATTGGATTTATTCTATAAATTATATGTGGTTTCGAAGTGCACATGTATA  
GTTGAAATGATTGGAATTTATAGATTAGATGAAGTTGTAAGTGCAAGT

>M6-PGSC0003DMG400004195-(rev)M6LRR-RLP\_0

CTAAACTCTTAACATAAATTGTTAAATATTTCTAACCTAAGTAGGTATTACCGAAAATCTTTAACACAGG  
GTGACATCGAGCTATTTAAGGAACATAAACAATTGGTAATTGCTTCACG

>M6-PGSC0003DMG400004195-(rev)M6LRR-RLP\_1178

GACTAACAGGGCAAATTCCTGAGTCCATTGGGGTTCTCAAGAATCTCAAAGAACTCAACTTACAACTAA  
TCAAATCTCTAGTACAATCCCAGAGTCAGTATTCACATTGACGTCTCTAA

>M6-PGSC0003DMG400004195-(rev)M6LRR-RLP\_124

CTATTGCTCCTTTATTCATGAATTCATGTATATACAATGTAATTTTCTGTTAGAGGGGATCGTTGCACCTA  
TGTGGTTCTGCCCTGACATCACTTATCTAGTTAAGCTCAACACTTTGAA

>M6-PGSC0003DMG400004195-(rev)M6LRR-RLP\_1240

CAAATAATCAAATCTCTAGTACAATCCCAGAGTCAGTATTCACATTGACGTCTCTAACAACCTTTGAACCT  
TGAAAATAACCACTTGAAAGGGGAAATATCGGAGAATATTGGCAACTTA

>M6-PGSC0003DMG400004195-(rev)M6LRR-RLP\_1302

TTTGAACCTTGAAAATAACCACTTGAAAGGGGAAATATCGGAGAATATTGGCAACTTACAAGCACTTCA

AAAGCTTTTCTTGTCAAACAATTCGTTCACTGGAAAAATCCCAGTTTCAAT

>M6-PGSC0003DMG400004195-(rev)M6LRR-RLP\_1364

CACTTCAAAAGCTTTTCTTGTCAAACAATTCGTTCACTGGAAAAATCCCAGTTTCAATAACAAAACACTACAT  
TCCATTTCCACTATCCACTTAGAAACAAATCAACTTGTTGGTGAAATAC

>M6-PGSC0003DMG400004195-(rev)M6LRR-RLP\_1426

AAACTACATTCCATTTCCACTATCCACTTAGAAACAAATCAACTTGTTGGTGAAATACAATTGCCATTGAG  
TCCTGCCCAATGGCCTTAATTAATAAACTTTGGTTCTTGACAACAATAAA

>M6-PGSC0003DMG400004195-(rev)M6LRR-RLP\_1488

GCCATTGAGTCCTGCCCAATGGCCTTAATTAATAAACTTTGGTTCTTGACAACAATAAACTTACTGGAGTTA  
TACCTGATTCTATTGGTTATTTGACAACACTTTCATCACTCTCTATATC

>M6-PGSC0003DMG400004195-(rev)M6LRR-RLP\_1550

CTGGAGTTATACCTGATTCTATTGGTTATTTGACAACACTTTCATCACTCTCTATATCAAATAATCAACTCA  
CAGGATCTATTCTTCTTGCTGGGAAACATAAAGCAATTGCAAATAT

>M6-PGSC0003DMG400004195-(rev)M6LRR-RLP\_1612

AATCAACTCACAGGATCTATTCCTTCTTGCTGGGAAACATAAAGCAATTGCAAATATTGAAGGTCAATA  
ACAACAATTCTCTGTTGAGATGTTGCCAACGTCGATTTGTGGACTTACT

>M6-PGSC0003DMG400004195-(rev)M6LRR-RLP\_1674

GGTCAATAACAACAACCTTCTCTGTTGAGATGTTGCCAACGTCGATTTGTGGACTTACTGAGCTAAGTGTT  
TTGTATGTTTCTCAAACAAGATTCATGGACCATTACCTGGATGTCTTTC

>M6-PGSC0003DMG400004195-(rev)M6LRR-RLP\_1736

TAAGTGTTTTGTATGTTTCTCAAACAAGATTCATGGACCATTACCTGGATGTCTTTCATCATTCAAGTAC  
TTACTAGATGTCGATATACCGTTCAAACGTACAGTCACTCTTCTATGG

>M6-PGSC0003DMG400004195-(rev)M6LRR-RLP\_1798

TTCAAGTACTTACTAGATGTCGATATACCGTTCAAACGTACAGTCACTCTTCTATGGGAGTACACAAAC  
AATAAGTAACGGTGACGGAGCCAGAAATTATGAAGGAAATCCAAAAATGC

>M6-PGSC0003DMG400004195-(rev)M6LRR-RLP\_186

TTGCACCTATGTGGTTCTGCCCTGACATCACTTATCTAGTTAAGCTCAACACTTTGAATATGTTCTTAAAA  
ATGTGACTTTTAGAGGCTTCATAGGTCAATTTGTTGATAAAACAAAAAT

>M6-PGSC0003DMG400004195-(rev)M6LRR-RLP\_1860



ACACAAACAATAAGTAACGGTGACGGAGCCAGAAATTATGAAGGAAATCCAAAAATGCCTCAATTTGAA  
ATGTTATGTATGTCTACAACAACCAAAAAAAAAAAAAAATTGTGTTTACTTAT

>M6-PGSC0003DMG400004195-(rev)M6LRR-RLP\_1922

ATTTGAAATGTTATGTATGTCTACAACAACCAAAAAAAAAAAAAAATTGTGTTTACTTATTATCTCTATGTTA  
TATGAGACTCCAAGTCCAGAAATCATTGGCTAGTATGAAAAAATCTA

>M6-PGSC0003DMG400004195-(rev)M6LRR-RLP\_1954

AAAAAAAAAACTTGTGTTTACTTATTATCTCTATGTTATATGAGACTCCAAGTCCAGAAATCATTGGCT  
AGTATGAAAAAATCTAATACATAAAGTACTTTCTTTGTTTTATTTTTG

>M6-PGSC0003DMG400004195-(rev)M6LRR-RLP\_248

TTCTTAAAAATGTGACTTTTAGAGGCTTCATAGGTCAATTTGTTGATAAAACAAAAATATTATAGAATGG  
GAACAGTGATATCCTCCATAAATGAACTCAACTAACTATTTATAAGAC

>M6-PGSC0003DMG400004195-(rev)M6LRR-RLP\_310

TAGAATGGGAACAGTGATATCCTCCATAAATGAACTCAACTAACTATTTATAAGACTATGTTTGTGAC  
TATAATAGTGGAGTAATAATAGTAGAAAGGCTTTCCATATTATTTGCCT

>M6-PGSC0003DMG400004195-(rev)M6LRR-RLP\_372

TTTGTGACTATAATAGTGGAGTAATAATAGTAGAAAGGCTTTCCATATTATTTGCCTGACATTTTTACTA  
ATTGTTTTGTTGCTTAAATTGTTATGAATTGTTTTCTTGAGCCGAATG

>M6-PGSC0003DMG400004195-(rev)M6LRR-RLP\_434

TTTTTACTAATTGTTTTGTTGCTTAAATTGTTATGAATTGTTTTCTTGAGCCGAATGTCTACCAGAAACAA  
TCATCTTATCTTTTTTACACAGATAGGGATAATGTATGCATATACATT

>M6-PGSC0003DMG400004195-(rev)M6LRR-RLP\_496

CCAGAAACAATCATCTTATCTTTTTTACACAGATAGGGATAATGTATGCATATACATTATCCTCCTCAGAT  
CCCCTTTATGAGATTAACTTCAGTAGTGATATTCTAAGCAATTACAA

>M6-PGSC0003DMG400004195-(rev)M6LRR-RLP\_558

TCCTCAGATCCCCTTTATGAGATTAACTTCAGTAGTGATATTCTAAGCAATTACAAAAATATTTCCATA  
AAAACGAAAAATATACTAAGGAGAGACATAATATTGTGTTTTATAAAAT

>M6-PGSC0003DMG400004195-(rev)M6LRR-RLP\_62

TAACACAGGGTGACATCGAGCTATTTAAGGAACATAAACAATTGGTAATTGCTTCACGCTATCTATTGCT  
CCTTTATTCATGAATTCATGTATATACAATGTAATTTCTGTTAGAGGGG

>M6-PGSC0003DMG400004195-(rev)M6LRR-RLP\_620

ATTTCCATAAAAACGAAAAATATACTAAGGAGAGACATAATATTGTGTTTTATAAAATGAAGTTGTAGTA  
ATTTGTCTATTTGTTTACTTTCTTTAAAATTAACATGGCTTGTGAAAAAA

>M6-PGSC0003DMG400004195-(rev)M6LRR-RLP\_682

TTGTAGTAATTTGTCTATTTGTTTACTTTCTTTAAAATTAACATGGCTTGTGAAAAAACTTGACAACATG  
AGATGCTTAATGTATCGAGCTAGCGAATCTATTATTGACATAATCATCC

>M6-PGSC0003DMG400004195-(rev)M6LRR-RLP\_744

GACAACATGAGATGCTTAATGTATCGAGCTAGCGAATCTATTATTGACATAATCATCCCTTTTTTGGCAG  
GCCAAAATGACATCTCATCAATTTATTTGTTTCCTAGCAATGATATCTCT

>M6-PGSC0003DMG400004195-(rev)M6LRR-RLP\_806

TTTGGCAGGCCAAAATGACATCTCATCAATTTATTTGTTTCCTAGCAATGATATCTCTTATGATTATCAATA  
TTAGTGCAAACAAGGCATGCCACCCTGATGATCTCAAGGGTCTCAATG

>M6-PGSC0003DMG400004195-(rev)M6LRR-RLP\_868

ATTATCAATATTAGTGCAAACAAGGCATGCCACCCTGATGATCTCAAGGGTCTCAATGACTTCAAAGATG  
GCATACATTCTGATACTTCAGGCAGACTAAGCAAATGGATTGGGCAAGAT

>M6-PGSC0003DMG400004195-(rev)M6LRR-RLP\_930

CAAAGATGGCATAACATTCTGATACTTCAGGCAGACTAAGCAAATGGATTGGGCAAGATTGTTGCAATTG  
GCCAGGCATTTCTTGTA ACTCTACA ACTGACAGAGTTGTAGAAATCTATCT

>M6-PGSC0003DMG400004195-(rev)M6LRR-RLP\_992

GCAATTGGCCAGGCATTTCTTGTA ACTCTACA ACTGACAGAGTTGTAGAAATCTATCTACCTGGTCACTA  
TGTATCTGGTGACGATGAATCTCCAACTTCGTGTCAAGCACAATGAGTG

>M6-PGSC0003DMG400004284-(rev)M6LRR-RLP\_0

AACTTTTTTTCTTTTATTACCTACCATTTTTCTTGCAAATGAGTCTCTTGTCTTACTTGCATCTTTCTTTCT  
TTGTGAACTTGTTTTGTCTCATTGCAATATGCCCCAGAGATCAA

>M6-PGSC0003DMG400004284-(rev)M6LRR-RLP\_1037

GCTATCAAATAACTCCCTGAATGGAGAAATACCGTCCTGGATATTCTCCCTTCCATTACTGAGTGA ACTA  
GACTTGAGTAATAACCACTTTTCTGGTCAACTTAAGGAATTCAGTAACAC

>M6-PGSC0003DMG400004284-(rev)M6LRR-RLP\_1098

AGTGA ACTAGACTTGAGTAATAACCACTTTTCTGGTCAACTTAAGGAATTCAGTAACACTTCAGTACTAG

TCGGTGTTGATATAAGCGAGAATGAGTTGCAAGGATGTCTTCCCAAATCA

>M6-PGSC0003DMG400004284-(rev)M6LRR-RLP\_1159

CAGTACTAGTCGGTGTTGATATAAGCGAGAATGAGTTGCAAGGATGTCTTCCCAAATCAATTCAGAACC

TTGTGAACCTAGTCTGGATTGATTTAGCAAATAACCAGTTGCAATGTCCTC

>M6-PGSC0003DMG400004284-(rev)M6LRR-RLP\_122

TCTTGCCCTTGTAGAATCAACCAGTCTTTTGTGTTGATGCATCTGCATCTTTTATTTGTGACAAGCAGTC

TTATCTAAAACGAGTTCATGGAACATGAACAAAGATTGTTGTTTCGTG

>M6-PGSC0003DMG400004284-(rev)M6LRR-RLP\_1220

TCAGAACCTTGGAACCTAGTCTGGATTGATTTAGCAAATAACCAGTTGCAATGTCCTCTTCCCAAGTCAC

TCCAGAACCTCAGAAATCTAAAATTACTTGATCTTTTGTCTAACAATTT

>M6-PGSC0003DMG400004284-(rev)M6LRR-RLP\_1281

CCCAAGTCACTCCAGAACCTCAGAAATCTAAAATTACTTGATCTTTTGTCTAACAATTTTAGTGGGAGTGT

AGATGTCAGTGTCTTTTCGAACCTCAAACAACCTTTGGTATCTTGATCTG

>M6-PGSC0003DMG400004284-(rev)M6LRR-RLP\_1342

GTGGGAGTGATAGATGTCAGTGTCTTTTCGAACCTCAAACAACCTTTGGTATCTTGATCTGTCATACAATAG

TATTTCTCTGATCAATGAGAACAAGTCAAGTCTACATTGCCCAATCTC

>M6-PGSC0003DMG400004284-(rev)M6LRR-RLP\_1403

ATACAATAGTATTTCTCTGATCAATGAGAACAAGTCAAGTCTACATTGCCCAATCTCTTGAATACTTAT

ATTTGGCTGCTTGCAAGTAAAAGAACTGGATTTTTTGAGATCAGCAAA

>M6-PGSC0003DMG400004284-(rev)M6LRR-RLP\_1464

GAATACTTATATTTGGCTGCTTGCAAGTAAAAGAACTGGATTTTTTGAGATCAGCAAATAACTTTTATAC

CTTGATCTTTTCATATAACAACATTCAAGGAACAATTCCTGATGTGGTA

>M6-PGSC0003DMG400004284-(rev)M6LRR-RLP\_1525

ACTTTTATACCTTGATCTTTTCATATAACAACATTCAAGGAACAATTCCTGATGTGGTATTGTCTAATTGG

ATGCATTCCATAAAAAATCTTAATCTAGCCCACAACATGTTGACTAGTA

>M6-PGSC0003DMG400004284-(rev)M6LRR-RLP\_1586

GTCTAATTGGATGCATTCCATAAAAAATCTTAATCTAGCCCACAACATGTTGACTAGTATTGACCACATT

CATCATTTTCCCAACTGATCTCTATTAATTATTGTCCAATTCTCTTCA

>M6-PGSC0003DMG400004284-(rev)M6LRR-RLP\_1647

GACCACATTTTCATCATTTTTCCCAACTGATCTCTATTA ACTTATTGTCCAATTCTCTTCAAGGGACTACCA  
ATTCCACCACCCTCTATAGAATTCTTCTTCATGTCAAATAATAATGTC

>M6-PGSC0003DMG400004284-(rev)M6LRR-RLP\_1708

GGACTACTACCAATTCCACCACCCTCTATAGAATTCTTCTTCATGTCAAATAATAATGTCAGTGGTAAGATC  
CCTTCTTCTATTTGCAATTTGACAACATTA AAAATCCTAGATTTGTCAA

>M6-PGSC0003DMG400004284-(rev)M6LRR-RLP\_1769

TGGTAAGATCCCTTCTTCTATTTGCAATTTGACAACATTA AAAATCCTAGATTTGTCAAATAACAATTTGA  
AGGGAGAAATTCCACAATGTTTGGGTAACATGAGTGATCAACTCGAGGT

>M6-PGSC0003DMG400004284-(rev)M6LRR-RLP\_183

GACAAGCAGTCTTATCCTAAAACGAGTTCATGGAACATGAACAAAGATTGTTGTTTCGTGGGATGGAATA  
ATATGTGATGAGATGACCGGTCATGTGATTGAGCTTGACCTCAGTTGCAGC

>M6-PGSC0003DMG400004284-(rev)M6LRR-RLP\_1830

AACAATTTGAAGGGAGAAATTCCACAATGTTTGGGTAACATGAGTGATCAACTCGAGGTTTTGGATATG  
CGACGCAATAGTCTTTCTGGGAGTCTGCAAACA ACTTTTAGCTTGGGAAGT

>M6-PGSC0003DMG400004284-(rev)M6LRR-RLP\_1891

TGGATATGCGACGCAATAGTCTTTCTGGGAGTCTGCAAACA ACTTTTAGCTTGGGAAGTAAACTCAAAA  
GTTTCAACTTGCATGGCAATAATCTAGAGGGAAA ACTCCCAAGATCCTTGG

>M6-PGSC0003DMG400004284-(rev)M6LRR-RLP\_2074

TGTGGTTGGGGACTCTTCCAAATCTACAAGTTTTAAGTTTTGAGACTCAATAATTTGCATGGACCAATTAG  
AACTTCAACTAGTTCGAAACTGTTTCCTCAGCTTCGGATGTTAGATCTCT

>M6-PGSC0003DMG400004284-(rev)M6LRR-RLP\_2135

ACCAATTAGAACTTCAACTAGTTCGAAACTGTTTCCTCAGCTTCGGATGTTAGATCTCTCTCGCAATGCCT  
TTACAGCAGAACTGCCAACAATTCTTTTCAGAAATCTGAAAGCAATGAG

>M6-PGSC0003DMG400004284-(rev)M6LRR-RLP\_2196

CGCAATGCCTTTACAGCAGAACTGCCAACAATTCTTTTCAGAAATCTGAAAGCAATGAGGAGAATTGCCA  
TTGATAAAACAATGAAGGCACTAGGTGATGAAGAAAAATCATATTACCAA

>M6-PGSC0003DMG400004284-(rev)M6LRR-RLP\_2257

GAATTGCCATTGATAAAACAATGAAGGCACTAGGTGATGAAGAAAAATCATATTACCAAGACTCGGTAA  
CTGTTGTAACAAAGGGAACGGAGTTTGAAATTGTGAGAATCTTGTCTTTGT

>M6-PGSC0003DMG400004284-(rev)M6LRR-RLP\_2440

TCATTGCACTACGCGTGTGAATTTATCTCACAATGAGTTGCAGGGTCATATACCACCATCATTTGGAAA  
GTTATCTGTAGTCGAATCATTGGACCTTTCATCCAACAGGCTTTCAGGAG

>M6-PGSC0003DMG400004284-(rev)M6LRR-RLP\_2684

AAATGATGGATTGCGTGGATTCCCAGTTTCAGGAGGTTGTGGAAGTGATCGGATACCGGATACAAACA  
ACACAACATTTGTGCCAGATGAAGAAAATGATTCAACATTTCTAAGTGAGCT

>M6-PGSC0003DMG400004284-(rev)M6LRR-RLP\_2745

ACAAACAACACAACATTTGTGCCAGATGAAGAAAATGATTCAACATTTCTAAGTGAGCTCAGTTGGAAA  
GTGGTTCTTATGGGATATGGTACTGGATTGATTATTGGATTCTCCATAGCA

>M6-PGSC0003DMG400004284-(rev)M6LRR-RLP\_2806

GTTGGAAGTGGTTCTTATGGGATATGGTACTGGATTGATTATTGGATTCTCCATAGCATATTTGATGCT  
TTCTTCTCAAATCCAAATTGGCTTCTGGGATAGCTGAAGATTTAGAAA

>M6-PGSC0003DMG400004284-(rev)M6LRR-RLP\_2867

TTTGATGCTTCTTCTCAAATCCAAATTGGCTTCTGGGATAGCTGAAGATTTAGAAAACAGAATCATT  
TGAGAAGGCGAAAGAAGCAGCGAGGTCAAATGCATTACAGAAGAAGAAG

>M6-PGSC0003DMG400004284-(rev)M6LRR-RLP\_2928

AGAATCATTATGAGAAGGCGAAAGAAGCAGCGAGGTCAAATGCATTACAGAAGAAGAAGAATA  
ATGGCATCTAGATGTAAGTTCAAATTTATGAGAGATGTAGTCATGTTAAGCT

>M6-PGSC0003DMG400004284-(rev)M6LRR-RLP\_2989

GAAATAATGGCATCTAGATGTAAGTTCAAATTTATGAGAGATGTAGTCATGTTAAGCTCTATACTGATT  
CTTTTTGTTTACTGTAAGTGGTATTAAGAATGAGATTAGTGTTCTGTA

>M6-PGSC0003DMG400004284-(rev)M6LRR-RLP\_305

ACTTGTTGGGAAGATTGATTCCAATAGCAGCCTATTCCAATCTCTCATCTCAAAGGCTCAATCTTTCTA  
ATAATGACTTTGACGGTCTCATATCTCGCCTAAATTTGGTAGGTTAGC

>M6-PGSC0003DMG400004284-(rev)M6LRR-RLP\_3050

ATACTGATTCTTTTTGTTTACTGTAAGTGGTATTAAGAATGAGATTAGTGTTCTGTATCTGACTCTTCT  
TTTGTAAGTCTTTATGTAGGCAAAGGGTGTATCCAGTTGAAATATCAAG

>M6-PGSC0003DMG400004284-(rev)M6LRR-RLP\_3111

TGACTCTTCTTTTGTAACTTTTATGTAGGCAAAGGGTGTATCCAGTTGAAATATCAAGAAGATGATGCC

TGCAACAACAAATATATCTTCTTGGAGGAAATTACTTGAGCAAGAGATGC

>M6-PGSC0003DMG400004284-(rev)M6LRR-RLP\_3172

GATGATGCCTGCAACAACAAATATATCTTCTTGGAGGAAATTACTTGAGCAAGAGATGCTTTTGATATTT  
CCTGGAGGTTGCTACTCCTTTTTCTTCATAAAAATAAAATAAATTCTAGG

>M6-PGSC0003DMG400004284-(rev)M6LRR-RLP\_3233

TTGATATTTCTGGAGGTTGCTACTCCTTTTTCTTCATAAAAATAAAATAAATTCTAGGATTGAAGTATGT  
TGCTTTACTATAAACAGTTGTCACAATGAAGTGTTTTGTTTTCCATC

>M6-PGSC0003DMG400004284-(rev)M6LRR-RLP\_3294

TGAAGTATGTTGCTTTACTATAAACAGTTGTCACAATGAAGTGTTTTGTTTTCCATCCAAGTGTAGTA  
AAGAGAAAAAAGATATTTGTCTGCAAATAATAGCTTTCTTTTGACATG

>M6-PGSC0003DMG400004284-(rev)M6LRR-RLP\_3335

TGTTTTGTTTTCCATCCAAGTGTTAGTAAAGAGAAAAAAGATATTTGTCTGCAAATAATAGCTTTCTT  
TTGACATGTGTATTGACTTGGAATATTACATTTACCTGGAATACAGTTT

>M6-PGSC0003DMG400004284-(rev)M6LRR-RLP\_366

AATCTTTCTAATAATGACTTTGACGGTTCATATCTCGCCTAAATTTGGTAGGTTAGCAAGCTTGACACA  
TCTTGATCTTTCCAGGCAGACTTCTCAGGTCAAATTCCTTCTGAAATC

>M6-PGSC0003DMG400004284-(rev)M6LRR-RLP\_427

GCTTGACACATCTTGATCTTTCCAGGCAGACTTCTCAGGTCAAATTCCTTCTGAAATCTCTCATCTCTCCA  
AGTTACAGTCTGTTTTTTATCGTCTAACAGTGAGCTTAGACTCGTAG

>M6-PGSC0003DMG400004284-(rev)M6LRR-RLP\_488

TCATCTCTCCAAGTTACAGTCTGTTTTTTATCGTCTAACAGTGAGCTTAGACTCGTAGCTTACGATTTCAA  
GATGTCCTTCAAATTTGACTCAATTAAGAGAGCTTCATCTTAGTGG

>M6-PGSC0003DMG400004284-(rev)M6LRR-RLP\_61

CATCTTTCTTTCTTTGTGAACCTGTTTTGTCCTCATTTGCAATATGCCCCAGAGATCAAAGTCTTGCCCTTG  
TAGAATCAACCAGTCTTTTGTTGTTGATGCATCTGCATCTTTATTT

>M6-PGSC0003DMG400004284-(rev)M6LRR-RLP\_610

TGAACATCTCTCCACCATTCCTCTGAATTTCTTCTCATTTAACGACGCTGGGGCTGACGAGTACAGGA  
GTGTATGGGATAATACCTGAGAGTATCTTTAACCTGCCAACCTGGAAA

>M6-PGSC0003DMG400004284-(rev)M6LRR-RLP\_671

GAGTACAGGAGTGTATGGGATAATACCTGAGAGTATCTTTAACCTGCCAACCTGGAAACACTTGACTT  
AAGTTCCAACGATCAGCTCAATGGTTATTTTCCAAATACCAAATGGAATAG

>M6-PGSC0003DMG400004284-(rev)M6LRR-RLP\_732

CTTGACTTAAGTTCCAACGATCAGCTCAATGGTTATTTTCCAAATACCAAATGGAATAGCAGTGCATCTCT  
CATGGAGCTGAATCTCGCTGGGGTAAATTTTTCTGGTAATTTCTGCCT

>M6-PGSC0003DMG400004284-(rev)M6LRR-RLP\_793

GTGCATCTCTCATGGAGCTGAATCTCGCTGGGGTAAATTTTTCTGGTAATTTCTGCCTGAATGTCTTGGC  
TATCTAACTTCACTGCAGAGATTGGTACTTAGTTCTGCAATTTATCGG

>M6-PGSC0003DMG400004284-(rev)M6LRR-RLP\_854

ATGTCTTGGCTATCTAACTTCACTGCAGAGATTGGTACTTAGTTCTGCAATTTATCGGGGCAGGTTCCG  
AAATCTCTTTGGAACCTCACCCATCTGGAGTATATGGACCTTGAAGATAA

>M6-PGSC0003DMG400004284-(rev)M6LRR-RLP\_915

CAGGTTCCGAAATCTCTTTGGAACCTCACCCATCTGGAGTATATGGACCTTGAAGATAACCGTCTTGAAG  
GACCGATATTTCTCAGTTTACAAGTGGACTGCAGGATCTGAACACACTT

>M6-PGSC0003DMG400004284-(rev)M6LRR-RLP\_976

GTCTTGAAGGACCGATATTTCTCAGTTTACAAGTGGACTGCAGGATCTGAACACACTTAAGCTATCAAA  
TAACTCCCTGAATGGAGAAATACCGTCTGGATATTCTCCCTTCCATTAC

>M6-PGSC0003DMG400004384M6LRR-RLP\_0

CAACCCTCTTCTCAGGGATGGTCGAAGAGAGGTTCTCTTCTGAGATCATCCTGAACACAGCAGTCAAC  
AAAAAATATTCAAAAAAAAATAAAATATTTTTTTTTGGGATTTTAATTCTA

>M6-PGSC0003DMG400004384M6LRR-RLP\_1098

AAGTTCTACATTGGTAGCTAAAAAGATTGGAATCTACAATTCTACATAAGGTGTAGGATCTCTTAACAT  
GGTGTGAGGCCTTTTGTGAAAACCGTGCGGGCGTGCCCTAAGCGGACAA

>M6-PGSC0003DMG400004384M6LRR-RLP\_1159

TCTTAACATGGTGTGAGGCCTTTTGTGAAAACCGTGCGGGCGTGCCCTAAGCGGACAACATTGCACCA  
TGTTAAGAGTATTTTTGGGTTGACTTAGCCCAACAAGATGAAATTACTTGC

>M6-PGSC0003DMG400004384M6LRR-RLP\_122

TTTCATAAAAAATCCACAATTTCCATTGGGTAAATTTCTTGAATTTTTTTTTCTTTGATCTCTGTTTGT  
TTTTCTGGTAAATCTTTCATCTTTACCCCACTTTTTGAATTTTTGT

>M6-PGSC0003DMG400004384M6LRR-RLP\_1525

CTTGATCTTTCATGGTTTTTACTCACTTAGGGCTGTGTCTTCTGTCTCCCTGGGCCGTGGGCTATTCTCTA  
GTTTCTTTAGTCTATTCATGTTATTGGCTTATTCTTTGTTTCGCTGAT

>M6-PGSC0003DMG400004384M6LRR-RLP\_1586

GCTATTCTCTAGTTTCTTTAGTCTATTCATGTTATTGGCTTATTCTTTGTTTCGCTGATTACTGTTGATTGA  
GAAACAGGATTGTCGTTGTTGAATTCAAATTGAATGTGTATTCTGA

>M6-PGSC0003DMG400004384M6LRR-RLP\_1647

CTGTTGATTGAGAAACAGGATTGTCGTTGTTGAATTCAAATTGAATGTGTATTCTGATCCAAATGGAG  
TTCTTGAAAACCTGGAATGCTGATCACTGTGACCCGTGCATGTGGTCTGGT

>M6-PGSC0003DMG400004384M6LRR-RLP\_1708

CAAATGGAGTTCTTGAAAACCTGGAATGCTGATCACTGTGACCCGTGCATGTGGTCTGGTGTGAGTGCA  
TGGATGGTAAAGTGTACATGTTGTAAGTCTCTTGTATAGATACTCAAGTT

>M6-PGSC0003DMG400004384M6LRR-RLP\_1769

CGAGTGCATGGATGGTAAAGTGTACATGTTGTAAGTCTCTTGTATAGATACTCAAGTTTTCTAGTTAAG  
ATTGTGTTAATAAACTTTCTCTAATGGTTAGTGTGTTAGTGATTGATTCT

>M6-PGSC0003DMG400004384M6LRR-RLP\_183

TCTCTGTTTGCTTTTTCTGGTAAATCTTTCATCTTACCCCACTTTTTGAATTTTTGTTTGATTTTGCTGA  
GAATATGGTTATCTTATGATGGTTTTTTGTTTTTCCCAAAAAGA

>M6-PGSC0003DMG400004384M6LRR-RLP\_1830

CTAGTTAAGATTGTGTTAATAAACTTTCTCTAATGGTTAGTGTGTTAGTGATTGATTCTGGAACCAGTTTG  
TTGAACTAATAATGATAAACCAATGCAACAGGGTGAAATTGTTTGTTT

>M6-PGSC0003DMG400004384M6LRR-RLP\_1891

AACCAGTTTGTTGAACTAATAATGATAAACCAATGCAACAGGGTGAAATTGTTTGTTTCGACTCTTGTG  
ATTCTTCTTATGTCGTTAAATTAGTTGACCTATCTTCTTTTTTTCATTCT

>M6-PGSC0003DMG400004384M6LRR-RLP\_1952

ACTCTTGATTCTTCTTATGTCGTTAAATTAGTTGACCTATCTTCTTTTTTTCATTCTGTTTCAGAAATCTCC  
ATGGATTTTCTTTGGAAGGAACACTAGCATCAGAGCTTGGAATCTC

>M6-PGSC0003DMG400004384M6LRR-RLP\_2013

TCAGAAATCTCCATGGATTTTCTTTGGAAGGAACACTAGCATCAGAGCTTGGAATCTCACTTACTTGAG



ATCACTGTAAGCTTTAGCTATACTAATATGCCTTTTCTTTAGGCTCCTGC

>M6-PGSC0003DMG400004384M6LRR-RLP\_2074

TTACTTGAGATCACTGTAAGCTTTAGCTATACTAATATGCCTTTTCTTTAGGCTCCTGCTCATTAAAGTCTTA  
AATGGTATTTTTTACCTGAACCGTCATCCGTAGAAGGTTGTCATAATC

>M6-PGSC0003DMG400004384M6LRR-RLP\_2135

ATTAAGTCTTAAATGGTATTTTTTACCTGAACCGTCATCCGTAGAAGGTTGTCATAATCTTTGAATAGTCT  
TCTATCTTCTTATGTAAATTCGAAAGAACGTAAGGGATTGTTTGGTGTGA

>M6-PGSC0003DMG400004384M6LRR-RLP\_244

GATTTTGCTTGAGAATATGGTTATCTTATGATGGGTTTTTTGTTTTTCCCAAAAAGATTCAATTTTTATT  
AATTCTTGTTGTTTTATGTCTGCATTTTCAGCTAAAATTGAATCTT

>M6-PGSC0003DMG400004384M6LRR-RLP\_2623

CCTAAGAGTTATGTTGGTCAAGTAAATTGGGAGGTAGAGACAAAGGTGGATAAGCTTTGGATATCTACT  
AATCAGCTTTCATCATCTTGTATTCTGCATTTACATTGTTCTCTGCATAAG

>M6-PGSC0003DMG400004384M6LRR-RLP\_2684

TATCTACTAATCAGCTTTCATCATCTTGTATTCTGCATTTACATTGTTCTCTGCATAAGTTGTGTTTGAATCT  
TAACAGTATTTCTTCTTGCTGTCTGGTTGCTTTTACAGAATGCTCTC

>M6-PGSC0003DMG400004384M6LRR-RLP\_2745

GTGTTTGAATCTTAACAGTATTTCTTCTTGCTGTCTGGTTGCTTTTACAGAATGCTCTCAGGGAATCATTTT  
TTCGGTGCTATTCCTAAAGAATTCGGAAGACTCGATATGCTTGAAGTG

>M6-PGSC0003DMG400004384M6LRR-RLP\_2867

TGACTTGAGGGATAATAATTTGAGTGAACAATTCCAGCAGAAATAGGAGACCTGCAATCACTAAGAAT  
CTTGTGAGTTAATGATTTTTTGTGTGCACGATAAACGGTTTGTGTGTGGA

>M6-PGSC0003DMG400004384M6LRR-RLP\_2928

CTAAGAATCTTGTGAGTTAATGATTTTTTGTGTGCACGATAAACGGTTTGTGTGTGGACGATAAACGGT  
TTGTTGTGTGCAGATGTATATATACATATGCATACACATTCATTATGCGA

>M6-PGSC0003DMG400004384M6LRR-RLP\_2989

ATAAACGGTTTGTGTGTGCAGATGTATATATACATATGCATACACATTCATTATGCGAAGTGATTCAA  
AATGCTCATCAATCGTGTATTTTCGTTTTTCCAGGTTGATTCATAACAA

>M6-PGSC0003DMG400004384M6LRR-RLP\_305

CAATTTTATTAATTCTTGTTGTTTTATGTCTGCATTTTCAGCTAAAAATTGAATCTTGGAATTTTGAAG  
ACTTGGGGTTTCTGCAATGATGGAGAAAACAGAGGTAATATAGCCTAT

>M6-PGSC0003DMG400004384M6LRR-RLP\_3050

TGATTTCAAATGCTCATCAATCGTGTTTATTTTCGTTTTCCAGGTTGATTCATAACAATAACTTTGAGGA  
GAGTGTTCCTTTGAAATTGGGAAGCTTCATTTAGTCACAGAATTACAA

>M6-PGSC0003DMG400004384M6LRR-RLP\_3172

CGACGAAAATCTCACTTCTGCTTTTGCTTCTGGAACCTCTCTGTATAAGAAAATTCGTCATTGGTAGGATT  
CTTTATTTGTTTTAGTACCCTATCTTCATTTTCAGCTGGTTTTTTGCA

>M6-PGSC0003DMG400004384M6LRR-RLP\_3233

TGGTAGGATTCTTTATTTGTTTTAGTACCCTATCTTCATTTTCAGCTGGTTTTTTGCATATCAGATGCTGG  
ATAGTCTATCTTTGTGGCAACACACTATCTAATTGATCTAGCTCATT

>M6-PGSC0003DMG400004384M6LRR-RLP\_3294

TCAGATGCTGGATAGTCTATCTTTGTGGCAACACACTATCTAATTGATCTAGCTCATTCTCAATTTGATA  
TTTTGCATGTCTTACAGCATCTGGCAAGGCAGCATGAAGCCATTCAAGA

>M6-PGSC0003DMG400004384M6LRR-RLP\_3416

ATAACCTCCATTATTGAACCAATAAAATGTACACTTTTGCATTACCTCAGTTTCTTCCAAGTAAAGTAATT  
AAATAGTTTTTCACATCACGAGTCATCTAGTTAAGTTTTATTATTGAG

>M6-PGSC0003DMG400004384M6LRR-RLP\_3477

TGTAAGTAATTAATAGTTTTTCACATCACGAGTCATCTAGTTAAGTTTTATTATTGAGAGACATTTTTTCT  
ATTTCTTTAGGCCATCTCCTGGAACGGGCTTTATGGATGACCGGAAAG

>M6-PGSC0003DMG400004384M6LRR-RLP\_3599

TGCTCTGACAACCTTCCAAGTGAGTAAACACGTCATATTTTTTAAAATAACTCTGAAGAACCGTTTACAAA  
TAATAATTCTTCATTGTCTAGCAGGGTTATCCAGGCCTCACATCATCCA

>M6-PGSC0003DMG400004384M6LRR-RLP\_366

AATTTTGAAGACTTGGGGTTTCTGCAATGATGGAGAAAACAGAGGTAATATAGCCTATATTATAGAAA  
TGTTAAGAAAATGAGAGACCCCATGAAGGGTGGAGCCAGGGGTAGGGCCG

>M6-PGSC0003DMG400004384M6LRR-RLP\_3660

CGTTTACAAATAATAATTCTTCATTGTCTAGCAGGGTTATCCAGGCCTCACATCATCCACACTATACAGCA  
CCAAGAGGAGATTGCACGCCGTAAGTTGGCTGAACAATCCAGTAACCTT

>M6-PGSC0003DMG400004384M6LRR-RLP\_3721

CTATACAGCACCAAGAGGAGATTGCACGCCGTAAGTTGGCTGAACAATCCAGTAACCTTGCTGCAGCTC  
CTGCCAATTTCAAAGGACCGTTGGGTCTGTCAATTCAAATGCCAAGAAGCA

>M6-PGSC0003DMG400004384M6LRR-RLP\_3782

TGCAGCTCCTGCCAATTTCAAAGGACCGTTGGGTCTGTCAATTCAAATGCCAAGAAGCAGTGGGTCTGTT  
CGTGCGGTGCCAATTTCAAATGGAGCACATCCTACAACTTACCATCACC

>M6-PGSC0003DMG400004384M6LRR-RLP\_3843

GGGTCTGTTTCGTGCGGTGCCAATTTCAAATGGAGCACATCCTACAACTTACCATCACCACCTCCACAGC  
ATGAATCTCAAGACAAATTACATCCTGTGGGACAGTCTGCAAGTGCTGTA

>M6-PGSC0003DMG400004384M6LRR-RLP\_3904

CTCCACAGCATGAATCTCAAGACAAATTACATCCTGTGGGACAGTCTGCAAGTGCTGTAAAACAGTCGC  
CTGCTGTGAAAAAGCCAACTAATAGCCAAGGCCCCCTGCTGGAAAATCGG

>M6-PGSC0003DMG400004384M6LRR-RLP\_3965

ACAGTCGCCTGCTGTGAAAAAGCCAACTAATAGCCAAGGCCCCCTGCTGGAAAATCGGAAAGTACTTG  
GAAGTACGTAGTTGGGATTTGCATTGGAGTAATTTTGTCTATTCTTGCTGC

>M6-PGSC0003DMG400004384M6LRR-RLP\_4087

CTGTGTTCTTAATCTGCCGAATCAGAGCAGCTAGAACAATTGGCCCTTGGAAGACTGGATTGAGTGGAC  
AGCTGCAAAAAGCATTGTTACAGGTAATTATATCATATTGTGCCAAAAG

>M6-PGSC0003DMG400004384M6LRR-RLP\_4148

GAGTGGACAGCTGCAAAAAGCATTGTTACAGGTAATTATATCATATTGTGCCAAAAGTGATACTGCTA  
ATATTCTGCTCCCCACCCTGATAGTAGTTGCATTGCTAACAATATTCTTA

>M6-PGSC0003DMG400004384M6LRR-RLP\_4209

ATACTGCTAATATTCTGCTCCCCACCCTGATAGTAGTTGCATTGCTAACAATATTCTTAGCATAGTGTTAC  
CTTATCAAAAAAATATTCTTAGTGTAGTGTGTTATAACAATTTAACT

>M6-PGSC0003DMG400004384M6LRR-RLP\_4270

ATAGTGTACCTTATCAAAAAAATATTCTTAGTGTAGTGTGTTATAACAATTTAACTGGAGTAAAGGG  
AGGTAAGTATATTCTTCGTCTTATGAGGAATTAGAGGACTAATATTCTCA

>M6-PGSC0003DMG400004384M6LRR-RLP\_4331

AGTAAAGGGAGGTAAGTACTGATATTCTTCGTCTTATGAGGAATTAGAGGACTAATATTCTCAGTGTAGCATTG

TTATATAACCCTTTTTCACTATATGTTTGCTAGGACGAGAAGGTACAAATG

>M6-PGSC0003DMG400004384M6LRR-RLP\_4392

GTAGCATTGTTATATAACCCTTTTTCACTATATGTTTGCTAGGACGAGAAGGTACAAATGGAACACTATTCCT

TCTTTCTCATGAGAAGTGAATTAGCTGAGACATCAATACTAACGCTTGA

>M6-PGSC0003DMG400004384M6LRR-RLP\_4453

ACTATTTCTTCTTTCTCATGAGAAGTGAATTAGCTGAGACATCAATACTAACGCTTGAAGGCTGGAATC

CTTCCCTTATACTTCTAAAATGTCGCTGATCTTTCCTCATACTTTGCTT

>M6-PGSC0003DMG400004384M6LRR-RLP\_4575

GTCTAGCTTATATCCCCCACAAAGTTGCTTTTCAACGACAACCATAGGAACGTGCAATCCTTTATGTTA

ATCTATGATATTTTTCGTCTATTTTAATCCTTTTGCCCGTGAAAACATT

>M6-PGSC0003DMG400004384M6LRR-RLP\_4636

CTTTATGTTAATCTATGATATTTTTCGTCTATTTTAATCCTTTTGCCCGTGAAAACATTGTTATAGGGGTTT

CAAACTGAACAGATCCGAGCTTGAACAGCATGCGAGGATTTTAGCA

>M6-PGSC0003DMG400004384M6LRR-RLP\_4758

ATTATTACCAGCGGCGATTCATATATAGTATAACAAGGGAACACTGTCTAGCGGAGTGGAGATTGCTGTT

ATCTCAACTACTATAAGTTCTCTGGAAGATTGGTCCATGCACTCGGAAACA

>M6-PGSC0003DMG400004384M6LRR-RLP\_4811

AGTGGAGATTGCTGTTATCTCAACTACTATAAGTTCTCTGGAAGATTGGTCCATGCACTCGGAAACAGCC

TTCCGGAAGAAGTTAATCATTCTTTGCTTTTACAAATTAACCACCTCC

>M6-PGSC0003DMG400004384M6LRR-RLP\_61

GCAGTCAACAAAAAATATTCAAAAAAAATAAAATATTTTTTTTTGGGATTTTAATTCTACATTTTCATAAAA

AATCCCACAATTTCCATTGGGTAAATTTCTTGAATTTTTTTTTTTCTTT

>M6-PGSC0003DMG400004384M6LRR-RLP\_610

CTGGCTCCGCAGTTGACCTCATTGTGGCTAATATAGATAGATTTTGTGTAATCTTTTTTATTTTTTGTGT

CTAGTGTAGAGTTGTGCAGATAAGCAACTGTGTGTTCTGTGTCCGAG

>M6-PGSC0003DMG400004384M6LRR-RLP\_671

ATTTTTTGTGTCTAGTGTAGAGTTGTGCAGATAAGCAACTGTGTGTTCTGTGTCCGAGTGATTTTTGTT

GCTCGGAGGAGAGTCATTTTCATATCAAAAAGCTGGCGATTTCTGTGTGAGA

>M6-PGSC0003DMG400004384M6LRR-RLP\_732

ATTTTTGTTGCTCGGAGGAGAGTCATTTTCATATCAAAAAGCTGGCGATTTTCGTGTGAGAATTTGTTTCAGA  
ATCCTGGCTGTTGGCAAGAAATGAGGCGTAGATGGAACATTTATGGAATC

>M6-PGSC0003DMG400004384M6LRR-RLP\_793

TTGTTTCAGAATCCTGGCTGTTGGCAAGAAATGAGGCGTAGATGGAACATTTATGGAATCAAGTTATTGC  
TTCTCACCATTTTAATTCTTCTTTTGGAGGTTTCATGAATGTTGCACTCTGA

>M6-PGSC0003DMG400004384M6LRR-RLP\_854

GTTATTGCTTCTCACCATTTTAATTCTTCTTTTGGAGGTTTCATGAATGTTGCACTCTGAATTCTGAAGGTA  
GTTACTATTCTCTAGTTTCTTTCTTTTCTTACTTCTGGAGGACCATAGT

>M6-PGSC0003DMG400004396-(rev)M6L-LecRK\_0

ACATTTCTCTAACTATGGCTGTTTTTGCATATTTACATACCTTATTTTGATAATCCCCTTTGTCACCTTCATT  
GTCCTTCAATTTTGATAGTTTCAATCCCAATGATATGAATGTAACAT

>M6-PGSC0003DMG400004396-(rev)M6L-LecRK\_1008

TGAATTTGAAAGAAACACAGGACCAAAGAGTTTTTGTACGGTGAGTTGGCTAGATGTACAAATAACTTT  
TCGCCGGAAGAGATGCTTGGGCATGGTGGGTTTCGGAGGTGTTTATAAAGGA

>M6-PGSC0003DMG400004396-(rev)M6L-LecRK\_1071

AACTTTTCGCCGGAAGAGATGCTTGGGCATGGTGGGTTTCGGAGGTGTTTATAAAGGATATCTCAGGGA  
ATATGACTCCTATATTGTTGTTAAGAGGATTTCAAGGGAGTCAAAGCAAGGA

>M6-PGSC0003DMG400004396-(rev)M6L-LecRK\_1134

AGGGAATATGACTCCTATATTGTTGTTAAGAGGATTTCAAGGGAGTCAAAGCAAGGAATAAAGAGATAT  
GCATCAGAAGTCAGGATTATCAGCCGGTTAAAGACATAAACATTTGGTGCA

>M6-PGSC0003DMG400004396-(rev)M6L-LecRK\_1197

GAGTATGCATCAGAAGTCAGGATTATCAGCCGGTTAAAGACATAAACATTTGGTGCAACTCATTGGTTG  
GTGCCATCAAAAAAGAGAACTTCTACTTGTCTATGAGTTTATGCCTAATGG

>M6-PGSC0003DMG400004396-(rev)M6L-LecRK\_126

CAGATGCTTCTCCAGCAAACGGTGTAAATTCAGCTCACCAAAAACCAGCTTGATAGTAGTGAAAGCTTTAG  
CGTAGGCCGAGCTACATATTCTAAAGAACTCTATCTTGGGACAAGGCCTC

>M6-PGSC0003DMG400004396-(rev)M6L-LecRK\_1260

TGGTTGGTGCCATCAAAAAAGAGAACTTCTACTTGTCTATGAGTTTATGCCTAATGGAAGCTTAGATCAT  
CATCTTTTCAAGGGAAAAAGCCATTTGACATGGCCAATAAGATTCAAGAT

>M6-PGSC0003DMG400004396-(rev)M6L-LecRK\_1449

CATAAAGTCGAGCAATATTATGTTGGATTCCAATTTCAATGCTAAACTTGGGGAAAGCTTTGGCAGGCAC  
GATGGGTTACATGGCTCCTGAATGTCTCACCACTGGCAAAGCTAGCAAGG

>M6-PGSC0003DMG400004396-(rev)M6L-LecRK\_1575

ACTTCTATAGCTTTGGTGTGTCGCGTTAGAAATAGTTTGTGGAAGGAAACCTATTGATCCTAAATCTGA  
GGAGCATCAAGTAAATATTATCGAATGGGCTTGGAGACTTTACGGGATGG

>M6-PGSC0003DMG400004396-(rev)M6L-LecRK\_1638

AATCTGAGGAGCATCAAGTAAATATTATCGAATGGGCTTGGAGACTTTACGGGATGGGAAATCTTAGTG  
AAGCAGTTGATCCTAGACTCTCATCAGAGTTGAATGAACAGGAGGTGGAGC

>M6-PGSC0003DMG400004396-(rev)M6L-LecRK\_1701

TTAGTGAAGCAGTTGATCCTAGACTCTCATCAGAGTTGAATGAACAGGAGGTGGAGCACTTGCTAATTG  
TTGGCTTATGGTGTGCTCGATCATCCAGATAACAATTGCAGACCTTCTATT

>M6-PGSC0003DMG400004396-(rev)M6L-LecRK\_189

GCTTTAGCGTAGGCCGAGCTACATATTCTAAAGAACTCTATCTTGGGACAAGGCCTCTGGGAAAGTCAC  
AGATTTCTCTACGCACTTCTCCTTTGAGATCAATTCACAGGGCAGAAATTA

>M6-PGSC0003DMG400004396-(rev)M6L-LecRK\_1890

ATATATTGCAGTTATGAATCAATTACTTCACTTGCATCACCATACGACTCCAATGGTCCTCAGATTTCTGA  
AATAAACTCTTCAGTGACTAGAGATCATTGACACAGCAGCATCTTCGC

>M6-PGSC0003DMG400004396-(rev)M6L-LecRK\_1953

ATTTCTGAAATAAACTCTTCAGTGACTAGAGATCATTGACACAGCAGCATCTTCGCCTTCCGCATCACTT  
CTGTACACACGTTGATATTGTCTTGTAAGGAACTGGTTTTTTATTTCC

>M6-PGSC0003DMG400004396-(rev)M6L-LecRK\_2003

TCTTCGCCTTCCGCATCACTTCTGTACACACGTTGATATTGTCTTGTAAGGAACTGGTTTTTTATTTCCCT  
GCAGTGTCCAACCTTTGCTCTTCGTATTCTTTATTATTTATACTGTTA

>M6-PGSC0003DMG400004396-(rev)M6L-LecRK\_315

TGATGGTCTTGCCTTCTCCTCGCTCCTGCAGGTTAGTAATTCCTGAAAAATACTCAGCTGCAGGAGAG  
GGCCTTGGCCTTGCAATTGATAATGGACTAAATACATCGAGAAATCAGCC

>M6-PGSC0003DMG400004396-(rev)M6L-LecRK\_378

AGGAGAGGGCCTTGGCCTTGCAATTGATAATGGACTAAATACATCGAGAAATCAGCCTTTTGTGCTGT

CGAGTTTGACACCTTTTAGAACGCTTATGATCCACCAGGTGATCATGTAGG

>M6-PGSC0003DMG400004396-(rev)M6L-LecRK\_441

TGCTGTCGAGTTTGACACCTTTTAGAACGCTTATGATCCACCAGGTGATCATGTAGGCGTTGATATCAAC

TCCATGTTATCTCTTGTTAATGTGGCCTGGCTTAGTAGAATCCCTATGG

>M6-PGSC0003DMG400004396-(rev)M6L-LecRK\_504

TATCAACTCCATGTTATCTCTTGTTAATGTGGCCTGGCTTAGTAGAATCCCTATGGTACGAAAACCTGATG

CCTGGATTACTTATAATTCAACCTCAAGAAATCCTAGTGTTGTCTTCAC

>M6-PGSC0003DMG400004396-(rev)M6L-LecRK\_567

AACTGATGCCTGGATTACTTATAATTCAACCTCAAGAAATCCTAGTGTTGTCTTCACCGGTTTCAGACAAC

AAGGGAATACCACAGTCACTGTCCTGCAGAACCTATCTTACAATCTTGA

>M6-PGSC0003DMG400004396-(rev)M6L-LecRK\_63

TCACTTCATTGTCCTTCAATTTTGATAGTTTCAATCCCAATGATATGAATGTAACATATGAAGCAGATGCT

TCTCCAGCAAACGGTGTAATTCAGCTCACCAAAAACCAGCTTGATAGTA

>M6-PGSC0003DMG400004396-(rev)M6L-LecRK\_693

GGAATATTTGCCAGAATGGGTAACTTTTGGTTTCTCAGGTGCAACAGGAACCTTCTTTGCAATACAAAAC

ATATATTCTTGGAATTTACTTCTTCTTTAAAATATAGTGACAGCATAAC

>M6-PGSC0003DMG400004396-(rev)M6L-LecRK\_756

ACAAAACATATATTCTTGGAATTTACTTCTTCTTTAAAATATAGTGACAGCATAACAGATCCAGATGTAC

CCCAACCAAGCCCTGTGCCAGAAGATACTTCAAGCAAAAAGAAGTCAGG

>M6-PGSC0003DMG400004396-(rev)M6L-LecRK\_882

GATTGGATTGATTTCTGGTGGTTGTGTTTCGGTAGCAGTATCTGTTTTTATATTGTTTGCATTTTGGAGAA

AGAGGAAGGTCAGAGAAGATGAAGATGATGATATTATTGATGGTTCCAT

>M6-PGSC0003DMG400004396-(rev)M6L-LecRK\_945

TTGGAGAAAGAGGAAGGTCAGAGAAGATGAAGATGATGATATTATTGATGGTTCCATGACTAATGAAT

TTGAAAGAAACACAGGACCAAAGAGTTTTTGTACGGTGAGTTGGCTAGATGT

>M6-PGSC0003DMG400004397-(rev)M6L-LecRK\_1364

ATTGCTCAAGGCTTGGCCTCAGCGTTGTTTTATCTACACGAAGAATGGGAACAATGTGTGGTGCATAGG

GACATAAAGTCGAGCAATATTATGTTGGATTCCAATTTCAATGCTAAACTT

>M6-PGSC0003DMG400004401M6L-LecRK\_0

TCTCTCAAATACTTGCTTCTTATCATAATTATCCCTCTAGTCACTTCACTCTCCTTCAATTTTGATACTTTTA  
CACCCAATGATCACAAATGTAACCTATGAGAGAGATGCTTCTCCAGAA

>M6-PGSC0003DMG400004401M6L-LecRK\_1054

TGCTTGGGCGGGGTGGATTGCGAGGTGTTTATAAAGGATATCTCAGTGAATCCAACCTTATATTGCTG  
TTAAGAGGGTTTCAAGGGAATCACAGCAAGGAATAAAGAGTATGTATCAG

>M6-PGSC0003DMG400004401M6L-LecRK\_124

GTGCAATTCTACTCACCAAAAACCTCCTCAATCGCGATATTAATGCTAGTATAGGTCGAGCTATATATTCA  
AAACCACTGCATCTATGGGACAAGGCCTCTAGAAATCTCACTGATTTCA

>M6-PGSC0003DMG400004401M6L-LecRK\_1302

AAGGGAAAAAGCCATTTGACATGGCCAATAAGATTCAAGATTGCTCAAGGTTTGGCCTCGGCGTTGCTA  
TATCTACACGAAGAATGGGAACAATGTGTGGTGCATAGGGATATAAAGTCT

>M6-PGSC0003DMG400004401M6L-LecRK\_1364

GTTGCTATATCTACACGAAGAATGGGAACAATGTGTGGTGCATAGGGATATAAAGTCTAGCAATATTAT  
GTTGGATTCTAATTTCAATGCCAAGCTTGGGGATTTTGGGTTAGCTAGGCT

>M6-PGSC0003DMG400004401M6L-LecRK\_1550

ATGTGTCACCACTGGCAAAGCTAACAAGGAAACAGACGTCTATAGCTTTGGTATAGTCGTGTTAGAAAT  
AGGTTGTGGAAGGAAACCTATTGATCCTAAAGCAGAGGAGCATCGAGTAAA

>M6-PGSC0003DMG400004401M6L-LecRK\_1612

TAGAAATAGGTTGTGGAAGGAAACCTATTGATCCTAAAGCAGAGGAGCATCGAGTAAACATTGTCGATT  
GGGTTTGGAGACTTTATGGGATGAGAAGTATTCTTGAAGCAGTTGATCCGA

>M6-PGSC0003DMG400004401M6L-LecRK\_1674

GTCGATTGGGTTTGGAGACTTTATGGGATGAGAAGTATTCTTGAAGCAGTTGATCCGAAACTATCATCA  
GAGTTCAATGAAGAGGAGATGGAGCATTTGCTAGTTGTTGGCTTATGGTGT

>M6-PGSC0003DMG400004401M6L-LecRK\_1736

ATCATCAGAGTTCAATGAAGAGGAGATGGAGCATTTGCTAGTTGTTGGCTTATGGTGTGCTCATCCAGA  
TAATAATTGCAGGCCTTCTATTAGGCAAGCAGTTCAGGTGCTTAATTTTGA

>M6-PGSC0003DMG400004401M6L-LecRK\_1798

ATCCAGATAATAATTGCAGGCCTTCTATTAGGCAAGCAGTTCAGGTGCTTAATTTTGAAGCTCCATTACC  
CACTCTCCCTCGGAACATGCCTGTGCCACATATTGCAGCTTCTCACGCC



>M6-PGSC0003DMG400004401M6L-LecRK\_186

ATATATTCAAACCACTGCATCTATGGGACAAGGCCTCTAGAAATCTCACTGATTTCACTACACATTTCTC  
CTTTAGCATTAAATTCACAGGGAATAACAAAATATGGAGATGGTTTTGCC

>M6-PGSC0003DMG400004401M6L-LecRK\_1922

ACCAACTATTTTCAGTTTCATCAACACATGAAACCAGCGGTACAGAGATTGCCCTTACCCAAATCCAGCAT  
TCAGTAAACGGAAACACCACTGATGGTTCAATAAAAAGAACATCTTCTTC

>M6-PGSC0003DMG400004401M6L-LecRK\_2046

TCTTCATCTTCAACATCAGTTTTGTATCCAAGTTAATATTGCCCTGTTATAACCCTGCATTTTGTCTTCCATT  
AGCAGTGTCCATCTTTTCCTTTCTTACTTTTTGCTGTTTCTTCTTA

>M6-PGSC0003DMG400004401M6L-LecRK\_2100

CTGCATTTTGTCTTCCATTAGCAGTGTCCATCTTTTCCTTTCTTACTTTTTGCTGTTTCTTCTTAATGAAGA  
GGATTCTTTGGATTACATTTCTGTAATTTAACTGTTCTATTAAC

>M6-PGSC0003DMG400004401M6L-LecRK\_248

ACATTTCTCCTTTAGCATTAAATTCACAGGGAATAACAAAATATGGAGATGGTTTTGCCTTCTTCCTTGCCC  
CTGCAGGTTCAACAATTCCTTATAATACAACAAGAGGTGGAAGTCTTGG

>M6-PGSC0003DMG400004401M6L-LecRK\_310

TCCTTGCCCCTGCAGGTTCAACAATTCCTTATAATACAACAAGAGGTGGAAGTCTTGGCCTTACAAGTAA  
TAATGAGCGACTAAATTCTTCGAGCAATCATTTTGTGCTGTGGAGTTTG

>M6-PGSC0003DMG400004401M6L-LecRK\_372

ACAAGTAATAATGAGCGACTAAATTCTTCGAGCAATCATTTTGTGCTGTGGAGTTTGACACCTATCAGA  
ACCCCTATGACCCAAAGGGTGATCATGTAGGTGTCGATATCAACTCTATG

>M6-PGSC0003DMG400004401M6L-LecRK\_496

CTGTTGTTAATGTGACTTGGTTTAGTAGCATTCCAAATGGTACGAAAACCTGATGCCTGGATCAGTTATAA  
TTCTAACTCAAAAATCTTACTGCTGTCTTCACTGGTTTTCAACTCCAAG

>M6-PGSC0003DMG400004401M6L-LecRK\_558

AGTTATAATTCTAACTCAAAAATCTTACTGCTGTCTTCACTGGTTTTCAACTCCAAGGGAACAATATCAC  
AGTCACTGTCCTGCAGAACCTATCTTACAATCTTGATCTGAGGGAATAT

>M6-PGSC0003DMG400004401M6L-LecRK\_62

TGATACTTTTACACCCAATGATCACAATGTAACCTATGAGAGAGATGCTTCTCCAGAAAATGGTGCAATT

CTACTCACCAAAAACCTCCTCAATCGCGATATTAATGCTAGTATAGGTCTG

>M6-PGSC0003DMG400004401M6L-LecRK\_682

CAGAATGGGTCACTTTTGGCTTCACTGGTGGAGCGGGAAGGAGATTTGCATTTCAAAGAATCTATTCTT  
GGAATTTTACTTCTTCTTTAGATAATACGACAGATACAGGGGTAACCTTAA

>M6-PGSC0003DMG400004401M6L-LecRK\_744

TATTCTTGGAATTTTACTTCTTCTTTAGATAATACGACAGATACAGGGGTAACCTTAACAAACACCATGCC  
AAAGGATGCACCAACAAAACTAAGTTAGGACTTGTGGTTGGATTGATT

>M6-PGSC0003DMG400004401M6L-LecRK\_806

CACCATGCCAAAGGATGCACCAACAAAACTAAGTTAGGACTTGTGGTTGGATTGATTTCTGGTGGTTG  
TGTTTTGGTTGCAGTATGTGCTTTGGTGTATTTCATTTTGGAGAAAGAG

>M6-PGSC0003DMG400004401M6L-LecRK\_868

GTGGTTGTGTTTTGGTTGCAGTATGTGCTTTGGTGTATTTCATTTTGGAGAAAGAGTAAGGTGAGAG  
AAGATGATTATGTCTTTGATGGTCCATGACTAATGAATTTCAAAAAAGTG

>M6-PGSC0003DMG400004401M6L-LecRK\_930

GTGAGAGAAGATGATTATGTCTTTGATGGTCCATGACTAATGAATTTCAAAAAAGTGCAGGACCAAAG  
AAGTTCTGTACAGTGAGTTGGCTAGATGTACAAATAACTTTTCACAGGAA

>M6-PGSC0003DMG400004401M6L-LecRK\_992

ACCAAAGAAGTTCTTGTACAGTGAGTTGGCTAGATGTACAAATAACTTTTCACAGGAAGAGATGCTTGG  
GCGGGGTGGATTCGGAGGTGTTATAAAGGATATCTCAGTGAATCCAACCC

>M6-PGSC0003DMG400004529-(rev)M6LRR-RLP\_198

CATTCAAGTTAAATTTCTTCTTGCTTCGAAAAGGTAAAGTAAATTTTAATATATTCTTTATATTTACACTT  
TTTTATTTTCGATTGTTAGTTCTGATTTTAAATTTCTTTCACAATTTTT

>M6-PGSC0003DMG400004529-(rev)M6LRR-RLP\_264

ACACTTTTTTATTTTCGATTGTTAGTTCTGATTTTAAATTTCTTTCACAATTTTTATGTATAAATATTAGGGTT  
ATGACAAAATCCGAGTTGAATAAGTTGTGTATGGAGCTAGGTGAAGG

>M6-PGSC0003DMG400004529-(rev)M6LRR-RLP\_330

TAGGGTTATGACAAAATCCGAGTTGAATAAGTTGTGTATGGAGCTAGGTGAAGGATGTCCTTGCTGAG  
GGATATTGTGTTGTCTCACTGTCGTCAAATAACAGATGTAGGGTTAAGTTA

>M6-PGSC0003DMG400004529-(rev)M6LRR-RLP\_527

CGGTGATTACGAGCTGCACAAATTTAAAGAAAGTCCTTGTAGAGAAGTGGAAAGTGAGTCCAAGAACC  
AAAAGGAGAGCAGGATCCATCATCTCCTATCTCTGTGTTGATCTGTAGATCT

>M6-PGSC0003DMG400004529-(rev)M6LRR-RLP\_66

ACACTGACCAATAAAAATTGGCCACGTGTTAAAATAAACTTTATTGTTGTTTATTGTTCTTCATCTTTAACT  
AAGTTTTCTTCTTCTTTATTGTTCTTGATCTTTAGAAAAAAAAACCTC

>M6-PGSC0003DMG400004553M6RLKWAX-EGF\_0

ATCCAGATATCAGTAATTGGCTGCTTCTGTTTTTCATGTGTAAGCTCCTATATATCCCTTTAGCAATCTATA  
TGTTATTTGGATGGACACAGATTAACATTTTCATTGATCATGTGTTTTA

>M6-PGSC0003DMG400004553M6RLKWAX-EGF\_1054

ATGGCTAGAAAGCTGAGTTTAGTTGCATTATGGTGTATACAAACAAATCCGATTCAACGCCCTTCAATGA  
GTAAAGTGGTAGAAATGCTTGAAGGTGAAGTTGGAGTGCTAGAAGTACCT

>M6-PGSC0003DMG400004553M6RLKWAX-EGF\_1116

TTCATGAGTAAAGTGGTAGAAATGCTTGAAGGTGAAGTTGGAGTGCTAGAAGTACCTCCTCAGCCTCT  
TCAATCTCAACCAATTGTTTCATCAGATCATGGGAAGTTCTACAACATTTTC

>M6-PGSC0003DMG400004553M6RLKWAX-EGF\_1178

AGCCTCTTCAATCTCAACCAATTGTTTCATCAGATCATGGGAAGTTCTACAACATTTTCGTCTGATTCAATA  
GCTTTGTTAGATAATCCCGTTGAGGTAGACATTTATGCTGATTGATTAT

>M6-PGSC0003DMG400004553M6RLKWAX-EGF\_1240

GATTCAATAGCTTTGTTAGATAATCCCGTTGAGGTAGACATTTATGCTGATTGATTATAGTCGATGTAAT  
GTTTATGTGAAATAAACATAGCCAACCAATAATGTTTGGGACAAAGAAT

>M6-PGSC0003DMG400004553M6RLKWAX-EGF\_186

CCTTCCACTGGTAATTGCATTTCTGGTGTACAAATTCAAAAGGAGGCATTTATCAATGTACGATACGATT  
GAAGGCTTTTTGCAAACACAAAACAATTTTCATGCCAATCAGATACAATTA

>M6-PGSC0003DMG400004553M6RLKWAX-EGF\_248

ATACGATTGAAGGCTTTTTGCAAACACAAAACAATTTTCATGCCAATCAGATACAATTAATCAACATAAA  
GAGAATGACAAGAGGATTCAAAGAGAAATTAGGAGAGGGGGTTACGGAA

>M6-PGSC0003DMG400004553M6RLKWAX-EGF\_496

GTTGGACTCGTGCGGTATTGCGTTGAGGGAACAAAGCTTGCTCTTGTATACGACTTCATGCCAACGGA  
TCACTTGATAAGTACATCAGCACGAGTCAAGAAGGAAGTCCTCCGTTAAGT

>M6-PGSC0003DMG400004553M6RLKWAX-EGF\_62

GCAATCTATATGTTATTTGGATGGACACAGATTAACATTTTCATTGATCATGTGTTTTATCATCTCTATGGT  
TCGTTATAACTTCTCAAACGTGCAGTGCATTTGGGAGCAAATTTGTAA

>M6-PGSC0003DMG400004553M6RLKWAX-EGF\_868

GCAATCTCGTACAAAGCTGATGTTTACAGCTTCGGAATGCTGCTAATGGAAATGTTGGACTTGAAGAGA  
AATGAAGTTGCAAATGAAGAGAATTCCAGCCAATACTTTCCTTATAATATT

>M6-PGSC0003DMG400004553M6RLKWAX-EGF\_930

GAAGAGAAATGAAGTTGCAAATGAAGAGAATTCCAGCCAATACTTTCCTTATAATATTTACGATAAGTTC  
AACCAGGGGAAAGAGATTGTGGTGGATGAAGGAGCGAATGATGATGAAAA

>M6-PGSC0003DMG400004553M6RLKWAX-EGF\_992

ATAAGTTCAACCAGGGGAAAGAGATTGTGGTGGATGAAGGAGCGAATGATGATGAAAAGAAGATGGC  
TAGAAAGCTGAGTTTAGTTGCATTATGGTGTATACAAACAAATCCGATTCAAC

>M6-PGSC0003DMG400004561M6LRR-RLP\_0

GTTTGATGTAAATTGTTTCTTCTGAGAAGTTGAAAGGAAGGATTTTTTTTTATTTTTTTTTATTTTTTAACTA  
CTTTGGCTTGATTAGTGAGAATAGAAAGAGGAAAAGAAAATGAAGGGC

>M6-PGSC0003DMG400004561M6LRR-RLP\_1054

TAAGAGATTTCCATAGGTTGAAAGTAAATGGTTGTGTTGAGTATGAAACAATCGAATATGTCTTACCTCA  
TCTTCAACTTATGGCTCTGAGAGTAGTAACTTCTGATTTACTCTTTTGA

>M6-PGSC0003DMG400004561M6LRR-RLP\_1116

TTACCTCATCTTCAACTTATGGCTCTGAGAGTAGTAACTTCTGATTTACTCTTTTGAATAGTCAACTGGA  
CAAATTCGATGAATCGGATGTCTTTCTGGTTAACTCCAAGCTAGCTAAT

>M6-PGSC0003DMG400004561M6LRR-RLP\_1178

TCAACTGGACAAATTCGATGAATCGGATGTCTTTCTGGTTAACTCCAAGCTAGCTAATACACTTGTGGAG  
GTTATTCTGTTGAACTGGAGGATATGCACATATGTTGAACAAATTTGAA

>M6-PGSC0003DMG400004561M6LRR-RLP\_124

AAAAGGGGTTTCATTCACATAATTACATATTCTTGTAAGTAAGTTTGTTACTTTATGTAAGTTAGATGGTGA  
ATATAATCTTTATAACCTATAAGAATTGATGATTTAATCTTTCTGCTAT

>M6-PGSC0003DMG400004561M6LRR-RLP\_1364

TAGAGTATCTCTGATTCATCTACAAGAGCACATGGCTAATGCTGGTATTCTAGCGCATCTACGTGTAAC

ATTCATGTCATGACAGAGTTCCTATTGATTATTCTTCCTGATGTGCCCAA

>M6-PGSC0003DMG400004561M6LRR-RLP\_1426

CGTGTAACATTCATGTCATGACAGAGTTCCTATTGATTATTCTTCCTGATGTGCCCAAGGACATTATTCGT  
CAAGACAAATTGTTTGTCTCTTGGCACGTGTTAGAGAACTTACCAAGG

>M6-PGSC0003DMG400004561M6LRR-RLP\_1488

ATTATTCGTCAAGACAAATTGTTTGTCTCTTGGCACGTGTTAGAGAACTTACCAAGGAGGTATTCGTTCT  
TGTTGCAACTTAGAAGAGAATATGAATGACGCAAGTGATGCAAATCTA

>M6-PGSC0003DMG400004561M6LRR-RLP\_1550

ATTCGTTCTTGTTGCAACTTAGAAGAGAATATGAATGACGCAAGTGATGCAAATCTAACTTGCTGGAA  
AATATTGAACTCCTGAAGGAAGATCTCAAGAATGTTTTCTTGAAAGCCCG

>M6-PGSC0003DMG400004561M6LRR-RLP\_1674

GACTCATCTCGTCTTTGCTTCCCATGAGTGATGGACCGCTTTCATGACTCTTCTGCTTACAACTTGAA  
AGACTTTGTCGATTCCAATGCTTATTCAGTTACTTTGATAAAAAGAAGAA

>M6-PGSC0003DMG400004561M6LRR-RLP\_1736

AACTTGAAAGACTTTGTCGATTCCAATGCTTATTCAGTTACTTTGATAAAAAGAAGAAATTAAGCAGGTG  
AAAGAAGACCTGGAAATCATAAGATCGTTCTTCGGGTATGCTGAGCAAGA

>M6-PGSC0003DMG400004561M6LRR-RLP\_1798

AGCAGGTGAAAGAAGACCTGGAAATCATAAGATCGTTCTTCGGGTATGCTGAGCAAGAGTTGAACAGA  
GATCTTTGGACTCATGTTCTAGATTTGGCATATGAGGCGGAACATGCCATTA

>M6-PGSC0003DMG400004561M6LRR-RLP\_186

AGATGGTGAATATAATCTTTATAACCTATAAGAATTGATGATTTAATCTTTCTGCTATAAGTTAACTCTA  
TGTAATAATCATCTGCTATAGTTGATAAATGTAAGGGGTAAAGAACTA

>M6-PGSC0003DMG400004561M6LRR-RLP\_1860

AACAGAGATCTTTGGACTCATGTTCTAGATTTGGCATATGAGGCGGAACATGCCATTA ACTCAATTCTTG  
CCCGGATCATGGTCTATTATAGCTTATCTTCATACTTCTGATACTGTA

>M6-PGSC0003DMG400004561M6LRR-RLP\_1922

AATTCTTGCCCGGATCATGGTCTATTATAGCTTATCTTCATACTTCTGATACTGTAGAAAAGATCAAGC  
TTGTCAAAAAGAGGTACAAGAGAAGATCCCCAAGAGCAGCGGTATTAT

>M6-PGSC0003DMG400004561M6LRR-RLP\_2170

ATGCCATTTCCATAGTCGGCATGCCAGGGCTTGGAAAACTACTTTGGCATACAGAGTGTATAATGATA  
AGTTCATTGTTGATCATTTGACGTTTGTGCTTGATGCACAGTCGACCAGG

>M6-PGSC0003DMG400004561M6LRR-RLP\_2232

AATGATAAGTTCATTGTTGATCATTTGACGTTTGTGCTTGATGCACAGTCGACCAGGAACGTAATGCGA  
AAAAGTTGTGGCAGAAAATTTCAATCAAGTATTGGTTTGACAGAAAGA

>M6-PGSC0003DMG400004561M6LRR-RLP\_2294

TAATGCGAAAAAGTTGTGGCAGAAAATTTCAATCAAGTATTGGTTTGACAGAAAGATTCAGTGAGAA  
TGACATAGATGATGACGTTGGTTATAAGCTGCGGAAACAACACTATTTGCAAA

>M6-PGSC0003DMG400004561M6LRR-RLP\_2332

TTATTGGTTTGACAGAAAGATTCAGTGAGAATGACATAGATGATGACGTTGGTTATAAGCTGCGGAAAC  
AACTATTTGCAAAACGGTACCTTATTGTCTTGGATGACATGTGGGATACTG

>M6-PGSC0003DMG400004561M6LRR-RLP\_248

TAAACTCTATGTACTAAATCATCTGCTATAGTTGATAAATGTAAGGGGTTAAGAACTAGGAAAGTAAGA  
GCTTTTGTAGAGAGATAGCGCGTAAACAATGAGAGAGCTTAGTGACCA

>M6-PGSC0003DMG400004561M6LRR-RLP\_310

AGTAAGAGCTTTTGTAGAGAGATAGCGCGTAAACAATGAGAGAGCTTAGTGACACCAGGAGGCTGTC  
ATTTTTGGTTAAGATTTGAGGTGTAACAGGACAAACATTTGGCTTCTCTA

>M6-PGSC0003DMG400004561M6LRR-RLP\_372

GCTGTCATTTTTGGTTAAGATTTGAGGTGTAACAGGACAAACATTTGGCTTCTCTATTAGGTTATTCTG  
GAGAAAGTCCTCTGCACCTTGACAGTTGCTTGTGTAATAAAGAGC

>M6-PGSC0003DMG400004561M6LRR-RLP\_434

GTTATTCTGGAGAAAGTCCTCTGCACCTTGACAGTTGCTTGTGTAATAAAGAGCTATCACATTTTCG  
AGAGTTTTACACCTCAACTATATTAGTCGTTCCCTTTTCTATCTAAAT

>M6-PGSC0003DMG400004561M6LRR-RLP\_496

ACATTTTCGAGAGTTTTACACCTCAACTATATTAGTCGTTCCCTTTTCTATCTAAATTTGAAACAACATTT  
GCTCTTTGGTAGGTGTCATCCGTTGACTTCGTGAGGACATTGTCAA

>M6-PGSC0003DMG400004561M6LRR-RLP\_558

AACAACATTTGCTCTTTGGTAGGTGTCATCCGTTGACTTCGTGAGGACATTGTCAATCTTCTAGATTT  
ATAGAGATGTTAAATAGTGGGCGTGTCAAACCTCTTTTGACATGGATC

>M6-PGSC0003DMG400004561M6LRR-RLP\_62

TTTTAACTACTTTGGCTTGATTAGTGAGAATAGAAAGAGGAAAAGAAAATGAAGGGCAAACAAAAGG  
GGTTCATTACATAATTACATATTCTTGTAAGTAAGTTTGTACTTTATGTA

>M6-PGSC0003DMG400004561M6LRR-RLP\_620

CTAGATTCATAGAGATGTTAAATAGTGGGCGTGTTCAAACCTCTTTTGACATGGATCAAATTGAAAAGT  
TGACATTGGAGCTGACGTTTGTGTCCGCATTTTGTATCTTTATTACTTT

>M6-PGSC0003DMG400004561M6LRR-RLP\_682

TGAAAAGTTGACATTGGAGCTGACGTTTGTGTCCGCATTTTGTATCTTTATTACTTTCTTTTTGGAAAGT  
TGTAATGACGAAATGTCCTGCATATCAAATGAGATTCATGATTTGGTTC

>M6-PGSC0003DMG400004561M6LRR-RLP\_744

TTGGAAAGTTGTAATGACGAAATGTCCTGCATATCAAATGAGATTCATGATTTGGTTCGGTCACTGTTTC  
ATCCAAGTGGAGAAGACATGCTGGTTAATATAAAGAATCATGACCTCTTG

>M6-PGSC0003DMG400004561M6LRR-RLP\_806

ACTGTTTCATCCAAGTGGAGAAGACATGCTGGTTAATATAAAGAATCATGACCTCTTGGAGAATATCAAA  
AGTTATATTAECTCACATAGCTATGTTGAACCAAGTCGTGTAATCATGAC

>M6-PGSC0003DMG400004561M6LRR-RLP\_868

ATATCAAAAGTTATATTAECTCACATAGCTATGTTGAACCAAGTCGTGTAATCATGACCGAGGATCGTTT  
GGTTGAACTTTTAGATGCCATCCTCGTGTATCTCCAATGTCTACTCAACT

>M6-PGSC0003DMG400004561M6LRR-RLP\_930

GATCGTTTGGTTGAACTTTTAGATGCCATCCTCGTGTATCTCCAATGTCTACTCAACTGTAGTTCTGAATA  
TATTTTCCATTAGTGACTIONTGTGAGCTTCTTCAGAATGTATTTGGC

>M6-PGSC0003DMG400004561M6LRR-RLP\_992

TTCTGAATATATTTTCCATTAGTGACTIONTGTGAGCTTCTTCAGAATGTATTTGGCAATTTAAGAGATT  
TCCATAGTTGAAAGTAAATGGTTGTGTTGAGTATGAAACAATCGAATA

>M6-PGSC0003DMG400004667M6LRR-RLK\_0

ATCTAAAGCTGTCACTTAGCTTACTGCTGAAAACTCATAAACCCAAAATTTTCAACAAACAATACCAAA  
AAAAAAAAAAAAATATCTTCAAATTTTGAAGAATCATAGCAAAAAAAG

>M6-PGSC0003DMG400004667M6LRR-RLK\_1054

GTTGAATATATCTTTGCAAAACAATAAGTTGCAGGGTCCAATGCCACAGTTTGGACAGGGGATTAATT

GGAGATTGAGGGTACTAATAGTTTTGTTGGATACTCCTGGACCTTGTGA

>M6-PGSC0003DMG400004667M6LRR-RLK\_1116

TTAAATTGGAGATTGAGGGTACTAATAGTTTTGTTGGATACTCCTGGACCTTGTGATTCGCAGGTTAT  
GACGCTTTTAGATGTGGCGGGTGGTTTTGGATATCCGGGGTTTTGGCTG

>M6-PGSC0003DMG400004667M6LRR-RLK\_1178

CAGGTTATGACGCTTTTAGATGTGGCGGGTGGTTTTGGATATCCGGGGTTTTGGCTGATTCTTGGAAA  
GGAAATGATGCTTGAATGGATGGTCACATGTAAGTTGTGATGGATCGAAA

>M6-PGSC0003DMG400004667M6LRR-RLK\_1240

TTGGAAAGGAAATGATGCTTGAATGGATGGTCACATGTAAGTTGTGATGGATCGAAAAAGAATGTGG  
ATGTTGTAACATTTGGTAAGCTACGTTTATCGGGTTTTATATCTCCTGCTTT

>M6-PGSC0003DMG400004667M6LRR-RLK\_1302

ATGTGGATGTTGTAACATTTGGTAAGCTACGTTTATCGGGTTTTATATCTCCTGCTTTTGCTAATTTGACT  
AGTTTGAGGAATTTGTTATTGAATGATAACAATCTTACTGGATCTATAC

>M6-PGSC0003DMG400004667M6LRR-RLK\_1364

AATTTGACTAGTTTGAGGAATTTGTTATTGAATGATAACAATCTTACTGGATCTATACCGGAAAGCTTGG  
CAGCATTGCCTCTGCTTCAAACACTTGATGTTTCTAATAACAATTTATCT

>M6-PGSC0003DMG400004667M6LRR-RLK\_1426

AAGCTTGGCAGCATTGCCTCTGCTTCAAACACTTGATGTTTCTAATAACAATTTATCTGGTCCTGTACCTG  
CATTTGCATCAAATGTGAAGCTTATTAATGGTGGTAACGTGTTTCTTGG

>M6-PGSC0003DMG400004667M6LRR-RLK\_1488

CTGTACCTGCATTTGCATCAAATGTGAAGCTTATTAATGGTGGTAACGTGTTTCTTGGAAAGAATATTAG  
TGATGGAGGGGGTAGTGGTGGATCACCGGGGTCTGGGTGCGAGTAGTGATG

>M6-PGSC0003DMG400004667M6LRR-RLK\_1550

AATATTAGTGATGGAGGGGGTAGTGGTGGATCACCGGGGTCTGGGTGCGAGTAGTGATGGTGGAAATTC  
ATCTGGTGGTTCGAAGGGATCCTCAGTTCAACCTGGAGTGGTTGCTGGTGT

>M6-PGSC0003DMG400004667M6LRR-RLK\_1612

AAATTCATCTGGTGGTTCGAAGGGATCCTCAGTTCAACCTGGAGTGGTTGCTGGTGTGTTATATCTGTC  
GTTATATTTATCCTTGTGTGTGATGTGTCTTACAAATGTTACATAAG

>M6-PGSC0003DMG400004667M6LRR-RLK\_1674



TATCTGTCGTTATATTTATCCTTGTTGTGTGTATGTGTCTTACAAATGTTACATAAGGAGACGGCATAAG  
AGATTTGGAAGGGTTCAGAATCCGGAAAGAAGCAATGATATGGTTAAGC

>M6-PGSC0003DMG400004667M6LRR-RLK\_1736

CGGCATAAGAGATTTGGAAGGGTTCAGAATCCGGAAAGAAGCAATGATATGGTTAAGCCTGGTGTAGT  
GATAGGTAATGGATATGCAGGAGTCCCTAGTGAATTACAGAGCCAGAGCAGT

>M6-PGSC0003DMG400004667M6LRR-RLK\_1798

TGTAGTGATAGGTAATGGATATGCAGGAGTCCCTAGTGAATTACAGAGCCAGAGCAGTGGGGATCATA  
GTGAGATGCCGATATTTGAAGGTGGAAATGTTGCCATTTCTTTTCAGGTGCT

>M6-PGSC0003DMG400004667M6LRR-RLK\_186

TGATTGTTCTTAGATCTCTAAACCTCCATTAATGGCACCCCAAGCTTTTTTTTCTTGTTAACTTCTTCT  
CACCTTCATTTCAATCACATTTTCCGATGACAGCACGGTCATGTCAA

>M6-PGSC0003DMG400004667M6LRR-RLK\_1860

ATCATAGTGAGATGCCGATATTTGAAGGTGGAAATGTTGCCATTTCTTTTCAGGTGCTTCGACAAGTGAC  
AAACAACCTTCAGCGAAGAAAATATCTTGGGTAGAGGAGGATTTGGAGTCG

>M6-PGSC0003DMG400004667M6LRR-RLK\_1922

CAAGTGACAAACAACCTTCAGCGAAGAAAATATCTTGGGTAGAGGAGGATTTGGAGTCGTTTATAAGGG  
TGAATTACATGATGGGACTAAGATTGCTGTGAAGAGGATGGAATCTGGCGCG

>M6-PGSC0003DMG400004667M6LRR-RLK\_1984

TAAGGGTGAATTACATGATGGGACTAAGATTGCTGTGAAGAGGATGGAATCTGGCGCGATGGGTACTA  
AAGGAATGAATGAGTTCCAAGCTGAAATCGCGGTCCTTACCAAAGTTAGGCA

>M6-PGSC0003DMG400004667M6LRR-RLK\_2046

GTAATAAGGAATGAATGAGTTCCAAGCTGAAATCGCGGTCCTTACCAAAGTTAGGCATAGGCATCTGG  
TCGCTCTTCTGGTTCCTGTGTTAACGGCAATGAAAGACTTTTGGTGTATG

>M6-PGSC0003DMG400004667M6LRR-RLK\_2108

CATCTGGTCGCTCTTCTTGGTTCCTGTGTTAACGGCAATGAAAGACTTTTGGTGTATGAGTACATGCCAC  
AAGGAACCTTAAGTCAGCATTTGTTTGAATGGCAAGAACACGGGTGCCCA

>M6-PGSC0003DMG400004667M6LRR-RLK\_2170

CATGCCACAAGGAACCTTAAGTCAGCATTTGTTTGAATGGCAAGAACACGGGTGCCCAATTTTGACCTG  
GAAGCAAAGGGTCACAATAGCATTAGATGTTGCAAGGGGAGTCGAGTATCT

>M6-PGSC0003DMG400004667M6LRR-RLK\_2232

TGACCTGGAAGCAAAGGGTCACAATAGCATTAGATGTTGCAAGGGGAGTCGAGTATCTCCACAGCTTG  
GCACAGACAAGTTTTATCCATAGGGATTTGAAGCCCTCTAACATACTTCTTG

>M6-PGSC0003DMG400004667M6LRR-RLK\_2294

AGCTTGGCACAGACAAGTTTTATCCATAGGGATTTGAAGCCCTCTAACATACTTCTTGGGGATGACATGA  
GAGCCAAGGTTGCAGATTTTGGATTGGTTAAGAATGCCCCCGATGGGAAA

>M6-PGSC0003DMG400004667M6LRR-RLK\_2356

TGACATGAGAGCCAAGGTTGCAGATTTTGGATTGGTTAAGAATGCCCCCGATGGGAAATATTCTGTTGA  
GACACGGTTGGCTGGAACTTTTGGCTATCTGGCGCCTGAATATGCTGGTAA

>M6-PGSC0003DMG400004667M6LRR-RLK\_2418

CTGTTGAGACACGGTTGGCTGGAACTTTTGGCTATCTGGCGCCTGAATATGCTGGTAAGTCTGTCTTTCC  
TCTGCTGATCTTTAATCCTTTTAGTTGTAAACTGGTAGAAAACATAAAAC

>M6-PGSC0003DMG400004667M6LRR-RLK\_248

AACTTCTTCTTCACCTTCATTTCAATCACATTTCCGATGACAGCACGGTCATGTCAAATTTTCTGAAGGGT  
CTGTCTAAACCACCATCTGGTTGGGATGCTTCAAAGTCTTACTGTGAA

>M6-PGSC0003DMG400004667M6LRR-RLK\_2480

GTCTTTCTCTGCTGATCTTTAATCCTTTTAGTTGTAAACTGGTAGAAAACATAAAACAATATCCTATCATT  
AGCTTTCATGTTCTTTTTAATCTTCACTATATTAGAGATAAATGGAGA

>M6-PGSC0003DMG400004667M6LRR-RLK\_2542

TCCTATCATTAGCTTTCATGTTCTTTTTAATCTTCACTATATTAGAGATAAATGGAGAGGTGTTAGCTTCGT  
TGAAGGTCATTTCCATGTTCAAATGCTAGTTTGTAAATCTCGATCTGA

>M6-PGSC0003DMG400004667M6LRR-RLK\_2604

TTAGCTTCGTTGAAGGTCATTTCCATGTTCAAATGCTAGTTTGTAAATCTCGATCTGATTCAAGGATTGAT  
ACCGCAAACGTTGTCCAGTAAATTAATAATGTTAGCAAAAAAGAGTAC

>M6-PGSC0003DMG400004667M6LRR-RLK\_2666

AGGATTGATACCGCAAACGTTGTCCAGTAAATTAATAATGTTAGCAAAAAAGAGTACGATTTGAAAGA  
CAAACATAAGGTAGAAATCTAGAAGCCCACTCATCCGGTTTTCAAATTGAA

>M6-PGSC0003DMG400004667M6LRR-RLK\_2728

TGAAAGACAAACATAAGGTAGAAATCTAGAAGCCCACTCATCCGGTTTTCAAATTGAAATTCGGATGTT

GGTACAGCATGTGTGACTGATCCCATTGTATCTAAATAGAAATTTGGCTTT

>M6-PGSC0003DMG400004667M6LRR-RLK\_2790

GGATGTTGGTACAGCATGTGTGACTGATCCCATTGTATCTAAATAGAAATTTGGCTTTCAGAATATCACT  
CTTCTTCAAGACATTAAGTTCAACATATCTAGATTTAGTGTTGGCTGTCA

>M6-PGSC0003DMG400004667M6LRR-RLK\_2852

ATATCACTCTTCTTCAAGACATTAAGTTCAACATATCTAGATTTAGTGTTGGCTGTCAATAGTTTTCTGCTC  
GTAACATGTTTAATTTCTTTAGAGATCTTGTTCTGGCCTGTTTCTTG

>M6-PGSC0003DMG400004667M6LRR-RLK\_2914

TTTTCTGCTCGTAACATGTTTAATTTCTTTAGAGATCTTGTTCTGGCCTGTTTCTTGCATGTCTTAGCAAG  
GTTGTCTGTGATCATTATTAATTTGGATTAAACGTGACTGCTCCTCT

>M6-PGSC0003DMG400004667M6LRR-RLK\_2976

TCTTAGCAAGGTTGTCTGTGATCATTATTAATTTGGATTAAACGTGACTGCTCCTCTTTATTTACAGCTA  
CTGGACGAGTCACGACCAAAGTAGATGTGTATGCATTTGGAGTTGTTCT

>M6-PGSC0003DMG400004667M6LRR-RLK\_3038

TTACAGCTACTGGACGAGTCACGACCAAAGTAGATGTGTATGCATTTGGAGTTGTTCTAATGGAGATCA  
TCACTGGTAGAAAAGCATTAGATGAGACCTTGCCAGATGAGAGGTCTCATT

>M6-PGSC0003DMG400004667M6LRR-RLK\_310

TCTGAAGGGTCTGTCTAAACCACCATCTGGTTGGGATGCTTCAAAGTCTTACTGTGAATGGAGTAAAGTT  
ACTTGTGATAAATCGAGTAATACTGTTGTTTCCATTAATCTTGAATCTCA

>M6-PGSC0003DMG400004667M6LRR-RLK\_3100

GAGATCATCACTGGTAGAAAAGCATTAGATGAGACCTTGCCAGATGAGAGGTCTCATTTGGTCACCTGG  
CTTCGCAGGGTCTTGTCAACAAAGACAACCTCCGAAAGGCTATTGACCCA

>M6-PGSC0003DMG400004667M6LRR-RLK\_3162

CACCTGGCTTCGCAGGGTCTTGTCAACAAAGACAACCTCCGAAAGGCTATTGACCCAACTCTTGATCCT  
GATGAGGAAACATACGAGAGCATTTGTAAGGTCGCTGAGTTAGCAGGCCA

>M6-PGSC0003DMG400004667M6LRR-RLK\_3224

TTGATCCTGATGAGGAAACATACGAGAGCATTTGTAAGGTCGCTGAGTTAGCAGGCCATTGCACTGCAC  
GAGAACCATTCCAGCGCCCTGACATGGGACATGCAGTCAATGTCCTTGCCC

>M6-PGSC0003DMG400004667M6LRR-RLK\_3286

ACTGCACGAGAACCATTCCAGCGCCCTGACATGGGACATGCAGTCAATGTCCTTGCCCCCTCATAGAAC  
TGTGGAAGCCTACAAGAAATGAAGACGAAGACAGTGGCATCGACCTCAA

>M6-PGSC0003DMG400004667M6LRR-RLK\_3348

CATAGAACTGTGGAAGCCTACAAGAAATGAAGACGAAGACAGTGGCATCGACCTCCAAATGAGCCTTCC  
TCAAATCCTTCAAAGATGGCAAGCTGATGAAGGAACTTCAAGAATGTTCTGA

>M6-PGSC0003DMG400004667M6LRR-RLK\_3410

GCCTTCCTCAAATCCTTCAAAGATGGCAAGCTGATGAAGGAACTTCAAGAATGTTTCGATGACATCTCCTT  
CAGTCAAACACATTCAAGTATACCCTCGAAACCTTCTGGATTTGCAGATA

>M6-PGSC0003DMG400004667M6LRR-RLK\_3472

ATCTCCTTCAGTCAAACACATTCAAGTATACCCTCGAAACCTTCTGGATTTGCAGATACTTTCAATTCAAC  
AGATTGCAGATGACATTAAGGCAACAATCAAGAAAGGCACACAATTCAT

>M6-PGSC0003DMG400004667M6LRR-RLK\_3534

CAATTC AACAGATTGCAGATGACATTAAGGCAACAATCAAGAAAGGCACACAATTCATTTGGTTAATTG  
GTTTCGTCTTTAACAACGCTTTTTACTTCGTCTTTTCATAGCCCTTTTGGT

>M6-PGSC0003DMG400004667M6LRR-RLK\_3596

TTAATTGGTTTCGTCTTTAACAACGCTTTTTACTTCGTCTTTTCATAGCCCTTTTGGTGATAGATCATTAGA  
CCAAAGAAGCCAAGATGGATAGCAGAGTTTATTTATGTGGTTTTGTTA

>M6-PGSC0003DMG400004667M6LRR-RLK\_3658

GATCATTAGACCAAGAAGCCAAGATGGATAGCAGAGTTTATTTATGTGGTTTTGTTAGAAGAGAAAAA  
TTGTATTA AATTCTTTAATCTTACATAGTTGATGTAAATAGATTTGAGTT

>M6-PGSC0003DMG400004667M6LRR-RLK\_372

GTAAAGTTACTTGTGATAAATCGAGTAATACTGTTGTTCCATTAATCTTGAATCTCAAGGTCTTTCTGGG  
GTTTTGCCTCCTGAGCTTAATCAACTGTCAAATCTCAAACTCTTTCAG

>M6-PGSC0003DMG400004667M6LRR-RLK\_3720

AGAAAAATTGTATTA AATTCTTTAATCTTACATAGTTGATGTAAATAGATTTGAGTTCTTGTGTTAAACA  
TGCAAAATATACTCTTGAAGTTTTTTACTACAAGATTTTATTATTTGTG

>M6-PGSC0003DMG400004667M6LRR-RLK\_434

CTTTCTGGGGTTTTGCCTCCTGAGCTTAATCAACTGTCAAATCTCAAACTCTTTCAGTTCAGAGGAATTC  
GCTTTCTGGGATTCTTCCATCTTTCGCAAACATGTCTGAATTTAGCTGAG

>M6-PGSC0003DMG400004667M6LRR-RLK\_496

GAGGAATTCGCTTCTGGGATTCTCCATCTTCGCAAACATGTCGAATTTAGCTGAGATTTACTTGAATG  
ACAATGGATTACATCTGTTCTCAAGATTCCTTTTGGGTCTTACTAG

>M6-PGSC0003DMG400004667M6LRR-RLK\_558

ACTTGAATGACAATGGATTACATCTGTTCTCAAGATTCCTTTTGGGTCTTACTAGTTTGCAGACTTTT  
AGTATTAGTGAGAATGGGAAGTTGAGTCCTTGGCAAATTCCTAGTTATT

>M6-PGSC0003DMG400004667M6LRR-RLK\_620

CAGACTTTTAGTATTAGTGAGAATGGGAAGTTGAGTCCTTGGCAAATTCCTAGTTATTTGATTGATAGCA  
ACAATTTGGCTAATGTTTATGCTAGTAATGCTAGTTTGTGGTGTATA

>M6-PGSC0003DMG400004667M6LRR-RLK\_682

TGATAGCAACAATTTGGCTAATGTTTATGCTAGTAATGCTAGTTTGTGGTGTATACTGATTTTCTTG  
GTAAATCCCTAATCTTCAGGATTTGAGATTGTCTTATAATAATTTTAC

>M6-PGSC0003DMG400004667M6LRR-RLK\_744

ATTTTCTTGGTAAATCCCTAATCTTCAGGATTTGAGATTGTCTTATAATAATTTTACTGGTTCTTGCCTG  
CTAGTTTGGGGATTCTGAGATTAAGAATTTATGGCTGAATAATCAGG

>M6-PGSC0003DMG400004667M6LRR-RLK\_806

TCTTGCCTGCTAGTTTTGGGGATTCTGAGATTAAGAATTTATGGCTGAATAATCAGGGTAAAGGGTTAT  
CAGGAACTATTGATGTGATTTCAAGTATGGTTCAGTTGTCACAAGTGTGG

>M6-PGSC0003DMG400004667M6LRR-RLK\_868

AGGGTTATCAGGAACTATTGATGTGATTTCAAGTATGGTTCAGTTGTCACAAGTGTGGTTACATGCTAAT  
TCTTTTACTGGTCCTATACCCGATTTGTCGAAATGCGAAAATATATTTGA

>M6-PGSC0003DMG400004667M6LRR-RLK\_930

ATGCTAATCTTTTACTGGTCCTATACCCGATTTGTCGAAATGCGAAAATATATTTGATTTGCAGTTAAGG  
GATAATGATTTTACTGGTGTATACTGATTCGGTGATGAAACTTCCTA

>M6-PGSC0003DMG400004667M6LRR-RLK\_992

CAGTTAAGGGATAATGATTTTACTGGTGTATACTGATTCGGTGATGAAACTTCCTAAGTTGTTGAATA  
TATCTTTGCAAACAATAAGTTGCAGGGTCCAATGCCACAGTTTGGACAG

>M6-PGSC0003DMG400004722M6LRR-RLP\_0

TTCAAGAAAATGCTTACTGTAGATACCTCATTAGTTTGGTGTAGTTACTTTTACCACACACGAGTTCATGG

AACATAAGCAGAGATTGCTGCTCTTCGGATGGAGTCGTATGTGATGACA

>M6-PGSC0003DMG400004722M6LRR-RLP\_1054

AACTCTTGATGTCAGCTATATGAAATCTCAGTAGTCATATAGCTTTACCTAAACTCATCTCGATCTAGTAC

AAAGTATATTAGAGGTAATAATGTAGTCTAGAATTATTGTTCTATGACA

>M6-PGSC0003DMG400004722M6LRR-RLP\_1116

ATCTAGTACAAAGTATATTAGAGGTAATAATGTAGTCTAGAATTATTGTTCTATGACATAATTGTTGGATT

GGTCCACTAATTTAAAGGTGAGATTGAGAACCAAACATGTCCGCATCAT

>M6-PGSC0003DMG400004722M6LRR-RLP\_1178

TGTTGGATTGGTCCACTAATTTAAAGGTGAGATTGAGAACCAAACATGTCCGCATCATGGCTGATAACA

CAACAAAACTTTTGGCTACTTGGTTAAGTCCTTAGCTGAATTACATATGT

>M6-PGSC0003DMG400004722M6LRR-RLP\_124

TGGCCATGTCACTGAACTTGACCTCAGTCTATTCAGGGACGAGAGCTTGAACCTGTCAAATTTTTGACCA

TTTACACCACTATTGTTCTTTCAAGTAACAGATTTGAAGGACGTATTCCA

>M6-PGSC0003DMG400004722M6LRR-RLP\_1240

GATAACACAACAAAACTTTTGGCTACTTGGTTAAGTCCTTAGCTGAATTACATATGTAACCCGTGGATA

AAAATAAAAAGCAAAAAGACAAGGACAGAACAACCAAATTTGAATGGAG

>M6-PGSC0003DMG400004722M6LRR-RLP\_1302

CGTGGATAAAAATAAAAAGCAAAAAGACAAGGACAGAACAACCAAATTTGAATGGAGAATGAGAACA

CTTTCTCTGATAAATATGAACAGACAAAGAAGTGTGAATAAGAGAGACAGAA

>M6-PGSC0003DMG400004722M6LRR-RLP\_1364

AGAACACTTTCTCTGATAAATATGAACAGACAAAGAAGTGTGAATAAGAGAGACAGAAGCCGAATTGG

CAACATTTGGTGGCAGTCAAACATGTTTCGCTTTGATCTTTAATATTATGCA

>M6-PGSC0003DMG400004722M6LRR-RLP\_1426

AATTGGCAACATTTGGTGGCAGTCAAACATGTTTCGCTTTGATCTTTAATATTATGCACTATATAAAATCC

TACGAACTCTCTACAATTAGTTCATTGAAACACAAAATATGATGATGGT

>M6-PGSC0003DMG400004722M6LRR-RLP\_1488

ATAAAATCCTACGAACTCTCTACAATTAGTTCATTGAAACACAAAATATGATGATGGTTACCAAATATCC

TCTCTACTTCAGTTTTTCACTCTTTTATATCTCTTTACAGTTACTTTTG

>M6-PGSC0003DMG400004722M6LRR-RLP\_1550

AAAATATCCTCTCTACTTCAGTTTTTCACTCTTTTATATCTCTTTACAGTTACTTTTTGCTTCCACTGAGGAAA  
CAACTGCCCTCTTTAAATGGAAAGCGACTTTCAAGAACAAAAATAAT

>M6-PGSC0003DMG400004722M6LRR-RLP\_1798

TCCGTTTTTCATCCCTCCCTTTTCTCGAGTATCTTAATCTTAGCAGGAACAATTTATTTGGCACCATCCCACC  
TGAGATTGGTTATCTAACTAATCTTGTCTATCTTGACTTGCATATCAA

>M6-PGSC0003DMG400004722M6LRR-RLP\_1860

CCATCCCACCTGAGATTGGTTATCTAACTAATCTTGTCTATCTTGACTTGCATATCAATCACATTTTCAGGCT  
CAATCCCACCACAAATCGGCTCACTAGCCAAACTTCAGATCATCCGTT

>M6-PGSC0003DMG400004722M6LRR-RLP\_1922

ATTTTCAGGCTCAATCCCACCACAAATCGGCTCACTAGCCAAACTTCAGATCATCCGTTTATTTGACAATCA  
TTTAACTGGTCCTATTCCAGAAACAATAGGGTACCTAAGGTCTCTTACT

>M6-PGSC0003DMG400004722M6LRR-RLP\_2170

CCTAAGGTCTCTTGCTCGACTAGATTTGAGGAATAACTTTCTTATTGGTTCTATTCCTACTTCCCTTGGCAA  
CTTGAAAAATTTGCAAGTTCTGCTTCTCAATGACAACAATCTAATTGA

>M6-PGSC0003DMG400004722M6LRR-RLP\_2232

CCCTTGGCAACTTGAAAAATTTGCAAGTTCTGCTTCTCAATGACAACAATCTAATTGAGGAAATTCCTCCA  
TCTATTTGCAATTTGACATCACTGGCAATCCTGTATTTGTGCGAGAAACA

>M6-PGSC0003DMG400004722M6LRR-RLP\_2294

ATTCTCCATCTATTTGCAATTTGACATCACTGGCAATCCTGTATTTGTGCGAGAAACAACCTTGAAAGGAAA  
AATTCTGCAATGCTTAGGTAATATCAGTACCCTCCAGTTTGTGATGATG

>M6-PGSC0003DMG400004722M6LRR-RLP\_2356

GAAAGGAAAAATTCTGCAATGCTTAGGTAATATCAGTACCCTCCAGTTTGTGATGATGTCACATAATAAT  
CTCAGTGGGAACTCCCTTTGTCTATTTGCAATCTAACATCACTACAAGT

>M6-PGSC0003DMG400004722M6LRR-RLP\_2480

AATTTGGGTAGAAACAATCTGAACGGAGCAATTCGCAATGTTTTGGCAACATGAGTGGTCATCTTGAG  
ATTCTTGATATGCAGCACAACAATCTTTCTGGTACTTTTTCAAAGCACTTTT

>M6-PGSC0003DMG400004722M6LRR-RLP\_2542

TCTTGAGATTCTTGATATGCAGCACAACAATCTTTCTGGTACTTTTTCAAAGCACTTTTAGCATTGGAGGAG  
CACTCAGAAGCTTCAATTTGCATGGCAATAAGCTAGAGGGGAAAATTCC

>M6-PGSC0003DMG400004722M6LRR-RLP\_2790

TGCATGGACCCATCAGAACTTCAAAGTTCATGAAGAACTTGTTTCCTAAGCTTCGAATCATAGACCTCGC  
TAGCAATGCATTTACAGCAGAGTTACCTGCAAATCTTTTTCAAATTTTG

>M6-PGSC0003DMG400004722M6LRR-RLP\_2852

GACCTCGCTAGCAATGCATTTACAGCAGAGTTACCTGCAAATCTTTTTCAAATTTTGAAGCCATGAAGA  
GAGTTGATCAAAGTGTGGAGGATTCAAGTAATAAAGAAGGCGGTTATTAC

>M6-PGSC0003DMG400004722M6LRR-RLP\_2914

CATGAAGAGAGTTGATCAAAGTGTGGAGGATTCAAGTAATAAAGAAGGCGGTTATTACCAAGACTCCGT  
AACTGTCGTAACAAAGGGACTGGAGCTTGAAGTTGATTCAATCTTGTCTTT

>M6-PGSC0003DMG400004722M6LRR-RLP\_2976

ACTCCGTAAGTGTGTAACAAAGGGACTGGAGCTTGAAGTTGATTCAATCTTGTCTTTGTACATCACAAT  
TGATTTTTCAAATAACAGATTTGAAGGACGCATTCCAAGTATTATGGGAA

>M6-PGSC0003DMG400004722M6LRR-RLP\_3162

TCGGAAAATTATCTTCAGTTGAATCATTGGACCTATCAGCTAATCATCTTGAAGGAGAGATACCTAAACA  
ACTTACATCTCTTACATTTCTTGAATTCTTGAATCTCTCCACAATCAGC

>M6-PGSC0003DMG400004722M6LRR-RLP\_3224

CCTAAACAACCTTACATCTTACATTTCTTGAATTCTTGAATCTCTCCACAATCAGCTCCAAGGATGCATC  
CCAACAGGACGCCAATTTGATACATTGAGAAGAAGTCAATATGAAGGT

>M6-PGSC0003DMG400004722M6LRR-RLP\_3286

AGGATGCATCCCAACAGGACGCCAATTTGATACATTGAGAAGAAGTCAATATGAAGGTAATGATAAGTT  
ACGTGGATTTCTAGTTTGGAGGTTGTGGAAACAGCAGGTTTCCCAAGACA

>M6-PGSC0003DMG400004722M6LRR-RLP\_3348

ATAAGTTACGTGGATTTCTAGTTTGGAGGTTGTGGAAACAGCAGGTTTCCCAAGACAAACAACACGAC  
ACATGAGCTGGAACAAGAAAGTGAATCTACATTTCTGAATGAACTCAACTG

>M6-PGSC0003DMG400004722M6LRR-RLP\_3410

ACACGACACATGAGCTGGAACAAGAAAGTGAATCTACATTTCTGAATGAACTCAACTGGAAAGTGGTTC  
TTATGGGATATGTGTGTGGACTTATTATTGGATTCTCCATAACATATTTAA

>M6-PGSC0003DMG400004722M6LRR-RLP\_3472

GTGGTTCTTATGGGATATGTGTGTGGACTTATTATTGGATTCTCCATAACATATTTAATGCTTTCAGCTCG



AAATCCCAATTGGCTTTCTAGGATTGCTGAAGAAGTACAATAACAGAATC

>M6-PGSC0003DMG400004722M6LRR-RLP\_434

ACAATCATCTCGATGGATGCATCCCTCAAGTACCTCAATTCGCTACATTAAAGAAATATTCATATGAAGG

CAATAATGGATTACGTGAATTTATGCATTGCCAAATTCATCATTGCATAT

>M6-PGSC0003DMG400004722M6LRR-RLP\_496

TATGAAGGCAATAATGGATTACGTGAATTTATGCATTGCCAAATTCATCATTGCATATGTTGGAGGAATA

TCAGGGGCCATAAAATTTTATGAGCTTAAGTTGGCTCGAACATCATAATT

>M6-PGSC0003DMG400004722M6LRR-RLP\_558

GAGGAATATCAGGGGCCATAAAATTTTATGAGCTTAAGTTGGCTCGAACATCATAATTATTAATAAAAAAAT

GTCTAAAACCCGTTGACATACTAATGACAAGGTGATATATAGAGTTGAAA

>M6-PGSC0003DMG400004722M6LRR-RLP\_62

AGTTCATGGAACATAAGCAGAGATTGCTGCTCTTCGGATGGAGTCGTATGTGATGACATGACTGGCCAT

GTCACTGAACTTGACCTCAGTCTATTCAGGGACGAGAGCTTGAACCTTGCA

>M6-PGSC0003DMG400004722M6LRR-RLP\_620

AAAAAATGTCTAAAACCCGTTGACATACTAATGACAAGGTGATATATAGAGTTGAAACAAGTTAGATA

TTTTTTTCCTTTTGTTTTTCAGTAATCACCTCTTATTTGTTTTAATGTCAT

>M6-PGSC0003DMG400004722M6LRR-RLP\_682

TTAGATATTTTTTCCTTTTGTTTTTCAGTAATCACCTCTTATTTGTTTTAATGTCATAAATCAACTTTCTGA

TGCAATATAGTTGAAAGTAGTACCTATTAATTTGAAAGTACATAGA

>M6-PGSC0003DMG400004722M6LRR-RLP\_744

TCAACTTTCTGATGCAATATAGTTGAAAGTAGTACCTATTAATTTGAAAGTACATAGATTCTGCTTATATG

GGTGCAGCTAAAGTATTTATGTACAACTATACTTCCTTTTCATGATTCAT

>M6-PGSC0003DMG400004722M6LRR-RLP\_806

GCTTATATGGGTGCAGCTAAAGTATTTATGTACAACTATACTTCCTTTTCATGATTCATAAATGTACACAAC

AACCTCATGACCCACTGCAATAGATTATGAAGTACCTTCACTGCAAATT

>M6-PGSC0003DMG400004722M6LRR-RLP\_868

GTACACAACAACCTCATGACCCACTGCAATAGATTATGAAGTACCTTCACTGCAAATTGAATGAGTTGTA

GCTTTCATTTCTAAGCGCGTGACTTTTCTCTGATAACGAGTGACTTTTCT

>M6-PGSC0003DMG400004722M6LRR-RLP\_930

GAGTTGTAGCTTTCATTTCTAAGCGCGTGACTTTTCTCTGATAACGAGTGACTTTTCTGTTACATAACAAA  
TAAGGTGACTTTCAAAGATAATTATCAATAATTGAGTGACAATATGAGA

>M6-PGSC0003DMG400004722M6LRR-RLP\_992

CATAACAAATAAGGTGACTTTCAAAGATAATTATCAATAATTGAGTGACAATATGAGAAATCAACTCTTG  
ATGTCAGCTATATGAAATCTCAGTAGTCATATAGCTTTACCTAAACTCAT

>M6-PGSC0003DMG400004725M6LRR-RLP\_1008

CTAACATACCTGAAGACTATTATTACCAAGATTCTATTATAGTCATAAGCAAGGGATATGAGATTGAAC  
TTATCAAAATTTTGACTGTTTACGCCTCTATTGATCTTTCAAGTAACAAA

>M6-PGSC0003DMG400004725M6LRR-RLP\_126

AATTCCACAGCCTCTGATTCTAATGTCTGTGAAATATTTTATGGTCAGAAGCCATATCCAAAAACGAGTTC  
ATGGAACATGAGTATAGATTGTTGTTTCATGGGATGGAGTCATATGTGAT

>M6-PGSC0003DMG400004725M6LRR-RLP\_1260

TCAGTTAACCAGCTTTCGGGAGAGATACCAAACAACCTTGCTTCTCTTAAGTATCTTGAATACTTCTTCAC  
ATCAGAAAATAATCTCACTGAAGAAATTCCTTCATCTATTTGCAATTTG

>M6-PGSC0003DMG400004725M6LRR-RLP\_1512

TTCAGCAATGGGAGATCACTGAGGAGCCTCAACTTGCATGGCAATAAACTAGAGGGGAATATCCCCGA  
TCTTTGTCCAATTGCAAAGCGTTGCAGGTTCTTGATTTAGGACATAATCAT

>M6-PGSC0003DMG400004725M6LRR-RLP\_1764

GATCTCTTACAATGCCTTCTCAGGAAACCTACCTACGAGTTTGTTC AACATCTGAAAACCATGAGGAC  
AATTGATCCATCCAAGACGGCACTAATTGATGGTTATTATTACCAAGAC

>M6-PGSC0003DMG400004725M6LRR-RLP\_1827

ATGAGGACAATTGATCCATCCAAGACGGCACTAATTGATGGTTATTATTACCAAGACTCAGTAGTTGTAG  
TTACAAAGGGATTGGAGCTTGAAGTTGAGAGAATCTTGTTTTTGTACACC

>M6-PGSC0003DMG400004725M6LRR-RLP\_189

ACGAGTTCATGGAACATGAGTATAGATTGTTGTTTCATGGGATGGAGTCATATGTGATGAGATGACTGGC  
CATGTCATTGAACTTGACCTCGGCTGCAGCTGTCTCGTAGGAAAGCTTGAT

>M6-PGSC0003DMG400004725M6LRR-RLP\_2205

AAAGGACCTCAATTCAATACATTTGAGATCAATTCATATGAAGGTAACGATGGATTATGTGGATACCCTT  
TTCCTCAAGGTTGTGGAAGTAGCAGGATGCCAGAGACAGAAAACACAGCA

>M6-PGSC0003DMG400004725M6LRR-RLP\_2268

TACCCTTTTCCTCAAGGTTGTGGAAGTAGCAGGATGCCAGAGACAGAAAACACAGCATATGTTCTGGAT  
GAAGAAAGCAATTCTACATTTCTGAGTGAATTTTGAATGGGATTCTCATG

>M6-PGSC0003DMG400004725M6LRR-RLP\_2394

GGAAGTGGACTTATTATTGGATTCTCCATAGCATCTTTCATGCTTTTCGAGTCGAAATCCAATTGGCTTTC  
TAGGATTGCTGAAGAACTTGAATACAGAATCGTTATGAGAAGGCGAAAG

>M6-PGSC0003DMG400004725M6LRR-RLP\_252

ACTGGCCATGTCATTGAACTTGACCTCGGCTGCAGCTGTCTCGTAGGAAAGCTTGATTCCAATAGCAGCC  
TTTTCCAACCTCTCTCATCTCCAAAGGCTCAACCTTTCTGTTAATAACTTC

>M6-PGSC0003DMG400004725M6LRR-RLP\_315

AGCAGCCTTTTCCAACCTCTCTCATCTCCAAAGGCTCAACCTTTCTGTTAATAACTTCTCTCGTGTGGATTCA  
ATTCCTCTTCAGTCTCTAGATACTATTGATTTGCGGTCCAATTTGCTT

>M6-PGSC0003DMG400004725M6LRR-RLP\_378

GTGGATTCAATTCCTCTTCAGTCTCTAGATACTATTGATTTGCGGTCCAATTTGCTTCAAGGTTCACTACCT  
ATTCCACCAATTTCCACGAGATTCTTCTCATAGCCCATAATAATCTC

>M6-PGSC0003DMG400004725M6LRR-RLP\_441

TCACTACCTATTCCACCAATTTCCACGAGATTCTTCTCATAGCCCATAATAATCTCACTGAAGAAATTCCT  
TCACATATTTGCAATTTGAAATCATTGGTAATGCTAGATTTGGCGAGA

>M6-PGSC0003DMG400004725M6LRR-RLP\_63

CCTCATCCATGCCGCAAAGATCAAAGTATTTCCCTTCTAAAATTCAAGAAAACGTTTACTGTAAATTCCAC  
AGCCTCTGATTCTAATGTCTGTGAAATATTTTATGGTCAGAAGCCATAT

>M6-PGSC0003DMG400004725M6LRR-RLP\_945

TTACCTACGAGTCTGTTTCGACATCTGAAAACCATGAGAACAATTGATCCATCAAAGAAGAACTAACAT  
ACCTTGAAGACTATTATTACCAAGATTCTATTATAGTCATAAGCAAGGGA

>M6-PGSC0003DMG400004727M6LRR-RLP\_0

TTGGTCTTTCCTTCAATAATTTTAGTGGTTTTGTGGATGTCAGCCTCTTTTCAAACCTTAAACAGCTTGGG  
GAACTTAGTCTTTCATATAATAATATCTCACTGACCAATGACAACAAAG

>M6-PGSC0003DMG400004727M6LRR-RLP\_1178

AGTTTATCTTTGGTTGAATCACTGGACCTGTCAAGTAACCATCTTGTAGGAGATATACCAGCACAATTTG

CTTCTCTTACTTCTCTTGCAGTCTTAAATCTTTCCTACAATCATCTCGAA

>M6-PGSC0003DMG400004727M6LRR-RLP\_124

TGTTACTTTGCCGAATCTCTTTATTTGTTAGAATTGGCCGCATGTGAAGTGAAAGAATTGGAGTTTCTAA  
GATCTGCAAACCAGCTTTTCGATTTGGATCTTTCAAATAATAAGATTCA

>M6-PGSC0003DMG400004727M6LRR-RLP\_1364

TTACGTGGTTTTCTGTTTCAATAAGTTGTGGCAATGATCATGTATCAGGTAAAAATTATGCCGTAGATG  
ATGAAGAAAGCAATTCTGAATTTCTGAGTGACTTTCGGAAAGCTGCTCTT

>M6-PGSC0003DMG400004727M6LRR-RLP\_1550

CCGATATGGTTTGCAAGAATCATTGTAGAGCTGGAGCACAAAATAATGATGGGAAGGAGAAAGAAGCA  
GCGAAGTCAAAGGAATAACAGAAGAAGAAATAATCACTAATCATATTACTGT

>M6-PGSC0003DMG400004727M6LRR-RLP\_1612

GAAGCAGCGAAGTCAAAGGAATAACAGAAGAAGAAATAATCACTAATCATATTACTGTTATTTCTTTAA  
GGAAAAGATGTAATAAGTTGTAGACGCATTATCGTTAAATCCTGTTTGCAT

>M6-PGSC0003DMG400004727M6LRR-RLP\_1653

ACTAATCATATTACTGTTATTTCTTTAAGGAAAAGATGTAATAAGTTGTAGACGCATTATCGTTAAATCCT  
GTTTGCATAAAGTGTGTAGCATCATTTGGCCATGAAAATTGAGGGTGAG

>M6-PGSC0003DMG400004727M6LRR-RLP\_186

AGTTTCTAAGATCTGCAAACCAGCTTTTCGATTTGGATCTTTCAAATAATAAGATTCAAGGAAGAATTCCT  
GATTGGGCATGGTCTAACTGGATGTTTTATTGCGAGATCTTAATATAT

>M6-PGSC0003DMG400004727M6LRR-RLP\_248

AGAATTCCTGATTGGGCATGGTCTAACTGGATGTTTTATTGCGAGATCTTAATATATCCCACAATATGCT  
AACGAGTATGGATTCAATTCCTCTTCAACATCATTTAACAATTGATTTG

>M6-PGSC0003DMG400004727M6LRR-RLP\_310

CAATATGCTAACGAGTATGGATTCAATTCCTCTTCAACATCATTTAACAATTGATTTGCGGTCAAATTTAC  
TTCAAGGTTCACTACCTATTCCACCAAATTCACAAGATACTTCTTCAT

>M6-PGSC0003DMG400004727M6LRR-RLP\_372

CAAATTTACTTCAAGGTTCACTACCTATTCCACCAAATTCACAAGATACTTCTTCATATCCCATAATAATC  
TCACTGGAGAAATTCCTTCATCTATTTGCAACTTGACATCACTGATAA

>M6-PGSC0003DMG400004727M6LRR-RLP\_62

CAGCTTGGGGAACCTTAGTCTTTCATATAATAATATCTCACTGACCAATGACAACAAAGTTAATGTTACTTT  
GCCCGAATCTCTTTATTTGTTAGAATTGGCCGCATGTGAAGTGAAAGAA

>M6-PGSC0003DMG400004727M6LRR-RLP\_930

GGACAATTCATCAAACGATGAACACACCAAGTTATGAAGGAAGTCGATATTACCAAGACTCGATAGCTG  
TCGTATCCAAGGGATATGAGCGTGAAATTGTGAGAATCTTGTTTTGTACA

>M6-PGSC0003DMG400004928-(rev)M6G-LecRK\_0

GGATCATTCACTATGGAAATTGGAATGGTATCAACCAGCAGAAAGCAAATGAAAAATTTCTGCTTATGT  
TGCACATATTGTTATGTGGTTTTGTATGCTCAATTTCTAGTGCAAAGAT

>M6-PGSC0003DMG400004928-(rev)M6G-LecRK\_1037

AAAGTGGTCCGGCGGGTGTATTAGAAGGACACCCCTTAATTGCTAGAATGGAGATGGATTTCTCAAGTA  
CTCTGTTATAAAGCTTCCAGATACACAGTATTCACGGTTTGATGTGAGAAT

>M6-PGSC0003DMG400004928-(rev)M6G-LecRK\_1098

CTCAAGTACTCTGTTATAAAGCTTCCAGATACACAGTATTCACGGTTTGATGTGAGAATGACACTCCGAG  
AGTGCGAGAAAGTTTGCCTAAAGAATTGTTCTTGTATGGCTTACTCAAAT

>M6-PGSC0003DMG400004928-(rev)M6G-LecRK\_1159

CACTCCGAGAGTGCGAGAAAGTTTGCCTAAAGAATTGTTCTTGTATGGCTTACTCAAATCTTGATATACG  
CAATGGTGGCAGTGGCTGTTTGCCTTGGTATGGCGACTTAATTGACATTC

>M6-PGSC0003DMG400004928-(rev)M6G-LecRK\_122

CATCACTACAACCTGACTTTCTAATAGAGGGTAAGACCATTGTTTCATGTGATGAAAGCTTTGAATTGGGA  
TTTTTTTCCCAGGTAGTTTCGCGAATAATTGGTATATTGGAATATGGTA

>M6-PGSC0003DMG400004928-(rev)M6G-LecRK\_1220

TGATATACGCAATGGTGGCAGTGGCTGTTTGCCTTGGTATGGCGACTTAATTGACATTCGAGAATTACCT  
GGAGGACAGGACATTTACATAAGGATAGCTAACTCAGAGTTAGGTAAAAT

>M6-PGSC0003DMG400004928-(rev)M6G-LecRK\_1281

GAATTACCTGGAGGACAGGACATTTACATAAGGATAGCTAACTCAGAGTTAGGTAAAATTTATGCAACA  
AATTCATTAATTTGATCAATATGAAGCATTAGCTGAATGAAGTAACTT

>M6-PGSC0003DMG400004928-(rev)M6G-LecRK\_1342

ATGCAACAAATTCATTAATTTGATCAATATGAAGCATTAGCTGAATGAAGTAACTTCATAATCTTAG  
CTTTCGTTGTGTTTTGCTTATCTATTTGTTAAAAAGTTCACATAGCATA

>M6-PGSC0003DMG400004928-(rev)M6G-LecRK\_1403

TAATTCTTAGCTTTCGTTGTGTTTTGCTTATCTATTTGTTAAAAAGTTACATAGCATATATTTATTTTAGTT  
TACCCTCCATTTTTTTTCAGGCTCGAAGAAGAAAATGAAAACACTTG

>M6-PGSC0003DMG400004928-(rev)M6G-LecRK\_1464

TTTATTTTAGTTTACCCTCCATTTTTTTTCAGGCTCGAAGAAGAAAATGAAAACACTTGTGCTGAGTCTAT  
CATTGTTGAGCGGAGTGTCTGTCATTGGCCTGATCATAGGGCTGTATAT

>M6-PGSC0003DMG400004928-(rev)M6G-LecRK\_1525

CTGAGTCTATCATTGTTGAGCGGAGTGTCTGTCATTGGCCTGATCATAGGGCTGTATATTTTGATAAAGG  
CGAGAAAGAAGAAGAGGAAGATGATTCTGAAAGATGATCTAGAACTTCCA

>M6-PGSC0003DMG400004928-(rev)M6G-LecRK\_1586

TGATAAAGGCGAGAAAGAAGAAGAGGAAGATGATTCTGAAAGATGATCTAGAACTTCCACTGTTTTCCC  
TATCAACAGTAACTAAAGCGACCTCTAATTTCTCAGACAAGAACATGCTCG

>M6-PGSC0003DMG400004928-(rev)M6G-LecRK\_1647

GTTTTCCCTATCAACAGTAACTAAAGCGACCTCTAATTTCTCAGACAAGAACATGCTCGGAGAAGGTGGA  
TTTGGATCTGTTTACAAGGTAGCATATCTTGTAGGTTTATTATATGTACT

>M6-PGSC0003DMG400004928-(rev)M6G-LecRK\_1708

GAAGGTGGATTTGGATCTGTTTACAAGGTAGCATATCTTGTAGGTTTATTATATGTACTATAATTGACAG  
TAAACAGATAAGTAACTTTGAATTATCCCTGTCAAACATCCTTAGCT

>M6-PGSC0003DMG400004928-(rev)M6G-LecRK\_1769

AATTGACAGTAAACAGATAAGTAACTTTGAATTATCCCTGTCAAACATCCTTAGCTTCAATATGAGTC  
AGCTGTATGTTATGATATCGTAGGGAATCCTGGAGGAAGGACAAGAAGT

>M6-PGSC0003DMG400004928-(rev)M6G-LecRK\_183

GAATTGGGATTTTTTTCCCCAGGTAGTTTCGCGAATAATTGGTATATTGGAATATGGTACAAGCACGACG  
ATGGGCCTGACAAGTCTGTTGTATGGGTTGCCAATAGAGAACTCCACTC

>M6-PGSC0003DMG400004928-(rev)M6G-LecRK\_1830

AATATGAGTCAGCTGTATGTTATGATATCGTAGGGAATCCTGGAGGAAGGACAAGAAGTAGCTATAAA  
GAGGCTCTCAAATCTTCCTTGCAAGGAGTCAACGAGTTCAAGAATGAAGTT

>M6-PGSC0003DMG400004928-(rev)M6G-LecRK\_1891

CTATAAAGAGGCTCTCAAATCTTCCTTGCAAGGAGTCAACGAGTTCAAGAATGAAGTTAATTGCATTGC

CAAACCTTCAGCATCGAAACCTTGTGATGCTTATAGGTTGCTGCGTTGAAG

>M6-PGSC0003DMG400004928-(rev)M6G-LecRK\_1952

TTGCATTGCCAACTTCAGCATCGAAACCTTGTGATGCTTATAGGTTGCTGCGTTGAAGGAGAAGAGAA

AATTCTGGTCTATGAATACATGCCCAATAGAAGTCTTGATTTCTTCATATT

>M6-PGSC0003DMG400004928-(rev)M6G-LecRK\_2013

GAAGAGAAAATTCTGGTCTATGAATACATGCCCAATAGAAGTCTTGATTTCTTCATATTTGGTATGCTTAC

TCTTGCTTAACACATAAAACCTCAAGTACTGTTTCATAGTATAGCATTGA

>M6-PGSC0003DMG400004928-(rev)M6G-LecRK\_2074

GTATGCTTACTCTTGCTTAACACATAAAACCTCAAGTACTGTTTCATAGTATAGCATTGAGCTTGCAGCTTT

CACCATGATTTTGAAAAAGGTTGTTAATTTCAAATGGAAGTAGATTCTG

>M6-PGSC0003DMG400004928-(rev)M6G-LecRK\_2135

TTGCAGCTTTCACCATGATTTTGAAAAAGGTTGTTAATTTCAAATGGAAGTAGATTCTGTTAACATACTA

AAAGCAGTTAGAGCATCAGTACTATACTAATTGTTGGAAGATCTGTTA

>M6-PGSC0003DMG400004928-(rev)M6G-LecRK\_2196

TAACATACTAAAAGCAGTTAGAGCATCAGTACTATACTAATTGTTGGAAGATCTGTTAACAGATGAAGG

GAAGAGCTCGATACTCGATTGGCCTAAGCGCTTCAACATCATCAATGGAA

>M6-PGSC0003DMG400004928-(rev)M6G-LecRK\_2257

AGATGAAGGGAAGAGCTCGATACTCGATTGGCCTAAGCGCTTCAACATCATCAATGGAATTGTTAGAGG

ACTTTTGTATCTCCATCAAGATTCTCGGCTAAGAATTATCCATAGAGACCT

>M6-PGSC0003DMG400004928-(rev)M6G-LecRK\_2318

GTTAGAGGACTTTTGTATCTCCATCAAGATTCTCGGCTAAGAATTATCCATAGAGACCTCAAAGCTAGTA

ACATTTTGCTAGATGCTGACATGAACCCCAAGATCTCAGATTTTGGCATA

>M6-PGSC0003DMG400004928-(rev)M6G-LecRK\_244

AGCACGACGATGGGCCTGACAAGTCTGTTGTATGGGTTGCCAATAGAGAACTCCACTCAACAATACAT

CAGGTGTTATGCTGAAAATCGTTGATCCAGGACGACTTGCTCTTGTTACTT

>M6-PGSC0003DMG400004928-(rev)M6G-LecRK\_2440

TAGAAGTGTGATAGGGAATGAGACGGGTGCTAATACACATCATGTGGTTGGGACACAGTAAGTGATTT

CACACTGCGACCTTTTAGCATTTATCCCATGTACTACTCATATAATATCATC

>M6-PGSC0003DMG400004928-(rev)M6G-LecRK\_2501

GTGATTCACACTGCGACCTTTTAGCATTTATCCCATGTACTIONACTCATATAATATCATCTGTCTAACACTAT  
TTTCTGTCTAATATGTGATGCAGTGGCTACATGTCCCCAGAATATCTA

>M6-PGSC0003DMG400004928-(rev)M6G-LecRK\_2562

TCTAACACTATTTTCTGTCTAATATGTGATGCAGTGGCTACATGTCCCCAGAATATCTAGTACACGGTGT  
TTCTCAATAAAATCAGATGTATTTAGCTTTGGCGTGTAGTTCTAGAGA

>M6-PGSC0003DMG400004928-(rev)M6G-LecRK\_2623

ACACGGTGTTTTCTCAATAAAATCAGATGTATTTAGCTTTGGCGTGTAGTTCTAGAGATAATCAGTGGT  
CGAAGAAACAGAGGATTTGCCCGTGAAAGTCACAGTATCAACCTTCTCGG

>M6-PGSC0003DMG400004928-(rev)M6G-LecRK\_2684

ATCAGTGGTCGAAGAAACAGAGGATTTGCCCGTGAAAGTCACAGTATCAACCTTCTCGGACATGTAAGT  
CTTGTATGTTAAAAAGTACTTACATATTCAGACCACTCGTAAGGTAATTAC

>M6-PGSC0003DMG400004928-(rev)M6G-LecRK\_2745

ATGTAAGTCTTGTATGTTAAAAAGTACTTACATATTCAGACCACTCGTAAGGTAATTACAAGTGATAGTG  
TAACTAAACTGATAGTGCAAAAAGTCTTACTAAGTGTTCGGTGTATACAAC

>M6-PGSC0003DMG400004928-(rev)M6G-LecRK\_2806

GTGATAGTGTAACATAACTGATAGTGCAAAAAGTCTTACTAAGTGTTCGGTGTATACAACCTTAAATCTATC  
AAACATGCTTCACTTACTTATACATGTTCTTATTACTATATACTGATTG

>M6-PGSC0003DMG400004928-(rev)M6G-LecRK\_2867

AAATCTATCAAACATGCTTCACTTACTTATACATGTTCTTATTACTATATACTGATTGTGTTATTAACAGG  
TATGGAAACTTTATAAAGAAGGTAGACCATTGGAGCTGATTGATGTGC

>M6-PGSC0003DMG400004928-(rev)M6G-LecRK\_2928

TTATTAACAGGTATGGAAACTTTATAAAGAAGGTAGACCATTGGAGCTGATTGATGTGCATATTACAGA  
TTCATGTTATTTTACTGAAGTGCTACGGTTAATTCATGTTCGCTCTATTATG

>M6-PGSC0003DMG400004928-(rev)M6G-LecRK\_2989

ATTACAGATTCATGTTATTTTACTGAAGTGCTACGGTTAATTCATGTTCGCTCTATTATGCGTACAACATAG  
TCCAGAAGACAGGCCAGACATGTCTGAAGTGGTTGTGATGTTGGCTAAT

>M6-PGSC0003DMG400004928-(rev)M6G-LecRK\_305

CAATACATCAGGTGTTATGCTGAAAATCGTTGATCCAGGACGACTTGCTCTTGTTACTTCTGCTAATATGA  
GCATATGGTCTACTAATTCGTCAAGGATTTTGTCTGTGAAGAATCCAAT



>M6-PGSC0003DMG400004928-(rev)M6G-LecRK\_3050

TACAACATAGTCCAGAAGACAGGCCAGACATGTCTGAAGTGGTTGTGATGTTGGCTAATGATACCATTT  
TGCCTGAAGCTAAGGAGCCTGGTTTTTTCACAGAAAGTAAATTCCTGATT

>M6-PGSC0003DMG400004928-(rev)M6G-LecRK\_3111

TACCATTTTGCCTGAAGCTAAGGAGCCTGGTTTTTTCACAGAAAGTAAATTCCTGATTCTGAATATTCTA  
CAAGCATGTATTCGAAAATGAAATCACTATTACACAGTTAGATCCCCG

>M6-PGSC0003DMG400004928-(rev)M6G-LecRK\_3172

GAATATTCTACAAGCATGTATTCGAAAATGAAATCACTATTACACAGTTAGATCCCCGGTAAATTAAT  
TTCATTTTCTTGTAGATCTTTAAGTGTCTAGAAGCTTGAATAACAGAGGA

>M6-PGSC0003DMG400004928-(rev)M6G-LecRK\_3233

AAATTAATTTTCATTTTCTTGTAGATCTTTAAGTGTCTAGAAGCTTGAATAACAGAGGAGAACATTTTATG  
AGTTGTATCATATTAGGAAAGAATTTACCTAACTCTTGAATTAATAAAAAA

>M6-PGSC0003DMG400004928-(rev)M6G-LecRK\_3416

TTGTACGACAGTTTTACAGGAACTTGAGTGTAGTTACAAATTGCCATTGTTGTGTATGTTACATGGTTTT  
GTTATACTTACAGATACGTATCCACTCTGGGTGTGTGTAAGAATCTAAT

>M6-PGSC0003DMG400004928-(rev)M6G-LecRK\_3458

TGCCATTGTTGTGTATGTTACATGGTTTTGTTATACTTACAGATACGTATCCACTCTGGGTGTGTGTAAGA  
ATCTAATATGAATACTACAGTTTTTTTTGAAATTTTAATTTACTCTCCA

>M6-PGSC0003DMG400004928-(rev)M6G-LecRK\_366

GCTAATATGAGCATATGGTCTACTAATTCGTCAAGGATTTTGTCTGTGAAGAATCCAATTGCGCAGTTGT  
TGAGTTCAGGGAATCTAATCATAAGAGATGCAAATGAACTAAAACAGAG

>M6-PGSC0003DMG400004928-(rev)M6G-LecRK\_427

CGCAGTTGTTGAGTTCAGGGAATCTAATCATAAGAGATGCAAATGAACTAAAACAGAGAACTTCCTGT  
GGCAGAGTTTTGATTATCCGACTAATACGCTCTTACCAGGCATGCAACTTG

>M6-PGSC0003DMG400004928-(rev)M6G-LecRK\_488

CTTCCTGTGGCAGAGTTTTGATTATCCGACTAATACGCTCTTACCAGGCATGCAACTTGGTAAGAACTTT  
GTGACTGGACAAGAATTTTACCTGTCCTCATGGAAGAACGAATATGATCC

>M6-PGSC0003DMG400004928-(rev)M6G-LecRK\_549

AAGAACTTTGTGACTGGACAAGAATTTTACCTGTCCTCATGGAAGAACGAATATGATCCGGCTCCAGGG

AAATATACGTATCATTGTGATCCTACTGGATATCCTCAGGTTGTCATGAGG

>M6-PGSC0003DMG400004928-(rev)M6G-LecRK\_61

TGCTTATGTTGCACATATTGTTATGTGGTTTTGTATGCTCAATTTCTAGTGCAAAAGATAACCATCACTACA  
ACTGACTTTCTAATAGAGGGTAAGACCATTGTTTCATGTGATGAAAGCT

>M6-PGSC0003DMG400004928-(rev)M6G-LecRK\_610

CTCCAGGGAAATATACGTATCATTGTGATCCTACTGGATATCCTCAGGTTGTCATGAGGAAAGGTAAAG  
TTAAGGTGTTTCAGTGGCGGACCATGGAATGGACTCCGCTGGAGTGGTGTAC

>M6-PGSC0003DMG400004928-(rev)M6G-LecRK\_671

AGGTAAAGTTAAGGTGTTTCAGTGGCGGACCATGGAATGGACTCCGCTGGAGTGGTGTACTAGGATTGA  
CAAAAAATACAATTTATACATTTAAGCTGGATTTTGATGAAAAGAAAGCAAT

>M6-PGSC0003DMG400004928-(rev)M6G-LecRK\_732

GGATTGACAAAAAATACAATTTATACATTTAAGCTGGATTTTGATGAAAAGAAAGCAATTTACAGCTACG  
CGCTAGTGGATAATTCTGTTTTATCGAAATTAACCTTGAACAGTCATGGT

>M6-PGSC0003DMG400004928-(rev)M6G-LecRK\_793

ACAGCTACGCGCTAGTGGATAATTCTGTTTTATCGAAATTAACCTTGAACAGTCATGGTATGCTTAAGCG  
TTGGACGTGGGATGAGAAGATAAAGGAATGGCATGTTTACCTGGCTTCAC

>M6-PGSC0003DMG400004928-(rev)M6G-LecRK\_854

GCTTAAGCGTTGGACGTGGGATGAGAAGATAAAGGAATGGCATGTTTACCTGGCTTCACCAGCAGATG  
CCTGTGAAAATTATGGAGCATGTGGTGCCTATGGTAGTTGCAACATCATATT

>M6-PGSC0003DMG400004928-(rev)M6G-LecRK\_915

GCAGATGCCTGTGAAAATTATGGAGCATGTGGTGCCTATGGTAGTTGCAACATCATATTTTCTCCTGTTT  
GTCGTTGTTTAGACAAGTTTGTGCCTAAAGATCTGAAAATTGGTCAGTG

>M6-PGSC0003DMG400004928-(rev)M6G-LecRK\_976

CTCCTGTTTGTGCGTTGTTTAGACAAGTTTGTGCCTAAAGATCTGAAAATTGGTCAGTGACAAAGTGGTC  
CGGCGGGTGTATTAGAAGGACACCCCTTAATTGCTAGAATGGAGATGGAT

>M6-PGSC0003DMG400004930-(rev)M6G-LecRK\_0

ATTAAGGCTTAGGCATCAAATACATTGATGGAATCTAAATACTTCATACTTTTCTTACTATCTTTCTACT  
CTTTTATACCGAAGATTAGTTCTACTACGACAAATGTAATCAATACTA

>M6-PGSC0003DMG400004930-(rev)M6G-LecRK\_1037

TGTGTTAGGAAGACACCTATTGATTGCAACAAGGAACATGGATTTCTAAAATATTCTGGAATCAAGTTGC  
CAGAAACTAACAACCTCTCAGTACAATAAGACCATGACACTCGAAGGATGT

>M6-PGSC0003DMG400004930-(rev)M6G-LecRK\_1098

TCAAGTTGCCAGAACTAACAACCTCTCAGTACAATAAGACCATGACACTCGAAGGATGTAGGCAAGTAT  
GCTCGACGAACTGTTCTTGACAGCTTATTCGAGCCTAGATATAAGCAATG

>M6-PGSC0003DMG400004930-(rev)M6G-LecRK\_1159

GCAAGTATGCTCGACGAACTGTTCTTGACAGCTTATTCGAGCCTAGATATAAGCAATGGAGATAAAGG  
TTGCTTGTGTTTGGTCTGGGGAGTTGATTGATATCAGAGAGCTCTCTGGAAG

>M6-PGSC0003DMG400004930-(rev)M6G-LecRK\_122

CGGTTCATAACAGATGGTGACACTATTGTTTCATCTGGTGGAACCTTTGAGCTGGGATTTTTTCAGCCCCA  
ATGGTTCCACAACGCGATATATTGGGATATGGTACAAGCAAATTCTTCTCT

>M6-PGSC0003DMG400004930-(rev)M6G-LecRK\_1220

GATAAAGGTTGCTTGTTTTGGTCTGGGGAGTTGATTGATATCAGAGAGCTCTCTGGAAGAGGACAAGAC  
ATTTACATACGAATGGATTCTTCAGACCTAGGTAAGAACTTATATTAACGA

>M6-PGSC0003DMG400004930-(rev)M6G-LecRK\_1281

GACAAGACATTTACATACGAATGGATTCTTCAGACCTAGGTAAGAACTTATATTAACGAAATTTCTAATG  
ATGTGTTTTTGAACTTTTAAATTTTTGAACATATGTAGACCATATTATAT

>M6-PGSC0003DMG400004930-(rev)M6G-LecRK\_1342

TTTCTAATGATGTGTTTTTGAACTTTTAAATTTTTGAACATATGTAGACCATATTATATATGCAAAAGTAG  
AGGCCTATATCAATTCGAAGAAGCTAATTTAGAAAATGGTTGTAGTATC

>M6-PGSC0003DMG400004930-(rev)M6G-LecRK\_1403

GCAAAAGTAGAGGCCTATATCAATTCGAAGAAGCTAATTTAGAAAATGGTTGTAGTATCTCAGGCAAGT  
TCAAACAGAAAGAAGACAGGGACAGTACTCGCGGTGAGTTTCTCGTTGTTG

>M6-PGSC0003DMG400004930-(rev)M6G-LecRK\_1464

AGGCAAGTTCAAACAGAAAGAAGACAGGGACAGTACTCGCGGTGAGTTTCTCGTTGTTGGTGGCAGTG  
ATTCTGCTAGGCCTGATTTTGTTTCATGTACATACGTAAAAAGAAGAACTAA

>M6-PGSC0003DMG400004930-(rev)M6G-LecRK\_1525

GGCAGTGATTCTGCTAGGCCTGATTTTGTTTCATGTACATACGTAAAAAGAAGAACTAAACTCAAAGA  
AGATTTTGAGCTGCCACAGTTTCAATTGTCGTTAATAACAAGAGCCACAGA

>M6-PGSC0003DMG400004930-(rev)M6G-LecRK\_1586

CTCAAAGAAGATTTTGAGCTGCCACAGTTTCAATTGTCGTTAATAACAAGAGCCACAGATAACTTTTCGG  
TCAACAACCAGATTGGAGAAGGTGGATATGGACCTGTTTATAAGGTATAA

>M6-PGSC0003DMG400004930-(rev)M6G-LecRK\_1647

ACTTTTCGGTCAACAACCAGATTGGAGAAGGTGGATATGGACCTGTTTATAAGGTATAAACTAAAAATT  
ATTGGAATAGTGACCAGGCTAGAGATGACTTTCATTCTGTAATACTCGCTC

>M6-PGSC0003DMG400004930-(rev)M6G-LecRK\_1708

TAAAAATTATTGGAATAGTGACCAGGCTAGAGATGACTTTCATTCTGTAATACTCGCTCGTCTTTGTAAA  
ATATATTTCTTCTGATATACTTTTTCCATTTCAAGGGAGTGCTCGAAGA

>M6-PGSC0003DMG400004930-(rev)M6G-LecRK\_1769

CTTTGTAAAATATATTTCTTCTGATATACTTTTTCCATTTCAAGGGAGTGCTCGAAGAGGGACAAGAAAT  
TGCTGTGAAGAGACTTTCAAGGACTTCCATGCAAGGAATTGATGAATTC

>M6-PGSC0003DMG400004930-(rev)M6G-LecRK\_183

TCAGCCCCAATGGTCCACAACGCGATATATTGGGATATGGTACAAGCAAATTCCTTCTTATGTCCAAAC  
AATTGTATGGGTTGCAAACAGAGAGAAACCACTCACCAATACATCTTCAG

>M6-PGSC0003DMG400004930-(rev)M6G-LecRK\_1830

GACAAGAAATTGCTGTGAAGAGACTTTCAAGGACTTCCATGCAAGGAATTGATGAATTCAAGAATGAAG  
TTACCTATATTGCCAAGCTTCAGCATAGAAATCTTGTGAGACTTCTGGGTT

>M6-PGSC0003DMG400004930-(rev)M6G-LecRK\_1891

GAATGAAGTTACCTATATTGCCAAGCTTCAGCATAGAAATCTTGTGAGACTTCTGGGTTGCTGTATTCAA  
GGGAAGAAAAGATGTTGATCTATGAATACATGCCTAATAAAAAGCCTGGA

>M6-PGSC0003DMG400004930-(rev)M6G-LecRK\_1952

TGTATTCAAGGGGAAGAAAAGATGTTGATCTATGAATACATGCCTAATAAAAAGCCTGGACTCATAkata  
TTTGGTTTGGTTTTCTAACTATTCTACAAGCTAAAATGACATGTTTTCAA

>M6-PGSC0003DMG400004930-(rev)M6G-LecRK\_2013

CATACATATTTGGTTTGGTTTTCTAACTATTCTACAAGCTAAAATGACATGTTTTCAAAGTTGCTAACA  
AGAAAGCTTTTCTTCTTTTTTTTTTTGTAGATCAAACAAAGAAAAAGTTA

>M6-PGSC0003DMG400004930-(rev)M6G-LecRK\_2074

GTTGCTAACAAGAAAGCTTTTCTTCTTTTTTTTTTTGTAGATCAAACAAAGAAAAAGTTACTTGATTGGTCA

AGGCGTTTCGACATCATTAAATGGAATTGCTCGTGGCTTATTGTATCTCC

>M6-PGSC0003DMG400004930-(rev)M6G-LecRK\_2135

TGATTGGTCAAGGCGTTTCGACATCATTAAATGGAATTGCTCGTGGCTTATTGTATCTCCATCAAGATTCTA  
GACTACGTATTATCCATAGAGACCTTAAAGCAAGCAATGTTTTGTTAGA

>M6-PGSC0003DMG400004930-(rev)M6G-LecRK\_2196

CAAGATTCTAGACTACGTATTATCCATAGAGACCTTAAAGCAAGCAATGTTTTGTTAGATACAGAAATGA  
ATCCAAAGATATCAGACTTTGGGATGGCTCGAAGTGTTCAGGAAATGAT

>M6-PGSC0003DMG400004930-(rev)M6G-LecRK\_2257

CAGAAATGAATCCAAAGATATCAGACTTTGGGATGGCTCGAAGTGTTCAGGAAATGATATGGGAGCA  
AAAACATGCCATGTAGTTGGGACACAGTAAGAATCGATCATACAGAAGTACT

>M6-PGSC0003DMG400004930-(rev)M6G-LecRK\_2318

GGGAGCAAAAACATGCCATGTAGTTGGGACACAGTAAGAATCGATCATACAGAAGTACTCTCATATGAA  
ATCCCCCTTCTCATGGTGTAGTTCTTTTTTTGGAACAGCGGTTACATGTCC

>M6-PGSC0003DMG400004930-(rev)M6G-LecRK\_2379

CATATGAAATCCCCCTTCTCATGGTGTAGTTCTTTTTTTGGAACAGCGGTTACATGTCCCCTGAATATGCA  
GTAGATGGAATCTTCTCAGTAAAATCAGATGTGTTTAGCTTTGGCGTAT

>M6-PGSC0003DMG400004930-(rev)M6G-LecRK\_244

TGTCCAAACAATTGTATGGGTTGCAAACAGAGAAACCACTCACCAATACATCTTCAGTCGTTTTGAAG  
GTCAACAAGCCGGAATACTTGCTCTTCTTAATGACAAGAATGAAACTAT

>M6-PGSC0003DMG400004930-(rev)M6G-LecRK\_2440

TGAATATGCAGTAGATGGAATCTTCTCAGTAAAATCAGATGTGTTTAGCTTTGGCGTATTGGTGTAGAG  
ATTGTGAGTTGCAAGAAAAATAGAGGATTTGTCCATCAAGATCACAACT

>M6-PGSC0003DMG400004930-(rev)M6G-LecRK\_2501

GTGTTAGAGATTGTGAGTTGCAAGAAAAATAGAGGATTTGTCCATCAAGATCACAACTTAACCTTCTCG  
GTCACGTAAGCACTCTCTCTATACATTCTTGTGATCTATATTACATATAG

>M6-PGSC0003DMG400004930-(rev)M6G-LecRK\_2562

ACCTTCTCGGTCACGTAAGCACTCTCTCTATACATTCTTGTGATCTATATTACATATAGAATTAATTTGTCA  
TGATCTAAATACTCAAACAGGCATGGAAGCTTTACAAGGAAGATAGG

>M6-PGSC0003DMG400004930-(rev)M6G-LecRK\_2623

TTAATTTGTCATGATCTAAATTACTCAAACAGGCATGGAAGCTTTACAAGGAAGATAGGTCCTTGGA  
AATTGATGAGAAGCTAGCTGAATCTTGTCATATTTCTCAAGTTTTAAGGT

>M6-PGSC0003DMG400004930-(rev)M6G-LecRK\_2684

CTTGGAACTAATTGATGAGAAGCTAGCTGAATCTTGTCATATTTCTCAAGTTTTAAGGTCAATTCAAGTG  
GGACTATTATGTGTGCAACACTGTCCTGAAGATAGACCAAACATGTCTTC

>M6-PGSC0003DMG400004930-(rev)M6G-LecRK\_2745

ATTCAAGTGGGACTATTATGTGTGCAACACTGTCCTGAAGATAGACCAAACATGTCTTCTGTGGTTCAA  
TGCTAGGTAATGAGAGTTTACTTGCAAAGCTAAAGAACCAGGATTTTTTC

>M6-PGSC0003DMG400004930-(rev)M6G-LecRK\_2806

TGGTTCAAATGCTAGGTAATGAGAGTTTACTTGCAAAGCTAAAGAACCAGGATTTTTTCATGGAAAGAA  
CGTTACATGATTCAGATAATTCAGGAATGCAGACAGGAAGTTCGAAAAATG

>M6-PGSC0003DMG400004930-(rev)M6G-LecRK\_2867

GGAAAGAACGTTACATGATTCAGATAATTCAGGAATGCAGACAGGAAGTTCGAAAAATGAAATAACAA  
TGACAATGTTAGATCCTCGGTAGAGTACTGTGATTGAGGCAACTACTGTTGA

>M6-PGSC0003DMG400004930-(rev)M6G-LecRK\_2928

ATAACAATGACAATGTTAGATCCTCGGTAGAGTACTGTGATTGAGGCAACTACTGTTGATAAGCATGAG  
TTTTTAGAGGGCATGATAACAACATTGAAGCGCCTGAGAAGCGCTCAAGCA

>M6-PGSC0003DMG400004930-(rev)M6G-LecRK\_2989

AGCATGAGTTTTTAGAGGGCATGATAACAACATTGAAGCGCCTGAGAAGCGCTCAAGCATCACCTCAGG  
GATTAAGCGTGCCTTTGAGTATTTAGAAAAATGGTTCATAATTGCCATGCT

>M6-PGSC0003DMG400004930-(rev)M6G-LecRK\_305

GTTTTGAAGGTCAACAAGCCGGAATACTTGCTCTTCTTAATGACAAGAATGAACTATATGGTCCACGA  
ACACCTCACGATCAGTCCAAAATCCAGTTGCAGTGTGTTGGATTCTGGT

>M6-PGSC0003DMG400004930-(rev)M6G-LecRK\_3050

ACCTCAGGGATTAAGCGTGCCTTTGAGTATTTAGAAAAATGGTTCATAATTGCCATGCTAGCTATTATAA  
GTAGCTATTCAACTTGAATTTTCATTTGTATCTTATCTTAGAAAGAAATG

>M6-PGSC0003DMG400004930-(rev)M6G-LecRK\_3111

CTATTATAAGTAGCTATTCAACTTGAATTTTCATTTGTATCTTATCTTAGAAAGAAATGTAAATTCTAGTAA  
GCAAAAATGTCCAAATTATATTGCCTATGACAATACATAAAAATCGAAT

>M6-PGSC0003DMG400004930-(rev)M6G-LecRK\_3171

AAATTCTAGTAAGCAAAAATGTCCAAATTATATTGCCTATGACAATACATAAAAATCGAATCAAACCGACA  
GATGCATGAGCTCTCCAATATCTGCATGGAATAGTCCAATATGTTGAAAT

>M6-PGSC0003DMG400004930-(rev)M6G-LecRK\_366

GGTCCACGAACACCTCACGATCAGTCCAAAATCCAGTTGCAGTGTTGTTGGATTCTGGTAATCTTGTCTCT  
AAAAGATGCAAATGATGACAATCCAGAAAATTTCTATGGCAGAGTTTCA

>M6-PGSC0003DMG400004930-(rev)M6G-LecRK\_427

TCTTGTCTAAAAGATGCAAATGATGACAATCCAGAAAATTTCTATGGCAGAGTTTCAATTTTCCA  
GATACTTTCTTGCCTGATATGAAACTCGGAAAGAATTTTAAGACTGGTAT

>M6-PGSC0003DMG400004930-(rev)M6G-LecRK\_488

TTTCCAAGTACTTTCTTGCCTGATATGAAACTCGGAAAGAATTTTAAGACTGGTATTGAAGTTTACCT  
TTTAGCATGGAAGAACGATAACGATCCAAGTCCAGGGGAATACAGTCTC

>M6-PGSC0003DMG400004930-(rev)M6G-LecRK\_549

AAGTTTACCTTTTAGCATGGAAGAACGATAACGATCCAAGTCCAGGGGAATACAGTCTCCACATTGATCC  
TACTGGATATCCACAAGGCCTCATTAGACATGGGGCAAGGGTATCAGCTC

>M6-PGSC0003DMG400004930-(rev)M6G-LecRK\_61

ATCTTTCTACTCTTTTATACCGAAGATTAGTTCTACTACGACAAATGTAATCAATACTAATCGGTTTCATAAC  
AGATGGTGACACTATTGTTTCATCTGGTGGAACCTTTGAGCTGGGATT

>M6-PGSC0003DMG400004930-(rev)M6G-LecRK\_610

CATTGATCCTACTGGATATCCACAAGGCCTCATTAGACATGGGGCAAGGGTATCAGCTCGAGCAGGACC  
ATGGAATGGTTTACGGTGGAGTGGAGCACCTGCACCACTACAAACACAAAG

>M6-PGSC0003DMG400004930-(rev)M6G-LecRK\_671

GCAGGACCATGGAATGGTTTACGGTGGAGTGGAGCACCTGCACCACTACAAACACAAAGCAGCATATA  
TACTTTTCAATTTGTTTCAATGAAGAGGAGGTTTACTATAGTTTTTCTCTC

>M6-PGSC0003DMG400004930-(rev)M6G-LecRK\_732

GCATATATACTTTTCAATTTGTTTCAATGAAGAGGAGGTTTACTATAGTTTTTCTCTCATTAACTCAC  
TGTTAAACAAGGTTAGTCTGACTAACAATGGTTTTATACAACGTTTGA

>M6-PGSC0003DMG400004930-(rev)M6G-LecRK\_793

TAACAACTCACTGTTAAACAAGGTTAGTCTGACTAACAATGGTTTTATACAACGTTTGACGTGGGTGGAT

AGGACAAAGAGTTGGCATCTTTACCTCAATATTCCTCTGGATACTTGTGA

>M6-PGSC0003DMG400004930-(rev)M6G-LecRK\_854

TGGGTGGATAGGACAAAGAGTTGGCATCTTTACCTCAATATTCCTCTGGATACTTGTGATACATATAGCT  
TATGTGGTGCATATGGGAACTGTGTCATAGATAGTTCTCCTGTTTGTGGA

>M6-PGSC0003DMG400004930-(rev)M6G-LecRK\_915

CATATAGCTTATGTGGTGCATATGGGAACTGTGTCATAGATAGTTCTCCTGTTTGTGGATGTTTGGACAA  
GTTTGAACCTAAATATCCACAAAATTGGCAAACAGGAGACTGGTCACAAG

>M6-PGSC0003DMG400004930-(rev)M6G-LecRK\_976

TTTGGACAAGTTTGAACCTAAATATCCACAAAATTGGCAAACAGGAGACTGGTCACAAGGGTGTGTTAG  
GAAGACACCTATTGATTGCAACAAGGAACATGGATTTCTAAAATATTCTGG

>M6-PGSC0003DMG400004963M6LRR-RLK\_0

CTTTTATTTCTTCCTCTCTAAGAAAAACAATTTAATAACAATGACTATTCAAAAATTATCACCCCTTGT  
GTTATTTTTCTTACTTTGACGTCCACTTTTGTCAAGGTGATCAATC

>M6-PGSC0003DMG400004963M6LRR-RLK\_1054

AATCGATTTTCTGGAAAGCTACCGCCTTTTCTGTGTAGTGGAGGTAAATTGAGTTATATTCTTTTACTTCA  
AAACATGTTCTCAGGTGAACTGCCTGATGGATATGTGAAATGTCAGTCT

>M6-PGSC0003DMG400004963M6LRR-RLK\_1116

TTTACTTCAAACATGTTCTCAGGTGAACTGCCTGATGGATATGTGAAATGTCAGTCTGTTCTTCGCTTTC  
GAGTGAATTACAATCAGTTGGAGGGAAGAATACCACAAGAGCTTTTTAC

>M6-PGSC0003DMG400004963M6LRR-RLK\_1178

TTCGCTTTCGAGTGAATTACAATCAGTTGGAGGGAAGAATACCACAAGAGCTTTTTACTCTTCCACATGT  
TTCAATCATTGATTTGAGTTATAATCATTTTAGTGGTCCAATTCCAACAA

>M6-PGSC0003DMG400004963M6LRR-RLK\_124

TTCTTTGTACTIONCATGAAGAAATTTGTCACAGGAAGTTCTTTGTCTAATTGGGATATTGGAAAACCAATTTG  
TCAATACAAAGGTGTCGGTTGTGATGAAAGGGGAGACGTTATCAAATTT

>M6-PGSC0003DMG400004963M6LRR-RLK\_1240

CCACATGTTTCAATCATTGATTTGAGTTATAATCATTTTAGTGGTCCAATTCCAACAACAATTGGAAGTGC  
TAGGAATTTATCAGAATTGTTTATGCAAAGTAACAAGCTTTCAGGTTTG

>M6-PGSC0003DMG400004963M6LRR-RLK\_1302



TGGAAGTGCTAGGAATTTATCAGAATTGTTTATGCAAAGTAACAAGCTTTCAGGTTTGCTTCCTCATGAA  
ATATCTACATCTTCTAATCTTGTGAAGCTTGATCTTAGCAATAACCTTTT

>M6-PGSC0003DMG400004963M6LRR-RLK\_1364

CTCATGAAATATCTACATCTTCTAATCTTGTGAAGCTTGATCTTAGCAATAACCTTTTGTATGGTCCAATTC  
CTTCTGAAATTGGTGGTTTAAAAAGCCTCAATTTGTTACTCTTGCAAG

>M6-PGSC0003DMG400004963M6LRR-RLK\_1426

GGTCCAATTCCTTCTGAAATTGGTGGTTTAAAAAGCCTCAATTTGTTACTCTTGCAAGGTAACAAGTTCAA  
TTCTTCAATCCCCGAGTCACTTTCTTCGCTTAAATATCTCAACTATCTT

>M6-PGSC0003DMG400004963M6LRR-RLK\_1488

CAAGTTCAATTCTTCAATCCCCGAGTCACTTTCTTCGCTTAAATATCTCAACTATCTTGATCTGTCTAACAA  
TCTTTTGATAGGAAAGATCCCTGAGAGCCTAGGTGAATTGTTACCAA

>M6-PGSC0003DMG400004963M6LRR-RLK\_1550

TGTCTAACAAATCTTTTGATAGGAAAGATCCCTGAGAGCCTAGGTGAATTGTTACCAAACCTCATGAACTT  
GTCAAACAACCTTACTTTCTGGTGCTATACCTCTTTTGTATAAAAAGGAG

>M6-PGSC0003DMG400004963M6LRR-RLK\_1612

ATGAACTTGTCAAACAACCTTACTTTCTGGTGCTATACCTCTTTTGTATAAAAAGGAGGTGTTTTGGAAAG  
TTTTTTAGGCAATCCGGGACTTTGTGTCCCTACCTCTTTGAACTCAACA

>M6-PGSC0003DMG400004963M6LRR-RLK\_1674

TTTGAAAGTTTTTTAGGCAATCCGGGACTTTGTGTCCCTACCTCTTTGAACTCAACAACACAAGTTTTTC  
AAACATGTTACATAGCTATAACCATAAGAAGAGGAACAACATTGTTTG

>M6-PGSC0003DMG400004963M6LRR-RLK\_1736

CAAGTTTTCAAACATGTTACATAGCTATAACCATAAGAAGAGGAACAACATTGTTTGGGTTATTGGGAC  
ATCGGTGGGGATAGTCATTGTTGGATTAGTCTTGTATCAAACGATGGT

>M6-PGSC0003DMG400004963M6LRR-RLK\_1798

ATTGGGACATCGGTGGGGATAGTCATTGTTGGATTAGTCTTGTATCAAACGATGGTTTGGTAACAAA  
AAGGCGGTGATGGAACAGGATGATCATTGTCATCATCATTTTTCTCC

>M6-PGSC0003DMG400004963M6LRR-RLK\_186

ACCAATTTGTCAATACAAAGGTGTCGGTTGTGATGAAAGGGGAGACGTTATCAAATTAACATATCGGC  
CTGGTATTTATCTGGCCAATTTCCAAGTGATGTGTGTAGTTATTTGCCAAG

>M6-PGSC0003DMG400004963M6LRR-RLK\_1860

TAACAAAAGGCGGTGATGGAACAGGATGATCATTATTGTCATCATCATTTTTCTCCTATGATGTAAAG  
AGTTTCCATCGATTGAGTTTTGATCAACGTGAGATCTTTGAAGCTATGGT

>M6-PGSC0003DMG400004963M6LRR-RLK\_1922

ATGTTAAGAGTTTCCATCGATTGAGTTTTGATCAACGTGAGATCTTTGAAGCTATGGTTGAGAAGAATAT  
TGTTGGATATGGAGGGTCAGGGGCTGTCTATAAGATCGAGTTGAGTAACG

>M6-PGSC0003DMG400004963M6LRR-RLK\_1984

AAGAATATTGTTGGATATGGAGGGTCAGGGGCTGTCTATAAGATCGAGTTGAGTAACGGAGGAGTAGT  
TGCTGCAAAGAAGCTGTGGAGTCACAAACATAAGCATTCTGTTTCTGAGGAT

>M6-PGSC0003DMG400004963M6LRR-RLK\_2046

AGTAGTTGCTGCAAAGAAGCTGTGGAGTCACAAACATAAGCATTCTGTTTCTGAGGATAAATTGGTTTT  
GGATAAGGAACTTAAGACAGAAGTTGAGACTCTTGTAACATAAGGCACAA

>M6-PGSC0003DMG400004963M6LRR-RLK\_2108

TGGTTTTGGATAAGGAACTTAAGACAGAAGTTGAGACTCTTGTAACATAAGGCACAAAAACATTGTGA  
AATTGTAAGTTATTTCTCAAGTTTGGATTGCAGCTTGTGGTTTATGAAT

>M6-PGSC0003DMG400004963M6LRR-RLK\_2170

ATTGTGAAATTGTAAGTTATTTCTCAAGTTTGGATTGCAGCTTGTGGTTTATGAATACATGCCTAATGG  
AAACCTTTGGCATGCTCTTCATGGTGGGAAGTTCGTGTTGGATTGGCCT

>M6-PGSC0003DMG400004963M6LRR-RLK\_2232

GCCTAATGGAAACCTTTGGCATGCTCTTCATGGTGGGAAGTTCGTGTTGGATTGGCCTATTCGTCATCAA  
ATTGCACTTGGAAATAGCTCAAGGATTGGCCTATCTTCACCATGATCTTAT

>M6-PGSC0003DMG400004963M6LRR-RLK\_2294

GTCATCAAATTGCACTTGAATAGCTCAAGGATTGGCCTATCTTCACCATGATCTTATGCCACCGATTATT  
CATAGAGATATCAAATCCACCAACATCCTCCTGGATATTGATTATCAAC

>M6-PGSC0003DMG400004963M6LRR-RLK\_2356

CCGATTATTCATAGAGATATCAAATCCACCAACATCCTCCTGGATATTGATTATCAACCAAAAAGTCGCGG  
ATTTTGGTATAGCCAAAGTGTGCAAGCCAGAGGAGGCAAAGATTCCAGC

>M6-PGSC0003DMG400004963M6LRR-RLK\_2418

AGTCGCGGATTTTGGTATAGCCAAAGTGTGCAAGCCAGAGGAGGCAAAGATTCCAGCACCACGGTCA

TCGCAGGAACTTATGGTACTTGGCACCAGGTATAATTTTCCCAATTCATAT

>M6-PGSC0003DMG400004963M6LRR-RLK\_248

TATCGGCCTGGTATTTATCTGGCCAATTTCCAAGTGATGTGTGTAGTTATTTGCCAAGATTGAAAAGTCTT  
CATATTGGTCATAATAATTTCCAAGGTGGTTTTCTAAGTACCTAACAA

>M6-PGSC0003DMG400004963M6LRR-RLK\_2480

CGGTCATCGCAGGAACTTATGGTACTTGGCACCAGGTATAATTTTCCCAATTCATATTTGTTACTTCAAT  
CTTTGAGCTTAAGAGTTATAATACATATCACAATCTTGATTGAGTAGAT

>M6-PGSC0003DMG400004963M6LRR-RLK\_2542

TACTTCAATCTTTGAGCTTAAGAGTTATAATACATATCACAATCTTGATTGAGTAGATTAAATTAATCCT  
TTATGTGCAAATAACATCCCATAGTTGAAGTGGCCTAATGTTACTCTAA

>M6-PGSC0003DMG400004963M6LRR-RLK\_2604

TTAAATCCTTTATGTGCAAATAACATCCCATAGTTGAAGTGGCCTAATGTTACTCTAAATTGGCCATTTAA  
TATAGTCATTGCCTAACGTTAAGAGTATATTTGACCCTTTTCCGTTCTT

>M6-PGSC0003DMG400004963M6LRR-RLK\_2666

GCCATTTAATATAGTCATTGCCTAACGTTAAGAGTATATTTGACCCTTTTCCGTTCTTAATTATGGCTTTTT  
ATGTGTAAAAACCATCACATATGCTCAAGTTTCTTGATTGAACTTTCA

>M6-PGSC0003DMG400004963M6LRR-RLK\_2728

ATGGCTTTTTATGTGTAAAAACCATCACATATGCTCAAGTTTCTTGATTGAACTTTCATTTAACACATGTTT  
AAGTGTTCAAATTAGGCTAATGTTACTCAACTTTGGTGTAACAGAGTA

>M6-PGSC0003DMG400004963M6LRR-RLK\_2790

ACACATGTTTAAGTGTTCAAATTAGGCTAATGTTACTCAACTTTGGTGTAACAGAGTATGCATATTCTTCA  
AAGGCAACTACAAAGTGTGATGTGTATAGTTTTGGAGTTGTTCTAATGG

>M6-PGSC0003DMG400004963M6LRR-RLK\_2852

TATTCTTCAAAGGCAACTACAAAGTGTGATGTGTATAGTTTTGGAGTTGTTCTAATGGAATTGATTACTG  
GAAAGAAGCCAGTGGAGCCAGAATTTGGAGACAACAAGAACATTGTTTAT

>M6-PGSC0003DMG400004963M6LRR-RLK\_2914

GATTACTGGAAAGAAGCCAGTGGAGCCAGAATTTGGAGACAACAAGAACATTGTTTATTGGGTATCAAC  
AAAAGTGGAGACTAAAGAAGGTGCATTTGAAGTATTGGATAAAAAAGTCTC

>M6-PGSC0003DMG400004963M6LRR-RLK\_2976

TATCAACAAAAGTGGAGACTAAAGAAGGTGCATTTGAAGTATTGGATAAAAAAGTCTCAGATTCTTTCA  
AAGAGGACATGATTAAGGTTCTACGTATAGCTATACGTTGTACGTATAGTA

>M6-PGSC0003DMG400004963M6LRR-RLK\_3038

TCTTTCAAAGAGGACATGATTAAGGTTCTACGTATAGCTATACGTTGTACGTATAGTACACCAACACTTC  
GTCCTACCATGAATGAAGTTGTTGAGTTGCTAATCGAAGCGGATCCTTGC

>M6-PGSC0003DMG400004963M6LRR-RLK\_310

AAAAGTCTTCATATTGGTCATAATAATTTCCAAGGTGGTTTTCTAAGTACCTAACAAATTGTTCTTTTTTG  
GAAGAATTGAACATGACTAAAACATCACTTACAGGACAAATTCCTGAT

>M6-PGSC0003DMG400004963M6LRR-RLK\_3100

AACACTTCGTCCTACCATGAATGAAGTTGTTGAGTTGCTAATCGAAGCGGATCCTTGCAAGTTCAATTGT  
TGCAACATGTCAAATAAGAAGAAGAATGACACACAAGATCAACTGATCAA

>M6-PGSC0003DMG400004963M6LRR-RLK\_3162

TCAATTGTTGCAACATGTCAAATAAGAAGAAGAATGACACACAAGATCAACTGATCAATAAGCCACCAA  
AGAACATATATGAGTTGTAAAATATTTAGTGTATCAAATTAGTATACAAGG

>M6-PGSC0003DMG400004963M6LRR-RLK\_3224

CCACCAAAGAACATATATGAGTTGTAAAATATTTAGTGTATCAAATTAGTATACAAGGTATATAGAATAT  
GTGTACTCATGAGATATTACACCCTCAAAGAATCAGTCTTTATGTTTTT

>M6-PGSC0003DMG400004963M6LRR-RLK\_3286

TAGAATATGTGTACTIONCATGAGATATTACACCCTCAAAGAATCAGTCTTTATGTTTTCTAATAAATGCTAC  
TACTTTTTATTAGTATATAGATTCTCCAATTAGTGTACTTTGCTTTTT

>M6-PGSC0003DMG400004963M6LRR-RLK\_3329

AGTCTTTATGTTTTCTAATAAATGCTACTACTTTTTATTAGTATATAGATTCTCCAATTAGTGTACTTTGCT  
TTTTTATATTTTTTGGCCTGTTGTAAGTATTTGGGAATTTTATGAA

>M6-PGSC0003DMG400004963M6LRR-RLK\_372

TTCTTTTTTGAAGAATTGAACATGACTAAAACATCACTTACAGGACAAATTCCTGATTTGTCACCATTAC  
AATCTTTGAACTACTTGATCTTTCATGTAATTAATTGACAGGGGATTT

>M6-PGSC0003DMG400004963M6LRR-RLK\_434

CACCATTACAATCTTTGAACTACTTGATCTTTCATGTAATTAATTGACAGGGGATTTTCTTTGTCAATTA  
TTAATCTCACCAACTTAGTTATCCTGAATTTCAATGAAAATCGCCATT

>M6-PGSC0003DMG400004963M6LRR-RLK\_496

TTGTCAATTATTAATCTCACCAACTTAGTTATCTGAATTTCAATGAAAATCGCCATTTCAATCCGTGGCG  
ATTACCAGAGGACATTTCCAGGCTTATAAATCTCAAGTGGATGATTTTA

>M6-PGSC0003DMG400004963M6LRR-RLK\_558

TCCGTGGCGATTACCAGAGGACATTTCCAGGCTTATAAATCTCAAGTGGATGATTTTAACAGCATGTAAT  
ATGCATGGGACAATTCCAGTGTCAATAAGTAACATGACTTCTCTTGTGA

>M6-PGSC0003DMG400004963M6LRR-RLK\_62

TCACCTTGTGTTATTTTTCTTACTTTGACGTCCACTTTTGTTCAAGGTGATCAATCTCAGTTCTTTGTACT  
CATGAAGAAATTTGTACAGGAAGTTCTTTGTCTAATTGGGATATTG

>M6-PGSC0003DMG400004963M6LRR-RLK\_620

CATGTAATATGCATGGGACAATTCCAGTGTCAATAAGTAACATGACTTCTCTTGTGATCTTGAATTGAG  
CGCGAATCGCCTTGTGGTAAGGTGCCTAGAGAACTCGGGAAGCTGAAGA

>M6-PGSC0003DMG400004963M6LRR-RLK\_682

GAATTGAGCGCAATCGCCTTGTGGTAAGGTGCCTAGAGAACTCGGGAAGCTGAAGAATTTGAACT  
CCTTGAGCTTTTTTACAACCTTACTTGATGGTGAAATCCCCGCGGAGCTAGGG

>M6-PGSC0003DMG400004963M6LRR-RLK\_744

GAAACTCCTTGAGCTTTTTTACAACCTTACTTGATGGTGAAATCCCCGCGGAGCTAGGGAATTTGACAGAA  
CTTGTGGACTTAGACATGTCCGCGAATAATTTACAGGGAGAATTCCAGA

>M6-PGSC0003DMG400004963M6LRR-RLK\_806

TGACAGAACTTGTGGACTTAGACATGTCCGCGAATAATTTACAGGGAGAATTCCAGAGTCTATAAGCC  
GGCTTCCTAAGCTGGAAGTGTGCAGCTTTACCATAACGCGCTATCTGGAG

>M6-PGSC0003DMG400004963M6LRR-RLK\_868

ATAAGCCGGCTTCCTAAGCTGGAAGTGTGCAGCTTTACCATAACGCGCTATCTGGAGAGTTTCCAGCA  
GCACTTGCTAATTCAACAACCTTTAACTATCCTGTCTCTTTATGACAATCTT

>M6-PGSC0003DMG400004963M6LRR-RLK\_930

TCCAGCAGCACTTGCTAATTCAACAACCTTTAACTATCCTGTCTCTTTATGACAATCTTTTTACAGGAGAAG  
TTCCACAACACTTTGGTCTTTTCATCAGCTTTGTTGGCATTGGACTTGTC

>M6-PGSC0003DMG400004963M6LRR-RLK\_992

CAGGAGAAGTTCCACAACACTTTGGTCTTTTCATCAGCTTTGTTGGCATTGGACTTGTCAGAAAATCGATT

TTCTGGAAAGCTACCGCCTTTTCTGTGTAGTGGAGGTAAATTGAGTTATA

>M6-PGSC0003DMG400004966M6LRR-RLK\_0

GCGCTCTTCATAGTCGTCTCCTTACACGTTTTTCTGAAGGCGGAAGAAAAAACTTCTCTTCGTCAACTT  
CTTCGTCACTATGGCGGCGCTATTCAATTGCCGGCCGGAACCTATCCA

>M6-PGSC0003DMG400004966M6LRR-RLK\_1037

TGTACTAACAACACTACTGGTCAGCTTCCGCAGAAGTTGGGTTCTTGGGCGAATTTTGATTTCATTGA  
TGTATCAGAGAATAGTTTCACTGGTCCAATTCCACCGGACATGTGTAAGA

>M6-PGSC0003DMG400004966M6LRR-RLK\_1098

TTTCATTGATGTATCAGAGAATAGTTTCACTGGTCCAATTCCACCGGACATGTGTAAGATGGGGACGATG  
AGAGGATTATTGATACTTCAGAACAATTTCACTGGCGGAATCCCTGAAAG

>M6-PGSC0003DMG400004966M6LRR-RLK\_1159

GGGACGATGAGAGGATTATTGATACTTCAGAACAATTTCACTGGCGGAATCCCTGAAAGTTATGCTAAT  
TGTACAACAATGACGCGGATTCGAGTGAGCAAAAACACTACTCTCCGGTGTG

>M6-PGSC0003DMG400004966M6LRR-RLK\_122

TCTTCTCTATTTTCTCCTTCTTCTTCTTCCCGTCTGCTTTTTCCGACGAGCTTCAAACACTTTTATCCATC  
AAATCCTCTTTATCAAACCCCATCACCAATGTATTCCAAAATTGGG

>M6-PGSC0003DMG400004966M6LRR-RLK\_1220

ATGCTAATTGTACAACAATGACGCGGATTCGAGTGAGCAAAAACACTACTCTCCGGTGTGATTCTGCAG  
GAATTTGGGGGCTACCAAAGCTCGAAATCCTTGATGTTGCAATGAATGAGT

>M6-PGSC0003DMG400004966M6LRR-RLK\_1281

TCCTGCAGGAATTTGGGGGCTACCAAAGCTCGAAATCCTTGATGTTGCAATGAATGAGTTTGAAGGTAC  
TATTACTTCTGTTATTGGAAATGCAAAATCTTTAGGTGAAATTGATGCGGC

>M6-PGSC0003DMG400004966M6LRR-RLK\_1342

GAAGGTAATACTTCTGTTATTGGAAATGCAAAATCTTTAGGTGAAATTGATGCGGCTAATAACAGAT  
TCTCTGGTGAATTGCCTTTTGATATTTGCAATGCTTCTTTCTTAGTGAAA

>M6-PGSC0003DMG400004966M6LRR-RLK\_1403

ATAACAGATTCTCTGGTGAATTGCCTTTTGATATTTGCAATGCTTCTTTCTTAGTGAAAATTGATTTTAGTA  
ACAATCAGTTTTCCGGTGAATTCGGGAACAATTGGGGAGCTTAAGA

>M6-PGSC0003DMG400004966M6LRR-RLK\_1464

TGATTTTAGTAACAATCAGTTTTCCGGTGAAATTCCGGGAACAATTGGGGAGCTTAAGAAGATTGTTAAT  
CTTAATTTACAGAACAACAAGTTTTCTGGTTCAATACCAGATTCTTTAGG

>M6-PGSC0003DMG400004966M6LRR-RLK\_1525

ATTGTTAATCTTAATTTACAGAACAACAAGTTTTCTGGTTCAATACCAGATTCTTTAGGCTCTTGTTTCA  
CTAAGCGACATTAACATGGCTAACAATTTGCTTAGTGGCTCTATTCCT

>M6-PGSC0003DMG400004966M6LRR-RLK\_1586

CTTGTTTCACTAAGCGACATTAACATGGCTAACAATTTGCTTAGTGGCTCTATTCCTGTTTCTCTAGGA  
TCATTACCGACTTTAACTTCATTAACTTGTTCGGAGAATCAGCTTTCAG

>M6-PGSC0003DMG400004966M6LRR-RLK\_1647

TTCTCTAGGATCATTACCGACTTTAACTTCATTAACTTGTTCGGAGAATCAGCTTTCAGGGAAAATTCCGA  
CGAGTTTATCAAATCTGAAGTTAAATCTTCTTGATTTTTCCAACAATCA

>M6-PGSC0003DMG400004966M6LRR-RLK\_1708

AAAATTCCGACGAGTTTATCAAATCTGAAGTTAAATCTTCTTGATTTTTCCAACAATCAGTTGACTGGAGC  
AATACCAAATCTCTATCAATTGATGCTTATAAGGGTAGCTTTGCTGGG

>M6-PGSC0003DMG400004966M6LRR-RLK\_1769

TGACTGGAGCAATACCAAATCTCTATCAATTGATGCTTATAAGGGTAGCTTTGCTGGGAATAATGGTCT  
TTGTAGCCAAAACATTAAGAACTCCGTAGATGTTATGGTGAATCTGGAA

>M6-PGSC0003DMG400004966M6LRR-RLK\_183

ACTTTTATCCATCAAATCTCTTTATCAAACCCCATCACCAATGTATTCCAAAATTGGGAACCCAATACTCC  
TCTCTGTAAGTTCACTGGCATCACATGTAATTCCGATGGGTCAGTCAA

>M6-PGSC0003DMG400004966M6LRR-RLK\_1830

TAATGGTCTTTGTAGCCAAAACATTAAGAACTCCGTAGATGTTATGGTGAATCTGGAAAGCCTAGAGA  
ATGGTACACTCTGTTGATCTGTTTATTGGTGGCTGTGATTGTGGTGCTCGT

>M6-PGSC0003DMG400004966M6LRR-RLK\_1891

CCTAGAGAATGGTACACTCTGTTGATCTGTTTATTGGTGGCTGTGATTGTGGTGCTCGTTTCATTTGCGG  
GCTATTTGTTCTTGAAGAAGAAGAGTCATAAGGAACATGAGAGGTCTTTG

>M6-PGSC0003DMG400004966M6LRR-RLK\_1952

CATTTGCGGGCTATTTGTTCTTGAAGAAGAAGAGTCATAAGGAACATGAGAGGTCTTTGAAGCAAAT  
CTTGAATACAAAGTCATTCCATATATTGACCTTCACAGAGGATGATATTC

>M6-PGSC0003DMG400004966M6LRR-RLK\_2013

GCAAAATTCTTGGAATACAAAGTCATTCCATATATTGACCTTCACAGAGGATGATATTCTTGATGGAATC  
AAACACGACAATTTGATTGGAAAAGGTGGTTCTGGTAGTGTATACAGAGT

>M6-PGSC0003DMG400004966M6LRR-RLK\_2074

GATGGAATCAAACACGACAATTTGATTGGAAAAGGTGGTTCTGGTAGTGTATACAGAGTGCAGCTTTCA  
GATGGAACAGATTTGCGCGTGAAACATATTTGGACTTCTGATTCAGGAAAC

>M6-PGSC0003DMG400004966M6LRR-RLK\_2135

AGCTTTCAGATGGAACAGATTTGCGCGTGAAACATATTTGGACTTCTGATTCAGGAAACAGGAAAATAT  
CAGGAACAACATCTCCAATGTTGGGAAAACCAGGGAAGAAATCGAAAGAAT

>M6-PGSC0003DMG400004966M6LRR-RLK\_2196

GAAAATATCAGGAACAACATCTCCAATGTTGGGAAAACCAGGGAAGAAATCGAAAGAATTTGAGGCTG  
AGTTGAAACACTGAGCTCAATTCGACATGTGAATGTGGTGAAATTGTACTG

>M6-PGSC0003DMG400004966M6LRR-RLK\_2257

GAGGCTGAGGTTGAAACACTGAGCTCAATTCGACATGTGAATGTGGTGAAATTGTACTGTAGCATAACG  
AGTGATGACTCGAGCTTGTGGTGTATGAATATATGCCAAATGGAAGTTTG

>M6-PGSC0003DMG400004966M6LRR-RLK\_2318

GCATAACGAGTGATGACTCGAGCTTGTGGTGTATGAATATATGCCAAATGGAAGTTTGTGGGATCGAT  
TGCATACTTGCAAAAAGATGTCACTTGATTGGGAGACGAGGTACGAGATAG

>M6-PGSC0003DMG400004966M6LRR-RLK\_2379

GGATCGATTGCATACTTGCAAAAAGATGTCACTTGATTGGGAGACGAGGTACGAGATAGCTCTTGGTGC  
AGCCAAAGGACTGGAGTATTTACACCATGGTTGTGATAAGCCAGTGATTCA

>M6-PGSC0003DMG400004966M6LRR-RLK\_244

CCAATACTCCTCTCTGTAAGTTCACTGGCATCACATGTAATCCGATGGGTCAGTCAAAGAAATCGAGC  
TTTCGAGTCAAAAATTTCTGGGTTTGTTCCTTTTGATAAAATATGTTCA

>M6-PGSC0003DMG400004966M6LRR-RLK\_2440

CTTGGTGCAGCCAAAGGACTGGAGTATTTACACCATGGTTGTGATAAGCCAGTGATTCATAGAGATGTT  
AAATCAAGTAACATCTTGTGGATGAGTTTTGCAAGCCAAGAATCGCCGAC

>M6-PGSC0003DMG400004966M6LRR-RLK\_2501

GAGATGTTAAATCAAGTAACATCTTGTGGATGAGTTTTGCAAGCCAAGAATCGCCGACTTTGGTCTTGC



TAGGATTGCTCAAGCTGATTCAACCAAAGATACTCATGTCATTGCTG

>M6-PGSC0003DMG400004966M6LRR-RLK\_2562

TGGTCTTGCTAGGATTGCTCAAGCTGATTCAACCAAAGATACTCATGTCATTGCTGGAACACATGGA  
TATATTGCTCCTGGTAAGAAGCTCATTATATTGTAGTTGATTTTATACGT

>M6-PGSC0003DMG400004966M6LRR-RLK\_2623

ACACATGGATATATTGCTCCTGGTAAGAAGCTCATTATATTGTAGTTGATTTTATACGTAGAATTTGAGTA  
TATCTACTTAACACTAACCATGTATTCATTTTTACCATCGGTAAAATT

>M6-PGSC0003DMG400004966M6LRR-RLK\_2684

AATTTGAGTATATCTACTTAACACTAACCATGTATTCATTTTTACCATCGGTAAAATTGACTTACGAAAT  
AGGCAACTCCCCATATCAAGCAATATGGTATCTTGAAAGATATAGTGAA

>M6-PGSC0003DMG400004966M6LRR-RLK\_2745

CTTACGAAATAGGCAACTCCCCATATCAAGCAATATGGTATCTTGAAAGATATAGTGAAAACCTTGCTATA  
AACAGTTGGATCACTATGTTGCTCGGATCCTTCAAAAATGTTGCTGCACC

>M6-PGSC0003DMG400004966M6LRR-RLK\_2806

CTTGCTATAAACAGTTGGATCACTATGTTGCTCGGATCCTTCAAAAATGTTGCTGCACCCGTGTTGGTTCC  
CTCAAAAATAGCGCATTCTTGGAGGATTTGACATGAGTGTGACAGCATT

>M6-PGSC0003DMG400004966M6LRR-RLK\_2867

TGTTGGTTCCCTCAAAAATAGCGCATTCTTGGAGGATTTGACATGAGTGTGACAGCATTGTTGAAGGATC  
CGAGCAATAAGTGAATTGCACTAATAAGAGTGAAAACAATATTAGTGTT

>M6-PGSC0003DMG400004966M6LRR-RLK\_2928

TGAAGGATCCGAGCAATAAGTGAATTGCACTAATAAGAGTGAAAACAATATTAGTGTTAATTAECTTA  
GATCCTATCTTGATTATCTATTCATTTGGTCATAGTGAGTGTCTCATTCT

>M6-PGSC0003DMG400004966M6LRR-RLK\_2989

TTAACTTAGATCCTATCTTGATTATCTATTCATTTGGTCATAGTGAGTGTCTCATTCTGGCATCCTTTTTG  
AACTTATTTGAATTGAATTGGTGTTCAGAAATATGGATACACACACAA

>M6-PGSC0003DMG400004966M6LRR-RLK\_305

AAATCGAGCTTTGAGTCAAAAATTTCTGGGTTTGTTCCTTTTGATAAAATATGTTCACTTAATTCATTG  
GAAAAGCTCTCTCTGGGTTACAATTCATTTCTGGGGAATTTACTGATG

>M6-PGSC0003DMG400004966M6LRR-RLK\_3050

CATCCTTTTTGAACTTATTTGAATTGAATTGGTGTTGCAGAATATGGATACACACACAAAGTGAACGAGA  
AAAGTGATGTATATAGTTTCGGAGTTGTATTGATGGAGCTTATATCTGGG

>M6-PGSC0003DMG400004966M6LRR-RLK\_3111

TGAACGAGAAAAGTGATGTATATAGTTTCGGAGTTGTATTGATGGAGCTTATATCTGGGAAACGGCCAA  
TAGAATCCGAATACGGAGAGAATGGCAACATAGTTACATGGGTGAGCAGCA

>M6-PGSC0003DMG400004966M6LRR-RLK\_3172

ACGGCCAATAGAATCCGAATACGGAGAGAATGGCAACATAGTTACATGGGTGAGCAGCAAATTGAAGA  
GCAAGGAAAAGTGATTAAGCATAGTGGATTCAAGAATTCCTGAAGCTTTCAA

>M6-PGSC0003DMG400004966M6LRR-RLK\_3233

TTGAAGAGCAAGGAAAAGTGATTAAGCATAGTGGATTCAAGAATTCCTGAAGCTTTCAAGGAAGATGCA  
ATCAAAGTCTTGAGGATTGCTATTGTATGCACATCTAGGCTTCCCACATTA

>M6-PGSC0003DMG400004966M6LRR-RLK\_3294

AAGATGCAATCAAAGTCTTGAGGATTGCTATTGTATGCACATCTAGGCTTCCCACATTAAGGCCAACAAAT  
GAGAAATGTAGTCAAATGCTGGAAAATGCAGAACCTTGCAGATTAGTTG

>M6-PGSC0003DMG400004966M6LRR-RLK\_3355

GCCAACAATGAGAAATGTAGTCAAATGCTGGAAAATGCAGAACCTTGCAGATTAGTTGGGATAATTGT  
AAGCAAAGATGATGGTAGTATCAAGACAGAACAATTGAAGGATCACACCAA

>M6-PGSC0003DMG400004966M6LRR-RLK\_3416

ATAATTGTAAGCAAAGATGATGGTAGTATCAAGACAGAACAATTGAAGGATCACACCAAGATGTAATTG  
GATCCCCCGTCTTTGCTCGTTTCACTCTTCAACCTGATCTCTGTCTCCAT

>M6-PGSC0003DMG400004966M6LRR-RLK\_3477

TGTAATTGGATCCCCGTCTTTGCTCGTTTCACTCTTCAACCTGATCTCTGTCTCCATGGAACATCGAATC  
TTGTAGCAGTATGTAAAGTTCTGAAGATGGCCTCTTGGCATTGTAACA

>M6-PGSC0003DMG400004966M6LRR-RLK\_3538

AACATCGAATCTTGTAGCAGTATGTAAAGTTCTGAAGATGGCCTCTTGGCATTGTAACATATAGTAGAAG  
CTAGATCCATACTAGTATGTGGAATTAGATTGAATTTAGAGATGCATGGC

>M6-PGSC0003DMG400004966M6LRR-RLK\_3589

TTGTAACATATAGTAGAAGCTAGATCCATACTAGTATGTGGAATTAGATTGAATTTAGAGATGCATGGC  
ATAAGTGCTATAAGATTGGTTTAGTTATTCAAATCCCTTTTCAACCCTGCA

>M6-PGSC0003DMG400004966M6LRR-RLK\_366

TAATTCATTGGAAAAGCTCTCTCTGGGTTACAATTCATTTTCTGGGGAATTTACTGATGATTTGAACAAGT  
GTGTTAGCTTGAATTACTTGGATGTTGGTAATAATGAATTTACTGGGTA

>M6-PGSC0003DMG400004966M6LRR-RLK\_427

TTGAACAAGTGTGTTAGCTTGAATTACTTGGATGTTGGTAATAATGAATTTACTGGGTATTTCCCTGATG  
TATCTTCACTCAGTGAGTTAACCCATTTTTATGCAAATAACAGTGGGTTT

>M6-PGSC0003DMG400004966M6LRR-RLK\_488

TCCCTGATGTATCTTCACTCAGTGAGTTAACCCATTTTTATGCAAATAACAGTGGGTTTACAGGAAAATTT  
CCATGGAATTTCTTTGCGAGTATGAGTAATTTGATTGTGCTTAGCCTTG

>M6-PGSC0003DMG400004966M6LRR-RLK\_549

AGGAAAATTTCCATGGAATTTCTTTGCGAGTATGAGTAATTTGATTGTGCTTAGCCTTGGTGATAATCAG  
TTTGATCGGACACCGTTTCTGAAGTGATTTTGAAGCTTAATAAATTGAA

>M6-PGSC0003DMG400004966M6LRR-RLK\_61

TCGTCAACTTCTTCGTCAGCTATGGCGGCGCTATTCAATTGCCGGCCGGAACCTATCCACTTCTTCTCTAT  
TTTCTCCTTCTTCTTCTTCTTCCCGTCGCTTTTTCCGACGAGCTTCAA

>M6-PGSC0003DMG400004966M6LRR-RLK\_610

GATAATCAGTTTGATCGGACACCGTTTCTGAAGTGATTTTGAAGCTTAATAAATTGAATTGGCTCTACTT  
ATCGAATTGTGAGCTTGAAGGGGAAATTCCTGAAGAAATTGGAAATCTT

>M6-PGSC0003DMG400004966M6LRR-RLK\_671

GGCTCTACTTATCGAATTGTGAGCTTGAAGGGGAAATTCCTGAAGAAATTGGAAATCTTACAGAGCTGA  
TTGATTTAGAGCTGTCGATGAATCACCTTACTGGTGAATTCCTTCGGGAA

>M6-PGSC0003DMG400004966M6LRR-RLK\_732

AGAGCTGATTGATTTAGAGCTGTCGATGAATCACCTTACTGGTGAAATTCCTTCGGGAATTACGAAGCTG  
AAGAAATTATGGCAGCTTGAGTTGTATGAAAACCAGCTTACAGGGAAGTT

>M6-PGSC0003DMG400004966M6LRR-RLK\_793

ACGAAGCTGAAGAAATTATGGCAGCTTGAGTTGTATGAAAACCAGCTTACAGGGAAGTTGCCGGTTGG  
ATTTGGAAATTTGACAAGTCTTGAATATCTTGATGCTTCGACTAATAATCTG

>M6-PGSC0003DMG400004966M6LRR-RLK\_854

CGGTTGGATTTGGAAATTTGACAAGTCTTGAATATCTTGATGCTTCGACTAATAATCTGTACGGTGATTT

GTCGGAAATTCGAAAGTTGAATCAATTGGTAAGTTTGCAGTTATTGCAGA

>M6-PGSC0003DMG400004966M6LRR-RLK\_915

CGGTGATTTGTCGGAAATTCGAAAGTTGAATCAATTGGTAAGTTTGCAGTTATTGCAGAACCAATTTTCA

GGGGAAGTACCAGCAGAATTGGGAGAGTTCAAAAAGCTGGTGAACATCTC

>M6-PGSC0003DMG400004966M6LRR-RLK\_976

CAATTTTCAGGGGAAGTACCAGCAGAATTGGGAGAGTTCAAAAAGCTGGTGAACATCTCTTTGTACT

AACAACTACTGGTCAGCTTCCGCAGAAGTTGGGTTCTTGGGCGAATTTT

>M6-PGSC0003DMG400004972M6LRR-RLK\_0

AGCTTGAAATCTTTTGTTTAAGCCGTTAACTATACCCTTACTAAATGATTCTCTATAAAATGTAATGTTTCC

AGGACTTAAGAGCATTATACATTCAAATTTTGGAAATTTTGAAGCT

>M6-PGSC0003DMG400004972M6LRR-RLK\_1037

TAATTGAATTGATTATTGTAACTTTTGCATTATAGGAGGCACTCCACCTGCCAAAAGCAATCCAGCGCAG

AGCAATAATAAGCACGGGACTGTTGAAGGAAGAGCCAAACATAAGTCTGC

>M6-PGSC0003DMG400004972M6LRR-RLK\_1098

CCAGCGCAGAGCAATAATAAGCACGGGACTGTTGAAGGAAGAGCCAAACATAAGTCTGCTTCAAACC

TACCTGGCTTTTTGTGTTAGAAGTGGTAACTGGAGTTATTGCAGGTTCTCTC

>M6-PGSC0003DMG400004972M6LRR-RLK\_1159

CAAACCTACCTGGCTTTTTGTGTTAGAAGTGGTAACTGGAGTTATTGCAGGTTCTCTCTTCCTTGTGGCT

ATTTTGGCTGCCATTCAGAAGTGTAAGAACGAATCTTCTATTATCATCC

>M6-PGSC0003DMG400004972M6LRR-RLK\_122

ATTAAATTTATATATCTTTTAATCTTCTAAGGTGCCCATAGTATCTCAATTAGCATATGATTTGCTGCAAC

ATTTTTGGCTGCAGTTTGTCTGGACATTTACAGAGTCTTAAAATTGAA

>M6-PGSC0003DMG400004972M6LRR-RLK\_1220

CCTTGTGGCTATTTTGGCTGCCATTCAGAAGTGTAAGAACGAATCTTCTATTATCATCCCTTGGAAGAAAT

CAGCAAGTATGAAAGACCATTTGAAAGACCATATGGCAGTTTATGTAGG

>M6-PGSC0003DMG400004972M6LRR-RLK\_1281

TGGAAGAAATCAGCAAGTATGAAAGACCATTTGAAAGACCATATGGCAGTTTATGTAGGTGAGTACCAT

GCAATTTAGTTGGGGGATTACAGTTAAGAATTGCCTTTAAACATTTGTAT

>M6-PGSC0003DMG400004972M6LRR-RLK\_1647

GGAGGGTGGGGAGGACACAATTGATGTGAAATACCACTTGTGGAACCTGTTTTCCCTACCTCCATACCG  
AACACACCCTTAATTCTTTCTCATATAGGATCTGATTCTTCAATTTAGTAC

>M6-PGSC0003DMG400004972M6LRR-RLK\_183

TTTGCTGCAACATTTTTGGCTGCAGTTTGTCTGGACATTTACAGAGTCTTAAAATTGAAAGATTATGGCTA  
ATGTTTAATCTTTCTGTCGTCTTGATTGATCGTGCTGGACTTCTGTTGA

>M6-PGSC0003DMG400004972M6LRR-RLK\_2074

CACCTGTGGGATCACACAGGGTATAGGATCACAAGTTCAGAAGCATTAAATTATAATTCACATTTCTATTA  
GTAACAAATGTTTCTTTGTCAGATACTGAGATGCTAAAGGACGTTGAAAG

>M6-PGSC0003DMG400004972M6LRR-RLK\_2135

TTTCTATTAGTAACAAATGTTTCTTTGTCAGATACTGAGATGCTAAAGGACGTTGAAAGATATAGCAGAC  
AAGAACTTGAGGTAGCTTGTGAAGATTTAGCAACATTATTGGATCCTCA

>M6-PGSC0003DMG400004972M6LRR-RLK\_2196

ATAGCAGACAAGAACTTGAGGTAGCTTGTGAAGATTTAGCAACATTATTGGATCCTCACCAGACAGCT  
TGGTCTATAAAGGAACTGTGAAAGGCGGACCTGAATTAGCTGTAATTTCCA

>M6-PGSC0003DMG400004972M6LRR-RLK\_2257

AGACAGCTTGGTCTATAAAGGAACTGTGAAAGGCGGACCTGAATTAGCTGTAATTTCCATCTGTGTCAA  
AGAAGAGCAGTGGACCACCTATCTAGAGCTTTATTTTCAGAAAGAGGTGAA

>M6-PGSC0003DMG400004972M6LRR-RLK\_2318

TGTGTCAAAGAAGAGCAGTGGACCACCTATCTAGAGCTTTATTTTCAGAAAGAGGTGAAGCCTGTTCTCT  
CCTTAAAATACATGGCTACTGCTGAGCTCTCGTGCCCAATAAAAATTTCA

>M6-PGSC0003DMG400004972M6LRR-RLK\_2379

CTGTTCTCTCCTTAAAATACATGGCTACTGCTGAGCTCTCGTGCCCAATAAAAATTTTCATCTTTGCTGCAA  
TGCTCTAACTTGTATGGCTTACAACTCAGGTAGCAGAATTGGCCAGAA

>M6-PGSC0003DMG400004972M6LRR-RLK\_244

ATTATGGCTAATGTTAATCTTTCTGTCGTCTTGATTGATCGTGCTGGACTTCTGTTGACATGTATGTCTGT  
TGTACTIONGAACTTAATTTAATACATTTGTTGTTCTCCTAGAACTTCA

>M6-PGSC0003DMG400004972M6LRR-RLK\_2440

TTTGCTGCAATGCTCTAACTTGTATGGCTTACAACTCAGGTAGCAGAATTGGCCAGAATAAATCACGAG  
AACACTGCAAACTTCTAGGTTACTGCAGAGAGAGCAGTCCCTTCACAAG

>M6-PGSC0003DMG400004972M6LRR-RLK\_2501

AATCACGAGAACACTGCAAAACTTCTAGGTTACTGCAGAGAGAGCAGTCCCTTCACAAGGATGTTGGTG  
TTCGAGTATGCATCTAACGGGACTTTATATGAACACCTCCATTGTGAGTGG

>M6-PGSC0003DMG400004972M6LRR-RLK\_2562

TGTTGGTGTTTCGAGTATGCATCTAACGGGACTTTATATGAACACCTCCATTGTGAGTGGAAAAAACTATT  
TTTTATACATTTGCTACTGCATGTTTTAGAGGCTGAAATCCAAACTCTTT

>M6-PGSC0003DMG400004972M6LRR-RLK\_2623

AAAACTATTTTTTATACATTTGCTACTGCATGTTTTAGAGGCTGAAATCCAAACTCTTTGAACTTATCACA  
GATGGAGAAGGATGCCAACTTTCTTGACACGGCGAATGAAAATAGTTA

>M6-PGSC0003DMG400004972M6LRR-RLK\_2684

ACTTATCACAGATGGAGAAGGATGCCAACTTTCTTGACACGGCGAATGAAAATAGTTATTGGCATCGC  
TAAAGGACTGAAATATCTCCATTCAGAACTTGACCCGCCATTCACTATATC

>M6-PGSC0003DMG400004972M6LRR-RLK\_2745

GGCATCGCTAAAGGACTGAAATATCTCCATTCAGAACTTGACCCGCCATTCACTATATCAGAACTGAATT  
CAAATGCTGTATATCTCACAGAAGATTTTTCTCCCAAGGTAAGCGAAAGA

>M6-PGSC0003DMG400004972M6LRR-RLK\_2806

AACTGAATTCAAATGCTGTATATCTCACAGAAGATTTTTCTCCCAAGGTAAGCGAAAGATTTCTGTATCA  
CTGCTGCAAACCAATTCCTGTTAACTTTCTGGTTCATCTTACTGTCA

>M6-PGSC0003DMG400004972M6LRR-RLK\_2867

TCTGTATCACTGCTGCAAACCAATTCCTGTTAACTTTCTGGTTCATCTTACTGTCAATTGTGCTCATCC  
ATAAGACAATTTTAGTTTACTCTCCACGGTTTCTGCTCATTTTGTCTT

>M6-PGSC0003DMG400004972M6LRR-RLK\_2928

TGTGCTCATCCATAAGACAATTTTAGTTTACTCTCCACGGTTTCTGCTCATTTTGTCTTTGAACTCGCCGAG  
TTTCCTTACAAACAATTTGGGCTTACATTTTCCATTTTGGTTTCCTT

>M6-PGSC0003DMG400004972M6LRR-RLK\_2989

AACTCGCCGAGTTTCTTACAAACAATTTGGGCTTACATTTTCCATTTTGGTTTCTTCAAGCTCAACCCT  
TTGTGCTTTTTAACCCGAGCAATAGAAAGCTGATTTTCCATACCCCTT

>M6-PGSC0003DMG400004972M6LRR-RLK\_305

TGTATGTCTGTTGTACTIONGAACTTAATTTAATACATTTGTTGTTCTCCTAGAACTTCACACGATTACCGAG

TGTAATGAAATCTTAAAGGGTTCAACATGTATATTCAAAGTCATCAC

>M6-PGSC0003DMG400004972M6LRR-RLK\_3050

AGCTCAACCCTTTGTGCTTTTTAACCCGAGCAATAGAAAGCTGATTTCCATACCCTTTCTCTCAAAGTTT

AATTTATCTGGTGCAGCTTGTTGATTTTGAAAGTTGGAAAACAACATT

>M6-PGSC0003DMG400004972M6LRR-RLK\_3111

TCTCAAAGTTTAATTTATCTGGTGCAGCTTGTTGATTTTGAAAGTTGGAAAACAACATTTGCCAGATCAG

AAAAGAATTCCGGTGCTATCAGTAGTGAAGGAGCAATGTGTGTCCTTCCA

>M6-PGSC0003DMG400004972M6LRR-RLK\_3172

CCAGATCAGAAAAGAATTCCGGTGCTATCAGTAGTGAAGGAGCAATGTGTGTCCTTCCAATTTCTCTACA

GAGCCGTCATCTTGACATGCAGGGTAACATCTATGCATTTGGAGTACTAC

>M6-PGSC0003DMG400004972M6LRR-RLK\_3233

TTCTCTACAGAGCCGTCATCTTGACATGCAGGGTAACATCTATGCATTTGGAGTACTACTGCTCGAAATA

ATCAGTGGAAGACCTGCAAATTGCAAAGATAAAGGGTGCTTAGTAGATTG

>M6-PGSC0003DMG400004972M6LRR-RLK\_3294

CTCGAAATAATCAGTGGAAGACCTGCAAATTGCAAAGATAAAGGGTGCTTAGTAGATTGGGTAAGCATT

TCTTTTCATGAAGTTTTGTATAGGCATAGTACATAAATATACTCAAAC

>M6-PGSC0003DMG400004972M6LRR-RLK\_3599

CTTTATGGAATCTCAAGTTGACTCTGATATGGCAGGCCAAAGAATTCCTTGAATTGCCAGAGGTATTGCC

ATATGTTGTAGATCCCGAGTTGAAACATTTAGATACGAAGACCTCAAAG

>M6-PGSC0003DMG400004972M6LRR-RLK\_366

CGATTACCGAGTGTAATGAAATCTTAAAGGGTTCAACATGTATATTCAAAGTCATCACTGACGTTATCG

GCAATATTCTGTATAGTTTCTGGAAAAATCAGTAAAAAGCCTCCTATGCT

>M6-PGSC0003DMG400004972M6LRR-RLK\_3660

GGTATTGCCATATGTTGTAGATCCCGAGTTGAAACATTTAGATACGAAGACCTCAAAGTGATTTCTGAA

GTGGTCAATCTCTGTATCCACCCAAGTTCGAGTAGCAGGACTTCGATGAG

>M6-PGSC0003DMG400004972M6LRR-RLK\_3721

ATTTCTGAAGTGGTCAATCTCTGTATCCACCCAAGTTCGAGTAGCAGGACTTCGATGAGAGATTTGTGTG

CTATGCTGGAGAGCGACATTGACACATCCATAACTGCAGAGCTCAAGACA

>M6-PGSC0003DMG400004972M6LRR-RLK\_3760

AGTAGCAGGACTTCGATGAGAGATTTGTGTGCTATGCTGGAGAGCGACATTGACACATCCATAACTGCA  
GAGCTCAAGACATCGTCTTTAGCATGGGCTGAGCTTGCACTCTCATCCTAA

>M6-PGSC0003DMG400004972M6LRR-RLK\_427

ACGTTATCGGCAATATTCTGTATAGTTTCTGGAAAAATCAGTAAAAAGCCTCCTATGCTTGCTTGAACCTG  
TAATTGTTCTACATAGATCCCTTTTAAGTTTTATCTCACAGTTGGTTTC

>M6-PGSC0003DMG400004972M6LRR-RLK\_488

CCTGAACTTGTAATTGTTCTACATAGATCCCTTTTAAGTTTTATCTCACAGTTGGTTTCTTAGTAATCGTCT  
TTTATTTTTGTTTAGGCATGCCTCTGGTGCCAAGCCTACTGGTCTTTG

>M6-PGSC0003DMG400004972M6LRR-RLK\_549

AGTAATCGTCTTTTATTTTTGTTTAGGCATGCCTCTGGTGCCAAGCCTACTGGTCTTTGTCGTTTATCTCAA  
CTGAGAGTTGCTGATTTCTCCTTCAACTTCTTCTTTGGTAGCATACCG

>M6-PGSC0003DMG400004972M6LRR-RLK\_61

GTAATGTTTCCAGGACTTAAGAGCATTATACATTCAAATTTTTGGAATATTTGAAGCTTGATTAAATTTA  
TATATCTTTTAAATCTTCTAAGGTGCCCATAGTATCTCAATTAGCATAT

>M6-PGSC0003DMG400004972M6LRR-RLK\_610

GTTTATCTCAACTGAGAGTTGCTGATTTCTCCTTCAACTTCTTCTTTGGTAGCATACCGAAGTGTCTGGAG  
TACCTTTCAAAGTATAGTTCTTAATTCCGATCCACAAGCATTTTTTATA

>M6-PGSC0003DMG400004972M6LRR-RLK\_671

GTGTCTGGAGTACCTTTCAAAGTATAGTTCTTAATTCCGATCCACAAGCATTTTTTATATTCTTTATTTCAA  
TTTCTGAGTGCCTATTATTTTTGTTCTTTCTATAGAACTAGCTTTCAAG

>M6-PGSC0003DMG400004972M6LRR-RLK\_732

CTTTATTTCAATTTCTGAGTGCCTATTATTTGTTCTTTCTATAGAACTAGCTTTCAAGGAAATTGCCTTCA  
AGCAAAGATCCCAGGCAGCGTTCTACTGCTTTATGTGGTATGTGTAA

>M6-PGSC0003DMG400004972M6LRR-RLK\_793

AATTGCCTTCAAGCAAAGATCCCAGGCAGCGTTCTACTGCTTTATGTGGTATGTGTAATCTGCTAGACA  
ACTCTTACACTTTAGCAGAATCATTAACCAAGCCTTTGAATCTTTTATGC

>M6-PGSC0003DMG400004972M6LRR-RLK\_854

TGCTAGACAACTCTTACACTTTAGCAGAATCATTAACCAAGCCTTTGAATCTTTTATGCATACATTAGTGT  
ACGAAAATGCAAGCTGGTCATGCTTACTTTTGATTGTATATCCTAAAGA



>M6-PGSC0003DMG400004972M6LRR-RLK\_915

ACATTAGTGACGAAAATGCAAGCTGGTCATGCTTACTTTTGATTGTATATCCTAAAGAGGCTTCTGCGA  
CTAAGTTCGCCATTTCACTAACAGTCGCAGTTGAACAGATCAACTTTAA

>M6-PGSC0003DMG400004972M6LRR-RLK\_976

CTTCTGCGACTAAGTTCGCCATTTCACTAACAGTCGCAGTTGAACAGATCAACTTTAAAATAATTGAATT  
GATTATTGTAACTTTTGCATTATAGGAGGCACTCCACCTGCCAAAAGCA

>M6-PGSC0003DMG400005044M6G-LecRK\_0

ATGTCACCAGAGTATGCAATGGGAGGACTATTTTCTGAGAAATCTGATGTCTACAGCTTTGGTGTATTGC  
TACTAGAGATTGTCAGTGGAAAGAGAAACAGCGGATATTATGACCACGAA

>M6-PGSC0003DMG400005044M6G-LecRK\_114

CACGAAAGGCATCTCAACCTTCTCAGTTATGTAAGTGCAAAATCAGCAGGATCTCTTGCCACAAGTTATT  
CACACAACTTATAGTATAAATGATTTTCAGGCATGGAAGCTACAGACCGA

>M6-PGSC0003DMG400005044M6G-LecRK\_171

GCCACAAGTTATTCACACAACTTATAGTATAAATGATTTTCAGGCATGGAAGCTACAGACCGAAAGCAA  
AGAGTTAGACTTAATGGATAAATCAATTTTGGACTCATATTCATCTGCAAC

>M6-PGSC0003DMG400005044M6G-LecRK\_228

GACCGAAAGCAAAGAGTTAGACTTAATGGATAAATCAATTTTGGACTCATATTCATCTGCAACAGTGCTG  
AGATGCATACATATTGGCCTGCTTTGTGTCCAGGATCATGCTGTTGATAG

>M6-PGSC0003DMG400005044M6G-LecRK\_342

TGATAGGCCATCAATGCCGTCTATCGTTCTTATGCTAAGTAGTGAGATGGATCTGCCTCAACCAAAGAAA  
CCTACATTTATATTTCAAAGATGGTTGAATTCTAATACCCAATCACAATT

>M6-PGSC0003DMG400005044M6G-LecRK\_397

CCTCAACCAAAGAAACCTACATTTATATTTCAAAGATGGTTGAATTCTAATACCCAATCACAATTCAGCAA  
AACTCAGTCTGTTAATGATCTTACTGTCTCTGTGGCAGAAGGCCGATAA

>M6-PGSC0003DMG400005044M6G-LecRK\_57

TTTGGTGTATTGCTACTAGAGATTGTCAGTGGAAAGAGAAACAGCGGATATTATGACCACGAAAGGCAT  
CTCAACCTTCTCAGTTATGTAAGTGCAAAATCAGCAGGATCTCTTGCCACA

>M6-PGSC0003DMG400005103M6LRR-RLK\_0

CTCATGGCCACCATCTTGAGAAAAAATTCTCCAATTTCTCTCGCGTGGATTTTCATGTTCCACAGAAACCA

AACATCAAACATAGCCATACCAAACCTTTCTTCTCTATTCTTCTTACTAG

>M6-PGSC0003DMG400005103M6LRR-RLK\_1037

TTCTGGTGAGATTCCTGTTGAATTTGGAGAGTTCAAGTTTACAGAACTGTCATTGTACAGAAACATGTTT

TCTGGTTCTCTTCTCAAATATTGGATCATGGGCAGAACTTCAGTACAT

>M6-PGSC0003DMG400005103M6LRR-RLK\_1098

AACATGTTTTCTGGTTCTTCTCAAATATTGGATCATGGGCAGAACTTCAGTACATTGATGTTTCTGA

GAATATGTTCACTGGTTCAATACCACCTGATATGTGCAAGAAAGGGAGT

>M6-PGSC0003DMG400005103M6LRR-RLK\_1159

ATGTTTCTGAGAATATGTTCACTGGTTCAATACCACCTGATATGTGCAAGAAAGGGAGTATGACTGATCT

TTTGCTTCTCCAGAACAACCTCACTGGTGGGATACCTTCGAACTATGCTA

>M6-PGSC0003DMG400005103M6LRR-RLK\_122

AAAAAAAAAAATGTCAGCCAGTGCCAACCTTTTTCCGGCCATGCCCAATTTTATTGATCTGTTTTTTCATAT

TCTTGATTTCTCCTTCTCATCAACAAGATGAGTTACAACCTCCTTATGAA

>M6-PGSC0003DMG400005103M6LRR-RLK\_1220

GACTGATCTTTTGCTTCTCCAGAACAACCTCACTGGTGGGATACCTTCGAACTATGCTAATTGTTTGTCTG

TGCAGCGTTTAAGGGTTAGCAACAATTCACCTTCAGGAGTAGTCCCTAG

>M6-PGSC0003DMG400005103M6LRR-RLK\_1281

TGTTTGTCTGTTGCAGCGTTTAAGGGTTAGCAACAATTCACCTTCAGGAGTAGTCCCTAGTGAATTTGGA

GTTTGCAGATTTGGAAATCATTGATCTCACATTGAATCTATTTGAAGGC

>M6-PGSC0003DMG400005103M6LRR-RLK\_1342

GAATTTGGAGTTTGCCAGATTTGGAAATCATTGATCTCACATTGAATCTATTTGAAGGCCAGTGACATC

AAATATTGGTGAAGCAAAGTCTTTAGCACAGTTGTTCTAGCCTACAACC

>M6-PGSC0003DMG400005103M6LRR-RLK\_1403

AGTGACATCAAATATTGGTGAAGCAAAGTCTTTAGCACAGTTGTTCTAGCCTACAACCGTTCAATGGT

CAATTACCACAGACAATATCAGAAGTTTCTTCATTAGTAGCCATTAATCT

>M6-PGSC0003DMG400005103M6LRR-RLK\_1464

TTCAATGGTCAATTACCACAGACAATATCAGAAGTTTCTTCATTAGTAGCCATTAATCTGAGCGCGAATC

AGTTCTCTGGTGATATTCCAGCAGCAATAGGTGAACTTAAGAAGCTTAAT

>M6-PGSC0003DMG400005103M6LRR-RLK\_1525

GCGCGAATCAGTTCTCTGGTGATATTCCAGCAGCAATAGGTGAACTTAAGAAGCTTAATACTCTTCATTT  
AGAGTATAATTTGTTTTCTGGAAGTCTTCCAGATTCTATTGGATCATGTG

>M6-PGSC0003DMG400005103M6LRR-RLK\_1586

TCTTCATTTAGAGTATAATTTGTTTTCTGGAAGTCTTCCAGATTCTATTGGATCATGTGTTTCTCTCTGTGA  
AATTAATCTTGCTGGTAATTCACTTTCTGGTGCAATCCCGAAAGTCT

>M6-PGSC0003DMG400005103M6LRR-RLK\_1647

TCTCTCTGTGAAATTAATCTTGCTGGTAATTCACTTTCTGGTGCAATCCCGAAAGTCTTGGCTCTTTGCCT  
AGCTTGAACCTCTCAATCTATCTGATAACAGCCTCTCAGGTCAAATT

>M6-PGSC0003DMG400005103M6LRR-RLK\_1708

GCTCTTTGCCTAGCTTGAACCTCTCAATCTATCTGATAACAGCCTCTCAGGTCAAATCCAGCGACCCTT  
TCGAGTTTAAGATTAAGCCTTCTTGATTTGTCAAACAATAGGTTGAGTG

>M6-PGSC0003DMG400005103M6LRR-RLK\_1769

AGCGACCCTTTTCGAGTTTAAGATTAAGCCTTCTTGATTTGTCAAACAATAGGTTGAGTGGTAGCATACCG  
GATTCTTTATCAATAAAAGCTTTTAGTAATAGCTTTTTGGGAAATCCAGA

>M6-PGSC0003DMG400005103M6LRR-RLK\_183

TTTTTCATATTCTTGATTTCTCCTTCTCATCAACAAGATGAGTTACAACCTTATGAATTTCAAATCCACTC  
TGAAAACAACACAAATTTACATCTTTTTGACACGTGGACACCTCAG

>M6-PGSC0003DMG400005103M6LRR-RLK\_1830

AGCATACCGGATTCTTTATCAATAAAAGCTTTTAGTAATAGCTTTTTGGGAAATCCAGATCTTTGTAGTGA  
GAATTTTGGTAGTCTCAGGCCATGTTTCATCAGATCCTCACACATCTAGA

>M6-PGSC0003DMG400005103M6LRR-RLK\_1891

TTTGTAGTGAGAATTTTGGTAGTCTCAGGCCATGTTTCATCAGATCCTCACACATCTAGAGACCACAGGAC  
AGTCATGTTGTGCTTGATAGCTGGGGTAGTTGTTCTTGTCTGTCACTTA

>M6-PGSC0003DMG400005103M6LRR-RLK\_1952

CCACAGGACAGTCATGTTGTGCTTGATAGCTGGGGTAGTTGTTCTTGTCTGTCACTTACGTGTTTCGTGT  
ATGTGAAGTTTAAGCACAATAATCAGAACACTCCCGTAAAGAGACTTGA

>M6-PGSC0003DMG400005103M6LRR-RLK\_2013

TGTTTCGTGTATGTGAAGTTTAAGCACAATAATCAGAACACTCCCGTAAAGAGACTTGATTCTTGGGATA  
TCAAACAGTTTCATGTATTGAGCTTTAGTGAAGATCAAGTCTTGAAGGCA

>M6-PGSC0003DMG400005103M6LRR-RLK\_2074

CTTGGGATATCAAACAGTTTCATGTATTGAGCTTTAGTGAAGATCAAGTCTTGAAGGCATTGAAGCAAG  
AAAATTTGATTGGTAGAGGTGGTTCAGGGAATGTGTACAGATTAGTCTTGA

>M6-PGSC0003DMG400005103M6LRR-RLK\_2135

GAAGCAAGAAAATTTGATTGGTAGAGGTGGTTCAGGGAATGTGTACAGATTAGTCTTGAATTGTGGAA  
AACAGTTGGCTGTGAAACACATTGTTAAATCCGATTCTGGTGACCAAAAAAAG

>M6-PGSC0003DMG400005103M6LRR-RLK\_2196

TGTGGAAAACAGTTGGCTGTGAAACACATTGTTAAATCCGATTCTGGTGACCAAAAAAAGTTACCGGGAC  
AGCTCAGCCATACTGGTGAAGGAGAATAGAAGATCAAAGGAGTATGATGCT

>M6-PGSC0003DMG400005103M6LRR-RLK\_2257

ACCGGGACAGCTCAGCCATACTGGTGAAGGAGAATAGAAGATCAAAGGAGTATGATGCTGAGGTGACC  
ACGTTAAGTTCCATTAGGCATGTCAATGTTGTCAAATTGTAAGTACTGTAGCATCA

>M6-PGSC0003DMG400005103M6LRR-RLK\_2318

GGTGACCACGTTAAGTTCCATTAGGCATGTCAATGTTGTCAAATTGTAAGTACTGTAGCATCACAAGTGAGGAC  
TCAAATATGCTGGTTTATGAATACTTAACTAATGGAAGCTTATGGGACCG

>M6-PGSC0003DMG400005103M6LRR-RLK\_2379

AGTGAGGACTCAAATATGCTGGTTTATGAATACTTAACTAATGGAAGCTTATGGGACCGATTGCACACG  
TCTCAGAAAGTCAAGATGGATTGGTTGGTGAGATATGATATTGCATTAGGT

>M6-PGSC0003DMG400005103M6LRR-RLK\_244

TCAAATCCACTCTGAAAACAACACAAATTTACATCTTTTTGACACGTGGACACCTCAGAATAACATTTGC  
AACTTCACTGGAATTTTCTGTGATTCTGACAGCAAATTGGTTAAAGAAA

>M6-PGSC0003DMG400005103M6LRR-RLK\_2440

TGCACACGTCTCAGAAAGTCAAGATGGATTGGTTGGTGAGATATGATATTGCATTAGGTGCTGCTCAAG  
GGCTTGAGTATCTGCATCACGGATATGACAGCCCCGTGATGCACCGGGATG

>M6-PGSC0003DMG400005103M6LRR-RLK\_2501

TGCTCAAGGGCTTGAGTATCTGCATCACGGATATGACAGCCCCGTGATGCACCGGGATGTCAAGTCTAG  
CAACATCTTGTGGATGAACAGATGAAGCCAAAAATTGCTGATTTTGGATT

>M6-PGSC0003DMG400005103M6LRR-RLK\_2562

AAGTCTAGCAACATCTTGTGGATGAACAGATGAAGCCAAAAATTGCTGATTTTGGATTAGCCAAAGTTT

TGCATGTTAATGGTAATAAGGACTCTTCTCAGGTTGTAGCTGGGACACAT

>M6-PGSC0003DMG400005103M6LRR-RLK\_2623

CCAAAGTTTTGCATGTTAATGGTAATAAGGACTCTTCTCAGGTTGTAGCTGGGACACATGGCTACATTGC  
TCCTGGTACATATTTTTCTCTCCCTTTTCCATTTTCATTGTCACTTAAAA

>M6-PGSC0003DMG400005103M6LRR-RLK\_2684

CTACATTGCTCCTGGTACATATTTTTCTCTCCCTTTTCCATTTTCATTGTCACTTAAAAATAACTTTGGCAAA  
TTCTAAATTTTTTCTTTCTTCATTGTTTGACACAACAGAGTATGCTT

>M6-PGSC0003DMG400005103M6LRR-RLK\_2745

AACTTTGGCAAATTCTAAATTTTTTCTTTCTTCATTGTTTGACACAACAGAGTATGCTTACACAACCAAGG  
TGACCGAGAAGAGTGATGTCTATAGCTTCGGGGTGGTGCTAATGGAATT

>M6-PGSC0003DMG400005103M6LRR-RLK\_2806

ACAACCAAGGTGACCGAGAAGAGTGATGTCTATAGCTTCGGGGTGGTGCTAATGGAATTGGTGACTGG  
AAAGAAGCCAGTGGATGCAGAGTACGGGGGAGAACAGTGACATAGTCCAATGG

>M6-PGSC0003DMG400005103M6LRR-RLK\_2867

TGACTGGAAAGAAGCCAGTGGATGCAGAGTACGGGGGAGAACAGTGACATAGTCCAATGGGTTTGTAGC  
AAGATAAGAAACAAAACACTAGCATGATCGATTTGGTGGATTCAAGCATTTCG

>M6-PGSC0003DMG400005103M6LRR-RLK\_2928

TTGTAGCAAGATAAGAAACAAAACACTAGCATGATCGATTTGGTGGATTCAAGCATTTCGAGGGGTTCAA  
AGAAGATGCTGTTGAGGTTCTAAAATTGCAGTTCATTGCACATCAAGGAC

>M6-PGSC0003DMG400005103M6LRR-RLK\_2989

GGGTTCAAAGAAGATGCTGTTGAGGTTCTAAAATTGCAGTTCATTGCACATCAAGGACGCCAGCATTAA  
AGACCTTCATGAGGATGGTAGTTCATATGCTAGAAGAAGCCGAGCCTTGC

>M6-PGSC0003DMG400005103M6LRR-RLK\_305

TAACATTTGCAACTTCACTGGAATTTTCTGTGATTCTGACAGCAAATTGGTTAAAGAAATCAATCTTTCTG  
AACAGAATCTATCTGGGGTGTCTTTTTGATTCACTATGCTCTCTGAA

>M6-PGSC0003DMG400005103M6LRR-RLK\_3050

CAGCATTAAAGACCTTCCATGAGGATGGTAGTTCATATGCTAGAAGAAGCCGAGCCTTGCAAGCTGACAA  
ATGTAGTCGTAAATTCACCGAATGAGGATGGCAGGAAACAAGGACTTGCTA

>M6-PGSC0003DMG400005103M6LRR-RLK\_3111

GCTGACAAATGTAGTCGTAAATTCACCGAATGAGGATGGCAGGAAACAAGGACTTGCTAACTAATGGC  
AAGTCATGATGTTGAACTATCTCGTTGAGAGCAGAGGAATTTTGCAGAATAT

>M6-PGSC0003DMG400005103M6LRR-RLK\_3172

TAATGGCAAGTCATGATGTTGAACTATCTCGTTGAGAGCAGAGGAATTTTGCAGAATATTGAACTATGTT  
GTAAGTTCACAAAGAATGCTTAGTGTACATATGACACTTTTGAAGAAATA

>M6-PGSC0003DMG400005103M6LRR-RLK\_3233

AACTATGTTGTAAGTTCACAAAGAATGCTTAGTGTACATATGACACTTTTGAAGAAATAGTGTATTTTAC  
AGCTGCATTAATAAATCCAAGTAATGTATTTTACATCCAAATT

>M6-PGSC0003DMG400005103M6LRR-RLK\_3284

AAGAAATAGTGTATTTTACAGCTGCATTAATAAATCCAAGTAATGTATTTTACATCCAAATTAC  
TTATAGAACTGAGCAGTTGATCTACCCTACAACCAATTTTATTTTCT

>M6-PGSC0003DMG400005103M6LRR-RLK\_366

AATCTTTCTGAACAGAATCTATCTGGGGTTGTCTTTTTGATTCACTATGCTCTCTGAAATCACTAGAAAA  
GATTTCTTGGTACTAACTACTTGTATGGTAGAGTCAGCGACCATTG

>M6-PGSC0003DMG400005103M6LRR-RLK\_427

CACTAGAAAAGATTTCTTGGTACTAACTACTTGTATGGTAGAGTCAGCGACCATTGAAAACTGTAC  
AGAGTTGCAGTATTTGGATTTGGTAACAATTCTTTTTCAGGGGAAGTTC

>M6-PGSC0003DMG400005103M6LRR-RLK\_488

AAACTGTACAGAGTTGCAGTATTTGGATTTGGTAACAATTCTTTTTCAGGGGAAGTTCCAAATTTGTCT  
TCTTTAAGCCAATTGGAGTTTTTGAATCTCAATAGAAGTGGATTCTCTGG

>M6-PGSC0003DMG400005103M6LRR-RLK\_549

AATTTGTCTTCTTTAAGCCAATTGGAGTTTTTGAATCTCAATAGAAGTGGATTCTCTGGTTCATTTCCATG  
GAGTTCACCTGGAAATCTTACTAGTTTAACTTTCTTGAGTTTGGGTGAC

>M6-PGSC0003DMG400005103M6LRR-RLK\_61

ACAGAAACCAAACATCAAACATAGCCATACCAACTTTCTTCTATTCTTCTTACTAGCGAAAAAAAAAAAA  
ATGTCAGCCAGTGCCAATTTTTCCGGCCATGCCCAATTTTATTGATCT

>M6-PGSC0003DMG400005103M6LRR-RLK\_610

CATTTCCATGGAGTTCACCTGGAAATCTTACTAGTTTAACTTTCTTGAGTTTGGGTGACAATTCATTTAAT  
AAAAGTCCATTCCCTCTGAAATCTTGAATCTTGATAAGTTATATTGGG

>M6-PGSC0003DMG400005103M6LRR-RLK\_671

TTCATTTAATAAAAAGTCCATTCCCTCTTGAAATCTTGAATCTTGATAAGTTATATTGGGTTTACCTTACCAA  
TAGTAGTATTGAAGGCCAAATCCAGAAGGTATTGGAAATCTCACTCT

>M6-PGSC0003DMG400005103M6LRR-RLK\_732

TACCTTACCAATAGTAGTATTGAAGGCCAAATCCAGAAGGTATTGGAAATCTCACTCTGCTTGAAAATA  
TTGAGCTTTCATATAATGACTTGTGAGGCAAATCCCAGATGGAATAACC

>M6-PGSC0003DMG400005103M6LRR-RLK\_793

TTGAAAATATTGAGCTTTCATATAATGACTTGTGAGGCAAATCCCAGATGGAATAACCAAACCTTTCTAA  
GCTTAAACAGCTTGAGATCTATTCTAATGGACTCACAGGAAAGTTCCCTG

>M6-PGSC0003DMG400005103M6LRR-RLK\_854

ACTTTCTAAGCTTAAACAGCTTGAGATCTATTCTAATGGACTCACAGGAAAGTTCCTGTGGAGTTTGGG  
AATCTCAGTAGCCTTGTCAATTTTGATGCTTCAAGTAACAATCTTGAAGG

>M6-PGSC0003DMG400005103M6LRR-RLK\_915

GAGTTTGGGAATCTCAGTAGCCTTGTCAATTTTGATGCTTCAAGTAACAATCTTGAAGGTGATCTTTCAG  
AGCTCAAGTCTTTATCTCTTCTTGAATCTTGCAGCTGTTTGAAAACCAT

>M6-PGSC0003DMG400005103M6LRR-RLK\_976

ATCTTTCAGAGCTCAAGTCTTTATCTCTTCTTGAATCTTGCAGCTGTTTGAAAACCATTTTTCTGGTGAGA  
TTCCTGTTGAATTTGGAGAGTTCAAGTTTACAGAACTGTCATTGTACA

>M6-PGSC0003DMG400005171-(rev)M6LRR-RLP\_0

ATGATGAAGCTAAGGCATCTGAATATAATCAATTTGTGCTTCTTGTGGGAAGATAATGATCGAGCAATTT  
TTGACGAATCTTCAACAACCTATGCTAGAGAACTTGAAGACATTCTTCAGT

>M6-PGSC0003DMG400005171-(rev)M6LRR-RLP\_124

ATATACGTGTAGATGATACAACCTCCAAGATTCTGGTGGAGGTTTCCAAATATTGAATAACTTAGCTGCCT  
CAGTGTTGACGATTTACCTAGTTGTCCTTTGTTCCCTCAGTGGAAGTTA

>M6-PGSC0003DMG400005171-(rev)M6LRR-RLP\_186

AGCTGCCTCAGTGTTGACGATTTACCTAGTTGTCCTTTGTTCCCTCAGTGGAAGTTAATACTCGGCATCA  
ATCTCTTGATCTGATGATAAGCTATAAGGGATTCTGGGATTTCAGTTGGT

>M6-PGSC0003DMG400005171-(rev)M6LRR-RLP\_248

TCGGCATCAATCTCTTGATCTGATGATAAGCTATAAGGGATTCTGGGATTTCAGTTGGTTGGGAGAGCTA

CTTTGTCTTCCCTTCAAATCTTAGGCATCTGTCCCTCAGTGGTTGTTTTT

>M6-PGSC0003DMG400005171-(rev)M6LRR-RLP\_310

AGAGCTACTTTGTCTTCCCTTCAAATCTTAGGCATCTGTCCCTCAGTGGTTGTTTTTTGACAGAAAAAATG  
GTTTCAAACATTGCAAGATTGAAGAACTTGAGAACTCTCATTAGTTG

>M6-PGSC0003DMG400005171-(rev)M6LRR-RLP\_372

GAAAAAATGGTTTCAAACATTGCAAGATTGAAGAACTTGAGAACTCTCATTAGTTGGGGGATTCCTT  
TGGGGAAAATAGAGAACCGTTGCTGGGACGTCACAAATGTGGAGTTCCTT

>M6-PGSC0003DMG400005171-(rev)M6LRR-RLP\_434

ATTTCTTTGGGGAAAATAGAGAACCGTTGCTGGGACGTCACAAATGTGGAGTTCCTTGCCTAAAATA  
CTTGGCATTACGCTTTATGAGGATGGAAGAATGGAAAGCTTCAGAGGAATC

>M6-PGSC0003DMG400005171-(rev)M6LRR-RLP\_496

TAAAATACTTGGCATTACGCTTTATGAGGATGGAAGAATGGAAAGCTTCAGAGGAATCCTTTCTGTGCT  
TGAGGAGCTAACTATTAGTGTGGTTACATCATGGAGATTCCTCCTAGTT

>M6-PGSC0003DMG400005171-(rev)M6LRR-RLP\_558

CCTGTGCTTGAGGAGCTAACTATTAGTGTGGTTACATCATGGAGATTCCTCCTAGTTTTGCGGATATTTT  
AACACTGCGACTTATTAAGCTGGACAAGCTCTCCAATTCATTGTGGTT

>M6-PGSC0003DMG400005171-(rev)M6LRR-RLP\_615

TTTGCGGATATTTTAACTGCGACTTATTAAGCTGGACAAGCTCTCCAATTCATTGTGGTTTCAGCTTT  
GACTATTAAGGAAATAGAAGAAAACACAGGATGTGACCGTCTCAA

>M6-PGSC0003DMG400005171-(rev)M6LRR-RLP\_62

AGCAATTTTGGACGAATCTTCAACAATATGCTAGAGAACTTGAAGACATTCTTCAGTATTCATATACGTG  
TAGATGATACAACCTCAAGATTCTGGTGGAGGTTTCAAATATTGAATA

>M6-PGSC0003DMG400005172-(rev)M6LRR-RLP\_0

ATGGAAGTTGTTGAGACTTGTGGAAAAGGAACTTTCTGCTGGAGAACCTTCCACCAAACATAATATTA  
CATCAATTTATGATGATGATGATGATGAAGTTGTGGGCTTGAGAAAGAT

>M6-PGSC0003DMG400005172-(rev)M6LRR-RLP\_128

TATAATGAAGAAAATGATACGAGGAACAAAGGAGCAGGATGTTATCTCCATCTATGGAATGCCTGGACT  
TGGTAAAACAACCTTGGCAAGGAAGGTGTACAACAATCCCTCTATTATTA

>M6-PGSC0003DMG400005172-(rev)M6LRR-RLP\_192



GGACTTGGTAAAACAACCTTTGGCAAGGAAGGTGTACAACAATCCCTCTATTATTAATTACTTTGATGTTA  
AAGCATGGTGTGCTTTGTCGCAAGCATATAATAGGAGGACATTATTGGTT

>M6-PGSC0003DMG400005172-(rev)M6LRR-RLP\_256

ATGTTAAAGCATGGTGTGCTTTGTCGCAAGCATATAATAGGAGGACATTATTGGTTGAGATTTTCAAACA  
AGCTACAAATGATAAGATCAAAATCAAAGAGGACGACGATGTAGCTGACA

>M6-PGSC0003DMG400005172-(rev)M6LRR-RLP\_320

CAAACAAGCTACAAATGATAAGATCAAAATCAAAGAGGACGACGATGTAGCTGACATGTTGCGCAGGG  
TTCTAATTGGCAAGAGATACCTCATCGTATTAGATGACATTTGGGATGTCTGA

>M6-PGSC0003DMG400005172-(rev)M6LRR-RLP\_384

AGGGTTCTAATTGGCAAGAGATACCTCATCGTATTAGATGACATTTGGGATGTCTGAGGCATGGGAAGAT  
TTGGGAATATGTTTCCCTCAAGGTGAATATGGAAGCAGAGTAATGGTCACA

>M6-PGSC0003DMG400005172-(rev)M6LRR-RLP\_448

AAGATTTGGGAATATGTTTCCCTCAAGGTGAATATGGAAGCAGAGTAATGGTCACAACACGAATTGAAC  
AAGTGGCTAAGCATCTTCAGCACACAGTGATCCTTATTCTCTTAGCTTTC

>M6-PGSC0003DMG400005172-(rev)M6LRR-RLP\_512

TGAACAAGTGGCTAAGCATCTTCAGCACACAGTGATCCTTATTCTCTTAGCTTTCTAACGTCCGAAAAG  
AGTTGGGAATTATTGGAGAAGAAGGTATTTGAGGAGAGAGTTGTCCTCC

>M6-PGSC0003DMG400005172-(rev)M6LRR-RLP\_64

ATATTACATCAATTTATGATGATGATGATGATGAAGTTGTGGGCTTTGAGAAAGATGCAGAAATTATAAT  
GAAGAAAATGATACGAGGAACAAAGGAGCAGGATGTTATCTCCATCTATG

>M6-PGSC0003DMG400005226M6LRR-RLP\_0

AATATTAAGACTTGATTTGTCTTCTAATAATTTTCAGGATCGCTCATTTACCTAAATTTGGTGAGTTT  
TCTAGTTTGACGCATCTTGATTTGTCAAATTCAGGTTTTAGATTCGGA

>M6-PGSC0003DMG400005226M6LRR-RLP\_1054

CCACAATGTTTGGGTGAGATGAGTGGACTTTGGGTTTTGATCTAAGCAACAACGGTCTTAGTGGGGCA  
ATTAATACAACATTTAGTATAGGAAACACGCTCAAAGTCATTAACCTTGCAC

>M6-PGSC0003DMG400005226M6LRR-RLP\_1116

TGGGGCAATTAATACAACATTTAGTATAGGAAACACGCTCAAAGTCATTAACCTTGCACGGGAATAAGCT  
AGAGGGGAAGTCCCACGATCTTTGGTCAATTGCAAGAGTTTGGAAATTCTA

>M6-PGSC0003DMG400005226M6LRR-RLP\_1178

ATAAGCTAGAGGGGAAGTCCCACGATCTTTGGTCAATTGCAAGAGTTTGAAATTCTAGATTTAGGTAA  
CAATGAGTTGAGTGACACATTTCCAAAATGGTTAGGAACCCTACCGAATTT

>M6-PGSC0003DMG400005226M6LRR-RLP\_124

ACAATTTTGAACCTTCTTCTTAAGAACTTAACCCAATTAACAGAGCTTGACCTTTACGGTGTGAGCATCTCA  
TCCACCTTTCCTTTGAATTTCTTCTTATTTAGCAACTCTACGACTTA

>M6-PGSC0003DMG400005226M6LRR-RLP\_1302

ATTTTAAGCTTGAGATCAAATAAGTCCACGGGCCATTAAAACTTCAAGGGCTGGAACTTGTTTGTAC  
ATCTTCGAATAATTGATCTATCATCCAATGGATTTAGTGGGAATTTACCT

>M6-PGSC0003DMG400005226M6LRR-RLP\_1364

GTTTGTACATCTTCGAATAATTGATCTATCATCCAATGGATTTAGTGGGAATTTACCTATGAGCCTTTTTG  
AGAATTTGAAAGCTATGAAGATAATTGATGAGATCACGAAAATCCCACG

>M6-PGSC0003DMG400005226M6LRR-RLP\_1426

GCCTTTTTGAGAATTTGAAAGCTATGAAGATAATTGATGAGATCACGAAAATCCCACGGTATGTGGGAG  
AAGACTTGTATTATTATTATAATTTTTCTGAAACAATTACAACAAAGGGGT

>M6-PGSC0003DMG400005226M6LRR-RLP\_1488

GTGGGAGAAGACTTGTATTATTATTATAATTTTTCTGAAACAATTACAACAAAGGGGTTGGATCTTGAAT  
TTCGTGGAGTTTTGACTACAAACATAGTTATCAATCTCTCGAAGAATAGA

>M6-PGSC0003DMG400005226M6LRR-RLP\_1550

TCTTGAATTCGTGGAGTTTTGACTACAAACATAGTTATCAATCTCTCGAAGAATAGATTTGAAGTTGT  
ATTCCAAGTTCCATTGGAGATCTTATTGCACTTCGTACTTTGAATTTATC

>M6-PGSC0003DMG400005226M6LRR-RLP\_1612

AAGTTGTATTCCAAGTTCCATTGGAGATCTTATTGCACTTCGTACTTTGAATTTATCTCATAATGGCTTG  
GAGGGTGTACACCAACATCGCTGCAGTACTTATCTGTACTTGAATCAT

>M6-PGSC0003DMG400005226M6LRR-RLP\_1674

AATGGCTTGGAGGGTGTACACCAACATCGCTGCAGTACTTATCTGTACTTGAATCATTAGATCTCTCATT  
CAACAAAATAAGCGGAGAAATTCACAACAACCTGCATCCCTCACATTT

>M6-PGSC0003DMG400005226M6LRR-RLP\_1736

TCTCTCATTCAACAAAATAAGCGGAGAAATTCACAACAACCTGCATCCCTCACATTTCTTGCTGTCTTAA

ATCTCTCTCACAAATCATTTTGTGGATGTATCCCTAGAGGAAAACAATT

>M6-PGSC0003DMG400005226M6LRR-RLP\_1860

ACGTTTGAGAATAGTTCATACCAAGGGAATGATGGGTTACGTGGATTGCCAGTGTCAAAGATTGTGGT  
GGTGATGAAGGGGTACCACAAACAACAACACTCCATTTGGGCTTGATCAAGGA

>M6-PGSC0003DMG400005226M6LRR-RLP\_1922

TTGTGGTGGTGATGAAGGGGTACCACAAACAACAACACTCCATTTGGGCTTGATCAAGGAGAAGAAGGAG  
ACTCAACAATGATCAGTTGGCAGGCAGTTCTCATGGGTTATGGTTGCGGTCT

>M6-PGSC0003DMG400005226M6LRR-RLP\_1984

AAGGAGACTCAACAATGATCAGTTGGCAGGCAGTTCTCATGGGTTATGGTTGCGGTCTAATTATTGGAT  
TATCCGTAATATACATAATGTTATCAACTCAAATCCAACATGGTTTTCGA

>M6-PGSC0003DMG400005226M6LRR-RLP\_2108

GGTTGAAGAATTGGACCACAAGATTATTACGAGAATGAAAAATACAATAAAAGCTATTAGTGTGCAAC  
CTAGCCAGGTATTCAACTTGATCTTTATCCTTCATAAGATTATTTTGTATA

>M6-PGSC0003DMG400005226M6LRR-RLP\_2170

GTGCAACCTAGCCAGGTATTCAACTTGATCTTTATCCTTCATAAGATTATTTTGTATATCTCAATGTATTAT  
ATATCTACCTCCTTCATCCTTAAAATTCTTGACTTCGATTCTTCATT

>M6-PGSC0003DMG400005226M6LRR-RLP\_2232

AATGTATTATATATCTACCTCCTTCATCCTTAAAATTCTTGACTTCGATTCTTCATTTTTTAAAATTGCAGGA  
TTCGAGCCTAATATGTTGTTGGTGATGCAAATATAAGCTTTTTATTTT

>M6-PGSC0003DMG400005226M6LRR-RLP\_2294

AAATTGCAGGATTCGAGCCTAATATGTTGTTGGTGATGCAAATATAAGCTTTTTATTTTTCACATTTTGTGA  
TGTATCTAAGTATTTATCGCCCTACGAATAAAGACATGAGCTTTCTTCC

>M6-PGSC0003DMG400005226M6LRR-RLP\_2356

ATTTTGTGATGTATCTAAGTATTTATCGCCCTACGAATAAAGACATGAGCTTTCTTCTTTGAGCTTCGGC  
CATAATTTTLAGAATGTTTTTAAATAGAGATTGTTAGCTTGAGTTCAGC

>M6-PGSC0003DMG400005226M6LRR-RLP\_2396

AGACATGAGCTTTCTTCTTTGAGCTTCGGCCATAATTTTLAGAATGTTTTTAAATAGAGATTGTTAGCTT  
GAGTTCAGCCTCATAATTAGTTGAGTAATTAGGCTCAACTGCAAAGTCA

>M6-PGSC0003DMG400005226M6LRR-RLP\_248

CACACAATTATGGGGGATACTGCCCGAAAGTGTTTTTCACCTTTCCAACCTGGAAACACTTGATTTATCAT  
ACAATTCCCAACTCACAATTAGGTTTCCCACGACCAAATGGAATAGCAG

>M6-PGSC0003DMG400005226M6LRR-RLP\_310

ATTTATCATACAATTCCCAACTCACAATTAGGTTTCCCACGACCAAATGGAATAGCAGTACATCTCTCATG  
TACTTATCTCTACCTGAAGTGAATTTTATTGGTAAGATACCCGAATCAT

>M6-PGSC0003DMG400005226M6LRR-RLP\_372

TCTCTCATGTACTTATCTCTACCTGAAGTGAATTTTATTGGTAAGATACCCGAATCATTTAGCTATCTAACT  
TCATTGCATTACTTGGATATGAGTTCTTGTAGCCTCTCAGGTCCTATT

>M6-PGSC0003DMG400005226M6LRR-RLP\_434

CTATCTAACTTCATTGCATTACTTGGATATGAGTTCTTGTAGCCTCTCAGGTCCTATTATTAACCTCTTTG  
GAATCTCTCCACATACAAAGTTTGAATCTCAGAAATAACCATCTTGA

>M6-PGSC0003DMG400005226M6LRR-RLP\_496

AACCTCTTTGGAATCTCTCCACATACAAAGTTTGAATCTCAGAAATAACCATCTTGAAGGACCAATTTCC  
CAATTCTTCAAATTTGGAAACCTCACTTGAATTAACAACCTTTGATGGC

>M6-PGSC0003DMG400005226M6LRR-RLP\_558

CCAATTTCCCAATTCTTCAAATTTGGAAACCTCACTTGAATTAACAACCTTTGATGGCTAACTTGATTTTTT  
ATCCTCCAACAGAAGTTGGACTCAACTGAAGGGTTCGAAGTTTCTTC

>M6-PGSC0003DMG400005226M6LRR-RLP\_62

TGGTGAGTTTTCTAGTTTGACGCATCTTGATTTGTCAAATTCAGGTTTTAGATTCGGACCTCACAATTTTG  
AACTTCTTCTTAAGAACTTAACCCAATTAACAGAGCTTGACCTTTACGG

>M6-PGSC0003DMG400005226M6LRR-RLP\_620

TTGATTTTTTATCCTCCAACAGAAGTTGGACTCAACTGAAGGGTTCGAAGTTTCTTCCAATTCCTTAGTT  
GGTCCAATTCCTTCCGATGTAAGTGGTCTGCAAAGCCTACAATCATTCT

>M6-PGSC0003DMG400005226M6LRR-RLP\_682

TCCTTAGTTGGTCCAATTCCTTCCGATGTAAGTGGTCTGCAAAGCCTACAATCATTCTTCTTGTCAATCAA  
CCACTTGAATGGGACTATACCATCATGGATATTCTCCCTTCCTTCACTA

>M6-PGSC0003DMG400005226M6LRR-RLP\_744

GTCATCAAACCACTTGAATGGGACTATACCATCATGGATATTCTCCCTTCCTTCACTAGATGAATTATACT  
TGAATGATAACTATTTTCAAGAGGAGAAATTCAGGAGTTCAAGTCCAAAAC

>M6-PGSC0003DMG400005226M6LRR-RLP\_806

AATTATACTTGAATGATAACTATTTTCAGAGGAGAAATTCAGGAGTTCAAGTCCAAAACATTGTGGGACG  
TACTCTAAAACAAAATCAGTTGCAAGGTCTATTCCGATGTCACTCCTAA

>M6-PGSC0003DMG400005226M6LRR-RLP\_868

TGGGACGTTACTCTAAAACAAAATCAGTTGCAAGGTCTATTCCGATGTCACTCCTAAACCAACAGAGCC  
TATCTTATCTTCTCCTTTTCGAAAAATAATCTCAGTGGACAGATTTCTTCA

>M6-PGSC0003DMG400005226M6LRR-RLP\_930

ACAGAGCCTATCTTATCTTCTCCTTTTCGAAAAATAATCTCAGTGGACAGATTTCTTTCAGCTATCTGCAGTC  
TAAATGCCCTGAAAGTGCTAGATCTTGGAAAGTAATAATTTGAAGGGAAC

>M6-PGSC0003DMG400005226M6LRR-RLP\_992

TCTGCAGTCTAAATGCCCTGAAAGTGCTAGATCTTGGAAAGTAATAATTTGAAGGGAACAATCCCACAAT  
GTTTGGGTGAGATGAGTGGACTTTGGGTTTTTGGATCTAAGCAACAACGGTC

>M6-PGSC0003DMG400005254-(rev)M6LRR-RLK\_0

AAAGATTTAAAAAGTAATTGGCACCTTGCTTTTTAGTGGCCTACAATGGAAAGAATGGCTTTTTATTGCCA  
AAAGGACTTTAGGCAAAGTATGCAATAAATCCTCTTCCCACTCACTTTGA

>M6-PGSC0003DMG400005254-(rev)M6LRR-RLK\_1054

TGATATTCCTGTTTCTTTATCTCCTCGTCTTGGTGTACTAGATCTCTCCTTTAACTCTTTTACTGGAGAAATC  
CCCCCACAATCAAGAACTTGACGCGATTATCTGTGTTGAACCTTCA

>M6-PGSC0003DMG400005254-(rev)M6LRR-RLK\_1116

CTGGAGAAATCCCCCACAATCAAGAACTTGACGCGATTATCTGTGTTGAACCTTCAGTTCAATTCATT  
GACAGGAGAAATCCCAGCCTTGACACCCTCAGGTTAACTAACCTGAATT

>M6-PGSC0003DMG400005254-(rev)M6LRR-RLK\_1178

AATTCATTGACAGGAGAAATCCCAGCCTTGACACCCTCAGGTTAACTAACCTGAATTTGAGTTACAATA  
TGCTAAATGGCTCCGTTCCAGACCCCCTCCAGAAGTTTCCACTTACATCA

>M6-PGSC0003DMG400005254-(rev)M6LRR-RLK\_124

CTGTCTTCAGTAGTTCAATTAGTATCTGTCATAATTCTTGCCTACTGGATTGATCCATTTTCAATATGAAGA  
GGTAGTAAATCAAATGAAGTTTCCCTTTCATTGAACAACACAGCTCTC

>M6-PGSC0003DMG400005254-(rev)M6LRR-RLK\_1240

TTACAATATGCTAAATGGCTCCGTTCCAGACCCCCTCCAGAAGTTTCCACTTACATCATTGCGAGGAAACT

CTCATTATGTGGTACACCTCTAAATAGCTGTTCTCGACCCCGTCACC

>M6-PGSC0003DMG400005254-(rev)M6LRR-RLK\_1302

CAGGAACTCTCATTATGTGGTACACCTCTAAATAGCTGTTCTCGACCCCGTCACCTTCTCCAGCAGCT  
GATGGCTCTGCAATCCCTGAAAAACAGAAGGCTGTCCACTCTAAGAAAC

>M6-PGSC0003DMG400005254-(rev)M6LRR-RLK\_1364

CCAGCAGCTGATGGCTCTGCAATCCCTGAAAAACAGAAGGCTGTCCACTCTAAGAACTAAGTACCGGA  
ATCATCATTGCCATTGTGGTAGTGGTTTCTTTAGTAATGTTTCTCCTAGTT

>M6-PGSC0003DMG400005254-(rev)M6LRR-RLK\_1426

TACCGAATCATCATTGCCATTGTGGTAGTGGTTTCTTTAGTAATGTTTCTCCTAGTTTTAGTAATCTCCTT  
CTGCTGCTTGAAAAAGAAAGTGAGTCATAGCACTAGCATAATTAAGA

>M6-PGSC0003DMG400005254-(rev)M6LRR-RLK\_1488

TAATCTCCTTCTGCTGCTTGAAAAAGAAAGTGAGTCATAGCACTAGCATAATTAAGAGAAGGTGGCTA  
ATGGGGGAAGAAGTGAAAAACCCGAGGACTTCGGAAGTGGTGTGCCAGATG

>M6-PGSC0003DMG400005254-(rev)M6LRR-RLK\_1550

GTGGCTAATGGGGGAAGAAGTGAAAAACCCGAGGACTTCGGAAGTGGTGTGCCAGATGCTGAGAAAA  
ACAAGTTGGTGTTTTTCGAAGTTGCTTTACAGCTTCAATCTGGAGGATCTT

>M6-PGSC0003DMG400005254-(rev)M6LRR-RLK\_1612

GAAAAACAAGTTGGTGTTTTTCGAAGTTGCTTTACAGCTTCAATCTGGAGGATCTTCTTAGAGCTTCT  
GCTGAGGTTCTTGAAAAGGGAGTTATGGTACAGCTTACAAAGCTGTCTT

>M6-PGSC0003DMG400005254-(rev)M6LRR-RLK\_1674

GAGCTTCTGCTGAGGTTCTTGAAAAGGGAGTTATGGTACAGCTTACAAAGCTGTCTTGGATGAGGCAA  
CGATTGTGGTGGTGAACGGCTGAGAGAAGTAGGGGTTGCCAAAAGGAGT

>M6-PGSC0003DMG400005254-(rev)M6LRR-RLK\_1736

GAGGCAACGATTGTGGTGGTGAACGGCTGAGAGAAGTAGGGGTTGCCAAAAGGAGTTTGAACAGC  
ATATGGAGATAGTTGGAAGGGCTGGGAGGCACCCTAATATCGTTCCACTCCGC

>M6-PGSC0003DMG400005254-(rev)M6LRR-RLK\_1798

ACAGCATATGGAGATAGTTGGAAGGGCTGGGAGGCACCCTAATATCGTTCCACTCCGCGCATATTATTA  
TTCCAAGGATGAGAACTTCTTGTTAATGAATACATGCCTGCTGGTAGCTT

>M6-PGSC0003DMG400005254-(rev)M6LRR-RLK\_186

AATATGAAGAGGTAGTAAATCAAATGAAGTTTCCCTTTCATTGAACAACACAGCTCTCAGATCCCTTCA  
TGCATATCATATAGGTAAGTTAACTTGTGTGCCATATATTTAGAACTAA

>M6-PGSC0003DMG400005254-(rev)M6LRR-RLK\_1860

ATTATTATTCCAAGGATGAGAACTTCTTGTTAATGAATACATGCCTGCTGGTAGCTTGTGAGCAGCCTT  
GCACGGTATAATTGCTAACCTTTATCTAACCTGTGTTGCTCAGACTCTTC

>M6-PGSC0003DMG400005254-(rev)M6LRR-RLK\_2046

ATTTTTGAAGAGTCCGAGCAACACAACCTCTAAACTTTTTTCTTGACATTAATTGCTTTGATCATCTGTAA  
TGATTCATATTTTTACGCAATCTTGATAATGAATGACAGGTAATCGAG

>M6-PGSC0003DMG400005254-(rev)M6LRR-RLK\_2108

TCATCTGTAATGATTCATATTTTTACGCAATCTTGATAATGAATGACAGGTAATCGAGGTATTGGAAGAA  
CTCCACTAGATTGGGATTCAAGATTGAAGATATCTCAGGGAGCAGCAAAA

>M6-PGSC0003DMG400005254-(rev)M6LRR-RLK\_2170

TGGAAGAACTCCACTAGATTGGGATTCAAGATTGAAGATATCTCAGGGAGCAGCAAAAAGGAATTGCC  
ACATCCACTGAAGGTGGTGTGAAATTTACTCATGGAAACATCAAGTCCTC

>M6-PGSC0003DMG400005254-(rev)M6LRR-RLK\_2232

TTGCCACATCCACTGAAGGTGGTGTGAAATTTACTCATGGAAACATCAAGTCCTCCAATGTACTCCT  
GACAAGAGACCTAGATGGATGCATTTCTGATTTTGGCTTAACACCTCTGA

>M6-PGSC0003DMG400005254-(rev)M6LRR-RLK\_2294

GTAATCCTGACAAGAGACCTAGATGGATGCATTTCTGATTTTGGCTTAACACCTCTGATGAACTACATAT  
CATACAAATATAGATGTGCTGGTTACCGCGCACCAGAAGTTATTGAAACA

>M6-PGSC0003DMG400005254-(rev)M6LRR-RLK\_2356

CTACATATCATACAAATATAGATGTGCTGGTTACCGCGCACCAGAAGTTATTGAAACACGGAAAGGGAC  
ACAAAAATCCGATGTTTATAGCTTTGGAGTGCTGCTCCTTGAGATGCTAAC

>M6-PGSC0003DMG400005254-(rev)M6LRR-RLK\_2418

AAGGGACACAAAAATCCGATGTTTATAGCTTTGGAGTGCTGCTCCTTGAGATGCTAACAGGCAAATCCC  
CTCTCCATTATCAGGGCAGGATGAGGTAGTTGATTTACCTAGGTGGGTCC

>M6-PGSC0003DMG400005254-(rev)M6LRR-RLK\_248

CCCTTTCATGCATATCATATAGGTAAGTTAACTTGTGTGCCATATATTTAGAACTAAAAGAGTAAATCTT  
GGCTTTCACAATAACCAAATGAATTTTTTCTATTCTGTCATTCTGAGAT

>M6-PGSC0003DMG400005254-(rev)M6LRR-RLK\_2480

AAATCCCCTCTCCCATTATCAGGGCAGGATGAGGTAGTTGATTTACCTAGGTGGGTCCGGTCCGTTGTAA  
GAGAGGAATGGACTGCTGAAGTTTTCGACGTAGAGCTGTTGAAGTACCAG

>M6-PGSC0003DMG400005254-(rev)M6LRR-RLK\_2542

CGTTGTAAGAGAGGAATGGACTGCTGAAGTTTTCGACGTAGAGCTGTTGAAGTACCAGAATATTGAAG  
AAGAGATGGTGCAGATGCTTCAGATTGGACTAGCTTGTGTAGCAAAGGTGCC

>M6-PGSC0003DMG400005254-(rev)M6LRR-RLK\_2604

TTGAAGAAGAGATGGTGCAGATGCTTCAGATTGGACTAGCTTGTGTAGCAAAGGTGCCTGATATGAGA  
CCTGCTATGGGAGAAGTGGTTAGAATGATTGAAGAAATTTGACAACCAGAAG

>M6-PGSC0003DMG400005254-(rev)M6LRR-RLK\_2666

ATGAGACCTGCTATGGGAGAAGTGGTTAGAATGATTGAAGAAATTTGACAACCAGAAGGTGAAACGAG  
ACCTTCCTCGGAGGACAGCAGGTCCAAGGACTCTAATGCACAAACACCTGAA

>M6-PGSC0003DMG400005254-(rev)M6LRR-RLK\_2728

AACGAGACCTTCCTCGGAGGACAGCAGGTCCAAGGACTCTAATGCACAAACACCTGAATGAAAAATGCA  
GTTTTTAGTCATTCAGCTTTCAATCTTGATCATTTTAAGAATGCAATTTAT

>M6-PGSC0003DMG400005254-(rev)M6LRR-RLK\_2790

AAATGCAGTTTTTAGTCATTCAGCTTTCAATCTTGATCATTTTAAGAATGCAATTTATCTCCATTGCCAACT  
TTTGCATGTTCTTGGCCATACAAGTAGTGTTATTTTTATTTTATTTTT

>M6-PGSC0003DMG400005254-(rev)M6LRR-RLK\_310

GTAAATCTTGGCTTTACAATAACCAAATGAATTTTTTCTATTCTGTCAATTCTGAGATAGAGTTCTTCCTTT  
TTCGTTACTTCTTTAGCTGATATTATTTCTGGATTGTATAGTTTTCTT

>M6-PGSC0003DMG400005254-(rev)M6LRR-RLK\_372

TTCTTCCTTTTTCGTTACTTCTTTAGCTGATATTATTTCTGGATTGTATAGTTTTCTTGCATTGTGTTAAAAC  
TTTTTCATTGATTTGTTAATGGTTTCTTATAGCAATCTGATTTTAT

>M6-PGSC0003DMG400005254-(rev)M6LRR-RLK\_434

TGTGTAAAACCTTTTTATTGATTTGTTAATGGTTTCTTATAGCAATCTGATTTTATCTCTCTTTCACAGTG  
GCTAATGAGCTGCTTCCTCTAAGCGGAACCAACCGGCTGATTTTGTCT

>M6-PGSC0003DMG400005254-(rev)M6LRR-RLK\_496

CTTTCACAGTGGCTAATGAGCTGCTTCCTCTAAGCGGAACCAACCGGCTGATTTTGTCTAATGCTCTTCAA



AAGTAGTCAAGGAGAGAGAGGGAAGAAGTGAAGGACTGCTGTAACCTCGG

>M6-PGSC0003DMG400005254-(rev)M6LRR-RLK\_558

GCTCTTCAAAAGTAGTCAAGGAGAGAGAGGGAAGAAGTGAAGGACTGCTGTAACCTCGGATCTTGCTTT  
TGCATTTTTGTCAGCCAGATCAGTGAAAACATAATGAAGCTTCAGCCTTTAC

>M6-PGSC0003DMG400005254-(rev)M6LRR-RLK\_62

TATTGCCAAAAGGACTTTAGGCAAAGTATGCAATAAATCCTCTTCCCACTCACTTTGAAAATCTGTCTTCA  
GTAGTTCAATTAGTATCTGTCATAATTCTTGCCTACTGGATTGATCCAT

>M6-PGSC0003DMG400005254-(rev)M6LRR-RLK\_620

TGCTTTTGCATTTTTGTCAGCCAGATCAGTGAAAACATAATGAAGCTTCAGCCTTTACTGGCAGCTATTGC  
TTTTCTTATTCTGCTGCTATCAGTATTTCTTCATGTTATAGCTGATCTT

>M6-PGSC0003DMG400005254-(rev)M6LRR-RLK\_682

AGCTATTGCTTTTCTTATTCTGCTGCTATCAGTATTTCTTCATGTTATAGCTGATCTTGATTCCGATAGACA  
GGCGCTACTCGACTTTGCAGAATCTGTCCCTCATATCCGAAAACCTCAA

>M6-PGSC0003DMG400005254-(rev)M6LRR-RLK\_744

CCGATAGACAGGCGCTACTCGACTTTGCAGAATCTGTCCCTCATATCCGAAAACCTCAACTGGAATTTGGC  
TCTCCCTATTTGCAAATCTTGGGCTGGTATAGCTTGTAAACAAAGATGGAA

>M6-PGSC0003DMG400005254-(rev)M6LRR-RLK\_806

AATTTGGCTCTCCCTATTTGCAAATCTTGGGCTGGTATAGCTTGTAAACAAAGATGGAACGAGAGTCATTG  
CAATCCATCTCCCTGCTGTAGGACTTTTTGGTCCTATCCCAGCTAATAGT

>M6-PGSC0003DMG400005254-(rev)M6LRR-RLK\_868

AGTCATTGCAATCCATCTCCCTGCTGTAGGACTTTTTGGTCCTATCCCAGCTAATAGTATAGGCAAGCTAG  
ATGCTCTTAAAGTCCTTAGTTTAAAGAGCCAATTATCTTAATGGAAGTGT

>M6-PGSC0003DMG400005254-(rev)M6LRR-RLK\_930

GCAAGCTAGATGCTCTTAAAGTCCTTAGTTTAAAGAGCCAATTATCTTAATGGAAGTGTTCCCTTCTGATCTC  
CTTTGATACCGTCTCTCCAATTTGTTTACCTTCAGCATAATAGCTTCT

>M6-PGSC0003DMG400005254-(rev)M6LRR-RLK\_992

TCTGATCTCCTTTGATACCGTCTCTCCAATTTGTTTACCTTCAGCATAATAGCTTCTCTGGTGATATTCTT  
GTTTCTTTATCTCCTCGTCTTGGTGTACTAGATCTCTCCTTTAACTCT

>M6-PGSC0003DMG400005395-(rev)M6LRR-RLP\_0

ATGGGCTGTTGTGTGAAAGCTAATGCCTCCAAGGAGATTAGAACCCGCAATCATAGACATGTAGGACTT  
GAAAAGATCTTTCGCCAAGTGCACGAACCTCTACTTTGCATTCTGGTGCCT

>M6-PGSC0003DMG400005395-(rev)M6LRR-RLP\_1037

AAAGTTGCAACACTTGATGGGAATCGAATCAGAGCATTGCCTGATGAATGTAATTTCCACCGTCCTAGA  
TCATATGTGAAGTTAAGCAGGATTCTCTCTGCTATAGAGTATCACACTCT

>M6-PGSC0003DMG400005395-(rev)M6LRR-RLP\_1098

CGTCCTAGATCATATGTGAAGTTAAGCAGGATTCTCTCTGCTATAGAGTATCACACTCTCTATTCTAACAA  
CATAATGTTCTCATATTCAGTGGGCCAGTTGGTGAAGCTTGAGCGTTTG

>M6-PGSC0003DMG400005395-(rev)M6LRR-RLP\_1159

ATTCTAACAAACATAATGTTCTCATATTCAGTGGGCCAGTTGGTGAAGCTTGAGCGTTTGTCTGTCTCAGC  
AAACTTGTTAATGAGCTTGCCTGAGACTATTGGGAGATTGCAGAATGTGA

>M6-PGSC0003DMG400005395-(rev)M6LRR-RLP\_122

GTGTATCTATTTCTAAGATATCAAGATAGTTACCTATATAAACCAAGTTTCCATCGAAGTTTCCGGGTGCA  
GGTGTATCCTCAACCTACTATAAACGGGCTTGCTAAATCCAGATTGAGG

>M6-PGSC0003DMG400005395-(rev)M6LRR-RLP\_1220

TGTCTCAGCAAACCTTGTTAATGAGCTTGCCTGAGACTATTGGGAGATTGCAGAATGTGAGTGATCCATTC  
TGATGGCTAATACGGTGCCATCTCCGCAATTCTAAAAAGTGTGCCAGTT

>M6-PGSC0003DMG400005395-(rev)M6LRR-RLP\_1281

GATCCATTCTGATGGCTAATACGGTGCCATCTCCGCAATTCTAAAAAGTGTGCCAGTTAATATATTATTT  
CTTAGCTTGCTTTACTGCTTTGTTATTTTTTTTTTCCGAGTATAAAGGT

>M6-PGSC0003DMG400005395-(rev)M6LRR-RLP\_1342

TATATTATTTCTTAGCTTGCTTTACTGCTTTGTTATTTTTTTTTTCCGAGTATAAAGGTGCTAAGGTGTCTA  
ATGAAATGGTGTCAATCTTGTAAGAAATGTTTCAGCATATTGATATCCA

>M6-PGSC0003DMG400005395-(rev)M6LRR-RLP\_1403

TAAGGTGTCTAATGAAATGGTGTCAATCTTGTAAGAAATGTTTCAGCATATTGATATCCATATTAATGGAT  
CATTTTGCTTACAACCTTTCTGTTCTTACAACCTAAAAGCCCTACTTTTTTTT

>M6-PGSC0003DMG400005395-(rev)M6LRR-RLP\_1464

TAAATGGATCATTTTGCTTACAACCTTTCTGTTCTTACAACCTAAAAGCCCTACTTTTTTTTTCTCTATTTCTATA  
GTGATGCCGCTTCTTCATGAATTTCTATTATCTTCCTGGTAGTTGAT

>M6-PGSC0003DMG400005395-(rev)M6LRR-RLP\_1525

TCTATTTCTATAGTGATGCCGCTTCTTCATGAATTTCTATTATCTTCCTGGTAGTTGATGATGTCTCTTTGC  
TCTCTTATGTTAGTATTTTGGATTTGGAATAGGGTCTGCAGCTCTG

>M6-PGSC0003DMG400005395-(rev)M6LRR-RLP\_1586

TGTCTCTTTGCTCTCTTATGTTAGTATTTTGGATTTGGAATAGGGTCTGCAGCTCTGGGGGAGGGTGG  
TTGAATTTGGAGAATAAGTGGCTCTATTGCAGGTTGTCTTGAGGTCCACC

>M6-PGSC0003DMG400005395-(rev)M6LRR-RLP\_1647

GGAGGGTGGTTGAATTTGGAGAATAAGTGGCTCTATTGCAGGTTGTCTTGAGGTCCACCACCCTGAGTG  
CCGTCTGTTCTTCCTTTTTATTTCACTCTCTCCTTATATTGAATATTTTTTC

>M6-PGSC0003DMG400005395-(rev)M6LRR-RLP\_1708

CCTGAGTGCCGTCTGTTCTTCCTTTTTATTTCACTCTCTCCTTATATTGAATATTTTTCTTCTCAAGTTTTTTT  
CTTCAATGTCATTGATGAACCAAGTGTGAGAAAGAAAGACTCGGAA

>M6-PGSC0003DMG400005395-(rev)M6LRR-RLP\_1769

CTCAAGTTTTTTTCTTCAATGTCATTGATGAACCAAGTGTGAGAAAGAAAGACTCGGAAAATACTTTCAA  
TATACGTAAACTACATTATTACACAAAGCATTGTTTATAGACAATACACT

>M6-PGSC0003DMG400005395-(rev)M6LRR-RLP\_183

TCCGGGTGCAGGTGTATCCTCAACCTACTATAAACGGGCTTGCTAAATCCAGATTGAGGGAAATTCATG  
ATTAATGTGTCTTTTAGTAAATATTAAGTGTGTTACTCTGTTGGAAATGC

>M6-PGSC0003DMG400005395-(rev)M6LRR-RLP\_1830

TACTTTCAATATACGTAAACTACATTATTACACAAAGCATTGTTTATAGACAATACACTACAATCCTTTTCC  
ATGTATGGCACCATGTACAATCCTATTTGAGCACTCCCCCTCAAGCTG

>M6-PGSC0003DMG400005395-(rev)M6LRR-RLP\_244

AATTCATGATTAATGTGTCTTTTAGTAAATATTAAGTGTGTTACTCTGTTGGAAATGCAAGGTTAAAGCA  
GTAACAATTTGTCCAAAATATAATGGCAAACACAAAATTAAGATATGC

>M6-PGSC0003DMG400005395-(rev)M6LRR-RLP\_2745

CCCCTCTGCATTCAAGAGTACAAGTCCATTTGACTGTTTTTTCTAAATTTTAATTCTCTGCGCATTGACA  
AACAAAGACTCAGAAAATATTATTAAGATACGTAAATATCACACTGAG

>M6-PGSC0003DMG400005395-(rev)M6LRR-RLP\_2806

GCGCATTGACAAACAAAGACTCAGAAAATATTATTAAGATACGTAAATATCACACTGAGGTCTACTTATA

GATAATACACTACAATCCTTTTCCATGTAGGACACCATGTACAACCTATT

>M6-PGSC0003DMG400005395-(rev)M6LRR-RLP\_2867

CTACTTATAGATAATACACTACAATCCTTTTCCATGTAGGACACCATGTACAACCTATTGTAACACCAAGA  
AGTATAGTGTTCACTTTTAGGTGTATATCTGATTCTCATGGTTGCTGAC

>M6-PGSC0003DMG400005395-(rev)M6LRR-RLP\_2928

AACACCAAGAAGTATAGTGTTCACTTTTAGGTGTATATCTGATTCTCATGGTTGCTGACATGGGATTATG  
AATTAAAGTTTTTCAATCAAGTTAACTAGCTCTATCCTCTAGTAGTGTTT

>M6-PGSC0003DMG400005395-(rev)M6LRR-RLP\_2989

GGGATTATGAATTAAGTTTTTCAATCAAGTTAACTAGCTCTATCCTCTAGTAGTGTTTCATATCATTCTAA  
ACACTTGCATATACTTTTACTCCAAATATGTTTTGATATTTGTGAGTTC

>M6-PGSC0003DMG400005395-(rev)M6LRR-RLP\_305

GGTTAAAGCAGTAACAATTTGTCCAAAATATAATGGCAAACACAAAATTAAGATATGCTGACAGCTTA  
ACTTCAAAGGGAGATTTTAAGCTATCGTAGGATAAGTCTTAGGAGGAAATA

>M6-PGSC0003DMG400005395-(rev)M6LRR-RLP\_3050

ATCATTCTAAACACTTGCATATACTTTTACTCCAAATATGTTTTGATATTTGTGAGTTCAGTTC AATATGAT  
GATGCCGTTTTTTGTCTGTCAGAGATAGTCGTT CAGCCTATACTTAAA

>M6-PGSC0003DMG400005395-(rev)M6LRR-RLP\_3111

TTCAATATGATGATGCCGTTTTTTGTCTGTCAGAGATAGTCGTT CAGCCTATACTTAAAAGTATTCTTAAT  
TCATCTTCTTTGGAAAATGAGGCCTTTGGAATTGACAGTAATGGTTTTT

>M6-PGSC0003DMG400005395-(rev)M6LRR-RLP\_3172

TATTCTTAATTCATCTTCTTTGGAAAATGAGGCCTTTGGAATTGACAGTAATGGTTTTTCACTGCAGTTGG  
TGCTGTTGGACATTTCAAACAATAAGTTAAAGTTTTTTTCTGAATCAAT

>M6-PGSC0003DMG400005395-(rev)M6LRR-RLP\_3233

CTGCAGTTGGTGCTGTTGGACATTTCAAACAATAAGTTAAAGTTTTTTTCTGAATCAATTGGAAGTTGCTT  
CTCTTTGGAAGAATTGCAAGCAAATGGTACCTTCAAATTTTAGTGTCAC

>M6-PGSC0003DMG400005395-(rev)M6LRR-RLP\_3294

GAAGTTGCTTCTCTTTGGAAGAATTGCAAGCAAATGGTACCTTCAAATTTTAGTGTCACCTCATCCATTCTT  
GCTATTTCTCTATTTCTTTTATTTTCTGGCACTGGA ACTCTGTATCA

>M6-PGSC0003DMG400005395-(rev)M6LRR-RLP\_3355

ATCCATTCTTGCTATTTCTCTATTTCTTTTATTTTCTGGCACTGGAECTCTGTATCAAATATCCATCGAG  
GAAAAAAAAACATGTTACCATCAACATAAAATTAAGTGAAATTTATGG

>M6-PGSC0003DMG400005395-(rev)M6LRR-RLP\_3416

TATCCATCGAGGAAAAAAAAACATGTTACCATCAACATAAAATTAAGTGAAATTTATGGCCGATGATAA  
AATTGGAGTGTGGGTGACCTAGAAAGCTAAAGGAAAATCTACAAATTTTC

>M6-PGSC0003DMG400005395-(rev)M6LRR-RLP\_3477

GATGATAAAATTGGAGTGTGGGTGACCTAGAAAGCTAAAGGAAAATCTACAAATTTTCTCTGTAAAGC  
TTATAAGATAATATTCTTGGCACCATCCATTTGAACTGGTACATGATTTTC

>M6-PGSC0003DMG400005395-(rev)M6LRR-RLP\_3538

TGTTAAGCTTATAAGATAATATTCTTGGCACCATCCATTTGAACTGGTACATGATTTTCACGTTCTGTTTCT  
TATTCTCAGTGTGGCATAATGAGGTTTACTGTGTTTTTTTGGCAATC

>M6-PGSC0003DMG400005395-(rev)M6LRR-RLP\_3599

GTTCTGTTTCTTATTCTCAGTGTGGCATAATGAGGTTTACTGTGTTTTTTTGGCAATCTTGCCTCGTGATA  
ACAATATTTCTTTTCAAGATAATTCCATTGAAGAGCTTCTGCATCAGT

>M6-PGSC0003DMG400005395-(rev)M6LRR-RLP\_366

ACAGCTTAACTTCAAAGGGAGATTTTAAGCTATCGTAGGATAAGTCTTAGGAGGAAATAGCCCTGTGAA  
GGAGCTGTAATGAAAGTCAATTTTTTTGTCAACGAGGTAATATGTGGTGGG

>M6-PGSC0003DMG400005395-(rev)M6LRR-RLP\_3660

GCCTCGTGATAACAATATTTCTTTTCAAGATAATTCCATTGAAGAGCTTCTGCATCAGTTTGAATCTTGT  
TCAACTAAAATCACTCTGCCTGAACAATAACAATCTCAATCAGGTTAGT

>M6-PGSC0003DMG400005395-(rev)M6LRR-RLP\_3721

GCAATCTTGTTCAACTAAAATCACTCTGCCTGAACAATAACAATCTCAATCAGGTTAGTGTCTAATTTTAC  
CTGTGTGTATGTGTGTGTGACCCTGTTATTTTGGAGTCATATCTAGTA

>M6-PGSC0003DMG400005395-(rev)M6LRR-RLP\_3904

ACATGTGCAGTCAACTGCTGTGCATGTGTGTGTGTGTCTGTCTATCATCGTCACACATAAAAAGTGCA  
AAGAATAGTAAACCACGTGGATCAAAGCTTACCTGTTTGTACACCGAA

>M6-PGSC0003DMG400005395-(rev)M6LRR-RLP\_3965

AAAAGTGCAAAGAATAGTAAACCACGTGGATCAAAGCTTACCTGTTTGTACACCGAAAAGCTGAACT  
TATTGTTGTATTGGTGATACTTGTATGTGCTCTCTCTCACTTTCTATCT

>M6-PGSC0003DMG400005395-(rev)M6LRR-RLP\_4026

GCTGAACTTATTGTTGTATTGGTGATACTTGTATGTGCTCTCTCTCACTTTCTATCTTAATAATACTATT  
AAGCAGAGTTAGGAACTCTCTTCGCATGATCTGTAAGCCTAGTTCACT

>M6-PGSC0003DMG400005395-(rev)M6LRR-RLP\_4087

ATAATACTATTAAGCAGAGTTAGGAACTCTCTTCGCATGATCTGTAAGCCTAGTTCACTTCCCCGTGTATG  
AGTGTTAAAAGGAACTCATACTTAACCTTAAAACGTGCATCTAAAAG

>M6-PGSC0003DMG400005395-(rev)M6LRR-RLP\_4148

CCCGTGTATGAGTGTTAAAAGGAACTCATACTTAACCTTAAAACGTGCATCTAAAAGCTTTTCCTTTTA  
ATAAGACCTCATGAAGAAACGAAGATAATCAAACAACCCAGTAGCATCTA

>M6-PGSC0003DMG400005395-(rev)M6LRR-RLP\_4209

TTTCCTTTTAATAAGACCTCATGAAGAAACGAAGATAATCAAACAACCCAGTAGCATCTACATTGCAAACC  
GGCAATAAAGCCAAATACGCATAATGATCCACATTTGAGGTCATTGGATT

>M6-PGSC0003DMG400005395-(rev)M6LRR-RLP\_427

CCTGTGAAGGAGCTGTAATGAAAGTCAATTTTTTTGTCAACGAGGTAATATGTGGTGGGTAAAAAGCCC  
AAGTGTCACACCCGAAATCCACGCTTATTGCTCAAAGTACTTCCATGCTTG

>M6-PGSC0003DMG400005395-(rev)M6LRR-RLP\_4270

TTGCAAACCGGCAATAAAGCCAAATACGCATAATGATCCACATTTGAGGTCATTGGATTGAACCTCACGT  
ATCTTCCATTTAAAGCATCATCATCCAAGTTTTTTGACTTGTGCCTATCA

>M6-PGSC0003DMG400005395-(rev)M6LRR-RLP\_4331

ACCTCACGTATCTTCCATTTAAAGCATCATCATCCAAGTTTTTTGACTTGTGCCTATCAAGTATATGTTTTT  
ACTAGATAGTCATGCTTCTTTTGGTAACTGGATTGTTTCAGATGCCTC

>M6-PGSC0003DMG400005395-(rev)M6LRR-RLP\_4392

TATATGTTTTTACTAGATAGTCATGCTTCTTTTGGTAACTGGATTGTTTCAGATGCCTCTAAATTTGTTAAG  
AGAATGCAAGAGCTTGCAGACCATATCCCTGCATGGAAATCCGATTTTC

>M6-PGSC0003DMG400005395-(rev)M6LRR-RLP\_4453

AATTTGTTAAGAGAATGCAAGAGCTTGCAGACCATATCCCTGCATGGAAATCCGATTTCCATGGACCAAT  
TTCAACAGGTTACTCACTAATATTCTACTATTTAGTTCTGCAAGTACTAA

>M6-PGSC0003DMG400005395-(rev)M6LRR-RLP\_4514

TGGACCAATTTCAACAGGTTACTCACTAATATTCTACTATTTAGTTCTGCAAGTACTAAAAAATCATTTA

TGAAGAATTCTATTTGCCTTTTCTTTTTCCAGATGGATGGCTTCAAGGA

>M6-PGSC0003DMG400005395-(rev)M6LRR-RLP\_4575

AAATCATTATGAAGAATTCTATTTGCCTTTTCTTTTTCCAGATGGATGGCTTCAAGGACTTTGAAGCCCG  
CCGTAAACAGAAGTTTGATAAACAATTGATTCAAATGTGATAATCAGT

>M6-PGSC0003DMG400005395-(rev)M6LRR-RLP\_4636

TTGAAGCCCGCCGTAAACAGAAGTTTGATAAACAATTGATTCAAATGTGATAATCAGTTCTAAAGGGCT  
TGATGAGGGTGTTGACTTGTGATTCTCTCCGCAGGCGTTTTCTATAAGG

>M6-PGSC0003DMG400005395-(rev)M6LRR-RLP\_4697

TAAAGGGCTTGATGAGGGTGTTGACTTGTGATTCTCTCCGCAGGCGTTTTCTATAAGGCTCCGCGCAAT  
CTTGTTAATCTCAGGTTTACTATTTTTTTGCTTCAATCCCTGATGGAAA

>M6-PGSC0003DMG400005395-(rev)M6LRR-RLP\_4758

CCGCGCAATCTTGTTAATCTCAGGTTTACTATTTTTTTGCTTCAATCCCTGATGGAAAATTTCCCTTTATTT  
TATGTATGACCATGTAGTAGCCACACTACACAGTTGTGCTCCTTCAG

>M6-PGSC0003DMG400005395-(rev)M6LRR-RLP\_4819

TTCCCTTTATTTTATGTATGACCATGTAGTAGCCACACTACACAGTTGTGCTCCTTCAGTTGCTGTCAAGC  
TTTTAGTATTTCTAGTGTCTGTAATGCCTAATTTGGACAATTCATTCTT

>M6-PGSC0003DMG400005395-(rev)M6LRR-RLP\_488

AAAAGCCCAAGTGTACACCCGAAATCCACGCTTATTGCTCAAAGTACTTCCATGCTTGTTCTAGTACGTT  
TAATCACTTTTGGACTTTAGTATCCTTGCTGGTCCCCACACTTCCAACC

>M6-PGSC0003DMG400005395-(rev)M6LRR-RLP\_4880

GCTGTCAAGCTTTTAGTATTTCTAGTGTCTGTAATGCCTAATTTGGACAATTCATTCTTGTTTACTTCATGC  
ATGTCTCCGTTGCTCTTAGCTCCCAGCCTGGCGTGCCTGCATAGTTGC

>M6-PGSC0003DMG400005395-(rev)M6LRR-RLP\_4941

TTACTTCATGCATGTCTCCGTTGCTCTTAGCTCCCAGCCTGGCGTGCCTGCATAGTTGCCTCTTCTCATTTA  
TGTTCCAGTCTTCTAGTTTGTATTACTCTCCATTATACCCGTGCCCT

>M6-PGSC0003DMG400005395-(rev)M6LRR-RLP\_5002

CTTCTCATTTATGTTCCAGTCTTCTAGTTTGTATTACTCTCCATTATACCCGTGCCCTAAGTGTATATAATT  
GTGGTAATTATTAGTAACACCAATTTCAAAGATTGAACACGAAAAA

>M6-PGSC0003DMG400005395-(rev)M6LRR-RLP\_5063

GTGTATATAATTGTGGTAATTATTAGTAACACCAATTTCAAAGATTGAACACGAAAAAGCTTCTCATT  
ATGTTCCATGGAAGCAGGACCGTTTTGTCCATTTAGTTTCTGAATTTGAT

>M6-PGSC0003DMG400005395-(rev)M6LRR-RLP\_5124

TTCTCATTTATGTTCCATGGAAGCAGGACCGTTTTGTCCATTTAGTTTCTGAATTTGATAGGTAGTAGCTA  
ATCCAGTGGCCAAATTAGTTCAAAAAGAAATTGCACTCGTTTTTCTAAA

>M6-PGSC0003DMG400005395-(rev)M6LRR-RLP\_5185

GTAGTAGCTAATCCAGTGGCCAAATTAGTTCAAAAAGAAATTGCACTCGTTTTTCTAAACTTCCCAGTCA  
ACTGGTGCTATTGATGATACAATTTTTTTGAATAAATCATTATATCTTA

>M6-PGSC0003DMG400005395-(rev)M6LRR-RLP\_5246

TCCCAGTCAACTGGTGCTATTGATGATACAATTTTTTTGAATAAATCATTATATCTTATTTACTGCAGGT  
AAATTTGTTGAGTTGGATGGAATTGCGACAGTTTTGACTTTGATGAA

>M6-PGSC0003DMG400005395-(rev)M6LRR-RLP\_5307

TACTGCAGGTTAAATTTGTTGAGTTGGATGGAATTGCGACAGTTTTGACTTTGATGAAAGGTATTGCTT  
CTGCTTATTTGGCATGAGATATTTACACCTTTCTATAGTTTGTGATTGA

>M6-PGSC0003DMG400005395-(rev)M6LRR-RLP\_5368

GTATTGCTTCTGCTTATTTGGCATGAGATATTTACACCTTTCTATAGTTTGTGATTGATTGTAAGTTGTA  
CTTGTGCGTAATTGTATCTATGCTGACTTGCTGAGTATGTTTGTGATT

>M6-PGSC0003DMG400005395-(rev)M6LRR-RLP\_5429

GTAAGTTGTGACTTGTGCGTAATTGTATCTATGCTGACTTGCTGAGTATGTTTGTGATTGTAATGACTC  
AACTCTAACAAATTCTGTACATTTAGCGAGCTGTATATCACTTTAAAATC

>M6-PGSC0003DMG400005395-(rev)M6LRR-RLP\_549

CTAGTACGTTTAATCACTTTTGGACTTTAGTATCCTTGCTGGTCCCCACACTTCCAACCTTGATCTGATTTT  
TTCAAGGTTTGAATTTTCGGGGTCTTACACCAAGTATACTAGTGGTGT

>M6-PGSC0003DMG400005395-(rev)M6LRR-RLP\_5490

AAATGACTCAACTCTAACAAATTCTGTACATTTAGCGAGCTGTATATCACTTTAAAATCAAACCTAACGATT  
TTTGTACCTAAAGATATTTGATTTAATATGTTTGGATTGTAACGATCC

>M6-PGSC0003DMG400005395-(rev)M6LRR-RLP\_5551

ACTAACGATTTTTGTACCTAAAGATATTTGATTTAATATGTTTGGATTGTAACGATCCTTTCAACGTATCC  
AAGAGTAGGGCCTGGTGGCCAATAAAGTGGCTGAAAATTGTGGCCACT



>M6-PGSC0003DMG400005395-(rev)M6LRR-RLP\_5612

TCAACGTATCCAAGAGTAGGGCCTGGTGGCCAATAAAGTGGCTGAAAATTGTGGCCACTTTTTATCTCC  
GTTTCGTCGTTTTAAAATTAATTGAAACTAAGGGCGTGTATGATATTTTC

>M6-PGSC0003DMG400005395-(rev)M6LRR-RLP\_5673

TTATCTCCGTTTCGTCGTTTTAAAATTAATTGAAACTAAGGGCGTGTATGATATTTTCATGTTTGGTTGG  
TTAAATTTTTTGGAAAATATTGCTCTAGTAAGTATTTCATACGCGAGC

>M6-PGSC0003DMG400005395-(rev)M6LRR-RLP\_5734

GTTTGGTTGGTTAAATTTTTTGGAAAATATTGCTCTAGTAAGTATTTCATACGCGAGCCATCATCTAAAA  
TCAATTCATCGATATCAAGTCAGCAACACAAGCATTATCTAGTGCTAT

>M6-PGSC0003DMG400005395-(rev)M6LRR-RLP\_5795

TCATCTAAAATCAATTCATCGATATCAAGTCAGCAACACAAGCATTATCTAGTGCTATATACTAGGAGTC  
AAGCTCACATAATCACATTAATCAATTCAGGAAGAAAATCTCCAATTTT

>M6-PGSC0003DMG400005395-(rev)M6LRR-RLP\_5856

ACTAGGAGTCAAGCTCACATAATCACATTAATCAATTCAGGAAGAAAATCTCCAATTTTTCATATTCATGG  
CATTGGTACTCAAAGCATTTCATATTCATGGCATTGGTACTCATAGAAA

>M6-PGSC0003DMG400005395-(rev)M6LRR-RLP\_5917

ATATTCATGGCATTGGTACTCAAAGCATTTCATATTCATGGCATTGGTACTCATAGAAAATGCTTGTTATCT  
CTTTTATACCGGACCTCCATTATCCATTAACCTTTTATTCAATTAATAA

>M6-PGSC0003DMG400005395-(rev)M6LRR-RLP\_5978

CTTGTTATCTCTTTTATACCGGACCTCCATTATCCATTAACCTTTTATTCAATTAATAAATACACTTTAACAT  
TTCATAAAAAGTTTCAACTTGCCTTAATTGGAATTCAAAAAGTTAAT

>M6-PGSC0003DMG400005395-(rev)M6LRR-RLP\_6039

ACACTTTAACATTTTCATAAAAAGTTTCAACTTGCCTTAATTGGAATTCAAAAAGTTAATGTGGATACCTAG  
GCACCCAAAGACAATGAAGGGTGTAGTAATCGACAAAATGCTTTAGGGA

>M6-PGSC0003DMG400005395-(rev)M6LRR-RLP\_61

TAGGACTTGAAAAGATCTTTTCGCCAAGTGCACGAACCTCTACTTTGCATTCTGGTGCCTTTGTGTATCTAT  
TTCTAAGATATCAAGATAGTTACCTATATAAACCAAGTTTCCATCGAAG

>M6-PGSC0003DMG400005395-(rev)M6LRR-RLP\_610

GATCTGATTTTTTCAAGGTTTGAATTTTCGGGGTCTTACACCAAGTATACTAGTGGTGTACAAGAAGTGG

ACCTACACCAACACATATTTCTGGTACTCCAAAAATCTATTTAAAAAAC

>M6-PGSC0003DMG400005395-(rev)M6LRR-RLP\_6222

CCACGGGTAGGCAAGATACAACCTAACGATTTGCTCTTCTTTTATGCCTTTGAACTATTTCAATTTGGTCAT  
AAATGTAATTTAGATGAGTATAACAAGTTCGTAGACACACAAATTGGCAC

>M6-PGSC0003DMG400005395-(rev)M6LRR-RLP\_6283

ATTTGGTCATAAATGTAATTTAGATGAGTATAACAAGTTCGTAGACACACAAATTGGCACATAATTGGCTC  
GAAAATTGAGTGAAAAAGTCAACCTTGAGCCTTACTGTCAAATTTGAAAA

>M6-PGSC0003DMG400005395-(rev)M6LRR-RLP\_6344

AATTGGCTCGAAAATTGAGTGAAAAAGTCAACCTTGAGCCTTACTGTCAAATTTGAAAATTTGTTTACCC  
ATAGGTGGGTCAAAAATCCGCTAAAATGGATTGTTAATCGGTCCCCAAAT

>M6-PGSC0003DMG400005395-(rev)M6LRR-RLP\_6405

TGTTTACCCATAGGTGGGTCAAAAATCCGCTAAAATGGATTGTTAATCGGTCCCCAAATCGAAAGCTACA  
TAAATCATTCTTTGGAGAATTA AAAACCAACCAAAATCCCCAATTCAAAA

>M6-PGSC0003DMG400005395-(rev)M6LRR-RLP\_6466

AAAGCTACATAAATCATTCTTTGGAGAATTA AAAACCAACCAAAATCCCCAATTCAAAAACCCCCAAATT  
AAATATCTATGAGCTTGTATAGCAAGGTGAGACCCTCCTCTTATTGGATT

>M6-PGSC0003DMG400005395-(rev)M6LRR-RLP\_6527

CCCCAAATTAATATCTATGAGCTTGTATAGCAAGGTGAGACCCTCCTCTTATTGGATTCTAATTACTTTA  
AGTCACAAATAGTATTTTAGGATGAAAATTCATATCTTTTCGTCGGATTG

>M6-PGSC0003DMG400005395-(rev)M6LRR-RLP\_6588

AATTACTTTAAGTCACAAATAGTATTTTAGGATGAAAATTCATATCTTTTCGTCGGATTGTCATAGTACTTC  
TTGTTATTGATTGTTGAGTGAACCTATTGTTATAGTAATGTGGGGCTGT

>M6-PGSC0003DMG400005395-(rev)M6LRR-RLP\_6649

ATAGTACTTCTTGTTATTGATTGTTGAGTGAACCTATTGTTATAGTAATGTGGGGCTGTGGGAAAAAGTT  
ATTGGATGGCAAAGAGTCAATGGAAAAAGGTATGATTAGGTTACTCTCTT

>M6-PGSC0003DMG400005395-(rev)M6LRR-RLP\_671

AAGAAGTGGACCTACACCAACACATATTTCTGGTACTCCAAAAATCTATTTAAAAAACAAAAAATCAGT  
TGTAATCTGTACAAGAGTCTCAAGACTCTACTGGGATGAAAATCAGTTC

>M6-PGSC0003DMG400005395-(rev)M6LRR-RLP\_6710

GAAAAAGTTATTGGATGGCAAAGAGTCAATGGAAAAAGGTATGATTAGGTTACTCTTCTTTTAGCAT  
GTTTTCTTAAAAGGGTAAAGCTATATGTCAAGCGTACTTTGGATGAGCTAC

>M6-PGSC0003DMG400005395-(rev)M6LRR-RLP\_6771

TTTAGCATGTTTTCTTAAAAGGGTAAAGCTATATGTCAAGCGTACTTTGGATGAGCTACTCATAGCCATA  
AGTTTAGTGTGTTGGCTTCCTAGAGTTGTTATGTTTCGTCCTTGTGGGA

>M6-PGSC0003DMG400005395-(rev)M6LRR-RLP\_6832

ATAGCCATAAGTTTAGTGTGTTGGCTTCCTAGAGTTGTTATGTTTCGTCCTTGTGGGACTCCTATTATAA  
TGATAGCGACCTCGTGCTTAGATACAACTTAGAGATTACTCATATAGGT

>M6-PGSC0003DMG400005395-(rev)M6LRR-RLP\_6893

CCTATTATAATGATAGCGACCTCGTGCTTAGATACAACTTAGAGATTACTCATATAGGTCGCTTATAGTTG  
GTTTGCTTGCCTTAGGGCCACTTGATTGATGTTGATGCCTTTGGGCCAT

>M6-PGSC0003DMG400005395-(rev)M6LRR-RLP\_6937

ATTACTCATATAGGTCGCTTATAGTTGGTTTGCTTGCCTTAGGGCCACTTGATTGATGTTGATGCCTTTGG  
GCCATATGTTGGTTGTTACTTCTTTCGGGGGGGGGGGGGGGGGATTGTG

>M6-PGSC0003DMG400005395-(rev)M6LRR-RLP\_732

AAAATCAGTTGTAATCTGTACAAGAGTCTCAAGACTCTACTGGGATGAAAATCAGTTCTACCTGGGAA  
AACTGAAAAGTGTCTGCTTCTCATTTATTCTTAAGGGACTCTTCATCTGGG

>M6-PGSC0003DMG400005395-(rev)M6LRR-RLP\_793

CCTGGGAAAAGTGAAGGTGTCTGCTTCTCATTTATTCTTAAGGGACTCTTCATCTGGGTTTTACGCTGA  
ATACTATTGATATTGACATATTGTAGGGTGTATTCTCTTAAAAAGAAAA

>M6-PGSC0003DMG400005395-(rev)M6LRR-RLP\_854

TTCACGCTGAATACTATTGATATTGACATATTGTAGGGTGTATTCTCTTAAAAAGAAAATTTATAAAGA  
GTTTGTTATATCTGATTCTATCCAAAAAATTGAGTCTGATTATTTCTTTT

>M6-PGSC0003DMG400005395-(rev)M6LRR-RLP\_915

TTATAAAGAGTTTGTATATCTGATTCTATCCAAAAAATTGAGTCTGATTATTTCTTTTCAGGTTTTGGCTG  
ATAACCTTATTGAGAATCTCCCGGTGAACCTGGGATTGCTTAAGTCTT

>M6-PGSC0003DMG400005395-(rev)M6LRR-RLP\_976

GGTTTTGGCTGATAACCTTATTGAGAATCTCCCGGTGAACCTGGGATTGCTTAAGTCTTTGAAAGTTGCA  
ACACTTGATGGGAATCGAATCAGAGCATTGCCTGATGAATGTAATTTCCC

>M6-PGSC0003DMG400005485M6LRR-RLK\_0

CTAACACGATAAATCTTAGGAATAATAGCTCCATGGTGAAGTCCCTATGGAAATTGGCAACCTCTTGC  
AACTGCAACATCTTAATCTCACTTGGAAATCATTACTGGAACCATTCT

>M6-PGSC0003DMG400005485M6LRR-RLK\_1037

GTCTACTTTACACATTGAGGACAATGAATTAGAAGGAAACATACCTCTGGAGCTCGGGCAGTGCATCCG  
CTTATCAAGGCTAAACCTTACAGGAAATAATCTTGTTGGTTCCATACCAA

>M6-PGSC0003DMG400005485M6LRR-RLK\_1098

TGCATCCGCTTATCAAGGCTAAACCTTACAGGAAATAATCTTGTTGGTTCCATACCAAAGGAGCTTGCAG  
GTCTTTCTTCTCTTTTCGATTTCTTAGCCTTAGCAAACAATTCGTTGACC

>M6-PGSC0003DMG400005485M6LRR-RLK\_1159

AGCTTGCAGGTCTTTCTTCTTTTCGATTTCTTAGCCTTAGCAAACAATTCGTTGACCGGTTCTTGCCAG  
CTGAATTTGGAAAGTTGATAAATCTCAAGGAAATGGATATTTACATA

>M6-PGSC0003DMG400005485M6LRR-RLK\_122

TAATCTGAGTTGCTGTAAAGAACTTAGATCACTTGCTCTAGAATATAATAGTCTGGTTGGTAAAGTATTA  
CCTGATCAGTTCAGTTCACTTTCAAAGTTGAATTATTTAGGCCTTGGAAAG

>M6-PGSC0003DMG400005485M6LRR-RLK\_1220

TTCCTTGCCAGCTGAATTTGGAAAGTTGATAAATCTCAAGGAAATGGATATTTACATAACAAATTATCA  
GGTGAAATTCCAAGTACTCTAAGTAGCTGTGTCAGCTTAGAGCGCTTCAT

>M6-PGSC0003DMG400005485M6LRR-RLK\_1281

AAATTATCAGGTGAAATTCCAAGTACTCTAAGTAGCTGTGTCAGCTTAGAGCGCTTCATAGCGAATAACA  
ACCTGTTTCGAGGAGAAATTCCTGAATCCTTGCAAGGTTTAAGAGGTTTA

>M6-PGSC0003DMG400005485M6LRR-RLK\_1342

CGAATAACAACCTGTTTCGAGGAGAAATTCCTGAATCCTTGCAAGGTTTAAGAGGTTTAGAAGAAATTG  
ATTTGTCACACAATAACATCTCAGGAGGAATACCTGAGTTTCTTGGGAAAC

>M6-PGSC0003DMG400005485M6LRR-RLK\_1403

AGAAATTGATTTGTCACACAATAACATCTCAGGAGGAATACCTGAGTTTCTTGGGAAACTTCATATCTT  
AGGAAGCTTGATCTTTCATTCAACGAACTTGAAGGCGAAGTACCAACTGA

>M6-PGSC0003DMG400005485M6LRR-RLK\_1464

CCATATCTTAGGAAGCTTGATCTTTCATTCAACGAACTTGAAGGCGAAGTACCAACTGAAGGGATCTTTG

CAAATGAAACCGCCGTCTCAATCTCAGGGAATGAAGAACTATGTGGAGGT

>M6-PGSC0003DMG400005485M6LRR-RLK\_1525

GGATCTTTGCAAATGAAACCGCCGTCTCAATCTCAGGGAATGAAGAACTATGTGGAGGTCCTCCAAACT

ACAATTTTCCTACATGCCCTAAACAAAAAGATGCATCATCAAAGAAACACA

>M6-PGSC0003DMG400005485M6LRR-RLK\_1586

TCCAAACTACAATTTTCCTACATGCCCTAAACAAAAAGATGCATCATCAAAGAAACACATTAGTTCAAGG

ATAAAAGTAGCAATTATTATTTTCGGTTGCATTTCTATTTTTACTTTTTGTG

>M6-PGSC0003DMG400005485M6LRR-RLK\_1647

AGTTCAAGGATAAAAGTAGCAATTATTATTTTCGGTTGCATTTCTATTTTTACTTTTTGTGTTCTTTTGCAGCT

TGCTATATAGTAATTAGGAAGTCAAGAAAGAGAGATCTTACTGGACGG

>M6-PGSC0003DMG400005485M6LRR-RLK\_1708

CTTTTGCAGCTTGCTATATAGTAATTAGGAAGTCAAGAAAGAGAGATCTTACTGGACGGTCCTCAAGAG

AAAGGCAGTCTGATCATTTTGTATGATGAAGAACCTACTTTATTTAATGATC

>M6-PGSC0003DMG400005485M6LRR-RLK\_1769

CTCAAGAGAAAGGCAGTCTGATCATTTTGTATGATGAAGAACCTACTTTATTTAATGATCCAATTTTGACA

GCAAAGATAACTTACCAAGATATATTCAAGTCAACCAATGGATTTTCTGA

>M6-PGSC0003DMG400005485M6LRR-RLK\_183

AAAGTATTACCTGATCAGTTCAGTTCACCTTCAAAGTTGAATTATTTAGGCCTTGGAAGCAACAATCTAAC

AGGAGGTATCCCATCTTGATAGGAAATTTTCGACTCTTCGAGGTCTT

>M6-PGSC0003DMG400005485M6LRR-RLK\_1830

ATTTTGACAGCAAAGATAACTTACCAAGATATATTCAAGTCAACCAATGGATTTTCTGAGGATAATCTAG

TCGGTACAGGAAGTTTTGGTTCTGTTTACAGAGGAAAGTTTCAGGTTTTT

>M6-PGSC0003DMG400005485M6LRR-RLK\_1891

ATAATCTAGTCGGTACAGGAAGTTTTGGTTCTGTTTACAGAGGAAAGTTTCAGGTTTTTGATAAAGTTAT

GGCAGTGAAAGTATTGAACCTTCAACAAAGAGGTGCTTTGAAAAGCTTTT

>M6-PGSC0003DMG400005485M6LRR-RLK\_1952

TAAAGTTATGGCAGTGAAAGTATTGAACCTTCAACAAAGAGGTGCTTTGAAAAGCTTTTCGGATGAATG

TAGAGCTTTGAAAAGCATAAGGCATCGAAATCTACTTAAGATAATAGCTGT

>M6-PGSC0003DMG400005485M6LRR-RLK\_2013

GATGAATGTAGAGCTTTGAAAAGCATAAGGCATCGAAATCTACTTAAGATAATAGCTGTTTGTTC AAGC  
ATCGATTACCAAGGTAATGATTTCAAATGCAAAGTCTTTGAGTTCATGGAA

>M6-PGSC0003DMG400005485M6LRR-RLK\_2074

GTTCAAGCATCGATTACCAAGGTAATGATTTCAAATGCAAAGTCTTTGAGTTCATGGAAAATGGAAGCT  
AGATGACTGGCTGCACTCGAAAGGTGATGAGCAATACCTCAATATTATCC

>M6-PGSC0003DMG400005485M6LRR-RLK\_2135

TGGAAGCTTAGATGACTGGCTGCACTCGAAAGGTGATGAGCAATACCTCAATATTATCCAAAGACTAAA  
CATCGCAATAGATGCTGCTTCAGCACTTGATTATCTCCACAACAATTGCCA

>M6-PGSC0003DMG400005485M6LRR-RLK\_2196

AGACTAAACATCGCAATAGATGCTGCTTCAGCACTTGATTATCTCCACAACAATTGCCAAGTATCAATTG  
TTCCTGTGATTTAAAACCGAGCAACATACTCCTCGATGAAGAGATGACT

>M6-PGSC0003DMG400005485M6LRR-RLK\_2257

TATCAATTGTTCACTGTGATTTAAAACCGAGCAACATACTCCTCGATGAAGAGATGACTGCCCATGTTGG  
TGACTTTGGATTGGCAAATTTCTCTTCAAATCATCATGGAACAAATATA

>M6-PGSC0003DMG400005485M6LRR-RLK\_2318

CCATGTTGGTGACTTTGGATTGGCAAATTTCTCTTCAAATCATCATGGAACAAATATACATCTATTGCAC  
TAAAGGGTTCTATTGGTTACCACCAGGTATGTCATTAATCCATGTTGAT

>M6-PGSC0003DMG400005485M6LRR-RLK\_2379

TCTATTGCACTAAAGGGTTCTATTGGTTACCACCAGGTATGTCATTAATCCATGTTGATTTCTCTTGCATA  
TCTATTTCCCTTATCAAGGGTCTTAACATGTAAGATGTTTGTGTACCTC

>M6-PGSC0003DMG400005485M6LRR-RLK\_244

ACAATCTAACAGGAGGTATCCCATCTTGATAGGAAATTTTTCGACTCTTCGAGGTCTTTCCCTTGCAATC  
AACAATCTACAAGGACCAATACCTCGAGATATTGGACGTTTGTCAAAT

>M6-PGSC0003DMG400005485M6LRR-RLK\_2684

TTATAAATGGACTATAAAGGAAAGTAAGACAAATGAATTGAAACGAAGGGAGCTTATCTTTCTGATGCT  
TAAGGTGTGAATGAACAAATCAATAACTAAGCATTATGAGGTTGTCA

>M6-PGSC0003DMG400005485M6LRR-RLK\_2745

CTGATGCTTAAGGTGTGAATGAACAAATCAATAACTAAGCATTATGAGGTTGTCATTTTCATGTGA  
GTGAACATATGTTCAAGTGTCCCAACATAATTCATCATTATCTTGCAGAAT

>M6-PGSC0003DMG400005485M6LRR-RLK\_2806

TTCATGTGAGTGAACATATGTTTCAGTGTCCCAACATAATTCATCATTATCTTGCAGAATATGGATCAGGT  
GTAAATGTGTCCACTCTAGGAGATGTTTATAGCTTTGGTATCATGTTGCT

>M6-PGSC0003DMG400005485M6LRR-RLK\_2867

GGATCAGGTGTAAATGTGTCCACTCTAGGAGATGTTTATAGCTTTGGTATCATGTTGCTAGAGTTGTGTA  
CCGGTAGAAGGCCAACCGATGAGATCTTCAAAGATGGCCTGAATATTCAC

>M6-PGSC0003DMG400005485M6LRR-RLK\_2928

AGTTGTGTACCGGTAGAAGGCCAACCGATGAGATCTTCAAAGATGGCCTGAATATTCACCAATATGTCA  
AATCCCATCTGCCTAGACGTGTCACGGAGATTGCTGATGCATCATTGCTTT

>M6-PGSC0003DMG400005485M6LRR-RLK\_2989

ATATGTCAAATCCCATCTGCCTAGACGTGTCACGGAGATTGCTGATGCATCATTGCTTTTAGCATATGAA  
GAACACAATATATATGAGGACAATGCAAGTGATTTGGAAGAAAAGGCAAT

>M6-PGSC0003DMG400005485M6LRR-RLK\_305

CCTTGCAATCAACAATCTACAAGGACCAATACCTCGAGATATTGGACGTTTGTCAAACCTTGCAAATATTC  
CAAGTTTATGGAAATCAGTTGAATGGTACAATTCCTCAATCTCTTTTCAA

>M6-PGSC0003DMG400005485M6LRR-RLK\_3050

GCATATGAAGAACACAATATATATGAGGACAATGCAAGTGATTTGGAAGAAAAGGCAATACTTCAAGAT  
GATGAGTATATATCCAAGCTAAACACCAGCACTATTATACAAGAATGCTTG

>M6-PGSC0003DMG400005485M6LRR-RLK\_3111

TTCAAGATGATGAGTATATATCCAAGCTAAACACCAGCACTATTATACAAGAATGCTTGATCTCAATCAT  
GAAAATAGGACTTTTATGTAGTAGCTCATAGCCAAGAGATCGAATGCCAA

>M6-PGSC0003DMG400005485M6LRR-RLK\_3172

CTCAATCATGAAAATAGGACTTTTATGTAGTAGCTCATAGCCAAGAGATCGAATGCCAATAAGCATAGCT  
TTGAAAGAGATTCACACAATCAAGAACTTATTTCTAGAGTCTAAGAGGAT

>M6-PGSC0003DMG400005485M6LRR-RLK\_3233

AGCATAGCTTTGAAAGAGATTCACACAATCAAGAACTTATTTCTAGAGTCTAAGAGGATAAATAATAGTA  
TAGATAGATCAGATGGTAATAAGCTAATCAAATTATCATCTTCAGAATTT

>M6-PGSC0003DMG400005485M6LRR-RLK\_3294

ATAATAGTATAGATAGATCAGATGGTAATAAGCTAATCAAATTATCATCTTCAGAATTTTATTGATGAAG

GCTAATATACATAGAATTACAACCTTTGAAATAGATAATATTTACAATTAG

>M6-PGSC0003DMG400005485M6LRR-RLK\_3355

TTGATGAAGGCTAATATACATAGAATTACAACCTTTGAAATAGATAATATTTACAATTAGTACTATAGATA

GCCTCACAAAATGTGAATTGTGACCAAGAAATTAAGGGATATGGTTCGAGT

>M6-PGSC0003DMG400005485M6LRR-RLK\_366

CAAATATTCCAAGTTTATGGAAATCAGTTGAATGGTACAATTCCTCAATCTCTTTTCAATATATCCTCTGTT

TACTATTTCTCTGTTACTCAAACTTGTTGTATGGAGAGCTTCCATCA

>M6-PGSC0003DMG400005485M6LRR-RLK\_427

TATCCTCTGTTTACTATTTCTCTGTTACTCAAACTTGTTGTATGGAGAGCTTCCATCAGATATAGGCCTTA

CTCTTCCGAATCTTGTGGTGTGGTGGTGTGAACGATTTCACTG

>M6-PGSC0003DMG400005485M6LRR-RLK\_488

TATAGGCCTTACTCTTCCGAATCTTGTGGTGTGGTGGTGTGAACGATTTCACTGGACCAATTCCTG

TTTCATTATCAAATGCAACAAAACCTTGGTGTACTTGAATTGTCTCAAAA

>M6-PGSC0003DMG400005485M6LRR-RLK\_549

CCAATTCCTGTTTCATTATCAAATGCAACAAAACCTTGGTGTACTTGAATTGTCTCAAATAAGCTCACCGG

AAATGTCCCTACGAGTTTAGGACAATTGCAAGGGTTGTATAGGATGAAC

>M6-PGSC0003DMG400005485M6LRR-RLK\_61

ACCTCTTGCAACTGCAACATCTTAATCTCACTTGGAAATTCATTTACTGGAACCATTCCTGCTAATCTGAGTT

GCTGTAAAGAACTTAGATCACTTGCTCTAGAATATAATAGTCTGGTTG

>M6-PGSC0003DMG400005485M6LRR-RLK\_610

AGCTCACCGGAAATGTCCCTACGAGTTTAGGACAATTGCAAGGGTTGTATAGGATGAACTTTGAGATCA

ATAGTCTTGGAAGAAACACAAGTGGGGATTTGAGGTTTCTTGATTTCCCTAG

>M6-PGSC0003DMG400005485M6LRR-RLK\_671

TGAGATCAATAGTCTTGAAGAAACACAAGTGGGGATTTGAGGTTTCTTGATTTCCCTAGTTAACTGCACA

AGTTTGCAAGTTCTTAGCTTTGAGGACAACATTTTGGGAGGTGAATTGCC

>M6-PGSC0003DMG400005485M6LRR-RLK\_732

AACTGCACAAGTTTGCAAGTTCTTAGCTTTGAGGACAACATTTTGGGAGGTGAATTGCCTAAAACAATCG

GTAACCTTTCCACGAGGCTAGAAATATTTGCTCTTGGTTATAATATGATA

>M6-PGSC0003DMG400005485M6LRR-RLK\_793



AAACAATCGGTAACCTTTCCACGAGGCTAGAAAATATTTGCTCTTGGTTATAATATGATAGTTGGTTCTCTT  
CCTACAGGACTAGAAAATCTTGTTAATTTGACCCTTCTATCACTGGATA

>M6-PGSC0003DMG400005485M6LRR-RLK\_854

TGGTTCTCTTCCTACAGGACTAGAAAATCTTGTTAATTTGACCCTTCTATCACTGGATAATAACTACTTGA  
GAGGCAGTGTTCTGAGTCTTTAGGTAAGCTTCGACGCCTGCAAGGACT

>M6-PGSC0003DMG400005485M6LRR-RLK\_915

AACTACTTGAGAGGCAGTGTTCTGAGTCTTTAGGTAAGCTTCGACGCCTGCAAGGACTGCTGTTGAAT  
GGAAACAAGTTATCAGGAAGGATTCCATCTTCTATTGGTAACTTAACATCT

>M6-PGSC0003DMG400005485M6LRR-RLK\_976

TGTTGAATGGAAACAAGTTATCAGGAAGGATTCCATCTTCTATTGGTAACTTAACATCTTTGTCTACTTTA  
CACATTGAGGACAATGAATTAGAAGGAAACATACCTCTGGAGCTCGGGC

>M6-PGSC0003DMG400005538M6LRR-RLP\_0

TTGACATTTTCCTAGAAAGACTTTGTGCATTGATTTGAGAATGACAACATTTTGTTGAATTGATTGATGAT  
TTGATATGGAGGCAGCAGTCCATACTTGACTTTTCCCCTTCTCTCTT

>M6-PGSC0003DMG400005538M6LRR-RLP\_1037

ATCGAGGAAGCAACTTCCCTCCTGAAATGGAAATTAACCTTCAAGAACCAGAACAACTCCTTATTCGCTT  
CATGGACACCAAGTTCTAACTCATGCAGGGACTGGTACGGAGTTATATGC

>M6-PGSC0003DMG400005538M6LRR-RLP\_1098

TATTCGCTTCATGGACACCAAGTTCTAACTCATGCAGGGACTGGTACGGAGTTATATGCTTAAATGGTAG  
GGTAAACACGTTGAATATTACAAATTCTAGTGTTCATTGGTACCCTCTATG

>M6-PGSC0003DMG400005538M6LRR-RLP\_1159

AAATGGTAGGGTAAACACGTTGAATATTACAAATTCTAGTGTTCATTGGTACCCTCTATGCTTTTCCGTTTT  
CATCTCTCCCTTTTCTTGAATATTTTGAACCTAGCCTGAACAATTTTTC

>M6-PGSC0003DMG400005538M6LRR-RLP\_122

TGATTAGAAAATTCGCAAGTAATTAATTTCAATATGAAGATTCAAAGTTGAAGGGATTTGTTTGATAAGT  
AGCTTTCATTGAAATTTTGCAGCAAGACTCATTGCAATTAATTGATAAG

>M6-PGSC0003DMG400005538M6LRR-RLP\_1342

TCAGATTCAGGCACAATTCCGCCACAAATCGGCTCACTAGCCAAGCTTGAGACCCTCCACATCTTTGCC  
AACCATTTAAGTGGTTCATTCCACAAGAAATAGGTTACCTAAGGTCTCT

>M6-PGSC0003DMG400005538M6LRR-RLP\_1586

ATAGGAAAACCTTGTCATCTTGTGGAGTTTCTTTTGATACAAACCAATTAACAGGTCATATCCCTCCAGA  
AATAGGCAACTTGACCAATGTAAAATTGTTCTATGCTCCCTTCAATGAA

>M6-PGSC0003DMG400005538M6LRR-RLP\_1647

TCCCTCCAGAAATAGGCAACTTGACCAATGTAAAATTGTTCTATGCTCCCTTCAATGAATTATCTGGTCCC  
ATTCCTGCAGAAATAGGGAAGATGAAGTCACTTCAGGAATTAATCTTAC

>M6-PGSC0003DMG400005538M6LRR-RLP\_1708

ATCTGGTCCCATTCTGCAGAAATAGGGAAGATGAAGTCACTTCAGGAATTAATCTTACATACAAACAAT  
CTTTCTGGTCTAATTCCAAGAACTATAGGTGGCTTAACTGAGCATATCTA

>M6-PGSC0003DMG400005538M6LRR-RLP\_1769

ACAAACAATCTTTCTGGTCTAATTCCAAGAACTATAGGTGGCTTAACTGAGCATATCTACAACCTAATGAT  
AATCAACTCTCTGGCCTAATTCCTAGAGAGATGGGGAATCTGAAAACC

>M6-PGSC0003DMG400005538M6LRR-RLP\_183

TTGATAAGTAGCTTTCATTGAAATTTTTGCAGCAAGACTCATTGCAATTACTTGATAAGTCAAAGAACTG  
CACTAATACTTCTAGGTGCAAGAAAAAAGATAATTGGAGGGACACTCTGT

>M6-PGSC0003DMG400005538M6LRR-RLP\_1891

AATGGTCTGGCATTATTCAATAATCAACTTTTTGGCCTAATCCCTAGTGAGTTGGGGAATCTTAGTATCCA  
CTATCATCTAACATTATCCAATAATCAACTCACTGGTTCAATTCCTTCC

>M6-PGSC0003DMG400005538M6LRR-RLP\_1952

TTAGTATCCACTATCATCTAACATTATCCAATAATCAACTCACTGGTTCAATTCCTTCTCCTTTGGTAATTT  
GAGAACTTGCGAGTTCTGTATCTCCATGACAACAATCTGATTGAGG

>M6-PGSC0003DMG400005538M6LRR-RLP\_2013

CTTTGGTAATTTGAGAACTTGCGAGTTCTGTATCTCCATGACAACAATCTGATTGAGGAAATTCCTTCAT  
CTATATGCAATTTGACATTCCTCATGTTCTGCATTTGTCGAGAAACAA

>M6-PGSC0003DMG400005538M6LRR-RLP\_2074

ATTCCTTCATCTATATGCAATTTGACATTCCTCATGTTCTGCATTTGTCGAGAAACAACCTTGAAAGGAAA  
AATTCTGCAATGTTTGGGTAATATCAGTACTCTCCAGTTGGTGACTG

>M6-PGSC0003DMG400005538M6LRR-RLP\_2135

TGAAAGGAAAAATTCTGCAATGTTTGGGTAATATCAGTACTCTCCAGTTGGTGACTGTACATAATAA

TCTCAGTGGAGAGCTCCCTTTGTCTATTTGCAATTTAGCATCACTACAAA

>M6-PGSC0003DMG400005538M6LRR-RLP\_2257

CTAAATTTGGGCAAAAACAATATAAAGGGAGTAATTCGCAATGTTTTGGCAACATGAGTGGTTATCTT  
GAGGTTCTTGATATGCAGCACAACAATCTTTCTGGGACTCTTCCAATGACT

>M6-PGSC0003DMG400005538M6LRR-RLP\_244

AAAGAACTGCACTAATACTTCTAGGTGCAAGAAAAAAGATAATTGGAGGGACACTCTGTGCAAAAACCT  
GGTGTTATTTCCCTCTTTGATAGGCCTTACACGCCGAGAATTCAGATTATT

>M6-PGSC0003DMG400005538M6LRR-RLP\_2501

ACATCTTCCTGATGTGGTTGGGAACTCTTCCTAAGTTGAGAGTTTTAAGCTTGAGATCGAATAAGTTGCA  
TGGACCCATTAGAACTTTAGGAAGTGAAAACATGTTTCTTGAGCTTCAAA

>M6-PGSC0003DMG400005538M6LRR-RLP\_2562

TAAGTTGCATGGACCCATTAGAACTTTAGGAAGTGAAAACATGTTTCTTGAGCTTCAAATATTGGATATC  
TCTTCCAATGCCTTCATGGAAAACCTTACCTATGGGCCTGTTTCAACATTT

>M6-PGSC0003DMG400005538M6LRR-RLP\_2684

AAGCCATGAGGACAATTGATCCATCAAAGAAGGCACCAAGTGATGGATTTTACCAAGACATGGTAGCTG  
TCGTAACAAAGGGATTTGAGCGTGAAATTGTGAGTATCTTGTATTTGTACA

>M6-PGSC0003DMG400005538M6LRR-RLP\_2745

GGTAGCTGTCGTAACAAAGGGATTTGAGCGTGAAATTGTGAGTATCTTGTATTTGTACACTGTTATCGAC  
CTTTCAAGTAATAAATTTGGAGGGGAAATTCOAAGTATCATGGGGGATCT

>M6-PGSC0003DMG400005538M6LRR-RLP\_305

AAAACTTGGTGTATTTCCCTCTTTGATAGGCCTTACACGCCGAGAATTCAGATTATTCGGGATCCTAAT  
CTGGATATCAAAAATCGAATAGAAAATCAATTTATTTTTAGAAAAAGCC

>M6-PGSC0003DMG400005538M6LRR-RLP\_3111

TGATGGATTACGTGGATTCCCTGTTTCAAAAAGTTGCAGCGATGCTCGGGTATTAGATACAAATGATACT  
GTGTCTGGACTAGACGATGAAGAAAGCAATTCTGAATTTCTGAGTGATTT

>M6-PGSC0003DMG400005538M6LRR-RLP\_3294

CATGTTGTCAACTGGAAAACCGATATGGCTAGCAAGAATCATTCTAGAGATGGAGCACAAAATTATGAG  
GGGAAGGAGAAAGAAGCAGCGAAGGCAAAGGCATTACAGAAGAAGAAGCAA

>M6-PGSC0003DMG400005538M6LRR-RLP\_3355

ATTATGAGGGGAAGGAGAAAGAAGCAGCGAAGGCAAAGGCATTACAGAAGAAGAAGCAATCATTCT  
AGACAAGTTATAAGTTTTGATTTTCAGAACTTCAGGTAGTTCTAATCGATCCCC

>M6-PGSC0003DMG400005538M6LRR-RLP\_3416

ATTTCTAGACAAGTTATAAGTTTTGATTTTCAGAACTTCAGGTAGTTCTAATCGATCCCCTATATACACTAA  
TCATTTTTTTTCATTTCCAATAATTTCAAAGGCTCAGCCTCAGTTGATG

>M6-PGSC0003DMG400005538M6LRR-RLP\_3477

TATACACTAATCATTTTTTTTCATTTCCAATAATTTCAAAGGCTCAGCCTCAGTTGATGTTTAACTAAGATA  
TTTTGGATTACAGGGAGGAGCTAGTGTCTATGGAAGTGGAGAAAGCTG

>M6-PGSC0003DMG400005538M6LRR-RLP\_3538

TAACTAAGATATTTTTGGATTACAGGGAGGAGCTAGTGTCTATGGAAGTGGAGAAAGCTGGGAAGAAGA  
AGTTATGGCAATGAATGGAAACGAATGCCAATCAGTTTTTAAGCAATAATAA

>M6-PGSC0003DMG400005538M6LRR-RLP\_3579

TGGAAGTGGAGAAAGCTGGGAAGAAGAAGTTATGGCAATGAATGGAAACGAATGCCAATCAGTTTTTA  
AGCAATAATAATTGTCTAACTGAATATTTTCGTTGAACAGTCTTAGATGTGGC

>M6-PGSC0003DMG400005538M6LRR-RLP\_366

GGATCCTAATCTGGATATCAAAAATCGAATAGAAAATCAATTTATTTTTAGAAAAAGCCATTTCTCATTAT  
AAATATTAGGTAAACAAGTCAATATCCTGTAATTATACCAAAAAGACAC

>M6-PGSC0003DMG400005538M6LRR-RLP\_427

TTCTCATTATAAATATTAGGTAAACAAGTCAATATCCTGTAATTATACCAAAAAGACACTTTGGCATATGA  
CTTAGTCTTGTCTAATATTTGAGAATGACATTTCTCTACTTTCTTTTGA

>M6-PGSC0003DMG400005538M6LRR-RLP\_488

TGGCATATGACTTAGTCTTGTCTAATATTTGAGAATGACATTTCTCTACTTTCTTTTGAAATTTTCATAGGA  
AGACTTGTGCATTGACTTAAGAATAACAAACATTAATTTCCCTATGCA

>M6-PGSC0003DMG400005538M6LRR-RLP\_549

TTTTCATAGGAAGACTTGTGCATTGACTTAAGAATAACAAACATTAATTTCCCTATGCAATATGATTCTGG  
ATTTGTTTTTAATTTCTTTTTTTGTTAAGAAAGCCTTTTCTTCTTCT

>M6-PGSC0003DMG400005538M6LRR-RLP\_61

GATTGATGATTTGATATGGAGGCAGCAGTCCATACTTGACTTTTCCCCTTCTCTTTTTGATTAGAAA  
ATTCGCAAGTAATTAATTTCAATATGAAGATTCAAAGTTGAAGGGATT

>M6-PGSC0003DMG400005538M6LRR-RLP\_610

ATGATTCTGGATTTGTTTTAATTTCTTTTTTGTTTAAGAAAGCCTTTTCTTCTCCTTTTGGAGTAGCTAG  
GAATGAACTTTGCCATTTAGAGCCACTTTTATAACGAGGATATATGA

>M6-PGSC0003DMG400005538M6LRR-RLP\_793

AAGTAAAACAACGTACAATTATATTTAAGAAAAAAGATGATTCTCTACTCCTTTTTTAAGCTTGTTTCT  
TTAGAGAAATAAAAACAACCCAACTTGACTTGTGTTGAACAATATAAAA

>M6-PGSC0003DMG400005538M6LRR-RLP\_854

GCTTGTTTCTTTAGAGAAATAAAAACAACCCAACTTGACTTGTGTTGAACAATATAAAAATCCTAAGTTAG  
TTCATTGAAACCCAAAATAATAAAAATCAAATATGATGATGGTTCCAGT

>M6-PGSC0003DMG400005538M6LRR-RLP\_915

CTAAGTTAGTTCATTGAAACCCAAAATAATAAAAATCAAATATGATGATGGTTCCAGTAAAATATTTTCT  
CTACTTCAGTTTTTCACTCTTTTATATCTCCTTACAGTTACTTTTGCTT

>M6-PGSC0003DMG400005538M6LRR-RLP\_976

AATATTTTCTCTACTTCAGTTTTTCACTCTTTTATATCTCCTTACAGTTACTTTTGCTTCGATCGAGGAAGCA  
ACTTCCCTCCTGAAATGGAAATTAACCTTCAAGAACCAGAACAACCTC

>M6-PGSC0003DMG400005539M6LRR-RLP\_1008

TACATCAAATCCACAAATTACTTCTTCATATCCATAATAATCTCACTGGAGAAATTCCTTCATCTATATG  
CAAGTTGACATCACTGGTAATGCTGGATTTAGCGACAAACAATTTGCG

>M6-PGSC0003DMG400005539M6LRR-RLP\_1071

ATCTATATGCAAGTTGACATCACTGGTAATGCTGGATTTAGCGACAAACAATTTGCGTGGAGAAATTCGG  
AAGTGTTCGGAAATATCACTTCCCTCCAGGTTTTGGATATGCGCCACAA

>M6-PGSC0003DMG400005539M6LRR-RLP\_126

ATTGTATGGGATAATACCTGAGAGTATTTTTCACCTGCCCACTTGGAACACTTGACTTATTCTTCAATA  
ATCACCTCAGTGGTTATTTTCAAAGACCAAATGGAACAGCAGTGCATC

>M6-PGSC0003DMG400005539M6LRR-RLP\_1575

GGAAGTCGATATTACCAAGACTCGATAGCTGTCGTATCCAAGGGATATGAGCGTGAAATTGTGAGAATC  
TTGTTTTTGTACACCACTATCGATCTTCAAACAACAAATTCGAAGGACAT

>M6-PGSC0003DMG400005539M6LRR-RLP\_1638

AGAATCTTGTTTTTGTACACCACTATCGATCTTCAAACAACAAATTCGAAGGACATATTCCAACTATTAT

GGGAGATCTCATCGCACTCCGTGTGCTGAATATATCTCACAATGGATTG

>M6-PGSC0003DMG400005539M6LRR-RLP\_189

CTTCAATAATCACCTCAGTGGTTATTTTCCAAAGACCAAATGGAACAGCAGTGCATCTCTCATAACAATTA  
GATCTCAGTGACGTGAATTTTTCTTGTAATTTGCCTGAGTCTCTTGGCTA

>M6-PGSC0003DMG400005539M6LRR-RLP\_1953

TATGAAGGCAATGATGGATTACGTGGTTTTCTGTTTCAAAAAGTTGTGGGACAACCTTATGCCGTATCTG  
GACAGCTAGACGGTGAAGAAAGCAATTCTGAATTTCTGAGTGATTTTCGG

>M6-PGSC0003DMG400005539M6LRR-RLP\_2142

ACTGAAAACCGATATGGTTTGCAAGAATCATTGTAAAGCTGGAGCACAAAATAATGATGGGAAGGAG  
AAAGAAGCAACGAAGGCAAAGGAACTGCAGAAGAAGAAATAATCACTAGTAA

>M6-PGSC0003DMG400005539M6LRR-RLP\_2205

AGGAGAAAGAAGCAACGAAGGCAAAGGAACTGCAGAAGAAGAAATAATCACTAGTAATGTTACTGTTA  
TTTCTTTAAGGAAAATATGTAATAAGTTGTAGACGTACTATTGTTAAATCCT

>M6-PGSC0003DMG400005539M6LRR-RLP\_2268

TGTTATTTCTTTAAGGAAAATATGTAATAAGTTGTAGACGTACTATTGTTAAATCCTGTTTGCTTAAAGTG  
TGTAGCATTATTTGACCATGAAAATTGAGGGTGAGATAATCTTTAATGA

>M6-PGSC0003DMG400005539M6LRR-RLP\_252

ACAATTAGATCTCAGTGACGTGAATTTTTCTTGTAATTTGCCTGAGTCTCTTGGCTATTATCTAACTTCGG  
TGC GTTATTTGTCTCTTCAAAGTTGCAACCTTAGAGGGCCTATTCCTGA

>M6-PGSC0003DMG400005539M6LRR-RLP\_378

TTCAAATCTCACCCGCATTGAGTATTTATACCTTAATGGTAACTCCCTGAATGGAACAATACCACCAGGG  
ATGTTATCCCTTCCATCACTAAAGGAAATAGGCGTGAGTTTTAATCACTT

>M6-PGSC0003DMG400005539M6LRR-RLP\_441

ACCAGGGATGTTATCCCTTCCATCACTAAAGGAAATAGGCGTGAGTTTTAATCACTTATCTGGTCCGCTT  
GAAGATTTCAAGTCCAATTCATAATCTGGATAAGTTTAGAGGGCAATCA

>M6-PGSC0003DMG400005539M6LRR-RLP\_504

TCCGCTTGAAGATTTCAAGTCCAATTCATAATCTGGATAAGTTTAGAGGGCAATCAGCTGCAGGGTCAT  
CTTCCCCACTCAATTCAAAACCTTGTGAGCCTAACAGATCTTGATCTTTC

>M6-PGSC0003DMG400005539M6LRR-RLP\_63

CTCTCCACCATTCTCTGAATTTTTCTTCTCATTTAACAACCTCTGATCCTGTCAGAAACAGGATTGTATGG  
GATAATACCTGAGAGTATTTTTCACCTGCCCACTTGGAACACTTGA

>M6-PGSC0003DMG400005539M6LRR-RLP\_630

TAATTTTAGTGGTCGTGTGGATGCCAGCCTTTTTCAAACCTTAAACAGCTTCGGTCTATTAGTCTTTCAT  
ATAATAACATCTCATTGACCAATGACAACAACGTTACTTTGCCCGAATC

>M6-PGSC0003DMG400005539M6LRR-RLP\_693

TCTTTCATATAATAACATCTCATTGACCAATGACAACAACGTTACTTTGCCCGAATCTCTTACTAGGTTAG  
AATTGGCCTCTTGTGAAGTGAAAGAGTTGGAGTTTCTAAGATCCGCAAA

>M6-PGSC0003DMG400005539M6LRR-RLP\_756

TAGGTTAGAATTGGCCTCTTGTGAAGTGAAAGAGTTGGAGTTTCTAAGATCCGCAAACCAGCTTTGGCA  
GTTGGATCTTTCAAATAATAAGATTGAAGGAAGAATTCCTGATTGGGCATG

>M6-PGSC0003DMG400005539M6LRR-RLP\_882

CTGGATGTTTTATTGCAAGATCTTAATATATCCCACAATATGCTGACGAGTGTGGATTCAATTCCTCTTC  
AGTTTGCAGATACTATTAATTTGCGGTCCAATTTGCTTCAAGGTTCACT

>M6-PGSC0003DMG400005539M6LRR-RLP\_945

TCCTCTTCAGTTTGCAGATACTATTAATTTGCGGTCCAATTTGCTTCAAGGTTCACTACCTATTACATCAA  
TTCCACAAATTACTTCTTCATATCCCATAATAATCTCACTGGAGAAAT

>M6-PGSC0003DMG400005542M6LRR-RLP\_0

ATGGGGTATGCAGTTATTATGCTCTTAATTGTGTTTTCTGTCATGAAGTTTCTTCAATATCCATATTACCT  
CACAAACATCAAACCTTTCACTTTTTAAAATTCAAGCAGTCCTTTACT

>M6-PGSC0003DMG400005542M6LRR-RLP\_1054

CCTTTGAAGATTTCAAGTCCAATTTGCTTCAAGGTTCACTACCCATTCTATCAAATTCACAGTACTCTTCT  
TCATATCCCATAATAATCTCACTGGAGAAATTCCTTCATCTATTTGCA

>M6-PGSC0003DMG400005542M6LRR-RLP\_1116

GTACTCTTCTTCATATCCCATAATAATCTCACTGGAGAAATTCCTTCATCTATTTGCAACTTAACATCACTG  
ATAATGCTGGATTTGGCGACAAACAATTTGCGTGGAGAAATTCGCGAG

>M6-PGSC0003DMG400005542M6LRR-RLP\_1488

TTGCGATTCAACAAATTGCATGGTCCCATCAGAACATCAAGGATTGAGAACATATTTTCAGAGCTCCGAA  
TCATTGATCTCTTACAATGCCTTCTCAGGAACTTACCTTCGAGTTTG

>M6-PGSC0003DMG400005542M6LRR-RLP\_1550

GCTCCGAATCATTGATCTCTTACAATGCCTTCTCAGGAACTTACCTTCGAGTTTGTTC AACATCTGA  
AAGCCATGAGGACAGCTGATCCATCAAAGGAACCATCAAATATGGTGG

>M6-PGSC0003DMG400005542M6LRR-RLP\_1612

AACATCTGAAAGCCATGAGGACAGCTGATCCATCAAAGGAACCATCAAATATGGTGGAGATT CATATT  
ACCAAGACTCGATAGCTTTCGTATTCAAGGGATATGAGCGTGAAGTTGTGA

>M6-PGSC0003DMG400005542M6LRR-RLP\_1674

TCATATTACCAAGACTCGATAGCTTTCGTATTCAAGGGATATGAGCGTGAAGTTGTGAGAATCTTGTTTT  
TGTATATCACTATCGATCTTTC AAACAACAAATTCTGAAGGACATATTCCA

>M6-PGSC0003DMG400005542M6LRR-RLP\_1798

TTATGGGAGATCTCATTGCACTCCGTGTGCTGAATATATCTCATAATGGATTGGAAGGTCCTATACCGTC  
ATCACTTGGAAGTTTATCTTTGGTTGAATCACTGGACCTGTCAAGTAACC

>M6-PGSC0003DMG400005542M6LRR-RLP\_1860

ATACCGTCATCACTTGGAAGTTTATCTTTGGTTGAATCACTGGACCTGTCAAGTAACCATCTTGTAGGAA  
AGATACCAGCACAATTTGCTTCTTACATCTCTTGAAGTCTTCAATCTT

>M6-PGSC0003DMG400005542M6LRR-RLP\_1922

TGTAGGAAAGATACCAGCACAATTTGCTTCTTACATCTCTTGAAGTCTTCAATCTTTCCTACAATCATCT  
CGAAGGGTGCATTCTCAGGGAAATCAACTTCACACCTTTGAGAACAA

>M6-PGSC0003DMG400005542M6LRR-RLP\_248

ACTTGACCTCAGTTGCAGTAATCTCACTGGAACCATCGATTCCAATAGCAGCCTATTCCA ACTCTCGCATC  
TCCAAAGGCTTGATCTTCTTGAATAACTTCTCCAATTCTCATATCTC

>M6-PGSC0003DMG400005542M6LRR-RLP\_310

TCTCGCATCTCCAAAGGCTTGATCTTCTTGAATAACTTCTCCAATTCTCATATCTCCCCTGAATTCAGCA  
AGTTTTCGAGCTTGATGCATCTTGATCTTCTGGGTCCTATTTCTCAG

>M6-PGSC0003DMG400005542M6LRR-RLP\_372

GAATTCAGCAAGTTTTCGAGCTTGATGCATCTTGATCTTCTGGGTCCTATTTCTCAGGTCAAATTCCTTCT  
GAAATCTCTCATCTTTC AAGTTACTCTCTTCGTATCTCCACATTT

>M6-PGSC0003DMG400005542M6LRR-RLP\_434

AATTCCTTCTGAAATCTCTCATCTTTC AAGTTACTCTCTTCGTATCTCCACATTTTATTACTTTTACAGT



AACAACCTTTACAATAAAAAGCTAAGACTCACAAACCCATGGTTTTAA

>M6-PGSC0003DMG400005542M6LRR-RLP\_496

ACTTTTACAGTAACAACCTTTACAATAAAAAGCTAAGACTCACAAACCCATGGTTTTAAATCGCTTCTTCAA

AACTTGACCCAATTAAGAGAGCTTGATCTTAGTGGCATAAACATCTCTT

>M6-PGSC0003DMG400005542M6LRR-RLP\_62

CATATTACCTCACAAACATCAAACCATTTCACTTTTAAAATTCAAGCAGTCCTTTACTATACATCCCACAGT

AGAATCTTATTATTGTCCGAAGCCTTATCCAAAACGAGTTCATGGAA

>M6-PGSC0003DMG400005542M6LRR-RLP\_620

CATTCTCTTAATTTTTCTTCTCATTTCACGACTCTGAGCCTGTCAGAAACAGGATTGTAAGGGATAATAC

CTGAGAGTATATTTACCTGCCCAACTTGGAATACTTGACTTAGGGAT

>M6-PGSC0003DMG400005542M6LRR-RLP\_682

GGATAACCTGAGAGTATATTTACCTGCCCAACTTGGAATACTTGACTTAGGGATCAATCATGAGCT

CAATGGTAATTTTCCGAAGACCAAATGGAACAGCAGTGCATCTCTCATTG

>M6-PGSC0003DMG400005542M6LRR-RLP\_744

CATGAGCTCAATGGTAATTTTCCGAAGACCAAATGGAACAGCAGTGCATCTCTCATTGAGTTAGATCTCC

GTGGCGTGAATTTTTCTGATAATTTGCCCGAGTCTCTTGGCTATCATCTA

>M6-PGSC0003DMG400005542M6LRR-RLP\_806

AGATCTCCGTGGCGTGAATTTTTCTGATAATTTGCCCGAGTCTCTTGGCTATCATCTAACTTCGCTGCTTT

ATTTGTCTCTTGAAAGTTGCAACCTTAGAGGGCCTATTCCTGAATCTCT

>M6-PGSC0003DMG400005542M6LRR-RLP\_868

CGCTGCTTATTTGTCTCTTGAAAGTTGCAACCTTAGAGGGCCTATTCCTGAATCTCTTTCAAATCTCACCC

GCATTGAGTATTTGCACCTTAATCGTAACTCCCTGAATGGAACAATAC

>M6-PGSC0003DMG400005542M6LRR-RLP\_992

AGGGATGTTATCCTTTCCATCACTACATAGAATAGACTTGAGTAATAATCACTTATCTGGTCCCTTTGAAG

ATTTCAAGTCCAATTTGCTTCAAGTTCACTACCCATTCTATCAAATTC

>M6-PGSC0003DMG400005590M6LRR-RLP\_0

ACCTTAACACATCCTACAGAATAAAAATACATCTCTACGGACTTTAGATTGAAAATTGTGGGATACAAATT

AGATTTAATAAGATCCAACCTTATTCTTATTTTAAAATGTATATGAT

>M6-PGSC0003DMG400005590M6LRR-RLP\_1054

ACTTGGATGTTAGTTCTAATACAATAATTCAGATACCGAATTCCAAAATTGGATCCCAAATTTCCAGTTG  
GAGTTTTTTGCTATCGAAGGATGTAAAAACCTTCAAAAATTGCCTTCTT

>M6-PGSC0003DMG400005590M6LRR-RLP\_1116

TTCCAGTTGGAGTTTTTTGCTATCGAAGGATGTAAAAACCTTCAAAAATTGCCTTCTTTCCTTCACTACCA  
ATATGACATGAGGATTCTTGCTATAAATGGAAATCAATTGCCAAGAAAC

>M6-PGSC0003DMG400005590M6LRR-RLP\_1178

TCACTACCAATATGACATGAGGATTCTTGCTATAAATGGAAATCAATTGCCAAGAACTTTCCAACATGG  
TTGTTAGAAAATAACACCAGACTTGCAGGGATTTATAGTAGAGATAATGC

>M6-PGSC0003DMG400005590M6LRR-RLP\_124

TTATTCACCATTTAACAGGTAACAAAAGAATGAGTTCTCTTCGGAATTTACAATTGGGAAGTTCCTACTCC  
AACTTAAGCAGAGTCATAGAATCCCTAAAATCATTCTCTTCTCTTAAAT

>M6-PGSC0003DMG400005590M6LRR-RLP\_1240

CAACATGGTTGTTAGAAAATAACACCAGACTTGCAGGGATTTATAGTAGAGATAATGCTTTCAGCGGAC  
CATTCAAGTTGCCATCGAGTTGTCACCTCCATCTAGAGACAATTGATGTTT

>M6-PGSC0003DMG400005590M6LRR-RLP\_1302

AGCGGACCATTCAAGTTGCCATCGAGTTGTCACCTCCATCTAGAGACAATTGATGTTTCTAATAACAAT  
TAAATGGGCATATTCCAGATAAAAATGAATTCAGCATTCCCAAAGCTTACT

>M6-PGSC0003DMG400005590M6LRR-RLP\_1364

TAACAAATTAATGGGCATATTCCAGATAAAAATGAATTCAGCATTCCCAAAGCTTACTTATTTGAACATGT  
CACAAAATTATCTTGAAGGTCTATACCTTCCAAGATTAGTGGCATTCA

>M6-PGSC0003DMG400005590M6LRR-RLP\_1426

TGAACATGTCACAAAATTATCTTGAAGGTCTATACCTTCCAAGATTAGTGGCATTCAATTACATAATCTA  
GACCTATCTCACAATTTCTTATTTGGAGGAGTTCCTAGTGATCTGGCAA

>M6-PGSC0003DMG400005590M6LRR-RLP\_1488

CATAATCTAGACCTATCTCACAATTTCTTATTTGGAGGAGTTCCTAGTGATCTGGCAATTGGTTCTCCAGT  
ATTAGCTTACCTTCGATGTCAAATTTTTCCAAAGGATGTCAAACCAAAG

>M6-PGSC0003DMG400005590M6LRR-RLP\_1550

TTCTCCAGTATTAGCTTACCTTCGATGTCAAATTTTTCCAAAGGATGTCAAACCAAAGATGTTATTCTTTTT  
GTTCTTGAATGGAAATAACTTTGAGGGACCACTACCTTGAACATGTT

>M6-PGSC0003DMG400005590M6LRR-RLP\_1612

TATTCTTTTTGTTCTTGAATGGAAATAACTTTGAGGGACCACTACCTTGCAACATGTTTATCACATCCCTTA  
TTGTATTGGACGCTAGCAACAATAATTTCTCTGGAGAGATTCCGAGAT

>M6-PGSC0003DMG400005590M6LRR-RLP\_1674

ACATCCCTTATTGTATTGGACGCTAGCAACAATAATTTCTCTGGAGAGATTCCGAGATGCATTAGGGATA  
ATACAAGATTGTTACAACCTTGATTTGTCCAAGAATCATCTCGATGGTTCG

>M6-PGSC0003DMG400005590M6LRR-RLP\_1736

TAGGGATAATACAAGATTGTTACAACCTTGATTTGTCCAAGAATCATCTCGATGGTTCGATTCCAGTTGAG  
ATTTCCAATTTAAAGCTCATTGAGGCTTAGCTATATCCGAAAACAGGCT

>M6-PGSC0003DMG400005590M6LRR-RLP\_1798

CAGTTGAGATTTCCAATTTAAAGCTCATTGAGGCTTAGCTATATCCGAAAACAGGCTTTCAGGCTTTATT  
CCTTCTTGTGTGAATTTTTTACCTCTTGAGCACATCCATCTACAGAAAA

>M6-PGSC0003DMG400005590M6LRR-RLP\_186

TCCTACTCCAACCTAAGCAGAGTCATAGAATCCCTAAAATCATTCTCTTCTTAAATCACTTTCTTATGAA  
TTTAGTGATCTCACTTCTCCAACCATAATTTACGGTAAGCTCAAATTC

>M6-PGSC0003DMG400005590M6LRR-RLP\_1860

GGCTTTATTCTTCTTGTGTGAATTTTTTACCTCTTGAGCACATCCATCTACAGAAAAATCAATTGGGTGG  
TGAATTGGAACATGTACTTTTCAACTTCTTCTCTGATAACTTTGGAT

>M6-PGSC0003DMG400005590M6LRR-RLP\_1922

ATTGGGTGGTGAATTGGAACATGTACTTTTCAACTTCTTCTCTGATAACTTTGGATCTTGGGTACAACA  
ATTTTACAGGAAGTATCCCACACACCATAGGCTCACTTAATACTCTCAA

>M6-PGSC0003DMG400005590M6LRR-RLP\_1984

GGTACAACAATTTTACAGGAAGTATCCCACACACCATAGGCTCACTTAATACTCTCAACTACCTTCTCCTT  
AGCAATAATCAATTCGAAGGAGAGATTCCAACCTCAGATTTGTATGCTGA

>M6-PGSC0003DMG400005590M6LRR-RLP\_2046

CTTCTCCTTAGCAATAATCAATTCGAAGGAGAGATTCCAACCTCAGATTTGTATGCTGAACAAGTTATCTAT  
CGTGGATTTATCTTTCAATAAGCTTTATGGTTCACTCCTTCTTGTGG

>M6-PGSC0003DMG400005590M6LRR-RLP\_2108

GTTATCTATCGTGGATTTATCTTTCAATAAGCTTTATGGTTCACTCCTTCTTGTGGAGTTACTTAACACA

AGCCAAAAGGATGCAGAGATAAGTAAGACCAATTATGCTACGACTTC

>M6-PGSC0003DMG400005590M6LRR-RLP\_2170

ACTTAACACAAGCCAAAAGGATGCAGAGATAAGTAAGACCAATTATGCTACGACTTCTAGGCGTTCAT  
GGATAACTTTTTTGGCCTGGATGCGTTTGAAAAGGCACTACCACGATAGTC

>M6-PGSC0003DMG400005590M6LRR-RLP\_2232

CGTTCATGGATAACTTTTTTGGCCTGGATGCGTTTGAAAAGGCACTACCACGATAGTCATGGATTTCTAA  
GTGACATATTTCTGATGGATGTGGAAACTCAGGTCCAGTTTTCAACAAAA

>M6-PGSC0003DMG400005590M6LRR-RLP\_2294

ATTTCTAAGTGACATATTTCTGATGGATGTGGAAACTCAGGTCCAGTTTTCAACAAAAAGAACTCATA  
ACTTATAAGGGAAGCATTCTAAAATATATGTTGGGTATTGATCTCTCAAG

>M6-PGSC0003DMG400005590M6LRR-RLP\_2356

ACTCATACACTTATAAGGGAAGCATTCTAAAATATATGTTGGGTATTGATCTCTCAAGTAACAGATTAAC  
TGGGGAAATCCCGTTGAGCTAGGGAACATGAGCAATATACATGCATTGA

>M6-PGSC0003DMG400005590M6LRR-RLP\_2418

AGATTAAGTGGGAAATCCCGTTGAGCTAGGGAACATGAGCAATATACATGCATTGAATCTATTGCAC  
AACCATCTCATCGGAAGAATACCAAATACCTTCTCCAATCTACAGAAAATT

>M6-PGSC0003DMG400005590M6LRR-RLP\_248

TTCTTATGAATTTAGTGATCTCACTTCTCCAACCATAATTTACGGTAAGCTCAAATTCATATATACCTTAGC  
TACTTCTATTGCCACTCTTTTCTTTTGATATGTAAATTTAGTTTTCT

>M6-PGSC0003DMG400005590M6LRR-RLP\_2480

ATTGCACAACCATCTCATCGGAAGAATACCAAATACCTTCTCCAATCTACAGAAAATTGAGAGTTTAGAC  
CTTTCTACAACAACCTTGAATGGGAGCATTCTGTTGGTTCGACTTGAGCT

>M6-PGSC0003DMG400005590M6LRR-RLP\_2542

GTTTAGACCTTTCCTACAACAACCTTGAATGGGAGCATTCTGTTGGTTCGACTTGAGCTAAATTCCTTGGCA  
GTATTCAAGTGTGCATACAACAACCTTATCGGGTGCAGTGCCTGATTTA

>M6-PGSC0003DMG400005590M6LRR-RLP\_2666

TCAATTTGGAACCTTCAACAAAAGCAGCTACGAGGGAAATCCTTTTCTTTGCGGTTATCCATTAGACAAC  
ACGTGTGGCATTCTAAATTGTCAAATACCTCCAAGATTAATGGAGGTGA

>M6-PGSC0003DMG400005590M6LRR-RLP\_2728

TAGACAACACGTGTGGCATTCTAAATTGTCAAATACCTCCAAGATTAATGGAGGTGAGGAATCATCAG  
ACTTGGAGGATATTCAGTGTTTTTACATTGGCTTTGTTGTGTCTTATGGAG

>M6-PGSC0003DMG400005590M6LRR-RLP\_2852

CTTGTTGGGATTAGCTGCGGCACTCTGCTTCAATCGTTATTGGAGAAAACATGGTTTAGGATGATAGA  
GGCATTGATGTTTTATTGTTACTATTCTCTCTTGGACAACGTTGTTACACC

>M6-PGSC0003DMG400005590M6LRR-RLP\_2914

TGATAGAGGCATTGATGTTTTATTGTTACTATTCTCTCTTGGACAACGTTGTTACACCCATCAAGAATATA  
TGGTACAGGAATGTTGGTTAATTCTAGGTTGTTGTTTTACAATATTGTT

>M6-PGSC0003DMG400005590M6LRR-RLP\_2976

AAGAATATATGGTACAGGAATGTTGGTTAATTCTAGGTTGTTGTTTTACAATATTGTTGTATGTGTATCAC  
CATTATTAATTATATTGTCATTCTGTTTTATCAATATTCAACAAATAGG

>M6-PGSC0003DMG400005590M6LRR-RLP\_3038

GTGTATCACCATTATTAATTATATTGTCATTCTGTTTTATCAATATTCAACAAATAGGATCTGTTTGGAGTA  
GTTACAACCTCATAATTTAATACCCCCTGCATAGCTTCATTAGTGTTG

>M6-PGSC0003DMG400005590M6LRR-RLP\_310

ATACCTTAGCTTACTTCTATTGCCACTCTTTTCTTTTGATATGTAAATTTAGTTTTCTTTATTTTTGGACTC  
TATGATATAAGCATTAAAGAAATTTGAGCACGGTGGAGCACCTATAC

>M6-PGSC0003DMG400005590M6LRR-RLP\_372

TTTTTTGGACTCTATGATATAAGCATTAAAGAAATTTGAGCACGGTGGAGCACCTATACTTGGAGGGATGT  
TCTTTAAATGACAACCTTTCTCCCAAACATTGGACAAATGACTTCTCTCTT

>M6-PGSC0003DMG400005590M6LRR-RLP\_434

AGGGATGTTCTTTAAATGACAACCTTTCTCCCAAACATTGGACAAATGACTTCTCTCTTGGTGTTTCAGTATA  
GCATTTGGTGACAATGACGGCACCCCTCCCTAATCAAGGTACCCTATTTT

>M6-PGSC0003DMG400005590M6LRR-RLP\_496

TTCAGTATAGCATTTGGTGACAATGACGGCACCCCTCCCTAATCAAGGTACCCTATTTTTCTTTTTTCCCT  
AATGCCCGCATTTTCATGTTGGAGGTCTGATTTTAGCATGTTTCAGTTG

>M6-PGSC0003DMG400005590M6LRR-RLP\_558

TTTTTCCCTAATGCCCGCATTTTCATGTTGGAGGTCTGATTTTAGCATGTTTCAGTTGATCAAACATTATAA  
TATTTTTGTTTATTACCAAACACAAGAAAATAAGTAACACAAGCCAT

>M6-PGSC0003DMG400005590M6LRR-RLP\_62

TACAAATTAGATTTTAATAAGATCCAACACTTTCATTCTTATTTTAAAATGTATATGATTTATTTATTCACCA  
TTTAACAGGTAACAAAAGAATGAGTTCTCTTCGGAATTTACAATTGGG

>M6-PGSC0003DMG400005590M6LRR-RLP\_620

AACATTATAATATTTTTTTGTTTATTACCAAACACAAGAAAATAAGTAACACAAGCCATCTAATTTTTCTAG  
AAAATATTTTCCTTCGTATCGAACACATCCATAGACATAAAAAAATATA

>M6-PGSC0003DMG400005590M6LRR-RLP\_682

TTTTTCTAGAAAATATTTTCCTTCGTATCGAACACATCCATAGACATAAAAAAATATAATAAGATGTCACT  
CATCATAGATATTTGTTTTAGCTAAATGTTTCTTAATATATATATATAG

>M6-PGSC0003DMG400005590M6LRR-RLP\_744

GATGTCACTCATCATAGATATTTGTTTTAGCTAAATGTTTCTTAATATATATATATAGGCTGGTGTGA  
CAACACATTCAAGAGCTGGATTTCTCAGACAATAATTTTCGTGGAACA

>M6-PGSC0003DMG400005590M6LRR-RLP\_806

GTGTGAACTCAAACACATTCAAGAGCTGGATTTCTCAGACAATAATTTTCGTGGAACACTGCCTTCATGT  
TTTGAAACTTGACATCACTTCGACGATTGAGTTTTTTTTGGGAATTACTT

>M6-PGSC0003DMG400005590M6LRR-RLP\_868

CTTCATGTTTTGGAACTTGACATCACTTCGACGATTGAGTTTTTTTTGGGAATTACTTCATGGGAAATATA  
GCGTCACATTCTATTTGGAGGAGACTCACATCACTTGAGTACCTCAATA

>M6-PGSC0003DMG400005590M6LRR-RLP\_930

GGAAATATAGCGTCACATTCTATTTGGAGGAGACTCACATCACTTGAGTACCTCAATATTGTGGATAACC  
AATTTGATGTTCTCTGTCATTGAGCAATTTTCCAACCATACAAAATTG

>M6-PGSC0003DMG400005590M6LRR-RLP\_992

GGATAACCAATTTGATGTTCTCTGTCATTGAGCAATTTTCCAACCATACAAAATTGATCTACTTGGATG  
TTAGTTCTAATACAATAATTCAGATACCGAATTCCAAAATTGGATCCC

>M6-PGSC0003DMG400005600M6LRR-RLP\_0

CCCTGAGACTTAGTTACCATCACCTTCCACTTGATTTGAGACAATGCTTTGCATATTGTGCAGTATCCCA  
AAGGATACGAAATGGAAAAGAAAATCTAATCTCTCTCTGGATGGCACA

>M6-PGSC0003DMG400005600M6LRR-RLP\_1024

TGAAAAATGTTGTCTCTATTGTAATTGAAGTTTGCGAAAACACTGCTCATGCTTACCACCCTTTGGAGAGCT

GCCTTGTCTAGAAGGTTTAGAGTTACACAAGGGGTCTGTGGAGGTGGAGT

>M6-PGSC0003DMG400005600M6LRR-RLP\_1088

AGAGCTGCCTTGTCTAGAAGGTTTAGAGTTACACAAGGGGTCTGTGGAGGTGGAGTATGTTGATTCTGG  
ATTCCTACAAGAAGAAGGTTTCCATCTCTGAGAAACTTATTATAGGCGA

>M6-PGSC0003DMG400005600M6LRR-RLP\_1152

TCTGGATTCCCTACAAGAAGAAGGTTTCCATCTCTGAGAAACTTATTATAGGCGACTTTGATAATCTGA  
AAGGATTGCTGAAAAAGGAAGGAGAAGAGCAATTCCTGTGCTTGAAGAG

>M6-PGSC0003DMG400005600M6LRR-RLP\_128

TTTTATCGAAAGGAACTTGGAGCTAGAGGATGTAGGTAATGAAGTATGGAATGAATTATACTTGAGGT  
CTTTCTTCCAAGAGATTGAAGTTAAATATGGTAGAACTTATTTCAAGATGC

>M6-PGSC0003DMG400005600M6LRR-RLP\_1280

TTACTGGTGCCCTATGTTTGTATTCCGACCCTTTCTTCTGTCAAGAAATTGGTAGTTCATGGGGAGAAGT  
CAGATGCAATAGGTTTCAGTTCATATCTAATCTCAGGCCTCTTACTTC

>M6-PGSC0003DMG400005600M6LRR-RLP\_1344

GAGAAGTCAGATGCAATAGGTTTCAGTTCATATCTAATCTCAGGCCTCTTACTTCCCTCCAAATTAGCAA  
AAACGAAGAAGCTACTTCGCTCCCAGAAGAGATGTTACATGCCTTGCA

>M6-PGSC0003DMG400005600M6LRR-RLP\_1408

TTAGCAAAAACGAAGAAGCTACTTCGCTCCCAGAAGAGATGTTACATGCCTTGCAAATCTCAAATACTT  
GAATATCAATTCCTTACGAATCTCAACGAGCTGCCTACCAGCCTGGCTA

>M6-PGSC0003DMG400005600M6LRR-RLP\_1472

ATACTTGAATATCAATTCCTTACGAATCTCAACGAGCTGCCTACCAGCCTGGCTAGTCTTAATGCTTTGA  
AGCATCTGGATATTATTGGGTGTGATGCACTCGAGAGTCTCCCCGAGGA

>M6-PGSC0003DMG400005600M6LRR-RLP\_1536

GCTTTGAAGCATCTGGATATTATTGGGTGTGATGCACTCGAGAGTCTCCCCGAGGAAGGGGTGAAAGG  
TTAACTTCACTCACACAGTTATCCATAACATGCTGTGAGATGCTACAATGT

>M6-PGSC0003DMG400005600M6LRR-RLP\_192

GAGGTCTTTCTTCCAAGAGATTGAAGTTAAATATGGTAGAACTTATTTCAAGATGCATGATCTCATT  
GATTTGGCAACATTTCTATTTTCAGCAAGCACATCAAGCAGCAATATCCG

>M6-PGSC0003DMG400005600M6LRR-RLP\_256

ATTCATGATTTGGCAACATTTCTATTTTCAGCAAGCACATCAAGCAGCAATATCCGAGAAATAAATGTAA  
AAGGTGACCCTTACCCACATATGATGTTCGATTGGTTTCTCTGAATTGGTG

>M6-PGSC0003DMG400005600M6LRR-RLP\_320

ATGTAAAAGGTGACCCTTACCCACATATGATGTTCGATTGGTTTCTCTGAATTGGTGCCTTCTTACTCTCCT  
TCTCTCTTTGACAGGTTTGTCTCATTGAGGGTGCTTAATCTTAGTAAAT

>M6-PGSC0003DMG400005600M6LRR-RLP\_576

CATGATTGCTCCTCACTTTGTTGTTTGCCAAAACAACAAGTAACTTGGTAGTCTCCGAAATCTTTTACT  
TGAAAATTGCAAAGCATTGACTTGTATGCCACCAAGGATAGCTTCTTTG

>M6-PGSC0003DMG400005600M6LRR-RLP\_64

ATTCCCAAAGGATACGAAATGGAAAAGAAAAATCTAATCTCTCTCTGGATGGCACATGGTTTTCTTTTAT  
CGAAAGGAACTTGGAGCTAGAGGATGTAGGTAATGAAGTATGGAATGAA

>M6-PGSC0003DMG400005600M6LRR-RLP\_640

TTTTACTTGAAAATTGCAAAGCATTGACTTGTATGCCACCAAGGATAGCTTCTTTGACATGCCTTAAGACT  
CTTGGTTGCTTTGCAGTGGGAAGGAAGAAAAGTTCTCAAATTGGTGAAT

>M6-PGSC0003DMG400005600M6LRR-RLP\_704

TAAGACTCTTGTTGCTTTGCAGTGGGAAGGAAGAAAAGTTCTCAAATTGGTGAATTACGAAACCTGAA  
TCTCTATGGCTCAATTTCAATAACGCATCTTGAGAGAGTGAAGAATGATAT

>M6-PGSC0003DMG400005600M6LRR-RLP\_768

CTGAATCTCTATGGCTCAATTTCAATAACGCATCTTGAGAGAGTGAAGAATGATATGGATGCAAAAAGAA  
GCCAATTTATCTGCAAAAAGAAAATCTGTATTCTTTAAGCATGATTTGGAGT

>M6-PGSC0003DMG400005600M6LRR-RLP\_832

AAGAAGCCAATTTATCTGCAAAAAGAAAATCTGTATTCTTTAAGCATGATTTGGAGTAGGATAGGACCAC  
ATAGATATGAATCAGAAGAAGTTGAAGTGCTTGAAGCCCTCAAACCACACT

>M6-PGSC0003DMG400005600M6LRR-RLP\_960

ACTTGTTTAAACAATCAGTGGCTTCAGAGGAATCCGTCCCCAGACTGGATGAATCACTCAGTTTTGAAAA  
ATGTTGTCTCTATTGTAATTGAAGTTTGCGAAAAGTCTCATGCTTACCA

>M6-PGSC0003DMG400005689M6G-LecRK\_0

AAAAAACCTGGTCAACAAAAGAAAATCAAAGCCAACAGCATGCTTGTCTCTGTTTTGGTCATACTATTTT  
GACTGTAAACATTCATGTGTGGATTAAGGAGCTTCTCTCATATGGCTACC



>M6-PGSC0003DMG400005689M6G-LecRK\_1054

TTAAATTTGATGAGAACTATACTTTGAGCCTCTCTGATTGCAAGGCCAAGTGTGAGAATGACTGCTCGTG  
TGTTGCCTATGCCTCAGTCGATAGTGACACCGGAATTGGCTGTCAAATTT

>M6-PGSC0003DMG400005689M6G-LecRK\_1116

TGCTCGTGTGTTGCCTATGCCTCAGTCGATAGTGACACCGGAATTGGCTGTCAAATTTGGGGGAATGAC  
ACGAGTTTTGTGACAGCACAAAACAGTCTAGCCAGAGATGTTTTCTTTCTT

>M6-PGSC0003DMG400005689M6G-LecRK\_1178

GAATGACACGAGTTTTGTGACAGCACAAAACAGTCTAGCCAGAGATGTTTTCTTTCTTACAAGAAAAGG  
TAATTCTTGAGTACAAAGTTATTCAATAGAGTGAGAGGACATGTTAATAAT

>M6-PGSC0003DMG400005689M6G-LecRK\_124

GAATTCTGATTGCTTTCATCCTCGTGTTATCCTGTCACTTTTTGCGTGCAGATTTTGCTAATTTCAACTCAA  
TATTGAAGGGAGAAAGTTTAGCTGATTACCAACAGCTGGTCTCAGCAA

>M6-PGSC0003DMG400005689M6G-LecRK\_1240

GAAAAGGTAATTCTTGAGTACAAAGTTATTCAATAGAGTGAGAGGACATGTTAATAATGTTGCATCTCAT  
ATTATGATTACTTTATCCAGCTCAAGATAAATTGTTTTGTGAGGGCATCA

>M6-PGSC0003DMG400005689M6G-LecRK\_1302

CATCTCATATTATGATTACTTTATCCAGCTCAAGATAAATTGTTTTGTGAGGGCATCACACTAATATCACC  
AATCTGCATTACTCTCATTTGCACGTCATTCAAAAATTACTAGTACTA

>M6-PGSC0003DMG400005689M6G-LecRK\_1364

AATATACCAATCTGCATTACTCTCATTTGCACGTCATTCAAAAATTACTAGTACTAGAACAAGCAATTT  
TCTCCGATCGCGATGCTGCAGGATTTGAGTTAATAAGAGTGTCATCTTC

>M6-PGSC0003DMG400005689M6G-LecRK\_1426

AAGCAATTTTCTCCGATCGCGATGCTGCAGGATTTGAGTTAATAAGAGTGTCATCTTCATTTCAAAAATA  
CACTCGAGCAAATGAACAACCATACCATAGAGAATCTTGTTTTGGAGGCT

>M6-PGSC0003DMG400005689M6G-LecRK\_1488

CAAAAATACACTCGAGCAAATGAACAACCATACCATAGAGAATCTTGTTTTGGAGGCTATTAATTATTA  
TTTTTGGTATTTCTAGAGTACCGACAATTATGATAGCATCATAGTGTAT

>M6-PGSC0003DMG400005689M6G-LecRK\_1550

AATTATTATTTTTGGTATTTCTAGAGTACCGACAATTATGATAGCATCATAGTGTATTCCCAAGGTAAT

ATGTGGAATTTTGGTCATAAACACTGACTTGCAATTTTGACAGATAGGA

>M6-PGSC0003DMG400005689M6G-LecRK\_1612

AAGGTAAATATGTGGAATTTTGGTCATAAACACTGACTTGCAATTTTGACAGATAGGAAGCGGAAATGG  
TGGATATGGTTGACAATAGCAGTGTCACTAATGGTATTTGCGTTTATTTTC

>M6-PGSC0003DMG400005689M6G-LecRK\_1674

GAAATGGTGGATATGGTTGACAATAGCAGTGTCACTAATGGTATTTGCGTTTATTTTCTCTTTATTCTGTC  
TGATACGAAGAAAACCTCAGAGCAAGAGGTGAGCAATACATCCGCTCTAG

>M6-PGSC0003DMG400005689M6G-LecRK\_1736

TATTCTGTCTGATACGAAGAAAACCTCAGAGCAAGAGGTGAGCAATACATCCGCTCTAGCATTAGTCTAA  
GGTGACATTTTTTTTCTTTGAAATCTTCAATTTTGCATTTGTCACCTAGG

>M6-PGSC0003DMG400005689M6G-LecRK\_1798

AGTCTAAGGTGACATTTTTTTTCTTTGAAATCTTCAATTTTGCATTTGTCACCTAGGCAAAGTCAGACAA  
ATGGAGAAAATATTATACGAGCTTGAAGATCCTAAGACCATTTCTGGCC

>M6-PGSC0003DMG400005689M6G-LecRK\_186

TTCAACTCAATATTGAAGGGAGAAAGTTTAGCTGATTACCAACAGCTGGTCTCAGCAAATGGCTTCTTCA  
AAATGAAATTTTTTCAGTCCAGGCAAGTCAAGGAACCGCTACTTGGGTATA

>M6-PGSC0003DMG400005689M6G-LecRK\_1860

GTCAGACAAATGGAGAAAATATTATACGAGCTTGAAGATCCTAAGACCATTTCTGGCCAGTACAATACT  
AACAAGACTGCTAGACTAAGGAAGAAGTTCAGGCATGATATACACATATTC

>M6-PGSC0003DMG400005689M6G-LecRK\_1922

CAATACTAACAAGACTGCTAGACTAAGGAAGAAGTTCAGGCATGATATACACATATTCAGCCTAGAAAC  
TATGAATATGGCCACAAACAATTTCTCGTCTTCTAATAAGTTGGGACAGGG

>M6-PGSC0003DMG400005689M6G-LecRK\_1984

TAGAACTATGAATATGGCCACAAACAATTTCTCGTCTTCTAATAAGTTGGGACAGGGCGGTTATGGAC  
CTGTTTATAAGGTAAACGTTTAGAAGTTTGTGTCTTAAGCTGATTTTTAG

>M6-PGSC0003DMG400005689M6G-LecRK\_2046

TATGGACCTGTTTATAAGGTAAACGTTTAGAAGTTTGTGTCTTAAGCTGATTTTTAGATTTGCTAAGTAG  
CAAAAATTTTCAGGGGATGTTACTCGACGGGCAAGAGATAGCCATCAAGA

>M6-PGSC0003DMG400005689M6G-LecRK\_2108

GCTAAGTAGCAAAAATTTTCAGGGGATGTTACTCGACGGGCAAGAGATAGCCATCAAGAGACTTTCAAG  
AAGTTCAGGGCAAGGATTGGTTGAGTTTCAAACGAAATTGTGCTGATTGCT

>M6-PGSC0003DMG400005689M6G-LecRK\_2170

TTCAAGAAGTTCAGGGCAAGGATTGGTTGAGTTTCAAACGAAATTGTGCTGATTGCTAAACTCCAGCA  
CACTAATCTTGTGACTTTTAGGATGTTGCATTGAAGGGGAAGAGAAGAT

>M6-PGSC0003DMG400005689M6G-LecRK\_2232

TCCAGCACTAATCTTGTGACTTTTAGGATGTTGCATTGAAGGGGAAGAGAAGATATTAGTTTATGA  
ATACATGATGAACAAAAGCTTAGACTTCTTCCTATTTGGTATGGATTCC

>M6-PGSC0003DMG400005689M6G-LecRK\_2294

GTTTATGAATACATGATGAACAAAAGCTTAGACTTCTTCCTATTTGGTATGGATTCCAATTCATGCCTA  
AATTGCTTAATTAATCATATTTGATAACTAATACCCCTCCCATTTTGA

>M6-PGSC0003DMG400005689M6G-LecRK\_2356

TCATGCCTAAATTGCTTAATTAATCATATTTGATAACTAATACCCCTCCCATTTTGATTGAACAGATCCTA  
GCAGAAAAGATTCATAAAATGGAATACGCGTATGAACATTATTGAAG

>M6-PGSC0003DMG400005689M6G-LecRK\_2418

ACAGATCCTAGCAGAAAAGATTCATAAAATGGAATACGCGTATGAACATTATTGAAGGAGTTGCTCAG  
GGACTACTTTATCTCCATAAGTATTCAAGGCTGAGGGTGATTCACAGAGAT

>M6-PGSC0003DMG400005689M6G-LecRK\_248

CTTCTTCAAATGAAATTTTTTCAGTCCAGGCAAGTCAAGGAACCGCTACTTGGGTATATTTTACACTCAGC  
CAAGTCTTGATATGTACTCTGATGTTAATGGAGGAGGAGATGAAAAAGC

>M6-PGSC0003DMG400005689M6G-LecRK\_2480

TGCTCAGGGACTACTTTATCTCCATAAGTATTCAAGGCTGAGGGTGATTCACAGAGATCTAAAAGCCAG  
CAATGTCTTGCTTGATGACAATATGAACCCCAAATCTCAGATTTTGGGT

>M6-PGSC0003DMG400005689M6G-LecRK\_2542

AAGCCAGCAATGTCTTGCTTGATGACAATATGAACCCCAAATCTCAGATTTTGGGTGGCCAGGATATT  
TGGAATGCAAGAATTTGAAGCAAACACGGAGCGAATTGTTGGTACCTAGT

>M6-PGSC0003DMG400005689M6G-LecRK\_2604

AGGATATTTGGAATGCAAGAATTTGAAGCAAACACGGAGCGAATTGTTGGTACCTAGTAAGTCCTTAAT  
AGATATAATTATCTAACAATGGTGATTCACTGTGTCCTTTTTATTATGCGC

>M6-PGSC0003DMG400005689M6G-LecRK\_2666

CCTTAATAGATATAATTATCTAACAAATGGTGATTCACTGTGTCCTTTTTATTATGCGCTAAATTGCTACCTT  
TTCAGTGGTTATATGTCTCCAGAATATGCCATGAATGGCATTGTGTCC

>M6-PGSC0003DMG400005689M6G-LecRK\_2728

TTGCTACCTTTTCAGTGGTTATATGTCTCCAGAATATGCCATGAATGGCATTGTGTCCATGAAGACAGAT  
GTATTCAGTTTTGGAGTTCTAGTACTCGAGATTTTGAGTGGCAAAGAAA

>M6-PGSC0003DMG400005689M6G-LecRK\_2790

AGACAGATGTATTCAGTTTTGGAGTTCTAGTACTCGAGATTTTGAGTGGCAAAGAAAACAACAGCTGCT  
ATCATTTAGAACGCCCACTAAACATCATCGGATATGTAAGTTCCTCTCGTA

>M6-PGSC0003DMG400005689M6G-LecRK\_2852

AGCTGCTATCATTTAGAACGCCCACTAAACATCATCGGATATGTAAGTTCCTCTCGTAAAATATCAATATA  
GCATGATCAAGAGGCGGATGGAGTGTATTCAATGAGTTCAACTAAAC

>M6-PGSC0003DMG400005689M6G-LecRK\_2914

ATCAATATAGCATGATCAAGAGGCGGATGGAGTGTATTCAATGAGTTCAACTAAACCCAATACTTTAG  
AAACGAAACATAAATATACAACATCAACATACCCATTGGAATCCACAGG

>M6-PGSC0003DMG400005689M6G-LecRK\_310

ACACTCAGCCAAGTCTTGATATGTACTCTGATGTTAATGGAGGAGGAGATGAAAAAGCTTTATGGATAG  
CTAACAGAGACGATCCGATAACGGATACATCTGGAAGTTTTATGATTGCTC

>M6-PGSC0003DMG400005689M6G-LecRK\_3100

GTTTTCAATAGACCCTCGACTCAAGACACGAAACATGGATATACATGTGAAAATCACTTGAATTATAAAA  
TTCTGAAGTATAATGAGTCTAGTTCTAAAAACTTTAAAGGTTCAACCTGT

>M6-PGSC0003DMG400005689M6G-LecRK\_3162

TTATAAAATTCTGAAGTATAATGAGTCTAGTTCTAAAAACTTTAAAGGTTCAACCTGTCAACTTTACATTG  
TTTTGGATCCGCCCTGGCATGATCACTTAGTTGAACAAGGAAATTTCAA

>M6-PGSC0003DMG400005689M6G-LecRK\_3224

TTTACATTGTTTTGGATCCGCCCTGGCATGATCACTTAGTTGAACAAGGAAATTTCAAACCTTGATATGCTC  
AATTTGTCTCAGGCATGGGAATTGTGGAAAGCAGGCAGCGTCCTTGAAG

>M6-PGSC0003DMG400005689M6G-LecRK\_3286

GATATGCTCAATTTGTCTCAGGCATGGGAATTGTGGAAAGCAGGCAGCGTCCTTGAAGAACTAACAGAT

CCTGTATTGACAAATGAATCAACACCAAAGAATGAAGTGATGAGATGCATT

>M6-PGSC0003DMG400005689M6G-LecRK\_3348

AACAGATCCTGTATTGACAAATGAATCAACACCAAAGAATGAAGTGATGAGATGCATTCATGTAGGATT

ACTCTGTGTTCAAGTCAATCCTATGGACAGGCCATCCATGTCAAATGTGGT

>M6-PGSC0003DMG400005689M6G-LecRK\_3410

TAGGATTACTCTGTGTTCAAGTCAATCCTATGGACAGGCCATCCATGTCAAATGTGGTTATGATGCTCAC

AAATGATAGCCTACAACCTACCCGTCCCAAGCAACCAGCATTTCATTG

>M6-PGSC0003DMG400005689M6G-LecRK\_3472

ATGCTCACAAATGATAGCCTACAACCTACCCGTCCCAAGCAACCAGCATTTCATTGAGACAGCTATGA

CTGAGACTGAAACTCGCGAAGAAGTTGGACATTGTTCCACAAATGGGCTA

>M6-PGSC0003DMG400005689M6G-LecRK\_3534

AGCTATGACTGAGACTGAAACTCGCGAAGAAGTTGGACATTGTTCCACAAATGGGCTATCAATTCAGA

TATGGTAGCGAGATGACTTTCATCATTGCACCCCTCAAATTTGTCAAAAAT

>M6-PGSC0003DMG400005689M6G-LecRK\_3596

TTTCAGATATGGTAGCGAGATGACTTTCATCATTGCACCCCTCAAATTTGTCAAAAATGGTAATATGCAA

TCTCCCTAATGATACAAAATAAAAACCACTGCTTGTCTCCTTCATCCAGA

>M6-PGSC0003DMG400005689M6G-LecRK\_3658

ATATGCAATCTCCCTAATGATACAAAATAAAAACCACTGCTTGTCTCCTTCATCCAGATTTTACTTTATCTA

GCATCGAAATTAAGTATGAGTTGTTGACAAAATAAAGTAAGCTTGTTA

>M6-PGSC0003DMG400005689M6G-LecRK\_372

TGGATAGCTAACAGAGACGATCCGATAACGGATACATCTGGAAGTTTTATGATTGCTCCTGATGGCAGA

TTAATAATTTCTCATAAGGAAGGTAATATTACTTTGTTTCAGTGCTACACCA

>M6-PGSC0003DMG400005689M6G-LecRK\_3720

ACTTTATCTAGCATCGAAATTAAGTATGAGTTGTTGACAAAATAAAGTAAGCTTGTTAGAGCCTTTTGAA

GATTATACTGTGTCTAAACAATTTTACACATTTGTTTTGAATGCAAATG

>M6-PGSC0003DMG400005689M6G-LecRK\_3782

CTTTTGAAGATTATACTGTGTCTAAACAATTTTACACATTTGTTTTGAATGCAAATGAGTTTTCAGAGTA

TCAATTGTTACTGAAATCAGAACTCATAAATGTAGTAATTGTCACTAGT

>M6-PGSC0003DMG400005689M6G-LecRK\_3844

TTCAGAGTATCAATTGTTACTGAAATCAGAACTCATAAATGTAGTAATTGTCAGTACTAGTTTTGCAAAGATG  
ATTAGTATCTGTACACTAGAAAATCAAATGGATGTTTCCCACGTTTCCTTT

>M6-PGSC0003DMG400005689M6G-LecRK\_434

TGGCAGATTAATAATTTCTCATAAGGAAGGTAATATTACTTTGTTTCAGTGCTACACCAACAACAGCCACT  
AACTTAACTGCTATACTACTCGATAATGGGAATTTTGTGCTGAGGGAACT

>M6-PGSC0003DMG400005689M6G-LecRK\_496

CAGCCACTAACTTAACTGCTATACTACTCGATAATGGGAATTTTGTGCTGAGGGAACTGAATACCAATAG  
CTTTGTAAATCGAACGCTATGGCAAAGCTTTGATTATCCAACACTGATACAC

>M6-PGSC0003DMG400005689M6G-LecRK\_558

ACCAATAGCTTTGTAAATCGAACGCTATGGCAAAGCTTTGATTATCCAACACTGATACACTTCTGCCTGGAA  
TGAAGCTTGGGATTAACCTTGCGAACGGGGCATAAATGGTCATTGACTTCA

>M6-PGSC0003DMG400005689M6G-LecRK\_62

ACTATTTTGACTGTAAACATTCATGTGTGGATTAAGGAGCTTCTCTCATATGGCTACCAACAGAATTCTGA  
TTGCTTTCATCCTCGTGTTATCCTGTCACTTTTTGCGTGCAGATTTTGC

>M6-PGSC0003DMG400005689M6G-LecRK\_620

GCCTGGAATGAAGCTTGGGATTAACCTTGCGAACGGGGCATAAATGGTCATTGACTTCATGGGTAAATGA  
TCAAGCACCTGGTTCAGGGTCTTTTACCTTTGGTCTTGACCCTAATGGTAC

>M6-PGSC0003DMG400005689M6G-LecRK\_682

TAAATGATCAAGCACCTGGTTCAGGGTCTTTTACCTTTGGTCTTGACCCTAATGGTACAAATCAGCTGAT  
GATCTTGTGGATGGGCAAGGTCTATTGGAAGAGTGGCCCGTGGCCTACTG

>M6-PGSC0003DMG400005689M6G-LecRK\_744

CAGCTGATGATCTTGTGGATGGGCAAGGTCTATTGGAAGAGTGGCCCGTGGCCTACTGGCCATCTTGCT  
CTTAAATATGTCTCAAATGAGGATGAGAAATACTTTATGTATACTGTTGAA

>M6-PGSC0003DMG400005689M6G-LecRK\_806

TCTTGCTCTTAAATATGTCTCAAATGAGGATGAGAAATACTTTATGTATACTGTTGAATTGGAATATCAAA  
GATACTTTGTGAGTCCATTTGGAATAATTCAGGATACTTTTAAAGGAAA

>M6-PGSC0003DMG400005689M6G-LecRK\_868

AATATCAAAGATACTTTGTGAGTCCATTTGGAATAATTCAGGATACTTTTAAAGGAAATGCAGTGTTTGG  
TAATTGTAGTAATGAGACTCCCCATGCTGGCTGCGTAAAGCAGGTATTGC

>M6-PGSC0003DMG400005689M6G-LecRK\_930

GTGTTTGGTAATTGTAGTAATGAGACTCCCCATGCTGGCTGCGTAAAGCAGGTATTGCCCCAGTGCAGG  
GCAGCTAAAAAGTACTGGTTTGAGCTTAGACAAGTTTACATGTTTGGAGAC

>M6-PGSC0003DMG400005689M6G-LecRK\_992

GTGCAGGGCAGCTAAAAAGTACTGGTTTGAGCTTAGACAAGTTTACATGTTTGGAGACAGCGTTAAATT  
TGATGAGAACTATACTTTGAGCCTCTCTGATTGCAAGGCCAAGTGTGAGAA

>M6-PGSC0003DMG400005730M6RLKWAX-EGF\_0

CCACCTAGTCTCTCTTTGATGAGTTCTCACAAATGCATGATCAAAGCTTACTTCTTCACTCCATAATCACC  
ATCCTATGCTTCGTGATCACGTCTCGCCAGCCTATGGCCAAGAGGAT

>M6-PGSC0003DMG400005730M6RLKWAX-EGF\_1037

AGATATCTATATTGTTAAAAAATTTTCATGTATTGATAAATTTGAAAATAATATTTTGTATAGAAAATATA  
ATTGAGAAATTGAATATTATTTAGTTGATTGTAGTGTCTTTTCTATATT

>M6-PGSC0003DMG400005730M6RLKWAX-EGF\_1098

AGAAAATATAATTGAGAAATTGAATATTATTTAGTTGATTGTAGTGTCTTTTCTATATTCTTATGTGGCTA  
GTTAATTGTAGTATCCTTTCTAATTTTCGCATGTGGCTGTCTATTTTGT

>M6-PGSC0003DMG400005730M6RLKWAX-EGF\_1159

TATGTGGCTAGTTAATTGTAGTATCCTTTCTAATTTTCGCATGTGGCTGTCTATTTTGTGTCTAGGTCATT  
ATATTTTGACGATTAACATAAACCAACAATATTGTGTTTCGTATACTTA

>M6-PGSC0003DMG400005730M6RLKWAX-EGF\_122

ACAGTACTCCACTTGTAATAGCTCCTACACCTGTGGGAATATTCAAAATATCAGCTTCCCTTTCTGGGGTG  
GTGATCGACCTCAAGAATGTGGTCTTCCACAATTCGAGCTTTTCATGTGA

>M6-PGSC0003DMG400005730M6RLKWAX-EGF\_1220

CTAGGTCATTTATATTTTGACGATTAACATAAACCAACAATATTGTGTTTCGTATACTTACTTTTCTTTATTC  
TCCTTTCACTATTTTTTATTCTTTTCATTATTGAAAATTCTTAAGTCTC

>M6-PGSC0003DMG400005730M6RLKWAX-EGF\_2257

AGCCCATATTGATAGCTCTAATCATATTTTTAAAATTTTGAGTCATGTATTATTATTCCGACTTTTTTTTTTG  
GACTTCAGGATAACCCGCAATCACGACAACCTCTGCAATTTGGGTGA

>M6-PGSC0003DMG400005730M6RLKWAX-EGF\_244

CCAATCAGGATCCCCTTATACATATCAATGGTCATAATTTCCGCGTACTTGACATAAATGGAGACTATCA

AACCATGAGAATTGCACGAAATGATCTTGAGGATGACATTTGTCCTGATA

>M6-PGSC0003DMG400005730M6RLKWAX-EGF\_2440

CGCACTAGGCAAGCCATATGCAACAGACTCGACTCAAAGGCGTAGGATTACATTATAATTATTCAATTT  
ATATTTATCAACTAAAAAAATAGGGTCTCTTTATAATGTTTGGCTTAAG

>M6-PGSC0003DMG400005730M6RLKWAX-EGF\_2562

CTCCAACTTGTTGAGACGACCCTGATGAAATGTGTGATCATCTCAACTTAAACTTAATTATTAGAGAA  
AACACATTTTTACTAGTTAATTATATTCTCAACATTTTCTGCACTAGGGT

>M6-PGSC0003DMG400005730M6RLKWAX-EGF\_2623

ATTAGAGAAAACACATTTTTACTAGTTAATTATATTCTCAACATTTTCTGCACTAGGGTTCGAGATTATGCC  
TGAATAACAGAGGGCACTGTGGTGC GCGGTTAATGAATCCAACCTCCAAA

>M6-PGSC0003DMG400005730M6RLKWAX-EGF\_2684

AGATTATGCCTGAATAACAGAGGGCACTGTGGTGC GCGGTTAATGAATCCAACCTCCAAAGCAGAACATG  
TCGTCATGGTAAATCTAGAATCTAAAAGTCTTACACGTTTGACTATAATTC

>M6-PGSC0003DMG400005730M6RLKWAX-EGF\_2745

AGAACATGTCGTCATGGTAAATCTAGAATCTAAAAGTCTTACACGTTTGACTATAATTCCATTGGACTAA  
AACAAAATCTTCTTCCTTCGTTATAGATGTTGATGATTTGTTATACTACC

>M6-PGSC0003DMG400005730M6RLKWAX-EGF\_2806

TTGGACTAAAACAAAATCTTCTTCCTTCGTTATAGATGTTGATGATTTGTTATACTACCAGAAGATCCTTT  
ATTATGGTTTTATATCAATTCATCACTTGTTTATCTCTGCATTACAGGC

>M6-PGSC0003DMG400005730M6RLKWAX-EGF\_2867

AAGATCCTTTATTATGGTTTTATATCAATTCATCACTTGTTTATCTCTGCATTACAGGCAATAATAGACATA  
TCTCGGTGAAGATAGCCCTAGGTAATTGTCTTTTTGACCTTGTTTCATG

>M6-PGSC0003DMG400005730M6RLKWAX-EGF\_2928

TAATAGACATATCTCGGTGAAGATAGCCCTAGGTAATTGTCTTTTTGACCTTGTTTCATGTTATATTGTCCC  
CACAACATAGAGATGAGACTCTTTTTACATCTGGTTAACAGTTATCTCT

>M6-PGSC0003DMG400005730M6RLKWAX-EGF\_2989

ATATTGTCCCACAACATAGAGATGAGACTCTTTTTACATCTGGTTAACAGTTATCTCTGCTGCTGGGATT  
GGAATAGTATTAATCTGCTACATGATCTACTGGTTTGTCTTTAAGAAAT

>M6-PGSC0003DMG400005730M6RLKWAX-EGF\_305



AGACTATCAAACCATGAGAATTGCACGAAATGATCTTGAGGATGACATTTGTCCTGATAGATTCCGGTAA  
CACTAGCTTAAATGATGCCCTTTCCGCTATGGTCCTAACTATGTGGTGCT

>M6-PGSC0003DMG400005730M6RLKWAX-EGF\_3050

TGCTGGGATTGGAATAGTATTAATCTGCTACATGATCTACTGGTTTGTCTTTAAGAAATTATCTGCTACTT  
GCCTTTTGTACCAAAGCAGAGGAGGGAACATCAGAATGTTGAGGCCTT

>M6-PGSC0003DMG400005730M6RLKWAX-EGF\_3111

TCTGCTACTTGCCTTTTGTACCAAAGCAGAGGAGGGAACATCAGAATGTTGAGGCCTTCCTCAAGCAAT  
ATGGATCCCTTGCCCCTAAGGTATACAGCTATTCAGACATTAGGAAAATG

>M6-PGSC0003DMG400005730M6RLKWAX-EGF\_3172

TCAAGCAATATGGATCCCTTGCCCCTAAGGTATACAGCTATTCAGACATTAGGAAAATGACAAATTCACT  
TCAACAGAACTTGGACAAGGGGGTATGGAGGGGTCTATAAAGGTTACC

>M6-PGSC0003DMG400005730M6RLKWAX-EGF\_3233

AAATTCACCTCAACAGAACTTGGACAAGGGGGTATGGAGGGGTCTATAAAGGTTACCTTAACGGCCG  
TCCTGTTGCTGTAAAGATTTTAAATTCTACCAAAGGGAATGGAGAAGACTT

>M6-PGSC0003DMG400005730M6RLKWAX-EGF\_3294

AACGGCCGTCCTGTTGCTGTAAAGATTTTAAATTCTACCAAAGGGAATGGAGAAGACTTTATCAACGAA  
GTTGCAAGCATCAGTAGAACTTCACATGTGAACATAGTTACTCTGTTGGGA

>M6-PGSC0003DMG400005730M6RLKWAX-EGF\_3355

TCAACGAAGTTGCAAGCATCAGTAGAACTTCACATGTGAACATAGTTACTCTGTTGGGATTCTGTTTCAA  
TGGTCGAGAAAGAGCTCTTATTTATGAATTCATGTGCAATGGATCACTCG

>M6-PGSC0003DMG400005730M6RLKWAX-EGF\_3416

CTGTTTCAATGGTCGAGAAAGAGCTCTTATTTATGAATTCATGTGCAATGGATCACTCGATCAACACATC  
TATGGTGAAGATTCTAAGTTGGGATGGGAAAAGTTGTACAAAATTGCACT

>M6-PGSC0003DMG400005730M6RLKWAX-EGF\_3477

CAACACATCTATGGTGAAGATTCTAAGTTGGGATGGGAAAAGTTGTACAAAATTGCACTTGAGATAGGT  
CGAGGACTGGAGTATTTGCACCGAGGGTGAATGCACGAATACTGCATTTT

>M6-PGSC0003DMG400005730M6RLKWAX-EGF\_3538

AGATAGGTCGAGGACTGGAGTATTTGCACCGAGGGTGAATGCACGAATACTGCATTTTGTATATAAAAC  
CTCACAACATCCTTCTTGATGAAGACTTTTGCCCCAAGATATCTGATTTTG

>M6-PGSC0003DMG400005730M6RLKWAX-EGF\_3599

TATAAACCTCACACATCCTTCTTGATGAAGACTTTTGCCCCAAGATATCTGATTTTGGCTTAGCTAAAC  
TATGCCTTCAGAAAGAAAGCATGATATCAATGTTGGAAGCAAGAGGAAC

>M6-PGSC0003DMG400005730M6RLKWAX-EGF\_366

TTCGGTAACACTAGCTTAAATGATGCCCTTTCCGCTATGGTCCTAACTATGTGGTGCTCATCCTGTTCTA  
TGCTTGTCTTTTCGATATACCTTCTGAATGGAAAAATTTACCTTTAGC

>M6-PGSC0003DMG400005730M6RLKWAX-EGF\_3660

TTAGCTAACTATGCCTTCAGAAAGAAAGCATGATATCAATGTTGGAAGCAAGAGGAACCATTGGTTAC  
ATTGCTCCGGAAGTATTCAGTAGAAATTTTGGAGGCGTCTCACACAAATCC

>M6-PGSC0003DMG400005730M6RLKWAX-EGF\_3721

TTGGTTACATTGCTCCGGAAGTATTCAGTAGAAATTTTGGAGGCGTCTCACACAAATCCGATGTTTACAG  
CTATGGAATGATGATTCTTCAAATGGTTGGAGGAAGGAGGAACTACAGTG

>M6-PGSC0003DMG400005730M6RLKWAX-EGF\_3782

TGTTTACAGCTATGGAATGATGATTCTTCAAATGGTTGGAGGAAGGAGGAACTACAGTGCTGAAAGAA  
GTCATCATAGTGAAATATACTTCCCGCGTTGGGCTTATCAACGCCTTGTGAC

>M6-PGSC0003DMG400005730M6RLKWAX-EGF\_3843

GAAAGAAGTCATCATAGTGAAATATACTTCCCGCGTTGGGCTTATCAACGCCTTGTGACAGATGAAGAC  
TTGAATATACAATGCATCACGACCAAAGAAGACGAAGAAATTGCTAAGAAG

>M6-PGSC0003DMG400005730M6RLKWAX-EGF\_3904

ATGAAGACTTGAATATACAATGCATCACGACCAAAGAAGACGAAGAAATTGCTAAGAAGATGATACTA  
GTAGGCTTGTGGTGCATTCAAAGTATCCCTCACAAAGGCCACCAATGAGAA

>M6-PGSC0003DMG400005730M6RLKWAX-EGF\_3965

GATACTAGTAGGCTTGTGGTGCATTCAAAGTATCCCTCACAAAGGCCACCAATGAGAAAGGCAATTGA  
AATGCTTGAAGGTAAGTATAGAGGCCATCCAATTTCCACCAAAGCCTTTTAT

>M6-PGSC0003DMG400005730M6RLKWAX-EGF\_4026

GCAATTGAAATGCTTGAAGGTAAGTATAGAGGCCATCCAATTTCCACCAAAGCCTTTTATATGTTCTCCCTC  
GCAATCAGAAGGATCATCGATGATCCCTTTGGGGAAGCCAATAATGCC

>M6-PGSC0003DMG400005730M6RLKWAX-EGF\_4083

ATATGTTCTCCCTCGCAATCAGAAGGATCATCGATGATCCCTTTGGGGAAGCCAATAATGCCCTTTATAT

ATTCTTCTTCGAGTTCAACACTTGATTCTACAGAACATTTGGTTATATAA

>M6-PGSC0003DMG400005730M6RLKWAX-EGF\_427

TCCTGTTCTATGCTTGTCTTTTCGATATACCTTCTGAATGGAAAAATTTACCTTTAGCTGCAATAAAACTG  
GAGATTCCAGTCATGGTTTCTATCCAGATCAGTCATTTATATCATTCT

>M6-PGSC0003DMG400005730M6RLKWAX-EGF\_488

CAATAAACTGGAGATTCCAGTCATGGTTTCTATCCAGATCAGTCATTTATATCATTCTGGGGACCAAAG  
TATGGGAATTGTGAGCGTATTGTCATAGTTCCTGTGTTGTTAACGGCATT

>M6-PGSC0003DMG400005730M6RLKWAX-EGF\_61

CCATAATCACCATCCTATGCTTCGTGATCACGTCCTCGCCAGCCTATGGCCAAGAGGATAAACAGTACTC  
CACTTGTAATAGCTCCTACACCTGTGGGAATATTCAAAATATCAGCTTCC

>M6-PGSC0003DMG400005730M6RLKWAX-EGF\_610

AGCGGTTCCAAGACCAAGGAAGTACGAAAATATTGGAGCTATTGAAGCAAGGTTTTGATGTGGTTTACA  
ACAAAAGTGTATTATGTATGGCTTGTGAGAGGTCAGGGGGATTATGTTGGT

>M6-PGSC0003DMG400005730M6RLKWAX-EGF\_671

GGTTTACAACAAAAGTGTATTATGTATGGCTTGTGAGAGGTCAGGGGGATTATGTTGGTCAGAAACAGA  
TTTTGCGGAGTCATCTTGCCTTTGTCAGGATCGAACTTATTCTTACAACCTG

>M6-PGSC0003DMG400005730M6RLKWAX-EGF\_732

GAAACAGATTTTGC GGAGTCATCTTGCCTTTGTCAGGATCGAACTTATTCTTACAACCTGCGGTTATACATT  
ACTGGCTCAAGGTGTGTTAATTAATCTCCCTATTACCTAATCTAACTT

>M6-PGSC0003DMG400005730M6RLKWAX-EGF\_793

GTTATACATTACTGGCTCAAGGTGTGTTAATTAATCTCCCTATTACCTAATCTAACTTAGTTCTGTTTACC  
AAATATTACTTGAATTCAATTGGCAGCTAAGAGTTTTGGTACTGAACT

>M6-PGSC0003DMG400005730M6RLKWAX-EGF\_854

TTCTGTTTACCAAATATTACTTGAATTCAATTGGCAGCTAAGAGTTTTGGTACTGAACTTCTGAAACCACT  
ATTTTTTTTCTGTTCAAATATATACCATGATGAAATACAGGGTCGACC

>M6-PGSC0003DMG400005730M6RLKWAX-EGF\_915

TGAAACCACTATTTTTTTTCTGTTCAAATATATACCATGATGAAATACAGGGTCGACCATAAAAGCCAAT  
AAAGCAATGTCTTGGGGCGCGAATTTTTTTGGGGCCTCTATTTTCTCTC

>M6-PGSC0003DMG400005730M6RLKWAX-EGF\_976

AAAAGCCAATAAAGCAATGTCTTGGGGCGCGAATTTTTTTGGGGCCTCTATTTTCTCTCAAAGATATCTA  
TATTGTTAAAAAATTTTCATGTATTGATAAATTTGAAAATAATATTTTGT

>M6-PGSC0003DMG400005896M6LRR-RLK\_0

GAGAAATCAAAGGACAGAAGGAGACAGAAAAAAGGTGTCATGAATTTGTACTTGTCTTTAGGGTTTG  
ATCCACACTGCACCACAACTCTTTGCTAAACTCATCTCTCTTTTTTACAAAA

>M6-PGSC0003DMG400005896M6LRR-RLK\_1037

CAAGGAAACAGTTTTAGTGGACCAATTCCTGATACAATTGGTGATTTAAATGACTTGAAGGAGCTGAAT  
TTTAACGGAAATCAACTAGTTGGTCTGATTCCGCAAGGTTTGGCAAATCTA

>M6-PGSC0003DMG400005896M6LRR-RLK\_1098

AGCTGAATTTTAAACGGAAATCAACTAGTTGGTCTGATTCCGCAAGGTTTGGCAAATCTAGACTTGAGTGT  
GTTAGACTTGAACAATAATAAGCTCATGGGTCCTATCCCAAAGTTTAGAG

>M6-PGSC0003DMG400005896M6LRR-RLK\_1159

CTTGAGTGTGTTAGACTTGAACAATAATAAGCTCATGGGTCCTATCCCAAAGTTTAGAGCTGCGAATGCT  
ACATATTCCTCAAATTCCTTCTGTCAGCCAACCTCCTGGTGTTCTTGTAC

>M6-PGSC0003DMG400005896M6LRR-RLK\_122

CACTCACATTATTAAAAAAAGGTACCATTTTTACAACAATTTATAGTTATTATGTACTTGCATCCTTATATG  
TACTGTTATGTACTTTGTTCAATTTGGGGTTCACAATTCTTGAGAAAA

>M6-PGSC0003DMG400005896M6LRR-RLK\_1220

GCGAATGCTACATATTCCTCAAATTCCTTCTGTCAGCCAACCTCCTGGTGTTCTTGTACTCCTCAAGTTAAT  
GCACTTTTAGATCTTCTTTGTGGTTGGAATTATCCAGCCAACCTTGCT

>M6-PGSC0003DMG400005896M6LRR-RLK\_1281

CTCAAGTTAATGCACTTTTAGATCTTCTTTGTGGTTGGAATTATCCAGCCAACCTTGCTCCTGAATGGAGT  
GGCAATGATCCATGTACAGGTCCTTGGTTGGGAATCAGTTGCAATCCTA

>M6-PGSC0003DMG400005896M6LRR-RLK\_1342

TGAATGGAGTGGCAATGATCCATGTACAGGTCCTTGGTTGGGAATCAGTTGCAATCCTAAAGGCCAGAT  
TACAATTGTTAATCTACAGAACAAGAACCTTACGGGTACGCTTAGCCCTTC

>M6-PGSC0003DMG400005896M6LRR-RLK\_1403

GGCCAGATTACAATTGTTAATCTACAGAACAAGAACCTTACGGGTACGCTTAGCCCTTCACTTGCAAACCT  
TGGATTCACTGCTTGAAGTTCACTTAAAAAGAAATAGTTTGCACGGTCGA

>M6-PGSC0003DMG400005896M6LRR-RLK\_1464

TTGCAAACCTGGATTCACTGCTTGAAGTTCACCTAAAAAGAAATAGTTTGCACGGTCGAGTTCCTGCAA  
CTTAACAGAGCTCAGATCCTTGAGATTGTTGGACTTAAGTGGGAACAATT

>M6-PGSC0003DMG400005896M6LRR-RLK\_1525

TCCTGCAAACCTAACAGAGCTCAGATCCTTGAGATTGTTGGACTTAAGTGGGAACAATTTTGATCCACCA  
TTACCGAAATTCCGGGATCGTGTGAAAGTCATTACAGACGGAAATGCTCA

>M6-PGSC0003DMG400005896M6LRR-RLK\_1586

GATCCACCATTACCGAAATTCCGGGATCGTGTGAAAGTCATTACAGACGGAAATGCTCATCTTGTTGCTA  
ATGTAAGTGCAGGCTCCTCCTCTGAGTATTAGCCATTCCTCCATTG

>M6-PGSC0003DMG400005896M6LRR-RLK\_1647

TTGTTGCTAATGTAAGTGCAGGCTCCTCCTCTGAGTATTAGCCATTCCTCCATTGAGCCACAGTCCT  
AAATCAAGCAAGGAGTTACCATCGAAAAGCCCGTTTCCCGGTGATAATC

>M6-PGSC0003DMG400005896M6LRR-RLK\_1708

CCACAGTCCTAAATCAAGCAAGGAGTTACCATCGAAAAGCCCGTTTCCCGGTGATAATCAGCCAACATTA  
TCAGATACACCGCCCTCCCAGAGAAAAGTTCAGGTTTCAGACTCAAAGTC

>M6-PGSC0003DMG400005896M6LRR-RLK\_1769

CCAACATTATCAGATACACCGCCCTCCCAGAGAAAAGTTCAGGTTTCAGACTCAAAGTCTCCAGGGGA  
ACCAAAGGGCAGACCACATCAGAGAACCATGATAAGACCATGATCATTGTA

>M6-PGSC0003DMG400005896M6LRR-RLK\_183

ATCCTTATATGTTACTGTTATGTACTTTGTTTCATTTGGGGTTCACAATTCTTGAGAAAAAAGTATGTAATT  
TTATGATAATCTTGAATTTTCATCATGTGTGTATATAAGTATTGTGATT

>M6-PGSC0003DMG400005896M6LRR-RLK\_1830

CCAGGGGAACCAAAGGGCAGACCACATCAGAGAACCATGATAAGACCATGATCATTGTAGTTGTAAGT  
GCAGCTTCTTTCGTCTTCACTCTTCTTGCCGTTGTTTTGTATTTCAAGAGCA

>M6-PGSC0003DMG400005896M6LRR-RLK\_1891

TGTAAGTGCAGCTTCTTTCGTCTTCACTCTTCTTGCCGTTGTTTTGTATTTCAAGAGCAAGAGAAAACGAG  
AAAAGGATTCAGGTAATGTTATCCACCCAAAGAGCCATTCGATCA

>M6-PGSC0003DMG400005896M6LRR-RLK\_1952

AGAAAACGAGAAAAGGATTCAGGTAATGTTATCCACCCAAAGAGCCATTCGATCAAGATAACATT

GTTAAGATCACTATCTTAGAAGATCCCATGATGTACAGCTTACAGAGTGGT

>M6-PGSC0003DMG400005896M6LRR-RLK\_2013

ATAACATTGTTAAGATCACTATCTTAGAAGATCCCATGATGTACAGCTTACAGAGTGGTACTACAACAAC

TACTACAACACTAGTGGTGGAAACAAAAGGAAGTCGAGTGATTGAGATTGGAA

>M6-PGSC0003DMG400005896M6LRR-RLK\_2074

TACAACAACACTACTACAACACTAGTGGTGGAAACAAAAGGAAGTCGAGTGATTGAGATTGGAAACCTTGTCAT

TTCAACCCAGGACCTTCGGAGGGTAACCGATAATTTTGCACCAGAGAATGA

>M6-PGSC0003DMG400005896M6LRR-RLK\_2135

CTTGTCATTTCAACCCAGGACCTTCGGAGGGTAACCGATAATTTTGCACCAGAGAATGAGCTTGGTCGTG

GTGGCTTTGGAGTTGTTTACAAAGGCGTAATTGAAGATGGAATTCAAATT

>M6-PGSC0003DMG400005896M6LRR-RLK\_2196

TTGGTCGTGGTGGCTTTGGAGTTGTTTACAAAGGCGTAATTGAAGATGGAATTCAAATTGCAGTGAAGA

GAATGGAATCTGCCATTATCAACAGCAAGGCATTGGATGAATTTCAAGCAG

>M6-PGSC0003DMG400005896M6LRR-RLK\_2257

AGTGAAGAGAATGGAATCTGCCATTATCAACAGCAAGGCATTGGATGAATTTCAAGCAGAAATAGCTGT

GCTTTCTAAGGTTTCGACATCGCCATTTAGTTTCACTTTTGGGTTATTCCAT

>M6-PGSC0003DMG400005896M6LRR-RLK\_2318

ATAGCTGTGCTTTCTAAGGTTTCGACATCGCCATTTAGTTTCACTTTTGGGTTATTCCATTGAAGGAAATGA

GAGGCTTTTGGTATATGAATATATGTCAAAGGGCGCTTTGAGTAGACAT

>M6-PGSC0003DMG400005896M6LRR-RLK\_2379

AAGGAAATGAGAGGCTTTTGGTATATGAATATATGTCAAAGGGCGCTTTGAGTAGACATCTTTCCGCT

GGAAGATCCTGAACTTAGAGCCTTTATCATGGACAAAGAGACTCAATATTG

>M6-PGSC0003DMG400005896M6LRR-RLK\_244

GTATGTAATTTTATGATAATCTTGAATTTTCATCATGTGTGTATATAAGTATTGTGATTTTCAGAGGTGTTG

TTATATACTTATGTACATTAGGTGTATTTCTTGTAATGTTGTTTCTGG

>M6-PGSC0003DMG400005896M6LRR-RLK\_2440

TTCCGCTGGAAGATCCTGAACTTAGAGCCTTTATCATGGACAAAGAGACTCAATATTGCTCTAGATGTC

GCTCGAGGGATGGAGTACCTTCATAATCTGGCACACCAGAGCTTCATACA

>M6-PGSC0003DMG400005896M6LRR-RLK\_2501

CTAGATGTCGCTCGAGGGATGGAGTACCTTCATAATCTGGCACACCAGAGCTTCATACATCGCGATCTCA  
AATCATCAAACATTCTTCTAGATGATGATTTTAGAGCAAAGTTTCTGAT

>M6-PGSC0003DMG400005896M6LRR-RLK\_2562

GCGATCTCAAATCATCAAACATTCTTCTAGATGATGATTTTAGAGCAAAGTTTCTGATTTTGGATTAGTG  
AAACTCGCTCCTGACAAAGAAAGGTCCGTTGCAACAAGGCTTGCAGGAA

>M6-PGSC0003DMG400005896M6LRR-RLK\_2623

TGGATTAGTGAAACTCGCTCCTGACAAAGAAAGGTCCGTTGCAACAAGGCTTGCAGGAACATTTGGATA  
CCTTGCTCCCGAGTATGCTGGTATGTGTGCATTTTTTTCCATTGGTATCTC

>M6-PGSC0003DMG400005896M6LRR-RLK\_2684

TTTGGATACCTTGCTCCCGAGTATGCTGGTATGTGTGCATTTTTTTCCATTGGTATCTCTTTCTTAGACACT  
CGTTTTGACTGTTCTGGTAAATATTATCATTTAAGCATCAATTGTATT

>M6-PGSC0003DMG400005896M6LRR-RLK\_2745

TCTTAGACACTCGTTTTGACTGTTCTGGTAAATATTATCATTTAAGCATCAATTGTATTTTTTACGCTCAGG  
TAAGCTGTTACATGAACACATCTCTACCTGAACGAAACCAATACTCTT

>M6-PGSC0003DMG400005896M6LRR-RLK\_2806

TTACGCTCAGGTAAGCTGTTACATGAACACATCTCTACCTGAACGAAACCAATACTCTTTTAGTCCCTCTA  
TTTTAAGAAATGCATCAGTTCTATAATGAGAATCCAGACTGCTGAATTG

>M6-PGSC0003DMG400005896M6LRR-RLK\_2867

AGTCCCTCTATTTAAGAAATGCATCAGTTCTATAATGAGAATCCAGACTGCTGAATTGCGCTTCTGACCT  
TCCAAGCCCTTCTTCTCCAGCCAAAATAGAACAGAGTAACTAATGGAG

>M6-PGSC0003DMG400005896M6LRR-RLK\_2928

CTTCTGACCTTCCAAGCCCTTCTTCTCCAGCCAAAATAGAACAGAGTAACTAATGGAGCATTTACGTTTT  
TCCTTTAAGTTGTCGGTGTGCCTACTAAATTGATATACCTCAGACATTG

>M6-PGSC0003DMG400005896M6LRR-RLK\_2989

TTTACGTTTTTCTTTAAGTTGTCGGTGTGCCTACTAAATTGATATACCTCAGACATTGATGTATCAATCTC  
GCATCATTAGTGATATTCTCATTCTGTTCACTATCTTTGTTAAACAA

>M6-PGSC0003DMG400005896M6LRR-RLK\_305

AGAGGTGTTGTTATATACTTATGTACATTAGGTGATTTCTTGTAATGTTGTTTCTGGTGTAACAAATTT  
GAATGATTTCAAGATTTTGTAGTATTTAGAAATGGATTAGAGAATCCT

>M6-PGSC0003DMG400005896M6LRR-RLK\_3050

GTATCAATCTCGCATCATTCAAGTATCTCATTCTGTTCACTATCTTTGTTAAACAATTCAAGTAGAAG  
GTTTCACATCCTCTCTCCATATGATCATTCAAGCATAGTTATCATCTT

>M6-PGSC0003DMG400005896M6LRR-RLK\_3111

CAAGTAGAAGGTTTCACATCCTCTCTCCATATGATCATTCAAGCATAGTTATCATCTTGATTCCATAAAA  
AGAAACAGAAACTCTATCCCTTTAAAGATACTTTTCCCTTGAGGCATGG

>M6-PGSC0003DMG400005896M6LRR-RLK\_3172

TTCCATAAAAAGAAACAGAAACTCTATCCCTTTAAAGATACTTTTCCCTTGAGGCATGGTACTGAAATAT  
GTTTGTGTAAAGCTGTTCAACAAGCATGTCATACCTGTTAATTTTGGTGT

>M6-PGSC0003DMG400005896M6LRR-RLK\_3233

CTGAAATATGTTTGTGTAAAGCTGTTCAACAAGCATGTCATACCTGTTAATTTTGGTGTAGAAACTATTGC  
TTACTTTATCTTTATGTTACCCGTATATTTTAGTTCTCAGTCTTGTTGA

>M6-PGSC0003DMG400005896M6LRR-RLK\_3294

AAACTATTGCTTACTTTATCTTTATGTTACCCGTATATTTAGTTCTCAGTCTTGTTGAACGAATTACCTAG  
TCACCTTTATATATCCTAACTCACATTTTACCTCTCCAGTGACCGGA

>M6-PGSC0003DMG400005896M6LRR-RLK\_3355

GAATTACCTAGTCACCTTTCATATATCCTAACTCACATTTTACCTCTCCAGTGACCGGAAAAGTCACAACA  
AAAATAGATGTCTTCAGCTTTGGGGTGGTGTGATGGAACCTTGACTG

>M6-PGSC0003DMG400005896M6LRR-RLK\_3416

AGTCACAACAAAATAGATGTCTTCAGCTTTGGGGTGGTGTGATGGAACCTTGACTGGACTAACAGC  
CCTTGATGAGCATCGGTCCGAGGAACTCGATATCTAGTTGAGTGGTTCTG

>M6-PGSC0003DMG400005896M6LRR-RLK\_3477

CTAACAGCCCTTGATGAGCATCGGTCCGAGGAACTCGATATCTAGTTGAGTGGTTCTGGCAGATAAAA  
TCGAATAAAGAAAACCTCCTTGCTTCCGTTGATCCAGCTCTTGACGTGAAG

>M6-PGSC0003DMG400005896M6LRR-RLK\_3538

AGATAAATCGAATAAAGAAAACCTCCTTGCTTCCGTTGATCCAGCTCTTGACGTGAAGGAAGATATCCA  
CAAGAGCATTGCACTATGGCTGAATTAGCTGGACATTGCACTGCAAGAG

>M6-PGSC0003DMG400005896M6LRR-RLK\_3599

AGATATCCACAAGAGCATTGCACTATGGCTGAATTAGCTGGACATTGCACTGCAAGAGACCCCAATCA



CAGGCCTGACATGTCACACGTTGTGAATGTGCTTGGCCAACTAGTTGAGTC

>M6-PGSC0003DMG400005896M6LRR-RLK\_366

TAACAAATTTGAATGATTTCAAGATTTTGAGTGATTTTAGAAATGGATTAGAGAATCCTGAACTATTGAA  
ATGGCCTTCCAAGGGGAATGATCCTTGTGGTCCTCCTGCATGGCCTCATG

>M6-PGSC0003DMG400005896M6LRR-RLK\_3660

CCCAATCACAGGCCTGACATGTCACACGTTGTGAATGTGCTTGGCCAACTAGTTGAGTCTTGGAAACCCG  
TAGAAGAGTTAGATGAATATTCAGGAATTGACTACAGTCCACCTCTGCCA

>M6-PGSC0003DMG400005896M6LRR-RLK\_3721

GGAAACCCGTAGAAGAGTTAGATGAATATTCAGGAATTGACTACAGTCCACCTCTGCCAGAAATGTTGA  
AGGACTGGCAGGATGAAGACACTGGAGACTTCACCAGTACTAGTCAAGATA

>M6-PGSC0003DMG400005896M6LRR-RLK\_3782

AATGTTGAAGGACTGGCAGGATGAAGACACTGGAGACTTCACCAGTACTAGTCAAGATAGCAGAGGAA  
GTATTCCTGCTAAGCCAAATGGATTTGCGGATTCTTTTACATCCAACGATGC

>M6-PGSC0003DMG400005896M6LRR-RLK\_3843

AGAGGAAGTATTCCTGCTAAGCCAAATGGATTTGCGGATTCTTTTACATCCAACGATGCTCGATAGGTGA  
AGTTGGTTTTGGCTACCAAAGTCCATTGCTTCCTTACTATTAGTTTTGCT

>M6-PGSC0003DMG400005896M6LRR-RLK\_3904

GATAGGTGAAGTTGGTTTTGGCTACCAAAGTCCATTGCTTCCTTACTATTAGTTTTGCTAGCATTTCGAC  
ATGAATTTTGCTTTTGGCTCGTAAAATAATCTATGGAGGCATTGCGTC

>M6-PGSC0003DMG400005896M6LRR-RLK\_3965

CATTTTCGACATGAATTTTGCTTTTGGCTCGTAAAATAATCTATGGAGGCATTGCGTCCAGTCTATATAT  
GGTGAATATACAGATACCGAGTTGTCATGAATGATTGATACAGAGCAA

>M6-PGSC0003DMG400005896M6LRR-RLK\_4026

GTCTATATATGGTGAATATACAGATACCGAGTTGTCATGAATGATTGATACAGAGCAAAAAACAGAAAA  
AACTTTTCAATTAATGTTGTTTACACAGTTATTTGTTTTGAATGTTGCTT

>M6-PGSC0003DMG400005896M6LRR-RLK\_4087

ACAGAAAAACTTTTCAATTAATGTTGTTTACACAGTTATTTGTTTTGAATGTTGCTTGTAAAAGTTATAT  
TTATAATAGTTGGTCCAATTTGCTGTATAAGTTATTTACATGACACT

>M6-PGSC0003DMG400005896M6LRR-RLK\_4136

AATGTTGCTTGTA AAAAGTTATATTTATAATAGGTTGGTCCAATTTGCTGTATAAGTTATTTACATGACACT  
CTTGAGAATCTTACGCATGAATTTGAGAGTGTAATAATGCAAAAAAAG

>M6-PGSC0003DMG400005896M6LRR-RLK\_427

ACTATTGAAATGGCCTTCCAAGGGGAATGATCCTTGTGGTCCTCCTGCATGGCCTCATGTGTTCTGTTCT  
AGTGACAGAGTTACCCAAATTCAGGTTTCAGAGTTTGGGTTTAAAGGGTCC

>M6-PGSC0003DMG400005896M6LRR-RLK\_488

TTCTGTTCTAGTGACAGAGTTACCCAAATTCAGGTTTCAGAGTTTGGGTTTAAAGGGTCCTTTACCTCAGA  
ACTTGAATCAACTTGATAAGCTTCAAATCTTGGCCTTCAGGGGAATGGT

>M6-PGSC0003DMG400005896M6LRR-RLK\_549

TACCTCAGAACTTGAATCAACTTGATAAGCTTCAAATCTTGGCCTTCAGGGGAATGGTTTTAGTGGGAA  
ATTACCTACTTTCAATGGATTATCTGATTTGAAATATGCATACTTGGACA

>M6-PGSC0003DMG400005896M6LRR-RLK\_61

GGGTTTGATCCCACTGCACCACA ACTCTTTGCTAACTCATCTCTCTTTTTTACAAAATTCACTCACATTA  
TTAAAAAAGGTACCATTTTTACAACAATTTATAGTTATTATGTA CTT

>M6-PGSC0003DMG400005896M6LRR-RLK\_610

TAGTGGGAAATTACCTACTTTCAATGGATTATCTGATTTGAAATATGCATACTTGGACAACAATAAATTC  
GATACGATTCTGGTGATTTCTTTAATGGTCTTAGCAGTGTTCAAGTTTT

>M6-PGSC0003DMG400005896M6LRR-RLK\_671

AATAAATTCGATACGATTCTGGTGATTTCTTTAATGGTCTTAGCAGTGTTCAAGTTTTGGCTTTGGATTA  
TAATCCGTTTAATGAGAGTGGATGGTCTATTCCCATTGAGTTGCAAGAT

>M6-PGSC0003DMG400005896M6LRR-RLK\_732

CTTTGGATTATAATCCGTTTAATGAGAGTGGATGGTCTATTCCCATTGAGTTGCAAGATTCAGCTCAGTT  
GACGAATTTTTCTTGTGTGCAATGTAATATAGTTGGACCTGTGCCTGATT

>M6-PGSC0003DMG400005896M6LRR-RLK\_793

AGCTCAGTTGACGAATTTTTCTTGTGTGCAATGTAATATAGTTGGACCTGTGCCTGATTTTTTTGGGAAAT  
TGCCTTCTCTAAGTGC GTTGAAGCTGTCGTATAATCGTTTGACCGGTGA

>M6-PGSC0003DMG400005896M6LRR-RLK\_854

TTTGGGAAATTGCCTTCTCTAAGTGC GTTGAAGCTGTCGTATAATCGTTTGACCGGTGAGATACCGGACA  
GTTTTCGTGATTCAATGCTTCGAATTTTTGTGGTTGAATAATCAAGATAGT

>M6-PGSC0003DMG400005896M6LRR-RLK\_915

TACCGGACAGTTTTCGTGATTCAATGCTTCGAATTTTGTGGTTGAATAATCAAGATAGTCCTGGAATGAC  
GGGTCCAATCGACATAATTGGTACTATGGATCAGCTTATGTTGTTATGGC

>M6-PGSC0003DMG400005896M6LRR-RLK\_976

TGGAATGACGGGTCCAATCGACATAATTGGTACTATGGATCAGCTTATGTTGTTATGGCTTCAAGGAAA  
CAGTTTTAGTGGACCAATTCCTGATACAATTGGTGATTTAAATGACTTGAA

>M6-PGSC0003DMG400005972-(rev)M6LRR-RLP\_0

TAAGAAAATACTGCGTATTGCCATTTAAGCACTTACAGAAGTTATTTAATACGAGCTTTTTTCAGCAACTC  
TGGATGCATCATGTCTGCAGCTGATATTAATCATTAAAGCCAAGACAAC

>M6-PGSC0003DMG400005972-(rev)M6LRR-RLP\_1037

GGAATAAATTTCTGGAATTATACTGCCTTCTTTATTTAAATAAAAATGTTTAAATATTACTGTTTTCTTATCA  
ACTGCAACTACAGAAAGGATTCTTTGTTACTTTTTCAAACTCTTGCA

>M6-PGSC0003DMG400005972-(rev)M6LRR-RLP\_1098

TTTTCTTATCAACTGCAACTACAGAAAGGATTCTTTGTTACTTTTTCAAACTCTTGACATTAATTTACTA  
GTATCTTAAGTGGCTCATAAGTAGACCCGCCAGATCACGTAAGTGTA

>M6-PGSC0003DMG400005972-(rev)M6LRR-RLP\_1159

TTAATTTACTAGTATCTTAAGTGGCTCATAAGTAGACCCGCCAGATCACGTAAGTGTAACAACGTTAATT  
CCATATAACAATGAATGAATCTTACCACACTGTGATAGCCAAGCATACA

>M6-PGSC0003DMG400005972-(rev)M6LRR-RLP\_122

ATAAGGAGGGCGAGAAGAAAGAGGATAAGCTGCTGCGAGTAATGCTCCTAAAGGGACAACAGGTACA  
TTGAGAGCTTGGGCAGGATCAGCCTGCAGCCAAGGTAAATAAATAAGAATA

>M6-PGSC0003DMG400005972-(rev)M6LRR-RLP\_1220

ACGTTAATTCATATAACAATGAATGAATCTTACCACACTGTGATAGCCAAGCATACAGTAATATTCCTC  
CCATAGAATGTCCAATGGCAAGAAGTTTACCATCTTTTGGTGCAAGTTG

>M6-PGSC0003DMG400005972-(rev)M6LRR-RLP\_1281

AATATTCCTCCATAGAATGTCCAATGGCAAGAAGTTTACCATCTTTTGGTGCAAGTTTGGGCCTTAATGTA  
TTCCATCTAGAATGAAAATAAATAAATTAGACTAGTCAGAATAATAAAT

>M6-PGSC0003DMG400005972-(rev)M6LRR-RLP\_1342

CCTTAATGTATTCCATCTAGAATGAAAATAAATAAATTAGACTAGTCAGAATAATAAATAAGAGTGAAAT

TTCAACAAATTCTGAATTTCAATTTGGTTGTGTAATCTCAAGGACAATAAT

>M6-PGSC0003DMG400005972-(rev)M6LRR-RLP\_1403

GAGTGAAATTTCAACAAATTCTGAATTTCAATTTGGTTGTGTAATCTCAAGGACAATAATATCTTTATATTC

TACAACATGGGAATCTGTACCTCACCGCAGCAGGAACATCCTCTTCCA

>M6-PGSC0003DMG400005972-(rev)M6LRR-RLP\_1464

CTTTATATTCTACAACATGGGAATCTGTACCTCACCGCAGCAGGAACATCCTCTTCCAGGTAATGATCA

AAGTCCCAATCATACTTGACAATCAAGTCAAGCTGTTTCTGGAAATCTTC

>M6-PGSC0003DMG400005972-(rev)M6LRR-RLP\_1525

TAATGATCAAAGTCCCAATCATACTTGACAATCAAGTCAAGCTGTTTCTGGAAATCTTCTATGGTAGTGG

TTAGACGTTTCATGCAGATCAACTAACGGAGAAACAGAACGTTGGCCTTCT

>M6-PGSC0003DMG400005972-(rev)M6LRR-RLP\_1586

TGGTAGTGGTTAGACGTTTCATGCAGATCAACTAACGGAGAAACAGAACGTTGGCCTTCTTCAATGATAT

TAAGTAGCTTTTGGCTAAGATCCTTTACTTGGTCAACAACGGCAGAGTTTT

>M6-PGSC0003DMG400005972-(rev)M6LRR-RLP\_1647

AATGATATTAAGTAGCTTTTGGCTAAGATCCTTTACTTGGTCAACAACGGCAGAGTTTTGCCCTGTCTCCA

GCAGACTTAACAACCTCCCCCTTGTCTCGTTAAAGCGTTCATAAAGAAA

>M6-PGSC0003DMG400005972-(rev)M6LRR-RLP\_1708

CCTGTCTCCAGCAGACTTAACAACCTCCCCCTTGTCTCGTTAAAGCGTTCATAAAGAAAGGAATCCTCTAA

TAATTTTGATATTTGATCAAATAGTTTAGCAGACATAATCCTTGATTGG

>M6-PGSC0003DMG400005972-(rev)M6LRR-RLP\_1769

AATCCTCTAATAATTTTGATATTTGATCAAATAGTTTAGCAGACATAATCCTTGATTGGCTTTCATTGAGG

AAGCCAGAGACTCTTCTGACAAGCGCATAAATGTTTCCGTAAGCTCGT

>M6-PGSC0003DMG400005972-(rev)M6LRR-RLP\_183

GGTACATTGAGAGCTTGGGCAGGATCAGCCTGCAGCCAAGGTAAATAAATAAGAATATGCTGAAAG

AGCTTTTTGCTGCACAATGAGAGTTGAAAGACATTTATTTTTGCTTACAAG

>M6-PGSC0003DMG400005972-(rev)M6LRR-RLP\_1830

TTCATTGAGGAAGCCAGAGACTCTTCTGACAAGCGCATAAATGTTTCCGTAAGCTCGTTTACTACTCTTG

ATTCATCCCACATTGTTGCAATAGCTGTGGATTCTTCTTTGACCACAGC

>M6-PGSC0003DMG400005972-(rev)M6LRR-RLP\_1891

ACTACTCTTGATTCATCCACATTGTTGCAATAGCTGTGGATTCTTCTTTGACCACAGCTGTGTCAGACTC  
TTCTAAGGTACTCTGGGCATCTGTTGACTGCTGTGCTGCAGAAAGAACT

>M6-PGSC0003DMG400005972-(rev)M6LRR-RLP\_1952

TGTCAGACTCTTCTAAGGTACTCTGGGCATCTGTTGACTGCTGTGCTGCAGAAAGAACTTTGTCAGTAGC  
ATTATCAGCGGCAGCTTCCATCTGTTCTGAGACTGCAATTGCAGTCTTCT

>M6-PGSC0003DMG400005972-(rev)M6LRR-RLP\_2013

GTCAGTAGCATTATCAGCGGCAGCTTCCATCTGTTCTGAGACTGCAATTGCAGTCTTCTCAATGTTTGTG  
GAATCTGACTCCTGCACACTCAACCCAGCTCCACGAAGTTCAAGAACCCA

>M6-PGSC0003DMG400005972-(rev)M6LRR-RLP\_2074

ATGTTTGTGGAATCTGACTCCTGCACACTCAACCCAGCTCCACGAAGTTCAAGAACCCAAGTGTCAAATC  
CTTACCAGACATGTACCGGGCGAAAGATGACTGCATAATTATTTTTAAA

>M6-PGSC0003DMG400005972-(rev)M6LRR-RLP\_2135

TGTCAAATCCTTACCAGACATGTACCGGGCGAAAGATGACTGCATAATTATTTTTAAAAGTAAAAACCG  
TGATTAATAACTTTTAGAAAGAATTTAAAAAAACCAGCCATACTATGTA

>M6-PGSC0003DMG400005972-(rev)M6LRR-RLP\_2196

TAAAAACCGTGATTAATAACTTTTAGAAAGAATTTAAAAAAACCAGCCATACTATGTAAAATTTCTTTG  
ATAAGCAGGATGGACATGGTTGCCTGAAGTGATAAAGAATTCTAACCTC

>M6-PGSC0003DMG400005972-(rev)M6LRR-RLP\_2257

ATTTCTTTGATAAGCAGGATGGACATGGTTGCCTGAAGTGATAAAGAATTCTAACCTCCACTGAAGAG  
TAGGGTGCACATACTTGCCTCAAGTGATAAAAATGAACTTGAACGGATAGG

>M6-PGSC0003DMG400005972-(rev)M6LRR-RLP\_2318

CTGAAGAGTAGGGTGCACATACTTGCCTCAAGTGATAAAAATGAACTTGAACGGATAGGAAGATGCATC  
AACAGAACTTTAAACAAAAAATAGACAAGAAATAATCCAAGTGAAATCAAG

>M6-PGSC0003DMG400005972-(rev)M6LRR-RLP\_2379

GATGCATCAACAGAACTTTAAACAAAAAATAGACAAGAAATAATCCAAGTGAAATCAAGTTGGCATTAG  
TTATTGCATTAACCAGCAGACATTTAGATTTATCTCACTAAAAAAAAG

>M6-PGSC0003DMG400005972-(rev)M6LRR-RLP\_244

CTGAAAGAGCTTTTTGCTGCACAATGAGAGTTGAAAGACATTTATTTTTGCTTACAAGGGGTAGGAGC  
AGTCTGAGTGCAGACTTCGAAGATGTGTAATCCAGTGATGAAGCCAAAGTT

>M6-PGSC0003DMG400005972-(rev)M6LRR-RLP\_2440

GGCATTAGTTATTGCATTAACCAGCAGACATTTAGATTTATCTCACTAAAAAAAAAAGGATAGAAATCA  
TCACTAGCAGCTAAGCAAAAAATCGTCATCACAATTCATATTTTAGAAAT

>M6-PGSC0003DMG400005972-(rev)M6LRR-RLP\_2501

TAGAAATCATCACTAGCAGCTAAGCAAAAAATCGTCATCACAATTCATATTTTAGAAATGTACAATCACA  
GAGAGTGCTAGCCACATGACTACCATCAACACCTGATTGATGCAGGCATG

>M6-PGSC0003DMG400005972-(rev)M6LRR-RLP\_2562

ACAATCACAGAGAGTGCTAGCCACATGACTACCATCAACACCTGATTGATGCAGGCATGCAGCCATAAA  
GCCTTATAAAAAAAGGAAGATGAAATAGATAACAAGCCAGTAATAAAAAA

>M6-PGSC0003DMG400005972-(rev)M6LRR-RLP\_2623

GCCATAAAGCCTTATAAAAAAAGGAAGATGAAATAGATAACAAGCCAGTAATAAAAAAATCACACAA  
GTAAACTTTTATACGCTTGAAATGCATAAAGTATGAGAAAAGGACGAAGTTT

>M6-PGSC0003DMG400005972-(rev)M6LRR-RLP\_2684

CACACAAGTAACTTTTATACGCTTGAAATGCATAAAGTATGAGAAAAGGACGAAGTTTTTAACCGACCC  
ACCATTTTGATCACCGCACCAACATGTGTGCAGAAGGAAGTAGATGCAGA

>M6-PGSC0003DMG400005972-(rev)M6LRR-RLP\_2745

AACCGACCCACCATTTTGATCACCGCACCAACATGTGTGCAGAAGGAAGTAGATGCAGATGCACTAGGA  
ACTAGTTACCCTAGGACCTTAAACAATCCATTTTGTATTATCCAGGGTCGG

>M6-PGSC0003DMG400005972-(rev)M6LRR-RLP\_2806

CACTAGGAACTAGTTACCCTAGGACCTTAAACAATCCATTTTGTATTATCCAGGGTCGGGATGTGACCCA  
AACTACTTACAATGACCCACCCGTTGACACAGGTGGGGAACTACTAATG

>M6-PGSC0003DMG400005972-(rev)M6LRR-RLP\_2867

TGTGACCCAACTACTTACAATGACCCACCCGTTGACACAGGTGGGGAACTACTAATGCTCTTGATCCC  
TAATTATATAATATAATATAAGTATCCTTTTGTATCAAAAAAAAAAAGTA

>M6-PGSC0003DMG400005972-(rev)M6LRR-RLP\_2928

CTTGATCCCTAATTATATAATATAATATAAGTATCCTTTTGTATCAAAAAAAAAAAGTAGTAAGGATAAT  
ACAACATCAAACCAGGGTAACTCTAAAAAATTTGAGCATGCCATAGAA

>M6-PGSC0003DMG400005972-(rev)M6LRR-RLP\_2989

AAGGATAATACAACATCAAACCAGGGTAACTCTAAAAAATTTGAGCATGCCATAGAATTCTACCAGAT

TCAGAAACAAGAACCACTCCACGAAATAAAGAGTGAAACTTTAATGGAAC

>M6-PGSC0003DMG400005972-(rev)M6LRR-RLP\_305

GTAGGAGCAGTCTGAGTGCAGACTTCGAAGATGTGTAATCCAGTGATGAAGCCAAAGTTGCAATAGCA

GTTAATCCAGGCTCTCTTCTTGCAATCCTTTCCAAGATAAAACCAGAAACA

>M6-PGSC0003DMG400005972-(rev)M6LRR-RLP\_3050

CTACCAGATTCAGAAACAAGAACCACTCCACGAAATAAAGAGTGAAACTTTAATGGAACCTGACATATC

CACTAAGCACTGATAATATACACATTTGACATCTGTCATTATGATCTATTA

>M6-PGSC0003DMG400005972-(rev)M6LRR-RLP\_3111

GACATATCCACTAAGCACTGATAATATACACATTTGACATCTGTCATTATGATCTATTAATGTGGCTATC

AATGAACGATCCATGAAGATCCCCTAGTTCTGTTACCTATACAGGCAT

>M6-PGSC0003DMG400005972-(rev)M6LRR-RLP\_3172

TGTGGCTATCAATGAACGATCCATGAAGATCCCCTAGTTCTGTTACCTATACAGGCATGAATTTGCAA

TAAGAGTGTCCCGACTACTCTTTACACAATACTGCACATACAACAAAA

>M6-PGSC0003DMG400005972-(rev)M6LRR-RLP\_3233

ATTTGCAAATAAGAGTGTCCCGACTACTCTTTACACAATACTGCACATACAACAAAACAGAAGAATGC

ACAAAGAACGGAGAGAAGGCAGACGAGTATCATACCCCAGGAGCAAGATC

>M6-PGSC0003DMG400005972-(rev)M6LRR-RLP\_3294

GAAGAATGCACAAAGAACGGAGAGAAGGCAGACGAGTATCATACCCCAGGAGCAAGATCATATCCAAT

AGCATTAGTCCCCACGCCAGACAACAGAAGCAGGGGATGATTTCTCTTTGGA

>M6-PGSC0003DMG400005972-(rev)M6LRR-RLP\_3355

ATCCAATAGCATTAGTCCCCACGCCAGACAACAGAAGCAGGGGATGATTTCTCTTTGGAGCCTATCATCA

TCAAAAATCACACACCCTTAATGCAAAGCTCAAATCCTTGAACAAAAAAA

>M6-PGSC0003DMG400005972-(rev)M6LRR-RLP\_3416

CTATCATCATCAAAAATCACACACCCTTAATGCAAAGCTCAAATCCTTGAACAAAAAATCATGTAACAG

AACTGTAAACCTTCTAGTATCACTCCCTGTGTTTCATTTTATATAACA

>M6-PGSC0003DMG400005972-(rev)M6LRR-RLP\_3477

ATGTAACAGAAGCTGTTAAACCTTCTAGTATCACTCCCTGTGTTTCATTTTATATAACAGTATTTGATAGA

ACACAAAATTTAAATATTCAATAGTTGAATTAGATAAAAATGGTGTCA

>M6-PGSC0003DMG400005972-(rev)M6LRR-RLP\_3538

ATTTGATAGAACACAAAATTTAAAATATTCAATAGTTGAATTAGATAAAAATGGTGTCAAACCTTCTTAAT  
GCCTTCATGTCTTATATATTGGGACCAATTCTATATGACCACATTTACT

>M6-PGSC0003DMG400005972-(rev)M6LRR-RLP\_366

AATAGCAGTTAATCCAGGCTCTCTTCTTGCAATCCTTTCCAAGATAAAACCAGAAACATATTTAAAATTAT  
CTCATATCTGTATGATTCCCGGATGTAGTGAGTTTGAAAATATTTTTTTT

>M6-PGSC0003DMG400005972-(rev)M6LRR-RLP\_3782

TAATTGATCACAAAATTTAAAATTTGAACTTATATAGAAATGAAAGTGTCAAATATATTATTTTTTTTCAA  
ATTGTCATACAGTTAAGAGTAACAGTTCAAATTAACATAAAAAA

>M6-PGSC0003DMG400005972-(rev)M6LRR-RLP\_3843

TTTTTTTCAAATTGTCATACAGTTAAGAGTAACAGTTCAAATTAACATAAAAAAATTGAACCTGAG  
GAGGAGGAATGTAGCGCCAGAGAGCAAGTTTCCAATCGGAATTATTAACA

>M6-PGSC0003DMG400005972-(rev)M6LRR-RLP\_3904

GAACCTGAGGAGGAGGAATGTAGCGCCAGAGAGCAAGTTTCCAATCGGAATTATTAACAGATACGTAG  
TGGAGTTCATCGGCAGTGCATAACGATGGCTTATTACAAACCTTCTGGGCTG

>M6-PGSC0003DMG400005972-(rev)M6LRR-RLP\_3965

TACGTAGTGGAGTTCATCGGCAGTGCATAACGATGGCTTATTACAAACCTTCTGGGCTGTAGTATCGCCA  
TCATTGGTGGTGAAAGCTCTGAGTTTAAAGGCGGAGTTCACCGCGAAGCA

>M6-PGSC0003DMG400005972-(rev)M6LRR-RLP\_4026

GTATCGCCATCATTGGTGGTGAAAGCTCTGAGTTTAAAGGCGGAGTTCACCGCGAAGCAGTAGTTCGGG  
GAGTTCGGTATGAAATGACGGCGGGAGGAAGTCGCCGGCGGTGATTTGTT

>M6-PGSC0003DMG400005972-(rev)M6LRR-RLP\_4087

AGTTCGGGGAGTTCGGTATGAAATGACGGCGGGAGGAAGTCGCCGGCGGTGATTTGTTAAGTGGTG  
GTAATGGTTGTGGTGGCGGAAGACGGCAGCGATTTGAATCGCCGATCGAATAT

>M6-PGSC0003DMG400005972-(rev)M6LRR-RLP\_4148

GTGGTGGTAATGGTTGTGGTGGCGGAAGACGGCAGCGATTTGAATCGCCGATCGAATATCGGATTGAA  
TTGGATAAACCATATTTTTTTGGGATTCGTGACAATTTGGATAAAGAAAATTG

>M6-PGSC0003DMG400005972-(rev)M6LRR-RLP\_4207

CGGATTGAATTGGATAAACCATATTTTTTTGGGATTCGTGACAATTTGGATAAAGAAAATTGGTTTGATAA  
ATCTTTTACTCTTTTGACTTTTGAAGTTTGAGACGTAACTTTTTTATT



>M6-PGSC0003DMG400005972-(rev)M6LRR-RLP\_427

TTAAAATTATCTCATATCTGTATGATTCCCGGATGTAGTGAGTTTGAAAATATTTTTTTGAGACTGTGCC  
ACTGCACATTAACAAGGAATCAGACAATGCTCCAAGTGACTTATCTGTT

>M6-PGSC0003DMG400005972-(rev)M6LRR-RLP\_488

GACTGTGCCCACTGCACATTAACAAGGAATCAGACAATGCTCCAAGTGACTTATCTGTTAGTTGCGAAAC  
CTTTTTACATCTAAAACCAGGTCAAATTCCTTCCAAATCAAATTGTCCCT

>M6-PGSC0003DMG400005972-(rev)M6LRR-RLP\_549

TTGCGAAACCTTTTTACATCTAAAACCAGGTCAAATTCCTTCCAAATCAAATTGTCCCTTACACACTGTAA  
AAACGTATGGATAAAGTATAAAATCTTGCCTAGCTCCCTATAATCTCAA

>M6-PGSC0003DMG400005972-(rev)M6LRR-RLP\_61

TCAGCAACTCTGGATGCATCATGTCTGCAGCTGATATTAATCATTAAAGCCAAGACAACACATAAGGAG  
GGCGAGAAGAAAGAGGATAAGCTGCTGCGAGTAATGCTCCTAAAGGGACAA

>M6-PGSC0003DMG400005972-(rev)M6LRR-RLP\_610

CACACTGTAAAAACGTATGGATAAAGTATAAAATCTTGCCTAGCTCCCTATAATCTCAATAAGGTCAAAA  
GATGGCTCATTTTCAGCTCTGTATGAAAGACGCTAGTAAGCAGATAAGTC

>M6-PGSC0003DMG400005972-(rev)M6LRR-RLP\_671

AGGTCAAAGATGGCTCATTTTCAGCTCTGTATGAAAGACGCTAGTAAGCAGATAAGTCACACTGTAA  
CCAGATCCTGTTTACCTTGGTGCACCCTATCATGGTATTTTTAAGTTAATA

>M6-PGSC0003DMG400005972-(rev)M6LRR-RLP\_732

ACTGTTAACCAGATCCTGTTTACCTTGGTGCACCCTATCATGGTATTTTTAAGTTAATAGGAGTACTGCAC  
TTGGTGGCTATTACAACATACTCCCAAAGTTGTTGTGAACTATAGCAT

>M6-PGSC0003DMG400005972-(rev)M6LRR-RLP\_793

AGTACTGCACTTGGTGGCTATTACAACATACTCCCAAAGTTGTTGTGAACTATAGCATCTTTCTTATTTTT  
CAGCAAAAAGCTTGTGAAGTTGAGTCTGAAGATTTTGCTCCATGAAT

>M6-PGSC0003DMG400005972-(rev)M6LRR-RLP\_854

TTCTTATTTTTCAGCAAAAAGCTTGTGAAGTTGAGTCTGAAGATTTTGCTCCATGAATATTAGGAATTAA  
AAGAACATTAAGTCAAGAGGAGACCAGGTAACTCAAAGTTGCACCAAG

>M6-PGSC0003DMG400005972-(rev)M6LRR-RLP\_915

TAGGAATTAAGAACATTAAGTCAAGAGGAGACCAGGTAACTCAAAGTTGCACCAAGTGAAGTGGT

AGCCTTTGGAATTTAATCCCAAGACTAAATCGTATGATACTCCAGCAGGTTTC

>M6-PGSC0003DMG400005972-(rev)M6LRR-RLP\_976

AAGTGGTAGCCTTTGGAATTTAATCCCAAGACTAAATCGTATGATACTCCAGCAGGTTTCATGGAATAAAT  
TTCTGGAATTATACTGCCTTCTTTATTTAAATAAAATGTTTAAATATTAC

>M6-PGSC0003DMG400005975M6RLKWAX-EGF\_0

GAAAAAAGTATAGTATAGCATAACAATTTTTTTGAGTATGGTATCATTAAATTCTTTGTCAATTCTCTTG  
ATTCGTATCAAATGGTGTATGTTTGGTTCAGTTGTAGCGCAGAATCAAA

>M6-PGSC0003DMG400005975M6RLKWAX-EGF\_1159

TATTCTGCTTGTTCATTGTGTAACGTGGGACAAATCGCCTGCAGGATTTATGTCTGTAGCTTCTTCATA  
GTGATCTTGTCTGAATTTAGTATAGCAGCATAAGCTTGTCACTTAA

>M6-PGSC0003DMG400005975M6RLKWAX-EGF\_122

CAAATAATAGTAGTTGTGTGGATAAATTCAAATGTGGGAATCTTGAAATGTGAGTTTTCCATTTTCTG  
TATCTTCACAACCTGATTGTGGATTGTACTATAGATTGTGATGCTACT

>M6-PGSC0003DMG400005975M6RLKWAX-EGF\_1220

CTTCTTCATAGTGATCTTGTCTGAATTTAGTATAGCAGCATAAGCTTGTCACTTAACTCTCAGTTCCTC  
CTCCGCGTGCAACAATTATCTAACTTTTTCGTGATTTGGTTTTCGTTGC

>M6-PGSC0003DMG400005975M6RLKWAX-EGF\_1281

CTCAGTTCCTCCTCCGCGTGCAACAATTATCTAACTTTTTCGTGATTTGGTTTTCGTTGCAGTAACAAGAAA  
GTCGAGACGAGTTCTAATTGTAGGTAACAATCTATAACTTCAAATCTTT

>M6-PGSC0003DMG400005975M6RLKWAX-EGF\_1342

TAACAAGAAAGTCGAGACGAGTTCTAATTGTAGGTAACAATCTATAACTTCAAATCTTTTTCATATAACCA  
CATGTTCTCAAGTATGTTCTTACTTTGAAATGCCAGCTTTTCGTGCAAT

>M6-PGSC0003DMG400005975M6RLKWAX-EGF\_1403

CATATAACCACATGTTCTCAAGTATGTTCTTACTTTGAAATGCCAGCTTTTCGTGCAATTCTGTCTACTTTT  
CTGTAGCCATTTTTCAAACAAATTCTGATTAGTTTCTCTGCATTTGCT

>M6-PGSC0003DMG400005975M6RLKWAX-EGF\_1464

TGTCTACTTTTCTGTAGCCATTTTTCAAACAAATTCTGATTAGTTTCTCTGCATTTGCTTCAGTCTTACCTGT  
GGTATTGGCTTGACCTTTTCAATCTGTCTTGGTATTGTTATCTGGC

>M6-PGSC0003DMG400005975M6RLKWAX-EGF\_1525

AGTCTTACCTGTGGTGATTGGCTTGACCTTTTCAATCTGTCTTGGTATTGTTATCTGGCATTTC AAGAAAG  
GAAAAGGCGGTTCGTTCTCACTCTTTCACAAGAAATACATTTTCTGATCC

>M6-PGSC0003DMG400005975M6RLKWAX-EGF\_1586

TTCAAGAAAGGAAAAGGCGGTTCGTTCTCACTCTTTCACAAGAAATACATTTTCTGATCCTTCAAGAAAAG  
ATCTGGAAGGGGATAGCAAGTACTTTGGGGTCCCAGTCTTCTCCTACTCT

>M6-PGSC0003DMG400005975M6RLKWAX-EGF\_1647

CAAGAAAAGATCTGGAAGGGGATAGCAAGTACTTTGGGGTCCCAGTCTTCTCCTACTCTACTCTCGAAG  
AAGCCACCAATAATTTTGATCCCTCCCAAGAGCTTGGAGATGGAGGTTTTG

>M6-PGSC0003DMG400005975M6RLKWAX-EGF\_1708

TCTCGAAGAAGCCACCAATAATTTTGATCCCTCCCAAGAGCTTGGAGATGGAGGTTTTGGAAGTGTATAC  
TATGGTAATAAGCCACGTAAATCAAGTCATGACATTTCAAATCATATTTG

>M6-PGSC0003DMG400005975M6RLKWAX-EGF\_1769

ACTGTATACTATGGTAATAAGCCACGTAAATCAAGTCATGACATTTCAAATCATATTTGGAAAGCATTAG  
GCAGAGTTTTGCATACTGTATTAAGAATGCAATAGTTTGGTAACATGAT

>M6-PGSC0003DMG400005975M6RLKWAX-EGF\_183

CATTTTCTGTATCTTCAACCTGATTGTGGATTGTACTATAGATTGTGATGCTACTCCCAATCCAACA  
ATTCATCTCGGAGAAAATGTTTATAGTGTCTGAGACAACGCTTCTCTG

>M6-PGSC0003DMG400005975M6RLKWAX-EGF\_1830

AAGCATTAGGCAGAGTTTTGCATACTGTATTAAGAATGCAATAGTTTGGTAACATGATTCAGCAGCTAA  
CAATGCACTTCTTTTATTAGGTAACTTCGTGATGGACGAGAAGTTGCAG

>M6-PGSC0003DMG400005975M6RLKWAX-EGF\_1891

AGCAGCTAACAAATGCACTTCTTTTATTAGGTAACTTCGTGATGGACGAGAAGTTGCAGTGAAACGCCTC  
TATGAGCAAAGTTCCAAGAGGATGGTGCAGTTTAAGAATGAAATTGAAAT

>M6-PGSC0003DMG400005975M6RLKWAX-EGF\_1952

AAACGCCTCTATGAGCAAAGTTCCAAGAGGATGGTGCAGTTTAAGAATGAAATTGAAATTCTTACTCGC  
TTAAGGCACCAGAATCTTGTTATGCTCTATGGTTGCACGTCAAGGCATAGT

>M6-PGSC0003DMG400005975M6RLKWAX-EGF\_2013

TTACTCGCTTAAGGCACCAGAATCTTGTTATGCTCTATGGTTGCACGTCAAGGCATAGTCGTGAACTCCT  
CCTGGTTTATGAATACATCCCTAATGGAACAGTTGCTGATCATCTCCATG

>M6-PGSC0003DMG400005975M6RLKWAX-EGF\_2074

TGAACTCCTCCTGGTTTATGAATACATCCCTAATGGAACAGTTGCTGATCATCTCCATGGAGAGAAAGCT  
AAGAATGGAGCCCTTATATGGCCTATACGCATGAAGATTGCCATAGAAAC

>M6-PGSC0003DMG400005975M6RLKWAX-EGF\_2135

GAGAAAGCTAAGAATGGAGCCCTTATATGGCCTATACGCATGAAGATTGCCATAGAAACTGCTAGTGCT  
TTAGCTTATCTCCATGCTTCTGACATAATACACCGCGATGTCAAGACTTGT

>M6-PGSC0003DMG400005975M6RLKWAX-EGF\_2196

CTAGTGCTTTAGCTTATCTCCATGCTTCTGACATAATACACCGCGATGTCAAGACTTGTAACATTCTACTT  
GACAACAATTTCTGTGTCAAAGTTGCAGATTTTGGGCTTTCGCGACTTT

>M6-PGSC0003DMG400005975M6RLKWAX-EGF\_2257

CATTCTACTTGACAACAATTTCTGTGTCAAAGTTGCAGATTTTGGGCTTTCGCGACTTTTTCCAAATGATG  
TGACTCATATCTCAACTGCTCCACAGGGGACACCAGGATATGTTGATCC

>M6-PGSC0003DMG400005975M6RLKWAX-EGF\_2318

CCAAATGATGTGACTCATATCTCAACTGCTCCACAGGGGACACCAGGATATGTTGATCCGGATTATCATG  
CTTGCTATCAGCTAACAAAGTAAAAGTGATGTGTACAGCTTTGGAGTTGTC

>M6-PGSC0003DMG400005975M6RLKWAX-EGF\_2379

ATTATCATGCTTGCTATCAGCTAACAAAGTAAAAGTGATGTGTACAGCTTTGGAGTTGTCCTTATTGAGCT  
CATATCGTCGCTCCTTGCTGTGGATATAAGAAGGCATAGGGATGAAATTA

>M6-PGSC0003DMG400005975M6RLKWAX-EGF\_244

CAATCCAACAATTCATCTCGGAGAAAATGTTTATAGTGTTCTGAGACAACGCTTCTCTGATCGTTTTTCGAG  
TTTCAGACCATAGACTTGAGTACTTATTGGCGAGAAACAGTTGTGAAAC

>M6-PGSC0003DMG400005975M6RLKWAX-EGF\_2440

TATTGAGCTCATATCGTCGCTCCTTGCTGTGGATATAAGAAGGCATAGGGATGAAATTAGTTTGGCTAAC  
TTTGCAGTAAGTAAGATTTTGAATGTGCATTTCGAGGAGCTGATTGATCC

>M6-PGSC0003DMG400005975M6RLKWAX-EGF\_2501

TTGGCTAACTTTGCAGTAAGTAAGATTTTGAATGTGCATTTCGAGGAGCTGATTGATCCATCTCTTGGTT  
ACGAGTCCAATGCTGAAGTTAGGAGAATGACTACTTCAGTTGCAGAGCTA

>M6-PGSC0003DMG400005975M6RLKWAX-EGF\_2562

CTCTTGGTTACGAGTCCAATGCTGAAGTTAGGAGAATGACTACTTCAGTTGCAGAGCTAGCTTTTCAATG

TCTCCAACCTCGAGAAGGAAATGAGACCAACAATGGATGAAGTGTGGAAA

>M6-PGSC0003DMG400005975M6RLKWAX-EGF\_2623

TTTTCAATGTCTCCAACCTCGAGAAGGAAATGAGACCAACAATGGATGAAGTGTGGAAAATTCTAAAGGC  
GATTCAGAGTGGTGAGTTTGAAAACCAGAAGAAAGAAGAGATTAACGTCGT

>M6-PGSC0003DMG400005975M6RLKWAX-EGF\_2684

CTAAAGGCGATTCAGAGTGGTGAGTTTGAAAACCAGAAGAAAGAAGAGATTAACGTCGTTGATAATGT  
AGAAGTCCCTCAGGACCCTGAATCAGAAAATGATGATGCACAATTGATGAAA

>M6-PGSC0003DMG400005975M6RLKWAX-EGF\_2745

ATAATGTAGAAGTCCCTCAGGACCCTGAATCAGAAAATGATGATGCACAATTGATGAAATCTAAATTACC  
TGTTTCGACAAATTCTGTGAATGATAAGTGGTTTAGTTGCTCTACCACAG

>M6-PGSC0003DMG400005975M6RLKWAX-EGF\_2806

TAAATTACCTGTTTCGACAAATTCTGTGAATGATAAGTGGTTTAGTTGCTCTACCACAGTTAGTATTAGCG  
GGTGAAATTCCTTCGATATTAAGCTAACTTCATTACTTTTTAGCTTTC

>M6-PGSC0003DMG400005975M6RLKWAX-EGF\_2867

AGTATTAGCGGGTGAAATTCCTTCGATATTAAGCTAACTTCATTACTTTTTAGCTTTCCTCTCTTCTCAT  
TCTTTTTTCGCTCTCTGCTTGTATGAGTTCAATACCTAATTGTATC

>M6-PGSC0003DMG400005975M6RLKWAX-EGF\_2928

TCTCTTCTCATTCTTTTTTCGCTCTCTGCTTGTATGAGTTCAATACCTAATTGTATCAGAAATGTATTA  
AATAGAGATGCCTTTTTGTAAAGCAAGCCATCACCTTAACGATGTGG

>M6-PGSC0003DMG400005975M6RLKWAX-EGF\_2981

TGTATCAGAAATGTATTAATAAATAGAGATGCCTTTTTGTAAAGCAAGCCATCACCTTAACGATGTGGGGG  
GTTAGGCTTGACCCGTACCATGTCTATAAACATCCAAAAAGTTATCAAAG

>M6-PGSC0003DMG400005975M6RLKWAX-EGF\_305

CGTTTTCGAGTTTCAGACCATAGACTTGAGTACTTATTGGCGAGAAACAGTTGTGAAACTTTTGATAGAA  
GTATATCGTTTCAAATTCTCCTTCTATCTCGTTTGAATCAATGAACGA

>M6-PGSC0003DMG400005975M6RLKWAX-EGF\_366

TTGATAGAAGTATATCGTTTCAAATTCTCCTTCTATCTCGTTTGAATCAATGAACGAAATGTTACTTTGT  
TCAGATGCAACAACAGTTTAGATATCAACAGGAGCATGAGTGATCATT

>M6-PGSC0003DMG400005975M6RLKWAX-EGF\_427

TGTTACTTTGTTTCAGATGCAACAACAGTTTAGATATCAACAGGAGCATGAGTGATCATTATTTTCGCGAA  
TATCTGAATTATACTAAATGTAGTGGTTTTACTATATACTACAAGTATCC

>M6-PGSC0003DMG400005975M6RLKWAX-EGF\_488

TTTCGCGAATATCTGAATTATACTAAATGTAGTGGTTTTACTATATACTACAAGTATCCTAGTAGAAGACG  
GGAAGATTCCTCCGATGCACCAGAGGGAGATATTCCTGATAACTGTTCC

>M6-PGSC0003DMG400005975M6RLKWAX-EGF\_549

GTAGAAGACGGGAAGATTCCTCCGATGCACCAGAGGGAGATATTCCTGATAACTGTTCCCGATTCAAT  
TGCCAATTACATGGAATTCAGGATCAAACGTTTCGAATAGTAGCTTGTTG

>M6-PGSC0003DMG400005975M6RLKWAX-EGF\_61

AATTCTCTTGATTCGTATCAAATGGTGATGTTTGGTTCAGTTGTAGCGCAGAATCAAATCAAATAATA  
GTAGTTGTGTGGATAAATCAAATGTGGGAATCTTGAAATGTGAGTTT

>M6-PGSC0003DMG400005975M6RLKWAX-EGF\_610

GATTCAATTGCCAATTACATGGAATTCAGGATCAAACGTTTCGAATAGTAGCTTGTTTGATCTCTTAGCTG  
TGAATTATAACAATTCAGTGGAGTCTGTCTGAAGATTGTAGTAAATGTCA

>M6-PGSC0003DMG400005975M6RLKWAX-EGF\_671

CTCTTAGCTGTGAATTATAACAATTCAGTGGAGTCTGTCTGAAGATTGTAGTAAATGTCACTATCAAGGAG  
GTCGATGTTTAACCGATAGCAACAATAGATTTCTTTGCTCCAGAGGTAAT

>M6-PGSC0003DMG400005975M6RLKWAX-EGF\_732

ATCAAGGAGGTGCATGTTTAACCGATAGCAACAATAGATTTCTTTGCTCCAGAGGTAATATTTTACTTGC  
AATATGCTTGTCATATAACAATACTCTGACCTTTGTCTAATTCTACTTCGA

>M6-PGSC0003DMG400005975M6RLKWAX-EGF\_793

TTTACTTGCAATATGCTTGTCATATAACAATACTCTGACCTTTGTCTAATTCTACTTCGAATAGTTGCTTCTA  
GTTTTTGTACTCTAGCTTCGAGATTGCCATCTACACACCTCAACTTG

>M6-PGSC0003DMG400006027-(rev)M6LRR-RLP\_0

TAGAGGCGTCTACTTGCTATTTAATTCAAATCAAATTCATTATTCAACAACACATTTTACATTGTG  
TGAAAAAAACTTCATTTTCTTCTTAGCTTGAAAATCTCTATCAA

>M6-PGSC0003DMG400006027-(rev)M6LRR-RLP\_1037

CTTACTGGGGTTATACCAGCTAGCATTTGCCAACTCCAAGGTTGCAGAACTTTACGTATTCGTTCAATTA  
CTTCACTGGGGAGGCTCCGTTTGTGCTGCGACTAGATCTGGTGATGGT

>M6-PGSC0003DMG400006027-(rev)M6LRR-RLP\_1098

CGTTCAATTACTTCACTGGGGAGGCTCCGGTTTGTGCTGCGACTAGATCTGGTGATGGTCAGGAGAACT  
GTATCGTTGGAAAGAAGAATCAAAGATCTGCTAAAGAATGCTCTTCGGATG

>M6-PGSC0003DMG400006027-(rev)M6LRR-RLP\_1159

GGAGAACTGTATCGTTGGAAAGAAGAATCAAAGATCTGCTAAAGAATGCTCTTCGGATGATGCAAAACC  
GTATGATTGTAAGAAATCGAAGTGTATAGCCCATATGCTACGTCTCCTTC

>M6-PGSC0003DMG400006027-(rev)M6LRR-RLP\_122

TCAGCAATGCGGCCTCCTAGCCGCTGCGTATTTATCTCTTTTCTGTTATCTCCATCTTGTCGTACCAGATC  
TCGAATGTGGTAGGACAAGAAGGTGATAGCGATATCGATTTAGATGAT

>M6-PGSC0003DMG400006027-(rev)M6LRR-RLP\_1342

TTCGCATAACAAGCGATCTCCGCCACCACCTAAATCAACTCCTCTTCTCCACCAGCACCTTACAAAAAGT  
CCCCAGTGTATCGACATAGAAGTCCACCACCACCTACTCACAAAATTTTC

>M6-PGSC0003DMG400006027-(rev)M6LRR-RLP\_1403

TACAAAAAGTCCCCAGTGTATCGACATAGAAGTCCACCACCACCTACTCACAAAATTTACCTGTAATCTC  
ATCATTACCTCCTCCACCTTCACCCGTATATTACCACCCATCTCCATCG

>M6-PGSC0003DMG400006027-(rev)M6LRR-RLP\_1464

CTGTAACTCATCATTACCTCCTCCACCTTCACCCGTATATTACCACCCATCTCCATCGTCCCCACCACCAC  
CAGTTTATTATTCTCCACCACCCCGGTGTATCACGAGCCACCTACTT

>M6-PGSC0003DMG400006027-(rev)M6LRR-RLP\_1525

CCCACCACCACCAGTTTATTATTCTCCACCACCCCGGTGTATCACGAGCCACCTACTTACAAGCCTAAAT  
CACCACCACCACCAACACCGTCATATGAACACCCAAAAACCCCATCATC

>M6-PGSC0003DMG400006027-(rev)M6LRR-RLP\_1708

ATACGAGCATCCTAAAACACCACCACCAACACCATCATAACGAACATCCAAAAACACCATCACCACCACCA  
CCAACACCATCATAACGAACATCCAAAAACACCATCACCACCACCACCAAC

>M6-PGSC0003DMG400006027-(rev)M6LRR-RLP\_183

CGTACCAGATCTCGAATGTGGTAGGACAAGAAGGTGATAGCGATATCGATTTAGATGATATTAAGGCTA  
ATGCTAGTAAGTTTAGTTTCGAAAACCCAAAGATTGCGGATGCTTATATCG

>M6-PGSC0003DMG400006027-(rev)M6LRR-RLP\_1952

CCACCACCAACACCATCATAACGAACACCCAAAAACCCCATCACACCCAACTCCACCTACCCACCTTGTA

CGAACCACCACCTCCACCACCTAATTCACATTGGGAACCAAACCATCC

>M6-PGSC0003DMG400006027-(rev)M6LRR-RLP\_2013

CACCTTGTAACGAACCACCACCTCCACCACCTAATTCACATTGGGAACCAAACCATCCCCACCATACACC  
TACTCATCACCACCGCCTCCATCACCATCTCCTCCTCCCACTTACT

>M6-PGSC0003DMG400006027-(rev)M6LRR-RLP\_2135

TACTCATCACCACCGCCACCATCACCATCACCATCACCTCCCCACCCACTTACTACTACTCATCACCGCCG  
CCACCACCACCATTTTACGAAAATATCCCTCTCCCACCAGTAATCGGA

>M6-PGSC0003DMG400006027-(rev)M6LRR-RLP\_2196

CATCACCGCCGCCACCACCACCATTTTACGAAAATATCCCTCTCCCACCAGTAATCGGAGTCTCCTACGCA  
TCTCCACCACCACCAGTCATTCCATATTACTGAACAAGGGTTATCAATT

>M6-PGSC0003DMG400006027-(rev)M6LRR-RLP\_2257

CTCCTACGCATCTCCACCACCACCAGTCATTCCATATTACTGAACAAGGGTTATCAATTAGCCTTTGATTTT  
CCATTATCAAAAAAAAAAAGAATTCATTTTTTTTTATGAATTATGTATA

>M6-PGSC0003DMG400006027-(rev)M6LRR-RLP\_2318

CCTTTGATTTTCCATTATCAAAAAAAAAAAGAATTCATTTTTTTTTATGAATTATGTATACTTTGTTATTTATT  
TTTTGTAATATTTTTATTTTGAGTTTGATTATATTTATGAAAATTGG

>M6-PGSC0003DMG400006027-(rev)M6LRR-RLP\_2375

TACTTTGTTATTTATTTTTTGTAATATTTTTATTTTGAGTTTGATTATATTTATGAAAATTGGGATTATGGG  
CGGGAGTTAGTGAGGGGTTAACTATCAATATTTTAATATTGTTATAT

>M6-PGSC0003DMG400006027-(rev)M6LRR-RLP\_244

TAAGGCTAATGCTAGTAAGTTTAGTTTCGAAAACCCAAAGATTCGCGATGCTTATATCGCGTTGCAATAT  
TGAAAACAGCAATGTTTTCTGATCCTTTAACTTCACAGCTAATTGGAC

>M6-PGSC0003DMG400006027-(rev)M6LRR-RLP\_305

TTGCAATATTGGAAAACAGCAATGTTTTCTGATCCTTTAACTTCACAGCTAATTGGACAGGACCTTATGT  
TTGTTTCGTATGGTGGAGTGTTTTGTGCTCCTTCGTTAACGGATGATTTCG

>M6-PGSC0003DMG400006027-(rev)M6LRR-RLP\_366

GACCTTATGTTTGTTCGTATGGTGGAGTGTTTTGTGCTCCTTCGTTAACGGATGATTTCGATTAGAGTTGTA  
GCTGGCATTGATCTTAATCATGCTGACATTGCTGGTTCATTAGTTGCAG

>M6-PGSC0003DMG400006027-(rev)M6LRR-RLP\_427



TAGAGTTGTAGCTGGCATTGATCTTAATCATGCTGACATTGCTGGTTCATTAGTTGCAGAACTTGGTCTTC  
TTACAGATCTGGTTCTTTTCCATCTTAACTCGAATCGTTTTTGTGGAGT

>M6-PGSC0003DMG400006027-(rev)M6LRR-RLP\_488

CTTGGTCTTCTTACAGATCTGGTCTTTTCCATCTTAACTCGAATCGTTTTTGTGGAGTTGTACCGAAAAC  
TTTAGCCATTTGAAGCTTCTTAGGGAGCTTGATTTGAGTAACAACAGG

>M6-PGSC0003DMG400006027-(rev)M6LRR-RLP\_549

TACCGAAAACTTTTAGCCATTTGAAGCTTCTTAGGGAGCTTGATTTGAGTAACAACAGGTTTGTGGTGG  
GTTCCCTAAGGTAGTTCTTTCATTACCTTCTTTGAAGTTTCTGGATCTAA

>M6-PGSC0003DMG400006027-(rev)M6LRR-RLP\_61

TTTACATTGTGTGAAAAAACTTCATTTTCTTCTTCTTAGCTTGAAAATCTCTATCAAATTCAGCAATGCG  
GCCTCCTAGCCGCTGCGTATTTATCTCTTTTCTTGTTATCTCCATCTT

>M6-PGSC0003DMG400006027-(rev)M6LRR-RLP\_610

TGTTGGTGGGTTCCCTAAGGTAGTTCTTTCATTACCTTCTTTGAAGTTTCTGGATCTAAGGTTTAATGATT  
TTGAAGGACCAGTTCCTTCCGAATTGTTTCGATAAAGATTTGGATGCGTT

>M6-PGSC0003DMG400006027-(rev)M6LRR-RLP\_671

TTTAATGATTTTGAAGGACCAGTTCCTTCCGAATTGTTTCGATAAAGATTTGGATGCGTTGTTTCTGAATGA  
CAATAGATTCCGTTTTGGCATCCCGGAGAACTGGGTAACCTCCCCTGTT

>M6-PGSC0003DMG400006027-(rev)M6LRR-RLP\_732

TTCTGAATGACAATAGATTCCGTTTTGGCATCCCGGAGAACTGGGTAACCTCCCCTGTTTCTGTTCTTGTG  
TTTGCTAATAACGATCTTGGAGGGTGTATTCCCGCGAGTATTGGGAAAA

>M6-PGSC0003DMG400006027-(rev)M6LRR-RLP\_793

TGTTCTTGTGTTTGCTAATAACGATCTTGGAGGGTGTATTCCCGCGAGTATTGGGAAAATGGGGAAAAC  
GTTGAATGAGTTGATATTGATGAATGATAACCTCACTGGGTGTTTGCCCAT

>M6-PGSC0003DMG400006027-(rev)M6LRR-RLP\_854

GGGAAAACGTTGAATGAGTTGATATTGATGAATGATAACCTCACTGGGTGTTTGCCCATGGAGATTGGA  
TTGTTGAATAAGTTGACAGTGTGTTGATGTTAGCTTCAACAAGATTCAAGGC

>M6-PGSC0003DMG400006027-(rev)M6LRR-RLP\_915

AGATTGGATTGTTGAATAAGTTGACAGTGTGTTGATGTTAGCTTCAACAAGATTCAAGGCTCATTGCCATT  
AACTGTGAGCAAAATGAGGAGTGTGGAGGAACTCAATGTGGCTCACAACA

>M6-PGSC0003DMG400006027-(rev)M6LRR-RLP\_976

ATTGCCATTAAGTGTGAGCAAAATGAGGAGTGTGGAGGAAGTCAATGTGGCTCACAACAAGCTTACTGG  
GGTTATACCAGCTAGCATTGCGCAACTTCCAAGGTTGCAGAACTTTACGTA

>M6-PGSC0003DMG400006065M6LRR-RLK\_0

GAAGAACATTCTCTTATTGATTCTTCTTTCAAATTCATTTTCTATGTAACTGCTTCATCAAATGAGAC  
TGACCAACAAGCTTACTAGCTTTCCAAAATCTTATTACAAGTCCGAG

>M6-PGSC0003DMG400006065M6LRR-RLK\_1037

CTCCGGAATTAGGGAAGCTATCAAATTTGCAGCAATTATGCTTTAGGAATAATTATAATCTAATTGGTCA  
AATTCCAGAGGCTATTTTCAACATATCTTCTTTGGAAGTTATTGATTTCA

>M6-PGSC0003DMG400006065M6LRR-RLK\_1098

AATTGGTCAAATCCAGAGGCTATTTTCAACATATCTTCTTTGGAAGTTATTGATTTTCAGTTTCAATAACCT  
CTCGGGGAGAATTCCAACCACTACAGGTCTTCATCTTCCAACGTTAA

>M6-PGSC0003DMG400006065M6LRR-RLK\_1159

TTCAATAACCTCTCGGGGAGAATTCCAACCACTACAGGTCTTCATCTTCCAACGTTAAGGAACTTATCTT  
GGCAGTCAATCAGCTGAAAGGGGAAATTCCATTGTTTACAACAAATGCT

>M6-PGSC0003DMG400006065M6LRR-RLK\_1220

AACTTATCTTGGCAGTCAATCAGCTGAAAGGGGAAATTCCATTGTTTACAACAAATGCTTCCAAGCTTGA  
GAGATTGGGGCTAAATAATAACTTTCTCACAGGAACTATTCCTAATAACT

>M6-PGSC0003DMG400006065M6LRR-RLK\_1281

CAAGCTTGAGAGATTGGGGCTAAATAATAACTTTCTCACAGGAACTATTCCTAATAACTTGGGAAATCTT  
CATGAGCTGCAAATACTGCTCCTACATACTAATCAACTTGCCAATGAACC

>M6-PGSC0003DMG400006065M6LRR-RLK\_1342

GGAAATCTTCATGAGCTGCAAATACTGCTCCTACATACTAATCAACTTGCCAATGAACCAAGACAGCGTG  
AGTTGCTATTCTTCAATTCTTTGGCGGACTGTAGGATGTTGCGATATCTA

>M6-PGSC0003DMG400006065M6LRR-RLK\_1403

GACAGCGTGAGTTGCTATTCTTCAATTCTTTGGCGGACTGTAGGATGTTGCGATATCTACAAGTGGGTAA  
CAATCAGTTGAATGGTTTTCTGCCAATTCTATTGGGAATCTTTCATATA

>M6-PGSC0003DMG400006065M6LRR-RLK\_1464

AGTGGGTAACAATCAGTTGAATGGTTTTCTGCCAATTCTATTGGGAATCTTTCATATACTATTCAAACCT

TTTATATAGGAGATGCACACATCAATGGCCTAATCCCCACAAGTATAGG

>M6-PGSC0003DMG400006065M6LRR-RLK\_1586

ACATGAGCGGTCTTACATTCTAAGCCTTGGAGGAAACAACCTTGACAGGGAGTATTCCTCTGAGATTG  
GTAAGCTTAAACAACCTCCAAGGGTTGCATCTAACTAACAATAAATTGCAGG

>M6-PGSC0003DMG400006065M6LRR-RLK\_1647

TGAGATTGGTAAGCTTAAACAACCTCCAAGGGTTGCATCTAACTAACAATAAATTGCAGGGACATATTTCT  
GAGGCAGTATGCAATTTATCTAATTTGGTTCAATTATATCTGGAACATAA

>M6-PGSC0003DMG400006065M6LRR-RLK\_1708

CATATTTCTGAGGCAGTATGCAATTTATCTAATTTGGTTCAATTATATCTGGAACATAATGAGCTCACTGG  
AGTGATCCAAGAATGTATAGGAGATCTAAGCATGCTACAACCTGCTTTAT

>M6-PGSC0003DMG400006065M6LRR-RLK\_1769

AGCTCACTGGAGTGATCCAAGAATGTATAGGAGATCTAAGCATGCTACAACCTGCTTTATTTAAATTCTAA  
TAGATTTTCATCAAATTTCCGTTGAGCCTTTGGAAAATGAGTGGTCTTC

>M6-PGSC0003DMG400006065M6LRR-RLK\_183

CAGTTCCAAAAGGCAAAGGATTGTGGCCTTGGATCTTCTAATTTGCAACTTCAAGGACAAATTTCCCA  
TCTTTGGCCAATTTGTCCTTTCTCAGAGAGCTGAATCTTGGGAACAACAG

>M6-PGSC0003DMG400006065M6LRR-RLK\_1830

AAATTCTAATAGATTTTCATCAAATTTCCGTTGAGCCTTTGGAAAATGAGTGGTCTTCTCTTTCTAAACG  
TGTCACAAAATTTCTTTAGAGGGAGAAGTTCCATCAGATATTGGAGAACT

>M6-PGSC0003DMG400006065M6LRR-RLK\_1891

TTTCTAAACGTGTCACAAAATTTCTTTAGAGGGAGAAGTTCCATCAGATATTGGAGAACTTAAAGTCATTA  
TAGCGCTAGATCTTTCCAGTAATCACTTTTCAGGAATGTTACCAAGCAGA

>M6-PGSC0003DMG400006065M6LRR-RLK\_1952

AAGTCATTATAGCGCTAGATCTTTCCAGTAATCACTTTTCAGGAATGTTACCAAGCAGATTGGGAGAACT  
CCTAAACCTGCAGTCTTGTCTATCAAACAATTCATTTTTTTGGACAAA

>M6-PGSC0003DMG400006065M6LRR-RLK\_2013

GGGAGAACTCCTAAACCTGCAGTCTTGTCTATCAAACAATTCATTTTTTTGGACAAATTCATTATCCC  
TTGCCAACTTGATAAGCTTAGAATTCTTGAATTTGTCTTTAAATGCATT

>M6-PGSC0003DMG400006065M6LRR-RLK\_2074

CCATTATCCCTTGCCAACTTGATAAGCTTAGAATTCTTGAATTTGTCTTTAAATGCATTGTCAGGTACTATT  
CCGAAGTCTTTGGAAAACTCTTATACCTTAAAAGCATTAAATGTTTCA

>M6-PGSC0003DMG400006065M6LRR-RLK\_2135

CAGGTACTATTCCGAAGTCTTTGGAAAACTCTTATACCTTAAAAGCATTAAATGTTTCATTTAATGATTTA  
GAAGGTGTAATACCGAGTGGTGGTGTGTTTGCAAATCCACTCTGCAAT

>M6-PGSC0003DMG400006065M6LRR-RLK\_2257

TTTCTTGGGAACAAAGGTCTATGTGGAGTCCACATATTGGAGATTCTGCTTGTGCTATCACTTATCCTG  
GAAAACAATCAAAGCTTAAGGAGGTTGTGCTAAAAATTGCTACTCCAGTG

>M6-PGSC0003DMG400006065M6LRR-RLK\_2318

CTTATCCTGGAAAACAATCAAAGCTTAAGGAGGTTGTGCTAAAAATTGCTACTCCAGTGGTTATTTTCATC  
CTTGATGATATTCTTGTTGGTTTCAATTTGGATAATGAAACGACAGAAGA

>M6-PGSC0003DMG400006065M6LRR-RLK\_2379

TATTTTCATCCTTGATGATATTCTTGTTGGTTTCAATTTGGATAATGAAACGACAGAAGAAAGGAAAGTCC  
AAAGATGTTGAAAAGGTACCGGAGATCAGGACTCATCAATTAGTTTCTTA

>M6-PGSC0003DMG400006065M6LRR-RLK\_244

ATTTTCCCATCTTTGGCCAATTTGTCCTTTCTCAGAGAGCTGAATCTTGGGAACAACAGCTTTCACGGTGG  
CATCCCTTATGGACTTGGCCACTTGCCTCACTTGCAAGTGATTGATATT

>M6-PGSC0003DMG400006065M6LRR-RLK\_2562

TGGCTCTGTGTACAAAGGCACATTATCTGGTGGAACTTTGGTGGCCATTAAGGTTCTGGATTTGCGAAG  
TGAGGAAGTATGCAAAGGTTTGACACCGAATGCGAAGTGATGAGAAATGT

>M6-PGSC0003DMG400006065M6LRR-RLK\_2623

TTGCGAAGTGAGGAAGTATGCAAAGGTTTGACACCGAATGCGAAGTGATGAGAAATGTTAGACATAG  
AAATCTTGTTCCGGTGATTACTACTTGTCTAGTGACTACATAAGAGCCTTC

>M6-PGSC0003DMG400006065M6LRR-RLK\_2684

GACATAGAAATCTTGTTCCGGTGATTACTACTTGTCTAGTGACTACATAAGAGCCTTCGTTCTGCAATAT  
ATGTCAAATGGGAGTCTTGAGAATTGGTTGTACAGAGAAGAGTTCAACT

>M6-PGSC0003DMG400006065M6LRR-RLK\_2745

TCTGCAATATATGTCAAATGGGAGTCTTGAGAATTGGTTGTACAGAGAAGAGTTCAACTTAAACCTTCTT  
CAAAGAGTCGCCATAATGCTTGATGTGGCTGTGGCAATTGAATATCTACA

>M6-PGSC0003DMG400006065M6LRR-RLK\_2806

AACCTTCTCAAAGAGTCGCCATAATGCTTGATGTGGCTGTGGCAATTGAATATCTACACCATGGGCATA  
ACACTCCAATAGTTCATTGCGACGTAAAGCCAGCCAACGTTCTTTTGAT

>M6-PGSC0003DMG400006065M6LRR-RLK\_2989

ATGGCTTATACAGAGACATTGGGCACTCTTGATACATTGCACCAGGTATAAAAAAATCTTTTCTCTTT  
GATTTTCTCTTATCATAATTAAGCCTCTCCAAGTTCTAGAAGTAAAAAGA

>M6-PGSC0003DMG400006065M6LRR-RLK\_3050

TTTCTCTTTGATTTTCTTATCATAATTAAGCCTCTCCAAGTTCTAGAAGTAAAAAGAGCAAGTCTTTATT  
TATGCAGAATTATTGTTGTATTTCAATTGAGTAACTTTTCTTCAATCC

>M6-PGSC0003DMG400006065M6LRR-RLK\_3111

AAGTCTTTATTTATGCAGAATTATTGTTGTATTTCAATTGAGTAACTTTTCTTCAATCCTTTCTAAGAATA  
TGGCTTGGAGGGAATAGTGTCTGCTAGTGGTGATGTTTATAGCTACGG

>M6-PGSC0003DMG400006065M6LRR-RLK\_3233

TCATGTTGATGGAGATTTTGACCAAAGAAGGCCAACAGATGAAGAGATATGCAACCAAATCTTGACT  
TGAGGAAATGGATCACACAATCATTTTCAGGGACTATGATGGATGTTGTGG

>M6-PGSC0003DMG400006065M6LRR-RLK\_366

AAACAATCAGCTTAACGGAAGTATACCAACAAGTCTATTTCAACACCGGAGAGTTCAGAAGATTTTCATTG  
GCTTTCAATAAACTCGGTGGTGAAATGTGGAAAGGTCCATGGTATGTACC

>M6-PGSC0003DMG400006065M6LRR-RLK\_427

ATTTTCATTGGCTTTCAATAAACTCGGTGGTGAAATGTGGAAAGGTCCATGGTATGTACCCAAACTCAAAG  
TCTTTGATCTCAGGAACAATAGCCTCACAGGTATGATCCCTCCTTCTGTT

>M6-PGSC0003DMG400006065M6LRR-RLK\_488

AACTCAAAGTCTTTGATCTCAGGAACAATAGCCTCACAGGTATGATCCCTCCTTCTGTTGGAAATGCAAC  
AAAGTTGCTGAACTTCAGTGGGAATAGAGTCTGCGGCAACATTCCAAAGG

>M6-PGSC0003DMG400006065M6LRR-RLK\_549

AAATGCAACAAAGTTGCTGAACTTCAGTGGGAATAGAGTCTGCGGCAACATTCCAAAGGAAATTGGTAA  
TCTCAGCAAACCTTGCATATTTGTCCTTGGCCGATAATCAATTAACAGGTTC

>M6-PGSC0003DMG400006065M6LRR-RLK\_61

TCAAATGAGACTGACCAACAAGCTTTACTAGCTTTCCAAAATCTTATTACAAGTCCGAGTCATTTTTTGGC

CAGTAATTGGACCAAAAATATTTCTTTTTGCTCTTGGTTTGGTGTCCT

>M6-PGSC0003DMG400006065M6LRR-RLK\_610

ATTGGTAATCTCAGCAAACCTTGCATATTTGTCCTTGGCCGATAATCAATTAACAGGTTCCATTCCCAGT

ACTGTTTAATATCTCGTCGCTACTTGAAGTGCATCTGGGAATCAATAGC

>M6-PGSC0003DMG400006065M6LRR-RLK\_671

TTCCCGCAGTACTGTTTAATATCTCGTCGCTACTTGAAGTGCATCTGGGAATCAATAGCCTTTCTGGTCCT

CTCTTGCTAGATGAAGGGAATGCTGTGTCAAATCTGAAGTTTTTAAGTC

>M6-PGSC0003DMG400006065M6LRR-RLK\_732

TTCTGGTCCTCTCTTGCTAGATGAAGGGAATGCTGTGTCAAATCTGAAGTTTTTAAGTCTATCTAACAACC

AAATTTCTGGTTGCATTCCTTCCAACATATGCCAACTCACAGAGCTCGA

>M6-PGSC0003DMG400006065M6LRR-RLK\_854

TTTTGTCCATATCTTACAACAACATAACTGGAGAAATACCCAGAAATATTGATTGTTTATCCAAGCTCAAA

AAGTTCTTAATTGGTGATAATCCAACAAAAGGGACTATTCCCACATCAT

>M6-PGSC0003DMG400006065M6LRR-RLK\_915

CAAGCTCAAAAAGTTCTTAATTGGTGATAATCCAACAAAAGGGACTATTCCCACATCATTGGGAAATATT

TCCACTCTGCAATATCTTTATTGTGGAACAATCGCATAGTGGGGCAAAT

>M6-PGSC0003DMG400006065M6LRR-RLK\_976

GGAAATATTTCCACTCTGCAATATCTTTATTGTGGAACAATCGCATAGTGGGGCAAATTCCTCCGGAAT

TAGGGAAGCTATCAATTTGCAGCAATTATGCTTTAGGAATAATTATAAT

>M6-PGSC0003DMG400006076M6LRR-RLP\_0

AATTCCCCTTTCAAGCCAAAAACATGGCCGCCACCGCTGACATATTCTCGGAATGTGTGATTCACAAAAT

ACTCTGTTATCTTAGCTATGGCCAAGCATCCCGGATGAGAATTCTATCTA

>M6-PGSC0003DMG400006076M6LRR-RLP\_1054

CCAAGTTCTCCTTTGTTTTCCCGAATACAATGAAATCAAGATTAAAGATTTGCAGCAGAACCAAGGAGTT

GCTAGCCCACAAATGGACGTTTTAAATGTCAACATTACAAGGTCATATGG

>M6-PGSC0003DMG400006076M6LRR-RLP\_1116

AAGGAGTTGCTAGCCCACAAATGGACGTTTTAAATGTCAACATTACAAGGTCATATGGGGAGTGACCAA

CATTTGTGGATGCTTTGCTATGGAGTTGTAATCCTAGGAGACTCAACCTAT

>M6-PGSC0003DMG400006076M6LRR-RLP\_124

ATGGCTACAAGCTTGGTCTACTCTTCCCAACTTGAATTCTTAGTTGAATATTTTGAAGAAACAAAATA  
GTGGACGCAATTATGGAGACATACAGGGAAAACAAAATCCCCATTGACAA

>M6-PGSC0003DMG400006076M6LRR-RLP\_1240

AACGGTTGAAATGATTACATGTTTCGTCAGTCGTTTGATGTATATGAAGAATCTGAGTCATTCTTCTTCGG  
AAAGAAGCAACCCTTGGCATAGTCAATTGAAAGAAATAAAAGTTTTTGA

>M6-PGSC0003DMG400006076M6LRR-RLP\_1302

CTTCTTCGGAAAGAAGCAACCCTTGGCATAGTCAATTGAAAGAAATAAAAGTTTTTGGATGGGAAAATC  
AAGAGCTGCAACTCGTAAGTGGGGAAGTGGAGATAAGCACCCCTTTCGGAGG

>M6-PGSC0003DMG400006076M6LRR-RLP\_1364

AAAAATCAAGAGCTGCAACTCGTAAGTGGGGAAGTGGAGATAAGCACCCCTTTCGGAGGACAGGAAGGA  
AGTTTATTTTTATTAGATTGGCAATGCAATTAATTTATCACTATTTCAAAA

>M6-PGSC0003DMG400006076M6LRR-RLP\_1426

GAAGGAAGTTTATTTTTATTAGATTGGCAATGCAATTAATTTATCACTATTTCAAACGAATGCACTTGT  
TCATTCTAAACTTTATTAATCTGTTTTATGTCTAGCTTTAAATTCTTG

>M6-PGSC0003DMG400006076M6LRR-RLP\_1479

CAAACGAATGCACTTGTTTCTTAACTTTATTAATCTGTTTTATGTCTAGCTTTAAATTCTTGCACTT  
TCTCACCATTGTATAAAATTGTGTTGAAGTTGAAGCATAAGATTCTTT

>M6-PGSC0003DMG400006076M6LRR-RLP\_186

CAAAAATAGTGGACGCAATTATGGAGACATACAGGGAAAACAAAATCCCCATTGACAAGTTTGGATTTT  
CAAATTGTTGAAATTCAATCGTCGTCATCAAGTTTTCCCTCTGATTGATA

>M6-PGSC0003DMG400006076M6LRR-RLP\_248

GGATTTCAAATTGTTGAAATTCAATCGTCGTCATCAAGTTTTCCCTCTGATTGATAAGTGGCTTGACAC  
AGCTCTCAAATGGCGCAAGAGATTTAGTCTATGTAGATCTTCTCTAC

>M6-PGSC0003DMG400006076M6LRR-RLP\_310

GCTTGACACAGCTCTCAAATGGCGCAAGAGATTTAGTCTATGTAGATCTTCTCTACTCGGTACGATTA  
TATCCTTTTCTATTTCTAAAGTCTTGGCTGCAAATCTTTAAGAGAATT

>M6-PGSC0003DMG400006076M6LRR-RLP\_372

TACGATTATATCCTTTTCTATTTCTAAAGTCTTGGCTGCAAATCTTTAAGAGAATTAGTTCTGAAAGGT  
GTAACCTTATGCATGTTTCGTCATCTAGTGGGTTTCGCGAATTGTCATT

>M6-PGSC0003DMG400006076M6LRR-RLP\_434

CTGAAAGGTTGTAACCTTATGCATGTTTCGTCATCTAGTGGGTTGCGGAATTGTCATTCTTTGAGAAAGC  
TTTCTCTATCTTATATAATTTAAGCAAAAATTTGCTTCAGACTTTACTT

>M6-PGSC0003DMG400006076M6LRR-RLP\_496

GAGAAAGCTTTCTCTATCTTATATAATTTAAGCAAAAATTTGCTTCAGACTTTACTTAATAGTTGTCCTTT  
CATTGTCTCTTTCAACCTTGATCATTGTTGCGGGTTGGTAAAGATTGA

>M6-PGSC0003DMG400006076M6LRR-RLP\_558

GTTGTCCTTTCATTGTCTCTTTCAACCTTGATCATTGTTGCGGGTTGGTAAAGATTGAGCTTATGAATCTT  
CAAAAGATCAAGTCAGTTTCCGTATCAATAAATAGAAACCAACATGTGA

>M6-PGSC0003DMG400006076M6LRR-RLP\_62

CACAAAATACTCTGTTATCTTAGCTATGGCCAAGCATCCCGGATGAGAATTCTATCTAAAACATGGCTAC  
AAGCTTGGTCTACTCTTCCCAACTTGGAATTCTTAGTTGAATATTTGAA

>M6-PGSC0003DMG400006076M6LRR-RLP\_620

ATGAATCTTCAAAGATCAAGTCAGTTTCCGTATCAATAAATAGAAACCAACATGTGAAAATCCAAGCAC  
CAACTCTGAACACTTGTTTTATAATGGATATTTATCGGGAAATTTGGTT

>M6-PGSC0003DMG400006076M6LRR-RLP\_682

CCAAGCACCAACTCTTGAACACTTGTTTTATAATGGATATTTATCGGGAAATTTGGTTATCGTTGGATGTC  
TGAATCTAAAATCTTTAGAGCTATCACATGTGAAGATATGTATTGGATT

>M6-PGSC0003DMG400006076M6LRR-RLP\_744

TTGGATGTCTGAATCTAAAATCTTTAGAGCTATCACATGTGAAGATATGTATTGGATTTCTCCATAACCTA  
ATTTCTAGATCGCAATCCCTAGAAGTATTGAAGATTCAGTATTGTGTGG

>M6-PGSC0003DMG400006076M6LRR-RLP\_806

CATAACCTAATTTCTAGATCGCAATCCCTAGAAGTATTGAAGATTCAGTATTGTGTGGGCATAAGACAGA  
TTGAAACTTCGAATTTGGTATCACTTGAGTATATAGGATATCAAATTCCT

>M6-PGSC0003DMG400006076M6LRR-RLP\_868

AAGACAGATTGAAACTTCGAATTTGGTATCACTTGAGTATATAGGATATCAAATTCCTGAAATTTAAAT  
GCGAAAGCTTCAAGTCAATTGAAGCATTCAAAAATCGTTCTTCATGGCAA

>M6-PGSC0003DMG400006076M6LRR-RLP\_930

TTAAAATTGCGAAAGCTTCAAGTCAATTGAAGCATTCAAAAATCGTTCTTCATGGCAACAACAATTTAGA



TGCTGCATGGTTTAGTAAGTTGAGGAAGCTTCTATCGAATTCGGCCCCCTT

>M6-PGSC0003DMG400006076M6LRR-RLP\_992

AATTTAGATGCTGCATGGTTTAGTAAGTTGAGGAAGCTTCTATCGAATTCGGCCCCCTTGGTCCCAAGTTC

TCCTTTGTTTTCCCGAATACAATGAAATCAAGATTAAGATTTGCAGCAG

>M6-PGSC0003DMG400006086M6LysM-RLK\_0

ACAAACACACATCTCTCCTCCAACAAAAAACAAGCAAAAAAAAATGATAACAAAACAAATATTTGGTT

TTTCACTTCTTCTTCTTATCATTTCATATTCAACCAAAACAAATGTTAT

>M6-PGSC0003DMG400006086M6LysM-RLK\_1098

TCTGTGTTTAAAGGAACAATTGATGAAGAAGTGTTCGCAATCAAAAAAATGAAATGGAATGCCCGTGAA

GAACTCAAATCCTGCAAAGGTAAAAAACAACGTTACGTAAAATTC

>M6-PGSC0003DMG400006086M6LysM-RLK\_1159

CCCGTGAAGAACTCAAATCCTGCAAAGGTAAAAAACAACGTTACGTAAAATTCTACATATATA

CGTATCCACTCAAGAATTGCTTCTGTGTACTAGTCCTAATTTATGTGACGT

>M6-PGSC0003DMG400006086M6LysM-RLK\_122

ACAAGATCCACCAAGCATAACAGGATATACTTGTAAATCCCAACCAATTCAATCCATGTCAAACCTTATGTG

TTATACAGAGCTAGAGGACCAGAGTTTCTTGATTTAGCCTCAATAGGTGA

>M6-PGSC0003DMG400006086M6LysM-RLK\_1342

ATGTCATTCTTTTACCTTTTTTTGTTTGTGTAGGTGAACCATGGGAATTTGGTGAAGCTAGAGGGTTTTT

GCATAGACCCTAAAGAAGCAAATTGCTACTTAGTCTATGAGTATGTTGA

>M6-PGSC0003DMG400006086M6LysM-RLK\_1403

GAGGGTTTTTGCATAGACCCTAAAGAAGCAAATTGCTACTTAGTCTATGAGTATGTTGAAAATGGTTCAC

TACATTCTTGGCTTACGGTGAAAAACCTGAAAAATTGAGCTGGAAAACA

>M6-PGSC0003DMG400006086M6LysM-RLK\_1464

ATGGTTCACTACATTCTTGGCTTACGGTGAAAAACCTGAAAAATTGAGCTGGAAAACAAGACTAAGAA

TTGCCACTGATGTTGCAAATGGTCTTATAACATCCATGAACATACAAGGC

>M6-PGSC0003DMG400006086M6LysM-RLK\_1525

ACTAAGAATTGCCACTGATGTTGCAAATGGTCTTATAACATCCATGAACATACAAGGCCAAGAGTTGTC

CACAAAGACATCAAGAGTAGCAACATTCTCCTAGACTCCAACATGAGAGC

>M6-PGSC0003DMG400006086M6LysM-RLK\_183

ACTTATGTGTTATACAGAGCTAGAGGACCAGAGTTTCTTGATTTAGCCTCAATAGGTGATCTTTTTTCAGT  
AAGTAGGGTAATGATTGCAAACCCAAGTAATATTTCCAGCCCAAACACA

>M6-PGSC0003DMG400006086M6LysM-RLK\_1891

GAGGAAATTGCAAGAATGGATGGATGAAAGTCTTTGAGGGAAGAATTAACAATGGAGAGTGTTATGA  
ATGTGATGTCTGTGGCTATTTTCATGTTTGAATAAAGATCCTTCAAGAAGGCC

>M6-PGSC0003DMG400006086M6LysM-RLK\_1952

GTTATGAATGTGATGTCTGTGGCTATTTTCATGTTTGAATAAAGATCCTTCAAGAAGGCCAGGGATGATTG  
AAATTGTGTATGCCTTATCTAAAAGTATTGATCTATTTTCTGATGTTTCA

>M6-PGSC0003DMG400006086M6LysM-RLK\_2013

GGATGATTGAAATTGTGTATGCCTTATCTAAAAGTATTGATCTATTTTCTGATGTTTCAGAGGAAGGACA  
ATCTCCAAGGCAAGTCACAGCAAGATAGACTACATAATAGTACTAGCATA

>M6-PGSC0003DMG400006086M6LysM-RLK\_2074

GGAAGGACAATCTCCAAGGCAAGTCACAGCAAGATAGACTACATAATAGTACTAGCATACTATGTAAAG  
TTGTTTTGAAGTGGAGTAGCATTGAGTTTTGAGGTTTCTACTTAACTTT

>M6-PGSC0003DMG400006086M6LysM-RLK\_2135

ATGTAAAGTTGTTTTGAAGTGGAGTAGCATTGAGTTTTGAGGTTTCTACTTAACTTAAAGTTTGCTTC  
TATATATGTGTAATATTACTCCTATATTATCGTTTATAGTAGTAGTGGT

>M6-PGSC0003DMG400006086M6LysM-RLK\_2196

AGTTTGCTTCTATATATGTGTAATATTACTCCTATATTATCGTTTATAGTAGTAGTGGTAAATCCAATTCG  
AATAAGAGCATGTTTAAAGGTTGTTCTAGTGAATATATATTAGTACCA

>M6-PGSC0003DMG400006086M6LysM-RLK\_2253

GTAAATCCAATTCGAATAAGAGCATGTTTAAAGGTTGTTCTAGTGAATATATATTAGTACCACATAAGA  
CTCTCGTAATGAATTTATTTTTATGTTATGTTGCTTCGATTCTTCAAAA

>M6-PGSC0003DMG400006086M6LysM-RLK\_244

TTTTTTCAGTAAGTAGGGTAATGATTGCAAACCCAAGTAATATTTCCAGCCCAAACACAACCTCTTGTTAAT  
GATCAACTCCTTTTTATCCCCATCACATGTTCTTGCAATAACATCAACA

>M6-PGSC0003DMG400006086M6LysM-RLK\_305

TCTTGTTAATGATCAACTCCTTTTTATCCCCATCACATGTTCTTGCAATAACATCAACACAACCTTTTGGTAG  
CATATCTTATGCAGGCTTAAACTACAGTTTCAAACCAGGTGACACTAT

>M6-PGSC0003DMG400006086M6LysM-RLK\_366

ACTTTTGGTAGCATATCTTATGCAGGCTTAAACTACAGTTTCAAACCAGGTGACACTATGTATGATATGTC  
AATATCCAAATACCAAATCTTACTACTTATCAATCTGTTGAGGCTGTT

>M6-PGSC0003DMG400006086M6LysM-RLK\_427

ATGATATGTCAATATCCAAATACCAAATCTTACTACTTATCAATCTGTTGAGGCTGTTAATCCCACAGTT  
GTAGCAACCAACATTGATGTAGGCCAGGCCATAAAATTCCCAATTTTTT

>M6-PGSC0003DMG400006086M6LysM-RLK\_549

AAGTGTCCAAACACGACACAAAATCAACCAAGACTACTCATAAGTTATGTTTTTCAACCTAATGATAACA  
TTTCTTCTATCGCATCAAGATTCGGGATAACCCCAATCCATAACACAA

>M6-PGSC0003DMG400006086M6LysM-RLK\_61

TATTTGGTTTTTCACTTCTTCTTCTTATCATTATCAACCAAACAAATGTTATGCACAAGATCCAC  
CAAGCATAACAGGATATACTTGTAAATCCCAACCAATTCAATCCATGTC

>M6-PGSC0003DMG400006086M6LysM-RLK\_610

ATGATAACATTTCTTCTATCGCATCAAGATTCGGGATAACCCCAATCCATAACACAAATTAATGGAAA  
TAATACCAATATTCTTGATACCCTTTTCATCCCTCTTTCTAATCTACCTA

>M6-PGSC0003DMG400006086M6LysM-RLK\_793

AAGAAAATGACAGAAAAGGGACTGTGATAGGGTTAGCAATTGGTTTAGGGATTTGTGGGCTGCTGTTG  
GTTTTGGTTCTTGGTTTGTTTTACAAGGAGAAAACAGTAAAGAAAGAAAAGT

>M6-PGSC0003DMG400006086M6LysM-RLK\_854

GCTGTTGGTTTTGGTTCTTGGTTTGTTTTACAAGGAGAAAACAGTAAAGAAAGAAAAGTATAGTGATGT  
AGAAAGGCAAAAAGTTTGTATCTTGGATCAAAAAGAAGTCTTTTGTGTA

>M6-PGSC0003DMG400006086M6LysM-RLK\_915

AGTGATGTAGAAAGGCAAAAAGTTTGTATCTTGGATCAAAAAGAAGTCTTTTGTGATAAAGATGTT  
GAAGTGAATTTGTTGGCTGATTTATCAGAGTGTGGATAAGTATAAAATG

>M6-PGSC0003DMG400006086M6LysM-RLK\_976

AAGATGTTGAAGTGAATTTGTTGGCTGATTTATCAGAGTGTGGATAAGTATAAAATGTATAAAATGGT  
ACAACCTTGGGAAGCAACAAATGGATTTGATGAAGGGTGTGTTGATTCAAG

>M6-PGSC0003DMG400006087M6LysM-RLK\_1827

AGGGAAAGTTTTGTGGGCAAAAAGTAGCGATTTTTCGGAAGGGAGTGAAGAGAGGAAGGTGAGGAAA

TTGCAAGAATGGATGGATGAAAGTCTTTTGAGGGAAGAATTAACAATGGAGAG

>M6-PGSC0003DMG400006087M6LysM-RLK\_504

ACATTGATGTAGGCCAGGCCATAAAATTCCCAATTTTTGTAAAGTGCCAAACACGACACAAAATCAACC

AAGACTACTCATAAGTTATGTTTTCAACCTAATGATAACATTTCTTCTA

>M6-PGSC0003DMG400006088M6LysM-RLK\_0

AAGGAAATGAGGGAATTCACAATTAGAGGTACTATTTTTGTAGATTGATTGGTTTTGATTTGTTTCTATA

ATTTGGTGTAGATTTTTTATTTTTTTAAGATATGAAGTGTCTGTATGCA

>M6-PGSC0003DMG400006088M6LysM-RLK\_1178

AATTATTGTTAAATTGTCTATTGAAAATAGTATTTCTACCTCTAAGGTAATGATAAGTTTTGTGTATATT

TAACTCTTCAGATCGTACTTTATGGAATTACATGAGTATGTTATTGT

>M6-PGSC0003DMG400006088M6LysM-RLK\_124

TTTCTGTTGTATATTTTAGATTTAATAAGATCTTTTAGTGTTTATGATTAATAATTTATTATTTTTGTCAA

ATTTAATAAACATAAAATTATTAAGTATTGACGAAGATTAATAATGTT

>M6-PGSC0003DMG400006088M6LysM-RLK\_1240

GTGTATATTTAACCTCTTCAGATCGTACTTTATGGAATTACATGAGTATGTTATTGTTATATTGTTCCAAA

TTAATTATGTCTACTTAATAATTTCCCCTTTTGTGTTGTGTAGGTGA

>M6-PGSC0003DMG400006088M6LysM-RLK\_1302

TTGTTCCAAATTAATTATGTCTACTTAATAATTTCCCCTTTTGTGTTGTGTAGGTGAACCATGGGAATTTG

GTGAAGCTAGAAGGTTTTGCATAGACCCTAAAGAAGCAAATTGCTAC

>M6-PGSC0003DMG400006088M6LysM-RLK\_1364

TGGGAATTTGGTGAAGCTAGAAGTTTTGCATAGACCCTAAAGAAGCAAATTGCTACTTAGTCTATGA

GTATGTTGAAAATGGTTCACTACATTCATGGATTCATGGTGAAAAACCTGA

>M6-PGSC0003DMG400006088M6LysM-RLK\_1426

TCTATGAGTATGTTGAAAATGGTTCACTACATTCATGGATTCATGGTGAAAAACCTGAAAAATTGAGTTG

GAAAACAAGACTAAGAATTGCAACTGATGTTGCAAATGGTCTATTATACA

>M6-PGSC0003DMG400006088M6LysM-RLK\_1488

TTGAGTTGAAAACAAGACTAAGAATTGCAACTGATGTTGCAAATGGTCTATTATACATTCATGAACATA

CAAGGCCAAGAGTTGTCCAAAAGACATCAAACTAGAAACATTCTCCTA

>M6-PGSC0003DMG400006088M6LysM-RLK\_1550

TGAACATACAAGGCCAAGAGTTGTCCAAAAAGACATCAAACCTAGAAACATTCTCCTAGACTCCAACAT  
GAGAGCCAAAGTTGCCAATTTTGGTCTAGCTAAATCAGGATGCAATGCTAT

>M6-PGSC0003DMG400006088M6LysM-RLK\_1674

ATGCACATTGTAGGTAAGTACTCAGGGGTACATCGCCCCTGAGTACCTAACCGATGGGATTGTATCCACTAAG  
ATGGATGTTTTCTCATTAGGAGTTGTGTTGCTCGAGCTAGTGTCAGGGAAG

>M6-PGSC0003DMG400006088M6LysM-RLK\_1736

CACTAAGATGGATGTTTTCTCATTAGGAGTTGTGTTGCTCGAGCTAGTGTCAGGGAAGGAGGCTATAGA  
AGATGAAGGGAAAGTATTGTGGGCAAAAAATAACGATTTTTTCGGAAGGGAG

>M6-PGSC0003DMG400006088M6LysM-RLK\_1798

CTATAGAAGATGAAGGGAAAGTATTGTGGGCAAAAAATAACGATTTTTTCGGAAGGGAGTGAAGAGAG  
GAAGGTGAGGAAATTGCAAGAATGGATGGATGATAGTCTTTTGAGGGAAGAGT

>M6-PGSC0003DMG400006088M6LysM-RLK\_186

ATTTTTGTCAAATTTAATAAACATAAATTATTAAGTATTGACGAAGATTAATAATGTTAACTTTTGATAA  
ACTTAAAGAATCAAATTTCAAACCTGTTGATTACATATTTAAGGAACTA

>M6-PGSC0003DMG400006088M6LysM-RLK\_1860

GAGAGGAAGGTGAGGAAATTGCAAGAATGGATGGATGATAGTCTTTTGAGGGAAGAGTTAACAATGG  
AGAGTGTTGTGAATGTGATGTCTGTGGCTATTTCTTGTGTTGAATAAAGATCCA

>M6-PGSC0003DMG400006088M6LysM-RLK\_1922

AATGGAGAGTGTTGTGAATGTGATGTCTGTGGCTATTTCTTGTGTTGAATAAAGATCCATCAAGAAGGCC  
AGGGATGATTGAAATTGTGTATGCATTGTCTAAAAGTATTGATCTATTTAC

>M6-PGSC0003DMG400006088M6LysM-RLK\_1984

GAAGGCCAGGGATGATTGAAATTGTGTATGCATTGTCTAAAAGTATTGATCTATTTACTGATGTCTCAGA  
GGAAGGACTATCTCCAAGGCAAGTCACAGCAAGATAGGGGACATATCTAT

>M6-PGSC0003DMG400006088M6LysM-RLK\_2046

GTCTCAGAGGAAGGACTATCTCCAAGGCAAGTCACAGCAAGATAGGGGACATATCTATTTAGCATATTA  
TGTAAGAGTAGTTTTGAAGTGAGTAGTATTATTGTGTTTTGAGGTTTTTAC

>M6-PGSC0003DMG400006088M6LysM-RLK\_2108

CATATTATGTAAGAGTAGTTTTGAAGTGAGTAGTATTATTGTGTTTTGAGGTTTTTACTTTACTTTAAAGT  
TTGCTTCTATATATGTGTAATATACTCCAATATTATCTTTTCTAGTAG

>M6-PGSC0003DMG400006088M6LysM-RLK\_2170

CTTTAAAGTTTGCTTCTATATATGTGTAATATTACTCCAATATTATCTTTTCTAGTAGTTGTGGAAAATCCA  
ATTTCAAATAAGAGGATGTTTAAGGTTGGTCAAGTGAATATATATTA

>M6-PGSC0003DMG400006088M6LysM-RLK\_2227

GTTGTGGAAAATCCAATTTCAAATAAGAGGATGTTTAAGGTTGGTCAAGTGAATATATATTATGTTGTA  
ATGAGTGTTTTATGTTATGTTGCTCGGATTCTTTAAATTGTATAACTT

>M6-PGSC0003DMG400006088M6LysM-RLK\_248

TTTTGATAAACTTAAAGAATCAAATTTCAAACCTGTTGATTACATATTTAAGGAACTATTTTGAACCTGTT  
CAGTGTTCTCCACCTTAGAGGCTACTTTGGTCATTTTCTCAATTGATA

>M6-PGSC0003DMG400006088M6LysM-RLK\_310

GAACCTGTTTCAGTGTTCTCCACCTTAGAGGCTACTTTGGTCATTTTCTCAATTGATATTTTAGTAATGTTA  
AAATCCACTGCAGAATTGTTTTCTCCAATGGATCAGATTAAGTAT

>M6-PGSC0003DMG400006088M6LysM-RLK\_372

AGTAATGTTAAAATTCCACTGCAGAATTGTTTTCTCCAATGGATCAGATTAAGTATTTAATTTAATAA  
AATATTTAACAATTTAAATTATTAGGTCTAGTGACCTGTCGTATTCTTG

>M6-PGSC0003DMG400006088M6LysM-RLK\_434

TTTTAATAAAATATTTAACAATTTAAATTATTAGGTCTAGTGACCTGTCGTATTCTTGAGACATTAGTACTT  
TATTTAAATATTTAAGTGGACCATTATGGCCGTTGGGATTTGATAAT

>M6-PGSC0003DMG400006088M6LysM-RLK\_496

ATTAGTACTTTATTTAAATATTTAAGTGGACCATTATGGCCGTTGGGATTTGATAATTTATAATTTAAGC  
TAATCAACATCATTTAATACTCAATTTATTTGTCCTCTGATGTCTATTT

>M6-PGSC0003DMG400006088M6LysM-RLK\_558

AATTTAAGCTAATCAACATCATTTAATACTCAATTTATTTGTCCTCTGATGTCTATTTTCATTAATACTCCT  
CTTTTTGTTTCTCAATTATTCATTTTTGTTTTCTTTTTATTTTTG

>M6-PGSC0003DMG400006088M6LysM-RLK\_62

TTTCTATAATTTGGTGTAGATTTTTTATTTTTTTAAGATATGAAGTGTCTGTATGCAATGTTTTCTGTTGT  
ATATTTTAGATTTAATAAGATCTTTTTAGTGTTTATGATTAATAATTT

>M6-PGSC0003DMG400006088M6LysM-RLK\_620

TAAATACTCCTTTTTGTTTCTCAATTATTCATTTTTGTTTTCTTTTTATTTTTGTCCCTAAGGAGACCCT

CCCATATGTGCCATCGGAGTCGAGTGTATATCAAAAATAATTTT

>M6-PGSC0003DMG400006088M6LysM-RLK\_682

TAAGGAGACCCTCCCATATGTGCCATCGGAGTCGAGTGTATATCAAAAATAATTTTATATATATTATCCT  
TTTCATAACTTACTTATAAAGATTTTACTAGATATATTGTTGCTGTGAT

>M6-PGSC0003DMG400006088M6LysM-RLK\_744

TATTATCCTTTTCATAACTTACTTATAAAGATTTTACTAGATATATTGTTGCTGTGATAAGAATTGAGATAT  
TAAAAATTAACAAGATGTCTAGAAAGATTTTTTTTTCTTTTTTTGCCA

>M6-PGSC0003DMG400006088M6LysM-RLK\_806

ATTGAGATATTAATAAACAAGATGTCTAGAAAGATTTTTTTTTCTTTTTTTGCCATAGAAAAGAGCAT  
CTTTTATTAATAATTTATTTTATCAAGACAAAGTTCAAATAAATTTTC

>M6-PGSC0003DMG400006088M6LysM-RLK\_868

AAAGAGCATCTTTTATTAATAATTTATTTTATCAAGACAAAGTTCAAATAAATTTCTCCTAAATGAAA  
TTTCTTGTCTGTGACCTCAATTTGTTAGTACCCTGCCTGCTTTCTCCC

>M6-PGSC0003DMG400006088M6LysM-RLK\_930

TAAATGAAATTTCTTGTCTGTGACCTCAATTTGTTAGTACCCTGCCTGCTTTCTCCAAAAAAGCGTCAT  
GCTTTTAGCTTGGTTTGGCTGTACTCTTTGACTAGATTTATTAGTTGT

>M6-PGSC0003DMG400006088M6LysM-RLK\_992

AAGCGTCATGCTTTTAGCTTGGTTTGGCTGTACTCTTTGACTAGATTTATTAGTTGTCCTATTAATAAAT  
AAAACGTCATCAAGTCCTATTTGCAGCCGTTACTATAATTAGTACTT

>M6-PGSC0003DMG400006095-(rev)M6LRR-RLP\_0

ATGGGGACAGCTGACATGTTGCCTATATGCCTCATTCGCAAATACTCTGTTATCTTAGTTATGAAGAAG  
CATCTCGGATGAGAATTCTCTCCAAAACATGGCTACTAGCCTGGTTGGAT

>M6-PGSC0003DMG400006095-(rev)M6LRR-RLP\_1116

ATCAACATGATAGATTTGCTACTGCAACCTAGAGTTGCTATCCCCAAAGTGGACATTTTAGATGTAAATT  
TTTCAAGGCCGAATTGGGAGTTTCTACATTTGTGGATTCTTTGCTGTGG

>M6-PGSC0003DMG400006095-(rev)M6LRR-RLP\_1178

TGTAAATTTTCAAGGCCGAATTGGGAGTTTCTACATTTGTGGATTCTTTGCTGTGGAGTTGTCATCCCA  
GGAAACTTAACCTACAATCAACAACCTACAATTTTACATGTTTCATGAA

>M6-PGSC0003DMG400006095-(rev)M6LRR-RLP\_124

CCAAGTTGGAATTCACAGTCTCGTCGGGCAAACCATAACAATAGTGGATCATGTCATGGAGAGATATA  
ATAACGGAAATATTCCTATTGACAAGTTTGAATTACACAACCTCTACATAGT

>M6-PGSC0003DMG400006095-(rev)M6LRR-RLP\_1240

GTCATCCCAGGAACTTAACCTACAATCAACAACCTACAATTTTTACATGTTTCATGAATCGTTTCATGCAG  
ATGAAGAATTTGCGTCGTGGTCAATTAAGAAGCAAATGCCTACAAAT

>M6-PGSC0003DMG400006095-(rev)M6LRR-RLP\_1302

TTCATGCAGATGAAGAATTTGCGTCGTGGTCAATTAAGAAGCAAATGCCTACAAATTTGATCAGAAA  
AGTCATAGTTGGCATCCTGTAGAACACAAAAGAGGAAGAGATTTCCCATTA

>M6-PGSC0003DMG400006095-(rev)M6LRR-RLP\_1350

GCCTACAAATTTGATCAGAAAAGTCATAGTTGGCATCCTGTAGAACACAAAAGAGGAAGAGATTTCCCA  
TTAAGGACCAGTAGCAAGTCGAAGAAATATTTCTTCTTATTAGATTGGTGA

>M6-PGSC0003DMG400006095-(rev)M6LRR-RLP\_186

AGATATAATAACGGAAATATTCCTATTGACAAGTTTGAATTACACAACCTCTACATAGTCTGATCATATTTT  
TCCTCTGATTGATAGGTGGCTCGGTATTGCTCTTCAAATGGTGTAAGA

>M6-PGSC0003DMG400006095-(rev)M6LRR-RLP\_248

TCATATTTTTCTCTGATTGATAGGTGGCTCGGTATTGCTCTTCAAATGGTGTAAGACATCTAGAGTACA  
TAGATGTTGAACTTTCAACATCATATCCCTCCCTATTTTTAAATTCTT

>M6-PGSC0003DMG400006095-(rev)M6LRR-RLP\_310

TAGAGTACATAGATGTTGAACTTTCAACATCATATCCCTCCCTATTTTTAAATTCTTGGAAAGCAAATTTT  
TACGAGAACTGGTCTTGATGGGTTGTGATCTGATGCATGTTTCGTTAT

>M6-PGSC0003DMG400006095-(rev)M6LRR-RLP\_372

GCAAATTTTTACGAGAACTGGTCTTGATGGGTTGTGATCTGATGCATGTTTCGTTATCTAGTGCTAGTC  
AAGCGGTGACGTGTCATTCTCTGAGAAATCTTCTCTATCTCTTGTACAC

>M6-PGSC0003DMG400006095-(rev)M6LRR-RLP\_434

TGCTAGTCAAGCGGTGACGTGTCATTCTCTGAGAAATCTTCTCTATCTCTTGTACACTTAGACAATAACA  
TGCTTCAGACTATACTCAGTAGTTGTCCGTTTCATTGTTGATTTAATCAT

>M6-PGSC0003DMG400006095-(rev)M6LRR-RLP\_496

ACAATAACATGCTTCAGACTATACTCAGTAGTTGTCCGTTTCATTGTTGATTTAATCATTGGGTATTGTAGT  
AGGCTGAAAAATATTGAGATCCGGAATCTTCAAATATCAGGTCTCTTG



>M6-PGSC0003DMG400006095-(rev)M6LRR-RLP\_558

TATTGTAGTAGGCTGAAAAATATTGAGATCCGGAATCTTCCAAATATCAGGTCTCTTGTCATTGGTAATG  
ACCAACTCGTTAAATCCAAGCACCGTCTCTTGAACACTTGTATTATAGT

>M6-PGSC0003DMG400006095-(rev)M6LRR-RLP\_62

TGAAGAAGCATCTCGGATGAGAATTCTCTCCAAAACATGGCTACTAGCCTGGTTGGATCATCCCAACTTG  
GAATTCACAGTCTCGTCGGGCAAACCATAACAATAGTGGATCATGTCAT

>M6-PGSC0003DMG400006095-(rev)M6LRR-RLP\_620

TGGTAATGACCAACTCGTTAAATCCAAGCACCGTCTCTTGAACACTTGTATTATAGTAGTTCTTGTTTGA  
ATAAATTGAATATTGTTGAACATAAGAATCTGAAAACCTTTAGATATATC

>M6-PGSC0003DMG400006095-(rev)M6LRR-RLP\_682

CTTGTTTGAATAAATTGAATATTGTTGAACATAAGAATCTGAAAACCTTTAGATATATCATGTACAGAGAT  
ATCTGATTTATATCTCAACCACCTTATCTCCATACCTTACTGCCTGGAGA

>M6-PGSC0003DMG400006095-(rev)M6LRR-RLP\_744

ACAGAGATATCTGATTTATATCTCAACCACCTTATCTCCATACCTTACTGCCTGGAGAAACTGATATTAGC  
AAACATTGCTTTTGGAAAGATTGCACATTTGCAGGAGTCAATCCCTAAAG

>M6-PGSC0003DMG400006095-(rev)M6LRR-RLP\_806

GATATTAGCAAACATTGCTTTTGGAAAGATTGCACATTTGCAGGAGTCAATCCCTAAAGGTGTTAAAGATT  
CATAATTGCAAGATCATAGGAGCAATTGATGCTCCAAATTTGGTTTTGCT

>M6-PGSC0003DMG400006095-(rev)M6LRR-RLP\_868

TAAAGATTCATAATTGCAAGATCATAGGAGCAATTGATGCTCCAAATTTGGTTTTGCTTTAGTATAAAGG  
AAATGATATTCCTCAGCTTAAATTTGCTCAAGAATCAAGACAATTGAGGC

>M6-PGSC0003DMG400006095-(rev)M6LRR-RLP\_930

TATAAAGGAAATGATATTCTCAGCTTAAATTTGCTCAAGAATCAAGACAATTGAGGCAATCACAAATGA  
TTCTTTATCCCTTGTTCAATGTAGATTCGGCATGGTTTTGTCAGTTGAGG

>M6-PGSC0003DMG400006095-(rev)M6LRR-RLP\_992

ACAAATGATTCTTTATCCCTTGTTCAATGTAGATTCGGCATGGTTTTGTCAGTTGAGGAAATCTTTATCAG  
ATTCGACGATCTCTTGGTCTCAAGTTACCATTTACTTTCACAAATGCGA

>M6-PGSC0003DMG400006226M6LRR-RLP\_0

ATACAAAATTTCAAGAACACAATTACTCTTGATCCTTTTGGTGTACAAAAACTTGGACAGGCCCTGATA

TTTGCAATTATAAAGGCTTTTATTGTGATAATCCACCTAATAATTCATCA

>M6-PGSC0003DMG400006226M6LRR-RLP\_128

TCTTGCTTCTATAGATTTCAATGGATTTCAACTTAGTGACCTACATTAGATGGTTTCATTGATCAACTCCC

TGACTTAGCCATATTTTCATGCTAATACCAACAACCTTTTCAGGCATAAT

>M6-PGSC0003DMG400006226M6LRR-RLP\_192

CAACTCCCTGACTTAGCCATATTTTCATGCTAATACCAACAACCTTTTCAGGCATAATTTCTTCGAAAATTTCA

AATCTTCCATATCTTTAAGAAGCTTGATCTTAGTAACAACCAATTCATC

>M6-PGSC0003DMG400006226M6LRR-RLP\_256

AAATTTCAAATCTTCCATATCTTTAAGAAGCTTGATCTTAGTAACAACCAATTCATCGGTTTCATTTCCCATGT

CAATTCTCAATATCAAGACTCTAACTTTCTTGGATATTCGTTACAATC

>M6-PGSC0003DMG400006226M6LRR-RLP\_320

TCCCATGTCAATTCTCAATATCAAGACTCTAACTTTCTTGGATATTCGTTACAATCTCTTGACAGGAATAAT

CCCACCTCAAATTTTCGTACAATATCTTGATGCATTTTTTCTTAACAA

>M6-PGSC0003DMG400006226M6LRR-RLP\_384

GGAATAATCCACCTCAAATTTTCGTACAATATCTTGATGCATTTTTTCTTAACAATAACAATTTTCATTCAA

AAACTTCCAGACAACATTGGATCCACCTCTGCTTTTTATTTAACCTTA

>M6-PGSC0003DMG400006226M6LRR-RLP\_448

TCATTCAAAACTTCCAGACAACATTGGATCCACCTCTGCTTTTTATTTAACCTTAGCCAACAACAAATTC

GTTGGTCCAATCCCACGTAGCATTGGACAAGCTCCGAATTTATTGGAAA

>M6-PGSC0003DMG400006226M6LRR-RLP\_512

CAAATTCGTTGGTCCAATCCCACGTAGCATTGGACAAGCTCCGAATTTATTGGAAATTTTATTCTTGAACA

ACTTGCTCACTGGTTGCATTCCTTATGAATTAGGCCTTTTGAAAAAAGC

>M6-PGSC0003DMG400006226M6LRR-RLP\_64

CTGATATTTGCAATTATAAAGGCTTTTATTGTGATAATCCACCTAATAATTCATCAGCAATTTCTCTTGCTT

CTATAGATTTCAATGGATTTCAACTTAGTGACCTACATTAGATGGTT

>M6-PGSC0003DMG400006255M6LRR-RLP\_0

ATGAATGAAGCAAGACCATACCAAAGACGAACTTCCATAAGTCAAAGTCTTCCACAAATGAACCAAAA

AGGCTAACATCAAACGAGTAAAAGGAGTTAATTCAATCTGTACAAACGCGT

>M6-PGSC0003DMG400006255M6LRR-RLP\_1037

TTTCCTGAAAAGATCTTTCAGGTACAAGTTTTAGAGATTTTGGACTTGTCAAATAACAAGTTGCTTAGTG  
GTAGTATTCCGAGTTTTCTCGAAATGGATCTTTGAGGACGATATCACTA

>M6-PGSC0003DMG400006255M6LRR-RLP\_1098

TGCTTAGTGGTAGTATTCCGAGTTTTCTCGAAATGGATCTTTGAGGACGATATCACTAAGCAACACCAA  
CTTTTCGGGTTTCATTACCAGAGTCCATTTCGAACCTTCAGAACCTGTCCA

>M6-PGSC0003DMG400006255M6LRR-RLP\_1159

CAACACCAACTTTTTCGGGTTTCATTACCAGAGTCCATTTCGAACCTTCAGAACCTGTCCAGGTTAGAGCTTT  
CCGATTGCAATTTCAATGGATCAATACCTTCCACGATAGCAAACCTTAC

>M6-PGSC0003DMG400006255M6LRR-RLP\_122

TTTTTCTTTGACATTTCTCAATCACCTTCCCCTTATTAAGTTCCTTCTAACTGCATACTTCAGTTATATTCA  
AGCTAACAAGTTGCAAGAATATGACAACTCTTACTTTCTATGGCTT

>M6-PGSC0003DMG400006255M6LRR-RLP\_1220

TTAGAGCTTTCCGATTGCAATTTCAATGGATCAATACCTTCCACGATAGCAAACCTTACAAATCTTGTTTA  
TTTAGATTTTTCTTCAACAACCTTAACTGGTTCTATCCCATATTTTCAA

>M6-PGSC0003DMG400006255M6LRR-RLP\_1281

ATCTTGTTTATTTAGATTTTTCTTCAACAACCTTAACTGGTTCTATCCCATATTTTCAAAGATGCAAGAAAC  
TCACCCACTTAGATCTCTCTCGTAATGGTTTAACTGGTCTCCTCTCCC

>M6-PGSC0003DMG400006255M6LRR-RLP\_1342

ATGCAAGAACTCACCCACTTAGATCTCTCTCGTAATGGTTTAACTGGTCTCCTCTCCCCGGCTCATTTTG  
AAGGACTCTCAGAGCTTGCTACATAAATTTAGGGAACAACCTTACTCAA

>M6-PGSC0003DMG400006255M6LRR-RLP\_1403

GCTCATTTTGAAGGACTCTCAGAGCTTGCTACATAAATTTAGGGAACAACCTTACTCAACGGGATCCTTC  
CTGAATGTATCTTTGAGCTTCCCTCCTTGCAGACGCTTTTACTTAACAGC

>M6-PGSC0003DMG400006255M6LRR-RLP\_1464

GGATCCTTCTGAATGTATCTTTGAGCTTCCCTCCTTGCAGACGCTTTTACTTAACAGCAATCAATTTGTT  
GGCCAAGTCAACCATTTTACAATGCATCCTCCTTTCTCGATGAAATTG

>M6-PGSC0003DMG400006255M6LRR-RLP\_1525

TCAATTTGTTGGCCAAGTCAACCATTTTACAATGCATCCTCCTTTCTCGATGAAATTGATTTGAGCAACA  
ACCAACTAAATGGTTCAATTCCAAGTCCATGTTTGACGTTGGGAGGCT

>M6-PGSC0003DMG400006255M6LRR-RLP\_1586

TTGAGCAACAACCAACTAAATGGTTCAATTCCCAAGTCCATGTTTGACGTTGGGAGGCTTAAGGTTCTCT  
CACTTTCTTCCAATTTCTTTAGCGGAACAGTACCCCTTGACCTCATCGGG

>M6-PGSC0003DMG400006255M6LRR-RLP\_1647

AGGTTCTCTCACTTTCTTCCAATTTCTTTAGCGGAACAGTACCCCTTGACCTCATCGGGAAGCTGAGCAAT  
CTTTCACGACTGGAGCTTTCTTACAATAACTTGACTGTTGATGCAAGTA

>M6-PGSC0003DMG400006255M6LRR-RLP\_1708

GCTGAGCAATCTTTCACGACTGGAGCTTTCTTACAATAACTTGACTGTTGATGCAAGTAGCAGTAATTCA  
GACGCTTTCACATTTCCCAGTTGAACATTTTGAACTAGCTTCGTGTGCG

>M6-PGSC0003DMG400006255M6LRR-RLP\_1769

AGTAATTCAGACGCTTTCACATTTCCCAGTTGAACATTTTGAACTAGCTTCGTGTGCGGCTGCAAAAAGTT  
TCCTGATCTTAAAAATCAGTCAAGGATGATCCAATTAGACCTTTCTGAC

>M6-PGSC0003DMG400006255M6LRR-RLP\_183

CAGTTATATTCAAGCTAACAAGTTGCAAGAATATGACAACCTTTACTTTCTATGGCTTTTCTTGATTCCCT  
TGTTTCAAATCTTAGGAAATGACATTTTCTTGTTTTCTCTCAATGTC

>M6-PGSC0003DMG400006255M6LRR-RLP\_1830

TGCAAAAAGTTTCTGATCTTAAAAATCAGTCAAGGATGATCCAATTAGACCTTTCTGACAACAAAATACT  
GGGGGCAATACCAAATTGGATTTGGGGAATAGGTAACGGAGCTCTGACTC

>M6-PGSC0003DMG400006255M6LRR-RLP\_1891

CAAAATACTGGGGGCAATACCAAATTGGATTTGGGGAATAGGTAACGGAGCTCTGACTCACCTGAATCT  
TTCTTTCAATCAGTTGGAGTACGTGGAACAGCCTTACAATGTTTCCAGATA

>M6-PGSC0003DMG400006255M6LRR-RLP\_1952

CTGAATCTTTCTTCAATCAGTTGGAGTACGTGGAACAGCCTTACAATGTTTCCAGATATCTTGTCGTCTCT  
TGACTTGCAATCCAATAAGCTAAAAGGTGACCTACCAATTCCACCTTCC

>M6-PGSC0003DMG400006255M6LRR-RLP\_2013

TTGTCGTCCTTGACTTGCAATCCAATAAGCTAAAAGGTGACCTACCAATTCCACCTTCCTTTGCTGCATATT  
TGGACTACTCGAGCAATAATTTAGCAATTCATCCCCTAGATATTG

>M6-PGSC0003DMG400006255M6LRR-RLP\_2074

TGCTGCATATTTGGACTACTCGAGCAATAATTTAGCAATTCATCCCCTAGATATTGGCAATTATCTTG

GTTTTGCCTTCTTTTTCTTGGTAGCAAACAATGGCATTACTGGAAGAAT

>M6-PGSC0003DMG400006255M6LRR-RLP\_2135

AATTATCTTGGTTTTGCCTTCTTTTTCTTGGTAGCAAACAATGGCATTACTGGAAGAATTCCCGAATCCAT  
ATGCAATGTCAGCTACCTTCAAGTTCTTGATTTCTCTAACAATTCCTTG

>M6-PGSC0003DMG400006255M6LRR-RLP\_2196

CCGAATCCATATGCAATGTCAGCTACCTTCAAGTTCTTGATTTCTCTAACAATTCCTTGAGTGGAACAATA  
CCACCATGTCTACTGGAATATGGTACAAATCTTGGAGTGCTGAATCTAG

>M6-PGSC0003DMG400006255M6LRR-RLP\_2257

TGGAACAATACCACCATGTCTACTGGAATATGGTACAAATCTTGGAGTGCTGAATCTAGGGAACAATAA  
ACTCAATGGCGTTATACCAGATTCATTTCCAATTGGTTGACTCTACAAAC

>M6-PGSC0003DMG400006255M6LRR-RLP\_2318

AACAATAAACTCAATGGCGTTATACCAGATTCATTTCCAATTGGTTGACTCTACAACTTTAGACCTCAG  
TGAGAATAAGTTACAAGGTAGGCTGCCAAAATCTCTTGTGAACTGCAAG

>M6-PGSC0003DMG400006255M6LRR-RLP\_2379

TAGACCTCAGTGAGAATAAGTTACAAGGTAGGCTGCCAAAATCTCTTGTGAACTGCAAGTTGTTGGAGG  
TCCTGAATGTTGGAAATAACAGACTTGTTGATCATTTCATGCATATTGA

>M6-PGSC0003DMG400006255M6LRR-RLP\_244

CTTGATTCCTTGTTCAAATCTTAGGAAATGACATTTTCTTGGTTTCCTCTCAATGTCTTGACAATCAAAA  
GTCGTTGTTGCTGCAGTTGAAGGGCAGCCTTCAGTATGATTCTAGTTT

>M6-PGSC0003DMG400006255M6LRR-RLP\_2440

GTTGGAGGTCCTGAATGTTGGAATAACAGACTTGTTGATCATTTCATGCATATTGAGGAACTCAAAC  
AGTCTGAGGGTCCTAGTCTTGC GTTCCAATCAATTTAATGGAAGTGTTCA

>M6-PGSC0003DMG400006255M6LRR-RLP\_2501

AACTCAAACAGTCTGAGGGTCCTAGTCTTGC GTTCCAATCAATTTAATGGAAGTGTTCAAGTGATGCAA  
CCAGGAATAACTGGAAAAATCTCCAGATCATAGATATAGCTTCCAACAAC

>M6-PGSC0003DMG400006255M6LRR-RLP\_2562

GTGATGCAACCAGGAATAACTGGAAAAATCTCCAGATCATAGATATAGCTTCCAACAACCTTCACTGGTGT  
GTTAAATGCAGAATTCTTTTCAAATTGGAAAGGAATGATGGTTGCAGATG

>M6-PGSC0003DMG400006255M6LRR-RLP\_2623

CACTGGTGTGTTAAATGCAGAATTCTTTTCAAATTGGAAAGGAATGATGGTTGCAGATGATTACGTGGA  
GACAGGACTCAATCATATCCAGTACAAGTTCCTCCAATAAGTAACTTATA

>M6-PGSC0003DMG400006255M6LRR-RLP\_2684

TACGTGGAGACAGGACTCAATCATATCCAGTACAAGTTCCTCCAATAAGTAACTTATACTATCAGGACA  
AAGTGACAATAACCATCAAAGGGCTAGAGCTAGAGCTTGTGAAGATTCTC

>M6-PGSC0003DMG400006255M6LRR-RLP\_2745

ATCAGGACAAAGTGACAATAACCATCAAAGGGCTAGAGCTAGAGCTTGTGAAGATTCTCAGGGTATTCA  
CATCTATTGATTTCTTCAAATAGATTTCAAGGTGTGATACCAGATACGG

>M6-PGSC0003DMG400006255M6LRR-RLP\_2806

GGTATTCACATCTATTGATTTCTTCAAATAGATTTCAAGGTGTGATACCAGATACGGTTGGGGATCTTA  
GCTCACTTTATGTTCTGAACCTATCACACAATGCCCTTGAAGGACCAAT

>M6-PGSC0003DMG400006255M6LRR-RLP\_2867

GGGGATCTTAGCTCACTTTATGTTCTGAACCTATCACACAATGCCCTTGAAGGACCAATTCCAAAATCGA  
TTGGGAAGCTACAAATGCTTGAATCACTAGACCTGTCAACAAACCACCTG

>M6-PGSC0003DMG400006255M6LRR-RLP\_2928

CAAAATCGATTGGGAAGCTACAAATGCTTGAATCACTAGACCTGTCAACAAACCACCTGTCCGGGGAGA  
TCCCATCAGAGCTTGCAAGTCTCACATTCTTAGCAGCTTTGAACTTATCGT

>M6-PGSC0003DMG400006255M6LRR-RLP\_305

GACAATCAAAGTCTGTTGTTGCTGCAGTTGAAGGGCAGCCTTCAGTATGATTCTAGTTTGTCAAATAAAT  
TCGCAAAATGGAACCAGAAGACAAGTGAATGTTGCAATTGGGATGGGGTT

>M6-PGSC0003DMG400006255M6LRR-RLP\_3050

AACAAATTGTTTGGCAAAATCCCATCGACCAATCAGTTTCAAACATTCTCAGCAGATTCTTTGGAGGAA  
ACAGTGGCCTATGTGGGCTCCCTCTCAACAACAGTTGTCAAAGCAATGGC

>M6-PGSC0003DMG400006255M6LRR-RLP\_3111

TTGGAGGAAACAGTGGCCTATGTGGGCTCCCTCTCAACAACAGTTGTCAAAGCAATGGCTCAGAGTCCC  
TGCTCCACCAACTTCGCTACCAGACTCAGATGATGAATGGAAGTTCATTT

>M6-PGSC0003DMG400006255M6LRR-RLP\_3172

AGAGTCCCTGCCTCCACCAACTTCGCTACCAGACTCAGATGATGAATGGAAGTTCATTTTCGCAGCTGTT  
GGATACGTAGTAGGGGCAGCAAACACCATTTCACTTCTGTGGTTTTACGA

>M6-PGSC0003DMG400006255M6LRR-RLP\_3294

CAGTGAAGAAATGGTTTGATAAGCATACGGAGAAATGCATGCTTTGGTTTTCAAGAAAGTGATCCTTAA  
ACCCGTAAATGATGAGTTTATTTAATCCTTGCTTTGTTATAATAAACATCA

>M6-PGSC0003DMG400006255M6LRR-RLP\_3355

ATCCTTAAACCCGTAAATGATGAGTTTATTTAATCCTTGCTTTGTTATAATAAACATCAAGATCCAAATTCT  
TATTTCCCTTGATGAATGTATAAAATTTTCTACTATCAGAAACAGCAC

>M6-PGSC0003DMG400006255M6LRR-RLP\_427

ATGTGATCTCTCTGGTCATGTGATTGCCTTGGAACTGGATAATCAGACTATTTCTAGTGGAATTGAGAAT  
TCAACTGCTCTTTTCAGTCTTCAGTATCTTGAGAGGCTAAATTTGGCTTA

>M6-PGSC0003DMG400006255M6LRR-RLP\_488

ATTGAGAATTCAACTGCTCTTTTCAGTCTTCAGTATCTTGAGAGGCTAAATTTGGCTTACAACATGTTCAA  
TGTTGGCGTACCAGTTGGTATAGGCAACCTCACGAACTTGAAGTACCTG

>M6-PGSC0003DMG400006255M6LRR-RLP\_549

ACATGTTCAATGTTGGCGTACCAGTTGGTATAGGCAACCTCACGAACTTGAAGTACCTGAATTTATCCAA  
TGCTGGTTTTGTCGGGCAAATTCCTATGATGTTATCAAGATTAACAAAGC

>M6-PGSC0003DMG400006255M6LRR-RLP\_61

AACCAAAAAGGCTAACATCAAACGAGTAAAAGGAGTTAATTCAATCTGTACAAACGCGTAGTTTTTCTTT  
GACATTTCTCAATCACCCCTCCCCTTATTAAGTTCCTTCTAACTGCATAC

>M6-PGSC0003DMG400006255M6LRR-RLP\_610

TTTATCCAATGCTGGTTTTGTCGGGCAAATTCCTATGATGTTATCAAGATTAACAAAGCTAGTTACTCTCG  
ATCTCTCAACTCTTTCCCTTACTCTGACCAGACACTAAAACCTTGAGAA

>M6-PGSC0003DMG400006255M6LRR-RLP\_671

GTTACTCTCGATCTCTCAACTCTTTCCCTTACTCTGACCAGACACTAAAACCTTGAGAATCCCAATTTGAGT  
CATTTCAATTGAGAATTCAACAGAGCTTACAGAGCTTTACCTTGATGGG

>M6-PGSC0003DMG400006255M6LRR-RLP\_732

CCAATTTGAGTCATTTCAATTGAGAATTCAACAGAGCTTACAGAGCTTTACCTTGATGGGGTTGATCTTTCA  
TCTCAGAGGACTGAGTGGTGTCAATCTTTATCTTCATATTTGCCTAACT

>M6-PGSC0003DMG400006255M6LRR-RLP\_854

ACCGTCTTGAGTTTGCCTGCTTGTCAAATTTACAGGCCCTATTGATGAATCACTTTCTAAGTTTAAGATTCT

CTCTATCATCCGTCTTGACCAGAACAATATCTCTACCACAGTTCCAGGA

>M6-PGSC0003DMG400006255M6LRR-RLP\_915

TTAAGATTCTCTATCATCCGTCTTGACCAGAACAATATCTCTACCACAGTTCCAGGATATTTTGCCAGTT

TCACAACTTGACTACCTTGTCCTCGACTCTTGTAATCTGCAAGGAG

>M6-PGSC0003DMG400006255M6LRR-RLP\_976

TTTTGCCAGTTTCACAACTTGACTACCTTGTCCTCGACTCTTGTAATCTGCAAGGAGCTTTTCCTGAAA

AGATCTTTCAGGTACAAGTTTTAGAGATTTTGGACTTGTCAAATAACAA

>M6-PGSC0003DMG400006268-(rev)M6LRR-RLP\_0

ACTTTCTATGGCTTTTCTTGATTCCCTTGTTTCAAATCTTATCAGGATATCACATTTTCTTGGTTTCTGTCA

ATGTCTTCACGATCAAAAGTCGTTGTTGCTGCAGTTGAAGGGCAGCC

>M6-PGSC0003DMG400006268-(rev)M6LRR-RLP\_1054

AATCTTGTTTATTTGGACTTCTCAAACAATTTCACTGGTTCTATCCCATATTTCCGACAGTCCAAGAACTC

ACCCACTTAGACCTTTCATGTAATGGTCTAACTGGTCTTGTCTAGA

>M6-PGSC0003DMG400006268-(rev)M6LRR-RLP\_1116

CAAGAACTCACCCACTTAGACCTTTCATGTAATGGTCTAACTGGTCTTGTCTAGAGCTCATTTGGAAG

GACTIONCAGATCTTGTATACATAAATTTAGGGAACAATATACTCAACGG

>M6-PGSC0003DMG400006268-(rev)M6LRR-RLP\_1178

ATTTGGAAGGACTCTCAGATCTTGTATACATAAATTTAGGGAACAATATACTCAACGGGAACCTTCTGA

ATATATATTTGAGCTCCCCTCCTTGCAGCAGCTTTTTCTTAACAGCAATC

>M6-PGSC0003DMG400006268-(rev)M6LRR-RLP\_124

GTATGATTCTAGTTTTTCAAATAAATTAGCAAATGGAATCAGAAGACAAGTGAATGTTGCAATTGGGA

TGGGGTTACATGCGATCTCTCTGGTCATGTGATTGCCTTGGAACTGGATTA

>M6-PGSC0003DMG400006268-(rev)M6LRR-RLP\_1240

CTTCTGAATATATATTTGAGCTCCCCTCCTTGCAGCAGCTTTTTCTTAACAGCAATCAATTTGTTGGCCAA

GTCGACGAATTCTGCAATGCATCCTCCTCTCTGTTGTATACAATTGAT

>M6-PGSC0003DMG400006268-(rev)M6LRR-RLP\_1302

TGTTGGCCAAGTCGACGAATTCTGCAATGCATCCTCCTCTCTGTTGTATACAATTGATTTGGCAAACAACC

ACCTGAATGGATCGATTCAAAGTCCATGTTTCAAATTGGGAGGCTTAA

>M6-PGSC0003DMG400006268-(rev)M6LRR-RLP\_1364



CAAACAACCACCTGAATGGATCGATTCCAAGTCCATGTTTGAAATTGGGAGGCTTAAGGAACTCTTACT  
TTCTTCCAACCTCTTTAGTGGGACAGTGACCCTTGATCTCATTGGGAAGC

>M6-PGSC0003DMG400006268-(rev)M6LRR-RLP\_1426

CTCTTACTTTCTTCCAACCTCTTTAGTGGGACAGTGACCCTTGATCTCATTGGGAAGCTGAGAAACCTTTC  
AAGCCTGGAGCTATCTTACAATAACATGACTGTTGAAGTAAGTAGCAGC

>M6-PGSC0003DMG400006268-(rev)M6LRR-RLP\_1488

AAACCTTTCAGCCTGGAGCTATCTTACAATAACATGACTGTTGAAGTAAGTAGCAGCAATTTAACCTCT  
TTCACATCTCCCAGTTGAGCATATTGAAACTAGCTTCTTGTCGGCTGCA

>M6-PGSC0003DMG400006268-(rev)M6LRR-RLP\_1550

TAACTCTTTCACATCTCCCAGTTGAGCATATTGAAACTAGCTTCTTGTCGGCTGCAAAAGTTTCCTGAT  
CTTAAAAATCAGTCATGGATGATCCACTTAGACCTTCTGACAACGAAA

>M6-PGSC0003DMG400006268-(rev)M6LRR-RLP\_1612

TTTCTGATCTTAAAAATCAGTCATGGATGATCCACTTAGACCTTCTGACAACGAAATACTGGGGGCAA  
TACCAAATTGGATTTGGGGAATTGGTGACGGAGCTCTGGCTCACCTGAAT

>M6-PGSC0003DMG400006268-(rev)M6LRR-RLP\_1674

GGGGGCAATACCAAATTGGATTTGGGGAATTGGTGACGGAGCTCTGGCTCACCTGAATCTTTCCTTCAA  
TCAGCTGGAGTACGTGGAACAGCCTTACAATGTGTCCAGCAATCTTTTTGT

>M6-PGSC0003DMG400006268-(rev)M6LRR-RLP\_1736

CCTTCAATCAGCTGGAGTACGTGGAACAGCCTTACAATGTGTCCAGCAATCTTTTTGTCCTTGACTTGCAT  
TCCAACCGTTTAAAAGGTGACTTACCAATTCCACCTTCTCTGCCATCT

>M6-PGSC0003DMG400006268-(rev)M6LRR-RLP\_1798

GACTTGCATTCCAACCGTTTAAAAGGTGACTTACCAATTCCACCTTCTCTGCCATCTATGTGGACTATTC  
GAGCAATAATTTAAACAAATCCATCCCCTAGATATTGGAAATTCTCTT

>M6-PGSC0003DMG400006268-(rev)M6LRR-RLP\_186

ATTGGGATGGGGTTACATGCGATCTCTCTGGTCATGTGATTGCCTTGGAAGCTGGATTATGAGACAATTC  
TGGTGGAAATTGAGAATTCAAGTTCTTTTTAGTCTACAGTATCTTGAGA

>M6-PGSC0003DMG400006268-(rev)M6LRR-RLP\_1860

GGACTATTCGAGCAATAATTTAAACAAATCCATCCCCTAGATATTGGAAATTCTCTTGCTCTTGCTCTCT  
TTTTCTCGGTAGCAAACAATGACATTACTGGAATAGTTCCTGAATCCAT

>M6-PGSC0003DMG400006268-(rev)M6LRR-RLP\_1922

TTGCCTCCTTTTTCTCGGTAGCAAACAATGACATTACTGGAATAGTTCCTGAATCCATATGCAGTGTCTCAGC  
TACCTTCAAGTTCTTGATTTCTCTAACAATGCCTTGAGTGGAAACAATTC

>M6-PGSC0003DMG400006268-(rev)M6LRR-RLP\_1984

AGTGTCTCAGCTACCTTCAAGTTCTTGATTTCTCTAACAATGCCTTGAGTGGAAACAATTCCACGATGTCTACT  
GGAATATAGTACTACTCTTGGAGTGCTGAATCTAGGGAACAACAGACTC

>M6-PGSC0003DMG400006268-(rev)M6LRR-RLP\_2046

ATGTCTACTGGAATATAGTACTACTCTTGGAGTGCTGAATCTAGGGAACAACAGACTCCATGGTGTATA  
CCAGATTCATTTCCAATTGGTTGTGCTCTAAAACTCTAGACCTCAGTGA

>M6-PGSC0003DMG400006268-(rev)M6LRR-RLP\_2108

GTGTTATACCAGATTCATTTCCAATTGGTTGTGCTCTAAAACTCTAGACCTCAGTGAGAATAAGTTACA  
AGGTAGCCTCCCAAATCGCTTGTGAACTGCAAGTTGTTGGAGGTCCTGA

>M6-PGSC0003DMG400006268-(rev)M6LRR-RLP\_2170

AAGTTACAAGGTAGCCTCCCAAATCGCTTGTGAACTGCAAGTTGTTGGAGGTCCTGAATGTTGGAAAT  
TACAGACTTGTTGATCATTCCCGTGCATGTTGAGGAACTCAAACAGTCTG

>M6-PGSC0003DMG400006268-(rev)M6LRR-RLP\_2232

TGGAAATTACAGACTTGTTGATCATTCCCGTGCATGTTGAGGAACTCAAACAGTCTGAGGGTCCTAGTC  
TTGCGCTTCAATCAATTCAGTGGAAATCTTCAGTGTGAAGTAACCATAAA

>M6-PGSC0003DMG400006268-(rev)M6LRR-RLP\_2294

TCCTAGTCTTGCGCTTCAATCAATTCAGTGGAAATCTTCAGTGTGAAGTAACCATAAATAGCTGCCCAA  
TCTCCAGATCATAGATATAGCTTCCAACAACCTTCACTGGTGTGTTGAATG

>M6-PGSC0003DMG400006268-(rev)M6LRR-RLP\_2356

TGCCCAAATCTCCAGATCATAGATATAGCTTCCAACAACCTTCACTGGTGTGTTGAATGCCGAATCTTTTC  
AAATTGGAGAGGAATGATGGTTGCAGATGATTACGTGGAGACAGGGCGG

>M6-PGSC0003DMG400006268-(rev)M6LRR-RLP\_2418

ATTCTTTTCAAATTGGAGAGGAATGATGGTTGCAGATGATTACGTGGAGACAGGGCGGAATCATATCCA  
GTACAAGTTCTCCAACCTAAGTAACTTATACTATCAGGTCACAGTAACAAT

>M6-PGSC0003DMG400006268-(rev)M6LRR-RLP\_248

ACAATTTCTGGTGGAAATTGAGAATTCAAGTTCTCTTTTCAGTCTACAGTATCTTGAGAAGTTAAATTTGGC

TTACAACAGGTTTCAGTGTTGGCATAACCAGTTGGTATAGGCAACCTCACG

>M6-PGSC0003DMG400006268-(rev)M6LRR-RLP\_2480

ATATCCAGTACAAGTTCCTCCAACCTAAGTAACTTATACTATCAGGTCACAGTAAACAATAACCAACAAAGG  
GATGGAGATGAAGCTTGTGAAAATTCTCAGAGTCTACACATCTATTAATT

>M6-PGSC0003DMG400006268-(rev)M6LRR-RLP\_2542

AACAAAGGGATGGAGATGAAGCTTGTGAAAATTCTCAGAGTCTACACATCTATTAATTTCTCTTCAAATA  
GATTTCAAGGAGTGATACCAGATACTATCGGGAATCTCAGCTCACTTTAT

>M6-PGSC0003DMG400006268-(rev)M6LRR-RLP\_2604

TTCAAATAGATTTCAAGGAGTGATACCAGATACTATCGGGAATCTCAGCTCACTTTATGTTCTGAACCTG  
TCACACAATGCCCTTGAAGGACCAATCCAAAATCGATTGGGAAGCTACA

>M6-PGSC0003DMG400006268-(rev)M6LRR-RLP\_2790

TCTCACATTCTTAGCAGCTTTGAACTTATCGTTCAACAAATTGTTTGGCAAATCCCATTAATAATCAGTT  
TCAAACATTCTCAGCAGATTCCTTTGAAGGAAACAGAGGCCTATGCGG

>M6-PGSC0003DMG400006268-(rev)M6LRR-RLP\_2852

CTAATCAGTTTCAAACATTCTCAGCAGATTCCTTTGAAGGAAACAGAGGCCTATGCGGGTCCCTCTCAA  
CAACAATTGCGAAAGCAATGGCTTAGAGTCCCTCTCCCTGCTGCCACCAA

>M6-PGSC0003DMG400006268-(rev)M6LRR-RLP\_2914

CCTCTCAACAACAATTGCGAAAGCAATGGCTTAGAGTCCCTCTCCCTGCTGCCACCAACTTTGGTACCAG  
ACTCAGACTCAGATGATGAATGGAAGTTCATTTTCGCGGCTGTTGGATAC

>M6-PGSC0003DMG400006268-(rev)M6LRR-RLP\_2976

GGTACCAGACTCAGACTCAGATGATGAATGGAAGTTCATTTTCGCGGCTGTTGGATACGTAGTAGGGGC  
AGCAAACACTATTTCACTTCTGTGGTTTTACGAGCCAGTGAAGAAATGGTT

>M6-PGSC0003DMG400006268-(rev)M6LRR-RLP\_3016

TTCGCGGCTGTTGGATACGTAGTAGGGGCAGCAAACACTATTTCACTTCTGTGGTTTTACGAGCCAGTGA  
AGAAATGGTTTGATAAGCATATAGAGAAATGTTTACTTTGGTTTTCAAGA

>M6-PGSC0003DMG400006268-(rev)M6LRR-RLP\_372

TGAAGTACCTGAATTTATCCAATGCTGGTTTTGTGCGGCAAATTCCTATGTCGTTACCAAGATTA AAAAG  
GCGAGTTACTCTTGATCTCTCAATCTTTCCCTGACTTTGATCAGCCACT

>M6-PGSC0003DMG400006268-(rev)M6LRR-RLP\_434

TTAAAAAGGCGAGTTACTCTTGATCTCTCAATCTTTCCCTGACTTTGATCAGCCACTTAACTTGAGAAT  
CCCAATTTGAGACAATTCATTGAGAACTCAACAGAGCTTAGAGAGCTTT

>M6-PGSC0003DMG400006268-(rev)M6LRR-RLP\_496

CTTGAGAATCCCAATTTGAGACAATTCATTGAGAACTCAACAGAGCTTAGAGAGCTTTACCTTGATGGG  
GTTGATCTTTCATCTCAGAGGACTGAATGGTGTCAATCTTTATCTTCATAT

>M6-PGSC0003DMG400006268-(rev)M6LRR-RLP\_558

TGATGGGGTTGATCTTTCATCTCAGAGGACTGAATGGTGTCAATCTTTATCTTCATATTTGCCTAAATTGA  
CTATCTTGAGTTTGCGTGCTTGTCAAATTCAGGCCCTATTGATGAATC

>M6-PGSC0003DMG400006268-(rev)M6LRR-RLP\_62

GTTTCCTGTCAATGTCTTCACGATCAAAAGTCGTTGTTGCTGCAGTTGAAGGGCAGCCTTCAGTATGATT  
CTAGTTTTTCAAATAAATTAGCAAAATGGAATCAGAAGACAAGTGAATGT

>M6-PGSC0003DMG400006268-(rev)M6LRR-RLP\_620

CTAAATTGACTATCTTGAGTTTGCGTGCTTGTCAAATTCAGGCCCTATTGATGAATCACTTTCTAAGCTT  
CTCTTCTCTCTTTCATCCGTCTTGAACGGAACAATCTCTCTACCACAG

>M6-PGSC0003DMG400006268-(rev)M6LRR-RLP\_682

TCTAAGCTTCTCTTCTCTTTCATCCGTCTTGAACGGAACAATCTCTCTACCACAGTTCCTGAATATTTT  
GCCCATTTCTCGAACTTGACTACCTTGCCCTCGGCTCTTGTAATCTG

>M6-PGSC0003DMG400006268-(rev)M6LRR-RLP\_744

TGAATATTTTGCCATTTCTCGAACTTGACTACCTTGCCCTCGGCTCTTGTAATCTGCATGGAACATTTT  
CTGAAAGAATCTTTCAGGTACCAGTTTTAGAGAGTTTGGACTTGTCAAA

>M6-PGSC0003DMG400006268-(rev)M6LRR-RLP\_806

GAACATTTCTGAAAGAATCTTTCAGGTACCAGTTTTAGAGAGTTTGGACTTGTCAAATAACGAGTTGCT  
TCGAGGTAGTATTCCTGTTGTTCTTCAAATGGATCTCTGAGGAGATTAT

>M6-PGSC0003DMG400006268-(rev)M6LRR-RLP\_868

GAGTTGCTTCGAGGTAGTATTCCTGTTGTTCTTCAAATGGATCTCTGAGGAGATTATCACTAAGCTACA  
CCAATTTTCTGGCTCATTACCAGAGTCCATTTTGAACCTTCAGAACCTG

>M6-PGSC0003DMG400006268-(rev)M6LRR-RLP\_930

AAGCTACACCAACTTTTCTGGCTCATTACCAGAGTCCATTTTGAACCTTCAGAACCTGTCCAGGTTAGAGC  
TCTCCAATTGCAATTTCAATGGACCAATACCTTCCACAATGGCAAACCT

>M6-PGSC0003DMG400006268-(rev)M6LRR-RLP\_992

GGTTAGAGCTCTCCAATTGCAATTTCAATGGACCAATACCTTCCACAATGGCAAACCTTACAAATCTTGTT  
TATTTGGACTTCTCAAACAATTTCACTGGTTCTATCCCATATTTCCGAC

>M6-PGSC0003DMG400006279M6LRR-RLP\_0

CTTTTAGTTACGTTGATAGGTTTTTCCAAGTGTAAAGGTCCATCTTTGGATTTGCAAGCTAACCATGAA  
CACGTTGATATGTGTACAGTCATATAGTCCAAGTTATTTTTATGTTATA

>M6-PGSC0003DMG400006279M6LRR-RLP\_1024

GCGATCGCTGCCCCAAGTGACAACCTTCATCCCCTGAATATTGTCTTCTAATATCTTCTTGTTCCCAGCA  
GCCTTCTTTAACACCTGATTGCCTAAAATCGCCATGAATGGTCTTACCA

>M6-PGSC0003DMG400006279M6LRR-RLP\_1088

CCCAGCAGCCTTCTTTAACACCTGATTGCCTAAAATCGCCATGAATGGTCTTACCAACTTCAGAACCTGTA  
GCATCTGATTTCTCACCCAAATTTCGAACACTCTGTGCAGCTCGTCTTG

>M6-PGSC0003DMG400006279M6LRR-RLP\_1152

ACCTGTAGCATCTGATTTCTCACCCAAATTTCGAACACTCTGTGCAGCTCGTCTTGCATTAATAATTTCCCT  
AGCATTCCCTGATGCTTAATACCTTGCATATTAATCTGCATACTTAA

>M6-PGSC0003DMG400006279M6LRR-RLP\_1216

ATTTCCCTAGCATTTCCTGATGCTTAATACCTTGCATATTAATCTGCATACTTAATCTCTGTGACCTTGAT  
GTTTGCATGTACGTATATGAAGGTTAATAATCATATGTTATTATTTGG

>M6-PGSC0003DMG400006279M6LRR-RLP\_128

TGTGCATTTCAATTTATTAAGTATCCCATGTTTGCTTGTTTGACATATTTGGTTTGTCTGTTTTGGTTTAT  
CAGTGCCTGTCCATCCTAGAGTTGAAAGGGTGGCGTCCTCCACCATC

>M6-PGSC0003DMG400006279M6LRR-RLP\_1280

ACCTTGATGTTTGCATGTACGTATATGAAGGTTAATAATCATATGTTATTATTTGGTACACTATCAATTCA  
TTCGACTTTGGCTCTAATGAGCAATCTCACACGTTTCAGGCAAAGCAGCC

>M6-PGSC0003DMG400006279M6LRR-RLP\_1344

CAATTCATTCGACTTTGGCTCTAATGAGCAATCTCACACGTTTCAGGCAAAGCAGCCAGTAAGTTGACTTC  
AACTTTAACTCTTGCTGTGCTTGGCCTTGTTTGATCTGTGGTTGCTCTAT

>M6-PGSC0003DMG400006279M6LRR-RLP\_1408

GACTTCAACTTTAACTCTTGCTGTGCTTGGCCTTGTTTGATCTGTGGTTGCTCTATCAACAACCAAAGGTC

TGCCCACTGCTGATGCTAACAAATATAATGCCTCTCGAACGAAAAATTG

>M6-PGSC0003DMG400006279M6LRR-RLP\_1472

AAAGGTCTGCCCACTGCTGATGCTAACAAATATAATGCCTCTCGAACGAAAAATTGCACCAGTAAATTCT  
GAAACAATATCCAAGTCAAAGCAATGGATTCTTCTTCTTTGGGATTAAC

>M6-PGSC0003DMG400006279M6LRR-RLP\_1516

AACGAAAAATTGCACCAGTAAATTCTGAAACAATATCCAAGTCAAAGCAATGGATTCTTCTTCTTTGGGA  
TTAAACCAAGGGGTCCAACGAAAAAATTCTAAATTGATAGTCTTCCTCCA

>M6-PGSC0003DMG400006279M6LRR-RLP\_192

TTGGTTTATCAGTGCCTGTCCATCCTAGAGTTGAAAGGGTGGCGTCTCCACCATCAAGCCGGAAATTTT  
TAGAACTGAACCTAGCCGTAATACAATTGGACTTCCTGGAATTTACAGC

>M6-PGSC0003DMG400006279M6LRR-RLP\_256

AATTTTTAGAACTGAACCTAGCCGTAATACAATTGGACTTCCTGGAATTTACAGCTTTCTACAGAGCTCA  
TCGGATCTTGAGACATTGATCATTGGTTGTTGGTACAATCACAATGAAA

>M6-PGSC0003DMG400006279M6LRR-RLP\_320

GAGCTCATCGGATCTTGAGACATTGATCATTGGTTGTTGGTACAATCACAATGAAAGAGTAAGTTTCCTT  
TCGACCTTTATTTATATTACTTCATGTTATTCAAATCAAACAACTTTTAG

>M6-PGSC0003DMG400006279M6LRR-RLP\_384

TTCTTTTCGACCTTTATTTATATTACTTCATGTTATTCAAATCAAACAACTTTTAGTGGAGGAATAAGCTGA  
TATATATCAACATATTTCTAATCTTAAGTACTTCAGGAAAGAAAATTT

>M6-PGSC0003DMG400006279M6LRR-RLP\_448

TAAGCTGATATATATCAACATATTTCTAATCTTAAGTACTTCAGGAAAGAAAATTTATTGAAGTTTTTTTT  
AATAGCAATCTCCTCAGTCACTTTACCATCCCAATTGTGCTTCCTTCCA

>M6-PGSC0003DMG400006279M6LRR-RLP\_512

TTTTTTAATAGCAATCTCCTCAGTCACTTTACCATCCCAATTGTGCTTCCTTCCATGAGTTCTATTTTTGTT  
TTTTCCAATTCATCGTTGCCTAGGAGATATTGCAGCTTCCTAGCT

>M6-PGSC0003DMG400006279M6LRR-RLP\_576

ATTTTTGTTTTTTTCCAATTCATCGTTGCCTAGGAGATATTGCAGCTTCCTAGCTTCATTTTTAAAATATTC  
ATCCAGTGTGGCATCCTCCTCGCTTCTCTCAAAAATGTTTGCACCTC

>M6-PGSC0003DMG400006279M6LRR-RLP\_64

CCATGAACACGTTGATATGTGTACAGTCATATAGTCCAAGTATTTTTATGTTATATCCAACAATGTGCAT  
TTCATTTATTAAGTATCCCATGTTTGCTTGTTTTGACATATTTTGGTTT

>M6-PGSC0003DMG400006279M6LRR-RLP\_640

AAAATATTCATCCAGTGTGGCATCCTCCTCGCTTCTCTCAAAAATGTTTGCACCTCTAGAACTTCTTGGAG  
AAAAATCACTAGGTCTAACATGTAGTTGCTTACTAGTGTTAATAGGAGT

>M6-PGSC0003DMG400006279M6LRR-RLP\_704

CTTGGAGAAAATCACTAGGTCTAACATGTAGTTGCTTACTAGTGTTAATAGGAGTAAGAGAATTCACCTC  
TTTCAATATTCGAACTCATCAGTATATCAAGAAGCGCCATGTCTATAGTA

>M6-PGSC0003DMG400006279M6LRR-RLP\_768

TCACTCTTTCAATATTCGAACTCATCAGTATATCAAGAAGCGCCATGTCTATAGTATTATTGATCTTCTGA  
ACATCAGAAGTCTGCGCAGAATTCTCAGGTGATGCATCTATCAAATTT

>M6-PGSC0003DMG400006279M6LRR-RLP\_832

CTTCTGAACATCAGAAGTCTGCGCAGAATTCTCAGGTGATGCATCTATCAAATTTGCAGATTTTTTCAGCT  
ACTTCAGTTTCTAGATCTGTCGGTTTCGAAATTGTATGACGTCCCTGTC

>M6-PGSC0003DMG400006279M6LRR-RLP\_896

TTCAGCTACTTCAGTTTCTAGATCTGTCGGTTTCGAAATTGTATGACGTCCCTGTCTCCGGTGCATCTGTC  
TAGCACTTGAAGTTGCAATTTCTTGTGAACCTAACGCTCCATCTTTCAT

>M6-PGSC0003DMG400006279M6LRR-RLP\_960

ATCTGTCTAGCACTTGAAGTTGCAATTTCTTGTGAACCTAACGCTCCATCTTTCATGATTTTCAGGCGATCG  
CTGCCCCAAGTGACAAGTTCATTCCCCTGAATATTGTCTTCTAATATC

>M6-PGSC0003DMG400006280M6LRR-RLK\_0

CCAAAGCCAAAAATTACTATCATATTTTATCAGTATCAATGGAATCTTTCAAATACTTGTTGCATCTTCTT  
CTTCTTCTTCTTACCTTTGATGTTTTCTAAAGTATTTGAAGTTCAATT

>M6-PGSC0003DMG400006280M6LRR-RLK\_1054

GAGATTCCTGGATGTATCGCGGAGCTGCCAAAGTTGGAAATGTTGAATCTTTGGAGGAATAATTTCACT  
GGATCGATTCTTCTAAGCTTGGGATGAACGGTAAACTAGTTGAAATTGAT

>M6-PGSC0003DMG400006280M6LRR-RLK\_1116

TTTCACTGGATCGATTCTTCTAAGCTTGGGATGAACGGTAAACTAGTTGAAATTGATCTTCTAGTAATA  
GACTCACTGGCTTGATACCAAATCTCTATGCTTTGGGAGGAATTTGAA

>M6-PGSC0003DMG400006280M6LRR-RLK\_1178

CTAGTAATAGACTCACTGGCTTGATACCAAATCTCTATGCTTTGGGAGGAATTTGAAAATCTTGATTCT  
GCTTGATAATTTTCTGTTTGGACCTTTACCTGATGATTTTGGGCAGTGTC

>M6-PGSC0003DMG400006280M6LRR-RLK\_124

GTTATCTAAATGGCTACTTCTAACACAAGTCTCTTCTTTTTTCGCGTATTTCCCTACTCGTGTTCCCTCATTACTC  
CATCTCAATCGCATAACCTGTCTCTGAGACGACAGGCTAAAACCTCTA

>M6-PGSC0003DMG400006280M6LRR-RLK\_1240

TTGATTCTGCTTGATAATTTTCTGTTTGGACCTTTACCTGATGATTTTGGGCAGTGTCGAACCTTGCCAG  
AGTCAGAATGGGACAGAATTACTTGAGTGGATCAATACCAACAGGGTTT

>M6-PGSC0003DMG400006280M6LRR-RLK\_1302

CTTGCCAGAGTCAGAATGGGACAGAATTACTTGAGTGGATCAATACCAACAGGGTTTCTTTATTTGCCT  
GAGTTGTCACTGGTGGAACTGCAGAACAACACTACATCAGTGGACAACCTCTC

>M6-PGSC0003DMG400006280M6LRR-RLK\_1364

ATTTGCCTGAGTTGTCACTGGTGGAACTGCAGAACAACACTACATCAGTGGACAACCTCTCGAACGAGAAAA  
TCTCAGCGTCTTCTAAACTTGAAGGGCTGAACCTGTGCAACAATCGCTTGT

>M6-PGSC0003DMG400006280M6LRR-RLK\_1426

GAGAAAATCTCAGCGTCTTCTAAACTTGAAGGGCTGAACCTGTGCAACAATCGCTTGTCTGGTGCACCTC  
CCAGTGCTATTGGAACTATTCAGGGCTGAAGAATCTTGTGTTAACTGGA

>M6-PGSC0003DMG400006280M6LRR-RLK\_1488

TGCACTCCCAGTGCTATTGGAACTATTCAGGGCTGAAGAATCTTGTGTTAACTGGAAATGGTTTCTCA  
GGAGATATCCCTTCTGATATTGGCAGACTAAAAAGCATCTTAAAGCTGGA

>M6-PGSC0003DMG400006280M6LRR-RLK\_1550

GTTTCTCAGGAGATATCCCTTCTGATATTGGCAGACTAAAAAGCATCTTAAAGCTGGACCTGAGTAGGA  
ACAACCTCTCTGGCACAATCCCCCTCAGATTAGTAACTGTCTTTCCTTAA

>M6-PGSC0003DMG400006280M6LRR-RLK\_1612

AGTAGGAACAACCTTCTCTGGCACAATCCCCCTCAGATTAGTAACTGTCTTTCCTTAACTTACTTGGATTT  
GAGCCAAAATCAACTTTCTGGTCCTATCCCAGTTCAAATTGCTCAAATT

>M6-PGSC0003DMG400006280M6LRR-RLK\_1674

CTTGATTTGAGCCAAAATCAACTTTCTGGTCCTATCCCAGTTCAAATTGCTCAAATTCACATCTTAAATT



ACATCAATATTTCTGGAATCACTTCAACGATAGCCTTCCCGCGGAGAT

>M6-PGSC0003DMG400006280M6LRR-RLK\_1736

TCTTAAATTACATCAATATTTCTGGAATCACTTCAACGATAGCCTTCCCGCGGAGATTGGCTCGATGAA  
GAGCTTAACTTCAGCAGATTTTTCCACAATAACTTATCTGGATCAATAC

>M6-PGSC0003DMG400006280M6LRR-RLK\_1798

TCGATGAAGAGCTTAACTTCAGCAGATTTTTCCACAATAACTTATCTGGATCAATACCTGAAACAGGAC  
AGTATTTATATTTCAACTCAACTTCCTTCATTGGCAACCCTTATCTCTCT

>M6-PGSC0003DMG400006280M6LRR-RLK\_186

CCTCATTACTCCATCTCAATCGCATAACCTGTCTCTGAGACGACAGGCTAAAACCTCTAGTTTCATTGAAAC  
AAGCATTTGTAGTATCCTCTGTTCTAGTACTCTGTCTACTTGGAACAT

>M6-PGSC0003DMG400006280M6LRR-RLK\_1860

AACAGGACAGTATTTATATTTCAACTCAACTTCCTTCATTGGCAACCCTTATCTCTCTGGATCCGACTCGA  
CTCCTAGCAACATTACATCCAACCTCACCGTCAAAACTTGGAGACGGAAG

>M6-PGSC0003DMG400006280M6LRR-RLK\_1922

CCGACTCGACTCCTAGCAACATTACATCCAACCTCACCGTCAAAACTTGGAGACGGAAGTGACAACAGAA  
CTAAGTTCCAACAATATAACAAGTTCATATTTGCATTTGGGCTCTTATTCT

>M6-PGSC0003DMG400006280M6LRR-RLK\_1984

AACAGAACTAAGGTTCCAACAATATAACAAGTTCATATTTGCATTTGGGCTCTTATTCTGCTCCCTCATTTTT  
GTTGTCTTAGCAATAATCAAGACAAGAAAGGGGAGTAAGAATTCAAAT

>M6-PGSC0003DMG400006280M6LRR-RLK\_2046

CCTCATTTTTGTTGTCTTAGCAATAATCAAGACAAGAAAGGGGAGTAAGAATTCAAATTTGTGGAAGCT  
GACAGCATTTCAGAAGCTTGAATTCGGAAGTGAAGACGTCTTGCAAGTCTT

>M6-PGSC0003DMG400006280M6LRR-RLK\_2108

GGAAGCTGACAGCATTTCAGAAGCTTGAATTCGGAAGTGAAGACGTCTTGCAAGTCTTGAAGACAAC  
AACGTCATAGGGAGAGGTGGAGCAGGGATAGTGTATAAAGGAACTATGCCAA

>M6-PGSC0003DMG400006280M6LRR-RLK\_2170

GACAACAACGTCATAGGGAGAGGTGGAGCAGGGATAGTGTATAAAGGAACTATGCCAAATGGTGATCA  
TGTCGCGGTGAAGAAGTTGGGAATAAGCAAAGGCTCACATGATAACGGCCTA

>M6-PGSC0003DMG400006280M6LRR-RLK\_2232

TGATCATGTCGCGGTGAAGAAGTTGGGAATAAGCAAAGGCTCACATGATAACGGCCTATCTGCTGAACT  
TAAAACATTAGGAAAGATCAGGCATAGGTACATTGTGAGACTGCTCGCGTT

>M6-PGSC0003DMG400006280M6LRR-RLK\_2294

CTGAACTTAAAACATTAGGAAAGATCAGGCATAGGTACATTGTGAGACTGCTCGCGTTTTGTTCAAACA  
AGGAAATCAACTTGCTAGTTTATGAGTACATGCTAAATGGAAGCTTAGGTG

>M6-PGSC0003DMG400006280M6LRR-RLK\_2356

TCAAACAAGGAAATCAACTTGCTAGTTTATGAGTACATGCTAAATGGAAGCTTAGGTGAAGTGCTTCAT  
GGGAAGAACGGCGGGCAACTCCAATGGGACACTAGGCTAAAAATTGCCATA

>M6-PGSC0003DMG400006280M6LRR-RLK\_2418

GCTTCATGGGAAGAACGGCGGGCAACTCCAATGGGACACTAGGCTAAAAATTGCCATAGAAGCTGCCA  
AGGGCCTTTCTTATTTGCACCATGATTGCTCCCCTATGATAATCCACCGCGA

>M6-PGSC0003DMG400006280M6LRR-RLK\_248

CATTGAAACAAGCATTGTAGTATCCTCTGTTCTAGTACTCTGTCTACTTGGAACATGTCAAATTATATG  
TCTATATGTTGTTGGACCGGTATCACGTGTGATGATACCAAATCAGTAA

>M6-PGSC0003DMG400006280M6LRR-RLK\_2480

CTGCCAAGGGCCTTTCTTATTTGCACCATGATTGCTCCCCTATGATAATCCACCGCGATGTCAAGTCCAAC  
AATATATTGTTGAACTCTGAACTTGAAGCTCATGTTGCAGATTTTGGCT

>M6-PGSC0003DMG400006280M6LRR-RLK\_2542

AAGTCCAACAATATATTGTTGAACTCTGAACTTGAAGCTCATGTTGCAGATTTTGGCTTAGCCAAGTACTT  
TCATAATAATGGTACTTCTGAGTGCATGTCTGCAATTGCAGGGTCTTAT

>M6-PGSC0003DMG400006280M6LRR-RLK\_2604

CAAGTACTTTCATAATAATGGTACTTCTGAGTGCATGTCTGCAATTGCAGGGTCTTATGGCTACATTGCTC  
CAGGTAAGTACTGTTTCTTACATAGTTGATTTAATTTCTTCTCGACT

>M6-PGSC0003DMG400006280M6LRR-RLK\_2666

ACATTGCTCCAGGTAAGTACTGTTTCTTACATAGTTGATTTAATTTCTTCTCGACTGGCCTATTATGCAC  
TCGGACCAATCTACAACCTACTAATAATGGTCTTTACATGTTATCTTT

>M6-PGSC0003DMG400006280M6LRR-RLK\_2728

TATTATGCACTCGGACCAATCTACAACCTACTAATAATGGTCTTTACATGTTATCTTTTTGTATAGAATATG  
CATAACGCTGAAAATTGATGAGAAAAGCGATGTGTATAGCTTTGGAG

>M6-PGSC0003DMG400006280M6LRR-RLK\_2790

ATAGAATATGCATACACGCTGAAAATTGATGAGAAAAGCGATGTGTATAGCTTTGGAGTGGTGTGTTG  
GAGCTTATAACAGGACGAAAGCCAGTTGGAAATTTTGGAGAAGAAGGAATG

>M6-PGSC0003DMG400006280M6LRR-RLK\_2852

GTTGTTGGAGCTTATAACAGGACGAAAGCCAGTTGGAAATTTTGGAGAAGAAGGAATGGACATTGTCC  
AATGGGCGAAAACGGAGACAAATTGGAGCAAAGAAGAGGTGGTAAAATCTT

>M6-PGSC0003DMG400006280M6LRR-RLK\_2914

TTGTCCAATGGGCGAAAACGGAGACAAATTGGAGCAAAGAAGAGGTGGTAAAATCTTGGATGAGAG  
GCTAAAAAATGTTGCAATTGTAGAAGCTATGCAAGTATTTTTTGTAGCAATGC

>M6-PGSC0003DMG400006280M6LRR-RLK\_2976

GAGAGGCTAAAAAATGTTGCAATTGTAGAAGCTATGCAAGTATTTTTTGTAGCAATGCTTTGTGTTGAAG  
AGTACAGCATTGAGAGGCCTACAATGAGGGAAGTAGTCCAAATGCTTTCT

>M6-PGSC0003DMG400006280M6LRR-RLK\_3038

TGTTGAAGAGTACAGCATTGAGAGGCCTACAATGAGGGAAGTAGTCCAAATGCTTTCTCAAGCTAAACA  
ACCAAATACTTTCCAAATCCAATGATCTAATTGTGGCTCTACTAATTCTTA

>M6-PGSC0003DMG400006280M6LRR-RLK\_310

AATTATATGTCTATATGTTGTTGGACCGGTATCACGTGTGATGATACCAAATCAGTAACTACCATTGATAT  
ATCCAATCTAAACATTTCTGGCTCTTATCACCTGATATTCATGAGCTC

>M6-PGSC0003DMG400006280M6LRR-RLK\_3100

CTAAACAACCAAATACTTTCCAAATCCAATGATCTAATTGTGGCTCTACTAATTCTTATAGTATATCTTTTT  
TTGTTTCTTGTGTGCTTGGGAAGACCCCTTTTGTAGCTTTGCAAACA

>M6-PGSC0003DMG400006280M6LRR-RLK\_3162

ATATCTTTTTTTGTTTCTTGTGTGCTTGGGAAGACCCCTTTTGTAGCTTTGCAAACAAATTACAATTATGT  
TAGATCTTAGGGCATGATATCTAACTATCCTCTCAACTTGAATAGTG

>M6-PGSC0003DMG400006280M6LRR-RLK\_3224

ACAATTATGTTAGATCTTAGGGCATGATATCTAACTATCCTCTCAACTTGAATAGTGTATTGGATGTGTA  
GAACTAGTATTAGTATCCGCGTGATGTGTGGTGAATATCAAAGAAATT

>M6-PGSC0003DMG400006280M6LRR-RLK\_372

CATTGATATATCCAATCTAAACATTTCTGGCTCTTATCACCTGATATTCATGAGCTCACCAGACTTCGCAT

CCTGAATATTTCTAACAACTTGTTAGGTGGGAACTTGAGCTGGGAGTA

>M6-PGSC0003DMG400006280M6LRR-RLK\_434

GACTTCGCATCCTGAATATTTCTAACAACTTGTTAGGTGGGAACTTGAGCTGGGAGTATCGAAAGTTTAA  
CGTACTTCAAGTGTGGATGCTTATAACAACAATTTCACTGGTCCACTCC

>M6-PGSC0003DMG400006280M6LRR-RLK\_496

AAGTTAACGTACTTCAAGTGTGGATGCTTATAACAACAATTTCACTGGTCCACTCCCCTGGGAGTTAC  
TCAACTTCTGCAGCTGAAGTATTTGAATTTGGGGGTAACTACTTTTTCG

>M6-PGSC0003DMG400006280M6LRR-RLK\_558

GGGAGTTACTCAACTTCTGCAGCTGAAGTATTTGAATTTGGGGGTAACTACTTTTTCGGGGAAAATTCCT  
CTGAGTTATGGTAGTTTTAATCAGCTTGAGTTCCTGTCTCTTGCTGGGAA

>M6-PGSC0003DMG400006280M6LRR-RLK\_62

GCATCTTCTTCTTCTTCTTACCTTTGATGTTTTCTAAAGTATTTGAACTTCAATTACTAGTTATCTAAAT  
GGCTACTTCTAACACAAGTCTTCTTTTTTCGCGTATTTCTACTCG

>M6-PGSC0003DMG400006280M6LRR-RLK\_620

AAATTCCTCTGAGTTATGGTAGTTTTAATCAGCTTGAGTTCCTGTCTCTTGCTGGGAATGACTTGCACGGT  
CCTATACCAAGGGAGCTGGGCAACGTTACGAGCCTCAGGTGGTTACAAT

>M6-PGSC0003DMG400006280M6LRR-RLK\_682

TTGCACGGTCTATACCAAGGGAGCTGGGCAACGTTACGAGCCTCAGGTGGTTACAATTGGGTTATTAT  
AATCAATTTGATGAGGGGATTCGCCAGAGTTGGGGAACTTGTAATTTG

>M6-PGSC0003DMG400006280M6LRR-RLK\_744

TTATTATAATCAATTTGATGAGGGGATTCGCCAGAGTTGGGGAACTTGTAATTTGGTTCATCTAGAT  
CTTTCTAGCTGTAACCTTGACGGGTTTCGATTCCAGCAGAATTGGGCAATCT

>M6-PGSC0003DMG400006280M6LRR-RLK\_806

ATCTAGATCTTTCTAGCTGTAACCTTGACGGGTTTCGATTCCAGCAGAATTGGGCAATCTTAATATGTTGGA  
TACTCTTTTCTTGCAAAAAATCAACTTACTGGTGTATTTCTCCTCAGC

>M6-PGSC0003DMG400006280M6LRR-RLK\_868

ATGTTGGATACTCTTTTCTTGCAAAAAATCAACTTACTGGTGTATTTCTCCTCAGCTAGGGAATTTGAC  
AAGGTTAAAATCTCTTGATATATCCGTCAATGAACTCACAGGAGAGATA

>M6-PGSC0003DMG400006280M6LRR-RLK\_930

GAATTTGACAAGGTTAAAATCTCTTGATATATCCGTC AATGAACTCACAGGAGAGATACCAGTTGACTTG  
TCAGGACTCAAGGAGCTCACATTGTTGAACCTCTTCATCAACAATTTGCA

>M6-PGSC0003DMG400006280M6LRR-RLK\_992

TTGACTTGTCAGGACTCAAGGAGCTCACATTGTTGAACCTCTTCATCAACAATTTGCACGGTGAGATTCC  
TGGATGTATCGCGGAGCTGCCAAAGTTGGAAATGTTGAATCTTTGGAGGA

>M6-PGSC0003DMG400006364-(rev)M6LRR-RLK\_0

ATGTATCTTGCAAATTATGGGATTAGAGGTAACCTTCACCATCTAAATTTCACTTCTTTTCCCCATCTCCAA  
TTGATTAATTTTTCTAATAACTCACTCAATGGTACACTTCCAAAAAAC

>M6-PGSC0003DMG400006364-(rev)M6LRR-RLK\_1054

ATTTAGGTAACCTTGCACTCTCTAGCGTATCTTGATCTCAGTTATAACATGCTCAGTGGTGAGATACCGTG  
GCACATAGGGAGTTTGAGAAGTTTGAAAGAATGAATCTTTGCGTAATA

>M6-PGSC0003DMG400006364-(rev)M6LRR-RLK\_1116

ATACCGTGGCACATAGGGAGTTTGAGAAGTTTGAAAGAATGAATCTTTGCGTAATAACTTGTCTGGT  
TCAATCCCGCCTAGTTTCAATGAACGTGTTAGTTTGAGGTCAATTGATATA

>M6-PGSC0003DMG400006364-(rev)M6LRR-RLK\_1178

GTCTGGTTCAATCCCGCCTAGTTTCAATGAACGTGTTAGTTTGAGGTCAATTGATATATCTTGCAATCAAT  
TGGTTGGTCCCCTTCCCAAGATCGTGGCATTTCAAAATGCATCGCGTGA

>M6-PGSC0003DMG400006364-(rev)M6LRR-RLK\_124

TCAATCTTTCAAGATTAAGTTTCTATATTTGAGTTACAATCATTTTGATGGTGTGATTCCACATGAAATA  
GGGCTATTGAAGAATCTCAAGCACTTAGACTTGTGCGTAAATCTTTTTA

>M6-PGSC0003DMG400006364-(rev)M6LRR-RLK\_1240

GCAATCAATTGGTTGGTCCCCTTCCCAAGATCGTGGCATTTCAAAATGCATCGCGTGAAGAATTAAGAG  
ATAACAAGGATTTATGCAGCAATGATCATATTGGTATGAGACCTTGCTCTT

>M6-PGSC0003DMG400006364-(rev)M6LRR-RLK\_1302

TTAAGAGATAACAAGGATTTATGCAGCAATGATCATATTGGTATGAGACCTTGCTCTTCATTGAGGAAAA  
AAGAGAGAACAAGTAGAAAGCTTATACTGACCTTAACTCTGTCTCTAATT

>M6-PGSC0003DMG400006364-(rev)M6LRR-RLK\_1364

GAGGAAAAAAGAGAGAACAAGTAGAAAGCTTATACTGACCTTAACTCTGTCTCTAATTTGGTTGCCTTG  
CTTCTACTTGTGATTACTTGTATACTTTTTCGAATGAAAAGGAAAAGAAA

>M6-PGSC0003DMG400006364-(rev)M6LRR-RLK\_1426

TTGCCTTGCTTCTACTTGTGATTACTTGTATACTTTTTCGAATGAAAAGGAAAAGAAATAGAAGTATTCAG  
CCTAGAGAACCATCCAGCAATTCTTTTTTCAGTTAGGGACTTTGATGGGA

>M6-PGSC0003DMG400006364-(rev)M6LRR-RLK\_1488

AGTATTCAGCCTAGAGAACCATCCAGCAATTCTTTTTTCAGTTAGGGACTTTGATGGGAAAATAGCACATG  
AAAACATAATTGCAGCAACAGAAAACCTTTGATAGCAAATATTGCATTGGG

>M6-PGSC0003DMG400006364-(rev)M6LRR-RLK\_1550

AGCACATGAAAACATAATTGCAGCAACAGAAAACCTTTGATAGCAAATATTGCATTGGGAAGGGAGGAC  
ATGGAAGTGTCTATAAGGTTGAGTTACCATGTGGTCAAGTTGTTGCAGTGAA

>M6-PGSC0003DMG400006364-(rev)M6LRR-RLK\_1612

GAGGACATGGAAGTGTCTATAAGGTTGAGTTACCATGTGGTCAAGTTGTTGCAGTGAAAAAAGTTCATG  
CTTTAGAAGATGAAGAATCTGATGACAACCTTGATCAAAGCTTTTTCAAAG

>M6-PGSC0003DMG400006364-(rev)M6LRR-RLK\_1674

GTTTCATGCTTTAGAAGATGAAGAATCTGATGACAACCTTGATCAAAGCTTTTTCAAAGAGATACAAGCTC  
TAGTAAACATCCGCCATCGGAATATTGTGAAGCTTTATGGGTTCTGTTCA

>M6-PGSC0003DMG400006364-(rev)M6LRR-RLK\_1736

ACAAGCTCTAGTAAACATCCGCCATCGGAATATTGTGAAGCTTTATGGGTTCTGTTACACACGCGGCCAT  
TCATTCTTGTTTATGAGTTGTTGGAAGGAGGAACTTGTCTCAAACCT

>M6-PGSC0003DMG400006364-(rev)M6LRR-RLK\_1798

CGCGCCATTCACTTCTTGTTTATGAGTTGTTGGAAGGAGGAACTTGTCTCAAACCTTAGCAATGAGG  
GTAGAGCAAGAGATTTAAATTGGCTCAAGAGGGTTGATATTGTCAAGGGGA

>M6-PGSC0003DMG400006364-(rev)M6LRR-RLK\_186

CATGAAATAGGGCTATTGAAGAATCTCAAGCACTTAGACTTGTCTGGTAAATCTTTTTATTGGCTTTATCCC  
TTCATCTATTGGTAACTTGATTAACCTTGAGTTGTTATTTTTATCAGTT

>M6-PGSC0003DMG400006364-(rev)M6LRR-RLK\_1860

AATGAGGGTAGAGCAAGAGATTTAAATTGGCTCAAGAGGGTTGATATTGTCAAGGGGATAGCAAACGC  
GTTGTGTTACTTGCATCACGCGTGTTCACCTCCTATAGTTCATAGAGATATA

>M6-PGSC0003DMG400006364-(rev)M6LRR-RLK\_1922

AAACGCGTTGTGTTACTTGCATCACGCGTGTTCACCTCCTATAGTTCATAGAGATATATCAAGTAACAAT

GTTCTCTTAGATGATGAAGGCAATCCCCATGTTTCTGATTTTGGTACTGC

>M6-PGSC0003DMG400006364-(rev)M6LRR-RLK\_1984

GTAACAATGTTCTCTTAGATGATGAAGGCAATCCCCATGTTTCTGATTTTGGTACTGCTAAACTCTTAAGG  
CCTAACTCCACCAACTGGACATCGTTTGCTGGAACCTTGGCTATGTAG

>M6-PGSC0003DMG400006364-(rev)M6LRR-RLK\_2170

GAAACAAATGGAGTATATTTTTAACTAGGAATTCATTGCTTCAAAATTGTTCACTCTTTCACACAATTTTCT  
AATTTGTTTGTAGAGCTTGCTTACACAATGAAGGTAATGAGAAGAGT

>M6-PGSC0003DMG400006364-(rev)M6LRR-RLK\_2232

ACAATTTTCTAATTTGTTTGTAGAGCTTGCTTACACAATGAAGGTAATGAGAAGAGTGATGTTTACAGC  
TTCGGGGTGATATCACTAGAAGTTATTATAGGTCATCATCCAGGTGATAT

>M6-PGSC0003DMG400006364-(rev)M6LRR-RLK\_2294

TTTACAGCTTCGGGGTGATATCACTAGAAGTTATTATAGGTCATCATCCAGGTGATATTACTCAAGCTAT  
ATCATCATTTTCGCCAGCATCAGGAGCGAATGGAACGCTGTAAAGGAAT

>M6-PGSC0003DMG400006364-(rev)M6LRR-RLK\_2356

CAAGCTATATCATCATTTTCGCCAGCATCAGGAGCGAATGGAACGCTGTAAAGGAATTGATTGACAAA  
CGGACACTAGCTCCTGGAAAACAAGAAGCAGAAGAATTGATCAAGATCACA

>M6-PGSC0003DMG400006364-(rev)M6LRR-RLK\_2418

TGACAAACGGACACTAGCTCCTGGAAAACAAGAAGCAGAAGAATTGATCAAGATCACAAAAGTAGCATT  
CGCGTGTCTTCATCAGAGTCCTCTAGCTCGGCCAAGTATGAAGCAAGTTTG

>M6-PGSC0003DMG400006364-(rev)M6LRR-RLK\_248

CTTTATCCCTTCATCTATTGGTAACTTGATTAACTTGAGTTGTTATTTTTATCAGTTAATGAACTCTATGG  
CCCTGTCCCTTCAAGTTTTGGTAACTTAAAATCCCTTGTGCATTTGTG

>M6-PGSC0003DMG400006364-(rev)M6LRR-RLK\_2480

TAGCATTGCGTGTCTTCATCAGAGTCCTCTAGCTCGGCCAAGTATGAAGCAAGTTTGTGCATCTTTATCA  
AAAGAAAATTGGCCTTCAAAGGCTTGTCTCCACTGTTACATTAGGCC

>M6-PGSC0003DMG400006364-(rev)M6LRR-RLK\_2512

GCTCGGCCAAGTATGAAGCAAGTTTGTGCATCTTTATCAAAGAAAATTGGCCTTCAAAGGCTTGTCTCT  
CCACTGTTACATTAGGCCAGTTGATTGAACCAACACTACTAAGATGTTGA

>M6-PGSC0003DMG400006364-(rev)M6LRR-RLK\_310

AACTCTATGGCCCTGTCCTTCAAGTTTTGGTAACTTAAAATCCCTTGTGCATTTGTGTTTGCTTAGAAAT  
AAACTCAATGGATCACTTCCAAAAGAGTTTGAAAATCTTACACATATGC

>M6-PGSC0003DMG400006364-(rev)M6LRR-RLK\_372

CTTAGAAATAAACTCAATGGATCACTTCCAAAAGAGTTTGAAAATCTTACACATATGCAAATTTTTCAAGT  
AGCAGAGAACAATTTTTCTGGTCATTTGCCACAAAATGTGTGCCTTGGT

>M6-PGSC0003DMG400006364-(rev)M6LRR-RLK\_434

TTTTCAAGTAGCAGAGAACAATTTTTCTGGTCATTTGCCACAAAATGTGTGCCTTGGTGGATCACTTGCTA  
AATTCATAGCATATGACAATAAGTTTATTGGTCATGTCCCAAAAACCTT

>M6-PGSC0003DMG400006364-(rev)M6LRR-RLK\_496

CACTTGCTAAATTCATAGCATATGACAATAAGTTTATTGGTCATGTCCCAAAAACCTTGAAAATTGCTCT  
ACGCTATCAAGAGTTAGGCTTGATGGTAACCAATTGTCTAGCAATATAT

>M6-PGSC0003DMG400006364-(rev)M6LRR-RLK\_558

AATTGCTCTACGCTATCAAGAGTTAGGCTTGATGGTAACCAATTGTCTAGCAATATATCAGAAGCTTTTG  
GTGTCTATCCAAGTCTAGTTTACATGGATTTGAGTCACAATAAACTATAT

>M6-PGSC0003DMG400006364-(rev)M6LRR-RLK\_62

CCATCTCCAATTGATTAATTTTTCTAATAACTCACTCAATGGTACACTTCCAAAAACATGTTCAATCTTTC  
AAGATTAAGTTTCCTATATTTGAGTTACAATCATTTTGATGGTGTGAT

>M6-PGSC0003DMG400006364-(rev)M6LRR-RLK\_620

AGCTTTTGGTGTCTATCCAAGTCTAGTTTACATGGATTTGAGTCACAATAAACTATATGGCGAGTTATCGT  
CACAATGGGGCTTTTCTCATAATCTAACAAGTTTGAAGATCTCCAAGAA

>M6-PGSC0003DMG400006364-(rev)M6LRR-RLK\_682

AGTTATCGTCACAATGGGGCTTTTCTCATAATCTAACAAGTTTGAAGATCTCCAAGAACAACCTGTTTGGT  
GCCATACCAGTTGAAATAGGAAATTTGATCAAACCTAGAAATGCTTGATC

>M6-PGSC0003DMG400006364-(rev)M6LRR-RLK\_744

TTGTTTGGTGCCATACCAGTTGAAATAGGAAATTTGATCAAACCTAGAAATGCTTGATCTCTCTTCAAATCA  
CTTGACCGGCGAAATTCCTAAAAGTTTLAGAGAGGCTAACTCTCTTGCTG

>M6-PGSC0003DMG400006364-(rev)M6LRR-RLK\_806

TTCAAATCACTTGACCGGCGAAATTCCTAAAAGTTTLAGAGAGGCTAACTCTCTTGCTGGTACTTGATTTAC  
ATGAGAATATAATTTAGGAAAAATACCTATAGAAGTGGGGAAGTTGTC



>M6-PGSC0003DMG400006364-(rev)M6LRR-RLK\_868

TTGATTTACATGAGAATATAATTTTCAGGAAAAATACCTATAGAAGTGGGGAAGTTGTCTAAACTTACAAG  
ACTTAACTTAGGTGCGAATAATATGAGTGGAACGATTCCAGGAGAAATAG

>M6-PGSC0003DMG400006364-(rev)M6LRR-RLK\_930

CTTACAAGACTTAACTTAGGTGCGAATAATATGAGTGGAACGATTCCAGGAGAAATAGGAGATTGTAG  
GCAGCTTTGGTACTTGAATTTAAGCAAGAACATGCTGAACACAACCTATTCCCT

>M6-PGSC0003DMG400006364-(rev)M6LRR-RLK\_992

TTGTAGGCAGCTTTGGTACTTGAATTTAAGCAAGAACATGCTGAACACAACCTATTCCCTTCTAATTTAGGT  
AACTTGCACTCTCTAGCGTATCTTGATCTCAGTTATAACATGCTCAGTGG

>M6-PGSC0003DMG400006422M6LRR-RLP\_0

ATGGTCAAAGGAAAAAAGGAAGTGGGAGATGATGATGAGTTAAATTATTCCTACTTTTTGGGAGTTTTG  
AGAGAGAGTGCCATAGTGACGAATAAAGGCAACAGGTACCAGTATGACACC

>M6-PGSC0003DMG400006422M6LRR-RLP\_128

GTTGTTTACAAGTATGGACATGTCTAGCAATAATCTCTCTGGGGATATTCCTATAAGTTTAACTTCTTG  
CAGGATTAAGATCATTTAATTTTTCTAAAATAACCTAACTGGTAGGAT

>M6-PGSC0003DMG400006422M6LRR-RLP\_192

CTTCTTGCAGGATTAAGATCATTTAATTTTTCTAAAATAACCTAACTGGTAGGATTCCAAATGACATTGG  
TGACATGAAAGTTTTGGAATCTGTTGATCTTTCAGAAAATCAATTTTAT

>M6-PGSC0003DMG400006422M6LRR-RLP\_256

ACATTGGTGACATGAAAGTTTTGGAATCTGTTGATCTTTCAGAAAATCAATTTTATGGTCAAATCCCACA  
AAGCTTTTCAAGTTTGTTCACCTTGAGCTACTTGAATCTATCTGATAACA

>M6-PGSC0003DMG400006422M6LRR-RLP\_320

CCCACAAAGCTTTTCAAGTTTGTTCACCTTGAGCTACTTGAATCTATCTGATAACAATTTGTCAGGTATGA  
TACCATTGAGCACTCAACTTCAAAGCTTTGATCCCACGAGTTTTCAAGG

>M6-PGSC0003DMG400006422M6LRR-RLP\_384

GGTATGATACCATTGAGCACTCAACTTCAAAGCTTTGATCCCACGAGTTTTCAAGGAAACAAACTCTGCG  
GGCTTCCACTCTCGCTGAATTGTAGTTCAAATGGTAATATTCCAAATCAT

>M6-PGSC0003DMG400006422M6LRR-RLP\_573

GCACTAAGCTTTTGGGGTGTGGTTTCATTGCTTTTCAAGAGATCATGGAGACATGCTTATTTTTGTTT

TCTAGACCGTAGCTGGGAAATGTTGCTTGCAAAGTTATCAGTATGTTGA

>M6-PGSC0003DMG400006422M6LRR-RLP\_64

TTTTGAGAGAGAGTGCCATAGTGACGAATAAAGGCAACAGGTACCAGTATGACACCATTTTGGCGTTGT

TTACAAGTATGGACATGTCTAGCAATAATCTCTCTGGGGATATTCCTATAA

>M6-PGSC0003DMG400006458M6LRR-RLP\_0

TTTCTCCTCTCCATTCCCTATAAGTGTGTTGTGTCAACCACACACAAGTAACGACCCCTCAATTTGTCAATAAA

CAAATAATAGGATTAGTTAATTAACAAAGGAAGAAGAAGATTATGGAA

>M6-PGSC0003DMG400006458M6LRR-RLP\_1037

TTCTGACAAGCAGTCACGACTAGTATTTTGGAAAACATTAATTTTTCAATCATACCAAATACAGTCGTTGC

TTCCATTTTTAGTTGCTTTTGGTTCCTTGTACTTTCACAAATATTTAGT

>M6-PGSC0003DMG400006458M6LRR-RLP\_1098

CAGTCGTTGCTTCCATTTTTAGTTGCTTTTGGTTCCTTGTACTTTCACAAATATTTAGTTTTGTTAATTTCT

TCCATATTTATGGAAAGATATATTTATCATTTACCTTTCTTCTATTT

>M6-PGSC0003DMG400006458M6LRR-RLP\_1403

AAAGAGGTGTCAAATAAGAATTTAATGTACTACTATATTTTCTTAAAATATTCCCCTTTACTTGATAATG

AGTCGTTTATGTGGACTATACAGTATAATATTTTTCAGGAATAAAATGCA

>M6-PGSC0003DMG400006458M6LRR-RLP\_1586

TCCAAATCAACCGTCCTAACGTCATATTTTGTGTTTCATCATTATTGTAAATTGACCCAATAGTAAGGATA

AAGTCTTGATAAGTTTATTTTTTACTTCATTGATATATTTAAAAAAA

>M6-PGSC0003DMG400006458M6LRR-RLP\_1647

AGTAAGGATAAAGTCTTGATAAGTTTATTTTTTACTTCATTGATATATTTAAAAAAAATATAACAACTTG

AAAGGTTTTCCAATTATTCGTATTAACGCAATAGTATATTTTTCTGGT

>M6-PGSC0003DMG400006458M6LRR-RLP\_1708

TAACAACTTGAAAGGTTTTCCAATTATTCGTATTAACGCAATAGTATATTTTTCTGGTTGTTATATGTAT

GTGTGAATTGTGGATTTACTTAAATATAATTGACAAAATTTGACAAAAC

>M6-PGSC0003DMG400006458M6LRR-RLP\_1769

TTATATGTATGTGTGAATTGTGGATTTACTTAAATATAATTGACAAAATTTGACAAAACACGATAGTACA

TAACGTAACAACATTTTCGTTAATTATATATCCCGTCTTTGTTTATAGTC

>M6-PGSC0003DMG400006458M6LRR-RLP\_1830

GATAGTACATAACGTAACAACATTTTCGTTAATTATATATCCCGTCTTTGTTTATAGTCTAATACAATGTAT  
ATGTCTCTCATTGTGTTTTACAATGTGTATGTGTCTCACTCGTCTCTC

>M6-PGSC0003DMG400006458M6LRR-RLP\_1891

ATACAATGTATATGTCTCTCATTGTGTTTTACAATGTGTATGTGTCTCACTCGTCTCTCTTCTTCTATGTATT  
TGTATTTTATAATGTATATGTGTCTCACAATTTCAATTATAAGTACC

>M6-PGSC0003DMG400006458M6LRR-RLP\_1952

CTTCTATGTATTTGTATTTTATAATGTATATGTGTCTCACAATTTCAATTATAAGTACCATACAAATATCTG  
ATACACAGATACGTCGACGGTTTATATTTTTTTTTTATATCAATGTAT

>M6-PGSC0003DMG400006458M6LRR-RLP\_2013

ACAAATATCTGATACACAGATACGTCGACGGTTTATATTTTTTTTTTATATCAATGTATCTATTTTCATATAT  
GTATCGATTTTAAGTAGCATGAATTGTATCATAGATTAACACTTTATC

>M6-PGSC0003DMG400006458M6LRR-RLP\_2074

ATTTTCATATATGTATCGATTTTAAGTAGCATGAATTGTATCATAGATTAACACTTTATCATTTTACTTTCTC  
TGTCCAACAATAGTTGTCCACTATTGACTTGGCATAACGGCATAACCCCT

>M6-PGSC0003DMG400006458M6LRR-RLP\_244

GGAAAAAGTACAAGAAGAAAGATGACAATTAGTATTGTTGAAGAAGAAGAAGAAGAGAGCCCAAAGA  
TTGTGGATCTAAGTGGCATGTCATTAGACTCTCTTCTGTAATCCTACAATC

>M6-PGSC0003DMG400006458M6LRR-RLP\_2684

GAGTATATTTATCCTTTTTCCCTTTTTAGTATAGTGGACAACACTATTGTTGGACAGAGGAAGTACTAGAC  
ACAGGATTTTAGGGTAAGTCACATTCTTATTTGGTTGGACGATTTTCAA

>M6-PGSC0003DMG400006458M6LRR-RLP\_2745

AGTACTAGACACAGGATTTTAGGGTAAGTCACATTCTTATTTGGTTGGACGATTTTCAATTATCATGTATC  
ACTTGTGTATATAGATACATAAACACACATATGTATCTCTCAAAGTTC

>M6-PGSC0003DMG400006458M6LRR-RLP\_2989

ATATATATATCTCTTAAAAAATTTCCACTCGTCTTTTCATGGATACACAAATACACATCCATAGATACGCAA  
TACACATATATATCTCTCAAACACTACTCACTCATTGCAATAGATGCA

>M6-PGSC0003DMG400006458M6LRR-RLP\_305

CAAAGATTGTGGATCTAAGTGGCATGTCATTAGACTCTCTTCTGTAATCCTACAATCAATTTGGGAGC  
TATATCAAATTACATATTTCCAACAATAATCTTCAGGTTAGTCAGTTTT

>M6-PGSC0003DMG400006458M6LRR-RLP\_3050

AGATACGCAATACACATATATATCTCCTCAAAACTACTCACTCATTGCAATAGATGCACAAAAATATAG  
ATACACTTATACATTGATATACATATGTATCTCCTCAAAGTTGCACTCTA

>M6-PGSC0003DMG400006458M6LRR-RLP\_3111

AAAATATAGATACACTTATACATTGATATACATATGTATCTCCTCAAAGTTGCACTCTAATTTGCCATAGA  
TGCACAAATACATATAGTCCCTCTGTAAATCGAGAGTGGAGAGAGGGAG

>M6-PGSC0003DMG400006458M6LRR-RLP\_3172

TTGCCATAGATGCACAAATACATATAGTCCCTCTGTAAATCGAGAGTGGAGAGAGGGAGGAGAGTGGC  
GAATTTTCTAGGAAAAAGGGAAATCTCATTGAGTTATGTAATTTTTTAAAAC

>M6-PGSC0003DMG400006458M6LRR-RLP\_3233

GAGTGGCGAATTTTCTAGGAAAAAGGGAAATCTCATTGAGTTATGTAATTTTTTAAAACATAAATAGGT  
TGAGTAGATATATACTAGCTATGCTTGATTAATTATGTAATTTTTTCAT

>M6-PGSC0003DMG400006458M6LRR-RLP\_3294

TAAATAGGTTGAGTAGATATATACTAGCTATGCTTGATTAATTATGTAATTTTTTCATGTATAATTCTCA  
CTTCATTGTTTTTGTGTATGTTTGACAGAGTATACCAGAGTCTTTAAC

>M6-PGSC0003DMG400006458M6LRR-RLP\_3355

ATAATTCTCACTTCATTGTTTTTGTGTATGTTTGACAGAGTATACCAGAGTCTTTAACAGCAAGACTACT  
TAACTTGTTGAGTTAGATATGCATTCAAATCAGCTCAACTTCATTCTCT

>M6-PGSC0003DMG400006458M6LRR-RLP\_3416

CAAGACTACTTAACTTGGTTGAGTTAGATATGCATTCAAATCAGCTCAACTTCATTCTCTAACTCAATAGGT  
TGCTTATCAAAGCTCAAACCTTCTCAACATTTCTGGGAATCTCCTTCTTT

>M6-PGSC0003DMG400006458M6LRR-RLP\_3477

CTCAATAGGTTGCTTATCAAAGCTCAAACCTTCTCAACATTTCTGGGAATCTCCTTCTTTGCTCCCTAAAAC  
TATCGAGAATTGTAGGTTAGTCATCTAAACATTTCTAATCCATAACAT

>M6-PGSC0003DMG400006458M6LRR-RLP\_3538

CTCCCTAAAACATCGAGAATTGTAGGTTAGTCATCTAAACATTTCTAATCCATAACATTATCACTACAAC  
AAAAGAGATATTTAGCAGCAATTGAGTTACTGTCATTGCATTCAAAGTC

>M6-PGSC0003DMG400006458M6LRR-RLP\_3599

TCACTACAACAAAAGAGATATTTAGCAGCAATTGAGTTACTGTCATTGCATTCAAAGTCGCTAAAGCCTT

TAGAACATAATAAGTATAACCTTTTCTTCTACTTGCAGATCATTGGAAG

>M6-PGSC0003DMG400006458M6LRR-RLP\_366

TTTGGGAGCTATATCCAAATTACATATTTCCAACAATAATCTTCAGGTTAGTCAGTTTTCGTACACCTCAA

TTAATTTTTGTGAAATATTTGTTACCTTCTATCAGCAATAAGCAATATG

>M6-PGSC0003DMG400006458M6LRR-RLP\_3660

TAAAGCCTTTAGAACATAATAAGTATAACCTTTTCTTCTACTTGCAGATCATTGGAAGAGTTGAATGCCA

ACTTCAATATGCTTACTCATTTACCGGACACCATTGGATTTGAGCTCAT

>M6-PGSC0003DMG400006458M6LRR-RLP\_3721

TTGAATGCCAACTTCAATATGCTTACTCATTTACCGGACACCATTGGATTTGAGCTCATAAATCTCAAGAA

GCTATGCATAAATTCAAATAAAATAGCATAACCTTCCTTACTCCACCTCC

>M6-PGSC0003DMG400006458M6LRR-RLP\_3782

ATCTCAAGAAGCTATGCATAAATTCAAATAAAATAGCATAACCTTCCTTACTCCACCTCCCACTTGACCAAC

CTTCGCGTGTTAGATGCTAGGCTAAACTGCCTTAGATCACTCCCCGATG

>M6-PGSC0003DMG400006458M6LRR-RLP\_3843

CTTGACCAACCTTCGCGTGTTAGATGCTAGGCTAAACTGCCTTAGATCACTCCCCGATGATCTTGAGAAC

CTAATCAACCTTGAAATCCTTAACGTTAGTCAAATTTCCAGTACCTCTC

>M6-PGSC0003DMG400006458M6LRR-RLP\_3904

CTTGAGAACCTAATCAACCTTGAAATCCTTAACGTTAGTCAAATTTCCAGTACCTCTCAAAGTTGCCGTA

TTCAGTAGGATTTCTCATTCTCTTCATGAACTAGATGTTAGTTACAAC

>M6-PGSC0003DMG400006458M6LRR-RLP\_3965

AGTTGCCGTATTCAAGTAGGATTTCTCATTCTCTTCATGAACTAGATGTTAGTTACAACAAGATTACTGAA

TTACCAGATTCCATCGGATGCTTGAAGAAGCTCCAAAAGCTGAGTGTAG

>M6-PGSC0003DMG400006458M6LRR-RLP\_4026

GATTACTGAATTACCAGATTCCATCGGATGCTTGAAGAAGCTCCAAAAGCTGAGTGTAGAAGGCAACCG

CCTTGTTTCTCCCCACCGGAGGTAGTGGAGCAAGGGATACGTGCAGTTAA

>M6-PGSC0003DMG400006458M6LRR-RLP\_4148

AATACTTGTGTGAAAAGATAAATGGAATGCATGACAAGTCCCCTAAGAAGAAGTCATGGTTTGGAAAGC

TAGCAAGATGTAGCACATTTAGTGGTGCTAACATACCAAGAGATGATAGAG

>M6-PGSC0003DMG400006458M6LRR-RLP\_4209

TGGAAAGCTAGCAAGATGTAGCACATTTAGTGGTGCTAACATACCAAGAGATGATAGAGAGGACTTTG  
GTGTTCCAAGCAATCGTACTATCGATGCAATTGCCTCACCACGATTTATGGG

>M6-PGSC0003DMG400006458M6LRR-RLP\_427

TACACCTCAATTAATTTTTGTGAAATATTTGTTACCTTCTATCAGCAATAAGCAATATGTACTAGATGACT  
CTGTTCATAGAGGTTAGGATAGATGAATAAATCACTTAGTTTTTTTT

>M6-PGSC0003DMG400006458M6LRR-RLP\_4270

GACTTTGGTGTTCCAAGCAATCGTACTATCGATGCAATTGCCTCACCACGATTTATGGGAATGCTTTCTCC  
TCGTCGTCTTCTATCTCCAAAAACCTACTTCTCCAAATAAGGGACATTG

>M6-PGSC0003DMG400006458M6LRR-RLP\_4331

TGCTTTCTCCTCGTCGTCTTCTATCTCCAAAAACCTACTTCTCCAAATAAGGGACATTGCAATTTGCTTGGT  
AGCTCTTAGCTTGTTTTCTTTACGTTTGAAATCGTGCAATGTGTGCT

>M6-PGSC0003DMG400006458M6LRR-RLP\_4392

ATTTGCTTGGTAGCTCTTAGCTTGTTTTCTTTACGTTTGAAATCGTGCAATGTGTGCTAGATCAAGCTGT  
ACATTATGTTCTGTAGATTTTGTGTCTTTGAGATAGTACAGATTTTCA

>M6-PGSC0003DMG400006458M6LRR-RLP\_4453

ATCAAGCTGTACATTATGTTCTGTAGATTTTGTGTCTTTGAGATAGTACAGATTTTCATAGATGATTAGC  
CTCATGAGTCATGGGTATGTTTGAGAGGTAACAATGCGGTACAAATTTA

>M6-PGSC0003DMG400006458M6LRR-RLP\_4514

GATGATTAGCCTCATGAGTCATGGGTATGTTTGAGAGGTAACAATGCGGTACAAATTTACCCGAACAGA  
GTGTTTATATCAAATCATATGAATAATTACATCGAATCAAATTTGTTATC

>M6-PGSC0003DMG400006458M6LRR-RLP\_4575

CGAACAGAGTGTATATCAAATCATATGAATAATTACATCGAATCAAATTTGTTATCATAACATGTCTT  
GTATTATATCACTTGTACAAAACTCATTTTGATCATTAAATTATCAAAA

>M6-PGSC0003DMG400006458M6LRR-RLP\_4636

AACATGTCTTGTATTATCACTTGTACAAAACTCATTTTGATCATTAAATTATCAAACTCAAAAAAAAA  
AAAATTAATAATCTTACATAAACAGAACCATTAAAAAAGCCCCAAAAA

>M6-PGSC0003DMG400006458M6LRR-RLP\_4697

CAAAAAAAAAAATTAATAATCTTACATAAACAGAACCATTAAAAAAGCCCCAAAAAACAGAACAAG  
ACTCTTAGAAAGCAAACAGAACTAATGAAAACTTCCCAAATCACAATT

>M6-PGSC0003DMG400006458M6LRR-RLP\_4758

AGAACAAGACTCTTAGAAAGCAAACAGAACTAATGAAAACTCCCAAATCACAAATTATGAATTAGT  
TTCTTGCACTTGCGATTCATTTCTTTGCAAATCCGATTCACCTTCTCCTATT

>M6-PGSC0003DMG400006458M6LRR-RLP\_4819

GAATTAGTTTCTTGCACTTGCGATTCATTTCTTTGCAAATCCGATTCACCTTCTCCTATTAACGACCATTCT  
CTAATGGTAGACAAAAGCTGGCTTCCATGATCGCGATTTATTTGACCTT

>M6-PGSC0003DMG400006458M6LRR-RLP\_488

CTAGATGACTCTGTTCATAGAGGTTAGGATAGATGAATAAATTCACCTTAGTTTTTTTTTTTTTTGTCTTCG  
CTAGAATTAATTGAACAACCACTTCGATGATCACTATGTGCTATCGTG

>M6-PGSC0003DMG400006458M6LRR-RLP\_4880

ACGACCATTCTCTAATGGTAGACAAAAGCTGGCTTCCATGATCGCGATTTATTTGACCTTTCTCAAATTTG  
CACGAAGTTGTGTTAGTTGCACCACTTTTAGCTATGCAACTGAGTTTTTC

>M6-PGSC0003DMG400006458M6LRR-RLP\_4941

TCCAAATTTGCACGAAGTTGTGTTAGTTGCACCACTTTTAGCTATGCAACTGAGTTTTCTAGCTATTGGAA  
CTAAATCCATTGGAGAAACACTTGATTGAAATAAGGATTTAGGCAATAA

>M6-PGSC0003DMG400006458M6LRR-RLP\_5002

GCTATTGGAACATAATCCATTGGAGAAACACTTGATTGAAATAAGGATTTAGGCAATAAATAGTAAATA  
TGACCTTGTCTAACTTAGTATCAGGGTTGAGAGGCTTTGAAGCAGCAGAT

>M6-PGSC0003DMG400006458M6LRR-RLP\_5063

AGTAAATATGACCTTGTCTAACTTAGTATCAGGGTTGAGAGGCTTTGAAGCAGCAGATAAAAGTTGGG  
CATGAGTGAAGACAAAGTGTGTTTTGAGATTTGGCCATGAGTTCATGTACAC

>M6-PGSC0003DMG400006458M6LRR-RLP\_5124

AAGTTGGGCATGAGTGAAGACAAAGTGTGTTTTGAGATTTGGCCATGAGTTCATGTACACTAATAGGATG  
ATCAAATCCTCTACATGACCATTCAAATGTACAACCTAATAGTCTTTAA

>M6-PGSC0003DMG400006458M6LRR-RLP\_5185

ATAGGATGATCAAATCCTCTACATGACCATTCAAATGTACAACCTAATAGTCTTTAATATATCACATGA  
TTTGGGAGAAAAACAACAATATGTTATTTTGTGATGTACATATTGTTAATA

>M6-PGSC0003DMG400006458M6LRR-RLP\_5246

TATCACATGATTTGGGAGAAAAACAACAATATGTTATTTTGTGATGTACATATTGTTAATATTTTCCTTATTTT

TCTCTAGCTAGTGTGTAAAAGGGTCCCAAAGAAGATGTCCTTTTATA

>M6-PGSC0003DMG400006458M6LRR-RLP\_5307

TTCTTATTTCTCTCTAGCTAGTGTGTAAAAGGGTCCCAAAGAAGATGTCCTTTTATATAAGGGGAAAG  
ATGGTGCTGAAACCGGGTTGTGGTGCGGTAGTGGAATTGCTCCACCCTTA

>M6-PGSC0003DMG400006458M6LRR-RLP\_549

TTTTGTCTTCGCTAGAATTAATTGAACAACCACTTCGATGATCACTATGTGCTATCGTGAATTATTTATTTA  
TGAGAATTTTATTCATGATAGAATTTTTTAATCTTTGATTGGAAATT

>M6-PGSC0003DMG400006458M6LRR-RLP\_5490

ATGGGCCTTGCAATGTGCAAATACAGATTTAGTCGGGGATGGGCCCTACAATGCACAATTCAGATTTAA  
TCTAAGCTCGAATGCGGACTCCGGATATCGAGTAGAAACAAAAAAATGGT

>M6-PGSC0003DMG400006458M6LRR-RLP\_5551

AGATTTAATCTAAGCTCGAATGCGGACTCCGGATATCGAGTAGAAACAAAAAAATGGTGGTGGGAAA  
GAGTTGTGGAGATAGATGATGGGAACACGCTATTTAAGTTAGGAATTTTTTA

>M6-PGSC0003DMG400006458M6LRR-RLP\_5612

TGGGAAAGAGTTGTGGAGATAGATGATGGGAACACGCTATTTAAGTTAGGAATTTTTTATCTACTTCAC  
GGCTTAAGTGGCACTCTCAATAGGATTTTCTTCATACCAAGGCTCAAAGTG

>M6-PGSC0003DMG400006458M6LRR-RLP\_5643

ACACGCTATTTAAGTTAGGAATTTTTTATCTACTTCACGGCTTAAGTGGCACTCTCAATAGGATTTTCTTC  
ATACCAAGGCTCAAAGTGAGACTTGTGGTTAAGGATAGAGCAATTTTCAT

>M6-PGSC0003DMG400006458M6LRR-RLP\_61

TTGTCAATAAACAATAATAGGATTAGTTAATTAACAAAGGAAGAAGAAGATTATGGAATTTCAATGAT  
GATTTGTGTTAGGATTAAGAGATCATGAAGATGAGGATGGAATTAGTTGAA

>M6-PGSC0003DMG400006458M6LRR-RLP\_610

TTATTTATTTATGAGAATTTTATTCATGATAGAATTTTTTAATCTTTGATTGGAAATTAAGTGAAAATATC  
TTCTTTTTGAAATAAGTGGTGGCTAAAGTATTTGATATGAAGATAAGA

>M6-PGSC0003DMG400006458M6LRR-RLP\_671

GTGAAAATATCTTCTTTTTGAAATAAGTGGTGGCTAAAGTATTTGATATGAAGATAAGATAATTATGAAG  
AAAAATGTTTTAGTCAAATCGAGTGAAATTATTTTTTTCATTTTGACTG

>M6-PGSC0003DMG400006458M6LRR-RLP\_732



ATTATGAAGAAAAATGTTTTAGTCAAATCGAGTGAAATTATTTTTTCATTTTGGACTGGAGGCGAACTA  
GTTGATTGCTTTGAATTGTATCAGCAACACAAGGACACTATTA AAAACAC

>M6-PGSC0003DMG400006458M6LRR-RLP\_793

GGCGAACTAGTTGATTGCTTTGAATTGTATCAGCAACACAAGGACACTATTA AAAACACTAGTTGATTGC  
TTTGAATTGTATCAGCAACACAAGGACACTATTA AAAACACTATTGCATT

>M6-PGSC0003DMG400006458M6LRR-RLP\_854

GTTGATTGCTTTGAATTGTATCAGCAACACAAGGACACTATTA AAAACACTATTGCATTTCATAAATGTAT  
GATTAATTATATATTAATTTATGTCGATATTAATAGGTGGATGTGCACT

>M6-PGSC0003DMG400006458M6LRR-RLP\_915

ATAAATGTATGATTAATTATATATTAATTTATGTCGATATTAATAGGTGGATGTGCACTACCTATATAGGT  
GGATCTGCCTCTAATATAATTTTGACCAAAGAATATTTTCTAAAATA

>M6-PGSC0003DMG400006458M6LRR-RLP\_976

CTATATAGGTGGATCTGCCTCTAATATAATTTTGACCAAAGAATATTTTCTAAAATATTTTCTGACAAG  
CAGTCACGACTAGTATTTTGAAAACATTAATTTTCAATCATACCAAA

>M6-PGSC0003DMG400006486M6LRR-RLP\_0

CTAAGGTTACAGTGTTGCGAGGGTATAAGCAAATGTCATATTTTGGCTTAGTACATCTCAAGTATTTTCG  
ATGCTAGTTATTGCAAACCTCCATAGTCTGATAGTCCAAGCTCCATCTCTT

>M6-PGSC0003DMG400006486M6LRR-RLP\_1056

GTAAAGAATGTCCATTCAATACCAAGTGGCATCGTAACTTAAAAGAAGTCATCAGTTGTAGTGGGACAT  
CTGAAGAGGGAATGGCTGCCTCCATGTGGTATCTCTGGTTGAAATCCACAT

>M6-PGSC0003DMG400006486M6LRR-RLP\_1109

AGTTGTAGTGGGACATCTGAAGAGGGAATGGCTGCCTCCATGTGGTATCTCTGGTTGAAATCCACATCT  
GTAATTGACCAAGTGAATAATTTCTGTGTTAAAATGGAAAGATGAAGCCTAG

>M6-PGSC0003DMG400006486M6LRR-RLP\_198

ACTTTACAAACACTCGAGCTCGCTGGTGCCAGCATCACAGACCAACAGCTTCGAGATTTATCCTATAAGT  
TCCCAAACATTTCAGAATTGAATCTAACAAGATGCTATAACCTGAAAAAT

>M6-PGSC0003DMG400006486M6LRR-RLP\_264

AAGTTCCCAAACATTTCAGAATTGAATCTAACAAGATGCTATAACCTGAAAAATATAGAGATTCAGAGTG  
AAAAACTCAAGAAATTCACCTTATTAAAGTTGAAGAGTCTGGAAAAACTC

>M6-PGSC0003DMG400006486M6LRR-RLP\_330

AGTGAAAACTCAAGAAATTCACCTTATTAAGTTGAAGAGTCTGGAAAACTCACGATTCAAGCTCCA  
AATTCATTGGAATTTGATTTTCATGGTAGTAAATGGCCCTTCTCATATATG

>M6-PGSC0003DMG400006486M6LRR-RLP\_396

CCAAATTCATTGGAATTTGATTTTCATGGTAGTAAATGGCCCTTCTCATATATGGATACTTCTCCCTAGA  
AAGAGTCCGACTCAATTCTTCTTGCCCGTCATAAACTTTGGATCAGTGG

>M6-PGSC0003DMG400006486M6LRR-RLP\_462

CTAGAAAGAGTCCGACTCAATTCTTCTTGCCCGTCATAAACTTTGGATCAGTGGACAGCAGTTGGTACAC  
GAGCCTTCATCACTTTGTTCAAAGTTCAACTATTCTAAAGATTTTCATAT

>M6-PGSC0003DMG400006486M6LRR-RLP\_528

ACACGAGCCTTCATCACTTTGTTCAAAGTTCAACTATTCTAAAGATTTTCATATTAATAATATTTTGCCGCC  
AGGTAGTTTACATTCTTTTTATGCTTATGTCATTTATTTATGCATTAC

>M6-PGSC0003DMG400006486M6LRR-RLP\_594

GCCGCCAGGTAGTTTACATTCTTTTTATGCTTATGTCATTTATTTATGCATTACTTGTTGAATTTGGCTTAA  
AATATGGCATTGACTAAATTCTTGACAGACCAAAGCATCCTTATTTAT

>M6-PGSC0003DMG400006486M6LRR-RLP\_66

TTCGATGCTAGTTATTGCAAACCTCCATAGTCTGATAGTCCAAGCTCCATCTCTTCAATGCTTTAGATATAG  
AGAACCTACTGAACAGGGAAATCTTCATCCTTGCCAAATTGCTATTTTG

>M6-PGSC0003DMG400006486M6LRR-RLP\_660

GCTTAAAATATGGCATTGACTAAATTCTTGACAGACCAAAGCATCCTTATTTATGAAAATCCAAGAGAAA  
TTGTTATTCCACCAAGCCACAAAATCGAGATATTCATTACATCCATGCTG

>M6-PGSC0003DMG400006486M6LRR-RLP\_726

GAAATTGTTATTCCACCAAGCCACAAAATCGAGATATTCATTACATCCATGCTGCGTGTTGAATCGATCA  
TTGGAATGTTAATGGTCTACCGTCCCTATATCATGTCCATACTTCCATGT

>M6-PGSC0003DMG400006486M6LRR-RLP\_792

ATCATTGGAATGTTAATGGTCTACCGTCCCTATATCATGTCCATACTTCCATGTACAGATAGCAAAGCACT  
ACAGGTGATTTCTTGCTTTACCTCAAAAACGTCTCTTGTGCTTGTATAA

>M6-PGSC0003DMG400006486M6LRR-RLP\_858

GCACTACAGGTGATTTCTTGCTTTACCTCAAAAACGTCTCTTGTGCTTGTATAAACTAAGACATTAATTTG

AGAAGAAAATTTGTTGTTAAATGTTGATTGGTCGTCTCATAAGCATTAT

>M6-PGSC0003DMG400006486M6LRR-RLP\_924

ATTTGAGAAGAAAATTTGTTGTTAAATGTTGATTGGTCGTCTCATAAGCATTATTGTATAATATATCTTAT  
GTTTTTGCTTAAATGCAGGCGATGTCTACACTAAAAGGGTGTACACAAA

>M6-PGSC0003DMG400006486M6LRR-RLP\_990

CTTATGTTTTTGCTTAAATGCAGGCGATGTCTACACTAAAAGGGTGTACACAAAAGCAAAAATGTGGTA  
AAGAATGTCCATTCAATACCAAGTGGCATCGTAACTTAAAAGAAGTCATCA

>M6-PGSC0003DMG400006487M6LRR-RLP\_0

TATAAACCTAACAGCAAACGCGGCACCTACCAAATCAGAAACCCTAATGGAAGAAAGTGTGGATGG  
AGAAGACAGAATATCAGAATTGCCTGTGCATATCATTATCACATCTTATG

>M6-PGSC0003DMG400006487M6LRR-RLP\_1054

GATAAAATGCCCTTCTTATCTATGGATTCTTCTCCCTGGAAAGAGCCCGACTCAATTTCTTCTTGCCGAG  
GACAGTAATATCAAACCTTTGGAGATGTGGATAGCAGTTGGTACACAAAC

>M6-PGSC0003DMG400006487M6LRR-RLP\_1116

CTTGCCGAGGACAGTAATATCAAACCTTTGGAGATGTGGATAGCAGTTGGTACACAAACCTTAATCACTTT  
GTTCAAACCTTCAACTATTCTAAAGTTTGTATGTTAGTAATATTTTGCCG

>M6-PGSC0003DMG400006487M6LRR-RLP\_1178

ATCACTTTGTTCAAACCTTCAACTATTCTAAAGTTTGTATGTTAGTAATATTTTGCCGCAAGGTACTTTCC  
ATTCTTTTTGTGCCATTGATTTATGCATTAATTGTTGAATTTGGTTTTA

>M6-PGSC0003DMG400006487M6LRR-RLP\_124

ACTAACCTCGACCTCAGAGAGGCGGCATAACTTGTGTTTTATCCAAGAAATGGCAGTATTATTGGCTCT  
CAAGACCTTATTTGCTGTTCCGTCAATGTAAAGGCAACAATTGTATACCC

>M6-PGSC0003DMG400006487M6LRR-RLP\_1240

GTACTTTCCATTCTTTTTGTGCCATTGATTTATGCATTAATTGTTGAATTTGGTTTTAAGCTATGTCATTGG  
CAAAATCTTGACAGACCAAAAACATCCTTATTTATGAAAATCCAAGAG

>M6-PGSC0003DMG400006487M6LRR-RLP\_1302

ATGTCATTGGCAAATCTTGACAGACCAAAAACATCCTTATTTATGAAAATCCAAGAGAAATCTTATTCC  
ACCAAGTCAAATGTTGAGATATTCATTGTACCCATCCTGAGCATTGAA

>M6-PGSC0003DMG400006487M6LRR-RLP\_1364

TCTTATTCCACCAAGTCAAATGTTGAGATATTCATTGTACCCATCCTGAGCATTGAATTGATCATTGGAT  
CGATATTGCTCAACCGTCCCAGCATCATGTCCATACTTCCATGTACAGA

>M6-PGSC0003DMG400006487M6LRR-RLP\_1426

TCATTGGATCGATATTGCTCAACCGTCCCAGCATCATGTCCATACTTCCATGTACAGATAGCAAAGTACTC  
CAGGTAATTTCTTGCTTTACCTGGAAATCCTTTCAAAAAAACGTCCCT

>M6-PGSC0003DMG400006487M6LRR-RLP\_1488

AAAGTACTCCAGGTAATTTCTTGCTTTACCTGGAAATCCTTTCAAAAAAACGTCCCTTGTGCTGTAGAC  
ACTAATGCAGTAGAGCTTAAGCATTATTGTATTCTCTATATCTTATGTT

>M6-PGSC0003DMG400006487M6LRR-RLP\_1550

CTTGTAGACACTAATGCAGTAGAGCTTAAGCATTATTGTATTCTCTATATCTTATGTTTTTGTAAATACA  
GGTATTGCCTGCATTAGAGCGGTGTACACAAAATCAAATTGTGGTAA

>M6-PGSC0003DMG400006487M6LRR-RLP\_1612

TTAAATACAGGTATTGCCTGCATTAGAGCGGTGTACACAAAATCAAATTGTGGTAAAGAATGTCCATT  
CAGTACCAGGTTTTCCACAAGCATCGTATATTAGAAGAAATCATCAGTT

>M6-PGSC0003DMG400006487M6LRR-RLP\_1674

TGTCCATTCAGTACCAGGTTTTCCACAAGCATCGTATATTAGAAGAAATCATCAGTTGTACTGGGACAT  
CTGAGGAGGAAATGGCCTCCATTTGGTATACCTGGTTGAAATCTACGTCT

>M6-PGSC0003DMG400006487M6LRR-RLP\_1736

TGGGACATCTGAGGAGGAAATGGCCTCCATTTGGTATACCTGGTTGAAATCTACGTCTCTAATTGGCAA  
AGTGAATAATTTTCATGTTCAAATGGAAAGAACAAGCTTAGACCGAAGAATC

>M6-PGSC0003DMG400006487M6LRR-RLP\_1798

TTGGCAAAGTGAATAATTTTCATGTTCAAATGGAAAGAACAAGCTTAGACCGAAGAATCTTGGGGAATTC  
AGCATATAGTGTATTAGTGTGTTTCAAGATAAAGTTCAGTTAACCCGCTT

>M6-PGSC0003DMG400006487M6LRR-RLP\_186

TTGGCTCTCAAGACCTTATTTGCTGTTCCGTCAATGTAAAGGCAACAATTGTATACCCCTGGAAAATTTTG  
TCAAGTTGATTGATCGACCCCTACGAATCCATGCTGAACAAAACCTTACA

>M6-PGSC0003DMG400006487M6LRR-RLP\_1860

GGAATTCAGCATATAGTGTATTAGTGTGTTTCAAGATAAAGTTCAGTTAACCCGCTTGTGGCTCTGTCA  
AATCCATGAAAGGTTCTTAACCTTGCTCTAGCTCTAAATAAATTGTGCT

>M6-PGSC0003DMG400006487M6LRR-RLP\_1922

CTCTGTCAAATCCATGAAAGGTTCCCTAACCTTGCTCTAGCTCTAAATAAATTGTGCTCAAATCTGTGGTT  
TAATTTCAATTTGTTTCGATTGTACGGAGTGAAGTTTAACTGTTAACAAC

>M6-PGSC0003DMG400006487M6LRR-RLP\_1984

TCTGTGGTTTAATTTCAATTTGTTTCGATTGTACGGAGTGAAGTTTAACTGTTAACAACAGCATAAGAGGT  
CTTCATTTCAATTTTTTTTTTCTGGCTCTGCCTCTTCTTCACATTCCATT

>M6-PGSC0003DMG400006487M6LRR-RLP\_2046

TAAGAGGTCTTCATTTCAATTTTTTTTTTCTGGCTCTGCCTCTTCTTCACATTCCATTCAATTTCTCTCATGCT  
TAGACTACTTGGAGGTGATTTAAAAGAAGTGAGCACTTGAGGTAGA

>M6-PGSC0003DMG400006487M6LRR-RLP\_2108

TTCTCTCATGCTTAGACTACTTGGAGGTGATTTAAAAGAAGTGAGCACTTGAGGTAGAGAGATGTAATG  
ATGGATGCATATGCCTCCTACTTGTCTGAAATCTGGTATATATTTCACTGT

>M6-PGSC0003DMG400006487M6LRR-RLP\_2153

CACTTGAGGTAGAGAGATGTAATGATGGATGCATATGCCTCCTACTTGTCTGAAATCTGGTATATATTC  
ACTGTCATACTTGAATGTAATATGATTTTTCGTATAACTTTCTTTGTCA

>M6-PGSC0003DMG400006487M6LRR-RLP\_248

AAAATTTTGTCAAGTTGATTGATCGACCCCTACGAATCCATGCTGAACAAAACCTACATCTTGCAAAATTC  
TTCCTTGCATATCGGGATCGAGAATTGGATCCTTATTTGGATCATTGGA

>M6-PGSC0003DMG400006487M6LRR-RLP\_310

GCAAAATTCCTTGCATATCGGGATCGAGAATTGGATCCTTATTTGGATCATTGGATTGAATCGGCTA  
TTAAAGTCAATGTTTCGGTGCTGGTGATTCATGCTCCGGATATTGATTCG

>M6-PGSC0003DMG400006487M6LRR-RLP\_372

ATCGGCTATTAAGTCAATGTTTCGGTGCTGGTGATTCATGCTCCGGATATTGATTCGTCGTATTATAGCT  
TACCTGATGTTGTTTATGATGCGAAAAAGCTCAACACATTGTGGTTAAG

>M6-PGSC0003DMG400006487M6LRR-RLP\_434

ATTATAGCTTACCTGATGTTGTTTATGATGCGAAAAAGCTCAACACATTGTGGTTAAGCAGGTGCAAGTT  
TGAATTTGATATTAGCACCCTCATATAAGATTTTGTCTCTTGTGGCTC

>M6-PGSC0003DMG400006487M6LRR-RLP\_496

TGCAAGTTTGAATTTGATATTAGCACCCTCATATAAGATTTTGTCTCTTGTGGCTCTTTTTTTGTATAAT

GTTTCATATTTTCAGATGCCCAAATGCAAAGTGTTATAGATAAATGCCCA

>M6-PGSC0003DMG400006487M6LRR-RLP\_558

TTTGTATAATGTTTCATATTTTCAGATGCCCAAATGCAAAGTGTTATAGATAAATGCCCATCCATCAGGAAT  
ATAAGAGTACTGGCTTGCAAAGGTATGAGCAAATTGTATGTTGTTGGACG

>M6-PGSC0003DMG400006487M6LRR-RLP\_62

TTGATGGAGAAGACAGAATATCAGAATTGCCTGTGCATATCATTATCACATCTTATGTCCGACTAACCT  
CGACCTCAGAGAGGCGGCGATAACTTGTGTTTTATCCAAGAAATGGCAGT

>M6-PGSC0003DMG400006487M6LRR-RLP\_620

TCAGGAATATAAGAGTACTGGCTTGCAAAGGTATGAGCAAATTGTATGTTGTTGGACGGTTACATCTAC  
ACTCTTTGGCTGTACTATTATGCAAACCTCGATAGTGTGATTGTCTGAAGCTC

>M6-PGSC0003DMG400006487M6LRR-RLP\_682

CATCTACTCTTTGGCTGTACTATTATGCAAACCTCGATAGTGTGATTGTCTGAAGCTCCGAAACTTGAATC  
CTTTAGTTATACAGAATGTATTGATCAGGGAAATTTTCATCCTTGCAAA

>M6-PGSC0003DMG400006487M6LRR-RLP\_744

ACTTGAATCCTTTAGTTATACAGAATGTATTGATCAGGGAAATTTTCATCCTTGCAAAATTGATATTTTGG  
ATGGTAACAATACTTTACAAACACTCGAGCTCACTGGCTCCAGCATCAC

>M6-PGSC0003DMG400006487M6LRR-RLP\_806

ATATTTTGGATGGTAACAATACTTTACAAACACTCGAGCTCACTGGCTCCAGCATCACAGACCAACAGTT  
TCGAGATGTATTCCACAAGTTCCCAAACATTTTCAGTGTTGCATCTAACAA

>M6-PGSC0003DMG400006487M6LRR-RLP\_868

CAACAGTTTCGAGATGTATTCCACAAGTTCCCAAACATTTTCAGTGTTGCATCTAACAAAGATGTTATAAGCT  
GAAACATATAGAGATTCAGAGTGAAAACTCAACAAAATCACCTTATCG

>M6-PGSC0003DMG400006487M6LRR-RLP\_930

TTATAAGCTGAAACATATAGAGATTCAGAGTGAAAACTCAACAAAATCACCTTATCGAAGTTGGAGAG  
TATAGAAAAAATCATGATTCAAGCTCCAAATTTATCGCAATTTGATTTTGA

>M6-PGSC0003DMG400006487M6LRR-RLP\_992

TGGAGAGTATAGAAAAAATCATGATTCAAGCTCCAAATTTATCGCAATTTGATTTTGGAGGGTGATAAAAT  
GCCCTTCTTATCTATGGATTCTTCTCCCTGGAAAGAGCCCGACTCAATT

>M6-PGSC0003DMG400006498-(rev)M6RLKWAX-EGF\_2583

CTAGCTTGAAAGGGGTATTCAACATGTGAATGTGATGCAGGGTGACCTGTCATTTGCTGATTGGACTAG  
AAGTTAGTTAATTAGATATTTTATCATTTTCAGTTAGTTAGGTTGTTAGAA

>M6-PGSC0003DMG400006502M6LRR-RLK\_0

CCATGGCCTATTATCTTGACAAAATCTTCCTTCTCTTATTTCTCTTCACACTTAGTACTCCCTCAAAATCAG  
ATAATATGACAGATATTGAAGCACTCTTTGCTATCAAGAATGAAATAA

>M6-PGSC0003DMG400006502M6LRR-RLK\_1054

TGAGTTTTTCAGCAACCTTTCAAGTAATCTGGCGTTTGTAGACTTGCAAGCAATCATTTTTTCAGGACATA  
TCCCGATAGACATTGGGAAATTCGTCAACTTGGAAAGAGCTTAGGCTGAG

>M6-PGSC0003DMG400006502M6LRR-RLK\_1178

AACCAACTCACAGGTATCATCCCTTCGACTATTGGGAAGCTTTATAAGCTACGATATTTACACCTGTCCCA  
AAACAGAATTTCTGGGTAGTATACCCTTTTCCATTGCAAATCTGACCCTT

>M6-PGSC0003DMG400006502M6LRR-RLK\_124

TCCCTTTGAATCATTAAAGTTCATGGAATGAGTCTGTTCCCTTTATGTCAATGGCGTGGCGTTGTATGTGGA  
ACGCGAAATCAACGAGTCATTGAACTAAACCTTCTTGACCATAAGCTAGC

>M6-PGSC0003DMG400006502M6LRR-RLK\_1240

CCTGTCCCAAACAGAATTTCTGGGTAGTATACCCTTTTCCATTGCAAATCTGACCCTTCTAACAGAGTTAA  
ATCTTGATCATAACAATCTTAGAGGTAGAATACCTTCAAGTGTGCAA

>M6-PGSC0003DMG400006502M6LRR-RLK\_1302

CAGAGTTAAATCTTGATCATAACAATCTTAGAGGTAGAATACCTTCAAGTGTGCAAATGTCAAAGTTT  
GTTGTACCTTAACCTGAACCAAACAATTTAATCGGTTTGATACCTAAAG

>M6-PGSC0003DMG400006502M6LRR-RLK\_1364

CAAAGTTTGTTGTACCTTAACCTGAACCAAACAATTTAATCGGTTTGATACCTAAAGAAATTTGTCTAAT  
CTCTTCCTTAGTTGTTCTAAACCTTTCCAGTAACAACCTTGACTGGCGCC

>M6-PGSC0003DMG400006502M6LRR-RLK\_1426

TTGTCTAATCTCTCCTTAGTTGTTCTAAACCTTTCCAGTAACAACCTTGACTGGCGCCCTCCCAAAGAAAT  
CGAAAGCCTGAAAAATCTCTTATCATTAGATGTCTCTTTGAATAATCT

>M6-PGSC0003DMG400006502M6LRR-RLK\_1488

CCAAAGAAATCGAAAGCCTGAAAAATCTCTTATCATTAGATGTCTCTTTGAATAATCTCAATGGTGAAAT  
TCCTAGTACACTTGGGAGTTGTGTGACAATTGTTAACTTAACAATGAAAA

>M6-PGSC0003DMG400006502M6LRR-RLK\_1550

GGTGAAATTCCTAGTACACTTGGGAGTTGTGTGACAATTGTTAACTTAACAATGAAAAGGAATTTATTCC  
GCGGGATTATTCCTTCCACTTTCAGTTCACTAAAGAGTCTTCAAGTTTTA

>M6-PGSC0003DMG400006502M6LRR-RLK\_1612

TTTATTCCGCGGGATTATTCCTTCCACTTTCAGTTCACTAAAGAGTCTTCAAGTTTTAGATCTTTCGCGGA  
ATAAGCTATCAGGTATGATTCCAAAGTACTTGGAAGGATTTGCCTTGCA

>M6-PGSC0003DMG400006502M6LRR-RLK\_1674

TTTCGCGGAATAAGCTATCAGGTATGATTCCAAAGTACTTGGAAGGATTTGCCTTGCAATTTCTTAACTTA  
TCGTTTAATGATTTTGAAGGTGGCCTTCCACAACGAGGCATCTTTGAGA

>M6-PGSC0003DMG400006502M6LRR-RLK\_1798

GAGTGTAGACTCTTTCGTTGGAAATCTTAGAATCTGTGGTGGTGTACCTGGCTTGAACTCCCAATTGC  
AACTTCAGTCATTCAAAGAAAATGAACTTTAAGCTTGTTATTTTAGTAAT

>M6-PGSC0003DMG400006502M6LRR-RLK\_186

TATGTGGAACGCGAAATCAACGAGTCATTGAACTAAACCTTCTTGACCATAAGCTAGCCGGTGTGTTATC  
ACCCTTTGTTGGAAATTTGAGCTTCTCATACTAGACTAGACATCGGAAACA

>M6-PGSC0003DMG400006502M6LRR-RLK\_1860

CCAATTGCAACTTCAGTCATTCAAAGAAAATGAACTTTAAGCTTGTTATTTTAGTAATATTAGGAATTTTG  
GGGCTAGTTGTTATGGTTTGTGCTTTTTTCTTCTATCGATTTGGAAGGT

>M6-PGSC0003DMG400006502M6LRR-RLK\_1922

GGAATTTTGGGGCTAGTTGTTATGGTTTGTGCTTTTTTCTTCTATCGATTTGGAAGGTCCAAAAGAACAA  
TTCCTTCATTAGATAACAATCTAAACCAACTCATAGCTATGTCCTATCAA

>M6-PGSC0003DMG400006502M6LRR-RLK\_1984

AAGAACAATTCCTTCATTAGATAACAATCTAAACCAACTCATAGCTATGTCCTATCAAAGTATTCTCAAAG  
TTACCAACGGGTTTTCTACGAGCAACTTGATTGGTGTGGGAGTCATGG

>M6-PGSC0003DMG400006502M6LRR-RLK\_2046

TTCTCAAAGTTACCAACGGGTTTTCTACGAGCAACTTGATTGGTGTGGGAGTCATGGATATGTTTACAA  
GGGAATTTTAGAAACGGATGGTAAACACGTTGCTATAAAAGTGTGAATC

>M6-PGSC0003DMG400006502M6LRR-RLK\_2108

GTTTACAAGGGAATTTTAGAAACGGATGGTAAACACGTTGCTATAAAAGTGTGAATCTTTTACAATATG



GAGCTATCAAAAGTTTCATAGCAGAATGTGAGGCCTTGAGAAATGTTAGA

>M6-PGSC0003DMG400006502M6LRR-RLK\_2170

ACAATATGGAGCTATCAAAAGTTTCATAGCAGAATGTGAGGCCTTGAGAAATGTTAGACATCGGAATTT

AGTTAAGCTACTTACTGCATGTTCTGGTGTGATTATCATGGCAACGAATT

>M6-PGSC0003DMG400006502M6LRR-RLK\_2232

GGAATTTAGTTAAGCTACTTACTGCATGTTCTGGTGTGATTATCATGGCAACGAATTCAAGGCACTGAT

TTACGAGTTTATGGCCAACGGAAGTTTGGAGGACTGGTTGCATCCAGATA

>M6-PGSC0003DMG400006502M6LRR-RLK\_2294

GCACTGATTTACGAGTTTATGGCCAACGGAAGTTTGGAGGACTGGTTGCATCCAGATAAATTCAAGACCG

AATGTTCAAGCAAGAAGGTTAGGATTTCTACAAAGGCTGAATATTGCTATT

>M6-PGSC0003DMG400006502M6LRR-RLK\_2356

AAGACCGAATGTTCAAGCAAGAAGGTTAGGATTTCTACAAAGGCTGAATATTGCTATTGATGTTGCTAG

TGCAATTCATTATCTTCATAATGATTGTCAAATATCAATAGTTCATTGTGA

>M6-PGSC0003DMG400006502M6LRR-RLK\_2418

TTGCTAGTGCAATTCATTATCTTCATAATGATTGTCAAATATCAATAGTTCATTGTGATCTCAAACCAAGC

AATATTCTCCTTGACAATGAATTGGTTGCCCATGTTGGGGATTTTGGAT

>M6-PGSC0003DMG400006502M6LRR-RLK\_248

GTGTTATCACCTTTGTTGGAAATTTGAGCTTCCTCATACGACTAGACATCGGAAACAATACCATTTCTGG

CAATATCCCTCCTGAATTAGGCCGTTTGACAAGCTTACGCCATCTATAT

>M6-PGSC0003DMG400006502M6LRR-RLK\_2480

AAACCAAGCAATATTCTCCTTGACAATGAATTGGTTGCCCATGTTGGGGATTTTGGATTGTCAAGATTCC

TACATCTTACTGACGAAACCACTTGTAGAATTCAGACAAGCTCTTCAACT

>M6-PGSC0003DMG400006502M6LRR-RLK\_2542

AAGATTCTACATCTTACTGACGAAACCACTTGTAGAATTCAGACAAGCTCTTCAACTTTTAAAGGATCTA

TTGGCTACATAGCTCCAGGTAAATTTCACTCTATATAAATGCCTCTAAA

>M6-PGSC0003DMG400006502M6LRR-RLK\_2604

AAGGATCTATTGGCTACATAGCTCCAGGTAAATTTCACTCTATATAAATGCCTCTAAAGACTTTAGTGACT

CTGGATGCAATGACATTAACCAATTGCCTTTATATTTTCATTGCAGAG

>M6-PGSC0003DMG400006502M6LRR-RLK\_2666

TTAGTGA CTCTGGATGCAATGACATTA ACTCAATTGCCTTTATATTTTCATTGCAGAGTATGGTATGGGA  
AGCGAGGCATCAACGCAAGGTGATGTGTATAGTTTTGGTATCGTCTTACT

>M6-PGSC0003DMG400006502M6LRR-RLK\_2728

GTATGGGAAGCGAGGCATCAACGCAAGGTGATGTGTATAGTTTTGGTATCGTCTTACTTGAAATGTAA  
CTGGGAAAAGACCAACAGATGACACGTTTGGCAGCGATTTAAGCCTTCATG

>M6-PGSC0003DMG400006502M6LRR-RLK\_2790

ATGTTAACTGGGAAAAGACCAACAGATGACACGTTTGGCAGCGATTTAAGCCTTCATGATTTTGTTAGG  
AATGCCATGCCTGATGGAGCACTTGAGATAGTAGATCCAGTTCTTAATTTT

>M6-PGSC0003DMG400006502M6LRR-RLK\_2852

TGTTAGGAATGCCATGCCTGATGGAGCACTTGAGATAGTAGATCCAGTTCTTAATTTTGAAGAGGAAGA  
GATAAGCACAGAGAGGTCTCAAATTCCAAGTTCATGAGAAGGCCAAAAAAT

>M6-PGSC0003DMG400006502M6LRR-RLK\_2914

AGGAAGAGATAAGCACAGAGAGGTCTCAAATTCCAAGTTCATGAGAAGGCCAAAAAATGGTAGAGGG  
TTTAATTTCTTATTTGGAGTTGGTATTGATTGTTCAATGTATGATTCAAGTA

>M6-PGSC0003DMG400006502M6LRR-RLK\_2976

GAGGGTTTAATTTCTTATTTGGAGTTGGTATTGATTGTTCAATGTATGATTCAAGTAAAAGAAAAACA  
TGAAGGAGGTTGTTAGAGAGTTGTGTTCTATAAGAGATTCTATTGTTGGT

>M6-PGSC0003DMG400006502M6LRR-RLK\_3009

GATTGTTCAATGTATGATTCAAGTAAAAGAAAAACATGAAGGAGGTTGTTAGAGAGTTGTGTTCTATA  
AGAGATTCTATTGTTGGTTGTACAATATGAAACACTTTTCTTGTGTTTTGTTT

>M6-PGSC0003DMG400006502M6LRR-RLK\_310

CATTTCTGGCAATATCCCTCCTGAATTAGGCCGTTTGACAAGCTTACGCCATCTATATTTGCAAACAATT  
CATTTTATGGTGAAATTCCTGTCAATCTATCGTTTTGTAGTAACCTCGT

>M6-PGSC0003DMG400006502M6LRR-RLK\_372

AAAACAATTCATTTTATGGTGAAATTCCTGTCAATCTATCGTTTTGTAGTAACCTCGTTGAGTTATGGGCA  
TACAAGAACAATTTTGTAGGTGTTCTTCCAAGGGAGCTTGGTTTACTTA

>M6-PGSC0003DMG400006502M6LRR-RLK\_434

TTATGGGCATACAAGAACAATTTTGTAGGTGTTCTTCCAAGGGAGCTTGGTTTACTTACCAAACCTCAAT  
ATTTAGATTTTCGGTTACAACAAGCTCATTGGTGAAATCCCAAAATCTTAT

>M6-PGSC0003DMG400006502M6LRR-RLK\_496

ACTCAAATATTTAGATTTTCGGTTACAACAAGCTCATTGGTGAAATCCCAAATCTTATGGTAACTTTTCAA  
GTCTATTGGAAATGTACCTTTTGGATAATGATCTCGAGGGTAAAATCCC

>M6-PGSC0003DMG400006502M6LRR-RLK\_558

ACTTTTCAAGTCTATTGGAAATGTACCTTTTGGATAATGATCTCGAGGGTAAAATCCCCGATGAGTTTGG  
GAAACTGAAGAGTTTGGAAATATTTGACGCGGACTTTAATAGGTTATCTG

>M6-PGSC0003DMG400006502M6LRR-RLK\_62

TCAAAATCAGATAATATGACAGATATTGAAGCACTCTTTGCTATCAAGAATGAAATAATTGATCCCTTGG  
AATCATTAAGTTCATGGAATGAGTCTGTTCCCTTATGTCAATGGCGTGGC

>M6-PGSC0003DMG400006502M6LRR-RLK\_620

GAGTTTGGGAAACTGAAGAGTTTGGAAATATTTGACGCGGACTTTAATAGGTTATCTGGTAGAATTCCG  
AGCTCATTGTACAATCTTACCTCATTGAAAGTCATTGATGTGTCATTTAAC

>M6-PGSC0003DMG400006502M6LRR-RLK\_682

AATTCCGAGCTCATTGTACAATCTTACCTCATTGAAAGTCATTGATGTGTCATTTAACCAACTCGAAGGTA  
CTCTGCCTCGGGATTTAGGGATCAACCTTCTAACCTGGAGTGTCTCAG

>M6-PGSC0003DMG400006502M6LRR-RLK\_806

AGTGAGAATCAATCACTGGATCGCTTCTCATTCACTTTTCAACCTCACAGGACTCGCGTACCTTTATGT  
TGGAAAAAATGACTTAGGAGGACGTGTTCTAGGTTTCGATAAGTTGCAT

>M6-PGSC0003DMG400006502M6LRR-RLK\_868

CCTTTATGTTGGAAAAAATGACTTAGGAGGACGTGTTCTAGGTTTCGATAAGTTGCATAATTTGTATATT  
TTAAGCATGGAAAATAACCAATTTGATAATGACTTGACCCTCATGTCCTC

>M6-PGSC0003DMG400006502M6LRR-RLK\_930

TGTATATTTAAGCATGGAAAATAACCAATTTGATAATGACTTGACCCTCATGTCCTCCTTGACAAATGCA  
ACTAACCTCAACCGTCTGTATATGCAAAACAACGCGTTTGGAGGGACAT

>M6-PGSC0003DMG400006502M6LRR-RLK\_992

ACAAATGCAACTAACCTCAACCGTCTGTATATGCAAAACAACGCGTTTGGAGGGACATTTTCATGAGTTTT  
TCAGCAACCTTTCAAGTAATCTGGCGTTTGTAGACTTGTCAAGCAATCAT

>M6-PGSC0003DMG400006563-(rev)M6LRR-RLK\_0

AGTAAACATACAGAGCTAAGGAGATCAAGTGTACATTCTGTATATTTAGGTCTCTGAAATGCATA

GCATAGTTATTTAAAATTTATGTTTACTTGTGAGTAAGATTTTGGAAGCTT

>M6-PGSC0003DMG400006563-(rev)M6LRR-RLK\_1037

GTAAGTGCAGAGTTTGTATTGTTTTGTTCTTCTTTTGTTAAGCTTTATCTGTATATTTTACTTCAAGATTGT  
TCAACTAGTAGATCTCTGAAAATGTCTAGCTTCTGCTTGCTATACAG

>M6-PGSC0003DMG400006563-(rev)M6LRR-RLK\_1098

CTTCAAGATTGTTCAACTAGTAGATCTCTGAAAATGTCTAGCTTCTGCTTGCTATACAGTGATCTCAGCTG  
GAATCAACTTTCTGGATCTATACCACAGAATAAGCTTTCCAACAATATG

>M6-PGSC0003DMG400006563-(rev)M6LRR-RLK\_1159

ATCTCAGCTGGAATCAACTTTCTGGATCTATACCACAGAATAAGCTTTCCAACAATATGACAACTATGTAA  
GCCTTTTGATTTGGCCTCGATAGTTTCTTCATATAGTTATATAAATTGA

>M6-PGSC0003DMG400006563-(rev)M6LRR-RLK\_122

GTTGTATTTTAAAGGTGTGAAATTATGAACCAATGCAGGTATTCTTTAAAGCCAATAATTGAAAAGTTG  
GATAAACATATGTTTTTTGCTCATGGAGCTGTTAATTGTATAACGCCTGG

>M6-PGSC0003DMG400006563-(rev)M6LRR-RLK\_1220

AACTATGTAAGCCTTTTGATTTGGCCTCGATAGTTTCTTCATATAGTTATATAAATTGACAGATGTTGGCT  
TTTGTTCACAGCATTGAACTGGATTGCCTGGGTTCTTTTACTTAT

>M6-PGSC0003DMG400006563-(rev)M6LRR-RLK\_1281

GATGTTGGCTTTTGTTCACAGCATTGAACTGGATTGCCTGGGTTCTTTTACTTATTAGCATATTCTAA  
TGTATATTTCAAATGCATGATGCAGTATTCTATCACATAACCGTCTTA

>M6-PGSC0003DMG400006563-(rev)M6LRR-RLK\_1342

GCATATTCTAATGTATATTTCAAATGCATGATGCAGTATTCTATCACATAACCGTCTTAATGGATCTATAC  
CCAAGAGCTTTTCTCTCCTTCCCTGCAGAACTGTGAGAATCTGG

>M6-PGSC0003DMG400006563-(rev)M6LRR-RLK\_1403

GGATCTATACCCAAGAGCTTTTCTCTCCTTCCCTGCAGAACTGTGAGAATCTGGACTTAGTCTTGC  
AATATCTACTATTTCACTGAAGGAAATGTACCATTAACGAATTGGTGGG

>M6-PGSC0003DMG400006563-(rev)M6LRR-RLK\_1464

TTAGTCTTGCAATATCTACTATTTCACTGAAGGAAATGTACCATTAACGAATTGGTGGGACAAATTTGTC  
ACAGGTCTTTGAGAACAATTTCTGAATGGTTCCATTTCACTGACATT

>M6-PGSC0003DMG400006563-(rev)M6LRR-RLK\_1525

AAATTTGTCACAGGTCTCTTGAGAACAACCTTTCTGAATGGTTCCATTTCCACTGACATTTGGCAAACAA  
GATCTTTAATAACAACCTCCAGACTTGTGATGTAAGATGTGAAGCAGAAAA

>M6-PGSC0003DMG400006563-(rev)M6LRR-RLK\_1586

GCAAACAAGATCTTTAATAACAACCTCCAGACTTGTGATGTAAGATGTGAAGCAGAAAAATAACAGATC  
TTATTTCAATAGAAGTATTTACTTCCAGAGTCAAACCTTTGAATGAGGATT

>M6-PGSC0003DMG400006563-(rev)M6LRR-RLK\_1647

AACAGATCTTATTTCAATAGAAGTATTTACTTCCAGAGTCAAACCTTTGAATGAGGATTTCTTTCTAACAA  
CTCTTTCAATTGATTTTGCAAACCTAGTGATCTGCGGAATAATTCAGTTT

>M6-PGSC0003DMG400006563-(rev)M6LRR-RLK\_1708

TTTCTAACAACTCTTTCAATTGATTTTGCAAACCTAGTGATCTGCGGAATAATTCAGTTTCAAACATTTTCGG  
GTGCTTTTGAACCTCATGTAAATGTCACACTAAGGTATGATTTCTTCTT

>M6-PGSC0003DMG400006563-(rev)M6LRR-RLK\_1769

AACATTTGCGGTGCTTTTGAACCTCATGTAAATGTCACACTAAGGTATGATTTCTTCTTTCAAATTCAAAA  
ATAGAACAATTTGAATGTCGGTTTATGTCCTCATGGGCCACATAAATAG

>M6-PGSC0003DMG400006563-(rev)M6LRR-RLK\_183

GAAAAGTTGGATAAACATATGTTTTTGTCTCATGGAGCTGTTAATTGTATAACGCCTGGCCATTTCTTTTCG  
TGATTAAGGTGGTGTCTTGTGAGGACCTTGATTGGTCCAACATATACCT

>M6-PGSC0003DMG400006563-(rev)M6LRR-RLK\_1830

AAATTCAAAAATAGAACAATTTGAATGTCGGTTTATGTCCTCATGGGCCACATAAATAGGACAAACAAAT  
GGGTAAAGAACTAGAATAACAGAAGCAATATGCCATACCAAAAAGGGAA

>M6-PGSC0003DMG400006563-(rev)M6LRR-RLK\_1891

CAAACAATGGGTAAAGAACTAGAATAACAGAAGCAATATGCCATACCAAAAAGGGAAAGTACGTCTG  
ATTTTCCTCGTGTGTGTGACAACAATTACTTAAATTACTTGAAGAAGCACAA

>M6-PGSC0003DMG400006563-(rev)M6LRR-RLK\_1952

TACGTCGATTTTCCTCGTGTGTGTGACAACAATTACTTAAATTACTTGAAGAAGCACAAATGCATGGAAT  
CACTTCTGTTATGTTTTATCCACACACACCGATACACATGCTTTTAGCAA

>M6-PGSC0003DMG400006563-(rev)M6LRR-RLK\_2013

GCATGGAATCACTTCTGTTATGTTTTATCCACACACACCGATACACATGCTTTTAGCAAATTCATATATGG  
TGCTTTATAAAATGTAAACAAAATGGAAAGAACAAGGAGTTGAGAGAAC

>M6-PGSC0003DMG400006563-(rev)M6LRR-RLK\_2074

TCATATATGGTGCTTTATAAAATGTAAACAAAATGGAAAGAACAAGGAGTTGAGAGAACCTTTGTGGTT  
ATCAGTTTTTTCATTGTTTGAAAAATTTAAGTATGCTTAAAAAGGAGGTAT

>M6-PGSC0003DMG400006563-(rev)M6LRR-RLK\_2135

TTGTGGTTATCAGTTTTTTCATTGTTTGAAAAATTTAAGTATGCTTAAAAAGGAGGTATAGATAGAAAAG  
GGAATTCTGAAATTCTTAGTCACATATTTTCATCTAGTTGCAGTGGAAAA

>M6-PGSC0003DMG400006563-(rev)M6LRR-RLK\_2196

ATAGAAAAGGGAATTCTGAAATTCTTAGTCACATATTTTCATCTAGTTGCAGTGGAAAAGGATGAAATG  
ATGAAGGGCCCTATAATATTGGTTATGGTCCTGATCAGCGTAAATCTTGAA

>M6-PGSC0003DMG400006563-(rev)M6LRR-RLK\_2257

ATGAAATGATGAAGGGCCCTATAATATTGGTTATGGTCCTGATCAGCGTAAATCTTGAAAAAGTACAAA  
GTTTTACCCAATAATATAAATGAGAAGTGTGTGTGTGTGGGGGTGGGGGGT

>M6-PGSC0003DMG400006563-(rev)M6LRR-RLK\_2318

AGTACAAAGTTTTACCCAATAATATAAATGAGAAGTGTGTGTGTGTGGGGGTGGGGGGTAAAAAGATA  
TAAATAGAGGGAAACTATGAGCATAAAAGGAGTTTTTGTCTTTTGTGAGTC

>M6-PGSC0003DMG400006563-(rev)M6LRR-RLK\_2379

AAAGATATAAATAGAGGGAAACTATGAGCATAAAAGGAGTTTTTGTCTTTTGTGAGTCTCTCATTTATT  
CGTTGAAAGGAGGCCTGAACAAATGGAGAGGAAGGAAGATTCTGTAAAT

>M6-PGSC0003DMG400006563-(rev)M6LRR-RLK\_2440

TCATTTATTCGTTGAAAGGAGGCCTGAACAAATGGAGAGGAAGGAAGATTCTGTAAAATTTGAGTCCAC  
TACATGCCTTATGATGATTTTTTAATGTGACACAATGTAATTCTAATCTAA

>M6-PGSC0003DMG400006563-(rev)M6LRR-RLK\_2989

GCAACTTAGATTCTAATAGTTTGTGAAACTGAGGGAGATTTTCTGCAGTATATCACATCAAGACAAGTGA  
TATAAACTGGTATCATTAAATTCTGAAGAAGGAAAACATCACATTTAGG

>M6-PGSC0003DMG400006563-(rev)M6LRR-RLK\_3050

GACAAGTGATATAAACTGGTATCATTAAATTCTGAAGAAGGAAAACATCACATTTAGGAAAGTGGAGA  
ATGGAAATTGTGCCAAACAAAAAGAGTTATTGGTCTAAAATTAATTGTACA

>M6-PGSC0003DMG400006563-(rev)M6LRR-RLK\_3111

AGTGGAGAATGGAAATTGTGCCAAACAAAAAGAGTTATTGGTCTAAAATTAATTGTACATCTTTGTTACT

GTCTCTGGAGTTCATGTTTTAGTTATGCACTCATTCTTGTTGTCCAATT

>M6-PGSC0003DMG400006563-(rev)M6LRR-RLK\_3172

TTTGTTACTGTCTCTGGAGTTCATGTTTTAGTTATGCACTCATTCTTGTTGTCCAATTATTCATAAATATCT  
GATTTTGACAGTGAATTGAGGTCATCTTTCAAAAATTACTTTCTGAT

>M6-PGSC0003DMG400006563-(rev)M6LRR-RLK\_3233

TCATAAATATCTGATTTTGACAGTGAATTGAGGTCATCTTTCAAAAATTACTTTCTGATCTCTTTCTATCTC  
ATGAGGTCAATTCATCTTGAATTCTTAATTGAAAATCTGCTCAATGTT

>M6-PGSC0003DMG400006563-(rev)M6LRR-RLK\_3294

CTTTCTATCTCATGAGGTCAATTCATCTTGAATTCTTAATTGAAAATCTGCTCAATGTTTCTCAAAGAAAC  
ATGTCAATAAAAATGTTTTAGATTTAGTACTATGTTAAAATTCATTTA

>M6-PGSC0003DMG400006563-(rev)M6LRR-RLK\_3355

TCAAAGAAACATGTCAATAAAAATGTTTTAGATTTAGTACTATGTTAAAATTCATTTATTATTTTCATAG  
TCTTCCCCTAACTTTAGCAGACGATTTCCAGGTTCCAAAGCAATCCCAT

>M6-PGSC0003DMG400006563-(rev)M6LRR-RLK\_3416

ATTTTCATAGTCTTCCCCTAACTTTAGCAGACGATTTCCAGGTTCCAAAGCAATCCCATCTGCAGCAGTAC  
AAGTATCAGAAACATTGGTAAATACTGTGGCCCTGACTTTGGAGCAGAT

>M6-PGSC0003DMG400006563-(rev)M6LRR-RLK\_3477

GCAGCAGTACAAGTATCAGAAACATTGGTAAATACTGTGGCCCTGACTTTGGAGCAGATGACGACGAAC  
CTAGTAATTCACAAATCCAAGTGGTGTGGTCTTATTCATGCTTGTCCAA

>M6-PGSC0003DMG400006563-(rev)M6LRR-RLK\_3538

CGACGAACCTAGTAATTCACAAATCCAAGTGGTGTGGTCTTATTCATGCTTGTCCAACTGACAACCTATT  
ATGAATATGTTCTGCATCACCTAAACCATGCTTTTGTGCCTCACCTCT

>M6-PGSC0003DMG400006563-(rev)M6LRR-RLK\_3599

GACAACCTATTATGAATATGTTCTGCATCACCTAAACCATGCTTTTGTGCCTCACCTCTTAGAATTGGGTA  
CAGGTTGAAAAGTCTAGTATTTCTTATTTTGTATCCGTACAAGCAACTA

>M6-PGSC0003DMG400006563-(rev)M6LRR-RLK\_3660

GAATTGGGTACAGGTTGAAAAGTCTAGTATTTCTTATTTTGTATCCGTACAAGCAACTATTCGAATCTTAT  
GTGACTAGTTCCCTTCAGTTGGACCTTTACCAATTGTGGATCGATTCAT

>M6-PGSC0003DMG400006563-(rev)M6LRR-RLK\_3721

CGAATCTTATGTGACTAGTTCCTTCAGTTGGACCTTTACCAATTGTGGATCGATTCATATTTTTGGGAAA  
AAGGACCTCGTCTGAGGATGTATTTGAAGCTTTTCCCGGTGGTTGGGGA

>M6-PGSC0003DMG400006563-(rev)M6LRR-RLK\_3782

TTTTGGGAAAAGGACCTCGTCTGAGGATGTATTTGAAGCTTTTCCCGGTGGTTGGGGACAATACATTTA  
ATGAAAGTGAGATTCTTCGTATCAGCGAGATTTTTGCCTCTTGGGAATTT

>M6-PGSC0003DMG400006563-(rev)M6LRR-RLK\_3843

ATACATTTAATGAAAGTGAGATTCTTCGTATCAGCGAGATTTTTGCCTCTTGGGAATTTGAGGAAGTCA  
CCTATTTGGACCATATGAGCTCCTGAACTTCACACTCCTCGGACCTTATT

>M6-PGSC0003DMG400006563-(rev)M6LRR-RLK\_3904

AGGAAGTCACCTATTTGGACCATATGAGCTCCTGAACTTCACACTCCTCGGACCTTATTCACACTGTAAGT  
ACTCACAGCTTAAATTGATTCTAATTCAACTTGTAACAACCTTAGGCTGT

>M6-PGSC0003DMG400006563-(rev)M6LRR-RLK\_3965

CACTGTAAGTACTCACAGCTTAAATTGATTCTAATTCAACTTGTAACAACCTTAGGCTGTGTTACTACAATT  
GCATGACAATTGAATCATTGACATGCAGCATGTGGATAAGATTGAAATA

>M6-PGSC0003DMG400006563-(rev)M6LRR-RLK\_4026

TACTACAATTGCATGACAATTGAATCATTGACATGCAGCATGTGGATAAGATTGAAATATTTGACTATCA  
TTGCCACTTCTAGCCAACAAGTATAAGGATCTTAATTCATATAATCAAAT

>M6-PGSC0003DMG400006563-(rev)M6LRR-RLK\_4087

TGACTATCATTGCCACTTCTAGCCAACAAGTATAAGGATCTTAATTCATATAATCAAATAGTTTAGATAAG  
CAACAAAAGACTATGATCCATGATCTTCTAAGGACTTCATATATATTGG

>M6-PGSC0003DMG400006563-(rev)M6LRR-RLK\_4148

TTTAGATAAGCAACAAAAGACTATGATCCATGATCTTCTAAGGACTTCATATATATTGGGTTGAAAAGA  
CAATGAAGTCTTTGTTTATATCCAAAGATTTTTTAAGACTTCAGATATTT

>M6-PGSC0003DMG400006563-(rev)M6LRR-RLK\_4209

TGAAAAAGACAATGAAGTCTTTGTTTATATCCAAAGATTTTTTAAGACTTCAGATATTTACGTTGAGGA  
ACCTTACTTGATTAAGGTTGAAACTTCAAGGGGTTCAAACCTTAGATAG

>M6-PGSC0003DMG400006563-(rev)M6LRR-RLK\_427

TTGTATCCCTTTTCGACTTTCAGCTTGTGCATTTCTTCATCTGTTGTATTCCCTTCTCTCTTTTGATAATGTT  
TGACCCTTTATTTGCATTGTGGTTTCTCTTTCCTATTCAGTCTATC



>M6-PGSC0003DMG400006563-(rev)M6LRR-RLK\_4270

CGTTGAGGAACCTTACTTGATTAAGGTTGAACTTCAAGGGTTCAAACCTTAGATAGTTTGGTCCAGT  
CTCTCTCAAGAGCTTCAATTCTGGAGGTCTCAGCCCTTACAGTTTTTGT

>M6-PGSC0003DMG400006563-(rev)M6LRR-RLK\_4331

TGGTCCAGTCTCTCTCAAGAGCTTCAATTCTGGAGGTCTCAGCCCTTACAGTTTTTGTGGGATGAAAG  
TGGATAAAAAAATGGACCTTAGGCCTCCAAAAAGCTAGCTCATGAGG

>M6-PGSC0003DMG400006563-(rev)M6LRR-RLK\_4453

GGGATTGTCCAAAATCATATAAGGAGAATAACCCTTGCTACTCCAACACCTTGCTGCACTCCCAAGAATT  
GACATTGGAGCGTGGACAATATAATAAGGGGGGGTTCAACACCGGAAACA

>M6-PGSC0003DMG400006563-(rev)M6LRR-RLK\_4514

CCAAGAATTGACATTGGAGCGTGGACAATATAATAAGGGGGGGTTCAACACCGGAAACAATAAATTGG  
GATCAGTGTGGATCTGAGACCATGTGGGAAATAAAGAAGAAAAATATTACTC

>M6-PGSC0003DMG400006563-(rev)M6LRR-RLK\_488

TTTTGATAATGTTTGACCCTTTATTTGCATTGTGGTTTCTCTTTCCTATTAGTCTATCAGGAAAATGGTGT  
GAGGGTTCAATAAGTTCACTAAACATCTGAAGACTAAGATGCTAATAT

>M6-PGSC0003DMG400006563-(rev)M6LRR-RLK\_5246

CTTTGTACAAGCTTTGATTTCTTATATTATCTGCAGTGAATCCTGAAATGAAAGGTAAAAACAAAGCAA  
AGGCGTTGTGATAGCTTGCATTGTAGCAGCAGGTGCTTTTGCTGCCTTTG

>M6-PGSC0003DMG400006563-(rev)M6LRR-RLK\_5307

ACAAAGCAAAGGCGTTGTGATAGCTTGCATTGTAGCAGCAGGTGCTTTTGCTGCCTTTGTTTCCTCAATT  
GCCACTATATTAATCACAAGACGACGTGCTAAGTATCAAAGATCTTGTC

>M6-PGSC0003DMG400006563-(rev)M6LRR-RLK\_5368

TCCTCAATTGCCACTATATTAATCACAAGACGACGTGCTAAGTATCAAAGATCTTGTCAAGAAAACGTT  
TGTGTAAGTCCTCTTATTAGATTAGCTATAATTTTACTTTATCAAGTCTG

>M6-PGSC0003DMG400006563-(rev)M6LRR-RLK\_5429

GAAAACGTTTGTGTAAGTCCTCTTATTAGATTAGCTATAATTTTACTTTATCAAGTCTGCTATTTTAAATTC  
TTTCTGCAAATTGATGACTATGGGTTTTTGTGGCAGCTTCAAGCCT

>M6-PGSC0003DMG400006563-(rev)M6LRR-RLK\_549

GAAAATGGTGTGAGGGTTCAATAAGTTCACTAAACATCTGAAGACTAAGATGCTAATATTGATAGTGAT

CAGTTCAATTTCCACCTTTAACTTTTTTAAATTGCATCGATCCTAGCAGAA

>M6-PGSC0003DMG400006563-(rev)M6LRR-RLK\_5490

ATTTTTAATTCTTTCTGCAAATTGATGACTATGGGTTTTTTGTTTGCAGCTTCAAGCCTCTCTATAAAAGTA  
GATGGCGTTAAAAGTTTCACCTTCAGAGAAATGACTTCGGCCACTAAC

>M6-PGSC0003DMG400006563-(rev)M6LRR-RLK\_5551

CTATAAAAGTAGATGGCGTTAAAAGTTTCACCTTCAGAGAAATGACTTCGGCCACTAACAACTTTGATAC  
CTCAACTCAAGTTGGTGAAGGAGGATATGGTTCCGTCTTTAGGGGAATTT

>M6-PGSC0003DMG400006563-(rev)M6LRR-RLK\_5612

CTTTGATACCTCAACTCAAGTTGGTGAAGGAGGATATGGTTCCGTCTTTAGGGGAATTTAGCTGACAAA  
ACAGTTGTTGCTATCAAGCGAGCAAAGTAGGATCCCTGCAAGGGCAAAA

>M6-PGSC0003DMG400006563-(rev)M6LRR-RLK\_5673

GCTGACAAAACAGTTGTTGCTATCAAGCGAGCAAAGTAGGATCCCTGCAAGGGCAAAAAGGAATTCTTG  
ACCGAAATAGAACTATTATCAAGGTTACATCACCGTAATCTGGTTGTGTTG

>M6-PGSC0003DMG400006563-(rev)M6LRR-RLK\_5734

AATTCTTGACCGAAATAGAACTATTATCAAGGTTACATCACCGTAATCTGGTTGTGTTGCTTGGATACTGT  
GACGAAGAAGGAGAGCAGGTATGACAAAAGCTGAAAACCTTTTCAATTC

>M6-PGSC0003DMG400006563-(rev)M6LRR-RLK\_5795

TGGATACTGTGACGAAGAAGGAGAGCAGGTATGACAAAAGCTGAAAACCTTTTCAATTCCAACTGTTTT  
AGTTACTAATAATTCACACCATTTCATTTTTTAATCATAGTTAGTCATAT

>M6-PGSC0003DMG400006563-(rev)M6LRR-RLK\_5856

ACTGTTTTAGTTACTAATAATTCACACCATTTCATTTTTTAATCATAGTTAGTCATATTTATTTAGTGTAG  
CATCATAAACCTTCTTGATTCTTTCTCACTTCAGTTGCTAATGATCA

>M6-PGSC0003DMG400006563-(rev)M6LRR-RLK\_5917

ATTTAGTGTAGCATCATAAACCTTCTTGATTCTTTCTCACTTCAGTTGCTAATGATCAGACTGAATGTGTA  
GCAGACTAAATGCTTTCTTGAGCTACTGAAGTCTTCTGTTTAGCACA

>M6-PGSC0003DMG400006563-(rev)M6LRR-RLK\_5978

CTGAATGTGTAGCAGACTAAATGCTTTCTTGAGCTACTGAAGTCTTCTGTTTAGCACAAAGAGTGATAT  
AGTCGAGCAATTATGAGTCTTCTGTATACATTTGCAGATGCTGATTTATG

>M6-PGSC0003DMG400006563-(rev)M6LRR-RLK\_6039

GAGTGATATAGTCGAGCAATTATGAGTCTTCTGTATACATTTGCAGATGCTGATTTATGAGTTCATGCCC  
AATGGAACCTTTGCGAGACTGGCTTTCTGGTAAGAACTGTTTCCTGGTTGT

>M6-PGSC0003DMG400006563-(rev)M6LRR-RLK\_61

AAATGCATAGCATAGTTATTTAAAATTTATGTTTACTTGTGAGTAAGATTTTGGAACCTGCGTTGTATTTT  
TAAAGGTGTGAAATTATGAACCAATGCAGGTATTCTTTAAAGCCAATAA

>M6-PGSC0003DMG400006563-(rev)M6LRR-RLK\_610

ATAGTGATCAGTTCAATTTCCACCTTTAACTTTTTAAATTGCATCGATCCTAGCAGAACTCTTATTCTATT  
TTTACTTTTCTTTACATGTTAGATGATGATGGAGAGAAAGGATATGAA

>M6-PGSC0003DMG400006563-(rev)M6LRR-RLK\_6100

TTCATGCCCAATGGAACCTTTGCGAGACTGGCTTTCTGGTAAGAACTGTTTCCTGGTTGTTTCTAGCTTTCA  
TATGATTAATCCTCCTCAATTTCTTTCTTTTAGTTTAGTAGTGAAGATC

>M6-PGSC0003DMG400006563-(rev)M6LRR-RLK\_6161

CTAGCTTTCATATGATTAATCCTCCTCAATTTCTTTCTTTTAGTTTAGTAGTGAAGATCCAATGCGGAGTTG  
CAATGTTTATAGATGTTCCCTGCACATGTTGTGTCATTAGTAGTACTA

>M6-PGSC0003DMG400006563-(rev)M6LRR-RLK\_6222

ATGCGGAGTTGCAATGTTTATAGATGTTCCCTGCACATGTTGTGTCATTAGTAGTACTATGGTGAATTGA  
TAATACAGGCTTCAGTATTTTATTGTGTTTGTGGAGAAACCATTGTCAAG

>M6-PGSC0003DMG400006563-(rev)M6LRR-RLK\_6283

GTGAATTGATAATACAGGCTTCAGTATTTTATTGTGTTTGTGGAGAAACCATTGTCAAGGTGGTGATCGA  
TCTAAAAGTTGCATAATGGAAAAGATATCGCAGGAAATCTAATAGTCAGA

>M6-PGSC0003DMG400006563-(rev)M6LRR-RLK\_6344

GGTGATCGATCTAAAAGTTGCATAATGGAAAAGATATCGCAGGAAATCTAATAGTCAGAGAAACATAG  
ATTCCATCTTCTTTTCTTATCAGAACAAAAAATTTGTTAGTTTCTTTAT

>M6-PGSC0003DMG400006563-(rev)M6LRR-RLK\_6405

AACATAGATTCCATCTTCTTTTCTTATCAGAACAAAAAATTTGTTAGTTTCTTTATGCGGCTGTGATAA  
ACTTCAAGAACTTTTGTATTGCTATCTAAGTAGGTGATTTCCATCAT

>M6-PGSC0003DMG400006563-(rev)M6LRR-RLK\_6466

GGCTGTGATAAACTTCAAGAACTTTTGTATTGCTATCTAAGTAGGTGATTTCCATCATTTGACAGCCAA  
ATGTAAAAAATTTTGAAGTTTGGAGCAAGGTTGGGGATCGCACTGGGGG

>M6-PGSC0003DMG400006563-(rev)M6LRR-RLK\_6527

GACAGCCAAATGTAAAAAATTTTGAAGTTTGGAGCAAGTTGGGGATCGCACTGGGGGCATCTAAGG  
GCATCCTTTACCTCCATACTGAAGCTGATCCACCCATATTCCAAAGGGATAT

>M6-PGSC0003DMG400006563-(rev)M6LRR-RLK\_6588

TCTAAGGGCATCCTTTACCTCCATACTGAAGCTGATCCACCCATATTCCAAAGGGATATTAAGCCAGCA  
ACATTCTTTTAGACTCTAACTCACTGCCAAAGTTGCTGATTTTGGATTG

>M6-PGSC0003DMG400006563-(rev)M6LRR-RLK\_6649

AAGCCAGCAACATTCTTTTAGACTCTAACTCACTGCCAAAGTTGCTGATTTTGGATTGTCTCGGCTTGCA  
CCTGTCCAGGATGATGAAGGTCTTCTGCCTAATCATGTGTCAACAATGG

>M6-PGSC0003DMG400006563-(rev)M6LRR-RLK\_671

CTTATTCTATTTTTACTTTTCTTTACATGTTAGATGATGATGGAGAGAAAGGATATGAAGGTATAACAGAT  
ATAATGAATTCATGATACATGTTGTGAAAAGACAACCTACCAAAAAGTT

>M6-PGSC0003DMG400006563-(rev)M6LRR-RLK\_6710

TCGGCTTGCACCTGTCCAGGATGATGAAGGTCTTCTGCCTAATCATGTGTCAACAATGGTGAAGGGGAC  
ACCTGTAAGTCTGTCTATGCTCTAGATTTAAGGAAATAATTGTGCAATGAT

>M6-PGSC0003DMG400006563-(rev)M6LRR-RLK\_6771

AAGGGGACACCTGTAAGTCTGTCTATGCTCTAGATTTAAGGAAATAATTGTGCAATGATCTTACTGATTT  
TCTTATGTATATGCACAGGGTTACCTTGATCCCGAATATTTCTTGACCCG

>M6-PGSC0003DMG400006563-(rev)M6LRR-RLK\_6832

TACTGATTTTCTTATGTATATGCACAGGGTTACCTTGATCCCGAATATTTCTTGACCCGTAAAATGACAGA  
TAAAAGTGATGTCTACAGCATTGGGGTTGTATTTCTGGAGATCTTAACT

>M6-PGSC0003DMG400006563-(rev)M6LRR-RLK\_6893

AAATGACAGATAAAAGTGATGTCTACAGCATTGGGGTTGTATTTCTGGAGATCTTAACTGGCATGCATCC  
TATCTCACATGGAAAAACATTGTCCGTGAGGTATTTCTGTCCGGCTGAAC

>M6-PGSC0003DMG400006563-(rev)M6LRR-RLK\_6954

CATGCATCCTATCTCACATGGAAAAACATTGTCCGTGAGGTATTTCTGTCCGGCTGAACACCTATTGGAA  
TACAAAAACAGTGAATATTTGTCTAGCATTTTAGCAATAAAAGCATAGGT

>M6-PGSC0003DMG400006563-(rev)M6LRR-RLK\_7015

CTATTGGAATACAAAAACAGTGAATATTTGTCTAGCATTTTAGCAATAAAAGCATAGGTGTATGTATATA

ACCATTAAGTGTCCATGACAGGTAAAAATGGCTCATAAATCGGGAGTAAT

>M6-PGSC0003DMG400006563-(rev)M6LRR-RLK\_7076

ATGTATATAACCATTAAGTGTCCATGACAGGTAAAAATGGCTCATAAATCGGGAGTAATGTTCTCCATTA

TGGATAAGAACATGGGATCTTACCCCTCCGAATGTGCGGAGAAGATGGTG

>M6-PGSC0003DMG400006563-(rev)M6LRR-RLK\_7137

TCTCCATTATGGATAAGAACATGGGATCTTACCCCTCCGAATGTGCGGAGAAGATGGTGGAGTTGGCCC

TGAAGTGTGGCCAGGACAAACCAGAAGACAGACCCTCAATGCTGGAGGTGG

>M6-PGSC0003DMG400006563-(rev)M6LRR-RLK\_7198

GTTGGCCCTGAAGTGTGGCCAGGACAAACCAGAAGACAGACCCTCAATGCTGGAGGTGGTTAGGACGC

TAGAAACCATACTCCAAATGATGCCATATACTGACGCCGATCCTTTGGATGA

>M6-PGSC0003DMG400006563-(rev)M6LRR-RLK\_7259

AGGACGCTAGAAACCATACTCCAAATGATGCCATATACTGACGCCGATCCTTTGGATGATAAAGCCAGT

TTCAGTGAAACTACATCATCAGCTTCATTTTCTAATACTAGAAGTGGAGAC

>M6-PGSC0003DMG400006563-(rev)M6LRR-RLK\_732

TATAACAGATATAATGAATTCATGATACATGTTGTGAAAAGACAACCTTACCAAAAAGTTATATATGAGAA

AGGAATAAATCGAAACATATTTGGACTCCCACATTATGTTTGAATTTTTG

>M6-PGSC0003DMG400006563-(rev)M6LRR-RLK\_7320

AAGCCAGTTTCAGTGAAACTACATCATCAGCTTCATTTTCTAATACTAGAAGTGGAGACCTATTTATATCA

TCATCCAATGTATCAGGTGGTGATCTTATTAGTGGTGTACTCTTAATA

>M6-PGSC0003DMG400006563-(rev)M6LRR-RLK\_7381

ATTTATATCATCATCCAATGTATCAGGTGGTGATCTTATTAGTGGTGTACTCTTAATATTACACCTCGTTA

ACATTAGCTTGTCTTCCACTGCATAAACATTGGCTTGTACACTATGAC

>M6-PGSC0003DMG400006563-(rev)M6LRR-RLK\_7442

ACACCTCGTTAACATTAGCTTGTCTTCCACTGCATAAACATTGGCTTGTACACTATGACTAGTAGGAAGTC

TATACGACTTGTCTTTTATGATGTATACGAGTGTACAATAATACCATCT

>M6-PGSC0003DMG400006563-(rev)M6LRR-RLK\_7498

GACTAGTAGGAAGTCTATACGACTTGTCTTTTATGATGTATACGAGTGTACAATAATACCATCTTACTGCT

TCTAGATTTATGTATATTCCTCAAGAATCTGTTGTGACAGACAACCCTT

>M6-PGSC0003DMG400006563-(rev)M6LRR-RLK\_793

ATATGAGAAAGGAATAAATCGAAACATATTTGGACTCCCACATTATGTTTGAATTTTTGAAAGACAGATT  
ATGGAATATTTTATCATGATAGAACATGTTGGTAGAAATAAACATGAAGT

>M6-PGSC0003DMG400006563-(rev)M6LRR-RLK\_854

AGACAGATTATGGAATATTTTATCATGATAGAACATGTTGGTAGAAATAAACATGAAGTTAGGTCCTCAT  
CTTGACACTTATTGAAGATCAAATGCTGATTCTGATATTGCAGAAAGTGT

>M6-PGSC0003DMG400006563-(rev)M6LRR-RLK\_915

GGTCCTCATCTTGACACTTATTGAAGATCAAATGCTGATTCTGATATTGCAGAAAGTGCAGAAATTGCT  
CTTTGCAAGGATCCATTCCTGATTTGAGCAGAAATTGCAAACCTAAGCTAT

>M6-PGSC0003DMG400006563-(rev)M6LRR-RLK\_976

GAAATTGCTCTTTGCAAGGATCCATTCCTGATTTGAGCAGAAATTGCAAACCTAAGCTATCTGTAAGTGCG  
AGTTTGTTATTGTTTTGTTCTTCTTTGTTAAGCTTTATCTGTATATTTT

>M6-PGSC0003DMG400006580-(rev)M6LRR-RLP\_0

TATAGAAACTTTAATTGTGAAGAATTCTCCTTACGTATGGTTACCAGGGTCTTTTTTGCAAATGGAAAAAT  
TAAGGCATGCTCATTGTTGTAAGGCTGTTTTGATAAGCAGGGGCTCTT

>M6-PGSC0003DMG400006580-(rev)M6LRR-RLP\_130

TCTAAATTGGAAAATTTGAGGATATTAAGAAAATTGAGAAATTTCCAATTGATAGGGCGGATGTGTTA  
TCAAGGAGGTGTCCTAATCTTCAACAACCTTCATATCGAATTTGATGGACAT

>M6-PGSC0003DMG400006580-(rev)M6LRR-RLP\_260

CTTTTTGTCTCACATTGGAGAATCTTACCCAGCTTCAAATACTTCGCGTTTCCTTTGAGCGGCCCCACATC  
ATTGTATCTGGATTGCAATTGCCTTCAAATTTAAACAAGTTGGTACTTA

>M6-PGSC0003DMG400006580-(rev)M6LRR-RLP\_325

CACATCATTGTATCTGGATTGCAATTGCCTTCAAATTTAAACAAGTTGGTACTTAAAGGAATTCATATAGA  
AAGTGTTATTCCCTTCATTGCGGGACTACCAAGCCTGGAGTATCTCAA

>M6-PGSC0003DMG400006580-(rev)M6LRR-RLP\_390

TATAGAAAGTGTTATTCCTTCATTGCGGGACTACCAAGCCTGGAGTATCTCCAATTACAAGATGTGTGT  
TTTCTCAATCAAAGAGTGGTGCCTTGGAGATATCACGTTCCATAAACT

>M6-PGSC0003DMG400006580-(rev)M6LRR-RLP\_520

AAACTGGTGCAGTTAGGTATCTCAAGGTGGGATGCCTCGGAGGAATCATTTCCCTTGCTTGAAACACTA  
GTTATAAAAATGTGTGGTCACCTAGAGGAGATCCCAATTAGCTTTGCTGAT

>M6-PGSC0003DMG400006580-(rev)M6LRR-RLP\_585

ACTAGTTATAAAAATGTGTGGTCACCTAGAGGAGATCCCAATTAGCTTTGCTGATATTCCATCATTGAAA  
CAGATTAAATTGATTGGGCCCTGGAAAGAATCTCTGGAGGATTCAGCTGT

>M6-PGSC0003DMG400006580-(rev)M6LRR-RLP\_65

AAAAATTAAGGCATGCTCATTTTTGGTAAGGCTGTTTTTGATAAGCAGGGGCTCTTTGAAGGATCCTCTAA  
ATTGGAAAATTTGAGGATATTAAAGAAAATTGAGAAAATTTCCAATTGATA

>M6-PGSC0003DMG400006580-(rev)M6LRR-RLP\_715

GAAGAAATCGAAGAGATTGAAGGATGTGATCGTATACACCTCGTCAAAGAACCGACAAATTGGGAGGC  
ATATAGCAATTTGTCTGAAGCTGTGCTTATACTGAAGTCTATTTTGTAGCTAG

>M6-PGSC0003DMG400006580-(rev)M6LRR-RLP\_780

GGCATATAGCAATTTGTCTGAAGCTGTGCTTATACTGAAGTCTATTTTGTAGCTAGCCCATTCTCTTATATT  
GTAACACTACTACTGTTTGTATGTTTGTATTGATCAACTCTTTT

>M6-PGSC0003DMG400006580-(rev)M6LRR-RLP\_837

CATTCTCTTATATTGTAACACTACTACTGTTTGTATGTTTGTATTGATCAACTCTTTTTATGTATGGT  
TGGAGACAAATATATATCAGATGATCTTTCAGTATTCATGTTTTT

>M6-PGSC0003DMG400006652M6LRR-RLP\_1071

GATCTTCTCGTAATGATTTTCAGTGGCTCACTTCTGCAAAAAGTTTTTGGAAACTTCAAGGCAATGATCAA  
ATTAGATAACGAAGACACAAGAGAGATAAAGTACATGAAATCTGTGTTG

>M6-PGSC0003DMG400006652M6LRR-RLP\_1134

ATGATCAAATTAGATAACGAAGACACAAGAGAGATAAAGTACATGAAATCTGTGTTGCATTGGCCGCCA  
TTCGTCACATCGTATGAGGAGTCAGTGAGTTTGGTAATCAAAGGGCAGGAT

>M6-PGSC0003DMG400006652M6LRR-RLP\_1260

CTACAAAGAATCAGCACAATTACGACAACCATAGATCTCTCAAGCAACCATTTGGAAGGTGTGATTCCGA  
AAACTAAAGGATCTCAGATCACTTTGGCTACTCAATTTATCTCATAAC

>M6-PGSC0003DMG400006652M6LRR-RLP\_1323

ATTCCGAAAACACTAAAGGATCTCAGATCACTTTGGCTACTCAATTTATCTCATAACAATCTCAGAGGAG  
ATATTCCAATGAAATTAGGACAATTGAGTATGCTTGAAGCTTTAGATCTC

>M6-PGSC0003DMG400006652M6LRR-RLP\_441

AAGGATTTTCCACACTTCTTGAGAAATGTAAGAAACTTGTGTAAGTGGATATTTCTAACAATAAGATTC

GTGGTCAAATCCCTAACTGGTTTAGCGGCATGAGATGGGACTCGTTACAG

>M6-PGSC0003DMG400006652M6LRR-RLP\_882

CCTGTGTCATTGCTCAAGTGTGGTGATCTAGAAGTACTTGATGTGGGGAACAATGCTATAAATGACAGG

TTCCATCTTGGCTCGGAACTCTTGAATACTTGCAGGTCCTTATATTAAG

>M6-PGSC0003DMG400006652M6LRR-RLP\_945

GACAGGTTTCCATCTTGGCTCGGAACTCTTGAATACTTGCAGGTCCTTATATTAAGTCGAACAAGTTCC

ATGGACCTATAAGTATGTGTCAGACTAAGTTTTGCTTTCCCAAGTTGCGA

>M6-PGSC0003DMG400006655M6LRR-RLP\_1197

TTAGATGGTGAAGACACAGGAAATATCAAGTACATAAAATCTGTGTTGAATTCGTCATTTGACACATCGT

ATGAGGATTCAGTGAGTTTGGTAATCAAAGGGCACGATATTGAGCTACAA

>M6-PGSC0003DMG400006655M6LRR-RLP\_1386

CTAAAGGACCTCAGCTCACTTAGGCTACTCAATTTATCCCATAACAATCTCATAGGTCATATTCCAGTGGA

ATTGGGGCAATTGAATAAGCTGGAAGCTTTAGATCTCTCTTGAATCGG

>M6-PGSC0003DMG400006655M6LRR-RLP\_1512

GGAAAGATTCCGCAGGAATTGACAAGAATGAACTTTCTGGCAGTCTTAAACATCTCTCAAATCATCTCA

TCGGACCAATTCCTCACGGTCTACAGTTCAACACATTTGAAAATGACTCG

>M6-PGSC0003DMG400006655M6LRR-RLP\_1638

GGTAACCTTGATTTATGTGGTCTTCTTTAACAAAGAAATGTGGAACGAGTGATTCATCACATGTTCTC

AACAATTGGAGTCCGAAGAAGAAGGCGAGTCATATTTTTTTAGTGGATT

>M6-PGSC0003DMG400006655M6LRR-RLP\_315

CCAACATTAAGAAGAACTGCATTTAAGCAATAATCAACTCAGTGGTTCTTTTCTCAATCACTTGTGAATCT

CACAAATCTTTTTACCCTTGACATTTTCATCAAATAACATCACCATTGAT

>M6-PGSC0003DMG400006655M6LRR-RLP\_378

GTGAATCTCACAAATCTTTTTACCCTTGACATTTTCATCAAATAACATCACCATTGATGAGGGAATGAATAT

CACCTTTCTTAGCCTATCATCTTTATTCTTATCATCTTGTGAACTGAAG

>M6-PGSC0003DMG400006655M6LRR-RLP\_630

CATAATTCATTAACAGGCCACCTACCACAATTGCATTTCCATAATCTAGGGTATCTTGATCTGAAATTTAA

CTCCCTCAGGGTCCACTACCTTCATCCATTTGTAACATGAGCTCGCTT

>M6-PGSC0003DMG400006655M6LRR-RLP\_693



AAATTTAACTCCCTTCAGGGTCCACTACCTTCATCCATTTGTAACATGAGCTCGCTTGAATTTCTTGATTTA  
TCACGCAACAACCTTCAGTGACTCAGTTTCACATTGTTTGGGAAGCATG

>M6-PGSC0003DMG400006667M6OtherRLKTM\_0

CTTTCACCTACACTGCTCTTATTTTGAGAAGATGTAGTTTTGAAGCATTTAATGCTCACTTTTCTCTCTCTA  
TTTCTCCTATGCTGTCTTTCACCACTTCATTCTTGAGGGCACCGATAA

>M6-PGSC0003DMG400006667M6OtherRLKTM\_1054

GCACCAAAGATTGAGATTTATTAAGATTGCAGCTGGGGGATATCATGTTTGTGGGATCCTAGAAGGG  
GTGAATTCTCAAGTGATTGCTGGGGAAGGAGCATGAACCTGAAGAAGAA

>M6-PGSC0003DMG400006667M6OtherRLKTM\_1116

AGAAGGGGTGAATTCTCAAGTGATTGCTGGGGAAGGAGCATGAACCTGAAGAAGAATTCTCTGTTG  
CTCAACTCAATGTTGAATTGGCAGCCCCTAGTGATCCAATTATATCTGTTGT

>M6-PGSC0003DMG400006667M6OtherRLKTM\_1178

CTGTTGCTCAACTCAATGTTGAATTGGCAGCCCCTAGTGATCCAATTATATCTGTTGTTGGTGGTAAGTTT  
CATGCTTGTGGGATTAGGAGCTATGACCGTCATGTCGTTTGCTGGGGTT

>M6-PGSC0003DMG400006667M6OtherRLKTM\_124

GACACAAAAGGGGCTAAAAAAATGTCATTATCTTCTTTTTTGTGTTTCTTGAAGTAAATATGCAGCT  
TCTTGGCTACAAATTTGTTTAATTGTATTGATAACGAGGGTATTATAA

>M6-PGSC0003DMG400006667M6OtherRLKTM\_1240

GGTAAGTTTCATGCTTGTGGGATTAGGAGCTATGACCGTCATGTCGTTTGCTGGGGTTACAGAGTTGAG  
AAAAGCACACCACCTCCTAGTGGAGTTAGGCTTTATGAGATAGCAGCTGGT

>M6-PGSC0003DMG400006667M6OtherRLKTM\_1302

AGTTGAGAAAAGCACACCACCTCCTAGTGGAGTTAGGCTTTATGAGATAGCAGCTGGTGACTACTTCAC  
TTGTGGTATCCTTGCGGAAATTTCAATTTGCCTGTTTGTGGGGTTTGG

>M6-PGSC0003DMG400006667M6OtherRLKTM\_1364

ACTTCACTTGTGGTATCCTTGCGGAAATTTCAATTTGCCTGTTTGTGGGGTTTGGTTTTCCCTCATCG  
CTACCACTCGCTGTTTCTCCTGGAGTCTGCAAGCCTAGACCCTGTGCAT

>M6-PGSC0003DMG400006667M6OtherRLKTM\_1426

CCCTCATCGCTACCACTCGCTGTTTCTCCTGGAGTCTGCAAGCCTAGACCCTGTGCATCTGGCTTCTATGA  
GTTTAAACAACGGAAGTGCAACTTGCAAGTCTCCTGATTCTCGCATTGTC

>M6-PGSC0003DMG400006667M6OtherRLKTM\_1488

CTTCTATGAGTTTAAACAACGGAAGTGCAACTTGCAAGTCTCCTGATTCTCGCATTTGCCTTCCCTGCACCA  
ATGGCTGCCCTGCTGAAATGTATCAACAGGTTGAATGCACTTCATCTAC

>M6-PGSC0003DMG400006667M6OtherRLKTM\_1550

CCTGCACCAATGGCTGCCCTGCTGAAATGTATCAACAGGTTGAATGCACTTCATCTACGGACAGTCAGTG  
CACGTATAATTGTTCAAGTTGTATCTCTGTTGACTGCATAAACAGCTGTT

>M6-PGSC0003DMG400006667M6OtherRLKTM\_1612

AGTCAGTGCACGTATAATTGTTCAAGTTGTATCTCTGTTGACTGCATAAACAGCTGTTCTACTGCTATTTT  
TGAAAGAAGAACGCTAAATTTTGGTCACTCCAGTTACCAGTAATTGTT

>M6-PGSC0003DMG400006667M6OtherRLKTM\_1674

TGCTATTTCTGGAAAGAAGAACGCTAAATTTTGGTCACTCCAGTTACCAGTAATTGTTGCTGAGGTTGCA  
TTTGCAGTATTCTTGGTGAGTGTTGTATCTCTAACTTCGATCGTATATGT

>M6-PGSC0003DMG400006667M6OtherRLKTM\_1736

AGGTTGCATTTGCAGTATTCTTGGTGAGTGTTGTATCTCTAACTTCGATCGTATATGTTTCGCTACAAATTA  
AGGAACTGTAGATGTTCAAGGAAAGGTCCTAGTCCTAGGAAGAATGGTA

>M6-PGSC0003DMG400006667M6OtherRLKTM\_1798

TACAAATTAAGGAACTGTAGATGTTCAAGGAAAGGTCCTAGTCCTAGGAAGAATGGTACTTTCCCAAAG  
GAAATTGCTAAAGATAGGGCTGATTTGGATGATCTTAAAATAAGGAGAGCT

>M6-PGSC0003DMG400006667M6OtherRLKTM\_186

TATGCAGCTTCTTGGCTACAAATTTTGTAAATTGTATTGATAACGAGGGTATTATAATTATTTGGGATGA  
AGGAAAGTTGTGAATTTTGTATCCACCTACCCACCCATGGTATGTTTGA

>M6-PGSC0003DMG400006667M6OtherRLKTM\_1860

CCCAAAGGAAATTGCTAAAGATAGGGCTGATTTGGATGATCTTAAAATAAGGAGAGCTCAGATGTTTAC  
TTATGAAGATCTTGAGAGAGCAACTGAGGGATTCAAAGAAGAATCACAAGT

>M6-PGSC0003DMG400006667M6OtherRLKTM\_1922

TGTTTACTTATGAAGATCTTGAGAGAGCAACTGAGGGATTCAAAGAAGAATCACAAGTTGGAAAGGGT  
AGCTTTTCGTGTGTGTTCAAGGGCGTTTTGAAGGACGGTACTGTGGTTGCTG

>M6-PGSC0003DMG400006667M6OtherRLKTM\_1984

AAGGGTAGCTTTTCGTGTGTGTTCAAGGGCGTTTTGAAGGACGGTACTGTGGTTGCTGTCAAGAGGGCT

ATAATGTCATCTGACATGAAGAAGAATTCAAAGGAGTTCCACAATGAGCTA

>M6-PGSC0003DMG400006667M6OtherRLKTM\_2046

GAGGGCTATAATGTCATCTGACATGAAGAAGAATTCAAAGGAGTTCCACAATGAGCTAGACTTGCTGTC

CAGGTTGAATCATGCTCATTGCTCAATTTGCTAGGTTATTGTGAAGAAGG

>M6-PGSC0003DMG400006667M6OtherRLKTM\_2108

TGCTGTCCAGGTTGAATCATGCTCATTGCTCAATTTGCTAGGTTATTGTGAAGAAGGTGGAGAGAGACT

TCTAGTTTATGAGTACATGGCTAATGGCACGTTGCATGAACATCTACACG

>M6-PGSC0003DMG400006667M6OtherRLKTM\_2170

GAGAGACTTCTAGTTTATGAGTACATGGCTAATGGCACGTTGCATGAACATCTACACGGGAAAAGAAG

GAGCAATTGGATTGGATAAGAAGGGTAACCATTGCAGTCCAAGCTGCTCGG

>M6-PGSC0003DMG400006667M6OtherRLKTM\_2232

AAAGAAGGAGCAATTGGATTGGATAAGAAGGGTAACCATTGCAGTCCAAGCTGCTCGGGGAATCGAAT

ATTTGCATGGTTATGCATGTCCACCTGTGATTCACAGAGACATCAAGTCCTC

>M6-PGSC0003DMG400006667M6OtherRLKTM\_2294

TCGAATATTTGCATGGTTATGCATGTCCACCTGTGATTCACAGAGACATCAAGTCCTCAAACATCCTTATA

GATGAAGAACACAATGCTCGAGTAGCTGATTTTGGGCTTTCCTTGCTTG

>M6-PGSC0003DMG400006667M6OtherRLKTM\_2356

ATCCTTATAGATGAAGAACACAATGCTCGAGTAGCTGATTTTGGGCTTTCCTTGCTTGGACCTGCTAATA

GCAGTTCCCATTAGCTGAGTTACCAGCAGGGACACTTGGGTACCTTGAT

>M6-PGSC0003DMG400006667M6OtherRLKTM\_2418

TGCTAATAGCAGTTCCCATTAGCTGAGTTACCAGCAGGGACACTTGGGTACCTTGATCCCGAGTACTAC

AGACTACATTATCTTACAACCAAATCTGATGTCTATAGCTTTGGTGTTTT

>M6-PGSC0003DMG400006667M6OtherRLKTM\_248

TTGGGATGAAGGAAAGTTGTGAATTTTATCCACCTACCCACCATGGTATGTTTGAACATTTTTTTTTT

CCGTGTGTTTCATAAATCAACTCAGCTAATATGGAGAAGGAGAGGTGTT

>M6-PGSC0003DMG400006667M6OtherRLKTM\_2480

AGTACTACAGACTACATTATCTTACAACCAAATCTGATGTCTATAGCTTTGGTGTTTTGCTTTTGGAAATT

CTCAGTGGTCGGAAAGCTATTGACATGCAATACGATGAAGGGAACATAG

>M6-PGSC0003DMG400006667M6OtherRLKTM\_2542

TTGGAAATTCTCAGTGGTCGGAAAGCTATTGACATGCAATACGATGAAGGGAACATAGTGGAAATGGGC  
AGTCCCATTAATCAAAGCTGGTGAAATAGAAGCAATACTGGATCCAGTTTTG

>M6-PGSC0003DMG400006667M6OtherRLKTM\_2604

ATGGGCAGTCCCATTAATCAAAGCTGGTGAAATAGAAGCAATACTGGATCCAGTTTTGAAATCACCTTCT  
GATGGTGAAGCTCTTAGAAGAATCGCTAATATAGCCAGCAAATGCGTGAG

>M6-PGSC0003DMG400006667M6OtherRLKTM\_2666

CACCTTCTGATGGTGAAGCTCTTAGAAGAATCGCTAATATAGCCAGCAAATGCGTGAGGATGAGAGGG  
AAAGAGAGGCCGTCAATGGATAAAGTAACAACAGCTTTGGAGAGAGCACTTG

>M6-PGSC0003DMG400006667M6OtherRLKTM\_2728

AGAGGGAAAGAGAGGCCGTCAATGGATAAAGTAACAACAGCTTTGGAGAGAGCACTTGCTCAATTGAT  
GGGTAGTCCAAGCAATGACCAGCCTATCTTGCCAACAGAGGTTGTTCTAGGA

>M6-PGSC0003DMG400006667M6OtherRLKTM\_2790

ATTGATGGGTAGTCCAAGCAATGACCAGCCTATCTTGCCAACAGAGGTTGTTCTAGGAAGCAGCAGAAT  
GCACAAGAAGTCCTCATCAAATCGATCAACGTCAGAAACAACAGATGTTGC

>M6-PGSC0003DMG400006667M6OtherRLKTM\_2852

GCAGAATGCACAAGAAGTCCTCATCAAATCGATCAACGTCAGAAACAACAGATGTTGCAGAAACTGAG  
GATCAGAGGTATGTGGAATTCAGAGCTCCTTCGTGGATTACATTCCCAAGTG

>M6-PGSC0003DMG400006667M6OtherRLKTM\_2914

ACTGAGGATCAGAGGTATGTGGAATTCAGAGCTCCTTCGTGGATTACATTCCCAAGTGATCATCATCTC  
AGAGAAGAAAGTCTTCAGTATCGGACGCAGATGTTGAAGCAAAGAATTTA

>M6-PGSC0003DMG400006667M6OtherRLKTM\_2976

ATCATCTCAGAGAAGAAAGTCTTCAGTATCGGACGCAGATGTTGAAGCAAAGAATTTAGAAAGTAGGA  
ACTGTGGAATGGAAGTATGGAATGAGAAGTTTGAAGAAGAAATTGGACC

>M6-PGSC0003DMG400006667M6OtherRLKTM\_3038

GTAGGAAGTGTGGAATGGAAGTATGGAATGAGAAGTTTGAAGAAGAAATTGGACCAGCTTCTCCT  
CATGAACATTTGTTCTTGAAACACAACCTTCTAATTAACATAACACTAAAAAG

>M6-PGSC0003DMG400006667M6OtherRLKTM\_310

TTTTTTTTTCCGTGTGTTTCATAAATCAACTCAGCTAATATGGAGAAGGAGAGGTGTTATTTTGGTTTTAT  
CAGAAGGATAAAGGTGAAAGAAAGCACTGACTTTTTGTTTGTGTACTTT

>M6-PGSC0003DMG400006667M6OtherRLKTM\_3100

TCTCCTCATGAACATTTGTTCTTGAAACACAACCTCTAATTAACATAACACTAAAAAGGAAATGCTCTGCA  
GGTTGATGCTTAATTATTTGTTAGTGGAAGAAATGTATACAAGTAAAA

>M6-PGSC0003DMG400006667M6OtherRLKTM\_3162

TGCTCTGCAGGTTGATGCTTAATTATTTGTTAGTGGAAGAAATGTATACAAGTAAAAGGTAAATGTTGT  
GAATCTTGATAAATGTGATCAAGAATTCCCCACTCAACCATTGGCGATG

>M6-PGSC0003DMG400006667M6OtherRLKTM\_3224

AATGTTGTGAATTCTTGATAAATGTGATCAAGAATTCCCCACTCAACCATTGGCGATGAGCTTTAGCTAG  
ATGTTTGATCCTGTAATTGTAACCTCAATCTTTCTTCTTTTTATGCA

>M6-PGSC0003DMG400006667M6OtherRLKTM\_372

TGGTTTTATCAGAAGGATAAAGGTGAAAGAAAGCACTGACTTTTTGTTTGTGTACTTTGTTTAATTTTTAA  
TTTGTGTAATGGACAGTTTAAATAAGTGGTGTGTGGTGATGTGGAAATG

>M6-PGSC0003DMG400006667M6OtherRLKTM\_434

AATTTTTAATTTGTGTAATGGACAGTTTAAATAAGTGGTGTGTGGTGATGTGGAAATGTAGATACTTTGT  
AAGAGCTTTTATGCTCCTTGTGGTATTTTCAAAGTATCAGGGTTTGGAT

>M6-PGSC0003DMG400006667M6OtherRLKTM\_496

TACTTTGTAAGAGCTTTTATGCTCCTTGTGGTATTTTCAAAGTATCAGGGTTTGGATCAATGTCTTCAAT  
TGCTATTTTCAATGTTGAATATGGTTCTGTTTTTGTGGGTTGAAGTCA

>M6-PGSC0003DMG400006667M6OtherRLKTM\_558

GTCTTCAATTGCTATTTTCAATGTTGAATATGGTTCTGTTTTTGTGGGTTGAAGTCAGATGGATCTCATT  
TGGTCAGTTGCTATGGCTCTACTTCTTCTATAATATATTCAACTCCAGC

>M6-PGSC0003DMG400006667M6OtherRLKTM\_62

TCTCTCTATTTCTCCTATGCTGTCTTTCACTTCTTCTTCTGAGGGCACCGATAACTTTGACACAAAAG  
GGGCTAAAAAAATGTCATTATCTTCTTTTTTGTGTTTCTTGAAC

>M6-PGSC0003DMG400006667M6OtherRLKTM\_620

GATCTCATTGGTCAGTTGCTATGGCTCTACTTCTTCTATAATATATTCAACTCCAGCTCATTCCCTTTTAT  
TGGTCTTACTGCTGGAAATGGCTTTGTATGTGGACTTTTGATGGATT

>M6-PGSC0003DMG400006667M6OtherRLKTM\_682

TTCCCTTTTATTGGTCTTACTGCTGGAAATGGCTTTGTATGTGGACTTTTGATGGATTCTTACCAGCCTTAT

TGTTGGGGGAAAAGTAATTTTGTACAAATGGGAGTGCCTCAGCCTATG

>M6-PGSC0003DMG400006667M6OtherRLKTM\_744

CCAGCCTTATTGTTGGGGGAAAAGTAATTTTGTACAAATGGGAGTGCCTCAGCCTATGATCAAAGGGTC

TCAATACTTGAAATATCTGCAGGTGAAAATCATTGTGTGGACTAAGGCA

>M6-PGSC0003DMG400006667M6OtherRLKTM\_806

AAGGGTCTCAATACTTGAAATATCTGCAGGTGAAAATCATTGTGTGGACTAAGGCAACCTTTAATGG

GGAAGCATAGGAACACTTCACTTGTGATTGCTGGGGTTATAACATGACTA

>M6-PGSC0003DMG400006667M6OtherRLKTM\_868

TTAATGGGGAAGCATAGGAACACTTCACTTGTGATTGCTGGGGTTATAACATGACTACAAACAATGAG

TTTGAAGGTCAGATCCACTCTATTTTCACTTGTGATTGCTGGGGTTATAACATGACTACAAACAATGAG

>M6-PGSC0003DMG400006667M6OtherRLKTM\_930

CAATGAGTTTGAAGGTCAGATCCACTCTATTTTCACTTGTGATTGCTGGGGTTATAACATGACTACAAACAATGAG

ATAAAAGTGTTTTATGTTGGGGGGATGAACTAGTAGCCAGGTTATTAC

>M6-PGSC0003DMG400006667M6OtherRLKTM\_992

TTTCTGTCAATAAAAGTGTTTTATGTTGGGGGGATGAACTAGTAGCCAGGTTATTACCCTAGCACCAAA

AGATTTGAGATTTATTAAGATTGCAGCTGGGGGATATCATGTTTGTGGGA

>M6-PGSC0003DMG400006729-(rev)M6RLKWAX-EGF\_0

TTGTAACCTACCTTTTCAACCTCCTCAGCTTTATCTCGGTGACACAACCTATTCAAATCACACGCATATCGCT

CGCTGGGCAACTAACAGTCTTACAATTTATATCGAGAGATTGTTAAAA

>M6-PGSC0003DMG400006729-(rev)M6RLKWAX-EGF\_124

GGGATAAACACGGAGAATAACACACCATGGATAGCATTACCACTGTCGTTTTCTGTGAATGACACCACA

AATAAGTTCATCGCAATTGGCTGTGACACATATGTTATAGTTCAGGGTTAT

>M6-PGSC0003DMG400006729-(rev)M6RLKWAX-EGF\_186

CACCACAAATAAGTTCATCGCAATTGGCTGTGACACATATGTTATAGTTCAGGGTTATTATTCCAAGTTTG

AAAGTAGTAAAATCGAGGATTATTATTCTACATAACAGGATGATGCAT

>M6-PGSC0003DMG400006729-(rev)M6RLKWAX-EGF\_248

CCAAGTTTGAAAGTAGTAAAATCGAGGATTATTATTCTACATAACAGGATGATGCATGTCCATGTGCAA

TAGTATTGATGATGATAAATGTTCTGGTGTGGTTGTTGCATGACATCCA

>M6-PGSC0003DMG400006729-(rev)M6RLKWAX-EGF\_310

ATGTGCAATAGTATTGATGATGATAAATGTTCTGGTGTGGTTGTTGCATGACATCCATCCCTAATGGGG  
CCTGGAATGTTACTATAACACTAAGGAGCTATTATAATCATACTTATGTG

>M6-PGSC0003DMG400006729-(rev)M6RLKWAX-EGF\_372

TAATGGGGCCTGGAATGTTACTATAACACTAAGGAGCTATTATAATCATACTTATGTGAAAGATAACCCT  
AGTTACGTTGTAGCTATGGTTTTGTAGTTGAAGAAGCTAATTTTAGTTAT

>M6-PGSC0003DMG400006729-(rev)M6RLKWAX-EGF\_434

ATAACCCTAGTTACGTTGTAGCTATGGTTTTGTAGTTGAAGAAGCTAATTTTAGTTATTCTAAGAATTATC  
TAAGAAGTTTGCAGAATATGGAGGAGCTTCCTCTTGCTAGATTGGGT

>M6-PGSC0003DMG400006729-(rev)M6RLKWAX-EGF\_496

AGAATTATCTAAGAAGTTTGCAGAATATGGAGGAGCTTCCTCTTGCTAGATTGGGTAATTGGTGAAG  
AAACATGTGAAATAGCTAAGAGAACTCGACTACATATGTATGTAAGAGTA

>M6-PGSC0003DMG400006729-(rev)M6RLKWAX-EGF\_62

GCATATCGCTCGCTGGGCAACTAACAGTCTTACAATTTATATCGAGAGATTGTTAAAAGTCCGGGATAAA  
CACGGAGAATAACACACCATGGATAGCATTACCACTGTCGTTTTCTGTGA

>M6-PGSC0003DMG400006792M6LRR-RLP\_0

CAACAACAACTATCCGGAAAGTTCCCCTCGTGGATATCTGATGGTTTTCAAATCTTAGAATCCTCAGC  
TTAAGGTCAAATTCATTTCCGGAGAACTTCCTTTAGGAATGTCAAACT

>M6-PGSC0003DMG400006792M6LRR-RLP\_130

CAGGTGCTTGATCTTGCAGAAAACAATAACTGGCGCCATTCCAACAACCATAGGAGACCTGAACGCC  
ATGGTACAAGAGGAAAAAGTGAATGAATATCTGTTATATGGGAAGTATAGA

>M6-PGSC0003DMG400006792M6LRR-RLP\_195

CGCCATGGTACAAGAGGAAAAAGTGAATGAATATCTGTTATATGGGAAGTATAGAGGGATTTACTATG  
AAGAAAGCTTGGTAGTGAATTTGAAAAACCAGTTCCAAAAGTACACCAAGAC

>M6-PGSC0003DMG400006792M6LRR-RLP\_260

ATGAAGAAAGCTTGGTAGTGAATTTGAAAAACCAGTTCCAAAAGTACACCAAGACTCTATCACTTCTTAC  
CTCAATAGACTTGTGCGAGAAACAACCTCAACGGAGCATTTCCTGTGGAAT

>M6-PGSC0003DMG400006792M6LRR-RLP\_325

CTTACCTCAATAGACTTGTGCGAGAAACAACCTCAACGGAGCATTTCCTGTGGAATTGACAACTTGCATG  
GCCTCATAGTTTTGAACTTGTCCGGAAACCAAATCAGTGGAAAAATACCA

>M6-PGSC0003DMG400006792M6LRR-RLP\_390

GCATGGCCTCATAGTTTTGAACTTGTCCGGAAACCAAATCAGTGGAAAAATACCAGAAAACATTTCAAG  
CTTACATCAGTTAGCATCGCTTGATCTCTCGAGTAATACTGTCTGGTGT

>M6-PGSC0003DMG400006792M6LRR-RLP\_455

CAAGCTTACATCAGTTAGCATCGCTTGATCTCTCGAGTAATACTGTCTGGTGTGCATCCCATCAAGCATG  
GAATCAATGTCATTCTTGAGCTATATTAATTCTCAAACAACAATTAT

>M6-PGSC0003DMG400006792M6LRR-RLP\_520

AGCATGGAATCAATGTCATTCTTGAGCTATATTAATTCTCAAACAACAATTATCCGGTATGGTTCCTTA  
TAAGGGACAGATGACAACTTTTACAGTGTCCGCGTTTGAGGGGAATCCC

>M6-PGSC0003DMG400006792M6LRR-RLP\_585

TCCTTATAAGGGACAGATGACAACTTTTACAGTGTCCGCGTTTGAGGGGAATCCCCATCTTTGTGGAGCT  
CCACTTCTAGTACTATGTCAAATGGAACTCGGACAATAGAACGGTACT

>M6-PGSC0003DMG400006792M6LRR-RLP\_65

TCAGCTTAAGGTCAAATTCATTTCCGGAGAACTTCCTTTAGGAATGTCAAACACTGAGTTCATTGCAGGT  
GCTTGATCTTGCAGAAAACAACATAACTGGCGCCATTCCAACAACCATAG

>M6-PGSC0003DMG400006792M6LRR-RLP\_650

GAGCTCCACTTCTAGTACTATGTCAAATGGAACTCGGACAATAGAACGGTACTAGAGAATGACAGCA  
GTGATGAATTTCTGATAAATGGTTTTATGTTAGTGTTCATTGGGATTTA

>M6-PGSC0003DMG400006792M6LRR-RLP\_715

AGCAGTGATGAATTTCTGATAAATGGTTTTATGTTAGTGTTCATTGGGATTTATTACAGGTATTCTTGT  
TCCTTACTATATCTTGCTCGTTTCGAAAGCCATGGAGACGAGCATATTTT

>M6-PGSC0003DMG400006792M6LRR-RLP\_780

TCTTGTTCTTACTATATCTTGCTCGTTTCGAAAGCCATGGAGACGAGCATATTTTAGTTTCTTAGACACAG  
TCATCGACAGATTTGTCCAGTCAGAAGCAACAGAACAACCAGCACCAA

>M6-PGSC0003DMG400006792M6LRR-RLP\_840

CTTAGACACAGTCATCGACAGATTTGTCCAGTCAGAAGCAACAGAACAACCAGCACCAAAGATCAGA  
TACGGGCACCAGATATGGCAAAGAAGTGTTCATAGGTACTAGTCCTAGT

>M6-PGSC0003DMG400006880-(rev)M6LRR-RLP\_0

CACAGAAGAACTCTCTGTAAATAGAAAAATAGAGAGTAATAGTACTGCATTTTGTAAATAGAGAGAG



GAGAAATGGGTCTCACCGGAGTAACATTGTTGGTCACTCTCATGGTGGTGG

>M6-PGSC0003DMG400006880-(rev)M6LRR-RLP\_1024

AAAATCATTATCATCAGCTAAGTACATTGGCCATTTGGATTTAAGCCATAATCACCTTTGTGGCCCGATTCCAAACGGGTACCCCTTCGATCATCTAGAAGCTTCTTCTTTCTCTAACA

>M6-PGSC0003DMG400006880-(rev)M6LRR-RLP\_1088

CCGATTCCAAACGGGTACCCCTTCGATCATCTAGAAGCTTCTTCTTTCTCTAACAACGATTGTTTGTGTGGATCGCCATTACGTACTTGTTAATTCTTTTTTGTTTACTTACTAAGTTTG

>M6-PGSC0003DMG400006880-(rev)M6LRR-RLP\_1152

TGTGTGGATCGCCATTACGTACTTGTTAATTCTTTTTTGTTTACTTACTAAGTTTGTAATTAATCGAAATTA TCGGTTGATTACGCATAAATGGATGTGTAATTGTGTATTATGTTATGA

>M6-PGSC0003DMG400006880-(rev)M6LRR-RLP\_1216

CGAAATTATCGGTTGATTACGCATAAATGGATGTGTAATTGTGTATTATGTTATGATTAAAAAATATTCT TATGTGTTTAGCTTAATTATTATTATTATTGCTAAGCAATATGATGGAT

>M6-PGSC0003DMG400006880-(rev)M6LRR-RLP\_128

ACTTTGCCGGCAAATGCCTGCCTGCCGGCGGACCAAGCAGCACTGATGGATATCAAAGCAGCTCTTAAG GAGCCATATTTGGGCATTTTCAACACATGGACTGGCAGCAACTGTTGCCAG

>M6-PGSC0003DMG400006880-(rev)M6LRR-RLP\_1280

ATATTCTTATGTGTTTAGCTTAATTATTATTATTATTGCTAAGCAATATGATGGATTATGCGGTTCTATCAT GCATGCACGTGAAAATGCGTGACAGTTTACAAGAAAAATTATTGAAGA

>M6-PGSC0003DMG400006880-(rev)M6LRR-RLP\_1327

ATGATGGATTATGCGGTTCTATCATGCATGCACGTGAAAATGCGTGACAGTTTACAAGAAAAATTATTG AAGAAATTGTGTGCTATTATTATTAGTAAATTGTAATATAATAAATCCAC

>M6-PGSC0003DMG400006880-(rev)M6LRR-RLP\_192

TTAAGGAGCCATATTTGGGCATTTTCAACACATGGACTGGCAGCAACTGTTGCCAGGGCTGGTATGGTG TTAGCTGTGACCCGACTACGCAACGAGTTGCAGACATTGTTCTTCGGGGAG

>M6-PGSC0003DMG400006880-(rev)M6LRR-RLP\_256

TGGTGTAGCTGTGACCCGACTACGCAACGAGTTGCAGACATTGTTCTTCGGGGAGAATCCGAAGATCC GATTTACGAGAAAGCCGGCCGGTCTGGTTACATGACCGGTTCACTCTCCCC

>M6-PGSC0003DMG400006880-(rev)M6LRR-RLP\_320

GATCCGATTTACGAGAAAGCCGGCCGGTCTGGTTACATGACCGGTTCACTCTCCCCTTCTCTCTGCAAAC  
TCGACAAGCTCACTACTCATCGTCGCCGACTGGAAAGATATCTCCGGC

>M6-PGSC0003DMG400006880-(rev)M6LRR-RLP\_384

GCAAACCTCGACAAGCTCACTACTCATCGTCGCCGACTGGAAAGATATCTCCGGCGAAATTCGGGCTT  
GTGTCACTTCATTACCAGATCTCCGTATCCTTGAGCTCATCGGCAACAAAA

>M6-PGSC0003DMG400006880-(rev)M6LRR-RLP\_448

GGCTTGTGTCACTTCATTACCAGATCTCCGTATCCTTGAGCTCATCGGCAACAAAATCACCGGTCAAATCC  
CGGAAAACATCGGTCAGCTGAGTAACTCACTGTTCTAAACCTCGCCGA

>M6-PGSC0003DMG400006880-(rev)M6LRR-RLP\_512

CAAATCCCGGAAAACATCGGTCAGCTGAGTAACTCACTGTTCTAAACCTCGCCGATAATAAAATCTGCG  
GTTCAATCCCCGCCTCCATTGTCAACCTCGGAAAACCTAAAGCATCTCGAA

>M6-PGSC0003DMG400006880-(rev)M6LRR-RLP\_576

TCTGCGGTTCAATCCCCGCCTCCATTGTCAACCTCGGAAAACCTAAAGCATCTCGAACTCAGCAACAATCA  
ACTCACCGGCGAAATCCCGTCCGATATCGGAAAACCTCGGCATGATGAGCC

>M6-PGSC0003DMG400006880-(rev)M6LRR-RLP\_64

GAGAGGAGAAATGGGTCTCACCGGAGTAACATTGTTGGTCACTCTCATGGTGGTGGCCGCCGTTACTTT  
GCCGGCAAATGCCTGCCTGCCGGCGGACCAAGCAGCACTGATGGATATCAA

>M6-PGSC0003DMG400006880-(rev)M6LRR-RLP\_640

CAATCAACTCACCGGCGAAATCCCGTCCGATATCGGAAAACCTCGGCATGATGAGCCGAGCACTACTCAA  
CAAGAACAAACTCACAGGTTCAATCCCTAACTCAATCACTCAACTTCGCCG

>M6-PGSC0003DMG400006880-(rev)M6LRR-RLP\_704

CTCAACAAGAACAAACTCACAGGTTCAATCCCTAACTCAATCACTCAACTTCGCCGGTTAGCCGATCTAG  
ATCTGTCAATGAATCAAATCACCGGTTCACTCCCGGCTCAGCTCGGTTCA

>M6-PGSC0003DMG400006880-(rev)M6LRR-RLP\_768

ATCTAGATCTGTCAATGAATCAAATCACCGGTTCACTCCCGGCTCAGCTCGGTTCAATGCCGGTTCTCTCA  
ACTCTAAACCTCGATTCCAACCAAATCTCCAGTTCAATCCCCACTAATC

>M6-PGSC0003DMG400006880-(rev)M6LRR-RLP\_832

TCTCTCAACTCTAAACCTCGATTCCAACCAAATCTCCAGTTCAATCCCCACTAATCTACTTAGCAGCAGCG  
GATTAACATCTTAACTTAAGCAGAACTCATTAGAAGGAGAATTACC

>M6-PGSC0003DMG400006880-(rev)M6LRR-RLP\_896

AGCAGCGGATTAACATCTTAACTTAAGCAGAACTCATTAGAAGGAGAATTACCAGATGTATTTGCT  
CAAAAACGTATTTACACATCTGGATTTATCATAACAATAATCTTCGAGGT

>M6-PGSC0003DMG400006880-(rev)M6LRR-RLP\_960

TTTGCTCAAAAACGTATTTACACATCTGGATTTATCATAACAATAATCTTCGAGGTACAGTTCCAAAATCA  
TTATCATCAGCTAAGTACATTGGCCATTTGGATTTAAGCCATAATCACC

>M6-PGSC0003DMG400006912M6RLKantifungi(GNK)\_0

AATTTAACGTGCAGACTTGAAACATTTAGGGAGAAAAGGGGCATAGCGGATAATAGAAGATGCGAAT  
GAAGTGCTAAGGGTGGTTCAAATTGTGATGCTATGTAAGAGTCGCCTA

>M6-PGSC0003DMG400006912M6RLKantifungi(GNK)\_147

TTAAACTACTTACACAAGAAAAATTATATATATAGAAGTGACTGTTCTTCAAAGCCTCCTTTCATTGATA  
TGGTTCCGAACAACATGGTTCTAGTCATCATCACCCATTTTCATCAT

>M6-PGSC0003DMG400006912M6RLKantifungi(GNK)\_49

GATAATAGAAGATGCGAATGAAGTGCTAAGGGTGGTTCAAATTGTGATGCTATGTAAGAGTCGCC  
TATTATGCGTTCAGATATTTCAACAATTATTAACTACTTACACAAGAAAA

>M6-PGSC0003DMG400006912M6RLKantifungi(GNK)\_98

CTATGTAAGAGTCGCCTATTATGCGTTCAGATATTTCAACAATTATTAACTACTTACACAAGAAAA  
ATTATATATATAGAAGTGACTGTTCTTCAAAGCCTCCTTTCATTGATA

>M6-PGSC0003DMG400006923M6LRR-RLK\_0

ATTTTGAAGTCACTGTAAATGGGTTTCTTCAAGATTTTTGTGATAGTGTTGGTTATTTGCGCTTCTTTAT  
AGCAAATACTTATCAGTTACAGTCCTATGAAATTCAAGCTCTTCTTCA

>M6-PGSC0003DMG400006923M6LRR-RLK\_1008

TGGTTTTGTTGATATTTCTAATAATAGATTAGTTGGTGGGCTTCTTCTTGCTTGAACACTATTTAGATA  
AGCGAATTGTTAAGGTTGGTGGAAATTGCTTGTCTCTTGACTCAATA

>M6-PGSC0003DMG400006923M6LRR-RLK\_1071

TTCAGATAAGCGAATTGTTAAGGTTGGTGGAAATTGCTTGTCTCTTGACTCAATATCAGCATTAGAG  
GGCTATTGTAAACAAGCTAATTCGGATAAGAAACAGATCACAGGAAAACA

>M6-PGSC0003DMG400006923M6LRR-RLK\_1134

TTCAGAGGGCTATTGTAAACAAGCTAATTCGGATAAGAAACAGATCACAGGAAAACAAATAGCATTGTT

GGCAGGTGTTATTGGGGGAATTGTAATTGTTGTGGTGTCTGTTAGTTGT

>M6-PGSC0003DMG400006923M6LRR-RLK\_1197

ATTGTTGGCAGGTGTTATTGGGGGAATTGTAATTGTTGTGGTGTCTGTTAGTTGTCCTTTTCATCTTCC  
GTAGAAAACGACATGCGCGTAACATGGTGGATAAGCACATTCCTCCGAA

>M6-PGSC0003DMG400006923M6LRR-RLK\_126

GAAGCACCTGGAATATCCAGTTCAGTTGGATGTTTGGGAGAATTACCATGGAGATTTTTGCAGCTTGACT  
TCAACACTGCATATGAGCATTACCTGTCAAGATAACTCTGTTACTGAACT

>M6-PGSC0003DMG400006923M6LRR-RLK\_1260

CATCTTCCGTAGAAAACGACATGCGCGTAACATGGTGGATAAGCACATTCCTCCGAAAGTTGTGCAAAA  
TACACAGCCCGGGGTTCCCTCTGAACTCCTAGCAAACGCCAGTGAGTTGAT

>M6-PGSC0003DMG400006923M6LRR-RLK\_1323

GCAAATAACACAGCCCGGGGTTCCCTCTGAACTCCTAGCAAACGCCAGTGAGTTGATGTTTTTCTGATTT  
CATTTTTAATCTGTTTAATTTATATGAAGGAAATGTTCTCCAGAAAAGCT

>M6-PGSC0003DMG400006923M6LRR-RLK\_1386

CTGATTTCATTTTAATCTGTTTAATTTATATGAAGGAAATGTTCTCCAGAAAAGCTTGATCTCAATCTTCG  
AATTCTCAGGAGTCATTTCTCAAGTGGCAAACACAGGATCACAAGGTG

>M6-PGSC0003DMG400006923M6LRR-RLK\_1449

CAATCTTCGAATTCTCAGGAGTCATTTCTCAAGTGGCAAACACAGGATCACAAGGTGCCCCATCATATCG  
AGTGTCTCCATGGAAGAATTGCTAGAAGCAACAGAAAATTTTGATCAGT

>M6-PGSC0003DMG400006923M6LRR-RLK\_1506

CCCCATCATATCGAGTGTTCTCCATGGAAGAATTGCTAGAAGCAACAGAAAATTTTGATCAGTCAGCATT  
ACTTGGTGAAGGGTCAGTTGGAAAAGTATGGCTTCAAACAATACTTATG

>M6-PGSC0003DMG400006923M6LRR-RLK\_189

CTTGACTTCAACACTGCATATGAGCATTACCTGTCAAGATAACTCTGTTACTGAACTCAAATCAAAGGA  
GATAAGTTAGTTAAGTTGAATGAATTTTCATGGATTTGCAATTCCAAACCA

>M6-PGSC0003DMG400006923M6LRR-RLK\_252

CAAAGGAGATAAGTTAGTTAAGTTGAATGAATTTTCATGGATTTGCAATTCCAAACCAAACATTATCTGAG  
GGTTTCTCATTGATTCTTTTGTACCACATTGACAAGGCTAAGTAGCTT

>M6-PGSC0003DMG400006923M6LRR-RLK\_315

ATCTGAGGGTTTCTCCATTGATTCTTTTGTACCACATTGACAAGGCTAAGTAGCTTAAAGGTTCTTACTT  
TAGTTTCTCTTGGTATTTGGGGACCCCTCCTGATAAAAATTCATAGGTT

>M6-PGSC0003DMG400006923M6LRR-RLK\_378

TCTTACTTTAGTTTCTCTTGGTATTTGGGGACCCCTCCTGATAAAAATTCATAGGTTAGCTTCACTTGA  
ACTTTGGATATGAGTTCAAATTTTCTATTTGGTTCTGTTCCCTTTTCAGAT

>M6-PGSC0003DMG400006923M6LRR-RLK\_441

ACTTGAACCTTTGGATATGAGTTCAAATTTTCTATTTGGTTCTGTTCCCTTTTCAGATGTCAAGATTGATTA  
A GCTTCATACTTTGACATTAGATGCCAATTTTTTCAATGAAACTTTCCC

>M6-PGSC0003DMG400006923M6LRR-RLK\_504

ATTGATTAAGCTTCATACTTTGACATTAGATGCCAATTTTTTCAATGAAACTTTCCCTGATTGGTTTGATTC  
CTTACACAATCTTACTATATTAAGCTTCAAGAACAACAGGTTGAAGGG

>M6-PGSC0003DMG400006923M6LRR-RLK\_567

GTTTGATTCCTTACACAATCTTACTATATTAAGCTTCAAGAACAACAGGTTGAAGGGTCAGTTTCCTTCTT  
CAATGTCTAAAATCACAACCCTCACTGACATTGTTCTGTCACACAATGT

>M6-PGSC0003DMG400006923M6LRR-RLK\_63

TTTCTTTATAGCAAATACTTATCAGTTACAGTCCTATGAAATTCAAGCTCTTCTTTCAGTTGAGGAAGCACC  
TGGAATATCCAGTTCAGTTGGATGTTTGGGAGAATTACCATGGAGATTT

>M6-PGSC0003DMG400006923M6LRR-RLK\_630

TCCTTCTTCAATGTCTAAAATCACAACCCTCACTGACATTGTTCTGTCACACAATGTGCTTTCTGGTAAATT  
GCCCGATTTAACGGCCTTGTCTAAGTTGCTTTTGTGGATTTAAGGGA

>M6-PGSC0003DMG400006923M6LRR-RLK\_693

TGGTAAATTGCCCGATTTAACGGCCTTGTCTAAGTTGCTTTTGTGGATTTAAGGGAAAATCATTGGAT  
TCTGAATTGCCACCCTTGCCAAAAGGACTTACCACAGTTCTTCTTAGCAG

>M6-PGSC0003DMG400006923M6LRR-RLK\_756

TTTGGATTCTGAATTGCCACCCTTGCCAAAAGGACTTACCACAGTTCTTCTTAGCAGTAACGTTTTTACGG  
GTGAAATCCCAGTAGAATTTGGCACACTAAATCAACTTCAACACCTTGA

>M6-PGSC0003DMG400006923M6LRR-RLK\_819

TTTTACGGGTGAAATCCCAGTAGAATTTGGCACACTAAATCAACTTCAACACCTTGATCTGTGCAACAAT  
TCTCTCAGTGGAATGCTGCCTGCTGGCTTATTCTCTTTGTCTAGCATTAG

>M6-PGSC0003DMG400006923M6LRR-RLK\_882

GAACAATTCTCTCAGTGAATGCTGCCTGCTGGCTTATTCTCTTTGTCTAGCATTAGTTACTTGAATTTAG  
CGTCTAATGTTCTTAGTGGTTCACTTCTAGCCATCTCAATTGTGGGGG

>M6-PGSC0003DMG400006923M6LRR-RLK\_945

GAATTTAGCGTCTAATGTTCTTAGTGGTTCACTTCTAGCCATCTCAATTGTGGGGGTGAACTTGGTTTTG  
TTGATATTTCTAATAATAGATTAGTTGGTGGGCTTCTTCTTGCTTGAA

>M6-PGSC0003DMG400006942-(rev)M6LRR-RLK\_0

GGTGCTTACTCAGGGAGTCCACTCCATTAACAGGATTAACAATAAATTAACCTTACAAATTCTCTAAATC  
CATAATCCAAGTTCCACTTCATCATTCAAAGTCAAATGTCATCTTCT

>M6-PGSC0003DMG400006942-(rev)M6LRR-RLK\_1054

GGCTCATAGGCTTACTCAGGTTACATTGTTTAAGAAACCGCTTGTGAAGGTTAAGTTGGCGGATCTGTTG  
GCTGCCACGAACAATTTTAGTACGTCGAGTGTGATAAACTCGACTAGGAC

>M6-PGSC0003DMG400006942-(rev)M6LRR-RLK\_1116

ATCTGTTGGCTGCCACGAACAATTTTAGTACGTCGAGTGTGATAAACTCGACTAGGACGGGGACTACAT  
TTAGAGCTGTTCTACGTGATGGTTCTACGCTTGCTATTAAACGGCTTAAAG

>M6-PGSC0003DMG400006942-(rev)M6LRR-RLK\_1178

ACTACATTTAGAGCTGTTCTACGTGATGGTTCTACGCTTGCTATTAAACGGCTTAAAGCTTGCAAGCTGA  
GTGAGAAGTTGTTTCGAATGGAAATGAATGGACTAGGACAAGTTAGGCAT

>M6-PGSC0003DMG400006942-(rev)M6LRR-RLK\_124

TTTTGCTTTTTTCATACACTTATATTTCTCATGTAAACAATTCATCAAACACCTTCTATGCATCCCTACTCCC  
TAAAGCTCAAAGATGAAACTTTTCAGATTTTTCAATCTTCCCCTTAT

>M6-PGSC0003DMG400006942-(rev)M6LRR-RLK\_1240

CAAGCTGAGTGAGAAGTTGTTTCGAATGGAAATGAATGGACTAGGACAAGTTAGGCATCCTAATTTGGT  
ACCACTTTTGGGCTTTTGTGTTGTTGAGGAGGAAAACTTTTGGTTTATAA

>M6-PGSC0003DMG400006942-(rev)M6LRR-RLK\_1302

ATTTGGTACCACTTTTGGGCTTTTGTGTTGTTGAGGAGGAAAACTTTTGGTTTATAAGCACCTGTCAA  
TGGTACTTTGTATTCAATTATTGAAAGGGAGCGCAAGTGTGTTGGATTGGC

>M6-PGSC0003DMG400006942-(rev)M6LRR-RLK\_1364

CTGTCAAATGGTACTTTGTATTCAATTATTGAAAGGGAGCGCAAGTGTGTTGGATTGGCCTACTAGGTTTA

GGATTGGCTTGGGTGCTGCAAGGGGCCTTGCTTGGCTTCATCATGGTTGT

>M6-PGSC0003DMG400006942-(rev)M6LRR-RLK\_1426

TAGGTTTAGGATTGGCTTGGGTGCTGCAAGGGGCCTTGCTTGGCTTCATCATGGTTGTCAACCACCAATA  
TTGCACCAAACATATGTTCTAACGTTATTTTCCTTGATGAGGATTTTGA

>M6-PGSC0003DMG400006942-(rev)M6LRR-RLK\_1488

CACCAATATTGCACCAAACATATGTTCTAACGTTATTTTCCTTGATGAGGATTTTGATGCTAGAATAATG  
GATTTTGGGTGGCAAGGCTGGTGACACCTCCAGATGCAAAGAGACTA

>M6-PGSC0003DMG400006942-(rev)M6LRR-RLK\_1550

AGAATAATGGATTTTGGGTGGCAAGGCTGGTGACACCTCCAGATGCAAAGAGACTAGTTTTGTGAAT  
GGGGAGTTGGGTGAATTTGGCTATGTTGCTCCGGAGTACTCAAGCACAATT

>M6-PGSC0003DMG400006942-(rev)M6LRR-RLK\_1674

CTTCACTGAAAGGGGATGCTTACAGCTTTGGGGTTGTGCTTTTGGAGTTGGCTACTGGGCAAAGACCTC  
TAGAAATCACTGCTGCTGATGAAGGTTTTAAGGGAAATTTGGTGGACTGGG

>M6-PGSC0003DMG400006942-(rev)M6LRR-RLK\_1736

AGACCTCTAGAAATCACTGCTGCTGATGAAGGTTTTAAGGGAAATTTGGTGGACTGGGTAAATCAGCTC  
TCTGTTTCTGGTCGGATAAAAGATGCAATTGATAAGCATATTTGTAGAAAG

>M6-PGSC0003DMG400006942-(rev)M6LRR-RLK\_1798

TCAGCTCTCTGTTTCTGGTCGGATAAAAGATGCAATTGATAAGCATATTTGTAGAAAGGGCCATGATGA  
AGAGATTGTAAAATTCCTCAAATGCTTGCAATTGTTAATTTCTCGGCC

>M6-PGSC0003DMG400006942-(rev)M6LRR-RLK\_186

TCCCTACTCCCTAAAGCTCAAAGATGAACTTTTCAGATTTTCAATCTTCCCCTTATAGTATTCATCTTATT  
GATTCTTGATTTCAACCCCTTCTTCATTGTACTGCTGTTGCTGGTG

>M6-PGSC0003DMG400006942-(rev)M6LRR-RLK\_1860

ATGATGAAGAGATTGTAAAATTCCTCAAATGCTTGCAATTGTTAATTTCTCGGCCCAAGGAGAGGTG  
GTCTATGTATCAGGTATATGAAGCACTGAAGAGCATGGCTGAGAAACATG

>M6-PGSC0003DMG400006942-(rev)M6LRR-RLK\_1922

GAGAGGTGGTCTATGTATCAGGTATATGAAGCACTGAAGAGCATGGCTGAGAAACATGGTTTTCTCTGAA  
CATTATGATGAATTTCCCTTACTATTTAACAACAAGAGACCAGCAGTCCC

>M6-PGSC0003DMG400006942-(rev)M6LRR-RLK\_1984

CTCTGAACATTATGATGAATTTCCCTTACTATTTAACAAACAAGAGACCAGCAGTCCCATTTGATACATGA  
ATGGGAAAGCATTACGAGATGCTTCACATCTGGTGAACACAAATGCATT

>M6-PGSC0003DMG400006942-(rev)M6LRR-RLK\_2046

GATACATGAATGGGAAAGCATTACGAGATGCTTCACATCTGGTGAACACAAATGCATTATGGTACGTTCT  
TCACTTCTCTTAGGTGCAAGTGAATCAGGCACGATACATATGGTTCTGT

>M6-PGSC0003DMG400006942-(rev)M6LRR-RLK\_2108

TACGTTCTTCACTTCTCTTAGGTGCAAGTGAATCAGGCACGATACATATGGTTCTGTGAAGTACTACCA  
CAGATATTGCTGTATTGTACTGTGAAGTGTCAAATCATTCTGAGGTGTTCT

>M6-PGSC0003DMG400006942-(rev)M6LRR-RLK\_2170

TACTACCACAGATATTGCTGTATTGTACTGTGAAGTGTCAAATCATTCTGAGGTGTTCTGCTCGAAATTTA  
TGTTACAGATAGCTAATATTATTGGTATCTTAGGTTTATGTTTCTCTTT

>M6-PGSC0003DMG400006942-(rev)M6LRR-RLK\_2232

CGAAATTTATGTTACAGATAGCTAATATTATTGGTATCTTAGGTTTATGTTTCTCTTTGCTCATACTTATGC  
ATTAACAAGGCAGTAAGCAAAGCTGTCACAGTTTATTTGAAAGCTG

>M6-PGSC0003DMG400006942-(rev)M6LRR-RLK\_2294

ATACTTATGCATTAACAAGGCAGTAAGCAAAGCTGTCACAGTTTATTTGAAAGCTGTAATACCACTAA  
TTTAGCTGTATATAACTGACCTGGGCATTGGCCTTTTTAGGGTTCGAGATA

>M6-PGSC0003DMG400006942-(rev)M6LRR-RLK\_2356

ACCACTAATTTAGCTGTATATAACTGACCTGGGCATTGGCCTTTTTAGGGTTCGAGATATCTTCAGTATGTC  
CCTTACAGTCATTTATGGTTTGTAAGATCAAATCACACTAGATTTCCCT

>M6-PGSC0003DMG400006942-(rev)M6LRR-RLK\_2418

CAGTATGTCCCTTACAGTCATTTATGGTTTGTAAGATCAAATCACACTAGATTTCCCTGATAGATTGGTTC  
GGTAGAATATCTGCCTCCACACAGATATTAATTCATCTAACCGGAATGC

>M6-PGSC0003DMG400006942-(rev)M6LRR-RLK\_248

TTCATCTTATTGATTCTTGATTTCAACCCCTTCTTCATTGTACTGCTGTTGCTGGTGTAGCTGAAGAT  
GATATAAAGTGTTAAAAGGAGTCAAGAACTCCTTAACAGATCCAAAA

>M6-PGSC0003DMG400006942-(rev)M6LRR-RLK\_2480

GATTGGTTCGGTAGAATATCTGCCTCCACACAGATATTAATTCATCTAACCGGAATGCTATCAAGCAGAG  
TTATTAGTATTTACTCCTTCTGATTAATTTGGATGATGTTGATCAGTAA



>M6-PGSC0003DMG400006942-(rev)M6LRR-RLK\_2542

AAGCAGAGTTATTAGTATTTACTCCTTCTGATTAATTTTGGATGATGTTGATCAGTAATTGTAGGTCCTTT  
TGCAAAATTTGTGTCTGAATGGGAATAATTTTCACTAAAATGGAAGTTG

>M6-PGSC0003DMG400006942-(rev)M6LRR-RLK\_2604

AGGTCCTTTTGCAAAATTTGTGTCTGAATGGGAATAATTTTCACTAAAATGGAAGTTGAATGGGCTTTCT  
AAAAGTTATGTGCCCTCTGAATTTGATTTGGCAGCTGAAATTTTCATTC

>M6-PGSC0003DMG400006942-(rev)M6LRR-RLK\_2666

GGCTTTCTAAAAGTTATGTGCCCTCTGAATTTGATTTGGCAGCTGAAATTTTCATTCACCTTGATTCTAATC  
TGCTTCTTTACAATCTCAGAAACATAATGCACAATTAAGTTTCCAAG

>M6-PGSC0003DMG400006942-(rev)M6LRR-RLK\_2728

GATTCTAATCTGCTTCTTTACAATCTCAGAAACATAATGCACAATTAAGTTTCCAAGTAGGAAAAAAAA  
TAATTCTTGTTGACAGTTGAAACTCTTTGCAATAGTAGTTATCAAACCTC

>M6-PGSC0003DMG400006942-(rev)M6LRR-RLK\_2790

AAAAAAAAATAATTCTTGTTGACAGTTGAAACTCTTTGCAATAGTAGTTATCAAACCTCTTACTTTTTCCCT  
CAAGCTCAAGCTCGGATGCGTGTTTCCATGTGCTCTCCTGCTTCCCTG

>M6-PGSC0003DMG400006942-(rev)M6LRR-RLK\_2852

CTTTTTCCCTCAAGCTCAAGCTCGGATGCGTGTTTCCATGTGCTCTCCTGCTTCCCTGAAAAGTCATTTTGT  
AATATTTCAAACAATAACTTGTAGTCTAATAGTAAATGAAGGGAAAA

>M6-PGSC0003DMG400006942-(rev)M6LRR-RLK\_310

AGCTGAAGATGATATAAAGTGTAAAAGGAGTCAAGAACTCCTAACAGATCCAAAAGGGAAGTTGAA  
TTCATGGAATTTTGCTAATTCTACAGTGGGGTTTATATGTAAATTTGTTGG

>M6-PGSC0003DMG400006942-(rev)M6LRR-RLK\_372

ACTTGAATTCATGGAATTTTGCTAATTCTACAGTGGGGTTTATATGTAAATTTGTTGGTGCTTCTTGCTGG  
AATGACCGTGAAAATCGTCTCATAAATCTTGAAGTTCCGGGATATGAATC

>M6-PGSC0003DMG400006942-(rev)M6LRR-RLK\_434

TCTTGCTGGAATGACCGTGAAAATCGTCTCATAAATCTTGAAGTTCCGGGATATGAATCTTGGAGGTAATG  
TTCCAGATTCGTTAAAGTATTGTGCGAAGCTTGAATATCTTGATCTTTCT

>M6-PGSC0003DMG400006942-(rev)M6LRR-RLK\_496

AGGTAATGTTCCAGATTCGTTAAAGTATTGTGCGAAGCTTGAATATCTTGATCTTTCTGGTAATCGGATAT

CTGGTTCAATTCCTTCTGATATTTGTA CTCTGGCTACCTTACTTGGTAAC

>M6-PGSC0003DMG400006942-(rev)M6LRR-RLK\_558

ATCGGATATCTGGTTCAATTCCTTCTGATATTTGTA CTCTGGCTACCTTACTTGGTAACCTTGATTTGTCGA

ACAATGAATTTACCGTTCTATTCCGTCTGATCTTGTTAGTTGTTCCCT

>M6-PGSC0003DMG400006942-(rev)M6LRR-RLK\_62

CTCTAAATCCATAATTCCAAGGTTCCACTTCATCATTCAAAGTCAAATGTCATCTTCTATTCTTTTGCTTTTT

TCATACACTTATATTTCTCATGTAAACAATTCATCAAACACCTTCTA

>M6-PGSC0003DMG400006942-(rev)M6LRR-RLK\_620

GATTTGTCGAACAATGAATTTACCGTTCTATTCCGTCTGATCTTGTTAGTTGTTCCCTATTTGAATAAATT

GATGCTTAATGATAATAGGCTTTCTGGGAATATACCACCTCAGTTTTCT

>M6-PGSC0003DMG400006942-(rev)M6LRR-RLK\_682

GAATAAATTGATGCTTAATGATAATAGGCTTTCTGGGAATATACCACCTCAGTTTTCTAGTTTGGGGAGG

CTTAAAATATTTTCTGTGGCAAACAATGATCTTTCTGGTAGGATTCCGGA

>M6-PGSC0003DMG400006942-(rev)M6LRR-RLK\_744

TGGGGAGGCTTAAAATATTTTCTGTGGCAAACAATGATCTTTCTGGTAGGATTCCGGAAGCTTTTGATTC

GGCTGAGTCGTTTGATTTTGGAGGAAATGATGGGCTTTGTGGTGGTCCGT

>M6-PGSC0003DMG400006942-(rev)M6LRR-RLK\_806

TTTGATTCGGCTGAGTCGTTTGATTTTGGAGGAAATGATGGGCTTTGTGGTGGTCCGTTGGGGAAATGT

GGGAGGCTTAGTAAGAAAAGTTTAGCTATTATTATTGCTGCCGGTGTGTTT

>M6-PGSC0003DMG400006942-(rev)M6LRR-RLK\_868

GAAATGTGGGAGGCTTAGTAAGAAAAGTTTAGCTATTATTATTGCTGCCGGTGTGTTTGGTGCTGCTGC

TTCTCTGTTGTTGGGTTTTGGGGCTTGGTATTGGTATTTTACGAAGGCGGG

>M6-PGSC0003DMG400006942-(rev)M6LRR-RLK\_930

CTGCTGCTTCTCTGTTGTTGGGTTTTGGGGCTTGGTATTGGTATTTTACGAAGGCGGGGACAAGGAGGA

AGATGGGGTATGGATTAGGGAGAGTTGACTCGGAAAGGTGGGCGGATAAGT

>M6-PGSC0003DMG400006942-(rev)M6LRR-RLK\_992

AGGAGGAAGATGGGGTATGGATTAGGGAGAGTTGACTCGGAAAGGTGGGCGGATAAGTTGAAGGCTC

ATAGGCTTACTCAGGTTACATTGTTTAAGAAACCGCTTGTGAAGGTTAAGTTG

>M6-PGSC0003DMG400007033-(rev)M6LRR-RLP\_0

ATGGCCAGATTAGTTAACTCCATTTTCTTTACCTTCTTGTACATAAGTTTCATATACACACTTTCACCTTAT  
GTCAATGCAACAACCTTCACCATCTGATATTCAAGTTCTAGTAGCCATC

>M6-PGSC0003DMG400007033-(rev)M6LRR-RLP\_1054

CATGGAGAAATCTCAACTTGAATATAATAACCTGGAGGGATCGGTGCCTCGAGAGCTCAACAGGACTT  
TAGAAGGGGTTTCAGGGAAGTTTTGAACATAACTGTCTCATTTGTCCAAAGG

>M6-PGSC0003DMG400007033-(rev)M6LRR-RLP\_124

CGTCGATAGACCCTTTTTCAATAACCCCGGATTCTTCTTAGTAGTTGGGATTTCAACTTAGACCCTTGT  
GAGACAACCTGGTGCAAGTTTCTTAGGCATTCTTGCACAGTTCCTGATC

>M6-PGSC0003DMG400007033-(rev)M6LRR-RLP\_186

GACCCTTGTGAGACAACCTGGTGCAAGTTTCTTAGGCATTCTTGCACAGTTCCTGATCAGGTAGACACTA  
ATGCCACGAGCCGGATAATTGAGATTGATCTAGAAGGTGATGGACTAGAG

>M6-PGSC0003DMG400007033-(rev)M6LRR-RLP\_248

AGACACTAATGCCACGAGCCGGATAATTGAGATTGATCTAGAAGGTGATGGACTAGAGGGGTTCTTGA  
CATCGTCTATAGGGAACCTAACAGAACTTGTCTCTCAATCTAGGGAGGAA

>M6-PGSC0003DMG400007033-(rev)M6LRR-RLP\_310

TCTTGACATCGTCTATAGGGAACCTAACAGAACTTGTCTCTCAATCTAGGGAGGAACAAGTTCAGAGG  
ACCAGTGCCAGAGAGTATTACTAATTTGAGGAACTCACAAGTCTTCAAC

>M6-PGSC0003DMG400007033-(rev)M6LRR-RLP\_372

TTCAGAGGACCAGTGCCAGAGAGTATTACTAATTTGAGGAACTCACAAGTCTTCAACTTTATGAGAATT  
TTTTCTCAGGTAGTCTTGTTGATGACATTGGTGTCTTACAAAACCTTGAA

>M6-PGSC0003DMG400007033-(rev)M6LRR-RLP\_434

TGAGAATTTTTCTCAGGTAGTCTTGTTGATGACATTGGTGTCTTACAAAACCTTGAACTCTTGATGTCT  
CGAATAACAGGCTATCTGGCTCAATCCCTTCTCGATTACATCACTTAG

>M6-PGSC0003DMG400007033-(rev)M6LRR-RLP\_496

TTGATGTCTCGAATAACAGGCTATCTGGCTCAATCCCTTCTCGATTACATCACTTAGAAGTTTAAACGCGA  
TTAGACCTGTCTAACAATGAATTCCTGGAATAATCCTCAACTCAACG

>M6-PGSC0003DMG400007033-(rev)M6LRR-RLP\_558

TTAACGCGATTAGACCTGTCTAACAATGAATTCCTGGAATAATCCTCAACTCAACGGATTATGGCAAC  
TCTCTTCATTTGACATTTCAAATAACCAAATTTATGGGAATTTACCACAA

>M6-PGSC0003DMG400007033-(rev)M6LRR-RLP\_62

TTCACCTTATGTCAATGCAACAACCTTACCATCTGATATTCAAGTTCTAGTAGCCATCAAGACGTCGATAG  
ACCCTTTTTCAATAACCCCGGATTCCCTTCTTAGTAGTTGGGATTCAA

>M6-PGSC0003DMG400007033-(rev)M6LRR-RLP\_620

ATGGCAACTCTCTTCATTTGACATTTCAAATAACCAAATTTATGGGAATTTACCACAATTCCTTGAAGA  
TTAAACACTATCACTAAGCCACAACCTGTTATCAGGACACATTACCCC

>M6-PGSC0003DMG400007033-(rev)M6LRR-RLP\_682

CATTGAAGATTAACACTATCACTAAGCCACAACCTGTTATCAGGACACATTACCCCAGTGCATAAACT  
TAGACATTTAAGCACATTAGACCTTAGTGATAACAGATTTTCAGGAGGAA

>M6-PGSC0003DMG400007033-(rev)M6LRR-RLP\_744

CATAAACTTAGACATTTAAGCACATTAGACCTTAGTGATAACAGATTTTCAGGAGGAATAAACAAAGGG  
ATCTTCATGTTACCTGAATTAAGTCACGTAAACGTTTCAGTAAACCGTTTC

>M6-PGSC0003DMG400007033-(rev)M6LRR-RLP\_806

CAAAGGGATCTTCATGTTACCTGAATTAAGTCACGTAAACGTTTCAGTAAACCGTTTCACAGTGTTTGAG  
GTGGTAGAATTCTCTGATAAAAAATCACAGCTACACACGTTAGACGTACA

>M6-PGSC0003DMG400007033-(rev)M6LRR-RLP\_868

TGTTTGAGGTGGTAGAATTCTCTGATAAAAAATCACAGCTACACACGTTAGACGTACATGCTAATCGTCT  
ACATGGTCATTTGCCTGTGAACCTGGTTACTTACCCAACTTAACAGAGA

>M6-PGSC0003DMG400007033-(rev)M6LRR-RLP\_930

AATCGTCTACATGGTCATTTGCCTGTGAACCTGGTTACTTACCCAACTTAACAGAGATAAACCTTGGAC  
ATAACCTGTTTTCGGGTGAGATTCCATCAGAGTATTGGTCAAGACTCGGA

>M6-PGSC0003DMG400007033-(rev)M6LRR-RLP\_992

CCTTGGACATAACCTGTTTTCGGGTGAGATTCCATCAGAGTATTGGTCAAGACTCGGATTTTCATGGAGA  
AATCTCAACTTGGAAATAATAACCTGGAGGGATCGGTGCCTCGAGAGCT

>M6-PGSC0003DMG400007073-(rev)M6G-LecRK\_0

CCAATCTCAAGAAGCAAATGTATCATATAACAAACAAGCTAAAACAACAACTAAACATGTCTCCTTCAT  
GGCCTACTACACTTCTTGCCTCTCTTTCTTTTCTCCCAAATATTTTCT

>M6-PGSC0003DMG400007073-(rev)M6G-LecRK\_1024

TTATTGTTGTTGTTATATTGTTGTAAACGTAGCTCTATAAGATAATGATTAGTGTGTCCAGTACAATAAGT

GGGTCCACAAC TAGTAGTCCAATAAATGAGTAGTACTTCCTATTTAATG

>M6-PGSC0003DMG400007073-(rev)M6G-LecRK\_1083

AGTACAATAAGTGGGTCCACAAC TAGTAGTCCAATAAATGAGTAGTACTTCCTATTTAATGTCAATTATA

TTTTTCTTTTTCCCTTTTTGAAAAAATATTATGTTTTGGTTGAATTAAGA

>M6-PGSC0003DMG400007073-(rev)M6G-LecRK\_128

TCAAGTTCAGCTGAAAACACCTTTAAATTCGTCGATGAAGGCGAATTAGGAGATTATATTGTAGAATAC

AGAGCAAATTATCGCGTTATTAGTATTTTCAATAACCCATTTTCAGTTCTG

>M6-PGSC0003DMG400007073-(rev)M6G-LecRK\_192

GAATACAGAGCAAATTATCGCGTTATTAGTATTTTCAATAACCCATTTTCAGTTCTGTTTCTACAACACAAC

TCCTAATGCATGGACATTAGCATTGCGAATGGGCACTGTCCGTTCTGAA

>M6-PGSC0003DMG400007073-(rev)M6G-LecRK\_256

ACACAACCTCTAATGCATGGACATTAGCATTGCGAATGGGCACTGTCCGTTCTGAATCACTCATGCGTTG

GGTGTGGGAAGCAAATAGGGGAAACCCCGTTAAAGAAAACGCGACATTCA

>M6-PGSC0003DMG400007073-(rev)M6G-LecRK\_384

ACTAACAGAAATCTTGTATTGGCGGATGCAGACGGTTGAATCGCTTGGCAGACCAACACGGCCAATAAG

GGGGTCACCGGGTTCAAGTTGTTACCTAACGGTAATGTTGTGCTACATGAC

>M6-PGSC0003DMG400007073-(rev)M6G-LecRK\_448

ATAAGGGGGTCACCGGGTTCAAGTTGTTACCTAACGGTAATGTTGTGCTACATGACTCCAAGGGTAAAT

TTGTCTGGCAGAGTTTCAACTATCCCACTGACACATTACTAGTGGGCCAAA

>M6-PGSC0003DMG400007073-(rev)M6G-LecRK\_576

TTGTCCGGCCCGAATAAGCTTGTGAGCTGGGCCTCGGTGAAAAGAATGCGAACGGGCCTTATAGCTTG

GTGGTCCAGCCGAGATTGTTTCGCTGTCTACAAGGGAAACAAGGTAGACGTG

>M6-PGSC0003DMG400007073-(rev)M6G-LecRK\_64

CTTCATGGCCTACTACACTTCTGCCTCTCTTTCTTTTCTCCCAAATATTTTCTTGCATTGCTCAAGTTCC

AGCTGAAAACACCTTTAAATTCGTCGATGAAGGCGAATTAGGAGATT

>M6-PGSC0003DMG400007073-(rev)M6G-LecRK\_640

GCTTGGTGGTCCAGCCGAGATTGTTTCGCTGTCTACAAGGGAAACAAGGTAGACGTGGAATTAGCTTGGT

TCGATTATGGGAATAACACGTTGGAATCGATAAAATTGAATAGTGGGAATC

>M6-PGSC0003DMG400007073-(rev)M6G-LecRK\_704

TTGGTTCGATTATGGGAATAACACGTTGGAATCGATAAAAATTGAATAGTGGGAATCAAAGATTGAAATT  
GGATTATAGATTTGCAAATCAACACAGAGAAGTTCACATGTGATGGCATT

>M6-PGSC0003DMG400007073-(rev)M6G-LecRK\_768

AAATTGGATTATAGATTTGCAAATCAACACAGAGAAGTTCACATGTGATGGCATTACTAAATACAACA  
CAACATTGACATATCTTAGACTTGAAATTGATGGAAATCTAAAGGCTTAT

>M6-PGSC0003DMG400007073-(rev)M6G-LecRK\_832

ACAACACAACATTGACATATCTTAGACTTGAAATTGATGGAAATCTAAAGGCTTATACTTTTCGTTAGAGA  
TGAAGAAGCAGATGAATTCCGTTGGAAAGTAACTTACAGTAGGATTTAAA

>M6-PGSC0003DMG400007073-(rev)M6G-LecRK\_896

TAGAGATGAAGAAGCAGATGAATTCCGTTGGAAAGTAACTTACAGTAGGATTTAAAACGTTTCATATTT  
GAAACGTCTAAATCCATGTGCACATTATCCTTTACGAGCAAATTTACGGG

>M6-PGSC0003DMG400007073-(rev)M6G-LecRK\_960

TATTTGAAACGTCTAAATCCATGTGCACATTATCCTTTACGAGCAAATTTACGGGTTATATTATTATTGTT  
GTTGTTATATTGTTGTAAACGTAGCTCTATAAGATAATGATTAGTGTG

>M6-PGSC0003DMG400007234-(rev)M6LRR-RLK\_0

CTCATCTTTACTTGCCTTATTTTCTCAACCAATTTTTCTTACAATCTCATAACCATGAACCATTTCTATCT  
CACTACAATTTTCTTCTTTCTCATACAATTTTCACTTGTTTTCTCTA

>M6-PGSC0003DMG400007234-(rev)M6LRR-RLK\_1054

AATCCCTGAAGGGATTGGTGAGTTACCAAATCTCGAATTGTTAGCTCTTTGGAACAATTCACACTCACTGGA  
ATTTTACCACGAATGTTAGGATCAAATGCTAAGTTACAAAACTTGATGT

>M6-PGSC0003DMG400007234-(rev)M6LRR-RLK\_1116

TCACTGGAATTTTACCACGAATGTTAGGATCAAATGCTAAGTTACAAAACTTGATGTGTCCTCAAACAA  
TTTGACTGGTCCAATTTCCCAAATCTCTGCCTCAGCAACAACCTTAGTTA

>M6-PGSC0003DMG400007234-(rev)M6LRR-RLK\_1178

TCAAACAATTTGACTGGTCCAATTTCCCAAATCTCTGCCTCAGCAACAACCTTAGTTAAACTCATTCTGTT  
TTCGAACGAGTTTACTGGTGAGATTCCTTCATCCTTAACTAACTGCAAC

>M6-PGSC0003DMG400007234-(rev)M6LRR-RLK\_124

AAATTTTCTCTTCAACTCATTTCACTTTTATCGTTAAAATCTTCATTTCAAGATCCAAACAATACATTTCAA  
GATTGGAATCCTACATCAACTTTCTCAAATTTTGGTTACAACCCTT

>M6-PGSC0003DMG400007234-(rev)M6LRR-RLK\_1240

CATTCTGTTTTCGAACGAGTTTACTGGTGAGATTCCTTCATCCTTAACTAACTGCAACGCTTTATCCAGGT  
TGAGAATCCAAGACAACAACTCAATGGCACGATTCCATCAGGATTCGG

>M6-PGSC0003DMG400007234-(rev)M6LRR-RLK\_1302

TATCCAGGTTGAGAATCCAAGACAACAACTCAATGGCACGATTCCATCAGGATTCGGTTTTTTGCCTGA  
TTTCACTTACATGGACATCAGCAAGAACAATTTTCGGGGCAAATCCCAA

>M6-PGSC0003DMG400007234-(rev)M6LRR-RLK\_1364

TTGCCTGATTTCACTTACATGGACATCAGCAAGAACAATTTTCGGGGCAAATCCCAAAGATTTTGGAA  
ATGCCCCGAAAATGATGTACTTGAACATTTCTGAGAATTTTTTCGGTAGT

>M6-PGSC0003DMG400007234-(rev)M6LRR-RLK\_1426

TTTTGGAAATGCCCCGAAAATGATGTACTTGAACATTTCTGAGAATTTTTTCGGTAGTAACTTGCCTGATA  
ATATCTGGAACGCCCGAATTTACAGATATTCTCAGCAAGTAAGAGTGG

>M6-PGSC0003DMG400007234-(rev)M6LRR-RLK\_1488

TGCCTGATAATATCTGGAACGCCCGAATTTACAGATATTCTCAGCAAGTAAGAGTGGCCTTGTTGGAAA  
TCTCCCTGATTTCAAAGGATGTCAAAGTCTTTACAAAATCGAACTCGAAG

>M6-PGSC0003DMG400007234-(rev)M6LRR-RLK\_1550

GTTGGAAATCTCCCTGATTTCAAAGGATGTCAAAGTCTTTACAAAATCGAACTCGAAGGAAACAATCTCA  
ATGGTAGCATTCCATGGGACATTGAACATTGTGAAAAGCTTATTTCTCTA

>M6-PGSC0003DMG400007234-(rev)M6LRR-RLK\_1612

CAATCTCAATGGTAGCATTCCATGGGACATTGAACATTGTGAAAAGCTTATTTCTCTAAATCTTCGACGA  
AATTCATTTACAGGAATCATTCCCTGGGAAATATCTGGTATTCCCTTCGAT

>M6-PGSC0003DMG400007234-(rev)M6LRR-RLK\_1674

TTCGACGAAATTCATTTACAGGAATCATTCCCTGGGAAATATCTGGTATTCCCTTCGATAACAGACGTTGAT  
TTGTCACATAATTTTCTCACAGGAACAATCCCTTCCAATTTTCGAAAAGT

>M6-PGSC0003DMG400007234-(rev)M6LRR-RLK\_1736

GACGTTGATTTGTCACATAATTTTCTCACAGGAACAATCCCTTCCAATTTTCGAAAAGTCTAGCACGTTGGA  
ACATTTCAACGTGTCGTATAATCAGCTCACTGGTCCATTGCCTTCTTCA

>M6-PGSC0003DMG400007234-(rev)M6LRR-RLK\_1798

CACGTTGGAACATTTCAACGTGTCGTATAATCAGCTCACTGGTCCATTGCCTTCTTCAGGGTCTATGTTCT

CAACGTTCCATCCTTCGTCCTTCGTAGGAAACGAAGGTCTTTGTGGTAC

>M6-PGSC0003DMG400007234-(rev)M6LRR-RLK\_186

ATACATTTCAAGATTGGAATCCTACATCAACTTTCTCAAATTTTGGTTCACAACCCTTTTGGTGTTTCATGGT

CAGGCATCAAATGTGACACAAAACAAGTCACATTACATCACTTAATC

>M6-PGSC0003DMG400007234-(rev)M6LRR-RLK\_1860

CTATGTTCTCAACGTTCCATCCTTCGTCCTTCGTAGGAAACGAAGGTCTTTGTGGTACTATCATAACATAAT

CCGTGCAGGACTGATGAACTCAAAGATGGAAAAACAGATTTTTTCGAACC

>M6-PGSC0003DMG400007234-(rev)M6LRR-RLK\_1922

ATACATAATCCGTGCAGGACTGATGAACTCAAAGATGGAAAAACAGATTTTTTCGAACCATTCAAAGAAA

ACAGATGGTGCATTGATAGTATGGATTGCGTCTGCAGCATTGGAGTAGTA

>M6-PGSC0003DMG400007234-(rev)M6LRR-RLK\_1984

AAAGAAAACAGATGGTGCATTGATAGTATGGATTGCGTCTGCAGCATTGGAGTAGTAATTATCATTCTT

ATTGTGGCAATTCGGTGTTCATTCAAATTACAATCGAAGATTTCCATG

>M6-PGSC0003DMG400007234-(rev)M6LRR-RLK\_2046

TCATTCTTATTGTGGCAATTCGGTGTTCATTCAAATTACAATCGAAGATTTCCATGTGACAAGGAAATC

GGACCGTGGAAGTTAACAGCATTCAAAGGTTGAATTTACAGCAGATG

>M6-PGSC0003DMG400007234-(rev)M6LRR-RLK\_2108

AAGGAAATCGGACCGTGGAAGTTAACAGCATTCAAAGGTTGAATTTACAGCAGATGATGTAAGTCTCGAA

AGCATAGCAATCACAGATAAGATCATCGGTATGGGGTCTGCAGGTAAGTAA

>M6-PGSC0003DMG400007234-(rev)M6LRR-RLK\_2170

ACTCGAAAGCATAGCAATCACAGATAAGATCATCGGTATGGGGTCTGCAGGTAAGTAAAGTCTATAT

TGTTAGTTATTATGAATTCAATTGAACCCGCAATTTTCATTAAGTATATG

>M6-PGSC0003DMG400007234-(rev)M6LRR-RLK\_2232

TCTATATTGTTAGTTATTATGAATTCAATTGAACCCGCAATTTTCATTAAGTATATGTGGGGGGGAAATC

ATACAAAATTAGTGACATATGTTTTTAAAAAATGCTAACATCACCTA

>M6-PGSC0003DMG400007234-(rev)M6LRR-RLK\_2270

AATTTTTCATTAAGTATATGTGGGGGGGAAATCATACAAAATTAGTGACATATGTTTTTAAAAAATGC

TAACATCACCTAGACAAGTTGGCAATGTGGAATTTATTAATAAAAATCTC

>M6-PGSC0003DMG400007234-(rev)M6LRR-RLK\_248



TGTTTCATGGTCAGGCATCAAATGTGACACAAAAACAAGTCACATTACATCACTTAATCTCTCAAAGAGGA  
ATCTTTCTGGTAAAATACCTCAAATATTGCATCCTTGATACACTTACAT

>M6-PGSC0003DMG400007234-(rev)M6LRR-RLK\_310

AAAGAGGAATCTTTCTGGTAAAATACCTCAAATATTGCATCCTTGATACACTTACATCACTTGAATTTAA  
GTGGAAATTCATTTGATGGACCTTACCATCCATCATTTTTGAATTTCC

>M6-PGSC0003DMG400007234-(rev)M6LRR-RLK\_372

TGAATTTAAGTGGAATTCATTTGATGGACCTTACCATCCATCATTTTTGAATTTCCATTTCTTAGAACAC  
TTGATATTAGTCATAATTATTTCAATTCAGCATTTCTCTTGACGGGC

>M6-PGSC0003DMG400007234-(rev)M6LRR-RLK\_434

CTTAGAACACTTGATATTAGTCATAATTATTTCAATTCAGCATTTCTCTTGACGGGCTAACGAATCTCAA  
GTCCCTAGTACACTTGAATGCCTATAGCAACAGCTTACAGGCGCGTTG

>M6-PGSC0003DMG400007234-(rev)M6LRR-RLK\_496

GAATCTCAAGTCCCTAGTACACTTGAATGCCTATAGCAACAGCTTACAGGCGCGTTGCCTATAGAGCTT  
GTTGGGCTACAAAATCTTGAGTATTTGAATCTTGGTGGCAGTTACTTCAC

>M6-PGSC0003DMG400007234-(rev)M6LRR-RLK\_558

TAGAGCTTGTTGGGCTACAAAATCTTGAGTATTTGAATCTTGGTGGCAGTTACTTCACTGGTGAATTTCC  
GGCAAGTTATGGGAATTTAACAAGTTGAAATTCCTACATTTAGCCGGAA

>M6-PGSC0003DMG400007234-(rev)M6LRR-RLK\_62

CATTTCTATCTCACTACAATTTTCTTTCTCATACAATTTCACTTGTTTTCTCTACTTCAAATTTTCTCTT  
CAACTCATTTCACTTTTATCGTTAAAATCTTCATTTCAAGATCCA

>M6-PGSC0003DMG400007234-(rev)M6LRR-RLK\_620

GAAATTCGGCAAGTTATGGGAATTTAACAAGTTGAAATTCCTACATTTAGCCGGAAATTCACTGAGTG  
GGAAAATTCGGAGGAATTGAGATTGTTGAACCAACTCGAACATCTTGAA

>M6-PGSC0003DMG400007234-(rev)M6LRR-RLK\_682

ACTGAGTGGGAAAATTCGGAGGAATTGAGATTGTTGAACCAACTCGAACATCTTGAAATTTGGATACAA  
CAATTATACTGGAAATGTTCTCTCTGGATTTTCTCGTTATCGAATTTAGC

>M6-PGSC0003DMG400007234-(rev)M6LRR-RLK\_744

GATACAACAATTATACTGGAAATGTTCTCTCTGGATTTTCTCGTTATCGAATTTAGCCTATCTTGACATCT  
CACAAAGCTAATCTTTAGGTGAAATTCGAATTCAGCTTGGAAATTTAA

>M6-PGSC0003DMG400007234-(rev)M6LRR-RLK\_806

CTTGACATCTCACAAAGCTAATCTTTCAGGTGAAATTCGAATTCAGCTTGGAATTTAACAAAGATTGAATC  
CTTATTTCTTTTCAAGAACCATTTTATCGGTACAATCCCTCGAGTTTT

>M6-PGSC0003DMG400007234-(rev)M6LRR-RLK\_868

GATTGAATCCTTATTTCTTTTCAAGAACCATTTTATCGGTACAATCCCTCGAGTTTTTCCAAACTCACATT  
GCTGAAATCATTGGATTATCGGATAATCGTCTCTCAGGCAACATTCC

>M6-PGSC0003DMG400007234-(rev)M6LRR-RLK\_930

AACTCACATTGCTGAAATCATTGGATTATCGGATAATCGTCTCTCAGGCAACATTCCTTTTGGATTTTCA  
GAGTTGAAAGAGCTAATCATGTTGTATTTGATGAACAATAACTTATCAG

>M6-PGSC0003DMG400007234-(rev)M6LRR-RLK\_992

GGATTTTCAGAGTTGAAAGAGCTAATCATGTTGTATTTGATGAACAATAACTTATCAGGTGAAATCCCTG  
AAGGGATTGGTGAGTTACCAAATCTCGAATTGTTAGCTCTTTGGAACAAT

>M6-PGSC0003DMG400007281M6LRR-RLP\_0

GCTCTACGCCGCCAAATTTCTACCCTCTCTACGGTTAATTTGAACAAAACGATCAACAGCTTCATTGGAAA  
CTGAAACCTCCAAGAAGCTCGTAAGCTCTTCGATCAAAGTTCCCACTTG

>M6-PGSC0003DMG400007281M6LRR-RLP\_1088

GAGGATGCTAAAGAGTGGTATCAGGCCTGATGAAATACTTTTATTAATTTGGTATATGCATGTGGCCAT  
GGTGGGCTAGTCGAGGAAGGTGAGAGAATTTTCAATTCTATGGTAACAGA

>M6-PGSC0003DMG400007281M6LRR-RLP\_1395

AATGGAATCTACACATTGGAACACGACCATCCTGCAGTATTCTCGGTGCTTTCCAAAATCTATGGAGACA  
AAGGAGTCTGCAGTGACATAACTGGTTTGGATAAGTTGATGAAGAAATGG

>M6-PGSC0003DMG400007281M6LRR-RLP\_192

CTGTTTGACAAAATGCCTCACAGAGATGTCGTTTCTTGGAACACCATGTTCTCCGGATATCGCAACGTTA  
ACAACCCAGAGAAAGTATATAGATGTTTTCTAGATATGAACAGATGTGGA

>M6-PGSC0003DMG400007281M6LRR-RLP\_256

ACGTTAACAACCCAGAGAAAGTATATAGATGTTTTCTAGATATGAACAGATGTGGAGATATGAGACCCA  
ATGAGCTCACTTTTGTGTGTCAATTAGCTCCTTCTTGCATTTAGATTACA

>M6-PGSC0003DMG400007281M6LRR-RLP\_320

ACCCAATGAGCTCACTTTTGTGTGTCAATTAGCTCCTTCTTGCATTTAGATTACAAGCATTGATCCCTCA

GCTTCACGGTCTCGTGCTCTGTTTGGGGATAAGTCTCAATGTCTTTGT

>M6-PGSC0003DMG400007281M6LRR-RLP\_384

ATCCCTCAGCTTCACGGTCTCGTGCTCTGTTTGGGGATAAGTCTCAATGTCTTTGTAGGGTCAGCATTGA  
TGAGGGGTTATGTTGATTTGGATGATTACAGAGGTTTAGCTCGAGTTTTT

>M6-PGSC0003DMG400007281M6LRR-RLP\_448

CATTGATGAGGGGTTATGTTGATTTGGATGATTACAGAGGTTTAGCTCGAGTTTTTTATGAGATTTTGGGA  
TAAAGATGTTACGCCGTGGAATGTGTTGATTTTGGGTTATATGAAATTTG

>M6-PGSC0003DMG400007281M6LRR-RLP\_576

AGTGAGGCGCAGAGGGCTTTTGATATGATGCCTATGAGAAATTCTTTACTTGGAGTACTTTGATCAATG  
GGTATATTGAGAACAAGAAGCTTAATGAAGCTCGATTTCGTTTTTGGATAAG

>M6-PGSC0003DMG400007281M6LRR-RLP\_64

TTGGAAACTGAAACCTCCAAGAAGCTCGTAAGCTCTTCGATCAAAGTTCCCACTTGACAAATGTCGTATC  
ATGGAATTCCCTTATCGCTGGTTACTTCAAACACAACCTCATCCAACAAG

>M6-PGSC0003DMG400007281M6LRR-RLP\_640

TCAATGGGTATATTGAGAACAAGAAGCTTAATGAAGCTCGATTTCGTTTTTGGATAAGATGAGTGAGAAAG  
ATGTGGTTTCTTGGACAGCAATGATAAGAGGGTATGTGCAATATGGAGAGT

>M6-PGSC0003DMG400007281M6LRR-RLP\_704

GAAAGATGTGGTTTCTTGGACAGCAATGATAAGAGGGTATGTGCAATATGGAGAGTTTATGAAGGCTTT  
GAAATTGTTAAGTTGATGTTGAACTCGGGTTCTCGTCCTAATCATTTTAC

>M6-PGSC0003DMG400007281M6LRR-RLP\_768

GCTTTGAAATTGTTAAGTTGATGTTGAACTCGGGTTCTCGTCCTAATCATTTTACGTTTTCAACTGTTTTA  
GATGCCTGTGCAGGCTACTCTGCTGTTCTGGTAGGCAATCAAGTTCAT

>M6-PGSC0003DMG400007281M6LRR-RLP\_896

CTTGAAGTCTGGTTTCCCTCTTGATGTCGTCTTGTTGACCTCCCTTCTTGACATGTATGCTAAATGTGGAG  
ACATTGAAGTTGCTTTCTGCATTTTTGAGTCTATCCCGGCAAGAAATTT

>M6-PGSC0003DMG400007281M6LRR-RLP\_960

TGTGGAGACATTGAAGTTGCTTTCTGCATTTTTGAGTCTATCCCGGCAAGAAATTTGGTAGCTTGGAATT  
CAATCATTGGAGGTTATGCAAGACATGGGCTTGCAGAGAGTGCAATGCAG

>M6-PGSC0003DMG400007299-(rev)M6RLKmalectin\_0

CTTCATTGTAGGTTGTTTCCCAGCATCCTATAGTTGATTAGCTAAACACTTGTTTCATGGATGCCAAGAAA  
TGACCTGGTCTTTGTACCAAAGCAAAGAAACCTCCAAGTTTCTCTTTG

>M6-PGSC0003DMG400007299-(rev)M6RLKmalectin\_1024

CATACGTTGCACCACTTGCTGTCTACGAGAGCTGTAGATCGATGGGTTATGATTCAAACCTCAACAAGAA  
CTATAACCTCACTTGGGTTTTCAATGTTGATCCCAATTTTATATATCTTG

>M6-PGSC0003DMG400007299-(rev)M6RLKmalectin\_1088

CAAGAACTATAACCTCACTTGGGTTTTCAATGTTGATCCCAATTTTATATATCTTGTGAGGCTTCACTGGT  
GTGATTCAGCATCGATGCCACGAAATACAAATCCATGGTCTTTAATGT

>M6-PGSC0003DMG400007299-(rev)M6RLKmalectin\_1152

CACTGGTGTGATTTTCAGCATCGATGCCACGAAATACAAATCCATGGTCTTTAATGTATATATTAATGGAC  
AAATTGCAGAAACAGAAGTCGATTTAGTTGCAATGAAAAGTGGAAAAAAG

>M6-PGSC0003DMG400007299-(rev)M6RLKmalectin\_1216

ATGGACAAATTGCAGAAACAGAAGTCGATTTAGTTGCAATGAAAAGTGGAAAAAAGGAAGTTGCAATC  
GTAAAAGATTATGTGACTCGTGTTAATGATAAAGAAGGAGGTCAGCTTTGGG

>M6-PGSC0003DMG400007299-(rev)M6RLKmalectin\_128

AGGCGTACAGGATTGTTTATTGTCCTGTACGCCTTTTTCTTTTCGTTTGTCAACCATGTTAACAAAATTATC  
CCACATTTTGTACTAGTGATCTTATGTTACATCTCTTCTATTCTCG

>M6-PGSC0003DMG400007299-(rev)M6RLKmalectin\_1280

AATCGTAAAAGATTATGTGACTCGTGTTAATGATAAAGAAGGAGGTCAGCTTTGGGTAGCAGTGCATCC  
ATTAGTGCATGCATTAGGAGTTGGAAGTGAGATAGCTAATGCTATTGTAAA

>M6-PGSC0003DMG400007299-(rev)M6RLKmalectin\_1344

CATCCATTAGTGCATGCATTAGGAGTTGGAAGTGAGATAGCTAATGCTATTGTAAATGGAATAGAGATA  
TTTAAGATTGGCGGTGGAGATACGAGCTTGGCTGGAAGGAATCCTACAATG

>M6-PGSC0003DMG400007299-(rev)M6RLKmalectin\_1408

AGATATTTAAGATTGGCGGTGGAGATACGAGCTTGGCTGGAAGGAATCCTACAATGTCAAATTAATGC  
AAAAATATCAGGAAGAACATAGTAAAGAAGCTTCGGGGGCATTCTCTAATC

>M6-PGSC0003DMG400007299-(rev)M6RLKmalectin\_1472

AATGCAAAAATATCAGGAAGAACATAGTAAAGAAGCTTCGGGGGCATTCTCTAATCAGGACAAATCACA  
TAGTAAAACCTGTTATAATCAGTGGTGCTGCTGGTGGAGTTGCTGCTGCATT

>M6-PGSC0003DMG400007299-(rev)M6RLKmalectin\_1600

CTGCTGTTTTGGTCTTTGTTGCTTTGAAGAGGAAAAAAGATCCCCGGGAGCTGAACCAGGCATAACTA  
GTTGGCTGCCGATTCATGGGAACTCTCATTCTTCTGGTAGCAGCAAGTCAG

>M6-PGSC0003DMG400007299-(rev)M6RLKmalectin\_1664

AACTAGTTGGCTGCCGATTCATGGGAACTCTCATTCTTCTGGTAGCAGCAAGTCAGCTTCTCGAAGAAGT  
GATGGTAGCACAGCCATTTTCATCAGATGCTGCTTCTAACTGCCGATATTT

>M6-PGSC0003DMG400007299-(rev)M6RLKmalectin\_1728

AGAAGTGATGGTAGCACAGCCATTTTCATCAGATGCTGCTTCTAACTGCCGATATTTTTCACTAGCTGAGA  
TCAAACAGGCCACTAAAACTTCGACGAATCATATGTCATTGGAGTTGGT

>M6-PGSC0003DMG400007299-(rev)M6RLKmalectin\_1769

TAACTGCCGATATTTTTCACTAGCTGAGATCAAACAGGCCACTAAAACTTCGACGAATCATATGTCATT  
GGAGTTGGTGGATTTGGAAAAGTGTACAAAGGAGTTATCGATGGTGACAC

>M6-PGSC0003DMG400007299-(rev)M6RLKmalectin\_192

AAATTATCCACATTTTGTACTAGTGATCTTATGTTACATCTCTTCTATTCTCGCTCGCTTCATGCTGCAT  
TAATCAATGATCAAACTCATTGTTCTTAGCATGTGGTTCTCAAAT

>M6-PGSC0003DMG400007299-(rev)M6RLKmalectin\_256

ATGCTGCATTAATCAATGATCAAACTCATTGTTCTTAGCATGTGGTTCTCAAATGGTGGAGTTGATGA  
AGATATGATAAAATGGGAATCAGACACGAAGTATCTCGTGTCTGGTGATA

>M6-PGSC0003DMG400007299-(rev)M6RLKmalectin\_320

TGATGAAGATATGATAAAATGGGAATCAGACACGAAGTATCTCGTGTCTGGTGATAAATCAGTCATGAC  
ACAACCTGAATCCCCTGACCCTTTGGCTCCATCTATTGTACCATATACAAA

>M6-PGSC0003DMG400007299-(rev)M6RLKmalectin\_384

ATGACACAACCTGAATCCCCTGACCCTTTGGCTCCATCTATTGTACCATATACAAATGCAAGAGTTTTTCA  
ATCAGAATCTTCATATAATCTTCCTGTTACAAACCAACAACACATGTT

>M6-PGSC0003DMG400007299-(rev)M6RLKmalectin\_448

TTTTTCAATCAGAATCTTCATATAATCTTCCTGTTACAAACCAACAACACATGTTATGCTTAGGCTTCGTT  
TCAACCAACGCCTTATCCTAATTTCAATATTTCTAAATCATTTATGA

>M6-PGSC0003DMG400007299-(rev)M6RLKmalectin\_512

GCTTCGTTTCAACCAACGCCTTATCCTAATTTCAATATTTCTAAATCATTTATGACTGTTTTTCTGGTAA

AGTGACATTGTTAAATAATTTAAGCGCGTATATAACTGCAGAAGCCTT

>M6-PGSC0003DMG400007299-(rev)M6RLKmalectin\_576

GCTGGTAAAGTGACATTGTTAAATAATTTAAGCGCGTATATAACTGCAGAAGCCTTGTACAAAGTTGCA  
TTACCAAAGAGTACTTATTGTCTCCTGTGGGTTCTCCAACCTTTGGAGATC

>M6-PGSC0003DMG400007299-(rev)M6RLKmalectin\_64

CAAGAAATGACCTGGTCTTTGTACCAAAGCAAAGAAACCTCCAAGTTTCTCTTTGTATTGCGTAGGCCGT  
ACAGGATTGTTTATTGTCCTGTACGCCTTTTTTCTTTCGTTTGTCAACCA

>M6-PGSC0003DMG400007299-(rev)M6RLKmalectin\_640

GTTGCATTACCAAAGAGTACTTATTGTCTCCTGTGGGTTCTCCAACCTTTGGAGATCAAGATTAAGCCTTTT  
GGTGATTCATCATTTCATTTCATAAATGGAATTGAAATGATCACCACGC

>M6-PGSC0003DMG400007299-(rev)M6RLKmalectin\_704

GCCTTTTGGTGATTTCATCATTTCATTTCATAAATGGAATTGAAATGATCACCACGCCAGATATATTTTATG  
GTCCGGATCCTTTGATGGTTGGATTTCAGTACAAGTATTCAAATTTCTAT

>M6-PGSC0003DMG400007299-(rev)M6RLKmalectin\_768

TTTTATGGTCCGGATCCTTTGATGGTTGGATTTCAGTACAAGTATTCAAATTTCTATTACTCAGCAAAGTAT  
TTCTGTAAAGGAAAACAATATGGAGTTAGCATATAGGCTCAATGTTGGT

>M6-PGSC0003DMG400007299-(rev)M6RLKmalectin\_832

AAAGTATTTCTGTAAAGGAAAACAATATGGAGTTAGCATATAGGCTCAATGTTGGTGGACAATACATTT  
CTCCAAAAACGATTCAGGTGGGTTAATAAGAAGTTGGTATGAAGATACTC

>M6-PGSC0003DMG400007299-(rev)M6RLKmalectin\_896

CATTTCTCCAAAAACGATTCAGGTGGGTTAATAAGAAGTTGGTATGAAGATACTCCCTACTTATATGGT  
GCTTCAATAGGCATTACTATGAAGAGTAACAGGACAATTCAATACGATAA

>M6-PGSC0003DMG400007299-(rev)M6RLKmalectin\_960

TATGGTGCTTCAATAGGCATTACTATGAAGAGTAACAGGACAATTCAATACGATAACATACCAACATACG  
TTGCACCACTTGCTGTCTACGAGAGCTGTAGATCGATGGGTTATGATTCA

>M6-PGSC0003DMG400007307-(rev)M6RLKmalectin\_0

TTGATTAAGCTAAAACCTTTCAACAATGGATGCCTAGAAGGCAAGAAATGATCTCGTCTTCGCCATAAA  
TCAAACACAAAAGATCAATCTCTCATTTTTATTGTTTCATAGGCGTACAG

>M6-PGSC0003DMG400007307-(rev)M6RLKmalectin\_1054

TAGATCGATGGGTTTTGAGTCGAATATCAACATGAATTATAACCTTACTTGGGTTTTTCAGAGTTGATGCA  
AACTTTTCCTACCTTGTGAGGTTTCACTGGTGTGATTTTCATTGTCGATTC

>M6-PGSC0003DMG400007307-(rev)M6RLKmalectin\_1116

TTGATGCAAACCTTTTCCTACCTTGTGAGGTTTCACTGGTGTGATTTTCATTGTCGATTCCACTAAGGTCAAT  
TCGTTAGTCTTTAATGTATATATAAACGGACAAATCGAAGAAAGTGGAG

>M6-PGSC0003DMG400007307-(rev)M6RLKmalectin\_1178

AAGGTCAATTCGTTAGTCTTTAATGTATATATAAACGGACAAATCGAAGAAAGTGGAGTCGATTTAGTT  
GCAATGCAACATGGGGAAAAGGCAATTCCTTTAGTGAAAGACTATGTGACT

>M6-PGSC0003DMG400007307-(rev)M6RLKmalectin\_124

CATTGCTTTCCTGTACGCCTTTTTTTTTCTTTTTTGTTAACACCATGTTAACAAAAAATCGTATTTTGCTAATA  
TTCATATGCCTTCTTTATTTTCACGATCATTACATGCTGCAGTAGG

>M6-PGSC0003DMG400007307-(rev)M6RLKmalectin\_1240

TTTAGTTGCAATGCAACATGGGGAAAAGGCAATTCCTTTAGTGAAAGACTATGTGACTCATGTTGAAGA  
TAAAGAAGGAGATGATCTGCTTTGGATAGCAGTGCATCCATCAGGAGATAA

>M6-PGSC0003DMG400007307-(rev)M6RLKmalectin\_1302

TTGAAGATAAAGAAGGAGATGATCTGCTTTGGATAGCAGTGCATCCATCAGGAGATAATGCTGATTTAG  
CTAATGCTATTGTAAATGGACTAGAGATATTTAAGATCAACGGTGGCCACA

>M6-PGSC0003DMG400007307-(rev)M6RLKmalectin\_1364

GATTTAGCTAATGCTATTGTAAATGGACTAGAGATATTTAAGATCAACGGTGGCCACACGAGCTTGGCA  
GGTCAGAATCCTGCAATGTCAGATTTAATGATGAAGTATCAGGAAGAACAT

>M6-PGSC0003DMG400007307-(rev)M6RLKmalectin\_1426

CTTGGCAGGTCAGAATCCTGCAATGTCAGATTTAATGATGAAGTATCAGGAAGAACATAGTAAAGAAGA  
AGCTCAACGGGGATTCACTGATCAGGACAAATCACATAGTCATACTGTTAT

>M6-PGSC0003DMG400007307-(rev)M6RLKmalectin\_1488

AAGAAGAAGCTCAACGGGGATTCACTGATCAGGACAAATCACATAGTCATACTGTTATAATCAGTGGTG  
CTGCTGGTGGAGTTGCTGCTGCATTTGGTCTAGCTGCTGTTTTAGTTTTTG

>M6-PGSC0003DMG400007307-(rev)M6RLKmalectin\_1550

AGTGGTGCTGCTGGTGGAGTTGCTGCTGCATTTGGTCTAGCTGCTGTTTTAGTTTTTGTTGCTTTGAAGA  
GGAAAAGAAAATCCCTAGGAGGTGAATCAGGCACGACTAGTTGGCTACCG

>M6-PGSC0003DMG400007307-(rev)M6RLKmalectin\_1674

ATGGCAACTCTCATTCTTCTCTAGCAAATCAGCTTCCGGAAGAAGTGGTAGTGGTAGCACAAATCATTTC  
ATCAGATGTTGCTAGTAACTGTGCGATACTTTTCACTTGCTGAGATCAAAC

>M6-PGSC0003DMG400007307-(rev)M6RLKmalectin\_1736

ATCATTTCATCAGATGTTGCTAGTAACTGTGCGATACTTTTCACTTGCTGAGATCAAACAAGCTACTAAAA  
CTTTGACGAATCATATGTCATTGGAGTTGGTGGATTTGGAAAGGTATAC

>M6-PGSC0003DMG400007307-(rev)M6RLKmalectin\_1798

TACTAAAACTTTGACGAATCATATGTCATTGGAGTTGGTGGATTTGGAAAGGTATACAAAGGAGTTAT  
CGATGGTGACACGAAAGTTGCAATCAAAAGATCAAATCCATCTTCAGAACA

>M6-PGSC0003DMG400007307-(rev)M6RLKmalectin\_186

TTTTGCTAATATTCATATGCCTTTCTTTATTTTACGATCATTACATGCTGCAGTAGGTGATCATACTCAT  
TTTTCATAGCATGTGGTTCTGAAAATGGTGGAACAGATGAAGATGCTA

>M6-PGSC0003DMG400007307-(rev)M6RLKmalectin\_1860

GAGTTATCGATGGTGACACGAAAGTTGCAATCAAAAGATCAAATCCATCTTCAGAACAAGGAGTCAATG  
AATTCCAGACAGAAATAGAGATGCTCTCAAAGCTAAGGCATCGACATTTAG

>M6-PGSC0003DMG400007307-(rev)M6RLKmalectin\_1922

GTCAATGAATTCCAGACAGAAATAGAGATGCTCTCAAAGCTAAGGCATCGACATTTAGTGTCTTGATC  
GGATTTTGTGAAGAGAATAATGAAATGGTCCTTGTTTATGACCACATGGCA

>M6-PGSC0003DMG400007307-(rev)M6RLKmalectin\_1984

CTTGATCGGATTTTGTGAAGAGAATAATGAAATGGTCCTTGTTTATGACCACATGGCACATGGAACATTA  
AGGGAGCATCTTTATAAAGGTAACAAACTATACTATCTTGGAAGCAAAG

>M6-PGSC0003DMG400007307-(rev)M6RLKmalectin\_2046

GAACATTAAGGGAGCATCTTTATAAAGGTAACAAACTATACTATCTTGGAAGCAAAGGTTGGAGATTT  
GTATTGGATCAGCCAGAGGACTTCATTACCTTCACACAGGAGCTAAATACA

>M6-PGSC0003DMG400007307-(rev)M6RLKmalectin\_2108

GAGATTTGTATTGGATCAGCCAGAGGACTTCATTACCTTCACACAGGAGCTAAATACACTATTATACATA  
GAGATGTGAAAAGTACAAACATTTTGTAAATGACAAATGGGTTGCTAAG

>M6-PGSC0003DMG400007307-(rev)M6RLKmalectin\_2170

TATACATAGAGATGTGAAAAGTACAAACATTTTGTAAATGACAAATGGGTTGCTAAGGTTTCAGATTTT



GGACTTTCAAAAACAGGTCCAAACATGAACCAAGGACATGTTTCAACAGT

>M6-PGSC0003DMG400007307-(rev)M6RLKmalectin\_2232

CAGATTTTGGACTTTCAAAAACAGGTCCAAACATGAACCAAGGACATGTTTCAACAGTCGTAAAGGGTA

GCTTCGGGTACTTAGATCCTGAATACTTCAGAAGACAACAATTGACTGAAA

>M6-PGSC0003DMG400007307-(rev)M6RLKmalectin\_2294

AAGGGTAGCTTCGGGTACTTAGATCCTGAATACTTCAGAAGACAACAATTGACTGAAAAATCAGATGTG

TACTCATATGGTGTGTCTGTTTGAAGTACTGTGTGCAAGGCCAGCACTT

>M6-PGSC0003DMG400007307-(rev)M6RLKmalectin\_2418

CAAATCTTCCGAAAGAACAAGTTAGTCTTGCAGATTGGGCATTAGCTTGTCAAAGAAAAGGGAATTTAG

AAGATATTATTGATCCACATTTGAAAGGCAAGATCAATCCTGAATGCTTGA

>M6-PGSC0003DMG400007307-(rev)M6RLKmalectin\_248

CATACCTCATTTTTCATAGCATGTGGTTCTGAAAATGGTGGAACAGATGAAGATGCTAGAAAATGGGAA

TCGGACGCGAAGTATCTCATATCAGGTGATAAATCAGTCATGACACAACCT

>M6-PGSC0003DMG400007307-(rev)M6RLKmalectin\_2480

AATTTAGAAGATATTATTGATCCACATTTGAAAGGCAAGATCAATCCTGAATGCTTGAAAAAATTTGCAG

AAACAGCTGAGAAATGCTTAGCTGACAATGGTATAAATCGTCCGTCCATG

>M6-PGSC0003DMG400007307-(rev)M6RLKmalectin\_2542

ATTTGCAGAAACAGCTGAGAAATGCTTAGCTGACAATGGTATAAATCGTCCGTCCATGGGAGATGTGCT

ATGGAATCTTGAATATGCCCTTCAGATACAAGAAAATCCAGATGGAGTTTT

>M6-PGSC0003DMG400007307-(rev)M6RLKmalectin\_2604

ATGTGCTATGGAATCTTGAATATGCCCTTCAGATACAAGAAAATCCAGATGGAGTTTTATCAACTCCGA

GGCAACGAAACAAGTTGATCATGACAATGCTGATCAACACAGTTTGATAG

>M6-PGSC0003DMG400007307-(rev)M6RLKmalectin\_2790

TCTTTTCACAAATTGTGAATCCAACAGGAAGGTAATAGAAAATATACACACATATATATAAGTAGTTGTT

TCTTATGAATGGTTATAATAAGTATACAAAACCTGTACATTTCACTATATA

>M6-PGSC0003DMG400007307-(rev)M6RLKmalectin\_310

ATGGGAATCGGACGCGAAGTATCTCATATCAGGTGATAAATCAGTCATGACACAACCTCAATCTCCTGA

CCCCTCTGTTCCATCTGTTGTACCATATGTAAATGCAAGATTTTTTCAATC

>M6-PGSC0003DMG400007307-(rev)M6RLKmalectin\_372

CTCCTGACCCCTCTGTTCCATCTGTTGTACCATATGTAAATGCAAGATTTTTCAATCAGAATCTTCATATA  
ACCTTCCTGTTACAAATAGATCAGCTCATATTTTGCTTAGGCTTCATT

>M6-PGSC0003DMG400007307-(rev)M6RLKmalectin\_434

TCTTCATATAACCTTCCTGTTACAAATAGATCAGCTCATATTTTGCTTAGGCTTCATTTCTACCCGACTTCT  
TATCCTAATTTCAACGTTTCCAATTCATACATCTCTCTTTCTGCTGGT

>M6-PGSC0003DMG400007307-(rev)M6RLKmalectin\_496

CCCGACTTCTTATCCTAATTTCAACGTTTCCAATTCATACATCTCTCTTTCTGCTGGTAAAGTTACGTTGTT  
AAATAATTTCAAGTGCATATATAACAGCACAAGCATGGTCACAAAATTA

>M6-PGSC0003DMG400007307-(rev)M6RLKmalectin\_558

TTACGTTGTAAATAATTTCAAGTGCATATATAACAGCACAAGCATGGTCACAAAATTACATTATTAAGA  
ATACATTTTGTATCCTATGGATTCTCCAACCTTTGGAGATCAAAATTAGTC

>M6-PGSC0003DMG400007307-(rev)M6RLKmalectin\_62

GCCATAAATCAAACACAAAAGATCAATCTCTCATTTTTATTGTTTCATAGGCGTACAGAAAACATTGCTTT  
CCTGTACGCCTTTTTTTTTCTTTTTTGTTAACACCATGTTAACAAAAAAT

>M6-PGSC0003DMG400007307-(rev)M6RLKmalectin\_620

ATTAAGAATACATTTTGTATCCTATGGATTCTCCAACCTTTGGAGATCAAAATTAGTCCTGTTGGTAACTC  
ATCACTTGCATTCATCAATGGAATTGAAATGATCACCTCACCTGATTTG

>M6-PGSC0003DMG400007307-(rev)M6RLKmalectin\_682

TGGTAACTCATCACTTGCATTCATCAATGGAATTGAAATGATCACCTCACCTGATTTGTTTTACGGCCCTG  
ATCCTGTGATGGCTGGGTTTAGTACTGATGAAGAACCGGATTCTTCTGG

>M6-PGSC0003DMG400007307-(rev)M6RLKmalectin\_744

ACGGCCCTGATCCTGTGATGGCTGGGTTTAGTACTGATGAAGAACCGGATTCTTCTGGTGACGGAGATG  
TTGTTTCTCAGCAAATATATCTGTAAGGGAAAATAATATGGAGCTGATGT

>M6-PGSC0003DMG400007307-(rev)M6RLKmalectin\_806

GGAGATGTTGTTTCTCAGCAAATATATCTGTAAGGGAAAATAATATGGAGCTGATGTTTAGGGTCAAT  
GTAGGTGGACAATTTATTCTCCGAAAATGATTCAGGAGGGTTAATGAGG

>M6-PGSC0003DMG400007307-(rev)M6RLKmalectin\_868

GGTCAATGTAGGTGGACAATTTATTCTCCGAAAATGATTCAGGAGGGTTAATGAGGAGTTGGTATGA  
AGATACTCCCTACGTATATGGCGGTTCAAGGTGTTGGTATTGCTATGAGCAC

>M6-PGSC0003DMG400007307-(rev)M6RLKmalectin\_930

GGTATGAAGATACTCCCTACGTATATGGCGGTTTCAGGTGTTGGTATTGCTATGAGCACCAATATGACAAT  
TCGTTATGATGACTTACCATCATATGTTGCACCCCTTGATGTGTATGATA

>M6-PGSC0003DMG400007307-(rev)M6RLKmalectin\_992

ATGACAATTCGTTATGATGACTTACCATCATATGTTGCACCCCTTGATGTGTATGATAGTTGTAGATCGAT  
GGGTTTTGAGTCGAATATCAACATGAATTATAACCTTACTTGGGTTTTTC

>M6-PGSC0003DMG400007389M6OtherRLKTM\_0

TTGTTACATCCTCTGTTCTTCTCAAGAAGTTATAAATCTTTCATTCTTTTCGAGTGTGCACCTTTGATATGG  
AGGAGAGACAATTGTTGTTTGAGAAGTATGAAATTGGGACATTATTAG

>M6-PGSC0003DMG400007389M6OtherRLKTM\_1008

CTGCATTTTTCAATGCATTCGAGTTGATTTTCATCGATGTCATCTGGTTTCGACTTGTCTAGCTTGTTTGAG  
ATCAAAGGGAAGGCATCATCCATGTTCACTTCAAGGAGCACTGCCCGGG

>M6-PGSC0003DMG400007389M6OtherRLKTM\_1071

TGTTTGAGATCAAAGGGAAGGCATCATCCATGTTCACTTCAAGGAGCACTGCCCGGGATGTCATCCGTA  
AAATGGAGAAAATGGCTAAAGTTATGAGGTATAAGGTTTATAGGGTAAAAC

>M6-PGSC0003DMG400007389M6OtherRLKTM\_1134

TCCGTAAAATGGAGAAAATGGCTAAAGTTATGAGGTATAAGGTTTATAGGGTAAAACCATTCAAGTTGA  
AGATGCAATGCCCCGAGGAAGGACGAAAAGGGCGGTTGTTGGTCACCGCTG

>M6-PGSC0003DMG400007389M6OtherRLKTM\_1197

AGTTGAAGATGCAATGCCCCGAGGAAGGACGAAAAGGGCGGTTGTTGGTCACCGCTGAGGTGTTTAAG  
GTGGCCCCGGAAGTCACCGTGGTCGAGCTCTCTAAGTCCTCCGGTGACACGT

>M6-PGSC0003DMG400007389M6OtherRLKTM\_126

GAACTTTTGCGAAAGTGTACTATGGTAAGGAACTCGAAACAGGGGAAAGTGTAGCCATTAAGTGATA  
AAAAAAGATCAAGTTCAGAAAGAAGGAATGATGGAGCAAATCACAAGAGAAA

>M6-PGSC0003DMG400007389M6OtherRLKTM\_1260

TTAAGGTGGCCCCGGAAGTCACCGTGGTCGAGCTCTCTAAGTCCTCCGGTGACACGTTGGAGTATAACA  
AGTTTTGTGAAGAGGAAGTTAGGCCTGCATTGAAGGACATTGTTTGGACAT

>M6-PGSC0003DMG400007389M6OtherRLKTM\_1323

ATAACAAGTTTTGTGAAGAGGAAGTTAGGCCTGCATTGAAGGACATTGTTTGGACATGGCAAGGGACA

GGTACTGGAAATGCTGATATTGATAACAAAAAGAACTTGGAGCAATAAAATT

>M6-PGSC0003DMG400007389M6OtherRLKTM\_1386

GGACAGGTAAGTACTGGAAATGCTGATATTGATAACAAAAAGAACTTGGAGCAATAAAATTTGGTACATGTGC  
ATCTTTCTCCCTCTTCTTTTGTGTTTGTGTTTCGCTCCCCTGATCGGCTGA

>M6-PGSC0003DMG400007389M6OtherRLKTM\_1449

ATGTGCATCTTTCTCCCTCTTCTTTTGTGTTTGTGTTTCGCTCCCCTGATCGGCTGATAGAAATAAATCAAC  
CATCGGAGATATTCGTGTTACTTTGTCAATATTGATTTGTACATAAAT

>M6-PGSC0003DMG400007389M6OtherRLKTM\_1512

TAAATCAACCATCGGAGATATTCGTGTTACTTTGTCAATATTGATTTGTACATAAATTGTGTGTTATACTG  
ACCACTGGGATTTGTATTGTTTGCATGTTGTGATTCACCTAATTTCT

>M6-PGSC0003DMG400007389M6OtherRLKTM\_1575

TTATACTGACCACTTGGGATTTGTATTGTTTGCATGTTGTGATTCACCTAATTTCTCTAGTTATTCAAGCA  
CGGGGATCTTGTTCAAAAAGATATATTTACCTCCCGGCACCCCTTTAT

>M6-PGSC0003DMG400007389M6OtherRLKTM\_1624

AATTTCTCTAGTTATTCAAGCACGGGATCTTGTTCAAAAAGATATATTTACCTCCCGGCACCCCTTTAT  
CTATTTGTAAGTTGCAAGTTGAAGTTGCAATATGGACATTTTGTTCAGA

>M6-PGSC0003DMG400007389M6OtherRLKTM\_189

TGATAAAAAAAGATCAAGTTCAGAAAGAAGGAATGATGGAGCAAATCACAAGAGAAATCTCTGTGATG  
GGCCTTGTCGTCATCCAAATATTGTTGAACTCAAAGAAGTCATGGCTACAA

>M6-PGSC0003DMG400007389M6OtherRLKTM\_252

TGATGGGCCTTGTCGTCATCCAAATATTGTTGAACTCAAAGAAGTCATGGCTACAAAGTCTAAAATCTT  
CTTTATAATGGAGTATGTTAAAGGGGGTGAGCTATTCGCAAATAGTAT

>M6-PGSC0003DMG400007389M6OtherRLKTM\_315

AAATCTTCTTTATAATGGAGTATGTTAAAGGGGGTGAGCTATTCGCAAATAGTATCCAAAGGCAAATT  
TAAAGAAGATACAGCAAGAAAGTACTTTCAACAATTGATAAGTGCTGTTG

>M6-PGSC0003DMG400007389M6OtherRLKTM\_378

GCAAATTTAAAGAAGATACAGCAAGAAAGTACTTTCAACAATTGATAAGTGCTGTTGATTACTGTCATAG  
TCGAGGTGTTTATCATCGCGATTTGAAGCCTGAGAACCTACTCCTTGATG

>M6-PGSC0003DMG400007389M6OtherRLKTM\_441

GTCATAGTCGAGGTGTTTATCATCGCGATTTGAAGCCTGAGAACCTACTCCTTGATGAGAATGAGGACTT  
GAAGATATCTGATTTTGGGTTATCGGCTTTCCTGATGAGCAGTTGAGTA

>M6-PGSC0003DMG400007389M6OtherRLKTM\_504

AGGACTTGAAGATATCTGATTTTGGGTTATCGGCTTTCCTGATGAGCAGTTGAGTAGAAATGATGGTTT  
GCTTCATACACAGTGTGGGACACCAGCATATGTTGCTCCTGAGGTTTTAA

>M6-PGSC0003DMG400007389M6OtherRLKTM\_567

ATGTTTGGCTTCATACACAGTGTGGGACACCAGCATATGTTGCTCCTGAGGTTTTAAGGAGGAAAGGTT  
ATGATGGTGCAAAGCTGATATTTGGTCATGTGGGGTTATTTTGTATGTGC

>M6-PGSC0003DMG400007389M6OtherRLKTM\_63

TTGATATGGAGGAGAGACAATTGTTGTTTGAAGAAGTATGAAATTGGGACATTATTAGGCAAAGGAACTT  
TTGCGAAAGTGTACTATGGTAAGGAACTCGAAACAGGGGAAAGTGTAGCCA

>M6-PGSC0003DMG400007389M6OtherRLKTM\_630

AAGGTTATGATGGTGCAAAGCTGATATTTGGTCATGTGGGGTTATTTTGTATGTGCTTCTAGCTGGTTA  
CCTACCATTTCAAGATGAGAATGTGATGAACATGTACAAGAAGATTTTCA

>M6-PGSC0003DMG400007389M6OtherRLKTM\_693

CTGGTTACCTACCATTTCAAGATGAGAATGTGATGAACATGTACAAGAAGATTTTCAAGGCGTATTTCGA  
GTTCCCTCCATGGTTTTCAATGGATTCGAGGCGTTTGATATCTAAACTTT

>M6-PGSC0003DMG400007389M6OtherRLKTM\_756

ATTTGAGTTCCCTCCATGGTTTTCAATGGATTCGAGGCGTTTGATATCTAAACTTTTAAATGGCTGATCCG  
GACAGGAGGATCACTATTCAAGGTATCATGAGGGTTCCATGGTATAGGA

>M6-PGSC0003DMG400007389M6OtherRLKTM\_819

CTGATCCGGACAGGAGGATCACTATTCAAGGTATCATGAGGGTTCCATGGTATAGGAAGGATTTGCGGA  
TGCCACGGGCTTTTTCAATCCAAGATTTTCAAAGTTAGAAAAGGAACAAG

>M6-PGSC0003DMG400007389M6OtherRLKTM\_882

TCGCGATGCCACGGGCTTTTTCAATCCAAGATTTTCAAAGTTAGAAAAGGAACAAGAAAATGATCATG  
TTGAAGAAGGAATGAGCAGCAAACAAGGAGGGATGATTAGGAAATCCCCTT

>M6-PGSC0003DMG400007389M6OtherRLKTM\_945

ATCATGTTGAAGAAGGAATGAGCAGCAAACAAGGAGGGATGATTAGGAAATCCCCTTCATCCCCTGCAT  
TTTTCAATGCATTCGAGTTGATTTTCATCGATGTCATCTGGTTTCGACTTGT

>M6-PGSC0003DMG400007455M6G-LecRK\_0

ATTTTTTAGAGGAATGAGGTGGAAAAAGGAAAAAAGAAATTGGGTCCTTTGTGATTTCTTGCAATTGG  
CAGTAACCAACGTCCGAAGGCCAAATCTCATCGATTGTGACATTGTAACAA

>M6-PGSC0003DMG400007455M6G-LecRK\_1037

GCCTCACTACCAATCTTACAGACTTATAATGGATTCTTCACCATCTCATGAAGAATCTGCTCCTCCAAGT  
ATGTGGCACCTCCAAAGTTTAGTCCTCCGCCTACACCTTCTAGTCCATC

>M6-PGSC0003DMG400007455M6G-LecRK\_1098

CCTCCAAGTATGTGGCACCTCCAAAGTTTAGTCCTCCGCCTACACCTTCTAGTCCATCTGATAGCTCACC  
ACCACCTCCATCTTCTAGTCCACCTCCTAGTTCACCGCCACCTGTATCT

>M6-PGSC0003DMG400007455M6G-LecRK\_122

TATACATAATTCATCAATCTTCATAAACCTATCATCATAATCATAATCAATACAACATTATTGTAAACAAAA  
CAAATATTCCTTCTTGTATATACACACAATATTAATAAAATTATAAACT

>M6-PGSC0003DMG400007455M6G-LecRK\_1220

TAGTCCACCTCCTAGTTCACCTCCACCTGAATCAACTAGTCCGCCACCTAGTTCACCACCACCTCAATCTTC  
TAGTCCACCACCAGCCTCACCTCCACCTGAACCAACTCCTTCTTCTCC

>M6-PGSC0003DMG400007455M6G-LecRK\_1281

CCTCAATCTTCTAGTCCACCACCAGCCTCACCTCCACCTGAACCAACTCCTTCTTCTCCTGTCAGTTCACCT  
CCACCAACTTCATCACCTCCCCCTGCATTGTCACCTCCGCCACACGTA

>M6-PGSC0003DMG400007455M6G-LecRK\_1342

TCAGTTCACCTCCACCAACTTCATCACCTCCCCCTGCATTGTCACCTCCGCCACACGTACAGAATCCAGAA  
CCTCCTCCAGCACCACAATCACATGGAAATTCATCCCCACCACAATCTC

>M6-PGSC0003DMG400007455M6G-LecRK\_1403

GAATCCAGAACCTCCTCCAGCACCACAATCACATGGAAATTCATCCCCACCACAATCTCCTGAACCTAAA  
AAAGGTTTCATCATCTTACCACCTTCACTACCTTCATCCAAGTCACTCACC

>M6-PGSC0003DMG400007455M6G-LecRK\_1464

GAACCTAAAAAAGGTTTCATCATCTTACCACCTTCACTACCTTCATCCAAGTCACTGCGGGATGGAG  
GTGGAGGTGGAAATTCACCACCATCCCCAATATCTAAGTCATCAGATAAT

>M6-PGSC0003DMG400007455M6G-LecRK\_1525

GGGATGGAGGTGGAGGTGGAAATTCACCACCATCCCCAATATCTAAGTCATCAGATAATTCGCTCCTTC

ACCAGCCTCAGGCCCTCCTAAAGATTCGCCACCTTCACCAGCTGCATTAT

>M6-PGSC0003DMG400007455M6G-LecRK\_1586

GCCTCCTTCACCAGCCTCAGGCCCTCCTAAAGATTCGCCACCTTCACCAGCTGCATTATCTCCAAGTAACT

CACCATCTTCTGATTCACCCTCAAACCTCATCAACACCAACATCTGTAAT

>M6-PGSC0003DMG400007455M6G-LecRK\_1647

CCAAGTAACTCACCATCTTCTGATTCACCCTCAAACCTCATCAACACCAACATCTGTAATACAATGGTCACC

ACCACCTCCATCCTCTAATGGTGCACAATCTTCTCTTAATCCTCCTTCA

>M6-PGSC0003DMG400007455M6G-LecRK\_1708

AATGGTCACCACCACCTCCATCCTCTAATGGTGCACAATCTTCTCTTAATCCTCCTTCATCACAAGTTCCTA

GTAACCATAGTTCCGGAAACCATTCAACAGGAAGTCCAAAGCCTGCTG

>M6-PGSC0003DMG400007455M6G-LecRK\_1769

ACAAGTTCCTAGTAACCATAGTTCCGGAAACCATTCAACAGGAAGTCCAAAGCCTGCTGGTGGCAACAG

CAATGGTACTGCAGAGACAGTTTCCATTGGCGTTGTAATTGTTCTTTTTTT

>M6-PGSC0003DMG400007455M6G-LecRK\_183

TGTAAACAAAACAAATATTCCTTCTTGTATATACACACAATATTAATAAAATTATAAACTTTTTTACATTCTT

GATTGTGTATGTGGGAAATTGGGCAGCAAATTTGCAATTTTTGATCCT

>M6-PGSC0003DMG400007455M6G-LecRK\_1830

GGCAACAGCAATGGTACTGCAGAGACAGTTTCCATTGGCGTTGTAATTGTTCTTTTTTTGGTTGGTATCA

TCGGAGCAGTTGCATGGTGCATACGGAAGCGAAAGAAGAAGAATTCTGTC

>M6-PGSC0003DMG400007455M6G-LecRK\_1891

TTGGTATCATCGGAGCAGTTGCATGGTGCATACGGAAGCGAAAGAAGAAGAATTCTGTCCATTGTAGTG

GTTATGTCAAGCCAATCTCTGCGTGCTCCTCTCCAAAATCAGGTAAATTTT

>M6-PGSC0003DMG400007455M6G-LecRK\_1952

TTGTAGTGGTTATGTCAAGCCAATCTCTGCGTGCTCCTCTCCAAAATCAGGTAAATTTTTCAGAAACTATAA

AATCATTCTTTTAGTTTGTATTTCAGTGTTCAAGATGCTTGCAAGAAA

>M6-PGSC0003DMG400007455M6G-LecRK\_2013

GAAACTATAAAATCATTCTTTTAGTTTGTATTTCAGTGTTCAAGATGCTTGCAAGAAAAATCAATGTAAT

ATTTGTAGTTGAGACCTTTCAAGTGAAATCTGAGAAGATGTGAAAGTTG

>M6-PGSC0003DMG400007455M6G-LecRK\_2074

TCAATGTAATATTTGTAGTTGAGACCTTTCAAGTGAAATCTGAGAAGATGTGAAAGTTGTGTACAGAGTC  
TGCTTTATTGAAGGTCAATGAATCAGCACCTGAGAGAAATGGAACGAGCT

>M6-PGSC0003DMG400007455M6G-LecRK\_2135

TACAGAGTCTGCTTTATTGAAGGTCAATGAATCAGCACCTGAGAGAAATGGAACGAGCTCTAATTCCTC  
AATTCTCCAGCAGACCCTGGCGGATTCAACAGTTCAAAGGCATGGTTTAC

>M6-PGSC0003DMG400007455M6G-LecRK\_2196

AATTCCTCAATTCTCCAGCAGACCCTGGCGGATTCAACAGTTCAAAGGCATGGTTTACTTATCAAGAAC  
TTGTTGAGGCCACTAATGATTTTTTCAGCGAATAATGAATTAGGGAAGGGT

>M6-PGSC0003DMG400007455M6G-LecRK\_2257

ATCAAGAACTTGTTGAGGCCACTAATGATTTTTTCAGCGAATAATGAATTAGGGAAGGGTGGATTTGGTT  
CTGTATACAAAGGCTATCTAGCAGATGGAAGATATGTCGCGGTAAAACAGC

>M6-PGSC0003DMG400007455M6G-LecRK\_2318

ATTTGGTTCTGTATACAAAGGCTATCTAGCAGATGGAAGATATGTCGCGGTAAAACAGCTAAATATTGG  
TGGGAGCCAGGGCGAACGGGAATTTAGAGCTGAAGTTGAAATCATTAGCCG

>M6-PGSC0003DMG400007455M6G-LecRK\_2379

AATATTGGTGGGAGCCAGGGCGAACGGGAATTTAGAGCTGAAGTTGAAATCATTAGCCGGATACACCA  
TCGTCAATTTGGTTTCACTTGTAGGTTATTGCATTTAGAGAACAAAAGGCTC

>M6-PGSC0003DMG400007455M6G-LecRK\_244

TTTACATTCTTGATTGTGTATGTGGGAAATTGGGCAGCAAATTTGCAATTTTTGATCCTGTATCTAATGCT  
TTGTGGATGTTTTACAATTTGATTCACCTTTTTGGAGTGGGGTTTTCT

>M6-PGSC0003DMG400007455M6G-LecRK\_2440

TACACCATCGTCATTTGGTTTCACTTGTAGGTTATTGCATTTAGAGAACAAAAGGCTCCTCGTTTATGAC  
TATGTATCCAATAATACCCTTACTTCCATCTTCATGGTAAGCATAACA

>M6-PGSC0003DMG400007455M6G-LecRK\_2501

CGTTTATGACTATGTATCCAATAATACCCTTACTTCCATCTTCATGGTAAGCATAACATTTGTAGATTTAA  
TTATTTCAATTTGTTATGTTTGGTCACTAAAGCGAGCTGTTGATACTTG

>M6-PGSC0003DMG400007455M6G-LecRK\_2562

TGTAGATTTAATTATTTCAATTTGTTATGTTTGGTCACTAAAGCGAGCTGTTGATACTTGCAAGTTACAGCA  
CAAGGGAGGCCTGTCATGAATTGGCCAACACGTGTTAAAATTGCTGTTG



>M6-PGSC0003DMG400007455M6G-LecRK\_2623

AGTTACAGCACAAAGGGAGGCCTGTCATGAATTGGCCAACACGTGTTAAAATTGCTGTTGGTGCAGCTCG  
TGAATAGCTTATCTGCATGAAGATTGTAATACTGCTCTCTTCTCAATTC

>M6-PGSC0003DMG400007455M6G-LecRK\_2684

GCAGCTCGTGAATAGCTTATCTGCATGAAGATTGTAATACTGCTCTCTTCTCAATTCTTATGAGTTATC  
CATGTTTTATTCATGTGATATCTTTCATTGGTTGAACAAACGTCCCCCT

>M6-PGSC0003DMG400007455M6G-LecRK\_2745

ATGAGTTATCCATGTTTTATTCATGTGATATCTTTCATTGGTTGAACAAACGTCCCCCTTATAGTTAAAAG  
AGAATGTACAGTTAAAACTTTACCACAACCTTGAATTAGTTTTAATGA

>M6-PGSC0003DMG400007455M6G-LecRK\_2806

TAGTTAAAAGAGAATGTACAGTTAAAACTTTACCACAACCTTGAATTAGTTTTAATGATCCCTAAAGCT  
GTGGCGGGATCATGGATGGAAATTTAAGCTCCACAACCACCTTCTTCCTA

>M6-PGSC0003DMG400007455M6G-LecRK\_2867

CCTAAAGCTGTGGCGGGATCATGGATGGAAATTTAAGCTCCACAACCACCTTCTTCTACTCTTCCTAAA  
AGCATACCTTAACGAAAGGAAAATAAAAAAGAGAGAGAAAACAAAACATG

>M6-PGSC0003DMG400007455M6G-LecRK\_2928

CTTCCTAAAAGCATACCTTAACGAAAGGAAAATAAAAAAGAGAGAGAAAACAAAACATGTAGTAATAAT  
TTTCAGCTCATAGAAGTAGAAGGCCTTCCAGTTGGCATTTCCTTTTTGTAA

>M6-PGSC0003DMG400007455M6G-LecRK\_2989

GTAATAATTTTCAGCTCATAGAAGTAGAAGGCCTTCCAGTTGGCATTTCCTTTTTGTAATGTAATGATATT  
ACTTATGCCATTTAGAATTGAGTTCTAAGGTCCTTTTTTCATGCCATAAA

>M6-PGSC0003DMG400007455M6G-LecRK\_305

ATCTAATGCTTTGTGGATGTTTTCACAATTTGATTCACCTTTTTGGAGTGGGGTTTCCTTAGAAAGGGTAA  
ATTCTACATAATCTTGAATTTCTATATCTTTTTCTTGATTTGGGTGTCT

>M6-PGSC0003DMG400007455M6G-LecRK\_3050

TAATGATATTACTTATGCCATTTAGAATTGAGTTCTAAGGTCCTTTTTTCATGCCATAAATTACCTCGTTATA  
TAACTTTTTGGCATGAGTGTGGATTATCATATCTGCATTAAGATTGTA

>M6-PGSC0003DMG400007455M6G-LecRK\_3111

ACCTCGTTATATAACTTTTTGGCATGAGTGTGGATTATCATATCTGCATTAAGATTGTAAGTAGTGTCTG

TTCCTTAATCCTTTTATGTTATTCATGTTTATTTTTATTTTCAGTTCGTT

>M6-PGSC0003DMG400007455M6G-LecRK\_3172

TAGTGTTCTGTTCCCTTAATCCTTTTATGTTATTCATGTTTATTTTTATTTTCAGTTCGTTTGTATGGCTGAAAA

AAAATGTTTCTCCTCTTTCTGCCCCAAAAGTTAAGAGAGAAAGCAG

>M6-PGSC0003DMG400007455M6G-LecRK\_3233

TATGGCTGAAAAAAAATGTTTCTCCTCTTTCTGCCCCAAAAGTTAAGAGAGAAAGCAGGTGGTAAAAC

TTTTTACCATATGACGAATCGGATTGTGATATTAGATTATGTGTTCTATC

>M6-PGSC0003DMG400007455M6G-LecRK\_3294

GGTAAACTTTTTACCATATGACGAATCGGATTGTGATATTAGATTATGTGTTCTATCATATCACTTACA

TTCTTTTTATTGATCCCTACTCCACTAGCTGAACAGCTGTAGTAAATTA

>M6-PGSC0003DMG400007455M6G-LecRK\_3355

ATCACTTACATTCTTTTTATTGATCCCTACTCCACTAGCTGAACAGCTGTAGTAAATTAATGATGCAATCT

GAGCTACTTCCAGAACCAACTTTCTCCTATTATCCCTATAAGAGGACT

>M6-PGSC0003DMG400007455M6G-LecRK\_3416

TGATGCAATCTGAGCTACTTCCAGAACCAACTTTCTCCTATTATCCCTATAAGAGGACTTGAAGTAAAAA

GAGAAAATGGAACGTATAAATAGTTTAAGCTCAATGGAAGTAGCAAGATC

>M6-PGSC0003DMG400007455M6G-LecRK\_3477

AAGTAAAAGAGAAAATGGAACGTATAAATAGTTTAAGCTCAATGGAAGTAGCAAGATCTTGATATTGG

ATTTCCCTTTGGTAATGTTATAATAACTTCCGCAATTTAGAATTGTGTC

>M6-PGSC0003DMG400007455M6G-LecRK\_3538

GATATTGGATTTCCCTTTGGTAATGTTATAATAACTTCCGCAATTTAGAATTGTGTCATCAATTTTTATG

CATCTCGTAAATTATCTCGATTATATGACCTTTTGGCAGTATAAATAA

>M6-PGSC0003DMG400007455M6G-LecRK\_3599

CAATTTTTATGCATCTCGTAAATTATCTCGATTATATGACCTTTTGGCAGTATAAATAATGAATTCTAATCA

CTTCTAATTAGTTACTTAAAGATGTTTTTGTAGCTGAATGTACCA

>M6-PGSC0003DMG400007455M6G-LecRK\_366

GAAAGGGTAAATTCTACATAATCTTGAATTTCTATATCTTTTTCTTGATTTGGGTGTCTGGGTATTGGAAT

AAATCTGTTTGGTGTGTGGATGTTTCTTGAAACTGCATTTGGTGATCT

>M6-PGSC0003DMG400007455M6G-LecRK\_3660

AATTCTAATCACTTCTCTAATTAGTTACTTAAAAGATGTTTTGTAGCTGAATGTACCAAATGAGGCTCAA  
AATCGAACTAAGACTGAACAAAACATGATTGGTTCCATTGAGAGAACAG

>M6-PGSC0003DMG400007455M6G-LecRK\_3721

TGAGGCTCAAATCGAACTAAGACTGAACAAAACATGATTGGTTCCATTGAGAGAACAGAAAAAATTGT  
ATGACTAAGTTCTTTATACACTCTTGTATTGCACCATGTAGTTACATTCCC

>M6-PGSC0003DMG400007455M6G-LecRK\_3782

AAAATTGTATGACTAAGTTCTTTATACACTCTTGTATTGCACCATGTAGTTACATTCCCGAGAAAGAAATA  
ATTTAATCCATGAGCAGGCATAGTCTCCTTGAACATGAGTATATCTTCC

>M6-PGSC0003DMG400007455M6G-LecRK\_3843

GAAAGAAATAATTTAATCCATGAGCAGGCATAGTCTCCTTGAACATGAGTATATCTTCCACACTGAAGTG  
AGCGCATCAGGCTCTGCATTTGTAGTGCATTATATGCTTTTCGCTTGCCA

>M6-PGSC0003DMG400007455M6G-LecRK\_3904

ACTGAAGTGAGCGCATCAGGCTCTGCATTTGTAGTGCATTATATGCTTTTCGCTTGCCAATATCACTCTA  
CGACAAGCATTTGAATAAATCTTCACTGATCGAGCCAGGTTGAAAAGTG

>M6-PGSC0003DMG400007455M6G-LecRK\_3965

ATTCACTCTACGACAAGCATTTGAATAAATCTTCACTGATCGAGCCAGGTTGAAAAGTGAGAGAAACAT  
GTTCAACTGCTCTTGTGAAGCATATAGTGAAGCAAGTGACAAACTGGTT

>M6-PGSC0003DMG400007455M6G-LecRK\_4026

AGAAACATGTTCAACTGCTCTTGTGAAGCATATAGTGAAGCAAGTGACAAACTGGTTTCTCCATATAA  
CAAAGCTGAATGTGTTAATCATCACTGAGTTATTATGCTATACTGTTGAA

>M6-PGSC0003DMG400007455M6G-LecRK\_4087

TCCATATAACAAAGCTGAATGTGTTAATCATCACTGAGTTATTATGCTATACTGTTGAATAAGTAATGAA  
AAGTTAAGAAAAGTAGACCAGGCGAAGAGATTGTGATTTTCTATGCTCAT

>M6-PGSC0003DMG400007455M6G-LecRK\_4148

AGTAATGAAAAGTTAAGAAAAGTAGACCAGGCGAAGAGATTGTGATTTTCTATGCTCATTACCTTCATTC  
TTGTTACTTGAGCTACCTTTAATTATATAGTTAAAGTATGATACTCCTTT

>M6-PGSC0003DMG400007455M6G-LecRK\_4209

CCTTCATTCTTGTTACTTGAGCTACCTTTAATTATATAGTTAAAGTATGATACTCCTTTTTTATTTGGTTCTT  
AATTAATTCTTTGGTGTGGATGACAGGTTATCCTCGTATTATTAC

>M6-PGSC0003DMG400007455M6G-LecRK\_427

GTATTCGAATAAATCTGTTTGGTGTGGATGTTTCTTGAAACTGCATTTGGTGATCTGGGGTACTTTTA  
TTTTGGTCATAGTTGCTGGTGATAATCATTATTTGGCTGCTTTGTTAG

>M6-PGSC0003DMG400007455M6G-LecRK\_4270

TATTTGGTCTTAATTAATTCTTTTGGTGTGGATGACAGGTTATCCTCGTATTATTCACAGGGACATTAAG  
TCATCAAACATTCTTTTAGATGATAACTTTGAGGCCCATGTATGTCTAA

>M6-PGSC0003DMG400007455M6G-LecRK\_4331

GGACATTAAGTCATCAAACATTCTTTTAGATGATAACTTTGAGGCCCATGTATGTCTAAGTCTTCGAACTC  
CTATATCCACATTCTTTGTCTCACGAGCCGCCTTTTACAATTAATTTAC

>M6-PGSC0003DMG400007455M6G-LecRK\_4392

CTTCGAACTCCTATATCCACATTCTTTGTCTCACGAGCCGCCTTTTACAATTAATTTACTTTCAACAGGTTG  
CTGATTTTGGACTAGCTAAATTAGCTCAGGATGCAGAAAGTCATATCA

>M6-PGSC0003DMG400007455M6G-LecRK\_4453

TCAACAGTTGCTGATTTTGGACTAGCTAAATTAGCTCAGGATGCAGAAAGTCATATCACAACACGTGTC  
GTGGGAACATTTGGGTATGTTTCAGTGCCAACTTTTATATTAAGTTGACA

>M6-PGSC0003DMG400007455M6G-LecRK\_4514

ACACGTGTCGTGGGAACATTTGGGTATGTTTCAGTGCCAACTTTTATATTAAGTTGACAGCATAAAATAA  
ATATTTTATTCCATCTTTTTGAATTTACATATTTATTCTAATTCCTTAG

>M6-PGSC0003DMG400007455M6G-LecRK\_4575

ATAAAATAAATATTTTATTCCATCTTTTTGAATTTACATATTTATTCTAATTCCTTAGATCTGACTCAGATA  
CATGGCTCCTGAATATGCATCAACTGGCAAGCTGACTGAAAAATCTG

>M6-PGSC0003DMG400007455M6G-LecRK\_4636

CTGACTCAGATACATGGCTCCTGAATATGCATCAACTGGCAAGCTGACTGAAAAATCTGATGTATATTCC  
TTTGGCGTGGTGCTTCTGGAGCTAATTACTGGAAGGAAGTCAGTGGATAC

>M6-PGSC0003DMG400007455M6G-LecRK\_4697

GTATATTCCTTTGGCGTGGTGCTTCTGGAGCTAATTACTGGAAGGAAGTCAGTGGATACATCTCAGCCTT  
CAGGGCAAGAGAATCTAGTTGAGTGGGTATGTTTGTAGCCAATCTATTAT

>M6-PGSC0003DMG400007455M6G-LecRK\_4758

CTCAGCCTTCAGGGCAAGAGAATCTAGTTGAGTGGGTATGTTTGTAGCCAATCTATTATTTGTCTTTCTC

GAAATCCATATTTTCATCAGGTCTCCTTTATTACCTCTTTGTTAGAAATT

>M6-PGSC0003DMG400007455M6G-LecRK\_4819

GTCTTTCTCGAAATCCATATTTTCATCAGGTCTCCTTTATTACCTCTTTGTTAGAAATTTTGACATTAATATC  
CGACCTAAGGCAATGAAAGTGCATATCAGCATGCAGAGAGAACTTAA

>M6-PGSC0003DMG400007455M6G-LecRK\_488

GGTACTTTTATTTTGGTCATAGTTGCTGGTGATAATCATTATTTGGCTGCTTTGTTAGAAAGATTGAATC  
TTTTTTACTCTGATAAGGTTCTGCAGTGTGTGGAGGGATTGTTCTTATG

>M6-PGSC0003DMG400007455M6G-LecRK\_4880

GACATTAATATCCGACCTAAGGCAATGAAAGTGCATATCAGCATGCAGAGAGAACTTAATTTTTAGTCCT  
TTTAGCTAGGATAACCTACAAAATTTCAATTTGAGTCAGGATTTGGTTGTT

>M6-PGSC0003DMG400007455M6G-LecRK\_4941

TTTAGTCCTTTTAGCTAGGATAACCTACAAAATTTCAATTTGAGTCAGGATTTGGTTGTTCTCCGTCTTTTC  
CCATACTGCACAAGAAGCTTGGTAGCTGATATGTGAAGAAACCGCCATT

>M6-PGSC0003DMG400007455M6G-LecRK\_5002

TCCGTCTTTTCCATACTGCACAAGAAGCTTGGTAGCTGATATGTGAAGAAACCGCCATTTTGCTACTGTAC  
AGTAGGCCTCTAGTTGGTCTGCTAGTGAAGTTCCTCTTCTTTATTTTTTC

>M6-PGSC0003DMG400007455M6G-LecRK\_5063

GCTACTGTACAGTAGGCCTCTAGTTGGTCTGCTAGTGAAGTTCCTCTTCTTTATTTTTCCCTTTTTTACCAT  
GAAATGTGCCTTATCCTGGGAAGAATGTGCTTGAATGCTGTAAGCCT

>M6-PGSC0003DMG400007455M6G-LecRK\_5124

TTTTTTACCATGAAATGTGCCTTATCCTGGGAAGAATGTGCTTGAATGCTGTAAGCCTGAAACATTGTG  
TCTACATTTTTATTTTTATTTTACAACAATCAAACAGCTTGATCAAGTTA

>M6-PGSC0003DMG400007455M6G-LecRK\_5185

AACATTGTGTCTACATTTTTATTTTTATTTTACAACAATCAAACAGCTTGATCAAGTTATCCGCTTTAATTT  
CATTGATCCTTTAATGTTAGAAAACCTGAAAAACCATTAACAGTAGCAG

>M6-PGSC0003DMG400007455M6G-LecRK\_5246

CGCTTTAATTTCAATGATCCTTTAATGTTAGAAAACCTGAAAAACCATTAACAGTAGCAGCCGAAAACCTTG  
TATCTTTTATCATGCTGAATGTGTGAATTCATTTACTATAGTTATTTTA

>M6-PGSC0003DMG400007455M6G-LecRK\_5307

GAAAACCTGTATCTTTTATCATGCTGAATGTGTGAATCCATTTACTATAGTTATTTTATTTTCGAACTCTT  
TTGTTTTCTTATCGTCAGTGCATAGTAGCAGTAGCCAGTTTACAAACT

>M6-PGSC0003DMG400007455M6G-LecRK\_5368

TTCGAACTCTTTTGTCTTATCGTCAGTGCATAGTAGCAGTAGCCAGTTTACAAACTTTTAATGCGTTG  
TATTCTGGTACTAGTTTCCACTGCTAAATTTGAACCAGGCTTAAAAATA

>M6-PGSC0003DMG400007455M6G-LecRK\_5429

TAATGCGTTGTATTCTGGTACTAGTTTCCACTGCTAAATTTGAACCAGGCTTAAAAATAACTACTCCATTA  
TATTGTACTGTAACCTGATTTTTTTGTTGTCCAGGCACGACCTTTGCTT

>M6-PGSC0003DMG400007455M6G-LecRK\_549

AGATTGAATCTTTTTACTCTGATAAGGTTCTGCAGTGTGTGGAGGGATTGTTCTTATGAATTATAGCTA  
AAAAGGAGATATTGTTCTGCTTTAGACCTGTCACTAAATTCTGTGTCCTG

>M6-PGSC0003DMG400007455M6G-LecRK\_5490

TACTCCATTATATTGTACTGTAACCTGATTTTTTTGTTGTCCAGGCACGACCTTTGCTTAGTCGAGCACTTC  
AAAAGGAGGAATTTGATCTGTTAGCAGATCCGTGCCTTGAAAAGAACT

>M6-PGSC0003DMG400007455M6G-LecRK\_5551

TCGAGCACTTCAAAGGAGGAATTTGATCTGTTAGCAGATCCGTGCCTTGAAAAGAACTACGTTGGCAC  
GGAGATGTTCCGAATGATTGAGGCTGCTGCATCTTGCCTGCGTCACTCATC

>M6-PGSC0003DMG400007455M6G-LecRK\_5612

GTTGGCACGGAGATGTTCCGAATGATTGAGGCTGCTGCATCTTGCCTGCGTCACTCATCTGCAAAGAGA  
CCAGCAATGGGACAGGTAACCTTTGTTCTGTTATATTGAAAACCTATGCAA

>M6-PGSC0003DMG400007455M6G-LecRK\_5673

CAAAGAGACCAGCAATGGGACAGGTAACCTTTGTTCTGTTATATTGAAAACCTATGCAAAGACACCTTC  
AAGACTCTTCTTGTGAAGGGCATTTACAACATTCTGAATTCTGATCATGG

>M6-PGSC0003DMG400007455M6G-LecRK\_5734

GACACCTTCAAGACTCTTCTGTGAAGGGCATTTACAACATTCTGAATTCTGATCATGGTTATGCTTCGTA  
GATCATGAGAGCTTTTCGATGGTATGGCTATAACAAGATCTGTCAAACGGG

>M6-PGSC0003DMG400007455M6G-LecRK\_5795

ATGCTTCGTAGATCATGAGAGCTTTTCGATGGTATGGCTATAACAAGATCTGTCAAACGGGATGAAAGTTG  
GTGAAAGTGCAATACATAGCGCTGCACTACAATCTGCAGAAATAAGTTGGT

>M6-PGSC0003DMG400007455M6G-LecRK\_5856

GAAAGTTGGTGAAAGTGCAATACATAGCGCTGCACTACAATCTGCAGAAATAAGTTGGTTTAGGAAAAT  
GGCATTGGTAAGCAAGATTTTAGTTCCGATTTTTTCAGCGAAAGTAATCA

>M6-PGSC0003DMG400007455M6G-LecRK\_5917

AGGAAAATGGCATTGGTAAGCAAGATTTTAGTTCCGATTTTTTCAGCGAAAGTAATCAGAATAGTAGA  
GAGTCAAATGAACATCCTTAGAGGATTTATAGAACAAAAAGGCTTATTGA

>M6-PGSC0003DMG400007455M6G-LecRK\_5978

ATAGTAGAGAGTCAAATGAACATCCTTAGAGGATTTATAGAACAAAAAGGCTTATTGAAGCTATGTAT  
GCATCTGTTGATACATCAAAGGTACCTTGTTAGCTTAGAGATGCCTTGGTT

>M6-PGSC0003DMG400007455M6G-LecRK\_6023

AAAAGGCTTATTGAAGCTATGTATGCATCTGTTGATACATCAAAGGTACCTTGTTAGCTTAGAGATGCCT  
TGGTTTAGCTTTCATATGTATAAGTTCCTTTTGGCTTTGAGTAATTTTC

>M6-PGSC0003DMG400007455M6G-LecRK\_61

TGCATTGGCAGTAACCAACGTCCGAAGGCCAAATCTCATCGATTGTGACATTGTAACAAAATATACATAA  
TTCATCAATCTTCATAAACCTATCATCATAATCATAATCAATACAACATT

>M6-PGSC0003DMG400007455M6G-LecRK\_610

TTATAGCTAAAAGGAGATATTGTTCTGCTTTAGACCTGTCACTAAATTCTGTGTCTGTGGCAACATTTT  
GATTTGCTTAAAATCTGATATGTTTAAGGTTGAGGTTGAGGTTCTTGT

>M6-PGSC0003DMG400007455M6G-LecRK\_732

TGTTGAAAATCCTAGCTGTTAACTTGGGGGTGGTGTGTGTGTATACTATGAGTGAATTGGTTGGTGAG  
TTTGGATAAATTTTGAATAAGAGGAAGTAATTTACTGCATATTAGGGATA

>M6-PGSC0003DMG400007455M6G-LecRK\_793

TTGGTGAGTTTGGATAAATTTTGAATAAGAGGAAGTAATTTACTGCATATTAGGGATATTAGTTTTATG  
TCAGCAAGTCTGCATTGTATAAGAAATGTTGTAATGTAGCTAGCTTTGG

>M6-PGSC0003DMG400007455M6G-LecRK\_854

AGTTTTATGTCAGCAAGTCTGCATTGTATAAGAAATGTTGTAATGTAGCTAGCTTTGGTGGTGGTGAGA  
TGTTAAACTTTAATCATCCACCTCCAAGTTATAGAATTTGAAGTTCCAT

>M6-PGSC0003DMG400007455M6G-LecRK\_915

GTGGTGAGATGTTAAACTTTAATCATCCACCTCCAAGTTATAGAATTTGAAGTTCCATTATCTGTGACTT

CTCTCCGGGATCGTTACTCTCTTTGACAAATGCAAATATAGTCTGTCC

>M6-PGSC0003DMG400007455M6G-LecRK\_976

TCTGTGACTTCTCTCCGGGATCGTTACTCTCTTTGACAAATGCAAATATAGTCTGTCCTAGCCTCACTAC  
CAATCTTACAGACTTATAATGGATTCTTCACCATCTCATGAAGAATCTG

>M6-PGSC0003DMG400007517-(rev)M6LRR-RLK\_0

TTACTCCTGGTGGTGTTAATTATGAAGGTTAGTTCTTGTTATTTTTAATAAAGATTGAAACTTTGAGACAT  
TATTGGAATGAGATTGATCATATTAGAAAATATCAAGAATTTAAAAGTA

>M6-PGSC0003DMG400007517-(rev)M6LRR-RLK\_1054

ATTACTTTTTAACTTTTTTTTTTTTTTTTAAACAGGCTTCTGCAGAGCAATAATATAACAGGACCAATTCCAA  
CTGAACTTGGAATGCTTCAGAACTTAATACAATTGATCTTTCTGATA

>M6-PGSC0003DMG400007517-(rev)M6LRR-RLK\_1116

CCAATTCCAAGTGAAGTGGAAATGCTTCAGAACTTAATACAATTGATCTTTCTGATAATCAACTCACTGG  
GAAAATCCCTTCATCTTTAGCTCAATTAATAAGCCTTCAATACTTGTA

>M6-PGSC0003DMG400007517-(rev)M6LRR-RLK\_1178

ACTCACTGGGAAAATCCCTTCATCTTTAGCTCAATTAATAAGCCTTCAATACTTGTAAGCAAAGAAAATTT  
TAAAGATTTTGATATAAAAATGAGTTCTTGAATTATAAAAAGCTAATGA

>M6-PGSC0003DMG400007517-(rev)M6LRR-RLK\_124

TTACTCCTGTTGGTGTAAATTATGAAGGTTGTTTCTTGTTGTTTTCTCATTAAAGATTGAAACTTTATGACT  
TTTTTGTTGAAAAATCATATGAGGTGTTGAAAATTTGAAAGGAAT

>M6-PGSC0003DMG400007517-(rev)M6LRR-RLK\_1240

AGAAAATTTTAAAGATTTTGATATAAAAATGAGTTCTTGAATTATAAAAAGCTAATGATTATGGTTTTTTT  
TTCTTTTTCAATTGTGTTATAGGAGACTAAACAACAATAGTCTTAGTGG

>M6-PGSC0003DMG400007517-(rev)M6LRR-RLK\_1302

GGTTTTTTTTCTTTTTCAATTGTGTTATAGGAGACTAAACAACAATAGTCTTAGTGGAGCTGTTCTTTG  
GAATTGTCTAATATGACTCAACTTACTCTTCTGTAAGTTCCTTAGCTTC

>M6-PGSC0003DMG400007517-(rev)M6LRR-RLK\_1364

GTTCTTTGGAATTGTCTAATATGACTCAACTTACTCTTCTGTAAGTTCCTTAGCTTCATTTAGTTTTGTTA  
TTTTCTCATACTTGAAGGGGAGCCTCGGAGCAATAGTAACTTGTCT

>M6-PGSC0003DMG400007517-(rev)M6LRR-RLK\_1426



AGTTTTGTTTATTTTCTCATACTTGAAGGGGAGCCTCGGAGCAATAGTAAACTTGTCTCCTTGTTATCTAT  
ATAGGTCACGCGTTCGAGTTAGGGGTAGGCTGCCTATAGTATAGCCTTT

>M6-PGSC0003DMG400007517-(rev)M6LRR-RLK\_1488

GTTATCTATATAGGTCACGCGTTCGAGTTAGGGGTAGGCTGCCTATAGTATAGCCTTTCCCCGGACCTTG  
CGTGAACGTGGAATGCTTTGTGTACCTTTTTCTAATTGCTTTCTGTTTT

>M6-PGSC0003DMG400007517-(rev)M6LRR-RLK\_1550

GGACCTTGCGTGAACGTGGAATGCTTTGTGTACCTTTTTCTAATTGCTTTCTGTTTTCATGAGTATATTTT  
GATGGGATTTTTGTTGTTTTTTCTAGAGACTTGTCTTTTAATAATTT

>M6-PGSC0003DMG400007517-(rev)M6LRR-RLK\_1612

AGTATATTTTGATGGGATTTTTGTTGTTTTTTCTAGAGACTTGTCTTTTAATAATTTGAGTGGTCCTGTGC  
CAAGGCTTCTAGCTAAAACATTCAAGTAAGTTTCTGAACAATTCCTTT

>M6-PGSC0003DMG400007517-(rev)M6LRR-RLK\_1674

GGTCCTGTGCCAAGGCTTCTAGCTAAAACATTCAAGTAAGTTTCTGAACAATTCCTTTGAATTTCATTTTT  
TTCCCTTTGCTAAAGATTAGAGAAAATAAATCATTTTTTCTCTCATTG

>M6-PGSC0003DMG400007517-(rev)M6LRR-RLK\_1736

TTCATTTTTTTTCCCTTTGCTAAAGATTAGAGAAAATAAATCATTTTTTCTCTCATTGATGCAGCCTTTTGG  
GAAATCCTATTATATGTGCAACTGGAAAAGAACCAGAATGCAATGGAA

>M6-PGSC0003DMG400007517-(rev)M6LRR-RLK\_1798

AGCCTTTTGGGAAATCCTATTATATGTGCAACTGGAAAAGAACCAGAATGCAATGGAACAACAACATCC  
ATGCCTTTGCCCTTCACTTTGAACAACCTCACAAGTAAGAGTCTTGAATCA

>M6-PGSC0003DMG400007517-(rev)M6LRR-RLK\_186

CTTTATGACTTTTTTGTGAAAAAATCATATGAGGTGTTTAAAATTTTAAAAGGAATGAAATTTTGATCA  
AATTTTAGAAATATCAAGCATTGAAATATGCTTACCCTTGTGGAGT

>M6-PGSC0003DMG400007517-(rev)M6LRR-RLK\_1860

AACATCCATGCCTTTGCCCTTCACTTTGAACAACCTCACAAGTAAGAGTCTTGAATCATCCTCCTAAGTAT  
TTTTTCGAGCTAGCTTGTGTGCCTCTCGACTATTCCACAAATCTTGTT

>M6-PGSC0003DMG400007517-(rev)M6LRR-RLK\_1922

CCTAAGTATTTTTTCGAGCTAGCTTGTGTGCCTCTCGACTATTCCACAAATCTTGTTGTTGTCAAGTCTCC  
TGCTTTCAATGTCGTTATGATTAACACTCAACTCTATTATAAGGATTCA

>M6-PGSC0003DMG400007517-(rev)M6LRR-RLK\_1984

TCAAGTCTCCTGCTTTCAATGTCGTTATGATTAACACTACAACCTATTATAAGGATTCATCATGAAGTCTTG  
GATAGTTTCTGTGTTGTAATACTTCACTGAAAAGTCTCTTGTATAT

>M6-PGSC0003DMG400007517-(rev)M6LRR-RLK\_2046

GAAAGTCTTGATAGTTTCTGTGTTGTAATACTTCACTGAAAAGTCTCTTGTATATCTCAGATGCTCAG  
CCTTTTAGAAGATCTAAAACACTCAAAAATTGCCTTAGCCTTTGGGACAA

>M6-PGSC0003DMG400007517-(rev)M6LRR-RLK\_2108

GATGCTCAGCCTTTTAGAAGATCTAAAACACTCAAAAATTGCCTTAGCCTTTGGGACAAGTCTTGGATGCA  
TCTGCCTACTAATTATTGGGTTTGGAAATTTCTGTGGTGGAGACAAAAG

>M6-PGSC0003DMG400007517-(rev)M6LRR-RLK\_2170

TGGATGCATCTGCCTACTAATTATTGGGTTTGGAAATTTCTGTGGTGGAGACAAAAGCACAAACAAGCA  
AATTTTCTTTGACATCAATGGTGAGTATGATATGCAGCTAAAACCTATATT

>M6-PGSC0003DMG400007517-(rev)M6LRR-RLK\_2232

ACAAGCAAATTTTCTTTGACATCAATGGTGAGTATGATATGCAGCTAAAACCTATATTGCTCGAATCTCG  
AGATGCTAGTAATGTCTTGCTTTAACCAAGAGGATCATGCTTGTGATAA

>M6-PGSC0003DMG400007517-(rev)M6LRR-RLK\_2294

GAATCTCGAGATGCTAGTAATGTCTTGCTTTAACCAAGAGGATCATGCTTGTGATAATTTCAGAACAAC  
ATCATGAACAAGTGTGTTTGGGACACTTGACGAGGTTCCAATTTAGGGAA

>M6-PGSC0003DMG400007517-(rev)M6LRR-RLK\_2356

AGAACAACATCATGAACAAGTGTGTTTGGGACACTTGACGAGGTTCCAATTTAGGGAACTTCAAGTTGC  
CACAAACAACCTCAGCAACAAGAAGATACTGGGAAAAGGCGGTTTTGGAAA

>M6-PGSC0003DMG400007517-(rev)M6LRR-RLK\_2418

AAGTTGCCACAAACAACCTCAGCAACAAGAAGATACTGGGAAAAGGCGGTTTTGGAAACGTGTACAAA  
GGTTGTCTTAGTGATGGCACGATTGTTGCTGTAAAAAGGCTCAAAGATGGAA

>M6-PGSC0003DMG400007517-(rev)M6LRR-RLK\_248

TTTTGATCAAATTTTAGAAATATCAAGCATTTTGAATATGCTTACCCTTGTGGAGTTGATTATGAAGGT  
TAGTTCTTGTGGTTTTTCTCATGAAGATTGAACTTTATGACTTTTTAT

>M6-PGSC0003DMG400007517-(rev)M6LRR-RLK\_2480

TACAAAGGTTGTCTTAGTGATGGCACGATTGTTGCTGTAAAAAGGCTCAAAGATGGAAATGCAATCGGA

GGAGACAAACAATTCCAAACAGAAGTTGAAATGATCAGCTTGGCAGTGCAT

>M6-PGSC0003DMG400007517-(rev)M6LRR-RLK\_2542

AATCGGAGGAGACAAACAATTCCAAACAGAAGTTGAAATGATCAGCTTGGCAGTGCATCGCAATCTCCT  
ACGTTTGTATGGGTTCTCCATGACACCAACTGAAAGGCTTCTGGTTTACCC

>M6-PGSC0003DMG400007517-(rev)M6LRR-RLK\_2604

ATCTCCTACGTTTGTATGGGTTCTCCATGACACCAACTGAAAGGCTTCTGGTTTACCCTTACATGTCTAAT  
GGAAGCGTTGCTTCTCGTCTCAAAGGTAAAAAGAAACAACCTTAGAGAA

>M6-PGSC0003DMG400007517-(rev)M6LRR-RLK\_2666

ATGTCTAATGGAAGCGTTGCTTCTCGTCTCAAAGGTAAAAAGAAACAACCTTAGAGAACTAAATATTCTG  
CAAGTATTCTTAAATATGGGGGATGGTTGAGATCCCGTCATCCTTAACCA

>M6-PGSC0003DMG400007517-(rev)M6LRR-RLK\_2728

ATATTCTGCAAGTATTCTTAAATATGGGGGATGGTTGAGATCCCGTCATCCTTAACCATAGTAGGCTTAC  
CTGTGTGAACCGGAATAGTCGAACTAGTGGACTTCAGATACCTGATGGTA

>M6-PGSC0003DMG400007517-(rev)M6LRR-RLK\_2790

AGGCTTACCTGTGTGAACCGGAATAGTCGAACTAGTGGACTTCAGATACCTGATGGTAGATTTCTCTATT  
TCTGTTGTTTCTTGCAGCCAAGCCACCATTGGACTGGACTACAAGAAAAA

>M6-PGSC0003DMG400007517-(rev)M6LRR-RLK\_2852

TCTCTATTTCTGTTGTTTCTTGCAGCCAAGCCACCATTGGACTGGACTACAAGAAAAAGAATTGCATTAG  
GAGCTGCAAGAGGTTTACTATATCTACATGAGCAGTGTGATCCAAAGATT

>M6-PGSC0003DMG400007517-(rev)M6LRR-RLK\_2914

TGCATTAGGAGCTGCAAGAGGTTTACTATATCTACATGAGCAGTGTGATCCAAAGATTATCCACAGGGA  
TGTGAAGGCAGCAAACATATTGCTCGACGATGACTGTGAGGCTGTCGTGGG

>M6-PGSC0003DMG400007517-(rev)M6LRR-RLK\_2976

ACAGGGATGTGAAGGCAGCAAACATATTGCTCGACGATGACTGTGAGGCTGTCGTGGGAGATTTTGGGA  
TTGGCAAAGCTATTGGATCATCGCGATTCACATGTCACAACCTGCAGTTAGGG

>M6-PGSC0003DMG400007517-(rev)M6LRR-RLK\_3038

TTTGGATTGGCAAAGCTATTGGATCATCGCGATTCACATGTCACAACCTGCAGTTAGGGGAACCTGTAGGA  
CATATAGCTCCTGAGTATCTCTCTACAGGACAGTCCTCTGATAAAACAGAT

>M6-PGSC0003DMG400007517-(rev)M6LRR-RLK\_310

TATGAAGGTTAGTTCTGTGGTTTTTCTCATGAAGATTGAACTTTATGACTTTTTATTTGAAAAATCAT  
ATGGGGTGTGTTGAAATTTTTGAAAGGAATGAGATTTTGATCAAATTTTA

>M6-PGSC0003DMG400007517-(rev)M6LRR-RLK\_3100

TGTAGGACATATAGCTCCTGAGTATCTCTCTACAGGACAGTCCTCTGATAAACAGATGTTTTCGGGTTT  
GGAATTCTCCTGCTAGAGTTGATATCTGGCCAGAAAGCTCTAGAATTTGG

>M6-PGSC0003DMG400007517-(rev)M6LRR-RLK\_3162

TCGGGTTTGAATTCTCCTGCTAGAGTTGATATCTGGCCAGAAAGCTCTAGAATTTGGTAAAGCAGCAA  
ATCAGAAAGGCATTATGCTTGATTGGGTAAGTATTACACATTCCAAGAAGT

>M6-PGSC0003DMG400007517-(rev)M6LRR-RLK\_372

AAAAATCATATGGGGTGTGTTGAAATTTTTGAAAGGAATGAGATTTTGATCAAATTTAGAAATATTAAGA  
ATTTTGAAATATGTTTACCCCTGTTGGAGTTGATTATGAAGGCTAGTTCT

>M6-PGSC0003DMG400007517-(rev)M6LRR-RLK\_434

TATTAAGAATTTTGAATATGTTTACCCCTGTTGGAGTTGATTATGAAGGCTAGTTCTCATAAAGATTGA  
AACTTTGATACTTTTTTGTGAAAAATTCATAAGGGGTTTCTGATTTTTTT

>M6-PGSC0003DMG400007517-(rev)M6LRR-RLK\_496

AAGATTGAACTTTGATACTTTTTTGTGAAAAATTCATAAGGGGTTTCTGATTTTTTTTGAAGGAATGA  
GATTTGAACAAATTTAAAATATTTCAAGAATTTTCATCTATTTTAACTTTC

>M6-PGSC0003DMG400007517-(rev)M6LRR-RLK\_558

AGGAATGAGATTTGAACAAATTTAAAATATTTCAAGAATTTTCATCTATTTTAACTTTCTTGTTATGTTGATT  
TTGGACAGTGCAAGCTTTAATGGAGATCAAGAACTCATTACATGATCC

>M6-PGSC0003DMG400007517-(rev)M6LRR-RLK\_62

TTGAGACATTATTGGAATGAGATTGATCATATTAGAAAATATCAAGAATTTAAAAGTATGATTTACTCCT  
GTTGGTGTTAATTATGAAGGTTGTTTCTTGTTGGTTTTTCTCATTAAAGATT

>M6-PGSC0003DMG400007517-(rev)M6LRR-RLK\_620

TATGTTGATTTTGACAGTGCAAGCTTTAATGGAGATCAAGAACTCATTACATGATCCACTTGGTGTTTT  
GAATTGGGATGAAAGTTCTGTTGATCCATGTAGCTGGAATATGATCACTT

>M6-PGSC0003DMG400007517-(rev)M6LRR-RLK\_682

GGTGTGTTTGAATTGGGATGAAAGTTCTGTTGATCCATGTAGCTGGAATATGATCACTTGTTCAAATGATA  
AATTTGCTACTGGCTTGTAAGTATACCCGATTGTCTGGTATCTGCATTGG

>M6-PGSC0003DMG400007517-(rev)M6LRR-RLK\_744

AAATGATAAATTTGTCACTGGCTTGTAAGTATACCCGATTGTCTGGTATCTGCATTGGAGCCCGACTAAC  
AAAACCTTTTCTATTCTAATACTTGAACCGGAGACCTCTAGTTAAGGAT

>M6-PGSC0003DMG400007517-(rev)M6LRR-RLK\_806

CGACTAACAAAACCTTTTCTATTCTAATACTTGAACCGGAGACCTCTAGTTAAGGATGAAAGTGCTTAC  
AAGTTTTCTGAATTGTGCAGGGCTTGTTCAAGCCAAAGTTTGTCTGGGA

>M6-PGSC0003DMG400007517-(rev)M6LRR-RLK\_868

GTGCTTACAAGTTTTCTTGAATTGTGCAGGGCTTGTTCAAGCCAAAGTTTGTCTGGGAAAATATCACCAT  
ACATCCACAACCTTGACTCACTTGGATCTACTGTGAGTACTTTATATGAAG

>M6-PGSC0003DMG400007517-(rev)M6LRR-RLK\_930

ATCACCATACATCCACAACCTTGACTCACTTGGATCTACTGTGAGTACTTTATATGAAGAAAAAATAATGA  
AATTTCAAATGATTGATTATTTGAATCAAGAATATAGAAAATAGTAGTAC

>M6-PGSC0003DMG400007517-(rev)M6LRR-RLK\_992

AATAATGAAATTTCAAATGATTGATTATTTGAATCAAGAATATAGAAAATAGTAGTACTAATATTACTTTT  
TAACTTTTTTTTTTTTTTTTTTAAACAGGCTTCTGCAGAGCAATAATATAAC

>M6-PGSC0003DMG400007606M6LRR-RLP\_0

ATGGACTTAACGCATGACAATTGGAAGAAGGTTGAGGAAAATCTGAACTCATTCTTTGGTACGGTATCC  
GAACGATGCCAATCAATTCTTTCTTTGAGCTACAACCTACTTGCCCAATAT

>M6-PGSC0003DMG400007606M6LRR-RLP\_1024

CGATGATTATCTCTGGAGATATTTCTCTCCTAATCTTAAGGATTTGACATTAACAATTACTCGTATACCAT  
GGGAAGTTGTGAATTTGCTGGCTAATTTACCCAATCTTGAGGCGCTCG

>M6-PGSC0003DMG400007606M6LRR-RLP\_1088

TATACCATGGGAAGTTGTGAATTTGCTGGCTAATTTACCCAATCTTGAGGCGCTCGTTGGGAATTGTGCA  
TTCAATGGAACAGCTTGGAAAGTAGATGAAGATGTTGTATTTCACAAATT

>M6-PGSC0003DMG400007606M6LRR-RLP\_1152

TGTGCATTCAATGGAACAGCTTGGAAAGTAGATGAAGATGTTGTATTTCACAAATTAATATCTACATC  
TATTTATGTGCAGAGATCTGGAAAGGTGGGAATTAGCAGCTGGTAGTGAT

>M6-PGSC0003DMG400007606M6LRR-RLP\_128

ATGTTTTCTCTACATTGGAGTTTTCCAGAAGACAGAGAAATTAATGTTTCCAAGTTGATTAGGCTATGG

ATTGCAGAGCAATTTGTAAAGGCAAGAAACAATAAAAGATTAGAAGTGGT

>M6-PGSC0003DMG400007606M6LRR-RLP\_1280

GATGCTTGAGAACTAATGATGCTTGGGTTGGAAAACTGGAGGAGATTCCCGAGAGTATTGGAGAAA

TAATGACACTAAAATCCATCCGAATAGTTAATTGCGGCTCTGGTGTAGAGAC

>M6-PGSC0003DMG400007606M6LRR-RLP\_1343

AGAAATAATGACACTAAAATCCATCCGAATAGTTAATTGCGGCTCTGGTGTAGAGACAAGTGCAAAGCA

AATTCAGGAAGAGCAAGAAAGCTTGGGAAATTATGAGCTTCAACTTCAAAT

>M6-PGSC0003DMG400007606M6LRR-RLP\_192

CTATGGATTGCAGAGCAATTTGTAAAGGCAAGAAACAATAAAAGATTAGAAGTGGTGGCAGAGGAGTA

TCTGCAAGAGTTAATTGATAGAAGTCTAATTTTGATTGTTACGCGAAGCGAT

>M6-PGSC0003DMG400007606M6LRR-RLP\_320

GATAGAAAGTTGCAAAATTCATGATCTTCTTCGCCAACTCTGCCTAAGTGAAGGTCATACTGAAAATAT

GTCATGAATGGAAAAGTTCTCGAAGCCATAGATGGTCAACGTCGAGTGAT

>M6-PGSC0003DMG400007606M6LRR-RLP\_384

AACTATGTCATGAATGGAAAAGTTCTCGAAGCCATAGATGGTCAACGTCGAGTGATCCTTCTATCTAAAT

ATGAAGAGAAGTATGATTATTTTCTGCGACATAGCAGTGGTATTGTCCGT

>M6-PGSC0003DMG400007606M6LRR-RLP\_448

CTAAATATGAAGAGAAGTATGATTATTTTCTGCGACATAGCAGTGGTATTGTCCGTACCTTTACTTCAAT

GGGTGTAGCTTTTCCAAAAGATATGTGTTCCATTATTTTCAGAGTTCAAGT

>M6-PGSC0003DMG400007606M6LRR-RLP\_512

TTCAATGGGTGTAGCTTTTCCAAAAGATATGTGTTCCATTATTTTCAGAGTTCAAGTTGATTAAGGTGTTG

GACGTGTTAGAAGTCCCGTACGATTTCTCTAGTGTAATACCTCAACTTGT

>M6-PGSC0003DMG400007606M6LRR-RLP\_64

TATCCGAACGATGCCAATCAATTCTTTCTTTGAGCTACAACACTTGCCCCAATATTTGAGGGCATGTTTT

CTCTACATTGGAGGTTTTCCAGAAGACAGAGAAATTAATGTTTCCAAGT

>M6-PGSC0003DMG400007606M6LRR-RLP\_640

GATATGTTTCTGCAAGAATTGATGAAGGTCTTTCACTAGCCAAATTGAGAAATCTACAGACCATAATTCT

TCAAAGTCTTCAAAGGGAAGAATTGGAGCAGCCAGTAGATATCTGGAGTA

>M6-PGSC0003DMG400007606M6LRR-RLP\_704

AATTCTTCAAAGTCTTCAAAGGGAAGAATTGGAGCAGCCAGTAGATATCTGGAGTATGACAGAGATAAG  
ACATGTGGATATTGATCGGCCACTATATATATCAAATCCTGTTGAAGCAGA

>M6-PGSC0003DMG400007606M6LRR-RLP\_768

ATAAGACATGTGGATATTGATCGGCCACTATATATATCAAATCCTGTTGAAGCAGAACAAGCTTTGTGCC  
TTCTGAATAACTTGCAAACACTATATCTCCGTAACCTCCTTTTGTGTTG

>M6-PGSC0003DMG400007606M6LRR-RLP\_832

TGTGCCTTCTGAATAACTTGCAAACACTATATCTCCGTAACCTCCTTTTGTGTTGGAAATCATAAGAAGA  
ACTCCCAATCTAAAAGAGCTAAAGATTTTAGATAGTTCTGAGCGTTCTG

>M6-PGSC0003DMG400007606M6LRR-RLP\_896

AAGAAGAACTCCCAATCTAAAAGAGCTAAAGATTTTAGATAGTTCTGAGCGTTCTGATTGGGCTGTTATT  
CTTGATTCTCTCAGTATTTTACAGGATCTGGAGACACTACACATACAAAA

>M6-PGSC0003DMG400007606M6LRR-RLP\_960

GTTATTCTTGATTCTCTCAGTATTTTACAGGATCTGGAGACACTACACATACAAAACATTGATCCGATGAT  
TATCTCTGGAGATATTTCTCTCCTAATCTTAAGGATTTGACATTAACA

>M6-PGSC0003DMG400007634-(rev)M6LRR-RLK\_0

TATATATTCATTTTTATCAATTTGGCATTTTCTTCACACCTCCAATGTTGACCAAAATCAACTCATAATTCTA  
ACCCACCTTTTTTTTTTTTTCATGGAGTTTTCCCATTTTCCGACCG

>M6-PGSC0003DMG400007634-(rev)M6LRR-RLK\_1037

GGGTTTAAACATTTGGAAATTATGAATCTGTTTGGTAACCAATTGTATGGAGCAATTCCAGAGAGCATA  
GCCAAGATTCCATCTTTGAAGGTATTCAAAGTGTTTAGGAATAAACTGAAT

>M6-PGSC0003DMG400007634-(rev)M6LRR-RLK\_1098

AGAGCATAGCCAAGATTCCATCTTTGAAGGTATTCAAAGTGTTTAGGAATAAACTGAATGGGAGCTTAC  
CATCTGAAATGGGACTTCATTGAAACTCGAATCTTTTGAAGTTTCACTGA

>M6-PGSC0003DMG400007634-(rev)M6LRR-RLK\_1159

GAGCTTACCATCTGAAATGGGACTTCATTGAAACTCGAATCTTTTGAAGTTTCACTGAATTCCTTCACTG  
GAAACTTGCCAGAGCATTTGTGTGCTGGAGGAACTCTTTTGGTGCTGT

>M6-PGSC0003DMG400007634-(rev)M6LRR-RLK\_122

ATCTTCGCCGAAAACAGTCCCTTTATCTCATTCTTCTACTAACTTCATACCCATTTTCGTAACCTTCACAA  
TCTCCGGCCACTACTGAACGTGACACTCTACTGAAGATTAAGCGTCAA

>M6-PGSC0003DMG400007634-(rev)M6LRR-RLK\_1220

TCCTTCACTGGAACTTGCCAGAGCATTGTGTGCTGGAGGAACTCTTTTTGGTGCTGTAGCTTATGTTA  
ACAATTTGTCTGGTGAAATACCAAATCACTCGGAACTTGTTCTAGCTTA

>M6-PGSC0003DMG400007634-(rev)M6LRR-RLK\_1281

CTTATGTTAACAATTTGTCTGGTGAAATACCAAATCACTCGGAACTTGTTCTAGCTTACGTTTCGATTGAG  
CTCTACAAGAATCAGTTTTCGGGTGAAATTCCATCTGGGGTTTGGACTT

>M6-PGSC0003DMG400007634-(rev)M6LRR-RLK\_1403

GTTGACATGACAAGTTTGTGTTGAATGATAACTCATTTCCGGGGAGCTACCGAGCAAATTCATACA  
ATTTTACGCGGTTAGAGATCAGTAACAACAAGTTTTCTGGTGAAATTCCT

>M6-PGSC0003DMG400007634-(rev)M6LRR-RLK\_1464

TTGCATACAATTTTACGCGGTTAGAGATCAGTAACAACAAGTTTTCTGGTGAAATTCCTGTGGGGATATC  
TTCTTGGAGGAGTTTAGTGGTGCTTTTGGCAAGTAACAATTCATTTTCAG

>M6-PGSC0003DMG400007634-(rev)M6LRR-RLK\_1525

GGGGATATCTTCTTGGAGGAGTTTAGTGGTGCTTTTGGCAAGTAACAATTCATTTTCAGGTCGGATTCCA  
GTGGAATTGACTAGTCTTTCTCAGATAACTCAGCTAGAGCTTGATGGTAA

>M6-PGSC0003DMG400007634-(rev)M6LRR-RLK\_1586

CGGATTCCAGTGAATTGACTAGTCTTTCTCAGATAACTCAGCTAGAGCTTGATGGTAATTCGTTATCAG  
GAGAACTTCCAGCCGATATAATATCGTGGAAGTCGTTGACAATATTGGAT

>M6-PGSC0003DMG400007634-(rev)M6LRR-RLK\_1647

CGTTATCAGGAGAACTTCCAGCCGATATAATATCGTGGAAGTCGTTGACAATATTGGATCTTGCCAGGA  
ACAACTCTCTGGCAAGATTCCAGCAGCTATAGGTTAATCCCTGATCTTG

>M6-PGSC0003DMG400007634-(rev)M6LRR-RLK\_1769

GCTCTAGATTTGTCTCAAAATCAATTTTCAGGTCCAATTCCACCTCAACTAGGTGTAAAAAGGATCACTA  
GCCTTAACGTGTCGTTCAATCAACTTATCGGGAATATCCCTGATGCATTT

>M6-PGSC0003DMG400007634-(rev)M6LRR-RLK\_183

TAACTTCACAATCTCCGGCCACTACTGAACGTGACTCTACTGAAGATTAAGCGTCAATGGGGAAACCC  
AGTAGCACTTGACTCATGGAATCTACTTCTTCTCCTTGTAGCTGGCCGG

>M6-PGSC0003DMG400007634-(rev)M6LRR-RLK\_1830

GGATCACTAGCCTTAACGTGTCGTTCAATCAACTTATCGGGAATATCCCTGATGCATTTGCTAACCTAGC



CTTTGAAAACAGTTTCTTGAACAATCCCAGTCTTTGTACCACCAACTCAC

>M6-PGSC0003DMG400007634-(rev)M6LRR-RLK\_1952

CCATATCTTCCAAGTTGTAATAATGCGAAAGTCGCCAATCCAAAAGATTGTCCCATAGAGTCCTAGCCC

TGATTCTAGTCCTTGCATTCGCTGTTTTCTATTTAGTGTTATATCGACC

>M6-PGSC0003DMG400007634-(rev)M6LRR-RLK\_2013

TCCTAGCCCTGATTCTAGTCCTTGCATTCGCTGTTTTCTATTTAGTGTTATATCGACCTTGTTTCATGGTTA

GAGACTACAGGAGGAAGAAGCATAAGCGCGATGTTGCAAGCTGGAAGT

>M6-PGSC0003DMG400007634-(rev)M6LRR-RLK\_2074

GTTTCATGGTTAGAGACTACAGGAGGAAGAAGCATAAGCGCGATGTTGCAAGCTGGAAGTTGACTTCAT

TCCAGAGGTTGGATTTACAGAGGCGAACATTTTGTCAAGTTTGACGGAAAA

>M6-PGSC0003DMG400007634-(rev)M6LRR-RLK\_2196

ACATGATTGGAAGTGGTGGATCGGGTAAGGTGTACAGAATTTCCGTTGGCAGACCAAATGAGTATGTT

GCTGTGAAGAGGATTTGGAGTGATAGGAAAGTAGACTACATTCTGGAGAGGG

>M6-PGSC0003DMG400007634-(rev)M6LRR-RLK\_2257

GTATGTTGCTGTGAAGAGGATTTGGAGTGATAGGAAAGTAGACTACATTCTGGAGAGGGGAATTCTTGG

CTGAGGTTTCAGATATTGGGATCAATTAGACATTCCAATATCGTGAAGTTATT

>M6-PGSC0003DMG400007634-(rev)M6LRR-RLK\_2318

TTCTTGGCTGAGGTTTCAGATATTGGGATCAATTAGACATTCCAATATCGTGAAGTTATTGTGTTGTATATC

AAGCGAAGATTCAAAGTTGCTCGTTTACGAGTACATGGTAAATCACAGT

>M6-PGSC0003DMG400007634-(rev)M6LRR-RLK\_2379

GTTGTATATCAAGCGAAGATTCAAAGTTGCTCGTTTACGAGTACATGGTAAATCACAGTCTTGATGGATG

GCTTCATGGGAAGAAGAGAGTATCCTTGAGTAATAAAGTCATGGATTGGC

>M6-PGSC0003DMG400007634-(rev)M6LRR-RLK\_2440

TGATGGATGGCTTCATGGGAAGAAGAGAGTATCCTTGAGTAATAAAGTCATGGATTGGCCAAAAGAT

TGGAGTTGCCATTGGAGCTGCTCAAGGACTTTGTTATATGCACCATGACTG

>M6-PGSC0003DMG400007634-(rev)M6LRR-RLK\_2501

AAAAGATTGGAGGTTGCCATTGGAGCTGCTCAAGGACTTTGTTATATGCACCATGACTGCACTCCACCAA

TCATTCATCGCGATGTAAAAACAAGCAATATCTTGTTGGATTCTGATTC

>M6-PGSC0003DMG400007634-(rev)M6LRR-RLK\_2562

CTCCACCAATCATTTCATCGCGATGTAAAAACAAGCAATATCTTGTTGGATTCTGATTTACAGCCAAAATA  
GCTGATTTTGGGTTGGCCAAGATTTTAGAGAAGAAAGGAGAGCTTAACA

>M6-PGSC0003DMG400007634-(rev)M6LRR-RLK\_2684

ATGTCTGCTGTTGCGGGTTCCTTTGGTTACATAGCTCCAGGTAAAAGCAAAATCCAAGCTTGAACCTCGT  
ATTACATCAATTTGTTAACATTATATCAAAAGTATGACTAACTAATAAT

>M6-PGSC0003DMG400007634-(rev)M6LRR-RLK\_2745

GAACTTCGTATTACATCAATTTGTTAACATTATATCAAAAGTATGACTAACTAATAATTTACTGTTTGGTT  
ACAGAGTATGCTTATACTAAAGTGAACGAGAAGATTGATATCTAT

>M6-PGSC0003DMG400007634-(rev)M6LRR-RLK\_2806

ACTGTTTGGTTACAGAGTATGCTTATACTAAAGTGAACGAGAAGATTGATATCTATAGCTTCGGGGT  
GGTGCTATTGGAGCTAGTGACTGGAAGACAACCAATTTTGGGGACGAGC

>M6-PGSC0003DMG400007634-(rev)M6LRR-RLK\_2867

CTTCGGGGTGGTGCTATTGGAGCTAGTGACTGGAAGACAACCAATTTTGGGGACGAGCATAACAAGCC  
TGGCAGAATGGGCATGGAAGCAGCACGGAGAAGGGAACACTGCCATCGATAA

>M6-PGSC0003DMG400007634-(rev)M6LRR-RLK\_2928

ACAAGCCTGGCAGAATGGGCATGGAAGCAGCACGGAGAAGGGAACACTGCCATCGATAATATGTTAGA  
TACAGATATCAAAGAAACATGTTACTTGGAAAGAAATGAAGACTGTGTTTCAGA

>M6-PGSC0003DMG400007634-(rev)M6LRR-RLK\_2989

TGTTAGATACAGATATCAAAGAAACATGTTACTTGGAAAGAAATGAAGACTGTGTTTCAGACTCGGGCTTA  
TATGCACGAGCAACTTACCTGCAAGCAGGCCTTCCATGAAAGAGATTCTGC

>M6-PGSC0003DMG400007634-(rev)M6LRR-RLK\_305

ATTGAGTGTGATGATGGGAAGGTTACCGGAATAATAATTCAAGAAAAGATATTACTGTTGAAATTCCA  
AGTTCTATTTGTGAACTTAAAATCTTACTTTTCTTAATCTCCGGTTGAAT

>M6-PGSC0003DMG400007634-(rev)M6LRR-RLK\_3050

CGGGCTTATATGCACGAGCAACTTACCTGCAAGCAGGCCTTCCATGAAAGAGATTCTGCAGATACTTCAT  
CGATGCAAGTCCTTTAGGTATTCTGGAGGAAAATCACCAGACACAGAGTA

>M6-PGSC0003DMG400007634-(rev)M6LRR-RLK\_3172

ATGTTGCTCCTCTCCTTAGCGGAAACAACAGTGAAAATAACATTGCTAGTTACAAACGTATTAATTCCAA  
TAAGGTAATAGATGATAGTAGTGATGATGGTCTAATAATTTCCAGTGTGT

>M6-PGSC0003DMG400007634-(rev)M6LRR-RLK\_3233

TAATTCCAATAAGGTAATAGATGATAGTAGTATGATGGTCTAATAATTTCCAGTGTGTAATATTGGAGA  
TGCCGAAGTAACTGAGTTGTTGTAAAATGATCATAGAATAGTGCCACTT

>M6-PGSC0003DMG400007634-(rev)M6LRR-RLK\_3294

TATTGGAGATGCCGAAGTAACTGAGTTGTTGTAAAATGATCATAGAATAGTGCCACTTAAGTAAAGTA  
CAAGTTTGAATTTCTAGTGTACTCTTGAATTTGTTCACTGCTTGTAGATTG

>M6-PGSC0003DMG400007634-(rev)M6LRR-RLK\_3338

AGAATAGTGCCACTTAAGTAAAGTACAAGTTTGAATTTCTAGTGTACTCTTGAATTTGTTCACTGCTTGTA  
GATTGAGTGAAATGCATCATTTAACTTTTGCTAGTTATGTAGATTGTAA

>M6-PGSC0003DMG400007634-(rev)M6LRR-RLK\_366

AAATTCCAAGTTCTATTTGTGAACCTAAAAATCTTACTTTTCTTAATCTCCGGTTGAATTATCTTCCCGGAA  
AATTCCCAACTTTTCTTTACAAATGTTCCAATTTGCAGCATTGGATC

>M6-PGSC0003DMG400007634-(rev)M6LRR-RLK\_427

TCTTCCCGGAAAATTCCCAACTTTTCTTTACAAATGTTCCAATTTGCAGCATTGGATCTTCTCAGAATTA  
CTTTGTGGGTTCCATTCCGGAGGATATCACCGGCTGGGAAACTCAA

>M6-PGSC0003DMG400007634-(rev)M6LRR-RLK\_488

TCTCAGAATTACTTTGTGGGTTCCATTCCGGAGGATATCACCGGCTGGGAAACTCAAGTATCTTAATCT  
GGGTGGTAATAATTTACCGGAGATATCCCGTCGTCAGTCGGGAATTTG

>M6-PGSC0003DMG400007634-(rev)M6LRR-RLK\_549

ATCTTAATCTGGGTGGTAATAATTTACCGGAGATATCCCGTCGTCAGTCGGGAATTTGACGGAGCTGG  
AGACTTTGTGCATGCATTGAACTTGTGGATGGGAGTTTTCCGGCGGAAA

>M6-PGSC0003DMG400007634-(rev)M6LRR-RLK\_61

CTCATAATTCTAACCCACCTTTTTTTTTTTTTCATGGAGTTTTCCCATTTTCCGACCGGCATCTTCGCCGGA  
AACAGTCCCTTTATCTCATTCTTCTACTAACTTCATACCCATTTT

>M6-PGSC0003DMG400007634-(rev)M6LRR-RLK\_610

GGAGCTGGAGACTTTGTGCATGCATTGAACTTGTGGATGGGAGTTTTCCGGCGGAAATCGGAACTT  
AACCAATCTTGAAAGTTTGGGGTTGGAGTTAATGGGTTTTCTCCAATGGC

>M6-PGSC0003DMG400007634-(rev)M6LRR-RLK\_732

TACCGCCGGAGTTTGGGAAGCTGAAGAAGATAAAGTATATTTGGATGAGAGAGACGAAATTAATCGGT

GAAATCCCTGAAAGTTTTGGGGAATTTCAAATCTTGAGCTTATTGATTTTG

>M6-PGSC0003DMG400007634-(rev)M6LRR-RLK\_793

AATCGGTGAAATCCCTGAAAGTTTTGGGGAATTTCAAATCTTGAGCTTATTGATTTTGCTTACAACAATC

TGGAAGGAAAAATCCCTTCTGGGTTGTTTCTGTTGAAGAATTTGACGAT

>M6-PGSC0003DMG400007634-(rev)M6LRR-RLK\_854

TACAACAATCTGGAAGGAAAAATCCCTTCTGGGTTGTTTCTGTTGAAGAATTTGACGATGATGTACTTGT

TCAGTAATCGGCTTTCGGGTGCAATCCCTGAACTTTTGATTCATCAAAG

>M6-PGSC0003DMG400007634-(rev)M6LRR-RLK\_915

TGTACTTGTTCAAGTAATCGGCTTTCGGGTGCAATCCCTGAACTTTTGATTCATCAAAGTTGATGGAACCT

GATGTTTCCAACAACAATAATTTAACTGGAACAATCCCAGAAAGTTTTG

>M6-PGSC0003DMG400007634-(rev)M6LRR-RLK\_976

GATGGAACCTTGATGTTTCCAACAACAATAATTTAACTGGAACAATCCCAGAAAGTTTTGGAGGGTTTAAA

CATTTGGAAATTATGAATCTGTTTGGTAACCAATTGTATGGAGCAATTCC

>M6-PGSC0003DMG400007684M6LRR-RLP\_0

ATGAAACTCATCAACTTAGCCCTTTTTGGCTTCTTGCTCATCATTTTTCTTCTCATCAAACCCCTCATTCAA

GCTTCAATCAACTATGAACCAAACCCTAGACTTTTCGATGCTTACATA

>M6-PGSC0003DMG400007684M6LRR-RLP\_126

CAAGCTTGGAAACATGTCATGACTTCCGATCCAAGAACTTCACAAAAGATTGGTATGATTACAATGTTT

GTA ACTACACCGGGTTTATTGTGCTCCAGCTCCAGATAACCCTAATATT

>M6-PGSC0003DMG400007684M6LRR-RLP\_189

AATGTTTGTAACTACACCGGGTTTATTGTGCTCCAGCTCCAGATAACCCTAATATTACCACTGTTGCTGG

TATTGACCTCAACCATGCAAATATCTCCGGATACTTACCTGAAAACTT

>M6-PGSC0003DMG400007684M6LRR-RLP\_252

GTTGCTGGTATTGACCTCAACCATGCAAATATCTCCGGATACTTACCTGAAAACTTGGTTTATTGACTGA

TTTAGCCGTCTTTCATATAAATTCCAATAGATTTCAAGGCTCAATCCCG

>M6-PGSC0003DMG400007684M6LRR-RLP\_315

TTGACTGATTTAGCCGTCTTTCATATAAATTCCAATAGATTTCAAGGCTCAATCCCGAAATCTTTTTCTAAG

CTTCGAATTTTATTGAACTTGACGTGAGTAACAATCTTTTTTGTGGT

>M6-PGSC0003DMG400007684M6LRR-RLP\_378

TTTTCTAAGCTTCGAATTTTATTGAACTTGACGTGAGTAACAATCTTTTTTGTGGTGAGTTTCCTTCCGTT  
GTGTTATCTCTTCTTCTTTGAAATTTCTTGATATTAGGTATAACCAA

>M6-PGSC0003DMG400007684M6LRR-RLP\_441

CCTTCCGTTGTGTTATCTCTTCTTCTTTGAAATTTCTTGATATTAGGTATAACCAATTCGAAGGAAAAGTC  
CCTTCAACCCTTTGGGATCGAACACTCGATGCTCTTTTCATAAACAAAC

>M6-PGSC0003DMG400007684M6LRR-RLP\_504

GGAAAAGTCCCTTCAACCCTTTGGGATCGAACACTCGATGCTCTTTTCATAAACAAACAACAAATTTCAATT  
TTCTTGGCCTAAAACTTAGGTAAATCACCCGTTTCTGCTTTGGTTATG

>M6-PGSC0003DMG400007684M6LRR-RLP\_567

TTTCAATTTTCTTGGCCTAAAACTTAGGTAAATCACCCGTTTCTGCTTTGGTTATGGCAAATATTAATGT  
AACGGGGTGTATACCATCAAGTATAGCAAAAATGTCGAAAACATTAAAT

>M6-PGSC0003DMG400007684M6LRR-RLP\_63

TCATTTCAAGCTTCAATCAACTATGAACCAAACCCTAGACTTTTCGATGCTTACATAGCTCTACAAGCTTG  
GAAACATGTCATGACTTCCGATCCAAGAACTTCACAAAAGATTGGTAT

>M6-PGSC0003DMG400007684M6LRR-RLP\_630

ATTAATGTAACGGGGTGTATACCATCAAGTATAGCAAAAATGTCGAAAACATTAAATGAGATTATTCTCT  
CGAATTCGAGTTTAAGTGGATGTTTACCACAAGAATTAGGGTTATTGAAA

>M6-PGSC0003DMG400007684M6LRR-RLP\_693

ATTCTCTCGAATTCGAGTTTAAGTGGATGTTTACCACAAGAATTAGGGTTATTGAAAAATGTTAGGGTTC  
TTGATGTGAGTTTTAACAAGCTTGTGGTGAGTTGCCGGAATCAATTGGT

>M6-PGSC0003DMG400007684M6LRR-RLP\_756

AGGGTTCTTGATGTGAGTTTTAACAAGCTTGTGGTGAGTTGCCGGAATCAATTGGTGGAATGAAGAAA  
TTGGAACATCTTAACGTGGCACATAACAAGTTTTCCGGTGAGATTCCGATG

>M6-PGSC0003DMG400007684M6LRR-RLP\_819

AAGAAATTGGAACATCTTAACGTGGCACATAACAAGTTTTCCGGTGAGATTCCGATGAGTATTTGTTTCAT  
TACCAAAGTTGGAGAATTTCACTTACTCTTATAATTATTTTTGTGGTGAA

>M6-PGSC0003DMG400007684M6LRR-RLP\_882

TGTTCAATACCAAAGTTGGAGAATTTCACTTACTCTTATAATTATTTTTGTGGTGAACCAAAGATTTGTCTC  
AAGTTGAAGGATAGAAATGATAAGAAAAATTGTATACCATATCGACCA

>M6-PGSC0003DMG400007684M6LRR-RLP\_945

ATTTGTCTCAAGTTGAAGGATAGAAATGATAAGAAAAATTGTATACCATATCGACCATCACAACGTTTCAG  
AAAGTGAATGTAAGACATTTTATTCACGAGGTCCGGTGGATTGTAGTTCA

>M6-PGSC0003DMG400007709M6LRR-RLK\_0

TTTTCTCCATCTGTCTCTAACTATTCTCAAAGTTTTATCTGAGTAACGACTTCTCAAATGCAGATCATTGT  
TATCCAGAGGTATGCTTGGGTACCTGAAAAGGTACACCCTTAAGGAA

>M6-PGSC0003DMG400007709M6LRR-RLK\_124

GGACTGCCACTGACCATTTTCAGCTCAAACGTATTTTGGGAAAGGGAGGATTTGGGGTGTGTACAAGG  
CCAGCTTAAACAATGGTACTGTTGTGGCCGTCAAACGATTGAACGACTACA

>M6-PGSC0003DMG400007709M6LRR-RLK\_186

TACAAGGCCAGCTTAAACAATGGTACTGTTGTGGCCGTCAAACGATTGAACGACTACAATGCTGTTGGT  
GGTAAAATCAATTTTCAGACTGAAGTAGAATTGATTAGTTTGGCTGTCCAT

>M6-PGSC0003DMG400007709M6LRR-RLK\_248

TGTTGGTGGTAAAATCAATTTTCAGACTGAAGTAGAATTGATTAGTTTGGCTGTCCATCGGAATCTTCTC  
CATCTTCTGGGGTTTTGTTCAACTGAAAGTGAACGGCTTCTTGTTTACCC

>M6-PGSC0003DMG400007709M6LRR-RLK\_309

AATCTTCTCCATCTTCTGGGGTTTTGTTCAACTGAAAGTGAACGGCTTCTTGTTTACCCCTATATGCCAAA  
TGGAAGTGTAGCATCACGATTAAGGTTAGCTCTTGCCTCCATGTGTT

>M6-PGSC0003DMG400007709M6LRR-RLK\_62

AGATCATTGTTATCCAGAGGTATGCTTGGGTACCTGAAAAGGTACACCCTTAAGGAACTGCGGACTGC  
CACTGACCATTTTCAGCTCAAACGTATTTTGGGAAAGGGAGGATTTGGGGT

>M6-PGSC0003DMG400007862-(rev)M6LRR-RLK\_0

AGTTGAGGCCACTGTTATGATATGTGAATACTAATTGTGGTCATCTCCTGTGGCAGAGATCTGAGCAACA  
ACCATATTGGCGGAAGCATTCCGTCTAATCTGCCAGTTACCTTGC GGAAT

>M6-PGSC0003DMG400007862-(rev)M6LRR-RLK\_1037

TAATATCACTGTATCCCTAGTCGTTTGTGGAGATATCATTGACATGTAACATATCCCACAAAAAAGATA  
TATAATCATAGAAGACAATAGGCATGTATGTCGAAACCGCGGAAACAAA

>M6-PGSC0003DMG400007862-(rev)M6LRR-RLK\_1098

AAAAAAGATATATAATCATAGAAGACAATAGGCATGTATGTCGAAACCGCGGAAACAAATATCTTTTCA

AGTTCAATGTTACTTAATACTGCTCCTTATTTTCCAATAATGCCTCACTTT

>M6-PGSC0003DMG400007862-(rev)M6LRR-RLK\_1159

TCTTTTCAAGTTCAATGTTACTTAATACTGCTCCTTATTTTCCAATAATGCCTCACTTTTGTACTATCTACCA  
GTGGTTATAACCAAACATATAACTTTTCTAGCTCCCAATACCCCCCT

>M6-PGSC0003DMG400007862-(rev)M6LRR-RLK\_122

GTAAGTTCTACCATTTGACTTATGAAGGATCCCCAGAAACACGGGAAAAAGAAAGAAAAGAAAGAGGA  
CATATTGCTAAACCTAGCTTTACTTATTGACTAAAACAGTTGCTATTCTTCA

>M6-PGSC0003DMG400007862-(rev)M6LRR-RLK\_1220

TACTATCTACCAGTGGTTATAACCAAACATATAACTTTTCTAGCTCCCAATACCCCCCTTAAAGCTTGAG  
AACTTGAATCGTCTGTGCTATGCTTCATACACACAAGTAAACCTTTTCAG

>M6-PGSC0003DMG400007862-(rev)M6LRR-RLK\_1281

AAAGCTTGAGAACTTGAATCGTCTGTGCTATGCTTCATACACACAAGTAAACCTTTCAGAACTTCTTGTT  
TACAAGTTCCTGAAATCTTACTTAGTAAAAAATGGATGTACTTGTATGC

>M6-PGSC0003DMG400007862-(rev)M6LRR-RLK\_1342

ACTTCTTGTTTACAAGTTCCTGAAATCTTACTTAGTAAAAAATGGATGTACTTGTATGCTATGTTGCTTGG  
ACTCGTATTGGATCCTCCCAAAGTAATCCGACACTGGTGCAACAACATA

>M6-PGSC0003DMG400007862-(rev)M6LRR-RLK\_1403

TGTTGCTTGGACTCGTATTGGATCCTCCCAAAGTAATCCGACACTGGTGCAACAACATATTTGGAAAGTC  
CGAGCAACATAGCTTGTATGCTGCATGACCAGAAATATAGACTTAACGTC

>M6-PGSC0003DMG400007862-(rev)M6LRR-RLK\_1464

TGGAAAGTCCGAGCAACATAGCTTGTATGCTGCATGACCAGAAATATAGACTTAACGTCTGACATGGAT  
ATGAATCCTAAACTTGCCCTTAGCATAAATGAAAGCTCAATGAGTAAAAGT

>M6-PGSC0003DMG400007862-(rev)M6LRR-RLK\_1525

ACATGGATATGAATCCTAAACTTGCCCTTAGCATAAATGAAAGCTCAATGAGTAAAAGTAAGAATAAAA  
CAAATAAGAAATTGACCTGAAAAAAGAAAAATAGAATCCTGACAAGCTTGT

>M6-PGSC0003DMG400007862-(rev)M6LRR-RLK\_1586

GAATAAAACAAATAAGAAATTGACCTGAAAAAAGAAAAATAGAATCCTGACAAGCTTGTCAATTAATA  
CATGAATTCTATCATATGGCCAGTCCCTCAAACCTTGGAAGTAAACAACCTC

>M6-PGSC0003DMG400007862-(rev)M6LRR-RLK\_1647

TTTAAATACATGAATTCTATCATATGGCCAGTCCCTCAAACCTTGGAAGTAAACAACCTCATATAGACACA  
ATAAATAGACTGCAGATATAGGTATAGATTTACAAACCGTAGTACAATAT

>M6-PGSC0003DMG400007862-(rev)M6LRR-RLK\_1708

ATAGACACAATAAATAGACTGCAGATATAGGTATAGATTTACAAACCGTAGTACAATATGCATATGAAA  
ACATACAAACAGTTAAGTTATGATATTCATGACCTGTAAAATAGACAAAAT

>M6-PGSC0003DMG400007862-(rev)M6LRR-RLK\_1769

ATATGAAAACATACAAACAGTTAAGTTATGATATTCATGACCTGTAAAATAGACAAAATTGCAAGTTATT  
TAGTTTAGCAAGCTGGCTCCTGGTCTAAACTTGATCATAATTTAAGTTCA

>M6-PGSC0003DMG400007862-(rev)M6LRR-RLK\_183

AAGAGGACATATTGCTAAACCTAGCTTTACTTATTGACTAAAACAGTTGCTATTCTTCACCTTGGACAGTT  
TTCTTTAGCTAACGCATTCCTGGAAGTATCCCTACTTCTTTGTCTTC

>M6-PGSC0003DMG400007862-(rev)M6LRR-RLK\_1830

CAAGTTATTTAGTTTAGCAAGCTGGCTCCTGGTCTAAACTTGATCATAATTTAAGTTCACATTCCATAGTG  
GCTATACTCTAGTTAGGTCACCCACCTTAATCATATATCGAGCCCTTAA

>M6-PGSC0003DMG400007862-(rev)M6LRR-RLK\_1891

TTCCATAGTGGCTATACTCTAGTTAGGTCACCCACCTTAATCATATATCGAGCCCTTAACTTTAGGAGGC  
AAATAACATGGAAGTCAGGCAGTCTTATTTATTAAGCTGACTTAAATGG

>M6-PGSC0003DMG400007862-(rev)M6LRR-RLK\_1952

TTCAGGAGGCAAATAACATGGAAGTCAGGCAGTCTTATTTATTAAGCTGACTTAAATGGTACAAGTTGG  
TAGATATATTTGATATATGCAAAGATCAATGTATCAGTTGTTGGATCATTT

>M6-PGSC0003DMG400007862-(rev)M6LRR-RLK\_2013

CAAGTTGGTAGATATATTTGATATATGCAAAGATCAATGTATCAGTTGTTGGATCATTTTGTACCATCTG  
ATACATGCCTTGTGCGATTATGATCAGTGATGGTTTGTACTGTCTTAGTT

>M6-PGSC0003DMG400007862-(rev)M6LRR-RLK\_2074

TTACCATCTGATACATGCCTTGTGCGATTATGATCAGTGATGGTTTGTACTGTCTTAGTTACCGGTTTTGTTT  
TTCGTGCAGAAAAGATGGAAATCTTTTCAACAGTAGTACTGCTCCTTT

>M6-PGSC0003DMG400007862-(rev)M6LRR-RLK\_2135

CGGTTTTGTTTTTCGTGCAGAAAAGATGGAAATCTTTTCAACAGTAGTACTGCTCCTTTACCTCCACCCAC  
ATCATCAACAGCACCTCCCATTTCTGGGTCTCCAACCTCAGCACAGATG



>M6-PGSC0003DMG400007862-(rev)M6LRR-RLK\_2196

CTCCACCCACATCATCAACAGCACCTCCCATTCTGGGTCTCCAACCTTCAGCACAGATGCCATCTTCTCAA  
AGCAAACCTAAAACACAGGCCGATGGACCATCAGCATCTGCAGAATCAA

>M6-PGSC0003DMG400007862-(rev)M6LRR-RLK\_2257

ATCTTCTCAAAGCAAACCTAAAACACAGGCCGATGGACCATCAGCATCTGCAGAATCAAGTTCAACAGG  
AAAAAAAAGTCTTTATCTGTAAAAGGGTGGTCTGGATATCAATTGCAGC

>M6-PGSC0003DMG400007862-(rev)M6LRR-RLK\_2318

TCAACAGGAAAAAAAAAGTCTTTATCTGTAAAAGGGTGGTCTGGATATCAATTGCAGCAGTTTTGTCAT  
TTATCATATTGGTTTTAGCAATCCTTCTCTGTCTGCCAAAGTGCCTCAGG

>M6-PGSC0003DMG400007862-(rev)M6LRR-RLK\_2379

TTTTGTCATTTATCATATTGGTTTTAGCAATCCTTCTCTGTCTGCCAAAGTGCCTCAGGAAATGGCACGAG  
ACTCAAAGAACCCCCAAACACCATGAAATAGCCCCTTATATGGGTGCTA

>M6-PGSC0003DMG400007862-(rev)M6LRR-RLK\_244

TTGGACAGTTTTCTTTCAGCTAACGCATTCCTGGAAGTATCCCTACTTCTTTGTCTTCCCTGAGTCAACTT  
TCAGCTATGTAAGTATCATTATAGTGTAGATTAAGTTGCTTTCTT

>M6-PGSC0003DMG400007862-(rev)M6LRR-RLK\_2440

ATGGCACGAGACTCAAAGAACCCCCAAACACCATGAAATAGCCCCTTATATGGGTGCTAGAGAGAATCT  
TGGAGATAGTGGTTCATTAGTCCAACCTGGCCATGATATAGAAAAAGGTGC

>M6-PGSC0003DMG400007862-(rev)M6LRR-RLK\_2501

GAGAATCTTGGAGATAGTGGTTCATTAGTCCAACCTGGCCATGATATAGAAAAAGGTGCTACAAAATAC  
TCAATATCTATGTTATTTTATGATATCTTTTATCACTGTTTCTTAAAGTTC

>M6-PGSC0003DMG400007862-(rev)M6LRR-RLK\_305

TGAGTCAACTTTCAGCTATGTAAGTATCATTATAGTGTAGATTAAGTTGCTTTCTTCATGAAGAATCA  
AACTCAGGTATTTGTTGTGTGTCAGGTCTCTGAATGGCAACCATTTGA

>M6-PGSC0003DMG400007862-(rev)M6LRR-RLK\_3172

TTAGAACTGAAAAGTTAATGAATCTCAAAGTTAACCTTCTACTCTTTAGTCTTTAGTGATAAGTGGCTTT  
CTTATGTGTTAAACAGCTCCCCTAGTTGTGACGCCAAAAGAAAAGCAAC

>M6-PGSC0003DMG400007862-(rev)M6LRR-RLK\_3233

AAGTGGCTTTCTTATGTGTTAAACAGCTCCCCTAGTTGTGACGCCAAAAGAAAAGCAACCAAGAAGACC

GGCTCCTATTCCAAAGCCACAAGATGAGCAGCAGGTAAATGTGCAAACCAT

>M6-PGSC0003DMG400007862-(rev)M6LRR-RLK\_3294

AGAAGACCGGCTCCTATTCCAAAGCCACAAGATGAGCAGCAGGTAAATGTGCAAACCATGAGTGCTGT  
GCCAAAGAAGGATGATAGTGAGATAAACCTTGGCAGATTGGATATTGATTTG

>M6-PGSC0003DMG400007862-(rev)M6LRR-RLK\_3477

GTCGAGCCGATTGCGCCTGCTGAAGATACAGCAACGAGGCTTCCAACCAGGCCACTTCCACTAACTTCT  
GTGAAATCTTACACAATTGCATCACTTCAGCAATACACTAATAGCTTCTCT

>M6-PGSC0003DMG400007862-(rev)M6LRR-RLK\_3538

TAACCTTCTGTGAAATCTTACACAATTGCATCACTTCAGCAATACACTAATAGCTTCTCTCAAGATAATCTG  
TTGGGATCAGGAATGCTGGGTAGTGTATACAGGGTGGAGCTTCTAATG

>M6-PGSC0003DMG400007862-(rev)M6LRR-RLK\_3599

AGATAATCTGTTGGGATCAGGAATGCTGGGTAGTGTATACAGGGTGGAGCTTCTAATGGAAAGGTAT  
AACTTTCAATCGGCATGAATATATTATGATGTACCAATTTATTAACCGTGGT

>M6-PGSC0003DMG400007862-(rev)M6LRR-RLK\_366

TGAAGAATCAAACCTCAGGTATTTGTTGTGTGTCAGGTCTCTGAATGGCAACCATTTGACTGGAGAAATT  
CCTGATTCCTTTCAAGGCCTTACCGCTTTGGTCAATCTGTATGAAAGCAA

>M6-PGSC0003DMG400007862-(rev)M6LRR-RLK\_3660

AAGGTATAACTTTCAATCGGCATGAATATATTATGATGTACCAATTTATTAACCGTGGTTTCCTACTTCCA  
CTAGATTGCGAGAGTCTTGACTTACCACTTTTTCTCTCCTTGCTTTTAT

>M6-PGSC0003DMG400007862-(rev)M6LRR-RLK\_3721

CCTACTTCCACTAGATTGCGAGAGTCTTGACTTACCACTTTTTCTCTCCTTGCTTTTATTTCTCCATCATGTT  
TGGTATTCTGGAATGCTAAATTATCAGCAAGTAGCATCAAAATTGCC

>M6-PGSC0003DMG400007862-(rev)M6LRR-RLK\_3782

CTCCATCATGTTTGGTATTCTGGAATGCTAAATTATCAGCAAGTAGCATCAAAATTGCCTCTTTATCTCTA  
GTATAAATTGTTACATTGCTTAGATTTATCAAGAATGGTTGTGATACAA

>M6-PGSC0003DMG400007862-(rev)M6LRR-RLK\_3843

TTTATCTCTAGTATAAATTGTTACATTGCTTAGATTTATCAAGAATGGTTGTGATACAAGCACAATTATAT  
GCAAAAAGGCTGTTTTTAATGGAAAATTCACCTTCATATATCCTTAATT

>M6-PGSC0003DMG400007862-(rev)M6LRR-RLK\_3904

ACAATTATATGCAAAAAGGCTGTTTTAATGGAAAATTCACCTTCATATATCCTTAATTAGAGCACTCCTT  
AGCAAATCTATTAATGAGTTCTACCTATTGTATCTGATATAATGTTTC

>M6-PGSC0003DMG400007862-(rev)M6LRR-RLK\_3965

AGCACTCCTTAGCAAATCTATTAATGAGTTCTACCTATTGTATCTGATATAATGTTTCTTGAATTACTTTA  
GCTAGTTGAGACCTGCTTAAGGACAAAAGTTGTAATTGCAATATTTTT

>M6-PGSC0003DMG400007862-(rev)M6LRR-RLK\_4026

GAATTACTTTAGCTAGTTGAGACCTGCTTAAGGACAAAAGTTGTAATTGCAATATTTTTCTCTAGGTTTC  
TTCTAGTTCTTTCTTTCTCCTTGTCCAAATTAATCTTCAACTAGT

>M6-PGSC0003DMG400007862-(rev)M6LRR-RLK\_4087

TCTAGGTTTCTTCTAGTTCTTTCTTTCTCCTTGTCCAAATTAATCTTCAACTAGTATTTTTTTTTTCCAG  
TAACCAACATCATCGACGAAATCTGTCCTAGAAGTGTATTACAAA

>M6-PGSC0003DMG400007862-(rev)M6LRR-RLK\_4148

TTTTTTTTTCCAGTAACCAACATCATCGACGAAATCTGTCCTAGAAGTGTATTACAAATTTGTTAAAATG  
AAAAACAGCCTTCTAGCTATATGATATTACTATTTTTCTGCCTTGACTT

>M6-PGSC0003DMG400007862-(rev)M6LRR-RLK\_4209

TGTTAAAATGAAAAACAGCCTTCTAGCTATATGATATTACTATTTTTCTGCCTTGACTTTTGTCTCACTTTA  
TAAGAGGAACCGCCAGATACTGCTGCATCTTTTTCTGGTCATGATTT

>M6-PGSC0003DMG400007862-(rev)M6LRR-RLK\_427

GGAGAAATTCCTGATTCCTTTCAAGGCCTTACCGCTTGGTCAATCTGTATGAAAGCAAACAAAAGCATT  
TACATACTCCATTTAGTTTTTTTCATATGAATAACTGGTTTGGGTGTTT

>M6-PGSC0003DMG400007862-(rev)M6LRR-RLK\_4270

GTCTCACTTTATAAGAGGAACCGCCAGATACTGCTGCATCTTTTTCTGGTCATGATTTAACTATTAAG  
TAAGTATATGCATGCTGTTTCATTTATATAAATTCCTTGGGGATGTATA

>M6-PGSC0003DMG400007862-(rev)M6LRR-RLK\_4331

ACTATTAAAGTAAGTATATGCATGCTGTTTCATTTATATAAATTCCTTGGGGATGTATATGCATTTCTCTG  
GCATGTAAATTTTACCGCTCTTCTTCTTGCCTATGCACCACATCA

>M6-PGSC0003DMG400007862-(rev)M6LRR-RLK\_4392

CATTTCTCTGGCATGTAAATTTTACCGCTCTTCTTCTTGCCTATGCACCACATCATTCAAGTGGTTGC  
AACATTTCACTTCTGACACATGCTCCTTTTGGATGCTTCTGCAGTTGC

>M6-PGSC0003DMG400007862-(rev)M6LRR-RLK\_4453

CAAGTGGTTGCAACATTTCACTTCTGACACATGCTCCTTTGGATGCTTCTGCAGTTGCTTGCTGTCAAAA  
AACTGGACAAAAGAGTTTGTGATCAACAAAAGGATGATGAGTTTCTTGA

>M6-PGSC0003DMG400007862-(rev)M6LRR-RLK\_4514

GCTGTCAAAAACTGGACAAAAGAGTTTGTGATCAACAAAAGGATGATGAGTTTCTTGACCTAGTAAAC  
AATATTGACAGAATTCGTCATGCTAATGTTGTTGAGCTGATGGGCTATTGT

>M6-PGSC0003DMG400007862-(rev)M6LRR-RLK\_4575

TAGTAAACAATATTGACAGAATTCGTCATGCTAATGTTGTTGAGCTGATGGGCTATTGTGCAGAGCATG  
GTCAAAGGCTTCTGGTCTATGAGTATTGCTGTAACGGGACACTACAAGATG

>M6-PGSC0003DMG400007862-(rev)M6LRR-RLK\_4636

AGAGCATGGTCAAAGGCTTCTGGTCTATGAGTATTGCTGTAACGGGACACTACAAGATGCACTGCATTT  
CGACGATGAATTCAGAGACAACCTTTCATGGAATACTCGCATGAGGATGGC

>M6-PGSC0003DMG400007862-(rev)M6LRR-RLK\_4697

CTGCATTTGACGATGAATTCAGAGACAACCTTTCATGGAATACTCGCATGAGGATGGCTCTTGGAGCT  
GCAAGAGCTTTAGAGTATGTCAAATAACATTACATACATTTAATTATGCAC

>M6-PGSC0003DMG400007862-(rev)M6LRR-RLK\_4758

TTGGAGCTGCAAGAGCTTTAGAGTATGTCAAATAACATTACATACATTTAATTATGCACATCATGTTTGTA  
CACGCTCGCGTTCATGCGTGTGTATTAGTGTGTTTGGGACCTATAATC

>M6-PGSC0003DMG400007862-(rev)M6LRR-RLK\_4819

CATGTTTGTACACGCTCGCGTTCATGCGTGTGTATTAGTGTGTTTGGGACCTATAATCAGTGTGTTTCTGCA  
CATACCATATGATAAATCAGTGCTATTAACACTAAACAATAAAATGGT

>M6-PGSC0003DMG400007862-(rev)M6LRR-RLK\_488

AAAAGCATTTACATACTTCCATTTAGTTTTTTTCATATGAATAACTGGTTTGGGTGTTTATCTTTCAACAGT  
GATTTGTCAAGTAACAATTTAAGTGGATCATTGCCACCATCTGTAGGA

>M6-PGSC0003DMG400007862-(rev)M6LRR-RLK\_4880

TGTTTCTGCACATACCATATGATAAATCAGTGCTATTAACACTAAACAATAAAATGGTTCTGATATAGT  
GGCAAATTCATAACAAGCTCATTTTAGTCCTAACTTTCTTGTGTTGTGT

>M6-PGSC0003DMG400007862-(rev)M6LRR-RLK\_4941

TGATATAGTGGCAAATTCATAACAAGCTCATTTTAGTCCTAACTTTCTTGTGTTGTGTATATTACATGAT

AGAAAGCCACACAAACGACTTGGAATGGTCTTAACTATATGTAAAATGT

>M6-PGSC0003DMG400007862-(rev)M6LRR-RLK\_5002

ATTACATGATAGAAAGCCACACAAACGACTTGGAATGGTCTTAACTATATGTAAAATGTTAGATGTAGCT  
GTCTTTTGCTTCCTCTCCTTTCTTTGCTTCTGAATGTTCAAGAAAAAGAT

>M6-PGSC0003DMG400007862-(rev)M6LRR-RLK\_5063

GATGTAGCTGTCTTTTGCTTCCTCTCCTTTCTTTGCTTCTGAATGTTCAAGAAAAAGATGAAGAAAATTAA  
ATTAATTGGTTTGCCACGCTATGCTGTAAAAGGGAAGCCCTATGCACAA

>M6-PGSC0003DMG400007862-(rev)M6LRR-RLK\_5307

GAGACAACCTCACCGTTGCTAAGCAGTCTGATTCTCATTCAAGAATTGCATGAAAAAGTGAGGTAGACT  
GCTAGAGCATGTTTGTAAATAAATAATTATTCTCGTTTGATGCAATGCAGG

>M6-PGSC0003DMG400007862-(rev)M6LRR-RLK\_5368

AGGTAGACTGCTAGAGCATGTTTGTAAATAAATAATTATTCTCGTTTGATGCAATGCAGGTATCTCCATGA  
AGTCTGTGAGCCACCTATTATTCATAGAACTTCAAGTCTGCCAATCTTC

>M6-PGSC0003DMG400007862-(rev)M6LRR-RLK\_5429

TCTCCATGAAGTCTGTGAGCCACCTATTATTCATAGAACTTCAAGTCTGCCAATCTTCTGCTTGATGAGG  
AGTTGGCTGTACATGTTTCAGATTGTGGTTTGGCTCCACTTATGTCATC

>M6-PGSC0003DMG400007862-(rev)M6LRR-RLK\_549

CTTCAACAGTGATTTGTCAAGTAACAATTTAAGTGGATCATTGCCACCATCTGTAGGAAATTTGTCTTCA  
TTGACCACTCTGTGAGTAATTCAACATATTATACAGTTTGTGTGAACT

>M6-PGSC0003DMG400007862-(rev)M6LRR-RLK\_5490

CTTGATGAGGAGTTGGCTGTACATGTTTCAGATTGTGGTTTGGCTCCACTTATGTCATCTGGTGCTGTGA  
GTCAGGTAACCTGTGACCCTAATGTTATGGAGTAGAAAGAATTGAAATGC

>M6-PGSC0003DMG400007862-(rev)M6LRR-RLK\_5551

GTGCTGTGAGTCAGGTAACCTGTGACCCTAATGTTATGGAGTAGAAAGAATTGAAATGCTTCCTTGGATT  
ATTAGTTTCCTCTATGAGCTGCAAGTGGAAAGAAAAATGGATTCCTAGTG

>M6-PGSC0003DMG400007862-(rev)M6LRR-RLK\_5612

CCTTGGATTATTAGTTTCCTCTATGAGCTGCAAGTGGAAAGAAAAATGGATTCCTAGTGTGTTGATAGAAG  
TGGAATGGGAGCTGAATAAATAATTTAAAAAAGGAACAGTAGTGATGGTC

>M6-PGSC0003DMG400007862-(rev)M6LRR-RLK\_5673

TGATAGAAGTGGAATGGGAGCTGAATAAATAATTTAAAAAAGGAACAGTAGTGATGGTCAAAGTGTTT  
TCAACAAGATGTTGGAATAAGGAGCAGTAATAATGAATTCCTGTAAATGTGT

>M6-PGSC0003DMG400007862-(rev)M6LRR-RLK\_5734

AGTGTTTTCAACAAGATGTTGGAATAAGGAGCAGTAATAATGAATTCCTGTAAATGTGTAAAGTATATTC  
TTTGGGAAATGGTTGGTTCTCACCTGTAGGATAGGGTGAAGTGTTGTCA

>M6-PGSC0003DMG400007862-(rev)M6LRR-RLK\_5795

AGTATATTCTTTGGGAAATGGTTGGTTCTCACCTGTAGGATAGGGTGAAGTGTTGTCAAAGGTGCGCT  
TAAAGCACGCTTGAACCCTGAAGTGAGGCTCAAAATGTGTTGAGCATTTC

>M6-PGSC0003DMG400007862-(rev)M6LRR-RLK\_6039

AATGGTGAAGGTGCTCTTCTCATGATGTGTTTTATATGAACAGAAAATTTCTCTAGGATGCATGTGGATC  
ATCTATCTTGCTGTTATTTGTTGTTCTTTTGATAAAGTAGTCTTGGGATT

>M6-PGSC0003DMG400007862-(rev)M6LRR-RLK\_61

TGAGCAACAACCATATTGGCGGAAGCATTCCGTCTAATCTGCCAGTTACCTTGCGGAATATGTAAGTTCT  
ACCATTTGACTTATGAAGGATCCCCAGAAACACGGGAAAAAGAAAGAAAA

>M6-PGSC0003DMG400007862-(rev)M6LRR-RLK\_610

TTTGTCTTCATTGACCACTCTGTGAGTAATCAACATATTATACAGTTTGTTTGTAACCTTATAGTTTGATC  
AATATGATAAAACTAACTTCTTGATTTCCAGATATTTGCAGAATAATC

>M6-PGSC0003DMG400007862-(rev)M6LRR-RLK\_6100

ATGTGGATCATCTATCTTGCTGTTATTTGTTGTTCTTTTGATAAAGTAGTCTTGGGATTGATTACTGTTAC  
GTTCAATTTAAGGTATGTTAAAACTATATCAAGTTGACATTACACTGA

>M6-PGSC0003DMG400007862-(rev)M6LRR-RLK\_6161

TTACTGTTACGTTCAATTTAAGGTATGTTAAAACTATATCAAGTTGACATTACACTGATTTTTAGTTGTC  
GGGACAACCTTCTCACAACATATGGCTACGGTGCTCCCGAATTTGAGTC

>M6-PGSC0003DMG400007862-(rev)M6LRR-RLK\_6222

TTTCAGTTGTCGGGACAACCTTCTCACAACATATGGCTACGGTGCTCCCGAATTTGAGTCAGGGATTTACA  
CTTCCCAAAGTGATGTTTACAGTTTTGGTGTGGTGATGCTGGAACATAATA

>M6-PGSC0003DMG400007862-(rev)M6LRR-RLK\_6283

GGATTTACACTTCCCAAAGTGATGTTTACAGTTTTGGTGTGGTGATGCTGGAACATAAACAGGCAGAAT  
GTCATATGACCGGTAAAAAGCCTTCTGCATCTTTTTGAGCTAATATAGT

>M6-PGSC0003DMG400007862-(rev)M6LRR-RLK\_6344

AGGCAGAATGTCATATGACCGGTAAAAAGCCTTCTGCATCTTTTTGAGCTAATATAGTTGTGCCTCATT  
TCTCAGTTAACACACCTGCATATCATATTCAGGACACGAAGTCGAGGAGA

>M6-PGSC0003DMG400007862-(rev)M6LRR-RLK\_6405

TGCCTCATTCTCAGTTAACACACCTGCATATCATATTCAGGACACGAAGTCGAGGAGAGCAGTTCTTGG  
TCAGGTGGGCAATCCCTCAGCTACATGATATTGATCTCTTGACAAGGATG

>M6-PGSC0003DMG400007862-(rev)M6LRR-RLK\_6466

AGTTCTTGGTCAGGTGGGCAATCCCTCAGCTACATGATATTGATCTCTTGACAAGGATGGTTGATCCTGC  
TCTCGATGGAAAATACCCATTAAATCACTATCACACTTTGCTGACATAA

>M6-PGSC0003DMG400007862-(rev)M6LRR-RLK\_6527

TGATCCTGCTCTCGATGGAAAATACCCATTAAATCACTATCACACTTTGCTGACATAATTTCCCGCTGTG  
TTCAGGTGAGTTATTCTGTTGTTCCCTTCATGTGAAACACATAAATGCTT

>M6-PGSC0003DMG400007862-(rev)M6LRR-RLK\_6588

TCCCGCTGTGTTTCAGGTGAGTTATTCTGTTGTTCCCTTCATGTGAAACACATAAATGCTTACTAATATGCAT  
TGTCTAATCGCTGAGTGTACCGAATAGTCTTAGATTGTTTCGTCATCTCA

>M6-PGSC0003DMG400007862-(rev)M6LRR-RLK\_6649

TAATATGCATTGTCTAATCGCTGAGTGTACCGAATAGTCTTAGATTGTTTCGTCATCTCAATCGGTTGGAA  
GGATATTTCTAGGATCTAGTTGTGGAATAGGTTTGCCTTCAAATGTCACT

>M6-PGSC0003DMG400007862-(rev)M6LRR-RLK\_671

ATAGTTTGATCAATATGATAAAACTAACTTCTTGATTTCCAGATATTTGCAGAATAATCAGCTTTCTGGAA  
CTCTTGATGTTTTGCAGGATCTTCCCCTTGCAAATTTGTA CTCTTCCAA

>M6-PGSC0003DMG400007862-(rev)M6LRR-RLK\_6710

CGGTTGGAAGGATATTTCTAGGATCTAGTTGTGGAATAGGTTTGCCTTCAAATGTCACTTAACTTTTAAA  
CTCTTATACAGCATGAGCGAGAATTCAGGCCACCAATGTCTGAAGTTGTT

>M6-PGSC0003DMG400007862-(rev)M6LRR-RLK\_6771

ACTTTTAACTCTTATACAGCATGAGCGAGAATTCAGGCCACCAATGTCTGAAGTTGTTTCAGGACCTCAT  
ACAAATGATAAGAAGAGAGTCTCACAAAAGATCTGATGGTGAATGATTTG

>M6-PGSC0003DMG400007862-(rev)M6LRR-RLK\_6832

GGACCTCATACAAATGATAAGAAGAGAGTCTCACAAAAGATCTGATGGTGAATGATTTGAGTTAGACGC

GCATACTGGGAATTCAGCCGATGAGAACTAAGATTATTTCTTCTTCTCGAAG

>M6-PGSC0003DMG400007862-(rev)M6LRR-RLK\_6893

TTAGACGCGCATACTGGGAATTCAGCCGATGAGAACTAAGATTATTTCTTCTTCTCGAAGGAGCTGAGAT  
ACTCGGAAAAAGAAAGGCGGTTTGCAGGCCAAGCACCGTGCTAAAGACAAC

>M6-PGSC0003DMG400007862-(rev)M6LRR-RLK\_6954

GCTGAGATACTCGGAAAAAGAAAGGCGGTTTGCAGGCCAAGCACCGTGCTAAAGACAACCTCAAACCTG  
AAGCAAATGCACCTCAAAGAAGCGCGATTGATGAAAATACCAACACATGCA

>M6-PGSC0003DMG400007862-(rev)M6LRR-RLK\_7015

CAAACCTGAAGCAAATGCACCTCAAAGAAGCGCGATTGATGAAAATACCAACACATGCAGGCGACTTAA  
TGACCTGTAAAAACAGCTTGCTCATCTGATTCTTGTCAAGCTGCATCATTT

>M6-PGSC0003DMG400007862-(rev)M6LRR-RLK\_7076

CGACTTAATGACCTGTAAAAACAGCTTGCTCATCTGATTCTTGTCAAGCTGCATCATTTTAATGTTCAATT  
AGGCTTACATGTGAGCACCAATGCATATAATTCATTGATCTTGACAAAA

>M6-PGSC0003DMG400007862-(rev)M6LRR-RLK\_7137

ATGTTCAATTTAGGCTTACATGTGAGCACCAATGCATATAATTCATTGATCTTGACAAAATGGTATATTTTC  
TTGAAGTTGTATATCTTTACTTGCTGCAACATGTACAACTTCATTTGG

>M6-PGSC0003DMG400007862-(rev)M6LRR-RLK\_7198

GTATATTTTCTTGAAGTTGTATATCTTTACTTGCTGCAACATGTACAACTTCATTTGGTTGTACAAGGAT  
ACCTTCACTCTTCTCATGTACTTGTTGCACATGCCAAAGTTATTTACT

>M6-PGSC0003DMG400007862-(rev)M6LRR-RLK\_7259

GTACAAGGATACCTTCACTCTTTCTCATGTACTTGTTGCACATGCCAAAGTTATTTACTACTAGTCATTACC  
TAAGGAGTTGGAGACCTACAACCTCAACCATGTAACAATATGTAAA

>M6-PGSC0003DMG400007862-(rev)M6LRR-RLK\_732

CTTTCTGGAACCTTGATGTTTTGCAGGATCTTCCCCTTGCAAATTTGTAATCTTCCAACTAGATTTTACT  
CAAATATAATTCAGTTCACTAGAATGATAGAATCTTACTAACATCTCT

>M6-PGSC0003DMG400007862-(rev)M6LRR-RLK\_793

TAGATTTTACTCAAATATAATTCAGTTCACTAGAATGATAGAATCTTACTAACATCTCTCCACCCTCCCTGT  
GTCCTTCTAGGAATGTGGAAAACAACCTGTTTTCTGGGCCCATACCT

>M6-PGSC0003DMG400007862-(rev)M6LRR-RLK\_854



ACCTCCCTGTGTCCTTTCTAGGAATGTGGAAAACAACCTGTTTTCTGGGCCCATACCTCAAAGTTGTTCTCTATTCCCAATTTCAAGTAAGTACATTCATTTTATGCTTTCATATACC

>M6-PGSC0003DMG400007862-(rev)M6LRR-RLK\_915

AAAGTTGTTCTCTATTCCCAATTTCAAGTAAGTACATTCATTTTATGCTTTCATATACCCGTTTCATTTTTGT  
TTATGTTGAGTCAACATCTTGTATCTTAAAATGTAATCTTGGTCACA

>M6-PGSC0003DMG400007862-(rev)M6LRR-RLK\_976

TTTCATTTTTGTTTATGTTGAGTCAACATCTTGTATCTTAAAATGTAATCTTGGTCACATTTAATATCACTG  
TATCCCTAGTCGTTTGTGGAGATATCATTGACATGTAACATATCCC

>M6-PGSC0003DMG400007876-(rev)M6LRR-RLP\_0

ATGGAAGGTGTAGCTTTAGTACTTTCACCTCTCCTTGTTGTTGTTAATTTAGATGGATTTTCTTGTTTAT  
TCAGGAAGTCATTGCATTGAGAGTGAAAAAATGCTCTTATTAAGTTC

>M6-PGSC0003DMG400007876-(rev)M6LRR-RLP\_1054

ACTCTTCAAGGACTCGATTACAGAACATTTCTGAATTTAACTCATTTGAGAGTGTTAGACTTGTCATCC  
AACTCATTTATTTCAATGTAAGCGCAACTTGGATGCCTCGTTTTCAAC

>M6-PGSC0003DMG400007876-(rev)M6LRR-RLP\_1116

TTGTCATCCAACCTCATTTATTTCAATGTAAGCGCAACTTGGATGCCTCGTTTTCAACTGACTCTCTAAGC  
CTGCAGTCTTGCGGACTTGGTGCACAGTTTCCCAGTGGATTCAGACA

>M6-PGSC0003DMG400007876-(rev)M6LRR-RLP\_1178

CTCTCTAAGCCTGCAGTCTTGCGGACTTGGTGCACAGTTTCCCAGTGGATTCAGACACAAAAAGAGTTG  
TCATTTATTGATATCTCTCGCACCAATATCTCAGGTGAAGTGCCTGATTG

>M6-PGSC0003DMG400007876-(rev)M6LRR-RLP\_124

AAGGTTTCAAGAATCCGTACGAAGCATGTTATCTTGGATGTTTGACGAAAACCTGCTGCAGCTGGAAAG  
GTGTTGAATGTGACAACAAAACCGGGCACGTGATCACTCTTGATCTACATA

>M6-PGSC0003DMG400007876-(rev)M6LRR-RLP\_1240

AAGAGTTGTCATTTATTGATATCTCTCGCACCAATATCTCAGGTGAAGTGCCTGATTGGTTCTGGAATTT  
TCTGCCAAGGTTTATCACATAGACCTTTCAGGAAACAATTTTCAAGTGGAG

>M6-PGSC0003DMG400007876-(rev)M6LRR-RLP\_1302

TGGAATTTTTCTGCCAAGGTTTATCACATAGACCTTTCAGGAAACAATTTTCAAGTGGAGAAATCCCTGAAT  
TTACAGAAAGAGTTTGTCTTACAAAATTAGACCTGAGTGATAACAATTTT

>M6-PGSC0003DMG400007876-(rev)M6LRR-RLP\_1364

CCCTGAATTTACAGAAAGAGTTTGTCTTACAAAATTAGACCTGAGTGATAACAATTTTCACGGTCCTTTGC  
CACATTTTTCACCCAAGATGATGACATTGATTTTGGCAAGGAATTCGTT

>M6-PGSC0003DMG400007876-(rev)M6LRR-RLP\_1426

GTCCTTTGCCACATTTTTACCCAAGATGATGACATTGATTTTGGCAAGGAATTCGTTTAATGGTACCATT  
GCTCCTGTATGTGAATCACTTGTTCATGAATAACTCTCTGAGTCTTCTAA

>M6-PGSC0003DMG400007876-(rev)M6LRR-RLP\_1488

GGTACCATTGCTCCTGTATGTGAATCACTTGTTCATGAATAACTCTCTGAGTCTTCTAAACCTATCTTCAA  
TTTTCTATCAGGACAACCTTTCAGATTGTTGGAGATATGGGAAGAATCTG

>M6-PGSC0003DMG400007876-(rev)M6LRR-RLP\_1550

ATCTTCAAATTTTCTATCAGGACAACCTTTCAGATTGTTGGAGATATGGGAAGAATCTGCAAGGATTGAAT  
TTAGGCCATAATGATCTATCAGGGGAGATACCTCATTTCGATTGGAGATCT

>M6-PGSC0003DMG400007876-(rev)M6LRR-RLP\_1612

GATTGAATTTAGGCCATAATGATCTATCAGGGGAGATACCTCATTTCGATTGGAGATCTTACTAACCTTTT  
CTTTTTGCAATTGCAGAACAACAGTTTCTCCAAAATCTTCCTTCATCAT

>M6-PGSC0003DMG400007876-(rev)M6LRR-RLP\_1674

AACCTTTTCTTTTTGCAATTGCAGAACAACAGTTTCTCCAAAATCTTCCTTCATCATTGAAGAACAATACT  
GGACTAAAAATTCTTGATGTTTCTGAAAATAGTTTATCTGGGAATATA

>M6-PGSC0003DMG400007876-(rev)M6LRR-RLP\_1736

GAACATAACTGGACTAAAAATTCTTGATGTTTCTGAAAATAGTTTATCTGGGAATATAACCATTTTGGTTA  
GGGGAGAGTTTAAATGCTCTTGAGATTCTTATATTAAGCAGAAACAACATA

>M6-PGSC0003DMG400007876-(rev)M6LRR-RLP\_1771

AAAATAGTTTATCTGGGAATATAACCATTTTGGTTAGGGGAGAGTTTAAATGCTCTTGAGATTCTTATATT  
AAGCAGAAACAACACTATGATGGAATTATCCCAGGGAGATTTGCCAGCTTA

>M6-PGSC0003DMG400007876-(rev)M6LRR-RLP\_186

TGGAAAGGTGTTGAATGTGACAACAAAACCGGGCACGTGATCACTCTTGATCTACATAAGCAATTCTTG  
CAAGGTGAGTTCAGGATTTCTTTACTTGGTTTGCCTTATTTAAGGCACTTA

>M6-PGSC0003DMG400007876-(rev)M6LRR-RLP\_248

ATTCTTGCAAGGTGAGTTCAGGATTTCTTTACTTGGTTTGCCTTATTTAAGGCACTTAGACATGAGCCACA

TTGATTTCTCGGGGAACGGATTCCTGAGTTTATTTCCAGTTTAAAGGA

>M6-PGSC0003DMG400007876-(rev)M6LRR-RLP\_310

TGAGCCACATTGATTTCTCGGGGAACGGATTCCTGAGTTTATTTCCAGTTTAAAGGACCTGGAGTATCT

CAATTTGTCTAAAACGAATTTTAGGGGAATGATTCCTGAACATCTTGGGA

>M6-PGSC0003DMG400007876-(rev)M6LRR-RLP\_372

GAGTATCTCAATTTGTCTAAAACGAATTTTAGGGGAATGATTCCTGAACATCTTGGGAATCTGTGCGGGT

TGCAGTTTCTTGATCTGAGTGGTGATTTTCACTCCGGGTTAATAACCTT

>M6-PGSC0003DMG400007876-(rev)M6LRR-RLP\_434

GTCGCGGTTGCAGTTTCTTGATCTGAGTGGTGATTTTCACTCCGGGTTAATAACCTTGAATGGATTCAC

CCCTCTTCTCTATGAAGATTCTTGATTTGAGTGGTGTTTACATGAGAAG

>M6-PGSC0003DMG400007876-(rev)M6LRR-RLP\_496

GGATTCACCTCCTTCTCTATGAAGATTCTTGATTTGAGTGGTGTTTACATGAGAAGCGCGGAAAAC

GCTACATGACATCAATTTGTTAAGTTCTCTCTCTGTATTACGTTTGTCTG

>M6-PGSC0003DMG400007876-(rev)M6LRR-RLP\_558

GAAAACCTGGCTACATGACATCAATTTGTTAAGTTCTCTCTCTGTATTACGTTTGTCTGCTTGTGAGCTTACT

TCATTTCTGAATTGCTTCCGACTTCTGTGAATTTACATCCCTTCGG

>M6-PGSC0003DMG400007876-(rev)M6LRR-RLP\_62

TTGTGTTTATTCAGGAAGTCATTGCATTGAGAGTGAAAAAATGCTCTTATTAAGTTCAGCCAAGGTTTC

AAGAATCCGTCACGAAGCATGTTATCTTGGATGTTTGACGAAAACCTGCTG

>M6-PGSC0003DMG400007876-(rev)M6LRR-RLP\_620

TCAGCTTACTTCATTTCTGAATTGCTTCCGACTTCTGTGAATTTACATCCCTTCGGATTCTTGATCTTTCA

ATAAACTATTTAATACTAGGATTCCTAGCTGGTTGTTCAACACAAG

>M6-PGSC0003DMG400007876-(rev)M6LRR-RLP\_682

TTGATCTTTCAATAAACTATTTAATACTAGGATTCCTAGCTGGTTGTTCAACACAAGCCATAATCTTGTTT

ACCTTAATCTTTGAGAAGTCAGCTGAGCGGTTCACTTCCAAATGCCT

>M6-PGSC0003DMG400007876-(rev)M6LRR-RLP\_744

AATCTTGTTTACCTTAATCTTTGAGAAGTCAGCTGAGCGGTTCACTTCCAAATGCCTTTGGCAACATGAG

TTCATTTAGAGTGCTTGATCTTTCTGGGAACTCTCTCCGAGGCAACCTT

>M6-PGSC0003DMG400007876-(rev)M6LRR-RLP\_806

CAACATGAGTTCACTTAGAGTGCTTGATCTTTCTGGGAACTCTCTCCGAGGCAACCTTCCACATTCCTTTG  
AGAAAATGAGTTCAGTTTCCTTTCTTAATCTCTCAAGAACTCGTTCAC

>M6-PGSC0003DMG400007876-(rev)M6LRR-RLP\_868

ATTCTTTGAGAAAATGAGTTCAGTTTCCTTTCTTAATCTCTCAAGAACTCGTTCACGGGCAATTTACCA  
CCAACCCTGCCATCAAAGCTGAAATACTTGGATATTTCTGATAATAAAA

>M6-PGSC0003DMG400007876-(rev)M6LRR-RLP\_930

AATTTACCACCAACCCTGCCATCAAAGCTGAAATACTTGGATATTTCTGATAATAAAATGGAGGGTCCTT  
TAGCAAGAAGCATCACACAACTTAAGCAATTAGTTGTCCTCAATGTTGCT

>M6-PGSC0003DMG400007876-(rev)M6LRR-RLP\_992

GGGTCCTTTAGCAAGAAGCATCACACAACTTAAGCAATTAGTTGTCCTCAATGTTGCTCGGAACTCTTTC  
AAGGACTCGATTACAGAACATTTCTTGAATTTAACTCATTTGAGAGTGTT

>M6-PGSC0003DMG400007899-(rev)M6OtherRLKTM\_0

TCGCCGGCGGCAGGAATTGCCACCGGAAACACGTAGAAGACGGGTGAATCAATCACCCGTTTTTGTCTT  
CTCCGTTACCAAATCTCTTTTTATTAACAGATTCAAACACCCTTTTCAAT

>M6-PGSC0003DMG400007899-(rev)M6OtherRLKTM\_1054

ACGCGTTTCATATCATTTTCGTTATCTGAAGGGTTTGATTTGTCACCATTGTTTGAAGAGAATAAGAGGAA  
TGAGAAAGAACAGATGAGATTCGCAACTACTAGGTCAGCAAGTAGTGTGA

>M6-PGSC0003DMG400007899-(rev)M6OtherRLKTM\_1116

AAGAGGAATGAGAAAGAACAGATGAGATTCGCAACTACTAGGTCAGCAAGTAGTGTGATATCTAAGCT  
TGAGGAGGTAGCAAAGACATCGAATTTAGCGTAAAAAAGAGTGATTCATGT

>M6-PGSC0003DMG400007899-(rev)M6OtherRLKTM\_1178

TAAGCTTGAGGAGGTAGCAAAGACATCGAATTTAGCGTAAAAAAGAGTGATTCATGTGTAAGGTTACA  
AGGACAAGTGACTGGGAGAAAAGGGAAATTGGGAATTGCTGCTGATATATT

>M6-PGSC0003DMG400007899-(rev)M6OtherRLKTM\_124

AGTCTCTTTTTTCAATCAATTTGGAACAAAAACAAATGGCTCCGGAAGAGAAATGTGGAGCTTTGAACG  
GAAAATATGAACTTGGTTCGGCTTTTAGGCCATGGAACATTCGCGAAAGTTT

>M6-PGSC0003DMG400007899-(rev)M6OtherRLKTM\_1240

GGTTACAAGGACAAGTGACTGGGAGAAAAGGGAAATTGGGAATTGCTGCTGATATATTTGCTGTGACA  
AATTCATTTCTAGTTGTGGAAGTGAATAAAGCTAGTGGTGATACATTGGAGT

>M6-PGSC0003DMG400007899-(rev)M6OtherRLKTM\_1299

GCTGTGACAAATTCATTTCTAGTTGTGGAAGTGAATAAAGCTAGTGGTGATACATTGGAGTATAATCAAT  
TCTGCAGAAAAGAGCTTAGACCAGCACTTAAGGATATTGTTTGGACATCA

>M6-PGSC0003DMG400007899-(rev)M6OtherRLKTM\_186

TTGAACGGAAAATATGAACTTGGTCGGCTTTTAGGCCATGGAACATTCGCGAAAGTTTATCACGCACGA  
AACGTGCAGAATGGTAAAAATGTTGCCATGAAAGTAGTGGGGAAAGAGAAA

>M6-PGSC0003DMG400007899-(rev)M6OtherRLKTM\_248

CGCACGAAACGTGCAGAATGGTAAAAATGTTGCCATGAAAGTAGTGGGGAAAGAGAAAGTCATTAAAG  
TCGGTATGATGGATCAGATCAAGCGAGAAATATCCGTAATGAAAATGGTGAA

>M6-PGSC0003DMG400007899-(rev)M6OtherRLKTM\_310

TTAAAGTCGGTATGATGGATCAGATCAAGCGAGAAATATCCGTAATGAAAATGGTGAAAAACCCGAATA  
TAGTTGAGCTCCACGAAGTCATGGCGAGTAAACTAAGATTTACTTCGCCA

>M6-PGSC0003DMG400007899-(rev)M6OtherRLKTM\_372

CCGAATATAGTTGAGCTCCACGAAGTCATGGCGAGTAAACTAAGATTTACTTCGCCATGGAGTTAGTT  
AGAGGAGGTGAGCTTTTCGCGAAGATCGCGAAAGGCAAGCTGAGAGAGGAT

>M6-PGSC0003DMG400007899-(rev)M6OtherRLKTM\_434

GTTAGTTAGAGGAGGTGAGCTTTTCGCGAAGATCGCGAAAGGCAAGCTGAGAGAGGATGTTGCTAGAG  
GTTACTTCAGCAACTGATCTCAGCTATCGAATTCTGTCATAGCAGAGGAGT

>M6-PGSC0003DMG400007899-(rev)M6OtherRLKTM\_496

CTAGAGGTTACTTCCAGCAACTGATCTCAGCTATCGAATTCTGTATAGCAGAGGAGTATTTTCATCGCGA  
TTTGAACCTGAGAACTTGTATTAGATGAAGAAGGAAATCTCAAAGTGA

>M6-PGSC0003DMG400007899-(rev)M6OtherRLKTM\_558

CATCGCGATTTGAAACCTGAGAACTTGTATTAGATGAAGAAGGAAATCTCAAAGTGACTGATTTCTGGG  
CTAAGTGCATTTACAGAACATTTAAGACAGGACGGATTGCTTCACACAACCT

>M6-PGSC0003DMG400007899-(rev)M6OtherRLKTM\_62

TTGTCTTCTCCGTTACCAAATCTCTTTTATTAACAGATTCAAACACCCTTTTCAATCTTTAGTCTCTTTTTT  
CAATCAATTTGGAACAAAAACAAATGGCTCCGGAAGAGAAATGTGG

>M6-PGSC0003DMG400007899-(rev)M6OtherRLKTM\_620

TTTCGGGCTAAGTGCATTTACAGAACATTTAAGACAGGACGGATTGCTTCACACAACCTGTGGAACTCCG

GCTTATGTTGCCCTGAAGTTATTGGTAAAAAAGGCTAAGATGGTTCAAA

>M6-PGSC0003DMG400007899-(rev)M6OtherRLKTM\_682

GAACTCCGGCTTATGTTGCCCTGAAGTTATTGGTAAAAAAGGCTAAGATGGTTCAAAAGCGGATATTT

GGTCCTGTGGAGTGATCCTCTATGTTTTATTAGCCGGTTTTTTACCATTTC

>M6-PGSC0003DMG400007899-(rev)M6OtherRLKTM\_744

GATATTTGGTCCTGTGGAGTGATCCTCTATGTTTTATTAGCCGGTTTTTTACCATTTC AAGAAGAAAACAT

CATGGCGATGTATAAGAAGATTTATAGGGGTGATTTCAAATGTCCACCT

>M6-PGSC0003DMG400007899-(rev)M6OtherRLKTM\_806

AGAAAACATCATGGCGATGTATAAGAAGATTTATAGGGGTGATTTCAAATGTCCACCTTGGTTTTCTTCA

GAAGCTAGGAGGTTGATCACAAGATGTTGGATCCGAATCCCAATTCAAG

>M6-PGSC0003DMG400007899-(rev)M6OtherRLKTM\_868

TTTCTTCAGAAGCTAGGAGGTTGATCACAAGATGTTGGATCCGAATCCCAATTCAAGAATCACCCACCTC

GAAGATCATGGATTCGTCATGGTTCAAGAAATCAATCCCAAGGACGTAA

>M6-PGSC0003DMG400007899-(rev)M6OtherRLKTM\_930

ACCACCTCGAAGATCATGGATTCGTCATGGTTCAAGAAATCAATCCCAAGGACGTTAAGGAACAAAGAT

GAGGAAGAATTTGCATTTGCCTCAGATAAGGCTTGTAAGAAGTTGAGACA

>M6-PGSC0003DMG400007899-(rev)M6OtherRLKTM\_992

CAAAGATGAGGAAGAATTTGCATTTGCCTCAGATAAGGCTTGTAAGAAGTTGAGACAATGAACGCGTT

TCATATCATTTCGTTATCTGAAGGGTTTGATTTGTCACCATTGTTCAAGA

>M6-PGSC0003DMG400007915-(rev)M6LRR-RLP\_128

TTCATCCATTTGTAACATGAGTTCGCTTATCTTATTAGATTTATCACGCAACAACCTTCAGTGA CTGACTCAGTTCC

ACATTGCTTGGGAAGCATGGCTAGTCTAACGGTGCTAGACTTAAGAAG

>M6-PGSC0003DMG400007915-(rev)M6LRR-RLP\_704

GCAGGATATTGAGCTATAAAGAATCAGCACAATTACGACAACCATAGATCTCTCAAGCAACCATTTTGAA

GGTGTCAATCCGAAAACACTAAAGGATCTCATATCACTTTGGCTACTCAA

>M6-PGSC0003DMG400007915-(rev)M6LRR-RLP\_960

TTCTTAAACCTCTCTCAAATCATCTCGTTGGACCAATTCCTCAAGGTCGGCAATTCAACACATTTGAAAA

TGACTCATATGGTGGCAACCTTGATTTATGTGGTGTTCTTTAACAAG

>M6-PGSC0003DMG400007948M6LRR-RLK\_0

TTAATAATTAATTCTAAAATAACTTATTATTTTCGACCGTGAAACATTATGGCCATGGCTGACACAGAAAC  
AGAGAGAAAAATAGCCAGACTAAATATTGGAAGTCCCCACTTCCCTTTT

>M6-PGSC0003DMG400007948M6LRR-RLK\_1037

CTCCGGCAGAACTCGGCCAAAACGAAGAGTTACGACAGGGTAGCCCGTTAAACCGTAAAGAAAACAAA  
TTACATAAAAGATCCTTACTCATTATTGGAGTTTCAACAGCTTGTTTAGTCC

>M6-PGSC0003DMG400007948M6LRR-RLK\_1098

AAACAAATTACATAAAAGATCCTTACTCATTATTGGAGTTTCAACAGCTTGTTTAGTCCTTTTATGTTTCAG  
TTATACTATTAGCATTAGCGTCTGAAGAAGCACAGGAACTCGAAGAAATT

>M6-PGSC0003DMG400007948M6LRR-RLK\_1159

TTATGTTTCAGTTATACTATTAGCATTAGCGTCTGAAGAAGCACAGGAACTCGAAGAAATTAGGAGAACT  
AAGAAATCCGCATTTCGATCCAAGTGTTAGCGGCAATGCAGAAGCAGTAATA

>M6-PGSC0003DMG400007948M6LRR-RLK\_122

CTTTCTCAAAAATCTTCACGTGAATCTGACTCTGCCTTTTGCCATATCTTCTTAGACTGCTGCTTTTCTCTTC  
ACTCTTCCACCTCTTTTGTACGTATTGCACCTCTACACATATTCCA

>M6-PGSC0003DMG400007948M6LRR-RLK\_1220

GAGAACTAAGAAATCCGCATTTCGATCCAAGTGTTAGCGGCAATGCAGAAGCAGTAATAAGAATTGAA  
GAAGACAACAATGAACTGGAAGAGAAGGTGAAGAGAGTACAACAAGGAATGC

>M6-PGSC0003DMG400007948M6LRR-RLK\_1281

AATTGAAGAAGACAACAATGAACTGGAAGAGAAGGTGAAGAGAGTACAACAAGGAATGCAGCAAGTG  
ATGGGTATAAGTGGGAGCTTAGTTTTCTGTGCAGGTGAGGTGCAGGTGTATAC

>M6-PGSC0003DMG400007948M6LRR-RLK\_1342

CAAGTGATGGGTATAAGTGGGAGCTTAGTTTTCTGTGCAGGTGAGGTGCAGGTGTATACCCTGGAGCA  
GCTGATGAGAGCTTCTGCTGAGCTTTTAGGTAGAGGAACAATGGGGACTACT

>M6-PGSC0003DMG400007948M6LRR-RLK\_1403

TGGAGCAGCTGATGAGAGCTTCTGCTGAGCTTTTAGGTAGAGGAACAATGGGGACTACTTACAAAGCA  
GTGCTTGATAACCGTCTGATTGTATGTGTTAAGAGATTGGACGGTGGGAGAT

>M6-PGSC0003DMG400007948M6LRR-RLK\_1464

CAAAGCAGTGCTTGATAACCGTCTGATTGTATGTGTTAAGAGATTGGACGGTGGGAGATTGGCAGGTAC  
AAGTCAAGAGGAGTTTGTAGCAGCATATGGAATCAGTGGGCGGGCTTAGGCA

>M6-PGSC0003DMG400007948M6LRR-RLK\_1525

GCAGGTACAAGTCAAGAGGAGTTTGAGCAGCATATGGAATCAGTGGGCGGGCTTAGGCACCCGAATTT  
GGTTCCTTTTCGGGCTTATTTTCAGGCCCGACAAGAAAGGCTTTTGTTTTAT

>M6-PGSC0003DMG400007948M6LRR-RLK\_1586

CGAATTTGGTTCCTTTTCGGGCTTATTTTCAGGCCCGACAAGAAAGGCTTTTGTTTTATGATTATCAACCC  
AATGGCAGCCTGTCTTCTTATTTCATGGTACGTTCTTCTCTGTATATC

>M6-PGSC0003DMG400007948M6LRR-RLK\_1647

TTATCAACCCAATGGCAGCCTGTCTTCTTATTTCATGGTACGTTCTTCTCTGTATATCTTGTACTTATTATT  
TATTAAGATGCGCATAAACTATACGAAAAATATTATTAATGCAATTA

>M6-PGSC0003DMG400007948M6LRR-RLK\_1708

GTACTIONTATTATTATTAAGATGCGCATAAACTATACGAAAAATATTATTAATGCAATTATTTTGACCTTTG  
ATAAGTAAAATATAATATAATGAACGGAGTATTTTGAAGGTGTTGTCCA

>M6-PGSC0003DMG400007948M6LRR-RLK\_1769

TTGACCTTTGATAAGTAAAATATAATATAATGAACGGAGTATTTTGAAGGTGTTGTCCAATCAAATAGGG  
TCCATACACCATAACCCTATTGTTACAGTTTCTCAACCCCAATGTTCTCAC

>M6-PGSC0003DMG400007948M6LRR-RLK\_183

GCTTTTCTCTTCACTCTTCCACCTCTTTTGTACGATTGCACCTCTACACATATTCCACAACAATTCAATCT  
GGAAATTTTTTCTTAAACAAGATGAAAATACAACAATTCTTACTACT

>M6-PGSC0003DMG400007948M6LRR-RLK\_1830

CAAATAGGGTCCATACACCATAACCCTATTGTTACAGTTTCTCAACCCCAATGTTCTCACAAACACAGAGAA  
TCTTGCAGCTGACTCTGATGACATTTTTGGACACATATTTCTGTCATCG

>M6-PGSC0003DMG400007948M6LRR-RLK\_1891

ACACAGAGAATCTTGCAGCTGACTCTGATGACATTTTTGGACACATATTTCTGTCATCGTAAAATACTTTT  
ATGTTTGTAGTGTCTAATCATAGATTATAGTATTACTTTATTGAAG

>M6-PGSC0003DMG400007948M6LRR-RLK\_1952

AAATACTTTTATGTTTGTAGTGTCTAATCATAGATTATAGTATTACTTTATTGAAGCTAGTTCTGTCTG  
CATTAGAATGTTATTAATTTTGTTCACGTGTGGTTGCGTAATGTGA

>M6-PGSC0003DMG400007948M6LRR-RLK\_2013

AGTTCTGTCTGCATTAAGAATGTTATTAATTTTGTTCACGTGTGGTTGCGTAATGTGAAGTTAATAAGA



GTACGGTGGTTAGCATTAAATAATTCATAAAGTAATATAAATAATAGCTTT

>M6-PGSC0003DMG400007948M6LRR-RLK\_2074

TTAATAAGAGTACGGTGGTTAGCATTAAATAATTCATAAAGTAATATAAATAATAGCTTTATTTTCATATTTA  
ATGCCACGACGGTACTGAATTTTTTTGGTCAATCTGACGTGGCATATGGA

>M6-PGSC0003DMG400007948M6LRR-RLK\_2135

TTCATATTTAATGCCACGACGGTACTGAATTTTTTTGGTCAATCTGACGTGGCATATGGACTGGTCAACCT  
GCCACGTGTTCAAGTTCAGGTTCCAAGTCATCAAGAGCAAAGCCACTTCACTGGAC

>M6-PGSC0003DMG400007948M6LRR-RLK\_2196

GGTCAACCTGCCACGTGTTCAAGTTCAGGTTCCAAGTCATCAAGAGCAAAGCCACTTCACTGGACTTCATGTTTGA  
AAATAGCAGAGGATGTAAGTCAAGGACTTTCCTACATCCACCAAGCATGG

>M6-PGSC0003DMG400007948M6LRR-RLK\_2257

CATGTTTGAAAATAGCAGAGGATGTAAGTCAAGGACTTTCCTACATCCACCAAGCATGGAGGCTTGTC  
ATGGCAATCTCAAGTCATCTAACGTCCTCCTCGGCTCCGATTTTCGAGGCGT

>M6-PGSC0003DMG400007948M6LRR-RLK\_2318

GCTTGTCATGGCAATCTCAAGTCATCTAACGTCCTCCTCGGCTCCGATTTTCGAGGCGTGCATAACTGAC  
TACTGTCTCTCCATCCTAGCTGTCCCCTCAGACGATGACAATCCTGATTC

>M6-PGSC0003DMG400007948M6LRR-RLK\_2379

ATAACTGACTACTGTCTCTCCATCCTAGCTGTCCCCTCAGACGATGACAATCCTGATTCTGTAGCCTATCA  
GGCTCCAGAAATTCGGAAACTGAATCACAACAACCACAACCACCACCGC

>M6-PGSC0003DMG400007948M6LRR-RLK\_244

ACAATTCAATCTGGAAATTTTTCTTAAACAAGATGAAAATACAACAATTCTTACTACTAACCATTCTTCT  
GTTTTATCTGTTTCTTTTCATTCCACTGTTTCGTTGATTCCTTCAGAT

>M6-PGSC0003DMG400007948M6LRR-RLK\_2440

TAGCCTATCAGGCTCCAGAAATTCGGAAACTGAATCACAACAACCACAACCACCACCGCCAAGCTAGTG  
CCAAGGCTGATGTCTATTCGTTTGGCGTTCTTTTGCTTGAACCTTCTTACGG

>M6-PGSC0003DMG400007948M6LRR-RLK\_2501

AGCTAGTGCCAAGGCTGATGTCTATTCGTTTGGCGTTCTTTTGCTTGAACCTTCTTACGGGGAGGCATCCT  
TCGGAACATCCATATCTAATGCCAGATGATATGATACATTGGGTGAAGTC

>M6-PGSC0003DMG400007948M6LRR-RLK\_2562

AGGCATCCTTCGGAACATCCATATCTAATGCCAGATGATATGATACATTGGGTGAAGTCTACTAGAGAG  
GATCATGATGGTAGTATTGGAGAAGATAGTAAGTTGGAGATGCTTCTTGAA

>M6-PGSC0003DMG400007948M6LRR-RLK\_2623

CTAGAGAGGATCATGATGGTAGTATTGGAGAAGATAGTAAGTTGGAGATGCTTCTTGAAGTTGCTATGG  
CTTGTAGAGTGAGCTCACCAGAGCAAAGACCAACAATGTGGCAAGTGTTAA

>M6-PGSC0003DMG400007948M6LRR-RLK\_2684

TGCTATGGCTTGTAGAGTGAGCTCACCAGAGCAAAGACCAACAATGTGGCAAGTGTTAAAGATGATACA  
AGAGATTAAGAAGCTGTTGTTATGGAAGATAGTCATGAAATGGACCTCCT

>M6-PGSC0003DMG400007948M6LRR-RLK\_2745

ATGATACAAGAGATTAAGAAGCTGTTGTTATGGAAGATAGTCATGAAATGGACCTCCTCACTGGCCCT  
CCTAAATCCTAATTCTTAGTTATTATAAAATTGAATTTGTATTATATTAC

>M6-PGSC0003DMG400007948M6LRR-RLK\_2804

CACTGGCCCTCCTAAATCCTAATTCTTAGTTATTATAAAATTGAATTTGTATTATATTCACTACATGAGACT  
TTTCAATATTAGTAATTGCAAAGAAAGGAACAAAAGGGGAAAGACTT

>M6-PGSC0003DMG400007948M6LRR-RLK\_305

CCATTCTTCTGTTTTATCTGTTTCTTTTCATTCCACTGTTTCGTTGATTCTTCAGATGCATCAGCATTGTT  
AGCATTCAAATATAAAGCTGATTTGGACAACAACTTGCATTTTCTG

>M6-PGSC0003DMG400007948M6LRR-RLK\_366

ATCAGCATTGTTAGCATTCAAATATAAAGCTGATTTGGACAACAACTTGCATTTTCTGCTAATACAAGTT  
TCAGATTCTGCAAATGGAAAGGGATAACAATGCTCGGAGAAGAAAGTTAT

>M6-PGSC0003DMG400007948M6LRR-RLK\_427

AATACAAGTTTCAGATTCTGCAAATGGAAAGGGATAACAATGCTCGGAGAAGAAAGTTATTCGTATTGTT  
ATCGAAAGTTTTAGCTTACGAGGTACGTTTCCAGCTAATACATTGTCTATG

>M6-PGSC0003DMG400007948M6LRR-RLK\_488

GTATTGTTATCGAAAGTTTTAGCTTACGAGGTACGTTTCCAGCTAATACATTGTCTATGCTTGATCAACTG  
AGAGTATTGAGTTTACATAACAACCTCACTTACCGGTCCGATTCCGGACC

>M6-PGSC0003DMG400007948M6LRR-RLK\_549

TGATCAACTGAGAGTATTGAGTTTACATAACAACCTCACTTACCGGTCCGATTCCGGACCTTTCTCCACTTA  
TTAATCTCAAAGTTCTTTTCTGGACCATAATTTGTTACCGGTTCAAT

>M6-PGSC0003DMG400007948M6LRR-RLK\_61

ACACAGAAACAGAGAGAAAAATAGCCAGACTAAATATTGGAAGTCCCCACTTCCCTTTTTCTTTCTCAA  
AAATCTTCACGTGAATCTGACTCTGCCTTTTGCCATATCTTCTTAGACTG

>M6-PGSC0003DMG400007948M6LRR-RLK\_610

TCTCCACTTATTAATCTCAAAGTTCTTTTCCTGGACCATAATTTGTTACCGGTTCAATACCATCTTCCATT  
TCACTCTTCATAGGCTTAAAACCTTGATCTCTTACAATAACCTC

>M6-PGSC0003DMG400007948M6LRR-RLK\_671

CATCTTCCATTTTCACTCTTCATAGGCTTAAAACCTTGATCTCTTACAATAACCTCACCGGTTCAATAT  
CCGTTGCAATCAACGGGTTGAACCGGTTGACTATCTCCGGCTTGACT

>M6-PGSC0003DMG400007948M6LRR-RLK\_732

CGGTTCAATATCCGTTGCAATCAACGGGTTGAACCGGTTGACTATCTCCGGCTTGACTCGAACCGGTTA  
AACGGATCAATCCCACCGCTGAACCAATCTACCCTCCATATCTTCAACAT

>M6-PGSC0003DMG400007948M6LRR-RLK\_793

AACCGGTTAAACGGATCAATCCCACCGCTGAACCAATCTACCCTCCATATCTTCAACATTTCTCACAATGC  
CCTTTCTGGTCCTATTCCGGTAACGAAAACGTTATCCCGGTTTAAAACG

>M6-PGSC0003DMG400007948M6LRR-RLK\_854

CTCACAATGCCCTTTCTGGTCCTATTCCGGTAACGAAAACGTTATCCCGGTTTAAAACGGCGTCGTTTTCA  
GATAATAAAGGACTTTGTGGTGAGATCGTACATAAAGAATGCCGTCCAA

>M6-PGSC0003DMG400007948M6LRR-RLK\_915

GTCGTTTTTCAGATAATAAAGGACTTTGTGGTGAGATCGTACATAAAGAATGCCGTCCAATACAACCGTTT  
TTCAGTCCATCCACCGCTGCCGCCACTAAAATTACGCCGCCGCCGTCTAA

>M6-PGSC0003DMG400007948M6LRR-RLK\_976

CAACCGTTTTTCAGTCCATCCACCGCTGCCGCCACTAAAATTACGCCGCCGCCGTCTAAAACCTCCGGCAG  
AACTCGGCCAAAACGAAGAGTTACGACAGGGTAGCCCGTTAAACCGTAAA

>M6-PGSC0003DMG400007999M6LRR-RLP\_0

CTCCAGTAGCATAATAACATCACTCAAACTTCAACTTCTTCGAGCAGAATGTAAAATCAGTTTGAAGTC  
CCCAAACATGGCGGTGACGGACTTTTTTCGTCGGCGAAATCACCACCGAAC

>M6-PGSC0003DMG400007999M6LRR-RLP\_1037

TATTAACATATTAGTTGAGTGGACATCCGTGAAATCAACTCATATTTTTCGTTGCTGATGATCGAGTTATTA

GAAGTTAATAATCACACAAAAGTTTCTCATTTTCATTTTGTTTTACTCT

>M6-PGSC0003DMG400007999M6LRR-RLP\_1098

CGAGTTATTAGAAGTTAATAATCACACAAAAGTTTCTCATTTTCATTTTGTTTTACTCTTCTGTTGCGGATG  
AAACAGTGGATAAAAGTTGAAAACCTTTATTGGCTATTATCTCTATTTT

>M6-PGSC0003DMG400007999M6LRR-RLP\_1159

TGTTGCGGATGAAACAGTGGATAAAAGTTGAAAACCTTTATTGGCTATTATCTCTATTTTATCAGTTGAATT  
CTAATAGAGATCAATTTTGCATGTAAAGGACTCATCAAAGTTTTGATT

>M6-PGSC0003DMG400007999M6LRR-RLP\_122

ATAAAAAACCTTCTGCTAATAGTTAAAAAATCCACTTTATGCCGTTCAAGCGCCGAGAATCTCATCGACA  
GCATCAATGGTCTCCTTCCAATCATCCAAGAAATCAAACAAACCGGTGTT

>M6-PGSC0003DMG400007999M6LRR-RLP\_1220

CAGTTGAATTCTAATAGAGATCAATTTTGCATGTAAAGGACTCATCAAAGTTTTGATTGGAATACAGTT  
TAAATTGGTCTTAAAAACCTTTTCTTTAAATAATGGTATGGTGTCTGGGC

>M6-PGSC0003DMG400007999M6LRR-RLP\_1281

AATACAGTTTAAATTGGTCTTAAAAACCTTTTCTTTAAATAATGGTATGGTGTCTGGGCCATGTTGTTCCA  
GGTATTTC AAGACAAGATTTTCTTTTCACTGTTTCTCAATCTCCAA

>M6-PGSC0003DMG400007999M6LRR-RLP\_1342

TGTTGTTCCAGGTTATTTCAAGGACAAGATTTTCTTTTCACTGTTTCTCAATCTCCAAACGTGGAGCAAT  
TAAGGAAAATGATTTGGGAAAAGATATCAGGGTGCAATCTCCATGGTTA

>M6-PGSC0003DMG400007999M6LRR-RLP\_1403

GTGGAGCAATTAAGGAAAATGATTTGGGAAAAGATATCAGGGTGCAATCTCCATGGTTATGGATACGG  
GGAGATGTTACCCAGTGGAACTACAGTACCAATGGAATACGAAATCTGCA

>M6-PGSC0003DMG400007999M6LRR-RLP\_1464

GATACGGGAGATGTTACCCAGTGGAACTACAGTACCAATGGAATACGAAATCTGCATCCCCAGTAC  
TCTTGATTCTTGATGATGTGTGGTCTGCATCTGTGCTAGAGCCACTAATTG

>M6-PGSC0003DMG400007999M6LRR-RLP\_1525

CCCAGTACTCTTGATTCTTGATGATGTGTGGTCTGCATCTGTGCTAGAGCCACTAATTGTCAAGATCCCCG  
GCTGCAAGATCCTAGTTGTATCGCGTATCAAGTTTCTCCATCAATCAT

>M6-PGSC0003DMG400007999M6LRR-RLP\_1586

AAGATCCCCGGCTGCAAGATCCTAGTTGTATCGCGTATCAAGTTTCCTCCATCAATCATTGACTGTATTTA  
TGATTTAGAGTTGTTAAGGGAAGATGAAGCTATGTCCTTATTATGCCAT

>M6-PGSC0003DMG400007999M6LRR-RLP\_1647

ACTGTATTTATGATTTAGAGTTGTTAAGGGAAGATGAAGCTATGTCCTTATTATGCCATTTTGCATTTGGA  
CACAAATCCTTTCCGCGTGGTTTCAGCCAAAAGCTTGTCAAAGAGGTAT

>M6-PGSC0003DMG400007999M6LRR-RLP\_1708

TGCATTTGGACACAATTCCTTTCCGCGTGGTTTCAGCCAAAAGCTTGTCAAAGAGGTATTAGTGTATGTT  
TTTGGCAGCATATTAGTTTTTCTTTGCAAAAACCTTCTTGTATACTTGAG

>M6-PGSC0003DMG400007999M6LRR-RLP\_1769

GTGTATGTTTTTGGCAGCATATTAGTTTTTCTTTGCAAAAACCTTCTTGTATACTTGAGTTAAGCTAACAA  
AAGCTTCTTGGACTTTTTAGATTGTGGATGAATGTGAAGGGCTTCCTTT

>M6-PGSC0003DMG400007999M6LRR-RLP\_183

TCATCGACAGCATCAATGGTCTCCTTCCAATCATCCAAGAAATCAAACAAACCGGTGTTGAACTTCCACA  
GATACGTCAAACCTCAGATCGACGATTTCTCAAACCTTCTCCGAGATGGTT

>M6-PGSC0003DMG400007999M6LRR-RLP\_1830

AAGCTAACAAAAGCTTCTTGGACTTTTTAGATTGTGGATGAATGTGAAGGGCTTCCTTTGGCTCTTAAGG  
TCATTGGATCTTCATTAAGGGAAAACCTGAGATGTTCTGGATAAGTGCA

>M6-PGSC0003DMG400007999M6LRR-RLP\_1891

CTCTTAAGGTCATTGGATCTTCATTAAGGGAAAACCTGAGATGTTCTGGATAAGTGCAAAAACAGAT  
TATCACGATGCCAACCTGTCTGCGAGTCTCATGAACTGCAGTTGCTTGAGC

>M6-PGSC0003DMG400007999M6LRR-RLP\_1952

AAACAGATTATCACGATGCCAACCTGTCTGCGAGTCTCATGAACTGCAGTTGCTTGAGCGAATGAAATT  
GAGTATTGACTGTTTGCCTGAGAAGGTGAGAGAGTGTTCCTGGACTTGGG

>M6-PGSC0003DMG400007999M6LRR-RLP\_2013

ATGAAATTGAGTATTGACTGTTTGCCTGAGAAGGTGAGAGAGTGTTCCTGGACTTGGGTGCTTTCCCA  
GAAGACAAAAGGATTCTCTTGATGTTCTAATTAACATGTGGGTGGAGCTA

>M6-PGSC0003DMG400007999M6LRR-RLP\_2074

CTTCCCAGAAGACAAAAGGATTCTCTTGATGTTCTAATTAACATGTGGGTGGAGCTACATGATATTGA  
TGAGGAGGAGGCTTTTCACATTCTTGTGAACTTTCAGACAAAATCTCC

>M6-PGSC0003DMG400007999M6LRR-RLP\_2135

TGATATTGATGAGGAGGAGGCTTTTCACATTCTTGTTGAACTTTCAGACAAAAATCTCCTAAATCTAGTC  
AAAGATGCACGGTAAGCGGTGGACTAAAATCTCCTCAAACAATCTTTTAA

>M6-PGSC0003DMG400007999M6LRR-RLP\_2196

AATCTAGTCAAAGATGCACGGTAAGCGGTGGACTAAAATCTCCTCAAACAATCTTTTAATTTTTGTTAGA  
AGGTGATTGTTTATGGAAAAATCAATATGTTGATAGTCTTCAATGTGGT

>M6-PGSC0003DMG400007999M6LRR-RLP\_2257

TTTGTTAGAAGGTGATTGTTTATGGAAAAATCAATATGTTGATAGTCTTCAATGTGGTCTTCATGTGGC  
AGAGCTGGAGACATGTATACAAGTTACTATGAGATATCGGTATTTTCAGCA

>M6-PGSC0003DMG400007999M6LRR-RLP\_2318

TCATGTGGCAGAGCTGGAGACATGTATACAAGTTACTATGAGATATCGGTATTTTCAGCATGATGTATTAC  
GAGACCTAGCAATTCAGATGAGCAACCGTGATGATATAAATCAGAGAAAG

>M6-PGSC0003DMG400007999M6LRR-RLP\_2379

ATGTATTACGAGACCTAGCAATTCAGATGAGCAACCGTGATGATATAAATCAGAGAAAGCGATTGGTTA  
TGCCACGAAGAGACGTAAGCTTTCCAAGAGAATGGGAAAGAAATGTGGACG

>M6-PGSC0003DMG400007999M6LRR-RLP\_244

ACTTCCACAGATACGTCAAACCTCAGATCGACGATTTCTCCAACTTCTCCGAGATGGTTACGAACTCGCC  
GGAAAAGTTATCCACTCCGGCCGTTGGAACATGTACAGGTGTCACCTTCT

>M6-PGSC0003DMG400007999M6LRR-RLP\_2440

ATTGGTTATGCCACGAAGAGACGTAAGCTTTCCAAGAGAATGGGAAAGAAATGTGGACGAACCTTTCCA  
TGCACGAGTTATCTCTGTGCATACAGGTATTTTTAGATCCTTGGTTACTGC

>M6-PGSC0003DMG400007999M6LRR-RLP\_2501

CCTTTCCATGCACGAGTTATCTCTGTGCATACAGGTATTTTTAGATCCTTGGTTACTGCTGATTGATTAAT  
AATGAAAAGTTTATCATGTGATATAAACAGAAATATTTCTCTTTAATGC

>M6-PGSC0003DMG400007999M6LRR-RLP\_2562

ATTGATTAATAATGAAAAGTTTATCATGTGATATAAACAGAAATATTTCTCTTTAATGCAGATGAAATGA  
GAGAAATAGACTGGTTCAGAATGGATTGCCCGAAAGCTGAAGTACTGATT

>M6-PGSC0003DMG400007999M6LRR-RLP\_2623

ATGAAATGAGAGAAATAGACTGGTTCAGAATGGATTGCCCGAAAGCTGAAGTACTGATTCTCAATTTTG

CCTCATCTGAGTACTTCTTGCCTCCTTTCCTGGAGAATATGCCAAAGCTAA

>M6-PGSC0003DMG400007999M6LRR-RLP\_2684

CAATTTTGCCTCATCTGAGTACTTCTTGCCTCCTTTCCTGGAGAATATGCCAAAGCTAAGGGCATTGATAA  
TCATAAACTATAGTGCTGGCAATGCAGTTCTTCATAACATGTCTGTATT

>M6-PGSC0003DMG400007999M6LRR-RLP\_2745

GCATTGATAATCATAAACTATAGTGCTGGCAATGCAGTTCTTCATAACATGTCTGTATTTCAGTCATTTAAC  
CAACTTGAGAAGCCTTTGGTTTCGAGAAGATATCCATCACTCACTTATCT

>M6-PGSC0003DMG400007999M6LRR-RLP\_2806

GTCATTTAACCAACTTGAGAAGCCTTTGGTTTCGAGAAGATATCCATCACTCACTTATCTGACTCCACAAAT  
CCTCTCAATAACTTGCGGAAGATATCTCTAGTGCTTTGTGACATGAAAA

>M6-PGSC0003DMG400007999M6LRR-RLP\_2867

CTCCACAAATCCTCTCAATAACTTGCGGAAGATATCTCTAGTGCTTTGTGACATGAAAAACAGCTTAGAT  
GAGTCAGATGTGGACCTCCCTGGTTTGTCCACAGCTTTCTGAGTTCAC

>M6-PGSC0003DMG400007999M6LRR-RLP\_2928

AGCTTAGATGAGTCAGATGTGGACCTCCCTGGTTTGTCCACAGCTTTCTGAGTTCACAATGGATCATT  
GCATCAACTTCAATAAGCTGCCATCAAGTATTTGCCGGTTCATAAGCTC

>M6-PGSC0003DMG400007999M6LRR-RLP\_305

GAACTCGCCGAAAAGTTATCCACTCCGGCCGTTGGAACATGTACAGGTGTCACCTTCTCATTGACTCT  
AATTACAGTGAATTGAACCTCTTCTGCTCTAATTAGGGTTATTGAATTG

>M6-PGSC0003DMG400007999M6LRR-RLP\_3050

CAGCCTTAGTATCACTAATTGTGATAGTCTTATGAACTCCATCTGATTTAGGTGAATTACAACTCTAC  
AAGTTTTAAGGATATATGCCTGTCCACATCTGAAAAGGCTTCCCCCTGG

>M6-PGSC0003DMG400007999M6LRR-RLP\_3111

CAAACCTACAAGTTTTAAGGATATATGCCTGTCCACATCTGAAAAGGCTTCCCCCTGGAATAGGTCATC  
TGGTGAAGCTGAAGTATCTTGACATTTACAATGTGTTGGTTTGAGATGT

>M6-PGSC0003DMG400007999M6LRR-RLP\_3172

TAGGTCATCTGGTGAAGCTGAAGTATCTTGACATTTACAATGTGTTGGTTTGAGATGTCTCCCTGAAGC  
AATTGGTTGCTGTAGAACTTGGAGAAGATTGATATGAGGGAGTGCCCTC

>M6-PGSC0003DMG400007999M6LRR-RLP\_3233

CCCTGAAGCAATTGGTTGCTGTAGAACTTGGAGAAGATTGATATGAGGGAGTGCCTCAAATTGACAG  
TTTGCCAAGCGCTCTATCCTTTCTTGAATCATTACGTTGTGTTATTTGTGA

>M6-PGSC0003DMG400007999M6LRR-RLP\_3294

ATTGACAGTTTGCCAAGCGCTCTATCCTTTCTTGAATCATTACGTTGTGTTATTTGTGACGATGAAGTTTT  
TTGTCAATGGAAAGATGTTGAGAAGGCTGTACCAGGTCTATGTGTACAG

>M6-PGSC0003DMG400007999M6LRR-RLP\_3355

ATGAAGTTTTTTGTCAATGGAAAGATGTTGAGAAGGCTGTACCAGGTCTATGTGTACAGGTTGCCGAGG  
AGTGCTATACTCTTGACTGGCTATCTCAGTAATCAAGTTTTCAATCCCTT

>M6-PGSC0003DMG400007999M6LRR-RLP\_3416

TGCCGAGGAGTGCTATACTCTTGACTGGCTATCTCAGTAATCAAGTTTTCAATCCCTTATCTTGGGTTTC  
TTTCGTGTAATGCTCAGTCAATTTCCAGTTCTGTATTTCCCTTTA

>M6-PGSC0003DMG400007999M6LRR-RLP\_3477

CTTGGGTTTCTTTCGTGTAATGCTCAGTCAATTTCCAGTTCTGTATTTCCCTTTACATGGGGTTCATT  
GTATCTCTTGTAATAATATATAGCAATATGTAAATATGTAGATGGAC

>M6-PGSC0003DMG400007999M6LRR-RLP\_3538

TGGGGTTCATTGTATCTCTTGTAATAATATATAGCAATATGTAAATATGTAGATGGACTACATCTCAATA  
GCTGATCTTTCCTTTTACTTTAAAACCATAATGCTGGAAGCAAATTAC

>M6-PGSC0003DMG400007999M6LRR-RLP\_3582

AATATGTAGATGGACTACATCTCAATAGCTGATCTTTCCTTTTACTTTAAAACCATAATGCTGGAAGCAA  
ATTACCACAGGCAATCCAACACTAAGGCAAGTTATCTGCTATAACATGT

>M6-PGSC0003DMG400007999M6LRR-RLP\_366

TTCGACTCTAATTACAGTGAATTGAACCTCTCCTGCTCTAATTAGGGTTATTGAATTGTACGAATCTGTT  
AGAAATTACTTAATTTATATTATGCCTTGATAACAGGAACCTACAGTTG

>M6-PGSC0003DMG400007999M6LRR-RLP\_427

CGAATCTGTTAGAAATTACTTAATTTATATTATGCCTTGATAACAGGAACCTACAGTTGGCTAGGAAAAT  
GGAGAGGCTGGAGAAAAGAGTAGCGAGGTTTCATGCAAGTTACAATGCAAG

>M6-PGSC0003DMG400007999M6LRR-RLP\_488

TAGGAAAATGGAGAGGCTGGAGAAAAGAGTAGCGAGGTTTCATGCAAGTTACAATGCAAGCTCATGTAC  
TAGCGGATGTTTCATCATGTTAGGTTTAGTATGGAGCAGAGATTTGACGTGCT





ACCAATTGATTTTTGCAGATCAAAGGCTTGCTATAGTATACCCCATTATA

>M6-PGSC0003DMG400008036M6LRR-RLP\_1024

TAGCTGAATGTGTTGCATTTTTTGCTTACCCAAGGTAAGTGCCTCATATGGCTACATATACTTATATTCCTT  
GTTGGCTTTCAAATTTCAAACGCCTCCTCTGGATCTCCCTGAATTGG

>M6-PGSC0003DMG400008036M6LRR-RLP\_1088

TATTCCTTGTGGCTTTCAAATTTCAAACGCCTCCTCTGGATCTCCCTGAATTGGCTCCTTAGTAAGGGT  
AACACGGTGTACAAAGCATTCTGTGTTAGCATGGTTCGGGAAAAGATCA

>M6-PGSC0003DMG400008036M6LRR-RLP\_1152

TAAGGGTAACACGGTGTACAAAGCATTCTGTGTTAGCATGGTTCGGGAAAAGATCATTAGAAAATTCTG  
GTATTTGATCATAAACATACATGTCCCCTTTTCGCGATCTTTTTTATTTTA

>M6-PGSC0003DMG400008036M6LRR-RLP\_1216

TTCTGGTATTTGATCATAAACATACATGTCCCCTTTTCGCGATCTTTTTTATTTTAATTAATTAAGCTTGT  
AATTTCAATTGAATAGAGTGTGATATATCATAATAACTTGTGATCTCT

>M6-PGSC0003DMG400008036M6LRR-RLP\_1266

ATTTTAATTAATTAAGCTTGTAAATTTCAATTGAATAGAGTGTGATATATCATAATAACTTGTGATCTCTG  
TTTATGGAGTATTGCTCAGTAGTAAATTTACGTTACTTTTATGTTATGG

>M6-PGSC0003DMG400008036M6LRR-RLP\_128

CAAGAATATCATCTCTGCTGATCCTCTAGGTATTACAAAACTTGGGTTGGTCCAAACATATGTAATTATA  
CTGGTTTTTATTGTGAAAGTCCTCCAGACAACAATTCAGCAATTGCTCT

>M6-PGSC0003DMG400008036M6LRR-RLP\_192

AATTATACTGGTTTTTATTGTGAAAGTCCTCCAGACAACAATTCAGCAATTGCTCTTGCTTCTATTGATTC  
AATGGTTTTCAACTTAGCGCGTTTACTCTTGATGGCTTCCTTGATCAG

>M6-PGSC0003DMG400008036M6LRR-RLP\_256

TTGATTTCAATGGTTTTCAACTTAGCGCGTTTACTCTTGATGGCTTCCTTGATCAGCTTCCTGATATAGCTA  
TTTTCCATGCTAATTCAAACAATTTTGGTGGGACTCTGTCTCCAAAAA

>M6-PGSC0003DMG400008036M6LRR-RLP\_320

TATAGCTATTTCCATGCTAATTCAAACAATTTTGGTGGGACTCTGTCTCCAAAAATCGCGAATCTTCCTT  
ATCTCTATGAACTTGATATTAGTAACAACCAATTTTTCGGCCCATTTCC

>M6-PGSC0003DMG400008036M6LRR-RLP\_384

CTTCCTTATCTCTATGAACTTGATATTAGTAACAACCAATTTTTCGGCCCATTTCTAGTCCAATTTGGGC  
ATGAATAGCTTAAATATATTGGATATAAGATTCAATTCTTCACTGGA

>M6-PGSC0003DMG400008036M6LRR-RLP\_448

TTTTGGGCATGAATAGCTTAAATATATTGGATATAAGATTCAATTCTTCACTGGATCAGTCCCACCTCAA  
TTGTTCACTAAAGATCAATTAGACGCGCTCTTCATCAACAACAACAATT

>M6-PGSC0003DMG400008036M6LRR-RLP\_512

ACCTCAATTGTTCACTAAAGATCAATTAGACGCGCTCTTCATCAACAACAACAATTTTCATGCAGATGCTTC  
CTGATAACATCGCGACCAGCCATGTTACATATCTTACTTTAGCTAACAA

>M6-PGSC0003DMG400008036M6LRR-RLP\_576

ATGCTTCCTGATAACATCGCGACCAGCCATGTTACATATCTTACTTTAGCTAACAAACAGATTTTTCGGTCC  
TATCCCACATAGTATTTCCAAAATCTTGTCGAGTTTGTCTGAGATTTTG

>M6-PGSC0003DMG400008036M6LRR-RLP\_64

GACAGAACCAATTGATTTTTGCAGATCAAAGGCTTGCTATAGTATACCCATTATACAAAAATTCAAGAA  
TATCATCTCTGCTGATCCTCTAGGTATTACAAAACTTGGGTTGGTCCAA

>M6-PGSC0003DMG400008036M6LRR-RLP\_640

TCGGTCCTATCCCACATAGTATTTCCAAAATCTTGTCGAGTTTGTCTGAGATTTTGCTGCTTAACAACTTG  
TTAAGTGGATGTCTTCCTTACGAGATAGGATTCTTAAACGAAGCAATAG

>M6-PGSC0003DMG400008036M6LRR-RLP\_704

CAACTTGTTAAGTGGATGTCTTCCTTACGAGATAGGATTCTTAAACGAAGCAATAGTCTTCGATGCTGGC  
AATAATAGACTCACCGGTCCACTTCCATTCTCATTAGGGTGTGGAAAA

>M6-PGSC0003DMG400008036M6LRR-RLP\_768

GCTGGCAATAATAGACTCACCGGTCCACTTCCATTCTCATTAGGGTGTGGAAAATGTAGAAATGTTGA  
ATTTTGCTTGAAATCAGATGTATGGGATAGTGCCTGATGTGATTTGTGCC

>M6-PGSC0003DMG400008036M6LRR-RLP\_832

TGTTGAATTTTGCTTGAAATCAGATGTATGGGATAGTGCCTGATGTGATTTGTGCCCTGGGGAATTTGGC  
AAATTTATCTTTTCCGATAACTATTTTACAGGATTTGGGCCAATTTGTT

>M6-PGSC0003DMG400008036M6LRR-RLP\_896

TTTGGCAAATTTATCTTTTCCGATAACTATTTTACAGGATTTGGGCCAATTTGTTTGAGATTGATAGAAA  
ATGGAGTGTGGATTTGAGGAATAATTGTATTCCTGGTTTTCCATTTCA

>M6-PGSC0003DMG400008036M6LRR-RLP\_960

ATAGAAAATGGAGTGTGGATTGATTGAGGAATAATTGTATTCCTGGTTTTCCATTTCAAAGATCAATAGCTG  
AATGTGTTGCATTTTTTCTTACCCAAGGTAAGTGTCTCATATGGCTACA

>M6-PGSC0003DMG400008146-(rev)M6LRR-RLK\_0

ATGGATTCTTGATTGTTCTATCTGTTGTTTTGGAGGGAAAAGGAGGAAGAAATTGAAGAAAAGGTGTT  
TTCTTGAAAAAATACTCAAGAATGGCAATTTTGAGGTTTCTGTAA

>M6-PGSC0003DMG400008146-(rev)M6LRR-RLK\_1054

TGGAACTATTCCTCTGAGTTTGGTCAGCTTAACAGTTTGCAAGAATTGATTGTTTCTGGTAATAACCTTT  
ATGGAGAGATTCCAATATCAGTTCTTAAGTGCAAGAATCTCAATAAGCT

>M6-PGSC0003DMG400008146-(rev)M6LRR-RLK\_1116

ATAACCTTTATGGAGAGATTCCAATATCAGTTCTTAAGTGCAAGAATCTCAATAAGCTTGACTTGAGCAA  
CAACAAGTTCAATGGTACCATACCGGCAGATATCTGCAATACGTCCAGAT

>M6-PGSC0003DMG400008146-(rev)M6LRR-RLK\_1178

TTGAGCAACAACAAGTTCAATGGTACCATACCGGCAGATATCTGCAATACGTCCAGATTGCAATATTTGC  
TGTTGGGGGAGAACTCGATTGAGGGGAGATACCTCATGAGATAGGGAAT

>M6-PGSC0003DMG400008146-(rev)M6LRR-RLK\_124

GTTTTTTCTAGTTGTTTGTATCAAGATTCCAAGTTGTGAATCCCAGTTGGTATTTTCATGATCAAGATG  
TAGTGGAAGCAATTGGGAAAGAGCTATAAGTACCTGGATGGGGTGTGAT

>M6-PGSC0003DMG400008146-(rev)M6LRR-RLK\_1240

ATATTTGCTGTTGGGGGAGAACTCGATTGAGGGGAGATACCTCATGAGATAGGGAATTGTGTAAAGTT  
GCTTGAGTTGGAAATGGGGAGTAATGAACTTACTGGAAGTATCCCTCCTGA

>M6-PGSC0003DMG400008146-(rev)M6LRR-RLK\_1302

TAAAGTTGCTTGAGTTGGAAATGGGGAGTAATGAACTTACTGGAAGTATCCCTCCTGAGATTGGTCATA  
TGAAGAAGTTGCAGATTTGTTGAATTTGAGTCATAATCGTCTCCACGGAA

>M6-PGSC0003DMG400008146-(rev)M6LRR-RLK\_1364

GGTCATATGAAGAAGTTGCAGATTTGTTGAATTTGAGTCATAATCGTCTCCACGGAAAATTGCCTCAGG  
ATTTAGGAAAAGTTGACAAGTTGGTTTCTTTAGATGTATCTGATAATCAG

>M6-PGSC0003DMG400008146-(rev)M6LRR-RLK\_1426

GCCTCAGGATTTAGGAAAAGTTGACAAGTTGGTTTCTTTAGATGTATCTGATAATCAGCTCTCGGGGAAT

ATTCCGCCGGCATTGAAGGGCATGCAGAGTTTGATAGAGGTTGATTTTTTC

>M6-PGSC0003DMG400008146-(rev)M6LRR-RLK\_1488

CGGGGAATATTCCGCCGGCATTGAAGGGCATGCAGAGTTTGATAGAGGTTGATTTTTTCGAGCAACCAAT

TCACTGGTCCAATACCTACTTTTTGCACCATTTAGAAAAGTCCTAATTCAA

>M6-PGSC0003DMG400008146-(rev)M6LRR-RLK\_1550

AACCAATTCCTGGTCCAATACCTACTTTTTGCACCATTTAGAAAAGTCCTAATTCAAGTTTTCTTGAAA

CAAAGATCTCTGTGGTGATCCTTTGAGTGTGGTTGTGGGGATTTAAAT

>M6-PGSC0003DMG400008146-(rev)M6LRR-RLK\_1612

TCTTGAAACAAGATCTCTGTGGTGATCCTTTGAGTGTGGTTGTGGGGATTTAAATGGTTATGACCAC

AGCGTTTACGGTCACAAGGTCTCTTACCGAATCGTTTTGGCTGTTATCGG

>M6-PGSC0003DMG400008146-(rev)M6LRR-RLK\_1674

ATGACCACAGCGTTTACGGTCACAAGGTCTCTTACCGAATCGTTTTGGCTGTTATCGGTTCTGGTTTGGC

AGTTTTGTATGTGTACAGTGGTTGTTTTGCTGTTTCATGATGAGGGAGA

>M6-PGSC0003DMG400008146-(rev)M6LRR-RLK\_1736

GGTTTGGCAGTTTTTGTATGTGTACAGTGGTTGTTTTGCTGTTTCATGATGAGGGAGAAACAAGAGAAA

GCTGCCAAGGAAGCAGCTGGAAAAACCATTGATGAAATTTCTAGCAAACCA

>M6-PGSC0003DMG400008146-(rev)M6LRR-RLK\_1798

AGAGAAAGCTGCCAAGGAAGCAGCTGGAAAAACCATTGATGAAATTTCTAGCAAACCAGTGATACTAG

CGGGAAACGTCTTTGTTGACAATCTAAAGCAAGCAATTGATTTTGATGCAGT

>M6-PGSC0003DMG400008146-(rev)M6LRR-RLK\_186

ATCAAGATGTAGTGGAAGCAATTGGGAAAGAGCTATAAGTACCTGGATGGGGTGTGATGAACACAAC

GATTTCTGCTCTTGGCATGGAGTATTTGCAGCTCAAACAGTTCAATGGTGG

>M6-PGSC0003DMG400008146-(rev)M6LRR-RLK\_1860

TACTAGCGGGAAACGTCTTTGTTGACAATCTAAAGCAAGCAATTGATTTTGATGCAGTTGTAAAGGCAG

TCATGAAAGACTCGAATAAGATTTGTGTTGGTACTTTTCAGCACTGTCTATA

>M6-PGSC0003DMG400008146-(rev)M6LRR-RLK\_1922

AAGGCAGTCATGAAAGACTCGAATAAGATTTGTGTTGGTACTTTTCAGCACTGTCTATAAAGCAGACATG

CCTTCCGGGATGATTTTGTCCGGTAAAAAGCTAAAGTCAATGGACAAAAC

>M6-PGSC0003DMG400008146-(rev)M6LRR-RLK\_1984

AGACATGCCTTCCGGGATGATTTTGTCCGGTGAAAAAGCTAAAGTCAATGGACAAAACCTATAATTCATCA  
CCAGAGTAAGATGATCAGAGAGCTTGAAAACTTAGTAAGCTCGTTCATGA

>M6-PGSC0003DMG400008146-(rev)M6LRR-RLK\_2046

TTCATCACCAGAGTAAGATGATCAGAGAGCTTGAAAACTTAGTAAGCTCGTTCATGATAATCTTGCTCG  
TCCTATCGGATTTGGAATCTATGAAGATGTCGTTCTTCTGTTGCATGAAT

>M6-PGSC0003DMG400008146-(rev)M6LRR-RLK\_2108

CTTGCTCGTCCTATCGGATTTGGAATCTATGAAGATGTCGTTCTTCTGTTGCATGAATATTATGCCAAAGG  
AACGTTGACTCAATATCTTCATAACTCTAGCCAGAAACCTGAATATAAG

>M6-PGSC0003DMG400008146-(rev)M6LRR-RLK\_2170

TGCCAAAGGAACGTTGACTCAATATCTTCATAACTCTAGCCAGAAACCTGAATATAAGCCCGACTGGCCA  
ACAAGACTTGCCATTGCCACTGGAGTTGCAGAAGGATTGGCATTCCCTCA

>M6-PGSC0003DMG400008146-(rev)M6LRR-RLK\_2232

ACTGGCCAACAAGACTTGCCATTGCCACTGGAGTTGCAGAAGGATTGGCATTCCCTCATCATGTTGCTAT  
CATCCATCTTGACATTTCTCCGGGAATGTGCTTCTTGATTCTAATTTCA

>M6-PGSC0003DMG400008146-(rev)M6LRR-RLK\_2294

GTTGCTATCATCCATCTTGACATTTCTCCGGGAATGTGCTTCTTGATTCTAATTTAGGCCTTTGGTTAGT  
GAAGTTGAAATCTCTAGGCTTCTCGATCCATCTAGAGGGACTGCAAGT

>M6-PGSC0003DMG400008146-(rev)M6LRR-RLK\_2340

ATTCTAATTTAGGCCTTTGGTTAGTGAAGTTGAAATCTCTAGGCTTCTCGATCCATCTAGAGGGACTGC  
AAGTATTAGTGCTGTTGCTGGTTCATTCGGATATATTCCTCCAGGTACAT

>M6-PGSC0003DMG400008146-(rev)M6LRR-RLK\_248

ACAACCTGATTTCTGCTCTTGGCATGGAGTTATTTGCAGCTCAAACAGTTCAATGGTGGAAAGACTTGATC  
TTTCTGGTTTTAGATTACAAGGTAATGTAACCTAATATCTGAGCTCAAA

>M6-PGSC0003DMG400008146-(rev)M6LRR-RLK\_310

ACTTGATCTTTCTGGTTTTAGATTACAAGGTAATGTAACCTAATATCTGAGCTCAAAGGTTTAAAGTGGC  
TGGACCTTTCTAATAATAACTTCCAAGTTCTATTCCATTTGCATTTGG

>M6-PGSC0003DMG400008146-(rev)M6LRR-RLK\_372

TAAAGTGGCTGGACCTTTCTAATAATAACTTCCAAGTTCTATTCCATTTGCATTTGGGAATTTATCTGAG  
CTTCAATATCTTGATTTGTCTTTTAACAAATTTGGAAACTCAATACCTA

>M6-PGSC0003DMG400008146-(rev)M6LRR-RLK\_434

TTATCTGAGCTTCAATATCTTGATTTGTCTTTTAACAAATTTGGAAACTCAATACCTAGTGAATTAGGTAA  
GCTCAGAAGCCTAAAGGCATTGAACCTTTGAAAAACTGGCTTACAGGA

>M6-PGSC0003DMG400008146-(rev)M6LRR-RLK\_496

ATTAGGTAAGCTCAGAAGCCTAAAGGCATTGAACCTTTGAAAAACTGGCTTACAGGAGCTATACCTGA  
TGAGCTTGAGGGGTTAGAGAATTTGCAAGATTTTCAAATATTTACTAACAA

>M6-PGSC0003DMG400008146-(rev)M6LRR-RLK\_558

TACCTGATGAGCTTGAGGGGTTAGAGAATTTGCAAGATTTTCAAATATTTACTAACAACTTGAATGGTTC  
TATCCCAATGTGGATTGGTAATTTGACCAATCTTAAGGTTTTTGCTGCTT

>M6-PGSC0003DMG400008146-(rev)M6LRR-RLK\_62

AGGTGTTTTCTTGAAAAAAAAAAAAACTCAAGAATGGCAATTTTGAGGTTTCTGTAACTGTGTTTTTTCT  
AGTTGGTTTGTATCAAGATTCCAACCTGTGAATTCCCAGTTGGTATTT

>M6-PGSC0003DMG400008146-(rev)M6LRR-RLK\_620

AATGGTCTATCCAATGTGGATTGGTAATTTGACCAATCTTAAGGTTTTTGCTGCTTATGAGAATGAATT  
TAGTGGTGGTGTTCCTGTAACTTAGGATTGACTCTGATCTTTCTTTG

>M6-PGSC0003DMG400008146-(rev)M6LRR-RLK\_682

GAATGAATTTAGTGGTGGTGTTCCTGTAACTTAGGATTGACTCTGATCTTTCTTTGTTGAACCTTCACT  
CAAACCAGCTTGAAGGTAATTCCTGAGAGCATTGTGCTAATGGGAA

>M6-PGSC0003DMG400008146-(rev)M6LRR-RLK\_744

ACCTTCACTCAAACCAGCTTGAAGGTAATTCCTGAGAGCATTGTGCTAATGGGAATCTTGAATTTCTT  
GTTCTAACTCAGAATAAGTTGACCGGAAAGATTCTGATTCGATTGGGA

>M6-PGSC0003DMG400008146-(rev)M6LRR-RLK\_806

GAATTTCTTGTCTAACTCAGAATAAGTTGACCGGAAAGATTCTGATTCGATTGGGAATTGTAAAGGAC  
TTTCTAGTATTAGAATTGGGAATAACAAGTTGATTGGAGGTATCCCTAAA

>M6-PGSC0003DMG400008146-(rev)M6LRR-RLK\_868

TAAAGGACTTTCTAGTATTAGAATTGGGAATAACAAGTTGATTGGAGGTATCCCTAAATCAATTGGGAA  
TATCAGAAGTCTTACTTATTTTGAAGCAGATAGTAATAGTTTGTCTGGTGA

>M6-PGSC0003DMG400008146-(rev)M6LRR-RLK\_930

TTGGGAATATCAGAAGTCTTACTTATTTTGAAGCAGATAGTAATAGTTTGTCTGGTGAATTTGTCACCGA

GTTTCGCAAATGCTCAAATCTCACTCTACTTAATTTAGCTTCAAATAAGT

>M6-PGSC0003DMG400008146-(rev)M6LRR-RLK\_992

GTCACCGAGTTCGCAAATGCTCAAATCTCACTCTACTTAATTTAGCTTCAAATAAGTTTAATGGAAGTAT  
TCCTCCTGAGTTTGGTCAGCTTAACAGTTTGCAAGAATTGATTGTTTCT

>M6-PGSC0003DMG400008185M6LRR-RLP\_0

TATATTTGGCTTTTTAAAATATATAAATAAATGTGTGTAAGCACTTTTAGCTTGCCACTTATGACCTAG  
TGTTTTGTTCCAATGGCTCCAAGTCTATCTGCAACAATGTTTGCAGGTT

>M6-PGSC0003DMG400008185M6LRR-RLP\_496

AAATGAAGACGTTTGTCCAACAGGGAATATCTGTGAGTACACCCAGTCTCAAATTTATGATCTTCAATTA  
TAGGAGGCGGAAAGTAGATGATCTGAATAAGTCGATACAGCAGATGTTTA

>M6-PGSC0003DMG400008185M6LRR-RLP\_558

TTCAATTATAGGAGGCGGAAAGTAGATGATCTGAATAAGTCGATACAGCAGATGTTTAACAAGGTATGT  
CTTATTCCGCTAGCTACATATTCTAATTAGGTTCTACTGCTCTCTTTCCGT

>M6-PGSC0003DMG400008185M6LRR-RLP\_62

ATGACCTAGTGTTTTGTCCAATGGCTCCAAGTCTATCTGCAACAATGTTTGCAGGTTTTTTGTCCCAACC  
TGGAAGACCTATCCATCAACAGCCTTAAAAGCATAAGTGCTCTATGCTC

>M6-PGSC0003DMG400008185M6LRR-RLP\_620

GGTATGTCTTATTCCGCTAGCTACATATTCTAATTAGGTTCTACTGCTCTCTTTCCGTTTTTCGATACTTATTT  
AAGTTCATCAACTTTCTTTTACTTAATAATCTAGTCATCTCTCTCT

>M6-PGSC0003DMG400008185M6LRR-RLP\_682

GATACTTATTTAAGTTCATCAACTTTCTTTTACTTAATAATCTAGTCATCTCTCTCTTTGCATTCTCTGTT  
TCCTGCAGAAACAAGAAGCTAGTGATGACGACGAAGCTAGTAGTGG

>M6-PGSC0003DMG400008185M6LRR-RLP\_744

GCATTCTCTGTTTCTGCAGAAACAAGAAGCTAGTGATGACGACGAAGCTAGTAGTGGCTATGTAATAA  
TGATGCCGACGAATCTGAACCTAGTCATTCCAGAAGTTAGGAAGCGGGTAG

>M6-PGSC0003DMG400008185M6LRR-RLP\_806

GTAATAATGATGCCGACGAATCTGAACCTAGTCATTCCAGAAGTTAGGAAGCGGGTAGGAAAACTCAA  
TGAAATAATGCAAGTAAACCTCGAACATCACCTGATACCTATGCTCGTGA

>M6-PGSC0003DMG400008185M6LRR-RLP\_868



AACTCAATGAAATAATGCAAGTAAAACCTCGAACATCACCTGATACCTATGCTCGTGATGGAGGTAATTA  
ACAAGCAGAGGCGGATCTACATTATTGTAACCTATTGGTTCATGTCAACC

>M6-PGSC0003DMG400008185M6LRR-RLP\_927

GGAGGTAATTAACAAGCAGAGGCGGATCTACATTATTGTAACCTATTGGTTCATGTCAACCTACTAGCTA  
TTGGCTATAGATCTTGTCTATGTATTAGTAATATCTAAAAATAAATGAT

>M6-PGSC0003DMG400008296M6LRR-RLK\_0

TTATGTACTCCTAGGTTTCGAGTAGGTGACGAAGTTCTTGTTGTCTTTTCTTGTGTGGGGGTACATACAA  
CTTGTTCTTTAACACGGAGCATCCTAGATTAGAGGCATGCTTGGTATTTT

>M6-PGSC0003DMG400008296M6LRR-RLK\_1037

ACTCTCTTTCTGGGAAAATCCCATCTGAACTTGGCCTCTGTATCAATCTTTTTACCTTGAACATGTATACTA  
ATCAATTTACTGGAAGCATACTCCTGAGCTTGGAAATTTAGAAAAT

>M6-PGSC0003DMG400008296M6LRR-RLK\_1098

CATGTATACTAATCAATTTACTGGAAGCATACTCCTGAGCTTGGAAATTTAGAAAATTTGCAAGTGCTC  
AGATTGCATAACAATAAGTTGAACTCCAGTATACCTGCCTCAATATTCCA

>M6-PGSC0003DMG400008296M6LRR-RLK\_1159

CAAGTGCTCAGATTGCATAACAATAAGTTGAACTCCAGTATACCTGCCTCAATATTCCACCTGAAGTCATT  
AACTCATTTAGGACTCTCACAGAATGAACTAACTGGTAATATTCTCTCC

>M6-PGSC0003DMG400008296M6LRR-RLK\_122

AACAAATTCATAGAATGCAAGTCATTTTCCTTAGTGTGAATGGATGACTAGTTGACTGCTACTGAAAACG  
GTGATTCACTGTACGATTCACTAAGAAATGTGTATAAAGGCTTCATTGTC

>M6-PGSC0003DMG400008296M6LRR-RLK\_1220

TGAAGTCATTAACCTCATTTAGGACTCTCACAGAATGAACTAACTGGTAATATTCTCTCCCGAGTTGGGATC  
TTTAACGTCACTAGAAAGTGCTTACCCTTCACTCAAATAGGTTATCGGGGG

>M6-PGSC0003DMG400008296M6LRR-RLK\_1281

GTTGGGATCTTTAACGTCACTAGAAAGTGCTTACCCTTCACTCAAATAGGTTATCGGGGGAGATCCCATCA  
ACTATAACAAACCTGGCAAACCTTGACATATTTGTCTTTGGGCTTTAATTT

>M6-PGSC0003DMG400008296M6LRR-RLK\_1342

ATCCCATCAACTATAACAAACCTGGCAAACCTTGACATATTTGTCTTTGGGCTTTAATTTATTGACTGGATC  
ACTTCCATCGGAATTTGGGTTACTCTATAATCTGAAGAATCTAACTGCA

>M6-PGSC0003DMG400008296M6LRR-RLK\_1403

TGACTGGATCACTTCCATCGGAATTTGGGTTACTCTATAATCTGAAGAATCTAACTGCAAATGATAACCT  
CCTGGAAGGATCTATTCCATCGAGCATAACAAATTGTTCTCATCTTCTTG

>M6-PGSC0003DMG400008296M6LRR-RLK\_1464

TGATAACCTCCTGGAAGGATCTATTCCATCGAGCATAACAAATTGTTCTCATCTTCTTGTTTTAACCCCTGC  
TTATAATAGAATAACGGGGAAAATACCAAATGGGTTGGGGCAATTGTC

>M6-PGSC0003DMG400008296M6LRR-RLK\_1525

TTAACCCCTTGCTTATAATAGAATAACGGGGAAAATACCAAATGGGTTGGGGCAATTGTCCAATCTTACAT  
TTTTGTCTTTGGGATCAAACAAAATGATGGGGGAGATTCCTGAAGATCTC

>M6-PGSC0003DMG400008296M6LRR-RLK\_1586

ATCTTACATTTTTGTCTTTGGGATCAAACAAAATGATGGGGGAGATTCCTGAAGATCTCTTCAACTGTTCA  
ATGCTTGAAATTCTAGATCTGAGTGACAACAATTCAGCGGGAAACTCA

>M6-PGSC0003DMG400008296M6LRR-RLK\_1647

CAACTGTTCAATGCTTGAAATTCTAGATCTGAGTGACAACAATTCAGCGGGAAACTCAAATCAATGATT  
GGCAGACTCTCTAACTTCGAGTTTTAAGAGCTCGTACTAATTCATTTCT

>M6-PGSC0003DMG400008296M6LRR-RLK\_1708

TCAATGATTGGCAGACTCTCTAACTTCGAGTTTTAAGAGCTCGTACTAATTCATTTCTTGGGCCAATCCC  
ACCAGAGATTGGTAAACTGAGTCAACTCATGGATATAGTGCTTCACGAA

>M6-PGSC0003DMG400008296M6LRR-RLK\_1769

GGCCAATCCCACCAGAGATTGGTAAACTGAGTCAACTCATGGATATAGTGCTTCACGAAAACAGTTTCTC  
AGGTGCGATACCACCAGAAATTTCAATGCTTTCAAACCTTCAGGGTCTTT

>M6-PGSC0003DMG400008296M6LRR-RLK\_183

CTGAAAACGGTGATTCACTGTACGATTCACTAAGAAATGTGTATAAAGGCTTCATTGTCAGCATAAGTAT  
TTTCAGTGAGTGAAGCTTTTTTCTTTTGAACAATGATGTCAAAGACAGT

>M6-PGSC0003DMG400008296M6LRR-RLK\_1830

CAGTTTCTCAGGTGCGATACCACCAGAAATTTCAATGCTTTCAAACCTTCAGGGTCTTTTGCTATCTGAAA  
ACAAGCTGGAAGGTGAACTTCCTGTGCAACTTTTTGAGCTCAAACAGCT

>M6-PGSC0003DMG400008296M6LRR-RLK\_1891

CTATCTGAAAACAAGCTGGAAGGTGAACTTCCTGTGCAACTTTTTGAGCTCAAACAGCTCAATGAACTCC

GGCTGAAGAACAATAATTTCTTTGGTCCACTACCGCAACATATATCCAAA

>M6-PGSC0003DMG400008296M6LRR-RLK\_1952

ATGAACTCCGGCTGAAGAACAATAATTTCTTTGGTCCACTACCGCAACATATATCCAAACTAGAATCACT  
GTCGCTCATGGATCTGAGTGGAATAAGCTTAATGGCACAATCCCAGAGA

>M6-PGSC0003DMG400008296M6LRR-RLK\_2013

AGAATCACTGTCGCTCATGGATCTGAGTGGAATAAGCTTAATGGCACAATCCCAGAGAGCATGGCGA  
GCCTCCGAGATTGATGACCGTAGATCTTTCACACAACCTTCTTACCGGAAC

>M6-PGSC0003DMG400008296M6LRR-RLK\_2074

ATGGCGAGCCTCCGAGATTGATGACCGTAGATCTTTCACACAACCTTCTTACCGGAACTATTCCAAGAG  
CAGTACTTGCCAGCATGAGAAGAATGCAACTTTACTTGAACGTTTCCAGC

>M6-PGSC0003DMG400008296M6LRR-RLK\_2135

TTCCAAGAGCAGTACTTGCCAGCATGAGAAGAATGCAACTTTACTTGAACGTTTCCAGCAATTTGTTGCA  
CGGAGAGATCCCAGATGAGATAGGCGTGTAGAAATGGTTCAAGAGATTG

>M6-PGSC0003DMG400008296M6LRR-RLK\_2196

TTTGTTGCACGGAGAGATCCCAGATGAGATAGGCGTGTAGAAATGGTTCAAGAGATTGACATGTCAA  
TAATAAACTGTCAGGCAGCATTCCCAAATCCCTAGAACGCTGCAAAAACCT

>M6-PGSC0003DMG400008296M6LRR-RLK\_2257

ATGTCAAATAATAAACTGTCAGGCAGCATTCCCAAATCCCTAGAACGCTGCAAAAACCTATTTTCACTGG  
ACCTATCAGGAAACATGCTCTCTGGTCCTGCTCCAGGTGAAATTCTCACC

>M6-PGSC0003DMG400008296M6LRR-RLK\_2318

TTTCACTGGACCTATCAGGAAACATGCTCTCTGGTCCTGCTCCAGGTGAAATTCTCACCAAATTAAGAGA  
GCTTGTGTTCTTGAACCTCTCAAGGAACAGATTAGAAGGCAGTCTTCTG

>M6-PGSC0003DMG400008296M6LRR-RLK\_2379

ATTAAGAGAGCTTGTGTTCTTGAACCTCTCAAGGAACAGATTAGAAGGCAGTCTTCTGAAATAGCAGG  
ATTATCACATCTTCGCTCTCTTGATGTTTCACAAAACAAGTTCAATGGAAT

>M6-PGSC0003DMG400008296M6LRR-RLK\_244

CATAAGTATTTTCACTGAGTGAAGCTTTTTTCTTTTGAACAATGATGTCAAAGACAGTTGTATATGCATT  
AGCCATATTTTCTATTACCTTCTCATACTCTGTCATCTGGGCAAAAT

>M6-PGSC0003DMG400008296M6LRR-RLK\_2440

ATAGCAGGATTATCACATCTTCGCTCTCTTGATGTTTCACAAAACAAGTTCAATGGAATCATTCCCGAGA  
GATTTGCCAATATGACTGCATTGAAATATCTCAACCTTTCTTTCAACCAA

>M6-PGSC0003DMG400008296M6LRR-RLK\_2501

TTCCCGAGAGATTTGCCAATATGACTGCATTGAAATATCTCAACCTTTCTTTCAACCAACTTGAAGGTCAC  
ATTCCAAAGGGGGGTGTATTCAACAATATAAGGTCGGAGGATTTACTGG

>M6-PGSC0003DMG400008296M6LRR-RLK\_2562

TGAAGGTCACATTCCAAAGGGGGGTGTATTCAACAATATAAGGTCGGAGGATTTACTGGGAAATCCATC  
TCTAAGTGGAACAAAGTTTCTCAGTCCATGCAACATAAAAAGAAACGGAAC

>M6-PGSC0003DMG400008296M6LRR-RLK\_2623

AATCCATCTCTAAGTGGAACAAAGTTTCTCAGTCCATGCAACATAAAAAGAAACGGAACAAGTTCTCATG  
GTTTTTCCAAGAAAACCTGGATCATACTTGCAGCACTTGGATCTGTTTTC

>M6-PGSC0003DMG400008296M6LRR-RLK\_2684

GTTCTCATGGTTTTTCCAAGAAAACCTGGATCATACTTGCAGCACTTGGATCTGTTTTCAGTCTCATTCTTC  
TTGTCCTGGGAATATTTTTATTTTCATCGGTACATGAAGAAGAAGAAAA

>M6-PGSC0003DMG400008296M6LRR-RLK\_2745

TCTCATTCTTCTTGTCCTGGGAATATTTTTATTTTCATCGGTACATGAAGAAGAAGAAAAATGTGAATGAA  
GCGGAGGATACAAATCCAAAGTATACCGCAGCACTGAGCCTCCAGAGATT

>M6-PGSC0003DMG400008296M6LRR-RLK\_2806

GTGAATGAAGCGGAGGATACAAATCCAAAGTATACCGCAGCACTGAGCCTCCAGAGATTTTATCAAAG  
GATTTGGAACATGCTACCAATAATTTTCAGTCCGGAAAACATTATTGGAGCC

>M6-PGSC0003DMG400008296M6LRR-RLK\_2867

ATCAAAGGATTTGGAACATGCTACCAATAATTTTCAGTCCGGAAAACATTATTGGAGCCAGCAGTTTAA  
GTACTGTGTACAAAGGTACACTGGAAGATGGGAAGATTGTAGCAGTTAAGA

>M6-PGSC0003DMG400008296M6LRR-RLK\_2928

CAGTTTAAAGTACTGTGTACAAAGGTACACTGGAAGATGGGAAGATTGTAGCAGTTAAGAAGCTGAATC  
ACCAGTTCTCAGCAGAATCTGGTAAATGCTTTGATAGGGAAGTCAAGACTCT

>M6-PGSC0003DMG400008296M6LRR-RLK\_2989

CTGAATCACCAGTTCTCAGCAGAATCTGGTAAATGCTTTGATAGGGAAGTCAAGACTCTGAGCCAACTC  
AGACACAGGAACCTAGTTAAGGTGCTAGGTTACGCTTGGGAAAGCAAGAAG

>M6-PGSC0003DMG400008296M6LRR-RLK\_305

TATATGCATTAGCCATATTTTCTATTACCTTTCTCATACCTCTGTCATCTGGGCAAATCCAAGCTTTGAAG  
TTGAAGTTGCTGCTTTGAAAGCTTTCAAGAGCTCAATCTCTGACGACC

>M6-PGSC0003DMG400008296M6LRR-RLK\_3050

GCCAACTCAGACACAGGAACCTAGTTAAGGTGCTAGGTTACGCTTGGGAAAGCAAGAAGCTAAGGGCT  
TTAGTTTTAGAATACATGGAGAATGGGAACTTGGACAACATGATTTATGGTC

>M6-PGSC0003DMG400008296M6LRR-RLK\_3111

AAGGGCTTTAGTTTTAGAATACATGGAGAATGGGAACTTGGACAACATGATTTATGGTCAAGTGGAGG  
ATAACTGGACGTTGTCCAATAGGATTGACATTTTAGTTTCAGTTGCAAGTGG

>M6-PGSC0003DMG400008296M6LRR-RLK\_3172

GTGGAGGATAACTGGACGTTGTCCAATAGGATTGACATTTTAGTTTCAGTTGCAAGTGGACTGTCATACC  
TGCATTCAGGCTATGATTTTCCAATAGTGCCTGCGACATGAAGCCTTCA

>M6-PGSC0003DMG400008296M6LRR-RLK\_3233

TGTCATACCTGCATTCAGGCTATGATTTTCCAATAGTGCCTGCGACATGAAGCCTTCAAATATTCTTCTG  
GATAAAAATATGGAGGCACATGTGAGTGACTTTGGGACAGCTAGGATGT

>M6-PGSC0003DMG400008296M6LRR-RLK\_3355

GGTATTCATCTCCAGGATGGGAGCAGCATATCATCAGCATCCGCATTTGAAGGAACGATTGGTTACATG  
GCGCCAGGTAATAATTCTTACAACCTTCTGACCCACACTTTACTAACTAGA

>M6-PGSC0003DMG400008296M6LRR-RLK\_3416

GTTACATGGCGCCAGGTAATAATTCTTACAACCTTCTGACCCACACTTTACTAACTAGATTATGTGTTACA  
ATATCATGAATACAAGATGTCTACAATGTAAACGAGCTTATATGGGTAC

>M6-PGSC0003DMG400008296M6LRR-RLK\_3477

ATGTGTTACAATATCATGAATACAAGATGTCTACAATGTAAACGAGCTTATATGGGTACCACAAATAATA  
TTTTGTCCATGATGAATGTTTCAAATACATTCCATTTTAGCATCATTTCAG

>M6-PGSC0003DMG400008296M6LRR-RLK\_3538

CAAATAATATTTTGTCCATGATGAATGTTTCAAATACATTCCATTTTAGCATCATTTCAGTAGTAACATAAC  
TTCTGTCAATCACAATACGCAGCACAGCAGATTTTTTTTTTTCCTTTCAAT

>M6-PGSC0003DMG400008296M6LRR-RLK\_3599

GTAACATAACTTCTGTCAATCACAATACGCAGCACAGCAGATTTTTTTTTTTCCTTTCAATCACAAAATACTG

ATTTAACTTTTATGTGGAAGAATAGACAAGCAAGTAAATGATGCAATGT

>M6-PGSC0003DMG400008296M6LRR-RLK\_366

AAGCTTTGAAGTTGAAGTTGCTGCTTTGAAAGCTTTCAAGAGCTCAATCTCTGACGACCCTTTCAGTGCA  
CTTGTGGATTGGACTGATGCAAATCACCATTGCAACTGGTCTGGAATCAT

>M6-PGSC0003DMG400008296M6LRR-RLK\_3660

CAAATACTGATTTAACTTTTATGTGGAAGAATAGACAAGCAAGTAAATGATGCAATGTTTAGAACATAT  
AATCTGTAAAGTATTTTTTAAATGATAATGTCAGTTTTAATCTATCCAA

>M6-PGSC0003DMG400008296M6LRR-RLK\_3721

AGAACATATAATCTGTAAAGTATTTTTTAAATGATAATGTCAGTTTTAATCTATCCAAAAATCTAGCGCA  
AGCTTTGAAAATTTGAATTTCTTGGACATTTTACATGCTCCTAATTTAA

>M6-PGSC0003DMG400008296M6LRR-RLK\_3782

ATCTAGCGCAAGCTTTGAAAATTTGAATTTCTTGGACATTTTACATGCTCCTAATTTAATTTGAGACCTCA  
CTTACATGAAATGTTATCTATGAAACAGAGTTTGCATATATGAGGAAAG

>M6-PGSC0003DMG400008296M6LRR-RLK\_3843

TGAGACCTCACTTACATGAAATGTTATCTATGAAACAGAGTTTGCATATATGAGGAAAGTGACCACAAA  
AGTAGATGTATTCAGCTTTGGTGTCAATTGTGATGGAGATCATTACAAAAAG

>M6-PGSC0003DMG400008296M6LRR-RLK\_3904

ACCACAAAAGTAGATGTATTCAGCTTTGGTGTCAATTGTGATGGAGATCATTACAAAAAGAAGGCCAACA  
AGTCTTACCGGAGCAGATGAATTACCAATGACTTTGCATCAAATTGTTTCAG

>M6-PGSC0003DMG400008296M6LRR-RLK\_3965

GGCCAACAAGTCTTACCGGAGCAGATGAATTACCAATGACTTTGCATCAAATTGTTTCAGAATGCCCTTGC  
GAATGGCATAAACAAGCTAGTTTCAGATTGTGGATCCTAATCTAGCTTCGT

>M6-PGSC0003DMG400008296M6LRR-RLK\_4026

TGCCCTTGCGAATGGCATAAACAAGCTAGTTTCAGATTGTGGATCCTAATCTAGCTTCGTATGTCTCCAAG  
AAACAGGATGTAGTAGAGGGACTTCTTAACTTGGCTTTGTCCTGCACCTG

>M6-PGSC0003DMG400008296M6LRR-RLK\_4087

GTCTCCAAGAAACAGGATGTAGTAGAGGGACTTCTTAACTTGGCTTTGTCCTGCACCTGTCCTGATCCTG  
AAGATAGACCTGACATGGAACAAATTCTGTCTTCTTTCAAAGCTAAGT

>M6-PGSC0003DMG400008296M6LRR-RLK\_4148

CTGATCCTGAAGATAGACCTGACATGGAACAAATTCTGTCTTCTCTTTCAAAGCTAAGTAAGATGGACTG  
CATGCCTTCGCATTTGGTAAAAGATTAAATTTGATGTAGAAGAAGCTGGA

>M6-PGSC0003DMG400008296M6LRR-RLK\_4209

GATGGACTGCATGCCTTCGCATTTGGTAAAAGATTAAATTTGATGTAGAAGAAGCTGGAATATCATCACT  
CTTAATGTGAACCACCACCAAGTTTCCCATGGTGGCTAATGGAAGTAGTT

>M6-PGSC0003DMG400008296M6LRR-RLK\_427

TTCAGTGCACCTTGTGGATTGGACTGATGCAAATCACCATTGCAACTGGTCTGGAATCATATGTGATCCTT  
CTTCAAATCATGTCATCAACATTTTCGCTTATTGAGACACAGCTCAAAGGC

>M6-PGSC0003DMG400008296M6LRR-RLK\_4270

ATCATCACTCTTAATGTGAACCACCACCAAGTTTCCCATGGTGGCTAATGGAAGTAGTTCATAACTTAAA  
ATGTATTTACTATTTAAATAAATTTTCCATATTTCAAGCCACAAATGAAC

>M6-PGSC0003DMG400008296M6LRR-RLK\_4331

TAACCTAAAATGTATTTACTATTTAAATAAATTTTCCATATTTCAAGCCACAAATGAACTCTCGAGTGTTCC  
TGCTTTGCTAGAGAGATATAATGGAAGTGTCCCATCAGATTATGTTGA

>M6-PGSC0003DMG400008296M6LRR-RLK\_488

GTGATCCTTCTTCAAATCATGTCATCAACATTTTCGCTTATTGAGACACAGCTCAAAGGCCGAAATTTCTCCG  
TTTCTAGGAAACCTCTCCAAACTCCAGGTTCTTGATCTAACTTTGAATT

>M6-PGSC0003DMG400008296M6LRR-RLK\_549

AATTTCTCCGTTTCTAGGAAACCTCTCCAAACTCCAGGTTCTTGATCTAACTTTGAATTCATTTACTGGAAA  
TATCCCACCCCAGCTGGGGCATTGCACAGACCTGGTTGAGCTTGTTTT

>M6-PGSC0003DMG400008296M6LRR-RLK\_61

TACATACAACCTTGTCTTTAACACGGAGCATCCTAGATTAGAGGCATGCTTGGTATTTTGTAAACAAATTCA  
TAGAATGCAAGTCATTTTCTTAGTGTGAATGGATGACTAGTTGACTGC

>M6-PGSC0003DMG400008296M6LRR-RLK\_610

TTTACTGGAAATATCCCACCCCAGCTGGGGCATTGCACAGACCTGGTTGAGCTTGTTTTTAACCAAACCT  
CTCTTTTTGGTGAAATTCCTGCCGAGCTGGAAAACCTAAAAAACTGCAG

>M6-PGSC0003DMG400008296M6LRR-RLK\_671

ACCAAACCTCTTTTTTGGTGAAATTCCTGCCGAGCTGGAAAACCTAAAAAACTGCAGTTAATAGATTT  
TGGAATAACTTTCTAAATGGGAGTATACCTGATAGTATATGCAACTGCA

>M6-PGSC0003DMG400008296M6LRR-RLK\_732

AATAGATTTTGGAAATAACTTTCTAAATGGGAGTATACCTGATAGTATATGCAACTGCACTGAATTGTTG  
TTAGTAGGCCTCAACAACAACAATCTCACAGGTAAATTACCATCTGAAAT

>M6-PGSC0003DMG400008296M6LRR-RLK\_793

GAATTGTTGTTAGTAGGCCTCAACAACAACAATCTCACAGGTAAATTACCATCTGAAATTGGCAATTTGG  
CTAATCTTCAGTTGTTTGTAGCTTATACAAACAATTTGGTTGGTTCTATT

>M6-PGSC0003DMG400008296M6LRR-RLK\_854

GCAATTTGGCTAATCTTCAGTTGTTTGTAGCTTATACAAACAATTTGGTTGGTTCTATTCTACCTCCATTG  
GAATGCTGACAGCATTGCAAACCCTTGATCTGAGCGAAAACCAGTTAT

>M6-PGSC0003DMG400008296M6LRR-RLK\_915

TACCTCCATTGGAATGCTGACAGCATTGCAAACCCTTGATCTGAGCGAAAACCAGTTATCTGGACCTATA  
CCACCAGCAATTGGCAACTTGTCAAGTTTAGGAATTCTTCAGTTACATCT

>M6-PGSC0003DMG400008296M6LRR-RLK\_976

GGACCTATACCACCAGCAATTGGCAACTTGTCAAGTTTAGGAATTCTTCAGTTACATCTCAACTCTCTTTC  
TGGGAAAATCCCATCTGAACTTGGCCTCTGTATCAATCTTTTTACCTTG

>M6-PGSC0003DMG400008394-(rev)M6LRR-RLP\_0

CTTCCTTTGAGTACTCTACAAACAACCTACCAAACGAAGACTTACTTTGAGAAGACTTTGTTGCATACAGCT  
CAGGAAGAAGACTTTGGTGCAGATTGCAGAGGAAGAGGAAGCAAACACA

>M6-PGSC0003DMG400008394-(rev)M6LRR-RLP\_1037

GAAGCAGGTGGCATCCACAGTAGCAACAGATCTTCATATCTTGGGGAAGTTAACAGAAGATCATTGTTG  
GTCTATTTTCAAACAAAAAGCATTGTTGATGGCAGGGTTCCAGAGGAATT

>M6-PGSC0003DMG400008394-(rev)M6LRR-RLP\_1159

CGAGCATGGGCAACAAGATTGTTAAAATGTGCCAAGGTCTACCGTTGGCTGCAAGTGCATTGGGAGGG  
CTCTTACACAACAAGAAAAACATGAATGGCAAGCAATTCTTGATGGCAACC

>M6-PGSC0003DMG400008394-(rev)M6LRR-RLP\_1220

GGGAGGGCTCTTACACAACAAGAAAAACATGAATGGCAAGCAATTCTTGATGGCAACCTCCTTGTTAC  
TGGTGAAGATGATAATGGAGAAAATAGCATAAAGAAAATCCTAAAACCTCAG

>M6-PGSC0003DMG400008394-(rev)M6LRR-RLP\_1281

CTTGTTACTGGTGAAGATGATAATGGAGAAAATAGCATAAAGAAAATCCTAAAACCTCAGCTATGATTAT



CTACCATCTCCACATCTGAAAAAATGTTTTGCTTACTTTGCAATGTTTCCA

>M6-PGSC0003DMG400008394-(rev)M6LRR-RLP\_1342

ATGATTATCTACCATCTCCACATCTGAAAAAATGTTTTGCTTACTTTGCAATGTTTCCAAAAGATTATATGT

TTGAAAAGGACCAACTAATCCAACCTCTGGATGGCAGAAGGGTTTCTTC

>M6-PGSC0003DMG400008394-(rev)M6LRR-RLP\_1464

CCAAGTCAAGAGATCCCTGTGATGGAAGACGTTGGGCACAGGTTTTTCAAATCTTGTTGCAGAATTCCT

TGCTACAAGATGTTGTGTTAGATGAACACAACAATATAACACACTGTAAG

>M6-PGSC0003DMG400008394-(rev)M6LRR-RLP\_1525

AGAATTCCTTGCTACAAGATGTTGTGTTAGATGAACACAACAATATAACACACTGTAAGATGCACGATCT

TGTGCATGATTTGGCTGGAGATATCTTAAAATCTAGACTATTTGATCCGA

>M6-PGSC0003DMG400008394-(rev)M6LRR-RLP\_1586

GCACGATCTTGTCATGATTTGGCTGGAGATATCTTAAAATCTAGACTATTTGATCCGAAGGGCGACAAT

GGAGAAAACTTTCTCAAGTTCGATACTTTGGATGTGAGTCACCAACGGA

>M6-PGSC0003DMG400008394-(rev)M6LRR-RLP\_1647

GGCGACAATGGAGAAAACTTTCTCAAGTTCGATACTTTGGATGTGAGTCACCAACGGATCAAATAGAT

AAGATATATGAGCCAGAACGTTTGTGCACACTGTTTTGGAGAAGCAATTAT

>M6-PGSC0003DMG400008394-(rev)M6LRR-RLP\_1708

AAATAGATAAGATATATGAGCCAGAACGTTTGTGCACACTGTTTTGGAGAAGCAATTATACATCTAAAG

ATATGCTGTTGAAATATAAGTTCTTGAGAGTTTTAGATTTGTCCAGTTCAG

>M6-PGSC0003DMG400008394-(rev)M6LRR-RLP\_1769

ATCTAAAGATATGCTGTTGAAATATAAGTTCTTGAGAGTTTTAGATTTGTCCAGTTCAGGAATCAAGGAG

TTGTCAACCAAATCGGGAAGCTGATATACTTGAGATATCTTGATCTCTC

>M6-PGSC0003DMG400008394-(rev)M6LRR-RLP\_183

ACTATCGAGGAGGTCAACAGCTCAAGGGATTTCAACAAAGATCTCGAAATGTTGACACAAAATGTATCA

TTAATCCAAGCTTTCATTCATGATGTTGAAACACCACAAGAGAAACAACAG

>M6-PGSC0003DMG400008394-(rev)M6LRR-RLP\_1830

ATCAAGGAGTTGTCAACCAAATCGGGAAGCTGATATACTTGAGATATCTTGATCTCTCGAACACTGAG

ATCACAGCCTTGCCCAACTCCATTTGCGAGCTCTATAATTTGCAAACATTT

>M6-PGSC0003DMG400008394-(rev)M6LRR-RLP\_1952

AGTCATCAACTGCTTTTCACTCCAGGAACTTCCATATGAGATGAGAAATATGATAAGTTTGAGACACATA  
TATTACACTTCTGTTGACGAAACAAGTGGGCATTGGGGAGGATGGTGTCT

>M6-PGSC0003DMG400008394-(rev)M6LRR-RLP\_2013

AGACACATATATTACACTTCTGTTGACGAAACAAGTGGGCATTGGGGAGGATGGTGTCTTCAATGAA  
CATTTTCAGATTCCACTTAATATGGGGCAATTGACTAGTCTTCAAACCCTC

>M6-PGSC0003DMG400008394-(rev)M6LRR-RLP\_2074

ACAATGAACATTTTCAGATTCCACTTAATATGGGGCAATTGACTAGTCTTCAAACCCTCAAGTTTTTCAAG  
GTAGGTTTAGAGAAAGGTCGTCAAATAGAAGAATTAGGTCATTTGAAAA

>M6-PGSC0003DMG400008394-(rev)M6LRR-RLP\_2135

GTTTTTCAAGGTAGGTTTAGAGAAAGGTCGTCAAATAGAAGAATTAGGTCATTTGAAAAACCTAAGAGG  
TGAATTGACGATCAATGGTCTCCAATTGGTCTGTGATAAAGAAGAGGCTCG

>M6-PGSC0003DMG400008394-(rev)M6LRR-RLP\_2196

CTAAGAGGTGAATTGACGATCAATGGTCTCCAATTGGTCTGTGATAAAGAAGAGGCTCGAACAGCATAT  
TTACACGATAAACCAACATCTGCAAGCTGGCATATTTATGGTCCCACGAT

>M6-PGSC0003DMG400008394-(rev)M6LRR-RLP\_2257

CAGCATATTTACACGATAAACCAACATCTGCAAGCTGGCATATTTATGGTCCCACGATGAATCAGAAGG  
CTGTGAGATCAATGATGAGCATGTGTTGGATGGTCTTCAACCGCATCCTA

>M6-PGSC0003DMG400008394-(rev)M6LRR-RLP\_2379

TTGAAAACCATAGCAGTAGTGGACTATTTAGGGACTAAATTTCTTCATGGTCCGTGAAGAGTCGCTAC  
CAAATTTGGTCAAGTTGAAATTAAGTGGAAGCAAAAGGTGCAAAGAAATT

>M6-PGSC0003DMG400008394-(rev)M6LRR-RLP\_244

ATGTATCATTAATCCAAGCTTTCATTCATGATGTTGAAACACCACAAGAGAAACAACAGTCTGTGGAACA  
ATGGCTCAACAGGCTTGAGAGAGTTGCTGAAGATGCTGAAAATGTGTTTG

>M6-PGSC0003DMG400008394-(rev)M6LRR-RLP\_2501

ATCCCTTGCCAACTGAAATTCCTTCGGCATCTTGAGCTGATAGGATTCCATGAGTTGGAATGCATTGGA  
CCTGCTTTTTATGGTGTGAGATTAGAAATATTGGATCAAACAGCATTAT

>M6-PGSC0003DMG400008394-(rev)M6LRR-RLP\_2562

TGCATTGGACCTGCTTTTTATGGTGTGAGATTAGAAATATTGGATCAAACAGCATTATTCAAGTGTCCC  
GTCATTGAAAGAACTAGTATTGGAGGATATGCGTAGCCTTATTGAGTGG

>M6-PGSC0003DMG400008394-(rev)M6LRR-RLP\_2623

AAGTGTCCCGTCATTGAAAGAAGTATTGGAGGATATGCGTAGCCTTATTGAGTGGAAGGGAGATG  
AAGTTGGAGTAAGAATGTCTCCCGGGCTTGAGAAGTTGCGGATTACAGACT

>M6-PGSC0003DMG400008394-(rev)M6LRR-RLP\_2684

GGGAGATGAAGTTGGAGTAAGAATGTCTCCCGGGCTTGAGAAGTTGCGGATTACAGACTGTCCATTGTT  
AAAAAGTATTCCGAATCAATTTGAAATCCTCCGTGAATTAGAAATTAGAGG

>M6-PGSC0003DMG400008394-(rev)M6LRR-RLP\_2745

CCATTGTAAAAAGTATTCCGAATCAATTTGAAATCCTCCGTGAATTAGAAATTAGAGGAGTTGACAGTG  
AAATGCCATTGTTGAACTTGTGCAGCAACTTGACATCTCTCGTGAATCTT

>M6-PGSC0003DMG400008394-(rev)M6LRR-RLP\_2806

TTGACAGTGAAATGCCATTGTTGAACTTGTGCAGCAACTTGACATCTCTCGTGAATCTTAGTGTCTATGAT  
ATGAAAGAGCTCACTTGTCTTCCAGATGAGATACTACGTAACAACATTT

>M6-PGSC0003DMG400008394-(rev)M6LRR-RLP\_2928

CTTCAACAGATAACGATTTTTCGAATGTGGAGAGTTTCGTGAATTGCCACAAAGCTTGACAATCTCCATT  
CTCTTTATAGATTAGACATTTACAACACTGCACCAATTTTCAGTTCTCTTCT

>M6-PGSC0003DMG400008394-(rev)M6LRR-RLP\_2989

ATCTCCATTCTCTTTATAGATTAGACATTTACAACACTGCACCAATTTTCAGTTCTCTTCTGTTCCCAAGGGAG  
ACAACATTTGACTTCCCTCATATTCTTTTTCTTACATAATTGTAATG

>M6-PGSC0003DMG400008394-(rev)M6LRR-RLP\_305

TGTGCAACAATGGCTCAACAGGCTTGAGAGAGTTGCTGAAGATGCTGAAAATGTGTTTGATCGATTGAG  
ATATGAATCTCTCAAAACAAAAGTGGTGAGGAGCCCATTGAAAAAGGTCGG

>M6-PGSC0003DMG400008394-(rev)M6LRR-RLP\_3050

TCCAAGGGAGACAACACTATTTGACTTCCCTCATATTCTTTTTCTTACATAATTGTAATGGATTGATCAGTAT  
ACCAATTGGAATGCTAGATCAATGCCGGTCTCTAGAGTATTTGCATGT

>M6-PGSC0003DMG400008394-(rev)M6LRR-RLP\_3111

TTGATCAGTATACCAATTGGAATGCTAGATCAATGCCGGTCTCTAGAGTATTTGCATGTCAGCTGCTGTA  
ACAACCTGGTTTCATTCCCTTTACATGTGTGGGAAATTCCTTCATTTTCA

>M6-PGSC0003DMG400008394-(rev)M6LRR-RLP\_3172

GCTGCTGTAACAACCTTGGTTTCATTCCCTTTACATGTGTGGGAAATTCCTTCATTTTCAGTTTTGGAAATA

ACAGAATGTCCCAAATTGATTAGTGTACCCGAAGTGGGCCTTCACCATC

>M6-PGSC0003DMG400008394-(rev)M6LRR-RLP\_3233

TTTGAAATAACAGAATGTCCCAAATTGATTAGTGTACCCGAAGTGGGCCTTCACCATCTCACCGGGTTA

TTGAGATTGGGAATTGGTCCTTTCTCAGAGATGGTGGATTTTGATGCATT

>M6-PGSC0003DMG400008394-(rev)M6LRR-RLP\_3355

AATTGATTTTAAATGGCATTGAGAAGTTGTTGTCTCTTCGTGATCTGGAGGTGTACGGACGTGGGCACTG

GGATTCTCTGCCCTATCAGCTTATGCAACTCTCTAACCTAAGAAAGATCA

>M6-PGSC0003DMG400008394-(rev)M6LRR-RLP\_3416

TGGGCACTGGGATTCTCTGCCCTATCAGCTTATGCAACTCTCTAACCTAAGAAAGATCACAAATAGCTGAT

TTCGGAATTGAGGCTCTTCTCCTAGACTTGACAACCTTACTTCTCTTGA

>M6-PGSC0003DMG400008394-(rev)M6LRR-RLP\_3477

ATAGCTGATTTCGGAATTGAGGCTCTTCTCCTAGACTTGACAACCTTACTTCTTCTTGAAGTTTGACGCT

AGAGAGGTGCAAACGGCTACAACATCTGAACTTCTCAGATGCCATGCCC

>M6-PGSC0003DMG400008394-(rev)M6LRR-RLP\_3538

GTTTGACGCTAGAGAGGTGCAAACGGCTACAACATCTGAACTTCTCAGATGCCATGCCCAAATTACGGC

ATCTGTGGATAAGTGATTGTCCATTGTTAGAAGCCCTGTCCGATGGGCTCG

>M6-PGSC0003DMG400008394-(rev)M6LRR-RLP\_3599

ATTACGGCATCTGTGGATAAGTGATTGTCCATTGTTAGAAGCCCTGTCCGATGGGCTCGGCAGCATTGT

TTCTTTGGAAGAATTATATTTACAGGACTGCGAAAACTAGAGCATCTACC

>M6-PGSC0003DMG400008394-(rev)M6LRR-RLP\_366

CGATTCAGATATGAATCTCTCAAAACAAAAGTGGTGAGGAGCCATTGAAAAAGGTCCGGTGGTTTCTTT

TCTCATACTGCTTTTAAGAGAAAAATGTCTCAAAAAATCAACAACATCAAT

>M6-PGSC0003DMG400008394-(rev)M6LRR-RLP\_3660

AGCATTGTTTCTTTGGAAGAATTATATTTACAGGACTGCGAAAACTAGAGCATCTACCGTCCCGAGATG

CCATGCGACGCCTCACTAAATTATGGAACATGAGAATTAAGGATGCCCA

>M6-PGSC0003DMG400008394-(rev)M6LRR-RLP\_3782

GTTAGAAGAAAGTTTACCAACTACTCCAGTGGTCCAAAATTTCCCATATTTCAAATATTGAATTAGGT

GGGTGGAGAAGGACAACCATAAGTCTCGGTTTCTTTCACTTTCTGAGT

>M6-PGSC0003DMG400008394-(rev)M6LRR-RLP\_3843

GAATTAGGTGGGTGGAGAAGGACAACCATAAGTCTCGGTTTCTCTTTCACTTTCTGAGTCGCTTGCATTT  
TTAATTAGAATATTATTTTCCACGAGTTCCAAAAAGAAGTTTTGTAAGT

>M6-PGSC0003DMG400008394-(rev)M6LRR-RLP\_3904

CTTGCATTTTTAATTAGAATATTATTTTCCACGAGTTCCAAAAAGAAGTTTTGTAAGTAATGTAATAATT  
TTTCTTGAAATTATTTTGACATAAAAAAAAAAAGCTAGATTATCAATCAA

>M6-PGSC0003DMG400008394-(rev)M6LRR-RLP\_3965

TGTAATAATTTTTCTTGAAATTATTTTGACATAAAAAAAAAAAGCTAGATTATCAATCAATTGCATCTGTTG  
CTATGCTTTCAGGATTCTGCTTGCCACTTGAAGTGAATTGCTGTTATT

>M6-PGSC0003DMG400008394-(rev)M6LRR-RLP\_4026

GCATCTGTTGCTATGCTTTCAGGATTCTGCTTGCCACTTGAAGTGAATTGCTGTTATTCTAAAAATTATG  
TTTCTTTTCCTTATAGGTAGCCATTATAGACGTCTCTGTGGTAAATCAA

>M6-PGSC0003DMG400008394-(rev)M6LRR-RLP\_4087

AAAAATTATGTTTCTTTTCTTATAGGTAGCCATTATAGACGTCTCTGTGGTAAATCAAGCCAAATCATAT  
GAGCAGCAGGCAATTACGTAAGGTAAATTTTCATTTATAATTTATAGGC

>M6-PGSC0003DMG400008394-(rev)M6LRR-RLP\_4148

CAAATCATATGAGCAGCAGGCAATTACGTAAGGTAAATTTTCATTTATAATTTATAGGCACTTTGTAATCT  
ACTTGTTTCTATCTTTCTTTTGTGGAAACCAATTTTCGGAGGTCTAT

>M6-PGSC0003DMG400008394-(rev)M6LRR-RLP\_4209

TTTGTAATCTACTTGTCTATCTTTCTTTTGTGGAAACCAATTTTCGGAGGTCTATGCTGATGAATACA  
ACATTACCTTCCTTAAAAAAAAGTTTAATCATGAAAATTTATGATTC

>M6-PGSC0003DMG400008394-(rev)M6LRR-RLP\_427

GTTTCTTTTCTCATACTGCTTTTAAGAGAAAAATGTCTCAAAAAATCAACAACATCAATAAAGAGTTGACG  
GCTATCAATAAGGTAGCCAAAGACCTCGGTCTACAATCACTCATGGTAC

>M6-PGSC0003DMG400008394-(rev)M6LRR-RLP\_4270

TGATGAATACAACATTACCTTCCTTAAAAAAAAGTTTAATCATGAAAATTTATGATTTCTGCTCATAGGTT  
ACTAGGTACAAGGACATGGTAGAACGTCGTTGTGGTATATCTAGTCAAA

>M6-PGSC0003DMG400008394-(rev)M6LRR-RLP\_4331

CTCATAGGTTACTAGGTACAAGGACATGGTAGAACGTCGTTGTGGTATATCTAGTCAAAATCCATGGGC  
AGAATCATGTTAGGCATTTTTATTTAGTTGTTAGAGGAATGCTATAACAAG

>M6-PGSC0003DMG400008394-(rev)M6LRR-RLP\_4392

CCATGGGCAGAATCATGTTAGGCATTTTTATTTAGTTGTTAGAGGAATGCTATAACAAGTTTGAAAGTT  
TCTTTTTTTACTTTCTTTTCTCTCATGAAATAATTTTAATGTTAACG

>M6-PGSC0003DMG400008394-(rev)M6LRR-RLP\_4453

TGTAAAGTTTCTTTTTTTACTTTCTTTTCTCTCATGAAATAATTTTAATGTTAACGGGACGTCGTGTTTC  
ACAGAGGAACCGCCACTGTTATTTGGATGAAGAACAATCTTCAACT

>M6-PGSC0003DMG400008394-(rev)M6LRR-RLP\_4514

ACGTCGTGTTTCACAGAGGAACCGCCACTGTTATTTGGATGAAGAACAATCTTCAACTGTAGACTCATT  
ATGGGACACTTTCATGAGTATTTTCGGGGAACACTACAGTCTACATATGAAA

>M6-PGSC0003DMG400008394-(rev)M6LRR-RLP\_4575

AGACTCATTATGGGACACTTTCATGAGTATTTTCGGGGAACACTACAGTCTACATATGAAACATCAAAAAC  
CAAAAGCGTATAGGGTGCTCAATGAGAAGCTACACGGGGTCTATTCTCCA

>M6-PGSC0003DMG400008394-(rev)M6LRR-RLP\_4636

TCAAAAACACTCAAAAGCGTATAGGGTGCTCAATGAGAAGCTACACGGGGTCTATTCTCCATGTAAGTATT  
GATAACTCTCAAGGAACAATACCAAGTCTCATATATGGTAGAAATCTATAT

>M6-PGSC0003DMG400008394-(rev)M6LRR-RLP\_4697

TAAGTATTGATAACTCTCAAGGAACAATACCAAGTCTCATATATGGTAGAAATCTATATAAGTTTCTTAAT  
AAACTCATAAAAGAATAATCTTTATGTCTTCTGCAGTTCTGGTTTTATT

>M6-PGSC0003DMG400008394-(rev)M6LRR-RLP\_4758

GTTTCTTAATAAACTCATAAAAGAATAATCTTTATGTCTTCTGCAGTTCTGGTTTTATTTTCATGCTTAAGA  
CAGTACAGCTTTTATGAATATATGACACACTTCTCGTTCCTTTACCT

>M6-PGSC0003DMG400008394-(rev)M6LRR-RLP\_4819

CATGCTTAAGACAGTACAGCTTTTATGAATATATGACACACTTCTCGTTCCTTTACCTCACAGGACAATT  
TCTCTGTTTATTAAACTTCCGCGAATGAAGGACTTCAACAAAGATAGT

>M6-PGSC0003DMG400008394-(rev)M6LRR-RLP\_488

AGAGTTGACGGCTATCAATAAGGTAGCCAAAGACCTCGGTCTACAATCACTCATGGTACCTTCTCGGAA  
AATACTACCAATTCGAGAAACAGATTCTTAGTAGTTGCTTCTGATATTGT

>M6-PGSC0003DMG400008394-(rev)M6LRR-RLP\_4880

CAGGACAATTTCTCTGTTTATTAAACTTCCGCGAATGAAGGACTTCAACAAAGATAGTTGTGATGAATA

TTTTTGCAAAGGGTGACCCATTGGCTCTTAAAATGTCCTTAGCAGTATAC

>M6-PGSC0003DMG400008394-(rev)M6LRR-RLP\_4941

TGATGAATATTTTTGCAAAGGGTGACCCATTGGCTCTTAAAATGTCCTTAGCAGTATACGTTTCATCTTAAA  
CAGGTTTTCTCTGTCTTTTTTAGTGGTACTTGTAATGATCCGCTTC

>M6-PGSC0003DMG400008394-(rev)M6LRR-RLP\_5002

TCATCTTAAACAGGTTTTCTCTGTCTTTTTAGTGGTACTTGTAATGATCCGCTTCTCCATTCTCCAAG  
GAGGAAACGTGTGCCAAAACACTGACTTTTTACCATTCCCGTGTTTCAG

>M6-PGSC0003DMG400008394-(rev)M6LRR-RLP\_5063

CATTCTCCAAGGAGGAAACGTGTGCCAAAACACTGACTTTTTACCATTCCCGTGTTTCAGATTCATGTTTGA  
AACTCCAGCATGGACCTTGTGCGAAATGCTACTTGTGTTAGACGTGTTTG

>M6-PGSC0003DMG400008394-(rev)M6LRR-RLP\_5185

TGTCATGATTGGCAAGGGAAATTGCATGTGGCGGAAATTGGAGTGGAATACTATTTACTTGTATGACT  
AAGATTTGACAGCAGAGGCGCCTTTCTTTCACAGCATACGTGCCTTTTGGT

>M6-PGSC0003DMG400008394-(rev)M6LRR-RLP\_5246

GTATGACTAAGATTTGACAGCAGAGGCGCCTTTCTTTCACAGCATACGTGCCTTTTGGTACAAATAGAGT  
TCATTTCTCCAACAAACATTTTGAACTTTTATACTTAGCTGCTGCATCAT

>M6-PGSC0003DMG400008394-(rev)M6LRR-RLP\_5307

AAATAGAGTTCATTTCTCCAACAAACATTTTGAACTTTTATACTTAGCTGCTGCATCATTGCCTAGTTGTTA  
GCTTCTGTAATGTACATCTGCTTTTCTCTTGAAATTTCTCTTGGCTT

>M6-PGSC0003DMG400008394-(rev)M6LRR-RLP\_5368

CCTAGTTGTTAGCTTCTGTAATGTACATCTGCTTTTCTCTTGAAATTTCTCTTGGCTTTTGTTCGCAAGTA  
TAAACAAAAAAGACAGGGCCTACCATTTCATTGTTTAAATCCAAACA

>M6-PGSC0003DMG400008394-(rev)M6LRR-RLP\_5429

GTTTCGCAAGTATAAACAAAAAAGACAGGGCCTACCATTTCATTGTTTAAATCCAAACAATATGTATTCA  
AAAGTCACAAGCAATGTGTGTTATTCCAATTTTCGTACAGGACTGCATTTT

>M6-PGSC0003DMG400008394-(rev)M6LRR-RLP\_5488

ATATGTATTCAAAGTCACAAGCAATGTGTGTTATTCCAATTTTCGTACAGGACTGCATTTTGTGTCTATG  
TATAACATATCGCATTGCTCATTATTCTTTCAGATAGACCAGATTGCAC

>M6-PGSC0003DMG400008394-(rev)M6LRR-RLP\_549

TCTCGGAAAATACTACCAATTCGAGAAACAGATTCCTTAGTAGTTGCTTCTGATATTGTCGGTAGAGATT  
TGGATGTTGCTGAGATAAAGGAGAAGATTTTGAAGATGAGAGAGGAGGAT

>M6-PGSC0003DMG400008394-(rev)M6LRR-RLP\_61

GCATACAGCTCAGGAAGAAGACTTTGGTGCAGATTGCAGAGGAAGAGGAAGCAAACACAACAATGGCC  
GATCCTGTAATTGGTGCTACTGTTCAAGTTTTGCTTGAAAAGTTGATTTCTC

>M6-PGSC0003DMG400008394-(rev)M6LRR-RLP\_610

GTAGAGATTTGGATGTTGCTGAGATAAAGGAGAAGATTTTGAAGATGAGAGAGGAGGATATTGTTCTG  
TCCACCATTCCCATTGTAGGTATGGGAGGTTTAGGGAAAACAACACTGTGGCTA

>M6-PGSC0003DMG400008394-(rev)M6LRR-RLP\_671

TGTTCTGTCCACCATTCCCATTGTAGGTATGGGAGGTTTAGGGAAAACAACACTGTGGCTAAGAGGATTTA  
CAATGATGAACACATGAAGCAAATCTTTAAAAAGAGAATTTGGTTGTGTCT

>M6-PGSC0003DMG400008394-(rev)M6LRR-RLP\_732

AGGATTTACAATGATGAACACATGAAGCAAATCTTTAAAAAGAGAATTTGGTTGTGTCTACCTGAAATGT  
CTGAAACGAAGAGCTTTCTTGAACAAATCCTCGAATCATTGATAGAGAGG

>M6-PGSC0003DMG400008394-(rev)M6LRR-RLP\_854

AATTGAGGTTGAAAGGAGAGATATAATAGTCAAGAAGCTACAAGATGAATTGGGAGGAAAAAATATT  
TGCTAGTCCTGGATGATTTGTGGCGTGTTGACTCTACATCGTGGCATGAGTT

>M6-PGSC0003DMG400008394-(rev)M6LRR-RLP\_915

AAATATTTGCTAGTCCTGGATGATTTGTGGCGTGTTGACTCTACATCGTGGCATGAGTTCGTCGACACCC  
TGAGAAGAATAAATACATCCAGAGGAAACTGCATTCTTGTGACTACTCGT

>M6-PGSC0003DMG400008394-(rev)M6LRR-RLP\_976

TCGACACCCTGAGAAGAATAAATACATCCAGAGGAAACTGCATTCTTGTGACTACTCGTAGGAAGCAGG  
TGGCATCCACAGTAGCAACAGATCTTCATATCTTGGGGAAGTTAACAGAAG

>M6-PGSC0003DMG400008403M6LRR-RLK\_0

AGTGACCATATGCATGAAAAATCAAATTAGTTATTTGCTGATCTGAAGCAAATTTTTGAACAATGGCAGC  
CACTCGGCTGTTACTCTGCTTTATCGTCTTCTCGTCTGGCATTGATTTCA

>M6-PGSC0003DMG400008403M6LRR-RLK\_122

TACACTGTTACAGATCCCAGAGATGGTAAGAACTTTGTATAAAATTGTCGGATCCAATATTTAACTTTAT  
GAGTTTTACTATTTGTTGCAGTTTTTGTGAACTTTTACTTATAAATTTA



>M6-PGSC0003DMG400008403M6LRR-RLK\_1281

ATTTACGTAAGTTTCTCACTTTTTTATACTTCAAACCAAGCCACAACCTAGTTTTTGAAATTGTTGTTTCAC  
CAACGAAGTAGTTGTTAACAATTGATTGTGTTTATTGTTTCTTTCAGG

>M6-PGSC0003DMG400008403M6LRR-RLK\_1342

TGTTGTTTCACCAACGAAGTAGTTGTTAACAATTGATTGTGTTTATTGTTTCTTTCAGGGGATTATCAACA  
ATGGGACTGAGAGGAAAATTAAGTGGTGACATTGGAGGGCTCACTGAAT

>M6-PGSC0003DMG400008403M6LRR-RLK\_1403

ATTATCAACAATGGGACTGAGAGGAAAATTAAGTGGTGACATTGGAGGGCTCACTGAATTAATTTCTT  
GTGAGTTCGGTTTTTAAATCCAATAAACTTCTGTATATGACACCAACAATT

>M6-PGSC0003DMG400008403M6LRR-RLK\_1464

ATTTCTTGTGAGTTCGGTTTTTAAATCCAATAAACTTCTGTATATGACACCAACAATTATTAGCAATAAG  
CTTGATTTGTCACCATAATTTGCTCACTTCAGTTGCTAAACTTGCACT

>M6-PGSC0003DMG400008403M6LRR-RLK\_1525

TAGCAATAAGCTTGTATTTGTCACCATAATTTGCTCACTTCAGTTGCTAAACTTGCACTGCAGAGACCTGT  
CGTTCAACCGAGGACTTACAGGTTCCCTTTCTCCGCGGATAGGAGATCT

>M6-PGSC0003DMG400008403M6LRR-RLK\_1586

AGAGACCTGTCGTTCAACCGAGGACTTACAGGTTCCCTTTCTCCGCGGATAGGAGATCTGCAGAAACTA  
AACATATTGTAAGACTACGAAACTTGATCATTTTGATTGTATAGTGTATA

>M6-PGSC0003DMG400008403M6LRR-RLK\_1769

TTTCTTCTCGTAATTTGTATCATGATTCAATGACATACATAACTTACTTGTACGCGAATGAATTTATTTAC  
TTTTCAGAATCCTCGCGGGCTGTAGCTTCAGTGGCAGTATACCGAGGG

>M6-PGSC0003DMG400008403M6LRR-RLK\_183

TAAACTTTATGAGTTTTACTATTTGTTGCAGTTTTTGTGAACTTTTACTTATAAATTTATGTTCTGCGTTGA  
AAGTACTGAGTTCAGATAATAATGTTTTGTTATGAATAAGTGTGAACT

>M6-PGSC0003DMG400008403M6LRR-RLK\_1830

AATTTATTTACTTTTCAGAATCCTCGCGGGCTGTAGCTTCAGTGGCAGTATACCGAGGGAGTTGGGAAG  
ACTTGCTGAGTTATCCTTCTTGTAAGAATTTCTCAGCAACATCAACTTGTG

>M6-PGSC0003DMG400008403M6LRR-RLK\_1891

TTGGGAAGACTTGCTGAGTTATCCTTCTTGTAAGAATTTCTCAGCAACATCAACTTGTGATCGTTTTTGGT

GTATCATCAACTCATTTAGTTCCATGTAAATTTCTTTGACAGGGCACTT

>M6-PGSC0003DMG400008403M6LRR-RLK\_1952

CGTTTTTGGTGTATCATCAACTCATTTAGTTCCATGTAAATTTCTTTGACAGGGCACTTAACTCAAATAATT

TCACCGGTGAGATTCCACGAACTCTGGCAATCTGTCAAACTGTACT

>M6-PGSC0003DMG400008403M6LRR-RLK\_2013

CTCAAATAATTTACACCGGTGAGATTCCACGAACTCTGGCAATCTGTCAAACTGTACTGGCTTGATCTA

GCAGATAACCTGTAAACAGGACCAATTCCTGTTTCAACCTCCTCAAGTCC

>M6-PGSC0003DMG400008403M6LRR-RLK\_2074

CTTGATCTAGCAGATAACCTGTAAACAGGACCAATTCCTGTTTCAACCTCCTCAAGTCCGGGGTTAGACC

TTCTAAAAAAGCAAAACACTTGTGAGTAACTTTATATGTCCATATTAC

>M6-PGSC0003DMG400008403M6LRR-RLK\_2135

GGTTAGACCTTCTAAAAAAGCAAAACACTTGTGAGTAACTTTATATGTCCATATTACATGCTGTTCTTA

AGTTGGTATATATACCTCTTAAGGTCTGACTTCTACGTTATGTCATTAT

>M6-PGSC0003DMG400008403M6LRR-RLK\_2196

GCTGTTCTTAAGTTGGTATATATACCTCTTAAGGTCTGACTTCTACGTTATGTCATTATCGCAGCCATTTTA

ACAAAACCAACTTTCAGGCTCCATTCCGGACATTCTTTTTAGTGCTG

>M6-PGSC0003DMG400008403M6LRR-RLK\_2257

CAGCCATTTTAACAAAACCAACTTTCAGGCTCCATTCCGGACATTCTTTTTAGTGCTGACATGGTGCTAA

TACATGTGTAAGTCAAGAACTAAAGGGTGATTTCGCGCTATTCTTCCTG

>M6-PGSC0003DMG400008403M6LRR-RLK\_2318

ATGGTGCTAATACATGTGTAAGTCAAGAACTAAAGGGTGATTTCGCGCTATTCTTCCTGCCCTCCTTCTC

ACTTTGTGAACCTTCTGATATGGCAGACTGTTTGATGGAAATCAACTTAGC

>M6-PGSC0003DMG400008403M6LRR-RLK\_2379

CTCCTTCTCACTTTGTGAACTTCTGATATGGCAGACTGTTTGATGGAAATCAACTTAGCGGGAGCATTCC

ATTTACACTAGGACTTGTTTCAGACACTTGAGGTTCTGTGAGTAGAATTGA

>M6-PGSC0003DMG400008403M6LRR-RLK\_244

TTCTGCGTTGAAAGTACTGAGTTCAGATAATAATGTTTTGTTATGAATAAGTGTGAACTTGGTTGATTGC

AGTAACGATACTTCGATCACTGAAAGATCAGTGGGAAAATACGCCGCCTA

>M6-PGSC0003DMG400008403M6LRR-RLK\_2440

GAGCATTCCATTTACTAGGACTTGTTTCAGACACTTGAGGTTCTGTGAGTAGAATTGACCGTCTTATTTA  
TCCTATCTTTTCGTGCTACTTCACCTTCTGTTTTGGATTATATGCTTGTA

>M6-PGSC0003DMG400008403M6LRR-RLK\_2501

GTCTTATTTATCCTATCTTTTCGTGCTACTTCACCTTCTGTTTTGGATTATATGCTTGACTCTTTTATCTTTTG  
CTGGTATTCATGTAACCTAACATATACAGTCGGCTCGATAGAAATG

>M6-PGSC0003DMG400008403M6LRR-RLK\_2562

CTTTTATCTTTTGCTGGTATTCATGTAACCTAACATATACAGTCGGCTCGATAGAAATGCCTTAAATGGTA  
GCGTCCCATCAAACCTCAACAATCTCACAAGCGTTGTAGAGTTGTAAGT

>M6-PGSC0003DMG400008403M6LRR-RLK\_2623

TTAAATGGTAGCGTCCCATCAAACCTCAACAATCTCACAAGCGTTGTAGAGTTGTAAGTATACTTTTTCCC  
ATCATTGCTCACTCAATTGTCTGCTTCAAATCAATAACTTGTAGATTGA

>M6-PGSC0003DMG400008403M6LRR-RLK\_2684

ACTTTTTCCCATCATTGCTCACTCAATTGTCTGCTTCAAATCAATAACTTGTAGATTGAAGTAGTCCTTTTG  
TGCTCTTATTTCTGTCTTCAGGAACCTAGCTCACAACGAACTGTCCGG

>M6-PGSC0003DMG400008403M6LRR-RLK\_2745

TAGTCCTTTTGCTCTTATTTCTGTCTTCAGGAACCTAGCTCACAACGAACTGTCCGGTCCACTACCAGA  
TTTAACTGGAATGAATTCCCTTAATTATCTGTAAGGAAAATATCCAGAA

>M6-PGSC0003DMG400008403M6LRR-RLK\_2806

CACTACCAGATTTAACTGGAATGAATTCCCTTAATTATCTGTAAGGAAAATATCCAGAATCCTGATTTTCC  
CTAGTTGTTTCTTAATGTTGAAGTGATACATCATATTTTGTCTCTTC

>M6-PGSC0003DMG400008403M6LRR-RLK\_2867

CTGATTTTCCCTAGTTGTTTCTTAATGTTGAAGTGATACATCATATTTTGTCTCTTCCAGGGACTTGAGC  
AATAATCCTTCCATAAATCGGAGGCGCCAATATGGTTCTCGACTCTA

>M6-PGSC0003DMG400008403M6LRR-RLK\_2928

GGGACTTGAGCAATAATCCTTCCATAAATCGGAGGCGCCAATATGGTTCTCGACTCTAGAGTCTCTCAC  
CACTCTGTGAGTATTAATCAGTTATGAATGCAACTATGAATTTCCCAAAA

>M6-PGSC0003DMG400008403M6LRR-RLK\_2989

GTCTCTCACCCTCTGTGAGTATTAATCAGTTATGAATGCAACTATGAATTTCCCAAAAAGTTTGATGAAT  
CTAAGTAGGAAGAAGTATGTAATGCTCAGAGTCATCGAGTATGGCTCA

>M6-PGSC0003DMG400008403M6LRR-RLK\_305

GTTGATTGCAGTAACGATACTTCGATCACTGAAAGATCAGTGGGAAAATACGCCGCCTAGTTGGCAGAG  
ATCGGATGATCCTTGTGGAACATCTTGGGAAGGTGTAACCTGCAACAACCTC

>M6-PGSC0003DMG400008403M6LRR-RLK\_3050

TTTGATGAATCTAAGTAGGAAGAACTGATGTAATGCTCAGAGTCATCGAGTATGGCTCACTCCATGGAT  
CAGTGCCTCAGAACTTTTCGCTTTACCTCAATTACAACAAGTGTGAGTCT

>M6-PGSC0003DMG400008403M6LRR-RLK\_3111

CCATGGATCAGTGCCTCAGAACTTTTCGCTTTACCTCAATTACAACAAGTGTGAGTCTCGCGATCCTAAC  
TGGATATTCCATGTCTATTACCTGCAATGAAGAGGTCGTAATGATCATA

>M6-PGSC0003DMG400008403M6LRR-RLK\_3172

CGATCCTAACTGGATATTCCATGTCTATTACCTGCAATGAAGAGGTCGTAATGATCATAATAACTTATGC  
AGGAACTGAGGAACAACGCATTGAATGACACATTGAACATGGGTGGCAT

>M6-PGSC0003DMG400008403M6LRR-RLK\_3233

AACTTATGCAGGAACTGAGGAACAACGCATTGAATGACACATTGAACATGGGTGGCATCAGTGGCAG  
GCAACTCACACTTGTGATTTACAGAACAACGAGATTTCTCAATAACACTT

>M6-PGSC0003DMG400008403M6LRR-RLK\_3294

GTGGCAGGCAACTCACACTTGTGATTTACAGAACAACGAGATTTCTCAATAACACTTGGCTCTGGATA  
CAAAAATACCTTGATGTAAGATGGTTCATTTCTCCTTTTCGTCGATTAGA

>M6-PGSC0003DMG400008403M6LRR-RLK\_3355

CTCTGGATACAAAAATACCTTGATGTAAGATGGTTCATTTCTCCTTTTCGTCGATTAGATGATTGTTTTTTT  
TCTTTCTCCTTGATTGCTTTGTCGTTGCCTCAGACTGATCGGAAACC

>M6-PGSC0003DMG400008403M6LRR-RLK\_3416

ATTGTTTTTTTTCTTTCTCCTTGATTGCTTTGTCGTTGCCTCAGACTGATCGGAAACCCTGTGTGTGACAC  
GGCCCTTGGAAACACGAACTACTGTCAGCTTCAGCAGCAATCTGCAAA

>M6-PGSC0003DMG400008403M6LRR-RLK\_3477

GTGTGTGACACGGCCCTTGGAAACACGAACTACTGTCAGCTTCAGCAGCAATCTGCAAAGCCTTACTCA  
ACCAGCCTAGCTAACTGTGGGAGAAAATCATGTCCTGCTGATCAAAAAGTT

>M6-PGSC0003DMG400008403M6LRR-RLK\_3538

CTTACTCAACCAGCCTAGCTAACTGTGGGAGAAAATCATGTCCTGCTGATCAAAAAGTTAGCCCACAAAG

TTGTGATTGTGCTTATCCGTACCAGGGAACATTCTACTTTAGAGGACCCT

>M6-PGSC0003DMG400008403M6LRR-RLK\_3599

CCCACAAAGTTGTGATTGTGCTTATCCGTACCAGGGAACATTCTACTTTAGAGGACCCTCTTTTAGAGAG

TTGTCCAATGATAATACGTTCCATTCACTCGAAATGAGCCTGTGGGTGAA

>M6-PGSC0003DMG400008403M6LRR-RLK\_366

TGGCAGAGATCGGATGATCCTTGTGGAACATCTTGGGAAGGTGTAACCTGCAACAACCAAGGGTAACT

GCATTGTGAGTATGCTGTTTTCTTCCAATATATCTAGGGATCGTTTGATTT

>M6-PGSC0003DMG400008403M6LRR-RLK\_3660

TTTAGAGAGTTGTCCAATGATAATACGTTCCATTCACTCGAAATGAGCCTGTGGGTGAAGTTGGATCTCA

CGCCTGGTTCGGTTTTCTCTGCAAACCCCTTCTTCAACATTGATGATTAT

>M6-PGSC0003DMG400008403M6LRR-RLK\_3721

TGGATCTCACGCCTGGTTCGGTTTTCTCTGCAAACCCCTTCTTCAACATTGATGATTATCTTCAGGTGCAG

TTAGAATTATTTCCACCAACAGGAAAGTATTTTAATAGATCAGAGGTTG

>M6-PGSC0003DMG400008403M6LRR-RLK\_3782

TCAGGTGCAGTTAGAATTATTTCCACCAACAGGAAAGTATTTTAATAGATCAGAGGTTGAGAGGATTGG

ATTCTCCTTGAGTAACCAAACCTTATAAGCCGCCTCATGAGTTTGGACCGTA

>M6-PGSC0003DMG400008403M6LRR-RLK\_3843

AGGATTGGATTCTCCTTGAGTAACCAAACCTTATAAGCCGCCTCATGAGTTTGGACCGTACTATTTTATAG

CATCTCCTTACACTTTCCAAGGTATAATTACTGAGTTTCTTTACAACCTGT

>M6-PGSC0003DMG400008403M6LRR-RLK\_3904

ATTTTATAGCATCTCCTTACACTTTCCAAGGTATAATTACTGAGTTTCTTTACAACCTGTAACCTCTGGACCA

ATACTGACTTAAAACCTAAAACCTGTTTCAGCCGAACATGGAGAAACTTC

>M6-PGSC0003DMG400008403M6LRR-RLK\_3965

CTTCTGGACCAATACTGACTTAAAACCTAAAACCTGTTTCAGCCGAACATGGAGAAACTTCTATTAGCTCAA

AACAAGTTATAGGAATAGCTACCGGGTGTACCATCCTGGTCCTCTTGCTC

>M6-PGSC0003DMG400008403M6LRR-RLK\_4026

TTAGCTCAAACAAGTTATAGGAATAGCTACCGGGTGTACCATCCTGGTCCTCTTGCTCGTTGCTCTTGCT

AATATATGCTATTCAACAAAAGAACTTGCTGAAAGAGCTATTGGATTGA

>M6-PGSC0003DMG400008403M6LRR-RLK\_4087

TGCTCTTGCAATATATGCTATTCAACAAAAGAACTTGCTGAAAGAGCTATTGGATTGAGTAGACCATTT  
GGTAATGTCATCTTTTACTGAAATAAACCGATGAGTTATAACTGCATATA

>M6-PGSC0003DMG400008403M6LRR-RLK\_4148

AGACCATTTGGTAATGTCATCTTTTACTGAAATAAACCGATGAGTTATAACTGCATATACATTCATGCCTC  
TCTATAACAGTTATCCTCTATGATTACATTTCACTATAACGACCAAGTT

>M6-PGSC0003DMG400008403M6LRR-RLK\_4209

TTCATGCCTCTCTATAACAGTTATCCTCTATGATTACATTTCACTATAACGACCAAGTTTTCTTTGGAAGT  
ATTTTTCATGTTGTATTGAATTATATGTTTTCTATAACAACATCTCGC

>M6-PGSC0003DMG400008403M6LRR-RLK\_4270

CTTTGGAAGTGAATTTTTCATGTTGTATTGAATTATATGTTTTCTATAACAACATCTCGCTATAGCAGCCAAA  
GAAATATCAGAACAATGACGTCTTTATAGAGAGGTTTACTATATGT

>M6-PGSC0003DMG400008403M6LRR-RLK\_4331

TAGCAGCCAAAGAAATATCAGAACAATGACGTCTTTATAGAGAGGTTTACTATATGTCCATAATGCA  
ACTAGGATTAATACTAAAATGTCTGATTACTTTGACCTTCTTTGTCCAGCAT

>M6-PGSC0003DMG400008403M6LRR-RLK\_4392

ATAATGCAACTAGGATTAATACTAAAATGTCTGATTACTTTGACCTTCTTTGTCCAGCATCGTGGGCTCCAA  
GTGGAAACGACAGTGAAGGTGCACCACAATAAAGGGAGCCAGATGGTT

>M6-PGSC0003DMG400008403M6LRR-RLK\_4453

TGGGCTCCAAGTGGAAACGACAGTGAAGGTGCACCACAATAAAGGGAGCCAGATGGTTTTCTTATGA  
TGAACTTAAGAAATGCACGGGAACTTCTCGGAGAGAAATGAGATTGGTTCC

>M6-PGSC0003DMG400008403M6LRR-RLK\_4514

CTTATGATGAACTTAAGAAATGCACGGGAACTTCTCGGAGAGAAATGAGATTGGTTCCGGTGGCTATG  
GGAAGGTTTGCTACCAAAATCCACAGTAGATATAGAATAAAGGGATAAACT

>M6-PGSC0003DMG400008403M6LRR-RLK\_4575

TGGCTATGGGAAGGTTTGCTACCAAAATCCACAGTAGATATAGAATAAAGGGATAAACTCTTAGTTACT  
TTGCTTATTTGCGTCTGTTCTGTTTCTAGGTATACAGAGGAACACTCGCA

>M6-PGSC0003DMG400008403M6LRR-RLK\_4636

TAGTTACTTTGCTTATTTGCGTCTGTTCTGTTTCTAGGTATACAGAGGAACACTCGCAAATGGGCAAGT  
AATTGCTATCAAAGGGCTCAACATGGATCCATGCAAGGTGGACAAGAGT

>M6-PGSC0003DMG400008403M6LRR-RLK\_4697

TGGGCAAGTAATTGCTATCAAAAGGGCTCAACATGGATCCATGCAAGGTGGACAAGAGTTCAAGACAG  
AAATTGAATTGCTTTACGGGTTTCATCACAAGAACCTAGTTGGTCTGGTTGG

>M6-PGSC0003DMG400008403M6LRR-RLK\_4758

AAGACAGAAATTGAATTGCTTTACGGGTTTCATCACAAGAACCTAGTTGGTCTGGTTGGATTCTGTTTTG  
AGCAAGGGGAACAAGTACTGGTATACGAGTATATGCCAAATGGTTCACTC

>M6-PGSC0003DMG400008403M6LRR-RLK\_4819

TCTGTTTTGAGCAAGGGGAACAAGTACTGGTATACGAGTATATGCCAAATGGTTCACTCAGGGAGAATT  
TGTCAGGTAAGTTACATCCTCCTATACATTAAAGACTGCTTCCTATTTATA

>M6-PGSC0003DMG400008403M6LRR-RLK\_4880

GGAGAATTTGTCAGGTAAGTTACATCCTCCTATACATTAAAGACTGCTTCCTATTTATAGTAATTTACACA  
AAAAAGTTCCTAATATCTCCATTTGCTGTAGAAGTTAATTTCCACTAT

>M6-PGSC0003DMG400008403M6LRR-RLK\_4941

AATTTACACAAAAAAGTTCCTAATATCTCCATTTGCTGTAGAAGTTAATTTCCACTATGCTCTACAGGGA  
AAACGAGCATTTATCTAGATTGGAAGAGGAGACTTCGTGTTGCGCTTGG

>M6-PGSC0003DMG400008403M6LRR-RLK\_5002

TCTACAGGGAAAACGAGCATTTATCTAGATTGGAAGAGGAGACTTCGTGTTGCGCTTGGTTCAGCCAGA  
GGATTAGCTTATCTGCATGAGCTTGCCAATCCTCCTATAATTCACAGAGAT

>M6-PGSC0003DMG400008403M6LRR-RLK\_5063

CAGCCAGAGGATTAGCTTATCTGCATGAGCTTGCCAATCCTCCTATAATTCACAGAGATGTGAAATCAAC  
TAACATTTTGTGGATCAGAACTTAACAGCAAAGGTCGGGGATTTTGGCT

>M6-PGSC0003DMG400008403M6LRR-RLK\_5124

GAAATCAACTAACATTTTGTGGATCAGAACTTAACAGCAAAGGTCGGGGATTTTGGCTTGTCCAAACTC  
GTATCAGATAGCTCAAAGGGTCATGTTTCCACTCAAGTTAAAGGCACATT

>M6-PGSC0003DMG400008403M6LRR-RLK\_5185

TCCAAACTCGTATCAGATAGCTCAAAGGGTCATGTTTCCACTCAAGTTAAAGGCACATTGGTCAGTACCA  
CATCCTGCACATTTTTCGCGTTCTATTTCAAGAAAAAGATTGAATTTTGT

>M6-PGSC0003DMG400008403M6LRR-RLK\_5246

TCAGTACCACATCCTGCACATTTTTCGCGTTCTATTTCAAGAAAAAGATTGAATTTTGTGAACTCTTGAAG

CATGAAATTGAATTTAAGACTATTGATTACATTGCAGGGTTATCTAGAT

>M6-PGSC0003DMG400008403M6LRR-RLK\_5307

ACTCTTGAAGCATGAAATTGAATTTAAGACTATTGATTACATTGCAGGGTTATCTAGATCCTGAATACTAT  
ATGACTCAACAATAACCGAGAAGAGCGATGTGTATAGCTTTGGTGTTG

>M6-PGSC0003DMG400008403M6LRR-RLK\_5368

TGAATACTATATGACTCAACAATAACCGAGAAGAGCGATGTGTATAGCTTTGGTGTTGTAATGCTAGA  
ACTCATAACTGCAAAACAACCAATAGAGAAGGGGAAATACGTTGTTGCGAGA

>M6-PGSC0003DMG400008403M6LRR-RLK\_5429

ATGCTAGAACTCATAACTGCAAAACAACCAATAGAGAAGGGGAAATACGTTGTTGCGAGAGATGAGAAC  
AGCAATAAATAAGAACGACGAGGAGCATTATGGCTTGAGCAATATGATCGAT

>M6-PGSC0003DMG400008403M6LRR-RLK\_5490

TGAGAACAGCAATAAATAAGAACGACGAGGAGCATTATGGCTTGAGCAATATGATCGATCCAGTCATTA  
GAAACATGCCAAATCTAATTGGTTTTACAAGTTTTGTGGACGTGGCGATGC

>M6-PGSC0003DMG400008403M6LRR-RLK\_5551

AGTCATTAGAAACATGCCAAATCTAATTGGTTTTACAAGTTTTGTGGACGTGGCGATGCAATGTGTTGA  
AGAGGCTGCTGCTGATCGTCCAACGATGAGTGAAGTGGTAAAAATGCTTGA

>M6-PGSC0003DMG400008403M6LRR-RLK\_5612

TGTGTTGAAGAGGCTGCTGCTGATCGTCCAACGATGAGTGAAGTGGTAAAAATGCTTGAAAGTATTCTT  
CAAATGATGGTCTGGAAACGAATTCTACGTCTGCATCATCATCGATAACG

>M6-PGSC0003DMG400008403M6LRR-RLK\_5673

GTATTCTTCAAATGATGGTCTGGAAACGAATTCTACGTCTGCATCATCATCGATAACGGATTTTGGGAC  
AGCAATAGCTGCTTCTAGACATCCTTATAACAAGGAGGCTCTACAGAGAA

>M6-PGSC0003DMG400008403M6LRR-RLK\_5734

TTTTGGGACAGCAATAGCTGCTTCTAGACATCCTTATAACAAGGAGGCTCTACAGAGAAAGGAGATCAA  
TGATACTCATGCGTTTGATTACAGTGGTGGATACACTCTTCCAACAAATGT

>M6-PGSC0003DMG400008403M6LRR-RLK\_5795

GAGATCAATGATACTCATGCGTTTGATTACAGTGGTGGATACACTCTTCCAACAAATGTGGAACCAAAAT  
AGTGACAACCAAAAAAAAAAAGGACTTGTCTCTACTGTCTCTCATTCTTTA

>M6-PGSC0003DMG400008403M6LRR-RLK\_5856



AACCAAATAGTGACAACCAAAAAAAAAAAGGACTTGTCTCTACTGTCTCTCATTCTTTAATTTATTCTCTA  
GAAAAAAAAATTGGAAAATTGGTGAAAGGGATAAGAGAATTTAGTTGTTG

>M6-PGSC0003DMG400008403M6LRR-RLK\_5917

TTATTCTCTAGAAAAAAAAATTGGAAAATTGGTGAAAGGGATAAGAGAATTTAGTTGTTGTATTGTCCCTA  
TATTGGCTACTTTTCGCGAAACAATCACGTATAGTATCAGGATCGAAGTT

>M6-PGSC0003DMG400008403M6LRR-RLK\_5978

TTGTCCCTATATTGGCTACTTTTCGCGAAACAATCACGTATAGTATCAGGATCGAAGTTCAGATTTTCTAT  
TGCCAAGACTTACTGTCTAGTGGTACTAGTGAGAGTCTCCTATACACTA

>M6-PGSC0003DMG400008403M6LRR-RLK\_6039

GATTTTCTATTGCCAAGACTTACTGTCTAGTGGTACTAGTGAGAGTCTCCTATACACTAAGTGTGAGTTC  
GATTTTACCACCCCGATCCTCAAATGTAATAGAAAAAAGTTAAAAGGA

>M6-PGSC0003DMG400008403M6LRR-RLK\_61

AATGGCAGCCACTCGGCTGTTACTCTGCTTTATCGTCTTCTCGTCTGGCATTGATTCATATACACTGTTA  
CAGATCCCAGAGATGGTAAGAACTTTGTATAAAATTGTCGGATCCAATA

>M6-PGSC0003DMG400008403M6LRR-RLK\_6100

TGTGAGTTCGATTTTTACCACCCCGATCCTCAAATGTAATAGAAAAAAGTTAAAAGGAAAAAATTTAGA  
TTTTGTACCATCAAGGCTGCAGTCTAGTGGTATACCTAAGAGGTCTTCCA

>M6-PGSC0003DMG400008403M6LRR-RLK\_6161

AAATTTAGATTTTGTACCATCAAGGCTGCAGTCTAGTGGTATACCTAAGAGGTCTTCCATACACTAAGTG  
TGAGTTCGATTTTTTACTATCTCCTTTCCATTCCCTGATTCTACAATGT

>M6-PGSC0003DMG400008403M6LRR-RLK\_6198

GGTATACCTAAGAGGTCTTCCATACACTAAGTGTGAGTTCGATTTTTTACTATCTCCTTTCCATTCCCTGA  
TTCTACAATGTAATAGAAAAAATCAAATTTAAAAGTTCAGATTTTC

>M6-PGSC0003DMG400008403M6LRR-RLK\_671

TATTAACCTCATATGACTAGTGCAGAGTTTAATACCGGAAACAAAACATCATGTTAGTTATATGGAAAC  
TATATTAGCTTACACGTTTTTTACATTGAAAACCAAATGTTGTATAAGTA

>M6-PGSC0003DMG400008403M6LRR-RLK\_732

TATGGAACTATATTAGCTTACACGTTTTTTACATTGAAAACCAAATGTTGTATAAGTAAAATGAAAATTA  
CTTCTTTTTTTTTTAGGAAAACTACATAATTAGGACATAGGTCGCTAT

>M6-PGSC0003DMG400008403M6LRR-RLK\_793

ATGAAAATTACTTCTTTTTTTTTTAGGAAAACTACATAATTAGGACATAGGTCGCTATCGTAAATACTAT  
TATTATCTATACTTCAAATACTATGTATCTTACCACTAATTAAGAAT

>M6-PGSC0003DMG400008450M6LRR-RLP\_0

TCCTTATGTTACACACCTCTTCTCTCTGAAGGTGTATGATGGGATTCATGATTGTCTTTCCTACAACAGTC  
ACCTAAAACACTTGAGGCTTCTTAAAAGTTTGGATTTGAAGGGCCTAAC

>M6-PGSC0003DMG400008450M6LRR-RLP\_128

ATTCTTTGCTGAATGAAATCGGTTTGCTTGTTCAATTTGAAGTACTTAATCATTGACGACGAAGGCAAAAGC  
TCTCCCTCCGTTATTTCAAACCTCTGCAATCTAGAACTCTATCGGTGT

>M6-PGSC0003DMG400008450M6LRR-RLP\_192

AAAAGCTCTCCCTCCGTTATTTCAAACCTCTGCAATCTAGAACTCTATCGGTGTATAACATTGAGAGAT  
CATGCATGATACTATCGCCTTGTTTTGGAGTCTTGCAAAGCTACAAGA

>M6-PGSC0003DMG400008450M6LRR-RLP\_256

GAGAGATCATGCATGATACTATCGCCTTGTTTTGGAGTCTTGCAAAGCTACAAGATGTGTGGATGATG  
GAATGTGCTCTCTTTGAACCAACTGTGTTAGACGAGGACTCAAGGTTAGAA

>M6-PGSC0003DMG400008450M6LRR-RLP\_320

TGATGGAATGTGCTCTCTTTGAACCAACTGTGTTAGACGAGGACTCAAGGTTAGAAAATTTGAGAACAT  
TACAGCATCTCTCCCTTCCCGGTTCAGAAGACATGGAGGATATTTCAAAA

>M6-PGSC0003DMG400008450M6LRR-RLP\_384

AACATTACAGCATCTCTCCCTTCCCGGTTCAGAAGACATGGAGGATATTTCAAAGGTTTCCTAATCTTC  
AAATCCTTAGTGTCTCTATCATAGCAGAGAAGATTTGTTTTCCAAGATT

>M6-PGSC0003DMG400008450M6LRR-RLP\_448

AATCTTCAAATCCTTAGTGTCTCTATCATAGCAGAGAAGATTTGTTTTCCAAGATTGGATGTCCTTAACGA  
ACTTGAACAACTCAATTTATCTGCTTCTTGGGATTCATTCCATGAATAT

>M6-PGSC0003DMG400008450M6LRR-RLP\_512

TTAACGAACTTGAACAACTCAATTTATCTGCTTCTTGGGATTCATTCCATGAATATACACACGGCTTCCCT  
TTGAGCTTGAAGAAAATGAGGTTGCAAGGGCTCGCTCTGACATCCGATT

>M6-PGSC0003DMG400008450M6LRR-RLP\_64

AACAGTCACCTAAAACACTTGAGGCTTCTTAAAAGTTTGGATTTGAAGGGCCTAACATTGACAGATTCTT

TGCTGAATGAAATCGGTTTGCTTGTTCAATTTGAAGTACTTAATCATTAG

>M6-PGSC0003DMG400008450M6LRR-RLP\_640

AGAATTGCTAGACTACCCAACCTTCAAAAACCTAAGTCTAAAAACGCAATCATCGATGGGGGGCCAGGA  
GAATGGAACATGGAAGTTGTACCTTCAAGAATCTCAAATATCTAAAATTG

>M6-PGSC0003DMG400008450M6LRR-RLP\_704

CAGGAGAATGGAACATGGAAGTTGTACCTTCAAGAATCTCAAATATCTAAAATTGGATAGTGTGGAAT  
TTTCTGAATGGCAGTTGATGCAGAGAAATCATTTCCTGCTCGAGATGT

>M6-PGSC0003DMG400008450M6LRR-RLP\_768

GGAATTTTCTGAATGGCAGTTGATGCAGAGAAATCATTTCCTGCTCGAGATGTTAGATATAGTTACA  
TGTGAGAAGCTTATGGACATCCCAGATAGTTTTGGAGATATTGCGTCATT

>M6-PGSC0003DMG400008450M6LRR-RLP\_825

AGATATAGTTACATGTGAGAAGCTTATGGACATCCCAGATAGTTTTGGAGATATTGCGTCATTAGA  
ACTTCAAAAGTATGGTTTAGCCCTCAGCTTAAAGAGTCAATCTTCAATATTA

>M6-PGSC0003DMG400008482M6RLKWAX-EGF\_1426

GGCCGTGCCTTGGGGCATATCGATTGAAGTAGATTCTGATTCATATGTTATGCTTAATTAGATACTCATA  
GTTGCCATTAATGACAAAGTAATTAATCCTGGAATTTTCGTCGGGTGTAA

>M6-PGSC0003DMG400008482M6RLKWAX-EGF\_1488

TACTCATAGTTGCCATTAATGACAAAGTAATTAATCCTGGAATTTTCGTCGGGTGTAATCACA  
ACTTGTGC TAGTTGTA  
AAAACAAAGAAGATATAAAGACATAGCCAAAGGGATTAAATT

>M6-PGSC0003DMG400008482M6RLKWAX-EGF\_1550

AACTTGTGCTAGTTGTA  
AAAACAAAGAAGATATAAAGACATAGCCAAAGGGATTAAATTAATGTGGTATG  
TTTCTCTGTTTGGCATGTTAGATATTGATGAATGTCAA  
AATTCAACTTCCA

>M6-PGSC0003DMG400008482M6RLKWAX-EGF\_1612

TGGTATGTTTCTCTGTTTGGCATGTTAGATATTGATGAATGTCAA  
AATTCAACTTCCAATAAGTGTGGACA  
CAACAATTGTATAACACGTTGGGGAGTTACAAATGTTCTTGT  
CGAAAA

>M6-PGSC0003DMG400008482M6RLKWAX-EGF\_1674

GTGTGGACACAACAATTGTATAACACGTTGGGGAGTTACAAATGTTCTTGT  
CGAAAAGGATACACTGA  
TGATGGTGA  
AAACAATGGTCTTGTCTGTATTGCAACAACTCCGAGTTCCC

>M6-PGSC0003DMG400008482M6RLKWAX-EGF\_1736

ACACTGATGATGGTGAAAACAATGGTCTTGTCTGTATTGCAACAACTCCGAGTTCCCATGGATCAAGTT  
TTCCGTTGGTAAGTTTCTCAGATATATATATATATATATATATATATA

>M6-PGSC0003DMG400008482M6RLKWAX-EGF\_1860

TATATTGAAGTGATCATAGGAATTCCTTCTGTTATTATAAACACAGGTATGGGAGTTGGCTTTATATCC  
CTAGTGGTTGGGACAATCTTGCTCTATTTTTGTATCAACAAACGAAGAC

>M6-PGSC0003DMG400008482M6RLKWAX-EGF\_1922

TTTATATCCCTAGTGGTTGGGACAATCTTGCTCTATTTTTGTATCAACAAACGAAGACTCATTAAAAGTAG  
GGAGAAGTTCTCCAACAAAATGGTGGTTTACTCTTGAAACAACAAATC

>M6-PGSC0003DMG400008482M6RLKWAX-EGF\_1984

TAAAAGTAGGGAGAAGTTCTCCAACAAAATGGTGGTTTACTCTTGAAACAACAAATCTCCTCTAAAAAG  
GGTGGTGTGGAAGCAACCAAAAATTTTTACAGCTGAGGAGTTGAAGAAGGC

>M6-PGSC0003DMG400008482M6RLKWAX-EGF\_2046

CTAAAAGGGTGGTGTGGAAGCAACCAAAAATTTTTACAGCTGAGGAGTTGAAGAAGGCGACAATAAC  
TATGCTAGTGATAGAATTCTTGGTCGCGGTGGAAGTGAATTGTCTATAAAG

>M6-PGSC0003DMG400008482M6RLKWAX-EGF\_2108

AATAACTATGCTAGTGATAGAATTCTTGGTCGCGGTGGAAGTGAATTGTCTATAAAGGTATTCTACCTG  
ATAACCGTATAGTTGCTATTAAGAAATCTAAGATTGTGGATGAGAATCAA

>M6-PGSC0003DMG400008482M6RLKWAX-EGF\_2170

TCTACCTGATAACCGTATAGTTGCTATTAAGAAATCTAAGATTGTGGATGAGAATCAAATTGAACAGTTC  
ATCAATGAGGTACTTATTCTTACTCAAGTAAACCATAGAAACGTCGTGAG

>M6-PGSC0003DMG400008482M6RLKWAX-EGF\_2232

AACAGTTCATCAATGAGGTACTTATTCTTACTCAAGTAAACCATAGAAACGTCGTGAGACTCTTTGGATG  
TTGTTTGAAGCTGAAGTGCCTTACTGGTTTACGAATACGTTTCTCATG

>M6-PGSC0003DMG400008482M6RLKWAX-EGF\_2294

TTTGGATGTTGTTTGAAGCTGAAGTGCCTTACTGGTTTACGAATACGTTTCTCATGGAAGTCTTTACGA  
GCATATCCACAATCAAATGGGTTATCTTTGCAAATCGGTTGAGAATT

>M6-PGSC0003DMG400008482M6RLKWAX-EGF\_2356

TCTTTACGAGCATATCCACAATCAAATGGGTTATCTTTGCAAATCGGTTGAGAATTGCTTCAGAGACA  
GCAAGTTCACCTTGCTTACCTTCATTCATCAGCATCGATGCCAATAATTCA

>M6-PGSC0003DMG400008482M6RLKWAX-EGF\_2418

CAGAGACAGCAAGTTCACCTTGCTTACCTTCATTCATCAGCATCGATGCCAATAATTCATAGAGACGTTAA  
ATCTACTAATATATTATTGGATGATGGTTACACAGCAAAAGTGGCAGATT

>M6-PGSC0003DMG400008482M6RLKWAX-EGF\_2480

GACGTAAATCTACTAATATATTATTGGATGATGGTTACACAGCAAAAGTGGCAGATTTTGGAGCTTCAA  
GATTAGTCCCTCTTGACCAAACACGTGTTGCTACATTGGTTCAAGGAACG

>M6-PGSC0003DMG400008482M6RLKWAX-EGF\_2542

AGCTTCAAGATTAGTCCCTCTTGACCAAACACGTGTTGCTACATTGGTTCAAGGAACGTTAGGGTACTTA  
GATCCTGAATATTTCCACACAGGTCAATTGACAGACAAAAGTGACGTTTA

>M6-PGSC0003DMG400008482M6RLKWAX-EGF\_2604

GGTACTTAGATCCTGAATATTTCCACACAGGTCAATTGACAGACAAAAGTGACGTTTATAGTTTTGGAGT  
AGTTCTTGCAGAACTTTTAACAGGGATGAAACCTATTTTGAGGGACACAA

>M6-PGSC0003DMG400008482M6RLKWAX-EGF\_2666

TTTGGAGTAGTTCTTGCAGAACTTTTAACAGGGATGAAACCTATTTTGAGGGACACAATTAGTGACAAG  
GACAAATGTTTGGTGGAGTACTTTGTCTCATCGATGAACAAGAATAGCTTA

>M6-PGSC0003DMG400008482M6RLKWAX-EGF\_2728

TGACAAGGACAAATGTTTGGTGGAGTACTTTGTCTCATCGATGAACAAGAATAGCTTATTTCAAATTGTT  
GATTGTAGAGTTGTAAGAGAAGGAGGTCTTGAGCAACTTCAAAGATAGC

>M6-PGSC0003DMG400008482M6RLKWAX-EGF\_2790

AAATTGTTGATTGTAGAGTTGTAAGAGAAGGAGGTCTTGAGCAACTTCAAAGATAGCTGAGCTCATT  
AGAGTTGCCTTCACTTGCACGGAGAAGATAGGCCTACGATGAAGGAAGTGG

>M6-PGSC0003DMG400008482M6RLKWAX-EGF\_2914

GGAACCTTGAGAGTTTAAGAAAGTTCCTAGCCTTTGGACTAATGGAAAGGAACATGAAGATGAGAAGG  
AAGTTGAATTAACAGATCTTTATACAATTCCAATTGATTCTAATATAGGTAT

>M6-PGSC0003DMG400008482M6RLKWAX-EGF\_2976

AGAAGGAAGTTGAATTAACAGATCTTTATACAATTCCAATTGATTCTAATATAGGTATGGACAACTTCTC  
TGAAAATATCCTAGCTCCTACACAAATAGCAGCACCATCTTTTCTGGAC

>M6-PGSC0003DMG400008482M6RLKWAX-EGF\_3038

AACTTCTCTGGAAAATATCCTAGCTCCTACACAAATAGCAGCACCATCTTTTCTGGACAATATAGTTCCGA

TAGTTCCTTCATTAATAACAATAACAATTTACCGCGGTGATCGATCCAG

>M6-PGSC0003DMG400008482M6RLKWAX-EGF\_3100

TAGTTCGGATAGTTCCTTCATTAATAACAATAACAATTTACCGCGGTGATCGATCCAGAATAAAAGGTCA  
ATATATGAAGATTTTTCTCTGTTTTGTAAGTTCCTTTTTAGCCATCTTTC

>M6-PGSC0003DMG400008482M6RLKWAX-EGF\_3162

AAAGGTCAATATATGAAGATTTTTCTCTGTTTTGTAAGTTCCTTTTTAGCCATCTTCTTTCTTGTTGAATG  
TTGTTATGATTTTTATTGCTTCTGAATTAATCATCAATATATTGT

>M6-PGSC0003DMG400008482M6RLKWAX-EGF\_3224

TTGTTGAATGTTGTTATGATTTTTATTGCTTCTGAATTAATCATCAATATATTGTTGATTGTATGATTG  
CCAAGAACTTTTAGATTGTATGATTGACAAGAACTTTTAGTACATCGA

>M6-PGSC0003DMG400008482M6RLKWAX-EGF\_496

AGCACAATGAACGTTTTTTAAAGTTTGATACATATTTGAGTCTTTTCCCTATAAACCAATTGAAATGGA  
GGAATTAATAAAGTAAGAGGTATAAATTGAAAATAAGAAAAGAAATAC

>M6-PGSC0003DMG400008482M6RLKWAX-EGF\_558

TGAAATGGAGGAATTAATAAAGTAAGAGGTATAAATTGAAAATAAGAAAAGAAATACTTTAGTAGGT  
TGGGTGTCAAGAAGGGTAGGATATCAAATCATAGGGACATTTATATTTATT

>M6-PGSC0003DMG400008482M6RLKWAX-EGF\_620

GTAGGTTGGGTGTCAAGAAGGGTAGGATATCAAATCATAGGGACATTTATATTTATTGTAGGATAGTG  
AGTGCCTTTTTAACACCACACACTAGAAATTAATGAATCGAAGTACCTAAT

>M6-PGSC0003DMG400008482M6RLKWAX-EGF\_682

GATAGTGAGTGCCTTTTTAACACCACACACTAGAAATTAATGAATCGAAGTACCTAATTATCTGCCTGAT  
TGAAGCGTGGCCATAACGATAGAGGTGAAGTTGACTCCTCACTAAGGTTT

>M6-PGSC0003DMG400008482M6RLKWAX-EGF\_744

TGCCTGATTGAAGCGTGGCCATAACGATAGAGGTGAAGTTGACTCCTCACTAAGGTTTTGCTCTCATCAA  
AATTTGACTAATTCAAACTTACCAATATATAATAGTCACCCATCAACC

>M6-PGSC0003DMG400008482M6RLKWAX-EGF\_806

CTCATCAAATTTGACTAATTCAAACTTACCAATATATAATAGTCACCCATCAACCTGACTTGTGGTAT  
AGTGCGGAGGTACTATTCCAATTTAATTAGAGATTTTAAGTTTCGAAC

>M6-PGSC0003DMG400008482M6RLKWAX-EGF\_868

TTGTGGTATAGTGCGGAGGTAATTCCAATTTTAATTAGAGATTTTAAGTTTCGAACTCTGAGTATAGA  
GAAAATTTTGTTAGGAGCGTCACCTCAAATGGGCCTTGCAGTGCATGAT

>M6-PGSC0003DMG400008482M6RLKWAX-EGF\_930

AGTATAGAGAAAATTTTGTTAGGAGCGTCACCTCAAATGGGCCTTGCAGTGCATGATTTAGATTTAATC  
AGAGCTCCAATATAGAAACCGAATAACAAATTTAAGAAGATATTTTCTTT

>M6-PGSC0003DMG400008482M6RLKWAX-EGF\_992

ATTTAATCAGAGCTCCAATATAGAAACCGAATAACAAATTTAAGAAGATATTTTCTTTATCTTGATTTAA  
ACTAAGTTAATACATGTAATTTTACTAAAAATATTTTGCCTTATATTTA

>M6-PGSC0003DMG400008492M6LRR-RLP\_1008

TGCTCCACTGCCGCCCTGTAAATGATCATCACTAGTATCCTGTCTGTGCGATCTATCTATGTATTTCAACTTC  
TCTTTGAATGTTGATGAATAATTGAGTGAGTAACTCAAGGCATAAAC

>M6-PGSC0003DMG400008492M6LRR-RLP\_1063

CTATGTATTTCAACTTCTCTTTGAATGTTGATGAATAATTGAGTGAGTAACTCAAGGCATAAACATGTAC  
TTTAATTAATTTATGAATGTTATCCTTTTTTAGTAACCTTCTCGATGGAT

>M6-PGSC0003DMG400008492M6LRR-RLP\_126

AAAAGCCCTCCTAGAATTCAAAAAAGGTCTAGGCAATCCTGATGACTTGGGTAATTGGGATCCGAAAAC  
TGATTGTTGACTGATTGGTACGGACCTACTATCAAATGTGATGAAAAAAC

>M6-PGSC0003DMG400008492M6LRR-RLP\_189

GAAAACGATTGTTGACTGATTGGTACGGACCTACTATCAAATGTGATGAAAAACCAATCGTATTAAC  
GTCATCGACTTCACCAAATGGATATGGCCGGATACCTCTCCCCGCCAT

>M6-PGSC0003DMG400008492M6LRR-RLP\_252

TATTAACGTCATCGACTTCACCAAATGGATATGGCCGGATACCTCTCCCCGCCATCGGAGACCTTACA  
TACCTTACAACATTCAGTATCCACAATGTACGTAATCTCACCGGTCCAAT

>M6-PGSC0003DMG400008492M6LRR-RLP\_315

CCTTACATACCTTACAACATTCAGTATCCACAATGTACGTAATCTCACCGGTCCAATTCATCAACAATCC  
TTAAACTCACTCATCTCGAATTCTCAGAATTAGTCAAACAAACATTTT

>M6-PGSC0003DMG400008492M6LRR-RLP\_378

AACAATCCTTAACTCACTCATCTCGAATTCTCAGAATTAGTCAAACAAACATTTCTGGACCTGTACCTG  
AAGTTCTTAGTAAATTGAAAAGCTTAACGTACATTAACCTTATCCTATAA

>M6-PGSC0003DMG400008492M6LRR-RLP\_441

TGTACCTGAAGTTCTTAGTAAATTGAAAAGCTTAACGTACATTAACCTATCCTATAATAAGCTTGTTGGAA  
CTATTCCACCTTCGCTATCTCAACTCCACACTTGGAGTTTTTACGATT

>M6-PGSC0003DMG400008492M6LRR-RLP\_504

TGTTGGAACCTATTCCACCTTCGCTATCTCAACTCCACACTTGGAGTTTTTACGATTAGACAGGAACAAAC  
TACTGGACCAATCCCGGAGTCTTTTAGCAAGTTAGCTCCAAATCTAAC

>M6-PGSC0003DMG400008492M6LRR-RLP\_567

GAACAACTTACTGGACCAATCCCGGAGTCTTTTAGCAAGTTAGCTCCAAATCTAACGTATCTTTACCTTG  
GACATAACCAACTTACAGGGATTGTCCCAACTTCATTTGCTGGCTGGAG

>M6-PGSC0003DMG400008492M6LRR-RLP\_630

TTACCTTGGACATAACCAACTTACAGGGATTGTCCCAACTTCATTTGCTGGCTGGAGTTTTGAGACAATT  
GACTTGTCAAGGAACATGCTTGAAGGGGATATTTCATTTTTGTGGTAA

>M6-PGSC0003DMG400008492M6LRR-RLP\_693

GACAATTGACTTGTCAAGGAACATGCTTGAAGGGGATATTTCATTTTTGTGGTAAAGATAAGAATACA  
TTTGAAATGCTTTTGGATCGGAATAAGTTTGAATTTGACATGTCAAAGTT

>M6-PGSC0003DMG400008492M6LRR-RLP\_756

GAATACATTTGAAATGCTTTTGGATCGGAATAAGTTTGAATTTGACATGTCAAAGTTGACGTTTGGGAAG  
AGATTATGGAGGTTGCATTTAAATCATAACAAGATTTATGGGAGTCTTCC

>M6-PGSC0003DMG400008492M6LRR-RLP\_819

TGGGAAGAGATTATGGAGGTTGCATTTAAATCATAACAAGATTTATGGGAGTCTTCCAAAAATCATGTC  
CAAGAATCCGTGGCAACTCTTGAATGTGAGTTATAATAGACTTTGTGGAAA

>M6-PGSC0003DMG400008492M6LRR-RLP\_882

CATGTCCAAGAATCCGTGGCAACTCTTGAATGTGAGTTATAATAGACTTTGTGGAAAGATACCAAAGGG  
TGAGAATATGCAGAGATTTGAGATATATGAGTATTTCCACAACAAATGCTT

>M6-PGSC0003DMG400008492M6LRR-RLP\_945

AAAGGGTGAGAATATGCAGAGATTTGAGATATATGAGTATTTCCACAACAAATGCTTGTGTGGTGCTCC  
ACTGCCGCCCTGTAAATGATCATCACTAGTATCCTGTCTGTGCGATCTATCT

>M6-PGSC0003DMG400008493M6G-LecRK\_0

TAAAAAGTTGTATATAGCTAGTGTCCGGCATGCTTTTATTTCAACTATAATGGCTTTTGATTTTCAATCAC



AACAAGAAATCATGTACGTATAGATTATTATCTAAATTTTCATGTTTT

>M6-PGSC0003DMG400008493M6G-LecRK\_1054

TTTGTACTTATGCAACTTTGTTCTTTAAATGTAGGGAGTTTTGAGAGATGGAAGTTGTGTTGCCATTAAAT  
GTCTCTCTGCTGAGTCAAACAAGGGACTAAAGAATTCTTAACAGAGAT

>M6-PGSC0003DMG400008493M6G-LecRK\_1116

CCATTAAATGTCTCTCTGCTGAGTCAAACAAGGGACTAAAGAATTCTTAACAGAGATTAATATGATTTCC  
AAATACCCAACATCCAAATCTTGTTGAGTTGATTGGTTGTTGTGTTGAGA

>M6-PGSC0003DMG400008493M6G-LecRK\_1178

ATGATTTCAAATACCCAACATCCAAATCTTGTTGAGTTGATTGGTTGTTGTGTTGAGAGTGGCAATAGAA  
TGTTGATATATGAATACTTGAAGAATAACAGCCTTGCCAGTGCTTTACTA

>M6-PGSC0003DMG400008493M6G-LecRK\_124

TTTGTCTAAGTAGATTTTATAGTAGTTGATTATTTTTTTTTTCGATTTTCCTTTTCATTAATTTGCAGAAATAT  
TAGGTGCTACAAATTTAAATTTTGAATATTTGAGCAATGGGTTGGA

>M6-PGSC0003DMG400008493M6G-LecRK\_1240

CAATAGAATGTTGATATATGAATACTTGAAGAATAACAGCCTTGCCAGTGCTTTACTAGGTAATGTTCTC  
ACAGATCAGTTTGAAAAAAAAAACTTATTTTGAACCAAATGAACATGTC

>M6-PGSC0003DMG400008493M6G-LecRK\_1302

ATGTTCTCACAGATCAGTTTGAAAAAAAAAACTTATTTTGAACCAAATGAACATGTCATAGTTGAAGTT  
AGGAATGTTAAATGAGCAGATTGGACTGAATCTGGACGGGTAAAATTGT

>M6-PGSC0003DMG400008493M6G-LecRK\_1364

TTGAAGTTAGGAATGTTAAATGAGCAGATTGGACTGAATCTGGACGGGTAAAATTGTTATTTTCAGGTT  
CTAATGGTAAACGCGTTGCCCTGAATTGGCCTCAGAGAGTTGCTATATGTT

>M6-PGSC0003DMG400008493M6G-LecRK\_1426

TCAGGTTCTAATGGTAAACGCGTTGCCCTGAATTGGCCTCAGAGAGTTGCTATATGTTTAGGTACAGCAT  
CTGGTTTAGCATTTCTTCATGAGGAAGCCTCACCACCGATTGTTTCATCGA

>M6-PGSC0003DMG400008493M6G-LecRK\_1488

TACAGCATCTGGTTTAGCATTTCTTCATGAGGAAGCCTCACCACCGATTGTTTCATCGAGATATTAAGGCT  
AGTAATATCCTTATAGATGAAAACCTTCATCCTAAAATTGGAGATTTTGG

>M6-PGSC0003DMG400008493M6G-LecRK\_1550

TTAAGGCTAGTAATATCCTTATAGATGAAAACCTTCATCCTAAAATTGGAGATTTTGGTCTGGCTAAGCTT  
TTTCCTGAAAATGTCACCTCATCTAAGTACGCGAGTAGCAGGAACAATGT

>M6-PGSC0003DMG400008493M6G-LecRK\_1612

GCTAAGCTTTTTCTGAAAATGTCACCTCATCTAAGTACGCGAGTAGCAGGAACAATGTGAGTAGTTACAT  
TGAATTTAGTTTTATAACATTCGATATTCCTCTCCTGTCTCGTCTCAGT

>M6-PGSC0003DMG400008493M6G-LecRK\_1674

AGTTACATTGAATTTAGTTTTATAACATTCGATATTCCTCTCCTGTCTCGTCTCAGTAAGGTATTCTGATG  
TGCAGAGGTTACCTTGCTCCGGAGTATGCCTTGTGGACAACCTCACG

>M6-PGSC0003DMG400008493M6G-LecRK\_1736

TATTCTGATGTGCAGAGGTTACCTTGCTCCGGAGTATGCCTTGTGGACAACCTCACGAAAAAGGCTGAT  
GTCTATAGCTTTGGAGTTCTTGTACTTGAAATCATAAGTGGAAGAAGCAG

>M6-PGSC0003DMG400008493M6G-LecRK\_1798

AGGCTGATGTCTATAGCTTTGGAGTTCTTGTACTTGAAATCATAAGTGGAAGAAGCAGTAGTAAATCAG  
CATTTGGAGTGGATCTCTTGGTTCTGGTGGAAATGGGTAGGATTATACTTTC

>M6-PGSC0003DMG400008493M6G-LecRK\_186

TGCAGAAATATTAGGTGCTACAAATTTAAAATTTGAATATTTGAGCAATGGGTTGGAATTGCTTTGGAG  
TTTTGCAATCATACAAAAACAATAGAGAGACTCAAATCCAAGGTAAGTAC

>M6-PGSC0003DMG400008493M6G-LecRK\_1860

AAATCAGCATTTGGAGTGGATCTCTTGGTTCTGGTGGAAATGGGTAGGATTATACTTTCAGCTTTATGATC  
TTCAAGATTCATCAGTAATCAGCATTTTAAAAGTTTACGCGTTGCAGGTA

>M6-PGSC0003DMG400008493M6G-LecRK\_1922

TTATGATCTTCAAGATTCATCAGTAATCAGCATTTTAAAAGTTTACGCGTTGCAGGTATGGAAGCTAAGA  
GAAGAAGCACGGCTTCTGGAATCATTGATCCAGAGCTAACAGAGTATCC

>M6-PGSC0003DMG400008493M6G-LecRK\_1984

AGCTAAGAGAAGAAGCACGGCTTCTGGAATCATTGATCCAGAGCTAACAGAGTATCCAGAAACTGAAT  
TGCTGCGGTTTCATCAAAGTTGCTCTCTTTTGCACACAATCAGCACCTACCC

>M6-PGSC0003DMG400008493M6G-LecRK\_2046

ACTGAATTGCTGCGGTTTCATCAAAGTTGCTCTCTTTTGCACACAATCAGCACCTACCCAAAGACCTAATAT  
GAAACAAGTGATTGAGATGTTGTCTAAGGAAGTCAACCTCAACGAGAAG

>M6-PGSC0003DMG400008493M6G-LecRK\_2108

ACCTAATATGAAACAAGTGATTGAGATGTTGTCTAAGGAAGTCAACCTCAACGAGAAGTCGTTAACTGA  
ACCAGGAGTTTATAGACCACATAGCTCGAAACGATCAAGTTATGGTAGTCT

>M6-PGSC0003DMG400008493M6G-LecRK\_2170

TAACTGAACCAGGAGTTTATAGACCACATAGCTCGAAACGATCAAGTTATGGTAGTCTGCAGAAATCAT  
CCTCTGCGGGGAAGAATGGGGTGCAATCTGTAAATCCTTCTGTAACATCAA

>M6-PGSC0003DMG400008493M6G-LecRK\_2232

AAATCATCCTCTGCGGGGAAGAATGGGGTGCAATCTGTAAATCCTTCTGTAACATCAACAAAGTTTGAG  
AGCTTTCAGAGTGTCAACCAAATGCTTCTAGATAATGTAACTGGTGTTT

>M6-PGSC0003DMG400008493M6G-LecRK\_2294

GTTTGAGAGCTTTCAGAGTGTCAACCAAATGCTTCTAGATAATGTAACTGGTGTTCTTATTCTTCATAC  
TTGTATATTGTCGTTCTTCTAACGTGGGCTATCGAGGAGTAAATGTATT

>M6-PGSC0003DMG400008493M6G-LecRK\_2356

TCTTCATACTTGATATTGTCGTTCTTCTAACGTGGGCTATCGAGGAGTAAATGTATTGTCTCTCATTAGA  
CTTACCTTTTTTCATACATTTTCTCATGTAATGTAAAGTTGGCAGTAGCT

>M6-PGSC0003DMG400008493M6G-LecRK\_2418

CTCATTAGACTTACCTTTTTTCATACATTTTCTCATGTAATGTAAAGTTGGCAGTAGCTGATAAGGGAGAAA  
GAGAGACAAATCACACAGAATGAGCTACTATGTAAC TACA AATTTTCAGA

>M6-PGSC0003DMG400008493M6G-LecRK\_248

CTTTGGAGTTTTGCAATCATACAAAAACAATAGAGAGACTCAAATCCAAGGTAAGTACACTCATAACTCT  
TATTTCTGTTTTCTCAATTACATGCTTAAAACA AATCGTTCTTATAAAAT

>M6-PGSC0003DMG400008493M6G-LecRK\_2480

AGGGAGAAAGAGAGACAAATCACACAGAATGAGCTACTATGTAAC TACA AATTTTCAGATATGAAGATG  
AAGTTTACAGCAGAGACTATGAACACAGTAAAGGATAGAACTTTTCTCTAT

>M6-PGSC0003DMG400008493M6G-LecRK\_2542

AAGATGAAGTTTACAGCAGAGACTATGAACACAGTAAAGGATAGAACTTTTCTCTATGCACATATTAG  
CTCCTAAA ACTAGAAATGAAGGTAAA AACTTCTGATAGAAGTTATTCTCA

>M6-PGSC0003DMG400008493M6G-LecRK\_2604

ATATTAGCTCCTAAA ACTAGAAATGAAGGTAAA AACTTCTGATAGAAGTTATTCTCAA ACTCATAACAT

TTAAGTTAACGTATAAAGGATGACTGCTTTACAAGATCAACACAGTAGCA

>M6-PGSC0003DMG400008493M6G-LecRK\_2666

CATAACATTTAAGTTAACGTATAAAGGATGACTGCTTTACAAGATCAACACAGTAGCATTTTCATTGTGC

AGCAGAGAATAAACCTTCAAGATGCAGCAGTAGTAGCTTGAGGCTTTGCA

>M6-PGSC0003DMG400008493M6G-LecRK\_2728

CATTGTGCAGCAGAGAATAAACCTTCAAGATGCAGCAGTAGTAGCTTGAGGCTTGCAGAGGCAGCAA

CAGAAGTTTCTATTCTGTCTTTGCATCTTTTCTGGTCCGAAGATGGTTT

>M6-PGSC0003DMG400008493M6G-LecRK\_2790

CAGCAACAGAAGTTTCTATTCTGTCTTTGCATCTTTTCTGGTCCGAAGATGGTTTTGCAGAAGGCTTC

ATATGCTCAGGGGGGTTGTGTTTGAGTTTCACAAGTATTTGACGCATTC

>M6-PGSC0003DMG400008493M6G-LecRK\_2852

GAAGGCTTCATATGCTCAGGGGGGTTGTGTTTGAGTTTCACAAGTATTTGACGCATTCTAGAGAGTTCA

GTTGGCCTGCCAGGTTTGGTCCCTTGATGACATTGATGGATGGCTGCTTC

>M6-PGSC0003DMG400008493M6G-LecRK\_2914

GAGTTCAGTTGGCCTGCCAGGTTTGGTCCCTTGATGACATTGATGGATGGCTGCTTCTCCTTATCCTTC

TTTCTTTCTTCTATGGTCGGGACCTCCTTTGGGATAAGCTCTCCAAT

>M6-PGSC0003DMG400008493M6G-LecRK\_2976

TATCCTTCTTTCTTTCTTCTATGGTCGGGACCTCCTTTGGGATAAGCTCTCCAATTGCCCTCCAATAAG

CCTTATTAGCTTCAGTATGGAACCTTCTTTGGTTGGCCAAGAATAACT

>M6-PGSC0003DMG400008493M6G-LecRK\_3038

CTCCAATAAGCCTTATTAGCTTCAGTATGGAACCTTCTTTGGTTGGCCAAGAATAACTGGAAAAAAGAA

AAAGATGACACATGAACTGCAACACATTGATTGACTAAGGAGGAACTTGC

>M6-PGSC0003DMG400008493M6G-LecRK\_310

ATAACTCTTATTTCTGTTTTCTCAATTACATGCTTAAAACAAATCGTTCTTATAAAATTCAGAATCCAAAAA

ATTTAAAAATTTGACGCATCTGCTCTACTTTTTGTAGTCCATCCAAAT

>M6-PGSC0003DMG400008493M6G-LecRK\_3100

AAAAAGAAAAAGATGACACATGAACTGCAACACATTGATTGACTAAGGAGGAACTTGCCGTAAGTGTGG

AACTATGTTTAGAGATTTGACAAACCATAAAACCAAAGACATAGTTCTGTGG

>M6-PGSC0003DMG400008493M6G-LecRK\_3162

CTGTGGA ACTATGTTTAGAGATTTGACAA ACCATAAAACCAAAGACATAGTTCTGTGGAGATTAGCAA  
TAAAACTACCAAAGCACAAAACTCAGCATATATTGTTCTAAAGGTTATC

>M6-PGSC0003DMG400008493M6G-LecRK\_3224

TAGCAAATAAACTACCAAAGCACAAAACTCAGCATATATTGTTCTAAAGGTTATCAGCACATTTTGA  
TCTCTTGTGGAAA ACTTCCACTTTCAAAAATTTAATTTACACCTCTTAC

>M6-PGSC0003DMG400008493M6G-LecRK\_3286

CATTTTGATCTCTTGTGGAAA ACTTCCACTTTCAAAAATTTAATTTACACCTCTTACGCAGTATTAATGCT  
AAATCATATGAAATGTAAACAGACAAAATGTAGAACTGCTTTTCTCT

>M6-PGSC0003DMG400008493M6G-LecRK\_3348

TATTAATGCTAAATCATATGAAATGTAAACAGACAAAATGTAGAACTGCTTTTCTCTGTGTCCCTACCT  
GGTTGAGTCGAAAGTACCAATACAATGATTTTTTCAA AACTAATAACTT

>M6-PGSC0003DMG400008493M6G-LecRK\_3410

CCCTACCTTG GTTGAGTCGAAAGTACCAATACAATGATTTTTTCAA AACTAATAACTTAAAAAGGAGAGT  
AACAAGTACTATGATTA AAAATTGGATGGTACTTTTACTAGGTTAACTAG

>M6-PGSC0003DMG400008493M6G-LecRK\_3472

AGGAGAGTAACAAGTACTATGATTA AAAATTGGATGGTACTTTTACTAGGTTAACTAGGTTAATCTCCCT  
GTCTCAACTCATATCCTATTCCGAAGAGTTGAAAGCAATGATTAGGAA

>M6-PGSC0003DMG400008493M6G-LecRK\_3534

ATCTCCCTGTCTCAACTCATATCCTATTCCGAAGAGTTGAAAGCAATGATTAGGAAGAGAAGGTA ACT  
AGATGCATGACATGTCAGACCTTCCAGCTAAAGCAACTGTTTGGAAAACA

>M6-PGSC0003DMG400008493M6G-LecRK\_3596

AGGTA ACTAGATGCATGACATGTCAGACCTTCCAGCTAAAGCAACTGTTTGGAAAACAAACATCCAGCA  
CAAGCAAATTTATGCCAAACTAGTTAACAAACCGTGACTTTAAGCAA AATG

>M6-PGSC0003DMG400008493M6G-LecRK\_3658

TCCAGCACAAGCAAATTTATGCCAAACTAGTTAACAAACCGTGACTTTAAGCAA AATGCCTCGGAAAGA  
CTTTAATTTATATAGCTATAGGTCTCACCTTCTCCTTCTCCCGGTTAGCA

>M6-PGSC0003DMG400008493M6G-LecRK\_372

AATCCAAAAATTTAAAAATTTGACGCATCTGCTCTACTTTTTGTAGTCCATCCAAATTTGAGAAGTACTT  
CACATAATTTTCATTTTCTTTTGTGTTTTTCATTGTGTAGAGTTCACG

>M6-PGSC0003DMG400008493M6G-LecRK\_3720

GGAAAGACTTTTAATTTATATAGCTATAGGTCTCACCTTCTCCTTCTCCCGTTAGCAGCTATGTTGTTCTC  
ACATCTAAGTTTCCATTTCTATAGTACTCTGCTTTGTATTCTCTGCTC

>M6-PGSC0003DMG400008493M6G-LecRK\_3782

TGTTGTTCTCACATCTAAGTTTCCATTTCTATAGTACTCTGCTTTGTATTCTCTGCTTCTCTGATTATTTCC  
CCTAACAAATTTCTTTCTCCCTTTTCTCCTTCTCCTCCAGCCGATGG

>M6-PGSC0003DMG400008493M6G-LecRK\_434

GAAGTACTTCACATAATTTTCATTTTCTTTTTGTGTTTTTCATTGTGTAGAGTTCACGACCAACAATGTGAG  
GGTTTTTCTCTATAACTCATTGAGATCAGCAACAAGTCACTTCCATCC

>M6-PGSC0003DMG400008493M6G-LecRK\_496

ACAATGTGAGGGTTTTTCTATAACTCATTGAGATCAGCAACAAGTCACTTCCATCCATCTAACAAAATA  
GGAGGTGGTGGTTTTGGAGTTGTTTATAAGGTAATCATCTCTTGTTTAT

>M6-PGSC0003DMG400008493M6G-LecRK\_558

AACAAAATAGGAGGTGGTGGTTTTGGAGTTGTTTATAAGGTAATCATCTCTTGTTTATGGTGTGCATGCCT  
TTAATGGTCTTGTGGATGCTAGTTATTAAGTACTGAGTTTAAACATCTA

>M6-PGSC0003DMG400008493M6G-LecRK\_62

TTCAATCACAACAAGAAATCATGTACGTATAGATTATTATCTAAATTTTCATGTTTTTCCATTTGTCTAAG  
TAGATTTTATAGTAGTTGATTATTTTTTTTTTCGTATTTCTTTTCATT

>M6-PGSC0003DMG400008493M6G-LecRK\_620

TCATGCCTTTTAATGGTCCCTTGTGGATGCTAGTTATTAAGTACTGAGTTTAAACATCTATACGTTCAAAT  
TAGAAGAAGTCACCTAAAAGATAACTATAATAATTTAAATCATTGAAG

>M6-PGSC0003DMG400008493M6G-LecRK\_682

TTCAAAATTTAGAAGAAGTCACCTAAAAGATAACTATAATAATTTAAATCATTGAAGTGGGATTTGCTA  
GTGAGTAGAAAAATGAGAGCATGTAAGGATAGATGCAGCCTAATGATCAA

>M6-PGSC0003DMG400008493M6G-LecRK\_930

CTGATACAAACACCACCATCATAAAAATTAATTAATAAGGTAGATTACCTGCTACATTAATAATGTAA  
AAATATTTTACACTATCAATATATATAGGTTAAATCTTTTATGTATTTCC

>M6-PGSC0003DMG400008493M6G-LecRK\_992

TAATGTAAAAATATTTTACACTATCAATATATATAGGTTAAATCTTTTATGTATTTCCACTCTTTGTA

GCAACTTTGTTCTTTAAATGTAGGGAGTTTTGAGAGATGGAACCTTGT

>M6-PGSC0003DMG400008499-(rev)M6RLKWAX-EGF\_0

ATGCTAATTTTGACATTAGCCACTCCCCAAATTATCCCCTCTAACACCACTTCTCCTCCGCCCAACACACC

ACATCTCCGCCAACACGACGATCACTAAAGCTGCGATCATTACAAAA

>M6-PGSC0003DMG400008499-(rev)M6RLKWAX-EGF\_1054

AATTATATGATTAATGTAATTCTTCTCAAGTCAATACGATAAACAAGTTAAATTTAAATGTTTGTCAA

ACTTCGCATGCATAATCTTAGTTATAAGACAAGAGAGAGTTATTCTGAAT

>M6-PGSC0003DMG400008499-(rev)M6RLKWAX-EGF\_124

GATGTCCGAAAAAGTGTGGGAACCTAACAGTTCCATACCCTTTTGGGATTGGCTTAGGATCTGGTTGTG

CCTTGGACCGGAATTTTGAATCAATTGTGATACTAATACAACAGATTCTC

>M6-PGSC0003DMG400008499-(rev)M6RLKWAX-EGF\_1240

GCTCCTGGGGGAGGGAGAGAAAAATAAAATTAAAAAAATTATTATAAATTGAAACAAAGAGAATAAAAA

CTATTTTATTGGGGGAAAAATAACAATTTGAGTTGAGACTTTTTTTGAGGTG

>M6-PGSC0003DMG400008499-(rev)M6RLKWAX-EGF\_1302

ATAAACTATTTTATTGGGGGAAAAATAACAATTTGAGTTGAGACTTTTTTTGAGGTGAATCAGTCTAGC

AGTGAGGTCGCTATTAACCTATCATTTTTTTTTAATATAGAAATGATTAA

>M6-PGSC0003DMG400008499-(rev)M6RLKWAX-EGF\_1364

AGTCTAGCAGTGAGGTCGCTATTAACCTATCATTTTTTTTTAATATAGAAATGATTAATATTCAAAGTTGT

ACAAATATTAGTTAGCTTTTAAATATTTAACATATGTGATAATGAATA

>M6-PGSC0003DMG400008499-(rev)M6RLKWAX-EGF\_1426

CAAAGTTGTACAAATATTAGTTAGCTTTTAAATATTTAACATATGTGATAATGAATATGGTTTAAACT

TGGAAAAAGAGCGACGCTAATTAATACTCCTACTTGCCATTAGTTAAC

>M6-PGSC0003DMG400008499-(rev)M6RLKWAX-EGF\_1488

TTAAATACTTGAAAAAGAGCGACGCTAATTAATACTCCTACTTGCCATTAGTTAACAAAACAATGTTG

GACCGTACAACCTCACAAAGTAAATACGTAAAAAATAAAGATAAAAAAACA

>M6-PGSC0003DMG400008499-(rev)M6RLKWAX-EGF\_1550

CAATGTTGGACCGTACAACCTCACAAAGTAAATACGTAAAAAATAAAGATAAAAAAACAAGTGTCACAA

ATTAATTTATTTGATCCACCAGCCAACGTAATATATATTTTATGTACGCTAT

>M6-PGSC0003DMG400008499-(rev)M6RLKWAX-EGF\_1612

GTCACAAATTAATTTATTTGATCCACCAGCCAACGTAATATATATTTATGTACGCTATGATTTTGACAGAT  
AAAAAGAAATTACTATCTAATGTCATGATTTTCATTCACCATATTGATC

>M6-PGSC0003DMG400008499-(rev)M6RLKWAX-EGF\_1674

TTGACAGATAAAAAGAAATTACTATCTAATGTCATGATTTTCATTCACCATATTGATCGATTAATCTTTCTT  
TAATTTTGGGTGACGCAACGTTTGGTTAATTGTACCAGATATTGATGA

>M6-PGSC0003DMG400008499-(rev)M6RLKWAX-EGF\_1736

AATCTTTCTTTAATTTTGGGTGACGCAACGTTTGGTTAATTGTACCAGATATTGATGAATGTGCTAATCCA  
AATACCAATTTGTGTGAACAAAATTGTATAAACATACCGGGGAGTTACA

>M6-PGSC0003DMG400008499-(rev)M6RLKWAX-EGF\_1798

GCTAATCCAAATACCAATTTGTGTGAACAAAATTGTATAAACATACCGGGGAGTTACAATTGTTTCATGTC  
CAAAGGGTACACTGGTGATGGAAGAAAGAATGGTCGTGGTTGTATTGCA

>M6-PGSC0003DMG400008499-(rev)M6RLKWAX-EGF\_186

GGTTGTGCCTTGGACCGGAATTTGAAATCAATTGTGATACTAATACAACAGATTCTCCAACACCATACA  
TAGGGAATATTCCAGTGTATGACATCTCTGATGCTGAAATGCGCGTATCG

>M6-PGSC0003DMG400008499-(rev)M6RLKWAX-EGF\_1860

TTCATGTCCAAAAGGGTACACTGGTGATGGAAGAAAGAATGGTCGTGGTTGTATTGCACCAAACCTCGAA  
CTCAGAGTTCCCATGGATTAAGTTTTCCGTTGGTAAGTTTCTCAGAAATTC

>M6-PGSC0003DMG400008499-(rev)M6RLKWAX-EGF\_1922

ACTCGAACTCAGAGTTCCCATGGATTAAGTTTTCCGTTGGTAAGTTTCTCAGAAATTCGACTTGACTCTAC  
TTGCATATAGATAAACGTACTIONGATTTGTATTTCAATTTATCTGTCTTAG

>M6-PGSC0003DMG400008499-(rev)M6RLKWAX-EGF\_1984

TGACTCTACTTGCATATAGATAAACGTACTIONGATTTGTATTTCAATTTATCTGTCTTAGTTTGATTGGACAC  
GAAATTTAAGAAAATAAATTTGTTGGATAAACACAGGTATGGGAGTTGG

>M6-PGSC0003DMG400008499-(rev)M6RLKWAX-EGF\_2046

ATTGGACACGAAATTTAAGAAAATAAATTTGTTGGATAAACACAGGTATGGGAGTTGGTTTTATGTCCTT  
AGTAGTTGGGACAACCTTGGCTCTATTTTCAGCATCAAGAAAAGAAAACCTCA

>M6-PGSC0003DMG400008499-(rev)M6RLKWAX-EGF\_2108

ATGTCCCTAGTAGTTGGGACAACCTTGGCTCTATTTTCAGCATCAAGAAAAGAAAACCTCATTAACTTCGCG  
AGAAATCTTCCAACAAAATGGTGGTTTGCTGTTGAAACAACGATTATCT



>M6-PGSC0003DMG400008499-(rev)M6RLKWAX-EGF\_2170  
ACTTCGCGAGAAATTCTTCCAACAAAATGGTGGTTTGCTGTTGAAACAACGATTATCTTCTAACGAGGGT  
GGTGTGGAAGCAACCAAAGTTTTTACAGCAGAAGAGTTGAAGAAGGCTAC

>M6-PGSC0003DMG400008499-(rev)M6RLKWAX-EGF\_2232  
ACGAGGGTGGTGTGGAAGCAACCAAAGTTTTTACAGCAGAAGAGTTGAAGAAGGCTACAAACAACTAT  
GCTAGTGATAGAATTCTTGGTCGTGGTGGAAATGGAATTGTCTATAAAGGTA

>M6-PGSC0003DMG400008499-(rev)M6RLKWAX-EGF\_2294  
AACTATGCTAGTGATAGAATTCTTGGTCGTGGTGGAAATGGAATTGTCTATAAAGGTATACTACCCGATA  
ATCTCATAGTTGCTATTA AAAAGTCTAAGTTTGTGGACGAGGATCAAATT

>M6-PGSC0003DMG400008499-(rev)M6RLKWAX-EGF\_2356  
ACCCGATAATCTCATAGTTGCTATTA AAAAGTCTAAGTTTGTGGACGAGGATCAAATTGAACAGTTCATC  
AATGAGGTTCTTATTCTTACTCAAGTCAACCATAGAAACGTGGTGAGACT

>M6-PGSC0003DMG400008499-(rev)M6RLKWAX-EGF\_2418  
AGTTCATCAATGAGGTTCTTATTCTTACTCAAGTCAACCATAGAAACGTGGTGAGACTCTTTGGATGTTG  
TTTGAAGCCGAAGTTCTTTACTAGTTTACGAATACATTTCTAATGGTA

>M6-PGSC0003DMG400008499-(rev)M6RLKWAX-EGF\_248  
ACCATACATAGGGAATATTCCAGTGTATGACATCTCTGATGCTGAAATGCGCGTATCGACTAACATAAAT  
CGGAGGTGTTATTCATCGACGGGCATGTTGCTTCGAAATGATCCTTCTTG

>M6-PGSC0003DMG400008499-(rev)M6RLKWAX-EGF\_2480  
GGATGTTGTTTGAAGCCGAAGTTCTTTACTAGTTTACGAATACATTTCTAATGGTACTCTTTACGAGCA  
TATCCACAACCAAATGGAGCACCTTGTTATCATGGAAGAATCGGCTA

>M6-PGSC0003DMG400008499-(rev)M6RLKWAX-EGF\_2542  
TTACGAGCATATCCACAACCAAATGGAGCACCTTGTTATCATGGAAGAATCGGCTAAGAGTTGCTAG  
TGAGACAGCAAGTGCACTTGCTTACCTTCATTCATCCGCGTCAATGCCTAT

>M6-PGSC0003DMG400008499-(rev)M6RLKWAX-EGF\_2604  
TTGCTAGTGAGACAGCAAGTGCACTTGCTTACCTTCATTCATCCGCGTCAATGCCTATAATTCATAGAGAT  
GTCAAGTCTGCCAATTTATTGTTAGATGATGTTTACACCGCGAAAGTGG

>M6-PGSC0003DMG400008499-(rev)M6RLKWAX-EGF\_2666  
CATAGAGATGTCAAGTCTGCCAATTTATTGTTAGATGATGTTTACACCGCGAAAGTGCCAGATTTTGGAG

CTTCAAGACTAATTCCTCTTGATCAAACACATATTGCTACATTGGTTCAA

>M6-PGSC0003DMG400008499-(rev)M6RLKWAX-EGF\_2728

TTTTGGAGCTTCAAGACTAATTCCTCTTGATCAAACACATATTGCTACATTGGTTCAAGGGACATTAGGAT

ACCTAGATCCTGAATATTTTCGTTTAAGTAAATTGACCGAGAAAAGTGA

>M6-PGSC0003DMG400008499-(rev)M6RLKWAX-EGF\_2790

CATTAGGATACCTAGATCCTGAATATTTTCGTTTAAGTAAATTGACCGAGAAAAGTGATGTTTATAGTTTT

GGAGTAGTCCTTGCAGAACTTTTAACAGGGATAAAACCTATTTTCGAGGG

>M6-PGSC0003DMG400008499-(rev)M6RLKWAX-EGF\_2852

TATAGTTTTGGAGTAGTCCTTGCAGAACTTTTAACAGGGATAAAACCTATTTTCGAGGGATAAAAATAATG

AGGACAAGAATTTGGCAGAGTACTTCATTTTGTCCATGAGAAAGAATCAA

>M6-PGSC0003DMG400008499-(rev)M6RLKWAX-EGF\_2914

AAATAATGAGGACAAGAATTTGGCAGAGTACTTCATTTTGTCCATGAGAAAGAATCAATTGTTTCAAATT

CTTGATCGTAGAGTGGTAAGAGAAGGAAGCCTTGAACAACTCCAAAAGGT

>M6-PGSC0003DMG400008499-(rev)M6RLKWAX-EGF\_2976

TTCAAATTCCTTGATCGTAGAGTGGTAAGAGAAGGAAGCCTTGAACAACTCCAAAAGGTGGCTGAGCTAG

TGAAAAATTGTCTTAGATTGCACGGTGAACATAGGCCTACGATGAAGGAAG

>M6-PGSC0003DMG400008499-(rev)M6RLKWAX-EGF\_3038

GAGCTAGTGAAAAATTGTCTTAGATTGCACGGTGAACATAGGCCTACGATGAAGGAAGTAGCAATGGA

ACTTGAGAGTTTGCGAAAGTTCACAAAAAATAACCTTTGGGCTGATGGACAC

>M6-PGSC0003DMG400008499-(rev)M6RLKWAX-EGF\_310

ACATAAATCGGAGGTGTTATTCATCGACGGGCATGTTGCTTCGAAATGATCCTTCTTGATGAATTTAGG

AACCTCGAGTCCTTACAGTTTCTCTACCCTCAACAGGTACGTACCTAATT

>M6-PGSC0003DMG400008499-(rev)M6RLKWAX-EGF\_3100

AATGGAACCTTGAGAGTTTGCGAAAGTTCACAAAAAATAACCTTTGGGCTGATGGACACGGACATGAAG

AGAACGAAGATGAATCAACAGATCTTTATACAATTCCAATTGACTCGAATAC

>M6-PGSC0003DMG400008499-(rev)M6RLKWAX-EGF\_3162

ATGAAGAGAACGAAGATGAATCAACAGATCTTTATACAATTCCAATTGACTCGAATACAGGTATCAACA

AATTCTCTGGACAATACAGTTCCAACCTCAACACAAATAGCAGCATGTTTT

>M6-PGSC0003DMG400008499-(rev)M6RLKWAX-EGF\_3200

ATTCCAATTGACTCGAATACAGGTATCAACAAATTCTCTGGACAATACAGTTCCAACCTCCAACACAAATA  
GCAGCATGTTTTCTTCATTGATATATACTAGTACAAATATTCCGCGGTGA

>M6-PGSC0003DMG400008499-(rev)M6RLKWAX-EGF\_372

AATTTAGGAACCTCGAGTCCTTACAGTTTCTCTACCCTCAACAGGTACGTACCTAATTATAAATTTTCTCT  
GAAACCTTATAAACTTTAATTTTGAATTCACATATATATATATACAGG

>M6-PGSC0003DMG400008499-(rev)M6RLKWAX-EGF\_434

ATTTTCTCTTGAAACCTTATAAACTTTAATTTTGAATTCACATATATATATATACAGGTTACCGTTGTTGG  
TTGTGATGAAGCTGCTATAATATTTGGAGGTGACTTTGCTAATGGCTG

>M6-PGSC0003DMG400008499-(rev)M6RLKWAX-EGF\_496

CCGTTGTTGGTTGTGATGAAGCTGCTATAATATTTGGAGGTGACTTTGCTAATGGCTGCCCCACGGTCTG  
TATTAGTACGAGTCAGGTAACCTGAAGGAAGGTGTATGGGTAATGGTTGCT

>M6-PGSC0003DMG400008499-(rev)M6RLKWAX-EGF\_558

ACGGTCTGTATTAGTACGAGTCAGGTAACCTGAAGGAAGGTGTATGGGTAATGGTTGCTGCCAAATAACA  
ATACCAAAGGCTTGAAAATTTCAACACAACGATGCAAAGTTTGAAAAT

>M6-PGSC0003DMG400008499-(rev)M6RLKWAX-EGF\_62

CACAAACACCACATCTCCGCCAACCACGACGATCACTAAAGCTGCGATCATTACAAAAGCAGGATGTCC  
GAAAAGTGTGGGAACCTAACAGTTCCATACCCTTTGGGATTGGCTTAGG

>M6-PGSC0003DMG400008499-(rev)M6RLKWAX-EGF\_620

AATAACAATACCAAAGGCTTGAAAATTTCAACACAACGATGCAAAGTTTGAAAATCACACTGGAGT  
TTGGTCTTCAATCCATGTGGCTATTCATTTCTTGGTGAAGCTACTCGATT

>M6-PGSC0003DMG400008499-(rev)M6RLKWAX-EGF\_682

CTGGAGTTTGGTCTTCAATCCATGTGGCTATTCATTTCTTGGTGAAGCTACTCGATTCGAATTCATGGGT  
TTACAAGATCTACGCGATCTTAATTTTAAAAGAGGTCTTTGGATAATG

>M6-PGSC0003DMG400008499-(rev)M6RLKWAX-EGF\_744

TTCATGGGTTTACAAGATCTACGCGATCTTAATTTTAAAAGAGGTCTTTGGATAATGTCCCTATTGTGCT  
AGATTGGGCTATTGGAACCTTAGTTGTGTTGAAGCACAGAAGAGTAGT

>M6-PGSC0003DMG400008499-(rev)M6RLKWAX-EGF\_806

TATTGTGCTAGATTGGGCTATTGGAACCTTAGTTGTGTTGAAGCACAGAAGAGTAGTAACGATTATGCT  
TGTTTGAATAATAGCCAATGTGTTGATTCCAACACTGGCCTTGGTGGTTA

>M6-PGSC0003DMG400008499-(rev)M6RLKWAX-EGF\_868

ATTATGCTTGTGTTGAATAATAGCCAATGTGTTGATTCCAACACTGGCCTTGGTGGTTACAGGTGTGCCTG  
TAACCCGGGATATGAAGGCAATCCATATATCGGCCCCAGGTTGTCAAGGTA

>M6-PGSC0003DMG400008499-(rev)M6RLKWAX-EGF\_930

TGTGCCTGTAACCCGGGATATGAAGGCAATCCATATATCGGCCCCAGGTTGTCAAGGTAACCTTCATTTCTC  
TACTTCCCTCACATGTTTCAACTTCCTTTTATTTGTAAAATTTAGATATT

>M6-PGSC0003DMG400008499-(rev)M6RLKWAX-EGF\_992

CATTTCTCTACTTCCCTCACATGTTTCAACTTCCTTTTATTTGTAAAATTTAGATATTTAAAAATTATATGAT  
TAAAATGTAATTCTTCTCAAGTCAATACGATAAACAAGTTAAATTTA

>M6-PGSC0003DMG400008508-(rev)M6G-LecRK\_0

CATGGAAATGAAGAACAATCATTACTTTCTGCTACTCTTTTTATGCTTCAGTCTCAACAGTAATCTCTGTAT  
CGGAAGGGACACCATTTCTGCGACTGAATCTCTTTCTTTTGGTGAAAC

>M6-PGSC0003DMG400008508-(rev)M6G-LecRK\_1054

TTATGGATAACTTCAATTGTGAGAGTACCTTCTTCTCAAAATACTAATATCACAGTTGGGGAAGCCTCAC  
AGTGTAGATCTGCATGTTTCAACGATTGCTCTTGCACTGCTTATACTTAT

>M6-PGSC0003DMG400008508-(rev)M6G-LecRK\_1178

GTTCCGGTACCTGTTCTATCTGGACAGGGGATCTGTTCAATCTGCAACAACTCAGCACAACCTGAAACAGA  
AAGGACTATATTTGTCAAACGCAGCTCACCTGAAGGTTAGAATAGCATAG

>M6-PGSC0003DMG400008508-(rev)M6G-LecRK\_124

GTCTCTTCAGGTGAGATATTTGAGCTTGGTTTTTTCAAACCAGGTAACCTCTTAAATATTATCTAGGCAT  
ATGGTACAAGAACGTTATTTTATCGCAAACAGTAATTTGGGTAGCAAAT

>M6-PGSC0003DMG400008508-(rev)M6G-LecRK\_1240

GAAACAGAAAGGACTATATTTGTCAAACGCAGCTCACCTGAAGGTTAGAATAGCATAGTATAACATGCT  
TTGATTCTTTATTTTCATATTAGTACAATGTTATGAATAGAATTCCTTATTA

>M6-PGSC0003DMG400008508-(rev)M6G-LecRK\_1302

ACATGCTTTGATTCTTTATTTTCATATTAGTACAATGTTATGAATAGAATTCCTTATTAACGTTAGCACTTAA  
CAACAATGATTCTCCTTTTCAGCTCAAACCTAATGCTAAGAAATCAAAGA

>M6-PGSC0003DMG400008508-(rev)M6G-LecRK\_1364

TAGCACTTAACAACAATGATTCTCCTTTTCAGCTCAAACCTAATGCTAAGAAATCAAAGAACTAAAAGCAA

TCATTTTCGTC AATATCAACTTTGATGTTTCTACTCATAGGCAGCATTAGC

>M6-PGSC0003DMG400008508-(rev)M6G-LecRK\_1426

AAAAGCAATCATTTCGTC AATATCAACTTTGATGTTTCTACTCATAGGCAGCATTAGCTACATTTACTATA  
GAAGAAGAATGGCAAAAAGAGCAGGTATTTGCTGAATGAATCTAACTTT

>M6-PGSC0003DMG400008508-(rev)M6G-LecRK\_1488

TTTACTATAGAAGAAGAATGGCAAAAAGAGCAGGTATTTGCTGAATGAATCTAACTTTGGAAGATATTT  
TCTCTTATACCATTTTGGACTTAATTCCAAAGGTCATCCTCAATCCAATTG

>M6-PGSC0003DMG400008508-(rev)M6G-LecRK\_1550

GATATTTTCTCTTATACCATTTTGGACTTAATTCCAAAGGTCATCCTCAATCCAATTGAGGTAATGAAATC  
CCTCCCACTCCCCTTTTCTATTTTCAGATAGTAGTAAAGGTAAGTCAAGGG

>M6-PGSC0003DMG400008508-(rev)M6G-LecRK\_1612

AATGAAATCCCTCCCACTCCCCTTTTCTATTTTCAGATAGTAGTAAAGGTAAGTCAAGGGGCACGTAAATCTC  
ACTGGCACAAAGCTGAAGGAGAAGCAAAAGTATTAATGAATGAAAACAG

>M6-PGSC0003DMG400008508-(rev)M6G-LecRK\_1674

GTAAATCTCACTGGCACAAAGCTGAAGGAGAAGCAAAAGTATTAATGAATGAAAACAGTGATGAAGCG  
ATTGATGTTCCATACTTTCACTTGGAGACTATTTTGAAGCTACAGACAACT

>M6-PGSC0003DMG400008508-(rev)M6G-LecRK\_1798

AAATGCGAATAAGCTCGGACAAGGAGGATTTGGTCCTGTTTACAAGGTTAAAACCTTCATTCTACATCTA  
TGTGGACTGGCATTGACCCATAGTAATGAGATGAATTTTTTTTTGCAGGGT

>M6-PGSC0003DMG400008508-(rev)M6G-LecRK\_186

TCTAGGCATATGGTACAAGAACGTTATTTTATCGCAAACAGTAATTTGGGTAGCAAATAGGGATAAACC  
ACTTGATTATGGTGCTGCTGGGATGATAATTAATCAAGGAAACCTGGTGCT

>M6-PGSC0003DMG400008508-(rev)M6G-LecRK\_1860

TACATCTATGTGGACTGGCATTGACCCATAGTAATGAGATGAATTTTTTTTTGCAGGGTATCTTTCCGGGT  
GAAAAGAAATTGCGGTAAAACGTTATCTAGTCAATCAGGACAAGGCAT

>M6-PGSC0003DMG400008508-(rev)M6G-LecRK\_1984

GAATTTAAGAATGAAGTACTCTAATTGCAAAGCTTCAACATCGAAATCTGGTGAGGCTATTGGGCTATT  
GCATCAATGCAACCGAACAAATATTACTTTATGAATATATGCCGAATAAA

>M6-PGSC0003DMG400008508-(rev)M6G-LecRK\_2046

GGGCTATTGCATCAATGCAACCGAACAAATATTACTTTATGAATATATGCCGAATAAAAGTTTAGATACA  
TTCATATTTGGTGAGTTAGCCTTAATAAATTCTTTATTCTCAAAGTCATA

>M6-PGSC0003DMG400008508-(rev)M6G-LecRK\_2108

TAGATACATTCATATTTGGTGAGTTAGCCTTAATAAATTCTTTATTCTCAAAGTCATACATTTCTTATGATG  
ATCTAATTTTATTGACGTACCAAACCTTTGTTATGGTAACAATGCAAGA

>M6-PGSC0003DMG400008508-(rev)M6G-LecRK\_2170

TCTTATGATGATCTAATTTTATTGACGTACCAAACCTTTGTTATGGTAACAATGCAAGATGGAACACTTTGT  
CAATTATTGGATTGGAAGAAACGTTATGACATCATATTGGGCATTGCAC

>M6-PGSC0003DMG400008508-(rev)M6G-LecRK\_2232

ACACTTTGTCAATTATTGGATTGGAAGAAACGTTATGACATCATATTGGGCATTGCACGGGGTCTATCTT  
ATCTTCATCATGATTCACGACTAAGGATCATTATAGAGATTTAAAAACC

>M6-PGSC0003DMG400008508-(rev)M6G-LecRK\_2294

TCTATCTTATCTTCATCATGATTCACGACTAAGGATCATTATAGAGATTTAAAAACCAGTAACATTTTATT  
AGATGAGGAGATGAACCCGAAAATTTAGATTTTGGCTTGGCAAGGAT

>M6-PGSC0003DMG400008508-(rev)M6G-LecRK\_2418

GAAGGAAAAGTAACAGAAGCAAATACAAAGAAAATAGTGGGGACCTAGTAAGTATAATATTCCTTCCT  
GTCATTAATTTCTTACAAAAGGAGCTTGGGAGAAAATCTTATACATAATGTT

>M6-PGSC0003DMG400008508-(rev)M6G-LecRK\_248

ATAAACCACTTGATTATGGTGCTGCTGGGATGATAATTAATCAAGGAAACCTGGTGCTTCTTGATAGATT  
TCAAGGCGAAGTTTGGTCGGCACTTGCTGGAAACATCAATCCAGATATTT

>M6-PGSC0003DMG400008508-(rev)M6G-LecRK\_2480

CTTCCTGTCATTAATTTCTTACAAAAGGAGCTTGGGAGAAAATCTTATACATAATGTTTTGTTGACCTGGT  
GAAATCTAGTGGCTATATGTCTCCTGAATATGCACTAGATGGATTGTTT

>M6-PGSC0003DMG400008508-(rev)M6G-LecRK\_2542

TGACCTGGTGAAATCTAGTGGCTATATGTCTCCTGAATATGCACTAGATGGATTGTTTTCCATTAATCA  
GATGTATTAGTTTTGGAGTAGTCGTACTTGAGATAATCAGTGGGAAGAAG

>M6-PGSC0003DMG400008508-(rev)M6G-LecRK\_2604

TTAAATCAGATGTATTAGTTTTGGAGTAGTCGTACTTGAGATAATCAGTGGGAAGAAGGAATACAGGAT  
TTTATCAGTCAGAAGAAGCCTTAAACTTGTTGGGCTATGTAAGTGAAGAAA

>M6-PGSC0003DMG400008508-(rev)M6G-LecRK\_2666

ACAGGATTTTATCAGTCAGAAGAAGCCTTAAACTTGTTGGGCTATGTAAGTGAAGAACTTCCCATGACT  
TAATTATTATATCTTCTTCTTAGCTTTGTCTCTCTGATATAAAAATTATC

>M6-PGSC0003DMG400008508-(rev)M6G-LecRK\_2728

CCATGACTTAATTATTATATCTTCTTCTTAGCTTTGTCTCTCTGATATAAAAATTATCACAGGCATGGAAAT  
TGTGGACAGAAAAAGCTGAGACACAATTAATAGAGAAGTCATTACTTG

>M6-PGSC0003DMG400008508-(rev)M6G-LecRK\_2790

GCATGGAAATTGTGGACAGAAAAAGCTGAGACACAATTAATAGAGAAGTCATTACTTGAATCATGCAAC  
AGAAGTGAAGCAATAAAGTGCATAAATATTGCGCTCCTGTGTGTACAAGAA

>M6-PGSC0003DMG400008508-(rev)M6G-LecRK\_2852

ATGCAACAGAAGTGAAGCAATAAAGTGCATAAATATTGCGCTCCTGTGTGTACAAGAAGATCCAAATCA  
TCGTCCTAATATGTCAGATGTCATTTTGATGCTGGGAGGGGAAGGTAATA

>M6-PGSC0003DMG400008508-(rev)M6G-LecRK\_2976

CCAACACCTAATAGACCAGCTTTTGTAAATAAGGACGCATGCTTCTAGTACATCTTCTTCTCCTCCGATAA  
GAAATACATCGTATCCAACAATCAGGTGACGATTACAGTTGAAGAAGGA

>M6-PGSC0003DMG400008508-(rev)M6G-LecRK\_3038

CTCCGATAAGAAATACATCGTATCCAACAATCAGGTGACGATTACAGTTGAAGAAGGACGTTAGCAGGA  
ATAGTGAAGGCATTTAATTCGTATGGAAAGGGCTAGGGTGGCACTAGCTAG

>M6-PGSC0003DMG400008508-(rev)M6G-LecRK\_310

GATAGATTTCAAGGCGAAGTTTGGTCGGCACTTGCTGGAAACATCAATCCAGATATTTCAAGTTACTGCAC  
TTCTTCGTGATGATGGGAATTTGATTTGAGTGTTGTGTCAAATTCATCA

>M6-PGSC0003DMG400008508-(rev)M6G-LecRK\_3100

AGCAGGAATAGTGAAGGCATTTAATTCGTATGGAAAGGGCTAGGGTGGCACTAGCTAGGACTTATAGA  
TGAGCCATATTATACTTTTTTAACCTCTACTTTGGTCCTTAAAAAGTCCAGG

>M6-PGSC0003DMG400008508-(rev)M6G-LecRK\_3162

TATAGATGAGCCATATTATACTTTTTTAACCTCTACTTTGGTCCTTAAAAAGTCCAGGGATACTTGACCAA  
ATGTCGTCTTCTCTATATATAATAGTTAGGACAAAAGTGGAAATGTTGG

>M6-PGSC0003DMG400008508-(rev)M6G-LecRK\_3224

CTTGACCAAATGTCGTCTTCTCTATATATAATAGTTAGGACAAAAGTGGAAATGTTGGGAAAACCTTCAA

GTGTTTGAACCTCAAACATATACTATATTTTTGGTTTAGAATATAGTAGGC

>M6-PGSC0003DMG400008508-(rev)M6G-LecRK\_3286

ACTTTCAAGTGTTTGAACCTCAAACATATACTATATTTTTGGTTTAGAATATAGTAGGCCTTAGCAATCAAG  
TACAAGAATAATTCGATTATTCCTGATTCCTTCAAGCTTCAAATATATA

>M6-PGSC0003DMG400008508-(rev)M6G-LecRK\_372

TACTGCACTTCTTCGTGATGATGGGAATTTGATTTTGAGTGTTGTGTCAAATTCATCAACACCCTTACTAC  
TTTGGCAAAGTTTTGATCACCCAACACACACTTTTATGCCTGGTGCTAA

>M6-PGSC0003DMG400008508-(rev)M6G-LecRK\_434

CCTTACTACTTTGGCAAAGTTTTGATCACCCAACACACACTTTTATGCCTGGTGCTAAGCTTGGATATGAC  
AAACGTACACAAAGAAAACAGGTTCTGGTTTCATGGAAGAATTCGAACG

>M6-PGSC0003DMG400008508-(rev)M6G-LecRK\_496

GGATATGACAAACGTACACAAAGAAAACAGGTTCTGGTTTCATGGAAGAATTCGAACGATCCAGCACCA  
GGATTGTATTCTATGGAAATGGACCCAAGCATGCCAGTTTGTITTTAAAA

>M6-PGSC0003DMG400008508-(rev)M6G-LecRK\_558

AGCACCAGGATTGTATTCTATGGAAATGGACCCAAGCATGCCAGTTTGTITTTAAAATGGAATAGGAC  
TACAGAGTATTGGGCAAGTGGTTTCATGGGATGGCCAAAGATTCAGCTCAGT

>M6-PGSC0003DMG400008508-(rev)M6G-LecRK\_62

ATCTCTGTATCGGAAGGGACACCATTTCTGCGACTGAATCTCTTTCTTTTGGTGAAACTCTAGTCTCTTCA  
GGTGAGATATTTGAGCTTGGTTTTTTCAAACCAGGTAACCTCTTTAAAT

>M6-PGSC0003DMG400008508-(rev)M6G-LecRK\_620

ATAGGACTACAGAGTATTGGGCAAGTGGTTTCATGGGATGGCCAAAGATTCAGCTCAGTGCCTGAGATG  
AGGTTAAACTACATATATAATTACAGCTATATCGACAATGAGAATGAGTCAT

>M6-PGSC0003DMG400008508-(rev)M6G-LecRK\_682

GAGATGAGGTTAAACTACATATATAATTACAGCTATATCGACAATGAGAATGAGTCATATTTTACATATT  
CCCTTTACAATAGTTCAATCTTATCAATATTCATTATGGATGTCTCGGGA

>M6-PGSC0003DMG400008508-(rev)M6G-LecRK\_744

TACATATCCCTTTACAATAGTTCAATCTTATCAATATTCATTATGGATGTCTCGGGACAAATTAAGCAAC  
TAACATGGTTGGATGATAGCAGTGTTTGGAAATCTATTCTGGTCTCAACC

>M6-PGSC0003DMG400008508-(rev)M6G-LecRK\_806



TTAAGCAACTAACATGGTTGGATGATAGCAGTGTGGAAATCTATTCTGGTCTCAACCAAGACCAGATTG  
TGAGGTTTATGCTAAATGTGGGGCATTGGAGTCTGTGATGAAGCTAATG

>M6-PGSC0003DMG400008508-(rev)M6G-LecRK\_868

CCAGATTGTGAGGTTTATGCTAAATGTGGGGCATTGGAGTCTGTGATGAAGCTAATGCAACCTGCAAT  
TGTTTGAGTGGTTTCAAGCAAAGATCAGATACAGAATGGAATTCAGATGAT

>M6-PGSC0003DMG400008508-(rev)M6G-LecRK\_930

CTGCAATTGTTGAGTGGTTTCAAGCAAAGATCAGATACAGAATGGAATTCAGATGATTATTCTGGTGG  
CTGTGTAAGAGACCAAAAAGGTGCAGTGTAAATGCAATTACTGAAGACACAGA

>M6-PGSC0003DMG400008508-(rev)M6G-LecRK\_992

CTGGTGGCTGTGTAAGAGACCAAAAAGGTGCAGTGTAAATGCAATTACTGAAGACACAGATAGTTTATGG  
ATAACTTCAATTGTGAGAGTACCTTCTCTCAAATACTAATATCACAGTTG

>M6-PGSC0003DMG400008523M6G-LecRK\_0

AAACAAGAACTTGTGTTTACTAGTTTCATGGACTCCAAAGAAGAAAAATCTCCTTCCGTAAACACTTGC  
ACTCCTTATTTTCTCTCATTCTTTCAGTCATCAATTTCTCTATGTACGTA

>M6-PGSC0003DMG400008523M6G-LecRK\_1830

AAAGTATTAATGAATGAAAACAGTGATGAAGCGATTGATGTTCCATACTTCACTTGGAGACTATTTTGG  
AAGCTACAGACAACTTCTCAAATGCGAATAAGCTCGGACAAGGAGGATTT

>M6-PGSC0003DMG400008523M6G-LecRK\_2013

AATGAGATGAATTTTTTTTGCAGGGTATCTTCCGGGTGAAAAAGAAATTGCGGTAAAAACGTTATCTAG  
TCAATCAGGACAAGGCATAGATGAATTTAAGAATGAAGTGACTCTAATTG

>M6-PGSC0003DMG400008523M6G-LecRK\_2501

ACCCGAAAATTTTCAAGATTTTGGCTTGGCAAGGATTGTTGAAGGAAAAGTAACAGAAGCAAATACAAAGA  
AAATAGTGGGGACCTAGTAAGTATAATATTCCTTCTGTCATTAATTTCTT

>M6-PGSC0003DMG400008523M6G-LecRK\_3050

ATATGTCAGATGTCATTTTGTGCTGGGAGGGGAAGGTACTAACCTTCCAACACCTAATAGACCAGCTTT  
TGTAATAAGGACGCATGCTTCTAGTACATCTTCTTCTTCTCCGATAAGA

>M6-PGSC0003DMG400008523M6G-LecRK\_61

AACACTTGCACTCCTTATTTTCTCTCATTCTTTCAGTCATCAATTTCTCTATGTACGTAGCATGGAAATGAA  
GAACAATCATTACTTTCTGCTACTCTTTTTATGCTTCAGTCTCAACAG

>M6-PGSC0003DMG400008524M6G-LecRK\_0

GTGAAGTTTCTCCACTTGCCATAATCTTGTCTCCAACCCATTAAGAGAAAAAAAAAATAAAATTAACA  
ACAGAGCAAGAAAAGCTGGAGCTCAAGAAGGTGAATGATACTCAAAGAAG

>M6-PGSC0003DMG400008524M6G-LecRK\_1037

TTTAGCTAGTTTTCTCAAATGCATGAAAAGGAAGAGATGCTCTATTTTCATCTTTTAAGTTTAATTCTGA  
GGCTATTTCTTGAATTCATTTTTTTTTTAAAAATAAAATAAAATTGA

>M6-PGSC0003DMG400008524M6G-LecRK\_1098

TAATTCTTGAGGCTATTTCTTGAATTCATTTTTTTTTTAAAAATAAAATAAAATTGAGGGCCTAAGAAA  
GGGATTACAATGTGGGGAATCGAATACTCACACACGTAGACAATACT

>M6-PGSC0003DMG400008524M6G-LecRK\_1159

GCCTAAGAAAGGGATTACAATGTGGGGAATCGAATACTCACACACGTAGACAATACTGAGTTATTGA  
GATTCTCCTTTATCTTGATTTACATGATTTGCTTATATTTTGTGTGATC

>M6-PGSC0003DMG400008524M6G-LecRK\_122

AAATACAGGAAGAAAATTGTTTGGATTTCTAAAATCCAATTTAATTTAAGGTAAATTAGTTTTAGGTA  
CTTTAAACTTTATTTGGAGTAAATATAATGTGTATGTTATTCATTTTC

>M6-PGSC0003DMG400008524M6G-LecRK\_1220

GTTATTGAGATTCTCCTTTATCTTGATTTACATGATTTGCTTATATTTTGTGTGATCCAAGTTGTCTATCT  
ATTTTAGCTTTAGGTTATCAGTTCTGTTCTATTTTCAGGCTAATTGC

>M6-PGSC0003DMG400008524M6G-LecRK\_1281

AGTTGTCTATCTATTTTAGCTTTAGGTTATCAGTTCTGTTCTATTTTCAGGCTAATTGCAAATGATTTGAG  
GCTTTGAAGGTTTAAGAGGATGTTGGACTTAAACAAAATAGAACCTGAA

>M6-PGSC0003DMG400008524M6G-LecRK\_1342

ATGATTTGAGGCTTTGAAGGTTTAAGAGGATGTTGGACTTAAACAAAATAGAACCTGAAGAAGGGAAG  
CTAGACTTGGATCTTCGTCGCGTAACTATGATCTTGATGACAAATCTCATC

>M6-PGSC0003DMG400008524M6G-LecRK\_1403

AGGGAAGCTAGACTTGGATCTTCGTCGCGTAACTATGATCTTGATGACAAATCTCATCTTAGATATGGT  
GATTGGGTCACTTTCAAGAGCCATTCATCTAAAAAAGTTAGAATCTCTCG

>M6-PGSC0003DMG400008524M6G-LecRK\_1464

AGATATGGTGATTGGGTCACTTTCAAGAGCCATTCATCTAAAAAAGTTAGAATCTCTCGACCTGAATCTC

CGAGAGGTGAAAATTCAGATAGACAACCTCAGGATGCAGATTATCCCTCA

>M6-PGSC0003DMG400008524M6G-LecRK\_1525

CTGAATCTCCGAGAGGTGAAAATTCAGATAGACAACCTCAGGATGCAGATTATCCCTCACTTAGCTATGA  
ACTCGAAAGTGAGATTCTAGCCAGGTTTCCTAGGTGGGAGTATTGGAAAC

>M6-PGSC0003DMG400008524M6G-LecRK\_1586

TAGCTATGAACTCGAAAGTGAGATTCTAGCCAGGTTTCCTAGGTGGGAGTATTGGAACTTAGCCTCGT  
AAACAAGAGATGTTCAATGCTTCTAAAGAGCGGTGAGATATTTGAGATTTCG

>M6-PGSC0003DMG400008524M6G-LecRK\_1647

AGCCTCGTAAACAAGAGATGTTCAATGCTTCTAAAGAGCGGTGAGATATTTGAGATTTCGTAAAGAGAAT  
GGATTTAAAGAACCTTCGGTATATATGTTAGCAAGTGGGGAGACTAACTGG

>M6-PGSC0003DMG400008524M6G-LecRK\_1708

AAGAGAATGGATTTAAAGAACCTTCGGTATATATGTTAGCAAGTGGGGAGACTAACTGGTGGACATTTG  
ATCGAGAGTTTAAGTCCCGGAGGAAAATCCCTGACTTACCATCAGATGTGT

>M6-PGSC0003DMG400008524M6G-LecRK\_1769

GACATTTGATCGAGAGTTTAAGTCCCGGAGGAAAATCCCTGACTTACCATCAGATGTGTGCTTCACATTT  
GGCGATAAGGAATCGCTTTGTGCAGGCACACATTTACTTGTTTCGGGTAG

>M6-PGSC0003DMG400008524M6G-LecRK\_183

TTTTAGGTACTTTTAACTTTATTTTGGAGTAAATATAATGTGTATGTTATTCATTTTCTTTTTATGGCTTT  
TATGGTCTTGAGTGATTGATTTTTGGATTTTCATCTTGTTGTTGC

>M6-PGSC0003DMG400008524M6G-LecRK\_1830

TTCACATTTGGCGATAAGGAATCGCTTTGTGCAGGCACACATTTACTTGTTTCGGGTAGGGAAATCGATG  
GCCTAGTTATATGGAGGTTTCGAATTAGCAACGAATTGTTGGTACAAAGGT

>M6-PGSC0003DMG400008524M6G-LecRK\_1891

AAATCGATGGCCTAGTTATATGGAGGTTTCGAATTAGCAACGAATTGTTGGTACAAAGGTCCCTCTATGG  
TTAATCCAAGATGTTTATTTGCATCAGCTACTTGTGGCACCTCTGTTTTTG

>M6-PGSC0003DMG400008524M6G-LecRK\_1952

CTCTATGGTTAATCCAAGATGTTTATTTGCATCAGCTACTTGTGGCACCTCTGTTTTTGTGCTGGTGGTG  
TTGGTATTATGGCGAATAGTGAGGTATACGACACAGCTGAGAAATACAA

>M6-PGSC0003DMG400008524M6G-LecRK\_2013

GCTGGTGGTGTGGTATTATGGCGAATAGTGAGGTATACGACACAGCTGAGAAATACAACCCCGATAG  
CAGATCGTGGGACCTACTACCGAGGATGAAGAGGAAGAGGAAGCTTTGTTCA

>M6-PGSC0003DMG400008524M6G-LecRK\_2074

CCGATAGCAGATCGTGGGACCTACTACCGAGGATGAAGAGGAAGAGGAAGCTTTGTTTCAGGATGTTAC  
ATGGACAAGAAATTCTACGTGATCGGGGGGAGGAATGAGAACGGAGAGCTTA

>M6-PGSC0003DMG400008524M6G-LecRK\_2135

ATGTTACATGGACAAGAAATTCTACGTGATCGGGGGGAGGAATGAGAACGGAGAGCTTACCTGTGGAG  
AATTCTTCGATGAGGGTATGAACAAGTGGGAGCTGATTCCGGACATGTTGAA

>M6-PGSC0003DMG400008524M6G-LecRK\_2196

TGTGGAGAATTCTTCGATGAGGGTATGAACAAGTGGGAGCTGATTCCGGACATGTTGAAGGATGATCC  
AGTCCTAACATGCCACTCACCACCCCTCATTGCTGTCGTGAACAACGAGCTG

>M6-PGSC0003DMG400008524M6G-LecRK\_2257

ATGATCCAGTCCTAACATGCCACTCACCACCCCTCATTGCTGTCGTGAACAACGAGCTGTACTCACTTGA  
GGCATCTTCAAACCAGCTGAAGCTTTACCTGAAAAAAACCAACACTTGGA

>M6-PGSC0003DMG400008524M6G-LecRK\_2318

CTCACTTGAGGCATCTTCAAACCAGCTGAAGCTTTACCTGAAAAAAACCAACACTTGAAAAATGTTAGGA  
CAAGTGCCAGTGAGAGCTGATTCAAACAGAGGATGGGGCATTGCTTTCAA

>M6-PGSC0003DMG400008524M6G-LecRK\_2379

ATGTTAGGACAAGTGCCAGTGAGAGCTGATTCAAACAGAGGATGGGGCATTGCTTTCAAGTCATTGGG  
AAATGAACTTCTTGTAATCGGAGCTGCTTCGTCTTCAGCCTCTTATTCGGGT

>M6-PGSC0003DMG400008524M6G-LecRK\_244

TTTTATGGCTTTTATGGTTCTTGAGTGATTGATTTTTGGATTTTCATCTTGGTTGTTGCATGTTATTTGCTT  
TTGCGTGTGTGTGTGGATTTTCATGGTTCTTGAGTTTATTCTGATT

>M6-PGSC0003DMG400008524M6G-LecRK\_2440

CATTGGGAAATGAACTTCTTGTAATCGGAGCTGCTTCGTCTTCAGCCTCTTATTCGGGTAATTCCATGGCT  
ATATATACTTGCTGTCCAGATCCTGATGTAATTGATTTGCAGTGGAAC

>M6-PGSC0003DMG400008524M6G-LecRK\_2501

TTCCATGGCTATATATACTTGCTGTCCAGATCCTGATGTAATTGATTTGCAGTGGAACCTCTAGACAGT  
GGTCGAAATCGGCTTAGTAGTTTCATCTTAACTGTTCTGTTATGGTAGC

>M6-PGSC0003DMG400008524M6G-LecRK\_2562

CTAGACAGTGGTCGAAATCGGCTTAGTAGTTTCATCTTAAACTGTTCTGTTATGGTAGCTTGAATAATGT  
CATTTATCTAGCAAACAAATTATGTATTGTGATCAAAATATATAAGTGCC

>M6-PGSC0003DMG400008524M6G-LecRK\_2623

GAATAATGTCATTTATCTAGCAAACAAATTATGTATTGTGATCAAAATATATAAGTGCCATATGGCCACT  
GGTTTCTGATATTTTCTTGCATATATTCACTACTGTTTGCTCTGCTATGT

>M6-PGSC0003DMG400008524M6G-LecRK\_2682

ATATGGCCACTGGTTTCTGATATTTTCTTGCATATATTCACTACTGTTTGCTCTGCTATGTTTGATGTAATT  
TGCATTTATTGTTGCATTATTATGATTTATATTGAAGGTGTTATTCTA

>M6-PGSC0003DMG400008524M6G-LecRK\_305

GTTATTTGCTTTTTGCGTGTGTGTGTGGATTTCATGGTTCTTGAGTTTATTCTGATTCAATAATGAATTC  
TTGAAAGTTAGTATAGTTTTTCATATTGAATTTACATGTGGAAACTAC

>M6-PGSC0003DMG400008524M6G-LecRK\_366

ATAATGAATTCTTGAAAGTTAGTATAGTTTTTCATATTGAATTTACATGTGGAAACTACTTTTGATTTTGA  
CTTTTATGTTATAAGCATTCTAGGTGGAAAAGTTATTTAAAAAATTGTTA

>M6-PGSC0003DMG400008524M6G-LecRK\_427

TTGATTTTGACTTTTATGTTATAAGCATTCTAGGTGGAAAAGTTATTTAAAAAATTGTTATATAACTTAA  
ATCCTTTGACTTTTGTCAATTCAGGCATTTATGTTTGTATTGGGTAT

>M6-PGSC0003DMG400008524M6G-LecRK\_488

TATAACTTAAATCCTTTGACTTTTGTCAATTCAGGCATTTATGTTTGTATTGGGTATATGTGTTATCAAT  
TACTACAATTACCTAAAAAGAAAAATTGTGTCTTATTACTCTCAACAT

>M6-PGSC0003DMG400008524M6G-LecRK\_549

GTGTTATCAATTACTACAATTACCTAAAAAGAAAAATTGTGTCTTATTACTCTCAACATAATTTGTTGTCT  
AGCAAGATACGTCTAGTTCTCCCTCTACTTACCTATCCATTAGGAAAG

>M6-PGSC0003DMG400008524M6G-LecRK\_61

AATTAACAACAGAGCAAGAAAAGCTGGAGCTCAAGAAGGTGAATGATACTCAAAGAAGTGAAATACA  
GGAAGAAAAATTGTTTGGATTTTCTAAAATCCAATTTAATTTAAGGTAAATT

>M6-PGSC0003DMG400008524M6G-LecRK\_610

TTTCGTTGTCTAGCAAGATACGTCTAGTTCTCCCTCTACTTACCTATCCATTAGGAAAGTGGAACCTTCTT

GACCTTCGAAAAGGTATAAAATGGTTTTATAAATATGGTATGTTATATG

>M6-PGSC0003DMG400008524M6G-LecRK\_671

GAACTTTCTTGACCTTCGAAAAGGTATAAAATGGTTTTATAAATATGGTATGTTATATGGACTAATTTGTT  
AGGTGCTACTTGCTTGCTTCAAGCACAATACTTTGATTTCTTTTTAAAG

>M6-PGSC0003DMG400008524M6G-LecRK\_732

CTAATTTGTTAGGTGCTACTTGCTTGCTTCAAGCACAATACTTTGATTTCTTTTTAAAGTTTTAGACAAAG  
GCGGAGCCAAGATTTAAAATTTATGGGTTTTAGATTCTAATCTTTTTATG

>M6-PGSC0003DMG400008524M6G-LecRK\_793

TTAGACAAAGGCGGAGCCAAGATTTAAAATTTATGGGTTTTAGATTCTAATCTTTTTATGTTACTGGGTTCT  
AAATTGATAAAATGTATAAATTCAAAAGATTTTAAAGACAATTACAAGA

>M6-PGSC0003DMG400008524M6G-LecRK\_854

ACTGGGTTCTAAATTGATAAAATGTATAAATTCAAAAGATTTTAAAGACAATTACAAGATTTAACTAAA  
ACTACTTTATTACAGACTTAACCCTTAGCTGATATTCTAGCTCCGCCCTA

>M6-PGSC0003DMG400008524M6G-LecRK\_915

TAAACTAAACTACTTTATTACAGACTTAACCCTTAGCTGATATTCTAGCTCCGCCCTAGACTTTTTTTATTA  
GCATCCTCAAATACTAAAGTGGTGTATTGCCCTTCTTTTGTCACAC

>M6-PGSC0003DMG400008524M6G-LecRK\_976

CTTTTTATTAGCATCCTCAAATACTAAAGTGGTGTATTGCCCTTCTTTTGTCACACTTTTTAGCTAGTTT  
TCTCAAATGCATGAAAAGGAAGAGATGCTCTATTTTCATCTTTAAG

>M6-PGSC0003DMG400008581-(rev)M6LRR-RLK\_0

ATGAATTTATTAACCATTTTCATACTCTTCTTGTCTACTATTACAGTGTTTTTGCTAACGGAGTGGTTGCG  
AAAGTTGATTTGAATGATGAGGTGTCTATTCTACTTTCTATTAAGAA

>M6-PGSC0003DMG400008581-(rev)M6LRR-RLK\_1054

TGTGGAATAACAGCTTTTCAGGTCCTTGCCAAGTGATCTTGGAAGAAATTCGCCATTGCAATGGGTGG  
ATATTTTCATCCAATCATTTACCGGTCCAATTCCAGCAGGATTATGCGCCA

>M6-PGSC0003DMG400008581-(rev)M6LRR-RLK\_1116

TGGGTGGATATTTTCATCCAATCATTTACCGGTCCAATTCCAGCAGGATTATGCGCCAAAGGTGACCTCA  
CTAAGCTTATCATGTTTAAACAATGCTTTCTCAGGTCCAATTCCAATGCT

>M6-PGSC0003DMG400008581-(rev)M6LRR-RLK\_1178

TGACCTCACTAAGCTTATCATGTTTAAACAATGCTTTCTCAGGTCCAATTCCAAGTGGTTTATCAACCTGCA  
CGCCCCTTGTCGTGTAAGAATGCAGAACAATCTTCTTTCGGGGACGAT

>M6-PGSC0003DMG400008581-(rev)M6LRR-RLK\_124

TCGTTGATCCATTGGATCATCTTCATGATTGGACAGTGCCCAATAATGCAGCTGCAGGGAACAATAGAA  
GTATTATTGTTCCCTGCAGCTGGACGGGAGTTGAATGCAACTCCCATGGGG

>M6-PGSC0003DMG400008581-(rev)M6LRR-RLK\_1240

CAACCTGCACGCCCTTGTCGTGTAAGAATGCAGAACAATCTTCTTTCGGGGACGATCCCAGCAGGTTT  
TGGTAAACTTGGGAAACTACAGAGGCTGGAAGTGGCAAACAATAGTCTGA

>M6-PGSC0003DMG400008581-(rev)M6LRR-RLK\_1302

GCAGGTTTTGGTAAACTTGGGAAACTACAGAGGCTGGAAGTGGCAAACAATAGTCTGACAGGACAAAT  
CCCAAGTGATCTTGCTTCTTCTACCTCTCTTCTTTTATTGATTTCTCTAGA

>M6-PGSC0003DMG400008581-(rev)M6LRR-RLK\_1488

TCCGACAATAAGATGACAGGCGAAATCCCGGATCAATTCCAGGATTGTCCTTCTTACTGTTCTGGATC  
TATCCACAAACCATTTCACTGGAGATCTTCCAGCTAGCATTGCTTCTGT

>M6-PGSC0003DMG400008581-(rev)M6LRR-RLK\_1550

TCTGGATCTATCCACAAACCATTTCACTGGAGATCTTCCAGCTAGCATTGCTTCTGTGAGAAGTTAGTAA  
CTTTGAACCTTCGAAATAATCAATTAACGGTCCAATTCCAAGAGCGAT

>M6-PGSC0003DMG400008581-(rev)M6LRR-RLK\_1612

AGTTAGTAACTTTGAACCTTCGAAATAATCAATTAACGGTCCAATTCCAAGAGCGATTTCCATGATGCC  
AACATTAGCTATTCTAGATCTATCCAATAATTCTTTAACTGGTGGGATAC

>M6-PGSC0003DMG400008581-(rev)M6LRR-RLK\_1674

ATGATGCCAACATTAGCTATTCTAGATCTATCCAATAATTCTTTAACTGGTGGGATACCTGAGAACTTTGG  
CAATTCACCAGCACTAGAAATGCTGAATGTTTCTCATAACAAACTGGAG

>M6-PGSC0003DMG400008581-(rev)M6LRR-RLK\_1736

GAACTTTGGCAATTCACCAGCACTAGAAATGCTGAATGTTTCTCATAACAAACTGGAGGGTCTGTACCG  
GAAAATGGCATGTTGAGAACAATCAATCCGGATGACCTGATTGGAAATGC

>M6-PGSC0003DMG400008581-(rev)M6LRR-RLK\_1798

CTGTACCGGAAAATGGCATGTTGAGAACAATCAATCCGGATGACCTGATTGGAAATGCCGGTCTATGTG  
GTGGAGTGCTTCTCCTTGTTCATAATGCAGCATAACATCAAAGCAGA

>M6-PGSC0003DMG400008581-(rev)M6LRR-RLK\_186

AATAGAAGTATTATTGTTCCCTGCAGCTGGACGGGAGTTGAATGCAACTCCCATGGGGCAGTCGAGAAG  
CTTGATCTGTCCCACATGAATCTCACTGGCACAGTGTCTAATGATATCCAA

>M6-PGSC0003DMG400008581-(rev)M6LRR-RLK\_1860

CTATGTGGTGGAGTGCTTCCTCCTTGTTCATAATGCAGCATAACACATCAAAGCAGAAGAGCTTGCACG  
TGAAGCACATCATTACAGGATGGCTAATTGGTGTGGCAGCTGTTCTGCTT

>M6-PGSC0003DMG400008581-(rev)M6LRR-RLK\_1922

CTTGACGTGAAGCACATCATTACAGGATGGCTAATTGGTGTGGCAGCTGTTCTGCTTTTTGTGACAGCA  
GGTCTTGTAGCTAGATCTCTATAACAAGAGATGGCATGAAAATGGGAGCTG

>M6-PGSC0003DMG400008581-(rev)M6LRR-RLK\_1984

TGACAGCAGGTCTTGTAGCTAGATCTCTATAACAAGAGATGGCATGAAAATGGGAGCTGCTTTGAACCAA  
GCTTTGAGATGAGCCGTGGTGAATGGCCATGGAGGTTGATGGCATTCCAGA

>M6-PGSC0003DMG400008581-(rev)M6LRR-RLK\_2046

GAACCAAGCTTTGAGATGAGCCGTGGTGAATGGCCATGGAGGTTGATGGCATTCCAGAGGCTAGGATT  
CACTAGTAATGACATCTTGGCTTGCCTTAAAGAGTCAAATGTCATTGGAATG

>M6-PGSC0003DMG400008581-(rev)M6LRR-RLK\_2108

AGGATTCAGTAATGACATCTTGGCTTGCCTTAAAGAGTCAAATGTCATTGGAATGGGAGCAACAGG  
GGTTGTATACAAAGCTGAAATGCAACGCGAGAATATGGTTGTTGCAGTAAA

>M6-PGSC0003DMG400008581-(rev)M6LRR-RLK\_2170

CAACAGGGGTTGTATACAAAGCTGAAATGCAACGCGAGAATATGGTTGTTGCAGTAAAGAAGCTGTGG  
AAATCTGGAAGTATGAGATGGGGCACAGTGATGATCTCGTAGGTGAGG

>M6-PGSC0003DMG400008581-(rev)M6LRR-RLK\_2232

CTGTGGAAATCTGGAAGTATGAGATGGGGCACAGTGATGATCTCGTAGGTGAGGTGAAAGTTCTT  
GGAAAATTGAGGCATCGAAATATTGTCAGGCTTCTGGGGTTCCTTCACAAC

>M6-PGSC0003DMG400008581-(rev)M6LRR-RLK\_2294

AGTTCTTGAAAATTGAGGCATCGAAATATTGTCAGGCTTCTGGGGTTCCTTCACAACAAACGTGATGCA  
ATGATAATATACGAGTATATGCAAATGGTAGCCTTGGAGAGGTTTTACA

>M6-PGSC0003DMG400008581-(rev)M6LRR-RLK\_2356

GTGATGCAATGATAATATACGAGTATATGCAAATGGTAGCCTTGGAGAGGTTTTACATGGTAAACAAG



CAGCAGGGAGACTGCTTGTAGATTGGGTCACTCGATATAACATAGCCCTTG

>M6-PGSC0003DMG400008581-(rev)M6LRR-RLK\_2418

AAACAAGCAGCAGGGAGACTGCTTGTAGATTGGGTCACTCGATATAACATAGCCCTTGGAGTGGCACA

AGGCCTTGCTTATCTCCATCATTACTGCCATCCACCAGTTATTCACCGGGAT

>M6-PGSC0003DMG400008581-(rev)M6LRR-RLK\_248

CGAGAAGCTTGATCTGTCCCACATGAATCTCACTGGCACAGTGTCTAATGATATCCAAAAGTTGAAGAGT

TTGACTTCTCTAAATCTATGCTGCAATGAGTTTTTCATCGCCATTGCCGAA

>M6-PGSC0003DMG400008581-(rev)M6LRR-RLK\_2480

GGCACAAGGCCTTGCTTATCTCCATCATTACTGCCATCCACCAGTTATTCACCGGGATGTCAAGTCAAAT

AACATACTTCTTGATGCAAATCTAGAGGCAAGAATTGCAGATTTTGTTTT

>M6-PGSC0003DMG400008581-(rev)M6LRR-RLK\_2542

AGTCAAATAACATACTTCTTGATGCAAATCTAGAGGCAAGAATTGCAGATTTTGTTTTGGCAAGAACGA

TGCTCAAGAAGAATGAAACAGTTTCCATGGTTGCTGGATCTTATGGATACA

>M6-PGSC0003DMG400008581-(rev)M6LRR-RLK\_2604

AGAACGATGCTCAAGAAGAATGAAACAGTTTCCATGGTTGCTGGATCTTATGGATACATAGCCCCCGGT

AAGTCCTTCAAATTTTTCATCAATGTTTACTCTAGAGTGATTTTGTACT

>M6-PGSC0003DMG400008581-(rev)M6LRR-RLK\_2666

CCCCGGTAAGTCCTTCAAATTTTTCATCAATGTTTACTCTAGAGTGATTTTGTACTAATATTTAACAATC

ATTTATCTGGATTTTGACTTTGCAGAGTACGGATACACGTTGAAAGTG

>M6-PGSC0003DMG400008581-(rev)M6LRR-RLK\_2728

TTTAAACAATCATTATCTGGATTTTGACTTTGCAGAGTACGGATACACGTTGAAAGTGGATGAGAAGAGT

GATATTTACAGCTATGGAGTTGTTCTCATGGAGCTCCTAACGGGTAAACG

>M6-PGSC0003DMG400008581-(rev)M6LRR-RLK\_2790

AGAAGAGTGATATTTACAGCTATGGAGTTGTTCTCATGGAGCTCCTAACGGGTAAACGACCTCTAGATC

CTGAATTTGGGGAATCTGTTGACATTGTAGAGTGGTTTTCGGATGAAGATCC

>M6-PGSC0003DMG400008581-(rev)M6LRR-RLK\_2852

CTAGATCCTGAATTTGGGGAATCTGTTGACATTGTAGAGTGGTTTTCGGATGAAGATCCGAGACAACAAG

TCTTTAGAAGAAGCACTTGACCCAAATGTAGGAGCAACACAACATGTTCAA

>M6-PGSC0003DMG400008581-(rev)M6LRR-RLK\_2914

CAACAAGTCTTTAGAAGAAGCACTTGACCCAAATGTAGGAGCAACACAACATGTTCAAGAAGAAATGTT  
GTTAGTTTTAAGGATAGCAATTCTATGTATAGCCAAACTCCCCAAGGACAG

>M6-PGSC0003DMG400008581-(rev)M6LRR-RLK\_2976

AAATGTTGTTAGTTTTAAGGATAGCAATTCTATGTATAGCCAAACTCCCCAAGGACAGACCATCCATGAG  
GGATGTTTTGACGATGCTCGAAGAGGCAAAGCCTCGGAGAAAAAGCAATA

>M6-PGSC0003DMG400008581-(rev)M6LRR-RLK\_3038

TCCATGAGGGATGTTTTGACGATGCTCGAAGAGGCAAAGCCTCGGAGAAAAAGCAATAGCAACAGTGG  
AGGTAGCCATGATGCTACTACTAACAAGATAAGCCAATATTCAGTACATCA

>M6-PGSC0003DMG400008581-(rev)M6LRR-RLK\_310

TGAAGAGTTTGACTTCTCTAAATCTATGCTGCAATGAGTTTTTCATCGCCATTGCCGAAAAGTTTATCAAAT  
CTAACTGCATTGAGAAGCATTGATGTGAGCCAGAACTATTTTGTCTATG

>M6-PGSC0003DMG400008581-(rev)M6LRR-RLK\_372

TTATCAAATCTAACTGCATTGAGAAGCATTGATGTGAGCCAGAACTATTTTGTCTATGACTTCCCTGTAG  
GTCTTGGAATGTCAGAAGCACTTATGTATTTGAATGCTTCGAGTAATAAC

>M6-PGSC0003DMG400008581-(rev)M6LRR-RLK\_434

CCCTGTAGGTCTTGGAATGTCAGAAGCACTTATGTATTTGAATGCTTCGAGTAATAACTTCTCCGGTTATC  
TTCCTGAGGATATTGGAATGCTACATTGCTCGAGACATTGGATTTTCG

>M6-PGSC0003DMG400008581-(rev)M6LRR-RLK\_496

CCGGTTATCTTCTGAGGATATTGGAATGCTACATTGCTCGAGACATTGGATTTTCGAGGGAATTTCTT  
CGAAGGTTCAATTCCTAAATCTTATAGGAATTTGGGGAAATTGAAGTTTT

>M6-PGSC0003DMG400008581-(rev)M6LRR-RLK\_558

AATTTCTTCGAAGGTTCAATTCCTAAATCTTATAGGAATTTGGGGAAATTGAAGTTTTAGGTCTTTCAGG  
GAACAATTTGACTGGACACATTCCAGGAGAGTTGGGGCAGCTTTCGTCG

>M6-PGSC0003DMG400008581-(rev)M6LRR-RLK\_62

AGTGGTTGCGAAAGTTGATTTGAATGATGAGGTGTCTATTCTACTTTCTATTAAGAAAGTCTCGTTGAT  
CCATTGGATCATCTTCATGATTGGACAGTGCCCAATAATGCAGCTGCAGG

>M6-PGSC0003DMG400008581-(rev)M6LRR-RLK\_620

TCTTTCAGGGAACAATTTGACTGGACACATTCCAGGAGAGTTGGGGCAGCTTTCGTCGCTTGAGACTGT  
AGTACTGGGATACAATGTTTTCGAAGGTGGAATTCCAGCTGAATTTGGAAA

>M6-PGSC0003DMG400008581-(rev)M6LRR-RLK\_682

AGACTGTAGTACTGGGATACAATGTTTTCGAAGGTGGAATTCCAGCTGAATTTGAAATCTGACAAATC  
TCAAGTATCTTGATCTTGCTATTGGAAATCTGGAGGTTCAATTCCTTCTG

>M6-PGSC0003DMG400008581-(rev)M6LRR-RLK\_744

ACAAATCTCAAGTATCTTGATCTTGCTATTGGAAATCTGGAGGTTCAATTCCTTCTGAGCTAGGAAAGC  
TGAAGCTGCTCGATACGATTTTCTGTACAAGAACAAGCTTGAAGGCAAG

>M6-PGSC0003DMG400008581-(rev)M6LRR-RLK\_806

AGGAAAGCTGAAGCTGCTCGATACGATTTTCTGTACAAGAACAAGCTTGAAGGCAAGATTCCGCCAGA  
GATTGGCAATATGACTTCATTGCAGTTGCTTGATCTGTCTGATAACATGCT

>M6-PGSC0003DMG400008581-(rev)M6LRR-RLK\_868

CGCCAGAGATTGGCAATATGACTTCATTGCAGTTGCTTGATCTGTCTGATAACATGCTTACGGGTGAAAT  
TCCAGCTAAGATTGCTGAACTTAAGAATTTGCAGCTTTTGAATATAATGT

>M6-PGSC0003DMG400008581-(rev)M6LRR-RLK\_930

GGTGAATTCAGCTAAGATTGCTGAACTTAAGAATTTGCAGCTTTTGAATATAATGTCAAACAAATTAT  
CAGGTTCAAGTTCCCCCTGGGATTGGAGGTTTACTCAGCTGGAAGTAGTT

>M6-PGSC0003DMG400008581-(rev)M6LRR-RLK\_992

CAAATTATCAGGTTCAAGTTCCCCCTGGGATTGGAGGTTTACTCAGCTGGAAGTAGTTGAGCTGTGGAA  
TAACAGCTTTTCAAGTCCTTTGCCAAGTGATCTTGGAAGAAATTCGCCATT

>M6-PGSC0003DMG400008596-(rev)M6LRR-RLP\_0

CTTTATTTAGGTAAAGAAGACTTTGGTACAGAGAAAGAACATTTTGTGAAGGAGCAAACACAGTAATGG  
CCGATCCTGTAATTGGTGCTACTGCTCAAGTTTTGCTTGACAAGTTGCTT

>M6-PGSC0003DMG400008596-(rev)M6LRR-RLP\_1037

GCAGAAGATCATTGTCGGTCCATTTTCAAACAAAGAGCGTTTGTGATGGGGAAATTCACAGGAATTA  
GCAAGCATGGGCAACAGGATTGTTAAAATGTGCCAAGGTCTACCGTTGGCT

>M6-PGSC0003DMG400008596-(rev)M6LRR-RLP\_1098

AGGAATTAGCAAGCATGGGCAACAGGATTGTTAAAATGTGCCAAGGTCTACCGTTGGCTGCAAGTGAT  
TGGGAGGCCTCTTACGCAGTAAGGAAAAACATGAATGGCAGGCAATTCCTG

>M6-PGSC0003DMG400008596-(rev)M6LRR-RLP\_122

CCCACTATTGAGGAGGTCAAAAGTTTAAGGAACTGCAAGAAAGATCTCGAAATGCTGATAAAAAATGTA

TCCTTGATCCAAGCTTTCATTCATGATGCTGAAAGACGACAAGTCGAAGAT

>M6-PGSC0003DMG400008596-(rev)M6LRR-RLP\_1220

GGAAAGCCCCTTGTTGCAGGTGAAGATGATAATGGAGAAAATAACATAAAGAAAATCCTAAAACCTCAG  
CTATGATTATCTACCATATCCACATCTGAAAAAATGCTTTGCTTACTTTGCA

>M6-PGSC0003DMG400008596-(rev)M6LRR-RLP\_1281

AACTCAGCTATGATTATCTACCATATCCACATCTGAAAAAATGCTTTGCTTACTTTGCAATGTTTCCAAAA  
GACCTTGAGTTTGAAAAGGACCAACTGATCCAACCTCTGGATGGCAGAAG

>M6-PGSC0003DMG400008596-(rev)M6LRR-RLP\_1342

GTTTCCAAAAGACCTTGAGTTTGAAAAGGACCAACTGATCCAACCTCTGGATGGCAGAAGGCTTTCTTCAT  
CCATGTCAAGAGACCACCGTGATGGAGGACATCGGGAACAAGTTCTTTCA

>M6-PGSC0003DMG400008596-(rev)M6LRR-RLP\_1403

TTTCTTCATCCATGTCAAGAGACCACCGTGATGGAGGACATCGGGAACAAGTTCTTTCAAATCTTGTTGC  
GGAATTCCTTGCTGCAAGATGTTAAGCTAGATGAGCATAACAATATAACA

>M6-PGSC0003DMG400008596-(rev)M6LRR-RLP\_1464

TCTTGTTGCGGAATTCCTTGCTGCAAGATGTTAAGCTAGATGAGCATAACAATATAACACACTGTAAGAT  
GCACGATCTTGTCATGATTTGGCTGGAGATATCTTAAAATCTAAACTAA

>M6-PGSC0003DMG400008596-(rev)M6LRR-RLP\_1525

CTGTAAGATGCACGATCTTGTCATGATTTGGCTGGAGATATCTTAAAATCTAAACTAATTGATCCCAAG  
GGCGATGGTGGAGAAAATCTTTCTCATGCGGATACTTTGGATGGGACTC

>M6-PGSC0003DMG400008596-(rev)M6LRR-RLP\_1586

GATCCCAAGGGCGATGGTGGAGAAAATCTTTCTCATGCGGATACTTTGGATGGGACTCACCAAGTGAT  
CAAATAGATAAGATATATGAGCCAGGACGTTTGTACACACTGTTCTGGAGA

>M6-PGSC0003DMG400008596-(rev)M6LRR-RLP\_1647

CAAGTGATCAAATAGATAAGATATATGAGCCAGGACGTTTGTACACACTGTTCTGGAGAAGCAATCATA  
TATCGGAAGCTATGCTGTTGAGCTTTAAGTTCTTGAGAGTTTTAAATTTGT

>M6-PGSC0003DMG400008596-(rev)M6LRR-RLP\_1769

AGTTCAGGAATCAAGGAGCTGCCAGCCAAAATCAGCAAGCTAATACTTGAGATATCTTGATCTCTCCA  
ACACTAAGATCACAGCCTTGCCCAACTCCATTTGCAAGCTCTACAATTTG

>M6-PGSC0003DMG400008596-(rev)M6LRR-RLP\_1830

ATCTCTCCAACACTAAGATCACAGCCTTGCCCAACTCCATTTGCAAGCTCTACAATTTGCAAACATTTAGA  
GTCAATGACTGCTATTCACTCAAGGAACTTCCATATGAGATGGGAAATA

>M6-PGSC0003DMG400008596-(rev)M6LRR-RLP\_1891

AACATTTAGAGTCAATGACTGCTATTCACTCAAGGAACTTCCATATGAGATGGGAAATATGATAAGTTTG  
AGACACATTTACTGCTATTCTCGATCTCAGTTGCCACTTAACATGGGACA

>M6-PGSC0003DMG400008596-(rev)M6LRR-RLP\_1952

ATAAGTTTGAGACACATTTACTGCTATTCTCGATCTCAGTTGCCACTTAACATGGGACAATTGACTTGTCT  
TCAGACCCTGCAGTATTTCAATGTGGGGTTAGAGAAAGGGCGTCAATA

>M6-PGSC0003DMG400008596-(rev)M6LRR-RLP\_2013

TGACTTGTCTTCAGACCCTGCAGTATTTCAATGTGGGGTTAGAGAAAGGGCGTCAATAGGAGAATTAG  
GTTGTTTGAAGAACCTTAGAGGTGAATTGACGATCAATGAGCTGGAATTGG

>M6-PGSC0003DMG400008596-(rev)M6LRR-RLP\_2135

TGTAGTATTGAAGAAGCTCGAACAGCATATTTACAAGAGAAATCGAATATCTACAAGCTGGCATATGTG  
TGGTCCACGATGAACCAGAAGGCTGTGAAACCATTGTTGAGCATGTGTTG

>M6-PGSC0003DMG400008596-(rev)M6LRR-RLP\_2196

CATATGTGTGGTTCACGATGAACCAGAAGGCTGTGAAACCATTGTTGAGCATGTGTTGGATGGTCTTC  
AACCGCATACTAACTTGAAAACCTTAGAAGTCAAGAACTATTTAGGTACTA

>M6-PGSC0003DMG400008596-(rev)M6LRR-RLP\_2257

TGGTCTTCAACCGCATACTAACTTGAAAACCTTAGAAGTCAAGAACTATTTAGGTACTAGATTTCTTCAT  
GGTTCAGAGAAGAATCTCTACCAAATTTGGTCAAGTTGAAATTAAGTGG

>M6-PGSC0003DMG400008596-(rev)M6LRR-RLP\_2318

TTTCCTTCATGGTTCAGAGAAGAATCTCTACCAAATTTGGTCAAGTTGAAATTAAGTGGTTGCAAAGAT  
GCAAAGAAATTCCATGGCTTGGCCAACTGAAATTGCTTCGGCATCTTGAG

>M6-PGSC0003DMG400008596-(rev)M6LRR-RLP\_2379

GCAAAGATGCAAAGAAATTCATGGCTTGGCCAACTGAAATTGCTTCGGCATCTTGAGCTATTAGGGT  
TACATAAGGTTGAATGCATCGGAACTATTTTTTATGGTATTGATGGTAACA

>M6-PGSC0003DMG400008596-(rev)M6LRR-RLP\_244

GGCTGTGGAAAATGGCTCAAGATGCTTGAGAGAGTTGCTGAAAATGCTGATAAGGTGTTTGACGAAT  
TCAGGTATGAGTCTCTCAAAGACAAGTGAAGATTCGAAACAATCCAATGAA

>M6-PGSC0003DMG400008596-(rev)M6LRR-RLP\_2440

ATTAGGGTTACATAAGGTTGAATGCATCGGAACTATTTTTTATGGTATTGATGGTAACAATATTGGATCA  
AGCAGCAATGTCCAAGTGTCCCATCATTGACTGAACTAGTATTGAAGGA

>M6-PGSC0003DMG400008596-(rev)M6LRR-RLP\_2501

ATTGGATCAAGCAGCAATGTCCAAGTGTCCCATCATTGACTGAACTAGTATTGAAGGATATGTCTAGCC  
TTATTGAGTGGAAGGGAGATGAAATTGGAGTAAGAATGTTTCCTCTGCTT

>M6-PGSC0003DMG400008596-(rev)M6LRR-RLP\_2562

TGTCTAGCCTTATTGAGTGGAAGGGAGATGAAATTGGAGTAAGAATGTTTCCTCTGCTTGAGAAGTTGA  
GGATTAGTAGCTGTCCATTGTTAAAAATTACTCCAAGTCAATTTGAAATCC

>M6-PGSC0003DMG400008596-(rev)M6LRR-RLP\_2684

CGTGAATTAAGAATTGAAAGAGTTGACAGTGAAATGCCATTGTTGAACTTGTGCAGTAAATTGACATCT  
CTCGTAAAGCTTAGTGTTTATGATGTGAAAGAGCTCACTTGTTTTCCAGAT

>M6-PGSC0003DMG400008596-(rev)M6LRR-RLP\_2745

TGACATCTCTCGTAAAGCTTAGTGTTTATGATGTGAAAGAGCTCACTTGTTTTCCAGATGAGATGCTACG  
CAACAAGGTTTTCTTCAACACCTATTGGTCTCAGACTGTGGAGAGTTTC

>M6-PGSC0003DMG400008596-(rev)M6LRR-RLP\_2806

GATGCTACGCAACAAGGTTTTCTTCAACACCTATTGGTCTCAGACTGTGGAGAGTTTCGTGAATTGCCA  
CAAAGCTTATACAGTCTCCGTTCTTTAAAAGCTTAAAGATTTACCGCTG

>M6-PGSC0003DMG400008596-(rev)M6LRR-RLP\_2867

GAATTGCCACAAAGCTTATACAGTCTCCGTTCTTTAAAAGCTTAAAGATTTACCGCTGCACCAATTTAG  
TTCTTTCTGTTCCAGTGGAGAGAATTATTTGACTTCCCTCCAAAGT

>M6-PGSC0003DMG400008596-(rev)M6LRR-RLP\_2989

TCAGTTATGGAAGTGTGATGGATTGACCAGTGTACCAAGTGGGATGCTAGAGCATTGTCCGGTCTCTGGA  
ATCTTTGATGGTCTGCTACTGTAACAACTTAGTTTCCTTCCCTATATGTGT

>M6-PGSC0003DMG400008596-(rev)M6LRR-RLP\_305

GACGAATTCAGGTATGAGTCTCTCAAAGACAAGTGAAGATTGAAACAATCCAATGAAAAAGGTCAGT  
GATTTCTTTTCTCATAACAGCTTTTAAGAGCAAATGTCTCAAAAAATCAAC

>M6-PGSC0003DMG400008596-(rev)M6LRR-RLP\_3050

TCTCTGGAATCTTTGATGGTCTGCTACTGTAACAACTTAGTTTCCTTCCCTATATGTGTGGGGGAAATGCC

TTTACTTTTTGATGTGTATCTATCAGAATGTCCCAAATTGATTAGTGTA

>M6-PGSC0003DMG400008596-(rev)M6LRR-RLP\_3111

GGGAAATGCCTTTACTTTTTGATGTGTATCTATCAGAATGTCCCAAATTGATTAGTGACCCGCAGGGGA

CCTTTACCGTCTCACTGGGTTACGGCATTGGAAATTGGTCCTTTCTCAG

>M6-PGSC0003DMG400008596-(rev)M6LRR-RLP\_3233

ATGGTGGATTTTGAGGCATTCCAATTGATTTTCAATGGCATTGAGCAGCTGTTGTCCCTTCGTTTTTTGTG

TGTGGTAGGACATTTGCACTGGGATTCTCTGCCCTATCAGCTTATGCAA

>M6-PGSC0003DMG400008596-(rev)M6LRR-RLP\_3294

GTTTTTTGTGTGTGGTAGGACATTTGCACTGGGATTCTCTGCCCTATCAGCTTATGCAACTCTCTGACCTA

ACAGAGATCCAAATATATCGATTTCGGAATCGAGGCTCTTCCTCATAAAT

>M6-PGSC0003DMG400008596-(rev)M6LRR-RLP\_3355

CTCTGACCTAACAGAGATCCAAATATATCGATTTCGGAATCGAGGCTCTTCCTCATAAATTTGACAACCTT

GCTTCTCTTGAAGATTAACGTTAGTGAGGTGCAAACGGCTACAACATCT

>M6-PGSC0003DMG400008596-(rev)M6LRR-RLP\_3416

GACAACCTTGCTTCTCTTGAAGATTAACGTTAGTGAGGTGCAAACGGCTACAACATCTGGACTTCTCAG

TTGCCATGCCCAAATTACGGCATCTCCAGATACAGGATTGTCCATTGTTA

>M6-PGSC0003DMG400008596-(rev)M6LRR-RLP\_3477

ACTTCTCAGTTGCCATGCCCAAATTACGGCATCTCCAGATACAGGATTGTCCATTGTTAGAAACACTGTC

GGATGGGCTCGGCAACCTTGTTCCTTTCAGGAGTTAGTTTTACAGAAAT

>M6-PGSC0003DMG400008596-(rev)M6LRR-RLP\_3538

AACACTGTCCGATGGGCTCGGCAACCTTGTTCCTTTCAGGAGTTAGTTTTACAGAAATGCGAGAAACT

AGAGCATCTGCCATCTGGAGATGCCATGCAACGCCTCACCAAATTACGTTA

>M6-PGSC0003DMG400008596-(rev)M6LRR-RLP\_3599

GAGAACTAGAGCATCTGCCATCTGGAGATGCCATGCAACGCCTCACCAAATTACGTTACCTGAAAATT

GAAGGCTGCCCAAAGTTAGAAGAAAGTTGCACCAATCGGATTGGCTCAAAC

>M6-PGSC0003DMG400008596-(rev)M6LRR-RLP\_366

AGGTCAGTGATTTCTTTCTCATACAGCTTTTAAGAGCAAATGTCTCAAAAAATCAACAACATCAATGA

AGATTTGACGGCTATCAATAGGTTAGCCAAAGACCTTGGTCTCCAATCAT

>M6-PGSC0003DMG400008596-(rev)M6LRR-RLP\_3721

CCAGTGGTCCAACATTTCCCATATTCCAAAAATTAAGTAGGTGAAAGCATAATTCAGGACTTAAGTAAG  
TCTCTGTTCTCTTTTCAGTTTCTGAGTCGATTTTTTTGTTCTTTCTTTTC

>M6-PGSC0003DMG400008596-(rev)M6LRR-RLP\_3782

TTAAGTAAGTCTCTGTTCTCTTTTCAGTTTCTGAGTCGATTTTTTTGTTCTTTCTTTTCCACGAGTTGCTTTC  
CTTCTTTTTAACAAATTTTCCATTCCCCAACTAATACATGTTATGG

>M6-PGSC0003DMG400008596-(rev)M6LRR-RLP\_3843

CGAGTTGCTTTCCTTCTTTTTAACAAATTTTCCATTCCCCAACTAATACATGTTATGGTACTTAAGAATTA  
CAGAATTTTTTATCTCTCACTTGAACTAACTGTTCTTCTTCTTATTC

>M6-PGSC0003DMG400008596-(rev)M6LRR-RLP\_3904

CTTAAGAATTACAGAATTTTTTATCTCTCACTTGAACTAACTGTTCTTCTTCTTATTCGTCATCAAACAAG  
GAATAGATACATTCCCGTCCTTTAATAATGTAAATATGTTCTTCTCA

>M6-PGSC0003DMG400008596-(rev)M6LRR-RLP\_3965

CATCAAACAAGGAATAGATACATTCCCGTCCTTTAATAATGTAAATATGTTCTTCTCATAGGTGCCTAGA  
TCAAATGTCATGCTGGAACGTTGCTAGCTGTGGTATATCAAGTCAAAT

>M6-PGSC0003DMG400008596-(rev)M6LRR-RLP\_4026

GGTGCCTAGATCAAATGTCATGCTGGAACGTTGCTAGCTGTGGTATATCAAGTCAAATTTACGGTTGG  
CAATCAGGTTGGCTAAAATTTTCATTTAGACTTGGTAGAGGAATGCTATAA

>M6-PGSC0003DMG400008596-(rev)M6LRR-RLP\_4087

ACGGTTGGCAATCAGGTTGGCTAAAATTTTCATTTAGACTTGGTAGAGGAATGCTATAACAAATTTATCG  
CTTCTTCCACAGGTCATTACTIONGTTAATTAGGTTGGTTATGTTCT

>M6-PGSC0003DMG400008596-(rev)M6LRR-RLP\_4148

AATTTATCGCTTCTTCCACAGGTCATTACTIONGTTAATTAGGTTGGTTATGTTCTGTATGAATGCAA  
TGTAAGCTTGGTTGCGTTTCTAGCATCATGAGGGACGTGCATCCATTTG

>M6-PGSC0003DMG400008596-(rev)M6LRR-RLP\_4209

ATGAATGCAATGTAAGCTTGGTTGCGTTTCTAGCATCATGAGGGACGTGCATCCATTTGGTTTAAGGATT  
CTCTACTCGCATTGGACCAAAAATCTTCATGTAAGCTTCTTCCCAGTTGT

>M6-PGSC0003DMG400008596-(rev)M6LRR-RLP\_427

CATCAATGAAGATTTGACGGCTATCAATAGGTTAGCCAAAGACCTTGGTCTCCAATCATTGATGGTTCTCT  
CCTCGGCAAATACTACTAATTCGAGAAACAGATTCTGTAGTAGTTGCTTT



>M6-PGSC0003DMG400008596-(rev)M6LRR-RLP\_4270

TTAAGGATTCTCTACTCGCATTGGACCAAAAATCTTCATGTAAGCTTCTTCCCAGTTGTTAATCTCCTAGG  
TCCAATAGTTTGCTTTGTTTTAATTGTTTGTGTTTGCACGATTATCGTGC

>M6-PGSC0003DMG400008596-(rev)M6LRR-RLP\_4331

ATCTCCTAGGTCCAATAGTTTGCTTTGTTTTAATTGTTTGTGTTTGCACGATTATCGTGCAACAAAAGAGCC  
TATCTCTCAATCCTCAAATATTATAATGCTCTTCGTTACAGGGTATAGT

>M6-PGSC0003DMG400008596-(rev)M6LRR-RLP\_4392

CAAAAGAGCCTATCTCTCAATCCTCAAATATTATAATGCTCTTCGTTACAGGGTATAGTGTGTTAGCACGT  
TGGACAAATTCCAATTAGCTGTACATATCTATGTAAGAACTCTAAATAT

>M6-PGSC0003DMG400008596-(rev)M6LRR-RLP\_4453

GTTAGCACGTTGGACAAATTCCAATTAGCTGTACATATCTATGTAAGAACTCTAAATATTTATTGTAAC  
TGGTGTCACTTGCTTTCCACATGTAGGAGATATCAGGAATAACAGATAT

>M6-PGSC0003DMG400008596-(rev)M6LRR-RLP\_4514

ATTGTAECTATGGTGCTCACTTGCTTTCCACATGTAGGAGATATCAGGAATAACAGATATTTATTTAGGGG  
TGTAATGACAACCTCTAATTTAATGGAAGAACTTTAATATGAGAGCAT

>M6-PGSC0003DMG400008596-(rev)M6LRR-RLP\_4575

ATTTAGGGGTGTAAATGACAACCTCTAATTTAATGGAAGAACTTTAATATGAGAGCATTTCATTCAGCAA  
ATTTGACTCTGGATAAAGACAATTTCTCATTCTCTTTAGGAAAATGAAGT

>M6-PGSC0003DMG400008596-(rev)M6LRR-RLP\_4636

ATTCAGCAAATTTGACTCTGGATAAAGACAATTTCTCATTCTCTTTAGGAAAATGAAGTATTTGATTCACA  
TAATATTGGCTTATCATGGTTGACAGTTACAATCAGTTTCTTTTGCATA

>M6-PGSC0003DMG400008596-(rev)M6LRR-RLP\_4697

TTGATTCACATAATATTGGCTTATCATGGTTGACAGTTACAATCAGTTTCTTTTGCATAAGAGAAGGTGA  
AACATAGAGGGGGATAAACGACCTTCTGCAAGGCGACTTTATTATCGACT

>M6-PGSC0003DMG400008596-(rev)M6LRR-RLP\_4758

AGAAGGTGAAACATAGAGGGGGATAAACGACCTTCTGCAAGGCGACTTTATTATCGACTATCTAGTGAA  
ATAGTATAGGTAACAAAGCCATTTATCATAAGCCTTGGATGCAAGACAGA

>M6-PGSC0003DMG400008596-(rev)M6LRR-RLP\_4819

CTAGTGAAATAGTATAGGTAACAAAGCCATTTATCATAAGCCTTGGATGCAAGACAGATTTTATTTTGG

TAAAACATGTGACTTCAATTGATAGAAGAGGCTTCTCCAAATTTTGTTAC

>M6-PGSC0003DMG400008596-(rev)M6LRR-RLP\_488

ATGGTTCCTCCTCGGCAAATACTACTAATTCGAGAAACAGATTCTGTAGTAGTTGCTTTGGATGTTGTTG  
GTAGAGACAAAGATGTTGCTGAAATAAAGGAGAAGATATTGACCATGAGA

>M6-PGSC0003DMG400008596-(rev)M6LRR-RLP\_4880

TCATTTTGGTAAAACATGTGACTTCAATTGATAGAAGAGGCTTCTCCAAATTTTGTTACCTGTCTTCACTTT  
TCAACAGTATTTCTTTAATTTTCATCAGACTTATCGGAACATTGTTT

>M6-PGSC0003DMG400008596-(rev)M6LRR-RLP\_4912

AGAAGAGGCTTCTCCAAATTTTGTTACCTGTCTTCACTTTTCAACAGTATTTCTTTAATTTTCATCAGACT  
TATCGGAACATTGTTTACATTGGTGCCTTTGGGGACGGTGATTGCACA

>M6-PGSC0003DMG400008596-(rev)M6LRR-RLP\_549

ATGTTGTTGGTAGAGACAAAGATGTTGCTGAAATAAAGGAGAAGATATTGACCATGAGAGAGGATGTT  
GTTCTGTCAACCATTCCAATAGTGGGTATGGGAGGTTTAGGGAAAACAACCTG

>M6-PGSC0003DMG400008596-(rev)M6LRR-RLP\_61

AGTAATGGCCGATCCTGTAATTGGTGCTACTGCTCAAGTTTTGCTTGACAAGTTGCTTTCTCCCACTATTG  
AGGAGGTCAAAGTTTAAGGAACTGCAAGAAAGATCTCGAAATGCTGAT

>M6-PGSC0003DMG400008596-(rev)M6LRR-RLP\_610

GGATGTTGTTCTGTCAACCATTCCAATAGTGGGTATGGGAGGTTTAGGGAAAACAACCTGTCGCAAAGAG  
AATTTACAATGACGAACACATCAAGCAAATCTTTGAAAAGAGAGTTTGGTT

>M6-PGSC0003DMG400008596-(rev)M6LRR-RLP\_671

GCAAAGAGAATTTACAATGACGAACACATCAAGCAAATCTTTGAAAAGAGAGTTTGGTTGTGTCTACCT  
GAAATGTCGGAGACTAAGAGCTTTCTCGAACTGATCCTCGAATCATTGACA

>M6-PGSC0003DMG400008596-(rev)M6LRR-RLP\_793

GAGGAAAGTTAAGGTCCAGAGCAGAGATATAATTGTCAAGAAGCTCCGAGATGAACTGACAGGAAGG  
AAGTATTTGCTTGTCTGGATGATTTGTGGCGTGTTGACTCTACATTGTGGAA

>M6-PGSC0003DMG400008596-(rev)M6LRR-RLP\_854

GGAAGGAAGTATTTGCTTGTCTGGATGATTTGTGGCGTGTTGACTCTACATTGTGGAATGAGTTTGTG  
GATACCTTGAGAGGAATAAATACTTCCCGGGGAACTTCATTCTCGTGACT

>M6-PGSC0003DMG400008596-(rev)M6LRR-RLP\_915

AGTTTGTGGATACCTTGAGAGGAATAAATACTTCCCGGGGAAACTTCATTCTCGTGACTIONCTCGTATGGA  
ACAGGTGGCGTCCACAGTAGCAGCAGTAGGTCCTCATAAGTTGGAAAAAC

>M6-PGSC0003DMG400008596-(rev)M6LRR-RLP\_976

TCGTATGGAACAGGTGGCGTCCACAGTAGCAGCAGTAGGTCCTCATAAGTTGGAAAACTAGCAGAAG  
ATCATTGTCGGTCCATTTTCAAACAAAGAGCGTTTGTGATGGGGAAATTCC

>M6-PGSC0003DMG400008822M6L-LecRK\_0

ATGTTCTTCAATCTTTTCATACTAGTAGCACTCTTTTAGTTGATTTTACCAGCTTCTGTGAAGTTGAT  
GCATTCATTACAATGGATTCCAATCAGCTAATCTTAGCTTGGATGGC

>M6-PGSC0003DMG400008822M6L-LecRK\_1008

GCTACTAAGGGATTCAAGAGAAAAGGAGGTATTGGGAGCTGGAGGATTTGGTAAAGTTTATAAAGGAGT  
GATGCCTATCACTAACTTGAGATAGCTGTAAAGAAGATATCTCATGAATCA

>M6-PGSC0003DMG400008822M6L-LecRK\_1071

GGAGTGATGCCTATCACTAACTTGAGATAGCTGTAAAGAAGATATCTCATGAATCAAGACAAGGTATG  
AAGGAATTTGTTTCGGAGATTGTAAGTATTGGTCGCATGCAACACAGGAAT

>M6-PGSC0003DMG400008822M6L-LecRK\_1134

GGTATGAAGGAATTTGTTTCGGAGATTGTAAGTATTGGTCGCATGCAACACAGGAATGTAGTACA  
TTGGGTTATTGCAGGCGAAAAGGGGAGTTGATTTTATATGAATACATG

>M6-PGSC0003DMG400008822M6L-LecRK\_1197

CAACTTTTGGGTTATTGCAGGCGAAAAGGGGAGTTGATTTTATATGAATACATGTCTAATGGAAGT  
CTAGACAAGTATTTATACGATCAACCAAGATACACCCTCGATTGGAACCAA

>M6-PGSC0003DMG400008822M6L-LecRK\_126

CAGTTCACATCTGATGATCTTTTGTGTTAACAAATTCAGGAACACAAAATCAGGGCCATGCTTTCTATCC  
AAATCCAATTCATTTCAAGAATTCATCAAATGGTACTGTATTTTCTTTC

>M6-PGSC0003DMG400008822M6L-LecRK\_1260

GGAAGTCTAGACAAGTATTTATACGATCAACCAAGATACACCCTCGATTGGAACCAAAGATTCAAAGTC  
ATTAGAGGTGTAGCCTCAGGACTATTTTCTACACGAAGAATGTGATCAC

>M6-PGSC0003DMG400008822M6L-LecRK\_1323

AAAGTCATTAGAGGTGTAGCCTCAGGACTATTTTCTACACGAAGAATGTGATCACGTAGTGGTTCATA  
GAGATGTTAAGGCCAGTAATGTCTTGTAGATGGTGAACCTAAATGGCAGG

>M6-PGSC0003DMG400008822M6L-LecRK\_1386

GTTTCATAGAGATGTTAAGGCCAGTAATGTCTTGTAGATGGTGAACATAAATGGCAGGTTAGGTGATTTT  
GGACTCGCAAGGCTGTATGGTCATGGGACCGATCCTCAGTCTACTCGTGTT

>M6-PGSC0003DMG400008822M6L-LecRK\_1449

GATTTTGGACTCGCAAGGCTGTATGGTCATGGGACCGATCCTCAGTCTACTCGTGTTGTTGGTACTCTTG  
GTTACCTTGCAACAGAGCATACTAGAACTGGCAGGGCAACACCGAGTAGT

>M6-PGSC0003DMG400008822M6L-LecRK\_1575

TTTTCAATTTGGGGCATTCTGCTTGAAGTTGCATGTGGTAGGAGGCCGATACAGCCAAGACAAGACGGT  
GATGATCTGATTTTGGTCGATTGGGTGTTCTCGTGCTGGAATAGGGGTAAT

>M6-PGSC0003DMG400008822M6L-LecRK\_1638

GACGGTGATGATCTGATTTTGGTCGATTGGGTGTTCTCGTGCTGGAATAGGGGTAATATACTTGATGCT  
GCTGATCCAAACATAGGCATTGATTTTGTCCAGGGCAAGTGGAGTTGGTC

>M6-PGSC0003DMG400008822M6L-LecRK\_1701

GATGCTGCTGATCCAAACATAGGCATTGATTTTGTCCAGGGCAAGTGGAGTTGGTCTTAAAGTTAGGC  
TTGTTCTGTTCTCATTAGATCCTTCGTGTAGGCCAACCATGCGACAAATC

>M6-PGSC0003DMG400008822M6L-LecRK\_1764

TTAGGCTTGTCTGTTCTCATTAGATCCTTCGTGTAGGCCAACCATGCGACAAATCTTGTTGTTCTTGA  
TGGTGTGTTGGCCTTACCAGAGTTATCAGAACTCGGTGTTTCATCAGCT

>M6-PGSC0003DMG400008822M6L-LecRK\_1827

TTCTTGGATGGTGTGTTGTGGCCTTACCAGAGTTATCAGAACTCGGTGTTTCATCAGCTAACCTAACATTTGA  
ACATCGCGGAGGTTTTGATGATTTTGTCAAGTCATATCCAGCTTCTTTG

>M6-PGSC0003DMG400008822M6L-LecRK\_1887

CTAACATTTGAACATCGCGGAGGTTTTGATGATTTTGTCAAGTCATATCCAGCTTCTTTGGGCTATGCATA  
TTCCTGCTCTCCATCTGTAACAGACTCCTTTCTCTCTGGTGGCCGTTGA

>M6-PGSC0003DMG400008822M6L-LecRK\_189

TTCTATCCAAATCCAATTCATTTCAAGAATTCATCAAATGGTACTGTATTTTCTTTCTCCACAACCTTCGTG  
TTCGCGATAAGGTCTGATTATGGAAATTTGAGTGGTCATGGACTGGCT

>M6-PGSC0003DMG400008822M6L-LecRK\_252

ACTTTTCGTGTTTCGCGATAAAGTCTGATTATGGAAATTTGAGTGGTCATGGACTGGCTTTCGTTATCGCGC

CACATAAAGGACTTCAGGGGTCTTTGGCAAATCACTATCTTGGTCTTTTT

>M6-PGSC0003DMG400008822M6L-LecRK\_315

ATCGCGCCACATAAAGGACTTCAGGGGTCTTTGGCAAATCACTATCTTGGTCTTTTTAACTCTAATAATAA  
TGGGAATAGATCAAACCATGTCGTTGGAGTTGAGCTCGATAACAATCATT

>M6-PGSC0003DMG400008822M6L-LecRK\_378

AATAATAATGGGAATAGATCAAACCATGTCGTTGGAGTTGAGCTCGATAACAATCATTAGCGAGGATTTT  
GGTGATATCAATGACAATCATGTTGGAATTGATATAAATGGATTGAGGTCT

>M6-PGSC0003DMG400008822M6L-LecRK\_441

GATTTTGGTGATATCAATGACAATCATGTTGGAATTGATATAAATGGATTGAGGTCTGTAGCATATCATA  
CAGCAGGTTATTTTGGTACTGGTTTTTTTCATAACTTGACTTTAATT

>M6-PGSC0003DMG400008822M6L-LecRK\_504

TATCATACAGCAGGTTATTTTGGTACTGGTTTTTTTCATAACTTGACTTTAATTAGTGGCCAGGAAAT  
GCAAGTTTGGATTGATTATGATGGGAGGACTAAGCAAATGAATGTAACA

>M6-PGSC0003DMG400008822M6L-LecRK\_567

CAGGAAATGCAAGTTTGGATTGATTATGATGGGAGGACTAAGCAAATGAATGTAACAGTAGCTCAATTA  
CATATGGAAAAACAGTTAGACCACTTTTGGCTTTGAAATATGATCTTTTCG

>M6-PGSC0003DMG400008822M6L-LecRK\_63

GAAGTTGATGCATTCATTTACAATGGATTCCAATCAGCTAATCTTAGCTTGGATGGCATAGCACAGTTCA  
CATCTGATGATCTTTTGTGTTAAACAATTCAGGAACACAAAATCAGGGC

>M6-PGSC0003DMG400008822M6L-LecRK\_630

CAATTACATATGGAAAAACAGTTAGACCACTTTTGGCTTTGAAATATGATCTTTTCGTCTATTCTTGAGCA  
GAGTATGTATGTTGGTTTTTCATCGTCAACAGGTTTCAGTCCCGACACAT

>M6-PGSC0003DMG400008822M6L-LecRK\_693

CTTGAGCAGAGTATGTATGTTGGTTTTTCATCGTCAACAGGTTTCAGTCCCGACACATCATTATATCTTGGG  
ATGGAGCTTCAAGACAAATGGGAAAGCTCAAGAACTCTCGCAACTTCCT

>M6-PGSC0003DMG400008822M6L-LecRK\_756

ATCTTGGGATGGAGCTTCAAGACAAATGGGAAAGCTCAAGAACTCTCGCAACTTCCTAAGCTTCCTCCTC  
TTGGGAGTAAAGGGACGTCAAGATTTGTAACGATTGGTTTGCCTATAATC

>M6-PGSC0003DMG400008822M6L-LecRK\_819

CCTCCTCTTGGGAGTAAAGGGACGTCAAGATTTGTAACGATTGGTTTGCCTATAATCTCATTGGTTTCACT  
TGTTGCAGCTGTGTTAGCGGTGGTTTTTATGTAAGAAGGAAGAAGTAT

>M6-PGSC0003DMG400008822M6L-LecRK\_882

GTTTCACTTGTGTCAGCTGTGTTAGCGGTGGTTTTTATGTAAGAAGGAAGAAGTATGAAGAAATTCATG  
AAGATTGGGAACGCGAGTATAGACTACAAAGGTTTAAGTATAAAGAATTG

>M6-PGSC0003DMG400008822M6L-LecRK\_945

ATTCATGAAGATTGGGAACGCGAGTATAGACTACAAAGGTTTAAGTATAAAGAATTGTACATTGCTACT  
AAGGGATTCAGAGAAAAGGAGGTATTGGGAGCTGGAGGATTTGGTAAAGTT

>M6-PGSC0003DMG400008897-(rev)M6L-LecRK\_0

ACTAGATTTGACTATATTGTGTGATTATTTTTCATATATACATATTGAAGTTTGACTGGCCTCAAGAAAAT  
GACATTACAGAGTTTACATTGTAGACTTGAGCATTAGGAGATAGATAGT

>M6-PGSC0003DMG400008897-(rev)M6L-LecRK\_1054

GCTTGGCTTGCCCGTGATTTCTCAGTTTCATTTGTGATTGTAGTCCTGGTAATAATTTATTGCATAGGAA  
AGAAGATGAAGTTTGCTGAATTGCAAGAAGAGTGGGAGCTTGATTATGG

>M6-PGSC0003DMG400008897-(rev)M6L-LecRK\_1116

GCATAGGAAAGAAGATGAAGTTTGCTGAATTGCAAGAAGAGTGGGAGCTTGATTATGGACCACACAGG  
TTCAAGTACAAGGATTTGTACACTGCCACAAAGGGCTTTAGCAGGAAGGATT

>M6-PGSC0003DMG400008897-(rev)M6L-LecRK\_1178

CACAGTTCAAGTACAAGGATTTGTACACTGCCACAAAGGGCTTTAGCAGGAAGGATTTGTTGGGATCC  
GGCGGATTTGGTAGAGTCTACAGAGGGGTATTGCCCATATCCAACATTCAG

>M6-PGSC0003DMG400008897-(rev)M6L-LecRK\_124

TTTGTGATTGTTATCAGCACTAATCCTAGGAGAGTTCTGAGCAGACATGGAGAAATTGTTTTAGCCATG  
ATTTTTCAGTTTCTTGTTTTGCTTTTTTCATGCTCCATTAGGCTATGCAGC

>M6-PGSC0003DMG400008897-(rev)M6L-LecRK\_1240

GGGATCCGCGGATTTGGTAGAGTCTACAGAGGGGTATTGCCCATATCCAACATTCAGATAGCAGTCAA  
GAGGGTCTCTCATGAATCAAGACAAGGGATGAGGGAATTTGTTTCAGAAAT

>M6-PGSC0003DMG400008897-(rev)M6L-LecRK\_1302

CAGTCAAGAGGGTCTCTCATGAATCAAGACAAGGGATGAGGGAATTTGTTTCAGAAATTGTTAGTGTTG  
GCCGGCTACGTACAGGAATTTAGTACCACTTTTGGGTTATTGCAGGCGTA

>M6-PGSC0003DMG400008897-(rev)M6L-LecRK\_1364

AGTGTTGGCCGGCTACGTCACAGGAATTTAGTACCACTTTTGGGTTATTGCAGGCGTAAAGGAGAGTTA  
CTTCTGGTTTACGAATGCATGCCTAACGGAAGCCTAGACAAGTATTTGTTT

>M6-PGSC0003DMG400008897-(rev)M6L-LecRK\_1426

AGAGTTACTTCTGGTTTACGAATGCATGCCTAACGGAAGCCTAGACAAGTATTTGTTTGACAAACCAAGC  
TGCACTCTTGATTGGAACCAAGATTTTCGAGTCATCAAAGGTGTAGCATC

>M6-PGSC0003DMG400008897-(rev)M6L-LecRK\_1488

AACCAAGCTGCACTCTTGATTGGAACCAAGATTTTCGAGTCATCAAAGGTGTAGCATCAGGACTAGTCT  
ATCTTCATGAAGAGTGGGAACAAGTAGTGATTCATAGAGATATAAAAAGCGA

>M6-PGSC0003DMG400008897-(rev)M6L-LecRK\_1550

CTAGTCTATCTTCATGAAGAGTGGGAACAAGTAGTGATTCATAGAGATATAAAAAGCGAGTAACGTGTTG  
TTAGATGTTGAATTAATGGAAGATTAGGAGATTTTGGGCTAGCAAGATTG

>M6-PGSC0003DMG400008897-(rev)M6L-LecRK\_1612

CGTGTTGTTAGATGTTGAATTAATGGAAGATTAGGAGATTTTGGGCTAGCAAGATTGTATGATCATGG  
GACAGATCCTCAGACTACGCATATCGTTGGAAGTCTCGGATACCTTGCCCC

>M6-PGSC0003DMG400008897-(rev)M6L-LecRK\_1674

ATCATGGGACAGATCCTCAGACTACGCATATCGTTGGAAGTCTCGGATACCTTGCCCCAGAGCATACAA  
GAACAGGCAAAGCCACGACTAGAACTGATGTATATTCATTTGGAGCATTTT

>M6-PGSC0003DMG400008897-(rev)M6L-LecRK\_1736

CATACAAGAACAGGCAAAGCCACGACTAGAACTGATGTATATTCATTTGGAGCATTTTACTTGAGGTG  
GCTTGTGGGAGAAGGCCAATAGATCAAAGGGTATCGGACGAGGATCTCGTT

>M6-PGSC0003DMG400008897-(rev)M6L-LecRK\_1798

TGAGGTGGCTTGTGGGAGAAGGCCAATAGATCAAAGGGTATCGGACGAGGATCTCGTTTTGGTTGACT  
ATGTATTCTCTTGTGGACTAGAGGTGATATTCTTGAAGCCATTGATCCAAA

>M6-PGSC0003DMG400008897-(rev)M6L-LecRK\_186

TAGCCATGATTTTTAGTTTTCTGGTTTCTTTTTTCATGCTCCATTAGGCTATGCAGCTGCAGAAGATCTC  
GATTTACCTACAACGGGTTCCACTCAACAACTTGAGTCTTGATGGAA

>M6-PGSC0003DMG400008897-(rev)M6L-LecRK\_1860

TTGACTATGTATTCTCTTGTGGACTAGAGGTGATATTCTTGAAGCCATTGATCCAACTTGGGCAATAA

CTATGTAAAAGAAGAGATTGAGTTGGTACTAAAACCTGGACTATTGTGCT

>M6-PGSC0003DMG400008897-(rev)M6L-LecRK\_1922

GGCAATAACTATGTAAAAGAAGAGATTGAGTTGGTACTAAAACCTGGACTATTGTGCTCTCAGACAGAA  
CCAGCAGCTAGGCCAAATATGAGGCAAGTGTTGATGTACTTGGAAAATGCC

>M6-PGSC0003DMG400008897-(rev)M6L-LecRK\_1984

GACAGAACCAGCAGCTAGGCCAAATATGAGGCAAGTGTTGATGTACTTGGAAAATGCCCTGCCTTTGCC  
AGAGTTATCACTGATGCAAACCTCAAATTTTAGCTTAACTTTTGCAGGCTT

>M6-PGSC0003DMG400008897-(rev)M6L-LecRK\_2046

CTTTGCCAGAGTTATCACTGATGCAAACCTCAAATTTTAGCTTAACTTTTGCAGGCTTTGATCATTTTGCA  
ATGTCATGGTCTTCTTCTGTTACTGACTCCCTTCTCTCCGGTGGTCGAT

>M6-PGSC0003DMG400008897-(rev)M6L-LecRK\_2108

CATTTTGCAATGTCATGGTCTTCTTCTGTTACTGACTCCCTTCTCTCCGGTGGTCGATGACTCGGGCGAAA  
TTTTAATATATTCCTAGTAAAAATAAACTTGTTATATAAGCTATATTT

>M6-PGSC0003DMG400008897-(rev)M6L-LecRK\_2153

TCCGGTGGTCGATGACTCGGGCGAAATTTTAATATATTCCTAGTAAAAATAAACTTGTTATATAAGCTA  
TATTTCTTCCACCTAAGGTTGTATACTTGGTTCATTTAGGCATCTTGGAG

>M6-PGSC0003DMG400008897-(rev)M6L-LecRK\_248

GAAGATCTCGATTTACCTACAACGGGTTCCACTCAACAACTTGAGTCTTGATGGAATAGCAGAGTTCA  
CATCAGATGGCTTGTTAAGGCTAACTAATGCTTCTCAATTGCAGGAGGGT

>M6-PGSC0003DMG400008897-(rev)M6L-LecRK\_310

AGAGTTCACATCAGATGGCTTGTTAAGGCTAACTAATGCTTCTCAATTGCAGGAGGGTCATGCTTTTTAT  
CCTAGACCTATCAATTTTATGAATTTAGCATCCAATGGTTCAGATTTCTC

>M6-PGSC0003DMG400008897-(rev)M6L-LecRK\_372

CTTTTTATCCTAGACCTATCAATTTTATGAATTTAGCATCCAATGGTTCAGATTTCTCTTTCTCAACCACATT  
TGCTTTGCCATAGTGCCTCAGTACTCGATTTTAGCTGGTCATGGTA

>M6-PGSC0003DMG400008897-(rev)M6L-LecRK\_434

TCAACCACATTTGTCTTTGCCATAGTGCCTCAGTACTCGATTTTAGCTGGTCATGGTATGTCTTTTGTGATT  
GCACCAGCTAGAAGGCTTCCAGAAGCACTTCCAAGCTCTTATCTTGGC

>M6-PGSC0003DMG400008897-(rev)M6L-LecRK\_496



TTTTGTGATTGCACCAGCTAGAAGGCTTCCAGAAGCACTTCCAAGCTCTTATCTTGGCTTGTTAATGATT  
CTAGTAATGGAAATGCCACCAGCCATGTTGTTGCGGTGGAGTTTGACAC

>M6-PGSC0003DMG400008897-(rev)M6L-LecRK\_558

TTAATGATTCTAGTAATGGAAATGCCACCAGCCATGTTGTTGCGGTGGAGTTTGACACGCTACAGAACC  
GTGAGTTTGATGATATTGACAGCAACCATGTTGGCATTGACATCAATGACC

>M6-PGSC0003DMG400008897-(rev)M6L-LecRK\_62

CAAGAAAATGACATTACAGAGTTTACATTGTAGACTTGAGCATTAGGAGATAGATAGTCATATTTGTGAT  
TGTTATCAGCACTAATCCTAGGAGAGTTCTGAGCAGACATGGAGAAATTG

>M6-PGSC0003DMG400008897-(rev)M6L-LecRK\_620

CAGAACCGTGAGTTTGATGATATTGACAGCAACCATGTTGGCATTGACATCAATGACCTAAAATCTGTAA  
TAGCCAAGCCGGCCAGTTATTATAACAGTAATGAGCAATCCTTCAATAAC

>M6-PGSC0003DMG400008897-(rev)M6L-LecRK\_682

ATCTGTAATAGCCAAGCCGGCCAGTTATTATAACAGTAATGAGCAATCCTTCAATAACTTAACTCTAGCT  
AGTGGCCAGCCAATGCAAGTTTGGGTGGAATATGATTCTGTGGATAAGCA

>M6-PGSC0003DMG400008897-(rev)M6L-LecRK\_744

CTCTAGCTAGTGGCCAGCCAATGCAAGTTTGGGTGGAATATGATTCTGTGGATAAGCATATGAATGTCA  
CAATGGCTCCACTGCACGTTGCAAACCAGACCGTCCTCTCCTGTCCTTAG

>M6-PGSC0003DMG400008897-(rev)M6L-LecRK\_806

AATGTCACAATGGCTCCACTGCACGTTGCAAACCAGACCGTCCTCTCCTGTCCTTAGTCTACGATCTTTC  
ATCTGCCACGGATGAAAACGTGTCTGTTGGCTTCTCAGCATCCACCGGT

>M6-PGSC0003DMG400008897-(rev)M6L-LecRK\_868

CGATCTTTCATCTGCCACGGATGAAAACGTGTCTGTTGGCTTCTCAGCATCCACCGGTGCAGTTGTTTCA  
ACACATTATATCCTTGGATGGAGCTTCAAATTGAATGGAATGGCTCGAGG

>M6-PGSC0003DMG400008897-(rev)M6L-LecRK\_930

TTGTTTCAACACATTATATCCTTGGATGGAGCTTCAAATTGAATGGAATGGCTCGAGGGCTTGATCTCTC  
TCAACTTCTAAGCTTCTCGAGTAGTACCTAAGAAAGAATCCAAGCTTT

>M6-PGSC0003DMG400008897-(rev)M6L-LecRK\_992

GATCTCTCTCAACTTCTAAGCTTCTCGAGTAGTACCTAAGAAAGAATCCAAGCTTTTATTGCTTGGCTT  
GCCCGTGATTTCTTCAGTTTCATTTGTGATTGTAGTCCTGGTAATAATT

>M6-PGSC0003DMG400008925-(rev)M6LRR-RLP\_0

TGAGGTCCTCAAACACTTTCCCGAGCCTTTGAGGGCGTGCAATGGGACATGAAAGACCGAGAGTTCTT  
GAAACTAAAATTCTTGAAGTTAGACTCTTTGAACATTGAACAATGGAACAT

>M6-PGSC0003DMG400008925-(rev)M6LRR-RLP\_104

TTGAACAATGGAACATCTCATCTGATTGCTTACCTTCCCTTGGGCATCTTGTTCTGCAAAGTTGTAAGAAA  
CTTAAGGAGTTCCCTTCATGCTTAGGCAATGTTTCAACGCTGCAGAGTG

>M6-PGSC0003DMG400008925-(rev)M6LRR-RLP\_156

TCTGCAAAGTTGTAAGAACTTAAGGAGTTCCTTCATGCTTAGGCAATGTTTCAACGCTGCAGAGTGTT  
GAGCTACACTGGTGCAGCTGTTCTTCTGTGAACTCGATTATCTCAATTCA

>M6-PGSC0003DMG400008925-(rev)M6LRR-RLP\_208

TCAACGCTGCAGAGTGTTGAGCTACACTGGTGCAGCTGTTCTTCTGTGAACTCGATTATCTCAATTCAAG  
AAGATGAGGGGTTCAAGGTCCATGTATACCCTCGAGAATTTCGATTCCTGA

>M6-PGSC0003DMG400008925-(rev)M6LRR-RLP\_52

AAAGACCGAGAGTTCTTGAAACTAAAATTCTTGAAGTTAGACTCTTTGAACATTGAACAATGGAACATCT  
CATCTGATTGCTTACCTTCCCTTGGGCATCTTGTTCTGCAAAGTTGTAAG

>M6-PGSC0003DMG400009029M6LRR-RLP\_0

GGTTATCCCTCGAGTAACAAGATAGTCGAATATAAAAACACTGTTCCACACAACACACACATTGTTTAC  
TTCACTTTTTTCAGTTGAGATTTTCTTCACTTGCACTCTCTCCGGCGGCG

>M6-PGSC0003DMG400009029M6LRR-RLP\_1054

TCACTATATTCCTTTGATTCTAGGTTTTCTCCAATGGATGCCACAACAGCTAACTCTCAGCGCAGACCAT  
TTTCAATTAACACTGTGGCCTCCAAGTGAGAACACAAGAAAAATGCTGGT

>M6-PGSC0003DMG400009029M6LRR-RLP\_1116

GCAGACCATTTTCAATTAACACTGTGGCCTCCAAGTGAGAACACAAGAAAAATGCTGGTGGAAAGAATGA  
TGAATAATCTTTCTAGTCCAACCATTTTCACCCGCAAGTACCGCAGTCTAT

>M6-PGSC0003DMG400009029M6LRR-RLP\_1178

AGAATGATGAATAATCTTTCTAGTCCAACCATTTTCACCCGCAAGTACCGCAGTCTATCCAAGGAAGAGG  
CTGCCAAAATGCTGAAGAAATTGAAGATGCAGCTTTTACCATTGCTAAT

>M6-PGSC0003DMG400009029M6LRR-RLP\_124

GAACTCACACATTCTCCCTTGTTGTTTTCCGGTGAGTTACAACAGACACTCACTCCAACGATAATCAGAAA

AATCCCAAAAAGGTTTTTCTTTTCTTTGATTTCTAGGGTTTTTGCGC

>M6-PGSC0003DMG400009029M6LRR-RLP\_1240

GGAAGAGGCTGCCAAAATGCTGAAGAAATTGAAGATGCAGCTTTTACCATTGCTAATCAACATTATGA  
GAAGGAGCCTGATGGTGTGATGGAAGTTCTGCTGTGCAACTTTATGCCAGGGA

>M6-PGSC0003DMG400009029M6LRR-RLP\_1302

ATTATGAGAAGGAGCCTGATGGTGTGATGGAAGTTCTGCTGTGCAACTTTATGCCAGGGAATGCAGCAAG  
CTTATCCTGGAAATTCTAAAGAAGATACCCAAATCAGAGGACAAGGAAATTT

>M6-PGSC0003DMG400009029M6LRR-RLP\_1364

AGCAAGCTTATCCTGGAAATTCTAAAGAAGATACCCAAATCAGAGGACAAGGAAATTTCAATTTCTGAA  
GTGGTTCCTACTGTTTCAGGAGACCTTTTTTGATATCTCAAAGGTAAAAGG

>M6-PGSC0003DMG400009029M6LRR-RLP\_1426

TTCTGAAGTGGTTCCTACTGTTTCAGGAGACCTTTTTTGATATCTCAAAGGTAAAAGGGCTTTTATCGAA  
GCGGAAGAGGCTCAAGAACTTTTAAAGCCATTAAGAGCCTGGAAATTC

>M6-PGSC0003DMG400009029M6LRR-RLP\_1488

TTATCGAAGCGGAAGAGGCTCAAGAACTTTTAAAGCCATTAAGAGCCTGGAAATTCTTACAGCAAAA  
TTTGTTTTAGCAATAGAAGCTTCAGTATAGATGCAGCACGTATTGCAGGCC

>M6-PGSC0003DMG400009029M6LRR-RLP\_1550

AGCAAAATTTGTTTTAGCAATAGAAGCTTCAGTATAGATGCAGCACGTATTGCAGGCCCTATCTTGGCAG  
CCTTGAAGGATCAATTGAAGGAAGTTGATTTGTCAGATTTTGTGCGGGA

>M6-PGSC0003DMG400009029M6LRR-RLP\_1612

CTTGGCAGCCTTGAAGGATCAATTGAAGGAAGTTGATTTGTCAGATTTTGTGCGGGAAGAAATGAGGC  
AGAAGCACTTGATGTGATGAATATATTCTCAGAAGCTCTGGAAGGTTCTAA

>M6-PGSC0003DMG400009029M6LRR-RLP\_1674

ATGAGGCAGAAGCACTTGATGTGATGAATATATTCTCAGAAGCTCTGGAAGGTTCTAACTTGAAGTTTCT  
GAATCTCTCTGATAATGCTCTGGGTGAGAAGGGAGTTAGGGCATTGGAA

>M6-PGSC0003DMG400009029M6LRR-RLP\_1736

AAGTTTCTGAATCTCTCTGATAATGCTCTGGGTGAGAAGGGAGTTAGGGCATTGGAAAGCTCCTTCAG  
TCTCAAACCAACTTGAAGAATTATTTTGTGATGAATGATGGGATTTACAG

>M6-PGSC0003DMG400009029M6LRR-RLP\_1798

CCTTCAGTCTCAAACCAACTTGGAAGAATTATTTTTGATGAATGATGGGATTTACAGGAAGCTGCAAAT  
GCTGTTAGCGAGCTAGTTCCTTCCACCGAGAAGCTTAAGGTTCTTTATTT

>M6-PGSC0003DMG400009029M6LRR-RLP\_186

AATCAGAAAAATCCCAAAAAGGTTTTTTCTTTCTCTTGATTTCTAGGGTTTTTGCGCTTATGCTCTGTACG  
AGTCTACATTTTTGGTCATGTGATTTACAGATCTGTGCTGGATTTA

>M6-PGSC0003DMG400009029M6LRR-RLP\_1860

CTGCAAATGCTGTTAGCGAGCTAGTTCCTTCCACCGAGAAGCTTAAGGTTCTTTATTTTCATAATAATATG  
ACAGGTGATGAAGGGGCTGTTGCGATTGCGGAAATTGTGAAGCGTTCTC

>M6-PGSC0003DMG400009029M6LRR-RLP\_1922

AATAATATGACAGGTGATGAAGGGGCTGTTGCGATTGCGGAAATTGTGAAGCGTTCTCCTTTATTGGAA  
GATTCAGGTGCTCTTCTACCAGGGTAGGCTCTGAAGGAGGGAGTGTCTTG

>M6-PGSC0003DMG400009029M6LRR-RLP\_1984

ATTGGAAGATTTTCAGGTGCTCTTCTACCAGGGTAGGCTCTGAAGGAGGGAGTGTCTTGTGTGAAGCACT  
TGGGATGTGCTCCATTTGAAGAAGCTTGATTTGCGAGACAATATGTTTGG

>M6-PGSC0003DMG400009029M6LRR-RLP\_2046

AAGCACTTGGGATGTGCTCCATTTGAAGAAGCTTGATTTGCGAGACAATATGTTTGGTCCAGAAGTTG  
GTCTTGTGTTGTGTAAGGCACTCAGCAAACATGAAAATCTTACGGAAATTT

>M6-PGSC0003DMG400009029M6LRR-RLP\_2108

GAAGTTGGTCTTGTGTTGTGTAAGGCACTCAGCAAACATGAAAATCTTACGGAAATTTACCTGAGCTACC  
TTAATTTAGAGGATGAAGGAGCAATTGCAATAGCTAACGCTCTTAAAGAT

>M6-PGSC0003DMG400009029M6LRR-RLP\_2170

GAGCTACCTTAATTTAGAGGATGAAGGAGCAATTGCAATAGCTAACGCTCTTAAAGATTCAGCTCCTTCA  
CTTGCTGTCTTGGAGATGGCAGGTAATGATATAACTGCTGAAGCTGCTTC

>M6-PGSC0003DMG400009029M6LRR-RLP\_2232

CTCCTTCACTTGCTGTCTTGGAGATGGCAGGTAATGATATAACTGCTGAAGCTGCTTCAGCAATAGCTTC  
TTGTATAGCTGCAAAGCAGCTTCTTGCCAAGTTAAGCTTGGGTGAGAATG

>M6-PGSC0003DMG400009029M6LRR-RLP\_2294

ATAGCTTCTTGTATAGCTGCAAAGCAGCTTCTTGCCAAGTTAAGCTTGGGTGAGAATGAACTCAAGGAT  
GAAGGTGCAATTCAGATTGCTAAGGCACTGGAAGGACACAGCCATCTGATT

>M6-PGSC0003DMG400009029M6LRR-RLP\_2356

CAAGGATGAAGGTGCAATTCAGATTGCTAAGGCACTGGAAGGACACAGCCATCTGATTGAAGTTGATAT  
GAGCAGCAATGCACTAAGGAGGGCTGGGGCTAGAGTGCTGGCTCAAACCTGT

>M6-PGSC0003DMG400009029M6LRR-RLP\_2418

TTGATATGAGCAGCAATGCACTAAGGAGGGCTGGGGCTAGAGTGCTGGCTCAAACCTGTGCTGCGCAA  
GATGAGTTTAAATACTAAATGTTAATGGGAATTCATCTCAGAAGAAGGCG

>M6-PGSC0003DMG400009029M6LRR-RLP\_248

GCTCTGTACGAGTCTACATTTTTGGTCATGTGATTTACAGATCTGTGCTGGATTTTAGGTATTTTTCTTGT  
TTAATGTGCTTTCGTTTGTGGTTTTAGGTCGTTTTTTTTATGTTTAT

>M6-PGSC0003DMG400009029M6LRR-RLP\_2480

CGCAAAGATGAGTTTAAATACTAAATGTTAATGGGAATTCATCTCAGAAGAAGGCGTTGACGAGTTG  
AAAGAGATCTTCAAGAAATCCTGAAATGCTTGCATCCCTGGAAGATAAT

>M6-PGSC0003DMG400009029M6LRR-RLP\_2666

GACGTTGAGGATGAACTAGAATCAAACTCAAAAACCTGGACGTCAAGCAAGAGGCAAGTCTTGACAC  
ACCAGATAGCAATTAGAATCCAGTACTTGACGACTTCTGCATGTTGCAGTTT

>M6-PGSC0003DMG400009029M6LRR-RLP\_2728

TGACACACCAGATAGCAATTAGAATCCAGTACTTGACGACTTCTGCATGTTGCAGTTTTAGTTTTACCATT  
TTCTTTATGCTAAGCTGGCCATATTATGTTCTCCAGCAAGTGCTCTAA

>M6-PGSC0003DMG400009029M6LRR-RLP\_2790

TTTACCATTTTCTTTATGCTAAGCTGGCCATATTATGTTCTCCAGCAAGTGCTCTAATATATAGTTCCATC  
AGTAATTTAAATTTGGTGGAATTGAACTGTTGCCTTAATTGGTCAAGT

>M6-PGSC0003DMG400009029M6LRR-RLP\_2852

TAGTTCCATCAGTAATTTAAATTTGGTGGAATTGAACTGTTGCCTTAATTGGTCAAGTTAGGTCTCTGGCT  
GAATTATGTAGGGTACGAGAGAGAGAACTGCTATTTATGTTGAACCTTC

>M6-PGSC0003DMG400009029M6LRR-RLP\_310

TTTTTCTTGTTAATGTGCTTTCGTTTGTGGTTTTAGGTCGTTTTTTTTATGTTTATTATTTGGGGTTTGG  
TAGAGTAGGTTGCAATACTGGGAGGAGGACTACAACTTCACTATT

>M6-PGSC0003DMG400009029M6LRR-RLP\_372

TTGGGGTTTGGTAGAGTAGGTTGCAATACTGGGAGGAGGACTACAACTTCACTATTAGGTATAAAGT



TGCACGAACTCGTTCTTGCCTGGTACTTTGTTTTGGTTGTTATGTTCTTAACTGCCAGAGATGAGTCTTG  
TAGTGGTTATATTTCTTGAAAGATAATCACTTCTATAGAACTGAGACA

>M6-PGSC0003DMG400009029M6LRR-RLP\_992

TGAGTCTTGTAGTGGTTATATTTCTTGAAAGATAATCACTTCTATAGAACTGAGACATGATTCACTATAT  
TCCTTTGATTCTAGGTTTTCTTCCAATGGATGCCACAACAGCTAACTCT

>M6-PGSC0003DMG400009068-(rev)M6LRR-RLK\_0

CGTGATTAAGAGTGGTTAATTTCTTTCCCTTTTCGTAATTGCAATCTGTGTCTTCCTTTAGTGAAGAGCT  
TCAAAAATGGCGGAAATGGTGGATAATGCTCTTCTGGTGCTCCCTTG

>M6-PGSC0003DMG400009068-(rev)M6LRR-RLK\_1054

GTAGAGATGAAGGGTGTGTTACTAGAAGTTGATGCCTTTGTAGTTTAGCTCAGAGGAGGAGAAGGAT  
GGCTACAAAGTTCCTGTTTTTTTTCAGTTTTATTCTGCACAGCTCTGTTCTTG

>M6-PGSC0003DMG400009068-(rev)M6LRR-RLK\_1116

AAGGATGGCTACAAAGTTCCTGTTTTTTTTCAGTTTTATTCTGCACAGCTCTGTTCTTGCTAGCAAGTAGTG  
AACCATATGAGGACAAAGAAGCGCTTCTTGATTTCTTAATAATGTTAA

>M6-PGSC0003DMG400009068-(rev)M6LRR-RLK\_1178

CAAGTAGTGAACCATATGAGGACAAAGAAGCGCTTCTTGATTTCTTAATAATGTTAATCATACCCGATA  
CCTGAATTGGGATGAGAGAACTTCTGCTTGCAGTTCTTGGACTGGAGTCA

>M6-PGSC0003DMG400009068-(rev)M6LRR-RLK\_124

ACTGGCACACGTGCACCCACTTCTCCTCTTCTTCTAAATCCAAGCAAATTGTTAAAGAATTGATTTTGTG  
TATTACTGTAACTTCTTCATAGCATAGTAGTAGTCCACTTTTGT

>M6-PGSC0003DMG400009068-(rev)M6LRR-RLK\_1240

ACCCGATACCTGAATTGGGATGAGAGAACTTCTGCTTGCAGTTCTTGGACTGGAGTCACTTGTAAATCATG  
ACAAATCAAGAATTATAGCAATTAGGTTGCCTGGAGTTGGATTCCGTGGT

>M6-PGSC0003DMG400009068-(rev)M6LRR-RLK\_1302

TAATCATGACAAATCAAGAATTATAGCAATTAGGTTGCCTGGAGTTGGATTCCGTGGTTCGATTCTGGA  
AACACTCTTAGCCGCTTGTCTGATCTTCAGATCTTGAGTTTAAGGTCTAA

>M6-PGSC0003DMG400009068-(rev)M6LRR-RLK\_1364

TTCCTGGAAACACTCTTAGCCGCTTGTCTGATCTTCAGATCTTGAGTTAAGGTCTAATAGTTTTAGTGGC  
AGTTTACCTTCTGATTTTGCAAACCTTGGAAATCTTACTTCTATTTATC

>M6-PGSC0003DMG400009068-(rev)M6LRR-RLK\_1426

TTTAGTGGCAGTTTACCTTCTGATTTTGCAAACCTTGAAATCTTACTTCTATTTATCTTCAATCCAATAAC  
TTTCAAGGTCCATTGCCTGCTGATTTTTCTGCTTGAAAAGCCTTTTCG

>M6-PGSC0003DMG400009068-(rev)M6LRR-RLK\_1488

ATCCAATAACTTTCAAGGTCCATTGCCTGCTGATTTTTCTGCTTGAAAAGCCTTTTCGGTTTTGAATTTGT  
CAAATAATGATTTTAGTGGGAGTATACCTTCTTCAATATCGAACTTGAC

>M6-PGSC0003DMG400009068-(rev)M6LRR-RLK\_1550

TGAATTTGTCAAATAATGATTTTAGTGGGAGTATACCTTCTTCAATATCGAACTTGACTCATTGACTGCT  
CTGGTTCTTGCTAATAACTCGCTTTCTGGCAATATTCCTGATCTCAATC

>M6-PGSC0003DMG400009068-(rev)M6LRR-RLK\_1612

TTGACTGCTCTGGTTCTTGCTAATAACTCGCTTTCTGGCAATATTCCTGATCTCAATCTCCCTAGTTTGCAA  
ATATTAGATCTATCAAACAATAACTTCACTGGAAGTATCCCCAATTCT

>M6-PGSC0003DMG400009068-(rev)M6LRR-RLK\_1674

TAGTTTGCAAATATTAGATCTATCAAACAATAACTTCACTGGAAGTATCCCCAATTCTCTTCAAAGATTTTC  
CTGGTTCAGCTTTTGCTGGTAACCGGCTTTCTCCTGCAAATTTTTACC

>M6-PGSC0003DMG400009068-(rev)M6LRR-RLK\_1736

AAAGATTTCTGGTTCAGCTTTTGCTGGTAACCGGCTTTCTCCTGCAAATTTTTCACCTTCATTTCTCCAG  
TTCCTCCTCCAAGTGTCTACCGAAAAAGAAATCGTTTAAACTCCGTG

>M6-PGSC0003DMG400009068-(rev)M6LRR-RLK\_1798

TTTCTCCAGTTCCTCCTCCAAGTGTCTACCGAAAAAGAAATCGTTTAAACTCCGTGAACCTGCAATACT  
TGGAATTGTAATTGGAGGGTGTGTTTTAGGTTTCTGGTAGTAGCTGCA

>M6-PGSC0003DMG400009068-(rev)M6LRR-RLK\_186

GATTTTGTGTATTACTGTAACTTCTTCATAGCATAGTAGTAGTTCACCTTTTGTCTCCACGTGCTTTT  
CCCCTCTTTTCGCTTCTTTGTTAACCAAATACATACATATACCCCAT

>M6-PGSC0003DMG400009068-(rev)M6LRR-RLK\_1860

TGCAATACTTGGAATTGTAATTGGAGGGTGTGTTTTAGGTTTCTGGTAGTAGCTGCAGTGCTGATTATG  
TGCTTTTCGAAGAAAGAGGGTAAAAGTGGGGCCACAGAGAAATCAATCAA

>M6-PGSC0003DMG400009068-(rev)M6LRR-RLK\_1922

TGATTATGTGCTTTTCGAAGAAAGAGGGTAAAAGTGGGGCCACAGAGAAATCAATCAAGAAAGAAGAT



TTAGTCAGGAAGGGAGTTTCCAGCAGTCAGCATGGAGTAGGGAATCTCGCAT

>M6-PGSC0003DMG400009068-(rev)M6LRR-RLK\_1984

GAAGATTTAGTCAGGAAGGGAGTTTCCAGCAGTCAGCATGGAGTAGGGAATCTCGCATTCTTTGAGGG

TTGTAATCTTGCATTTGACCTTGAAGATCTGTTGAGAGCTTCAGCGGAAGTG

>M6-PGSC0003DMG400009068-(rev)M6LRR-RLK\_2046

TGAGGGTTGTAATCTTGCATTTGACCTTGAAGATCTGTTGAGAGCTTCAGCGGAAGTGCTTGGAAAGGG

AACATTTGGCACTACATATAAGGCAGCTTTGGAGGATTCTACCACAGTTGT

>M6-PGSC0003DMG400009068-(rev)M6LRR-RLK\_2108

GAAAGGGAACATTTGGCACTACATATAAGGCAGCTTTGGAGGATTCTACCACAGTTGTGGTGAAGAGAT

TGAAGGAGAGTGTGGGAAGAAAAGATTTTGAGCAACAGATGGAGGTTGTTG

>M6-PGSC0003DMG400009068-(rev)M6LRR-RLK\_2170

AAGAGATTGAAGGAGAGTGTGGGAAGAAAAGATTTTGAGCAACAGATGGAGGTTGTTGGCAATATCA

GGCATGAGAATGTGGCTCCACTGAGGGCATACTACTATTCCAAGGATGAGAAG

>M6-PGSC0003DMG400009068-(rev)M6LRR-RLK\_2232

TATCAGGCATGAGAATGTGGCTCCACTGAGGGCATACTACTATTCCAAGGATGAGAAGCTCATGGTGTA

TGATTTCTACAGCCAAGGGAGTGCATCTTTGATGCTGCATGGTATGTTAAG

>M6-PGSC0003DMG400009068-(rev)M6LRR-RLK\_2294

TGGTGTATGATTTCTACAGCCAAGGGAGTGCATCTTTGATGCTGCATGGTATGTTAAGCACCCAATTTCT

ACTAATCTTGCTGTTTTATTCTTGACCGATCCATAGAGAACTGGTTATCA

>M6-PGSC0003DMG400009068-(rev)M6LRR-RLK\_2356

CAATTTCTACTAATCTTGCTGTTTTATTCTTGACCGATCCATAGAGAACTGGTTATCAGGACCAAAAAGAT

AATGCAGATCATTTTTAGCTATGATGTGTCTTGTGCAGTAGTATTTGAA

>M6-PGSC0003DMG400009068-(rev)M6LRR-RLK\_2418

CAAAAAGATAATGCAGATCATTTTTAGCTATGATGTGTCTTGTGCAGTAGTATTTGAAATTGCTTGTAGG

CTAATTCCAACATAACCAATTACCTTTGAATTAATAGAGTATCTGCTGTT

>M6-PGSC0003DMG400009068-(rev)M6LRR-RLK\_248

ACGTGCTTTTCCCACTCTTTTCGCTTCTTTGTTAACCAATACATACATATACCCCATTTCTTTATTTGCTTT

CTTCTTCTTCAAATTAAGTGCCTTTCAATCATTTATTGCCTCTCACC

>M6-PGSC0003DMG400009068-(rev)M6LRR-RLK\_2480

CTTGTAGGCTAATTCCAACATAACCAATTACCTTTGAATTAATAGAGTATCTGCTGTTGTTGTCCTCTTGA  
TAGTTTTTTTTTATCATCAATAGCTTATAGGACAGCATAAGAGTCTCGG

>M6-PGSC0003DMG400009068-(rev)M6LRR-RLK\_2542

TCCTCTTGATAGTTTTTTTTTATCATCAATAGCTTATAGGACAGCATAAGAGTCTCGGAGTCATGTCTAAG  
TGCCATTTTTGTTTTAATTTGTCAAATTCAATAACATCATGTTGCTCG

>M6-PGSC0003DMG400009068-(rev)M6LRR-RLK\_2604

ATGTCTAAGTGCCATTTTTGTTTTAATTTGTCAAATTCAATAACATCATGTTGCTCGCGAACTTTGCTTTG  
GCGCTATAGTCAACTTTCATCATTGTTAGGTGGATAGTCTCTTAACTG

>M6-PGSC0003DMG400009068-(rev)M6LRR-RLK\_2666

CTTTGCTTTGGCGCTATAGTCAACTTTCATCATTGTTAGGTGGATAGTCTCTTAACTGCACCTTCAAGTAT  
TCCTATCATTATATCTGATGCACTCTGTAATTGCAGCAAAGAGGTCTGC

>M6-PGSC0003DMG400009068-(rev)M6LRR-RLK\_2728

TTCAAGTATTCCTATCATTATATCTGATGCACTCTGTAATTGCAGCAAAGAGGTCTGCTGATCGAATTCCT  
CTGGACTGGGAAACCCGACTACGCATTGCCATTGGTGCAGCTAGAGGCA

>M6-PGSC0003DMG400009068-(rev)M6LRR-RLK\_2790

CGAATTCCTCTGGACTGGGAAACCCGACTACGCATTGCCATTGGTGCAGCTAGAGGCATTGCTCAAATA  
CATGGACAGTCTGGGGGAGGCTTGTCCACGGGAACATAAAATCCTCAAAC

>M6-PGSC0003DMG400009068-(rev)M6LRR-RLK\_2852

TCAAATACATGGACAGTCTGGGGGAGGCTTGTCCACGGGAACATAAAATCCTCAAACGTATTCCTCAA  
CTCCAAGGTTTCGGTTGTATTTCTGATCTTGGCTTGGCAACTATAATGGG

>M6-PGSC0003DMG400009068-(rev)M6LRR-RLK\_2914

TCCTCAACTCCCAAGGTTTCGGTTGTATTTCTGATCTTGGCTTGGCAACTATAATGGGTCCAATTGCTACA  
CCAATTGTGCGAGCTGCTGGTTATCAACCTCCAGAAGTTACAGATTCAA

>M6-PGSC0003DMG400009068-(rev)M6LRR-RLK\_2976

ATTGCTACACCAATTGTGCGAGCTGCTGGTTATCAACCTCCAGAAGTTACAGATTCAAGAAAAGTATCTC  
AAGCCACTGATGTCTACAGCTTTGGTGTCTAATACTTGAACCTTCTCACT

>M6-PGSC0003DMG400009068-(rev)M6LRR-RLK\_3038

AGTATCTCAAGCCACTGATGTCTACAGCTTTGGTGTCTAATACTTGAACCTTCTCACTGGAAAGTCACCTA  
CACATGCCACAGGTACAAGCGACATTGTCCACTTAGTCAGGTGGGTACA

>M6-PGSC0003DMG400009068-(rev)M6LRR-RLK\_310

TTATTTGCTTTCTTCTTCTTCAAATTAAGTGCCTTCAATCATTTATTGCCTCTCACCCACTTCCCCCCTTCT  
TCTCATTTAATCATTGTTTCTCTCTAGCTACTTACTTAATTCTGCA

>M6-PGSC0003DMG400009068-(rev)M6LRR-RLK\_3100

AGTCACCTACACATGCCACAGGTACAAGCGACATTGTCCACTTAGTCAGGTGGGTACATTCTGTGCGTTCC  
TGAGGAGTGGACTGCTGAAGTATTCGACGTGGAGCTTTTGAGGTATCCAA

>M6-PGSC0003DMG400009068-(rev)M6LRR-RLK\_3162

GTCGTTCTGTGAGGAGTGGACTGCTGAAGTATTCGACGTGGAGCTTTTGAGGTATCCAAATATAGAAGAA  
GAAATGGTAGAGATGTTACAAATAGGTTTACTTGTGTATCCAGAATGCCA

>M6-PGSC0003DMG400009068-(rev)M6LRR-RLK\_3224

AGAAGAAGAAATGGTAGAGATGTTACAAATAGGTTTACTTGTGTATCCAGAATGCCAGAGCAGAGAC  
CAAAAATGACTGAAGTAGTAAAGATGGTAGAGGGTGTAGGAGAGTGAATAC

>M6-PGSC0003DMG400009068-(rev)M6LRR-RLK\_3286

AGAGACCAAAAATGACTGAAGTAGTAAAGATGGTAGAGGGTGTAGGAGAGTGAATACGGGGACTCG  
AACATCCACTGAAGCTTCTACACCGAACCTGACACCACCGATGACTGAAATAG

>M6-PGSC0003DMG400009068-(rev)M6LRR-RLK\_3348

ACTCGAACATCCACTGAAGCTTCTACACCGAACCTGACACCACCGATGACTGAAATAGGGTCGTCTTCCA  
TTACACACTGATATTTCTTTGTTATTTAGTGATTAGTTACTGTTCTATAT

>M6-PGSC0003DMG400009068-(rev)M6LRR-RLK\_3410

GTCTTCCATTACACACTGATATTTCTTTGTTATTTAGTGATTAGTTACTGTTCTATATATGCTTAATTGTTTC  
ATTGTTATAAGTTTTTCTCAGACTTCTGTCAAACATTATTTTCAGC

>M6-PGSC0003DMG400009068-(rev)M6LRR-RLK\_3441

ATTTAGTGATTAGTTACTGTTCTATATATGCTTAATTGTTTCATTGTTATAAGTTTTTCTCAGACTTCTGT  
CAAACATTATTTTCAGCTACAAAATTGAATAGAAATATTTACTTGATC

>M6-PGSC0003DMG400009068-(rev)M6LRR-RLK\_372

TCCCCCCTTCTTCTCATTTAATCATTGTTTCTCTCTAGCTACTTACTTAATTCTGCATTTACTTCCCATCATT  
TTCCTTTCATCTACTCCTTCTTTTCAGTTTACTCTGCCAAGTGTT

>M6-PGSC0003DMG400009068-(rev)M6LRR-RLK\_434

CTTCCCATCATTTTCTTCTCATCTACTCCTTCTTTTCAGTTTACTCTGCCAAGTGTTTGATTTTTTGCCTCAC

TGGTACTTGCTTGATACTATACAGTTTCTGAATTTATGGGGTTTT

>M6-PGSC0003DMG400009068-(rev)M6LRR-RLK\_496

TTTTTGCTCACTGGTACTTGCTTGATACTATACAGTTTCTGAATTTATGGGGTTTTCCGTATTCTCCATT

TTGATGTGATTTGGCTATCTGGGTATTGCTATTCAGGTTCAATTTCAAT

>M6-PGSC0003DMG400009068-(rev)M6LRR-RLK\_558

ATTCTCCATTTTGATGTGATTTGGCTATCTGGGTATTGCTATTCAGGTTCAATTTCAATGTTCTTTTTGTTATT

GCCGACAGTTTTCAAATTATGCATACTTTGCTTTAAGGTCAAGAAAT

>M6-PGSC0003DMG400009068-(rev)M6LRR-RLK\_62

GTGAAGAGCTTCAAAAAATGGCGGAAATGGTGGATAATGCTCTTCTGGTGCTCCCTTGCTTACTGGCA

CCACGTGCACCCACTTCTCCTCTTCTTCTAAATCCAAGCAAATTGTAAAG

>M6-PGSC0003DMG400009068-(rev)M6LRR-RLK\_620

TTTTTGTTATTGCCGACAGTTTTCAAATTATGCATACTTTGCTTTAAGGTCAAGAAATGTGTTAAAAATTC

AATCTTTGTATGTGTGTGTGCTTGAAATAGGTGAAGAACGTGAAATGC

>M6-PGSC0003DMG400009068-(rev)M6LRR-RLK\_806

ATTTGTAGCTGGTTCTTGTTTTACTTTAGCTGTTCTGTTCAATGAAACCTAACTTTTACTTAACTTGCGTG

GTTGACCCAAAAACAAAATGTGTTCTGAGTGTCTACGTAACCTTAGTT

>M6-PGSC0003DMG400009068-(rev)M6LRR-RLK\_868

AACTTGCGTGGTTGACCCAAAAACAAAATGTGTTCTGAGTGTCTACGTAACCTTAGTTGCCCTATAAATT

GTATATTTATGGTTAAGAAACGGTTCTCTAGTTTAAATGGTAATTATTTA

>M6-PGSC0003DMG400009068-(rev)M6LRR-RLK\_930

TATAAATTGTATATTTATGGTTAAGAAACGGTTCTCTAGTTTAAATGGTAATTATTTATAGTGAATAATGA

ACATCATGCCGTTTCAATGTCTGATTCCATTTTTATTTTTTTTTGAAAT

>M6-PGSC0003DMG400009068-(rev)M6LRR-RLK\_992

GAATAATGAACATCATGCCGTTTCAATGTCTGATTCCATTTTTATTTTTTTTTGAAATTCTTGTAGAGATGA

AGGGTGCTGTTACTAGAAGTTGATGCCTTTGTAGTTTAGCTCAGAGGA

>M6-PGSC0003DMG400009114M6RLKWAX-EGF\_0

CCACCTTTCCTCAGACTCCACTCGTGGGACTACACTGAGTATGTTGTTGCACTATGTTCAACTAGGAATAC

CTTTTCGAATTATCTGTTTTAAGATGTGGTTTATTCAGATTGTAAATGG

>M6-PGSC0003DMG400009114M6RLKWAX-EGF\_1037

GATGACTAACAAATTCAAGGAAAACTAGGCGAAGGAGCCTATGGAAGTGTCTTTAAAGGAAAACTGC  
GTAGTGGTCCTTTTGTTCAGTGAAGATGATGCACCAATCTATGGCGAGTGG

>M6-PGSC0003DMG400009114M6RLKWAX-EGF\_1098

AAACTGCGTAGTGGTCCTTTTGTTCAGTGAAGATGATGCACCAATCTATGGCGAGTGGGCAAGAATTT  
ATCAGTGAAGTTTCCACAATTGGAAGGATTCACCATGTTAACATTGTGCAA

>M6-PGSC0003DMG400009114M6RLKWAX-EGF\_1159

AAGAATTTATCAGTGAAGTTTCCACAATTGGAAGGATTCACCATGTTAACATTGTGCAACTCGTTGGATT  
CTGTGTAGAGGGATCAAACGTGCTTTGGTTTATGAGTTCATGCTCAATG

>M6-PGSC0003DMG400009114M6RLKWAX-EGF\_122

GTAAAATTATTGAAATATGGTATTTTGATAACAGAAATATCTCCTTTCTGGCATCCGAGCAATTTAACTGT  
ACTTCCAAGTTTCAAAGGTGTCATGATTTACAACAGATTAGGTTGTCAA

>M6-PGSC0003DMG400009114M6RLKWAX-EGF\_1220

CGTTGGATTCTGTGTAGAGGGATCAAACGTGCTTTGGTTTATGAGTTCATGCTCAATGGTTCTTTAGAC  
AAGTACATATCTCCCCGAGAAGGAAGTTCCTTGAGTTACAAGCAAAT

>M6-PGSC0003DMG400009114M6RLKWAX-EGF\_1281

TCTTTAGACAAGTACATATCTCCCCGAGAAGGAAGTTCCTTGAGTTACAAGCAAATGTTTCGACATAT  
CTCTTGGAGTGGCCTCTGGCATAGACTACCTACATCGGGGCTGTGACATG

>M6-PGSC0003DMG400009114M6RLKWAX-EGF\_1342

TCGACATATCTCTTGGAGTGGCCTCTGGCATAGACTACCTACATCGGGGCTGTGACATGCAGATCTTACA  
TTTTGATATTAAGCCTCACAACATTCTTCTTGATGAAAATTTCAATCCCA

>M6-PGSC0003DMG400009114M6RLKWAX-EGF\_1464

ATATCTGACTTTGGGCTTGCGAAACTGTACTCCTCAGATGATAGTATTGTGAGTCTAACTGCAGCTAGAG  
GGACAATGGGTTACATGGCACCAGAGCTGTTTTATAAAAATATTGGAGGA

>M6-PGSC0003DMG400009114M6RLKWAX-EGF\_1525

CAGCTAGAGGGACAATGGGTTACATGGCACCAGAGCTGTTTTATAAAAATATTGGAGGAGTGTACACA  
AAGCCGATGTATATAGCTATGGCATGTTATTGATGGAAATGGCAGGCAGAA

>M6-PGSC0003DMG400009114M6RLKWAX-EGF\_1586

GTCACACAAAGCCGATGTATATAGCTATGGCATGTTATTGATGGAAATGGCAGGCAGAAGGAAGAACA  
TGAACCCATTTGAGGACCACTTAAGCCAAATCTACTTTCCTACATGGATTTA

>M6-PGSC0003DMG400009114M6RLKWAX-EGF\_1647

AAGAACATGAACCCATTTGAGGACCACTTAAGCCAAATCTACTTTCCTACATGGATTTACGACCAATTTA  
ATGAAGGAAATGATATAGAGATACAGGATGCAAGCGAGGAAGATAGGAGA

>M6-PGSC0003DMG400009114M6RLKWAX-EGF\_1708

ACCAATTTAATGAAGGAAATGATATAGAGATACAGGATGCAAGCGAGGAAGATAGGAGACTTGTCAAG  
AAGATGATGATTGTGGCTTTGTGGTGCATACAAATGAAGCCTGCTGATCGCC

>M6-PGSC0003DMG400009114M6RLKWAX-EGF\_1769

TGTCAAGAAGATGATGATTGTGGCTTTGTGGTGCATACAAATGAAGCCTGCTGATCGCCCTGCCATGAA  
CAAAGTAGTTGAAATGCTTGAAGGAAATGTTGAACTCCTACAGATGCCCCC

>M6-PGSC0003DMG400009114M6RLKWAX-EGF\_183

ATTTAACTGTACTTCCAAGTTTCAAAGGTGTCATGATTTACAACAGATTAGGTTGTCAATCAAAGCAGGT  
CGAAGATGTGTCATGGTTCTTTCAATTTATTATATCCATTCTCTATGGGGT

>M6-PGSC0003DMG400009114M6RLKWAX-EGF\_1830

GCCATGAACAAAGTAGTTGAAATGCTTGAAGGAAATGTTGAACTCCTACAGATGCCCCCAAGACCTTTT  
ATAGCTCCTCGTGAGATTGCTGGAGACAGTATTGAGACAATACAAATTTCC

>M6-PGSC0003DMG400009114M6RLKWAX-EGF\_1891

GACCTTTTATAGCTCCTCGTGAGATTGCTGGAGACAGTATTGAGACAATACAAATTTCCAGTGACGTATA  
GGTGCCGGTGGTTGGCTGCTTACTGTGCTGTGCAAACACTACAGTCAAATTT

>M6-PGSC0003DMG400009114M6RLKWAX-EGF\_1952

TGACGTATAGGTGCCGGTGGTTGGCTGCTTACTGTGCTGTGCAAACACTACAGTCAAATTTCACTTAATTTA  
GTTACGGCATCCAATACTATCAGAAGAGCTCAATCTCAGGCCAACATTC

>M6-PGSC0003DMG400009114M6RLKWAX-EGF\_2013

CTTAATTTAGTTCACGGCATCCAATACTATCAGAAGAGCTCAATCTCAGGCCAACATTTCACTTGAGATGT  
CACTGTGGATTAAGAGTTGAACGAAAAGATGCCTATATCTTCGAGCAA

>M6-PGSC0003DMG400009114M6RLKWAX-EGF\_2074

TTGAGATGTCACTGTGGATTAAGAGTTGAACGAAAAGATGCCTATATCTTCGAGCAAGTAGTCATTTT  
TGTCCCATGGTGGTGACACTAGTTCCTCCTAGTTTTTTAGGTAAGAATTT

>M6-PGSC0003DMG400009114M6RLKWAX-EGF\_2135

AGTCATTTCTGTCCCATGGTGGTGACACTAGTTCCTCCTAGTTTTTTAGGTAAGAATTTGAATGTAATATG

ATAATTTAGTAAAGTGTAATTAGTTTGCATGTTGGTGTGTAATTCT

>M6-PGSC0003DMG400009114M6RLKWAX-EGF\_2196

ATGTAATATGATAATTTAGTAAAGTGTAATTAGTTTGCATGTTGGTGTGTAATTCTTGGAAAAGGTA  
ACTATCAAGCATAGATGTATCAAACAAGGAAATGATTACACCTTCAATTT

>M6-PGSC0003DMG400009114M6RLKWAX-EGF\_2252

TCTTGGAAAAGGTAAGTATCAAGCATAGATGTATCAAACAAGGAAATGATTACACCTTCAATTTTTGTG  
TTTAAACTACCATTGATCGTCTTTATGGATTGAGAGCATCTTCTGTTTCT

>M6-PGSC0003DMG400009114M6RLKWAX-EGF\_244

AAAGCAGGTCGAAGATGTGTCATGTTCTTTCATTTATTATATCCATTCTCTATGGGGTCTGTTCTTTGAA  
GTTATAAGAAAATTTGGATCTCTTTTGTATTCAACTCTCCCCTGGGCC

>M6-PGSC0003DMG400009114M6RLKWAX-EGF\_305

GTTCTTTGAAGTTATAAGAAAATTTGGATCTCTTTTGTATTCAACTCTCCCCTGGGCCCTCTCTTTATGCGT  
ATCAGTTTCAATTCTCAGCAACTTATTTTGTAGATGTAGCATCTGTATT

>M6-PGSC0003DMG400009114M6RLKWAX-EGF\_366

TCTTTATGCGTATCAGTTTCAATTCTCAGCAACTTATTTTGTAGATGTAGCATCTGTATTTACTCATATTCC  
TATATTTGGACAAATGCAGGTAGCATCCACTACTATGGCGGTACGTAT

>M6-PGSC0003DMG400009114M6RLKWAX-EGF\_427

ACTCATATTCCTATATTTGGACAAATGCAGGTAGCATCCACTACTATGGCGGTACGTATTTGAGATACTG  
GAGTGCAATAACTTCATTACACTAAGCATTTTATTGAAAGGAGATCGTTA

>M6-PGSC0003DMG400009114M6RLKWAX-EGF\_488

GAGATACTGGAGTGCAATAACTTCATTACACTAAGCATTTTATTGAAAGGAGATCGTTACAGCAATATGT  
TTACCATATCTAGAATCTGCGTTCATTGCACTATATAGCTGTAAGCTTTT

>M6-PGSC0003DMG400009114M6RLKWAX-EGF\_549

GCAATATGTTTACCATATCTAGAATCTGCGTTCATTGCACTATATAGCTGTAAGCTTTTTCTTCAAACCTTT  
AATGATTTTACATCTCTAACTTTATGTTTCCTTTGTGATTTGCCTGT

>M6-PGSC0003DMG400009114M6RLKWAX-EGF\_61

CTAGGAATACCTTTTCGAATTATCTGTTTTAAGATGTGGTTTATTCAGATTGTAATGGTGGTAAAATTAT  
TGAAATATGGTATTTTGTAAACAGAAATATCTCCTTTCTGGCATCCGAG

>M6-PGSC0003DMG400009114M6RLKWAX-EGF\_610

TTCAAAACTTTAATGATTTTACATCCTCTAACTTTATGTTTCCTTTGTGATTTGCCTGTTTTGACAGTTCTTA  
CTATATTGTACGGTGGAATAGTTATAGGTGAGTCTTCTTATCTTACT

>M6-PGSC0003DMG400009114M6RLKWAX-EGF\_671

TGACAGTTCTTACTATATTGTACGGTGGAATAGTTATAGGTGAGTCTTCTTATCTTACTCAAGGATAAGC  
ATTCTTCGCACACTCAGAATTCTGAAAAATAATTAGCTTTTGAAGCTTTT

>M6-PGSC0003DMG400009114M6RLKWAX-EGF\_732

AGGATAAGCATTCTTCGCACACTCAGAATTCTGAAAAATAATTAGCTTTTGAAGCTTTTCTCAACCCATTT  
ACCCCTATGAAAAAGATGTACTGGTTTTCTGTGCGATGACTTCCATTTT

>M6-PGSC0003DMG400009114M6RLKWAX-EGF\_793

CAACCCATTTACCCCTATGAAAAAGATGTACTGGTTTTCTGTGCGATGACTTCCATTTTTATTTTTGAAATC  
ATGCAGTATCAATTCTATCGTTACGACTTCTCTTTGGATTGGTGTCC

>M6-PGSC0003DMG400009114M6RLKWAX-EGF\_854

TTTTTGAAATCATGCAGTATCAATTCTATCGTTACGACTTCTCTTTGGATTGGTGTTCCTGACTGCATTAAT  
AGTGATAAATGGAGAAGACGACACTTATCTATGTATCAATCAATTGA

>M6-PGSC0003DMG400009114M6RLKWAX-EGF\_915

ACTGCATTAATAGTGTATAAATGGAGAAGACGACACTTATCTATGTATCAATCAATTGAAGACTTCCTGC  
AAGTCCAGAGCAACCTCTTGCCGATTAATACTCCTACTCTGAGATTA

>M6-PGSC0003DMG400009114M6RLKWAX-EGF\_976

ACTTCTGCAAGTCCAGAGCAACCTCTTGCCGATTAATACTCCTACTCTGAGATTAATAAAGATGACTAA  
CAAATTCAAGGAAAAACTAGGCGAAGGAGCCTATGGAAGTGTCTTTAAAG

>M6-PGSC0003DMG400009180M6LRR-RLK\_0

ATTAATCAAATAAAAATAGGAAAGTTCTGACAAAGCCTTTCTTCTGTTCCCGAGCTGAAGCTTGGGGTT  
TTGTGTTTTGTGGTGCCCGTACTGGTGGTGAAAGAAAACTCCGACGACT

>M6-PGSC0003DMG400009180M6LRR-RLK\_1037

TGGACAGCTAACAAAATGGAATGCCAATGGTGGTGATCCTTGTGGAGAATCCTGGACAGGTATTACTTG  
CTCGGGCAATAGAGTTACTGAAATGTGAGTTCCTCTCTTCTTACTGTTGT

>M6-PGSC0003DMG400009180M6LRR-RLK\_1098

ATTACTTGCTCGGGCAATAGAGTTACTGAAATGTGAGTTCCTCTCTTCTTACTGTTGTAAGTAATTATTG  
TTGATGTTTTCTTCTTTATCTTCTTCATCATGTTTCAATACTTGAAT



>M6-PGSC0003DMG400009180M6LRR-RLK\_1159

GTAATTATTGTTGATGTTTTCTTCTTTATCTTCTTCATCATGTTTCAATACTTGGAATTGTTGACTTGGTG  
ATTTCTGATGCTTTCTCCCTTTTCATTTTCTCCAGCAAGATATCAC

>M6-PGSC0003DMG400009180M6LRR-RLK\_122

GACTGAGGTGGAAGAGGAGAAAACGACGCCGTGTAGATGAGGTTGCTGCTGCTGTTGCCGATACTCAT  
CGGCATTTTGCTTTATTGTGCTAATTATGCCATTGCCGACACAGATCCAAAT

>M6-PGSC0003DMG400009180M6LRR-RLK\_1220

TTGACTTGGTGATTTCTGATGCTTTCTCCCTTTTCATTTTCTCCAGCAAGATATCACGTCTTGGACTCTC  
TGGTTCACTGGGCTACCAATTGGCAAGTCTTACATCGGTGACTAATTT

>M6-PGSC0003DMG400009180M6LRR-RLK\_1281

CTTGGACTCTCTGGTTCACTGGGCTACCAATTGGCAAGTCTTACATCGGTGACTAATTTGTAAGATAAAT  
GGCCTTCAATAATGTCCTCATAAATGTTTCTTCGATCTATATCTATATCA

>M6-PGSC0003DMG400009180M6LRR-RLK\_1342

AAGATAAATGGCCTTCAATAATGTCCTCATAAATGTTTCTTCGATCTATATCTATATCAAATTCTTACACAC  
TTCTAATTTTGCAGTGACATAAGTAATAACAATTTGGGAAACCAGTTA

>M6-PGSC0003DMG400009180M6LRR-RLK\_1403

TTCTTACACACTTCTAATTTTGCAGTGACATAAGTAATAACAATTTGGGAAACCAGTTACCTTATCAGCTT  
CCTCCAAATGTGCAAAGATTGTATGTCTCGTAGTTAGTATATTTTCATC

>M6-PGSC0003DMG400009180M6LRR-RLK\_1464

TTATCAGCTTCTCCAAATGTGCAAAGATTGTATGTCTCGTAGTTAGTATATTTTCATCATTCCAGATGCT  
ATTTTCCACCTATCTTTCTTAAACCTTGCCTTGCAATGCAGAAACCTT

>M6-PGSC0003DMG400009180M6LRR-RLK\_1525

TCCAGATGCTATTTTTCCACCTATCTTTCTTAAACCTTGCCTTGCAATGCAGAAACCTTGCTGCTAATGGTT  
TTAATGGTGCCCTTCCATATTCCGTTTCGCAGATGACTTCCCTCCGAT

>M6-PGSC0003DMG400009180M6LRR-RLK\_1586

TGCTAATGGTTTTAATGGTGCCCTTCCATATTCCGTTTCGCAGATGACTTCCCTCCGATACTTGTATGAAA  
AATCTTTGAATTTGACTGCAATTTGCTTTCCAGCAATAAGCTTTTGGTT

>M6-PGSC0003DMG400009180M6LRR-RLK\_1647

TTGTATGAAAAATCTTTGAATTTGACTGCAATTTGCTTTCCAGCAATAAGCTTTTGGTTAAGGTTGCGCT

TTTCAATGACTTTAATATTTTTATCTGGCTGTAGAAATGTCAGTCATAA

>M6-PGSC0003DMG400009180M6LRR-RLK\_1708

AGGTTGCGCTTTTCAATGACTTTAATATTTTTATCTGGCTGTAGAAATGTCAGTCATAATCAAATTCAAGG

ACAAGTGACTGTCGCGTTCGACTCTCTGTCTTCTCTCGATACATTGTAA

>M6-PGSC0003DMG400009180M6LRR-RLK\_1769

AAATTCAAGGACAAGTGACTGTCGCGTTCGACTCTCTGTCTTCTCTCGATACATTGTAAGCCCTATCTTCT

CTCATGCCATTTCTTGAGTGTTTAATATTACAAAGTTGTGGTCATAAC

>M6-PGSC0003DMG400009180M6LRR-RLK\_183

TACTCATCGGCATTTTGCTTTATTGTGCTAATTATGCCATTGCCGACACAGATCCAAATGACGGTCAGCTA

TTGCTTTTAATCATTCTCATTATTGTTTCAATCTGTTTGTCTGTATGC

>M6-PGSC0003DMG400009180M6LRR-RLK\_1830

CCTATCTTCTCTCATGCCATTTCTTGAGTGTTTAATATTACAAAGTTGTGGTCATAACTCATATATGAGGT

GTTGTAGATAAAACATGTCATTCTTACTTCATTAGTATAAACTTTTCT

>M6-PGSC0003DMG400009180M6LRR-RLK\_1891

ATATATGAGGTGTTGTAGATAAAACATGTCATTCTTACTTCATTAGTATAAACTTTTCTTCTCGCATCCGA

GTTGTTGACTTGTTGCTTTGGGAAAGAAAGTCAATATCATGAAAGACAG

>M6-PGSC0003DMG400009180M6LRR-RLK\_1952

TCGCATCCGAGTTGTTGACTTGTTGCTTTGGGAAAGAAAGTCAATATCATGAAAGACAGTATCTGATCCT

TGTTGTAATCTGTAAACTTATGTGATTGTCCCAGTTAAGTCAACTAAGAA

>M6-PGSC0003DMG400009180M6LRR-RLK\_2013

TCTGATCCTTGTTGTAATCTGTAAACTTATGTGATTGTCCCAGTTAAGTCAACTAAGAAGCTGTATACATT

TCGAGATATTCTTAAGTCAAGTCTTAGAAACCTCTAAATGACTAGTTTA

>M6-PGSC0003DMG400009180M6LRR-RLK\_2074

TGTATACATTTGAGATATTCTTAAGTCAAGTCTTAGAAACCTCTAAATGACTAGTTTATCATTCTGTCTCA

TAGTTTTTGATTGATTGATCTGTACGCTTCAGGGATTTCTCATTCAAT

>M6-PGSC0003DMG400009180M6LRR-RLK\_2135

ATTCTGTCTCATAGTTTTTGATTGATTGATCTGTACGCTTCAGGGATTTCTCATTCAATGCTATGACGGGT

GATCTTCCTCAAAGCTTCAAGACACTGACTAGTATGAATAAAATGTGAG

>M6-PGSC0003DMG400009180M6LRR-RLK\_2196

TATGACGGGTGATCTTCCTCAAAGCTTCAAGACACTGACTAGTATGAATAAAATGTGAGCTAATAAATTT  
TCTGCTTCGTCCTTGTAGACAATTGGTTGAGTCCTTCAGTGGTGAAGTTT

>M6-PGSC0003DMG400009180M6LRR-RLK\_2257

AATAAATTTTCTGCTTCGTCCTTGTAGACAATTGGTTGAGTCCTTCAGTGGTGAAGTTTACATGTTGAAGT  
ATGCAGGTATTTGCAGAACAACCAGTTTACAGGAACTATTGATATCTTA

>M6-PGSC0003DMG400009180M6LRR-RLK\_2318

ATGTTGAAGTATGCAGGTATTTGCAGAACAACCAGTTTACAGGAACTATTGATATCTTAGCCAATCTTCC  
TCTTGATGATTTGTGAGTTTTAGTCTATGCTTCTTTTTAGATGTTATCC

>M6-PGSC0003DMG400009180M6LRR-RLK\_2379

CAATCTTCCTCTTGATGATTTGTGAGTTTTAGTCTATGCTTCTTTTTAGATGTTATCCCTGATGTTTTATCT  
TATTTATATAGACTCGATTGAAAGCATGGTTGAAAGTCATGTGTATT

>M6-PGSC0003DMG400009180M6LRR-RLK\_244

CGGTCAGCTATTGCTTTAATCATTCTCATTATTGTTTCAATCTGTTTGTCTGTATGCTTACTGATCATTA  
TGATTTAATGGAGGTTGATTGATTGGAAAGTCAATGAGTATCAATC

>M6-PGSC0003DMG400009180M6LRR-RLK\_2440

GATGTTTTATCTTATTTATATAGACTCGATTGAAAGCATGGTTGAAAGTCATGTGTATTCTTTATGCTTT  
AGGAATGTTGAGAACAACCGTTTTACTGGCTGGGTTCTGATCACTTGA

>M6-PGSC0003DMG400009180M6LRR-RLK\_2501

TTTATGCTTTAGGAATGTTGAGAACAACCGTTTTACTGGCTGGGTTCTGATCACTTGAAGGGATCACG  
AAGTAAGTATATCATGTTAGAGTAATAAATTTTGAACCTTATATCAGAAG

>M6-PGSC0003DMG400009180M6LRR-RLK\_2562

GGGATCACGAAGTAAGTATATCATGTTAGAGTAATAAATTTTGAACCTTATATCAGAAGTATTTTGAATT  
TATTCAGGGTTTGTGACATTTCTGTTACAGATCAAATGGTAACTCATGGA

>M6-PGSC0003DMG400009180M6LRR-RLK\_2623

TTTTGAATTTATTCAGGGTTTGTGACATTTCTGTTACAGATCAAATGGTAACTCATGGAACCTCAGGATCTG  
CACCCCCTCCTCCACCTGGCACACCCCCTGCAAGCAGGCCGCACCACAA

>M6-PGSC0003DMG400009180M6LRR-RLK\_2684

TCAGGATCTGCACCCCCTCCTCCACCTGGCACACCCCCTGCAAGCAGGCCGCACCACAAATCTGGAGGC  
AATAATAGCCCTACTGATGGTGCAAGCAGTGGTGATGGTGGTAAATCG

>M6-PGSC0003DMG400009180M6LRR-RLK\_2745

CTGGAGGCAATAATAGCCCTACTGATGGTGCAAGCAGTGGTGATGGTGGTGGTAAATCGGGGATAGGG  
GGTGGAGCCATTGCAGGCATAGTGATATCTGTTCTAGTTGTTGGGGCAATTG

>M6-PGSC0003DMG400009180M6LRR-RLK\_2806

GATAGGGGGTGGAGCCATTGCAGGCATAGTGATATCTGTTCTAGTTGTTGGGGCAATTGTAGCATTCTT  
TGTTATCAAGAAGAGATTGAAGCGGTCATCGACGGACATTGAGAAACATGA

>M6-PGSC0003DMG400009180M6LRR-RLK\_2867

GCATTCTTTGTTATCAAGAAGAGATTGAAGCGGTCATCGACGGACATTGAGAAACATGATAATCAGCCA  
TTTGCTCCTCTTGCTCCCCCCCAGGAAGTACATGGTACTTCTTTTCATAAT

>M6-PGSC0003DMG400009180M6LRR-RLK\_2928

ATCAGCCATTTGCTCCTCTTGCTCCCCCCCAGGAAGTACATGGTACTTCTTTTCATAATTTCTTGTTTTAT  
CAGTTAAGATGTCTTTTAGACCCTTTCATGGCCTCTGTGATTGTTATT

>M6-PGSC0003DMG400009180M6LRR-RLK\_2989

CTTGGTTTTATCAGTTAAGATGTCTTTTAGACCCTTTCATGGCCTCTGTGATTGTTATTTAACTGTGGAAC  
ATATCAATCAACCACACTATCATCAACCTCATTCTGTATCCTGCTTAA

>M6-PGSC0003DMG400009180M6LRR-RLK\_305

ACTGATCATTAAATGATTTAATGGAGGTTGATTGATTTGGAAAGTCAATGAGTATCAATCTACCTGACAAT  
GAACTCGGCAACCGTCACAAATTTGTTGATATTTTCCTTACCTGGATAGT

>M6-PGSC0003DMG400009180M6LRR-RLK\_3050

ACTGTGGAACATATCAATCAACCACACTATCATCAACCTCATTCTGTATCCTGCTTAAAAAGGTGTAAAA  
TAAACCTGCTGCATAAAATGGAAATTTTATGAAAGTGAATTTGGAGAAT

>M6-PGSC0003DMG400009180M6LRR-RLK\_3111

AGGTGTAATAAAACCTGCTGCATAAAATGGAAATTTTATGAAAGTGAATTTGGAGAATCAATCTTATCC  
TTTGTGCTTTATCACTGCCTGTGGTGTATGCCTAATAGTGGATCAACACA

>M6-PGSC0003DMG400009180M6LRR-RLK\_3172

ATCTTATCCTTTGTGCTTTATCACTGCCTGTGGTGTATGCCTAATAGTGGATCAACACAGCCACTGTCTTC  
GCTATAAAAGAAAAACACCAAAGTAAAAACAACTTTATATCGAAATGT

>M6-PGSC0003DMG400009180M6LRR-RLK\_3233

CACTGTCTTCGCTATAAAAGAAAAACACCAAAGTAAAAACAACTTTATATCGAAATGTAAAACTGCTAA

GGCTGATAGGTCCTATCTCCATGGAAGCAAACCTTCTTGCTTACTGAAA

>M6-PGSC0003DMG400009180M6LRR-RLK\_3294

AACTGCTAAGGCTGATAGGTCCTATCTCCATGGAAGCAAACCTTCTTGCTTACTGAAAAGTTCCAAGAA  
CTTGATTGTAGAAATCTGAACTGATGTTTATACTCTGTATTGCCTGTAGA

>M6-PGSC0003DMG400009180M6LRR-RLK\_3355

TTCCAAGAACTTGATTGTAGAAATCTGAACTGATGTTTATACTCTGTATTGCCTGTAGATGCTGATAGTG  
GGATAAAGAGAACTTCAGATTTTTTGATAATGAAGAAAACCTTCAGCTTTA

>M6-PGSC0003DMG400009180M6LRR-RLK\_3416

CTGATAGTGGGATAAAGAGAACTTCAGATTTTTTGATAATGAAGAAAACCTTCAGCTTTATGATCTCTTTC  
AGTGGATCTGGTCCTATGCTTGTATAAGTTAGCTCCACTTGATGGTTTT

>M6-PGSC0003DMG400009180M6LRR-RLK\_3477

ATCTCTTTCAGTGGATCTGGTCCTATGCTTGTATAAGTTAGCTCCACTTGATGGTTTTCTTCCTATGAAA  
CTACTATTCATAAATCTTATTGACCTTTATAGAACAACCTATTGCTTCA

>M6-PGSC0003DMG400009180M6LRR-RLK\_3538

TTCCTATGAACTACTATTCATAAATCTTATTGACCTTTATAGAACAACCTATTGCTTCAAATGCAACTTTC  
AGCTAAGTAAAAGTTTCTCCATTCTAAACCTTTGTGCTCACCACCA

>M6-PGSC0003DMG400009180M6LRR-RLK\_3599

ATGCAACTTTCAGCTAAGTAAAAGTTTCTCCATTCTAAACCTTTGTGCTCACCACCAAATTCACCTCTTT  
GCAAATTCTAATTCTTTGCTTTTCTCAACTCCATCACTCGTGGTGCAT

>M6-PGSC0003DMG400009180M6LRR-RLK\_366

CCTGACAATGAACTCGGCAACCGTCACAAATTTGTTGATATTTTCTTACCTGGATAGTATATTGTCTTAT  
TGTATATGTAAAAATGCGACAAGTTCCTTTCTAATCAAGGCATGAATCA

>M6-PGSC0003DMG400009180M6LRR-RLK\_3660

TTCACCTCTTTGCAAATTCTAATTCTTTGCTTTTCTCAACTCCATCACTCGTGGTGCATAGTTATGCCTTTTA  
AGCCTCATCTCACTTCCGTATCTCATTAATCCGAACCTGAGTATGCA

>M6-PGSC0003DMG400009180M6LRR-RLK\_3721

TTATGCCTTTTAAGCCTCATCTCACTTCCGTATCTCATTAATCCGAACCTGAGTATGCATTTGCCTGTTTGT  
AACACTTACAGTCTTGTGCTTCTTCTGTCTGGATTTTCTGTTTATT

>M6-PGSC0003DMG400009180M6LRR-RLK\_3782

TGCCTGTTTGTAACTTACAGTCTTGTGCTTCTTCTGTCTGGATTTTCTGTTTCATTATTGTCCTTTTTT  
TTTACTGCAGAATTGAAAATAATGAAGCTTCTCTGCGCCAATAGT

>M6-PGSC0003DMG400009180M6LRR-RLK\_3843

TTGTCCTTTTTTTTTACTGCAGAATTGAAAATAATGAAGCTTCTCTGCGCCAATAGTGAAAGTATTTGA  
AGCTCCTGCAGTAGTAAATCTAAGACCTCCACCTATTGAACGCCACAAG

>M6-PGSC0003DMG400009180M6LRR-RLK\_3904

AAGTATTTGAAGCTCCTGCAGTAGTAAATCTAAGACCTCCACCTATTGAACGCCACAAGTCATTTGATGA  
AGTTGACATAGCAGCAAACCAATTGTCCCACCAAGAAAGTTAATACAG

>M6-PGSC0003DMG400009180M6LRR-RLK\_3965

ATTTGATGAAGTTGACATAGCAGCAAACCAATTGTCCCACCAAGAAAGTTAATACAGCTAAAATAGA  
TGCAAGACAATATTCAATCGCAGACCTACAGATGGCGACTGATAGCTTCAA

>M6-PGSC0003DMG400009180M6LRR-RLK\_4026

AAAATAGATGCAAGACAATATTCAATCGCAGACCTACAGATGGCGACTGATAGCTTCAATGTTGATAAC  
CTTATTGGCGAGGGATCATTTGGGCGTGTTTATAGGGCTCAGTTCGAAGAT

>M6-PGSC0003DMG400009180M6LRR-RLK\_4087

TTGATAACCTTATTGGCGAGGGATCATTTGGGCGTGTTTATAGGGCTCAGTTCGAAGATGGAAAGGTAT  
GATTTCTCTTATGACTGACTGACTATCTATGTGAAGAAAATGGCTCTCT

>M6-PGSC0003DMG400009180M6LRR-RLK\_4148

AAAGGTATGATTTCTCTTATGACTGACTGACTATCTATGTGAAGAAAATGGCTCTCTCTAATTGGATAA  
AAAAATCATGAATTTTTTATGTGCTGAGAATGAATGTTTAAGCAAGATA

>M6-PGSC0003DMG400009180M6LRR-RLK\_4209

AATTGGATAAAAAATCATGAATTTTTTATGTGCTGAGAATGAATGTTTAAGCAAGATAGTTGAAATGAC  
AGATAAACGTTCAATATGAAAAAGTACCTATCTAAAGAAAATGAAAGAAG

>M6-PGSC0003DMG400009180M6LRR-RLK\_427

ATTGCTTATTGTATATGTAAAAATGCGACAAGTTCCTTTCTAATCAAGGCATGAATCATATAGAGGGAG  
CTCTCTTGATTCTTATATATGTTATGTATGTATTGGCCATGTCGGTGGA

>M6-PGSC0003DMG400009180M6LRR-RLK\_4270

TGAAATGACAGATAAACGTTCAATATGAAAAAGTACCTATCTAAAGAAAATGAAAGAAGTTTGATCATT  
AAAAATTAGTTGAAAAATTATGTTTGTTCAAAACCTCAGTTCGGAGCTACTA

>M6-PGSC0003DMG400009180M6LRR-RLK\_4331

TGATCATTAATAAATTAGTTGAAAAATTATGTTTGTTCAAACCTCAGTTCGGAGCTACTATCATCTTGTCTCT  
GTGTAACCTGAACCATCCTCATAAGTTCCTTTCTAATTTTTGAAATGCCA

>M6-PGSC0003DMG400009180M6LRR-RLK\_4392

ATCTTGTCTGTGTAACCTGAACCATCCTCATAAGTTCCTTTCTAATTTTTGAAATGCCATAGGTTCTTGCAG  
TCAAGAAAATCAACTCTTCTGCACTCCAGAATCCTGAAGATTTTTCTCG

>M6-PGSC0003DMG400009180M6LRR-RLK\_4453

GGTCTTGCAGTCAAGAAAATCAACTCTTCTGCACTCCAGAATCCTGAAGATTTTTCTCGATATTGTTTCTG  
AGATATCACGGTTGCACCATCCAAATGTTACTGAGCTGGTTGGATATTG

>M6-PGSC0003DMG400009180M6LRR-RLK\_4514

ATTGTTTCTGAGATATCACGGTTGCACCATCCAAATGTTACTGAGCTGGTTGGATATTGTTTCAGAGCAGC  
GGCAGCATCTGCTGGTTTATGAATTCCACAAAATGGTTCTCTGCATGAT

>M6-PGSC0003DMG400009180M6LRR-RLK\_4575

CAGAGCACGGGCAGCATCTGCTGGTTTATGAATTCCACAAAATGGTTCTCTGCATGATTTCTGCATCT  
GTCAGATGAGGAAAGCAAGCCTCTAACATGGAATAGCCGAGTTAAGATTG

>M6-PGSC0003DMG400009180M6LRR-RLK\_4636

CCTGCATCTGTCAGATGAGGAAAGCAAGCCTCTAACATGGAATAGCCGAGTTAAGATTGCACTAGGCAC  
AGCAAGAGCACTAGAGTGAGTTTCCATGATCTACAAAGATATTTGATGCCA

>M6-PGSC0003DMG400009180M6LRR-RLK\_4697

CTAGGCACAGCAAGAGCACTAGAGTGAGTTTCCATGATCTACAAAGATATTTGATGCCATTTTATAATGT  
TCACGGAGCTCATAACAAGGATTTATAATTTCTTGTACCATTGGTTGAA

>M6-PGSC0003DMG400009180M6LRR-RLK\_4758

TTATAATGTTACGGAGCTCATAACAAGGATTTATAATTTCTTGTACCATTGGTTGAAATACTAGTCTCT  
GTCATATATTTTCTGGTATGTGTAGTCAAACAATAATGAAGTTTCTTTT

>M6-PGSC0003DMG400009180M6LRR-RLK\_488

TAGAGGGAGCTCTCTTGGATTCTTATATATGTTATGTATGTATTGGCCATGTCGGTGGACTTTTAGTACT  
GTTGAATCTTTGCATTATACTTCCATTCTGAGAACTGACATATTG

>M6-PGSC0003DMG400009180M6LRR-RLK\_549

TTTAGTACTGTTGAATCTTTGCATTATACTTCCATTCTGAGAACTGACATATTGAACTTCGTCAGA

CATATTTGACTTAGTTACCATTTTCAGCCAAGTTGCTCCAGAAGATTT

>M6-PGSC0003DMG400009180M6LRR-RLK\_61

CTTGGGGTTTTGTGTTTTGTGGTGCCCGGTAAGTGGTGGTAAAGAAAAGTCCGACGACTGTGACTGAGG  
TGGAAGAGGAGAAAACGACGCCGTGTAGATGAGGTTGCTGCTGCTGTTGCC

>M6-PGSC0003DMG400009180M6LRR-RLK\_610

ACTTCGTCAGACATATTTGACTTAGTTACCATTTTCAGCCAAGTTGCTCCAGAAGATTTTGGCTTTTCTTCT  
TTCTGCTGCTTGAAGCGGGACAGGGTAGTGGGGGTGGGACGCCAAAA

>M6-PGSC0003DMG400009180M6LRR-RLK\_671

GCTTTTCTTCTTTCTGCTGCTTGAAGCGGGACAGGGTAGTGGGGGTGGGACGCCAAAACAAGTGTGAT  
CAAGGGCATTATAACCTAAAAGACTCTTCTCCCAGTGATAATACACAAATA

>M6-PGSC0003DMG400009180M6LRR-RLK\_732

AGTGTGATCAAGGGCATTATAACCTAAAAGACTCTTCTCCCAGTGATAATACACAAATAGGTTTCATGGCT  
TCATCAACGCACTTGTTCGTTTTACCATGTTTATTGATGTCTTGTAGAT

>M6-PGSC0003DMG400009180M6LRR-RLK\_793

TTCATGGCTTCATCAACGCACTTGTTCGTTTTACCATGTTTATTGATGTCTTGTAGATTTACCACTCGTTA  
ACAGTTTGTCCACCGTTTGATTACTCTTCAAGCTATTATTAATGAAAA

>M6-PGSC0003DMG400009180M6LRR-RLK\_854

ACCACTCGTTAACAGTTTGTCCACCGTTTGATTACTCTTCAAGCTATTATTAATGAAAAGAACTTTTTGTT  
TGAACAGTATAAGAATATGTTGACCTGTAAGTATGCCTAGCTGATTTT

>M6-PGSC0003DMG400009180M6LRR-RLK\_915

AACTTTTTGTTTGAACAGTATAAGAATATGTTGACCTGTAAGTATGCCTAGCTGATTTTTTTGGTGGCGCT  
TTGATTTTCAGCTTCTGCTCTGAGAGTTCTGTATAGCAGCCTAAATTCA

>M6-PGSC0003DMG400009180M6LRR-RLK\_976

TGGTGGCGCTTTGATTTTCAGCTTCTGCTCTGAGAGTTCTGTATAGCAGCCTAAATTCACCTGGACAGCT  
AACAAAATGGAATGCCAATGGTGGTGTATCCTTGTGGAGAATCCTGGACAG

>M6-PGSC0003DMG400009181M6LRR-RLK\_0

GAGGAGAGGAGAATAGTATGGTAAAGTCTCTCTCTCTCTCCACGTATATTACACGCTTTCAAATATCCA  
TAGAATAACAAAAGTCCACCAGCCATCTATCTATCTAGCCGTCCCAAAG

>M6-PGSC0003DMG400009181M6LRR-RLK\_1054



GACTTCAGGGGCCAGATGCCCAAGGGTTTGGGAGTTGCTCCAGTTTGGTTACTTTGAGAGCAGGATTC  
AACCATCTTTCGGGATTCATTCCTGATGATATTTATAGTGTGTCAACACTG

>M6-PGSC0003DMG400009181M6LRR-RLK\_1116

AGGATTCAACCATCTTTCGGGATTCATTCCTGATGATATTTATAGTGTGTCAACACTGCAAGAAATCTCTT  
TACCTGGAAATAAATTTTCTGGACCCATCCCAGAAAGCATTGTCAACCT

>M6-PGSC0003DMG400009181M6LRR-RLK\_1178

AAATCTCTTTACCTGGAAATAAATTTTCTGGACCCATCCCAGAAAGCATTGTCAACCTTGTCAACCTCAGA  
ATCCTCGCACTCTATGGCAATGAATTGACAGGTTTGATCCCTCAAGATA

>M6-PGSC0003DMG400009181M6LRR-RLK\_124

CGCTTTATTTCAAAAACCTACACCTCACCTTTTTGCTACATAAAAATTGCACCTTGTCAACATCAACTACAC  
TCTCTCTTTCTCTTCATGGGGTTAGACTAAAGTCTGCACGATCAACA

>M6-PGSC0003DMG400009181M6LRR-RLK\_1240

AACCTCAGAATCCTCGCACTCTATGGCAATGAATTGACAGGTTTGATCCCTCAAGATATTGGAAGGCTCT  
CTAGATTGGAACAGTTGCTCCTCCATATAAACAATCTAAATGGCACTGTG

>M6-PGSC0003DMG400009181M6LRR-RLK\_1302

AAGGCTCTTAGATTGGAACAGTTGCTCCTCCATATAAACAATCTAAATGGCACTGTGCCGCCATCGCTG  
ATGACTTGCACCCGTCTCACTGTGCTCAATTTAAGGGTCAACTTCTTGGA

>M6-PGSC0003DMG400009181M6LRR-RLK\_1364

CATCGCTGATGACTTGCACCCGTCTCACTGTGCTCAATTTAAGGGTCAACTTCTTGGAAGGTGAACTCTC  
AGGTCTTGATTTCTCCAACCTTAGTCGACTTGGCATAATCGACCTTGGA

>M6-PGSC0003DMG400009181M6LRR-RLK\_1426

GAACTCTCAGGTCTTGATTTCTCCAACCTTAGTCGACTTGGCATAATCGACCTTGGAATAACTTCTTCAC  
TGGAAGCATTCCACAAAGCCTTTTTTTCATGCAGGTCATTAAGTCAATC

>M6-PGSC0003DMG400009181M6LRR-RLK\_1488

CTTCTTCACTGGAAGCATTCCACAAAGCCTTTTTTTCATGCAGGTCATTAAGTCAATCCGTCTGGCTACTA  
ACTATCTGACAGGAGATATCTTGCCTGGCATAACGTCTTTACAAGCTCT

>M6-PGSC0003DMG400009181M6LRR-RLK\_1550

TGGCTACTAACTATCTGACAGGAGATATCTTGCCTGGCATAACGTCTTTACAAGCTCTGTCCTTCTCTCG  
GTTTCCAATAAAAGCCTAACCAATTTTGCAGGGGCAATAGAAGTCCTTA

>M6-PGSC0003DMG400009181M6LRR-RLK\_1612

TTCCTCTCGGTTTCCAATAAAAAGCCTAACCAATTTTGACAGGGCAATAGAAGTCCTTAAGGGTTGTAAGA  
ATCTTACCACACTAATCCTCACCAAAAACCTTTTATAATGAAACGTTGCCT

>M6-PGSC0003DMG400009181M6LRR-RLK\_1674

TTGTAAGAATCTTACCACACTAATCCTCACCAAAAACCTTTTATAATGAAACGTTGCCTGATAATGAGAACT  
TGATTGGGTCTGAAGATTTTCAAATCTCCAATTCTGGGTTTAGGTGG

>M6-PGSC0003DMG400009181M6LRR-RLK\_1736

ATGAGAACTTGATTGGGTCTGAAGATTTTCAAATCTCCAATTCTGGGTTTAGGTGGTTGTAATTCAC  
CGGACAGATACCCACATGGCTGGTTAACTTGGGAGGGTAGAGGTTCTAG

>M6-PGSC0003DMG400009181M6LRR-RLK\_1798

AATTTACCGGACAGATACCCACATGGCTGGTTAACTTGGGAGGGTAGAGGTTCTAGACCTTTCTATG  
AATCAAATCACAGGCAAATTCAGGTTGGTTGGGGACTTTACAGAATCTA

>M6-PGSC0003DMG400009181M6LRR-RLK\_186

TCAACTACTCTCTCTCTTCTTTCATGGGGTTAGACTAAAGTCTGCACGATCAACAGGACAAAGAATT  
GCCAAAAAATACCCACATGGTTGATTGGAGTATCTTGGCATCTTCAACT

>M6-PGSC0003DMG400009181M6LRR-RLK\_1860

TTCTATGAATCAAATCACAGGCAAATTCAGGTTGGTTGGGGACTTTACAGAATCTATTTTACCTGGAT  
TTGTCTCAGAATTTTCTATATGGAGGCTTCCAGGTGAACTTACTCAACT

>M6-PGSC0003DMG400009181M6LRR-RLK\_1922

ACCTGGATTTGTCTCAGAATTTTCTATATGGAGGCTTCCAGGTGAACTTACTCAACTGCAAAGACTCGC  
ATCACAAGAGGCTGCTGATCAGGTCGACAGAAGTGCTTTAGAATTGCCTG

>M6-PGSC0003DMG400009181M6LRR-RLK\_1984

AGACTCGCATCACAAGAGGCTGCTGATCAGGTCGACAGAAGTGCTTTAGAATTGCCTGTGTTTGTTTCAG  
CCAAACAATGCCTCAAATCAGCAATATAATCTACTGTCAAACCTGCCACCA

>M6-PGSC0003DMG400009181M6LRR-RLK\_2046

TGTTGAGCCAAACAATGCCTCAAATCAGCAATATAATCTACTGTCAAACCTGCCACCAGCTATTTACCTTG  
GAAACAACAACCTTGATGGCAATATTCCAACCTAAGATTGGCCAGCTGAA

>M6-PGSC0003DMG400009181M6LRR-RLK\_2108

TTTACCTTGAAACAACAACCTTGATGGCAATATTCCAACCTAAGATTGGCCAGCTGAAGTACATTCATGT

TCTTGATCTGAGCAAGAACAACCTTTACAGGAAACATTCCAGAAACAATAT

>M6-PGSC0003DMG400009181M6LRR-RLK\_2170

ATTCATGTTCTTGATCTGAGCAAGAACAACCTTTACAGGAAACATTCCAGAAACAATATCCAACCTCACTA

ATCTGGAGAACTAGACCTCTCTGCCAACAACTCTCAGGTGAAATTCCT

>M6-PGSC0003DMG400009181M6LRR-RLK\_2232

CCTCACTAATCTGGAGAACTAGACCTCTCTGCCAACAACTCTCAGGTGAAATTCCTTCTTCACTCAAGG

GTCTTCATTTTTTTGTCTTCTTTCAGTGTTGCTCACAACAATCTTGAGGG

>M6-PGSC0003DMG400009181M6LRR-RLK\_2294

CACTCAAGGGTCTTCATTTTTTTGTCTTCTTTCAGTGTTGCTCACAACAATCTTGAGGGACCTATTCCAACA

GGAGGTCAGTTTGACACATTTCTATCACTAGTTTCTTAGGTAATCCAG

>M6-PGSC0003DMG400009181M6LRR-RLK\_2356

ATTCCAACAGGAGGTCAGTTTGACACATTTCTATCACTAGTTTCTTAGGTAATCCAGGACTGTGTGGTC

AAATCCTGCAGCACCTTGCCCTGATCGATCAGGAACTACACAACCTTCT

>M6-PGSC0003DMG400009181M6LRR-RLK\_2418

GTGTGGTCAAATCCTGCAGCACCTTGCCCTGATCGATCAGGAACTACACAACCTTCTGCAGTTAGAAAA

ACCGCAAAAAGGAAAATCTTAATTGGACTCATCCTAGGGATCTCCTTTGG

>M6-PGSC0003DMG400009181M6LRR-RLK\_248

AAAGAATTGCCAAAAAATACCCACATGGTTGATTGGAGTATCTTGGCATCTTCAACTGTCTTTCTTCTTC

ATCTTTAGTTGTCTAAAAATAATAATGATCATGAATAATAAAGACAGCC

>M6-PGSC0003DMG400009181M6LRR-RLK\_2480

TTAGAAAAACCGCAAAAAGGAAAATCTTAATTGGACTCATCCTAGGGATCTCCTTTGGCATTGCCTTCAC

AGTCATCATCATAGCATTCTGGATATTCTCCAAGAGGAGGATCCTTCCAA

>M6-PGSC0003DMG400009181M6LRR-RLK\_2542

GCCTTCACAGTCATCATCATAGCATTCTGGATATTCTCCAAGAGGAGGATCCTTCCAAGAGGTGACGCCG

AGAAAAATGACATGGAAATTGTGTCTTACAACCTCACTTCTGGATTGTCT

>M6-PGSC0003DMG400009181M6LRR-RLK\_2604

TGACGCCGAGAAAAATGACATGGAAATTGTGTCTTACAACCTCACTTCTGGATTGTCTGCTGAGATTGG

AAAGGATAACAGCATGCTTGTATGTTTCCAACCAATAAGGATCAGATTAA

>M6-PGSC0003DMG400009181M6LRR-RLK\_2666

AGATTGGAAAGGATAACAGCATGCTTGTTATGTTTCCAACCAATAAGGATCAGATTAATGATCTCACAAT  
TTTTGACATTCTGAGAGCCACGAATAACTTCAACCAAGCAAACATAGTAG

>M6-PGSC0003DMG400009181M6LRR-RLK\_2728

CTCACAATTTTTGACATTCTGAGAGCCACGAATAACTTCAACCAAGCAAACATAGTAGGTTGTGGAGGCT  
TTGGCCTGGTCTATAAAGCAACTTTAGCAGATGGAACTACACTGGCTGTT

>M6-PGSC0003DMG400009181M6LRR-RLK\_2790

TGGAGGCTTTGGCCTGGTCTATAAAGCAACTTTAGCAGATGGAACTACACTGGCTGTTAAGAACTTTCA  
GGAGATATGGGTTTAATTGAAAGAGAATTTAAAGCAGAGGTGGAAGTTTT

>M6-PGSC0003DMG400009181M6LRR-RLK\_2852

AACTTTCAGGAGATATGGGTTTAATTGAAAGAGAATTTAAAGCAGAGGTGGAAGTTTTATCCACTGCCC  
AACATGAGAATTTGGTCTCTCTTCAAGGTTACTGTGTGCATGATGGCTGTA

>M6-PGSC0003DMG400009181M6LRR-RLK\_2914

ACTGCCAACATGAGAATTTGGTCTCTCTTCAAGGTTACTGTGTGCATGATGGCTGTAGGTTGCTGATCT  
ATTCCTATATGCAAACGGAAGTCTGGACTACTGGTTGCACGAGAAAAC

>M6-PGSC0003DMG400009181M6LRR-RLK\_2976

GCTGATCTATTCCTATATGCAAACGGAAGTCTGGACTACTGGTTGCACGAGAAAACGATGGAGCATT  
CCTACTTGATTGGCCAACTCGACTGAAGATTGCACAGGGGGCAAGTTGTGG

>M6-PGSC0003DMG400009181M6LRR-RLK\_3038

GAGCATTCTACTTGATTGGCCAACTCGACTGAAGATTGCACAGGGGGCAAGTTGTGGGCTGGCTTACA  
TGCATCAGATATGTGAACCACATATTGTTTCATCGTGACATAAAGTCCAGTA

>M6-PGSC0003DMG400009181M6LRR-RLK\_3100

GCTTACATGCATCAGATATGTGAACCACATATTGTTTCATCGTGACATAAAGTCCAGTAACATCCTCCTGA  
TGAAAAGTTTAAAGCACATGTGGCAGATTTCCGATTGTCCAGAATGATT

>M6-PGSC0003DMG400009181M6LRR-RLK\_3162

CCTCCTTGATGAAAAGTTTAAAGCACATGTGGCAGATTTCCGATTGTCCAGAATGATTCTCCTTACCAA  
ACTCACGTCACCACTGAACTGGTTGGTACCCTCGGCTACATCCCACCAGA

>M6-PGSC0003DMG400009181M6LRR-RLK\_3224

CTTACCAAACCTCACGTCACCACTGAACTGGTTGGTACCCTCGGCTACATCCCACCAGAGTATAGTCAATC  
ATGGATAGCCACTTTGAGAGGAGATGTCTATAGTTTTGGAGTTGTGATGT

>M6-PGSC0003DMG400009181M6LRR-RLK\_3286

AGTCAATCATGGATAGCCACTTTGAGAGGAGATGTCTATAGTTTTGGAGTTGTGATGTTAGAACTCCTG  
GCTGGCAGAAGACCTGTGGACATGAGCAAACCAAAGATGTCAAGGGAATTG

>M6-PGSC0003DMG400009181M6LRR-RLK\_3348

ACTCCTGGCTGGCAGAAGACCTGTGGACATGAGCAAACCAAAGATGTCAAGGGAATTGGTTGTATGGG  
TGCACCTAATGAGAAATGAGGGTAAACAAGAAGAAATATTTGATCCTATACT

>M6-PGSC0003DMG400009181M6LRR-RLK\_3410

TATGGGTGCACCTAATGAGAAATGAGGGTAAACAAGAAGAAATATTTGATCCTATACTGAGAGACAAG  
GGTTTCGAAGAAGATATGCTTCAAGTGCTTGATGTTGCATGTATGTGTGTCA

>M6-PGSC0003DMG400009181M6LRR-RLK\_3472

GACAAGGGTTTCGAAGAAGATATGCTTCAAGTGCTTGATGTTGCATGTATGTGTGTCAGCCAGAATCCTT  
TCAAAGGCCAACTATAGCAGAAGTGGTTGAGTGGCTCAACAGAGTAGTA

>M6-PGSC0003DMG400009181M6LRR-RLK\_3534

GAATCCTTTCAAAGGCCAACTATAGCAGAAGTGGTTGAGTGGCTCAACAGAGTAGTATCCAACCAGGG  
AGCACCTAAATAAGGTGGTGGTACACATAAATTTGATGTAGATGTGAGTGT

>M6-PGSC0003DMG400009181M6LRR-RLK\_3596

ACCAGGGAGCACCTAAATAAGGTGGTGGTACACATAAATTTGATGTAGATGTGAGTGTCTGTATAGATG  
AACTTTTGCTTTTACACGTAGGAAGTTAACATACAGGAATAAATGTATAA

>M6-PGSC0003DMG400009181M6LRR-RLK\_3658

ATAGATGAACTTTTGCTTTTACACGTAGGAAGTTAACATACAGGAATAAATGTATAAAGTGAACAATTT  
CCTCAATAAATTACATTTACGATTTTGCGTCATGGCTAACATTGGATGAC

>M6-PGSC0003DMG400009181M6LRR-RLK\_434

CTTCTTCTTTACCCACCATAAATCTTTCAATCCAATAATATTGATAGTTGTTCTACTTCTTTCTTCAATTGC  
TACCATCTGTCATGCTTCTTGCAATCAGCTTGATCGTGACTCTTTGT

>M6-PGSC0003DMG400009181M6LRR-RLK\_496

TCTTCAATTGCTACCATCTGTCATGCTTCTTGCAATCAGCTTGATCGTGACTCTTTGTTATCATTCTCTGTT  
GGTATCTCTTACCTTCTCCTTTGAATTGGTCCTCTTCCGTGGATTGC

>M6-PGSC0003DMG400009181M6LRR-RLK\_558

ATTCTCTGTTGGTATCTCTTACCTTCTCCTTTGAATTGGTCCTCTTCCGTGGATTGCTGCACCTTGTGGGA

AGGTGTTGGTTGTGATGATAATGGCCGAGTAACCACTCTCTGGCTTCC

>M6-PGSC0003DMG400009181M6LRR-RLK\_62

AATATCCATAGAATAAACAAAGTCCACCAGCCATCTATCTATCTAGCCGTCCCAAAAGTAAACGCTTTATT  
TCAAAAACCTACACCTCACCTTTTTGCTACATAAAAATTGCACCTTGTC

>M6-PGSC0003DMG400009181M6LRR-RLK\_620

CCTTGTGGGAAGGTGTTGGTTGTGATGATAATGGCCGAGTAACCACTCTCTGGCTTCCCTCAAGAAGCCT  
TTTTGGAAACATAACCCCTGCTATTGCAAATTTGAGCAAACCTCTCTCAAC

>M6-PGSC0003DMG400009181M6LRR-RLK\_682

AGAAGCCTTTTTGGAAACATAACCCCTGCTATTGCAAATTTGAGCAAACCTCTCTCAACTCAGCCTGTCAA  
ATAATCGATTTATTGGTCCCCTCCAGATGGATTTTTCAAGTCATTTAGT

>M6-PGSC0003DMG400009181M6LRR-RLK\_744

CCTGTCAAATAATCGATTTATTGGTCCCCTCCAGATGGATTTTTCAAGTCATTTAGTAGCTTGCAGATCA  
TTGACTTGAGTTATAACCGTTTATCAGGACGATTGCCGCTATCAGATAG

>M6-PGSC0003DMG400009181M6LRR-RLK\_806

TGCAGATCATTGACTTGAGTTATAACCGTTTATCAGGACGATTGCCGCTATCAGATAGATTAACATCACC  
CATCAAGACAGTAAATCTCTCTAGCAACCACTTCAATGGGACAATTCTAT

>M6-PGSC0003DMG400009181M6LRR-RLK\_868

ACATCACCCATCAAGACAGTAAATCTCTCTAGCAACCACTTCAATGGGACAATTCTATCATCATTTCTCGA  
GCCAGCAATTAATTTAGAGAGTTTCGATATTAGCAACAATAGCTTCTCT

>M6-PGSC0003DMG400009181M6LRR-RLK\_930

ATTTCTCGAGCCAGCAATTAATTTAGAGAGTTTCGATATTAGCAACAATAGCTTCTCTGGTCCAATACCCT  
CCTTTATTTGCAGCTACTCAGCCGCTGTCAGAGTTCTTGATTTCACTTC

>M6-PGSC0003DMG400009181M6LRR-RLK\_992

CAATACCCTCCTTTATTTGCAGCTACTCAGCCGCTGTCAGAGTTCTTGATTTCACTTCCAATGACTTCAGG  
GGCCAGATGCCCAAGGGTTTGGGAGTTGCTCCAGTTTGGTTACTTTGA

>M6-PGSC0003DMG400009196M6LRR-RLK\_0

TTCTTGAAAGATGACATTGAGAAATTTGACTTACCTGATTTGTTGAAAGCCTCTGCTGAAGTATTGGGAA  
GTGGAGTGTGGTTCAACTTATAAAGCTGCACTTAGTACTGGTCCTGTC

>M6-PGSC0003DMG400009196M6LRR-RLK\_128

TAAGAGGTTTAGACATATGAATAAAGTTGGTAAAGAAGATTTCCATGAACATATGAGAAGGCTTGGAAAG  
ATTGAGTCATAAGAACTTGCTTCCTGTTATTGCTTTCTATTATAGGAAAGA

>M6-PGSC0003DMG400009196M6LRR-RLK\_190

TTGGAAGATTGAGTCATAAGAACTTGCTTCCTGTTATTGCTTTCTATTATAGGAAAGAGGAGAAGCTTCT  
TGTCTTTGAATATGTCAACAATGTCAGCCTTGCTGTTTATCTTCATGGTA

>M6-PGSC0003DMG400009196M6LRR-RLK\_64

TGGGAAGTGGAGTGTTTGGTTCAACTTATAAAGCTGCACTTAGTACTGGTCCTGTCATGGTTGTTAAGAG  
GTTTAGACATATGAATAAAGTTGGTAAAGAAGATTTCCATGAACATATGA

>M6-PGSC0003DMG400009230-(rev)M6LRR-RLP\_0

TTCAAACATCACTACATACTACAAGGAGAAGTAGAAAGTCTACCTTATTTAAGTAATTTAGTTGAGTAAT  
TATACATGTAACAGAAACCATCACAAACACCCAAGTTTGAAAATTTGCAG

>M6-PGSC0003DMG400009230-(rev)M6LRR-RLP\_1054

CACATGTTTCTCCCTTCCTTCCTTCTTTCTTAATTCTAGAAGTAGAGACTCTGTAGGGATATAGATCAA  
TACAATAGAGGCACTAACCGTCAAGGAACCAATAATGGAGCAAACACC

>M6-PGSC0003DMG400009230-(rev)M6LRR-RLP\_1116

TATAGATCAATACAATAGAGGCACTAACCGTCAAGGAACCAATAATGGAGCAAACACCAATATAGACCA  
TGATATTTGTCCGACCATAGCGAGGCTCACAATACAAGACTAGTACCAATG

>M6-PGSC0003DMG400009230-(rev)M6LRR-RLP\_1178

TAGACCATGATATTTGTCCGACCATAGCGAGGCTCACAATACAAGACTAGTACCAATGTTATTGCAACTG  
CTGATGCAGTGTAACAAAAGAAAAGCTGCAAAAACAAAGAGTGGAACATCAA

>M6-PGSC0003DMG400009230-(rev)M6LRR-RLP\_124

GTTTGAACCCTCCAATGTAAGCTTTATAGCTATACCTATAGCTTTGATGCTCATAACCTACAACAGAGCAA  
CAAACAAGCTTAAAATGACTGCTACATGCAATTTTTACCAATTGTTCTT

>M6-PGSC0003DMG400009230-(rev)M6LRR-RLP\_1240

TGCAACTGCTGATGCAGTGTACAAAAGAAAAGCTGCAAAAACAAAGAGTGGAACATCAAAAAAATGATA  
TATCAGCAAGGCAAATAAGAATGATATTCAAGGAAATACAGCACAGTACATC

>M6-PGSC0003DMG400009230-(rev)M6LRR-RLP\_1302

ATGATATATCAGCAAGGCAAATAAGAATGATATTCAAGGAAATACAGCACAGTACATCAGCACACCTGG  
TTGTGTAGCTAATGCCCATATTTTCATCCACTGAATTGAGATCATGTTACAG

>M6-PGSC0003DMG400009230-(rev)M6LRR-RLP\_1364

CACCTGGTTGTGTAGCTAATGCCCATATTTTCATCCACTGAATTGAGATCATGTTCCACGAGGTGCATGAAG  
AACAAATGACAACGGAACCTACTATACATAAAAAGACATCCTAATACTCCCA

>M6-PGSC0003DMG400009230-(rev)M6LRR-RLP\_1426

GCATGAAGAACAATGACAACGGAACCTACTATACATAAAAAGACATCCTAATACTCCCAGTTTCTTCAATT  
TTTCCTTCAGTATGAAATGTGCTAGAACAGCACTGCAGCAAAGCGCCAAA

>M6-PGSC0003DMG400009230-(rev)M6LRR-RLP\_1488

CTTCAATTTTTCTTCAGTATGAAATGTGCTAGAACAGCACTGCAGCAAAGCGCCAAATTATATGGAAGA  
AAACCGAATAAGCCATTTCCAGAAAATAATAAAGTCAAGTGGAAATTTA

>M6-PGSC0003DMG400009230-(rev)M6LRR-RLP\_1550

ATGGAAGAAAACCGAATAAGCCATTTCCAGAAAATAATAAAGTCAAGTGGAAATTTACCTCACAATTA  
TACTTAAAGCTCCAAGCGGTGTCACAAGAACTGCTGGCGCATAAATGTAAG

>M6-PGSC0003DMG400009230-(rev)M6LRR-RLP\_1612

ACAATTATACTTAAAGCTCCAAGCGGTGTCACAAGAACTGCTGGCGCATAAATGTAAGCCACAAAATTT  
GCAAATTCTCCAACAATCACTGCAAGGATTATGGTGAACATTGCACTCTAT

>M6-PGSC0003DMG400009230-(rev)M6LRR-RLP\_1674

AAAATTTGCAAATTCTCCAACAATCACTGCAAGGATTATGGTGAACATTGCACTCTATATTAGAATAACA  
AATTCAGGAACATATTCTCTGACAAATAAGAAGCAATTCAAAACCTTACTA

>M6-PGSC0003DMG400009230-(rev)M6LRR-RLP\_1736

GAATAACAAATTCAGGAACATATTCTCTGACAAATAAGAAGCAATTCAAAACCTTACTAGTTACCATCCCA  
ATCCACCAAAGAGGCTCCCGTAGATAACCATATCCACCCGAGCCTTCAGC

>M6-PGSC0003DMG400009230-(rev)M6LRR-RLP\_1798

CCATCCCAATCCACCAAAGAGGCTCCCGTAGATAACCATATCCACCCGAGCCTTCAGCAAGAAACAAATA  
TCTCATTGTCAAATAGACAGAGCAACAGAGTTCATATAATCAGCTTTTAA

>M6-PGSC0003DMG400009230-(rev)M6LRR-RLP\_186

ACAGAGCAACAAACAAGCTTAAAATGACTGCTACATGCAATTTTTACCAATTGTTCTTTTGAGAAATTTA  
GAAGGACCAGTTCCTATATTTTCTTTACTTTTCATTCGGAATAATTTTAC

>M6-PGSC0003DMG400009230-(rev)M6LRR-RLP\_1860

AACAAATATCTCATTGTCAAATAGACAGAGCAACAGAGTTCATATAATCAGCTTTTAAACTAAGTTCTATT



AAATGTTGATACAGAAAAGCATCTTCTATATATAAACTTTACAAGATGT

>M6-PGSC0003DMG400009230-(rev)M6LRR-RLP\_1922

AGTTCTATTAATGTTGATACAGAAAAGCATCTTCTATATATAAACTTTACAAGATGTGCCCGATGTATCT  
ACTTTTAATGTGGAACTAGCTGATAAATTACAATGTCAAGGAAATTCA

>M6-PGSC0003DMG400009230-(rev)M6LRR-RLP\_1984

GATGTATCTACTTTTAATGTGGAACTAGCTGATAAATTACAATGTCAAGGAAATTCATTCAGCTTATTAC  
AGTGCAGAATGATTTAAAAAATCCATTACACTGATCATTTTCAGTTCTT

>M6-PGSC0003DMG400009230-(rev)M6LRR-RLP\_2046

GCTTATTACAGTGCAGAATGATTTAAAAAATCCATTACACTGATCATTTTCAGTTCTTAAAGTCAAGATCC  
ATTTATTATGTCTTGAGCTCATTTCTTCTCTGTAATACATGTATTAGTA

>M6-PGSC0003DMG400009230-(rev)M6LRR-RLP\_2108

TCAAGATCCATTTATTATGTCTTGAGCTCATTTCTTCTCTGTAATACATGTATTAGTACTACCCAATACAGC  
AGTCTGTTTATTTGGAAATGATAGATCAAATAATTTGGAATTACCAAC

>M6-PGSC0003DMG400009230-(rev)M6LRR-RLP\_2170

CCAATACAGCAGTCTGTTTATTTGGAAATGATAGATCAAATAATTTGGAATTACCAACAACAATCATTTA  
GTGAAGCAGAATCATGAGTGCATATATTTAAATTGCTGACCCATTCTACA

>M6-PGSC0003DMG400009230-(rev)M6LRR-RLP\_2232

ATCATTTAGTGAAGCAGAATCATGAGTGCATATATTTAAATTGCTGACCCATTCTACAAGTGGTAACTAT  
CAAAGTATCAAAGGTATTAAGTTTAAACAGGTGCTGCTGGAGTCACTCTG

>M6-PGSC0003DMG400009230-(rev)M6LRR-RLP\_2294

GTAECTATCAAAGTATCAAAGGTATTAAGTTTAAACAGGTGCTGCTGGAGTCACTCTGATTGCTAAAACA  
ATGTCATTAATCCTAGATAACTGCCACCAAATCTAGGCAGCTGACTGG

>M6-PGSC0003DMG400009230-(rev)M6LRR-RLP\_2356

CTAAAACAATGTCATTAATCCTAGATAACTGCCACCAAATCTAGGCAGCTGACTGGTCAACATTCAGA  
AGAATATGAATTCATTTCAAGAACCTCTCCAAGATTATTCAAGGACTAC

>M6-PGSC0003DMG400009230-(rev)M6LRR-RLP\_2418

CATTCAGAAGAATATGAATTCATTTTCAAGAACCTCTCCAAGATTATTCAAGGACTACACTTACTTGCATG  
ATAAGTGTGAAGTGTCAATTCCAATATAAGTAACTTGATATTCATTTTC

>M6-PGSC0003DMG400009230-(rev)M6LRR-RLP\_248

GAAATTTAGAAGGACCAGTTCCTATATTTTCTTTACTTTTCATTCGGAATAATTTTACCATGTTTCATTGGC  
AACACAAGCACTCTCTAAGTCAGTTCCTGCAAAAAGAACTGCAATAGTA

>M6-PGSC0003DMG400009230-(rev)M6LRR-RLP\_2480

ACTTGCATGATAAGTGTGAAGTGTCAATTCCAATATAAGTAACTTGATATTCATTTTCCCATAAATGTACA  
CCCAATACTTCCCTTTCGGAGAGAAGTGTGAATTCCATTCCCTTGAGTTC

>M6-PGSC0003DMG400009230-(rev)M6LRR-RLP\_2542

AAATGTACACCCAATACTTCCCTTTCGGAGAGAAGTGTGAATTCCATTCCCTTGAGTTCAGAACAAAGTTTT  
CTTTATTCCCACACAGATAACTGCTTTGTAAGATGCAATATCACCTTTT

>M6-PGSC0003DMG400009230-(rev)M6LRR-RLP\_2604

ACAAGTTTTCTTTATTCCCACACAGATAACTGCTTTGTAAGATGCAATATCACCTTTTATAAGCAGTCATT  
GTGTATTAGTAATACTCACTGTGACTCTACATTTGCTGGAAGAGTTACC

>M6-PGSC0003DMG400009230-(rev)M6LRR-RLP\_2666

GCAGTCATTGTGTATTAGTAATACTCACTGTGACTCTACATTTGCTGGAAGAGTTACCCCATGCTCTTAT  
TTTACAGTCGGGCACCTACAACATGGTGTACCAACAGAGGATAACATAG

>M6-PGSC0003DMG400009230-(rev)M6LRR-RLP\_2728

TGCTCTTATTTTACAGTCGGGCACCTACAACATGGTGTACCAACAGAGGATAACATAGTCTTAGACTGTA  
CTTAAGCAGAAAAAAAAAATGAAGTAAGAATTTTCAGGTGTAAAACATTTG

>M6-PGSC0003DMG400009230-(rev)M6LRR-RLP\_2790

AGACTGTACTTAAGCAGAAAAAAAAAATGAAGTAAGAATTTTCAGGTGTAAAACATTTGTTTCACCCGCA  
AAACTAAAATGGGGACAGCAGAAAAGCAGGTACCACCATACCAGTATAAAA

>M6-PGSC0003DMG400009230-(rev)M6LRR-RLP\_2852

ACCCGCAAACTAAAATGGGGACAGCAGAAAAGCAGGTACCACCATACCAGTATAAAAAGAAACCCAAC  
ATCATCAGTCTGTTGCCACTTGATATTTCAAAGTAAGAAGTAAAGAACAATA

>M6-PGSC0003DMG400009230-(rev)M6LRR-RLP\_2914

CCCAACATCATCAGTCTGTTGCCACTTGATATTTCAAAGTAAGAAGTAAAGAACAATATATTCATCAAGC  
ATAATCTCCAATTCCATACATCTAGAAACAGCATCTGATATACTATAAAA

>M6-PGSC0003DMG400009230-(rev)M6LRR-RLP\_2976

CATCAAGCATAATCTCCAATTCCATACATCTAGAAACAGCATCTGATATACTATAAAAATTTGATTACTATG  
CCTCTTGCTGATGGTAAATTGGTAATGCAGTAAAATGGTTAGAAATAT

>M6-PGSC0003DMG400009230-(rev)M6LRR-RLP\_3038

ATTACTATGCCTCTTGGCTGATGGTAAATTGGTAATGCAGTAAAATGGTTAGAAATATCAATCTTCAATT  
GACTAATTTTGACTIONGATCATATAATAGTCAGTGTCTATATGAGTCC

>M6-PGSC0003DMG400009230-(rev)M6LRR-RLP\_310

TTTCATTGGCAACACAAGCACTCTCTAAGTCAGTTCTGCAAAAAGAACTGCAATAGTAGCTCAATTAATA  
CAAAAAATTTAAGAGAGGAACCAATTCATAAACTGTTATTTATCAAGTCT

>M6-PGSC0003DMG400009230-(rev)M6LRR-RLP\_3100

CTTCAATTGACTAATTTTGACTIONGATCATATAATAGTCAGTGTCTATATGAGTCCACTATATCCATTCT  
ACATATCTGGGCCTAAATCAATTTCAACTACAAGAATTTTATATAA

>M6-PGSC0003DMG400009230-(rev)M6LRR-RLP\_3162

TATCCATTCTACATATCTGGGCCTAAATCAATTTCAACTACAAGAATTTTATATAAAGAAAAACTGGGG  
GTTTTTTAGAGTTGAGAGATTCTCAAATGTCACACTTCTTTTTTGTAC

>M6-PGSC0003DMG400009230-(rev)M6LRR-RLP\_3224

AAACTGGGGGTTTTTTAGAGTTGAGAGATTCTCAAATGTCACACTTCTTTTTTGTACACTAACATACAAG  
GTTTTAACCTCATTCTCAATTAGCTAGCGTCATCTACAATAAATCATT

>M6-PGSC0003DMG400009230-(rev)M6LRR-RLP\_3286

ACATACAAGGTTTTAACCTCATTCTCAATTAGCTAGCGTCATCTACAATAAATCATTACTTTAACTGTGAT  
TCTTACCTAAATTGCCTTAGTTGAGAGATTGTAGGGGTTTTGTGGTTA

>M6-PGSC0003DMG400009230-(rev)M6LRR-RLP\_3348

TAACTGTGATTCTTACCTAAATTGCCTTAGTTGAGAGATTGTAGGGGTTTTGTGGTTATTGTTAGGATCTT  
CATTACCATGTGTCATGAAGAAGCTAATAAAGCAAACATTGGACTATGA

>M6-PGSC0003DMG400009230-(rev)M6LRR-RLP\_3410

TAGGATCTTCATTACCATGTGTCATGAAGAAGCTAATAAAGCAAACATTGGACTATGATAAATAATATAA  
CAAAGAGACATATACCAATACAAAAAATTTAACATGAGAAATTCACAAA

>M6-PGSC0003DMG400009230-(rev)M6LRR-RLP\_3472

TAATATAACAAAGAGACATATACCAATACAAAAAATTTAACATGAGAAATTCACAAAGATAAAAAAAA  
AAGAGTACAAACATATAAAGAGAATAACCCACAAAATTCACTCTTAAAGA

>M6-PGSC0003DMG400009230-(rev)M6LRR-RLP\_372

AATTAATACAAAAAATTTAAGAGAGGAACCAATTCATAAACTGTTATTTATCAAGTCTTTAAAGCAAAT

ACATGAGAGTATTATTCATAAGATAGTGAATTCGATTGATAAAGAATTCA

>M6-PGSC0003DMG400009230-(rev)M6LRR-RLP\_3782

AATTAGGGCAAACACCTACAACACTTGCATTTGTATAATTTTAAGCAAGGTCAACCTTCCTAACCTTAGC

AAGAAGTAATGCATTGCAACACACACATATAAAGAACTGAGCATATTA

>M6-PGSC0003DMG400009230-(rev)M6LRR-RLP\_3844

AACCTTAGCAAGAAGTAATGCATTGCAACACACACATATAAAGAACTGAGCATATTAACAACCTTCAGC

AAAACCTACAAGGTAGAAGAAAACACACAAACATCGGCAAACCTGAATGGGAA

>M6-PGSC0003DMG400009230-(rev)M6LRR-RLP\_3906

CTTCAGCAAACCTACAAGGTAGAAGAAAACACACAAACATCGGCAAACCTGAATGGGAACACAACCTAAA

CCTCCATGAATCCACCACTAGAAGCATTGACAAAGTTCAAATCAACAAAA

>M6-PGSC0003DMG400009230-(rev)M6LRR-RLP\_3968

ACTAAACCTCCATGAATCCACCACTAGAAGCATTGACAAAGTTCAAATCAACAAAAAGCAATAAATTAT

TGACAATTAGACCTAAAAACACTTAGCTATCAAGAAAATGAATTACTION

>M6-PGSC0003DMG400009230-(rev)M6LRR-RLP\_4030

TAAATTATTGACAATTAGACCTAAAAACACTTAGCTATCAAGAAAATGAATTACTION

CAGAGGCGCCTGCCCTCTGAAGACCCTTCTTCTTGATAATGAACTGGAA

>M6-PGSC0003DMG400009230-(rev)M6LRR-RLP\_4092

CCGAGTACCAGAGGCGCCTGCCCTCTGAAGACCCTTCTTCTTGATAATGAACTGGAACCAATAAAAGCT

CTAGACGCCACAGCCAATCCAAAACAGTCAAATTAGCACTGTACATGAT

>M6-PGSC0003DMG400009230-(rev)M6LRR-RLP\_4154

TAAAAGCTCTAGACGCCACAGCCAATCCAAAACAGTCAAATTAGCACTGTACATGATCCCAATATTATA

TCTAACTATTGGGCAACAATTTTGAATTTAATTCTCATCTGAACTTCC

>M6-PGSC0003DMG400009230-(rev)M6LRR-RLP\_4216

ATATTATATCTAACTATTGGGCAACAATTTTGAATTTAATTCTCATCTGAACTTCCCAAGAACAACCT

TTCAACACCCAAAAGGTTTCCCTGGATATACTCAACAAGACAACACTCA

>M6-PGSC0003DMG400009230-(rev)M6LRR-RLP\_4278

AACAAAACCTTTCAACACCCAAAAGGTTTCCCTGGATATACTCAACAAGACAACACTCAAGTAAGACTAAA

ATAACAAGAAAAACGAAATGGGCAAGTTTGAAAACTTGAAACCACTGTA

>M6-PGSC0003DMG400009230-(rev)M6LRR-RLP\_434

AGCAAATACATGAGAGTATTATTCATAAGATAGTGAATTCGATTGATAAAGAATTCATAAAATAACTCG  
ACCTCGAACTAACAAGATGTGACTAGATAAAAGCTTATCTTAACTAGCAA

>M6-PGSC0003DMG400009230-(rev)M6LRR-RLP\_4340

AGACTAAAATAACAAGAAAAACGAAATGGGCAAGTTTGAAAACTTGAAACCACTGTAGCTTTACTCAA  
TTACCCCAAATTGTAGAGCTGAGAATGGAAAAACAGCAAGAAAAACGAAA

>M6-PGSC0003DMG400009230-(rev)M6LRR-RLP\_4402

TACTCAATTACCCCAAATTGTAGAGCTGAGAATGGAAAAACAGCAAGAAAAACGAAATGGGTATATG  
AGAAAATTGGCGAAAACAGTTTGAAATGGTGAGCTAACAGTGCAAGCTCGT

>M6-PGSC0003DMG400009230-(rev)M6LRR-RLP\_4464

TATATGAGAAAATTGGCGAAAACAGTTTGAAATGGTGAGCTAACAGTGCAAGCTCGTTATAGACAATA  
ATGGAGAATAGTATTACAATAAGCATAATTTTGTTCATGCTTTGATTCGTTG

>M6-PGSC0003DMG400009230-(rev)M6LRR-RLP\_4523

ATAGACAATAATGGAGAATAGTATTACAATAAGCATAATTTTGTTCATGCTTTGATTCGTTGCTTTGGGTT  
GATTTGGCTATGGTATGTCTTCGACAATTGGGCATAACTATGAATAAATC

>M6-PGSC0003DMG400009230-(rev)M6LRR-RLP\_496

ATAACTCGACCTCGAACTAACAAGATGTGACTAGATAAAAGCTTATCTTAACTAGCAACAAAGACTTGTT  
TTAAATTTATTTAAAAGACAAATTAATAAAATAAAGTATTAGCACTGCAA

>M6-PGSC0003DMG400009230-(rev)M6LRR-RLP\_558

GACTTGTTTTAAATTTATTTAAAAGACAAATTAATAAAATAAAGTATTAGCACTGCAATCTTTTATTGAGT  
TACACACCTACTAGTCATGGAAAAACAACAGCAACCCTGGATGCCTTAT

>M6-PGSC0003DMG400009230-(rev)M6LRR-RLP\_62

TGAGTAATTATACATGTAACAGAAACCATCACAAACACCCAAGTTTGAAAATTTGCAGCTTGGTTTGAAC  
CCTCCAATGTAAGCTTTATAGCTATACCTATAGCTTTGATGCTCATAACC

>M6-PGSC0003DMG400009230-(rev)M6LRR-RLP\_620

TTATTGAGTTACACACCTACTAGTCATGGAAAAACAACAGCAACCCTGGATGCCTTATAAATTATAACAG  
ATCAAAGAATAGTCATTTGTACAAGCATAGTGGCAGGAAAAGACATCTAG

>M6-PGSC0003DMG400009230-(rev)M6LRR-RLP\_682

TATAACAGATCAAAGAATAGTCATTTGTACAAGCATAGTGGCAGGAAAAGACATCTAGTGACATGCTAA  
AACGTTACAGCACCTAAAGCTCTGGAGTAATATTTCAAGTTCCATACATC

>M6-PGSC0003DMG400009230-(rev)M6LRR-RLP\_744

ATGCTAAAACGTTACAGCACCCCTAAAGCTCTGGAGTAATATTTCAAGTTCCATACATCCATTTATACCTAA  
ATGAGAAGTTCTCTTTTACTTCAGTGACAACCTAGCAATGGATCGAGGAC

>M6-PGSC0003DMG400009230-(rev)M6LRR-RLP\_806

TATACCTAAATGAGAAGTTCTCTTTTACTTCAGTGACAACCTAGCAATGGATCGAGGACCCAGGGGCAGTT  
TGACTCTTAACAACCTTAAAAAATATGATCCATTTTGTGGTCAAATAATGC

>M6-PGSC0003DMG400009230-(rev)M6LRR-RLP\_868

GGGCAGTTTGACTCTTAACAACCTTAAAAAATATGATCCATTTTGTGGTCAAATAATGCTATTCCAATACCA  
CAGAGAAAGGTAGAATTCGGATTAACCTTAAAAGATAAGGCGTCTTGCA

>M6-PGSC0003DMG400009230-(rev)M6LRR-RLP\_930

CCAATACCACAGAGAAAGGTAGAATTCGGATTAACCTTAAAAGATAAGGCGTCTTGCAAACCTGACAATT  
TAGCTACACGGTAACTCAGTCAGGTCAGAGCTACAGACTAAAGCACGGTT

>M6-PGSC0003DMG400009230-(rev)M6LRR-RLP\_992

GACAATTTAGCTACACGGTAACTCAGTCAGGTCAGAGCTACAGACTAAAGCACGGTTGTGACACATGT  
TTCTTCCCTTCCCTTCTCTTTCTTAATTCTAGAAGTAGAGACTCTGTA

>M6-PGSC0003DMG400009238M6LRR-RLK\_0

ATGAAACACAAAACATTTGTTCCCTTGTCCCTCCCCTTATTTACCTGAGCTCAGAGAGTATATGCAAAT  
CTTGACATAGATTTTCTTGAAACCCCTTATCATTTTCTTGAAGTTTTT

>M6-PGSC0003DMG400009238M6LRR-RLK\_1054

ACAGATTAATGGTACAATTCCTCAGGACCTCTTATTCCCAATGAAATTGCAGTTTGTGATCTCACTTCC  
AATAAATTAGAGGGACCTGTTCCCTCAAACATGTCGATAAATTTGATCA

>M6-PGSC0003DMG400009238M6LRR-RLK\_1116

CTCACTTCCAATAAATTAGAGGGACCTGTTCCCTCAAACATGTCGATAAATTTGATCAGGTTGAGATTGG  
GGCAAATGCTTTGAATGGATCATTTCATCTGCTTCATTTGAAAGCCTT

>M6-PGSC0003DMG400009238M6LRR-RLK\_1178

GAGATTGGGGCAAATGCTTTGAATGGATCATTTCATCTGCTTCATTTGAAAGCCTTCAAAGTTTGACC  
TACTTGGAACCTGGACAACAACCTAGTTAACTGGACCAATTCCTTCTGAATT

>M6-PGSC0003DMG400009238M6LRR-RLK\_124

TTCTGACTGTCAAAGCCAAAAACAAAAAATGAACCTAAGGTATTCTCCCATATAGTTACTAT

ATTCTTGTCTTTTTCTCTTCAAATTGTGTTTTCTCAATTGCCCCCAAATC

>M6-PGSC0003DMG400009238M6LRR-RLK\_1240

GTTTGACCTACTTGGAAGTGGACAACAACCGTAACTGGACCAATTCCTTCTGAATTGGGAAAGTGCCA  
AAAGATGGCCCTTTGAACTTAGCCCAGAATAAGCTGAGTGGTGTATTTC

>M6-PGSC0003DMG400009238M6LRR-RLK\_1364

TGAGTTGGGTGATATTTCTAATCTTCAGGTAAGTCTTCAGTCCAATAACCTAGTTGGAGAAATTCCA  
AGTAACATTTACAGTTGAACAGATTGCAGAGGATCAATTCAGCTAGAA

>M6-PGSC0003DMG400009238M6LRR-RLK\_1426

AAATCCAAGTAACATTTACAGTTGAACAGATTGCAGAGGATCAATTCAGCTAGAATTAGTTGACTGG  
TTCCATCCAAGTTCATTATCAAGTTTGAGAAATCTCACAACTTGAATT

>M6-PGSC0003DMG400009238M6LRR-RLK\_1488

TTGACTGGTTCATTCCAAGTTCATTATCAAGTTTGAGAAATCTCACAACTTGAATTTGCAGGGGAATA  
ATCTAAGTGGTCAATTCCGGTTGACATTAGTAACTTAAATATGCTATTA

>M6-PGSC0003DMG400009238M6LRR-RLK\_1550

GGGGAATAATCTAAGTGGTCAATTCCGGTTGACATTAGTAACTTAAATATGCTATTAGAACTCCA  
GGAGGGAACCAACTCGGTGGGCCTATTCCTGATATGCCTTTGAGTTTACA

>M6-PGSC0003DMG400009238M6LRR-RLK\_1612

TCCAATTGGAGGGAACCAACTCGGTGGGCCTATTCCTGATATGCCTTTGAGTTTACAGATTGCTTTGAA  
TCTGAGTGGCAATCTTTTTCAAGGACCTATACCAAGTAGTTTTTCAAGAT

>M6-PGSC0003DMG400009238M6LRR-RLK\_1674

GCTTTGAATCTGAGTGGCAATCTTTTTCAAGGACCTATACCAAGTAGTTTTTCAAGATTGACTTCATTGGA  
AGTTTTGGATCTCTTACAACAGTTCTCGGGTCAGATTCCAGACTAC

>M6-PGSC0003DMG400009238M6LRR-RLK\_1798

CGGGAATGAGAGGATTGACTAGGTTGGTGCTTTCAAACAATCAACTGTCTGGAGTTATTCAAAGTTTG  
AAAGATTTGTCAGTGTGAGACAGATGGAAATGGGGATCTGATATATCCAT

>M6-PGSC0003DMG400009238M6LRR-RLK\_186

ATTACTATATTCTTGTCTTTTTCTCTTCAAATTGTGTTTTCTCAATTGCCCCCAAATCAAATTAATGACATGA  
GAAGTGTCTATGATCTGTTTCAGAATGAACTGGTGCTTCTTTTGTGA

>M6-PGSC0003DMG400009238M6LRR-RLK\_1860

AAGTTTGAAAGATTTGTCAGTGTTGAGACAGATGGAAATGGGGATCTGATATATCCATACACAGTTAAT  
CCACCACAAGCTGCTGCAAAAAAGAGAAAATCAATAGTTGTTGCAGTTGTT

>M6-PGSC0003DMG400009238M6LRR-RLK\_1922

AGTTAATCCACCACAAGCTGCTGCAAAAAAGAGAAAATCAATAGTTGTTGCAGTTGTTGTCCCAATTGCA  
TGTGTAGCAACAATTGCTGTATTAGTGGTGATTGCTATTTCAATCTCTAG

>M6-PGSC0003DMG400009238M6LRR-RLK\_1984

CAATTGCATGTGTAGCAACAATTGCTGTATTAGTGGTGATTGCTATTTCAATCTCTAGAAGATATTACAG  
GATCAATGATGAACATTTTCACTCAGGATTAGAAAATTTCTCAATCCCCTG

>M6-PGSC0003DMG400009238M6LRR-RLK\_2046

TATTACAGGATCAATGATGAACATTTTCACTCAGGATTAGAAAATTTCTCAATCCCCTGTCGTTCCAGGGAA  
AGGTTTTAACTGCAAACAGCATTCAAGTCAAATATAGACTTCACAAAG

>M6-PGSC0003DMG400009238M6LRR-RLK\_2108

TCAGGGAAAGTTTTAACTGCAAACAGCATTCAAGTCAAATATAGACTTCACAAAGGCCATGGTAGC  
AGTGTCTGAGCCCTCAAATGTTGTGTTCAAGACAAGATTTTCAACCTACTA

>M6-PGSC0003DMG400009238M6LRR-RLK\_2170

TGGTAGCAGTGTCTGAGCCCTCAAATGTTGTGTTCAAGACAAGATTTTCAACCTACTATAAAGCTGTTAT  
GCCGTCGGGTACAACCTATTTTGTCAAGAAGCTTAATTGGAGTGACAAAA

>M6-PGSC0003DMG400009238M6LRR-RLK\_2232

GCTGTTATGCCGTCGGGTACAACCTATTTTGTCAAGAAGCTTAATTGGAGTGACAAAATATTTTCAGTTGG  
GAAGCCATGAACTATTTGGGGAAGAGCTAAAAAATATTGGAAAGCTGAAT

>M6-PGSC0003DMG400009238M6LRR-RLK\_2294

TCAGTTGGGAAGCCATGAACTATTTGGGGAAGAGCTAAAAAATATTGGAAAGCTGAATAATTCAAATGT  
TATGATTCCTCTAGGCTATCTTTGGCTGCTGATAGTGCTTATCTCTTCTA

>M6-PGSC0003DMG400009238M6LRR-RLK\_2356

CAAATGTTATGATTCCTCTAGGCTATCTTTGGCTGCTGATAGTGCTTATCTCTTCTACGAATTTGCCCCCA  
TTGGCTCGTTATATGATGTTCTTCGTGGTAGCTTGGGCTACTCGTTAG

>M6-PGSC0003DMG400009238M6LRR-RLK\_2418

TTTGCCCCATTGGCTCGTTATATGATGTTCTTCGTGGTAGCTTGGGCTACTCGTTAGATTGGGCAAGTC  
GCTACAGCATAGCTATTGGAGTAGCTCAGGGTTTAGCTTTTCTTCATGGA



>M6-PGSC0003DMG400009238M6LRR-RLK\_248

TAATGACATGAGAAGTGTCTATGATCTGTTTCAGAATGAAACTGGTGCTTCTTTGTATGGAATGGAAC  
GATAAAGCTTCAACCCCATGTTCTTGAAAGGGGTTTCTTGCAATTCTGA

>M6-PGSC0003DMG400009238M6LRR-RLK\_2480

GGCAAGTCGCTACAGCATAGCTATTGGAGTAGCTCAGGGTTAGCTTTTCTTCATGGATGTGAAAAGGG  
TCCAATCCTCCTCGACCTTCCAGCAAGAGCATTCTCTTGAAGTCCCA

>M6-PGSC0003DMG400009238M6LRR-RLK\_2542

AAAAGGGTCCAATCCTCCTCGACCTTCCAGCAAGAGCATTCTCTTGAAGTCCCAGAATGAGGCTCA  
GATAGGAGACATTGAACTCTACAAGGTGATGGATCCTCGAAGAGCACAG

>M6-PGSC0003DMG400009238M6LRR-RLK\_2604

GAGGCTCAGATAGGAGACATTGAACTCTACAAGGTGATGGATCCTCGAAGAGCACAGGCAGCTTTTCT  
GCTGTTGCTGGTCTGTGCGTTATATCCTCCAGGTAATGAACTATTACTT

>M6-PGSC0003DMG400009238M6LRR-RLK\_2666

CTTTTCTGCTGTTGCTGGTCTGTGCGTTATATCCTCCAGGTAATGAACTATTACTTGGTTAATGGTAAA  
AGTTTAAGATCCTTCAACATTGATTTATACTCCTTAAGGGTAATGTGAC

>M6-PGSC0003DMG400009238M6LRR-RLK\_2728

AATGGTAAAAGTTTAAGATCCTTCAACATTGATTTATACTCCTTAAGGGTAATGTGACGTTTTTTGTCTTA  
ACTGTCGTACCATGCTTTAAACTCATTTTTGTGTTAATCTTCATAT

>M6-PGSC0003DMG400009238M6LRR-RLK\_2790

TTTGTCTAACTGTCGTACCATGCTTTAAACTCATTTTTGTGTTAATCTTCATATAGTTATTGTTGTTTT  
CAAACCTAAGACTTCATTATATCCTCCCACCATGAAACGGTGTGAA

>M6-PGSC0003DMG400009238M6LRR-RLK\_2852

ATTGTTGTTTTCAAACCTAAGACTTCATTATATCCTCCCACCATGAAACGGTGTGAACTATCTTTGATAT  
CTAAAGTGAAACGGTGTGTCAGTATAGCTTAGAGAGGGTGGGGTGCAT

>M6-PGSC0003DMG400009238M6LRR-RLK\_2914

CTTTGATATCTAAAGTGAAACGGTGTGTCAGTATAGCTTAGAGAGGGTGGGGTGCATTAAAATGTAAC  
ATGAGAAGCCTCAAATTTGAGCATATATTTAGTGATGCATTTCTTTTTGT

>M6-PGSC0003DMG400009238M6LRR-RLK\_2976

ATGTAACATGAGAAGCCTCAAATTTGAGCATATATTTAGTGATGCATTTCTTTTTGTGTTACAGAATATG

CATACACAATGAGAGTCACAATGGCTGGAAATGTATATAGCTTTGGGGT

>M6-PGSC0003DMG400009238M6LRR-RLK\_3038

CAGAATATGCATACACAATGAGAGTCACAATGGCTGGAAATGTATATAGCTTTGGGGTTGTCCTGCTGG  
AATTGTTGACAGGAAGGCCTGCAGTTAGTCAGGGAACCGAGTTAGCCAAGT

>M6-PGSC0003DMG400009238M6LRR-RLK\_310

ATGGAAGTCTGATAAAGCTTCAACCCCATGTTCTTGAAAGGGGTTTCTTGCAATTCTGATAATTCTTCCCTT  
ACCAAAGTTACCTTTTCATTGTTCACTATTTCTAGCTCTGAATTCTTGC

>M6-PGSC0003DMG400009238M6LRR-RLK\_3100

CTGCTGGAATTGTTGACAGGAAGGCCTGCAGTTAGTCAGGGAACCGAGTTAGCCAAGTCAGTGCTGAG  
CAACTCTGAGAAGCACAGCAAGTGGGATCACATTCTGGATTCTAGCATTCT

>M6-PGSC0003DMG400009238M6LRR-RLK\_3162

GCTGAGCAACTCTGAGAAGCACAGCAAGTGGGATCACATTCTGGATTCTAGCATTCTAAAACATCGCTC  
AACGTTAGGAGCCAGATGTTAGCAGTCCTCAAATTGGCTCTAGCTTGTGT

>M6-PGSC0003DMG400009238M6LRR-RLK\_3224

CATCGCTCAACGTTAGGAGCCAGATGTTAGCAGTCCTCAAATTGGCTCTAGCTTGTGTCAGTGTATCACC  
AGAAGGCCGGCCAAAGATGAAGAGTGTGCTTCGAGTGCTTCTCCATGCAA

>M6-PGSC0003DMG400009238M6LRR-RLK\_3286

GTATCACCAGAAGGCCGGCCAAAGATGAAGAGTGTGCTTCGAGTGCTTCTCCATGCAAGGTAATCGGAC  
GTCAAAGGAAAGTTAAGGAGAAAAGTCCAAGGTGGTTTTCTTCTTTTTCT

>M6-PGSC0003DMG400009238M6LRR-RLK\_3348

ATCGGACGTCAAAGGAAAGTTAAGGAGAAAAGTCCAAGGTGGTTTTCTTCTTTTTCTTTTGGGGAGGA  
GCTGCAAGTGGTGAAGGTGTTGTGAGCTATGCAGAATATGCCAGTTTTGCC

>M6-PGSC0003DMG400009238M6LRR-RLK\_3410

GGGAGGAGCTGCAAGTGGTGAAGGTGTTGTGAGCTATGCAGAATATGCCAGTTTTGCCAGTTTATACAT  
ATTATATTAATGTAAACATATAGATATATGATGATAGTAGTTACATAACTT

>M6-PGSC0003DMG400009238M6LRR-RLK\_3472

TATACATATTATTAATGTAAACATATAGATATATGATGATAGTAGTTACATAACTTTGAATATGATGTT  
AGTTCTCAGTGTAACATAGTCCATTTTTCTTGTTTCATGTGTAATATATA

>M6-PGSC0003DMG400009238M6LRR-RLK\_3508

GATGATAGTAGTTACATAACTTTGAATATGATGTTAGTTCTCAGTGTAACATAGTCCATTTTTCTTGTTCA  
TGTGTAATATATATAATATATAAAAAGGTCTTTGGGAGTGAATCCAATTT

>M6-PGSC0003DMG400009238M6LRR-RLK\_372

TCTTCCCTTACCAAAGTTACCTTTTCATTGTTCACTATTTCTAGCTCTGAATTCTTGCCTGTTATTTGTCAAA  
TTGATACTTTGGAGTCTATTGATGTTTCCCAAACCTTTTTGAGCTCT

>M6-PGSC0003DMG400009238M6LRR-RLK\_434

TATTTGTCAAATTGATACTTTGGAGTCTATTGATGTTTCCCAAACCTTTTTGAGCTCTATCCCAAATGAGTT  
CATCACTGTTTGTGGGGGAATTAGTGGGTTGAAATTGTTGAACTTTAG

>M6-PGSC0003DMG400009238M6LRR-RLK\_558

AATAAATTGGAGGGTTTTTGCCTACTTTCCTGGTTTTGGAAAGTTGGAGTCTTTGGACTTTTCTGACAA  
TAAGATGAATGGGAAAGTTGACTTGCAGTTGGATGGATTAGACTCACTC

>M6-PGSC0003DMG400009238M6LRR-RLK\_62

TATGCAAATCTTGACATAGATTTTCTTGAACCCCTTATCATTTTCTTGAAGTTTTCAGCTTTCTGACTGT  
CAAAGCCAAAAACAAAAAATGAACCTAAGGTATTCTCCCATAT

>M6-PGSC0003DMG400009238M6LRR-RLK\_620

TTCTGACAATAAGATGAATGGGAAAGTTGACTTGCAGTTGGATGGATTAGACTCACTCAAGAGTTTGGAA  
CCTTAGCTTTAACATGTTTAATGGTTCAGTTCCTACCAGTCTTGGAAAATT

>M6-PGSC0003DMG400009238M6LRR-RLK\_682

GTTTGGACCTTAGCTTTAACATGTTTAATGGTTCAGTTCCTACCAGTCTTGGAAAATTTAATCTTCTGGAG  
GAGCTTCATCTTTCTGCAAATGCTTTTGGAGGTGAATCCCACTCAAA

>M6-PGSC0003DMG400009238M6LRR-RLK\_744

CTTCTGGAGGAGCTTCATCTTTCTGCAAATGCTTTTGGAGGTGAATCCCACTCAAATTGTGAACTTTGG  
CAACTTAACTTTGATTGACCTTTCTCTAAACAACCTATCTGGTGTAATT

>M6-PGSC0003DMG400009238M6LRR-RLK\_806

GAACTTTGGCAACTTAACTTTGATTGACCTTTCTCTAAACAACCTATCTGGTGTAATTCCTGATAGATTAG  
GTGAACTTTCAAATGCAAGTCTTGATTTTGTCAACCAATAGATTGAG

>M6-PGSC0003DMG400009238M6LRR-RLK\_868

ATAGATTAGGTGAACTTTCAAATGCAAGTCTTGATTTTGTCAACCAATAGATTGAGTGGCACAATCCC  
ACAATCCCTTAGGAATATCACAACGCTGACGCGTTTTGCTGCAAATCAGA

>M6-PGSC0003DMG400009238M6LRR-RLK\_930

ACAATCCCACAATCCCTTAGGAATATCACAAACGCTGACGCGTTTTGCTGCAAATCAGAATAATTTTGTTG  
GAAATATAACCTTTGGTATAACACATAACTGAGGAATTTGGACCTCAGT

>M6-PGSC0003DMG400009238M6LRR-RLK\_992

TTTTGTTGAAATATAACCTTTGGTATAACACATAACTGAGGAATTTGGACCTCAGTTTTAACAGATTAA  
ATGGTACAATTCCTCAGGACCTCTTATTCCCAATGAAATTGCAGTTTGT

>M6-PGSC0003DMG400009324-(rev)M6LRR-RLP\_0

AGGAGACCTAGTAAAAAAGAAAAGAAAAAACATGGCCGACAAATTCAGCCAGTCAACCAGAGGTAC  
GGAGAATTGTTGGTATATGCAGTTATCATGAAATATATAAAGTCCACACACT

>M6-PGSC0003DMG400009324-(rev)M6LRR-RLP\_1037

GTTAACTTAGCCTGGATCTGCTATTAGAAGTGGAATTTTTGTGGCACTAAACAATGCAATGGGTCTGG  
ATTCATTTTTGCATTAACATTTGTTTAGACGATTTTCTTTATCGAATTTT

>M6-PGSC0003DMG400009324-(rev)M6LRR-RLP\_1098

TGGGTCTGGATTCATTTTTGCATTAACATTTGTTTAGACGATTTTCTTTATCGAATTTTACTGTCTAAAAAG  
GAAAAACAAAGAAATAAGAAGTATACAGAGGCTGACTTCTTCATAGT

>M6-PGSC0003DMG400009324-(rev)M6LRR-RLP\_1159

TGTCTAAAAAGGAAAAACAAAGAAATAAGAAGTATACAGAGGCTGACTTCTTCATAGTATTTCTCATA  
AAAAAAAACATTGATTTCTAGGATATGGGTTATTTTAAATTACAAATTTG

>M6-PGSC0003DMG400009324-(rev)M6LRR-RLP\_122

TCAACTGAGCAAACCAGACACTTCGAATTGGTCAATATTTCTTTACTGGATTCAATACATGGCGGAAGCT  
TTTCTTTATGTTCTGCTATAAAATCTCTTTTCTTTTATTGAGGGAAACT

>M6-PGSC0003DMG400009324-(rev)M6LRR-RLP\_1220

TTCTCATAAAAAAAAAAACATTGATTTCTAGGATATGGGTTATTTTAAATTACAAATTTGTGAGTTAAACA  
GTTCTGTTGGGAAGGATTTAGATACACGTGGATAGTATCTAGAAGTTTT

>M6-PGSC0003DMG400009324-(rev)M6LRR-RLP\_1281

AGTAAAACAGTTCTGTTGGGAAGGATTTAGATACACGTGGATAGTATCTAGAAGTTTTTAAATAAAAA  
ATTAGCAAATTATGTGGGCTGGGGCGGATTGAAAACAGCAAACCTTTGCAA

>M6-PGSC0003DMG400009324-(rev)M6LRR-RLP\_1342

AAATAAAAAATTAGCAAATTATGTGGGCTGGGGCGGATTGAAAACAGCAAACCTTTGCAAGGCAGGGCG

GGTTGAAATCTTTGCAAGTTTGTGTGGGTTTGCCTGCACCACCCCATCTGT

>M6-PGSC0003DMG400009324-(rev)M6LRR-RLP\_1403

CAGGGCGGGTTGAAATCTTTGCAAGTTTGTGTGGGTTTGCCTGCACCACCCCATCTGTCATTCCTGTCT  
AAATGTTTGTCTATATAATTCTTGCTGACTCATTCTAATGAGCTC

>M6-PGSC0003DMG400009324-(rev)M6LRR-RLP\_1464

TTCCTGTCTAAATGTTTGTCTATATAATTCTTGCTGACTCATTCTAATGAGCTCAATTGTAACAAAT  
TCTTTGTGTCCACTCTACTTGAACAGGTTTTGTTTAACTGAACCAA

>M6-PGSC0003DMG400009324-(rev)M6LRR-RLP\_1525

TTGTAACAAATTCTTTGTGTCCACTCTACTTGAACAGGTTTTGTTTAACTGAACCAAAGTCTACGGAA  
GGGATAAAGAGGAGGATGAGATAGTGAAAATCTTGATAACAATTTTAA

>M6-PGSC0003DMG400009324-(rev)M6LRR-RLP\_1586

GTCTACGGAAGGGATAAAGAGGAGGATGAGATAGTGAAAATCTTGATAACAATTTAATTTTGCCGAA  
GAACTCCAGTCTCCCTATAATTGGTATGGGGGGACTAGGAAAGACGACA

>M6-PGSC0003DMG400009324-(rev)M6LRR-RLP\_1647

TTGCCGAAGAACTCCAGTCTCCCTATAATTGGTATGGGGGGACTAGGAAAGACGACACTTGCCCAA  
TGATCTCAATGATGAGAGAGTGACTAAGCATTTCATCCCAAATATGGG

>M6-PGSC0003DMG400009324-(rev)M6LRR-RLP\_1708

TGCCCAAATGATCTTCAATGATGAGAGAGTGACTAAGCATTTCATCCCAAATATGGGTTTGTGTCTCA  
GATGATTTTGTGAGAAGAGGTTAATTAAGACAATTTTAGGAAATATTGA

>M6-PGSC0003DMG400009324-(rev)M6LRR-RLP\_1769

TGTGTCTCAGATGATTTTGTGAGAAGAGGTTAATTAAGACAATTTTAGGAAATATTGAAAGAAGTTCTC  
CTCATGTCGAGGACTTGGCTTCATTCAGAAGAAGCTCCATGAGTTATTG

>M6-PGSC0003DMG400009324-(rev)M6LRR-RLP\_183

GCGGAAGCTTTTCTTTATGTTCTGTATAAAATCTCTTTTCTTTCATTTGAGGGAACTTGATTGTTTTTC  
GGTTTCGAAAAGGAATTTGAAAAGCTGTCGTGTGTGTTTTCCACAATT

>M6-PGSC0003DMG400009324-(rev)M6LRR-RLP\_1830

GAAGTTCTCCTCATGTCGAGGACTTGGCTTCATTCAGAAGAAGCTCCATGAGTTATTGAATGGAAATCG  
ATACTTGCTTGTCTTAGATGATGTTTGAATGATGATCTAGATAAGTGGG

>M6-PGSC0003DMG400009324-(rev)M6LRR-RLP\_1891

TGGAAATCGATACTTGCTTGTCTTAGATGATGTTTGGGAATGATGATCTAGATAAGTGGGCTAAGTTAAG  
AGCAGTCTTAAATGTTGGAGCAAGAGGTGCTTCTATTCTAGCTACTACTCG

>M6-PGSC0003DMG400009324-(rev)M6LRR-RLP\_1952

AAGTTAAGAGCAGTCTTAAATGTTGGAGCAAGAGGTGCTTCTATTCTAGCTACTACTCGTCTTGAAAAGG  
TTGGATCAATTATGGGAACGTCGCGACCATATCATTGTCAAATTTGTCT

>M6-PGSC0003DMG400009324-(rev)M6LRR-RLP\_2013

TTGAAAAGGTTGGATCAATTATGGGAACGTCGCGACCATATCATTGTCAAATTTGTCTCCACATGATAG  
TTTACTGTTATTTATGCAACGCGCATTGGGCAACAAAGAGAAGCAAATC

>M6-PGSC0003DMG400009324-(rev)M6LRR-RLP\_2074

ACATGATAGTTTACTGTTATTTATGCAACGCGCATTGGGCAACAAAGAGAAGCAAATCCTAATCTAGTG  
GCCATTGAAAAGGAGATTGTGAAGAAATGTGGTGGTGTGCCTTTAGCGGC

>M6-PGSC0003DMG400009324-(rev)M6LRR-RLP\_2135

AATCTAGTGGCCATTGAAAAGGAGATTGTGAAGAAATGTGGTGGTGTGCCTTTAGCGGCCAAGACTCTT  
GGTGGTCTTTTACGCTTCAAGAGAGAAGAGAGTGAATGGGAACATGTGAGA

>M6-PGSC0003DMG400009324-(rev)M6LRR-RLP\_2196

AGACTCTTGGTGGTCTTTTACGCTTCAAGAGAGAAGAGAGTGAATGGGAACATGTGAGAGATAATGAG  
ATTTGGAGTCTGCCTCAAGATGAAAGTTCTATTTGCCTGCTCTAAGACTGA

>M6-PGSC0003DMG400009324-(rev)M6LRR-RLP\_2257

TAATGAGATTTGGAGTCTGCCTCAAGATGAAAGTTCTATTTTGCCTGCTCTAAGACTGAGTTATCATCACC  
TTCCATTTGATTTGAGACAATGCTTTGCGTATTGTGCAGTATTCCCAA

>M6-PGSC0003DMG400009324-(rev)M6LRR-RLP\_2318

TATCATCACCTTCCATTTGATTTGAGACAATGCTTTGCGTATTGTGCAGTATTCCCAAAGGACACCAAAT  
GATAAAGGAAAATCTCATCACTCTCTGGATGGCCCATGGTTTTCTTTA

>M6-PGSC0003DMG400009324-(rev)M6LRR-RLP\_2379

ACACCAAATGATAAAGGAAAATCTCATCACTCTCTGGATGGCCCATGGTTTTCTTTATCAAAGGGAAA  
CTTGGAGCTAGAGTATGTGGTAATGAAGTATGGAATGAATTATACTTGA

>M6-PGSC0003DMG400009324-(rev)M6LRR-RLP\_244

TATTGTTTTTCGGTTTCGAAAAGGAATTTGAAAAGCTGTCGTGTGTGTTTTCCACAATTCAAGCTGTGCTT  
CAAGATGCTCATGAGAAGCAATTGAAGGACATTGCAATTGATAATTGGT

>M6-PGSC0003DMG400009324-(rev)M6LRR-RLP\_2440

AAAGGGAAACTTGGAGCTAGAGTATGTGGGTAATGAAGTATGGAATGAATTATACTTGAGGTCTTTCTT  
CCAAGAGATTGAAGTTAAATCCGGTAATACTTATTTCAAGATACACGATCT

>M6-PGSC0003DMG400009324-(rev)M6LRR-RLP\_2501

TCTTTCTTCCAAGAGATTGAAGTTAAATCCGGTAATACTTATTTCAAGATACACGATCTCATCCATGATTT  
GGCTACATTTCTGTTTTTGGCAAGCACATCAAGCAGCAATATCCGCGAA

>M6-PGSC0003DMG400009324-(rev)M6LRR-RLP\_2562

TCCATGATTTGGCTACATTTCTGTTTTTGGCAAGCACATCAAGCAGCAATATCCGCGAAATAAATGTCAA  
AGATTATAAGCATATAATGTCCATTGGTTTCGCTGAAGTGGTGTCTTCTT

>M6-PGSC0003DMG400009324-(rev)M6LRR-RLP\_2623

AAATGTCAAAGATTATAAGCATATAATGTCCATTGGTTTCGCTGAAGTGGTGTCTTCTTACTCTCCTTCGC  
TCTTGAAAAAGTTTGTCTCGTTAAGGGTGCTTAATCTAAGCTACTCAA

>M6-PGSC0003DMG400009324-(rev)M6LRR-RLP\_2928

GAAATCTTGTTCTTGATGGCTGTCCATTGACTTCTACTCCACCAAGGATAGGATTGTTGACATGCCTTAAG  
ACTCTAGGTTTCTTTATTGTGGGAAGCAAGAAAGGTTATCAACTTGGTG

>M6-PGSC0003DMG400009324-(rev)M6LRR-RLP\_2989

ATGCCTTAAGACTCTAGGTTTCTTTATTGTGGGAAGCAAGAAAGGTTATCAACTTGGTGAACACTACGAAAT  
TTAAACCTCCGTGGTGCAATTTCAATCACACATCTTGAGAGAGTGAAAAA

>M6-PGSC0003DMG400009324-(rev)M6LRR-RLP\_305

AGCTGTGCTTCAAGATGCTCATGAGAAGCAATTGAAGGACATTGCAATTGATAATTGGTTGCAGAACT  
AAATTCTGCTGCGTATGAAGTTGATGACATATTGGGCGAATGTAAAAATGA

>M6-PGSC0003DMG400009324-(rev)M6LRR-RLP\_3050

CTACGAAATTTAAACCTCCGTGGTGCAATTTCAATCACACATCTTGAGAGAGTGAAAAACGATATGGAG  
GCAAAAGAAGCCAATTTATCTGCAAAGCAAATCTGCAATCTTTAAGCATG

>M6-PGSC0003DMG400009324-(rev)M6LRR-RLP\_3111

ATATGGAGGCAAAGAAGCCAATTTATCTGCAAAGCAAATCTGCAATCTTTAAGCATGAGTTGGGATA  
ACGATGGACCAAACAGATATGAATCTGAAGAAGTTAAAGTGCTTGAAGCCC

>M6-PGSC0003DMG400009324-(rev)M6LRR-RLP\_3172

TTGGGATAACGATGGACCAAACAGATATGAATCTGAAGAAGTTAAAGTGCTTGAAGCCCTCAAACCACA

CCCCAATCTGAAATATTTAGAGATCATTGCCTTCGGAGGATTCCGTTTTCC

>M6-PGSC0003DMG400009324-(rev)M6LRR-RLP\_3233

AAACCACACCCCAATCTGAAATATTTAGAGATCATTGCCTTCGGAGGATTCCGTTTTCCAAGCTGGATAA

ATCACTCAGTTTTGGAGAAGGTCATCTCTATTAGAATTTAAAGCTGCAAA

>M6-PGSC0003DMG400009324-(rev)M6LRR-RLP\_3294

GCTGGATAAATCACTCAGTTTTGGAGAAGGTCATCTCTATTAGAATTTAAAGCTGCAAAAAGCTGCTTGTG

CTTACCACCCTTTGGGGAGCTTCCTTGTCTAGAAAGTCTAGAGTTACAAA

>M6-PGSC0003DMG400009324-(rev)M6LRR-RLP\_3416

GGGTCTGCGGAGGTGGAGTTTGTGAAGAGGATGATGTTTATTCTAGATTTTCCACAAGAAGAAGTTT

CCATCCCTGAAAAATCTTCGTATATGGTTCTTTCGTAATTTGAAAGGTTTG

>M6-PGSC0003DMG400009324-(rev)M6LRR-RLP\_3477

GAAGGTTTCCATCCCTGAAAAATCTTCGTATATGGTTCTTTCGTAATTTGAAAGGTTTGGTGAAAGAGGA

AGGAGAATATAAATTTCCCATGCTTGAAGAGATGGCGATTTTACATTGCC

>M6-PGSC0003DMG400009324-(rev)M6LRR-RLP\_3538

GAAAGAGGAAGGAGAATATAAATTTCCCATGCTTGAAGAGATGGCGATTTTACATTGCCCTCTGTTTGT

TTTCCAACCCTTTCTTCTGTCAAGAAATTAGAAGTTCACGGCAACACAAA

>M6-PGSC0003DMG400009324-(rev)M6LRR-RLP\_3599

CTGTTTGTTTTTCCAACCCTTTCTTCTGTCAAGAAATTAGAAGTTCACGGCAACACAAAAGCAAGAGGTTT

GAGCTCCATATCTAATCTTAGCACTCTTACTTCCCTCCGCATTGGTGCT

>M6-PGSC0003DMG400009324-(rev)M6LRR-RLP\_366

CAGAACTAAATTCTGCTGCGTATGAAGTTGATGACATATTGGGCGAATGTAAAAATGAGGCAATAAGA

TTTGAGCAGTCTCGATTAGGGTTTTATCATCCAGGTATTATCAATTTCCGT

>M6-PGSC0003DMG400009324-(rev)M6LRR-RLP\_3660

CAAGAGGTTTGAGCTCCATATCTAATCTTAGCACTCTTACTTCCCTCCGCATTGGTGCTAACTACAGAGCG

ACTTCTCTCCAGAAGAGATGTTTACAAGTCTTACAAATCTCGAATACT

>M6-PGSC0003DMG400009324-(rev)M6LRR-RLP\_3721

CTACAGAGCGACTTCTCTCCAGAAGAGATGTTTACAAGTCTTACAAATCTCGAATACTTGAGCTTCTTTG

ACTTCAAGAATCTCAAAGAGCTGCCTACCAGCCTGACTAGTCTCAATGC

>M6-PGSC0003DMG400009324-(rev)M6LRR-RLP\_3782



AGCTTCTTTGACTTCAAGAATCTCAAAGAGCTGCCTACCAGCCTGACTAGTCTCAATGCTTTGAAGCGTCT  
CCAAATTGAAAGTTGTGACTCACTAGAGAGCCTCCCTGAACAAGGGCTG

>M6-PGSC0003DMG400009324-(rev)M6LRR-RLP\_3843

TGAAGCGTCTCCAAATTGAAAGTTGTGACTCACTAGAGAGCCTCCCTGAACAAGGGCTGGAAGGTTTAA  
CTTCACTCACACAGTTATTCGTAAATACTGTAAGATGCTAGAATGTTTAC

>M6-PGSC0003DMG400009324-(rev)M6LRR-RLP\_3904

AGGTTTAACTTCACTCACACAGTTATTCGTAAATACTGTAAGATGCTAGAATGTTTACCCGAGGGATTG  
CAGCACCTAACTGCCCTCACAAATTTGGAGTAACCGGTTGTCCAGAAGT

>M6-PGSC0003DMG400009324-(rev)M6LRR-RLP\_3965

GAGGGATTGCAGCACCTAACTGCCCTCACAAATTTGGAGTAACCGGTTGTCCAGAAGTGGAAAAGCGC  
TGTGATAAGGAATTAGGAGAAGACTGGCACAAAATTGCTCACATTCCTAAT

>M6-PGSC0003DMG400009324-(rev)M6LRR-RLP\_4087

GAGTATATATTAGTGAGTTATTTGTAATTGTTTCTTGGGTTATTTTTTTGTCAGTCTCCCACACAGGTTATA  
ATTCCTGCCATTGGATTATTATAGCAAAGTTTGACTGTATGAGGTAAC

>M6-PGSC0003DMG400009324-(rev)M6LRR-RLP\_4148

CACAGGTTATAATTCCTGCCATTGGATTATTATAGCAAAGTTTGACTGTATGAGGTAACATTTTTAAACAA  
AAAAGGTAAATCCGTTTAAACATGACTTTTTTTTACTGTTTAATTTAATA

>M6-PGSC0003DMG400009324-(rev)M6LRR-RLP\_4181

AGCAAAGTTTGACTGTATGAGGTAACATTTTTAAACAAAAAAGGTAAATCCGTTTAAACATGACTTTTTTTT  
ACTGTTTAATTTAATATAAAAAGGATTGTACTAATTTTCTATTTGAAAAC

>M6-PGSC0003DMG400009324-(rev)M6LRR-RLP\_427

CAATAAGATTTGAGCAGTCTCGATTAGGGTTTTATCATCCAGGTATTATCAATTTCCGTCACAAAATTGG  
GAAAATGATGAAAGAGATAATGGAGAACTAGATGCAATTGCTGAGGAAA

>M6-PGSC0003DMG400009324-(rev)M6LRR-RLP\_549

AGGAAGTTTCATTTCTTGAAAAAATTACAGAGAGACAAGCTGCCGCTGCTACGCGTGAAACAGGTGTG  
AGTACTGAGTAATAGTAACTTAGTTTATGTTCAATTTGTTACCACATCGTG

>M6-PGSC0003DMG400009324-(rev)M6LRR-RLP\_61

GAGGTACGGAGAATTGTTGGTATATGCAGTTATCATGAAATATATAAAGTCCACACACTGCTCAACTGA  
GCAAACCAGACACTTCGAATTGGTCAATATTTCTTTACTGGATTCAATACA

>M6-PGSC0003DMG400009324-(rev)M6LRR-RLP\_610

CAGGTGTGAGTACTGAGTAATAGTAACTTAGTTTTATGTTCAATTTGTTACCACATCGTGTGTTCCACCGTG  
ATCTCTACAGTAGGATGGCAATGGGGCGGGGCGGGGTTGGAGGTGTGCAG

>M6-PGSC0003DMG400009324-(rev)M6LRR-RLP\_976

ATGCCTTTAAATTATGATTCAATTTTATATCAGTCTGTCCAAAAGATGTTCTAGTGAAAGTGTTAAACTTA  
GCCTGGATCTGCTATTAGAAGTGTGAATTTTTGTGGCACTAAACAATGC

>M6-PGSC0003DMG400009380M6LRR-RLK\_0

AAAGCTTACACCATTTTAAACAAGCTCAGCAAACACCCATTTACCATTATTACAGAATAATCTCTGTATCT  
TCTTCTGTGCATGAAAAACCATGCAAATGAACTATTACTCTTCTTTC

>M6-PGSC0003DMG400009380M6LRR-RLK\_1037

CAAGACACTTGAACCTTGCTTACAACCCTTTTGCATCGAGTCAGTTTCTCCTGAACTCGGTAACCTTGACTA  
ATCTTGAGACATTATGGCTAAGCATGTGTAGTCTTGTGGTTCAATTCC

>M6-PGSC0003DMG400009380M6LRR-RLK\_1098

AACTTGACTAATCTTGAGACATTATGGCTAAGCATGTGTAGTCTTGTGGTTCAATTCCAAAAAGTATTG  
AGAAATTGAGTCGATTGACTAATTTTGATGTGTCCAATAATGGACTGGTT

>M6-PGSC0003DMG400009380M6LRR-RLK\_1159

AAAGTATTGAGAAATTGAGTCGATTGACTAATTTTGATGTGTCCAATAATGGACTGGTTGGGTCAATACC  
AAGTGCAATTTTCCAGCTTAATAGTATTGTTCAAATTGAGCTCTACAATA

>M6-PGSC0003DMG400009380M6LRR-RLK\_122

AGTACATTCCTTTGATTTTTGCTTTAAATCAAGATGGGTTGTATCTACAAAACTGAAACACTCTTTGTC  
AACCTCAGATCAAGGGGATTTTCTACTTGGTATGAAAATGATCCTACC

>M6-PGSC0003DMG400009380M6LRR-RLK\_1220

GTCAATACCAAGTGCAATTTTCCAGCTTAATAGTATTGTTCAAATTGAGCTCTACAATAATCCCTCACCG  
GAGAATTGCCTTCGGGATGGTCTAACTTGACCAGGTTGAGAAGATTCTGA

>M6-PGSC0003DMG400009380M6LRR-RLK\_1281

TCCCTCACCGGAGAATTGCCTTCGGGATGGTCTAACTTGACCAGGTTGAGAAGATTCTGATGTGTCGACT  
AACAAAGTTAAATGGGACTATTCCTGATGAGTTGTGCGAGTTGCCACTTGAG

>M6-PGSC0003DMG400009380M6LRR-RLK\_1342

TGTGACTAACAAGTTAAATGGGACTATTCTGATGAGTTGTGCGAGTTGCCACTTGAGTCACTCAATTT

ATTTGAGAATCAATTTGAGGGGTTTCTTCCAGAAAGTATAGCTAACTCGC

>M6-PGSC0003DMG400009380M6LRR-RLK\_1403

ACTCAATTTATTTGAGAATCAATTTGAGGGGTTTCTTCCAGAAAGTATAGCTAACTCGCCGAATCTGTAT  
GAGCTTAAGTTATTCTCAAACAGATTTTCTGGTTCATTGCCTAGTGA

>M6-PGSC0003DMG400009380M6LRR-RLK\_1464

AATCTGTATGAGCTTAAGTTATTCTCAAACAGATTTTCTGGTTCATTGCCTAGTGA

>M6-PGSC0003DMG400009380M6LRR-RLK\_1525

GGAAGAACTCGGCTTTACAGTATCTTGATGTTTCATAACAATACATTTTCTGGTAAAATTCCTGAAAGTTG  
TGTGAGATGGGAGCTTTAGAGGATATTATAGTGATATATAATTCGTTCT

>M6-PGSC0003DMG400009380M6LRR-RLK\_1586

TGAAAGTTTGTGTGAGATGGGAGCTTTAGAGGATATTATAGTGATATATAATTCGTTCTCTGGGAGTATT  
CCGGCTAGTATTGGCAACTGCCGGAGTTTACTTAGGGTCAGGTTTCGGGC

>M6-PGSC0003DMG400009380M6LRR-RLK\_1647

GGGAGTATTCCGGCTAGTATTGGCAACTGCCGGAGTTTACTTAGGGTCAGGTTTCGGGCTAATAAGCTA  
TGCGGGGAAGTCCCAACTGAGTTTTGGAGTTTGCCTCAGGTTTATCTCTTA

>M6-PGSC0003DMG400009380M6LRR-RLK\_1708

ATAAGCTATGCGGGGAAGTCCCAACTGAGTTTTGGAGTTTGCCTCAGGTTTATCTCTTAGACCTTTTTGG  
CAATGCATTTTCAGGAAATATATCACACATGATTTCTGGTGCCAAAAAATT

>M6-PGSC0003DMG400009380M6LRR-RLK\_1769

CCTTTTTGGCAATGCATTTTCAGGAAATATATCACACATGATTTCTGGTGCCAAAAAATTTGTCTAACCTAC  
AGATATCAAGAAACAAATTCTCAGGGGTAATACCTAGTGAAGTAGGAAA

>M6-PGSC0003DMG400009380M6LRR-RLK\_183

ACTCTTTGTCAACCTCAGATCAAGGGGATTTTCTACTTGGTATGAAAATGATCCTACCCCATGTA

>M6-PGSC0003DMG400009380M6LRR-RLK\_1830

TCTAACCTACAGATATCAAGAAACAAATTCTCAGGGGTAATACCTAGTGAAGTAGGAAAGTTGAAGAAC  
TTGGTTGAGTTTTCCGCGAGTCATAATGAGCTAACGGGAGAACTTCCAGAC

>M6-PGSC0003DMG400009380M6LRR-RLK\_1891

TGAAGAACTTGGTTGAGTTTTCCGCGAGTCATAATGAGCTAACGGGAGAACTTCCAGACACATTAGTGC  
AGCTAGGGCAGTTAGGAACCCTTGATCTTAGTTTTCAATGAGCTATCAGGGA

>M6-PGSC0003DMG400009380M6LRR-RLK\_1952

ATTAGTGCAGCTAGGGCAGTTAGGAACCCTTGATCTTAGTTTTCAATGAGCTATCAGGGAAAATCCCCTTC  
GGAATTCACACAATGAAGCAACTCAGTGAGCTTGACTTGGCAAACAATGG

>M6-PGSC0003DMG400009380M6LRR-RLK\_2013

ATCCCCTTCGGAATTCACACAATGAAGCAACTCAGTGAGCTTGACTTGGCAAACAATGGATTTTCTGGGG  
AAATTCGGGAGGAAATTGGGACTTTGCCCGTGCTTAATTATCTTGATCTT

>M6-PGSC0003DMG400009380M6LRR-RLK\_2074

TTTCTGGGGAAATTCCGGAGGAAATTGGGACTTTGCCCGTGCTTAATTATCTTGATCTTTCTGGGAATTA  
CTTCTCAGGGGAAATCCCACTCAGTCTGCAAAGCTTGAAGCTTAATAAGC

>M6-PGSC0003DMG400009380M6LRR-RLK\_2135

TGGGAATTACTTCTCAGGGGAAATCCCACTCAGTCTGCAAAGCTTGAAGCTTAATAAGCTAAATTTGTCT  
AATAATCAGCTGTCAGGGATGATTCCTGCAGTTTTTGATAAGGGTGTTTA

>M6-PGSC0003DMG400009380M6LRR-RLK\_2196

AATTTGTCTAATAATCAGCTGTCAGGGATGATTCCTGCAGTTTTTGATAAGGGTGTTTATAGAGACAGCT  
TTCGAGGTAATCCAGGTTTGTGTCAAGGTGTTGCTGGTCTTTGTCCTACG

>M6-PGSC0003DMG400009380M6LRR-RLK\_2257

GAGACAGCTTCGAGGTAATCCAGGTTTGTGTCAAGGTGTTGCTGGTCTTTGTCCTACGAAAGGTAGAG  
GACAGCATGAAGGATACTTATGGACTTTGAGAGCTATCTACACAGTTGCTG

>M6-PGSC0003DMG400009380M6LRR-RLK\_2318

AGGTAGAGGACAGCATGAAGGATACTTATGGACTTTGAGAGCTATCTACACAGTTGCTGGCTTCGTTTTT  
CTTGTCGGGATTGCTATGTTCAATTTGGAAGTATCAGAAATTCAAGAAGAT

>M6-PGSC0003DMG400009380M6LRR-RLK\_2379

TTCGTTTTTCTTGTCGGGATTGCTATGTTCAATTTGGAAGTATCAGAAATTCAAGAAGATTAAGAAAGGAA  
ACACTATGACAAAGTGGACATCATTCCATAAGCTTGGATTTAGTGAATTT

>M6-PGSC0003DMG400009380M6LRR-RLK\_244

ATGTAAGTGGACAGGTGTCACCTGTAATGACGCCGAGATTCTCCCTCCGTCGCTGTTAACCTCTCC  
GGTGCTTCTCTTGCCGGACCCTTTCCGGTTTTCTCTGCCATCTTACTTC

>M6-PGSC0003DMG400009380M6LRR-RLK\_2440

AGAAAGGAAACACTATGACAAAGTGGACATCATTCCATAAGCTTGGATTTAGTGAATTTGAAATACCCG  
TTGGCCTAGATGAAGCTAATGTAATTGGCAATGGAGCTTCAGGAAGAGTGT

>M6-PGSC0003DMG400009380M6LRR-RLK\_2501

AATACCCGTTGGCCTAGATGAAGCTAATGTAATTGGCAATGGAGCTTCAGGAAGAGTGTACAAAGCTGT  
CCTAAGCAATGGTGAGGCAGTAGCTGTCAAGAAGCTATGGGAGAGAACAGT

>M6-PGSC0003DMG400009380M6LRR-RLK\_2562

AAAGCTGTCCTAAGCAATGGTGAGGCAGTAGCTGTCAAGAAGCTATGGGAGAGAACAGTTAAAGATGA  
AACCCCTTATGGTGCTCTTGAGTCTGATAAAGACGAGTTTGAAATTGAAGTT

>M6-PGSC0003DMG400009380M6LRR-RLK\_2623

AAGATGAAACCCCTTATGGTGCTCTTGAGTCTGATAAAGACGAGTTTGAAATTGAAGTTGAAACTCTGG  
GTAAAATTAGGCACAAGAATATTGTGAGATTGTGGTGCTGTTGCGATACTG

>M6-PGSC0003DMG400009380M6LRR-RLK\_2684

AACTCTGGGTAAAATTAGGCACAAGAATATTGTGAGATTGTGGTGCTGTTGCGATACTGGGGATAGCAA  
GCTCTTGGTATATGAGTACATGCCAAATGGAAGTTTGGGCGATTTGCTGCA

>M6-PGSC0003DMG400009380M6LRR-RLK\_2745

GATAGCAAGCTCTTGGTATATGAGTACATGCCAAATGGAAGTTTGGGCGATTTGCTGCACAGTTGCAAG  
GCCAAATTGTTGGATTGGCCGTTGAGGTTCAAGATAGCTTTAGATGCTGCT

>M6-PGSC0003DMG400009380M6LRR-RLK\_2806

GTTGCAAGGCCAAATTGTTGGATTGGCCGTTGAGGTTCAAGATAGCTTTAGATGCTGCTGAGGGGCTCT  
CTTATTTGCACCATGGTTGTGTTCCCTCCAATTGTTACCGTGATGTTAAGT

>M6-PGSC0003DMG400009380M6LRR-RLK\_2867

GGGGCTCTCTTATTTGCACCATGGTTGTGTTCCCTCCAATTGTTACCGTGATGTTAAGTCAAACAACATAT  
TGCTGGATGATGAGTTTCGAGCCAAAATTTAGATTTTGGTGTGGCAAA

>M6-PGSC0003DMG400009380M6LRR-RLK\_2928

AACAACATATTGCTGGATGATGAGTTTCGAGCCAAAATTTAGATTTTGGTGTGGCAAAAATTGTTAAAG  
CAGGCAGCAAAGGTGACGTTGAATCCATGTCTGTAATTGCTGGTTCCTGT

>M6-PGSC0003DMG400009380M6LRR-RLK\_2989

TTGTTAAAGCAGGCAGCAAAGGTGACGTTGAATCCATGTCTGTAATTGCTGGTTCCTGTGGTTACATTGC

ACCAGGTATTGATTTGTTCAAACCTATATCACTGGCTTTAGTCATTTTAA

>M6-PGSC0003DMG400009380M6LRR-RLK\_305

AACCTCTCCGGTGCTTCTCTTGCCGGACCCTTCCGGTTTTCTCTGCCATCTTACTTCGCTTTCGTCACCTCT  
CGCTTTCGAATAATCTTATTAATTCTACTCTTCCGGTTTTCTATTTCT

>M6-PGSC0003DMG400009380M6LRR-RLK\_3050

TTACATTGCACCAGGTATTGATTTGTTCAAACCTATATCACTGGCTTTAGTCATTTTTACCGATATATTGGC  
TCATCTAGCTTATATTTTCGGAAAGATTGCAATTTCATTTTAAAGTAG

>M6-PGSC0003DMG400009380M6LRR-RLK\_3111

GATATATTGGCTCATCTAGCTTATATTTTCGGAAAGATTGCAATTTCATTTTAAAGTAGCCAAAACCTAACAA  
TTAGTGAAATTCATTGATTGCAGAGTATGCATATACTCTTCATGTGAAT

>M6-PGSC0003DMG400009380M6LRR-RLK\_3172

AAAACCTAACATTAGTGAAATTCATTGATTGCAGAGTATGCATATACTCTTCATGTGAATGAAAAAAGTGA  
CATATATAGCTTTGGAGTGGTCATTTTGGAGCTGGTGACAGGCCAAAAGAC

>M6-PGSC0003DMG400009380M6LRR-RLK\_3233

AAAAAGTGACATATATAGCTTTGGAGTGGTCATTTTGGAGCTGGTGACAGGCCAAAAGACCAGTCAGTCC  
AGAATTCGGGGAGAAAGATCTAGCTACTTGGGTACACACGACGTTGAACGA

>M6-PGSC0003DMG400009380M6LRR-RLK\_3294

GTCAGTCCAGAATTCGGGGAGAAAGATCTAGCTACTTGGGTACACACGACGTTGAACGAGAAAGGAGT  
TGATCAGTTGCTCGACCCAAATCTAAACTCCAGCTTCAAAGAACATATATGC

>M6-PGSC0003DMG400009380M6LRR-RLK\_3355

AAGGAGTTGATCAGTTGCTCGACCCAAATCTAAACTCCAGCTTCAAAGAACATATATGCAAGGTTCTTGA  
TGTTGGTCTACGTTGTCTTAACCAAACCTCCAGCTAATCGCCCCTCAATGC

>M6-PGSC0003DMG400009380M6LRR-RLK\_3416

GGTTCTTGATGTTGGTCTACGTTGTCTTAACCAAACCTCCAGCTAATCGCCCCTCAATGCACAGAGTGGTG  
AAAATGATCCAAGAATCAGTTCCTTATAATGTGCCAGAAATGGAAAACAA

>M6-PGSC0003DMG400009380M6LRR-RLK\_3477

AGAGTGGTGAAAATGATCCAAGAATCAGTTCCTTATAATGTGCCAGAAATGGAAAACAAGAATGGTAA  
ACTTTCCCCTCACTTCCAAAGTCTGTCTAGTTAATATATTAGATCAAGTAA

>M6-PGSC0003DMG400009380M6LRR-RLK\_3538

ATGGTAAACTTTCCCCTCACTTTCCAAAGTCTGTCTAGTTAATATATTAGATCAAGTAATAGAGCAGGAG  
TGTTTCTTGTCAAGAATTGGCAAGGAAGAAGCTGCATAATGAAAAATTAG

>M6-PGSC0003DMG400009380M6LRR-RLK\_3599

GAGCAGGAGTGTTTCTTGTCAAGAATTGGCAAGGAAGAAGCTGCATAATGAAAAATTAGTAGTCTTTTT  
CAAGAATTAAGCATATTGACTCTTTGAATTCTACAACCCTTTATGAATCT

>M6-PGSC0003DMG400009380M6LRR-RLK\_366

TTTCGTCACTCTCGCTTTCGAATAATCTTATTAATTCTACTCTTCCGTTTTCTATTTCTGAATGCCGTAGCCT  
CACGTACCTTGACCTTCTCAGAATCTCATCGGTGGAECTATCCCCG

>M6-PGSC0003DMG400009380M6LRR-RLK\_3660

GTCTTTTTCAAGAATTAAGCATATTGACTCTTTGAATTCTACAACCCTTTATGAATCTATATTACGAGGAT  
TCATCATGAATTAACAAATTTTACGCTAGCTGTCAGCCTACCGCAACA

>M6-PGSC0003DMG400009380M6LRR-RLK\_3721

ATTACGAGGATTCATCATGAATTAACAAATTTTACGCTAGCTGTCAGCCTACCGCAACACAGATGGGGTA  
CTGAAAGTTGTAAGTATTCTTAATAATGCCTTTGATTAAGTTTGTTAAA

>M6-PGSC0003DMG400009380M6LRR-RLK\_3776

AACACAGATGGGGTACTGAAAGTTGTAAGTATTCTTAATAATGCCTTTGATTAAGTTTGTTAACTTAG  
GTCCTACTTTGCTGTCCATCATTCACTGAGCTGGGGCCTTTAGAAGTAAA

>M6-PGSC0003DMG400009380M6LRR-RLK\_427

ATGCCGTAGCCTCACGTACCTTGACCTTCTCAGAATCTCATCGGTGGAECTATCCCCGACACTATTTCCG  
ATCTTCCTTACCTCAGGTAECTCAGTTTGAACCTCAATTTTGCATTTCC

>M6-PGSC0003DMG400009380M6LRR-RLK\_488

ACTATTTCCGATCTTCCTTACCTCAGGTAECTCAGTTTGAACCTCAATTTTGCATTTCCCCTGTTTTTTTTT  
CTTTCAATTTTTCGAAAAATATCAACTAATTGTGACTTACATTTAGC

>M6-PGSC0003DMG400009380M6LRR-RLK\_549

TGTTTTTTTTTCTTTCAATTTTTCGAAAAATATCAACTAATTGTGACTTACATTTAGCCATATATGCGTATT  
TGGGTCTGTTTTAAGGTGAATATAAGATCTATAGTTAGTGTATATAA

>M6-PGSC0003DMG400009380M6LRR-RLK\_61

CTCTGTATCTTCTCCTGTGCATGAAAAACCATGCAAATGAACTATTACTCTTCTTTCTGAGTACATTCCC  
TTTGATTTTTGCTTTAAATCAAGATGGGTTGTATCTACAAAACTGAA

>M6-PGSC0003DMG400009380M6LRR-RLK\_610

TATATGCGTATTTGGGTCTGTTTTAAGGTGAATATAAGATCTATAGTTAGTGTATATAACATAAACATCTC  
GCATTAGCAAGGTCCGGGGAAGGGGCTGTAAGCAATGATTCAGCTGAAC

>M6-PGSC0003DMG400009380M6LRR-RLK\_671

TAAACATCTCGCATTAGCAAGGTCCGGGGAAGGGGCTGTAAGCAATGATTCAGCTGAACCCACATAACC  
TGCCCGGATTTGCTTGCTGGTGTATAGTAACTCTAAATTACTATTCATTG

>M6-PGSC0003DMG400009380M6LRR-RLK\_732

ACATAACCTGCCCGGATTTGCTTGCTGGTGTATAGTAACTCTAAATTACTATTCATTGTTTGAATAAAAA  
TGCAGATGGAACGAAATGACTATTATGATCTTTTATTGCAGATTTTGT

>M6-PGSC0003DMG400009380M6LRR-RLK\_793

TGAATAAAAATGCAGATGGAACGAAATGACTATTATGATCTTTTATTGCAGATTTTGTATTCTTCTTGT  
TCATTAGTATATATTATGATCTTTTATTGCAGGTATCTTGATCTTAGCG

>M6-PGSC0003DMG400009380M6LRR-RLK\_854

TCTTCTTGTTCATTAGTATATATTATGATCTTTTATTGCAGGTATCTTGATCTTAGCGGATGCTATTTTC  
GGGGAATATTCCGGCAAGTTTCGGAAGATTCAGGCAACTGGAGACTCT

>M6-PGSC0003DMG400009380M6LRR-RLK\_915

TGCTATTTTTCGGGGAATATTCCGGCAAGTTTCGGAAGATTCAGGCAACTGGAGACTCTTATTCTGACTG  
AGAACATACTTACTGGTGAAGTTCCTGCTGCATTAGGTAATGTAACGAGT

>M6-PGSC0003DMG400009380M6LRR-RLK\_976

TTCTGACTGAGAACATACTTACTGGTGAAGTTCCTGCTGCATTAGGTAATGTAACGAGTCTCAAGACACT  
TGAACTTGCTTACAACCCTTTTGCATCGAGTCAGTTTCCTCCTGAACTCG

>M6-PGSC0003DMG400009417-(rev)M6C-LecRK\_0

AACACAATTAGGAGTCCAAGCTGAATGAAAAGAGAAGAGAACACTGGAGCTTATTTTTTTATAGATTTTT  
TTTTAAAGTTTCAGTGTTCTTCTCTTTTCGTTTCAGCTTGGACAAGCT

>M6-PGSC0003DMG400009417-(rev)M6C-LecRK\_1037

CCCTTTTCTAATTTCTTTTCTTCTTAGATAAATGAAGAAGTTAGATCAAGTATTATTAACACTAGT  
GCAACTGAACTTATTTGGACCTCTCAACATGGTTTTTCTTAGTGTAT

>M6-PGSC0003DMG400009417-(rev)M6C-LecRK\_1098

AAAACACTAGTGCAACTGAACTTATTTGGACCTCTCAACATGGTTTTTCTTAGTGTATGTTTTTTATTTTT



AATTGGTCAAGTTATTATGTCTCATCTCTTTGGCACTGTTGTTTATTG

>M6-PGSC0003DMG400009417-(rev)M6C-LecRK\_1159

TTTTTATTTTAAATTGGTCAAGTTATTATGTCTCATCTCTTTGGCACTGTTGTTTATTGTTTCTCAAGCAGG

AAGATGTGATCCTGGTTGGTTTAGCAGCCCAAATGGGAAAAAGTGTTT

>M6-PGSC0003DMG400009417-(rev)M6C-LecRK\_122

GTTTAATGCAAGTTTGGCTTTGTTTGTGAGAACTTGGTACTTTCATTTATCCTTCATACTTGAATCTAGCAC

ACCTTCCCTCTCAACAAAGGAAAAGTGAAAAGTGAAGAACACACTGTGCG

>M6-PGSC0003DMG400009417-(rev)M6C-LecRK\_1220

TCTCAAGCAGGAAGATGTGATCCTGGTTGGTTTAGCAGCCCAAATGGGAAAAAGTGTTTCAAATATAAT

GCGACCTCTTTGCAATGGAATGAATCAGAGACTTACTGCAATGGTTTTGGA

>M6-PGSC0003DMG400009417-(rev)M6C-LecRK\_1281

AATATAATGCGACCTCTTTGCAATGGAATGAATCAGAGACTTACTGCAATGGTTTTGGAGGAAACCTGG

CTGCCATAACATCTTCAGAAGAACTGAACTTTGCCCAAAGCTCTGTGGCA

>M6-PGSC0003DMG400009417-(rev)M6C-LecRK\_1342

AAACCTGGCTGCCATAACATCTTCAGAAGAACTGAACTTTGCCCAAAGCTCTGTGGCAATGATAGTAAC

GGATGCTGGGTTGGCGGAAGGAGCATCAATACCACAGCTGGGTTGGGTTG

>M6-PGSC0003DMG400009417-(rev)M6C-LecRK\_1403

GATAGTAACGGATGCTGGGTTGGCGGAAGGAGCATCAATACCACAGCTGGGTTGGGTTGGAAATGGTC

TGATAATGCTTCTAGCTGGAATGAGAGTATTGCTCCTAAGACAACCTTTGGAC

>M6-PGSC0003DMG400009417-(rev)M6C-LecRK\_1464

AATGGTCTGATAATGCTTCTAGCTGGAATGAGAGTATTGCTCCTAAGACAACCTTTGGACTCAAGTTGCAA

AAATTTCTCATGCTATGGCTTTAAGTCGGTGGATTTGTGTACATCGATAA

>M6-PGSC0003DMG400009417-(rev)M6C-LecRK\_1525

AAGTTGCAAAAATTTCTCATGCTATGGCTTTAAGTCGGTGGATTTGTGTACATCGATAACCAATGGTGCT

ATTATAGCTGAGAGATGCAATGTAACCTCATGCTTCTATATGCACACTTGA

>M6-PGSC0003DMG400009417-(rev)M6C-LecRK\_1586

AATGGTGCTATTATAGCTGAGAGATGCAATGTAACCTCATGCTTCTATATGCACACTTGTGCTGGTAAGT

GATTGCAGACCAATTTATTTCTAATTGTTTCTTTACCCAGTGTAATTTT

>M6-PGSC0003DMG400009417-(rev)M6C-LecRK\_1647

CTGGTAAGTGATTGCAGACCAATTTATTTCTAATTGTTTCTTTCACCCAGTGTAATTTTGAAAAGTAGGAG  
CAAAACTCTTCCCTGATATAGTGTGGTTATAATATGTGATTAAGCC

>M6-PGSC0003DMG400009417-(rev)M6C-LecRK\_1708

AAAGTAGGAGCAAAACTCTTCCCTGATATAGTGTGGTTATAATATGTGATTAAGCCTCATAGTCCCC  
TTTTGTTTTTCCATGAGAAGTGCATTTTAGCTAACCATTAACAGGCCT

>M6-PGSC0003DMG400009417-(rev)M6C-LecRK\_1769

ATAGTCCCCTTTTGTTTTTTCCATGAGAAGTGCATTTTAGCTAACCATTAACAGGCCTACATTGTTATCTG  
GATAAATCTATTACATTCCTTAATTGGTTTTTAAATAATCCTCTAAAT

>M6-PGSC0003DMG400009417-(rev)M6C-LecRK\_183

GAATCTAGCACACCTTCCCTCTCAACAAAGGAAAAGTGAAAAGTGAACACACTGTCGATGTCAAACC  
TCCACTAATTTGAGTGATATCACACAATCCATAACACGGAGGCCAAGCAAC

>M6-PGSC0003DMG400009417-(rev)M6C-LecRK\_1830

ATTGTTATCTGGATAAATCTATTACATTCCTTAATTGGTTTTTAAATAATCCTCTAAATTTTATATTAGGGA  
GCAAGTGTGTCATATGCGTTGCCACAGGGAGTATCTCATTATTCTTG

>M6-PGSC0003DMG400009417-(rev)M6C-LecRK\_1891

TATATTAGGGAGCAAGTGTGTCATATGCGTTGCCACAGGGAGTATCTCATTATTCTTGCAGTTGTGAGT  
GGGTTGATCCTTTCACACTACTTTGGCTATTGTGATATGGCTTCTTGTATT

>M6-PGSC0003DMG400009417-(rev)M6C-LecRK\_1952

GTTGTGAGTGGGTTGATCCTTTCACACTACTTTGGCTATTGTGATATGGCTTCTTGTATTTTCGGCGAAGTA  
AAAGACGCAAAGATCATCGCGTGCATCATTAGCATTAGTTCCTCCGTCT

>M6-PGSC0003DMG400009417-(rev)M6C-LecRK\_2013

GGCGAAGTAAAAGACGCAAAGATCATCGCGTGCATCATTAGCATTAGTTCCTCCGTCTTGGAAAATTTT  
CAATCGTGATGAAGTAAAGTCCATGACAAAGAATTTAGTGAAGCAAATC

>M6-PGSC0003DMG400009417-(rev)M6C-LecRK\_2074

GAAAATTTTCAATCGTGATGAAGTAAAGTCCATGACAAAGAATTTAGTGAAGCAAATCGTCTCCTTGG  
GGATGCCAAAACAGGTGGTACCTATAGTGGGCTTTTACCTGATGGTTCAAG

>M6-PGSC0003DMG400009417-(rev)M6C-LecRK\_2135

CTCCTTGGGGATGCCAAAACAGGTGGTACCTATAGTGGGCTTTTACCTGATGGTTCAAGGGTGGCTGTG  
AAAAGATTGAAGAGGTGTGGTATTAGAGGAAGAAAGAGTTCTACTCTGAG

>M6-PGSC0003DMG400009417-(rev)M6C-LecRK\_2196

TGGCTGTGAAAAGATTGAAGAGGTGTGGTATTCAGAGGAAGAAAGAGTTCTACTCTGAGATTGGAAGA  
GTTGCGAGACTTCATCATTCAAATCTGGTGTCTATCAAAGGATGTTGCTATC

>M6-PGSC0003DMG400009417-(rev)M6C-LecRK\_2257

TGGAAGAGTTGCGAGACTTCATCATTCAAATCTGGTGTCTATCAAAGGATGTTGCTATCATCATGGTGAC  
CGCTATATTCTGTATGAGTTTATTATCAATGGACCCCTGGATAGGTGGCT

>M6-PGSC0003DMG400009417-(rev)M6C-LecRK\_2318

CATGGTGACCGCTATATTCTGTATGAGTTTATTATCAATGGACCCCTGGATAGGTGGCTACACCATATTC  
CTAGAGGAGGTAGGAGTTTGGACTGGAGCATGAGAATGAAGGTCGCCACC

>M6-PGSC0003DMG400009417-(rev)M6C-LecRK\_2379

ACCATATTCCTAGAGGAGGTAGGAGTTTGGACTGGAGCATGAGAATGAAGGTCGCCACCACCCTTGCTC  
AAGGGATTGCGTAAGTAGTGTTCCAACATTATCTTCATGTGCATTGTAGAT

>M6-PGSC0003DMG400009417-(rev)M6C-LecRK\_244

GTCAAACCTCCACTAATTTGAGTGATATCACACAATCCATAACACGGAGGCCAAGCAACGACTACTCCTA  
TCAGGTTCATAAGACACAGGGGTAGAGGGCAATGACCTGGTGTCAACATC

>M6-PGSC0003DMG400009417-(rev)M6C-LecRK\_2440

CCTTGCTCAAGGGATTGCGTAAGTAGTGTTCCAACATTATCTTCATGTGCATTGTAGATTAGGAATAAAT  
ATTTAACTTATCCGTGAGGTGGATTGATTTTAGTCAGAAATGTGAGTTT

>M6-PGSC0003DMG400009417-(rev)M6C-LecRK\_2501

GGAATAAATATTTAACTTATCCGTGAGGTGGATTGATTTTAGTCAGAAATGTGAGTTTATTCTTTAAATT  
TTATCATACTTCCCTTCTTTGTCATGAGTATGAACTCATATATACATGT

>M6-PGSC0003DMG400009417-(rev)M6C-LecRK\_2562

TCTTTAAATTTTATCATACTTCCCTTCTTTGTCATGAGTATGAACTCATATATACATGTTTGGGTTGATGTC  
CAATGAAGATGTTATCGTGGAAGTCAAACAAGGGTGAAAATAGATGAT

>M6-PGSC0003DMG400009417-(rev)M6C-LecRK\_2623

GGGTTGATGTCCAATGAAGATGTTATCGTGGAAGTCAAACAAGGGTGAAAATAGATGATAAGAATGCA  
TTATCTATATTGTTAAGAAAAAAGGGTGTGTTATCTGTCTTGCAATATTCCT

>M6-PGSC0003DMG400009417-(rev)M6C-LecRK\_2684

GAATGCATTATCTATATTGTTAAGAAAAAAGGGTGTGTTATCTGTCTTGCAATATTCCTTTTCTATTTTCT

TTTTCTTCCCTAGATTTTTTCATTCAGAAGAAAGTCAAATTCTGCACA

>M6-PGSC0003DMG400009417-(rev)M6C-LecRK\_2745

TCCTATTTTCTTTTTCTTCCCTAGATTTTTTCATTCAGAAGAAAGTCAAATTCTGCACATCTTGACCAAGAT

ACTTCTTGTTAACATATAATGCAATTAATAAATGAAAACCTTTTTGGT

>M6-PGSC0003DMG400009417-(rev)M6C-LecRK\_2806

TTGACCAAGATACTTCTTGTTAACATATAATGCAATTAATAAATGAAAACCTTTTTGGTTTACAACATCCG

TTCCAGTACTAAGGAGAATTCACCTCCTAGGGATCTACCTATCTGCTTT

>M6-PGSC0003DMG400009417-(rev)M6C-LecRK\_2867

ACAACATCCGTTCCAGTACTAAGGAGAATTCACCTCCTAGGGATCTACCTATCTGCTTTTCCCTACTCCAGC

TAGATCTTACCATTGCCAAACGTGTTTTGCAGCACTGGCCTTCTGGCT

>M6-PGSC0003DMG400009417-(rev)M6C-LecRK\_2928

CTACTCCAGCTAGATCTTACCATTGCCAAACGTGTTTTGCAGCACTGGCCTTCTGGCTTCTCATGTTTCCT

TTCAGGTTTGGGGTGGATCTTTCCTTCTCAATTATCACATACTCGGT

>M6-PGSC0003DMG400009417-(rev)M6C-LecRK\_2989

TCATGTTTCCTTTCAGGTTTGGGGTGGATCTTTCCTTCTCAATTATCACATACTCGGTTAGGTGCGCCCGT

GTGTGTGTTTTCAATTTAAGTGTGTTGAACAGGAACTCTCTTCATGAAT

>M6-PGSC0003DMG400009417-(rev)M6C-LecRK\_305

CTACTCCTATCAGGTTTCATAAGACACAGGGGTAGAGGGCAATGACCTGGTGTCAACATCGTTCCTTGGGC

CTTCTTATTTGTAAGCTTAGTTGAGATGGCAGTGGAGGCCAATTGTGGT

>M6-PGSC0003DMG400009417-(rev)M6C-LecRK\_3050

GGTCGCCCCGTGTGTGTGTTTTCAATTTAAGTGTGTTGAACAGGAACTCTCTTCATGAATTTCACTAAAATA

TTGTAGGAAAGCTATGATTGATTTTCTATTCGGGGATTCATTATTA

>M6-PGSC0003DMG400009417-(rev)M6C-LecRK\_3111

CACTAAAATATTGTAGGAAAGCTATGATTGATTTTCTATTCGGGGATTCATTATTA

ATTTATTGGTGACAGAATTGTTGAACTTTTATCTAGGGAATATTTCTT

>M6-PGSC0003DMG400009417-(rev)M6C-LecRK\_3172

TTATGACCCTATTTATTGGTGACAGAATTGTTGAACTTTTATCTAGGGAATATTTCTTGACATGGAAATT

ATGGCAAAAATTTTTTTCAGGGGTTTGTGAGACTACTCACCACCTAACC

>M6-PGSC0003DMG400009417-(rev)M6C-LecRK\_3233

CATGGAAATTATGGCAAAAATTTTTTCAGGGGTTTGTGAGACTACTCACCACCTAACCCCAACAACAA  
ATATACATGGAAGAAATATTGAAGTGTACAAAAGAAGCCAATATATTAT

>M6-PGSC0003DMG400009417-(rev)M6C-LecRK\_3294

CAACAACAAATATACATGGAAGAAATATTGAAGTGTACAAAAGAAGCCAATATATTATTCCAATTATTC  
ACGATGATATAGTGAAATAATTAGCATAAGATAGACCAAACCTTAGGCTT

>M6-PGSC0003DMG400009417-(rev)M6C-LecRK\_3355

CAATTATTCACGATGATATAGTGAAATAATTAGCATAAGATAGACCAAACCTTAGGCTTATCTACATCAC  
CATATTTAATATATGCAATGTATTATGTATGGTCCCTGGTAGTTTTAACT

>M6-PGSC0003DMG400009417-(rev)M6C-LecRK\_3416

CTACATCACCATATTTAATATATGCAATGTATTATGTATGGTCCCTGGTAGTTTTAACTTTTCATGGACTTC  
TTTGTTAAGAGGTATTATTTCCATAATTTATTCAGTGTAAGTTGAAA

>M6-PGSC0003DMG400009417-(rev)M6C-LecRK\_3477

TCATGGACTTCTTTGTTAAGAGGTATTATTTCCATAATTTATTCAGTGTAAGTTGAAAAATATAGGCCAC  
TTGAGTAAGCTGGGTTCAATTCATAATGTACATACTTTTAAAGATTTTCG

>M6-PGSC0003DMG400009417-(rev)M6C-LecRK\_3538

TATAGGCCACTTGAGTAAGCTGGGTTCAATTCATAATGTACATACTTTTAAAGATTTTCGATAGTTTGCAAG  
TAGGTCTTTGTAATTTTTATATGCTACAAGGAATCCAGAGAGAAGCGAG

>M6-PGSC0003DMG400009417-(rev)M6C-LecRK\_3599

AGTTTGCAAGTAGGTCTTTGTAATTTTTATATGCTACAAGGAATCCAGAGAGAAGCGAGTGAGAAAAGA  
TGAAATGCTTAAGGAAATGGATACCAGCGACATCTTAGTAAGAAAATAAAA

>M6-PGSC0003DMG400009417-(rev)M6C-LecRK\_366

TCTTGGGCCTTCTTATTTTCGTAAGCTTAGTTTGAGATGGCAGTGGAGGCCAATTGTGGTGAACCGTGAAT  
CTTTCAATCTTCAAATCTTGGAGACCTTATCTGAAATGAATTCTTATTTT

>M6-PGSC0003DMG400009417-(rev)M6C-LecRK\_3660

AGAAAAGATGAAATGCTTAAGGAAATGGATACCAGCGACATCTTAGTAAGAAAATAAAAAGTGCATATT  
ACTTTCTGTTGTCTTCATGAGCTTTTGTCCAAGTGTCTTACCTTGTCT

>M6-PGSC0003DMG400009417-(rev)M6C-LecRK\_3721

TGCATATTACTTTCCTGTTGTCTTCATGAGCTTTTGTCCAAGTGTCTTACCTTGTCTAGGGCGGATGTCT  
ATGGAAAGTGAAGTCATAGAAAATAGGATGTCTATGGAGGTCCTGTT

>M6-PGSC0003DMG400009417-(rev)M6C-LecRK\_3782

GGCGGATGTCTATGGAAAGTGAAGTCATAGAAAATAGGATGTCTATGGAGGTCCTGTTATAAGCGAA  
GCAACCTAGATGCCTAATATATCGATGGATAGATACTTTAAGACCAGTCATG

>M6-PGSC0003DMG400009417-(rev)M6C-LecRK\_3843

AAGCGAAGCAACCTAGATGCCTAATATATCGATGGATAGATACTTTAAGACCAGTCATGCCTATGGCAT  
ATTTGTTAAAAAAGGGAAAATAAACAGAGACAATTCAGGGTCTATTACTAG

>M6-PGSC0003DMG400009417-(rev)M6C-LecRK\_3904

TATGGCATATTTGTTAAAAAAGGGAAAATAAACAGAGACAATTCAGGGTCTATTACTAGTTTATTACCTT  
TGTAATTTATGGAATTGAAGGATCTAGCATGTTAATCAACTGCATAAGGT

>M6-PGSC0003DMG400009417-(rev)M6C-LecRK\_3965

TATTACCTTTGTAATTTATGGAATTGAAGGATCTAGCATGTTAATCAACTGCATAAGGTGAAAATGAGTG  
GTCTGGTTGTGTTATGGTTGTATTTTAAACCATGAAAGGTGGTGATAGTT

>M6-PGSC0003DMG400009417-(rev)M6C-LecRK\_4026

AAATGAGTGGTCTGGTTGTGTTATGGTTGTATTTTAAACCATGAAAGGTGGTGATAGTTGTTAAACTCT  
GTTTTGTGTCCTGTGTCAGCTAGTGCACAAGAGGAAGTGCGAGTGGACA

>M6-PGSC0003DMG400009417-(rev)M6C-LecRK\_4087

TAAAACTCTGTTTTGTGTCCTGTGTCAGCTAGTGCACAAGAGGAAGTGCGAGTGGACAAAAGCATGAC  
ATTGTTTGTGTTGCTAATCTCTGTGATGTCAGTTTCTTTGCTTATATTGTTT

>M6-PGSC0003DMG400009417-(rev)M6C-LecRK\_4148

AGCATGACATTGTTTGTGTTGCTAATCTCTGTGATGTCAGTTTCTTTGCTTATATTGTTAATGTTTACTTTC  
ATCATATGTGACAGGTTTCTTCACGACAAAATGAAGCCACAAGTTGTG

>M6-PGSC0003DMG400009417-(rev)M6C-LecRK\_4209

TGTTTACTTTTCATCATATGTGACAGGTTTCTTCACGACAAAATGAAGCCACAAGTTGTGCATAGGGATAT  
CCGTGCAAGCAATGTTCTTCTTGACGAAGACTTTGGCGCCCATCTAATGG

>M6-PGSC0003DMG400009417-(rev)M6C-LecRK\_427

ACCGTGAATCTTTCAATCTTCAAATCTTGAGACCTTATCTGAAATGAATTCTTATTTTGAAGCTGATCCC  
TCAATTGTTAGCATAATCAAGTAAATAAATCCATTAATGAAGATAAAGA

>M6-PGSC0003DMG400009417-(rev)M6C-LecRK\_4270

TAGGGATATCCGTGCAAGCAATGTTCTTCTTGACGAAGACTTTGGCGCCCATCTAATGGGAGTTGGTCTG

TCTAAGTTTGTACCATGGGAAATTATGCATGAGAGGAGAGTCATGGCAGG

>M6-PGSC0003DMG400009417-(rev)M6C-LecRK\_4331

GTTGGTCTGTCTAAGTTTGTACCATGGGAAATTATGCATGAGAGGAGAGTCATGGCAGGTGGTACTCAT

GGGTATCTTGCTCCGGAGTTTGTTTACAGAAATGAGCTTACTACAAAGAGT

>M6-PGSC0003DMG400009417-(rev)M6C-LecRK\_4392

GTAATCATGGGTATCTTGCTCCGGAGTTTGTTTACAGAAATGAGCTTACTACAAAGAGTGACGTCTACAG

CTTTGGAGTTCTCTTGCTTGAATAATTAGTGGACGAAGACCAGCACAGG

>M6-PGSC0003DMG400009417-(rev)M6C-LecRK\_4453

CGTCTACAGCTTTGGAGTTCTCTTGCTTGAATAATTAGTGGACGAAGACCAGCACAGGCAGTTGATTCT

GTTGGATGGCAAAGTATATTTGAATGGGCCACTCCTCTGGTGCAGGCTCA

>M6-PGSC0003DMG400009417-(rev)M6C-LecRK\_4514

GTTGATTCTGTTGGATGGCAAAGTATATTTGAATGGGCCACTCCTCTGGTGCAGGCTCATCGATATGTTG

AACTGTTGGATCCTCTCATATCATCTTCTTCTCTCAGATTCCTGAA

>M6-PGSC0003DMG400009417-(rev)M6C-LecRK\_4575

GATATGTTGAACTGTTGGATCCTCTCATATCATCTTCTTCTCTCAGATTCCTGAAGTTGGAGTCATCC

AAAAAGTTGTTGATCTTGTTTATTCTTGTACACAACATGTACCATCAA

>M6-PGSC0003DMG400009417-(rev)M6C-LecRK\_4636

TGGAGTCATCCAAAAGTTGTTGATCTTGTTTATTCTTGTACACAACATGTACCATCAATGCGTCCGAGG

ATGTCACACGTCGTCATCAGCTACAACAATTAGCTCAGCCCCCTATTGT

>M6-PGSC0003DMG400009417-(rev)M6C-LecRK\_4697

CGTCCGAGGATGTCACACGTCGTCATCAGCTACAACAATTAGCTCAGCCCCCTATTGTAAAGTAAGTGG

ATAAGAATTATAGTTCAGCATTTCTTTTACTGAAATCAGCCTGCAATCT

>M6-PGSC0003DMG400009417-(rev)M6C-LecRK\_4758

AGTAAGTGGATAAGAATTATAGTTCAGCATTTCTTTTACTGAAATCAGCCTGCAATCTTTTATCCTAGTT

GCAAGGGCTAATTGTATTAGGCATTATTTTGAACCTGACATGCAAGGC

>M6-PGSC0003DMG400009417-(rev)M6C-LecRK\_488

AGCTGATCCCTCAATTGTTAGCATAATCAAGTAAATAAATCCATTAATGAAGATAAAGATACTTTTAGGG

TGAAAAGTTATCTTTAGTTGTGGTATTAGAAATAACTAGTTCAGAATACC

>M6-PGSC0003DMG400009417-(rev)M6C-LecRK\_4880

TGAGGCTTGAACCAGTCCATGATGTTTGAGATGTAATACAACAATAATCTGTATCACTAAAGCCAGTAT  
GCTTTTCATCTGCTGCTGCTTGCATTGTTTACTTGTAACACCTGTATTT

>M6-PGSC0003DMG400009417-(rev)M6C-LecRK\_4941

AGCCAGTATGCTTTTCATCTGCTGCTGCTTGCATTGTTTACTTGTAACACCTGTATTTTTAAAATTTGTTT  
CTGTTTCCTGTGTTAAAATATCACTATGCATAACAACCAATTCAATAA

>M6-PGSC0003DMG400009417-(rev)M6C-LecRK\_549

CTTTTAGGGTGAAAAGTTATCTTTAGTTGTGGTATTAGAAATAACTAGTTCAGAATACCCGAGCTTTATT  
GTCCATTATGAGGTATTTATTAGTTATAACAAGTTCATGATACCTGAGT

>M6-PGSC0003DMG400009417-(rev)M6C-LecRK\_61

TAGATTTTTTTTTTAAAGTTTCAGTGTTCTCTTCTTTTTCGTTCAGCTTGGACAAGCTTAGTTTAATGCAA  
GTTTGGCTTTGTTTGTGAGAACTTGGTACTTTCATTTATCCTTCATAC

>M6-PGSC0003DMG400009417-(rev)M6C-LecRK\_610

AGCTTTATTGTCCATTATGAGGTATTTATTAGTTATAACAAGTTCATGATACCTGAGTTTTACCTACCTA  
GATACAAACAATACTTCCCTACCTAGCACTTCCAGTCCCCGCAATCTTA

>M6-PGSC0003DMG400009417-(rev)M6C-LecRK\_671

TACCTACCTAGATACAAACAATACTTCCCTACCTAGCACTTCCAGTCCCCGCAATCTTACTAGTATTATTTA  
CAACTGAAGTCGATGTTCAAACCTAAGGAAACAACAGAAAGAAAAAAC

>M6-PGSC0003DMG400009417-(rev)M6C-LecRK\_732

AGTATTATTTACAATACTGAAGTCGATGTTCAAACCTAAGGAAACAACAGAAAGAAAAAACATTAAAATA  
CAAATATAGAAAGATGGTGAAAAGAATCAACAAATGTGTACAAGAGTTGGA

>M6-PGSC0003DMG400009417-(rev)M6C-LecRK\_793

TAAAATAACAATATAGAAAGATGGTGAAAAGAATCAACAAATGTGTACAAGAGTTGGAGATCATGTG  
GCTAAATGGATGGGGTTAGTGCAGGAATGTCAAGTTTGAGCCACTTTTATAA

>M6-PGSC0003DMG400009417-(rev)M6C-LecRK\_854

TCATGTGGCTAAATGGATGGGGTTAGTGCAGGAATGTCAAGTTTGAGCCACTTTTATAACATTAGGAAC  
ACATATAGACTGATAGAATAACATTAGGGGTATATATGTAAGTACTGATAGTTTA

>M6-PGSC0003DMG400009417-(rev)M6C-LecRK\_915

TTAGGAACACATATAGACTGATAGAATAACATTAGGGGTATATATGTAAGTACTGATAGTTTAATGGAGGGTA  
AAATTAACCTTTTCAATAGTACAGCTGTACAGGAAGTGAGGGACAAATAT



>M6-PGSC0003DMG400009417-(rev)M6C-LecRK\_976

GGAGGGTAAAATTAACCTTTTCAATAGTACAGCTGTACAGGAAGTGAGGGACAAATATGACCCTTTTC  
CTAATTTCTTTTCTTCTTCTTAGATAAATGAAGAAGTTAGATCAAGTATTA

>M6-PGSC0003DMG400009532-(rev)M6LRR-RLP\_0

TGGATCGAATTTCTCAGTTACCGGCGGGAATGTTAGAGCACATCTTGTCTTTCCTCCGTTTGAAGAAGC  
TGCACGAATGAGTAGAGTATCAACGACTTGGAAAAATGCATACAATTCAC

>M6-PGSC0003DMG400009532-(rev)M6LRR-RLP\_1024

ATTGGAAGCCAATATTGAATTCGACTCAGAAGGAGGAGAAACCCCTAACAGTGATTGGTACTCTAAGCT  
CGTGAAATTTCTTGATAACTTCAATCATTCCATGGCTCTTGAATTAACATG

>M6-PGSC0003DMG400009532-(rev)M6LRR-RLP\_1088

AAGCTCGTGAAATTTCTTGATAACTTCAATCATTCCATGGCTCTTGAATTAACATGCAAAAAGTGAAAAGG  
TATGTCCCAGAAATTTCTTAACTAGCTAGTTAATACTATATTGTTATGGA

>M6-PGSC0003DMG400009532-(rev)M6LRR-RLP\_1152

AAAAGGTATGTCCCAGAAATTTCTTAACTAGCTAGTTAATACTATATTGTTATGGATTTCTCAAAAGTTGT  
TTCTTTTTGCTAATACAGGGGCTAGTTATACCAAAGATGTGAGAGAAC

>M6-PGSC0003DMG400009532-(rev)M6LRR-RLP\_1216

AAGTTGTTTCTTTTTGCTAATACAGGGGCTAGTTATACCAAAGATGTGAGAGAACACTTGTTTCCTCCCC  
TTTATGGAACATAATCGCGTGAAAGTACGCATTCATAGTCCATTGATAAG

>M6-PGSC0003DMG400009532-(rev)M6LRR-RLP\_128

TTAAATTTGAGAGGTATTTTTTAAACAAGCCAATAGAAAACTTGTGAATGCTGTGGATCCAATTCTAA  
CTTATCGGAAAAATCAAAGATTTCTGTAGAAAAGTTTTCGCTACACATA

>M6-PGSC0003DMG400009532-(rev)M6LRR-RLP\_1280

CCTCCCCTTTATGGAACATAATCGCGTGAAAGTACGCATTCATAGTCCATTGATAAGTTATTCAGTTGTAGA  
TATTCTTGATGGTATTTTCTGGCTTTCCTCAATTGGACACCCTATCT

>M6-PGSC0003DMG400009532-(rev)M6LRR-RLP\_1342

AGTTGTAGATATTCTTGATGGTATTTTCTGGCTTTCCTCAATTGGACACCCTATCTTATTCTAAATTCGA  
CTTGAACACCCTTGAGGTAAATACTTTTATCTTTCAAAGGCACCGACT

>M6-PGSC0003DMG400009532-(rev)M6LRR-RLP\_192

TTCTAACTTATCGGAAAAATCAAAGATTTCTGTAGAAAAGTTTTCGCTACACATAAATCAACAATGGAG

TAGTCTGTTTTCCAATTGGATTGATACACTCGTAGATTGTAAGATCAAAG

>M6-PGSC0003DMG400009532-(rev)M6LRR-RLP\_256

ATGGAGTAGTCTGTTTTCCAATTGGATTGATACACTCGTAGATTGTAAGATCAAAGAGTTAAGCCTAGTT

TTAAGATCAACCAGAACCGGATACACGAAATTGCCTGAGGCAATTTTTAA

>M6-PGSC0003DMG400009532-(rev)M6LRR-RLP\_320

CTAGTTTTAAGATCAACCAGAACCGGATACACGAAATTGCCTGAGGCAATTTTTAATGCCAAAGCACTAA

AAGTGTGAAATTGAGTGAATTCATATTGAATTGCCATCTAATAGTACT

>M6-PGSC0003DMG400009532-(rev)M6LRR-RLP\_384

CACTAAAAGTGTGAAATTGAGTGAATTCATATTGAATTGCCATCTAATAGTACTATTATGTTTTCATCA

TCTTTGCGAGAGTTATACCTTCAATGTGTATATTTGACGAGGAGTTTA

>M6-PGSC0003DMG400009532-(rev)M6LRR-RLP\_448

TTCATCATCTTTGCGAGAGTTATACCTTCAATGTGTATATTTGACGAGGAGTTTATGCAAGCTTTATGCA

CAAGTTGTATCAATTTAGAGGTTTTTCATGGTGCAGGGCTTGAAAGGGCT

>M6-PGSC0003DMG400009532-(rev)M6LRR-RLP\_512

TTATGCACAAGTTGTATCAATTTAGAGGTTTTTCATGGTGCAGGGCTTGAAAGGGCTTACTAGATTTCAA

CTAGTTTACCTAAATTGAAAAAGCTACAGGTGACAGCGTATTATTCTAAA

>M6-PGSC0003DMG400009532-(rev)M6LRR-RLP\_576

TTCAAAGTACTTTACCTAAATTGAAAAAGCTACAGGTGACAGCGTATTATTCTAAATTACGATTTGTTGAT

ATTAGATCACCTAATATTGAAGATCTTGACGTCTATGGCTCCAACCTCA

>M6-PGSC0003DMG400009532-(rev)M6LRR-RLP\_64

AGAAGCTGCACGAATGAGTAGAGTATCAACGACTTGGAAAAATGCATACAATCACTCCCCTGTTTAAAT

TTTGAGAGGTATTTTTTAAACAAGCCAATAGAAAACTTGTGAATGCTGT

>M6-PGSC0003DMG400009532-(rev)M6LRR-RLP\_640

TGTTGATATTAGATCACCTAATATTGAAGATCTTGACGTCTATGGCTCCAACCTCAGCTCCAACCTTTA

AGAATGAGAGTGATCTAAATGTAGTTATTACTAATTGTTGCAAATC

>M6-PGSC0003DMG400009532-(rev)M6LRR-RLP\_704

TACTTTAAGAATGAGAGTGATCTAAATGTAGTTATTACTAATTGTTGCAAATCCCCTTAAGAGTTTGCA

GCTCAATGGTGTGGCCATGACCCAAAAATGGTTTGACGAAATTTTTACC

>M6-PGSC0003DMG400009532-(rev)M6LRR-RLP\_768

GTTTGCAGCTCAATGGTGTGGCCATGACCCAAAATGGTTTGACGAAATTTTACCTGCCTTCAGAATAT  
AGAGAAGTTGGATTTAGGTGATTGCGACATGTTGAAGACTGTGAATATCT

>M6-PGSC0003DMG400009532-(rev)M6LRR-RLP\_832

GAATATAGAGAAGTTGGATTTAGGTGATTGCGACATGTTGAAGACTGTGAATATCTCAGGCGGCTCTCT  
CAAACAGCTGAGAGTGTATCATTGTGATAATGTGATTGCTATTGAATTAGA

>M6-PGSC0003DMG400009532-(rev)M6LRR-RLP\_896

TCTCTCAAACAGCTGAGAGTGTATCATTGTGATAATGTGATTGCTATTGAATTAGACTCCTAATTTGAT  
AGAGTTCTCGTATGATTGTTCTTCATTGCCGAATTTGAAACTAAAAGCT

>M6-PGSC0003DMG400009532-(rev)M6LRR-RLP\_960

ATTTGATAGAGTTCTCGTATGATTGTTCTTCATTGCCGAATTTGAAACTAAAAGCTTCAGCTTCATTGGAA  
GCCAATATTGAATTCGACTCAGAAGGAGGAGAAACCCCTAACAGTGATT

>M6-PGSC0003DMG400009561M6LRR-RLK\_0

AAAACACAAAAACAAAAACAAAAATCTTTCATTTGTAGGAGCCCTTTGAGAGGGCGCGCACCTGCAAG  
TGCGCGCACCCAGAAAAAAGTTTAAAAAATAAAGAAGACGGTCTC

>M6-PGSC0003DMG400009561M6LRR-RLK\_1037

ACCAACAACACTTTTTCTTTTTTTCTTAAAAACAATCCTCTCTTCTTTCAAGTTCTTGTGAAAGGATT  
TCATAGAACAACCTTCTGTAACAGGTACGCGATTTTAGACTATGGCT

>M6-PGSC0003DMG400009561M6LRR-RLK\_1098

TGTGAAAGGATTTTCATAGAACAACCTTCTGTAACAGGTACGCGATTTTAGACTATGGCTTAATATGTAGT  
TCGTCTTTATATGTGATTACATCTAGTGAAACCAAATTCATTATTGATTT

>M6-PGSC0003DMG400009561M6LRR-RLK\_1159

ATATGTAGTTCGTCTTTATATGTGATTACATCTAGTGAAACCAAATTCATTATTGATTTATTAACAACTAA  
ACATAAGTATTTTTCTTCTTATAAAATAGGCAATGATGGTCTTTGTGG

>M6-PGSC0003DMG400009561M6LRR-RLK\_122

TTCTCTATGCAATCATGGCATCACAAAAAACTACAAAAACAAAAACAAAAACAAACATGTCCT  
CCTCCTTGCTATCATCATGTGTTTCATTAGCATTGTGACAGAGGGAAAAT

>M6-PGSC0003DMG400009561M6LRR-RLK\_1220

TAACTAACTAACATAAGTATTTTTCTTCTTATAAAATAGGCAATGATGGTCTTTGTGGTCCTCCTTAGC  
AAAATCATGCAATAAGGAAGATGAACAAAAGAAGCAAGAATCATCATCA

>M6-PGSC0003DMG400009561M6LRR-RLK\_1281

CTCCTTTAGCAAATCATGCAATAAGGAAGATGAACAAAAGAAGCAAGAATCATCATCATCGTCATCGT  
CATCAGGTTGGAAGATTGCCCTTATTGTGGTTATAGTAGTTGTAGTGATAG

>M6-PGSC0003DMG400009561M6LRR-RLK\_1342

GTCATCGTCATCAGGTTGGAAGATTGCCCTTATTGTGGTTATAGTAGTTGTAGTGATAGGCATTATTGTG  
TTTGTACTAATCAATCGTCGCAAGAAGAATCACCAACAAGAAGTAGTACT

>M6-PGSC0003DMG400009561M6LRR-RLK\_1403

ATTATTGTGTTTGTACTAATCAATCGTCGCAAGAAGAATCACCAACAAGAAGTAGTACTTGGAGGATCAT  
CATTAAAGTTCTTCCTCACCAACAAGTCAAGACCAAAAATAATCCCTCAA

>M6-PGSC0003DMG400009561M6LRR-RLK\_1464

GAGGATCATCATTAAAGTTCTTCCTCACCAACAAGTCAAGACCAAAAATAATCCCTCAATCTCATGATCAT  
CTAAACAAAATGGAACAAGGCCAATCATCAGCTGCATCTACTCCTGATC

>M6-PGSC0003DMG400009561M6LRR-RLK\_1525

TCATGATCATCTAAACAAAATGGAACAAGGCCAATCATCAGCTGCATCTACTCCTGATCGCGCGTCTAAT  
GATGGCGGTAAAAGAGCTGAAGTTGCTGGACAAAACCTTCTATTCTTGAA

>M6-PGSC0003DMG400009561M6LRR-RLK\_1586

GCGTCTAATGATGGCGGTAAAAGAGCTGAAGTTGCTGGACAAAACCTTCTATTCTTGAAAGATGACATT  
GAGAAATTTGACTTACCTGATTTGTTGAAAGCCTCTGCTGAAGTATTGGGA

>M6-PGSC0003DMG400009561M6LRR-RLK\_183

ACATGTCCTCCTCCTTGCTATCATCATGTGTTCAATAGCATTGTGACAGAGGGAAAATTATCAGAGCCTG  
AGGTTCTTCTCAAGTTTCGTCAATCATTAAAGTTTCGATGGAGATCCCTT

>M6-PGSC0003DMG400009561M6LRR-RLK\_2196

TTCTGTCTCAATTTAAATGTCTTACTTCACTCTTGTCTTTTCTAAAAAGTGTGTGCGTTTCTATATTTAGT  
AAGTTTTCAAATTGTGACATTCTACCTGCTTAGTTTAAGACCACAAA

>M6-PGSC0003DMG400009561M6LRR-RLK\_2257

TCTATATTTAGTAAGTTTTCAAATTGTGACATTCTACCTGCTTAGTTTAAGACCACAAAATTAATAAAT  
TCTTTATTTTTTTTAAACTATTTACTGACTTAGATTAAGACACTTAAA

>M6-PGSC0003DMG400009561M6LRR-RLK\_2318

TAAAAAAAATTCTTTATTTTTTTTAAACTATTTACTGACTTAGATTAAGACACTTAAATTGAAAGGAAGG

ATGTACTCCTGCATCTATCTTTACTTGTCTAGTATATGGGATGTCCAAT

>M6-PGSC0003DMG400009561M6LRR-RLK\_2379

GAAAGGAAGGATGTACTCCTGCATCTATCTTTACTTGTCTAGTATATGGGATGTCCAATAATACTTGTCC  
AGTTTATAAACTAATGAATAATTTTTCATTTTATGTCTATTTTACTTTT

>M6-PGSC0003DMG400009561M6LRR-RLK\_244

TCAGAGCCTGAGGTTCTTCTCAAGTTTCGTCAATCATTAAAGTTTCGATGGAGATCCCTTCTCGACGTGGG  
ATATTAATGTACCACCTTGCATCAAAGAGAACAATAAGCCTAAATGGAAC

>M6-PGSC0003DMG400009561M6LRR-RLK\_2501

TATTAATACTATTTCATTTTTTAATGTTTAAATGACTTATATTTAAATAAAAAGTGATTTAATAAACTACCC  
CTATTATTTACTGCTTCATAATCCATGTGCCAAGTCAGTAGTGTACGA

>M6-PGSC0003DMG400009561M6LRR-RLK\_2562

TAAACTACCCCTATTATTTACTGCTTCATAATCCATGTGCCAAGTCAGTAGTGTACGACGGACAGAGGG  
AGAGGGAGTAATATTTTTTTCATAGTTTTGACCACCTTTTCTTGATTTTT

>M6-PGSC0003DMG400009561M6LRR-RLK\_2623

GACAGAGGGAGAGGGAGTAATATTTTTTTCATAGTTTTGACCACCTTTTCTTGATTTTTTCAGGTAATAGC  
AAATCACGTGGTAACCAAAGTCTTGATTGGCCAACTCGTTTGAAAATTGT

>M6-PGSC0003DMG400009561M6LRR-RLK\_2684

GGTAATAGCAAATCACGTGGTAACCAAAGTCTTGATTGGCCAACTCGTTTGAAAATTGTGAAAGGAGTA  
AGCAAAGGAATTTTATACCTTTACAATGAGCTACCAAGCTTAACATCACCT

>M6-PGSC0003DMG400009561M6LRR-RLK\_2745

AAGGAGTAAGCAAAGGAATTTTATACCTTTACAATGAGCTACCAAGCTTAACATCACCTCATGGTCACCT  
CAAGTCTTCAAATGTTCTTCTAACTGAAAACCTTTGAGGCAGTTCTCACAG

>M6-PGSC0003DMG400009561M6LRR-RLK\_2806

TGGTCACCTCAAGTCTTCAAATGTTCTTCTAACTGAAAACCTTTGAGGCAGTTCTCACAGACTATGCCTTAC  
TACCAGTAGTAAATGCTGAACATGCACATGAACACATGATCTCATACAA

>M6-PGSC0003DMG400009561M6LRR-RLK\_2867

TATGCCTTACTACCAGTAGTAAATGCTGAACATGCACATGAACACATGATCTCATACAAAGCACCAGAGT  
TAAACAATCAGGCAAAATCAATAGAAAACTGATGTTTGGACACTTGGT

>M6-PGSC0003DMG400009561M6LRR-RLK\_2928

CACCAGAGTTAAAACAATCAGGCAAAATCAATAGAAAACTGATGTTTGGACACTTGGTATGTTAATCCT  
TGAGATCTTGACTGGAAAATCCCTTCAAATCTTTTAGGCAAAGGAACAC

>M6-PGSC0003DMG400009561M6LRR-RLK\_2989

GTTAATCCTTGAGATCTTGACTGGAAAATCCCTTCAAATCTTTTAGGCAAAGGAACACAAGATAGCGAT  
GATTTAGCGACATGGGTTAATACTACTCTTGGAGATGAATCATCTGAGAA

>M6-PGSC0003DMG400009561M6LRR-RLK\_305

CGACGTGGGATATTAATGTACCACCTTGCATCAAAGAGAACAATAAGCCTAAATGGAACAATCTATTTTG  
CGAAAGTGGAAAGGTTTATGGTTTGAATCTTGAAAATCTTGGGTTAAGTG

>M6-PGSC0003DMG400009561M6LRR-RLK\_3050

GATAGCGATGATTTAGCGACATGGGTTAATACTACTCTTGGAGATGAATCATCTGAGAAAGAAGTGTTT  
GATAAAGAAATGAAAGGAACAAAAGATTGTGAGAGTGAAATGATGAAGTTA

>M6-PGSC0003DMG400009561M6LRR-RLK\_3111

AAGTGTGGATAAAGAAATGAAAGGAACAAAAGATTGTGAGAGTGAAATGATGAAGTTATTGAAGATT  
GGACTAAGTTGTTGTGAGGTTGATGTGGAGAAGAGATGGGATATAAAAAGAGG

>M6-PGSC0003DMG400009561M6LRR-RLK\_3172

GAAGATTGGACTAAGTTGTTGTGAGGTTGATGTGGAGAAGAGATGGGATATAAAAAGAGGCAGTTGAA  
AGGATTGATGAAGTAAAAGAGAAAAGGTGATTCAGCTCTAATGTTGCAACTAA

>M6-PGSC0003DMG400009561M6LRR-RLK\_3233

GTTGAAAGGATTGATGAAGTAAAAGAGAAAAGGTGATTCAGCTCTAATGTTGCAACTAATGAAGTTGAC  
AATATGCATACTTCAAGATAAAAAAATATTTTTGATTGATAAGCTCATGAT

>M6-PGSC0003DMG400009561M6LRR-RLK\_3294

AAGTTGACAATATGCATACTTCAAGATAAAAAAATATTTTTGATTGATAAGCTCATGATCATAATATGGA  
AATTTTGATTATACTGGATGCATATTGCATGACTATATATACTTTGGGTA

>M6-PGSC0003DMG400009561M6LRR-RLK\_3355

TAATATGGAAATTTTGATTATACTGGATGCATATTGCATGACTATATATACTTTGGGTATATGATTTTGTT  
TTGTCATGGTGGAGGATAAATTGAACCATGATGTGGGGTTACTACAAA

>M6-PGSC0003DMG400009561M6LRR-RLK\_3532

AATTTTGTTTGCATATTGTAAATTTGTCCTTTATGAATCTATAGTCTAGGTGTGTTTCTTTATTTTTTTA  
TTATTCATTCATCAAAGCTTATTTGGGACTTGCTTTGCAAAATTGGC

>M6-PGSC0003DMG400009561M6LRR-RLK\_366

TCTATTTTGCGAAAGTGGAAAGGTTTATGGTTTGAATCTTGAAAATCTTGGGTTAAGTGGTACCATTGAT  
TTGGACATACTTAAAGACTTGCCAAATTTGAGAACCATAAGTGTTTTCAA

>M6-PGSC0003DMG400009561M6LRR-RLK\_427

ACCATTGATTTGGACATACTTAAAGACTTGCCAAATTTGAGAACCATAAGTGTTTTCAAAAATAAATTTG  
AAGTTTCCTTACCAATATTAATAAATTGCCTGCATTAAAGAGTGCTTAT

>M6-PGSC0003DMG400009561M6LRR-RLK\_488

ATAAATTTGAAGTTCCTTACCAATATTAATAAATTGCCTGCATTAAAGAGTGCTTATTTCTCAAATAAC  
AAGTTTTCTGGTCCAATTGATCAAAAGATATTTGAAGGGATGAATTCAT

>M6-PGSC0003DMG400009561M6LRR-RLK\_549

CTCAAATAACAAGTTTTCTGGTCCAATTGATCAAAAGATATTTGAAGGGATGAATTCATTAAAGAACTT  
CACCTAGCAAATAATGAATTTACAGGACCACTCCCTCCTATTTTTGGTGA

>M6-PGSC0003DMG400009561M6LRR-RLK\_61

CCTGCAAGTGC GCGCACCAGAAAAAAAAAAAAAGTTTAAAAAAAAATAAAGAAGACGGTCTCTCTTCTCTAT  
GCAATCATGGCATCACAAAAAACTACAAAAACAAAAACAAAAACAAAAAC

>M6-PGSC0003DMG400009561M6LRR-RLK\_610

AAGAACTTCACCTAGCAAATAATGAATTTACAGGACCACTCCCTCCTATTTTTGGTGATATGCCAAATCT  
AAGGGAGTTGAATATTCAAACAATAAGTTTGAGGGTCCAATTCCTCCT

>M6-PGSC0003DMG400009561M6LRR-RLK\_671

TGCCAAATCTAAGGGAGTTGAATATTCAAACAATAAGTTTGAGGGTCCAATTCCTCCTCCTATTACAT  
CTATATTTTCTGCTTATGATGGTAATTCCTACCTCGATCTTTTCCTTT

>M6-PGSC0003DMG400009561M6LRR-RLK\_732

CTATTCACATCTATATTTTCTGCTTATGATGGTAATTCCTACCTCGATCTTTTCTTTTTATATTTCAATAA  
TTATTGTGTCCAATGAATTAACACTTTTTTTGTTTATCATTATGC

>M6-PGSC0003DMG400009561M6LRR-RLK\_793

TATATTTCAATTAATTATTGTGTCCAATGAATTAACACTTTTTTTGTTTATCATTATGCCATGTTTGTCTCC  
AATCCTAGATCATTAAAAAGATCATATCATTGGTTACATAATAAACA

>M6-PGSC0003DMG400009561M6LRR-RLK\_854

TGTTTGTCTTCCAATCCTAGATCATTAAAAAGATCATATCATTGGTTACATAATAAACAAGATCATTAG

ATTCGGGTCATCCATGTAAATAATAAGGGAAGAGACACAACACTATTCAGA

>M6-PGSC0003DMG400009561M6LRR-RLK\_915

AGATCATTAGATTCGGGTCATCCATGTAAATAATAAGGGAAGAGACACAACACTATTCAGATTATTTCTGAA

AAGTAGTAGTACTCCATCTCTTTAGAATTATAAAAGAATTGTCTTAATAG

>M6-PGSC0003DMG400009561M6LRR-RLK\_976

ATTTCTGAAAAGTAGTAGTACTCCATCTCTTTAGAATTATAAAAGAATTGTCTTAATAGAAACCAACAACA

CTTTTTCTTTTTTTCTTAAAAACAATCCTCTCTTCTTCTTTCAAGTT

>M6-PGSC0003DMG400009689M6RLKmalectin\_1054

GCTGCTGGTAATGATGCTAGTGCTAATTTAATGTGACGTGGGTGTTCAATGTGGATGTTGGTTTCCAGT

ATTTGTTTCGATTACATTTGTGTGATATTGTGAGTACAGCTGCTAATCAG

>M6-PGSC0003DMG400009689M6RLKmalectin\_1116

TTTCCAGTATTTGTTTCGATTACATTTGTGTGATATTGTGAGTACAGCTGCTAATCAGCTGTTGTTTAATA

TCTATGTTGATTCGTCGAATATAGCTTCTGATTTTGATCTGAGTTCTAA

>M6-PGSC0003DMG400009689M6RLKmalectin\_1178

TGTTTAATATCTATGTTGATTCGTCGAATATAGCTTCTGATTTTGATCTGAGTTCTAAAGTTCAGAGCAGA

TTGGCTACCGCGTATTACATGGATTTTGTGACACCACAAGCTAATAGCA

>M6-PGSC0003DMG400009689M6RLKmalectin\_124

TCCAAATCTGGGCAATCTCATTCTTGGAGCATATTTAATCAAAAAGGTTCAATCTTTTTCTTCTTCAGCTGT

AGTTATAATTGAAATTTTTTCCAATTCTTGGATTGTTGGGGTTTTGAA

>M6-PGSC0003DMG400009689M6RLKmalectin\_1240

CAGAGCAGATTGGCTACCGCGTATTACATGGATTTTGTGACACCACAAGCTAATAGCAACAACATTAGC

ATTAGTATTGGCCCATCTTCAAAGAGTGGTTTTCCAGATGCCTTTCTAAAT

>M6-PGSC0003DMG400009689M6RLKmalectin\_1302

CATTAGCATTAGTATTGGCCCATCTTCAAAGAGTGGTTTTCCAGATGCCTTTCTAAATGGAGTGGAAGTGG

CTGAAGTTGAATAACTCTCAAGGCAGCCTTGCTGTTGTTTCTCTGTTCC

>M6-PGSC0003DMG400009689M6RLKmalectin\_1364

TGGAAGTCTGAAGTTGAATAACTCTCAAGGCAGCCTTGCTGTTGTTTCTCTGTTTCTTCTTCTCGAGC

TGGGCTCGAAAAAGAATATCGGAGTCATTGTGGGCGCGATTGTAGGTG

>M6-PGSC0003DMG400009689M6RLKmalectin\_1426



TCCTCGAGCTCGGGCTCGAAAAAGAATATCGGAGTCATTGTGGGCGCGATTGTAGGTGTGACACTTGTG  
TTGCTCGTTGTTGGTTTTCTGTTTTGTATGCGCAGAAGAAGAAAGCAGGAA

>M6-PGSC0003DMG400009689M6RLKmalectin\_1488

ACTTGTGTTGCTCGTTGTTGGTTTTCTGTTTTGTATGCGCAGAAGAAGAAAGCAGGAACAACCTCGGCCTG  
TCGAAAACATGGATTCTTTGTCTATTGGTGGTGGTGGCTTGTCTCATAAC

>M6-PGSC0003DMG400009689M6RLKmalectin\_1550

TCGGCCTGTCGAAAACATGGATTCTTTGTCTATTGGTGGTGGTGGCTTGTCTCATACTATGGGAAGCAA  
ATACTCGAACGGGACGACCTTAAGTGCTGCTTCTAACTTGAGTTATCGCA

>M6-PGSC0003DMG400009689M6RLKmalectin\_1612

GGAAGCAAATACTCGAACGGGACGACCTTAAGTGCTGCTTCTAACTTGAGTTATCGCATCCCTTTTGCAG  
CCATGCTAGCAGCAACCAAAAAGTTTGATGAGAGTTTGGTCATTGGGATA

>M6-PGSC0003DMG400009689M6RLKmalectin\_1674

TTTTGCAGCCATGCTAGCAGCAACCAAAAAGTTTGATGAGAGTTTGGTCATTGGGATAGGTGGCTTTGG  
TAAGGTATTCAAGGGCGTTTTAAACGATGGGACGAACGTAGCTATTAAGAG

>M6-PGSC0003DMG400009689M6RLKmalectin\_1736

GCTTTGGTAAGGTATTCAAGGGCGTTTTAAACGATGGGACGAACGTAGCTATTAAGAGGGGTAATCATA  
GCTCCCAACAAGGTCTTAGAGAGTTCCAACTGAAATAGAGATGCTCTCTC

>M6-PGSC0003DMG400009689M6RLKmalectin\_1798

AATCATAGCTCCCAACAAGGTCTTAGAGAGTTCCAACTGAAATAGAGATGCTCTCTCAGTTCCGTCATC  
GTCATCTTGTTCATTGATTGGATATTGTGATGAAAAGAATGAGATGATT

>M6-PGSC0003DMG400009689M6RLKmalectin\_186

CTTCAGCTGTAGTTATAATTGAAATTTTTCCAATTCTTGGATTGTTGGGGTTTTGAAATGTTGTCATTAC  
ATAGTTTTTTGTTTGTATTGTTGTTGGGGTTTTCTGTGTTTGTCTGG

>M6-PGSC0003DMG400009689M6RLKmalectin\_1860

CCGTCATCGTCATCTTGTTCATTGATTGGATATTGTGATGAAAAGAATGAGATGATTCTTGTGTACGAG  
TACATGGAAAATGGGACCCTCAAGAGCCATCTGTATGGTTCGGATATGCC

>M6-PGSC0003DMG400009689M6RLKmalectin\_1922

TGTACGAGTACATGGAAAATGGGACCCTCAAGAGCCATCTGTATGGTTCGGATATGCCTAGTATGAGCT  
GGAAACAGAGGCTGGAGATTTGCATTGGGGCAGCCAGAGGTCTACACTACC

>M6-PGSC0003DMG400009689M6RLKmalectin\_1984

ATGAGCTGGAAACAGAGGCTGGAGATTTGCATTGGGGCAGCCAGAGGTCTACACTACCTTCATACTAGC  
TATGCCAAAGCAGTTATACATCGTGATGTCAAATCAGCAAACATATTGCTT

>M6-PGSC0003DMG400009689M6RLKmalectin\_2046

TACTAGCTATGCCAAAGCAGTTATACATCGTGATGTCAAATCAGCAAACATATTGCTTGATGAGAATATG  
ATGGCAAAGTAGCTGATTTCCGACTTTCTAAGGCTGGACCTGAGCTCGA

>M6-PGSC0003DMG400009689M6RLKmalectin\_2108

AGAATATGATGGCAAAGTAGCTGATTTCCGACTTTCTAAGGCTGGACCTGAGCTCGATCAAACCTCATG  
TTAGCACGGCAGTGAAAGGAAGCTTCGGGTACCTAGATCCTGAATATTTCA

>M6-PGSC0003DMG400009689M6RLKmalectin\_2170

ACTCATGTTAGCACGGCAGTGAAAGGAAGCTTCGGGTACCTAGATCCTGAATATTTTCAGGAGGCAGCAA  
CTGACTGAAAAAAGTGATGTTTACTCTTTTGGTGTGTTCTGTTTGAAGTT

>M6-PGSC0003DMG400009689M6RLKmalectin\_2232

GCAGCAACTGACTGAAAAAAGTGATGTTTACTCTTTTGGTGTGTTCTGTTTGAAGTTCTTTGTGCTAGG  
CCTGTAATCGATCCGTCTCTTCCAAGGGAGATGGTTAATTTAGCTGAATG

>M6-PGSC0003DMG400009689M6RLKmalectin\_2294

GTGCTAGGCCTGTAATCGATCCGTCTCTTCCAAGGGAGATGGTTAATTTAGCTGAATGGGCGATGAAGT  
GGCAGAAGAAGGGACAACACTAGAGCAAATCATAGATCCCAATCTTGCTGGAA

>M6-PGSC0003DMG400009689M6RLKmalectin\_2356

ATGAAGTGGCAGAAGAAGGGACAACACTAGAGCAAATCATAGATCCCAATCTTGCTGGAAAAATAAGACC  
GGATCCCTAAGGAAGTTCGGTGAAACAGCAGAGAAATGCTTGGCTGATTTT

>M6-PGSC0003DMG400009689M6RLKmalectin\_2418

AAGACCGGATTCCCTAAGGAAGTTCGGTGAAACAGCAGAGAAATGCTTGGCTGATTTTGGTGTGGACA  
GACCTTCAATGGGCGACGTGCTGTGGAACCTCGAGTATGCACTTCAACTACA

>M6-PGSC0003DMG400009689M6RLKmalectin\_248

TGTCATTACATAGTTTTTTGTTTGTATTGTTGTTGGGGTTTTTCTGTGTTTGTCTGGATTTGATCCTTCTG  
ATGAGTACTTAATAGACTGTGGATCTTCAAAGATACTAATTTTGGTA

>M6-PGSC0003DMG400009689M6RLKmalectin\_2480

TGGACAGACCTTCAATGGGCGACGTGCTGTGGAACCTCGAGTATGCACTTCAACTACAAGAGGCAGTTA

TTCAAGTCGATCCTGACGAGAACAGTAGCAATCTCATCGGAGAACTCTCTC

>M6-PGSC0003DMG400009689M6RLKmalectin\_2542

GCAGTTATTCAAGTCGATCCTGACGAGAACAGTAGCAATCTCATCGGAGAACTCTCTCCTCAGGTAAAC

GATTCAGTCACGTCGATGCCACTACTTCAGCAATGCAATTCGAAGGGTCG

>M6-PGSC0003DMG400009689M6RLKmalectin\_2604

GGTAAACGATTCAGTCACGTCGATGCCACTACTTCAGCAATGCAATTCGAAGGGTCGAATCTAGATGA

TCTATCTGGAGTTTCCATGAGTAAAGTTTTCTCACAATTGGTTAAGTCTGA

>M6-PGSC0003DMG400009689M6RLKmalectin\_2666

TAGATGATCTATCTGGAGTTTCCATGAGTAAAGTTTTCTCACAATTGGTTAAGTCTGAAGGAAGATAAAT

TTGGTGAAAGATTGTATAACAATTGACTCTTTTTTTTTCTTAGCTCCTCTT

>M6-PGSC0003DMG400009689M6RLKmalectin\_2728

AGATAAATTTGGTGAAAGATTGTATAACAATTGACTCTTTTTTTTTCTTAGCTCCTCTTTTAATTCCACTTTTT

TGTTCAATTAATCATTGAAGAATGACTTTTTATTTTTTTAAACTAT

>M6-PGSC0003DMG400009689M6RLKmalectin\_2776

AGCTCCTCTTTTAATTCCACTTTTTTTGTTCAATTAATCATTGAAGAATGACTTTTTATTTTTTTAAACTATA

GTTTTACATGACTACTTTTTGTTATGAATATAAAAATTATTCCAGCA

>M6-PGSC0003DMG400009689M6RLKmalectin\_310

GATCCTTCTGATGAGTACTTAATAGACTGTGGATCTTCAAAGATACTAATTTTGGTAATAGGGTTTTTGT

GTCTGATAAATCTGGTTCGAAGTTTCTGTCAGTTTCTCAAGATATATTA

>M6-PGSC0003DMG400009689M6RLKmalectin\_372

GGTTTTTGTGTCTGATAAATCTGGTTCGAAGTTTCTGTCAGTTTCTCAAGATATATTAGCTGATAATACAA

GGTCTAGTGATTCACCCCTTTATCAAACAGCTAGAGTATTTACTCAAAC

>M6-PGSC0003DMG400009689M6RLKmalectin\_434

ATAATACAAGGTCTAGTGATTCACCCCTTTATCAAACAGCTAGAGTATTTACTCAAACCTCTAGTTATAAA

TTCCCTACTAAAGTTGGAAGGCATTGGATCCGTCTTCATTTTTCCC

>M6-PGSC0003DMG400009689M6RLKmalectin\_496

AGTTATAAATCCCTACTAAAGTTGGAAGGCATTGGATCCGTCTTCATTTTTCCCATTGTGTACCA

ATCTTATGATATGAGTTCAGCAACTTTCTCTGTTTCAACTCAACAAAAT

>M6-PGSC0003DMG400009689M6RLKmalectin\_558

TGTGTACCAATCTTATGATATGAGTTCAGCAACTTTCTCTGTTTCAACTCAACAAAATGTTCTCCTTGGA  
ATTTTAGTCCTAAAAAGATGTATCTGTAAAGGAGTTTTCTGTAAACGT

>M6-PGSC0003DMG400009689M6RLKmalectin\_62

CTTTACTACCCCTTCCCAAAAAAAAAAAAAAAAAAACTTGTGATTTGGCTTCTATTCACCCATTCCAAATCT  
GGGCAATCTCATTCTTGGAGCATATTTAATCAAAAAGGTTCAATCTTTT

>M6-PGSC0003DMG400009689M6RLKmalectin\_620

TCCTTGGAATTTTAGTCCTAAAAAGATGTATCTGTAAAGGAGTTTTCTGTAAACGTAACGACGGGTGA  
TCTTGTTATCACTTTTTCCCTTTGAGTGATTCATTTGCTTATATAAATG

>M6-PGSC0003DMG400009689M6RLKmalectin\_682

ACGGGTGATCTTGTTATCACTTTTTCCCTTTGAGTGATTCATTTGCTTATATAAATGCTTTGGAAGTTGTC  
TCTGTACCTGATAGTCTTATAACTAATGATGCCTCGACGTTTGGTCCA

>M6-PGSC0003DMG400009689M6RLKmalectin\_744

GGAAGTTGTCTCTGTACCTGATAGTCTTATAACTAATGATGCCTCGACGTTTGGTCCATCTGGAGTATTTA  
GTGGTATGTATGCACAAGCACTTGAAACAGTTGCTAGAGTAAATATGGG

>M6-PGSC0003DMG400009689M6RLKmalectin\_806

GAGTATTTAGTGGTATGTATGCACAAGCACTTGAAACAGTTGCTAGAGTAAATATGGGTGGACCAGCTG  
TATCGTCTGAAAACGATACATTATGGAGGAGTTGGGTGCCTGATCGGGCTT

>M6-PGSC0003DMG400009689M6RLKmalectin\_868

CCAGCTGTATCGTCTGAAAACGATACATTATGGAGGAGTTGGGTGCCTGATCGGGCTTTCTTGACACAG  
CCGGATTTTGCAAAGTCCTTGTCTAAGATTGGATCTGTAAAGTATTTAGCG

>M6-PGSC0003DMG400009689M6RLKmalectin\_930

GACACAGCCGGATTTTGCAAAGTCCTTGTCTAAGATTGGATCTGTAAAGTATTTAGCGGGTGGAGCAAC  
ATCGGATATAGCACCACCGAGTGTTTATGGTACTTGTACTAAGATGAATGT

>M6-PGSC0003DMG400009689M6RLKmalectin\_992

GAGCAACATCGGATATAGCACCACCGAGTGTTTATGGTACTTGTACTAAGATGAATGTGGATGCTGCTG  
GTAATGATGCTAGTGCTAATTTAATGTGACGTGGGTGTTCAATGTGGATG

>M6-PGSC0003DMG400009755M6LRR-RLP\_0

ATGGAGGAACCAAGTTATGAAGGACGTGGATATTACCAAGACTCGGTAGTTGTTGTAACAAAGGGATT  
GAAGCTTGAAGTTGTGAGAATTTTGTCTTTGTACACAGTTATCGATCTTTCA

>M6-PGSC0003DMG400009755M6LRR-RLP\_1040

ATTTTCAAATGCCAAGAATAAGAAGACGTTTCGCGTAACCGATTTGGTTCTTCCTGCAGCTTATGATGTTT  
GATTTGATTTTTAGTTTCTTTTTATCTTTATAAGTAAGCTTTTTCTTAAC

>M6-PGSC0003DMG400009755M6LRR-RLP\_1090

TCCTGCAGCTTATGATGTTTGATTTGATTTTTAGTTTCTTTTTATCTTTATAAGTAAGCTTTTTCTTAACCTTG  
GAAAATGTAATATTATGAATTTTGACAATATATCAAGTTTATGTAAG

>M6-PGSC0003DMG400009755M6LRR-RLP\_130

TCGAAGGACATATTCCTAGTGTTCTAGGAGGTCTCATTGCTCTTCGGGTGTTGAATATATCTCACAATGG  
ATTGAAAGGCCATATAACCACCATCACTTGGACGTTTATCTGTAGTGGAAT

>M6-PGSC0003DMG400009755M6LRR-RLP\_195

AATGGATTGAAAGGCCATATAACCACCATCACTTGGACGTTTATCTGTAGTGGAATCATTGGACCTTTTCAT  
TTAACTGCCTTTCGGGAGAGATACCACAACAACCTTGCTTCTCTTACGTCT

>M6-PGSC0003DMG400009755M6LRR-RLP\_390

AACAGTTCATTTGGTGGTAATGATGGATTACGTGGATTCCCCATTTCAAAGGTTGTGGCAATGATCTTG  
TGTCAGAGACAAATTATACAGTATCTGCGCTAGACGATCAAGAAAGCAAT

>M6-PGSC0003DMG400009755M6LRR-RLP\_455

TCTTGTGTCAGAGACAAATTATACAGTATCTGCGCTAGACGATCAAGAAAGCAATTCTGAATTTCTCAAT  
GATTTTTGGAAAGCTGCTCTGATGGGCTATGGCAGTGGATTATGTATTGG

>M6-PGSC0003DMG400009755M6LRR-RLP\_585

ATGTATTTTCATGATTTCAACTAGAAATCCGAAATGGCTTGCAAGAATCATTGAAGAAATGGAACACAAA  
ATTAACATGCGAAGGAGAAAGAAGCAGCAAGGTCAAAGGAATTACAGAAGA

>M6-PGSC0003DMG400009755M6LRR-RLP\_650

CAAAATTAACATGCGAAGGAGAAAGAAGCAGCAAGGTCAAAGGAATTACAGAAGAAGAAATAATCGCT  
TATAGACAAGTTACCAATAAAGAAGAATTTGATTTCAGAACTTCAGGTATTC

>M6-PGSC0003DMG400009755M6LRR-RLP\_715

GCTTATAGACAAGTTACCAATAAAGAAGAATTTGATTTCAGAACTTCAGGTATTCAAGCTAAGCTCTACA  
CTAATCTTTTTTAGTTCATTCTACTACTAATATGCTAGGTTTTATGCTTT

>M6-PGSC0003DMG400009755M6LRR-RLP\_780

CTACACTAATCTTTTTTAGTTCATTCTACTACTAATATGCTAGGTTTTATGCTTTTATGTTATAAACAACAA

CTAATTAATGCTCGATACGAAGCATATTTTTCTTTCCAACAACCTTTAA

>M6-PGSC0003DMG400009755M6LRR-RLP\_845

ACAACAACATAATTAATGCTCGATACGAAGCATATTTTTCTTTCCAACAACCTTTAAGAAGCTGAAGATTGA  
AAAAGGATTAGCCTTAGCTAATGTTATGGATGGTTTAAACAGTGAAAAAC

>M6-PGSC0003DMG400009755M6LRR-RLP\_910

ATTTGAAAAAGGATTAGCCTTAGCTAATGTTATGGATGGTTTAAACAGTGAAAAACTAATGCATAATTCGG  
TTTTAGCTATATGATTGAAATATAATTTACAATTGTTTACTCACTATCT

>M6-PGSC0003DMG400009755M6LRR-RLP\_975

TTCGGTTTTAGCTATATGATTGAAATATAATTTACAATTGTTTACTCACTATCTTATTTTTTCAGATTTTCA  
AATGCCAAGAATAAGAAGACGTTTCGCGTAACCGATTTGGTTCTTCCTG

>M6-PGSC0003DMG400009843M6LRR-RLK\_0

TTAGAGACTATTTTGACCCTACGGCCAAAATTAATGGACCATATTTGTCATTTTCTTCTTCTCACCCCTAC  
CCCTCGTTTTCCCACTTCACTCTTCTCCATAGTTCCTCACTGTCTCCG

>M6-PGSC0003DMG400009843M6LRR-RLK\_1037

CCAAAACGCACAGTCGCAAGGTATTCTTACTCCTCCACCTCAGCACAAACACAAAAAAGTTGGTGT  
GTTTTGGGTTTTGTAGTTGGAACATTGATCTTGATTGCAGCTGTTCTCTG

>M6-PGSC0003DMG400009843M6LRR-RLK\_1098

GTTGGTGTGTTTTGGGTTTTGTAGTTGGAACATTGATCTTGATTGCAGCTGTTCTCTGTCTTTTTGCTTTT  
GTGAAAAAGAGAAGAGAATAAACTGAACTGAATCAAAAGCAACAAAA

>M6-PGSC0003DMG400009843M6LRR-RLK\_1159

TTTTTGCTTTTGTGAAAAAGAGAAGAGAATAAACTGAACTGAATCAAAAGCAACAAAATGTACCATTG  
AGACCATCACTAATAGTGCGGCGAACGCAACGGTTTCTGAGCCAGATGATA

>M6-PGSC0003DMG400009843M6LRR-RLK\_122

AATCCAGTCCATTTTTAGACCTCCTTTAACGCACAACATGACAACAACAACACTAACTTGGCCTCTAG  
TCACTAAACCAATCACTCGACATTTTTAGTTGCATAACTTGCAATGTC

>M6-PGSC0003DMG400009843M6LRR-RLK\_1220

TACCATTGAGACCATCACTAATAGTGCGGCGAACGCAACGGTTTCTGAGCCAGATGATAGTAGCCAAGA  
GATTAAATTAGAAAAGGAAATGAAAGTGCTTCAAGCCCCCAAACAACAGAT

>M6-PGSC0003DMG400009843M6LRR-RLK\_1281

AGCCAAGAGATTAATTAGAAAAGGAAATGAAAGTGCTTCAAGCCCCAAACAACAGATGAAGAGTGG  
AAATCTGATATTTTGTTCAGGGGAAACAGAGTTGTATTCTTTAGAACAACATA

>M6-PGSC0003DMG400009843M6LRR-RLK\_1342

AGAGTGGAAATCTGATATTTTGTTCAGGGGAAACAGAGTTGTATTCTTTAGAACAACATAATGAGAGCAT  
CAGCAGAGTTGCTTGAAGAGGCACAATTGGAACAACGTATAAAGCTCTGA

>M6-PGSC0003DMG400009843M6LRR-RLK\_1403

GAGAGCATCAGCAGAGTTGCTTGAAGAGGCACAATTGGAACAACGTATAAAGCTCTGATGGCTAGTC  
AGTTAATCGTTTCAGTAAAGCGATTGGATGCTGGTAAAACCTCGATTACGAG

>M6-PGSC0003DMG400009843M6LRR-RLK\_1464

GCTAGTCAGTTAATCGTTTCAGTAAAGCGATTGGATGCTGGTAAAACCTCGATTACGAGTGCAGAAGCG  
TTTGAGCAACACATGGAGTCAGTTGGGATGTTGAGGCACCCAAATTTGGTT

>M6-PGSC0003DMG400009843M6LRR-RLK\_1525

CAGAAGCGTTTGAGCAACACATGGAGTCAGTTGGGATGTTGAGGCACCCAAATTTGGTTGCAGTCAGA  
GCATACTTTCAGGCTAAACAAGAAAGTCTTGTTATCTATGATTATCAGCCTA

>M6-PGSC0003DMG400009843M6LRR-RLK\_1586

AGTCAGAGCATACTTTCAGGCTAAACAAGAAAGTCTTGTTATCTATGATTATCAGCCTAATGGCAGTCTC  
TTCAATCTAATTCATGGTAAAGTTTCTAACTTTTTAATATATCATTACTA

>M6-PGSC0003DMG400009843M6LRR-RLK\_1647

GGCAGTCTCTTCAATCTAATTCATGGTAAAGTTTCTAACTTTTTAATATATCATTACTAGTTCATCTGAAAT  
GGATCAATGTTTATTTTTCATTTTTGGTAATTCTGCTAATTGGTCAAT

>M6-PGSC0003DMG400009843M6LRR-RLK\_1708

TCATCTGAAATGGATCAATGTTTATTTTTCATTTTTGGTAATTCTGCTAATTGGTCAATGTGAAGTCAATTT  
GGTGGACCTGTGATGGAGAAAAAAGTGAAGAGTGAGTTGTCTGTGGC

>M6-PGSC0003DMG400009843M6LRR-RLK\_1769

GAAGTCAATTTGGTGGACCTGTGATGGAGAAAAAAGTGAAGAGTGAGTTGTCTGTGGCTACTGGCTA  
ATCACTATCTAGCTTTTTTTTTTTCTTTACAGAAATTAGTTGTAGTGTTTTG

>M6-PGSC0003DMG400009843M6LRR-RLK\_1830

CTGGCTAATCACTATCTAGCTTTTTTTTTTTCTTTACAGAAATTAGTTGTAGTGTTTTGGATCTTTCAGTGG  
TTGCTATGGTTGTAGTAGCAGGGGACTTTTTTAGCTTTTAGTGTGGAT

>M6-PGSC0003DMG400009843M6LRR-RLK\_1891

TCTTTCAGTGGTTGCTATGGTTGTAGTAGCAGGGGACTTTTTAGCTTTTAGTGTGGATGCCTAACATGG  
CTCCCATTGAGTTCCTACTACCGACAATTGCAAAGTTTGTGTTTACAGGGCA

>M6-PGSC0003DMG400009843M6LRR-RLK\_1952

CTAACATGGCTCCCATTGAGTTCCTACTACCGACAATTGCAAAGTTTGTGTTTACAGGGCAGCCAAATAGTA  
ATGTGTTTTAGTTTCAGGCTGTCACTGACTGACCGGTATGGGTTGATAGC

>M6-PGSC0003DMG400009843M6LRR-RLK\_2013

CAAATAGTAATGTGTTTTAGTTTCAGGCTGTCACTGACTGACCGGTATGGGTTGATAGCATTATATTCCTC  
AAATATTTTTATCATGCATTGAGGCAAATGGTCCTTGGCTCTTGCGTCT

>M6-PGSC0003DMG400009843M6LRR-RLK\_2074

TATATTCCTCAAATATTTTTATCATGCATTGAGGCAAATGGTCCTTGGCTCTTGCGTCTGTCTTTTTGGTAT  
TTATGAGTATGTTTGCTTCTTCTTTAAGTTGAATAGGATGTTGACAGT

>M6-PGSC0003DMG400009843M6LRR-RLK\_2135

CTTTTTGGTATTTATGAGTATGTTTGCTTCTTCTTTAAGTTGAATAGGATGTTGACAGTAACTTTTTGGTGT  
TTTCTTTTACTTGTCCAAATGTTCTCTGTTTCTTAAATATTAATTT

>M6-PGSC0003DMG400009843M6LRR-RLK\_2196

CTTTTTGGTGTTCCTTTTACTTGTCCAAATGTTCTCTGTTTCTTAAATATTAATTTACTTTAAGTGAACG  
TTAACGTTGTTAGATAGAAGGATTAAGGGAAAGATCTAGAACATCCT

>M6-PGSC0003DMG400009843M6LRR-RLK\_2257

TTTAAGTGAACGTTAACGTTGTTAGATAGAAGGATTAAGGGAAAGATCTAGAACATCCTTGGGAACTCT  
TAGTGTAGTGACAGAAATGGTATGAATTTGCTTAATTTACATTTTTTTGAA

>M6-PGSC0003DMG400009843M6LRR-RLK\_2318

GGAACCTTAGTGTAGTGACAGAAATGGTATGAATTTGCTTAATTTACATTTTTTTGAATCTTAGGTATTG  
CATTTTTTGTATCCCCTTGTGATACGCTATCAAGAAATTGGGATTTTCAT

>M6-PGSC0003DMG400009843M6LRR-RLK\_2379

TTAGGTATTGCATTTTTTGTATCCCCTTGTGATACGCTATCAAGAAATTGGGATTTTCATTTTCATAGATTAC  
TCTGCTCAAGAAGATTGATTCCTCTATATAATTGTGTGTGTTTTTTAA

>M6-PGSC0003DMG400009843M6LRR-RLK\_2440

TCATAGATTACTCTGCTCAAGAAGATTGATTCCTCTATATAATTGTGTGTGTTTTTTAAGTGGTTGGTCTTT



TCACCTAAAACCTGATAATCTGTTGTTTCGTTTACTTATATATTGTGTT

>M6-PGSC0003DMG400009843M6LRR-RLK\_2501

GGTTGGTCTTTTACCTAAAACCTGATAATCTGTTGTTTCGTTTACTTATATATTGTGTTCAATTTTCTATTG  
TTCGTGGCAGGTTCAAGATCAACAAGGGCAATGCCTCTTCACTGGACA

>M6-PGSC0003DMG400009843M6LRR-RLK\_2562

ATTTTCTATTGTTTCGTGGCAGGTTCAAGATCAACAAGGGCAATGCCTCTTCACTGGACATCGTGTCTAAA  
AATAGCAGAAGATGTGGCTCAGGGCCTTGCTTACATCCATCAAGCGTCAA

>M6-PGSC0003DMG400009843M6LRR-RLK\_2623

GTGTCTAAAAATAGCAGAAGATGTGGCTCAGGGCCTTGCTTACATCCATCAAGCGTCAAATCTCACTCAT  
GGCAACTTGAAATCCTCCAACGTCCTTCTAGGGTCTGATTTTGAGGCCTG

>M6-PGSC0003DMG400009843M6LRR-RLK\_2684

CTCACTCATGGCAACTTGAAATCCTCCAACGTCCTTCTAGGGTCTGATTTTGAGGCCTGTCTAACAGACTA  
CTCCATCATCGCGCTTGCAGATATTTCTTCGGAGGATGATCCTGATTCA

>M6-PGSC0003DMG400009843M6LRR-RLK\_2745

TAACAGACTACTCCATCATCGCGCTTGCAGATATTTCTTCGGAGGATGATCCTGATTCAGCATGCTATAA  
AGCACCAGAAGTGCGCAAATCAGCACGAAGAGCCACACCAGGGTCTGACG

>M6-PGSC0003DMG400009843M6LRR-RLK\_2806

ATGCTATAAAGCACCAGAAGTGCGCAAATCAGCACGAAGAGCCACACCAGGGTCTGACGTATATGCCTA  
TGGCATTCTGTTATTAGAGCTTTTAAACGGGTAAACCTCCATCTCAGCATCC

>M6-PGSC0003DMG400009843M6LRR-RLK\_2867

TATGCCTATGGCATTCTGTTATTAGAGCTTTTAAACGGGTAAACCTCCATCTCAGCATCCCCATCTCTCTCCC  
CCTGATGTGCCAGATTGGGTTAGAGCTATGAGGGAGGATGATAATGAG

>M6-PGSC0003DMG400009843M6LRR-RLK\_2928

ATCTCTCTCCCCCTGATGTGCCAGATTGGGTTAGAGCTATGAGGGAGGATGATAATGAGGAGGATAGAT  
GGCTTGCAATGCTAGTTGACCTTGCTAGTATATGTAGCTTGACATCACCAG

>M6-PGSC0003DMG400009843M6LRR-RLK\_2989

GGATAGATGGCTTGCAATGCTAGTTGACCTTGCTAGTATATGTAGCTTGACATCACCAGAACAGAGACC  
AACAAATGAGGCAAATCTTGAAAATGATACAAGATATAAAGGATAGTGCAAT

>M6-PGSC0003DMG400009843M6LRR-RLK\_3050

CAGAGACCAACAATGAGGCAAATCTTGAAAATGATACAAGATATAAAGGATAGTGCAATGGTGGAGAA  
TAACAAAAGAGATGCACATAATGGATACTCATAGCTTCTTCTGAATTGCAGT

>M6-PGSC0003DMG400009843M6LRR-RLK\_3111

TGGAGAATAACAAAAGAGATGCACATAATGGATACTCATAGCTTCTTCTGAATTGCAGTTACACCATTAA  
CCAGCGAGGGTACATGGTCAATTGTAAGTAAGTGCATCTCCCCCTTGGC

>M6-PGSC0003DMG400009843M6LRR-RLK\_3172

CACCATTAACCAGCGAGGGTACATGGTCAATTGTAAGTAAGTGCATCTCCCCCTTGGCAAACCTGCCATT  
GATCGACAGCATATCTGTAATTGAGGTTTGCTCAGATAGACCAAATGACT

>M6-PGSC0003DMG400009843M6LRR-RLK\_3233

ACTGCCATTGATCGACAGCATATCTGTAATTGAGGTTTGCTCAGATAGACCAAATGACTCATCAACTATA  
ATGGTGCTTGTACCTTTACTATTCAGCAGTAAACAACCTAAAACCTGACAG

>M6-PGSC0003DMG400009843M6LRR-RLK\_3294

TCAACTATAATGGTGCTTGTACCTTTACTATTCAGCAGTAAACAACCTAAAACCTGACAGGTTAAGGTCTA  
TCTGCTAGAACATGGTCAACTTAGTCACTGAAGATTACGACACATTTTGT

>M6-PGSC0003DMG400009843M6LRR-RLK\_3355

TAAGGTCTATCTGCTAGAACATGGTCAACTTAGTCACTGAAGATTACGACACATTTTGTTCGAAATCCCTC  
TCTTTTTTGGTCACACAAACATATGGTGCCTATATTTTTAGGGCATT

>M6-PGSC0003DMG400009843M6LRR-RLK\_3416

GAAATCCCTCTCTTTTTTGGTCACACAAACATATGGTGCCTATATTTTTAGGGCATTGTAGTAGGTGGT  
TTTGGTTGATTCTTTTTCTAAAGAACTTCAAATGTATTCGCTTTACCT

>M6-PGSC0003DMG400009843M6LRR-RLK\_3477

AGTAGGTGGTTTTGGTTGATTCTTTTTCTAAAGAACTTCAAATGTATTCGCTTTACCTTAGTGGCAGAAG  
AATATTGTATAATCTTGAATGGTAAAGCTAACCCAAATTCTGAACTTTC

>M6-PGSC0003DMG400009843M6LRR-RLK\_3531

TACCTTAGTGGCAGAAGAATATTGTATAATCTTGAATGGTAAAGCTAACCCAAATTCTGAACTTCCCTTC  
TCTGCATGGTTGGTTAGTATCAACTTAGCAGGAGAAGAGTTGTTTAATG

>M6-PGSC0003DMG400009843M6LRR-RLK\_366

CCCTCCGACGCTGTTTCTTTATTGTCTTTCAAGTCAAAGCTGACCTTGACAACAAGCTTCATTACACACTT  
AACGAGCGTTTTGATTACTGTCAATGGCGAGGAGTGAAATGTGTACAG

>M6-PGSC0003DMG400009843M6LRR-RLK\_427

ATTACACACTTAACGAGCGTTTTGATTACTGTCAATGGCGAGGAGTGAAATGTGTACAGGGTCGTGTTG  
TGC GTTTTGTCTTCAAGGGTTTAGTCTCCGGGGTACTTTTCCGGCGAATA

>M6-PGSC0003DMG400009843M6LRR-RLK\_488

TCGTGTTGTGCGTTTTGTTCTTCAAGGGTTTAGTCTCCGGGGTACTTTTCCGGCGAATAGTTTAACTCATC  
TTGACCAACTCCGAATCCTTAATCTTAGGAATAACTCACTTTCCGGTCC

>M6-PGSC0003DMG400009843M6LRR-RLK\_549

TAACTCATCTTGACCAACTCCGAATCCTTAATCTTAGGAATAACTCACTTTCCGGTCCATTCTGATCTT  
TCTGGTCTTCCCAACCTCAAACTCTGTTTCTTGATCATAATTTTTTC

>M6-PGSC0003DMG400009843M6LRR-RLK\_61

CTTACCCTACCCCTCGTTTTCCCACTTCACTCTTCTCCATAGTTCCTCACTGTCTCCGAAAATCCAGTCCAT  
TTTTCAGACCTCCTTAAACGCACAACATGACAACAACAAACTAAA

>M6-PGSC0003DMG400009843M6LRR-RLK\_610

TTCTGATCTTTCTGGTCTTCCCAACCTCAAACTCTGTTTCTTGATCATAATTTTTTCTCTGGAACCTTTCC  
CCTTTCTGTTCTTTCTATTGCGCCGCTTGTTATTCTTGATCTTTCTC

>M6-PGSC0003DMG400009843M6LRR-RLK\_671

TGGAACTTTTCCCTTTCTGTTCTTTCTATTGCGCCGCTTGTTATTCTTGATCTTTCTCGGAACAATCTCACT  
GGTCACTCCCTGTTAGGCTTACTGTTCTTGACCGGTTGAACTATCT

>M6-PGSC0003DMG400009843M6LRR-RLK\_732

AACAATCTCACTGGTTCCTGTTAGGCTTACTGTTCTTGACCGGTTGAACTATCTCCGGCTTGATTC  
CAACTGGTTTAAACGGTTCGATTCCGCCGTTGAACCAGACCCAACTCCA

>M6-PGSC0003DMG400009843M6LRR-RLK\_793

GGCTTGATTCCAACCTGTTTAAACGGTTCGATTCCGCCGTTGAACCAGACCCAACTCCAATATTCAATGT  
GTCTAATAATAACCTTACTGGTCCAGTACCTGTTACTCCAACCTCTGAAGA

>M6-PGSC0003DMG400009843M6LRR-RLK\_854

ATTCAATGTGTCTAATAATAACCTTACTGGTCCAGTACCTGTTACTCCAACCTCTGAAGAAATTTAACATAC  
GCTCGTTCTTACGGAACCCTAGTCTTTGTGGTGAGGTTGTCGACAAGCC

>M6-PGSC0003DMG400009843M6LRR-RLK\_915

TTTAAACATACGCTCGTTCTTACGGAACCCTAGTCTTTGTGGTGAGGTTGTCGACAAGCCGTGCCGTTCCGG

CTCCATTCTTTGATTGCGCTTCCTCTGCTGCCTCTCCGCCACACCGTTA

>M6-PGSC0003DMG400009843M6LRR-RLK\_976

GCCGTTGCGCTCCATTCTTTGATTGCGCTTCCTCTGCTGCCTCTCCGCCACACCGTTATACCAAACGCA

CAGTCGCAAGGTATTCTTACTCTCCACCTCAGCACAAACACAAAA

>M6-PGSC0003DMG400009899M6LRR-RLP\_0

ATTCTCTAATAAATTTCTCTTTGATTATTGAGCAAAATTTGTACCAATGGAAGGTGTAAATTTACTACT

AGTCCTTCTTATAGCTAGTAGTACTATATTAGATGGATTGATATTA

>M6-PGSC0003DMG400009899M6LRR-RLP\_1037

TTCATCCAATAATCTGGAGGGTACTTTAGCAAGAAGCATCGCACAACTTAGGCAATTAGTTGTCCTCAAT

GTTGCTTGGAACCTTTCAATGACTCGATTACTGAACATTTCTTGAATTT

>M6-PGSC0003DMG400009899M6LRR-RLP\_1098

GTCCTCAATGTTGCTTGGAACCTTTCAATGACTCGATTACTGAACATTTCTTGAATTTGAGTATTGAG

AGTGTAGACTTGTCACTCAACTCAATTATCCTCAATATAACTGCAACT

>M6-PGSC0003DMG400009899M6LRR-RLP\_1159

GTGATTTGAGAGTGTTAGACTTGTCACTCAACTCAATTATCCTCAATATAACTGCAACTTGGATGCCTCCC

TTTCAACTTGACATTATTGGCCTGATGTCTTGCCAACTTGGTACACAGT

>M6-PGSC0003DMG400009899M6LRR-RLP\_122

CAGGGCTATGAATTCAGACATTCTTTGTGATGAAAATGAAAAAATGCTCTTATCAAGTTCAGACAGGG

TTAAGGAATCCATCACAGTCAATGATCATGTCGTCTTGGATGCTCGAGGA

>M6-PGSC0003DMG400009899M6LRR-RLP\_1220

GATGCCTCCCTTTCAACTTGACATTATTGGCCTGATGTCTTGCCAACTTGGTACACAGTTTCCCCAGTGGC

TTCATACACAAAAGGATTTTCTCATTTATCGATATCTCATATGGTAACA

>M6-PGSC0003DMG400009899M6LRR-RLP\_1281

CCCCAGTGGCTTCATACACAAAAGGATTTTCTCATTTATCGATATCTCATATGGTAACATCTCAGATAAAG

TGCCTGATTGGTTCTGGAATCTCTCTCAAAGGTACAACACATGAACCT

>M6-PGSC0003DMG400009899M6LRR-RLP\_1342

TCAGATAAAGTGCCTGATTGGTTCTGGAATCTCTCTCAAAGGTACAACACATGAACCTTTGCTTAACT

ATTTAGAGGGGAAGTACCTCAAGTTACATCAAGACTTACTAGTCTTGAA

>M6-PGSC0003DMG400009899M6LRR-RLP\_1403

CGCTTAACTATTTAGAGGGGAAGTACCTCAAGTTACATCAAGACTTACTAGTCTTGAAAACTAGACCT  
GAGCCAAAACAACCTTTCATGGTCCTTACCTCATTTTTTCGTCCAAGATGA

>M6-PGSC0003DMG400009899M6LRR-RLP\_1464

ACTAGACCTGAGCCAAAACAACCTTTCATGGTCCTTACCTCATTTTTTCGTCCAAGATGAAGACGTTGATT  
TGTCCCGGAATTCTTTAATGGCGCCATTTCCCCTGTATGTGAATCACT

>M6-PGSC0003DMG400009899M6LRR-RLP\_1525

ACGTTGATTTTGTCCCGGAATTCTTTAATGGCGCCATTTCCCCTGTATGTGAATCACTTGTCATGAATAA  
TTCTCTTATGTTTCTTGACTTATCGTTCAATAATCTATCAGGAACACTT

>M6-PGSC0003DMG400009899M6LRR-RLP\_1586

TCATGAATAATTCTTATGTTTCTTGACTTATCGTTCAATAATCTATCAGGAACACTTTCAGACTGTTGGA  
GATATGGAAACAATCTGGCAGTATTAAGTTAGGCAATAATAATCTGT

>M6-PGSC0003DMG400009899M6LRR-RLP\_1647

AGACTGTTGGAGATATGGAAACAATCTGGCAGTATTAAGTTAGGCAATAATAATCTGTCTGGTGAAAT  
ACCTCATTCTTTGGATATCTTGAAACTCTCAGGTATCTGCAACTGAGAAA

>M6-PGSC0003DMG400009899M6LRR-RLP\_1708

GGTGAAATACCTCATTCTTTGGATATCTTGAAACTCTCAGGTATCTGCAACTGAGAAAGAACAGGTTGT  
CCAAAATCTGCCTTCATCACTGAAGAACTTACAAGAACTAAAATTACTT

>M6-PGSC0003DMG400009899M6LRR-RLP\_1769

ACAGGTTGTCCAAAATCTGCCTTCATCACTGAAGAACTTACAAGAACTAAAATTACTTGATCTTAGCAG  
AAATTGTTTATCTGGAACGATACCATCTTTCTTAGGGGAGACTTCACAGA

>M6-PGSC0003DMG400009899M6LRR-RLP\_183

AGACAGGGTTAAGGAATCCATCACAGTCAATGATCATGTCGTCTTGATGCTCGAGGAAAATTGCTGC  
AACTGGAAAGGTGTTGAATGTGACAACACAACCGGACATGTGATCACTCTT

>M6-PGSC0003DMG400009899M6LRR-RLP\_1830

TCTTAGCAGAAATTGTTTATCTGGAACGATACCATCTTTCTTAGGGGAGACTTCACAGAAGCTAATGCTT  
CTTTGTTAGGAGAGAACAAGTTTCGATGGAAACATTCCCCTACAGATTTG

>M6-PGSC0003DMG400009899M6LRR-RLP\_1891

CTAATGCTTCTTTGTTAGGAGAGAACAAGTTTCGATGGAAACATTCCCCTACAGATTTGCCAGCTCAAAA  
ACTTGATTATTTGGACCTTAGTTCCAATGCTCTATCAGGCACCATTCCA

>M6-PGSC0003DMG400009899M6LRR-RLP\_1952

AGCTCAAAAACCTTGATTATTTTGGACCTTAGTTCCAATGCTCTATCAGGCACCATTCCAAAGTGTGTTAAA  
AATTTCTAACGATGGCCGGGGTAGAGGAGTTCCTTCCTTGGTTTATG

>M6-PGSC0003DMG400009899M6LRR-RLP\_2013

GTGTGTTAAAAATTCCTAACGATGGCCGGGGTAGAGGAGTTCCTTCCTTGGTTTATGGTCCCTATGAA  
GAATACAGGAAGGATGTGATGTTGATGCTGAAAGAGAGAGGCTATGATTA

>M6-PGSC0003DMG400009899M6LRR-RLP\_2074

CCCTATGAAGAATACAGGAAGGATGTGATGTTGATGCTGAAAGAGAGAGGCTATGATTATAGGTTTTTC  
CTTGCGGCAATTTATCTATCAGATAACCATTTATCAGGGGAAATTCCTGAG

>M6-PGSC0003DMG400009899M6LRR-RLP\_2135

GGTTTTTCCTTGCGGCAATTTATCTATCAGATAACCATTTATCAGGGGAAATTCCTGAGGAAATCACCAC  
ACTTGTTCAATTGCAGGTATTGAATTTATCAAGGAATAATTTAACTGGAG

>M6-PGSC0003DMG400009899M6LRR-RLP\_2196

AATCACCACACTTGTTCAATTGCAGGTATTGAATTTATCAAGGAATAATTTAACTGGAGCAATTCCTTGTG  
ACATTAGTAAATTGCAATATTTGGAAGCACTTGATCTTCCAGGAATTA

>M6-PGSC0003DMG400009899M6LRR-RLP\_2257

ATTCCTTGTGACATTAGTAAATTGCAATATTTGGAAGCACTTGATCTTCCAGGAATTACCTGTCATCCTT  
TTTGCCCTCCAGCATAGTGGAGCTTTCATGCTCGCGATCGCAAATTTT

>M6-PGSC0003DMG400009899M6LRR-RLP\_2318

TGTCATCCTTTTTGCCTTCCAGCATAGTGGAGCTTTCATGCTCGCGATCGCAAATTTTTCGTTCAATAGTT  
TGACAGGAAAAATTCCAATAGGTCGTCAATTTTTAACCTTCGATAATA

>M6-PGSC0003DMG400009899M6LRR-RLP\_2379

GTTCAATAGTTTGACAGGAAAAATTCCAATAGGTCGTCAATTTTTAACCTTCGATAATAGTTCTTATATTG  
GGAATCCAGAGTTGTGTGGCATGCCACTTCCAAAAGCTGCTCGGGACA

>M6-PGSC0003DMG400009899M6LRR-RLP\_244

ATTGCTGCAACTGGAAGGTGTTGAATGTGACAACAACCGGACATGTGATCACTCTTGACCTGCACC  
AGCAATTCTTGCAAGGTGAGTTTGGGACTTCCTTGCTTGGCTTGTCTCACT

>M6-PGSC0003DMG400009899M6LRR-RLP\_2440

TCTTATATTGGGAATCCAGAGTTGTGTGGCATGCCACTTCCAAAAGCTGCTCGGGACATTTTCGTGAGG

ACGTTACTCACTGTAACACTCCCAAGAAAAAAGACGTGCAGGCCATTCAT

>M6-PGSC0003DMG400009899M6LRR-RLP\_2501

TTCGTGAGGACGTACTCACTGTAACACTCCCAAGAAAAAAGACGTGCAGGCCATTCATCAGCATGAGG  
AAGACAATTGGCTTGATGAATCATCATTCTATATCAGCATGGTAATTGGTT

>M6-PGSC0003DMG400009899M6LRR-RLP\_2562

GCATGAGGAAGACAATTGGCTTGATGAATCATCATTCTATATCAGCATGGTAATTGGTTTCATCACAAGT  
TTCTGGTTATTTGGGCTACTCTATTGGTGAAAACATCTTGGAGACATGC

>M6-PGSC0003DMG400009899M6LRR-RLP\_2684

ATATGAGGTATCTTAATAAAATGGGCAACAATTTATGTGTTTGTAGCCATAAGATTACCAAATAAGCA  
TAAACCATCAAAGATGAAAGACTGAAGTTATTTTCAGGGCTTTCTGAATAA

>M6-PGSC0003DMG400009899M6LRR-RLP\_2745

AAATAAGCATAAACCATCAAAGATGAAAGACTGAAGTTATTTTCAGGGCTTTCTGAATAAGGTAATGAAG  
GTCTTATTTCTGGTGCAACTTTCTTTTTTGTGTTTTGATTTCTAGGAGCT

>M6-PGSC0003DMG400009899M6LRR-RLP\_2806

TAATGAAGGTCTTATTTCTGGTGCAACTTTCTTTTTTGTGTTTTGATTTCTAGGAGCTCTTCTGGTTTTTT  
GTTTTTGAAAATCTTCTAAGTACTATATTGTGTATGCTTAGTTGCAT

>M6-PGSC0003DMG400009899M6LRR-RLP\_2867

TCTGGTTTTTTGTTTTGTAAAATCTTCTAAGTACTATATTGTGTATGCTTAGTTGCATTGTTTCATCTCGT  
GGGATTGAACTAGGTATGTTGTTGTTGTCATAATTGTATTCTATGATA

>M6-PGSC0003DMG400009899M6LRR-RLP\_2915

CTTAGTTGCATTGTTTCATCTCGTGGGATTGAACTAGGTATGTTGTTGTTGTCATAATTGTATTCTATGAT  
ATGTTTTGTGGATATCTAAGTAACTTGAGAATACTATTACTAATGTTTT

>M6-PGSC0003DMG400009899M6LRR-RLP\_305

CCTGCACCAGCAATTCTTGCAAGGTGAGTTTGGGACTTCCTTGCTTGGCTTGTCTCACTTAAGACACTTAG  
ACTTGAGCCAAAATGATTTACTCAAGGCCTTGCTTCCTGAGTTTATTTG

>M6-PGSC0003DMG400009899M6LRR-RLP\_366

AGACACTTAGACTTGAGCCAAAATGATTTACTCAAGGCCTTGCTTCCTGAGTTTATTTGCAAATTTAAGA  
GCCTAGAGTATCTCAATTTGCACAAAACCAACTTTAGGGGATCAATCCCT

>M6-PGSC0003DMG400009899M6LRR-RLP\_427

AATTTAAGAGCCTAGAGTATCTCAATTTGCACAAAACCAACTTTAGGGGATCAATCCCTGAGTGTCTTGG  
AAATCGGTCGCGGTTGCAGTACTTGATCTTGGTGATAGTTTTTCACTCC

>M6-PGSC0003DMG400009899M6LRR-RLP\_488

GTGTCTTGAAATCGGTCGCGGTTGCAGTACTTGATCTTGGTGATAGTTTTTCACTCCGGGTTGATAGT  
CTTCAATGGATTGAGCATCTTCCAATATGAGGATTCTTGACCTGAGTGG

>M6-PGSC0003DMG400009899M6LRR-RLP\_549

GTTGATAGTCTTCAATGGATTGAGCATCTTCCAATATGAGGATTCTTGACCTGAGTGGAGTTGACCTGA  
GCAATGCCAAAACCTGGCTACATGACATCAATTCCTAAGGTCTCTCGTG

>M6-PGSC0003DMG400009899M6LRR-RLP\_61

ATTTACTACTAGTCCTTCTTATAGCTAGTAGTACTATATTAGATGGATTGATATTATGCAGGGCTATG  
AATTCAGACATTCTTTGTGATGAAAATGAAAAAATGCTCTTATCAAGT

>M6-PGSC0003DMG400009899M6LRR-RLP\_610

TTGACCTGAGCAATGCCAAAACCTGGCTACATGACATCAATTCCTAAGGTCTCTCGTGGAATTACGTTT  
GTCTTCTTGCAACTTCCTAAATACTTCTGTTTTTGTAATTCACAT

>M6-PGSC0003DMG400009899M6LRR-RLP\_671

ATTACGTTTGTCTTCTTGCAACTTCCTAAATACTTCTGTTTTTGTAATTCACATCCCTTCAGGTTCTT  
GACCTCTCGTTAACTATCTGGATGTTCCATTCCTAGCTGGTTAGT

>M6-PGSC0003DMG400009899M6LRR-RLP\_732

CTTCAGGTTCTTGACCTCTCGTTAACTATCTGGATGTTCCATTCCTAGCTGGTTAGTCAATACAAGCTC  
TCAGAGTCTTGTTTATCTTAATCTCAAAGAAGTCTGCTGCATGGTTTA

>M6-PGSC0003DMG400009899M6LRR-RLP\_793

ATACAAGCTCTCAGAGTCTTGTTTATCTTAATCTCAAAGAAGTCTGCTGCATGGTTTACTTCCAAATACC  
GCCTTTGGAAACATGTACTCACTTAGAGTTCTTGATCTTCTGACAACT

>M6-PGSC0003DMG400009899M6LRR-RLP\_854

TCCAAATACCGCTTTGGAACATGTACTCACTTAGAGTTCTTGATCTTCTGACAACTCTATCCGAGGCA  
AGCTCCGTCTTTGAGAACATGACTTCAGTACTTCTTCTTGATATCTC

>M6-PGSC0003DMG400009899M6LRR-RLP\_915

ATCCGAGGCAAGCTTCCGTCTTTGAGAACATGACTTCAGTACTTCTTCTTGATATCTCAAGGAATTCTCT  
TGAAGGCAAATTACCACCAACCCTGCCTTCAAAGTTGAAACATTTGGAT



>M6-PGSC0003DMG400009899M6LRR-RLP\_976

GGAATTCTCTTGAAGGCAAATTACCACCAACCCTGCCTTCAAAGTTGAAACATTTGGATCTTTCATCCAAT  
AATCTGGAGGGTACTTTAGCAAGAAGCATCGCACAACTTAGGCAATTAG

>M6-PGSC0003DMG400009941-(rev)M6LRR-RLK\_0

CTTCAAATACCCTTAAACCTATCCTAAAATTTGTACAAACCAGACTGAACTAACAGTGTAACAATGTCACT  
CCCCAAAAAATATCCCTTTTCTCCAATTTTCATCTTTTTGGTTTTT

>M6-PGSC0003DMG400009941-(rev)M6LRR-RLK\_1037

ACTGAACATCAAATTGTTTTAAATACTCAATAGTAATAGTTGTTTCTTGAGTGACGTGCAAAGTCTAGA  
GTTGATAAGTAAAAGTGAATGGAGTGAGAATATCATAAAAAGTCTCTTTG

>M6-PGSC0003DMG400009941-(rev)M6LRR-RLK\_1098

AAGTCTAGAGTTGATAAGTAAAAGTGAATGGAGTGAGAATATCATAAAAAGTCTCTTTGAGAAAACTG  
TGTGTTTATAGTGAAATGATGTTAGAGTATGAGTGTTAATAGAGAGGTTCT

>M6-PGSC0003DMG400009941-(rev)M6LRR-RLK\_1159

AAAACTGTGTGTTTATAGTGAAATGATGTTAGAGTATGAGTGTTAATAGAGAGGTTCTTGTGTAACAT  
ATATGTATATGTGCAAAATATTATGCATATAAAGTTTTGAAGTCATAATC

>M6-PGSC0003DMG400009941-(rev)M6LRR-RLK\_122

CATTAATGCAAACCTGATCTTGAACCCTTTTGAAGCTCAAAGAATCCATGGTTGCTCCTGGAACCTCTG  
CACTTCTTGATTGGAACAACAACACAAATTACCCTTTTTCCCATTGTTC

>M6-PGSC0003DMG400009941-(rev)M6LRR-RLK\_1342

CGCATACCATCTGAACTATCTGGTTTAGAGAGTTTGATGTCGTTTGATTTGTCTTTAAACCAACTGACGG  
GAGAAATACCAGAGAGTTTTGTGAAGTTGCAGAATTTGACATTGATTAAC

>M6-PGSC0003DMG400009941-(rev)M6LRR-RLK\_1403

AACTGACGGGAGAAATACCAGAGAGTTTTGTGAAGTTGCAGAATTTGACATTGATTAACCTTGTTTAGAA  
ACAACCTGCATGGTCCAATTCCCCCTTTTATTGGTGACCTTCCAAATCTTG

>M6-PGSC0003DMG400009941-(rev)M6LRR-RLK\_1464

GTTTAGAAACAACCTGCATGGTCCAATTCCCCCTTTTATTGGTGACCTTCCAAATCTTGAAGTGTTCAGA  
TTTGGGGAAACAATTTACTCTCGAATTACCGGAAAATCTTGGGCGCAA

>M6-PGSC0003DMG400009941-(rev)M6LRR-RLK\_1525

GTGTTGCAGATTTGGGGAAACAATTTACTCTCGAATTACCGGAAAATCTTGGGCGCAACGGGAGGTTT

TTGTTTCTTGATATTTCTGTTAATCATTTTACTGGAAGGATACCACCTGAT

>M6-PGSC0003DMG400009941-(rev)M6LRR-RLK\_1586

GGAGGTTTTTGTCTTGATATTTCTGTTAATCATTTTACTGGAAGGATACCACCTGATTTGTGTAAAGGG

GGGAAGTTAAAGACACTTATTCTAATGGAGAATTACTTCTTTGGTCCTA

>M6-PGSC0003DMG400009941-(rev)M6LRR-RLK\_1647

GTGTAAAGGGGGGAAGTTAAAGACACTTATTCTAATGGAGAATTACTTCTTTGGTCCTATTCCTGAACAA

CTTGGTGAGTGCAAATCGCTTACTCGAATTCGCGTTAGGAAGAATTACTT

>M6-PGSC0003DMG400009941-(rev)M6LRR-RLK\_1708

CCTGAACAACCTTGGTGAGTGCAAATCGCTTACTCGAATTCGCGTTAGGAAGAATTACTTAAATGGTACTA

TTCCAGTTGGTTTTTTCAAGTTACCTGCATTGGATATGCTTGAACCTTGAC

>M6-PGSC0003DMG400009941-(rev)M6LRR-RLK\_1769

ATGGTACTATTCCAGTTGGTTTTTTCAAGTTACCTGCATTGGATATGCTTGAACCTTGACAACAACCTATTTTC

ACTGGTGAGCTGCCAACGGAGATAAACGCGAATAATCTCACTAAACTTG

>M6-PGSC0003DMG400009941-(rev)M6LRR-RLK\_183

GGAACCTTCTGCACTTCTTGATTGGAACAACAACACAAATTACCCTTTTTCCCATTGTTCTTTTTCTGGTGTT

ACATGTAACAATAACTCTCATGTTATATCTATAAACATCACTAATGTT

>M6-PGSC0003DMG400009941-(rev)M6LRR-RLK\_1830

CAACTATTTCACTGGTGAGCTGCCAACGGAGATAAACGCGAATAATCTCACTAAACTTGTACTTTCCAAC

AACTGGATCACGGGGAACATTCCTCCGTCATTAGGGAACCTGAAGAATCT

>M6-PGSC0003DMG400009941-(rev)M6LRR-RLK\_1891

CTTTCCAACAACCTGGATCACGGGGAACATTCCTCCGTCATTAGGGAACCTGAAGAATCTAGTAACTCTAT

CACTTGATATGAACAGATTGTCCGGTGAAATTCCTCAAGAAATTGCGAGT

>M6-PGSC0003DMG400009941-(rev)M6LRR-RLK\_1952

TAACTCTATCACTTGATATGAACAGATTGTCCGGTGAAATTCCTCAAGAAATTGCGAGTTTGAATAAACT

CGTGACCATCAACTTGAGCGGCAACAATTTAACAGGTGAAATCCCGAGTT

>M6-PGSC0003DMG400009941-(rev)M6LRR-RLK\_2013

GAATAAACTCGTGACCATCAACTTGAGCGGCAACAATTTAACAGGTGAAATCCCGAGTTCAATTGCGCTT

TGTTCAAGAGCTAACATTGGTTGACTTGAGCAGAAATCAACTGGTTGGTGA

>M6-PGSC0003DMG400009941-(rev)M6LRR-RLK\_2074

ATTGCGCTTTGTTGAGAGCTAACATTGGTTGACTTGAGCAGAAATCAACTGGTTGGTGAAGTGCCAAA  
GAAATCACCAAGTTAAATAGCTTGAATGCGCTGAACTTGTCAAGAAACCAA

>M6-PGSC0003DMG400009941-(rev)M6LRR-RLK\_2135

TGCCAAAAGAAATCACCAAGTTAAATAGCTTGAATGCGCTGAACTTGTCAAGAAACCAACTGAGTGGCG  
CCATTCCTGGAGAAGTAGGAGTGATGAATGGCTTGACAGTTTTGGATCTTT

>M6-PGSC0003DMG400009941-(rev)M6LRR-RLK\_2196

GAGTGGCGCCATTCCTGGAGAAGTAGGAGTGATGAATGGCTTGACAGTTTTGGATCTTTCTTACAATGA  
TCTTTCTGGAAGGAGACCGACCAACGGACAATAAGTTCTTCAATGACAC

>M6-PGSC0003DMG400009941-(rev)M6LRR-RLK\_2257

TACAATGATCTTTCTGGAAGGAGACCGACCAACGGACAATAAGTTCTTCAATGACACTTATTTTGTAG  
GAAATCCAAAATCTGTTGCGCTCATGCTACTATTTGCCCGTCAGCTTCC

>M6-PGSC0003DMG400009941-(rev)M6LRR-RLK\_2318

ATTTTGTAGGAAATCCAAAATCTGTTGCGCTCATGCTACTATTTGCCCGTCAGCTTCCAATTCACCACAA  
AATGCGCTCAAAATCCATGCTGGGAAGTTCACAATAACCAATTGGTGA

>M6-PGSC0003DMG400009941-(rev)M6LRR-RLK\_2379

TTCACCACAAAATGCGCTCAAAATCCATGCTGGGAAGTTCACAATAACCAATTGGTGATTACAATAATC  
ATCTTAGTCACTGTTGCATTGCTGTTGGCAGTTACCGTGTGTTTCATCAA

>M6-PGSC0003DMG400009941-(rev)M6LRR-RLK\_244

TTTCTGGTGTACATGTAACAATAACTCTCATGTTATATCTATAAACATCACTAATGTTCTCTATTTGGTA  
CTATTCCACCTGAAATTGGTCTTTTACAAAATCTTAAAAATCTTATTA

>M6-PGSC0003DMG400009941-(rev)M6LRR-RLK\_2440

ACAATAATCATCTTAGTCACTGTTGCATTGCTGTTGGCAGTTACCGTGTGTTTCATCAAGAAGGAAAAGT  
TCAAGAATTCGAAACTTTGGAAGTTAACAGCATTCCAGAACTTGATTC

>M6-PGSC0003DMG400009941-(rev)M6LRR-RLK\_2501

AGGAAAAGTTCAGAATTCGAAACTTTGGAAGTTAACAGCATTCCAGAACTTGATTCAGAGCTGAGG  
ATGTTTTGGAGTGTAAAAGAGGAGAACATAATTGGGAAAGGTGGAGCTG

>M6-PGSC0003DMG400009941-(rev)M6LRR-RLK\_2562

AGCTGAGGATGTTTTGGAGTGTAAAAGAGGAGAACATAATTGGGAAAGGTGGAGCTGGCGTTGTGT  
ACCGAGGGTCTATGTCAAATGGCATCGACGTTGCAATTAAGAACTTGTAGG

>M6-PGSC0003DMG400009941-(rev)M6LRR-RLK\_2623

GTTGTGTACCGAGGGTCTATGTCAAATGGCATCGACGTTGCAATTAAGAACTTGTAGGCCGAGGAACC  
GGACACCATGATCACGGATTCTCAGCTGAAATCCAAACACTAGGAAGGATC

>M6-PGSC0003DMG400009941-(rev)M6LRR-RLK\_2684

GAGGAACCGGACACCATGATCACGGATTCTCAGCTGAAATCCAAACACTAGGAAGGATCAGGCACAGA  
AACATCGTACGATTACTAGGATATGTCTCAAACAAAGACACAACTTGTGT

>M6-PGSC0003DMG400009941-(rev)M6LRR-RLK\_2745

GCACAGAAACATCGTACGATTACTAGGATATGTCTCAAACAAAGACACAACTTGTGTTGTACGAATAC  
ATGTCGAATGGGAGCTTAGGTGAAATGTTACATGGTGCCAAAGGAGCACA

>M6-PGSC0003DMG400009941-(rev)M6LRR-RLK\_2806

TACGAATACATGTCGAATGGGAGCTTAGGTGAAATGTTACATGGTGCCAAAGGAGCACATTTGAAATG  
GGAGACGAGGTACCGTATTGCTGTGGAAGCTGCAAAGGGATTGTGTTATTG

>M6-PGSC0003DMG400009941-(rev)M6LRR-RLK\_2867

TGAAATGGGAGACGAGGTACCGTATTGCTGTGGAAGCTGCAAAGGGATTGTGTTATTGACCCATGATT  
GTTTCGCTTCGATTATTCATAGAGATGTCAAGTCCAATAATATTCTGCTGG

>M6-PGSC0003DMG400009941-(rev)M6LRR-RLK\_2928

CCATGATTGTTTCGCTTCGATTATTCATAGAGATGTCAAGTCCAATAATATTCTGCTGGATTCTGATTACG  
AGGCTCATGTTGCTGATTTTGGTCTAGCCAAATTCTTGCAGGATGCTGG

>M6-PGSC0003DMG400009941-(rev)M6LRR-RLK\_2989

TCTGATTACGAGGCTCATGTTGCTGATTTTGGTCTAGCCAAATTCTTGCAGGATGCTGGTGCATCAGAGT  
GCATGTCCTCTATTGCTGGCTCATATGGTTACATTGCTCCAGGTAAATTA

>M6-PGSC0003DMG400009941-(rev)M6LRR-RLK\_305

TCTATTTGGTACTATTCCACCTGAAATTGGTCTTTTACAAAATCTTGAAAATCTTATTATTTTTGGTGATAA  
TATTACTGGTACACTCCCTTTAGAAATGTCACAACCTTTCTTCTATTAA

>M6-PGSC0003DMG400009941-(rev)M6LRR-RLK\_3050

CATCAGAGTGCATGTCCTCTATTGCTGGCTCATATGGTTACATTGCTCCAGGTAAATTAATACAGTTACA  
GTATTTTTTCATATTTATAACAATTATGAATTTTCCGTATTAGTATTCTTTT

>M6-PGSC0003DMG400009941-(rev)M6LRR-RLK\_3111

ACAGTTACAGTATTTTTTCATATTTATAACAATTATGAATTTTCCGTATTAGTATTCTTTTATTGCTGGCTCAT

ATGGTAATCATATTTATACAATTAGGTGGCATATAATGTAGTTACTGG

>M6-PGSC0003DMG400009941-(rev)M6LRR-RLK\_3172

TGCTGGCTCATATGGTAATCATATTTATACAATTAGGTGGCATATAATGTAGTTACTGGTAAAATTTAAT

GATAATCTTAAAATGTGATACTAATTAACCTTTCTATAATAGATTAAATTA

>M6-PGSC0003DMG400009941-(rev)M6LRR-RLK\_3233

AAATTTAATGATAATCTTAAAATGTGATACTAATTAACCTTTCTATAATAGATTAAATTATGATGATACTAA

TTAACCTTAAGCTATGTTGCTCAAACCTTAAAAAATGTCAGTGGGGTA

>M6-PGSC0003DMG400009941-(rev)M6LRR-RLK\_3416

TGAAGAATCAGAGAAAAATAAACCTTAAGACCTTTTATATACCTGTGTTATTGGTCAATATTTTCCTATT

TCATGAAAGATGCACTTCACCAACTTTTAGTACCAATTACCAAGACCTA

>M6-PGSC0003DMG400009941-(rev)M6LRR-RLK\_3477

TTTTCTATTTTCATGAAAGATGCACTTCACCAACTTTTAGTACCAATTACCAAGACCTATGAACTTTTAGA

ATTTACTGAACTGGGGTTTAAAGTAGTAGGTATTTAAAAGCTATGCTCC

>M6-PGSC0003DMG400009941-(rev)M6LRR-RLK\_3538

AACTTTTAGAATTTACTGAACTGGGGTTTAAAGTAGTAGGTATTTAAAAGCTATGCTCCAGGACAAAATC

TATTTAAAACATTTGTCCAAAACATTAATTTGTGCAATTAATGTTTTTCT

>M6-PGSC0003DMG400009941-(rev)M6LRR-RLK\_3599

GACAAAATCTATTTAAAACATTTGTCCAAAACATTAATTTGTGCAATTAATGTTTTTCTGAGGTGCATTTT

TGTTTGGATATGAAACAGAGTATGCATACACATTGAAAGTTGACCAAAA

>M6-PGSC0003DMG400009941-(rev)M6LRR-RLK\_366

TTTGGTGATAATATACTGGTACACTCCCTTTAGAAATGTCACAACCTTTCTTCTATTAAACATGTTAATCTT

TCTTACAACAATTTTTCTGGTCCTTTTCCTAGAGAAATCTTGTTGGGG

>M6-PGSC0003DMG400009941-(rev)M6LRR-RLK\_3660

GGTGCATTTTTGTTTGGATATGAAACAGAGTATGCATACACATTGAAAGTTGACCAAAAAGAGTGATGTA

TACAGTTTTGGAGTAGTACTGTTGGAACCTTATCACAGGTCACAAGCCAGTT

>M6-PGSC0003DMG400009941-(rev)M6LRR-RLK\_3721

GTGATGTATACAGTTTTGGAGTAGTACTGTTGGAACCTTATCACAGGTCACAAGCCAGTTGGTGAATTCG

GAGACGGTGTAGATATAGTCAGATGGGTAAATAAAACAATGTCCGAATTAT

>M6-PGSC0003DMG400009941-(rev)M6LRR-RLK\_3782

TGAATTCGGAGACGGTGTAGATATAGTCAGATGGGTAAATAAAACAATGTCCGAATTATCTCAGCCATC  
TGATGCAGCCTCAGTTTTAGCAGTCGTTGACTCGAGGCTACATAGTTACCC

>M6-PGSC0003DMG400009941-(rev)M6LRR-RLK\_3843

CAGCCATCTGATGCAGCCTCAGTTTTAGCAGTCGTTGACTCGAGGCTACATAGTTACCCTCTTGCAAGTG  
TTATCAATTTGTTCAAGATTGCTATAATGTGTGTTGAAGAAGAGAGTTGT

>M6-PGSC0003DMG400009941-(rev)M6LRR-RLK\_3904

TTGCAAGTGTTATCAATTTGTTCAAGATTGCTATAATGTGTGTTGAAGAAGAGAGTTGTGCTAGGCCTAC  
TATGAGGGAAGTTGTTACATGCTTACAAATCTTCCTCAGTCTACTACTA

>M6-PGSC0003DMG400009941-(rev)M6LRR-RLK\_3965

TAGGCCTACTATGAGGGAAGTTGTTACATGCTTACAAATCTTCCTCAGTCTACTACTACTACTCCTACTC  
TCCTTGCCCTTTAAAATTGTGCGGATATTAAGTGTCTGGTTGAAAACCTC

>M6-PGSC0003DMG400009941-(rev)M6LRR-RLK\_4026

ACTCCTACTCTCCTTGCCCTTTAAAATTGTGCGGATATTAAGTGTCTGGTTGAAAACCTCGTGGAGTTTGAG  
GCCGGGAACACGAGCCTCATGAGTCTATTTGGGTATGGGGAACAAAAAA

>M6-PGSC0003DMG400009941-(rev)M6LRR-RLK\_4087

GGAGTTTGAGGCCGGGAACACGAGCCTCATGAGTCTATTTGGGTATGGGGAACAAAAAAATTGTGCAA  
GTAGAGATATGTATTTGAAATGTATTGCTTGTTTTATATTTTGAAGTAGT

>M6-PGSC0003DMG400009941-(rev)M6LRR-RLK\_4148

TGTGCAAGTAGAGATATGTATTTGAAATGTATTGCTTGTTTTATATTTTGAAGTAGTTGTATAAAAAGG  
GGCATGAAAAAAGAAGGAAAAAGACTCCTTTAATTACTTATTATGGGT

>M6-PGSC0003DMG400009941-(rev)M6LRR-RLK\_4209

TATAAAAAGGGGCATGAAAAAAGAAGGAAAAAGACTCCTTTAATTACTTATTATGGGTATCGAGTATA  
ATTATGTGGCCTTAGGAAATAAATATCAATATGGCAATTAGTCAATATTTG

>M6-PGSC0003DMG400009941-(rev)M6LRR-RLK\_4264

GGGTATCGAGTATAATTATGTGGCCTTAGGAAATAAATATCAATATGGCAATTAGTCAATATTTGCTTTT  
AATAACATGGCCTATGTAATGTTTTCAAGAGTTTGCGAAGTTAAAATTTG

>M6-PGSC0003DMG400009941-(rev)M6LRR-RLK\_427

ATGTTAATCTTTCTTACAACAATTTTCTGGTCCTTTTCTAGAGAAATCTTGTTGGGGTTAATAAAGCTTG  
AATCTTTTGACATTTATAACAACAATTTCACTGGTGAACCTCCTAATG

>M6-PGSC0003DMG400009941-(rev)M6LRR-RLK\_488

AATAAAGCTTGAATCTTTTGACATTTATAACAACAATTTCACTGGTGAACCTCCTAATGAGTTTGTAAGT  
TGAAAAAGTTGGAAACTTTACATCTTGGTGGAAACTATTTTCATGGTGA

>M6-PGSC0003DMG400009941-(rev)M6LRR-RLK\_549

TTTGTAAGTTGAAAAAGTTGGAAACTTTACATCTTGGTGGAAACTATTTTCATGGTGAATACCAGAAG  
TTTATTCTCATATTGTAAGTTTAAAGTGGTTGGGTTTAGAGGGAAATTCA

>M6-PGSC0003DMG400009941-(rev)M6LRR-RLK\_61

CAATGTCCTCCCAAAAAAATATCCCTTTTCTCCAAATTTTCATCTTTTTGGTTTTCCACCTAATGCAA  
ACTCTGATCTTGAAACCCTTTTGAAGCTCAAAGAATCCATGGTTGCTC

>M6-PGSC0003DMG400009941-(rev)M6LRR-RLK\_610

TACCAGAAGTTTATTCTCATATTGTAAGTTTAAAGTGGTTGGGTTTAGAGGGAAATTCACTTACTGGGAA  
AATACCAAAGAGTTTGGCTTTGTTACCAAATCTTGAAGAAGTTAGATTGG

>M6-PGSC0003DMG400009941-(rev)M6LRR-RLK\_671

TACTGGGAAAATACCAAAGAGTTTGGCTTTGTTACCAAATCTTGAAGAAGTTAGATTGGGTTATTATAAT  
AGTTATGAAGGGGGTATTCCATCTGAGTTTGGTAATATTAGTACACTTAA

>M6-PGSC0003DMG400009941-(rev)M6LRR-RLK\_732

TATTATAATAGTTATGAAGGGGGTATTCCATCTGAGTTTGGTAATATTAGTACACTTAACTTCTTGATCT  
TGGAATTGTAATCTTGATGGTGAAGTTCTCCAAGTCTTGGAAATTTG

>M6-PGSC0003DMG400009941-(rev)M6LRR-RLK\_793

TTCTTGATCTTGGAAATTGTAATCTTGATGGTGAAGTTCTCCAAGTCTTGGAAATTTGAAGAAGTTGCA  
TACTTTGTTTCTACAAGTGAACAGACTTACAGGTATTCATGAACTCACTA

>M6-PGSC0003DMG400009941-(rev)M6LRR-RLK\_854

GAAGTTGCATACTTTGTTTCTACAAGTGAACAGACTTACAGGTATTCATGAACTCACTATTTGTTTAGTTA  
TACAATCAAATCTCTCTAATAACGTCGTTTGTCTGAATATATATTAG

>M6-PGSC0003DMG400009941-(rev)M6LRR-RLK\_915

TGTTTAGTTATAACAATCAAATCTCTCTAATAACGTCGTTTGTCTGAATATATATTAGTTGACATGGTTAA  
ATATTGTTATAGGAAACATATTTGTTACAAATCATTTTCCAAGATGTA

>M6-PGSC0003DMG400009941-(rev)M6LRR-RLK\_976

GACATGGTTAAATATTGTTATAGGAAACATATTTGTTACAAATCATTTTCCAAGATGTAAGACTGAACAT

CAAATTGTTTTAAATACTCAATAGTAATAGTTGTTTCTTGAGTGACGTG

>M6-PGSC0003DMG400010032M6RLKWAX-EGF\_0

TGGATATGCGCTGCGTGTGCGTAAAAGAAGCTTCTTCCCCGGTGTATTTTAAAGTCTACCTTCCTTGTTG  
TATCTCCGATTACTATTTGATAGCTTCATTGTTAGGAAATCCAGTTTTT

>M6-PGSC0003DMG400010032M6RLKWAX-EGF\_1037

ATCTTGATTGGTATGGATAATGATACAATGAAGAGTTCTGCCATGTTCTGGAGTTTCAGACGATGGAAT  
TAGCGTGGGGATTGAAAGGGGATTGTGCATGTCATGACGATGCAAATTGT

>M6-PGSC0003DMG400010032M6RLKWAX-EGF\_1098

CGATGGAATTAGCGTGGGGATTGAAAGGGGATTGTGCATGTCATGACGATGCAAATTGTACCAACGTTT  
CTCTTCCGGGGAACCGAAAAGTTTCCGATGCCGGTGTAAGATGGATTCCG

>M6-PGSC0003DMG400010032M6RLKWAX-EGF\_122

AGAGCTGTTTTTGGAGTTGAGATATTTCAAATTTTGGACTCTTTAATTGCTACTATTTGCTTCCAATCAA  
GAAAGGAAAATTTGCAGACGAAGGAAGAGAGAGAAGTAAAAGCTAAGGT

>M6-PGSC0003DMG400010032M6RLKWAX-EGF\_1220

GGTGATGGCTTCCGCGACGGTGATGGGTGCCGTAAAGGTTAGTTCTTTTTTTTTTCAAGTGTTAAAATAG  
TTAATTTGCAACATTATTCACCTCCTTGTTGAATTGTGTGAATCATCTTA

>M6-PGSC0003DMG400010032M6RLKWAX-EGF\_1403

TATAAAGATATGGGAAGTTCAAATGGAGATGTTAAATTTGACGTTCAAATTCATAAAATCTTAGTTT  
TATTTTACATAACATATATTTTCGTTTCAATGATATTAATTTCAATTGAAC

>M6-PGSC0003DMG400010032M6RLKWAX-EGF\_1464

TCTTAGTTTTATTTTACATAACATATATTTTCGTTTCAATGATATTAATTTCAATTGAACTCAAGAGTTCCAT  
CTACACGTATTGGTAGATATTTTAAATTTTAGTACTTGGAGATATATC

>M6-PGSC0003DMG400010032M6RLKWAX-EGF\_1525

AAGAGTTCATCTACACGTATTGGTAGATATTTTAAATTTTAGTACTTGGAGATATATCATTAAATGGAAAT  
GCCGTTGAACTCAAATGTCTACTTAATTTGGTATATGGCTTTTCAATA

>M6-PGSC0003DMG400010032M6RLKWAX-EGF\_1586

TAATGGAAATGCCGTTGAACTCAAATGTCTACTTAATTTGGTATATGGCTTTTCAATAGAGACAACGTT  
TATATTATATTAGGGGTAAAATTCAAAGTTAATTGCTAGATGGCCTAATT

>M6-PGSC0003DMG400010032M6RLKWAX-EGF\_1647



GACAACGTTTATATTATATTAGGGGTAAAATTCAAAGTTAATTGCTAGATGGCCTAATTATTGTTTGACTA  
TGGGCAAAAAGTGACGTGTGAGATGATAAGATGACCAGTAGTTTTTATA

>M6-PGSC0003DMG400010032M6RLKWAX-EGF\_1708

TGTTTGACTATGGGCAAAAAGTGACGTGTGAGATGATAAGATGACCAGTAGTTTTTATATTTGGTTTGAC  
CAGTAGCAACACGCCACGAAGAAGGGCTGTTGTTAATTTCAATGGAGATT

>M6-PGSC0003DMG400010032M6RLKWAX-EGF\_1769

TGGTTTGACCAGTAGCAACACGCCACGAAGAAGGGCTGTTGTTAATTTCAATGGAGATTTACATGAATT  
GACTATGATTAATACTAATGATATTTTAGTGTGATTAAGTTATTTAGTAAAT

>M6-PGSC0003DMG400010032M6RLKWAX-EGF\_183

TCCAATCAAAGAAAGGAAAATTTGCAGACGAAGGAAGAGAGAGAAGTAAAAGCTAAGGTAGACATTA  
ATACATGAAACCAGTCCACGGTACTCTTACTCTCTACTTTCCCTTCTATGGA

>M6-PGSC0003DMG400010032M6RLKWAX-EGF\_1830

CATGAATTGACTATGATTAATACTAATGATATTTTAGTGTGATTAAGTTATTTAGTAAATCCAAATATTCCA  
CAAGTTGTGTTAAACTTAAAGAGCACTGCATATGCGGCTGGTGTAGT

>M6-PGSC0003DMG400010032M6RLKWAX-EGF\_1891

AAATATTCCACAAGTTGTGTTAAACTTAAAGAGCACTGCATATGCGGCTGGTGTAGTCAATAAAGCCT  
TCTCTTGATTTTGATATGGTCGAATTTGGGTTCTAAGCTGTGCGACTGTTG

>M6-PGSC0003DMG400010032M6RLKWAX-EGF\_1952

ATAAAGCCTTCTCTTGATTTTGATATGGTCGAATTTGGGTTCTAAGCTGTGCGACTGTTGAAAGTCTCCTAT  
ATGACCTCCTCATGCGACTTGGGTTGTGTTGATATCTTTTATTACTCG

>M6-PGSC0003DMG400010032M6RLKWAX-EGF\_2013

AGTCTCCTATATGACCTCCTCATGCGACTTGGGTTGTGTTGATATCTTTTATTACTCGAATTTATAGTCTT  
TAGCTAGTTTTTATTAAGATAAAAAATTCTATTTACGAACAATCAT

>M6-PGSC0003DMG400010032M6RLKWAX-EGF\_2074

TTTATAGTCTTTAGCTAGTTTTTATTAAGATAAAAAATTCTATTTACGAACAATCATGGGGGTTTCAGCT  
TTATCTTATCATTCTAATAAAGTAATGAAATTCTAGTAATTTATAAGT

>M6-PGSC0003DMG400010032M6RLKWAX-EGF\_2135

GGGTTTCAGCTTTATCTTATCATTCTAATAAAGTAATGAAATTCTAGTAATTTATAAGTATGAAGAAAATA  
GGTATTTTATGATCATTACCAATGAGAATGTTTATATGATGCAAAAATA

>M6-PGSC0003DMG400010032M6RLKWAX-EGF\_2196

GAAGAAAATAGGTATTTTATGATCATTACCAATGAGAATGTTTATATGATGCAAAAATATAAAAACTAAA  
AAAAAATTGAGTTTTCAAACGCAAATAACTTTAACAAAGGTATATTTAA

>M6-PGSC0003DMG400010032M6RLKWAX-EGF\_2257

AAAACTAAAAAAAATTGAGTTTTCAAACGCAAATAACTTTAACAAAGGTATATTTAACCTTTTCACATT  
CCATCAAAAAAATTGGAAAAATAAATTTCTTTAAAAATGATAGTCTAG

>M6-PGSC0003DMG400010032M6RLKWAX-EGF\_2318

TTTTACATTCCATCAAAAAAATTGGAAAAATAAATTTCTTTAAAAATGATAGTCTAGTCTACTGTGTTC  
TCCTCTCCCTTTCATATTCACCCATAGTTTCCATTCCCATTACCCTACA

>M6-PGSC0003DMG400010032M6RLKWAX-EGF\_2379

TACTGTGTTCTCCTCTCCCTTTCATATTCACCCATAGTTTCCATTCCCATTACCCTACATATTAGTTTAGATT  
ATACGTCCAACAATAATTGTTCACTGTTGATTTGGCACACTCCTTAA

>M6-PGSC0003DMG400010032M6RLKWAX-EGF\_244

ACATTAATACATGAAACCAGTCCACGGTACTCTTTACTCTCTACTTTCCCTTCTATGGAATTCGGAAAATA  
GCATTTATTGACAAACAATGAACTCCCCACCAACATCAACTGCACCCCC

>M6-PGSC0003DMG400010032M6RLKWAX-EGF\_2623

TAAATTATCTCTTAATTTTCTAAATTGGATAAGTATTGTTAGACAACAATTTTTAGAGTAGTAAAGAACTA  
TTGTTGGAAGAATGGAGTACATAAATACTTCGATGGAAGTTTAATTTTC

>M6-PGSC0003DMG400010032M6RLKWAX-EGF\_2806

GATAAAAAGATATAATATGAAAAATAATTTGCTTGGTACTAAACATACCCTTGATCACTTTTTTTTTGGTCA  
TGTGGGACATTGGGACTTGGTCTCACTAACTTTTTCCCCACTAGGTTCC

>M6-PGSC0003DMG400010032M6RLKWAX-EGF\_2867

TTTTTGGTCATGTGGGACATTGGGACTTGGTCTCACTAACTTTTTCCCCACTAGGTTCCCTAACTTCAGCCT  
GCCACCATTTCGCGTATTAGGCTTTTAGGTATTACTCACAGTACCTTC

>M6-PGSC0003DMG400010032M6RLKWAX-EGF\_2928

ACTTCAGCCTGCCACCATTTCGCGTATTAGGCTTTTAGGTATTACTCACAGTACCTTCCACTTTCTTTCT  
TCTTCTAGCTCCTGCACATGGACCCAAGACAAATAATATTATTCTTG

>M6-PGSC0003DMG400010032M6RLKWAX-EGF\_2989

CTTTCTTTCTTCTTCTTAGCTCCTGCACATGGACCCAAGACAAATAATATTATTCTTGTGAAGATATTTGA

TTCTATGAGAAGCATTTTAAAAAGTTTGTGATTTTAAATGCACATTTT

>M6-PGSC0003DMG400010032M6RLKWAX-EGF\_305

TCGGAAAATAGCATTATTGACAAACAATGAACTCCCCACCAACATCAACTGCACCCCCTTAATTTCTCTCA

ATAAATGGTCTTCAACAAGTCAAACCTTCAACTTTTTTCTTCCTTTTT

>M6-PGSC0003DMG400010032M6RLKWAX-EGF\_3050

AAGATATTTGATTCTATGAGAAGCATTTTAAAAAGTTTGTGATTTTAAATGCACATTTTTGTGGATATAAA

ATAATGTTGTTAGCATTAAATATGGGGATTCTAATATCAGTTCTTTTTTT

>M6-PGSC0003DMG400010032M6RLKWAX-EGF\_3111

TGGATATAAAATAATGTTGTTAGCATTAAATATGGGGATTCTAATATCAGTTCTTTTTTTCAAGATGTGTCA

TTCTTTCTTCCATTGACAAGAAAGGAAGAGTGTTGACTTTGTAACATTG

>M6-PGSC0003DMG400010032M6RLKWAX-EGF\_3172

AGATGTGTCATTCTTTCTTCCATTGACAAGAAAGGAAGAGTGTTGACTTTGTAACATTGTTATAAAGTAG

TTGTCGGTACAATGATATTTCTATCACCAGTCACCAATGTGCCATCTCT

>M6-PGSC0003DMG400010032M6RLKWAX-EGF\_3233

ATAAAGTAGTTGTCGGTACAATGATATTTCTATCACCAGTCACCAATGTGCCATCTCTGGTCTTTCTTAA

TAAGATGAAGAAGGATCTGAGTCTTTATGAGACTGCCGATTCGCGGTGG

>M6-PGSC0003DMG400010032M6RLKWAX-EGF\_3294

TCTTTCTTAATAAGATGAAGAAGGATCTGAGTCTTTATGAGACTGCCGATTCGCGGTGGTAATGTAACCT

ATCAAAATGACAAGTTTGAGCTCGATAACCGGAATTTTGTGGAATTGAGC

>M6-PGSC0003DMG400010032M6RLKWAX-EGF\_3355

ATGTAACCTATCAAAATGACAAGTTTGAGCTCGATAACCGGAATTTTGTGGAATTGAGCTCTCAAATGAA

TTTTCTTGTCTTGAAGAGTTGAACACTTCAATTAGTTATCTTACCCAATT

>M6-PGSC0003DMG400010032M6RLKWAX-EGF\_3416

TCAAATGAATTTTCTTGTCTTGAAGAGTTGAACACTTCAATTAGTTATCTTACCCAATTGCATATTACATG

ACACGTTCAAAGATCTTACTTTAAAATAAAAATAAAAATAAAGAAGCATT

>M6-PGSC0003DMG400010032M6RLKWAX-EGF\_3477

ATATTACATGACACGTTCAAAGATCTTACTTTAAAATAAAAATAAAAATAAAGAAGCATTACTTGTTTGTTTC

TATGACTCGAAGATGGTGAATGTGATTGATGATGAGGTTTGAATTACTC

>M6-PGSC0003DMG400010032M6RLKWAX-EGF\_3538

TTGTTTGTCTATGACTCGAAGATGGTGAATGTGATTGATGATGAGGTTTGAATTACTCTATTCCGTAGA  
TTATCAATTGGACAATCCCCAGGTCAATGATTTTCTTGCCTTTTTAAGTT

>M6-PGSC0003DMG400010032M6RLKWAX-EGF\_3599

TTCCGTAGATTATCAATTGGACAATCCCCAGGTCAATGATTTTCTTGCCTTTTTAAGTTTATTTTGAGGGG  
GACAGCACATGGTCACTTGATGTCCACATGTTTGAACGGGTGAAAGTCA

>M6-PGSC0003DMG400010032M6RLKWAX-EGF\_366

AATTTCTCAATAAATGGTCTTCAACAAGTCAAACCTTCAACTTTTTCTTCTTTTTTCATGGGTAAATTA  
GCTATCACTCATTTTCATTTTCTTTTGCAGAAGCAGATGATTGTTCT

>M6-PGSC0003DMG400010032M6RLKWAX-EGF\_3660

TTTTGAGGGGGACAGCACATGGTCACTTGATGTCCACATGTTTGAACGGGTGAAAGTCAGAGGATGAA  
CAAGACCTGGATTGTTGAATAATTTCTTATTTTATTATTGAGTAAGCGTTAT

>M6-PGSC0003DMG400010032M6RLKWAX-EGF\_3721

GGATGAACAAGACCTGGATTGTTGAATAATTTCTTATTTTATTATTGAGTAAGCGTTATGATAAAAGGAT  
CTGGAATCAATGCCCCGTCTTAAACCAAACGTGTAATGAGACGGCTTATT

>M6-PGSC0003DMG400010032M6RLKWAX-EGF\_3782

TAAAAGGATCTGGAATCAATGCCCCGTCTTAAACCAAACGTGTAATGAGACGGCTTATTATTATGCCAGT  
TTAATTTTAAACAACCTTAGTACTTCACCTGAATCAATGGCATAATTTGAA

>M6-PGSC0003DMG400010032M6RLKWAX-EGF\_3843

TATGCCAGTTTAAATTTTAAACAACCTTAGTACTTCACCTGAATCAATGGCATAATTTGAAGGGATGAAAGT  
TGAAACTGATTCATCTTCATTTTACCAGTACATTCCATGTCCAGGAAAC

>M6-PGSC0003DMG400010032M6RLKWAX-EGF\_3904

GATGAAAGTTGAAACTGATTCATCTTCATTTTACCAGTACATTCCATGTCCAGGAAACTATCTGTTAAGA  
CAACATCTTGACTTTGGAGATTTAAACTTAACTGACTAGCACGTTTCC

>M6-PGSC0003DMG400010032M6RLKWAX-EGF\_3965

TCTGTTAAGACAACATCTTGACTTTGGAGATTTAAACTTAACTGACTAGCACGTTTCCAGTGAATTGATT  
TCATTTGTTGATCATGTGCTTGCTTCATGACTCTGGGCGGGCAAACATT

>M6-PGSC0003DMG400010032M6RLKWAX-EGF\_4026

TGAATTGATTTCAATTTGTTGATCATGTGCTTGCTTCATGACTCTGGGCGGGCAAACATTTTCATTCTGACG  
ATGTTCTAAGATACTTTATCTATATATTCAATCAACTCTGGGAGGGCAT

>M6-PGSC0003DMG400010032M6RLKWAX-EGF\_4087

CATTCTGACGATGTTCTAAGATACTTTATCTATATATTCAATCAACTCTGGGAGGGCATAACATTTTCATTCT  
AACGATGTTCTAAGATACTTTGCCATATGCTCCTTCCTTCTACATCTT

>M6-PGSC0003DMG400010032M6RLKWAX-EGF\_4148

ATTTTCATTCTAACGATGTTCTAAGATACTTTGCCATATGCTCCTTCCTTCTACATCTTTCTCTATGATTATC  
TTCAGTATGTCGTCTTTATGCTAACTTCTTTATATTTGTCTCTCAA

>M6-PGSC0003DMG400010032M6RLKWAX-EGF\_4209

TCTATGATTATCTTCAGTATGTCGTCTTTATGCTAACTTCTTTATATTTGTCTCTCAAATCAGTTTCAAGAT  
GCAATCCTTCCAGATACCTCTCTGGCCGATGTGGTGGAACCTACCAGAA

>M6-PGSC0003DMG400010032M6RLKWAX-EGF\_427

TGGGTAAATTAGCTATCACTCATTTTCATTTTCTCTTTGCAGAAGCAGATGATTGTTCTCTTTGATTCAATT  
TCGAGCCATGGGTTTTTCATCAGATCGTTATTATTAGATTCGTTTTCTC

>M6-PGSC0003DMG400010032M6RLKWAX-EGF\_4270

AGTTTCAAGATGCAATCCTTCCAGATACCTCTCTGGCCGATGTGGTGGAACCTACCAGAATTGGTGTGCTC  
GTTGGAGGTATATTTCTTTCTTTTTTTGGTTAACTTGTTTCAGAAAATGTT

>M6-PGSC0003DMG400010032M6RLKWAX-EGF\_4331

GGTGTGCTCGTTGGAGGTATATTTCTTTCTTTTTTTGGTTAACTTGTTTCAGAAAATGTTGGTAAATAGTAA  
CCATTAATTCTCAACTCGTTTAATGCACTAGTGTTCAATTCTGCATCTC

>M6-PGSC0003DMG400010032M6RLKWAX-EGF\_4392

TAAATAGTAACCATTACTTCTCAACTCGTTTAATGCACTAGTGTTCAATTCTGCATCTCCTGCTCCTCTGTT  
TCAATTTGGCAACACCTCAATTACCAAATGCGCACTCTTTAGTTTTCT

>M6-PGSC0003DMG400010032M6RLKWAX-EGF\_4453

GCTCCTCTGTTTCAATTTGGCAACACCTCAATTACCAAATGCGCACTCTTTAGTTTTCTATAAACGAGCTT  
GCAAGCCATCACAGATTGGTTTTGTGTTCTTCATATGTACGAGATTTTG

>M6-PGSC0003DMG400010032M6RLKWAX-EGF\_4514

AAACGAGCTTGCAAGCCATCACAGATTGGTTTTGTGTTCTTCATATGTACGAGATTTTGCAAAGAGTTG  
CTGTAGTTGCTAATTGATCAGTCATCAGTAACTTCCGAGACTGCTTACT

>M6-PGSC0003DMG400010032M6RLKWAX-EGF\_4575

AAAGAGTTGCTGTAGTTGCTAATTGATCAGTCATCAGTAACTTCCGAGACTGCTTACTTTTTACTGCCGTT

TGATTTAATAATACTAGTGAGTTTGATCTCTTCCTGGTCTAATGAAATT

>M6-PGSC0003DMG400010032M6RLKWAX-EGF\_4636

TACTGCCGTTTGATTTAATAATACTAGTGAGTTTGATCTCTTCCTGGTCTAATGAAATTTCAACCACCTAC

AGGGATTATTGCTGGAGCTGGTTAATGGCTGCTTTAGCTGTTCTTTGC

>M6-PGSC0003DMG400010032M6RLKWAX-EGF\_4697

AACCACCTACAGGGATTATTGCTGGAGCTGGTTAATGGCTGCTTTAGCTGTTCTTTGCTACTGCATTCG

AAGACGTTCTTCATCTCTCAAGAAAAGAATGAGCGCAAGACGCCTTCTCT

>M6-PGSC0003DMG400010032M6RLKWAX-EGF\_4758

CTGCATTCTGAAGACGTTCTTCATCTCTCAAGAAAAGAATGAGCGCAAGACGCCTTCTCTCTGAAGCTGCA

GGCAGCAACAGTGTTTCATGTATTTCAATACAAAGAAATTGAGAGGGCAAC

>M6-PGSC0003DMG400010032M6RLKWAX-EGF\_4819

GAAGCTGCAGGCAGCAACAGTGTTTCATGTATTTCAATACAAAGAAATTGAGAGGGCAACAAATAGTTTC

TCTGAGAAACAGAGGCTTGAATAGGGGCTTATGGCACAGTTTATGCTGGA

>M6-PGSC0003DMG400010032M6RLKWAX-EGF\_488

TTGATTCAATTTGAGCCATGGGTTTTTCATCAGATCGTTATTATTAGATTCGTTTTCTCAATTTTATTGGGT

TGGTTATCATCGTCAGTTGAGGCTACTAATTCAACTAAGTGCAATCAG

>M6-PGSC0003DMG400010032M6RLKWAX-EGF\_4880

ATAGTTTCTCTGAGAAACAGAGGCTTGAATAGGGGCTTATGGCACAGTTTATGCTGGAAAGCTCCACA

GTGATGAATGGGTTGCAATTAAGAACTAAGACACCGAGATCCGGATGGTG

>M6-PGSC0003DMG400010032M6RLKWAX-EGF\_4941

GCTCCACAGTGATGAATGGGTTGCAATTAAGAACTAAGACACCGAGATCCGGATGGTGTTGAACAAG

TAATGAATGAGGTTAAGCTTTTGTCTTCTGTAAGTCATCCAACTTAGTCCG

>M6-PGSC0003DMG400010032M6RLKWAX-EGF\_5002

GAACAAGTAATGAATGAGGTTAAGCTTTTGTCTTCTGTAAGTCATCCAACTTAGTCCGCCTCTTAGGTT

GTTGTATAGAAAATGGTGAACAGATTCTTGTTTATGAATTTATGCCTAAC

>M6-PGSC0003DMG400010032M6RLKWAX-EGF\_5063

TCTTAGGTTGTTGTATAGAAAATGGTGAACAGATTCTTGTTTATGAATTTATGCCTAACGGAAGTGTAGC

TCAGCATCTACAGAGAGAAAGGGGTTTCAGGACTTCCTTGGACAATACGTC

>M6-PGSC0003DMG400010032M6RLKWAX-EGF\_5124

AACTGTAGCTCAGCATCTACAGAGAGAAAGGGGTTCAGGACTTCCTTGGACAATACGTCTCACTATCGC  
AACAGAAACTGCTCATGCAATTGCTCACCTTCACTCAGCAATGAATCCACC

>M6-PGSC0003DMG400010032M6RLKWAX-EGF\_5185

ACTATCGCAACAGAAACTGCTCATGCAATTGCTCACCTTCACTCAGCAATGAATCCACCAATATAACCACA  
GGGATATCAAATCAAGTAACATACTATTGGATTACAACTTCAACTCAAAG

>M6-PGSC0003DMG400010032M6RLKWAX-EGF\_5246

TATACCACAGGGATATCAAATCAAGTAACATACTATTGGATTACAACTTCAACTCAAAGGTTGCAGACTT  
TGGTCTTCCAGATTTGGCATGACAGATGATTCCCACATTTCTACAGCAC

>M6-PGSC0003DMG400010032M6RLKWAX-EGF\_5307

TGCAGACTTTGGTCTTCCAGATTTGGCATGACAGATGATTCCCACATTTCTACAGCACCACAAGGTACTC  
CAGGTTATGTGGATCCTCAGTACCATCAGAATTACCATCTTCCGATAA

>M6-PGSC0003DMG400010032M6RLKWAX-EGF\_5368

CAAGGTACTCCAGGTTATGTGGATCCTCAGTACCATCAGAATTACCATCTTCCGATAAGAGTGATGTGT  
ACAGCTTCGGGGTGGTTCTTGTAGAAATCATCACAGCAATGAAAGTGGTT

>M6-PGSC0003DMG400010032M6RLKWAX-EGF\_5429

GTGATGTGTACAGCTTCGGGGTGGTTCTTGTAGAAATCATCACAGCAATGAAAGTGGTTGATTTCTCTAG  
ATCACACAGTGAGATTAATTTGGCTGCACTGGCAATAGACAGAATAGGTA

>M6-PGSC0003DMG400010032M6RLKWAX-EGF\_549

TTTTATTGGGTTGGTTATCATCGTCAGTTGAGGCTACTAATTCAACTAAGTGCAATCAGTACTGTGGAGC  
TGCTGGTTCTAATGGTCTGCGTGTCTTATCCATTTGGTTTCTCAGAGG

>M6-PGSC0003DMG400010032M6RLKWAX-EGF\_5490

TTTCTCTAGATCACACAGTGAGATTAATTTGGCTGCACTGGCAATAGACAGAATAGGTAAGGGTCGTGT  
GGATGAGATTATCGATCCATTTCTCGAGCCACACAGAGATGCATGGACTCT

>M6-PGSC0003DMG400010032M6RLKWAX-EGF\_5551

GGTCGTGTGGATGAGATTATCGATCCATTTCTCGAGCCACACAGAGATGCATGGACTCTATCATCAGTTC  
ATAGAGTTGCAGAGCTTGCTTTCAGATGCCTTGCATTTACAAGGATATG

>M6-PGSC0003DMG400010032M6RLKWAX-EGF\_5612

CATCAGTTCATAGAGTTGCAGAGCTTGCTTTCAGATGCCTTGCATTTACAAGGATATGAGGCCTTCAAT  
GACAGAAGTGGCAGATGAGCTAGAACAGGTCAGGCTCAGCAGTTGGGCAT

>M6-PGSC0003DMG400010032M6RLKWAX-EGF\_5673

GCCTTCAATGACAGAAGTGGCAGATGAGCTAGAACAGGTCAGGCTCAGCAGTTGGGCATCATTGGAGG  
ACAATGTATGCATGACATCATCAGTGAATTCCTCTTGCTCATCTCCCCGTAG

>M6-PGSC0003DMG400010032M6RLKWAX-EGF\_5734

TTGGAGGACAATGTATGCATGACATCATCAGTGAATTCCTCTTGCTCATCTCCCCGTAGTATGAGTGAGA  
CATCTTTTCGTAGTACAACAATAAGAAAGGAGTAGGGAGTAGGAGGTTG

>M6-PGSC0003DMG400010032M6RLKWAX-EGF\_5795

TGAGTGAGACATCTTTTCGTAGTACAACAATAAGAAAGGAGTAGGGAGTAGGAGGTTGATTGTTCCGC  
AGAAGATAGCGAATTCCTGGCAATCATGGAGGAAATAAAAGACAGTTCCC

>M6-PGSC0003DMG400010032M6RLKWAX-EGF\_5856

TGTTCCGCAGAAGATAGCGAATTCCTGGCAATCATGGAGGAAATAAAAGACAGTTCCCCTGTTTCTGT  
GCAGGATCCTTGTTTGTAGTGAAGAGAGTCCCCCTTCAACTAACCGATTATT

>M6-PGSC0003DMG400010032M6RLKWAX-EGF\_5917

GTTTCTGTGCAGGATCCTTGTTTGTAGTGAAGAGAGTCCCCCTTCAACTAACCGATTATTAGGTAATTCTG  
GTCGATGATGACTTGAAATAAAAGAAGTTTGCTCTAGGTAGAAAATTGAG

>M6-PGSC0003DMG400010032M6RLKWAX-EGF\_5978

GTAATTCTGGTCGATGATGACTTGAAATAAAAGAAGTTTGCTCTAGGTAGAAAATTGAGGGGGATCACC  
TGTAATCTATTACCACCTTTTCTTGCCTTCTAATCTAGTGATAATATCAAA

>M6-PGSC0003DMG400010032M6RLKWAX-EGF\_6039

GGATCACCTGTAATCTATTACCACCTTTTCTTGCCTTCTAATCTAGTGATAATATCAAAGAGTATTAGAGC  
ACTTCTCTTTGTATCGAAATTTTATTGCTTCATACGCAGAATTATACAT

>M6-PGSC0003DMG400010032M6RLKWAX-EGF\_61

TCCTTGTTTGTATCTCCGATTACTATTTGATAGCTTCATTGTTAGGAAATCCAGTTTTTGCAGAGCTGTTTT  
TGGAGTTGAGATATTTCAAATTTTGGACTCTTTAATTGCTACTATTTG

>M6-PGSC0003DMG400010032M6RLKWAX-EGF\_610

CTGTGGAGCTGCTGGTTCTAATGGTCTGCGTGTTCCTTATCCATTTGGTTTCTCAGAGGGTTGTGGGATT  
CGTTTAGATTGTAAGTAAAGTAGTGGAGAAATCAGAATTGGGGAATATAT

>M6-PGSC0003DMG400010032M6RLKWAX-EGF\_6100

GTATTAGAGCACTTCTTTGTATCGAAATTTTATTGCTTCATACGCAGAATTATACATCATGAAGAATGT



GAAATAGTATTTGCAATGCCATGAATTTGAATCGTCCTTGCGCAGTTGT

>M6-PGSC0003DMG400010032M6RLKWAX-EGF\_6161

TGAAGAATGTGAAATAGTATTTGCAATGCCATGAATTTGAATCGTCCTTGCGCAGTTGTGTTTCGTTATTTT  
TCTGTTATTTACAACAAGTGTAATCCTACATCATAACATCATCTTCAAGA

>M6-PGSC0003DMG400010032M6RLKWAX-EGF\_6222

TCGTTATTTTTCTGTTATTTACAACAAGTGTAATCCTACATCATAACATCATCTTCAAGAATTTGAGTTAAAT  
AATTTATAAAGTCATATTATATAACAGAATTAATTGTTACACTAATAG

>M6-PGSC0003DMG400010032M6RLKWAX-EGF\_6283

TTGAGTTAAATAATTTATAAAGTCATATTATATAACAGAATTAATTGTTACACTAATAGAAATGCCCAAGC  
TTTGAATTTAGCAAATTCATTTGCAAATAACAACAATGAAAAGCAAGA

>M6-PGSC0003DMG400010032M6RLKWAX-EGF\_6344

ATGCCCAAGCTTTGAATTTAGCAAATTCATTTGCAAATAACAACAATGAAAAGCAAGAATCTTTTCAAG  
ATTTTTGAGGTTTCAGGTCCTAAAATACCATTAACAACAGCTCCGGCAACC

>M6-PGSC0003DMG400010032M6RLKWAX-EGF\_6405

CTTTTCAAGATTTTTGAGGTTTCAGGTCCTAAAATACCATTAACAACAGCTCCGGCAACCAAACTCCAAC  
AAATTCAGCTCCGGCCACCGCTCCAGCTTGCGCCAACCCACCGAAACTCA

>M6-PGSC0003DMG400010032M6RLKWAX-EGF\_6466

AACTCCAACAAATTCAGCTCCGGCCACCGCTCCAGCTTGCGCCAACCCACCGAAACTCACTGTACTCTCG  
ATCTTCTCCTCCGCTGCTTCAATCCCCTTCTCAGCCGTCCTAACCCTTT

>M6-PGSC0003DMG400010032M6RLKWAX-EGF\_6588

CCGCCGCTTCAATTCCTTCTCTGCCGCTGCGATTCCCTTGTCTGCCGCCTCAAATCCCTCCTTCACTAATT  
CTTCTGCCTCCTTCTACTTTCTTAAGCTTCTTCTCAGTCCGAAGA

>M6-PGSC0003DMG400010032M6RLKWAX-EGF\_6649

CTTCACTAATTCTTCTGCCTCCTTCTACTTTCTTAAGCTTCTTCTCAGTCCGAAGAGGCCAATGTCCGC  
AGCCTTGACGGCATATCCAGCACTTTCAGTACCGTTGTGCGCCGTCAC

>M6-PGSC0003DMG400010032M6RLKWAX-EGF\_671

TGTGGGATTCGTTTAGATTGTAAGTAGTGAGAAATCAGAATTGGGGAATATATAATACAGAAT  
GTAATTCAGAGACTCTGATGGTGAACCTCCCGATGAATTGCAGCCGTCCT

>M6-PGSC0003DMG400010032M6RLKWAX-EGF\_6710

CCAATGTCCGCAGCCTTGACGGCATATCCAGCACTTTCAGTACCGTTGTCGCCGTCACCAGAGAGATCA  
ACTGCCTCCGCCCCGGGAGAGCCGCCGCCGCTGTTTGGTAGGAGGATTT

>M6-PGSC0003DMG400010032M6RLKWAX-EGF\_6771

GAGAGATCAACTGCCTCCGCCCCGGGAGAGCCGCCGCCGCTGTTTGGTAGGAGGATTTGTGTTTGCAT  
TTAGCACACAACGGGATGTGAAAATCCTTACTGTAAGTGAAGTAGTGGTGG

>M6-PGSC0003DMG400010032M6RLKWAX-EGF\_6832

GTTTGCATTTAGCACACAACGGGATGTGAAAATCCTTACTGTAAGTGAAGTAGTGGTGGGAGCCATGGA  
TTTGCTCTCTGTGCAATCAAATGAGGTTTGCAGTTTGCACAACCTCCCTTG

>M6-PGSC0003DMG400010032M6RLKWAX-EGF\_6893

GCCATGGATTTGCTCTCTGTGCAATCAAATGAGGTTTGCAGTTTGCACAACCTCCCTTGACACCACAATC  
ACAAACAAGTGTGTGGACTGATATTTTTTGAACGGACAAGAGAAAATACA

>M6-PGSC0003DMG400010032M6RLKWAX-EGF\_6924

GAGGTTTGCAGTTTGCACAACCTCCCTTGACACCACAATCACAACAAGTGTGTGGACTGATATTTTTTGA  
ACGGACAAGAGAAAATACAAAAAATTACTCCTAAAACCTGAACCAGAAA

>M6-PGSC0003DMG400010032M6RLKWAX-EGF\_732

TACAGAATGTAACCTCAGAGACTCTGATGGTGAACCTCCCGATGAATTGCAGCCGTCCTATTGAGGATCT  
ACAGGAATTTGATCGAACCAACTTTGGTATGACTTGGAGAAATGGACTGC

>M6-PGSC0003DMG400010032M6RLKWAX-EGF\_793

TGAGGATCTACAGGAATTTGATCGAACCAACTTTGGTATGACTTGGAGAAATGGACTGCTTCTACACAAT  
TGTAAGTCCCGAGGAGTGAGTGTACCATACCATCGGAAATTTAAGCAC

>M6-PGSC0003DMG400010032M6RLKWAX-EGF\_854

CTACACAATTGTAAAGTCCCGAGGAGTGAGTGTACCATACCATCGGAAATTTAAGCACGCGTTTGAAT  
ATACAGTCATGTGATTCTGAAGAAAGAGAATGTCAGTTGTTATTCAGAGGCG

>M6-PGSC0003DMG400010032M6RLKWAX-EGF\_915

GTTTGAATATACAGTCATGTGATTCTGAAGAAAGAGAATGTCAGTTGTTATTCAGAGGCGAGGGCGGATT  
ATTTAGATTACCAGAACTGAAGAATACAGGGTGTGGAACCTGTGGTTTCGT

>M6-PGSC0003DMG400010032M6RLKWAX-EGF\_976

GGCGGATTATTTAGATTACCAGAACTGAAGAATACAGGGTGTGGAACCTGTGGTTTCGTCCATCTTGAT  
TGGTATGGATAATGATACAATGAAGAGTTCTGCCATGTTCTGGAGTTTCA

>M6-PGSC0003DMG400010120M6RLKmalectin\_0

TATGCGGTTAACTTGAGACTTCGCGCTCTTATGCAAAATATGATATTCAAGTTCCTAATGTACCTACATTT  
TTTCACTCTTATTCTTCTAGAAATTCGATGAACATTAACATAGGTATT

>M6-PGSC0003DMG400010120M6RLKmalectin\_130

ATCTCATTTGCACACTGTACAACGTATTTTCATACAATGAGCAATTGTGAATAGAGGATATATATTCCCAG  
AAGGACTAAGTATCACTTTGCTTGTAATCTTCTACACTTCTGTACGTTT

>M6-PGSC0003DMG400010120M6RLKmalectin\_195

TCCCAGAAGGACTAAGTATCACTTTGCTTGTAATCTTCTACACTTCTGTACGTTCTATTGATGTTACTTTGG  
ACTTAGAAGACCAAATACTGGGCATGAGTAACTTGTATGTATCTCAT

>M6-PGSC0003DMG400010120M6RLKmalectin\_260

ACTTTGGACTTAGAAGACCAAATACTGGGCATGAGTAACTTGTATGTATCTCATATTATTATGGCTTGT  
ATTTGTTTTTGTATTCCTAGTTCAATCTCGTTATGTGTCAATTGTTAATG

>M6-PGSC0003DMG400010120M6RLKmalectin\_325

CTTGATTTGTTTTGTATTCCTAGTTCAATCTCGTTATGTGTCAATTGTTAATGTAATACCATTTTGTGTG  
GGTTCATCATAAATCAATTAACCTTCATGTTGGTTGTCAATCCATTGGA

>M6-PGSC0003DMG400010120M6RLKmalectin\_390

TTGTGTGGGTTTCATCATAAATCAATTAACCTTCATGTTGGTTGTCAATCCATTGGATCCCTCATTCTTTATCC  
AAGCTATTTTCTGTTATTCTTAGTGTAATGTCTTATTTCTTTATCAA

>M6-PGSC0003DMG400010120M6RLKmalectin\_455

TTTATCCAAGCTATTTTCTGTTATTCTTAGTGTAATGTCTTATTTCTTTATCAACCAAAGGGCTCTTAAT  
AGAAGTCAAGTATGTTAAACGAGTGATTCTGTTTATTGAAAGAATTGG

>M6-PGSC0003DMG400010120M6RLKmalectin\_520

TCTTAATAGAAGTCAAGTATGTTAAACGAGTGATTCTGTTTATTGAAAGAATTGGATTATAAAGGATCCT  
AATGTAGGAATAATGTAATTTTATTGTTTCACTAGGTTAAGTGTTTTTAA

>M6-PGSC0003DMG400010120M6RLKmalectin\_585

ATCCTAATGTAGGAATAATGTAATTTTATTGTTTCACTAGGTTAAGTGTTTTTAAGAGATCAAGATGGAG  
GGGTGTAAATGTTAATGTCTTGATGGAGTATGTTGAATTTTCAGATTTTTT

>M6-PGSC0003DMG400010120M6RLKmalectin\_65

ACATTTTTTCACTCTTATTCTTCTAGAAATTCGATGAACATTAACATAGGTATTGGTCTGCTCCATCTCAT

TTGCACACTGTACAACCTGTATTTTCATACAATGAGCAATTGTGAATAGA

>M6-PGSC0003DMG400010120M6RLKmalectin\_650

TGGAGGGGTGTAAATGTTAATGTCTTGATGGAGTATGTTGAATTTTCAGATTTTTTCGAGTCAGGGCAAG

TGAAACTAACTAAAACCTGCTCTCTTTGTATATAGGTAGTTCTTTGAT

>M6-PGSC0003DMG400010120M6RLKmalectin\_715

CAAGTGAACTAACTAAAACCTGCTCTCTTTGTATATAGGTAGTTCTTTGATTGAAGGAATGAAGAG

CAGACATGAGGATACATCACCATGATGAAGAACTTCCTTCAGGTTTCATTC

>M6-PGSC0003DMG400010120M6RLKmalectin\_845

AGTGATCTTCCAAATGTGTCAATTCAGAGCTCAATCTTAATATTCTCTATACTGTGTTAATTACAGCATC

ACAAGTTGTTGTATCCGAGTTTGTATGATAGTGGGTGAGGTTGTATCTA

>M6-PGSC0003DMG400010183-(rev)M6LRR-RLP\_0

TCATCTCTTGCTCCTTGACATTTTCCAGAATGGAAATTTTCTCAATGAGTATTAATTCCCACACCTTACTGG

CAACCCATGCTGTGTTTCTATTCTCATCTACTCTCAAATATGCTGCAG

>M6-PGSC0003DMG400010183-(rev)M6LRR-RLP\_1054

AACTGCAGCAGCAGTCTACAAATGCTCCATTTTGGAGACAACCAGTTTGTAGGTACATTAACCTCATTCAA

CAGTCAACCTTTCTAGTCAGTTACAACCTCTACTCTTCTTCGGGAACAGA

>M6-PGSC0003DMG400010183-(rev)M6LRR-RLP\_1116

TCATTCAACAGTCAACCTTTCTAGTCAGTTACAACCTCTACTCTTCTTCGGGAACAGAATTGGTGGAAGCA

TACCCAGAGAGATCTCAAACCTGGTGAATTTGAATCTACTCGACATGAG

>M6-PGSC0003DMG400010183-(rev)M6LRR-RLP\_1178

GTGGAAGCATACCCAGAGAGATCTCAAACCTGGTGAATTTGAATCTACTCGACATGAGCAACAAAAATC

TTACAGGTAGCATTCCAGATTCTATTGGAAGACTTGCAAACCTGGGAAGTC

>M6-PGSC0003DMG400010183-(rev)M6LRR-RLP\_124

TACTATATACTTGGAACGAACTGACGAACTAGCCTTACTTGGATTCAAGTCCCAAATAACTGAGGATC

CATCAAGAGTTTTCGCCTCTTGGAAACCAATCTGTTCAATTTATGTCAGTGG

>M6-PGSC0003DMG400010183-(rev)M6LRR-RLP\_1240

AAAAATCTTACAGGTAGCATTCCAGATTCTATTGGAAGACTTGCAAACCTGGGAAGTCTTGACTTGCATA

ACAACCTCTTGACAGGGGTAATCCCTTCTTCAATAGGCAACCTCACTGAA

>M6-PGSC0003DMG400010183-(rev)M6LRR-RLP\_1300

GACTTGCATAACAACCTCTTGACAGGGGTAATCCCTTCTTCAATAGGCAACCTCACTGAACTAGTCTATCT  
TTATTTAGGATTTAACAGGTTAGAGGGTAAAATACCTTTAAGGCTTTAA

>M6-PGSC0003DMG400010183-(rev)M6LRR-RLP\_186

TGAGGATCCATCAAGAGTTTTCGCCTCTTGGACCAATCTGTTCAATTTATGTCAGTGGACTGGAGTAAAA  
TGTGGCCAGACACAGGAAAGGGTCATCAGTTTGAATCTAAAAGGGCTAAG

>M6-PGSC0003DMG400010183-(rev)M6LRR-RLP\_248

GAGTAAAATGTGGCCAGACACAGGAAAGGGTCATCAGTTTGAATCTAAAAGGGCTAAGTCTGGCAGGT  
ACAATCTCAGATATCTTTCTTTGCTCAATTCTCTTGACCTGGCAGAAAATTC

>M6-PGSC0003DMG400010183-(rev)M6LRR-RLP\_310

GCAGGTACAATCTCAGATATCTTTCTTTGCTCAATTCTCTTGACCTGGCAGAAAATTCATTCCATGACGAA  
ATTCCTCAACAACCTCAGCAGGCTGTCAAGGCATCAAAACCTGAATTTGA

>M6-PGSC0003DMG400010183-(rev)M6LRR-RLP\_372

CATGACGAAATTCCTCAACAACCTCAGCAGGCTGTCAAGGCATCAAAACCTGAATTTGAGTTTAACTATC  
TAACAGGGGAAATTCAGTTAATCTATCACATTGTGTTAACCTCAAGAGC

>M6-PGSC0003DMG400010183-(rev)M6LRR-RLP\_434

AAACTATCTAACAGGGGAAATTCAGTTAATCTATCACATTGTGTTAACCTCAAGAGCCTTGTGCTGGAC  
CACAACATTCTTGTGGGACAGATTCCTTACCAAGTTGGATCTTTAACAAA

>M6-PGSC0003DMG400010183-(rev)M6LRR-RLP\_496

TGCTGGACCACAACATTCTTGTGGGACAGATTCCTTACCAAGTTGGATCTTTAACAAAGTTAGTGAGGTT  
GTATCTCAGAAATAACAACCTGACAGGAATCTTTCCAATGTCTATTGGAA

>M6-PGSC0003DMG400010183-(rev)M6LRR-RLP\_558

GTGAGGTTGTATCTCAGAAATAACAACCTGACAGGAATCTTTCCAATGTCTATTGGAAATCTTACATCTTT  
AGAAGAGTTGTATTTATCGTACAACAGTCTAGAGGGAGAAGTGCCAGCT

>M6-PGSC0003DMG400010183-(rev)M6LRR-RLP\_62

ACCTTACTGGCAACCCATGCTGTGTTTCTATTCTCATCTACTCTCAAATATGCTGCAGCAGCTACTATATAC  
TTGGAAACGAAACTGACGAACTAGCCTTACTTGGATTCAAGTCCCAAA

>M6-PGSC0003DMG400010183-(rev)M6LRR-RLP\_620

TACATCTTTAGAAGAGTTGTATTTATCGTACAACAGTCTAGAGGGAGAAGTGCCAGCTTCTTTAGCTCGA  
TTGACCAAGTTGAGACTGCTTGGATTGTCAGTAAATAGCTTCTCCGGGGA

>M6-PGSC0003DMG400010183-(rev)M6LRR-RLP\_682

TAGCTCGATTGACCAAGTTGAGACTGCTTGGATTGTGAGTAAATAGCTTCTCCGGGGAGTTCCTCCTTC  
GTTGTACAATTTGTCATCCCTGGAATTAATAGCACTTTCCTGGTAATCTC

>M6-PGSC0003DMG400010183-(rev)M6LRR-RLP\_744

CCTCCTTCGTTGTACAATTTGTCATCCCTGGAATTAATAGCACTTTCCTGGTAATCTCAGATCCGATTTAG  
GCCACTACTTCCCTAATCTCCAAAGACTTTACTTGGGGAACTGTCAATT

>M6-PGSC0003DMG400010183-(rev)M6LRR-RLP\_806

CCGATTTAGGCCACTACTTCCCTAATCTCCAAAGACTTTACTTGGGGAACTGTCAATTCATGGCTCCATA  
CAATCCTCTTTGGCCAATGCTTCAAATGCTACAGCTTGATTTCCCTG

>M6-PGSC0003DMG400010183-(rev)M6LRR-RLP\_868

GGCTCCATAACAATCCTCTTTGGCCAATGCTTCAAATGCTACAGCTTGATTTCCCTGTAAACAAATTCAC  
TGAAATATAACCAAAGCGTTTTGATAACTTGTGGAATTTGTTGTGGCTC

>M6-PGSC0003DMG400010183-(rev)M6LRR-RLP\_930

CAAATTCCTGGAAATATAACCAAAGCGTTTTGATAACTTGTGGAATTTGTTGTGGCTCAATGTTGGGAGT  
AACCATCTTGGATACGGTAAGAATGACGACCTTGACTTTGTAAATTCTCT

>M6-PGSC0003DMG400010183-(rev)M6LRR-RLP\_992

TTGGGAGTAACCATCTTGGATACGGTAAGAATGACGACCTTGACTTTGTAAATTCTCTTACCAACTGCAG  
CAGCAGTCTACAAATGCTCCATTTTGGAGACAACCAGTTTGTAGGTACAT

>M6-PGSC0003DMG400010230-(rev)M6LRR-RLK\_0

AAAAAAGAGAAAAAATCTTGTAGAGAGAGAAACAAGAGAGAGGAAAAAATTTTTTTTTCCACCATT  
TCCCATATTTCCCTCTTGTTCCTCCTCAACCATTTTTCTGAGAAAAAAA

>M6-PGSC0003DMG400010230-(rev)M6LRR-RLK\_1037

AAGCTATGGGTGGTAGATGGAACACTTATGGAATCAAATTGTCGATCTCGCTCTTTTGATTATCATTTTG  
GATATTCGCGGTTGTTGTTCTTAATTCGGAAGGTAATTCTTATGCTT

>M6-PGSC0003DMG400010230-(rev)M6LRR-RLK\_1098

TATCATTTTGGATATTCGCGGTTGTTGTTCTTAATTCGGAAGGTAATTCTTATGCTTGGAGTACAGTTCT  
ATTGGTTTTGTAGTTCCGTCTTAGGCTAGTTTTAAGTGTGGTATGTT

>M6-PGSC0003DMG400010230-(rev)M6LRR-RLK\_1159

GTACAGTTCTATTGGTTTTGTAGTTCCGTCTTAGGCTAGTTTTAAGTGTGGTATGTTTTCTGTTTGCTA

ATTATTGTTGGTGTGAGAAACAGGATTGGCACTATTGAGATTCCGCGT

>M6-PGSC0003DMG400010230-(rev)M6LRR-RLK\_122

TAGTTAAAATGAAGCCTCTGTTTTGAAATCACCTGCAAAGTCAAGAAAAAAGAAAAGATAT

TACACTATTTTTTACAAAAAAGAAAAAAGATTGATTTTTTCTTGTGT

>M6-PGSC0003DMG400010230-(rev)M6LRR-RLK\_1220

CTTGTTTGCTAATTATTGTTGGTGTGAGAAACAGGATTGGCACTATTGAGATTCCGCGTGAAAGTGGATT

CTGATCCGTATGGCATTCTTGAAAAGTGAATTCAGATCATTATGACCCG

>M6-PGSC0003DMG400010230-(rev)M6LRR-RLK\_1281

AAGTGGATTCTGATCCGTATGGCATTCTTGAAAAGTGAATTCAGATCATTATGACCCGTGCTTGTGGTC

TGGTGTCCAGTGTATGGACGGGAGAGTGCAAATGTTGTAAGTCTCTTGT

>M6-PGSC0003DMG400010230-(rev)M6LRR-RLK\_1342

CTTGTTGGTCTGGTGTCCAGTGTATGGACGGGAGAGTGCAAATGTTGTAAGTCTCTTGTTAAATATACCCA

AAAATTCCTAGTGTGAATCCTTTCTTATAAATTTATATGTGTTGATT

>M6-PGSC0003DMG400010230-(rev)M6LRR-RLK\_1403

ATATACCCAAAAATTCCTAGTGTGAATCCTTTCTTATAAATTTATATGTGTTGATTTGCTATCGACAAGC

CGGTTGAAATGATAATGACAGACAAAGTGCAAAAAGTGAATTTGTGAGT

>M6-PGSC0003DMG400010230-(rev)M6LRR-RLK\_1464

TATCGACAAGCCGGTTGAAATGATAATGACAGACAAAGTGCAAAAAGTGAATTTGTGAGTTTTTCTGTTT

GTGGTTCTTCGGATATTGTTAAATCATTGTCTGTTCTCTATTTAGGGACC

>M6-PGSC0003DMG400010230-(rev)M6LRR-RLK\_1525

TTCTGTTTGTGGTTCTTCGGATATTGTTAAATCATTGTCTGTTCTCTATTTAGGGACCTTCATGGATATTC

GTTGAAAGGAAAAGTTCGCAGCAGAACTTGAAATCTTACTCACTTAAA

>M6-PGSC0003DMG400010230-(rev)M6LRR-RLK\_1586

CATGGATATTCGTTGAAAGGAAAAGTTCGCAGCAGAACTTGAAATCTTACTCACTTAAAATCACTGTAAG

CTTCAGCTATACTTATATACTTCTCATTGTTTCTTTAGCTCATATTCCT

>M6-PGSC0003DMG400010230-(rev)M6LRR-RLK\_1647

CACTGTAAGCTTCAGCTATACTTATATACTTCTCATTGTTTCTTTAGCTCATATTCCTGTCCTCACCATCTG

AAAAAAGATTGTTCCAATCATTGATGTTTTTTTCTACTTACAAAATG

>M6-PGSC0003DMG400010230-(rev)M6LRR-RLK\_1708

CCTCACCATCTGAAAAAAGATTGTTCCAATCATTGATGTTTTTTTCTACTTACAAAATGCTTTCATGATTCT  
GGTCTTAGTCTAGAAACAATATTTAGTGTGCTATGTCATGGAACAAAT

>M6-PGSC0003DMG400010230-(rev)M6LRR-RLK\_1769

TTCATGATTCTGGTCTTAGTCTAGAAACAATATTTAGTGTGCTATGTCATGGAACAAATACTTCCCTATCG  
TGGTAGACACTATCTTATCACTAAACAATTTGAAATTGCACTATACTTA

>M6-PGSC0003DMG400010230-(rev)M6LRR-RLK\_183

AAAGATATTACACTATTTTTTACAAAAAAGAAAAAAGATTGATTTTTTCTTGTGTGATTTCAATTTT  
CTTCTTCAATCTCTGTTATTTCTTTAATTTTTTCAAAAAAGAAAAAA

>M6-PGSC0003DMG400010230-(rev)M6LRR-RLK\_1830

TTCCCTATCGTGGTAGACACTATCTTATCACTAAACAATTTGAAATTGCACTATACTTACATGTCTGGTCA  
GTACAGGTTTCCATTTTTCGTCCCATTGTTACTTAGGAGATGTCTCA

>M6-PGSC0003DMG400010230-(rev)M6LRR-RLK\_1891

TGTCTGGTCAGTACAGGTTTCCATTTTTCGTCCCATTGTTACTTAGGAGATGTCTCAAATATAAAGAG  
CGTCATATACATTAGGATATTTAGCATATTTGGTCAGGCAAATTGCACC

>M6-PGSC0003DMG400010230-(rev)M6LRR-RLK\_1952

ATATAAAGAGCGTCATATACATTAGGATATTTAGCATATTTGGTCAGGCAAATTGCACCAAAGAAAACT  
TTACCTTTTTTTTTTCCAAAGAAAAATGTATAAAGTGAATTGGGTAGATT

>M6-PGSC0003DMG400010230-(rev)M6LRR-RLK\_2013

AGAAAACTTTACCTTTTTTTTTTCCAAAGAAAAATGTATAAAGTGAATTGGGTAGATTTATGGTAATCA  
ATGTTTCACCTTCTGTTCTGCATCTATGTAATTAATAAATTTTC

>M6-PGSC0003DMG400010230-(rev)M6LRR-RLK\_2074

TGGTAATCAATGTTTCACCTTCTGTTCTGCATCTATGTAATTAATAAATTTCTTCTCTTTGAAT  
GCTTTTCTTCCACAGTGTGCTTTCTGAAAACCGTCTTTTTGGTGCTAT

>M6-PGSC0003DMG400010230-(rev)M6LRR-RLK\_2135

CCTCTTTGAATGCTTTTCTTCCACAGTGTGCTTTCTGAAAACCGTCTTTTTGGTGCTATTCCTAAAGAATTT  
GGACGACTCAGAATGCTGGAAGTGCTTGACATTAAGAACAACAATTTG

>M6-PGSC0003DMG400010230-(rev)M6LRR-RLK\_2196

CTAAAGAATTTGGACGACTCAGAATGCTGGAAGTGCTTGACATTAAGAACAACAATTTGAGTGGAAGAA  
TTCCAGCAGTAATAGGAGATTTGCAATCACTTAGAAGCTTGTAAGTTGATA



>M6-PGSC0003DMG400010230-(rev)M6LRR-RLK\_2257

TGGAAGAATTCCAGCAGTAATAGGAGATTTGCAATCACTTAGAAGCTTGTAAGTTGATAATTTGTTGTGT  
TTCCGTCTTATAATATATTTGTATGTATTTATGCTACAACATTGCTAACA

>M6-PGSC0003DMG400010230-(rev)M6LRR-RLK\_2318

TTGTTGTGTTTCCGTCTTATAATATATTTGTATGTATTTATGCTACAACATTGCTAACAAAATGTTCTTGAA  
TTGTGCTTGATACTTCTTTTCCAGGTTGATTAGGGACAATAACTTCAA

>M6-PGSC0003DMG400010230-(rev)M6LRR-RLK\_2379

ATGTTCTTGAATTGTGCTTGATACTTCTTTTCCAGGTTGATTAGGGACAATAACTTCAAAGGGAAGATCC  
CTTTGGAGATCAGAAAGCTTCATCTGCTCTCGGAATTGCAATTTGATGAT

>M6-PGSC0003DMG400010230-(rev)M6LRR-RLK\_244

TTTCAATTTTCTTCTTCAATCTCTGTTATTTCTTTAATTTTTTTCAAAAAAGAAAAAATAAATTCTGTCCCA  
CCGCCTGCATTTTCTATTGCAGTTATTAATTTTTGGCTTTTTTTTC

>M6-PGSC0003DMG400010230-(rev)M6LRR-RLK\_2440

GGAAGATCCCTTTGGAGATCAGAAAGCTTCATCTGCTCTCGGAATTGCAATTTGATGATTACCTCACCTC  
TGGTGTGCTGTCGGAAGTGGTGCATAAATAGAAAATTTGGGCGTTGGT

>M6-PGSC0003DMG400010230-(rev)M6LRR-RLK\_2501

CCTCACCTCTGGTGTGCTGTCGGAAGTGGTGCATAAATAGAAAATTTGGGCGTTGGTAAGACTTCCGT  
AGTTGTTTGGTCTTTTATCTTCATGTTTCAGCTGTGCTGCATTTTAAAG

>M6-PGSC0003DMG400010230-(rev)M6LRR-RLK\_2562

GACTCCGTAGTTGTTTGGTCTTTTATCTTCATGTTTCAGCTGTGCTGCATTTTAAAGTCGCAGACTTGT  
TCTATGTTCAATTATATTGAAAATGCATAAAATCCATCATTGAGGAA

>M6-PGSC0003DMG400010230-(rev)M6LRR-RLK\_2623

GCAGACTTGTTTCTATGTTCAATTATATTGAAAATGCATAAAATCCATCATTGAGGAACATATACAAATA  
TACTACTTTCATACGAACTACCTCCTGCTATAAGTTTGGTATTAACATT

>M6-PGSC0003DMG400010230-(rev)M6LRR-RLK\_2684

TATACAAATATACTACTTTCATACGAACTACCTCCTGCTATAAGTTTGGTATTAACATTAAATTAAGTGCA  
AACAAATTATCCCATGGAGTTGCACTGAAGATCTTTGAGACATTTTCTAT

>M6-PGSC0003DMG400010230-(rev)M6LRR-RLK\_2745

ATTAAGTGCAAACAATTATCCCATGGAGTTGCACTGAAGATCTTTGAGACATTTTCTATGCATAGTGTGT

CCCCACTAAACTCTCATACTTCCCTTACAATAGTGAAGCAACTATGATGG

>M6-PGSC0003DMG400010230-(rev)M6LRR-RLK\_2806

ATAGTGTGTCCCCACTAAACTCTCATACTTCCCTTACAATAGTGAAGCAACTATGATGGTGATTGTGCGAA

AGCATTGCCATGGGGCACTTGATACTTTCCTGTCTCCAACCCTAATATTC

>M6-PGSC0003DMG400010230-(rev)M6LRR-RLK\_2867

ATTGTGAAAGCATTGCCATGGGGCACTTGATACTTTCCTGTCTCCAACCCTAATATTCAGAGGGGGATTA

GACTTTAGTGTCTTAAAGTTGTGATTCATCTTCTTATTCATCAAGACCT

>M6-PGSC0003DMG400010230-(rev)M6LRR-RLK\_2928

AGGGGATTAGACTTTAGTGTCTTAAAGTTGTGATTCATCTTCTTATTCATCAAGACCTGTTTATGTGGAA

ATTTGACTGATCTATTGCATAATATTTGTTTATTTTGTGCGACTTTTCTG

>M6-PGSC0003DMG400010230-(rev)M6LRR-RLK\_2989

TTATGTGGAAATTTGACTGATCTATTGCATAATATTTGTTTATTTTGTGCGACTTTTCTGTACATTAACCAAT

AAAATTGCTGGAAATGTGGTTATTCTTTCCCATGAGTAGAAGAACAACCT

>M6-PGSC0003DMG400010230-(rev)M6LRR-RLK\_305

AATTCTGTCCCACCGCTGCATTTTCCTATTGCAGTTATTAATTTTTGGCTTTTTTTTTCAAGAAATGTGACG

AATTGGCATTTCATTTCTGCAATAAAAAGCAGAAAAAGATTTTCATTC

>M6-PGSC0003DMG400010230-(rev)M6LRR-RLK\_3050

CATTAACCAATAAAATTGCTGGAAATGTGGTTATTCTTTCCCATGAGTAGAAGAACAACCTTGGATATTATC

GTATTCCTGTTTTGTAGCATGAACTTCAGCCAGCTATATGAATAAATTT

>M6-PGSC0003DMG400010230-(rev)M6LRR-RLK\_3111

GATATTATCGTATTCTGTTTTGTAGCATGAACTTCAGCCAGCTATATGAATAAATTTATTCTATTTCATCC

CGTTGACTATGTTTGAATTCTGGATCGAGATACTCATCTTGGACAAGT

>M6-PGSC0003DMG400010230-(rev)M6LRR-RLK\_3172

TCTATTCATCCCGTTGACTATGTTTGAATTCTGGATCGAGATACTCATCTTGGACAAGTACCTTCAGCTTT

ACCTTATAACTGATGACAGATTACTGACTACCTCTTAATATGCTAATG

>M6-PGSC0003DMG400010230-(rev)M6LRR-RLK\_3233

CTTCAGCTTTACCCTTATAACTGATGACAGATTACTGACTACCTCTTAATATGCTAATGTTTTATTCTCAA

TCACGCACTTTAAGTTTCATACTCCGCTCTGAAAATTTGGTGACTTT

>M6-PGSC0003DMG400010230-(rev)M6LRR-RLK\_3294

TTATTTCTCAATCACGCACTTTTAAGTTTCATACTCCGCTCTGAAAATTTGGTGACTTTTTCTTGCAGCATC  
TGGCATGGCAGTTTGAGGCCATATAAGACTATAGGCTCCTTCTCAGA

>M6-PGSC0003DMG400010230-(rev)M6LRR-RLK\_3355

CTTGCAGCATCTGGCATGGCAGTTTGAGGCCATATAAGACTATAGGCTCCTTCTCAGACCAATTAAGG  
GATGCTAGCATGGTATTTTAGTTTTTTCACACTGTAAGTAACTAAATACG

>M6-PGSC0003DMG400010230-(rev)M6LRR-RLK\_3416

AATTAAAGGGATGCTAGCATGGTATTTTAGTTTTTTCACACTGTAAGTAACTAAATACGTTTTTTTCACCT  
TATGCTCTCTAAATAAGTTTAATGGTTCAGAAGCAACTTTTTTGTTC

>M6-PGSC0003DMG400010230-(rev)M6LRR-RLK\_3477

TTTTTCACCTTATGCTCTCTAAATAAGTTTAATGGTTCAGAAGCAACTTTTTTGTTCCTAAAAGGTTCCCA  
CGTTTTTTGGATGCTCAGGCAGACTTCTGCTCAGACAACCTACCAAGT

>M6-PGSC0003DMG400010230-(rev)M6LRR-RLK\_3538

AAAGGTTCCACGTTTTTTGGATGCTCAGGCAGACTTCTGCTCAGACAACCTACCAAGTGAGTGAAAATA  
TTTTGTGACATATCTTTTATTCGATTTCAAAGAATTGTACACAAAAAAAAA

>M6-PGSC0003DMG400010230-(rev)M6LRR-RLK\_3599

GTGAAAATATTTTGTGACATATCTTTTATTCGATTTCAAAGAATTGTACACAAAAAAAAAGAAAGTATTTTA  
TTCTTTTTGTTTTTGCAGGTTCAACTAGGCCTCACAATATCCACGCTG

>M6-PGSC0003DMG400010230-(rev)M6LRR-RLK\_366

GAAATGTGACGAATTGGCATTTCATTTCTGCAATAAAAAGCAGAAAAAGATTTTATTCTTGTCTGGTAA  
GTTTTACTCTATACATTTTACCATCTTTTGGGTTTTTGGATTTTTATTTT

>M6-PGSC0003DMG400010230-(rev)M6LRR-RLK\_3660

AAGTATTTTATTCTCTTTTGTTTTTGCAGGTTCAACTAGGCCTCACAATATCCACGCTGTAGAGAATCAAG  
CAAACATTGAACGCCGTAAGTTAGCTGAACAATCCAGTAACTTTGCTGC

>M6-PGSC0003DMG400010230-(rev)M6LRR-RLK\_3782

CTCCTGCTAACGGAGGGAAACCATTGGGACCTGTTGATCCTATTCCAAGCAGCAGAAGTAGTGGTTCAT  
TTCGTGCTGTGCCAAGTACTGAAGGAGCTCCTCCACCTCCTCTGACTACAC

>M6-PGSC0003DMG400010230-(rev)M6LRR-RLK\_3843

TGGTTCATTTCTGCTGTGCCAAGTACTGAAGGAGCTCCTCCACCTCCTCTGACTACACCATCACGGACC  
ACACATGATCATCATCCGCTCCAAATCCTGGGGGACTCTAATGGTGC

>M6-PGSC0003DMG400010230-(rev)M6LRR-RLK\_3904

TCACGGACCACACATGATCATCATCCGCCTCCAAATCCTGGGGGACACTCTAATGGTGCTGTAAACAGC  
CAATTGCTAGTCAAGCTCCACCTGGTGGAAAGTCTGGAAGTACATGGAAG

>M6-PGSC0003DMG400010230-(rev)M6LRR-RLK\_3965

TTAAACAGCCAATTGCTAGTCAAGCTCCACCTGGTGGAAAGTCTGGAAGTACATGGAAGTATATAGGAA  
TTGGCATTGGGGCTTTTCTGGTTGCTGTTTTGTGTGCCTGATAATCATCT

>M6-PGSC0003DMG400010230-(rev)M6LRR-RLK\_4026

TATAGGAATTGGCATTGGGGCTTTTCTGGTTGCTGTTTTGTGTGCCTGATAATCATCTGCAAGAGCAAA  
GCTGCACAAACAATAGGCCCTTGGAAAGACTGGATTGAGTGGACAGCTGCA

>M6-PGSC0003DMG400010230-(rev)M6LRR-RLK\_4148

AAGCATTTATTACAGGTACTTTTGATTTAATATTGTGTCAAAGCTGATGAATCCATATGTTCTAGTTCAAC  
TGTTGGATTCATTTTTCTCTGGTGGATATAATCCGAATCTTCAACTCCT

>M6-PGSC0003DMG400010230-(rev)M6LRR-RLK\_4209

CTAGTTCAACTGTTGGATTCATTTTTCTCTGGTGGATATAATCCGAATCTTCAACTCCTACAATAGTTTTTG  
TTTCATACTCCAAGATGATGTTAAAAGCATGTATTAATACTCCTGTGC

>M6-PGSC0003DMG400010230-(rev)M6LRR-RLK\_427

GTCTGGTAAGTTTTACTCTATACATTTTACCATCTTTTGGGTTTTTGGATTTTTATTTTTCTTTTGATTGCTT  
GCAAATTCAGTTATTCCCTCATCATCATCTTTTTCTTTTTCTTTTTT

>M6-PGSC0003DMG400010230-(rev)M6LRR-RLK\_4270

AATAGTTTTTGTTCATACTCCAAGATGATGTTAAAAGCATGTATTAATACTCCTGTGCTATATTGTTTCTC  
ATGTCTTATGCATGAAATCAATTTTGCAGGGTCCCAAACTAAACAG

>M6-PGSC0003DMG400010230-(rev)M6LRR-RLK\_4331

TATTGTTTCTCATGTCTTATGCATGAAATCAATTTTGCAGGGTCCCAAACTAAACAGGCCGGAGCTTG  
AAAATGCATGCGAGGATTTTAGCAACATAGTTTGCCATCAAGATACATTT

>M6-PGSC0003DMG400010230-(rev)M6LRR-RLK\_4392

CGGAGCTTGAAAATGCATGCGAGGATTTTAGCAACATAGTTTGCCATCAAGATACATTTACAGTCTACAA  
GGGAACTATATCCAGTGGAGTAGAGATTGCTGTTGTGTCAACTGCTGTAA

>M6-PGSC0003DMG400010230-(rev)M6LRR-RLK\_4453

AGTCTACAAGGGA ACTATATCCAGTGGAGTAGAGATTGCTGTTGTGTCAACTGCTGTAAATCTTTGAAA

GATTGGTCCAAGCATTCTGAATTGGCCTTCAGGAAGAAGGTTAGTAGTTG

>M6-PGSC0003DMG400010230-(rev)M6LRR-RLK\_4514

TCTTTGAAAGATTGGTCCAAGCATTCTGAATTGGCCTTCAGGAAGAAGGTTAGTAGTTGTCATCTCCTTC

ACAAATAAAAAAACTGCTTCATAACTTATTACCATCTCACTCTTTCTGTT

>M6-PGSC0003DMG400010230-(rev)M6LRR-RLK\_4575

ATCTCCTTCACAAATAAAAAAACTGCTTCATAACTTATTACCATCTCACTCTTTCTGTTGAGATATCCTAGT

CGTCTCGTTTTTTTTACTTATAAGATTTCTACTTATTGTGCACTTGGG

>M6-PGSC0003DMG400010230-(rev)M6LRR-RLK\_4636

GATATCCTAGTCGTCTCGTTTTTTTTACTTATAAGATTTCTACTTATTGTGCACTTGGGTAGATCGATTAC

TCTCAAGGATAAACCACAAGAATTTTGTTAATCTAATTGGATATTGCG

>M6-PGSC0003DMG400010230-(rev)M6LRR-RLK\_4697

GATCGATTCACTCTCAAGGATAAACCACAAGAATTTTGTTAATCTAATTGGATATTGCGAGGAAGATGAA

CCTTCACTAGGATGATGGTCTTTGAGTATGCAACAAATGGAACACTTTT

>M6-PGSC0003DMG400010230-(rev)M6LRR-RLK\_4758

GAAGATGAACCTTCACTAGGATGATGGTCTTTGAGTATGCAACAAATGGAACACTTTTCGAGCATCTGC

ATGGTAAACTGGTTAATTGTTCAAGTTTCAGTCTAATCATTTTTGTGATT

>M6-PGSC0003DMG400010230-(rev)M6LRR-RLK\_4819

AGCATCTGCATGGTAAACTGGTTAATTGTTCAAGTTTCAGTCTAATCATTTTTGTGATTTGTTTTAGATTA

ATGCAGTCTACATGTTTTGTTGTTTCAGATGAAGAACTTGAACCTCTTG

>M6-PGSC0003DMG400010230-(rev)M6LRR-RLK\_4880

GTTTAGATTAATGCAGTCTACATGTTTTGTTGTTTCAGATGAAGAACTTGAACCTCTTGAAGCTGCAA

GGGTACGAGCTATAATGGGAACAGCATATTGTCTCGAGTACATGCACAA

>M6-PGSC0003DMG400010230-(rev)M6LRR-RLK\_4941

TGGCCTGCAAGGGTACGAGCTATAATGGGAACAGCATATTGTCTCGAGTACATGCACAATTTGAATCCT

CCTCTGTCGATTCTGATGTGAATTCACACTCCATATTTTTTACGGACGAT

>M6-PGSC0003DMG400010230-(rev)M6LRR-RLK\_5002

TGAATCCTCCTCTGTCGATTCTGATGTGAATTCACACTCCATATTTTTTACGGACGATTATGCTGCTAAG

GTATGCTTCATTTTGTATAACCACATTGAATTTAGAAACGTTTTACTGTC

>M6-PGSC0003DMG400010230-(rev)M6LRR-RLK\_5063

TGCTGCTAAGGTATGCTTCATTTTGTATACCACATTGAATTTAGAAACGTTTTACTGTCTTGAATTAACG  
AATCGTTTTTTATTTACACAGATTACAGAGCTTGCTTTCTGGTCAGATA

>M6-PGSC0003DMG400010230-(rev)M6LRR-RLK\_5124

GAATTAACGAATCGTTTTTTATTTACACAGATTACAGAGCTTGCTTTCTGGTCAGATATAATGGTGAAG  
TCAAAGTCCTCTAGTGGTGGTGATGTAGAGAACTCTGAGCTACCACCACT

>M6-PGSC0003DMG400010230-(rev)M6LRR-RLK\_5185

ATGGTGAAGTCAAAGTCCTCTAGTGGTGGTGATGTAGAGAACTCTGAGCTACCACCACTTTCTGATCCCG  
AAACAAATGTCTACAATTTTGGGATTTTGTGCTGGAAGTAATTTCTGGG

>M6-PGSC0003DMG400010230-(rev)M6LRR-RLK\_5246

CTGATCCCGAAACAAATGTCTACAATTTTGGGATTTTGTGCTGGAAGTAATTTCTGGGAAGTCACCTTA  
CTCGGAACGAGATTCTTCTGAGCTGGGTAAAGTCTCAATCTATGTAAC

>M6-PGSC0003DMG400010230-(rev)M6LRR-RLK\_5307

GTCACCTTACTCGGAACGAGATTCTTCTGAGCTGGGTAAAGTCTCAATCTATGTAAGTCAATTTTCTT  
CGGTGTTAATATAGACTAGTGAAACGTTCTTCTGCTTTTGTAGG

>M6-PGSC0003DMG400010230-(rev)M6LRR-RLK\_5368

TAATTTTCTTCGGTGTTAATATAGACTAGTGAAACGTTCTTCTGCTTTTGTAGGCGGAGCAATGCG  
TTAACGATAGACAGTTGGTTGATCCAAAATTGAAGTCGTTCAAGAATAA

>M6-PGSC0003DMG400010230-(rev)M6LRR-RLK\_5429

GAGCAATGCGTTAACGATAGACAGTTGGTTGATCCAAAATTGAAGTCGTTCAAGAATAATGAGCTTATG  
GTTATGTGTGAGGTAATGAGAGAATGTATTGGAGAAGATTCAAGGAAGAGA

>M6-PGSC0003DMG400010230-(rev)M6LRR-RLK\_549

TTTCTTTTCTCTCTCTCTTTTTCTTTTCATGGTTTGGCTTGTGAAGTGTTCTTAGGTTTTTACCAACCCC  
TTTTCAAGAAACATATTTTACTAATTTTTTTTTCTTTTGTGTTTAT

>M6-PGSC0003DMG400010230-(rev)M6LRR-RLK\_5490

AGCTTATGGTTATGTGTGAGGTAATGAGAGAATGTATTGGAGAAGATTCAAGGAAGAGACCAACAATA  
AAAGAAGTGATTA AAAAGCTAAGGGAAGCGATTGATATCTCCCCTGATGCTG

>M6-PGSC0003DMG400010230-(rev)M6LRR-RLK\_5551

AACAATAAAGAAGTGATTA AAAAGCTAAGGGAAGCGATTGATATCTCCCCTGATGCTGCAGTTCCAAG  
GCTATCTCCCCTGTGGTGGGCTGAACTTGAGATCCTATCCTCTGAGGCAGC



GTGGTAGATGGAACACTTATGGAATCAAATTGTCGTATCTCGCTCTTTTG

>M6-PGSC0003DMG400010240-(rev)M6G-LecRK\_0

TCTTCTTTGCTTGTAAATAACACTTTGTTCCCTTATTCATAGTAACATTAGCTAATGTTCCCTCCTTCCAAAACCT

TCAAGTACATAAATGAAGGCACATTTGGCGAATACTCCGTTGAATAT

>M6-PGSC0003DMG400010240-(rev)M6G-LecRK\_1040

AAAGTTGCCAGTATGCAGGGGAGGATCAAATGTGGACTATTATAAGGTGGAAGGAGTTGAACATTTTA

CTAGTGATTATAATGAAGGAGTTGGACCTATAAAAATAAGTGAATGCAAAAA

>M6-PGSC0003DMG400010240-(rev)M6G-LecRK\_1105

TTACTAGTGATTATAATGAAGGAGTTGGACCTATAAAAATAAGTGAATGCAAAAATAGGTGCAGCAAAG

ATTGCAAATGTGTGGGCTTTTTCTACAAACAAGAGTCATCAAATGTTTGG

>M6-PGSC0003DMG400010240-(rev)M6G-LecRK\_1170

AAAGATTGCAAATGTGTGGGCTTTTTCTACAAACAAGAGTCATCAAATGTTTGGTTGTACCTGAGCTTG

GAGCTTTGGTTAAAGTGGACAATTCCTCCCATGTTGGCTACATCAAGATC

>M6-PGSC0003DMG400010240-(rev)M6G-LecRK\_1235

GCTTGGAGCTTTGGTTAAAGTGGACAATTCCTCCCATGTTGGCTACATCAAGATCTCAAAGTAGATTAAG

TTATTACTGATTTGTATTTATATCAAGCAAGCATTTTATATTTTTTTAAA

>M6-PGSC0003DMG400010240-(rev)M6G-LecRK\_1288

TCTCAAAGTAGATTAAGTTATTACTGATTTGTATTTATATCAAGCAAGCATTTTATATTTTTTTAAAATTC

AGTAATAATAATGTAACTTTTGTCAAATATAATGATAAAAAATGCAC

>M6-PGSC0003DMG400010240-(rev)M6G-LecRK\_130

ATCGTGTGTTGGACATTGTCAACTCCCTTTCACCTTTGTTTCTTCAATTCTACTCCAAACACCTTCATACT

TGGGCAACGAATGGGTCATCGTAGATCTGAGTCCATTATGCGATGGG

>M6-PGSC0003DMG400010240-(rev)M6G-LecRK\_195

TTCATACTTGGGCAACGAATGGGTCATCGTAGATCTGAGTCCATTATGCGATGGGTCTGGGAGGCTAAT

CGTGGTAAGCCTGTTTCGCGAAAACGCCACTCTAACGTTTGGTACTAATGGG

>M6-PGSC0003DMG400010240-(rev)M6G-LecRK\_260

TAATCGTGGTAAGCCTGTTTCGCGAAAACGCCACTCTAACGTTTGGTACTAATGGGAATTTGGTACTAACT

GATGTCAATGGCACGGTAGCTTGGCATACCAATACTGTCAACAAAGGTGT

>M6-PGSC0003DMG400010240-(rev)M6G-LecRK\_325



TAACTGATGTCAATGGCACGGTAGCTTGGCATACCAATACTGTCAACAAAGGTGTA ACTGGGCTAAAAC  
TTTTGCCAAATGGCAACTTGGTTTTACATGACAAAAATGATAGATTTGTTT

>M6-PGSC0003DMG400010240-(rev)M6G-LecRK\_390

AAACTTTTGCCAAATGGCAACTTGGTTTTACATGACAAAAATGATAGATTTGTTTGGCAAAGTTTTGATC  
ACCCAACGGATACACTTTTGGTGGGCCAAAGTTTAAGGGCTAAAGGCCCA

>M6-PGSC0003DMG400010240-(rev)M6G-LecRK\_455

TGATCACCCAACGGATACACTTTTGGTGGGCCAAAGTTTAAGGGCTAAAGGCCCATCTAAGATTGTTAG  
TAGAAAGTCCAGTAAAGAACCTGTTGATGGGCCTTATAGTTTTATCCTAGA

>M6-PGSC0003DMG400010240-(rev)M6G-LecRK\_520

TTAGTAGAAAGTCCAGTAAAGAACCTGTTGATGGGCCTTATAGTTTTATCCTAGAAGGGAGACATTGGG  
CCATGTATTATAACAAGTGTAATTCACAAAAGCCTTACCATATTTCAAAT

>M6-PGSC0003DMG400010240-(rev)M6G-LecRK\_585

TGGGCCATGTATTATAACAAGTGTAATTCACAAAAGCCTTACCATATTTCAAATCAGATGATTTTGGTAA  
TGGGAAAGGCTCTTTAGCCAATTTTGATTTCTACTGTGAGCCAGAATAT

>M6-PGSC0003DMG400010240-(rev)M6G-LecRK\_65

CAAAACCTTCAAGTACATAAATGAAGGCACATTTGGCGAATACTCCGTTGAATATTTTGCAGATTATCGT  
GTGTTGGACATTGTCAACTTCCCTTTCACCCTTGTCTTCAATTCTAC

>M6-PGSC0003DMG400010240-(rev)M6G-LecRK\_650

TGGTAATGGGAAAGGCTCTTTAGCCAATTTTGATTTCTACTGTGAGCCAGAATATGGTGAAAATTATGCT  
TTTGAGCTAGGATTTAGGATCAACATGACCAATTCTCCTAGCTCTGGCAC

>M6-PGSC0003DMG400010240-(rev)M6G-LecRK\_715

ATGCTTTTGAGCTAGGATTTAGGATCAACATGACCAATTCTCCTAGCTCTGGCACATCTATATTTACTAGG  
CCCAAATACAATAGTACATACTATGTTTAGAGTTGATATGGATGGTG

>M6-PGSC0003DMG400010240-(rev)M6G-LecRK\_780

ACTAGGCCCAAATACAATAGTACATACTATGTTTAGAGTTGATATGGATGGTGATTTAAGAATGTACA  
CTTATGAACCAAATGTTGATTGGGGAGCATGGGAAGTCACATATCGACTT

>M6-PGSC0003DMG400010240-(rev)M6G-LecRK\_845

GTACACTTATGAACCAAATGTTGATTGGGGAGCATGGGAAGTCACATATCGACTTCTCGATAGGGACAA  
CGATGGAAAAAGTGAATGCAAGCTACCGAGGAGGTGTGGATCATTAGGCGT

>M6-PGSC0003DMG400010240-(rev)M6G-LecRK\_910

ACAACGATGGAAAAAGTGAATGCAAGCTACCGAGGAGGTGTGGATCATTAGGCGTTTGTGAGGACAGC  
CAGTGTGTGGCGTGTCCGAGCCCTCAAGGCTTGATTGGGTGGAGTAAGGGAT

>M6-PGSC0003DMG400010240-(rev)M6G-LecRK\_975

AGCCAGTGTGTGGCGTGTCCGAGCCCTCAAGGCTTGATTGGGTGGAGTAAGGGATGTGCACCACCAAA  
GTTGCCAGTATGCAGGGGAGGATCAAATGTGGACTATTATAAGGTGGAAGGA

>M6-PGSC0003DMG400010325-(rev)M6LRR-RLP\_0

ATGGTGGAAACAAGAAGCAGTGTTCATGTTCTTGAATCCATTA ACTCTGATGTCTCTTGGCGTTCCTTTT  
CCCTGATGATCTCTGTTCTTCTTCCCCACATGGGGTTATTTGTGATTAC

>M6-PGSC0003DMG400010325-(rev)M6LRR-RLP\_1024

GTGGTAGACTTCCATTCTCTCCAAAATTTGTATCCAAAGTTGGAGAAAAGTTGAAGTTGGGAGGCAATC  
CTCAACTCTGTGTAGATGAAGGCTTGAGAATATCTAATGTTAGTGTAGCT

>M6-PGSC0003DMG400010325-(rev)M6LRR-RLP\_1088

CAATCCTCAACTCTGTGTAGATGAAGGCTTGAGAATATCTAATGTTAGTGTAGCTTGAGGCTACTAAAA  
ATGTGCAACAATGCTATTAGTGCCAAATTTGTCCCATTCTCTGGGGCATC

>M6-PGSC0003DMG400010325-(rev)M6LRR-RLP\_1152

CTAAAAATGTGCAACAATGCTATTAGTGCCAAATTTGTCCCATTCTCTGGGGCATCTTTAGTACTGGTGCC  
TGTTTCCCATGTTGTCTTTTTTCTTGGAAATTTGTTTCTCCTGTGCTAG

>M6-PGSC0003DMG400010325-(rev)M6LRR-RLP\_128

CACTACAAACTCATTTACTCCTCATGTTACTGAGATTAGTCTTGGTTATGTTTCAGATTATGCTCCTAATCC  
ACCTTGACTCCTAATAGCACACTTAATGCTTCCCTTTTTGCCCTTT

>M6-PGSC0003DMG400010325-(rev)M6LRR-RLP\_192

CCTAATCCACCTTGACTCCTAATAGCACACTTAATGCTTCCCTTTTTGCCCTTTTTCTTATCTAAGAAAG  
ATTTTTGTTTACAAATGTTTACTGAAAATGAGGTTTCTTTGATTGAC

>M6-PGSC0003DMG400010325-(rev)M6LRR-RLP\_256

TAAGAAAGATTTTTGTTTACAAATGTTTACTGAAAATGAGGTTTCTTTGATTGACTTTGGATCTTTGCCT  
TCTTCTTTGGAGGAGGTGGTTTTCTTGGAGAATCCAGGTCTTGTTGGTT

>M6-PGSC0003DMG400010325-(rev)M6LRR-RLP\_320

TTTGCCTTCTTCTTTGGAGGAGGTGGTTTTCTTGGAGAATCCAGGTCTTGTTGGTTCTTTAAGTGATAAAG

TTGGAAACTTGATGAGTTTGAGGAGGTTGGTTTTGAGTGGGAGTGGTGT

>M6-PGSC0003DMG400010325-(rev)M6LRR-RLP\_384

GATAAAGTTGGAACTTGATGAGTTTGAGGAGGTTGGTTTTGAGTGGGAGTGGTGTATGGGGAAAT

CCCAAATGGGGTTGGTGGTTTGGTCAATTTAGAGCAGCTGACTTTATCAAGA

>M6-PGSC0003DMG400010325-(rev)M6LRR-RLP\_448

AAATCCCAAATGGGGTTGGTGGTTTGGTCAATTTAGAGCAGCTGACTTTATCAAGAAACAAAATTAGTG

GTGAAATTCCAGTGGGGTTGATGACATTGAAGAACTCAAGATTCTTGATT

>M6-PGSC0003DMG400010325-(rev)M6LRR-RLP\_512

TAGTGGTGAAATTCCAGTGGGGTTGATGACATTGAAGAACTCAAGATTCTTGATTGAGTCAAAATGA

GCTTGAAAGTAGTGTTCTTGAATCTATAGGGAACTTTACTCAACTTTTGAA

>M6-PGSC0003DMG400010325-(rev)M6LRR-RLP\_576

AATGAGCTTGAAAGTAGTGTTCTTGAATCTATAGGGAACTTTACTCAACTTTTGAACTTGACTTGAGTT

ACAACAAGCTTACTGGGAAAATCCCTCAAAGTTTGAAGGGTTTGAAGAGT

>M6-PGSC0003DMG400010325-(rev)M6LRR-RLP\_64

CCCTTTCCCTGATGATCTCTGTTCTTCTTCCCACATGGGGTTATTTGTGATTACTTTGTTTCCACTACAA

ACTCATTACTCCTCATGTTACTGAGATTAGTCTTGGTTATGTTTCAG

>M6-PGSC0003DMG400010325-(rev)M6LRR-RLP\_640

TGAGTTACAACAAGCTTACTGGGAAAATCCCTCAAAGTTTGAAGGGTTTGAAGAGTTTGGAGTTTTTGG

ACTTGAGTTACAATAACTTTTCCAATTCTGGGGTTCCATTGTTTTTGGCTG

>M6-PGSC0003DMG400010325-(rev)M6LRR-RLP\_704

TTTGGACTTGAGTTACAATAACTTTTCCAATTCTGGGGTTCCATTGTTTTTGGCTGAGATGTCTAGTTTGA

AGGAAGTCTACTTAAGTGGAACATCTTGGAGGGGAAATTCCAGAAAT

>M6-PGSC0003DMG400010325-(rev)M6LRR-RLP\_768

AGTTTGAAGGAAGTCTACTTAAGTGGAACATCTTGGAGGGGAAATTCCAGAAATATGGGAGAATCTT

GAGGGTATTGTGGGGCTAGGATTATCAAAAACAGGACTAGTTGGGAACATT

>M6-PGSC0003DMG400010325-(rev)M6LRR-RLP\_832

ATCTTGAGGGTATTGTGGGGCTAGGATTATCAAAAACAGGACTAGTTGGGAACATTCTGTTTCTATGG

GGGTGTAATTGAAAAACATATGTTATTTGGGGCTTGATAATAACAAGCTGG

>M6-PGSC0003DMG400010325-(rev)M6LRR-RLP\_896

TATGGGGGTGTACTIONGAAAAACATATGTTATTTGGGGCTTGATAATAACAAGCTGGAAGGGGCATTGCC  
TGAAGAGTTTGGGGCATTGGAATATGTGAATGAGTTACATTTGGAGAACAA

>M6-PGSC0003DMG400010325-(rev)M6LRR-RLP\_960

TTGCCTGAAGAGTTTGGGGCATTGGAATATGTGAATGAGTTACATTTGGAGAACAATAATTTGAGTGGT  
AGACTTCCATTCTCTCCAAAATTTGTATCCAAAGTTGGAGAAAAGTTGAAG

>M6-PGSC0003DMG400010328-(rev)M6LRR-RLP\_0

TACAAACATTATCTTATGTAGAACCCATGGAGAAAAGACTGCGACTTTCCAACAAATTTGCTTTAAAAAA  
GGTGTTTTTCTCAACCCCATATCTCTTTTCTTCAGTCTCTTGTCAATTCTT

>M6-PGSC0003DMG400010328-(rev)M6LRR-RLP\_1037

TAGATGCTTGTATATCATTGGTTAGTGAACAAAGTTTGTGTCTATCTACTCTTGTTTTACTAGCCTAGCAC  
TAACTGGTGCCTTCTCTGTAGTTTGATTATCCGCACGAAGATTTGGAGC

>M6-PGSC0003DMG400010328-(rev)M6LRR-RLP\_1098

AGCCTAGCACTAACTGGTGCCTTCTCTGTAGTTTGATTATCCGCACGAAGATTTGGAGCATTACAATTTTC  
CTGAACTTACGAAGCTCAAGAAATTTGTTTTTATGACATTTGGAAATTC

>M6-PGSC0003DMG400010328-(rev)M6LRR-RLP\_1159

TACAATTTTCTGAACTTACGAAGCTCAAGAAATTTGTTTTTATGACATTTGGAAATTCACTAAGAGTGTC  
AGGCCAGAGTCTCTTAGGTTGCACGTCTATAATAAGGGCTGCCCCACAG

>M6-PGSC0003DMG400010328-(rev)M6LRR-RLP\_122

GGTTTGATCAATTTTTTTGTTTCTAGTGTCAAAGGAAGTCTGCATTGCACAAGAAGATCGTGTCAAGTCA  
GTTACCTGATGAAATTCTGGTATATATATTGTCTTTCTTTACTGTTAAGG

>M6-PGSC0003DMG400010328-(rev)M6LRR-RLP\_1281

GAAGGAATTTGAACTACAGGTAAGTATCATGCCTTTTCTCTTTGGTTTACAAAAGTCTGATTTATTCATA  
TTAGCAATTCTGGTTCATGCAGTTATTGATGCTACTTCTTTAATAAACT

>M6-PGSC0003DMG400010328-(rev)M6LRR-RLP\_1342

TTTATTCATATTAGCAATTCTGGTTCATGCAGTTATTGATGCTACTTCTTTAATAAACTTAGTTATTTAAGT  
CGTTGAGCTTGAGTTGAAACAATTGTGAAGAGCTAAACTTGAATAAAT

>M6-PGSC0003DMG400010328-(rev)M6LRR-RLP\_1464

TACTCTTGCAATTTAACTCATCTGACTGTGCCAATATAAAAGTCCTGCCCTTACATAGGTGTCATTTAGAT  
AGGTAGTAGATAGCTCTGTCGTCTCTGAGCTTTGATTTATTATCTGTA

>M6-PGSC0003DMG400010328-(rev)M6LRR-RLP\_1525

TCATTTTAGATAGGTAGTAGATAGCTCTGTCGTCTCTGAGCTTTGATTTATTATCTGTAACAAAGAGCTTA  
AAGTCTCATCATTTTCATCAAAGAGCTTAGAGTCTCATCATTCCTTCAGT

>M6-PGSC0003DMG400010328-(rev)M6LRR-RLP\_1586

AAAGAGCTTAAAGTCTCATCATTTTCATCAAAGAGCTTAGAGTCTCATCATTCCTTCAGTTTCTTGAATATT  
TTTACTGAATTACTGCACTTGTTTAGCGTAATGGAATGACCTCAGAGTG

>M6-PGSC0003DMG400010328-(rev)M6LRR-RLP\_1708

GGGATTGTGGTTTCAGTTGTGCGATTGTGTTGCTCCAAAATCTTAGGTTTCCACCTGTTTGTGTCAGTATA  
TTATATGATGGAATTGGGAAGTACTATACAGTGATTATTATGTGTTTAA

>M6-PGSC0003DMG400010328-(rev)M6LRR-RLP\_183

TGTCAGTCAGTTACCTGATGAAATTCTGGTATATATATTGTCTTTCTTACTGTTAAGGAAGCTGCAGATA  
CAAGTCTCCTCTCAAGGCGTTGGCTAAACTTATGGACATATATTGATCA

>M6-PGSC0003DMG400010328-(rev)M6LRR-RLP\_244

GCTGCAGATACAAGTCTCCTCTCAAGGCGTTGGCTAAACTTATGGACATATATTGATCACCTTGATTTTG  
ATGCTACAAAATACTTGGATCAAGTGTTTCGTGCAACCCAAGCTACAAAAA

>M6-PGSC0003DMG400010328-(rev)M6LRR-RLP\_2745

GGTTTCAAATGAGAACAACCAACTAAGAAAATTGAGAAGTAAGTTGTTGCCTAGCTAGGTAGATGGGT  
GAAGGAGGAATGCACTGGGGTAGAGTTTCAGAGATGAGGGATTACAAAATG

>M6-PGSC0003DMG400010328-(rev)M6LRR-RLP\_2806

GATGGGTGAAGGAGGAATGCACTGGGGTAGAGTTTCAGAGATGAGGGATTACAAAATGTTGTTAGA  
ACCGAGGGGAACTTCCAAATTCTATAGTAGGATTCGAAGGTGGCATCCCGAAT

>M6-PGSC0003DMG400010328-(rev)M6LRR-RLP\_2867

GTTAGAACCGAGGGGAACTTCCAAATTCTATAGTAGGATTCGAAGGTGGCATCCCGAATCCCAATCAAA  
TGACTCCAGGCTCAAAGAGTCAGAATCGAGCCTGGATGGTATTGTAGAGGA

>M6-PGSC0003DMG400010328-(rev)M6LRR-RLP\_2989

CTTAGGGCTTCACATGGTATCTGATGTTTTCTCTCTTGAATATTTATTTTTTCAAAAATCAAGTAACGAT  
TATATAAGGGAAAAGAGAAAAAATACCCGAACTTGTATCGGATTTCTT

>M6-PGSC0003DMG400010328-(rev)M6LRR-RLP\_3050

CAAGTAACGATTATATAAGGGAAAAGAGAAAAAATACCCGAACTTGTATCGGATTTCTTGTACACTTAT

TATTTGAAGTTGTTCTATGAATTATTTTGTAGTAGAATAATACCATAGGA

>M6-PGSC0003DMG400010328-(rev)M6LRR-RLP\_3111

TACACTTATTATTTGAAGTTGTTCTATGAATTATTTTGTAGTAGAATAATACCATAGGAAGTGTTGATGTG  
GCTTTTACTTTGCACCTCCATATAGTGCATAAAAAGACAAATACAAGCT

>M6-PGSC0003DMG400010328-(rev)M6LRR-RLP\_3172

TGTTGATGTGGCTTTTACTTTGCACCTCCATATAGTGCATAAAAAGACAAATACAAGCTAAATGATAGAG  
GCTCTAGAGTCCAAAAGATATAATTTTTCTTCTACTTTTTAGGCCCTTTT

>M6-PGSC0003DMG400010328-(rev)M6LRR-RLP\_3233

ATGATAGAGGCTCTAGAGTCCAAAAGATATAATTTTTCTTCTACTTTTTAGGCCCTTTTCTAAATCTTGAG  
CGGTGATCCACCACTTGTCCACCAGGCCACCATCCATGCCCCCACCC

>M6-PGSC0003DMG400010328-(rev)M6LRR-RLP\_3355

ATGTCTGAGCCAGGATTTTTTTTTTTTGTAGCTGAGTAGATACACAAATTATGTTTTTCCTACTCATGAGT  
GGGTGCACGCACTTGGCAAAGTTGTGTGCATAATTTTTCAATAAAAA

>M6-PGSC0003DMG400010328-(rev)M6LRR-RLP\_3416

ACTCATGAGTGGGTGCACGCACTTGGCAAAGTTGTGTGCATAATTTTTCAATAAAAAATCAAGCAATAA  
AAGTAAAAAATTTATCTAGGGTGTGTTTTGTATGGAGAAAAATGTTTAT

>M6-PGSC0003DMG400010328-(rev)M6LRR-RLP\_3477

AAGCAATAAAAGTAAAAAATTTATCTAGGGTGTGTTTTGTATGGAGAAAAATGTTTATCTATTTTCATG  
ATTGGTTAGTCAATATATTTTGTGAAATATTTTTTCTAGGAAAACAAGCT

>M6-PGSC0003DMG400010328-(rev)M6LRR-RLP\_3599

TTAAAAATGAGGAAATTTACTTTTCTAATGGAAGTAGAAAACATAAGTTCCAAAGCAATTAATCATATT  
AGCATTTATAACTATAAAAAACAATCATATAAATCACTATAGACATAGAG

>M6-PGSC0003DMG400010328-(rev)M6LRR-RLP\_366

GCATATGGACAAGTATCTGACATGGGTCAACTCTGCTTTGCAAAGTTTAAAGGCCAGAGACTTGACCA  
ATTCGTGTTTACTTTGATTTAATCAAATTTGCTCAGCACGACATTGACAA

>M6-PGSC0003DMG400010328-(rev)M6LRR-RLP\_3660

AATCATATTAGCATTTATAACTATAAAAAACAATCATATAAATCACTATAGACATAGAGAAGTTAATAAA  
AATAATTTTAGTTACTAGTTAAATAAAAAACAATACATATCACAA

>M6-PGSC0003DMG400010328-(rev)M6LRR-RLP\_3721

GTTAATAAAAATAATTTTAGTTACTAGTTAAATAAAAATAAAAACAATACATATCACAATAAAAGTAATA  
AAATAATAATTAATAAAAAGAATTACCGCGAACATTAGAAAAAAACT

>M6-PGSC0003DMG400010328-(rev)M6LRR-RLP\_3782

AAAGTAATAAAATAATAATTAATAAAAAGAATTACCGCGAACATTAGAAAAAAACTATTGATAATCT  
CAACCACAAAAAACTTTAAAGGAAAAACACGAGTACGGAGCCAAAAGGG

>M6-PGSC0003DMG400010328-(rev)M6LRR-RLP\_3843

TGATAATCTCAACCACAAAAAACTTTAAAGGAAAAACACGAGTACGGAGCCAAAAGGGCAAAAAAAT  
TGACCAAAAATTCCAAAAGGGTTTGAAATCAAAGGGTAACATTTAAACGGT

>M6-PGSC0003DMG400010328-(rev)M6LRR-RLP\_3904

AAAAAATTGACCAAAAATTCCAAAAGGGTTTGAAATCAAAGGGTAACATTTAAACGGTAGGGGAGAT  
GCTGTTTAAATTAGGGTAGCAAGGCGCAACTCCCTATGCGCCTTACAAGGTG

>M6-PGSC0003DMG400010328-(rev)M6LRR-RLP\_4026

AGAAAACAGAGCCACCATCATTGTTTATTTTTCCATGTCAGTACTTACGGTGGTACTTTTTGCACTACAA  
AATAGTATAGGGGTCGTAGGGACATCACAAAGAATAAGTGTGTAAGTGG

>M6-PGSC0003DMG400010328-(rev)M6LRR-RLP\_4087

TGCACTACAAAATAGTATAGGGGTCGTAGGGACATCACAAAGAATAAGTGTGTAAGTGGAAAAGT  
ATAAGTCCATAGGGTTTTTATGCCTTTTCCCACTGTGTTATTTAAAAAAGCA

>M6-PGSC0003DMG400010328-(rev)M6LRR-RLP\_4148

AACTGAGATAAGTCCATAGGGTTTTTATGCCTTTTCCCACTGTGTTATTTAAAAAAGCACCAAGAGGGCT  
CCAACCTTACAAGTAGAAGATTCTGTTGTTCTGTCAACCTCCCAGTCAT

>M6-PGSC0003DMG400010328-(rev)M6LRR-RLP\_427

CTTGACCAATTTCTGTTTACTTTGATTTAATCAAATTTGCTCAGCACGACATTGACAAATGGCTTGAAGT  
TGCTTTTCTAAGAAAGTTCAAAGACTAGAGTTAGACTTATTAAGGTGT

>M6-PGSC0003DMG400010328-(rev)M6LRR-RLP\_4270

AATCTCCTTCTAATCTAATATTAATAAGATAGCCTTTCTCTGTATTCTTCAATCACATCTTTTATATGGATA  
GCTATGAGATCTAATTCTGAATAAGTTATTAAGCTTCTTGATCCGGC

>M6-PGSC0003DMG400010328-(rev)M6LRR-RLP\_4331

TTATATGGATAGCTATGAGATCTAATTCTGAATAAGTTATTAAGCTTCTTGATCCGGCGTACATGAAAC  
TTTATCTTCTTCTTGCAACTAAAAGCTTTCACAAGATTAAGAATCAAT

>M6-PGSC0003DMG400010328-(rev)M6LRR-RLP\_4392

ACATGAAACTTTATCTTCTTCTTGCAACTAAAAGCTTTCACAAGATTAAGAATCAATTCCATAAGTTCT  
AATGTACTTTCAAAGTGTGACATCATCAGATGTATTGATTAGTTTTGCT

>M6-PGSC0003DMG400010328-(rev)M6LRR-RLP\_4453

CATAAGTTCTAATGTACTTTCAAAGTGTGACATCATCAGATGTATTGATTAGTTTTGCTTTTGAACATCTCA  
TATCGTTGCCATGCTCTATGTTAACAGCTTAATCCATAAATTGTTTT

>M6-PGSC0003DMG400010328-(rev)M6LRR-RLP\_4514

TGAACATCTCATATCGTTGCCATGCTCTATGTTAACAGCTTAATCCATAAATTGTTTTGCTCTACTGTGTT  
TTATCTCCACAACTAATTCGACAATAGACACTTTTTTTAATACCCAA

>M6-PGSC0003DMG400010328-(rev)M6LRR-RLP\_4575

TCTACTGTGTTTTATCTCCACAACTAATTCGACAATAGACACTTTTTTTAATACCCAAAGTTTTTATCTAT  
GAACTACTCTTCTTAGAGAATATAGCTCTATTTTTATGCTCTTTGAAT

>M6-PGSC0003DMG400010328-(rev)M6LRR-RLP\_4636

TTTTTATCTATGAACTACTCTTCTTAGAGAATATAGCTCTATTTTTATGCTCTTTGAATCAACTTGCCACAT  
CTTTCTCCTTGCAATTATCGAACGGTCTTTGCACCTTAAAAAATGATAG

>M6-PGSC0003DMG400010328-(rev)M6LRR-RLP\_4697

ACTTGCCACATCTTTCTCCTTGCAATTATCGAACGGTCTTTGCACCTTAAAAAATGATAGATACAGTTTCTT  
GCAGGTTGCCAATCTTCTCAACCTTATGTATCACTCTCTGCCATATTAT

>M6-PGSC0003DMG400010328-(rev)M6LRR-RLP\_4819

CACTTCTATATCTGGCATTAGAGACTTGCTCATGTATGTCTCTGCCTGGATTCTCAATTTAAATGCAGTC  
AAGTGCTGTCTCAAAGTGTAATAGTAGAGATCTGTGATGCATGATCTTC

>M6-PGSC0003DMG400010328-(rev)M6LRR-RLP\_488

GGCTTGAAGTTCCTTTTCTAAGAAAGTTCAAAGACTAGAGTTAGACTTATTAAGGTGTGGATCATTAC  
TCGTAATTTTGATTCTGTTATACTTTCCGGAGCGGCTCCTTGGTCTTG

>M6-PGSC0003DMG400010328-(rev)M6LRR-RLP\_4880

AAATGCAGTCAAGTGTCTCAAAGTGTAATAGTAGAGATCTGTGATGCATGATCTCCGCTCCTCAAG  
TCCAAATAGAAATAGGGTATAGTCTGCATATCGTGTACATGAAAAATTC

>M6-PGSC0003DMG400010328-(rev)M6LRR-RLP\_4941

CTCCTCAAGTCCAAATAGAAATAGGGTATAGTCTGCATATCGTGTACATGAAAAATTTCCATATTTTCATT



TGTACAACCTTTCCCAACTTTTGACTCCTTTTATCCATACTATATTCAT  
>M6-PGSC0003DMG400010328-(rev)M6LRR-RLP\_5002  
TATTTTCATTTGTACAACCTTTCCCAACTTTTGACTCCTTTTATCCATACTATATTCATGGCATAATGTAGCA  
TCTTACTGAATGTTTCCATTGCTTAGGAAGAGAATGGGATAATGGGG  
>M6-PGSC0003DMG400010328-(rev)M6LRR-RLP\_5063  
CATAATGTAGCATCTTACTGAATGTTTCCATTGCTTAGGAAGAGAATGGGATAATGGGGTTCTCTATTT  
AACTGCATATCCTATTTATATTTTTCCATTTGTTTGCAAACCGTGTTGAT  
>M6-PGSC0003DMG400010328-(rev)M6LRR-RLP\_5124  
CTCCTATTTAACTGCATATCCTATTTATATTTTTCCATTTGTTTGCAAACCGTGTTGATTCAAAGCTTCAG  
TAATATTGCCAGTTTACATGATTGTTCCACTGGGTCAAATCTTTGCTT  
>M6-PGSC0003DMG400010328-(rev)M6LRR-RLP\_5185  
AAAAGCTTCAGTAATATTGCCAGTTTACATGATTGTTCCACTGGGTCAAATCTTTGCTTGATCCTGTGTTG  
TCCCTAGTCTGAGGTGATAACTTGAGAATGAATCATTTCATCGGTGCTCT  
>M6-PGSC0003DMG400010328-(rev)M6LRR-RLP\_5307  
TAGTAAAGAAGGCTTCACTCAAGGAGTGACAGATTTTGACGGAGTCTTGGCTTTGATGCTAAGGAGACA  
AGATCCATCGATCTGAATAAGTCTAGTAACCTTTCTCAAGTCCAGCTAACA  
>M6-PGSC0003DMG400010328-(rev)M6LRR-RLP\_5368  
AGGAGACAAGATCCATCGATCTGAATAAGTCTAGTAACCTTTCTCAAGTCCAGCTAACAAATAATTCTTC  
CTATTTTAATTCTATTTAAGGCTCCAAGAATTCATTTTCTAAGAACA CTG  
>M6-PGSC0003DMG400010328-(rev)M6LRR-RLP\_5429  
TAATTCTTCCTATTTTAATTCTATTTAAGGCTCCAAGAATTCATTTTCTAAGAACA CTGGATCTGTAGTTTA  
TCCTTCCCTTTACAAATACATGCATTTTTTGACCTTGATATCTACTTG  
>M6-PGSC0003DMG400010328-(rev)M6LRR-RLP\_549  
ATCATTCACTCGTAATTTTGATTCCTGTTATACTTTTCCGGAGCGGCTCCTTGGTCTTGAGATTCTTCTTC  
ATGCTCTAATAACCTCCAAATACTCTCACTTATCAACCAGAATTTCAA  
>M6-PGSC0003DMG400010328-(rev)M6LRR-RLP\_5490  
TCTGTAGTTTATCCTTCCCTTTACAAATACATGCATTTTTTGACCTTGATATCTACTTGCCAATACTTGTTTC  
ATCCTTGTTGTTAGGACCCCGGAGTAATCTCATCCTTTTACCTTGT  
>M6-PGSC0003DMG400010328-(rev)M6LRR-RLP\_5551

AATACTTGTTTCATCCTTGTTGTTAGGACCCCGGGAGTAATCTCATCCTTTTACCTTGTTCTTAAGAACCAA  
TGCTGTGAATATTTTCAGTCCTGCCTCTTGTA AAAATTTCTGTCTCATG

>M6-PGSC0003DMG400010328-(rev)M6LRR-RLP\_5612

TTAAGAACCAATGCTGTGAATATTTTCAGTCCTGCCTCTTGTA AAAATTTCTGTCTCATGAAAGAAGTGCA  
ATGCACTGATAATGTCCCTTTCCAAAAAGTTCCTAGATTTCTGGTAAGAA

>M6-PGSC0003DMG400010328-(rev)M6LRR-RLP\_5734

CATTATCTGCCCATCTGGCCCTAAAGTTGTTATCACCCTAGACCATCTCCATTACTTCTCCGAGAAAATTT  
CTTAGTAGCCAACACTCTTCTGTGATAATAGCTCAAGGTCATTGTAA

>M6-PGSC0003DMG400010328-(rev)M6LRR-RLP\_5795

CGAGAAAATTTCTTAGTAGCCAACACTCTTCTGTGATAATAGCTCAAGGTCATTGTA ACTGGAAGGCGC  
CATCATTGCTCGGTTTTACTAAATAACTTCTCATAGCATTACACTCATCT

>M6-PGSC0003DMG400010328-(rev)M6LRR-RLP\_5856

GGAAGGCGCCATCATTGCTCGGTTTTACTAAATAACTTCTCATAGCATTACACTCATCTGATGACCTTTGG  
ATTTGGTAGTTCGTCCATCTCTTACAAGTTAGTTTATATGGCTGTACTT

>M6-PGSC0003DMG400010328-(rev)M6LRR-RLP\_5917

TGACCTTTGGATTTGGTAGTTCGTCCATCTCTTACAAGTTAGTTTATATGGCTGTACTTTTTATTTGTATTG  
ATCAATTTACAGTAAAACACTTAGTATTTTGTAGGGGTGTCAAAAATG

>M6-PGSC0003DMG400010328-(rev)M6LRR-RLP\_61

TTTAAAAAAGGTGTTTTTCTCAACCCCATATCTTTTTCTTCAGTCTCTTGTCATTCTTGTTGGTTTGATCAAT  
TTTTTTGTTTCTAGTGTCAAAGGAAGTCTGCATTGCACAAGAAGAT

>M6-PGSC0003DMG400010328-(rev)M6LRR-RLP\_610

GATTCTTCTTCATGCTCTAATAACCTCCAAATACTCTCACTTATCAACCAGAATTTCAAGTCTCTAAAAGTG  
CTTCTATTGAAATCTGTAAATGTGACGGGCCAAGTTCCTTGAGTTCTTT

>M6-PGSC0003DMG400010328-(rev)M6LRR-RLP\_6466

CAACCCGCCCATTTGGCACCTCTAGTATGTTGTCTCATTCAATTAACCAGAAACACCTCAATTGTTGTTTCC  
AGGGTGTTTTTTAGCATTGGTTATTTGTTCCAGTTCTACTAAGTGGTT

>M6-PGSC0003DMG400010328-(rev)M6LRR-RLP\_6527

TTGTTGTTTCCAGGGTGTTTTTTAGCATTGGTTATTTGTTCCAGTTCTACTAAGTGGTTCCTTTAGGCTTTT  
CGTTTTTCTATATCCGTTACCTTTTTCTGATCATACTTACCAATCCA

>M6-PGSC0003DMG400010328-(rev)M6LRR-RLP\_6588

TTTAGGCTTTTCGTTTTCTATATCCGTTACCTTTTCTGATCATACTTACCAATCCAGCAATCTGATTATG  
TATAATTTTTCGACATGCATTGTTGTTTGAACCTCAAAGTCTGCCTT

>M6-PGSC0003DMG400010328-(rev)M6LRR-RLP\_6649

AATCTGATTATGTATAATTTTTCGACATGCATTGTTGTTTGAACCTCAAAGTCTGCCTTTTAAGTTCAGTTT  
CCTTTCTATTAACCATAATCAGATTGCCAACACTATCATAAGATTGCT

>M6-PGSC0003DMG400010328-(rev)M6LRR-RLP\_671

CTCTAAAAGTGCTTCTATTGAAATCTGTAAATGTGACGGGCCAAGTTCTTGAGTTCTTTCTACGCAATTGT  
CCATTTCTTGAAAGAATGCAAGTTCATGGATCAGGAACATTGAAAAATT

>M6-PGSC0003DMG400010328-(rev)M6LRR-RLP\_6710

AAGTTCAGTTTCCTTTCTATTAACCATAATCAGATTGCCAACACTATCATAAGATTGCTATTGCTGTTCCGC  
TAAATCAATGAATCCCTCTATAGCTTTTTTCATTTTCTCGAATTTGCA

>M6-PGSC0003DMG400010328-(rev)M6LRR-RLP\_6832

AAGATTGCCTATTCCCAAGTCTGCACTCTGATGGAATGGGTGTATGATGTTGGTAATCATCATATGCTT  
TGAAAACCTGAATATCACATTCCAAAGAAATTGTACACAAAAATTTCTGT

>M6-PGSC0003DMG400010328-(rev)M6LRR-RLP\_6893

CATATGCTTTGAAAACCTGAATATCACATTCCAAAGAAATTGTACACAAAAATTTCTGTGTATTCCACCTC  
ATAAGTTTACTGTACATGCTATTGTATTTATACAAAACCTAGGTCTAAAT

>M6-PGSC0003DMG400010328-(rev)M6LRR-RLP\_6954

ATTCCACCTCATAAGTTTACTGTACATGCTATTGTATTTATACAAAACCTAGGTCTAAATTCTGTACCAAAA  
TAAATGAATTAACAATGATTATTTTACACTTGGCACCTAATTATTGG

>M6-PGSC0003DMG400010328-(rev)M6LRR-RLP\_7015

TGTACCAAAATAAATGAATTAACAATGATTATTTTACACTTGGCACCTAATTATTGGACTATTTTGTAA  
CAAACCTAACAGCCATTTTGCTCTTCACGTGCCTTCCTTGTGCCTAGG

>M6-PGSC0003DMG400010328-(rev)M6LRR-RLP\_7137

GAGAATCTTCTAGACCTTGTACAACCTGGTTAGGTTGAGAATCTTCTAGACCTTCTGATTAGGTTTCTAGA  
ACTTTTGTCTTTTTGGCATATGTTATTTTGGTTCTTGAAAAGAAATGT

>M6-PGSC0003DMG400010328-(rev)M6LRR-RLP\_7198

GTTTCCTAGAACCTTTTGTCTTTTTGGCATATGTTATTTTGGTTCTTGAAAAGAAATGTTGGAGAAATTCA

TTTCGGTTAGCAAGTTGGGCATGCAGCTCGAATATGTTTATATGATAAG

>M6-PGSC0003DMG400010328-(rev)M6LRR-RLP\_7259

GAGAAATTCATTTTCGGTTAGCAAGTTGGGCATGCAGCTCGAATATGTTTATATGATAAGTCACTTGTGTA  
TTCTTTTGTTCCTAATTTCTCCAAGTTAAGATTTTTCTCACAGAGAGTC

>M6-PGSC0003DMG400010328-(rev)M6LRR-RLP\_7320

ACTTGTGTATTCTTTTGTTCCTAATTTCTCCAAGTTAAGATTTTTCTCACAGAGAGTCTAGAACATGGATA  
ATGAGTAGTGGTGATTGAATATTGTTGAATTAGTCAACTTGACTAGGA

>M6-PGSC0003DMG400010328-(rev)M6LRR-RLP\_7381

GAACATGGATAATGAGTAGTGGTGATTGAATATTGTTGAATTAGTCAACTTGACTAGGAGGCATCTTAC  
ATGATAATGGGAAGTTTTTCATTCAGTCGATCAAGGAACCCATATATCCCGA

>M6-PGSC0003DMG400010328-(rev)M6LRR-RLP\_7442

CATCTTACATGATAATGGGAAGTTTTTCATTCAGTCGATCAAGGAACCCATATATCCCGAATCTTAAAATTT  
AGATCCACAACCGAGTCCGAGCAACTTAGTCTAAAATAAGTCGACCTAA

>M6-PGSC0003DMG400010328-(rev)M6LRR-RLP\_7503

CTTAAAATTTAGATCCACAACCGAGTCCGAGCAACTTAGTCTAAAATAAGTCGACCTAAACATGTTGAAA  
GAAGTTGCAATTCTCTCAGAAAATTGAGCACTCCACGTCTGTAATATTCT

>M6-PGSC0003DMG400010328-(rev)M6LRR-RLP\_7564

ATGTTGAAAGAAGTTGCAATTCTCTCAGAAAATTGAGCACTCCACGTCTGTAATATTCTTGTCCATATTCC  
CCACTTTCCTCCTCCATGTGGTAATACTTTAGAATTTGTAGAAGAACA

>M6-PGSC0003DMG400010328-(rev)M6LRR-RLP\_7625

TCCATATTCCCCTTTCTTCTCCATGTGGTAATACTTTAGAATTTGTAGAAGAACAAAGTAGAGTAGG  
AGAAGTCAAATGACAAGAGCGATTGATACAATCATGGTTCATCAGTGAT

>M6-PGSC0003DMG400010328-(rev)M6LRR-RLP\_7686

GTAGAGTAGGAGAAGTCAAATGACAAGAGCGATTGATACAATCATGGTTCATCAGTGATTGGTACATA  
GTTTTATGTTATACTGATTCCCCAAAGTTTAATTCTTTTCATTTAACTTGTG

>M6-PGSC0003DMG400010328-(rev)M6LRR-RLP\_7747

GTACATAGTTTTATGTTATACTGATTCCCCAAAGTTTAATTCTTTTCATTTAACTTGTGTCCAAGAAAAAG  
GCCTGTTCAAATTTTCTTTTATTAGCTTTACTGACTTATCTTATCAT

>M6-PGSC0003DMG400010328-(rev)M6LRR-RLP\_793

GAAGTTGTTGGTCCATCCCTCAAGTTGAGACACTTGGAGATATATAGCTGCTTCAATGTAAAATCACTTA  
AAATTTGTGATACAAATCTTATATCATTAAAGGACTTCAGCAGGAAAAGTA

>M6-PGSC0003DMG400010328-(rev)M6LRR-RLP\_7930

CGAGGCAAAGAAAGAGTGTAAAGAAAGCAGCCATAAAATGCCCACTCCATCACCTCAAAGTGGTCAAATT  
TTTGGGGTTTTATACAGGCTTATTTCAACTTGAACCTCGTTAGGTACTTTTT

>M6-PGSC0003DMG400010328-(rev)M6LRR-RLP\_7991

GTCAAATTTTTGGGGTTTTATACAGGCTTATTTCAACTTGAACCTCGTTAGGTACTTTTTGGAAAATGGTGT  
TGCTCTTGAGAAAATCATTATTGATCCAGGTACTCCATTTTTTTATCGT

>M6-PGSC0003DMG400010328-(rev)M6LRR-RLP\_8052

AAAATGGTGTGCTCTTGAGAAAATCATTATTGATCCAGGTACTCCATTTTTTTATCGTATCCCTCCGTGC  
CCTAGCGAAATCAAACACACGCAAGCTTCGAGAAATCTTGCTAAGCTCC

>M6-PGSC0003DMG400010328-(rev)M6LRR-RLP\_8174

CTTGAATGTGAAGTGCCTCCGGCTATTGAGTTGGTCATACTTTAATGAAAATAATAATGTTATTACGGTT  
AAATTTGTGATACATAACGGAGGTGAATTTTTATTTCTTAGTAGATGTTC

>M6-PGSC0003DMG400010328-(rev)M6LRR-RLP\_8235

ATTACGGTTAAATTTGTGATACATAACGGAGGTGAATTTTTATTTCTTAGTAGATGTTCCCTCATGCTTTGT  
TTCATTATTGAGTGATATTTTCACTTTTTGTGAGGTTTATATTGCTATA

>M6-PGSC0003DMG400010328-(rev)M6LRR-RLP\_8283

AGTAGATGTTCCCTCATGCTTTGTTTCATTATTGAGTGATATTTTCACTTTTTGTGAGGTTTATATTGCTATA  
TGAAATATGGGGGATTTTCAAATGAAAATGTCGCAGTTATTCCGCCA

>M6-PGSC0003DMG400010328-(rev)M6LRR-RLP\_854

AATCACTTAAAATTTGTGATACAAATCTTATATCATTAAAGGACTTCAGCAGGAAAAGTATTACTGCTTAA  
GAATGTCCCGATGCTGGTTGATGTAGAGATTTTGGGTATGCCATACACCC

>M6-PGSC0003DMG400010328-(rev)M6LRR-RLP\_915

ACTGCTTAAGAATGTCCCGATGCTGGTTGATGTAGAGATTTTGGGTATGCCATACACCCATTTATTGGAT  
GACATATCCTCTCGTCTTTTGTGCGTTCTCTCTCAGCTGGAGGTCCTTAC

>M6-PGSC0003DMG400010348-(rev)M6LRR-RLK\_0

CTCTGTCTTCATCTCTTCGTCATTAAATGCAACGTCGCCACAACCTAACCAGAAGTGATATGACATTTAGGT  
TGACATTTTTGGCAAACATCTCATAAAGGCAATATTAGCACTGAGCCAC

>M6-PGSC0003DMG400010348-(rev)M6LRR-RLK\_1037

TTCATCCACCTTACCCTTCTTTTCAGTAATAAATTATGCTCTTCTGTGAATATTTCTCTAGGGGTTTTCCCAT  
CTTTGTTTTGTTAGTGCAAAGTTTTAATGATAAACAACCTTATTCTTG

>M6-PGSC0003DMG400010348-(rev)M6LRR-RLK\_1098

GGGTTTTCCCATCTTTGTTTTGTTAGTGCAAAGTTTTAATGATAAACAACCTTATTCTTGCATCAAAAAGGA  
AAGAATCAAGAATGTGTACATCCTTGACTCTGTAAAAAACAATGGAGG

>M6-PGSC0003DMG400010348-(rev)M6LRR-RLK\_122

ATGAAGCAAGAAATGTGATAAATTCTCGTTGTTGGTTAGGATGTTGCATAATTTGTCACCTCTATATTGAT  
TCTACAGTTACTTCGCAGGGTGAATACTACTGGATATATGGATCAGAAG

>M6-PGSC0003DMG400010348-(rev)M6LRR-RLK\_1403

TAAATATGAACAATTAACCTCTCTTGAACCTATCACTTAGAAAAGGTAAATGAAAGACAAAAATGGAAGA  
AATTTTTAACAACTCTCTTGAACATTGAATAATTGAAAAATGTCAAAAGT

>M6-PGSC0003DMG400010348-(rev)M6LRR-RLK\_1464

ATGGAAGAAATTTTTAACAACTCTCTTGAACATTGAATAATTGAAAAATGTCAAAAGTTCAATTAGTAT  
GGACTAGATGGAGTAAAATATATAGTTTATATTTTATTAGTCCATATATC

>M6-PGSC0003DMG400010348-(rev)M6LRR-RLK\_1525

AATTAGTATGGACTAGATGGAGTAAAATATATAGTTTATATTTTATTAGTCCATATATCATAAAACAATTT  
TTTTTTGTTTCTAGTCAATAGTAATATGAATTTTACACATCATATTAG

>M6-PGSC0003DMG400010348-(rev)M6LRR-RLK\_1586

AAAACAATTTTTTTTTTTGTTTCTAGTCAATAGTAATATGAATTTTACACATCATATTAGGCCTCTTATTGTA  
ATTTGAAGTAATTCCATTGACCCATCCCTGTGTAACACACTTGTGGAG

>M6-PGSC0003DMG400010348-(rev)M6LRR-RLK\_1647

CTCTTATTGTAATTTGAAGTAATTCCATTGACCCATCCCTGTGTAACACACTTGTGGAGATGTGTAACACA  
TTATGAAGGGTAGAGAGGACTATTGATAGACACAAAAATCACGCCAAAA

>M6-PGSC0003DMG400010348-(rev)M6LRR-RLK\_1708

GTGTAACACATTATGAAGGGTAGAGAGGACTATTGATAGACACAAAAATCACGCCAAAATAATGGCA  
GTATTCAAATGCAAGGCCACAAGTAGTGATCAGAAAGACCAAGATTCTTGC

>M6-PGSC0003DMG400010348-(rev)M6LRR-RLK\_1769

AATGGCAGTATTCAAATGCAAGGCCACAAGTAGTGATCAGAAAGACCAAGATTCTTGCACATTTTCATT

GAAGGCAAAAAACATTTTCCCTGTAGGTCCTAATGCCATTTTCTAGTCTT

>M6-PGSC0003DMG400010348-(rev)M6LRR-RLK\_183

CTATATTGATTCTACAGTTACTTCGCAGGGTGAATACTACTGGATATATGGATCAGAAGACAATTGTGTT  
TTACGGTTTAGTGTCGAGGCGTGTGTCATGATGTCAGATTTTGTGTCAGTGG

>M6-PGSC0003DMG400010348-(rev)M6LRR-RLK\_1830

ATTTCAATTGAAGGCAAAAAACATTTTCCCTGTAGGTCCTAATGCCATTTTCTAGTCTTCACTAAAAGAAG  
TTGTTGAACTCCAAATTGTCACTCTAAACCAAAAAATACTCCAGTCATC

>M6-PGSC0003DMG400010348-(rev)M6LRR-RLK\_1891

CTAAAAGAAGTTGTTGAACTCCAAATTGTCACTCTAAACCAAAAAATACTCCAGTCATCAATTCTTGTTTT  
AGGAAAAAGAGAAACCTGTCAGTTATAGTTATGGGAAGAAGTTGCGATC

>M6-PGSC0003DMG400010348-(rev)M6LRR-RLK\_1952

TTCTTGTTTTAGGAAAAAGAGAAACCTGTCAGTTATAGTTATGGGAAGAAGTTGCGATCTTCTCTTTGCT  
CTTTGTTTTTCACTCTGCTCCATACTTCACTATCTATTAGTACTGATGA

>M6-PGSC0003DMG400010348-(rev)M6LRR-RLK\_2013

CTCTTTGCTCTTTGTTTTTCACTCTGCTCCATACTTCACTATCTATTAGTACTGATGAAGCTGCTCTTCTTG  
CCTTCAAATCTCACATTTCTTCTTCTGATCCTAACAACATCTTAGCA

>M6-PGSC0003DMG400010348-(rev)M6LRR-RLK\_2074

CTGCTCTTCTTGCCTTCAAATCTCACATTTCTTCTTCTGATCCTAACAACATCTTAGCAACCAACTGGTCTTC  
TTCCACCCCTGTTTGCACCTGGATTGGAATCACTTGCACCTCCCCAC

>M6-PGSC0003DMG400010348-(rev)M6LRR-RLK\_2196

CATCGAGTCGCAGCTTTAGACATTTCTAGTATGCAACTTCATGGTACCATTTCTCCACACCTTGGAACCT  
CTCATTTCTTGTTTCCCTCAACATTAGTAACAACCTTTCCGTGGAGAT

>M6-PGSC0003DMG400010348-(rev)M6LRR-RLK\_2257

TTGGAAACCTCTCATTTCTTGTTTCCCTCAACATTAGTAACAACCTTTCCGTGGAGATTTGCCAAAGAG  
TTGGCTCATTTGCAGAGGTTGAAATTGATTGATGTCTCAAGCAATAACT

>M6-PGSC0003DMG400010348-(rev)M6LRR-RLK\_2318

GCCCAAAGAGTTGGCTCATTTGCAGAGGTTGAAATTGATTGATGTCTCAAGCAATAACTTCACTGGTGCC  
ATTCCATCATTTTTAAGTTTGCTAGTAGACCTTTGCATTTTGCGCCTGTC

>M6-PGSC0003DMG400010348-(rev)M6LRR-RLK\_2379

ACTGGTGCCATTCCATCATTTTTAAGTTTGCTAGTAGACCTTTGCATTTTGCGCCTGTTCGAGCAACCAATT  
TTCAGGAAAAATCCCATCTTCACTTTCCAATCTAACAAAGCTGGAGGTG

>M6-PGSC0003DMG400010348-(rev)M6LRR-RLK\_244

AATTGTGTTTTACGGTTTAGTGTTCGAGGCGTGTGTCATGATGTCAGATTTTGTTCAGTGGCTTACACTTAC  
ATACATACGATTTTTTACCCTGCAGAGATACTTGTTTTAGAGCATAAGCT

>M6-PGSC0003DMG400010348-(rev)M6LRR-RLK\_2440

GCAACCAATTTTCAGGAAAAATCCCATCTTCACTTTCCAATCTAACAAAGCTGGAGGTGTTGAAAATAAA  
GGGAAATCTTCTCGAAGGAGAGATCCCTCGAGAACTTGGTGATCTTCATT

>M6-PGSC0003DMG400010348-(rev)M6LRR-RLK\_2501

GAAAATAAAGGGAAATCTTCTCGAAGGAGAGATCCCTCGAGAACTTGGTGATCTTCATTACATGACTGC  
TTTAAACCTGGGAAGTAACCACCTTACTGGCTCTATACCACCATCAATTTA

>M6-PGSC0003DMG400010348-(rev)M6LRR-RLK\_2562

ATGACTGCTTTAAACCTGGGAAGTAACCACCTTACTGGCTCTATACCACCATCAATTTATAACATTACAAC  
CATGCGAATCATTGCTCTTACCAACAATAATCTTAGTGGTGAGCTTCCA

>M6-PGSC0003DMG400010348-(rev)M6LRR-RLK\_2623

ACATTACAACCATGCGAATCATTGCTCTTACCAACAATAATCTTAGTGGTGAGCTTCCAACAACCTATATGT  
GACCATCTTCCAAACTTGGAAGGGCTTTACCTCTCAGAAAACATCCTAG

>M6-PGSC0003DMG400010348-(rev)M6LRR-RLK\_2684

AACTATATGTGACCATCTTCCAAACTTGGAAGGGCTTTACCTCTCAGAAAACATCCTAGGTGGCGTTATT  
CCACCAAACCTTGAAAAATGCAAAAACCTCAAATTTTGTTCATTGTCTGT

>M6-PGSC0003DMG400010348-(rev)M6LRR-RLK\_2745

GGCGTTATTCCACCAAACCTTGAAAAATGCAAAAACCTCAAATTTTGTTCATTGTCTGTAAACGAGTTCA  
CTGGAACCATAACCAAGAGAGTTAGGCAACATAACAGATCTTACAGATATA

>M6-PGSC0003DMG400010348-(rev)M6LRR-RLK\_2806

ACGAGTTCACTGGAACCATAACCAAGAGAGTTAGGCAACATAACAGATCTTACAGATATAGCTCTTGGAA  
TACAGCACTTGGGAGGTAGTATTGCATCTCCTAGCAAGAAATTTTGAATTT

>M6-PGSC0003DMG400010348-(rev)M6LRR-RLK\_2867

TCTTGAATACAGCACTTGGGAGGTAGTATTGCATCTCCTAGCAAGAAATTTTGAATTTTCTTCTTTTCA  
CTCTTCCACAAATTTGGTACTCATATATATATATATATATATATATATTTTC





CCATCCAAGGCTTGTCAAACCTTCAAGAACTTTACTTAGGTGGCAACATG

>M6-PGSC0003DMG400010348-(rev)M6LRR-RLK\_3599

TTCCAAAACCATCCAAGGCTTGTCAAACCTTCAAGAACTTTACTTAGGTGGCAACATGATAAAAGGAAC  
CATAACCAGATGTTATGTGCAATTTAAATAAACTTGGAGCATTAGATTTGT

>M6-PGSC0003DMG400010348-(rev)M6LRR-RLK\_366

TATACAATGAAGTAAATGATGTGCTAAACCTATTAATTATTACCAATCTCAAATAGCATTGATGAAAAAA  
TTCTCTCAAGTTTCATAAACAAACATTACAATGTTTTTGCCTGTATTTT

>M6-PGSC0003DMG400010348-(rev)M6LRR-RLK\_3660

AAAAGGAACCATAACCAGATGTTATGTGCAATTTAAATAAACTTGGAGCATTAGATTTGTCAAAAAATCAA  
GCTTCTGGTTCCATAACCACCATGCTTAGGGAACGTTACCAATTTGAGGTA

>M6-PGSC0003DMG400010348-(rev)M6LRR-RLK\_3782

TTTATCTAGCTAACAAACAGGCTGAACTGGACCTTACCTTCAAGCTTGGGGAGCCTTCAAGATCTCCTAGA  
ATTCAATGTTTCGTCCAATTTATTAAGTGGGGAAGTTCCTATAGAGATTG

>M6-PGSC0003DMG400010348-(rev)M6LRR-RLK\_3843

TCTCCTAGAATTCAATGTTTCGTCCAATTTATTAAGTGGGGAAGTTCCTATAGAGATTGGAAATTTAAAG  
GTTGCAACACTAGTTGATCTGTCAAAAAATGATTTTAATGGTAAGATCCC

>M6-PGSC0003DMG400010348-(rev)M6LRR-RLK\_3904

AATTTAAAGGTTGCAACACTAGTTGATCTGTCAAAAAATGATTTTAATGGTAAGATCCCTAGCACACTAG  
GGGGTCTGGATAGAATGCTTAGTCTTTCTCTAGCACATAATAAATTATAT

>M6-PGSC0003DMG400010348-(rev)M6LRR-RLK\_3965

GCACACTAGGGGGTCTGGATAGAATGCTTAGTCTTTCTCTAGCACATAATAAATTATATGGGCCTATTCC  
AGATTCATTTGGCAAAATGCTGGCCTTGAATTCTTGGATTTGAGCAATA

>M6-PGSC0003DMG400010348-(rev)M6LRR-RLK\_4026

GCCTATTCCAGATTCATTTGGCAAAATGCTGGCCTTGAATTCTTGGATTTGAGCAATAACAACTTAGT  
GGTGAAATTCCAAAGTCATTAGAAGCTCTCGTGTATCTCAAATACTTGAA

>M6-PGSC0003DMG400010348-(rev)M6LRR-RLK\_4148

TCTCATTTAATGAACTCAGTGGAGAGATTCCCACGGGTGGTCTTTTGC AAATGCCACAAGTCAATCTTT  
CTTGAAAAATTATGCCCTTTGTGGCGACTCTAAGTTTCATGTTTCACCAT

>M6-PGSC0003DMG400010348-(rev)M6LRR-RLK\_4209

TCAATCTTTCTTGAAAAATTATGCCCTTTGTGGCGACTCTAAGTTTCATGTTTCACCATGCATCATCAAATC  
TCCCAAGAGGTCAAAGAAAAAAAAGGCAATATTGGTTTTGGGAGTGGG

>M6-PGSC0003DMG400010348-(rev)M6LRR-RLK\_427

ATGAAAAAATTCTCTCAAGTTTCATAAACAAACATTACAATGTTTTGCACTGTATTTTACTGACAATAAG  
AAGATACTCCTATGTGAAACCGTCATCAGCAATGAAGGCTCTGTTGTTA

>M6-PGSC0003DMG400010348-(rev)M6LRR-RLK\_4270

ATCATCAAATCTCCCAAGAGGTCAAAGAAAAAAAAGGCAATATTGGTTTTGGGAGTGGGTATGCTTTTT  
CTTGCAATTAGCCCTCACATATGTATTTTTGAGATTGAGAAAGAAAAAAAAG

>M6-PGSC0003DMG400010348-(rev)M6LRR-RLK\_4331

TGCTTTTTCTTGCAATTAGCCCTCACATATGTATTTTTGAGATTGAGAAAGAAAAAAAAGAATGCAGGTCA  
ATCTGATATGTCTCTGATAAAATGTCATGAAAGAATTCCTATTATGAAC

>M6-PGSC0003DMG400010348-(rev)M6LRR-RLK\_4392

TGCAGGTCAATCTGATATGTCTCTGATAAAATGTCATGAAAGAATTCCTATTATGAACTTTAACAAGCA  
ACCGAAAGATTCAGTGAAAGCAACTTGCTTGGTAACGGGAACTTCTGCAA

>M6-PGSC0003DMG400010348-(rev)M6LRR-RLK\_4453

TAACAAGCAACCGAAAGATTCAGTGAAAGCAACTTGCTTGGTAACGGGAACTTCTGCAAGGTCTACAAA  
GGGAGACTAAAGGATGGTACTCTTTTGGCAGCAAAGGTATTCAATGTGCAA

>M6-PGSC0003DMG400010348-(rev)M6LRR-RLK\_4575

GGAGGGTGCATTCAAAGTTTTGATACAGAATGTGAGATGTTGCGCAACCTCCGCCACCGAAATCTGAC  
CAAAGTCATCACCAGTTGCTCCAACCTTGATTTCAAAGCCTTAGTGTTGGA

>M6-PGSC0003DMG400010348-(rev)M6LRR-RLK\_4636

AATCTGACCAAAGTCATCACCAGTTGCTCCAACCTTGATTTCAAAGCCTTAGTGTTGGAATACATGTCCA  
ATGGGACACTTGATAAATGGCTATACTCTCACAACCTGTTCTTGGATTTA

>M6-PGSC0003DMG400010348-(rev)M6LRR-RLK\_4697

ACATGTCCAATGGGACACTTGATAAATGGCTATACTCTCACAACCTGTTCTTGGATTTATTTTCAGAGATTA  
GATATAATGATAGATGTTGCATCTGCAATGGTATATCTCCACAGTGGTT

>M6-PGSC0003DMG400010348-(rev)M6LRR-RLK\_4758

TCAGAGATTAGATATAATGATAGATGTTGCATCTGCAATGGTATATCTCCACAGTGGTTGTTCAAATCCG  
GTGGTGCATTGTGACTTAAAGCCAAGCAATGTCTTGCTAGATCAAGACAT

>M6-PGSC0003DMG400010348-(rev)M6LRR-RLK\_488

TGACAATAAGAAGATACTCCTATGTGAAACCGTCATCAGCAATGAAGGCTCTGTTGTTAAGAGAATTTGT  
GCTTTCCCGATCTAAAGAGAAACTTGGACCAATATGTTGATTTTGCCATA

>M6-PGSC0003DMG400010348-(rev)M6LRR-RLK\_4880

TTGGCCATGTCAGTGATTTTGGAAATTGCAAAATTGTTAGGTGCAGGGGAGACTTTTGTCCAAACAAGGA  
CAATAGCAACCATTGGATATATTGCTCCAGGTATTAACACTTTTACATCTT

>M6-PGSC0003DMG400010348-(rev)M6LRR-RLK\_549

AGAATTTGTGCTTTCCCGATCTAAAGAGAAACTTGGACCAATATGTTGATTTTGCCATATCAAGCCATAA  
TTTATACTGTAAACACCCAAATAAAGCCACAGGAACACCAACACAAGCAG

>M6-PGSC0003DMG400010348-(rev)M6LRR-RLK\_61

ACATTTAGGTTGACATTTTGGCAAACATCTCATAAAGGCAATATTAGCACTGAGCCACTGATGAAGCAA  
GAAATGTGATAACTTCTCGTTGTTGGTTAGGATGTTGCATAATTTGTCAC

>M6-PGSC0003DMG400010348-(rev)M6LRR-RLK\_610

AAGCCATAATTTATACTGTAAACACCCAAATAAAGCCACAGGAACACCAACACAAGCAGCAATGAGCTT  
TGGCTCCCAACCAATATGATTACTATAGACCAAAAAGAATGTTGCTGCAAA

>M6-PGSC0003DMG400010348-(rev)M6LRR-RLK\_671

ATGAGCTTTGGCTCCCAACCAATATGATTACTATAGACCAAAAAGAATGTTGCTGCAAAAGCCAAGAGC  
ATGCTAACTATTGAGACAAACAGCATTGTGAGTCCAAACAATAACTTGGCT

>M6-PGSC0003DMG400010348-(rev)M6LRR-RLK\_732

CCAAGAGCATGCTAACTATTGAGACAAACAGCATTGTGAGTCCAAACAATAACTTGGCTGGCAACGACA  
CAAGAAAATCACCTTCAGCATAGTGGGATGTCACAATGGACAAGAACATAA

>M6-PGSC0003DMG400010348-(rev)M6LRR-RLK\_793

CAACGACACAAGAAAATCACCTTCAGCATAGTGGGATGTCACAATGGACAAGAACATAATGATGGAAA  
CTATTGAGGTGAATAGTGCCACTGCATCTGAATTGACAAAGATCCTAAATCC

>M6-PGSC0003DMG400010348-(rev)M6LRR-RLK\_854

ATGGAACTATTGAGGTGAATAGTGCCACTGCATCTGAATTGACAAAGATCCTAAATCCATACAATTTTA  
GCAATATCAGAATGCAATTATCACTGTTATTACCGCCTGGCACAGTGAAT

>M6-PGSC0003DMG400010348-(rev)M6LRR-RLK\_915

ACAATTTTAGCAATATCAGAATGCAATTATCACTGTTATTACCGCCTGGCACAGTGAATCCAGCAGCAAA

GACCATGGTGGTAATCAAAGTAGCGATAATCATACAAGAATTTGCAGTGT

>M6-PGSC0003DMG400010348-(rev)M6LRR-RLK\_976

AGCAGCAAAGACCATGGTGGTAATCAAAGTAGCGATAATCATACAAGAATTTGCAGTGTCTTTCATCCA  
CCTTTACCCTTCTTTCAGTAATAACTTATGCTCTTCTGTGAATATTTCTCT

>M6-PGSC0003DMG400010350-(rev)M6LRR-RLK\_0

TTTCTTTCATTTTTATCTTCCGCCAAATTGGTACTAATCATGTATTTTCCTCACTTAACAGGAGAGATTCCA  
GCAAGCATTTCTAACATGTCAGAACTGCAGAACCTAGGATTTGCAAGA

>M6-PGSC0003DMG400010350-(rev)M6LRR-RLK\_1116

TGCCGAGAATCCCTTGGACGGTTTTTGCCTGCCTCCATTGAAAATTTCTCTGATTCTCTGCAAATTTTCCA  
AGGATGGTATTGTAAACTGAAAGGCTTCATTCCCGGAGAAATTGGCAA

>M6-PGSC0003DMG400010350-(rev)M6LRR-RLK\_1302

CCAAGGCTTGTGCAACCTTCAAGAACTTAAGTTAGGTGGCAACATGATAAAAGGAATCATACCAGATGT  
TATCTGCAATTTATATAATCTTGGAGCATTAGATTTGTCAGGAAATCAAGT

>M6-PGSC0003DMG400010350-(rev)M6LRR-RLK\_1364

CAGATGTTATCTGCAATTTATATAATCTTGGAGCATTAGATTTGTCAGGAAATCAAGTTTCTGGTTCCATA  
CCGCCATGCTTAGGGAACACTACCAGTTTGAGGTATCTTTATCTAGCTA

>M6-PGSC0003DMG400010350-(rev)M6LRR-RLK\_1426

GGTCCATACCGCCATGCTTAGGGAACACTACCAGTTTGAGGTATCTTTATCTAGCTAACAACAGGCTGA  
ATTTGAGCTTACCTTCAAGCTTGTGGACTCTTCAAGATCTCATAAAATTC

>M6-PGSC0003DMG400010350-(rev)M6LRR-RLK\_1488

CAGGCTGAATTTGAGCTTACCTTCAAGCTTGTGGACTCTTCAAGATCTCATAAAATTCATGTTTCGTCCA  
ATTTATTAAGTGGGAAAGTTCCTATTGAGATTGGAAATTTAAAGGTTGC

>M6-PGSC0003DMG400010350-(rev)M6LRR-RLK\_1550

TTTCGTCCAATTTATTAAGTGGGAAAGTTCCTATTGAGATTGGAAATTTAAAGGTTGCAACACTAGTTGA  
TCTGTCAAAAAATGATTTTAGTGGTAAGATCCCTAGCACGCGGGGGTCTG

>M6-PGSC0003DMG400010350-(rev)M6LRR-RLK\_1612

CTAGTTGATCTGTCAAAAAATGATTTTAGTGGTAAGATCCCTAGCACGCGGGGGTCTGGATAGATTGAT  
GAAACTTTCTCTAGCACATAATAAATTAGATGGGCCTATTCCAGATTCATT

>M6-PGSC0003DMG400010350-(rev)M6LRR-RLK\_1674

GATTGATGAACTTTCTCTAGCACATAATAAATTAGATGGGCCTATTCCAGATTCATTTGGCAAATGCT  
GGCCTTAGAATTCTTGGATTTGAGCAATAACAATCTAACCGGTGAAATTC

>M6-PGSC0003DMG400010350-(rev)M6LRR-RLK\_1736

AAAATGCTGGCCTTAGAATTCTTGGATTTGAGCAATAACAATCTAACCGGTGAAATTCCAAAGTCATTAG  
AAGCTCTTGTGTATCTCAAATACTTGAAGTTCTCATTTAATGAACTTAGT

>M6-PGSC0003DMG400010350-(rev)M6LRR-RLK\_1798

GTCATTAGAAGCTCTTGTGTATCTCAAATACTTGAAGTTCTCATTTAATGAACTTAGTGGAGAGATTCCCA  
CGGGTGGTCCTTTTGCAAATGCCACAAGTCGATCTTTCTTGAAAAATTA

>M6-PGSC0003DMG400010350-(rev)M6LRR-RLK\_1922

CTTTGTGGTGAAGTCTAAGTTTCATGTTTCACCATGCGTCATCAAATCTCCGAAGAAGTCAAAGAGAAAAA  
AGATAATCTTGGTTTTGTACATCCTTTTGGGAGTGGGTATGCTATTTCTT

>M6-PGSC0003DMG400010350-(rev)M6LRR-RLK\_1984

GAGAAAAAAGATAATCTTGGTTTTGTACATCCTTTTGGGAGTGGGTATGCTATTTCTTGCATTAGCCCTC  
GCATATGTATTTTTAAGATGGAGAAAGATAAAGAAGAATGCAGATCAAGC

>M6-PGSC0003DMG400010350-(rev)M6LRR-RLK\_2046

TAGCCCTCGCATATGTATTTTTAAGATGGAGAAAGATAAAGAAGAATGCAGATCAAGCAGATGTCTTTC  
CCGTAAAAGGGAAACGTGAAAGAATTTCTTACTATGAACTTGAACAAGCAA

>M6-PGSC0003DMG400010350-(rev)M6LRR-RLK\_2108

GTCTTTCCCGTAAAAGGGAAACGTGAAAGAATTTCTTACTATGAACTTGAACAAGCAACAGAAGGATTC  
GATGAAAGCAACTTGCTTGGTAGTGGGAGTTTCAGCAAGGTTTTCAAAGGG

>M6-PGSC0003DMG400010350-(rev)M6LRR-RLK\_2161

AGCAACAGAAGGATTCGATGAAAGCAACTTGCTTGGTAGTGGGAGTTTCAGCAAGGTTTTCAAAGGGA  
TATTTAAGGATGGTACTCTTTTGGCAGCAAAGGTATTCAATGTGCAATTGGA

>M6-PGSC0003DMG400010350-(rev)M6LRR-RLK\_62

AGAGATTCCAGCAAGCATTCTAACATGTCAGAAGTGCAGAAGCTAGGATTTGCAAGAAACAGGCTTTC  
AGGTAATTGTTGTGTAACAAAAAATCTGAAGTGTATGTAAATATATGAC

>M6-PGSC0003DMG400010350-(rev)M6LRR-RLK\_620

GCCCACATTTTACATTTTACATTCTCAAGTACTAACATGTCAACTCATATTTCCCTCTTGACAGGAG  
AGATACCAATGGAAGTACTAGGTTATCTTCAGAACTACTGTTTCTGGCAT

>M6-PGSC0003DMG400010350-(rev)M6LRR-RLK\_806

TAGGAATTGCAGAAAACAGGCTTTCAGGTACTCTACCTTCAGATTTAGGTCGTGGAATGCCCAACCTAG  
ACGGATTCTATTGTTATCAGAATAGTTTGAGTGGTTTTCTCCCTGCTTCTA

>M6-PGSC0003DMG400010350-(rev)M6LRR-RLK\_868

AACCTAGACGGATTCTATTGTTATCAGAATAGTTTGAGTGGTTTTCTCCCTGCTTCTATCTCAAATTCTTCA  
AGACTCAGAGTACTTGAACTCTCATATAACAGTTTCACAGGCCCAATT

>M6-PGSC0003DMG400010350-(rev)M6LRR-RLK\_930

AAATTCTTCAAGACTCAGAGTACTTGAACTCTCATATAACAGTTTCACAGGCCCAATTCCTGAATCAGTTA  
GTGACTTAGAATACATTGAGTTTTGAACTTAGGGGCGAATAATTTTGT

>M6-PGSC0003DMG400010350-(rev)M6LRR-RLK\_992

AATCAGTTAGTGACTTAGAATACATTGAGTTTTGAACTTAGGGGCGAATAATTTTGTGTCAGCAATTCAGC  
ATTGAGCTTCTTGACATCTTTGGCAAAGTGTAGGAAACTGAAAGAAATCA

>M6-PGSC0003DMG400010351-(rev)M6LRR-RLK\_2542

CTTGGTAACGGAACTTCTGCAAGGTCTACAAAGGGAGACTAAAGGATGGTACTCTTTTGGCAGCAAAG  
GTATTCAATGTGCAATTGGAGGGTGCATTCAAAGTTTTGATACAGAATGT

>M6-PGSC0003DMG400010351-(rev)M6LRR-RLK\_2852

TATATCTCCACAGTGGTTGTTCAAATCCGGTGGTGCATTGTGACTTAAAGCCAAGCAATGTCTTGCTAGA  
TCAAGACATGGTTGGCCATGTCAGTGATTTTGGAAATTGCAAATTTGTTAG

>M6-PGSC0003DMG400010400M6LRR-RLK\_0

GGCATTAAATCGAGCCTTCGATTGGAACCTCACCACATTTTGTCCAGAAATTGGAGCTCAGACACACAC  
TTCTGCAGCTGGTATGGAGTTTCATGCTTGCACCAGAGAGTTGTAGCTTT

>M6-PGSC0003DMG400010400M6LRR-RLK\_1037

GCAATGCTTCAAAGCTTGAAAATCTTGAAGTTGCAAACAATAGTTTTACCGGACCGATTCCCATGATGTT  
AGGTAACCTGGTGGACCTTATAACTCTAAATCTGCAAATAATCTGTTGG

>M6-PGSC0003DMG400010400M6LRR-RLK\_1098

CATGATGTTAGGTAACCTGGTGGACCTTATAACTCTAAATCTGCAAATAATCTGTTGGAGAACAATCCT  
GGAGCCACACAACCTTGACTTCTTGAATTCATTGGTAACCAGCAGGAATCT

>M6-PGSC0003DMG400010400M6LRR-RLK\_1159

AACAATCCTGGAGCCACACAACCTTGACTTCTTGAATTCATTGGTAACCAGCAGGAATCTGGTGTACCTGA

TTCTTGCATCTAATCCTTTGAATGGAATTTTTACGGAATCAATAGGAAAT

>M6-PGSC0003DMG400010400M6LRR-RLK\_1220

TGTACCTGATTCTTGCATCTAATCCTTTGAATGGAATTTTTACGGAATCAATAGGAAATTTATCAAGCAAT

ATCAGGGTCCTTGATGCATTCGACTGTGGAATTAGAGGCAGTATGCCAA

>M6-PGSC0003DMG400010400M6LRR-RLK\_1281

ATCAAGCAATATCAGGGTCCTTGATGCATTCGACTGTGGAATTAGAGGCAGTATGCCAACAAACATTGG

AAACTTAAGTGGCTTGATTTTCCTGGGATTAGCAAGTAATAACATTGTCTGG

>M6-PGSC0003DMG400010400M6LRR-RLK\_1342

AACATTGGAAACTTAAGTGGCTTGATTTTCCTGGGATTAGCAAGTAATAACATTGTCTGGTAATGTGCCCC

CCTCGTTTGTGGCCTGCAAACCTGGAAAGGCTGTATCTTACTAGAAAT

>M6-PGSC0003DMG400010400M6LRR-RLK\_1403

ATGTGCCCCCTCGTTTGTGGCCTGCAAACCTGGAAAGGCTGTATCTTACTAGAAATAAATTAGAAGG

GACATTTCCAGCTGAACTGTGCAGCATAGGAAGATTAGGTCTACTGCATT

>M6-PGSC0003DMG400010400M6LRR-RLK\_1464

ATTAGAAGGGACATTTCCAGCTGAACTGTGCAGCATAGGAAGATTAGGTCTACTGCATTTGGGAGAAAA

CAGACTGTCAGGAGAAGTACCCTCGTGTATCGGAAATCTGACTGAATTAAG

>M6-PGSC0003DMG400010400M6LRR-RLK\_1525

GGAGAAAACAGACTGTCAGGAGAAGTACCCTCGTGTATCGGAAATCTGACTGAATTAAGAGTAATGTCA

ATTGCTGCCAACAAATTTAGCTCAAAGTTACCTTCAAGTTTCTGGAGATTA

>M6-PGSC0003DMG400010400M6LRR-RLK\_1586

TAATGTCAATTGCTGCCAACAAATTTAGCTCAAAGTTACCTTCAAGTTTCTGGAGATTAGTAAAGCTTGAT

GATCTGAACTTATCGAGAAACCTGCTGCATGGTTTCTTCCCTTCTGATG

>M6-PGSC0003DMG400010400M6LRR-RLK\_1647

AAAGCTTGATGATCTGAACTTATCGAGAAACCTGCTGCATGGTTTCTTCCCTTCTGATGTGGGAACTCTG

AACGCAATGAGGATCATGGACCTCTCTTTCAATAGGTATTTTGGTGAAT

>M6-PGSC0003DMG400010400M6LRR-RLK\_1708

GGAECTCTGAACGCAATGAGGATCATGGACCTCTCTTTCAATAGGTATTTTGGTGAATACCCAATTCCA

TAGGATCTCTTCAATATCTAGTTTCACTAGATATGTCAAGAAATGCATTA

>M6-PGSC0003DMG400010400M6LRR-RLK\_1769



CCAATTCCATAGGATCTCTTCAATATCTAGTTTCACTAGATATGTCAAGAAATGCATTACAAGGTCCCATA  
CCGGCCACATTTAGCAATCTAATAGTTCTTGAGGCTCTGGATTTGTCTA

>M6-PGSC0003DMG400010400M6LRR-RLK\_183

TGCTCTTCTTGACCTTAGTAGCAATGATTTGAATGGCAATTTACCAAGTGAGTTGGGCTTCTTGCAACAA  
CTGAGACTTTTTAATGTGACTGGGAATTCTCTTGATGGAACTATTCCTCT

>M6-PGSC0003DMG400010400M6LRR-RLK\_1830

AGGTCCCATACCGGCCACATTTAGCAATCTAATAGTTCTTGAGGCTCTGGATTTGTCTACTAATGCTCTAT  
CAGGTGTGATTCCCAAATCTCTTGAGCTATTGCGAGATCTCAAGTATCT

>M6-PGSC0003DMG400010400M6LRR-RLK\_1891

AATGCTCTATCAGGTGTGATTCCCAAATCTCTTGAGCTATTGCGAGATCTCAAGTATCTCAATGTTTCTTT  
CAATAACTTGCAAGGAGAAGTTCCAAAGAAAGGGGTATTTGCAAATGTT

>M6-PGSC0003DMG400010400M6LRR-RLK\_1952

ATGTTTCTTTCAATAACTTGCAAGGAGAAGTTCCAAAGAAAGGGGTATTTGCAAATGTTAATTACCGGTT  
CTTGATGGGAAATCCAAGACTTTGTGGAGCACCTGACTTATATATTCCTA

>M6-PGSC0003DMG400010400M6LRR-RLK\_2013

TTACCGGTTCTTGATGGGAAATCCAAGACTTTGTGGAGCACCTGACTTATATATTCCTATATGTCCAGCTC  
AAGGTAGAAAGACAACAAGGAAAAAGTCCATTATTCTTAGAACAGCAGT

>M6-PGSC0003DMG400010400M6LRR-RLK\_2074

TGTCCAGCTCAAGGTAGAAAGACAACAAGGAAAAAGTCCATTATTCTTAGAACAGCAGTACCTGTTGCT  
GTAACATTTCTGATATTGGTCGCGTTGTTTTTACATGGATGATTTGGTCA

>M6-PGSC0003DMG400010400M6LRR-RLK\_2135

CTGTTGCTGTAACATTTCTGATATTGGTCGCGTTGTTTTTACATGGATGATTTGGTCAAGAAAAAACAT  
GCGATTGGAAACAATGAATCGGATTACCCTCCTAGAATTGCACATCAGA

>M6-PGSC0003DMG400010400M6LRR-RLK\_2196

AAAAAACATGCGATTGGAAACAATGAATCGGATTACCCTCCTAGAATTGCACATCAGAAAATCACTTAT  
TATGAGCTTCTCCAAGCTACAGAAAATTTAGTCAGTCCAAGCTAATAGG

>M6-PGSC0003DMG400010400M6LRR-RLK\_2257

ATCACTTATTATGAGCTTCTCCAAGCTACAGAAAATTTAGTCAGTCCAAGCTAATAGGAAGTGGAAGTT  
CCGGTACAGTCTACCAAGGTACATTTTCTGGTGGTGCTGTCTTTGCAATC

>M6-PGSC0003DMG400010400M6LRR-RLK\_2318

GTGGAAGTTCCGGTACAGTCTACCAAGGTACATTTTCTGGTGGTGTCTTTGCAATCAAAGTTTTTGA  
TATGCAATGGCAACGGGGTTTAAGAAATTTTGATTCAGAATGTGAAATTT

>M6-PGSC0003DMG400010400M6LRR-RLK\_2379

AGTTTTTGATATGCAATGGCAACGGGGTTTAAGAAATTTTGATTCAGAATGTGAAATTTTGAGCAATGTA  
AGACACAGAACTTGGTCAAGATAGTGTGACTTGTTCAAATTTGGATTT

>M6-PGSC0003DMG400010400M6LRR-RLK\_244

TTGCAACAACCTGAGACTTTTTAATGTGACTGGGAATTCTCTTGATGGAACTATTCCTCTGAATATAAGCC  
GTTGTCGTGTACTGCAAGAACTTCATTTATCAGATAACATGATCAAAGGA

>M6-PGSC0003DMG400010400M6LRR-RLK\_2440

AGCAATGTAAGACACAGAACTTGGTCAAGATAGTGTGACTTGTTCAAATTTGGATTTACAGCAATTG  
TGCTGGAGTACATGCCTAATGGAAGCTTAGACAAAAGATTATACTCTGAT

>M6-PGSC0003DMG400010400M6LRR-RLK\_2501

CAGCAATTGTGCTGGAGTACATGCCTAATGGAAGCTTAGACAAAAGATTATACTCTGATGAAAATTGCTT  
GAGCCTGGTTGAAAGACTCAATATAATGATCGATGTAGCACTAGCCATGG

>M6-PGSC0003DMG400010400M6LRR-RLK\_2562

AAATTGCTTGAGCCTGGTTGAAAGACTCAATATAATGATCGATGTAGCACTAGCCATGGAGTATCTTCAT  
CATGATTATACAGTGCCATTGTGCACTGTGATCTGAAGCCAGGTAACGT

>M6-PGSC0003DMG400010400M6LRR-RLK\_2623

TATCTTCATCATGATTATACAGTGCCATTGTGCACTGTGATCTGAAGCCAGGTAACGTGCTTCTTGATCA  
GGATCTGACTGCTCATGTTGCAGATTTTGGAAATTGCAAAAATGTTGGCA

>M6-PGSC0003DMG400010400M6LRR-RLK\_2684

TTCTTGATCAGGATCTGACTGCTCATGTTGCAGATTTTGGAAATTGCAAAAATGTTGGCACAAGAAGGAA  
ACATGGCTCAAACCAAGACTCTCGGAACTATTGGTTACATTGCTCCAGGTA

>M6-PGSC0003DMG400010400M6LRR-RLK\_2745

AGAAGGAAACATGGCTCAAACCAAGACTCTCGGAACTATTGGTTACATTGCTCCAGGTATGATAATGTC  
TTGAAATGAAGGTGTCCTATGCTGGTTACTTTTTTCTTTATGTCTACCAT

>M6-PGSC0003DMG400010400M6LRR-RLK\_2806

ATAATGTCTTGAAATGAAGGTGTCCTATGCTGGTTACTTTTTTCTTTATGTCTACCATAGCTTTATACTGT

AACATGGATAACTACACATTTTAACTGGGAATTTGTTGAAACAGAATA

>M6-PGSC0003DMG400010400M6LRR-RLK\_2867

CTTTATACTGTAACATGGATAACTACACATTTTAACTGGGAATTTGTTGAAACAGAATATGGTTTAGACG

GGCAAATTTCCACTAGCAGTGATGTTTATAGCTTTGGGATTTTGTGCTT

>M6-PGSC0003DMG400010400M6LRR-RLK\_2928

GTTTAGACGGGCAAATTTCCACTAGCAGTGATGTTTATAGCTTTGGGATTTTGTGCTTGAGACATTCAC

AAGAAAGAAGCCTACAGATGACTTGTTTAGCGGAGACTTAAGCTTGCATA

>M6-PGSC0003DMG400010400M6LRR-RLK\_2989

GACATTCACAAGAAAGAAGCCTACAGATGACTTGTTTAGCGGAGACTTAAGCTTGCATAAATGGACATC

TCTCTCCTTTCTGATGCTGTACTGGATATTCTGGATGCTGACCTTGTTAG

>M6-PGSC0003DMG400010400M6LRR-RLK\_305

ATATAAGCCGTTGTCGTGTACTGCAAGAACTTCATTTATCAGATAACATGATCAAAGGAAGCATACTCA

AGAACTTGGTCGTTAAGTCAACTTAGAATTTTGCCTCAACGACAATA

>M6-PGSC0003DMG400010400M6LRR-RLK\_3050

TGGACATCTCTCTCCTTTCTGATGCTGTACTGGATATTCTGGATGCTGACCTTGTTAGCGACATTGGCTT

TACAATTGATGAAAACCAAAGCCAAATCAAACAATTGCTGGTTTTGATA

>M6-PGSC0003DMG400010400M6LRR-RLK\_3111

ACATTGGCTTTACAATTGATGAAAACCAAAGCCAAATCAAACAATTGCTGGTTTTGATAATAAATGTTGC

ATTCTGTGTTTGAAAGAGTTGCCAGAGGAAAGGATAAACATGAGAGAGG

>M6-PGSC0003DMG400010400M6LRR-RLK\_3172

AAATGTTGCATTCCTGTGTTTGAAAGAGTTGCCAGAGGAAAGGATAAACATGAGAGAGGTTGTGGTGC

AGCTAAACAAGATAAGAGCTGAATTAACCAAGCTTTTAACTCAATCCCATTC

>M6-PGSC0003DMG400010400M6LRR-RLK\_3233

GTGGTGCAGCTAAACAAGATAAGAGCTGAATTAACCAAGCTTTTAACTCAATCCCATTCAAATTTGAGA

AAGAGGATTGATGCAGCAACAACCAAATTCAGTTTTCCACCTTCTATGGC

>M6-PGSC0003DMG400010400M6LRR-RLK\_3270

AGCTTTTAACTCAATCCCATTCAAATTTGAGAAAGAGGATTGATGCAGCAACAACCAAATTCAGTTTTC

CACCTTCTATGGCCTGTCAAACATCTGTTATTTCTTAACATTTTCTTTC

>M6-PGSC0003DMG400010400M6LRR-RLK\_366

CATACCTCAAGAACTTGGTCGTTTAAGTCAACTTAGAATTTTGGCTCTCAACGACAATAATCTGACAGGA  
AAGATTCCACCTTTATTAGGAACTTATCAAAGCTGGAATATTTTTATCT

>M6-PGSC0003DMG400010400M6LRR-RLK\_427

CTGACAGGAAAGATTCCACCTTTATTAGGAACTTATCAAAGCTGGAATATTTTTATCTGCATGAAAATG  
ATTTGGAAGGTGAAATACCTGATGAAATTGGTGATCTTACCAATTTGAGG

>M6-PGSC0003DMG400010400M6LRR-RLK\_488

ATGAAAATGATTTGGAAGGTGAAATACCTGATGAAATTGGTGATCTTACCAATTTGAGGCTCCTTTCCTT  
TCGTGGCAATGACTTCACTGGATCGATACCTGCTTCAATTTTCAATATTT

>M6-PGSC0003DMG400010400M6LRR-RLK\_549

CCTTTCCTTTCGTGGCAATGACTTCACTGGATCGATACCTGCTTCAATTTTCAATATTTCAAGATTACAAAT  
TGTGGATCTCTCGATAAATGCCTTATCAGGGGAACTTCCAAGTGATTT

>M6-PGSC0003DMG400010400M6LRR-RLK\_61

GACACACTTCTGCAGCTGGTATGGAGTTTCATGCTTGCACCAGAGAGTTGTAGCTTTGCAACTTCCTA  
ATTTGGCCATTCAAGGCAGAGTTTCTTCAGAAATTGCCAACTTGACTCAA

>M6-PGSC0003DMG400010400M6LRR-RLK\_610

AGATTACAAATTGTGGATCTCTCGATAAATGCCTTATCAGGGGAACTTCCAAGTGATTTGGGTAATTATC  
TTCCTATCCTTGAACATCTTTTTCTGGACAGCAACAGGATCACGGGGAAA

>M6-PGSC0003DMG400010400M6LRR-RLK\_671

GTAATTATCTTCTATCCTTGAACATCTTTTTCTGGACAGCAACAGGATCACGGGGAAAATCCCGGTTTCT  
TTATCAAATGCATCAAAGATTACTCATCTCTTCTTTACTGAAAATGATG

>M6-PGSC0003DMG400010400M6LRR-RLK\_732

CCCGGTTTCTTATCAAATGCATCAAAGATTACTCATCTCTTCTTTACTGAAAATGATGTGCAAGGAAATA  
TTCAAATGAGTTTGGTAAGTTGCATGAACTAGTCTGGTTTGAATTTGA

>M6-PGSC0003DMG400010400M6LRR-RLK\_793

CAAGGAAATATCCAAATGAGTTTGGTAAGTTGCATGAACTAGTCTGGTTTGAATTTGAATATAATCGAA  
TTTCTGGTACCATTCCATCCAGCTTATTCAATATTTGCTCTCTTGAATC

>M6-PGSC0003DMG400010400M6LRR-RLK\_854

ATAATCGAATTTCTGGTACCATTCCATCCAGCTTATTCAATATTTGCTCTCTTGAATCCTCAAAGCCAGG  
CATAATTAATAATGGGCATCTTCCATATGATCTTGGTACTTGGCTAC

>M6-PGSC0003DMG400010400M6LRR-RLK\_915

CAAAGCCAGGCATAATTACTTAAATGGGCATCTCCATATGATCTTGGTACTTGGCTACCTAACTTGCAG  
GAGATTTTCCTTTACACAACCAATTCAGTGGAGATCTACCCGCTGCAAT

>M6-PGSC0003DMG400010400M6LRR-RLK\_976

AACTTGCAGGAGATTTTCCTTTACACAACCAATTCAGTGGAGATCTACCCGCTGCAATATGCAATGCTT  
CAAAGCTTGAAAATCTTGAAGTTGCAAACAATAGTTTTACCGGACCGATT

>M6-PGSC0003DMG400010427M6RLKWAX-EGF\_0

TTCTAGCTTATTGGCTAACTCTTGTCACTCCTATCTCCACAGGTGTATTCATAAGTATCGGAGTACTGCTA  
CTACTGTTTGGGAGCTATTTATTGTACAAAACAATCAAGAAGAGAAGGA

>M6-PGSC0003DMG400010427M6RLKWAX-EGF\_1008

GTTGCATGAACTTGAATGGTAAGAAAAGGCCTACTATGAAGGAAGTAACTACAGCATTGGAAGCCATCA  
GATCACAAATGCAATCTACAGCAGTAACAAATTTCAACTGGATAAGGGTG

>M6-PGSC0003DMG400010427M6RLKWAX-EGF\_1071

CCATCAGATCACAAATGCAATCTACAGCAGTAACAAATTTCAACTGGATAAGGGTGTACAGCAGAAA  
GAACTGTGATATCAGAAGTAACTACACATGGACAAACACAAGTACCTCAT

>M6-PGSC0003DMG400010427M6RLKWAX-EGF\_1134

CAGAAAGAACTGTGATATCAGAAGTAACTACACATGGACAAACACAAGTACCTCATCATCAGATATCC  
ATCCATTGTTGTTTGAACTAGTTAATTACTCCCTCTATCGGAGAAAG

>M6-PGSC0003DMG400010427M6RLKWAX-EGF\_1188

CATCATCAGATATCCATCCATTGTTGTTTGAACTAGTTAATTACTCCCTCTATCGGAGAAAGAATGT  
GTGTGTCTGTTTGTTCGACTTTACAATAGTTTAAATGTCTACTTCTACA

>M6-PGSC0003DMG400010427M6RLKWAX-EGF\_126

GACAGAAACAAAAGTTTTTCAAGCGAAATGGCGGCCTCTTATTACAACAGCAGCTATCATCCAATAATGA  
AGGTACTATTGACAAAGGAAAACCTTTTCACTGCTAAAGAGCTGGAGAAGG

>M6-PGSC0003DMG400010427M6RLKWAX-EGF\_189

ATAATGAAGGTACTATTGACAAAGGAAAACCTTTTCACTGCTAAAGAGCTGGAGAAGGCAACAGACCACT  
TCAATGAAAATCGCATACTTGGTCGTGGAGGTCAAGGTACGGTATACAAGG

>M6-PGSC0003DMG400010427M6RLKWAX-EGF\_252

ACCACTTCAATGAAAATCGCATACTTGGTCGTGGAGGTCAAGGTACGGTATACAAGGGCATGTTACTTG

ATGGAAAGATTGTAGCAGTGAAAAAGTCTAAGCTGGTAGACGAAAACCAAGT

>M6-PGSC0003DMG400010427M6RLKWAX-EGF\_315

TACTTGATGGAAAGATTGTAGCAGTGAAAAAGTCTAAGCTGGTAGACGAAAACCAAGTTGGATCAGTTTA

TCAACGAGGTGGCTGTTCTTTCACAAATCAATCACAGGAATGTGGTGAAGC

>M6-PGSC0003DMG400010427M6RLKWAX-EGF\_378

AGTTTATCAACGAGGTGGCTGTTCTTTCACAAATCAATCACAGGAATGTGGTGAAGCTACTTGGCTGTTG

TTTGAAACAGAAGTTCCTCTATTAGTATACGAGTTCATAATTAATGGCA

>M6-PGSC0003DMG400010427M6RLKWAX-EGF\_441

GCTGTTGTTTGGAAACAGAAGTTCCTCTATTAGTATACGAGTTCATAATTAATGGCACACTTTACAGCCTC

ATACATAATGAGAACAATGAGTTTCCCTTACTTGGAGCACGCGTTTGA

>M6-PGSC0003DMG400010427M6RLKWAX-EGF\_504

ACAGCCTCATAATAATGAGAACAATGAGTTTCCCTTACTTGGAGCACGCGTTTGAGAATTGCCACAGA

GGTAGCTGGAGCATTGGCTTATCTACACTCAGCAACTTCTGTTCCAGTCT

>M6-PGSC0003DMG400010427M6RLKWAX-EGF\_567

CCACAGAGGTAGCTGGAGCATTGGCTTATCTACACTCAGCAACTTCTGTTCCAGTCTATCATTGGGACAT

CAAATCAAGCAATATACTTTTAGACGAAAAATACCGTGCCAAGGTATCAG

>M6-PGSC0003DMG400010427M6RLKWAX-EGF\_63

TACTGCTACTACTGTTTGGGAGCTATTTATTGTACAAAACAATCAAGAAGAGAAGGAACAAACGACAGA

AACAAAAGTTTTTCAAGCGAAATGGCGGCCTCTTATTACAACAGCAGCTAT

>M6-PGSC0003DMG400010427M6RLKWAX-EGF\_630

GGGACATCAAATCAAGCAATATACTTTTAGACGAAAAATACCGTGCCAAGGTATCAGATTTGGGCACCTC

AAGGTCTATTGCAATTGATCAAACCTCACCTAACGACCGGAGTCCAAGGGA

>M6-PGSC0003DMG400010427M6RLKWAX-EGF\_693

GCACCTCAAGGTCTATTGCAATTGATCAAACCTCACCTAACGACCGGAGTCCAAGGGACATTTGGCTATTT

AGATCCTGAGTACTTCCAATCCAGCCAATATACTGAAAAAAGTGATGTCT

>M6-PGSC0003DMG400010427M6RLKWAX-EGF\_756

GCTATTTAGATCCTGAGTACTTCCAATCCAGCCAATATACTGAAAAAAGTGATGTCTATAGCTTCGGAGT

TGTTCTTGCTGAACTCTTAACAGGAAAGAAAGCAATTTCAACCACAACAA

>M6-PGSC0003DMG400010427M6RLKWAX-EGF\_819

TCGGAGTTGTTCTTGCTGAACTCTTAACAGGAAAGAAAGCAATTTCAACCACAACAAACCAAGACAGAA  
GTTTAGCAACAAACTTCCTTTTGGCAACAGATAGAAATCTCCTTGATACGA

>M6-PGSC0003DMG400010427M6RLKWAX-EGF\_882

ACAGAAGTTTAGCAACAAACTTCCTTTTGGCAACAGATAGAAATCTCCTTGATACGATTATCTATACAAA  
AATTTACAAGAAGGTAGAAAAGAGGATATAATGGCGGCTGCTAATATAG

>M6-PGSC0003DMG400010427M6RLKWAX-EGF\_945

ATACAAAATTTTACAAGAAGGTAGAAAAGAGGATATAATGGCGGCTGCTAATATAGCGTATCGTTGCA  
TGAACTTGAATGGTAAGAAAAGGCCTACTATGAAGGAAGTA ACTACAGCAT

>M6-PGSC0003DMG400010447-(rev)M6LRR-RLP\_0

CAACTTGCACTTTCCAAGTCTAAAAGCAGCCATCACATTTAACATTTATAATTTTCAAGCCACCAAGAA  
TTTGTATCCAAATGTATGTATATATTATGCCATTTTTTGGCACATTCT

>M6-PGSC0003DMG400010447-(rev)M6LRR-RLP\_1037

AATTTTCTTTCTGGAAAGTTACCGAGTGTAATTGGAAAGCTATGGAAATTAGAAGATCTTGATCTCTCAG  
AAAATTGATTTGAAGGAGAAGTATCCGAGATTTTCAATACTATGAATGAT

>M6-PGSC0003DMG400010447-(rev)M6LRR-RLP\_1098

ATCTCTCAGAAAATTGATTTGAAGGAGAAGTATCCGAGATTTTCAATACTATGAATGATTGCCCTCCAAT  
AGGCTCAGGAAATTGTTCTTCTTTGAGGACCTTAAGACTAAATGACAACA

>M6-PGSC0003DMG400010447-(rev)M6LRR-RLP\_1159

CCCTCCAATAGGCTCAGGAAATTGTTCTTCTTTGAGGACCTTAAGACTAAATGACAACAAACTGATTGGA  
AATCTTCCAAAAGTTTTGGGCAACTTTCTAATCTACAATTCTGTTTCAT

>M6-PGSC0003DMG400010447-(rev)M6LRR-RLP\_122

TCTTATAATTTACAAAAATGAGAGGGCTGTACTACATAGTACTTGTCCTGTTTACTATAAAGTTTTGTTCT  
TTGCAGTGGAGTTTGCAAAGAAAATGAGAAAACAGCTTTGCTAAGGTTA

>M6-PGSC0003DMG400010447-(rev)M6LRR-RLP\_1220

CTGATTGGAAATCTTCCAAAAGTTTTGGGCAACTTTCTAATCTACAATTCTGTTTCATATCCAATAATAG  
GTTGGAAGGGGTGTTAACAGAAGAACATTTACCAACTTGACAAATTTG

>M6-PGSC0003DMG400010447-(rev)M6LRR-RLP\_1281

CCAATAATAGGTTGGAAGGGGTGTTAACAGAAGAACATTTACCAACTTGACAAATTTGAAGTTTTTCTC  
TGCATCTAAGAGTAATTTGACTTTAAGGGTGAGTTCAGATTGGATTCCAT

>M6-PGSC0003DMG400010447-(rev)M6LRR-RLP\_1342

GTTTTCTCTGCATCTAAGAGTAATTTGACTTTAAGGGTGAGTTCAGATTGGATTCCATCATTCCAAGCTA  
GTGACATTGTAATGGGCGGTTGGCGCTTAGGCCCTGACTTCCCTTTGTG

>M6-PGSC0003DMG400010447-(rev)M6LRR-RLP\_1403

TTCCAAGCTAGTGACATTGTAATGGGCGGTTGGCGCTTAGGCCCTGACTTCCCTTTGTGGATCCAGACTC  
AACAAATCAATCATGAATTTGGACATATCAAATGCTGGTATAGTAGGTGAG

>M6-PGSC0003DMG400010447-(rev)M6LRR-RLP\_1464

TCCAGACTCAACAATCAATCATGAATTTGGACATATCAAATGCTGGTATAGTAGGTGAGGTTCCCTACTTG  
GTTCTGAAACTTATCGTCTCAAATTCGTTTCCTCAACATGTCTCACAACC

>M6-PGSC0003DMG400010447-(rev)M6LRR-RLP\_1525

TCCTACTTGGTTCTGAAACTTATCGTCTCAAATTCGTTTCCTCAACATGTCTCACAACCAGCTCATTGGTGA  
GATTCCAACCTTTCTCAATTTCTGATAGCTCCATGGGAAGTGGAGGTCC

>M6-PGSC0003DMG400010447-(rev)M6LRR-RLP\_1586

CTCATTGGTGAGATTCCAACCTTTCTCAATTTCTGATAGCTCCATGGGAAGTGGAGGTCCTTGGTTGATAT  
ACTTGAGTTCCAACAACCTCAGTGGTTTACTCCCTCATATTCCAACCATG

>M6-PGSC0003DMG400010447-(rev)M6LRR-RLP\_1647

GGTTGATATACTTGAGTTCCAACAACCTCAGTGGTTTACTCCCTCATATTCCAACCATGGTAACAGAGTTA  
GACCTTTCAGATAACACTTTCTCGGAAGGTTTAAACAAGCTTCTTGTGTG

>M6-PGSC0003DMG400010447-(rev)M6LRR-RLP\_1708

AACAGAGTTAGACCTTTCAGATAACACTTTCTCGGAAGGTTTAAACAAGCTTCTTGTGTGATAAAAAGAAT  
GAATCTTACATGTTGGAGATTCTACACCTTGGGGGAAACCGTTTCTCCGA

>M6-PGSC0003DMG400010447-(rev)M6LRR-RLP\_1769

AAAAAGAATGAATCTTACATGTTGGAGATTCTACACCTTGGGGGAAACCGTTTCTCCGAAGAAATTCCTG  
ATTGTTGGATGAATTGGCCAGAGTTGAGAGTTGTCAACTTGGGAGAGAAT

>M6-PGSC0003DMG400010447-(rev)M6LRR-RLP\_183

AGTTTTGTTCTTGCAGTGGAGTTTGCAAAGAAAATGAGAAAACAGCTTTGCTAAGGTTAAAGAAAGAAG  
CAAATGATCCCACAAATGTAATCTTCTAGGGTTGATAAAGAAGATTGTT

>M6-PGSC0003DMG400010447-(rev)M6LRR-RLP\_1830

AAATTCCTGATTGTTGGATGAATTGGCCAGAGTTGAGAGTTGTCAACTTGGGAGAGAATAAGCTTACCG



GAGGAATCCCAAGATCCATTGGAGCTTTAAGCAATTTGAAATCTTTGGACT

>M6-PGSC0003DMG400010447-(rev)M6LRR-RLP\_1891

GCTTACCGGAGGAATCCCAAGATCCATTGGAGCTTTAAGCAATTTGAAATCTTTGGACTTGAAAAGAAA

CAAACCTTTCTGGTCCATTGCCTTCATCCTTGAACAACCTGCACAAGATTGTG

>M6-PGSC0003DMG400010447-(rev)M6LRR-RLP\_1952

AAAAGAAACAACTTTCTGGTCCATTGCCTTCATCCTTGAACAACCTGCACAAGATTGTGGAAAATAAACA

TGAATGAGAACGAGTTAGATGGAAATTTACCACCTTGGTTTGGTACACTT

>M6-PGSC0003DMG400010447-(rev)M6LRR-RLP\_2013

AAATAAACATGAATGAGAACGAGTTAGATGGAAATTTACCACCTTGGTTTGGTACACTTTCAAAGCTGAT

AGTCCTTAGTCTTCGGTCTAATAAATTCGATGGTGAAGTAGCTCCAGAAC

>M6-PGSC0003DMG400010447-(rev)M6LRR-RLP\_2074

AAAGCTGATAGTCCTTAGTCTTCGGTCTAATAAATTCGATGGTGAAGTAGCTCCAGAACTTTGCCAGCTC

AATGATCTTCAAATCTTGGATCTTGCCAACAACAATTTGTTTGGAGCTAT

>M6-PGSC0003DMG400010447-(rev)M6LRR-RLP\_2135

TGCCAGCTCAATGATCTTCAAATCTTGGATCTTGCCAACAACAATTTGTTTGGAGCTATACCTCGGTGTGT

TAATAATTTACAGCAATGGTGAATGGAAGGAAGGAAATTAGAGATGGA

>M6-PGSC0003DMG400010447-(rev)M6LRR-RLP\_2196

CTCGGTGTGTTAATAATTTACAGCAATGGTGAATGGAAGGAAGGAAATTAGAGATGGAGACGGCGAA

ATGGATTATTCTTATTATGTTGGAGTTTTTCAGGGAAAGTGCAAGAGTAGCAA

>M6-PGSC0003DMG400010447-(rev)M6LRR-RLP\_2257

CGGCGAAATGGATTATTCTTATTATGTTGGAGTTTTTCAGGGAAAGTGCAAGAGTAGCAACTAAGGGCAA

CATGTATCAGTATGATACCATTTTGTCAATTGTTACTAGCATGGATCTTTC

>M6-PGSC0003DMG400010447-(rev)M6LRR-RLP\_2318

AAGGGCAACATGTATCAGTATGATACCATTTTGTCAATTGTTACTAGCATGGATCTTCTAACAATAATCT

TTCTGGAAACATTCCTATGAGTCTTACAAGTCTTGTTGGATTGAGATAA

>M6-PGSC0003DMG400010447-(rev)M6LRR-RLP\_2379

ACAATAATCTTTCTGGAAACATTCCTATGAGTCTTACAAGTCTTGTTGGATTGAGATAATTAATTTCTCC

CACAATCAGCTGACTAGTAGTATTCCAAGGGACATTGACAAGATGAAGG

>M6-PGSC0003DMG400010447-(rev)M6LRR-RLP\_244

GAAAGAAGCAAATGATCCCACAAATGTACTATCTTCTAGGGTTGATAAAGAAGATTGTTGTAAGTGGGA  
AGGAGTTTTGTGCCACAATGTGACTGGTCTGTCATTGAGCTATCGATTAA

>M6-PGSC0003DMG400010447-(rev)M6LRR-RLP\_2440

AAATTTCTCCCACAATCAGCTGACTAGTAGTATTCCAAGGGACATTGACAAGATGAAGGTATTAGAATCA  
CTTGATATCTCAAATAATCAACTCTCTGGTCAAATACCACAAAGCATTTC

>M6-PGSC0003DMG400010447-(rev)M6LRR-RLP\_2501

TTAGAATCACTTGATATCTCAAATAATCAACTCTCTGGTCAAATACCACAAAGCATTTCGAGTTTGCCTC  
TTTGAGCTACTTGAATGTATCTCACAACAACCTATCAGGGCAGATTCTC

>M6-PGSC0003DMG400010447-(rev)M6LRR-RLP\_2562

GTTTGTCTCTTTGAGCTACTTGAATGTATCTCACAACAACCTATCAGGGCAGATTCTGTGAGCACTCAA  
CTTCAAAGCTTTAGCCCTTTTAGTTTTACTGGAAATAAACTGTGTGGGC

>M6-PGSC0003DMG400010447-(rev)M6LRR-RLP\_2623

GAGCACTCAACTTCAAAGCTTTAGCCCTTTTAGTTTTACTGGAAATAAACTGTGTGGGCTTCCACTCGTG  
GAGCGTTGCAGTAAAAATCCCAAGGTTGAAAATGAAGAAGAAGAAGAAGA

>M6-PGSC0003DMG400010447-(rev)M6LRR-RLP\_2684

CCACTCGTGGAGCGTTGCAGTAAAAATCCCAAGGTTGAAAATGAAGAAGAAGAAGAAGAAGAAGAAG  
ATGATAATGAAGTGAATGGTTCTATGTTTCCATGGCAATAGGATTCATTGTG

>M6-PGSC0003DMG400010447-(rev)M6LRR-RLP\_2745

AAGAAGATGATAATGAAGTGAATGGTTCTATGTTTCCATGGCAATAGGATTCATTGTGGCCTTTTGGG  
GTGTAAGTGCTCCTTTGCTTTTCATAAGACCATGGAGACATGCCTATTATA

>M6-PGSC0003DMG400010447-(rev)M6LRR-RLP\_2806

CTTTTGGGGTGTAAGTGCTCCTTTGCTTTTCATAAGACCATGGAGACATGCCTATTATAGATTTTTAGATA  
GAACATGGAAATCATGGCACACATAATTTGTAAAGACGTGACATTGAGG

>M6-PGSC0003DMG400010447-(rev)M6LRR-RLP\_2867

TTTTTAGATAGAACATGGAAATCATGGCACACATAATTTGTAAAGACGTGACATTGAGGAGATCTCTATT  
CATGTATACTGGATGAAATTTGTTTATATCTCAGGAAATCCATCACCATT

>M6-PGSC0003DMG400010447-(rev)M6LRR-RLP\_2928

ATCTCTATTCATGTATACTGGATGAAATTTGTTTATATCTCAGGAAATCCATCACCATTGAGCGTTCTCAA  
ATTAAGACATTTTTATATTTGTTGTCTCCATATATATGGGAAATTTGA

>M6-PGSC0003DMG400010447-(rev)M6LRR-RLP\_2985

TTCAGCGTTCCTCAAATTAAGACATTTTTATATTTGTTGTCTCCATATATATATGGGAAATTTGACAATTTTGT  
TTTGGCAAGGTTTGAGTTATGGAATGAACAAGGAAATTAACAGTTCCT

>M6-PGSC0003DMG400010447-(rev)M6LRR-RLP\_305

AACTGGGAAGGAGTTTTGTGCCACAATGTGACTGGTCTGTCTATTGAGCTATCGATTAACGGATGAGAT  
TGGTCAGAACTTAAAGGCCTAAAGATTGATGATTTCCAGTGGTTGTCAAGT

>M6-PGSC0003DMG400010447-(rev)M6LRR-RLP\_366

GATGAGATTGGTCAGAACTTAAAGGCCTAAAGATTGATGATTTCCAGTGGTTGTCAAGTCTTGAAAATCT  
TGATAGTTTGGACATGTCTGGTGTGGATTTAAGTGAAGCAACAAACTGGA

>M6-PGSC0003DMG400010447-(rev)M6LRR-RLP\_427

TGAAAATCTTGATAGTTTGGACATGTCTGGTGTGGATTTAAGTGAAGCAACAAACTGGACTGAGGTGAT  
TAGCATGCTTCCTTTGGTTAATCTTCGTTTTTCGAATTGTAGTCTTCATTC

>M6-PGSC0003DMG400010447-(rev)M6LRR-RLP\_488

GAGGTGATTAGCATGCTTCCTTTGGTTAATCTTCGTTTTTCGAATTGTAGTCTTCATTCAATACCTCCTTTG  
TTTGATCACAACAGTTCTGATCTTGAAAATCTTGATCTTTCTTTGAAT

>M6-PGSC0003DMG400010447-(rev)M6LRR-RLP\_549

TACCTCCTTTGTTTGATCACAACAGTTCTGATCTTGAAAATCTTGATCTTTCTTTGAATAACTTTGGCTCTC  
CGATCCCCGGGTGGGTTTTAGTTTTGGTAGTCTTGTTTCTCTTAAAT

>M6-PGSC0003DMG400010447-(rev)M6LRR-RLP\_61

CCACCAAGAATTTGTCATCCAAATGTATGTATATATTATGCCATTTTTGGCACATTCTTTCTTATAATTT  
CACAAAATGAGAGGGCTGTACTACATAGTACTTGTCTGTTTACTAT

>M6-PGSC0003DMG400010447-(rev)M6LRR-RLP\_610

CTTTGGCTCTCCGATCCCCGGGTGGGTTTTAGTTTTGGTAGTCTTGTTTCTCTTAAATTCAGTGGTAGCA  
ATTTCACTGGTTCATTTCTGAGGGTCTTTTAACTTGACTTCTTTTAC

>M6-PGSC0003DMG400010447-(rev)M6LRR-RLP\_671

ACTGGTAGCAATTTCACTGGTTCATTTCTGAGGGTCTTTTAACTTGACTTCTTTCACAACATTGAGAGC  
TTCTAGCAACTCCTTTGGTTCTGTTTTGCCTCAATGGTATTTGATCTT

>M6-PGSC0003DMG400010447-(rev)M6LRR-RLP\_732

CATTGAGAGCTTCTAGCAACTCCTTTGGTTCTGTTTTGCCTCAATGGTATTTGATCTTAGTAATCTTGAAT

ATCTTGATTTGAGTTTTAGTGGTCTTGAGGGTCCAATACCAAATGGAG

>M6-PGSC0003DMG400010447-(rev)M6LRR-RLP\_793

TAATCTTGAATATCTTGATTTGAGTTTTAGTGGTCTTGAGGGTCCAATACCAAATGGAGTTGGTGATTTT  
ACCAAGCTTACATATCTTAGTCTTGCTTCCAATAATCTGAATTCCACTAT

>M6-PGSC0003DMG400010447-(rev)M6LRR-RLP\_854

GGTGATTTTACCAAGCTTACATATCTTAGTCTTGCTTCCAATAATCTGAATTCCACTATACCAGATTGGCT  
CTATGGATGCAAGAATCTTGAAACACTTGCCATGAAGGATAACAGTCTT

>M6-PGSC0003DMG400010447-(rev)M6LRR-RLP\_915

CAGATTGGCTCTATGGATGCAAGAATCTTGAAACACTTGCCATGAAGGATAACAGTCTTGAGGGGAACAG  
TTTCAGACTCGATTTCAAATCTGACATCTCTAACTAGTATCGATATGTCTG

>M6-PGSC0003DMG400010447-(rev)M6LRR-RLP\_976

GGGAACAGTTTCAGACTCGATTTCAAATCTGACATCTCTAACTAGTATCGATATGTCTGAAAATTTTCTTT  
CTGGAAAGTTACCGAGTGTAATTGGAAAGCTATGGAAATTAGAAGATCT

>M6-PGSC0003DMG400010466-(rev)M6L-LecRK\_0

CGTGTTTCCTTTGGATTCTCTGCTTCATTCACACCCCTCTTCTTCACCCCTGTTTCCAGTTTTCTTCAAAAA  
AAATCACTATTTTCTAAGCTCAAAAAATAGCTAAAAATGAAATCTTT

>M6-PGSC0003DMG400010466-(rev)M6L-LecRK\_1037

TGTTGAATTCAAAGATATTAATGGTAATCATGTTGGTTTGGATCTAAATTCAATGATTTCAACTGAAATTG  
GTAATTTGGATTCCATTGATATTGATCTCAAGAGTGGTGATTTGGTTAA

>M6-PGSC0003DMG400010466-(rev)M6L-LecRK\_1098

ACTGAAATTGGTAATTTGGATTCCATTGATATTGATCTCAAGAGTGGTGATTTGGTTAATTGTTGGATTG  
AATATTCTGGTTCTAATGGAGAGATGGATATATTTGTGTCATATACTAAT

>M6-PGSC0003DMG400010466-(rev)M6L-LecRK\_1159

GTTGGATTGAATATTCTGGTTCTAATGGAGAGATGGATATATTTGTGTCATATACTAATCTCAAGCCAAA  
AGAATCATTTTTATCAGTTAACATCAATCTTGCTGAGTATGTAAATGATT

>M6-PGSC0003DMG400010466-(rev)M6L-LecRK\_122

GCAATTCATCTTCATTGTGTAATGGGGTTTTGCTAAAATCTAGCAATGAAGTCAATCTTGAAGAACTTT  
CCAGCAACATATTCCTGTAAAAGTCATCCTGTTGTAGTGTGTTCTCTC

>M6-PGSC0003DMG400010466-(rev)M6L-LecRK\_1220

CAAGCCAAAAGAATCATTTTTATCAGTTAACATCAATCTTGCTGAGTATGTAAATGATTCATGTTTGTGG  
GGTTTTCTGGTTCAACTCAAGGGAGTACTGAGATTCATAATATTGTGTG

>M6-PGSC0003DMG400010466-(rev)M6L-LecRK\_1281

ATGTTTGTGGGGTTTTCTGGTTCAACTCAAGGGAGTACTGAGATTCATAATATTGTGTGGTGGAGTTTCA  
GTTTCATCATTTGATGCAACTCCAACTCGGGGGAGGTGGTGGCTGAGCCA

>M6-PGSC0003DMG400010466-(rev)M6L-LecRK\_1342

GGAGTTTCAGTTCATCATTTGATGCAACTCCAACTCGGGGGAGGTGGTGGCTGAGCCACCACCGCCAA  
CGACTAGTTTGATGAACCCAACGGCAGATTCTGTAACGTTGCCAACACCTT

>M6-PGSC0003DMG400010466-(rev)M6L-LecRK\_1403

ACCGCCAACGACTAGTTTGATGAACCCAACGGCAGATTCTGTAACGTTGCCAACACCTTCTATGGCTCCA  
TCAGAGTCTAATAGTAGCACAGGTGTATTGCAAGAAAAGAGTAGTAGGAA

>M6-PGSC0003DMG400010466-(rev)M6L-LecRK\_1464

ATGGCTCCATCAGAGTCTAATAGTAGCACAGGTGTATTGCAAGAAAAGAGTAGTAGGAAATGTCATAGC  
AATTTTTGTAGACAAGGTCCTGGAGCTGTTGTTGGTGTGGTACTGCTGGT

>M6-PGSC0003DMG400010466-(rev)M6L-LecRK\_1525

GTCATAGCAATTTTTGTAGACAAGGTCCTGGAGCTGTTGTTGGTGTGGTACTGCTGGTGCATTTTTTCT  
TGCATTTGCTACATTGGTACTTATTTGGTTATACTCCAAAAGATTCAAGA

>M6-PGSC0003DMG400010466-(rev)M6L-LecRK\_1586

ATTTTTCTTGCAATTTGCTACATTGGTACTTATTTGGTTATACTCCAAAAGATTCAAGAGAGTGAAAAATT  
CTGAAATTGTGGCATCTGATATCATCAAATGCCTAAGGAGTTCAGCTA

>M6-PGSC0003DMG400010466-(rev)M6L-LecRK\_1647

GTGAAAAATTCTGAAATTGTGGCATCTGATATCATCAAATGCCTAAGGAGTTCAGCTATAAAGAGCTTA  
AATTGGCCACAAAAGGTTTCATTCCAACGAGAATTATAGGCCGTGGTGCA

>M6-PGSC0003DMG400010466-(rev)M6L-LecRK\_1708

AAGAGCTTAAATTGGCCACAAAAGGTTTCATTCCAACGAGAATTATAGGCCGTGGTGCATTTGGGACTG  
TTTACAAGGGCATTTTATCGGATACCGGTGGCATTGTTGCAGTCAAGAGAT

>M6-PGSC0003DMG400010466-(rev)M6L-LecRK\_1769

TGGGACTGTTTACAAGGGCATTTTATCGGATACCGGTGGCATTGTTGCAGTCAAGAGATGTAGTCATAA  
TGGACAAGGGAAAGCAGAGTTCTTATCTGAATTATCTATAATTGGAACCCT

>M6-PGSC0003DMG400010466-(rev)M6L-LecRK\_183

GAAGAACTTTCCAGCAACATATTCCTGTAAAAGTCATCCTGTTGTAGTGTTGTTCTCTCCTGTCTACTTTCT  
TGCGTTTTCACTGTTTCTAAGCTAAAAAAAAAAGCTAAAAAACAAATCT

>M6-PGSC0003DMG400010466-(rev)M6L-LecRK\_1830

AGTCATAATGGACAAGGGAAAGCAGAGTTCTTATCTGAATTATCTATAATTGGAACCCTTAGGCATAGA  
AATCTTGTTAGGCTTCAAGGATGGTGCCATGAGAAAGGTGAAATTTTGTTG

>M6-PGSC0003DMG400010466-(rev)M6L-LecRK\_1891

GGCATAGAAATCTTGTTAGGCTTCAAGGATGGTGCCATGAGAAAGGTGAAATTTTGTTGGTTTACGATC  
TTATGCCTAATGGGAGTCTTGATAAGGTACTATTTGAATCAAGAATGGTTC

>M6-PGSC0003DMG400010466-(rev)M6L-LecRK\_1952

TTACGATCTTATGCCTAATGGGAGTCTTGATAAGGTACTATTTGAATCAAGAATGGTCTTTTCATGGTCAC  
ATAGGCGAAAAATCTTGATAGGTGTTGCTTCTGCCTTGGCATATTTGCA

>M6-PGSC0003DMG400010466-(rev)M6L-LecRK\_2013

TCATGGTCACATAGGCGAAAAATCTTGATAGGTGTTGCTTCTGCCTTGGCATATTTGCATCAAGAATGCG  
AAAACCAGGTGATTCATAGGGACATTAAGAGTAGTAACATCATGTTGGAT

>M6-PGSC0003DMG400010466-(rev)M6L-LecRK\_2074

AAGAATGCGAAAACCAGGTGATTCATAGGGACATTAAGAGTAGTAACATCATGTTGGATGAAGGGTTC  
AATGCAAGATTAGGAGATTTTGGATTAGCAAGGCAAGTTGAGCATGACAAGT

>M6-PGSC0003DMG400010466-(rev)M6L-LecRK\_2135

AGGGTTCAATGCAAGATTAGGAGATTTTGGATTAGCAAGGCAAGTTGAGCATGACAAGTCCCCGATGC  
AACGGTAGCAGCCGGGACAATGGGCTACTTGGCTCCAGAGTACTTGTTAAC

>M6-PGSC0003DMG400010466-(rev)M6L-LecRK\_2196

CCCGATGCAACGGTAGCAGCCGGGACAATGGGCTACTTGGCTCCAGAGTACTTGTTAACCGGTAGGGC  
AACCGAAAAAATGATGTTTTTCAGCTATGGAGCAGTGGTTCTTGAAGTGGCT

>M6-PGSC0003DMG400010466-(rev)M6L-LecRK\_2257

GTAGGGCAACCGAAAAAATGATGTTTTTCAGCTATGGAGCAGTGGTTCTTGAAGTGGCTTGTGGAAGG  
AGGCCAATTGAGAGGGAAACAATAAGTTGAGAAAGTTAGAGTGAATAGCA

>M6-PGSC0003DMG400010466-(rev)M6L-LecRK\_2318

TGGAAGGAGGCCAATTGAGAGGGAAACAATAAGTTGAGAAAGTTAGAGTGAATAGCAACTTGGTTG

AATGGGTATGGGGGGTGCATAGAGAAGGGAATTTACTAAATGCAGCTGATTC

>M6-PGSC0003DMG400010466-(rev)M6L-LecRK\_2379

TTGGTTGAATGGGTATGGGGGGTGCATAGAGAAGGGAATTTACTAAATGCAGCTGATTCAAGACTTTGT  
GGTGAGTTTGATGAACAAGAAATGAGAAGGGTTCTAATGATTGGACTAGCT

>M6-PGSC0003DMG400010466-(rev)M6L-LecRK\_244

GTCTACTTTCTTGCCTTTTCACTGTTTCTAAGCTAAAAAAAAGCTAAAAACAAATCTTTGTGCAATTTG  
ATTTTCATTGTGTAATGGGGTTTTGCTAAATCAATTCTTGAAGAAATTT

>M6-PGSC0003DMG400010466-(rev)M6L-LecRK\_2440

GACTTTGTGGTGAGTTTGATGAACAAGAAATGAGAAGGGTTCTAATGATTGGACTAGCTTGTTACATC  
CCGACCCTACGGCTAGACCAACAATGAGAGGTGTAGTTCAAATGCTGGAAG

>M6-PGSC0003DMG400010466-(rev)M6L-LecRK\_2501

TTCACATCCCGACCCTACGGCTAGACCAACAATGAGAGGTGTAGTTCAAATGCTGGAAGGTGAATCTGA  
AATCCCAATTGTCCCAAGAACTAGACCTTCTATGAGTTTTAGCACATCACA

>M6-PGSC0003DMG400010466-(rev)M6L-LecRK\_2562

GAATCTGAAATCCCAATTGTCCCAAGAACTAGACCTTCTATGAGTTTTAGCACATCACATCTTCTAATGAG  
TTTGCAAGATAGTGTCTGACTTGAATGGTTTGATCACACTTTCCCCT

>M6-PGSC0003DMG400010466-(rev)M6L-LecRK\_2623

TTCTAATGAGTTTGCAAGATAGTGTCTGACTTGAATGGTTTGATCACACTTTCCCCTTCATCATCCGAA  
AGTAGCTTACCGGTGGTCGCAATGGCAATGGCATGGAGTTGGTCTAAA

>M6-PGSC0003DMG400010466-(rev)M6L-LecRK\_2684

ATCATCCGAAAGTAGCTTACCGGTGGTCGCAATGGCAATGGCATGGAGTTGGTCTAAATGCAAGACTA  
AAAAAGACTTGACTTTTCGAGTTAATGCACCTATAAGAGCCCAACAATCCC

>M6-PGSC0003DMG400010466-(rev)M6L-LecRK\_2745

CAAGACTAAAAAGACTTGACTTTTCGAGTTAATGCACCTATAAGAGCCCAACAATCCCACATATGGGGC  
CACCATCAAGGCGGAACAGACACAATGACTACTCTGATTGGGCGTGGACA

>M6-PGSC0003DMG400010466-(rev)M6L-LecRK\_2806

ATATGGGGCCACCATCAAGGCGGAACAGACACAATGACTACTCTGATTGGGCGTGGACAAGGAAAAAG  
TGGCGTCTTTTTTGTTCATAAATTCATTAATTTTATTCATAATATAT

>M6-PGSC0003DMG400010466-(rev)M6L-LecRK\_2867

GAAAAAGTGGCGTCTTTTTGTTTTGTTTCATAAATTCATTAATTTTATTCATAATATATATGTACCAAATAA  
GCTTTAAGATTTAGTAATGTAATTTTCTCCTTTTCCTTTCATATACTA

>M6-PGSC0003DMG400010466-(rev)M6L-LecRK\_2915

TCATAATATATATGTACCAAATAAGCTTTAAGATTTAGTAATGTAATTTTCTCCTTTTCCTTTCATATACTAT  
AGTCCATTGAGTGCAAGATTAGAGATATTTAGTGGGGGAAAAATAAA

>M6-PGSC0003DMG400010466-(rev)M6L-LecRK\_305

GTGCAATTTGATTTTCATTGTGTAATGGGGTTTTGCTAAATCAATTCTTGAAGAAATTTCTTCTGTAAAA  
GCCATCATGTTGTAGTGTTGTTCTCTCCTTAATCCTCACTCTACTGTGT

>M6-PGSC0003DMG400010466-(rev)M6L-LecRK\_366

TTCTGTAAAAGCCATCATGTTGTAGTGTTGTTCTCTCCTTAATCCTCACTCTACTGTGTCAGTTTTCTACTTT  
TTTGCATTTTCACTGTTTCTAATCCCAAAAAAAGCCTACCCTTTTT

>M6-PGSC0003DMG400010466-(rev)M6L-LecRK\_427

GTTTTCTACTTTTTTGCATTTTCACTGTTTCTAATCCCAAAAAAAGCCTACCCTTTTTGTATCTTCACCAAA  
TTCTTGATTTGGTGTGAAAAATCTTACCTTTTGTACACTTTGATC

>M6-PGSC0003DMG400010466-(rev)M6L-LecRK\_488

ATCTTCACCAAATTCTTGTGATTTGGTGTGAAAAATCTTACCTTTTGTACACTTTGATCTTCATTCTCTGAT  
GGGTTTTTCTAGAATCTAGCAATGACATCAAATCTTGAAAAAAAT

>M6-PGSC0003DMG400010466-(rev)M6L-LecRK\_549

CATTCTCTGATGGGTTTTTCTAGAATCTAGCAATGACATCAAATCTTGAAAAAAATTCAGGGGCTTTCT  
TGTATGGCTCATCTTATTGTTCTGTTTCTGTAGTATTAGTTCAACATTT

>M6-PGSC0003DMG400010466-(rev)M6L-LecRK\_61

TTTCTTCAAAAAAATCACTATTTTCTAAGCTCAAAAAATAGCTAAAAATGAAATCTTTGTGCAATTTTCAT  
CTTCATTGTGTAATGGGGTTTTGCTAAAATCTAGCAATGAAGTCAATTC

>M6-PGSC0003DMG400010466-(rev)M6L-LecRK\_610

GGGGCTTTCTTGATGGCTCATCTTATTGTTCTGTTTCTGTAGTATTAGTTCAACATTTGGTAAACTGATT  
TCGATTTTGAAAATTTAACACTAAGTAGTTTAAACTTCTTGGTGATG

>M6-PGSC0003DMG400010466-(rev)M6L-LecRK\_671

TAAACTGATTTGATTTTGAAAATTTAACACTAAGTAGTTTAAACTTCTTGGTGATGCACACTTGAGTA  
ACAACACTGTAAGGTTGACAGGTGATCTTGCTGTACCAAATCCGGTGC



>M6-PGSC0003DMG400010466-(rev)M6L-LecRK\_732

CACTTGAGTAACAACACTGTAAGGTTGACAGGTGATCTTGCTGTACCAAATCCGGTGCCGGAAAAGTT  
CTGTATTCAAACAGTAAGATTCCGGCAACCGGGGTTTGATTTCCGGCG

>M6-PGSC0003DMG400010466-(rev)M6L-LecRK\_793

GAAAAGTTCTGTATTCAAACAGTAAGATTCCGGCAACCGGGGTTTGATTTCCGGCGAGTTTCTCGAC  
ATTCTTTACATTTTCAGTTACTAATTTGAACCCATCATCGATTGGTGGTG

>M6-PGSC0003DMG400010466-(rev)M6L-LecRK\_854

TTTCTCGACATTCTTTACATTTTCAGTTACTAATTTGAACCCATCATCGATTGGTGGTGGTCTTGCTTTTGT  
GCTTACGCCGGGTGATGAGTTAGTAGGTGATGCTGGTGGGTATATGGG

>M6-PGSC0003DMG400010466-(rev)M6L-LecRK\_915

CTTGCTTTTGTGCTTACGCCGGGTGATGAGTTAGTAGGTGATGCTGGTGGGTATATGGGAATCTTGAT  
GCTAAAGGGACACAAATTGGTACAATTGCTGTGGAATTTGACACCCTTATG

>M6-PGSC0003DMG400010466-(rev)M6L-LecRK\_976

TCTTGGATGCTAAAGGGACACAAATTGGTACAATTGCTGTGGAATTTGACACCCTTATGGATGTTGAATT  
CAAAGATATTAATGGTAATCATGTTGGTTTGGATCTAAATTCAATGATTT

>M6-PGSC0003DMG400010484-(rev)M6RLKWAX-EGF\_0

GATTCATTCTATTTCCATGCATAGTTGTTGTTCTAATGACTGAGTTACAAAGAAGGCATTTGTCGATTTAT  
GATGCAATTGAAAATTTCTTACGGTGAGAACAATTTCCGCGCCCATTA

>M6-PGSC0003DMG400010484-(rev)M6RLKWAX-EGF\_1053

TATCTAATTAGTTCTTCAATAAGCTCAATAGAGTCTGTGAAGTTGCTTGAGAGTTGTTCTGATTCTGCAA  
AATAGATGTAGTTGTTGCTTGACATCACATATTGTGTACGTAATTCGTG

>M6-PGSC0003DMG400010484-(rev)M6RLKWAX-EGF\_124

TTCCAACCTCAACATAAGAAAGATGACTAGGAACTTCAAAGAGAACTAGGCCAAGGAGGTTATGGTTC  
AATATATAAAGGTAAGCTTCAAAGTGGACCTAATGTAGCAGTGAAGATATT

>M6-PGSC0003DMG400010484-(rev)M6RLKWAX-EGF\_372

ACTTCATGCCTAACAGATCACTTGAAAAGTACATCACACCTCAAGATGGAGGAGCTGATCAACTGTAAAG  
TTGGGACAGAAAGTTTGAAATTGCTCTTGGAGTTGCTCGAGGTATTGAAT

>M6-PGSC0003DMG400010484-(rev)M6RLKWAX-EGF\_558

ATGAGAATTTCAATCCAAAATCTGATTTTGGTCTTGCAAATCATACCCGGCTGATAAGAGCATTGTT

ACTCTAACACCAGCCAGGGGAACAATTGGTTATGCAGCTCCAGAGCTGA

>M6-PGSC0003DMG400010484-(rev)M6RLKWAX-EGF\_62

TCGATTTATGATGCAATTGAAAATTTCTTCACGGTGAGAACAATTCGCGCCCATTAGATATTCCAACCT

CAACATAAGAAAGATGACTAGGAACTTCAAAGAGAACTAGGCCAAGGA

>M6-PGSC0003DMG400010484-(rev)M6RLKWAX-EGF\_620

AGCATTGTTACTCTAACACCAGCCAGGGGAACAATTGGTTATGCAGCTCCAGAGCTGATTAACAGAAGC

ATTGGTCCAATATATTATAAGGCATATGTCTATAGCTTATAAGGCATATGT

>M6-PGSC0003DMG400010484-(rev)M6RLKWAX-EGF\_682

CAGAAGCATTGGTCCAATATATTATAAGGCATATGTCTATAGCTTATAAGGCATATGTCTATAGCTTTGG

AATGTTACTCATTGATATCGTAGGCTTGAAAACAACTCGGCAGCCAAAG

>M6-PGSC0003DMG400010484-(rev)M6RLKWAX-EGF\_744

AGCTTTGGAATGTTACTCATTGATATCGTAGGCTTGAAAACAACTCGGCAGCCAAAGAGGACATATCA

AGCCAGTATTTCCCATATTGGATTTATGATTAAGCTCGACAAGGGAAAGGAG

>M6-PGSC0003DMG400010484-(rev)M6RLKWAX-EGF\_806

CATATCAAGCCAGTATTTCCCATATTGGATTTATGATTAAGCTCGACAAGGGAAAGGAGATTGAAGTACTA

GACGAGACACATGAAGACGTAAAGAAGCTGACTTTAGTTGCTTTGTGGTG

>M6-PGSC0003DMG400010484-(rev)M6RLKWAX-EGF\_992

ACAAGCACTGCAAATGCCTCCCAGGCCCTCTGAATTGCAGGAACCATGTTTCGTTGGAATTCTATCTAATT

AGTTCTCAATAAGCTCAATAGAGTCTGTGAAGTTGCTTGAGAGTTGTTC

>M6-PGSC0003DMG400010503-(rev)M6OtherRLKTM\_0

ATGGTCCCATCATTCAATTTCCCATTCAGACTCAGTCATCAACCAAACATTGTGGCTATGATCCTGGCTTT

GAACTACACTGTAACAATAAAAAAGACACCATCCTTGAGCTTCCCTCCT

>M6-PGSC0003DMG400010503-(rev)M6OtherRLKTM\_65

GGCTTTGAACTACACTGTAACAATAAAAAAGACACCATCCTTGAGCTTCCCTCCTCTGTTCACTTAGTTGT

TGAAAAGATTGATTATGTCTCACAGCAAATTCACCTTCATGATCCTGAA

>M6-PGSC0003DMG400010504-(rev)M6OtherRLKTM\_0

CAAGTAGAAATGAAAGAGAGAGTTCGAGTTAGACTTGAAAAGTTTTTGAAGACTACAAGGCCATCAGA

CCGACACGATATGCTTATGCTGATATTAAGAAGATAACAGATGATTTAATG

>M6-PGSC0003DMG400010504-(rev)M6OtherRLKTM\_128

GGAGAAGGGAGTTATGGAAGTGTATACAAAGGCAGACTTTCCAGTGAAATCTATGTTGCAGTAAAAGTC  
CTACACGATTCCAAGGGTAAAGGGGAAGAATTTATCAATGAAATAGGTACA

>M6-PGSC0003DMG400010504-(rev)M6OtherRLKTM\_448

TGAGTATCTTCACCAGGGATGTGATCAGCAAATCCTACATTTTCGATATCAAACCACAAAACATCCTTTTA  
GACCAGAACTTGAACCCCAAAATATGTGATTTTCGCCTAGCCAAACTATG

>M6-PGSC0003DMG400010504-(rev)M6OtherRLKTM\_576

AAAAAAGTGCGGTCACTATGACAGCTGCTAGGGGAACCATTTGGTTACATTGCACCAGAAGTGTTATCAA  
GAAACTTTGGTAAAGTTTCTCATAAGTCTGATATTTATAGCTTTGGGATGG

>M6-PGSC0003DMG400010504-(rev)M6OtherRLKTM\_64

CAGACCGACACGATATGCTTATGCTGATATTAAGAAGATAACAGATGATTTTAATGAAAAGTTAGGAGA  
AGGGAGTTATGGAAGTGTATACAAAGGCAGACTTTCCAGTGAAATCTATGT

>M6-PGSC0003DMG400010504-(rev)M6OtherRLKTM\_640

ATCAAGAACTTTGGTAAAGTTTCTCATAAGTCTGATATTTATAGCTTTGGGATGGTCTTGTTAGAAATG  
GTTGGTGGGAGGATAAAGATGGATCCTAAGATGAATAACCACAGCAAAGT

>M6-PGSC0003DMG400010504-(rev)M6OtherRLKTM\_704

GAAATGGTTGGTGGGAGGATAAAGATGGATCCTAAGATGAATAACCACAGCAAAGTGAATTCTTTGGA  
ATGGATATATAGACATTTGGAGAAAGGGGAAGAATTGAAGATTCGGATAGAG

>M6-PGSC0003DMG400010504-(rev)M6OtherRLKTM\_768

TGGAATGGATATATAGACATTTGGAGAAAGGGGAAGAATTGAAGATTCGGATAGAGGAAGACGGAGA  
TGGTACAATTGTGAGAAAGTTAGCTATTGTTGGACTTTGGTGCATACAGTGGC

>M6-PGSC0003DMG400010504-(rev)M6OtherRLKTM\_822

AGGAAGACGGAGATGGTACAATTGTGAGAAAGTTAGCTATTGTTGGACTTTGGTGCATACAGTGGCATC  
CCAATGATAGGCCTTCAATAAAAGAAGTTATTCAGATGATGGAAGGAGATG

>M6-PGSC0003DMG400010519M6LRR-RLP\_0

TCAGTTCAAGTCTCGAGAAATTTCAAATCAACATGTCTTGGATGACCGTCTGCAGCTAAACCATAACGA  
AAATAGTACGGTCTCAAACAGATTTTTGCCATTTCTATAGCCTACTTC

>M6-PGSC0003DMG400010519M6LRR-RLP\_1054

GCCAATCGTCTACATGGTCATTTTCTGTGAACTTGGATACTTACCCAACTTAACAGAAATAAACCTTGG  
ACATAACCTGTTTTCGGGTGGAGATTCCATAGGAATATTGGTCAAGACTC

>M6-PGSC0003DMG400010519M6LRR-RLP\_1116

AAACCTTGGACATAACCTGTTTTCGGGTGAGATTCCATAGGAATATTGGTCAAGACTCAGGTTTTTCATGG  
AGAAGTCTCAACTTGGAATATAATAACCTGGAAGGATCGGTTCCCTCGAGA

>M6-PGSC0003DMG400010519M6LRR-RLP\_1178

TTTCATGGAGAAGTCTCAACTTGGAATATAATAACCTGGAAGGATCGGTTCCCTCGAGAGCTCAACAAGA  
CTTTAGAAGGGGTTTCAGGGAAGTTTTGAACACAACCTGTCTCATTGTCCAA

>M6-PGSC0003DMG400010519M6LRR-RLP\_124

AAAGCCTTACAAGTGGCTCCATATATGCTGTAATTTTCCTAAACATGTAAAAGTAAGTTACTACAAGG  
AATTTCTGGATGAGTTATTGGCTGAAACAAACCAATTTCTTGAATCATA

>M6-PGSC0003DMG400010519M6LRR-RLP\_1302

CTTTCAGCTATGTCATGGACAGAGGACAGCTTCAGAATGTCATGGAAGAGACCATAATTAGCTGAGAAT  
GTTTTGAAAATTACATTGCATTTTTTTAATGTTTTCCAGTTTCCAATAT

>M6-PGSC0003DMG400010519M6LRR-RLP\_1364

TGAGAATGTTTTGAAAATTACATTGCATTTTTTTAATGTTTTCCAGTTTCCAATATAGTTTATAAGTTGC  
ATTTTTTTTTATGTTTTCTAGTTTCCAATATAGTAGAAGTTCCTTA

>M6-PGSC0003DMG400010519M6LRR-RLP\_1426

TATAAGTTGCATTTTTTTTTATGTTTTCTAGTTTCCAATATAGTAGAAGTTCCTTAAATTTGTCAATATAT  
TTTATTTAGAACTCGAACTACAACATGTTTCCTATTAAGCACCTGA

>M6-PGSC0003DMG400010519M6LRR-RLP\_1488

TGTCAATATATTTTATTTAGAACTCGAACTACAACATGTTTCCTATTAAGCACCTGACATGATGAACTGT  
GTTAGAGTTTTGCCCTGAATGTATGATATTATCAGTTATAGCAAAGTAT

>M6-PGSC0003DMG400010519M6LRR-RLP\_1550

ATGAACTGTGTTAGAGTTTTGCCCTGAATGTATGATATTATCAGTTATAGCAAAGTATATTTGCATAACA  
ATATTGAACAAGAGTATCAAAATTGGTTAAGTATACGACATGAGCAAGAG

>M6-PGSC0003DMG400010519M6LRR-RLP\_1612

GCATAACAATATTGAACAAGAGTATCAAAATTGGTTAAGTATACGACATGAGCAAGAGTATCAAAATTA  
ACTACTGAAGCAACATGGCAGCCAACGTTTTAAGTGCGAGCTTGTTTTAAG

>M6-PGSC0003DMG400010519M6LRR-RLP\_1674

AAAATTAACACTGAAGCAACATGGCAGCCAACGTTTTAAGTGCGAGCTTGTTTTAAGTTCAACTATAAG

TGATCTTGTTTACTTTGTTGGTTCCAAGATTAGATAAATTCTCATAATTT

>M6-PGSC0003DMG400010519M6LRR-RLP\_1736

ACTATAAGTGATCTTGTTTACTTTGTTGGTTCCAAGATTAGATAAATTCTCATAATTTATGGTGAAGCAAG  
GTTGCTGCAAAGAAAAGTGATTCACTCTCAACTACCTTACTAACATAAA

>M6-PGSC0003DMG400010519M6LRR-RLP\_186

CTACAAGGAATTTCTGGATGAGTTATTGGCTGAAACAAACCAATTTCTTGAATCATACGTTACTAGTAT  
GGCGTTGTATGATAACACCATACTGGCAACATATGACATTTTGATCAATC

>M6-PGSC0003DMG400010519M6LRR-RLP\_1922

AGCACCATACTAGTAGTAACTGGAAAAATCAAACAAGCTATAATGAAAGTTGTCTTAATTGCTAAAGA  
AGCTCATGAAGACAATGACATTACAACCTCATTTCTGTTGCCTAGTCTAATA

>M6-PGSC0003DMG400010519M6LRR-RLP\_1984

CTAAGAAGCTCATGAAGACAATGACATTACAACCTCATTTCTGTTGCCTAGTCTAATAAAAACAATATTT  
GCCACCTAAAGATATATTTTAGCAGAATTGCATGTCTAAGAACTTAAGTA

>M6-PGSC0003DMG400010519M6LRR-RLP\_2046

CAATATTTGCCACCTAAAGATATATTTTAGCAGAATTGCATGTCTAAGAACTTAAGTACCTTTTTCAGGGG  
AAGAAGCTGGGAACAGTCCTTTACAAGCATCTGTATTCCACAAACATGA

>M6-PGSC0003DMG400010519M6LRR-RLP\_2108

TTTCAGGGGAAGAAGCTGGGAACAGTCCTTTACAAGCATCTGTATTCCACAAACATGAAATCAAAGAG  
CAAGTCAGGCCCGAGACTACAAGCTGCTGTATTTAAAAGCATCTCAATGGA

>M6-PGSC0003DMG400010519M6LRR-RLP\_2170

AAAAGAGCAAGTCAGGCCCGAGACTACAAGCTGCTGTATTTAAAAGCATCTCAATGGATTAGAGAAAAA  
ACCTGACACCCACGAGTGTTAAGCTAGTAATATTATAGCTATTGACAGAAG

>M6-PGSC0003DMG400010519M6LRR-RLP\_2232

AGAAAAACCTGACACCCACGAGTGTTAAGCTAGTAATATTATAGCTATTGACAGAAGGCTTGAAAATT  
GCACTACTTGTGTAATGATATGTGTAATTCATTGTTATTTTATACTCGTTC

>M6-PGSC0003DMG400010519M6LRR-RLP\_2294

GAAAATTGCACTACTTGTGTAATGATATGTGTAATTCATTGTTATTTTATACTCGTTCATGAGTTTTTGAA  
GTTGAGAAAGAGATTCTGAAAGTAACTAGTGAAGATTTGAGAATA

>M6-PGSC0003DMG400010519M6LRR-RLP\_2356

GTTTTGAAGTTGAGAAAGAGATTCTGAAAGTAACTAGTGACTGAAGATTTGAGAATAGCAATTCACAC  
ATTTTCTAAGAGTGGGAATTGTGTACAAAAATGTACTATTTCTTCTAAAGT

>M6-PGSC0003DMG400010519M6LRR-RLP\_2418

TTCACACATTTTCTAAGAGTGGGAATTGTGTACAAAAATGTACTATTTCTTCTAAAGTAACGTCTGCATTT  
TGGAAGAAAATCTCACCTCCTATATGTGTCCGAGTGTTCCCTTTGCTGTC

>M6-PGSC0003DMG400010519M6LRR-RLP\_248

ACTAGTATGGCGTTGTATGATAACACCATACTGGCAACATATGACATTTTGATCAATCCAAGGCAAGTTT  
TTTTTCTTTTTTGTAAATGGTATCAGGCTAACTTGTATGTGCTTCAACTG

>M6-PGSC0003DMG400010519M6LRR-RLP\_2480

TCTGCATTTTGGGAAGAAAATCTCACCTCCTATATGTGTCCGAGTGTTCCCTTTGCTGTCAAATGGGGGCATC  
CCATACAGAAACTCAAAGCATAGGACACCAAGGCTCTAAATGTCCACAC

>M6-PGSC0003DMG400010519M6LRR-RLP\_2604

ATCATGCTCCACACTTTCCACTGCAAGTTCAACAATTTACATATCAGAAAAAATGTAAAAACAGATAACA  
AAATGTTAAAAGCTAAACTCTCATACACGCCCATGTGAAGGTAAAAAGCA

>M6-PGSC0003DMG400010519M6LRR-RLP\_2666

AGATAACAAAATGTTAAAAGCTAAACTCTCATACACGCCCATGTGAAGGTAAAAGCAATGTATAACAT  
TCACACATAGTCCGCCTTAAATCAAAGGTATGCACTGACCACCCAAAGTCT

>M6-PGSC0003DMG400010519M6LRR-RLP\_2728

ATAACATTCACACATAGTCCGCCTTAAATCAAAGGTATGCACTGACCACCCAAAGTCTGCCGTTTTGAGT  
TCAACTTAAAAGAAGAAATATTAAGCTGTCATTTTACTGCAATGCATTG

>M6-PGSC0003DMG400010519M6LRR-RLP\_2790

TTTTGAGTTCAACTTAAAAGAAGAAATATTAAGCTGTCATTTTACTGCAATGCATTGTATATACTGTTTA  
GCAATGCTAAGTTTATACCTCAATATCTTCTCTGTGTATTGTGTGATTC

>M6-PGSC0003DMG400010519M6LRR-RLP\_2852

TACTGTTTAGCAATGCTAAGTTTATACCTCAATATCTTCTCTGTGTATTGTGTGATTCCCATGACAGTATAT  
TGAAAGTTCGTAAGAATTGGGAAGAAGCAATGCAGAAGAGGCAACGAC

>M6-PGSC0003DMG400010519M6LRR-RLP\_2914

GACAGTATATTGAAAGTTCGTAAGAATTGGGAAGAAGCAATGCAGAAGAGGCAACGACTAGTTACCAG  
GTCATAAAAGTAACCGTAAGTATTTCAACTTCACGATGAAGCTGATGTTCAA

>M6-PGSC0003DMG400010519M6LRR-RLP\_2976

TACCAGGTCATAAAAGTAACCGTAAGTATTTCAACTTCACGATGAAGCTGATGTTCAACCAGGGACTGTT  
TTAGCTGGCTCTTGAACAACACTTTTAATGCGACGATATGATTGCTATGT

>M6-PGSC0003DMG400010519M6LRR-RLP\_3038

GGACTGTTTTAGCTGGCTCTTGAACAACACTTTTAATGCGACGATATGATTGCTATGTTTCCAATAAACAA  
CTAACCTTAGTATTGGAATGTGATTGTAGAATGTTAAGTCTATCGAATA

>M6-PGSC0003DMG400010519M6LRR-RLP\_310

GCAAGTTTTTTTTCTTTTTGTAATGGTATCAGGCTAACTGTATGTGCTTCAACTGGATAACAAGATTG  
TGCATTTTCAACACTAAGAATAATAAATAATCTAGAAGGTGATAGACAA

>M6-PGSC0003DMG400010519M6LRR-RLP\_3100

AATAAACAACTAACCTTAGTATTGGAATGTGATTGTAGAATGTTAAGTCTATCGAATAGAATTCGAAAA  
TCTTTTAAGCCATGTCCACAAGATCCCACCAATCCATATCAAATATAACA

>M6-PGSC0003DMG400010519M6LRR-RLP\_3162

TCGAAAAATCTTTTAAGCCATGTCCACAAGATCCCACCAATCCATATCAAATATAACAAATATGTTGAATG  
AGAGATTCTCACTCGCAATGCATAAATCCGAGGCATTGAAAAAGTAAGT

>M6-PGSC0003DMG400010519M6LRR-RLP\_3224

TGTTGAATGAGAGATTCTCACTCGCAATGCATAAATCCGAGGCATTGAAAAAGTAAGTAGTTTTATCAGC  
CATTCTTAACATGTAAAGGTTTAAAGGACTTACATACATGACCGAACTTT

>M6-PGSC0003DMG400010519M6LRR-RLP\_3286

TTATCAGCCATTCTTAACATGTAAAGGTTTAAAGGACTTACATACATGACCGAACTTTCCTCTTCCAAGAG  
GCTTCCCAATGTGCGAAACCATGAAGTGTCCGCCTCTTTATATTAGCCTC

>M6-PGSC0003DMG400010519M6LRR-RLP\_3348

TTCCAAGAGGCTTCCAATGTGCGAAACCATGAAGTGTCCGCCTCTTTATATTAGCCTCTGATGAAGTCTG  
CAGAAGTTGAAAATTCTGTAGTCCATTTAAAAGATCAGTTAATTAAAAAT

>M6-PGSC0003DMG400010519M6LRR-RLP\_3410

GAAGTCTGCAGAAGTTGAAAATTCTGTAGTCCATTTAAAAGATCAGTTAATTAAAAATAACAATAAATTC  
TTGTTGTTGTTGTGTACAGTATAACAGATCAGTTAATTAAAAATAACAAT

>M6-PGSC0003DMG400010519M6LRR-RLP\_3472

ATAAATTCTTGTTGTTGTTGTGTACAGTATAACAGATCAGTTAATTAAAAATAACAATAAATTGTTCTTTT

AATTTTCATGATAACATATGGTTATTTACATCACAAAGTTGTACGATC

>M6-PGSC0003DMG400010519M6LRR-RLP\_3534

TGTTCTTTTAATTTTCATGATAACATATGGTTATTTACATCACAAAGTTGTACGATCCAGCTGAGCTTGA

TTCCATTTAGTGCGGGAAGAATACAATTTGCTTTACATGCACTGGTAGA

>M6-PGSC0003DMG400010519M6LRR-RLP\_3596

TGAGCTTGATTCCATTTAGTGCGGGAAGAATACAATTTGCTTTACATGCACTGGTAGAAGATTATCTCAA

TTAACTGCAACTTTGTTCACTACTGTCCTTTACAGGACTTCATGAACAAG

>M6-PGSC0003DMG400010519M6LRR-RLP\_3658

TATCTCAATTAAGTCAACTTTGTTCACTACTGTCCTTTACAGGACTTCATGAACAAGCAATGAACCACAA

GTGATCGCAACTAACATAAAAGCTTAACTCAATCAACAAATTTTAACT

>M6-PGSC0003DMG400010519M6LRR-RLP\_372

ACAAGATTGTGCATTTTCAACACTAAGAATAATAATAATCTAGAAGGTGATAGACAAGAGGGGTTCTT

GACATCGTCTATCGGGAACGTAACAGAACTTGCTCTCTGAATCTAGGCAG

>M6-PGSC0003DMG400010519M6LRR-RLP\_3720

GAACCACAAGTGATCGCAACTAACATAAAAGCTTAACTCAATCAACAAATTTTAACTAACCTCAACATT

CATCCTTTAGCAAGGTGGTACACTTGGAAGTATCAAGTACAAGTCAACTCAACT

>M6-PGSC0003DMG400010519M6LRR-RLP\_3782

TCAACATTCATCCTTTAGCAAGGTGGTACACTTGGAAGTATCAAGTACAAGTCAACTCAATCTACATACT

AATTTATTATAACTTCAAAAATAACCAAACACAGTGAGGTCAGATCATG

>M6-PGSC0003DMG400010519M6LRR-RLP\_434

GGTTCTTGACATCGTCTATCGGGAACGTAACAGAACTTGCTCTCTGAATCTAGGCAGGAACAAGTTTAG

AGGACCAGTGCCAGAGAGTATTACTTATTTGAGGAACTTACAAGTCTTC

>M6-PGSC0003DMG400010519M6LRR-RLP\_496

AAGTTTAGAGGACCAGTGCCAGAGAGTATTACTTATTTGAGGAACTTACAAGTCTTCAACTTTATGAGA

ATTTTTCTCTAGTAGTCTTGTTAATGACATTGGTGTCTTACAAAACCTT

>M6-PGSC0003DMG400010519M6LRR-RLP\_558

TTATGAGAATTTTTCTCTAGTAGTCTTGTTAATGACATTGGTGTCTTACAAAACCTTGAAGATTCTTGATG

TCGCGAATAATAAGCTATCTGGTTCAATCCCTTCATCGACTACATCACT

>M6-PGSC0003DMG400010519M6LRR-RLP\_62



CATAACGAAAATAGTACGGTGCTCCAAACAGATTTTTGCCATTTCTATAGCCTACTTCTTCCAAAGCCTTC  
ACAAGTGGCTCCATATATGCTGTAAATTTTCCTAAACATGTAAAAAGTAA

>M6-PGSC0003DMG400010519M6LRR-RLP\_620

TTCTTGATGTCGCGAATAATAAGCTATCTGGTTCAATCCCTTCATCGACTACATCACTTAGAAGTTTGACG  
CGATTAGACCTGTCTAACAAATGAATTGACAGGGAAAATTCCTCAACTCA

>M6-PGSC0003DMG400010519M6LRR-RLP\_682

AGTTTGACGCGATTAGACCTGTCTAACAAATGAATTGACAGGGAAAATTCCTCAACTCAACGGTTTATGGA  
AACTCCATTCATTTGACATTTCCAATAACCAAATTTAAGGGAATTTGCCA

>M6-PGSC0003DMG400010519M6LRR-RLP\_744

TTTATGGAAACTCCATTCATTTGACATTTCCAATAACCAAATTTAAGGGAATTTGCCACAACCTCCATCGA  
AGATCAAGACATTGTCCTAAGCCACAACCTTGCTATCAGGACACATTAC

>M6-PGSC0003DMG400010519M6LRR-RLP\_806

TTCCATCGAAGATCAAGACATTGTCCTAAGCCACAACCTTGCTATCAGGACACATTACCACAGTGCATAA  
ACTAAGACAGCTAAGAACATTAGACCTTAGTGAAAACAGATTTTCAGGAG

>M6-PGSC0003DMG400010519M6LRR-RLP\_868

GTGCATAAACTAAGACAGCTAAGAACATTAGACCTTAGTGAAAACAGATTTTCAGGAGGAATAAACAAA  
GGGATCTTCATGATACCTGCATCAAGTCACGTAAGCATTACAGTAAACCGG

>M6-PGSC0003DMG400010519M6LRR-RLP\_930

AAACAAAGGGATCTTCATGATACCTGCATCAAGTCACGTAAGCATTACAGTAAACCGGTTACAGTGTTT  
GAGGTGGTAGAATTCTCTGATAAAGAATCACAGCTTCACACGTTAGACGT

>M6-PGSC0003DMG400010519M6LRR-RLP\_992

CAGTGTTTGAGGTGGTAGAATTCTCTGATAAAGAATCACAGCTTCACACGTTAGACGTAAATGCCAATC  
GTCTACATGGTCATTTTCCTGTGAACTTGGATACTTACCCAACTTAACAG

>M6-PGSC0003DMG400010577-(rev)M6RLKmalectin\_0

TTTGATGGTAGGCACACTATTCCGCTTCAAATGTTTGTATCGCACTTGTAATTCTAACAAATCAATTGA  
ACATGTTTCTCTCTCAGTTATTCACTTCTTATTGTGTATTCAAAAAAT

>M6-PGSC0003DMG400010577-(rev)M6RLKmalectin\_1037

TGATAAATGAAGGCCAAAGGAATTTCACTATTGTCATAACAATCAGAATGCTGAAGATGATGCTGAAG  
GGATCAAATGGAGTGGGGGGCATGGAATTTCTGTATACAGGGACTATGTTG

>M6-PGSC0003DMG400010577-(rev)M6RLKmalectin\_1159

ATTATGGAGGGTGATAGAAGGGAAGGGAAGCGTAACCTTACTATAGTTTTGCAGCCAAACTTTGCTTCA  
ATCGGTAAACATGCTAATGCCATCTTAAATGGGCTAGAAGTCTTCAAGATA

>M6-PGSC0003DMG400010577-(rev)M6RLKmalectin\_122

TCATATCTACTGCAACTAACATTCATGAAAACGTTGCCATATCATGTGGTGCCTCTGCTAATTCCCCTGCA  
CCAGATGGACGACTATGGATTGGAGATTCTACTTTCACTTCCTCATTTC

>M6-PGSC0003DMG400010577-(rev)M6RLKmalectin\_1220

TTGCTTCAATCGGTAAACATGCTAATGCCATCTTAAATGGGCTAGAAGTCTTCAAGATAAGCAACCCTGA  
CAACAATCTTGGTAGTGTGAGCCCAGTGCATCCTGTGACAAGTTCAACAC

>M6-PGSC0003DMG400010577-(rev)M6RLKmalectin\_1281

CAACCCTGACAACAATCTTGGTAGTGTGAGCCCAGTGCATCCTGTGACAAGTTCAACACCAGAAAAATC  
AGAGGAAACTGTGCTGTTCTATACAAAGAATCAAATTGCAACTGCACTGAT

>M6-PGSC0003DMG400010577-(rev)M6RLKmalectin\_1342

GAAAAATCAGAGGAAACTGTGCTGTTCTATACAAAGAATCAAATTGCAACTGCACTGATATTTATAGTCA  
CTTTGATTAACGTTGCTGTTTATTACATTAGGCGTAATGCAGAAATAAAG

>M6-PGSC0003DMG400010577-(rev)M6RLKmalectin\_1403

TTATAGTCACTTTGATTAACGTTGCTGTTTATTACATTAGGCGTAATGCAGAAATAAAGTCTGGCAAGAC  
ATACAATGGAATATCTTCAGGAGTGCATCAGTGTGTCGTCATTTTCACTGG

>M6-PGSC0003DMG400010577-(rev)M6RLKmalectin\_1464

TGGCAAGACATACAATGGAATATCTTCAGGAGTGCATCAGTGTGTCGTCATTTTCACTGGATGAGATGGA  
AAGATCAACGAACAATTTTGATCCTCAGCTTGTGTCATTGGTAGCGGTGGATA

>M6-PGSC0003DMG400010577-(rev)M6RLKmalectin\_1586

GTACAGTATACAAAGGGGATATTGATGGTGGAGAGACCACTGTAGCAGTTAAGCGATCGAAACCAGGA  
TCTAGCCAGGGGGAGAAAGAGTTTTGGACGGAAATCAATATGTTATCTACAC

>M6-PGSC0003DMG400010577-(rev)M6RLKmalectin\_1647

ACCAGGATCTAGCCAGGGGGAGAAAGAGTTTTGGACGGAAATCAATATGTTATCTACACACCGCCATGA  
GAACCTTCTCTCCCTAATTGGTACTGCAATGAAGGTCAAGAGATGTTATT

>M6-PGSC0003DMG400010577-(rev)M6RLKmalectin\_1708

CGCCATGAGAACCTTCTCTCCCTAATTGGTACTGCAATGAAGGTCAAGAGATGTTATTAGTTTATGATT

ATATGCCTCGAGGATCACTTGCTGACAACTGTACAAAATGGACAAAAAT

>M6-PGSC0003DMG400010577-(rev)M6RLKmalectin\_1769

TTTATGATTATATGCCTCGAGGATCACTTGCTGACAACTGTACAAAATGGACAAAAATAGCTCATCTCT  
CTCTTGGGAACGGAGACTCAAGATTGCTATGGGTGCTGCACGTGGACTGG

>M6-PGSC0003DMG400010577-(rev)M6RLKmalectin\_183

TTCCCCTGCACCAGATGGACGACTATGGATTGGAGATTCTACTTTCCTCCTCATTCTACACTTAACTG  
GAAAATCTATTAATTCAAGAGTACCTCACCAAGCTGCCTTGTCCGATCC

>M6-PGSC0003DMG400010577-(rev)M6RLKmalectin\_1830

CTCATCTCTCTCTTGGGAACGGAGACTCAAGATTGCTATGGGTGCTGCACGTGGACTGGATTTCTTCAT  
ACATCTCAAATAGGGTGATACATCGTGATATCAAAGCTCAAACATTCT

>M6-PGSC0003DMG400010577-(rev)M6RLKmalectin\_1891

TTCCCTCATACTCTCAAATAGGGTGATACATCGTGATATCAAAGCTCAAACATTCTATTGGATGAAA  
ACTGGGAAAGTAAGATCTCAGATTTGGGTTGTCCAAAATGGGGCCTGGA

>M6-PGSC0003DMG400010577-(rev)M6RLKmalectin\_2013

TGAATCAGCTACTCATGTTAGTACACAAGTCAAAGGCACATTTGGGTACCTCGATCCTGAGTACTTCTG  
ACTAATAGATTGACATGGAAAAGTATGATGTATATGCTTTTGGAGTAGTACT

>M6-PGSC0003DMG400010577-(rev)M6RLKmalectin\_2074

TACTTCCTGACTAATAGATTGACATGGAAAAGTATGATGTATATGCTTTTGGAGTAGTACTATTTGAATTGCT  
CTCAGGAAGACCTGCAGTCGATATGAGCCTGACTGAGGAACAACATGGA

>M6-PGSC0003DMG400010577-(rev)M6RLKmalectin\_2135

TTGAATTGCTCTCAGGAAGACCTGCAGTCGATATGAGCCTGACTGAGGAACAACATGGACTTGTAGCAT  
GGGCCAAACAATGCATCAAGGAAGGAGAAATTAATAAGCTTATTGATCAGA

>M6-PGSC0003DMG400010577-(rev)M6RLKmalectin\_2196

TGTAGCATGGGCCAAACAATGCATCAAGGAAGGAGAAATTAATAAGCTTATTGATCAGAATCTGTTGGG  
GTCCATCTCATCACTTGTCTAAAGGCGTTTATAGGAATTTCTGCTAAATG

>M6-PGSC0003DMG400010577-(rev)M6RLKmalectin\_2257

CTGTTGGGGTCCATCTCATCACTTGTCTAAAGGCGTTTATAGGAATTTCTGCTAAATGCTTCGATGGTC  
GTCCGCAAGAACGGCCTGCGATGTCTGAAGTGGTGAAAAGCCTGGAATTA

>M6-PGSC0003DMG400010577-(rev)M6RLKmalectin\_2318

TCGATGGTCCGCAAGAACGGCCTGCGATGTCTGAAGTGGTGAAAAGCCTGGAATTAGCATTAGTAT  
TTCAGCAGAACGAAGGTGAAGGTATCATTTCAATTTGATGACACATCAACGT

>M6-PGSC0003DMG400010577-(rev)M6RLKmalectin\_2379

ATTAGTATTTTCAGCAGAACGAAGGTGAAGGTATCATTTCAATTTGATGACACATCAACGTCATCTCAGTTA  
CAGATTGAAGGAGAGAGGGCATCCATTAAGAGGATTGTAATGGCGGTGA

>M6-PGSC0003DMG400010577-(rev)M6RLKmalectin\_244

CACTTAACTGGAAAATCTATTAATTCAAGAGTACCTCACCAAGCTGCCTTGTCCGATCCAGTTCCTTATAA  
CTCTGCTCGAACGTCTCGCCATCAGTTTACCTATCAATTTTCAATGAAA

>M6-PGSC0003DMG400010577-(rev)M6RLKmalectin\_2440

TCTCAGTTACAGATTGAAGGAGAGAGGGCATCCATTAAGAGGATTGTAATGGCGGTGATACAACAGA  
AAGGAGTGCCATCTCAAGGGAAAAGGTAAAATCTGAGGATAAAAGTCCCTAC

>M6-PGSC0003DMG400010577-(rev)M6RLKmalectin\_2501

CAACAGAAAGGAGTGCCATCTCAAGGGAAAAGGTAAAATCTGAGGATAAAAGTCCCTACACTGCTTCAC  
CAAGATGGTGGGATGTTTCGTAGCCATTTTCAGAAAAGCACCAACCAAAGCCAG

>M6-PGSC0003DMG400010577-(rev)M6RLKmalectin\_2562

TGCTTCACCAAGATGGTGGGATGTTTCGTAGCCATTTTCAGAAAAGCACCAACCAAAGCCAGGGAATTTTGT  
TTATCCAGATAGCCAAATATCACAGCACCCAAATTTAAGGATATTTTCTTT

>M6-PGSC0003DMG400010577-(rev)M6RLKmalectin\_2623

AATTTTGTATCCAGATAGCCAAATATCACAGCACCCAAATTTAAGGATATTTTCTTTCTCTGAACTCAA  
GGCCGCCACCAGAAAATTTAGCAAGGACACGGTGCTGGGAGAAGGTGGT

>M6-PGSC0003DMG400010577-(rev)M6RLKmalectin\_2684

CTGAACTCAAGGCCGCCACCAGAAAATTTAGCAAGGACACGGTGCTGGGAGAAGGTGGTTTTGGTAAA  
GTTTACAAGGGTTACCTTGCTGAGTCGCTTTCTTCCAAGAGTGGCCGGACAG

>M6-PGSC0003DMG400010577-(rev)M6RLKmalectin\_2745

TGGTAAAGTTTACAAGGGTTACCTTGCTGAGTCGCTTTCTTCCAAGAGTGGCCGGACAGTAATTGCTGTC  
AAGCAATTGAGTTCTGAAAGATTTCAAGAGTGGCAGGTGATTCCTCTGTG

>M6-PGSC0003DMG400010577-(rev)M6RLKmalectin\_2806

ATTGCTGTCAAGCAATTGAGTTCTGAAAGATTTCAAGAGTGGCAGGTGATTCCTCTGTGCTAAATATGTG  
AACTTCTAGTTTAAAGTTTTCTAATTGAAGCTATTTCTAGTTTATGCCTGG

>M6-PGSC0003DMG400010577-(rev)M6RLKmalectin\_2867

AAATATGTGAACTTCTAGTTTAAGTTTTCTAATTGAAGCTATTTCTAGTTTATGCCTGGCACTAGCTTGCTT  
CATTTTAATGATGCTGCAATTGCTCTCTTCTTTATTGTCTGTCTGCGA

>M6-PGSC0003DMG400010577-(rev)M6RLKmalectin\_2928

CTAGCTTGCTTCATTTTAATGATGCTGCAATTGCTCTCTTCTTTATTGTCTGTCTGCGAGAAATATAGATT  
ACGTAGAAGCACTTGAAATTGATTATTACTTAGTAGTAACACATTCT

>M6-PGSC0003DMG400010577-(rev)M6RLKmalectin\_2989

AATATAGATTTACGTAGAAGCACTTGAAATTGATTATTACTTAGTAGTAACACATTCTAGGTAAATGTT  
GGTTATATATCTCTTGCAAATTTCAATTCATTTGTTAATTATGCAGTCTG

>M6-PGSC0003DMG400010577-(rev)M6RLKmalectin\_3050

GTAAATGTTGGTTATATATCTCTTGCAAATTTCAATTCATTTGTTAATTATGCAGTCTGAGGTGAGCATTC  
TTGGAAGACTTTCTCATCCTAACCTCATCAAACCTCTGGGTTACTGCCA

>M6-PGSC0003DMG400010577-(rev)M6RLKmalectin\_3111

GTGAGCATTCTTGGAAGACTTTCTCATCCTAACCTCATCAAACCTCTGGGTTACTGCCAGGAAGATAAAA  
AACTACTGCTTGTCTATGAGTTTATGCCAAAGGGCAGCTTGAACAACCAT

>M6-PGSC0003DMG400010577-(rev)M6RLKmalectin\_3172

AAGATAAAAACTACTGCTTGTCTATGAGTTTATGCCAAAGGGCAGCTTGAACAACCATCTTTTTGGAAG  
TAAGAGATTATCTATACGTTCCGTCAATAATATATAACATATTGTAGATC

>M6-PGSC0003DMG400010577-(rev)M6RLKmalectin\_3233

TTTTGGAAGTAAGAGATTATCTATACGTTCCGTCAATAATATATAACATATTGTAGATCAAAGCAGCAAG  
GAATGTGCCTAGCTACTTCATGCTCCACCTAAACATATTTGTTATCTTTG

>M6-PGSC0003DMG400010577-(rev)M6RLKmalectin\_3294

AGCAGCAAGGAATGTGCCTAGCTACTTCATGCTCCACCTAAACATATTTGTTATCTTTGTTTGCTTAGGGC  
ACTCTGTTGCTTTGTCACTTACATGGAATGTAAGGGTTCAAATTATGAT

>M6-PGSC0003DMG400010577-(rev)M6RLKmalectin\_3355

TGCTTAGGGCACTCTGTTGCTTTGTCACTTACATGGAATGTAAGGGTTCAAATTATGATTGGCGCAGCTC  
GAGGCTTGGCATTCTACATGCATCAGAAAAGCAAGTCATTTACAGAGAC

>M6-PGSC0003DMG400010577-(rev)M6RLKmalectin\_3416

GCGCAGCTCGAGGCTTGGCATTCTACATGCATCAGAAAAGCAAGTCATTTACAGAGACTTCAAAGCCT

CAAATATATTACTTGATGGCGTATGTTCTCTTACTTCTCCCTAGGAATAT

>M6-PGSC0003DMG400010577-(rev)M6RLKmalectin\_3477

CAAAGCCTCAAATATATTACTTGATGGCGTATGTTCTCTTACTTCTCCCTAGGAATATACCTTTATTAGCG

CAAGTAATAAAGGTATCACAAAGCCCTTTTCTTACTGGGCCCTTTTGG

>M6-PGSC0003DMG400010577-(rev)M6RLKmalectin\_3538

CTTTATTAGCGCAAGTAATAAAGGTATCACAAAGCCCTTTTCTTACTGGGCCCTTTTGGTTTACACACAC

TGTTTTGCCTTAAGTTTTGGACCTATTTATCACAGAGAGACAACACCAG

>M6-PGSC0003DMG400010577-(rev)M6RLKmalectin\_3599

TTACACACACTGTTTTGCCTTAAGTTTTGGACCTATTTATCACAGAGAGACAACACCAGACGTATAACAG

TGAAAACATTAGAGAAAGGTTGTTATTAATAACTGTTCCATGACATTC

>M6-PGSC0003DMG400010577-(rev)M6RLKmalectin\_366

GGGACACAAGTTCATACGCCTGCACTTCAAACCAGCTTCATACAAAGGTTTCATCAAGTCCAAACCCATT

TTTACTGTCAAACTGATCAGCATAACCTGCTCAGTGACTTCATGCCTAC

>M6-PGSC0003DMG400010577-(rev)M6RLKmalectin\_3660

GTATAACAGTGAAAACATTAGAGAAAGGTTGTTATTAATAACTGTTCCATGACATTCTTTATTTCTTTA

ATGTTTCAGTCTTACAATGCGAAGATAGCAGATTTTGGCATTGCAAAC

>M6-PGSC0003DMG400010577-(rev)M6RLKmalectin\_3721

TATTTCTTTAATGTTTCAGTCTTACAATGCGAAGATAGCAGATTTTGGCATTGCAAACAAGGTATTTTCGG

CTAGTCAATCATATGTGACAACACAGATACTTGGAACGTACGGTTATGC

>M6-PGSC0003DMG400010577-(rev)M6RLKmalectin\_3782

GGTATTTTCGGCTAGTCAATCACATGTGACAACACAGATACTTGGAACGTACGGTTATGCTGCTCCTGAGT

ATATTGCAACAGGTAACTTGGAGTCTGTTGGGCTTCTGCACTTGGAAAT

>M6-PGSC0003DMG400010577-(rev)M6RLKmalectin\_3843

CTCCTGAGTATATTGCAACAGGTAACTTGGAGTCTGTTGGGCTTCTGCACTTGGAAATTCTACTTCTCTT

GAATCACATGCATCTTGTGCTTACAAGTTTAAACATATAGTCAAGTGTA

>M6-PGSC0003DMG400010577-(rev)M6RLKmalectin\_3904

TACTTCTCTTGAATCACATGCATCTTGTGCTTACAAGTTTAAACATATAGTCAAGTGTATTATTTGTTTTCT

ACAGGATTTTTGTACTTGAAGAGCGATGTCTATGCTTTTGGTGTCTTT

>M6-PGSC0003DMG400010577-(rev)M6RLKmalectin\_3965

ATTTGTTTTCTACAGGATTTTTGTAAGAGCGATGTCTATGCTTTTGGTGTCTTTTAGTGAAATG  
CTAACAGGTCTACGAGTAATAGACTTAAACCGTCCAAGCAACCAGCATA

>M6-PGSC0003DMG400010577-(rev)M6RLKmalectin\_4026

AGTGAAATGCTAACAGGTCTACGAGTAATAGACTTAAACCGTCCAAGCAACCAGCATAATCTAATTGA  
CTGGATTAAGCCTCATTATCTGACAGAAGGAAGTTGAAGGACAGAATCGA

>M6-PGSC0003DMG400010577-(rev)M6RLKmalectin\_4087

CTAATTGACTGGATTAAGCCTCATTATCTGACAGAAGGAAGTTGAAGGACAGAATCGATTCACGGCTG  
GGAGGAAAATATCCATCCAGAGCTGCAGTACAAATAGCACAACTGGCACTA

>M6-PGSC0003DMG400010577-(rev)M6RLKmalectin\_4148

CACGGCTGGGAGGAAAATATCCATCCAGAGCTGCAGTACAAATAGCACAACTGGCACTATCATGTCTTG  
GAAATGAACCTAAAAGCAGACCATCGATGAAGGAAATAGTGGAGAACTAG

>M6-PGSC0003DMG400010577-(rev)M6RLKmalectin\_4209

ATGTCTTGAAATGAACCTAAAAGCAGACCATCGATGAAGGAAATAGTGGAGAACTAGAACAGATTG  
AAGTTACCAATGAAAGATCCAAGGACCATGCTTCTCCTTCTAATCCAAGGAA

>M6-PGSC0003DMG400010577-(rev)M6RLKmalectin\_427

AAACCCATTTTTACTGTCAAACTGATCAGCATACCCTGCTCAGTGACTTCATGCCTACCCTTGCTGCAGG  
CATCAACTATTTCAAAAAGGAATTTGCATCAATGTAAAAGAAAGTGAA

>M6-PGSC0003DMG400010577-(rev)M6RLKmalectin\_4270

CAGATTGAAGTTACCAATGAAAGATCCAAGGACCATGCTTCTCCTTCTAATCCAAGGAACCGGGCCTATC  
CACTCCTTAGAAGAGCAGAGTGAATATGATACTACTTTTTACAATATGAA

>M6-PGSC0003DMG400010577-(rev)M6RLKmalectin\_4331

GGGCCTATCCACTCCTTAGAAGAGCAGAGTGAATATGATACTACTTTTTACAATATGAAGAAGCTACTTG  
TTAAAATTTCAACTGTGAGTACTGTCACTTTAGGCGAGATCGTGCCAGT

>M6-PGSC0003DMG400010577-(rev)M6RLKmalectin\_4697

TCATTCCTTTGTCTAGAAAATCCAATCTTGGCAGAATTGTTTATCGGAGAATATTTGTGTCCCCATTCCT  
TCTATATTACTATAGCTCCTGTGGATCCTGGAAAGGTTTCATGACTGC

>M6-PGSC0003DMG400010577-(rev)M6RLKmalectin\_4758

CCCCATTCCTTCTATATTACTATAGCTCCTGTGGATCCTGGAAAGGTTTCATGACTGCTATAAATCAGTA  
ATGATGCCTTCTATGTAGTTCTATTAGTCTCTCAAAGAATTCTGAGAG

>M6-PGSC0003DMG400010577-(rev)M6RLKmalectin\_4819

TAAATCAGTAATGATGCCTTCTATGTAGTTCTATTAGTCTCTCAAAGAATTCTGAGAGTTAACAGACATA  
AAATTCTAGAATATGATTTTTTTTTGCAATCATTGATCAATGGATCGGG

>M6-PGSC0003DMG400010577-(rev)M6RLKmalectin\_488

TTGCTGCAGGCATCAACTATTTCAAAAAGGAATTTGCATCAATGAAAAGAAAGTGAAACATTAAGCAT  
AACATTCATACCATCTCGAAAATCAGGCTTTTCAGAAGACACTTATGCTT

>M6-PGSC0003DMG400010577-(rev)M6RLKmalectin\_4880

AACAGACATAAAATTCTAGAATATGATTTTTTTTTGCAATCATTGATCAATGGATCGGGTCTTATCTTTAC  
TGCTCCTTGTCTAACCTGAAGAGGGATCACAGATTTGCCTTTTCTGAT

>M6-PGSC0003DMG400010577-(rev)M6RLKmalectin\_4941

TTATCTTTACTGCTCCTTGTCTAACCTGAAGAGGGATCACAGATTTGCCTTTTCTGATCCTACTCTTCAGG  
TTATGTATGTGTCTAGGGCACAAAGTCCCATCTTTGTTGATTTGATG

>M6-PGSC0003DMG400010577-(rev)M6RLKmalectin\_5002

TACTCTTCAGGTTATGTATGTGTCTAGGGCACAAAGTCCCATCTTTGTTGATTTGATGAATATTCTCCTC  
CACACTATCATCCTTCTCCACATCCTTTCTCATTGTATATGTTTCTCT

>M6-PGSC0003DMG400010577-(rev)M6RLKmalectin\_5063

TATTCTCTCCACACTATCATCCTTCTCCACATCCTTTCTCATTGTATATGTTTCTCTGTTGCTACTACATT  
GTTTTGTGGTATCTCCTTGAAGTTTTGTTCTTCCGTGTCCTTCG

>M6-PGSC0003DMG400010577-(rev)M6RLKmalectin\_5185

TATAGCTGTGGGTGTTCAACATAACATTCCTCCTAGTTATGTCTCTAAATCATAACGTTTCACAATATTT  
GGGACATTGTCAACTTGATTCAGATACACTTCTCAACTATCTCTCCATT

>M6-PGSC0003DMG400010577-(rev)M6RLKmalectin\_5246

CACAATATTTGGGACATTGTCAACTTGATTCAGATACACTTCTCAACTATCTCTCCATTTTGTGTTTCATC  
CTATGTTGATGCGCATTGGAAACTCGCCCACCAGATCTACTTCAACTT

>M6-PGSC0003DMG400010577-(rev)M6RLKmalectin\_5307

GTTGTTTCATCCTATGTTGATGCGCATTGGAAACTCGCCCACCAGATCTACTTCAACTTCCAATCTTGCAT  
AGCTTGGTCTGTTCTGATTCTTGATGGTCATATTATCCTGTATGTAATG

>M6-PGSC0003DMG400010577-(rev)M6RLKmalectin\_5368

AATCTTGCATAGCTTGGTCTGTTCTGATTCTTGATGGTCATATTATCCTGTATGTAATGAATTATAAATCA



TTGTTGCTAGAGAAAACATTGTTTCCTTCCCAAAAAATATTTGGTGAA

>M6-PGSC0003DMG400010577-(rev)M6RLKmalectin\_549

ATTAAGCATAACATTCATACCATCTCGAAAATCAGGCTTTTCAGAAGACACTTATGCTTTTGTTAATGCAA

TCGAGATTGTTTCCATATCGTCTGGTCTGTATTTACACCAGATGGCGA

>M6-PGSC0003DMG400010577-(rev)M6RLKmalectin\_61

AATCAATTGAACATGTTTCTCTCTCAGTTATTCATTCTTATTGTGTATTCAAAAAATCATCATATCTACT

GCAACTAACATTCATGAAAACGTTGCCATATCATGTGGTGCCTCTGCT

>M6-PGSC0003DMG400010577-(rev)M6RLKmalectin\_610

GTTAATGCAATCGAGATTGTTTCCATATCGTCTGGTCTGTATTTACACCAGATGGCGATCAGGGAGTCC

CTGTTGTTGGACGAAATTACAGATTCTACATTGACAATAGCACAGCACTG

>M6-PGSC0003DMG400010577-(rev)M6RLKmalectin\_732

GACAATTCAGCGAATAAATGTTGGCGGAAACTCTATTTATCCTTGAAGATGCAACCATGTTTCGGGAC

TGGGAAGATGACTAATTACCTGATTCAAGTTGGTGCCTTTTCGATCAA

>M6-PGSC0003DMG400010577-(rev)M6RLKmalectin\_793

TTTCGGGACTGGGAAGATGACTAATTACCTGATTCAAGTTGGTGCCTTTTCGATCAACAGAGCCGTTG

ATATCAGATATGCATCCTCAGCAACTCACATTGCACCAAAGAGGTTTAC

>M6-PGSC0003DMG400010577-(rev)M6RLKmalectin\_854

GAGCCGTTGATATCAGATATGCATCCTCAGCAACTCACATTGCACCAAAGAGGTTTACCAAACGGCCA

GGTCAGTGGGTGTTCACTGCCATTGCAATTTCTGTAATCTCACATGGAACA

>M6-PGSC0003DMG400010577-(rev)M6RLKmalectin\_976

CCACTTGATTTGGGATTCAGATACCTTGTTAGGCTTCACTTTTGTGAAATTGAACCTACAATGATAAATGA

AGGCCAAAGGAATTTCACTATTGTCATAAACAATCAGAATGCTGAAGAT

>M6-PGSC0003DMG400010700-(rev)M6LRR-RLP\_0

ATGGGCATTGAAAACTTGCATTGTTTCTGCTATACGCGTTTCTGTGTCAACTTGTTTTCTCCTCATCTTTA

CCTCATTTGTGCCCAATGATCAAGCCCTTGCTCTTCTCAATTCAA

>M6-PGSC0003DMG400010700-(rev)M6LRR-RLP\_1054

CGCAACTTGTTGAGCTAGATATTTCAATTAATCCCTAACAGGTTCAATTCCTTCTAATGTAAGTGGTATG

CAAAACCTACAATGTCTCAACTTGTCATCAAACCACTTGAATGGGACTA

>M6-PGSC0003DMG400010700-(rev)M6LRR-RLP\_1116

AGTGGTATGCAAACCTACAATGTCTCAACTTGTCATCAAACCACTTGAATGGGACTATACCTTCCTGGA  
TATTCTCCCTCCCTTCACTTGAATGGTTAGACTTGAGTGATAACCATTTTC

>M6-PGSC0003DMG400010700-(rev)M6LRR-RLP\_1178

TTCCTGGATATTCTCCCTCCCTTCACTTGAATGGTTAGACTTGAGTGATAACCATTTTCAGTGGAAACATTC  
AGGAGTTCAAGTCTAAAACATTGTATTCTGTTTCTCTAAAACAAAATCA

>M6-PGSC0003DMG400010700-(rev)M6LRR-RLP\_124

CGTTTACTATAAATCTTGATGCTTCTTATAGTGGTTATTATCCTAAAACAGTTAAATGGAATAAGAGCACA  
GATTGTTGTTTCATGGGTTGGAGTTAAGTGTACGAGATGACAGGACAAG

>M6-PGSC0003DMG400010700-(rev)M6LRR-RLP\_1240

GAAACATTCAGGAGTTCAAGTCTAAAACATTGTATTCTGTTTCTCTAAAACAAAATCAGCTGCAAGGTCC  
TATTCCAAAGTCACTCTTAGATCTGCAGTACCTAGAAATTCTTCTCCTTT

>M6-PGSC0003DMG400010700-(rev)M6LRR-RLP\_1302

CAAGGTCCTATTCCAAAGTCACTCTTAGATCTGCAGTACCTAGAAATTCTTCTCCTTTTCGCACAATAATCT  
CAATGGAGAGATTGCTTCACCCATATGCAATCTGAAAACACTACGAGTG

>M6-PGSC0003DMG400010700-(rev)M6LRR-RLP\_1488

TGGGTTTTGGATTTAAGCAACAATAGTCTTAGTGGGACAATTAATACTACTTTTAGTATAGGAACTAAT  
TTATAGTCATTAATTTGATGGGAATAAGCTAGAGGGGAAAGTCCCGCAA

>M6-PGSC0003DMG400010700-(rev)M6LRR-RLP\_1550

AAACTAATTTATAGTCATTAATTTGATGGGAATAAGCTAGAGGGGAAAGTCCCGCAATCATTGATCAAT  
TGCACATATTTGGAAGTTCTTGATTTAGGTAACAATGAGTTGAATGACAC

>M6-PGSC0003DMG400010700-(rev)M6LRR-RLP\_1612

TGATCAATTGCACATATTTGGAAGTTCTTGATTTAGGTAACAATGAGTTGAATGACACATTTCTAAATG  
GTTGAGAGCCCTACCGTATCTGAAGATTCTAAGACTGAGATCAAATAAGT

>M6-PGSC0003DMG400010700-(rev)M6LRR-RLP\_1674

CCTAAATGGTTGAGAGCCCTACCGTATCTGAAGATTCTAAGACTGAGATCAAATAAGTTCTTTGGCCCTT  
TAAAAGATTCATCGACTTACAAGTTTGCTCAAATTCGAATCATAGATCTC

>M6-PGSC0003DMG400010700-(rev)M6LRR-RLP\_1736

TGGCCCTTTAAAAGATTCATCGACTTACAAGTTTGCTCAAATTCGAATCATAGATCTCTCATCCAATGGAT  
TTAGTGGAGATTTACCAGTGAGCCTTTTTGAGTATTTTGAAGCCATGAA

>M6-PGSC0003DMG400010700-(rev)M6LRR-RLP\_1798

CCAATGGATTTAGTGGAGATTTACCAGTGAGCCTTTTTGAGTATTTTGAAGCCATGAAAATAATTAGTGA  
GAACAGTGAACCCGAGAGTATGTAGCAGATATGTCTTCATTTTATTACA

>M6-PGSC0003DMG400010700-(rev)M6LRR-RLP\_186

AAGAGCACAGATTGTTGTTTCATGGGTTGGAGTTAAGTGTACGAGATGACAGGACAAGTGATTTAGCTT  
GATCTCAGTTGCAGCCAATTCTAGGTAAGTTTCATTCCAAGTGTAGTCTC

>M6-PGSC0003DMG400010700-(rev)M6LRR-RLP\_1860

ATTAGTGAGAACAGTGGAAACCCGAGAGTATGTAGCAGATATGTCTTCATTTTATTACACAAATTCCTTTA  
TAGTGACAACAAAGGGACTGGAGCTTGAAGTTCCTCGAGTTTTGACTACA

>M6-PGSC0003DMG400010700-(rev)M6LRR-RLP\_1922

TTCCTTTATAGTGACAACAAAGGGACTGGAGCTTGAAGTTCCTCGAGTTTTGACTACAGACATGATTATC  
GATCTCTCAAGGAATAGATTTGAAGGTCATATCCCAAGCATTATTGGAGA

>M6-PGSC0003DMG400010700-(rev)M6LRR-RLP\_1984

TGATTATCGATCTCTCAAGGAATAGATTTGAAGGTCATATCCCAAGCATTATTGGAGATCTCATTGGGCT  
TCGCACGTTGAACCTATCGCATAATCACTTGGAAAGGTATTATAACCATCAT

>M6-PGSC0003DMG400010700-(rev)M6LRR-RLP\_2046

ATTGGGCTTCGCACGTTGAACCTATCGCATAATCACTTGGAAAGGTATTATAACCATCATCACTGCACCAGT  
TATCTGTAATCATTGGATCTCTCATCCAACAAAATCAGCGGAGAA

>M6-PGSC0003DMG400010700-(rev)M6LRR-RLP\_2356

CGAATCCAGTTGAGCTAGATGAAGAAGGAGGAGGAGATTCATCAATGATCAGTTGGCAGGCGATTCTC  
ATGGGTTACAGTTGTGGACTTGTATTGGACTGTCCATAATATACATAATGT

>M6-PGSC0003DMG400010700-(rev)M6LRR-RLP\_2418

ATTCTCATGGGTTACAGTTGTGGACTTGTATTGGACTGTCCATAATATACATAATGTTGTCAACTCAATA  
TCCAGCATGGTTTTCGAGGATGGATATAAAATTGGAACACAAAATTCTT

>M6-PGSC0003DMG400010700-(rev)M6LRR-RLP\_2462

AATATACATAATGTTGTCAACTCAATATCCAGCATGGTTTTCGAGGATGGATATAAAATTGGAACACAAA  
ATTCTTACGAGAATGAGAAGGCACAAGAAAAGACATTAGTGTGTAACCTC

>M6-PGSC0003DMG400010700-(rev)M6LRR-RLP\_248

TTAGCTTGATCTCAGTTGCAGCCAATTCTAGGTAAGTTTCATTCCAAGTGTAGTCTCTTTCAACTCTCCAA

TCTCAAAGGCTTGATTTGTCTAATAATAATTTTCAGGGTCGCTCAT

>M6-PGSC0003DMG400010700-(rev)M6LRR-RLP\_372

CCTAAATTTGGTGAGCTTTCTAGTTTGACTCATCTTGATTTGTCGTATTCAAGTTTTACAGGTCTAATACCA  
GCAGAAATCTCTCATCTTTCTAAATTACACGTTCTTCAAATCGCGAGT

>M6-PGSC0003DMG400010700-(rev)M6LRR-RLP\_434

TCTAATACCAGCAGAAATCTCTCATCTTTCTAAATTACACGTTCTTCAAATCGCGAGTGATACAGATGAGC  
TTAGATTCGGACCTCACAATTTGAACTGCTCCTTAAGAACTTGACCCA

>M6-PGSC0003DMG400010700-(rev)M6LRR-RLP\_496

CAGATGAGCTTAGATTCGGACCTCACAATTTGAACTGCTCCTTAAGAACTTGACCCAATAAGAGAGCT  
CAACCTTAGGTTTGTGAACATCTTTCCACCATTCTCTGAATTTCTCTT

>M6-PGSC0003DMG400010700-(rev)M6LRR-RLP\_62

CTCATCTTTACCTCATTTGTGCCCAATGATCAAGCCCTTGCTCTTCTTCAATTCAAAACACGTTTACTAT  
AAATCTTGATGCTTCTTATAGTGGTTATTATCCTAAAACAGTTAAATG

>M6-PGSC0003DMG400010700-(rev)M6LRR-RLP\_620

TTAACTACTCTGGACCTTCGGAAAACACAGTTATACGGAATATTGCCCGAAGGAGTTTTCCACCTTTCCA  
ACTTAGAATTTCTGGATTTATCGGACAATCCCAGCTCACTGTAAAGTT

>M6-PGSC0003DMG400010700-(rev)M6LRR-RLP\_682

ACCTTTCCAACCTTAGAATTTCTGGATTTATCGGACAATCCCAGCTCACTGTAAAGTTTCCACAACCAAA  
TGGAATAGCAGTGCATCACTCATGGAGTTAGTTCTCTATAGTGTGAATG

>M6-PGSC0003DMG400010700-(rev)M6LRR-RLP\_744

ACAACCAAATGGAATAGCAGTGCATCACTCATGGAGTTAGTTCTCTATAGTGTGAATGCTGCTGGTAGG  
ATACCTGAATCATTGGTCATCTAACTTCACTGCGTACATTGGACATAGCT

>M6-PGSC0003DMG400010700-(rev)M6LRR-RLP\_806

TGGTAGGATACCTGAATCATTGGTCATCTAACTTCACTGCGTACATTGGACATAGCTTCTGTAATCTCT  
CAGGCTCTATTCTAAACCTCTATTGAATCTACCAACATAGAGGATTT

>M6-PGSC0003DMG400010700-(rev)M6LRR-RLP\_868

GTAATCTCTCAGGCTCTATTCTAAACCTCTATTGAATCTACCAACATAGAGGATTTGTACCTTGGTTAT  
AACCATCTGAAGGACCAATTTCTGATTTCTTAGATTTGGAAAGCTCA

>M6-PGSC0003DMG400010700-(rev)M6LRR-RLP\_930

CTTGGTTATAACCATCTTGAAGGACCAATTTCTGATTTCTTTAGATTTGGAAAGCTCAGGTGGTTATCACT  
TAGAAATAACAACCTTGATGGCCAACCTTGAGTTCTTATCCTTTAACAGA

>M6-PGSC0003DMG400010701M6RLKWAX-EGF\_1089

GTGAAGTTGCTTGAGAGTTGTTCTGATTCTGCAAAAATAGATGTAGTTGTTGCTTGACATCACATATTGT  
GTACGTAATTCGTGTTGTTCTGAATAAAATATCAAGTTCATAATAAATTT

>M6-PGSC0003DMG400010701M6RLKWAX-EGF\_520

TCTACATTTTGACATCAAGCCACACAACATACTTTGGATGAGAATTTCAATCCAAAACATCTGATTTTG  
GTCTTGCAAAATCATACCCGGCTGATAAGAGCATTGTTACTCTAACACC

>M6-PGSC0003DMG400010746M6RLKmalectin\_0

CATGACTCAAATTTCTTTCCCAAAGCAAAGTGAAAAAGTTGAAGATGAAAGATGAAGTTGAATTCATCT  
ACCTTTGGAAAAAGCAAATTTCAAATATTCAAAGAAAAACAACATAG

>M6-PGSC0003DMG400010746M6RLKmalectin\_1037

GAGCTTAAACGGAATGTTATGGTCAGTGAGGATTCATGTAGCTGATAGCCGATCCAACCTCGCTTGGGAT  
TGAGGCATAGTTACAAGTAACTTGATTTTTATTAGGACAAGATAAATGAGT

>M6-PGSC0003DMG400010746M6RLKmalectin\_1098

CTTGGGATTGAGGCATAGTTACAAGTAACTTGATTTTTATTAGGACAAGATAAATGAGTGGCAATCTTGT  
TCATGAACTAAAGGTTTAAATATGCAGAGTTTGTAAGTATAGACTGTGGA

>M6-PGSC0003DMG400010746M6RLKmalectin\_1159

CAATCTTGTTTCATGAACTAAAGGTTTAAATATGCAGAGTTTGTAAGTATAGACTGTGGAAGTGCAAGCA  
ATTATACGGACACGAGTACAGGATTAGCATGGACTTCAGATGCTGGAATGA

>M6-PGSC0003DMG400010746M6RLKmalectin\_122

ATGTGAGTGAACATTACATAAAAACACCTCAATGACAAAAAAGTTAAAGGTAAACCAACAAAAGATCAA  
TTAAGATCCACTTTTAGAGAGTCTTGAACCTTCACTAAATACTAAAATATTA

>M6-PGSC0003DMG400010746M6RLKmalectin\_1220

TGCAAGCAATTATACGGACACGAGTACAGGATTAGCATGGACTTCAGATGCTGGAATGATGGGGCAAG  
GAAAACCAGTTGTGGTAGTGAATGCAAATGTAACTCACAACAATATCAAAG

>M6-PGSC0003DMG400010746M6RLKmalectin\_1281

GGGCAAGGAAAACCAGTTGTGGTAGTGAATGCAAATGTAACTCACAACAATATCAAAGGCGCAGAGA  
CTTCCAGCAGACAGCAACAAATACTGTTATACTTTAAATACCAAGGAGAGA

>M6-PGSC0003DMG400010746M6RLKmalectin\_1342

GCAGAGACTTTCCAGCAGACAGCAACAAATACTGTTATACTTTAAATACCAAGGAGAGAAGGCGATATC  
TTGTCCGAGCAACATTTCTATATGGAAGTCCTGCAGCAGAGGGGAACATACC

>M6-PGSC0003DMG400010746M6RLKmalectin\_1403

GCGATATCTTGTCCGAGCAACATTTCTATATGGAAGTCCTGCAGCAGAGGGGAACATACCCCAAATTTGA  
GCTCTACTTGGATGCAACTAAATGGGGAACTATAACCATTTTCAGAATCTTC

>M6-PGSC0003DMG400010746M6RLKmalectin\_1464

AAATTTGAGCTCTACTTGGATGCAACTAAATGGGGAACTATAACCATTTTCAGAATCTTCAAGGATATATG  
TGAACGAAATGATCATAAGAGCACCTTCAAACCTCTATCGATGTGTGCTTG

>M6-PGSC0003DMG400010746M6RLKmalectin\_1525

GGATATATGTGAACGAAATGATCATAAGAGCACCTTCAAACCTCTATCGATGTGTGCTTGTGTTGTGCAAC  
AACAGAGTCCCCCTTCATATCTACTCTTGAGCTGAGACCTCTAAACTTGT

>M6-PGSC0003DMG400010746M6RLKmalectin\_1586

TTGTGCAACAACAGAGTCCCCCTTCATATCTACTCTTGAGCTGAGACCTCTAAACTTGTCAATGTATGCCA  
CAGACTATGAAGATAACTTTTATTTAAAAGTGGCAGCAAGAGTAGATTT

>M6-PGSC0003DMG400010746M6RLKmalectin\_1647

ATGTATGCCACAGACTATGAAGATAACTTTTATTTAAAAGTGGCAGCAAGAGTAGATTTTGGAGCTCAA  
AGCAAGGAACCTATAAGGTATAGTAAATTTTGAGAATATGCTTTAGTCATG

>M6-PGSC0003DMG400010746M6RLKmalectin\_1708

GAGCTCAAAGCAAGGAACCTATAAGGTATAGTAAATTTTGAGAATATGCTTTAGTCATGCTTGTACGTT  
TCTTTGGATCCTGCGTTTTTTAAGAGTCTTTTAGTCCTGTTAGTAATTTA

>M6-PGSC0003DMG400010746M6RLKmalectin\_1769

TGTACGTTCTCTTTGGATCCTGCGTTTTTTAAGAGTCTTTTAGTCCTGTTAGTAATTTATATGCCAATAGAA  
AATATAGTGAACCTATAGCATCTTTTTTTTTTTAATTGTAATATTGGT

>M6-PGSC0003DMG400010746M6RLKmalectin\_183

AAGATCAATTAAGATCCACTTTTAGAGAGTCTTGAACCTCACTAAATACTAAAATATTATACTTCAAGTTT  
ATCAAACAAAACACAACCTTATCTTCTTCTTCTTTCATCTTCCATGG

>M6-PGSC0003DMG400010746M6RLKmalectin\_1830

TGCCAATAGAAAATATAGTGAACCTATAGCATCTTTTTTTTTTTAATTGTAATATTGGTCTAATATGCACTT

AAATGGAGCGACAATGATCAGTGAGGATTCATATAGCGTAACTTGCTT

>M6-PGSC0003DMG400010746M6RLKmalectin\_1891

AATATGCACTTAAATGGAGCGACAATGATCAGTGAGGATTCATATAGCGTAACTTGCTTGGGAATGAGG  
CATAGTTGTTGCTGTTTGTGAGGTGATACAAAAGCAGATAAACTATATGTT

>M6-PGSC0003DMG400010746M6RLKmalectin\_1952

GAATGAGGCATAGTTGTTGCTGTTTGTGAGGTGATACAAAAGCAGATAAACTATATGTTTTGACTTTTTTC  
AGCTCTCACAAGATCATAACATGAATAGATCTGTCTCACAGGTATCCTGA

>M6-PGSC0003DMG400010746M6RLKmalectin\_2013

GACTTTTTTCAGCTCTCACAAGATCATAACATGAATAGATCTGTCTCACAGGTATCCTGATGATCCCTATGA  
CCGTATATGGGATTCGGATCTTAAAAAAGGCCAAATTTTCTAGTAGAT

>M6-PGSC0003DMG400010746M6RLKmalectin\_2074

ATCCCTATGACCGTATATGGGATTCGGATCTTAAAAAAGGCCAAATTTTCTAGTAGATGTGGCGGCAG  
GCACAGAAAGAATCAACACAACAAAGTACATAGATACAAACACTAGAGAAT

>M6-PGSC0003DMG400010746M6RLKmalectin\_2135

GGCGGCAGGCACAGAAAGAATCAACACAACAAAGTACATAGATACAAACACTAGAGAATACCCGCCCG  
TTAAAGTAATGCAGACTGCAGTAGTTGGGACTAAAGGAAAGCTCAGCTATAG

>M6-PGSC0003DMG400010746M6RLKmalectin\_2196

CCGCCCCGTTAAAGTAATGCAGACTGCAGTAGTTGGGACTAAAGGAAAGCTCAGCTATAGGCTGAATCTT  
GATGACTTTCCAGCGAATGCACGAGCTTTTGCATACTTTGCTGAGATTGAA

>M6-PGSC0003DMG400010746M6RLKmalectin\_2257

TGAATCTTGATGACTTTCCAGCGAATGCACGAGCTTTTGCATACTTTGCTGAGATTGAAGATTTGGGGAT  
GAATGAGACCAGGAAGTTTAAAATGGAGCACCCCTTACGTTCCGGACTACA

>M6-PGSC0003DMG400010746M6RLKmalectin\_2318

TTTGGGGATGAATGAGACCAGGAAGTTTAAAATGGAGCACCCCTTACGTTCCGGACTACAGCAATGCTGT  
GGTGAATATAGCAGAGAATGCAAATGGAAGTTATACTTTGTATGAACCTAG

>M6-PGSC0003DMG400010746M6RLKmalectin\_2379

AATGCTGTGGTGAATATAGCAGAGAATGCAAATGGAAGTTATACTTTGTATGAACCTAGCTACATGAAC  
ATAACATTGGATTTTATACTGTCATTCTCCTTTGTGAAGACTCCTGACTCA

>M6-PGSC0003DMG400010746M6RLKmalectin\_244

CTTCAAGTTTATCAAACAAAACACAACCTTATCTTCTTCTTCTTTCATCTTCCATGGGTTTTGTTTTACAA  
TCCTTTGTTGTACTTCTTTGCTTCACTCCAGCAATTGTGTGTCAAGT

>M6-PGSC0003DMG400010746M6RLKmalectin\_2440

ACATGAACATAACATTGGATTTTATACTGTCATTCTCCTTTGTGAAGACTCCTGACTCAACTCGAGGTCCA  
CTACTAAGTGCAATGGAAATATGTAGATACGTGCAAATTGCTACAAAGA

>M6-PGSC0003DMG400010746M6RLKmalectin\_2501

TCGAGGTCCACTACTAAGTGCAATGGAAATATGTAGATACGTGCAAATTGCTACAAAGACCGATGAACA  
AGATGGTACAATGACCATTCCCTGTTTAGTCTAGTTATTTCTCTCTATCCA

>M6-PGSC0003DMG400010746M6RLKmalectin\_2562

GATGAACAAGATGGTACAATGACCATTCCCTGTTTAGTCTAGTTATTTCTCTCTATCCATATATGGTAATT  
GTGCTACTTCTACGCATATTTTTACCAAAAATAGCTAATTTATTTAAAG

>M6-PGSC0003DMG400010746M6RLKmalectin\_2623

TATGGTAATTGTGCTACTTCTACGCATATTTTTACCAAAAATAGCTAATTTATTTAAAGCTTCTACTTGGAA  
GTGAGTACTCTCAACGCCTTCCGCTCTATGTCATTGGGAAGTGATTGG

>M6-PGSC0003DMG400010746M6RLKmalectin\_2684

TCTACTTGGAAGTGAGTACTCTCAACGCCTTCCGCTCTATGTCATTGGGAAGTGATTGGTCAGATGAAGA  
CGGTGATCCTTGTGTACCTACACAATGGGAATGGGTGACTTGCAGCACAA

>M6-PGSC0003DMG400010746M6RLKmalectin\_2745

AGATGAAGACGGTGATCCTTGTGTACCTACACAATGGGAATGGGTGACTTGCAGCACAACTAGTCCACC  
AAGAATCACAAAATGTGAGTTATATTGCTACTATATGATATATGGATATA

>M6-PGSC0003DMG400010746M6RLKmalectin\_2806

AGTCCACCAAGAATCACAAAATGTGAGTTATATTGCTACTATATGATATATGGATATAATGCTAGTCAC  
AGGAAGAAAACAAAAGGACATTATTTGCAACTACTACTACCCACTGTCCT

>M6-PGSC0003DMG400010746M6RLKmalectin\_2867

GCTAGTCACAGGAAGAAAACAAAAGGACATTATTTGCAACTACTACTACCCACTGTCCTGCTATAACCCG  
ACAGTCAGTTACAGATAAGAGATGATAAACTTTAACACAGCATTAGACA

>M6-PGSC0003DMG400010746M6RLKmalectin\_2928

TATAACCCGACAGTCAGTTACAGATAAGAGATGATAAACTTTAACACAGCATTAGACAGAAATGGAAA  
CTCAGGTCAGTGCTTAAAGTATAGTCTTTCCAGTCAATTTGATATTTTAC



>M6-PGSC0003DMG400010746M6RLKmalectin\_2989

AATGGAAACTCAGGTCAGTGCTTAAAGTATAGTCTTTCCCAGTCAATTTGATATTTTACTTTAATTTTCATC  
AGAACACTGTCAGGAAAGAATGTTACGGGTGAAATTCCTCGCGAGCTAC

>M6-PGSC0003DMG400010746M6RLKmalectin\_305

TTTGTTTTACAATCCTTTGTTGTACTTCTTTGCTTCACTCCAGCAATTGTGTGTCAAGTAACAGGTATGTGT  
TCTTTACATCTTTACCCTTTACTATAACCACATAATCTTGAAATAAAAA

>M6-PGSC0003DMG400010746M6RLKmalectin\_3050

TAATTTTCATCAGAACACTGTCAGGAAAGAATGTTACGGGTGAAATTCCTCGCGAGCTACAACATATGGA  
AGGACTGACAGAGTTGTAAGTTTGCTTATAAAACAAGTCAAATTTTAATCT

>M6-PGSC0003DMG400010746M6RLKmalectin\_3111

CATATGGAAGGACTGACAGAGTTGTAAGTTTGCTTATAAAACAAGTCAAATTTTAATCTTACTATTTTCAG  
TTCCTCATATTTTCTACTCTTTAGGTGGTTGGATGGAAACTCCCTGACCG

>M6-PGSC0003DMG400010746M6RLKmalectin\_3172

CTATTTTCAGTTCCTCATATTTTCTACTCTTTAGGTGGTTGGATGGAAACTCCCTGACCGGACCAATCCCTG  
ATATGAGCAATCTTGTTAATTTGAGAATTATGTAAGATCTTTTCTAGTG

>M6-PGSC0003DMG400010746M6RLKmalectin\_3233

CCAATCCCTGATATGAGCAATCTTGTTAATTTGAGAATTATGTAAGATCTTTTCTAGTGGATCACTATTAC  
TACCACTTCAACAAGTAAATCTTTCTCTTTTCTGTTTTTCCTTTTAAAC

>M6-PGSC0003DMG400010746M6RLKmalectin\_3294

TCACTATTACTACCACTTCAACAAGTAAATCTTTCTCTTTTCTGTTTTTCCTTTTAACTAGATTGTTGTATT  
TTGTCAACATGCAGACATCTTGAGAACAACAAGTTGACTGGTCCAAT

>M6-PGSC0003DMG400010746M6RLKmalectin\_3355

GATTGTTGTATTTTGTCAACATGCAGACATCTTGAGAACAACAAGTTGACTGGTCCAATACCTTCATACCT  
TGGAGGTTTACCAAGCTTATTAGAACTGTATGTTGTGATCTGGATAACA

>M6-PGSC0003DMG400010746M6RLKmalectin\_3416

CTTCATACCTTGGAGGTTTACCAAGCTTATTAGAACTGTATGTTGTGATCTGGATAACAAAATCTTAACTT  
TCTTTAGCGTATAATGCTTCATAATTTGGCTACTCCAAATTTTGGAGTAT

>M6-PGSC0003DMG400010746M6RLKmalectin\_3477

ATCTTAACTTTCTTTAGCGTATAATGCTTCATAATTTGGCTACTCCAAATTTTGGAGTATCCAACATGGATA

GTTGGCAGTCTTCTTTATATTTTTACTTGTGCATAAAACACCTTGTATCA

>M6-PGSC0003DMG400010746M6RLKmalectin\_3538

AACATGGATAGTTGGCAGTCTTCTTTATATTTTTACTTGTGCATAAAACACCTTGTATCAATTTTGGAAATTT

TGTTTCTTTGTGGCAGAGATGTACAGAATAACAGCCTAACCGGAGAAA

>M6-PGSC0003DMG400010746M6RLKmalectin\_3599

TTTGGAAATTTTGTCTTTGTGGCAGAGATGTACAGAATAACAGCCTAACCGGAGAAATACCGTCATCT

TTATTAACAGGAAAAGTAACTTTCAAGTAAGTATAACTTTAATTCTGTAC

>M6-PGSC0003DMG400010746M6RLKmalectin\_366

CAGGTATGTGTTCTTTACATCTTTACCCTTTACTATACCACATAATCTTGAAATAAAAAATCAATCTTGGCT

TCAAATAACCTGAATTTCAATAGAATAAAAAAAATTGCCACAGAGAG

>M6-PGSC0003DMG400010746M6RLKmalectin\_3660

CCGTCATCTTTATTAACAGGAAAAGTAACTTTCAAGTAAGTATAACTTTAATTCTGTACTGGATTGTTGTA

CCCATAATACCATGAGAATATGTTAGCAACTAGATCAAAGTAGCTATTT

>M6-PGSC0003DMG400010746M6RLKmalectin\_3721

GATTGTTGTACCCATAATACCATGAGAATATGTTAGCAACTAGATCAAAGTAGCTATTTTACTATAGACT

GATTATATTCCTTAGTTTGGATTATCTATAGCATAAACAAAGTTTCATTT

>M6-PGSC0003DMG400010746M6RLKmalectin\_3782

CTATAGACTGATTATATTCCTTAGTTTGGATTATCTATAGCATAAACAAAGTTTCATTTTTTATGTCACATT

ATGCTAGGAAGAGAGCAAATGAAATTCATGAATTTTCATAAATTTCTT

>M6-PGSC0003DMG400010746M6RLKmalectin\_3843

TATGTCACATTATGCTAGGAAGAGAGCAAATGAAATTCATGAATTTTCATAAATTTCTTGTAAGTGAGAA

CTAGGAAGTAACATGTACATTTATCTTTGAACATAGTAAAAGAAAGAGAA

>M6-PGSC0003DMG400010746M6RLKmalectin\_3904

AAGTGAGAACTAGGAAGTAACATGTACATTTATCTTTGAACATAGTAAAAGAAAGAGAAATTTTCTTGC

AACTTTCCGGAGTACCACATGGATGTGTGTGCACTGATGGAAGATCTGTTAC

>M6-PGSC0003DMG400010746M6RLKmalectin\_3965

TTTCTTGCAACTTTCCGGAGTACCACATGGATGTGTGTGCACTGATGGAAGATCTGTTACAATCAGGAAAT

GAACGTCACTTAAAAATGTGTTCCATGTCTCACAGGCATGAAGGAAATCC

>M6-PGSC0003DMG400010746M6RLKmalectin\_4026

TCAGGAAATGAACGTCACCTAAAAATGTGTTCCATGTCTCACAGGCATGAAGGAAATCCTGATCTAAGA  
CCCGAGTCAAAGCATAGTACACGTTACAAAGTGATACTAGGAGCTTCAATT

>M6-PGSC0003DMG400010746M6RLKmalectin\_4087

ATCTAAGACCCGAGTCAAAGCATAGTACACGTTACAAAGTGATACTAGGAGCTTCAATTGGAGGACTTG  
TGATTATATTGTTCTATTTGCTGCCAGTATATTCTTTTTATGCCACTTCA

>M6-PGSC0003DMG400010746M6RLKmalectin\_4148

AGGACTTGTGATTATATTGGTTCTATTTGCTGCCAGTATATTCTTTTTATGCCACTTCAGAACAAAAGTAT  
CTCATCAAAAAGGTGATACAAATCCTTAAGTGTCTGATCTTAACTTTTA

>M6-PGSC0003DMG400010746M6RLKmalectin\_4209

ACAAAAGTATCTCATCAAAAAGGTGATACAAATCCTTAAGTGTCTGATCTTAACTTTTAATTCTATTGCTC  
CGACACCTTTTCATATAAATCATTTTCATCTGTACCTCCAGGTGAATCT

>M6-PGSC0003DMG400010746M6RLKmalectin\_427

CAATCTTGGCTTCAAATAACCTGAATTTCAATAGAATAAAAAAAATTGCCACAGAGAGACATTTTCTAC  
TTGATTTTCATTAGGTCAAGATAGAGGGTTTTTTTTATTTATTTTATATAT

>M6-PGSC0003DMG400010746M6RLKmalectin\_4270

TCTATTGCTCCGACACCTTTTCATATAAATCATTTTCATCTGTACCTCCAGGTGAATCTATGCGCACAAAC  
ACTAAACCGTCAACAACCTTGTTCATGGCAAGAGGTGGATCCTTAATGG

>M6-PGSC0003DMG400010746M6RLKmalectin\_4331

GCGCACAAACACTAAACCGTCAACAACCTTGTTCATGGCAAGAGGTGGATCCTTAATGGATGAAGGTGT  
GGCATACTATATCCCACAATCCGAGATAGAAGAAGCAACTGAAAATTTTTC

>M6-PGSC0003DMG400010746M6RLKmalectin\_4392

GAAGGTGTGGCATACTATATCCCACAATCCGAGATAGAAGAAGCAACTGAAAATTTTCAAAGAAAATT  
GGAAAGGGAAGTTTTGGACCTGTTTACTATGGAAGACTTAGGGATGGGAAA

>M6-PGSC0003DMG400010746M6RLKmalectin\_4453

AGAAAATTGGAAAGGGAAGTTTTGGACCTGTTTACTATGGAAGACTTAGGGATGGGAAAGAAGTTGCT  
GTCAAAACTATGGCAGATTCATCAAGCCATGGAACCAAACAGTTCGCTACAG

>M6-PGSC0003DMG400010746M6RLKmalectin\_4514

AGTTGCTGTCAAACTATGGCAGATTCATCAAGCCATGGAACCAAACAGTTCGCTACAGAGGTATATTA  
AGTTGCTATACTTTTGGTATCATCTGAATAAAACATATTAATTTTCTATT

>M6-PGSC0003DMG400010746M6RLKmalectin\_4575

GTATATTAAGGTTGCTATACTTTTGGTATCATCTGAATAAAACATATTAATTTTCTATTTGGAGTAGCTTAT  
TTAAGCTGCTAATTGGCTTTAAGCCCAAATAATAGCAGCTGGCACAGC

>M6-PGSC0003DMG400010746M6RLKmalectin\_4636

GAGTAGCTTATTTAAGCTGCTAATTGGCTTTAAGCCCAAATAATAGCAGCTGGCACAGCTATGGTAATAA  
GGACTATGAAATTGTCTAAGCTAACACATTTGACACGGCGTAAACTGAT

>M6-PGSC0003DMG400010746M6RLKmalectin\_4697

TGGTAATAAGGACTATGAAATTGTCTAAGCTAACACATTTGACACGGCGTAAACTGATCATAAGTCAG  
ACTTCATACATTATAAGACATGACTAAAGAAATTGTTCTGTTGCTTATTT

>M6-PGSC0003DMG400010746M6RLKmalectin\_4758

TAAGTCAGACTTCATACATTATAAGACATGACTAAAGAAATTGTTCTGTTGCTTATTTTCATTCCTGTACA  
AATTAGAAAATTCACAACCTTGATATGATATTACTTTTGGTTGAAAATTT

>M6-PGSC0003DMG400010746M6RLKmalectin\_4819

TTCCTGTACAAATTAGAAAATTCACAACCTTGATATGATATTACTTTTGGTTGAAAATTTATACCGTTTGTG  
AAATAACATACTTGCAGGTGGCTCTCTTGTCAAGGATCCATCACAGAAA

>M6-PGSC0003DMG400010746M6RLKmalectin\_4880

ACCGTTTGTGAAATAACATACTTGCAGGTGGCTCTCTTGTCAAGGATCCATCACAGAACTTGGTTCCAT  
TGATCGGATACTATGAGGATGACCATCAACGTATGCTTGTCTATGAATAC

>M6-PGSC0003DMG400010746M6RLKmalectin\_4941

TGGTTCCATTGATCGGATACTATGAGGATGACCATCAACGTATGCTTGTCTATGAATACATGCATAATGG  
AACTTTGAGAGATCATATAACTGGTCTGCCCTTTATGTGTACTATAATT

>M6-PGSC0003DMG400010746M6RLKmalectin\_5002

GCATAATGGAACCTTTGAGAGATCATATAACTGGTCTGCCCTTTATGTGTACTATAATTGCTTTACATTTT  
TCTGCATTATTTCTTCTTGAACATCACACCACATATTTGTGAA

>M6-PGSC0003DMG400010746M6RLKmalectin\_5063

TTTACATTTTCTGCATTATTTCTTCTTGAACATCACACCACATATTTGTGAACAGAATCCACTGA  
TAAAAGCATTTGGACTGGCTAGCACGTCTTAATATTGCAGAAGATGC

>M6-PGSC0003DMG400010746M6RLKmalectin\_5124

GAATCCACTGATAAAAAGCATTTGGACTGGCTAGCACGTCTTAATATTGCAGAAGATGCAGCCAAAGGT

TACCAGAAATTTTTCATTGTCAATAACTTAGAAGTATGTATTCTCCTAGTT

>M6-PGSC0003DMG400010746M6RLKmalectin\_5185

CCAAAGGTTACCAGAAATTTTTCATTGTCAATAACTTAGAAGTATGTATTCTCCTAGTTAGTCCGGAATCA

CAAGATAATATTTTCAGCCTCCTTGTAGGCCTTGAGTACTTACATACTG

>M6-PGSC0003DMG400010746M6RLKmalectin\_5246

TCCGGAATCACAAAGATAATATTTTTCAGCCTCCTTGTAGGCCTTGAGTACTTACATACTGGATGCAACCCCT

CTATCATTCATCGAGATGTGAAAAGTCAACATTCTCTTAGATATAAA

>M6-PGSC0003DMG400010746M6RLKmalectin\_5307

TGCAACCCCTCTATCATTTCATCGAGATGTGAAAAGTCAACATTCTCTTAGATATAAAATATGCGAGCAA

AAGTATCTGATTTTGGACTATCAAGGCAAGCTGAAGAAGATTTAACACAT

>M6-PGSC0003DMG400010746M6RLKmalectin\_5368

TGCGAGCAAAGTATCTGATTTTGGACTATCAAGGCAAGCTGAAGAAGATTTAACACATGTCTCAAGCG

TGGCACGAGGAACTGTCGGCTACCTTGATCCTGAGTAGGCCATAATCTATC

>M6-PGSC0003DMG400010746M6RLKmalectin\_5429

CTCAAGCGTGGCACGAGGAACTGTCGGCTACCTTGATCCTGAGTAGGCCATAATCTATCATGAGACTGA

ATATTTTGCTAGTGATTTTCATTCTTTGTCCTCATGTTTCTGCATTCCAA

>M6-PGSC0003DMG400010746M6RLKmalectin\_549

ATATATAGTGAACCTCTAGTGTTTCTTCTTTTGGTATAATATTAGTGGGAGCTAGATGAGCTTAAATGACT

AGACAGAGTTGCTCGGATGAAAAGCACCCCTCATAATCCTTAGTGGTTGT

>M6-PGSC0003DMG400010746M6RLKmalectin\_5490

GAGACTGAATATTTTGCTAGTGATTTTCATTCTTTGTCCTCATGTTTCTGCATTCCAACAGGTAATGCA

AATCAGCAATTGACAGAGAAAAGTGATGTATATAGCTTTGGGGTTGTC

>M6-PGSC0003DMG400010746M6RLKmalectin\_5551

GGTACTATGCAAATCAGCAATTGACAGAGAAAAGTGATGTATATAGCTTTGGGGTTGTCCTTTTGAATT

GATCTCTGGAAGAAAGCCTTTTCTTCTGAGGAATATGGTGCTGATTGGA

>M6-PGSC0003DMG400010746M6RLKmalectin\_5612

TTTGAATTGATCTCTGGAAGAAAGCCTTTTCTTCTGAGGAATATGGTGCTGATTGGAGCATTGTTTAC

TGGGTAAAGTTTATCATACTTTCTATATATTTTCAGGGATGCTATGCCATC

>M6-PGSC0003DMG400010746M6RLKmalectin\_5673

ATTGTTCACTGGGTAAAGTTTATCATACTTTCTATATATTTTCAGGGATGCTATGCCATCCACTGTGATAAT  
AACATATAGTTGAGCTTCAGCAGGGAAACATGGCCAGTGAGGATTCATA

>M6-PGSC0003DMG400010746M6RLKmalectin\_5734

CTGTGATAATAACATATAGTTGAGCTTCAGCAGGGAAACATGGCCAGTGAGGATTCATATAGCGAACCC  
CAACTTGTTTCAAATTGAGGAATAGTTGTTGTAAATATCACCCACCGGCAT

>M6-PGSC0003DMG400010746M6RLKmalectin\_5795

GCGAACCCCAACTGTTTCAAATTGAGGAATAGTTGTTGTAAATATCACCCACCGGCATCACGTTTTTCAT  
AATGCATATAAAAAAATTCAGATATCTCTTCTACAAAAATCACAATAACT

>M6-PGSC0003DMG400010746M6RLKmalectin\_5856

CGTTTTTCATAATGCATATAAAAAAATTCAGATATCTCTTCTACAAAAATCACAATAACTATCAAAGCCAAA  
GCCAGCTCAGTAGAAAGTGCAGCAAAACACAAGAAATCAATAAGAAGCT

>M6-PGSC0003DMG400010746M6RLKmalectin\_5917

CAAAGCCAAAGCCAGCTCAGTAGAAAGTGCAGCAAAACACAAGAAATCAATAAGAAGCTGATCAGGGG  
AATATAAATTTTCAGGGTGGATAGTTATTGTAGTGATATATAAAGGATTCAG

>M6-PGSC0003DMG400010746M6RLKmalectin\_5978

TCAGGGGAATATAAATTTTCAGGGTGGATAGTTATTGTAGTGATATATAAAGGATTCAGGAAATGAACA  
TAAGAAAAGTTAATGATTTCAAATGCTGGTATAGTGGTGAATCACCCACACA

>M6-PGSC0003DMG400010746M6RLKmalectin\_6039

AATGAACATAAGAAAAGTTAATGATTTCAAATGCTGGTATAGTGGTGAATCACCCACACATAAAGTTCTG  
TCTGTCTGAGAAAAAATCGAAAGACGAAAAACATGGTTCTTTTCTCTGGAT

>M6-PGSC0003DMG400010746M6RLKmalectin\_61

ATTCCATCTACCTTTGGAAAAAGCAAATTTCAAATATTCAAAGAAAAACAACATAGGAATGTGAGT  
GAACATTACATAAAAAACACCTCAATGACAAAAAAGTTAAAGGTAAACCAAC

>M6-PGSC0003DMG400010746M6RLKmalectin\_6100

AAGTTCTGTCTGTCTGAGAAAAAATCGAAAGACGAAAAACATGGTTCTTTTCTCTGGATAGAAGCAGAA  
GATACTCTATCAAGTTCTGGATGTGCTGTAGTATGCATGCAAATAAAATGT

>M6-PGSC0003DMG400010746M6RLKmalectin\_6161

AAGCAGAAGATACTCTATCAAGTTCTGGATGTGCTGTAGTATGCATGCAAATAAAATGTTGTGGAGTAT  
TATGAAGTTGCTAATTAGAAAAACTGAAATAAATTGAATACAATCTGCTGA

>M6-PGSC0003DMG400010746M6RLKmalectin\_6222

TGGAGTATTATGAAGTTGCTAATTAGAAAACTGAAATAAATTGAATACAATCTGCTGAAATAAATTCAT  
TGTTAAGTTGTTAGATAGAACACACTTTATTAAGTTAATTATATTATGCT

>M6-PGSC0003DMG400010746M6RLKmalectin\_6283

TAAATTCATTGTTAAGTTGTTAGATAGAACACACTTTATTAAGTTAATTATATTATGCTTCAACAGATCTG  
ACTAACAATATCTTGTAGGCAAGATCATTGATTCGCAAAGGAGATGTGA

>M6-PGSC0003DMG400010746M6RLKmalectin\_6344

AACAGATCTGACTAACAATATCTTGTAGGCAAGATCATTGATTCGCAAAGGAGATGTGATAAGTATCAT  
GGATCCTGCACTAGTAGGACATGTCAAAGTTGAGTCAGTATGGAGAATAGC

>M6-PGSC0003DMG400010746M6RLKmalectin\_6405

AGTATCATGGATCCTGCACTAGTAGGACATGTCAAAGTTGAGTCAGTATGGAGAATAGCAGAAGTTGCA  
ATACAATGTGTGGAAAGGCATGGCACATCCAGGCCAAGAATGCATGAAATT

>M6-PGSC0003DMG400010746M6RLKmalectin\_6466

AAGTTGCAATACAATGTGTGGAAAGGCATGGCACATCCAGGCCAAGAATGCATGAAATTCTATCAGCCA  
TACAGGATGCAATCAAGATCGAAAAGGGGATTGATAAACTGTCTTCATCAG

>M6-PGSC0003DMG400010746M6RLKmalectin\_6527

ATCAGCCATACAGGATGCAATCAAGATCGAAAAGGGGATTGATAAACTGTCTTCATCAGGAAGTTCAA  
GGCTCAATCTTCCAGAAAGACACTCTTAACAAGCTTCTCGACGTAGAAAG

>M6-PGSC0003DMG400010746M6RLKmalectin\_6588

AGTTCAAAGGCTCAATCTTCCAGAAAGACACTCTTAACAAGCTTCTCGACGTAGAAAGCCCTGACATAT  
CCAATAGCTCACTTACCCCTTCTGCTAGGTGAACAAGTAACTAACAAGAA

>M6-PGSC0003DMG400010746M6RLKmalectin\_6771

TTGGATGTACATTAGTACATAATGTCTATTATTGTAAGTGTACATTAACACAGACATTAATAGGATGTTAC  
ACACTAACAAGTGAATCATATTTGGGGGGCAATAGTCAGTACATTATGT

>M6-PGSC0003DMG400010746M6RLKmalectin\_6832

AGGATGTTACACACTAACAAGTGAATCATATTTGGGGGGCAATAGTCAGTACATTATGTCTCAACTCAG  
AAACTACAGTATCTAACCATATACCTCTAAGTTGCATGAAAGTAGCATCAT

>M6-PGSC0003DMG400010746M6RLKmalectin\_6893

CAACTCAGAACTACAGTATCTAACCATATACCTCTAAGTTGCATGAAAGTAGCATCATTGAGCAATGTT

TCATCCTCTATCTCTACTTCTTGTTGTAATTTGGACTAGTTTGGAGTTAA

>M6-PGSC0003DMG400010746M6RLKmalectin\_976

GTCACCAAAGGGAGCAAAAAGGGTGGGAGCTCCTAGGGAGGGGTAAAAAGAGAAGAGATGAGCTT  
AAACGGAATGTTATGGTCAGTGAGGATTCATGTAGCTGATAGCCGATCCAAC

>M6-PGSC0003DMG400010940-(rev)M6LRR-RLP\_1008

GGATGTTGAGATATCTAGAAGTGGGTAACAATCCGTTGAGTGGCGTTCTACCAAATTCTGTTGGGAATC  
TCTCATCTACTATTGAAAAGATTTATATAGGAGATGCACACATCAATGGCC

>M6-PGSC0003DMG400010940-(rev)M6LRR-RLP\_1197

GGAATATTCCTTCTGAGATTGGTAAGCTTAAACAACCTCAAGGGCTGGCTCTATATAACAATAAATTGCA  
GGGACGTATTCCAGAGGTGGTATGCCATTTATCGAATTTGGTTGGCTTAT

>M6-PGSC0003DMG400010940-(rev)M6LRR-RLP\_1260

AATTGCAGGGACGTATTCCAGAGGTGGTATGCCATTTATCGAATTTGGTTGGCTTATTACTGGATGGTAA  
TGAGCTCTGTGGATTAATTCCAGAATGCTTTGGAAATCTTAGCATGCTAC

>M6-PGSC0003DMG400010940-(rev)M6LRR-RLP\_1323

ATGGTAATGAGCTCTGTGGATTAATTCCAGAATGCTTTGGAAATCTTAGCATGCTACAAGCGCTTTATTT  
GGATTCTAATAAATTTTCATCAAATTTCCGTTGAGCCTTTGGAAGATGA

>M6-PGSC0003DMG400010940-(rev)M6LRR-RLP\_1386

TTTATTTGGATTCTAATAAATTTTCATCAAATTTCCGTTGAGCCTTTGGAAGATGAGTGGTCTTCTCTATC  
TAAGTGTGTACGAAATTCATAGAGGGAGAACTTCCATCAGATATTG

>M6-PGSC0003DMG400010940-(rev)M6LRR-RLP\_1449

TTCTCTATCTAAGTGTGTACGAAATTCATAGAGGGAGAACTTCCATCAGATATTGGAGGACTGAAAG  
CCATTGTAGAACTATATCTTTACAATAACCACTTTTCAGGTGTGATACCAA

>M6-PGSC0003DMG400010940-(rev)M6LRR-RLP\_1512

TGAAAGCCATTGTAGAACTATATCTTTACAATAACCACTTTTCAGGTGTGATACCAACCAGATTGGGGGA  
ACTCCAAAACCTGCAGCATCTTGACCTATCCAACAATTCATTTTTTGGCC

>M6-PGSC0003DMG400010940-(rev)M6LRR-RLP\_1575

TGGGGGAACCTCCAAAACCTGCAGCATCTTGACCTATCCAACAATTCATTTTTTGGCCAAATTCATTATCC  
TTTGCCAACTTGATAAGCTTGGAAATCTTGAATTTGTCTTTAAATGCCT

>M6-PGSC0003DMG400010940-(rev)M6LRR-RLP\_1638



CATTATCCTTTGCCAACTTGATAAGCTTGGAATTCTTGAATTTGTCTTTAAATGCCTTGTCCGGTACTATTC  
CTAAATCTTTGGAAAACTCTCATACCTTAAAAGCATTAAATGTTTCAT

>M6-PGSC0003DMG400010940-(rev)M6LRR-RLP\_1701

GTAATTCCTAAATCTTTGGAAAACTCTCATACCTTAAAAGCATTAAATGTTTCATTTAATGATTTAGAA  
GGTGAATACCAAGTGGTGGCGTGTGGCAACTTCCACTGTGCAATCAT

>M6-PGSC0003DMG400010940-(rev)M6LRR-RLP\_1827

GGAACAAAGGTCTTTGCGGAATGCACATATTGGAGATTCTACTTGTGCTATCACTAATCATGGAAAACA  
ATCAAAGCTTAAGGAGGTTGTGCTAAAAATTGTTACTCCAGTGGTTATTG

>M6-PGSC0003DMG400010940-(rev)M6LRR-RLP\_189

AACTTGCAGACTTGTCTTGACTGATAATCAATTAACAGGTTCCATTCTGTAGGACTATTTAATATCTCG  
TCGCTACTTGCCATAAATCTGCTATAACAATAAACTTTCCGGTCCTCTCT

>M6-PGSC0003DMG400010940-(rev)M6LRR-RLP\_1890

GAAAACAATCAAAGCTTAAGGAGGTTGTGCTAAAAATTGTTACTCCAGTGGTTATTGCATCCTTTCTGAT  
ATTCTTGTTCGTTTCAATTTGGATAATGAAACGACAGAAGAAAGGGAAGT

>M6-PGSC0003DMG400010940-(rev)M6LRR-RLP\_1953

TTCTGATATTCTTGTTCGTTTCAATTTGGATAATGAAACGACAGAAGAAAGGGAAGTCCAAAGATATTGA  
AAAGGTATTGGAGATCGGGACTCATCAATTAGTTTCTTATCACGAGATTC

>M6-PGSC0003DMG400010940-(rev)M6LRR-RLP\_252

ATATCTCGTCTACTTGCATAAATCTGCTATAACAATAAACTTTCCGGTCCTCTCTTGCTAGATGAAGGA  
ATTTTTTTGTCAAATCTGAAGTTTCTAAGGATATCTCGCAACCAGATTT

>M6-PGSC0003DMG400010940-(rev)M6LRR-RLP\_315

ATGAAGGAATTTTTTTGTCAAATCTGAAGTTTCTAAGGATATCTCGCAACCAGATTTTAGGATGCATTCCT  
TCCAACATATGCCAACTCAGAGAGCTCAAAGTTTTGTCCATATCTTTCA

>M6-PGSC0003DMG400010940-(rev)M6LRR-RLP\_378

GCATTCCTTCCAACATATGCCAACTCAGAGAGCTCAAAGTTTTGTCCATATCTTTCAACAACATAATTGGA  
GACAAACCCAAAAATATTGATTGTTTATCCAATCTCCAGGAGTTTTATA

>M6-PGSC0003DMG400010940-(rev)M6LRR-RLP\_441

TAATTGGAGACAAACCCAAAAATATTGATTGTTTATCCAATCTCCAGGAGTTTTATAATCGTCATAATTCA  
ATAAAAGGACTATTCCCACTTCATTGGGAAATATTTCAACTCTGCAAT

>M6-PGSC0003DMG400010940-(rev)M6LRR-RLP\_504

ATAATTCAATAAAAGGGACTATCCCACCTTCATTGGGAAATATTTCAACTCTGCAATATCTTTATTCTGGA  
AACAAATCTCATGGTGGGGCCAATTCCTCCAGAATTAGGGAAGCTATCAA

>M6-PGSC0003DMG400010940-(rev)M6LRR-RLP\_567

ATTCTGGAAACAATCTCATGGTGGGGCCAATTCCTCCAGAATTAGGGAAGCTATCAAATTTGAGGCAAT  
TAATTTTTTCCAATAATTCTAATCTTATTGGTCAAATTCCAGAGGCTATTT

>M6-PGSC0003DMG400010940-(rev)M6LRR-RLP\_630

GGCAATTAATTTTTTCCAATAATTCTAATCTTATTGGTCAAATTCCAGAGGCTATTTCAACATATCTTCTT  
TGGAATTAATCAATTTTCAGTTTCAATACCCTGTCGGGTAGAATTCCAA

>M6-PGSC0003DMG400010940-(rev)M6LRR-RLP\_693

TATCTTCTTTGGAATTAATCAATTTTCAGTTTCAATACCCTGTCGGGTAGAATTCCAACCACTACAGGTCTT  
CATCTTCCGAACCTTAAAGTACTTGACTTGGGAGTCAATCAGCTTGAAG

>M6-PGSC0003DMG400010940-(rev)M6LRR-RLP\_819

TTCCATTGTTCATAACAAATGCTTCCAAGCTTCAGATACTGTCGCTAGAACATAACTCTCTCTCGGGAGCT  
ATTCCTACTAATTTGGGAAATCTTCATGAGCTGCAATCACTCTTACTAC

>M6-PGSC0003DMG400010940-(rev)M6LRR-RLP\_882

CGGGAGCTATTCCTACTAATTTGGGAAATCTTCATGAGCTGCAATCACTCTTACTACATACTAATCAACT  
ACCAATGAACCAAGAGAGCATGAGTTGAAATCTTCAATTCGTTGGCGA

>M6-PGSC0003DMG400010940-(rev)M6LRR-RLP\_945

ATCAACTTACCAATGAACCAAGAGAGCATGAGTTGAAATCTTCAATTCGTTGGCGAACTGTAGGATGTT  
GAGATATCTAGAAGTGGGTAACAATCCGTTGAGTGGCGTTCTACCAAATT

>M6-PGSC0003DMG400010950-(rev)M6LRR-RLP\_0

CATTTTTCTATTAATATTTGCACTAATGGAGAAAGCCTTCACATTTTTCTCTCAACAATACTCCTGTTGCT  
TCACTATGTTATGACCCAACCGAACATTACGACTGATCAATTAGTTCT

>M6-PGSC0003DMG400010950-(rev)M6LRR-RLP\_132

ATCCCAAATTAGTTCCGATCCTTTTCATTACTTGGATGAAAGTTGGTCTCCTGCTACTTATGTTTGCCATTG  
GGTAGGAGTCACTTGTGACTATCGTCACCAGAGAGTGAAGTCCTTGAA

>M6-PGSC0003DMG400010950-(rev)M6LRR-RLP\_198

CCATTGGGTAGGAGTCACTTGTGACTATCGTCACCAGAGAGTGAAGTCCTTGAATCTTTCAACATGACT

CTTACCGCAAGATTCCCAGTGATTTTGGAAACCTCACATTTCTTGTTTC

>M6-PGSC0003DMG400010950-(rev)M6LRR-RLP\_264

GACTCTTACCGCAAGATTCCCAGTGATTTTGGAAACCTCACATTTCTTGTTTCTCTTGACTTGAGAAAGA  
ATAATTTCCATGGAAATTTGCCTCAAGAAATGGTACGCTTACGTCGGCT

>M6-PGSC0003DMG400010950-(rev)M6LRR-RLP\_396

GTTAAGTTTCAACAAATTCAGAGGGGAAATTCCTTCTTGGTTTGGGTTTTTAAACAACCTCAAGTTTTAA  
ATCTTAAGAATAATAGTTTCACTGGTTCATTCTCTGTCACTCTCAA

>M6-PGSC0003DMG400010950-(rev)M6LRR-RLP\_462

TTTAAATCTTAAGAATAATAGTTTCACTGGTTCATTCTCTGTCACTCTCAAATGCCTCAAGGTTGGACA  
CTTTAGTAATATCTGCCAATTTACTTGAAGGAAACATCCCGGAAGAGAT

>M6-PGSC0003DMG400010950-(rev)M6LRR-RLP\_528

GGACACTTTAGTAATATCTGCCAATTTACTTGAAGGAAACATCCCGGAAGAGATTGGCAATCTTCACAAC  
CTGAAATACTTGTACATAGAAGATAATCAGCTTACGGGTTCTATACCATT

>M6-PGSC0003DMG400010950-(rev)M6LRR-RLP\_594

CAACCTGAAATACTTGTACATAGAAGATAATCAGCTTACGGGTTCTATACCATTCAATTTTCAATATTT  
CTAGTATCCAAGTCATTGCATTTACAGACAATAGCTTATCAGGAAATCT

>M6-PGSC0003DMG400010950-(rev)M6LRR-RLP\_66

GTTGCTTCACTATGTTATGACCCAACCGAACATTACGACTGATCAATTAGTTCTTCTCTTTGAAATCCCA  
AATTAGTCCGATCCTTTTCACTTGGATGAAAGTTGGTCTCCTGC

>M6-PGSC0003DMG400010950-(rev)M6LRR-RLP\_660

TATTTCTAGTATCCAAGTCATTGCATTTACAGACAATAGCTTATCAGGAAATCTTCCAATGGTTTATGCA  
ATGGTCTCCCGATACTCAAAGAGCTTTATCTATCAATAAACAAGCTTGA

>M6-PGSC0003DMG400010950-(rev)M6LRR-RLP\_726

ATGCAATGGTCTCCCGATACTCAAAGAGCTTTATCTATCAATAAACAAGCTTGATGGTCATATGCCTACA  
AGCTTGTCAAATTGTTCACTTCAAATGTTGTATCTATCCAGAAATGA

>M6-PGSC0003DMG400010950-(rev)M6LRR-RLP\_792

TACAAGCTTGTCAAATTGTTCACTTCAAATGTTGTATCTATCCAGAAATGAGTTTGATGGACCAATAC  
ATAGTGAAATTGGAAGATTGAGTAACTGCAGTTCTTGTATCTTGAGTC

>M6-PGSC0003DMG400010950-(rev)M6LRR-RLP\_858

AATACATAGTGAAATTGGAAGATTGAGTAACTTGCAGTCTTGTATCTTGAGTCCAACCATTTACAGGT  
ATGTGTTATCTTACTAGTTTCTGGACACGTGTGTGGTCATCTAAATTGAC

>M6-PGSC0003DMG400010950-(rev)M6LRR-RLP\_920

TCACAGGTATGTGTTATCTTACTAGTTTCTGGACACGTGTGTGGTCATCTAAATTGACATAAATTGTTTCA  
AATTATCATTGTATTAATAATAGATTTATAATTAATTACATGAATATCG

>M6-PGSC0003DMG400010952-(rev)M6LRR-RLP\_0

TTCAAAGTCTCAAACCACAGGTTACTAGTACTAATATTTGCACTAATGGAGAAAGCCTTCACTATTTTAT  
TCTTAACAATGCTCTTGTTCCTCACTATGTTATGGCCCAAACCAATAT

>M6-PGSC0003DMG400010952-(rev)M6LRR-RLP\_130

CAATTAGCTCTTCTCTCTTTTAAATCCCAAATTAGTTCCGACCCCTTCACTTCTTGAATGAAAGTTGGTCT  
CCTGCTATTTCTGTTTGCCGTTGGGTTGGAGTCATTTGTGGTTCTCGT

>M6-PGSC0003DMG400010952-(rev)M6LRR-RLP\_195

TTGGTCTCCTGCTATTTCTGTTTGCCGTTGGGTTGGAGTCATTTGTGGTTCTCGTCACCAGCGAGTGAAGT  
CGTTGAAGCTTTCCAACCTGGCTCTTACAGGCAGAATCCCCGTGATTT

>M6-PGSC0003DMG400010952-(rev)M6LRR-RLP\_260

TGAAGTCGTTGAAGCTTTCCAACCTGGCTCTTACAGGCAGAATCCCCGTGATTTTGGAAACCTCACATT  
CTTGCTTCTCTTGACTTGGGAAGCAACCATTTCCATGGAAATTTGCCTC

>M6-PGSC0003DMG400010952-(rev)M6LRR-RLP\_325

ACATTTCTTGCTTCTCTTGACTTGGGAAGCAACCATTTCCATGGAAATTTGCCTCAAGAAATGGCACATTT  
GCGTCGGCTTAAGTTTCTTGATTTAAGTTTAAACAGCTTCACAGGGGAA

>M6-PGSC0003DMG400010952-(rev)M6LRR-RLP\_390

ACATTTGCGTCGGCTTAAGTTTCTTGATTTAAGTTTAAACAGCTTCACAGGGGAAATTCCTTCTTGGTTTG  
GGTTTTTACACCAACTTCAAGTTGTAAACCTTAGGAGTAACAGTTTTAC

>M6-PGSC0003DMG400010952-(rev)M6LRR-RLP\_520

CCTCCGTCCTCGAATGCCTCAAGGTTGGAGATTTTAGTAATATCTACCAATTTACTTGAAGGAAACA  
CCCCGGAAGAGTTTGGCAATCTTACAACCTGAAATCGTTGTCCATAGAA

>M6-PGSC0003DMG400010952-(rev)M6LRR-RLP\_585

AAACACCCCGGAAGAGTTTGGCAATCTTACAACCTGAAATCGTTGTCCATAGAACAAAATCAGCTTACA  
GGTTCTATACCATTACAATATTCAATATTCGTAGAATTGAAGTCATTTT

>M6-PGSC0003DMG400010952-(rev)M6LRR-RLP\_65

TTTTATTCTTAACAATGCTCTTGTTGCCTCACTATGTTATGGCCCAAACCAATATTAACACTGATCAATTAG  
CTCTTCTCTCTTTTAAATCCCAAATTAGTCCGACCCCTTTCACCTTCT

>M6-PGSC0003DMG400010952-(rev)M6LRR-RLP\_650

TTACAGGTTCTATAACCATTACAATATTCAATATTCGTAGAATTGAAGTCATTTTCATTTTCATATAATAGCC  
TATCAGGAGATCTTCCAATGGTTTATGCAATGATCTCCAATACTCA

>M6-PGSC0003DMG400010952-(rev)M6LRR-RLP\_715

AATAGCCTATCAGGAGATCTTCCAATGGTTTATGCAATGATCTCCAATACTCAAAGAGCTTTATCTATC  
CAGAAACAAGCTTGATGGTCATATGCCTACAAGCTTGTCAAATTGTTCA

>M6-PGSC0003DMG400010963-(rev)M6RLKWAX-EGF\_0

ATTCTCATATGTTACGCTTAATAAGACTCCCTTATAGGAATGACATGGAATCTCCAAGATCACAGGATTT  
AAAGTACTTTTAGGGATGTTTCAGTACAAAGATTAATAAAGCAGAGATTAG

>M6-PGSC0003DMG400010963-(rev)M6RLKWAX-EGF\_1037

ACAATCTACCAAACGACCCCTTAGTGTGTTATAGGCACCTTTTGTTTAATATCACAAGATCCAAATGTATT  
TTTTATGTTTTTAAATTTTCGTGCAAAATCAAATAAGACATATAAAAATG

>M6-PGSC0003DMG400010963-(rev)M6RLKWAX-EGF\_1098

CAAATGTATTTTTATGTTTTTAAATTTTCGTGCAAAATCAAATAAGACATATAAAAATGAAACAAAGAGA  
GTAACAATATAACAATATCCCACTGTGCCCTTTATTTTAACTTGTTTTT

>M6-PGSC0003DMG400010963-(rev)M6RLKWAX-EGF\_1159

ACAAAGAGAGTAACAATATAACAATATCCCACTGTGCCCTTTATTTTAACTTGTTTTTAGCATGTAACAT  
GTCTTATTTTCTAAGTTACTAATCTCAGTTTTTATGATGATTTCTTGTT

>M6-PGSC0003DMG400010963-(rev)M6RLKWAX-EGF\_1220

CATGTAACATGTCTTATTTTCTAAGTTACTAATCTCAGTTTTTATGATGATTTCTTGTTAATTTCCACAGAC  
ATTGATGAGTGTGCAAGTCCAAAAGGAATCGTTGTCCAACAATACT

>M6-PGSC0003DMG400010963-(rev)M6RLKWAX-EGF\_1281

TTTCCACAGACATTGATGAGTGTGCAAGTCCAAAAGGAATCGTTGTCCAACAATACTCGCTGTGTTAA  
TACTCCTGGCACTTACCGTTGTGACTCAAATAATGTGAGACATATGCTAG

>M6-PGSC0003DMG400010963-(rev)M6RLKWAX-EGF\_1342

CTGTGTTAATACTCCTGGCACTTACCGTTGTGACTCAAATAATGTGAGACATATGCTAGCTAAACAACCTCT

CCATCGGTATTGTATAACTCTCTTCTTTGTCTTCTTTTTCTCCTCTTG

>M6-PGSC0003DMG400010963-(rev)M6RLKWAX-EGF\_1403

AAACAACCTCCATCGGTATTGTATAACTCTCTTCTTTGTCTTCTTTTTCTCCTCTTGTTTCTTTGTTAGATT

AACTTAAGCTTTCTATAGATTTTTATTTGAGACAAACTACTCCTTT

>M6-PGSC0003DMG400010963-(rev)M6RLKWAX-EGF\_1464

TCTTTGTTAGATTAACCTAAGCTTTCTATAGATTTTTATTTGAGACAAACTACTCCTTTGAACTGTCCCAAC

AAATGATTCATAATCCTATTCATGTTTATTCTAGCTAACTGCTCTTTA

>M6-PGSC0003DMG400010963-(rev)M6RLKWAX-EGF\_1525

ACTGTCCCAACAAATGATTCATAATCCTATTCATGTTTATTCTAGCTAACTGCTCTTTAGAAAATTAGAAG

CTCAACTTAATATATGCTTTAAAATTACAAAGGGGCCTGGATAAGCATT

>M6-PGSC0003DMG400010963-(rev)M6RLKWAX-EGF\_1586

AAATTAGAAGCTCAACTTAATATATGCTTTAAAATTACAAAGGGGCCTGGATAAGCATTAAAGCTCTTT

CTCTTAAATTCTCAAATGAATTTATGCTTGTTTTAGATGAAATTGGTTT

>M6-PGSC0003DMG400010963-(rev)M6RLKWAX-EGF\_1647

AAGCTCTTTCTCTTAAATTCTCAAATGAATTTATGCTTGTTTTAGATGAAATTGGTTTGCTCACAAGCAG

GTATTGGAGCAGCAACTTTTTGTGATCCTGGTAGCAGTTTGTCTTTG

>M6-PGSC0003DMG400010963-(rev)M6RLKWAX-EGF\_1708

TCACAAGCAGGTATTGGAGCAGCAACTTTTTGTGATCCTGGTAGCAGTTTGTCTTTGGCTACGCAAAT

GGCTCCGGAAGAGGGAAGAAAACAAAGCAAAGCAAAGTATTTCAAGAGG

>M6-PGSC0003DMG400010963-(rev)M6RLKWAX-EGF\_1769

TACGCAAATGGCTCCGGAAGAGGGAAGAAAACAAAGCAAAGCAAAGTATTTCAAGAGGAATGGTGG

ATTGCTTTTGCGACAACGTATTTCTTAATTGGAGAAAGTAGTGGTGGCTCTT

>M6-PGSC0003DMG400010963-(rev)M6RLKWAX-EGF\_1830

TGGTGGATTGCTTTTGCGACAACGTATTTCTTAATTGGAGAAAGTAGTGGTGGCTCTTTGCCAAAGCTC

TTTTTGAAAGAGGAGTTGGAGAAAGCAACAGACAATTTCAATGAAATTCG

>M6-PGSC0003DMG400010963-(rev)M6RLKWAX-EGF\_1891

CCAAAGCTCTTTTGAAGAGGAGTTGGAGAAAGCAACAGACAATTTCAATGAAATTCGAATTCTTGGT

AAAGGAGGGGCTGGGACTGTTTACAAAGGAATGTTATCAGATGGGAGCATT

>M6-PGSC0003DMG400010963-(rev)M6RLKWAX-EGF\_2013

AGCTGTGAAGAAGTCCAATGCAGTGGATAAAGATCAAATTGAACAGTTTATAAATGAGATACTCATTCT  
CTCCCAAATAAATCACAGACACATTGTCAAGGTACTGTTGATTTTTGTACT

>M6-PGSC0003DMG400010963-(rev)M6RLKWAX-EGF\_2074

CTCATTCTCTCCCAAATAAATCACAGACACATTGTCAAGGTACTGTTGATTTTTGTACTAGGCTCCTGCTA  
CCATTTTATTATGAATGGAAGAAGAGAGTAACACAATTTGACGATAGAG

>M6-PGSC0003DMG400010963-(rev)M6RLKWAX-EGF\_2135

GCTCCTGCTACCATTTTATTATGAATGGAAGAAGAGAGTAACACAATTTGACGATAGAGAAATTTATAAT  
GCCTAAAGAGGATTGAAGAGAGAACTTATAATATTAGAAAGACTCCTATA

>M6-PGSC0003DMG400010963-(rev)M6RLKWAX-EGF\_2196

ATTTATAATGCCTAAAGAGGATTGAAGAGAGAACTTATAATATTAGAAAGACTCCTATACTCTTACAATA  
TAACACACTAGACTTACACACACGCGCAGTCGCACACACAGAGCTGCTAC

>M6-PGSC0003DMG400010963-(rev)M6RLKWAX-EGF\_2257

CTTACAATATAACACACTAGACTTACACACACGCGCAGTCGCACACACAGAGCTGCTACATCAACTAGTG  
CTCCTATTCACTTCAACCATAATAAACGAACAGTTTAGGATAACTCATTA

>M6-PGSC0003DMG400010963-(rev)M6RLKWAX-EGF\_2318

CAACTAGTGCTCCTATTCACTTCAACCATAATAAACGAACAGTTTAGGATAACTCATTAGTCACTCATGAA  
CCAAAGATAACTCAAATTACAATTGAACCTAGCACTTGATCACACTTT

>M6-PGSC0003DMG400010963-(rev)M6RLKWAX-EGF\_2379

CACTCATGAACCAAAGATAACTCAAATTACAATTGAACCTAGCACTTGATCACACTTTTAACATTTAAGT  
TTACTGTTTACAACAGGTACTTGGTTGTTGCTTAGAAACTCAAGTCCCA

>M6-PGSC0003DMG400010963-(rev)M6RLKWAX-EGF\_2440

ACATTTAAGTTTACTGTTTACAACAGGTACTTGGTTGTTGCTTAGAAACTCAAGTCCCATTATTAGTGTAT  
GAGTACATCTCGAATGGAACCTTGTCCATCCATATTCATGGAAAGCTCA

>M6-PGSC0003DMG400010963-(rev)M6RLKWAX-EGF\_2501

ATTAGTGTATGAGTACATCTCGAATGGAACCTTGTCCATCCATATTCATGGAAAGCTCAGTCACAGTTCT  
AACCTACTGTCTCAAAGTCTGATTTGGATGATCAGATTCTCCGCACCC

>M6-PGSC0003DMG400010963-(rev)M6RLKWAX-EGF\_2562

CACAGTTCTAACCTACTGTCTCAAAGTCTGATTTGGATGATCAGATTCTCCGCACCCAGCAATAATATT  
ATCGTGGGATCATCGGGTGC GAATTGCTGCAGAAATAGCAGGGGCACTA

>M6-PGSC0003DMG400010963-(rev)M6RLKWAX-EGF\_2684  
TTACATGCACTCATGTGCTTCTACTCCCATTCTTCACAGAGATATAAAATCAAGCAACATATTACTAGACG  
ATAATTTTAGAGCAGTGGTTTCTGATTTTGGACTATCGAGATTGTTGTC

>M6-PGSC0003DMG400010963-(rev)M6RLKWAX-EGF\_2745  
TTACTAGACGATAATTTTAGAGCAGTGGTTTCTGATTTTGGACTATCGAGATTGTTGTCTGTTGACAAGA  
CTCATTTAACAACAATGGTAGGGGGTACATTTGGTTACATAGATCCAGAA

>M6-PGSC0003DMG400010963-(rev)M6RLKWAX-EGF\_2806  
TTGACAAGACTCATTTAACAACAATGGTAGGGGGTACATTTGGTTACATAGATCCAGAATACTTCCGCTC  
AGGTCAACTTACAGACAAATGTGATGTCTATGCCTTCGGTGTAATTCTTG

>M6-PGSC0003DMG400010963-(rev)M6RLKWAX-EGF\_2928  
GAGCTTCTAACAAGTCAAAGAGTTGTCATTCTAACCAACCAGAAGATCCAGGTTTGGCTTCCGTTTCA  
CATTAGCATTGAAAGAAAATCGTATAATTGAGATTGTAGACCCTGAAATT

>M6-PGSC0003DMG400010963-(rev)M6RLKWAX-EGF\_2989  
TCCGTTTCACATTAGCATTGAAAGAAAATCGTATAATTGAGATTGTAGACCCTGAAATTGTAAAAGAAGT  
TGAGGATGAACATGTGATTCCCTGCTGTGGCCAAACTTGCCAAGAGATGCT

>M6-PGSC0003DMG400010963-(rev)M6RLKWAX-EGF\_3172  
GAAAAATGAGGCAAGATATGCCTCATAATGAGAGTTTTCAAGATAACATTTACCAAAAAGTGAAAGTT  
CATGTAGTCATACTTCTGATTGTACCGAAGAAGATTATCAGAACTCAGTGT

>M6-PGSC0003DMG400010963-(rev)M6RLKWAX-EGF\_3233  
TGAAAGTTCATGTAGTCATACTTCTGATTGTACCGAAGAAGATTATCAGAACTCAGTGTCTCACAATGAA  
ATGCATTATGACAGAAAGGGAAGTTTGTAACTTTTATAACTTCAACTTTT

>M6-PGSC0003DMG400010963-(rev)M6RLKWAX-EGF\_3294  
CACAAATGAAATGCATTATGACAGAAAGGGAAGTTTGTAACTTTTATAACTTCAACTTTTATCTTTTGTAAAT  
TGTAATGTCTGAAGTAATTGCATGTATGGACACATAATCAAATGAAGATT

>M6-PGSC0003DMG400010963-(rev)M6RLKWAX-EGF\_3332  
ACTTTTATAACTTCAACTTTTATCTTTTGTAAATTGTAATGTCTGAAGTAATTGCATGTATGGACACATAATCA  
AATGAAGATTAGCATGATTTGCATTAATATTTAAGTCGTATATATGAT

>M6-PGSC0003DMG400010964M6LRR-RLP\_1008  
AACTGGTGACAGTTTGATGTTACCCTCTCCTGGGGGTTTCGTTGTTGAGGTTATTGAAAAGCTTAGAT



CTCAGTGGATGCAACTTATCTGTAAACCAAAGTCTGCTCTTATGAAATT

>M6-PGSC0003DMG400010964M6LRR-RLP\_1071

CTTAGATCTCAGTGGATGCAACTTATCTGTAAACCAAAGTCTGCTCTTATGAAATTGCCTTCTTACTGG

AACTGAATCTGAGCAGAAACAAGTTTATTTTATTACCTGATTCATCAG

>M6-PGSC0003DMG400010964M6LRR-RLP\_1134

TTTACTGGAAGTGAATCTGAGCAGAAACAAGTTTATTTTATTACCTGATTCATCAGTCAACTTTCTCAGC

TTCGATATCTCAACATAACACAGTGTGAGGAACTTAAGGAACTTCCCAA

>M6-PGSC0003DMG400010964M6LRR-RLP\_1197

TTCTCAGCTTCGATATCTCAACATAACACAGTGTGAGGAACTTAAGGAACTTCCCAAAGTCTTTCGAGTA

TAGAGGAATTATATGCAGAAGATTTTTGGCCAAGCAAAGTATCGAAAA

>M6-PGSC0003DMG400010964M6LRR-RLP\_1260

TTCGAGTATAGAGGAATTATATGCAGAAGATTTTTGGCCAAGCAAAGTATCGAAAAGCTACAAATATA

CCCGAGGTTGAATTTGGTGTCAATCACCAATTATAGTTTTGATCAACAATC

>M6-PGSC0003DMG400010964M6LRR-RLP\_1323

AATATACCCGAGGTTGAATTTGGTGTCAATCACCAATTATAGTTTTGATCAACAATCTTATACAGAGGAG

AGCAATGGTAGCTCAGTTTTGGATGAGATTCTCAGCTTGTCTCTCAGA

>M6-PGSC0003DMG400010964M6LRR-RLP\_1386

AGAGGAGAGCAATGGTAGCTCAGTTTTGGATGAGATTCTCAGCTTGTCTCTCAGAAGATATGGATCA

TGTGGTTCGAGCACTCTTAACTCTGATCACAGGGTGACCTGTTCTATTGT

>M6-PGSC0003DMG400010964M6LRR-RLP\_1449

GGATCATGTGGTCGAGCACTCTTAACTCTGATCACAGGGTGACCTGTTCTATTGTCTTCCCTGAATGT

GCGATTCCCAGGTGGTTAAGCATCAGAGTGTGATGAAAAGATATTGTT

>M6-PGSC0003DMG400010964M6LRR-RLP\_1575

GCCCATGAATTGGTATAATGATAAGTTCAAGGGCTTTGCTATATGTTGTGCCACTCTCATGGGAGCAGGT

GTGTTGAATCCTGATTCAGGGCTATCCAAGAAGTATGATTATGCTTTCTT

>M6-PGSC0003DMG400010964M6LRR-RLP\_1638

AGCAGGTGTGTTGAATCCTGATTCAGGGCTATCCAAGAAGTATGATTATGCTTTCTTCAAAGCTAAATTG

ATATGCAAAGATGATTTAGAAGACCTTAAAGTGCTAGAGAAAGAATGTAA

>M6-PGSC0003DMG400010964M6LRR-RLP\_1701

TAAATTGATATGCAAAGATGATTTAGAAGACCTTAAAGTGCTAGAGAAAGAATGTAAAGTGGGAACAG  
CATCTAGAACATATGGCTTGTGTGTTTGCTTTGTCTACATACCATTGTATGC

>M6-PGSC0003DMG400010964M6LRR-RLP\_1764

AACAGCATCTAGAACATATGGCTTGTGTGTTTGCTTTGTCTACATACCATTGTATGCTTCACTGCAGGTGT  
CCGGCACAGATGTTGGAAATATTAACCAGTATAGCCTATTTGAGGCATC

>M6-PGSC0003DMG400010964M6LRR-RLP\_1818

TGCTTCACTGCAGGTGTCCGGCACAGATGTTGGAAATATTAACCAGTATAGCCTATTTGAGGCATCTATC  
CATGGGCGCATTGTGAGACAGTGGGGAGTTCATTTGATCTATCAGGATGA

>M6-PGSC0003DMG400010964M6LRR-RLP\_252

ATGACTTTTAGTTCTCTTGTTGAAGTTGTCAAGGAGCCGAAGGTATTATTTATCTCCTTTAGAAACAAATC  
ATATATGAAGAAAATAAAATGATAGCTAAAGCTGAAGTTTCTATGCATT

>M6-PGSC0003DMG400010964M6LRR-RLP\_315

AACAAATCATATATGAAGAAAATAAAATGATAGCTAAAGCTGAAGTTTCTATGCATTCTCTTTTTCTGAAC  
AGGCATTTGATAAGTTGACAGTCCTCAATTTAAGTTTTTCTAGAAATTT

>M6-PGSC0003DMG400010964M6LRR-RLP\_945

TGTTAGAAACTTGAGCAAACCTAAAGTCCTATCATTAAAGAAGAGGCCGGAAGGTAAAGCGTCAAACCTGG  
TGACAGTTTGATGTTACCCTCTTCCTGGGGGTTTCGTTGTTTGAGGTATT

>M6-PGSC0003DMG400011045-(rev)M6LRR-RLP\_0

ATGGCCGATCTTGTAATTGGTGCTACTGTTAAAGTTGTGCTTGATAAGCTGCTTTCTCTCACAATTGAGG  
AGGCCAAAACCTTAAGGAACTGCAAGAAAAATCTAAGAATTCTGACAAAA

>M6-PGSC0003DMG400011045-(rev)M6LRR-RLP\_1098

GTGTTGGGAGGCCTCTTATGCAACAAGGAAAAACATGAATGGCGGGCAGTTCTTGATGGAAATCCCCTT  
GTTGCAGGGGAAGATGATAACGGGGAAAGTAGCATAAAGAAGATCCTTAAA

>M6-PGSC0003DMG400011045-(rev)M6LRR-RLP\_1159

ATCCCCTTGTTGCAGGGGAAGATGATAACGGGGAAAGTAGCATAAAGAAGATCCTTAAACTCAGCTATG  
ATTATCTACCATCTCCACATCTGAAAAAGTGTGTTGCTTACTTTGCCATTT

>M6-PGSC0003DMG400011045-(rev)M6LRR-RLP\_122

TGTATCCATGATTCAAGCTCTCATTGATGCTGAAAAACGACAAGTTGATGATCAGGCTGTTGAACAA  
TGGCTCAAGATGCTTGAGAGAGTTGCTGAAGATGCTGAAAAACGTGTTTGA

>M6-PGSC0003DMG400011045-(rev)M6LRR-RLP\_1220

CAGCTATGATTATCTACCATCTCCACATCTGAAAAAGTGTGGCTTACTTTGCCATTTTTCCAAAAGGATT  
TGAGTTTGAAAAGGACCAGCTTATCCAACCTCTGGATGGCAGAAGGTTT

>M6-PGSC0003DMG400011045-(rev)M6LRR-RLP\_1281

CCAAAAGGATTTGAGTTTGAAAAGGACCAGCTTATCCAACCTCTGGATGGCAGAAGGTTTTCTCGGTCCA  
TCTCAAGAGACCACTTTGATGGAAGACGTTGGGAACAAGGCTTTTCAACTT

>M6-PGSC0003DMG400011045-(rev)M6LRR-RLP\_1342

TCGGTCCATCTCAAGAGACCACTTTGATGGAAGACGTTGGGAACAAGGCTTTTCAACTTTTGTGCAAAA  
TTCCTTGCTGCAAGATGTTAAGCTAGATGATCTGAACAAAATAACATACT

>M6-PGSC0003DMG400011045-(rev)M6LRR-RLP\_1403

GTTGCAAAATTCCTTGCTGCAAGATGTTAAGCTAGATGATCTGAACAAAATAACATACTGTAAGATGCAT  
GATCTTGTGCATGATTTGGCTGGAGATATTTTAAAGTCTAAACTATTTGA

>M6-PGSC0003DMG400011045-(rev)M6LRR-RLP\_1464

AAGATGCATGATCTTGTGCATGATTTGGCTGGAGATATTTTAAAGTCTAAACTATTTGATCAAAAAGAGTA  
TTGGAGGAGAAAATCTTTCTCAAGTCCGATACTTTGGATGGGACTCACCA

>M6-PGSC0003DMG400011045-(rev)M6LRR-RLP\_1525

AAAAGAGTATTGGAGGAGAAAATCTTTCTCAAGTCCGATACTTTGGATGGGACTCACCAAGTGATCAAA  
TAGATAAGATAAACGAGTCAGGACGTTTGTGCACATTGTTCTGGAAAAGAA

>M6-PGSC0003DMG400011045-(rev)M6LRR-RLP\_1586

TGATCAAATAGATAAGATAAACGAGTCAGGACGTTTGTGCACATTGTTCTGGAAAAGAATTATATCTGA  
AGAACTGTTGTTGAGCTTTCAGTTCTTGAGAGTTTTAAATTTGTCCAGGTC

>M6-PGSC0003DMG400011045-(rev)M6LRR-RLP\_1708

GCATCAAGGTATTGTCAGCCAAAATCGGCAAGCTAATATACTTGAGATATCTTGATCTCTCCAGCACTGA  
GATCAAAGCCTTGCCCAACTCCATTTGCAAGCTCTACAATTTGCAAACAT

>M6-PGSC0003DMG400011045-(rev)M6LRR-RLP\_1769

CAGCACTGAGATCAAAGCCTTGCCCAACTCCATTTGCAAGCTCTACAATTTGCAAACATTTAGAATCAAT  
AGTTGTTACTCACTTAGGAAGCTCCCAGAAGAAATGGCAAATATGATAAG

>M6-PGSC0003DMG400011045-(rev)M6LRR-RLP\_1830

AGAATCAATAGTTGTTACTCACTTAGGAAGCTCCCAGAAGAAATGGCAAATATGATAAGTTTGAGACAC

ATATATTGCGACTTTCATTACCAAACATATCTTGATTTTGCGGGTTGGAGA

>M6-PGSC0003DMG400011045-(rev)M6LRR-RLP\_1891

TGAGACACATATATTGCGACTTTCATTACCAAACATATCTTGATTTTGCGGGTTGGAGATCAAGGTTTAT  
AGGTAATTATCAGTTTCAGATGCCACTTAATATGGGGCAATTGACTAGTC

>M6-PGSC0003DMG400011045-(rev)M6LRR-RLP\_1952

AAGGTTTATAGGTAATTATCAGTTTCAGATGCCACTTAATATGGGGCAATTGACTAGTCTTCAGACGCTA  
CAGTTTTTCTATGTAGGTTTAAAGACAGGTCGTCGAATAGAAGAATTAGG

>M6-PGSC0003DMG400011045-(rev)M6LRR-RLP\_2013

CAGACGCTACAGTTTTTCTATGTAGGTTTAAAGACAGGTCGTCGAATAGAAGAATTAGGTCATTTGAAA  
AACCTTAGAGGTGAATTGACGATCAAACATCTCCAATTAGTCGTAAATAAA

>M6-PGSC0003DMG400011045-(rev)M6LRR-RLP\_2074

ATTTGAAAAACCTTAGAGGTGAATTGACGATCAAACATCTCCAATTAGTCGTAAATAAAGAAGAGGCTC  
GAACAGCATATTTACAGGAGAAACCAAATATCTACAAGCTGACATATTTAT

>M6-PGSC0003DMG400011045-(rev)M6LRR-RLP\_2135

AGAGGCTCGAACAGCATATTTACAGGAGAAACCAAATATCTACAAGCTGACATATTTATGGACCCATGA  
TGAATCAGAAGGCTGTGAGATCAATGATGAGCATGTGTTGGATGGTCTTCA

>M6-PGSC0003DMG400011045-(rev)M6LRR-RLP\_2257

CGCATCCGAACCTTGAAAACCTTAGCAGTAGTGGACTATTTTGGGACTAAATTCCTTCATGGTTCAGTGA  
AGGATTGCTACCAAATTTGGTCAAGTTGAAATTAAGTCGCTGCAAAGGT

>M6-PGSC0003DMG400011045-(rev)M6LRR-RLP\_2318

GTTTCAGTGAAGGATTGCTACCAAATTTGGTCAAGTTGAAATTAAGTCGCTGCAAAGGTGCAAAGAAAT  
TCCATCGCTTGCCAACTGAAGTTCCTTCGGCATCTTGAGCTGATAGGATT

>M6-PGSC0003DMG400011045-(rev)M6LRR-RLP\_244

AATTCAGATATGAATATCTCAAAGCACAAGTCATGAACATCCGAACCAAATAATGGAAAAGGTCAGCA  
GCTTCTTTTCTCACTAGCTTTTAAAGTACAAAATGTCGCGAAAAATAAACA

>M6-PGSC0003DMG400011045-(rev)M6LRR-RLP\_2440

TTGAATTGGAATGCCTTGGATCTACATTTTATGGCGTTGATGTTAATGATAAAGGATCAAGCAGCAATAA  
TGGCAATATCCAAGTGTCCCATCACTGAAAGAACTAGTATTGCAGAATA

>M6-PGSC0003DMG400011045-(rev)M6LRR-RLP\_2501

CAGCAATAATGGCAATATCCAAGTGTCCCATCACTGAAAGAACTAGTATTGCAGAATATGAATAGCCTT  
ATTGAGTGGAAGGGTGATGAAGTTGGAGTTAGAATGTTTTCTGCGCTTGA

>M6-PGSC0003DMG400011045-(rev)M6LRR-RLP\_2562

AATAGCCTTATTGAGTGGAAGGGTGATGAAGTTGGAGTTAGAATGTTTTCTGCGCTTGAGAAGTTGAGG  
ATCACAAAGTGTCCACTGTAAAAGGTACCCACGTCAATTGGAAATCCTC

>M6-PGSC0003DMG400011045-(rev)M6LRR-RLP\_2623

AGTTGAGGATCACAAAGTGTCCACTGTAAAAGGTACCCACGTCAATTGGAAATCCTCCGTGAATTAA  
GCATTGAAGGAGTTGACAGTGAAATGCCATTGTTGACCTTGTGTAGCAACT

>M6-PGSC0003DMG400011045-(rev)M6LRR-RLP\_2684

TGAATTAAGCATTGAAGGAGTTGACAGTGAAATGCCATTGTTGACCTTGTGTAGCAACTTGACATCTCTG  
GTAAAGCTTATTGTGACTGATGTGGAAGAGCTCACTTGTCTTCCTGATGA

>M6-PGSC0003DMG400011045-(rev)M6LRR-RLP\_2745

ACATCTCTGGTAAAGCTTATTGTGACTGATGTGGAAGAGCTCACTTGTCTTCCTGATGAGATGCTACGCA  
ATAACGTTTCTCTTCAACAACACTATTGGTCACACACTGCAGAGAGTTTCGT

>M6-PGSC0003DMG400011045-(rev)M6LRR-RLP\_2806

TGCTACGCAATAACGTTTCTCTTCAACAACACTATTGGTCACACACTGCAGAGAGTTTCGTGAATTGCCCA  
AAGCCTGTACGATCTCCATTCTTTGAGAGCTTACAAATACTCTTCTGCA

>M6-PGSC0003DMG400011045-(rev)M6LRR-RLP\_2867

ATTGCCCAAAGCCTGTACGATCTCCATTCTTTGAGAGCTTACAAATACTCTTCTGCACCAATTCAGGT  
CTCTTCTGTTCCAGTGTAGAGAATCGTTTGACTTCCCTCCAAAGTCT

>M6-PGSC0003DMG400011045-(rev)M6LRR-RLP\_2928

AATTCAGGTCTCTTCTGTTCCAGTGTAGAGAATCGTTTGACTTCCCTCCAAAGTCTTGATTTATCACT  
GTGTATTGGATTGACCAGTTTACCAAGTGAATGCTAGAGCATTGTCCGG

>M6-PGSC0003DMG400011045-(rev)M6LRR-RLP\_2989

ATTTATCACTGTGTATTGGATTGACCAGTTTACCAAGTGAATGCTAGAGCATTGTCCGGTCTCTACAGAC  
TTTGAAGCTCAGCTGTTGTCGCAACTTAGTTTCCTTGCCTTTACACGTAT

>M6-PGSC0003DMG400011045-(rev)M6LRR-RLP\_305

GGTCAGCAGCTTCTTTTCTCATACTGCTTTAAGTACAAAATGTCGCGAAAAATAACAACATCAATGAA  
GAGTTGAAGGCTATCAATCAGTTAGCCAATGACCTCGGTCTCAAACCACT

>M6-PGSC0003DMG400011045-(rev)M6LRR-RLP\_3050

TCTACAGACTTTGAAGCTCAGCTGTTGTCGCAACTTAGTTTCCTTGCCTTTACACGTATGGGAAATGCCTT  
CAATTTTCATATTTGGGTTTATCAAATTGTCCCAAATTGGTTAGTGTACC

>M6-PGSC0003DMG400011045-(rev)M6LRR-RLP\_3111

GAAATGCCTTCAATTTTCATATTTGGGTTTATCAAATTGTCCCAAATTGGTTAGTGTACCCACAGGGGGCC  
TTCACAACCTCACAGGGTTAAAGGTATTGGAAATTGGTCCTTTCTCAGAT

>M6-PGSC0003DMG400011045-(rev)M6LRR-RLP\_3172

CAGGGGGCCTTACAACCTCACAGGGTTAAAGGTATTGGAAATTGGTCCTTTCTCAGATACGGTGGATT  
TTGAGGCATTCCAATTGATTTTTAATGGCATTCAACAGCTATCATCCCTTC

>M6-PGSC0003DMG400011045-(rev)M6LRR-RLP\_3233

GGTGGATTTTGAGGCATTCCAATTGATTTTTAATGGCATTCAACAGCTATCATCCCTTCGTACATTGGAG  
GTGTATGGATGGATGCGTTGGGATTCTCTGCCTTATCAACTTATGCAACT

>M6-PGSC0003DMG400011045-(rev)M6LRR-RLP\_3294

ACATTGGAGGTGTATGGATGGATGCGTTGGGATTCTCTGCCTTATCAACTTATGCAACTCTCTGCCCTAA  
CAAAGATCTGTATATATGATTTTTGGAATTGAGGCTCTCCTCATAGACTT

>M6-PGSC0003DMG400011045-(rev)M6LRR-RLP\_3355

CTGCCCTAACAAAGATCTGTATATATGATTTTTGGAATTGAGGCTCTCCTCATAGACTTGACAACCTTACT  
TCTCTTGTAACATTACATCTAATGGGGTGCCAAAGGCTACAACATGTGG

>M6-PGSC0003DMG400011045-(rev)M6LRR-RLP\_3416

CAACCTTACTTCTCTTGTAACATTACATCTAATGGGGTGCCAAAGGCTACAACATGTGGACTTCTCAAATA  
TCATGCCCAAATTACGGTATCTGGAGATCCATTATTGTCTATTGTTAGA

>M6-PGSC0003DMG400011045-(rev)M6LRR-RLP\_3477

TTCTCAAATATCATGCCCAAATTACGGTATCTGGAGATCCATTATTGTCTATTGTTAGAAGGTCTGTCCGA  
TGGGCTTGGCAACCTTGTTTCTTTGGAAGAATTAAGTTTACGTAAGTGC

>M6-PGSC0003DMG400011045-(rev)M6LRR-RLP\_3538

GTCTGTCGGATGGGCTTGGCAACCTTGTTTCTTTGGAAGAATTAAGTTTACGTAAGTGCAGAGAACTACA  
ACATCTGCCATCCAGATATGCCATGCTGCGCCTCACTAAATTATGGAAAC

>M6-PGSC0003DMG400011045-(rev)M6LRR-RLP\_3599

GAAACTACAACATCTGCCATCCAGATATGCCATGCTGCGCCTCACTAAATTATGGAAACTTCTAATTTAA

GGCTGCCCGCAGTTAGAAGAAAGTTGCACCAATCAAAGTAGCCCAAACCTC

>M6-PGSC0003DMG400011045-(rev)M6LRR-RLP\_366

ATCAATGAAGAGTTGAAGGCTATCAATCAGTTAGCCAATGACCTCGGTCTCAAACCACTGATGGTTCCTT  
CTCAGAAAATACTTCCAATTCGAGAAACAGATTCCTTAGTTGTTGCTTCG

>M6-PGSC0003DMG400011045-(rev)M6LRR-RLP\_3660

CTAATTAAAGGCTGCCCGCAGTTAGAAGAAAGTTGCACCAATCAAAGTAGCCCAAACCTCCCAGTGGTCC  
AACATTTCCCATATTCAAAAATTGAAGTAGGTGGGAGGATAATTCAGAAG

>M6-PGSC0003DMG400011045-(rev)M6LRR-RLP\_3721

AGTGGTCCAACATTTCCCATATTCAAAAATTGAAGTAGGTGGGAGGATAATTCAGAAGTTACGTAAGT  
CTCTGTTTCTCTTTCACTTTCTGATCAGTAAAATTTTGAATATTATTTTC

>M6-PGSC0003DMG400011045-(rev)M6LRR-RLP\_3753

GAAGTAGGTGGGAGGATAATTCAGAAGTTACGTAAGTCTCTGTTTCTCTTTCACTTTCTGATCAGTAAAA  
TTTTGAAATATTATTTTCCCGAGTTCAGAAAAGAAGTTATGTATGTAG

>M6-PGSC0003DMG400011045-(rev)M6LRR-RLP\_427

TGGTTCCTTCTCAGAAAATACTTCCAATTCGAGAAACAGATTCCTTAGTTGTTGCTTCGGATGTTGTTGGT  
AGAGACAATGATGTTGCTGAAATAAAAGAGAAGATTTTGAACATGAGAA

>M6-PGSC0003DMG400011045-(rev)M6LRR-RLP\_488

TGTTGTTGGTAGAGACAATGATGTTGCTGAAATAAAAGAGAAGATTTTGAACATGAGAAAGGATGTTGT  
TCTGTGCACCATTCCCATAGTGGGTATGGGGGTTTAGGGAAAACAACCTGT

>M6-PGSC0003DMG400011045-(rev)M6LRR-RLP\_61

CAATTGAGGAGGCCAAAACCTTTAAGGAACTGCAAGAAAAATCTAAGAATTCTGACAAAATATGTATCCA  
TGATTCAAGCTCTCATTGATGCTGAAAAACGACAAGTTGATGATCAGG

>M6-PGSC0003DMG400011045-(rev)M6LRR-RLP\_610

CTAAGAGAATTTTCAATGACCAACACATCAAGCAGCAGTTCGAAAAGAGAGTTTGGTTGTGCCTACCTG  
AAATGGTAGAACTAAGAGCTTTCTTGAAGTATCCTCGAATCATTGACAA

>M6-PGSC0003DMG400011045-(rev)M6LRR-RLP\_671

CCTACCTGAAATGGTAGAACTAAGAGCTTTCTTGAAGTATCCTCGAATCATTGACAAAGAGGAAAGT  
TGAGGTCAAAGCAGAGATATAATAGTCAAGACGCTACAAGATGCATTGGG

>M6-PGSC0003DMG400011045-(rev)M6LRR-RLP\_732

AGGAAAGTTGAGGTCCAAAGCAGAGATATAATAGTCAAGACGCTACAAGATGCATTGGGAGAAAAAA  
GTATTTGCTTGCCTGGATGATTTGTGGCATGTTGACTCTACATCATGGCAT

>M6-PGSC0003DMG400011045-(rev)M6LRR-RLP\_793

AAAAAAGTATTTGCTTGCCTGGATGATTTGTGGCATGTTGACTCTACATCATGGCATGAGTTCATGGA  
CACCTTGAGAGGAATAAATACATTACAGAGGAACTGCATTCTCGTACTA

>M6-PGSC0003DMG400011045-(rev)M6LRR-RLP\_854

GTTTCATGGACACCTTGAGAGGAATAAATACATTACAGAGGAACTGCATTCTCGTACTACTCGTATCAAA  
CAAGTGGCATCCACAGTAGCAGTAGATCTTCATATGTTGGGGAAATTAAC

>M6-PGSC0003DMG400011045-(rev)M6LRR-RLP\_915

CGTATCAAACAAGTGGCATCCACAGTAGCAGTAGATCTTCATATGTTGGGGAAATTAACAGACTATCATT  
GTTGGTCCATTTTCAAACAAGAGTGTGGTTGATGGGGAAAGTTCCGGAG

>M6-PGSC0003DMG400011045-(rev)M6LRR-RLP\_976

ACTATCATTGTTGGTCCATTTTCAAACAAGAGTGTGGTTGATGGGGAAAGTTCCGGAGGAAATACTGA  
GCATGGAGAACAAGATAGTTGAAATGTGTCAAGGTCTACCGTTGGCTACAA

>M6-PGSC0003DMG400011071M6L-LecRK\_1054

CAATACGGAGATTCAAGAATGCTGACGTGATTGAGCAGTGGGAGCTTGAGATTGGTCCATAGATATT  
CGTATCATGAACTCAAGAAAGGTACTAGAGGTTTTAAGGAGAGTGA ACTAC

>M6-PGSC0003DMG400011071M6L-LecRK\_1116

AGATATTCGTATCATGAACTCAAGAAAGGTACTAGAGGTTTTAAGGAGAGTGA ACTACTCGGGCGAGG  
TGGATTTGGGAAAGTTTACAAAGGTGTTTTGAGAAATTCAAAGCAGAAATT

>M6-PGSC0003DMG400011071M6L-LecRK\_1178

GCGAGGTGGATTTGGGAAAGTTTACAAAGGTGTTTTGAGAAATTCAAAGCAGAAATTGCTGTGAAAC  
GAATTTCTCACGAATCTAAACAAGGGTTGAGGGAATTTGTGTCTGAGATTGC

>M6-PGSC0003DMG400011071M6L-LecRK\_124

CTTGCTTTAAAATGTTCAATTTTCTCACATTCCTCTGCTTTGTCATTTCTTCTCAATTCTTGCTTCATCTCAA  
CTTGATGAATTCATTTTCAAAAATTCAATCAACCAACAACAACA

>M6-PGSC0003DMG400011071M6L-LecRK\_1240

TGAAACGAATTTCTCACGAATCTAAACAAGGGTTGAGGGAATTTGTGTCTGAGATTGCGAGCATTGGAA  
GACTCCGTCATAGGAATTTGGTTCAATTGTTAGGATGGTGTAGACGTCGTG



>M6-PGSC0003DMG400011071M6L-LecRK\_1302

ATTGGAAGACTCCGTCATAGGAATTTGGTTCAATTGTTAGGATGGTGTAGACGTCGTGGTGATTTGTTG  
CTTGTGTATGAGTTTATGCCTAATGGAAGTTTGGATAACTTCTTGTTTGTAT

>M6-PGSC0003DMG400011071M6L-LecRK\_1364

TTTGTTGCTTGTGTATGAGTTTATGCCTAATGGAAGTTTGGATAACTTCTTGTTTGTATGAGCCAAAAATG  
GTGTTGACATGGGAACAAAGGTTTCAGGATTATTAAGGGGTTGCGTCTGG

>M6-PGSC0003DMG400011071M6L-LecRK\_1426

CAAAAATGGTGTGACATGGGAACAAAGTTTCAGGATTATTAAGGGGTTGCGTCTGGTTTACTTTACT  
TACATGAAGGCTATGAACAAGTCGTGCTACATCGAGATATTAAGGCAAGTA

>M6-PGSC0003DMG400011071M6L-LecRK\_1488

CTTTACTTACATGAAGGCTATGAACAAGTCGTGCTACATCGAGATATTAAGGCAAGTAATGTGTTACTAG  
ATGGTGAATTAATGGTAAGTTAGGGGATTTTGGACTTGCTAGATTGTAT

>M6-PGSC0003DMG400011071M6L-LecRK\_1550

GTTACTAGATGGTGAATTAATGGTAAGTTAGGGGATTTTGGACTTGCTAGATTGTATGAGCATGGGTC  
TAATCCGTCCACGACTAAAGTTGTAGGTACATTAGGGTACCTTGCACCAGA

>M6-PGSC0003DMG400011071M6L-LecRK\_1612

ATGGGTCTAATCCGTCCACGACTAAAGTTGTAGGTACATTAGGGTACCTTGCACCAGAATTACCAAGAAT  
AGGACGAGCCACTACAAAGACTGATGTGTTTGCCTTTGGTGCTTTGTTAC

>M6-PGSC0003DMG400011071M6L-LecRK\_1674

CCAAGAATAGGACGAGCCACTACAAAGACTGATGTGTTTGCCTTTGGTGCTTTGTTACTCGAGGTGGTTT  
GTGGACGTAGGCCAATTGAACACAAAGCAGGACCCGAGGAGTTTGTCTC

>M6-PGSC0003DMG400011071M6L-LecRK\_1736

GGTGGTTTGTGGACGTAGGCCAATTGAACACAAAGCAGGACCCGAGGAGTTTGTCTCGTGGACTTGGT  
GTGGGATAAATGGAGAGAAGGTAAAATACTTGACATTGTGGACTATAGATT

>M6-PGSC0003DMG400011071M6L-LecRK\_1798

ACTTGGTGTGGGATAAATGGAGAGAAGGTAAAATACTTGACATTGTGGACTATAGATTGAAAGGCGAA  
TACAATGAGAGTGAGGTTTTGATGGTGTAAAATTGGGACTAATGTGCTCAA

>M6-PGSC0003DMG400011071M6L-LecRK\_186

GCTTCATCTCAACTTGATGAATTCATTTTACAAAATTCAATCAACCAACAACAACATAACCTTAAGTGG

AGTAGCAAAAATAAGCCAAAATGGGTTTATTCAATTAACCAATGACACA

>M6-PGSC0003DMG400011071M6L-LecRK\_1860

GGCGAATACAATGAGAGTGAGGTTTTGATGGTGTTAAAATTGGGACTAATGTGCTCAAATAACAAGCCA  
TTGGCGCGACCAAGTATTAGGCAAGTTGTAAGATACTTTGAAGGTGAAATT

>M6-PGSC0003DMG400011071M6L-LecRK\_1922

CAAGCCATTGGCGCGACCAAGTATTAGGCAAGTTGTAAGATACTTTGAAGGTGAAATTGGGATGCCTGA  
GGCTCCAACAACACAAGGTTCTGATGATCTTGAAGGATTTGGATTGATGA

>M6-PGSC0003DMG400011071M6L-LecRK\_1984

TGCCTGAGGCTCCAACAACACAAGGTTCTGATGATCTTGAAGGATTTGGATTGATGAAAGTGAACGTT  
GGAATTCCTTAGCATCGACTAGTATTATGATCAAGTCAAGTTCATTTACAT

>M6-PGSC0003DMG400011071M6L-LecRK\_2046

GAACGTTGGAATTCCTTAGCATCGACTAGTATTATGATCAAGTCAAGTTCATTTACATGTTTGTCTAATGG  
AGATGAAAATAGTACTAATTATGTTTCCTTCTACTTCACCACTTCCA

>M6-PGSC0003DMG400011071M6L-LecRK\_2108

GTCTAATGGAGATGAAAATAGTACTAATTATGTTTCCTTCTACTTCACCACTTCCACTTCTATATAGTAG  
TGAATGTACCTAGATACTAATGTGAACTAGCATTGCAAACCTTTTCTAT

>M6-PGSC0003DMG400011071M6L-LecRK\_2170

TATATAGTAGTGAATGTACCTAGATACTAATGTGAACTAGCATTGCAAACCTTTTCTATATTTTCTGAAGA  
ACACTAATGTACATTGTTTTTCTTTTCTTTGTGTTACCTCTTTGTAG

>M6-PGSC0003DMG400011071M6L-LecRK\_2232

TCCTGAAGAACACTAATGTACATTGTTTTTCTTTTCTTTGTGTTACCTCTTTGTAGTAGTTTTTTTCCCAC  
AGAAAACCTTAGGAAGCTTCCCGGTATTTTCAAGTGAAGAACCTGTTTTCC

>M6-PGSC0003DMG400011071M6L-LecRK\_2294

TTTTTTCCACAGAAAACCTTAGGAAGCTTCCCGGTATTTTCAAGTGAAGAACCTGTTTTTCCACCATGTGTTTTT  
CCAGTTACCTGGTTTGTATGGGAAATGGGTGGAAAAATCATGTTTTATAA

>M6-PGSC0003DMG400011071M6L-LecRK\_248

CTTAAGTGGAGTAGCAAAAATAAGCCAAAATGGGTTTATTCAATTAACCAATGACACAAGTAGACTAAT  
AGGACATGCTTTTTACTCTTCACCTTTCCACTTCAAGACTACTAATGCCTC

>M6-PGSC0003DMG400011071M6L-LecRK\_310

GACTAATAGGACATGCTTTTTACTCTTCACCTTTCCACTTCAAGACTACTAATGCCTCTACCTTCTCTTTCTC  
AACGTGTTTCGCGTTGGCCATAGTCCCCGAGTATCCAAAACCTCGGGG

>M6-PGSC0003DMG400011071M6L-LecRK\_372

TTCTCTTTCTCAACGTGTTTCGCGTTGGCCATAGTCCCCGAGTATCCAAAACCTCGGGGGCCATGGCCTAG  
CGTTCACAATTTCTCCGTCAAAGACTTTAGTACAGCTCTCCGAGCCAG

>M6-PGSC0003DMG400011071M6L-LecRK\_434

TGGCCTAGCGTTCACAATTTCTCCGTCAAAGACTTTAGTACAGCTCTCCGAGCCAGTACTTAGGTCTGC  
TCAATGCTAGTGATATTGGTAACTTCTCTAACCATATTTTTGCTGTTGA

>M6-PGSC0003DMG400011071M6L-LecRK\_496

TAGGTCTGCTCAATGCTAGTGATATTGGTAACTTCTCTAACCATATTTTTGCTGTTGAATTCGATACGGTA  
CGTGATTTTGAGTTTGGTGATATTGATGATAACCATGTTGGTGTTAATA

>M6-PGSC0003DMG400011071M6L-LecRK\_558

GATACGGTACGTGATTTTGAGTTTGGTGATATTGATGATAACCATGTTGGTGTTAATATTAACAGCTTAG  
AATCAAATAAATCAGCTGCAGCTGGCTATTTTATTAACGATCAAATGTG

>M6-PGSC0003DMG400011071M6L-LecRK\_620

CAGCTTAGAATCAAATAAATCAGCTGCAGCTGGCTATTTTATTAACGATCAAATGTGAAACAAGATTTG  
AATCTTAAAAGTGGGAAAGTCATTCTTGTTTGGGTTGAATATGATTCTGT

>M6-PGSC0003DMG400011071M6L-LecRK\_682

AAGATTTGAATCTTAAAAGTGGGAAAGTCATTCTTGTTTGGGTTGAATATGATTCTGTTACAAAATTAAT  
TAATGTAACCTTTACCAAATTCTTAAAACCAAAAATTCCTCTTTTAT

>M6-PGSC0003DMG400011071M6L-LecRK\_744

AAATTAATTAATGTAACCTTTACCAAATTCTTAAAACCAAAAATTCCTCTTTTATCTTATAATTTTGAT  
GTCTCTACAATTTTTAAAGAAAATATGTATGTTGGCTTCTCTGCTTCT

>M6-PGSC0003DMG400011071M6L-LecRK\_806

TAATTTTGATGTCTCTACAATTTTTAAAGAAAATATGTATGTTGGCTTCTCTGCTTCTACTGGTTTGCTTGC  
TAGTTCACATTTCAATTTGGGTTGGAGTTTAAAGTTAAATGGAGAAGC

>M6-PGSC0003DMG400011071M6L-LecRK\_868

GTTTGCTTGCTAGTTCACATTTCAATTTGGGTTGGAGTTTAAAGTTAAATGGAGAAGCAAATCACTTGA  
CTTGATTCTCTACCATCACTTCTGGACCTAAGAAGAAGCACAGAAGAC

>M6-PGSC0003DMG400011071M6L-LecRK\_930

TCACTTGACTTGGATTCTCTACCATCACTTCCTGGACCTAAGAAGAAGCACAGAAGACTAATTATTGTCAT  
CTCGATTATAGTGTTTGTGTTTCGCGTTAATTTCAATCTTGATTGCTTTT

>M6-PGSC0003DMG400011071M6L-LecRK\_992

TATTGTCATCTCGATTATAGTGTTTGTGTTTCGCGTTAATTTCAATCTTGATTGCTTTTTATAACAATACGGAG  
ATCAAGAATGCTGACGTGATTGAGCAGTGGGAGCTTGAGATTGGTCC

>M6-PGSC0003DMG400011108M6LRR-RLP\_1071

TGCAAAGAAATCCATCGCTTGCCAACTGAAGTTCCTCAGCATCTTGACCTGGTAGGATTCCTTGAAT  
TGGAATGCATCGGACCTACATTTTATGGTGTGAGATAATGGATAATGGA

>M6-PGSC0003DMG400011108M6LRR-RLP\_1134

CTTGAATTGGAATGCATCGGACCTACATTTTATGGTGTGAGATAATGGATAATGGATCAAGCAGCAAT  
AATGGCAATATCCAAGTGTTCCCGTCATTGAAAGAAGTATTGAAGAAT

>M6-PGSC0003DMG400011108M6LRR-RLP\_1197

AGCAATAATGGCAATATCCAAGTGTTCCCGTCATTGAAAGAAGTATTGAAGAATATGGCTAGCCTTA  
TTGAGTGGAAGGGAGTTGAAGTTGGAGTAAGCTTGAGAAGTTGAGGATTA

>M6-PGSC0003DMG400011108M6LRR-RLP\_126

TTGTTGCGAAATTCCTTGCTGCAAGATGTCAAGCTAGATGAGCACAACAATATAACACACTGTAAGATGC  
ATGATCTTGTGCATGATTTGGCCAGAGATATATTGAAATCTAAATTATTT

>M6-PGSC0003DMG400011108M6LRR-RLP\_1260

AGCCTTATTGAGTGGAAGGGAGTTGAAGTTGGAGTAAGCTTGAGAAGTTGAGGATTAGTGAAGTGTCCC  
TTGTTAGAAAGTACTCCGAATCAATTTGAAATCCTATGTGAATTAGTGATTG

>M6-PGSC0003DMG400011108M6LRR-RLP\_1323

GTCCCTTGTTAGAAAGTACTCCGAATCAATTTGAAATCCTATGTGAATTAGTGATTGTTGGAGTTGGCAG  
TGAAATGCCATTGTTGAACTTGTGCAGCAACTTGACATCTCTTGTGAATC

>M6-PGSC0003DMG400011108M6LRR-RLP\_1386

TTGGCAGTGAAATGCCATTGTTGAACTTGTGCAGCAACTTGACATCTCTTGTGAATCTTGTGTTAGTAAC  
GTGAAAGAGCTCATTTTTCTCCCGATGAGATGCTACGCAACAATGTTT

>M6-PGSC0003DMG400011108M6LRR-RLP\_1512

AACACCTATTGGTCTCACTCTGCGGAGAGTTTCGTGAATTGCCACAAAGCTTATAACAATCTCCGTTCTCTT

AAGAGCTTAGAGATTATCAGCTGCACCAATTCAGTTCTTTTCCTGTTC

>M6-PGSC0003DMG400011108M6LRR-RLP\_1575

GTTCTCTTAAGAGCTTAGAGATTATCAGCTGCACCAATTCAGTTCTTTTCCTGTTCCCAGTGGAGAGAAC  
TATTTGACTTCCCTCCAAAATTTTGAGTTATCCAATTGTAATGGATTGA

>M6-PGSC0003DMG400011108M6LRR-RLP\_1638

GAGAGAACTATTTGACTTCCCTCCAAAATTTTGAGTTATCCAATTGTAATGGATTGACCAGTTTACCAAGT  
GGAATGCTAGAGCAATGCCGGTCTCTAGAGATTTTGACGGTCAGTACT

>M6-PGSC0003DMG400011108M6LRR-RLP\_1701

TACCAAGTGAATGCTAGAGCAATGCCGGTCTCTAGAGATTTTGACGGTCAGTACTGTAACAACCTGG  
TTTCCTTGCCTTACATGTGTGGGAAATGCCTTCTCTTTCGTATTTGTGTT

>M6-PGSC0003DMG400011108M6LRR-RLP\_1764

ACTTGTTTCCTTGCCTTACATGTGTGGGAAATGCCTTCTCTTTCGTATTTGTGTTTATCAGAATGTCCCA  
AATTGGTTAGTGTACCCGCAGGGGGTCTTACCACCTCACTGGGTTAC

>M6-PGSC0003DMG400011108M6LRR-RLP\_1827

AATGTCCCAAATTGGTTAGTGTACCCGCAGGGGGTCTTACCACCTCACTGGGTTACAGAATTTGGAAAT  
TGGTCCTTCTCAGAGACGGTGAATTTTGAGGCATTCCAATTGATTTTA

>M6-PGSC0003DMG400011108M6LRR-RLP\_189

AAGATGCATGATCTTGTGCATGATTTGGCCAGAGATATATTGAAATCTAAATTATTTGATCCAAAGAGAG  
TTGGAGGAGAAAATCTTCTCAAGTCCGATACTTTGGATGGGACTCACCA

>M6-PGSC0003DMG400011108M6LRR-RLP\_1890

TGGAAATTGGTCCTTCTCAGAGACGGTGAATTTTGAGGCATTCCAATTGATTTTAATGGCATTACAGCA  
GCTATCGTCCCTTCGTACATTGGAGGTATACGGACGTACGGATTGGGATT

>M6-PGSC0003DMG400011108M6LRR-RLP\_1953

TTCAGCAGCTATCGTCCCTTCGTACATTGGAGGTATACGGACGTACGGATTGGGATTCTCTGCCCCATCA  
GCTTATGCAACTCTCTGCCCTAACAGAGATCGGAATAAATGATTTTCGGAA

>M6-PGSC0003DMG400011108M6LRR-RLP\_2016

CCCATCAGCTTATGCAACTCTCTGCCCTAACAGAGATCGGAATAAATGATTTTCGGAATCGAGGCTCTTCC  
TCATAGACTTGGCAACCTTACTTCTTGTAAACATTAGATCTGGTGAGAT

>M6-PGSC0003DMG400011108M6LRR-RLP\_2079

CTCTTCCTCATAGACTTGGCAACCTTACTTCTCTTGTAACATTAGATCTGGTGAGATGCAAACGGCTACAA  
CATGTGGACTTCTCAGATGCCATGCCCAAATTACGGTATCTGAAGATCC

>M6-PGSC0003DMG400011108M6LRR-RLP\_2142

GGCTACAACATGTGGACTTCTCAGATGCCATGCCCAAATTACGGTATCTGAAGATCCGTGATTGTCCATT  
GTTAGAACTTTGTTCGGATGGGCTCGGCAACCTTGTTTCTTTGGAAGAGA

>M6-PGSC0003DMG400011108M6LRR-RLP\_2205

GTCCATTGTTAGAACTTTGTTCGGATGGGCTCGGCAACCTTGTTTCTTTGGAAGAGATAAGTTTATGTAA  
CTGCGAAAACTGGAGCATCTGCCATGCAACTCCTCACTAAATTATGGAA

>M6-PGSC0003DMG400011108M6LRR-RLP\_252

AAGAGAGTTGGAGGAGAAAATCTTCTCAAGTCCGATACTTTGGATGGGACTCACCAAGTGATCAAATA  
GAGAGGATAAATGAGCCAGGACGTTTGTGCACATTGTTCTGGAAAAGAAAT

>M6-PGSC0003DMG400011108M6LRR-RLP\_315

CAAATAGAGAGGATAAATGAGCCAGGACGTTTGTGCACATTGTTCTGGAAAAGAAATCTATCTGAAGAT  
ATGTTGTTGCGCTTTCAGTTCTTGAGAGTTTTAAATTTGTCCAGGTCAGAC

>M6-PGSC0003DMG400011108M6LRR-RLP\_378

GAAGATATGTTGTTGCGCTTTCAGTTCTTGAGAGTTTTAAATTTGTCCAGGTCAGACATCAAGGAGTTGT  
CAGCCTCAATCAGCAAGCTAATATACTTGAGATATCTTGATCTCTCCTAC

>M6-PGSC0003DMG400011108M6LRR-RLP\_504

ATCAGAGCCTTGCCAGCTCCATTTGCAAGCTCTACAATTTGCAAACCTTTAGAGTCAATAACTGTTTTTC  
ACTCAGGAAGCTTCCAGTAGAAATGGCAAATATGATAAGTTTGAGACAC

>M6-PGSC0003DMG400011108M6LRR-RLP\_567

TGTTTTTCACTCAGGAAGCTTCCAGTAGAAATGGCAAATATGATAAGTTTGAGACACATATATTGCAAGT  
ATCATTACCAATCATGTACAGGTAAGGATCGGTTTCAGATGCCACTTAAT

>M6-PGSC0003DMG400011108M6LRR-RLP\_63

TTTCTTCGTCCATGTCAAGAGACCACTGTGATGGAAGACGCCGGGAACAAGTTTTTCCAACACTTGTTGC  
GAAATTCCTTGCTGCAAGATGTCAAGCTAGATGAGCACAACAATATAACA

>M6-PGSC0003DMG400011108M6LRR-RLP\_630

TGCAAGTATCATTACCAATCATGTACAGGTAAGGATCGGTTTCAGATGCCACTTAATATGGAGCAATTGA  
CTAGTCTTCAGACGCTACAAGTTTTCTATGTAGGTTTAAAGAAAGGTAAT

>M6-PGSC0003DMG400011108M6LRR-RLP\_693

CAATTGACTAGTCTTCAGACGCTACAAGTTTTCTATGTAGGTTTAAAGAAAGGTAATCGAATAGAAGAAT  
TAGGTTGTTTAAAAAACTTAGAGGTGAATTGACGATCGAACGTCTTCAA

>M6-PGSC0003DMG400011108M6LRR-RLP\_756

GAAGAATTAGGTTGTTTAAAAAACTTAGAGGTGAATTGACGATCGAACGTCTTCAATTAGTCGGAAAT  
AAAGAAGAGGCTCGAACAGCATATTTACAGGAGAAACCAAATATCTACAAG

>M6-PGSC0003DMG400011108M6LRR-RLP\_819

GGAAATAAAGAAGAGGCTCGAACAGCATATTTACAGGAGAAACCAAATATCTACAAGCTGGTGTATTCA  
TGGTCCCGTGATGAATCAGAAGGCTGTGAGATCAATCATGAGCATGTGCTG

>M6-PGSC0003DMG400011108M6LRR-RLP\_882

TATTCATGGTCCCGTGATGAATCAGAAGGCTGTGAGATCAATCATGAGCATGTGCTGGATGGTCTTCAA  
CCACATCCTAACTTAAAAACCTTAGCAGTTGTGAACTATTTAGGAACTAAA

>M6-PGSC0003DMG400011108M6LRR-RLP\_945

CTTCAACCACATCCTAACTTAAAAACCTTAGCAGTTGTGAACTATTTAGGAACTAAATTTCTTCATGGTT  
CAGTGAAGAATTGCTACCAAATTTGGTCATGTTGAAATTAAGTGGTTGC

>M6-PGSC0003DMG400011116M6LRR-RLP\_0

ATGTTTCCTGGGCTTGAGAAGTTGACGATTACAGAGTGTTCACTGTTAAAAAGTGCTCCAACTCAATTGG  
AAACCCTGCGTGAATTAGAAATTGAAAGAGTTGACAGTGAAATGCCATTG

>M6-PGSC0003DMG400011116M6LRR-RLP\_1008

CTGCCATCCAGAGATGTCATGCGAAGCCTCACGAAATTACAGTTCCTGAAAATTAAGACTGCCACAGT  
TAGAAGAAAGTTGCACCAATTGGAGTAGCCCAAACCTCCAGTGGTCCAAC

>M6-PGSC0003DMG400011116M6LRR-RLP\_1060

TTAAAGACTGCCACAGTTAGAAGAAAGTTGCACCAATTGGAGTAGCCCAAACCTCCAGTGGTCCAACA  
TTTCCATAATCCAAAAATTAAGTAGGTGGGAGGATGATTCAGAACTTAA

>M6-PGSC0003DMG400011116M6LRR-RLP\_126

TTGTGCAGCAACTTAACATGTCTTGTGGATCTCGATGTCAGTGATGTGAAAGAGCTCACTTGTCTACCTG  
ATGAGATGCTACACAAGAACGTTTCTCTTCAACGCCTGTGGATCTCAGAT

>M6-PGSC0003DMG400011116M6LRR-RLP\_189

CTACCTGATGAGATGCTACACAAGAACGTTTCTCTTCAACGCCTGTGGATCTCAGATTGCAGAGAGTTTT

GTGAATTGCCACAGAGCTTGTACAATCTCCATTCCCTTAAGAGCTTACGA

>M6-PGSC0003DMG400011116M6LRR-RLP\_252

GAGTTTTGTGAATTGCCACAGAGCTTGTACAATCTCCATTCCCTTAAGAGCTTACGAATATCCTTCTTCCC  
CAATTCAGTTCTTTTCTGTTCCAGTGGAGAGAATTATTTAACTTCC

>M6-PGSC0003DMG400011116M6LRR-RLP\_378

AGGCTTCACTTACTTTATTGTGATGGATTGACCAGTTTACCAAATGGAATGCTAGAACAAATGCCCGTCTC  
TAAAGATTTTGAGGGTCAACAAGTAAAGAACTTGGTTTCCTTCCCTTTA

>M6-PGSC0003DMG400011116M6LRR-RLP\_441

CCGTCTCTAAAGATTTTGAGGGTCAACAAGTAAAGAACTTGGTTTCCTTCCCTTTACATGTGTGGGAAG  
TACCTTCACTTTCCATTTTGGATATGTCAAATTGCCCAAATTGATTAGT

>M6-PGSC0003DMG400011116M6LRR-RLP\_504

TGGGAAGTACCTTCACTTTCCATTTTGGATATGTCAAATTGCCCAAATTGATTAGTCTACCCACAGGAG  
GCCTTACCATCTCACTGGGTTATGACATTTGAAAATTGGTCCTTTCTCA

>M6-PGSC0003DMG400011116M6LRR-RLP\_63

CAATTGGAAACCCTGCGTGAATTAGAAATTGAAAGAGTTGACAGTGAAATGCCATTGTTGAACTTGTGC  
AGCAACTTAACATGTCTTGTGGATCTCGATGTCAGTGATGTGAAAGAGCTC

>M6-PGSC0003DMG400011116M6LRR-RLP\_630

GTGGATTTTGAGGCATTCCAATTGATTTTAAATGGCATTAGCCGCTATTGTCCCTTCGTACGTTGTGGGT  
GTACGGACATGGGCACTGGGATTCTCTGCCCTATCAGCTTATGTAAGTCT

>M6-PGSC0003DMG400011116M6LRR-RLP\_693

TTGTGGGTGTACGGACATGGGCACTGGGATTCTCTGCCCTATCAGCTTATGTAAGTCTCTTCCCTAATTG  
AGATCAGATTAAGTATTTCCGGTATCGAGGATCTTCCCTCATAGTCTTTGC

>M6-PGSC0003DMG400011116M6LRR-RLP\_756

CTAATTGAGATCAGATTAAGTATTTCCGGTATCGAGGATCTTCCCTCATAGTCTTTGCAATCTTACTTCTCT  
TGAAACATTACATCTAGTGGGGTGCAAACGGCTACAACATGTGGACTTC

>M6-PGSC0003DMG400011116M6LRR-RLP\_819

ACTTCTCTTGAACATTACATCTAGTGGGGTGCAAACGGCTACAACATGTGGACTTCAGAGATGCCATGC  
CCAAATTACATTTTCTTGAAGATCTGTGGTTGTCCATTGTTAGAAGCTCTG

>M6-PGSC0003DMG400011116M6LRR-RLP\_882



GCCATGCCCAAATTACATTTTCTTGAGATCTGTGGTTGTCCATTGTTAGAAGCTCTGTCGGATGGGCTCA  
GCAACCTGTTTGTGGAAACGTAAATTTTTGGAAGTGCAGAAATACTG

>M6-PGSC0003DMG400011116M6LRR-RLP\_945

GGGCTCAGCAACCTTGTGGTTGTTGAAACGTAAATTTTTGGAAGTGCAGAAATACTGGAGTGTCTGCCAT  
CCAGAGATGTCATGCGAAGCCTCACGAAATTACAGTTCCTGAAAATTA

>M6-PGSC0003DMG400011160-(rev)M6LRR-RLK\_1054

TCTAATAACCATTTCTCTGGTCATGTTCTGATTCTTTGGGTCTGTTAAACAGTCTTCAGTATCTGTAAGTG  
TATTAACCTTCAAATTTTCATTTTGTGTGATTATCAAGATTATGT

>M6-PGSC0003DMG400011160-(rev)M6LRR-RLK\_1116

TCTGTAAGTGTATTAACTTCAAATTTTCATTTTGTGTGATTATCAAGATTATGTTTTAGAGTTGAAT  
GGTCTAAAACACACCTGAAGTATCACGTTTTGCGAGTTTTCTACGAA

>M6-PGSC0003DMG400011160-(rev)M6LRR-RLK\_1178

AGAGTTGAATGGTCTAAAACACACCTGAAGTATCACGTTTTGCGAGTTTTCTACGAATTATCACCTAAA  
ACATATCTACCGCCATCTCATAGTCGATGTGTGTTTTGATAAATAGTTG

>M6-PGSC0003DMG400011160-(rev)M6LRR-RLK\_1240

CACCTAAAACATATCTACCGCCATCTCATAGTCGATGTGTGTTTTGATAAATAGTTGGTGATGGTTAA  
GAAGGAAAAGTGAACACATGATAGTTTAGGTAGAAAATGTGCGAAATCGT

>M6-PGSC0003DMG400011160-(rev)M6LRR-RLK\_1302

TGGTTAAGAAGGAAAAGTGAACACATGATAGTTTAGGTAGAAAATGTGCGAAATCGTGATACTTCAA  
GTGTGGTTTTTACCATTATCTCTGTTTTTCTGAGTACCCTTTTCTTTA

>M6-PGSC0003DMG400011160-(rev)M6LRR-RLK\_1364

CTTCAAAGTGTGGTTTTTACCATTATCTCTGTTTTTCTGAGTACCCTTTTCTTTAATTGTTGTTTTCTCAT  
GTAGACAATGTTAATTGCTATCTTATTCTTTGACTATATGTTTT

>M6-PGSC0003DMG400011160-(rev)M6LRR-RLK\_1550

TTGTCTGGTGCTATTCCTCTTTCTTTAGCCAGGGTACCTCAGCTTGCTTTCTGTGAGTATTGCTTCTTAA  
ATCTATGACTTTTGTGGATTTTGTATTCTTTGTCTGATTGTCC

>M6-PGSC0003DMG400011160-(rev)M6LRR-RLK\_1612

GCTTCTTAAATCTATGACTTTTGTGGATTTTGTATTCTTTGTCTGATTGTCCTGAGAATTGGAATTA  
TCTAGTCACTTCTTGAATCAGCCTTATGTTAAAGCTTTTTTGGTTT

>M6-PGSC0003DMG400011160-(rev)M6LRR-RLK\_1674

AATTGGAATTATCTAGTCACTTTCTTGAATCAGCCTTATGTTAAAGCTTTTTTGGTTAAAGGAAATTGAA  
TAGTTTGTCTGTTTAGGGGTATTATTATCTTTAACTTATTATTCATT

>M6-PGSC0003DMG400011160-(rev)M6LRR-RLK\_186

ACAAAATAGACAGACTGATAAAGAACCTGTTTCTTTTCCTTACACTCTCTCACTTTTTTTTTTTTAGTTTT  
GACTGAAAAAAGACACAGTTTTTACTCATTATATGAACCAAAATGT

>M6-PGSC0003DMG400011160-(rev)M6LRR-RLK\_1860

ACCCCAACTTGTTTGGGACTGAGGCGTTGTTGTCGTTGTCGGATAGTGTGTCCTTTTTTTGTATAAAGAA  
ATGAATAGTGTGTTCTGATTAGGGGTATTATTATATTTAACTATTTT

>M6-PGSC0003DMG400011160-(rev)M6LRR-RLK\_1984

TTTTATTATATTTAGTATGACGATGATATGCAATGACCTTAAATGAATGTGGGGATTCAATTATGCGGACC  
CCAACTTGTTTGTAACTGAGGCGTTGTTGTTTTGTTGTCATCGAATAGT

>M6-PGSC0003DMG400011160-(rev)M6LRR-RLK\_2046

TGCGGACCCCAACTTGTTTGTAACTGAGGCGTTGTTGTTTTGTTGTCATCGAATAGTGTGTTCTGTTTT  
GTGTAAAGGAAATGAAGAGTGTGTTCTGATCAGGGGTATTATTGTATTT

>M6-PGSC0003DMG400011160-(rev)M6LRR-RLK\_2170

TTATTTTTACTTTTATTTTATTTAGTATAATGATGATATGCAGTGAACCTTAAATGAAAGTGGGGATTCAT  
ATTGAACTTGTTTGGGATTGAGACGTTGTTGTTGTTGTCGAATAGTGTG

>M6-PGSC0003DMG400011160-(rev)M6LRR-RLK\_2232

GGGATTCATATTGAACTTGTTTGGGATTGAGACGTTGTTGTTGTTGTCGAATAGTGTGCTGCTTTGTGT  
AAAGGAAATGAATAGTGTGTTCTGTTTCAGGGTTATTATTATATTCTATAC

>M6-PGSC0003DMG400011160-(rev)M6LRR-RLK\_2294

CTTTGTGTAAAGGAAATGAATAGTGTGTTCTGTTTCAGGGTTATTATTATATTCTATACTTATATTTCACTTT  
TATTTAATCTAGAATGACGATGATATGCAACGAGCTTAAATGAAAGTG

>M6-PGSC0003DMG400011160-(rev)M6LRR-RLK\_2356

ATTTCACTTTTATTTAATCTAGAATGACGATGATATGCAACGAGCTTAAATGAAAGTGGCTATTCATATTG  
CCGACCCCAACTTTTTTTCTTGTTGAGACTGAGGCGTTGTTGCGTCTG

>M6-PGSC0003DMG400011160-(rev)M6LRR-RLK\_248

TTTTAGTTTTTACTGAAAAAAGACACAGTTTTTACTCATTATATGAACCAAAATGTTAAATAAATTCAT

GGGGTTTGCTTAATATATGTGTTGAATCATTGATTTTACTTTCTTGGT

>M6-PGSC0003DMG400011160-(rev)M6LRR-RLK\_310

TAAATTCATGGGGTTTGCTTAATATATGTGTTGAATCATTGATTTTACTTTCTTGGTTTTTTTTTTTTATCA  
TCAATGGCTTCCATTTTCTTGATTTTGTCTCTCTTTGCTTCTGTT

>M6-PGSC0003DMG400011160-(rev)M6LRR-RLK\_372

TTTTTTATCATCAATGGCTTCCATTTTCTTGATTTTGTCTCTCTTTGCTTCTGTTTTACCCTTTTCTTGT  
TTTCATATGAAGCTAGGAATCATGAAGGTAAACAAAAAAAAAAAA

>M6-PGSC0003DMG400011160-(rev)M6LRR-RLK\_434

CCTTTTCTTGTTCATATGAAGCTAGGAATCATGAAGGTAAACAAAAAAAAAAAAAGAACCCCATTTG  
CTTATTTTTCAGCTTTTGTATTTTCAAATTTGATCTTTTGTGTTTGTATGTA

>M6-PGSC0003DMG400011160-(rev)M6LRR-RLK\_496

CCCATTTGCTTATTTTTCAGCTTTTGTATTTTCAAATTTGATCTTTTGTGTTTGTATGTATAGTGGAAGCTTG  
ATTGCTATAAGGAGAAGTTTGGATGACCCAAAAGGAGCTTTAAGTAAT

>M6-PGSC0003DMG400011160-(rev)M6LRR-RLK\_558

GGAAGCTTTGATTGCTATAAGGAGAAGTTTGGATGACCCAAAAGGAGCTTTAAGTAATTGGGATGAAG  
ATTCTGTTGATCCTTGTAGTTGGGCTATGATCAGTTGTTCTTCTGAAAATCT

>M6-PGSC0003DMG400011160-(rev)M6LRR-RLK\_620

ATGAAGATTCTGTTGATCCTTGTAGTTGGGCTATGATCAGTTGTTCTTCTGAAAATCTTGTTATTGCACTG  
TATGTTAATAGTGTGTTTTTTTTTGGAAATTTATGGTACTATATGATA

>M6-PGSC0003DMG400011160-(rev)M6LRR-RLK\_682

ATTGCACTGTATGTTAATAGTGTGTTTTTTTTTGGAAATTTATGGTACTATATGATAATATTGGTTGTAA  
AGATTGAAACTTTTACTGTTTTATCAACTAAGAAAGTATTTTTTTTTT

>M6-PGSC0003DMG400011160-(rev)M6LRR-RLK\_744

TGGTTGTTAAAGATTGAAACTTTTACTGTTTTATCAACTAAGAAAGTATTTTTTTTTTGTGTTAGAGGAGC  
TCCAAGTCAAGATTTATCTGGGGTTTTGTCTGGGATGATATCAAATCTT

>M6-PGSC0003DMG400011160-(rev)M6LRR-RLK\_806

TAGAGGAGCTCCAAGTCAAGATTTATCTGGGGTTTTGTCTGGGATGATATCAAATCTTACAAACCTTAAA  
CAAGTGTAAGAGACAATTTTTAATGTTTTTGTGTTGTTGTAATTTCAAAT

>M6-PGSC0003DMG400011160-(rev)M6LRR-RLK\_868

ACCTTAAACAAGTGTAAGAGACAATTTTTAATGTTTTTGTGTATGTAATTTCAAATTTTGATGACCACA  
TTTGGTTAATTTCTTGTATGTTGAAAATTGTGTAGTTTATTGCAAAAC

>M6-PGSC0003DMG400011160-(rev)M6LRR-RLK\_930

ATGACCACATTTGGTTAATTTCTTGTATGTTGAAAATTGTGTAGTTTATTGCAAAACAACAACATTTCTG  
GGCATATTCCAAGAGAGCTAGGGAAACTTCCTAATCTTGAAACATTGGA

>M6-PGSC0003DMG400011160-(rev)M6LRR-RLK\_992

ACATTTCTGGGCATATTCCAAGAGAGCTAGGGAAACTTCCTAATCTTGAAACATTGGATCTGTCTAATAA  
CCATTTCTCTGGTCATGTTCTGATTCTTTGGGTCTGTAAACAGTCTTC

>M6-PGSC0003DMG400011205M6LRR-RLK\_0

ATGTCTATGATTGTTTCTGATCCATTTTCATGTACTTGAAAGTTGGAATTCTTCCAACGTTTCATGTATGTAAT  
TGGACAGGAATTGTATGTGACAAGAAAATGCATAGAGTTGTTGAGCTT

>M6-PGSC0003DMG400011205M6LRR-RLK\_1054

TCCCAAATACCTTTGCTAATCTTCCGCAACTGAGGAGGCTTTTGTGCACGATAATCACCTCTCTGGAACG  
ATTCCCCGAGCTTAGGTGATTGTGTTAACTTGAAATACTTGATCTTT

>M6-PGSC0003DMG400011205M6LRR-RLK\_1116

TCTGGAACGATTCCCCGAGCTTAGGTGATTGTGTTAACTTGAAATACTTGATCTTTCTCACAACAGAA  
TCACGGGGACGATTCCAAGTGCAGTTGCTGGATTGAGTAGTTTGAAGCTC

>M6-PGSC0003DMG400011205M6LRR-RLK\_1178

CAACAGAATCACGGGGACGATTCCAAGTGCAGTTGCTGGATTGAGTAGTTTGAAGCTCTATCTGAACTT  
GTCTAGTAATTACCTACATGGTCCAATTCCTTAGAGCTCAGCAAAATGGA

>M6-PGSC0003DMG400011205M6LRR-RLK\_124

TTAGTCATCATTGTTACGTGGAACGATTTCTCCTTCTCTCTCTGGGCTCTCTTTCTTGCAGATTCTTGATT  
TGTCTGGTAACTTGTTAGAAGGACAAATTCCAGCTGAATTAGGCAATC

>M6-PGSC0003DMG400011205M6LRR-RLK\_1240

TGAACTTGTCTAGTAATTACCTACATGGTCCAATTCCTTAGAGCTCAGCAAAATGGATATGGTGTGGC  
AATTGACTTGTCTTTGAATAATCTCTCGTCTAATGTCCCTTCACAGCTTG

>M6-PGSC0003DMG400011205M6LRR-RLK\_1302

GTGTTGGCAATTGACTTGTCTTTGAATAATCTCTCGTCTAATGTCCCTTCACAGCTTGGCAGCTGCATTGC  
TCTCGAATACTTGAATCTATCGCGTAATTCCTTAGAAGGACCTCTTCCA

>M6-PGSC0003DMG400011205M6LRR-RLK\_1364

CTGCATTGCTCTCGAATACTTGAATCTATCGCGTAATTCCTTAGAAGGACCTCTCCATCTTCGATAGGAA  
GATTGCCTTACCTTAAGGAAATCGACGTTTCATTCAATGTGTTGAGTGG

>M6-PGSC0003DMG400011205M6LRR-RLK\_1426

CGATAGGAAGATTGCCTTACCTTAAGGAAATCGACGTTTCATTCAATGTGTTGAGTGGGGAAATACCAC  
AGACATTTCAAGCATCGTCGACTTTGCAGAACCTCAACTTCTCCTATAACC

>M6-PGSC0003DMG400011205M6LRR-RLK\_1488

ATACCACAGACATTTCAAGCATCGTCGACTTTGCAGAACCTCAACTTCTCCTATAACCGTTTCTCGGGGAA  
CGTGACAGATACTGGTGCATTTTCATCACTAACCATCAGCTCATTTCATG

>M6-PGSC0003DMG400011205M6LRR-RLK\_1550

CTCGGGGAACGTGACAGATACTGGTGCATTTTCATCACTAACCATCAGCTCATTTCATGGGAAATTTCAAG  
CTTTGTGGCTCAGTACAAGGGATGAGAAGTTGCCATAAAAAGAGGGGTAG

>M6-PGSC0003DMG400011205M6LRR-RLK\_1612

ATTTCAAGCTTTGTGGCTCAGTACAAGGGATGAGAAGTTGCCATAAAAAGAGGGGTAGACATTTTCATTA  
TCACAATCCTCCTTTTCATTGCTTATAACTCCTATATTTTGCATAGTCGGGT

>M6-PGSC0003DMG400011205M6LRR-RLK\_1674

TTCATTATCACAATCCTCCTTTTCATTGCTTATAACTCCTATATTTTGCATAGTCGGGTACCCCTCCTCCTAA  
GATCAAGATTCAGGAACCAATTCGCGAGTTTTAATAAAAAGCAAGGTA

>M6-PGSC0003DMG400011205M6LRR-RLK\_1736

TCTCCTCCTAAGATCAAGATTCAGGAACCAATTCGCGAGTTTTAATAAAAAGCAAGGTAATTGAAGATGTG  
GAGCAAGGTGGTGGGAGGAAAGAGCAAAAAGTACCCGAGGATATCTCGTAT

>M6-PGSC0003DMG400011205M6LRR-RLK\_1798

AAGATGTGGAGCAAGGTGGTGGGAGGAAAGAGCAAAAAGTACCCGAGGATATCTCGTATGCAGCTGAT  
TGAAGCAACGGGAGGTTTTAGCAGCTCGAGTTTAATAGGAGCAGGAAGATATG

>M6-PGSC0003DMG400011205M6LRR-RLK\_186

ATTCTTGATTTGTCTGGTAACTTGTTAGAAGGACAAATTCAGCTGAATTAGGCAATCTTGTTAAGCTAA  
ATCAGCTTAGTTTGTCTTCTAATCTCCTCGAAGGGGAAATCCCAAACGAG

>M6-PGSC0003DMG400011205M6LRR-RLK\_1860

CTGATTGAAGCAACGGGAGGTTTTAGCAGCTCGAGTTTAATAGGAGCAGGAAGATATGGGCGTGTTTA

TAAAGGAGTCCTGAAGAACAACATGAGCATAGCTGTAAAGTAATTGACACA

>M6-PGSC0003DMG400011205M6LRR-RLK\_1922

TGTTTATAAAGGAGTCCTGAAGAACAACATGAGCATAGCTGTAAAGTAATTGACACAAAAGGAGGTG

GAGAGATATCAGGTAGCTTCAAAGGGAATGTCAAATCTTGAAAAGGACTAG

>M6-PGSC0003DMG400011205M6LRR-RLK\_1984

GAGGTGGAGAGATATCAGGTAGCTTCAAAGGGAATGTCAAATCTTGAAAAGGACTAGACATAGGAAC

TTGATAAGGATCATAACGACATGTAGCAGACCGGACTTCAAAGCTCTCGTGT

>M6-PGSC0003DMG400011205M6LRR-RLK\_2046

AGGAACTTGATAAGGATCATAACGACATGTAGCAGACCGGACTTCAAAGCTCTCGTGTTCCCTCTGATGT

CAAACGGAAGCCTAGAGAACCATCTGTACCCAAGCCACAGGCTGAGACAT

>M6-PGSC0003DMG400011205M6LRR-RLK\_2108

TCTGATGTCAAACGGAAGCCTAGAGAACCATCTGTACCCAAGCCACAGGCTGAGACATCAACTTGACTT

AGCTCAATTGGTTAACATTTGCAGTGATGTAGCAGAAGGAGTGCCTATCT

>M6-PGSC0003DMG400011205M6LRR-RLK\_2170

TTGACTTAGCTCAATTGGTTAACATTTGCAGTGATGTAGCAGAAGGAGTGCCTATCTCCACCACTATTC

GCCTGTAAAGTCGTGCATTGTGATCTAAAACCAAGCAATATCCTTCTTG

>M6-PGSC0003DMG400011205M6LRR-RLK\_2232

CACTATTCGCCTGTAAAGTCGTGCATTGTGATCTAAAACCAAGCAATATCCTTCTTGATTACAACATGAC

AGCTTTGGTAACAGATTTTGGGATTTCAACATTAGTAAAAGCTGTTGAG

>M6-PGSC0003DMG400011205M6LRR-RLK\_2294

CAACATGACAGCTTTGGTAACAGATTTTGGGATTTCAACATTAGTAAAAGCTGTTGAGGAAAATACTAAT

CCTATCGACGAATCAGTTAATTACAACACTCAACAGATGGATTACTTTGTGG

>M6-PGSC0003DMG400011205M6LRR-RLK\_2356

ATACTAATCCTATCGACGAATCAGTTAATTACAACACTCAACAGATGGATTACTTTGTGGATCAATTGGTTAC

ATTGCTCCTGGTTAGTAACAAATAATAGTTCTATTCTATCTAATTCATT

>M6-PGSC0003DMG400011205M6LRR-RLK\_2418

ATTGGTTACATTGCTCCTGGTTAGTAACAAATAATAGTTCTATTCTATCTAATTCATTTCATTTATATGAC

TAAAGTTTCTGTTTCTTTGATTGTAGAATATGGAATGGGAAGGAGGGC

>M6-PGSC0003DMG400011205M6LRR-RLK\_248

TAAGCTAAATCAGCTTAGTTTGTCTTCTAATCTCCTCGAAGGGGAAATCCCAAACGAGTTAGGATTCCTT  
CATGAATTGAAGTATCTTGATTTGGGAACAAACAATCTTTCTGGTGCAAT

>M6-PGSC0003DMG400011205M6LRR-RLK\_2480

TTTATATGACTAAAGTTTCTGTTTCTTTGATTGTAGAATATGGAATGGGAAGGAGGGCTTCAACAAAAGG  
AGATGTATTTAGCTATGGAGTTTTGTTACTTGAGATTGTGACAGGTAAAC

>M6-PGSC0003DMG400011205M6LRR-RLK\_2542

ACAAAAGGAGATGTATTTAGCTATGGAGTTTTGTTACTTGAGATTGTGACAGGTAAACGTCCCACAGAC  
GTTCTATTTCAACAAGGCTCGAGCTTACACGAATGGGTGAAGAGTCAGTAT

>M6-PGSC0003DMG400011205M6LRR-RLK\_2604

CACAGACGTTCTATTTCAACAAGGCTCGAGCTTACACGAATGGGTGAAGAGTCAGTATTCACATAAACTC  
GAGGCAATGATTGATGAAGCATTACAAAGATGTACAACAGTTCAACGCGA

>M6-PGSC0003DMG400011205M6LRR-RLK\_2666

ATAAACTCGAGGCAATGATTGATGAAGCATTACAAAGATGTACAACAGTTCAACGCGATAGCAATATAT  
GGCACGATATCGTGTTAGAGTTGATTGAACTTGGCTTAATGTGCACTCAGT

>M6-PGSC0003DMG400011205M6LRR-RLK\_2728

AATATATGGCACGATATCGTGTTAGAGTTGATTGAACTTGGCTTAATGTGCACTCAGTACAATCCATCAA  
CTAGGCCAACAAATGTTGGATGTTGCACTTGAAATTGGAAGGTTAAAACAG

>M6-PGSC0003DMG400011205M6LRR-RLK\_2790

TCCATCAACTAGGCCAACAAATGTTGGATGTTGCACTTGAAATTGGAAGGTTAAAACAGTATGTTTCAACT  
TCTTCAAACACTGTTACTGAAGATGTCACAACAAAAAGTTGAACAGTTTT

>M6-PGSC0003DMG400011205M6LRR-RLK\_2852

TTTCAACTTCTTCAAACACTGTTACTGAAGATGTCACAACAAAAAGTTGAACAGTTTTTTTTTTTTATATATC  
TAACAATGTACCTTTTAACTTTATTCATTGTACTTCTATGTTCTTTTT

>M6-PGSC0003DMG400011205M6LRR-RLK\_2914

TTTATATATCTAACAATGTACCTTTTAACTTTATTCATTGTACTTCTATGTTCTTTTTTTTTTTTACCATTTTA  
ATTGTTCTTCTTGGGGTGCGGACCTTCTCTGGATTCTGCGTGAAT

>M6-PGSC0003DMG400011205M6LRR-RLK\_2946

ATTCATTGTACTTCTATGTTCTTTTTTTTTTTTACCATTTTAAATTGTTCTTCTTGGGGTGCGGACCTTCTCT  
GGATTCTGCGTGAATGTGAGATGGTTCGTGCACCAAGACTACCCTTC

>M6-PGSC0003DMG400011205M6LRR-RLK\_310

GATTCCTTCATGAATTGAAGTATCTTGATTGGGAACAAACAATCTTTCTGGTGCAATTCCTCTGTCTTTG  
TTCTGTAATTGCTCTGCTTCATTACAATATATGGACCTTTCTAACAATT

>M6-PGSC0003DMG400011205M6LRR-RLK\_372

CTGTCTTTGTTCTGTAATTGCTCTGCTTCATTACAATATATGGACCTTTCTAACAATTCGCTTCGCGGTGAG  
ATCCCTATGAATGATCATTGTGAGTTGAGTGGTTTGAAGTTTCTTCTT

>M6-PGSC0003DMG400011205M6LRR-RLK\_434

TCGCGGTGAGATCCCTATGAATGATCATTGTGAGTTGAGTGGTTTGAAGTTTCTTCTTTTATGGTCTAAT  
GAACTTGTTGGTGAAGTTCTATTGCTCTTTGAAATCTACAAAGCTAGA

>M6-PGSC0003DMG400011205M6LRR-RLK\_496

GGTCTAATGAACTTGTTGGTGAAGTTCTATTGCTCTTTGAAATCTACAAAGCTAGAATGGCTTGATCTT  
GAATCGAATTCGTTGAGTGGTGAAGTTCTTCTGATATTGTAAGTAAAA

>M6-PGSC0003DMG400011205M6LRR-RLK\_558

CTTGATCTTGAATCGAATTCGTTGAGTGGTGAAGTTCTTCTGATATTGTAAGTAAAATGCCAAAGTTAC  
AGTTTTTGTATTTGTCTTACAACAACCTTTGATAGTCATAGTGGTAATACT

>M6-PGSC0003DMG400011205M6LRR-RLK\_62

TGTATGTAATTGGACAGGAATTGTATGTGACAAGAAAATGCATAGAGTTGTTGAGCTTGATCTTAGTCAT  
CATTGTTACGTGGAACGATTTCTCCTTCTCTCTCTGGGCTCTCTTTCTT

>M6-PGSC0003DMG400011205M6LRR-RLK\_620

AAAGTTACAGTTTTTGTATTTGTCTTACAACAACCTTTGATAGTCATAGTGGTAATACTGACCTGACGCCTT  
TTTTCGCGTCTTTAGTTAATTCTACTAAGTCAAGAACTTGAGTTAGC

>M6-PGSC0003DMG400011205M6LRR-RLK\_682

TGACGCCTTTTTTCGCGTCTTTAGTTAATTCTACTAAGTCAAGAACTTGAGTTAGCTGGGAATAATCTT  
GGTGGGAGTTACCTCCTATTATCGGTAACATCTCCAAGAACCTTGAC

>M6-PGSC0003DMG400011205M6LRR-RLK\_744

AATAATCTTGGTGGGAGTTACCTCCTATTATCGGTAACATCTCCAAGAACCTTGACAGATTCATCTTG  
ACGATAATCTTATCTATGGTCCAATCCCAACACAAATTTGAGTCTTGTA

>M6-PGSC0003DMG400011205M6LRR-RLK\_806

TCATCTTGACGATAATCTTATCTATGGTCCAATCCCAACACAAATTTGAGTCTTGTAATATTACTCTATT



GAATTTGTCTAGTAATCATCTGAATGGTACAATTCCTCCTGAGTTGTG

>M6-PGSC0003DMG400011205M6LRR-RLK\_868

T TACTCTATTGAATTTGTCTAGTAATCATCTGAATGGTACAATTCCTCCTGAGTTGTGTGCGAATGGGGAAA  
CTTGAGAGGCTTTATCTGTGCGAATAATCACTCTCTGGTGTCAATTCCTT

>M6-PGSC0003DMG400011205M6LRR-RLK\_930

ATGGGGAAACTTGAGAGGCTTTATCTGTGCGAATAATCACTCTCTGGTGTCAATTCCTTCTGCTTTTGGAAA  
TGTTTCTCATTTAGGCCTTCTTGATCTGTGCGAAAAACAACCTCTCTGGA

>M6-PGSC0003DMG400011205M6LRR-RLK\_992

T TTTGGAAATGTTTCTCATTTAGGCCTTCTTGATCTGTGCGAAAAACAACCTCTCTGGATTAATCCCAAATA  
CCTTTGCTAATCTCCGCAACTGAGGAGGCTTTTGTTGCACGATAATCA

>M6-PGSC0003DMG400011209M6LRR-RLP\_0

CGACTACTAGGCGGCCACCATACTATGACTATAAATGACAAGAGATGTTCCCTTCTACTTCATTCACAAA  
CAAGCAAATATGAAGAACAATCACTTCAACTTATCTTTCTCATATTGTT

>M6-PGSC0003DMG400011209M6LRR-RLP\_1037

TGAGTTTCAATAAATTGACAGGAAATCTTCTGATGCATTAGGCAACTTGAGGAAACTGAAACATCTTCA  
GCTGAGGTATAATCACTGACAGGCACAATACCTGAAAGTATAGGGAACT

>M6-PGSC0003DMG400011209M6LRR-RLP\_1098

ACATCTTCAGCTGAGGTATAATCACTGACAGGCACAATACCTGAAAGTATAGGGAACTTATTATCTTTG  
GAGACATTCTACCTCACATCAAACAAAATGAGTGGGAACATCACCACGAG

>M6-PGSC0003DMG400011209M6LRR-RLP\_1159

T TATCTTTGGAGACATTCTACCTCACATCAAACAAAATGAGTGGGAACATCACCACGAGTATCGGACAGC  
TCATGTCGTTGGTCTCGTTGGATATCTCGGAGAATATGTGGGATGGTATT

>M6-PGSC0003DMG400011209M6LRR-RLP\_122

CTCAACTTTTCTATTTCACTTGCATAAACCATCACTTTGTTTCCTCTACTAACACCTCTTGCATTGAAACAG  
AGAAAAATGCACTTCTAAACCTTAAAGAAAATCTTACAGATCCTTCAG

>M6-PGSC0003DMG400011209M6LRR-RLP\_1220

T CGGACAGCTCATGTCGTTGGTCTCGTTGGATATCTCGGAGAATATGTGGGATGGTATTGTCATTGAAG  
CTCATTTGGTGAATCTTTCCAACCTTGCAAGAGTTTTTCAGTTGGGATGAAAC

>M6-PGSC0003DMG400011209M6LRR-RLP\_1281

CATTGAAGCTCATTTGGTGAATCTTTCCAACCTTGCAAGAGTTTTTCAGTTGGGATGAAACTTAGTAAAAAT  
ATTACCTTGGCATTTCGATATCAGCCCGAATTGGAATCCTTCATTCAGGCT

>M6-PGSC0003DMG400011209M6LRR-RLP\_1342

AGTAAAAATATTACCTTGGCATTTCGATATCAGCCCGAATTGGAATCCTTCATTCAGGCTGACATTCTTGAC  
TATTCAGTCATGCCAATTAGGTCCTGAATTCCCACATTGGCTGAAGGAT

>M6-PGSC0003DMG400011209M6LRR-RLP\_1403

CATTCTTGACTATTCAGTCATGCCAATTAGGTCCTGAATTCCCACATTGGCTGAAGGATCAGAATGAGCT  
CACCAGCCTAATACTCAACACCGCGGGGATTCTGATGCGGTACCTGATT

>M6-PGSC0003DMG400011209M6LRR-RLP\_1464

GAATGAGCTCACCAGCCTAATACTCAACACCGCGGGGATTCTGATGCGGTACCTGATTGGTTTGTAGA  
GTTGGATTTGAAGCTTGATAATCTAGACATGGCATAACAACACTTGACAGG

>M6-PGSC0003DMG400011209M6LRR-RLP\_1525

TTTGTAGAGTTGGATTTGAAGCTTGATAATCTAGACATGGCATAACAACACTTGACAGGGAAAGTTCCA  
AACAAATTCAAGTTCAACTTTCAAGCCAATGTGGATTTAAGCACTAATCGC

>M6-PGSC0003DMG400011209M6LRR-RLP\_1586

AAGTTCCAAACAAATTCAAGTTCAACTTTCAAGCCAATGTGGATTTAAGCACTAATCGCTTCGAGGGACC  
TCTCCACTATGGTCTTCTAATGTTACAACATTGTATCTGAGGGATAACT

>M6-PGSC0003DMG400011209M6LRR-RLP\_1647

CGAGGGACCTCTCCCACTATGGTCTTCTAATGTTACAACATTGTATCTGAGGGATAACTTGTTTTCAGGA  
CCTATTCTCTCAACATTTGTGAAGCACTTCTCAATATAGAAGACTTGGA

>M6-PGSC0003DMG400011209M6LRR-RLP\_1708

TTTTCAGGACCTATTCTCTCAACATTTGTGAAGCACTTCTCAATATAGAAGACTTGGATATCTCCAGGAA  
CAATCTAAATGGCACAATTCCCTTATGCATAGGTGATATGAATCAGTTA

>M6-PGSC0003DMG400011209M6LRR-RLP\_1769

TCTCCAGGAACAATCTAAATGGCACAATTCCCTTATGCATAGGTGATATGAATCAGTTAACTACCTTAGC  
CCTCGATAACAACCAACTTATCGGCCAAGTTCCTGATTTCTGGGGTAAGT

>M6-PGSC0003DMG400011209M6LRR-RLP\_183

CATTGAAACAGAGAAAAATGCACTTCTAAACCTTAAAGAAAATCTTACAGATCCTTCAGGCAAGCTATCT  
TCTTGATTGATCAACAAGATTGTTGCCAATGGCTTGGTGTAACATGTAA

>M6-PGSC0003DMG400011209M6LRR-RLP\_1830

TACCTTAGCCCTCGATAACAACCAACTTATCGGCCAAGTTCCTGATTTCTGGGGTAAGTTACCATATCTTT  
ACTGGATAGATATGTCAGAGAATCGCCTATCCGGACAAATTCCACACTC

>M6-PGSC0003DMG400011209M6LRR-RLP\_1891

CCATATCTTTACTGGATAGATATGTCAGAGAATCGCCTATCCGGACAAATTCCACACTCACTAGGCTCTCT  
TGCTTATCTGATGTTCTTAAGACTCTCAGGCAACAATCTCTCTGGAGAA

>M6-PGSC0003DMG400011209M6LRR-RLP\_1952

TAGGCTCTCTTGCTTATCTGATGTTCTTAAGACTCTCAGGCAACAATCTCTCTGGAGAACTGCCTTTGAGT  
TTGAGAAATTGCACGAAAATGATCAACATTGATCTTAGTAACAATCAGT

>M6-PGSC0003DMG400011209M6LRR-RLP\_2013

GCCTTTGAGTTTGAGAAATTGCACGAAAATGATCAACATTGATCTTAGTAACAATCAGTTGTCAGGGCTA  
ATCCCAGCTTGGTTAGCGGAAACAATGAGATCACTGTTAATCCTTAGTGT

>M6-PGSC0003DMG400011209M6LRR-RLP\_2074

TCAGGGCTAATCCCAGCTTGGTTAGCGGAAACAATGAGATCACTGTTAATCCTTAGTGTAAGGAACAAC  
AGTTTTTTCGGTCACATTCCTTTAAAAATCTGTAGCCTTTCAGGTCTTCAC

>M6-PGSC0003DMG400011209M6LRR-RLP\_2135

GGAACAACAGGTTTTTTCGGTCACATTCCTTTAAAAATCTGTAGCCTTTCAGGTCTTCACATACTAGACCTT  
TCAGGAAACAACCTTATCCGGTTCTGTCCCGTCTGTTTTGGAAACTTGG

>M6-PGSC0003DMG400011209M6LRR-RLP\_2196

ACTAGACCTTTCAGGAAACAACCTTATCCGGTTCTGTCCCGTCTGTTTTGGAAACTTGGAAAGGGTTCAAG  
GTTGAGCTAACTGATGTAGAAGCTAAACAATATCAAGGTACATTGAAGCT

>M6-PGSC0003DMG400011209M6LRR-RLP\_2257

GGGTTCAAGGTTGAGCTAACTGATGTAGAAGCTAAACAATATCAAGGTACATTGAAGCTTGAGGCAAAA  
GGAAGAACAACCTTTCTTATGATAAAATCCTTTATCTAGTAAACAGTATCGAC

>M6-PGSC0003DMG400011209M6LRR-RLP\_2318

AGGCAAAAGGAAGAACAACCTTTCTTATGATAAAATCCTTTATCTAGTAAACAGTATCGACCTCTCGAGAAA  
CAGTTTGTCTGGTGAAATCCCGGAAGAGTTAACAACTTACACAACTTG

>M6-PGSC0003DMG400011209M6LRR-RLP\_2379

CTCGAGAAACAGTTTGTCTGGTGAAATCCCGGAAGAGTTAACAACTTACACAACTTGGAACCTTGAA

CTTGTCTATGAACCATTTGACAGGACATATACCAACAGATATCGGAAAGTT

>M6-PGSC0003DMG400011209M6LRR-RLP\_244

AAGCTATCTTCTTGGATTGATCAACAAGATTGTTGCCAATGGCTTGGTGTAACATGTAACAACAAGACCG  
GGCACGTCGTAAAGATTGATCTTAGGAACAAATACTCAACAGAACATGAA

>M6-PGSC0003DMG400011209M6LRR-RLP\_2440

ACCTTGAACCTTGTCTATGAACCATTTGACAGGACATATACCAACAGATATCGGAAAGTTACGTTGGGTTG  
AAACGTTAGATCTTTCAATAAATCAGTTATCAGGTACTATCCCACCAAGC

>M6-PGSC0003DMG400011209M6LRR-RLP\_2501

GTTGGGTTGAAACGTTAGATCTTTCAATAAATCAGTTATCAGGTACTATCCCACCAAGCTTAGCTACATTA  
GACTTTTTAAGTCATTTGAACTTGTCAACAATAAGTTGACAGGAAGAA

>M6-PGSC0003DMG400011209M6LRR-RLP\_2562

AGCTACATTAGACTTTTTAAGTCATTTGAACTTGTCAACAATAAGTTGACAGGAAGAATTCCTACTAGTA  
CTCAGTTTCAAACCAAAGTTGATCCAACAATTTTCCAAGGAAATGTTGC

>M6-PGSC0003DMG400011209M6LRR-RLP\_2623

CCTACTAGTACTCAGTTTCAAACCAAAGTTGATCCAACAATTTTCCAAGGAAATGTTGCACTTTGTGGTCC  
TCCTTTGGAACAATGTGTTGGTGATAGGACTACGACGACGATAACATCA

>M6-PGSC0003DMG400011209M6LRR-RLP\_2684

TTTGTGGTCCTCCTTTGGAACAATGTGTTGGTGATAGGACTACGACGACGATAACATCACAAAGTGGAG  
GAAATGATGAAGGGGAAACAGATGATGAAGATCAACTTGAGAAAGTATGGT

>M6-PGSC0003DMG400011209M6LRR-RLP\_2745

AAGTGGAGGAAATGATGAAGGGGAAACAGATGATGAAGATCAACTTGAGAAAGTATGGTTCTTTGCTG  
TTGTTGGTTTGGGATATATAGTTGGTTTTTGGGCATTTTTTGGCAGTTTGAT

>M6-PGSC0003DMG400011209M6LRR-RLP\_2806

TTTGCTGTTGTTGGTTTGGGATATATAGTTGGTTTTTGGGCATTTTTTGGCAGTTTGATCTTCAAGAAAAG  
ATGGAGAATTGCTTATTGCAGATTCATTGAGAGGTGTATTTTGGAGTTC

>M6-PGSC0003DMG400011209M6LRR-RLP\_2867

TCAAGAAAAGATGGAGAATTGCTTATTGCAGATTCATTGAGAGGTGTATTTTGGAGTTCTATGAAATGTC  
TTGTAGTTCTGTGAAAAAATTGTTAGGAATCTAATAAGCTATGTTGCTCA

>M6-PGSC0003DMG400011209M6LRR-RLP\_305

ACAAGACCGGGCACGTCGTAAAGATTGATCTTAGGAACAAATACTCAACAGAACATGAATTGAGAGGT  
GTGATTAATCCATCTTTGCTCAAGTTACAACAATTGAGATACTTAGACTTAA

>M6-PGSC0003DMG400011209M6LRR-RLP\_3050

TACGACAACATTTTTAGAGAGTCTGAGAACTTAGCTAATAAGTGGAECTATAGGAGTTTGTCTCTGCAG  
TTCTGTTATATGTTATGTTTTAGTTTCAATATAGCACATATTACTACTTT

>M6-PGSC0003DMG400011209M6LRR-RLP\_3111

TCTCTGCAGTTCTGTTATATGTTATGTTTTAGTTTCAATATAGCACATATTACTACTTTTTCTATATGTAAA  
ATAATGCTACCTAAGTATTGACACTAATAGAAATGCCAGTGTTTTGGG

>M6-PGSC0003DMG400011209M6LRR-RLP\_3172

CTATATGTAAAATAATGCTACCTAAGTATTGACACTAATAGAAATGCCAGTGTTTTGGGTAGAGTTACGA  
CATGTGAAGAGTGGTCAATTGAACACTTTTACGTAGGTCAAATAATACT

>M6-PGSC0003DMG400011209M6LRR-RLP\_3233

GAGTTACGACATGTGAAGAGTGGTCAATTGAACACTTTTACGTAGGTCAAATAATACTTCTTATATATG  
TATACATGTTCAACAAGACTATTGTAGTACATATAATTAGGAAGTTGTTA

>M6-PGSC0003DMG400011209M6LRR-RLP\_3281

AAAATAATACTTCTTATATATGTATACATGTTCAACAAGACTATTGTAGTACATATAATTAGGAAGTTGTTT  
AAATAGTATCTAAGACTATTCTTATACTATGCATGCATCTACTTGTATA

>M6-PGSC0003DMG400011209M6LRR-RLP\_366

GAGAGGTGTGATTAATCCATCTTTGCTCAAGTTACAACAATTGAGATACTTAGACTTAAGCATGAACAAT  
TTTGAAGGAATCAAAGTACCTGAATTCATCGGTGCGCTCAATGAACTAAG

>M6-PGSC0003DMG400011209M6LRR-RLP\_427

ATGAACAATTTTGAAGGAATCAAAGTACCTGAATTCATCGGTGCGCTCAATGAACTAAGGTATCTCAATC  
TATCTGGTGCATCTTTTACTGGTTTAGTCTCTTCATTCCTTGAAAACCTC

>M6-PGSC0003DMG400011209M6LRR-RLP\_488

ATCTCAATCTATCTGGTGCATCTTTTACTGGTTTAGTCTCTTCATTCCTTGAAAACCTCTCAAATTTGCAAG  
TTCTTGATTTAGGAGGCTTAGATCTTAGTGAAGATGCTAATTCTTGCC

>M6-PGSC0003DMG400011209M6LRR-RLP\_549

AAATTTGCAAGTTCTTGATTTAGGAGGCTTAGATCTTAGTGAAGATGCTAATTCTTGGCTTCAAATAATC  
AATGATCATGTTCTTCTCTGTTGGAGTTGCGTTTGCCTCGATGTCAACT

>M6-PGSC0003DMG400011209M6LRR-RLP\_61

ATTCACAAACAAGCAAATATGAAGAACAATCACTTCAACTTATCTTTCTCATATTGTTATCTCAACTTTTC  
TATTTCACTTGCATAAACCATCACTTTGTTTCCTCTACTAACACCTCT

>M6-PGSC0003DMG400011209M6LRR-RLP\_610

CAAATAATCAATGATCATGTTCTTCTCTGTTGGAGTTGCGTTTGCCTCGATGTCAACTTTTAAACATTCTC  
TCTTCTTTTCCATTACTAAATCTTACTTCCCTTTTGGTACTTGATCTT

>M6-PGSC0003DMG400011209M6LRR-RLP\_671

TAAACATTCTTCTTCTTTTCCATTACTAAATCTTACTTCCCTTTTGGTACTTGATCTTTCCAACAATGCTTTT  
AACTCATGTACATTTCTCAATGGATATTCAAACCTTAGTAGCCTTG

>M6-PGSC0003DMG400011209M6LRR-RLP\_732

CAACAATGCTTTTAACTCATGTACATTTCTCAATGGATATTCAAACCTTAGTAGCCTTGTGTATCTGGACT  
TAAGCTCCAACAATATGTGTAGTGAACCTTGTGATGAGTTTGCTAAGCT

>M6-PGSC0003DMG400011209M6LRR-RLP\_793

TATCTGGACTTAAGCTCCAACAATATGTGTAGTGAACCTTGTGATGAGTTTGCTAAGCTCACTTTCTTGA  
ACATCTTGATCTGTCTTCGAACCACGGTATCAATGGGGCACTCAAGAGG

>M6-PGSC0003DMG400011209M6LRR-RLP\_854

CTTTCTTGAACATCTTGATCTGTCTTCGAACCACGGTATCAATGGGGCACTCAAGAGGAGCTTGGGGAA  
ACTATGTAATTTGAAGAGTTTGATCCTGTCTTACAACAACATCAGTGGAG

>M6-PGSC0003DMG400011209M6LRR-RLP\_915

CTTGGGGAAACTATGTAATTTGAAGAGTTTGATCCTGTCTTACAACAACATCAGTGGAGACATAATCGA  
GTTTCATCGATGCGTTATCTGAATGCCAAAGCAATAGCTTGGAGACATTGGA

>M6-PGSC0003DMG400011209M6LRR-RLP\_976

ATAATCGAGTTCATCGATGCGTTATCTGAATGCCAAAGCAATAGCTTGGAGACATTGGAGTTGAGTTTCA  
ATAAATTGACAGGAAATCTTCTGATGCATTAGGCAACTTGAGGAAACTG

>M6-PGSC0003DMG400011251M6G-LecRK\_0

ATGTTAATTTCTCCAAAAGGAAATTTATTTGGGATTTTTAGTCCAAATGTTTCTAATAATCAAAGGTT  
TGTTGGTATATGGTATGTTGATGGTCCAAAAAATTCATTTGTTTGGTT

>M6-PGSC0003DMG400011251M6G-LecRK\_1054

CATTTGTGACATCTTATCTAAAAGATTAAGTTGATAACATGTGTTTCATAACTTACTTTTGTTTTAAACACA

ACCTCTCATGTGCTTCTTGAATCCTTGATATTGGATGGCAGTGAGATT

>M6-PGSC0003DMG400011251M6G-LecRK\_1116

TTTTAACACAACCTCTCATGTGCTTCTTGAATCCTTGATATTGGATGGCAGTGAGATTCGAACCTAAGAAC  
TATGCCTGTTCCGATAACAATGTTGCATTTGTGACATCCCAAAGTCAAAG

>M6-PGSC0003DMG400011251M6G-LecRK\_1178

CCTAAGAACTATGCCTGTTCCGATAACAATGTTGCATTTGTGACATCCCAAAGTCAAAGAGCATATTTTTAT  
TACTTAATTACGTTTCCAACAGGTACTIONTAGGAGTAAATACTCGCG

>M6-PGSC0003DMG400011251M6G-LecRK\_124

ACAGAGATAAACCAATTTTTGATAAAAATGGTGTTTTTACTATTGAGAAAAATGGGAATTTAGTGGTGA  
AAAATGGTCGTGGCGATTTAATGTGGACGAATAATGTTACTGCTATGAATA

>M6-PGSC0003DMG400011251M6G-LecRK\_1240

TATTTTTATTTACTTAATTACGTTTCCAACAGGTACTIONTAGGAGTAAATACTCGCGGATCACCACAAAT  
TGTGATTTTGGATGGAGAGAAGAGACGTTGGCGGAGTGGATATTGGGAT

>M6-PGSC0003DMG400011251M6G-LecRK\_1302

ACCACAAATTGTGATTTTGGATGGAGAGAAGAGACGTTGGCGGAGTGGATATTGGGATGGACGCATAT  
TCACAGGAGTTACAGATATGAAGCCCGAGTATCTACATGGTTTCAAGCTTTA

>M6-PGSC0003DMG400011251M6G-LecRK\_1364

GCATATTCACAGGAGTTACAGATATGAAGCCCGAGTATCTACATGGTTTCAAGCTTTACAATGAAGGAG  
ATATGCTATACTTCACTTACACTGTTGCAGATTCTTCTGATTTGGTGAGGT

>M6-PGSC0003DMG400011251M6G-LecRK\_1426

GAAGGAGATATGCTATACTTCACTTACACTGTTGCAGATTCTTCTGATTTGGTGAGGTTCCATATTAGTCC  
AACCGGATACGAGCTGGAACAAAGGTGGGATAAAGATAACGAAAAGTGG

>M6-PGSC0003DMG400011251M6G-LecRK\_1488

TATTAGTCCAACCGGATACGAGCTGGAACAAAGGTGGGATAAAGATAACGAAAAGTGGAGTATAATAC  
AGTCTCATCCATCAGGTGATTGTGACTTGTATAACTTATGTGGGAATTTTCGC

>M6-PGSC0003DMG400011251M6G-LecRK\_1550

TAATACAGTCTCATCCATCAGGTGATTGTGACTTGTATAACTTATGTGGGAATTTTCGCGAAATGTGATGT  
CACATATTTGAAAAAATGCATTTGTTTAGTTGGATTTGTACCGAAAGATT

>M6-PGSC0003DMG400011251M6G-LecRK\_1612

TGTGATGTCACATATTTGAAAAATGCATTTGTTTAGTTGGATTTGTACCGAAAGATTTGGGGCAGTGGA  
ATGCGAGGAACTGGTCAGAAGGGTGTGTTAGGAGGAAAGAACTGGAATGC

>M6-PGSC0003DMG400011251M6G-LecRK\_1674

GCAGTGAATGCGAGGAACTGGTCAGAAGGGTGTGTTAGGAGGAAAGAACTGGAATGCAGAGGAAAT  
AACAGTGC GTTGAAGAGTGT TAGTGGAAAGAAGGACGGATTCTTTGAGATTGA

>M6-PGSC0003DMG400011251M6G-LecRK\_1736

GAAATAACAGTGC GTTGAAGAGTGT TAGTGGAAAGAAGGACGGATTCTTTGAGATTGAGAAAATCAAG  
TTGCCGGATTTTGCTGATACTGCATATTTACAAAATATCGATGAGTGT CGAA

>M6-PGSC0003DMG400011251M6G-LecRK\_1798

ATCAAGTTGCCGGATTTTGCTGATACTGCATATTTACAAAATATCGATGAGTGT CGAAGCATGTGCCTTG  
AAAATTGTT CATGTACTGCTTATGCTTTTGTTAGCGGAATCAATTGCATG

>M6-PGSC0003DMG400011251M6G-LecRK\_186

GTGGTGAAAAATGGTCGTGGCGATTTAATGTGGACGAATAATGTTACTGCTATGAATAATAATTGTACA  
GCACATCTTTCTGATAATGGAATCTTAGGATGTTAATGGCAATAACAAG

>M6-PGSC0003DMG400011251M6G-LecRK\_1860

GTGCCTTGAAAATTGTT CATGTACTGCTTATGCTTTTGTTAGCGGAATCAATTGCATGATGTGGAGTGGA  
GATTTAGTCGATATGCAGCAGTTTCAGGAAGGCGGAAACACTCTCTATGT

>M6-PGSC0003DMG400011251M6G-LecRK\_1922

GGAGTGGAGATTTAGTCGATATGCAGCAGTTTCAGGAAGGCGGAAACACTCTCTATGTTGCCTTGCTG  
ATTCTGAATTTGGTAAAAATGTGTACTAACTTTTCTGTTGGTATCATTTTA

>M6-PGSC0003DMG400011251M6G-LecRK\_1984

CTTGCTGATTCTGAATTTGGTAAAAATGTGTACTAACTTTTCTGTTGGTATCATTTTAGATGTTCTTATTAT  
AAACTTTCTGAAACAGCTGGAAGCAACAGGACAGTCAAATTGTGGT

>M6-PGSC0003DMG400011251M6G-LecRK\_2046

TTCTTATTATAAACTTTCTGAAACAGCTGGAAGCAACAGGACAGTCAAATTGTGGTAATACCCGTTAT  
GGTAGCCGGGGCTTTACTTGTTTGTATGGTAGTTTTTCTACTATGCAAGT

>M6-PGSC0003DMG400011251M6G-LecRK\_2108

CCCGTTATGGTAGCCGGGGCTTTACTTGTTTGTATGGTAGTTTTTCTACTATGCAAGTACAAAGCCAAAA  
CTCGAGGTAAGATTT CAGAAAGGCTGGTGT TTTACGACAGTCATTTGTTG



>M6-PGSC0003DMG400011251M6G-LecRK\_2170

AGCCAAAACCTCGAGGTAAGATTTTCAGAAAGGCTGGTGTTTTACGACAGTCATTTGTTGTTATGCAATATA  
CCTATATCTTCTTCAATGTCCCATTTTCAGTGTCCAATAGGATCAACCAA

>M6-PGSC0003DMG400011251M6G-LecRK\_2232

GCAATATACCTATATCTTCTTCAATGTCCCATTTTCAGTGTCCAATAGGATCAACCAAATGGAGACAAGC  
GATCCAACTAGGAGCGGAGAGTTTTCTATGAACACATCAGGAGCAGGAGA

>M6-PGSC0003DMG400011251M6G-LecRK\_2294

AGACAAGCGATCCAACCTAGGAGCGGAGAGTTTTCTATGAACACATCAGGAGCAGGAGACTTGAGTATT  
GAAGGGCATCAAGGGAGTGGTTCAGAACTTATATTCTTCAGTTTCAGCGGTG

>M6-PGSC0003DMG400011251M6G-LecRK\_2356

AGTATTGAAGGGCATCAAGGGAGTGGTTCAGAACTTATATTCTTCAGTTTCAGCGGTGTAGCAGCAGCT  
ACCGACAACCTTTTCTAACGAAAACAAGCTGGGACAAGGTGGATTTGGCCCT

>M6-PGSC0003DMG400011251M6G-LecRK\_2418

AGCAGCTACCGACAACCTTTTCTAACGAAAACAAGCTGGGACAAGGTGGATTTGGCCCTGTCTACAAGGT  
TGGTTTTCAATCAATTGACAAGTGTGTCTTACTTTTCTAGAGAAGTATGAC

>M6-PGSC0003DMG400011251M6G-LecRK\_248

TTGTACAGCACATCTTTCTGATAATGGAAATCTTAGGATGTTTAATGGCAATAACAAGGAGTTGTGGCAG  
AGTTTTTCAGCATCCTACAGATACATTTTTACCAGAAATGAGATTTTATTT

>M6-PGSC0003DMG400011251M6G-LecRK\_2480

ACAAGGTTGGTTTTCAATCAATTGACAAGTGTGTCTTACTTTTCTAGAGAAGTATGACATTATTGTGTTAA  
ACTAACGTTCGATGTTTGTATTTAGGGAAAACCTACTATGTGGCTTAGA

>M6-PGSC0003DMG400011251M6G-LecRK\_2542

TTGTGTTAAACTAACGTCGATGTTTGTATTTAGGGAAAACCTACTATGTGGCTTAGAAATTGCAGTGAA  
GAGACTTTCAAGAAAGTCAGGACAAGGTGTGGAGGAATTCAAGAATGAGA

>M6-PGSC0003DMG400011251M6G-LecRK\_2604

GCAGTGAAGAGACTTTCAAGAAAGTCAGGACAAGGTGTGGAGGAATTCAAGAATGAGATCAAGCTAAT  
CGCCAAATTACAACATAGAAATCTTGTTAGACTTATGGGATGCTGCATTGAA

>M6-PGSC0003DMG400011251M6G-LecRK\_2666

GCTAATCGCCAAATTACAACATAGAAATCTTGTTAGACTTATGGGATGCTGCATTGAAGGAGAAGAAAA

GATGCTTCTTTACGAGTACATGGCAAACAGAAGTTTAGATTCATTTCTATT

>M6-PGSC0003DMG400011251M6G-LecRK\_2728

AAGAAAAGATGCTTCTTTACGAGTACATGGCAAACAGAAGTTTAGATTCATTTCTATTTGGTTAGTACTC  
TAGATATGCTATAAATTATTTTCATCGATAGAGAGATCGATCACTTACAAT

>M6-PGSC0003DMG400011251M6G-LecRK\_2790

TAGTACTCTAGATATGCTATAAATTATTTTCATCGATAGAGAGATCGATCACTTACAATTATTTTGGTTGGT  
AAATTTTTTGGACAGATCCTGTAAAGCAAGCTCAATTAGACTGGAGGAAA

>M6-PGSC0003DMG400011251M6G-LecRK\_2852

TTGGTTGGTAAATTTTTTGGACAGATCCTGTAAAGCAAGCTCAATTAGACTGGAGGAAAACGCTTCAACATT  
ATTGAAGGGATTGCACGAGGGCTATTGTATCTCCATAGAGATTCGCGACT

>M6-PGSC0003DMG400011251M6G-LecRK\_2914

TCAACATTATTGAAGGGATTGCACGAGGGCTATTGTATCTCCATAGAGATTCGCGACTCAGAATAATCCA  
TAGGGATTTAAAGGCTAGTAACATTTTGCTAGATGAAGATATGAACCCGA

>M6-PGSC0003DMG400011251M6G-LecRK\_2976

ATAATCCATAGGGATTTAAAGGCTAGTAACATTTTGCTAGATGAAGATATGAACCCGAAAATTTTCAGACT  
TTGGTATGGCTAGGATATTTGGTGAAATGAAAATGAAGCAAATACAAAT

>M6-PGSC0003DMG400011251M6G-LecRK\_3038

TTCAGACTTTGGTATGGCTAGGATATTTGGTGAAATGAAAATGAAGCAAATACAAATAGAGTAGTTGG  
GACATAGTGAGTATCATTTGATTTTTATACTTTAAGAGTGAGTACCTTTT

>M6-PGSC0003DMG400011251M6G-LecRK\_310

TGTGGCAGAGTTTTTCAGCATCCTACAGATACATTTTTACCAGAAATGAGATTTTATTTGGATGAAGTTTTG  
AGGTCATGGACTAGTGATAGTGATCCTTCACCTGGACGGTACGTAATCT

>M6-PGSC0003DMG400011251M6G-LecRK\_3100

TAGTTGGGACATAGTGAGTATCATTTGATTTTTATACTTTAAGAGTGAGTACCTTTTAACTTGTTCAAAG  
AACTAACTCCATCAACGCGTTTCTTTTTTTGTTTTTACTTAAATCAGCG

>M6-PGSC0003DMG400011251M6G-LecRK\_3162

TGTTCAAAGAACTAACTCCATCAACGCGTTTCTTTTTTTGTTTTTACTTAAATCAGCGGATATATGGCTCCT  
GAATATGCAATGGAAGGCTTGTCTCCGAAAATCTGATGTTTATAGC

>M6-PGSC0003DMG400011251M6G-LecRK\_3224

TATGGCTCCTGAATATGCAATGGAAGGCTTGTTCTCCGAAAATCTGATGTTTATAGCTTTGGTGTACTA  
TACTGGAGATCATCTGTGGACGGAGGAACACAAGCTTTCGTTCAAATGA

>M6-PGSC0003DMG400011251M6G-LecRK\_3286

GTGTACTATTACTGGAGATCATCTGTGGACGGAGGAACACAAGCTTTCGTTCAAATGAACACTCTGGCA  
TTATTGGTTATGTATGTCCAACAACACTACTTTTCAATATCTGTTGTTAAGTT

>M6-PGSC0003DMG400011251M6G-LecRK\_3348

TCTGGCATTATTGGTTATGTATGTCCAACAACACTACTTTTCAATATCTGTTGTTAAGTTAAATCATTTAACAA  
CAATTCTACGTTTTTCTTTTTAGGCATGGCAGAAGTGGGATGAAGGTA

>M6-PGSC0003DMG400011251M6G-LecRK\_3410

CATTTAACAAACAATTCTACGTTTTTCTTTTTAGGCATGGCAGAAGTGGGATGAAGGTACACCAATGGACT  
TAGTAGACCGTTCTATTTGGGACGAGTGTCAATATGATGAAGCATTGAGA

>M6-PGSC0003DMG400011251M6G-LecRK\_3472

AATGGACTTAGTAGACCGTTCTATTTGGGACGAGTGTCAATATGATGAAGCATTGAGATGTATACAGTT  
AGCACTAATTTGTGTACAAGACATGGCAGTTCACAGACCGAGCATATCATC

>M6-PGSC0003DMG400011251M6G-LecRK\_3534

TACAGTTAGCACTAATTTGTGTACAAGACATGGCAGTTCACAGACCGAGCATATCATCCATCGTGTTAAT  
GTTGGAGACGGACAATATACGATTGCCCTTGCCTAGGCAACCTACATATA

>M6-PGSC0003DMG400011251M6G-LecRK\_3596

GTGTTAATGTTGGAGACGGACAATATACGATTGCCCTTGCCTAGGCAACCTACATATACCTCAATGAGAA  
AACATGAAAATGCAGAAACATGGAATGAGAAGCAGGATTTTTCTGCAAAC

>M6-PGSC0003DMG400011251M6G-LecRK\_3629

CCCTTGCCTAGGCAACCTACATATACCTCAATGAGAAAACATGAAAATGCAGAAACATGGAATGAGAAG  
CAGGATTTTTCTGCAAACAATGTCACAATTAGTGTATATTTGGTAGATGA

>M6-PGSC0003DMG400011251M6G-LecRK\_372

GAAGTTTTGAGGTCATGGACTAGTGATAGTGATCCTTCACCTGGACGGTACGTAATCTTGTATCGTTTGA  
TCATCTTATCTGAAATCTTTTATTTACTTAATTTCTTTTGTACATGCC

>M6-PGSC0003DMG400011251M6G-LecRK\_434

TCGTTTGATCATCTTATCTGAAATCTTTTATTTACTTAATTTCTTTTGTACATGCCCCCTCACGTTTGGTAT  
GAATTTTTTACATAATGTGTGGTGGTGAGACTCTCTGATAGCATGTT

>M6-PGSC0003DMG400011251M6G-LecRK\_496

ACGTTTGGTATGAATTTTTACATAATGTGTGGTGGTGAGACTCTCTGATAGCATGTTGCGTTTGTGACA  
TTCATTTAAAAGCTTAATTGAGAATGTGCTTTTTATTTTACGTAATTT

>M6-PGSC0003DMG400011251M6G-LecRK\_558

TTGTGACATCTCATTTAAAAGCTTAATTGAGAATGTGCTTTTTATTTTACGTAATTTTGTTTTGAACACAA  
CCCCTCACGTGTTTGACTCATGGAAGTTGAAAGACAGAAGGGTTGTTG

>M6-PGSC0003DMG400011251M6G-LecRK\_62

TCAAAGGTTTGTGGTATATGGTATGTTGATGGTCCAAAAAATTCATTTGTTTGGGTTGCAAACAGAGAT  
AAACCAATTTTTGATAAAAATGGTGTTTTTACTATTGAGAAAAATGGGAA

>M6-PGSC0003DMG400011251M6G-LecRK\_620

TTGAACACAACCCCTCACGTGTTTGACTCATGGAAGTTGAAAGACAGAAGGGTTGTTGGTCAGTCACGG  
ACTATTTGATTTCAATTATGACAATTCAATGTTAATGACCTCATTCAATATA

>M6-PGSC0003DMG400011251M6G-LecRK\_682

GTCACGGACTATTTGATTTCAATTATGACAATTCAATGTTAATGACCTCATTCAATATATATATATTTTTTTG  
ATCCTTCACTATTGTGGGCTGGATGGATAGCTAGTAGTTGTGAGTAGC

>M6-PGSC0003DMG400011251M6G-LecRK\_744

TATTTTTTTGATCCTTCACTATTGTGGGCTGGATGGATAGCTAGTAGTTGTGAGTAGCAGTCCCCTTTTAA  
TAGATTAAGGTGATGATTTTTTTGATATGGGGTGGTAGGGAGACTCGAA

>M6-PGSC0003DMG400011251M6G-LecRK\_806

CCCTTTTTATAGATTAAGGTGATGATTTTTTTGATATGGGGTGGTAGGGAGACTCGAACCTACAACTTT  
GCTTGCCCTGATATGGTAATGCATTTGTGACATCTTATCGAAAAGATTAA

>M6-PGSC0003DMG400011251M6G-LecRK\_868

CAAACCTTGCTTGCCCTGATATGGTAATGCATTTGTGACATCTTATCGAAAAGATTAAGTTGAAAACATG  
TTTTCTTTACTTAATTTTGTTTTAAACACGACCCCTCACGGTTTCTTGA

>M6-PGSC0003DMG400011251M6G-LecRK\_930

AAAACATGTTTTCTTTACTTAATTTTGTTTTAAACACGACCCCTCACGGTTTCTTGAATCTTTGATATTGG  
GTGATAGTGAGACTCGAAACCTAAGAACTCTACTTGCACTGATATGGT

>M6-PGSC0003DMG400011251M6G-LecRK\_992

TTGATATTGGGTGATAGTGAGACTCGAAACCTAAGAACTCTACTTGCACTGATATGGTAATGCATTTGTG

ACATCTTATCTAAAAGATTAAGTTGATAACATGTGTTTCATAACTTACTT

>M6-PGSC0003DMG400011304-(rev)M6RLKWAX-EGF\_0

CCAGTTGCATCTTCTAGATGAGGACATGACCGTAAAACCTTTTTGGGTTAGAGCTCCCCACGAATGCAAA

CACCGATAACAAAAAGCATAGCGATGTTTACAACCTGGGGTTGGTTCTTT

>M6-PGSC0003DMG400011304-(rev)M6RLKWAX-EGF\_124

GGTTATTACAGGTAGCAGCTCAGATCATCTTCCATCAAAGATAGCTTTACAGAAGATAACAAGTGGGAA

GCTAGAAGAGATAGTCGATCCACGTCTTACTATCACGAGCAGCCTATTTT

>M6-PGSC0003DMG400011304-(rev)M6RLKWAX-EGF\_186

GTGGGAAGCTAGAAGAGATAGTCGATCCACGTCTTACTATCACGAGCAGCCTATTTTCCGGAGGGAAAC

AAATAGAGATAGTTGCAGACCTTGCAACAAGATGCATAATATTTGGTTGCC

>M6-PGSC0003DMG400011304-(rev)M6RLKWAX-EGF\_248

AGGGAACAAATAGAGATAGTTGCAGACCTTGCAACAAGATGCATAATATTTGGTTGCCAAAATGGGAA

ATTTACATTGGAGATGTTTCAAGAGAACTTGTTAACATAACAAAAGATGGA

>M6-PGSC0003DMG400011304-(rev)M6RLKWAX-EGF\_310

TGGGAAATTTACATTGGAGATGTTTCAAGAGAACTTGTTAACATAACAAAAGATGGAATTGATGGTAG

AAGTAGGAGATGTCCATCAACTCATAATCTTGAAGAACTTTTTCCAATTC

>M6-PGSC0003DMG400011304-(rev)M6RLKWAX-EGF\_372

ATGGTAGAAGTAGGAGATGTCCATCAACTCATAATCTTGAAGAACTTTTTCCAATTCAAGCCTTCTTCA

GATGATATCTATGTCTCCTGATTCAATACATGTCCCTGCAGCCAGAGGGT

>M6-PGSC0003DMG400011304-(rev)M6RLKWAX-EGF\_434

CTTCTTCAGATGATATCTATGTCTCCTGATTCAATACATGTCCCTGCAGCCAGAGGGTTCTCTTAAGCTAT

GCTATGTTGCCAATGTCAACGGCCGCTGTCAGTGCATTAAATTAGTTG

>M6-PGSC0003DMG400011304-(rev)M6RLKWAX-EGF\_496

TTAAGCTATGCTATGTTGCCAATGTCAACGGCCGCTGTCAGTGCATTAAATTAGTTGGAAAAAGAGGA

AGGCTCTCACACTATTGACATGCTGTAATTATGTACAGTAATGATTAACCT

>M6-PGSC0003DMG400011304-(rev)M6RLKWAX-EGF\_558

AAGAGGAAGGCTCTCACACTATTGACATGCTGTAATTATGTACAGTAATGATTAACCTACCTGCTGCTGT

TATTTCCATCTTCTTATGCATAAGCAATCCTATTTTTGTTTCAATAAACT

>M6-PGSC0003DMG400011304-(rev)M6RLKWAX-EGF\_611

AACCTACCTGCTGCTGTTATTTCCATCTTCTTATGCATAAGCAATCCTATTTTTGTTTCAATAAACTTCCAA  
ATCACATTGAAAAATGGTAATATATCCTGATAGTATTGCAGTTTGTAT

>M6-PGSC0003DMG400011304-(rev)M6RLKWAX-EGF\_62

AATGCAAACACCGATAACAAAAAGCATAGCGATGTTTACAACCTGGGGTTGGTTCTTTTGGAGGTTATTA  
CAGGTAGCAGCTCAGATCATCTTCCATCAAAGATAGCTTTACAGAAGATA

>M6-PGSC0003DMG400011353-(rev)M6LRR-RLP\_1037

TGCATCAGTCTGGTTCATCTCACTTAAATACTCAAAGATTAGAGCTTTTTGTTTGTCTTTTAGCTTCTTT  
TTTTTGGGGTGAACCTCTGGGAATTAATTTTTCTTGATTGAATGAGC

>M6-PGSC0003DMG400011353-(rev)M6LRR-RLP\_1098

TTTAGCTTCTTTTTTTGGGGTGAACCTCTGGGAATTAATTTTTCTTGATTGAATGAGCTGATGTCAATAA  
TTTCTTGACTTCCTTCCCAGATTTCTGCATTTGCATTCTATCTTTAC

>M6-PGSC0003DMG400011353-(rev)M6LRR-RLP\_1159

ATGTCAATAATTTCTTGACTTCCTTCCCAGATTTCTGCATTTGCATTCTATCTTTACAGATCTCTAAGGC  
CTTATAACAGGAAATGCTAACTTGTTGGGTTTTCTTAATTGTTATAGGA

>M6-PGSC0003DMG400011353-(rev)M6LRR-RLP\_122

AAGGAAGAAAAGGACTATTGTAAATCTCGAGTTCCTGTGAAATTACACTTTTGCCTTCCCCCTCCATT  
ACAGTACAACAATGGCGTACGCATTCCCGGAGGAAGTACTAGAACACGT

>M6-PGSC0003DMG400011353-(rev)M6LRR-RLP\_1220

ATCTCTAAGGCCTTATAACAGGAAATGCTAACTTGTTGGGTTTTCTTAATTGTTATAGGATTTAAACAGTTG  
GACTTCCTTTTAGCATTAAATTTCTTGTTGGTATACTGTGTAAACATGC

>M6-PGSC0003DMG400011353-(rev)M6LRR-RLP\_1281

TAAACAGTTGGACTTCCTTTTAGCATTAAATTTCTTGTTGGTATACTGTGTAAACATGCCCTTTAGCTTTG  
CTTTGTTTTGAAGTTGTTGGAGATTTGAATGTTTTCTTAATTATCTGGA

>M6-PGSC0003DMG400011353-(rev)M6LRR-RLP\_1342

TTTAGCTTTGCTTTGTTTTGAAGTTGTTGGAGATTTGAATGTTTTCTTAATTATCTGGAGATTTCCATACGT  
TTGTTTCTTGTTCTCTGGTGGGATTAATTTGTTTTATCAGGAGGGAG

>M6-PGSC0003DMG400011353-(rev)M6LRR-RLP\_1403

TTTCATACGTTTGTCTTGTTCTCTGGTGGGATTAATTTGTTTTATCAGGAGGGAGTTTTGTAATGGA  
GTATAGTTGTAGTTCAATGTTGAAATGGCAAGTGGGTTAGGAATAGGAA

>M6-PGSC0003DMG400011353-(rev)M6LRR-RLP\_1464

TTGTAATGGAGTATAGTTGTAGTTCAATGTTGAAATGGCAAGTGGGTTAGGAATAGGAAATGGTGATTA  
ATTGAAATTCCAATTGGAAGATGTGTCACTCTGAGGCAAACATGATTCTAA

>M6-PGSC0003DMG400011353-(rev)M6LRR-RLP\_1525

GGTGATTAATTGAAATTCCAATTGGAAGATGTGTCACTCTGAGGCAAACATGATTCTAAATCTTTCTTATT  
TATCTTGTTTCATATCGTCTGTCATTTATTATCATTTGTTGTTTTCTGTT

>M6-PGSC0003DMG400011353-(rev)M6LRR-RLP\_1586

CTTTCTTATTTATCTTGTTTCATATCGTCTGTCATTTATTATCATTTGTTGTTTTCTGTTGAGTCTGTTGATTT  
GCTTCAATTTATCACAGAATGATTGTGTAGATGGGTATTGTCATCTA

>M6-PGSC0003DMG400011353-(rev)M6LRR-RLP\_1647

GTCTGTTGATTTGCTTCAATTTATCACAGAATGATTGTGTAGATGGGTATTGTCATCTAACTCCCGTTTTG  
CTGCAGGAATCTGAGAAAAGTACTGAGTGGGAGAGAGTGAAGTGGAGGAC

>M6-PGSC0003DMG400011353-(rev)M6LRR-RLP\_1708

TCCCGTTTTGCTGCAGGAATCTGAGAAAAGTACTGAGTGGGAGAGAGTGAAGTGGAGGACCTTAGTGGG  
CATTGGTTAAGCCATTTCCCTGATAACTGCACGTCACCTGTTTCACTTAACA

>M6-PGSC0003DMG400011353-(rev)M6LRR-RLP\_1769

TAGTGGGCATTGGTTAAGCCATTTCCCTGATAACTGCACGTCACCTGTTTCACTTAACATTGCCTGTTTGG  
CTTCTGAGGTCAGTCTGTTAGCTTTGGAGCGCCTGGTTACTCGCTCTCC

>M6-PGSC0003DMG400011353-(rev)M6LRR-RLP\_183

CCCCTCCATTACAGTACAACAATGGCGTACGCATTCCCGGAGGAAGTACTAGAACACGTCTTCTCCTTCC  
TCACCTCCGACAAGGACCGTAACGCAGTATCACTAGTCTGCAAATCATGG

>M6-PGSC0003DMG400011353-(rev)M6LRR-RLP\_1830

GCCTGTTTGGCTTCTGAGGTCAGTCTGTTAGCTTTGGAGCGCCTGGTTACTCGCTCTCCTAATTTGAGAA  
CTCTTCGGATAAATCGTGCTGTGCCCTTGAGAGGCTTCCAAACTTGCTC

>M6-PGSC0003DMG400011353-(rev)M6LRR-RLP\_1891

ATTTGAGAACTCTTCGGATAAATCGTGCTGTGCCCTTGAGAGGCTTCCAAACTTGCTCCGCCGCACTTC  
CCAGTTGGTCGAATTTGGTACAGGTGTTTTCTCTGCTGATGTGCGATCTG

>M6-PGSC0003DMG400011353-(rev)M6LRR-RLP\_1952

CCGCACTTCCCAGTTGGTTCGAATTTGGTACAGGTGTTTTCTCTGCTGATGTGCGATCTGATTTTTTCTCAA

ACCTGACAGAAGCTTTTTCGAGCTGCAAGCAACTTAAATGCCTGTCTGG

>M6-PGSC0003DMG400011353-(rev)M6LRR-RLP\_2013

TTTTTCTCAAACCTGACAGAAGCTTTTTCGAGCTGCAAGCAACTTAAATGCCTGTCTGGGTTTTGGGATGT  
TGTACCAGCTTACCTTCCAGCTTTATATCCAGTGTGCTCAAGACTCACC

>M6-PGSC0003DMG400011353-(rev)M6LRR-RLP\_2074

TTTGGGATGTTGTACCAGCTTACCTTCCAGCTTTATATCCAGTGTGCTCAAGACTCACCTCCTTGAATTTG  
AGCTATGCTACCTGTCAGAACCCTGAGCTTGGCAAGCTCATAAGTCAGT

>M6-PGSC0003DMG400011353-(rev)M6LRR-RLP\_2135

CTTGAATTTGAGCTATGCTACCTGTCAGAACCCTGAGCTTGGCAAGCTCATAAGTCAGTGTCAACAATTTG  
CAGCGTTTGTGGGTATGTTCTAAATGTTTTGAAGTTTTAATTGATGTTCT

>M6-PGSC0003DMG400011353-(rev)M6LRR-RLP\_2196

CACAATTTGCAGCGTTTGTGGGTATGTTCTAAATGTTTTGAAGTTTTAATTGATGTTCTTGACTGCAAC  
TGCAAACATGTTTTTTTTTTTTTTTTTAATAAAGAAGAAGAGGCAATG

>M6-PGSC0003DMG400011353-(rev)M6LRR-RLP\_2257

ACACTGCAACTGCAAACATGTTTTTTTTTTTTTTTTTAATAAAGAAGAAGAGGCAATGAGATTGTAACAT  
CATACTTGCTGTGATGTCATTTAGCATATATTCTTAGTGAAGAATAAGA

>M6-PGSC0003DMG400011353-(rev)M6LRR-RLP\_2318

ATTGTAACATCATACTTGCTGTGATGTCATTTAGCATATATTCTTAGTGAAGAATAAGAAAAGACCTAAC  
TGCTACAGATCAACGAATCCACCACAACCTTAATCCCAATTTAGTTGGTCT

>M6-PGSC0003DMG400011353-(rev)M6LRR-RLP\_2379

AGACCTAACTGCTACAGATCAACGAATCCACCACAACCTTAATCCCAATTTAGTTGGTCTCAGCTTTATGG  
GTCCTCTTAAACATTTTGCTATATTCAGGTCATTTTCATTCCGATGCTA

>M6-PGSC0003DMG400011353-(rev)M6LRR-RLP\_244

TCTCCTTCCTCACCTCCGACAAGGACCGTAACGCAGTATCACTAGTCTGCAAATCATGGTACGAGATCGA  
ACGGTGGTGTAGGAAGAGAATATTCGTTGGAACTGCTATGCTGTTAGCC

>M6-PGSC0003DMG400011353-(rev)M6LRR-RLP\_2440

GCTTTATGGGTCTCTTAAACATTTTGCTATATTCAGGTCATTTTCATTCCGATGCTAAATTATTTGTCTT  
TACGCAATAATTGCCAAGGATAGGCAAAAAGTAATTCATTCTGTAGGT

>M6-PGSC0003DMG400011353-(rev)M6LRR-RLP\_2501



TTATTTGTCTTTACGCAATAATTGCCAAGGATAGGCACAAAAGTAATTCATTCTGTAGGTAAACTTCACCTA  
TGCTGGTTAGGAAGATTCCAGGCTACATATATTTGATATTATATTGCTA

>M6-PGSC0003DMG400011353-(rev)M6LRR-RLP\_2562

ACTTCACCTATGCTGGTTAGGAAGATTCCAGGCTACATATATTTGATATTATATTGCTAAGCAGCTCACTT  
TTCTTGGAAGTTGAAGCCAAGTGTACATGCTTCATATTGTGATCTGGG

>M6-PGSC0003DMG400011353-(rev)M6LRR-RLP\_2623

CAGCTCACTTTTCTTGGAAGTTGAAGCCAAGTGTACATGCTTCATATTGTGATCTGGGTTTCAGTTTTTT  
AATACTTGTGCCTACCCAATGCACCTAAAAATCCATCTAAATGTGATGT

>M6-PGSC0003DMG400011353-(rev)M6LRR-RLP\_2684

TCAGTTTTTTAATACTTGTGCCTACCCAATGCACCTAAAAATCCATCTAAATGTGATGTTTCTATGCTGAA  
AAATTGTATCTATTCTTCCCTAGTGGCTTCCCCAAACTGGTTCTGTAAT

>M6-PGSC0003DMG400011353-(rev)M6LRR-RLP\_2745

CTATGCTGAAAAATTGTATCTATTCTTCCCTAGTGGCTTCCCCAAACTGGTTCTGTAATATAAACTCCAGT  
ATCATGTTTAAAGTGTGAATTGCTTTTCTTGCAATATATGTGACTGCAG

>M6-PGSC0003DMG400011353-(rev)M6LRR-RLP\_2806

AAACTCCAGTATCATGTTTAAAGTGTGAATTGCTTTTCTTGCAATATATGTGACTGCAGGTGCTAGACTAC  
ATCGAAGATACTGGTCTTGAGGAACTTGCTGCCAATTGTAAGGACCTTC

>M6-PGSC0003DMG400011353-(rev)M6LRR-RLP\_2867

GCTAGACTACATCGAAGATACTGGTCTTGAGGAACTTGCTGCCAATTGTAAGGACCTTCAAGAGCTGCG  
GGTGTTTCTTCTGACCCATTTGCTGCAGAACCAAATACAACCTTGACGGA

>M6-PGSC0003DMG400011353-(rev)M6LRR-RLP\_2928

GAGCTGCGGGTGTTTCTTCTGACCCATTTGCTGCAGAACCAAATACAACCTTGACGGAGCAAGGCCTT  
GTAGCTGTCTCAGATGGCTGCCAAAGCTCCAGTCTGTTTTATACTTCTGC

>M6-PGSC0003DMG400011353-(rev)M6LRR-RLP\_2989

AAGGCCTTGAGCTGTCTCAGATGGCTGCCAAAGCTCCAGTCTGTTTTATACTTCTGCCGCCAAATGAC  
TAATGCAGCTTTAGTTACTATTGCTAGGAATCGACCTAACATGATCCGTT

>M6-PGSC0003DMG400011353-(rev)M6LRR-RLP\_305

CGAGATCGAACGGTGGTGTAGGAAGAGAATATTCGTTGGAACTGCTATGCTGTTAGCCCTAGGATCAT  
GATCCGACGGTTCCGGAAGTCAGATCTGTTGAGCTTAAAGGGAAGCCTCA

>M6-PGSC0003DMG400011353-(rev)M6LRR-RLP\_3050

CCAAATGACTAATGCAGCTTTAGTTACTATTGCTAGGAATCGACCTAACATGATCCGTTTTCGCTTGTGTA  
TCATTGAGCCTCGAACTCCTGATTATTTAACCCCTGGTTCATTTGATAC

>M6-PGSC0003DMG400011353-(rev)M6LRR-RLP\_3111

CGCTTGTGTATCATTGAGCCTCGAACTCCTGATTATTTAACCCCTGGTTCATTTGATACTGGTTTTGGGGC  
CATAGTAGAGAACTGTAAGGAATTGCGGCGCCTTTCACCTGCTGGCCTC

>M6-PGSC0003DMG400011353-(rev)M6LRR-RLP\_3172

GTTTTGGGGCCATAGTAGAGAACTGTAAGGAATTGCGGCGCCTTTCACCTGCTGGCCTCCTTACCGATCG  
TGTCTTCGAATACATTGGCGCCCATGCTAAAAAGTTGGAGATGCTTTCCA

>M6-PGSC0003DMG400011353-(rev)M6LRR-RLP\_3233

TACCGATCGTGTCTTCGAATACATTGGCGCCCATGCTAAAAAGTTGGAGATGCTTTCCATAGCTTTTGT  
GGTATAGCGATTTGGGACTCCACCATGTTCTCTCTGGTTGTGATAGCCT

>M6-PGSC0003DMG400011353-(rev)M6LRR-RLP\_3294

GCTTTTGCTGGTGATAGCGATTTGGGACTCCACCATGTTCTCTCTGGTTGTGATAGCCTTCGGAAGTTGG  
AGATCAGAGATTGTCCGTTTGGAGACAAGGCTCTTTTGGCTAATGCTGCA

>M6-PGSC0003DMG400011353-(rev)M6LRR-RLP\_3355

GGAAGTTGGAGATCAGAGATTGTCCGTTTGGAGACAAGGCTCTTTTGGCTAATGCTGCAAAGCTCGAGA  
CAATGCGATCCCTTTGGATGTCTTCTTGTTCAGTAAGTTTTGAAGCATGTA

>M6-PGSC0003DMG400011353-(rev)M6LRR-RLP\_3416

GCTCGAGACAATGCGATCCCTTTGGATGTCTTCTTGTTCAGTAAGTTTTGAAGCATGTAAGATGCTAGCT  
CAGAAGATGCCTAGGCTTAATGTGGAAGTCATAGATGAGAGGGGTCCTCC

>M6-PGSC0003DMG400011353-(rev)M6LRR-RLP\_3477

ATGCTAGCTCAGAAGATGCCTAGGCTTAATGTGGAAGTCATAGATGAGAGGGGTCCTCCAGATACAAG  
GCCAGAAAGCTGTCCTGTGGAGAACTTTACATATATCGAACTGTGGCTGGA

>M6-PGSC0003DMG400011353-(rev)M6LRR-RLP\_3538

ATACAAGGCCAGAAAGCTGTCCTGTGGAGAACTTTACATATATCGAACTGTGGCTGGACGAAGATTTG  
ACACACCTGGTTATGTTTGGACAATGGATGAAGATGCAGCTGTAAGGTTGA

>M6-PGSC0003DMG400011353-(rev)M6LRR-RLP\_3599

AAGATTTGACACACCTGGTTATGTTTGGACAATGGATGAAGATGCAGCTGTAAGGTTGACCTGAGCCAC

ACATCAAATGGAAAATTCCAGCAAGACTTCACATGGAAAGATGGACAGGTA

>M6-PGSC0003DMG400011353-(rev)M6LRR-RLP\_366

AGGATCATGATCCGACGGTTCCGGAAGTCAGATCTGTTGAGCTTAAAGGGAAGCCTCATTTTGCTGAC

TTAATCTTGTACCGGAAGGTTGGGGAGCTTATGTGTATCCTTGGATTTG

>M6-PGSC0003DMG400011353-(rev)M6LRR-RLP\_3660

TGAGCCACACATCAAATGGAAAATTCCAGCAAGACTTCACATGGAAAGATGGACAGGTATTAGCGCTAT

GTTTATCCTCCTGCATTTGTTTGTACGCCTTATGTAGTTGCAGTGCCAGT

>M6-PGSC0003DMG400011353-(rev)M6LRR-RLP\_3721

AGCGCTATGTTTATCCTCCTGCATTTGTTTGTACGCCTTATGTAGTTGCAGTGCCAGTTGAGGGTTGGA

ACTTCACTGCTTTGAAGTAGAGGCTCCAGAGCTCATAACGCCATCAATTTT

>M6-PGSC0003DMG400011353-(rev)M6LRR-RLP\_3782

AGGGTTGGAACCTTCACTGCTTTGAAGTAGAGGCTCCAGAGCTCATAACGCCATCAATTTTATTCTTGGCTG

AGAGCTACTTTACAGCAGGTAGTTTTTAATAAAGAGTTTGGACTCTGAGT

>M6-PGSC0003DMG400011353-(rev)M6LRR-RLP\_3843

TCTTGGCTGAGAGCTACTTTACAGCAGGTAGTTTTTAATAAAGAGTTTGGACTCTGAGTTTCTGTGTATC

ATCTAGAGTAACAATTATTCGTTTTCTTTGGGTGGGATTTTGCTTGGGGG

>M6-PGSC0003DMG400011353-(rev)M6LRR-RLP\_3904

CTGTGTATCATCTAGAGTAACAATTATTCGTTTTCTTTGGGTGGGATTTTGCTTGGGGGGTTTGGGGGCA

TATTTTGGCCATGTATGTGCTATTTCCAGACTTTGCTTCATTATGTAGTT

>M6-PGSC0003DMG400011353-(rev)M6LRR-RLP\_3950

TTTTGCTTGGGGGGTTTGGGGGCATATTTTGGCCATGTATGTGCTATTTCCAGACTTTGCTTCATTATGTA

GTTCACTTTATTTATTCTATTGACTTATTCTCTATGAAATGGAGTGTCT

>M6-PGSC0003DMG400011353-(rev)M6LRR-RLP\_427

TTGCTGACTTTAATCTTGTACCGGAAGGTTGGGGAGCTTATGTGTATCCTTGGATTTTGGCTATGTCTAA

ATCTTATCCATGGCTTGAAGAAATTAAGCTTAAGAGGATGGTAATTACTG

>M6-PGSC0003DMG400011353-(rev)M6LRR-RLP\_488

TATGTCTAAATCTTATCCATGGCTTGAAGAAATTAAGCTTAAGAGGATGGTAATTACTGATGAGTCGTTG

GAGTTGATTTCTAAGTCGTTAAGAACTTTAAAGTGTTGGTTTTGTCTTC

>M6-PGSC0003DMG400011353-(rev)M6LRR-RLP\_549

GAGTCGTTGGAGTTGATTTCTAAGTCGTTTAAGAACTTTAAAGTGTGGTTTTGTCTTCATGTGATGGGT  
TTACTACTGATGGACTTGCTGCTATTGCTGCTAACTGCAGGTGAAATTTT

>M6-PGSC0003DMG400011353-(rev)M6LRR-RLP\_61

CTAAAACACAGCAAATCTAAGCTCGTTAATGTCGATTCAGATCTGAGAGAAGAAGAAGAAGGAAG  
AAAAAGGACTATTGTAATCTCGAGTTCAGTGTGAAATTACACTTTTGCCCT

>M6-PGSC0003DMG400011353-(rev)M6LRR-RLP\_610

GTGATGGGTTTACTACTGATGGACTTGCTGCTATTGCTGCTAACTGCAGGTGAAATTTTTTTTCTTGCTTG  
ACATTTCTCTTCTGTTTTGCTCACTGTAAAGTGGCTAGTGGTGAGAGAA

>M6-PGSC0003DMG400011353-(rev)M6LRR-RLP\_671

TTCTTGCTTGACATTTCTCTTCTGTTTTGCTCACTGTAAAGTGGCTAGTGGTGAGAGAAGTCTTAATCTGT  
AAAGTAATTAGATCTAATTTTGGGTATTAGTTTGGACAGTGACTTTTAT

>M6-PGSC0003DMG400011353-(rev)M6LRR-RLP\_732

CTTAATCTGTAAAGTAATTAGATCTAATTTTGGGTATTAGTTTGGACAGTGACTTTTATTGTTGTAAAGC  
TTAAGCTTTTGGATGAATGCAGTATGCATGCATTTTGGGGGTTTGTAT

>M6-PGSC0003DMG400011353-(rev)M6LRR-RLP\_793

TTGTTAAAGCTTAAGCTTTTGGATGAATGCAGTATGCATGCATTTTGGGGGTTTGTATAATCCCTTGCTA  
AACACGAGAATGAAGAAGCACTTTTCTTGCAGCTGTTTGTCTGTTTAT

>M6-PGSC0003DMG400011353-(rev)M6LRR-RLP\_854

TCCCTTGCTAAACACGAGAATGAAGAAGCACTTTTCTTGCAGCTGTTTGTCTGTTTATAGGATATGTAAT  
GTATTAGTGGAAACGAAGTATCTACTGTAGATGAATTCGTAGTGTGTGA

>M6-PGSC0003DMG400011353-(rev)M6LRR-RLP\_915

GATATGTAATGTATTAGTGGAAACGAAGTATCTACTGTAGATGAATTCGTAGTGTGTAAGTGAAGAA  
CTGACATTTCTTCAAGTGATTATGGTATTATTGGATACGTCTTGCTGCTAC

>M6-PGSC0003DMG400011353-(rev)M6LRR-RLP\_976

TTGAAGAACTGACATTTCTTCAAGTGATTATGGTATTATTGGATACGTCTTGCTGCTACATTGCATCAGTC  
TGGTTCATCTCACTTTAATACTTCAAAGATTAGAGCTTTTTGTTTGT

>M6-PGSC0003DMG400011509-(rev)M6LRR-RLK\_0

ATGAAAACATGGAATGCATCCACACACTTTTGCCATTGGTCTGGAGTAACTTGTGGCTGTAAACATGTTA  
GAGTCATTCAACTAAACGTTGCGAACCAAAAACCTAGATGGCCCCTTGCA

>M6-PGSC0003DMG400011509-(rev)M6LRR-RLK\_1054

ACTTACTGGTACTATTCCAATCAATTTTGGTAAAGTTAAGAACTGCAAATTTGGATTGTCTCAGAATA  
GATTTTCAGGGAAAATTCCGTCATCTCTAGGAAATCTTAGTGTAGTATC

>M6-PGSC0003DMG400011509-(rev)M6LRR-RLK\_1116

CTCAGAATAGATTTTCAGGGAAAATTCCGTCATCTCTAGGAAATCTTAGTGTAGTATCCATCCTTCTTCTG  
CACGATAAAAATCTCACCGGTGAGATCCCAGCAAGTTTAGGAAATTGCA

>M6-PGSC0003DMG400011509-(rev)M6LRR-RLK\_1178

CTTCTTCTGCACGATAAAAATCTCACCGGTGAGATCCCAGCAAGTTTAGGAAATTGCAATTACGTGATTG  
AAATATATGTTGCTAAAATAACCTGTTAGGACAGATACCTAAGGACCTT

>M6-PGSC0003DMG400011509-(rev)M6LRR-RLK\_124

TCATTGGGAACATGAGTTTCCTCAGGTCTCTATACCTGTCAAACAATAGCTTCCGTGGTGAAATCCCTTCT  
GAGATTGGTCGTTTGAGAAGGCTACACCGATTGTATCTTGGTAACAACCT

>M6-PGSC0003DMG400011509-(rev)M6LRR-RLK\_1240

CGTGATTGAAATATATGTTGCTAAAATAACCTGTTAGGACAGATACCTAAGGACCTTTTTGCTCTCTTCC  
TTAGTTGCTGTGGACATTTCTGAGAACCATTTAGATGGTTTCATTCTCTC

>M6-PGSC0003DMG400011509-(rev)M6LRR-RLK\_1302

CTCTCTTCCTTAGTTGCTGTGGACATTTCTGAGAACCATTTAGATGGTTTCATTCTCTTGAAGTTGGAAA  
TATGATAAATCTTGAATATCTTAATGTTTCCGTAAATAACTTGACCGGT

>M6-PGSC0003DMG400011509-(rev)M6LRR-RLK\_1364

AGTTGGAAATATGATAAATCTTGAATATCTTAATGTTTCCGTAAATAACTTGACCGGTAAAATCCCAAGT  
ACTATTGGTAGCTGTGTGACACTAGAAGCCTTAGACATGAAAGGGAACCTT

>M6-PGSC0003DMG400011509-(rev)M6LRR-RLK\_1426

TCCCAAGTACTATTGGTAGCTGTGTGACACTAGAAGCCTTAGACATGAAAGGGAACCTCTTTCAAGGGA  
TTATACCTCCTTCTTTACGCTCTTTACGAGGTCTCCGTGTTTTAGACCTTT

>M6-PGSC0003DMG400011509-(rev)M6LRR-RLK\_1488

CAAGGGATTATACCTCCTTCTTTACGCTCTTTACGAGGTCTCCGTGTTTTAGACCTTTCTAGAAATAATTT  
GTCTGGCCAAGTACCAAATACTTGGAAGATTTCAAGTTTCAACTCTTG

>M6-PGSC0003DMG400011509-(rev)M6LRR-RLK\_1550

AAATAATTTGTCTGGCCAAGTACCAAATACTTGGAAGATTTCAAGTTTCAACTCTTGAATTTAGCGTTCA

ATGATTTGGAAGGAGCGTTACCAAATGAAGGCGTCATTAAGAATGCAAG

>M6-PGSC0003DMG400011509-(rev)M6LRR-RLK\_1612

TAGCGTTCAATGATTTGGAAGGAGCGTTACCAAATGAAGGCGTCATTAAGAATGCAAGTGCTATATCAG

AAATTGGAAATCCAAAACCTTTGTGGGGGTGTGCCTGACATACATCTTCCGG

>M6-PGSC0003DMG400011509-(rev)M6LRR-RLK\_1674

ATATCAGAAATTGGAAATCCAAAACCTTTGTGGGGGTGTGCCTGACATACATCTTCCGGGATGTGACATC

AAAAGATCGAAAAAATTTGGTTCGAGGTTTATCCTCAAGATTGTCATCTCT

>M6-PGSC0003DMG400011509-(rev)M6LRR-RLK\_1736

TGACATCAAAGATCGAAAAAATTTGGTTCGAGGTTTATCCTCAAGATTGTCATCTCTGTTGTCTTTGGTA

TACTAGGCCTTGGTATGCTTATCACTTTACTATTTTGTCTTGTAA

>M6-PGSC0003DMG400011509-(rev)M6LRR-RLK\_1798

TCTTTGGTATACTAGGCCTTGGTATGCTTATCACTTTACTATTTTGTCTTGTAAAGAAACCGAAAAGG

CCGCCTGTTCAAGTTCATTGGGTGAGTCTCTATAAATGTGTCTTACC

>M6-PGSC0003DMG400011509-(rev)M6LRR-RLK\_186

ATCCCTTCTGAGATTGGTCGTTTGAGAAGGCTACACCGATTGTATCTTGGTAACAACCTCATTTTCATGGAG

AGATCCCCTCAAATTTATCAAGGTGTTGAATCTTGTATCTCTTGTCTT

>M6-PGSC0003DMG400011509-(rev)M6LRR-RLK\_1860

CCGAAAAGGCCGCCTGTTTCAAGTTCATTGGGTGAGTCTCTATAAATGTGTCTTACCGAAGTTTGCTTC

AAGCTACTACTGGATTCTCTGAAGACAACCTTGATTGGTGCTGGGAGCTAA

>M6-PGSC0003DMG400011509-(rev)M6LRR-RLK\_1922

TTTGCTTCAAGCTACTACTGGATTCTCTGAAGACAACCTTGATTGGTGCTGGGAGCTAAGGATCTGTTTAT

AAAGGAACTCTCGATGGAGGAATGGTTGTCGCAGTTAAAGTGCTAAACCT

>M6-PGSC0003DMG400011509-(rev)M6LRR-RLK\_1984

CTGTTTATAAAGGAACTCTCGATGGAGGAATGGTTGTCGCAGTTAAAGTGCTAAACCTCTCGCGACATG

GAGCTTCCAAAAGCTTTATGGCTGAGTGTGAAGTCTTGAGAAACATTAGAC

>M6-PGSC0003DMG400011509-(rev)M6LRR-RLK\_2046

CGACATGGAGCTTCCAAAAGCTTTATGGCTGAGTGTGAAGTCTTGAGAAACATTAGACATCGGAATTTG

GTCAAGGTTCTCACAGCATGTTTCAGGAGTTGACTATCGAGGGAACGATGTC

>M6-PGSC0003DMG400011509-(rev)M6LRR-RLK\_2108

GAATTTGGTCAAGGTTCTCACAGCATGTTGAGGAGTTGACTATCGAGGGAACGATGTCAAGGCTTTGGT  
TTACGAGTTTATGGTTAATGGAAGCCTCGAAGACTGGTTGCATCCTAGTCC

>M6-PGSC0003DMG400011509-(rev)M6LRR-RLK\_2170

CTTTGGTTTACGAGTTTATGGTTAATGGAAGCCTCGAAGACTGGTTGCATCCTAGTCCAAGTGAAGATAC  
AAGTCAGGCAGCTGAAACAAAAAAGTTGAATATTCTTCAAAGGCTCAACA

>M6-PGSC0003DMG400011509-(rev)M6LRR-RLK\_2232

GAAGATACAAGTCAGGCAGCTGAAACAAAAAAGTTGAATATTCTTCAAAGGCTCAACATTGTTATAGAT  
GTTGCTTCTGCAATCAATTATCTTCATCTCCACTGCGAGACTCCGATAGTT

>M6-PGSC0003DMG400011509-(rev)M6LRR-RLK\_2294

TATAGATGTTGCTTCTGCAATCAATTATCTTCATCTCCACTGCGAGACTCCGATAGTTCACTGTGATCTCA  
AGCCAAGCAACATTCTTCTAGACAACCAATTGGTCGGGCACATTGGTGA

>M6-PGSC0003DMG400011509-(rev)M6LRR-RLK\_2356

GTGATCTCAAGCCAAGCAACATTCTTCTAGACAACCAATTGGTCGGGCACATTGGTGATTTTGGTTTGGC  
AAAGTTCCTTCAACCAACTGCACAAAATTCTTCTATTTTCAGAAGGAAGCT

>M6-PGSC0003DMG400011509-(rev)M6LRR-RLK\_2418

GGTTTGGCAAAGTTCCTTCAACCAACTGCACAAAATTCTTCTATTTTCAGAAGGAAGCTCTGGTCTTGTTA  
GAGGAACAATTGGTTACTGCTCCAGGTAACAATTAATACATAAACAAA

>M6-PGSC0003DMG400011509-(rev)M6LRR-RLK\_248

TCATGGAGAGATCCCCTCAAATTTATCAAGGTGTTTGAATCTTGATCTCTTGTCTTGAAGGTAACAAGT  
TAGTAGGAAGCCTTCCGCAGGAGCTAGGTGCCTTGCCAAACTCGAGTA

>M6-PGSC0003DMG400011509-(rev)M6LRR-RLK\_2480

TCTTGTTAGAGGAACAATTGGTTACTGCTCCAGGTAACAATTAATACATAAACAAACACTCGAACTTG  
GTATATGCCCTTTTTTCTCTCTCATTCTTCTATTTTTTCTTGAAAATG

>M6-PGSC0003DMG400011509-(rev)M6LRR-RLK\_2542

CGAACTTGGTATATGCCCTTTTTTCTCTCTCATTCTTCTATTTTTTCTTGAAAATGATATATTCATAGCAA  
AACCACTGCTTAACCATAACTTGGTTCGACAGAGTTAATTTATCA

>M6-PGSC0003DMG400011509-(rev)M6LRR-RLK\_2604

ATTCATAGCAAACCACTGCTTAACCATAACTTGGTTCGACAGAGTTAATTTATCAATATCATAAACTA  
TCTCTTAATTGTCACACACATACTTCCATTACTTTTATAAAAATCAAGTC

>M6-PGSC0003DMG400011509-(rev)M6LRR-RLK\_2666

CATAAACTATCTCTTAATTGTCACACACATACTTCCATTACTTTTATAAAATCAAGTCATACTAAGTTATGT  
CCCTATTAGGAAAGTTATTGTTCTCGTCTTTTTTTTTGTTTTGTGAA

>M6-PGSC0003DMG400011509-(rev)M6LRR-RLK\_2728

TAAGTTATGTCCCTATTAGGAAAGTTATTGTTCTCGTCTTTTTTTTTGTTTTGTGAATTTAGAAATATGGG  
ATGGGAAGCGAGCTATCGACTTGTGGTGATGTGTACAGCTTCGGGATC

>M6-PGSC0003DMG400011509-(rev)M6LRR-RLK\_2790

AGAATATGGGATGGGAAGCGAGCTATCGACTTGTGGTGATGTGTACAGCTTCGGGATCCTTTTACTAGA  
AATGTTACCCGGAAAAAGGCCTACTGATGGAATGTTTAGGGATGGGTTAGA

>M6-PGSC0003DMG400011509-(rev)M6LRR-RLK\_2852

TACTAGAAATGTTACCCGGAAAAAGGCCTACTGATGGAATGTTTAGGGATGGGTTAGACCTTCCAAGCT  
TCGCTAAACATGCATTGCTTAATGGAGCTATGGAAGTCATAGATCCATCCC

>M6-PGSC0003DMG400011509-(rev)M6LRR-RLK\_2914

CCAAGCTTCGCTAAACATGCATTGCTTAATGGAGCTATGGAAGTCATAGATCCATCCCTTATTTATGGAA  
GTGAAGAAGATGAGAAAGGTAAAAACACAAATATCTACCAGAATAAGGTG

>M6-PGSC0003DMG400011509-(rev)M6LRR-RLK\_2976

TTATGGAAGTGAAGAAGATGAGAAAGGTAAAAACACAAATATCTACCAGAATAAGGTGTATCTGGTTTTC  
TGTTCTTCGAGTCGGGGTTGCTTGTCTGCATATTCTGGAGCTGAAAGAAT

>M6-PGSC0003DMG400011509-(rev)M6LRR-RLK\_3038

TGGTTTCTGTTCTTCGAGTCGGGGTTGCTTGTCTGCATATTCTGGAGCTGAAAGAATGAACATCACTGA  
AACTGTTTCCCAATTGACTCTATCAAGGAAGCTCTTCTGAAATCAGAAA

>M6-PGSC0003DMG400011509-(rev)M6LRR-RLK\_310

GTAACAAGTTAGTAGGAAGCCTTCCGCAGGAGCTAGGTGCCTGTCCAAACTCGAGTACTTGTTACTCAC  
TCGAAACAACCTTGACAGGTGAAATCCCTTCTTCTTTGGAACTTAACAT

>M6-PGSC0003DMG400011509-(rev)M6LRR-RLK\_372

TTACTCACTCGAAACAACCTTGACAGGTGAAATCCCTTCTTCTTTGGAACTTAACATCATTGATAGGATT  
CTATGCACCATTGAATAATCTTCAGGGGAAAATCCCTGACTCTTTTGGG

>M6-PGSC0003DMG400011509-(rev)M6LRR-RLK\_434

GATAGGATTCTATGCACCATTGAATAATCTTCAGGGGAAAATCCCTGACTCTTTTGGGCAGCTGAAAAAC



TTAGAAATTATCGGAGTAGCTGCAAACCATTTGTCAGGTA CTATCCCTTC

>M6-PGSC0003DMG400011509-(rev)M6LRR-RLK\_496

TGAAAAACTTAGAAATTATCGGAGTAGCTGCAAACCATTTGTCAGGTA CTATCCCTTCTGAAATCTTCAA  
CATATCTTCCGTCACAACATTTGATGTTGGAATGAACCAAATCCAAGGTA

>M6-PGSC0003DMG400011509-(rev)M6LRR-RLK\_558

ATCTTCAACATATCTTCCGTCACAACATTTGATGTTGGAATGAACCAAATCCAAGGTACACTTCCATCAAG  
TTTGGGAATCACCCCTCCCGAATCTTGAATTATTTATCATCGGTGGGAAC

>M6-PGSC0003DMG400011509-(rev)M6LRR-RLK\_62

ACATGTTAGAGTCATTCAACTAAACGTTGCGAACCAAAAAGTAGATGGCCCCTTGTATCCTTCATTGGG  
AACATGAGTTTCTCAGGTCTCTATACCTGTCAAACAATAGCTTCCGTGG

>M6-PGSC0003DMG400011509-(rev)M6LRR-RLK\_620

TCCATCAAGTTTGGGAATCACCCCTCCCGAATCTTGAATTATTTATCATCGGTGGGAACAATATTTCTGGAT  
CGATCCCATCTACATTGTCCAATTCATCAAAGCTAGTGTATTTTCTTGC

>M6-PGSC0003DMG400011509-(rev)M6LRR-RLK\_682

TTTCTGGATCGATCCCATCTACATTGTCCAATTCATCAAAGCTAGTGTATTTTCTTGTGAAAGAAATCAA  
CTTACTGGAAGGTACCAAGTCTTGAGAACCTGAATGGGCTTCAACAGT

>M6-PGSC0003DMG400011509-(rev)M6LRR-RLK\_744

AGAAATCAACTTACTGGAAGGTACCAAGTCTTGAGAACCTGAATGGGCTTCAACAGTTGACAATTCCT  
GGGAATTATCTTGGAACTGGAGAACCAGATGATCTAAGCTTCATAGCCTCT

>M6-PGSC0003DMG400011509-(rev)M6LRR-RLK\_806

AATTCCTGGGAATTATCTTGGAACTGGAGAACCAGATGATCTAAGCTTCATAGCCTCTCTGACTAACGTG  
TCCCGTTTCAGAATTTTGGAGATTCAGTTCAATAGTTTTGGAGGGGTTCT

>M6-PGSC0003DMG400011509-(rev)M6LRR-RLK\_868

CTAACGTGTCCCGTTTCAGAATTTTGGAGATTCAGTTCAATAGTTTTGGAGGGGTTCTGCCTGCATCCTTT  
AGAAATCTTTCAACTGAGCTTCAGGTTGTGCAGTTGTCATACAACAGAA

>M6-PGSC0003DMG400011509-(rev)M6LRR-RLK\_930

GCATCCTTTAGAAATCTTTCAACTGAGCTTCAGGTTGTGCAGTTGTCATACAACAGAATACGTGGTAACA  
TACCGTCTGAGATTGAAAATTCGTCAACGTGGAAGAATTCAGGTGAGG

>M6-PGSC0003DMG400011509-(rev)M6LRR-RLK\_992

TGGTAACATACCGTCTGAGATTGAAAATTTCTGCAACGTGGAAGAATTTTCAGGTGAGGGAAAACCTACT  
GGTACTATTCCAATCAATTTTGGTAAAGTTAAGAACTGCAAATTTTGGAT

>M6-PGSC0003DMG400011513-(rev)M6LRR-RLP\_0

ATAAATAACAAAACAAACACAAAATGAAAAGATAACTCCTCTTTCTTTCCAGTAAGATCAGAACCATAAA  
CTTCTCCGATGGCCGGCGACTCTCATCTGCAAATGACGTCGTTTCA

>M6-PGSC0003DMG400011513-(rev)M6LRR-RLP\_1008

TTTGAAGTGGTAGCAAAGGGAGGATAGTGTAGTTATATCATATGTATTCTAATTTTCAAGAGAAAGTCT  
AACTTTGTTGCGAATCTAAGGCTCAGATTCTTCCTTGACTTAACTTGCGC

>M6-PGSC0003DMG400011513-(rev)M6LRR-RLP\_1071

AAAGTCTAACTTTGTTGCGAATCTAAGGCTCAGATTCTTCCTTGACTTAACTTGCGCGGTTTTCTGGTCCA  
AATTTACAGGCATAACAGACAAAGGATTGACAGCGATTGGATCAAGTCT

>M6-PGSC0003DMG400011513-(rev)M6LRR-RLP\_1134

CTGGTCCAAATTTACAGGCATAACAGACAAAGGATTGACAGCGATTGGATCAAGTCTCTCTTTTACAG  
TCCTTAGATGTATCCTACTGCAGAAAGATCACAGACAAGGGGCTTTCAGC

>M6-PGSC0003DMG400011513-(rev)M6LRR-RLP\_1197

TTTACAGTCCTTAGATGTATCCTACTGCAGAAAGATCACAGACAAGGGGCTTTCAGCTGTTGCTGAGGG  
GTGTCATGACTTGAGAACGTTGCATCTTGCTGGCTGTAGATTTGTCTCAGA

>M6-PGSC0003DMG400011513-(rev)M6LRR-RLP\_126

TGTATAAACGACAGTCTCGGCGACGACGAGCTTCGGGCCGTACTGTCGAGGCTAGGAGACGACAAAGA  
CAAGGAAGTTTTCGGGCTGGTATGTAAGCGGTGGCTTCGTATTCAAAGTACT

>M6-PGSC0003DMG400011513-(rev)M6LRR-RLP\_1260

TGAGGGGTGTCATGACTTGAGAACGTTGCATCTTGCTGGCTGTAGATTTGTCTCAGATTCATTAATGAAA  
GCTCTCTCCAAGAATTGCCATTATGTAGAAGACCTAGGTTTGCAAGGATG

>M6-PGSC0003DMG400011513-(rev)M6LRR-RLP\_1323

AATGAAAGCTCTCTCCAAGAATTGCCATTATGTAGAAGACCTAGGTTTGCAAGGATGCACCAACATTACC  
AACTCAGGTCTCTCTGTTTTGGTTGAAGGTTGCCGAAGGATAAAGTATTT

>M6-PGSC0003DMG400011513-(rev)M6LRR-RLP\_1386

CATTACCAACTCAGGTCTCTCTGTTTTGGTTGAAGGTTGCCGAAGGATAAAGTATTTGGACATTAACAAA  
TGCAGCAATATTGGTGATATTGGGATATCTAGCGTGTCTGAAGCTTGTTT

>M6-PGSC0003DMG400011513-(rev)M6LRR-RLP\_1449

TAACAAATGCAGCAATATTGGTGATATTGGGATATCTAGCGTGTCTGAAGCTTGTTCACTAACACTTAGG  
GCATTGAAGTTGTTGGATTGCTACAAAGTTGGTGATGACTCCATCTTATC

>M6-PGSC0003DMG400011513-(rev)M6LRR-RLP\_1512

ACTTAGGGCATTGAAGTTGTTGGATTGCTACAAAGTTGGTGATGACTCCATCTTATCCTTGCCAACTAA  
TGCAAAAATCTTGAGACACTCGTTATTGGTGGTTGCCGTAACATATCAGA

>M6-PGSC0003DMG400011513-(rev)M6LRR-RLP\_1575

CAACTAATGCAAAAATCTTGAGACACTCGTTATTGGTGGTTGCCGTAACATATCAGATGAGCCTATGAAG  
AACTGGCAGCTTCTTGTAGTAATAGTCTGAGGAACTGAGGATGGATTG

>M6-PGSC0003DMG400011513-(rev)M6LRR-RLP\_1638

TATGAAGACACTGGCAGCTTCTTGTAGTAATAGTCTGAGGAACTGAGGATGGATTGGTGTGTTGAATAT  
TACTGACTCTTCATTGGACTGCATCATTCCAAATGCAGAGAGCTTGAGGT

>M6-PGSC0003DMG400011513-(rev)M6LRR-RLP\_1701

GAATATACTGACTCTTCATTGGACTGCATCATTCCAAATGCAGAGAGCTTGAGGTTCTTGACATTGGC  
TGCTGTGAGGAGTTAACTGATGCTGCATTTCAACAATTAGGAAGTGAAAA

>M6-PGSC0003DMG400011513-(rev)M6LRR-RLP\_1764

CATTGGCTGCTGTGAGGAGTTAACTGATGCTGCATTTCAACAATTAGGAAGTGAAAACCTTATGTTGGG  
GATGAAGATTTTGAAGGTCAGTAACTGTCCAAAGATAACTGTTGAAGGAAT

>M6-PGSC0003DMG400011513-(rev)M6LRR-RLP\_1827

GTTGGGGATGAAGATTTTGAAGGTCAGTAACTGTCCAAAGATAACTGTTGAAGGAATTAAGAAGCTTAT  
GAAGTCATGTGAATATCTTGAATATCTAGACGTACGGTCTTGTCCTTAAT

>M6-PGSC0003DMG400011513-(rev)M6LRR-RLP\_189

AAAGACAAGGAAGTTTTCGGGCTGGTATGTAAGCGGTGGCTTCGTATTCAAAGTACTGAAAGGAAGAA  
GCTTTGTGCTCGAGCCGGCCTCACATGCTCAGAAGAATCGCGGCCCGATTCC

>M6-PGSC0003DMG400011513-(rev)M6LRR-RLP\_1890

GCTTATGAAGTCATGTGAATATCTTGAATATCTAGACGTACGGTCTTGTCCTTAATCACTAAAGCAGGG  
TGTGAGGAGGCTGGAATTCAGTTTCTGAATCCTGCAAAATAAACTTCAC

>M6-PGSC0003DMG400011513-(rev)M6LRR-RLP\_1953

AGCAGGGTGTGAGGAGGCTGGAATTCAGTTTCTGAATCCTGCAAAATAAACTTCACTGGAAGCTTAGC

AGAGCCAGATGTGTTACTTTGAGCAGTACTTGATTTAGCAATGTCTTTGAA

>M6-PGSC0003DMG400011513-(rev)M6LRR-RLP\_2016

CTTAGCAGAGCCAGATGTGTTACTTTGAGCAGTACTTGATTTAGCAATGTCTTTGAAGGACTGAAGGGG

ATCATGCAGTGAAATCATCACATTCTTTGCCTAAGACCTAAAATATGACTT

>M6-PGSC0003DMG400011513-(rev)M6LRR-RLP\_2079

AAGGGGATCATGCAGTGAAATCATCACATTCTTTGCCTAAGACCTAAAATATGACTTTGGAAGCTCCTGC

TGTCAGTCCCTTGTTCCCATTAATTTGCCTTTTGTTAAGCATCAAGTTTT

>M6-PGSC0003DMG400011513-(rev)M6LRR-RLP\_2142

CTCCTGCTGTCAGTCCCTTGTTCCCATTAATTTGCCTTTTGTTAAGCATCAAGTTTTTTGTTGTAGATTATT

CCCTGCTTTTCAGTTTGTTTTTTACCCCTGCTTTTCAGTTATTTGA

>M6-PGSC0003DMG400011513-(rev)M6LRR-RLP\_2205

TAGATTATTTCCCTGCTTTTCAGTTTGTTTTTTACCCCTGCTTTTCAGTTATTTGATATCAAACCTCCTGTAT

ATCATCCTTGTAACCTACTAGTAGGCACCATTGTTTGCTGTAGGTGT

>M6-PGSC0003DMG400011513-(rev)M6LRR-RLP\_2268

ACTCCTGTATATCATCCTTGTAACCTACTAGTAGGCACCATTGTTTGCTGTAGGTGTTTCCAGATTGTGAA

TGAAATGAGTCCATTGCTGCTAGCTTGAATGTGAACTTATACCAACAAT

>M6-PGSC0003DMG400011513-(rev)M6LRR-RLP\_2300

AGGCACCATTGTTTGCTGTAGGTGTTTCCAGATTGTGAATGAAATGAGTCCATTGCTGCTAGCTTGAATG

TGAACTTATACCAACAATGATGGTTTGATTGATTACATTTCTGTACGAC

>M6-PGSC0003DMG400011513-(rev)M6LRR-RLP\_252

AAGAAGCTTTGTGCTCGAGCCGGGCCTCACATGCTCAGAAGAATCGCGGCCCGATTCACTCGATTACAT

GAGCTTGATCTATCTCAATCGGTTTCTAGATCTTTCTATCCTGGTGTTACT

>M6-PGSC0003DMG400011513-(rev)M6LRR-RLP\_315

TTACATGAGCTTGATCTATCTCAATCGGTTTCTAGATCTTTCTATCCTGGTGTTACTGATTCTGATCTTTCA

GTTATTGCTACTGCTTTCTCTTGCTTACGAATTCTCAATCTTCAGAAC

>M6-PGSC0003DMG400011513-(rev)M6LRR-RLP\_378

GATCTTTCAGTTATTGCTACTGCTTTCTCTTGCTTACGAATTCTCAATCTTCAGAACTGTAAAGGTCCGTTT

TTGTATTTTTTAAAAGTTATATAGTTTGAAATTTGTTGAATTTAAATG

>M6-PGSC0003DMG400011513-(rev)M6LRR-RLP\_441

GGTCCGTTTTGTATTTTTAAAAGTTATATAGTTTGAAATTTGTTGAATTTAAATGTTTCATTGCTGAAGT  
GAACCTGAGCTACTGCAGGAGTGGCCAAATGCACCAATGAGTTGTAGTA

>M6-PGSC0003DMG400011513-(rev)M6LRR-RLP\_504

GCTGAAGTGAACCTGAGCTACTGCAGGAGTGGCCAAATGCACCAATGAGTTGTAGTATGTGTAGTGATA  
TTTCACATTAATTACTGATTTAAAATCTTGAATTCGTCTTTGTGTGGGGTG

>M6-PGSC0003DMG400011513-(rev)M6LRR-RLP\_567

GTGATATTTACATTAATTACTGATTTAAAATCTTGAATTCGTCTTTGTGTGGGGTGGTGGAGCTGGGAT  
TTTACTAAGAGGGTTTTGAAATACATAAAACATAATTTTAACCATGTAT

>M6-PGSC0003DMG400011513-(rev)M6LRR-RLP\_63

CCATAAACTTCTCCGATGGCCGGCGACGACTCTCATCTGCAAATGACGTCGTTTCAGTCCACTGTATAA  
ACGACAGTCTCGGCGACGACGAGCTTCGGGCCGACTGTGCGAGGCTAGGA

>M6-PGSC0003DMG400011513-(rev)M6LRR-RLP\_756

GTTACCAACTAGGACATAAAGGAAATTTTGAGATTTTGACTAAAATCTATTGTTTGAATGTTAAAGGTT  
TTGACCCGATATGGAGAAGACTGGCTCTTCCTCTTTTCTATCTTGTAAT

>M6-PGSC0003DMG400011513-(rev)M6LRR-RLP\_819

AAAGGTTTTGACCCGATATGGAGAAGACTGGCTCTTCCTCTTTTCTATCTTGTAATAATGGTTTTTATGA  
TAAAAGGGCGTAATGGGGTTTATGGAGGATTTAGGTGAATTTATGGT

>M6-PGSC0003DMG400011513-(rev)M6LRR-RLP\_882

TTTTATGATAAAAAGGGCGTAATGGGGTTTATGGAGGATTTAGGTGAATTTATGGTTGGTTTTTTTGA  
GATTTGTAGGATTTTGTGTTTCTGTGTAAAGGTTATGTCTTTTTTGCTAT

>M6-PGSC0003DMG400011513-(rev)M6LRR-RLP\_945

TTTTGAAGATTTGTAGGATTTTGTGTTTCTGTGTAAAGGTTATGTCTTTTTTGCTATGTGGTTTTTGAAGT  
GGTAGCAAAAGGGAGGATAGTGTAGTTATATCATATGTATTCTAATTTT

>M6-PGSC0003DMG400011580M6LRR-RLK\_0

AATAAAGTTGAATCTTTCTCATTTTTATCCAACCCCTTTTCAAATCTTGCATGTATATAGGAAGATCCCC  
ACCATTATTGAAAAATGTTATAGGTTCTTGTTTTAGATATAGTATA

>M6-PGSC0003DMG400011580M6LRR-RLK\_1037

TTCCAGGATTCGTTTAAACATTTGGGGAATTGGAATCAAATGATGAAACTCCTTGTGGCTGGGTAGGT  
GTGAATTGCACTTCTGATTATAATCCAGTTGTGCAATCTCTTTATCTGAGC

>M6-PGSC0003DMG400011580M6LRR-RLK\_1098

GGGTAGGTGTGAATTGCACTTCTGATTATAATCCAGTTGTGCAATCTCTTTATCTGAGCTATATGAATCTT  
TCAGGCACGTTGAGTTCTAGCATTGGTGGTCTTGAATATTTAGCTTATC

>M6-PGSC0003DMG400011580M6LRR-RLK\_1159

TATGAATCTTTCAGGCACGTTGAGTTCTAGCATTGGTGGTCTTGAATATTTAGCTTATCTTGACCTGTCTT  
ACAATCAATTCACCGGGAACATCCCAAAGAGATTGGAAATTGCTCAAA

>M6-PGSC0003DMG400011580M6LRR-RLK\_122

CTTTGATTTTATCTTTTCTCAATTCATGAGTTTTATGGTCTTTGCTCTGTCATCATCTAAAGGAATTACTTG  
AGAGTTTTTTGCTTTTTCTGGTTTTTGGTGGAAATTCAGCTCTTTTT

>M6-PGSC0003DMG400011580M6LRR-RLK\_1220

GACCTGTCTTACAATCAATTCACCGGGAACATCCCAAAGAGATTGGAAATTGCTCAAAAATTGCAGTCTC  
TCCAGCTCCATTTAATACTTTTTACGGTCCGATTCCCTGCTGAACTGTAT

>M6-PGSC0003DMG400011580M6LRR-RLK\_1281

TGCAGTCTCTCCAGCTCCATTTAATACTTTTTACGGTCCGATTCCCTGCTGAACTGTATAACCTGTCTAATT  
TGAAGGATGTGAACATGAGCAGCAACATGATCTCCGGTCCTATTGCTG

>M6-PGSC0003DMG400011580M6LRR-RLK\_1342

CCTGTCTAATTTGAAGGATGTGAACATGAGCAGCAACATGATCTCCGGTCCTATTGCTGAGGAGTTTGG  
GAAACTCTCGTCTCTAGTTACTTTTCGTTGCATACACCAATAATCTTACCGG

>M6-PGSC0003DMG400011580M6LRR-RLK\_1403

GAGTTTGGGAAACTCTCGTCTCTAGTTACTTTTCGTTGCATACACCAATAATCTTACCGGTCCAGTGCCTCG  
ATCTATTGGAAGTTTAAAAATTTGACAATATTTTCGAGTGGGGCAGAAT

>M6-PGSC0003DMG400011580M6LRR-RLK\_1464

CAGTGCCTCGATCTATTGGAAGTTTAAAAATTTGACAATATTTTCGAGTGGGGCAGAATGCACTTTCTGG  
AAGTTTACCTGCAGAGATAGGTGGTTGTGAGAGCTTGGAAATCTCTTGGTC

>M6-PGSC0003DMG400011580M6LRR-RLK\_1525

ACTTTCTGGAAGTTTACCTGCAGAGATAGGTGGTTGTGAGAGCTTGGAAATCTCTTGGTCTAACACAGAAT  
TGCCTGGAAGGAAACATACCAAAGAACTTGGCATGCTTAGTAAGTTGAA

>M6-PGSC0003DMG400011580M6LRR-RLK\_1586

ACACAGAATTGCCTGGAAGGAAACATACCAAAGAACTTGGCATGCTTAGTAAGTTGAAAGAGCTTGTG

CTTTGGGGAAATCAGTTCTCTGGTTATATTCCAAAGGAACTTGGAAATTTA

>M6-PGSC0003DMG400011580M6LRR-RLK\_1647

AGCTTGTGCTTTGGGGAAATCAGTTCTCTGGTTATATTCCAAAGGAACTTGGAAATTTAACACAAATTCA

ATTGCTTGCTTTATATCAGAATAACCTGATTGGAGATATTCCTGCTGAAA

>M6-PGSC0003DMG400011580M6LRR-RLK\_1708

ACAAATTCAATTGCTTGCTTTATATCAGAATAACCTGATTGGAGATATTCCTGCTGAAATAGGTAAACTC

AAAACCTTGACGAAGTTATACCTATACCGGAATGGATTAAATGGTAGCAT

>M6-PGSC0003DMG400011580M6LRR-RLK\_1769

GGTAAACTCAAACCTTTGACGAAGTTATACCTATACCGGAATGGATTAAATGGTAGCATTCCAAGGGAG

ATTGGGAATCTTTCTATGGCAACTGAAATTGATTTCTCGGAAAACCTTCTG

>M6-PGSC0003DMG400011580M6LRR-RLK\_183

AGGAATTACTTGAGAGTTTTTCTTTTTCTGGGTTTTTGGTGGAATTCAGCTTTTTTGACAAGGTGATG

GACTCAATAGCCTAGAGGTATGCTAAAGCTTAGATCTTTAATGAGTTTC

>M6-PGSC0003DMG400011580M6LRR-RLK\_1830

CAAGGGAGATTGGGAATCTTTCTATGGCAACTGAAATTGATTTCTCGGAAAACCTTCTGAAAGGAGAAA

TTCCAGTTGAGTTTGGCCAAATAAAAAGTCTGAAATTGTTGTTTCTTTTCC

>M6-PGSC0003DMG400011580M6LRR-RLK\_1891

AGGAGAAATCCAGTTGAGTTTGGCCAAATAAAAAGTCTGAAATTGTTGTTTCTTTTCCAGAATCAGCTC

GAAGGCGTTATACCAGATGAACTTACTACTCTAAAGAACTTGATTAGTCT

>M6-PGSC0003DMG400011580M6LRR-RLK\_1952

AATCAGCTCGAAGGCGTTATACCAGATGAACTTACTACTCTAAAGAACTTGATTAGTCTTGATTGTCAA

TTAATCACCTAACAGGTCCTATTCCATTTGGTTTTTCAGTATCAAAGGAA

>M6-PGSC0003DMG400011580M6LRR-RLK\_2013

ATTTGTCAATTAATCACCTAACAGGTCCTATTCCATTTGGTTTTTCAGTATCAAAGGAATTGATTCAGTTA

CAGCTTTTTGAGAATCTTTAACTGGTACTATTCCTCAACGTCTTGGCA

>M6-PGSC0003DMG400011580M6LRR-RLK\_2074

GATTCAGTTACAGCTTTTTGAGAATCTTTAACTGGTACTATTCCTCAACGTCTTGGCATTATAGTCGAC

TTTGGGTGCTTGATTTAAATAACAATCAACTCACAGGAAGAATTCCTCC

>M6-PGSC0003DMG400011580M6LRR-RLK\_2135

TATAGTCGACTTTGGGTGCTTGATTTAAATAACAATCAACTCACAGGAAGAATTCCTCCATTCGTTTGCA  
GAATCCAATTTGATTTTGTGAATCTTGCATCAAATAAATTGCATGGA

>M6-PGSC0003DMG400011580M6LRR-RLK\_2196

TCGTTTGTGAGAATTCCAATTTGATTTTGTGAATCTTGCATCAAATAAATTGCATGGATATATTCCATCT  
GGTGTCTTAAATGTGATTCATTGGTGCAACTTCGTCTGAACGATAACA

>M6-PGSC0003DMG400011580M6LRR-RLK\_2257

TATTCCATCTGGTGTCTTAAATGTGATTCATTGGTGCAACTTCGTCTGAACGATAACAGGCTAACAGGG  
ACATTTCTTCTGAGTTGTGCAAATTGATAAACCTGTCTGCTGTTGAACT

>M6-PGSC0003DMG400011580M6LRR-RLK\_2318

CTAACAGGGACATTTCTTCTGAGTTGTGCAAATTGATAAACCTGTCTGCTGTTGAACTGGGGCAGAACA  
AGTTCACTGGTCCAATACCTCCTGATATTGGATATTGCCAGAAGTTGCAG

>M6-PGSC0003DMG400011580M6LRR-RLK\_2379

GGCAGAACAAGTTCACTGGTCCAATACCTCCTGATATTGGATATTGCCAGAAGTTGCAGAGGCTTGATTT  
CTCAGGCAATAGTTTCAACCAGTTGCCAAGGGAGATAGGAAATCTTACCA

>M6-PGSC0003DMG400011580M6LRR-RLK\_244

CAAGGTGATGGACTCAATAGCCTAGAGGTATGCTAAAGCTTAGATCTTTAATGAGTTTCTTATTTATTCCT  
GAATTATTCCTTTTATATAGTTGAGTTTCTGGGCATTTCTGAGTTGATT

>M6-PGSC0003DMG400011580M6LRR-RLK\_2440

GCTTGATTTCTCAGGCAATAGTTTCAACCAGTTGCCAAGGGAGATAGGAAATCTTACCAGGCTTGTGAC  
ATTCAATGTCTCAGCAAATTCGCTCACTGGACCGATACCTCCAGAAATTCG

>M6-PGSC0003DMG400011580M6LRR-RLK\_2501

CTTGTGACATTCAATGTCTCAGCAAATTCGCTCACTGGACCGATACCTCCAGAAATTCGGAAGTCAAGG  
CACTACAAAGACTGGATCTCAGCAAGAACAGATTTACTGATGTTATACCT

>M6-PGSC0003DMG400011580M6LRR-RLK\_2562

ACTGCAAGGCACTACAAAGACTGGATCTCAGCAAGAACAGATTTACTGATGTTATACCTGATGACATTG  
GTAGCTTGTGCGCAGCTAGAACGTCTTTTGCTTTCAGAGAATAAGTTATCTG

>M6-PGSC0003DMG400011580M6LRR-RLK\_2623

TGACATTGGTAGCTTGTGCGCAGCTAGAACGTCTTTTGCTTTCAGAGAATAAGTTATCTGGAAAGATACCA  
GCAGCATTGGGGAGCCTCTCTCATTTGACTGAGCTGCAGATGGGCAGTAA



>M6-PGSC0003DMG400011580M6LRR-RLK\_2684

AAGATACCAGCAGCATTGGGGAGCCTCTCTCATTTGACTGAGCTGCAGATGGGCAGTAATCTATTGTCA  
GGTGAATACCATCAGAGTTGGGTAATCTTAGTGGCTTACAAATTGCAATG

>M6-PGSC0003DMG400011580M6LRR-RLK\_2745

TATTGTCAGGTGAAATACCATCAGAGTTGGGTAATCTTAGTGGCTTACAAATTGCAATGGATCTTAGCAA  
CAACAAGCTCTCTGGCAGTATACCACCCAACCTTGGTAATCTTATCCTAT

>M6-PGSC0003DMG400011580M6LRR-RLK\_2806

TCTTAGCAACAACAAGCTCTCTGGCAGTATACCACCCAACCTTGGTAATCTTATCCTATTAGAGTACCTAT  
ATCTCAACAACAATCATTTGAGTGGTGAATACCAAGCACATTTGGAAA

>M6-PGSC0003DMG400011580M6LRR-RLK\_2867

GAGTACCTATATCTCAACAACAATCATTTGAGTGGTGAATACCAAGCACATTTGGAAACCTGACAAGTC  
TCTTGGGCATTGACTTCTCATAACAATGACCTGACTGGACCACTGCCGGAT

>M6-PGSC0003DMG400011580M6LRR-RLK\_2928

TGACAAGTCTCTTGGGCATTGACTTCTCATAACAATGACCTGACTGGACCACTGCCGGATATACCACTCTTT  
CGGAACATGGATATCAGCAGCTTCATTGGAAACAAGGTCTTTGCGGTG

>M6-PGSC0003DMG400011580M6LRR-RLK\_2989

ACCACTCTTTCGGAACATGGATATCAGCAGCTTCATTGGAAACAAGGTCTTTGCGGTGGGCCTCTAGG  
GGAATGTAATGCATCTCCAGCTTATGATGCCAATAATCCTCCTAGAGTCGA

>M6-PGSC0003DMG400011580M6LRR-RLK\_305

ATTTATTCCTGAATTATTCCTTTTATATAGTTGAGTTTCTGGGCATTTCTGAGTTGATTGGATTCTTTGAAG  
TTAGTTGATTAATTGGTATGCATAGAACTTTTTCTGGTTTGTCTAGTT

>M6-PGSC0003DMG400011580M6LRR-RLK\_3050

CCTCTAGGGGAATGTAATGCATCTCCAGCTTATGATGCCAATAATCCTCCTAGAGTCGAGAGTGCAGATT  
CTCCTCGAGCAAAGATTACTGCAGTTGCCGGTGTAAATTGGTGGAGTT

>M6-PGSC0003DMG400011580M6LRR-RLK\_3111

GTGCAGATTCTCCTCGAGCAAAGATTACTGCAGTTGCCGGTGTAAATTGGTGGAGTTTCTTTGTTTT  
GATTGTGGTAGTTTTGTAATATATGAAGCAGCATCCAGTTGAGATGGTTG

>M6-PGSC0003DMG400011580M6LRR-RLK\_3172

TCTTGTGTTTGGATTGTGGTAGTTTTGTAATATATGAAGCAGCATCCAGTTGAGATGGTTGCAACCCAGGAT

AAAGACATGGCATCTTCAGATCCAGACATTTATTTCCGTCCCAAAGAGGG

>M6-PGSC0003DMG400011580M6LRR-RLK\_3233

ACCCAGGATAAAGACATGGCATCTTCAGATCCAGACATTTATTTCCGTCCCAAAGAGGGGTTCACTTTCC

AGGACTTGGTTGAGGCTACAAACAATTTTCAAGATTGTTATGTTCTTGGA

>M6-PGSC0003DMG400011580M6LRR-RLK\_3294

TCACTTTCCAGGACTTGGTTGAGGCTACAAACAATTTTCAAGATTGTTATGTTCTTGGAAGAGGAGCCGT

CGGAACAGTTTACAAAGCAGTCATGCAGTCTGGACAAACGATTGCAGTCA

>M6-PGSC0003DMG400011580M6LRR-RLK\_3355

AGGAGCCGTCCGAACAGTTTACAAAGCAGTCATGCAGTCTGGACAAACGATTGCAGTCAAGAAGCTTG

CTTCTAACAGAGAGGGTAATAACATCGACAATAGCTTCCGTGCAGAGATCTT

>M6-PGSC0003DMG400011580M6LRR-RLK\_3416

AAGCTTGCTTCTAACAGAGAGGGTAATAACATCGACAATAGCTTCCGTGCAGAGATCTTAACTCTAGGA

AAGATTAGGCATCGTAACATCGTAAAGCTATATGGCTTTTGCTATCATCAG

>M6-PGSC0003DMG400011580M6LRR-RLK\_3477

CTCTAGGAAAGATTAGGCATCGTAACATCGTAAAGCTATATGGCTTTTGCTATCATCAGGGTTCTAATTT

ACTTCTCTACGAGTATATGGCCAGAGGTAGCTTGGGTGAACTGCTTCACA

>M6-PGSC0003DMG400011580M6LRR-RLK\_3538

TTCTAATTTACTTCTCTACGAGTATATGGCCAGAGGTAGCTTGGGTGAACTGCTTCACAGTACATCTTGTA

GATTGGATTGGCCAACTCGCTTTATGGTGGCTGTTGGAGCTGCTCAAGG

>M6-PGSC0003DMG400011580M6LRR-RLK\_3599

ACATCTTGATAGATTGGATTGGCCAACTCGCTTTATGGTGGCTGTTGGAGCTGCTCAAGGACTTTCTTACT

TACATCATGATTGCAAGCCCCGGATCATCCACCGTGATATAAAGTCCAAT

>M6-PGSC0003DMG400011580M6LRR-RLK\_366

ATTCTTTGAAGTTAGTTGATTAATTGGTATGCATAGAACTTTTTCTGGTTTGCTAGTTTATCTAGTTAGTA

TTGTCTCTTCTTGATGATTGACCTAAGGGTGTGGAGGGTAGGACTTG

>M6-PGSC0003DMG400011580M6LRR-RLK\_3660

TTTCTTACTTACATCATGATTGCAAGCCCCGGATCATCCACCGTGATATAAAGTCCAATAATATTCTGATT

GATGAGAAGTTTGAAGCTCATGTTGGTGATTTTGGTTTGGCAAAGTTG

>M6-PGSC0003DMG400011580M6LRR-RLK\_3721

TATTCTGATTGATGAGAAGTTTGAAGCTCATGTTGGTGATTTTGGTTTGGCAAAGTTGTTGATATGCCT  
CAATCTAAGTCGATGTCTGCAGTTGCTGGCTCATATGGCTACATAGCACC

>M6-PGSC0003DMG400011580M6LRR-RLK\_3782

GATATGCCTCAATCTAAGTCGATGTCTGCAGTTGCTGGCTCATATGGCTACATAGCACCTGGTATGTCTTT  
CTGTTTTCTCCTGGACAACTTCTTATGTTCCCTTGTTATCTATAGAAAT

>M6-PGSC0003DMG400011580M6LRR-RLK\_3843

GTATGTCTTTCTGTTTTCTCCTGGACAACTTCTTATGTTCCCTTGTTATCTATAGAAATATGTCGAGAAATG  
TACTGCCATTTGATCCTTATTCCCACATATTTATCTGTATCTTCACTC

>M6-PGSC0003DMG400011580M6LRR-RLK\_3904

GTCGAGAAATGTACTGCCATTTGATCCTTATTCCCACATATTTATCTGTATCTTCACTCTGAAAGTGTTACC  
TTTTTCTGTTGATATGAATAGGATTTTCTTGTTGAGATTAGATAGTTA

>M6-PGSC0003DMG400011580M6LRR-RLK\_3965

AAAGTGTTACCTTTTTCTGTTGATATGAATAGGATTTTCTTGTTGAGATTAGATAGTTAGAATTGTATGCA  
ATGTCTATTTCTTCGATTATCTGAAGACAACAATGAAATGCTTTTAACT

>M6-PGSC0003DMG400011580M6LRR-RLK\_4026

ATTGTATGCAATGTCTATTTCTTCGATTATCTGAAGACAACAATGAAATGCTTTTAACTTTTATCTGTGTAT  
ACTTCTCATTTTATATGTGTTCTATGCCAGGAGAAACCATACAAACTG

>M6-PGSC0003DMG400011580M6LRR-RLK\_4087

TATCTGTGTATACTTCTCATTTTATATGTGTTCTATGCCAGGAGAAACCATACAAACTGCTCTATGTATCTT  
AGGCAAACCTTTGGGGACTCTCCTGATGCATATGGAGCATTCTTGTTT

>M6-PGSC0003DMG400011580M6LRR-RLK\_4148

CTATGTATCTTAGGCAAACCTTTGGGGACTCTCCTGATGCATATGGAGCATTCTTGTTCCCACATATTTAT  
GTTTCAAGTTTAGATATTCGACCATGTGTTGTTCACTTTGAAAGTCTAATT

>M6-PGSC0003DMG400011580M6LRR-RLK\_4209

ACATATTTATGTTTCAAGTTTAGATATTCGACCATGTGTTGTTCACTTTGAAAGTCTAATTCTTCTCTTTGTGA  
TATGAAATGCATATCTTGTTGAAGTTTGTATAGTTAAAATTGTTTACGA

>M6-PGSC0003DMG400011580M6LRR-RLK\_427

TCTAGTTAGTATTGTCTCTTCTTGATGATTGACCTTAAGGGTGTGGAGGGTAGGACTTGGATTAGGGTA  
GTAGGTGGTAATGCGTTGTCTTGTTGTCCGTTTCATGTTAGTAGTCATACTA

>M6-PGSC0003DMG400011580M6LRR-RLK\_4270

TCTCTTTGTGATATGAAATGCATATCTTGTTGAAGTTTGATAGTTAAAATTGTTTACGAACAAGTTAATTT  
CTTTGATGAAATGACAGAATACAAGAAAAAATGCTTTTAACTTTTCTCT

>M6-PGSC0003DMG400011580M6LRR-RLK\_4331

AAGTTAATTTCTTTGATGAAATGACAGAATACAAGAAAAAATGCTTTTAACTTTTCTCTGTCTATGTAGCT  
TTTAATATCCCTCTCGTAATTTTCATTCTGTGTTATAAAACCATTTTTT

>M6-PGSC0003DMG400011580M6LRR-RLK\_4392

CTATGTAGCTTTTAAATATCCCTCTCGTAATTTTCATTCTGTGTTATAAAACCATTTTTTCTTTTCAATTGAT  
GTTTTCTACCTTCTCTGTTGCAGAATATGCTTACACCATGAAAGTTA

>M6-PGSC0003DMG400011580M6LRR-RLK\_4453

TTTTCAATTGATGTTTTCTACCTTCTCTGTTGCAGAATATGCTTACACCATGAAAGTTACGGAAAAATGTG  
ATATCTATAGTTATGGGGTAGTCCTTTTGGAGTTGCTAACTGGAAAAGC

>M6-PGSC0003DMG400011580M6LRR-RLK\_4514

GAAAAATGTGATATCTATAGTTATGGGGTAGTCCTTTTGGAGTTGCTAACTGGAAAAGCACCCGTACAG  
CCCCTAGAACAAGGTGGTGATCTTGTCTCATGGGTGAAGCATTATGTTAGG

>M6-PGSC0003DMG400011580M6LRR-RLK\_4575

CCGTACAGCCCCTAGAACAAGGTGGTGATCTTGTCTCATGGGTGAAGCATTATGTTAGGAACCATTTCATT  
GACACCAGGGGTACTCGATAGCCGATTGGATTTGGAAGATGTAATTAATCTG

>M6-PGSC0003DMG400011580M6LRR-RLK\_4636

CCATTCATTGACACCAGGGGTACTCGATAGCCGATTGGATTTGGAAGATGTAATTAATCTGTTAGTCATATG  
CTTACAGTTCTTAAAATTGCTCTAATGTGCACTAGCATGTCCCCTTATGA

>M6-PGSC0003DMG400011580M6LRR-RLK\_4697

AGTCATATGCTTACAGTTCTTAAAATTGCTCTAATGTGCACTAGCATGTCCCCTTATGATCGTCCTTCAAT  
GCGCGAGGTTGTTCTGATGCTGATTGAGTCTGAAGAGCAAGAAGGGAAC

>M6-PGSC0003DMG400011580M6LRR-RLK\_4758

GTCCTTCAATGCGCGAGGTTGTTCTGATGCTGATTGAGTCTGAAGAGCAAGAAGGGAACTTTCTCTCATC  
TCCAGTTTATGATCCCCCTCTGAAAGATAATTCCTTCTAGATGCATGTAA

>M6-PGSC0003DMG400011580M6LRR-RLK\_4819

TCTCTCATCTCCAGTTTATGATCCCCCTCTGAAAGATAATTCCTTCTAGATGCATGTAAGAAGCACATCTC

AATTAAC TTTGATAATTTTTTAGTACTAATTCTCCTTGTATTTTTTTTC

>M6-PGSC0003DMG400011580M6LRR-RLK\_488

TTAGGGTAGTAGGTGGTAATGCGTTGTCTTGTGTCCGTTTCATGTTAGTAGTCATACTATTGCTCATTCTG

TTACTATATTTTGGTTCCTTATACCTCGATTGTGTACTGTTTTGTTGTA

>M6-PGSC0003DMG400011580M6LRR-RLK\_4880

AGCACATCTCAATTAAC TTTGATAATTTTTTAGTACTAATTCTCCTTGTATTTTTTTTCTTAATGGCTAAATT

ATAGATATCCCATGTATATTTCTCATAGTGAAAATTTTCATCAATCA

>M6-PGSC0003DMG400011580M6LRR-RLK\_4941

AATGGCTAAATTATAGATATCCCATGTATATTTCTCATAGTGAAAATTTTCATCAATCACTTTCTAGAACT

AGTTTGGAGGTGATTGATGTTATTTCAATAGTTCTCCATCTGATGGTTA

>M6-PGSC0003DMG400011580M6LRR-RLK\_4995

AATCACTTTCTAGAACTAGTTTGGAGGTGATTGATGTTATTTCAATAGTTCTCCATCTGATGGTTATGGAA

AATAATATGCTTTATGCTTTTCTCACTATATATTGAGGGCTACCTAGAT

>M6-PGSC0003DMG400011580M6LRR-RLK\_61

GGAAGATCCCCACCATTATTGGAAAAATGTTATAGGTTCTTGGTTTTAGATATAGTATAATCTTTGATTTT

ATCTTTTCTCAATTCATGAGTTTTATGGTCTTTGCTCTGTCATCATCT

>M6-PGSC0003DMG400011580M6LRR-RLK\_793

GACTACACTGGTTATGTTGTTGTTGTTGTTGTTATTTATAAGGATTGACACATAGTTGGATTAACAGGTC

AAACTGAGACTGTCTTATTGGAAGTTTGTATGATGTCTGGAGATTTTGA

>M6-PGSC0003DMG400011580M6LRR-RLK\_854

TAACAGGTCAAAC T GAGACTGTCTTATTGGAAGTTTGTATGATGTCTGGAGATTTTGAATCAAGAAGTG

GTTTGGTTCTTCTAATTTGGATAAGTGCTTTGGTGGCTGCTGTACTATTG

>M6-PGSC0003DMG400011580M6LRR-RLK\_915

CAAGAAGTGGTTTGGTTCTTCTAATTTGGATAAGTGCTTTGGTGGCTGCTGTACTATTGCTGGTTTCTCCT

GCCGAAGGATTGAATCAGGAAGGAATGTACCTTCTTGAATTGAAGAAGA

>M6-PGSC0003DMG400011580M6LRR-RLK\_976

GGTTTCTCCTGCCGAAGGATTGAATCAGGAAGGAATGTACCTTCTTGAATTGAAGAAGAATTTCCAGGA

TTCGTTTAACCATTTGGGGAATTGGAATCCAAATGATGAAACTCCTTGTGG

>M6-PGSC0003DMG400011610-(rev)M6LRR-RLP\_0

ATGGTTAATAGTATATCCCAACAAATTGATCAAACAGCGAAGGTACCGACATATCTTGGTAAATCTGGA  
GAGAGAGATTACAATGATTCTATAACAATTTCAACAAAGGGAATGGAGTAT

>M6-PGSC0003DMG400011610-(rev)M6LRR-RLP\_130

GAATTTTGACAATTCTCAAGACTATTGATCTTTCAAGTAACAAATTTGAAGGACATATCCAAGTAATCTC  
GGAGATCTCATTGCGCTCCGGGTGTTAAATTTGTCTCATAATAGATTGC

>M6-PGSC0003DMG400011610-(rev)M6LRR-RLP\_455

TGATGGATTACAAGGATTCCCTATTTGAAAGGTTGTGGAAGTAATTGGACACCGGAGACAAATAATAG  
GGATTATGAGTCAGATGATGAAGAAAGCAATTCTGAATTTCTAAATGATTT

>M6-PGSC0003DMG400011610-(rev)M6LRR-RLP\_65

TGGAGAGAGAGATTACAATGATTCTATAACAATTTCAACAAAGGGAATGGAGTATGAACTGGATAGAAT  
TTTGACAATTCTCAAGACTATTGATCTTTCAAGTAACAAATTTGAAGGACA

>M6-PGSC0003DMG400011611-(rev)M6LRR-RLP\_0

GCAATTTGATGAACTTGCAATTGATGTATTTGGAGAGAAACAACCTCAGTGGAAAAATTCCTTAATGTCT  
AGTTAATATCAGTGGACTCGAGGTATTGAAAATAGAAGATAATAATCTCA

>M6-PGSC0003DMG400011611-(rev)M6LRR-RLP\_1208

GTATCCATTATATATATCATGATCTCAACTGGAAATCTAAAATGGCTTGCAAATATTTTTGAAAAGTTAGA  
AGAAAAAATTATTATGAGACAGATAAGGAAGAAGCGAAGTCAAAGGTAA

>M6-PGSC0003DMG400011611-(rev)M6LRR-RLP\_192

AGGGAGCAATCCACAATGTTTTGGCAACATGGGTGGTCATCTTGAGGTTTTGGATATCCACCAAACA  
ATCTTTATGGGACTCTTCCAGAACTTTTAGCAATGGAAGTGTACTCAGAA

>M6-PGSC0003DMG400011611-(rev)M6LRR-RLP\_256

AAACAATCTTTATGGGACTCTTCCAGAACTTTTAGCAATGGAAGTGTACTCAGAATCTTAGTCTTGCATT  
ACAATGAATTAGAAGGAAAAATCCCCGATCTTTAGTCAATTGTAAAAA

>M6-PGSC0003DMG400011611-(rev)M6LRR-RLP\_320

TTGCATTACAATGAATTAGAAGGAAAAATCCCCGATCTTTAGTCAATTGTAAAACTTGGAAATTCTTG  
ATTTAGGAGACAATCACTTCAACGACACATTTCCAATATGGTTTGAAACT

>M6-PGSC0003DMG400011611-(rev)M6LRR-RLP\_576

CTAGTCTATTTCAAAAATTGAAAGCCATGAGGACAATTGATCAAACAGCAAAGGTACCAACATATCTTGG  
TAAATCTGGAGAGAGAGATTACAATGATTCTGTAACAGTTTCAACGAAGG

>M6-PGSC0003DMG400011611-(rev)M6LRR-RLP\_64

ATGTCTAGTTAATATCAGTGGACTCGAGGTATTGAAAATAGAAGATAATAATCTCAGTGAAGATATCCCT  
TCGTCTATTTGCAATCTAACATCACTAAGGATTTTAGATTTGGGTAGAAA

>M6-PGSC0003DMG400011611-(rev)M6LRR-RLP\_640

TCTTGGTAAATCTGGAGAGAGAGATTACAATGATTCTGTAACAGTTTCAACGAAGGGAATGGAGTATGA  
ACTGGATAGAATTTTGACACTTTTCAAGACTATCGATCTTTCAAGTAACAA

>M6-PGSC0003DMG400011611-(rev)M6LRR-RLP\_704

TATGAACTGGATAGAATTTTGACACTTTTCAAGACTATCGATCTTTCAAGTAACAAATTTGAAGGACATA  
TTCCAAGTAGTTTGGGAGATCTCATTGCACTTAAGGTGCTAAATTTGTCT

>M6-PGSC0003DMG400011611-(rev)M6LRR-RLP\_768

GACATATTCCAAGTAGTTTGGGAGATCTCATTGCACTTAAGGTGCTAAATTTGTCTCATAACAGATTGCA  
AGGTAATATAACCATCATCACTTGAAAGTTTATATTTAGTCGAATCATTGG

>M6-PGSC0003DMG400011708-(rev)M6LRR-RLP\_0

TGTTGCATGTGATTTTGTCTTTAAGTCAGTAAAGTTGGTTCTTTGTATATGTGGTTGGGAAAAATTTATGT  
AGGAGATATTTATCTCAAGTTCACATTTCTACTTTTTTTGTGGGGCCATT

>M6-PGSC0003DMG400011708-(rev)M6LRR-RLP\_130

TGTTTGGATTGGAATCTCCCTAGTTTGATTTTCATCTTCTCTATCATTTCAAAAACTCAATATGGAGGATG  
AGACGGAAACTGAAAAATCTCCGATTACTACTCGTGTGATACTTCTTTC

>M6-PGSC0003DMG400011708-(rev)M6LRR-RLP\_195

AGGATGAGACGGAAACTGAAAAATCTCCGATTACTACTCGTGTGATACTTCTTTCAAAAACAGTCTTA  
TGGAATACGAGTAGAGATTGTTGTACATGGGATGGATTACAACCTTGATTA

>M6-PGSC0003DMG400011708-(rev)M6LRR-RLP\_260

TCTTATGGAATACGAGTAGAGATTGTTGTACATGGGATGGATTACAACCTTGATTAGAGAACATTGGACA  
CAACACTTCATAACTTCACAAAAACCTGTGAATTTCCCAAAAACAGTCTTA

>M6-PGSC0003DMG400011708-(rev)M6LRR-RLP\_325

GACACAACACTTCATAACTTCACAAAAACCTGTGAATTTCCCAAAAACAGTCTTATGGAATGCGAGTAGA  
GATTGCTGTACTTTCTCTCCCTGATGTCAACATCTCATCTCCAATACCTA

>M6-PGSC0003DMG400011708-(rev)M6LRR-RLP\_390

GTAGAGATTGCTGTACTTTCTCTCCCTGATGTCAACATCTCATCTCCAATACCTATGAATTTTTCTTCTCC

TTAAGGTACGTGGATCTTGAATATACTAATATACAAATTAGGTATTTG

>M6-PGSC0003DMG400011708-(rev)M6LRR-RLP\_455

TTCTCCTTAAGGTACGTGGATCTTGAATATACTAATATACAAATTAGGTATTTGAATTTACCGGTCATA

TTTCTTTCACAATCTCTAAATTGAAGCAGCTCACAAGTTTAGATCTTTC

>M6-PGSC0003DMG400011708-(rev)M6LRR-RLP\_520

GTCATATTTCTTTCACAATCTCTAAATTGAAGCAGCTCACAAGTTTAGATCTTTCATCTAACTCCTTTTCAG

GTTAAATGCTCGACGTTTTCTCTAACCTCCAAGAGCTTACATCTTCT

>M6-PGSC0003DMG400011708-(rev)M6LRR-RLP\_585

TTTTCAGGTAAATGCTCGACGTTTTCTCTAACCTCCAAGAGCTTACATCTTCTGACAACATGAATTATG

CGGTTCTAAACCTTTCGCATAATTCATTAACAAGCCACCTAGCTACCA

>M6-PGSC0003DMG400011708-(rev)M6LRR-RLP\_65

TTATGTAGGAGATATTTATCTCAAGTTCACATTTCTACTTTTTTGTGGGGCCATTGAATGGTAAGTGTTTG

GATTGGAATCTCCCTAGTTTGATTTTCATCTTCTCTATCATTTCAAAAA

>M6-PGSC0003DMG400011708-(rev)M6LRR-RLP\_650

ATTATGCGGTTCTAAACCTTTCGCATAATTCATTAACAAGCCACCTAGCTACCACAAGTTCATTACCACA

ATCTAGAGTATCTTGATCTTAAATTTAACTTCTTTCAGGGTCCACTACC

>M6-PGSC0003DMG400011708-(rev)M6LRR-RLP\_780

TGTAACATGAGCTAGCTTGAATTTCTAGATTTATCACACAACAACCTTCAGTAACTCGATTACAAGTTGCTT

GGGAAGCATGGCTACTCTAAGGTTGTTGGACTTAAGAAGGAACAATTC

>M6-PGSC0003DMG400011708-(rev)M6LRR-RLP\_837

ATTACAAGTTGCTTGGGAAGCATGGCTACTCTAAGGTTGTTGGACTTAAGAAGGAACAATTTACAGGG

AGTCTTCCACCATTATGTGCGCAGAGCACTTCATTGAGTACCATTTTCTTG

>M6-PGSC0003DMG400011792M6RLKWAX-EGF\_0

TTTGTTAAATTATTTGATTTGTTAGATAAGTTTTGAAAATTGAGTTTATTGAAAAGAAAATATTTTTTAA

AATGCAAAGGGTATAGTTGGGTCTATTGTCAAGTTTAACTTGAATTCC

>M6-PGSC0003DMG400011792M6RLKWAX-EGF\_1054

GTATCAGATATTAATGAATGTGCTCATTCAAGTACCAATATGTGTGAACACAATTGCATAGACACGCCAG

GGAGTTACACTTGTACTTGTCTAGAAGGATTCAGTGGTGATGGCAGAAAG

>M6-PGSC0003DMG400011792M6RLKWAX-EGF\_1116



CACGCCAGGGAGTTACACTTGTACTTGTCTAGAAAGGATTCAGTGGTGATGGCAGAAAGGATGATGGTG  
GTTGTATTGCACCAAATTTGAACTATGAGTTCCCATGGATCAAGTTTTCTAT

>M6-PGSC0003DMG400011792M6RLKWAX-EGF\_1178

ATGGTGGTTGTATTGCACCAAATTTGAACTATGAGTTCCCATGGATCAAGTTTTCTATTGGTATGTTTCTC  
AAAAATTGAACTTAGCTTGTTTATTGAAGGAATTCATCTCCTTTAAATT

>M6-PGSC0003DMG400011792M6RLKWAX-EGF\_124

ATGACAATTATTTTTAGCATACTCCCTCCGTCTAATAGTATTCTTGTTTCAGCATGCTCTTTAAGAAATTA  
CTCACCTCTATAAAGTAAGAAATGTTTTCACTAAATTACCGTTAGTTT

>M6-PGSC0003DMG400011792M6RLKWAX-EGF\_1240

ATGTTTCTCAAAAATTGAACTTAGCTTGTTTATTGAAGGAATTCATCTCCTTTAAATTTTTGTTGTTATAAA  
CACAGGTATGGGAGTCGGCTTTATATCCCTCGTGGTTGGGACAATTTT

>M6-PGSC0003DMG400011792M6RLKWAX-EGF\_1302

TTGTTATAAACACAGGTATGGGAGTCGGCTTTATATCCCTCGTGGTTGGGACAATTTTGCTCTATTTTTGT  
ATCAAGAAACGAAAACCTCATTAAAAATAGGGAAAAGTTCTTCCAACAAA

>M6-PGSC0003DMG400011792M6RLKWAX-EGF\_1364

TATTTTTGTATCAAGAAACGAAAACCTCATTAAAAATAGGGAAAAGTTCTTCCAACAAAATGGTGGTTTAC  
TCTTGAAACAACAAATCTCTTCTATAAAGGGTGGTGTGGAAGCAACCCAAA

>M6-PGSC0003DMG400011792M6RLKWAX-EGF\_1426

TGGTTTACTCTTGAAACAACAAATCTCTTCTATAAAGGGTGGTGTGGAAGCAACCCAAAATTTTACAGCT  
GACGAGTTGAAGAAGGCTACGAATAACTATGCCAGTGATAGAATTCTTGG

>M6-PGSC0003DMG400011792M6RLKWAX-EGF\_1488

TTACAGCTGACGAGTTGAAGAAGGCTACGAATAACTATGCCAGTGATAGAATTCTTGGTCGTGGTGGAA  
ATGGAATTGTCTATAAAGGTATTCTACCTGATAATCGCATAGTTGCAATTA

>M6-PGSC0003DMG400011792M6RLKWAX-EGF\_1550

GGTGGAAATGGAATTGTCTATAAAGGTATTCTACCTGATAATCGCATAGTTGCAATTAATAAATCTAAGT  
TTGTGGATGAGAATCAAGTTGAACAGTTCATCAATGAGGTACTTATTCTT

>M6-PGSC0003DMG400011792M6RLKWAX-EGF\_1612

ATCTAAGTTTGTGGATGAGAATCAAGTTGAACAGTTCATCAATGAGGTACTTATTCTTACTCAAGTTAAC  
CATAGAAATGTAGTGAGACTCTTCGGGTGTTGTTTGGGAAGATGAAGTGCC

>M6-PGSC0003DMG400011792M6RLKWAX-EGF\_1674

AAGTTAACCATAGAAATGTAGTGAGACTCTTCGGGTGTTGTTTGGAAAGATGAAGTGCCTTTACTGGTTTA  
TGAATACGTTTCTCATGGAACCTTTACGAGCATATCCACAACCAAAATG

>M6-PGSC0003DMG400011792M6RLKWAX-EGF\_1736

CTGGTTTATGAATACGTTTCTCATGGAACCTTTACGAGCATATCCACAACCAAAATGGAGTCCCATGGT  
TATCTTTGCAAAATCGATTGAGAATTGCTTCAGAGACAGCAAGTTCACCTT

>M6-PGSC0003DMG400011792M6RLKWAX-EGF\_1798

CCCATGGTTATCTTTGCAAAATCGATTGAGAATTGCTTCAGAGACAGCAAGTTCACCTTGCTTACCTTCATT  
CATCTGCATCCATGCCAATAATTCATAGAGACGTCAAATCCACTAATAT

>M6-PGSC0003DMG400011792M6RLKWAX-EGF\_186

TAAGAAATTACTCACCTCTATAAAGTAAGAAATGTTTTCACTAAATTACCGTTAGTTTAATATTAGTATCA  
ATTTAATATAGTTTTTTGGTTATGTAAAAGTTCATTGATCTAATAAAGA

>M6-PGSC0003DMG400011792M6RLKWAX-EGF\_1860

ACCTTCATTCATCTGCATCCATGCCAATAATTCATAGAGACGTCAAATCCACTAATATATTATTGGATGAT  
GTTTATACAGCAAAAGTGGCGGATTTTGGAGCTTCAAGATTAGTCCCTC

>M6-PGSC0003DMG400011792M6RLKWAX-EGF\_1922

TTGGATGATGTTTATACAGCAAAAGTGGCGGATTTTGGAGCTTCAAGATTAGTCCCTCTTGACCAAACAC  
ATGTTGCTACATTGGTTCAAGGAACATTAGGGTACTTAGATCCTGAATAT

>M6-PGSC0003DMG400011792M6RLKWAX-EGF\_1984

CCAAACACATGTTGCTACATTGGTTCAAGGAACATTAGGGTACTTAGATCCTGAATATTTCCACACAGGT  
GAATTGACAAATAAAAGTGACGTTTATAGTTTTGGAGTAGTTCTTGCCGA

>M6-PGSC0003DMG400011792M6RLKWAX-EGF\_2046

ACACAGGTGAATTGACAAATAAAAGTGACGTTTATAGTTTTGGAGTAGTTCTTGCCGAACCTTTAACAGG  
GATGACACCTATTTTTAGGGATACAAGTGACAAGTACAAATGTTTGGTGG

>M6-PGSC0003DMG400011792M6RLKWAX-EGF\_2108

TTAACAGGGATGACACCTATTTTTAGGGATACAAGTGACAAGTACAAATGTTTGGTGGAGCATTATCT  
CGTCGATGAACAAGAATAACATATTTGAAATCCTTGATTATAGAGTTGTA

>M6-PGSC0003DMG400011792M6RLKWAX-EGF\_2170

TTTTATCTCGTCGATGAACAAGAATAACATATTTGAAATCCTTGATTATAGAGTTGTAAGAGAAGGAGGT

GTTGAGCAACTTCAAAGATAGCTGAGCTCATTAAGGGTTCCTTCAGTT

>M6-PGSC0003DMG400011792M6RLKWAX-EGF\_2294

GGGGAAGATAGGCCTATGATGAAGGAAGTGGCTATGGAACCTTGAGAGTTTAAGAAAGTTCAGCTAGCCC

ATGGACTAATGAACACGGACATGAAGATCATAATGAAGTTGAATTAAGAT

>M6-PGSC0003DMG400011792M6RLKWAX-EGF\_2356

TAGCCCATGGACTAATGAACACGGACATGAAGATCATAATGAAGTTGAATTAAGATCGGTATATAAT

TCCAATTGATTCTAATACAGGTATCGACAACCTTCTCTGGACAATATCCCGG

>M6-PGSC0003DMG400011792M6RLKWAX-EGF\_2418

ATATAATTCCAATTGATTCTAATACAGGTATCGACAACCTTCTCTGGACAATATCCCGGCTCCTACACAAAT

AACAACATCTTTTCTGGACAATATAGTTCGGATAAATCTTCATTACTAC

>M6-PGSC0003DMG400011792M6RLKWAX-EGF\_248

TTAGTATCAATTTAATATAGTTTTTTGGTTATGTAAAAGTTCATTGATCTAATAAAGATAAATTTGAAAAG

AAAAAATGATAATTTTTCTTATTTATGGAATTATATACTTTGGATT

>M6-PGSC0003DMG400011792M6RLKWAX-EGF\_2480

TACACAAATAACAACATCTTTTCTGGACAATATAGTTCGGATAAATCTTCATTACTACCCAATAGAAATAT

CCCGCGGTGATCCAAAATAAAATATTAATATGATAATTAGTGACAATAT

>M6-PGSC0003DMG400011792M6RLKWAX-EGF\_2542

TAGAAATATCCCGCGGTGATCCAAAATAAAATATTAATATGATAATTAGTGACAATATAATTTTTCTGTGTT

TTGTAAGTTTCTTTTCTGGCTATCTTTCTTTCATATTCAATGTATGTTG

>M6-PGSC0003DMG400011792M6RLKWAX-EGF\_2588

TAGTGACAATATAATTTTTCTGTGTTTTGTAAGTTTCTTTTCTGGCTATCTTTCTTTCATATTCAATGTATGTT

GTTATGTATTTTACTTGCTTTTGAATTAATCATCAATATATTGTTT

>M6-PGSC0003DMG400011792M6RLKWAX-EGF\_310

TTTGAAAAGAAAAAATGATAATTTTTCTTATTTATGGAATTATATACTTTGGATTGAATGTAAAGCTA

TAAACACTGTATAATTGAATGTAAAGCTAAAAACACTACTCCCTCTGTC

>M6-PGSC0003DMG400011792M6RLKWAX-EGF\_62

ATTTTTTAAATGCAAAGGGTATAGTTGGGTCTATTGTCAAGTTTAACCTTGAATTCCTAAAATGACAATT

ATTTTTAGCATACTCCCTCCGTCTAATAGTATTCTTGGTTTCAGCATGC

>M6-PGSC0003DMG400011792M6RLKWAX-EGF\_682

ACATGAAAGTTCATCTTAGATCATTTTTCAAAGAGCTCTAACTTTGATTAGGCAAAGAAACAACTTCAG  
TGAAAAACATGTTTCTCTCAGTGAGTTCACCCCAATTAGCTAACTTGTTA

>M6-PGSC0003DMG400011792M6RLKWAX-EGF\_744

AACTTCAGTGAAAAACATGTTTCTCTCAGTGAGTTCACCCCAATTAGCTAACTTGTTAGCCATCATATTGC  
CTTCCTTAAGGCAATGTTGGAATAATTTTCACCACTTGCCCAGAGGGAT

>M6-PGSC0003DMG400011792M6RLKWAX-EGF\_806

TCATATTGCCTTCCTTAAGGCAATGTTGGAATAATTTTCACCACTTGCCCAGAGGGATTGAGTTCCTTGTT  
GATCATGTTGATGATGATTTGAGAATCAGATTCAATAATGACTTGATGG

>M6-PGSC0003DMG400011792M6RLKWAX-EGF\_868

TTCCTTGTTGATCATGTTGATGATGATTTGAGAATCAGATTCAATAATGACTTGATGGAAGTTATTGTACA  
AGCACCATGACATCCGTTATTGTTCTGAGATAATGATCATTAACTAGAT

>M6-PGSC0003DMG400011792M6RLKWAX-EGF\_930

TATTGTACAAGCACCATGACATCCGTTATTGTTCTGAGATAATGATCATTAACTAGATTAGCTAGTGAAC  
CTATATAAAGGCAAAGCGCGAGGGATTAACGTGGTATATTTCTCTGTTTT

>M6-PGSC0003DMG400011792M6RLKWAX-EGF\_992

TAGTGAACCTATATAAAGGCAAAGCGCGAGGGATTAACGTGGTATATTTCTCTGTTTTGCATGTATCAGA  
TATTAATGAATGTGCTCATTCAAGTACCAATATGTGTGAACACAATTGCA

>M6-PGSC0003DMG400011793M6RLKWAX-EGF\_1054

TTTGTTGGTAAAAATTGAAGGGAAAGTAAATTTTAAAAAAGATTATCTAAGTTTAAGGCTGATGTGGT  
GTTTTTTTAACTATCACTCATCTAAAAGAATTGAGATCACTTGCTATGAT

>M6-PGSC0003DMG400011793M6RLKWAX-EGF\_1116

ATGTGGTGTTTTTTTAACTATCACTCATCTAAAAGAATTGAGATCACTTGCTATGATATGTGGCAAGCG  
AGGGGTGTTTTAAATTCAGTTAGTCAAGTAGAAAAATGTTTTAAGAAT

>M6-PGSC0003DMG400011793M6RLKWAX-EGF\_124

ATATTTACTTTGGATTGAATGTAAAGCTAAAAATACTATATAATTGAATGTAAAGCTAAAAACACTACAT  
AATTGAATGTAAAGCTAAAAATACTATTCCTCACTCCCAGTTTATATCG

>M6-PGSC0003DMG400011793M6RLKWAX-EGF\_1240

ATAGTTTATGGACAAAATTAATAATTCTCGCTAAGTTTGAAGGTGTTTTCAATACTTCTCTTCTTCAAAG  
GACTAACTTTAGTGAAGAACATGTTTCTCCAGTGAGTTCACCCCAATT

>M6-PGSC0003DMG400011793M6RLKWAX-EGF\_1302

CTTCAAAGGACTAACTTTAGTGAAGAACATGTTTCTCCCAGTGAGTTCACCCCAATTAGCTAACTTGCA  
ACCACCATATTTCTTCTTTATGGCGATGTAGGAATATATAGTTCCAC

>M6-PGSC0003DMG400011793M6RLKWAX-EGF\_1364

AACTTGCAACCACCATATTTCTTCTTTATGGCGATGTAGGAATATATAGTTCCACTAGAAGTGAAGTT  
CCATGTTGGTAGAAGAATTTTCATCACTTGCCAAAAGGGGTTGAGTTCC

>M6-PGSC0003DMG400011793M6RLKWAX-EGF\_186

CACTACATAATTGAATGTAAAGCTAAAAATACTATCCCTCACTCCCAGTTTATATCGCTTGATCTTCTTGC  
TTTTACTACTAGCTGGAAAGTGATCCTTCTTTTTTGTTTAATAGTAA

>M6-PGSC0003DMG400011793M6RLKWAX-EGF\_248

ATCTTCTTGCTTTTACTACTAGCTGGAAAGTGATCCTTCTTTTTTGTTTAATAGTAAAAACAAATGCTTT  
AATAGGTAGGGTCACAATAATTGGTAGGAATCAAATTGTGATAAACA

>M6-PGSC0003DMG400011793M6RLKWAX-EGF\_2852

ATCCTGGGATAAGTTTTAGTACCCTTCAAATCTTAGCTCTATCCAAGATCGATTTATATGCCAATAAACAA  
TATACATAAATTCTAGTACTTAAAACTTTTGGTAATAATGTCAACTAGT

>M6-PGSC0003DMG400011793M6RLKWAX-EGF\_2914

AATAACAATATACATAAATTCTAGTACTTAAAACTTTTGGTAATAATGTCAACTAGTGAGTTAAAAC TG  
AGAAATATTGCTACTGATGATTCATATGACCGATCGTGATTCGTAAGTCT

>M6-PGSC0003DMG400011793M6RLKWAX-EGF\_2976

TAAAAC TGAGAAATATTGCTACTGATGATTCATATGACCGATCGTGATTCGTAAGTCTAATGATTTAGTA  
GTTATAATGCTTAATTAATACTCTTTGCTAGTTTCCATTAACAACCTTCT

>M6-PGSC0003DMG400011793M6RLKWAX-EGF\_3038

ATTTAGTAGTTATAATGCTTAATTAATACTCTTTGCTAGTTTCCATTAACAACCTTCTACAAATAAATATGT  
TAAAAGAAAAGATATAAAGGCAACGCGAGGGATTAATGTGGTATAT

>M6-PGSC0003DMG400011793M6RLKWAX-EGF\_310

CAAATGCTTTAATAGGTAGGGTCACAATAATTGGTAGGAATCAAATTGTGATAAACATCATTGGGACA  
CTAATCACTAGAAATTAACCTCAATAGTGCGTAGTGCTTTATTTGCCTTATT

>M6-PGSC0003DMG400011793M6RLKWAX-EGF\_3100

ATAAATATGTTAAAAGAAAAGATATAAAGGCAACGCGAGGGATTAATGTGGTATATTTCTCTGTTTT

GCATGTCAGATATTGATGAATGTGCTGATTCAAGTTCCAATATGTGTGAAC

>M6-PGSC0003DMG400011793M6RLKWAX-EGF\_3162

CTGTTTTGCATGTCAGATATTGATGAATGTGCTGATTCAAGTTCCAATATGTGTGAACACAATTGCATAA

ACACGCCCGGAAATTTCACTTGTTCTGCTTAAAAGGCTACACTGGCGAT

>M6-PGSC0003DMG400011793M6RLKWAX-EGF\_3224

TTGCATAAACACGCCCGGAAATTTCACTTGTTCTGCTTAAAAGGCTACACTGGCGATGGTAAAAGAAT

GGTCGTGGTTGTATTGCACCAAACCTCGAACTATGAGTTCCCATGGATCAA

>M6-PGSC0003DMG400011793M6RLKWAX-EGF\_3286

AAAAGAATGGTCGTGGTTGTATTGCACCAAACCTCGAACTATGAGTTCCCATGGATCAAGTTTTCTGTTGG

TAAGTTTCTCAGAAATTCACTTGTTTCTACTTGCATTCTTCTCCCTAG

>M6-PGSC0003DMG400011793M6RLKWAX-EGF\_372

TGGGACACTAATCACTAGAAATTAACCTCAATAGTGCGTAGTGCTTTATTTGCCTTATTGGAGCATGGAGC

CTAACACTCGAGGTGAAGTTGACTCATCACCTAACAGGTGGATCGAGTT

>M6-PGSC0003DMG400011793M6RLKWAX-EGF\_434

CATGGAGCCTAACACTCGAGGTGAAGTTGACTCATCACCTAACAGGTGGATCGAGTTAGATATGGATT

GATCGAAAATAAATCAGATGAAAATAAATAAATATTTGACTCAATCTATA

>M6-PGSC0003DMG400011793M6RLKWAX-EGF\_496

ATGGATTGATCGAAAATAAATCAGATGAAAATAAATAAATATTTGACTCAATCTATATTTAAGACAAGT

AAAAATGAATAAATCCAAAAGATAATATAGATATTCATATTATCCATAAA

>M6-PGSC0003DMG400011793M6RLKWAX-EGF\_558

AGACAAGTAAAAATGAATAAATCCAAAAGATAATATAGATATTCATATTATCCATAAATTATCTGACCAA

CCAAATTATTATTTTTCTTCTTTTAGGATGTGTTTGGTATGAAAAAAAT

>M6-PGSC0003DMG400011793M6RLKWAX-EGF\_62

TTGATCTAAATAAGGATAAATTTGAAAAGAAAAAATTAATATTTTCTTCACTATTTATGGAATATTTACT

TTGGATTGAATGTAAAGCTAAAAATACTATATAATTGAATGTAAAGCTA

>M6-PGSC0003DMG400011793M6RLKWAX-EGF\_620

CTGACCAACCAAATTATTATTTTTCTTCTTTTAGGATGTGTTTGGTATGAAAAAAATATTTTAACGTTTTTC

AGAGAAAATATTTATCTAATTAAGTAAAGTTTTGAAAAGAAATATTT

>M6-PGSC0003DMG400011793M6RLKWAX-EGF\_682

TAACGTTTTTCAGAGAAAATATTTATCTAATTAAGTAAAGTTTTGAAAAGAAAATATTTTTTTATGAGGAA  
ATAATTTTTCTTGAATTAGAGGAAAATAAGTCCAATTAATAATTTTTTTT

>M6-PGSC0003DMG400011793M6RLKWAX-EGF\_744

ATGAGGAAATAATTTTTCTTGAATTAGAGGAAAATAAGTCCAATTAATAATTTTTTTTCAAATATTTA  
AATCAACTGGCAACTATTTTTAAAAACATTTTTCTTCACACCAAACAC

>M6-PGSC0003DMG400011793M6RLKWAX-EGF\_806

AAATATTTAAATCAACTGGCAACTATTTTTAAAAACATTTTTCTTCACACCAAACACATCCTTAATAAGTT  
ACTTTTTTATAGGATGTTACACCCTTACGTACTTTAAGGGGAGTGCA

>M6-PGSC0003DMG400011793M6RLKWAX-EGF\_868

TTAATAAGTTACTTTTTTATAGGATGTTACACCCTTACGTACTTTAAGGGGAGTGCAATTGATAGATACT  
CATAATTTATTCATATTTTACGTGGATAGTATGTTGATCCATATTTGAC

>M6-PGSC0003DMG400011793M6RLKWAX-EGF\_930

ATAGATACTCATAATTTATTCATATTTTACGTGGATAGTATGTTGATCCATATTTGACAAATTTTTAAATGA  
TTAAATAACCAACCCATTTAAATGAAAGAAGAAAGTTGACGTTAAAG

>M6-PGSC0003DMG400011793M6RLKWAX-EGF\_992

TTTTAAATGATTAATAACCAACCCATTTAAATGAAAGAAGAAAGTTGACGTTAAAGATTATTTGTTGG  
TAAAAATTGAAGGGAAAGTAAATTTAAAAAAGATTATCTAAGTTTAAG

>M6-PGSC0003DMG400011864M6LRR-RLP\_0

AATAATCGCTAGATGTGTTGTGTGATTCATTTTGAAGTACTGCTATTTGATTTCTCTTTGTCATACTCTGCCA  
AGCTTGTGGCCAATTGATGGCTTATCAGATTATAGTCTTTCATGAAT

>M6-PGSC0003DMG400011864M6LRR-RLP\_1037

CTTCAGATGAATAATTGAATGTTCTCTTATCATACTCATGCTGGAATACTCTAAGTTAGTGGAGGTTTTAT  
GCTATAGAACATCTATCCATATTCTCTTGATATCTGTGCACCACTCAAG

>M6-PGSC0003DMG400011864M6LRR-RLP\_1098

GAGGTTTTATGCTATAGAACATCTATCCATATTCTCTTGATATCTGTGCACCACTCAAGGATAGCATGACC  
AAAAAATTGTGTTTTAAGCACCTTGGTGCTTTGTCTGATGTCCAGGT

>M6-PGSC0003DMG400011864M6LRR-RLP\_1159

TAGCATGACCAAAAAAATTGTGTTTTAAGCACCTTGGTGCTTTGTCTGATGTCCAGGTCTCAATTACATT  
TCATGACCATCACAACATGCTCCTTTGTCATTGTATAATATGGGAAAG

>M6-PGSC0003DMG400011864M6LRR-RLP\_122

TTGCTTGTGTCATGAACTCAGTTTATTGAATTGTGATGTATCATGAATGCTAAATATGCACTGTATGTTAT  
AGAACAAATGTAGCTTGGTGATGATAATTTATGCGGCTTTGGAAGTGTT

>M6-PGSC0003DMG400011864M6LRR-RLP\_1220

CAATTACATTTTCATGACCATCACAACATGCTCCTTTTGTATTGTATAATATGGGAAAGTTCTTGTTTCATGT  
GATTCGAAGTCCTTTCTTGACTTATGAAGTTACCACGACTTGGATATG

>M6-PGSC0003DMG400011864M6LRR-RLP\_1281

CTTGTTTCATGTGATTCGAAGTCCTTTCTTGACTTATGAAGTTACCACGACTTGGATATGAGCTTAAATAGA  
GGGACATAGACAATGAAAATTCATATAGCTGGCCCCAACTGGCTTGAGA

>M6-PGSC0003DMG400011864M6LRR-RLP\_1342

CTTAAATAGAGGGACATAGACAATGAAAATTCATATAGCTGGCCCCAACTGGCTTGAGATTAAGGTGTG  
GTAGTAGTTGTTGGTGCTGTAGTTTCCCACTGCTTTGGTACAGAACTTAAA

>M6-PGSC0003DMG400011864M6LRR-RLP\_1403

AAGGTGTGGTAGTAGTTGTTGGTGCTGTAGTTTCCCACTGCTTTGGTACAGAACTTAAATTCAGATGTA  
CCAAGTTTCCAGTGACTGACTGTATTTATGAAGTTGTTACATGTAATCTG

>M6-PGSC0003DMG400011864M6LRR-RLP\_1464

CCAGATGTACCAAGTTTCCAGTGACTGACTGTATTTATGAAGTTGTTACATGTAATCTGTTTCTGTGTTCT  
GTTATTACATTCCATCTCTTTTTCTTTCTCCGTTTTTGTTTTGTTTTGT

>M6-PGSC0003DMG400011864M6LRR-RLP\_1525

TCTGTGTTCTGTTATTACATTCCATCTCTTTTTCTTTCTCCGTTTTTGTTTTGTTTTGTCTAGGGTTTCTTTAT  
CGATCATAACAATAATGTGTTGATCTTCTTATTAACAGATCACTAA

>M6-PGSC0003DMG400011864M6LRR-RLP\_1586

AGGGTTTCTTTATCGATCATAACAATAATGTGTTGATCTTCTTATTAACAGATCACTAATGAATGCTTATC  
ATCGATCTCGAACTGCAATATCTTGAAGATTTGGTTCTAGAAGGCTGT

>M6-PGSC0003DMG400011864M6LRR-RLP\_1647

AATGCTTATCATCGATCTCGAACTGCAATATCTTGAAGATTTGGTTCTAGAAGGCTGTTATGGAATTGA  
TGATTACAGCCTTGCATCCCTTGAGCAAGGCTGCAAGTCACTGGAGGTAT

>M6-PGSC0003DMG400011864M6LRR-RLP\_1708

TGGAATTGATGATTACAGCCTTGCATCCCTTGAGCAAGGCTGCAAGTCACTGGAGGTATGTACTTTGGA



GGACTCTGTTAACAGACTTTGATTCTCATATTTGCCTGATTGCCTCTCCT

>M6-PGSC0003DMG400011864M6LRR-RLP\_1769

ACTTTGGAGGACTCTGTTAACAGACTTTGATTCTCATATTTGCCTGATTGCCTCTCCTTGAGATAAAATG

AACAATAAAAAATGAAGCTAGTATTGATGTATGAAATTGCCAAAAGCTC

>M6-PGSC0003DMG400011864M6LRR-RLP\_183

TGTATGTTATAGAACAAATGTAGCTTGGTGATGATAATTTATGCGGCTTTGGAAGTGTTAACCAATGATT

TAGAAGGTAATGTGCAGATTAAGCTGGCCAAGAAAGTATCATTATAAATA

>M6-PGSC0003DMG400011864M6LRR-RLP\_1830

AGATAAAATGAACAATAAAAAATGAAGCTAGTATTGATGTATGAAATTGCCAAAAGCTCCCAGGACGTA

GCTCAATTGGCGAAGGTTGATAAACTTGTGACCTAGGTCATTAGTTTCGATC

>M6-PGSC0003DMG400011864M6LRR-RLP\_1891

AGGACGTAGCTCAATTGGCGAAGGTTGATAAACTTGTGACCTAGGTCATTAGTTTCGATCCCCATGTCAA

GCGAATCTGATATTTAAGTGGCGAAGGGAGAAGTGAGCCCATCATCCCCGA

>M6-PGSC0003DMG400011864M6LRR-RLP\_2013

TTCGAAGGCTGCGGTTGGTCCTAAGGTTGGCTCCTAATGGATTGCCCAAACCTTTGTCAAATTGTCCTA

GCTTCAAGCACTACTTTTAGATGTACATATATATGACTTTTTTTCCCTAA

>M6-PGSC0003DMG400011864M6LRR-RLP\_2074

ATTGTCCTAGCTTCAAGCACTACTTTTAGATGTACATATATATGACTTTTTTTCCCTAATTGCCTAGTCAAT

AATTGGAGACCTACTGTGTGAATGCCACTATAAGTACTCTGAAATAGT

>M6-PGSC0003DMG400011864M6LRR-RLP\_2135

GCCTAGTCAATAATTGGAGACCTACTGTGTGAATGCCACTATAAGTACTCTGAAATAGTTAAAGAACAA

GGTAACTCAGATTTTTTTTTTTGATAACCGAGAAATCCGTTTGTGACCCGC

>M6-PGSC0003DMG400011864M6LRR-RLP\_244

CCAATGATTTAGAAGGTAATGTGCAGATTAAGCTGGCCAAGAAAGTATCATTATAAATAAAATGCTAAG

CCGTTTAGGAATTTCTCACTGATATCTTAACGAAGTCTATGAGAATTGTGA

>M6-PGSC0003DMG400011864M6LRR-RLP\_2440

ACCCAGAATTCTACCTAATTGTCAGATGCCCCAAAGAAGTGGACTATTGTGCAAGTCAAGTGTTGCCTTG

CATGTATCATGCCTTTTGGTCCTTTTTTTCCTCTTAAATAACTTTTTTCT

>M6-PGSC0003DMG400011864M6LRR-RLP\_2501

GTTGCCTTGCATGTATCATGCCTTTTGGTCCTTTTTTCTCTTAAATAACTTTTTTCTTTACAAGGTA  
TACTAT  
TGACTAATGTCAGTGTATGTATGTTGGCTCTTTTCAGAACTTGATA

>M6-PGSC0003DMG400011864M6LRR-RLP\_2562

ACAAGGTA  
TACTATTGACTAATGTCAGTGTATGTATGTTGGCTCTTTTCAGAACTTGATATGTCGAGCTGT  
CAGAATGTTAGTCATGTGGGTTTGCATCTCTTACCAGCTGTGCTGGATG

>M6-PGSC0003DMG400011864M6LRR-RLP\_2623

T  
CGAGCTGTCAGAATGTTAGTCATGTGGGTTTGCATCTCTTACCAGCTGTGCTGGATGTCTGCGGCAAC  
TTGTATTGTCGATGGTTCTCCCGTAAGCCTTAACAACTTGAGCATCTT

>M6-PGSC0003DMG400011864M6LRR-RLP\_2684

T  
GCGGCAACTTGTATTGTCGATGGTTCTCCCGTAAGCCTTAACAACTTGAGCATCTTTCAGTAGTATGA  
GTTTTAATTTGATTGTTGATTTCAAATTACTGGTATTTACAGTTACACC

>M6-PGSC0003DMG400011864M6LRR-RLP\_2745

A  
GTAGTATGAGTTTTAATTTGATTGTTGATTTCAAATTACTGGTATTTACAGTTACACCTGCTGTGCAG  
TAGCTTGCAGAAGCTTTCCAGGTTGCAGTGCCTCAAAGTATGGTTGC

>M6-PGSC0003DMG400011864M6LRR-RLP\_2806

C  
TGTCGCAGATAGCTTGCAGAAGCTTTCCAGGTTGCAGTGCCTCAAAGTATGGTTGCCAAGTTACAT  
GTTCTGGACTGAAGGCTATTGGAAATTGGTGTGTCTCACTTAAAGAACTGA

>M6-PGSC0003DMG400011864M6LRR-RLP\_2867

A  
GTTACATGTTCTGGACTGAAGGCTATTGGAAATTGGTGTGTCTCACTTAAAGAACTGAGCTTAAGTAAA  
TGTGTGGGAGTGACAGATGAAGGTCTCTGCTCCCTCGTAACAAAGCACAA

>M6-PGSC0003DMG400011864M6LRR-RLP\_2928

T  
TAAGTAAATGTGTGGGAGTGACAGATGAAGGTCTCTGCTCCCTCGTAACAAAGCACAAAGACTTGGGG  
AAGCTTGACACTTGTGTTGCCGCAAGATTACTTACGTATCAATTTCCCAT

>M6-PGSC0003DMG400011864M6LRR-RLP\_2989

A  
CTTGGGGAAGCTTGACACTTGTGTTGCCGCAAGATTACTTACGTATCAATTTCCCATATAACGAATTCT  
TGTGCCTCCCTTACTTCTCTTAGGATGGAGTCTTGTACTCTAGTTCCAA

>M6-PGSC0003DMG400011864M6LRR-RLP\_305

A  
TGCTAAGCCGTTTAGGAATTTCTCACTGATATCTTAACGAAGTCTATGAGAATTGTGACATCCATGACA  
GAGGGCACACCAACAAGGGTGGGTCAAGTAATGGCAGGCATTTAGCTTGG

>M6-PGSC0003DMG400011864M6LRR-RLP\_3050

AACGAATTCTTGTGCCTCCCTTACTTCTCTTAGGATGGAGTCTTGTACTCTAGTTCCAAGAGAAGCTTTTG  
TTCTAATTGGACAGCGTTGCCAGTACCTTGAAGAGCTTGACCTTACAGA

>M6-PGSC0003DMG400011864M6LRR-RLP\_3111

GAAGCTTTTGTCTAATTGGACAGCGTTGCCAGTACCTTGAAGAGCTTGACCTTACAGACAACGAAATTG  
ATGATGAAGGTCACCCCTTACCTTAAAGGTCTCAGGCTTCTGTTGTAAT

>M6-PGSC0003DMG400011864M6LRR-RLP\_3172

ACGAAATTGATGATGAAGGTCACCCCTTACCTTAAAGGTCTCAGGCTTCTGTTGTAATTTTGAAAGTTCC  
ACCTTTATATCTGACGGTGTCTACATATGCAGGCTTGACAGACCATTTC

>M6-PGSC0003DMG400011864M6LRR-RLP\_3233

TGAAAGTTCCACCTTTATATCTGACGGTGTCTACATATGCAGGCTTGACAGACCATTCCAAGTGTGCCA  
GCCTTTCCAGCTTAAAGCTAGGGATCTGTCTGAACATAACCGATCAGGGT

>M6-PGSC0003DMG400011864M6LRR-RLP\_3294

AGTGTGCCAGCCTTCCAGCTTAAAGCTAGGGATCTGTCTGAACATAACCGATCAGGGTCTTATCCACAT  
TGGCATGTGCTGCTCAAATCTTAAGGAGCTTGACTTATATAGGTATGTAT

>M6-PGSC0003DMG400011864M6LRR-RLP\_3355

TATCCACATTGGCATGTGCTGCTCAAATCTTAAGGAGCTTGACTTATATAGGTATGTATTTTCATAGTTTCAT  
ATTAATTGAGATAGTGTAACATATATCTTGTGCAGTTTTTTTTTTTATA

>M6-PGSC0003DMG400011864M6LRR-RLP\_3416

CATAGTTCATATTAATTGAGATAGTGTAACATATATCTTGTGCAGTTTTTTTTTTTATATTCTTTTCTTTTG  
TGATGGATTGGCTAAACTCACTTTTAACTATGGAGTACAAGAGATT

>M6-PGSC0003DMG400011864M6LRR-RLP\_3477

CTTTTCTTTTGTGATGGATTGGCTAAACTCACTTTTAACTATGGAGTACAAGAGATTGAGTGTGCTGAT  
TACTGGGTTATTCTTCTTGACAGGCTGCTGGAATTTCCGACTTGGGAA

>M6-PGSC0003DMG400011864M6LRR-RLP\_3538

GTGTGCTGATTACTGGGTTATTCTTCTTGACAGGCTGCTGGAATTTCCGACTTGGGAATATTAGCAATC  
TCTCGCGGTTGTAGTGGCCTTCAAATGATCAATATTGCCTATTGCAATCG

>M6-PGSC0003DMG400011864M6LRR-RLP\_3599

TTAGCAATCTCTCGCGGTTGTAGTGGCCTTCAAATGATCAATATTGCCTATTGCAATCGTATTACTGATG

GCTCATT CATATCTATATCAAAGTGTTCAAAGTTGAATACACTTGAAAGT

>M6-PGSC0003DMG400011864M6LRR-RLP\_366

TCCATGACAGAGGGGCACACCAACAAGGGTGGGTCAAGTAATGGCAGGCATTTAGCTTGGCAAGCTTCC  
GAAGAAGGGGTGCACATGACACCTTAAGGGAATTCACATCAGAATGGGAAAG

>M6-PGSC0003DMG400011864M6LRR-RLP\_3660

TTACTGATGGCTCATT CATATCTATATCAAAGTGTTCAAAGTTGAATACACTTGAAAGTCGAGGTTGTCCT  
CTTGTCACATCTTTAGGTCTTGCAGCTGTTGCTGTGGGATGTAAGCAGC

>M6-PGSC0003DMG400011864M6LRR-RLP\_3721

AGGTTGTCCTCTTGTACATCTTTAGGTCTTGCAGCTGTTGCTGTGGGATGTAAGCAGCTTACAACACTA  
GACATCAAAAATTGCCACAACATTGATGATGCCGGAATGATTCCACTTGC

>M6-PGSC0003DMG400011864M6LRR-RLP\_3782

ACAACACTAGACATCAAAAATTGCCACAACATTGATGATGCCGGAATGATTCCACTTGCTCACTTCTCGA  
CAAACCTCAAACAGGTAACCACAGTTTCTCTTTCGTCGACATAGACGAAC

>M6-PGSC0003DMG400011864M6LRR-RLP\_3843

ACTTCTCGACAAACCTCAAACAGGTAACCACAGTTTCTCTTTCGTCGACATAGACGAACTGGAGCATTGA  
CATCTAATATGAGCTGGCCATCTGTCAATTACACAGATAAATTTATCCTA

>M6-PGSC0003DMG400011864M6LRR-RLP\_3904

GAGCATTGACATCTAATATGAGCTGGCCATCTGTCAATTACACAGATAAATTTATCCTACACTTCAGTGA  
CGGATGTGGGGCTGCTGTCTCTTGCCAGCATCAGCGGTCTACAGAACATG

>M6-PGSC0003DMG400011864M6LRR-RLP\_3965

CTTCAGTGACGGATGTGGGGCTGCTGTCTCTTGCCAGCATCAGCGGTCTACAGAACATGACAATCCTGC  
ACCTCAAGGGTTTATCTCCTGGTGGGCTAGGAGCTGCACTGTTGGCTTGTG

>M6-PGSC0003DMG400011864M6LRR-RLP\_4026

AATCCTGCACCTCAAGGGTTTATCTCCTGGTGGGCTAGGAGCTGCACTGTTGGCTTGTGGCGGACTTACT  
AAAGTTAAGCTGCAGACATCATTTAAATCATTGCTACCACAAGCTCTCCT

>M6-PGSC0003DMG400011864M6LRR-RLP\_4087

GGACTTACTAAAGTTAAGCTGCAGACATCATTTAAATCATTGCTACCACAAGCTCTCCTTCAACATCTAGA  
ATCCCGGGGTTGTGTTTTTTCAGTGGAGAGAGAAACCATTTTCAGGTATCT

>M6-PGSC0003DMG400011864M6LRR-RLP\_4148

AACATCTAGAATCCCGGGTGTGTTTTTCAGTGGAGAGAGAAACCATTCAGGTATCTTCTCATTATTT  
ATCATTACCTACTTTTTCTCTGAAAATATGTGAGGTACTTCTATGGTTG

>M6-PGSC0003DMG400011864M6LRR-RLP\_4209

CTCATTATTTATCATTACCTACTTTTTCTCTGAAAATATGTGAGGTACTTCTATGGTTGTTGAAATATAACCG  
TCGTATGAATCAATTAGAATTACATATTTTAGCTAAACATGACATAGT

>M6-PGSC0003DMG400011864M6LRR-RLP\_427

AGCTTCCGAAGAAGGGGTGCACATGACACCTTAAGGGAATTCACATCAGAATGGGAAAGAAGAACTTC  
GTGAGAATATTTTGCACAAGATTATTTTCACTCTCTATCCTCCGTAAGGGA

>M6-PGSC0003DMG400011864M6LRR-RLP\_4270

GAAATATAACCGTCGTATGAATCAATTAGAATTACATATTTTAGCTAAACATGACATAGTTATTACTTGATC  
TTGAGGGTCAATGCAGTTTCAGAGGCTTTCTTGTTTGGCATTTAATTGA

>M6-PGSC0003DMG400011864M6LRR-RLP\_4331

TTACTTGATCTTGAGGGTCAATGCAGTTTCAGAGGCTTTCTTGTTTGGCATTTAATTGAGACAATAAAATT  
ACAGTTTTGATTATCTTTGTTGTAATAATGAAAATATCCTTTTTGCTTG

>M6-PGSC0003DMG400011864M6LRR-RLP\_4392

CAATAAAATTACAGTTTTGATTATCTTTGTTGTAATAATGAAAATATCCTTTTTGCTTGATCTAGTCATTAA  
TTATCTTTCTTTTATTGGTTAAACACAGGCTGAAGTAGATCCAATATA

>M6-PGSC0003DMG400011864M6LRR-RLP\_4453

CTAGTCATTAATTATCTTTCTTTTATTGGTTAAACACAGGCTGAAGTAGATCCAATATACTGGAAAATTCA  
GCTGGACAATTTAGACTGAAGATTTGAGCCCTCAGTTTGAGCCATTTAT

>M6-PGSC0003DMG400011864M6LRR-RLP\_4514

GGAAAATTCAGCTGGACAATTTAGACTGAAGATTTGAGCCCTCAGTTTGAGCCATTTATGCGAGTGTCTT  
AAGATGGATAGTCGCCCCAGAACCTCCGGAGTCCTTACTTCATCTGTTAG

>M6-PGSC0003DMG400011864M6LRR-RLP\_4575

GAGTGTCTTAAGATGGATAGTCGCCCCAGAACCTCCGGAGTCCTTACTTCATCTGTTAGCACTTCATCAG  
GCAAGGTGCATTGTTTATGGCAACTGTTTTGCCTGTTAAGTGTCTGCAAC

>M6-PGSC0003DMG400011864M6LRR-RLP\_4636

CTTCATCAGGCAAGGTGCATTGTTTATGGCAACTGTTTTGCCTGTTAAGTGTCTGCAACTTGTTGTTTGT  
ATCCTCTAAATACAAACAGGGAAACTCAATGTCCATTCAGCATTGCCCT

>M6-PGSC0003DMG400011864M6LRR-RLP\_4697

GTTTCGTTTGTATCCTCTAAATACAAACAGGGAACTCAATGTCCATTCAGCATTGCCCTGGCATCAAATC  
AATTTTGTCAAAAATGTTATGAGATGGATTAACAGATCCAAATCATGTT

>M6-PGSC0003DMG400011864M6LRR-RLP\_4758

CATCAAATCAATTTTGTCAAAAATGTTATGAGATGGATTAACAGATCCAAATCATGTTTATTGTTTAGCA  
ATCAATATCTGGGTTTGTGAATGTTTATTCCTCTTGACTAATGTGATTT

>M6-PGSC0003DMG400011864M6LRR-RLP\_4803

ATCCAAATCATGTTTATTGTTTAGCAATCAATATCTGGGTTTGTGAATGTTTATTCCTCTTGACTAATGTG  
ATTTTCGCATGAAGTTACTTGAAATTTACTCTCAATTAACAGTTATTTG

>M6-PGSC0003DMG400011864M6LRR-RLP\_488

GAACTTCGTGAGAATATTTTGCACAAGATTATTTTCACTCTCTATCCTCCGTAAGGGAGGAAAATTCAT  
GAGTTTGC GTTGTCTCAACAAGTGCTGACATGTCTTAGGTTCAAACACTAG

>M6-PGSC0003DMG400011864M6LRR-RLP\_61

ATACTCTGCCAAGCTTGTTTGCCAATTGATGGCTTATCAGATTATAGTCTTTCATGAATCTTTGCTTGTGTC  
ATGAACTCAGTTTATTGAATTGTGATGTATCATGAATGCTAAATATGC

>M6-PGSC0003DMG400011864M6LRR-RLP\_732

AAAAGCTAGTGCTGATGTGTCGTCGAACTCAATGATGATTTTTTTTTGAAATTGAACGGAAAATGACATTT  
CACAGAACATTAAATACTTAATATTATTAAACATTTGCTAAGATTCTTAC

>M6-PGSC0003DMG400011864M6LRR-RLP\_793

ATGACATTTACAGAACATTAAATACTTAATATTATTAAACATTTGCTAAGATTCTTACATTGTCTTAGTTA  
AATTTATCCCGTGTATTGTGCTTTCTCTACTTGGGAGATATACAAGTT

>M6-PGSC0003DMG400011864M6LRR-RLP\_854

TGTCTTAGTTAAATTTATCCCGTGTATTGTGCTTTCTCTACTTGGGAGATATACAAGTTCTGAAAAATGAG  
CCTGCTTATGCACTTGGCATGCTTCTGACCTTGAGTTTGTGAAAAGAA

>M6-PGSC0003DMG400011864M6LRR-RLP\_915

GAAAAATGAGCCTGCTTATGCACTTGGCATGCTTCTGACCTTGAGTTTGTGAAAAGAAAAGATATTGCA  
GAGTCCAGCTTTTGAATCCTAATGAACACCTCTGCTTGACATTCCGATGC

>M6-PGSC0003DMG400011864M6LRR-RLP\_976

GATATTGCAGAGTCCAGCTTTTGAATCCTAATGAACACCTCTGCTTGACATTCCGATGCATCTTCAGATGA

ATAATTGAATGTTCTCTTATCATACTCATGCTGGAATACTCTAAGTTAG

>M6-PGSC0003DMG400011900-(rev)M6LRR-RLP\_0

TTTTAGGGAATTTGGAGAAAGAGCTATCATCTTACATCCATTTTAGAGAAGGAGCTATCATCCATTTTC  
AGATATGTCGTGCACCATGAACATAAAATTCCTAAAGATCTTCAGAGAC

>M6-PGSC0003DMG400011900-(rev)M6LRR-RLP\_124

CATCAATTTGGCATATGAGGCTGAGGTAGCCATTGACTCTATTCTTGCTCAGTATAATGCTTTTTTGCATA  
TTTTTGTCACTTCTACAATTTTAAAAGAGATCATGCAAATTAATGC

>M6-PGSC0003DMG400011900-(rev)M6LRR-RLP\_1240

CTTGATGGATCTCATTAGCAGTAACGTGGTAATAATTTCAAAAAAAGTTATAATGGTAAAGTCAAATAA  
TGAAAGGTTCAAGATGTTGTGCATCACTTTTGTGGAAAAGAGTAGAGA

>M6-PGSC0003DMG400011900-(rev)M6LRR-RLP\_1302

TCAAATAATGAAAGGTTCAAGATGTTGTGCATCACTTTTGTGGAAAAGAGTAGAGAAGAAAAGTTTA  
TGCTTGCAAGTGAAGGGCCAATATATCCAGTTTCAACCCTTGATTGGAAGG

>M6-PGSC0003DMG400011900-(rev)M6LRR-RLP\_1488

AGAAGCCTTTCCACCAACACTTGAGGTCTCTAATAACGGCAAATGGTGGAGAATCTATTGATGTGATTCC  
CTTTTGTGAGATTAGTGAATTGCGACTTCTTAAAGTCTTGGATTTGATTT

>M6-PGSC0003DMG400011900-(rev)M6LRR-RLP\_1550

GTGATTCCCTTTTGTGAGATTAGTGAATTGCGACTTCTTAAAGTCTTGGATTTGATTTCTTATACTGTGGA  
GTTTTTGTGCTTAGCTATATTCAAACCACTAAATCAGCTGAAGTACCTC

>M6-PGSC0003DMG400011900-(rev)M6LRR-RLP\_1612

TACTGTGGAGTTTTTGTGCTTAGCTATATTCAAACCACTAAATCAGCTGAAGTACCTCGCAGTTTGGGCA  
GATAAATTCTATTTTGTGCTTAGCTATATTCAAACCACTAAATCAGCTGAAGTACCTCGCAGTTTGGGCA

>M6-PGSC0003DMG400011900-(rev)M6LRR-RLP\_1674

TTTGGGCAGATAAATTCTATTTTGTGCTTAGCTATATTCAAACCACTAAATCAGCTGAAGTACCTCGCAGTTTGGGCA  
TTCTCCTTACGTATGTTACCAGGGTCTTTTTTGTGCTTAGCTATATTCAAACCACTAAATCAGCTGAAGTACCTCGCAGTTTGGGCA

>M6-PGSC0003DMG400011900-(rev)M6LRR-RLP\_186

TTTTGCATATTTTTTGTGCTTAGCTATATTCAAACCACTAAATCAGCTGAAGTACCTCGCAGTTTGGGCA  
ATGTGGTCAGATGACATTCTTAAATCCTCACTACGTGGCTGCTCCAT

>M6-PGSC0003DMG400011900-(rev)M6LRR-RLP\_1922

AGGAGGTGTCCTAATCTTCAACAACCTTCATATCGAATTTGATGGACATTCTGCAGATTCTTTTTGTCTCAC  
ATTGGAGAATCTTACCCAGCTTCAAATACTTCGCGTTTCCTTTGAGCGG

>M6-PGSC0003DMG400011900-(rev)M6LRR-RLP\_310

ACATCTGCCAACTCGACATAGCAATCCTGTGACTGATGAGGAGGTAGTGGGTTTTGAGAATAAAGCAGA  
AGAACTAATTGCTTATCTGATTAGAGGTACAAATGAGCTAGACGTCGTCCC

>M6-PGSC0003DMG400011900-(rev)M6LRR-RLP\_496

TGTTTCTCGCTTTGATGTTGAGCATGGTGCATCATTTCTCAAACATATAATCGGAGAGAGCTATTACAA  
GATATTTTAGTCAAGTTACAGGTTCCAAAGATAAGGGAGATACGGTTGA

>M6-PGSC0003DMG400011900-(rev)M6LRR-RLP\_558

TATTACAAGATATTTTTAGTCAAGTTACAGGTTCCAAAGATAAGGGAGATACGGTTGACGTTCTTGCCGA  
TTTGTTGAGGAGAAAATTAATGGGAAAGAGATATCTCATTGTATTGGATG

>M6-PGSC0003DMG400011900-(rev)M6LRR-RLP\_62

TCCATTTTCAGATATGTCGTGCACCATGAACATAAAATTCCTAAAGATCTTCAGAGACGTACCATCAATTT  
GGCATATGAGGCTGAGGTAGCCATTGACTCTATTCTTGCTCAGTATAAT

>M6-PGSC0003DMG400011900-(rev)M6LRR-RLP\_992

TGGTGGAATGAGGTGAAAGATGCTTTATTTGACTATCTTGACAGTGAGTTCGAAGAATATAGTTTGGCT  
ACTATGCAGTTGAGTTTTGATAACTTACCCGATTGTTTAAAGCCTTGTCTT

>M6-PGSC0003DMG400011932-(rev)M6LRR-RLK\_0

ATGTCACTACTAGCATTCAAGAATATGATCATTGATGACCCTTTCAAGATCATGGACTCCTGGAATGAAA  
CTATACATTTTTGTGACTGGCCTGGGGTTTCATGTGGTCGACGTCATCCC

>M6-PGSC0003DMG400011932-(rev)M6LRR-RLK\_1054

CAAGATGGATATCCAATCTCAAGAAGCTTCAGGCTTTCTTTGTAGCTTACAACAGATTTACGGTGAAAT  
TCCGTCTGAAATTGGTGATCTGATATATTTGCAAGAGCTGGCTTTACTTG

>M6-PGSC0003DMG400011932-(rev)M6LRR-RLK\_1178

TCAGTTCTCTGGCAAATTCATCTCATTGGGAAATTTAGCTTCTTTAACCAAACCTCAGTTTAAGAGAAA  
ACAATCTCCAGGGGAGAATTCCTTCCAGTTTAGGCAAATGCCACAATTT

>M6-PGSC0003DMG400011932-(rev)M6LRR-RLK\_124

TTACAGTTTTAAATCTTACTTCTCTGAAATTGAGGGGTTCTCTGTCACCAAGCATTGGTAATCTGAGCTTT  
CTTTATGTCCTTAAGCTCCAAAATAATAGTTTTTCAGGTGAAATTCCAT



>M6-PGSC0003DMG400011932-(rev)M6LRR-RLK\_1550

GGGTAGTATTCTTCAACCATGAATAGTTTGCAAGGCCTGGAACCTTTAGTCCTTCTCACAACAATCTGT  
CAGGTGGAATCCCGGGATTCTTGAAGGACTTCAAATTTCTGCAGATTTT

>M6-PGSC0003DMG400011932-(rev)M6LRR-RLK\_1612

ACAATCTGTCAGGTGGAATCCCGGGATTCTTGAAGGACTTCAAATTTCTGCAGATTTTAAATCTGTCTAG  
CAATACTTTGGAAGGTGCTGTCCCAACAGGAGGCATCTTTAGTAATGCTA

>M6-PGSC0003DMG400011932-(rev)M6LRR-RLK\_1674

CTGTCTAGCAATACTTTGGAAGGTGCTGTCCCAACAGGAGGCATCTTTAGTAATGCTACTGTGGTTTCCA  
TCATAGGAAATAGAAATCTCTGTGGGGGTGTACCAGAGTTGGACCTTCCG

>M6-PGSC0003DMG400011932-(rev)M6LRR-RLK\_186

CTGAGCTTTCTTTATGTCCTTAAGCTCCAAAATAATAGTTTTTCAGGTGAAATCCATCAGAGATTGGCTA  
CTTACATAAGTTAAAGTTTTTACGCCTTGATAACAACCTCGTTCACTGGT

>M6-PGSC0003DMG400011932-(rev)M6LRR-RLK\_1860

GTTAGTGGGCTTATAGGATTGACATTCATAGTTTGTCTTGGCATAACGACAGTTTAGTAGATCGAGAA  
AACCAACACCTACATATCTACCTGAAAACCTAACCTTAAGAGTATCTTAT

>M6-PGSC0003DMG400011932-(rev)M6LRR-RLK\_1922

ATCGAGAAAACCAACACCTACATATCTACCTGAAAACCTAACCTTAAGAGTATCTTATCAGTGTCTACTTA  
GGGAAACTGATAGATTTTCTGCATCAAATTTGCTTGGAAATGGGTGCTTT

>M6-PGSC0003DMG400011932-(rev)M6LRR-RLK\_1984

GTCTACTTAGGGAAACTGATAGATTTTCTGCATCAAATTTGCTTGGAAATGGGTGCTTTTGGGTCTGTATA  
TAAAGGAATTTCTGAACACGATGGTACGTTTTTTGCTGTTAAGGTACTGG

>M6-PGSC0003DMG400011932-(rev)M6LRR-RLK\_2046

TCTGTATATAAAGGAATTTCTGAACACGATGGTACGTTTTTTGCTGTTAAGGTACTGGACCTTTACACCA  
TGCAGCTTCCAGGAGTTTTTTAGCTGAATGTGAGGTTCTAAAGAACATT

>M6-PGSC0003DMG400011932-(rev)M6LRR-RLK\_2170

ATCGTAATCTTGTAAGGTTCTAAGTGCATGCTCAGGTATTGATTATGAAGGTAATGAGTTCAAGGCCAT  
AGTTTATGAATACATGGATAAGGGAAGTCTACATGACTGGTTACATTTCA

>M6-PGSC0003DMG400011932-(rev)M6LRR-RLK\_2232

AAGGCCATAGTTTATGAATACATGGATAAGGGAAGTCTACATGACTGGTTACATTTCACTCCTCAGGAG

AAATCTGAGTCACAGGAAGAGCACAGAAGCTCGGGTTTATTCAAAGATTA

>M6-PGSC0003DMG400011932-(rev)M6LRR-RLK\_248

GATTGGCTACTTACATAAGTTAAAGTTTTACGCCTTGATAACAACCTCGTTCCTGTCATATTCCATCAA  
ACATTTCAGGATGCTTCAATCTTGTCTGTTGTTCTTTCGTATAATAT

>M6-PGSC0003DMG400011932-(rev)M6LRR-RLK\_2480

TTTTGGTTTGGCAAGATTTGTTCCACCAGCAATTCCAACTCATCAGCAAATTCTAAAAGCTCTACAGGTG  
TAGGGGGAACCTATTGGTTATACACCTCCAGGTAATAATAAATCAAGATT

>M6-PGSC0003DMG400011932-(rev)M6LRR-RLK\_2542

CTACAGGTGTAGGGGGAACCTATTGGTTATACACCTCCAGGTAATAATAAATCAAGATTTCTGCTGTCATA  
TATGTCTTTTGATAAGAACATCTCTAATTCTGTAGTATTTCTTGTTGACA

>M6-PGSC0003DMG400011932-(rev)M6LRR-RLK\_2604

CTGTCATATATGTCTTTTGATAAGAACATCTCTAATTCTGTAGTATTTCTTGTTGACAGAATTAGGTATGG  
GAAGCGACGCCTCAATCTATGGAGATGTGTACAGCTTTGGCATCCTACT

>M6-PGSC0003DMG400011932-(rev)M6LRR-RLK\_2728

GAAATGTTTACCGGGAGGAAACCAACTGATGAAATGTTCAAAGATAATTTAAACCTTCATAAATATGCCA  
ATGCTGCTTTGCCAGACAGAGTGATGCATATTACAGATCCCATTCTTCTC

>M6-PGSC0003DMG400011932-(rev)M6LRR-RLK\_2790

ATATGCCAATGCTGCTTTGCCAGACAGAGTGATGCATATTACAGATCCCATTCTTCTCCAGGAAAGAGAT  
GAACTTGGAAATGAAATACAATGTTGATGACAATACAAGCAGTGCTGGCGA

>M6-PGSC0003DMG400011932-(rev)M6LRR-RLK\_2852

AAAGAGATGAACTTGGAAATGAAATACAATGTTGATGACAATACAAGCAGTGCTGGCGACATATTTCTGT  
CATTCTTAGTTAAGGTGATTCAAATCGGAGTTTCTGCTCCGTTGAATCTC

>M6-PGSC0003DMG400011932-(rev)M6LRR-RLK\_2965

GAATCTCCAAAAGAAAGAAAGCAGATCAGTGATGTCGTTGGAGAACTCAATTCATTAAGGAAGTTGTTT  
TTGGAGCAAGCATACCGGAAAGAAAAGGTTATAAGCTTCAGCCTGCATTGA

>M6-PGSC0003DMG400011932-(rev)M6LRR-RLK\_310

TTCCATCAAACATTTACAGGATGCTTCAATCTTGTCTGTTGTTCTTTCGTATAATATGATGGTAGGCAA  
ATTCCAGCAGAATTAGGCACATTGTTGAACTCAAACAACCTTCTCTTG

>M6-PGSC0003DMG400011932-(rev)M6LRR-RLK\_372

GTAGGCAAAATTCCAGCAGAATTAGGCACATTGTTGAAACTCAAACAACCTTCTCTTGTTTCTAACTATTT  
TACAGGAGGAATTCCGCCTTCATTTGGTAATCTTTCCTTACTTGATACC

>M6-PGSC0003DMG400011932-(rev)M6LRR-RLK\_434

TAACTATTTTACAGGAGGAATTCCGCCTTCATTTGGTAATCTTTCCTTACTTGATACCTTTTCCGCAAGCAA  
GAATAATTTGTTAGGGAAAATACCTGATGAATTATGTCAATTGCTCAA

>M6-PGSC0003DMG400011932-(rev)M6LRR-RLK\_62

GAATGAAACTATACATTTTTGTGACTGGCCTGGGGTTTCATGTGGTTCGACGTCATCCCCGAGTTACAGTT  
TTAAATCTTACTTCTCTGAAATTGAGGGTTCTCTGTCACCAAGCATTGG

>M6-PGSC0003DMG400011932-(rev)M6LRR-RLK\_682

TTGGTATTACTCTTCCTAATTTAGAGTTCCTTAGCATTATAGAAACAATGTAAGTGGAAATATTCCGGTA  
ACATTGTCAAATGCTACGAATCTTCAGTCTCTTATTGCTAGTAGAAATG

>M6-PGSC0003DMG400011989-(rev)M6LRR-RLK\_0

CACAACTTCATCACAAAACCAAAAACAATCAATCATTTAGCCTTGATGATGGTCCCACAATATTTTATAA  
CCTTCCCTTCTTATATCTTTTCATAGTTATAACTTTTGCTTCCACTGAG

>M6-PGSC0003DMG400011989-(rev)M6LRR-RLK\_1054

CTATTCCTGGTTCATTTGGCAATTTGAGAACTTGCAATTTCTGTATCTCCGTGCCAACAACTTTCTGGT  
TCTATTCCAAAAGAACTTGCATATTTGGATAACTTGGTTATAATGGAAA

>M6-PGSC0003DMG400011989-(rev)M6LRR-RLK\_1116

CTTTCTGGTTCATTTCCAAAAGAACTTGCATATTTGGATAACTTGGTTATAATGGAAATGGATGAAAATC  
AGTTTTCAGGCAATTTGCCTGAGCATCTTTGTCAAGGTGGAAAACCTTGAG

>M6-PGSC0003DMG400011989-(rev)M6LRR-RLK\_1178

TGAAAATCAGTTTTCAGGCAATTTGCCTGAGCATCTTTGTCAAGGTGGAAAACCTTGAGAACTTCACGGTG  
AATAGTAACAAGCTGACAGGGCCAATACCAAGAAGCTTTAGCAAGTGCTC

>M6-PGSC0003DMG400011989-(rev)M6LRR-RLK\_124

CAACTGCTCTTCTTAAATGGAAAGCAACATTCCTAAACCAGAACAATTCCTTACAGGCTTCATGGACT  
AAGTAGTCCTGCTGATACCAAGAATTCTTCCAGAATTGGAGCGACGAGTT

>M6-PGSC0003DMG400011989-(rev)M6LRR-RLK\_1302

TTCAAAGAGTTCGCTTGATAACAACAGTTTTACTGGGAATTTATCTGAAGCTTTTGGCGTCCATCCAC  
ACCTTTACTTCATTGATTTGAGTGATAATGATTTTCATGGTGAACCTCAGC

>M6-PGSC0003DMG400011989-(rev)M6LRR-RLK\_1364

CCATCCACACCTTTACTTCATTGATTTGAGTGATAATGATTTTCATGGTGAACCTCAGCAGAACTGGGGG  
AAATGCAAGAAATTGACTGATTTTCAGATAGCCAGAAATAACATTAGTGG

>M6-PGSC0003DMG400011989-(rev)M6LRR-RLK\_1426

ACTGGGGGAAATGCAAGAAATTGACTGATTTTCAGATAGCCAGAAATAACATTAGTGGTAGCATAACCAC  
CAGAGATTGGAAACATCAAAGGTCTTTTGGGACTTGATCTTTCAGCAAATC

>M6-PGSC0003DMG400011989-(rev)M6LRR-RLK\_1488

ATACCACCAGAGATTGGAAACATCAAAGGTCTTTTGGGACTTGATCTTTCAGCAAATCATTGATTGGGC  
GGATACCAAAGGAATTTGGAAAATTAACCTCTCTGGTTAAGCTTTCTGTG

>M6-PGSC0003DMG400011989-(rev)M6LRR-RLK\_1550

GATTGGGCGGATACCAAAGGAATTTGGAAAATTAACCTCTCTGGTTAAGCTTTCTGTGCAAATAACTAT  
ATTTCTGGCAATATTCTATAGAACTTGGGGCACTGACAAAGTTAGATTC

>M6-PGSC0003DMG400011989-(rev)M6LRR-RLK\_1612

ATAACTATATTTCTGGCAATATTCTATAGAACTTGGGGCACTGACAAAGTTAGATTCCCTAGATCTGTCA  
AACAAATAGATTGAATGGGTCGATCCCAACGTTTATAGGAGATTACCAGC

>M6-PGSC0003DMG400011989-(rev)M6LRR-RLK\_1674

GATCTGTCAAACAATAGATTGAATGGGTCGATCCCAACGTTTATAGGAGATTACCAGCACCTATTTCACT  
TGAACCTGAGTTGTAACAAGTTTGGGCAGAAAATTCCAAAGGAGATAGGG

>M6-PGSC0003DMG400011989-(rev)M6LRR-RLK\_1736

ATTTCACTTGAACCTGAGTTGTAACAAGTTTGGGCAGAAAATTCCAAAGGAGATAGGGAGGATAACTCA  
TCTTAGTGTACTTGATTTGAGCTATAATCTTCTTGATGGAGAAATACCTGC

>M6-PGSC0003DMG400011989-(rev)M6LRR-RLK\_1798

TAACTCATCTTAGTGTACTTGATTTGAGCTATAATCTTCTTGATGGAGAAATACCTGCTCAGTTAGCTAGT  
TTGCTGGACTTGGCAAACCTTGAATCTTCCACAACAGCCTTGCTGGGC

>M6-PGSC0003DMG400011989-(rev)M6LRR-RLK\_186

TGGACACTAAGTAGTCCTGCTGATACCAAGAATTCTCCAGAATTGGAGCGACGAGTTCTGATGCATGC  
AAGGGCTGGTATGGAGTTGTATGAGTTAATGGTCGGGTTAACAGGTTGAAT

>M6-PGSC0003DMG400011989-(rev)M6LRR-RLK\_1860

TTAGCTAGTTTGCTGGACTTGGCAAACCTTGAATCTTCCACAACAGCCTTGCTGGGCGTATTCTGAAG

AATTTGAAAGTTTGACCAGTTTGCAGGATGTTATCTTGTCATACAATGAG

>M6-PGSC0003DMG400011989-(rev)M6LRR-RLK\_1922

TCCTGAAGAATTTGAAAGTTTGACCAGTTTGCAGGATGTTATCTTGTCATACAATGAGTTGGAAGGTCCA

ATCCCTAATAATAAAGCTTTCATGAATGCCTCATTAGAAGGTAATAAAGA

>M6-PGSC0003DMG400011989-(rev)M6LRR-RLK\_1984

AAGGTCCAATCCCTAATAATAAAGCTTTCATGAATGCCTCATTAGAAGGTAATAAAGATCTTTGTGGCAA

TGTGATTGGATTCCAACCTTGCGAAAGGCCATCTTCTATTGTGAAGAAGC

>M6-PGSC0003DMG400011989-(rev)M6LRR-RLK\_2046

TGTGGCAATGTGATTGGATTCCAACCTTGCGAAAGGCCATCTTCTATTGTGAAGAAGCACTCAATGGCG

AAGGGACATAAACTCATCCTCATCACTGTACTTCCTATTATGGGAGCACTA

>M6-PGSC0003DMG400011989-(rev)M6LRR-RLK\_2108

AATGGCGAAGGGACATAAACTCATCCTCATCACTGTACTTCCTATTATGGGAGCACTAGTACTACTCTGT

GCTTTCATTGGTGTCTCTTTATGTGTAATAAAAAGAAGGAGAGTTAGAGA

>M6-PGSC0003DMG400011989-(rev)M6LRR-RLK\_2170

TACTCTGTGCTTTCATTGGTGTCTCTTTATGTGTAATAAAAAGAAGGAGAGTTAGAGACGTTGAAAGAAG

GGATTCCAGTGATGATGTTGATGGTTTGATTTACATATCCACATTAAATG

>M6-PGSC0003DMG400011989-(rev)M6LRR-RLK\_2232

GAAAGAAGGGATTCCAGTGATGATGTTGATGGTTTGATTTACATATCCACATTAAATGGAAATGCATTGT

ACTGGGATATCTTAAAAGCCACAAAGGAGTTTGATGCAATGTTTTGCATC

>M6-PGSC0003DMG400011989-(rev)M6LRR-RLK\_2294

TGCATTGTAAGGATATCTTAAAAGCCACAAAGGAGTTTGATGCAATGTTTTGCATCGGAAAAGGAGG

ATCTGGAAGCGTTTACAAGGTAAAACCTCCAACAATAGAAAATGTAGCTGT

>M6-PGSC0003DMG400011989-(rev)M6LRR-RLK\_2356

AAGGAGGATCTGGAAGCGTTTACAAGGTAAAACCTCCAACAATAGAAAATGTAGCTGTGAAGAGACTTC

ATTCTTCATTTGAGGTTACCCATCGCAAAAGCTTCATGAATGAGATAAGGT

>M6-PGSC0003DMG400011989-(rev)M6LRR-RLK\_2418

AGACTTCATTCTTCATTTGAGGTTACCCATCGCAAAAGCTTCATGAATGAGATAAGGTCATTGACAAGTA

TCAAGCATCGCAACATTGTGAAACTCTATGCCTTCTGTACAAATGCACAA

>M6-PGSC0003DMG400011989-(rev)M6LRR-RLK\_2542

CATTCTTGGTTTACGAGTACATGGAGAAGGGGAGCTTGTCTAGTATTTTGAGCAATGAAGTAGAGTCCA  
AGAAATTGGATTGGCTTACAAGGGTGAATATCATCAAAGGTGTTGCTTATG

>M6-PGSC0003DMG400011989-(rev)M6LRR-RLK\_2604

GAGTCCAAGAAATTGGATTGGCTTACAAGGGTGAATATCATCAAAGGTGTTGCTTATGCTTTATCTTACA  
TGCACCATGATTGCTCACCCCGATTGTTTCATCGAGACATATCAAGCAGT

>M6-PGSC0003DMG400011989-(rev)M6LRR-RLK\_2666

ATCTTACATGCACCATGATTGCTCACCCCGATTGTTTCATCGAGACATATCAAGCAGTAATGTTTTGCTTG  
ATTCCGAGTATGAAGCTCGTGTTCAGATTTTGGCATAGCTAAGATTCT

>M6-PGSC0003DMG400011989-(rev)M6LRR-RLK\_2790

CCAGACTCATCCAATTGTACTGCACTTGCAGGCACATATGGCTATGTAGCACCAGGTAAGATCTAACTTC  
TTATCCTTATATTAGTTCATGAAATATATCTGCAAATCTATATTGTTTC

>M6-PGSC0003DMG400011989-(rev)M6LRR-RLK\_2852

CTAACTTCTTATCCTTATATTAGTTCATGAAATATATCTGCAAATCTATATTGTTTCTATCTCATTTGAAAC  
TTTATTGTTTCAGAGCTTGCCTATAACAATGAAGGTGACGGAAATGTG

>M6-PGSC0003DMG400011989-(rev)M6LRR-RLK\_2976

GTCTATAGCTTTGGAGTATTAGCATTGGAGGTAATCAAAGGAAAGCATCTTGGGGAATACATTACTGTG  
CTAGCAAATTCATCGACAAGAGATCATGTGCAGCATAGCGATTTGCTAGAT

>M6-PGSC0003DMG400011989-(rev)M6LRR-RLK\_3038

TACTGTGCTAGCAAATTCATCGACAAGAGATCATGTGCAGCATAGCGATTTGCTAGATGAACGCCTTCCA  
TATCCTGAAGATAGAGTAAAAGAGGTTTTGGTTTTTATCATCAAGCTAGC

>M6-PGSC0003DMG400011989-(rev)M6LRR-RLK\_3100

GCCTTCCATATCCTGAAGATAGAGTAAAAGAGGTTTTGGTTTTTATCATCAAGCTAGCAAGCTCATGTTT  
GCTTGAAACTCCAAAATCAAGGCCAACAATGCACTTCATCTCCAGTATGT

>M6-PGSC0003DMG400011989-(rev)M6LRR-RLK\_3224

AATGGATCCACCTGTTTCTCAAATAACTTCTATGAAGGCGAAAAGAGTCCCGAGATGTAAGGTGTCAG  
TGTATGAAAAAAAAAGAAGCAAGTTTAGACACCAAGTGGTTGTGAAGTAAG

>M6-PGSC0003DMG400011989-(rev)M6LRR-RLK\_3286

GTGTCAGTGTATGAAAAAAAAAGAAGCAAGTTTAGACACCAAGTGGTTGTGAAGTAAGAATAAGAAGC  
TATTACTGGTACTAGTATTTGTGTATTTTATTGTTAGTTATGCTTATCT

>M6-PGSC0003DMG400011989-(rev)M6LRR-RLK\_3348

AGAAGCTATTACTGGTACTAGTATTTGTGTATTTTATTGTTAGTTATGCTTATCTAGTTTAGTGTTGTA  
CTAGAGTGGATAACAATATCAAGTAGAAGGTAATATTTTAATTTTCTTG

>M6-PGSC0003DMG400011989-(rev)M6LRR-RLK\_372

TATGTTGATCTTAGTATGAACCAGCTCTCTGGCACCATCCCACCTGAAATTGGTAAGCTCGCTAATCTTGT  
CTACCTTGACTTGTCTATCAATCATATTTCGGGCACAATCCCACAACAA

>M6-PGSC0003DMG400011989-(rev)M6LRR-RLK\_434

TAATCTTGTCTACCTTGACTTGTCTATCAATCATATTTCGGGCACAATCCCACAACAAATCAGCTCACTAA  
TAAAGCTTGAGACCCTCCACATATTTGACAACCAATTAATGGTTCCAT

>M6-PGSC0003DMG400011989-(rev)M6LRR-RLK\_496

GCTCACTAATAAAGCTTGAGACCCTCCACATATTTGACAACCAATTAATGGTTCCATTCCGAGGGAAAT  
AGGTCGCCTAAGGTCTTACTGATCTAGCTTTGAGTTCTAACTTTCTTA

>M6-PGSC0003DMG400011989-(rev)M6LRR-RLK\_62

ATTTTATAACCTTCCCTTCTTATATCTTTTCATAGTTATAACTTTTGCTTCCACTGAGGAAGCAACTGCTCTT  
CTTAAATGGAAAGCAACATTCCTAAACCAGAACAATTCCTTACAGGC

>M6-PGSC0003DMG400011989-(rev)M6LRR-RLK\_682

AGCTTTCTGGCTCCATTCCCTCAGAAATAGGAAAAGTTGTCAATCTTGTGAAGCTTATATTAGTAGAAAT  
CAATTAACAGGTCATATTCCTCCAGAAATAGGTAATTTGATCAATGCAA

>M6-PGSC0003DMG400011989-(rev)M6LRR-RLK\_744

AGTAGAAATCAATTAACAGGTCATATTCCTCCAGAAATAGGTAATTTGATCAATGCAAAAAGTGTGTATG  
CTTTTCCAATAACTTGTCTGGTCCCATTCTGATGAAATTGGGAAAATG

>M6-PGSC0003DMG400011989-(rev)M6LRR-RLK\_806

GTTGTATGCTTTTTCCAATAACTTGTCTGGTCCCATTCTGATGAAATTGGGAAAATGAAGTCACTTGAG  
AACTTAAGCTTCCAGACAAACAATCTTTCTGGTCCAATTCCTCAAAACAAT

>M6-PGSC0003DMG400011989-(rev)M6LRR-RLK\_992

TGATTTTGGGAATCTGAAAAAATTGAATGATCTGCAATTATCCAATAATCAACTTACTGGTCCTATTCTTG  
GTTCAATTTGGCAATTTGAGAAACTTGCAATTTCTGTATCTCCGTGCCAA

>M6-PGSC0003DMG400012218M6LRR-RLK\_0

TAGCTATTGTGTATTTATGAGAAAATATTCGAAGTTTGTATCAATCATAGCGACGCTGGTAAAGGCCCA

CTTCCTTTACTCCGCCGCTCCTTCTATTATCTCCTTCTCCATTTTCTGCT

>M6-PGSC0003DMG400012218M6LRR-RLK\_1037

TTATGCTCTCAATACCTTCAAGGAAGCTATATATGAAGACCCTCTTCTGGTTTTGTCAAATTGGAATGGTT  
TAGATTCAGATCCTTGTGGTTGGGCTGGAGTCTTTTGTCTATGGCTCA

>M6-PGSC0003DMG400012218M6LRR-RLK\_1098

TGGAATGGTTTAGATTCAGATCCTTGTGGTTGGGCTGGAGTCTTTTGTCTATGGCTCAAGATCATGTCA  
TGAAAATGTAAGTTAATTGTCATCAATTTTATGTGCAATACATGGATAGG

>M6-PGSC0003DMG400012218M6LRR-RLK\_1159

ATCATGTCATGAAAATGTAAGTTAATTGTCATCAATTTTATGTGCAATACATGGATAGGTTGTTTGGTTAA  
TGATTTTTCTCAACTAAAATGCAATCTAGTAAATCTTTTATGGACTCAA

>M6-PGSC0003DMG400012218M6LRR-RLK\_122

ATTTTTGTTCCCTTATAATTTTAACATATAGTTTTTATAACCCCAAATTCTTCTTCTCAGCTCATAAATT  
CTCTGTTTCTAGACACCAAATCTCTCTTTGAACCCAAGTTTTATTTT

>M6-PGSC0003DMG400012218M6LRR-RLK\_1220

GTTTGGTTAATGATTTTTCTCAACTAAAATGCAATCTAGTAAATCTTTTATGGACTCAAGTTTAGTGCAAA  
TGAGTCTCTAATACGCATTTCCACTGGATTGTGTGACAGAAACATTTCT

>M6-PGSC0003DMG400012218M6LRR-RLK\_1281

TTAGTGCAAATGAGTCTCTAATACGCATTTCCACTGGATTGTGTGACAGAAACATTTCTGGCGCTTCGTT  
GAAGGGGTTTCTTTCACCCAACCTGCAATTTACTCTCCTCTTTGCAAGAAC

>M6-PGSC0003DMG400012218M6LRR-RLK\_1342

CGCTTCGTTGAAGGGGTTTCTTTCACCCAACCTGCAATTTACTCTCCTCTTTGCAAGAACTGTAAGTTATTTT  
CGAATAGATTTGTAAGGATTACATAGTTCTGGTTGTTCTTTTATGTGG

>M6-PGSC0003DMG400012218M6LRR-RLK\_1403

TAAGTTATTTCCGAATAGATTTGTAAGGATTACATAGTTCTGGTTGTTCTTTTATGTGGTTTTGTTAAAGC  
TTATGTGATTCCCATGCAATATGCAGAATTTTGCATGGAAATGTGCTGA

>M6-PGSC0003DMG400012218M6LRR-RLK\_1464

TTGTTAAAGCTTATGTGATTCCCATGCAATATGCAGAATTTTGCATGGAAATGTGCTGATTGGTACAATT  
CCTAAGGAGATTGGTCTATTGAAAAACCTGAAGGCCTTGGATTTGGGTGC

>M6-PGSC0003DMG400012218M6LRR-RLK\_1525



GGTACAATTCCTAAGGAGATTGGTCTATTGAAAAACCTGAAGGCCTTGGATTTGGGTGCTAACCCAGCTA  
ACAGGACCAATTCCTCCGAGCTTGGCAATTTGACAAACATTATGAAAATG

>M6-PGSC0003DMG400012218M6LRR-RLK\_1586

ACCAGCTAACAGGACCAATTCCTCCGAGCTTGGCAATTTGACAAACATTATGAAAATGTTAGTCTAACT  
TGAATTTTGTAGGTTCAATTTGACTTGCCTTTACCTATCCTTGTGAATC

>M6-PGSC0003DMG400012218M6LRR-RLK\_1647

AGTCTAACTGAATTTTGTAGGTTCAATTTGACTTGCCTTTACCTATCCTTGTGAATCTCCCTTACTTTTCT  
AGCTTCCATGTGTCTCTGCAGAAACCTACAATCTAATGGATTAACAG

>M6-PGSC0003DMG400012218M6LRR-RLK\_1708

CCTTACTTTTCTAGCTTCCATGTGTCTCTGCAGAAACCTACAATCTAATGGATTAACAGGGAAATTGCCTG  
CTGAGCTTGGTAATTTGAAATACCTTGAGGAACTTCGGTTGGACAGGAA

>M6-PGSC0003DMG400012218M6LRR-RLK\_1769

AAATTGCCTGCTGAGCTTGGTAATTTGAAATACCTTGAGGAACTTCGGTTGGACAGGAACAAACTCCAA  
GGACTAGTGCCTGCTAATACTGGATCAGATTTTACATCCGGTGTACGTGGA

>M6-PGSC0003DMG400012218M6LRR-RLK\_183

AGCTCATAAATTCTCTGTTTCTAGACACCAAATCTCTCTTTGAACCAAGTTTTATTTTTTTAACTAAGTT  
GGTGACACTTAATAGTAGATTCCAACAAAAGGGTTGTTACAGATTTA

>M6-PGSC0003DMG400012218M6LRR-RLK\_1830

AACTCCAAGGACTAGTGCCTGCTAATACTGGATCAGATTTTACATCCGGTGTACGTGGAATGTGAGTTG  
ATTAGCTACGTCTTGTACTTTATCGTTTTTCTTTTGAATTTTCTGGTATGT

>M6-PGSC0003DMG400012218M6LRR-RLK\_1891

GTGAGTTGATTAGCTACGTCTTGTACTTTATCGTTTTTCTTTTGAATTTTCTGGTATGTGGATAAGGATTA  
ATGCACGATTCTCTGTTTACTTGCAAGATATTTTTGGTTGTCCTTAGAG

>M6-PGSC0003DMG400012218M6LRR-RLK\_1952

ATAAGGATTAATGCACGATTCTCTGTTTACTTGCAAGATATTTTTGGTTGTCCTTAGAGCGTTTTCCGTCT  
TGGCCCTCTAGGATTCTGTCAGATATTTGAAGGATTGAGTGACCAAAGA

>M6-PGSC0003DMG400012218M6LRR-RLK\_2013

TTTTCCGTCTTGGCCCTCTAGGATTCTGTCAGATATTTGAAGGATTGAGTGACCAAAGAATCTAATTTTCT  
GATCTTTATGACAGTCATTGTCTGGAATGATGATGACAGAATCCAGGAA

>M6-PGSC0003DMG400012218M6LRR-RLK\_2074

CTAATTTTCTGATCTTTATGACAGTCATTGTCTGGAATGATGATGACAGAATCCAGGAAAGAGATGCTTA  
TGGGATAATGTCTGTTCTTTCTGTCAGCATTGTTTGATATGTA CTGCTG

>M6-PGSC0003DMG400012218M6LRR-RLK\_2135

AGATGCTTATGGGATAATGTCTGTTCTTTCTGTCAGCATTGTTTGATATGTA CTGCTGCAGATTGACACT  
GATGGCTGTTTTACTTGAGTCTAGTGTAGTACATTCATTGTCTGTTGTT

>M6-PGSC0003DMG400012218M6LRR-RLK\_2196

GATTGACACTGATGGCTGTTTTACTTGAGTCTAGTGTAGTACATTCATTGTCTGTTGTTTGATGGGAGGA  
TGGTGAATTGGGGGACCCCAATGGAGTGTGTTTTTGCTATAGCCTTTAAT

>M6-PGSC0003DMG400012218M6LRR-RLK\_2257

ATGGGAGGATGGTGAATTGGGGGACCCCAATGGAGTGTGTTTTTGCTATAGCCTTTAATATTTGACCAA  
ATGAGAGCAATGTTACAGAGTTCAGAATGTATGTTTCAAAGTTTAACGAT

>M6-PGSC0003DMG400012218M6LRR-RLK\_2318

TTGACCAAATGAGAGCAATGTTACAGAGTTCAGAATGTATGTTTCAAAGTTTAACGATGATGTTCTTGG  
AATTGATCTGTATTTCTGTGAAGAAAATAAGTAAAAACTGTTTGATGTC

>M6-PGSC0003DMG400012218M6LRR-RLK\_2379

TGTTCTTGGAATTGATCTGTATTTCTGTGAAGAAAATAAGTAAAAACTGTTTGATGTCCTGTATATTTGA  
CCCAACTGATTTTGCTATAGCCTTACGTCCATCACATGTATCTTTATCT

>M6-PGSC0003DMG400012218M6LRR-RLK\_244

TTAACTAAGTTGGTGACACTTAATAGTAGATTCCACTCAAAGGGTTGTTACAGATTTAGATTCTTGAATT  
CACTCTTAAGCTTTGTTAAGTTTTCTTTAGTGTATCTTTCTCCCCTC

>M6-PGSC0003DMG400012218M6LRR-RLK\_2440

GTATATTTGACCCAACTGATTTTGCTATAGCCTTACGTCCATCACATGTATCTTTATCTGATTGTTTTTTTTTC  
TTTTCTGTTGTACCCATTTAGGTATGCCTCTGGTGCCAGCGCTACAG

>M6-PGSC0003DMG400012218M6LRR-RLK\_2501

TTGTTTTTTTTCTTTTCTGTTGTACCCATTTAGGTATGCCTCTGGTGCCAGCGCTACAGGTTTTTGTCGCAC  
ATCCCAGCTCAAAGTGGCTGATTTCTCATTCAACTTTCTTATTGGAAG

>M6-PGSC0003DMG400012218M6LRR-RLK\_2562

TTTTGTGCGACATCCCAGCTCAAAGTGGCTGATTTCTCATTCAACTTTCTTATTGGAAGCATAACCAAAGTG

TTTGGGTTACCTTCCAAAGTCAGTTCTTAATTCTACGCCATAATTCTTG

>M6-PGSC0003DMG400012218M6LRR-RLK\_2623

TACCAAAGTGTTTGGGTTACCTTCCAAAGTCAGTTCTTAATTCTACGCCATAATTCTTGTTTACCTCATCT

TCTCTATTCTGAATGCCTATTAGTTTTGTTGCTGTAAATCTATATCC

>M6-PGSC0003DMG400012218M6LRR-RLK\_2684

TTACCTCATCTTCTCTATTCTGAATGCCTATTAGTTTTGTTGCTGTAAATCTATATCCAAAGTAGCACTCT

GATGCTCTACCAGTGTTGTTTCTTTACCTTTTCTGTTTCTTAATGCC

>M6-PGSC0003DMG400012218M6LRR-RLK\_2745

AGTAGCACTCTGATGCTCTACCAGTGTTGTTTCTTTACCTTTTCTGTTTCTTAATGCCTGTTATTTTGTGAT

TCTATAGATCTAGTTTTCAAGGAAATTGCCTTCAGCACAAAGACCCG

>M6-PGSC0003DMG400012218M6LRR-RLK\_2806

TTATTTTGTGATTCTATAGATCTAGTTTTCAAGGAAATTGCCTTCAGCACAAAGACCCGAAGCAACGGTC

TGCTGCTTTATGTGGTAAGTAAACAATCATAGTTACAATTTTCAACACTA

>M6-PGSC0003DMG400012218M6LRR-RLK\_2867

GCAACGGTCTGCTGCTTTATGTGGTAAGTAAACAATCATAGTTACAATTTTCAACACTATGCATAGGAGA

ATTGATGTCTCAACCTTTTTTCTTTAATAGTTGCAGTCAAATAGATTTAT

>M6-PGSC0003DMG400012218M6LRR-RLK\_2928

CATAGGAGAATTGATGTCTCAACCTTTTTTCTTTAATAGTTGCAGTCAAATAGATTTATTTAAGAACTGA

ACTGGTTGTTTTGACATTGCATTATAGGTAGCACTCCGCCTCCCACTAG

>M6-PGSC0003DMG400012218M6LRR-RLK\_2989

AAGAACTGAACTGGTTGTTTTGACATTGCATTATAGGTAGCACTCCGCCTCCCACTAGCCATGCATCGA

CACTCAGCAATAAGCACCAGCCTGTTGAAGAACCGAGACATCAGACTTCT

>M6-PGSC0003DMG400012218M6LRR-RLK\_305

TTCTTGAATCACTCTTAAGCTTTGTTAAGTTTTCTTTAGTGTATCTTTCTCCCCTCACTTGTA AAAAAGA

CAACTTATCTTTTCCAGCTTTTTTTTTTTGTTTGTTCATCTACT

>M6-PGSC0003DMG400012218M6LRR-RLK\_3050

ATGCATCGACACTCAGCAATAAGCACCAGCCTGTTGAAGAACCGAGACATCAGACTTCTTCCAAGCCCAC

TTGGCTTTTGGCTTTAGAAGTGGTAACAGGAGTTATGGTGGGTTCTCTCT

>M6-PGSC0003DMG400012218M6LRR-RLK\_3111

CAAGCCCACTTGGCTTTTGGCTTTAGAAAGTGGTAACAGGAGTTATGGTGGGTTCTCTCTTCATTGTAGGT  
CTTGTGACTGGCCTTCAGAGGCTTAAGATCAAATCCTCAATTATACCTTG

>M6-PGSC0003DMG400012218M6LRR-RLK\_3172

ATTGTAGGTCTTGTGACTGGCCTTCAGAGGCTTAAGATCAAATCCTCAATTATACCTTGGAAGAAATCAG  
GAAGCGAGAAAGATCATATGACAATTTATGTAGGTTAGTACTATCATGCA

>M6-PGSC0003DMG400012218M6LRR-RLK\_3233

AGAAATCAGGAAGCGAGAAAGATCATATGACAATTTATGTAGGTTAGTACTATCATGCACTTGAACCTG  
AGCACTTAGTACTTTCAAAGCATTGAGCCTAATCTTCGTTTCTGTTTACC

>M6-PGSC0003DMG400012218M6LRR-RLK\_3294

TGAACTTGAGCACTTAGTACTTTCAAAGCATTGAGCCTAATCTTCGTTTCTGTTTACCGCTGATGATCTT  
TGATAGATACTGGTATGCTGAAAGATGTTGTAAGATACAGCAGACAAGAA

>M6-PGSC0003DMG400012218M6LRR-RLK\_3355

TGATGATCTTTGTAGATACTGGTATGCTGAAAGATGTTGTAAGATACAGCAGACAAGAACTTGAAGTGG  
CTTGTGAAGATTTAGCAACATCATTGGATCCTCACCAGATAGCATAGTTT

>M6-PGSC0003DMG400012218M6LRR-RLK\_3416

TGAAGTGGCTTGTGAAGATTTAGCAACATCATTGGATCCTCACCAGATAGCATAGTTTACAAAGGAAC  
CATGAAAGGTGGACCTGAAATCGCTGTAATATCCCTTTGCGTCAAAGAAGA

>M6-PGSC0003DMG400012218M6LRR-RLK\_3477

AAAGGAACCATGAAAGGTGGACCTGAAATCGCTGTAATATCCCTTTGCGTCAAAGAAGAGCACTGGACA  
GCCTATCTAGAACTTTATTTTCAGAAAGAGGCAAGACTCAATTCTTTCTTC

>M6-PGSC0003DMG400012218M6LRR-RLK\_3538

ACTGGACAGCCTATCTAGAACTTTATTTTCAGAAAGAGGCAAGACTCAATTCTTTCTTCATCATCACTATT  
TATCTCTTCCAAAAGTTTTATCTTTAGTTCCATGCTCTAACTTCTGTA

>M6-PGSC0003DMG400012218M6LRR-RLK\_3599

CATCACTATTTATCTCTTCCAAAAGTTTTATCTTTAGTTCCATGCTCTAACTTCTGTAAATTTACATTTAGG  
TGGCAGAATTGGCCAGAATAAATCACGAGAACGCTGGGAAACTTCTA

>M6-PGSC0003DMG400012218M6LRR-RLK\_366

TTGTAAAAAAGACAACCTTTATCTTTTCCAGCTTTTTTTTTTTGTTTGTTCATCTACTGTCTTGGGTCTTTT  
CTTGTTTTCTCTTTCAATTTTGTGGATTATTGCTTTTTGAATCTT

>M6-PGSC0003DMG400012218M6LRR-RLK\_3660

TTTACATTTAGGTGGCAGAATTGGCCAGAATAAATCACGAGAACGCTGGGAAACTTCTAGGCTACTGCA  
GAGAGAGTAGTCCCTTTACGAGGATGTTGGTGTGTTGAATATGCATCTAATG

>M6-PGSC0003DMG400012218M6LRR-RLK\_3721

CTACTGCAGAGAGAGTAGTCCCTTTACGAGGATGTTGGTGTGTTGAATATGCATCTAATGGGACATTATAT  
GAACACCTTCATTGTGAGTAAAGTGAATTAATTTTCTCATGCACTTCATT

>M6-PGSC0003DMG400012218M6LRR-RLK\_3782

ACATTATATGAACACCTTCATTGTGAGTAAAGTGAATTAATTTTCTCATGCACTTCATTTTATGTTTTCCAA  
AGCAAACCTCCTAACTCTTTGAATGTATCATAGATGGAGAAGGATGCCA

>M6-PGSC0003DMG400012218M6LRR-RLK\_3843

ATGTTTTCCAAAGCAAACCTCCTAACTCTTTGAATGTATCATAGATGGAGAAGGATGCCAACTATCTTGG  
CACGCCGGATGAAAATAGTTATTGGCATCGCTAAGGGACTGACATATTTT

>M6-PGSC0003DMG400012218M6LRR-RLK\_3904

TATCTTGACACGCCGGATGAAAATAGTTATTGGCATCGCTAAGGGACTGACATATTTCCATTCAGAACT  
TGACCCTCATTACTATATCAGAACTGAATTCAAATTCTGTATATCTCA

>M6-PGSC0003DMG400012218M6LRR-RLK\_3941

CGCTAAGGGACTGACATATTTCCATTCAGAACTTGACCCTCATTACTATATCAGAACTGAATTCAAATT  
CTGTATATCTCACCGAAGATTTTCTCCAAGGTAAACGAAAGACCATT

>M6-PGSC0003DMG400012218M6LRR-RLK\_427

CTTGGGTCTTTTCTTGTTTTCTCTTTCAATTTGTTGGATTATTGCTTTTTGAATCTTTTGCTTTCTGGGTTT  
TTCTTCTTTTGTGATTGCTTAAGTTCTTGGAGACTGTTTCTTTA

>M6-PGSC0003DMG400012218M6LRR-RLK\_488

GCTTTCTGGGTTTTTCTTCTTTTTGTTGATTGCTTAAGTTCTTGGAGACTGTTTCTTAGATGGGTTCTTTC  
AGTTCTGGATTTTTGTAGAACTTAGTGTGTTCTTGTGGTGTGGAATT

>M6-PGSC0003DMG400012218M6LRR-RLK\_549

TGGGTCTTTCAGTTCTGGATTTTTGTAGAACTTAGTGTGTTCTTGTGGTGTGGAATTATTGGGGGAA  
AAGATGAGACTTTGTGTTGTATTTCAAGTTTTAGTTACTGTTGGACTAAT

>M6-PGSC0003DMG400012218M6LRR-RLK\_61

AGGCCACACTTCCTTACTCCGCCGCTCCTTCTATTATCTCCTTCTCCATTTTCTGCTTGATTTTTTGTTC

CTTATAATTTTAACATATAGTTTTTATAACCCCAAATTCCTTCTCT

>M6-PGSC0003DMG400012218M6LRR-RLK\_610

TTGGGGGAAAAGATGAGACTTTGTGTTGATTTCAAGTTTTAGTTACTGTTGGACTAATTCTTGGGATTT  
GTGATGCTTTTCCATCAAATGAAGGTGTGTATTATTAAGTTAAGTTCAGA

>M6-PGSC0003DMG400012218M6LRR-RLK\_671

TTGGGATTTGTGATGCTTTTCCATCAAATGAAGGTGTGTATTATTAAGTTAAGTTCAGATCTTGATGTAGT  
TACTGCTGCAAAGATTCAATTTTTGTCTTTTAATTGAGCATTTAGTGTT

>M6-PGSC0003DMG400012218M6LRR-RLK\_732

TTGATGTAGTTACTGCTGCAAAGATTCAATTTTTGTCTTTTAATTGAGCATTTAGTGTTGTAATGTAATGT  
TGTTTAGGGAAGATCTTGATTTTTCTTGTTTTGAGATACTTGCTATATT

>M6-PGSC0003DMG400012218M6LRR-RLK\_976

ATTCAAAGAGTAGGTAGTTTATTCTGAGTGAATCTGATTGGGGACTCTTTGTTGATACAGTTTATGCTCT  
CAATACCTTCAAGGAAGCTATATATGAAGACCCTCTTCTGGTTTTGTCAA

>M6-PGSC0003DMG400012307-(rev)M6LRR-RLK\_0

GTTTTTTAGAAGTTTTGAACTTTAGATTCTTGATGCTCTTTTTGTTCTTCTTATGTGACTACAAAAGCTAAG  
TTTTTGAGGGGTTGAGGGTATTCATAATCTTTGAAATGGTTAAAGTTT

>M6-PGSC0003DMG400012307-(rev)M6LRR-RLK\_128

AGGGAGTGGTGGGGGATTGTTTCTTTGGGTTTCTTGGTGGGGTTGTTTCTGTTGTCACAAGACACTGTT  
GCTTTTCTTGAAAATGATAAGCAAGCATTGTTGGATTTTGTTAATCAGTTG

>M6-PGSC0003DMG400012307-(rev)M6LRR-RLK\_192

CTGTTGCTTTTCTTGAAAATGATAAGCAAGCATTGTTGGATTTTGTTAATCAGTTGCCTCATTGACACT  
TTAAACTGGGATGCAAATTCTTCCGTTTGCAAGAACTGGACTGGAGTGG

>M6-PGSC0003DMG400012307-(rev)M6LRR-RLK\_256

GCACACTTTAAACTGGGATGCAAATTCTTCCGTTTGCAAGAACTGGACTGGAGTGGGGTGTAGTGAAGA  
TGGTTCTAGAGTGATAGCACTGAGGTTACCTGGGGTTGGGTTCAATGGTCC

>M6-PGSC0003DMG400012307-(rev)M6LRR-RLK\_320

GAAGATGGTTCTAGAGTGATAGCACTGAGGTTACCTGGGGTTGGGTTCAATGGTCCAATTCCTAATAAT  
ACATTGAGTCGTTTACTGCATTGCAGATCTTGAGCCTTAGATCTAATGGT

>M6-PGSC0003DMG400012307-(rev)M6LRR-RLK\_384

ATAATACATTGAGTCGTTTGACTGCATTGCAGATCTTGAGCCTTAGATCTAATGGTATCAATGGCACTTTC  
CCTATGGACTTTGATAACCTGAAAACTTGTCTTATCTTTACCTTCATT

>M6-PGSC0003DMG400012307-(rev)M6LRR-RLK\_448

CACTTTCCCTATGGACTTTGATAACCTGAAAACTTGTCTTATCTTTACCTTCATTACAACAATTTCTCAGG  
TCCTCTGCCTTTTGATTGCTCTGTTTGGCAAAATCTCACCAATTTGAA

>M6-PGSC0003DMG400012307-(rev)M6LRR-RLK\_512

TTCTCAGGTCCTCTGCCTTTTGATTGCTCTGTTTGGCAAAATCTCACCAATTTGAACTTGTCAAACAACAG  
ATTCAATGGCACCGTTCCTAGCTCGATATCGGGTTTAAGTCATCTTACT

>M6-PGSC0003DMG400012307-(rev)M6LRR-RLK\_576

ACAACAGATTCAATGGCACCGTTCCTAGCTCGATATCGGGTTTAAGTCATCTTACTCCCCTTAATCTTGCT  
AACAACTCACTTTCTGGTACCGTTCCTGATTTTCATTTCCCAACTTGC

>M6-PGSC0003DMG400012307-(rev)M6LRR-RLK\_64

AAGCTAAGTTTTTGAGGGGTTGAGGGTATTCATAATCTTTGAAATGGTTAAAGTTTTGAGCTTTAGGGA  
GTGGTGGGGGATTGTTTCTTTGGGTTTCTTGGTGGGGTGTCTTCTGTTGTC

>M6-PGSC0003DMG400012307-(rev)M6LRR-RLK\_640

TCTTGCTAACAACTCACTTTCTGGTACCGTTCCTGATTTTCATTTCCCAACTTGCAGCTACTGAATTTGCC  
AAACAATAACCTTATAGGTATTGTGCCTAAATCACTTCAAAAATTCCC

>M6-PGSC0003DMG400012307-(rev)M6LRR-RLK\_704

AATTTGCCAAACAATAACCTTATAGGTATTGTGCCTAAATCACTTCAAAAATTCCCAAAGAATGTGTTTCAT  
TAGTAATGATATATCTTTACTTGACTATCCTGTTTCGAATTCTTCTATT

>M6-PGSC0003DMG400012307-(rev)M6LRR-RLK\_764

AATGTGTTTCATTAGTAATGATATATCTTTACTTGACTATCCTGTTTCGAATTCTTCTATTGTTTCCCTGCCTC  
AGCAACCAAATCCAAAACCAAGAATGATGGTAAATTGAGTGAGCGG

>M6-PGSC0003DMG400012443M6LRR-RLK\_0

CTTTGTCTAATCTTAATAACTGTTCCCTTTGATTTGAAATCTCAATCTTTATCAGCTTAAATAACAATTGT  
ATAATCTTTTTTTTTCTTTATTAGATTCTGTCCCTCTTCTTGAAATT

>M6-PGSC0003DMG400012443M6LRR-RLK\_1037

GTTCTTGATTTGAGTCATAATGTGTTGCTTGGACCAGTGTTGAGGGTGTGTTGATGGATTGGAATCAATCC  
ATTCTCTCAATATATCAAGCAATTTGTTCACTGGAAATTTCAAGTGAGTTT

>M6-PGSC0003DMG400012443M6LRR-RLK\_1098

AATCAATCCATTCTCTCAATATATCAAGCAATTTGTTCACTGGAAATTTTCAGTGAGTTTGGTGAATCCCT  
AACCTTGTTGCATTTAACACAAGCAACAATTCGTTTACTGGTAGTTTCA

>M6-PGSC0003DMG400012443M6LRR-RLK\_1159

TGAATCCCTAACCTTGTTGCATTTAACACAAGCAACAATTCGTTTACTGGTAGTTTCAAGTTTCAAATTT  
GCAGTTTTTCCAAGAAGCTTAAGGTTCTGGATATATCACTTAATCATCT

>M6-PGSC0003DMG400012443M6LRR-RLK\_122

CTAAAAGAGTTTGCTTGAGTTGAAAGTTGGGTTCTTGCTTCTTACAAGTGATGGGGTGTTGAAAAATC  
TTATCTTTTTCATTTTTTCTTCTAGTTTTAGGCTTTGAGTTTTGTAATT

>M6-PGSC0003DMG400012443M6LRR-RLK\_1220

TTTCAAATTTGCAGTTTTTCCAAGAAGCTTAAGGTTCTGGATATATCACTTAATCATCTCACTGGTGATCT  
TGGAGGACTGGATAATTGCAGTTCATTGCTCCAGCAGCTACATGTGGAT

>M6-PGSC0003DMG400012443M6LRR-RLK\_1281

CTGGTGATCTTGAGGACTGGATAATTGCAGTTCATTGCTCCAGCAGCTACATGTGGATTCTAATGATCT  
TGGGGGTCACCTCCGGACTCGTTGTATTCAATGACATCTTTGGAGCAAC

>M6-PGSC0003DMG400012443M6LRR-RLK\_1342

TAATGATCTTGGGGGTCACCTCCGGACTCGTTGTATTCAATGACATCTTTGGAGCAACTTTCACTGTCTG  
CCAATAATTTCTCAGGCCAGCTAAGCCCACAGCTTAGTAAGCTTTCCAA

>M6-PGSC0003DMG400012443M6LRR-RLK\_1403

TCACTGTCTGCCAATAATTTCTCAGGCCAGCTAAGCCCACAGCTTAGTAAGCTTTCCAAACTGAAATCCTT  
AGTTTTATCAGGAAATCGTTTTCATGTTTGCTTCTAATGTGTTTGGT

>M6-PGSC0003DMG400012443M6LRR-RLK\_1464

TGAAATCCTTAGTTTTATCAGGAAATCGTTTTCATGTTTGCTTCTAATGTGTTTGGTAATTTGACATTG  
TTAGAACAGCTAGCTGCACATTCTAATAGATTTTCAGGACCATTGCCCT

>M6-PGSC0003DMG400012443M6LRR-RLK\_1525

TTTGACATTGTTAGAACAGCTAGCTGCACATTCTAATAGATTTTCAGGACCATTGCCCTCTACGATTTTCTG  
ATCTTTCTGTGCTTAGGGTGCTTGATCTTAGGAATAATTCTTTGTCTGG

>M6-PGSC0003DMG400012443M6LRR-RLK\_1586

ACGATTTCTGATCTTTCTGTGCTTAGGGTGCTTGATCTTAGGAATAATTCTTTGTCTGGTCTGTTGATCTT



GATTTTACTAAATTGACAAGTTTGTGCACTCTTGACCTTGCAACTAAC

>M6-PGSC0003DMG400012443M6LRR-RLK\_1647

CTGTTGATCTTGATTTTACTAAATTGACAAGTTTGTGCACTCTTGACCTTGCAACTAACCATTTCAAAGGT  
AACCTTCCTGTATCGCTCTCTAGTCGGGAGTTGAAAATCATGAGTCTTG

>M6-PGSC0003DMG400012443M6LRR-RLK\_1708

TTTCAAAGGTAACCTTCCTGTATCGCTCTCTAGTCGGGAGTTGAAAATCATGAGTCTTGCCAAAAATGAA  
TTCACCGGGCCAATTCCTGAGAACTATGCAAACCTTTCATCCCTTGTGTT

>M6-PGSC0003DMG400012443M6LRR-RLK\_1769

AAAAATGAATTCACCGGGCCAATTCCTGAGAACTATGCAAACCTTTCATCCCTTGTGTTCTCTCATTGTC  
CAATAATTCCTTTCGAATTTATCTGGAGCTTTATCTGTTCTGCAGCAC

>M6-PGSC0003DMG400012443M6LRR-RLK\_1830

TCTCATTGTCCAATAATTCCTTTCGAATTTATCTGGAGCTTTATCTGTTCTGCAGCACTGCAGAAATCTTT  
CAACTCTTATTCTCACCAGGAACTTCCGTGGTGAAGAGATTCCGAAAA

>M6-PGSC0003DMG400012443M6LRR-RLK\_1891

CAGAAATCTTTCAACTCTTATTCTCACCAGGAACTTCCGTGGTGAAGAGATTCCGAAAAATGTGAGTGGA  
TTTGAGAACCTGATGATATTTGCATTGGGGAACTGTGGTTTGGAGGGGCG

>M6-PGSC0003DMG400012443M6LRR-RLK\_1952

GTGAGTGGATTTGAGAACCTGATGATATTTGCATTGGGGAACTGTGGTTTGGAGGGGCGAATTCGATA  
TGGTTATACAATTGCAGTAAATTGCAAGTGCTTGACCTGTCATGGAATCAT

>M6-PGSC0003DMG400012443M6LRR-RLK\_2013

TTCCGATATGGTTATACAATTGCAGTAAATTGCAAGTGCTTGACCTGTCATGGAATCATTTGGATGGCGA  
AATTCCTCCTTGGATTGGTGAATGGAAAAATTGTTCTACTTGGATTCT

>M6-PGSC0003DMG400012443M6LRR-RLK\_2074

GGATGGCGAAATTCCTCCTTGGATTGGTGAATGGAAAAATTGTTCTACTTGGATTTCTCGAATAATTCA  
CTCACAGGTGAAATCCCAAAAAATTTAACTGATCTAAAGAGCCTCATTTC

>M6-PGSC0003DMG400012443M6LRR-RLK\_2135

AATAATCACTCACAGGTGAAATCCCAAAAAATTTAACTGATCTAAAGAGCCTCATTTCACACA  
CGCATCTAGTCTGAATTCTCCCACTGGTATACCGTTGTTTGTCAAGAGA

>M6-PGSC0003DMG400012443M6LRR-RLK\_2196

CACACAACACTACGCATCTAGTCTGAATTCTCCCACTGGTATACCGTTGTTTGTCAAGAGAAATCAGAGCGG  
TAGTGGTTTGCAGTACAATCAGGCTTCAAGCTTCCCTCCGTCTATCTTAT

>M6-PGSC0003DMG400012443M6LRR-RLK\_2257

TCAGAGCGGTAGTGGTTTGCAGTACAATCAGGCTTCAAGCTTCCCTCCGTCTATCTTATTGAGTAATAAC  
AGACTAAACGGGACAATCTGGCCCGAAATTGGTCGTCTGAAACAACCTCA

>M6-PGSC0003DMG400012443M6LRR-RLK\_2318

AGTAATAACAGACTAAACGGGACAATCTGGCCCGAAATTGGTCGTCTGAAACAACCTTCATGTCTTGGAT  
CTCAGTAAGAACAACATTACGGGGACTATTCCTAGCTCGATTCAAATATG

>M6-PGSC0003DMG400012443M6LRR-RLK\_2379

TCTTGGATCTCAGTAAGAACAACATTACGGGGACTATTCCTAGCTCGATTCAAATATGGGGAACCTGGA  
AGTTTTGGATCTTTCATGTAATGATCTCAATGGATCAATTCCTGCTTCAT

>M6-PGSC0003DMG400012443M6LRR-RLK\_2440

GAACCTGGAAGTTTTGGATCTTTCATGTAATGATCTCAATGGATCAATTCCTGCTTCATTCAATAAGCTCA  
CATTCTTTCAAAGTTCAATGTAGCTAATAATCACTTGCAGGGAGCGAT

>M6-PGSC0003DMG400012443M6LRR-RLK\_2501

AATAAGCTCACATTCCTTTCAAAGTTCAATGTAGCTAATAATCACTTGCAGGGAGCGATTCCAACAGGGG  
GGCAGTTCTTGAGCTTTCCCAACTCGAGCTTTGAGGGTAATCCTGGACTT

>M6-PGSC0003DMG400012443M6LRR-RLK\_2562

CAACAGGGGGGCAGTTCTTGAGCTTTCCCAACTCGAGCTTTGAGGGTAATCCTGGACTTTGTGGAAAAA  
TCATTTCTCCTTGCTGCCAGCAATTTGGACCTCCGACCGGCTAGTCCTC

>M6-PGSC0003DMG400012443M6LRR-RLK\_2623

TGGAAAAATCATTTCTCCTTGCTGCCAGCAATTTGGACCTCCGACCGGCTAGTCCTCTTGCTTCTAGTA  
GTAGTAGGCTTGGCCGAGGCGGAATTATTGGAATTACAATCAGCATAGG

>M6-PGSC0003DMG400012443M6LRR-RLK\_2684

GCTTCTAGTAGTAGTAGGCTTGGCCGAGGCGGAATTATTGGAATTACAATCAGCATAGGGGTAGGAATT  
GCACTTCTTCTGCAATAGTGCTGCTTAGAGTGTCTAGAAGAGATGCTGGT

>M6-PGSC0003DMG400012443M6LRR-RLK\_2745

TAGGAATTGCACTTCTTCTGCAATAGTGCTGCTTAGAGTGTCTAGAAGAGATGCTGGTCACCAGATTGG  
GGACTTCGAGGAAGATTTAGCAGACCACCTCGATCGTCTGATACTTTTG

>M6-PGSC0003DMG400012443M6LRR-RLK\_2806

CCAGATTGGGGACTTCGAGGAAGATTCAGCAGACCACCTCGATCGTCTGATACTTTTGTTCCTTCTAAG  
TTGGTACTTTTTTCAGAATTCTGATTGCAAGGAACTGACTGTTGCAGACTT

>M6-PGSC0003DMG400012443M6LRR-RLK\_2867

CCTTCTAAGTTGGTACTTTTTTCAGAATTCTGATTGCAAGGAACTGACTGTTGCAGACTTGCTTAAATCTAC  
AAACAACCTCAACCAGTCGAACATTGTTGGATGTGGAGGATTTGGTCTT

>M6-PGSC0003DMG400012443M6LRR-RLK\_2928

TTAAATCTACAAACAACCTCAACCAGTCGAACATTGTTGGATGTGGAGGATTTGGTCTTGTTTACAAGGC  
GGAACCTCCTAATGGCATAAAGACTGCGATCAAGAGGCTTTTCGGGGGATT

>M6-PGSC0003DMG400012443M6LRR-RLK\_2989

TTACAAGGCGGAACTTCCTAATGGCATAAAGACTGCGATCAAGAGGCTTTTCGGGGGATTGTGGTCAGAT  
GGAGCGTGAATTCCAAGCTGAAGTGGAAGCCCTCTCGAGAGCTCAGCACAA

>M6-PGSC0003DMG400012443M6LRR-RLK\_305

GCTTTAATTACAAGTAGTTGGTAGGCTTTTTTCTTTGAGATTTTTGAGGTGTTTTCTTGGGATTTGTGTTAT  
TTGAAGTTTCTGCAACTGGGGTTCTCTTCTTCTTACTATAATAATA

>M6-PGSC0003DMG400012443M6LRR-RLK\_3050

GGTCAGATGGAGCGTGAATTCCAAGCTGAAGTGGAAGCCCTCTCGAGAGCTCAGCACAAAAACCTTGT  
ATCCCTTCAAGGTTACTGTCAGCATGGGAGTGATAGATTGCTGATATATTCT

>M6-PGSC0003DMG400012443M6LRR-RLK\_3111

ACCTTGATCCCTTCAAGGTTACTGTCAGCATGGGAGTGATAGATTGCTGATATATTCTTACATGGAAAA  
TGGAAGCTTGGACTATTGGCTACATGAAAGAGTCGACGGGAGCTCATTAA

>M6-PGSC0003DMG400012443M6LRR-RLK\_3172

CATGGAAAATGGAAGCTTGGACTATTGGCTACATGAAAGAGTCGACGGGAGCTCATTAAACATGGGACA  
TTAGGTTAAAGATTGCACAAGGAGCTGCTCGCGGATTAGCCTATTTGCATAA

>M6-PGSC0003DMG400012443M6LRR-RLK\_3233

TGGGACATTAGGTTAAAGATTGCACAAGGAGCTGCTCGCGGATTAGCCTATTTGCATAAGGAACCAAAT  
ATAGTTCATCGCGACATTAACCAGCAACATTCTTTTGAATGAGAGATTT

>M6-PGSC0003DMG400012443M6LRR-RLK\_3294

AACCAAATATAGTTCATCGCGACATTAACCAGCAACATTCTTTTGAATGAGAGATTTGAAGCTCATCT

AGCTGATTTTGGACTATCAAGGCTGTTGCATCCCTATGATACTCATGTCA

>M6-PGSC0003DMG400012443M6LRR-RLK\_3355

AGCTCATCTAGCTGATTTTGGACTATCAAGGCTGTTGCATCCCTATGATACTCATGTCACGACAGATCTCG  
TTGGAACCTTAGGATACATTCTCCTGAATATAGTCAAACATTAAGTGC

>M6-PGSC0003DMG400012443M6LRR-RLK\_3416

ACAGATCTCGTTGGAACCTTAGGATACATTCTCCTGAATATAGTCAAACATTAAGTGCCTACTTTTCGGG  
GGGATGTTTACAGCTTTGGTGTGTTCTACTTGAGCTATTGACAGGCAAG

>M6-PGSC0003DMG400012443M6LRR-RLK\_3477

CTTTTCGGGGGATGTTTACAGCTTTGGTGTGTTCTACTTGAGCTATTGACAGGCAAGCGTCCCGTGGA  
AGTATGCAGGGGGAAAACTGCAGGGACTTGGTATCATGGGTTTTTCAAC

>M6-PGSC0003DMG400012443M6LRR-RLK\_3538

TCCCGTGGAAGTATGCAGGGGGAAAACTGCAGGGACTTGGTATCATGGGTTTTTCAACTGAAATCTGA  
GAACAGAGTGGAGGAAATATTCGATACATCGATATGGGATACAAGTTACGA

>M6-PGSC0003DMG400012443M6LRR-RLK\_3599

AAATCTGAGAACAGAGTGGAGGAAATATTCGATACATCGATATGGGATACAAGTTACGAGAGGCAGCT  
TTTGGAGGTGTTAACTATAGCTTGTCAATGCATAGTGCAAGATCCACGCCAG

>M6-PGSC0003DMG400012443M6LRR-RLK\_366

ATTTGTGTTATTTGAAGTTTCTGCAACTGGGGTTCTTTCTTCTTTACTATAATAATAAGGGTGGTGGTG  
CCCTGCTGCTACCGTTAAGTAGTCTTGATTTTTTTCAGTCTTGGGATCTG

>M6-PGSC0003DMG400012443M6LRR-RLK\_3660

GGCAGCTTTTGGAGGTGTTAACTATAGCTTGTCAATGCATAGTGCAAGATCCACGCCAGAGGCCCTCGA  
TCGATCAAGTTGTCTTATGGCTCGAGGCAATCGGAAGTGTAAGAAAGAT

>M6-PGSC0003DMG400012443M6LRR-RLK\_3721

GCCCTCGATCGATCAAGTTGTCTTATGGCTCGAGGCAATCGGAAGTGTAAGAAAGATGAGATTCAAC  
TAGTTTTTCTTGTAGACTTGGCTTCTTTGCTTACAAAGTGAAAAATATC

>M6-PGSC0003DMG400012443M6LRR-RLK\_3782

GATTCAACTAGTTTTTCTTGTAGACTTGGCTTCTTTGCTTACAAAGTGAAAAATATCAGTGTAAGCAA  
CAGAAAATTTCAATTTTATAGAGTTAGTTATAAACTTATGAACAGCTT

>M6-PGSC0003DMG400012443M6LRR-RLK\_3843

TGTAAAGCAACAGAAAATTTCAATTTTATAGAGTTAGTTATAAACTTATGAACAGCTTTGTTTGGTTCAC  
TTTGTTCATACACAAAAAATAGTGATAGTTGTGTTTGTATACATATGG

>M6-PGSC0003DMG400012443M6LRR-RLK\_3889

TTATGAACAGCTTTGTTTGGTTCACCTTTGTTTCATACACAAAAAATAGTGATAGTTGTGTTTGTATACATA  
TGGTAACTTGGGGACAAGTCCTTACCAATATACTAATAATTACTCCC

>M6-PGSC0003DMG400012443M6LRR-RLK\_427

GGTGGTGGTGCCTGCTGCTACCGTTAAGTAGTCTTGATTTTTTCAGTCTTGGGATCTGATTTGATTTTTG  
GTACTAGGGGATCTGAGGAAGGTTCTTCTTGGTGCTAATTTGCATCAA

>M6-PGSC0003DMG400012443M6LRR-RLK\_488

TTGATTTTTGGTACTAGGGGATCTGAGGAAGGTTCTTCTTGGTGCTAATTTGCATCAAAGGTGGAAACT  
TTTCTTCATTTGAACTGTGAATTTGGAATACATGGTGGTGGAAATCTTGA

>M6-PGSC0003DMG400012443M6LRR-RLK\_549

GTGGAAACTTTTCTTCATTTGAACTGTGAATTTGGAATACATGGTGGTGGAAATCTTGATTTTGAGCTGT  
TTATATAAAGATTTGTGTGTTTTCATCAATGGTGATTTGGGAGTTTCTGC

>M6-PGSC0003DMG400012443M6LRR-RLK\_61

ATAACAATTGTATAATCTTTTTTTTTCTTTATTAGATTCTGTCCCTCTTCTTGAAATTAATAAAAGAGTTT  
GCTTGAGTTGAAAGTTGGGTTCTTGCTTCTTACAAGTGATGGGGT

>M6-PGSC0003DMG400012443M6LRR-RLK\_610

TTGAGCTGTTTATATAAAGATTTGTGTGTTTTCATCAATGGTGATTTGGGAGTTTCTGCCAATGAGTTTTC  
TGTGTTGGGTGTTTTGGCTTATCTTTTTGTACATCTTGAGTCTTGA

>M6-PGSC0003DMG400012443M6LRR-RLK\_671

ATGAGTTTTCTGTGTTGGGTGTTTTGGCTTATCTTTTTGTACATCTTGAGTCTTGAAACCCAGTTCAA  
ACCTGTCATCCATATGATTTGTTGGCATTGAAAGAAATTGCTGGCAAT

>M6-PGSC0003DMG400012443M6LRR-RLK\_732

CCCCAGTTCAAACCTGTCATCCATATGATTTGTTGGCATTGAAAGAAATTGCTGGCAATCTAACAGATGG  
GGTATTCTATCAGCTTGGTCTAATGAACCTAATTGCTGTAAATGGGATG

>M6-PGSC0003DMG400012443M6LRR-RLK\_793

AACAGATGGGGTTATTCTATCAGCTTGGTCTAATGAACCTAATTGCTGTAAATGGGATGGGGTTGTCTGT  
GGTAATGTTTCTGCTCAAAGTAGAGTGATCAGGCTAAATTTGTCAAGAAA

>M6-PGSC0003DMG400012443M6LRR-RLK\_854

GTTGTCTGTGGTAATGTTTCTGCTCAAAGTAGAGTGATCAGGCTAAATTTGTCAAGAAAAGGTTTGAGA  
GGTGTGGTTTCACAGTCCTTGGAGAAATTGGATCAGTTGAAATTGCTCGAT

>M6-PGSC0003DMG400012443M6LRR-RLK\_915

GTTTGAGAGGTGTGGTTTCACAGTCCTTGGAGAAATTGGATCAGTTGAAATTGCTCGATCTTTCGCACAA  
TCACTTGGAAGGTGGATTGCCTTGGACTTGTCCAAATGGAAGCAGTTGG

>M6-PGSC0003DMG400012443M6LRR-RLK\_976

TTCGCACAATCACTTGGAAGGTGGATTGCCTTGGACTTGTCCAAATGGAAGCAGTTGGAAGTTCTTGAT  
TTGAGTCATAATGTGTTGCTTGGACCAGTGTTGAGGGTGTGGATGGATT

>M6-PGSC0003DMG400012514-(rev)M6LRR-RLK\_0

GAAATCGGGATTCTTAATAATTTGGTGATTTTAGCACTGGATACTAACCATATTTCTGGTAATATCCCAAT  
CTCCACATTCAATATCTCCTCATTACAGGTTTTGGTACTGAATCACAAC

>M6-PGSC0003DMG400012514-(rev)M6LRR-RLK\_126

ATTGGATCCTTTCCAAGGGAGGTTGGCAATTTGACAGAATTGCAAATCTGGATCTTGCCGATAATAATC  
TTACAGGTATTCAAAGGGGTATGCAAATCATTACTAGCAAGATTTATAA

>M6-PGSC0003DMG400012514-(rev)M6LRR-RLK\_1386

TGTTTCAGGATTGATTCCCAAGTCTTTGGAGAAGCTTCTATATCTCAAGTATTTCAACGTTTCATTCAACA  
AGTTGGTTGGTGAATCCCTCGAATGGTCCTTTCAAGAACCTCTCCGG

>M6-PGSC0003DMG400012514-(rev)M6LRR-RLK\_189

AATAATCTTACAGGTATTCAAAGGGGTATGCAAATCATTACTAGCAAGATTTATAATTTCTTAAATCTTA  
GTAATTAATACTATAACATCTACATGCATACATTGACAGGTGAAATACC

>M6-PGSC0003DMG400012514-(rev)M6LRR-RLK\_1890

AGTGGCATTAGGAGTTTTGATACAGAATGTCAAGTTTTGCGCAACCTTCGTCATAGGAATCTCACCAA  
GTCATCACCAGTTGTTCCAACCTTGAATTTAAGGCTTTAATACTCGAGTA

>M6-PGSC0003DMG400012514-(rev)M6LRR-RLK\_252

AAATCTTAGTAATTAATACTATAACATCTACATGCATACATTGACAGGTGAAATACCGAAAAAATTTAGC  
AATCAGATTGAGTTGTTGATCTTAGTTTCAACAGGTTTACTGGTTCACT

>M6-PGSC0003DMG400012514-(rev)M6LRR-RLK\_2583

AATTAATGAAAAAGCTAGATTGTGTGGTATCCATCATGAAAGTGGCAATAGATTGTTGTGTTGAATCTCC

AAAAGGAAGGATTGACATGAAAGATGTTGTGGGGAGGTTAAAGACGATCA

>M6-PGSC0003DMG400012514-(rev)M6LRR-RLK\_441

TCTCCATTAAACATAGGTTCTACGTTACCCAACATTGAAGTTATTCATCTGAGAACTTAAATCTTTATG  
GGACTATACCTCATTCTCTCTCCAATTGTTCCAACTCACTAGTCTAGA

>M6-PGSC0003DMG400012514-(rev)M6LRR-RLK\_63

ATCCCAATCTCCACATTCAATATCTCCTCATTACAGGTTTTGGTACTGAATCACAACAATCTAATTGGATC  
CTTTCCAAGGGAGGTTGGCAATTTGACAGAATTGCAAATTCTGGATCTT

>M6-PGSC0003DMG400012594-(rev)M6LRR-RLK\_0

ATGCTGTAAGCAGTAACGAAATACTATTTCCATGGACAGAATCCCTCTGCCGCAGATGTTCCCATTGACA  
ATTTAAACACATTTTGAACCTCCTTTTCTTTTCTCTCAAAGGTGTAGCT

>M6-PGSC0003DMG400012594-(rev)M6LRR-RLK\_1037

TTTACATGCTATTCTTGTTATTTCCCGAAGCTCTGAAAAGCTAGATACTTCTGATGATCGTATATATGAGCA  
TAAATCTCAACCTGCTAACAGTGTGAAGAAGCTTTCTTAGATATTGGGC

>M6-PGSC0003DMG400012594-(rev)M6LRR-RLK\_1098

TATATGAGCATAAATCTCAACCTGCTAACAGTGTGAAGAAGCTTTCTTAGATATTGGGCATGAATTTTGT  
AGCATCTTCTAATACTACTATTCTTCTTCATTAGTCAAGTATTTACTACA

>M6-PGSC0003DMG400012594-(rev)M6LRR-RLK\_1159

GAATTTTGTAGCATCTTCTAATACTACTATTCTTCTTCATTAGTCAAGTATTTACTACAATGTACACATGGA  
CTGATTAATTAGCCGAGTTCTGTCTGTTAAGATTGATCAAACCTTTT

>M6-PGSC0003DMG400012594-(rev)M6LRR-RLK\_122

TGGATGCACTTATTAATTTTTAATGTGCTACATAGCTATGTGATGACTAATGTATAGCCCCTTAATTTTTAC  
AGATTGTGTGGTCCCTAAGTTTTAGAAGTATTGCTTACGACCTCTT

>M6-PGSC0003DMG400012594-(rev)M6LRR-RLK\_1281

TTCTTATTGTTATTGTTTTCTTTTGGCTAAATTGAAGGAGGCTTAACAATAACAGTTTGACTGGGCAAATT  
CCGATTCTTTAACCACAGTCACTTCACTTCAAGTGCTGTAAGTATAAA

>M6-PGSC0003DMG400012594-(rev)M6LRR-RLK\_1342

TGGGCAAATTCCGATTCTTTAACCACAGTCACTTCACTTCAAGTGCTGTAAGTATAAAGCTGGCACTTTT  
TTATCATGTGGTTTTTTTCGCCATCAGTTTTTTCTAATTCTTAGGTACT

>M6-PGSC0003DMG400012594-(rev)M6LRR-RLK\_1403

TGGCACTTTTTATCATGTGGTTTTTTTCGCCATCAGTTTTTTCTAATTCTTAGGTACTAATGTTTCATTCCCTC  
GCAATGCAGTGATTTGTCAAACAATAATTTAACAGGACCTATTCCAG

>M6-PGSC0003DMG400012594-(rev)M6LRR-RLK\_1464

TGTTTCATTCCCTCGCAATGCAGTGATTTGTCAAACAATAATTTAACAGGACCTATTCCAGTCAATGGTTCCT  
TCTCGCTTTTTACTCCTATCAGGTCTGTGAAAAGCACTAGTTTATATTT

>M6-PGSC0003DMG400012594-(rev)M6LRR-RLK\_1525

AATGGTTCCTTCTCGCTTTTTACTCCTATCAGGTCTGTGAAAAGCACTAGTTTATATTTAAGTTCTGTCCAC  
TGGAATCATGATAATGAAATTCCTACATCTGAATGTCTATATTTTCAGT

>M6-PGSC0003DMG400012594-(rev)M6LRR-RLK\_1586

AGTTCTGTCACTGGAATCATGATAATGAAATTCCTACATCTGAATGTCTATATTTTCAGTTTTGCTAATAAT  
CCATTGGATACTCCTCCACCTTCTCCACCTCCACCTATTTCTCCAACAC

>M6-PGSC0003DMG400012594-(rev)M6LRR-RLK\_1647

TGCTAATAATCCATTGGATACTCCTCCACCTTCTCCACCTCCACCTATTTCTCCAACACCCACTTCTCCAGG  
TTTGTTAAAATAATTTATGTTTTATGGGTTAAGACTGCCCCCCCCC

>M6-PGSC0003DMG400012594-(rev)M6LRR-RLK\_1708

ACTTCTCCAGGTTTGTTAAAATAATTTATGTTTTATGGGTTAAGACTGCCCCCCCCCCCCCCCCCCCCCCC  
CCCAAAGGAAGAAGGCAAAGGGCTGACTGTTTTAGGGGAAGAGATTT

>M6-PGSC0003DMG400012594-(rev)M6LRR-RLK\_1769

CCCCCCCCCCCCCAAAGGAAGAAGGCAAAGGGCTGACTGTTTTAGGGGAAGAGATTTGCACATTATA  
ATGAGTTTTAGTAGTGTATGTGAGATAAATTTTACAGGTGATTTTGGGGTT

>M6-PGSC0003DMG400012594-(rev)M6LRR-RLK\_183

TTAATTTTACAGATTGTGTGGTCCCTAAGTTTTAGAACTGATTTGCTTACGACCTCTTTTTCTAATTGCA  
GGGAACCTTATAGTAATAATATAAGTGGAAGAATTCCTTATGAACTGG

>M6-PGSC0003DMG400012594-(rev)M6LRR-RLK\_1830

ACATTATAATGAGTTTTAGTAGTGTATGTGAGATAAATTTTACAGGTGATTTTGGGGTTATCTACTGTTTG  
ATAGGTTTGAATAAATAGATTAACTTACAAGTGATATTGAAGAGTGGA

>M6-PGSC0003DMG400012594-(rev)M6LRR-RLK\_1891

CTACTGTTTGATAGGTTTGAATAAATAGATTAACTTACAAGTGATATTGAAGAGTGGATAGAAGTGCC  
CTACATCAGGAAATGCAACTGTATGCATTGGATATTGTGACTATAAAGGAC



>M6-PGSC0003DMG400012594-(rev)M6LRR-RLK\_1952

GAAGTGGCCTACATCAGGAAATGCAACTGTATGCATTGGATATTGTGACTATAAAGGACCCAAACTTTC  
AGAATTTATTGTCATACATTCTCTCAATTCTTTCCCATGTGTCTTATTTTC

>M6-PGSC0003DMG400012594-(rev)M6LRR-RLK\_2013

AAACTTTCAGAATTTATTGTCATACATTCTCTCAATTCTTTCCCATGTGTCTTATTTCTCACATGGTATCG  
GAGCTTTGGTGAAAAATTAGTTTCAGTGCATTACCAGCAACACGCGG

>M6-PGSC0003DMG400012594-(rev)M6LRR-RLK\_2135

GAAAAATCTCCTTGCTGTGCAATTCTCATTGACCATGAATGCTGTCAAATGTATGTATCCTTGCCGTCTC  
TGACTACTGTACATAAATTAACACCACCAAAGGCCGAATAACAAACAA

>M6-PGSC0003DMG400012594-(rev)M6LRR-RLK\_2196

TTGCCGTCTCTGACTACTGTACATAAATTAACACCACCAAAGGCCGAATAACAAACAAGTACCTGTTGT  
TATGAATAAACTGAAGGATCTTTACCTATTTCTGCATCTTTTCTATTTTG

>M6-PGSC0003DMG400012594-(rev)M6LRR-RLK\_2257

ACCTGTTGTTATGAATAAACTGAAGGATCTTTACCTATTTCTGCATCTTTTCTATTTTGTTAGCACTTTAGC  
TTTACAACATAGTCCTCGGTGCGAGTGTAATGGTGAAACTACCATAT

>M6-PGSC0003DMG400012594-(rev)M6LRR-RLK\_2318

AGCACTTTAGCTTTACAACATAGTCCTCGGTGCGAGTGTAATGGTGAAACTACCATATCCCTTTTCTCAA  
TTTTTTTTAACTACTTGTGTTAAGTTTTTATCATCCATCAAAAAAAGGG

>M6-PGSC0003DMG400012594-(rev)M6LRR-RLK\_2379

CTTTTCTCAATTTTTTTAACTACTTGTGTTAAGTTTTTATCATCCATCAAAAAAAGGGAATTAATACTTAA  
ATTTTGAAATTCCTAGGTATGGGAAACAGTGCAACCGGGGCGATTGCT

>M6-PGSC0003DMG400012594-(rev)M6LRR-RLK\_244

TCCTAATTGCAGGGAACCTTATAGTAATAATATAAGTGGAAGAATTCCTTATGAACTGGGGAATTTGACG  
AATTTGGTGAGCTTGGATCTTTACCTGAACAAGTTAGTTGGTCCAATCCC

>M6-PGSC0003DMG400012594-(rev)M6LRR-RLK\_2440

TTAAACTTAAATTTTGAATTCCTAGGTATGGGAAACAGTGCAACCGGGGCGATTGCTGGCGGTGTTG  
CTGCAGGGGCTGCTCTTCTGTTTGCAGCTCCTGCGATTTTGCTTGCCTGGT

>M6-PGSC0003DMG400012594-(rev)M6LRR-RLK\_2501

CGGTGTTGCTGCAGGGGCTGCTCTTCTGTTTGCAGCTCCTGCGATTTTGCTTGCCTGGTGGCGCCGAAGG

AAACCGGAAGACCACTTCTTTGATGTTCCAGGTGGGAAGCCTCAATCAAA

>M6-PGSC0003DMG400012594-(rev)M6LRR-RLK\_2562

CGCCGAAGGAAACCGGAAGACCACTTCTTTGATGTTCCAGGTGGGAAGCCTCAATCAAACACCTGAATT  
AGTTTTTTGTTTTCAATTAATTTAATTTAATGAGTTCTTGCAATTTTACA

>M6-PGSC0003DMG400012594-(rev)M6LRR-RLK\_2623

CCTGAATTAGTTTTTTGTTTTCAATTAATTTAATTTAATGAGTTCTTGCAATTTTACATTCTTTTGCAGCTG  
AGGAGGATCCAGAAGTTCATCTTGGACAACCTCAAGAGGTTCTCCTTG

>M6-PGSC0003DMG400012594-(rev)M6LRR-RLK\_2684

CTTTTGCAGCTGAGGAGGATCCAGAAGTTCATCTTGGACAACCTCAAGAGGTTCTCCTTGCGCGAATTACA  
AGTTGCAACTGACAGTTTTAGCAACAAAAATATACTTGGGAAGAGGAGGAT

>M6-PGSC0003DMG400012594-(rev)M6LRR-RLK\_2745

CGAATTACAAGTTGCAACTGACAGTTTTAGCAACAAAAATATACTTGGGAAGAGGAGGATTTGGCAAGGT  
TTACAAGGGCAGGTTGGCTGATGGCTCTTTAGTTGCTGTTAAAAGATTAAA

>M6-PGSC0003DMG400012594-(rev)M6LRR-RLK\_2806

GGCAAGGTTTACAAGGGCAGGTTGGCTGATGGCTCTTTAGTTGCTGTTAAAAGATTAAAAGAGGAGCG  
TACTCAAGGCGGGGAGTTACAGTTTCAGACAGAAGTTGAAATGATTAGTATG

>M6-PGSC0003DMG400012594-(rev)M6LRR-RLK\_2867

AGGAGCGTACTCAAGGCGGGGAGTTACAGTTTCAGACAGAAGTTGAAATGATTAGTATGGCCGTGCAT  
CGAAATCTACTTCGTTTATGGGGCTTTTGCATGACTGCAACTGAACGGTTGC

>M6-PGSC0003DMG400012594-(rev)M6LRR-RLK\_2928

CGTGCATCGAAATCTACTTCGTTTATGGGGCTTTTGCATGACTGCAACTGAACGGTTGCTTGTATCCAT  
ACATGGCGAATGGAAGTGTGCTTACGATTAAGAGGTATCTCTTAGTC

>M6-PGSC0003DMG400012594-(rev)M6LRR-RLK\_2989

GTTTATCCATACATGGCGAATGGAAGTGTGCTTACGATTAAGAGGTATCTCTTAGTCTTGAATTTTCCA  
TCCTTCTTTTCTTTGCTCCATTGAGTCGAAATACATCAGATCAAGCAC

>M6-PGSC0003DMG400012594-(rev)M6LRR-RLK\_305

AATTTGACGAATTTGGTGAGCTTGGATCTTTACCTGAACAAGTTAGTTGGTCCAATCCCCGACACTTTGG  
GCAAGCTTACAGAACTACGTTTCCTGTATGGGTTACACATCCTTTTTCT

>M6-PGSC0003DMG400012594-(rev)M6LRR-RLK\_3050

GAATTTTCCATCCTTCTTTTTCTTTGCTCCATTGAGTCGAAATACATCAGATCAAGCACTTGAAAAAGCTG  
AAAAATGATAACAACGTTTTTTTTGAACTTTTAAGTTATGGTCTGGTAA

>M6-PGSC0003DMG400012594-(rev)M6LRR-RLK\_3111

GAAAAAGCTGAAAAATGATAACAACGTTTTTTTTGAACTTTTAAGTTATGGTCTGGTAATATAAGTTATCT  
GGAAAAGTTACTGCAGATGTGTACATCATTGTGTAACTTGGCATTATT

>M6-PGSC0003DMG400012594-(rev)M6LRR-RLK\_3172

TAAGTTATCTGGAAAAGTTACTGCAGATGTGTACATCATTGTGTAACTTGGCATTATTGGATATTGTCG  
TGGTTGATTAGGAGTTAGTTTGTATAGTTAGAATATTCAATCCCGTAG

>M6-PGSC0003DMG400012594-(rev)M6LRR-RLK\_3233

ATATTGTCGTGGTTGTATTAGGAGTTAGTTTGTATAGTTAGAATATTCAATCCCGTAGTTAGAAGCTGTT  
GTTCTTTGTGATTTTACCCGTGGTCTATCAAGCAATTTCAAGAGCGTTG

>M6-PGSC0003DMG400012594-(rev)M6LRR-RLK\_3294

AGAAGCTGTTGTTCTTTGTGATTTTACCCGTGGTCTATCAAGCAATTTCAAGAGCGTTGCTATCCTTGATG  
TCCTACCAAATATTAAGATTTCCGTTCAAGTTTTATGTTCTGAATTCAT

>M6-PGSC0003DMG400012594-(rev)M6LRR-RLK\_3355

ATCCTTGATGTCCTACCAAATATTAAGATTTCCGTTCAAGTTTTATGTTCTGAATTCATAGTGTCAGATAT  
GGAAAGTAATCTTCATTTATGCATGAACCGCATATATCAATTAATTAATAA

>M6-PGSC0003DMG400012594-(rev)M6LRR-RLK\_3416

TGTCAGATATGGAAAGTAATCTTCATTTATGCATGAACCGCATATATCAATTAATTAATTAATTGCGTTCAAGC  
TAAAATGGGAACTTGAACCGATTTACTTGACATCTTGAACCTTGTCCCTA

>M6-PGSC0003DMG400012594-(rev)M6LRR-RLK\_3477

GCGTTCAAGCTAAAATGGGAACTTGAACCGATTTACTTGACATCTTGAACCTTGTCCCTACAGTAATTTATT  
TTTCTTGATAGAGCGGCCAGAGTCAGATCCACCACTTGGCTGGCCAATAA

>M6-PGSC0003DMG400012594-(rev)M6LRR-RLK\_3538

GTAATTTATTTTCTTGATAGAGCGGCCAGAGTCAGATCCACCACTTGGCTGGCCAATAAGGAAGTGTATA  
GCACTTGGATCTGCAAGAGGCCTTGCTTATTTGCATGATCATTGCGACCC

>M6-PGSC0003DMG400012594-(rev)M6LRR-RLK\_3599

AAGTGTATAGCACTTGGATCTGCAAGAGGCCTTGCTTATTTGCATGATCATTGCGACCCTAAGATCATCC  
ACCGTGATGTCAAAGCTGCAAATATATTGTTGGATGAGGAGTATGAAGCA

>M6-PGSC0003DMG400012594-(rev)M6LRR-RLK\_3660

AGATCATCCACCGTGATGTCAAAGCTGCAAATATATTGTTGGATGAGGAGTATGAAGCAGTTGTTGGGG  
ATTTTGGGTTAGCCAAACTCATGGACTACAAGGATACTCATGTTACTACTG

>M6-PGSC0003DMG400012594-(rev)M6LRR-RLK\_3721

TGTTGGGGATTTTGGGTTAGCCAAACTCATGGACTACAAGGATACTCATGTTACTACTGCTGTACGTGGT  
ACGATTGGGCATATCGCCCCGGAGTATTTATCCACGGGTAAATCTTCAGA

>M6-PGSC0003DMG400012594-(rev)M6LRR-RLK\_3782

GTACGTGGTACGATTGGGCATATCGCCCCGGAGTATTTATCCACGGGTAAATCTTCAGAGAAAAGTATGAT  
GTGTTTGGCTACGGAGTTATGCTTCTAGAGCTCATAACTGGGCAAAGGGCA

>M6-PGSC0003DMG400012594-(rev)M6LRR-RLK\_3843

AAACTGATGTGTTTGGCTACGGAGTTATGCTTCTAGAGCTCATAACTGGGCAAAGGGCATTGATCTTGC  
TCGACTTGCAAATGATGATGATGTCATGTTGCTAGATTGGGTAAGTATTT

>M6-PGSC0003DMG400012594-(rev)M6LRR-RLK\_3904

TGATCTTGCTCGACTTGCAAATGATGATGATGTCATGTTGCTAGATTGGGTAAGTATTTACTAGCCTACA  
TGCTCTAGTTATTCTACTAGCTTATGTCTTTTTCTTTTTCTTTATTTCGT

>M6-PGSC0003DMG400012594-(rev)M6LRR-RLK\_4026

AAACTTTATACTACTTACAATTGCTAGTTTTTGTGCTGCAACTGACTTCAAACATGGAAGTGAGCACGGG  
TGAGAAGATCCCACCTTTCCTGCATGCATCTCCCTATAAGCAGAAGTCTAT

>M6-PGSC0003DMG400012594-(rev)M6LRR-RLK\_4087

GAGCACGGGTGAGAAGATCCCACCTTTCCTGCATGCATCTCCCTATAAGCAGAAGTCTATCATTGCTGTAC  
CCAGCATGATGAAAAGCTGATTTGTAGACCCACTACAAATTAGGACTGGC

>M6-PGSC0003DMG400012594-(rev)M6LRR-RLK\_4148

TTGCTGTACCCAGCATGATGAAAAGCTGATTTGTAGACCCACTACAAATTAGGACTGGCGAATAAGACA  
CTGTCATGTCCCTTCTCTTCCCTGCCTTTTCCTTTAATATCCCCAATCCC

>M6-PGSC0003DMG400012594-(rev)M6LRR-RLK\_4209

ATAAGACACTGTCATGTCCCTTCTCTTCCCTGCCTTTTCCTTTAATATCCCCAATCCCGTTCTGTTCTGTT  
ATCGCTTCCCTACCCCGTATGTAACCCACATCCCATATTCTCGTTT

>M6-PGSC0003DMG400012594-(rev)M6LRR-RLK\_4270

TCCTGTTCTGTTATCGCTTCCCTACCCCGTATGTAACCCACATCCCATATTCTCGTTTTATATCCTCATCCA

TCAATGAGAAATCTCAGCTTCATCTCATCTCCCTCACTCTTTTGCAC

>M6-PGSC0003DMG400012594-(rev)M6LRR-RLK\_4331

TATCCTCATCCATCAATGAGAAATCTCAGCTTCATCTCATCTCCCTCACTCTTTTGCACAGATTACACACAC

TCATAGCTCTCTTTGTTCTTTACTCAAGTCTCAGGGCTGCAGTTCTGT

>M6-PGSC0003DMG400012594-(rev)M6LRR-RLK\_4392

ATTACACACACTCATAGCTCTCTTTGTTCTTTACTCAAGTCTCAGGGCTGCAGTTCTGTTTAAAGTAAAAA

GTTTTATATTGACCCCCCCCCAAAAAATAATAATAATAAAAAAATT

>M6-PGSC0003DMG400012594-(rev)M6LRR-RLK\_4453

AAAGTAAAAAGTTTTATATTGACCCCCCCCCAAAAAATAATAATAATAAAAAAATTGTTAGCTCTAG

TAGGTTTTGCATTGCAGTTTGGCATGTATGATTTCTGTAATCTTTGATAC

>M6-PGSC0003DMG400012594-(rev)M6LRR-RLK\_4514

TAGCTCTAGTAGGTTTTGCATTGCAGTTTGGCATGTATGATTTCTGTAATCTTTGATACTACATCATACGA

AACATCCAAATTTCCAAAATAATTTGATTCCTGGGACTTGTATTTGTGC

>M6-PGSC0003DMG400012594-(rev)M6LRR-RLK\_4575

CATCATACGAAACATCCAAATTTCCAAAATAATTTGATTCCTGGGACTTGTATTTGTGCACATTCTTCATG

TAATCTTTTTGTTTCTCTTTCTAGAACTTAACCATCTTGCGAAAACATT

>M6-PGSC0003DMG400012594-(rev)M6LRR-RLK\_4636

ATTCTTCATGTAATCTTTTTGTTTCTTTCTAGAACTTAACCATCTTGCGAAAACATTTGTTGCATTAGCT

GTATGGTCAGGGTGGATCACTTTCAATATCGTTTAGTAGCAGATTGTT

>M6-PGSC0003DMG400012594-(rev)M6LRR-RLK\_4697

TTGCATTAGCTGTATGGTCAGGGTGGATCACTTTCAATATCGTTTAGTAGCAGATTGTTCTGGAATTGCT

TTTTAGTGTTAAAATCTTTTTCCCTTTGGTTAGCAAAGCACTCATATAG

>M6-PGSC0003DMG400012594-(rev)M6LRR-RLK\_4758

GGAATTGCTTTTTAGTGTTAAAATCTTTTTCCCTTTGGTTAGCAAAGCACTCATATAGCATATTGCTATAT

CAGAAGATTTAGATACTTTTTCCCTGCCATATTGACTGTGCGCTTCCG

>M6-PGSC0003DMG400012594-(rev)M6LRR-RLK\_4819

TATTGCTATATCAGAAGATTTAGATACTTTTTCCCTGCCATATTGACTGTGCGCTTCCGTGCAGATAAAAC

TACATCTCTTTTTTTTTCCCTTTGTATGGAATTGCTAGGCTATTTCTCTG

>M6-PGSC0003DMG400012594-(rev)M6LRR-RLK\_488

TTATTTTCTGAACATTTTGCTTAGTCAAGAAAGGCCACCTTCTATGTTAGTGGCTCTGTACTCTGTAGTAC  
TATTTCTCTTGTAGTTATTTGGAAATAGGGATAGACTTTGCTCCTTA

>M6-PGSC0003DMG400012594-(rev)M6LRR-RLK\_4880

CAGATAAACTACATCTCTTTTTTTTCTTTGTATGGAATTGCTAGGCTATTTCTCTGTATTTGCATCACA  
GAGTAGGTGAGATAGAGAATACTTTACGAGAGGGGACTTCTTTGGG

>M6-PGSC0003DMG400012594-(rev)M6LRR-RLK\_4941

TTTGCATCACAGAGTAGGTGAGATAGAGAATACTTTACGAGAGGGGACTTCTTTGGGAGGATCCTCT  
AGAAAGGGAACCCACCCTTTAGGACTTGGGAGTGCAGAAGATGGTCAATTC

>M6-PGSC0003DMG400012594-(rev)M6LRR-RLK\_5002

GATCCTCTAGAAAGGGAACCCACCCTTTAGGACTTGGGAGTGCAGAAGATGGTCAATTCTTTCACTATG  
GTTTAAGTATAGAAAATTGAAAGACAAGTGGCTATCCGAACTTGAAAGTA

>M6-PGSC0003DMG400012594-(rev)M6LRR-RLK\_5063

TCACTATGGTTTAAGTATAGAAAATTGAAAGACAAGTGGCTATCCGAACTTGAAAGTAAATAAAGTGG  
CTATCTGAACTTGAAATTCAGTATCTCCCTATAGGGCTGCTTATCAAAAA

>M6-PGSC0003DMG400012594-(rev)M6LRR-RLK\_5124

TAAAGTGGCTATCTGAACTTGAAATTCAGTATCTCCCTATAGGGCTGCTTATCAAAAATCTCAACAACT  
CTATGGTGAATGCTTTGTTATTTTAGTGATGAAATTAATTATTTGCTGA

>M6-PGSC0003DMG400012594-(rev)M6LRR-RLK\_5185

TCAACAACCTTCTATGGTGAATGCTTTGTTATTTTAGTGATGAAATTAATTATTTGCTGACATGATGAGGAA  
AGTCCGCATGCACTGTGATTTCTTTTTAAAAAATGGCACTCAATTGAAA

>M6-PGSC0003DMG400012594-(rev)M6LRR-RLK\_5246

TGATGAGGAAAGTCCGCATGCACTGTGATTTCTTTTTAAAAAATGGCACTCAATTGAAAAAATGGTTAT  
GTACCTTATTTGACCTCAAAAATTGTGTTAAAATTTAGGTAAAGGGACT

>M6-PGSC0003DMG400012594-(rev)M6LRR-RLK\_5307

AATGGTTATGTACCTTATTTGACCTCAAAAATTGTGTTAAAATTTAGGTAAAGGGACTTCTTAAGGACG  
AGAAGTATGAAACATTAGTAGATGCAGATCTTCAGGGTAATTACAATGAA

>M6-PGSC0003DMG400012594-(rev)M6LRR-RLK\_5368

TAAAGGACGAGAAGTATGAAACATTAGTAGATGCAGATCTTCAGGGTAATTACAATGAAGAAGAGGTG  
AAACAGCTTATTCAGGTAGCTCTACTCTGCACACAGAGCTCTCCTATGGAAC

>M6-PGSC0003DMG400012594-(rev)M6LRR-RLK\_5429

AGAGGTGAAACAGCTTATTCAGGTAGCTCTACTCTGCACACAGAGCTCTCCTATGGAACGTCCAAAGAT  
GTCGGAAGTGGTCAGAATGCTTGAAGGTGATGGCCTTGCTGAGAGGTGGGA

>M6-PGSC0003DMG400012594-(rev)M6LRR-RLK\_549

TCTGTAGTACTATTTCTCTTGTGTTAGTTATTTGGAAATAGGGATAGACTTTGCTCCTTATTGGCCAAGTGG  
CAGACATGAAGATAAAAACATTTCAATCACCTGGAGTATCATTACCAAT

>M6-PGSC0003DMG400012594-(rev)M6LRR-RLK\_5490

CCAAAGATGTCGGAAGTGGTCAGAATGCTTGAAGGTGATGGCCTTGCTGAGAGGTGGGAAGAATGGC  
AGAAGGAAGAGATGTTCCGTCAAGACTTCAACCATGCTCACCATCCTCACACT

>M6-PGSC0003DMG400012594-(rev)M6LRR-RLK\_5551

AATGGCAGAAGGAAGAGATGTTCCGTCAAGACTTCAACCATGCTCACCATCCTCACACTGATTGGATTAT  
TGCAGACTCCACTTATAATCTACGACCCGATGAGTTATCAGGGCCAAGAT

>M6-PGSC0003DMG400012594-(rev)M6LRR-RLK\_61

CCATTGACAATTTAAACACATTTTGAACCTCCTTTTCTTTTCTCTCAAAGGTGTAGCTTGTGGATGCACTT  
ATTAATTTTTAATGTGCTACATAGCTATGTGATGACTAATGTATAGCC

>M6-PGSC0003DMG400012594-(rev)M6LRR-RLK\_610

GGCCAAGTGGCAGACATGAAGATAAAAACATTTCAATCACCTGGAGTATCATTACCAATGAGACAGCAT  
CATAATTTTCTATGTGGCTTAAATTATTCATAAAGAGAGAGAGAGGAAGAG

>M6-PGSC0003DMG400012594-(rev)M6LRR-RLK\_732

GGCGGAAGAAGAAAACCTGAAGCAGCTCATAGAAGTACCCAAAGTTGGTGTCTTAGGGTGTCCAAAGT  
GCTGGACATGCATGTCTGAAAATTCAAAAATATACAGGAAGTTAGACACAC

>M6-PGSC0003DMG400012594-(rev)M6LRR-RLK\_793

CCAAAGTGTGGACATGCATGTCTGAAAATTCAAAAATATACAGGAAGTTAGACACACACATTCTCAAT  
GTGTGTCCAACACCAGTACTTGACAATGAAATTTGTCCATCATCCTTGGC

>M6-PGSC0003DMG400012594-(rev)M6LRR-RLK\_854

ATTCTCAATGTGTGTCCAACACCAGTACTTGACAATGAAATTTGTCCATCATCCTTGGCAGTCATCGTTCC  
TATTTCCCTTATATAGGCTTGCAAAGGCTAGGTGGATTTGAGTGGTTG

>M6-PGSC0003DMG400012594-(rev)M6LRR-RLK\_915

TCATCGTTCCTATTTCCCTTATATAGGCTTGCAAAGGCTAGGTGGATTTGAGTGGTTGATAAAAATTGTG

GTTGCTGCTCTCTATAAAGGTTTCATTGGCGTGCTGCTGAACAGGATAAAA

>M6-PGSC0003DMG400012594-(rev)M6LRR-RLK\_976

AAAATTGTGGTTGCTGCTCTCTATAAAGGTTTCATTGGCGTGCTGCTGAACAGGATAAAAAATTTACATGC  
TATTCTTGTTATTTCCCGAAGCTCTGAAAAGCTAGATACTTCTGATGATCG

>M6-PGSC0003DMG400012816-(rev)M6RLKmalectin\_0

GCAAAAGGGAAATGTATTTGAGAAATTATAAGCAAATTGAAGAAAATTCAGAGCAGAAATTGGACTTA  
AAAATGCTCAAATTTCACTTTTTGTTGTTCTTTGCTTTCAAGATTGCT

>M6-PGSC0003DMG400012816-(rev)M6RLKmalectin\_1037

GGTTGTGGTTAATTCTATGAGTATGTTATTGGATGTAAGATAGGATTCCTAATTATTCGTAACGTAATTG  
CACGTGCTCGTCAGTATAACCCTGTATATTTGCAAAATTTCTAATCGCTT

>M6-PGSC0003DMG400012816-(rev)M6RLKmalectin\_1098

ACGTAATTGCACGTGCTCGTCAGTATAACCCTGTATATTTGCAAAATTTCTAATCGCTTCACTCCATGATA  
TGATGAAGTATCTTGAGTCTTGTTAAAGAGGAAAAAGAAATAAGTGA

>M6-PGSC0003DMG400012816-(rev)M6RLKmalectin\_1159

CTCCATGATATGATGAAGTATCTTGAGTCTTGTTAAAGAGGAAAAAGAAATAAGTGAGGTGTCTTCA  
CAAATTAATGAGCAGCTAGAAGTCTGGTTTTTTCATAAGAGATAAATTTT

>M6-PGSC0003DMG400012816-(rev)M6RLKmalectin\_122

TTGTCTACCTGGTTAGCTCCTTGTTATGGTTCTTTTTCTTTTTGTATAATGTGAATTTGATTAAGGGGTT  
TAAAGGGTGTCTATATTATGTAGTTATAATGTGTTGAGTAACTTTTT

>M6-PGSC0003DMG400012816-(rev)M6RLKmalectin\_1220

TGTCTTCACAACTTAATGAGCAGCTAGAAGTCTGGTTTTTTCATAAGAGATAAATTTTTTGGTGCAAAC  
ATACTAGGTGATTCTTCTCATATGTCCCCTGGAATTAGTCGAGGTGCAC

>M6-PGSC0003DMG400012816-(rev)M6RLKmalectin\_1403

TTTATAAGACGTTATTGCTTCCCTATATGTACTTTTTCTGCTGTTCTTCCATTGCTAGCACTGTTACATGA  
AAAGAAAAAGGCTGCTCCTTATTATTGATTTGCCTCTTCAAGTTGC

>M6-PGSC0003DMG400012816-(rev)M6RLKmalectin\_1464

CTGTTACATGAAAAGAAAAAGGCTGCTCCTTATTATTGATTTGCCTCTTCAAGTTGCTCTTTTGTACT  
AATCTAATTATCTATCCTGTTTATTCACTGCAGCACCATATGTAACGC

>M6-PGSC0003DMG400012816-(rev)M6RLKmalectin\_1525



TTTTGTTTACTAATCTAATTATCTATCCTGTTTATTCAGTGCAGCACCATATGTAACGCGAATAAGCTGTG  
GAGCTCAAATGATGTTTCGTAGTTCCTCAACAAATACCCTCTGGCATAA

>M6-PGSC0003DMG400012816-(rev)M6RLKmalectin\_1586

ATAAGCTGTGGAGCTCAAATGATGTTTCGTAGTTCCTCAACAAATACCCTCTGGCATAAAGATTTTGGAT  
ATACAGGAGGCATACGTACGAAAGCAAACCGCCCAAGTTACATAACACCT

>M6-PGSC0003DMG400012816-(rev)M6RLKmalectin\_1647

ATTTTGGATATACAGGAGGCATACGTACGAAAGCAAACCGCCCAAGTTACATAACACCTCCACTCGACA  
CATTACGGTATTTCCCTCTATCAGAGGGTCCTGATAATTGTTACAATATCG

>M6-PGSC0003DMG400012816-(rev)M6RLKmalectin\_1708

ACTCGACACATTACGGTATTTCCCTCTATCAGAGGGTCCTGATAATTGTTACAATATCGATAAAGTGCCA  
CATGGCCACTATTCAGTGAGGATCTACTTTGGATTGGTTAAGAACCAAG

>M6-PGSC0003DMG400012816-(rev)M6RLKmalectin\_1769

AAAGTGCCACATGGCCACTATTCAGTGAGGATCTACTTTGGATTGGTTAAGAACCAAGTTTTGATAACG  
AACCTCTATTTGATGTTTCTGTTGAAGGGACCTTGGTTTATTCTTTGCCG

>M6-PGSC0003DMG400012816-(rev)M6RLKmalectin\_183

ATTAAGGGGTTTAAAGGGTGTCTATATTATGTAGTTATAATGTGTTTGAGTAACTTTTTTTTTTTTGATAA  
CTGTGATGTTTGGGTCAGTTTGTGTGCAGCTTGACTAATGGATGATGTA

>M6-PGSC0003DMG400012816-(rev)M6RLKmalectin\_1830

TTGATAACGAACCTCTATTTGATGTTTCTGTTGAAGGGACCTTGGTTTATTCTTTGCCGTCTGGTTGGAGT  
AATCACGATGATGAACAAGCATTGTTGAACTCTTGTATTTCTTGAGA

>M6-PGSC0003DMG400012816-(rev)M6RLKmalectin\_1891

TGGTTGGAGTAATCACGATGATGAACAAGCATTGTTGAACTCTTGTATTTCTTGAGAATGGTACTACC  
TCACTTTGCTCCACAGCACTGGTCATGGAGATCCTGCTATACTCGCAAT

>M6-PGSC0003DMG400012816-(rev)M6RLKmalectin\_1952

GGTACTACCTCACTTTGCTCCACAGCACTGGTCATGGAGATCCTGCTATACTCGCAATCGAGATTCAAG  
AAGTAGATGAGAAAGCATACTATTCTGGTCCTGGATTTGGTCGAGGGACA

>M6-PGSC0003DMG400012816-(rev)M6RLKmalectin\_2013

AGATTCAAGAAGTAGATGAGAAAGCATACTATTCTGGTCCTGGATTTGGTCGAGGGACAATCTTTAGAA  
CTAGCAAAGATTGAGCTGTGGAGATCAGAATCCAAAGTTTGACGTTGACT

>M6-PGSC0003DMG400012816-(rev)M6RLKmalectin\_2074

CTTTAGAACTAGCAAAAAGATTGAGCTGTGGAGATCAGAATCCAAAGTTTGACGTTGACTACGATGGGGA  
CCGTTGGGGTGGGGATCGGTTCTGGAGCTCAATTATGACCTTTGGTCAGAA

>M6-PGSC0003DMG400012816-(rev)M6RLKmalectin\_2135

GATGGGGACCGTTGGGGTGGGGATCGGTTCTGGAGCTCAATTATGACCTTTGGTCAGAATTCTGATAAG  
CCTATATCTACTAAAAGCACCATAAAGTCAGCGTCTGTAGCTCCAACTTC

>M6-PGSC0003DMG400012816-(rev)M6RLKmalectin\_2196

CTGATAAGCCTATATCTACTAAAAGCACCATAAAGTCAGCGTCTGTAGCTCCAACTTCTATCCACAAGCT  
CTTTACCAAAGTCTCTTGTAGTACCGACAACGATCCGGATTTAACGC

>M6-PGSC0003DMG400012816-(rev)M6RLKmalectin\_2257

TCCACAAGCTCTTTACCAAAGTCTCTTGTAGTACCGACAACGATCCGGATTTAACGCACACAATAGAA  
GTCGATCCCAACAAAACTACTCTGTCTGGTTACACTTTGCCGAAATTGA

>M6-PGSC0003DMG400012816-(rev)M6RLKmalectin\_2318

ACAATAGAAGTCGATCCCAACAAAACTACTCTGTCTGGTTACACTTTGCCGAAATTGATCCTTCAGTTAC  
AGATGTGGGACAAAGGGTATTGACATTTGATTAATGGTAACATTGTG

>M6-PGSC0003DMG400012816-(rev)M6RLKmalectin\_2379

CTTCAGTTACAGATGTGGGACAAAGGGTATTGACATTTGATTAATGGTAACATTGTGTATCGAGATAT  
TGACATTGTGAGAATAGCGGGGGTGTAAACAGTGCTCTTGTACTGAACA

>M6-PGSC0003DMG400012816-(rev)M6RLKmalectin\_244

TTTTTGATAACTGTGATGTTGGGTCAGTTTGTGTGCAGCTTGACTAATGGATGATGTAAAATTTGTGTTT  
GAATTC AATTTGTTTTGGTTTGATTGGTTAATGTTAACTCAGAGCAGCA

>M6-PGSC0003DMG400012816-(rev)M6RLKmalectin\_2440

TCGAGATATTGACATTGTGAGAATAGCGGGGGTGTAAACAGTGCTCTTGTACTGAACACAACCATTCC  
AGTCAGTGGCAGGATTTTGACAATCACATTACATCCAACAACGGGGACTCA

>M6-PGSC0003DMG400012816-(rev)M6RLKmalectin\_2501

ACCATTCCAGTCAGTGGCAGGATTTTGACAATCACATTACATCCAACAACGGGGACTCATGCCATCATT  
GTGCCATTGAAATTTTTGAGGTTATACCAGTTGAATCTAAAACATTACCA

>M6-PGSC0003DMG400012816-(rev)M6RLKmalectin\_2562

CCATCATTAGTGCCATTGAAATTTTTGAGGTTATACCAGTTGAATCTAAAACATTACCAGAGGAAGGTAA

GTAAATGTTTCACTTGTACTTCTTGGATGCTACATGTTTTTTCATCTCA

>M6-PGSC0003DMG400012816-(rev)M6RLKmalectin\_2623

GGAAGGTAAGTTAAATGTTTCACTTGTACTTCTTGGATGCTACATGTTTTTTCATCTCATACTTTACACA  
CTGGAAAGGGGCCAAATGTAGTATGTTATTTTTTCTTTGTTCTTGG

>M6-PGSC0003DMG400012816-(rev)M6RLKmalectin\_2684

CACTTTACACACTGGAAAGGGGCCAAATGTAGTATGTTATTTTTTCTTTGTTCTTGGTCAAGCTTGTGC  
CTTTCTAATTAAGATAATCTTTATCTTCTTTTCTTTTTCAGTAAAGGCT

>M6-PGSC0003DMG400012816-(rev)M6RLKmalectin\_2745

AAGCTTGTGCCTTTCTAATTAAGATAATCTTTATCTTCTTTTCTTTTTCAGTAAAGGCTTTACAGTCACTGA  
AACTTGCACTTGGACTTCCCCTTCGTTTTGGGTGGAATGGTGATCCAT

>M6-PGSC0003DMG400012816-(rev)M6RLKmalectin\_2806

ACAGTCACTGAAACTTGCACCTGGACTTCCCCTTCGTTTTGGGTGGAATGGTGATCCATGTTTTCCGCAAC  
ATCCGTGGAGTGGAGTAGATTGTCAGTTTGACAACTCCAGCAATAAATG

>M6-PGSC0003DMG400012816-(rev)M6RLKmalectin\_2867

TTCCGCAACATCCGTGGAGTGGAGTAGATTGTCAGTTTGACAACTCCAGCAATAAATGGGTCATCGAT  
GGGCTGTACGTTCTTGACCTTGACCTTAGATAGAAAAGTTCCTCCCATTCC

>M6-PGSC0003DMG400012816-(rev)M6RLKmalectin\_2928

TCATCGATGGGCTGTACGTTCTTGACCTTGACCTTAGATAGAAAAGTTCCTCCCATTCCACACACGTGCAC  
AAGCACACACCTGTAACACTCATTGACATATATTCCTTCTATTGATGTT

>M6-PGSC0003DMG400012816-(rev)M6RLKmalectin\_2989

ACACGTGCACAAGCACACACCTGTAACACTCATTGACATATATTCCTTCTATTGATGTTCTGCACCCCAAT  
TTAAAAGTTTTGCTGGACTATACTTGGCTTTCTTTCTATGTTATGTGAT

>M6-PGSC0003DMG400012816-(rev)M6RLKmalectin\_305

ATTTGTGTTTGAATTCAATTTGTTTTGGTTTGATTGGTTAATGTTAACTCAGAGCAGCATTGGACTCAAA  
ATGCTCAAATTCACCTTTTTGCTCTTCTTTGCTTTCAGGATTGATT

>M6-PGSC0003DMG400012816-(rev)M6RLKmalectin\_3050

GCACCCCAATTTAAAAGTTTTGCTGGACTATACTTGGCTTTCTTTCTATGTTATGTGATTTTATTATTTAT  
CTTAATGTGCGTCCTCTTTATCTGTTTTTCTGTAAGCACAGTGACCT

>M6-PGSC0003DMG400012816-(rev)M6RLKmalectin\_3111

TATTATTTTATCTTAATGTGCGTCCTCTTTATCTGTTTTCTGTAAGCACAGTGACCTGGACAACCAAGGT  
TTACGAGGTTTCTTACCAGATGATGTTTCTCAATTGCGTCATCTTCAG

>M6-PGSC0003DMG400012816-(rev)M6RLKmalectin\_3172

ACAACCAAGGTTTACGAGGTTTCTTACCAGATGATGTTTCTCAATTGCGTCATCTTCAGAGCATGTAAGTT  
TAAATGCTGCTTTTTTTGAATATACTATTTGGATGAAAGATGTGTATCT

>M6-PGSC0003DMG400012816-(rev)M6RLKmalectin\_3233

CATGTAAGTTTAAATGCTGCTTTTTTTGAATATACTATTTGGATGAAAGATGTGTATCTTCCAACGGTCTT  
CTACTGCTTAAAATGGAGTTAATGATCAATATGAGTTTTAGCCAATATA

>M6-PGSC0003DMG400012816-(rev)M6RLKmalectin\_3294

CAACGGTCTTCTACTGCTTAAAATGGAGTTAATGATCAATATGAGTTTTAGCCAATATATTGACACTTTTT  
TCAAAATTATTTGAACATAATTTGTCTGAAGGAATTCATACTAAACGG

>M6-PGSC0003DMG400012816-(rev)M6RLKmalectin\_3355

GACACTTTTTTCAAATTATTTGAACATAATTTGTCTGAAGGAATTCATACTAAACGGTTAAATAACTTC  
CAGTTTAAGAGGTTTTCAATATTTGAGCATCTTTTGGAAATGTGTTTTCG

>M6-PGSC0003DMG400012816-(rev)M6RLKmalectin\_3416

AAATAACTTCCAGTTTAAGAGGTTTTCAATATTTGAGCATCTTTTGGAAATGTGTTTTCGTTCATGTATATT  
GCAATGCTGGCGTCCACTTCTCAAACATGATCTTCTCTGACTTATGCTT

>M6-PGSC0003DMG400012816-(rev)M6RLKmalectin\_3477

CATGTATATTGCAATGCTGGCGTCCACTTCTCAAACATGATCTTCTCTGACTTATGCTTTGCTTGTGTGCA  
TTTTACAGAAATTTGAGTGGAACAACATTCACGGGCCTATTCCCTCAG

>M6-PGSC0003DMG400012816-(rev)M6RLKmalectin\_3538

CTTGTGTGCATTTTACAGAAATTTGAGTGGAACAACATTCACGGGCCTATTCCCTCAGCACTTGGAAACA  
ATAACTAGTCTGGAGAAATTGTGAGTACATTTGTGGAGAGTTGTGCTTTT

>M6-PGSC0003DMG400012816-(rev)M6RLKmalectin\_3599

CTTGAACAATAACTAGTCTGGAGAAATTGTGAGTACATTTGTGGAGAGTTGTGCTTTTCTGTACTTGAT  
ATTAGATTTCTTAGCTGCCAGAGTAATAGTATATGAAAATATGGAAACAG

>M6-PGSC0003DMG400012816-(rev)M6RLKmalectin\_366

TGGACTCAAATGCTCAAATCCACTTTTTGCTCTTCTTTGCTTTCAGGATTGATTTTTGTCTACCTGG  
TTAGGTTCTTTTATGTTTATTTTTTCTTTTGTATGATGTGAATTTGA

>M6-PGSC0003DMG400012816-(rev)M6RLKmalectin\_3660

GTA CTTGATATTAGATTTCTTAGCTGCCAGAGTAATAGTATATGAAAATATGGAAACAGAATAGTTTTGT  
TAACTACTTTGTGAGTATGTTAGGCATTCAATATATAATTATTGTTTCATT

>M6-PGSC0003DMG400012816-(rev)M6RLKmalectin\_3721

TAGTTTTGTAACTACTTTGTGAGTATGTTAGGCATTCAATATATAATTATTGTTTCATTATCATCTATATGC  
GCCGCGAGATTAGTGAATGTGCATAATGTTTCGTTGGTTGTTTATGTGA

>M6-PGSC0003DMG400012816-(rev)M6RLKmalectin\_3782

CATCTATATGCGCCGCGAGATTAGTGAATGTGCATAATGTTTCGTTGGTTGTTTATGTGATTAGATCCTCA  
CTGTGTGATTACCTAACAAAAGTTGCTCAACAGGGATCTTTCATACAATT

>M6-PGSC0003DMG400012816-(rev)M6RLKmalectin\_3843

AGATCCTCACTGTGTGATTACCTAACAAAAGTTGCTCAACAGGGATCTTTCATACAATTCCTTCAACAGGT  
CAATTCCTGAAAGCCTTGGGGAATTGACGTCGTTACTGACACTGTAAGA

>M6-PGSC0003DMG400012816-(rev)M6RLKmalectin\_3904

TTCAACAGGTCAATTCCTGAAAGCCTTGGGGAATTGACGTCGTTACTGACACTGTAAGATACTTCAACAA  
GCTCAGTTGAGGACATTTGATGGATCAATAAAGAGCTCTAATTTACTACT

>M6-PGSC0003DMG400012816-(rev)M6RLKmalectin\_3965

CTTCAACAAGCTCAGTTGAGGACATTTGATGGATCAATAAAGAGCTCTAATTTACTACTTCATTTATTACA  
GGAATCTCAACGGCAATTTGCTCTCCGGAAAAATTCCTGCAGCGTTAGG

>M6-PGSC0003DMG400012816-(rev)M6RLKmalectin\_4026

ATTTATTACAGGAATCTCAACGGCAATTTGCTCTCCGGAAAAATTCCTGCAGCGTTAGGCGGAAGGCTCT  
TGCACAGAGCTAGCTTCAAGTATGTTCTCCTAATTGCACGTTCTTAGCAT

>M6-PGSC0003DMG400012816-(rev)M6RLKmalectin\_4087

GAAGGCTCTTGCACAGAGCTAGCTTCAAGTATGTTCTCCTAATTGCACGTTCTTAGCATAAGGCTCCGTC  
TTAGTGAAGCACCTTCAGAAATTGCATCGTAACTATAGATACATACAAT

>M6-PGSC0003DMG400012816-(rev)M6RLKmalectin\_427

TGTCTACCTGGTTAGGTTCTTTTATGTTTATTTTTCTTTTGTATGATGTGAATTTGATGAAGGACTTTAA  
AGGGTGTCTAAATTATGTAGTTTTAACGTGTTTTGAGTAACTTTCTTC

>M6-PGSC0003DMG400012816-(rev)M6RLKmalectin\_4453

ATTGAAACGGATAGAACATCACTTTCACGTAGTTTTTCTCGTGTCCAACCTTTTTATCGTCAACAATACATA

CTACTTATGGTCGATATTCAATTTCTAGATGCGTCGATGAAGGTCTCCT

>M6-PGSC0003DMG400012816-(rev)M6RLKmalectin\_4514

ACAATACATACTACTTATGGTCGATATTCAATTTCTAGATGCGTCGATGAAGGTCTCCTTGTTCATCATTTT

GTGTGGATGCTAACTGTGGAAAGAACAAGAAGTTTATAATCATAGCAT

>M6-PGSC0003DMG400012816-(rev)M6RLKmalectin\_4575

TCATCATTTTGTGTGGATGCTAACTGTGGAAAGAACAAGAAGTTTATAATCATAGCATTGTAAAACA

CACATACAATTATAAGTTAAGGTTAAACAAGTGTACTGTTAACTCCATT

>M6-PGSC0003DMG400012816-(rev)M6RLKmalectin\_4636

GTTAAAACACACATACAATTATAAGTTAAGGTTAAACAAGTGTACTGTTAACTCCATTGATTTAGCATCC

ACTATTGGTGGTTAGGCCTAACACCAACTTCCGCAATCCACTAGCTACT

>M6-PGSC0003DMG400012816-(rev)M6RLKmalectin\_4697

TTTAGCATCCACTATTGGTGGTTAGGCCTAACACCAACTTCCGCAATCCACTAGCTACTTCAATGGTTGGA

TGTTAACTATTACCACATAATCAACAAATGAAATATACTAGGGTTCTTT

>M6-PGSC0003DMG400012816-(rev)M6RLKmalectin\_4758

AATGGTTGGATGTTAACTATTACCACATAATCAACAAATGAAATATACTAGGGTTCTTTCTGATAGCTAG

GTAAACAGGGGTTAGCTAGGGTTCTTTCTGGGCCACATCACTATTCATTC

>M6-PGSC0003DMG400012816-(rev)M6RLKmalectin\_4819

GATAGCTAGGTAAACAGGGGTTAGCTAGGGTTCTTTCTGGGCCACATCACTATTCATTCAGGCTATAACC

AATTGACGTAAGTCCAAATTCTAACAGTAACATTTAGCATATTTCTCAA

>M6-PGSC0003DMG400012816-(rev)M6RLKmalectin\_4880

GCTATAACCAATTGACGTAAGTCCAAATTCTAACAGTAACATTTAGCATATTTCTCAAAGAAATGCTG

CGGTAAATAGGTGTCAATGTCATTTGTGTTAAGGCAGAGATGCTAATTAA

>M6-PGSC0003DMG400012816-(rev)M6RLKmalectin\_4941

GAAATGCTGCGGTAAATAGGTGTCAATGTCATTTGTGTTAAGGCAGAGATGCTAATTAAACCTTACCATT

CATGTGTTGAACTCATATGACAATTCATCGGTGTATTAACCTGAGGATC

>M6-PGSC0003DMG400012816-(rev)M6RLKmalectin\_5002

CTTACCATTCATGTGTTGAACTCATATGACAATTCATCGGTGTATTAACCTGAGGATCAGATAAAAAAC

CTGTGACTTTTTTTGTTTATTAGTACTTGTGCTAAATACTTACTTTGGAT

>M6-PGSC0003DMG400012816-(rev)M6RLKmalectin\_5063

ATAAAAAACCTGTGACTTTTTTTGTTTCATTAGTACTTGTGCTAAATACTTACTTTGGATGCTTTCAGTTTTA  
CTGATAATGCAGGCCTTTGTGGTATTCTGGATTACCAACATGTGGAC

>M6-PGSC0003DMG400012816-(rev)M6RLKmalectin\_5124

TTTCAGTTTTACTGATAATGCAGGCCTTTGTGGTATTCTGGATTACCAACATGTGGACCACATCTTACTG  
TTGGTGCCAAAATCGGCATTGGCTTAGGGGCGTGTGTCGCTGTTGTAGT

>M6-PGSC0003DMG400012816-(rev)M6RLKmalectin\_5185

CATCTTACTGTTGGTGCCAAAATCGGCATTGGCTTAGGGGCGTGTGTCGCTGTTGTAGTTATCGCTACAT  
GCATAACATGTTGGTGAAAAGGCGGCCAAAATATCCTCCGCGCTAAAAGA

>M6-PGSC0003DMG400012816-(rev)M6RLKmalectin\_5246

TCGCTACATGCATAACATGTTGGTGAAAAGGCGGCCAAAATATCCTCCGCGCTAAAAGAATGGCTGGTA  
AGAGTTTTTCAACATAACATGCTCTATATCCATAGTCAAATGTATTTCCCA

>M6-PGSC0003DMG400012816-(rev)M6RLKmalectin\_5307

GGCTGGTAAGAGTTTTTCAACATAACATGCTCTATATCCATAGTCAAATGTATTTCCCATCTCTTTCATGT  
GTACTGTTGTCAACATGGTGTGTTTTGAGAAATGAATTTTCGAGTGAAGAT

>M6-PGSC0003DMG400012816-(rev)M6RLKmalectin\_5368

TCTTTCATGTGTACTGTTGTCAACATGGTGTGTTTTGAGAAATGAATTTTCGAGTGAAGATGTATCTCTGCAC  
GATGAAATTAACGAGTTTCATGCTTCTCATAGATGAATCACTGTTTT

>M6-PGSC0003DMG400012816-(rev)M6RLKmalectin\_5429

ATCTCTGCACGATGAAATTAACGAGTTTCATGCTTCTCATAGATGAATCACTGTTTTTTTTTCTCTTCA  
TTTTTATACAGTGAGAGACGCTCCTTATGCGAAGAAAAGAACACATT

>M6-PGSC0003DMG400012816-(rev)M6RLKmalectin\_5490

TTTCCTCTTCATTTTTTATACAGTGAGAGACGCTCCTTATGCGAAGAAAAGAACACATTTAAACCACATCC  
AAATGACAAGACACCATCACAATGGTCATCATCACGAACATACTCGGAC

>M6-PGSC0003DMG400012816-(rev)M6RLKmalectin\_5551

AACCACATCCAAATGACAAGACACCATCACAATGGTCATCATCACGAACATACTCGGACAGCTGTTGAG  
AATGGACCTCCTTTGCTTGTCTGAGTTCGAACAATTTTTGAGTCAACTCAC

>M6-PGSC0003DMG400012816-(rev)M6RLKmalectin\_5612

CTGTTGAGAATGGACCTCCTTTGCTTGTCTGAGTTCGAACAATTTTTGAGTCAACTCACACTAGAACTTC  
TTTCACGTCAAGAGGATTCAACAATTTATACATATACCAACAAAAACAT

>M6-PGSC0003DMG400012816-(rev)M6RLKmalectin\_5673

TAGAAACTTCTTTACAGTCAAGAGGATTCAACAATTTATACATATACCAACAAAAACATTGTTTCGTATCCT  
ACTTACACAGTATAATTTTTTGACAAAGGAAGGATCATATGAATCTCAT

>M6-PGSC0003DMG400012816-(rev)M6RLKmalectin\_5734

TTCGTATCCTACTTACACAGTATAATTTTTTGACAAAGGAAGGATCATATGAATCTCATCCGCAGACCTTG  
TAACTCCATCGCAAGCTTAGTGAGAAGATTTCCAGATAACAATGCTGCTG

>M6-PGSC0003DMG400012816-(rev)M6RLKmalectin\_5795

GCAGACCTTGTAECTCCATCGCAAGCTTAGTGAGAAGATTTCCAGATAACAATGCTGCTGTTTTGTGGCTA  
GAAAATGTGTATAGTGGTTATACAGATCAGGAATCAATTTTAAATGCCAT

>M6-PGSC0003DMG400012816-(rev)M6RLKmalectin\_5856

TTGTGGCTAGAAAATGTGTATAGTGGTTATACAGATCAGGAATCAATTTTAAATGCCATAGATGTAATTC  
AGTGCAAGAGACCTATGTTGTTCCGACTCTTCAAAAATGTCGACGGGTGT

>M6-PGSC0003DMG400012816-(rev)M6RLKmalectin\_6039

GGAGAGTCCGAGCAACTTAGCAAGAGACAGTGTGTTGTATATTTTAACTATATAAATGTATTCTTGTCAT  
TAGTTTTGGAGCTTTTGGTTAAAGACACTCGTGTAAGTGTGAAATGGTG

>M6-PGSC0003DMG400012816-(rev)M6RLKmalectin\_6090

ATAAATGTATTCTTGTCATTAGTTTTGGAGCTTTTGGTTAAAGACACTCGTGTAAGTGTGAAATGGTGA  
ATTACAATAGAACCACAGAATGTGATCGCATTATACGGTCTCAATTGAAC

>M6-PGSC0003DMG400012816-(rev)M6RLKmalectin\_61

TGGACTTAAAAATGCTCAAATTTCACTTTTTGTTGTTCTTTGCTTTCAAGATTGCTTTTTGTCTACCTG  
GTTAGCTCCTTGTTATGTTCTCTTTTTCTTTTTGTATAATGTGAATT

>M6-PGSC0003DMG400012816-(rev)M6RLKmalectin\_610

TGTTTGAATTTCGATTTGTTGGTTTGATTGTCTAATGTTAACTAATTGCAAGTACTTAGCTGTTTGTGGTT  
GGTTCTATGATTATGTTGTTGGATTTAGTCATGGACCTTATGGTGCCTA

>M6-PGSC0003DMG400012816-(rev)M6RLKmalectin\_671

GTTTGTGGTTGGTTCTATGATTATGTTGTTGGATTTAGTCATGGACCTTATGGTGCCTAAATTTTCAATAT  
TGGAATTGAAGCAAATTGAAGAAAACATAGCAGCATTCTCAAAAAA

>M6-PGSC0003DMG400012816-(rev)M6RLKmalectin\_732

TTTTCAATATTGGAATTGAAGCAAATTGAAGAAAACATAGCAGCATTCTCAAAAAAAAATCCAACCTT



TGTTGTTCTTCTTTAACTCTCCCCGTCTCAGCTCCTTTTATGTTTTTAT

>M6-PGSC0003DMG400012816-(rev)M6RLKmalectin\_793

TCCAACTTTTGTTGTTCTTCTTTAACTCTCCCCGTCTCAGCTCCTTTTATGTTTTTATGCAATGTGAATTTA

GTTGTAATTATGTAGCTGTAATTGAGTCTGCATTAATAATGTTTTAGT

>M6-PGSC0003DMG400012816-(rev)M6RLKmalectin\_854

AATGTGAATTTAGTTGTAATTATGTAGCTGTAATTGAGTCTGCATTAATAATGTTTTAGTTTTGATTCACTA

ATCTTAACTTGTGTTGGAAGTGCAACAAGCATGTGAGATGTTGCGATTA

>M6-PGSC0003DMG400012816-(rev)M6RLKmalectin\_915

TGATTCACTAATCTTAACTTGTGTTGGAAGTGCAACAAGCATGTGAGATGTTGCGATTAGACTCTTTATA

TGGTCTTGAAAATAGTTAGCTCATGTGCTAGATTTTTGCAAGTACTTGG

>M6-PGSC0003DMG400012816-(rev)M6RLKmalectin\_976

CTCTTTATATGGTCTTGAAAATAGTTAGCTCATGTGCTAGATTTTTGCAAGTACTTGGCTGGTTGTGGTT

AATTCTATGAGTATGTTATTGGATGTAAGATAGGATTCCTAATTATTCG

>M6-PGSC0003DMG400012817-(rev)M6LRR-RLK\_0

GGCTTAATCACTTTTCCAGAAAAAATCCACTAATCCATTCATCTCCTTCAACAATGCATCTTCAAATCTTG

CTTATACTTCTATTACCTACATTGATTCTCTCAATAAACCAAGAATCC

>M6-PGSC0003DMG400012817-(rev)M6LRR-RLK\_1037

TTCACGCAATTTATACGAATTAAGCTCTTTGGTAATAGTTTAAATGGAACCTTACCTAAAGATCTTGGTA

AATTTTCTCCATTGGTATGGATTGATGTTTCAAACAATGAGTTTTCGGG

>M6-PGSC0003DMG400012817-(rev)M6LRR-RLK\_1098

GATCTTGGTAAATTTTCTCCATTGGTATGGATTGATGTTTCAAACAATGAGTTTTCGGGTGAAATCCGG

TGAATTTGTGCGGAAATGGGGTTTTAGAGGAGGTTTTGATGATAGATAAC

>M6-PGSC0003DMG400012817-(rev)M6LRR-RLK\_1159

AAATTCGGTGAAATTTGTGCGGAAATGGGGTTTTAGAGGAGGTTTTGATGATAGATAACTCGTTTTCCG

GTGGAATTCGGTGAGTTAAGCCAATGCCGAGCTTATTACGTGTGAGAT

>M6-PGSC0003DMG400012817-(rev)M6LRR-RLK\_122

TTATTTACACACCATAAAGCTTGGATTTGATGACCCAAATGGTGTTTTTTCAAACCTGGAATCTCCATGATA

ACTCCTCACCTGTAACCTGGTTTGGAGTAAAATGCGACTCTTTAACTCG

>M6-PGSC0003DMG400012817-(rev)M6LRR-RLK\_1220

GTTTTCCGGTGGAATCCGGTGAGTTTAAGCCAATGCCGGAGCTTATTACGTGTGAGATTAGCTCATAAT  
AAGTTCTCAGGTGATGTCCCTGTGGAATTTTGGGGGCTGCCACGCCTTTC

>M6-PGSC0003DMG400012817-(rev)M6LRR-RLK\_1281

GCTCATAATAAGTTCTCAGGTGATGTCCCTGTGGAATTTTGGGGGCTGCCACGCCTTTCGCTGCTTGAGT  
TAACGGACAATTCATTTTCTGGTGGAATCGTGAAAACCTATAGCTGGTGCA

>M6-PGSC0003DMG400012817-(rev)M6LRR-RLK\_1342

TGCTTGAGTTAACGGACAATTCATTTTCTGGTGGAATCGTGAAAACCTATAGCTGGTGCATCGAATTTATC  
CGCTTTGATTTTGTCAAAGAACGAATTTTCGGGTACTATTCCTGAAGAGA

>M6-PGSC0003DMG400012817-(rev)M6LRR-RLK\_1403

GAATTTATCCGCTTTGATTTTGTCAAAGAACGAATTTTCGGGTACTATTCCTGAAGAGATTGGCTTTTTGG  
AAAGTTTGGTTGATTTTGTGGGAAATGATAACAAGTTTTCAGGGTCATT

>M6-PGSC0003DMG400012817-(rev)M6LRR-RLK\_1464

GGCTTTTTGGAAAGTTTGGTTGATTTTGTGGGAAATGATAACAAGTTTTCAGGGTCATTACCGGTTAGTA  
TAGTGAATCTTGAGCAATTGGGAAGAATGGATTTTCACAACAATGAATTA

>M6-PGSC0003DMG400012817-(rev)M6LRR-RLK\_1525

CGGTTAGTATAGTGAATCTTGAGCAATTGGGAAGAATGGATTTTCACAACAATGAATTAAGTGGTAAGT  
TTCCTAGTGGGGTTCATTCTTTGAAGAAATTGAATGAATTGAACTTGCAA

>M6-PGSC0003DMG400012817-(rev)M6LRR-RLK\_1586

TGGTAAGTTTCCTAGTGGGGTTCATTCTTTGAAGAAATTGAATGAATTGAACTTGGCAAACAATGATCTT  
TCTGGAGAAATCCCCGGGAAATCGGGAGCTTGTCTGTTTTGAACTATCT

>M6-PGSC0003DMG400012817-(rev)M6LRR-RLK\_1647

AATGATCTTTCTGGAGAAATCCCCGGGAAATCGGGAGCTTGTCTGTTTTGAACTATCTTGACCTATCAG  
GAAACAAGTTTTCGGGGGAAATTCCAGTTGCGTTGCAGAATTTGAAGCTC

>M6-PGSC0003DMG400012817-(rev)M6LRR-RLK\_1708

ACCTATCAGGAAACAAGTTTTCGGGGGAAATTCCAGTTGCGTTGCAGAATTTGAAGCTCAATCAGCTGA  
ATTTATCGAATAATGGCCTTTCGGGTGGTATTCTCCTTCATATGCAAAGG

>M6-PGSC0003DMG400012817-(rev)M6LRR-RLK\_1769

TCAGCTGAATTTATCGAATAATGGCCTTTCGGGTGGTATTCTCCTTCATATGCAAAGGGAATGTACAAG  
AATAGCTTTCTGGGGAATCCCCGTTTATGTGGAGATATTGGAGGCTTATG

>M6-PGSC0003DMG400012817-(rev)M6LRR-RLK\_183

CTCCATGATAACTCCTCACCTGTAAGTGGTTGGAGTAAATGCGACTCTTAACTCGTTCTGTTACATC  
TATTGACCTCTCCAACACCAATATCGCCGGCCATTTCCGGCTTCTCTT

>M6-PGSC0003DMG400012817-(rev)M6LRR-RLK\_1830

ATGTACAAGAATAGCTTTCTGGGGAATCCCGGTTTATGTGGAGATATTGGAGGCTTATGTGATGGAAAA  
GATGAAGGTAAGTCTGCTGGTTATGTATGGTTACTGAGATTGCTTTTCGTA

>M6-PGSC0003DMG400012817-(rev)M6LRR-RLK\_1891

ATGGAAAAGATGAAGGTAAGTCTGCTGGTTATGTATGGTTACTGAGATTGCTTTTCGTAAGTCTGCTGTTT  
GGTGGTTGTAGTTGGGGTAGTTTCGTTCTATTGGAAGTATAGGAATTACA

>M6-PGSC0003DMG400012817-(rev)M6LRR-RLK\_1952

TGCTGTTTTGGTGGTTGTAGTTGGGGTAGTTTCGTTCTATTGGAAGTATAGGAATTACAAGAAAGCAAAA  
AGTTGGATAGATCGAAATGGACCTTGACGTCGTTTCATAAGTTAGGTTT

>M6-PGSC0003DMG400012817-(rev)M6LRR-RLK\_2013

AAAGCAAAAAGGTTGGATAGATCGAAATGGACCTTGACGTCGTTTCATAAGTTAGGTTTCGATGAGTAT  
GAAGTACTGGAAGCTCTAGATGAAGACAAGTATTGGTAGTGGTTCTTCC

>M6-PGSC0003DMG400012817-(rev)M6LRR-RLK\_2074

ATGAGTATGAAGTACTGGAAGCTCTAGATGAAGACAAGTATTGGTAGTGGTTCTTCCGGGAAGGTTT  
ACAAGGTCGTTTTGAGTAATGGTGAGGCTGCTGCTGTGAAAAAAGTTTCAA

>M6-PGSC0003DMG400012817-(rev)M6LRR-RLK\_2135

GAAGGTTTACAAGGTCGTTTTGAGTAATGGTGAGGCTGCTGCTGTGAAAAAAGTTTCAAGAAGTTTGAA  
AAAAACAGATGAGAGTTGTGACATTGAGAAAGGTAAGTATCAGGATGATAT

>M6-PGSC0003DMG400012817-(rev)M6LRR-RLK\_2196

AGTTTGAAAAAACAGATGAGAGTTGTGACATTGAGAAAGGTAAGTATCAGGATGATATATTTGAAGCG  
GAGGTTGAGACATTGGGCAAGATTCGACACAAGAACATCGTTAGGCTATGG

>M6-PGSC0003DMG400012817-(rev)M6LRR-RLK\_2257

TTGAAGCGGAGGTTGAGACATTGGGCAAGATTCGACACAAGAACATCGTTAGGCTATGGTGGTTGTTGTA  
CAACAAGGGGTTGCAAACTTTTGGTTTACGAGTACATGCCTAATGGAAGCT

>M6-PGSC0003DMG400012817-(rev)M6LRR-RLK\_2318

TTGTTGTACAACAAGGGGTTGCAAACTTTTGGTTTACGAGTACATGCCTAATGGAAGCTTGGGCGATTTG

CTACACAGCAGCAAAGTGGGTTGTTGGATTGGCCTAAGAGATTTAAGAT

>M6-PGSC0003DMG400012817-(rev)M6LRR-RLK\_2379

GGCGATTTGCTACACAGCAGCAAAGTGGGTTGTTGGATTGGCCTAAGAGATTTAAGATAGCTATGGAT

GCTGCAGAGGGACTCTCATATTTGCATCATGATTGTGCTCCTCCGATTGTT

>M6-PGSC0003DMG400012817-(rev)M6LRR-RLK\_244

CTGTTACATCTATTGACCTCTCCAACACCAATATCGCCGGCCCATTTCCGGCTTCTCTTCTTTGCCGGCTCA

AGTATATCAAGTACATTTCACTTCTACAATAACTCCATTAACTCGACAC

>M6-PGSC0003DMG400012817-(rev)M6LRR-RLK\_2440

CTATGGATGCTGCAGAGGGACTCTCATATTTGCATCATGATTGTGCTCCTCCGATTGTTACAGAGACTT

GAAGTCGAACAATATCTTGTGGACGGGGAGTTTGGAGCTCGAGTTGCTG

>M6-PGSC0003DMG400012817-(rev)M6LRR-RLK\_2501

CAGAGACTTGAAGTCGAACAATATCTTGTGGACGGGGAGTTTGGAGCTCGAGTTGCTGATTTTGGTGT

GGCAAAGGCGATGGATGTTGATGACAAGGGAACCACGTCTATGTCAGTCAT

>M6-PGSC0003DMG400012817-(rev)M6LRR-RLK\_2562

TTTGGTGTGGCAAAGGCGATGGATGTTGATGACAAGGGAACCACGTCTATGTCAGTCATTGCAGGGTCT

TGCGGTTATATTGCTCCAGGTTAGAGGATTAATCCTTCACTTTGGGAGTTC

>M6-PGSC0003DMG400012817-(rev)M6LRR-RLK\_2623

CAGGGTCTTGCGGTTATATTGCTCCAGGTTAGAGGATTAATCCTTCACTTTGGGAGTTCTACTAACATGA

TTTTGTTGAATTTGGTTTATGCCTTCCATTGCAAATTGTAGTTAAGATGT

>M6-PGSC0003DMG400012817-(rev)M6LRR-RLK\_2684

CTAACATGATTTTGTGAATTTGGTTTATGCCTTCCATTGCAAATTGTAGTTAAGATGTATGCCTAAATAT

AACATATTTCATATATTGTTATATTATAATTAAGCGTCGAATAAGGTCT

>M6-PGSC0003DMG400012817-(rev)M6LRR-RLK\_2867

GATTGTAAACGTCCAATATCTATAATCAGGCAGACAGCTATATATGAGTAATTTTGGTCCATTCTTGAG

CTATGTTGCTCAAATCCTTCAAAAATGTGGCATGTCTTTGTTCGGATTCT

>M6-PGSC0003DMG400012817-(rev)M6LRR-RLK\_2928

ATTCTTGAGCTATGTTGCTCAAATCCTTCAAAAATGTGGCATGTCTTTGTTCGGATTCTCCCAAAGTTATT

CAATTTTGGAGGATCCAATACAGGCGCAACAACATTTTGGAGGATCCG

>M6-PGSC0003DMG400012817-(rev)M6LRR-RLK\_2989

CAAAGTTATTCAATTTTGGAGGATCCAATACAGGCGCAACAACATTTTGGAGGATCCGAGCAACATAG  
TACTTGAGTGCCCTTGTACATTAACACTAAGGTTTGTCTCCAAGAACAGGGC

>M6-PGSC0003DMG400012817-(rev)M6LRR-RLK\_305

TTGCCGGCTCAAGTATATCAAGTACATTTATTCTACAATAACTCCATTAACTCGACTTCCGGTGGAGG  
AGTTATCCGCTTGTAATCTCTTGTCCATCTAGATTTAGCTCAAAATTT

>M6-PGSC0003DMG400012817-(rev)M6LRR-RLK\_3050

CAACATAGTACTTGAGTGCCCTTGTACATTAACACTAAGGTTTGTCTCCAAGAACAGGGCATTCTTTGTTTA  
CATTTGCTTTCTGGTTCTGGTAGTGCTCCTCCGGTTGAACTAAATTCTG

>M6-PGSC0003DMG400012817-(rev)M6LRR-RLK\_3111

TCTTTGTTTACATTTGCTTTCTGGTTCTGGTAGTGCTCCTCCGGTTGAACTAAATTCTGTTCGTCTTGCAGA  
ATATGCTTACACACTTCAGGTGAACGAGAAGAGTGATATATACAGTTT

>M6-PGSC0003DMG400012817-(rev)M6LRR-RLK\_3172

CGTCTTGCAGAATATGCTTACACACTTCAGGTGAACGAGAAGAGTGATATATACAGTTTTGGCGTGGTA  
ATCCTCGAGCTAGTGACAGGGAAACTCCCTGTAGGTCCTGAATACGGGGAA

>M6-PGSC0003DMG400012817-(rev)M6LRR-RLK\_3233

GCGTGGTAATCCTCGAGCTAGTGACAGGGAAACTCCCTGTAGGTCCTGAATACGGGGAAAAGGATTTG  
GTGAAGTGGGTTTGTGCTACTCTAGACCAGAAGGGTAGAGATCATGTTATTG

>M6-PGSC0003DMG400012817-(rev)M6LRR-RLK\_3294

GGATTTGGTGAAGTGGGTTTGTGCTACTCTAGACCAGAAGGGTAGAGATCATGTTATTGACCCGAAACT  
CGACTCTTGTTC AAGGAGGACATAAGCAAAGTCCTAAAAATTGGCCTCCT

>M6-PGSC0003DMG400012817-(rev)M6LRR-RLK\_3355

CCGAAACTCGACTCTTGTTC AAGGAGGACATAAGCAAAGTCCTAAAAATTGGCCTCCTCTGCACTAGCC  
CCCTCCAATTAACCGACCCTCGATGAGAAAAGTCGTAAAAATGCTGCAG

>M6-PGSC0003DMG400012817-(rev)M6LRR-RLK\_3416

GCACTAGCCCCCTCCAATTAACCGACCCTCGATGAGAAAAGTCGTAAAAATGCTGCAGGAAGTTGGTG  
GCGGAGACCAGCTCAAGACAGCATTAAACAGATGGCAAGTTGACCCCTTATT

>M6-PGSC0003DMG400012817-(rev)M6LRR-RLK\_3477

AGTTGGTGGCGGAGACCAGCTCAAGACAGCATTAAACAGATGGCAAGTTGACCCCTTATTACCACGAAGA  
CGCATCAGATCAAGGAAATGTAGCTTAAAGATAGTCAACATATCTTTGCTT

>M6-PGSC0003DMG400012817-(rev)M6LRR-RLK\_3538

CACGAAGACGCATCAGATCAAGGAAATGTAGCTTAAAGATAGTCAACATATCTTTGCTTAGATGTAGCG  
ACATGGACAGTGAAGATTCATAGGCATAGTCGTTGTATCGTGAAAGTGAAG

>M6-PGSC0003DMG400012817-(rev)M6LRR-RLK\_3599

ATGTAGCGACATGGACAGTGAAGATTCATAGGCATAGTCGTTGTATCGTGAAAGTGAAGATGTGTGAAT  
TTTTTATTTGCTAATTGCTTAATACTTTGTCTATCAATACGTGATTTTTG

>M6-PGSC0003DMG400012817-(rev)M6LRR-RLK\_3651

AGTGAAGATGTGTGAATTTTTTTATTTGCTAATTGCTTAATACTTTGTCTATCAATACGTGATTTTTGGTT  
GATTTTGGAGAGAAGGGGAAAACAGAATTGAGGTGAAATGTAAAAGGA

>M6-PGSC0003DMG400012817-(rev)M6LRR-RLK\_366

CCGGTGGAGGAGTTATCCGCTTGTAATCTCTGTCCATCTAGATTTAGCTCAAAATTTGTTAGTGGGTA  
GTCTTCCATCGAGTTTGGCGGAGCTTCCTGAGCTGAAATACCTTGATTTG

>M6-PGSC0003DMG400012817-(rev)M6LRR-RLK\_427

TAGTGGGTAGTCTTCCATCGAGTTTGGCGGAGCTTCCTGAGCTGAAATACCTTGATTTGACCGGAAATAA  
CTTTACCGGCGAAATCCGGCGAGTTTTGGGGCATTCCGGCGACTTGAAG

>M6-PGSC0003DMG400012817-(rev)M6LRR-RLK\_488

CGGAAATAACTTTACCGGCGAAATCCGGCGAGTTTTGGGGCATTCCGGCGACTTGAAGTTCTGGGTCT  
GGTTGAAAATTTGTTAACTGGGACTATCCCGCTGGAGATTGGAAACATTTT

>M6-PGSC0003DMG400012817-(rev)M6LRR-RLK\_549

CTGGGTCTGGTTGAAAATTTGTTAACTGGGACTATCCCGCTGGAGATTGGAAACATTTGAGTTTGAAG  
CAGCTGAATTTGTCGTACAACCCGTTTTCTCCGGGTCGGATCCCGCCGGAG

>M6-PGSC0003DMG400012817-(rev)M6LRR-RLK\_61

TTCAAATCTTGCTTATACTTCTATTACCTACATTGATTCTCTCAATAAACCAAGAATCCCTTTATTTACACAC  
CATAAAGCTTGGATTTGATGACCCAAATGGTGTTTTTTCAAAGTGA

>M6-PGSC0003DMG400012817-(rev)M6LRR-RLK\_610

GTTTGAAGCAGCTGAATTTGTCGTACAACCCGTTTTCTCCGGGTCGGATCCCGCCGGAGATTGGGAACCT  
CACGAATCTAGAGGTGCTATGGTTAACTGACTGTGGGTTAATCGGTGAGG

>M6-PGSC0003DMG400012817-(rev)M6LRR-RLK\_671

TGGGAACCTCACGAATCTAGAGGTGCTATGGTTAACTGACTGTGGGTTAATCGGTGAGGTTCCGGGTAC

GTAAAGGGGATTAATAAGCTTGTTAACTTGGACCTTGCCTAAACAACCTT

>M6-PGSC0003DMG400012817-(rev)M6LRR-RLK\_732

CCGGGTACGTTAAGGGGATTAATAAGCTTGTTAACTTGGACCTTGCCTAAACAACCTTGTACGGTCCTA

TTCCGAGCTGGCTCACTGAGTTAACTAGTGTTGAGCAAATTGAGCTGTAC

>M6-PGSC0003DMG400012817-(rev)M6LRR-RLK\_793

ACGGTCCTATTCCGAGCTGGCTCACTGAGTTAACTAGTGTTGAGCAAATTGAGCTGTACAATAACTCGTT

CTCTGGCGAGTTTCCGGTGAATGGGTGGTGAATATGACCTCGTTGAGGC

>M6-PGSC0003DMG400012817-(rev)M6LRR-RLK\_854

TAACTCGTTCTCTGGCGAGTTTCCGGTGAATGGGTGGTGAATATGACCTCGTTGAGGCGGGTTCGACCT

GTCGATGAATCGGGTTACCGGGTCGATCCCGAGCGGGTTGTGTGAGTTGCC

>M6-PGSC0003DMG400012817-(rev)M6LRR-RLK\_915

GTCGACCTGTGATGAATCGGGTTACCGGGTCGATCCCGAGCGGGTTGTGTGAGTTGCCACTTGAGTCG

CTCAATCTTTATGAGAATCAATTGTATGGTGAGTTACCTATAACCATTGCA

>M6-PGSC0003DMG400012817-(rev)M6LRR-RLK\_976

TTGAGTCGCTCAATCTTTATGAGAATCAATTGTATGGTGAGTTACCTATAACCATTGCAAATTCACGCAAT

TTATACGAATTAAGCTCTTTGGTAATAGTTTAAATGGAACCTTACCTA

>M6-PGSC0003DMG400012929M6LRR-RLK\_0

GCTGCCTGCAGTAACACCTTGAAAACCATATCTCATAGAAGCAAAAACAAGAGTCTGGTATTGTTGCT

GGTTAAATGATGAATGTTGTTGTAGTTGTGATCCTTAGTTTTTTCACATTT

>M6-PGSC0003DMG400012929M6LRR-RLK\_1037

TGGGATGGAAGTACTAGAGGATTTGTTAAGGGCTTCAGCTTATGTAGTAGGTAAGAGTAGGAGTGGGATAG

TCTACAAGGTGGTGGCTGGCGCTACGGCTGTTGCTGTTTCGACGATTAAGCGA

>M6-PGSC0003DMG400012929M6LRR-RLK\_1098

GGGATAGTCTACAAGGTGGTGGCTGGCGCTACGGCTGTTGCTGTTTCGACGATTAAGCGAGGGGGATGT

CACGTGGAAGTTCAAGGAGTTTGAGACGGAGGTGGAAGCCATTGGGAGAGTA

>M6-PGSC0003DMG400012929M6LRR-RLK\_1159

GGGATGTCACGTGGAAGTTCAAGGAGTTTGAGACGGAGGTGGAAGCCATTGGGAGAGTACAACATCC

AAATGTGGTGAGGCTTAGGGCTTACTATGCAAGTGATGAGAAATTGCTGG

>M6-PGSC0003DMG400012929M6LRR-RLK\_122

AATCTCTGTTATATTTTCATTGAATTCAGATGGTGTCTCTGTTAGCTTTGAAATCTGCAATTTCTAATGA  
CCCATCTGGGTTTCTTTCTTCTTGGTCGGAGTTAGACTCATCAGCATG

>M6-PGSC0003DMG400012929M6LRR-RLK\_1220

ACATCCAAATGTGGTGAGGCTTAGGGCTTACTACTATGCAAGTGATGAGAAATTGCTGGTAACTGATTTT  
ATCCGCAATGGCACCTTGACAATGCTTTACATGGTAATCTCACTTCATT

>M6-PGSC0003DMG400012929M6LRR-RLK\_1281

ACTGATTTTCATCCGCAATGGCACCTTGACAATGCTTTACATGGTAATCTCACTTCATTCTTACTTGGAAAT  
TTCTTTACTGTTAAAAGAAAATTCACTCTAAACATACTACTTACGGAG

>M6-PGSC0003DMG400012929M6LRR-RLK\_1342

TACTTGGAATTTTCTTTACTGTTAAAAGAAAATTCACTCTAAACATACTACTTACGGAGTATTATTCTAAAT  
CACTATAAGGATAAACTTTTAGTAGTGCTGGAGTAAGTTATCCTGCCT

>M6-PGSC0003DMG400012929M6LRR-RLK\_1403

TTATTCTAAATCACTATAAGGATAAACTTTTAGTAGTGCTGGAGTAAGTTATCCTGCCTATGCGAGTGAG  
AAAGGGTGTACTTTTTTGGAGAAAATTAGATCAAATCCTCATAAGCAGTA

>M6-PGSC0003DMG400012929M6LRR-RLK\_1464

GCGAGTGAGAAAGGGTGTACTTTTTTGGAGAAAATTAGATCAAATCCTCATAAGCAGTATTATCTCTGTG  
TCCATGGTACTTCAGGGGTTTTATTAATATATCAGACAACCTTGAAGGTG

>M6-PGSC0003DMG400012929M6LRR-RLK\_1525

ATCTCTGTGTCCATGGTACTTCAGGGGTTTTATTAATATATCAGACAACCTTGAAGGTGGCATTGTATTTG  
ATATTTATGCAAAAAAAGAAGTTAATGTCTACTCCATTGAAGTAAGTG

>M6-PGSC0003DMG400012929M6LRR-RLK\_1586

ATTGTATTTGATATTTATGCAAAAAAAGAAGTTAATGTCTACTCCATTGAAGTAAGTGTTTACAACCTAA  
GATTCCTAAAGCTGCTCATGATTATTCGTTGAAGTATTCTCTAGGCAC

>M6-PGSC0003DMG400012929M6LRR-RLK\_1647

TACAACCTAAGATTCCTTAAAGCTGCTCATGATTATTCGTTGAAGTATTCTCTAGGCACATTTAAGAATTT  
CTGTCATGGTTTCAAGCATTCTCTGGTAAATATTAATGATCCCAAATTA

>M6-PGSC0003DMG400012929M6LRR-RLK\_1708

TTAAGAATTTCTGTCATGGTTTCAAGCATTCTCTGGTAAATATTAATGATCCCAAATTATATGCTTTTAAGT  
CGTTAGCTGCCTACTGTCCTTATCTTCTTTTGGATCAAGAATAGGCAAC



>M6-PGSC0003DMG400012929M6LRR-RLK\_1769

TGCTTTTAAGTCGTTAGCTGCCTACTGTCCTTATCTTCTTTTGATCAAGAATAGGCAACCAAATGTAATTA  
TGATGAACAAGAAGACTAGTTTGGGGTAGTGGGGTGGAGAGGGGAATAATA

>M6-PGSC0003DMG400012929M6LRR-RLK\_183

ATTTCTAATGACCCATCTGGGTTTCTTCTTCTTGGTCGGAGTTAGACTCATCAGCATGCCATTGGAATGG  
AATCACATGCGATGAAAATCAGAAGGTGACTTCTATTTCTCTGTCGTCG

>M6-PGSC0003DMG400012929M6LRR-RLK\_1830

AATGTAATTATGATGAACAAGAAGACTAGTTTGGGGTAGTGGGGTGGAGAGGGGAATAATACGTGCATGG  
TTCATTTGTTTTTATCTGAGCAATTGGCATTGTGTGTTTTCTGCTTCTGGAA

>M6-PGSC0003DMG400012929M6LRR-RLK\_1891

TGCATGGTTCATTTGTTTTTATCTGAGCAATTGGCATTGTGTGTTTTCTGCTTCTGGAAAACATCTATGCA  
AGTGTTAAGCTATTGAGACCTTTTGGGCTCCACAATTCAACATCTGTTG

>M6-PGSC0003DMG400012929M6LRR-RLK\_1952

CATCTATGCAAGTGTTAAGCTATTGAGACCTTTTGGGCTCCACAATTCAACATCTGTTGGTTTATTGTAAT  
TCACTAGTTTCTGGTCCCCATTATGGCATTTCCTTCTGTTTTCTGCTT

>M6-PGSC0003DMG400012929M6LRR-RLK\_2013

TTATTGTAATCACTAGTTTCTGGTCCCCATTATGGCATTTCCTTCTGTTTTCTGCTTCTAGGGAGTACA  
TTTTATGTGGCCTAAGATACATTGAGAGAGGCTTTAAAGTTGAAGTAA

>M6-PGSC0003DMG400012929M6LRR-RLK\_2074

TAGGGAGTACATTTTATGTGGCCTAAGATACATTGAGAGAGGCTTTAAAGTTGAAGTAAACATTCGGAA  
GTTACACTAAGGAAAAAAAACATTAGATCTATCAATTGGATGTTAAGCTAT

>M6-PGSC0003DMG400012929M6LRR-RLK\_2135

ATTCGGAAGTTACACTAAGGAAAAAAAACATTAGATCTATCAATTGGATGTTAAGCTATTCGTTTCGATTC  
ACGTTATTAGGAATTGAACTAAGCATGGTTACACATAAAAATGTGAATCC

>M6-PGSC0003DMG400012929M6LRR-RLK\_2196

GTTTCGATTCACGTTTATTAGGAATTGAACTAAGCATGGTTACACATAAAAATGTGAATCCAAAGTGTGAAA  
TTTTGCAGAACAAAATATCGACTAATCATAAAAATGTTGTAGTTCCTCCT

>M6-PGSC0003DMG400012929M6LRR-RLK\_2257

AGTGTGAAATTTTTGCAGAACAAAATATCGACTAATCATAAAAATGTTGTAGTTCCTCCTTGTAAACATCTAT

CATTGTCAAGTTCACCTTAGGATGTTGGACTTTATGTAAAAGAGGCATT

>M6-PGSC0003DMG400012929M6LRR-RLK\_2318

TAACATCTATCATTGTCAAGTTCACCTTAGGATGTTGGACTTTATGTAAAAGAGGCATTCAGCTGACACC  
GAGAAGAAAACACTATTACACCACAGGTTATTTTTGTCTTCAAATTCCTTTT

>M6-PGSC0003DMG400012929M6LRR-RLK\_2379

GCTGACACCGAGAAGAAAACACTATTACACCACAGGTTATTTTTGTCTTCAAATTCCTTTTTAACTAAGTGG  
GAAGTCCACGACGTTAAGCTTTCTGATAGGTAAATATAAAACAAAAAAG

>M6-PGSC0003DMG400012929M6LRR-RLK\_244

ATTGGAATGGAATCACATGCGATGAAAATCAGAAGGTGACTTCTATTTCTCTGTCGTCGAAGAATTTGA  
GTGGTTACATTCTTCTGAAATCGGAGCACTTTCTTCTCTATCAATTCCTT

>M6-PGSC0003DMG400012929M6LRR-RLK\_2440

ACTAAGTGGAGAAGTCCACGACGTTAAGCTTTCTGATAGGTAAATATAAAACAAAAAAGATAATAAGCA  
AGACACGAAAACGAAATTCATCTGATTCCAAGACTTGGTAAGTCATTCCC

>M6-PGSC0003DMG400012929M6LRR-RLK\_2501

AATAAGCAAGACACGAAAACGAAATTCATCTGATTCCAAGACTTGGTAAGTCATTCCCTGTTTCCTTTA  
GTCTGTTTGTCTTGTATTTCAGAGGTGTCGTTTAATGTACCTATAATTTG

>M6-PGSC0003DMG400012929M6LRR-RLK\_2562

TTTCCTTAGTCTGTTTGTCTTGTATTTCAGAGGTGTCGTTTAATGTACCTATAATTTGTATTGTGGTTATA  
GAATCCCTGAATAGGCAGTTACTGGACTTGTGTTAGCCTTGTATTTTG

>M6-PGSC0003DMG400012929M6LRR-RLK\_2623

TTGTGTTATAGAATCCCTGAATAGGCAGTTACTGGACTTGTGTTAGCCTTGTATTTTGCTCTCTTTATTTT  
CAGAACCTTGCACTTCACAAAACATTAATGTTCTTTTGAACTCCAGT

>M6-PGSC0003DMG400012929M6LRR-RLK\_2684

CTCTTTATTTTCAGAACCTTGCACTTCACAAAACATTAATGTTCTTTTGAACTCCAGTTTGTCTTTCTTAAC  
TTCAATCTTTGTGTACAAGTCTTCTCCACATAATCCTTCCCTTTTGC

>M6-PGSC0003DMG400012929M6LRR-RLK\_2745

GTTTTCTTAACTTCAATCTTTGTGTACAAGTCTTCTCCACATAATCCTTCCCTTTTGTCTGACTTTGGTAT  
TGTC AATTGTGAACCAATCCTATATAAACACAAGTGGAAATGAAGAT

>M6-PGSC0003DMG400012929M6LRR-RLK\_2806

GTA CTTTGGTATTGTCAATTGTGAACCAATCCTATATAAACACAAGTGGAAATGAAGATTGCACCTACTT  
TGGGGTGGCTTCTTGAGAATGTGGTTCCTCTAGTTCATATTGGTAATTTT

>M6-PGSC0003DMG400012929M6LRR-RLK\_2867

CACCTACTTTGGGGTGGCTTCTTGAGAATGTGGTTCCTCTAGTTCATATTGGTAATTTTTGTCTCGACAA  
AATACCAACTGACCTATTTCTGTTTTCTTGACTCAGACTTCCATTGT

>M6-PGSC0003DMG400012929M6LRR-RLK\_2928

GTCTCGACAAAATACCAACTGACCTATTTCTGTTTTCTTGACTCAGACTTCCATTGTTTCAAGCACATAT  
TTTTGTACCAATTTCAAGGATTTGAAGTGAAAAATGTTCTATTTGTTAT

>M6-PGSC0003DMG400012929M6LRR-RLK\_2989

CAAGCACATATTTTTGTACCAATTTCAAGGATTTGAAGTGAAAAATGTTCTATTTGTTATTCTGAAAAGCTG  
TCATCGATTTGGCATGAATCACTTTTTAATTTATCTTCCACAAGTCCAA

>M6-PGSC0003DMG400012929M6LRR-RLK\_305

GAATTTGAGTGGTTACATTCCTTCTGAAATCGGAGCACTTTCTTCTCTATCAATTCTTTCTTTCTTCTACAA  
CAACTTTTCAAACCAATCCCTATTCGTCTCTTCAATGCTACTTCCCT

>M6-PGSC0003DMG400012929M6LRR-RLK\_3050

TGAAAAGCTGTCATCGATTTGGCATGAATCACTTTTTAATTTATCTTCCACAAGTCCAAAAATTTTTTTG  
GATTTCAAACCTTGCAATTTCCGGCAAAAAATTTCTCATGGAAAAAAC

>M6-PGSC0003DMG400012929M6LRR-RLK\_3111

ATATTTTTGGATTTCAAACCTTGCAATTTCCGGCAAAAAATTTCTCATGGAAAAAACACATACACAACCT  
AATTTCTCTAGAGAACTGGGTGATTTCTTTTTATGTTGGAGCATTATC

>M6-PGSC0003DMG400012929M6LRR-RLK\_3172

ATACACAACCTAATTTCTCTAGAGAACTGGGTGATTTCTTTTTATGTTGGAGCATTATCCTTGTTAATCAAT  
CTTTTTATGTTTATTTTTTACAATTGCAGGAGGACTTGGTAATAACTT

>M6-PGSC0003DMG400012929M6LRR-RLK\_3233

TGTTAATCAATTTTTATGTTTATTTTTTACAATTGCAGGAGGACTTGGTAATAACTTGCCACCTCTGTCA  
TGGGCAGCTAGATTGAAGATTGCTCAAGGCACAGCTCGGGGTCTAATG

>M6-PGSC0003DMG400012929M6LRR-RLK\_3294

CACCTCTGTCATGGGCAGCTAGATTGAAGATTGCTCAAGGCACAGCTCGGGGTCTAATGCACATTCATG  
AGTGAATCCCAGGAAGTATGTTTCATGGGAACATAAATTCAACAAAAATCC

>M6-PGSC0003DMG400012929M6LRR-RLK\_3355

CATTCATGAGTGTAATCCCAGGAAGTATGTTTCATGGGAACATAAATTCAACAAAAATCCTTCTTGATGAT  
GACTTGCAAGCCTACATATCTGGTTTTGGATTGACTCGCCTTGTTTCAGG

>M6-PGSC0003DMG400012929M6LRR-RLK\_3416

CTTGATGATGACTTGCAAGCCTACATATCTGGTTTTGGATTGACTCGCCTTGTTTCAGGTTGCTCCAAGCC  
CATAAACAGTAGTACCAAAAAGCTAAGTACAAGTCAAATCATAATAAGT

>M6-PGSC0003DMG400012929M6LRR-RLK\_3477

GCTCCAAGCCCATAAACAGTAGTACCAAAAAGCTAAGTACAAGTCAAATCATAATAAGTCCTCAAAACTC  
AACTCCGTCTTGTACTATGTACATGGCACCTGAGGGTTCGAGTGCCTGGCT

>M6-PGSC0003DMG400012929M6LRR-RLK\_3538

TCAAAACTCAACTCCGTCTTGTACTATGTACATGGCACCTGAGGGTTCGAGTGCCTGGCTCCAAGTTCACC  
CAGAAAAGCGACATCTACTCATTTGGTATGGTACTTTTTGGAGATTCTGAC

>M6-PGSC0003DMG400012929M6LRR-RLK\_3599

AAGTTCACCCAGAAAAGCGACATCTACTCATTTGGTATGGTACTTTTTGGAGATTCTGACTGGTCAGTTGA  
CAGATGGAGGATCGGAGGTGGAGGATGATGGGAAGGGGCTTGAGAGTTTT

>M6-PGSC0003DMG400012929M6LRR-RLK\_366

CTTTCTACAACAACCTTTTCAAACCAATCCCTATTCGTCTCTTCAATGCTACTTCCCTTCACTCCCTTGACC  
TCTCTAACAAATGCTTTCACAGGATTCTTACCTCAACAAATCACATCC

>M6-PGSC0003DMG400012929M6LRR-RLK\_3660

GTCAGTTGACAGATGGAGGATCGGAGGTGGAGGATGATGGGAAGGGGCTTGAGAGTTTTGTTAGAAA  
GGTTTTTAGACAAGAACGACCCTTGTCTGAGATCATAGACCCTGCTCTCTTGA

>M6-PGSC0003DMG400012929M6LRR-RLK\_3721

TAGAAAGGTTTTTAGACAAGAACGACCCTTGTCTGAGATCATAGACCCTGCTCTCTTGAATGAGGTTTCAT  
GCTAAAAGCAAGTTGTTGCAGCATTTTCATATCGCTCTCAACTGCACAGA

>M6-PGSC0003DMG400012929M6LRR-RLK\_3782

GAGGTTTCATGCTAAAAGCAAGTTGTTGCAGCATTTTCATATCGCTCTCAACTGCACAGAACTGGATCCTG  
AGCTTCGGCCAAGGATGAGAACAGTTTCTGATAACCTTGATCGCATCAAA

>M6-PGSC0003DMG400012929M6LRR-RLK\_3843

TGGATCCTGAGCTTCGGCCAAGGATGAGAACAGTTTCTGATAACCTTGATCGCATCAAACCTGCAGTAAA

AGAAACTTGATCAATGTAAAGGCTTCAATGTTTTGCTGACCGCCTATTGT

>M6-PGSC0003DMG400012929M6LRR-RLK\_3904

GCAGTAAAAGAACTTGATCAATGTAAAGGCTTCAATGTTTTGCTGACCGCCTATTGTAGAGCTGTTTA  
GTAATTGTGAATCAGAATTTTCAGTTTGTGTTGTGCCAAATCCTAGATT

>M6-PGSC0003DMG400012929M6LRR-RLK\_3965

AGCTGTTTAGTAATTGTGAATCAGAATTTTCAGTTTGTGTTGTGCCAAATCCTAGATTGGCGTTTCTATT  
GTAECTACTAATTCAATGTTCTATTTGTTGAATCATCAATTGAAAAT

>M6-PGSC0003DMG400012929M6LRR-RLK\_4026

CGTTTCTATTGTAECTACTAATTCAATGTTCTATTTGTTGAATCATCAATTGAAAATTGCTTGTGCTAGC  
GAATCTTACAAGGCTATTTGTGTTTGATGTACGGACATGATCTGAATT

>M6-PGSC0003DMG400012929M6LRR-RLK\_4087

CTTGTGCTAGCGAATCTTACAAGGCTATTTGTGTTTGATGTACGGACATGATCTGAATTCCAGATAACAT  
GCAAAGGAGCATGGTCAGACCCTGCCTATTCAAATGATGTAGTTCAATAG

>M6-PGSC0003DMG400012929M6LRR-RLK\_4148

AGATAACATGCAAAGGAGCATGGTCAGACCCTGCCTATTCAAATGATGTAGTTCAATAGTTGGAAAGTT  
CTGTATGAATTCTTGATTGCCATTACCCTATTCAATCTTTGAAACTACA

>M6-PGSC0003DMG400012929M6LRR-RLK\_4189

AATGATGTAGTTCAATAGTTGGAAAGTTCTGTATGAATTCTTGATTGCCATTACCCTATTCAATCTTTTG  
AAACTACTCCACCTCTATTCTCTCATTCTACCAAGTGAAGTTGCTAC

>M6-PGSC0003DMG400012929M6LRR-RLK\_427

ACTCCCTTGACCTCTCTAACAATGCTTTCACAGGATTCTTACCTCAACAAATCACATCCCTTATAAACCTTA  
AACACCTTGATCTTTCTTCTAATTTTCTCAATGGCTCACTTCCCCAAG

>M6-PGSC0003DMG400012929M6LRR-RLK\_488

TATAAACCTTAAACACCTTGATCTTTCTTCTAATTTTCTCAATGGCTCACTTCCCCAAGAGCTAACTCATCT  
TACACTTCTCACTGGAACCTTAAATCTTTCATACAACAGATTTACCGG

>M6-PGSC0003DMG400012929M6LRR-RLK\_549

CTAACTCATCTTACACTTCTCACTGGAACCTTAAATCTTTCATACAACAGATTTACCGGCCAACTTCCGGC  
GAGTTATGGTAAGTTTCTGTAACATTGAGTTTAGACCTTCGGCATAAC

>M6-PGSC0003DMG400012929M6LRR-RLK\_61

TTGTTGCTGGTTAAATGATGAATGTTGTTGTAGTTGTGATCCTTAGTTTTTTCACATTTTCAATCTCTGTTA  
TATTTTCATTGAATTCAGATGGTGTCTCTGTTAGCTTTGAAATCTG

>M6-PGSC0003DMG400012929M6LRR-RLK\_610

AACTCCGGCGAGTTATGGTAAGTTTCCTGTAACATTGAGTTTAGACCTTCGGCATAACAATCTGACCGG  
AAAGATACCTTCAATCGGGTCGTTGTTGAATCAAGGGCCTACTGCATTTT

>M6-PGSC0003DMG400012929M6LRR-RLK\_671

TCTGACCGGAAAGATACCTTCAATCGGGTCGTTGTTGAATCAAGGGCCTACTGCATTTTCCGGTAACCCT  
TTTCTTTGTGGGTTTCCATTGGAGACTCCGTGTGCAGAACCAGAAGCTCA

>M6-PGSC0003DMG400012929M6LRR-RLK\_732

GGTAACCCTTTTCTTTGTGGGTTTCCATTGGAGACTCCGTGTGCAGAACCAGAAGCTCAAAAACCACCAC  
CGAACCCGAACCCTAATGAGGAGGAGGTGGGGTTTGTAGGAAAAGGGAAA

>M6-PGSC0003DMG400012929M6LRR-RLK\_793

AACCACCACCGAACCCGAACCCTAATGAGGAGGAGGTGGGGTTTGTAGGAAAAGGGAAATCGGGAAA  
TGGGTCAGTGGTGGTTTCTTTGATCTCCGGCGTATCGGTTGTGATTGGGGTGA

>M6-PGSC0003DMG400012929M6LRR-RLK\_854

GGGAAATGGGTCAGTGGTGGTTTCTTTGATCTCCGGCGTATCGGTTGTGATTGGGGTGATGTTTGTTC  
AGTGTGGTGTGAGGAGAAAATGGAAGTTGGATGAGGGAAAAATGGGAAA

>M6-PGSC0003DMG400012929M6LRR-RLK\_915

TTTGTTCAGTGTTGGTGTGAGGAGAAAATGGAAGTTGGATGAGGGAAAAATGGGAAAAGAAAAGTT  
GGAGAAGCCAGAGGAGGGGCAAAAAGGGTAAGTATGTAGTGTTAGACGAGGGG

>M6-PGSC0003DMG400012929M6LRR-RLK\_976

AAAAGTTGGAGAAGCCAGAGGAGGGGCAAAAAGGGTAAGTATGTAGTGTTAGACGAGGGGTTTGGGAT  
GGAAGTAGAGGATTTGTTAAGGGCTTCAGCTTATGTAGTAGGTAAGAGTAGGA

>M6-PGSC0003DMG400012955-(rev)M6LRR-RLK\_0

CACCCCATCCAACAGAGAAATACAGAGAGAAAGAGCAAAATACAAAAGAGACACCAACTCATTGCCA  
CTCTACCCCAAATATAAAAACCCTAATTTCCCTCTTTTTTCTCCTTTCCC

>M6-PGSC0003DMG400012955-(rev)M6LRR-RLK\_1037

TTTCTGGAAAATTGTTGGAGGCATTTGAGAATTTGATGGTTTTGGATTTGAGGAATAATGCTATAATGG  
GGCAGCTTCCTTCTAACGGGTTTATGCATAATTTGAGGGTTTTAAGGCTT

>M6-PGSC0003DMG400012955-(rev)M6LRR-RLK\_1098

CTATAATGGGGCAGCTTCCTTCTAACGGGTTTATGCATAATTTGAGGGTTTTAAGGCTTGGGAATAATAA  
GCTTTATGGATTGATTCCCGATGAGCTCTTGCAGGGAACAGGTCCATTGG

>M6-PGSC0003DMG400012955-(rev)M6LRR-RLK\_1159

GAATAATAAGCTTTATGGATTGATTCCCGATGAGCTCTTGCAGGGAACAGGTCCATTGGAAGAACTGGA  
TCTTAGTGGCAATGGATTTTCAGGTTGGGAAATGGATATCAGTTTTTTGGA

>M6-PGSC0003DMG400012955-(rev)M6LRR-RLK\_122

CTCTTTCCCCACACCCCAACCCCTCTTACCACCCACCTACCCTAATCTCTCTCTGTCTCTGAACTCTT  
TCTTGGATTTCCATGGTGCTCTCTCCATAGTCATCCTTAAGCTTTTC

>M6-PGSC0003DMG400012955-(rev)M6LRR-RLK\_1220

GAACTGGATCTTAGTGGCAATGGATTTTCAGGTTGGGAAATGGATATCAGTTTTTTGGAATATTTACATT  
TCTTAGATCAGTATATATTGTTGTTGTTGAATGATCATAATCAAATACAC

>M6-PGSC0003DMG400012955-(rev)M6LRR-RLK\_1281

ATTTACATTTCTTAGATCAGTATATATTGTTGTTGTTGAATGATCATAATCAAATACACCTTTTATTTGTAT  
AGTGTTTTTGTGGATGCCTTTAACTTCAAGCCTCTTAATTTTTGGAGG

>M6-PGSC0003DMG400012955-(rev)M6LRR-RLK\_1342

TTTATTTGTATAGTGTTTTTGTGGATGCCTTTAACTTCAAGCCTCTTAATTTTTGGAGGTGGACTAAAATT  
GGAAACTTTCTTCTGTTTTAGGCATTGAAACTTTTACAGTTATGCAAAG

>M6-PGSC0003DMG400012955-(rev)M6LRR-RLK\_1586

TGTAAAATCTCGTTCTTTTTGTTTTCTTGTTCAGGTTATAATTAGTTTTCTTGTGTGAGTAGTGGTTGACAAAT  
CTATATAACAGAGAATAGAAATCTTCAAGGTCTTTCAGCTTATGCCAA

>M6-PGSC0003DMG400012955-(rev)M6LRR-RLK\_1647

TGGTTGACAATCTATATAACAGAGAATAGAAATCTTCAAGGTCTTTCAGCTTATGCCAAATACAGAAAAG  
TTTGCTTTTTTGTAGTAAGTAGGTTTTTAAAAAATGTTTTAACAAAACCA

>M6-PGSC0003DMG400012955-(rev)M6LRR-RLK\_1708

ACAGAAAAGTTTGCTTTTTTGTAGTAAGTAGGTTTTTAAAAAATGTTTTAACAAAACCAAGATTTTGAACA  
AACTTTTACCGCAAGCTTTTTTTGTTTGCCTCAACAGAACGTGAGCAGCG

>M6-PGSC0003DMG400012955-(rev)M6LRR-RLK\_1769

TTTTGAACAAACTTTTACCGCAAGCTTTTTTTGTTTGCCTCAACAGAACGTGAGCAGCGTGGACTGTATA

GACTAGTTTGAATTGCAAAGCATGTTCAATAGAAGCTTGCCATAATAAAT

>M6-PGSC0003DMG400012955-(rev)M6LRR-RLK\_183

CTCTGAACTCTTTCTTGGATTTCCATGGTGCTCTCCATAGTCATCCTTAAGCTTTTCTTCTTTTACCCTT  
TTTCAGACTTTCCTTCTTTTTCTCAATGCCTCATTTTTAGCACTTAA

>M6-PGSC0003DMG400012955-(rev)M6LRR-RLK\_1830

GACTGTATAGACTAGTTTGAATTGCAAAGCATGTTCAATAGAAGCTTGCCATAATAAATAGTCAACAAAG  
TGTTTCCTAATTGTAGTAAATTAATAAAAGCCCCTAATGGAATAGTTGC

>M6-PGSC0003DMG400012955-(rev)M6LRR-RLK\_1891

TCAACAAAGTGTTCCTAATTGTAGTAAATTAATAAAAGCCCCTAATGGAATAGTTGCATGAATGATTG  
CATCATTAGTAGCCATAAATAATCCTTTTTGCAATGGTATAACTGTATGC

>M6-PGSC0003DMG400012955-(rev)M6LRR-RLK\_1952

GAATGATTGCATCATTAGTAGCCATAAATAATCCTTTTTGCAATGGTATAACTGTATGCTCAAAGTTCATG  
GCAAGCTAGCTGGAGCAATATTTAGCCCAGTGCATCAAAGGCGCTTAA

>M6-PGSC0003DMG400012955-(rev)M6LRR-RLK\_2135

GTCATCAAGCTTCTAAGGCATACTTTTCCTTAAGTTTATATATTTGTAATTCATGCTTAGGACTAAAAATA  
AATATATTTATTTTTCTCCCTTTTCGCCTTTTTCCATTAAAGCCCATA

>M6-PGSC0003DMG400012955-(rev)M6LRR-RLK\_2257

TGTGCTTAAAGCCCAATCAAACCTTAGAGCTTTTTACTCTTTTTGCTTTCGATAAGACTGATTTAGCCTTT  
ATCTTGAAAAATTGAAAATGTTGAATTTTTCTTCTGCTTCCAATAGC

>M6-PGSC0003DMG400012955-(rev)M6LRR-RLK\_2318

ATTTAGCCTTTATCTTGAAAAATTGAAAATGTTGAATTTTTCTTCTGCTTCCAATAGCCAATGTTATAGCA  
CAATATTTGTACTIONACAGTAAAATGAGTTTTATTTCAATTAATGAGCTA

>M6-PGSC0003DMG400012955-(rev)M6LRR-RLK\_2379

ATGTTATAGCACAAATTTGTACTIONACAGTAAAATGAGTTTTATTTCAATTAATGAGCTATTTGCTCTTAATA  
TGCTCATCTTTCTATTTTGTTATCATTGCATTACACCGTCCAGGGCTT

>M6-PGSC0003DMG400012955-(rev)M6LRR-RLK\_244

CCTTTTACCCTTTTTTCAGACTTTCCTTCTTTTTCTCAATGCCTCATTTTTAGCACTTAACTCACATTCTCAACC  
CAATGACTCTCTCAATCTCTCTTTACTCCTCCTTGTACTTGT

>M6-PGSC0003DMG400012955-(rev)M6LRR-RLK\_2440



TGCTCTTAATATGCTCATCTTTCTATTTTGTTCATTGCATTACACCGTCCAGGGCTTCCCCCTTCCCTCTA  
GTATAGGCCGCTCATGATGACGTTGGGCCTTGAATTGGAAAATAAT

>M6-PGSC0003DMG400012955-(rev)M6LRR-RLK\_2501

CCCTTCCCTCTAGTATAGGCCGCTCATGATGACGTTGGGCCTTGAATTGGAAAATAATTGATGACAACA  
TTTCTTTTTTGATAAGGAATTGATGACAACATTCCTGTCTTCATTATTAT

>M6-PGSC0003DMG400012955-(rev)M6LRR-RLK\_2562

ATGACAACATTTCTTTTTTGATAAGGAATTGATGACAACATTCCTGTCTTCATTATTATCAAATCAGTACTC  
AGATTAGAGAAAAGAATGGAGTCGGTGAGACTTGATTATTGAAGAAAA

>M6-PGSC0003DMG400012955-(rev)M6LRR-RLK\_2623

AATCAGTACTCAGATTAGAGAAAAGAATGGAGTCGGTGAGACTTGATTATTGAAGAAAAGCAGAGCAA  
ATTTACAAGGGTGATAATTTGGGTCTCTGAGCTTAAACTCCTCGGTGACCC

>M6-PGSC0003DMG400012955-(rev)M6LRR-RLK\_2684

AGAGCAAATTTACAAGGGTGATAATTTGGGTCTCTGAGCTTAAACTCCTCGGTGACCCTCTGATAGGG  
AAGTTTGTCTGTTTCATGAGCTACAGAGAGGGTTCAAATTTTCATATTTT

>M6-PGSC0003DMG400012955-(rev)M6LRR-RLK\_2745

TGATAGGGAAGTTTGTCTGTTTCATGAGCTACAGAGAGGGTTCAAATTTTCATATTTCTTTAGTTACACT  
TGGATATCTTTCATCATAGGACCAGAGCGTGGTTCCATTTAGAGCCTAA

>M6-PGSC0003DMG400012955-(rev)M6LRR-RLK\_2806

TAGTTACACTTGGATATCTTTCATCATAGGACCAGAGCGTGGTTCCATTTAGAGCCTAAATGTGGAGATC  
CTCTGTTCAGAAGTTGAATGGTGCCGTTGACTGATGACTGATATTTTCATT

>M6-PGSC0003DMG400012955-(rev)M6LRR-RLK\_2867

GTGGAGATCCTCTGTTTCAGAAGTTGAATGGTGCCGTTGACTGATGACTGATATTTTCATTCTTCTCATCTTG  
CATTTATTCTTTGAGGAAATGACTCTCAGATCAGCTAGATAGTTTAGTA

>M6-PGSC0003DMG400012955-(rev)M6LRR-RLK\_2928

TCTCATCTTGCATTTATTCTTTGAGGAAATGACTCTCAGATCAGCTAGATAGTTTAGTATACTTGTCTCACT  
AATATACTTTTTGCCTTCTAATTTTTTTAGGCTATATAGTATTTCTA

>M6-PGSC0003DMG400012955-(rev)M6LRR-RLK\_2989

CTTGCTCACTAATACTTTTTGCCTTCTAATTTTTTTAGGCTATATAGTATTTCTACCATATTCTTTAGC  
TAGAAATAGTTGCACTTGGACCTGAAAGTTAAATTGGATGTTTAATA

>M6-PGSC0003DMG400012955-(rev)M6LRR-RLK\_305

CACATTCTCAACCCAATGACTCTCTCTCAATCTCTCTTTACTCCTCCTTGTACTTGTGTTTCGGCTCAATG  
GGTCTTCTGCTGCAGAAGATGAAGTTCGATCACTTTTGGAGTTCAA

>M6-PGSC0003DMG400012955-(rev)M6LRR-RLK\_3050

ATATTCTTTAGCTAGAAATAGTTGCACTTGGACCTGAAAGTTAAATTGGATGTTAATAACAATGCACAT  
TTTTTTTTAATAATATGAGCTCTTTTTCTGTTGGACTTGTAACCTTATTC

>M6-PGSC0003DMG400012955-(rev)M6LRR-RLK\_3111

AATGCACATTTTTTTTTAATAATATGAGCTCTTTTTCTGTTGGACTTGTAACCTTATTCTAAAGAGATATTT  
AAAGTTTAATATTTAGTTTCTACGCATGCAGGTTCAATTCCGATTGTG

>M6-PGSC0003DMG400012955-(rev)M6LRR-RLK\_3172

AAGAGATATTTAAAGTTTAATATTTAGTTTCTACGCATGCAGGTTCAATTCCGATTGTGAATTCAACAAA  
GTTGAGAGTTCTAAATATTTTCATCGAACACCTATTAGGTTCACTGCCAT

>M6-PGSC0003DMG400012955-(rev)M6LRR-RLK\_3233

TTCAACAAAGTTGAGAGTTCTAAATATTTTCATCGAACACCTATTAGGTTCACTGCCATCCTCCATAGAAA  
ATTGTGCAGTTGTGGATTTGAGCAGAAATATGCTTGTGGATGGTATATC

>M6-PGSC0003DMG400012955-(rev)M6LRR-RLK\_3294

TCCATAGAAAATTGTGCAGTTGTGGATTTGAGCAGAAATATGCTTGTGGATGGTATATCAGTTATTGAAA  
GCTGGGAAGTCAATTTGGAAATTATTGATTTGAGTTCAAATAGGTTAACT

>M6-PGSC0003DMG400012955-(rev)M6LRR-RLK\_3355

TTATTGAAAGCTGGGAAGTCAATTTGGAAATTATTGATTTGAGTTCAAATAGGTTAACTGGAAATATTCC  
CAATATAACCTCTCAGTTTCAACTATTGACTTCACTTAATTTTGGAAACA

>M6-PGSC0003DMG400012955-(rev)M6LRR-RLK\_3416

AAATATTCCAATATAACCTCTCAGTTTCAACTATTGACTTCACTTAATTTTGGAAACAATTCTCTTGAGG  
GAACCTTACCTTACACTGACTGGGCACCTTGCCAAGACTGGTTAACTTGA

>M6-PGSC0003DMG400012955-(rev)M6LRR-RLK\_3477

TCTCTTGAGGGAACCTTACCTTACACTGGGCACCTTGCCAAGACTGGTTAACTTGATCTCAGCACCA  
ATAAACTTGGTGGACCGATTCCATCTACATTTTTTACTTCGACGACATTG

>M6-PGSC0003DMG400012955-(rev)M6LRR-RLK\_3538

TCAGCACCAATAAACTTGGTGGACCGATTCCATCTACATTTTTTACTTCGACGACATTGATGAACCTAAAT

ATATCTGGAAATCAATTGTCAGGATCAATTCCTCTTGAAGGCTCTCATG

>M6-PGSC0003DMG400012955-(rev)M6LRR-RLK\_3599

GAACCTAAATATATCTGGAAATCAATTGTCAGGATCAATTCCTCTTGAAGGCTCTCATGCTAGCGAATTA  
ATTGTTCAATCACCATAACCCTGCACTGGAGTCTCTTGATCTTTCAGAAAA

>M6-PGSC0003DMG400012955-(rev)M6LRR-RLK\_366

TTCGGCTCAATGGGTCTTCTGCTGCAGAAGATGAAGTTCGATCACTTTTGGAGTTCAAAAAGGGTATTAA  
AAACGACCCATTAGGTAAATCTTCAGTTCATGGAGTCAAACGGGTCTTT

>M6-PGSC0003DMG400012955-(rev)M6LRR-RLK\_3660

AGCGAATTAATTGTTCAATCACCATAACCCTGCACTGGAGTCTCTTGATCTTTCAGAAAACAATTTACAGG  
TAATTTGTCTTCTGCCATTGGTAATCTGCGGAGGCTTCAAGTGCTAAAT

>M6-PGSC0003DMG400012955-(rev)M6LRR-RLK\_3721

ATTTACAGGTAATTTGTCTTCTGCCATTGGTAATCTGCGGAGGCTTCAAGTGCTAAATCTTGCTAAGAAT  
CAGTTATTAGGCATGCTGCCTACTGAATTGGGTGACCTTAGAAGTTTGG

>M6-PGSC0003DMG400012955-(rev)M6LRR-RLK\_3782

TGCTAAGAATCAGTTATTAGGCATGCTGCCTACTGAATTGGGTGACCTTAGAAGTTTGGAAATTCCTTGAT  
ATATCTAACAACAATTTTAGTGGTATGATCCCCGAAAATCTTTCATCAAA

>M6-PGSC0003DMG400012955-(rev)M6LRR-RLK\_3843

TTCCTTGATATATCTAACAACAATTTTAGTGGTATGATCCCCGAAAATCTTTCATCAAATTTGAGGGTGTT  
TAATGTGTCTAACAATGAATTAAGTGGTGCTATCCCTGATAACTTGAGA

>M6-PGSC0003DMG400012955-(rev)M6LRR-RLK\_3904

TGAGGGTGTTTAATGTGTCTAACAATGAATTAAGTGGTGCTATCCCTGATAACTTGAGAACTTTAATGA  
AAGTTCATTTCTGCTCTGGAACTCAAATTTGGCAATCCCAAGAACTGGT

>M6-PGSC0003DMG400012955-(rev)M6LRR-RLK\_3965

CTTTAATGAAAGTTCATTTCTGCTCTGGAACTCAAATTTGGCAATCCCAAGAACTGGTTACATGATAAT  
CATGGTGATCCTGATCAAATAGTCAGCACCATCATAACTCGAAATCCAG

>M6-PGSC0003DMG400012955-(rev)M6LRR-RLK\_4026

CATGATAATCATGGTGATCCTGATCAAATAGTCAGCACCATCATAACTCGAAATCCAGTATCAGGGTG  
GCTATTATTCTGCCTCAGTTGGAGCTGCTTAATGATTGGTGTTGTTCTC

>M6-PGSC0003DMG400012955-(rev)M6LRR-RLK\_4087

TCAGGGTGGCTATTATTCTTGCCTCAGTTGGAGCTGCTTTAATGATTGGTGTTGTTCTCCTGGCTTACCAT  
CGACAACAGTTCCAAGATTTCCACTTACCAAGTGGATTTAACAGCCAAT

>M6-PGSC0003DMG400012955-(rev)M6LRR-RLK\_4148

GGCTTACCATCGACAACAGTTCCAAGATTTCCACTTACCAAGTGGATTTAACAGCCAATCTGCTGGAAGG  
GATGTTAAACTCGGGAGGTTTCAGCCGGCCTGGAATTTTCAAGTTCCATGG

>M6-PGSC0003DMG400012955-(rev)M6LRR-RLK\_4209

GCTGGAAGGGATGTTAAACTCGGGAGGTTTCAGCCGGCCTGGAATTTTCAAGTTCCATGGCTCCTCAGAA  
CCACCACCAATTTCTTGAGTTTCTCTAATGATCACTTGCTCACAGCGAAC

>M6-PGSC0003DMG400012955-(rev)M6LRR-RLK\_427

GGGTATTA AAAACGACCCATTAGGTAAAATCTTCAGTTCATGGAGTCAAACGGGTCTTTCAAATCCATCA  
GCATGTCCAAAGTCGTTTCATGGTGTCTGTTGTGATGAAAACCTGATTC

>M6-PGSC0003DMG400012955-(rev)M6LRR-RLK\_4270

CCTCAGAACCACCACCAATTTCTTGAGTTTCTCTAATGATCACTTGCTCACAGCGAACTAGAGATCTCTG  
TCTGGGCAAATTGAGTCTGGTACAGAAATTGATGAGCAAGTTTTTCCAG

>M6-PGSC0003DMG400012955-(rev)M6LRR-RLK\_4331

GAGATCTCTGTCTGGGCAAATTGAGTCTGGTACAGAAATTGATGAGCAAGTTTTTCCAGAAGGAGTAAC  
TGCAGTTTCAGCATCTACGCATCTTGGCACTGTGGGTAATAATCCTGCAAC

>M6-PGSC0003DMG400012955-(rev)M6LRR-RLK\_4392

GGAGTAACTGCAGTTTCAGCATCTACGCATCTTGGCACTGTGGGTAATAATCCTGCAACATCTGGCCGG  
AGATCCTCTCCAGGCTCTCCAATAGCTTCCCTCCCTCGTTTCGTCGACACA

>M6-PGSC0003DMG400012955-(rev)M6LRR-RLK\_4453

CTGGCCGGAGATCCTCTCCAGGCTCTCCAATAGCTTCCCTCCCTCGTTTCGTCGACACAGTTGAACAACCA  
GAGACATTGGATGTGTATTACCGGATCGATTGGCTAGGGAATTGTTCT

>M6-PGSC0003DMG400012955-(rev)M6LRR-RLK\_4514

TGAACAACCAGAGACATTGGATGTGTATTACCGGATCGATTGGCTAGGGAATTGTTCTTCTGATGG  
TTCCTGTCATTTACTGCTGAGGAGTTATCTCGTGCCACTGCTGAAGTTCT

>M6-PGSC0003DMG400012955-(rev)M6LRR-RLK\_4575

CTGGATGGTTCACTGTCATTTACTGCTGAGGAGTTATCTCGTGCCACTGCTGAAGTTCTGGGTAGAAGTA  
GCCATGACACATTGTATAAAGCTACTCTGAATAGTGGGCATGTTCTTACT

>M6-PGSC0003DMG400012955-(rev)M6LRR-RLK\_4636

GTAGAAGTAGCCATGACACATTGTATAAAGCTACTCTGAATAGTGGGCATGTTCTTACTGTCAAGTGGTT  
GCGGGTTGGGTTGGTAAAAACAAGAAAGAGTTTGCAAAGGAAGTTAAAA

>M6-PGSC0003DMG400012955-(rev)M6LRR-RLK\_4697

CAAGTGGTTGCGGGTTGGGTTGGTAAAAACAAGAAAGAGTTTGCAAAGGAAGTTAAAAAGATTGGAT  
CTATTAGGCACCCAAATGCTGTTCTTTACGAGCATATTACTGGGGACCTCG

>M6-PGSC0003DMG400012955-(rev)M6LRR-RLK\_4758

ATTGGATCTATTAGGCACCCAAATGCTGTTCTTTACGAGCATATTACTGGGGACCTCGGGAACAAGAA  
AGGCTTATTTTAGCAGACTACATACCAGGAGATAGTTTGGAGTTGCATCTC

>M6-PGSC0003DMG400012955-(rev)M6LRR-RLK\_4819

AACAAGAAAGGCTTATTTTAGCAGACTACATACCAGGAGATAGTTTGGAGTTGCATCTCTATGGTAAGA  
TTTTCTTACGAATAACTTCAACAATGATATTCCATGTCTTCCATTGTTGTT

>M6-PGSC0003DMG400012955-(rev)M6LRR-RLK\_488

AATCCATCAGCATGTCCAAAGTCGTTTCATGGTGTCTTTGTGATGAAAACCTCTGATTCTGTTTTCTCCAT  
TTCTCTTGACGGGCTTGGGCTTGTAGGTGACTTGAAGTTCTCAACTCTT

>M6-PGSC0003DMG400012955-(rev)M6LRR-RLK\_4880

TGGTAAGATTTTCTTACGAATAACTTCAACAATGATATTCCATGTCTTCCATTGTTGTTTGGTTACTGTTAT  
TAGAAAGTTCCCTTTTGCTGGTCTGGTGGGTGATTATCTTGTGTTAGG

>M6-PGSC0003DMG400012955-(rev)M6LRR-RLK\_4941

GTTACTGTTATTAGAAAGTTCCCTTTTGCTGGTCTGGTGGGTGATTATCTTGTGTTAGGACCAATATTGAT  
ATCATTGCATAAATAGTTTCTATAGCAACATAGCTTATTTCTAGTGGT

>M6-PGSC0003DMG400012955-(rev)M6LRR-RLK\_5002

CAATATTGATATCATTGCATAAATAGTTTCTATAGCAACATAGCTTATTTCTAGTGGTGGTTTTCTAATT  
GCTGAGATCTCTTGTGTTTTGTGGGATTGTTTGATAAAAATTATGGAGG

>M6-PGSC0003DMG400012955-(rev)M6LRR-RLK\_5063

TTTTCTAATTGCTGAGATCTCTTGTGTTTTGTGGGATTGTTTGATAAAAATTATGGAGGATAAAGTTGACT  
TGGCCCTATTATTTATTTTTGGTTGGCCTCTCTTGCAAATGTCCCTCTT

>M6-PGSC0003DMG400012955-(rev)M6LRR-RLK\_5124

AAAGTTGACTTGGCCCTATTATTTATTTTTGGTTGGCCTCTCTTGCAAATGTCCCTCTTTTACATGTCTTAC

AATATGCAGATAGTGATGAGATCTTATTTGGATCTGTCGTCTCTTATG

>M6-PGSC0003DMG400012955-(rev)M6LRR-RLK\_5185

ACATGTCTTACAATATGCAGATAGTGATGAGATCTTATTTGGATCTGTCGTCTCTTATGAATCCAGTGGTA  
GAGTTGTTGATCAAGCGGAAAAGGAAAAAATAGGACTGCAATTGTAGA

>M6-PGSC0003DMG400012955-(rev)M6LRR-RLK\_5246

TCCAGTGGTAGAGTTGTTGATCAAGCGGAAAAGGAAAAAATAGGACTGCAATTGTAGAATCTGAATG  
ATTTTTTACAAAATTATGTTTGTAGAATGTATGTGCAGATCTTTATGTGTC

>M6-PGSC0003DMG400012955-(rev)M6LRR-RLK\_5307

CTGAATGATTTTTTACAAAATTATGTTTGTAGAATGTATGTGCAGATCTTTATGTGTCATCTGGTAACT  
TCAAAGGAGCTCCAAAAGGTACAATAGATCTTTGGTTCACCTAATTGCC

>M6-PGSC0003DMG400012955-(rev)M6LRR-RLK\_5368

CTGGTAACTTCAAAGGAGCTCCAAAAGGTACAATAGATCTTTGGTTCACCTAATTGCCGTACCCAACAG  
CCACACATCAATAGCCCATTAATAATTAGGGAGTAGACCTATTCTAAGATC

>M6-PGSC0003DMG400012955-(rev)M6LRR-RLK\_5429

ACCCAACAGCCACACATCAATAGCCCATTAATAATTAGGGAGTAGACCTATTCTAAGATCTCGTTAACATG  
ACCTAGAATGTAGTGATAGTTGCTCAACAATCCGCTTTAAATAGCATTTC

>M6-PGSC0003DMG400012955-(rev)M6LRR-RLK\_549

TTTTCTCATTCTCTTGACGGGCTTGGGCTTGTAGGTGACTTGAAGTTCTCAACTCTTAGTGGGTTGAAG  
CAGCTCAAATTCTTAGTCTTTCTGGTAACTCTTTTACGGGTAGGGTTG

>M6-PGSC0003DMG400012955-(rev)M6LRR-RLK\_5490

GTTAACATGACCTAGAATGTAGTGATAGTTGCTCAACAATCCGCTTTAAATAGCATTTCATTGTTTCTGA  
ATCATTGATGATGGTAAACTTGATAAATATGGAGAGTTGGCTTTGTCA

>M6-PGSC0003DMG400012955-(rev)M6LRR-RLK\_5551

TTGTTTCTGAATCATTGATGGTAAACTTGATAAATATGGAGAGTTGGCTTTGTCATAGTATCCCCTG  
TGCAGTGAGGACTGCTTACTTGTAGACATGTTGGGGGTTGTTGGAAACT

>M6-PGSC0003DMG400012955-(rev)M6LRR-RLK\_5612

GTATCCCCTGTGCAGTGAGGACTGCTTACTTGTAGACATGTTGGGGGTTGTTGGAAACTTTTTACTTTTT  
GTAATTTTTTGCAGTTTTAAGTTTTAATGAATGTTTACTTTTTACAGAG

>M6-PGSC0003DMG400012955-(rev)M6LRR-RLK\_5673

T T A C T T T T T G T A A T T T T T G C A G T T T T A A G T T T T T A A T G A A T G T T T A C T T T T T A C A G A G A C A A C C C C T C G G A  
G G T A C T C C C C G T T A T C C T T C A A C C A A A G G T T A A A A G T T T C C A T T G A A G

>M6-PGSC0003DMG400012955-(rev)M6LRR-RLK\_5734

A A C C C C T C G G A G G T A C T C C C C G T T A T C C T T C A A C C A A A G G T T A A A A G T T T C C A T T G A A G T T G C T C G G G G T  
T T G A C A T A T C T G C A T G A G A G A G G G C T G C C T C A T G G A G A C T T G A A A C C T A C

>M6-PGSC0003DMG400012955-(rev)M6LRR-RLK\_5795

G C T C G G G G T T T G A C A T A T C T G C A T G A G A G A G G G C T G C C T C A T G G A G A C T T G A A A C C T A C A A T A T A A T C  
T T G G T T G G T G C T G A T T A C A G T G T C C G C C T C A C T G A T T A T G G T C T C C A C C G C

>M6-PGSC0003DMG400012955-(rev)M6LRR-RLK\_5856

A T A T A A T C T T G G T T G G T G C T G A T T A C A G T G T C C G C C T C A C T G A T T A T G G T C T C C A C C G C C T G A T G A C T C C A  
G C A G G G A T T G C A G A G C A G A T A C T G A A C C T A G G G G C T C T A G G A T A C C G T G

>M6-PGSC0003DMG400012955-(rev)M6LRR-RLK\_5917

G A T G A C T C C A G C A G G G A T T G C A G A G C A G A T A C T G A A C C T A G G G G C T C T A G G A T A C C G T G C T C C T G A A C T  
T G C T A C T G C G A C C A A C C T A T C C C A T C A T T T A A G G C T G A T G T A T A T G C T C T

>M6-PGSC0003DMG400012955-(rev)M6LRR-RLK\_5978

C C T G A A C T T G C T A C T G C G A C C A A C C T A T C C C A T C A T T T A A G G C T G A T G T A T A T G C T C T T G G T G T G A T T C T  
A A T G G A A T T G C T G A C A A G A A G A A G T G C T G G A G A C T T A A T C T C A G C A C A C

>M6-PGSC0003DMG400012955-(rev)M6LRR-RLK\_6039

G T G T G A T T C T A A T G G A A T T G C T G A C A A G A A G A A G T G C T G G A G A C T T A A T C T C A G C A C A C T C T G C T G C A G  
T T G A T T T A A C A G A T T G G G T T A G G T T G T G T G A T C A A G A A G G T A G G G G A A T G G

>M6-PGSC0003DMG400012955-(rev)M6LRR-RLK\_61

A T T T G C C A C T C T A C C C C A A T A T A A A A C C C T A A T T T C C C T C T T T T T T C T C C T T T C C C A A C T C T T T C C C C A C  
A C C C C A A C C C C T C T C T T A C C A C C C C A C C T A C C C T A A T C T C T C T C T C T

>M6-PGSC0003DMG400012955-(rev)M6LRR-RLK\_610

T G G G T T G A A G C A G C T C A A A A T T C T T A G T C T T T C T G G T A A C T C T T T T A C G G G T A G G G T T G T T C C T G C T T T G G  
G T T C A A T G T T A A C T C T T C A G C A T T T G G A T C T C T C T G G A A A T C A G T T T T A

>M6-PGSC0003DMG400012955-(rev)M6LRR-RLK\_6100

T G C T G C A G T T G A T T T A A C A G A T T G G G T T A G G T T G T G T G A T C A A G A A G G T A G G G G A A T G G A C T G T A T C G A  
T A G G G A C A T C G C A G G A G A A G A A C A C T G C A A A G C G A T G G A T G A T C T G C T

>M6-PGSC0003DMG400012955-(rev)M6LRR-RLK\_6161

TGTATCGATAGGGACATCGCAGGAGGAGAAGAACAACACTGCAAAGCGATGGATGATCTGCTAGCTGTGTC  
GTTAAGGTGTATTCTTTTCGATAAACGAAAGGCCAAACATCAGACAAGTTGTT

>M6-PGSC0003DMG400012955-(rev)M6LRR-RLK\_6222

CTGTGTCGTTAAGGTGTATTCTTTTCGATAAACGAAAGGCCAAACATCAGACAAGTTGTTGAAAATCTGG  
GTTCCATATCTGTGTGAAATTTTTGTACATGTTGTCTTGAAATTACAATTC

>M6-PGSC0003DMG400012955-(rev)M6LRR-RLK\_6283

AAATCTGGGTTCCATATCTGTGTGAAATTTTTGTACATGTTGTCTTGAAATTACAATCTTTTTTCTTTTCCT  
TCACATTTTTTATTATGTCCTATTGGTTGCCTTCTAATGTTGGTCAA

>M6-PGSC0003DMG400012955-(rev)M6LRR-RLK\_6344

TTTTCTTTTCTTCACATTTTTTATTATGTCCTATTGGTTGCCTTCTAATGTTGGTCAATCCTTACATATTCCC  
CATTTTCTTTCCCTCCCCCTTCAATTTTTTTGTAAAGGGATGAT

>M6-PGSC0003DMG400012955-(rev)M6LRR-RLK\_6405

CTTACATATTCCCATTTTCTTTCCCTCCCCCTTCAATTTTTTTGTAAAGGGATGATCAGTCCATTGATTG  
ATTGGTTGACATTTTTCTCTAATTAGAAAAGATTGCAATTATTTATG

>M6-PGSC0003DMG400012955-(rev)M6LRR-RLK\_671

CCTGCTTTGGGTTCAATGTTAACTCTTCAGCATTGGATCTCTCTGGAAATCAGTTTTATGGAACAATTCC  
AGCACGAATTAATGAGCTTTGGGGTTTGAATTACCTCAATTTGTCCAAT

>M6-PGSC0003DMG400012955-(rev)M6LRR-RLK\_732

GAACAATTCAGCACGAATTAATGAGCTTTGGGGTTTGAATTACCTCAATTTGTCCAATAATAATTTTACA  
TTTGGTTACCCAATTGGAATTAGTAATCTTCAGCAGTTGAGAGTACTGG

>M6-PGSC0003DMG400012955-(rev)M6LRR-RLK\_793

TAATTTTACATTTGGTTACCCAATTGGAATTAGTAATCTTCAGCAGTTGAGAGTACTGGATTTGCATAACA  
ATGGGATTTGGGGTGATATCGGGGAGTTGTTTTTGAATTGAAGCGTAT

>M6-PGSC0003DMG400012955-(rev)M6LRR-RLK\_854

TTGCATAACAATGGGATTTGGGGTGATATCGGGGAGTTGTTTTTGAATTGAAGCGTATTGAGCATCTT  
GATTTGAGTAACAACCTCGTTTTTCGGGTCTCTTCTACGAGCCCGGAAAAT

>M6-PGSC0003DMG400012955-(rev)M6LRR-RLK\_915

AGCATCTTGATTTGAGTAACAACCTCGTTTTTCGGGTCTCTTCTACGAGCCCGGAAAATGTATCACTCTCT



TCGACAATTCAGGTCATGAATTTGAGTCACAACAACCTGGGTGGTGGTT

>M6-PGSC0003DMG400012955-(rev)M6LRR-RLK\_976

ATCACTCTCTTCGACAATTCAGGTCATGAATTTGAGTCACAACAACCTGGGTGGTGGTTTTTTTCTGGAA  
AATTGTTGGAGGCATTTGAGAATTTGATGGTTTTGGATTTGAGGAATAA

>M6-PGSC0003DMG400012992M6LRR-RLK\_1037

GAAATGCAAGAAGTTGACTAATTTTCGAGTAGCCAGAAATAGAATTAGTGGTCACATACCACCAGAGAT  
TGAAATCTCAAAGGTCTTCAAGGACTAGATCTTTCAGCAAATCATTGGT

>M6-PGSC0003DMG400012992M6LRR-RLK\_1098

CCAGAGATTGGAAATCTCAAAGGTCTTCAAGGACTAGATCTTTCAGCAAATCATTGGTTGGGAAGATC  
CCTAGGGAACCTGGAAAATTGACCTCTCTAGTTAATCTTTTTTTGCAAAAC

>M6-PGSC0003DMG400012992M6LRR-RLK\_1159

GGAAGATCCCTAGGGAACCTGGAAAATTGACCTCTCTAGTTAATCTTTTTTTGCAAAACAACCAGATTTCT  
GGCAATATTCCTATGGAACCTGGATCAATGACAAAGTTAGAATCCCTTG

>M6-PGSC0003DMG400012992M6LRR-RLK\_1220

CCAGATTTCTGGCAATATTCCTATGGAACCTGGATCAATGACAAAGTTAGAATCCCTTGATCTATCAAAC  
AATATGTTGAATGGGTTCGATCCCAACATTTATAGGAGATTACATACACTT

>M6-PGSC0003DMG400012992M6LRR-RLK\_1281

CTATCAAACAATATGTTGAATGGGTTCGATCCCAACATTTATAGGAGATTACATACACTTGTTCAGTTGA  
ACCTGAGCAACAACAATTTGGCCAAAATATTCCAATGGAGATAGGGAAG

>M6-PGSC0003DMG400012992M6LRR-RLK\_1342

TTCAGTTGAACCTGAGCAACAACAATTTGGCCAAAATATTCCAATGGAGATAGGGAAGATAACTCAGC  
TTAATGTACTTGATTTGAGCAATAATCTTCTGGTTGGAGATATATCCCCTC

>M6-PGSC0003DMG400012992M6LRR-RLK\_1403

AACTCAGCTTAATGTACTTGATTTGAGCAATAATCTTCTGGTTGGAGATATATCCCCTCAGTTAGCCAATT  
TAAAGGTCTTGGTAAACTTAAACCTTTCCACAATGGCCTATCTGGGCG

>M6-PGSC0003DMG400012992M6LRR-RLK\_1464

TTAGCCAATTTAAAGGTCTTGGTAAACTTAAACCTTTCCACAATGGCCTATCTGGGCGCATTCTAAAG  
AAGTTGAAAGTTTGACTGGTTTGCAGTATGTCGTATTGTCATACAATGAG

>M6-PGSC0003DMG400012992M6LRR-RLK\_1525

TTCCTAAAGAAGTTGAAAGTTTGACTGGTTTGCAGTATGTCGTATTGTCATACAATGAGTTGGAAGGTCC  
AATCCCAATAATAAAGCTTTTATGAATGCTTCATTAGAAGGTAACAAAG

>M6-PGSC0003DMG400012992M6LRR-RLK\_1586

GGAAGGTCCAATCCCAATAATAAAGCTTTTATGAATGCTTCATTAGAAGGTAACAAAGGTCTTTGCGGC  
AATGTAACAGGACTCCAGCCCTGTGATAGGCCATCTTCTGTGGTGAAGAA

>M6-PGSC0003DMG400012992M6LRR-RLK\_1647

CTTTGCGGCAATGTAACAGGACTCCAGCCCTGTGATAGGCCATCTTCTGTGGTGAAGAAGCACTCAATG  
GCAAAGGGATGTAAAGTCATCCTCATCACTGTACTTTCTGTTATGGGAGCA

>M6-PGSC0003DMG400012992M6LRR-RLK\_1708

ACTCAATGGCAAAGGGATGTAAAGTCATCCTCATCACTGTACTTTCTGTTATGGGAGCACTACTACTGCT  
CTGTGTTTTATTAGTGTCTTTTTATGTGTAATAAAAGAAGGAGAGTTA

>M6-PGSC0003DMG400012992M6LRR-RLK\_1769

ACTACTGCTCTGTGTTTTATTAGTGTCTTTTTATGTGTAATAAAAGAAGGAGAGTTAGAGACGTTGAA  
AGAAGGGATGGTGTATGGTTGGCTTTCAATATCTATGTTAGATGGAAAGGC

>M6-PGSC0003DMG400012992M6LRR-RLK\_1830

GACGTTGAAAGAAGGGATGGTGTATGGTTGGCTTTCAATATCTATGTTAGATGGAAAGGCATTGTACAG  
GGACATCTTAAATGCCACAGAAGAGTTTGATGTAAAATTTGCATCGGGCAT

>M6-PGSC0003DMG400012992M6LRR-RLK\_1891

TGTACAGGGACATCTTAAATGCCACAGAAGAGTTTGATGTAAAATTTGCATCGGGCATGGAGGACACG  
GAAGCGTTTACAAGGTAAACCTTCAATCATTAGGGAATATAGCTGTGAAGA

>M6-PGSC0003DMG400012992M6LRR-RLK\_1952

AGGACACGGAAGCGTTTACAAGGTAAACCTTCAATCATTAGGGAATATAGCTGTGAAGAGACTTCATTC  
TTCATATCAGAATACACATCCCAAAAGCTTCATGAATGAAGTAAGGGCATT

>M6-PGSC0003DMG400012992M6LRR-RLK\_2257

TAGCTTACATGCACCAGGATTGTTACCACCCATTGTTTCATCGAGACATATCAAGTAGTAATGTTTTGCTT  
GATTCAGAGTATGAAGCTCGTGTTCAGACTTTGGCATATCAAAGCTTC

>M6-PGSC0003DMG400012992M6LRR-RLK\_2318

TGTTTTGCTTGATTACAGAGTATGAAGCTCGTGTTCAGACTTTGGCATATCAAAGCTTCTCAAGCCAAAC  
TCATCCAATTGCACAGCGCTTGCAGGGACATATGGTTATGTTGCACCTGG

>M6-PGSC0003DMG400012992M6LRR-RLK\_2379

AAGCCAAACTCATCCAATTGCACAGCGCTTGCAGGGACATATGGTTATGTTGCACCTGGTAAGTTTAAAA  
TATTTTCATGAACTAAAGCCAAACATTCTATTGTTTATATCTCATTACAT

>M6-PGSC0003DMG400012992M6LRR-RLK\_2440

AGTTTAAAATATTTTCATGAACTAAAGCCAAACATTCTATTGTTTATATCTCATTACATGTTTATATTGTTT  
TGGAATTGTATTGTTTCAGAGTTTGCATATACTATGAAGGTTACTCAA

>M6-PGSC0003DMG400012992M6LRR-RLK\_2501

TTATATTGTTTTGGAAATTGTATTGTTTCAGAGTTTGCATATACTATGAAGGTTACTCAAATGTGTGATGTT  
TATAGCTTTGGAGTATTATCTTTGGAGATAATCAAAGGAAAGCATCTTG

>M6-PGSC0003DMG400012992M6LRR-RLK\_2562

GTGTGATGTTTATAGCTTTGGAGTATTATCTTTGGAGATAATCAAAGGAAAGCATCTTGGGGAATACATT  
ACCGTGCTAGCAAATTCATCTACTATAGATCATGAGCATCTTAGTGATTT

>M6-PGSC0003DMG400012992M6LRR-RLK\_2623

GAATACATTACCGTGCTAGCAAATTCATCTACTATAGATCATGAGCATCTTAGTGATTTGTTGGATGAAC  
GCCTTCCATATCCTGAAGATAGAGTAAAAGAGGTTTTTATTTTTATCATC

>M6-PGSC0003DMG400012992M6LRR-RLK\_2684

TGGATGAACGCCTTCCATATCCTGAAGATAGAGTAAAAGAGGTTTTTATTTTTATCATCAAGCTAGCATG  
CTCTTGTTTGCTTGAAACTCCAAAATCAAGGCCAACAAATGCACTTCATCT

>M6-PGSC0003DMG400012992M6LRR-RLK\_305

TAGAGAGATGGGAAATTTGAAAAGCCTCACTGATTTGGATTTATCCACTAATCATTTTATTGGTCCTATTC  
CTAGTGAGTTGGGAAATCTGATAAATCTCACATAGATAGATTTATCTAA

>M6-PGSC0003DMG400012992M6LRR-RLK\_549

AATGGTCTGTCCTTGTACGAAAATCAACTTACTGGTCCAATTCCTGCTTCCATTGGCAATTTGAGAAGCTT  
GCGATTTCTGTATCTCAGTGCCAACAACTTACTGGTCCAATTCCCGCT

>M6-PGSC0003DMG400012992M6LRR-RLK\_610

TGAGAAGCTTGCGATTTCTGTATCTCAGTGCCAACAACTTACTGGTCCAATTCCTGCTTCCCTTTGGCAAT  
TTAAGAACTTGCAATTTCTGTATCTGAGTGCCAACAACTTTACGGTT

>M6-PGSC0003DMG400012992M6LRR-RLK\_671

CTTTGGCAATTTAAGAACTTGCAATTTCTGTATCTGAGTGCCAACAACTTTACGGTTCTATTCCAAAAG

AACTTGCATATTTGGATAACTTGGAAAGAGCTGATAATAAGTGAAAATCA

>M6-PGSC0003DMG400012992M6LRR-RLK\_732

ATTCCAAAAGAACTTGCATATTTGGATAACTTGGAAAGAGCTGATAATAAGTGAAAATCAGTTTTCTGGTC  
AAATGCCTGAGCATCTTTGCCAAGGTGGGAACTTGAGAACTTTACGGTG

>M6-PGSC0003DMG400012992M6LRR-RLK\_793

TTTCTGGTCAAATGCCTGAGCATCTTTGCCAAGGTGGGAACTTGAGAACTTTACGGTGAATAGTAATAA  
GTTGTCAGGGCCTATACCAAGAAGCATGTCCAAGTGCTCGAGTTTCAAAA

>M6-PGSC0003DMG400012992M6LRR-RLK\_854

TAGTAATAAGTTGTCAGGGCCTATACCAAGAAGCATGTCCAAGTGCTCGAGTTTCAAAGGGTTCGCTTT  
GATAACAACAGTTTTACTGGAAATTTATCTGAAGCTTTTGGTATCTATCC

>M6-PGSC0003DMG400012992M6LRR-RLK\_915

GTTTCGCTTTGATAACAACAGTTTTACTGGAAATTTATCTGAAGCTTTTGGTATCTATCCGGAGCTACAGTT  
TATTAATTTGAGCAAAAATGATTTTCATGGTGAAGTCAAGTCAAGTCAAGTCAAGTCAAGTCAAGTCAAGT

>M6-PGSC0003DMG400012992M6LRR-RLK\_976

AGCTACAGTTTATTAATTTGAGCAAAAATGATTTTCATGGTGAAGTCAAGTCAAGTCAAGTCAAGTCAAGT  
AGAAGTTGACTAATTTTCGAGTAGCCAGAAATAGAATTAGTGGTCACATAC

>M6-PGSC0003DMG400013198M6LRR-RLK\_0

GATGGGATAATTACTGCAGCAGATTTTCAAGCACTTCAAGCTTTTAAACAAGAATTGGTTGATCCAA  
AAGGGTCTTGAAAAGCTGGAATGATAGTGGATTTGGAGCTTGTCTGGT

>M6-PGSC0003DMG400013198M6LRR-RLK\_1008

CCAGCTTCTTAGATACTTTACCAAATCTTAGTGCCTTCAATGTCTCATATAATAATCTGTCTGGTCCTGTT  
CCAAGTCACTCGCACGGGAATTCAAGTCAAGTCAAGTCAAGTCAAGTCAAGTCAAGTCAAGTCAAGTCAAGT

>M6-PGSC0003DMG400013198M6LRR-RLK\_1071

GGTCCTGTTCCAAGTCACTCGCACGGGAATTCAAGTCAAGTCAAGTCAAGTCAAGTCAAGTCAAGTCAAGT  
GTTACAGTGCATCAACCCATGTCCAATCTCTCCAGTTAGCCCATCCCC

>M6-PGSC0003DMG400013198M6LRR-RLK\_1134

CTATGTGGTTACAGTGCATCAACCCATGTCCAATCTCTCCAGTTAGCCCATCCCCGAAACACCAAAAA  
AGCAACGTCGTAAGTTAAGTACTAAGGACATAATTCTCATAGCAGGAGGG

>M6-PGSC0003DMG400013198M6LRR-RLK\_1197

CCAAAAAAGCAACGTCGTAAGTTAAGTACTAAGGACATAATTCTCATAGCAGGAGGGGCACTTCTCATA  
ATCTTGGCTCTGCTATGTTGCATTCTCCTATGCTGCTTGATCAGGAAAAGA

>M6-PGSC0003DMG400013198M6LRR-RLK\_126

CTTGGTATTAATGTGCTCAAGGACAAGTTATTGTTATTCAGCTTCCATGGAGAGGTTTAGGTGGAAGA  
ATTACTGAAAGAATTGGACAATTCAGTCTCTTAGAAAACCTCAGCTTACAT

>M6-PGSC0003DMG400013198M6LRR-RLK\_1260

CTCATAATCTTGGCTCTGCTATGTTGCATTCTCCTATGCTGCTTGATCAGGAAAAGATCTGCAGCTGAAGC  
AGGGAAGGATGGTCAAGGCACGAGTAGGGTGGCTGCAGCAGCCAGAGGT

>M6-PGSC0003DMG400013198M6LRR-RLK\_1323

GCTGAAGCAGGGAAGGATGGTCAAGGCACGAGTAGGGTGGCTGCAGCAGCCAGAGGTGAAAAGGGT  
GTTCCACCAACTGCTGGAGAAGTTGAAGCAGCAGGAGGAGGAGATACAGGAGGA

>M6-PGSC0003DMG400013198M6LRR-RLK\_1386

GGTGTCCACCAACTGCTGGAGAAGTTGAAGCAGCAGGAGGAGGAGATACAGGAGGAAAGCTTGTC  
ATTTTGATGGACCTATTGTGTTACAGCAGATGATCTTCTTTGTGCAACTGCC

>M6-PGSC0003DMG400013198M6LRR-RLK\_1449

GTCCATTTTGATGGACCTATTGTGTTACAGCAGATGATCTTCTTTGTGCAACTGCCGAAATAATGGGAA  
AGAGCACTTATGGTACGGTGTACAAGGCCACGTTAGAGGATGGCGATCAA

>M6-PGSC0003DMG400013198M6LRR-RLK\_1512

ATGGGAAAGAGCACTTATGGTACGGTGTACAAGGCCACGTTAGAGGATGGCGATCAAGTTGCTGTGAA  
AAGATTGAGAGAGAAGATCACAAGAGGTCAAAGGGAATTTGAGAGTGAAGTC

>M6-PGSC0003DMG400013198M6LRR-RLK\_1575

GTGAAAAGATTGAGAGAGAAGATCACAAGAGGTCAAAGGGAATTTGAGAGTGAAGTCAATATTCTTGG  
CAAGATCAGGCATCCAAATCTTTTGGCCCTTAGAGCATATTACATGGGACCT

>M6-PGSC0003DMG400013198M6LRR-RLK\_1638

CTTGGCAAGATCAGGCATCCAAATCTTTTGGCCCTTAGAGCATATTACATGGGACCTAAAGGAGAGAAA  
CTTCTTGTTTTTGACTACATGCCTAAGGGAAGTTTGGCAACTTTTCTTCAT

>M6-PGSC0003DMG400013198M6LRR-RLK\_1701

GAGAACTTCTTGTTTTTGACTACATGCCTAAGGGAAGTTTGGCAACTTTTCTTCATGGTAAGCACAAAA  
TCAGTTTTCCATTTCACTTTGTATTTGTGAGAACTTCAGATTATAAATCT

>M6-PGSC0003DMG400013198M6LRR-RLK\_1764

CACAAAATCAGTTTTCCATTTCACTTTGTATTTGTGAGAACTTCAGATTATAAATCTTTCTGTTTTTTGCAG  
CTCGCAGTCCTGATACACCAATTGATTGGGCAACAAGGATGAGAATAG

>M6-PGSC0003DMG400013198M6LRR-RLK\_1827

TTTTTGCAGCTCGCAGTCCTGATACACCAATTGATTGGGCAACAAGGATGAGAATAGCAAAGGGTACAG  
CAAGGGGATTGCTCTTCTTCATACAAATGCCAACATCATTGATGGGAATC

>M6-PGSC0003DMG400013198M6LRR-RLK\_189

GGAAGAATTACTGAAAGAATTGGACAATTTCACTCTTAGAAAACCTCAGCTTACATGATAATGTCATTG  
GTGGTTCAATTCCTTCTACTTTGGGACTCATACTAATCTTAGAGGACTT

>M6-PGSC0003DMG400013198M6LRR-RLK\_1890

GTACAGCAAGGGGATTGCTCTTCTTCATACAAATGCCAACATCATTGATGGGAATCTTACATCGAGCAA  
TGTTTTACTTGATGACAACACAAATGCAAAAATTGCAGATTATGGTCTTT

>M6-PGSC0003DMG400013198M6LRR-RLK\_1953

CGAGCAATGTTTTACTTGATGACAACACAAATGCAAAAATTGCAGATTATGGTCTTTTCGCGCCTAATGAC  
TGCTGCTGCAAATGCAAATGTTATTGCAACTGCTGGAGCACTTGGGTATC

>M6-PGSC0003DMG400013198M6LRR-RLK\_2016

TAATGACTGCTGCTGCAAATGCAAATGTTATTGCAACTGCTGGAGCACTTGGGTATCGGGCACCTGAAC  
TTTCAAACTCAAGAAAGCAAACACAAAGACAGATGTATACAGCCTTGGTG

>M6-PGSC0003DMG400013198M6LRR-RLK\_2079

CTGAACTTTCAAACTCAAGAAAGCAAACACAAAGACAGATGTATACAGCCTTGGTGTTATTATACTGGA  
ACTTCTAACTGGGAAGTCACCAGGAGAAGCAATGAATGGTGTGGATTTGC

>M6-PGSC0003DMG400013198M6LRR-RLK\_2142

TACTGGAACCTTCTAACTGGGAAGTCACCAGGAGAAGCAATGAATGGTGTGGATTTGCCTCAATGGGTTG  
CATCAATTGTGAAAGAGGAGTGGACTAATGAGGTATTTGATTTAGAACTAA

>M6-PGSC0003DMG400013198M6LRR-RLK\_2205

GGGTTGCATCAATTGTGAAAGAGGAGTGGACTAATGAGGTATTTGATTTAGAACTAATGAGGGATGCA  
TCCGTTATCGGTGATGAATTATTGAATACCTTCAAATTGGCTTTGCATTGTG

>M6-PGSC0003DMG400013198M6LRR-RLK\_2268

ATGCATCCGTTATCGGTGATGAATTATTGAATACCTTCAAATTGGCTTTGCATTGTGTTGATCCGTCACCA

TCAGCTCGACCAGAAGTTCAGCAACTTCTCCAGCAACTAGAAGAAATTA

>M6-PGSC0003DMG400013198M6LRR-RLK\_2302

CTTGAAATTGGCTTTGCATTGTGTTGATCCGTCACCATCAGCTCGACCAGAAGTTCAGCAACTTCTCCAGC  
AACTAGAAGAAATTAGACCTGAAACAGCTACCAGTTCTGGGGACGACGG

>M6-PGSC0003DMG400013198M6LRR-RLK\_252

GTCATTGGTGGTTCAATTCCTTCTACTTTGGGACTCATACCTAATCTTAGAGGACTTCAACTTTTTAAACAAT  
AGGTTATCTGGTTCTATTCTGCTTCTCTTGGTTTATGCCCTCTTCTT

>M6-PGSC0003DMG400013198M6LRR-RLK\_315

TTTAAACAATAGGTTATCTGGTTCTATTCTGCTTCTCTTGGTTTATGCCCTCTTCTTCAAACACTTGATCTCA  
GCAATAACTCATTCTCTGGTGCAATTCCAGACAGTCTTGTTAATTCA

>M6-PGSC0003DMG400013198M6LRR-RLK\_378

CTTGATCTCAGCAATAACTCATTCTCTGGTGCAATTCCAGACAGTCTTGTTAATTCAACTAAGCTTTATAG  
GCTTAATCTTAGCCATAATTCTTTGTCTGGTTCAATCCCACAAGTCTC

>M6-PGSC0003DMG400013198M6LRR-RLK\_441

CTTTATAGGCTTAATCTTAGCCATAATTCTTTGTCTGGTTCAATTCCCACAAGTCTCACACAATCTCCCGCA  
CTCATCTTTCTTGATCTCAAGTATAACAATCTTTCAGGCTCAATACCA

>M6-PGSC0003DMG400013198M6LRR-RLK\_504

TCTCCCGCACTCATCTTTCTTGATCTCAAGTATAACAATCTTTCAGGCTCAATACCAGATACTTGGGATGG  
AAATGGAAATGGAAAAAGACTCTTCCAACCTCAGTCTCTTACACTTGAT

>M6-PGSC0003DMG400013198M6LRR-RLK\_567

TGGGATGGAAATGGAAATGGAAAAAGACTCTTCCAACCTCAGTCTCTTACACTTGATCACAACCTCTTTT  
CTGGAAGTATTCTGCTTCTTAGGCAAGTTGAATGAACTTGTTGAGCTT

>M6-PGSC0003DMG400013198M6LRR-RLK\_63

GATCCAAAAGGGTTCTTGAAAAGCTGGAATGATAGTGGATTTGGAGCTTGTCTGGTGGATGGCTTGGT  
ATTAATGTGCTCAAGGACAAGTTATTGTTATTCAGCTTCCATGGAGAGGT

>M6-PGSC0003DMG400013198M6LRR-RLK\_630

TTCTTTTCTGGAAGTATTCTGCTTCTTAGGCAAGTTGAATGAACTTGTTGAGCTTCTCACTTAGTCATAA  
TCAATTGACTGGAGTTATCCAAGTCATATTGAGGGACTCTCTAGGCTT

>M6-PGSC0003DMG400013198M6LRR-RLK\_693

AGTCATAATCAATTGACTGGAGTTATCCCAAGTCATATTGAGGGACTCTCTAGGCTTACAACACTTGATT  
TGTCTTATAATGCCATTAATGGAAGCTTGTCTGATAGCTTCTTGAATCTA

>M6-PGSC0003DMG400013198M6LRR-RLK\_756

CTTGATTTGTCTTATAATGCCATTAATGGAAGCTTGTCTGATAGCTTCTTGAATCTATCCTCACTAGTGGT  
CTTGAACCTGGAAAGCAACCAACTTGATAACCAAATCCCAGCAGCCATA

>M6-PGSC0003DMG400013198M6LRR-RLK\_819

CTAGTGGTCTTGAACCTGGAAAGCAACCAACTTGATAACCAAATCCCAGCAGCCATAATAAAATTGCAG  
AAACTCTCAGTTCTCAACTTGAGGAGTAACCACTTTAGTGGTGATATTCCT

>M6-PGSC0003DMG400013198M6LRR-RLK\_882

TTGCAGAACTCTCAGTTCTCAACTTGAGGAGTAACCACTTTAGTGGTGATATTCCTGTCACTATAGGAA  
ACATCTCTACTCTTAGACA ACTAGATTTAGCTCATAATAATATAAGTGGA

>M6-PGSC0003DMG400013198M6LRR-RLK\_945

ATAGGAAACATCTCTACTCTTAGACA ACTAGATTTAGCTCATAATAATATAAGTGGAGAAATCCCAGCTT  
CTTTAGATACTTTACCAAATCTTAGTGCCTTCAATGTCTCATATAATAAT

>M6-PGSC0003DMG400013383M6G-LecRK\_1054

GAATTGTT CAGATAAGAATGATTGTTTAGGTTTTTTGTTAAGTATGATGGGACTGGATATTGTGTGCTT  
GTTTTGGAGAAATTGTTGTATGGATATTGGTCACCAGGTA CTGAGTTTGT

>M6-PGSC0003DMG400013383M6G-LecRK\_1116

GTGTGCTTGT TTTGGAGAAATTGTTGTATGGATATTGGTCACCAGGTA CTGAGTTTGT TATGTATTTGAG  
AGTTGATAGTAAAGAGAACGATATATCGAATTTACAGGCCTGACTAGTT

>M6-PGSC0003DMG400013383M6G-LecRK\_1178

TATTTGAGAGTTGATAGTAAAGAGAACGATATATCGAATTTACAGGCCTGACTAGTTTGTATGGAGACT  
TCATGTCCAGTGAGAATTAGCCTTCCATTTCCACCAGAAGAGTCTAAGACA

>M6-PGSC0003DMG400013383M6G-LecRK\_124

ATCATTCAATCCAAATCCCCTCCTTGGAAATCCAACCCAAAACCAAATCCTACTTTACCCAACTCCACTTT  
CGCTGCTGGGTTTCTTCAATCTTCCAAAATCCTTCAATTTCTCCAT

>M6-PGSC0003DMG400013383M6G-LecRK\_1240

GGAGACTTCATGTCCAGTGAGAATTAGCCTTCCATTTCCACCAGAAGAGTCTAAGACAACCACTAGAAAT  
ATTGTGATCATTTGATGCTTTTTGCAGCTGAGTTGATTAGTGGAGTGTT



>M6-PGSC0003DMG400013383M6G-LecRK\_1302

CTAGAAATATTGTGATCATTTTCGATGCTTTTTGCAGCTGAGTTGATTAGTGGAGTGTCTTCTTTTGGGCA  
TTTCTCAAGAAGTATATTAAGTATAGGGATATGGCTAGGACTTTTGGTC

>M6-PGSC0003DMG400013383M6G-LecRK\_1364

TTTTGGGCATTTCTCAAGAAGTATATTAAGTATAGGGATATGGCTAGGACTTTTGGTCTTGAAGTCATGC  
CTGCGATTGGACCGAAAAGGTTTAGCTTTTCTGAGATCAAGAATGCAACT

>M6-PGSC0003DMG400013383M6G-LecRK\_1426

AGTCATGCCTGCGATTGGACCGAAAAGGTTTAGCTTTTCTGAGATCAAGAATGCAACTAATGATTTCACT  
GATAAAATTGGGAGGGGTGGATTTGGAGATGTTTACAAAGGGAAGTTGAG

>M6-PGSC0003DMG400013383M6G-LecRK\_1488

ATTTCACTGATAAAATTGGGAGGGGTGGATTTGGAGATGTTTACAAAGGGAAGTTGAGTGATGGACGT  
GTTGTTGCCGTGAAGTGCTTGAAGAATGAAAAGGTGGTGATGCTGAGTTCT

>M6-PGSC0003DMG400013383M6G-LecRK\_1550

GGACGTGTTGTTGCCGTGAAGTGCTTGAAGAATGAAAAGGTGGTGATGCTGAGTTCTGGGCTGAGGT  
CACGATCATAGCACGTATGCACCATTTGAATTTGGTGAGGTTGTGGGGGTTT

>M6-PGSC0003DMG400013383M6G-LecRK\_1612

TGAGGTCACGATCATAGCACGTATGCACCATTTGAATTTGGTGAGGTTGTGGGGGTTTTGTGCTGAGAA  
GGGTAGAAGGATACTTGTGTATGAGTATGTACCTAATGGTTCATTGGGTGA

>M6-PGSC0003DMG400013383M6G-LecRK\_1674

CTGAGAAGGGTAGAAGGATACTTGTGTATGAGTATGTACCTAATGGTTCATTGGGTGAATTCCTCTCCA  
AAAGGCACCGATCCAGTCACCAGATGGGCAGAAACCCATACTCGATTGGA

>M6-PGSC0003DMG400013383M6G-LecRK\_1736

CTCTTCCAAAAGGCACCGATCCAGTCACCAGATGGGCAGAAACCCATACTCGATTGGAATATAAGGTAC  
AGGATTGCGCTTGGTGTGGCAGGCAATTGCCTATCTACATGAAGAGTGT

>M6-PGSC0003DMG400013383M6G-LecRK\_1798

AAGGTACAGGATTGCGCTTGGTGTGGCAGGCAATTGCCTATCTACATGAAGAGTGTGGGAATGGGT  
ATTACATTGTGATATCAAGCCTGAAAATATCCTCTTAGGCGACGATTTCTG

>M6-PGSC0003DMG400013383M6G-LecRK\_186

ACTCCACTTTCGCTGCTGGGTTTCTTCAATCTTCCAAAATTCCTTCAATTTCTCCATTTGGTACTACAAA

TCCCAGTCAAACCGTTGTTGGTCAGCTAACCCAAATCCCCACTTA

>M6-PGSC0003DMG400013383M6G-LecRK\_1860

AATGGGTATTACATTGTGATATCAAGCCTGAAAATATCCTCTTAGGCGACGATTTCTGCCCAAAGGTGTC  
TGATTTTGGGCTAGCGAAGCTAAAGAAGAAAGAGGAGATGATGACCATGT

>M6-PGSC0003DMG400013383M6G-LecRK\_1922

AAGGTGTCTGATTTTGGGCTAGCGAAGCTAAAGAAGAAAGAGGAGATGATGACCATGTCAAGATTTTCG  
AGGCACGCCAGGATATGTAGCACCAGAATGGACCAAGGCTGATCCAATTACT

>M6-PGSC0003DMG400013383M6G-LecRK\_1984

ATTTTCGAGGCACGCCAGGATATGTAGCACCAGAATGGACCAAGGCTGATCCAATTACTCCAAAAGCCGA  
TGTGTACAGCTTTGGATTGGTGCTGTTGGAGATAGTTTCAGGTACAAGGAA

>M6-PGSC0003DMG400013383M6G-LecRK\_2046

AAGCCGATGTGTACAGCTTTGGATTGGTGCTGTTGGAGATAGTTTCAGGTACAAGGAACTTTGAGCATC  
ATAACTCAAAGGTGGAAAGTGATCAATGGTTTTTCCCTGCTTGGGCATTTG

>M6-PGSC0003DMG400013383M6G-LecRK\_2108

GAGCATCATAACTCAAAGGTGGAAAGTGATCAATGGTTTTTCCCTGCTTGGGCATTTGATAAGGTGTTTA  
AGGATATGAATGTTGACGATATTTTGGACCCTCAAATCAAACAATCGTAT

>M6-PGSC0003DMG400013383M6G-LecRK\_2170

GGTGTTTAAGGATATGAATGTTGACGATATTTTGGACCCTCAAATCAAACAATCGTATGATTCAAGGGCA  
CACTTTGACTTAGTGAACAGGATGGTGAAGACAGCAATGTGGTGCATCCA

>M6-PGSC0003DMG400013383M6G-LecRK\_2232

CAAGGGCACACTTTGACTTAGTGAACAGGATGGTGAAGACAGCAATGTGGTGCATCCAAGATCAGCCA  
GATGCACGACCATCAATGGGGAAAGTGGCTAAGATGTTGGAAGGGACGGTGG

>M6-PGSC0003DMG400013383M6G-LecRK\_2294

CAGCCAGATGCACGACCATCAATGGGGAAAGTGGCTAAGATGTTGGAAGGGACGGTGGAGATCATCG  
AGCCAAAGAAGCCTACCATTTTCTTCTTATCAGAGGAATAATATAAGGCTCAA

>M6-PGSC0003DMG400013383M6G-LecRK\_2356

CATCGAGCCAAAGAAGCCTACCATTTTCTTCTTATCAGAGGAATAATATAAGGCTCAATCCTCTTCATAAT  
TTCCTCAAATGCTGTCTCAACAAGTTGCAGTAAGCATGTATTCCATGT

>M6-PGSC0003DMG400013383M6G-LecRK\_2418

CTTCATAATTTCTCAAATGCTGTCTCAACAAGTTGCAGTAAGCATGTATTCCATGTTGTTTGAATTTGG  
ATCATGTTGTGTTTTGTCTGTTTTTTTTTCCAGTTTTGTAATCTCTTG

>M6-PGSC0003DMG400013383M6G-LecRK\_247

GTTTGAATTTGGATCATGTTGTGTTTTGTCTGTTTTTTTTTCCAGTTTTGTAATCTCTTGTTGTAGTTGT  
AAAGTACATTTTGATCAATGAAGAAGCAAATGGTTGTTACATAGAAG

>M6-PGSC0003DMG400013383M6G-LecRK\_248

TACTACAAAATCCAGTCAAACCGTTGTTGGTCAGCTAACCCAAATCCCCACTTAATTCCTCAGCTAC  
CCTTTTCATTTCTTCTCCGGTGAAGTCAAGCTAACCCCATCTACATCT

>M6-PGSC0003DMG400013383M6G-LecRK\_310

CTCAGTACCCTTTTCATTTCTTCTCCGGTGAAGTCAAGCTAACCCCATCTACATCTTCTCAGCTCCAAA  
TTTATGGCCTTCAATTATTCGAAACACCTCCTCTGTTCTTTTCCTACA

>M6-PGSC0003DMG400013383M6G-LecRK\_372

CAGTCCAAATTTATGGCCTTCAATTATTCGAAACACCTCCTCTGTTCTTTTCTACAAGAAGATGGAAGC  
TTGGTTTATGCAAACCTGGAACAGTTTCTTGAACCCAACTGATACTTTTC

>M6-PGSC0003DMG400013383M6G-LecRK\_434

GATGGAAGCTTGTTTTATGCAAACCTGGAACAGTTTCTTGAACCCAACTGATACTTTTCTTCCGACCCAGA  
ACATCACCGGAACAAATTTAACTTCCGGTAATGGAAAATCCAGTTTGAT

>M6-PGSC0003DMG400013383M6G-LecRK\_496

GACCCAGAACATCACCGGAACAAATTTAACTTCCGGTAATGGAAAATCCAGTTTGATGGATCGAATTTG  
AATACCCTTTTCTTCGATGAAAATGATAGTTATTTCACTTTTCCCCAAAA

>M6-PGSC0003DMG400013383M6G-LecRK\_558

CGAATTTGAATACCCTTTTCTTCGATGAAAATGATAGTTATTTCACTTTTCCCCAAAATGCCCTTCAGAGG  
TTGGAGGAAACAGGGGAAGTACTCAAGTTAATGGAAGATTTTTTTTCGT

>M6-PGSC0003DMG400013383M6G-LecRK\_620

CTTCAGAGGTTGGAGGAAACAGGGGAAGTACTCAAGTTAATGGAAGATTTTTTTTCGTTCGGATTTCCGGG  
GAGAAAGGGAAACTGAGAAGGATGAAATTGGATGAAGATGGGAATATGAGA

>M6-PGSC0003DMG400013383M6G-LecRK\_682

TTTCGGGGAGAAAGGGAAACTGAGAAGGATGAAATTGGATGAAGATGGGAATATGAGAATCTATAGTT  
TTGATCTTAGTTCAAGTTTAGCTAAAAATTGGACAATTGTTTGGGAAGCAGT

>M6-PGSC0003DMG400013383M6G-LecRK\_744

ATAGTTTTGATCTTAGTTCAAGTTTAGCTAAAAATTGGACAATTGTTTGGGAAGCAGTTAATCAATTATGT  
ACAATACATGGTACTTGTGGTACAACTCTATATGCTTGTATGATACTT

>M6-PGSC0003DMG400013383M6G-LecRK\_806

CAATTATGTACAATACATGGTACTTGTGGTACAACTCTATATGCTTGTATGATACTTCTACAACCTCAAAC  
TTCTTGTGTTTGTCCACCTGGTTTTAGGAAAGACGCTAGTAAATCTTGT

>M6-PGSC0003DMG400013383M6G-LecRK\_868

AACTCAAACCTTCTTGTGTTTGTCCACCTGGTTTTAGGAAAGACGCTAGTAAATCTTGTGTGAGGAAAATT  
CCATTGATGACGAAGGATTCGAAGGCTAGTAAGTATTTACCTCTTGATTT

>M6-PGSC0003DMG400013383M6G-LecRK\_930

GGAAAATTCATTGATGACGAAGGATTCGAAGGCTAGTAAGTATTTACCTCTTGATTTTGTAGTTTTACT  
GGTGTGGGTAACCAAACAGACCTTAAAGCTTTGAGCTTTTCGAGTTGTG

>M6-PGSC0003DMG400013383M6G-LecRK\_992

AGTTTTACTGGTGTGGGTAACCAAACAGACCTTAAAGCTTTGAGCTTTTCGAGTTGTGAAAAGAATTGTT  
CAGATAAGAATGATTGTTTAGGTTTTTTGTTTAAGTATGATGGGACTGGA

>M6-PGSC0003DMG400013468-(rev)M6RLKantifungi(GNK)\_1037

ACACTGGGTATGCTTTTGTGTTCTTCTCTGCTGATCCCAAAGATATTGTAGGGAACCTCCATATTGCCT  
CATGGCGTGGAATACAAGTTGCTGTAAAAAAGTTTGGGGAGGATGTGAT

>M6-PGSC0003DMG400013468-(rev)M6RLKantifungi(GNK)\_1098

CATATTGCCTCATGGCGTGGAATACAAGTTGCTGTAAAAAAGTTTGGGGAGGATGTGATTGCTGATGAG  
GATAAAGTGTGAGTAACTTAAAAGTAATAGTGCTTCTATTTTTCTACTTAC

>M6-PGSC0003DMG400013468-(rev)M6RLKantifungi(GNK)\_1159

CTGATGAGGATAAAGTGTGAGTAACTTAAAAGTAATAGTGCTTCTATTTTTCTACTTACAAGGGGAAAAC  
CCGTAGTTGCTACTTCACATTGTTTAGCTAGCATCTCTCATTTATTTTTT

>M6-PGSC0003DMG400013468-(rev)M6RLKantifungi(GNK)\_122

TGTACTGGCTTTTCTTTTTCTTAGTCTTATCTATTTGATTTACTGTTGTCATATTTCTATGTCTGTTATCTT  
GGAAGATTCTAGTGACAAAGGGTTTACCTAGTGATGATGATGATC

>M6-PGSC0003DMG400013468-(rev)M6RLKantifungi(GNK)\_1220

GGGGAAAACCCGTAGTTGCTACTTCACATTGTTTAGCTAGCATCTCTCATTTATTTTTTGTGGATATTTAC

ATTCCCTAACAGTATAGCTTCTGCAGGAGCGCATTAGAGATGAGCTTG

>M6-PGSC0003DMG400013468-(rev)M6RLKantifungi(GNK)\_1281

GGATATTTACATTCCCTAACAGTATAGCTTCTGCAGGAGCGCATTAGAGATGAGCTTGC GTTGCTCCAG

AAGATGAGACATCCTAATGTGGTGCAATTTCTTGGTGCTGTAACACAAAG

>M6-PGSC0003DMG400013468-(rev)M6RLKantifungi(GNK)\_1342

TTGCTCCAGAAGATGAGACATCCTAATGTGGTGCAATTTCTTGGTGCTGTAACACAAAGTAGTCCTATGA

TGATAGTGACGGAGTACTTACCAAAGTCTTACTTATTA ACTCTTGACAG

>M6-PGSC0003DMG400013468-(rev)M6RLKantifungi(GNK)\_1403

GTCCTATGATGATAGTGACGGAGTACTTACCAAAGTCTTACTTATTA ACTCTTGACAGTTTGCAGAATT

ATATTTGACAACATTTTTATACTGTTTTCTCCCTTATAGTTCTATCCA

>M6-PGSC0003DMG400013468-(rev)M6RLKantifungi(GNK)\_1464

TGCAGAATTATATTTGACAACATTTTTATACTGTTTTCTCCCTTATAGTTCTATCCATTTTTTTCAGTTTAC

ATTCTCTTTTCTTCTTTTGGACCATATGTTTGAACTTTTCCAACAA

>M6-PGSC0003DMG400013468-(rev)M6RLKantifungi(GNK)\_1525

TTTTCAGTTTACATTCTCTTTTCTTCTTTTGGACCATATGTTTGAACTTTTCCAACAAACCTATCACTTTGA

AATGACTTTTCCATGCCGTATGTTTCCAGGGTGATCTCCGTGAATAT

>M6-PGSC0003DMG400013468-(rev)M6RLKantifungi(GNK)\_1586

CTATCACTTTGAAATGACTTTTCCATGCCGTATGTTTCCAGGGTGATCTCCGTGAATATTTGAATAGAAAA

GGAGCACTTAAACCAACTAAAGCTCTCAGATTTGCAATGGACATCGCGA

>M6-PGSC0003DMG400013468-(rev)M6RLKantifungi(GNK)\_1647

GAATAGAAAAGGAGCACTTAAACCAACTAAAGCTCTCAGATTTGCAATGGACATCGCGAGGTTACATC

CACTCTGTGCCACTGACCAATATCATTA ACTCTTTATAAATTGCAAGATTA

>M6-PGSC0003DMG400013468-(rev)M6RLKantifungi(GNK)\_1708

TTCACATCCACTCTGTGCCACTGACCAATATCATTA ACTCTTTATAAATTGCAAGATTAATGGTTTAGATTT

TTCTTAAAAAAAACAATTTTTTTCATTATGCATTACTTATAAACTTTG

>M6-PGSC0003DMG400013468-(rev)M6RLKantifungi(GNK)\_1769

GGTTTAGATTTTTCTTAAAAAAAACAATTTTTTTCATTATGCATTACTTATAAACTTTGAGTTAATGTTCAA

AAATACACTTAAAAGTATTCGTTTTTTTTGAGTTTACCACCTGAACTAT

>M6-PGSC0003DMG400013468-(rev)M6RLKantifungi(GNK)\_183

TGTCTGTTATCTTGAAGATTCTAGTGACAAAGGGTTTACCTAGTGTAGCATGATGATCACCTTAGAGTT  
CAATATTGAATTAGTAAGATTGTAAGATTGTAAGATTGGAATGGAAGCAGCAGTTGCC

>M6-PGSC0003DMG400013468-(rev)M6RLKantifungi(GNK)\_1830

TTAATGTTCAAAAATACACTTAAAAGTATTCGTTTTTTTGGAGTTTACCACCTGAACTATGCGAGTTTCCTAC  
CTAAACTAGCACCAACTATTTTTCAAATTCACCTCCTCGATCTGTTG

>M6-PGSC0003DMG400013468-(rev)M6RLKantifungi(GNK)\_1891

GAGTTTCCTACCTAACTAGCACCAACTATTTTTCAAATTCACCTCCTCGATCTGTTGTTCCCCTTTTCCA  
ACCTGAAATATAACCATCGTTCAGGTAAGAAAAGAGAAGAATTGATGT

>M6-PGSC0003DMG400013468-(rev)M6RLKantifungi(GNK)\_1952

CCCCTTTTCCAACCTGAAATATAACCATCGTTCAGGTAAGAAAAGAGAAGAATTGATGTTGAATTGTGTT  
TTGATGAGTAGTTCTGGTAGAAAACCTCGTACACTTGATAGCTCCGGTATG

>M6-PGSC0003DMG400013468-(rev)M6RLKantifungi(GNK)\_2074

ACTCGAAAACTGGAATACTTTAGGTGTGTTTTTGACCGTTCACTCTAAAGCTTTTTTTGGATGTAAAATA  
TCAATGTCTTTTAGTCCTTTGATTGGAGCATTACTGCTGAGTATTAATA

>M6-PGSC0003DMG400013468-(rev)M6RLKantifungi(GNK)\_2135

ATGTAATAATCAATGTCTTTTAGTCCTTTGATTGGAGCATTACTGCTGAGTATTAATAATTCTCATATATA  
ATATTTGGTTTTAGGGGAATGAATTACCTGCATGAACATAAAGAAGCAA

>M6-PGSC0003DMG400013468-(rev)M6RLKantifungi(GNK)\_2196

CTCATATATAATATTTGGTTTTAGGGGAATGAATTACCTGCATGAACATAAAGAAGCAATTATTCATCGT  
GATCTTGAGCCTTCGTAAGTTTCACTTTTCGTCAGGTTACCTGAATTACAT

>M6-PGSC0003DMG400013468-(rev)M6RLKantifungi(GNK)\_2257

ATTCATCGTGATCTTGAGCCTTCGTAAGTTTCACTTTTCGTCAGGTTACCTGAATTACATTTTGTCTATACTA  
ACGCCTAGCCAAGTTTTCGAGTAGCATCAATGCTTTCATATTGTGATT

>M6-PGSC0003DMG400013468-(rev)M6RLKantifungi(GNK)\_2318

TGTCTATACTAACGCCTAGCCAAGTTTTCGAGTAGCATCAATGCTTTCATATTGTGATTTGAGACTCTTCA  
TGTAATAATAGTTCACTTTTTTTTTGGAGTAAGATAACAGAAATATTTTG

>M6-PGSC0003DMG400013468-(rev)M6RLKantifungi(GNK)\_2379

AGACTTTCATGTAATAATAGTTCACTTTTTTTTTGGAGTAAGATAACAGAAATATTTTGCTGGATGATACT  
GGACATCTGAAAGTTGCTGACTTTGGAGTAAGCAAGCTACTGAAAGTTA

>M6-PGSC0003DMG400013468-(rev)M6RLKantifungi(GNK)\_244

CTTAGAGTTCAATATTGAATTAGTAAGATTGTACTATTGGAATGGAAGCAGCAGTTGCCTGAGGCAAGT  
ATGAGTAGATAAGGGATGTTCAATGGAGGAAAAGTGGAGGCTAGCCTCATCT

>M6-PGSC0003DMG400013468-(rev)M6RLKantifungi(GNK)\_2440

GGATGATACTGGACATCTGAAAGTTGCTGACTTTGGAGTAAGCAAGCTACTGAAAGTTACAAAAAGGGT  
CAAAGAAGATAAGCCTTTGACATACGAAGACAGTTATCGTGAGTACTTCTT

>M6-PGSC0003DMG400013468-(rev)M6RLKantifungi(GNK)\_2501

AAAAGGGTCAAAGAAGATAAGCCTTTGACATACGAAGACAGTTATCGTGAGTACTTCTTCTTTTAGATAT  
TCTAGTCCTCTATTCCTTCTCCATTGGAAAAGATATGGTAGCTTGTTACT

>M6-PGSC0003DMG400013468-(rev)M6RLKantifungi(GNK)\_2562

TTTAGATATTCTAGTCCTCTATTCCTTCTCCATTGGAAAAGATATGGTAGCTTGTTACTGTGGAAAATAAT  
ATATGCGTGAGTGTTTTCAAGTTTACTTGATAGCTCCAAAAAAGCTTT

>M6-PGSC0003DMG400013468-(rev)M6RLKantifungi(GNK)\_2623

GGAAAATAATATATGCGTGAGTGTTTTCAAGTTTACTTGATAGCTCCAAAAAAGCTTTCTTTATTTGAG  
ATGTTGTGATTTGATCCTGTTTAATGATATTTGAGAACCGATATTTGGAT

>M6-PGSC0003DMG400013468-(rev)M6RLKantifungi(GNK)\_2684

TTATTTGAGATGTTGTGATTTGATCCTGTTTAATGATATTTGAGAACCGATATTTGGATTTCTTCTAATATT  
TTCATCATCTTTTTTTCTAAAAAAAAGCTTTTCAATTCTTGTGCAACA

>M6-PGSC0003DMG400013468-(rev)M6RLKantifungi(GNK)\_2745

CTTCTAATATTTTCATCATCTTTTTTTCTAAAAAAAAGCTTTTCAATTCTTGTGCAACAAATAGGCCGATAT  
GTAGCTCCAGAGGTTTTTCAAGGAATGAGGAATATGATACCAAAGTTGAT

>M6-PGSC0003DMG400013468-(rev)M6RLKantifungi(GNK)\_2806

TAGGCCGATATGTAGCTCCAGAGGTTTTTCAAGGAATGAGGAATATGATACCAAAGTTGATGTCTTTTCATT  
TGCTTGATTTTACAAGAGGTAATAATTTTGTCTTATCAGATTCTTGTTTA

>M6-PGSC0003DMG400013468-(rev)M6RLKantifungi(GNK)\_2867

CTTTTCATTTGCCTTGATTTTACAAGAGGTAATAATTTTGTCTTATCAGATTCTTGTTTAACTTTGAGGAAG  
AACAGTTTGTGCACTCTTGTGGACCATATCTTTATTTTATGTTTAA

>M6-PGSC0003DMG400013468-(rev)M6RLKantifungi(GNK)\_2928

CTTTGAGGAAGAAGCAGTTTGTGCACTCTTGTGGACCATATCTTTATTTTATGTTTAAAGAGTGTGTGAAT

GCAAGGAGTATTATGTTCCGTGTTCTTAAAAGTGAAAGCGCAAAACTGG

>M6-PGSC0003DMG400013468-(rev)M6RLKantifungi(GNK)\_2989

GTGTGTGAATGCAAGGAGTATTATGTTCCGTGTTCTTAAAAGTGAAAGCGCAAAACTGGAAGTGAACAC

ATACTTTTTTAAAATGAAATCGAAATGAGTGCTCAATCTGTAGAAAATCAG

>M6-PGSC0003DMG400013468-(rev)M6RLKantifungi(GNK)\_305

AGGCAAGTATGAGTAGATAAGGGATGTTCAATGGAGGAAAAGTGGGCTAGCCTCATCTGATCACATCT

TAGACTGATCTGTGGCATATTGTTGAGCTGCATAGGATTGCTTATCTTCTT

>M6-PGSC0003DMG400013468-(rev)M6RLKantifungi(GNK)\_3050

GTGAACACATACTTTTTTAAAATGAAATCGAAATGAGTGCTCAATCTGTAGAAAATCAGAGATCGTGTAT

AACATATATGTATTTAATACTAATGGCATCAAATTACAAATAAATTACTA

>M6-PGSC0003DMG400013468-(rev)M6RLKantifungi(GNK)\_3111

ATCGTGTATAACATATATGTATTTAATACTAATGGCATCAAATTACAAATAAATTACTAACTTAAGAATTC

AATATATAATGATACCATATTATTCTTGCAATTCTGCTTCAGAAACATT

>M6-PGSC0003DMG400013468-(rev)M6RLKantifungi(GNK)\_3355

AGATCAAATTTAACATGATATAAATATGTTTCAAAGGTCACAGAAATATACAGTGATTATCGTTTACTTG

AATATTGATCTGATCTATTTATGTTGTATATCTGTGTAAGTTTGAAAGTA

>M6-PGSC0003DMG400013468-(rev)M6RLKantifungi(GNK)\_3416

GTTTACTTGAATATTGATCTGATCTATTTATGTTGTATATCTGTGTAAGTTTGAAAGTAACTCCGGTTTGA

TGAAATTTAGTGAGTCAAACATGTGTGTCTTTTGCAGTTTCTCTTTGCA

>M6-PGSC0003DMG400013468-(rev)M6RLKantifungi(GNK)\_3477

TCCGGTTTGATGAAATTTAGTGAGTCAAACATGTGTGTCTTTTGCAGTTTCTCTTTGCAGAAACAGGTGA

TATATTTATCTTTGTGTTGTGCTGTATTTTAGATGATTGAAGGCTATCCC

>M6-PGSC0003DMG400013468-(rev)M6RLKantifungi(GNK)\_3538

AACAGGTGATATATTTATCTTTGTGTTGTGCTGTATTTTAGATGATTGAAGGCTATCCCCCTTCCATGCG

AAGGAAGAAAACGATGTACCTAAATTGTATGCTGCTAAAGAGCGCCCTC

>M6-PGSC0003DMG400013468-(rev)M6RLKantifungi(GNK)\_3599

TTTCCATGCGAAGGAAGAAAACGATGTACCTAAATTGTATGCTGCTAAAGAGCGCCCTCCTTTTAAAGCC

CCGGCAAAGTTTTATGCCCATGGACTGAAAGAGTAAGTTCTATATTTTAC

>M6-PGSC0003DMG400013468-(rev)M6RLKantifungi(GNK)\_366



TCACATCTTAGACTGATCTGTGGCATATTGTTTCAGCTGCATAGGATTGCTTATCTTCTTCTTTGGAACCTT  
GGCTAACTATTTGTTGATTAGTGTGTACAATCTGATGCTTACAAGAAT

>M6-PGSC0003DMG400013468-(rev)M6RLKantifungi(GNK)\_3660

TTTAAAGCCCCGGCAAAGTTTTATGCCCATGGACTGAAAGAGTAAGTTCTATATTTTACATCAGTTGCTA  
CTATAAGTCACGATATTTTATTTTAGTATAATAAACCATGCTATTCTAGG

>M6-PGSC0003DMG400013468-(rev)M6RLKantifungi(GNK)\_3721

CAGTTGCTACTATAAGTCACGATATTTTATTTTAGTATAATAAACCATGCTATTCTAGGGTAAATATCGAT  
TGTTATAATCTGAGAATATGAAAACCTCATGTCAATTAGGTGTGAGAGGA

>M6-PGSC0003DMG400013468-(rev)M6RLKantifungi(GNK)\_3904

TTCTAAATAGTTACCTGGTACTTGCAACTGTGGCATAGTAAACGTACTIONAAAAAGAACACAAAAAACTA  
ATAAGAACTGAACAGACCTACAATTATAAAATCAAACCTATTCAGCATTG

>M6-PGSC0003DMG400013468-(rev)M6RLKantifungi(GNK)\_3965

AAAAAACTAATAAGAACTGAACAGACCTACAATTATAAAATCAAACCTATTCAGCATTGCGATCCTTTCT  
TCCGTATAGGTGGCAGCTTCTTTCCACCTCTCTGTTGCACATAAAACAC

>M6-PGSC0003DMG400013468-(rev)M6RLKantifungi(GNK)\_4026

ATCCTTTCTTCCGTATAGGTGGCAGCTTCTTTCCACCTCTCTGTTGCACATAAAACACCTACACATCTACG  
TATCATGATCCCCCTTTCTGTAGGTTGTTTTGTGTAAGGAAAGCATC

>M6-PGSC0003DMG400013468-(rev)M6RLKantifungi(GNK)\_4087

ACACATCTACGTATCATGATCCCCCTTTCTGTAGGTTGTTTTGTGTAAGGAAAGCATCCCAGGCGACAT  
GCTATACGAAAAAAGAGGGCTTTAGACTTACCAAAGCTGTTTCTATATCC

>M6-PGSC0003DMG400013468-(rev)M6RLKantifungi(GNK)\_4148

AGGCGACATGCTATACGAAAAAAGAGGGCTTTAGACTTACCAAAGCTGTTTCTATATCCCATTGGTAAA  
GCTGGTGGAGGGAGAAGCCCATATACGGGTTAAGCCGAGCCCAATAGCTTT

>M6-PGSC0003DMG400013468-(rev)M6RLKantifungi(GNK)\_4209

TTGGTAAAGCTGGTGGAGGGAGAAGCCCATATACGGGTTAAGCCGAGCCCAATAGCTTTTGTCAAACA  
ATGTATCTTTGTTAAGAGATTCATTAATATGTATACATATGAAATTTAGA

>M6-PGSC0003DMG400013468-(rev)M6RLKantifungi(GNK)\_427

TTTGGAACCTTGGCTAACTATTTGTTGATTAGTGTGTACAATCTGATGCTTACAAGAATTGTGAGATGAC  
TCATCTAATTGTTTACTGAAGTGGCCTAGTATATCTTTCTTCTCCAATAT

>M6-PGSC0003DMG400013468-(rev)M6RLKantifungi(GNK)\_4270

CTCAAACAATGTATCTTTGTTAAGAGATTCATTAATATGTATACATATGAAATTTAGAACCTAATGCATG  
AAGTCGTCGTTCTAAAATTTACAATCCATAAAGTTGAAATCCTGGCTCT

>M6-PGSC0003DMG400013468-(rev)M6RLKantifungi(GNK)\_4331

CTAATGCATGAAGTCGTCGTTCTAAAATTTACAATCCATAAAGTTGAAATCCTGGCTCTACCTTAGTTGGC  
TTAATCTTGATTCTACTTATACATAGATTAGTAGGGTTATAACTGATC

>M6-PGSC0003DMG400013468-(rev)M6RLKantifungi(GNK)\_4392

CTTAGTTGGCTTTAATCTTGATTCTACTTATACATAGATTAGTAGGGTTATAACTGATCAACTGGTGTCTT  
TACGTAGATGGTAGCATTTAAACAAACTGGGATCTTGAAAATGTCCTT

>M6-PGSC0003DMG400013468-(rev)M6RLKantifungi(GNK)\_4453

CTGGTGTCTTTACGTAGATGGTAGCATTTAAACAAACTGGGATCTTGAAAATGTCCTTATTTTCGTTTTA  
TTATGTATAAATTTTACCATTTTCATGATCATCAAGTTGTTGTTGTCTCC

>M6-PGSC0003DMG400013468-(rev)M6RLKantifungi(GNK)\_4819

AATAGTAATATTAGGGTTGCTTTTGGTGTTCAGATTGATCGAAGAGTGTGGAATGACAAGCCAACCGA  
GCGGCCAAGTTTCAAGCAAATTATCCCAAGGCTTGAGTTCATCTATAAAAA

>M6-PGSC0003DMG400013468-(rev)M6RLKantifungi(GNK)\_4880

CCAACCGAGCGGCCAAGTTTCAAGCAAATTATCCCAAGGCTTGAGTTCATCTATAAAAAGTCTGACCACA  
ACAAGCGCTGGAAGGAAAATATCCATTAGTGGTTCTTGCACTTCAAACCT

>M6-PGSC0003DMG400013468-(rev)M6RLKantifungi(GNK)\_4941

CTGACCACAACAAGCGCTGGAAGGAAAATATCCATTAGTGGTTCTTGCACTTCAAACCTATCGTATTGTT  
TTGATGTAGTGTCTGTTCTTTTTTAGTATGTCTTGTATGCTTTCTTTA

>M6-PGSC0003DMG400013468-(rev)M6RLKantifungi(GNK)\_5246

GTATTGGTGTTTTTGATCTTTTCACATTTTGGTCATCAATGAATCAAACCTATTTGCCATTTGTTTCATCGAA  
TAGAGACATATTAGCTCTAAATCACTCGAATTTTCATGCTTTTGTGAGA

>M6-PGSC0003DMG400013468-(rev)M6RLKantifungi(GNK)\_5307

GTTTCATCGAATAGAGACATATTAGCTCTAAATCACTCGAATTTTCATGCTTTTGTGAGATATTGACTTCTA  
GTGAAAAACAATATCCTGGCTCTGATTTGATAAGTAGCTCATCTGAGA

>M6-PGSC0003DMG400013468-(rev)M6RLKantifungi(GNK)\_5368

TTGACTTCTAGTGAAAAACAATATCCTGGCTCTGATTTGATAAGTAGCTCATCTGAGATACTATTAGTG

GACGAGTTAGTTATAATTAGCTCAGATGTAATTTCTTTGTTTCAGTGTTGG

>M6-PGSC0003DMG400013468-(rev)M6RLKantifungi(GNK)\_5429

CTATTAGTGGACGAGTTAGTTATAATTAGCTCAGATGTAATTTCTTTGTTTCAGTGTTGGTACTTGACTCA

ATAATGTCCCTTCAGTCCCAAACAAGTTGGGGTCGACTATATGAATCTG

>M6-PGSC0003DMG400013468-(rev)M6RLKantifungi(GNK)\_5490

ACTTGACTCAATAATGTCCCTTCAGTCCCAAACAAGTTGGGGTCGACTATATGAATCTGAGCTAATCACC

ACGTTCCCATTTAATTTTCATCTCAGTCCAACATTATTACACAAAACCTTA

>M6-PGSC0003DMG400013468-(rev)M6RLKantifungi(GNK)\_5551

CTAATCACCACGTTCCCATTTAATTTTCATCTCAGTCCAACATTATTACACAAAACCTTAATCTCGCCACGAT

CACTGCAGTTTAGCATAACATATTATTTCAGTAGATACCTAAGTGCCTC

>M6-PGSC0003DMG400013468-(rev)M6RLKantifungi(GNK)\_5612

CTCGCCACGATCACTGCAGTTTAGCATAACATATTATTTCAGTAGATACCTAAGTGCCTCTTTTTCCACCATG

AATACTTTGCTACATGCAGGTAATTAGACCATTGAACTGCTTTCAGCAT

>M6-PGSC0003DMG400013468-(rev)M6RLKantifungi(GNK)\_5673

TTTTACCATGAATACTTTGCTACATGCAGGTAATTAGACCATTGAACTGCTTTCAGCATTTAGCGGCAATG

TGGAAGAAAGATGGTTCAGTTTAAGTAGTCGGAATCGTTCATCTCGGT

>M6-PGSC0003DMG400013468-(rev)M6RLKantifungi(GNK)\_5734

AGCGGCAATGTGGAAGAAAGATGGTTCAGTTTAAGTAGTCGGAATCGTTCATCTCGGTCTATGCGCCA

CATCTAAGTAAGTTTCTGGATAAAGTTTTTCTACTTCTCCACATTGTCTGC

>M6-PGSC0003DMG400013468-(rev)M6RLKantifungi(GNK)\_5793

CTATGCGCCACATCTAAGTAAGTTTCTGGATAAAGTTTTTCTACTTCTCCACATTGTCTGCAAAAATATTC

AGTTGCTCTTAGTAGTATATAGGCTGTTGGATTATTTTCTAGTTTCAA

>M6-PGSC0003DMG400013468-(rev)M6RLKantifungi(GNK)\_61

ATCCATTTTTTCATTCTGCCATCATTGTTAGTTATCATTCTCCAACCTGAGACTCTGTAGTCTGTACTGGCTT

TTCTTTTTTCTAGTCTTATCTATTTGATTTACTGTTGTCATATTTT

>M6-PGSC0003DMG400013489-(rev)M6LRR-RLK\_0

AAAGAAAGAACTTGGCATTGGGTGTTTTGAGGTTTTTCCAGTTCTTGAAAATGCTAGTTGTGTAACGA

CTGAAACTTTGTCATTTGGGTGTTTGGAGTTTTTTCAGTTTCTTGAAAGA

>M6-PGSC0003DMG400013489-(rev)M6LRR-RLK\_1037

CTACGATTCCTCTCGTTATATTGAATCTTTGATGCAATGACAACTGAAAAGTGAAAACAGTGGAAGTA  
ATCTAATAGAGTGACTGTTTTTCCATATAATAATGTGCAGTTGTAGCTTT

>M6-PGSC0003DMG400013489-(rev)M6LRR-RLK\_1098

GTGGAAGTAATCTAATAGAGTGACTGTTTTTCCATATAATAATGTGCAGTTGTAGCTTTGACGGAAATTA  
AGAAGGCCTTACATGACCCCTATAATGTTCTGGACAATTGGGATGTGAAT

>M6-PGSC0003DMG400013489-(rev)M6LRR-RLK\_1159

CGGAAATTAAGAAGGCCTTACATGACCCCTATAATGTTCTGGACAATTGGGATGTGAATTCTGTAGACCC  
CTGCAGTTGGAGAATGGTCACTTGCTCCTTGGATGGCTATGTGTCTGCTC

>M6-PGSC0003DMG400013489-(rev)M6LRR-RLK\_122

TAGTTGTATAAAGACTGGAACCTTATCATTGGGTGTTGAGCTTTTTCCAGTTCTTGAAAAGCTAGTTGT  
GTAAAGACTGAACTTTATCATCTGAGTGTTGAGGTTTTCAATCTTGA

>M6-PGSC0003DMG400013489-(rev)M6LRR-RLK\_1220

TGTAGACCCCTGCAGTTGGAGAATGGTCACTTGCTCCTTGGATGGCTATGTGTCTGCTCTGTAAGTTGTT  
TGGATGAAAGAGTAATTTAGTAGAACTTAGTTGGCTCATGAAAAGGCCT

>M6-PGSC0003DMG400013489-(rev)M6LRR-RLK\_1281

TAAGTTGTTGGATGAAAGAGTAATTTAGTAGAACTTAGTTGGCTCATGAAAAGGCCTGATTTAATCCA  
GTAAATTTATCGCTGAATATTTTCTTGCATCAGAGCACTACCTAGTCA

>M6-PGSC0003DMG400013489-(rev)M6LRR-RLK\_1342

TTAATCCAGTAAATTTATCGCTGAATATTTTCTTGCATCAGAGCACTACCTAGTCAAAGTCTAGCTGG  
CACCTTATCGCCTGGAATTGGCAATCTTACTAACTTGCAATATGTGTAA

>M6-PGSC0003DMG400013489-(rev)M6LRR-RLK\_1403

GTCTAGCTGGCACCTTATCGCCTGGAATTGGCAATCTTACTAACTTGCAATATGTGTAAGTTCTTGACTAT  
ATACATCTCTTAGTTGCTGCTACTTGGTTCCGTAATACCTAAGGTCCT

>M6-PGSC0003DMG400013489-(rev)M6LRR-RLK\_1464

TCTTACTATATACATCTCTTAGTTGCTGCTACTTGGTTCCGTAATACCTAAGGTCACCTTCTTATATGATTT  
TCTTAGTGTTATTAAGCCATTTTCTCGCAAAGTCTTAACTTGTTT

>M6-PGSC0003DMG400013489-(rev)M6LRR-RLK\_1525

TTATATGATTTTCTTAGTGTTATTAAGCCATTTTCTCGCAAAGTCTTAACTTGTTTCTAGATTGTTG  
CAAAACAATGCCATTTCTGGTCATATTCCTGATGTGATTGGGAAGTTA

>M6-PGSC0003DMG400013489-(rev)M6LRR-RLK\_1586

GTAGATTGTTGCAAAACAATGCCATTTCTGGTCATATTCCTGATGTGATTGGGAAGTTACAAAAGCTTCA  
GACACTTGATCTTTCCAACAATAAATTTGAAGGCGAAATACCCACTTCCT

>M6-PGSC0003DMG400013489-(rev)M6LRR-RLK\_1647

AAAGCTTCAGACACTTGATCTTTCCAACAATAAATTTGAAGGCGAAATACCCACTTCCTTCGAAGACCTG  
AAGAATTTGAATTATTTGTGAGTTCATGAATTTCACTTATTATTATTCA

>M6-PGSC0003DMG400013489-(rev)M6LRR-RLK\_1708

GAAGACCTGAAGAATTTGAATTATTTGTGAGTTCATGAATTTCACTTATTATTATTCACTTTCAAGACTC  
CAACCATATATTTCACTCTGTCAAAGATTGAATACATCATGCTACCTAT

>M6-PGSC0003DMG400013489-(rev)M6LRR-RLK\_1769

TTCAAGACTCCAACCATATATTTCACTCTGTCAAAGATTGAATACATCATGCTACCTATTGACTCAAATCTT  
CTGTTTCGTCCTCATCCTTGTGATTGACTTAGCTGATCATTGCTTGCA

>M6-PGSC0003DMG400013489-(rev)M6LRR-RLK\_183

AGCTAGTTGTGTAAAGACTGAAACTTTATCATCTGAGTGTTTGAGGTTTTCAATCTTGAAATGAGCTAGT  
TGTGTAAAGACTGAAACTTTGTCATTTGGGTGTTTGAGATTTTCCAATTC

>M6-PGSC0003DMG400013489-(rev)M6LRR-RLK\_1830

ACTCAAATCTTCTGTTTCGTCCTCATCCTTGTGATTGACTTAGCTGATCATTGCTTGCAGGGATGTCTCTTA  
TAATAATCTAAGTGGTACCCTTCTAAAATATCAGCGCGAGCTTTCAA

>M6-PGSC0003DMG400013489-(rev)M6LRR-RLK\_1891

GATGTCTCTTATAATAATCTAAGTGGTACCCTTCTAAAATATCAGCGCGAGCTTTCAAGTAAGTCGGCC  
TTTTCTATTGCCGTAATATACTCAGTTATTTCAATTTCAAGTAGTTATCT

>M6-PGSC0003DMG400013489-(rev)M6LRR-RLK\_1952

AAGTCGGCCTTTTCTATTGCCGTAATATACTCAGTTATTTCAATTTCAAGTAGTTATCTTAATATTATTGAA  
GTTAAACTATTGCTGTACGGCTGTACATGTAAATCTCGATGCTTAGTT

>M6-PGSC0003DMG400013489-(rev)M6LRR-RLK\_2013

ATATTATTGAAGTTAAACTATTGCTGTACGGCTGTACATGTAAATCTCGATGCTTAGTTGATAAAAATCCA  
TTATTAATAATACATTGACAAATGCTTTTGGGTAAACTGGTACTTGAAA

>M6-PGSC0003DMG400013489-(rev)M6LRR-RLK\_2074

TAAAAATCCATTATTAATAATACATTGACAAATGCTTTTGGGTAAACTGGTACTTGAAAAGTATTTCATTA

GTATTCACACTATAGTGAGATTGACTTCCTCTTCATGGCTTTCAGAGT

>M6-PGSC0003DMG400013489-(rev)M6LRR-RLK\_2135

TATTTATTAGTATTCCACACTATAGTGAGATTGACTTCCTCTTCATGGCTTTCAGAGTGCTCGGGAATCC

TTAATTTGTGGTCAAGGTTCTGAGAATAATTGCTCAGCAGTTTATCCA

>M6-PGSC0003DMG400013489-(rev)M6LRR-RLK\_2196

TCGGGAATCCTTTAATTTGTGGTCAAGGTTCTGAGAATAATTGCTCAGCAGTTTATCCAGAACCACTGTC

CTTCCCACCTGATAGTCTGGCAGGTACAGATAGCATTTCATGCTCAAGT

>M6-PGSC0003DMG400013489-(rev)M6LRR-RLK\_2257

ACCACTGTCCTTCCCACCTGATAGTCTGGCAGGTACAGATAGCATTTCATGCTCAAGTCCCTTCCCTTGC

ACCTGAAAATGGAAAACACTGTTAAAACATATTATACATACTGAGGAAGT

>M6-PGSC0003DMG400013489-(rev)M6LRR-RLK\_2318

CTTCCCTTGACCTGAAAATGGAAAACACTGTTAAAACATATTATACATACTGAGGAAGTTTTGCTATTTGT

GTTATTGAAAATGTGTTGCATCTATTATTTTGGATATCACAGATCAATC

>M6-PGSC0003DMG400013489-(rev)M6LRR-RLK\_2379

TGCTATTTGTGTTATTGAAAATGTGTTGCATCTATTATTTTGGATATCACAGATCAATCTGGTGCTGCACG

CAAGAGCCGTCGTGTGGTGTGCGTTTGTGCAAGTTTTGGTGCTGCT

>M6-PGSC0003DMG400013489-(rev)M6LRR-RLK\_244

TGAGCTAGTTGTGTAAGACTGAACTTTGTCATTTGGGTGTTGAGATTTTCCAATTCTTGAAAGCTAG

TTGTGTAAGATTGAACTTTGTCATTTGGGTGTTGAGGTTTGCAATCT

>M6-PGSC0003DMG400013489-(rev)M6LRR-RLK\_2440

GTGCTGCACGCAAGAGCCGTCGTGTGGTGTGCGTTTGTGCAAGTTTTGGTGCTGCTTCTTGGTCAT

AATAGCCCTCGCTTCTTGGTGGCGCTACAGAAATAATCAGCAGA

>M6-PGSC0003DMG400013489-(rev)M6LRR-RLK\_2501

CTTGGTCATAATAGCCCTCGCTTCTTGGTGGCGCTACAGAAATAATCAGCAGATCTTCTTTGATG

TCAATGGTTAGTTGATTTACTTTCCCCCCTTCTCTATGATAATTTG

>M6-PGSC0003DMG400013489-(rev)M6LRR-RLK\_2562

TTCTTTGATGTCAATGGTTAGTTGATTTACTTTCCCCCCTTCTCTATGATAATTTGAGCTTTTATTAGTT

CTGCATTTCTGATTCTTTCTGCCACGGATATATAAGTTGAGCCAA

>M6-PGSC0003DMG400013489-(rev)M6LRR-RLK\_2623

CTTTTATTAGTTCTGCATTTCTGATTCTTTTCCTGCCACGGATATATAAGTTGAGCCAAGTGAGCTTTTGCA  
TTATTGTCTGAGTGATTGGTGTAGGTATCATGTGAATATTTTTTAAG

>M6-PGSC0003DMG400013489-(rev)M6LRR-RLK\_2684

GAGCTTTTGCATTATTGTCTGAGTGATTGGTGTAGGTATCATGTGAATATTTTTTAAGCTAGGATGTTAC  
AGAGTCACCTGCTTGTGGTTTGAATCTTTATTTAATCTCTAAAAAGAT

>M6-PGSC0003DMG400013489-(rev)M6LRR-RLK\_2745

AGGATGTTACAGAGTCACCTGCTTGTGGTTTGAATCTTTATTTAATCTCTAAAAAGATTTTTGTGATTGT  
TGATTTTAAATTCATTTGTTTAGTTTTAGAGAGGACATGAGTGGTCAAG

>M6-PGSC0003DMG400013489-(rev)M6LRR-RLK\_2806

TTGTGATTGTTGATTTTAAATTCATTTGTTTAGTTTTAGAGAGGACATGAGTGGTCAAGGAATAGGAATT  
GGGGATAAATTCTGTGTTTACCATATTCAATAAACCTGTTGAATATGAAG

>M6-PGSC0003DMG400013489-(rev)M6LRR-RLK\_2867

ATAGGAATTGGGGATAAATTCTGTGTTTACCATATTCAATAAACCTGTTGAATATGAAGAACTTTCGAAC  
CCCGTCAGTTAGAAAATTATGCCCTTTGGCATACTCAGTAGTTCTGGTCA

>M6-PGSC0003DMG400013489-(rev)M6LRR-RLK\_2928

CTTTCGAACCCCGTCAGTTAGAAAATTATGCCCTTTGGCATACTCAGTAGTTCTGGTCAATTTTCCTAGTA  
AGGACTCAGAAAAGCTGTTTGAATTTTATTGTTATCGGGACAAGTCCTG

>M6-PGSC0003DMG400013489-(rev)M6LRR-RLK\_2989

TTTCCTAGTAAGGACTCAGAAAAGCTGTTTGAATTTTATTGTTATCGGGACAAGTCCTGATCCACTACAG  
GCTACCTTAAACATTTAGTTCCAAACATTGACAGAATAATTTGTTAATCA

>M6-PGSC0003DMG400013489-(rev)M6LRR-RLK\_305

GAAAGCTAGTTGTGTAAAGATTGAACTTTGTCATTTGGGTGTTTGAGGTTTGAATCTTGAAATGAACT  
AGTTGTGTAAATACAGAGACTTTGTCATTTGGGTGTTTGAGCTTTTTCCA

>M6-PGSC0003DMG400013489-(rev)M6LRR-RLK\_3050

CCACTACAGGCTACCTTAAACATTTAGTTCCAAACATTGACAGAATAATTTGTTAATCACATATCTGAATA  
ATTACACTTGCATTTTCTTGTGCAAGTTGAAGTAAATATTTCTGTAAAA

>M6-PGSC0003DMG400013489-(rev)M6LRR-RLK\_3111

TATCTGAATAATTACACTTGCATTTTCTTGTGCAAGTTGAAGTAAATATTTCTGTAAAAAGGAAGATGGT  
GTTATGTTCACTCTCTCGGGCCACCATGCCTGGTGAATTGCCTTGCCACA

>M6-PGSC0003DMG400013489-(rev)M6LRR-RLK\_3172

GAAGATGGTGTATGTTCACTCTCTCGGGCCACCATGCCTGGTGAATTGCCTGCCACATTCATTGCGTT  
GAAAGTTACTCTTGATAATCTTGTACTTTGGTTGTCTGATTCATATATGT

>M6-PGSC0003DMG400013489-(rev)M6LRR-RLK\_3233

CATTGCGTTGAAAGTTACTCTTGATAATCTTGTACTTTGGTTGTCTGATTCATATATGTGGATCAGTTTTG  
GGACGTTTTTGCCAACCTCTATTATTTCTCCCTGTTTCACTTTTCAA

>M6-PGSC0003DMG400013489-(rev)M6LRR-RLK\_3294

ATCAGTTTTGGGACGTTTTTGCCAACCTCTATTATTTCTCCCTGTTTCACTTTTCAAAGATTTTCTCCATC  
TGTCTCTAACTATTCCTCAAAGTTTTATCTGAGTAACGACTTCTCAA

>M6-PGSC0003DMG400013489-(rev)M6LRR-RLK\_366

AAATGAACTAGTTGTGTAATAACAGAGACTTTGTCATTTGGGTGTTTGAGCTTTTTCCAGTTTCTTGAAAG  
AGCTAGTTATGAAAACACTGAACTTTATCATCTGTGTGTTTGAGATCT

>M6-PGSC0003DMG400013489-(rev)M6LRR-RLK\_3721

CCCCTATATGCCAAATGGAAGTGTAGCATCACGATTAAGGTTAGCTCTTGCCTCCATGTGTTAATACA  
TAATACTCACTATTGATTTAGATAATGAGTCCAACATTTCCATTTATAA

>M6-PGSC0003DMG400013489-(rev)M6LRR-RLK\_3782

GTTAATACATAATACTCACTATTGATTTAGATAATGAGTCCAACATTTCCATTTATAAAAGTTAAATATT  
CTCACATGGTGTGTTGTTGTTACTACTCCCTTCATTCATTTTGTGTTGAC

>M6-PGSC0003DMG400013489-(rev)M6LRR-RLK\_3843

GTTAAATATTCTCACATGGTGTGTTGTTGTTACTACTCCCTTCATTCATTTTGTGTTGACAGATAATTGATAG  
GATACAGAGTTTAAAATTTTAATTTCTTTCACTTATTACTTTGTAGTA

>M6-PGSC0003DMG400013489-(rev)M6LRR-RLK\_3904

ATAATTGATAGGATACAGAGTTTAAAATTTTAATTTCTTTCACTTATTACTTTGTAGTAGAATAAATTTATT  
AAATAGTGGTTATTATACTTGTTAAAGAGAACATCATATAAATTTTAG

>M6-PGSC0003DMG400013489-(rev)M6LRR-RLK\_3965

ATAAATTTATTAATAGTGGTTATTATACTTGTTAAAGAGAACATCATATAAATTTTAGAATGTGGATAGT  
ATGAATTTGAGTTCTTAAAGCTGTAAAAGGTGTACGGACAAATATAATA

>M6-PGSC0003DMG400013489-(rev)M6LRR-RLK\_4026

TGTGGATAGTATGAATTTGAGTTCTTAAAGCTGTAAAAGGTGTACGGACAAATATAACTAGAAATAGT



GCCAAATTTTGGACCATGTCTAATTTAAAAGAAGTCATGTTAGTGAACAGT

>M6-PGSC0003DMG400013489-(rev)M6LRR-RLK\_4087

AGAATAGTGCCAAATTTTGGACCATGTCTAATTTAAAAGAAGTCATGTTAGTGAACAGTCCCTACTTCCC

AATTTATTGTCATTAACATTAGTGAGTGCTCTGAAGACCAGCAACCGTT

>M6-PGSC0003DMG400013489-(rev)M6LRR-RLK\_4148

CTACTTCCCAATTTATTGTCATTAACATTAGTGAGTGCTCTGAAGACCAGCAACCGTTGTCATTGGTGAA

TTGAGGCCATAAGAGTCTGGTTAAATACAAGCTTAGATGTTATGACCCA

>M6-PGSC0003DMG400013489-(rev)M6LRR-RLK\_4209

CATTGGTGAATTGAGGCCATAAGAGTCTGGTTAAATACAAGCTTAGATGTTATGACCCACCCTTACGTCA

GTCCATCCTTGAGCCCGCGGTGGGCTGCCACCTTCACATACTCTGTACT

>M6-PGSC0003DMG400013489-(rev)M6LRR-RLK\_427

TTCTTGAAAGAGCTAGTTATGAAAACACTGAACTTTATCATCTGTGTGTTTGAGATCTTCAATCTTGAAA

TGAGCAAGTTTATCAGGTGTTTGTGGAGGTGTTGAAAATGGATAAAAAG

>M6-PGSC0003DMG400013489-(rev)M6LRR-RLK\_4270

CTTACGTCAGTCCATCCTTGAGCCCGCGGTGGGCTGCCACCTTCACATACTCTGTACTGCTGTAGTTATA

TGATAAGACATTATCAGTTTGTGCTGGCTGAAACCATTGTTGTGTGTT

>M6-PGSC0003DMG400013489-(rev)M6LRR-RLK\_4331

TGTAGTTATATGATAAGACATTATCAGTTTGTGCTGGCTGAAACCATTGTTGTGTGTTTCTGCATGTTCCG

AAAGCCAAGTTCATTTTACTTTTCTGGAACTTTATCAGTTACTTTTTAA

>M6-PGSC0003DMG400013489-(rev)M6LRR-RLK\_4392

TGCATGTTCGAAAGCCAAGTTCATTTTACTTTTCTGGAACTTTATCAGTTACTTTTTAATAGTTTCCAAGTA

ACTGAATTTTGTAACAGTTGAAGCTGATACATATATTGGCTTGATTGA

>M6-PGSC0003DMG400013489-(rev)M6LRR-RLK\_4453

GTTTCCAAGTAACTGAATTTTGTAACAGTTGAAGCTGATACATATATTGGCTTGATTGAAAATGCATTGT

GGTTTCTAAAATTTGCAGATAGCATAAATGGTAAACCAGTTTTAGACTGG

>M6-PGSC0003DMG400013489-(rev)M6LRR-RLK\_4514

ATGCATTGTGGTTTCTAAAATTTGCAGATAGCATAAATGGTAAACCAGTTTTAGACTGGTCAAGGCGGA

AAAAGATAGCACAAGGTACAGCAAGAGGGCTAGTTTACTTGCATGAGCAGT

>M6-PGSC0003DMG400013489-(rev)M6LRR-RLK\_4575

AAGGCGGAAAAAGATAGCACAAAGGTACAGCAAGAGGGCTAGTTTACTTGCATGAGCAGTGTGATCCCA  
AAATTATCCATCGTGATGTCAAAGCCGCAAACATTCTGTTGGATGAAGAATT

>M6-PGSC0003DMG400013489-(rev)M6LRR-RLK\_4636

GATCCCAAATTATCCATCGTGATGTCAAAGCCGCAAACATTCTGTTGGATGAAGAATTTGAGGCAGTA  
GTTGGTGATTTTGGGTTGGCAAAGCTCTTGGATCACCACGATTCCCATGTG

>M6-PGSC0003DMG400013489-(rev)M6LRR-RLK\_4697

AGGCAGTAGTTGGTGATTTTGGGTTGGCAAAGCTCTTGGATCACCACGATTCCCATGTGACAACCTGCTGT  
TAGGGGCACCATTGGCCACATTGCTCCTGAATATTTGTCTACTGGCCAAT

>M6-PGSC0003DMG400013489-(rev)M6LRR-RLK\_4758

AACTGCTGTTAGGGGCACCATTGGCCACATTGCTCCTGAATATTTGTCTACTGGCCAATCATCTGAAAAA  
ACTGACGTTTTTGGGTTTGAATCTTGCTACTTGAGCTGATTACTGGCCA

>M6-PGSC0003DMG400013489-(rev)M6LRR-RLK\_4819

TCTGAAAAAAGTACGTTTTTGGGTTTGAATCTTGCTACTTGAGCTGATTACTGGCCAGAAAGCTATGG  
ACTTTGGTCGAGGGGCCAACAGAACGGTGTGTTATGCTTGATTGGGTG

>M6-PGSC0003DMG400013489-(rev)M6LRR-RLK\_488

AATCTTGAAATGAGCAAGTTTATCAGGTGTTTGTGGAGGTGTTGAAAATGGATAAAAAGGGCATTTTTT  
TTAATGATAAATTATGGGGTTTTGTTAGAAAAATTACTTTGTTGAGTAGGT

>M6-PGSC0003DMG400013489-(rev)M6LRR-RLK\_4880

AAGCTATGGACTTTGGTTCGAGGGGCCAACAGAACGGTGTGTTATGCTTGATTGGGTGCGTCTCTCTCT  
CTTTCTCTTTCTCTGGATGTTGTACCAAGTACTTTTTGAAATATGTACTGT

>M6-PGSC0003DMG400013489-(rev)M6LRR-RLK\_4941

TCTCTCCTCTTTCTCTTTCTCTGGATGTTGTACCAAGTACTTTTTGAAATATGTACTGTGAGTTGTGAGAG  
GGAATAAGCTATACAGAGGCGGGTTATGCGTCTCTCTCTCTCTCTTTT

>M6-PGSC0003DMG400013489-(rev)M6LRR-RLK\_5002

GTTGTGAGAGGGAATAAGCTATACAGAGGCGGGTTATGCGTCTCTCTCTCTCTTTTCTCATAGCTGTT  
CTCTTTTCAGTTATTAGGAGTTGTAGGTTCAAACCTCAAATATAGCTAGC

>M6-PGSC0003DMG400013489-(rev)M6LRR-RLK\_5063

ATAGCTGTTCTTTTTAGTTATTAGGAGTTGTAGGTTCAAACCTCAAATATAGCTAGCTAGTGGTGTGTA  
CATGTAGTTTACAAGGCTCTTTTCCATTAGCATACTTCAACGAACTCTC

>M6-PGSC0003DMG400013489-(rev)M6LRR-RLK\_5124

GTGGTGTGTACATGTAGTTTACAAGGCTCTTTTCCATTAGCATACTTCAACGAACTCTCTCGTTTAATTAC  
TATTAATGATATGCAGGTGAGAAAGCTGCATCAAGAGGAGAAACTGAAC

>M6-PGSC0003DMG400013489-(rev)M6LRR-RLK\_5185

GTTTAATTACTATTAATGATATGCAGGTGAGAAAGCTGCATCAAGAGGAGAACTGAACCTTATGGTAG  
ACAACAATTTGAAAAATAACTTTGACCAGATTGAGCTAGAAGAGATGGTTA

>M6-PGSC0003DMG400013489-(rev)M6LRR-RLK\_5246

TATGGTAGACAACAATTTGAAAAATAACTTTGACCAGATTGAGCTAGAAGAGATGGTTAAAGTTGCCCT  
TCTATGCACCCATTTCAACCCTTCTCATCGCCCAAAAATGTCCGAAGCATT

>M6-PGSC0003DMG400013489-(rev)M6LRR-RLK\_5307

GTTGCCCTTCTATGCACCCATTTCAACCCTTCTCATCGCCCAAAAATGTCCGAAGCATTAAAGGATGTTAGA  
AGGCGATGGATTGGCTGAAAAATGGGAGGCATCACAAAAGCTCGAGACT

>M6-PGSC0003DMG400013489-(rev)M6LRR-RLK\_5368

GGATGTTAGAAGGCGATGGATTGGCTGAAAAATGGGAGGCATCACAAAAGCTCGAGACTCCAAGAAAC  
CGAGCTTTTGAACATACACCACAAAGATATTCCAACACTACGTCTGAAGACTCTT

>M6-PGSC0003DMG400013489-(rev)M6LRR-RLK\_5429

AAGAAACCGAGCTTTTGAACATACACCACAAAGATATTCCAACACTACGTCTGAAGACTCTTCACTAGTTGAA  
CCAATGGAACCTTCTGGACCTAGATGACATCCATTTTTTCGTCCTCGATT

>M6-PGSC0003DMG400013489-(rev)M6LRR-RLK\_549

CATTTTTTTTAAATGATAAATTATGGGGTTTTGTTAGAAAAATTACTTTGTTGAGTAGGTGAGATTGTAGAA  
ATCTGTACTGGAAAGAATGTTGTATCTGTTTTGGAATGTGGGGCTGCTA

>M6-PGSC0003DMG400013489-(rev)M6LRR-RLK\_5490

CTAGTTGAACCAATGGAACCTTCTGGACCTAGATGACATCCATTTTTTCGTCCTCGATTCTTATCATCCTTG  
AGTTGCTAAAGTTGAAGTGAGAAGTATTTTCATTGCTGTTGAATGTATGT

>M6-PGSC0003DMG400013489-(rev)M6LRR-RLK\_5551

ATCATCCTTGAGTTGCTAAAGTTGAAGTGAGAAGTATTTTCATTGCTGTTGAATGTATGTATTCATTTTTGTA  
AAAGAAAAGGGAATAAGTCATGTGTAAGCTGAGTTCATATATGATATAT

>M6-PGSC0003DMG400013489-(rev)M6LRR-RLK\_5612

TCATTTTGTA AAAAGAAAAGGGAATAAGTCATGTGTAAGCTGAGTTCATATATGATATATCCCTTGTCTT

TCAATTTTTGAAATGATATGCTATGTAATTATGATTTCAATTTGTTCTTT

>M6-PGSC0003DMG400013489-(rev)M6LRR-RLK\_5673

CCTTGTTCTTTCAATTTTTGAAATGATATGCTATGTAATTATGATTTCAATTTGTTCTTTTTATAAGAAAGAT

TTTGAGATTTATGAGTAATAAAACGCCATAGGCTTGCCATTCTCATTA

>M6-PGSC0003DMG400013489-(rev)M6LRR-RLK\_61

GTGTAACGACTGAAACTTTGTCATTTGGGTGTTTGAGGTTTTTTCAGTTTCTGAAAGAGCTAGTTGTATA

AAGACTGGAACTTTATCATTGGGTGTTTGAGCTTTTTCCAGTTCTTGA

>M6-PGSC0003DMG400013489-(rev)M6LRR-RLK\_610

GATTGTAGAAATCTGTAAGTGGAAAGAATGTTGTATCTGTTTTGGAATGTGGGGCTGCTACTGTTTTGTAC

ATTGATGGAGAGTTCTTCTGCTACACTTCTCCTGCTGGTGTAAGTAACTATG

>M6-PGSC0003DMG400013489-(rev)M6LRR-RLK\_671

GTTTTGTACATTGATGGAGAGTTCTTCTGCTACACTTCTCCTGCTGGTGTAAGTAACTATGAAGGTTAGCTTC

TTTCTTGAATTTCTCACTTGTACTGAAAATTTCTTTTTATCAAATTA

>M6-PGSC0003DMG400013489-(rev)M6LRR-RLK\_732

GGTTAGCTTCTTTCTTGAATTTCTCACTTGTACTGAAAATTTCTTTTTATCAAATTAAGCTAAGAGTAGA

AGAACTTGTTAATTCCTCTGGATCAGAGTTAGAGCCACATGGGTGCAAG

>M6-PGSC0003DMG400013489-(rev)M6LRR-RLK\_976

TGAACCCCTTAGGCCTTTGCAATGTATATGAGTATGTGACTATGTGTTCTATCTTTTTTCTCTACGATTTCC

TCTCGTTATATTGAATCTTTGATGCAATGACAACTGAAAAGTGAAAA

>M6-PGSC0003DMG400013500M6LRR-RLK\_0

ATGTTGGTTCTTTACCTCTTGAATTTGAAATTTAAAGGCTGCGACACTGATAGATCTGTCAATGAATC

AATTCTCAAATGGAATTCCTATAGAAATTGGAGGATTGCAGAATCTGGTG

>M6-PGSC0003DMG400013500M6LRR-RLK\_128

TTTGAGGCACAACAAGTTACAAGGATCTATACCTGACTCATTGAGCAACATGGTAGGTTTGGAAATTCCTA

GACTTTCTCATAACAATATATCGGGAACCATTCCTATGTCTTTGGAGAA

>M6-PGSC0003DMG400013500M6LRR-RLK\_256

ACATGAAGTATTTCAATGTTTCTGTCAACATGTTGCATGGTGAAATTCCTCGGGGGTCCCTTCAAGAA

CCTCTCGAGTCAGTTTTTTCATCAACAATGAAGCATTGTGTGGTTCTTCAA

>M6-PGSC0003DMG400013500M6LRR-RLK\_320

CAAGAACCTCTCGAGTCAGTTTTTCATCAACAATGAAGCATTGTGTGGTTCTTCAAGGTTTAGTGTC  
CCATGCCCCACATCATCAAAGCATAGATCAAATAGGAAAAAAGTGCTTGT

>M6-PGSC0003DMG400013500M6LRR-RLK\_384

GTCCCGCCATGCCCCACATCATCAAAGCATAGATCAAATAGGAAAAAAGTGCTTGTCTATTCTTATGC  
TGGGAGTTGCACTTGTATTTGTTCTATTACCCTTTTGTGGTATGGATA

>M6-PGSC0003DMG400013500M6LRR-RLK\_448

TTATGCTGGGAGTTGCACTTGTATTTGTTCTATTACCCTTTTGTGGTATGGATAAAGCATAGAAGAGAT  
AAGAAATACCCTCAACAAGATGATTCATTGTCTATTCAACGAGAGGAA

>M6-PGSC0003DMG400013500M6LRR-RLK\_512

AAGAGATAAGAAATACCCTCAACAAGATGATTCATTGTCTATTCAACGAGAGGAAGAATTCGTACTAT  
GAATTGCTCCAAGCAACTGATTCTCTCAGCGAGAGTAATCTGATTGGTTC

>M6-PGSC0003DMG400013500M6LRR-RLK\_576

TACTATGAATTGCTCCAAGCAACTGATTCTCTCAGCGAGAGTAATCTGATTGGTCCGGAAGTTTTGGCT  
CTGTCTACAAAGGCATTCTCAGAAGTGGGACTGCTATTGCAGTTAAAGTG

>M6-PGSC0003DMG400013500M6LRR-RLK\_64

TGAATCAATTCTCAAATGGAATTCCTATAGAAATTGGAGGATTGCAGAATCTGGTGCACCTTTCTTTGAG  
GCACAACAAGTTACAAGGATCTATACCTGACTCATTGAGCAACATGGTAG

>M6-PGSC0003DMG400013500M6LRR-RLK\_640

TTGGCTCTGTCTACAAAGGCATTCTCAGAAGTGGGACTGCTATTGCAGTTAAAGTGTTAATCTGCAACT  
GGATATGGCATTCAAGAGTTTCGATACAGAATGTGATGTTTTGCGCAACC

>M6-PGSC0003DMG400013500M6LRR-RLK\_704

GCAACTGGATATGGCATTCAAGAGTTTCGATACAGAATGTGATGTTTTGCGCAACCTTCGCCATAGGAAT  
CTCATAAAAGTCATCACTAGTTGTTCCAACATTGATTTAAGGCTTTAGT

>M6-PGSC0003DMG400013500M6LRR-RLK\_768

AGGAATCTCATAAAAGTCATCACTAGTTGTTCCAACATTGATTTAAGGCTTTAGTGCTCGAGTATATGCC  
TAATGGGAGTCTTGAGAAGTATTTGTATTCTCACAACACTTCTTGGAC

>M6-PGSC0003DMG400013500M6LRR-RLK\_828

GAGTATATGCCTAATGGGAGTCTTGAGAAGTATTTGTATTCTCACAACACTTCTTGGACATCAAGCAA  
GACTAAGCATAATAATAGATGTGGCATGTGCATTGGAATATCTCCACCAT

>M6-PGSC0003DMG400013524M6RLKantifungi(GNK)\_0

TTTTTTTTTTCTTTCTTCTTTGTCCTCTGTTCTTTATCAGAGTTCCTAAAGCATCTGCAATATAATT  
TTCTACAGCCATCTTGCTCAACAAATCGATTTTTCGCGATCGAAAG

>M6-PGSC0003DMG400013524M6RLKantifungi(GNK)\_1037

TTTAAACAAGGATATATGAGCTATATATATTACAAAGTCAAAGAGTATATTATGCCCTTTTTTCCTAATATT  
TTTTACATTTTCAGTGTGTACAAATCAATCTTAGTCTAATATAGGATGC

>M6-PGSC0003DMG400013524M6RLKantifungi(GNK)\_1098

TCCTAATATTTTTTACATTTTCAGTGTGTACAAATCAATCTTAGTCTAATATAGGATGCTGCAGTAGTTTCA  
ACATTCAACCATGAATATTTCTGGTTCCTTTTTTGACTTTGTTGACA

>M6-PGSC0003DMG400013524M6RLKantifungi(GNK)\_1159

CAGTAGTTTCAACATTCAACCATGAATATTTCTGGTTCCTTTTTTGACTTTGTTGACAACATTTTGGTTTA  
TGAAAATGAAGCTGCCTCATCATTCTTCATTTTTTCCATATTATACA

>M6-PGSC0003DMG400013524M6RLKantifungi(GNK)\_122

AAGATTTTTGAGTTTTAAGTGTCTTTTGCTTTCACTTTTTCTTTTATGTGTTTTTCCAAAGAACTGCTCAA  
ATTGAGAATTCTCTGTATTCAGCTCTGAGGCTTGTGTAATTTTTGAT

>M6-PGSC0003DMG400013524M6RLKantifungi(GNK)\_1220

ATTTTGGTTTATGAAAATGAAGCTGCCTCATCATTCTTCATTTTTTCCATATTATACAATAGTTCAATAAT  
GCTTTTAAATGCAGCGATTTGATGTTCTTATATTTGATTGATTTCACT

>M6-PGSC0003DMG400013524M6RLKantifungi(GNK)\_1281

AGTTCAATAATGCTTTTAAATGCAGCGATTTGATGTTCTTATATTTGATTGATTTCACTTATTAGATCTTGC  
AGTCGCGTAATGGAGAAAGCAGTGACATTAGTTGCATTTAGGCTATTT

>M6-PGSC0003DMG400013524M6RLKantifungi(GNK)\_1342

TTAGATCTTGACAGTCGCGTAATGGAGAAAGCAGTGACATTAGTTGCATTTAGGCTATTTGTTGTTCTGTC  
GATTTTACTTCTACCAAATGCATCAGAGGCAGAACCAAGATCTCAGACGG

>M6-PGSC0003DMG400013524M6RLKantifungi(GNK)\_1403

TGTTCTGTCGATTTTACTTCTACCAAATGCATCAGAGGCAGAACCAAGATCTCAGACGGTCCAGATCATA  
TGTAGTACGCAATATGAGCATAATACAACAGCTTTTGTCCCGAATTTTGT

>M6-PGSC0003DMG400013524M6RLKantifungi(GNK)\_1464

CAGATCATATGTAGTACGCAATATGAGCATAATACAACAGCTTTTGTCCCGAATTTTGTGCCACAATGG

AAACAATAAGTGATCAAATGAGAACTCAAGGCTATGGAATTGCACTCACC

>M6-PGSC0003DMG400013524M6RLKantifungi(GNK)\_1525

CCACAATGGAAACAATAAGTGATCAAATGAGAACTCAAGGCTATGGAATTGCACTCACCGGGAGTGGA

CCGGATGCTAACTATGGACTAGCACAGTGTTATGGGGATCTTTCTTTACTTG

>M6-PGSC0003DMG400013524M6RLKantifungi(GNK)\_1586

GAGTGGACCGGATGCTAACTATGGACTAGCACAGTGTTATGGGGATCTTTCTTTACTTGACTGTGTCCTA

TGCTATGCTGAAGCTCGAACTGTCCTTCCTCAATGTTTTCTTTCAATGG

>M6-PGSC0003DMG400013524M6RLKantifungi(GNK)\_1647

TGTGTCCTATGCTATGCTGAAGCTCGAACTGTCCTTCCTCAATGTTTTCTTTCAATGGAGGTCGAATTTA

TCTAGATGGATGCTTTATGCGAGCTGAGAATTACACGTTTGATCACCAG

>M6-PGSC0003DMG400013524M6RLKantifungi(GNK)\_1708

GTCGAATTTATCTAGATGGATGCTTTATGCGAGCTGAGAATTACACGTTTGATCACCAGTATTTAGGACC

TGAGGACAGACATGTTTGTGGAAATAGAACCAGAAAGGATTCTTTGTTCC

>M6-PGSC0003DMG400013524M6RLKantifungi(GNK)\_1769

TTTAGGACCTGAGGACAGACATGTTTGTGGAAATAGAACCAGAAAGGATTCTTTGTTCCAACAAACGGC

TAGGCGGGCTGTTTCAGCAGGCGGTTACTAATGCACCAAACAATAATGGCTA

>M6-PGSC0003DMG400013524M6RLKantifungi(GNK)\_183

GAAACTGCTCAAATTGAGAATTCTCTGTATTCAGCTCTGAGGCTTGTGTAATTTTTGATGCAATTAATA

TCTTAATTTCTTCTAATATGATTAAGATATATGAAAGATGAGTTTTTGA

>M6-PGSC0003DMG400013524M6RLKantifungi(GNK)\_1830

CAAACGGCTAGGCGGGCTGTTTCAGCAGGCGGTTACTAATGCACCAAACAATAATGGCTATGCCCGTGCT

GAATTGGCAGTTCCTGGGGCAACGAACGAGACAGCTTATGTCCTAGCTGAT

>M6-PGSC0003DMG400013524M6RLKantifungi(GNK)\_1891

CCCGTGCTGAATTGGCAGTTCCTGGGGCAACGAACGAGACAGCTTATGTCCTAGCTGATTGCTGGAAAA

CACTGAGTGCTAACTCGTGCCGAGCTTGTTTGGAAAATGCATCTGCCTCCA

>M6-PGSC0003DMG400013524M6RLKantifungi(GNK)\_1952

CTGGAAAACACTGAGTGCTAACTCGTGCCGAGCTTGTTTGGAAAATGCATCTGCCTCCATGATGGGGTG

CTTACCATGGTCAGAAGGACGAGCGTTGTACTGGATGCTTCCTGAGGTA

>M6-PGSC0003DMG400013524M6RLKantifungi(GNK)\_2013

ATGGGGTGCTTACCATGGTCAGAAGGACGAGCGTTGTACTGGATGCTTCCTGAGGTAAGTCTCGGATGTT  
AATTTTCTTAATGCCATTGCTAGCAGTGAAGACTCATCGCCAAATGGTAAT

>M6-PGSC0003DMG400013524M6RLKantifungi(GNK)\_2074

CGGATGTTAATTTTCTTAATGCCATTGCTAGCAGTGAAGACTCATCGCCAAATGGTAATCTTTACTTTGTC  
TCCTTCCTTTTTCTTTAAGTCAATCACCGAAACTGTTATCTAGACCAT

>M6-PGSC0003DMG400013524M6RLKantifungi(GNK)\_2135

TTACTTTGTCTCCTTCCTTTTTCTTTAAGTCAATCACCGAAACTGTTATCTAGACCATGTAGCTGATATAT  
TGACGTATTTTCAGTGGTAGTGATTGTAATTGCTGTTGTTAGTGCTGT

>M6-PGSC0003DMG400013524M6RLKantifungi(GNK)\_2196

AGCTGATATATTGACGTATTTTCAGTGGTAGTGATTGTAATTGCTGTTGTTAGTGCTGTGGTCGTCTTCGT  
ACTGGGAGCTATTATCGCCTTTTATATGTGGAAGAACAACAATAACAG

>M6-PGSC0003DMG400013524M6RLKantifungi(GNK)\_2257

TCGTCTTCGTAAGGAGCTATTATCGCCTTTTATATGTGGAAGAACAACAATAACAGAGAAGAGAA  
AAGGTAACAATTTTGGTGATATTTTCAGCTAAGGCTTTAGCTTTGAATGTC

>M6-PGSC0003DMG400013524M6RLKantifungi(GNK)\_2318

GAAGAGAAAAGGTAACAATTTTGGTGATATTTTCAGCTAAGGCTTTAGCTTTGAATGTCTCCTAAAGCAA  
CTAAGGAGTTCGAAATTTTCAGGTTCCAATGATGTGGAGAAGTTAGTGAA

>M6-PGSC0003DMG400013524M6RLKantifungi(GNK)\_2379

CTAAAGCAACTAAGGAGTTCGAAATTTTCAGGTTCCAATGATGTGGAGAAGTTAGTGAAGACCCTTAAC  
GACAGCAGCCTGAACTTCAAGTATTCAACTCTTGAGAAAGCCACCGCATCT

>M6-PGSC0003DMG400013524M6RLKantifungi(GNK)\_244

AATTAATATCTTAATTTCTTCTAATATGATTAAGATATATGAAAGATGAGTTTTTGAAGATGGGGAGT  
AAAGTTCTGAAAATTGGTCAATTGGGGGTATTTTAGTCTTTTTAATTATT

>M6-PGSC0003DMG400013524M6RLKantifungi(GNK)\_2440

CCCTTAACGACAGCAGCCTGAACTTCAAGTATTCAACTCTTGAGAAAGCCACCGCATCTTTTGATGAGGC  
GAACAAGCTCGGGCAAGGTGGATTTGGCACAGTTTATAAGGTAGTGAGCT

>M6-PGSC0003DMG400013524M6RLKantifungi(GNK)\_2562

AAATGCTTAGCTCGTTAATATTATTACATAATCACATCAGAGTAAATCTATAATATGCTTATTATATTGT  
AGGGAGTTCTACAAGACGGGAGAGAGATAGCTGTCAAAGGCTGTTCTT



>M6-PGSC0003DMG400013524M6RLKantifungi(GNK)\_2623  
ATTATATTGTAGGGAGTTCTACAAGACGGGAGAGAGATAGCTGTCAAAGGCTGTTCTTCAACAACAAA  
CACAGAGCTGCAGATTTTTACAATGAAGTCAATATTATTAGTAGTGTGAG

>M6-PGSC0003DMG400013524M6RLKantifungi(GNK)\_2684  
ACAACAAACACAGAGCTGCAGATTTTTACAATGAAGTCAATATTATTAGTAGTGTGAGCACAAAAATCT  
AGTAAGGTTATTAGGATGCAGCTGTTCTGGACCTGAAAGCCTTCTTGAT

>M6-PGSC0003DMG400013524M6RLKantifungi(GNK)\_2745  
CAAAAATCTAGTAAGGTTATTAGGATGCAGCTGTTCTGGACCTGAAAGCCTTCTTGATATGAGTTCCTC  
CCGAACCAGAGTCTTGATCGGTTTATCTTTGGTATGTAGAAGACTTTGTG

>M6-PGSC0003DMG400013524M6RLKantifungi(GNK)\_2806  
GAGTTCCTCCCGAACACAGAGTCTTGATCGGTTTATCTTTGGTATGTAGAAGACTTTGTGACTTTGACACA  
CTCGATTCTTACTGGCATGAAATTAATAGAATTCACCCTGTATGTTGAAA

>M6-PGSC0003DMG400013524M6RLKantifungi(GNK)\_2867  
TTTGACACACTCGATTCTTACTGGCATGAAATTAATAGAATTCACCCTGTATGTTGAAATTGGCAGACGC  
TACCAAAGGCCAAAACATTGAATTGGGAGAAAAGATTTGACATCATTATAG

>M6-PGSC0003DMG400013524M6RLKantifungi(GNK)\_2928  
GGCAGACGCTACCAAAGGCCAAAACATTGAATTGGGAGAAAAGATTTGACATCATTATAGGGACTGCAG  
AAGGCTTGGTGTACCTCCACGAAAACAATAGAACGAGGATTATTCATAGAGA

>M6-PGSC0003DMG400013524M6RLKantifungi(GNK)\_2989  
ACTGCAGAAGGCTTGGTGTACCTCCACGAAAACAATAGAACGAGGATTATTCATAGAGATATAAAAGCC  
AGCAATATCCTGTTGGATTGAGGCTCAGAGCAAAAATTGCTGATTTTGGG

>M6-PGSC0003DMG400013524M6RLKantifungi(GNK)\_3050  
TAAAAGCCAGCAATATCCTGTTGGATTGAGGCTCAGAGCAAAAATTGCTGATTTTGGGTTGGCCAGGT  
CTTTCCAAGAAGACAAGAGTCACATAAGCACCGCTATAGCTGGGACTTTGT

>M6-PGSC0003DMG400013524M6RLKantifungi(GNK)\_3111  
GGCCAGGTCTTTCCAAGAAGACAAGAGTCACATAAGCACCGCTATAGCTGGGACTTTGTTAGTGATTCC  
TACTTTTACCATATAAATCATAGCTCAAACTTATGTTTCGCGAAACATTA

>M6-PGSC0003DMG400013524M6RLKantifungi(GNK)\_3172  
GTGATTCTTACTTTTACCATATAAATCATAGCTCAAACTTATGTTTCGCGAAACATTAACAGCCAGCAGT

GTAATTAGTTATCTCATATGGTTAATTTTCTGTTATTTCCCTTGCAGAG

>M6-PGSC0003DMG400013524M6RLKantifungi(GNK)\_3233

AGCCAGCAGTGTAAATTAGTTATCTCATATGGTTAATTTTCTGTTATTTCCCTTGCAGAGGTTATATGGCAC  
CAGAATACTTAGCTCATGGTCAATTAAGTAAAAGGCAGATGTTTACAG

>M6-PGSC0003DMG400013524M6RLKantifungi(GNK)\_3294

TATATGGCACCAAGAATACTTAGCTCATGGTCAATTAAGTAAAAGGCAGATGTTTACAGCTTTGGTGTT  
TTTTATTGGAGATTGTTACCGGAAGGCAGAATAACAGAAGCAAAAACACT

>M6-PGSC0003DMG400013524M6RLKantifungi(GNK)\_3355

TTGGTGTTCTTTTATTGGAGATTGTTACCGGAAGGCAGAATAACAGAAGCAAAAACACTGAATACTCTG  
ACAGTTTAGTTTCCATTGTAAGTTGTGAACCAATTCTTCTAGTTACTTGAA

>M6-PGSC0003DMG400013524M6RLKantifungi(GNK)\_3416

ATACTCTGACAGTTTATGTTTCCATTGTAAGTTGTGAACCAATTCTTCTAGTTACTTGAATCTATAACAATTGC  
AGACAAGAATGTTTTTGTCTATTGATTTAACTATTGCCGTGGATGAAA

>M6-PGSC0003DMG400013524M6RLKantifungi(GNK)\_3477

TATACAATTGCAGACAAGAATGTTTTTGTCTATTGATTTAACTATTGCCGTGGATGAAACAGACGTGGCA  
GCATTTTCAGCATGCGAGAGTAGAGGAACTGTTTGATCCAAATCTAATGC

>M6-PGSC0003DMG400013524M6RLKantifungi(GNK)\_3538

GACGTGGCAGCATTTCAGCATGCGAGAGTAGAGGAACTGTTTGATCCAAATCTAATGCTGCACAAC  
TCACACAAACAATGTAAAAAAGGAGGTTTTAAGAGTGGTACATGTAGGACT

>M6-PGSC0003DMG400013524M6RLKantifungi(GNK)\_3599

CACAACTATCACACAAACAATGTAAAAAAGGAGGTTTTAAGAGTGGTACATGTAGGACTTTTGTGCACA  
CAAGAGATTCCGGGATTAAGACCGTCTATGTCTAAGGCATTGCAGATGCTA

>M6-PGSC0003DMG400013524M6RLKantifungi(GNK)\_366

TGTTATTATATTATCTAGCTTGTGCCAAGCTGTGATTGAGGTGGGGTCTTACTTTTTACATACTCCATGAA  
AATCAATGTTAGTTGGTTTTTTTTGGTATAATCATCAATGCTGACCTCTC

>M6-PGSC0003DMG400013524M6RLKantifungi(GNK)\_3660

TGTGCACACAAGAGATTCCGGGATTAAGACCGTCTATGTCTAAGGCATTGCAGATGCTAGTAAAGAAAG  
AAGAAGAGTTACCTGCACCAACTAATCCTCCCTTTGTAGATGAGAAAAC

>M6-PGSC0003DMG400013524M6RLKantifungi(GNK)\_3721

AAAGAAAGAAGAAGAGTTACCTGCACCAACTAATCCTCCCTTTGTAGATGAGAAAACCTATGGAGCTTCA  
TGACCCTTGGGATACCCCATCTCATCCCCATGGAGATGATTCAGCTTCAAT

>M6-PGSC0003DMG400013524M6RLKantifungi(GNK)\_3782

GAGCTTCATGACCCTTGGGATACCCCATCTCATCCCCATGGAGATGATTCAGCTTCAATTGCAAACATTTCC  
TCACAGCTCATTCTACCCCAGATGATGTTTCAGTTTCCTCAAACCTAAGA

>M6-PGSC0003DMG400013524M6RLKantifungi(GNK)\_3843

CAAACATTTCTCACAGCTCATTCTACCCCAGATGATGTTTCAGTTTCCTCAAACCTAAGACATGATATAAAT  
CTGCTAGAGAATGGATCTCGTGAATCTCAAGTATTATCTTGCCTCATGT

>M6-PGSC0003DMG400013524M6RLKantifungi(GNK)\_3904

TGATATAAATCTGCTAGAGAATGGATCTCGTGAATCTCAAGTATTATCTTGCCTCATGTTCCTTTTGTCA  
TACTCTAGGAGCAGATGTTTGTAGCAACAGGTTGCTTTGTCATTGTAA

>M6-PGSC0003DMG400013524M6RLKantifungi(GNK)\_3965

CTTTTTGTCATACTCTAGGAGCAGATGTTTGTAGCAACAGGTTGCTTTGTCATTGTAATGGTGATGTGCT  
TGCACAAATCTTGCGGGAAGTTTATCATTGTAGGTAGATACACATTATA

>M6-PGSC0003DMG400013524M6RLKantifungi(GNK)\_4026

GTGATGTGCTTGCACAAATCTTGCGGGAAGTTTATCATTGTAGGTAGATACACATTATATCTTGCATTTG  
TAATGGTGAAGTAAGAGATTGTTGGACATACTATCGGTAAGATTGTAGT

>M6-PGSC0003DMG400013524M6RLKantifungi(GNK)\_4087

TTGTCATTTGTAATGGTGAAGTAAGAGATTGTTGGACATACTATCGGTAAGATTGTAGTACAAGATTA  
TATAGTTTATCTTGATTCCAAGAATGGTTTATTCCAACAGTGTA AAAAAG

>M6-PGSC0003DMG400013524M6RLKantifungi(GNK)\_4142

TAGTACAAGATTAAATATAGTTTATCTTGATTCCAAGAATGGTTTATTCCAACAGTGTA AAAAAGATCGC  
TTGGTCATTGATGTTTTGTATTTCTGTTATACAAATTGGTTACTGTAAAC

>M6-PGSC0003DMG400013524M6RLKantifungi(GNK)\_427

ACTCCATGAAAATCAATGTTAGTTGGTTTTTTTTGGTATAATCATCAATGCTGACCTCTCTTTTGTCTAGA  
TGTATCACAATTCTCAACTTTCTGTCCTATTTTATACTACTATATACT

>M6-PGSC0003DMG400013524M6RLKantifungi(GNK)\_488

TTGTTTCTAGATGTATCACAATTCTCAACTTTCTGTCCTATTTTATACTACTATATACTTTTCAAATTGATGA  
GTTTAGCTTTTATATATTGAAAGTTAGATTATTA AAAATAAGTGGTAT

>M6-PGSC0003DMG400013524M6RLKantifungi(GNK)\_549

TCAAATTGATGAGTTTAGCTTTTATATATTGAAAGTTAGATTATTAATAAAGTGGTATTTAGTAACATGG  
AAAAAAAATCATTTTTTTGGAAAGGGGGGAATTATATTGTTCAACATTCT

>M6-PGSC0003DMG400013524M6RLKantifungi(GNK)\_61

CTGCAATATAATTTTCTACAGCCATCTTGCTCAACAAATCGATTTTTTCGCGATCGAAAGGTAAGATTTTTG  
AGTTTTAAGTGTCTTTTGTCTTCACTTTTTTCTTTTATGTGTTTTTCCA

>M6-PGSC0003DMG400013524M6RLKantifungi(GNK)\_610

AGTAACATGGAAAAAAAATCATTTTTTTGGAAAGGGGGGAATTATATTGTTCAACATTCTGATTTAGAGTT  
GATATATTTTTTTGTTAAAAAATGTCATATATATACTCTTGTCGTCTAAC

>M6-PGSC0003DMG400013524M6RLKantifungi(GNK)\_671

TTTAGAGTTGATATATTTTTTTGTTAAAAAATGTCATATATATACTCTTGTCGTCTAACAAATAGAGCATT  
GTTTACCCTTGTTAACAAATTTATATTTACTGAATTAATAAAAAAAAAAAGT

>M6-PGSC0003DMG400013524M6RLKantifungi(GNK)\_732

ATAGAGCATTGTTTACCCTTGTTAACAAATTTATATTTACTGAATTAATAAAAAAAAAAAGTAATCCTAAAATT  
GGTCTTTTAATTTCTAAAATGTTATGCGACTTTAAAAAATTACCTCACT

>M6-PGSC0003DMG400013524M6RLKantifungi(GNK)\_793

TCCTAAAATTGGTCTTTTAATTTCTAAAATGTTATGCGACTTTAAAAAATTACCTCACTCATTTTTTTACCTC  
TCCAATCCAATAAAAAAATGAGTGAAATTATTTTTTAAGGCTCGTG

>M6-PGSC0003DMG400013524M6RLKantifungi(GNK)\_854

TTTTTTTACCTCTCCAATCCAATAAAAAAATGAGTGAAATTATTTTTTAAGGCTCGTGATATCTTTTTTAAA  
TTAAAAACCAATTTTAGATTATTTTTTTAATTAATAAATATGACTT

>M6-PGSC0003DMG400013524M6RLKantifungi(GNK)\_915

ATCTTTTTAAATTAATAAACCAATTTTAGATTATTTTTTTAATTAATAAATATGACTTTGTTAATGAAAAG  
TATAAATATGCTATATTTATTAGATGATGAAGATATATATATGTCACT

>M6-PGSC0003DMG400013524M6RLKantifungi(GNK)\_976

TTAATGAAAAGTATAAATATGCTATATTTATTAGATGATGAAGATATATATATGTCACTTTTTTAACAAGG  
ATATATGAGCTATATATATTACAAAGTCAAAGAGTATATTATGCCCTTT

>M6-PGSC0003DMG400013525M6LRR-RLK\_0

GTAAACTTCCATCCATCAGCAAGTTGTAGCTCATAATAAACCTCTAAATTATGTCATAAATTTCAATTCTCT

TAGCTTAATTCCTTCAAATTCCTCATTAAATGGGGTTTTTCATCGAAATG

>M6-PGSC0003DMG400013525M6LRR-RLK\_1116

GTCATATATCTTTACGGATGTCATGTTTAGTTGTGTAATCATCTTATTTAACATATGCTTGCGATGTTTCTT  
GGTTTCATGAGTTATTTCAATCTTATCCAATATTCAATGATTTTAATG

>M6-PGSC0003DMG400013525M6LRR-RLK\_1178

GATGTTTCTTGGTTTCATGAGTTATTTCAATCTTATCCAATATTCAATGATTTTAATGTTTAATTTTGTTTTT  
GTATGATTTGCAATGATACTTGCTGCAAGCCTAACACTATTGGATGT

>M6-PGSC0003DMG400013525M6LRR-RLK\_124

TTTGTATTTACGTTATTTTCATTCATAAATCTTCAATTTCTGATCCAAGAGCAACAGAAGCAGCTCTAATT  
TGTACAAACAGAACAGCTGCACAATCCAATCGACAAGTCTATGTAGCA

>M6-PGSC0003DMG400013525M6LRR-RLK\_1240

ATTTTGTTTTTGTATGATTTGCAATGATACTTGCTGCAAGCCTAACACTATTGGATGTAGAGCAAGAAAA  
AGTTCAACTTGTTCTGCCCAATTATTTTTTTTACTAACAAAACAGATAAC

>M6-PGSC0003DMG400013525M6LRR-RLK\_1302

CAAGAAAAAGTTCAACTTGTTCTGCCCAATTATTTTTTTTACTAACAAAACAGATAACTACTTTGTCATTTG  
GAATGATTTGAAAAACGGCGGTTGGAAATCGAGGTGATTTGACATTT

>M6-PGSC0003DMG400013525M6LRR-RLK\_1364

TTGTCATTTGGAATGATTTGAAAAACGGCGGTTGGAAATCGAGGTGATTTGACATTTCTTGAAAGTTGC  
TCTTGTTATCTGTTTAAAATGTGGTAGTTTGTATTTCTTGGATTTTAGTT

>M6-PGSC0003DMG400013525M6LRR-RLK\_1426

AAAGTTGCTCTTGTTATCTGTTTAAAATGTGGTAGTTTGTATTTCTTGGATTTTAGTTCCATTCCAGGATTT  
AATAACTATCTAGACATTACTTGTGATGATGTTTCTTTTTGTCATCTG

>M6-PGSC0003DMG400013525M6LRR-RLK\_1488

TCCAGGATTTAATAACTATCTAGACATTACTTGTGATGATGTTTCTTTTTGTCATCTGATAAGTTGAAATG  
GTTGACTTATATATATACATGAAATGAATGAAGAGTGAATCAGCATTGA

>M6-PGSC0003DMG400013525M6LRR-RLK\_1550

GTTGAAATGGTTGACTTATATATATACATGAAATGAATGAAGAGTGAATCAGCATTGAGGCAAATGCAG  
ACAATGAATCTTTTAGAAGCTGTGACAAAATAAACTGTTTATACAAAATA

>M6-PGSC0003DMG400013525M6LRR-RLK\_1612

AATGCAGACAATGAATCTTTTAGAAGCTGTGACAAAATAAACTGTTTATACAAAACATATGTCATTCATGT  
TGTCGTATTTTGATTAATTATCAGGAGGATCGAATCGTTTGGCTGTTATT

>M6-PGSC0003DMG400013525M6LRR-RLK\_1674

ATTCATGTTGTCGTATTTTGATTAATTATCAGGAGGATCGAATCGTTTGGCTGTTATTCTTGCAACAACCTC  
TGAGTATTTCTGCTTTCTTGCTATTTGTATCGGCTGTTTCATTCTTTGT

>M6-PGSC0003DMG400013525M6LRR-RLK\_1736

CAACAACCTCTGAGTATTTCTGCTTTCTTGCTATTTGTATCGGCTGTTTCATTCTTTGTGCGGAGGAAGGTT  
CTGAAACAAAAGAGAGGTAATAATTTTAAGTCAAATCATTTCATTCT

>M6-PGSC0003DMG400013525M6LRR-RLK\_1798

AGGAAGGTTCTGAAACAAAAGAGAGGTAATAATTTTAAGTCAAATCATTTCATTCTTTCCGAAAAAAG  
AAATCTCATTTAAGTCTGATTGATCAAATGGTAATTTGACTTGAATTTGC

>M6-PGSC0003DMG400013525M6LRR-RLK\_186

AGCTCTAATTTGTACAAACAGAACAGCTGCACAATCCAATCGACAAGTCTATGTAGCAACTTTTCTAGAA  
GCCATGGATTCCATTACGCCATTAGTGGGGCGAGACAAATTTGGAGCAGT

>M6-PGSC0003DMG400013525M6LRR-RLK\_1860

GAAAAAAGAAATCTCATTTAAGTCTGATTGATCAAATGGTAATTTGACTTGAATTTGCTTCGATGATGTA  
GAGAAGAAGCAGCTAGGAGCTCTATAAGAACGGTTAATAAATCAAATTT

>M6-PGSC0003DMG400013525M6LRR-RLK\_1922

ATGATGTAGAGAAGAAGCAGCTAGGAGCTCTATAAGAACGGTTAATAAATCAAATTTGAATATTTTCAT  
ATGAAACTCTTGAGAAGGCGGCAAATTACTTTAACAACCTCGAATAAATTGG

>M6-PGSC0003DMG400013525M6LRR-RLK\_1984

ATTTTCATATGAAACTCTTGAGAAGGCGGCAAATTACTTTAACAACCTCGAATAAATTGGGACAAGGAGGT  
TCTGGTTCTGTTTACAAGGTAATTCTCTTTGAACATTATATTCATTTTTCT

>M6-PGSC0003DMG400013525M6LRR-RLK\_2046

AGGAGGTTCTGGTTCTGTTTACAAGGTAATTCTCTTTGAACATTATATTCATTTTTCTTATACTAATGAGAT  
TTGCCTTACGATAGTCGTGTTTACACATGAAATAGGGGATCTTGCCAG

>M6-PGSC0003DMG400013525M6LRR-RLK\_2108

CTAATGAGATTTGCCTTACGATAGTCGTGTTTACACATGAAATAGGGGATCTTGCCAGACGGGCAGGTT  
GTTGCTATAAAGAGGCTCTTCTTCAATACGAGGCAGTGGGTTGATCATTTTC

>M6-PGSC0003DMG400013525M6LRR-RLK\_2170

GCAGGTTGTTGCTATAAAGAGGCTCTTCTTCAATACGAGGCAGTGGGTTGATCATTCTTTAATGAGGTC  
AATTTGATTAGCGGCATCCATCACAAAACTTGGTAAAGCTATTGGGTTG

>M6-PGSC0003DMG400013525M6LRR-RLK\_2232

ATGAGGTCAATTTGATTAGCGGCATCCATCACAAAACTTGGTAAAGCTATTGGGTTGCAGCATTACAG  
GGCCGGAAAGTCTTCTAGTGTATGAGTACGTGCCCAATCATAGTCTTGCGG

>M6-PGSC0003DMG400013525M6LRR-RLK\_2294

ATTACAGGGCCGGAAAGTCTTCTAGTGTATGAGTACGTGCCCAATCATAGTCTTGCGGATTACGTCTTTG  
GTAAGTATCCAATCCACCTTAATTTATGAAAATTTTTAAATTGGTGTAGT

>M6-PGSC0003DMG400013525M6LRR-RLK\_2356

CGTCTTTGGTAAGTATCCAATCCACCTTAATTTATGAAAATTTTTAAATTGGTGTAGTCTTATCTCGTTATG  
TAAATGCCTTTGTTTTGCACTGAATCAGACACAAAGAACCTTCAACCA

>M6-PGSC0003DMG400013525M6LRR-RLK\_2418

TCTCGTTATGTAAATGCCTTTGTTTTGCACTGAATCAGACACAAAGAACCTTCAACCACTTACATGGAGTC  
AAAGATACAAAATTGTATTGGGTACTGCTGAGGGATTGGCCTATCTTCA

>M6-PGSC0003DMG400013525M6LRR-RLK\_248

TTCTAGAAGCCATGGATTCCATTACGCCATTAGTGGGGCGAGACAAATTTGGAGCAGTAATTAATGGAA  
CAGGGAATAATACAGTTTATGCGTTTGGTGAATGTATGAAGGACTTATCAC

>M6-PGSC0003DMG400013525M6LRR-RLK\_2480

CATGGAGTCAAAGATACAAAATTGTATTGGGTACTGCTGAGGGATTGGCCTATCTTCATGAAGAATCGA  
AATTAAGGATCATCCACCGAGATATAAAGTTGAGCAATGTTCTTCTAGATG

>M6-PGSC0003DMG400013525M6LRR-RLK\_2542

GAATCGAAATTAAGGATCATCCACCGAGATATAAAGTTGAGCAATGTTCTTCTAGATGAAGATTTACG  
GCAAAAATAGCTGATTTTGGTCTAGCCAGGTTATTTCTGAAGACAAGAGC

>M6-PGSC0003DMG400013525M6LRR-RLK\_2604

TTTCACGGCAAAAATAGCTGATTTTGGTCTAGCCAGGTTATTTCTGAAGACAAGAGCCACATTAGCACA  
GCTATTGCTGGCACTCTGTAAGTTCAATAACTTTTTCCGGTACTTGTTA

>M6-PGSC0003DMG400013525M6LRR-RLK\_2666

TTAGCACAGCTATTGCTGGCACTCTGTAAGTTCAATAACTTTTTCCGGTACTTGTTACTTTTTCTTTAATC

AATACACTAAGAAAGTGCTGAATTAATAAGTTTTGGCATTGCAGCGGT

>M6-PGSC0003DMG400013525M6LRR-RLK\_2728

TTCTTTAATCAATACACTAAGAAAGTGCTGAATTAATAAGTTTTGGCATTGCAGCGGTTACATGGCTCCA  
GAGTACGTTGTACGTGGCATACTGACCGAAAAAGCTGATGTCTATAGTTT

>M6-PGSC0003DMG400013525M6LRR-RLK\_2790

TGGCTCCAGAGTACGTTGTACGTGGCATACTGACCGAAAAAGCTGATGTCTATAGTTTTGGAGTTCTTGT  
TGTCGAAGTCGTGTGTGGAAAGAAGAACAATTATGTTTTCAAGAACACTA

>M6-PGSC0003DMG400013525M6LRR-RLK\_2852

GTTCTTGTGTGCGAAGTCGTGTGTGGAAAGAAGAACAATTATGTTTTCAAGAACACTAATTCTTCTTCTGC  
AGCAGGTACTTTCTTGTGATATTTTTCTTTCCTTAACGGACATTAATAG

>M6-PGSC0003DMG400013525M6LRR-RLK\_2914

TCTTCTGCAGCAGGTACTTTCTTGTGATATTTTTCTTTCCTTAACGGACATTAATAGTATTTACTCAACTC  
ATGTCATTGTGGTTTCTAGTTGTGGAACCTGTATGGGATGGGGAAATC

>M6-PGSC0003DMG400013525M6LRR-RLK\_2976

TACTCAACTCATGTCATTGTGGTTTCTAGTTGTGGAACCTGTATGGGATGGGGAAATCTTATGAAGCAGT  
TGACCCTTTATTAGAAGGTAACCTCAATAAAGAGGAGGCATCTAAGCTGC

>M6-PGSC0003DMG400013525M6LRR-RLK\_3038

GAAGCAGTTGACCCTTTATTAGAAGGTAACCTCAATAAAGAGGAGGCATCTAAGCTGCTGCAAGTAGGT  
CTTCTTTGTGTACAAGCATCAGCAGAACTACGACCCTCCATGTCAAGTGTC

>M6-PGSC0003DMG400013525M6LRR-RLK\_310

AATGGAACAGGGAATAATACAGTTTATGCGTTTGGTGAATGTATGAAGGACTTATCACAACAGATTGT  
AATCTCTGTTTTGCTCAGTGCAAACTCAAATCCTACGATGCTTACCTTTT

>M6-PGSC0003DMG400013525M6LRR-RLK\_3100

AGTAGGTCTTCTTTGTGTACAAGCATCAGCAGAACTACGACCCTCCATGTCAAGTGTCGTGAAAATGCTC  
ACCGAGAACCATGAAATTCCTCTGCCAACACAGCCACCATTCCCTCAATTC

>M6-PGSC0003DMG400013525M6LRR-RLK\_3162

AAATGCTCACCGAGAACCATGAAATTCCTCTGCCAACACAGCCACCATTCCCTCAATTCTGGTAGTTCAGA  
ATTTAGTCCATTTAATCTGCATGGCAAAAGATTTTTCGGTCAACCAAGCT

>M6-PGSC0003DMG400013525M6LRR-RLK\_3224



AGTTCAGAATTTAGTCCATTTAATCTGCATGGCAAAGATTTTTCGGTCAACCAAGCTCCTCTACACAATC  
TTCTGGGAATAAATTGACGGAGAGTTGGATTGAGCCTAGATAAACTAAG

>M6-PGSC0003DMG400013525M6LRR-RLK\_3286

TACACAATCTTCTGGGAATAAATTGACGGAGAGTTGGATTGAGCCTAGATAAACTAAGTTGATCATCTG  
GAATTGGTATTTGATTTTGTTCAGCAAAGGCCAACTTCTTGAAGGTGAA

>M6-PGSC0003DMG400013525M6LRR-RLK\_3348

TCATCTGGAATTGGTATTTGATTTTGTTCAGCAAAGGCCAACTTCTTGAAGGTGAATTGTTTCAGCCAAC  
TCAAGTTTTTCTGTGATTAAGTAGTACTCACTACTCACTCTCCATTTT

>M6-PGSC0003DMG400013525M6LRR-RLK\_3410

TCAGCCAACTCAAGTTTTTCTGTGATTAAGTAGTACTCACTACTCACTCTCCATTTTTTTTACTGATATTT  
GTTTAAAGTCTTATTTAGTCAACTTCCTTTGTGAATACCCAGTGA

>M6-PGSC0003DMG400013525M6LRR-RLK\_3472

TACTGATATTTGTTTAAAGTCTTATTTAGTCAACTTCCTTTGTGAATACCCAGTGAGCTATTTCAATTTCT  
AATGTAAAAAATTGTATAGTATCTGCAGCAGTTGCCATTAAGTATAT

>M6-PGSC0003DMG400013525M6LRR-RLK\_3625

AATTTTCATCAAGGATTATGCTTCACAATTGTCATCATCTTGTCTTAGAAGTGGCTATTCAGAATCCCCTG  
CCTAAAGTAACAGGCATTGGTGAACTACACATTACAATTACATCTACA

>M6-PGSC0003DMG400013525M6LRR-RLK\_372

AGATTGTAATCTCTGTTTTGCTCAGTGCAAACCTCAAATCCTACGATGCTTACCTTTCAAAGATTAGTTA  
CTGGTGGGAGATTATATTATGATGGGTGTTTCCTAAGGTACGATTATTA

>M6-PGSC0003DMG400013525M6LRR-RLK\_434

GATTAGTACTGGTGGGAGATTATATTATGATGGGTGTTTCCTAAGGTACGATTATTATAGATTTTTTAAT  
GAAAGTTTGAGTCCGTTGATAGGACGATCTGTGGGAACACGAGTTTTT

>M6-PGSC0003DMG400013525M6LRR-RLK\_496

TTTTTAATGAAAGTTTGAGTCCGTTGATAGGACGATCTGTGGGAACACGAGTTTTTCTGGGAATCAGA  
GTTTGTAGTGAAAATGTTGGGAAATTGGCGAGGGATTTGGAGTTTGGG

>M6-PGSC0003DMG400013525M6LRR-RLK\_558

GAATCAGAGTTTGTAGTGAAAATGTTGGGAAATTGGCGAGGGATTTGGAGTTTGGGGTTTGGAGGA  
ATGATGGGTTTTGACTGCAGTTGTGAGTACTGGGAATTTGAGTGTTTATGG

>M6-PGSC0003DMG400013525M6LRR-RLK\_62

TCAATTCTCTTAGCTTAATTCCTTCAAATTCTTCATTAATGGGGTTTTTCATCGAAATGGGTTTTTGTATTTA  
CGTTATTTTCATTCATAAATCTTTCAATTTCTGATCCAAGAGCAACAG

>M6-PGSC0003DMG400013525M6LRR-RLK\_620

TGAGGAATGATGGGTTTTTACTGCAGTTGTGAGTACTGGGAATTTGAGTGTATGGGTTAGCTCAAT  
GTTGGGAATTTGTGAATGGAAGTGCTTGTCAAAGGTGTCTTTCTGATGCAG

>M6-PGSC0003DMG400013525M6LRR-RLK\_682

GCTCAATGTTGGGAATTTGTGAATGGAAGTGCTTGTCAAAGGTGTCTTTCTGATGCAGTTTTGAAGATTA  
GTTCTTGTTCGCCTAAGGAAGAAGGGAGGGTGTGAATACTGGTTGTTAT

>M6-PGSC0003DMG400013525M6LRR-RLK\_744

GAAGATTAGTTCTTGTTCGCCTAAGGAAGAAGGGAGGGTGTGAATACTGGTTGTTATGTTAGGTATTC  
TACTCAGAGGTTCTTTAATAATTCTGCAAGTGATACTCCTCCTGCTGGAAA

>M6-PGSC0003DMG400013525M6LRR-RLK\_806

GGTATTCTACTCAGAGGTTCTTTAATAATTCTGCAAGTGATACTCCTCCTGCTGGAAATGGAGGTATGTT  
CTTTCTTTCTTGAATGTATGAAATGAATAAATTGTTTCGTTTAGTTGTGC

>M6-PGSC0003DMG400013525M6LRR-RLK\_868

GGTATGTTCTTTCTTTCTTGAATGTATGAAATGAATAAATTGTTTCGTTTAGTTGTGCGATCATTTCTGCTA  
AAAGTGTAAGCTATTAGAGATAGTACTTTTTGCTTGACATGTCATATC

>M6-PGSC0003DMG400013525M6LRR-RLK\_930

ATTTCTGCTAAAAGTGTAAGCTATTAGAGATAGTACTTTTTGCTTGACATGTCATATCTTTACATGGTGTC  
ATTGGGTCTGACTGTGAAGGGGTGTTAGAATGGTTAAAGTTTCACATTG

>M6-PGSC0003DMG400013644M6LRR-RLP\_0

TTCCACATAACCGAACAAAGACACATTTTCTGTCTTAGATAACTCATCCTTTCTCTTCCCTTCTTCTTCTCT  
CTCTGTTCTCCACATTTACGTACACTTTCAGAAACATTGTTGATTT

>M6-PGSC0003DMG400013644M6LRR-RLP\_1054

CTATTATAACTCAAAGAGCCTATTAAAGCGTCTGAACTGTATAGTAGAGATGACAGTACTTGAATAAG  
GCAAAGCCACGTTTCTTGTGGATGGAATTGGTGTGGGCTTCGATCTGG

>M6-PGSC0003DMG400013644M6LRR-RLP\_1116

TGAATAAGGCAAAGCCACGTTTCTTGTGGATGGAATTGGTGTGGGCTTCGATCTGGGGATGCTTTAT

CAGGGCCTAAGATTGTTGATTCCACCTTAAAGCCGGCGTCAATAAGTGGTA

>M6-PGSC0003DMG400013644M6LRR-RLP\_1178

GCTTTATCAGGGCCTAAGATTGTTGATTCCACCTTAAAGCCGGCGTCAATAAGTGGTATGTTACATCTAT  
TTGCTGCACCGTATTTCTAGTGAATTTGATTATATAATTTGTTGTATTGT

>M6-PGSC0003DMG400013644M6LRR-RLP\_124

TGGACAGAAAAGCCACTAAATAGTGTGAGTCAATTTCTTTCCTTAAATAATTGTTTGGAGTTTTGTTTTAA  
TGGGAAGTTTTTTTTTTCATTTTTATGAGTGTTTTTTCCGTGTTTTTG

>M6-PGSC0003DMG400013644M6LRR-RLP\_1240

ACATCTATTTGCTGCACCGTATTTCTAGTGAATTTGATTATATAATTTGTTGTATTGTTGTGTTGACTCAAA  
GTTTCGTATTTTTTTGATCAAGAAGACACTGGTTTCTTTGTTTGTAGGT

>M6-PGSC0003DMG400013644M6LRR-RLP\_1302

TTGACTCAAAGTTCGTATTTTTTTGATCAAGAAGACACTGGTTTCTTTGTTTGTAGGTCAAGATGGTGAG  
AAATTAAGTTTGATTAAGCTTGCTAGTATGATTGAAGTGCATCCAAAAA

>M6-PGSC0003DMG400013644M6LRR-RLP\_1364

ATGGTGAGAAATTAAGTTTGATTAAGCTTGCTAGTATGATTGAAGTGCATCCAAAAAAGGAAGTCGAG  
AACTTATCCTTCGGAATAAGTTGTCTGACCAAGTAGAATGGCTTCCAGATT

>M6-PGSC0003DMG400013644M6LRR-RLP\_1426

AGTCGAGAACTTATCCTTCGGAATAAGTTGTCTGACCAAGTAGAATGGCTTCCAGATTCTATAGGGAAG  
CTATCAAGTTTGATCACTTTGGATCTGTCTGAGAATCGAATTACGGTCCTA

>M6-PGSC0003DMG400013644M6LRR-RLP\_1488

AGGGAAGCTATCAAGTTTGATCACTTTGGATCTGTCTGAGAATCGAATTACGGTCCTACCCACCACCATA  
GGGGGGCTTTTATCATTGCAAAAGCTAGATTTGCACTCAAACAAAATTGT

>M6-PGSC0003DMG400013644M6LRR-RLP\_1550

CCACCATAGGGGGGCTTTTATCATTGCAAAAGCTAGATTTGCACTCAAACAAAATTGTTGAACTGCCTGA  
TTGTATTGGAGATCTTCTAACTTGGTCTATCTTGATCTCAGTGGAAATA

>M6-PGSC0003DMG400013644M6LRR-RLP\_1612

CTGCCTGATTGTATTGGAGATCTTCTTAACTTGGTCTATCTTGATCTCAGTGGAAATAACTTGAAGTTGTT  
GCCCGCGAGTTTTGCTAGGTTAGCCACCTTCAAGAACTTGATTTGAGC

>M6-PGSC0003DMG400013644M6LRR-RLP\_1674

GAAGTTGTTGCCCGCGAGTTTTGCTAGGTTAGCCACCTTCAAGAACTTGATTTGAGCTCTAACATGCTA  
TCAGTACTCCCTGAGACAATTGGCTCCTTAGTAAGTCTTAAGAAATTGAT

>M6-PGSC0003DMG400013644M6LRR-RLP\_1736

ACATGCTATCAGTACTCCCTGAGACAATTGGCTCCTTAGTAAGTCTTAAGAAATTGATTGTGGAACTAA  
TGACCTTGAGGAACTTCTCACACTATTGGCCAATGTACTTCGCTCAAAG

>M6-PGSC0003DMG400013644M6LRR-RLP\_1798

GAAACTAATGACCTTGAGGAACTTCTCACACTATTGGCCAATGTACTTCGCTCAAAGAGCTTCGTGTGG  
ACTATAATCATCTTAAAGCTCTTCTGAAGCAGTGGGACGAATTGAGTCT

>M6-PGSC0003DMG400013644M6LRR-RLP\_186

TTGTTTTAATGGGAAGTTTTTTTTTTCATTTTTATGAGTGTTTTTCCGTGTTTTTGAAAACAGTTGTTTT  
CATATAGGAAAATACGGCGAAAATAAGCTTTACTTTGCATGCCTTC

>M6-PGSC0003DMG400013644M6LRR-RLP\_1860

TCGTGTGGACTATAATCATCTTAAAGCTCTTCTGAAGCAGTGGGACGAATTGAGTCTTTGGAGATTCTG  
ACTGCGCGGTACAATAACATTAGGCTGTTGCCTACAACATATGTCATCCCT

>M6-PGSC0003DMG400013644M6LRR-RLP\_1922

AGATTCTGACTGCGCGGTACAATAACATTAGGCTGTTGCCTACAACATATGTCATCCCTTACAAGTTTGAA  
AGAGCTGAATGTTAGTTTCAATGAAATCGAATCAGTGCCTGAGAGCTTGT

>M6-PGSC0003DMG400013644M6LRR-RLP\_1984

AGTTTGAAAGAGCTGAATGTTAGTTTCAATGAAATCGAATCAGTGCCTGAGAGCTTGTGTTTTGCTACTT  
CACTGGTAAAGCTGAACATAAGCAACAATTTTGCAGACCTGAGATCACTA

>M6-PGSC0003DMG400013644M6LRR-RLP\_2046

TGCTACTTCACTGGTAAAGCTGAACATAAGCAACAATTTTGCAGACCTGAGATCACTACCAAGGTCCATT  
GGTAACCTTGAGTTGCTTGAAGAATTGGACATGAGTAACAACCAGATACG

>M6-PGSC0003DMG400013644M6LRR-RLP\_2108

GGTCCATTGGTAACCTTGAGTTGCTTGAAGAATTGGACATGAGTAACAACCAGATACGCGTTCTTCCAG  
ATTCGTTTAGGATGCTCACAAATTTGCGGGTCCTTAAAACCGATGGAAATC

>M6-PGSC0003DMG400013644M6LRR-RLP\_2170

CTTCCAGATTCGTTTAGGATGCTCACAAATTTGCGGGTCCTTAAAACCGATGGAAATCCTTTGGAAGTGC  
CACCAAGAAGCATCGTTGAGAAGGGAGCACAGGTTTAATTTGTTTCGTT

>M6-PGSC0003DMG400013644M6LRR-RLP\_2232

GGAAGTGCCACCAAGAAGCATCGTTGAGAAGGGAGCACAGGTTAATTTGTTTCGTTAACTATTATG  
CTTTCTGAGTTAGTGTAGTATTTAATTATCTTAGCTCTTCTCTTGGATATA

>M6-PGSC0003DMG400013644M6LRR-RLP\_2294

TATTATGCTTTCTGAGTTAGTGTAGTATTTAATTATCTTAGCTCTTCTCTTGGATATATCAATCACTATTGT  
TTTATTTGCTCGGATCCTCAGGCTGTTGTACAATATATGTCTGATCTG

>M6-PGSC0003DMG400013644M6LRR-RLP\_2356

TCACTATTGTTTTATTTGCTCGGATCCTCAGGCTGTTGTACAATATATGTCTGATCTGGTTGCCAATAGAG  
AGGTAAAGGCGCAACCCTTAAAGAAGAAGAAGAAATCATGGACTCATAT

>M6-PGSC0003DMG400013644M6LRR-RLP\_2418

CCAATAGAGAGGTAAAGGCGCAACCCTTAAAGAAGAAGAAGAAATCATGGACTCATATATGTCTGCTTTT  
CAAGTTCCAACAAACGTCAGCGCAATGGCAGTATGGACTATGTTAATGCCT

>M6-PGSC0003DMG400013644M6LRR-RLP\_248

CAGTTGTTTTCCATATAGGAAAATACGGCGAAAATAAGCTTTACTTTGCATGCCTTCATGTGGGTAAAG  
GTTTGAATTTGCTGTCATCGTTGATTGGCGCTTTCTAGAACTTGTAGAA

>M6-PGSC0003DMG400013644M6LRR-RLP\_2480

TGCTTTTCAAGTTCCAACAAACGTCAGCGCAATGGCAGTATGGACTATGTTAATGCCTGATGTGTTCCAC  
ACAAATTTGGTATGATTATATATTTCTCCTTCTTACCAAGTTAGTCATTA

>M6-PGSC0003DMG400013644M6LRR-RLP\_2542

TGTTCCACACAAATTTGGTATGATTATATATTTCTCCTTCTTACCAAGTTAGTCATTATGGTACTGAACTTT  
CCATATTTGTAATTTGTTGTTTTCAGTCAAATTAGTCTAGTCTATGAG

>M6-PGSC0003DMG400013644M6LRR-RLP\_2604

ACTGAACTTTCCATATTTGTAATTTGTTGTTTTCAGTCAAATTAGTCTAGTCTATGAGAGGTAGTTTTAAA  
TATATATATTGTTAATAAATGGGAATGGTGCATTATACATGGTGCTGAT

>M6-PGSC0003DMG400013644M6LRR-RLP\_2666

AGTTTTAAATATATATATTGTTAATAAATGGGAATGGTGCATTATACATGGTGCTGATTAGTGTTAATTA  
GAATAATGAAAATGAAGGGTTGTAAGGGTAACGGCTCACATGATGTCTGT

>M6-PGSC0003DMG400013644M6LRR-RLP\_2728

GTTAATTAGAATAATGAAAATGAAGGGTTGTAAGGGTAACGGCTCACATGATGTCTGTGTTATCCGTTG

TAGGGAAATGAGCTGTGATTTGGCTGGACGAAAGCTGCAAAATTTTCAGTTG

>M6-PGSC0003DMG400013644M6LRR-RLP\_2790

TCCGTTGTAGGGAAATGAGCTGTGATTTGGCTGGACGAAAGCTGCAAAATTTTCAGTTGAATTCGAACAT  
TTTTGCCAGCGAGATTCAATCAACTTTCTTCTTGTCCAGATAAGCTCTAA

>M6-PGSC0003DMG400013644M6LRR-RLP\_2852

CGAACATTTTTGCCAGCGAGATTCAATCAACTTTCTTCTTGTCCAGATAAGCTCTAATCCACTGCCACGT  
GGTTTTTTATTCTCATTTTCATGTAATAATTCTTTAATGCTCTTTCCCT

>M6-PGSC0003DMG400013644M6LRR-RLP\_2914

CTGCCACGTGGTTTTTTATTCTCATTTTCATGTAATAATTCTTTAATGCTCTTTCCCTGTATTTTCCTCGATT  
ATGATGTAAAATATCAAATGAGATGTAAAATCTTATCTTATTTTTTG

>M6-PGSC0003DMG400013644M6LRR-RLP\_2947

ATAATCTTTTAATGCTCTTTCCCTGTATTTTCCTCGATTATGATGTAAAATATCAAATGAGATGTAAAATC  
TTATCTTATTTTTGACTTTCAATATATTCAATGAATTCAGAATTTTC

>M6-PGSC0003DMG400013644M6LRR-RLP\_310

GGGTAAAGGTTTGAATTTGCTGTCATCGTTGATTGGCGCTTCTAGAACTTGTAGAAACAAAAAECTTA  
GCTGCGGTTTTCATTTTTCTTGATCTGCTGATTGGTTTAGATATAGCGGA

>M6-PGSC0003DMG400013644M6LRR-RLP\_372

AAAACCTAGCTGCGGTTTTCATTTTTCTTGATCTGCTGATTGGTTTAGATATAGCGGAATTCGTCTTTGTTT  
TTTGCTTTGAATAACATACACAACGAGGAAAAGGGTAGTCTGAGTC

>M6-PGSC0003DMG400013644M6LRR-RLP\_434

GTCTTTGTTTTTTGCTTTGAATAACATACACAACGAGGAAAAGGGTAGTCTGAGTCTAATTTTTGTGG  
CCGGAGTTGATTTATGTTGAATTAATTTATCTGGGTGTTTTTTGTTTT

>M6-PGSC0003DMG400013644M6LRR-RLP\_496

TTTTGTGGCCGGAGTTGATTTATGTTGAATTAATTTATCTGGGTGTTTTTTGTTTTCGAGAAATTTTCA  
GCGGATTATTGAAAATGGGGTCGTCAGGAATGTCGATTGATGAGATTGT

>M6-PGSC0003DMG400013644M6LRR-RLP\_558

AAATTTTCAGCGGATTATTGAAAATGGGGTCGTCAGGAATGTCGATTGATGAGATTGTGCAAGAAATTA  
TGAGAATTCATGGATCTCTACCTACAAGGCCATCGATTGATGAGGTTGAAG

>M6-PGSC0003DMG400013644M6LRR-RLP\_62

CTTCTTCTTCTCTGTTCTCCACATTTACGTACACTTTCAGAAACATTGTTGATTTACTTTGGACAGAAA  
AGCCACTAAATAGTGTGAGTCAATTTCTTTCCTTAAATAATTGTTTGG

>M6-PGSC0003DMG400013644M6LRR-RLP\_620

GAAATTATGAGAATTCATGGATCTCTACCTACAAGGCCATCGATTGATGAGGTTGAAGCAGCAAGAGGT  
TTAATTGGAAATCTGGAGAAAGAAGATCAGTTGAAAATAGAAGCTATCATG

>M6-PGSC0003DMG400013644M6LRR-RLP\_682

AAGAGGTTTAATTGGAAATCTGGAGAAAGAAGATCAGTTGAAAATAGAAGCTATCATGAGGCAAATA  
AAAGGAAAGGTGTACCAGAAGAGCTGTTCAAATTTTGCAAGAGATGCAGAG

>M6-PGSC0003DMG400013644M6LRR-RLP\_744

AAAATAAAAGGAAAGGTGTACCAGAAGAGCTGTTCAAATTTTGCAAGAGATGCAGAGGAACGCTGTT  
CTTTTTCAGAGTAAAGAACAAAAGAGGGAGGCGTTGAACTTTTAGATCTCG

>M6-PGSC0003DMG400013644M6LRR-RLP\_806

GCTGTTCTTTTTCAGAGTAAAGAACAAAAGAGGGAGGCGTTGAACTTTTAGATCTCGACAATATTCACA  
GTGTGTTTCGACGATTTGATTCAGAGAGCTACGAAATGTTTGCCTTCTAAA

>M6-PGSC0003DMG400013644M6LRR-RLP\_868

TATTCACAGTGTGTTTCGACGATTTGATTCAGAGAGCTACGAAATGTTTGCCTTCTAAATCTCACGATAAT  
GACCCGTCTTCTTCTTCAATTGAACCGAATGATTTATCTTTGGCAAACCA

>M6-PGSC0003DMG400013644M6LRR-RLP\_930

ACGATAATGACCCGTCTTCTTCTTCAATTGAACCGAATGATTTATCTTTGGCAAACCAAGTTTCCTTCTCC  
GGCGGGCGGCATTAATTCTCCGACAACACTACAGCTGCGGCTGCTTCTTCGT

>M6-PGSC0003DMG400013644M6LRR-RLP\_992

TCCTTCTCCGGCGGGCGGCATTAATTCTCCGACAACACTACAGCTGCGGCTGCTTCTTCGTGAGCTATTATAA  
CTCAAAGAGCCTATTAAAGCGTCTGAACTGTATAGTAGAGATGACAGT

>M6-PGSC0003DMG400013682M6LRR-RLK\_0

CTAAGCTTCTTTCCCTCACCTCCCTCCCATCTCTCTCTTTGTGCTTCCCATGCATGCCACACAATC  
CCATTTCCCTAGAGATGTTGAAATCTTTTTGCATGCCCTCTAAATC

>M6-PGSC0003DMG400013682M6LRR-RLK\_1054

TGATCAAGTTCATATCATCAGTAGATCATCAATCCATTTCCAATCAATAGGAGACTCTTAACTTCTTT  
CACACGCATCTCCCAAACAGAGATGAACCTGACTCTGACACCATATA

>M6-PGSC0003DMG400013682M6LRR-RLK\_1116

ACACTTCTTTCACACGCATCTCCCAAACAGAGATGAACCTGACTCTGACACCATATAAAGATATGACGT  
TTGCGTCTAACTAAATCTCAAAGTTAACTCACGAGGAAAAAATTGTCAA

>M6-PGSC0003DMG400013682M6LRR-RLK\_1178

TATGACGTTTTCGCTCTAACTAAATCTCAAAGTTAACTCACGAGGAAAAAATTGTCAAAGTCCCAATCAGC  
ACATTCCCATATGGCGCTTTAACCCACATTCTAACAATAGTTCTTCGTC

>M6-PGSC0003DMG400013682M6LRR-RLK\_124

TATTTTCTCATTTATAATTGCCCTTTGTAAAGGGCGCGCACCCACAAGTGTGCGCACCCCTACAACCTAGTC  
TATGCAATGTTCGGTGGCTTATCGTTATAGCAACCACAATCGCCAGTATC

>M6-PGSC0003DMG400013682M6LRR-RLK\_1240

CAATCAGCACATTCCCATATGGCGCTTTAACCCACATTCTAACAATAGTTCTTCGTCATATTGACAATAG  
ATCAAGAATTGTAGTTCATAACAATTTTTATATAGTTTTTAAATATCTA

>M6-PGSC0003DMG400013682M6LRR-RLK\_1302

TGACAATAGATCAAGAATTGTAGTTCATAACAATTTTTATATAGTTTTTAAATATCTAAATTTTTAATTTT  
AGAATATTGAGTTAATCTAAACATGCTCTCATTTTTGTTCAATTTGGTA

>M6-PGSC0003DMG400013682M6LRR-RLK\_1364

TTTTAATTTTAGAATATTGAGTTAATCTAAACATGCTCTCATTTTTGTTCAATTTGGTAAAATAATACAGGTA  
ATGATCTTTGTGATGGTCCATTATCGAAATGCACAAGTGAACCAAAG

>M6-PGSC0003DMG400013682M6LRR-RLK\_1426

AATACAGGTAATGATCTTTGTGATGGTCCATTATCGAAATGCACAAGTGAACCAAAGTAGCTCTCTGG  
ACAATTATATTGGTGGTTATCGCAGTTGCAGCAGCAGTAGCAGCAATTGTT

>M6-PGSC0003DMG400013682M6LRR-RLK\_1488

TCTCTGGACAATTATATTGGTGGTTATCGCAGTTGCAGCAGCAGTAGCAGCAATTGTTGTTGTTATCATC  
ATTCTTCGTCGGGGCAAGCAGACACCCGAAACTGAAACAAGACCAACACC

>M6-PGSC0003DMG400013682M6LRR-RLK\_1550

TTATCATCATTCTTCGTCGGGGCAAGCAGACACCCGAAACTGAAACAAGACCAACACCTACACCCTCTGG  
AGCTGCAGGGGGCGCTACTAACC AAACAGGAGCGCCCTCAGCAGCAGATC

>M6-PGSC0003DMG400013682M6LRR-RLK\_1612

CCCTCTGGAGCTGCAGGGGGCGCTACTAACC AAACAGGAGCGCCCTCAGCAGCAGATCTAAACAAAAT



GGAACAGGGCAGCAATCAAGCAATGGCTGCTCCTGCTCCTGACCAGTCTCCA

>M6-PGSC0003DMG400013682M6LRR-RLK\_1674

CAAAATGGAACAGGGCAGCAATCAAGCAATGGCTGCTCCTGCTCCTGACCAGTCTCCAGAGGGGACCG  
GTGGACTAAATAATAATAAGAGGCCTGAAGTACAAGCAATACAAAACTTTT

>M6-PGSC0003DMG400013682M6LRR-RLK\_1736

GGACCGGTGGACTAAATAATAATAAGAGGCCTGAAGTACAAGCAATACAAAACTTTTATTCTTAAAAG  
ATGATATTGAAAAGTTTGATTTGCCAGATCTACTAAAGGCTTCAGCTGAAA

>M6-PGSC0003DMG400013682M6LRR-RLK\_1798

TTAAAAGATGATATTGAAAAGTTTGATTTGCCAGATCTACTAAAGGCTTCAGCTGAAATATTGGGTAGCG  
GTGTATTTGGTTCGACTTATAAAGCTGCACTTAGCATGGGACGTGTTATG

>M6-PGSC0003DMG400013682M6LRR-RLK\_186

CAACTAGTCTATGCAATGTCGGTGGCTTATCGTTATAGCAACCACAATCGCCAGTATCGTTATCACCACC  
ACCATCTCTAATCCTTGTCGTGTTATTACTAGTCGTTGTCCCGATC

>M6-PGSC0003DMG400013682M6LRR-RLK\_1860

GGGTAGCGGTGTATTTGGTTCGACTTATAAAGCTGCACTTAGCATGGGACGTGTTATGGTTGTCAAAG  
ATTTAGGCAAATGAATAATGTAGGCAAGGAAGATTTTCATGAGCATATGAG

>M6-PGSC0003DMG400013682M6LRR-RLK\_1922

TCAAAGATTTAGGCAAATGAATAATGTAGGCAAGGAAGATTTTCATGAGCATATGAGAAGGCTAGGT  
AGGTTGAGTCATAAGAACTTACTTCCTGTTGTAGCTTTTACTATAGGAAAG

>M6-PGSC0003DMG400013682M6LRR-RLK\_1984

CTAGGTAGGTTGAGTCATAAGAACTTACTTCCTGTTGTAGCTTTTACTATAGGAAAGAGGAAAAGCTTT  
TGGTCTCAGAGTATGTCAACAATGTCAGCCTTGCAGTTCATCTTCATGGT

>M6-PGSC0003DMG400013682M6LRR-RLK\_2046

AAAGCTTTTGGTCTCAGAGTATGTCAACAATGTCAGCCTTGCAGTTCATCTTCATGGTACGTATTTCATAC  
TTTTAAGTTTCCGCGCTAAAATTAGATCATAAAATCATGATTTGCGCTA

>M6-PGSC0003DMG400013682M6LRR-RLK\_2108

ATTTCACTTTTAAAGTTTCCGCGCTAAAATTAGATCATAAAATCATGATTTGCGCTACCAGTTTATTATAT  
TAACTCAATCTATTTAACCTTTGTTTTATTCAATTCATTTCAAACA

>M6-PGSC0003DMG400013682M6LRR-RLK\_2170

TTTATTATATTAACCTCAATCTATTTTAACCTTTGTTTTATTCAATTCATTTCAAACAGAGTTGAGATATGC  
AACTCAAATCTTTTGAAGAGGGCTCATTAATTTGTTGTTCTCTCTACC

>M6-PGSC0003DMG400013682M6LRR-RLK\_2232

TGAGATATGCAACTCAAATCTTTTGAAGAGGGCTCATTAATTTGTTGTTCTCTCTACCTACTCTACTAGCT  
AGAGTGATGATCTGACGTGTGATCATCTCATCTAAGATATTAAGTTTTT

>M6-PGSC0003DMG400013682M6LRR-RLK\_2294

CTACTAGCTAGAGTGATGATCTGACGTGTGATCATCTCATCTAAGATATTAAGTTTTTACTATGATGAACT  
CTGTGATCATCTCATTATACATATTGTTTATTTTTTTTCAGGTAATAAAT

>M6-PGSC0003DMG400013682M6LRR-RLK\_2356

TGATGAACTCTGTGATCATCTCATTATACATATTGTTTATTTTTTTTCAGGTAATAAATCGCGGGGGCAACC  
AAGTCTTGATTGGCCAACTCGATTAATAAATCGTAAAGGGAGTAGCCAAA

>M6-PGSC0003DMG400013682M6LRR-RLK\_2418

GGGGCAACCAAGTCTTGATTGGCCAACTCGATTAATAAATCGTAAAGGGAGTAGCCAAAGGACTATTGTA  
CCTCTACAACGAGCTACCAAGCTTGACAGCACCCACGGTCACCTCAAGTC

>M6-PGSC0003DMG400013682M6LRR-RLK\_248

TCACCACCACCATCTCTTAATCCTTGTCGTGTTATTACTAGTCGTTGTCCCGATCAAATCGGATAGTTC  
TGAGGCAGAAATCCTCTTTTCGATTTAGCAAGTCCTGCAGAAAAATGG

>M6-PGSC0003DMG400013682M6LRR-RLK\_2480

TATTGTACCTCTACAACGAGCTACCAAGCTTGACAGCACCCACGGTCACCTCAAGTCCTCGAACGTGCT  
TCTGAATGAATCCTACGAGCCCCTCCTCACGGACTATGCATTACTACCCG

>M6-PGSC0003DMG400013682M6LRR-RLK\_2542

AACGTGCTTCTGAATGAATCCTACGAGCCCCTCCTCACGGACTATGCATTACTACCCGTAGTAAACCTAG  
AACACGCTCAAGAACACATGATTGCTTACAAATCTCCTGAATTCAAACAT

>M6-PGSC0003DMG400013682M6LRR-RLK\_2604

AAACCTAGAACACGCTCAAGAACACATGATTGCTTACAAATCTCCTGAATTCAAACATAGTGGTCGTATC  
ACACGTAAAAACGATGTGTGGACGCTTGAATATTAATCCTCGAGATCAT

>M6-PGSC0003DMG400013682M6LRR-RLK\_2666

GTCGTATCACACGTAAAAACGATGTGTGGACGCTTGAATATTAATCCTCGAGATCATAACGGGTAAAT  
TCCCGTCTAATTTCTTGCAACAAGGCAAGGGGAGTGACACGGATTTGGCTA

>M6-PGSC0003DMG400013682M6LRR-RLK\_2728

GGTAAATCCCGTCTAATTTCTTGCAACAAGGCAAGGGGAGTGACACGGATTTGGCTACGTGGGTAAGG  
TCCGTGGTAAATGAGGACATGACGGAGGTAGATGTATTTCGAGAAGGAAATG

>M6-PGSC0003DMG400013682M6LRR-RLK\_2790

GGTAAGGTCCGTGGTAAATGAGGACATGACGGAGGTAGATGTATTTCGAGAAGGAAATGAGAGGTACG  
ACGAATTCAGAGGGGGAAATGATGAAGTTATTGAAGATAGCTTTGGGTTGTTG

>M6-PGSC0003DMG400013682M6LRR-RLK\_2852

GTACGACGAATTCAGAGGGGGAAATGATGAAGTTATTGAAGATAGCTTTGGGTTGTTGTGATCTTGATA  
TGGAAAAGAGGTTTGTATGAAGGAAGCAATGGAAAGGATTGAGGAAGTAA

>M6-PGSC0003DMG400013682M6LRR-RLK\_2914

CTTGATATGAAAAAGAGGTTTGTATGAAGGAAGCAATGGAAAGGATTGAGGAAGTAAAAGAGAGAG  
ATGGGGATGATGATTTTTACTCTACAAGAGGATTATCTGATGATTATACTCAA

>M6-PGSC0003DMG400013682M6LRR-RLK\_2976

GAGAGATGGGGATGATGATTTTTACTCTACAAGAGGATTATCTGATGATTATACTCAAGTTTCTATGAAC  
ATTTGAAGAGTGCTGGTTATACATACTCATAGTTCGTGTGTAACACTTTT

>M6-PGSC0003DMG400013682M6LRR-RLK\_3038

CTATGAACATTTGAAGAGTGCTGGTTATACATACTCATAGTTCGTGTGTAACACTTTTTTATTTGTTCAA  
AATCATCATGGTAAATATGGAATGGGACTTTTTATTTGTTTGTATGCATG

>M6-PGSC0003DMG400013682M6LRR-RLK\_310

CGGATAGTTCTGAGGCAGAAATCCTCTTTTCGATTTAGCAAGTCCTTGCAGAAAAATGGTGAACCGCTA  
ATTGGAATACGAAAGTATTGCCTTGCAGATAAAAATACAGATAAACCTAATT

>M6-PGSC0003DMG400013682M6LRR-RLK\_3100

TTGTTCAAAAATCATCATGGTAAATATGGAATGGGACTTTTTATTTGTTTGTATGCATGGTTGGGGGTCGT  
ATATATATTGGTCAATGAAACCACAAAATAAATAAATATGAAAACAAAAA

>M6-PGSC0003DMG400013682M6LRR-RLK\_3224

AGAGATAGAAAAAATGAAGTTAAGTGTTTTTTTGTGTTGTGATTCAATTGAAGCAAGGGAACATGTAAATT  
GTCCTTGATGAATCTAGTTTAGCTAGTTGCCTTCACTTTTTTTCTTTTCTT

>M6-PGSC0003DMG400013682M6LRR-RLK\_3286

GTAAATTGTCCTTGATGAATCTAGTTTAGCTAGTTGCCTTCACTTTTTTTCTTTTCTTTTCTTTTGAACCTT

TATCTAGTTTATTATATTTGGGGCTTGTA AAAATTAAGTAAATCCAA

>M6-PGSC0003DMG400013682M6LRR-RLK\_3325

TCACTTTTTTTCTTTTCTTTTCTTTTCAAACCTTATCTAGTTTATTATATTTGGGGCTTGTA AAAATTAAGT  
AAATCCAAAAGCATGCAAGAACAAGAATTATAAATCTTTCAATTGC

>M6-PGSC0003DMG400013682M6LRR-RLK\_372

ACCGCTAATTGGAATACGAAAGTATTGCCTTGCGATAAAAATACAGATAAACCTAATTGGGATAATGTTA  
TTTGCGAAAACGGATTCGTTTTCGGGTTGCAATTGGAGAGTAAAGGCTTA

>M6-PGSC0003DMG400013682M6LRR-RLK\_434

TAATGTTATTTGCGAAAACGGATTCGTTTTCGGGTTGCAATTGGAGAGTAAAGGCTTAAGTGGGGCAAT  
AGATGTGGATGCTCTTAAAGACTTGCCTAATTCAGGACCATAAGTGTTAT

>M6-PGSC0003DMG400013682M6LRR-RLK\_496

GGGCAATAGATGTGGATGCTCTTAAAGACTTGCCTAATTCAGGACCATAAGTGTTATGAACAATAATTT  
TGAAGGACCTTTACCGAATTTAAGTAAACTTGCGGGGTTAAAAACGGCTT

>M6-PGSC0003DMG400013682M6LRR-RLK\_558

AATAATTTTGAAGGACCTTTACCGAATTTAAGTAAACTTGCGGGGTTAAAAACGGCTTATTTACAAATA  
ACAAATTTTCTGGCCAAATTGACAATACTCTTTTTGAAGGGATGCATTGG

>M6-PGSC0003DMG400013682M6LRR-RLK\_62

CCCACACAATCCCATTTCCCTAGAGATGTTGAAATCTTTTTGCATGCCCTCTAAATCATAGTATTTTCTCA  
TTTATAATTGCCCTTTGTAAAGGGCGCGCACCCACAAGTGTGCGCACC

>M6-PGSC0003DMG400013682M6LRR-RLK\_620

CACAAATAACAAATTTTCTGGCCAAATTGACAATACTCTTTTTGAAGGGATGCATTGGTTAAAAAACTT  
CATCTTGCTAATAATCAATTAAGTGGTAAAATCCCATCTGTTTTGGGTCA

>M6-PGSC0003DMG400013682M6LRR-RLK\_682

AAAACTTCATCTTGCTAATAATCAATTAAGTGGTAAAATCCCATCTGTTTTGGGTCAATTGCCTAAGCTT  
ACAGAATTGAGACTTGAAAACAACAATTTGAAGGCCAAATACCTGATT

>M6-PGSC0003DMG400013682M6LRR-RLK\_744

CCTAAGCTTACAGAATTGAGACTTGAAAACAACAATTTGAAGGCCAAATACCTGATTTTGTTC AAGAGA  
GACTTATGGATATGAATTTTGTAACTCTCTTGAGGGTCCAATTCCT

>M6-PGSC0003DMG400013682M6LRR-RLK\_806

TCAAGAGAGACTTATGGATATGAATTTTGCTAACAACTCTCTTGAGGGTCCAATTCCTCATGGCCTTACTA  
GTCTCAAACCTTCAGCATTGAAGGTAACTTTTTTTTCCATGTGTAGGA

>M6-PGSC0003DMG400013682M6LRR-RLK\_868

GCCTTACTAGTCTCAAACCTTCAGCATTGAAGGTAACTTTTTTTTCCATGTGTAGGATAAATTCATTTTC  
TGAAATTATTGTAACACTTATCTAGCTACGACGTACACAAATGTCTAC

>M6-PGSC0003DMG400013682M6LRR-RLK\_930

TTCCATTTTCTGAAATTATTGTAACACTTATCTAGCTACGACGTACACAAATGTCTACATTTTAAAATGTA  
GTCATAAAGATATGTCATGTATGCCTAACTCCACCTTAGAAGCTAGCAA

>M6-PGSC0003DMG400013682M6LRR-RLK\_992

TAAAATGTAGTCATAAAGATATGTCATGTATGCCTAACTCCACCTTAGAAGCTAGCAAGGATTGATCAAG  
TTCATATCATCAGTAGATCATCAATCCATTTCCAATCAATAGGAGACTC

>M6-PGSC0003DMG400013766M6LRR-RLP\_0

TACAATTAGCAATTTGCCTTGTAAATGTAAGTGGATGCTGTTCTTGGATGCTTGCCTTGAAAGATGCAGTG  
AGAACCAGTATCTTGTCAAAGACTGGAGGTACAAATGGGTAACACGTCA

>M6-PGSC0003DMG400013766M6LRR-RLP\_1054

CCTCAAATATTCTTTAGTACCAAGTGTGGGTGGGGGATATTTATGAACCTGTTGTACAGTTGCTACGAGC  
CCAACCATCCTCAAGCGGTGTTGTGAAGCTTCAAAGAGTTCAAGTGAACA

>M6-PGSC0003DMG400013766M6LRR-RLP\_1178

TACTGGTCTCGAGATGGAAATGGAGATTATGAAGTTTATATTGGCATCTGCACCTATACTTGAGGAGATC  
TTCATTTGAAATTGTATGCGTTTCCTTTTTCGTTCGTGTAACAAATGAT

>M6-PGSC0003DMG400013766M6LRR-RLP\_1238

TGAGGAGATCTTCATTTGAAATTGTATGCGTTTCCTTTTTCGTTCGTGTAACAAATGATCGATGAGATG  
AAAGAATTCCGCAGAGCATCAACCAATGTTGAATTCACATTTGAAGAAAT

>M6-PGSC0003DMG400013766M6LRR-RLP\_124

CTTGATTTTAATGATGAGTTTTTCAAGTCTTTCAAACAAGATGAAGAAGCCAAGAGAATCATTTACCAAG  
TCCTATTAGTCCATTAAGGACCAATACTGAAGTTTACTCTGTAGGATT

>M6-PGSC0003DMG400013766M6LRR-RLP\_186

TTACCAAGTCCTATTAGTCCATTAAGGACCAATACTGAAGTTTACTCTGTAGGATTACGAGTTGTCCA  
GGAATTCACCTTCATGTAAGCTTAGGAAACAAATATCATTACCTCATC

>M6-PGSC0003DMG400013766M6LRR-RLP\_248

GTTGTCCAGGAATTCACCCCTTCATGTAAGCTTAGGAAACAAATATCATTACCTCATCATCTTTTACATTC  
CAGCAACTAAGGTTTTTGGAACTTCAAGATTGCTTGTCCACCCCTCCA

>M6-PGSC0003DMG400013766M6LRR-RLP\_372

GTTTCAAAGGGTTTGAGAAGCTTATTAATCTCGATCTTGTACGTGTCACCTTTTGATCCATCAATATTTACT  
TATCTCATCTCTAAATGCTCGTTGCTTGAACGGTTGAGGTTGCGTTGCT

>M6-PGSC0003DMG400013766M6LRR-RLP\_434

ATATTTACTTATCTCATCTCTAAATGCTCGTTGCTTGAACGGTTGAGGTTGCGTTGCTGCACAAACTTTGA  
CATCCTTGAAATTGATGCCGCTAATCTCAAATTCTATGAGTTTATTGGA

>M6-PGSC0003DMG400013766M6LRR-RLP\_496

AAACTTTGACATCCTTGAAATTGATGCCGCTAATCTCAAATTCTATGAGTTTATTGGAAAAACAAAATCCA  
TTTCCTTCAAGAACGCTCCTATGCTTGA AAAAGTTACTGTGGCTTTCTCT

>M6-PGSC0003DMG400013766M6LRR-RLP\_558

CAAAATCCATTTCTTCAAGAACGCTCCTATGCTTGA AAAAGTTACTGTGGCTTTCTTGGACGACAACTT  
TTGACTGATACATCTCTTGTGTTGCTCTAATTTCCCAAAGTTCTTCCATT

>M6-PGSC0003DMG400013766M6LRR-RLP\_620

CGACAACTTTTGACTGATACATCTCTTGTGTTGCTCTAATTTCCCAAAGTTCTTCCATTACATGCCTTCACTG  
CTGGATATGGATATATGCGGTACAATATTAGAGGTAAGGTACATTTGT

>M6-PGSC0003DMG400013766M6LRR-RLP\_682

GCCTTCACTGCTGGATATGGATATATGCGGTACAATATTAGAGGTAAGGTACATTTGTGATATTACTATC  
ATAACTAAATGATGAATCTGATTGGTGTCTTAAAGTAATTTTTGACTTTC

>M6-PGSC0003DMG400013766M6LRR-RLP\_744

TTACTATCATAACTAAATGATGAATCTGATTGGTGTCTTAAAGTAATTTTTGACTTTCTTGTAGTACTTGAT  
CTAGGGAGGTTTACCAGAGAGTCCCCAACTGCTCTGAACAATATCAA

>M6-PGSC0003DMG400013766M6LRR-RLP\_868

CTCACTATTTGTCGGTGTCTTTAAGAAACGCCGAGGTGGTTTCAAGTGCAGTTTACTTGATTACAAGCT  
GTCCTAAATTACAAGATTTTACACTTGAATTTGTAAGCACTCTCTTTGTC

>M6-PGSC0003DMG400013766M6LRR-RLP\_930

TACAAGCTGTCCTAAATTACAAGATTTTACACTTGAATTTGTAAGCACTCTCTTTGTCTTTTTTTTTTTCATTA

AGGTGATTGAATATGGTTTCTTATTCATCTGAACTCGCCTAACTAAC

>M6-PGSC0003DMG400013766M6LRR-RLP\_992

TTTTTTCATTAAGGTGATTGAATATGGTTTCTTATTCATCTGAACTCGCCTAACTAACCGTTCCTCAAATAT

TCTTTAGTACCAAGTGTGGGTGGGGGATATTTATGAACCTGTTGTACA

>M6-PGSC0003DMG400013882M6G-LecRK\_0

TTCATTTTGGTCCAGAGTTTAAAGTTTGAGGAACCTAAACAGAGAAGATTACCTTGTTAGAAAGCATCAG

CTATGTGTCAGAAGAAAGAGTTGTTGATAGTAATTGTTTCATTTCTTGTC

>M6-PGSC0003DMG400013882M6G-LecRK\_1037

ACAATGGTTCTTGAGAGATGGCACTCATGGATGTTTGAGGAAGAAAATGAAGAGGTGTGCAACAGTG

GTGAGGGATTTCGTACATTAAGTCATGTAAAGGTCCCCGACACAGGTGCAGC

>M6-PGSC0003DMG400013882M6G-LecRK\_1098

AACAGTGGTGAGGGATTTCGTACATTAAGTCATGTAAAGGTCCCCGACACAGGTGCAGCTCGGATGAA

CAAGAGCATGGGATTGAAGGAATGTGAAGAGTTGTGTCTGAAGAACTGCTCC

>M6-PGSC0003DMG400013882M6G-LecRK\_1159

GGATGAACAAGAGCATGGGATTGAAGGAATGTGAAGAGTTGTGTCTGAAGAACTGCTCCTGCACAGCC

TATGCAAGTGCTAATATTAGTGCAGGAGGAAGTGGATGCATCACTTGGTATG

>M6-PGSC0003DMG400013882M6G-LecRK\_122

ATTTTGTAGTTCCATAGATACCATTTCTTTAACCAATCTCTCAAAGATGGTGATTTGTTGATCTCTTCAGG

GAAATCTTTTGCTTTGGGTTTCTTTGGGAATCCCCTGGTAAACGTTA

>M6-PGSC0003DMG400013882M6G-LecRK\_1220

CACAGCCTATGCAAGTGCTAATATTAGTGCAGGAGGAAGTGGATGCATCACTTGGTATGGTGAGTTGAC

AGACATAAAGCAATTTATAGATGGGGCCCAAGATTTATATATCAGAGTCTC

>M6-PGSC0003DMG400013882M6G-LecRK\_1281

GAGTTGACAGACATAAAGCAATTTATAGATGGGGCCCAAGATTTATATATCAGAGTCTCTGCATCTGATT

TAGGTAAGGAGTTAACTTAATATATTATGTGAGGATTTAGGTAATTCAAT

>M6-PGSC0003DMG400013882M6G-LecRK\_1342

CATCTGATTTAGGTAAGGAGTTAACTTAATATATTATGTGAGGATTTAGGTAATTCAATATTATGTGGAG

AAGAATGTGCAAGTTGATCATTTTTGGTTAGTAGTAGTACACAGTATCTT

>M6-PGSC0003DMG400013882M6G-LecRK\_1403

TATGTGGAGAAGAATGTGCAAGTTGATCATTTTTGGTTAGTAGTAGTACACAGTATCTTACCCTGGTGTT  
TACTGGAAGTTCTCATTTTTTGTGGTTTCAGCGCAATTCTCGAAGAATTC

>M6-PGSC0003DMG400013882M6G-LecRK\_1464

CCTGGTGTTTACTGGAAGTTCTCATTTTTTGTGGTTTCAGCGCAATTCTCGAAGAATTCAAGAGGCCATAA  
TAGGAAAAGAATGATAGGGATTCTAGTAGGGTCTGCTGCAGCAATAATT

>M6-PGSC0003DMG400013882M6G-LecRK\_1525

GAGGCCATAATAGGAAAAGAATGATAGGGATTCTAGTAGGGTCTGCTGCAGCAATAATTCTTTCACTCT  
CTTTGGCATGTTGTTTGGTGATCAATATAAGGAGAAATGGTAAGGATATTA

>M6-PGSC0003DMG400013882M6G-LecRK\_1586

TTCACTCTCTTTGGCATGTTGTTTGGTGATCAATATAAGGAGAAATGGTAAGGATATTATTCTACATCATA  
CTTTAGTCGAATATTTTCAGTATCTGTACAGCAGCTACAATGGTGAAGC

>M6-PGSC0003DMG400013882M6G-LecRK\_1647

CTACATCATACTTTAGTCGAATATTTTCAGTATCTGTACAGCAGCTACAATGGTGAAGCAACTATAGCAA  
CCTAGACCTTCTACTACCTTTCTATATCGTGCAGCAAAAACAATAACATT

>M6-PGSC0003DMG400013882M6G-LecRK\_1708

CTATAGCAACCTAGACCTTCTACTACCTTTCTATATCGTGCAGCAAAAACAATAACATTACTGCAAATTC  
ATTTGATCCTAATCGGTGTTTGGTGTGTCACAGATAATGAGAGAAGTG

>M6-PGSC0003DMG400013882M6G-LecRK\_1769

TGCAAATTTCAATTTGATCCTAATCGGTGTTTGGTGTGTCACAGATAATGAGAGAAGTGAAAGTATAGCA  
TCCTATGACGGCATGGATGAAAGTAAACATACAGAAATCTCTATCTTTGA

>M6-PGSC0003DMG400013882M6G-LecRK\_183

ATCTCTTCAGGGAAATCTTTTGCTTTGGGTTTCTTTGGGAATCCCCTGGTAAACGTTACGTCGGAATTTG  
GTACAACAATGTTCTGAACACTGTTGTTTGGGTTGCCAACAGAGAC

>M6-PGSC0003DMG400013882M6G-LecRK\_1830

AGTATAGCATCCTATGACGGCATGGATGAAAGTAAACATACAGAAATCTCTATCTTTGATTTAACCACAA  
TAACTAATGCCACTGATAAGTTCTCTGATGCTAACAACTTGGTGAAGGA

>M6-PGSC0003DMG400013882M6G-LecRK\_1891

TAACCACAATAACTAATGCCACTGATAAGTTCTCTGATGCTAACAACTTGGTGAAGGAGGATTTGGTA  
GCGTATAACAAGGTAACAACCTCCCAAACATGATTGAATTCCTAACAATCAAC



>M6-PGSC0003DMG400013882M6G-LecRK\_1952

ATTTGGTAGCGTATAACAAGGTAACAACCTCCCAAACATGATTGAATTCCTAACAAATCAACATTATCTTTATA  
GGAGGCTACAAATAGATTTAATAATACTTGTAAACCAAGATTTTCTCC

>M6-PGSC0003DMG400013882M6G-LecRK\_2013

TATCTTTATAGGAGGCTACAAATAGATTTAATAATACTTGTAAACCAAGATTTTCTCCCTAAAAATAAGA  
AGAAGAAGCTATGTTTACCAAATAATAATCTGGAATCAATATCAGGGTC

>M6-PGSC0003DMG400013882M6G-LecRK\_2074

AAAAATAAGAAGAAGAAGCTATGTTTACCAAATAATAATCTGGAATCAATATCAGGGTCACCTGACAGA  
TGGACAAGTAATAGCTGTCAAAGACTTTTCAGTAACTTCAGGGCAAGGGAC

>M6-PGSC0003DMG400013882M6G-LecRK\_2135

CTGACAGATGGACAAGTAATAGCTGTCAAAGACTTTTCAGTAACTTCAGGGCAAGGGACCGAGGAGTT  
CAAGAATGAAGTCACACTAATTGCAAGACTTCAGCACAGAAATTTGGTGAGG

>M6-PGSC0003DMG400013882M6G-LecRK\_2196

AGGAGTTCAAGAATGAAGTCACACTAATTGCAAGACTTCAGCACAGAAATTTGGTGAGGCTTTTAGGAT  
GTTGCGTTCAACGAGGAGAGAAGATGTTGGTTTATGAATATATGCCAAACA

>M6-PGSC0003DMG400013882M6G-LecRK\_2257

TTTAGGATGTTGCGTTCAACGAGGAGAGAAGATGTTGGTTTATGAATATATGCCAAACAAATCCTTGA  
CAGTTTTATTTTTGGTAAGGAACATCTCCAGAACCGGAATTTCTTCCATTG

>M6-PGSC0003DMG400013882M6G-LecRK\_2318

TCCTTGGACAGTTTTATTTTTGGTAAGGAACATCTCCAGAACCGGAATTTCTTCCATTGACCTCCAGTCTC  
TACATGCTTTTACATGTTTACTGATGATTAATGATTACTGCTTTAACGT

>M6-PGSC0003DMG400013882M6G-LecRK\_2379

CTCCAGTCTCTACATGCTTTTACATGTTTACTGATGATTAATGATTACTGCTTTAACGTGTGTGTGTGTCCC  
TAAAAGATTTCTTATGCACAAATTTTTAAACTGTGATCCAGATAAAAC

>M6-PGSC0003DMG400013882M6G-LecRK\_244

TCGGAATTTGGTACAACAATGTTCTGAACACTGTTGTTTGGGTTGCCAACAGAGACAATCCTGTTAA  
TGGCACATCTGGGATTCTCACCATCGATTCAACTGGAAATCTTGTGTAC

>M6-PGSC0003DMG400013882M6G-LecRK\_2440

GTGTGTGTCCCTAAAAGATTTCTTATGCACAAATTTTTAAACTGTGATCCAGATAAAACAAAAGGGTCTT

TGTTGGATTGGGGAAAACGGTTTGAAATCATACATGGGATTGCACGAGGA

>M6-PGSC0003DMG400013882M6G-LecRK\_2501

AAGGGTCTTTGTTGGATTGGGGAAAACGGTTTGAAATCATACATGGGATTGCACGAGGAATGTTATACC  
TTCACCAAGACTCTAGACTAAGAATTATTCATAGGGATCTAAAAGCAAGCA

>M6-PGSC0003DMG400013882M6G-LecRK\_2562

GTTATACCTTCACCAAGACTCTAGACTAAGAATTATTCATAGGGATCTAAAAGCAAGCAATGTTTTACTC  
GATGCCTCCATGCAACCAAAAATATCAGACTTTGGAATGGCCAGAATATT

>M6-PGSC0003DMG400013882M6G-LecRK\_2623

GTTTTACTCGATGCCTCCATGCAACCAAAAATATCAGACTTTGGAATGGCCAGAATATTTGGAGGTGACC  
AAATGGAAGCAAACACAAATCGAGTTGTTGGAACATAGTAAGTATGTCAA

>M6-PGSC0003DMG400013882M6G-LecRK\_2684

GAGGTGACCAAATGGAAGCAAACACAAATCGAGTTGTTGGAACATAGTAAGTATGTCAAGTTGTGTATA  
AACATAAATGAGTTATGTTAGATATGTGCATGTGATCTTTAAAATGATAAA

>M6-PGSC0003DMG400013882M6G-LecRK\_2745

TGTGTATAAACATAAATGAGTTATGTTAGATATGTGCATGTGATCTTTAAAATGATAAATCTTGACATTG  
CTTATCTATTGCAGTGGTTATATGTCACCTGAATATGCAATGGTAGGGCA

>M6-PGSC0003DMG400013882M6G-LecRK\_2806

TTGACATTGCTTATCTATTGCAGTGGTTATATGTCACCTGAATATGCAATGGTAGGGCACTTTTCAACAAA  
GTCTGATGTTTTAGTTTCAGTTTCGGTGTGTTTGGAAATTATCACTGGC

>M6-PGSC0003DMG400013882M6G-LecRK\_2867

TTTCAACAAAGTCTGATGTTTTAGTTTCAGTTTCGGTGTGTTTGGAAATTATCACTGGCAGAAAGAACAA  
CAGTCATAAGGATCAGGAGCAATCTCGACATTTAGTTGGATATGTAAGTA

>M6-PGSC0003DMG400013882M6G-LecRK\_2928

AAAGAACAACAGTCATAAGGATCAGGAGCAATCTCGACATTTAGTTGGATATGTAAGTACAAACATATA  
TATGCTGTAAAATCGATAAATTGCATTTATTATCTTACAGTTGCCTTAGA

>M6-PGSC0003DMG400013882M6G-LecRK\_2989

AACATATATATGCTGTAAAATCGATAAATTGCATTTATTATCTTACAGTTGCCTTAGACATAAGCTGTGT  
CATGGATGGTAGTACTGCAAATAATAATTTGGAAACAATCCCTTTCAG

>M6-PGSC0003DMG400013882M6G-LecRK\_305

TCCTGTAAATGGCACATCTGGGATTCTCACCATCGATTCAACTGGAAATCTTGTTGTACATCTTGATGCGG  
AAACAAAACTACAGCCTGGAGAACAAATGTTTCTTCAGCTACAAAACG

>M6-PGSC0003DMG400013882M6G-LecRK\_3050

TAAGCTGTGTCATGGATGGTAGTACTGCAAATAATAATTTGGAAACAATCCCTTTCAGGTTGTTAAAAG  
TGCTGAATAGATCGAGATTTTGTATTTTCAGAATTTCAATTTTTGGTGTTA

>M6-PGSC0003DMG400013882M6G-LecRK\_3111

TGTTAAAAGTGCTGAATAGATCGAGATTTTGTATTTTCAGAATTTCAATTTTTGGTGTTATAGTCGCTTCTC  
TTATAGAGAAGAAATTGTCTGAAATTTTGATTGTGATGCATTGTGGTGT

>M6-PGSC0003DMG400013882M6G-LecRK\_3172

GTCGCTTCTCTTATAGAGAAGAAATTGTCTGAAATTTTGATTGTGATGCATTGTGGTGTTTCTATTTTCAGG  
TTTGGGATCTTTGGAAGGATGAAAAGGCATTAGATGTTGTTGATCCATT

>M6-PGSC0003DMG400013882M6G-LecRK\_3233

CTATTTTCAGGTTTGGGATCTTTGGAAGGATGAAAAGGCATTAGATGTTGTTGATCCATTGTTAGGTGGCT  
CATATGAAGCTTGTGAAGTTTTGAGATGCATCCACATTGGCCTTTTGTGT

>M6-PGSC0003DMG400013882M6G-LecRK\_3294

TAGGTGGCTCATATGAAGCTTGTGAAGTTTTGAGATGCATCCACATTGGCCTTTTGTGTGTACAACCGTT  
TACAGATGACAGACCGACTATGTCAGAATTGGTCTTCATGCTGTGCAATG

>M6-PGSC0003DMG400013882M6G-LecRK\_3355

ACAACCGTTTACAGATGACAGACCGACTATGTCAGAATTGGTCTTCATGCTGTGCAATGAAACAAATCTT  
CCTTTCCCTAAACAACCTAGCCTTATATTCAGATCAGAGAATCATAGTTC

>M6-PGSC0003DMG400013882M6G-LecRK\_3416

ACAAATCTTCCTTTCCCTAAACAACCTAGCCTTATATTCAGATCAGAGAATCATAGTTCAGTTAAACACTC  
TTCATCAGCAAGTATAGCAACATCTTCTGTCAACGATATGTCTATTTCA

>M6-PGSC0003DMG400013882M6G-LecRK\_3477

TTAAACACTCTTCATCAGCAAGTATAGCAACATCTTCTGTCAACGATATGTCTATTTCAACAGTTCATGGT  
CGCTAGAGCTTATGCTAACTATTCAAGAACTATTTTCAAAGAAATACAG

>M6-PGSC0003DMG400013882M6G-LecRK\_3538

AGTTCATGGTCGCTAGAGCTTATGCTAACTATTCAAGAACTATTTTCAAAGAAATACAGAATTCCTTTTCT  
GTACTTTGCTTTCATATTATTAGAGAGATTTATTGGTGAGTTATACACA

>M6-PGSC0003DMG400013882M6G-LecRK\_3599

TTCCTTTTCTGTACTTTGCTTTCATATTATTAGAGAGATTTATTGGTGAGTTATACACAACATTTAACATGC  
TAGTCCATTCTTGATTGAAACTAGTGGGGTTGGGCTCTAATAGCACTG

>M6-PGSC0003DMG400013882M6G-LecRK\_366

CTTGATGCGGAAACAAAACTACAGCCTGGAGAACAATGTTTCTTCAGCTACAAAACGAGCAAACCTCG  
TATACAGCTAAGCTGGAGGATTCAGGGAATTTTATATTGTTTCAAGACTCC

>M6-PGSC0003DMG400013882M6G-LecRK\_3660

ATTTAACATGCTAGTCCATTCTTGATTGAAACTAGTGGGGTTGGGCTCTAATAGCACTGGAACCAAACCT  
GACTTCTGATTCCCATGGCCCATGTTACAGACTTAAAGGTAGGTGGGTG

>M6-PGSC0003DMG400013882M6G-LecRK\_3721

ACCAAACTGACTTCTGATTCCCATGGCCCATGTTACAGACTTAAAGGTAGGTGGGTGGCAAAGGATT  
GGTAGGAAAGAAGCATAAACACAGAGGGTTTCTATTTTCATCTGTGAATTAA

>M6-PGSC0003DMG400013882M6G-LecRK\_3782

AAAGGATTGGTAGGAAAGAAGCATAAACACAGAGGGTTTCTATTTTCATCTGTGAATTAATGGTGCTCT  
TTGTCAGCTGTATTTGATAATTGCCACACTTCATGTTTTCTTTAACAGTCT

>M6-PGSC0003DMG400013882M6G-LecRK\_3843

GGTGCTCTTTGTCAGCTGTATTTGATAATTGCCACACTTCATGTTTTCTTTAACAGTCTTCTCTGTGTTTCAT  
CAATGCTCTAAAAGCAACAAAGGCTAATCCTGCTAGCCACACACAACCT

>M6-PGSC0003DMG400013882M6G-LecRK\_3904

TCTGTGTTTCATCAATGCTCTAAAAGCAACAAAGGCTAATCCTGCTAGCCACACACAACCTTTTCAGTGTTTT  
TATTGATTTGCAGGATAGTAATTTGTTGTGGAGTTTTGTCAATTAATG

>M6-PGSC0003DMG400013882M6G-LecRK\_3965

TCAGTGTTTTTATTGATTTGCAGGATAGTAATTTGGTTGTGGAGTTTTGTCAATTAATGAGATATTTAACT  
ATTATTAGTTGGTTATGTTTTTCTCAAAAATTATTGATAAAAAAATAC

>M6-PGSC0003DMG400013882M6G-LecRK\_4026

ATATTTAACTATTATTAGTTGGTTATGTTTTTCTCAAAAATTATTGATAAAAAAATACAAACATGTAAGT  
TATCTTATGAAAGATTTTAACTTTTGTTCATAATTAGATCATGAGATA

>M6-PGSC0003DMG400013882M6G-LecRK\_4087

ACATGTAAGTTATCTTATGAAAGATTTTAACTTTTGTTCATAATTAGATCATGAGATAGACATGTATCAA

ATACAACAATAATATTATGATCATGAGTAAGAGCACTGTTGTCTCAATC

>M6-PGSC0003DMG400013882M6G-LecRK\_4148

CATGTATCAAATACAACAATAATATTATGATCATGAGTAAGAGCACTGTTGTCTCAATCTTTCTGTGATGA  
GTATCTGTAAAAGTAATATCAACTAGTCTATTGAAAATCTTTTAGCATT

>M6-PGSC0003DMG400013882M6G-LecRK\_4209

TCTGTGATGAGTATCTGTAAAAGTAATATCAACTAGTCTATTGAAAATCTTTTAGCATTATTTGCATTGAA  
ACATTGAAGACTATATCATACTTTGGGAAGTAATGAGCACTAGATACAT

>M6-PGSC0003DMG400013882M6G-LecRK\_427

CAAACCTCGTATACAGCTAAGCTGGAGGATTCAGGGAATTTTATATTGTTTCAAGACTCCAAAATGGATGT  
TACTGAGTGGCAGAGCTTTGATTATCCTACTAATACTCTGCTTCCTTCAA

>M6-PGSC0003DMG400013882M6G-LecRK\_4270

TTGCATTGAAACATTGAAGACTATATCATACTTTGGGAAGTAATGAGCACTAGATACATTTGATAAACAG  
ATAACAGGAATACATATACACATCAGACAATAACGAACATAAAGGTGCTG

>M6-PGSC0003DMG400013882M6G-LecRK\_4331

GATAAACAGATAACAGGAATACATATACACATCAGACAATAACGAACATAAAGGTGCTGTAATTGTCAC  
CTCGTTGATCGAAGATGATGCTGTTTCGGTAGTAATCAAGTCTGAGTTAGG

>M6-PGSC0003DMG400013882M6G-LecRK\_4392

ATTGTCACCTCGTTGATCGAAGATGATGCTGTTTCGGTAGTAATCAAGTCTGAGTTAGGGGTAATGAAG  
GGCTGCTTCGGGAAGGGAAGTGTGCTTCAATACTTAGCATGGACAGAATT

>M6-PGSC0003DMG400013882M6G-LecRK\_4453

TAATGAAGGGCTGCTTCGGGAAGGGAAGTGTGCTTCAATACTTAGCATGGACAGAATTGTTGACATGG  
TTGGTCTGTCTGCTGCGTTGAGTTGCAAACACAATAGTCCTACTAGAATGC

>M6-PGSC0003DMG400013882M6G-LecRK\_4514

TGACATGGTTGGTCTGTCTGCTGCGTTGAGTTGCAAACACAATAGTCCTACTAGAATGCAGCGTAATGCT  
TCCTCACTGGGACAAGAATCAACTATTGATGGATCTACCAGCTCAAAGGC

>M6-PGSC0003DMG400013882M6G-LecRK\_4557

AGTCCTACTAGAATGCAGCGTAATGCTTCCTCACTGGGACAAGAATCAACTATTGATGGATCTACCAGCT  
CAAAGGCCTTACCATCATTCCACAACCTCCAGGCCTGAAGCAGCAGTTCA

>M6-PGSC0003DMG400013882M6G-LecRK\_488

AATGGATGTTACTGAGTGGCAGAGCTTTGATTATCCTACTAATACTCTGCTTCCTTCAATGAAATATGGA  
ATAGACAAGAGGACGGGTTTGAACCGTTTCTAACATCCTGGAAATCGTT

>M6-PGSC0003DMG400013882M6G-LecRK\_549

AAATATGGAATAGACAAGAGGACGGGTTTGAACCGTTTCTAACATCCTGGAAATCGTTGAACGATCCA  
GGCACTGGAGAGTATCGTTACACAATGGAGCTCAATGGGACACCTCAAGTT

>M6-PGSC0003DMG400013882M6G-LecRK\_61

AAGCATCAGCTATGTGTCAGAAGAAAGAGTTGTTGATAGTAATTGTTTCATTTCTGTCCCATTTTGTAGT  
TCCATAGATACCATTTCTTTAACCAATCTCTCAAAGATGGTGATTTGT

>M6-PGSC0003DMG400013882M6G-LecRK\_610

ACGATCCAGGCACTGGAGAGTATCGTTACACAATGGAGCTCAATGGGACACCTCAAGTTTTCTGTACA  
AGAACTCTAGCAGGATTTGGCGGACAGGATCCTGGACGGGTCATGGTTGGA

>M6-PGSC0003DMG400013882M6G-LecRK\_671

CTTGACAAGAACTCTAGCAGGATTTGGCGGACAGGATCCTGGACGGGTCATGGTTGGAGTGGTGTAC  
CAGAAATGAGCCCACGATTCATCTTCAGCCTTAGTTATGTGGACAATGATAC

>M6-PGSC0003DMG400013882M6G-LecRK\_732

GGTGTACCAGAAATGAGCCCACGATTCATCTTCAGCCTTAGTTATGTGGACAATGATACCGAGGTTTCT  
TGACATATGGCATAACATGACAGTTCAATAATCTCAAGAATGGTCCTGAAT

>M6-PGSC0003DMG400013882M6G-LecRK\_793

AGGTTTCTTGACATATGGCATAACATGACAGTTCAATAATCTCAAGAATGGTCCTGAATGAATCAGGGAT  
CGTGAACCGGTTAACTTGGCAAGAGAGTGAGCAAAAGTGGGTGCAATTTT

>M6-PGSC0003DMG400013882M6G-LecRK\_854

ATCAGGGATCGTGAACCGGTTAACTTGGCAAGAGAGTGAGCAAAAGTGGGTGCAATTTTGGTCTGCCC  
CTAAAGACCCTTGTGACAATTATGAACATTGTGGAGCATTTAGCAATTGCAA

>M6-PGSC0003DMG400013882M6G-LecRK\_915

TCTGCCCTAAAGACCCTTGTGACAATTATGAACATTGTGGAGCATTTAGCAATTGCAATCTGTTCAATTT  
GGCTGAATTCGAATGCAGTTGTCTTCCAGGGTACGAGCCAAAGCTAAGC

>M6-PGSC0003DMG400013882M6G-LecRK\_976

TGTTCAATTTGGCTGAATTCGAATGCAGTTGTCTTCCAGGGTACGAGCCAAAGCTAAGCCGACAATGGTT  
CTTGAGAGATGGCACTCATGGATGTTTGGGAAGAAAAATGAAGAGGTGT

>M6-PGSC0003DMG400013884M6RLKWAX-EGF\_0

CAAAATTTGTGATAGGCCTTCCATTTGTAATTGTATTTCTGGTGATCAAATCAAAGGAGGCATTTGTC  
GATGTATGATAAGATTGAAGGCTTTTTACAAACACAAAATAATTTTCATGC

>M6-PGSC0003DMG400013884M6RLKWAX-EGF\_1008

AGCCTCTTCAATCTCAACCGATTGTTTCATCAGATCATGGGAAGTTCTATGACATTTTCGTCTGATTCAATG  
GCTTTGTTAGAAAATTCTGCTGATAATCCCGTTGAACTAGACATTTGTT

>M6-PGSC0003DMG400013884M6RLKWAX-EGF\_1071

ATTCAATGGCTTTGTTAGAAAATTCTGCTGATAATCCCGTTGAACTAGACATTTGTTCTGATTGACTATAG  
TTGATGTAATGTTTATGTGAAACAAATATAGCCACCCAACAATGTTTG

>M6-PGSC0003DMG400013884M6RLKWAX-EGF\_1134

GACTATAGTTGATGTAATGTTTATGTGAAACAAATATAGCCACCCAACAATGTTTGGGACTAAGGGTGT  
TGTTGCTATTGTTGTACTAGTTTAAAAACACACCTAGAAGCTAGCTGACC

>M6-PGSC0003DMG400013884M6RLKWAX-EGF\_1193

ACTAAGGGTGTTGTTGCTATTGTTGTACTAGTTTAAAAACACACCTAGAAGCTAGCTGACCAAGTGTTTCG  
AATACAATAGCCAAAACGCTCGTGATTACTTAATTTGCCCGTAAAATTC

>M6-PGSC0003DMG400013884M6RLKWAX-EGF\_126

GATATAATTACTCCACATAAAGAGAATGACAAGAGGATTCAAAGAGAAATTAGGTGAGGGAGGTTAT  
GGCAGTGTATACAAAGGAAAGCTTCAAAGTGGAAGGGATGTAGCAGTGAAGA

>M6-PGSC0003DMG400013884M6RLKWAX-EGF\_378

ACTTCATGCCAACGGATCACTCGACAAGTATATCAGCATCAGTCAAGAAGGAAGTCGTCTGTTAAGTT  
GGCAGAGGAAGTATGACATTATTCTTGGAGTGGCTCAAGGAATTGGGTATT

>M6-PGSC0003DMG400013884M6RLKWAX-EGF\_567

ATTTCAATCCAAAGATTTCTGACTTTGGGCTTGCGAAATTATATCCAACAGATAATAGCATAGTGAATCTC  
ACAGCTGCTCGAGGAACAATTGGTTATGTAGCTCCAGAGTTGATCAGCA

>M6-PGSC0003DMG400013884M6RLKWAX-EGF\_63

ATTTGTCGATGTATGATAAGATTGAAGGCTTTTTACAAACACAAAATAATTTTCATGCCAATCAGATATAA  
TTACTCCACATAAAGAGAATGACAAGAGGATTCAAAGAGAAATTAGGTG

>M6-PGSC0003DMG400013884M6RLKWAX-EGF\_756

ACTTGAAAAGACATGAAGTTGCAAATGAAGAGAATTCCAGCCAATATTTTCCTTATTATATTTACGATAA

GTTCAACAAGGGGAAGGAGATTGTGGTGGATGAAGAAGCAAATGATGATG

>M6-PGSC0003DMG400013884M6RLKWAX-EGF\_819

ACGATAAGTTCAACAAGGGGAAGGAGATTGTGGTGGATGAAGAAGCAAATGATGATGAAAAGAAGAT

GGTTAGAAAGCTGGCTTTAGTTGCGTTATGGTGCATACAAACAAATCCGATAC

>M6-PGSC0003DMG400013884M6RLKWAX-EGF\_882

AGATGGTTAGAAAGCTGGCTTTAGTTGCGTTATGGTGCATACAAACAAATCCGATACAACGCCCTTCGAT

GAGTAGAGTATTAGAAATGCTTGAAGGTGAAGTTGAAGTGCTAGAAGTAC

>M6-PGSC0003DMG400013885M6G-LecRK\_0

GGGATGTGTACCAAATACCATCTTCCTTCCTTCCTTCCTATCAAACAAGAGAAGAAGTACACCAAC

AAATGTCTCAAACACCAACTCTGCAGCAAACAAAATACTCTTTTCTTAA

>M6-PGSC0003DMG400013885M6G-LecRK\_1037

GGGGTATCTGGAATTTGTGACACAAATATTTACCAATCTGCAAATGTATGGTGGGATTCAAGCCTAAA

AATCAAGTGGCCTGGGAATTGCGAGATGGGTCTGATGGTTGTGTTTCGATTT

>M6-PGSC0003DMG400013885M6G-LecRK\_1098

AGCCTAAAATCAAGTGGCCTGGGAATTGCGAGATGGGTCTGATGGTTGTGTTTCGATTTTCATAAATTGG

ATTGTAAAATGATAAATTTAACGTATTGAGGAACATGAAGTTGCCAGATA

>M6-PGSC0003DMG400013885M6G-LecRK\_1159

TAAATTGGATTGTAAAATGATAAATTTAACGTATTGAGGAACATGAAGTTGCCAGATACGACGAATTC

GTTTGTGGATACAAATATGAATTTGGATGAATGTGAAGCTATGTGTATGAA

>M6-PGSC0003DMG400013885M6G-LecRK\_122

TCCACAATGAGAAACACCAAAGATTACTACTTTACCAATTCTTGTTCTTGATTTTGATTTCTCAATTTCTT

CATCCAATTCTTGCTATACCCACTGATACAATCACCCCAACACAGCCT

>M6-PGSC0003DMG400013885M6G-LecRK\_1220

ACGAATTCGTTTGTGGATACAAATATGAATTTGGATGAATGTGAAGCTATGTGTATGAAGAATTGTTCTT

GCACGGCCTATACAAATTCGAATATTAGCGGAAGTGGGTCTGGGTTGTGTG

>M6-PGSC0003DMG400013885M6G-LecRK\_1281

ATTGTTCTTGACGGCCTATACAAATTCGAATATTAGCGGAAGTGGGTCTGGGTTGTGTGATTTGGAGCA

CCGAACTTATTGACATGCGGCAGTATACGGCGGCGGAAGGTGGCCAAGTTC

>M6-PGSC0003DMG400013885M6G-LecRK\_1342



TTGGAGCACCGAACTTATTGACATGCGGCAGTATACGGCGGCGGAAGGTGGCCAAGTTCTCTACGTTAG  
GGTGGCTTCTTCTGACGCAGGTATCATCCTATTTCTCTACTAGCTTCGCTT

>M6-PGSC0003DMG400013885M6G-LecRK\_1403

TACGTTAGGGTGGCTTCTTCTGACGCAGGTATCATCCTATTTCTCTACTAGCTTCGCTTGCCATTTCTTTTT  
TCGCTTAGTACAATGATAACGATTAATAATCGATAAAAAATAGTTGTA

>M6-PGSC0003DMG400013885M6G-LecRK\_1464

CATTTCTTTTTTCGCTTAGTACAATGATAACGATTAATAATCGATAAAAAATAGTTGTATTA AAAAGAATT  
TGTACAATTAATTTTAAGTAATTTGGGGTTGAAAATTGATGGTTAGATA

>M6-PGSC0003DMG400013885M6G-LecRK\_1525

AAAAAGAATTTGTACAATTAATTTAAGTAATTTGGGGTTGAAAATTGATGGTTAGATAATCCACTTCTCT  
GTCAAGATCAAATTTTGGGTCACCGGGATGATTTGAGTCGACTAGGTCT

>M6-PGSC0003DMG400013885M6G-LecRK\_1586

CCACTTCTCTGTCAAGATCAAATTTTGGGTCACCGGGATGATTTGAGTCGACTAGGTCTGCACGAGTGGA  
GTTAGTTGGAATTTTTTATTTACTTGTTAGGTTAGACGATATTTCAACAC

>M6-PGSC0003DMG400013885M6G-LecRK\_1647

ACGAGTGGAGTTAGTTGGAATTTTTTATTTACTTGTTAGGTTAGACGATATTTCAACACAGAGAAGTAGA  
GTAAAATAGAAAGGGTGATGAAGTTTTTGGAAAATATTTTTGTGGAAGAT

>M6-PGSC0003DMG400013885M6G-LecRK\_1708

AGAAGTAGAGTAAAATAGAAAGGGTGATGAAGTTTTTGGAAAATATTTTTGTGGAAGATTGGAGAGTA  
TTTCCATGATTGAAAATATGCAATTTAATATTCTCGTTTAAGTTTATGTGTC

>M6-PGSC0003DMG400013885M6G-LecRK\_183

CTCAATTTCTTCATCCAATTCTTGCTATACCCACTGATACAATCACCCCAACACAGCCTTTAACCAAAGATC  
AAACCTTAGTATCTTCCGATCAACACTTTGAATTAGGCTTTTTCTCTC

>M6-PGSC0003DMG400013885M6G-LecRK\_2013

AAATTGAGACGAAGAAATAGTAATAATATTTTGCATATTTTGTGCGGAAGTTGATTTATCTCATTCAATTG  
TAAACTTGCTATTCTCTGCATTATTCCACTATATACATACTGTTCTGTT

>M6-PGSC0003DMG400013885M6G-LecRK\_2074

CATTCATTTGTAACTTGCTATTCTCTGCATTATTCCACTATATACATACTGTTCTGTTTGAATCTATTTTCA  
TAATTTCAAAGTCGAGTTCAAGACGAAAAATCTATTTGTCCAAAAAT

>M6-PGSC0003DMG400013885M6G-LecRK\_2135

AATCTATTTTCATAATTTCAAAGTCGAGTTCAAGACGAAAAATCTATTTGTCCAAAAATTGTTAGTACCAG  
TTTTGCATGTCATCCAATCCAAATGGACCAAATATTCCTTGAATAATAT

>M6-PGSC0003DMG400013885M6G-LecRK\_2196

TTAGTACCAGTTTTGCATGTCATCCAATCCAAATGGACCAAATATTCCTTGAATAATATTTTAAATGTATT  
GTTTTGTCATTTTAATAAGAAGCATATTACACATTATCATAATTTTAAT

>M6-PGSC0003DMG400013885M6G-LecRK\_2257

TAAATGTATTGTTTTGTCATTTTAATAAGAAGCATATTACACATTATCATAATTTTAATTTACTCTTTTCCTA  
TTGAATTCCAAAGTTGGGAAGCATGCCGTTAGATTTGCCTCTAATAG

>M6-PGSC0003DMG400013885M6G-LecRK\_2318

ACTCTTTTCTATTGAATTCCAAAGTTGGGAAGCATGCCGTTAGATTTGCCTCTAATAGATGAAATTACAA  
AAATATATTTATTTTTTTGAATTTTTCTTTTCTATTTTTTTTTTTTTTTGG

>M6-PGSC0003DMG400013885M6G-LecRK\_2379

GAAATTACAAAAATATATTTATTTTTTTGAATTTTTCTTTTCTATTTTTTTTTTTTTTTGGGTATTGCTATTTTTT  
TTAAACCACCCCCCCCCCCCCCTCCACAAACGTCATGCAGAAATT

>M6-PGSC0003DMG400013885M6G-LecRK\_244

AACCAAAGATCAAACCTTAGTATCTCCGATCAACACTTTGAATTAGGCTTTTTCTCTCCCGGCGGTGCAA  
ATTCAGACAAATGGTATATCGGTATTTGGTACAAAGAGATTCAAGACAG

>M6-PGSC0003DMG400013885M6G-LecRK\_2440

ATTGCTATTTTTTTTAAACCACCCCCCCCCCCCCCTCCACAAACGTCATGCAGAAATTAATTAGAGATTT  
TATTTTGAAAATAAATACTCTACCCCCTTTGAACAACACGTATAGTTG

>M6-PGSC0003DMG400013885M6G-LecRK\_2501

ATTAGAGATTTTATTTTGAAAATAAATACTCTACCCCCTTTGAACAACACGTATAGTTGTCTTTTAATATCC  
TTGGTCCCCTTTTTAAATTCCCTTTCACGTTACCTACTTTTCGATCTAA

>M6-PGSC0003DMG400013885M6G-LecRK\_2562

TTTTAATATCCTTGGTCCCCTTTTTAAATTCCTTTCACGTTACCTACTTTTCGATCTAATATTTTACATAATC  
AACTAGATTTCAAATAAAAATAAAATTCATAATTGCTAGTTGAAAA

>M6-PGSC0003DMG400013885M6G-LecRK\_2623

TTTTACATAATCAACTAGATTTCAAATAAAAATAAAATTCATAATTGCTAGTTGAAAAACAAGAAGTT

AGTATAATAATTATTGAGTGCATTTAATCCTGAAAAGGACTTGTAACAA

>M6-PGSC0003DMG400013885M6G-LecRK\_2684

CAAGAAGTTAGTATAATAATTATTGAGTGCATTTAATCCTGAAAAGGACTTGTAACAACCTACTTTTCA  
AAGTTATTCTGCTAATGAGTTTGCCAATATATTCTTTGTGGTATGCACGT

>M6-PGSC0003DMG400013885M6G-LecRK\_2745

TACTTTTCAAAGTTATTCTGCTAATGAGTTTGCCAATATATTCTTTGTGGTATGCACGTTTTCAATATAATT  
TTTCTTTTTCTATGCTTTGTGTATTTTACTTTGAAAAATCGAAAAGTA

>M6-PGSC0003DMG400013885M6G-LecRK\_2806

TCAATATAATTTTTCTTTTTCTATGCTTTGTGTATTTTACTTTGAAAAATCGAAAAGTATAAAAAACCTAAC  
CATATCTACCAATCCCCATCAACAATTTGCCTTCAATAGGGACTTAA

>M6-PGSC0003DMG400013885M6G-LecRK\_2867

AAAAACCTAACCATATCTACCAATCCCCATCAACAATTTGCCTTCAATAGGGACTTAATTTTATACAATTT  
GCTTTCATAGGGACTTAATTTTATTTACTATATTTGGACTTTC

>M6-PGSC0003DMG400013885M6G-LecRK\_2928

TTATACAATTTGCTTTCAATAGGGACTTAATTTATTTATTTACTATATTTGGACTTTCTTTTTCTCATTGA  
TTTGATAGGGATGATTAGTATTTGGAAAATATGTTACACGGCCAAGT

>M6-PGSC0003DMG400013885M6G-LecRK\_2989

TTTCTCATTTGATTTGATAGGGATGATTAGTATTTGGAAAATATGTTACACGGCCAAGTATCTCAAGGCT  
CTAAAAGTAATCAGCCACCTAATTCCACCTTCTTTCCAATCACCTGTTCA

>M6-PGSC0003DMG400013885M6G-LecRK\_305

GGCGGTGCAAATTCAGACAAATGGTATATCGGTATTTGGTACAAAGAGATTCAAGACAGGACTATTGTC  
TGGGTTGCAAACAGAGCTAAACCCCTTTCAGCTTCATCAACATCAGTCCTA

>M6-PGSC0003DMG400013885M6G-LecRK\_3050

CTCAAGGCTCTAAAAGTAATCAGCCACCTAATTCCACCTTCTTTCCAATCACCTGTTCATAAATTTGAACA  
AACATTATCGATTTATTGTCACAATTCAGCTCGTAATAATAATAATAA

>M6-PGSC0003DMG400013885M6G-LecRK\_3111

AATTTGAACAAACATTATCGATTTATTGTCACAATTCAGCTCGTAATAATAATAATAATCGAAATGTGCA  
TTTGCTTTTTCTTTGTACTTTCCTTTAAATCTGCATGCTTAAGAGG

>M6-PGSC0003DMG400013885M6G-LecRK\_3172

GAAATGTGCATTTGCTTTTTCTTTGTACTTTCCTCTTTAAATCTGCATGCTTAAGAGGAAACTTTTAATTA  
TGGTGGGAAATAAAATTTCAAATAAAGCTTATTTAGCTCTAAATTAT

>M6-PGSC0003DMG400013885M6G-LecRK\_3233

ACTTTTAATTATGGTGGGAAATAAAATTTCAAATAAAGCTTATTTAGCTCTAAATTATTTCCATTAATTG  
GTCCCACAATAAATGGGTCCCACAATAAATGGGTCCCACAAAGAGATA

>M6-PGSC0003DMG400013885M6G-LecRK\_3294

TCCATTAATTGGTCCCACAATAAATGGGTCCCACAATAAATGGGTCCCACAAAGAGATACTCCTTTGCAT  
TTCAAACGGTGACGACGCAATTTCTGGTTCGGTGTAAATGGGCCCTTACA

>M6-PGSC0003DMG400013885M6G-LecRK\_3355

CCTTTGCATTTCAAACGGTGACGACGCAATTTCTGGTTCGGTGTAAATGGGCCCTTACATGGCCGTCGAT  
CTTGACTTTTATTGGGCCATCCCGGCCAGTTGTTTTCCCTTTTTCTCC

>M6-PGSC0003DMG400013885M6G-LecRK\_3416

GCCGTCGATCTTGACTTTTATTGGGCCATCCCGGCCAGTTGTTTTCCCTTTTTCTCCTTTTTAGAGAAAA  
AAAGCATATGTTTCCTAATGTAATACAAGAAAATGATTGGACACCAAT

>M6-PGSC0003DMG400013885M6G-LecRK\_3477

TTTAGAGAAAAAAGCATATGTTTCCTAATGTAATACAAGAAAATGATTGGACACCAATTCCTTTGACAC  
GTTTGGGAAATGGTCATATACAGTTTGAAAAGTAAGTTTGGTGGGGTA

>M6-PGSC0003DMG400013885M6G-LecRK\_3538

CCTTGACACGTTTGGGAAATGGTCATATACAGTTTGAAAAGTAAGTTTGGTGGGGTAAATTAATTCA  
AATATTACAAAGGGATTAAGAAGTATTTATTAAGCTAATTATTTTTTTTA

>M6-PGSC0003DMG400013885M6G-LecRK\_3599

TTAATTCAAATATTACAAAGGGATTAAGAAGTATTTATTAAGCTAATTATTTTTTTTACCAAGAATATGT  
CATGGATGATATTAATAGTTTTTTTTGGACACAACCTTTGTGAAGTAGGT

>M6-PGSC0003DMG400013885M6G-LecRK\_366

CTATTGTCTGGGTTGCAAACAGAGCTAAACCCCTTCAGCTTCATCAACATCAGTCCTAAAAATCGCAGA  
AATTGGTACCCTTCTTCTCGTCGATGGCCAACTGGAAATTCGTCTGGT

>M6-PGSC0003DMG400013885M6G-LecRK\_3660

AAGAATATGTCATGGATGATATTAATAGTTTTTTTTGGACACAACCTTTGTGAAGTAGGTGAATTAGATCA  
TGTTTAGTGACACCATTGGACTGTAGTCTTTTCAATTCAAACCTTTGCTAT

>M6-PGSC0003DMG400013885M6G-LecRK\_3721

ATTAGATCATGTTTAGTGACACCATTGGACTGTAGTCTTTTCAATTCAAACCTTGCTATTGTCACCGAAAA  
TGATCTTTAACAACTATAGGTTTTTCATACATAAAGAGACATTCAAAT

>M6-PGSC0003DMG400013885M6G-LecRK\_3782

TCACCGAAAATGATCTTTAACAACTATAGGTTTTTCATACATAAAGAGACATTCAAATTTGGCCTCAGCT  
TGCAAGTAAACACCTTAACTTTAGTATACATACCTAGACACCTCAAATT

>M6-PGSC0003DMG400013885M6G-LecRK\_4087

CAAGTTTGAGTGTCTTTATGTATTATGCCAGTAAAAAATGATGAACTTCTTCTTGCAGAACTAAACTCT  
TGAATAAAATTAAGCATGATTAATTAACCTCGAAAACTTTTAATTTTCAG

>M6-PGSC0003DMG400013885M6G-LecRK\_4148

ACTAAACTCTTGAATAAAATTAAGCATGATTAATTAACCTCGAAAACTTTTAATTTTCAGTGCAAATTGGA  
GGTGTGGGATCTGGAAATAGTTCTGGCAAGACAAAATAGTTGCAATAGC

>M6-PGSC0003DMG400013885M6G-LecRK\_4209

CAAATTGGAGGTGTGGGATCTGGAAATAGTTCTGGCAAGACAAAATAGTTGCAATAGCTGCTGGGGT  
TACAGTTGGTATAGCTCTTGTGCTATTTGGACTAACCTTTGCTTCTTATCA

>M6-PGSC0003DMG400013885M6G-LecRK\_427

AATCGCAGAAATTGGTACCCTTCTTCTCGTCGATGGCCAACTGGAAATCCGTCTGGTCTTCCGAGCAA  
ACTCCGGCGACCAACGTAGTTGCCAACTCCTTGACTCCGGGAACTTTGT

>M6-PGSC0003DMG400013885M6G-LecRK\_4270

CTGGGGTTACAGTTGGTATAGCTCTTGTGCTATTTGGACTAACCTTTGCTTCTTATCAAAGAGAAGAAA  
ACATCAAGGTTCAATCCGAACTAAATCCGTAAACAGAGGTATTATATGAA

>M6-PGSC0003DMG400013885M6G-LecRK\_4331

GAGAAGAAAACATCAAGGTTCAATCCGAACTAAATCCGTAAACAGAGGTATTATATGAATCTATCATGA  
TAAATAAGATTGTCTAATATAAAATGCTTCATTTTCTAATGAATGTTTCTT

>M6-PGSC0003DMG400013885M6G-LecRK\_4392

TATCATGATAAATAAGATTGTCTAATATAAAATGCTTCATTTTCTAATGAATGTTTCTTATGATCCTAAACC  
AGGCACTAGTGAACGAAGTCAAGAACTTCTGATGAATGCAACTATTAT

>M6-PGSC0003DMG400013885M6G-LecRK\_4453

GATCCTAAACCAGGCACTAGTGAACGAAGTCAAGAACTTCTGATGAATGCAACTATTATTCCAAGTAAA

AGAGAATTTTCTGGTGAAACTTCCACGGAAGAGTTTGAATTGCCATTGTTT

>M6-PGSC0003DMG400013885M6G-LecRK\_4514

CAAGTAAAAGAGAATTTTCTGGTGAAACTTCCACGGAAGAGTTTGAATTGCCATTGTTTGATTACAGTAC  
CCTAGCTACGGCAACAGAAAATTTTCTGATGCGACTAAGTTGGGCCAAG

>M6-PGSC0003DMG400013885M6G-LecRK\_4575

TTACAGTACCCTAGCTACGGCAACAGAAAATTTTCTGATGCGACTAAGTTGGGCCAAGGTGGATTGG  
TTGTGTTTACAAGGTAAAATCTCAGTTATATGTAAACCATAGTGGTATAAT

>M6-PGSC0003DMG400013885M6G-LecRK\_4636

GGATTTGGTTGTGTTTACAAGGTAAAATCTCAGTTATATGTAAACCATAGTGGTATAATAAGAAGAAA  
AAATGATCGACAACTCAATAATATAATCTTTTGATCAGGCAATGCTGGTT

>M6-PGSC0003DMG400013885M6G-LecRK\_4697

AGAAGAAAAAATGATCGACAACTCAATAATATAATCTTTTGATCAGGCAATGCTGGTTGGTCAAGAAG  
TAGCAGTCAAAGGCTCTCGAAGAATTCGGACAAGGAGTAGAGGAATTTA

>M6-PGSC0003DMG400013885M6G-LecRK\_4758

TCAAGAAGTAGCAGTCAAAGGCTCTCGAAGAATTCGGACAAGGAGTAGAGGAATTTAAAAATGAGC  
TAAGATTAATTGCCAGGCTTCAACACAGAAATCTAGTCCGGCTTCTTGGCTG

>M6-PGSC0003DMG400013885M6G-LecRK\_4819

AATGAGCTAAGATTAATTGCCAGGCTTCAACACAGAAATCTAGTCCGGCTTCTTGGCTGTTGTGTTGATA  
TGGAAGAGAAGATGCTGATCTATGAATACCTGGAGAATAAAAGTTTAGAT

>M6-PGSC0003DMG400013885M6G-LecRK\_488

TCCGAGCAAACCTCCGGCGACCAACGTAGTTGCCCAACTCCTTGACTCCGGGAACCTTTGTCATTCGACCGG  
AAAACGATGACAGAGAACAGAGCTACCTGTGGCAGAGCTTTGATTATCCA

>M6-PGSC0003DMG400013885M6G-LecRK\_4880

GTGTTGATATGGAAGAGAAGATGCTGATCTATGAATACCTGGAGAATAAAAGTTTAGATTCAATTTTGT  
CAGTAAGTCTCTTTCGTTGTATCGCCAAGAGAGTAGTGTTTCACATCATT

>M6-PGSC0003DMG400013885M6G-LecRK\_4941

AATTTTGTTCAGTAAGTCTCTTTCGTTGTATCGCCAAGAGAGTAGTGTTTCACATCATTTACTTACAGGCT  
TATATAATTTGTGACTCACATTTGAATATGTTCTCAGATAAACAGAAT

>M6-PGSC0003DMG400013885M6G-LecRK\_5002

CTTACAGGCTTATATAATTTGTGACTCACATTTGAATATGTTCCCTCAGATAAACAGAATAGCTCGCTGCTC  
AACTGGCAAAGCGGTTCAATATTATTTGTGGTATTGCTCGGGGGCTTC

>M6-PGSC0003DMG400013885M6G-LecRK\_5063

CTCGCTGCTCAACTGGCAAAGCGGTTCAATATTATTTGTGGTATTGCTCGGGGGCTTCTATACCTTCACC  
AAGATTCAAGATTTAGGATTATCCACAGAGACCTTAAAGCAAGCAATAT

>M6-PGSC0003DMG400013885M6G-LecRK\_5185

TGCTTGATAAGGATTTGACCCCAAAATATCAGATTTTGGCATGGCAAGAATATTTGGCGGAGATGAGA  
CTGAAGGAAATACAAAAGAGTAGTTGGAACCTAGTAAGCACTCAACATAA

>M6-PGSC0003DMG400013885M6G-LecRK\_5246

AGATGAGACTGAAGGAAATACAAAAGAGTAGTTGGAACCTAGTAAGCACTCAACATAATTTCTTCACA  
TAATTCATAGAACCTTTAAAGCTGTTACTAAATCTGTTTTTTTGTGGT

>M6-PGSC0003DMG400013885M6G-LecRK\_5307

TCTTCACATAATTCATAGAACCTTTAAAGCTGTTACTAAATCTGTTTTTTTGTGGTGTAGTGGTTACAT  
GTCTCCGGAATATGCAATGGATGGCCTCTTCTCTGTTAAGTCCGATGT

>M6-PGSC0003DMG400013885M6G-LecRK\_5368

AGTGGTTACATGTCTCCGGAATATGCAATGGATGGCCTCTTCTCTGTTAAGTCCGATGTTTTTCAGCTTTG  
GGTTTTTGGTGTAGAAATAGTAACCGGAAGAAGAACAGGGGATTCTAT

>M6-PGSC0003DMG400013885M6G-LecRK\_5429

TCAGCTTTGGGGTTTTGGTGTAGAAATAGTAACCGGAAGAAGAACAGGGGATTCTATTATCAAATA  
ACCAACTCAACCTTCTTGACATGTAAGCTTCATTATTGGTAATACATTCA

>M6-PGSC0003DMG400013885M6G-LecRK\_549

TTCGACCGGAAAACGATGACAGAGAACAGAGCTACCTGTGGCAGAGCTTTGATTATCCAACAAACTT  
TATTACCTGGGATGAACTTGGGTGGGATTCAAATCCGGGATGAACAGAA

>M6-PGSC0003DMG400013885M6G-LecRK\_5490

TCAAATAACCAACTCAACCTTCTTGACATGTAAGCTTCATTATTGGTAATACATTCATCATTGATT  
TTCTGATAAACAAAGTAACCGATTATGCAGGCGTGGAGACTATGGAAA

>M6-PGSC0003DMG400013885M6G-LecRK\_5551

ATTTGATTCATTTCTGATAAACAAAGTAACCGATTATGCAGGCGTGGAGACTATGGAAAGAAGGGAGCG  
GCTCAGAGCTACTAGATCCATCTTTTGGAGAATCGTTTTCTCCGTCTGAAG

>M6-PGSC0003DMG400013885M6G-LecRK\_5612

AGGGAGCGGCTCAGAGCTACTAGATCCATCTTTTGGAGAATCGTTTTCTCCGTCTGAAGTAATGAGATGT  
ATACAAGTTGGACTGTTGTGTGTCCAGGAACAAGCAGAAGACAGACCAAAA

>M6-PGSC0003DMG400013885M6G-LecRK\_5673

ATGAGATGTATAACAAGTTGGACTGTTGTGTGTCCAGGAACAAGCAGAAGACAGACCAAACATGGCCACT  
GTGGTTTTGATGCTAGGTAGCGAAAGCGCGTCACTACCTCAGCCTAAAAAC

>M6-PGSC0003DMG400013885M6G-LecRK\_5734

TGGCCACTGTGGTTTTGATGCTAGGTAGCGAAAGCGCGTCACTACCTCAGCCTAAAAACCCAGGATTTT  
GCCTTGGAAGAAGACCCGTTGATTCTGATTCATATTCGACTAATTATGAAG

>M6-PGSC0003DMG400013885M6G-LecRK\_5795

AGGATTTTGCCTTGGAAGAAGACCCGTTGATTCTGATTCATATTCGACTAATTATGAAGAACTTGCACT  
GTCAATCAAGTTACAGTTACCATGATAGATCCCCGGTAGTTGATGGTATA

>M6-PGSC0003DMG400013885M6G-LecRK\_5856

ACTTGCACTGTCAATCAAGTTACAGTTACCATGATAGATCCCCGGTAGTTGATGGTATATATCGCCCTCA  
AGAAGTGTATATTACTACAAGAGGTTCACAATTTTCTCTCGTATAATTTT

>M6-PGSC0003DMG400013885M6G-LecRK\_5917

TCGCCCTCAAGAAGTGTATATTACTACAAGAGGTTCACAATTTTCTCTCGTATAATTTCTCAGTTTTTGCTT  
TTTGGGTAAGTTTTGTGTAAGATAAAGAGTATAATTAGGTCTTTTTTT

>M6-PGSC0003DMG400013885M6G-LecRK\_5978

AGTTTTTGCTTTTTGGGTAAGTTTTGTGTAAGATAAAGAGTATAATTAGGTCTTTTTTTCTCATTACATACA  
ATTGTGAGTTCAAAAATCTGTCTTTTTTTCATCATCAATGTAATAGTCC

>M6-PGSC0003DMG400013885M6G-LecRK\_6025

AGGTCTTTTTTTCTCATTACATACAATTGTGAGTTCAAAAATCTGTCTTTTTTTCATCATCAATGTAATAGTC  
CAATCATTCTTTTCCATATCCTTGAAATCCATTGTAATCACTGTGC

>M6-PGSC0003DMG400013885M6G-LecRK\_61

TACACCAACAAATGTCTCAAACACCAACTCTGCAGCAAACAAAATACTCTTTTCTTAAATTCCACAATGA  
GAAACACCAAAGATTACTACTTTTACCAATTCTTGTTCTTGATTTTGAT

>M6-PGSC0003DMG400013885M6G-LecRK\_610

AAACACTTTATTACCTGGGATGAAACTTGGGTGGGATTCAAAATCCGGGATGAACAGAAACATAACATC



ATGGAAATCAGCAATCGATCCAGCTCCCGGAGATTACACCTTCAAGATCAA

>M6-PGSC0003DMG400013885M6G-LecRK\_671

ATAACATCATGGAAATCAGCAATCGATCCAGCTCCCGGAGATTACACCTTCAAGATCAACACCAGTGGG  
TTCCCGGAAGTTTACTTAACAAATAAACAACAAACTATCTACAGGAGCGGC

>M6-PGSC0003DMG400013885M6G-LecRK\_732

CCAGTGGGTTCCCGGAAGTTTACTTAACAAATAAACAACAAACTATCTACAGGAGCGGCGCTTGGAATG  
GAATTAGATTCAGTGGGGTACCGGAAATGAAGGCAAGTGAGATTATCTCAT

>M6-PGSC0003DMG400013885M6G-LecRK\_793

TTGGAATGGAATTAGATTCAGTGGGGTACCGGAAATGAAGGCAAGTGAGATTATCTCATTCTGAATTTCA  
GTTCAAATCAGATGAAATTACTTACATGTTCAAATTACACAACAAAACCTT

>M6-PGSC0003DMG400013885M6G-LecRK\_854

GAATTTAGTTCAAATCAGATGAAATTACTTACATGTTCAAATTACACAACAAAACCTTATACTCAAGATT  
GTCTGTGAATCATACTGGTTATCTTGAAAGATTCACTTGGATCCCAACA

>M6-PGSC0003DMG400013885M6G-LecRK\_915

ACTCAAGATTGTCTGTGAATCATACTGGTTATCTTGAAAGATTCACTTGGATCCCAACAAGCAACATGTG  
GAATCGATTTTGGTATGCTCCAAAAGATCAATGTGACGGATACACAGAGT

>M6-PGSC0003DMG400013885M6G-LecRK\_976

CAACATGTGGAATCGATTTTGGTATGCTCCAAAAGATCAATGTGACGGATACACAGAGTGTGGGGTATC  
TGGAATTTGTGACACAAATATTTACCAATCTGCAAATGTATGGTGGGATT

>M6-PGSC0003DMG400013886M6G-LecRK\_0

GCCTCATCAGAACCTTCTTCTTTCTTTTGTCTTATACCTTTACCATTCTCCTTTCTAAATTCCCAATTT  
CTCCATTCTTGATTTGTGGCATCATCATTTCCAAATTCTTGAATGG

>M6-PGSC0003DMG400013886M6G-LecRK\_1037

TGTGATAAAGATGTATGCCAATGTTTAAAAGGTTTTGTACCACGTGTTTCAGGAGCAATGGCATGCTGGG  
AACCGAACCGGAGGATGTGTTAGGAAGACAGAATTGGAATGCAGGAGAAAT

>M6-PGSC0003DMG400013886M6G-LecRK\_1098

ATGCTGGGAACCGAACCGGAGGATGTGTTAGGAAGACAGAATTGGAATGCAGGAGAAATAGCAGTGT  
TTCAAGGAATGATAGTTCAAAGATGATGGATTCTCGACTATTCGGAGAGTTA

>M6-PGSC0003DMG400013886M6G-LecRK\_1159

CAGTGTTC AAGGAATGATAGTTCAAAGATGATGGATTCTCGACTATTCGGAGAGTTAAATTACCTGAC  
CATGCTGATGTTTCAGAAATAACCACAGACGAGTGCAAATCAGGTGCCT

>M6-PGSC0003DMG400013886M6G-LecRK\_1220

TTACCTGACCATGCTGATGTTTCAGAAATAACCACAGACGAGTGCAAATCAGGTGCCTGAATGATTGTT  
CCTGCAATGCTTATGCTTATGTCAGAGGAATCAATTGTATGATATGGCGT

>M6-PGSC0003DMG400013886M6G-LecRK\_1281

ATGATTGTTCTGCAATGCTTATGCTTATGTCAGAGGAATCAATTGTATGATATGGCGTAATGATTTAGTT  
GATATAGAGCATTTCAGGAAGGTGGGAACACTCTTTATGTTTCGTCTTC

>M6-PGSC0003DMG400013886M6G-LecRK\_1342

TGATTTAGTTGATATAGAGCATTTCAGGAAGGTGGGAACACTCTTTATGTTTCGTCTTCATCCTTCTGATA  
TCGGTAAGCACAATACTTTCTGCTGAATTCATAAATCTCTTACCAGTTT

>M6-PGSC0003DMG400013886M6G-LecRK\_1403

CCTTCTGATATCGGTAAGCACAATACTTTCTGCTGAATTCATAAATCTCTTACCAGTTTTCTTCTCATTTCGT  
GCAATTATACAAATCTAAAACCAAAGTAGTTTGTGCTTTAGTACAAAG

>M6-PGSC0003DMG400013886M6G-LecRK\_1464

TTCTCATTTCGTGCAATTATACAAATCTAAAACCAAAGTAGTTTGTGCTTTAGTACAAAGATCAATTTCTTG  
TTTGTCTTTACTCTTTATTTGTAGCAAGCTCAAACAATAAGCAATATAT

>M6-PGSC0003DMG400013886M6G-LecRK\_1525

CAATTTCTTGTTTGTCTTTACTCTTTATTTGTAGCAAGCTCAAACAATAAGCAATATATCTTTTTCTTCCTTG  
TGTTTGAAGAATGATTAGCCTTTCTAATTTCTTGATTTCTCCTTTGA

>M6-PGSC0003DMG400013886M6G-LecRK\_1586

TTTTCTTCCTTGTTTGAAGAATGATTAGCCTTTCTAATTTCTTGATTTCTCCTTTGAATATCTTTTTGAAAC  
AGGTCAAAAAAAGAAGACGATCATAATTGTTGTAATATCAATTCTAG

>M6-PGSC0003DMG400013886M6G-LecRK\_1647

ATCTTTTGAAACAGGTCAAAAAAAGAAGACGATCATAATTGTTGTAATATCAATTCTAGCAGCTCTGGCT  
TTGGTTGTTATGGTGGCCATTTGGCTAGTATGCAAGTACAGGGCCAGAAA

>M6-PGSC0003DMG400013886M6G-LecRK\_1708

GCTCTGGCTTTGGTTGTTATGGTGGCCATTTGGCTAGTATGCAAGTACAGGGCCAGAAAACGAGGTAAA  
TTTTGATGCAGTAACATTTCTGACTTGTTAGTTGCATTTATTATATGTTCC

>M6-PGSC0003DMG400013886M6G-LecRK\_1769

GAGGTAAATTTTGATGCAGTAACATTTCTGACTTGTTAGTTGCATTTATTATATGTTCCATATTGTACTTAT  
ACCTTTGACTTGCAATTTTCAGAATCCAAGAGGACCAGTGAAATTCCC

>M6-PGSC0003DMG400013886M6G-LecRK\_183

CATTCTGTTTAGGTGGTGACAGAGTTACACTAGGAGAGATTATTAAGATGGTGATAACATCACTTCTAA  
AGGAGGGGATTTTGTGTTGGGGTCTTTAGTCCTGCAAATACTAGTAAAA

>M6-PGSC0003DMG400013886M6G-LecRK\_1830

ATTGTACTTATACCTTTGACTTGCAATTTTCAGAATCCAAGAGGACCAGTGAAATTCCTAAAAACCATTTA  
GTTAGGAGTGGAGAGTTCTCCACAGAATATTCTGGACCAGGCGACATCA

>M6-PGSC0003DMG400013886M6G-LecRK\_1891

AAACCATTTAGTTAGGAGTGGAGAGTTCTCCACAGAATATTCTGGACCAGGCGACATCAGTGCTGAAGG  
GCATCAAGGAAATGGTTCAGAATTAGCATTTTTTCAGCTTCAGCATGGTGCC

>M6-PGSC0003DMG400013886M6G-LecRK\_1952

GCTGAAGGGCATCAAGGAAATGGTTCAGAATTAGCATTTTTTCAGCTTCAGCATGGTGGCCACAGCTACT  
GATGACTTCTCTTTGCAAACAAGCTTGGGCAAGGGGGATTTGGCCCCGTT

>M6-PGSC0003DMG400013886M6G-LecRK\_2013

CAGCTACTGATGACTTCTCTTTGCAAACAAGCTTGGGCAAGGGGGATTTGGCCCCGTTTATAAGGTAA  
ATTTTCAATCTTGATAGATTATTCTGTTCTTTAGGAAGTATATGGCCATG

>M6-PGSC0003DMG400013886M6G-LecRK\_2074

TAAGGTAAATTTTCAATCTTGATAGATTATTCTGTTCTTTAGGAAGTATATGGCCATGTTTTGGACTAAA  
GTTGATGTTTTTCAAATCTTTAGGGAAAGCTACCTTGTGGTCAAGAAGT

>M6-PGSC0003DMG400013886M6G-LecRK\_2135

TTGGACTAAAGTTGATGTTTTTCAAATCTTTAGGGAAAGCTACCTTGTGGTCAAGAAGTTGCTGTAAAAA  
GGCTTTCACAAAAGTCTGGACAAGGCGATGAGGAGTTCAAGAATGAGATC

>M6-PGSC0003DMG400013886M6G-LecRK\_2196

CTGTAAAAAGGCTTTCACAAAAGTCTGGACAAGGCGATGAGGAGTTCAAGAATGAGATCACTCTAATAG  
CAAAATTGCAACACAGAAATCTTGTTAGACTTTTGGGTTGCTGTGTTGAAG

>M6-PGSC0003DMG400013886M6G-LecRK\_2257

TCTAATAGCAAAATTGCAACACAGAAATCTTGTTAGACTTTTGGGTTGCTGTGTTGAAGGAGAAGAAAA

AATGCTGATTTACGAGTACATGCCCAACAAAAGCTTAGATACATTTCTATT

>M6-PGSC0003DMG400013886M6G-LecRK\_2318

GAAGAAAAAATGCTGATTTACGAGTACATGCCCAACAAAAGCTTAGATACATTTCTATTTGGTAAGTTCA

GGAAATTCTATCAAATAATTTCTGCTGCTCCACAGATGTAAGTATAGCA

>M6-PGSC0003DMG400013886M6G-LecRK\_2379

GTAAGTTCAGGAAATTCTATCAAATAATTTCTGCTGCTCCACAGATGTAAGTATAGCAACACATCTCATT

GAGATAGACTAACAAGTATTGGCTGTAAACTTTGACAGATACTG

>M6-PGSC0003DMG400013886M6G-LecRK\_244

CACTTCTAAAGGAGGGGATTTTGTGTTGGGGTTCTTTAGTCCTGCAAATACTAGTAAAAGGTATCTTGGT

ATATGGTATGTTGACGTACCAGTAAAGACATATATTTGGGTTGCCAACAG

>M6-PGSC0003DMG400013886M6G-LecRK\_2440

ACATCTCATTGAGATAGACTAACAAGTATTGGCTGTAAACTTTGACAGATACTGCTAGGAAATCC

CAGTTAGACTGGAGAAAACGCTTCAACATTATCGAAGGAATTGCCCGAGG

>M6-PGSC0003DMG400013886M6G-LecRK\_2501

AGGAAATCCCAGTTAGACTGGAGAAAACGCTTCAACATTATCGAAGGAATTGCCCGAGGATTACTGTAT

CTCCATAGAGATTCAAGGCTTAGAATAATCCATAGGGATCTAAAGGCTAGT

>M6-PGSC0003DMG400013886M6G-LecRK\_2562

TACTGTATCTCCATAGAGATTCAAGGCTTAGAATAATCCATAGGGATCTAAAGGCTAGTAACATTCTGTT

GGATGAAGAGATGACACCAAAAATTTGACACTTTGGCATGGCCAGAATAT

>M6-PGSC0003DMG400013886M6G-LecRK\_2623

CATTCTGTTGGATGAAGAGATGACACCAAAAATTTGACACTTTGGCATGGCCAGAATATTTGGAGGAAA

CCAAAATGAAGCAAATACAAATAGGGTCGTAGGAACATAGTAAGTATCATT

>M6-PGSC0003DMG400013886M6G-LecRK\_2684

GGAGGAAACCAAAATGAAGCAAATACAAATAGGGTCGTAGGAACATAGTAAGTATCATTGATTTTAAA

TCTTTAAGAGACTAATTTCAAATTTCTTGTTCCTGGAGCTAAATCCATT

>M6-PGSC0003DMG400013886M6G-LecRK\_2745

ATTTTAAATCTTTAAGAGACTAATTTCAAATTTCTTGTTCCTGGAGCTAAATCCATTTTATTTGTACCT

TGTTGCTAAACAACAGTGGATATATGGCTCCTGAGTATGCTATGGAGG

>M6-PGSC0003DMG400013886M6G-LecRK\_2806

ATTTTGTACCTTGTTGCTAAACAACAGTGGATATATGGCTCCTGAGTATGCTATGGAGGGCCTGTTCTCT  
GGCAAGTCTGATGTCTACAGCTTCGGCATAATATTGCTTGAAATTATATG

>M6-PGSC0003DMG400013886M6G-LecRK\_2867

CTGTTCTCTGGCAAGTCTGATGTCTACAGCTTCGGCATAATATTGCTTGAAATTATATGTGGACGTAGAA  
ATACAAGCTTTTCGGACAGATGAGCATTTCAGGCATCATTGGATATGTAAGT

>M6-PGSC0003DMG400013886M6G-LecRK\_2928

GACGTAGAAATACAAGCTTTTCGGACAGATGAGCATTTCAGGCATCATTGGATATGTAAGTCTGACTAATT  
TTCTCCAACACTATTTCAATCTTTTTAGTCCAGAACAAGCTGTCTGAATAATG

>M6-PGSC0003DMG400013886M6G-LecRK\_2989

GACTAATTTTCTCCAACACTATTTCAATCTTTTTAGTCCAGAACAAGCTGTCTGAATAATGGGGCTAATTTCTT  
GTGTGATGAGCAATGACGGAGTGATCATCTTTCTCATATTTTTCTGGT

>M6-PGSC0003DMG400013886M6G-LecRK\_305

TATCTTGATATATGGTATGTTGACGTACCAGTAAAGACATATATTTGGGTTGCCAACAGGAACAATCCTG  
TTCATGATAAAAATGGTACCTTTTCAATTGATAAAAATGGGAATTTGGTG

>M6-PGSC0003DMG400013886M6G-LecRK\_3050

GCTAATTTCTTGTGTGATGAGCAATGACGGAGTGATCATCTTTCTCATATTTTTCTGGTGGAAAATATTTTC  
AGGCATGGGAGAAGTGGGATGAAGGTAGACCAATGGACCTAGTGGATCG

>M6-PGSC0003DMG400013886M6G-LecRK\_3111

AAAATATTTTCAGGCATGGGAGAAGTGGGATGAAGGTAGACCAATGGACCTAGTGGATCGTTCGATTTG  
GGATGGTTGTCAACACAATGAAGCATTGAGATGTATACACTTGGCATTGCTT

>M6-PGSC0003DMG400013886M6G-LecRK\_3172

CGATTTGGGATGGTTGTCAACACAATGAAGCATTGAGATGTATACACTTGGCATTGCTTTGTGTTCAAGA  
TTTGGCCGCTCACAGACCAAACATGTCTTCTGTGGTTTTGATGCTGGAAA

>M6-PGSC0003DMG400013886M6G-LecRK\_3233

TGTTCAAGATTTGGCCGCTCACAGACCAAACATGTCTTCTGTGGTTTTGATGCTGGAAACTGACAATGTA  
AGGTTGCCCTTGCTTAGGCAACCTACCTATACTTCAATGAGAAGATCTGT

>M6-PGSC0003DMG400013886M6G-LecRK\_3294

GACAATGTAAGGTTGCCCTTGCTTAGGCAACCTACCTATACTTCAATGAGAAGATCTGTGGATGAAGAT  
ATATGGCATGGGAATCAGGATTTAACATCTTCCAACAATGTCACAGTTAGT

>M6-PGSC0003DMG400013886M6G-LecRK\_3355

ATGAAGATATATGGCATGGGAATCAGGATTTAACATCTTCCAACAATGTCACAGTTAGTGTACTAATAG  
GTAGATGATTGGTTAATGCTTGTTCCTTCTTACATACCTGCTTCATTTGAA

>M6-PGSC0003DMG400013886M6G-LecRK\_3416

ACTAATAGGTAGATGATTGGTTAATGCTTGTTCCTTCTTACATACCTGCTTCATTTGAAGAGAATGGGATC  
AAGTAGTGTAAGTATGTAAAGTTATACTTGGAACTATGTTTCATAATTTT

>M6-PGSC0003DMG400013886M6G-LecRK\_3477

GAATGGGATCAAGTAGTGTAAGTATGTAAAGTTATACTTGGAACTATGTTTCATAATTTTTTTGTTAGCTAG  
GTAAACTTTAGCACATCATGTGTATTGTAATTAGAAGGTGGTTCAGCTCT

>M6-PGSC0003DMG400013886M6G-LecRK\_3538

GTTAGCTAGGTAAACTTTAGCACATCATGTGTATTGTAATTAGAAGGTGGTTCAGCTCTGTAAGCTGAAA  
GAGAGATATTTACAACCTTGTTCATCAGTATGCTTGAAGTTTTTTTTCT

>M6-PGSC0003DMG400013886M6G-LecRK\_3599

AAGCTGAAAGAGAGATATTTACAACCTTGTTCATCAGTATGCTTGAAGTTTTTTTTCTTACTGTTTGTA  
GATGGAGATGCTCCACCAATCGAGCAAACCCCACTTGTTCATATCTAGTT

>M6-PGSC0003DMG400013886M6G-LecRK\_366

ACAATCCTGTTTCATGATAAAAATGGTACCTTTTCAATTGATAAAAATGGGAATTTGGTGGTTAAAGATGG  
ACATGGGGATTTACTATGGTCGTCTAATGTTTCTGTTAATACCACAAATT

>M6-PGSC0003DMG400013886M6G-LecRK\_427

TAAAGATGGACATGGGGATTTACTATGGTCGTCTAATGTTTCTGTTAATACCACAAATTCTACGGCTTGT  
CTGAGAGACGAGGGAAATCTTGTTCATCCTTAATAATGACAGGAATGCTAC

>M6-PGSC0003DMG400013886M6G-LecRK\_488

ACGGCTTGTCTGAGAGACGAGGGAAATCTTGTTCATCCTTAATAATGACAGGAATGCTACGAGGTTAAAT  
TCTGAATTGTGGAAGAGCTTCTCGGATCCTACAGATACATTTTTGCCTGGA

>M6-PGSC0003DMG400013886M6G-LecRK\_549

GGTTAAATTCTGAATTGTGGAAGAGCTTCTCGGATCCTACAGATACATTTTTGCCTGGAATGGAAGTTCT  
CATAGAAAGACGAGGCCAAGAGCAAAAAGTTTTCCGTTCTTGGACAAATG

>M6-PGSC0003DMG400013886M6G-LecRK\_610

GGAAGTTCTCATAGAAAGACGAGGCCAAGAGCAAAAAGTTTTCCGTTCTTGGACAAATGAGAGTGACCC

TTCACCTGGGAGGTACTIONCAATGGGAGTTGATCCTCGCGGAACACCTCAGAT

>M6-PGSC0003DMG400013886M6G-LecRK\_671

AGTGACCCTTCACCTGGGAGGTACTIONCAATGGGAGTTGATCCTCGCGGAACACCTCAGATTGTTATTTGG  
GATGGACCGAATAGACGATGGAGGAGTGGACATTTTGGATGGAGCGGAATTC

>M6-PGSC0003DMG400013886M6G-LecRK\_732

TTATTTGGGATGGACCGAATAGACGATGGAGGAGTGGACATTTTGGATGGAGCGGAATTCATTGGTGTTCC  
CAGATGTGATTAGAACTACTTTTTTCTCTGGCTTCAGAATTCAAAACCAAG

>M6-PGSC0003DMG400013886M6G-LecRK\_793

TGGTGTTCAGATGTGATTAGAACTACTTTTTTCTCTGGCTTCAGAATTCAAAACCAAGGAGACGATAAA  
TTGTTACTCACTTACAGTGCCTCAAATACATCTTCTTTTGTGAGGTTTCA

>M6-PGSC0003DMG400013886M6G-LecRK\_854

GACGATAAATTGTTACTCACTTACAGTGCCTCAAATACATCTTCTTTTGTGAGGTTTCAGCTTACTGTGAC  
TGAAATGAGCTGCAACAGAGGTGGAACGAAGACCAGGGTGAATGGAAC

>M6-PGSC0003DMG400013886M6G-LecRK\_915

TTACTGTGACTGGAAATGAGCTGCAACAGAGGTGGAACGAAGACCAGGGTGAATGGAACACGTTGCAA  
TCTAGGCCTGTAGGTGGTTGTGACTTGTATAACTTCTGTGGGAATTTTGCAG

>M6-PGSC0003DMG400013886M6G-LecRK\_976

GTTGCAATCTAGGCCTGTAGGTGGTTGTGACTTGTATAACTTCTGTGGGAATTTTGCAGAATGTGATAAA  
GATGTATGCCAATGTTTAAAAGGTTTTGTACCACGTGTTTCAGGAGCAATG

>M6-PGSC0003DMG400013887M6G-LecRK\_1054

TCCTTTACCTTCACAGAGACTCAAGACTATGAATTATTCATAGAGATCTGAAGGCAAGCAATATCCTGTT  
GGATGAATACCTAAACCCAAAAATTTCAAATTTTGGCATGGCGAGGATTT

>M6-PGSC0003DMG400013887M6G-LecRK\_1116

ATCCTGTTGGATGAATACCTAAACCCAAAAATTTCAAATTTTGGCATGGCGAGGATTTTGGAGCAATCA  
AGATCAGGCCAACACTATAAGAGTTGTTGGCACATAGTATGTTTGCATTG

>M6-PGSC0003DMG400013887M6G-LecRK\_1178

AGCAATCAAGATCAGGCCAACACTATAAGAGTTGTTGGCACATAGTATGTTTGCATTGCTTCCTTCATTT  
TTCATGGATGAACTGCCATCATTAGTCATTGATTTTCTGTGTAATATGT

>M6-PGSC0003DMG400013887M6G-LecRK\_124

ATGCTCACGAAGAACTGTGTATGGCTCATACATGTTTGCAGCTGCAAATGACAAGAAAGACATTCCTGT  
AGCAGCTATTGCAACCACAGTCTTAATAGGCTCAATAACAGTTATCTTATG

>M6-PGSC0003DMG400013887M6G-LecRK\_1240

CTTCATTTTTTCATGGATGAACTGCCATCATTAGTCATTGATTTTCTGTGTAATATGTTATGCAGTGGTTAC  
ATGGCCCCTGAATATTCAATGTACGGAAGATTCTCAGAAAAATCAGAT

>M6-PGSC0003DMG400013887M6G-LecRK\_1302

CAGTGGTTACATGGCCCCTGAATATTCAATGTACGGAAGATTCTCAGAAAAATCAGATGTCTACAGCTTC  
AGTGTGTTGGTATTGGAAATTGTCAGTGAAGGAAGAACTCTAGTTTTTA

>M6-PGSC0003DMG400013887M6G-LecRK\_1364

ACAGCTTCAGTGTGTTGGTATTGGAAATTGTCAGTGAAGGAAGAACTCTAGTTTTTATGATGATGAACT  
GACTCTACTTGCATATGTAAGTTCATTCTTGCAACTATATATGAAGCTTT

>M6-PGSC0003DMG400013887M6G-LecRK\_1426

GATGAACTGACTCTACTTGCATATGTAAGTTCATTCTTGCAACTATATATGAAGCTTTAATGTTCTGCTAG  
CTCATCAAACCAAAAAAATAGAGGAGAAAAATTATGGAACCTTCTGAAAA

>M6-PGSC0003DMG400013887M6G-LecRK\_1488

TTCTGCTAGCTCATCAAACCAAAAAAATAGAGGAGAAAAATTATGGAACCTTCTGAAAATAACATTTTTGC  
TGTTTGACAATGTCATTGTTTCATTAGGCATGGAAGTTGTGGAATGAAAAC

>M6-PGSC0003DMG400013887M6G-LecRK\_1550

ATTTTTGCTGTTTGACAATGTCATTGTTTCATTAGGCATGGAAGTTGTGGAATGAAAACAATATCATAAAA  
TTGATAGACCCCAAAATATTTGATTCATGCTTTGAAAAACAGATGGTGAG

>M6-PGSC0003DMG400013887M6G-LecRK\_1612

TCATAAAATTGATAGACCCCAAAATATTTGATTCATGCTTTGAAAAACAGATGGTGAGATGTGTACATAT  
TGGATTATTATGTGTTCAAGAATATGCAGAAGATAGGCCAAATGTCACCA

>M6-PGSC0003DMG400013887M6G-LecRK\_1674

GTACATATTGGATTATTATGTGTTCAAGAATATGCAGAAGATAGGCCAAATGTCACCACAGTTCTGTAA  
TGCTCACTAGTGATATTGCTGAACTACCTACTCCTAAACAACCTGCATTT

>M6-PGSC0003DMG400013887M6G-LecRK\_1736

TCTGTTAATGCTCACTAGTGATATTGCTGAACTACCTACTCCTAAACAACCTGCATTTACCGGAGGACATG  
CTTACCACAGCAAGTATCTTCTAAAAGCCAAGGGTCCGTGAATGCTGA



>M6-PGSC0003DMG400013887M6G-LecRK\_186

TTCCTGTAGCAGCTATTGCAACCACAGTCTTAATAGGCTCAATAACAGTTATCTTATGTGGATATCTTTTC  
TGCAAATTGTTGGCTAAGCACAGAGGTAATTAATCAAATAAGATTTTTG

>M6-PGSC0003DMG400013887M6G-LecRK\_1860

ATAACTGTATTGGAACCACGATAGGATGCAGAGTTTTCAACAGGCAGGCAAAGATCAGTACTTTCCCTA  
AAATGGTAACAGTAGCATAGTATTTCTTTCTTTTGAATGTGCATAGGGTAA

>M6-PGSC0003DMG400013887M6G-LecRK\_1922

TTCCCTAAAATGGTAACAGTAGCATAGTATTTCTTTCTTTTGAATGTGCATAGGGTAAAACACGCTCCTGC  
AATAACTCGCAAAACACACAAAAGAGGTAAAAGTGCACTAGCTATGTGA

>M6-PGSC0003DMG400013887M6G-LecRK\_1984

CGCTCCTGCAATAACTCGCAAAACACACAAAAGAGGTAAAAGTGCACTAGCTATGTGATGAATTAATTA  
CAGAGTGAGCTTGGAGAACATGAAACAGTTGATCAATTTTTAACTTTGCAT

>M6-PGSC0003DMG400013887M6G-LecRK\_2046

TTAATTACAGAGTGAGCTTGGAGAACATGAAACAGTTGATCAATTTTTAACTTTGCATTATGAAAATCCT  
TAGAAAGAAAGTAGACAAAAGGACAAAAGAACCGCAAATCCCCAATTAA

>M6-PGSC0003DMG400013887M6G-LecRK\_2108

AAAATCCTTAGAAAGAAAGTAGACAAAAGGACAAAAGAACCGCAAATCCCCAATTAACAAGTTCAAAT  
AATGGCAATCAAAGACTTGAAAAATCATACTGCTGTACTGATACACGAAA

>M6-PGSC0003DMG400013887M6G-LecRK\_2170

TTCAAATAATGGCAATCAAAGACTTGAAAAATCATACTGCTGTACTGATACACGAAACGGCGTAAGCG  
AAAAATAGCCACTCGTTTTACCACTGTTTTTTTTCTTAGAAAATTACAGAG

>M6-PGSC0003DMG400013887M6G-LecRK\_2232

GTAAGCGAAAAATAGCCACTCGTTTTACCACTGTTTTTTTTCTTAGAAAATTACAGAGAAGTGAATTGGT  
GAATTAATCAATGTTGAGGAAAAGTTAACTCTGCATTATTTTAGGTCATT

>M6-PGSC0003DMG400013887M6G-LecRK\_2294

GAATTGGTGAATTAATCAATGTTGAGGAAAAGTTAACTCTGCATTATTTTAGGTCATTCACATTTACACA  
AGTTATTTGGGTGTTGGTTAAAGACTATAATTGTTTCATTTTTAAAATT

>M6-PGSC0003DMG400013887M6G-LecRK\_248

TATCTTTTCTGGAAATTGTTGGCTAAGCACAGAGGTAATTAATCAAATAAGATTTTTGAGAAGACAACT

AGAACTTCTCTGTCTGCAAATGGTTTGATTTCTGAATGTCCACTCTAAAC

>M6-PGSC0003DMG400013887M6G-LecRK\_310

GACAACTAGAACTTCTCTGTCTGCAAATGGTTTGATTTCTGAATGTCCACTCTAAACCAGAAAGGAAGA  
GGAAAAATGAAGCACTCTTAAGAGAAGCATCTCCAAAATTTTACCAAGAA

>M6-PGSC0003DMG400013887M6G-LecRK\_372

AAGGAAGAGGAAAAATGAAGCACTCTTAAGAGAAGCATCTCCAAAATTTTACCAAGAAGGCATGAGTA  
AAGATGACATCAATCAAGTCAAATTGAAGACATCACCTTGTACATATTTGA

>M6-PGSC0003DMG400013887M6G-LecRK\_434

TGAGTAAAGATGACATCAATCAAGTCAAATTGAAGACATCACCTTGTACATATTTGATATGTTAGCGAA  
TGCCACTGACAGTTTTACCCAGCTAGCAAGCTGGGGCAAGGAGGCTTTG

>M6-PGSC0003DMG400013887M6G-LecRK\_558

AGTCTACAAAGTAATGTTTCTTGATGCATCTCTGCAGTGTTCTGACAAATGAACACAATATAAAATAAAT  
TAGATCAATTATCTGCAGGGACAATTGCCATATGGACAAGAAATTGTAGT

>M6-PGSC0003DMG400013887M6G-LecRK\_62

AGTTACCAGTTTCAAAAAAATAAAAAATCAATTAGTGCTTTCACTTCCATGGAAAGAAAGATATGCTCAC  
GAAGAACTGTGTATGGCTCATAATGTTTGCAGCTGCAAATGACAAGAAA

>M6-PGSC0003DMG400013887M6G-LecRK\_620

AAATAAATTAGATCAATTATCTGCAGGGACAATTGCCATATGGACAAGAAATTGTAGTAAAAAGGCTTT  
CACAGTCTCCGGTCAGGGGCTACAGGAGTTTATGAATGAGGTCGTTGTGA

>M6-PGSC0003DMG400013887M6G-LecRK\_744

TAGACTACAACATCGTAATCTTGTTAGACTCCTTGCTGTTGCACAGAGAGAGGGGAAAAGATGCTGGT  
TTATGATTTTCATGCCAAATAGAAGCTTAGATGCATATGTTTTTGGTCAGTG

>M6-PGSC0003DMG400013887M6G-LecRK\_806

TGCTGGTTTATGATTTTCATGCCAAATAGAAGCTTAGATGCATATGTTTTTGGTCAGTGCAGAATTTTCTTT  
CATTGGTTTTGCCTGTCCTTCACTTAAGTACTTCCAGAATCAAAGAA

>M6-PGSC0003DMG400013887M6G-LecRK\_868

ATTTTCTTTTATTGGTTTTGCCTGTCCTTCACTTAAGTACTTCCAGAATCAAAGAAAGCTGTATTTCTTT  
AAGGAAACAAAATCCATCATACTTTCTCAGTGATACCTTTTCAGGTT

>M6-PGSC0003DMG400013887M6G-LecRK\_930

GTATTTCTTTAAGGAAACAAAATCCATCATACTTTCTCAGTGATACCTTTTCAGGTTACACACCAGGAAAA  
GGTCCTTGATTGGGGTAAACGAGCCATCATTATTGAAGGAACTGGTCGA

>M6-PGSC0003DMG400013898M6LRR-RLP\_0

TATATATATATATGAGAACCCTTTAATGTAAAAGCTCAAAAAGTTGTATTATTGTTCTTGAAACCAAGT  
ACTCTACCTATTAGACATGACAACCTTCTTACAGTACCTTCCTTTACATT

>M6-PGSC0003DMG400013898M6LRR-RLP\_1054

TCGCTTGAATTCAACCATTCTTCTGAGCTAGGCCTTTGACTAACCTCATTCTCTTGGCTCTATCAGGGA  
ATGCCCTGCAAGGACCATTGCCTATATCCTTGTCTACAGTGACCAAGTT

>M6-PGSC0003DMG400013898M6LRR-RLP\_1116

TATCAGGGAATGCCCTGCAAGGACCATTGCCTATATCCTTGTCTACAGTGACCAAGTTATCTGACTTGGG  
CTTGTCTGATAATTTTCTTTCTGGTGAGGTTCAATCATATCTCATTACCA

>M6-PGSC0003DMG400013898M6LRR-RLP\_1178

GACTTGGGCTTGTCTGATAATTTTCTTTCTGGTGAGGTTCAATCATATCTCATTACCAATTGGACTGAGCT  
GACATCTTTCAGCTTCAAACAATTCATTTTCAGGGAAAATTCCACCT

>M6-PGSC0003DMG400013898M6LRR-RLP\_124

TTGTGCTTCTTCTTTTTTCACTTCCACTCACAATCACATCATCAGCAACAACCTGAAGCTGAAGCTCTTGTC  
AATGGAAGATGAACTTACCTTCTACTTCTTTCTTGGATTCATGGTCCA

>M6-PGSC0003DMG400013898M6LRR-RLP\_1240

GACTGAGCTGACATCTTTCAGCTTCAAACAATTCATTTTCAGGGAAAATTCCACCTGAAATCAGCCAG  
TTGAAAAACCTTGATATCTTTACCTCTATAGTAACAATTTCACTGGTTC

>M6-PGSC0003DMG400013898M6LRR-RLP\_1302

TCAGCCAGTTGAAAAACCTTGATATCTTTACCTCTATAGTAACAATTTCACTGGTTCATTCCCTATCAGA  
TTGGTAAGTTGCAAACTTGCTGGATCTAGATGTCTCTGAGAACCAGC

>M6-PGSC0003DMG400013898M6LRR-RLP\_1364

CCCTATCAGATTGGTAAGTTGCAAACTTGCTGGATCTAGATGTCTCTGAGAACCAGCTTTCAGGCACAA  
TACCTCCAACCATTGGAAACCTGACCAATCTAAGGACGTTGCAGCTTTTT

>M6-PGSC0003DMG400013898M6LRR-RLP\_1426

AGGCACAATACCTCCAACCATTGGAAACCTGACCAATCTAAGGACGTTGCAGCTTTTTCGGAACAACATC  
AGTGGAACCATTCTTCTGAGATTGGCAAATTGACATCTCTTCAAACCCT

>M6-PGSC0003DMG400013898M6LRR-RLP\_1488

ACAACATCAGTGGAACCATTCTTCTGAGATTGGCAAATTGACATCTCTTCAAACCCTTGACCTCAACACT  
AACCGGTTTAGTGGTGAGCTGCCCGACAGCATTCTAACCTCGGCAGTC

>M6-PGSC0003DMG400013898M6LRR-RLP\_1550

CTCAACACTAACCGGTTTAGTGGTGAGCTGCCCGACAGCATTCTAACCTCGGCAGTCTGAAGCTTCTTG  
AGTTCCTTTCTCTTAGTAACAACCAGTTTTTCAGGTGTGATCCCTTTGTCT

>M6-PGSC0003DMG400013898M6LRR-RLP\_1612

GCTTCTTGAGTTCCTTTCTCTTAGTAACAACCAGTTTTTCAGGTGTGATCCCTTTGTCTATTTGCAATTCGAC  
ATCACTACAAACTCTAGTTTTCAACAAGAAACAATTTTCAGGGGAGAGAT

>M6-PGSC0003DMG400013898M6LRR-RLP\_1674

GCAATTCGACATCACTACAAACTCTAGTTTTCAACAAGAAACAATTTTCAGGGGAGAGATTCCACAATGTTT  
GGGTAATATCAGTGGCCTCTCCATTTTGGATATGCGCTACAACAATCTTT

>M6-PGSC0003DMG400013898M6LRR-RLP\_1736

CAATGTTTGGGTAATATCAGTGGCCTCTCCATTTTGGATATGCGCTACAACAATCTTTCTGGGATTCTTCC  
AACAAAGTTTTGATATTGGATGTTCACTTAGAACCTTCAACTTTCATGGA

>M6-PGSC0003DMG400013898M6LRR-RLP\_1798

GATTCTTCCAACAAGTTTTGATATTGGATGTTCACTTAGAACCTTCAACTTTCATGGAAATGAACTACAAG  
GGAAAATCCCTCGATCTTTAGCCAATTGTAAAGAGTTGAAAGTTCTTGA

>M6-PGSC0003DMG400013898M6LRR-RLP\_186

GCTCTTGTCAAATGGAAGATGAACTTACCTTCTACTTCTTTCTTGGATTTCATGGTCCATTTTGAATCTCGG  
AAACTTGTGCAATTGGACATCTATTGTCTGCAATGCTGGTGGAAACAATT

>M6-PGSC0003DMG400013898M6LRR-RLP\_2108

CTATTTCAACATTTGAAAGCCATGAAGACAATAATCAAACAAGGAAGGCACCAATTGAAGGAAGCAAC  
TATTACCAAGACTCGGTAGTTGTTGTAATGAAGGGACACATCTTTGAAGTT

>M6-PGSC0003DMG400013898M6LRR-RLP\_2170

AAGCAACTATTACCAAGACTCGGTAGTTGTTGTAATGAAGGGACACATCTTTGAAGTTGTGAGAATCTT  
GTATTTATACACGAGTATGGATCTTTCAAGTAACAATTTGAAGGACTTAT

>M6-PGSC0003DMG400013898M6LRR-RLP\_248

GAATCTCGGAAACTTGTGCAATTGGACATCTATTGTCTGCAATGCTGGTGGAAACAATTTCCGAAATCAAT

CTTTCTGATGCAGGCCTCTCAGGCACTCTTGATCAGCTTGACTTCACTTC

>M6-PGSC0003DMG400013898M6LRR-RLP\_2542

TTCATATGAAGGTAATGATAGATTACATGGATTTCCAGTTTACAAGGTTGTGGTAATGATCAGGTATCA  
GAGACAAATTATACCATATCTGCACTAGACGAACAAGAAAGCAATTCGGA

>M6-PGSC0003DMG400013898M6LRR-RLP\_2728

CATAATATATTTTCATGATCTCAACTTGAAGTCCAATATGGCTAGCAAGAATCATGGAAGAGTTGGAACAC  
AATTATTATGCAAAGTAGAAAGAAGCAATGAGGTAAAAGGCATTACAGAA

>M6-PGSC0003DMG400013898M6LRR-RLP\_2790

TGGAACACAATTATTATGCAAAGTAGAAAGAAGCAATGAGGTAAAAGGCATTACAGAAGAAGAAAATA  
ATCGCTTCTAGACAAGTTACCAACTGAGTATTCAAGTTAAGGTCTGCTGATT

>M6-PGSC0003DMG400013898M6LRR-RLP\_2852

AAAATAATCGCTTCTAGACAAGTTACCAACTGAGTATTCAAGTTAAGGTCTGCTGATTTTTAGTATATAGT  
AATATATATTTATAGTTTCGTTACAACAACAGCTAATCGATACTTTATA

>M6-PGSC0003DMG400013898M6LRR-RLP\_310

AAATCAATCTTTCTGATGCAGGCCTCTCAGGCACTCTTGATCAGCTTGACTTCACTTCATTTCCGAGTCTC  
ACAAGTTATTCTCTCAATGGCAACAACCTTCAGTGGATCGATAACCATCAA

>M6-PGSC0003DMG400013898M6LRR-RLP\_372

CCGAGTCTCACAAAGTTATTCTCTCAATGGCAACAACCTTCAGTGGATCGATAACCATCAAATATTGGTAATG  
CTTCTATGCTCACTTTCTTGGACCTGAGCAACAATATCTTGGAGGGTGTGTC

>M6-PGSC0003DMG400013898M6LRR-RLP\_434

TGGTAATGCTTCTATGCTCACTTTCTTGGACCTGAGCAACAATATCTTGGAGGGTGTGTCATACCAGAAGAA  
ATTGGGAAGTTAACACAACCTGAATATCTCAGTTTCTATAACAACAATAT

>M6-PGSC0003DMG400013898M6LRR-RLP\_496

CAGAAGAAATTGGGAAGTTAACACAACCTGAATATCTCAGTTTCTATAACAACAATATCATTGGTGTAT  
TCCCTACCAAATAAGTAATCTTCAGAAGGCATGGCACTTGGATCTTGGAT

>M6-PGSC0003DMG400013898M6LRR-RLP\_558

GGTGTATTCCCTACCAAATAAGTAATCTTCAGAAGGCATGGCACTTGGATCTTGGATCAAATTTTTAGA  
AACTCCTGATTGGTCCAAATTGAGGAATATGCCTATGTTGACATATTTGA

>M6-PGSC0003DMG400013898M6LRR-RLP\_62

AAACCAAGTACTCTACCTATTAGACATGACAACCTTCTTACAGTACCTTCCTTTACATTCTACTTGTGCTTCT  
TCTTTTTTCACTTCCACTCACAATCACATCATCAGCAACAACCTGAAGC

>M6-PGSC0003DMG400013898M6LRR-RLP\_620

TTTTTAGAACTCCTGATTGGTCCAAATTGAGGAATATGCCTATGTTGACATATTTGAGCTTTGGTTACAA  
TGAACAAACATTAGAATCCCTGAATTTGACTCTGTTGCCATAATCTG

>M6-PGSC0003DMG400013898M6LRR-RLP\_682

TGGTTACAATGAACTAACATTAGAATCCCTGAATTTGACTCTGTTGCCATAATCTGACTTACCTCGATT  
TGTCGATAAACCATTTGAATGGTTCAATCCCAGAAACACTATTCACCAA

>M6-PGSC0003DMG400013898M6LRR-RLP\_744

ACCTCGATTTGTCGATAAACCATTTGAATGGTTCAATCCCAGAAACACTATTCACCAACTTGGATAAGCTT  
GAACACCTCAATCTTTCATCTAATTCATTTCAAGGTTCAATTGTCACCAA

>M6-PGSC0003DMG400013898M6LRR-RLP\_806

GATAAGCTTGAACACCTCAATCTTTCATCTAATTCATTTCAAGGTTCAATTGTCACCAAATTTTACCAAGTTG  
ACCAAGTTAAAAGAACTTCAGCTTGGTTCCAACATGTTTTCGGGCTTA

>M6-PGSC0003DMG400013898M6LRR-RLP\_868

TACCAAGTTGACCAAGTTAAAAGAACTTCAGCTTGGTTCCAACATGTTTTCGGGCTTAATTCCTGATGAA  
ATTTCTCTGATCAGCAGTCTTGAAGTAGTTGTACTTTTCAATAATTCACT

>M6-PGSC0003DMG400013898M6LRR-RLP\_930

CTGATGAAATTTCTCTGATCAGCAGTCTTGAAGTAGTTGTACTTTTCAATAATTCACTTCAAGGAAAGATT  
CCATCTTCTATAGGTAGACTTAGAAATCTTCAACAACCTGATCTTCGAA

>M6-PGSC0003DMG400013898M6LRR-RLP\_992

GGAAAGATTCCATCTTCTATAGGTAGACTTAGAAATCTTCAACAACCTGATCTTCGAAAGAATCGCTTGA  
ATTC AACATTCTTCTGAGCTAGGCCTTTGTACTAACCTCATTCTCTTG

>M6-PGSC0003DMG400013928M6OtherRLKTM\_1054

TTGTTAACGGGTCAGGTCCTTCGCCACCGTCAGTATCCCCACAGCCAACGCCAATGCCATCTCAGTGGAA  
TACGAGAAATGTGGCATTCTAGTGGTAGGTTGTGTTGGGTCCTTAATGA

>M6-PGSC0003DMG400013928M6OtherRLKTM\_1116

CAGTGAATACGAGAAATGTGGCATTCTAGTGGTAGGTTGTGTTGGGTCCTTAATGATGTTGAGTGT  
CTTGTTATAATGTTTCTCAAGCATTGCAAGATTAGAGGATGCAGAGTACAC

>M6-PGSC0003DMG400013928M6OtherRLKTM\_1178

GAGTGTCTTGTATAATGTTTCTCAAGCATTGCAAGATTAGAGGATGCAGAGTACACGACTCTGGCCGC  
CTTGATGAGGTCGGGACACCTCCACAGCAAGGCAGCCAGGCATCTCAAGT

>M6-PGSC0003DMG400013928M6OtherRLKTM\_124

CTTCTAATCAAACATTAGTTTGTGCATTGATTCCTCTCCTTATATCCCCAAGAATCATCTCTCAATTGTA  
CTAGTTTCCCTCAGGGTATTCAAATCCCTTTAAACCCTTCTGTTTCT

>M6-PGSC0003DMG400013928M6OtherRLKTM\_1240

CTGGCCGCCTTGATGAGGTCGGGACACCTCCACAGCAAGGCAGCCAGGCATCTCAAGTTCAAGATCAAT  
TAGGTCCTCAGCCATCAATCTTGAAAAAAGACCAAGTAAATTCCTTAGCA

>M6-PGSC0003DMG400013928M6OtherRLKTM\_1302

GATCAATTAGGTCCTCAGCCATCAATCTTGAAAAAAGACCAAGTAAATTCCTTAGCATGGGAAATGGG  
GGTCACTTAGAAGAATTTTCTTGCAAGTGTTACTTCTAGTGACGAATAAC

>M6-PGSC0003DMG400013928M6OtherRLKTM\_1364

AAATGGGGGTCACCTTAGAAGAATTTTCTTGCAAGTGTTACTTCTAGTGACGAATAACTTCTCCGAAGAG  
CACAAAATCGGGACAGGAAGTTTTGGATCTGTTTATCATGCTACATTAGA

>M6-PGSC0003DMG400013928M6OtherRLKTM\_1426

CCGAAGAGCACAAAATCGGGACAGGAAGTTTTGGATCTGTTTATCATGCTACATTAGATGACGGTCGCG  
AAGTAGCCATAAAAAGGGCAGAGGCTTCAGCCTCATCTTCTATGCTGGTG

>M6-PGSC0003DMG400013928M6OtherRLKTM\_1488

GGTCGCGAAGTAGCCATAAAAAGGGCAGAGGCTTCAGCCTCATCTTCTATGCTGGTGGTTCAAAGTAT  
AGACAAGAGGACAAAGACAGTGCATTCTCAATGAGCTAGACTTCTTGTC

>M6-PGSC0003DMG400013928M6OtherRLKTM\_1550

AAAGTATAGACAAGAGGACAAAGACAGTGCATTCTCAATGAGCTAGACTTCTGTACGACTCAATCA  
CAAGAACCTCGTTACGCTATTTGGCTATTGTGAAGATAACAACGAACGAGT

>M6-PGSC0003DMG400013928M6OtherRLKTM\_1612

TCAATCACAAGAACCTCGTTACGCTATTTGGCTATTGTGAAGATAACAACGAACGAGTCTTGGTTTTCGA  
GTACATGAACAATGGCACCTCCATGACCATCTCCACAAGCTTGAGACCT

>M6-PGSC0003DMG400013928M6OtherRLKTM\_1674

GTTTTCGAGTACATGAACAATGGCACCTCCATGACCATCTCCACAAGCTTGAGACCTCATCACTAATATC

ATGGACTGCTAGGATCAAGGTAGCATTGGACGCAGCCCGTGAATCGAG

>M6-PGSC0003DMG400013928M6OtherRLKTM\_1736

ACTAATATCATGGACTGCTAGGATCAAGGTAGCATTGGACGCAGCCCGTGAATCGAGTACCTCCACGA

ATACGCAGTCCCAGCTGTCATCCACCGAGACATCAAGTCATCCAACATATT

>M6-PGSC0003DMG400013928M6OtherRLKTM\_1798

TCCACGAATACGCAGTCCCAGCTGTCATCCACCGAGACATCAAGTCATCCAACATATTGCTCGACACCAA

TGGGAACGCCAAGGTGTCTGATTTTGGACTGTCCCTAATGGGACCACAAG

>M6-PGSC0003DMG400013928M6OtherRLKTM\_186

CTCAATTGTACTAGTTTCCCTCAGGGTATTCAAATCCCTTTAAACCCTTCTGTTTCCTTTACTGGAATTGTG

GGTGGAAATGGTTTCCTTTGTGGGTAAACCTCTTCTTCTAATTCAATC

>M6-PGSC0003DMG400013928M6OtherRLKTM\_1860

GACACCAATGGGAACGCCAAGGTGTCTGATTTTGGACTGTCCCTAATGGGACCACAAGAGGACGAATC

ACACCTTTCTTTGCGTGCAGCGGGGACGGTGGGTACATGGACCCTGAGTAC

>M6-PGSC0003DMG400013928M6OtherRLKTM\_1922

CGAATCACACCTTTCTTTGCGTGCAGCGGGGACGGTGGGTACATGGACCCTGAGTACTACAGATTGCA

ACAAGTACAAACAAAAGTGTGTGTATAGTTTTGGAGTAATGATGCTAGA

>M6-PGSC0003DMG400013928M6OtherRLKTM\_1984

GATTGCAACAACACTGACAACAAAAGTGTGTGTATAGTTTTGGAGTAATGATGCTAGAGTTGTTGTCAG

GTTACAAGGCGATTCAACAAGAATGAGAATGGTGTACCAAGGAATGTGGTTG

>M6-PGSC0003DMG400013928M6OtherRLKTM\_2046

TTGTCAGGTTACAAGGCGATTCAACAAGAATGAGAATGGTGTACCAAGGAATGTGGTTGATTTTGTCTGTG

CCATACATAGTACAAGATGAGATTCATAGAGTGTTGGATGGTAGAGTACCA

>M6-PGSC0003DMG400013928M6OtherRLKTM\_2108

TGTCGTGCCATACATAGTACAAGATGAGATTCATAGAGTGTTGGATGGTAGAGTACCACCACCAACACC

ATTTGAGATAGAGGCAGTGTTCATATGTAGGTTATCTTGCAGCTGATTGTAC

>M6-PGSC0003DMG400013928M6OtherRLKTM\_2170

CAACACCATTTGAGATAGAGGCAGTGTTCATATGTAGGTTATCTTGCAGCTGATTGTACTACATTAGAAGG

TAGAGATCGACCAACAATGACTGAAATTGTAATAACCTTGAAAGAGCCT

>M6-PGSC0003DMG400013928M6OtherRLKTM\_2232



TTAGAAGGTAGAGATCGACCAACAATGACTGAAATTGTAAATAACCTTGAAAGAGCCTTGCAAGCATGT  
TTGACATCTCCAAATTTCTCTCGATCCAACACCGATTCATCCACATAATCA

>M6-PGSC0003DMG400013928M6OtherRLKTM\_2294

AGCATGTTTGACATCTCCAAATTTCTCTCGATCCAACACCGATTCATCCACATAATCATATCATTACTTGGC  
TTTGGATTGTGTATATTGTAATTACAACATTTTTCTTATTTGTATTTA

>M6-PGSC0003DMG400013928M6OtherRLKTM\_2333

CGATTCATCCACATAATCATATCATTACTTGGCTTTGGATTGTGTATATTGTAATTACAACATTTTTCTTAT  
TTGTATTTAATCATTTTTCTCAAACCTTACACACCATTTCTTTCTTAA

>M6-PGSC0003DMG400013928M6OtherRLKTM\_248

TGGAATTGTGGGTGGAAATGGTTTCCTTTGTGGGTAACTCTTCTTAATTCAATCATGGTGTGTTGG  
AGGTTTTAGATAATGGGACTGATTTGAATTATAAAAGGGTTTATATTGG

>M6-PGSC0003DMG400013928M6OtherRLKTM\_310

TGTGTTGGAGTTTTAGATAATGGGACTGATTTGAATTATAAAAGGGTTTATATTGGCCATTGCTTAC  
AAATCTTGATTCTGGAAATCCCATGTTTGTGGAATTGTTAATGGAACCA

>M6-PGSC0003DMG400013928M6OtherRLKTM\_372

TTGCTTACAAATCTTGATTCTGGAAATCCCATGTTTGTGGAATTGTTAATGGAACCAATAGGCTTCAGTG  
TTGGCAGTGGCATGAATTCAGTTCATCAAATAACAGTTTGATAACTTCA

>M6-PGSC0003DMG400013928M6OtherRLKTM\_434

GCTTCAGTGTGGCAGTGGCATGAATTCAGTTCATCAAATAACAGTTTGATAACTTCAAATCTTGCTGTT  
GGAGAAGATTTTGTGGTGGTGGCCATCGGGTCAAATTCATGTCT

>M6-PGSC0003DMG400013928M6OtherRLKTM\_496

TTGCTGTTGGAGAAGATTTTGTGGTGGTGGCCATCGGGTCAAATTCATGTCTAGGAAGCTTTAG  
AAATGCTATTGATGTTGTTCTTCAGGGAATTACAGTGAAATTGCAGCTG

>M6-PGSC0003DMG400013928M6OtherRLKTM\_558

AGCTTTAGAAATGCTATTGATGTTGTTCTTCAGGGAATTACAGTGAAATTGCAGCTGGTTCTCAATACG  
CTTGTGCCATCTCCATGAATGGTAGTTGGCTTGTGGGGAAATATGGTA

>M6-PGSC0003DMG400013928M6OtherRLKTM\_62

TTTCATTTTTCCCTTTCTTCCAACCCATTTCTTCACTTTCCACTATTGCCATTTCCAAAACCTTCTAATCAAA  
CATTAGTTTGTGCATTGATTTCTTCTTATATCCCCAAGAATC

>M6-PGSC0003DMG400013928M6OtherRLKTM\_620

TCAATACGCTTGTGCCATCTCCATGAATGGTAGTTGGCTTGTGGGGAAATATGGTAGTAGAAAAGCCT  
GTTGACCAATTCAAGTCTCTTGCTTTAGGTGATACTAGGGGTTGTGGTTT

>M6-PGSC0003DMG400013928M6OtherRLKTM\_682

AAAAGCCTGTTGACCAATTCAAGTCTCTTGCTTTAGGTGATACTAGGGGTTGTGGTTTGAGGGTTAATGG  
GAAAGTGGTTTGCTGGGGTGAAAATGGTTTTAGTCTCCCTTCAACTTTGA

>M6-PGSC0003DMG400013928M6OtherRLKTM\_744

GTTAATGGGAAAGTGGTTTGCTGGGGTGAAAATGGTTTTAGTCTCCCTTCAACTTTGAGTGATATATCTT  
TTGAAACATTAGAAGCAAACGAGATATTTTTTGTGGCATTGCCACCTCA

>M6-PGSC0003DMG400013928M6OtherRLKTM\_806

TATATCTTTTGAAACATTAGAAGCAAACGAGATATTTTTTGTGGCATTGCCACCTCAAATTATTCATTGT  
TCTGTTGGGGAAATGAGATTTTCAATTCAAATCCAGTAGTCTTTGAAGA

>M6-PGSC0003DMG400013928M6OtherRLKTM\_868

ATTCATTGTTCTGTTGGGGAAATGAGATTTTCAATTCAAATCCAGTAGTCTTTGAAGAAGTTGTTCCAGG  
ACCATGTACCATGTCATGTCCTTGTGCACCTTTAGATAACTATGCTAGGT

>M6-PGSC0003DMG400013953-(rev)M6LRR-RLK\_1071

CATAACAAATGCTTCCAAGCTTCAGACACTGGCACTAAATGATAACTCTCTCAAAGGAACTATTCCTAAC  
AATTTGGGGAATCTTCGTGAGCTGCAAATACTGCTCCTACACACTAATCA

>M6-PGSC0003DMG400013953-(rev)M6LRR-RLK\_1134

TCCTAACAATTTGGGGAATCTTCGTGAGCTGCAAATACTGCTCCTACACACTAATCAACTTACCAATGAA  
CCAGGAAAGCATGCGTTGAAATTCTTCAATTCTTTGGCGAACTGTAGGAT

>M6-PGSC0003DMG400013953-(rev)M6LRR-RLK\_1197

CAATGAACCAGGAAAGCATGCGTTGAAATTCTTCAATTCTTTGGCGAACTGTAGGATGTTGAGATATCTA  
GAAGTGGGTAACAATCCGTTGAGTGGAGTTCTGCCAAATTCTATTGGGAA

>M6-PGSC0003DMG400013953-(rev)M6LRR-RLK\_1260

ATATCTAGAAGTGGGTAACAATCCGTTGAGTGGAGTTCTGCCAAATTCTATTGGGAATCTCTCATCTACT  
ATTGAAAAAATTATTTAGCAGATGCACACATCAATGGCCTCATCCCCAC

>M6-PGSC0003DMG400013953-(rev)M6LRR-RLK\_1386

AGGCAACATGACCGGTCTTACATCCTTAAGCCTTGGCGGAAACAACCTTGACAGGGAATATTCCTTCTGA

GATTGGTAAGCTTAAACAACCTCCAAGGACTCGATCTATCTAACAATAAATT

>M6-PGSC0003DMG400013953-(rev)M6LRR-RLK\_1449

TTCTGAGATTGGTAAGCTTAAACAACCTCCAAGGACTCGATCTATCTAACAATAAATTGCAAGGACATATT  
CCAGAAGTGGTATGCAATTTGTCTGATTTGGTTCAATTATATCTGTATGG

>M6-PGSC0003DMG400013953-(rev)M6LRR-RLK\_1512

ACATATTCCAGAAGTGGTATGCAATTTGTCTGATTTGGTTCAATTATATCTGTATGGTAATGAGCTCTCTG  
GATTAATTCCAGAATGCTTAGGAAATCTTACCATGCTTCAACAACCTTTA

>M6-PGSC0003DMG400013953-(rev)M6LRR-RLK\_1575

GCTCTCTGGATTAATTCCAGAATGCTTAGGAAATCTTACCATGCTTCAACAACCTTTATTTGGCTTCTAATA  
AATTTTCATCAAAATTTCCATTGACCCTTTGGAAAATGAGTGGTCTTCT

>M6-PGSC0003DMG400013953-(rev)M6LRR-RLK\_1638

TTCTAATAAATTTTCATCAAAATTTCCATTGACCCTTTGGAAAATGAGTGGTCTTCTCTATCTAAACGTGTC  
ACAGAATTCAATAGAGGGAGAACCTCCATCAGATATTGGAGGACTGAA

>M6-PGSC0003DMG400013953-(rev)M6LRR-RLK\_1701

AAACGTGTCACAGAATTCAATAGAGGGAGAACCTCCATCAGATATTGGAGGACTGAAAGCCATTGTAGA  
ACTATATCTTTCTGGTAACCACTTTTCAGGCATGATATCAACCAGATTCGG

>M6-PGSC0003DMG400013953-(rev)M6LRR-RLK\_1764

TGTAGAACTATATCTTTCTGGTAACCACTTTTCAGGCATGATATCAACCAGATTCGGGGAACTCCAAAAT  
CTGCAGTATCTCGACCTATCGAAAAATTCATTTTTTTGGCCGAATTCCATT

>M6-PGSC0003DMG400013953-(rev)M6LRR-RLK\_1827

CCAAAATCTGCAGTATCTCGACCTATCGAAAAATTCATTTTTTTGGCCGAATTCCATTATCCTTTGCCAACTT  
GATAAACTTGGAAATTCTTGAATTTGTCTTTAAATGCATTGTCAGGTAC

>M6-PGSC0003DMG400013953-(rev)M6LRR-RLK\_1890

TGCCAACTTGATAAACTTGGAAATTCTTGAATTTGTCTTTAAATGCATTGTCAGGTAATTCCTAAGTCTTT  
GGAAAACTCTCATACCTTAAAAGCATTAAATGTTTCATTTAATGATTT

>M6-PGSC0003DMG400013953-(rev)M6LRR-RLK\_315

TAGCCTCACGGGTATAATCCCTCCTTATGTTGGAAATGCCACAAAATTGATGAACATCAATTTGTCTGGG  
AATAGAATCAATGATAACATTCCAATGGAGATCAGTAATCTTAGCCAACT

>M6-PGSC0003DMG400013953-(rev)M6LRR-RLK\_378

GTCTGGGAATAGAATCAATGATAACATTCCAATGGAGATCAGTAATCTTAGCCAACCTGCATTTTTGTCC  
TTGTTCAATAATCAATTAACAGGTTCCATTCTCCAACACTGTTTAATAT

>M6-PGSC0003DMG400013953-(rev)M6LRR-RLK\_441

TTTGTCTTGTTCAATAATCAATTAACAGGTTCCATTCTCCAACACTGTTTAATATCTCGTCACTACTTGG  
CATATATCTGTCATTCAATGGCCTTTCTGGTCCTCTCTTGCTAGATGA

>M6-PGSC0003DMG400013953-(rev)M6LRR-RLK\_504

ACTACTGGCATATATCTGTCATTCAATGGCCTTTCTGGTCCTCTCTTGCTAGATGAAGGGAATATTGTGT  
CAAATCTGAAGCATTAAAGTATGTCTAACAACCAAATTTCTGGTTGCAT

>M6-PGSC0003DMG400013953-(rev)M6LRR-RLK\_567

TATTGTGTCAAATCTGAAGCATTAAAGTATGTCTAACAACCAAATTTCTGGTTGCATTCCTCCAACATAT  
GCCAACTCACAGAGCTCAAACCTTTGTCCATATCTTTCAACAATATAAC

>M6-PGSC0003DMG400013953-(rev)M6LRR-RLK\_630

CAACATATGCCAACTCACAGAGCTCAAACCTTTGTCCATATCTTTCAACAATATAACTGGAGACATACCTA  
GAAATATTGGTTGTTTATCCAAACTCGAAAGGTTTTATATTGGTGAAAA

>M6-PGSC0003DMG400013953-(rev)M6LRR-RLK\_693

CATACCTAGAAATATTGGTTGTTTATCCAAACTCGAAAGGTTTTATATTGGTGAAAATCCAATAGAAGGG  
ACTATTCCCCTTCATTGGGAAATATTTCTACTCTGCAATATCTTGATTG

>M6-PGSC0003DMG400013953-(rev)M6LRR-RLK\_756

AGAAGGGACTATCCCCTTCATTGGGAAATATTTCTACTCTGCAATATCTTGATTGTGTAGACAATTGG  
ATGAAGGGGCAAATTCCTCAAGAATTAGGGAAGCTATCAAATTTGAGGGA

>M6-PGSC0003DMG400013953-(rev)M6LRR-RLK\_819

CAATTGGATGAAGGGGCAAATTCCTCAAGAATTAGGGAAGCTATCAAATTTGAGGGAATTAAGCTTTGC  
CAATAATTCTAATCTTATTGGTCAAATTCAGAGGCTATTTTCAACATATC

>M6-PGSC0003DMG400013953-(rev)M6LRR-RLK\_882

CTTTGCCAATAATTCTAATCTTATTGGTCAAATTCAGAGGCTATTTTCAACATATCTTCTTTGGAAGTGAT  
CAATTTTAGTTTGAATAACCTCTCGGGGAGAATCCAACCACTACAGG

>M6-PGSC0003DMG400013955-(rev)M6LRR-RLP\_124

TGTCACGTTTCGATTTTCTTCTAAAGAAAAGATTAATAATTTCTCCATTTTGTGCTAATTAGTGAATGTGTG  
TTGTGTAACACAGACTTATAAGGTTGACTCCTATTGACTTGCTCTTAAC

>M6-PGSC0003DMG400013955-(rev)M6LRR-RLP\_186

GAATGTGTGTTGTGTAACACAGACTTATAAGGTTGACTCCTATTGACTTGCTCTTAACAATATAATGAAA  
ATTTAGCAACAATTATTCTTTCTATTATGACTTTTATTTTCGTTTTGTGAA

>M6-PGSC0003DMG400013955-(rev)M6LRR-RLP\_248

TAATGAAAATTTAGCAACAATTATTCTTTCTATTATGACTTTTATTTTCGTTTTGTGAAACACAACCCAAATA  
ATGTTTTTTTTCTTTTTGCTACTTATTTTCCTCCTTTTAATCTGTTTT

>M6-PGSC0003DMG400013955-(rev)M6LRR-RLP\_2728

TCTATGTGGAGTGCACATATTAGAGATTCTGCTTGTGCTATCACTAATCCTGGAAAACAATCAAAGCTT  
AAGGAGGTTATGCTAAAAATTGTTACTCCAGTGGTTATTGCATCCTTTAT

>M6-PGSC0003DMG400013955-(rev)M6LRR-RLP\_2852

TTCTTGTTTCGTTTCAATTTGGATAATGAAACGACAGAAGAAAGGGAAGTCCAAAGATGTGGAAAAGATA  
CCGGAGATGGGGACTCATCAATTAGTTTCTTATCACGAGATTCAACGAGCA

>M6-PGSC0003DMG400013955-(rev)M6LRR-RLP\_310

AACCCAAATAATGTTTTTTTTCTTTTTGCTACTTATTTTCCTCCTTTTAATCTGTTTTCACATTTTATTTGTTTT  
AGTGCTATATATATAGTGGAGTAACTTTGGTCACTGGAAATACAA

>M6-PGSC0003DMG400013955-(rev)M6LRR-RLP\_3116

TGTGAAGTGATGAGAAATGTTAGACACAGAAATCTTGTTACAGTGATTACTACATGTTCTAGTGACTATA  
TAAGAGCCTTTGTTCTGCGATATATGCCCAATGGGAGTCTTGAGAATTGG

>M6-PGSC0003DMG400013955-(rev)M6LRR-RLP\_372

TTTTATTTGTTTTAGTGCTATATATATAGTGGAGTAACTTTGGTCACTGGAAATACAACACACAAGTTAAT  
ATGGAGAAGCACATCTTCTTATTGATTCTTCTCTTTCTAATTCAATTTT

>M6-PGSC0003DMG400013955-(rev)M6LRR-RLP\_434

CAAGTTAATATGGAGAAGCACATCTTCTTATTGATTCTTCTCTTTCTAATTCAATTTTCTATATCACTTGCTT  
CCTCTAATGAGACTGACCAACAAGCTCTGTTAGCTTTCCAAAATCTT

>M6-PGSC0003DMG400013955-(rev)M6LRR-RLP\_496

ATCACTTGCTTCTCTAATGAGACTGACCAACAAGCTCTGTTAGCTTTCCAAAATCTTATTACAAGTCCTA  
ATCATTTTTTTGGCCAATAATTGGACCAAAAATACTTCTTTTTGCACTTG

>M6-PGSC0003DMG400013955-(rev)M6LRR-RLP\_62

ATTTTATTTTTATTTAAAAAAAAGTGAAACCACACGTGACAACGTGTGTAGTATAGTGC GTGTCACGT

TCGATTTTCTTCTAAAGAAAAGATTA AAAATTTCTTCCATTTTGTGCTAAT

>M6-PGSC0003DMG400013955-(rev)M6LRR-RLP\_868

TCAAGTAATTTCAATGGCTTTCAATGAACTCGGTGGTCAAATGTGGAGAGGCCCATGGTATGTACCAGA  
ACTCAGAGTCTTAAATCTCGGGAACAATAGCCTCACGGGTATAATCCCTCC

>M6-PGSC0003DMG400013955-(rev)M6LRR-RLP\_930

TACCAGAACTCAGAGTCTTAAATCTCGGGAACAATAGCCTCACGGGTATAATCCCTCCTTATGTTGGAAA  
TGCCACAAAATTGATGAACATCAATTTGTCTGGGAATAGAATCAATGATA

>M6-PGSC0003DMG400013956-(rev)M6LRR-RLK\_256

CCATGGCTTATACAGAGACATTGGGCACTCTTGGATATATTGCACCAGGTAAAAGAAAATCTACTCTCAT  
TGATTTTCTCTTATCATAATTAAGCCTCTCCAAGTTGTAGAAGTAAAAAG

>M6-PGSC0003DMG400013956-(rev)M6LRR-RLK\_320

TCTCATTGATTTTCTTATCATAATTAAGCCTCTCCAAGTTGTAGAAGTAAAAGAGAATTATTGTTGTA  
TTTCAATTGAATTA ACTTTTTTTTAAATCCTTTTTTAAGAATATGGCTC

>M6-PGSC0003DMG400013989-(rev)M6OtherRLKTM\_0

TTGTTGATTCAAATGGAGAAAAAAGGAAATGTACTGATGCAAAAATATGATTTGAGGAGATTATTAGGT  
CAAGGCAACTTTGCTAAGGTTTATTACGGAAGGAATCTTGAAACGGGACAG

>M6-PGSC0003DMG400013989-(rev)M6OtherRLKTM\_1040

GCAATTCATTTCCGCGAAGCCTGCCTCTTCTATCATATCCAACTTGAGGAAGTTGGCAGGAATCTAAAG  
CTGGAAGTAATGAAGAAAGAAGCTGGATCTATGAGATTAGAGGGATCGGG

>M6-PGSC0003DMG400013989-(rev)M6OtherRLKTM\_1105

TAAAGCTGGAAGTAATGAAGAAAGAAGCTGGATCTATGAGATTAGAGGGATCGGGTGAAGGTAGATA  
CGGGACTTTGTCCATCGATACTGAAATATCTGAAATTACTCCGTCCTTCCACT

>M6-PGSC0003DMG400013989-(rev)M6OtherRLKTM\_1170

TACGGGACTTTGTCCATCGATACTGAAATATCTGAAATTACTCCGTCCTTCCACTTGGTTGAGCTGAAAA  
AGTCATATGGTGATAAGGTAGAGTACCAAAGATGCTGAAACAAGTTATA

>M6-PGSC0003DMG400013989-(rev)M6OtherRLKTM\_1217

CTTCCACTTGGTTGAGCTGAAAAAGTCATATGGTGATAAGGTAGAGTACCAAAGATGCTGAAACAAGT  
TATAAGACCTGCTCTGGAGGAAATTGTTTGGGCTTGGCAAGGCGAGCAGCC

>M6-PGSC0003DMG400013989-(rev)M6OtherRLKTM\_130

TTAAGGTAATTGACAAAGAGAAGGTTCTTAAGGCCGGACTGATTGAACAAACGAAGAGAGAGATATCT  
GTTATGGCACTAGTTGAACATCCAAATGTTCTACAGCTATACGAGGTCATGG

>M6-PGSC0003DMG400013989-(rev)M6OtherRLKTM\_195

TCTGTTATGGCACTAGTTGAACATCCAAATGTTCTACAGCTATACGAGGTCATGGCAACTAAATCTAAGA  
TTTATTTAGTCATTGAACATGCCAAAGGCGGTGAGCTTTTCAAAAAGTTG

>M6-PGSC0003DMG400013989-(rev)M6OtherRLKTM\_260

TAAGATTTATTTAGTCATTGAACATGCCAAAGGCGGTGAGCTTTTCAAAAAGTTGACAAAGGGGAGGCT  
CAAGGAAAAATTAGCTAGGAAGTACTTTCAGCAATTGATTAGCGCTGTTGA

>M6-PGSC0003DMG400013989-(rev)M6OtherRLKTM\_325

GGCTCAAGGAAAAATTAGCTAGGAAGTACTTTCAGCAATTGATTAGCGCTGTTGAATGTTGCCACAGTC  
GAGATGTTTATCACCGTGATCTGAAACCAGAAAATGTGCTTCTAGATGAGA

>M6-PGSC0003DMG400013989-(rev)M6OtherRLKTM\_390

AGTCGAGATGTTTATCACCGTGATCTGAAACCAGAAAATGTGCTTCTAGATGAGAATGGAAATCTTAAG  
GTATCAGACTTTGGATTAAGCGCCCTGGCTGAATCTAAGAGGCAGGATGGC

>M6-PGSC0003DMG400013989-(rev)M6OtherRLKTM\_455

TAAGGTATCAGACTTTGGATTAAGCGCCCTGGCTGAATCTAAGAGGCAGGATGGCTTACTCCACACAAC  
ATGTGGAACCCAGCTTACGTTGCACCTGAGGTGATCAGTCGAAAAGGATA

>M6-PGSC0003DMG400013989-(rev)M6OtherRLKTM\_520

CAACATGTGGAACCCAGCTTACGTTGCACCTGAGGTGATCAGTCGAAAAGGATATGACGGTGCCAAA  
GCTGATATCTGGTCTTGTGGGGTGATCTTATTTGTTTTGCTAGCCGGTTATC

>M6-PGSC0003DMG400013989-(rev)M6OtherRLKTM\_585

AAAGCTGATATCTGGTCTTGTGGGGTGATCTTATTTGTTTTGCTAGCCGGTTATCTTCCATTCCAAGACTC  
AAATCTTATGGAGATTTATAGGAAGATAAAGCAAGCTGAGTTCAAATGT

>M6-PGSC0003DMG400013989-(rev)M6OtherRLKTM\_65

AGGTCAAGGCAACTTTGCTAAGGTTTATTACGGAAGGAATCTTGAAACGGGACAGAGTGTAGCCATTAA  
GGTAATTGACAAAGAGAAGGTTCTTAAGGCCGGACTGATTGAACAAACGAA

>M6-PGSC0003DMG400013989-(rev)M6OtherRLKTM\_650

AGACTCAAATCTTATGGAGATTTATAGGAAGATAAAGCAAGCTGAGTTCAAATGTCCAAATTGGTTCCCA  
CCAGAAGTGCGGAAATTACTTTCTAAAATCCTTGATCCAAACCCTCGTAC

>M6-PGSC0003DMG400013989-(rev)M6OtherRLKTM\_715

TCCCACCAGAAGTGCGGAAATTACTTTCTAAAATCCTTGATCCAAACCCTCGTACAAGGATTTCCATAGC  
AAAGATAAAGGAAAGCTCATGGTTCAAGAAAGGTTTGGAGTCTAGAAACG

>M6-PGSC0003DMG400013989-(rev)M6OtherRLKTM\_780

ATAGCAAAGATAAAGGAAAGCTCATGGTTCAAGAAAGGTTTGGAGTCTAGAAACGCGGTAACCAAAGT  
AGAAGAAAAGGAAAAGTTTAGCCTAGACGCCAACGCTACTATTCAAGATTGT

>M6-PGSC0003DMG400013989-(rev)M6OtherRLKTM\_845

AGTAGAAGAAAAGGAAAAGTTTAGCCTAGACGCCAACGCTACTATTCAAGATTGTACACATAACAGTAT  
CTCTCCCTCTGAGTCAAAGCTAGAGTTGCTAAAACCGTCAAATCTAAATGC

>M6-PGSC0003DMG400013989-(rev)M6OtherRLKTM\_910

GTATCTCTCCCTCTGAGTCAAAGCTAGAGTTGCTAAAACCGTCAAATCTAAATGCATTTGATATAATCTCT  
CTTTCAAGTGGATTTGACTTGTCCGGTTTATTCATAACAAAGGATCAGA

>M6-PGSC0003DMG400013989-(rev)M6OtherRLKTM\_975

ATCTCTCTTTCAAGTGGATTTGACTTGTCCGGTTTATTCATAACAAAGGATCAGAAGGAAGACTTGCAAT  
TCATTTCCGCGAAGCCTGCCTCTTCTATCATATCCAACTTGAGGAAGTT

>M6-PGSC0003DMG400014060-(rev)M6RLKWAX-EGF\_0

TAGAAATTTAACTCATCGTCGGACAACCTGGTTCATGGTGGCGACAGGTAACCTCATCTTCTTTTTCTTCT  
CTGTAAGTGGCACTGCAGTTTCGTAGATACCATTGCTTCCCTTTTGCTC

>M6-PGSC0003DMG400014060-(rev)M6RLKWAX-EGF\_1071

TGATGTTGGAGTTGATCGCACAAAGTAAAATCTACTTTCCACATTGGCTCTATCAGCGAATTGAACTAAGT  
GAAGAGCTTCAACTCCCTGGAATAATGAATGAAGAGGAGAATGAATGTGC

>M6-PGSC0003DMG400014060-(rev)M6RLKWAX-EGF\_1134

ACTAAGTGAAGAGCTTCAACTCCCTGGAATAATGAATGAAGAGGAGAATGAATGTGCAAGAAAGATGG  
TTATAGCAAGTTTATGGTGCATACAGACTGATCCCTCAAATCGACCATCGAT

>M6-PGSC0003DMG400014060-(rev)M6RLKWAX-EGF\_1258

AAGGTTGTGGAATGTTAGAAGGGAAACTAGACTCTTTACAAATGCCTCCAAGCCTTACCTATATTCTC  
CCTCAAGAACTGAGGTAGATTCATCAGTACTAGAGCTGGCCTAGTCTTAA

>M6-PGSC0003DMG400014060-(rev)M6RLKWAX-EGF\_126

CTTGATTTCTTGTCTCTGTACGTATCTTCTATATGAATTGTCCAAAACACAGACTGTTCCCAAATAGTTC



ATAGAACTTCCAGACTGAATTTAATTTATATTCTCTGATGGTGCATGA

>M6-PGSC0003DMG400014060-(rev)M6RLKWAX-EGF\_189

AAATAGTTCATAGAACTTCCAGACTGAATTTAATTTATATTCTCTGATGGTGCATGACTTCATTTTGCTTTC  
CACAGGTGCAGTTTTGTTTACAGTTGGACTGTTGGTTTTACTCTTCTG

>M6-PGSC0003DMG400014060-(rev)M6RLKWAX-EGF\_315

AGAGAAGATTTTGTGGTACAAATGCCTCAGGTTTTGGGAATCTAATGCTGAGGATCACCAAAAAGTTGA  
AGAATTCTTAAAGAACTATGGATCATATGCTCTAAACAGATACAATTATAC

>M6-PGSC0003DMG400014060-(rev)M6RLKWAX-EGF\_378

AGTTGAAGAATTCTTAAAGAACTATGGATCATATGCTCTAAACAGATACAATTATACAGACATCAAAAAA  
ATCACCAGTCACTTCAGAAGCAAAGTAGGCCAAGGAGGATTTGGTAATGT

>M6-PGSC0003DMG400014060-(rev)M6RLKWAX-EGF\_504

AGGAAGTTTGCCTAACGGGAGTCAAGTGGCAGTGAAGATCCTGAATAAACTAAAAGGCAGTGGTGAAG  
ATTTTATTAACGAGGTGGCAAGTATTAGCAGGACATCGCATGTAAACATCGT

>M6-PGSC0003DMG400014060-(rev)M6RLKWAX-EGF\_567

TGAAGATTTTATTAACGAGGTGGCAAGTATTAGCAGGACATCGCATGTAAACATCGTGAGCCTTGTGGG  
ATTTTGTGGTGGAGGGTCACAAAAGAGCTCTCATATATGAGTTCATGCCAAA

>M6-PGSC0003DMG400014060-(rev)M6RLKWAX-EGF\_63

TTTCTTCTCTGTAAGTGGCACTGCAGTTTCGTAGATACCATTGCTTCCCTTTTGCTCTTTGACTTGTATTTT  
TTGTCTCTGTACGTATCTTCTATATGAATTGTCCAAAACACAGACTG

>M6-PGSC0003DMG400014060-(rev)M6RLKWAX-EGF\_630

TGTGGGATTTTGTGGTGGAGGGTCACAAAAGAGCTCTCATATATGAGTTCATGCCAAATGGATCTCTTGAA  
AAGTTTATCTATGAGGAAAGATCCAACAGTGTTCGCCAATTGGGTTGGCC

>M6-PGSC0003DMG400014060-(rev)M6RLKWAX-EGF\_693

TCTTGAAAAGTTTATCTATGAGGAAAGATCCAACAGTGTTCGCCAATTGGGTTGGCCAATACTGTACAAA  
ATCACACTAGGCATTGCTCGAGGATTGGAGTACTTGCACCGTGGTTGTAA

>M6-PGSC0003DMG400014060-(rev)M6RLKWAX-EGF\_882

CTCTGACTTTGGTCTAGCCAACTGTGCATGAAAAAGGAGAGCATTGTGTCAATGCTAGGTGCACGAGG  
AACAAATCGGTTATATTGCTCCAGAAATTGTTTGCAGAACTTGGGAGGTAT

>M6-PGSC0003DMG400014064M6RLKWAX-EGF\_0

AATGGTTGTGTTTCTGATATCAAGAACGTGCTACTCGATCATAGTGCTTTTAAGTTTGTCAAGGAATCAA  
GAATTTACTTTTTGTCAAAGTGTAATGGATCGATATCTGAGGATCTTTTG

>M6-PGSC0003DMG400014064M6RLKWAX-EGF\_1054

AATTGGAACCATAAGTTATCTTTTCCACCTCATGTTCTATTTTGAGTAGACAACAATATTACTTTGTACAT  
TCAAATGCACAAATAACAGTATGCGGATTGATAGTTATTTTCAAAGTT

>M6-PGSC0003DMG400014064M6RLKWAX-EGF\_1116

CTTTGTACATTCAAATGCACAAATAACAGTATGCGGATTGATAGTTATTTTCAAAGTTATAAGAACTACTC  
GAGTTGTGATGCCTTTAGCTTTTAGTGTGCATAAACCAAGAATTGATCGA

>M6-PGSC0003DMG400014064M6RLKWAX-EGF\_1178

GAACTACTCGAGTTGTGATGCCTTTAGCTTTTAGTGTGCATAAACCAAGAATTGATCGAAGCCATAGTATT  
CAAGCTAGTGATCTTCCTGCAAATTCATCGTTCACCTTCAGAACCAAATT

>M6-PGSC0003DMG400014064M6RLKWAX-EGF\_1240

ATAGTATTCAAGCTAGTGATCTTCCTGCAAATTCATCGTTCACCTTCAGAACCAAATTCTACTGATTTGTTT  
GATCTATTGACTCCTAGTTTCACATTAGATTGGGAATTGTCGTTAAAT

>M6-PGSC0003DMG400014064M6RLKWAX-EGF\_1302

TGATTTGTTTGATCTATTGACTCCTAGTTTCACATTAGATTGGGAATTGTCGTTAAATTATTCCAGCTGTCT  
TCATAGAGAAGGGCGATACCAAAGTGACATCGAAAACAACCTCTTTTA

>M6-PGSC0003DMG400014064M6RLKWAX-EGF\_1364

CCAGCTGTCTTCATAGAGAAGGGCGATACCAAAGTGACATCGAAAACAACCTCTTTTACTCCAGAGGTAT  
TGGATATAAGAAGCTTGTCTGTTGCTTGTGTATGTCTGGTTTCATTTTTG

>M6-PGSC0003DMG400014064M6RLKWAX-EGF\_1426

AGAGGTATTGGATATAAGAAGCTTGTCTGTTGCTTGTGTATGTCTGGTTTCATTTTTGGAAAGGATTTAG  
ATGTGTGTTGGTTGGTTCAATCCAAGATGTTTAATATGTCAACGTGAACG

>M6-PGSC0003DMG400014064M6RLKWAX-EGF\_1488

GGATTTAGATGTGTGTTGGTTGGTTCAATCCAAGATGTTTAATATGTCAACGTGAACGGAAGTGAATTGC  
TTTCACTCTTATTGTGACTAATTAATCTTTCAATTTCTGTGTATTTGCAGA

>M6-PGSC0003DMG400014064M6RLKWAX-EGF\_1550

TGAATTGCTTTCACTCTTATTGTGACTAATTAATCTTTCAATTTCTGTGTATTTGCAGAAGCAAAAAGAAATT  
TGGGACTGATACTAGGCACAGGTACATGTCTGTTATCTGTAATTAGAC

>M6-PGSC0003DMG400014064M6RLKWAX-EGF\_1612

AAAAGAAATTTGGGACTGATACTAGGCACAGGTACATGTCTGTTATCTGTAATTAGACTTGCACAAAATC  
TCCTATTGCCTTGCAAATGTTGAAATTGTTGTGTTGCCTCAAACCAGGA

>M6-PGSC0003DMG400014064M6RLKWAX-EGF\_1674

ACAAAATCTCCTATTGCCTTGCAAATGTTGAAATTGTTGTGTTGCCTCAAACCAGGATCTTTCTGGAGCA  
TGACTTTCCTTTTTTCCCCACATTTGCAGTTTTCTTGCATCGGAGT

>M6-PGSC0003DMG400014064M6RLKWAX-EGF\_1798

ATTTTGCTCTTCTGCTTGAGAAAAAGATTTTCTGGCACAAAATATCAGGTTTTGGGAATCTATAGCTG  
AGGATCACCGAAATATTGAAGCATTCTGAAGAACTTTGGGTCATATGCT

>M6-PGSC0003DMG400014064M6RLKWAX-EGF\_186

GAGGATGAAAGCTTTGAGTCTGCATTACAAATGTGTAATAATCATGTAATGGTACCAGTAGAAATGCTT  
GGAAATGAAGGGAGTAATCGAGTTATTGACTATCAAGTGCTACTGAGAAGG

>M6-PGSC0003DMG400014064M6RLKWAX-EGF\_1860

TATAGCTGAGGATCACCGAAATATTGAAGCATTCTGAAGAACTTTGGGTCATATGCTCCAAAAGATAAC  
AGCTATACAGACATCAAGCGAATCACCAATCACTTTAAAACAAACTAGG

>M6-PGSC0003DMG400014064M6RLKWAX-EGF\_1922

AAAGATACAGCTATACAGACATCAAGCGAATCACCAATCACTTTAAAACAAACTAGGTCAAGGAGGAT  
TTGGTAATGTATACAGAGGAAGTTTGTGTAACGGGAGTCAAGTGGCAGTAA

>M6-PGSC0003DMG400014064M6RLKWAX-EGF\_2046

CCTGAATGAACTAAAAGGCAGTGGTGAGATTTTATTAAACGAAGTGGCAAGTATTAGCAGAACATCACAT  
GTTAACATCGTGAGCCTTGTGGGATTTTGTGTTTGGAGGGTCACAAAAGAGCT

>M6-PGSC0003DMG400014064M6RLKWAX-EGF\_2108

ATCACATGTTAACATCGTGAGCCTTGTGGGATTTTGTGTTTGGAGGGTCACAAAAGAGCTCTTTTATATGAG  
TTCATGCCAAATGGATCTCTTGAAAAGTTTATTTATGAGGAAATATCTGA

>M6-PGSC0003DMG400014064M6RLKWAX-EGF\_2170

TATATGAGTTCATGCCAAATGGATCTCTTGAAAAGTTTATTTATGAGGAAATATCTGACGGAGTTCGCCA  
ATTAGGCTGGCAAATATTGTATGAAATTGCATTAGGCATTGCTCGAGGAT

>M6-PGSC0003DMG400014064M6RLKWAX-EGF\_248

AATGCTTGGAAATGAAGGGAGTAATCGAGTTATTGACTATCAAGTGCTACTGAGAAGGGGGTTTAGATT

GAGCTGGATATCAAGTAACTGCAGTGACTGTGCAGAAAGTGGAGGACGTTG

>M6-PGSC0003DMG400014064M6RLKWAX-EGF\_2666

AATGAATGAAGAGGAGAACGAATGTGCAAGAAAGATGGTGATAGCAAGTTTGTGGTGCATACAGACTG  
ATCCTGCAAATCAACCATCAATGAGCAAGGTTGTGGAAATGTTAGAAGGGAA

>M6-PGSC0003DMG400014064M6RLKWAX-EGF\_2976

TTTTTCGATAGACTCTCTATGCCATGGAACAAAAGCGATTAATTCGTCCATCATTCCCAAGAATGTCAAC  
AATTTTGTACAATTCTTTCTGATTTCTTCTTCATCTCTTAGTTGAGTG

>M6-PGSC0003DMG400014064M6RLKWAX-EGF\_3038

AATGTCAACAATTTTGTACAATTCTTTCTGATTTCTTCTTCATCTCTTAGTTGAGTGTTTTATTACAGCATTG  
ACATCAGAGCTTACTATATTGGTTCTGTCAAATGAAAAGTGTTCTCA

>M6-PGSC0003DMG400014064M6RLKWAX-EGF\_310

TTAGATTGAGCTGGATATCAAGTAACTGCAGTGACTGTGCAGAAAGTGGAGGACGTTGCGGATTTGAT  
GTTAACAATTATCAATTCAAATGTTTCTGCACTGACAGGCCTCATGCTTCGA

>M6-PGSC0003DMG400014064M6RLKWAX-EGF\_372

TTTGATGTTAACAATTATCAATTCAAATGTTTCTGCACTGACAGGCCTCATGCTTCGAGTTGCCACCTAC  
CAGTAAGGCCCTATCTAGCAGTTAATTTCCAGTATAATTATGCGGAAC

>M6-PGSC0003DMG400014064M6RLKWAX-EGF\_434

CCCACCTACCAGTAAGGCCCTATCTAGCAGTTAATTTCCAGTATAATTATGCGGAACCTCATCTTATGAT  
TAGGCACCGTGCTTTAGGTTCTTTTCTTGTGATTATCAAGCGCACAAAA

>M6-PGSC0003DMG400014064M6RLKWAX-EGF\_496

TCTTATGATTAGGCACCGTGCTTTAGGTTCTTTTCTTGTGATTATCAAGCGCACAAAAAAGTATCGTTTGA  
TGATCTAGGCATCAAGATGCAGCTGCATTAAGCATTGGATTATGTGTT

>M6-PGSC0003DMG400014064M6RLKWAX-EGF\_558

ATCGTTTGTGATCTAGGCATCAAGATGCAGCTGCATTAAGCATTGGATTATGTGTTAACCACAAAATT  
TTGTGCAGCCAACTTTTAAAAAAGAAGGTAATATAAAAATTGGTGGTA

>M6-PGSC0003DMG400014064M6RLKWAX-EGF\_62

GGAATCAAGAATTTACTTTTTGTCAAAGTGTAATGGATCGATATCTGAGGATCTTTTGAAGCACAGGATT  
GGTTTTGGTTGTGGTGGAGAAAATGGGAATGATTGGGGTCTTGCAATGTT

>M6-PGSC0003DMG400014064M6RLKWAX-EGF\_620

ACAAAATTTTGTGCAGCCAACCTTTTAAAAAAGAAGGTAAATATAAAAATTGGTGGTAGGGGAAGGGG  
AAATGCGGGAGGGGATTACAAGATGGGGGATCGAACACCAACAAGGTGAAAC

>M6-PGSC0003DMG400014064M6RLKWAX-EGF\_744

GGTAGCCAACCAATTGAGGTACGAAGATTTCCCTGTGCAGCCAAGTTAATATTCTCGTAGCAGCTAATTA  
CTTCTCTGATGAATGGTGTCTGTCTGCTTAATTACCATGCATTTTCAGG

>M6-PGSC0003DMG400014064M6RLKWAX-EGF\_806

GCTAATACTTCTCTGATGAATGGTGTCTGTCTGCTTAATTACCATGCATTTTCAGGGTTTGACCTCTTG  
TCCTGTTAACCTGTGGTTATGCCAGCAGTATTTTCTGTTTGTATTG

>M6-PGSC0003DMG400014064M6RLKWAX-EGF\_868

GACCTCTTGTCTGTTAACCTGTGGTTATGCCAGCAGTATTTTCTGTTTGTATTGTTGAAGTTTAGAG  
TTAGACCAATGACTGCAGCCTCCTTTTCTGCTATGTTCTCTATGTTTCA

>M6-PGSC0003DMG400014064M6RLKWAX-EGF\_930

AGTTTAGAGTTAGACCAATGACTGCAGCCTCCTTTTCTGCTATGTTCTCTATGTTTCATCGGCATATCTTCA  
ACTTAGTTCAATTAGAGAGTAAATCTTGTCCAAAAGAGTTTCGTTGTG

>M6-PGSC0003DMG400014064M6RLKWAX-EGF\_992

CATATCTTCAACTTAGTTCAATTAGAGAGTAAATCTTGTCCAAAAGAGTTTCGTTGTGGAAGAATTGGAA  
CCATAAGTTATCTTTTCCACCTCATGTTCTATTTTGTAGTAGACAACAAT

>M6-PGSC0003DMG400014281-(rev)M6LRR-RLK\_0

AAGCCAAAGGAGCATCTGAGTATCAACATTGCAACCTTTGAGCAGTCTTTGTTACGGATTAACCCTACAG  
CTATTCTCTCAGCCACTGAGAACTTCAGCAAGAGTTACATCATTGGTGAT

>M6-PGSC0003DMG400014281-(rev)M6LRR-RLK\_126

TTTGGTACTGTATACAAAGCCAAACTTCTGAGGGCCAGAACATTGCTGTCAAGAGGCTGAACGGAGGC  
CACATGCACGGTGATCGCGAGTTCTTTGCTGAAATGGAAACAATTGGTAAA

>M6-PGSC0003DMG400014281-(rev)M6LRR-RLK\_189

GGAGGCCACATGCACGGTGATCGCGAGTTCTTTGCTGAAATGGAAACAATTGGTAAAGTAAAACATGA  
AAATCTGGTGCCATTGCTTGGTTATTGTGTCTTTGCAGATGAGAGGTTCTTG

>M6-PGSC0003DMG400014281-(rev)M6LRR-RLK\_252

CATGAAAATCTGGTGCCATTGCTTGGTTATTGTGTCTTTGCAGATGAGAGGTTCTTGATATATGAATACA  
TGGAGAATGGAAGCCTTGATTTCTGGTTGAGAAACCAAGCAGATGCAGTA

>M6-PGSC0003DMG400014281-(rev)M6LRR-RLK\_315

GAATACATGGAGAATGGAAGCCTTGATTTCTGGTTGAGAAACCAAGCAGATGCAGTAGAAGCACTTGA  
CTGGCCAACTCGTTTCAAGATTTGTCTAGGGTCAGCTGTCCGACTTTCCTTT

>M6-PGSC0003DMG400014281-(rev)M6LRR-RLK\_378

CTTGACTGGCCAACTCGTTTCAAGATTTGTCTAGGGTCAGCTGTCCGACTTTCCTTTCTACACCATGGTTT  
TGTTCCACACATCATCCACAGAGACATCAAGTCAAGCAACATACTCCTA

>M6-PGSC0003DMG400014281-(rev)M6LRR-RLK\_441

CATGGTTTTGTTCCACACATCATCCACAGAGACATCAAGTCAAGCAACATACTCCTAGACAAGAACTTTG  
AACCACGAGTCTCTGACTTTGGCCTGGCTCGAATAATTAGTGCTTGTGAG

>M6-PGSC0003DMG400014281-(rev)M6LRR-RLK\_504

AACTTTGAACCACGAGTCTCTGACTTTGGCCTGGCTCGAATAATTAGTGCTTGTGAGAGCCATGTTAGCA  
CAATCCTTGCTGGTACATTCGGGTACATACCTCCCGAGTATGGACAAACC

>M6-PGSC0003DMG400014281-(rev)M6LRR-RLK\_567

GTTAGACAATCCTTGCTGGTACATTCGGGTACATACCTCCCGAGTATGGACAAACCATGACGGCCACA  
ACAAAGGGTGACATCTACAGCTTTGGAGTGGTGATGTTGGAAGTGGTAACA

>M6-PGSC0003DMG400014281-(rev)M6LRR-RLK\_623

CATGACGGCCACAACAAAGGGTGACATCTACAGCTTTGGAGTGGTGATGTTGGAAGTGGTAACAGGAA  
GGGCACCAACAGGACAGGCTGATGTTGAAGGAGGCAATCTTGTTGGCTGGGT

>M6-PGSC0003DMG400014281-(rev)M6LRR-RLK\_63

CCTACAGCTATTCTCTCAGCCACTGAGAATTCAGCAAGAGTTACATCATTGGTGATGGTGGTTTTGGTA  
CTGTATACAAAGCCAACTTCTGAGGGCCAGAACATTGCTGTCAAGAGG

>M6-PGSC0003DMG400014463-(rev)M6LRR-RLP\_0

GCTAAAGATGGGGTAATGCAATTGTGCTCACTCTCGTCTTTTTCTGTCTTGAAGTTTCTTCATCCATATTA  
CCTCATCACTCTCACAACATCAAATTCAAACCATTTCCCTTCTAAAAT

>M6-PGSC0003DMG400014463-(rev)M6LRR-RLP\_1037

CTATCACTAATTTATTTAGAATTGAGTCATAACCACTTTTCTGGTCAGCTTGAGGATTTCAAGTCAAATTC  
ACTATTCTATATTGGTTTAAGCAATAATCAGCTGGAAGGCCATCTTCCA

>M6-PGSC0003DMG400014463-(rev)M6LRR-RLP\_1098

AGTCAAATTCATCTATTCTATATTGGTTTAAGCAATAATCAGCTGGAAGGCCATCTTCCAAAGTCAATTCAA

AACCTTGGAACCTGACAACCTTTGATCTTTCATCGAATAATTTTAGTG

>M6-PGSC0003DMG400014463-(rev)M6LRR-RLP\_1159

GTCAATTCAAAACCTTGGAACCTGACAACCTTTGATCTTTCATCGAATAATTTTAGTGGCAATGTGGATG  
TCAGCCTCTTTTCAAACCTCAAACAACCTTTCGTATCTTATTCTTTCATC

>M6-PGSC0003DMG400014463-(rev)M6LRR-RLP\_122

AAGAAGTCCTTTACTATAGATCCCTCAGCCTCTTATTTTTGTCAAGACTTCGGTAAGAAGTTTTATCCAAA  
AACGAGTTCATGGAACATGAGCAGAGATTGCTGCTCATGGGATGGAGTT

>M6-PGSC0003DMG400014463-(rev)M6LRR-RLP\_1220

AATGTGGATGTCAGCCTCTTTTCAAACCTCAAACAACCTTTCGTATCTTATTCTTTCATCGAATAATTTTAGT  
GGCAATGTGGATTTTCAGCCTCTTTTCAAACCTCAAACAGCTTTCATAT

>M6-PGSC0003DMG400014463-(rev)M6LRR-RLP\_1281

ATAATTTTAGTGGCAATGTGGATTTTCAGCCTCTTTTCAAACCTCAAACAGCTTTCATATCTTATTCTTTCTT  
CCAATAATTTTATTGGAAATGTAGATGTCAGCCTTTTTTTCAGACCTCA

>M6-PGSC0003DMG400014463-(rev)M6LRR-RLP\_1342

TATTCTTTCTTCCAATAATTTTATTGGAAATGTAGATGTCAGCCTTTTTTTCAGACCTCAAACAGCTTTCATA  
TCTTAGTCTTTCACAAAATCATTCTCATTGACCAATGAAAACAAAGT

>M6-PGSC0003DMG400014463-(rev)M6LRR-RLP\_1403

CAGCTTTCATATCTTAGTCTTTCACAAAATCATTCTCATTGACCAATGAAAACAAAGTTAAGGTTACTTT  
GCCAGGATCTCTTATACGTTACAATTGGCTGCATGTGAAGTGAAAGAA

>M6-PGSC0003DMG400014463-(rev)M6LRR-RLP\_1464

AGGTTACTTTGCCAGGATCTCTTATACGTTACAATTGGCTGCATGTGAAGTGAAAGAATTGGAGTTTCT  
AAAATCCACAAATCATCTTGTTTTCTTGGATCTGTCAAATAATAAGCTTC

>M6-PGSC0003DMG400014463-(rev)M6LRR-RLP\_1525

GGAGTTTCTAAAATCCACAAATCATCTTGTTTTCTTGGATCTGTCAAATAATAAGCTTCAAGGAAGAATCC  
CAGATTGGGCATGGTCTAAATGGATGTTTTCTTGGATCTGTCAAATAATAAGCTTCAAGGAAGAATCC

>M6-PGSC0003DMG400014463-(rev)M6LRR-RLP\_1586

GGAAGAATCCCAGATTGGGCATGGTCTAAATGGATGTTTTCTTGGATCTGTCAAATAATAAGCTTCAAGGAAGAATCC  
TGTTGACAAGTGTTGATTCAATTCCTCTTCAATCACTAGATACTATTGAT

>M6-PGSC0003DMG400014463-(rev)M6LRR-RLP\_1647

CCTACAACATGTTGACAAGTGTTGATTCAATTCCTCTTCAATCACTAGATACTATTGATTTACGGTCCAAT  
TTGCTTCAAGGTTCACTACCTGTTCCACCAAATTCCACAATATTCTTCT

>M6-PGSC0003DMG400014463-(rev)M6LRR-RLP\_1708

ACGGTCCAATTTGCTTCAAGGTTCACTACCTGTTCCACCAAATTCCACAATATTCTTCTTAATATCCCAAAA  
TAATCTCACTGGAGAAATTCCTGCATCTATTTGCAATTTGATGTCACT

>M6-PGSC0003DMG400014463-(rev)M6LRR-RLP\_1769

ATATCCCAAATAATCTCACTGGAGAAATTCCTGCATCTATTTGCAATTTGATGTCACTCCAAATTTTGGA  
TTTGGCGAGAAACAATTGAGAAATTCACAATGTTTGGGAAATATGACT

>M6-PGSC0003DMG400014463-(rev)M6LRR-RLP\_1830

AAATTTTGGATTTGGCGAGAAACAATTGAGAAATTCACAATGTTTGGGAAATATGACTCCCCTCCGGGT  
TTTGGATATGCGCCACAACAATCTTCTGGGAATATTCCACCAACTTTCA

>M6-PGSC0003DMG400014463-(rev)M6LRR-RLP\_1891

CCTCCGGGTTTTGGATATGCGCCACAACAATCTTCTGGGAATATTCCACCAACTTTCAGTAATGAAAGT  
ATATTGAGCAGCTCAACTTGCATGGCAATAATCTAGAGGGGAAAATTCC

>M6-PGSC0003DMG400014463-(rev)M6LRR-RLP\_2074

CACATTCCTGTGTGGTTGGGAGCTCTCCAGATCTGCTCATTTTAAGCTTGAGATCAAACAAATTGCAT  
GGACCAATCAGAACATCAAGTTGGAGTGAGAACATGTTTCCTAAGCTTCG

>M6-PGSC0003DMG400014463-(rev)M6LRR-RLP\_2196

TCATAGATCTTTCCTACAATGCCTTCTCGGGAAACTTACCTTCGAGTTTGTTC AACATCTTAAAACCATG  
AGGACAATTGATCCATCAAGGGAAGCAGCAAGACATGGTGGAAATACAT

>M6-PGSC0003DMG400014463-(rev)M6LRR-RLP\_2257

TAAAACCATGAGGACAATTGATCCATCAAGGGAAGCAGCAAGACATGGTGGAAATACATATTACCAAG  
ATTCTATTATAGTTGCAATCAAGGGATCTGAGCGTGAAATTGTCAGAATCTT

>M6-PGSC0003DMG400014463-(rev)M6LRR-RLP\_2318

TACCAAGATTCTATTATAGTTGCAATCAAGGGATCTGAGCGTGAAATTGTCAGAATCTTGTATTTGTACA  
CCGTTATCGATCTTTC AAGTAATAAATTTAGAGGGCAAATTCCAAGTATT

>M6-PGSC0003DMG400014463-(rev)M6LRR-RLP\_2379

ATTTGTACACCGTTATCGATCTTTC AAGTAATAAATTTAGAGGGCAAATTCCAAGTATTATGGGGCATCT  
CAATGCAGTTCACATATTGAATTTATCTCATAATGCATTGCAAGGTGATA



>M6-PGSC0003DMG400014463-(rev)M6LRR-RLP\_2440

GGGGCATCTCAATGCAGTTCACATATTGAATTTATCTCATAATGCATTGCAAGGTGATATACCGACATTA  
TTCGGAGATTTATCTTCACTTGAATCATTGGACTTGTGAGGAAACAACT

>M6-PGSC0003DMG400014463-(rev)M6LRR-RLP\_2684

TATGAAGGCAATGATGGATTACGTGGATTTCTATTTCAAAGGCTGTGGCGATACTCATCGTCTCTAAA  
GAATCCACGCCCTTTTTTAGCGTTTAGGGCCGGGCGTCATGAAACAAGA

>M6-PGSC0003DMG400014463-(rev)M6LRR-RLP\_2745

GTCTCTAAAGAATCCACGCCCTTTTTTAGCGTTTAGGGCCGGGCGTCATGAAACAAGAATTCAGAATTT  
TCTAAGTGTTCGTGTGTATCAATTCATGAATTTTTGGAAATATGACTGA

>M6-PGSC0003DMG400014463-(rev)M6LRR-RLP\_2799

CAAGAATTCAGAATTTTCTAAGTGTTCGTGTGTATCAATTCATGAATTTTTGGAAATATGACTGATCGAA  
TATTTTTGCCCAAATATTTATTGAAATCATCTGTAATGACCTAGTGAAC

>M6-PGSC0003DMG400014463-(rev)M6LRR-RLP\_305

ACCATTGATTCCAATAGCAGCCTATTCCAACCTCTCATCTCCAAAGGCTTGATCTTTCTTAAATAACTTC  
TCCAATTCTCACATCTCCCCTGAATTTGGCAGGTTTTCGAGCTTGACA

>M6-PGSC0003DMG400014463-(rev)M6LRR-RLP\_366

TAAATAACTTCTCCAATTCTCACATCTCCCCTGAATTTGGCAGGTTTTCGAGCTTGACACATCTTGATCTTT  
CAGGCTCCTATTTTTAGGTCAAATTCCTTTTGAATCTCTTATCTTT

>M6-PGSC0003DMG400014463-(rev)M6LRR-RLP\_427

TCTTGATCTTTCAGGCTCCTATTTTTAGGTCAAATTCCTTTTGAATCTCTTATCTTTCCAAGTTACTCT  
TTTCGTCTCTCCACAAATATTGGGTTTGTGGCCTCCCCTCATATTT

>M6-PGSC0003DMG400014463-(rev)M6LRR-RLP\_488

AAGTTACTCTTTTTCGTCTCTCCACAAATATTGGGTTTGTGGCCTCCCCTCATATTTGGGCCCATACAA  
AGACTCGCGGCCCATGATTTTAAATTGCTCCTTCAGAATTTGACCCAA

>M6-PGSC0003DMG400014463-(rev)M6LRR-RLP\_61

ATCCATATTACCTCATCACTCTCACAAACATCAAATTCAAACCATTTCCCTTCTAAAATTCAAGAAGTCCTT  
TACTATAGATCCCTCAGCCTCTATTTTTGTCAAGACTTCGGTAAGAA

>M6-PGSC0003DMG400014463-(rev)M6LRR-RLP\_610

AAGAGAACTTGATTTTAGTTTCATAAACATCTCTTCAACCATTCTCCGAATTTTTCTTCTCATTTACAAC

TCTGAGTCTGGGATTAACAGGATTGTATGGGATAATACCTGAGCGTAT

>M6-PGSC0003DMG400014463-(rev)M6LRR-RLP\_671

CATTTCACTCTGAGTCTGGGATTAACAGGATTGTATGGGATAATACCTGAGCGTATTTTTCACCTTCC

CAACTTGAAAAACTTGACTTATCCAGCAGTTATGAGCTCAGTGGTTAT

>M6-PGSC0003DMG400014463-(rev)M6LRR-RLP\_732

TTCACCTTCCCAACTTGAAAAACTTGACTTATCCAGCAGTTATGAGCTCAGTGGTTATTTTCCAAAGACC

AAATGGAACAACAACACATCTCTTAGGAAATTAGAACTCAGTGGCGTGA

>M6-PGSC0003DMG400014463-(rev)M6LRR-RLP\_793

TCCAAAGACCAAATGGAACAACAACACATCTCTTAGGAAATTAGAACTCAGTGGCGTGAATTTTCTGAT

AATATACCTGAGTCTCTGGCTATCATCTAACTTCGCTGAATTATTTTTC

>M6-PGSC0003DMG400014463-(rev)M6LRR-RLP\_854

TTTTCTGATAATACCTGAGTCTCTGGCTATCATCTAACTTCGCTGAATTATTTTCTCTTTCGCATTGCA

AGCTTTGGGGGCCTATTCCTAAATCTCTTCCAATCTCACTCACATA

>M6-PGSC0003DMG400014463-(rev)M6LRR-RLP\_915

TTTCGCATTGCAAGCTTTGGGGGCCTATTCCTAAATCTCTTCCAATCTCACTCACATAGAGTATTTGTACC

TTGATGGTAACTTGTTGAATGGAACAATACCATTAGGGATGTTCTCCC

>M6-PGSC0003DMG400014463-(rev)M6LRR-RLP\_976

GTATTTGTACCTTGATGGTAACTTGTTGAATGGAACAATACCATTAGGGATGTTCTCCCTTCTATCACTAA

TTTATTTAGAATTGAGTCATAACCACTTTTCTGGTCAGCTTGAGGATTT

>M6-PGSC0003DMG400014576-(rev)M6LRR-RLK\_1037

GCAAAAGAAAAAATTCACACTTTTTGGCAAGAGATGCCCTACTGTCCCATTGTGCTCTACAGCTTTTTT

GCTTATCTTTTTGACCTCACTTAGTATTCATATCTTGCAACTGTTTTGG

>M6-PGSC0003DMG400014576-(rev)M6LRR-RLK\_1098

CAGCTTTTTTGCTTATCTTTTTGACCTCACTTAGTATTCATATCTTGCAACTGTTTTGGTAGGTGGATAGTG

AAATATAACCTCTGTTTTTTTTCTGGTTCAAATGGTAAAGAATCAAC

>M6-PGSC0003DMG400014576-(rev)M6LRR-RLK\_1159

GGTGGATAGTGAAATATAACCTCTGTTTTTTTTCTGGTTCAAATGGTAAAGAATCAACTTCTGTTGAAT

TGCACCTGTCATTCATGTAACAGGAGACAGCTGCTTCATATGTTAAATT

>M6-PGSC0003DMG400014576-(rev)M6LRR-RLK\_122

TAC TTT GCT A A G A T T G A G T A G T T G T T G G T G A G T T T G G T G T A T G A T T T C A T C A C T T G T T T T G G C T T A T T C A  
T G G T A A A T A G T A T T C A A C T T T T G T T C T T T A A G A A A T T C A T A G T A C T A A

>M6-PGSC0003DMG400014576-(rev)M6LRR-RLK\_1220

C T T G T T G A A T T G C A C C T G T C A T T C A T G T A A C A G G A G A C A G C T G C T T C A T A T G T T A A A T T T T C T C A T T T T A G  
A A T T A T G A A C A A T T A T G T G T T A C T A T T C C T A C C A T C A A A G T C T G C T A T G

>M6-PGSC0003DMG400014576-(rev)M6LRR-RLK\_1281

C T C A T T T T A G A A T T A T G A A C A A T T A T G T G T T A C T A T T C C T A C C A T C A A A G T C T G C T A T G T C A A C T T C A A A C T  
C C T T G T C C T C T C T G C C C A G G T T T T T G T T C T T T T G T C T A G T T A A A G T T G

>M6-PGSC0003DMG400014576-(rev)M6LRR-RLK\_1586

G T G T A A G T G T T C C A T T T T A T A G T A G T T T G A G T A A A T G T T T T G A T G G A C A T G A A T C T T C T T G C T A C A G G T A A  
C A G A G G G C C T G G A A G A A C T C C T T T A G A C T G G A C A A C A A G G T T A A A G A T T

>M6-PGSC0003DMG400014576-(rev)M6LRR-RLK\_1647

C T A C A G G T A A C A G A G G G C C T G G A A G A A C T C C T T T A G A C T G G A C A A C A A G G T T A A A G A T T G C A G C C G G A  
G C A G C T C G A G G G C T A G C C T T C A T C C A C A A C T C A T G C A A G T C C T T G A A A C T C A

>M6-PGSC0003DMG400014576-(rev)M6LRR-RLK\_1708

A G C C G G A G C A G C T C G A G G G C T A G C C T T C A T C C A C A A C T C A T G C A A G T C C T T G A A A C T C A C T C A T G G C A A  
C A T C A A A T C A A C T A A C A T C C T C A T T G A C A A G A G C G G C A A T G C A C G T A T C T C

>M6-PGSC0003DMG400014576-(rev)M6LRR-RLK\_1769

C A T G G C A A C A T C A A A T C A A C T A A C A T C C T C A T T G A C A A G A G C G G C A A T G C A C G T A T C T C C G A C T T C G G T C  
T A G C C A T C T T C G C C A C A C C A T C T T C C G T C C C A A A A C C A A C G G C T A C C G A

>M6-PGSC0003DMG400014576-(rev)M6LRR-RLK\_183

G G C T T A T T C A T G G T A A A T A G T A T T C A A C T T T T G T T C T T T A A G A A A T T C A T A G T A C T A A A A T A T T T G T G A A  
T T A C T T G T T T C T T A A G A A A A A T G T G A T C T T A G C T T T T T G T T G T A G A A

>M6-PGSC0003DMG400014576-(rev)M6LRR-RLK\_1830

A C T T C G G T C T A G C C A T C T T C G C C A C A C C A T C T T C C G T C C C A A A A C C A A C G G C T A C C G A G C C C C T G A A G T  
C G C A T T G G A T G G T C G T A A A A T A A C T C A A A A G T C C G A C A T C T A C T C A T T C G

>M6-PGSC0003DMG400014576-(rev)M6LRR-RLK\_1891

C C C T G A A G T C G C A T T G G A T G G T C G T A A A A T A A C T C A A A A G T C C G A C A T C T A C T C A T T C G G G G T C C T A T T A  
C T C G A G C T G C T A A C C G G T A A A T G C C C C T C A G T C G T G G A C A A C G G T G G T G G

>M6-PGSC0003DMG400014576-(rev)M6LRR-RLK\_1952

GTCCTATTACTCGAGCTGCTAACCGGTAAATGCCCTCAGTCGTGGACAACGGTGGTGGCCTCACAACC  
GGCTACGGAGGGGTTGTGGACTTACCGAGATGGGTGCAATCCGTGGTGAGG

>M6-PGSC0003DMG400014576-(rev)M6LRR-RLK\_2013

TCACAACCGGCTACGGAGGGGTTGTGGACTTACCGAGATGGGTGCAATCCGTGGTGAGGGAAGAATG  
GACCGCGGAAGTGTTTCGATTTGGAGTTGATGAGGTATAAGGACATTGAGGAGG

>M6-PGSC0003DMG400014576-(rev)M6LRR-RLK\_2135

ATGGTGGGGCTATTGCAGATAGCTATGGCATGTACTTCAACATCACCGGATCAAAGGCCTAAAATAAAT  
TATGTTGTGAAAATGATTGAAGAGTTGAGAGGTGTTGAAGTTTCACCTTCT

>M6-PGSC0003DMG400014576-(rev)M6LRR-RLK\_2318

GCAGCTAGTCAGTAGTGAGAGTTTTTTTTTTTCTACTAGTTTGTATTCTGAGTTATGTAAATTAACCTCT  
AGTTTTAATCCTTTTATCTATAAGATATAATTTAGGAGAAGTTTTATA

>M6-PGSC0003DMG400014576-(rev)M6LRR-RLK\_244

TATTTGTGAATTACTTGTCTTAAAGAAAAATGTGATCTTTAGCTTTTTGTTGTAGAATAGATTATTGATT  
GACCAATAAGGATTATAGTGGAGTTGTAAGTACTTCGTCATCATTAAAT

>M6-PGSC0003DMG400014576-(rev)M6LRR-RLK\_305

GATTATTGATTGACCAATAAGGATTATAGTGGAGTTGTAAGTACTTCGTCATCATTAAATCTGAGGTTTCA  
AGTTGAGCCTTGAGTATGGACTTGCCCTTGTTAGGTAGCGGTTTGTCTCT

>M6-PGSC0003DMG400014576-(rev)M6LRR-RLK\_366

GAGGTTTCAAGTTCGAGCCTTGAGTATGGACTTGCCCTTGTTAGGTAGCGGTTTGTCTCTACGTGGGACTT  
CCTAGCGCGAACCCGTATCCGGCTCCAATGCGGTTGCCGTACACCGGATG

>M6-PGSC0003DMG400014576-(rev)M6LRR-RLK\_427

GTGGGACTTCCTAGCGCGAACCCGTATCCGGCTCCAATGCGGTTGCCGTACACCGGATGGGAAAAAAG  
GAGAAGATTATTGATTGATTTGGTGGTAAAGTTTGGCAAGTAGTATAGCATA

>M6-PGSC0003DMG400014576-(rev)M6LRR-RLK\_488

AAAAAAGGAGAAGATTATTGATTGATTTGGTGGTAAAGTTTGGCAAGTAGTATAGCATAATCACATGGG  
GTTTGAGTCTGGCTTTTTGTCTTTAATTGCTTTTGGTCTGCTACTGTTAAC

>M6-PGSC0003DMG400014576-(rev)M6LRR-RLK\_549

CACATGGGGTTTGAGTCTGGCTTTTTGTCTTTAATTGCTTTTGGTCTGCTACTGTTAACAGGACTAGCCT

TCTGATGCAATAGGAATAAAGATGGGATGCCTCAACTAGACAGTATT

>M6-PGSC0003DMG400014576-(rev)M6LRR-RLK\_61

AGGACTGGTCTCTAATGCATATAAGAATAGAAACCCAAATTTGGATAGTTTGAAAGCATATTACTTTGCT

AAAGATTGAGTAGTTGTTGGTGAGTTTGGTGTATGATTTTCATCACTTGTT

>M6-PGSC0003DMG400014576-(rev)M6LRR-RLK\_610

GGACTAGCCTTCTGATGCAATAGGAATAAAGATGGGATGCCTCAACTAGACAGTATTTGCTTTAGTTA

ATGTTTCTATTTACATAATTGAACTAGCCATGTGGGAATATTGAAAATC

>M6-PGSC0003DMG400014576-(rev)M6LRR-RLK\_671

CTTTAGTTAATGTTTCTATTTACATAATTGAACTAGCCATGTGGGAATATTGAAAATCTATGTTGCTCGG

ACTCTTTAAAAATATCGAGGGTGCGGCAACATGAGTAAGTCTTACATAG

>M6-PGSC0003DMG400014576-(rev)M6LRR-RLK\_732

TGTTGCTCGGACTCTTTAAAAATATCGAGGGTGCGGCAACATGAGTAAGTCTTACATAGTCTTTTCAAGC

TAAACTATAGAATAGTATGTTACTTTATTAACAATCTTTGTCACATAAG

>M6-PGSC0003DMG400014576-(rev)M6LRR-RLK\_793

TTTTCAAGCTAAACTATAGAATAGTATGTTACTTTATTAACAATCTTTGTCACATAAGCTATTCTTGATT

TCAAATGTAGGGAACTTAAATTATTTAACAATCTTTATCATCTTATTC

>M6-PGSC0003DMG400014576-(rev)M6LRR-RLK\_854

ATTCTTGATTTTCAAATGTAGGGAACTTAAATTATTTAACAATCTTTATCATCTTATTCTTGAAAAAGTTTT

TAAAGGAATCTAATTTACTCATGATGGTCCTAAAGTGACAGAAGATTA

>M6-PGSC0003DMG400014576-(rev)M6LRR-RLK\_915

GAAAAAGTTTTTAAAGGAATCTAATTTACTCATGATGGTCCTAAAGTGACAGAAGATTAGAGCAAAGGA

CTTGTTGTACCAGATGAATAGAATTATGTGTTCCCTCTGATTTTTGGGCCA

>M6-PGSC0003DMG400014576-(rev)M6LRR-RLK\_976

GCAAAGGACTTGTTGTACCAGATGAATAGAATTATGTGTTCCCTCTGATTTTTGGGCCAAAGCAAAGA

AAAAAATTCACACTTTTTTGGCAAGAGATGCCCTACTGTCCCATTGTGCTC

>M6-PGSC0003DMG400014577-(rev)M6RLKWAX-EGF\_0

ATGGATTTAGTTTCTTGTTTTTCGTCTTCATTTTGTTCATCAGAGGTGTTTTGATTCTGTTCAAGGACAG

AACACACCTTATTCAAAGTGCCTCAAGAATTCCAATGTGGAAGTTCA

>M6-PGSC0003DMG400014577-(rev)M6RLKWAX-EGF\_1008

GGATCATCGAAATATTGAAGCGTTTCTGAAGAACTACGGGCCATATGCTCCAATGAGATATAGTTATTCA  
GACATCAAAGGATGACTAGTAGCTTCAAAAACAACTAGGCCAAGGAGG

>M6-PGSC0003DMG400014577-(rev)M6RLKWAX-EGF\_1071

TTATTCAGACATCAAAGGATGACTAGTAGCTTCAAAAACAACTAGGCCAAGGAGGATATGGTTATGT  
ATACAAAGGAAGTTTACATAATGGAAATCCTGTTGCTGTGAAGGTTTTGAA

>M6-PGSC0003DMG400014577-(rev)M6RLKWAX-EGF\_1134

TTATGTATACAAAGGAAGTTTACATAATGGAAATCCTGTTGCTGTGAAGGTTTTGAATGGACTAAAAGG  
CAGTGGTGAAGAATTCATTAATGAGGTATCGAGTATTAGCAGGACATCACA

>M6-PGSC0003DMG400014577-(rev)M6RLKWAX-EGF\_1197

AAAAGGCAGTGGTGAAGAATTCATTAATGAGGTATCGAGTATTAGCAGGACATCACATGTTAACATCGT  
GAGCCTCGTGGGATTCTGTTTTGAGGGTCGAAAAGAGCTCTAGTTTACGA

>M6-PGSC0003DMG400014577-(rev)M6RLKWAX-EGF\_126

CTGAGTTTTCTTTCTATAAACCCGATCAACCTGATTGCGGATTATGTAAAGTTGATTGTGATACTGCTCC  
ACATCCGATGATCGAATTGGAAGGAGTAAAGTATCAAGTTCTTGAAAAA

>M6-PGSC0003DMG400014577-(rev)M6RLKWAX-EGF\_1260

CATCGTGAGCCTCGTGGGATTCTGTTTTGAGGGTCGAAAAGAGCTCTAGTTTACGAATTCATGCCAAAT  
GGATCACTTGAAAAGTTTATCTATGAAGAAAGATCAGACACAGACAGAGT

>M6-PGSC0003DMG400014577-(rev)M6RLKWAX-EGF\_1323

GCCAAATGGATCACTTGAAAAGTTTATCTATGAAGAAAGATCAGACACAGACAGAGTTCGTCAACTAGA  
TTGGCAAGTACTGTATAAAATTGCATTAGGCATTGCTCGTGGATTGGAGTA

>M6-PGSC0003DMG400014577-(rev)M6RLKWAX-EGF\_1386

ACTAGATTGGCAAGTACTGTATAAAATTGCATTAGGCATTGCTCGTGGATTGGAGTATTTGCATCGTGGT  
TGTAACACTAGAATTCTACATTTTGATATCAAGCCTCATAACATACTACT

>M6-PGSC0003DMG400014577-(rev)M6RLKWAX-EGF\_1512

AGATTTCTGTCCTAAGATATCTGACTTTGGACTTGCTAACTCTGCGTAAAAAAGGAAAGTATAGTGCA  
ATGTTAGGTGCACGAGGGACTATCGGTTACATTGCTCCTGAAATTGTTTG

>M6-PGSC0003DMG400014577-(rev)M6RLKWAX-EGF\_1575

AGTGTCATGTTAGGTGCACGAGGGACTATCGGTTACATTGCTCCTGAAATTGTTTGTAGAACTGGG  
AGGTGTCTCACACAAGTCTGATGTTTATAGCTATGGAATGATGGTGTTAGA

>M6-PGSC0003DMG400014577-(rev)M6RLKWAX-EGF\_1638  
CTTGGGAGGTGTCTCACACAAGTCTGATGTTTATAGCTATGGAATGATGGTGTAGAGATGGTTGGAGG  
GAGGAAAAATGTTGTTGATCGAACGAGTGAAGTCTACTTTCCAGATTGGCT

>M6-PGSC0003DMG400014577-(rev)M6RLKWAX-EGF\_1701  
TGGAGGGAGGAAAAATGTTGTTGATCGAACGAGTGAAGTCTACTTTCCAGATTGGCTTTATCAACGAAT  
TGAAGTAGACGAAGAAGTCAATTAATTGGGATAATGAATGAAGAGGAGAA

>M6-PGSC0003DMG400014577-(rev)M6RLKWAX-EGF\_1764  
ACGAATTGAAGTAGACGAAGAAGTCAATTAATTGGGATAATGAATGAAGAGGAGAAAGAATGTGCGC  
GAAAAATGGTGATAGTGAGTCTATGGTGCATCCAACTGGTCCTTCAAATAG

>M6-PGSC0003DMG400014577-(rev)M6RLKWAX-EGF\_1827  
TGC GCGAAAAATGGTGATAGTGAGTCTATGGTGCATCCAACTGGTCCTTCAAATAGACCATCTATGACT  
AAAGTTGTGCGAAATGCTAGAAGGGAAGTAACTCTTTGCAAATTCCTCC

>M6-PGSC0003DMG400014577-(rev)M6RLKWAX-EGF\_189  
ACTGCTCCACATCCGATGATCGAATTGGAAGGAGTAAAGTATCAAGTTCTTGAAAAACAGAATGTTTTTG  
TCAAATTAAGGATCCTGTTCTTGAAAATCTCTTAAGAAAAACAGTTGT

>M6-PGSC0003DMG400014577-(rev)M6RLKWAX-EGF\_1890  
TATGACTAAAGTTGTGCGAAATGCTAGAAGGGAAGTAACTCTTTGCAAATTCCTCCAACACCTTACCTAT  
ATTCTTCTCAAGGTCAGAAGTAAAATTGATCTCATCAGTAGAAGAATC

>M6-PGSC0003DMG400014577-(rev)M6RLKWAX-EGF\_1927  
AACTCTTTGCAAATTCCTCCAACACCTTACCTATATTCTTCTCAAGGTCAGAAGTAAAATTGATCTCATCA  
GTAGAAGAATCGAGTTCCCGATCAACTCTCTCTACCTCCACAAGGTAG

>M6-PGSC0003DMG400014577-(rev)M6RLKWAX-EGF\_252  
GTTTTTGTCAAATTAAGGATCCTGTTCTTGAAAATCTCTTAAAGAAAAACAGTTGTGCGATCTTTCGAAAG  
AAATCTATCTCTCCCAATATCTCCTATAATCACCTATAGTGTCAACCCT

>M6-PGSC0003DMG400014577-(rev)M6RLKWAX-EGF\_315  
TTCGAAAGAAATCTATCTCTCCAATATCTCCTATAATCACCTATAGTGTCAACCCTTCTCAACTTGTTT  
AAATGCAATACTAGTAATGATATCTCGTACGAGGGCTTTCAAAGTTAC

>M6-PGSC0003DMG400014577-(rev)M6RLKWAX-EGF\_378  
AACTTGTTTAAATGCAATACTAGTAATGATATCTCGTACGAGGGCTTTCAAAGTTACAATGGTTGCGAAA

GTTTCACTTTATACTATAATCATTTCGTCGGTTTCTTCTATTGGATCTAAT

>M6-PGSC0003DMG400014577-(rev)M6RLKWAX-EGF\_441

TGCGAAAGTTTCACTTTATACTATAATCATTTCGTCGGTTTCTTCTATTGGATCTAATCTTCTTAGTAAATGT

TCAATTATTCAATTGCCTATGGTGTGAGGTTATGAATCAAATCGAAC

>M6-PGSC0003DMG400014577-(rev)M6RLKWAX-EGF\_504

AGTAAATGTTCAATTATTCAATTGCCTATGGTGTGAGGTTATGAATCAAATCGAACAAATAGTAACCTGT

TCGATATGTTGGCTGCTGATGTTTCTCTAGGATGGACAGTATCTCATACA

>M6-PGSC0003DMG400014577-(rev)M6RLKWAX-EGF\_567

AACCTGTTTCGATATGTTGGCTGCTGATGTTTCTCTAGGATGGACAGTATCTCATACATGTAATCAGTGTTA

TTCGAGTGGAGGACGATGTCAAGTTGATAGTAACAACAAATTTTCATTGT

>M6-PGSC0003DMG400014577-(rev)M6RLKWAX-EGF\_63

CAAGGACAGAACACACCTTATTCAAAGTGCCTCAAGAATCCAATGTGGAAGTTCAGAAATTCTGAGTT

TTCCTTTCTATAAACCCGATCAACCTGATTGCGGATTATGTAAAGTTGAT

>M6-PGSC0003DMG400014577-(rev)M6RLKWAX-EGF\_630

CAGTGTTATTTCGAGTGGAGGACGATGTCAAGTTGATAGTAACAACAAATTTTCATTGTTCTGTTAGTGATC

CAGGCAAAGGTATTCAAGAAGTAAATTATGCTTGATTCCCTTCATCTTAGT

>M6-PGSC0003DMG400014577-(rev)M6RLKWAX-EGF\_693

AGTGATCCAGGCAAAGGTATTCAAGAAGTAAATTATGCTTGATTCCCTTCATCTTAGTACTCTTTATTTATT

CGTTTTTCGTATTGCAGGAAAGCATCTTCGTAGAACATGGATCGTTGTT

>M6-PGSC0003DMG400014577-(rev)M6RLKWAX-EGF\_756

TATTTATTCGTTTTTCGTATTGCAGGAAAGCATCTTCGTAGAACATGGATCGTTGTTTTAGCCACAGGTAA

CTCTTTGTAGAAACAGTACTAGTTGCATTGTTCCGAATAGAGACTCTT

>M6-PGSC0003DMG400014577-(rev)M6RLKWAX-EGF\_819

ACAGGTAACCTTTTTGTAGAAACAGTACTAGTTGCATTGTTCCGAATAGAGACTCTTCACGGTGTATGAC

TTCATTTTCTCCGTATAGTTGCAGTTTTTCGGTTGCATTGGAATCTTGAT

>M6-PGSC0003DMG400014577-(rev)M6RLKWAX-EGF\_882

GTATGACTTCATTTTCTCCGTATAGTTGCAGTTTTTCGGTTGCATTGGAATCTTGATTTTGCTGTTCTGCTT

CAGAAAAAGATTTTCTGGCATAAGTACCTCAGGTTTTGGGAATCAGA

>M6-PGSC0003DMG400014577-(rev)M6RLKWAX-EGF\_945



GTTCTGCTTCAGAAAAAAGATTTTCTGGCATAAGTACCTCAGGTTTTGGGAATCAGAAGCTGAGGATCAT  
CGAAATATTGAAGCGTTTCTGAAGAACTACGGGCCATATGCTCCAATGAG

>M6-PGSC0003DMG400014717-(rev)M6LRR-RLP\_0

CGTACAAGGATATTGAGTAGACAGTTGATGTATCAGACTCGATACTTCAAAGAATGGAGGAGAAGAC  
GATCTGCAGCTGCAAGTGTGCATGAAGACAATATATGAAATAACTGAGCAAA

>M6-PGSC0003DMG400014717-(rev)M6LRR-RLP\_1054

AAGAGTTTAGAAAAAATGGGAGTAGATGTGTAACACATGGATAAAGACAATAAAAAGACAATAATAT  
TTGAGTGACTTTTCTCTTACAAAACAAAGAAAAGTGACTTTCTGAGATAATT

>M6-PGSC0003DMG400014717-(rev)M6LRR-RLP\_1116

TAATATTTGAGTGACTTTTCTCTTACAAAACAAAGAAAAGTGACTTTCTGAGATAATTATCTATAGTTCAA  
TGACCACATAAGAAATCAACTTTTGGCATCTACTACATATGAATTAGAG

>M6-PGSC0003DMG400014717-(rev)M6LRR-RLP\_1178

ATAGTTCAATGACCACATAAGAAATCAACTTTTGGCATCTACTACATATGAATTAGAGATAATGTAGTTT  
AGAAATTTATTAATCTAAGACTGAAAATTGTTGAAACAAATATGTCAATG

>M6-PGSC0003DMG400014717-(rev)M6LRR-RLP\_124

CTTTGAAACAAACAGTTCACAATTCATATATCAGAAAAATAATTTCCCAGCACGTCTAAAACAAGCAAAA  
ATGGAAAAGAAAAACAAAACAGTCCCAAGGATAAATCTATATTGTCACAA

>M6-PGSC0003DMG400014717-(rev)M6LRR-RLP\_1240

TGTAGTTTAGAAATTTATTAATCTAAGACTGAAAATTGTTGAAACAAATATGTCAATGTGTGATAACAAA  
ACTATTTTTGCCACTTCGGTTAAGTCCTTGTTAGAATTAGTGTTGGTCTT

>M6-PGSC0003DMG400014717-(rev)M6LRR-RLP\_1302

ATAACAAAATTTTTGCCACTTCGGTTAAGTCCTTGTTAGAATTAGTGTTGGTCTTTAATTATAATTTAC  
GTAAAATATAAAATCCCATGAACCCGAAATAATAAACTCAAAATATGA

>M6-PGSC0003DMG400014717-(rev)M6LRR-RLP\_1364

TATAATTTACGTAAAATATAAAATCCCATGAACCCGAAATAATAAACTCAAAATATGATGATGGTTTCCA  
GTAAAATATTCTCTTCACTTCAGTTTTTCACTCTTTTATATCTCCTTACA

>M6-PGSC0003DMG400014717-(rev)M6LRR-RLP\_1426

GGTTCCAGTAAAATATTCTCTTCACTTCAGTTTTTCACTCTTTTATATCTCCTTACAGTTACTTTTGCTTCC  
AATGAGGAAGCAACTGCCCTCTGAAATGGAAAGCAACTTTCAAGAA

>M6-PGSC0003DMG400014717-(rev)M6LRR-RLP\_1550

AATAATTCCTTATTGGCTTCATGGACGCCAAGTTCTAATGCATGCAGGGACTGGTATGGAGTTAAATGCT  
TTAATGGTAGGGTAAACACGTTGAATATTACAAGTACTAGTGTCAGTGCT

>M6-PGSC0003DMG400014717-(rev)M6LRR-RLP\_1674

TCTATGCTTTTCCATTTTCATCTCTCCCTTTCTTGAGAATCTTAATCTTAGCATGAACAATTTCTCTGGCACC  
ATTCCACCTGAGATTAGTAATCTCACTAATTTTGTCTATCTTGACTT

>M6-PGSC0003DMG400014717-(rev)M6LRR-RLP\_1736

TCTCTGGCACCATTCCACCTGAGATTAGTAATCTCACTAATTTTGTCTATCTTGACTTGAACCTCAATCAGA  
TTTCAGGAACAATCCCACCACAAATCGGATCACTAGCCAAGCGTCAGA

>M6-PGSC0003DMG400014717-(rev)M6LRR-RLP\_186

AAGCAAAAATGGAAAAGAAAACAAAACAGTCCCAAGGATAAATCTATATTGTCACAACCTAAAAAGAT  
TTTAGCTCCTGTCTCACCACACCAGCCCTCTGCAATGTCCACAACACACGA

>M6-PGSC0003DMG400014717-(rev)M6LRR-RLP\_248

AAAAGATTTTAGCTCCTGTCTCACCACACCAGCCCTCTGCAATGTCCACAACACACGAATCAGATCGATG  
CATAACCATCACAACGGTAAAAAGATTATGCAATCACACCTTGATCTTTG

>M6-PGSC0003DMG400014717-(rev)M6LRR-RLP\_2480

TGGGGAATTTAAGAAATGTGCAAAGAATGTTTCTTGATGAAAACAATCTCACTGAAGAAATTCCTTTATC  
TCTGTGCAATTTAAAATCACTTGAAATTTTGTATTTGCGGAGAAACAACCT

>M6-PGSC0003DMG400014717-(rev)M6LRR-RLP\_2542

CCTTTATCTCTGTGCAATTTAAAATCACTTGAAATTTTGTATTTGCGGAGAAACAACCTTGAAGAGAAAAG  
TTCCGCAATGTTTGGATAATATCAGTGGCCTCCAGGTTTTGACGATGTCA

>M6-PGSC0003DMG400014717-(rev)M6LRR-RLP\_2604

GAGAAAAGTCCGCAATGTTTGGATAATATCAGTGGCCTCCAGGTTTTGACGATGTCACGTAATAATCTT  
AGTGGAGAGATCCCTTCATCCATTTCCAATTTAAACTCACTACAAATTCT

>M6-PGSC0003DMG400014717-(rev)M6LRR-RLP\_2666

ATAATCTTAGTGGAGAGATCCCTTCATCCATTTCCAATTTAAACTCACTACAAATTCTAGATTTGGGAAGA  
AATAGTCTGGAGGGAGCAATTCCAGAATGCTTTGGCAATATTAATACCC

>M6-PGSC0003DMG400014717-(rev)M6LRR-RLP\_2728

TTGGGAAGAAATAGTCTGGAGGGAGCAATTCCAGAATGCTTTGGCAATATTAATACCCTTCAGGCTTTT

GATATGCAGAACAACAACTTTCTGGGACTCGTCCAACAATTTTAGCATTG

>M6-PGSC0003DMG400014717-(rev)M6LRR-RLP\_2790

GGCTTTTGATATGCAGAACAACAACTTTCTGGGACTCGTCCAACAATTTTAGCATTGGAAGTTCACTTA

GAAGTTTCAATTTGCATGGCAATGAACTAGAGGGGGGAAATCCCTCGATC

>M6-PGSC0003DMG400014717-(rev)M6LRR-RLP\_2976

CATGTGGTTGGAACTTTGCTAGAGCTGAGAGTTTTAAGATTGACATCGAATAAATTGTATGGACCCAT

AAGATCTTCAGGGGCTGAAATCATGTTTCCTGATCTTCGAACCATAGATCT

>M6-PGSC0003DMG400014717-(rev)M6LRR-RLP\_3038

GACCCATAAGATCTTCAGGGGCTGAAATCATGTTTCCTGATCTTCGAACCATAGATCTCTCTAACAAATACC

TTCTCGAAAGACTTACCAACGAGTTTGTTCACATTTGAAAGGCATGA

>M6-PGSC0003DMG400014717-(rev)M6LRR-RLP\_310

GATCGATGCATAACCATCACAAACGGTAAAAAGATTATGCAATCACACCTTGATCTTTGCCAACATGAGCT

TAAACCTGTCAAATTTGTTGAGTGAGGCCCTCCTCTTCTGCACGATCAAC

>M6-PGSC0003DMG400014717-(rev)M6LRR-RLP\_3162

AATTGATCAAACAATGATGGTACCAAGTTATGAAGGAGATGGAGATTACAAAGACTCGATAGTTGTTGT

ATCAAAGGGATTGAAGCTTGAAGTTGTGAGAATTTTGTCTTTGTACACAGT

>M6-PGSC0003DMG400014717-(rev)M6LRR-RLP\_3224

TTGTTGTATCAAAGGGATTGAAGCTTGAAGTTGTGAGAATTTTGTCTTTGTACACAGTTATCGACCTTTCA

AACAACAAATTTGAAGGACATATTCCTAGTGTCTAGGAGATCTCATTG

>M6-PGSC0003DMG400014717-(rev)M6LRR-RLP\_3596

TGGATTCCCCATTTCAAAGGTTGTGGCAATGATCCTGTGTCAGAGACAAATTATATAGTATCTGCGCTA

GCTGATCAAGAAAGCAATTCTAAATTTCTCAATGATTTTTGGAAAGCTGC

>M6-PGSC0003DMG400014717-(rev)M6LRR-RLP\_372

CATGAGCTTAAACCTGTCAAATTTGTTGAGTGAGGCCCTCCTCTTCTGCACGATCAACTTCCTTTCTTAGG

AACTGGACTCCCACTTGGTCTTCACATCTGCGAGGACATAAAGCAAATG

>M6-PGSC0003DMG400014717-(rev)M6LRR-RLP\_434

TTTCTTAGGAACTGGACTCCCACTTGGTCTTCACATCTGCGAGGACATAAAGCAAATGAGAGTTAACCAA

GTTCTTATGTAACCCTGCCGTTAGCCAAATGACTCAAATTTACCACTTCT

>M6-PGSC0003DMG400014717-(rev)M6LRR-RLP\_496

TTAACCAAGTTCTTATGTAACCCTGCCGTTAGCCAAATGACTCAAATTTACCACTTCTGGCTGATGAAAAC  
CGTTTTTCCTAATCAAAAATTCAAATTTGAATACTGCAATTCACCCAAC

>M6-PGSC0003DMG400014717-(rev)M6LRR-RLP\_558

GATGAAAACCGTTTTTCCTAATCAAAAATTCAAATTTGAATACTGCAATTCACCCAACGTACACGTATCTT  
GATCTCTAGCTCGGCCACTGTTCCAGTGATATGTATTTTCTGAGGGGA

>M6-PGSC0003DMG400014717-(rev)M6LRR-RLP\_62

GAAGACGATCTGCAGCTGCAAGTGTGCATGAAGACAATATATGAAATAACTGAGCAAACATTCTTTGAA  
ACAAACAGTTCACAATTCATATATCAGAAAAATAATTTCCAGCACGTCTA

>M6-PGSC0003DMG400014717-(rev)M6LRR-RLP\_620

ACGTATCTTGATCTCTAGCTCGGCCACTGTTCCAGTGATATGTATTTTCTGAGGGGACTAATTAACGCAT  
AGTCTAGTCACTTTAGTATTTAGTATTGTAAGTCTAGTGTTACAAAGTG

>M6-PGSC0003DMG400014717-(rev)M6LRR-RLP\_682

TTAACGCATAGTCTAGTCACTTTAGTATTTAGTATTGTAAGTCTAGTGTTACAAAGTGTAAGTTTAGTAGT  
GACGATTCATGAGATTAACCTCGAAATTTTGTGATGACTGAAAATCAGA

>M6-PGSC0003DMG400014717-(rev)M6LRR-RLP\_744

TTTAGTAGTGACGATTCATGAGATTAACCTCGAAATTTTGTGATGACTGAAAATCAGAGAAAGTAACACA  
AGATGCTGTTCTATATTATGAAAAAGATTAGAAAGATGAAACTCTACTTC

>M6-PGSC0003DMG400014717-(rev)M6LRR-RLP\_806

GTAACACAAGATGCTGTTCTATATTATGAAAAAGATTAGAAAGATGAAACTCTACTTCTTTTTAAGCTTTG  
TATTCTAATTGATGGAATTTCTTTCCGTATGATAGTTTTGTTTTACTT

>M6-PGSC0003DMG400014717-(rev)M6LRR-RLP\_868

TAAGCTTTGTATTCTAATTGATGGAATTTCTTTCCGTATGATAGTTTTGTTTTACTTGGAAAAAGTGGA  
GTAGATGTGTAACACATTGGATAAAGACAATAAAAGGACAAAAGCACAA

>M6-PGSC0003DMG400014717-(rev)M6LRR-RLP\_930

AAAGTGGGAGTAGATGTGTAACACATTGGATAAAGACAATAAAAGGACAAAAGCACACAACCCAAAT  
TTGACTAAAGAATGACAACATTTTCTCTTATAAAATTGAACAGACAAAAGTGT

>M6-PGSC0003DMG400014717-(rev)M6LRR-RLP\_992

CCAAATTTGACTAAAGAATGACAACATTTTCTCTTATAAAATTGAACAGACAAAAGTGTGAATAAGAGTTT  
AGAAAAAATGGGAGTAGATGTGTAACACATGGATAAAGACAATAAAAG

>M6-PGSC0003DMG400014718-(rev)M6LRR-RLP\_1152

GTGTCTGCGCTAGAAGATCAAGAAAGAAATTCTGAATTTTTCAATGATTTTTGGAAAGCAGCTCTGATGG  
GCTATGGCAGTCGACTATGTATTGGCTTATCCATAATATATTTCTTGATC

>M6-PGSC0003DMG400014718-(rev)M6LRR-RLP\_128

AAGTGGCCTCCAGGTTCTAGTGATGTCACATAATGATCTCAGTGGAGAGATGCCTCCATCTATTTCCAAT  
TTAACGTCACTACAAATTCTAGATTTGGGCAGAAATAATCTAGAGGGAGC

>M6-PGSC0003DMG400014718-(rev)M6LRR-RLP\_192

TCCAATTTAACGTCACTACAAATTCTAGATTTGGGCAGAAATAATCTAGAGGGAGCAATTCCACAATGTT  
TTGGCAATAATAGTAGCCTCCAGGCATTTGATATGCAGAATAACAACTT

>M6-PGSC0003DMG400014718-(rev)M6LRR-RLP\_256

AATGTTTTGGCAATAATAGTAGCCTCCAGGCATTTGATATGCAGAATAACAACTTTCTGGGACTCTTCC  
AACAAATTTTAGCATTGGAAGTTCACTTATAAGTCTCAACTTGCATGACA

>M6-PGSC0003DMG400014718-(rev)M6LRR-RLP\_512

GACATCGAATAAACTGCATGGACCTATAAGATTTTCAGTGGCTGAAATCATGTTTCCTGATCTTCGAATC  
ATAGATCTCTCTAGCAATGCCTTTTCGAAAGACTTACCAAAGAGTCTGTT

>M6-PGSC0003DMG400014718-(rev)M6LRR-RLP\_576

CGAATCATAGATCTCTCTAGCAATGCCTTTTCGAAAGACTTACCAAAGAGTCTGTTTCAACAATTGAAAG  
GCATGAGGACTGTTGATCAAACAATGAAGACAACAAGTTATCTAGGAGGT

>M6-PGSC0003DMG400014718-(rev)M6LRR-RLP\_64

TTGAAATGTTTTATATGCCGAGAAACAACCTTGAAGGGAAAAGTTCCGCAATGTTTGGGTAATATAAGTG  
GCCTCCAGGTTCTAGTGATGTCACATAATGATCTCAGTGGAGAGATGCCTC

>M6-PGSC0003DMG400014718-(rev)M6LRR-RLP\_640

TGAAAGGCATGAGGACTGTTGATCAAACAATGAAGACAACAAGTTATCTAGGAGGTAGATATAACTACC  
AAGACTTGGTAGTTGTTGTAACGAAGGGATTGAAGCTTGAAGTTGTGAAAA

>M6-PGSC0003DMG400014718-(rev)M6LRR-RLP\_704

CTACCAAGACTTGGTAGTTGTTGTAACGAAGGGATTGAAGCTTGAAGTTGTGAAAATTTGTCTTTGTAC  
ACAGTTATCGATCTTTCAAACAACAATTTGAAGGACATATACCTAGTGT

>M6-PGSC0003DMG400014718-(rev)M6LRR-RLP\_832

ATCTTATTGCGATTCCGGTACTTAATTTATCTCATAATGGGTTGCAAGGCTATATATCACCATCACTTGGGA

AGTTTATCTGTACTGGAATCATTAGACCTTTCATTTAACCGCCTTTCGG

>M6-PGSC0003DMG400014719-(rev)M6LRR-RLP\_252

TTGATATGCAGAATAACAACTTTCTGGGACTCTTCCAACAAATTTTAGCATTGGAAGTTCACCTATAAGT  
CTCAACTTGCATGACAATGAACTAGAGGGGGAAATCCCTCGGTCTTTGG

>M6-PGSC0003DMG400014719-(rev)M6LRR-RLP\_441

TGGGAACCTTACCAGAGCTGAGAGTTCTAAGATTGACATCGAATAAACTGCATGGACCTATAAGATTTTC  
AGTGGCTGAAATCATGTTTCTGATCTTTCGAATCATAGATCTCTCTAGCA

>M6-PGSC0003DMG400014719-(rev)M6LRR-RLP\_756

ACAACAAATTTGAAGGACATATACCTAGTGTCTAGGAGATCTTATTGCGATTCGGGTACTTAATTTATCT  
CATAATGGGTTGCAAGGCTATATATCACCATCACTTGGAAAGTTTATCTG

>M6-PGSC0003DMG400014736-(rev)M6LRR-RLP\_120

GATCTTTCAGAAAATCAATTTTATGGTCAAATCCCACAAAGCTTTTCAAGTTTGTTACCTTGAGCTACTT  
GAATCTATCTGATAACAATTTGTCAGGTATGATACCATTGAGCACTCAA

>M6-PGSC0003DMG400014738-(rev)M6LRR-RLP\_458

GGATTGGTTTTACATTTCAATGGCTATAGGATTTGCACTAAGCTTTTGGGGTGTTTGTGGTTCATTGCTTT  
TCAAGAGATCATGGAGACATGCTTATTTTTGTTTTCTAGACCGTAGCTG

>M6-PGSC0003DMG400014739-(rev)M6LRR-RLP\_0

AGTCCAAAATATTACACACCATGAAAGTGTTAGCAATAACACTATGGGTTCTCTTGTTTTTATTTTGAAA  
AATACCAAGTTTGTCAATTTGTGTAGGGATTTGTAGAGAAAATGAGCAAC

>M6-PGSC0003DMG400014739-(rev)M6LRR-RLP\_1054

TACTTCTTTGATGGAATTGAGACTAGATGGTAATAAACTTAATGGAACCTTCCGAAAAGTCTTGGACAA  
CTTCAATGCTAGAATACTTTTTCAATTTCTAACAATAAGTTGGAAGGTGT

>M6-PGSC0003DMG400014739-(rev)M6LRR-RLP\_1116

TTGGACAACCTTCAATGCTAGAATACTTTTTCAATTTCTAACAATAAGTTGGAAGGTGTTGTAACAGAGAG  
TCATTTCTCTAAATTAACGCAATTACAACCTTCTCTGCATCTAGAAATA

>M6-PGSC0003DMG400014739-(rev)M6LRR-RLP\_1178

ACAGAGAGTCATTTCTCTAAATTAACGCAATTACAACCTTCTCTGCATCTAGAAATAATCTGACTTTAAA  
AGTGAGTAGGAATTGGATTCCACCTTTTCAAGTCACAAACATTGCGATA

>M6-PGSC0003DMG400014739-(rev)M6LRR-RLP\_1240

GACTTTAAAAGTGAGTAGGAATTGGATTCCACCTTTTCAAGTCACAAACATTGCGATAGGCGGGTGGAA  
TATAGGCCCTTTGTTTCCAATGTGGCTCCGAACCTCAGGAGATGATAATGAA

>M6-PGSC0003DMG400014739-(rev)M6LRR-RLP\_1364

GACATATCAGATTGTGGAATACAAGGTGAGGTTCCAACCTGGTTTTGGAACCTTATCTTCTCAAATTGTTTT  
TCTCAATCTTTCTCACAATCAATTTATTGGTGAGGTTCCAATCATCTCA

>M6-PGSC0003DMG400014739-(rev)M6LRR-RLP\_1426

AATTGTTTTTCTCAATCTTTCTCACAATCAATTTATTGGTGAGGTTCCAATCATCTCAACAGCTTCGTGGTT  
AGTTGGATTGGGAGGTCCTTGTTAATGTATTTAGGTTCCAACAATTT

>M6-PGSC0003DMG400014739-(rev)M6LRR-RLP\_1488

CTTCGTGGTTAGTTGGATTGGGAGGTCCTTGTTAATGTATTTAGGTTCCAACAATTTTAGTGGATCACT  
ACCACGTATTTCAACGAGTATAACTGAGTTAGGTCTCTCGAACAATTTTT

>M6-PGSC0003DMG400014739-(rev)M6LRR-RLP\_1550

GGATCACTACCACGTATTTCAACGAGTATAACTGAGTTAGGTCTCTCGAACAATTTTTTTTCAAAGGTTT  
ATCCAACCTCTTGTGTGAAGCAAAGAATGTATCTTATAATTTGGAGATC

>M6-PGSC0003DMG400014739-(rev)M6LRR-RLP\_1612

AAAAGGTTTATCCAACCTCTTGTGTGAAGCAAAGAATGTATCTTATAATTTGGAGATCTTAAATCTCGGG  
GGAAATGATTTATCAGAAGAAATTCCTGATTGTTGGATGAATTGGCCTGA

>M6-PGSC0003DMG400014739-(rev)M6LRR-RLP\_1674

ATCTCGGGGGAAATGATTTATCAGAAGAAATTCCTGATTGTTGGATGAATTGGCCTGAGTTGGAAGTTT  
TAATCTTGAGGGACAATAATTTGATTGGAAGCTTACCAAGATCTATGGAGG

>M6-PGSC0003DMG400014739-(rev)M6LRR-RLP\_1736

GAAGTTTTAATCTTGAGGGACAATAATTTGATTGGAAGCTTACCAAGATCTATGGAGGTTTTGAGTAATT  
TGCTATCATTAGACTTACGAAGAAATAGACTTAACGGTCCGTTTCCTTCA

>M6-PGSC0003DMG400014739-(rev)M6LRR-RLP\_1798

GAGTAATTTGCTATCATTAGACTTACGAAGAAATAGACTTAACGGTCCGTTTCCTTCATCCTTGAAAAATT  
GTACGAAACTGCATAAAATAGATTTAGCCGAGAATGAGTTTGCTGGGGG

>M6-PGSC0003DMG400014739-(rev)M6LRR-RLP\_186

GAAAAGATTGTTGTGAATGGGATGGAGTTGTGTGCAACAATCTAACTCGTCGTGTGATTGAACTACGCA  
TAAGTTATCTAAGGATCGATAACCTAGAGTGGTTGTCAAGTCTTTTGAGTC

>M6-PGSC0003DMG400014739-(rev)M6LRR-RLP\_1860

TGAAAAATTGTACGAAACTGCATAAAATAGATTTAGCCGAGAATGAGTTTGCTGGGGGACTACCATCTT  
AGTTGGGAATGAGGTTTTCAACCTTGATAGTATTTATCCTTCGGTCCAATA

>M6-PGSC0003DMG400014739-(rev)M6LRR-RLP\_1922

CCATCTTAGTTGGGAATGAGGTTTTCAACCTTGATAGTATTTATCCTTCGGTCCAATAAATTCAATGGTGA  
ATTGCCTCAAGAACTTTGTCAACTCAAAGATCTTCAGATCTTAGACCTT

>M6-PGSC0003DMG400014739-(rev)M6LRR-RLP\_1984

CAATGGTGAATTGCCTCAAGAACTTTGTCAACTCAAAGATCTTCAGATCTTAGACCTTGCAAACAATACA  
TTTGTGGGAATCATAACCAAGGTGTATTGGTAATTTCAAGTCAATGGTCAA

>M6-PGSC0003DMG400014739-(rev)M6LRR-RLP\_2046

ACAATACATTTGTTGGAATCATAACCAAGGTGTATTGGTAATTTCAAGTCAATGGTCAAAGGAAAAAAGG  
AAGTGGGAGATGATGATGAGTTAAATTATCCTACTTTTTGGGAGTTTTGA

>M6-PGSC0003DMG400014739-(rev)M6LRR-RLP\_248

CTACGCATAAGTTATCTAAGGATCGATAACCTAGAGTGGTTGTCAAGTCTTTGAGTCTTGAGAACCTGG  
AAATGTATCATGTGGATCTCCACAAAGCAACTAACTGGCTACAGGTTATT

>M6-PGSC0003DMG400014739-(rev)M6LRR-RLP\_2728

TTATTTTTGTTTTCTAGACCGTAGCTGGGAAATGTTGCTTGCAAAGTTATCAGTATGTTGAGAGATATCAT  
TAAGGATATTGCTATCATCAAAGTTAGTTTGTGTGCTTACATTTCTCA

>M6-PGSC0003DMG400014739-(rev)M6LRR-RLP\_2790

AGATATCATTAAAGGATATTGCTATCATCAAAGTTAGTTTGTGTGCTTACATTTCTCATGTTAGCAAACAT  
GTTGTTTCATTTTGTATTCAAATGAATGTTTCTGAAGATGTTCAAACAT

>M6-PGSC0003DMG400014739-(rev)M6LRR-RLP\_310

GAACCTGGAAATGTATCATGTGGATCTCCACAAAGCAACTAACTGGCTACAGGTTATTAACATGCTTCCT  
TCTTTGGTTGATCTAACGTTATCCAATTGTAGTCTTCATAATATAACAAA

>M6-PGSC0003DMG400014739-(rev)M6LRR-RLP\_372

TGCTTCCTTCTTTGGTTGATCTAACGTTATCCAATTGTAGTCTTCATAATATAACAAATCTACTTCATCACA  
ATCTTTCTTCACTTGAAACCCTCGATCTTTCTAGTACTAAGTTTAATT

>M6-PGSC0003DMG400014739-(rev)M6LRR-RLP\_434

CTTCATCACAATCTTTCTTCACTTGAAACCCTCGATCTTTCTAGTACTAAGTTTAATTCACCTATTCCCAATT



GGGTTTTCAACCTTTCCAATCTGTTTCTCTTAATTTGAGTGATTGT

>M6-PGSC0003DMG400014739-(rev)M6LRR-RLP\_496

TATTCCAATTGGGTTTTCAACCTTTCCAATCTGTTTCTCTTAATTTGAGTGATTGTAATTTTACTGGCCC

ATTTCCCGACTTTCCTGTAACTTGACTTCTCTCACTACCTTCAAGGC

>M6-PGSC0003DMG400014739-(rev)M6LRR-RLP\_558

TACTGGCCCATTTCCCGACTTTCCTGTAACTTGACTTCTCTCACTACCTTCAAGGCTTTTGAAAACCTCTT

TCAATTGTCTTTTACCCGAATGGTTGTTTGATTTAAGTAATCTAGAAC

>M6-PGSC0003DMG400014739-(rev)M6LRR-RLP\_62

ATTTTGAAAATAACCAAGTTTGTCAATTTGTGTAGGGATTTGTAGAGAAAATGAGCAACGAGCATTGGAG

AGCTTGAAGAAAGAAGTAGATGATCCCTTGGATATTCCCTCTTCTTGGGTT

>M6-PGSC0003DMG400014739-(rev)M6LRR-RLP\_620

GAAAACCTTTTCAATTGTCTTTTACCCGAATGGTTGTTTGATTTAAGTAATCTAGAACATCTTAACCTCCGT

TCTAGTGATTATAAAGGTGCAATACCAAATAAGAGTGGAAACACAACA

>M6-PGSC0003DMG400014739-(rev)M6LRR-RLP\_682

TAACCTCCGTTCTAGTGGTATTAAAGGTGCAATACCAAATAAGAGTGGAAACACAACAACACTTAAATAT

CTCGATCTTTTTGATAATAACCTTAACTCCACCATAACCAAATTGGTTATA

>M6-PGSC0003DMG400014739-(rev)M6LRR-RLP\_744

TTAAATATCTCGATCTTTTTGATAATAACCTTAACTCCACCATAACCAAATTGGTTATATCAATGCAAAGAT

CTAGAATCACTTTATCTTACTGAAAACCGTCTTGAGGGAACAGTTTCAA

>M6-PGSC0003DMG400014739-(rev)M6LRR-RLP\_806

TGCAAAGATCTAGAATCACTTTATCTTACTGAAAACCGTCTTGAGGGAACAGTTTCAAGTCTGATTCAA

ATTTGAGCTCAATAACTAATATTGACCTTTCTGGTAATATGCTTACTGGA

>M6-PGSC0003DMG400014739-(rev)M6LRR-RLP\_868

GATTTCAAATTTGAGCTCAATAACTAATATTGACCTTTCTGGTAATATGCTTACTGGAAAGTTACCAAATG

TAATTGGAATTTTAGGGAAATTAGAATTTCTTTCTTTTCAAAAAATCA

>M6-PGSC0003DMG400014739-(rev)M6LRR-RLP\_930

TACCAAATGTAATTGGAATTTTAGGGAAATTAGAATTTCTTTCTTTTCAAAAAATCAATTTGAGGGACA

AGTATCTGAATTATTCAAAGGTAGGAGTAATTTCTTTTCAAGGGGATTGG

>M6-PGSC0003DMG400014739-(rev)M6LRR-RLP\_992

GAGGGACAAGTATCTGAATTATTCAAAGGTAGGAGTAATTTCTTTTCAAGGGGATTGGGAAATACTTCT  
TTGATGGAATTGAGACTAGATGGTAATAAACTTAATGGAACCTTCCGAAA

>M6-PGSC0003DMG400014740-(rev)M6LRR-RLP\_0

AGGCCCTTTGTTTCCAATGTGGCTCCGAACTCAGGAGATGATAATGAATGTTGACATATCAGATTGTGGA  
ATACAAGGTGAGGTTCCAACCTTGTTTTGGAACCTTATCTTCTCAAATTGT

>M6-PGSC0003DMG400014829M6LRR-RLP\_0

CAAATATCGAAATTTTCTAACTACTTTGCACGAAAAACAAAGAGGAGGAGGAAGAAATAGTATTTCG  
TAGATTACATCTGAGCTTGACAACAAATTATGCAAGATTTTGAGTGAAACA

>M6-PGSC0003DMG400014829M6LRR-RLP\_1054

CAATGTTGTCAAATGCTCGAAGAGTTGATTCTTCGTGATCATAGGATGGAGGGTGGTTGGTTGTCTGCT  
CTTTCTATTGTGAAAATTTGAACACCTTGAGGTTTATGTCTTGTAAGAGT

>M6-PGSC0003DMG400014829M6LRR-RLP\_1116

GTCTGCTCTTTCCTATTGTGAAAATTTGAACACCTTGAGGTTTATGTCTTGTAAGAGTATTGATCATTGTG  
GATGGTTTGATGAAGATGTAGGATCTTGCCCAACACTTGAAAGATTACA

>M6-PGSC0003DMG400014829M6LRR-RLP\_1178

ATCATTGTGGATGGTTTGATGAAGATGTAGGATCTTGCCCAACACTTGAAAGATTACATTTTCGAGAAATG  
TCAATTAAGAAATAAGGAGAGTTTGAGAACGTTGTTTCTACTATGTCAAG

>M6-PGSC0003DMG400014829M6LRR-RLP\_124

GACCTTTCATGGTGTCTTCTGTTGGCTGCTAAGAAAACAATGGCGTTTTACCTGAAAAATCAAATTTCA  
GGTCACCATTGAAAGGGCCACCATCTCCTAGCTGGAATGATTTGTTGCTC

>M6-PGSC0003DMG400014829M6LRR-RLP\_1240

GAGAAATGTCAATTAAGAAATAAGGAGAGTTTGAGAACGTTGTTTCTACTATGTCAAGAAGTTAGAGAG  
GTTATTTTCCACAACCTGTTGGGGACTGGATAATGAAATGTTTCAGTCTATCC

>M6-PGSC0003DMG400014829M6LRR-RLP\_1302

TAGAGAGGTTATTTTCCACAACCTGTTGGGGACTGGATAATGAAATGTTTCAGTCTATCCACTGGTCTAAGG  
TATTGGTTATATTATTCTGTTCTCGTTTACTTTGCTTGCTGTTGCTGGAA

>M6-PGSC0003DMG400014829M6LRR-RLP\_1364

GTCTAAGGTATTGGTTATATTATTCTGTTCTCGTTTACTTTGCTTGCTGTTGCTGGAAAATTTTCGTGCTGG  
ATTAGCATTTTGTATGCATTTGACATACATGAACTTATTGAGTTTAGG

>M6-PGSC0003DMG400014829M6LRR-RLP\_1426

TCGTGCTGGATTAGCATTGTTATGCATTGACATACATGAACCTTATTGAGTTTAGGTTTTATGACCTTG  
AAATGTAGTTCCTTATTTTTGTTAAAAATGACTTTTTAGTGTTGCTGTA

>M6-PGSC0003DMG400014829M6LRR-RLP\_1488

ATGACCTTGAAATGTAGTTCCTTATTTTTGTTAAAAATGACTTTTTAGTGTTGCTGTAACCCCATCCCCA  
CCCCCGGGTATAATAGACGACCAAATGAAAGGATAGTTTGCTTGTA

>M6-PGSC0003DMG400014829M6LRR-RLP\_1550

CCATCCCCACCCCTCGGGTATAATAGACGACCAAATGAAAGGATAGTTTGCTTGTAATAGTGCATTTTA  
TTTTGGTCATAGTATAACCCATTGATCTTGTTTTCTTGGTAAAAGGATAAG

>M6-PGSC0003DMG400014829M6LRR-RLP\_1612

GCATTTTATTTTGGTCATAGTATAACCCATTGATCTTGTTTTCTTGGTAAAAGGATAAGTGTGATAAATTC  
CTTAGCTATTTGTGTTGGGGATAGATTGTTTTTTAAGGCCAGTTTGTA

>M6-PGSC0003DMG400014829M6LRR-RLP\_1674

ATAAATTCCTTAGCTATTTGTGTTGGGGATAGATTGTTTTTTAAGGCCAGTTTGTAGATGCATTTGTAA  
TCATGCACCGTCTTAGTGTTTCAGTTATTAATGTTAAAATAGCCTTACC

>M6-PGSC0003DMG400014829M6LRR-RLP\_1736

CATTTGTAATCATGCACCGTCTTAGTGTTTCAGTTATTAATGTTAAAATAGCCTTACCATTTCTCGAAGAG  
TATACTTCCATCTTGCATTAGAGAAAACACATAATGTTGATGGCATG

>M6-PGSC0003DMG400014829M6LRR-RLP\_1798

CTCGAAGAGTATACTTCCATCTTGCATTAGAGAAAACACATAATGTTGATGGCATGACAATTATGTTT  
CAATTCATTATTGATGCTTGATTATCAATATCATGTGTGCTATCTTGGA

>M6-PGSC0003DMG400014829M6LRR-RLP\_186

AAATTCAGGTCACCATTGAAAGGGCCACCATCTCCTAGCTGGAATGATTTGTTGCTCAAGAACAAGAA  
AGCACTCAATCATGTCCTTTTCACTATGCATCTTCAATCCAGGTCCAATAA

>M6-PGSC0003DMG400014829M6LRR-RLP\_1860

TTATGTTTCAATTCATTATTGATGCTTGATTATCAATATCATGTGTGCTATCTTGGATTATAAAGAGTCCA  
GTTTTGAGTTTTATACATTGAACTTGCTTCAGTTCTGACTGGCAATTT

>M6-PGSC0003DMG400014829M6LRR-RLP\_1922

AAAGAGTCCAGTTTTGAGTTTTATACATTGAACTTGCTTCAGTTCTGACTGGCAATTTGGTATCATATTTT

GTTTTGCATTCACCTGGAGCAACAGTAAAGTTGTTCCGTGTGACCTAT

>M6-PGSC0003DMG400014829M6LRR-RLP\_2046

CACCAATTTGAGCCGTGGAAGTAGCCACTAATGCTTGCATTAGGAGGGTATCCCCTTGCGTGAACAATG

GATAATTTATGCACAAGGCTGCCCTTAAAGTTCACCTTGAGTAAAGGGCCTG

>M6-PGSC0003DMG400014829M6LRR-RLP\_2108

AACAATGGATAATTTATGCACAAGGCTGCCCTTAAAGTTCACCTTGAGTAAAGGGCCTGTAATTAATAAA

TATAACATTATGTTAGGAATTTGGGTTTCACAGCTTCATTTTGGTGTTAT

>M6-PGSC0003DMG400014829M6LRR-RLP\_2170

TAACTAAATATAACATTATGTTAGGAATTTGGGTTTCACAGCTTCATTTTGGTGTTATTTTCAACAGGAGA

GTGAAGTCTCTTTGCCTAGAAAGCTGTTCACTGCTCACAACCTGAAGGCC

>M6-PGSC0003DMG400014829M6LRR-RLP\_2232

AACAGGAGAGTGAAGTCTCTTTGCCTAGAAAGCTGTTCACTGCTCACAACCTGAAGGCCTCGAATCTGCA

CTCCTTTCATGGAAGGAGATCCAGAGCCTCAAGGTGATATCATGTGGCAAT

>M6-PGSC0003DMG400014829M6LRR-RLP\_2294

ATCTGCACTCCTTTCATGGAAGGAGATCCAGAGCCTCAAGGTGATATCATGTGGCAATATAAAGGATAG

TGAAATCAGTCCAGCACTTCTACCTTGTCTCCACGCTAAAAGATTTTCA

>M6-PGSC0003DMG400014829M6LRR-RLP\_2356

AGGATAGTGAAATCAGTCCAGCACTTCTACCTTGTCTCCACGCTAAAAGATTTTTCAGTGGAGACCAGA

CACAAAATCTCTTCTTTCAGCTGGTCTTGTGGGAACTGGCATGCGAAAAA

>M6-PGSC0003DMG400014829M6LRR-RLP\_2418

AGACCAGACACAAAATCTCTTCTTTCAGCTGGTCTTGTGGGAACTGGCATGCGAAAAAAGAGGCAGTAAA

TTATTCAAGAAGACGTGCGACTGGAAGTCACTGCCTGGTGCATAGACTGGC

>M6-PGSC0003DMG400014829M6LRR-RLP\_248

ACAAGAAAGCACTCAATCATGTCCTTTTCACTATGCATCTTCAATCCAGGTCCAATAAGCAAACCCCATCT

TCATCCCCTTCTCCACAACCTTCGCAAATCCCTAGATTTCACTCTTCCCT

>M6-PGSC0003DMG400014829M6LRR-RLP\_2480

CAGTAAATTATTCAAGAAGACGTGCGACTGGAAGTCACTGCCTGGTGCATAGACTGGCTTCCCTCATCAT

GCATTCAGACAATAAATTATTCAAGAAGACATGCGACTGGAAGTCACTGCC

>M6-PGSC0003DMG400014829M6LRR-RLP\_2542

TCATCATGCATTCAGACAATAAATTATTCAAGAAGACATGCGACTGGAAGTCACTGCCTGGTGTATAGAC  
TGGCTTTCTCATCATGCATTCAGACAACCTACTAGATTTTACCTCCTGA

>M6-PGSC0003DMG400014829M6LRR-RLP\_2604

GTATAGACTGGCTTTCTCATCATGCATTCAGACAACCTACTAGATTTTACCTCCTGATTTATGCATATGA  
GAACTCTAACACATGAAAGAGGTCAGTGCAGACTTTGCTCCAATACTG

>M6-PGSC0003DMG400014829M6LRR-RLP\_2666

TGCATATGAGAACTCTAACACATGAAAGAGGTCAGTGCAGACTTTGCTCCAATACTGTCAGCAATGAG  
GCCTTGATGTCATTATCCTGTATTTGTAGTCGCTTAAGTATGTAACGTAGG

>M6-PGSC0003DMG400014829M6LRR-RLP\_2728

CAATGAGGCCTTGATGTCATTATCCTGTATTTGTAGTCGCTTAAGTATGTAACGTAGGAACTATAGGATC  
GAAGATCGGCACTTTCTCAGGGTAGAGATGGAGAAAGAGGCCTAAGTTAA

>M6-PGSC0003DMG400014829M6LRR-RLP\_2790

ATAGGATCGAAGATCGGCACTTTCTCAGGGTAGAGATGGAGAAAGAGGCCTAAGTTAATGTATAGAGC  
TCGATGCTGTAACCTCATGAGCATTAGCTAAAGCCATCTCGCTGTATCTTT

>M6-PGSC0003DMG400014829M6LRR-RLP\_2852

TAGAGCTCGATGCTGTAACCTCATGAGCATTAGCTAAAGCCATCTCGCTGTATCTTTGTCAAGAAGCTT  
AATGGTATTTCTGTATTTGGAACCCCAAAAACCTTTAAAAGGGGTTTTCC

>M6-PGSC0003DMG400014829M6LRR-RLP\_2914

AGAAGCTTAATGGTATTTCTGTATTTGGAACCCCAAAAACCTTTAAAAGGGGTTTTCTATCTACGATGTT  
ATAAAGAATTTTGGCACCTTTTATGCCATACTACTGCCTTCCACAATTG

>M6-PGSC0003DMG400014829M6LRR-RLP\_2976

TACGATGTTATAAAGAATTTTGGCACCTTTTATGCCATACTACTGCCTTCCACAATTGTGTGAAAGCATAT  
TTGATATGAACTATAACCAGCAAGCATGTCATTTGTGGAGGAGACGAGAA

>M6-PGSC0003DMG400014829M6LRR-RLP\_3011

CATACTACTGCCTTCCACAATTGTGTGAAAGCATATTTGATATGAACTATACCAGCAAGCATGTCATTTGT  
GGAGGAGACGAGAACCAGAATAATTTTCTACATCAATGGCATCTATGTC

>M6-PGSC0003DMG400014829M6LRR-RLP\_310

ACCCCATCTTCATCCCCTTCTCCACAACCTCGCAAATCCCTAGATTTCACTCTCCCTCACTTGTATCCGATC  
CAATTTCTCTTCTTTCTGATCAAATACTTCTTTCCATTCTCTCTAAA

>M6-PGSC0003DMG400014829M6LRR-RLP\_372

TGTATCCGATCCAATTTCTCTTTCTGATCAAATACTTCTTTCCATTCTCTCTAAACTCCCTGATTCACAA  
AGAAATTGTA ACTCTCTTGTATCTAAACGTTGGCTCAATCTCCAAGG

>M6-PGSC0003DMG400014829M6LRR-RLP\_434

CTGATTCACAAAGAAATTGTA ACTCTCTTGTATCTAAACGTTGGCTCAATCTCCAAGGTCGTCTGGTACG  
GTCGATTAAGCTTCTTGATTGGGATTCCTTGTTTCGGGTTCGGTTGTTTG

>M6-PGSC0003DMG400014829M6LRR-RLP\_496

CTGGTACGGTCGATTAAGCTTCTTGATTGGGATTCCTTGTTTCGGGTTCGGTTGTTTGTTTCGGTTCCCTAA  
TCTTATCCATGTTGATTTGGTTAATGGGTCTCTCATTTACCGGGGAAT

>M6-PGSC0003DMG400014829M6LRR-RLP\_558

GTTCCCTAATCTTATCCATGTTGATTTGGTTAATGGGTCTCTCATTTACCGGGGAATGCAGGTGTTTTTT  
GCTCTAACCGGTTGCTTTCTTCTCACGTGGATTGTAGCGCTGATGCGAA

>M6-PGSC0003DMG400014829M6LRR-RLP\_62

GTATTCGTAGATTACATCTGAGCTTGACAACAAATTATGCAAGATTTTGAGTGAAACAACCAGACCTTTC  
ATGGTGTTTCTTGTTGGCTGCTAAGAAAACAATGGCGTTTTTCACCTGAAA

>M6-PGSC0003DMG400014829M6LRR-RLP\_620

GTGTTTTTTGCTCTAACCGGTTGCTTTCTTCTCACGTGGATTGTAGCGCTGATGCGAAAGATTGGTTTCTT  
AAGGAAAGATTTGTGTTGCCTTCTGATGAGATTGATAAGGGGTTGAGAA

>M6-PGSC0003DMG400014829M6LRR-RLP\_682

TGGTTTCTTAAGGAAAGATTTGTGTTGCCTTCTGATGAGATTGATAAGGGGTTGAGAATACTAGCAAGT  
GGGTGTCCTAATTTGCGTAGATTGTTGGTGGTAAATGCTAGTGAATTGGGA

>M6-PGSC0003DMG400014829M6LRR-RLP\_744

AGCAAGTGGGTGTCCTAATTTGCGTAGATTGTTGGTGGTAAATGCTAGTGAATTGGGATTGTTGGGGGT  
AGCTGAGGAATGTCCAACCTTGCAAGTGTGGAATTGCACAGATGTAATGA

>M6-PGSC0003DMG400014829M6LRR-RLP\_806

TGGGGGTAGCTGAGGAATGTCCAACCTTGCAAGTGTGGAATTGCACAGATGTAATGATCAGGTTCTTC  
GTGGTATAGCGCCTGTCAGAACTTGCAAGATATTGAGATTGATTGGAAATG

>M6-PGSC0003DMG400014829M6LRR-RLP\_868

GTTCTTCGTGGTATAGCGCCTGTCAGAACTTGCAAGATATTGAGATTGATTGGAAATGTTGATGGGTTTT

ATAAATCTTTGGTTACTGATATTGGATTGACTATTTTAGCTCAGGGGTGT

>M6-PGSC0003DMG400014829M6LRR-RLP\_930

TGGGTTTTATAAATCTTTGGTTACTGATATTGGATTGACTATTTTAGCTCAGGGGTGTAAGAGGTTGGTG

AAGCTGGAGCTGAGTGGTTGTGAAGGGAGCTATGAAGGGATTAAGGCAAT

>M6-PGSC0003DMG400014829M6LRR-RLP\_992

GGTTGGTGAAGCTGGAGCTGAGTGGTTGTGAAGGGAGCTATGAAGGGATTAAGGCAATAGCACAATG

TTGTCAAATGCTCGAAGAGTTGATTCTTCGTGATCATAGGATGGAGGGTGGTT

>M6-PGSC0003DMG400014875-(rev)M6RLKmalectin\_1054

TGATAGATTTGAACAATTTGCAGTTCCTTTTTATGTTGATTTTGTGGTGGATTGAGATGGTTCTGGTTTTA

TGAATATCTCAGTTGGTCTCGGAATGATTCAAAGTCTATAAATGCTTT

>M6-PGSC0003DMG400014875-(rev)M6RLKmalectin\_1116

CTGGTTTTATGAATATCTCAGTTGGTCTCGGAATGATTCAAAGTCTATAAATGCTTTTTTGAATGGGGT

GGAAATAATGGAGTTGATTAATGATCGGGTTGAGTGTAGGGGAGAAAAGA

>M6-PGSC0003DMG400014875-(rev)M6RLKmalectin\_124

CACCTTCCCTGAAAAACACTTCATCAATTGTGGTTCTGATTCTCCCATCGTACTCAACCGCGGCGGCGGC

AGCACCCTTTTGCCGCGGACTTGAAATTCGACCCCAACCACAGTGATTC

>M6-PGSC0003DMG400014875-(rev)M6RLKmalectin\_1302

TGGTGATCTTGTGTTGTTTGAACCAAGAAAAGCACAAACGGTTGAGAACTCGAGTTGGTGGCCAAGG

ATGAGTGTTAATGCTGGAAGTACAGAGGATAGGACTCCTGTAAGAACTCCAA

>M6-PGSC0003DMG400014875-(rev)M6RLKmalectin\_1364

CCAAGGATGAGTGTTAATGCTGGAAGTACAGAGGATAGGACTCCTGTAAGAACTCCAATTGGTAGCACT

ACTCCTGATATGAACCTTGGGTTAAAGATATCTTTCGCAGAGATTTTGCAT

>M6-PGSC0003DMG400014875-(rev)M6RLKmalectin\_1426

TAGCACTACTCCTGATATGAACCTTGGGTTAAAGATATCTTTCGCAGAGATTTTGCATGCTACTAATAAGT

TTGATCCCAAATTTATGATTGGTGAGGGTGGTTTTGGGAAAGTTTACAA

>M6-PGSC0003DMG400014875-(rev)M6RLKmalectin\_1488

CTAATAAGTTTGATCCCAAATTTATGATTGGTGAGGGTGGTTTTGGGAAAGTTTACAAAGGAACTTTACA

CAGTGGTGTTAAAGTGGCTGTGAAAAGAAGCGAAGCTGGACATGGGCAGG

>M6-PGSC0003DMG400014875-(rev)M6RLKmalectin\_1550

ACTTTACACAGTGGTGTAAAGTGGCTGTGAAAAGAAGCGAAGCTGGACATGGGCAGGGTCTTATGGA  
ATTTCAAACCTCAGATAATGCTCTTGTCCAAAATCCGCCATCAGCATCTTGTT

>M6-PGSC0003DMG400014875-(rev)M6RLKmalectin\_1612

TATGGAATTTCAAACCTCAGATAATGCTCTTGTCCAAAATCCGCCATCAGCATCTTGTTTCATTGATTGGTT  
ATTGTGATGAACGAGATGAGATGATACTTGTATGAATTCATGGCGAA

>M6-PGSC0003DMG400014875-(rev)M6RLKmalectin\_1674

TGATTGGTTATTGTGATGAACGAGATGAGATGATACTTGTATGAATTCATGGCGAAGGGAACCTTGA  
GAGAGCATTTGTACAGTTTGAATGAAGATCTTGGTAAATCATCTTCACGGT

>M6-PGSC0003DMG400014875-(rev)M6RLKmalectin\_1736

ACTTTGAGAGAGCATTTGTACAGTTTGAATGAAGATCTTGGTAAATCATCTTCACGGTCAAATTATCGT  
GGGATCAAAGGCTTCAAATTTGTATAGGTGCAGCTAATGGTCTACAGTAC

>M6-PGSC0003DMG400014875-(rev)M6RLKmalectin\_1798

ATTATCGTGGGATCAAAGGCTTCAAATTTGTATAGGTGCAGCTAATGGTCTACAGTACCTTCATGCCGGT  
TTACCTGAGCCAACTATTCACAGGGATATTAAGTCAACAAACATACTTCT

>M6-PGSC0003DMG400014875-(rev)M6RLKmalectin\_186

GCGGCGGCAGCACCACTTTTGCCGGCGACTTGAAATTCGACCCCAACCACAGTGATTCCGTTAAAGACC  
ACACCACTACTACAGGTTTAGCTGGAATCTATCAAACCGCCAGAAAGTTCA

>M6-PGSC0003DMG400014875-(rev)M6RLKmalectin\_1860

ATGCCGGTTTACCTGAGCCAACTATTCACAGGGATATTAAGTCAACAAACATACTTCTTGATGAAGATTA  
TGTTGCTAAAGTTGCTGATTTCCGGTCTCTCAAATCAGGTCAACCTGAAG

>M6-PGSC0003DMG400014875-(rev)M6RLKmalectin\_1922

GAAGATTATGTTGCTAAAGTTGCTGATTTCCGGTCTCTCAAATCAGGTCAACCTGAAGAAACACACATTG  
TTACTGATGTTAAAGGTAGCTTCGGTTATCTTGATCCCGAGTACCTGAAA

>M6-PGSC0003DMG400014875-(rev)M6RLKmalectin\_1984

ACACATTGTTACTGATGTTAAAGGTAGCTTCGGTTATCTTGATCCCGAGTACCTGAAATCAATGCAACTA  
ACTCAAAGTCTGATGTCTATTCTTTGGAGTTGTACTTTTTGAAGTACT

>M6-PGSC0003DMG400014875-(rev)M6RLKmalectin\_2046

TGCAACTAACTCAAAGTCTGATGTCTATTCTTTGGAGTTGTACTTTTTGAAGTACTTTGTGCTAGACCA  
GCTGTTGATAATATGCTTCCAAGAAATCAAATGAACTTAGCTGAATGGG



>M6-PGSC0003DMG400014875-(rev)M6RLKmalectin\_2108

GCTAGACCAGCTGTTGATAATATGCTTCCAAGAAATCAAATGAAGCTTAGCTGAATGGGGACTTTCTTGGC  
TAAAAGAAAACCAGATCGAAAAGATAATTGATCCATTTCTTGTAGGTAAA

>M6-PGSC0003DMG400014875-(rev)M6RLKmalectin\_2170

TTCTTGGCTAAAAGAAAACCAGATCGAAAAGATAATTGATCCATTTCTTGTAGGTAAAATTAACCCAAAC  
TCTCTGAGGAAATTCGGAGAAATAGCAGAGAAGTGTCTGCAAGAGAATGG

>M6-PGSC0003DMG400014875-(rev)M6RLKmalectin\_2232

ACCCAAACTCTCTGAGGAAATTCGGAGAAATAGCAGAGAAGTGTCTGCAAGAGAATGGCACTGATAGG  
CCTAAGATGATGGATGTGTTGTGGGACTTGGATTACGCTCGACAGCTTCAAC

>M6-PGSC0003DMG400014875-(rev)M6RLKmalectin\_2294

GATAGGCCTAAGATGATGGATGTGTTGTGGGACTTGGATTACGCTCGACAGCTTCAACACCCTACAATG  
CCCCAACAATCTCATGAGGATACCAACTCCGATGTTTCGTGGCAAGTGGCA

>M6-PGSC0003DMG400014875-(rev)M6RLKmalectin\_2356

TACAATGCCCCAACAATCTCATGAGGATACCAACTCCGATGTTTCGTGGCAAGTGGCATTGCCTGGTATC  
AATCGCTTACCTTCTATAAATGTAAGCACAAGCTTTGTCAGTGTCACTGA

>M6-PGSC0003DMG400014875-(rev)M6RLKmalectin\_2418

CTGGTATCAATCGCTTACCTTCTATAAATGTAAGCACAAGCTTTGTCAGTGTCACTGATAGCGAGGCTTTT  
TCAGAATTGAGGATCGATGAAACCAGATGATTTGTGGCCTCGTTGTTGT

>M6-PGSC0003DMG400014875-(rev)M6RLKmalectin\_248

AAAGACCACACCACTACTACAGGTTTAGCTGGAATCTATCAAACCGCCAGAAAGTTCCTAAATCTGGGT  
CATAAATCTTCGAATTGATGAAAATGGGGTTTACATGGTACGGCTTCAT

>M6-PGSC0003DMG400014875-(rev)M6RLKmalectin\_2480

GAGGCTTTTTTCAGAATTGAGGATCGATGAAACCAGATGATTTGTGGCCTCGTTGTTGTTAGCATTATCT  
GATGATATGTAATTTTCATCTTATTCTACTTCATTCTGTCTAATGTAATTG

>M6-PGSC0003DMG400014875-(rev)M6RLKmalectin\_2542

ATTCATCTGATGATATGTAATTTTCATCTTATTCTACTTCATTCTGTCTAATGTAATTGTGTATCAAAACAGT  
GTGTAATAGTCAGTGTTTCAGTTTTAATATAGGCAAATGCCTCTTGACA

>M6-PGSC0003DMG400014875-(rev)M6RLKmalectin\_2602

TATCAAAACAGTGTGTAATAGTCAGTGTTTCAGTTTTAATATAGGCAAATGCCTCTTGACAATGCATCTGT

ATTGATAGTATATAATATTTTGATAATAAAGTCTCGTGTCTATTCTCCCA

>M6-PGSC0003DMG400014875-(rev)M6RLKmalectin\_310

ATCTGGGTCATACAATCTTCGAATTGATGAAAATGGGGTTTACATGGTACGGCTTCATTTCTTTCTTTTCG  
TTTCTCTATTCGATGCGAAATTCAGTGTTTCCGCTTCTGGGTTTTTGCT

>M6-PGSC0003DMG400014875-(rev)M6RLKmalectin\_372

TTCTTTTCGTTTCTCTATTCGATGCGAAATTCAGTGTTTCCGCTTCTGGGTTTTTGCTATTGTCCAATTTTA  
GCATACCTAGAACTTAATAACTTCCCCTGTTATCAAAGAGTTTCTGG

>M6-PGSC0003DMG400014875-(rev)M6RLKmalectin\_434

TCCAATTTTAGCATACCTAGAACTTAATAACTTCCCCTGTTATCAAAGAGTTTCTGGTTCCTGTACTAAA  
AGGTCGTAATTTGGAAATCATTTTCATACCTGATTCTTCTTTTGCATTT

>M6-PGSC0003DMG400014875-(rev)M6RLKmalectin\_496

TGTAATAAAGGTCGTAATTTGGAAATCATTTTCATACCTGATTCTTCTTTTGCATTTGTTAATGCAATAG  
AAGCATTTGTTACTCCTCAAAGTTTCATTCCTAACTCTAATGACACAAC

>M6-PGSC0003DMG400014875-(rev)M6RLKmalectin\_558

ATGCAATAGAAGCATTTGTTACTCCTCAAAGTTTCATTCCTAACTCTAATGACACAACCCATGTCACTAGC  
AGCAAATGGATTTATCCTCGAGTGTTTTGAATGTTATTCATAGGATTA

>M6-PGSC0003DMG400014875-(rev)M6RLKmalectin\_62

CTCTCATTTCTCACTTTTTCTCTTCTCTCCTCCCATTTTCCATTTTCGTCATCACCTAATTACACCTTCCCTGA  
AAACACTTCATCAATTGTGGTTCTGATTCTCCCATCGTACTCAAC

>M6-PGSC0003DMG400014875-(rev)M6RLKmalectin\_620

GTCACTAGCAGCAAATGGATTTATCCTCGAGTGTTTTGAATGTTATTCATAGGATTAATGTTGGGGGTT  
CTAATATTACCGACGATATGGATACCATGAGGAGAAAATGGGTAGCTGAT

>M6-PGSC0003DMG400014875-(rev)M6RLKmalectin\_682

TGGGGGTTCTAATATTACCGACGATATGGATACCATGAGGAGAAAATGGGTAGCTGATGATGATTACTT  
ACTTATCAAAGATTAGCTATGAACCTTCCAATGTATAGTAAAAGGCCTAA

>M6-PGSC0003DMG400014875-(rev)M6RLKmalectin\_744

ATTACTTACTTATCAAAGATTAGCTATGAACCTTCCAATGTATAGTAAAAGGCCTAACTATGGTCCAGT  
AGAAGGGGCTACTCAGTATGATGCTCCTGATTTGGTTTATAAACTGCCA

>M6-PGSC0003DMG400014875-(rev)M6RLKmalectin\_806

GGTCCAGTAGAAGGGGCTACTCAGTATGATGCTCCTGATTTGGTTTATAAACTGCCAAAGAAATGAAT  
AGTAGTCATGTTGAGACTCAAATGACAACCTCTTTAACATAACTTGCGT

>M6-PGSC0003DMG400014875-(rev)M6RLKmalectin\_868

AATGAATAGTAGTCATGTTGAGACTCAAATGACAACCTCTTTAACATAACTTGCGTTTTGAGGTGAAA  
AGGAATGCTACATTTTTGTACGTCTACACTTTTGTGACATTGTTAGTGA

>M6-PGSC0003DMG400014875-(rev)M6RLKmalectin\_930

AGGTGAAAAGGAATGCTACATTTTTGTACGTCTACACTTTTGTGACATTGTTAGTGATCAGCGGAATGG  
TACAGTTTTCAATGCCTATATATATGGTATGTTGGTAAGCCAATTAGTC

>M6-PGSC0003DMG400014875-(rev)M6RLKmalectin\_992

CGGAATGGTACAGTTTTCAATGCCTATATATATGGTATGTTGGTAAGCCAATTAGTCCATATGATAGAT  
TTGAACAATTTGCAGTTCCTTTTTATGTTGATTTTGTGGTGGATTCAGAT

>M6-PGSC0003DMG400014917M6LRR-RLK\_0

GTTCACTACTACTATTTTTATTTGTATCTCAATTTTGTCAAAAATAAAAAATCCCCAACAAATGATGTGG  
AGGATATTCGTTTTCTTGTCTTTTACTCAATTCTCATACCGGATTTT

>M6-PGSC0003DMG400014917M6LRR-RLK\_1054

ACTAGTGATTATTTACTTGTATTGGAAAAAGAAAGACTCTGGTGGTTGCAGCTGTACTGGAAAAGGGAA  
ATTTGGTGGAAATGAGAAGAGAATGCTTTGTAATTTCCCATGTATTAATGG

>M6-PGSC0003DMG400014917M6LRR-RLK\_1116

AAGGGAAATTTGGTGGAAATGAGAAGAGAATGCTTTGTAATTTCCCATGTATTAATGGATTTCCGAATA  
ATGATTCGGAAGTTGAGTCTGAGAAGGGAGGTGGCGGTGGGGCTAGTGGTG

>M6-PGSC0003DMG400014917M6LRR-RLK\_124

AACTCCGACGGACTTTCCTTCTATCTCTAAAATCCGCCATGGATGATGGCGGTGGTGGTACAGTTTTTC  
TCCGATTGGAATGAAAACGATGATACTCCTTGTACTTGGACTGGCATTTC

>M6-PGSC0003DMG400014917M6LRR-RLK\_1240

TGTTAGTGGTGGGGAGGGTGTCTTGTGGCTATTGATAAAGGTTTTAGCTTTGAGCTTGATGAGCTGTT  
GAGGGCTTCTGCTTATGTGTTGGGAAAGAGTGGGTTGGGGATAGTGACAA

>M6-PGSC0003DMG400014917M6LRR-RLK\_1302

AGCTGTTGAGGGCTTCTGCTTATGTGTTGGGAAAGAGTGGGTTGGGGATAGTGACAAGGTTGTGCTT  
GGGAACGGTATCCAGTGGCAGTGAGGAGGTTAGGGGAAGGTGGGGAACAGA

>M6-PGSC0003DMG400014917M6LRR-RLK\_1364

GTGCTTGGGAACGGTATCCCAGTGGCAGTGAGGAGGTTAGGGGAAGGTGGGGAACAGAGATATAAGG  
AGTTTGTGCTGAGATTCAGGCAATCGGAAGGGTTAAGCATCCTAATGTTGTG

>M6-PGSC0003DMG400014917M6LRR-RLK\_1426

TAAGGAGTTTGTGCTGAGATTCAGGCAATCGGAAGGGTTAAGCATCCTAATGTTGTGAAGTTAAGAGC  
TTATTATTGGGCTCCTGATGAGAACTTCTCATTAGTGATTCATTTCCAA

>M6-PGSC0003DMG400014917M6LRR-RLK\_1488

TAAGAGCTTATTATTGGGCTCCTGATGAGAACTTCTCATTAGTGATTCATTTCCAACGGCAACTTGGCT  
TCTGCTCTTACGGTGAGCTTTTCATTATAGTAAAACATCTTCAGTTTT

>M6-PGSC0003DMG400014917M6LRR-RLK\_1550

AACTTGGCTTCTGCTCTTACGGTGAGCTTTTCATTATAGTAAAACATCTTCAGTTTTGTTTGTCTAGTAG  
ATATAACCTGTTGAAAGAATCATTAAACACATTCATATTTTAGATATCGG

>M6-PGSC0003DMG400014917M6LRR-RLK\_1612

GTCTAGTAGATATAACCTGTTGAAAGAATCATTAAACACATTCATATTTTAGATATCGGGGTATACTATATT  
CTTATCATTTAGTAGCATGATACACTGATGGATGTTTCGTACTTTCCAA

>M6-PGSC0003DMG400014917M6LRR-RLK\_1674

TACTATATTCTTATCATTTAGTAGCATGATACACTGATGGATGTTTCGTACTTTCCAAGATCGATATGTGT  
AAAGTGTAATTCTTTTGTGCTGGATTAGTATTTACTTATTGATCACTCTT

>M6-PGSC0003DMG400014917M6LRR-RLK\_1736

GATATGTGTAAAGTGTAAATTCTTTTGTGCTGGATTAGTATTTACTTATTGATCACTCTTTGAGGAGTGGAA  
ATACAGTACAAGACTTTTGGTATTAGGTTAGTTAGGAGTTTGGGATGTT

>M6-PGSC0003DMG400014917M6LRR-RLK\_1798

GGAGTGGAAATACAGTACAAGACTTTTGGTATTAGGTTAGTTAGGAGTTTGGGATGTTCTAGTATTTATT  
CACTAGTATAACTGTTTAATATATTCCCGATGACAAAATAATGACTTTTA

>M6-PGSC0003DMG400014917M6LRR-RLK\_186

CAGTTTTCTCCGATTGGAATGAAAACGATGATACTCCTTGTACTTGGACTGGCATTTCATGTGCTAACATT  
TCTGGTTCTTCAGAGCCACGTGTCGTTGGGATTACTCTTCCGGTAAGA

>M6-PGSC0003DMG400014917M6LRR-RLK\_1860

TATTTATTCAGTAGTATAACTGTTTAATATATTCCCGATGACAAAATAATGACTTTTAGCTGTTGTGTGTTT

CTTGATGATTTTGAATAGCAATTATTTATATGCCATCTAGTGATAATT

>M6-PGSC0003DMG400014917M6LRR-RLK\_1922

TTGTGTGTTCCCTTGATGATTTTGAATAGCAATTATTTATATGCCATCTAGTGATAATTTTATATTGAATGTG

TCCCATGTGCTTGCAATCCTTGAGTGAAGGATGAGTTTTGTTTGCAC

>M6-PGSC0003DMG400014917M6LRR-RLK\_1984

ATTGAATGTGTCCCATGTGCTTGCAATCCTTGAGTGAAGGATGAGTTTTGTTTGCAGACTTGATAATTTGC

GTAGGATTTTTGTTTAATTGTATCAGCTGATAGGATAGTCTTTATTATGT

>M6-PGSC0003DMG400014917M6LRR-RLK\_2046

TAATTTGCGTAGGATTTTTGTTTAATTGTATCAGCTGATAGGATAGTCTTTATTATGTATCATAGATGAAA

AGTTATCTGCATAAAGGGTAAACCAACAACCTAACATTTTCCATCCATT

>M6-PGSC0003DMG400014917M6LRR-RLK\_2108

TAGATGAAAAGTTATCTGCATAAAGGGTAAACCAACAACCTAACATTTTCCATCCATTTCAATGGATGTT

AAAGCACATAGTAGTATATTAACCTATAATGATCCAGCTTAAGTCAATTT

>M6-PGSC0003DMG400014917M6LRR-RLK\_2170

TGGATGTTAAAGCACATAGTAGTATATTAACCTATAATGATCCAGCTTAAGTCAATTTGCAGACTTTAAC

GATTTACTGCCGATGCAATAATCATATGTTGACATCATATCGAACCTGGT

>M6-PGSC0003DMG400014917M6LRR-RLK\_2232

ACTTTAACGATTTACTGCCGATGCAATAATCATATGTTGACATCATATCGAACCTGGTAGAAAGGGCATT

TGGGCATGTTTTGAAGAATTTAGTCTCTCTTTTTTTCATGTGACATATGGT

>M6-PGSC0003DMG400014917M6LRR-RLK\_2294

AGGGCATTGGGCATGTTTTGAAGAATTTAGTCTCTCTTTTTTTCATGTGACATATGGTTGACTGCCCGAT

AAACCTTGCGGAAAATGATTTATCATCAATTAGAAGCAAACCAATAAGT

>M6-PGSC0003DMG400014917M6LRR-RLK\_2356

TGCCCCGATAAACCTTGCGGAAAATGATTTATCATCAATTAGAAGCAAACCAATAAGTACAAGGGGCCA

AGAAGTGAATTATGTCATGTACTAGGTCAATTCCTTAAGTTGTGGAGTTAC

>M6-PGSC0003DMG400014917M6LRR-RLK\_2418

GGGGCCAAGAAGTGAATTATGTCATGTACTAGGTCAATTCCTTAAGTTGTGGAGTTACGTATTCTGTCTC

TCAAAAGAGTCTAGATATTACATTGTTTTATTATGTCTTTTAGAGATGTA

>M6-PGSC0003DMG400014917M6LRR-RLK\_248

GCTAACATTTCTGGTTCCTCAGAGCCACGTGTCGTTGGGATTACTCTTTCCGGTAAGAATCTCCGGGGAT  
ACTTACCGTCTGAGCTGGGAACGTTACTCTATCTCCGGCGACTGAATCTT

>M6-PGSC0003DMG400014917M6LRR-RLK\_2480

TCTGTCTCTCAAAGAGTCTAGATATTACATTGTTTTATTATGTCTTTTAGAGATGTATTACTGATTTGCAT  
ATGCTAATATTCAAGAATTTTCGAATCGCTCCGCCTGGTGCAGTTTGA

>M6-PGSC0003DMG400014917M6LRR-RLK\_2542

TGATTTGCATATGCTAATATTCAAGAATTTTCGAATCGCTCCGCCTGGTGCAGTTTGACTTTACAGATGTT  
TACTTTTTCGAAGCAAACCTGGAATCTGCAGTATCTGGTCTGGTAACTAC

>M6-PGSC0003DMG400014917M6LRR-RLK\_2604

ACAGATGTTTACTTTTTCGAAGCAAACCTGGAATCTGCAGTATCTGGTCTGGTAACTACCATCTAGCATGA  
GCGGGACTTATACTCCCTTGAGATGGATTCTAGACTTCGAATTTTTAAAA

>M6-PGSC0003DMG400014917M6LRR-RLK\_2666

TAGCATGAGCGGGACTTATACTCCCTTGAGATGGATTCTAGACTTCGAATTTTTAAAACCTTAGTTTTCTGC  
AATTGAATTTTGCCTGTTGCTGTTGGTATAGCTGCTTGAATGTTACAT

>M6-PGSC0003DMG400014917M6LRR-RLK\_2728

GTTTTCTGCAATTGAATTTTGCCTGTTGCTGTTGGTATAGCTGCTTGAATGTTACATTTTTAAAAGAAT  
TAGATTTTTTCCCCTGATACAAATCGTTGTTTACATTTATGAATATCTA

>M6-PGSC0003DMG400014917M6LRR-RLK\_2790

AAAAGAATTAGATTTTTTCCCCTGATACAAATCGTTGTTTACATTTATGAATATCTACTTCACTGCCTCAT  
ATACATGTCACTATGAATCTATAACACATTCGTTACCCAAGAGTAACT

>M6-PGSC0003DMG400014917M6LRR-RLK\_2852

ACTGCCTCATATACATGTCACTATGAATCTATAACACATTCGTTACCCAAGAGTAACTGCTTGCTTTCTGA  
GACAAATATATTTGATGACCTTTGGTTCTATGGTACCTGATGTTCCAG

>M6-PGSC0003DMG400014917M6LRR-RLK\_2914

GCTTTCTGAGACAAATATATTTGATGACCTTTGGTTCTATGGTACCTGATGTTCCAGTTTCTTAATTTACC  
TGTTTTTAAAATTATGTAGCTGGAATTTGACAGTAGAGCAACTTACCT

>M6-PGSC0003DMG400014917M6LRR-RLK\_2976

TTAATTTACCTGTTTTTAAAATTATGTAGCTGGAATTTGACAGTAGAGCAACTTACCTTTTGCATTCTGAA  
GAAGTTGAGGAGTGTTTTCTTTCAGCATCTTTTTTCCAAATTGTTTTG

>M6-PGSC0003DMG400014917M6LRR-RLK\_3038

CATTCTGAAGAAGTTGAGGAGTGTTTTCTTTTCAGCATCTTTTTCCAAATTGTTTGGCCATGCTAGATCT  
GTATGTATTGACGTAGTGACAGTAGTTTCATGCTCTAGCTGATTGAGAT

>M6-PGSC0003DMG400014917M6LRR-RLK\_310

CCGGGGATACTTACCGTCTGAGCTGGGAACGTTACTCTATCTCCGGCGACTGAATCTTCATGGAAATAAT  
ATTTACGGTTCTATCCCTGACCCTTTATTCAATGCGACGTCGCTTCATAG

>M6-PGSC0003DMG400014917M6LRR-RLK\_3100

GCTAGATCTGTATGTATTGACGTAGTGACAGTAGTTTCATGCTCTAGCTGATTGAGATTAGCCAAATTAG  
TGTGAACACCGATTTGCCTATTGAGCTGAAAAGTTATTAACCTTGATCTT

>M6-PGSC0003DMG400014917M6LRR-RLK\_3162

CAAATTAGTGTGAACACCGATTTGCCTATTGAGCTGAAAAGTTATTAACCTTGATCTTGTTCGTCATACTG  
TGGTAAATGTTGTGATGACAATCTCGTTTGCCTTTATACAGGGAGAAAT

>M6-PGSC0003DMG400014917M6LRR-RLK\_3224

GTCATACTGTGGTAAATGTTGTGATGACAATCTCGTTTGCCTTTATACAGGGAGAAATGGGCAACCATCA  
CCTAGTTTAAACATGGTCAACGAGACTGAAAATTGCTAAGGGAACAGCGCG

>M6-PGSC0003DMG400014917M6LRR-RLK\_3286

AACCATCACCTAGTTTAAACATGGTCAACGAGACTGAAAATTGCTAAGGGAACAGCGCGAGGTTTAGCCT  
ATCTCCATGAGTGTAGCCCAAGGAAATTTGTCCATGGAGACGTCAAACCTT

>M6-PGSC0003DMG400014917M6LRR-RLK\_3348

TTAGCCTATCTCCATGAGTGTAGCCCAAGGAAATTTGTCCATGGAGACGTCAAACCTTCCAATATTCTCCT  
TGATACTGAACTGCAGCCATATATATCTGATTTTGGCCTCAATCGATTA

>M6-PGSC0003DMG400014917M6LRR-RLK\_3410

TATTCTCCTTGATACTGAACTGCAGCCATATATATCTGATTTTGGCCTCAATCGATTAATCAATATCACGG  
GAAACAACCCCTCCTCTTCTGGTGGATTTATGGGTGGAGCTCTTCCTTA

>M6-PGSC0003DMG400014917M6LRR-RLK\_3472

ATATCACGGGAAACAACCCCTCCTCTTCTGGTGGATTTATGGGTGGAGCTCTTCCTTACTTGAAGCCTGC  
TCAACCAGAACGTCCCAATAACTATCGAGCACCAGAAGCTCGAATCACTG

>M6-PGSC0003DMG400014917M6LRR-RLK\_3534

AAGCCTGCTCAACCAGAACGTCCCAATAACTATCGAGCACCAGAAGCTCGAATCACTGGTAACAGACCC

ACCCAAAAATGGGATGTGTACTCATTCCGGGGTGGTCTTGCTTGAAGTCTG

>M6-PGSC0003DMG400014917M6LRR-RLK\_3596

CAGACCCACCCAAAAATGGGATGTGTACTCATTCCGGGGTGGTCTTGCTTGAAGTCTGACTGGAAAGTC  
TCCTGACCTCTCAGTTCCTACAACATCCACTTCAACGGAGGTTCCAGATCT

>M6-PGSC0003DMG400014917M6LRR-RLK\_3658

GAAAGTCTCCTGACCTCTCAGTTCCTACAACATCCACTTCAACGGAGGTTCCAGATCTTGTAAGATGGGT  
AAGAAAGGGATTGAGGAGCAAATCCACTGTCCGATATGGTAGAACCAA

>M6-PGSC0003DMG400014917M6LRR-RLK\_372

GAAATAATATTTACGGTTCCTATCCCTGACCCTTTATTCAATGCGACGTCGCTTCATAGTATTTATTTGTATG  
ATAATAATATCTCTGGTATACTTCCTCCTTCTGTTTGTAATCTTCCTC

>M6-PGSC0003DMG400014917M6LRR-RLK\_3720

AGATGGGTAAGAAAGGGATTGAGGAGCAAATCCACTGTCCGATATGGTAGAACCAATGTTGCTTCA  
AGAAGTCCATGCTAAGAAGGAAGTACTAGCTGTATTTTCATGTAGCTCTTGCA

>M6-PGSC0003DMG400014917M6LRR-RLK\_3782

GCTTCAAGAAGTCCATGCTAAGAAGGAAGTACTAGCTGTATTTTCATGTAGCTCTTGCATGCACCGAGGC  
AGATCCAGATATTCGACCAAGGATGAAAACATCTCAGAAAACATTGAGAA

>M6-PGSC0003DMG400014917M6LRR-RLK\_3844

CCGAGGCAGATCCAGATATTCGACCAAGGATGAAAACATCTCAGAAAACATTGAGAAAGTTGGAGCTT  
AAACTTTTCGGTACACTCATGTCAAGGAGTTCCTGAGTTTCATGGACTTCT

>M6-PGSC0003DMG400014917M6LRR-RLK\_3906

GGAGCTTAACTTTTCGGTACACTCATGTCAAGGAGTTCCTGAGTTTCATGGACTTCTTTAATCCTTTTTT  
TGCAGTAATTGCTCCTATTATTTTTTTTTCTTTTAGAGGTTAATCAAAT

>M6-PGSC0003DMG400014917M6LRR-RLK\_3968

TCCTTTTTTTGCAGTAATTGCTCCTATTATTTTTTTTTCTTTTAGAGGTTAATCAAATCTTTACTTAACTACA  
GTACAAAATACTAGTGTGCTGCAACAAAATTCCTGTCATTTTTGAGA

>M6-PGSC0003DMG400014917M6LRR-RLK\_4030

ACTTAACTACAGTACAAAATACTAGTGTGCTGCAACAAAATTCCTGTCATTTTTGAGAAGTTAATTAGTTG  
CTTATCTTTAATCTATTTCTGTAATTCTGATGTTAAACAACTTTTT

>M6-PGSC0003DMG400014917M6LRR-RLK\_434



TATTTGATGATAATAATATCTCTGGTATACTCCTCCTTCTGTTTGTAATCTTCCTCGTTTGCAGAATTTG  
GATATTTCTGATAATTCACCTTTCTGGAACCTTTCTCTAAGGATCTACGT

>M6-PGSC0003DMG400014917M6LRR-RLK\_496

GCAGAATTTGGATATTTCTGATAATTCACCTTTCTGGAACCTTTCTCTAAGGATCTACGTAATTGTAGGCAGT  
TACAGAGGCTTATTCTAGCTCGGAATAAATTCTCCGGTGAGATTCCGGT

>M6-PGSC0003DMG400014917M6LRR-RLK\_558

GTAGGCAGTTACAGAGGCTTATTCTAGCTCGGAATAAATTCTCCGGTGAGATTCCGGTGGGGGTGTTCC  
CGGAGTTGGCGAATTTGGAACAACCTTGATCTTTCGTGCAATTTGTTCAATG

>M6-PGSC0003DMG400014917M6LRR-RLK\_62

ATGATGTGGAGGATATTCGTTTTTCTTGTCTTTTACTCAATTCTCATACCGGATTTTGTCTAACTTCCGAC  
GGACTTTCACCTTCTATCTCTAAAATCCGCCATGGATGATGGCGGTGGT

>M6-PGSC0003DMG400014917M6LRR-RLK\_620

GTGTTCCCGGAGTTGGCGAATTTGGAACAACCTTGATCTTTCGTGCAATTTGTTCAATGGTTCGATTCCTG  
AAGATATTGGTGAATTGAAGTCACTATCTGGAACCTTTGAATCTTTCTTTT

>M6-PGSC0003DMG400014917M6LRR-RLK\_682

GATTCCTGAAGATATTGGTGAATTGAAGTCACTATCTGGAACCTTTGAATCTTTCTTTAATCATTTTAGTG  
GAAGAATCCCAAATCTGTAGGTGATTTACCTTTAACTGTTAGCTTTGA

>M6-PGSC0003DMG400014917M6LRR-RLK\_744

ATTTTAGTGGAAGAATCCCAAATCTGTAGGTGATTTACCTTTAACTGTTAGCTTTGATCTAAGGAATAAT  
AATTTATCTGGTGAAATCCTCAGACTGGTCTTTTGCTAATCAAGGTC

>M6-PGSC0003DMG400014917M6LRR-RLK\_806

AGGAATAATAATTTATCTGGTGAAATCCTCAGACTGGTCTTTTGCTAATCAAGTCCGACGGCTTTTTT  
GAATAATCCCTTGTTATGTGGATTTCTTTACAAAAAACTGTAAAAAT

>M6-PGSC0003DMG400014917M6LRR-RLK\_868

GGCTTTTTTGAATAATCCCTTGTTATGTGGATTTCTTTACAAAAAACTGTAAAAATAGTTCAAACAATT  
CAACACAAGTTCAGGGTTCGTCTGATAACGAGGGAACGAATTCGCGCAA

>M6-PGSC0003DMG400014917M6LRR-RLK\_930

CAAACAATTCAACACAAGTTCAGGGTTCGTCTGATAACGAGGGAACGAATTCGCGCAAGGGGTTAAAC  
CTGGATTCATTATATTGATATGTTTGGCTGATGCATTTGGAGTGGCATTTA

>M6-PGSC0003DMG400014917M6LRR-RLK\_992

TTAAACCTGGATTCATTATATTGATATGTTTGGCTGATGCATTTGGAGTGGCATTATAGGACTAGTGA  
TTATTTACTTGTATTGGAAAAAGAAAGACTCTGGTGGTTGCAGCTGTACT

>M6-PGSC0003DMG400015081M6LRR-RLK\_0

CACAACAAGTTGCTAGGATCTATTCCTGACTCAGTGAGCAACATGGTAGGTTTGGAAATCCTAGACATTT  
CTCATAATAATATATCAGGAACCATTCCTATGTCTATGGAGAACTCAA

>M6-PGSC0003DMG400015081M6LRR-RLK\_1024

TTTTTATTTCCAATCAATAAAGTATATTGCATCTTTAAATCAATTGTTTGGACTGTAGAGTATGGACTGGAT  
GGACTGGTGTCAATAAAATGTGATGTCTATAGTTACGGGATTATGTTGC

>M6-PGSC0003DMG400015081M6LRR-RLK\_1280

ACAGAAGGAGTTAGATATCGTGGCATCAATCATGAAAGTAGCATTAGATTGTTGTGCTGAATCTCCGAC  
AAGAAGGACAAACATGAAAGATGTTGTAGGGATGCTACAGAAGATCAAGAT

>M6-PGSC0003DMG400015081M6LRR-RLK\_1390

AGATCAAGATTCAACTTCTTGCATGCTGAGCATGTCCTCTGTATCTCTTGTCTGAATCGATCACTTTTTTT  
TGTTTTGTTTTAGCACTTGATTTGTGCATGATTCTGTTTTCAAAAATG

>M6-PGSC0003DMG400015081M6LRR-RLK\_192

CTCTCGAGTCAGTTTTTCATCAACAATGAAGCATTGTGTGGTTTGTCAAGGTTTAGTGTCCC GCCATGCC  
CACTTCATCAAGGCATAGATCAAATAGGAAACAAATGCTACTTCTTTTT

>M6-PGSC0003DMG400015081M6LRR-RLK\_256

CATGCCCCACTTCATCAAGGCATAGATCAAATAGGAAACAAATGCTACTTCTTTTTCTTTTGCTTGGAATT  
GCACTTGTATTTGTTCTATCTCCTTTGTGTTCTATGGATAAGGTATA

>M6-PGSC0003DMG400015081M6LRR-RLK\_320

TGGAATTGCACTTGTATTTGTTCTATCTCCTTTGTGTTCTATGGATAAGGTATAGAAGAGGTAAAAGA  
TCTCCTCAACAAGCTGATTCATTGTCTATTGCAACAACAGAAAGAATTC

>M6-PGSC0003DMG400015081M6LRR-RLK\_384

AAAAGATCTCCTCAACAAGCTGATTCATTGTCTATTGCAACAACAGAAAGAATTCATACTATGAACTACT  
CCAAGCAACTGATTCGCTTAGCGACGGTAATCTAATTGGTTCTGGAAGT

>M6-PGSC0003DMG400015081M6LRR-RLK\_448

AACTACTCCAAGCAACTGATTCGCTTAGCGACGGTAATCTAATTGGTTCTGGAAGTTTTGGCTCTGTTTAC

AAAGGTGTTCTCAGGAGTGGGACTGCCATTGCAGTTAAAGTGTTCAATC

>M6-PGSC0003DMG400015081M6LRR-RLK\_64

ACATTTCTCATAATAATATATCAGGAACCATTCTATGTCTATGGAGAACTTCAAACCTGAAGTATTC

AATGTTTCTGACAACAAATTGTATGGTGAATACCCTCGGGGGGCCTT

>M6-PGSC0003DMG400015081M6LRR-RLK\_704

TAATGGAAGTCTTGACAAGTATTTGTATTCACACAACACTTCTAGACATTAGGCAGAGACTAAGCATT

ATGATAGATGTAGCATGCGCATTGGAATATCTTCATCATGGATGCTCCTC

>M6-PGSC0003DMG400015081M6LRR-RLK\_768

AGCATTATGATAGATGTAGCATGCGCATTGGAATATCTTCATCATGGATGCTCCTCCTGTGATTCATTG

TGACCTGAAGCCTAGTAACATCTTGCTGGATGAGGATATGGTTGCCAC

>M6-PGSC0003DMG400015081M6LRR-RLK\_896

CTTTGGTATTTCAAACCTGCTTGGTGAAGATGAGAGTGATTTATACACAAAACCTTAGCAACATTTGGT

TATATTGCACCAGGTACGTCTCTTTGTTTTGCTAATTTAAACATTGATT

>M6-PGSC0003DMG400015081M6LRR-RLK\_960

TTTGGTTATATTGCACCAGGTACGTCTCTTTGTTTTGCTAATTTAAACATTGATTTTTTGTCTTTTTTATTT

CCAATCAATAAAGTATATTGCATCTTTAAATCAATTGTTTACTGTA

>M6-PGSC0003DMG400015121-(rev)M6LRR-RLP\_0

TTTAATGTTTTGCATGATTGATGTGATAGTACCTTGAGAAATCGTGATATCGCAAATACCAATTGTTCCGGT

CAACTCAACAACATAAGTGTTGCTATAATACATTTGAAAAACAAATCAA

>M6-PGSC0003DMG400015121-(rev)M6LRR-RLP\_1054

TTTATCCAATCTCCAGGAGTTTTATAATCGTCATAATTCAATAAAAGGGACTATCCCACTTCATTGGGAA

ATATTTCAACTCTGCAATATCTTTATTCTGGAAACAATCTCATGGTGGG

>M6-PGSC0003DMG400015121-(rev)M6LRR-RLP\_124

TGAATCAATCATGAAGAAAACATTCTCTTATTGATTCTTCTTTCTAATTCAATTTTCTGTATCACTTTCT

TCCTCAAATGAGACTGACCAACAAGCTCTACTGGCTTTCCAAAATCT

>M6-PGSC0003DMG400015121-(rev)M6LRR-RLP\_1364

GTAATTGACTTGGGAGTCAATCAGCTTGAAGGGGAAATCCATTGTTTCATAACAAATGCTTCCAAGCTTC

AGATACTGTCGCTAGAACATAACTCTCTCTCGGGAGCTATTCCTACTAAT

>M6-PGSC0003DMG400015121-(rev)M6LRR-RLP\_1736

AGCGGTCTTACAGCCCTAAGCCTTGGAGGAAACAACCTGGCAGGGAATATTCCTTCTGAGATTGGTAAG  
CTTAAACAACCTCAAGGGCTGGCTCTATATAACAATAAATTGCAGGGACGT

>M6-PGSC0003DMG400015121-(rev)M6LRR-RLP\_186

TATCACTTTCTTCTCAAATGAGACTGACCAACAAGCTCTACTGGCTTTCCAAAATCTTATTACAACCTCCA  
ATCATTTTTTGGCCAATAATTGGACCAAAAATACTTCTTTTTGCTCTT

>M6-PGSC0003DMG400015121-(rev)M6LRR-RLP\_2356

TGAAATACCAAGTGGTGGCGTGTGGCAACTTCCACTGTGCAATCATTTCTTGGGAACAAAGGTCTTTGC  
GGAATGCACATATTGGAGATTCTACTTGTGCTATCACTAATCATGGAAA

>M6-PGSC0003DMG400015121-(rev)M6LRR-RLP\_3100

TGGAATATCTAAAATTTAGCCATAAGCAAGTCCATGGCTTATACAGAGACATTGGGCACTCTTGGATAT  
ATTGCACCAGGTAAAAGAAAATCTACTCTCATTGATTTTCTCTTATCATA

>M6-PGSC0003DMG400015121-(rev)M6LRR-RLP\_3534

TTGCGTCCATGATAGAATTGGGTTTAGACTGCACAAAGGAAATGCCAGAATCAAGAATAAGCATGAAAG  
AAGTAGTGAAGAGGCTTAACAAAATCAACAACACATTTCTGGAAACATAGT

>M6-PGSC0003DMG400015121-(rev)M6LRR-RLP\_62

TTGTTTCGGTCAACTCAACAACATAAGTGTGCTATAATACATTTGAAAAACAAATCAAGCTTTGAATCAAT  
CATGAAGAAAAACATTCTCTTATTGATTCTTCTTTCTAATTCAATTT

>M6-PGSC0003DMG400015121-(rev)M6LRR-RLP\_992

CTCAAAGTTTTGTCCATATCTTTCAACAACATAATTGGAGACAAACCCAAAAATATTGATTGTTTATCCAA  
TCTCCAGGAGTTTTATAATCGTCATAATTCAATAAAAGGGACTATTCCC

>M6-PGSC0003DMG400015157M6LRR-RLK\_0

TTCAGAACCACCAAGCAACTAAAAGAGACATCCTACTCCTAAAGCACCACCAGTGTGGTGCCTCATCCAA  
CTCCAATTCCACCATAATACTGCACCAATCCGATGGCCTTCACAGCCTC

>M6-PGSC0003DMG400015157M6LRR-RLK\_1054

GATTCAGGCTTAACAATTTTCAGTCCATTGATTAAGAAAGCCGAGCACTTGGCCTTTCTGGAGAACGAAG  
ATGGATTGGAATCGCTAGAACTCATTGGGCAAGGTGGATGTGGAAAAGTT

>M6-PGSC0003DMG400015157M6LRR-RLK\_1116

GAACGAAGATGGATTGGAATCGCTAGAACTCATTGGGCAAGGTGGATGTGGAAAAGTTTATAAAGCTG  
CGTTACCTGGAAGTGACGGAAAGATTATAGCCATAAAGAAGATCATAACAACC

>M6-PGSC0003DMG400015157M6LRR-RLK\_1178

AAGCTGCGTTACCTGGAAGTGACGGAAAGATTATAGCCATAAAGAAGATCATACAACCACCAAGGGAT  
GCTGCAGAACTCACTGAGGAAGATAGCAAGGCAATGAATAAGAAAATGCGCC

>M6-PGSC0003DMG400015157M6LRR-RLK\_124

ATACACCTTTCTTTTTGTCTTTTTTCACTGTCATCCTTCTTGTTC AAGCAAACTCAACCTTTACTCACCTG  
ATCACAGTGCTCTTTTGCTTGTCCAAAAGGCTTAGGCATCCGTGCT

>M6-PGSC0003DMG400015157M6LRR-RLK\_1240

AGGGATGCTGCAGAACTCACTGAGGAAGATAGCAAGGCAATGAATAAGAAAATGCGCCAGATTAAATC  
AGAAATCAAAATTGTAGGTCAAATCAGACACCAGAATTTGCTTCCCCTACTG

>M6-PGSC0003DMG400015157M6LRR-RLK\_1302

TAAATCAGAAATCAAAATTGTAGGTCAAATCAGACACCAGAATTTGCTTCCCCTACTGGCACATATGCCA  
AGACCAGACTGCCATTACTTGGTCTATGAGTACATGAAAAATGGGAGCTT

>M6-PGSC0003DMG400015157M6LRR-RLK\_1364

ATATGCCAAGACCAGACTGCCATTACTTGGTCTATGAGTACATGAAAAATGGGAGCTTACAGGATACCC  
TCCAGCAAGTCAGAGAGGGGACACGGGAACTAGATTGGTCGGCACGTCACC

>M6-PGSC0003DMG400015157M6LRR-RLK\_1426

GATACCCTCCAGCAAGTCAGAGAGGGGACACGGGAACTAGATTGGTCGGCACGTCACCGAATTGCAAT  
GGGAATAGCTGCTGGACTCGAGTATCTCCATATGAACCATACTCAGCGTATA

>M6-PGSC0003DMG400015157M6LRR-RLK\_1488

TGCAATGGGAATAGCTGCTGGACTCGAGTATCTCCATATGAACCATACTCAGCGTATAATTCACAGAGAT  
CTAAAGCCAGGCAATGTCCTCCTTGATGATGACATGGAAGCTCGAATTGC

>M6-PGSC0003DMG400015157M6LRR-RLK\_1550

ACAGAGATCTAAAGCCAGGCAATGTCCTCCTTGATGATGACATGGAAGCTCGAATTGCAGATTTTGCC  
TTGCAAAGGCTGTACCAGATGCTCAAACACATATTACAACTTCAAATGTGG

>M6-PGSC0003DMG400015157M6LRR-RLK\_1612

TTTGGCCTTGCAAAGGCTGTACCAGATGCTCAAACACATATTACAACTTCAAATGTGGCAGGAACTATAG  
GATACATAGCTCAAGAATATCATCAGACACTAAAGTTCACTAATAAGTGT

>M6-PGSC0003DMG400015157M6LRR-RLK\_1674

AACTATAGGATACATAGCTCAAGAATATCATCAGACACTAAAGTTCACTAATAAGTGTGATATATACAGA

TTCGGGGTGCTGCTAGGCGTGCTAGTTATGGGAAAGCTTCCATCTGATGA

>M6-PGSC0003DMG400015157M6LRR-RLK\_1736

TATACAGATTCGGGGTGCTGCTAGGCGTGCTAGTTATGGGAAAGCTTCCATCTGATGAGTTCTTCCAGA

ACACTTCTGAGATGAGTTTAGTGAAATGGATGAGAAATGTCATGACTTCTG

>M6-PGSC0003DMG400015157M6LRR-RLK\_1798

TTCCAGAACACTTCTGAGATGAGTTTAGTGAAATGGATGAGAAATGTCATGACTTCTGAGGATCCAAAC

AGAGCAATTGATCCAAAGCTGATGGGTAATGGAAATGAGGACCAAATGCTT

>M6-PGSC0003DMG400015157M6LRR-RLK\_186

TTACTCACCTGATCACAGTGCTCTTTTGCTTGCCAAAAGGCTTAGGCATCCGTGCTCACCGCAATGCTC

TTGAGAACCCATGCAACTCTGTTGGAATAACATGTGAAAAACGACTCAC

>M6-PGSC0003DMG400015157M6LRR-RLK\_1860

TCCAAACAGAGCAATTGATCCAAAGCTGATGGGTAATGGAAATGAGGACCAAATGCTTTTGTTCTCAA

GATTGCCTGCTTTGTACCCTGGAGAATCCTAAGGAGAGGCCTAATAGTAA

>M6-PGSC0003DMG400015157M6LRR-RLK\_1922

TTCTCAAGATTGCCTGCTTTGTACCCTGGAGAATCCTAAGGAGAGGCCTAATAGTAAGGATGTTAGGT

GCATGTTGATGCAGATCAAGCATTAAAGTATGTAGTGGATAACTTACAGTAA

>M6-PGSC0003DMG400015157M6LRR-RLK\_1984

GTTAGGTGCATGTTGATGCAGATCAAGCATTAAAGTATGTAGTGGATAACTTACAGTAAATAAAAGTTTG

TAATGAAACTAAAAAATATTTCTTGTGTATGACGGTCCTTGTGTATTCTT

>M6-PGSC0003DMG400015157M6LRR-RLK\_2046

AAGTTTGTAAATGAAACTAAAAAATATTTCTTGTGTATGACGGTCCTTGTGTATTCTTGTACATATCCAA

TATGAGAGACTGTCCTTGTGTGTTTTGTTTCCTCTCCAAAATGAGAAGT

>M6-PGSC0003DMG400015157M6LRR-RLK\_2108

CATATCCAATATGAGAGACTGTCCTTGTGTGTTTTGTTTCCTCTCCAAAATGAGAAGTTTATATTTAGCTG

TATGAAAGTTCTTGCAGAAGTTTCCTCTGCTATATTATGATACCTTAA

>M6-PGSC0003DMG400015157M6LRR-RLK\_2147

CCTCTCCAAAATGAGAAGTTTATATTTAGCTGTATGAAAGTTCTTGCAGAAGTTTCCTCTGCTATATTAT

GATACCTTAAAGCATGGTACGAAATGTGAATCGAATTCTTCCACTAGA

>M6-PGSC0003DMG400015157M6LRR-RLK\_248

GCAATGCTCTTGAGAACCCATGCAACTCTGTTGGAATAACATGTGAAAAACGACTCACAAACAATTCATA  
CGTGCTAAGAGTCACAAGGGTTGTCTTCAAATCCTACGGGTTGAAGGGTA

>M6-PGSC0003DMG400015157M6LRR-RLK\_310

AATTCATACGTGCTAAGAGTCACAAGGGTTGTCTTCAAATCCTACGGGTTGAAGGGTACTCTGTCTCCTG  
CCATTGGGAGGCTTTCTGAGCTCAAAGAACTGTCCCTCCAAAACAACAAA

>M6-PGSC0003DMG400015157M6LRR-RLK\_372

GTCTCCTGCCATTGGGAGGCTTTCTGAGCTCAAAGAACTGTCCCTCCAAAACAACAACTCTTTGACAGA  
ATACCAACTGAAATCGTTGACTCGAGGAAATTGGAAATCTTGAACCTTCA

>M6-PGSC0003DMG400015157M6LRR-RLK\_434

TTGACAGAATACCAACTGAAATCGTTGACTCGAGGAAATTGGAAATCTTGAACCTTCAAACAATCAATT  
TTCTGGCAAAGTCCACCTGAATTATCATCTCTAGTCCGCCTTCGTACCC

>M6-PGSC0003DMG400015157M6LRR-RLK\_496

AATCAATTTTCTGGCAAAGTCCACCTGAATTATCATCTCTAGTCCGCCTTCGTACCCTTGACCTTGGCTCT  
AATGAGTTATCTGGGAACCTGAACCTTCTTGAATACTTTCTAACCTT

>M6-PGSC0003DMG400015157M6LRR-RLK\_558

CCTTGGCTCTAATGAGTTATCTGGGAACCTGAACTTCTTGAATACTTTCTAACCTTGAAAACTCTCCC  
TTGCTGATAACATGTTTACTGGCAGAATACCTCAATCCTTGAATCTTT

>M6-PGSC0003DMG400015157M6LRR-RLK\_62

TCATCCAACCTCCAATTCCACCATAATACTGCACCAATCCGATGGCCTTCACAGCCTCACATATACACCTT  
TCTTTTTTGTCTTTTTTCACTGTCATCCTTCTTGTTCAGCAAACTCA

>M6-PGSC0003DMG400015157M6LRR-RLK\_620

AACTCTCCCTTGCTGATAACATGTTTACTGGCAGAATACCTCAATCCTTGAATCTTTCAGAAATCTCCGG  
CTCCTCAACATTTAGGCAATAGATTCCTTGAAGGTACGGTGCCTGTCTG

>M6-PGSC0003DMG400015157M6LRR-RLK\_682

AATCTCCGGCTCCTCAACATTTAGGCAATAGATTCCTTGAAGGTACGGTGCCTGTCGTGAGTCAAGTAG  
AGCACTTATCAGCAGAATTAATCGAAAAGATTATGTTCTTAAGCGTTAC

>M6-PGSC0003DMG400015157M6LRR-RLK\_744

TCAAGTAGAGCACTTATCAGCAGAATTAATCGAAAAGATTATGTTCTTAAGCGTTACATTCTTGCTGAG  
AACGAAAGAAGGCCAAGGCACAGCCCTGCAATGGCACCAGAGTCCAAATC

>M6-PGSC0003DMG400015157M6LRR-RLK\_806

TTGCTGAGAACGAAAGAAGGCCAAGGCACAGCCCTGCAATGGCACCAGAGTCCAAATCAGGATATGCC  
CAAGCTCCAGGAACTAGTACAGTTGTAGTACCAGAAAAAAAAGACAAACACA

>M6-PGSC0003DMG400015157M6LRR-RLK\_868

TATGCCCAAGCTCCAGGAACTAGTACAGTTGTAGTACCAGAAAAAAAAGACAAACACAACAAGATAAG  
GAAGGTAGGCGCCTGGATTCTTGGATTCTTTGCTGGAGTTTTCGCTGGGGGG

>M6-PGSC0003DMG400015157M6LRR-RLK\_930

GATAAGGAAGGTAGGCGCCTGGATTCTTGGATTCTTTGCTGGAGTTTTCGCTGGGGGGTTATCGGCGTT  
GGTCTTCTCCGTCCTCTTCAAGGTGCTAATGTTTTTAATCAGAGGGATCAG

>M6-PGSC0003DMG400015157M6LRR-RLK\_992

CGGCGTTGGTCTTCTCCGTCCTCTTCAAGGTGCTAATGTTTTTAATCAGAGGGATCAGAAATGATTCAGG  
CTTAACAATTTTCAGTCCATTGATTAAGAAAGCCGAGCACTTGGCCTTTC

>M6-PGSC0003DMG400015162M6LRR-RLK\_0

TTATGACACCTTGGTCCCCACATTCCACTCACTCTTCCCTTCCCTTTAAACAGTCATGCATTTACATAA  
AGAAAGTGACTGTTTTTCTCTCTCTAAAATTTTCATCTTCTTTCATGG

>M6-PGSC0003DMG400015162M6LRR-RLK\_1178

AGACGATTTAACCGGTGGTTCAGGTGAAGGGGAAAGGAATAAACTTGTGTTCTTTGATGGGGGTGGGT  
ATAGTTTTGATCTTGAAGATTTGTTAAGAGCTTCTGCTGAGGTTCTTGAAA

>M6-PGSC0003DMG400015162M6LRR-RLK\_124

TCGCCGAAAAATCAAGAATCCCGCCGGGAACCACATTCTTGATTCGCATTCTTCTTAAAAGGGTCCGA  
ACAAGAAAAAAAAGGGTGTATAAATGGCGGTGTTTTTAAGGTTTGT

>M6-PGSC0003DMG400015162M6LRR-RLK\_1240

GTGGGTATAGTTTTGATCTTGAAGATTTGTTAAGAGCTTCTGCTGAGGTTCTTGAAAAGGGAGTGTTG  
GAACAAGCTATAAAGCTGTTCTTGAAGAAGGTACTACAGTTGTTGTTAAAA

>M6-PGSC0003DMG400015162M6LRR-RLK\_1302

AGTGTTGGAACAAGCTATAAAGCTGTTCTTGAAGAAGGTACTACAGTTGTTGTTAAAAGGCTTAAAGAT  
GTCGTTGTGCCAGAAAAGAATTCGAGCAACAATTGGAAGTAATAGGGAAG

>M6-PGSC0003DMG400015162M6LRR-RLK\_1364

TAAAGATGTCGTTGTGCCAGAAAAGAATTCGAGCAACAATTGGAAGTAATAGGGAAGATGAAACATG



AAAATGTGCTACCTTTGAGAGCATTCTTACTATTCAAAGATGAGAAATTGTT

>M6-PGSC0003DMG400015162M6LRR-RLK\_1426

AACATGAAAATGTGCTACCTTTGAGAGCATTCTTACTATTCAAAGATGAGAAATTGTTGGTATCTGATTA  
TATGCCTGCTGGAAGTTTATCAGCTCTTCTCCATGGTACGCTGCTCTTAT

>M6-PGSC0003DMG400015162M6LRR-RLK\_1488

TCTGATTATATGCCTGCTGGAAGTTTATCAGCTCTTCTCCATGGTACGCTGCTCTTATTATTTTTAGTTAAA  
ACTTGTTTCGTTTTAGTGTATAATTTGCTCTATTATATGTTACTGCAAT

>M6-PGSC0003DMG400015162M6LRR-RLK\_1550

TTTAGTTAAAACCTTGTTTCGTTTTAGTGTATAATTTGCTCTATTATATGTTACTGCAATTCTGTGTCTAAAAT  
TTGCTCTCAACACTTAAGTTCCATTTTTCCACCAATGTTTTAAAACCT

>M6-PGSC0003DMG400015162M6LRR-RLK\_1612

TGTCTAAAATTTGCTCTCAACACTTAAGTTCCATTTTTCCACCAATGTTTTAAAACCTTAAATGGCAATAAA  
GATAGTAGCATTCAATTCTTGCTAGATTTTAGTGACTTTGTTCTGATTC

>M6-PGSC0003DMG400015162M6LRR-RLK\_1674

GGCAATAAAGATAGTAGCATTCAATTCTTGCTAGATTTTAGTGACTTTGTTCTGATTCTTGAAGAGTCTTG  
AAGGGGGATAGGTGGGTTATAGGTATGAAAAGATTGAATTTTTATTTT

>M6-PGSC0003DMG400015162M6LRR-RLK\_1736

AGAGTCTTGAAGGGGGATAGGTGGGTTATAGGTATGAAAAGATTGAATTTTTATTTTGTTCCTTTTTTT  
GGAAGAATAGATGGGGCTTCAATCTAATACACGTGCAGATCATGTACACA

>M6-PGSC0003DMG400015162M6LRR-RLK\_1798

CTTTTTTTGGAAGAATAGATGGGGCTTCAATCTAATACACGTGCAGATCATGTACACATTGTAGCCATAG  
TTTTACAGCCCTTCTGAACTGGCATTGCATTATTGTTTCACTCAATTATT

>M6-PGSC0003DMG400015162M6LRR-RLK\_186

GGGTCCGGAACAAGAAAAAAGGGTGTTTATAAATGGCGGTGTTTTAAGGTTTGTTTTTTGTGTTTTAT  
TCTTTGCTTTACTCGGATTGAGTCGTTACCGGGTTTTTTCAGAGCCTACA

>M6-PGSC0003DMG400015162M6LRR-RLK\_1860

AGCCATAGTTTTACAGCCCTTCTGAACTGGCATTGCATTATTGTTTCACTCAATTATTGAAGTTTGGTACC  
ACTTAATTTACTTCTTTAGTACATTTATTGTCAATTCAACCGCAAATTG

>M6-PGSC0003DMG400015162M6LRR-RLK\_1922

TTTGGTACCACTTAATTTACTTCTTTAGTACATTTATTGTCAATTCAACCGCAAATTGCGCATTTTGTCT  
ATAATTCCTTAAGCTACAGAACATTCTTTTTGAGAGAAATGGAACAA

>M6-PGSC0003DMG400015162M6LRR-RLK\_1984

TTTTGTTTCTATAATTCCTTAAGCTACAGAACATTCTTTTTGAGAGAAATGGAACAATGACATTTTATTA  
TGATTTATTCGAATCGAGAGCATATCGGATACAATCTCTCTATCTTAA

>M6-PGSC0003DMG400015162M6LRR-RLK\_2046

ATTTTTATTATGATTTATTCGAATCGAGAGCATATCGGATACAATCTCTCTATCTTAACGGACACACTTGT  
TAGATTACACTTTTACTCTTATTTTTTTTTATGAAACGAACGTTACAATG

>M6-PGSC0003DMG400015162M6LRR-RLK\_2108

CACACTTGTTAGATTACACTTTTACTCTTATTTTTTTTTATGAAACGAACGTTACAATGCAACAGACCACCAT  
GATGGTCAACATACCTTCCTTTATAAATGATGAAATGAGTTTAAAAAG

>M6-PGSC0003DMG400015162M6LRR-RLK\_2170

AGACCACCATGATGGTCAACATACCTTCCTTTATAAATGATGAAATGAGTTTAAAAAGTGGAAAAAGAA  
GGCTTCTTCTGTTCAAAGATTTTCCTTTATTTTGCTACATTGCTTGCG

>M6-PGSC0003DMG400015162M6LRR-RLK\_2232

AAAAGAAGGCTTCTTCTGTTCAAAGATTTTCCTTTATTTTGCTACATTGCTTGCGTCTATTTATCAACA  
AATAACTTGTATTATTATAGTTATATATATTTTAAAATATTTATTATA

>M6-PGSC0003DMG400015162M6LRR-RLK\_2294

TTTATCAACAAATAACTTGTATTATTATAGTTATATATATTTTAAAATATTTATTATACATAGGGGAAATG  
GGGGAGGGAATAACAAAGTGTGTTGGAGTTTGGTGATATCAAATATATT

>M6-PGSC0003DMG400015162M6LRR-RLK\_2356

GGGGAAATGGGGGAGGGAATAACAAAGTGTGTTGGAGTTTGGTGATATCAAATATATTAATTAATAT  
TAATCTTTTGTCTTCTAACCCACAATTTCAAATCATGATTTAATTAGTAG

>M6-PGSC0003DMG400015162M6LRR-RLK\_2418

AAATATTAATCTTTTGTCTTCTAACCCACAATTTCAAATCATGATTTAATTAGTAGTAATTGCTGTAAGT  
CTAAACAATACTTATATACTTAAAAAGCTTATATTACTTTGGCTTTAA

>M6-PGSC0003DMG400015162M6LRR-RLK\_248

TGTTTTATTCTTTGCTTACTCGGATTGAGTCGTTACCGGGTTTTTCAGAGCCTACACAGGATAAGCAAG  
CTCTCCTTGCTTTTTCTCTCAGATCCGACATGCGAATCGGGTCCAATG

>M6-PGSC0003DMG400015162M6LRR-RLK\_2480

TGCTGTAAGTCTAAACAATACTTATATACTTAAAAAGCTTATATTACTTTGGCTTTAAGCTATTTGGTGGT  
TATAACTGTCTGATTATTATTCATCTAATCTTGATTCTTTTGCTTACT

>M6-PGSC0003DMG400015162M6LRR-RLK\_2542

TTTGGTGGTTATAACTGTCTGATTATTATTCATCTAATCTTGATTCTTTTGCTTACTTTATTCATCATTGTT  
TCTTGCTGTCCCCATTTTTCTTCTTTTGTTGAAATAACGTGCTGCT

>M6-PGSC0003DMG400015162M6LRR-RLK\_2604

TCATCATTGTTTCTTGCTGTCCCCATTTTTCTTCTTTTGTTGAAATAACGTGCTGCTTACTCTATTGTCCA  
TTGATTCTTGCTGTCACCCATTTTTCTTCTTTTTTTGGTGAAGTAAAG

>M6-PGSC0003DMG400015162M6LRR-RLK\_2666

TCTATTGTCCATTGATTCTTGCTGTCACCCATTTTTCTTCTTTTTTTGGTGAAGTAAAGTGCAAAAGAAAAG  
CTAATAATACAATGTGTCCTGTTGAGTCTTGAGTAGTTCAACTGCTTTG

>M6-PGSC0003DMG400015162M6LRR-RLK\_2728

AAAGAAAAGCTAATAATACAATGTGTCCTGTTGAGTCTTGAGTAGTTCAACTGCTTTGAATTTGAATCCA  
ACTTATTAATTTGCATTGACATTAGTTTGTTAACAACATAACCAAGTGTA

>M6-PGSC0003DMG400015162M6LRR-RLK\_2914

TGTCGTTGGTTTGGTTGTCTAATTAATAATGTTAACTTTTGGTTAATTCTTGAGGTAGTAGAGGATCAGG  
GCGTACGCCACTTGACTGGGATAGTCGAATGAGAATAGTGTTAGGTGCAG

>M6-PGSC0003DMG400015162M6LRR-RLK\_2976

GGATCAGGGCGTACGCCACTTGACTGGGATAGTCGAATGAGAATAGTGTTAGGTGCAGCAAGAGGCAT  
TGCGTACCTCCATATTTAGGAAAAGTTGTCCATGGAAACATCAAGGCTTCG

>M6-PGSC0003DMG400015162M6LRR-RLK\_3038

AGGCATTGCGTACCTCCATATTTAGGAAAAGTTGTCCATGGAAACATCAAGGCTTCGAATGTTCTCCTT  
AAACAAGATAACCAAGATGCATGTGTATCTGACTACGGATTGAACCCTCT

>M6-PGSC0003DMG400015162M6LRR-RLK\_310

ATAAGCAAGCTCTCCTTGCTTTTTCTCTCAGATCCGACATGCGAATCGGGTCCAATGGAATTCTTCTGCT  
TCTGTTTGTACTTGGTTCGGAGTTGAATGTGACCCGAATAACTCTTTCG

>M6-PGSC0003DMG400015162M6LRR-RLK\_3100

TTCTCCTTAAACAAGATAACCAAGATGCATGTGTATCTGACTACGGATTGAACCCTCTATTCTCCACCTCT



TCTTCTGCTTCTGTTTGTACTTGGTTCGGAGTTGAATGTGACCCGAATAACTCTTTCGTTTATTCACTGAG  
ACTTCCTGCTGTTGGTCTCGTCGGAGAAATTCCTTCTAACAGTTTGGGC

>M6-PGSC0003DMG400015162M6LRR-RLK\_3720

GGGGGAGCCTTTATGTGTTTTATTTATTTTCATTTTTTTTTCTTCTTGAAATTATTATTTGAGAAAATT  
TGTGGAATGATTTTTACAGATGGTTAGTTGAGAATTTGAATATTTCA

>M6-PGSC0003DMG400015162M6LRR-RLK\_434

TTCCTGAGACTTCTGCTGTTGGTCTCGTCGGAGAAATTCCTTCTAACAGTTTGGGCCGGCTGAGTCAA  
CTTCGAGTTCTTAGTCTTCACGCCAATCGTCTATCTGGTTCAATTCCTTC

>M6-PGSC0003DMG400015162M6LRR-RLK\_496

TGAGTCAACTTCGAGTTCTTAGTCTTCACGCCAATCGTCTATCTGGTTCAATTCCTTCGGATTTTTCTAACC  
TTAAGCTTCTTCGTAGTCTCTATCTTCAAAAAAATGAGTTATCCGGCG

>M6-PGSC0003DMG400015162M6LRR-RLK\_558

TTTTCTAACCTTAAGCTTCTTCGTAGTCTCTATCTTCAAAAAAATGAGTTATCCGGCGAGTTCCCGGAGAG  
TATTCCCGGGTTGACCCGGTTAACAGGCTGGATCTTTCGTCTGAATAAC

>M6-PGSC0003DMG400015162M6LRR-RLK\_62

ATTTACATAAAGAAAGTGACTGTTTTTCTCTCTCTAAAATTCATCTTCTTTCATGGCTTCTCGCCGGAAA  
ATCAAGAATTCCCGCCGGGAACACATTCTTGATTCGCATTCTTCTTT

>M6-PGSC0003DMG400015162M6LRR-RLK\_620

CCCGGAGAGTATCCCGGGTTGACCCGGTTAACAGGCTGGATCTTTCGTCTGAATAACTTCACTGGTACT  
ATCCCTTCTCTATCAATAATCTGACCCATTTGACTGGACTTTTATTGCA

>M6-PGSC0003DMG400015162M6LRR-RLK\_682

CTGGTACTATCCCTTCTCTATCAATAATCTGACCCATTTGACTGGACTTTTATTGCAGAACAATAGCTTTA  
CTGGTACTCTTCTAGCATTAAATCCGCCTGGTTTAGTGGATTTCAAGTG

>M6-PGSC0003DMG400015162M6LRR-RLK\_744

AATAGCTTACTGGTACTCTTCTAGCATTAAATCCGCCTGGTTTAGTGGATTTCAAGTGTTTTCGAATAATCA  
GCTAAATGGGTCAATTCCTACTGCACTTTCCAAATTCAGCTTCTCTCT

>M6-PGSC0003DMG400015162M6LRR-RLK\_806

GAATAATCAGCTAAATGGGTCAATTCCTACTGCACTTTCCAAATTCAGCTTCTCTTTTTGCTGGTAACA  
TTGATTTATGTGGCGGCCATTACCCCATGTACCCCATTTTTTCTTC

>M6-PGSC0003DMG400015162M6LRR-RLK\_868

CTGGTAACATTGATTTATGTGGCGGCCATTACCCCATGTACCCATTTTTCTTCTCCTTCACCTTCCC  
CTGAAACAGAACCAAAAACCCCTCCGTCAATTAAGAAATCCAAGAAGC

>M6-PGSC0003DMG400015162M6LRR-RLK\_930

TCACCTTCCCCTGAAACAGAACCAAAAACCCCTCCGTCAATTAAGAAATCCAAGAAGCTTTCAACAGCCG  
CCATTGTTGGAATAGTTATAGGTTCAATAATTGGGGTTCTCTTACTCTTG

>M6-PGSC0003DMG400015162M6LRR-RLK\_992

AACAGCCGCCATTGTTGGAATAGTTATAGGTTCAATAATTGGGGTTCTCTTACTCTTGTTACTCCTTTTCTT  
CTGTTTAAAACGAAGAAAAACCGACACATCAAAGGTACAAAAACCTCC

>M6-PGSC0003DMG400015170M6RLKantifungi(GNK)\_1054

TCTGAAATATGCTGACAATTCTGATGTAATTAACCTCGTTTGATGGCAAATTGCATGCATTAGTGCAGTGT  
CTACCTGATTTGTCAGCTGTAAATTGTGTCACCTGCCTGAAAACCTGCTTT

>M6-PGSC0003DMG400015170M6RLKantifungi(GNK)\_1178

GGAATCCGTAGCCTCTCTGTGTCTATTGCCAAGGTACCACGTGGAGTCAGAATACTACTTCCTAGCTGCA  
ATTTAAGGTATGAGCTATATCCATTCTCTATGCCAGTGTACCGCCATCG

>M6-PGSC0003DMG400015170M6RLKantifungi(GNK)\_1240

TAGCTGCAATTTAAGGTATGAGCTATATCCATTCTCTATGCCAGTGTACCGCCATCGACCAGACAGGGG  
AATGAAGACGAAGGTATGAGTTCATTACATAAAAAGCCAAATTTCCCAGG

>M6-PGSC0003DMG400015170M6RLKantifungi(GNK)\_1302

GACAGGGGAATGAAGACGAAGGTATGAGTTCATTACATAAAAAGCCAAATTTCCCAGGAAATCTATTTG  
AAGGCACCTTTTCTCACTATTTTTCACATTAAGCTTTTAATCATAATCA

>M6-PGSC0003DMG400015170M6RLKantifungi(GNK)\_1364

CTATTTGAAGGCACCTTTTCTCACTATTTTTCACATTAAGCTTTTAATCATAATCATATACTACATGGTG  
TCATGGTCAATATCGAATGTCGTTTAAATTTTGATGCACACCCTCAA

>M6-PGSC0003DMG400015170M6RLKantifungi(GNK)\_1426

CTACATGGTGTGCATGGTCAATATCGAATGTCGTTTAAATTTTGATGCACACCCTCAAAGAAAATCATTAC  
TAATAGGAGTTATGGCTGAATGATCATTGTGCATGTATCAAATATCATT

>M6-PGSC0003DMG400015170M6RLKantifungi(GNK)\_1488

ATCATTTACTAATAGGAGTTATGGCTGAATGATCATTGTGCATGTATCAAATATCATTTCTCCAACCTTGTA

GAGAAGATAGTCACGCACACTTAAACACTTCACGAAGTAACGGTCTAAT

>M6-PGSC0003DMG400015170M6RLKantifungi(GNK)\_1550

CAACTTGTAGAGAAGATAGTCACGCACACTTAAACACTTCACGAAGTAACGGTCTAATTCAGCTTTTAAT

TGACCAACTATTTTTTTTTGCAGGCAAAAATACTTCAAAGACAAAGCTTA

>M6-PGSC0003DMG400015170M6RLKantifungi(GNK)\_1612

CTTTAATTGACCAACTATTTTTTTTTGCAGGCAAAAATACTTCAAAGACAAAGCTTATAAGTATCATTAT

AGGTGTTATACTAGCAATTTTAGCTGTTGTACTGGCAGGTACTTGCTTT

>M6-PGSC0003DMG400015170M6RLKantifungi(GNK)\_1674

TATCATTATAGGTGTTATACTAGCAATTTTAGCTGTTGTACTGGCAGGTACTTGCTTTTACCTTGTA AAAA

GAAGAAGACGAATAGAGAAGGGTAATTTTTCTTTGGTATTATGCATTG

>M6-PGSC0003DMG400015170M6RLKantifungi(GNK)\_1736

TTGTA AAAAAGAAGAAGACGAATAGAGAAGGGTAATTTTTCTTTGGTATTATGCATTGAAAAGAAAATA

ATTGTAGTTTCAGCTAACCAATCAAAGTTGGATCTTTACAGGGAGGAATG

>M6-PGSC0003DMG400015170M6RLKantifungi(GNK)\_1798

GAAAATAATTGTAGTTTCAGCTAACCAATCAAAGTTGGATCTTTACAGGGAGGAATGAAAAGAGTCGA

GAAATTCAATTGCTTGACATGATAGGAGAAACGCTTGATGCGAATGATGAT

>M6-PGSC0003DMG400015170M6RLKantifungi(GNK)\_1860

GAGTCGAGAAATTCAATTGCTTGACATGATAGGAGAAACGCTTGATGCGAATGATGATTTTGGCTCAGA

AAAGCAGGGGAGATCCAGAGAATTTCCAGTTGTA AAACTAGACCTCATTG

>M6-PGSC0003DMG400015170M6RLKantifungi(GNK)\_1984

GCTACACAAAATTTTTCTGAAGAAAACAAGCTTGGAGAAGGTGGATTTGGTCCAGTGTACAAGGTAACG

ATTCCTATCATTGTCATAACCAATTACCTAGGAAGTCCTTAAATCTTAGT

>M6-PGSC0003DMG400015170M6RLKantifungi(GNK)\_2046

GGTAACGATTCCTATCATTGTCATAACCAATTACCTAGGAAGTCCTTAAATCTTAGTCTAGAGACTAGTG

AATCTAAGTTGCTAGAGGGGGTCAATTTTTCATGATTTTGGGTTATTT

>M6-PGSC0003DMG400015170M6RLKantifungi(GNK)\_2108

AGACTAGTGAATCTAAGTTGCTAGAGGGGGTCAATTTTTCATGATTTTGGGTTATTTAGTGTGTGTAT

AACATTCCAGGGTACTCTAGCCAATGGCATAGCAATTGCAATCAAGAGGC

>M6-PGSC0003DMG400015170M6RLKantifungi(GNK)\_2170

TTGTGTATAACATTCCAGGGTACTCTAGCCAATGGCATAGCAATTGCAATCAAGAGGCTGTCTAGAACAT  
CCGGTCAGGGACTGAAAGAGTTCAAGAATGAAGTTGTCTTAATTGCCAGA

>M6-PGSC0003DMG400015170M6RLKantifungi(GNK)\_2232

TAGAACATCCGGTCAGGGACTGAAAGAGTTCAAGAATGAAGTTGTCTTAATTGCCAGATTACAACACAG  
AAATCTCGTGAGGCTCTTGGGTTGCTGTTTAGAGGGAAATGAGGCACTGCT

>M6-PGSC0003DMG400015170M6RLKantifungi(GNK)\_2356

TATGAGTTCATGCCCAACAAAAGCCTGGACTTGTTCTTTTTGGTTTGACGTTTACTTATTTGGCATATTA  
GTATATACCACAAAGAAGCAATTAATTCATAACTTCAAACCTTTCTTTT

>M6-PGSC0003DMG400015170M6RLKantifungi(GNK)\_2418

GGCATATTAGTATATACCACAAAGAAGCAATTAATTCATAACTTCAAACCTTTCTTTTTCTAGATTCAAGA  
GAAAATGAAATTCTGGAATGGAGACAACGTGTCCACATTATTAAGGAA

>M6-PGSC0003DMG400015170M6RLKantifungi(GNK)\_2480

GATTCAAGAGAAAATGAAATTCTGGAATGGAGACAACGTGTCCACATTATTAAGGAATAGCAAAGGG  
TATTTTGTATCTACACGAGGATTCTCGACTAAGAATCATTCATAGGGACCTA

>M6-PGSC0003DMG400015170M6RLKantifungi(GNK)\_2542

AAAGGGTATTTTGTATCTACACGAGGATTCTCGACTAAGAATCATTCATAGGGACCTAAAAGCTAGCAAT  
ATTTTACTGGACAAAGATATGAACCCCAAGATATCTGACTTTGGAATGGC

>M6-PGSC0003DMG400015170M6RLKantifungi(GNK)\_2604

CTAGCAATATTTTACTGGACAAAGATATGAACCCCAAGATATCTGACTTTGGAATGGCAAAGATGTTTAG  
CGGAAATCAACGAGAAGCCAATACAAATAGAGTTGTTGGAACCTAGTAAG

>M6-PGSC0003DMG400015170M6RLKantifungi(GNK)\_2666

ATGTTTAGCGGAAATCAACGAGAAGCCAATACAAATAGAGTTGTTGGAACCTAGTAAGTTGATGAAAAA  
ATGAAAAAATCTGTTGGTACTATTTAAAACAACATTGTACTGTAAGATTGA

>M6-PGSC0003DMG400015170M6RLKantifungi(GNK)\_2728

TGAAAAAATGAAAAAATCTGTTGGTACTATTTAAAACAACATTGTACTGTAAGATTGATGCTAAGAACCA  
TTTTTACTTTTGCCATTTTACAGTGGATATATGGCTCCTGAGTATGCT

>M6-PGSC0003DMG400015170M6RLKantifungi(GNK)\_2790

AAGAACCATTTTTACTTTTGCCATTTTACAGTGGATATATGGCTCCTGAGTATGCTATGGAGGGACTTT  
TTTCTACTAAATCAGATGTGTTTCAGCTTCGGTGTCTGTTGCTTGAGAT



>M6-PGSC0003DMG400015170M6RLKantifungi(GNK)\_2852  
AGGGACTTTTTTCTACTAAATCAGATGTGTTCCAGCTTCGGTGTCTGTTGCTTGAGATAGTAAGTGGAAG  
GAAGAACAATAGCTATGTTTCCGAATATGGTCAGAGTCTCCTTAATTTTG

>M6-PGSC0003DMG400015170M6RLKantifungi(GNK)\_2914  
AGTGGAAGGAAGAACAATAGCTATGTTTCCGAATATGGTCAGAGTCTCCTTAATTTTGTAAGTATACTTC  
TTCTCCATTTTTATTTTTGCTTATGTCAATCTCAACTGCATAAAGCATC

>M6-PGSC0003DMG400015170M6RLKantifungi(GNK)\_2976  
TATACTTCTTCTCCATTTTTATTTTTGCTTATGTCAATCTCAACTGCATAAAGCATCCTAAAACCTATCTTGA  
AAATATAGGCGTGGAAATTGTGGCGTGAAGGGCATGGATTAGAGCTA

>M6-PGSC0003DMG400015170M6RLKantifungi(GNK)\_310  
CCAGTACTGTTACTTTCCGTCCCGACTCCTTAGTCCAATTCTTCTTTGAAGTCAATGTTTTGTGGAAAAAA  
AACTTCATCAAATTGATTTTTCATGATCAGACTGTTGACTTCGTCGTC

>M6-PGSC0003DMG400015170M6RLKantifungi(GNK)\_3100  
ACCCTTGCTTATCGCAGTCTTGTGTGACAACTGAGATAACAGAATGCATCCATATAGGACTACTCTGAGT  
TCAACAAGATCCAGCAGATAGACCTACCATGACCTCTGTAGTTTTTATGC

>M6-PGSC0003DMG400015170M6RLKantifungi(GNK)\_3162  
CTCTGAGTTCAACAAGATCCAGCAGATAGACCTACCATGACCTCTGTAGTTTTTATGCTGGAAAATGACA  
CTAAAACACTTCCACAGCCATCACAACTGCATTTTCTATTGGGAGACTT

>M6-PGSC0003DMG400015170M6RLKantifungi(GNK)\_3224  
AAATGACACTAAAACACTTCCACAGCCATCACAACTGCATTTTCTATTGGGAGACTTGCCGTGAGATCA  
GCTGAGCCTCAATCTAATGATCAGTTGTGTTCCATTAACGAGGTCACTTT

>M6-PGSC0003DMG400015170M6RLKantifungi(GNK)\_3286  
TGAGATCAGCTGAGCCTCAATCTAATGATCAGTTGTGTTCCATTAACGAGGTCACTTTATCAATTCTATCA  
CCCCGATGACCATTAATATAGGGTCATCAAGGATCCGACTCATCTCCAT

>M6-PGSC0003DMG400015170M6RLKantifungi(GNK)\_3348  
ATTCTATCACCCCGATGACCATTAATATAGGGTCATCAAGGATCCGACTCATCTCCATTTTCCCCAAGTTC  
CTCCTTAGAGTGGTGACACATGACATATGTTGAATTTAATGGTTACCAT

>M6-PGSC0003DMG400015170M6RLKantifungi(GNK)\_372  
TGGAAAAAAAACCTTCATCAAATTGATTTTTCATGATCAGACTGTTGACTTCGTCGTCCTTGTAGTTTTGA

GCAGATTCATCTTCTGCTCCATCATTTAGATTACTTTAGACATAATTCA

>M6-PGSC0003DMG400015170M6RLKantifungi(GNK)\_434

TAGTTTTGAGCAGATTCATCTTCTGCTCCATCATTTAGATTACTTTAGACATAATTCAGCAGCAACTTATTT

TAGTCAAGAATGGCGTTGGTTATAGTTTTGTGTTTGTGCAGTATCCAA

>M6-PGSC0003DMG400015170M6RLKantifungi(GNK)\_496

CAACTTATTTTAGTCAAGAATGGCGTTGGTTATAGTTTTGTGTTTGTGCAGTATCCAAACAATTCTGATTT

TGTTGCTCCATTCCTGCTTGTGGCGTCAAAGCACAGATGCAGGCCTC

>M6-PGSC0003DMG400015170M6RLKantifungi(GNK)\_558

TTCTGATTTTGTGCTCCATTCCTGCTTGTGGCGTCAAAGCACAGATGCAGGCCTCACACTACACTTGT

TCAATGATCAATAATTATACAGAAGGAAGCATATCCAATCAAATCTTA

>M6-PGSC0003DMG400015170M6RLKantifungi(GNK)\_620

TACACTTGTTCAATGATCAATAATTATACAGAAGGAAGCATATCCAATCAAATCTTAACCAATTGCTGTA

CAGTCCATTAACAATAATGGTAACAATTCCATCTATACAAAAGCCAGA

>M6-PGSC0003DMG400015170M6RLKantifungi(GNK)\_682

ATTGCTGTACAGTCCATTAACAATAATGGTAACAATTCCATCTATACAAAAGCCAGAGAAGGAGAAGA

CCCTGATAAAGTTTATGGAGTATCCTCTGTAGAGGAGACGTTGTACCTAA

>M6-PGSC0003DMG400015170M6RLKantifungi(GNK)\_806

TGCAAAAACCTGCATTGACGTGGCAAGAGAGCGGATCCAACGTGAATGTCCGCTCAAGAAGCAGGCAAT

TATATGGTTTTGATGAGTGTGGTCCGCTATTCTAATGTATCTTTCGTGTCC

>M6-PGSC0003DMG400015170M6RLKantifungi(GNK)\_868

GGCAATTATATGTTTTGATGAGTGTGGTCCGCTATTCTAATGTATCTTTCGTGTCCATGTTAGACGCCT

CGATTTCTAAGATCCTGTATAGCGTAGAAAATGTTTCACAGCCAGAACA

>M6-PGSC0003DMG400015170M6RLKantifungi(GNK)\_930

TAGACGCCTCGATTTCTAAGATCCTGTATAGCGTAGAAAATGTTTCACAGCCAGAACAATTTATGGGGAA

TTTGTGAGTGAATTTGATAATCTTACCGCTCAAGCTACTACCATCAATC

>M6-PGSC0003DMG400015170M6RLKantifungi(GNK)\_992

ATGGGGAATTTGAGTGAATTTGATAATCTTACCGCTCAAGCTACTACCATCAATCTCAATCTGAAAT

ATGCTGACAATTCTGATGTAATTAACCTCGTTTGTGCAAAATTGCATGCA

>M6-PGSC0003DMG400015171M6RLKantifungi(GNK)\_1464

CTTGATGCGAATGATGATTTTGGCTCAGAAAAGCAGGGGAGATCCAGAGAATTTCCAGTTGTAAACTA  
GACCTCATTCGAGCTGCTACACAAAATTTTCTGAAGAAAACAAGCTTGGA

>M6-PGSC0003DMG400015171M6RLKantifungi(GNK)\_2013

TAATTCACTAACTTCAAACCTTTCTTTTTCTAGATTCAAGAGAAAATGAAATTCTGGAATGGAGACAACGT  
GTCCACATTATTAAGGAATAGCAAAGGGTATTTTGTATCTACACGAGGA

>M6-PGSC0003DMG400015171M6RLKantifungi(GNK)\_2623

GTGGAAATTGTGGCGTGAAGGGCATGGATTAGAGCTAATGGACCCTTGCTTATCGCAGTCTTGTGTGAC  
AACTGAGATAACAGAATGCATCCATATAGGACTACTCTGAGTTCAACAAGA

>M6-PGSC0003DMG400015171M6RLKantifungi(GNK)\_2989

AGAGTGGTGACACATGACATATGTTGAATTAATGGTTACCATTTAATTGACCAAAGTAAATCCCTAACC  
ATTGTTGAGATATCAAGTACTGCATATCAATTTAGTTCCAAACATTGTTA

>M6-PGSC0003DMG400015171M6RLKantifungi(GNK)\_3050

TCCCTAACCATTTGTTGAGATATCAAGTACTGCATATCAATTTAGTTCCAAACATTGTTATAATCCCACAAT  
CTTAATTCTTCCTGTCCATAAATATAGTAAAAAAAATATACATCTTCCT

>M6-PGSC0003DMG400015171M6RLKantifungi(GNK)\_3111

ATCCCACAATCTTAATTCTTCCTGTCCATAAATATAGTAAAAAAAATATACATCTTCCTACGCAAGATCTAT  
ATCCTTATTCTGCTACCTTGTGATAACTGGACCGTTAACTATCTTGA

>M6-PGSC0003DMG400015171M6RLKantifungi(GNK)\_3172

GCAAGATCTATATCCTTATTCTGCTACCTTGTGATAACTGGACCGTTAACTATCTTGATAACCAATTAAT  
CGTATTTTAACAATTTTATAACAGTTTAGCATGTCTATACCCTCAAAAC

>M6-PGSC0003DMG400015171M6RLKantifungi(GNK)\_3233

ACCAATTAATCGTATTTTAACAATTTTATAACAGTTTAGCATGTCTATACCCTCAAAACTGAAACCAATGA  
TAAACATCCCTACTTGAAAGTCTTAATTATATGGAACACATAGTATCAA

>M6-PGSC0003DMG400015171M6RLKantifungi(GNK)\_3294

AAACCAATGATAAACATCCCTACTTGAAAGTCTTAATTATATGGAACACATAGTATCAATGTCAAGTCTTC  
CTATAACTCAAAAAGTTCATTTGGGAATTTTCACAAACACATAGTATAC

>M6-PGSC0003DMG400015171M6RLKantifungi(GNK)\_3355

TCAAGTCTTCCTATAACTCAAAAAGTTCATTTGGGAATTTTCACAAACACATAGTATACAACCTTGTC AATT  
AGCATAATACTAAACATACAGATAACAAGTATTTGATCTAAATATATGA

>M6-PGSC0003DMG400015171M6RLKantifungi(GNK)\_3416  
CTTGTCAATTAGCATAATACTAAACATACAGATAACAAGTATTTGATCTAAATATATGAAAAAGAACCTG  
GCGATGATAGTTAGTTTAAATCCAGCCAAAAAGAAGCTCGGCGTCTTGTT  
>M6-PGSC0003DMG400015171M6RLKantifungi(GNK)\_3477  
AAGAACCTGGCGATGATAGTTAGTTTAAATCCAGCCAAAAAGAAGCTCGGCGTCTTGTTGTCTTTGTTTT  
TCTCCTTCTTCTTGTTCTTTCTGTTGATTTTCAGAAAATCAATTTTTC  
>M6-PGSC0003DMG400015171M6RLKantifungi(GNK)\_3538  
CTTTGTTTTTCTCCTTCTTCTTGTTCTTTCTGTTGATTTTCAGAAAATCAATTTTCTATAGTAAAAATAT  
GAGGGGGTTATCACTTATCTCAGCATGTTTTTAAAACATAATTTTGG  
>M6-PGSC0003DMG400015171M6RLKantifungi(GNK)\_3597  
TATAGTAAAAATATGAGGGGGTTATCACTTATCTCAGCATGTTTTTAAAACATAATTTTGGAAAATTATTC  
ATTCTCCTCTTAAATTAAGCTCCTACTTGCTATGATTTTCACTATAAT  
>M6-PGSC0003DMG400015276-(rev)M6LRR-RLK\_0  
CTATAACTATTTTTCAACTTTTTGATGTGTTTGACATTGTTTGAATTATACCCCAATGTTCAATTTTACTT  
CACCTACTACATACAACTGGTAAATTCTCAATCTAATATTACTTATC  
>M6-PGSC0003DMG400015276-(rev)M6LRR-RLK\_1054  
GTGAGACACATTTTTCGAAGGAGAAATATGTATTTTTTCGATATGGTTTATGTTAATCGCGAAAAGGTCA  
TTCAGAACTCGTTGGCTCCAGAGGCATTAAGATGTTTGTGATTGGGAAA  
>M6-PGSC0003DMG400015276-(rev)M6LRR-RLK\_1116  
AAAGGTCATTCAGAACTCGTTGGCTCCAGAGGCATTAAAGATGTTTGTGATTGGGAAAAGGTCATTCAG  
AACTTGTTGGGGCTGCTCCAGAGGTGCTAAGATGATTAGTTCATGATAGGA  
>M6-PGSC0003DMG400015276-(rev)M6LRR-RLK\_124  
ATTCTTCTAAGTCAAGTTGCCACGACCAGAAATGCGTAGGACGATCCTATTTTTCGCTTTGTTTCTGGTG  
GTGGAATCAGCTGAATTTTTCCCAAATGAAAGAGATGCTTTGTTGCAGC  
>M6-PGSC0003DMG400015276-(rev)M6LRR-RLK\_1426  
ATTGTGGCTATACAACATAGAACTAGATTAGCTAATTCAATTAACCTAAAGATCCATGTGATGAAGGAG  
CAGTTTATATTGTTATTATTTCTCCTTTTTAACATTTCCAGTTTCTATTT  
>M6-PGSC0003DMG400015276-(rev)M6LRR-RLK\_1488  
TGAAGGAGCAGTTTATATTGTTATTATTTCTCCTTTTTAACATTTCCAGTTTCTATTTTGACAGGTAATATT

TCAATAGAGAATGTGGTAAAGAGAAGTTATTGGTCCAAGAGTACAGAA

>M6-PGSC0003DMG400015276-(rev)M6LRR-RLK\_1550

AGGTAATATTTCAATAGAGAATGTGGTAAAGAGAAGTTATTGGTCCAAGAGTACAGAAGATCCAGAAA

AAACATTGGACTTAATATTCTTTGAAAAGGATATGTCAGTCTTTGACATGGA

>M6-PGSC0003DMG400015276-(rev)M6LRR-RLK\_1612

CAGAAAAACATTGGACTTAATATTCTTTGAAAAGGATATGTCAGTCTTTGACATGGATGACTTGTTAAG

AGCATCAGCTGAAGTTTTAGGAAAAGGAAAGCTAAGCACAAACATATAAAG

>M6-PGSC0003DMG400015276-(rev)M6LRR-RLK\_1674

TTGTTAAGAGCATCAGCTGAAGTTTTAGGAAAAGGAAAGCTAAGCACAAACATATAAAGCAATCCTGGAA

TCTGGTTCTGTTGTTGCTGTTAAGAGACTCAAAGAAATGAATTCTTTGAGC

>M6-PGSC0003DMG400015276-(rev)M6LRR-RLK\_1736

CCTGGAATCTGGTTCTGTTGTTGCTGTTAAGAGACTCAAAGAAATGAATTCTTTGAGCAAAAAGGAATTC

ACACAACCGGTGCAGTTGCTTGGGAAATTGAAACATGAAAACCTTGTGGA

>M6-PGSC0003DMG400015276-(rev)M6LRR-RLK\_1798

AGGAATTCACACAACCGGTGCAGTTGCTTGGGAAATTGAAACATGAAAACCTTGTGGAGATGTTGTCCCT

TCTACTATTCCAAGGAGGAGAAGCTCATTGTTTATGAATATGTTCCACAAG

>M6-PGSC0003DMG400015276-(rev)M6LRR-RLK\_186

TTTCTGGTGGTGAATCAGCTGAATTTTTCCCAAATGAAAGAGATGCTTTGTTGCAGCTGAGAGATAGT

GTAAATCAAGTGTCTTGATTTACATTCACATTGGACAGGGCCTCCTTGT

>M6-PGSC0003DMG400015276-(rev)M6LRR-RLK\_1860

TTGTCCTTCTACTATTCCAAGGAGGAGAAGCTCATTGTTTATGAATATGTTCCACAAGGAGACTTGTTTG

GGCTCTTACATGGTTGGTTCATCAACTTTCTTTACTTTTGGGAAAATGT

>M6-PGSC0003DMG400015276-(rev)M6LRR-RLK\_1922

CTTGTTTGGGCTCTTACATGGTTGGTTCATCAACTTTCTTTACTTTTGGGAAAATGTCTAAAGTTAACCCC

TCCTGAATGAAATACCTTAATTTTATCTTTTGTATACTTTGAGGTTA

>M6-PGSC0003DMG400015276-(rev)M6LRR-RLK\_1984

AGTTAACCCCTCCTGAATGAAATACCTTAATTTTATCTTTTGTATACTTTGAGGTTATTCATATCCTTATC

CTTAGTAAAACGTCTCCTGTTATACTTCGAGGTCATTCTGATTCTAAA

>M6-PGSC0003DMG400015276-(rev)M6LRR-RLK\_2046

TATCCTTATCCTTAGTAAAACGTCTCCTGTTATACTTCGAGGTCATTCTGATTCTAAACTATGAACTCATGA  
TCAAATGACTTTTTGAGGTGGGCTTCCCTTCTCTATAGTGCTACTGTG

>M6-PGSC0003DMG400015276-(rev)M6LRR-RLK\_2232

GAACATGTTGTTGTCATCTTATAGTAGTAATAGAGGAATATCTTTTACCATTTTCCCATCTTTTTTCCCCTT  
AAGATTCAACCTTGTA AAAACTTATGATTCTTGATTT CAGAAAACAGA

>M6-PGSC0003DMG400015276-(rev)M6LRR-RLK\_2294

TTTTCCCCTTAAGATTCAACCTTGTA AAAACTTATGATTCTTGATTT CAGAAAACAGAGGAATTGGGAGA  
CAACCACTAAACTGGACAGCAAGAATATCCATCATAAAAAGATGTAGCAAA

>M6-PGSC0003DMG400015276-(rev)M6LRR-RLK\_2356

TTGGGAGACAACCACTAAACTGGACAGCAAGAATATCCATCATAAAAAGATGTAGCAAAGGGTCTAAATT  
TCTTGACCAGTCCTTACAATCACATAAGGTGCCACATGGGAACATCAGAT

>M6-PGSC0003DMG400015276-(rev)M6LRR-RLK\_2418

CTAAATTTCTTGACCAGTCCTTACAATCACATAAGGTGCCACATGGGAACATCAGATCAAAAAATGTTC  
TAATCCAGCAAGACCAAAGCAAGAACTACCATTCTAAGCTGACAGATTAT

>M6-PGSC0003DMG400015276-(rev)M6LRR-RLK\_248

AGATAGTGTA AATTCAAGTGTTCTTGATTTACATTCACATTGGACAGGGCCTCCTTGTTACAACAACCAG  
AGTAAATGGGCTGGAATTTCTGTTCTAATGGGCATGTAAATCAACTTGT

>M6-PGSC0003DMG400015276-(rev)M6LRR-RLK\_2480

AAATGTTCTAATCCAGCAAGACCAAAGCAAGAACTACCATTCTAAGCTGACAGATTATGGATTCTTTCT  
TTGCTACCATCTAAAGAATCCTTAAGAAAAATAGCAGTAGGAAAATCTCC

>M6-PGSC0003DMG400015276-(rev)M6LRR-RLK\_2542

TCTTTCCTTTGCTACCATCTAAAGAATCCTTAAGAAAAATAGCAGTAGGAAAATCTCCAGAGTTCTCTCAA  
GGGAAAAAGTTAACAAGAAAAGCTGATATCTACTGCTTTGGTATTCTTC

>M6-PGSC0003DMG400015276-(rev)M6LRR-RLK\_2604

TTCTCTCAAGGGAAAAAGTTAACAAGAAAAGCTGATATCTACTGCTTTGGTATTCTTCTGTTGGAAGTTA  
TCACTGGAAAAGTACCAGGTGAATTGTTTTACCAGAAAATGGGGTACT

>M6-PGSC0003DMG400015276-(rev)M6LRR-RLK\_2666

GGAAGTTATCACTGGAAAAGTACCAGGTGAATTGTTTTACCAGAAAATGGGGTACTAGTTATGTTGA  
TGATGATTTGTCAGAGTGGGTAAGGACAGTGGTGAATAATGATTGGTCAAC

>M6-PGSC0003DMG400015276-(rev)M6LRR-RLK\_2728

ATGTTGATGATGATTTGTCAGAGTGGGTAAGGACAGTGGTGAATAATGATTGGTCAACAGACATTTTGG  
ATATGGAAATACTTGCACAAAAAGAAGGGTATGATGAAATGTTGAAGCTTA

>M6-PGSC0003DMG400015276-(rev)M6LRR-RLK\_2790

ATTTTGGATATGGAAATACTTGCACAAAAAGAAGGGTATGATGAAATGTTGAAGCTTACTGAATTGGCT  
TTGCAGTGTACAGATGAGGCACCAGAAAAAAGACCTAAGATGAGTGAAGTG

>M6-PGSC0003DMG400015276-(rev)M6LRR-RLK\_2852

ATTGGCTTTGCAGTGTACAGATGAGGCACCAGAAAAAAGACCTAAGATGAGTGAAGTGCTGAGAAGAA  
TTGAAGAGATTGAGCTTGAACCAAGAATTTAGTCACTGATGTGGAAGATGA

>M6-PGSC0003DMG400015276-(rev)M6LRR-RLK\_2914

GAAGAATTGAAGAGATTGAGCTTGAACCAAGAATTTAGTCACTGATGTGGAAGATGATTCAGTCTCTT  
ACTTGAAGACTTGAACCTTCCCTCCTAACTGTAATCAAGCCGTAGCAACA

>M6-PGSC0003DMG400015276-(rev)M6LRR-RLK\_2976

GTCTCTTACTTGAAGACTTGAACCTTCCCTCCTAACTGTAATCAAGCCGTAGCAACAACAACAATATATC  
CAGTATAATTTATCAGGTATAGCCTGAATAATATATTCAGTATAATCT

>M6-PGSC0003DMG400015276-(rev)M6LRR-RLK\_3038

CAATATATCCAGTATAATTTATCAGGTATAGCCTGAATAATATATTCAGTATAATCTTATCTACTGGAGT  
CGGATTCTGAAGAGAATTTCAAGTTGTGTCTGAACAATACATCCAATAT

>M6-PGSC0003DMG400015276-(rev)M6LRR-RLK\_310

ACAACCAGAGTAAATGGGCTGGAATTTCTGTTCTAATGGGCATGTAAATCAACTTGTTTTAGAAGGAA  
TTCAGTTAACTGGCTCACTTCCACCAACATTCTTGTGACATAACTTATT

>M6-PGSC0003DMG400015276-(rev)M6LRR-RLK\_3100

TACTGGAGTCGGATTCTGAAGAGAATTTCAAGTTGTGTCTGAACAATACATCCAATATAATCCCATCAAA  
TGGAGATTACCGTAACCAATCCTAACATGGGAGTAAAGAAAGGGTAAAA

>M6-PGSC0003DMG400015276-(rev)M6LRR-RLK\_372

GAAGGAATTCAGTTAACTGGCTCACTTCCACCAACATTCTTGTGACATAACTTATTTGACAAAAATCAG  
CTTTAGGAACAATTTATTGTATGGTCCTGTTCCCAATCTCACAGGACTA

>M6-PGSC0003DMG400015276-(rev)M6LRR-RLK\_434

AAAAATCAGCTTTAGGAACAATTTATTGTATGGTCCTGTTCCCAATCTCACAGGACTAATCTACCTGGAG

TTTGTTTTCTGTCAGATAATCGATTTTCGGGTTTGATTCCATTTGGGTA

>M6-PGSC0003DMG400015276-(rev)M6LRR-RLK\_496

ACCTGGAGTTTGTGTTTTCTGTCAGATAATCGATTTTCGGGTTTGATTCCATTTGGGTACACTGAGTTAAAG

AAACTAACAGAATTAGAGCTCCAGGGGAATGATCTTGAAGGTTCAATTC

>M6-PGSC0003DMG400015276-(rev)M6LRR-RLK\_558

GAGTTAAAGAACTAACAGAATTAGAGCTCCAGGGGAATGATCTTGAAGGTTCAATTCCACCATTTTATC

AACAGACTTTGATTGGTTTCAATGTGTCGTCGAATAAACTGGAAGGACCT

>M6-PGSC0003DMG400015276-(rev)M6LRR-RLK\_62

CAATTTTACTTCACCTACTACATACTGGTAAATTCTCAATCTAATATTACTTATCTATTATTCTTCTAAG

TCAAGGTTGCCACGACCAGAAATGCGTAGGACGATCCTATTTTTTCGC

>M6-PGSC0003DMG400015276-(rev)M6LRR-RLK\_620

ATTTTATCAACAGACTTTGATTGGTTTCAATGTGTCGTCGAATAAACTGGAAGGACCTATCCCTGAACT

CCTGTCCTGAAGAGATTTTCGAAGAGTTGTTATGAGAATAACGCGAATTT

>M6-PGSC0003DMG400015276-(rev)M6LRR-RLK\_682

CTGAAACTCCTGTCCTGAAGAGATTTTCGAAGAGTTGTTATGAGAATAACGCGAATTTGTGTGGTGAAG

TTGTAGGAATACCTTGTTCATATCACCTGCAAGTCCACCTAAAGCACCAA

>M6-PGSC0003DMG400015276-(rev)M6LRR-RLK\_744

GGTGAAGTTGTAGGAATACCTTGTTCATATCACCTGCAAGTCCACCTAAAGCACCAAGTGAAAAGAAA

AAGAATGGCCTTAAAGTATGGAGTATTGCTTTGATTGCAGCAGCAGTAGCA

>M6-PGSC0003DMG400015276-(rev)M6LRR-RLK\_806

AAAGAAAAAGAATGGCCTTAAAGTATGGAGTATTGCTTTGATTGCAGCAGCAGTAGCAGTACTTGTCT

AATTTCAATCATGTTTCAATTTGTTCCGTTACTTTAGAAGATCTCAAAGAAT

>M6-PGSC0003DMG400015276-(rev)M6LRR-RLK\_868

TTGTTCTAATTTCAATCATGTTTCAATTTGTTCCGTTACTTTAGAAGATCTCAAAGAATGGAAACACAAGGA

GAAGACAAACAAGGTAACAGTTTTATTGTATCATCTATGTTATCCTAGC

>M6-PGSC0003DMG400015276-(rev)M6LRR-RLK\_930

ACACAAGGAGAAGACAAACAAGGTAACAGTTTTATTGTATCATCTATGTTATCCTAGCTAGTGCCAGTTA

TTCTGGGGGTAAAGTTATTACTACTTAGATTGAATTAGATGATGAGTTTA

>M6-PGSC0003DMG400015276-(rev)M6LRR-RLK\_992



GCCAGTTATTCTGGGGGTAAAGTTATTACTACTTAGATTGAATTAGATGATGAGTTTATCTGGTGAGACA  
CATTTTTCGAAGGAGAAATATGTATTTTTTCGATATGGTTTATGTTAATC

>M6-PGSC0003DMG400015283-(rev)M6LRR-RLP\_0

ATGCACTCCAATACCAAACAACATTTACGAGAGGTATCGTCTTTTGCTTCTTGACATTTTCCAAAATGGA  
AGTTTTACAATGAGTTTAAATTTCCACACCTTTCTGGCTATCCGTGCT

>M6-PGSC0003DMG400015283-(rev)M6LRR-RLP\_1037

GTGGAATTTGTTGTGGCTCAATGTTTGGAGTAACCATCTTGGATACGGTAAGCATGATGACCTTGACTTT  
GTAAATTCTCTTACTAACTGCAGCAGCCTACAAATGCTCCATTTTGGAGG

>M6-PGSC0003DMG400015283-(rev)M6LRR-RLP\_1098

CTTGACTTTGTAAATTCTTACTAACTGCAGCAGCCTACAAATGCTCCATTTTGGAGGCAATCAGTTTGG  
AGGTACATTACCCATTAGTATGCAACCTTTCTAGTCAGTTGCAACGC

>M6-PGSC0003DMG400015283-(rev)M6LRR-RLP\_1159

ATCAGTTTGGAGGTACATTACCCATTAGTATGCAACCTTTCTAGTCAGTTGCAACGCCTACTCTTCTTC  
GAAAATAGAATTGGTGGGAATCATACCAAGAGAGATCTCAAACCTGGTGA

>M6-PGSC0003DMG400015283-(rev)M6LRR-RLP\_122

GTTTTTGTGTTTCTATTGTCATTTTCTCTCAACATGCTGCATCAGCTGCTTTTCTTGGCAATGAAACTGA  
TAAACTGCCTTGCTTGCATTCAAGACCCAAATAACCGAGGATCCATC

>M6-PGSC0003DMG400015283-(rev)M6LRR-RLP\_1220

ACTCTTCTTCGAAAATAGAATTGGTGGGAATCATACCAAGAGAGATCTCAAACCTGGTGAATTTGAATCTA  
CTCTACATTGGTTCTAACAATTTTATAGGTAGTATTCCAGATTCTATTGG

>M6-PGSC0003DMG400015283-(rev)M6LRR-RLP\_1281

TTGAATCTACTCTACATTGGTTCTAACAATTTTATAGGTAGTATTCCAGATTCTATTGGAAGACTTACAAA  
CTTGGGAGCTCTTCTTGTTTAACAATCTCTTGACAGGTGTCATCCCT

>M6-PGSC0003DMG400015283-(rev)M6LRR-RLP\_1342

GACTTACAACTTGGGAGCTCTTCTTGTTTAACAATCTCTTGACAGGTGTCATCCCTTTTCAATAGGA  
AACCTCACTGTACTCTTCTATCTTTTTTTGGGACTTAACAGGTTAGAGG

>M6-PGSC0003DMG400015283-(rev)M6LRR-RLP\_1403

TTCAATAGGAAACCTCACTGTACTCTTCTATCTTTTTTTGGGACTTAACAGGTTAGAGGGTAACATACCTT  
CAACATTGGGAAACTGTAACCAACTGCTAAAATTGGGATTTTCTGAAAA

>M6-PGSC0003DMG400015283-(rev)M6LRR-RLP\_1464

AACATACCTTCAACATTGGGAAACTGTAACCAACTGCTAAAATTGGGATTTTCTGAAAACAACCTGACAG  
GAACTATAACCACAACAACCTTTTTGGTCTCTCATCCCTCACAGATATTTAT

>M6-PGSC0003DMG400015283-(rev)M6LRR-RLP\_1525

ACCTGACAGGAACTATAACCACAACAACCTTTTTGGTCTCTCATCCCTCACAGATATTTATGCATCTTATAAC  
TCTTTGACTGGTCCATTACCGGTGGATATTGGTAACTGGAATCATCTTA

>M6-PGSC0003DMG400015283-(rev)M6LRR-RLP\_1586

ATCTTATAACTCTTTGACTGGTCCATTACCGGTGGATATTGGTAACTGGAATCATCTTACTTATCTTGATT  
TTCTTACAACAATTTTTCGGGTATGATTCCACTAACTCTTGAAAATG

>M6-PGSC0003DMG400015283-(rev)M6LRR-RLP\_1647

TATCTTGATTTTTCTTACAACAATTTTTCGGGTATGATTCCACTAACTCTTGAAAATGCTTGACCTTGTTGG  
GAGATCTATATGAAGGGAAACTCCCTCCAAGGAACCATTCCCAATTTA

>M6-PGSC0003DMG400015283-(rev)M6LRR-RLP\_1708

TGACCTTGTTGGGAGATCTATATGAAGGGAAACTCCCTCCAAGGAACCATTCCCAATTTAGAAGATTTGCC  
GGATCTCCAATCCTTGATCTTTCCCTAAACAACCTATCAGGGCCAATCC

>M6-PGSC0003DMG400015283-(rev)M6LRR-RLP\_1769

AGATTTGCCGGATCTCCAATCCTTGATCTTTCCCTAAACAACCTATCAGGGCCAATCCCTCACTTCATTG  
CAAATCTTACTTCCTTACACTACTTGAACCTTATCTTTTAACAATCTAGA

>M6-PGSC0003DMG400015283-(rev)M6LRR-RLP\_183

AATGAAACTGATAAACTTGCCTTGCTTGCATTCAAGACCCAAATAACCGAGGATCCATCAAGAGTTTTTG  
TCTCTTGAATGATTCTGTTCATTTCTGTCACTGGACTGGAGTAAAATGT

>M6-PGSC0003DMG400015283-(rev)M6LRR-RLP\_1830

CACTTCATTGCAAATCTTACTTCCTTACACTACTTGAACCTTATCTTTTAACAATCTAGAGGGTGAGGTTCCCT  
GTCACCGGAATATTTTCTAATTTGAGTGCAGTTGTATTAAGCGGAAAC

>M6-PGSC0003DMG400015283-(rev)M6LRR-RLP\_1891

GTGAGGTTCTGTACCGGAATATTTTCTAATTTGAGTGCAGTTGTATTAAGCGGAAACTCCAAGCTTTG  
TGGTGGGATTCAAGAGCTTCATTTACAACCTTGATTTATCAAAGACAC

>M6-PGSC0003DMG400015283-(rev)M6LRR-RLP\_1952

CAAGCTTTGTGGTGGGATTCAAGAGCTTCATTTACAACCTTGATTTATCAAAGACACGGAAGAAGCAT

GTGCTTGCCCTCAAGTTTATTTTGATAATTGTTTTGCTGCTTCATTTTC

>M6-PGSC0003DMG400015283-(rev)M6LRR-RLP\_2013

AAGAAGCATGTGCTTGCCCTCAAGTTTATTTTGATAATTGTTTTGCTGCTTCATTTTCAATCCTGGCCTTG  
TTAGTAGTTTTCTTTGTTGGAGAAGAAATTTGAACAATCAACCAGCA

>M6-PGSC0003DMG400015283-(rev)M6LRR-RLP\_2074

TCCTGGCCTTGTTAGTAGTTTTCTTTGTTGGAGAAGAAATTTGAACAATCAACCAGCACCAGAAGATAG  
TTCTAAATCTGCGCATTCTACCCAATATTTGATGAAGAGCTCCGCA

>M6-PGSC0003DMG400015283-(rev)M6LRR-RLP\_2135

AGAAGATAGTTCTAAATCTGCGCATTCTACCCAATATTTGATGAAGAGCTCCGCACTGCAACAGGT  
GGATTTTCTTCTGAAAATCTTATTGGCTCTGGCAGTTTTGGAAGTGTTA

>M6-PGSC0003DMG400015283-(rev)M6LRR-RLP\_2196

GCAACAGGTGGATTTTCTTCTGAAAATCTTATTGGCTCTGGCAGTTTTGGAAGTGTATAAGGGAAGT  
TTCCCTCCAATGGAACGGTCGTTGCTGTGAAGGTAAGTCAAAGTCCAGCTT

>M6-PGSC0003DMG400015283-(rev)M6LRR-RLP\_2257

AGGGAAGTTTTCCCTCCAATGGAACGGTCGTTGCTGTGAAGGTAAGTCAAAGTCCAGCTTGAAGGTGCTTC  
AAAAAGCTTCTTAGCAGAATGCCAAGCATTGAGAAACACAAGGCACCGGA

>M6-PGSC0003DMG400015283-(rev)M6LRR-RLP\_2379

CTTGCAAGGTCATCAGTGTATGCTCAAGTTCTGATTTCAAGGAAATGACTTTAAAGCTTTAGTCTTTCA  
GTTTCATGCCAAAAGGGAAGTGGACGAATGGCTACATCCAGAAAAGGAG

>M6-PGSC0003DMG400015283-(rev)M6LRR-RLP\_2440

TAGTCTTTCAGTTCATGCCAAAAGGGAAGTGGACGAATGGCTACATCCAGAAAAGGAGATGCATGAGA  
AGAGTAGCTTGACCACACTTTAGAGAATGAATATCATAATAGATGTGGCCT

>M6-PGSC0003DMG400015283-(rev)M6LRR-RLP\_2501

GCATGAGAAGAGTAGCTTGACCACACTTTAGAGAATGAATATCATAATAGATGTGGCCTCTGCACTTCAT  
TATCTTACCATGAATGCCAAACACCCATGATTCCTGATATAAAACC

>M6-PGSC0003DMG400015283-(rev)M6LRR-RLP\_2562

GCACTTCATTATCTTACCATGAATGCCAAACACCCATGATTCCTGATATAAAACCACAGAACATTCT  
TCTTGATGAAGATCTCACTGCTCATTTGGGTGATTTGGTTGGTGAGA

>M6-PGSC0003DMG400015283-(rev)M6LRR-RLP\_2623

AGAACATTCTTCTTGATGAAGATCTCACTGCTCATTTGGGTGATTTTGGTTTGGTGAGACTCGTTCCTGAA  
TTCAGTAATGAATCGGATCTACATCAGTTTAGCTCACTTGGAGTTCTGG

>M6-PGSC0003DMG400015283-(rev)M6LRR-RLP\_2684

CGTTCCTGAATTCAGTAATGAATCGGATCTACATCAGTTTAGCTCACTTGGAGTTCTGGGAACCATTGGC  
TATGCAGCTCCAGGTAATTTTTATATATAAAACAAAACTATGAATATACC

>M6-PGSC0003DMG400015283-(rev)M6LRR-RLP\_2745

ACCATTGGCTATGCAGCTCCAGGTAATTTTTATATATAAAACAAAACTATGAATATACCATATGGTTTCTC  
GTAACATTAGTGGTTTATTATAGGCTGATCAATTTGCTTGTTCAGAA

>M6-PGSC0003DMG400015283-(rev)M6LRR-RLP\_2806

ATGGTTTCTCGTAACATTAGTGGTTTATTATAGGCTGATCAATTTGCTTGTTCAGAAATACGGCATGGG  
TAGTAAGGTCTCCGTTGTAGGAGATATGTACAGTTTTGGGATCCTAATAT

>M6-PGSC0003DMG400015283-(rev)M6LRR-RLP\_2867

CGGCATGGGTAGTAAGGTCTCCGTTGTAGGAGATATGTACAGTTTTGGGATCCTAATATTGGAGATATT  
CACTGGAAGAAGACCCATGGACTCTTTGTTCCAAGCAAGCTCTACCCTCCA

>M6-PGSC0003DMG400015283-(rev)M6LRR-RLP\_2928

GAGATATTCAGTGAAGAAGACCCATGGACTCTTTGTTCCAAGCAAGCTCTACCCTCCACCACTTTGTAG  
AAACAGCATTGCCAGAGAAAGTTATGGAGATTCTAGACAAAACAGCTTTT

>M6-PGSC0003DMG400015283-(rev)M6LRR-RLP\_2989

ACTTTGTAGAAACAGCATTGCCAGAGAAAGTTATGGAGATTCTAGACAAAACAGCTTTTTCATGGTGAGA  
TGAGTAAAGAAACCTGTGGCTAAGAATACTGGGGCAGTATCAAGAAAGAAC

>M6-PGSC0003DMG400015283-(rev)M6LRR-RLP\_305

CCTGAGACACGTAAGAGTCATCCGTTTGAATCTCAAAGGGCTGAGGCTGGCAGGTAATCTCAGATCA  
TCTTGAAATCTCTCTTTTCTCAATTCTCTTGACCTTGACAGAAAATGTCTT

>M6-PGSC0003DMG400015283-(rev)M6LRR-RLP\_3050

TGGTGAGATGAGTAAAGAAACCTGTGGCTAAGAATACTGGGGCAGTATCAAGAAAGAACAGATGGAAT  
GCTTGGTTGGCATACTTGAGATTGGTGTTCATGTTTCAGCTGAATCCCCAAG

>M6-PGSC0003DMG400015283-(rev)M6LRR-RLP\_3111

ATGGAATGCTTGGTTGGCATACTTGAGATTGGTGTTCATGTTTCAGCTGAATCCCCAAGTGACAGATTG  
ACCATGACACAAGTTTACAGTAAGTTGACACTAATAAGAGAAAAATTCCTA

>M6-PGSC0003DMG400015283-(rev)M6LRR-RLP\_3165

CCAAGTGACAGATTGACCATGACACAAGTTTACAGTAAGTTGACACTAATAAGAGAAAAATTCCTACTA  
AGGGGAGATTGAGGCCACAGGCTACAAGTGAAAGCATTGGATTTAATCTAA

>M6-PGSC0003DMG400015283-(rev)M6LRR-RLP\_366

TCAGATCATCTTGAAAATCTCTCTTTTCTCAATTCTCTTGACCTTGCAGAAAATGTCTTCCATGAAAAAATT  
CCTCAACAACTCAGCAGGCTGCCAAGGCTTCAATACTTGAATTTGAGT

>M6-PGSC0003DMG400015283-(rev)M6LRR-RLP\_427

ATGAAAAAATTCCTCAACAACTCAGCAGGCTGCCAAGGCTTCAATACTTGAATTTGAGTTTTAACTATCT  
AACAGGAGAAATTCAGTTAATCTATCACATTGTGTTAACTCAAGAGCC

>M6-PGSC0003DMG400015283-(rev)M6LRR-RLP\_488

TAACTATCTAACAGGAGAAATTCAGTTAATCTATCACATTGTGTTAACTCAAGAGCCTTGTCTGGAC  
CACAACACTCTAGTGGGAAAGATTCTTACCAAGTTGGATCTTTAACGAA

>M6-PGSC0003DMG400015283-(rev)M6LRR-RLP\_549

GTCCTGGACCACAACACTCTAGTGGGAAAGATTCTTACCAAGTTGGATCTTTAACGAAGTTAGTGAAAT  
TGTATCTCGAAAATAACAACCTGACAGGAAACATTCCAGGTTCTATTGGA

>M6-PGSC0003DMG400015283-(rev)M6LRR-RLP\_61

CCAAAATGGAAGTTTTACAATGAGTTTTAATTTCCACACCTTTCTGGCTATCCGTGCTGTGTTTTTTGTGT  
TTCTATTGTCATTTTCTCTCCAACATGCTGCATCAGCTGCTTTTCTTG

>M6-PGSC0003DMG400015283-(rev)M6LRR-RLP\_610

TAGTGAAATTGTATCTCGAAAATAACAACCTGACAGGAAACATTCCAGGTTCTATTGGAAATCTTACATC  
TTTAGAGGAGCTGTATTTATCGTACAACAATCTAGAGGGAGAAGTGCCAG

>M6-PGSC0003DMG400015283-(rev)M6LRR-RLP\_671

TCTTACATCTTTAGAGGAGCTGTATTTATCGTACAACAATCTAGAGGGAGAAGTGCCAGCTTCTTTAGCT  
CGATTTACCAAGTTGAGGCTTCTTGGACTGTCAGTAAATAGCTTATCCGG

>M6-PGSC0003DMG400015283-(rev)M6LRR-RLP\_732

TCTTTAGCTCGATTTACCAAGTTGAGGCTTCTTGGACTGTCAGTAAATAGCTTATCCGGGGATTTCCCTCC  
TCCGTTGTACAATTTGTCATCCCTGGAACATAATCACTTTCCCTTAAC

>M6-PGSC0003DMG400015283-(rev)M6LRR-RLP\_793

ATTTCCCTCCTCCGTTGTACAATTTGTCATCCCTGGAACATAATCACTTTCCCTTAACAACCTTTCTGGTA

ATCTCAGATCTGATTTAGGCAACTACTTCCCTTATCTCCAAATACTTT

>M6-PGSC0003DMG400015283-(rev)M6LRR-RLP\_854

CTTTTCTGGTAATCTCAGATCTGATTTAGGCAACTACTTCCCTTATCTCCAAATACTTTTCTTGGCGAATTG

TCAATTCATTGGTTCCATACCATCCTCTTTGGCCAATGCTTCAAAGTT

>M6-PGSC0003DMG400015283-(rev)M6LRR-RLP\_915

TTGGCGAATTGTCAATTCATTGGTTCCATACCATCCTCTTTGGCCAATGCTTCAAAGTTGCGAGAGCTTGA

TTTTCTTTAAACAATTTCACTGGAAATATACCTAAGGGTTTTGGTAAC

>M6-PGSC0003DMG400015283-(rev)M6LRR-RLP\_976

GAGAGCTTGATTTTCTTTAAACAATTTCACTGGAAATATACCTAAGGGTTTTGGTAACTTGTGGAATTTG

TTGTGGCTCAATGTTTGGAGTAACCATCTTGGATACGGTAAGCATGATG

>M6-PGSC0003DMG400015345M6LRR-RLP\_128

ATCTAAGGTATCTTGATCTTAAATTTAACTCCCTTCAAGGTCCAATACCTTCATCCATTTGTAACATGAACA

GGCTTGAATTTCTAGATTTATCACGCAACGACTTCAGTAACTCGATT

>M6-PGSC0003DMG400015345M6LRR-RLP\_320

CATCGTTATGTGCGCAGAGCACTTCATTGAGAACCATTGTCTTGAATGGTAATCAATTTAAAGGAACTCT

CCCTGTGTCGTTGCTCAACTGTAGTGATTTAGAAGTTCTTGATATGGGGA

>M6-PGSC0003DMG400015345M6LRR-RLP\_512

CCAATGTGTTCCATGGACCAATTAGTACTTGTGCACTACATTTTGCTTTCCCAAGTTGCGGATTTTTGAT

CTTTGCGATAACAAATTCAGTGGCTCTCTCCCTGCAAAAGTTTTTGGAA

>M6-PGSC0003DMG400015345M6LRR-RLP\_576

TTTTGATCTTTGCGATAACAAATTCAGTGGCTCTCTCCCTGCAAAAGTTTTTGGAACTTCAAGGGAATGA

TTAGATTAGACGGTGAAGACACACGAGAGATCATGTACATGCAACCATC

>M6-PGSC0003DMG400015345M6LRR-RLP\_64

TTGTCCTACCTAAACCTTTGCGATAACTCTTTAACAGGCCACCTACAACAATTTAATTTCCATAATCTAAGG

TATCTTGATCTTAAATTTAACTCCCTTCAAGGTCCAATACCTTCATCC

>M6-PGSC0003DMG400015345M6LRR-RLP\_640

GGAATGATTAGATTAGACGGTGAAGACACACGAGAGATCATGTACATGCAACCATCTATAATGCCATTT

TACTCATCATATGAGGATTCTGTGAGTTTGGTGATCAAAGGCCTGGAT

>M6-PGSC0003DMG400015345M6LRR-RLP\_704

CATTTTACTCATCATCATATGAGGATTCTGTGAGTTTGGTGATCAAAGGCCTGGATATTGAGCTAGAAAG  
AATCAGCACGATTATGACAACCATAGACCTCTCGAGCAACCACTTTGATG

>M6-PGSC0003DMG400015345M6LRR-RLP\_768

AGAAAGAATCAGCACGATTATGACAACCATAGACCTCTCGAGCAACCACTTTGATGGTGTCATTCCGAA  
AACACTAAAGGATCTCAGCTCACTTTGGCTACTCAATTTATCCCATAACAA

>M6-PGSC0003DMG400015347M6LRR-RLP\_1116

TCAATACTTAGACTTGTCAAGTAATTCCCTATCTGGCCCACTGCCTAATAATTTGAGCATGCTTCAAAGC  
TAACCCAACTAGATTTGTCGCACAACCTCACTGAATGGTACCATAACCATC

>M6-PGSC0003DMG400015347M6LRR-RLP\_1178

TTCAAAGCTAACCCAACTAGATTTGTCGCACAACCTCACTGAATGGTACCATAACCATCTTCGGTTTTTAGC  
CTCCCTTTGCTAGGTGAGTTGTGGCTCGATAATAATCGATTTAGTGGAC

>M6-PGSC0003DMG400015347M6LRR-RLP\_1240

GTTTTAGCCTCCCTTTGCTAGGTGAGTTGTGGCTCGATAATAATCGATTTAGTGGACTACCCAATGAGC  
TCAAACAAACCCAACATTAGAAAGCCTGAGTTTAAGCCATAATCAACTC

>M6-PGSC0003DMG400015347M6LRR-RLP\_1302

CAATGAGCTCAAACAAACCCAACATTAGAAAGCCTGAGTTTAAGCCATAATCAACTCAGTGGTTCTTTG  
CTTCAATCACTTTTGAATCTCACAAACCTTTCTACCCTTGACCTTTCATC

>M6-PGSC0003DMG400015347M6LRR-RLP\_1364

GTTCTTTGCTTCAATCACTTTTGAATCTCACAAACCTTTCTACCCTTGACCTTTCATCAAATAACATCACCAT  
CGATGAGGGAATACAAATCACTTTTCTAGCCTACAAGATTTGTTGT

>M6-PGSC0003DMG400015347M6LRR-RLP\_1426

AACATCACCATCGATGAGGGAATACAAATCACTTTTCTAGCCTACAAGATTTGTTGTTATCATCTTGTGA  
ACTGAAGGATATTCCACACTTCTTGACAAATGTAAAGAACTTCAGGTC

>M6-PGSC0003DMG400015347M6LRR-RLP\_1488

ATCTTGTGAAGGATATTCCACACTTCTTGACAAATGTAAAGAACTTCAGGTCTTGGATATTTCTA  
ACAATAAGATTCGTGGCCAAATCCCAAACCTGGTTTAGCGGCATGAGGTG

>M6-PGSC0003DMG400015347M6LRR-RLP\_310

CATCTCCGGACACTAAACCTTGCTTACAATGACTTCTATTCTTCTTCAATCCCACATAACATTGGCCGATTG  
AGGAATTTGAGGCATCTCAACCTTTCTATTCTTTGTTTGAAGGGGAA

>M6-PGSC0003DMG400015347M6LRR-RLP\_372

TGGCCGATTGAGGAATTTGAGGCATCTCAACCTTTCTCATTCTTTGTTTGAAGGGGAAATCCCAACAGAA  
ATCTCATACCTTTCCAATTTGGTTTCACTGGAACTTTTTTGTAATGGATG

>M6-PGSC0003DMG400015347M6LRR-RLP\_434

CAACAGAAATCTCATACCTTTCCAATTTGGTTTCACTGGAACTTTTTTGTAATGGATGTGAACTTGCTGAG  
AGAACATTGAAACAATTCTTCAAACTTCACAAATCTAGAGGTAATAT

>M6-PGSC0003DMG400015347M6LRR-RLP\_496

CTTGCTGAGAGAACATTGAAACAATTCTTCAAACTTCACAAATCTAGAGGTAATATCTCTCTCTTATGT  
CAACATCTCATCTCCATTACCTGTGAATATTTCTTCTTCTCGTTAAGG

>M6-PGSC0003DMG400015347M6LRR-RLP\_558

CTCTTATGTCAACATCTCATCTCCATTACCTGTGAATATTTCTTCTTCTCGTTAAGGTACGTGGATCTTGA  
ATTTACTAATCTGGGAGGTGTTCTCCAGAGAGTCTTTTCCTTCTGCC

>M6-PGSC0003DMG400015347M6LRR-RLP\_62

CTGAAGCTTTTGCTTTGCTTCACTTCAAACAATCCTTTCAAATCTCTGACCAACCTAGCTCTCGGGATGAT  
ACTGGTGTGCAATTTGTTGATGTCCCAAAAACGAAGTCTTGAATGAGA

>M6-PGSC0003DMG400015347M6LRR-RLP\_620

TGGATCTTGAATTTACTAATCTGGGAGGTGTTCTCCAGAGAGTCTTTTCCTTCTGCCAACTTGGAAATG  
CTCTATTTGAATTACAATGATCTTCTCGAAGGAGTTTTACCAAAGATCC

>M6-PGSC0003DMG400015347M6LRR-RLP\_806

CAATTGGCACCTTGAGTTCATTGAATCTCTTGAACCTCAAAGATGTCAATTCTCTAGTTCCATTCTGAT  
TCCATTGGCAATCTTACACAAATGCGGGGTTTGGATTTTGGTAATAATC

>M6-PGSC0003DMG400015347M6LRR-RLP\_868

ATTCCTGATTCCATTGGCAATCTTACACAAATGCGGGGTTTGGATTTTGGTAATAATCATTTACCCGGCTA  
TATTCCTTCCATAATCTCTAAATTGAAGCACCTCACATCCCTAGATCTC

>M6-PGSC0003DMG400015347M6LRR-RLP\_930

CACCGGCTATATTCCTTCCATAATCTCTAAATTGAAGCACCTCACATCCCTAGATCTCTCGTCCAACCTCTT  
TTCAGGTGAAATTCCCGATATTTTTCTAACCTCCAAGAGCTACGTTA

>M6-PGSC0003DMG400015347M6LRR-RLP\_992

CCAACCTCTTTTCAGGTGAAATTCCTGATATTTTTCTAACCTCCAAGAGCTACGTTATTTATATCTTTCTG



ACAACAGCTTCATCGGTTTGCTTCCTTCTACAATTGTAAGCTTGACAC

>M6-PGSC0003DMG400015348M6LRR-RLP\_434

ATTCCGAAAACACTAAAGGATCTCAGCTCACTTTGGCTACTCAATTTATCCCATAACAATCTCATAGGTCA  
TATTCCAATGGAATTGGGGAAATTGAATAAGCTTGAAGCATTAGATCTC

>M6-PGSC0003DMG400015349M6LRR-RLP\_0

ATGGTGAGTCTCTTTTTCTTTTATTCATTTCTCTGTTTGGTGTTACTGATAAGTCTATGCTTTTTCTTCTTCT  
TTGATCATCATATTTGTTCTTCCAGTGAAGCTTCTGCTTTGCTTAAG

>M6-PGSC0003DMG400015349M6LRR-RLP\_1054

CTTCAATTCCAAGTTTCACACATCTTCAGTACTTATACTTGATGAGTAATCCCTATCTGGACCACTTCCTA  
TAAATGGAAGCATGCTTCAAAGCTAACCGAACTGGATTTGTCTTACA

>M6-PGSC0003DMG400015349M6LRR-RLP\_1116

CCACTTCCTATAAATGGAAGCATGCTTCAAAGCTAACCGAACTGGATTTGTCTTACAACCTCACTGAATG  
GTACCATACCATCTTGGGTGTTTAGCCTCCCTTTGCTATTTCAATCGGTT

>M6-PGSC0003DMG400015349M6LRR-RLP\_1178

ACTGAATGGTACCATACCATCTTGGGTGTTTAGCCTCCCTTTGCTATTTCAATCGGTTCTCCATAATAATC  
GATTTAGTGGACTACCCGATGAGCTCAAATAAACCTACCATTAGTACA

>M6-PGSC0003DMG400015349M6LRR-RLP\_1240

ATAATAATCGATTTAGTGGACTACCCGATGAGCTCAAATAAACCTACCATTAGTACACCTGGATTTAAG  
CCATAACTCACTCAGTGGTTCTTTTCTCAATCACTTGCGAATCTCACAA

>M6-PGSC0003DMG400015349M6LRR-RLP\_1302

GATTTAAGCCATAATCAACTCAGTGGTTCTTTTCTCAATCACTTGCGAATCTCACAAACCTTTATTCCCTT  
GAACTTTCATCAAATAACATCACCGGGGATATTGCGGGAATCAATATC

>M6-PGSC0003DMG400015349M6LRR-RLP\_1364

TTATTCCCTTGAACCTTTCATCAAATAACATCACCGGGGATATTGCGGGAATCAATATCACTTTCCCTAGCC  
TAGGATTTTTGCAATTATCATCATGTGAACTGAAGGATTTCCACACTT

>M6-PGSC0003DMG400015349M6LRR-RLP\_1426

TCCCTAGCCTAGGATTTTTGCAATTATCATCATGTGAACTGAAGGATTTCCACACTTCTTGAGAAATGTA  
ACGACACTTCGGTACTTGGATATTTCTAACAATAAGATTTGTGGTCAAA

>M6-PGSC0003DMG400015349M6LRR-RLP\_1488

AGAAATGTAACGACTTCGGTACTTGGATATTTCTAACAATAAGATTTGTGGTCAAATCCCTAACTGGT  
TTAGCGGCATGAAATGGAACCTCGTTGCAGTCCCTAATCCTTTCTCATAAT

>M6-PGSC0003DMG400015349M6LRR-RLP\_1550

TAACTGGTTTAGCGGCATGAAATGGAACCTCGTTGCAGTCCCTAATCCTTTCTCATAATTCATTAACAGGCC  
ATCTACCACAATTTTATTATTATAAGCTAAAGTATCTTGATCTGAAATT

>M6-PGSC0003DMG400015349M6LRR-RLP\_1612

TAAACAGGCCATCTACCACAATTTTATTATTATAAGCTAAAGTATCTTGATCTGAAATTTAACTCCCTTCAG  
GGTCCACTACCTTCATCCATTTGTAACATGAGTTCACCTTTCTTATTAG

>M6-PGSC0003DMG400015349M6LRR-RLP\_1660

ATCTGAAATTTAACTCCCTTCAGGGTCCACTACCTTCATCCATTTGTAACATGAGTTCACCTTTCTTATTAG  
ATTTATCACGCAACAACCTTCAGTAACTCGGTTCCAAGTTGCTTGGGAA

>M6-PGSC0003DMG400015349M6LRR-RLP\_248

TGACTTATTAACGGTCATGTTATCGGGTTAGACCTTAGTTGTAGTCTTCTTTTTGGCACTTTTCATCCCAA  
TAGTAGCCTCTTCCAACCTTCTCATCTCCACACACTAAACCTTTATGG

>M6-PGSC0003DMG400015349M6LRR-RLP\_310

TTCATCCCAATAGTAGCCTCTTCCAACCTTCTCATCTCCACACACTAAACCTTTATGGCAATGCCTTCAATC  
ATTCTTCAATCCACATAACATTGGCCGATTGACGAATTTGAGGCATC

>M6-PGSC0003DMG400015349M6LRR-RLP\_372

GCCTTCAATCATTCTTCAATCCACATAACATTGGCCGATTGACGAATTTGAGGCATCTCAACCTCTCTGG  
GTCTGGCTTAAGTGGGAAAATCCCAACAGAAATCTTAGACCTTTCCAAT

>M6-PGSC0003DMG400015349M6LRR-RLP\_434

CCTCTCTGGGTCTGGCTTAAGTGGGAAAATCCCAACAGAAATCTTAGACCTTTCCAATTTGGTGCTACTTC  
ATCTTTCTGCTGGTCTGTATGGATTACAACCTTGATCAGAGAGCATTGA

>M6-PGSC0003DMG400015349M6LRR-RLP\_496

TGCTACTTCATCTTTCTGCTGGTCTGTATGGATTACAACCTTGATCAGAGAGCATTGAAACACTGCTTCAG  
AACTCACAATCTGGAGCTACTTTCTCTCCCTGGTGTCAACATCTCAT

>M6-PGSC0003DMG400015349M6LRR-RLP\_558

CTGCTTCAGAACTTCACAAATCTGGAGCTACTTTCTCTCCCTGGTGTCAACATCTCATCTCCGATACCTGT  
GAATATTTCTTCTCCTTAAGGTACGTGGATCTTGAATATACTAATCAG

>M6-PGSC0003DMG400015349M6LRR-RLP\_62

TTCTTCTTCCTTTGATCATCATATTTGTTCTTCCAGTGAAGCTTCTGCTTTGCTTAAGTTCAAACAATCCTTT  
GAAATCACCGACTACCTTAATTGTTGGGTTGAAGAAGACCAACATAT

>M6-PGSC0003DMG400015349M6LRR-RLP\_620

GATACCTGTGAATATTTCTTCCTCCTTAAGGTACGTGGATCTTGAATATACTAATCAGCGAGGTGTTCTCA  
CAGAGAGCCTTTTCCTTCTGCCCAACTTGAAACACTCTATTTGAGTAA

>M6-PGSC0003DMG400015349M6LRR-RLP\_682

GTGTTCTCACAGAGAGCCTTTTCCTTCTGCCCAACTTGAAACACTCTATTTGAGTAATAACTATCTTCTC  
AAAGGAGTTTTTCCAAAGGTCCACCCGAGCAACACTCTGTTGGAGTTGG

>M6-PGSC0003DMG400015349M6LRR-RLP\_744

TATCTTCTCAAAGGAGTTTTTCCAAAGGTCCACCCGAGCAACACTCTGTTGGAGTTGGATATTTGAGGCA  
CAGGCATCTCTGGTGAGCTACCTGTTTCAATTGGCAACTTCAGTTCCTTG

>M6-PGSC0003DMG400015349M6LRR-RLP\_806

TTCAGGCACAGGCATCTCTGGTGAGCTACCTGTTTCAATTGGCAACTTCAGTTCCTTGAATACCTTAATAC  
TCGATGCATGTCAATTCTCGGGTCGCATTCTGATTCCATTGGAAACCT

>M6-PGSC0003DMG400015349M6LRR-RLP\_930

CAAATTAGGGTGTGTTTTTATCGCATAATCATTTCACTGGCAATATTCCTTTACAATCTCTAAAATGAAT  
CAGCTCTTAAGTTTAGATCTTTCTGATAATAGCTTCATCGGTCCATTT

>M6-PGSC0003DMG400015349M6LRR-RLP\_992

TAAAATGAATCAGCTCTTAAGTTTAGATCTTTCTGATAATAGCTTCATCGGTCCATTTCCCTCTTCAATTCC  
AAGTTTCACACATCTTCAGTACTTATACTTGATGAGTAATCCCTATC

>M6-PGSC0003DMG400015351M6LRR-RLP\_1364

AAACTGGTTTAGCGGCATGAGGTGGGACAACCTGTCTACCTAACCTTTCGCATAACTCTTAAACAGGC  
CACCTACAACAATTTAATTTCCATAATCTAAGGTATCTTGATCTTAAATT

>M6-PGSC0003DMG400015351M6LRR-RLP\_1426

TAACAGGCCACCTACAACAATTTAATTTCCATAATCTAAGGTATCTTGATCTTAAATTTAACTCCCTCAA  
GGTCCAATACCTTCATCCATTTGTAACATGAACAGGCTTGAATTTCTAG

>M6-PGSC0003DMG400015351M6LRR-RLP\_1612

TGTTGGACTTAAGAAGGAACAATTTCACTGGGAGTCTCCATCGTTATGTGCGCAGAGCACTTCATTGAG

AACCATTGTCTTGAATGGTAATCAATTTAAAGGAACTCTCCCTGTGTCGT

>M6-PGSC0003DMG400015351M6LRR-RLP\_1736

CAACTGTAGTGATTTAGAAGTTCTTGATATGGGGAATAACGCTATAAATGACACATTTCCAGCTTGGCTA  
GGAACACTTCAACAACACTGCAGGTCTTAATATTAAAGTCCAATGTGTTCCA

>M6-PGSC0003DMG400015351M6LRR-RLP\_1798

CTTGGCTAGGAACACTTCAACAACACTGCAGGTCTTAATATTAAAGTCCAATGTGTTCCATGGACCAATTAG  
TACTTGTGCACTACATTTTGCTTTCCCAAGTTGCGGATTTTTGATCTTT

>M6-PGSC0003DMG400015351M6LRR-RLP\_434

CCCAGAGAGTCTTTTCCTTCTGCCAAACTTGGAATGCTCTATTTGAATTACAATGATCTTCTCGAAGGAG  
TTTTACCAAAGATCCACCCGAGCAACACTCTGTTGGAGTTGGATATTTT

>M6-PGSC0003DMG400015352M6LRR-RLP\_0

ACTTGTGACATGTTAACCGGTCATGTTATTGGATTGGACCTTAGATGCAGTCTGCTTAAAGGAACTATTC  
ATCCCAATAGCAGCCTCTTCCAACCTCCATCATCTCCATACACTAAATCTT

>M6-PGSC0003DMG400015352M6LRR-RLP\_1037

TGTTTAGCCTCCCTTTGCTAGGTCAGTTGTGGCTCGATAATAATCGATTTAGTGGACTACACGATGAGCT  
CAAAACAAACCCAACATTAGAACGCTTGGGTTTAAGCCAAAATCAACTCA

>M6-PGSC0003DMG400015352M6LRR-RLP\_1098

CGATGAGCTCAAAACAAACCCAACATTAGAACGCTTGGGTTTAAGCCAAAATCAACTCAGTGGTTCTTTT  
CCTCATTCACTTGCTAGTCTCACAAACCTTTCTACCCTTGACCTTTTCATC

>M6-PGSC0003DMG400015352M6LRR-RLP\_1159

GGTTCTTTTCCTCATTCACTTGCTAGTCTCACAAACCTTTCTACCCTTGACCTTTTCATCAAATAACATCACC  
GTCGATGCAGGGATACAAATCACTTTTCTAGCCTAATAAATTTGTTG

>M6-PGSC0003DMG400015352M6LRR-RLP\_122

TTACAATTAATTCTATTCTTCTTCAATCCACATAACATTGGCCGATTGAGGAATTTGAGGCATCTCAACC  
TTTCTGGTTCATTCTTTGAAGGGGAAATCCCAACAGAAATATCATACT

>M6-PGSC0003DMG400015352M6LRR-RLP\_1220

ATAACATCACCGTCGATGCAGGGATACAAATCACTTTTCTAGCCTAATAAATTTGTTGTTATCATCTTGT  
AAACTGAAGGATTTTCCACACTTCTTGACAAATGTAAAGAACTTCAGG

>M6-PGSC0003DMG400015352M6LRR-RLP\_1281

ATCATCTTGTAAGGATTTCCACACTTCTTGACAAATGTAAAGAACTTCAGGTCTTGGATATT  
CTAACAATAAGATTCGTGGCCAAATCCCAAAGTGTAGCGGCACAAG

>M6-PGSC0003DMG400015352M6LRR-RLP\_1342

TTGGATATTCTAACAATAAGATTCGTGGCCAAATCCCAAAGTGTAGCGGCACAAGGTGGGACAAT  
TTGTACTACCTAAATCTTTCGCATAATTCTTACCAGGCCACCTACAATAA

>M6-PGSC0003DMG400015352M6LRR-RLP\_1403

GGGACAATTTGTACTACCTAAATCTTTCGCATAATTCTTACCAGGCCACCTACAATAATTTCAATTCATC  
ATCTAGGGTATCTTAATCTTCAATTTAACTTCCTTCAGGGTCCAATAC

>M6-PGSC0003DMG400015352M6LRR-RLP\_1464

TCATTTCCATCATCTAGGGTATCTTAATCTTCAATTTAACTTCCTTCAGGGTCCAATACCTTCATCCATTG  
TAACATGAACAATCTTCAATTTCTACATTTATCGCGCAACAACCTCAG

>M6-PGSC0003DMG400015352M6LRR-RLP\_1525

TCATCCATTTGTAACATGAACAATCTTCAATTTCTACATTTATCGCGCAACAACCTCAGTAACTCGATTCCA  
AGCTGCTTGGGAAGCATGTCTAGTCTAAAAGTGTGGACTTAAGAAGG

>M6-PGSC0003DMG400015352M6LRR-RLP\_1586

ACTCGATTCCAAGCTGCTTGGGAAGCATGTCTAGTCTAAAAGTGTGGACTTAAGAAGGAACAATTTCA  
CAGGGAGTCTTCCCCCATTATGTGCGTAGAGGACTTCATTGAGAACCATT

>M6-PGSC0003DMG400015352M6LRR-RLP\_1647

CAATTTACAGGGAGTCTTCCCCCATTATGTGCGTAGAGGACTTCATTGAGAACCATTGTCTTGAATGA  
CAATCAATTTGAAGGAACCTCCCTATGTCGTTGCTCAACTGTATTGGTT

>M6-PGSC0003DMG400015352M6LRR-RLP\_1708

CTTGAATGACAATCAATTTGAAGGAACCTCCCTATGTCGTTGCTCAACTGTATTGGTTAGAAAGTTCTTG  
ATATGGGGAATAAACTATAAATGACACATTTCTGCTTGGCTCGGAAC

>M6-PGSC0003DMG400015352M6LRR-RLP\_1769

GAAGTTCTTGATATGGGGAATAAACTATAAATGACACATTTCTGCTTGGCTCGGAACACTTCAACAAC  
TGCAGGTCTTAATATTAAGTCCAATATGTTCCATGGACCAATTAGTACT

>M6-PGSC0003DMG400015352M6LRR-RLP\_183

CATCTCAACCTTTCTGGTTCATTCTTGAAGGGGAAATCCCAACAGAAATATCATACCTTTCCAATTTGGT  
TTCATTGATCTTCTTCTTAGTGCTGTATGGATTACAACCTTGATCAG

>M6-PGSC0003DMG400015352M6LRR-RLP\_1891

TCAGACTATATTTTGCTTTCCCAAGTTGCGAATTTTGATCTTTCCCGTAACGAATTCAGTGGCTCTCTCCC  
TGCAAAAGTTTTTGAAACTTCAAGGCAATGATTAAATTAGACGATGA

>M6-PGSC0003DMG400015352M6LRR-RLP\_1952

GGCTCTCTCCCTGCAAAAGTTTTTGAAACTTCAAGGCAATGATTAAATTAGACGATGAAGACTCAGGA  
GAGATCATGTACATGAAACCATCTATAATGCCATTTTACTCATCATCATAT

>M6-PGSC0003DMG400015352M6LRR-RLP\_2013

ACTCAGGAGAGATCATGTACATGAAACCATCTATAATGCCATTTTACTCATCATCATATGAGGATTCTGT  
GAGTTTGGTGATCAAAGGCCTGGATATTGAGCTAGAAAGAATCAGCACAA

>M6-PGSC0003DMG400015352M6LRR-RLP\_2196

ATCTCAGCTCACTTTGGCTACTCAATTTATCCATAACAATCTCACAGGTGACATTCCAATGGAATTGGGG  
CAATTGAATACCTTGAAGCATTAGATCTCTCTTGAATCGGCTCACTG

>M6-PGSC0003DMG400015352M6LRR-RLP\_2318

AAGATTCCGCAGGAATTGACAAGGCTAACATTTCTGAAAAGTTAAACCTTTCTCAGAATGTCCTCGTTG  
GACCAATTCCTCACGGTCCACAATTCAACACATTTGAAAATGACTCCTAT

>M6-PGSC0003DMG400015352M6LRR-RLP\_244

CCAATTTGGTTTCACTTGATCTTTCTTCTTTAGTGCTGTATGGATTACAATTGATCAGAGAACATTTGAA  
ACAATGCTTCAGAACTTACTAATCTGGAGGTAGTTTCTCTCCATGGTG

>M6-PGSC0003DMG400015352M6LRR-RLP\_2440

CGGAAACCTTGATTTATGTGGTCCTCCTTTATCAAAGCAATGTGGAACGAGTGATCCATCACATACTCCT  
CAACCATTGGACTCTGAAGAAGATGAAGATGAGTCATATTTTTTAAGTGG

>M6-PGSC0003DMG400015352M6LRR-RLP\_366

GACATCTTCTCTCCGATACCTGTGAATATGTCTTTTCTCGTTAAGGTACGTGGATCTTGGATATACTAA  
TCTGCGAGGTGTTATCACAGAGAGCTTTTTCTTCTGTCAGAATTGGAA

>M6-PGSC0003DMG400015352M6LRR-RLP\_427

GATATACTAATCTGCGAGGTGTTATCACAGAGAGCTTTTTCTTCTGTCAGAATTGGAAAGGCTCTATTT  
GAGTGACAATGATCTTCTCAAAGGAGTTTTACCAAAGATCCACCAGCAAC

>M6-PGSC0003DMG400015352M6LRR-RLP\_488

GCTCTATTTGAGTGACAATGATCTTCTCAAAGGAGTTTTACCAAAGATCCACCAGCAACACTCTGTTGGA

GTTGGATATTTCTTACACAGGAATCTCTGGTGAGCTGCCTGATTCAGTTG

>M6-PGSC0003DMG400015352M6LRR-RLP\_549

TCTGTTGGAGTTGGATATTTCTTACACAGGAATCTCTGGTGAGCTGCCTGATTCAGTTGGCACCTTCAGT

TCCTTGAATATATTGAACCTCAAAGGATGTCAATTCTCTGGTTCATTCC

>M6-PGSC0003DMG400015352M6LRR-RLP\_61

GAACTATTCATCCCAATAGCAGCCTCTCCAACCTCCATCATCTCCATACACTAAATCTTGCTTACAATTACT

TCTATTCTTCTTCAATCCCACATAACATTGGCCGATTGAGGAATTTGA

>M6-PGSC0003DMG400015352M6LRR-RLP\_610

ACCTTCAGTTCCTTGAATATATTGAACCTCAAAGGATGTCAATTCTCTGGTTCATTCCCTGATTCCATTGG

CAATCTTACACAAATTTGGTATTTGGATTTTCAGTAATAATCATTTCACC

>M6-PGSC0003DMG400015352M6LRR-RLP\_671

ATTCCATTGGCAATCTTACACAAATTTGGTATTTGGATTTTCAGTAATAATCATTTCACCGGCCATATTCCTT

CCACAATCTCTCAATTGAAGCAGCTCACATTTCTATATCTTTCGTCCA

>M6-PGSC0003DMG400015352M6LRR-RLP\_732

CCATATTCCTTCCACAATCTCTCAATTGAAGCAGCTCACATTTCTATATCTTTCGTCCAACCTCCTTTTCAGG

TGAAATTCAGATATTTTTTCTAACCTCCAAGAGCTATGTTATTTATT

>M6-PGSC0003DMG400015352M6LRR-RLP\_793

TCCTTTTCAGGTGAAATTCAGATATTTTTTCTAACCTCCAAGAGCTATGTTATTTATTTCTTTATAGAAAT

AGTTTCATCGGTTTCGTTTCTTCTACAATTGTAAGCTTGACACATCTT

>M6-PGSC0003DMG400015352M6LRR-RLP\_915

ATACTTAGACTTGTCAAGTAATTCCTATCTGGCCCACTGCCTAATAATTTTAGCATGCTTCAAAAGCTAA

CCTGACTGGATTTGTGGTACAACCTCACTGAATGGTATCATACCATCTTC

>M6-PGSC0003DMG400015352M6LRR-RLP\_976

CAAAAGCTAACCTGACTGGATTTGTGGTACAACCTCACTGAATGGTATCATACCATCTTCGGTGTTAGCC

TCCCTTTGCTAGGTCAGTTGTGGCTCGATAATAATCGATTTAGTGGACTA

>M6-PGSC0003DMG400015353M6LRR-RLP\_0

TTGGATTTTCGGTAATAATCATTTCACCGGCCATATTCCTTCCACAATCTCTAAATTGAAGCAGCTCACATA

TCTAGACATTTTCGTCCAACCTCCTTACAGGTGAAATTCAGATATTTTT

>M6-PGSC0003DMG400015353M6LRR-RLP\_1024

ATGACACATTTCCAGCTTGGCTAGGAAGACTTGAACAACCTGCAGGTCCTAATATTAAGTCCAATGTGTT  
CCATGGACCAATAAGTAATTGTCAGAGTACGTTTTGCTTTCCCAAGTTGC

>M6-PGSC0003DMG400015353M6LRR-RLP\_1088

TGTGTTCCATGGACCAATAAGTAATTGTCAGAGTACGTTTTGCTTTCCCAAGTTGCGAATTTTTGATCTTT  
CTAGTAATGAATTCAGTGGCTCACTTCCAGCAAATTTTCTTGAAACTT

>M6-PGSC0003DMG400015353M6LRR-RLP\_1152

GATCTTTCTAGTAATGAATTCAGTGGCTCACTTCCAGCAAATTTTCTTGAAACTTCAAGGCAATGATTAA  
ATTAGATGGTGAAGAGACAGGAGAGATCAAGTACATGGAACCATCTGGG

>M6-PGSC0003DMG400015353M6LRR-RLP\_1216

TGATTAAATTAGATGGTGAAGAGACAGGAGAGATCAAGTACATGGAACCATCTGGGAAGTCATTGTAC  
ACATCGTATGAGGATTCTGTGAGTTTGGTGATCAAAGGCCAGGACATTGAGC

>M6-PGSC0003DMG400015353M6LRR-RLP\_128

CCAAGAGCTACATTCTTTATATCTTTGTAACAACAGCTTCATCGTTTTGTTTCCTTCTACAATTGTAAGCTT  
GACACAACCTCAACGCTTAGACTTGTCCAACAACCTCACTTAACGGTAC

>M6-PGSC0003DMG400015353M6LRR-RLP\_1280

GTACACATCGTATGAGGATTCTGTGAGTTTGGTGATCAAAGGCCAGGACATTGAGCTAGAAAGAATCAG  
CACAATTATGACAACCATAGACCTCTCAAGCAACCATTTTGAAGGTGTCAT

>M6-PGSC0003DMG400015353M6LRR-RLP\_1408

CACTAAAGGATCTCAGCTCACTTTGGCTACTCAATTTATCCATAACATTTTCATAGGTCATATTCCAATG  
GAATTGGGACAATTGAATACGCTTGAAGCGTTAGATCTCTCTTGGAAATC

>M6-PGSC0003DMG400015353M6LRR-RLP\_1525

ATCGGCTCACTGGAAAGATTCCGCAGGAATTGACAAGAATGAATTTTCTGGCCTTCTTAAACCTCTCTCA  
TAATCTTCTTATTGGACCAATCCTCAAGGTCCACAGTTCAACACATTTG

>M6-PGSC0003DMG400015353M6LRR-RLP\_192

GTAAGCTTGACACAACCTCAACGCTTAGACTTGTCCAACAACCTCACTTAACGGTACCATACCATCTTCGGT  
GTTTAGCCTCCCTTTGCTATTTTCATTGTCGCTCCAACATAATCAATTT

>M6-PGSC0003DMG400015353M6LRR-RLP\_256

CTTCGGTGTTTAGCCTCCCTTTGCTATTTTCATTGTCGCTCCAACATAATCAATTTAGTGGAGTAGCCGAT  
GAGTTCAAACATGCCAACATTAGCATACTAGATTTAAGCCATAATC



>M6-PGSC0003DMG400015353M6LRR-RLP\_320

AGCCGATGAGTTCAAACATGCCAACATTAGCATACCTAGATTTAAGCCATAATCAATTCAGTGGTACT  
TTTCTCAATCACTTGCGAGTCTCACAACCTTTCTACCCTCGAGCTTTC

>M6-PGSC0003DMG400015353M6LRR-RLP\_384

GGTACTTTTCTCAATCACTTGCGAGTCTCACAACCTTTCTACCCTCGAGCTTTCAGCAAATAACATCAC  
CGTCGATGAGGGAATACAAATCACTTTTCTAGCCTAGTAGTTTTACAG

>M6-PGSC0003DMG400015353M6LRR-RLP\_448

ACATCACCGTCGATGAGGGAATACAAATCACTTTTCTAGCCTAGTAGTTTTACAGTTATCATCTTGTGAA  
CTGAAGGATTTCCACACTTCTTGACAAATGTAAAGAACTTCAGGTCT

>M6-PGSC0003DMG400015353M6LRR-RLP\_64

TCACATATCTAGACATTTTCTCCAACCTTTTACAGGTGAAATTCCAGATATTTTTTCTAACCTCCAAGAG  
CTACATTTTATATCTTTGTAACAACAGCTTCATCGTTTTGTTTCCTT

>M6-PGSC0003DMG400015353M6LRR-RLP\_640

GGTACCTAAACCTTTTCGCATAATTCTTTAACAGGCCACCTACAACAATTTCAATTCATAATCTAAGGTAT  
CTTGATATTAATTTAACTCCCTTCAGGGTCCACTCTCTTTGTCCATTT

>M6-PGSC0003DMG400015353M6LRR-RLP\_704

AAGGTATCTTGATATTAATTTAACTCCCTTCAGGGTCCACTCTCTTTGTCCATTTGTAACAGTAACACGC  
TTGAATTTCTAGATTTATCACGCAACAACCTTCAGTAACTCGATTCCAAG

>M6-PGSC0003DMG400015353M6LRR-RLP\_768

AACACGCTTGAATTTCTAGATTTATCACGCAACAACCTTCAGTAACTCGATTCCAAGCTGCTTGGGAAGCA  
TGTCTAGTCTAAAAGTGTTGGACTTAAGAAGGAACAATTTACAGGGAGT

>M6-PGSC0003DMG400015353M6LRR-RLP\_832

GAAGCATGTCTAGTCTAAAAGTGTTGGACTTAAGAAGGAACAATTTACAGGGAGTCTTTCTCCATTATG  
TGCGCAGAGCACTTCATTGAGAACCATTGTCTTGAATGACAATCAATTTG

>M6-PGSC0003DMG400015353M6LRR-RLP\_960

CTCCCTATGTCGTTGCTCAACTGTATTGGTTTAGAAGTTCTTGATATGGGGAATAACGCTATAAATGACA  
CATTTCCAGCTTGGCTAGGAAGACTTGAACAACCTGCAGGTCCTAATATTA

>M6-PGSC0003DMG400015391M6LRR-RLK\_0

CAAGAATTTGGTGTCTTCTAAGTGCATGACAGCTATAATCTTTTTTATGCAGGGATATATCATACAACAAT

TTCACACAAATATCTACTTCAGTATGCGATTCCCTCTACCTTGTGAGCAT

>M6-PGSC0003DMG400015391M6LRR-RLK\_1054

AGTTCTGATATGATTGGCAACTTTCTGATTTAATATAGAAGGTACCAATTTGTTGGAGATAATGTGGTAT

ATTTTGATTTCTTACACAGGGGAGAGTAGTTTTGAGGGATTTC AACATTA

>M6-PGSC0003DMG400015391M6LRR-RLK\_1116

TGTGGTATATTTTGATTTCTTACACAGGGGAGAGTAGTTTTGAGGGATTTC AACATTATGGAGGAAGCTA

ACGGTGTGGAAAAGTCATTACCAAGGACTTTGCTGATGTTACTGTTAGT

>M6-PGSC0003DMG400015391M6LRR-RLK\_1178

GGAAGCTAACGGTGTGGAAAAGTCATTACCAAGGACTTTGCTGATGTTACTGTTAGTAGCACTCTGGA

GATTCACTTGTATTGGACCGGGAAGGGGACTAACGCTATTCCAGACAGAGG

>M6-PGSC0003DMG400015391M6LRR-RLK\_124

CCTCTTCATTTGGAACCTACATTCATCTACTATTTCTTTTTTTTTATAAGTGAAAATTTTGGTCCTTTAACTA

CATTACTTACAAACCTTCCCTCTTTAACAGAACTTAGCTGCCAGCT

>M6-PGSC0003DMG400015391M6LRR-RLK\_1302

TATGGACCACTGATTTTCAGCTATCACAGTGACACCAAGTCCGTATATCTCTGCTTATAGACTTTACACTTA

TCTTCCCACAATATTATCTTAATAAAAATCCCATTTTCTTCTTGCAGACT

>M6-PGSC0003DMG400015391M6LRR-RLK\_1364

TTACACTTATCTTCCCACAATATTATCTTAATAAAAATCCCATTTTCTTCTTGCAGACTTTGATGTTGATACA

GGCAGCGGGTTACCTGTGCGGAGCTGTTATTGGCATTGTA CTGCTTCA

>M6-PGSC0003DMG400015391M6LRR-RLK\_1488

TGGTGGTTCTGCTAGTTTTATTTGCTCTGTGGAAGAAAGGCATTTTGGAGGGAAAAATAATCAAGAAG

AATTAGGTAATACATACTTAAAAGAATTTTTCACTCTTTCCATTTGATAA

>M6-PGSC0003DMG400015391M6LRR-RLK\_1550

CAAGAAGAATTAGGTAATACATACTTAAAAGAATTTTTCACTCTTTCCATTTGATAAAAATGGGGATTCTT

CTGTTGTGATAAATAGAATTTTTTACGAGATTTCTAGCTGCGACAGACA

>M6-PGSC0003DMG400015391M6LRR-RLK\_1612

GGGATTCTTCTGTTGTGATAAATAGAATTTTTTACGAGATTTCTAGCTGCGACAGACAAATAATTATCTCC

CCGTAATTGACCAGCATTGAGATGATTGTTCTGTTGGTGGATCGACATC

>M6-PGSC0003DMG400015391M6LRR-RLK\_1674

ATTATCTCCCCGTAATTGACCAGCATTGAGATGATTGTTCTGTTGGTGGATCGACATCATGACATATCATA  
GATAGTTAAACTGTCTTCGTCATACAGATGTTTCATTCTTTTAAAAAATTG

>M6-PGSC0003DMG400015391M6LRR-RLK\_1736

CATATCATAGATAGTTAAACTGTCTTCGTCATACAGATGTTTCATTCTTTTAAAAAATTGTTGTTTCATCATA  
GACGTTTTAGAAGATCTATATATACTGACGTTTGCAATATTCTTCTCA

>M6-PGSC0003DMG400015391M6LRR-RLK\_1798

TCATCATACAGACGTTTTAGAAGATCTATATATACTGACGTTTGCAATATTCTTCTCATTACAGAACTCA  
GAGCCCTTGATTTACAAACAGGTCATTTTAGACTTAGACAAATTAAGC

>M6-PGSC0003DMG400015391M6LRR-RLK\_186

TCCTTTAACTACATTACTTACAAACCTCCCTCTTTAACAGAACTTAGCTGCCAGCTATTCAAATACAATA  
AACACGCTCAACAACCTCGTAAGTCCTAAATGTTGTCTTATGCATCAAC

>M6-PGSC0003DMG400015391M6LRR-RLK\_1922

ACAAATAACTTCGATCCTGCCAACAAAATTGGTGAAGGAGGGTTGGACCAGTTTACAAGGTATCAATT  
CTCTATCCATACTGATTTTGCATAAGGACAGCGGGTCTTTGGTGATATTC

>M6-PGSC0003DMG400015391M6LRR-RLK\_1984

ATCAATTCTCTATCCATACTGATTTTGCATAAGGACAGCGGGTCTTTGGTGATATTCCTACTGGTTATCC  
TTGATGTCACGTTTATAGGAAAATAGAGTAGTAATAGTTGAAGTAACCC

>M6-PGSC0003DMG400015391M6LRR-RLK\_2046

TGGTTATCCTTGATGTCACGTTTATAGGAAAATAGAGTAGTAATAGTTGAAGTAACCCGATCCTTCTTCT  
GTCTGTAATATGATCGTTGTGAATTAATCTTTCTATCTGTAGGGAGTAC

>M6-PGSC0003DMG400015391M6LRR-RLK\_2108

CCTTCTTCTGTCTGTAATATGATCGTTGTGAATTAATCTTTCTATCTGTAGGGAGTACTCGCCGATGGTGC  
CATCATAGCTGTTAAGCAGCTGTCTTCCAAGTCGAAGCAAGGAAATCGT

>M6-PGSC0003DMG400015391M6LRR-RLK\_2232

TTGTCAATGAGATAGGCATGATTTAGCTCTACAACACCCAAACCTTGTCAAGCTTACGGTTGTTGCAT  
AGAAGGGAACCAGTTATTAGTGATATACGAATACATGGAAAATAACTGTC

>M6-PGSC0003DMG400015391M6LRR-RLK\_2294

TGTTGCATAGAAGGGAACCAGTTATTAGTGATATACGAATACATGGAAAATAACTGTCTTGCTCGAGCT  
CTCTTTGGTAATGCTTTGCAACAACATTTTAAGAATCATTAAATTAGGCAGT

>M6-PGSC0003DMG400015391M6LRR-RLK\_2356

TCGAGCTCTCTTTGGTAATGCTTTGCAACAACATTTTAAGAATCATTAAATTAGGCAGTGATAGTTTATGCT  
TTACATTCTCTAATTCTCGTTTCTCAGGCCGTGACGACCAGAGGTTGA

>M6-PGSC0003DMG400015391M6LRR-RLK\_248

AAATACAATAAACACGCTCAACAACCTCGTAAGTCCTAAATGTTGTCTTATGCATCAACTGCTAGTTTGTT  
GATGCTTTCTGTCTATTGTCTATAATTATGTGGATTAATCTTTTTGAAA

>M6-PGSC0003DMG400015391M6LRR-RLK\_2480

AGACTGGGCAACCAGAAAAAGGATATGCTCAGGAATAGCAAAGGGTTAGCTTACCTTCATGAAGAAT  
CAAGGTTGAAAATCGTACACCGAGATATAAAGTGTACCAATGTGCTGCTTGA

>M6-PGSC0003DMG400015391M6LRR-RLK\_2542

AAGAATCAAGGTTGAAAATCGTACACCGAGATATAAAGTGTACCAATGTGCTGCTTGATAAGGATCTGA  
ATGCTAAGATTTTCAGATTTTGGATTGGCTAAATTAGATGAAGAAGAGAACA

>M6-PGSC0003DMG400015391M6LRR-RLK\_2604

GATCTGAATGCTAAGATTTTCAGATTTTGGATTGGCTAAATTAGATGAAGAAGAGAACACTCATATTAGC  
ACCCGAATTGCTGGAACAGTGTAAGCCTTCTTATCATAACTGTCTCTGTAC

>M6-PGSC0003DMG400015391M6LRR-RLK\_2666

TATTAGCACCCGAATTGCTGGAACAGTGTAAGCCTTCTTATCATAACTGTCTCTGTACTATCATGTGATGA  
GAGAGTTACAGTTCTGTGCGTTTAAGTTTGTTCATCATCAACATTA

>M6-PGSC0003DMG400015391M6LRR-RLK\_2728

ATGTGATGAGAGAGTTACAGTTCTGTGCGTTTAAGTTTGTTCATCATCAACATTA

>M6-PGSC0003DMG400015391M6LRR-RLK\_2790

TACTTTGAAGTATCTTACGTTTTGTTTTCTTTTTTTGAAGAGGTTATATGGCTCCGGAGTATGCAATGAGA  
GGCTACTTGACAGATAAAGCTGATGTTTATAGCTTTGGAGTTGTTTTAT

>M6-PGSC0003DMG400015391M6LRR-RLK\_2852

GCAATGAGAGGCTACTTGACAGATAAAGCTGATGTTTATAGCTTTGGAGTTGTTTTATTAGAGATTGTCA  
GTGGGAAAAGCAACACAACTACAGGCCAAAAGAGGAATTTGTTTACCTT

>M6-PGSC0003DMG400015391M6LRR-RLK\_2914

GATTGTCAGTGGGAAAAGCAACACAACTACAGGCCAAAAGAGGAATTTGTTTACCTTCTTGACTGGGT

AAACTATATCTTTTTACTGTACTGGCATTCCCAAATACTAATATCTGCAAC

>M6-PGSC0003DMG400015391M6LRR-RLK\_2976

ACTGGGTAAACTATATCTTTTTACTGTACTGGCATTCCCAAATACTAATATCTGCAACATCATATCTTTAGT  
TTAAGACCACGAGACAAACAAATTGAAACGAAGGGAGTATTTACTTTG

>M6-PGSC0003DMG400015391M6LRR-RLK\_3038

TATCTTTAGTTTAAGACCACGAGACAAACAAATTGAAACGAAGGGAGTATTTACTTTGATACCTCCAAAG  
AAAATATTAGAATCAGAGTTGTTTCATTAGTTTTCTTTTCTCCAATTTCA

>M6-PGSC0003DMG400015391M6LRR-RLK\_310

AGTTTGTTTGATGCTTTCTGTCTATTGTCTATAATTATGTGGATTAATCTTTTTGAAATTGTAGGGATGCCT  
GGTGTTCTATGAAACCCCTCATTTGTCCACAGAAACGAAATGTAAGA

>M6-PGSC0003DMG400015391M6LRR-RLK\_3100

CTCCAAAGAAAATATTAGAATCAGAGTTGTTTCATTAGTTTTCTTTTCTCCAATTTTCATCCTGATACGTGG  
ATGTCAATGTTTGTTTTCTTTTGTGCATGCAGGCTTACGTCCTACAAGA

>M6-PGSC0003DMG400015391M6LRR-RLK\_3162

GATACGTGGATGTCAATGTTTGTTTTCTTTTGTGCATGCAGGCTTACGTCCTACAAGAACAGGGAAATCT  
GTTAGAAGTAGTGGATCCACGTCTCGGTACCAATTACTCCAAAAAAGAGG

>M6-PGSC0003DMG400015391M6LRR-RLK\_3224

GGAAATCTGTTAGAACTAGTGGATCCACGTCTCGGTACCAATTACTCCAAAAAAGAGGCAATGCGGATG  
ATAAATATTTCTCTTTTGTGCACAAATCCCTCTCCTACTCTCCGACCATCC

>M6-PGSC0003DMG400015391M6LRR-RLK\_3286

GCGGATGATAAATATTTCTCTTTTGTGCACAAATCCCTCTCCTACTCTCCGACCATCCATGTCTTCAGTAGT  
GAGTATGCTCGAAGGAAAACCTCCCGTGCAAGCACCAATAATCAAGCG

>M6-PGSC0003DMG400015391M6LRR-RLK\_3348

CTTCAGTAGTGAGTATGCTCGAAGGAAAACCTCCCGTGCAAGCACCAATAATCAAGCGTACTACATCAG  
ACGATGAAATGAGATTTAAATCGTTTGAGAACTTTACATGACAGTCAAA

>M6-PGSC0003DMG400015391M6LRR-RLK\_3410

ACATCAGACGATGAAATGAGATTTAAATCGTTTGAGAACTTTACATGACAGTCAAACAACACAAGTG  
TCAACATACTCTCAGGACAGTCAAGGACAAAGTATGAATGCACCTTGGAGT

>M6-PGSC0003DMG400015391M6LRR-RLK\_3472

ACAAGTGTCAACATACTCTCAGGACAGTCAAGGACAAAGTATGAATGCACCTTGGAGTGATTCCTCAGT  
CTCAGTGTCTGTCCCTGGTAAAGATGGAAATGTTACTTCCACAAGTAGGCT

>M6-PGSC0003DMG400015391M6LRR-RLK\_3534

CCTCAGTCTCAGTGTCTGTCCCTGGTAAAGATGGAAATGTTACTTCCACAAGTAGGCTTCTTCCAGATCTT  
TATAATGTAAACTTGGATTGATTGATTGACACCTACATTTTGATTCCA

>M6-PGSC0003DMG400015391M6LRR-RLK\_3596

CCAGATCTTTATAATGTAAACTTGGATTGATTGATTGACACCTACATTTTGATTCCATCATGTAATTATCT  
AACTCTATCTTCACACAGGTCCCAGATAATTTCTTTTTGTGTATACTC

>M6-PGSC0003DMG400015391M6LRR-RLK\_3658

GTAATTATCTAACTCTATCTTCACACAGGTCCCAGATAATTTCTTTTTGTGTATACTCCAATTTGTTCAATT  
GTGGTCCATTATGTTTTGTAAAATGTATGTTACAATTCTTATTAATT

>M6-PGSC0003DMG400015391M6LRR-RLK\_372

AGGGATGCCTGGTGTCTATGAAACCCCTCATTTGTCCACAGAAACGAAATGTAAGAGTTACAGCCTAT  
AAACCTTTTTTTTATACTTGGAAATTCTTAACTTGACCCTTGAGAGGGCC

>M6-PGSC0003DMG400015391M6LRR-RLK\_434

CAGCCTATAAACCTTTTTTTTATACTTGGAAATTCTTAACTTGACCCTTGAGAGGGCCTGAAGTAGCAGTT  
TGTCAAAGGACCTCAGGGGTGGCAGCCTGTGCACCTTTAAGTACAAAAG

>M6-PGSC0003DMG400015391M6LRR-RLK\_496

GTAGCAGTTTGTCAAAGGACCTCAGGGGTGGCAGCCTGTGCACCTTTAAGTACAAAAGCATAACCTTGG  
AGTTGAGAGATAATTTCACAACTCTCCTCATGTTATGCTCTTTATGTCAA

>M6-PGSC0003DMG400015391M6LRR-RLK\_558

ACCTTGGAGTTGAGAGATAATTTCACAACTCTCCTCATGTTATGCTCTTTATGTCAATTGCAGATACTTC  
GCTATTCATAAACTGTGGAGGACCTAGAACTTCATTTGAGGGAAATGAT

>M6-PGSC0003DMG400015391M6LRR-RLK\_62

TACAACAATTTACACAAATATCTACTTCAGTATGCGATTCTCTACCTTGTGAGCATTGTTCTCTTCATT  
TGGAACCTACATTCATCTACTATTTCTTTTTTTTTATAAGTGAAAATT

>M6-PGSC0003DMG400015391M6LRR-RLK\_620

AGATACTTCGCTATTCATAAACTGTGGAGGACCTAGAACTTCATTTGAGGGAAATGATTATGAGGGGGA  
CACGACCGACAGAGGTCCATCATATTTTTCTTCACCCTCCGACAGATGGGC

>M6-PGSC0003DMG400015391M6LRR-RLK\_682

AGGGGGACACGACCGACAGAGGTCCATCATATTTTTCTTCACCCTCCGACAGATGGGCTTTCAGCAGTTC  
AGGAGTGACGTGGGTCTTCAAGCAGCCAGTTATGTTGCAACAAATACAT

>M6-PGSC0003DMG400015391M6LRR-RLK\_744

AGCAGTTCAGGAGTGACGTGGGTCTTCAAGCAGCCAGTTATGTTGCAACAAATACATTTTCACTGAATG  
TGTCCGGTCCTGACTTTTACAATACAGCACGCCTTGCCCCTAATTCTCTC

>M6-PGSC0003DMG400015391M6LRR-RLK\_930

TTTTCTAATGACTCAACATATAGCAGCCTTGGAAAGGCGGATATTTGATGTAGCAATACAAGTAAGTTTGA  
GGCCTAACTTCTTTTGTAAATAAGGAGTATGTAATCTAAAATGTTGATTT

>M6-PGSC0003DMG400015391M6LRR-RLK\_992

AAGTTTGAGGCCTAACTTCTTTTGTAAATAAGGAGTATGTAATCTAAAATGTTGATTTATTTAGTTCTGAT  
ATGATTGGCAACTTTCTGATTTAATATAGAAGGTACCAATTTGTTGGAG

>M6-PGSC0003DMG400015422M6LysM-RLK\_0

ATTGTTCAAAAATGTATCAAAAGTACATTAATATGTCTATAATACAAAGCTAAACATTGGCATAATGCAA  
TCAGGATAATTAAGGAAACGGCAACAGAAAAGGTCCTTTTCG

>M6-PGSC0003DMG400015422M6LysM-RLK\_1054

CGAAAGAAAAGTACGGCACTGAAAGCATAGAAACAATTGTCAGAACCTCACTTAAGCATTCTAATTGT  
TCCCCATCAGGAGCAATTTGGCAAGGGGAGGGTCCAATGGGAACTTCACC

>M6-PGSC0003DMG400015422M6LysM-RLK\_1116

TAATTGTTCCCCATCAGGAGCAATTTGGCAAGGGGAGGGTCCAATGGGAACTTCACCATTTTTTCGTCCA  
AGGTCCGTTAAATCACCAACATCGTTCAGTGCACCTAGTAACCACAAGT

>M6-PGSC0003DMG400015422M6LysM-RLK\_1178

TTCGTCCAAGGTCCGTTAAATCACCAACATCGTTCAGTGCACCTAGTAACCACAAGTATACATGGAGTT  
ATGGATGCTATCTTGAGGAGGTGGATCCATAAAATCAAATCCAACAAGT

>M6-PGSC0003DMG400015422M6LysM-RLK\_124

CAGATTTTCAGTCTTCCCCAGACAACAACCTAATACTTTCTCAAATTATACAGTCATAGAATTATTCTTCA  
TAGCTAAAATTAATAATAGACCTAAACTAAAGCTCACAAGAAACAGG

>M6-PGSC0003DMG400015422M6LysM-RLK\_1240

ATGGAGTTATGGATGCTATCTTGAGGAGGTGGATCCATAAAATCAAATCCAACAAGTTCTGAATTTTG

AGAGACTTGAGCAGCAAACCACATTCCCAAGATTTGTCCGTTGAATCTCT

>M6-PGSC0003DMG400015422M6LysM-RLK\_1302

AATTTTGAGAGACTTGAGCAGCAAACCACATTCCCAAGATTTGTCCGTTGAATCTCTGGCACTGAGCTT  
TGCAGCATTTCATTCTCATAAGCATTCTCTGTATAAAGTCGGTAACAAGT

>M6-PGSC0003DMG400015422M6LysM-RLK\_1364

CTGAGCTTTGCAGCATTTCATTCTCATAAGCATTCTCTGTATAAAGTCGGTAACAAGTCCCTGGGCCAGTT  
CTACCAGCTCGACCAGCACGTTGGTCTGCAGAAGCTCGACTAATGGGGA

>M6-PGSC0003DMG400015422M6LysM-RLK\_1488

TTGCAAAGCATTTCATACCCATACGGGGATTGTACACCTTCATTTTACCATAGCCTGTATCAATAACATAGA  
AAATTCCATCAATGGTCAGGGACGTCTCAGCGATATTAGTAGCAACAAT

>M6-PGSC0003DMG400015422M6LysM-RLK\_1550

TAACATAGAAAATTCATCAATGGTCAGGGACGTCTCAGCGATATTAGTAGCAACAATGCATTTGCGAG  
CCCCATCTTCAGCTTTCTGGAAAATTTTTGCTTGAAGATCAGCAGGCAGTT

>M6-PGSC0003DMG400015422M6LysM-RLK\_1612

TTGCGAGCCCCATCTTCAGCTTTCTGGAAAATTTTTGCTTGAAGATCAGCAGGCAGTTGAGAGTATATAG  
GAAGAATTAACAGCTTGAGTACTGGTTGCTCTGTTGATGAGATAAGTTGT

>M6-PGSC0003DMG400015422M6LysM-RLK\_1674

GTATATAGGAAGAATTAACAGCTTGAGTACTGGTTGCTCTGTTGATGAGATAAGTTGTTCCATCCTCTGT  
GAAAGTGCATAACAGGTTGCTTCGATCTCATCCTGACCAGTCAAGAAGAT

>M6-PGSC0003DMG400015422M6LysM-RLK\_1736

TCCTCTGTGAAAGTGCATAACAGGTTGCTTCGATCTCATCCTGACCAGTCAAGAAGATGAGTATATCACC  
AGGGGAACCAGCAATATGGATAGTCATGGCTTGCTTAACTGCAGCTTCGA

>M6-PGSC0003DMG400015422M6LysM-RLK\_1798

ATATCACCAGGGGAACCAGCAATATGGATAGTCATGGCTTGCTTAACTGCAGCTTCGACATAGTCTTCAC  
ATGGGGTTTTACTATAACATATTTGAACTCGAAAAGTCCTTCCAGGTATG

>M6-PGSC0003DMG400015422M6LysM-RLK\_186

TTATTCTTCATAGCTAAAAATTAATAATAGACCTAAACTAAAGCTCACAAAGAAACAGGTTAACAATCGCT  
TTGTTTACACTTTTGACAAACATCCAAGCTATAATATTTAAATATGGTGT

>M6-PGSC0003DMG400015422M6LysM-RLK\_1860



GTCTTCACATGGGGTTTTACTATAACATATTTGAACTCGAAAAGTCCTTCCAGGTATGTGAAATATTGGT  
ACGCCCCAAAGAAGTTTGAGAACTTCTCACCATTGAGAGTGGCAGAAGT

>M6-PGSC0003DMG400015422M6LysM-RLK\_1922

ATATTGGTACGCCCCAAAGAAGTTTGAGAACTTCTCACCATTGAGAGTGGCAGAAGTGACAATAAGCT  
TAAAATCACGTGCGCTAGCCACAACCTTTCTTGAGAATGCCAAAAAGGACAT

>M6-PGSC0003DMG400015422M6LysM-RLK\_1984

ATAAGCTTAAAATCACGTGCGCTAGCCACAACCTTTCTTGAGAATGCCAAAAAGGACATCAGTGTCAAGTG  
ATCTCTCATGGGCTTCATCCATTAATAATTATACTATATTTCTCAAGATCG

>M6-PGSC0003DMG400015422M6LysM-RLK\_2046

GTCAAGTGATCTCTCATGGGCTTCATCCATTAATAATTATACTATATTTCTCAAGATCGGGATCCTTAAGAG  
TTTCCCTTAAGAGCACACCATCGGTCATGTACTTGATAACAGTACTTGG

>M6-PGSC0003DMG400015422M6LysM-RLK\_2108

CCTTAAGAGTTTCCCTTAAGAGCACACCATCGGTCATGTACTTGATAACAGTACTTGGCCCAGTGGCATC  
TTCAAACGAATAGCATATCCAACCTTATCCCCGAGCTCAGTTTCCATTT

>M6-PGSC0003DMG400015422M6LysM-RLK\_2170

GTGGCATCTTCAAACGAATAGCATATCCAACCTTATCCCCGAGCTCAGTTTCCATTTCTCACTAACTCTT  
TGGGCAACACTCATCGCTGCCACACGTCTAGGTTGGGTGCAACCTATG

>M6-PGSC0003DMG400015422M6LysM-RLK\_2232

ACTAACTCTTGGGCAACACTCATCGCTGCCACACGTCTAGGTTGGGTGCAACCTATGATCCCATTA  
GTATAGCCATATTCATACAGGTATTGAGTTAGCTGTGTTGTTTTCCAGA

>M6-PGSC0003DMG400015422M6LysM-RLK\_2294

CATTAAGTATAGCCATATTCATACAGGTATTGAGTTAGCTGTGTTGTTTTCCAGAACCAGTTTCTCCA  
ATAATAACCACCACCTGATTTTCACGAACCACCTGCAATAACTCATCTC

>M6-PGSC0003DMG400015422M6LysM-RLK\_2356

GTTTCTCAAATAATAACCACCACCTGATTTTCACGAACCACCTGCAATAACTCATCTCGCACAGAGAATAT  
GGGCAAATTCTGTCGTTGCTGTGAAGTTGTTTTCGATTTTGTAATAATCA

>M6-PGSC0003DMG400015422M6LysM-RLK\_2418

AGAGAATATGGGCAAATTCTGTCGTTGCTGTGAAGTTGTTTTCGATTTTGTAATAACTGACAGCTAAG  
TGCTGCGAGAATCTGGCTTTTCCCTTAATAACTCAACTTCACCATCCTCACC

>M6-PGSC0003DMG400015422M6LysM-RLK\_248

CAATCGCTTTGTTTACACTTTTGACAAACATCCAAGCTATAATATTTAAATATGGTGTGTACCATTTTCTTA  
AACGACACAAATTCATAGTCTGACCTAAACAACCACGCAAACAATCGC

>M6-PGSC0003DMG400015422M6LysM-RLK\_2480

CAGCTAAGTGCTGCGAGAATCTGGCTTTTCCCTTAAAATCAACTTCACCATCCTCACCCACTACAACAGTA  
TCTGCATCAATCTCATCAGCACTCTTCTCCACACCAAGAATATCTCCGA

>M6-PGSC0003DMG400015422M6LysM-RLK\_2542

ACAACAGTATCTGCATCAATCTCATCAGCACTCTTCTCCACACCAAGAATATCTCCGAGTTTCGACCCAGC  
TAGCTCCCAAATCTTTGACGAGACTTATCCCTCTTTTGTTTTTCGTGT

>M6-PGSC0003DMG400015422M6LysM-RLK\_2604

CGACCCAGCTAGCTCCCAAATCTTTGACGAGACTTATCCCTCTTTTGTTTTTCGTGTATCTCCCGAACAA  
GAGCTGACCCTTTTCGTGAAATTAGTGCCATATCGGACATTGCATCCTT

>M6-PGSC0003DMG400015422M6LysM-RLK\_2666

CCCGAACAAAGAGCTGACCCTTTTCGTGAAATTAGTGCCATATCGGACATTGCATCCTTAATTGGCAATAT  
CGGCTCAGTTTGCTCAGTGAAAATAACTCTCCCATCCAAAATGGAGGCA

>M6-PGSC0003DMG400015422M6LysM-RLK\_2728

GGCAATATCGGCTCAGTTTGCTCAGTGAAAATAACTCTCCCATCCAAAATGGAGGCAGCTTTATATCAT  
GAACATGAAGAATCACCTTCCGTTCTTTCATCATCATCAAACCTCCGTC

>M6-PGSC0003DMG400015422M6LysM-RLK\_2790

TATATCATGAACATGAAGAATCACCTTCCGTTCTTTCATCATCATCAAACCTCCGTCTGCACCTTGTTACC  
TCTAACAGCTCCAGATCTCAAAGCTGATGATCCTCCAGTTTTTGCC

>M6-PGSC0003DMG400015422M6LysM-RLK\_2852

CCTTGTTACCTCTAACAGCTCCAGATCTCAAAGCTGATGATCCTCCAGTTTTTGCCAAGGAATTTTTTTC  
TAGTTCGTGAATAATCATTGTACTACCTATTTTCAGAGATACAATTTT

>M6-PGSC0003DMG400015422M6LysM-RLK\_2914

AATTTTTTCTAGTTCGTGAATAATCATTGTACTACCTATTTTCAGAGATACAATTTCTTTTAGTACTAAAA  
TTGTAATTTTTTGCAGGATACTTAGAAGTTGAAGATCTTACCGATGCC

>M6-PGSC0003DMG400015422M6LysM-RLK\_2976

AGTACTAAAATTGTAATTTTTTGCAGGATACTTAGAAGTTGAAGATCTTACCGATGCCCTAATTGGAATT

GGAGAAGGAGCCACAATGTCCCACGGAGAAGCAGCAGTAACAGCATATGA

>M6-PGSC0003DMG400015422M6LysM-RLK\_3038

TTGGAATTGGAGAAGGAGCCACAATGTCCCACGGAGAAGCAGCAGTAACAGCATATGAGTGTTCTTCG  
CTACTGGTTCTCTTTCTCCTTCTCACTTCCATGGATTTGCTTCTTCTATCCC

>M6-PGSC0003DMG400015422M6LysM-RLK\_310

CATTTTCTTAAACGACACAAATTCATAGTCTGACCTAAACAACCACGCAAACAATCGCTTAAACAATGCATA  
TATAGTCTTATATTTTTGGAATGATCTTTTCCTAATATTCATCAAATGG

>M6-PGSC0003DMG400015422M6LysM-RLK\_3100

TCTTCGCTACTGGTTCTCTTTCTCCTTCTCACTTCCATGGATTTGCTTCTTCTATCCCTCTCCGCCATCTATG  
TTTGTTTGAATTTGAAGGAATGGAATATTGCTTCTCACTATTTGGTG

>M6-PGSC0003DMG400015422M6LysM-RLK\_372

CAATGCATATATAGTCTTATATTTTTGGAATGATCTTTTCCTAATATTCATCAAATGGTAAAAAATATCCA  
AAACAACCTAAACAACAACAATCACAAGTAGATTTCTAATGAAGTTAA

>M6-PGSC0003DMG400015422M6LysM-RLK\_434

AAATATCCAAAACAACCTAAACAACAACAATCACAAGTAGATTTCTAATGAAGTTAACACATACTAACC  
AAAACAGTTTTCTGTTTCATTTTATGTTCTTGAATTAATGAATCAGAATC

>M6-PGSC0003DMG400015422M6LysM-RLK\_496

TACTAACCAAAACAGTTTTCTGTTTCATTTTATGTTCTTGAATTAATGAATCAGAATCTTACACGGAGAAA  
AACATTGGCCCCCAACTCTGCTAACCAAGTGAGGCTCCACAGCTGTCACA

>M6-PGSC0003DMG400015422M6LysM-RLK\_558

ACGGAGAAAAACATTGGCCCCCAACTCTGCTAACCAAGTGAGGCTCCACAGCTGTCACACACTGCATGTA  
CTCCTTTGTCGTCAAGATTGCCTCATGATAAACCACGTAATCGGGAGTGTA

>M6-PGSC0003DMG400015422M6LysM-RLK\_62

TAATGCAATCAGGATAATTAAGGAAACGGCAACAGAAAAGGTCCTTTTGAATCCAGATTT  
TCAGTCTTCCCCAGACAACAACCTTAATACTTTCTCAAATTATACAGTCAT

>M6-PGSC0003DMG400015422M6LysM-RLK\_620

GCATGTAATCCTTTGTCGTCAAGATTGCCTCATGATAAACCACGTAATCGGGAGTGTAACCCGATCCATA  
GAGAGCACTTGTGGGATGCAGGTTACAAGGCATTCTATTCTGCAATTAA

>M6-PGSC0003DMG400015422M6LysM-RLK\_682

GATCCATAGAGAGCACTTGTGGGATGCAGGTTACAAGGCATTCTATTCCTGCAATTAACATATTCCCCAA  
TCCCCTTCAGCATAGCTGCATTATGAAAGTATGCGGAACAGATTGTTTTTC

>M6-PGSC0003DMG400015422M6LysM-RLK\_744

TTCCCCAATCCCCTTCAGCATAGCTGCATTATGAAAGTATGCGGAACAGATTGTTTTCCGCACAACATCCC  
AATCAGGACCACAGTATGTGAGTGAATTTTGAGTGTCTTGAGGATGTC

>M6-PGSC0003DMG400015422M6LysM-RLK\_806

CAACATCCCAATCAGGACCACAGTATGTGAGTGAATTTTGAGTGTCTTGAGGATGTCCAGTAATTGGG  
ATCTTATCTCCCTAGCCTTGTACAGACCTTTGACCTGTAAAAAATGGTCAT

>M6-PGSC0003DMG400015422M6LysM-RLK\_868

AATTGGGATCTTATCTCCCTAGCCTTGTACAGACCTTTGACCTGTAAAAAATGGTCATTACACCAGTCTCC  
TCTGTATTCATTAGCTTCCCATTGCTGGTAAACATTAAGCAATGTAAGG

>M6-PGSC0003DMG400015422M6LysM-RLK\_930

CCAGTCTCCTCTGTATTCATTAGCTTCCCATTGCTGGTAAACATTAAGCAATGTAAGGTGATCAGATTCTG  
GCACAAAAAACTTTTCCCTAGCAGCATCACTTTCCGCTTCCCTATCCTT

>M6-PGSC0003DMG400015422M6LysM-RLK\_992

CAGATTCTGGCACAAAAAACTTTTCCCTAGCAGCATCACTTTCCGCTTCCCTATCCTTAGGTGCAAAGAAA  
ACTGACGGCACTGAAAGCATAGAAACAATTGTCAGAACCTCACTTAAGC

>M6-PGSC0003DMG400015449M6LRR-RLP\_0

CTCATCCAACAACATATATCTCCACAAAAAAAGTGAAAAAATCAATCTTCATTTCTTATATGATGAGCATT  
TCTTATCTTGAATAATTGTTATTGTGTTAATAGATAGTTCTTTTGTAT

>M6-PGSC0003DMG400015449M6LRR-RLP\_1054

CTGGGAATTTGCTTTCTGGGATATTGCCAAAGACACTTGATGGTCTTTCACATGTTGAGGAATTGGACAT  
TTCACATAATACCTTAACTGGGTTTGTCCGGAGAATCTATGTTTCATCGT

>M6-PGSC0003DMG400015449M6LRR-RLP\_1116

TTGGACATTTACATAAATACCTTAACTGGGTTTGTCCGGAGAATCTATGTTTCATCGTTGAGTTTGAAGAA  
GTTTGTGTTTTCGTTTAATTACTTTAATGGAGAGGCTAATGGTTGTGAA

>M6-PGSC0003DMG400015449M6LRR-RLP\_1178

TTTGAAGAAGTTTGTGTTTTCGTTTAATTACTTTAATGGAGAGGCTAATGGTTGTGAAGCGCGAACAAGG  
AAGGATATGAGTTTGGATGATAGGAACAATTGTTTGCCTGGTAGAGCAAA

>M6-PGSC0003DMG400015449M6LRR-RLP\_124

TCTTCCTTAGGGGCAGCCTTGGGGGTTGGTTCTCCGAGGCAGCTTGTTAGTCGGAAATCCCCTTAAAA  
AATGCAGGTGTATCGATGTTTTTTCAGTTTGTGCTGATCTCTGCTGTTT

>M6-PGSC0003DMG400015449M6LRR-RLP\_1240

GAACAAGGAAGGATATGAGTTTGGATGATAGGAACAATTGTTTGCCTGGTAGAGCAAAGCAAAAAGTCT  
CAAAAAGAATGTCAACCTATTGTGAGTAAGCCAATTGATTGTAGTAAGGCTA

>M6-PGSC0003DMG400015449M6LRR-RLP\_1302

AAGTCTCAAAAAGAATGTCAACCTATTGTGAGTAAGCCAATTGATTGTAGTAAGGCTAAATGTGGAGGA  
ACTTCAACAAAATCTCCTCCTAGTAAGAAAAATGAAGTGCCACCAAAACCT

>M6-PGSC0003DMG400015449M6LRR-RLP\_1364

TGGAGGAAGTTCAACAAAATCTCCTCCTAGTAAGAAAAATGAAGTGCCACCAAAACCTCGACCTACCCCT  
AAGTCACCACCCACCCCAAAGAAGGTTTCTCCTCCACCAACACAAGTCGT

>M6-PGSC0003DMG400015449M6LRR-RLP\_1426

CTACCCCTAAGTCACCACCCACCCCAAAGAAGGTTTCTCCTCCACCAACACAAGTCGTTTCATCGCCACCT  
CTAGTACATTCTCCACCACCTCTAGTACATTCTCCACCACCACGTGTCC

>M6-PGSC0003DMG400015449M6LRR-RLP\_1488

TCGCCACCTCTAGTACATTCTCCACCACCTCTAGTACATTCTCCACCACCACGTGTCCATTCTCCTCCTGTT  
TCCTCTCCACCACTACCCGTCCTCCCTCCACCACCACATGTCCAT

>M6-PGSC0003DMG400015449M6LRR-RLP\_1550

TCCTCCTGTTTCTCCTCCACCACCTACCCGTCCTCCCTCCACCACCACATGTCCATTCTCCTCTTGTGTCC  
TCTCCACCTCGCGTCTACTCCCTACCACCACCTCACGTCCAATCTCC

>M6-PGSC0003DMG400015449M6LRR-RLP\_1612

CTCTTGTGTCCTCTCCACCTCGCGTCTACTCCCTACCACCACCTCACGTCCAATCTCCACCGCCACTCCCCG  
TCAACTCCCCTCCATCACCTATAGTATATTCTCCACCACCACATGTCC

>M6-PGSC0003DMG400015449M6LRR-RLP\_1674

CCACTCCCCGTCAACTCCCCTCCATCACCTATAGTATATTCTCCACCACCACATGTCCATTCTCCTCCTGTTT  
CCTCTCCACCACCACAGTCTACTCCCCACCACCACCTCAAGTACAT

>M6-PGSC0003DMG400015449M6LRR-RLP\_1736

TCCTCCTGTTTCTCCTCCACCACCACAGTCTACTCCCCACCACCACCTCAAGTACATTCTCCACCACCACC

CGTCCACTCTCCTCCTTCTCCTATTTCTTCCCCACCACCACCTATCCA

>M6-PGSC0003DMG400015449M6LRR-RLP\_1798

CACCACCACCCGTCCACTCTCCTCCTTCTCCTATTTCTTCCCCACCACCACCTATCCATTCCCCTCCACCACC  
TCTTATCCAATCTCCACCGCCGCCTCTAGTACATTCTCCACCACCAC

>M6-PGSC0003DMG400015449M6LRR-RLP\_186

CCTTAAAAAATGCAGGTGTATCGATGTTTTTTCAGTTTGTTGCTGATCTCTGCTGTTCTGTTTTCTTTCTCT  
TGTGCACTCTCTGATCATGAAGCATCATTGCTTGCACGGCGACAACCTG

>M6-PGSC0003DMG400015449M6LRR-RLP\_1922

CCACTCTCCTCCTCCACCTGTTTCTCCTCCACCGCCACCAGTCCATTCCCCTCCACCACCACCGGTCCACTT  
CCCACCACCACCTCAAGTACATTCTCCACCACCACCCGTTCACTCTCC

>M6-PGSC0003DMG400015449M6LRR-RLP\_1984

CGGTCCACTTCCCACCACCACCTCAAGTACATTCTCCACCACCACCCGTTCACTCTCCTCCACCACCACCAC  
CACCACCCGTCCACTCTCCTCCTGTTTCTTCCCCATCACCACCAC

>M6-PGSC0003DMG400015449M6LRR-RLP\_2046

CCACCACCACCACCACCCGTCCACTCTCCTCCTCCTGTTTCTTCCCCATCACCACCACCCGTCCACTCCCCA  
CCACCACCTCTAGTACATTCTCCACCACCTCCCATCCACTCACCACCA

>M6-PGSC0003DMG400015449M6LRR-RLP\_2108

CCACTCCCCACCACCACCTCTAGTACATTCTCCACCACCTCCCATCCACTCACCACCACCACCTTTTGAACA  
TGTTGTCCTTCCACCAAATATTGGTTCAATTTACGCATCGCCACCCCC

>M6-PGSC0003DMG400015449M6LRR-RLP\_2170

CTTTTGAACATGTTGTCCTTCCACCAAATATTGGTTCAATTTACGCATCGCCACCCCCACCAATCTTCCAA  
GGATATTAATTAAGCAATGAATGAAGCTTCGTCTCGTTTCCACCTTTTT

>M6-PGSC0003DMG400015449M6LRR-RLP\_2232

ATCTTCCAAGGATATTAATTAAGCAATGAATGAAGCTTCGTCTCGTTTCCACCTTTTTAGTACGTAAAATA  
TTTAGTACATGCAGAATTACATCATCATATCTCTTAATGCAAGATTATT

>M6-PGSC0003DMG400015449M6LRR-RLP\_2290

AGTACGTAAAATATTTAGTACATGCAGAATTACATCATCATATCTCTTAATGCAAGATTATTATCTAATAT  
ATGGTGATGTTTTTCTTTCTTTTACACTGATACATATAATCTTGAAAAG

>M6-PGSC0003DMG400015449M6LRR-RLP\_248

TTCTTTCTCTTGTCACCTCTGATCATGAAGCATCATTGCTTGCACGGCGACAACACTGTCAACACTTGCTG  
AAAATGGTAATTTACCCGATAACTATGAATTCGAGGTGAATGTAGAATA

>M6-PGSC0003DMG400015449M6LRR-RLP\_310

CACTTGCTGAAAATGGTAATTTACCCGATAACTATGAATTCGAGGTGAATGTAGAATACACATTTCTAA  
TTCTAGGCTTAGACGTGCTTATATTGCGTTAAAGGCATGGAAAGAAGCTA

>M6-PGSC0003DMG400015449M6LRR-RLP\_372

TTTCCTAATTCTAGGCTTAGACGTGCTTATATTGCGTTAAAGGCATGGAAAGAAGCTATATATTCTGACC  
CTTCTGAATTCCTAGCAATTGGAAAGGTCCAGATGTTTGTAACACTACAAA

>M6-PGSC0003DMG400015449M6LRR-RLP\_434

TTCTGACCCTTCTGAATTCCTAGCAATTGGAAAGGTCCAGATGTTTGTAACACTACAAAGGCGTGTCTGT  
TCGCCTGCTTAGATGATCCTAATGTCACCTGTTGTTGCTGGGATTGATAT

>M6-PGSC0003DMG400015449M6LRR-RLP\_496

TGTTCTGTTGCGCTGCTTAGATGATCCTAATGTCACCTGTTGTTGCTGGGATTGATATGAATCATGCAGAT  
ATTGCAGGTTATTTTCTGTAGAATTAGGATTATTGACAGATGTAGCTT

>M6-PGSC0003DMG400015449M6LRR-RLP\_558

CATGCAGATATTGCAGGTTATTTTCTGTAGAATTAGGATTATTGACAGATGTAGCTTTGTTTCACCTAAA  
TTCCAATAGATTTTGTGGAATTGTTTCTGAGAGTTTTTTCGAAGCTTACG

>M6-PGSC0003DMG400015449M6LRR-RLP\_62

ATGAGCATTTCTTATCTTGAATAATTGTTATTGTGTTAATAGATAGTTCTTTTGTATATCATCTTCCTTAG  
GGGCAGCCTTGGGGGTTGGTTCTTCCGAGGCAGCTTGTTAGTCGGAAA

>M6-PGSC0003DMG400015449M6LRR-RLP\_620

TCACCTAAATTCCAATAGATTTTGTGGAATTGTTTCTGAGAGTTTTTTCGAAGCTTACGTTGATGCATGAGT  
TTGATGTTAGTAATAATCGTCTTGTGGCCCTTCCCTAAGGTTGTTCT

>M6-PGSC0003DMG400015449M6LRR-RLP\_682

TGCATGAGTTTGTAGTTAGTAATAATCGTCTTGTGGCCCTTCCCTAAGGTTGTTCTGAACATGTCTAGT  
CTTAAGTACTTGGATTTAAGGTTTAAACAACCTTGGAGGGAGAGTTGCCTC

>M6-PGSC0003DMG400015449M6LRR-RLP\_744

ATGTCTAGTCTTAAGTACTTGGATTTAAGGTTTAAACAACCTTGGAGGGAGAGTTGCCTCCACAGTTGTTTG  
ACAAAGATCTTGATGCTTTGTTCTTGAATGATAATCGATTTCGTGTCTACC





AAACTCCGGTGCAAAGAGCCTCGAAGGGCAGGCATAAACGTTTGTATC

>M6-PGSC0003DMG400015458M6LRR-RLK\_1302

TGGAATCCAAACTCCGGTGCAAAGAGCCTCGAAGGGCAGGCATAAACGTTTGTATCATGGTTGGAGT  
TTTTGGTGGAGTTGGTGTCTTATGCTTATGGCATTAGTCATTTTATTGTT

>M6-PGSC0003DMG400015458M6LRR-RLK\_1364

TTGGAGTTTTTGGTGGAGTTGGTGTCTTATGCTTATGGCATTAGTCATTTTATTGTTTTGGAAGGTATGC  
TATAGAGGGAATTCAAACGAAAGAGGCATATCGAATGTTAGTCCTGTTG

>M6-PGSC0003DMG400015458M6LRR-RLK\_1426

AAGGTATGCTATAGAGGGAATTCAAACGAAAGAGGCATATCGAATGTTAGTCCTGTTGTGGAAGGAGG  
AAATAATCAGGCACCACCAGTAAAGTTCTCTCGTGATACATCTGGTTCGATA

>M6-PGSC0003DMG400015458M6LRR-RLK\_1488

AGGAGGAAATAATCAGGCACCACCAGTAAAGTTCTCTCGTGATACATCTGGTTCGATAGAATCATTTACT  
TATGATCAGATACTAAAAGCCACAAGCAACTTCAATGAAACAGATCTTAT

>M6-PGSC0003DMG400015458M6LRR-RLK\_1550

CATTTACTTATGATCAGATACTAAAAGCCACAAGCAACTTCAATGAAACAGATCTTATCAAGAATGGTCA  
TACAGGAGACATTTTCCGAGGAATATTAGAAGGCGGTGTCACCGTAGTTA

>M6-PGSC0003DMG400015458M6LRR-RLK\_1612

AATGGTCATACAGGAGACATTTTCCGAGGAATATTAGAAGGCGGTGTCACCGTAGTTATCAAGAAAGTA  
AATGTACACCATATCGAAAAGAAACATACAAGTTGGAGTTGGATTTGTTA

>M6-PGSC0003DMG400015458M6LRR-RLK\_1674

GAAAGTAAATGTACACCATATCGAAAAGAAACATACAAGTTGGAGTTGGATTTGTAAATTGGACAAC  
ACACCATAGGCTTGTCCTTTTTTGGGACATTGCTTAGATCATGAGAATGA

>M6-PGSC0003DMG400015458M6LRR-RLK\_1736

GGACAACACACCATAGGCTTGTCCTTTTTTGGGACATTGCTTAGATCATGAGAATGAGAAATTCTTGGT  
CTATAAATATATGCCAAATGGAGATTTGTTCAATTTGTTGGCCCGGGATA

>M6-PGSC0003DMG400015458M6LRR-RLK\_1798

TTCTTGGTCTATAAATATATGCCAAATGGAGATTTGTTCAATTTGTTGGCCCGGGATATGGATTTAGAAG  
ACGAAAATGGACAGTCTTTGGATTGGATAACAAGATTAATAAATTGCAACA

>M6-PGSC0003DMG400015458M6LRR-RLK\_186

AAAAAACTGGCCAAGAAAATCCAACCCTTGTACCAATTGGACTGGAATTCATTGCAACAATGACAAAGT  
TGTGGCTATTAAGTTGACAGGACTAAGAAGAATTCACAAAGGGAACATGTC

>M6-PGSC0003DMG400015458M6LRR-RLK\_1860

TTTAGAAGACGAAAATGGACAGTCTTTGGATTGGATAACAAGATTA AAAATTGCAACAGGAGCTGCTGA  
AGGCTTAGTTTATTTGCACCATGAGTGTAAATCCTCCCCTTGTTTCATAGGTA

>M6-PGSC0003DMG400015458M6LRR-RLK\_1922

CTGCTGAAGGCTTAGTTTATTTGCACCATGAGTGTAAATCCTCCCCTTGTTTCATAGGTATTTTTTTCTTTTAC  
TTTTTTGCATTCTTGTTTGATAATGTTGTACACCAAGCTAATTATATT

>M6-PGSC0003DMG400015458M6LRR-RLK\_1984

TTTCTTTCACTTTTTTGCATTCTTGTTTGATAATGTTGTACACCAAGCTAATTATATTCTGCATGTTCTTGTT  
CTTGAAGAGATGTTCAAGCTAGCAGTATCCTTCTCGACGATAAATTT

>M6-PGSC0003DMG400015458M6LRR-RLK\_2046

ATGTTCTTGTTCTTGAAGAGATGTTCAAGCTAGCAGTATCCTTCTCGACGATAAATTTGAAGTAAGGCTG  
GGAAGTTTGAGCGACGTATGTGCACAGGAAGGTGATAGCCAGAATTTGAT

>M6-PGSC0003DMG400015458M6LRR-RLK\_2108

TAAGGCTGGGAAGTTTGAGCGACGTATGTGCACAGGAAGGTGATAGCCAGAATTTGATCTCAAAGTTTT  
TCCGCACGACAAAGTAAGTATTACTATGATCATAGTTTGATCCTAATACCA

>M6-PGSC0003DMG400015458M6LRR-RLK\_2170

AAGTTTTTCCGCACGACAAAGTAAGTATTACTATGATCATAGTTTGATCCTAATACCAGATTTTTTCAGAAA  
TGTAATAGACATTTAGTTAGATTTATGTGTTTACATTTCTGTATATTGC

>M6-PGSC0003DMG400015458M6LRR-RLK\_2232

TTTCAGAAATGTAATAGACATTTAGTTAGATTTATGTGTTTACATTTCTGTATATTGCTTTTTGTTCAATGT  
TCTAAGATATATTATGTTTCTTGTTGACAATAAACAGGAATCCTGAGG

>M6-PGSC0003DMG400015458M6LRR-RLK\_2294

TGTTCAATGTTCTAAGATATATTATGTTTCTTGTTGACAATAAACAGGAATCCTGAGGGAGAGCCTGCTG  
GTATGTAATTTCTTTTCGTAAAAAACGCATAGTTGAATAGAGTTATTT

>M6-PGSC0003DMG400015458M6LRR-RLK\_2356

GCCTGCTGGTATGTAATTTCTTTTCGTAAAAAACGCATAGTTGAATAGAGTTATTTTTCTGAATTTCTC  
ATATGCTGCCTTTATACATGAACAGGATCTTCATTTACAAGTTGCAGTA

>M6-PGSC0003DMG400015458M6LRR-RLK\_2418

GAATTTCTCATATGCTGCCTTTATACATGAACAGGATCTTCATTTACAAGTTGCAGTACTTATGATGTATA  
CTGTTTCGGGAAGGTCTTACTCGAGCTTGTAAGTTGGTAAGGTTGGAGTA

>M6-PGSC0003DMG400015458M6LRR-RLK\_248

ACAAAGTTGTGGCTATTAAGTTGACAGGACTAAGAAGAATTCACAAAGGGAACATGTCTCCACAGTTTG  
CTGTTGAATCTTTAGTCAATTTACTCACTTGACATCATTCAACTCATCAG

>M6-PGSC0003DMG400015458M6LRR-RLK\_2480

TGATGTATACTGTTTCGGGAAGGTCTTACTCGAGCTTGTAAGTTGGTAAGGTTGGAGTAAGTCACTTAGAT  
GATGCCTCAACCAAGGAGTGGTTGGACAAGCTTCTTCCTTTCATCACTAT

>M6-PGSC0003DMG400015458M6LRR-RLK\_2542

ACTTAGATGATGCCTCAACCAAGGAGTGGTTGGACAAGCTTCTTCCTTTCATCACTATACGCGAGAAAGA  
ACTAGTGTCCAAGATAGTCGATCCATCTCTAATTATAGACGATGACTTAC

>M6-PGSC0003DMG400015458M6LRR-RLK\_2604

GAGAAAGAACTAGTGTCCAAGATAGTCGATCCATCTCTAATTATAGACGATGACTTACTTGAAGAGATG  
TGGGCTGTAGCAATAGTAGCCAAAGCATGTCTTCATCCGAGGCCTTCTAGA

>M6-PGSC0003DMG400015458M6LRR-RLK\_2666

AGAGATGTGGGCTGTAGCAATAGTAGCCAAAGCATGTCTTCATCCGAGGCCTTCTAGACGTCCTGAAAT  
GAGACGTGTCCTGAAAGCTTTGAGAACCCGTTCAAGGTTGTTAGGGAAGG

>M6-PGSC0003DMG400015458M6LRR-RLK\_2728

CTGAAATGAGACGTGTCCTGAAAGCTCTTGAGAACCCGTTCAAGGTTGTTAGGGAAGGAAGTTTCAACT  
CTATAAGGCTACGAAATACTTCATCGAGGCGATCATGGAGTGCTGCTTTTC

>M6-PGSC0003DMG400015458M6LRR-RLK\_2790

TTCAACTCTATAAGGCTACGAAATACTTCATCGAGGCGATCATGGAGTGCTGCTTTTCTTGGTAGTTGGA  
ATCATAGCTCACAGGATAGTGTTAATGCTAGTGGCCAAACAAGCAAAGAA

>M6-PGSC0003DMG400015458M6LRR-RLK\_2852

TAGTTGGAATCATAGCTCACAGGATAGTGTTAATGCTAGTGGCCAAACAAGCAAAGAAGCTGGCATGAA  
CCTGAAACAGCATTCTATTAGCAGCGGGAACGAACATTCATCATCGTGTA

>M6-PGSC0003DMG400015458M6LRR-RLK\_2914

GCATGAACCTGAAACAGCATTCTATTAGCAGCGGGAACGAACATTCATCATCGTGTAAGAGATCATCGA

GTGAGATTTTCCCCGAACCTCAGGACACACTAGATATAGAGAGACAAGACA

>M6-PGSC0003DMG400015458M6LRR-RLK\_2976

TCATCGAGTGAGATTTTCCCCGAACCTCAGGACACACTAGATATAGAGAGACAAGACATGAGCTAGCCG

TCTAGCACGAATCTATGCCAAATGCATTTCTGCAGGCAGGGGTTTTGTAAG

>M6-PGSC0003DMG400015458M6LRR-RLK\_3038

CTAGCCGTCTAGCACGAATCTATGCCAAATGCATTTCTGCAGGCAGGGGTTTTGTAAGTATAAGGAACTT

TGATTTTTTATTAGATGAGCGGCGGTACTATGATCATTCTGAAGACATGG

>M6-PGSC0003DMG400015458M6LRR-RLK\_310

CAGTTTGCTGTTGAATCTTTAGTCAATTTTACTCACTTGACATCATTCAACTCATCAGGTTTTGTTCTTTCA

GGGCAAATACCTGATTGGTTTGGCCAAAAGTAACTCAACTTAAACAA

>M6-PGSC0003DMG400015458M6LRR-RLK\_3100

AGGAACTTTGATTTTTTATTAGATGAGCGGCGGTACTATGATCATTCTGAAGACATGGGGCCTACACACT

ACACACATGTTATGCGGTTGGTAAACTCTTTCCTTCTGCAACAGCCTATC

>M6-PGSC0003DMG400015458M6LRR-RLK\_3162

TACACACTACACACATGTTATGCGGTTGGTAAACTCTTTCCTTCTGCAACAGCCTATCAAATCGGATCAGT

ATTTTTGAATATGTTGTGTTACATCATGTACATGTATTCTGTTTTCTC

>M6-PGSC0003DMG400015458M6LRR-RLK\_3224

CGGATCAGTATTTTTGAATATGTTGTGTTACATCATGTACATGTATTCTGTTTTCTCTTTTCTTTTAGTGT

GTCACAAATGCTCATGTGCTTTGTAAATTTTCAAAAAGTTTACTCTTG

>M6-PGSC0003DMG400015458M6LRR-RLK\_3286

CTTTTAGTGTGTCACAAATGCTCATGTGCTTTGTAAATTTTCAAAAAGTTTACTCTTGTTCTGTGATGATA

GAACAAGTATATAACTGTGTCAAGACTCAAGAGTGTACACTATCTAAT

>M6-PGSC0003DMG400015458M6LRR-RLK\_3348

TGTGATGATAGAACAAGTATATAACTGTGTCAAGACTCAAGAGTGTACACTATCTAATCCAGATTCACAT

TTTCATGATCTCATTTTTGCAATTGCATGAAAAAGTATGATATGAATGA

>M6-PGSC0003DMG400015458M6LRR-RLK\_3565

GCACCAGGTATGTTGTTGTAATTGGATAAATAGGGCCTCAAACCTGCTATAGTGTGTAATCCCTTGGTG

GCCTAAATGTAATAAATACATGTAGATGCACCTGACAGTTACAATGAGC

>M6-PGSC0003DMG400015458M6LRR-RLK\_372

TGTTCTTTCAGGGCAAATACCTGATTGGTTTGGCCAAAAGTTAACTCAACTTAAACAACCTTGATCTTAGTT  
CAAGTTCAATTCTTGGTTCACCTCCATCCTCATTAGGGAGTTTGAGTAA

>M6-PGSC0003DMG400015458M6LRR-RLK\_434

ATCTTAGTTCAAGTTCAATTCTTGGTTCACCTCCATCCTCATTAGGGAGTTTGAGTAATCTTGATTTTCTGT  
CTTTGTTTAAACAATTCAATTACAGGAACTGTTCTTTAGAACTTGGA

>M6-PGSC0003DMG400015458M6LRR-RLK\_496

GATTTTCTGTCTTTGTTTAAACAATTCAATTACAGGAACTGTTCTTTAGAACTTGGAAGTTGAGTTCTTT  
AAGGGTTCTTGATCTTTCTTGAATTCATTTACAGGTGAAATTCCAAC

>M6-PGSC0003DMG400015458M6LRR-RLK\_558

GAGTTCTTTAAGGGTCTTGATCTTTCTTGAATTCATTTACAGGTGAAATTCCAACCTCTGTTTCAGATA  
TTAAGAATCTGTCTGTTCTTGATTTGTCTTCAAATTTCTTTCTGGACA

>M6-PGSC0003DMG400015458M6LRR-RLK\_62

AAAATATGTTAAAGATTACTCTTTTCTTCTTCTTCTTCTTTACTCAGTTTTATCTAATCAAATCTCCAG  
TTTAGAACACAAAGCTTTGCTTGATCTTAGATCATCTTTACACATCA

>M6-PGSC0003DMG400015458M6LRR-RLK\_620

TTTCAGATATTAAGAATCTGTCTGTTCTTGATTTGTCTTCAAATTTCTTTCTGGACAAATCCCAGTTGAGT  
TTGGTTCATTTCTTGGACTTAAGTTGCTTAAATTGTCAAATAACAGTT

>M6-PGSC0003DMG400015458M6LRR-RLK\_682

CCAGTTGAGTTTGGTTCATTTCTTGGACTTAAGTTGCTTAAATTGTCAAATAACAGTTTAAAGTTCTTATATT  
CCTTCTGAAATTTCAAATCTTTCTGCATTAGTAGAACTTGATCTTGGC

>M6-PGSC0003DMG400015458M6LRR-RLK\_744

TTCTTATATTCCTTCTGAAATTTCAAATCTTTCTGCATTAGTAGAACTTGATCTTGGCTATAACTACTTGTC  
AGGGTCATTGCCTGAGGGTTTTTTCAGAATGAGAAATTTGAGTAAATT

>M6-PGSC0003DMG400015458M6LRR-RLK\_806

ACTACTTGTCAGGGTCATTGCCTGAGGGTTTTTTCAGAATGAGAAATTTGAGTAAATTGTTAGTTGGAAA  
TAATGAGCTAGAGGGTACATTGTCAAGTACTATGTTTACTTCAAATGATT

>M6-PGSC0003DMG400015458M6LRR-RLK\_868

GTTGGAAATAATGAGCTAGAGGGTACATTGTCAAGTACTATGTTTACTTCAAATGATTCTGTATTGGTGT  
ATATAAATCTTAGTTGGAATCGATTCTGAAGGCAAAGTTCCTGATGTTTTG

>M6-PGSC0003DMG400015458M6LRR-RLK\_930

ATTGGTGTATATAAATCTTAGTTGGAATCGATTGAAGCAAAGTTCCTGATGTTTTGTGGTCATTGTCT  
GATCATTGAGGATTCTTGATATATCAGGGAACAATTTACTGGTGTGGT

>M6-PGSC0003DMG400015458M6LRR-RLK\_992

CATTGTCTGATCATTGAGGATTCTTGATATATCAGGGAACAATTTACTGGTGTGGTTTCAAATAGTACC  
TATTTTAGTGCTACTGGTGCTTCATATAACCTTTCTAATAATCTTTTCT

>M6-PGSC0003DMG400015476M6G-LecRK\_0

CTTGGTGGGTTCTCTAAGAGTCAGTTCATTATGAGGAGCTAGCTAGAGCGACTTCTGGATTTTCTAAGG  
CCAATTTGTTAGGCCAAGGTGGTTTTGGGTATGTACATAAAGGTGTTTTG

>M6-PGSC0003DMG400015476M6G-LecRK\_116

TTTGGTTGATGGAACGGTGGTAGCTGTCAAGAGTTGAAGTTGGGCAGTGGACAAGGTGAACGAGAAT  
TTCAGGCAGAGGTTGATATCATTAGCAGAGTTCATCATCGCCACCTTGTTTC

>M6-PGSC0003DMG400015476M6G-LecRK\_174

GAACGAGAATTCAGGCAGAGGTTGATATCATTAGCAGAGTTCATCATCGCCACCTGTTTCTCTTGTTG  
GATATTGCATTGCTGATAGCCAGCGAATGTTGGTCTATGAGTATGTTCCC

>M6-PGSC0003DMG400015476M6G-LecRK\_230

TGTTTCTCTTGTTGGATATTGCATTGCTGATAGCCAGCGAATGTTGGTCTATGAGTATGTTCCCAACAAAA  
CCTTGGAATTCCATCTTCATGGTACTTCCCCTGTCATTGAATACTCCCT

>M6-PGSC0003DMG400015476M6G-LecRK\_58

GATTTTCTAAGGCCAATTTGTTAGGCCAAGGTGGTTTTGGGTATGTACATAAAGGTGTTTTGGTTGATGG  
AACGGTGGTAGCTGTCAAGAGTTTGAAGTTGGGCAGTGGACAAGGTGAAC

>M6-PGSC0003DMG400015547-(rev)M6RLKmalectin\_0

CATCTTTTCTCTCTCTTTACCCTCCATGAATGACCTGAACAACATAACTCCACTCCCCATACTCAGAA  
AGAGTCAACACCACCAAAACCCTCAAAAAATGTTAATTCTTGGCACAA

>M6-PGSC0003DMG400015547-(rev)M6RLKmalectin\_1054

TGTTACCTCCAATGACCTTGTAGTAACGTTCTCTCCTTCGAGCAATTCATTTGCTTATATAAATGCTATGG  
AAATTGTCTCTGTACCTGATGTCCTTATAACTGATGATGCCTCCACCAT

>M6-PGSC0003DMG400015547-(rev)M6RLKmalectin\_1116

ATGCTATGGAAATTGTCTCTGTACCTGATGTCCTTATAACTGATGATGCCTCCACCATTAGTCCAGCTGGG

ACATTTAGTGGTATGTATGCACAGGCTCTCGAAACAGTTGCTAGGGTAA

>M6-PGSC0003DMG400015547-(rev)M6RLKmalectin\_1178

CCAGCTGGGACATTTAGTGGTATGTATGCACAGGCTCTCGAAACAGTTGCTAGGGTAAACATGGGTGGA  
TCGTTGGTGTCTGTTTGATAATGATACACTTTGGAGAACTTGGGTACTGAT

>M6-PGSC0003DMG400015547-(rev)M6RLKmalectin\_124

TTATACAAATGGCCCCTTTTGACTTCATGAATTGCTAGTTCACATTCTAGAAAATGATGTTTTTGGTTTCAT  
TGAATTTAAAATTCTATTAATTTGTTTGTATCTGAGGGAGGTGGGTTT

>M6-PGSC0003DMG400015547-(rev)M6RLKmalectin\_1240

GGGTGGATCGTTGGTGTCTGTTTGATAATGATACACTTTGGAGAACTTGGGTACTGATCAAAGTTTCTTG  
ATTCAGCCGAGTTCAGCTAAGTCGGTTAGTAAGATTGGATCCGTAAAATA

>M6-PGSC0003DMG400015547-(rev)M6RLKmalectin\_1302

GTTTCTTGATTGAGCCGAGTTCAGCTAAGTCGGTTAGTAAGATTGGATCCGTAAAATATCCAGCAGATGG  
AGCAACACCAGATTTTGCACCACCGTCAGTTTATGGTACTTGTAGTAAGA

>M6-PGSC0003DMG400015547-(rev)M6RLKmalectin\_1364

GCAGATGGAGCAACACCAGATTTTGCACCACCGTCAGTTTATGGTACTTGTAGTAAGATGAACGTGGCT  
GGTACTGGTGATGATCCTAATGCCAATTTAACGTGACCTGGACGTTTAAT

>M6-PGSC0003DMG400015547-(rev)M6RLKmalectin\_1426

CGTGGCTGGTACTGGTGTATGATCCTAATGCCAATTTAACGTGACCTGGACGTTTAATGTGGATCCTGG  
GTTTCAATATTTTCATTGCTTACACTTCTGTGACATAGTGAGTATAGCTGC

>M6-PGSC0003DMG400015547-(rev)M6RLKmalectin\_1488

ATCCTGGGTTTCAATATTTTCATTGCTTACACTTCTGTGACATAGTGAGTATAGCTGCCAATCAGCTGCTG  
TTAACATTTATGTTAACTCCTGGAACGTGGCTCATGATTTTGATCCTG

>M6-PGSC0003DMG400015547-(rev)M6RLKmalectin\_1550

CAGCTGCTGTTAACATTTATGTTAACTCCTGGAACGTGGCTCATGATTTTGATCCTGGTCAGAAAGCTC  
GGGGAATTTTGGCCACAGCTTATTACAATGATTATGTTACTCCAACCGCT

>M6-PGSC0003DMG400015547-(rev)M6RLKmalectin\_1612

GAAAGCTCGGGGAATTTTGGCCACAGCTTATTACAATGATTATGTTACTCCAACCGCTAAAAGTAATAGG  
CTTAACGTTAGTGTGGGCCCATCTCCAAGGAGTGCTTATCCTGATGCCTT

>M6-PGSC0003DMG400015547-(rev)M6RLKmalectin\_1674

GTAATAGGCTTAACGTTAGTGTGGGCCCATCTCCAAGGAGTGCTTATCCTGATGCCTTCCTAAATGGACT  
GGAACCTTCTGAAGTTGAATAATTCTCACGGCAGCCTTAGTCAGGTAGATT

>M6-PGSC0003DMG400015547-(rev)M6RLKmalectin\_1736

AATGGACTGGAACCTTCTGAAGTTGAATAATTCTCACGGCAGCCTTAGTCAGGTAGATTCTGTTTCTACTA  
ACCCGAGTTCAAAGGCAAAGAAGAATGTCGGAGTCATCGTGGGTGTGTGT

>M6-PGSC0003DMG400015547-(rev)M6RLKmalectin\_1798

TTCTACTAACCCGAGTTCAAAGGCAAAGAAGAATGTCGGAGTCATCGTGGGTGTGTGTATAGGTGTCCC  
AGTTGTGTTGGTGATGGTTGGCATCTTATTTTGCATGCATAGAAGAAGAAA

>M6-PGSC0003DMG400015547-(rev)M6RLKmalectin\_186

TTGGTTTCATTGAATTTAAAATTCTATTAATTTGTTTGTATCTGAGGGAGGTGGGTTTTTCAGTTAAAGCA  
TCAACCTGCCTGTTAATGTCCCAAATCCAAGATATCATTCTCTTTCTC

>M6-PGSC0003DMG400015547-(rev)M6RLKmalectin\_1860

GTGTCCCAGTTGTGTTGGTGATGGTTGGCATCTTATTTTGCATGCATAGAAGAAGAAAACAAGAAAAGC  
TTGCCAGTCAAAAATATGGATTCCTTTATCTATGAATGGTGGTACTTCAC

>M6-PGSC0003DMG400015547-(rev)M6RLKmalectin\_1922

GAAAAGCTTGCCAGTCAAAAATATGGATTCCTTTATCTATGAATGGTGGTACTTCACACACCATGGGAA  
GCAAGTATTCAAACGGAACAACCATAAGTGCTGCTTCAAACATGAGTTAT

>M6-PGSC0003DMG400015547-(rev)M6RLKmalectin\_1984

CATGGGAAGCAAGTATTCAAACGGAACAACCATAAGTGCTGCTTCAAACATGAGTTATCGCGTTCCTTTT  
GCAGCTTTGCTGGAAGCAACGAGCAACTTCGATGAGAGTTTGGTTATTGG

>M6-PGSC0003DMG400015547-(rev)M6RLKmalectin\_2046

TTCTTTTGCAGCTTTGCTGGAAGCAACGAGCAACTTCGATGAGAGTTTGGTTATTGGAATAGGTGGCT  
TGGAAGGTATACAAGGGTGTTTTGTATGATGGAACAAAGGTGGCTGTGA

>M6-PGSC0003DMG400015547-(rev)M6RLKmalectin\_2108

GGTGGCTTTGGGAAGGTATACAAGGGTGTTTTGTATGATGGAACAAAGGTGGCTGTGAAAAGGGGTAA  
TCCAAGTCCCAACAAGGTCTTGCAGAGTTCCGAACGGAAATTGAGATGCTT

>M6-PGSC0003DMG400015547-(rev)M6RLKmalectin\_2170

GGGTAATCCCAAGTCCCAACAAGGTCTTGCAGAGTTCCGAACGGAAATTGAGATGCTTTCTCAGTTCCG  
CCACCGGCATCTGGTTTCATTGATGGGATACTGTGATGAAAAAATGAAAT



>M6-PGSC0003DMG400015547-(rev)M6RLKmalectin\_2232

AGTTCCGCCACCGGCATCTGGTTTCATTGATGGGATACTGTGATGAAAAAATGAAATGATTCTAGTTTA  
TGAATATATGGAGAATGGGACCCTCAAGAGCCATCTGTATGGGTCAGATC

>M6-PGSC0003DMG400015547-(rev)M6RLKmalectin\_2294

CTAGTTTATGAATATATGGAGAATGGGACCCTCAAGAGCCATCTGTATGGGTCAGATCTACCCAGTATG  
AGCTGGAAGCAGAGGCTGGAGATATGCATTGGGTCCGCCAGAGGTCTGCAC

>M6-PGSC0003DMG400015547-(rev)M6RLKmalectin\_2356

CAGTATGAGCTGGAAGCAGAGGCTGGAGATATGCATTGGGTCCGCCAGAGGTCTGCACTACCTTCATA  
CTGGCTATGCTAAAGCAGTTATACATCGTGATGTCAAGTCCGCAAACATACT

>M6-PGSC0003DMG400015547-(rev)M6RLKmalectin\_2418

TTCATACTGGCTATGCTAAAGCAGTTATACATCGTGATGTCAAGTCCGCAAACATACTGCTTGATGAGAG  
TTTTATGTCAAAAGTTGCTGATTTTGGACTATCCAAGACAGGGCCTGAAC

>M6-PGSC0003DMG400015547-(rev)M6RLKmalectin\_248

GTTAAAGCATCAACCTGCCTGTTAATGTCCCAAAATCCAAGATATCATTCTCTTTCTCTTTTCTACCTG  
AAAAAAACAAATATTTTCTGGTACCCCTCAAGAGTTTTCTTCTGATT

>M6-PGSC0003DMG400015547-(rev)M6RLKmalectin\_2480

GATGAGAGTTTTATGTCAAAAGTTGCTGATTTTGGACTATCCAAGACAGGGCCTGAACTTGATCAAACCT  
ATGTTAGCACTGCCGTGAAAGGAAGTTTTGGCTACCTAGATCCAGAATAT

>M6-PGSC0003DMG400015547-(rev)M6RLKmalectin\_2542

TCAAACCTCATGTTAGCACTGCCGTGAAAGGAAGTTTTGGCTACCTAGATCCAGAATATTTAGAAAGGCAA  
CAGCTGACAGAAAAATCTGATGTTTATTCTTTCCGGTGTGTTTTATTCTGA

>M6-PGSC0003DMG400015547-(rev)M6RLKmalectin\_2604

GAAGGCAACAGCTGACAGAAAAATCTGATGTTTATTCTTTCCGGTGTGTTTTATTCTGAAGTTCTTTGTGCT  
AGGCCTGTCATAGATCCATCTCTTCCGAGAGAGATGGTCAACTTAGCTG

>M6-PGSC0003DMG400015547-(rev)M6RLKmalectin\_2666

CTTTGTGCTAGGCCTGTCATAGATCCATCTCTTCCGAGAGAGATGGTCAACTTAGCTGAATGGGCAATGA  
AGTGGCAGAAGTTGGGACAACCTGGAACAAATTATAGATTCCAATCTTGAG

>M6-PGSC0003DMG400015547-(rev)M6RLKmalectin\_2728

GGCAATGAAGTGGCAGAAGTTGGGACAACCTGGAACAAATTATAGATTCCAATCTTGAGGGCAAATAA

GACCAGATTCCCTCAGGAAGTTTGCAGAAACAGCAGAGAAATGCTTAGCTGA

>M6-PGSC0003DMG400015547-(rev)M6RLKmalectin\_2790

AAATAAGACCAGATTCCCTCAGGAAGTTTGCAGAAACAGCAGAGAAATGCTTAGCTGATTTTGGTGTAG

ACAGGCCATCAATGGGCGATGTGTTGTGGAATCTGGAGTATGCACTTCAAC

>M6-PGSC0003DMG400015547-(rev)M6RLKmalectin\_2852

GGTGTAGACAGGCCATCAATGGGCGATGTGTTGTGGAATCTGGAGTATGCACTTCAACTCAAGAAGCT

GTCATTCAAGATGATCCTGAAGAAAACAGCACCATCCTTATTGGTGAGCTC

>M6-PGSC0003DMG400015547-(rev)M6RLKmalectin\_2914

AGAAGCTGTCATTCAAGATGATCCTGAAGAAAACAGCACCATCCTTATTGGTGAGCTCTCTCCACAAGTT

GATGATTTCAAGTCAAGTTGATCCCGGTGCTTCTGCTGCTCATAACGGAAC

>M6-PGSC0003DMG400015547-(rev)M6RLKmalectin\_2976

CACAAGTTGATGATTTCAAGTCAAGTTGATCCCGGTGCTTCTGCTGCTCATAACGGAACACCAAATTTGGA

TGATCTCTCTGGTGTTCATGAGTAAGGTTTTCTACAATTGCTCAAGT

>M6-PGSC0003DMG400015547-(rev)M6RLKmalectin\_3038

AATTTGGATGATCTCTCTGGTGTTCATGAGTAAGGTTTTCTACAATTGCTCAAGTCTGAGGGTAGAT

AATTAAGTAAAAAGGCACATACAGTGTTTAGGTGTTTGTTAATTCCAATT

>M6-PGSC0003DMG400015547-(rev)M6RLKmalectin\_310

TTTCTACCTGAAAAAAACAAATATTTTCTGGTACCCCTCAAGAGTTTTCTTCTGATTTATGTTCTGTTTGT

TCATTATTGATTTGGGTTTCTCTTTTTCTCAGTCGTGGAGCTCTTTT

>M6-PGSC0003DMG400015547-(rev)M6RLKmalectin\_3100

GGGTAGATAATTAAGTAAAAAGGCACATACAGTGTTTAGGTGTTTGTTAATTCCAATTTGTTTGTGGAT

CATATAAAGATTGATCTTTTCTTTTGTAAACAGTGATTGTACGAAT

>M6-PGSC0003DMG400015547-(rev)M6RLKmalectin\_3162

TTGTGGATCATATAAAGATTGATCTTTTCTTTCTTTTGTAAACAGTGATTGTACGAATTTCCGAGTATTAA

ATAGGAACGTTAACTTTGAAAATATGCATTGTTCTACCTGTGGATCTTC

>M6-PGSC0003DMG400015547-(rev)M6RLKmalectin\_372

TTCTGTTTGTTCATTATTGATTTGGGTTTCTCTTTTTTCTCAGTCGTGGAGCTCTTTTGAATGAAAAAGGTG

ACATCTTACCCTTCTGTTGATGTTTCTTTAATGGGTATTTTCATATA

>M6-PGSC0003DMG400015547-(rev)M6RLKmalectin\_434

GAAAAAGGTGACATCTTTACCCTTCTGTTGATGTTTCTTTAATGGGTATTTTCATATATTGTGCTTCTGTG  
GTGATGAAATAGTTGTTCTTTGTGTTACTGTTCCCTTTTCAAGAACTGCT

>M6-PGSC0003DMG400015547-(rev)M6RLKmalectin\_496

GCTTCTGTGGTGATGAAATAGTTGTTCTTTGTGTTACTGTTCCCTTTTCAAGAACTGCTTGTTTTAGCCTTTA  
AGGTCTAATTTTGTGTTCTTTGGGATTTGAATGATGATGGAAGGTTT

>M6-PGSC0003DMG400015547-(rev)M6RLKmalectin\_558

TTAGCCTTTAAGGTCTAATTTTGTGTTCTTTGGGATTTGAATGATGATGGAAGGTTTTGGATTGTTAGTG  
AAGAGTTTGTATATTGGTGTGGGAGTTTTGTGTGTTTCTGGTTTTG

>M6-PGSC0003DMG400015547-(rev)M6RLKmalectin\_62

ATACTCAGAAAGAGTCAACACCACCAAACCCTCAAAAAATGTTAATTCTTGGCACAAATATTTATACAA  
ATGGCCCTTTTGACTTCATGAATTGCTAGTTCACATTCTAGAAAATGAT

>M6-PGSC0003DMG400015547-(rev)M6RLKmalectin\_620

TTGTTAGTGAAGAGTTTGTATATTGGTGTGGGAGTTTTGTGTGTTTCTGGTTTTGAACCTGCTGATAA  
TTTCTTAGTAGATTGTGGATCATCTAAAGATACTAATGTTGGTAATAGG

>M6-PGSC0003DMG400015547-(rev)M6RLKmalectin\_682

TGCTGATAATTTCTTAGTAGATTGTGGATCATCTAAAGATACTAATGTTGGTAATAGGGTTTTTATGGCT  
GATAAATCAGCTTCAAAGTTTTTGTCAACTTCAAAGATATATTGGCTGA

>M6-PGSC0003DMG400015547-(rev)M6RLKmalectin\_744

TTATGGCTGATAAATCAGCTTCAAAGTTTTTGTCAACTTCAAAGATATATTGGCTGATACCCCTTCGAAT  
TCAATTACAAAAGCTAATGATTCACCCCTTATCAAAGCTAGAAATTT

>M6-PGSC0003DMG400015547-(rev)M6RLKmalectin\_806

CCTTCGAATTCAATTACAAAAGCTAATGATTCACCCCTTATCAAAGCTAGAAATTTTACTCAGCAATC  
CAGCTATAAATTTCCAATTAGCCTAACGGGGAGGCATTGGATTGCCTT

>M6-PGSC0003DMG400015547-(rev)M6RLKmalectin\_868

TCAGCAATCCAGCTATAAATTTCCAATTAGCCTAACGGGGAGGCATTGGATTGCCTTTATTTTTACCCGT  
TTGTTTACCAAGGTTATGATATGAGCACTGCAATGTTCTCTGTTTCCAC

>M6-PGSC0003DMG400015547-(rev)M6RLKmalectin\_930

TTTACCCGTTTGTTACCAAGGTTATGATATGAGCACTGCAATGTTCTCTGTTTCCACTCAAAGAATGTT  
CTTCTTGGCAATTTCTCTCAAAAAATGCTTCTGTCAAGGAATTTTCAG

>M6-PGSC0003DMG400015547-(rev)M6RLKmalectin\_992

AAGAATGTTCTTCTTGCAATTTCTCTCCAAAAAATGCTTCTGTCAAGGAATTTTCAGTAAATGTTACCTC  
CAATGACCTTGTAGTAACGTTCTCTCCTTCGAGCAATTCATTTGCTTAT

>M6-PGSC0003DMG400015603M6LRR-RLP\_1037

CTTGCATCTGCAGAAAGAATAAAATGTCTTAGTTTTACCACAGTGTGCTCTGGTTCAGTCATTGACTATGG  
GCCCTGGCCATTTCTATTGCTGCACCCTTCCCAATGAACTCGTTGCAAG

>M6-PGSC0003DMG400015603M6LRR-RLP\_1098

TTGACTATGGGCCCTGGCCATTTCTATTGCTGCACCCTTCCCAATGAACTCGTTGCAAGTTATATCCTTCC  
AACTTTCGCCTGGCATCCTTTCTCACGGAGGTTGAATTTTGTGAGAATG

>M6-PGSC0003DMG400015603M6LRR-RLP\_1159

ATATCCTTCCAACCTTTCGCCTGGCATCCTTTCTCACGGAGGTTGAATTTTGTGAGAATGTGGCTGCTAGAC  
TGAAGATCTTCCTTTTATGAATTGTGACTCGAAATAGAAATCTTAAGTA

>M6-PGSC0003DMG400015603M6LRR-RLP\_122

TCCTTATTATTGTAGGCTAAAACACCTATTTAGGAGTCTTCTTGTATGGTTGTAAGCATCAATTA AAAAGA  
AGTTGTTATTCCCTTTTCAGATGTTATAGATCTTGCTAATGACTTAAGT

>M6-PGSC0003DMG400015603M6LRR-RLP\_1220

GCTGCTAGACTGAAGATCTTCCTTTTATGAATTGTGACTCGAAATAGAAATCTTAAGTAGAAGGAAGATT  
CTCTATATCGTACTAATCTATGTGTTGAGTTGACAGTTTTGTGGAAGCTG

>M6-PGSC0003DMG400015603M6LRR-RLP\_1281

AGGAAGATTCTCTATATCGTACTAATCTATGTGTTGAGTTGACAGTTTTGTGGAAGCTGGTGGAGAAAGT  
TCTTCTACCCAAACCAGCCAAGACTACATCAGAAGAAAGCAAGTCTACTC

>M6-PGSC0003DMG400015603M6LRR-RLP\_1342

GGAGAAAGTTCTTCTACCCAAACCAGCCAAGACTACATCAGAAGAAAGCAAGTCTACTCAGGGATTGAA  
GTGGTCCATTGCCGCTGGGACAACTTGTTCCTGGTTTTGGTGCAAAGAT

>M6-PGSC0003DMG400015603M6LRR-RLP\_1403

GGATTGAAGTGGTCCATTGCCGCTGGGACAACTTGTTCCTGGTTTTGGTGCAAAGATTGAAAGAGAA  
TCCAAGCTGAGGCTTAATGACTTTGCTAAAGAGCTTAGATCTTTCAGCATT

>M6-PGSC0003DMG400015603M6LRR-RLP\_1464

AAAGAGAATCCAAGCTGAGGCTTAATGACTTTGCTAAAGAGCTTAGATCTTTCAGCATTGTTGACATGTC

AGGTAAAATTGCAGTCAGTTCTGGCTCAGCTGCTTCAGTATTAAAGTTGG

>M6-PGSC0003DMG400015603M6LRR-RLP\_1525

TGACATGTCAGGTAAAATTGCAGTCAGTTCTGGCTCAGCTGCTTCAGTATTAAAGTTGGTGGTTCGTCTAT  
GCTAAATGCTGTCATAATGAATATCTTCCTTTTTTATACCTTTGATAAAA

>M6-PGSC0003DMG400015603M6LRR-RLP\_1586

GTCGTCTATGCTAAATGCTGTCATAATGAATATCTTCCTTTTTTATACCTTTGATAAAAAACCTTCTATCAT  
TTGTAGTTTTAGAAAATGTGATCACGATGTTAAAATATTTGCCTTGAC

>M6-PGSC0003DMG400015603M6LRR-RLP\_1647

CCTTCTATCATTTGTAGTTTTAGAAAATGTGATCACGATGTTAAAATATTTGCCTTGACTTGTTAAATCTT  
AAGTCCCACTTCTTTAGAAAAGTTCAACATATAAAGACCAAAGCTTTAC

>M6-PGSC0003DMG400015603M6LRR-RLP\_1708

GTTAAATTCTTAAGTCCCACTTCTTTAGAAAAGTTCAACATATAAAGACCAAAGCTTTACCGTGATTTATGA  
TTAAAAAACATTTTCTGCATACTGATTGTGCCTGAAGGAAATTTTCAA

>M6-PGSC0003DMG400015603M6LRR-RLP\_1769

TGATTTATGATTAAAAAACATTTTCTGCATACTGATTGTGCCTGAAGGAAATTTTCCAATCTGTTTCATT  
ATAAGCTTCCCCACCAAGTGC GCGACACACCAAACCAAAGTTTTGC

>M6-PGSC0003DMG400015603M6LRR-RLP\_183

ATTA AAAAGAAGTTGTTATTCCCTTTTCAGATGTTATAGATCTTGCTAATGACTTAAGTAACTTCTGCCTA  
TCAGTGCACGGCATTATGCTACTACTTTTGGGTGGACTTCTCTTTCTT

>M6-PGSC0003DMG400015603M6LRR-RLP\_1830

TTGTTTCATTTATAAGCTTCCCCACCAAGTGC GCGACACACCAAACCAAAGTTTTGCTGCATCTTCCTT  
GTATTGTGATTCTACATTCTTTGCATACTGATTAAGGATTA AAATTGCA

>M6-PGSC0003DMG400015603M6LRR-RLP\_1891

CATCTTCCTTGATTGTGATTCTACATTCTTTGCATACTGATTAAGGATTA AAATTGCAAGTCACAAGAGG  
TATTGGATTGAATGTTTTAGGCTTTGGCAGGTCGTA ACTTTGGAGATGA

>M6-PGSC0003DMG400015603M6LRR-RLP\_1952

TCACAAGAGGTATTGGATTGAATGTTTTAGGCTTTGGCAGGTCGTA ACTTTGGAGATGAGGGGCTCTTT  
TTCCTAGCAGAGAGTTTAGCATATAATCAGGTAATGGCTTTTGCTCTCTCT

>M6-PGSC0003DMG400015603M6LRR-RLP\_2013

GGCTCTTTTTCTAGCAGAGAGTTTAGCATATAATCAGGTAATGGCTTTTGCTCTCTCTACCCCCCTCCCT  
CTTCCTTTATCTGTGTAGAGTATGTCATTATTTATCATGGTCCATCTTG

>M6-PGSC0003DMG400015603M6LRR-RLP\_2074

CCCCCTCCCTCTTCCTTTATCTGTGTAGAGTATGTCATTATTTATCATGGTCCATCTTGTTAACCCAAGAGG  
ATAAAGCCATAATCCTGTAATGTAGACAAATAACAATACAATCCTGGC

>M6-PGSC0003DMG400015603M6LRR-RLP\_2135

AACCCAAGAGGATAAAGCCATAATCCTGTAATGTAGACAAATAACAATACAATCCTGGCTTATTTTTTCT  
GGAATAATGTTTTGGGCAAGTTTGGTTCCTTTACCAATGTACTGCA

>M6-PGSC0003DMG400015603M6LRR-RLP\_2196

ATTTTTTCTGGAATAATGTTTTGGGCAAGTTTGGTTCCTTTACCAATGTACTGCATTTCTTTTCATGT  
GATTTCCAGACAGCCGAGGAAGTAACTTTGCTGCTAATGGAATAACT

>M6-PGSC0003DMG400015603M6LRR-RLP\_2257

TCCTTTCATGTGATTTCCAGACAGCCGAGGAAGTAACTTTGCTGCTAATGGAATAACTGCAGATGGATT  
GAAGGCCTTTGATGGCATATTGCAATCAAATATTGCTCTAAAGACTCTTA

>M6-PGSC0003DMG400015603M6LRR-RLP\_2318

AGATGGATTGAAGGCCTTTGATGGCATATTGCAATCAAATATTGCTCTAAAGACTCTTAACCTATCTGGA  
AATGCTATTGGGGATGAAGGAGCCAAGGTAATGCACAGATGATATAGGTG

>M6-PGSC0003DMG400015603M6LRR-RLP\_2379

CTATCTGGAAATGCTATTGGGGATGAAGGAGCCAAGGTAATGCACAGATGATATAGGTGAAAATCCAA  
AGCAGTGAGTTCTTGAATACAGATGACTAATAAGCAGATCCTAACTTTCCC

>M6-PGSC0003DMG400015603M6LRR-RLP\_244

CTTCTGCCTATCAGTGCACGGCATTATGCTACTACTTTTGGGTGGACTTCTCTTTCTTTTTTACGTTTTACT  
GATCACACTTCTTTTTTCTTCTGGTGGCACTGCAATTCTTTTTTACT

>M6-PGSC0003DMG400015603M6LRR-RLP\_2440

AATCCAAAGCAGTGAGTTCTTGAATACAGATGACTAATAAGCAGATCCTAACTTTCCCTTTGCACTTAC  
TTAACTGTTATACCAATTTAACATGTGTATTTATGGTCATGCTTTGTATT

>M6-PGSC0003DMG400015603M6LRR-RLP\_2501

TGCACTTACTTAACTGTTATACCAATTTAACATGTGTATTTATGGTCATGCTTTGTATTGTATTCTCATCT  
CCGCCTTGGCACTTCACGATCAATCACGTCTATTTGGTGTTAATTTAT

>M6-PGSC0003DMG400015603M6LRR-RLP\_2562

ATTTCTCATCTCCGCCTTGGCACTTACGATCAATCACGTCTATTTGGTGTTAATTTATGTTTGCAGTGTCT  
ATGTGATATATTGGCAAATAACTCTGGTATTCAAAGCTCCAGCTGAA

>M6-PGSC0003DMG400015603M6LRR-RLP\_2623

TTGCAGTGTCTATGTGATATATTGGCAAATAACTCTGGTATTCAAAGCTCCAGCTGAACAGCACTGGCT  
TAGGAGATGAGGTCTTGAACATGCCTTGAGCATTTAATTGAAATGCTGTT

>M6-PGSC0003DMG400015603M6LRR-RLP\_2684

GCACTGGCTTAGGAGATGAGGTCTTGAACATGCCTTGAGCATTTAATTGAAATGCTGTTGCTAACTTGCG  
ATGGTATTTTCTGCTTTCTGGTAAATTATTGCCTAAATTTCACTGCAATG

>M6-PGSC0003DMG400015603M6LRR-RLP\_2745

TAACTTGCGATGGTATTTTCTGCTTTCTGGTAAATTATTGCCTAAATTTCACTGCAATGGTTTGTCTGAATT  
TTGCAGGGAGCCAAAGCCATCGGTGAAATGTTGAAGAAAAATTCAACT

>M6-PGSC0003DMG400015603M6LRR-RLP\_2806

TTGTCTGAATTTTGCAGGGAGCCAAAGCCATCGGTGAAATGTTGAAGAAAAATTCAACTTTGCGTGTCT  
TGAACTAAACAATAATCTGATTGACTATACTGTATGTTATTAAGCAGAAC

>M6-PGSC0003DMG400015603M6LRR-RLP\_2867

GCGTGTCTTGAACAAACAATAATCTGATTGACTATACTGTATGTTATTAAGCAGAACTTGTAATTTGTA  
TTTCCTAGTTATTAATTATCTCAATTTCTGAAGGAAAACATGTTTGATT

>M6-PGSC0003DMG400015603M6LRR-RLP\_2928

GTAATTTGTATTTCTAGTTATTAATTATCTCAATTTCTGAAGGAAAACATGTTTGATTGGATATGGAAA  
TAGGGATTTTCAAGTCTTGCTGGATCACTTCTTGAGAATAAACTTTAC

>M6-PGSC0003DMG400015603M6LRR-RLP\_2989

GATATGGAAATAGGGATTTTCAAGTCTTGCTGGATCACTTCTTGAGAATAAACTTTACAATCCTTGCAT  
CTCAAGTAAGCAAAATTTATTCTGCTGTCTTTCTGCGCCCATCCTCATT

>M6-PGSC0003DMG400015603M6LRR-RLP\_305

TACGTTTTACTGATCACACTTCTTTTTCTTCTGGTGGCACTGCAATTCTTTTTACTTCTTAAGTTACACT  
TTACCACCAATCCGAGCTATGTGGATGATGTCCAAGAGATTTAACTT

>M6-PGSC0003DMG400015603M6LRR-RLP\_3050

TCCTTGCATCTCAAGTAAGCAAAATTTATTCTGCTGTCTTTCTGCGCCCATCCTCATTGTCGTATGTCAA

TGTAGCAGTTAATTATTTTATTTTTCTTTATTGGTTTGGAGGGTGGGG

>M6-PGSC0003DMG400015603M6LRR-RLP\_3111

CGTATGTCAAATGTAGCAGTTAATTATTTTATTTTTCTTTATTGGTTTGGAGGGTGGGGGTGGGGGGAAA

AGAAGTGGATTTTAATTTGTGAGGGAAAGCATATCAATTCTTATTTTCCC

>M6-PGSC0003DMG400015603M6LRR-RLP\_3172

GGGGGGAAAAGAAGTGGATTTTAATTTGTGAGGGAAAGCATATCAATTCTTATTTTCCCTTATATCTTTT

AATTTATGTGCTTTAATTAAGTGTTCAGCGGCAATTATGGTGGTGCTTTA

>M6-PGSC0003DMG400015603M6LRR-RLP\_3233

ATATCTTTTAATTTATGTGCTTTAATTAAGTGTTCAGCGGCAATTATGGTGGTGCTTTAGGGGCTGCAGCA

CTGGCTAAAGGCTTGGAGAGCAATAAGTCCTTGAGGGTACATTTCTAAT

>M6-PGSC0003DMG400015603M6LRR-RLP\_3294

GGCTGCAGCACTGGCTAAAGGCTTGGAGAGCAATAAGTCCTTGAGGGTACATTTCTAATCAATTCCTTCC

TCCCCTGAGACCCTTCGCCTTTTGTCTTTTTTTTTGTTCTTGTAATTTG

>M6-PGSC0003DMG400015603M6LRR-RLP\_3355

ATTCCTTCTCCCCTGAGACCCTTCGCCTTTTGTCTTTTTTTTTGTTCTTGTAATTTGACTTGGCAAATAAT

TGAGCTTTTTGTCAGCCTTGATATCTTGCTTCTGCGTCATTGGACTG

>M6-PGSC0003DMG400015603M6LRR-RLP\_3416

TTGGCAAATAATTGAGCTTTTTGTCAGCCTTGATATCTTGCTTCTGCGTCATTGGACTGTTTCTTAGTATTT

AACTTCTGCACTCATGTTTCCCTTTTTTTTTTTTTTTGAAAACAACCT

>M6-PGSC0003DMG400015603M6LRR-RLP\_3599

GGATTACACTGGGTATGTTGTTGTTGTTACTCATGTTTCCATTTGATTGTATAGAAGAGCTCTTCTTTTCA

AAATCTTCAATTTCTCTGTGACTGCTGACACTGGGATTAAGTGTTAAA

>M6-PGSC0003DMG400015603M6LRR-RLP\_366

TTAAGTTACACTTTACCACCAATCCGAGCTATGTGGATGATGTCCAAGAGATTTAACTTAGCATATATCTT

CCGGTGGTTGAATTATAGATTCCTCTACATGTGTGCGAAAACACTTTCTT

>M6-PGSC0003DMG400015603M6LRR-RLP\_3660

CTTCTTTTCAAATCTTCAATTTCTCTGTGACTGCTGACACTGGGATTAAGTGTTAAATGCACTAATGTT

ATTAGATAAACTTCTTCGGGGGGTTTCTTCATGTTCTCACCACAATC

>M6-PGSC0003DMG400015603M6LRR-RLP\_3721



CACTAATGTTATTAGATAAACTTCTTCGGGGGGTTTCTTCATGTTCTCACCAACAATCCGAGGTTGAAGC  
TAGATCTGCTCCACCCAAAATGGAAATGGGCTACTGTTTACATATTACT

>M6-PGSC0003DMG400015603M6LRR-RLP\_3782

AGGTTGAAGCTAGATCTGCTCCACCCAAAATGGAAATGGGCTACTGTTTACATATTACTGTATATCATT  
ACATACACCTGTATAATCAAATGTGTTTGAAAAGATTTTTTATGTGCAGG

>M6-PGSC0003DMG400015603M6LRR-RLP\_3843

ATATCATTAAACATACACCTGTATAATCAAATGTGTTTGAAAAGATTTTTTATGTGCAGGAACTTTATTTGC  
AGGGGAACTCTGTTGGTGATGAAGGAGTACGGGCATTAATCTCTGGCCT

>M6-PGSC0003DMG400015603M6LRR-RLP\_3904

CTTTATTTGCAGGGGAACTCTGTTGGTGATGAAGGAGTACGGGCATTAATCTCTGGCCTATCTTTGCGTA  
AAGGTTTGCTTATTGGATATAATTAACCATTCTCTTTAAACATATATTGG

>M6-PGSC0003DMG400015603M6LRR-RLP\_3965

CTTTGCGTAAAGGTTTGCTTATTGGATATAATTAACCATTCTCTTTAAACATATATTGGCGTTGTTTCCTGT  
GCATCTTTTTTGAAAGGTCACCATCATATGTCTGCAGGGAAACTTGTC

>M6-PGSC0003DMG400015603M6LRR-RLP\_4026

TTGTTTCCTGTGCATCTTTTTTGAAAGGTCACCATCATATGTCTGCAGGGAAACTTGCTTACTTGACCT  
GCCAACAATTCAATTACTGCTAGAGGAGCATTTTCATGTTGCCGAATATG

>M6-PGSC0003DMG400015603M6LRR-RLP\_4087

ACTTGACCTTGCCAACAATTCAATTACTGCTAGAGGAGCATTTTCATGTTGCCGAATATGTCAAAAAAAGC  
AAAAGCTTACTGTGGTTGAATCTCTATATGAATGACATCAAAGATGAGGT

>M6-PGSC0003DMG400015603M6LRR-RLP\_4148

AAAAAAGCAAAGCTTACTGTGGTTGAATCTCTATATGAATGACATCAAAGATGAGGTAATTGAACCA  
CTTAGAACTTTTACAGTTTTTTTCTTTGTAATGTAGAAGACTCTTCTCA

>M6-PGSC0003DMG400015603M6LRR-RLP\_4209

TTGAACCACTTAGAACTTTTACAGTTTTTTTCTTTGTAATGTAGAAGACTCTTCTCAGCCTTGTCCTTCT  
CACTGCAATCAGTAGACTCTTGTATCTATTTTATGGTTTTATTTTAT

>M6-PGSC0003DMG400015603M6LRR-RLP\_427

CATATATCTCCGGTGGTTGAATTATAGATTCCTCTACATGTGTCGAAAACACTTTCTTTCATTATTCAATT  
ACCAGTAACCTTTTAGAAGAAAAAATTTTCAACGCTGCTTTTCTTTTC

>M6-PGSC0003DMG400015603M6LRR-RLP\_4270

CTTGTCTTCTCACTGCAATCAGTAGACTCTCTTGATCTATTTTATGGTTTTATTTTATGTAACAGAAGCAA  
AGAATAAGAAAGCTTGAGTTTTGTCAAGTTGAAACCACTAAAATAAG

>M6-PGSC0003DMG400015603M6LRR-RLP\_4331

AACAGAAGCAAAGAATAAGAAAGCTTGAGTTTTGTCAAGTTGAAACCACTAAAATAAGATAGAAAAG  
ATTTTTGGGTAAGAGGGTCAGGATTGATTGTGCGAGAAAAACAAAAGAATT

>M6-PGSC0003DMG400015603M6LRR-RLP\_4392

AGAAAAGATTTTTGGGTAAGAGGGTCAGGATTGATTGTGCGAGAAAAACAAAAGAATTTGATTGGTT  
AGAGCTGAAGGTGATGGCTGAGTCGTTCTTGAAACCAATCATAAGTTCAGAT

>M6-PGSC0003DMG400015603M6LRR-RLP\_4453

ATTGGTTAGAGCTGAAGGTGATGGCTGAGTCGTTCTTGAAACCAATCATAAGTTCAGATCACATGGTTA  
GGAAATTTTATAATGGTACTTACCATTAAAGAATATAATTTTGAGACTAGG

>M6-PGSC0003DMG400015603M6LRR-RLP\_4514

CATGGTTAGGAAATTTTATAATGGTACTTACCATTAAAGAATATAATTTTGAGACTAGGTTTAACTACTTT  
GGGGATTCTTGCCAGAAGAAAATTAGAAGGATTGCATGGTGTGGATGA

>M6-PGSC0003DMG400015603M6LRR-RLP\_4575

TAATCACTTTGGGGATTCTTGCCAGAAGAAAATTAGAAGGATTGCATGGTGTGGATGAACTGAGGTCT  
TTTTAAATTTTGTGAGCAGTTCAGAAAGATAAACTCAAATAATCCCAAAT

>M6-PGSC0003DMG400015603M6LRR-RLP\_4636

TGAGGTCTTTTTAAATTTTGTGAGCAGTTCAGAAAGATAAACTCAAATAATCCCAAATCTGTAGGGGTA  
GCTTTATTTTTCCCTTCAAATACATATGCATATGGACAGACATATTAAC

>M6-PGSC0003DMG400015603M6LRR-RLP\_4697

GTAGGGGTAGCTTTATTTTTCCCTTCAAATACATATGCATATGGACAGACATATTAATGTAATAAATG  
AATCCTTTTATAGTCCTGCACAACCTTAAACGTTAATATTTCAACAGTGA

>M6-PGSC0003DMG400015603M6LRR-RLP\_4758

TGTAATAATGAATCCTTTTATAGTCCTGCACAACCTTAAACGTTAATATTTCAACAGTGAGAAACCTAACTG  
TGCTCCTCTTGATTATAGAAGTGTGTATCCACCATAATTAAGTGC

>M6-PGSC0003DMG400015603M6LRR-RLP\_4819

AACCTAACTGTGCTCCTCTTGATTATAGAAGTGTGTATCCACCATAATTAAGTGCCTTCAATGGAGT

CAAAAGGAAAGCGTTGTGGTCTGAAGGGGAAAGATAAAAAATTGATGATT

>M6-PGSC0003DMG400015603M6LRR-RLP\_488

ATTATTCAATTACCAGTAACCTTTTAGAAGAAAAATTTCAACGCTGCTTTTCTTTTCCATGATCATTAC  
TACTAATTAGACGATTCAGGTGACTGTTCTTGTCTAATTACTTTTCT

>M6-PGSC0003DMG400015603M6LRR-RLP\_4880

TCATTGGAGTCAAAGGAAAGCGTTGTGGTCTGAAGGGGAAAGATAAAAAATTGATGATTGGAGGAAAT  
TGGTACGGATTCAGTAACAGAAGGTTAAATCTGTTGTGAAGAGTTCAAGGGA

>M6-PGSC0003DMG400015603M6LRR-RLP\_4941

AGGAAATTGGTACGGATTCAGTAACAGAAGGTTAAATCTGTTGTGAAGAGTTCAAGGGATTTGGGCTG  
CAAAGAAGGATTTTTTTTCAGAAATTTATGGGGGTGGGTTTGCATACGACAGG

>M6-PGSC0003DMG400015603M6LRR-RLP\_5002

TGGGCTGCAAAGAAGGATTTTTTTTCAGAAATTTATGGGGGTGGGTTTGCATACGACAGGGTAGTTGCTC  
AGAAGCACAATTAATTTCTGCTGGAGAAGAGCTCATGTGCTGGCAACATC

>M6-PGSC0003DMG400015603M6LRR-RLP\_5063

AGTTGCTCAGAAGCACAATTAATTTCTGCTGGAGAAGAGCTCATGTGCTGGCAACATCAGATTGAAAC  
ATAAAGTCAAACCTTAACCATATCCTTGGTAGATTAGACCAAAGTAGCTAA

>M6-PGSC0003DMG400015603M6LRR-RLP\_5124

ATTGAAACATAAAGTCAAACCTTAACCATATCCTTGGTAGATTAGACCAAAGTAGCTAATGTTGATTACCC  
ATTCCAGAACTTAAGGCTATGGTTTACAATGACAGGGTACAGTGCCTA

>M6-PGSC0003DMG400015603M6LRR-RLP\_5185

TTGATTACCCATTCCAGAACTTAAGGCTATGGTTTACAATGACAGGGTACAGTGCCTACAAGCAACAA  
GTCCTGCACAAGAAGTGGAAAGAAGTCTCTAAGTTAGCTCGCAAAAAAAAA

>M6-PGSC0003DMG400015603M6LRR-RLP\_5246

AGCAACAAGTCTGCACAAGAAGTGGAAAGAAGTCTCTAAGTTAGCTCGCAAAAAAAAAATTTACTGCCTT  
CATTTGTGTCAATAAAGTTCACATGTAATCAGTAGCCTCAAGTTTCCCAC

>M6-PGSC0003DMG400015603M6LRR-RLP\_5307

TACTGCCTTCATTTGTGTCAATAAAGTTCACATGTAATCAGTAGCCTCAAGTTTCCCCTTCTTCAATTCAA  
CCCAGTTTCTTTTGTGGTATGCGATTTCTTGGTGTGAAGATTAA

>M6-PGSC0003DMG400015603M6LRR-RLP\_5368

CTTCAATTCAACCCAGTTTCTTTTTGTTGGTATGCGATTCCTTGGTGTGAAGATTAAAGGCGAAGGCTT  
TTTGTAAAAAGAGAACACAAATCACATGCTTTTCACTTGAGAACTA

>M6-PGSC0003DMG400015603M6LRR-RLP\_5429

GCGAAGGCTTTTTGTTTTAAAAGAGAACACAAATCACATGCTTTTCACTTGAGAACTACCGTTAATATT  
GACGTCAAATTTGGGAAGGACCAAAGGTGTCCATTTTTGCAAAGACGA

>M6-PGSC0003DMG400015603M6LRR-RLP\_549

TGATCATTCACTACTAATTAGACGATTCAGGTGACTGTTCTTGTCTAATTACTTTTCTAGTTATTTGACCA  
TCTTGAATATGAAGGAGCATGCTTGACGTAAAGTGAATCGTTAAAAAT

>M6-PGSC0003DMG400015603M6LRR-RLP\_5490

GTTAATATTTGACGTCAAATTTGGGAAGGACCAAAGGTGTCCATTTTTGCAAAGACGAAGGATTTATT  
TATCCACAGTTATATTTGAAGGACAAAGTGTAACTGTCCCCATAAATAA

>M6-PGSC0003DMG400015603M6LRR-RLP\_5551

GATTTATTTTATCCACAGTTATATTTGAAGGACAAAGTGTAACTGTCCCCATAAATAAGGGATCATTTG  
AGTTTTTACATTGCAGATCCAGACTCAATCTTGTATATGCATTGACTTT

>M6-PGSC0003DMG400015603M6LRR-RLP\_5612

GATCATTTGAGTTTTTACATTGCAGATCCAGACTCAATCTTGTATATGCATTGACTTTTCCTTCTTTTTTT  
TCCCCCATTTACATCAATATCCATCAGGGAGCTGAAAAGATTGCAG

>M6-PGSC0003DMG400015603M6LRR-RLP\_5673

CTTCTTTTTTTTTCCCCCATTTACATCAATATCCATCAGGGAGCTGAAAAGATTGCAGAAGCTTTGAAGG  
AGAACCGCTCGATAACTAACGTTGATCTTGTAAAGAGTTGTTTCTCTTT

>M6-PGSC0003DMG400015603M6LRR-RLP\_5734

GCTTTGAAGGAGAACCGCTCGATAACTAACGTTGATCTTGTAAAGAGTTGTTTCTCTTTTCTATTTTATTC  
AACATTTCTGTTTTGTTTCATGGAGGAGGTTGGGTTTCTTAATCTTATC

>M6-PGSC0003DMG400015603M6LRR-RLP\_5795

TATTTTATTCAACATTTCTGTTTTGTTTCATGGAGGAGGTTGGGTTTCTTAATCTTATCAGAGCATAATTT  
CTATTTGCTCTGATGGCTGGAATTCTGCGAATTTTACAGGGGGGCAAT

>M6-PGSC0003DMG400015603M6LRR-RLP\_5856

AGCATAATTTTCTATTTGCTCTGATGGCTGGAATTCTGCGAATTTTACAGGGGGGCAATGACATACATGC  
TAAGGGTATTAGTGCATAGCAGAAGTTCTGAAAGATAATTCTGTCATTA

>M6-PGSC0003DMG400015603M6LRR-RLP\_5917

CATACATGCTAAGGGTATTAGTGCCATAGCAGAAGTTCTGAAAGATAATTCTGTCATTACCTCTGTAAGT  
TTCATCAAAATGTTAACTTTTACTGATTTATTGGACAAAATTAATACAT

>M6-PGSC0003DMG400015603M6LRR-RLP\_5978

TCTGTAAGTTTCATCAAAATGTTAACTTTTACTGATTTATTGGACAAAATTAATACATTATACTTCAAATT  
TCTCACGAACAGTTAGAACTTGGTTACAACCCCATTTGGACCAGAGGGG

>M6-PGSC0003DMG400015603M6LRR-RLP\_6039

TACTTCAAATTTCTCACGAACAGTTAGAACTTGGTTACAACCCCATTTGGACCAGAGGGGGCAATGGCATT  
AGCAGAGGTAAGTTTCATGGAAGTGTAAGATCTCATGCTTGGGT

>M6-PGSC0003DMG400015603M6LRR-RLP\_610

TTATTTGACCATCTTGAATATGAAGGAGCATGCTTGACGTTAAGTGAATCGTTAAAAATATTGTGTAAT  
TATTCATAATAATTATGTTTTATTAATTAAGAGAGCGGGAATTAGTAAAC

>M6-PGSC0003DMG400015603M6LRR-RLP\_6100

AATGGCATTAGCAGAGGTAAGTTTCATGGAAGTGTAAGATCTCATGCTTGGGTGGTGTGTCAGGT  
AATGCATGGATTGTTTCATATATGCCCTCTTAACTATCTTTTTTAGCATG

>M6-PGSC0003DMG400015603M6LRR-RLP\_6161

TGTCAGGTAATGCATGGATTGTTTCATATATGCCCTCTTAACTATCTTTTTTAGCATGTTCACTTAATTTT  
TTCCAGATCGGAGCCAAAGGTGCAGAATATTTTGCCGATATGTTGAA

>M6-PGSC0003DMG400015603M6LRR-RLP\_6222

CACTTAATTTTTTCCAGATCGGAGCCAAAGGTGCAGAATATTTTGCCGATATGTTGAAGTACAATAGTA  
CCATATCAACTCTAGACTTGCAGCAATGGACTTAGAGACGAGGTTTCA

>M6-PGSC0003DMG400015603M6LRR-RLP\_6283

ACAATAGTACCATATCAACTCTAGACTTGCAGCAATGGACTTAGAGACGAGGTTTCATTCAAAGTTTA  
TAGTTTTTCTATTCTGCCACAATTTCCCTCAAAGTACATAACCATTTCT

>M6-PGSC0003DMG400015603M6LRR-RLP\_6344

CAAAGTTTATAGTTTTTCTATTCTGCCACAATTTCCCTCAAAGTACATAACCATTTCTTTTTCAGGGTGCA  
ATCTGCCTTGCTCGGAGTTTAAAGTGGTCAATGAATCTTTGACGACA

>M6-PGSC0003DMG400015603M6LRR-RLP\_6405

TTCAGGGTGCAATCTGCCTTGCTCGGAGTTTAAAGTGGTCAATGAATCTTTGACGACACTCAATTTAGG

GTTCAATGAAATTAGAGTATGCAACTCTTTTCCAGTACAAGTACAACCAC

>M6-PGSC0003DMG400015603M6LRR-RLP\_6466

CAATTTAGGGTTCAATGAAATTAGAGTATGCAACTCTTTTCCAGTACAAGTACAACCACCTGTCTTGATA

AAGGTATCATCTTGTATTAAGTTAGTTTATGTTGCACACAGGATGAAGGA

>M6-PGSC0003DMG400015603M6LRR-RLP\_6527

GTCTTGATAAAGGTATCATCTTGTATTAAGTTAGTTTATGTTGCACACAGGATGAAGGAGCTTTTGCTATC

GCTCAAGCACTTAAGGCAAATGAAGATGTTAGACTCACATCTTTAAATC

>M6-PGSC0003DMG400015603M6LRR-RLP\_6588

TTTTGCTATCGCTCAAGCACTTAAGGCAAATGAAGATGTTAGACTCACATCTTTAAATCTTGCCAGTAACT

TCCTCACCAAATTAGGACAGGTAACATCAAATGATAATATTATTCTCTT

>M6-PGSC0003DMG400015603M6LRR-RLP\_6649

GCCAGTAACTTCCTCACCAAATTAGGACAGGTAACATCAAATGATAATATTATTCTCTTATTTTAGCTGTT

TTACGCGATTTTTAGTTCCTTACAATATCCGGATGGATTCCAAATTTCA

>M6-PGSC0003DMG400015603M6LRR-RLP\_671

TGTGTAAATTATTCATAATAATTATGTTTTATTAATTAAGAGAGCGGGAATTAGTAACTTTCCTTCTTAA

TTTAGTTCAGAATTTCTATATGAGTAGCTCCTTGAATGTGGTTAAACCT

>M6-PGSC0003DMG400015603M6LRR-RLP\_6710

TTTAGCTGTTTTACGCGATTTTTAGTTCCTTACAATATCCGGATGGATTCCAAATTCAGACAGCTCTCAC

AGATGCAAGAGACCATGTGTTTGAGATGACTGAGAAGGAGCTTGCTGTT

>M6-PGSC0003DMG400015603M6LRR-RLP\_6771

CAGCTCTCACAGATGCAAGAGACCATGTGTTTGAGATGACTGAGAAGGAGCTTGCTGTTATGTTCTAAA

ATATTACATTCCTTAGATCAGATATATTTTCTCCCTAGTTGGGGCAAGGT

>M6-PGSC0003DMG400015603M6LRR-RLP\_6832

GTTCTAAAATATTACATTCCTTAGATCAGATATATTTTCTCCCTAGTTGGGGCAAGGTAGATGAGTATTT

TTTTTTCTATTCTGGGGGAATAGAATCGCAGCCTACCTTGATATTCTTA

>M6-PGSC0003DMG400015603M6LRR-RLP\_6893

ATGAGTATTTTTTTTTCTATTCTGGGGGAATAGAATCGCAGCCTACCTTGATATTCTTAAGAGTCCCACCT

TAGTTCCTTTTGTGACTGAAATCATTTTGAGTGGGGAACAGTGGAAT

>M6-PGSC0003DMG400015603M6LRR-RLP\_6954

AGTCCCACCTTAGTTCCTTTTGTGACTGAAATCATTTTGAGTGGGGAACAGTGGAAATTTTGATATCGA  
GATACACACTGATATTATAAAAAATGTTCCCTTTTCTGAAACTTTTTTTGT

>M6-PGSC0003DMG400015603M6LRR-RLP\_7015

TGATATCGAGATACACACTGATATTATAAAAAATGTTCCCTTTTCTGAAACTTTTTTTGTGTCTGATAACGTT  
AGTGGCAAATACATAGAAATTACTTCTATTACCATTTTCAGATTCATT

>M6-PGSC0003DMG400015603M6LRR-RLP\_7076

CTGATAACGTTAGTGGCAAATACATAGAAATTACTTCTATTACCATTTTCAGATTCATTCTCTGGTTTGAA  
ACTCTTCTGAGTTGTTGTTCTTTCCCTATGGCCTTTTAAGCTTATTTTG

>M6-PGSC0003DMG400015603M6LRR-RLP\_732

TCCTTCTTAATTTAGTTCAGAATTTCTATATGAGTAGCTCCTTGAATGTGGTTAAACCTTTTCATTACAAGA  
GCTCATTCTCTCTCTTTTTTTTACAATGTCAAATTCTAATAAACAGTT

>M6-PGSC0003DMG400015603M6LRR-RLP\_793

CATTACAAGAGCTCATTCTCTCTCTTTTTTTTACAATGTCAAATTCTAATAAACAGTTAATCAACCACTGG  
TATCGTTGCATCTAATTTATCTTAACATTCAAAGTTCTTACATTTCCA

>M6-PGSC0003DMG400015603M6LRR-RLP\_854

TCAACCACTGGTATCGTTGCATCTAATTTATCTTAACATTCAAAGTTCTTACATTTCCATCTCCAAAGATGT  
TGCTCCATACTTCTATTCTATATGATGCGATTGAATTCCTCTTTTCATT

>M6-PGSC0003DMG400015603M6LRR-RLP\_915

TCCAAGATGTTGCTCCATACTTCTATTCTATATGATGCGATTGAATTCCTCTTTTCATTGCCAATTACCTCT  
ACTAATAACTTCTGAGCTCTTTCTGCCCAAAAAATTGAGGAGCTACTT

>M6-PGSC0003DMG400015603M6LRR-RLP\_976

CAATTACCTCTACTAATAACTTCTGAGCTCTTTCTGCCCAAAAAATTGAGGAGCTACTTAACTTGCATCTG  
CAGAAAGAATAAATGTCTTAGTTTTACCACAGTGTGCTCTGGTTCAGT

>M6-PGSC0003DMG400015666M6LRR-RLK\_0

CAAATCCCAACTAGTATTTCTTTATCTTCTCCAGCTCAGACACAGACACACAGTCCATTTTTCTCTCTCAA  
AATCAACCAACAAGAAGATGAACAACATGTTTACCACTCCTTTGAACA

>M6-PGSC0003DMG400015666M6LRR-RLK\_1054

TAGTAAGCAGGTTGAAGTTGAAATGCCTGAAGAAAGAGGGGTTGAGAGTAATGGTGGAAAAGATGGA  
TTCTTGGGTAGTGCAATTGCAGCTATTGGTGTGGAGGGGGTAATAAGGATAA

>M6-PGSC0003DMG400015666M6LRR-RLK\_1116

ATGGATTCTTGGGTAGTGCAATTGCAGCTATTGGTGTGGAGGGGGTAATAAGGATAAAGGTAAAGCT  
GAGGCTGTTGTAATGATGGAAAAAGTTTGGTGTTTTTTGGGAAAATGGCCA

>M6-PGSC0003DMG400015666M6LRR-RLK\_1178

AAAGCTGAGGCTGTTGTAAATGATGGAAAAAGTTTGGTGTTTTTTGGGAAAATGGCCAAAAATTTCAAT  
TTGGATGATTTGTTGAAAGCTTCTGCTGAAGTTTTGGGAAAAGGGACATTT

>M6-PGSC0003DMG400015666M6LRR-RLK\_124

TTGAATCAAGAAATCAAATTACCCAGAAAAAATCCTGTTTGGGGGTTTTGGGTTTACCCAAAATCTTCAA  
AAAATGAGCTCAAAAATCTTGTTTTTATTACCATTTCTGTATCAATTTT

>M6-PGSC0003DMG400015666M6LRR-RLK\_1240

TTTCAATTTGGATGATTTGTTGAAAGCTTCTGCTGAAGTTTTGGGAAAAGGGACATTTGGTACTGCTTAT  
AAAGCTGCTTTGGAATCAGGGATTACATTAGTTGTGAAGAGATTGAGAGA

>M6-PGSC0003DMG400015666M6LRR-RLK\_1302

CTGCTTATAAAGCTGCTTTGGAATCAGGGATTACATTAGTTGTGAAGAGATTGAGAGATGTTACTGTACC  
TGAGAAGGAGTTTAGAGAGAAAATTGAAGATGTTGGGAAAATGAATCATG

>M6-PGSC0003DMG400015666M6LRR-RLK\_1364

ACTGTACCTGAGAAGGAGTTTAGAGAGAAAATTGAAGATGTTGGGAAAATGAATCATGAGAATTTGGT  
TCCTTTGAGAGCTTATTATTATAGCAGAGATGAGAAGCTTCTTGTATTATGAT

>M6-PGSC0003DMG400015666M6LRR-RLK\_1426

TTTGGTTCCTTTGAGAGCTTATTATTATAGCAGAGATGAGAAGCTTCTTGTATTATGATTACATCTCAATGG  
GAAGCCTTTCTGCACTTTTACATGGTGAGAAAAATAACTTTTTTTTTTTC

>M6-PGSC0003DMG400015666M6LRR-RLK\_1488

TCTCAATGGGAAGCCTTTCTGCACTTTTACATGGTGAGAAAAATAACTTTTTTTTTTCTGTCATTCTTTTTC  
ATGTCATTATATTGCTGTTATGCTGTTTCTTGAATCGAGCGTCTATTG

>M6-PGSC0003DMG400015666M6LRR-RLK\_1550

ATTCTTTTTCATGTCATTATATTGCTGTTATGCTGTTTCTTGAATCGAGCGTCTATTGAATCATGTCATTAT  
AGTGCTGACTGTTGTTTACCATTTACATGATCTGCAAATTTTAGTTG

>M6-PGSC0003DMG400015666M6LRR-RLK\_1612

ATGTCATTATAGTGCTGTAAGTGTGTTTACCATTTACATGATCTGCAAATTTAGTTGTCTGATTGACACT



GATACTACTGCTTTCTATGTTGCCTAGACTCTTAAAATGTGGTGCTTGT

>M6-PGSC0003DMG400015666M6LRR-RLK\_1674

ATTGACACTGATACTACTGCTTTCTATGTTGCCTAGACTCTTAAAATGTGGTGCTTGTCCGGATCCTGGATC  
CTCCAAAAGTAGTGTATATTTGGAGGATCCAAACACGAGTCCGAATAAC

>M6-PGSC0003DMG400015666M6LRR-RLK\_1736

TCCTGGATCCTCCAAAAGTAGTGTATATTTGGAGGATCCAAACACGAGTCCGAATAACATAGACTGTTTT  
TGCTGATTTTATGAGGCTAGTAAGTTTGGATGATCATTGTTTTCTTGGGA

>M6-PGSC0003DMG400015666M6LRR-RLK\_1798

ACTGTTTTTGTGATTTTATGAGGCTAGTAAGTTTGGATGATCATTGTTTTCTTGGATCTTGTTATCTGTT  
ACTGAATTGGTGCTGTTGTGTAAAAGTTGCTGCATTTGCATTATTGTG

>M6-PGSC0003DMG400015666M6LRR-RLK\_186

ATCTTCAAAAATGAGCTCAAAAATCTGTTTTTATTCACCATTCTGTATCAATTTTCACTCTTTTCTTGCC  
GACAACTCCGACATTGTTCCGATCGAGCTACCCTTTTATCTATCC

>M6-PGSC0003DMG400015666M6LRR-RLK\_1860

GTTATCTGTTACTGAATTGGTGCTGTTGTGTAAAAGTTGCTGCATTTGCATTATTGTGCCCAATTGTGTTCC  
AGCCACTAAAATTAAGTTTTTTTTTTTACATTATTGTGCTGTTGTTGC

>M6-PGSC0003DMG400015666M6LRR-RLK\_1922

ATTGTGTTCCAGCCACTAAAATTAAGTTTTTTTTTTTACATTATTGTGCTGTTGTTGCATTGTTGTTTCATGTT  
TAATCAGATTTTATCGTAATCTAATGTGATGAACATTGTGTTTAGTG

>M6-PGSC0003DMG400015666M6LRR-RLK\_1984

TTGTTTCATGTTAATCAGATTTTATCGTAATCTAATGTGATGAACATTGTGTTTAGTGAATATGATATCTG  
ACATGTTTTATATAACTCAACCTGGAATGGCTTTACTATGTCCAATT

>M6-PGSC0003DMG400015666M6LRR-RLK\_2046

TGATATCTGACATGTTTTATATAACTCAACCTGGAATGGCTTTACTATGTCCAATTGTTGCTGTTCAA  
CTCGTGTTTCATCATTAGATTGAATGTATACTTTATCCACAAGGTGATC

>M6-PGSC0003DMG400015666M6LRR-RLK\_2294

GTTGTTGGAAGAGTTTAGGAAGAAGTCGTAAAATTGAATATATGTGTAGGACAGGTTCACTGCGTTCAA  
CAGGACGAAACAAGATCATTTAACATTTAATCTGTTTGTATGGATTTAAGC

>M6-PGSC0003DMG400015666M6LRR-RLK\_2356

CGTTCAACAGGACGAAACAAGATCATTTAACATTTAATCTGTTTGTATGGATTTAAGCCAAATGTACCTTT  
GTTAACTTATCGACTATATGTTGGGTAAAACTATGAATTATTTGGGTG

>M6-PGSC0003DMG400015666M6LRR-RLK\_2418

TGTACCTTTGTTAACTTATCGACTATATGTTGGGTAAAACTATGAATTATTTGGGTGCTTTATTCGGCAT  
ATTCCACTGCTACTATGTCATGTCACAATAGTTTTGTCATTCAACTTGT

>M6-PGSC0003DMG400015666M6LRR-RLK\_248

CTTTTCTTGCCGACAACTCCGACATTGTTCCGATCGAGCTACCCTTTTATCTATCCGATCTGCTCTTCGT  
GGACGTTCACTTTTATGGAATATCACAAGTCCAACCTGTTTCATGGCCT

>M6-PGSC0003DMG400015666M6LRR-RLK\_2480

ATTCGGCATATTCCACTGCTACTATGTCATGTCACAATAGTTTTGTCATTCAACTTGTCTTTTCTATAGGCA  
ACAAAGGAGCAGGTAGGACACCGTTGAATTGGGAAACAAGGGCTGGCA

>M6-PGSC0003DMG400015666M6LRR-RLK\_2542

TCTATAGGCAACAAAGGAGCAGGTAGGACACCGTTGAATTGGGAAACAAGGGCTGGCATTGCCCTTGG  
AGCTGCACACGGGATTGCGTACCTTCATGCACAAGGGCCCTCAGTATCACAT

>M6-PGSC0003DMG400015666M6LRR-RLK\_2604

CCTTGGAGCTGCACACGGGATTGCGTACCTTCATGCACAAGGGCCCTCAGTATCACATGGCAACATTAA  
GTCATCCAATATCCTCCTCACCAAATCATATGAGGCCCGTGTTTCAGATTT

>M6-PGSC0003DMG400015666M6LRR-RLK\_2666

ACATTAAGTCATCCAATATCCTCCTCACCAAATCATATGAGGCCCGTGTTTCAGATTTTGGCCTTGCTCAA  
CTCGTCGGTCCATCATCAACTCCCAACCGTGTTCAGGTTACAGGGCAC

>M6-PGSC0003DMG400015666M6LRR-RLK\_2728

CTTGCTCAACTCGTCGGTCCATCATCAACTCCCAACCGTGTTCAGGTTACAGGGCACCAGAGGTAAGT  
ACCCTCGTAAAGTCTCCAGAAAGCAGATGTCTACAGCTTTGGCGTCTTG

>M6-PGSC0003DMG400015666M6LRR-RLK\_2790

GGTAACTGACCCTCGTAAAGTCTCCAGAAAGCAGATGTCTACAGCTTTGGCGTCTTGTTGTTGGAAGT  
CTAACAGGGAAGGCTCCACACATTCAGTAATGAATGAGGAAGGTGTCTGA

>M6-PGSC0003DMG400015666M6LRR-RLK\_2852

TGGAAGTCTAACAGGGAAGGCTCCACACATTCAGTAATGAATGAGGAAGGTGTCTGACCTACCAAGAT  
GGGTGCAATCAGTGGTACGAGAGGAATGGACAGCCGAAGTCTTTGACCTCG

>M6-PGSC0003DMG400015666M6LRR-RLK\_2914

CCAAGATGGGTGCAATCAGTGGTACGAGAGGAATGGACAGCCGAAGTCTTTGACCTCGAGCTCCTTAG  
GTACCAAAACGTCGAGGAGGACATGGTCCAGCTATTGCAAGTTGCAGTTGAT

>M6-PGSC0003DMG400015666M6LRR-RLK\_2976

CCTTAGGTACCAAAACGTCGAGGAGGACATGGTCCAGCTATTGCAAGTTGCAGTTGATTGCACTGCTCA  
GTACCCTGACAGACGCCCTTCAATGGCCGAGGTCACTACTCGCGTTGAAGA

>M6-PGSC0003DMG400015666M6LRR-RLK\_3038

CTGCTCAGTACCCTGACAGACGCCCTTCAATGGCCGAGGTCACTACTCGCGTTGAAGAACTCTGTCGTAT  
GGATTCTGGAGGTGGTGACATAATTGACAATGATGCAGAAGTGCAAACCTG

>M6-PGSC0003DMG400015666M6LRR-RLK\_310

TGCTCTTCGTGGACGTTCACTTTTATGGAATATCACAAGTCCAACCTGTTTCATGGCCTGGTGTATTGTT  
CACCTGACAAATCTTCTGTTTTAGAGCTTCATCTACCTGGAATGGGACT

>M6-PGSC0003DMG400015666M6LRR-RLK\_3100

TGTCGTATGGATTCTGGAGGTGGTGACATAATTGACAATGATGCAGAAGTGCAAACCTGCATGAAATTGA  
ACAAGAAAAAATAGTTCCATCACATTATTTCAATTTTTTTCTTTTTCGTTT

>M6-PGSC0003DMG400015666M6LRR-RLK\_3162

AAATTGAACAAGAAAAAATAGTTCCATCACATTATTTCAATTTTTTTCTTTTTCGTTTTCGATTGAGCATT  
CGATAACTTTGTTCACTTTGGAGTTCTTCAGTGAAGATAAATTGTTT

>M6-PGSC0003DMG400015666M6LRR-RLK\_3286

TATTTTATTTTTTTGAATTTATTTCCAGTAGCAACAGAGTTTTATTAAGATCTGGTTGGTAGTTGAAAT  
GGAGCTGTTTTTTTTGTTTTATAGATATTGATGTATTCTTTTTGAAG

>M6-PGSC0003DMG400015666M6LRR-RLK\_3329

TTATTAAGATCTGGTTGGTAGTTGAAATGGAGCTGTTTTTTTTGTTTTATAGATATTGATGTATTCTTTTT  
TGAAGGTGTGATGAACTGTATAAATAATTGAGATGACCTGTAGTTACA

>M6-PGSC0003DMG400015666M6LRR-RLK\_372

TTATTTGTTACCTGACAAATCTTCTGTTTTAGAGCTTCATCTACCTGGAATGGGACTTTTAGGCCAAATC  
CCACCTGGGCTTTTCTCAAATTTGACTAAATTGAACTTTCTTAGTCTCC

>M6-PGSC0003DMG400015666M6LRR-RLK\_434

GGCCAAATCCCACCTGGGCTTTTCTCAAATTTGACTAAATTGAACTTTCTTAGTCTCCGGTATAATGCACT

TTCCGGTGTAATTCCGCCGGACTTGTTTACTTCACTTCATGATTTGCGT

>M6-PGSC0003DMG400015666M6LRR-RLK\_496

TAATGCACTTTCCGGTGTAATTCCGCCGGACTTGTTTACTTCACTTCATGATTTGCGTAACTTGTACCTTCA

AAATAATCTATTTTCCGGTCCGATTCTGATTCAATCTTCTCTCTTAC

>M6-PGSC0003DMG400015666M6LRR-RLK\_558

TGTACCTTCAAATAATCTATTTTCCGGTCCGATTCTGATTCAATCTTCTCTCTTACCAATCTTGCCGGC

TTAATCTTGCTCATAACAATTTCTCTGGTTCAATACCGGAATCTTTCA

>M6-PGSC0003DMG400015666M6LRR-RLK\_62

TCTCTCTCAAATCAACCAACAAGAAGATGAACAACATGTTTACCACTCCTTTGAACAAGAATTGAATCA

AGAAATCAAATTACCCAGAAAAATCCTGTTTGGGGTTTTGGGTTTACC

>M6-PGSC0003DMG400015666M6LRR-RLK\_620

CTTGCCGGCTTAATCTTGCTCATAACAATTTCTCTGGTTCAATACCGGAATCTTTCAACAATTTGACTAGT

TTGGGTACACTTTACTTGCAGGGAAATGGGTTTTCGGGTCAGATACCG

>M6-PGSC0003DMG400015666M6LRR-RLK\_682

TTTACTAGTTTGGGTACACTTTACTTGCAGGGAAATGGGTTTTCGGGTCAGATACCGGATCTGAATTTA

CCTGGTATGGTTCAGTTCAATGTATCGAATAATCAGCTAAACGGGTCAAT

>M6-PGSC0003DMG400015666M6LRR-RLK\_744

TGAATTTACCTGGTATGGTTCAGTTCAATGTATCGAATAATCAGCTAAACGGGTCAATTCCTAGTAACT

TGCGGGTCAACCCAAGGATGCTTTTTTGGGTACTTCACTTTGTGGTAAGC

>M6-PGSC0003DMG400015666M6LRR-RLK\_806

AGTAACTTGCGGGTCAACCCAAGGATGCTTTTTTGGGTACTTCACTTTGTGGTAAGCCACTTGATTCAT

GTGATGGTAGTAGTAGTAGTATTGGAGAAGGTAAAAAGAAGAACTT

>M6-PGSC0003DMG400015666M6LRR-RLK\_868

TGATTCATGTGATGGTAGTAGTAGTAGTATTGGAGAAGGTAAAAAGAAGAACTTTCTGGTGGAG

CAATTGCTGGTATAGTAATTGGTTGTGTTGTTGGTTTGCTTTTACTTCTTTG

>M6-PGSC0003DMG400015666M6LRR-RLK\_930

GTGGAGCAATTGCTGGTATAGTAATTGGTTGTGTTGTTGGTTTGCTTTTACTTCTTTGTTTGCTGTTTTCT

GTTGTAGAAAAAGGGGTAAAAAGAACAAGATCTGCTGATGTTGGTG

>M6-PGSC0003DMG400015666M6LRR-RLK\_992

CTGTTTTTCTGTTGTAGAAAAAGGGGTAAAAAAGAAACAAGATCTGCTGATGTTGGTGCTGTTAGTAAG  
CAGGTTGAAGTTGAAATGCCTGAAGAAAGAGGGGTTGAGAGTAATGGTGGA

>M6-PGSC0003DMG400015672M6LRR-RLP\_0

CCTTTAGTTTGTTCATTTTGTGCACAATAGGATGTGACTTAGTGGTCGATGAAGTAGTAGGAGAATTGTG  
AGGTTAAGAAAATGCTAGGTAATTTCTATTTATCTGCCTAGGATTTGGTG

>M6-PGSC0003DMG400015672M6LRR-RLP\_1024

GTTGATGATCCAACAAACGATGAAATATCAACTTTGGAGAAGCTTCTTGTTAGCTCTCCTGCACTTGAGG  
TACTCCATTTAGATTCATTCTTTGTTGAGGTAAGATATTGACTACTTGTT

>M6-PGSC0003DMG400015672M6LRR-RLP\_1088

TTGAGGTACTCCATTTAGATTCATTCTTTGTTGAGGTAAGATATTGACTACTTGTTTCTCTTGATATCTTAT  
AGTGATGGTAATTTCTTATGATTCTAATTATTGTGTTTTCTTCAAAGC

>M6-PGSC0003DMG400015672M6LRR-RLP\_1152

TATCTTATAGTGATGGTAATTTCTTATGATTCTAATTATTGTGTTTTCTTCAAAGCTTTTGAGTGCACGCAT  
TGTTCCGAATGGGCAACCTTCTACACTCAACTGCTTGTGGCATCAATA

>M6-PGSC0003DMG400015672M6LRR-RLP\_1216

GCACGCATTGTTCCGAATGGGCAACCTTCTACACTCAACTGCTTGTGGCATCAATATTTAGGTGTAGACT  
TCAGCAAATGGGTCAGATTTCTAATGTTCTGCAGTTAATTAAGAGTTCC

>M6-PGSC0003DMG400015672M6LRR-RLP\_128

CGCAGAATTACATTATACATGTGTTGGTGGTAGGTACGACATATTTAGTGAATATTCGATGTGCACGCA  
AGATGGCTCGGACATCACGGTCGTTAAAGATAAGACACCGCTTAACTTAA

>M6-PGSC0003DMG400015672M6LRR-RLP\_1280

TAGACTTCAGCAAAAATGGGTCAGATTTCTAATGTTCTGCAGTTAATTAAGAGTTCCCCAATTTGAGTAA  
ACTCCATATTTGCGTAAGAAAAGAAAATATATGCACGATCTGGTTCATTT

>M6-PGSC0003DMG400015672M6LRR-RLP\_1344

GAGTAACTCCATATTTGCGTAAGAAAAGAAAATATATGCACGATCTGGTTCATTTTTGCACTTCATATTT  
GTGAACATGAGAATCTGAAATAGCTTGGTATTTTCTTCATATACATTAT

>M6-PGSC0003DMG400015672M6LRR-RLP\_1397

TTTTTGCACTTCATATTTGTGAACATGAGAATCTGAAATAGCTTGGTATTTTCTTCATATACATTATTAGGT  
CCATCGCCATGGTACCAGTGACAATGCCGAAGCAATCTTGAAGTATCT

>M6-PGSC0003DMG400015672M6LRR-RLP\_192

CACGCAAGATGGCTCGGACATCACGGTCGTTAAAGATAAGACACCGCTTAACTTAAGGGACTAATTTGA  
TATTTTTTTTTCTCCATATTCTTCTAACAGATGGAACAAGATGTGTCATTGA

>M6-PGSC0003DMG400015672M6LRR-RLP\_256

TTTGATATTTTTTTTTCTCCATATTCTTCTAACAGATGGAACAAGATGTGTCATTGAAGGGGATAGTGAAG  
ATAGAATCAGTGGTTTACCAAGAAATGTTATCGATCGTATCCTTGAGCTC

>M6-PGSC0003DMG400015672M6LRR-RLP\_320

GTGAAGATAGAATCAGTGGTTTACCAAGAAATGTTATCGATCGTATCCTTGAGCTCATACCAGTTCAAGA  
TGCAGCAAGAACTAGTATTTTGTCCCGAAACTGGAGATATACTTGGGCAA

>M6-PGSC0003DMG400015672M6LRR-RLP\_384

TCAAGATGCAGCAAGAACTAGTATTTTGTCCCGAAACTGGAGATATACTTGGGCAACATTTCCAAATCTG  
GTGCTGGATTACTGCTTCCATTGTAATCTTGAAGGAAAGTTGTTATTCAA

>M6-PGSC0003DMG400015672M6LRR-RLP\_448

AATCTGGTGCTGGATTACTGCTTCCATTGTAATCTTGAAGGAAAGTTGTTATTCAACTTCAAAGAAGCGG  
TAGATTGTATCCTGTTACTGCATATGGGGGACATTGTGAAGTTTCTTCTT

>M6-PGSC0003DMG400015672M6LRR-RLP\_512

AAGCGGTAGATTGTATCCTGTTACTGCATATGGGGGACATTGTGAAGTTTCTTCTTGATACTAGAGGAAT  
TTTTTCTGCAAATTCTTCTATGCAATTATCGATAGATGGATTCTTTATG

>M6-PGSC0003DMG400015672M6LRR-RLP\_576

AGGAATTTTTTCTGCAAATTCTTCTATGCAATTATCGATAGATGGATTCTTTATGTCACCAGAAATGGAG  
TCAAGATGCTAACCTTCGCACTTCAAATGATGATACCTATACTCTGCC

>M6-PGSC0003DMG400015672M6LRR-RLP\_64

ATTGTGAGGTTAAGAAAATGCTAGGTAATTTCTATTTATCTGCCTAGGATTTGGTGGGCAGAGACGCAG  
AATTACATTATACATGTGTTGGTGGTAGGTACGACATATTTAGTGAATAT

>M6-PGSC0003DMG400015672M6LRR-RLP\_640

AATGGAGTCAAGATGCTAACCTTCGCACTTCAAATGATGATACCTATACTCTGCCCTCTTCTATCTTTAA  
TTGCTCAACCTTGACATATTTGGAACCTCTCCAACCTGTGTCTTCAAACCA

>M6-PGSC0003DMG400015672M6LRR-RLP\_704

TCTTTAATTGCTCAACCTTGACATATTTGGAACCTCTCCAACCTGTGTCTTCAAACCACCCAATCCCTTTCTTG

GTTTACAGAATCTTATTACCCTTCATCTGGAAGGGACAACCTTTGTGC

>M6-PGSC0003DMG400015672M6LRR-RLP\_768

CTTTCTTGGTTTACAGAATCTTATTACCCTTCATCTGGAAGGGACAACCTTTGTGCCAGCCACATCATTTT

GTGTTATCAAGGCTCCCCTTCTTGCCAAATTGGATTTGATCTCGTGTGCG

>M6-PGSC0003DMG400015672M6LRR-RLP\_832

TCATTTTGTGTTATCAAGGCTCCCCTTCTTGCCAAATTGGATTTGATCTCGTGTGCGTGGTACGCAATACCT

AAACATTGTTTCACCAGGACTGGAGTGCTTGCAAGTTCGTGACAGTCAC

>M6-PGSC0003DMG400015672M6LRR-RLP\_896

AATACCTAACATTGTTTCACCAGGACTGGAGTGCTTGCAAGTTCGTGACAGTCACTCATATCTTGTGCT

AGATTGCTTTATGAACTGCAAGAATATAAGAATGCTAAAACCTGAATTTA

>M6-PGSC0003DMG400015672M6LRR-RLP\_960

TGTGCTAGATTGCTTTATGAACTGCAAGAATATAAGAATGCTAAAACCTGAATTTAACGGAGTGGTTGAT

GATCCAACAAACGATGAAATATCAACTTTGGAGAAGCTTCTTGTTAGCTC

>M6-PGSC0003DMG400015687-(rev)M6LRR-RLP\_0

TCCATTTATCATAAGAGTTAGTAACTATGACTATGTTCCAAAAAGGACTGAAGTAGTTATACATATCAGC

AAGAATGTTAAATTCAAATTTAATCTATTTGACTCGCGAAAACCTAAACT

>M6-PGSC0003DMG400015687-(rev)M6LRR-RLP\_1037

GGATGGAAACACATTGGATGAGAACTTTCTCAGGAGTACTGGTGCAATGTCATCCCTTACAGTGTTATCA

GTAGCTAACTGCAACCTCAGTGGAGTCCTACCTCTTCAAGGTAATTTTCAG

>M6-PGSC0003DMG400015687-(rev)M6LRR-RLP\_1098

GTGTTATCAGTAGCTAACTGCAACCTCAGTGGAGTCCTACCTCTTCAAGGTAATTTTCAGGCATACGTAAA

TAGAACAGTGAATAGTTGAGAATAATGAATAATTTTCAGAACAATCCATGT

>M6-PGSC0003DMG400015687-(rev)M6LRR-RLP\_1159

ATACGTAAATAGAACAGTGAATAGTTGAGAATAATGAATAATTTTCAGAACAATCCATGTTTCTAATATTT

TCTGCATAACAACCTATATAAGAACATGAATAACAATCATCTATTTGTTCA

>M6-PGSC0003DMG400015687-(rev)M6LRR-RLP\_122

TTAGCATGTCTGATTTTAAGTTTCTTCGTGATTTGTTTACAGGTTTTGAGAACTGAGACAACTAGAAATA

CTTGATTTGTCATCGAACTACTTGAACCGCAGCATCTTTCAGTCTCTTA

>M6-PGSC0003DMG400015687-(rev)M6LRR-RLP\_1220

CTAATATTTTCTGCATAACAACATATAAGAACATGAATAACAATCATCTATTTGTTCAATTTATAGGCTTG  
TGTGATCTAAAATATCTTGAAGAACTAAGTCTCCGCCTAACTACTTC

>M6-PGSC0003DMG400015687-(rev)M6LRR-RLP\_1281

TTATAGGCTTGTGTGATCTAAAATATCTTGAAGAACTAAGTCTCCGCCTAACTACTTCATTGGAGAAGT  
CCCTGCATGTCTTGAAACTTAACATCTCTTCGGGTAATAGATCTCAGTC

>M6-PGSC0003DMG400015687-(rev)M6LRR-RLP\_1342

TGGAGAAGTCCCTGCATGTCTTGAAACTTAACATCTCTTCGGGTAATAGATCTCAGTCAAAATTATTTTA  
CTGGAAATATTGCCGTATCTCCACTTCCAAGTCTCTTGTCCCTTGAATA

>M6-PGSC0003DMG400015687-(rev)M6LRR-RLP\_1403

AATTATTTTACTGGAAATATTGCCGTATCTCCACTTCCAAGTCTCTTGTCCCTTGAATATCTCTTGTTAGCA  
AACAACAAGTTTGAAATACCAATTCATTCGAGCCATTTGCTAACCAT

>M6-PGSC0003DMG400015687-(rev)M6LRR-RLP\_1464

TCTTGTTAGCAAACAACAAGTTTGAAATACCAATTCATTCGAGCCATTTGCTAACCATTCAAACTTAAG  
TTTGTCAATTGCTGACCACAACCTCGATAATTGTACAAGCTTATTCTAAAA

>M6-PGSC0003DMG400015687-(rev)M6LRR-RLP\_1525

AAAACCTTAAGTTTGTCAATTGCTGACCACAACCTCGATAATTGTACAAGCTTATTCTAAAAGCTGGACTCCA  
AAGTTCCAATTGGAAGCCTTGTCTTTATCCAATTGCTCTCAAATGCCAAG

>M6-PGSC0003DMG400015687-(rev)M6LRR-RLP\_1586

TGGACTCCAAAGTTCCAATTGGAAGCCTTGTCTTTATCCAATTGCTCTCAAATGCCAAGTTTCCTTCAGTA  
TCAACATCATTTACGGATTCTTTGTCTCTCGAAATGTAACATTGGTGGA

>M6-PGSC0003DMG400015687-(rev)M6LRR-RLP\_1647

TCCTTCAGTATCAACATCATTTACGGATTCTTTGTCTCTCGAAATGTAACATTGGTGGAACCTCCCAAAT  
TGGTTGTTAGAAAACAATCCCAGACTAGGAGAAGTTTATTTGGATGGAA

>M6-PGSC0003DMG400015687-(rev)M6LRR-RLP\_1708

CTTCCCAAATTGGTTGTTAGAAAACAATCCCAGACTAGGAGAAGTTTATTTGGATGGAAATGCATTCAAT  
GGATCTCTTGAATTTCTGTTCCCTCCTAATCTGAAAGCTTTTGATATCTC

>M6-PGSC0003DMG400015687-(rev)M6LRR-RLP\_1769

GCATTCAATGGATCTCTTGAATTTCTGTTCCCTCCTAATCTGAAAGCTTTTGATATCTCCAGCAACAAAATT  
CAAGGACAACCTCCTCCTAACATTGGGTCCATTTATCCGAATCTCATG



>M6-PGSC0003DMG400015687-(rev)M6LRR-RLP\_183

ACTAGAAATACTTGATTTGTCATCGAACTACTTGAACCGCAGCATCTTTCAGTCTCTTAGTCAACTTTCAT  
CTCTCAAGTCGTTGTACCTCGCGGAAAACAACATTGAATCAGGTGCTAA

>M6-PGSC0003DMG400015687-(rev)M6LRR-RLP\_1830

GCAACAAAATTCAAGGACAACCTCCTCCTAACATTGGGTCCATTTATCCGAATCTCATGATATTCAAAATG  
TCCAAAATATGCTTGAAGGCTTGTGCCTTCAAGTTTTGGTGACATGA

>M6-PGSC0003DMG400015687-(rev)M6LRR-RLP\_1891

ATTCAAAATGTCCAAAATATGCTTGAAGGCTTGTGCCTTCAAGTTTTGGTGACATGAAAGACCTTCAA  
TGCTTGGATTTGTCTGGGCAATAAGCTAACAGGTGATCTACCTATTGGATT

>M6-PGSC0003DMG400015687-(rev)M6LRR-RLP\_1952

GACCTTCAATGCTTGGATTTGTCTGGGCAATAAGCTAACAGGTGATCTACCTATTGGATTGGCTCGTAAAG  
GATCCAAGTTAAATTTTCTGAGATTATCGAATAACATGTTGAAAGGGGAA

>M6-PGSC0003DMG400015687-(rev)M6LRR-RLP\_2013

CTCGTAAAGGATCCAAGTTAAATTTTCTGAGATTATCGAATAACATGTTGAAAGGGGAAATATTTCCAGT  
TTTGACTAGCATCAACAATTTTGCATATTTGTTCTTGGATGGAAATAACT

>M6-PGSC0003DMG400015687-(rev)M6LRR-RLP\_2074

ATTTCCAGTTTTGACTAGCATCAACAATTTTGCATATTTGTTCTTGGATGGAAATAACTTCTCAGGCCCAA  
TTCCGCAGGCGTTATCCACTGCCTTATTATTTTCACTGGATTTAAGTTA

>M6-PGSC0003DMG400015687-(rev)M6LRR-RLP\_2135

TCAGGCCCAATTCCGCAGGCGTTATCCACTGCCTTATTATTTTCACTGGATTTAAGTTACAATAATTTGTC  
AGGAACTTACCAGTGTGGCTTGGTGACATATCCTCCTTAGATTCCCTC

>M6-PGSC0003DMG400015687-(rev)M6LRR-RLP\_2196

ATAATTTGTCAGGAACTTACCAGTGTGGCTTGGTGACATATCCTCCTTAGATTCCCTCGCACTGTCCGG  
AAACCATCTAAGAGGTCATATTCCGCCTGATTTTTGTAGACTTGAAGGAC

>M6-PGSC0003DMG400015687-(rev)M6LRR-RLP\_2257

ACTGTCCGGAAACCATCTAAGAGGTCATATTCCGCCTGATTTTTGTAGACTTGAAGGACTTCAGGTGTTA  
GATCTCTCTGAAAACAACCTTGTGGCACGATTCCATCATGTTTTAGTGC

>M6-PGSC0003DMG400015687-(rev)M6LRR-RLP\_2318

CAGGTGTTAGATCTCTCTGAAAACAACCTTGTGGCACGATTCCATCATGTTTTAGTGCTTACGAGCCTT

AAGACGTGTGTATTTGAGCAAAAACATGTTACAAGGGGAATTTAACATG

>M6-PGSC0003DMG400015687-(rev)M6LRR-RLP\_2379

TACGAGCCTTAAGACGTGTGTATTTGAGCAAAAACATGTTACAAGGGGAATTTAACATGTTCTCGAATTC  
CCATCTACTAATGTTGGATCTTGGAGATAACAACCTTCAGTGGTTCAATTC

>M6-PGSC0003DMG400015687-(rev)M6LRR-RLP\_244

CAACTTTCATCTCTCAAGTCGTTGTACCTCGCGGAAAACAACATTGAATCAGGTGCTAACATTTGGTTCAT  
CTGTTTTCCCCTTGCACACTATTAGTCTTCCTCTTTTTACAGAACTGTGC

>M6-PGSC0003DMG400015687-(rev)M6LRR-RLP\_2440

CTCGAATTCATCTACTAATGTTGGATCTTGGAGATAACAACCTTCAGTGGTTCAATTCAAAATGGTTG  
GACGAAACTTCTGAGTTAACTGCCTTACTCTTGAAAGGAAATCGTCTTCA

>M6-PGSC0003DMG400015687-(rev)M6LRR-RLP\_2501

AAATGGTTGGACGAAACTTCTGAGTTAACTGCCTTACTCTTGAAAGGAAATCGTCTTCAAGGCACCATTC  
CTCCACAGTTATGTCATGCAAGTTACTTAAGAATGTTGGATCTTTCTCAC

>M6-PGSC0003DMG400015687-(rev)M6LRR-RLP\_2562

GCACCATTCTCCACAGTTATGTCATGCAAGTTACTTAAGAATGTTGGATCTTTCTCACAATAATATCTCA  
GGACCTATACCTCATTGCTTGGGAAACATAATGCAGAATCCATGGGACA

>M6-PGSC0003DMG400015687-(rev)M6LRR-RLP\_2623

TAATATCTCAGGACCTATACCTCATTGCTTGGGAAACATAATGCAGAATCCATGGGACACAGATGTATAC  
TACAGTCCATCATTTGGATATGGAGGATTCGAGATGTTTGGAGGAGATAC

>M6-PGSC0003DMG400015687-(rev)M6LRR-RLP\_2684

GATGTATACTACAGTCCATCATTTGGATATGGAGGATTCGAGATGTTTGGAGGAGATACCTTGATAGAT  
GTAGATGACTCATTGAGACAACATCAACAATTTCAATTCCAAATAGCTTT

>M6-PGSC0003DMG400015687-(rev)M6LRR-RLP\_2745

TGATAGATGTAGATGACTCATTGAGACAACATCAACAATTTCAATTCCAAATAGCTTTGGCACGTGGGT  
TGGAGTAGAGTTCACAACCAAATATAACTTATTCATATGAAGGTAGCA

>M6-PGSC0003DMG400015687-(rev)M6LRR-RLP\_2806

CACGTGGGTTGGAGTAGAGTTCACAACCAAATATAACTTATTCATATGAAGGTAGCATTCTTAGTTAC  
ATGTTTGGTGTGATTTATCTTGCAACCAGTTAAGTGGTGAAATACCCAA

>M6-PGSC0003DMG400015687-(rev)M6LRR-RLP\_2867

CTTAGTTACATGTTTGGTGTGATTTATCTTGCAACCAGTTAAGTGGTGAAATACCCAATGAACTCGGTA  
ATCTTACTGTCATTCATGCATTAACTTGTACATAACCACCTTACTGGA

>M6-PGSC0003DMG400015687-(rev)M6LRR-RLP\_2928

AACTCGGTAATCTTACTGTCATTCATGCATTAACTTGTACATAACCACCTTACTGGAACAATACCATCA  
GAATTCTCAAATCTCCAGAATATTGAGAGTTTGGACATATCATAACAACA

>M6-PGSC0003DMG400015687-(rev)M6LRR-RLP\_2989

AATACCATCAGAATTCTCAAATCTCCAGAATATTGAGAGTTTGGACATATCATAACAACAATTGACTGGG  
AGGCTTCTACTCAACTTCTAAAGTTGACAGCTCTAGAAGTTTTTCAGCGT

>M6-PGSC0003DMG400015687-(rev)M6LRR-RLP\_305

TTTGGTTCATCTGTTTTCCCTTTGCACTATTAGTCTTCTCTTTTTACAGAACTGTGCTAAAAATAATCCAT  
CTCCTTCTAACATTTTCAGGTTCTGAGAGATTATCAGGGTTAGACAAG

>M6-PGSC0003DMG400015687-(rev)M6LRR-RLP\_3050

TTGACTGGGAGGCTTCTACTCAACTTCTAAAGTTGACAGCTCTAGAAGTTTTTCAGCGTGGCACACAATA  
ATTTAACAGGTATGACTCCACAGCGTACAGCGCAGTTTGCACACTTTTGAT

>M6-PGSC0003DMG400015687-(rev)M6LRR-RLP\_3111

CACACAATAATTTAACAGGTATGACTCCACAGCGTACAGCGCAGTTTGCACACTTTTGATGAAAACAGTTA  
TGAGGGAAATCCTTCTCTTTGTGGTCCTCCATTGCACATCAGTTGCACAG

>M6-PGSC0003DMG400015687-(rev)M6LRR-RLP\_3172

AAACAGTTATGAGGGAAATCCTTCTCTTTGTGGTCCTCCATTGCACATCAGTTGCACAGAGGCTAAAGAG  
ATTCCAACATACCTTCTGCACCAAATTTCTCCGAAGACGATGCTTCTTT

>M6-PGSC0003DMG400015687-(rev)M6LRR-RLP\_3233

GCTAAAGAGATTCCAACATACCTTCTGCACCAAATTTCTCCGAAGACGATGCTTCTTTTTTAGATATGGA  
GTGGTTCTGTATTTCAATTTCTTGTGGCATATGCAAATGTGGTGGTTGCA

>M6-PGSC0003DMG400015687-(rev)M6LRR-RLP\_3294

TAGATATGGAGTGGTTCTGTATTTCAATTTCTTGTGGCATATGCAAATGTGGTGGTTGCAGTGGTTGTAGT  
ACTTTGCGTAAACCCCTCCTGGAGAAATGTCTGGTTTTATTATATCGAGT

>M6-PGSC0003DMG400015687-(rev)M6LRR-RLP\_3355

GGTTGTAGTACTTTGCGTAAACCCCTCCTGGAGAAATGTCTGGTTTTATTATATCGAGTCTTTCATGTATT  
CATGTTACGATTACTTTACTTCCAAAAGTTCATGACTTTCATAATTATG

>M6-PGSC0003DMG400015687-(rev)M6LRR-RLP\_3416

TTCATGTATTCATGTTACGATTACTTTACTTCCAAAAGTTCATGACTTTCATAATTATGTAACATTTTCATTAT  
GTAAATGTATGTGTGAGTTGTTCTTGGAATGTTGGTGCCTATCAAGT

>M6-PGSC0003DMG400015687-(rev)M6LRR-RLP\_3477

ACATTTTCATTATGTAAATGTATGTGTGAGTTGTTCTTGGAATGTTGGTGCCTATCAAGTTCATTAATACTA  
GTGAATGTTGTGTTGATTTGCTTGTGCCTTCTATAAGCATTGCCAGAT

>M6-PGSC0003DMG400015687-(rev)M6LRR-RLP\_3538

ATTAATACTAGTGAATGTTGTGTTGATTGCTTGTGCCTTCTATAAGCATTGCCAGATTAATTAATTAT  
TTCGAAATATAAAAATGTGTCATATTTTTTAGAACAGACGAATAGCCAA

>M6-PGSC0003DMG400015687-(rev)M6LRR-RLP\_3599

ATTAAATTATTTGAAATATAAAAATGTGTCATATTTTTTAGAACAGACGAATAGCCAAAATTCTTCAGTG  
CAATTATGGGTTTGAAAGATATGTATACTGCTCAATGAGCCATTTCTTC

>M6-PGSC0003DMG400015687-(rev)M6LRR-RLP\_366

AAAATAATCCATCTCCTTCTAACATTTTCAGGTTCTGAGAGATTATCAGGGTTAGACAAGCTGGAAATCCT  
GGATTTGAGCTACAATGCACTAAATGATGAAAACGTTCTCTCTGTTCTAG

>M6-PGSC0003DMG400015687-(rev)M6LRR-RLP\_3660

TTCTTCAGTGCAATTATGGGTTTGAAAGATATGTATACTGCTCAATGAGCCATTTCTTCTATATGGTCCAC  
TGAAATAAGTGATAAAGACTTGGTAACTCCTAAAGTAGCTGAATTTTT

>M6-PGSC0003DMG400015687-(rev)M6LRR-RLP\_3721

TATGGTCCACTGAAATAAGTGATAAAGACTTGGTAACTCCTAAAGTAGCTGAATTTTTTTGACATTAGC  
ACACAAAATTATACTAAAAAAAAGAAAGAAGAAGAAAATGGCTAAGG

>M6-PGSC0003DMG400015687-(rev)M6LRR-RLP\_4209

AAGCAATGTTTTGATGAAAATAGAGTAAAATAAAGAAGTTGAAAGGGACATAACAAGAAAAGAAGTTG  
CACAAAATTCCACTCTAGTCTACATCAATTATGACACTATTTTCTAGGGGTA

>M6-PGSC0003DMG400015687-(rev)M6LRR-RLP\_427

GGAAATCCTGGATTTGAGCTACAATGCACTAAATGATGAAAACGTTCTCTCTGTTCTAGGTAATTAAGT  
TATAGTTTCTTTTGTGAAAAGCCGTTTTTCTCAGTAGCTTCTACATAA

>M6-PGSC0003DMG400015687-(rev)M6LRR-RLP\_4270

GAAGTTGCACAAAATTCCACTCTAGTCTACATCAATTATGACACTATTTTCTAGGGGTACCTGCTACCTCT

CACCAGCACAGATAACGAACAAGCTTCTTTTTCTTATATATAGTTTGGT

>M6-PGSC0003DMG400015687-(rev)M6LRR-RLP\_4331

TGCTACCTCTCACCAGCACAGATAACGAACAAGCTTCTTTTTCTTATATATAGTTTGGTTATATCTTATAGT  
GTTGTCAAATTGTAGGTAAAGAAACAAAATATGACTAATAGCAAGATA

>M6-PGSC0003DMG400015687-(rev)M6LRR-RLP\_4392

TATCTTATAGTGTTGTCAAATTGTAGGTAAAGAAACAAAATATGACTAATAGCAAGATAGTATATTGGTG  
GTTGTTGATTTTGTTTCATGGCAAATGGATGGTTGTGTTGTTATTGTTGTT

>M6-PGSC0003DMG400015687-(rev)M6LRR-RLP\_4453

ATATTGGTGGTTGTTGATTTTGTTTCATGGCAAATGGATGGTTGTGTTGTTATTGTTGTTTGAATGAAGAA  
AAGACTGCTCTGTTGCATCTCAAGGCAAGCATAAACTACAGTATAGGCAA

>M6-PGSC0003DMG400015687-(rev)M6LRR-RLP\_4514

AATGAAGAAAAGACTGCTCTGTTGCATCTCAAGGCAAGCATAAACTACAGTATAGGCAACGATTACTTG  
TCATCGTGGGAGGCTAATGAAACCTCAGATTGTTGTCAATGGGAGGGAATT

>M6-PGSC0003DMG400015687-(rev)M6LRR-RLP\_4575

ATTACTTGTTCATCGTGGGAGGCTAATGAAACCTCAGATTGTTGTCAATGGGAGGGAATTGTTTGCAGCA  
ACAACACCAGAAGAGTCGTAGAGTTGTCCATTATTGTTAAGAAAATTAGTC

>M6-PGSC0003DMG400015687-(rev)M6LRR-RLP\_4636

TTGCAGCAACAACACCAGAAGAGTCGTAGAGTTGTCCATTATTGTTAAGAAAATTAGTCAAGAACAACCT  
AGAACTCTTAATGGTACAAATACTGATGATATTTTGAATAATTGGCTTTT

>M6-PGSC0003DMG400015687-(rev)M6LRR-RLP\_4697

GAACAACCTTAGAACTCTTAATGGTACAAATACTGATGATATTTTGAATAATTGGCTTTTTAATGCATCTCT  
ATTTATTCCCTTCAAAAATCTCAAAGCTTTGAACATACCTGGACATTCA

>M6-PGSC0003DMG400015687-(rev)M6LRR-RLP\_4758

ATGCATCTCTATTTATTCCCTTCAAAAATCTCAAAGCTTTGAACATACCTGGACATTCATTGGCAGGCTGG  
GTGAAGAATGAAGGTATGTTCTCTCCATATACGCTCCATAATATAGAA

>M6-PGSC0003DMG400015687-(rev)M6LRR-RLP\_4819

GGCAGGCTGGGTGAAGAATGAAGGTATGTTCTCTCCATATACGCTCCATAATATAGAACGAAAGAGAT  
TATACTACTCCCTCCGTTTTATATTGTATGGTGATGTTTACTAGGCACAA

>M6-PGSC0003DMG400015687-(rev)M6LRR-RLP\_488

AATTAACTTATAGTTTCTTTTGTGAAAAGCCGTTTTTCTCAGTAGCTTCTACATAATTATTCTGAATTC  
CTTGACAGAGCTAAATGTATCTAGAACGACGTTGAAGAAGCTTGATAT

>M6-PGSC0003DMG400015687-(rev)M6LRR-RLP\_4880

AAAGAGATTATACTACTCCCTCCGTTTTATATTGTATGGTGATGTTTGACTAGGCACAAAGGAATGATTTT  
TGGCACCTTGAAGCTTGTGGTTGTAACATGTAATGATAATTCTATTGT

>M6-PGSC0003DMG400015687-(rev)M6LRR-RLP\_4941

GAATGATTTTTGGCACCTTGAAGCTTGTGGTTGTAACATGTAATGATAATTCTATTGTGTTGTACTTTTT  
TTAAACGGACTAAAACAGAAAGAATGTCATATAAAAATGAAACAGATAGA

>M6-PGSC0003DMG400015687-(rev)M6LRR-RLP\_5002

TGTAATTTTTTAAACGGACTAAAACAGAAAGAATGTCATATAAAAATGAAACAGATAGAGTACTACATAT  
CTGAAAAATGGTTCTAAAGATCCATTTCTAAATACAAAAAGGTGTCATTC

>M6-PGSC0003DMG400015687-(rev)M6LRR-RLP\_549

ATTCTGAATTCCTTGACAGAGCTAAATGTATCTAGAACGACGTTGAAGAAGCTTGATATAAGGTACAACA  
GATTCCGGAGTTTTATACCAAATGGAGGTATATATAACAATTACTGAAGTT

>M6-PGSC0003DMG400015687-(rev)M6LRR-RLP\_61

CATATCAGCAAGAATGTTAAATTCAAAATTAATCTATTTGACTCGCGAAAACCTAAACTGTTTAGCATGTC  
TGATTTTAAGTTTCTTCGTGATTTGTTTACAGGTTTTGAGAAACTGAGA

>M6-PGSC0003DMG400015687-(rev)M6LRR-RLP\_610

GGTACAACAGATTCCGGAGTTTTATACCAAATGGAGGTATATATAACAATTACTGAAGTTTTTCTTCTTTCA  
ATTGATTTTATTCTACCTCCTTCTACATCTTGCTATGTAAGTATATCTT

>M6-PGSC0003DMG400015687-(rev)M6LRR-RLP\_671

TCTTCTTTCAATTGATTTTATTCTACCTCCTTCTACATCTTGCTATGTAAGTATATCTTATTGGTACCCAATC  
GAAATCACAAGCTTAAAAGAACTGAAAAGTCACAAATCATTTACAAA

>M6-PGSC0003DMG400015687-(rev)M6LRR-RLP\_732

TGGTACCCAATCGAAATCACAAGCTTAAAAGAACTGAAAAGTCACAAATCATTTACAAACTCCACAGGCT  
CCATTTGGATTTGATGAAATGTGTATAAATTCATAGACTTACATGCAAAG

>M6-PGSC0003DMG400015687-(rev)M6LRR-RLP\_793

CCACAGGCTCCATTTGGATTTGATGAAATGTGTATAAATTCATAGACTTACATGCAAAGATGTTATTTTAA  
TAACTCTCTGTGTCAACATTTTGGTTAAAAATATGACATTCCACCATT

>M6-PGSC0003DMG400015687-(rev)M6LRR-RLP\_854

GTTATTTTAATAACTCTCTGTGTCAACATTTTGGTTAAAAATATGACATTCCACCATTTTAGGTGTCATTTG  
CAAGTCGCTATTGCCATTTTAGTTCAAACATTTACAGTTTAAAGCGTA

>M6-PGSC0003DMG400015687-(rev)M6LRR-RLP\_915

GGTGTCAATTTGCAAGTCGCTATTGCCATTTTAGTTCAAACATTTACAGTTTAAAGCGTACTTTTAATGTTT  
CTTTTGCATGTAAGAGTTGGGAGCTTTAAGAAATATCGAGTGGTACTG

>M6-PGSC0003DMG400015687-(rev)M6LRR-RLP\_976

TTTAATGTTTCTTTTGCATGTAAGAGTTGGGAGCTTTAAGAAATATCGAGTGGTACTGTTGGATGGAAA  
CACATTGGATGAGAACTTTCTCAGGAGTACTGGTGCAATGTCATCCCTTA

>M6-PGSC0003DMG400015706M6LRR-RLP\_0

ATGAGAAATGCTTCGACATCTGGTGTAGATACAATTAGCAATTTGCCTTGTAATGTTCTCGATGTTATTCT  
TGGGTGCTTGCCTTGAAAGATGCAGTAAAGACCAGTATCTTGTCAAAA

>M6-PGSC0003DMG400015706M6LRR-RLP\_1024

TGTAAGCACTCGTTTTTTTTTTCATTAAGTTGATTGAATTAATATGATTTGTTCTTCATTTGGACTCGCCAAA  
TTAACTGTTCTTGGAAATCTTTTAGGACCTTGTGGTTGTGGAGGAT

>M6-PGSC0003DMG400015706M6LRR-RLP\_1088

TCGCCAAATTAAGTTCCTTGAAATCTTTTAGGACCTTGTGGTTGTGGAGGATATTGTTGAACCTGTT  
GTAGAATTTCTACGATGCCAATCATTCTCATTAGGTGTTGAGAAGCTTT

>M6-PGSC0003DMG400015706M6LRR-RLP\_1152

ACCTGTTGTAGAATTTCTACGATGCCAATCATTCTCATTAGGTGTTGAGAAGCTTTAAAGAGTTCATGTG  
AACTGTTTATGGGTCTTGAGATGGAAATGGAATTTATGAAGTTCATTTT

>M6-PGSC0003DMG400015706M6LRR-RLP\_1216

CATGTGAACCTGTTTATGGGTCTTGAGATGGAAATGGAATTTATGAAGTTCATTTTGGCATTGACCTG  
TACTTAAGGAGATTTCCATTTTGAATTTGCATATCTCCTTCATCGTTTCG

>M6-PGSC0003DMG400015706M6LRR-RLP\_128

GTACAAATGGGTAACACGTCAAGAACTTGATTTTAATGATGAGTTTTTCAAGTCTTTGAAACAAGATGAA  
GAAGCCAAGATAATTGTTTACCAAGTCCTATTAGTCCATAAAGGACCAAT

>M6-PGSC0003DMG400015706M6LRR-RLP\_1280

CACCTGTACTTAAGGAGATTTCCATTTTGAATTTGCATATCTCCTTCATCGTTCGGATAAACAAATGATG

GACGGGATGAAAGAAATTAGCAGAGCATCACTTAATGTTGAATTCATAT

>M6-PGSC0003DMG400015706M6LRR-RLP\_1337

ATAAACAAATGATGGACGGGATGAAAGAAATTAGCAGAGCATCACTTAATGTTGAATTCATATTTGAAT

AAGTCGAGTTGGCAGATCGCAGTGAACCCCAAGAAGTCATGGAAGTGCCAT

>M6-PGSC0003DMG400015706M6LRR-RLP\_192

GATGAAGAAGCCAAGATAATTGTTTACCAAGTCTATTAGTCCATAAAGGACCAATGCTGTGTAGGATT

ACGAGTTGTCTGATATTGATCATTGGATGCACTTCTTGTTGAAGAAAAAT

>M6-PGSC0003DMG400015706M6LRR-RLP\_256

GGATTACGAGTTGTCTGATATTGATCATTGGATGCACTTCTTGTTGAAGAAAAATGTCCAGGAATTCAC

CCTTCATGTAAGATCAGAAAATCATTTACCTCATCACCTTTTTACTTTCC

>M6-PGSC0003DMG400015706M6LRR-RLP\_384

AGGTATTTGGAACCTCAAGATTGCTTGTTCCACCCTCCACTCGGTTTCAAAGGGTTTGAGAAGCTTGTTA

ATCTCGACCTTATGCATGTCACCTTTGATCCATCAATATTAACAAATCTC

>M6-PGSC0003DMG400015706M6LRR-RLP\_448

TTGTTAATCTCGACCTTATGCATGTCACCTTTGATCCATCAATATTAACAAATCTCATATCTAAAAGCCCGT

TGCTTGAACAATTGAGGTTGTGTTTCATCACAACTTTGACACCCTTG

>M6-PGSC0003DMG400015706M6LRR-RLP\_512

AAGCCCGTTGCTTGAACAATTGAGGTTGTGTTTCATCACAACTTTGACACCCTTGAAGTTGATGTTGCT

AATCTCAAATCTTTTGAGTTTATTAGACAAACAAAACCATTTTCCTTCA

>M6-PGSC0003DMG400015706M6LRR-RLP\_576

GTTGCTAATCTCAAATCTTTTGAGTTTATTAGACAAACAAAACCATTTTCCTTCAAGAATGCTCCTATGC

TTGAAAAAGTTACCGTGTGTTTCATTGGACATCGACTTTTGACTGATAC

>M6-PGSC0003DMG400015706M6LRR-RLP\_640

CCTATGCTTGAAAAAGTTACCGTGTGTTTCATTGGACATCGACTTTTGACTGATACATCTCATTTTTCTCT

AATCTTACAAAGTTCTTTCATTACATGCCTTCACTACTGGAAGTGAAT

>M6-PGSC0003DMG400015706M6LRR-RLP\_704

TTTTCTAATCTTACAAAGTTCTTTCATTACATGCCTTCACTACTGGAAGTGAATCTATTCGGTTCAATAT

TAGGGTAACGTACATTTGTGATATTACTATCATAACCAAATGATGAAT

>M6-PGSC0003DMG400015706M6LRR-RLP\_768



TTCAATATTAGGGTAACGTACATTTGTGATATTACTATCATAACCAAATGATGAATCTGATTGGTATCTTA  
AAGTAATTTTTAACTTGCTTCTAGTACTTGATGGAGGGAGGTGAACCAG

>M6-PGSC0003DMG400015706M6LRR-RLP\_832

TATCTTAAAGTAATTTTTAACTTGCTTCTAGTACTTGATGGAGGGAGGTGAACCAGAGAGTTTCCCAACT  
GCTCTAGACAATATCAGATCTCTCAATTTTTCATCCATGTCTTTAAGCAA

>M6-PGSC0003DMG400015706M6LRR-RLP\_896

CCAAGTCTAGACAATATCAGATCTCTCAATTTTTCATCCATGTCTTTAAGCAAAATCGAGGAGGTTC  
AGGTGTTGTTTACTTGATTACGAGTTGTCCTAAATTACAAGATCTTACA

>M6-PGSC0003DMG400015706M6LRR-RLP\_960

AGGTTCCAGGTGTTGTTTACTTGATTACGAGTTGTCCTAAATTACAAGATCTTACAATTGAATTTGTAAGC  
ACTCGTTTTTTTTTCATTAAGTTGATTGAATTAATATGATTTGTTCTTC

>M6-PGSC0003DMG400015707M6LRR-RLP\_0

TAGCTCCAATATTTTTCTAATATTAATACATGGATTCTATTTTTGTTGGACAAAATGTCCAGGAATCATC  
ACTTGCATTTCTTAAATGCTTTCGCCTCCCTTCTCACCTATTCAAATT

>M6-PGSC0003DMG400015707M6LRR-RLP\_1040

GAGATTGACCTATCTTTGTAGCAAAAACAATATCAATTATCTGAGATTCTATTTTCCTTTTAAATTTTCATT  
GTGTTTTTGATCTCCTCATAAAGGAAAATAATTTATTTTTTGGATGGA

>M6-PGSC0003DMG400015707M6LRR-RLP\_1105

TTTCATTGTGTTTTGATCTCCTCATAAAGGAAAATAATTTATTTTTTGGATGGATGTTCCCTCATAATTGAG  
TTTCTCAATGTAATAAAAAGGAACCTAATGGTTTTTGTATATAGTTGA

>M6-PGSC0003DMG400015707M6LRR-RLP\_1170

AATTGAGTTTCTCAATGTAATAAAAAGGAACCTAATGGTTTTTGTATATAGTTGAAATTATTAATTATAA  
GTCACGTAAGGGTATGCATACATACTTAAATATGTATTCATGTAGATTT

>M6-PGSC0003DMG400015707M6LRR-RLP\_1235

TTATAAGTCACGTAAGGGTATGCATACATACTTAAATATGTATTCATGTAGATTTGAATATTGTCTTTCTG  
TCGAAATTCTCCCAAGAATATTGAATACTTTGAAAGTTGTTAAGTGCAT

>M6-PGSC0003DMG400015707M6LRR-RLP\_130

AAGCACCTGGAACCTAATAGTTGTAATTTACCCTCCTCCCAACTTTAAAGGTTTTTGAAGTCTTGTTAC  
CCTTAACTTTTAAATTTGTAACCTTCAAGGCCATGCCATTTTAAAGTCCTC

>M6-PGSC0003DMG400015707M6LRR-RLP\_1300

TTTCTGTGCGAAATTCTCCCAAGAATATTGAATACTTTGAAAGTTGTTAAGTGCATTTGCTTTGTACTAATG  
GTTTCAGTTTCTTAATCTCAACTTTAAGAAGTTCTTGCAAACCTCTCGTCA

>M6-PGSC0003DMG400015707M6LRR-RLP\_1348

AGTGCATTTGCTTTGTACTAATGGTTCAGTTTCTTAATCTCAACTTTAAGAAGTTCTTGCAAACCTCTCGTCA  
GTACTGGACCACGAGGAGTACTAGGAGATATGGTATAGATACAATTAG

>M6-PGSC0003DMG400015707M6LRR-RLP\_195

TGTTACCTTAACCTTTAATTTGTAACCTTCAAGGCCATGCCATTTTAAGTCCTCCTTTAAAGTAGATCATT  
ACTTGAGCGTGTATCGACAGTTTAGTGCAATAAGCTTAATAGCTTCAT

>M6-PGSC0003DMG400015707M6LRR-RLP\_260

GATCATTACTTGAGCGTGTATCGACAGTTTAGTGCAATAAGCTTAATAGCTTCATTATTGATGCCCCTAAT  
CTAGAAATCTTTGAATTTAGCAATCGAGCAAATTCCTTTGCTTTAGAA

>M6-PGSC0003DMG400015707M6LRR-RLP\_325

CCTAATCTAGAAATCTTTGAATTTAGCAATCGAGCAAATTCCTTTGCTTTAGAAAAACCCTCTACTTGA  
GGAAATTTTATTCGGAATGCCTTTAACATGTTGGCGGTAATCACCATC

>M6-PGSC0003DMG400015707M6LRR-RLP\_390

ACTTGAGGAAATTTTATTCGGAATGCCTTTAACATGTTGGCGGTAATCACCATCATTGAGATATATGTTT  
GATGCACTACTGGATTTTGCTCGTAATTTAGATAATTTTGTGCGCAGTT

>M6-PGSC0003DMG400015707M6LRR-RLP\_455

ATGTTTGATGCACTACTGGATTTTGCTCGTAATTTAGATAATTTTGTGCGCAGTTTGTGTTTAGTCCTTTACA  
GTACCATAGCCTTAGTTGATACTAGACCACATCAAATTTTGAATTTT

>M6-PGSC0003DMG400015707M6LRR-RLP\_520

CTTTACAGTACCATAGCCTTAGTTGATACTAGACCACATCAAATTTTGAATTTCAAGAATTTTATCTTTTC  
TGAGGTTGAGTGGGTTGCATATGTGATTGACTTGATCAACCGCTACCC

>M6-PGSC0003DMG400015707M6LRR-RLP\_585

TCTTTTCTGAGGTTGAGTGGGTTGCATATGTGATTGACTTGATCAACCGCTACCCCAACATAGAAAGGCT  
TCTAATTACGGTACGTCTCATTTTTCATTTTTGATTGTAAATATGTTGA

>M6-PGSC0003DMG400015707M6LRR-RLP\_65

AATCATCACTTGCATTTCTTAAATGCTTTGCCTCCCTTCTCACCTATTCAAATTTTCAAGGATCTAAAGCACC

TGGAACCTAATAGTTGTAAATTTACCCCTCCTCCCAACTTTAAAGGTT

>M6-PGSC0003DMG400015707M6LRR-RLP\_650

AGGCTTCTAATTACGGTACGTCTCATTTTTTCATCTTTTGATTGTAAATATGTTGATTTTTAGCATCTTCTTG  
TAGTTAATCTTCTTCTCCCTTCTCAAGTCTTATGCCTTTGAACTGTG

>M6-PGSC0003DMG400015707M6LRR-RLP\_715

CTTCTTGTAGTTAATCTTCTTCTCCCTTCTCAAGTCTTATGCCTTTGAACTGTGTGCGTGTTTCGTGTACAC  
ATCCCTTGCAATCCCAGGAAATGACAATGACACATATTGCAATGAAGT

>M6-PGSC0003DMG400015707M6LRR-RLP\_780

TGTACACATCCCTTGCAATCCCAGGAAATGACAATGACACATATTGCAATGAAGTGGCTCAAAGCGTG  
GATATGACCCTCATGTGGGTTAATAAAACTGAAATGGAATTCTTGAAGCAT

>M6-PGSC0003DMG400015707M6LRR-RLP\_845

CGTGGATATGACCCTCATGTGGGTTAATAAAACTGAAATGGAATTCTTGAAGCATGTATTGGAATTTGCA  
ATTGCACTTGAGAAAATATACATTGCAACTTCTGCAGAAATCCATAATAG

>M6-PGSC0003DMG400015707M6LRR-RLP\_910

TTGCAATTGCACTTGAGAAAATATACATTGCAACTTCTGCAGAAATCCATAATAGGGGAATGAAAAATG  
ATGGAGAAGATGAAGCGGTTCCCTCGAGCATCACCTAATATAGAATTTATA

>M6-PGSC0003DMG400015707M6LRR-RLP\_975

AATGATGGAGAAGATGAAGCGGTTCCCTCGAGCATCACCTAATATAGAATTTATATATCATTTCAGGAGA  
TTGACCTATCTTTGTAGCAAAAACAATATCAATTATCTGAGATTCTTATTT

>M6-PGSC0003DMG400015814-(rev)M6LRR-RLK\_0

ACCCCATGTAAATGGTCTTTCATAAAATGCAACTTTCAAGGTTTTATTACAGAAATCAATATTCAGTCTAT  
TCATCTTGAACCTCCTTTGCCTACAAATCTTCTTCATATAAGTACCTG

>M6-PGSC0003DMG400015814-(rev)M6LRR-RLK\_1054

ACCTTCAGGCATTGGACTTGTCACATAACTCGCTTACTGGTAGCATTCCCTCCAGGCTTGTTTCAGTTGAAA  
AACCTGACTAAGCTACTGTTGATTCTAACGATATTTCTGGGTACTATAC

>M6-PGSC0003DMG400015814-(rev)M6LRR-RLK\_1116

CAGTTGAAAAACCTGACTAAGCTACTGTTGATTCTAACGATATTTCTGGGTACTATACCTCGAGAAATTG  
GATATTGTAGCTCATTAGTGAGGTTAAGACTTGGAACAACCGGATTGCT

>M6-PGSC0003DMG400015814-(rev)M6LRR-RLK\_1178

AGAAATTGGATATTGTAGCTCATTAGTGAGGTTAAGACTTGGAACAACCGGATTGCTGGTGGGAATTCC  
TAAAGAAATTGGAGGTCTTAAGAGCTTAAACTTTCTTGATTTGTCCGAAA

>M6-PGSC0003DMG400015814-(rev)M6LRR-RLK\_124

AGCTTGTTATTTCTGATGCTAACATCACTGGTGCAATACCCTTTAACATTGGTGACTGTTTCGTCCTTGT  
ACTATTGATTTGAGCTCAAATGGTCTTGTGGGTACCATTCTTTAAGCA

>M6-PGSC0003DMG400015814-(rev)M6LRR-RLK\_1240

GAATTCCTAAAGAAATTGGAGGTCTTAAGAGCTTAAACTTTCTTGATTTGTCCGAAATCGCCTTTCTGG  
ACCAGTTCCTGATGAAATAAGTAGCTGTACTGAGCTACAAATGGTAGACC

>M6-PGSC0003DMG400015814-(rev)M6LRR-RLK\_1302

CTTTCTGGACCAGTTCCTGATGAAATAAGTAGCTGTACTGAGCTACAAATGGTAGACCTCAGCAGCAATA  
CACTGGAAGGTCCCCTGCCTAACACTCTGTCTTCACTATCAGGGATTCAA

>M6-PGSC0003DMG400015814-(rev)M6LRR-RLK\_1364

CAGCAATACTGGAAGGTCCCCTGCCTAACACTCTGTCTTCACTATCAGGGATTCAAGTCTTGGACGTT  
TCGAATAACCGGTTTGGAGGGCCTATACCGGCTAGTTTTGGGCGTCTTGT

>M6-PGSC0003DMG400015814-(rev)M6LRR-RLK\_1426

TGGACGTTTTGAATAACCGGTTTGGAGGGCCTATACCGGCTAGTTTTGGGCGTCTTGTGTCATTGAACA  
AGCTGATTCTCAGTAAGAACTCGTTCTCAGGGTCTATACCTCCATCTATTG

>M6-PGSC0003DMG400015814-(rev)M6LRR-RLK\_1488

TTGAACAAGCTGATTCTCAGTAAGAACTCGTTCTCAGGGTCTATACCTCCATCTATTGGCCTGTGTTTCGAG  
TCTTCAATTGCTAGATCTTAGCAGCAATGAGCTCTCGGGAGGCATACCG

>M6-PGSC0003DMG400015814-(rev)M6LRR-RLK\_1550

GTGTTGAGTCTTCAATTGCTAGATCTTAGCAGCAATGAGCTCTCGGGAGGCATACCGATGCAGTTAGG  
AAAGATTGAGTCCCTTGAATCACTCTCAACCTTAGTTTCAATGAACTAAC

>M6-PGSC0003DMG400015814-(rev)M6LRR-RLK\_1612

AGTTAGGAAAGATTGAGTCCCTTGAATCACTCTCAACCTTAGTTTCAATGAACTAACAGGTCCAATTCC  
TGCTGAAATTTCTTCACTAAGCAAGCTGTCGATACTTGACCTTTTCGCACA

>M6-PGSC0003DMG400015814-(rev)M6LRR-RLK\_1674

CCAATTCCTGCTGAAATTTCTTCACTAAGCAAGCTGTCGATACTTGACCTTTTCGCACAACAAGCTTGAAG  
GGAACCTGAATCCACTAGCGAGGCTCGATAATCTTGTCTCACTGAATGTC

>M6-PGSC0003DMG400015814-(rev)M6LRR-RLK\_1736

GCTTGAAGGGAACCTGAATCCACTAGCGAGGCTCGATAATCTTGTCTCACTGAATGTCTCATAACAAC  
TTCCTGTTATCTTCCGGACAATAAGCTCTTTCGACAGTTGCCATCATC

>M6-PGSC0003DMG400015814-(rev)M6LRR-RLK\_1798

ACAACAACCTTCACTGGTTATCTTCCGGACAATAAGCTCTTTCGACAGTTGCCATCATCAGACCTAGATGG  
AAATGAAGGTCTATGTTCAATTCGGAAGGCCTTCGTGTTTTCTCAGCAATA

>M6-PGSC0003DMG400015814-(rev)M6LRR-RLK\_186

TCACTTGTACTATTGATTTGAGCTCAAATGGTCTTGTGGGTACCATTCCTTAAGCATTGGAACCCCTTGT  
AAACCTTCAAGATTTGATTTGAACTCAAATCAGCTTACTGGGAGAATC

>M6-PGSC0003DMG400015814-(rev)M6LRR-RLK\_1860

CTAGATGGAAATGAAGGTCTATGTTCAATTCGGAAGGCCTTCGTGTTTTCTCAGCAATATTGATGGAGTAG  
GAGTAGCTAAAAATGGAAATGATGAGGGAAGGTCAAAGAAGCTCAAATTA

>M6-PGSC0003DMG400015814-(rev)M6LRR-RLK\_1922

TGGAGTAGGAGTAGCTAAAAATGGAAATGATGAGGGAAGGTCAAAGAAGCTCAAATTAGCCATTGCAT  
TGCTAGTCATCATGACAATAGCAATGGTGATCATGGGAACTATTGCTATCAT

>M6-PGSC0003DMG400015814-(rev)M6LRR-RLK\_1984

TTGCATTGCTAGTCATCATGACAATAGCAATGGTGATCATGGGAACTATTGCTATCATACGCGCACGAAG  
GGCGATGAGAAGGGATGATGATTCAGAGATGGGAGATTCTTGGGCTTGGC

>M6-PGSC0003DMG400015814-(rev)M6LRR-RLK\_2046

GCACGAAGGGCGATGAGAAGGGATGATGATTCAGAGATGGGAGATTCTTGGGCTTGGCAGTTTACTCC  
ATTCCAGAAGCTCAATTTTTCAGTGGACGAAATACTCAGATGCCTTGTGGAT

>M6-PGSC0003DMG400015814-(rev)M6LRR-RLK\_2108

TACTCCATTCCAGAAGCTCAATTTTTCAGTGGACGAAATACTCAGATGCCTTGTGGATACTAATGTCATTG  
GAAAAGGGTGCTCGGGGATGGTCTATCGTGCAGTTATGAACAATGGGGA

>M6-PGSC0003DMG400015814-(rev)M6LRR-RLK\_2170

ATGTCATTGGAAAAGGGTGCTCGGGGATGGTCTATCGTGCAGTTATGAACAATGGGGATGTCATAGCA  
GTGAAGAAGCTTTGGCCAATAACCATGACTACAATAATGGAGGCAATGATG

>M6-PGSC0003DMG400015814-(rev)M6LRR-RLK\_2232

ATAGCAGTGAAGAAGCTTTGGCCAATAACCATGACTACAATAATGGAGGCAATGATGAGAAATGTGG

GGTACGTGATTCGTTCTCTGCAGAAGTTAAGACGCTTGGTTCAATTCGACAC

>M6-PGSC0003DMG400015814-(rev)M6LRR-RLK\_2356

ACATTGTCCGATTCTTAGGGTGTGTTGTTGGAACAGAAGCACAAGATTGCTCATGTATGATTACATGCCTAA

TGGGAGCTTAGGAAGTCTTCTTCATGAGAGGGGTGGTAACCCTTTGGAAT

>M6-PGSC0003DMG400015814-(rev)M6LRR-RLK\_2418

ATGCCTAATGGGAGCTTAGGAAGTCTTCTTCATGAGAGGGGTGGTAACCCTTTGGAATGGGAATTGAGA

TACCAAATATTGCTCGGGGCAGCGCAAGGGCTCGCCTACTTGCACCATGAC

>M6-PGSC0003DMG400015814-(rev)M6LRR-RLK\_248

AACCCTTGTAACCTTCAAGATTTGATTTTGAACCTCAAATCAGCTTACTGGGAGAATCCCAGTTGAGATT

GGGAACTGTAGAACTTGAAAAATCTTGTTCTTTTTGATAACAGGCTTAG

>M6-PGSC0003DMG400015814-(rev)M6LRR-RLK\_2480

ATTGAGATACCAAATATTGCTCGGGGCAGCGCAAGGGCTCGCCTACTTGCACCATGACTGTGCTCCTCCA

ATTGTTACAGAGACATCAAGGCCAACAAACATTCTCATTGGTCTTGAGTT

>M6-PGSC0003DMG400015814-(rev)M6LRR-RLK\_2542

CTCCTCCAATTGTTACAGAGACATCAAGGCCAACAAACATTCTCATTGGTCTTGAGTTTGAGCCTTACATT

GCAGACTTTGGCCTCGCAAACTAGTCGATGATGGTGATTTTGGTCGTT

>M6-PGSC0003DMG400015814-(rev)M6LRR-RLK\_2586

ATTGGTCTTGAGTTTGAGCCTTACATTGCAGACTTTGGCCTCGCAAACTAGTCGATGATGGTGATTTTG

GTCGTTCTCCAATACAGTTGCTGGTCTTATGGCTACATTGCTCCAGGT

>M6-PGSC0003DMG400015814-(rev)M6LRR-RLK\_310

TTGAGATTGGGAACTGTAGAACTTGAAAAATCTTGTTCTTTTTGATAACAGGCTTAGTGGTGGTTTACC

AAGTGAATAGGGTTGTTGTCAAATCTTGAAGTGTTAAGAGCTGGTGGGA

>M6-PGSC0003DMG400015814-(rev)M6LRR-RLK\_372

GGTTTACCAAGTGAAATAGGGTTGTTGTCAAATCTTGAAGTGTTAAGAGCTGGTGGGAATAAAGATGTT

ACTGGTAAAATCCCAAATGAGTTTGGGGATTGTGGGAATTTGACTGTTTTA

>M6-PGSC0003DMG400015814-(rev)M6LRR-RLK\_434

AGATGTTACTGGTAAAATCCCAAATGAGTTTGGGGATTGTGGGAATTTGACTGTTTTAGGCTTAGCTGAT

ACCAGAATATCTGGTCTTTGCCTGTTTCTTTGGGTAAGCTTAAGAATCT

>M6-PGSC0003DMG400015814-(rev)M6LRR-RLK\_496

TAGCTGATACCAGAATATCTGGTTCTTTGCCTGTTTCTTTGGGTAAGCTTAAGAATCTTGAAACTTTGTCT  
ATTTATACTACAATGTTGTCTGGTGAGATACCTTCTGATTTAGGTAAC

>M6-PGSC0003DMG400015814-(rev)M6LRR-RLK\_558

ACTTTGTCTATTTATACTACAATGTTGTCTGGTGAGATACCTTCTGATTTAGGTAACGTACTGAGCTTGT  
GAACTTGTATTTGTATGAAAATAGTCTTTCTGGTTCAATCCCATCTGAG

>M6-PGSC0003DMG400015814-(rev)M6LRR-RLK\_62

TCAGTCTATTCATCTTGAACCTCCTTTGCCTACAAATCTTTCTTCATATAAGTACCTGAAGAAGCTTGTTAT  
TTCTGATGCTAACATCACTGGTGCAATACCCTTTAACATTGGTGACTG

>M6-PGSC0003DMG400015814-(rev)M6LRR-RLK\_620

TGAGCTTGTGAACTTGTATTTGTATGAAAATAGTCTTTCTGGTTCAATCCCATCTGAGCTAGGGAACCTTA  
GAAAGTTAGAAAAGTTGCTTCTTTGGCAGAATAATCTTGTTGGTGTTAT

>M6-PGSC0003DMG400015814-(rev)M6LRR-RLK\_682

GGAACCTTAGAAAAGTTAGAAAAGTTGCTTCTTTGGCAGAATAATCTTGTTGGTGTTATTCCAGAAGAGAT  
TGGAATTGTAAGCTGACTATGATTGATTTGTCTTTGAACTATTTGT

>M6-PGSC0003DMG400015814-(rev)M6LRR-RLK\_744

GAAGAGATTGGGAATTGTAAGCTGACTATGATTGATTTGTCTTTGAACTATTTGTCTGGGAGTATAC  
CATTATCTTTTGGTGGTCTTGTGTTACAAGAAGTTATGCTTAGTAAC

>M6-PGSC0003DMG400015814-(rev)M6LRR-RLK\_806

GAGTATACCATTATCTTTTGGTGGTCTTGTGTTGTACAAGAAGTTATGCTTAGTAACAACAATGTTTCTG  
GTTCAATCCCTTCTGTTCTTTACAATGTACAAGTCTTGTGCAGTTGCA

>M6-PGSC0003DMG400015814-(rev)M6LRR-RLK\_868

ATGTTTCTGGTTCAATCCCTTCTGTTCTTTACAATGTACAAGTCTTGTGCAGTTGCAGTTTGACACAAAT  
CAGATATCAGGTTTGATTCTTCTGAGTTGGGAATTTGACAAGTCTTG

>M6-PGSC0003DMG400015814-(rev)M6LRR-RLK\_930

GACACAAATCAGATATCAGGTTTGATTCTTCTGAGTTGGGAATTTGACAAGTCTTGTGTTGTTTTTGC  
TTGGGATAATCAACTGAAGGAAGTGTGCCTTCAACTTTGGGTAGTTGT

>M6-PGSC0003DMG400015814-(rev)M6LRR-RLK\_992

GTTTTTGTCTGGGATAATCAACTGAAGGAAGTGTGCCTTCAACTTTGGGTAGTTGTAGTAACCTTCAG  
GCATTGGACTTGTACATAACTCGCTTACTGGTAGCATTCTCCAGGCTT

>M6-PGSC0003DMG400015824-(rev)M6LRR-RLP\_0

ATGGACTATGCAATTGTGCTCTTACTTGTTTTCTCTATCATGAAGTATTTACCGTTTCATCATCCAAATTA  
CCTCATCTCTCTCACAAACATCAAATCGGTTCACTTCTAAAATTCAAG

>M6-PGSC0003DMG400015824-(rev)M6LRR-RLP\_1054

TGATTGATTTAAGCAATAATCAGTTGCAAGGCCATCTTCCCAACTCAATTCAAATCTTGTGAACCTAACA  
GATCTTGATCTTTCTTTCAATAATTTCCATGTGGATGTCAGCCTCTTTT

>M6-PGSC0003DMG400015824-(rev)M6LRR-RLP\_1116

AACCTAACAGATCTTGATCTTTCTTTCAATAATTTCCATGTGGATGTCAGCCTCTTTTCAGACCTCAAACAA  
CTTTCTGATCTTAGTCTTTTCATACAATACTGTTGATGAAAAGGAAGTT

>M6-PGSC0003DMG400015824-(rev)M6LRR-RLP\_1178

CCTCAAACAACCTTTCTGATCTTAGTCTTTTCATACAATACTGTTGATGAAAAGGAAGTTAATTCTACTTTGC  
CTGAGTCACTTGAGTACTTACTATTGGCCGCATGTGAAGTGAAAGAATT

>M6-PGSC0003DMG400015824-(rev)M6LRR-RLP\_124

CACTTACTGTAGATACCTCAGCCTCTTATCTTTGTCAAGAGCCTTATCCAAAAATGAGTTCATGGAACATG  
AGCAGAGATTGTTGCTCATGGGATGGTGTGCATATGCGATGAGATGACTG

>M6-PGSC0003DMG400015824-(rev)M6LRR-RLP\_1240

CTACTTTGCCTGAGTCACTTGAGTACTTACTATTGGCCGCATGTGAAGTGAAAGAATTGGAGTTTCTAAG  
ATTTGCAAAACAGCTTTCCAACCTGGATCTTTCAAATAATAAGCTTCAAG

>M6-PGSC0003DMG400015824-(rev)M6LRR-RLP\_1302

TTTCTAAGATTTGCAAAACAGCTTTCCAACCTGGATCTTTCAAATAATAAGCTTCAAGGAAGAATTCCTGA  
TTGGGCATGGTCTAACTGGATGTCGTTGATAACTCTTAATATATCCCAC

>M6-PGSC0003DMG400015824-(rev)M6LRR-RLP\_1364

AATTCCTGATTGGGCATGGTCTAACTGGATGTCGTTGATAACTCTTAATATATCCCACAATATGCTGACG  
AGTGTGGATACAACTCCTCTTCAGATTGTATATACTATTGATTTACGGTC

>M6-PGSC0003DMG400015824-(rev)M6LRR-RLP\_1426

TGCTGACGAGTGTGGATACAACTCCTCTTCAGATTGTATATACTATTGATTTACGGTCCAATTTGCTTCAA  
GGTTCACTACCTATTCCACCAAATTCACAACATTCTTCTTCATATCCT

>M6-PGSC0003DMG400015824-(rev)M6LRR-RLP\_1488

TTGCTTCAAGGTTCACTACCTATTCCACCAAATTCACAACATTCTTCTTCATATCCTATAATTATCTCAGT



GAAGAAATTCCTTCAGATATTTGCAATTTAACATCACTTGTAATACTA

>M6-PGSC0003DMG400015824-(rev)M6LRR-RLP\_1612

TGGCAAGAAACAATTTACGTGGAGAAATTCGCCATGTTTGGGAAAAATCACTGCCCTCCAAGTTTTGG  
AAATGCGCCACAACAATCTTTCTGGGAACATTCCAACGACTTTCAGCAATG

>M6-PGSC0003DMG400015824-(rev)M6LRR-RLP\_1674

GTTTTGGAAATGCGCCACAACAATCTTTCTGGGAACATTCCAACGACTTTCAGCAATGGAAGTTCACTGA  
GCAGCCTTAACCTGCATGGAAATAAACTAGAAGGGAAAATTCCCCAATCT

>M6-PGSC0003DMG400015824-(rev)M6LRR-RLP\_1736

TTCCTGAGCAGCCTTAACCTGCATGGAAATAAACTAGAAGGGAAAATTCCCCAATCTTTGGCCAATTGC  
AAAACTTGCAGCTTCTTGATTTAGGCAATAATAACCTCAACGGCACATT

>M6-PGSC0003DMG400015824-(rev)M6LRR-RLP\_186

TGGAACATGAGCAGAGATTGTTGCTCATGGGATGGTGTGCATATGCGATGAGATGACTGACCATGTAATT  
GAACTGGACCTCAGCTGCAGCAATCTTGCTGGGACCATCGATTCCAATAGC

>M6-PGSC0003DMG400015824-(rev)M6LRR-RLP\_1860

GTGTGGTTGGGAGCTCTGCCAGATCTGCTAGTTTTAAGCTTGAGATCAAATAAATTGCATGAACCCATCA  
GAACATCAAGCATTGAGAACATGTTTCCTGAGCTCCGAATCATAGATCTC

>M6-PGSC0003DMG400015824-(rev)M6LRR-RLP\_1984

ATAATGCCTTTTCGGGAACTTACCTTCGAGTTTGTTC AACATCTGAAAGCCATGAGGACAATTGATCC  
ATCAATGGGAACACCAAGATATCATGGAGATACATATTATGAAGATTCTA

>M6-PGSC0003DMG400015824-(rev)M6LRR-RLP\_2046

ATTGATCCATCAATGGGAACACCAAGATATCATGGAGATACATATTATGAAGATTCTATTACAGTTGCAA  
CCAAGGGATTTTATCGTGAAATTGTGAGAATCTTGTATTTGTACACAGTT

>M6-PGSC0003DMG400015824-(rev)M6LRR-RLP\_2170

ATCTTTCAAGTAATAAATTTAGGGGGCAAATTC AAGTATCATGGGGGATCTCATTGCAGTTCACATAAT  
GAATTTATCTCATAATGGATTGCAAGGTTATATACCGTCATCATTGGGAG

>M6-PGSC0003DMG400015824-(rev)M6LRR-RLP\_248

TGTAATTGAACTGGACCTCAGCTGCAGCAATCTTGCTGGGACCATCGATTCCAATAGCAGCCTCTTCCAA  
CTCACTCATCTCCAAAGGCTTGATTTTTCTCTGAATAACTTCTCCAATTC

>M6-PGSC0003DMG400015824-(rev)M6LRR-RLP\_2480

TGGATTCCTATTTCAAAAAGTTGTGGCGATGCTCGGGTATTAGATACAAATGATACCGTATCTGGACTA  
GATGATGAAGAAAACAATTCTGACTTTTCAGAGTGATTTTTGGAAAGGTGC

>M6-PGSC0003DMG400015824-(rev)M6LRR-RLP\_310

TCTTCCAACCTCACTCATCTCCAAAGGCTTGATTTTTCTCTGAATAACTTCTCCAATTCTCACATCTCCCCTGA  
ATTTGGCAAGTTTTCGAGCTTGACGCATCTTGATCTTTCTGACTCCA

>M6-PGSC0003DMG400015824-(rev)M6LRR-RLP\_372

ATCTCCCCTGAATTTGGCAAGTTTTCGAGCTTGACGCATCTTGATCTTTCTGACTCCAATTTCTCTGGTCAA  
ATTCCTTCTGAAATCTCTCATCTTTCCAAGTTGCAGTCTCTTCGTCTC

>M6-PGSC0003DMG400015824-(rev)M6LRR-RLP\_434

CTCTGGTCAAATTCCTTCTGAAATCTCTCATCTTTCCAAGTTGCAGTCTCTTCGTCTCTATGGTCGTCTACG  
ACTCATAGCTCACGATTTTAAATTGCTCCTTCAGAACTTGACTCAATT

>M6-PGSC0003DMG400015824-(rev)M6LRR-RLP\_558

GAGCTAGATCTTACTTCATAAACATCTCTTCCACCATTCTCTGAATTTTTCTTCTCATTTAACAACTCTTA  
GGCTGGGAGATACAACATTGTATAGGATAATACCTGAGACTATATTT

>M6-PGSC0003DMG400015824-(rev)M6LRR-RLP\_62

ATCCAAATTACCTCATCTCTCTCACAAACATCAAATCGGTTCACTTCTAAAATTCAAGAACACACTTACTGT  
AGATACCTCAGCCTTATCTTTGTCAAGAGCCTTATCCAAAAATGAG

>M6-PGSC0003DMG400015824-(rev)M6LRR-RLP\_620

AACAACTCTTAGGCTGGGAGATACAACATTGTATAGGATAATACCTGAGACTATATTTACCTGCCAAAC  
TGAAACACTTCACTTATGGGAAAATTTCAACTCAGTGGTTATTTTCCAA

>M6-PGSC0003DMG400015824-(rev)M6LRR-RLP\_682

TGCCAAACTGAAACACTTCACTTATGGGAAAATTTCAACTCAGTGGTTATTTTCCAAAGACCAAATAGA  
ACAGCAGCACATCTCTCCAGAAGTTACAACCTCAGTTTTGTGAATTTTCCT

>M6-PGSC0003DMG400015824-(rev)M6LRR-RLP\_744

CAAATAGAACAGCAGCACATCTCTCCAGAAGTTACAACCTCAGTTTTGTGAATTTTCTCATAATTTGCCCG  
AGTCTATTGGCTATCTAACTTCACTGCGTTATTTGTACTTCAAATTC

>M6-PGSC0003DMG400015824-(rev)M6LRR-RLP\_868

TTAGAGGGCCTATTCCTGAATCTTTTGAAGCTCACTCGCATAGAGGATTTGTACCTTCAATATAACTCC  
CTGAATGGAACAATACCATCAGGGATTTTCTCCCTTCATCACTAAGTC

>M6-PGSC0003DMG400015824-(rev)M6LRR-RLP\_930

TATAACTCCCTGAATGGAACAATACCATCAGGGATTTTCTCCCTTCCATCACTAAGTCGTTTAGTCTTGAG  
CAATAACCACTTTTCTGGTCAGTTTGAGGATTTCAATTCCAATTCACTA

>M6-PGSC0003DMG400015824-(rev)M6LRR-RLP\_992

AGTCTTGAGCAATAACCACTTTTCTGGTCAGTTTGAGGATTTCAATTCCAATTCACTAATCTTGATTGATT  
AAGCAATAATCAGTTGCAAGGCCATCTTCCCAACTCAATTCAAAATCT

>M6-PGSC0003DMG400015853-(rev)M6LRR-RLP\_0

TATAGAAGGTGAGGGATCTCTTTAAGGTCCCTTGTTGGTAGGGAAGCCACAGATGTTAGACTTGCTGC  
TATTGCTGTTGGAATCGCAAATCGTGGAGGTTTAGCAAAGCTATCTATTCG

>M6-PGSC0003DMG400015853-(rev)M6LRR-RLP\_1054

CACAACTAACTCATATAGAGCTGAGTGGGCTTCTTTGTATAACTGACGAGGGGCTCTCCCTCTAGTTA  
ATAACTGTGCAGCTAATTTGGTGGCGGTGAATCTAAGCGGGTGTGTCAAT

>M6-PGSC0003DMG400015853-(rev)M6LRR-RLP\_1116

TCTAGTTAATAACTGTGCAGCTAATTTGGTGGCGGTGAATCTAAGCGGGTGTGTCAATATTACAGACAA  
AGCAGTTTCAGCCATAGTTAAATTCAATGGGAGATCTCTGAAGTCTCTACT

>M6-PGSC0003DMG400015853-(rev)M6LRR-RLP\_1178

CAGACAAAGCAGTTTCAGCCATAGTTAAATTCAATGGGAGATCTCTGAAGTCTCTACTCGTAGATGGTTG  
CAGACATGATACTGATGCAACATTAGTAAAAATTTGGA ACTCTTGCTGGA

>M6-PGSC0003DMG400015853-(rev)M6LRR-RLP\_124

GACAATCCGTGTCGTGATGTGACAGATGCTGGTCTCAAGGCTATCGCTCGATGTTGCCCTACTCTGAGA  
GATCTTTCCTTGTTGGAATGTGTCTTTTGTGGTATGAAGGCTTATCTAAG

>M6-PGSC0003DMG400015853-(rev)M6LRR-RLP\_1240

GATGGTTGCAGACATGATACTGATGCAACATTAGTAAAAATTTGGA ACTCTTGCTGGATGCTTAATGTAC  
TCGATGTTTCCAAGTGTGGAATCACCGATTAGAGATTACA ACTTTGTCC

>M6-PGSC0003DMG400015853-(rev)M6LRR-RLP\_1302

TAATGTA CTGATGTTTCCAAGTGTGGAATCACCGATTAGAGATTACA ACTTTGTCCAGTGCTATACAA  
CTTCATTTGCAGATCCTCTCACTGTCTGGTTGCCCTTTGGTGT CAGACAA

>M6-PGSC0003DMG400015853-(rev)M6LRR-RLP\_1362

TGCTATACTTCAATTTGCAGATCCTCTCACTGTCTGGTTGCCCTTTGGTGT CAGACAATAGCTTACCCC

TCTTGCTCGATTTGGTTCAGAACCTTCAGGGCTTGAACATACAGCAATG

>M6-PGSC0003DMG400015853-(rev)M6LRR-RLP\_186

TCTGAGAGATCTTTCCTTGTGGAATGTGTCTTTTGTGGTGATGAAGGCTTATCTAAGATTGCTCATGAAT

GCCATCTATTATAGAAGCTTGATATTTTCCAATGTCCAACAATTACCGA

>M6-PGSC0003DMG400015853-(rev)M6LRR-RLP\_248

CTCATGAATGCCATCTATTATAGAAGCTTGATATTTTCCAATGTCCAACAATTACCGACAATTCTTTGTTG

GCCGTTGCAAAGAAATGTAATCACCTGACCTCCTTGATCATAGATTCTT

>M6-PGSC0003DMG400015853-(rev)M6LRR-RLP\_310

TCTTTGTTGGCCGTTGCAAAGAAATGTAATCACCTGACCTCCTTGATCATAGATTCTTGTTCAAAGATTGG

GAATAAGTCTCCCAAAGTTGTGGGTCAATACTGTCTGAACCTGAAGCTC

>M6-PGSC0003DMG400015853-(rev)M6LRR-RLP\_372

AAAGATTGGAATAAGTCTCCCAAAGTTGTGGGTCAATACTGTCTGAACCTGAAGCTCGTCATACTAAA

AAATTGTCCACTCATTGGGGATAAAGGAATTGAAGATCTCTTTTATTCAGC

>M6-PGSC0003DMG400015853-(rev)M6LRR-RLP\_434

TACTAAAAAATTGTCCACTCATTGGGGATAAAGGAATTGAAGATCTCTTTTATTCAGCCGGTACTGTTTTA

ACAGAAGTAGAGCTCCAGGCACTACACATTAGCGACATTTCTCTAAAAA

>M6-PGSC0003DMG400015853-(rev)M6LRR-RLP\_496

ACTGTTTTAACAGAAGTAGAGCTCCAGGCACTACACATTAGCGACATTTCTCTAAAAAATTATTTACATTA

TGGAAGTGTACTGACAAGTCTAGTTGTTGGTGAACCTCGAAGAATAATA

>M6-PGSC0003DMG400015853-(rev)M6LRR-RLP\_558

TTCACATTATGGAAGTGTACTGACAAGTCTAGTTGTTGGTGAACCTCGAAGAATAATAGCGAGGGATTTT

TGGGTCATGGGCATTGGTCAATGTCTGCATAAGCTGAAGGCCCTTTCAAT

>M6-PGSC0003DMG400015853-(rev)M6LRR-RLP\_62

TTGCTGCTATTGCTGTTGGAATCGCAAATCGTGGAGGTTTAGCAAAGCTATCTATTCGGGGAGACAATCC

GTGTCGTGATGTGACAGATGCTGGTCTCAAGGCTATCGCTCGATGTTGCC

>M6-PGSC0003DMG400015853-(rev)M6LRR-RLP\_620

GGGATTTTTGGGTCATGGGCATTGGTCAATGTCTGCATAAGCTGAAGGCCCTTTCAATAAGCTCTTCCAA

TGGAGTCAATGATTTGGGTCTTCACGTTATCTGTAAAGCTTGCCCAAATT

>M6-PGSC0003DMG400015853-(rev)M6LRR-RLP\_682

TCTTCCAATGGAGTCAATGATTTGGGTCTTCACGTTATCTGTAAAGCTTGCCCAAATTTAAAGTTGTTTTG  
TGTCCGAAAAAGTGTATCCTATCAGATAATGGATTGGTTGCTTGTGTC

>M6-PGSC0003DMG400015853-(rev)M6LRR-RLP\_744

GTTGTTTTGTGTCCGAAAAAGTGTATCCTATCAGATAATGGATTGGTTGCTTGTGTCAAAGCTTCAGTC  
TCACTTCAGAACCTTCAGTTAGAGGAATGCCACTTGATTACCCAGGCTGG

>M6-PGSC0003DMG400015853-(rev)M6LRR-RLP\_806

CTTCAGTCTCACTTCAGAACCTTCAGTTAGAGGAATGCCACTTGATTACCCAGGCTGGATTTTTTGGTATA  
CTTCTGAACTGTGGTAAGAACTGAAGACTCTTCCTTGGTGAAGTGCT

>M6-PGSC0003DMG400015853-(rev)M6LRR-RLP\_868

TTTGGTATACTTCTGAACTGTGGTAAGAACTGAAGACTCTTCCTTGGTGAAGTGCTTGGGTGTGATGG  
ACTTAATTAATGTAGCTCCTTCGAAGGCTCTTTGTTGTAACACTGCGTA

>M6-PGSC0003DMG400015853-(rev)M6LRR-RLP\_930

TGTGATGGACTTAATTAATGTAGCTCCTTCGAAGGCTCTTTGTTGTAACACTGCTGGTATCATTGACTATTC  
ACAAATGTCTTGGAGTAGGCAATGCTACCATTGTTGTAGTAGGTAGTCT

>M6-PGSC0003DMG400015853-(rev)M6LRR-RLP\_992

TGACTATTCACAAATGTCTTGGAGTAGGCAATGCTACCATTGTTGTAGTAGGTAGTCTATGTCACAACT  
AACTCATATAGAGCTGAGTGGGCTTCTTTGTATAACTGACGAGGGGCTCT

>M6-PGSC0003DMG400015878-(rev)M6LRR-RLP\_0

TGAATCAATCTCAGAGCTTCTGAATTTGCAAACCTAATTTGTGATGCTTATCCATTTGATATAACTTTACC  
TCGGAAGATATGGATGATGAAGAACTTGAGGTATATACGTTTAAGGGA

>M6-PGSC0003DMG400015878-(rev)M6LRR-RLP\_130

TTACCAAGTCCTAGAATAGATAAGAATCTTGTGACAGGGATGCCAAATTTAGAGGAATTTTTTGGTCTTG  
GTTACTCTAGTTGTACAAATGAAGTCTTTTCTAGCATCCCCAATTTAAAG

>M6-PGSC0003DMG400015878-(rev)M6LRR-RLP\_195

TCTTGGTACTCTAGTTGTACAAATGAAGTCTTTTCTAGCATCCCCAATTTAAAGAGATTGACCATTACAG  
GACATTTAAGAGTAGCAGACAATATTCCATATCTTCTCTTGGATATGTC

>M6-PGSC0003DMG400015878-(rev)M6LRR-RLP\_260

TTCACGGACATTTAAGAGTAGCAGACAATATTCCATATCTTCTCTTGGATATGTCGAGCTTGACAAACTT  
GAGGCATTCAAGCTTCTCTGGAGATATATTGTTGTAAAGCCCATCAAGA

>M6-PGSC0003DMG400015878-(rev)M6LRR-RLP\_325

AAACTTGAGGCATTCAAGCTTCTGGAGATATATTGTTGTAAAGCCCATCAAGATATTTGGTTTTCCAA  
AATCACTTAGAAGAGTGTCTTTAACTAGGTGTTATAAGTTTATTTGGGAA

>M6-PGSC0003DMG400015878-(rev)M6LRR-RLP\_390

TCCAAAATCACTTAGAAGAGTGTCTTTAACTAGGTGTTATAAGTTTATTTGGGAAGAGATATCATCAACT  
TTTATCAAGTTGCCACATCTTGAAGAGCTCAAACCTAAACGTTGTGGAGC

>M6-PGSC0003DMG400015878-(rev)M6LRR-RLP\_455

CAACTTTTATCAAGTTGCCACATCTTGAAGAGCTCAAACCTAAACGTTGTGGAGCCGAAGATGATGTATG  
GAGATTGAGTGACAAAGACATATTCAGAAGCTTGAAGTTGTTGTTACTGA

>M6-PGSC0003DMG400015878-(rev)M6LRR-RLP\_520

GTATGGAGATTGAGTGACAAAGACATATTCAGAAGCTTGAAGTTGTTGTTACTGAGTGAGCTAAATCTT  
AAGGGTTGGGTAGCAAGCAGCGATAACTTCCCAAATCTAAAACGTCTTGTT

>M6-PGSC0003DMG400015878-(rev)M6LRR-RLP\_585

TCTTAAGGGTTGGGTAGCAAGCAGCGATAACTTCCCAAATCTAAAACGTCTTGTTCTGAAGAGTTGCAA  
GGACCTGCAAGAAATTCCAACGGATTTCTGGAAATTTGTACTTTGGAATC

>M6-PGSC0003DMG400015878-(rev)M6LRR-RLP\_65

CTTTACCTCGGAAGATATGGATGATGAAGAACTTGAGGTATATACGTTTAAGGGAAGCCAGTTATTTAC  
CAAGTCCTAGAATAGATAAGAATCTTGTGACAGGGATGCCAAATTTAGAGG

>M6-PGSC0003DMG400015878-(rev)M6LRR-RLP\_650

GCAAGGACCTGCAAGAAATTCCAACGGATTTCTGGAAATTTGTACTTTGGAATCGATTGAGTTACATG  
ATTGCACCACTACTGCTGAGGATTCTGTCAGAAATATCGAACAAGAACGAG

>M6-PGSC0003DMG400015878-(rev)M6LRR-RLP\_709

GAGTTACATGATTGCACCACTACTGCTGAGGATTCTGTCAGAAATATCGAACAAGAACGAGAGGACATG  
GGATATAATATCCTTAAGGTCTACATCCATAACAGCCACAGTAAGTTATAA

>M6-PGSC0003DMG400015957-(rev)M6LRR-RLP\_0

ATTCTTGAGTGCTACTGATGCCACCACTTTTAGGTGATTTGGTGAATTTGGAGCAATTGAATGTGGCAC  
ATAATATGCTTTCTAGAACAATTCCAAAAAGTATTTGTCAGCTTCCTAAG

>M6-PGSC0003DMG400015957-(rev)M6LRR-RLP\_195

GATGAACGGAATTGTTTGCCCAAATACCGGTGCAACGGTCTCCGGGACAGTATAAAGCGTTTTTGTCT

AAAAAATTCATTGTAGTGCTTTTAGGTGTCATAAATTTGTTCTTGTTTTG

>M6-PGSC0003DMG400015957-(rev)M6LRR-RLP\_260

GTCTAAAAAATTCATTGTAGTGCTTTTAGGTGTCATAAATTTGTTCTTGTTTTGCCTTCTCCACCACCACT  
TTCACCGCCGTTGCCTGCCACTCCTCTGCCTGTTGTGGTGCTTATTTT

>M6-PGSC0003DMG400015957-(rev)M6LRR-RLP\_65

GGCACATAATATGCTTTCTAGAACAATTCCAAAAAGTATTTGTCAGCTTCCTAAGCTTCAGAATTTTACAT  
ATCCTTATAATTTCTTCACTGGTGAACCACCGGTGTATTTAGGGTTGCC

>M6-PGSC0003DMG400015957-(rev)M6LRR-RLP\_650

CTTGCAAGCCTCCTCTTCTCCTCCTCACATTTTTTCCGTCATCTAATGAAACCAACCAATCTAATCGCTTC  
CTATGCTTTTTTTCTATTTTTCTGCTGGTCCTAAACTCGACGAAGCC

>M6-PGSC0003DMG400015957-(rev)M6LRR-RLP\_706

CCAATCTAATCGCTTCTATGCTTTTTTTCTATTTTTCTGCTGGTCCTAAACTCGACGAAGCCCAATTCA  
CTGTCTTCGGCCTCTCCTTCTTGATCTCACCAATCTAATTGCTTCCTA

>M6-PGSC0003DMG400015977-(rev)M6OtherRLKTM\_0

CATATATTTTTGTCCATTCCATTGGATTTAATTTCTCCAACACAAACACACCTCCTCTAACCTGGCTAAT  
TTCCCTATGATTAGCCAGGGGAAATCACTAGGCGAATACACGATGA

>M6-PGSC0003DMG400015977-(rev)M6OtherRLKTM\_1054

ACGACGATGATTCACCTCGTAGTGTTTTGATATTGTGGATGATTCGGATGGAGAGTGTTCTTCAGGACA  
CAAAGAACAGAGTTCATCAGCAATAATGAAGCGTACTTGTTAAATGCTT

>M6-PGSC0003DMG400015977-(rev)M6OtherRLKTM\_1116

TCAGGACACAAAGAACAGAGTTCATCAGCAATAATGAAGCGTACTTGTTAAATGCTTTCGATATCATTT  
CTCTTCTCCTGGTTTTGATCTCCCTAGCTTGTTGAGAAAGATAAGAGT

>M6-PGSC0003DMG400015977-(rev)M6OtherRLKTM\_124

CCAATAATTTCAATTTCTTCGCGCGCTTGGATGCTCATCTATCCTCTTGCAGGATGATGAGCACAAAGAG  
CGCGAAAACGGAGAAAAAAGGGACAATTTTGATGCATAAATATGAGATTG

>M6-PGSC0003DMG400015977-(rev)M6OtherRLKTM\_1302

GTAGCTTCAATGGGTAGTTTTAAGGTACGTATGACCCATACATAGTATAATATCGGTGAAAGAAGTTCAT  
CTGACCACCGTTGAGCCTATATGTGACTTTGCCTATAGGTTTCATCTCATC

>M6-PGSC0003DMG400015977-(rev)M6OtherRLKTM\_1364

AAGTTCATCTGACCACCGTTGAGCCTATATGTGACTTTGCCTATAGGTTTCATCTCATCTAAAAGTTTAATC  
TGATCACCTTTAGCTTATGACCATCTGAGCTAAAAGTTTAGTATTATAG

>M6-PGSC0003DMG400015977-(rev)M6OtherRLKTM\_1426

AGTTTAATCTGATCACCTTTAGCTTATGACCATCTGAGCTAAAAGTTTAGTATTATAGAATGAACAGACTT  
TATTTACTTTTATTATGTCTTCAACAGGTGAAGAAAAAAGACGGGAAGGT

>M6-PGSC0003DMG400015977-(rev)M6OtherRLKTM\_1488

AACAGACTTTATTTACTTTTATTATGTCTTCAACAGGTGAAGAAAAAAGACGGGAAGGTGAAAATGCAAG  
GAAGCAAAGAAGGGAGAAAAGGGCAATTAGCAATTGATGTGGAGATATTTG

>M6-PGSC0003DMG400015977-(rev)M6OtherRLKTM\_1612

TACTCCAGCTTTCCATGTTGTACAAGTGACAAAAAATCAGGAGATACTGCAGAATACAGGAACTTTTGT  
GATCAAGGATTAAGCCTTCATTAAGATATAGTTTGGACATGGCAGGG

>M6-PGSC0003DMG400015977-(rev)M6OtherRLKTM\_1674

ACTTTTGTGATCAAGGATTAAGCCTTCATTAAGATATAGTTTGGACATGGCAGGGCAATGAGCAAC  
AACAAAGTGAAAATCAAGAAATCAAGACTTAAGAGGTAAAGATATGAAAAA

>M6-PGSC0003DMG400015977-(rev)M6OtherRLKTM\_1736

GAGCAACAACAAGTGAAAATCAAGAAATCAAGACTTAAGAGGTAAAGATATGAAAAAAAAAAAAAAAAA  
ACAAGTTGTGGGGCTAAAGTTGCCTCTGTGGGACCTATAGGTCATGATTTTCG

>M6-PGSC0003DMG400015977-(rev)M6OtherRLKTM\_186

ACAAAGAGCGCGAAAACGGAGAAAAAAGGGACAATTTTATGCATAAATATGAGATTGGTAAATTGTT  
AGGCCAAGGTACATTTGCCAAAGTATATCATGCAAGGAACCTAAAACAGGAC

>M6-PGSC0003DMG400015977-(rev)M6OtherRLKTM\_1922

GGATGAGAGCCTTCTCCATATTTTCATGCATCGAGCTGTTTCTGTTTTTTTTAAATCATGTAGGCATTATGA  
TCATAGCATTTTTTGTGATTGCTCTTTTTGTTGTTGTCTTGATGTTAT

>M6-PGSC0003DMG400015977-(rev)M6OtherRLKTM\_1984

GCATTATGATCATAGCATTTTTTGTGATTGCTCTTTTTGTTGTTGTCTTGATGTTATATGTCCTCTTGGTGT  
TTCCCATGTAAAACATTTACTATATTACTTGCCTATTTGTATTCATA

>M6-PGSC0003DMG400015977-(rev)M6OtherRLKTM\_2046

CCTCTTGGTGTTCATGTAAAACATTTACTATATTACTTGCCTATTTGTATTCATATAGATAATTCCTCTT  
AACAAATTTACAAAAAGATCATTCTGCTTCAAGATTTTCAAGAGGATC



>M6-PGSC0003DMG400015977-(rev)M6OtherRLKTM\_2108

TAATTCCTCTTAACAATTTACAAAAAGATCATTCTGCTTCAAGATTTTCAAGAGGATCGATTTAGTTTTAG  
TCATTCAATTTACTTGTTCTACCATTTTGCAACACTAATATTAAGAGGA

>M6-PGSC0003DMG400015977-(rev)M6OtherRLKTM\_2170

TAGTTTTAGTCATTCAATTTACTTGTTCTACCATTTTGCAACACTAATATTAAGAGGAAACAGTGACATTT  
ATTGCAACCAACTAGCATTCTGAAAACAGATTCATGCACAAATCAAGT

>M6-PGSC0003DMG400015977-(rev)M6OtherRLKTM\_2232

GTGACATTTATTGCAACCAACTAGCATTCTGAAAACAGATTCATGCACAAATCAAGTTCTAAAACAAAA  
CAAAAAAAGCATTATCTTTCCATAAAACAAACAAGTGATCGATTCAGACC

>M6-PGSC0003DMG400015977-(rev)M6OtherRLKTM\_2294

AAACAAAACAAAAAAGCATTATCTTTCCATAAAACAAACAAGTGATCGATTCAGACCAAGAGATACAG  
AGAACATGCTCAGCATGCAAGAAGTTGAATCTTGATCTTCTGTAGCATCCC

>M6-PGSC0003DMG400015977-(rev)M6OtherRLKTM\_2418

ACATCTTTCATGTTTGTCTTCTTGTCGGAGATTCAACACAACAATCTAATGCTACTATCATGATTGATGC  
CACAATATCTAACTCCTTCTGTAAGCGATTATCCATTGGTGTAACCAAG

>M6-PGSC0003DMG400015977-(rev)M6OtherRLKTM\_248

ATTGTTAGGCCAAGGTACATTTGCCAAAGTATATCATGCAAGGAACCTAAAACAGGACAATATGTAGCT  
GTTAAGGTAATTGACAAAGAAAAAGTCATGAAAGTTGGCCTAAAATCTAAT

>M6-PGSC0003DMG400015977-(rev)M6OtherRLKTM\_310

TGTAGCTGTTAAGGTAATTGACAAAGAAAAAGTCATGAAAGTTGGCCTAAAATCTAATTGACCAAATCA  
AACGTGAAATTTCTGTTATGAGATTAATTAGACATCCAAATGTTGTTGAAC

>M6-PGSC0003DMG400015977-(rev)M6OtherRLKTM\_372

CAAATCAAACGTGAAATTTCTGTTATGAGATTAATTAGACATCCAAATGTTGTTGAACTTTATGAAGTAA  
TGGCTAGCAAACAAAAATTTATTTTGCAATGGAATATGTTAGAGGTGGT

>M6-PGSC0003DMG400015977-(rev)M6OtherRLKTM\_434

TGAAGTAATGGCTAGCAAACAAAAATTTATTTTGCAATGGAATATGTTAGAGGTGGTGAATTCTTCAAT  
AAGGTTTCTAAAGGGAGGCTTAGGGAATCAGCAGCGCGAAAATACTTTCA

>M6-PGSC0003DMG400015977-(rev)M6OtherRLKTM\_496

TCTTCAATAAGGTTTCTAAAGGGAGGCTTAGGGAATCAGCAGCGCGAAAATACTTTCACCAATTAATCG

CTTCTGTTGATATCTGTCATAGTCGAGGGTATATCATAGGGACTTGAAACC

>M6-PGSC0003DMG400015977-(rev)M6OtherRLKTM\_558

TTAATCGCTTCTGTTGATATCTGTCATAGTCGAGGGTATATCATAGGGACTTGAAACCTGAAAACATACT

CCTGGATGAAACTGGAAACCTAAAGGTTTCTGATTTTGGGTTGAGTGCTC

>M6-PGSC0003DMG400015977-(rev)M6OtherRLKTM\_62

CCTGGCTAATTTTCCCCTATGATTAGCCAGGGGAAATCACTAGGCGAATACACGATGATTCACCAATAAT

TTCAATTTCTTCGCGCGCTTGGATGCTCATCTATCCTCTTGCAGGATGAT

>M6-PGSC0003DMG400015977-(rev)M6OtherRLKTM\_744

CAGAGGTCATAAATAAGAGAGGATATGATGGCAAAAAGGCGGATATTTGGTCATGTGGGGTGATTTTG

TTTGTATTGTTAGCTGGTTATCTTCCATTTTCATGACACAAATTTAATGGAAA

>M6-PGSC0003DMG400015977-(rev)M6OtherRLKTM\_806

ATTTTGTGGTATTGTTAGCTGGTTATCTTCCATTTTCATGACACAAATTTAATGGAAATGTATAAGAAAAT

TAGTAAAGGGATATTTAAATGCCCTGAATATTTTCCATATGAAGTGCAA

>M6-PGSC0003DMG400015977-(rev)M6OtherRLKTM\_868

TAAGAAAATTAGTAAAGGGATATTTAAATGCCCTGAATATTTTCCATATGAAGTGCAAAAAACTACTTCC

AAGAATTCTTGATCCAAATCCATTTTCAAGAATCACATTAGCTAAGCTAA

>M6-PGSC0003DMG400015977-(rev)M6OtherRLKTM\_930

CTACTTCCAAGAATTCTTGATCCAAATCCATTTTCAAGAATCACATTAGCTAAGCTAATGGACAATAATTG

GTTCAAGAAAGGATTCAAACAAATTGATAAACCCTAATTTTGGATCAA

>M6-PGSC0003DMG400015977-(rev)M6OtherRLKTM\_992

CAATAATTGGTTCAAGAAAGGATTCAAACAAATTGATAAACCCTAATTTTGGATCAAGAACACGACGA

TGATTCACCTCGTAGTGTGTTTTGATATTGTGGATGATTCGGATGGAGAGTG

>M6-PGSC0003DMG400016015-(rev)M6LRR-RLK\_0

TTTTTTTCCAATATATATCCTTTTTCCATTTCTTTCATAGTAGTATGTTTCAAGTGCGTAGTAACATCATG

GAGAAACACATTTTCTTATTGATACTTGCTATCTTAGTTCAATTTTTC

>M6-PGSC0003DMG400016015-(rev)M6LRR-RLK\_1054

TAGATGGAACAATTCCTACTTCATTAGGCAATATTTCCACTCTTCAAAACTTCATTGTGGAAACAATCAC

ATGGAGGGAGAACTTCTCTGGAATTAGGAAAGCTATCAAACCTTGAGAC

>M6-PGSC0003DMG400016015-(rev)M6LRR-RLK\_1116

AACAATCACATGGAGGGAGAACTTCCTCTGGAATTAGGAAAGCTATCAAACCTTGAGACAAATCAATTC  
GAAGAAAATTATAATCTTATAGGTGAAATTCCAAATGCTATTTTCAACATA

>M6-PGSC0003DMG400016015-(rev)M6LRR-RLK\_1240

CTTTGGAATTCATTGCTTTCACTTTCAACAACCTCTCAGGTAGAATTCCAAATCTTCTTCATCTTCCAAACC  
TTATACAACCTTCTTAGCAATCAATCAGCTCGAAGGTGAAATTCCTC

>M6-PGSC0003DMG400016015-(rev)M6LRR-RLK\_1302

CTTCCAAACCTTATACAACCTTCTTAGCAATCAATCAGCTCGAAGGTGAAATTCCTCGGTACATTACAAA  
TGCTACCAATCTTGAGCTATTGGAACCTATCAGATAACCTTCTCACAGGC

>M6-PGSC0003DMG400016015-(rev)M6LRR-RLK\_1364

CATTACAAATGCTACCAATCTTGAGCTATTGGAACCTATCAGATAACCTTCTCACAGGCAGTATTCCTTATG  
ATTTAGGAAATCTTCGCGAGCTGCAAGAACTTTTCTTCATCATAATCA

>M6-PGSC0003DMG400016015-(rev)M6LRR-RLK\_1426

TTCCTTATGATTTAGGAAATCTTCGCGAGCTGCAAGAACTTTTCTTCATCATAATCAACTTACTGAGTTG  
TGATTCTTTGATTCTTTGGTTAAATGTAGGATGTTGAGATATGTACAAG

>M6-PGSC0003DMG400016015-(rev)M6LRR-RLK\_1798

AGGTAGTATGTGATTTATCGAATTTGGTTGATTAGCTCTGTCTGAAAATGAGCTCTCGGGGGTGATTCC  
GGAATGTCTAGGAAGTCTTCCATGCTACAACACCTTTTTTTAGGTTCTA

>M6-PGSC0003DMG400016015-(rev)M6LRR-RLK\_186

CGAAATCTTGTTACGAGTGATTCTAGTCATTTTTTATCCAATAATTGGACCAAAAATACTTCATTTTGCTCT  
TGGTTTGGTGTCACTTGTAGTCCAAAAAGGCAAAGGGTTGTAGCCTTG

>M6-PGSC0003DMG400016015-(rev)M6LRR-RLK\_1860

GTGATTCCGGAATGTCTAGGAAGTCTTCCATGCTACAACACCTTTTTTTAGGTTCTAACAAGTTTGAATC  
AAAGCTTCCTTTAAGCTTTTGAAGATGAGTAGTCTTCTCTATGTAAAC

>M6-PGSC0003DMG400016015-(rev)M6LRR-RLK\_1922

GTTTGAATCAAAGCTTCCTTTAAGCTTTTGAAGATGAGTAGTCTTCTCTATGTAAACATGTCGCGTAATT  
CTATAGAGGGAGAAGTTCCATCAGATATCGGAGAACTTAAAGCTATTGT

>M6-PGSC0003DMG400016015-(rev)M6LRR-RLK\_1984

CGCGTAATTCTATAGAGGGAGAAGTTCCATCAGATATCGGAGAACTTAAAGCTATTGTAGCAATTGATA  
TCTCTGGTAACCACTTTTCGGGGATGATACCAAGCAATTTGGGGGAACTTC

>M6-PGSC0003DMG400016015-(rev)M6LRR-RLK\_2046

ATTGATATCTCTGGTAACCACTTTTCGGGGATGATACCAAGCAATTTGGGGGAACCTTCAAACCTTGAAGT  
TACTTTCTTATCGAACAATTCGTTTTCAGGTCCAATTCCATTATCCTTT

>M6-PGSC0003DMG400016015-(rev)M6LRR-RLK\_2294

AATACCTAGTGGTGGTGTGTTTGCAAACCTCCACCCTGCAATCATTCTCGGGAACAAAGGTCTATGTGGA  
AGGCAAATATTGGAGGTTCTGCTTGTGCTGTCACTACTCCTGAACAACA

>M6-PGSC0003DMG400016015-(rev)M6LRR-RLK\_2356

TATGTGGAAGGCAAATATTGGAGGTTCTGCTTGTGCTGTCACTACTCCTGAACAACAACAATCAAATC  
TAAGAAGCTTGTGCTAAAAATTGTCACTCCGGTGGTTATTTTCATTTTTTC

>M6-PGSC0003DMG400016015-(rev)M6LRR-RLK\_2418

TCAAATCTAAGAAGCTTGTGCTAAAAATTGTCACTCCGGTGGTTATTTTCATTTTTCTGATATTCTTGTTG  
GTTGTCTCAATTTGGATAATGAAACGAAAGAAGAAAGTTAAGTCCAAA

>M6-PGSC0003DMG400016015-(rev)M6LRR-RLK\_2604

ACAAATAATTTTGATGAATCCAATTTGATTGGCGTGGGAGGTTCTGGCTCTGTGTACAAAGCCACATTAC  
CTAGTGGAATTGTGGTTGCAATAAAGGTACTGGATTTGGAAAATGATGAA

>M6-PGSC0003DMG400016015-(rev)M6LRR-RLK\_2790

GTGATCACTACGTGTTCTACTGATCACATAAGAGCCTTCTTTCTGCAATATATGCCCAACGGAAGTCTGA  
CAATTGGTTGTACAAAGAAGATCGCCACTTAAACCTTCGTCAAAGAGTC

>M6-PGSC0003DMG400016015-(rev)M6LRR-RLK\_2976

CATTGTGACCTCAAGCCAGCCAACGTTCTTTTGGATGAAGATATGGTGGCGCGTGTGGTGATTTTGGC  
ATCTCAAAGATTTTAGCTGTAAGCAAGTCTATGGCACATACAAAGACATTA

>M6-PGSC0003DMG400016015-(rev)M6LRR-RLK\_310

TTCCTAATTTGCAACTTCAAGGCACAATTCGCCTTCTTTGGCCAATCTATCCTTTCTCATAGAGCTAAATC  
TCTCGAACAACAACCTCCATGGTAACATCCCTTATGGCATTGGCCACT

>M6-PGSC0003DMG400016015-(rev)M6LRR-RLK\_3100

CTCTTGATATATTGCACCAGGTATACTACTATACTCTATACTAGTCTCTTTCCATTTCACTTATGTATCGA  
AGACCTTTCATTATTGTTATATCAGATGAGTAATTGAGTAATACTTTT

>M6-PGSC0003DMG400016015-(rev)M6LRR-RLK\_3162

TATGTATCGAAGACCTTTCATTATTGTTATATCAGATGAGTAATTGAGTAATACTTTTTTTCATTTTCGTTT

TTTTAAGAATATGGCTCGGAGGGAATAGTGTCCACTCGTGGTGATGTT

>M6-PGSC0003DMG400016015-(rev)M6LRR-RLK\_3348

GATGAAAATCTTGGCTTGAGAGAGTGGATAACGCGAGCATTCCAAGAACTGTGATGGAAGTTGTGGA  
CGCGGATATTTACATGATGTAGAAAAATCACTTCCAAAAGTGA ACTCTGC

>M6-PGSC0003DMG400016015-(rev)M6LRR-RLK\_3410

TGTGGACGCGGATATTTACATGATGTAGAAAAATCACTTCCAAAAGTGA ACTCTGCATACTTTCCATG  
ATAGA ACTTGCTTTAGATTGCACAAAGGCAACACCATAATCAAGGATAAC

>M6-PGSC0003DMG400016015-(rev)M6LRR-RLK\_3534

AAAGATGTAGTCAAGAGGCTTAATAAAATTAAGAACACATTTTTGGAAACATAGAAGTTAGTTAGAATC  
TCTTTAATGTTGTTTTTTCTTATAAGTTGTAAGTTGATACTCAATCTGTT

>M6-PGSC0003DMG400016015-(rev)M6LRR-RLK\_3596

TAGAATCTCTTTAATGTTGTTTTTTCTTATAAGTTGTAAGTTGATACTCAATCTGTTTGT CATGCTTTTCAT  
TCTAGTCCGTTATAAAAAGAATGTCTCTTTTTCTTTTTGGCAACTGT

>M6-PGSC0003DMG400016015-(rev)M6LRR-RLK\_372

GAGCTAAATCTCTCGAACAACA ACTTCCATGGTAACATCCCTTATGGCATTGGCCACTTGCCTCGTTTACG  
AGTGATTGATATTCAGAACAATCAGCTCCATGGTAGTATTCCAACATGT

>M6-PGSC0003DMG400016015-(rev)M6LRR-RLK\_434

TCGTTTACGAGTGATTGATATTCAGAACAATCAGCTCCATGGTAGTATTCCAACATGTCTATTTCAACACC  
TGAGTGTTCAAATCATTTCAATTGGCTTTCAATAAACTCGGTGGTGAAAT

>M6-PGSC0003DMG400016015-(rev)M6LRR-RLK\_868

TTTCATCAAACCTCGAGCATATAGGTGTATCATACAATCAAATCACTGGTCACATTCTTCCAACATCTGC  
CAATTCAAAGCTCTCAAAGTCTTGCCATATCTTACAACA ACTTAACTG

>M6-PGSC0003DMG400016015-(rev)M6LRR-RLK\_992

AATACCGAGAAATATTGGTTGTTTAGCCAAGCTCGAAGAGCTTTATATCGGTTATAATGCAATAGATGG  
AACAATTCCTACTTCATTAGGCAATATTTCCACTCTTCAAAA ACTTCATTG

>M6-PGSC0003DMG400016164M6LRR-RLK\_0

ATGTGCTACTCTAGAAGTATATATTTATCGATTTCTTCATCAAGCTGATATTAATCTGCTCATGATATTG  
GCACATTGCTAACTGCTCTTATTTGGGGACTGGTGATTGCTTGATCT

>M6-PGSC0003DMG400016164M6LRR-RLK\_122

GCCCGTGCATGGTTTGGGATCTTAGCCTTTCCGATTGTACTACTTTCTACCCACACAAGCATGTGTAGA  
AATCTACTCGCAATTTTGGTTCTCAATATTCCAATAAGAGTAGTATT

>M6-PGSC0003DMG400016164M6LRR-RLK\_1403

AATAGCCCTGCCTCTTGCATGAGTCAGAACTGTTGATATTAGTTAACTCAGTTTGCCTACTAGTTTTCA  
GAGAACCATTTGAATTGTGGCTTAACTTCAGTCGTCGTTGTGTATCTG

>M6-PGSC0003DMG400016164M6LRR-RLK\_1464

TAGTTTTTCAGAGAACCATTTGAATTGTGGCTTAACTTCAGTCGTCGTTGTGTATCTGACAGTGAAGGT  
AATTAATTAAGAGCAAATACCACATTTTTAACTACAAGTATTTACTT

>M6-PGSC0003DMG400016164M6LRR-RLK\_1525

AGTGAAGGTAATTAATTAAGAGCAAATACCACATTTTTAACTACAAGTATTTACTTTAAAGTTAGA  
TGTTGCTGGAGATGTTTGGCAGTATTCTAAATTCTAAAGTTGATATCCTG

>M6-PGSC0003DMG400016164M6LRR-RLK\_1586

AAAGTTAGATGTTGCTGGAGATGTTTGGCAGTATTCTAAATTCTAAAGTTGATATCCTGGCAGGTTCTCC  
CAGTAAATCAAAGACTGGTCTCGTAATTGGTATCGTTGGTGGATTTCTTG

>M6-PGSC0003DMG400016164M6LRR-RLK\_1647

AGGTTCTCCAGTAAATCAAAGACTGGTCTCGTAATTGGTATCGTTGGTGGATTTCTTGAATTATCCTTC  
TTGGGGGATTAATGTTATTTTTCTGGCGGGGAGGAACAAAGGCTACAA

>M6-PGSC0003DMG400016164M6LRR-RLK\_1708

ATTATCCTTCTGGGGGATTAATGTTATTTTTCTGGCGGGGAGGAACAAAGGCTACAAACGTGAAATC  
TATGTTGATGTTCCAGGTCCTTATCAGTGTTTTACACAGTATTAACCTCAA

>M6-PGSC0003DMG400016164M6LRR-RLK\_183

CATGTGTAGAAATCTACTCGCAATTTTGGTTCTCAATATTCCAATAAGAGTAGTATTCTTTAAGTTAA  
TAATTAGGAAACAACATTCTTGAGTGTTTGGTCATGCTTTTGCCAGAGT

>M6-PGSC0003DMG400016164M6LRR-RLK\_2074

AAGAAGAAGGCTGAAGTAGTTACCTATTGCTACATTTCTTAGTTCCATCTTACATTGGAGACTTGTTCTTT  
TATCAGCAGTACCTTAGTTCACTTGCACTGTAAGATGGTATAGGCTCAT

>M6-PGSC0003DMG400016164M6LRR-RLK\_2135

CTTGTTCTTTTATCAGCAGTACCTTAGTTCACTTGCACTGTAAGATGGTATAGGCTCATTGAGTATGTTGT  
GACATTTTTCTTGTGTCTGTTGATGTGCCAGGTGAGGTTGACAGACG

>M6-PGSC0003DMG400016164M6LRR-RLK\_2196

AGTATGTTGTGACATTTTTCTTGTGTCTGTTTCGATGTGCCAGGTGAGGTTGACAGACGAATCCATTTG  
GTCAATTGAGGAGATTCGCATGGAGGGAATTGCAACTTGCTACTGATAAC

>M6-PGSC0003DMG400016164M6LRR-RLK\_2257

TTCCATTTGGTCAATTGAGGAGATTCGCATGGAGGGAATTGCAACTTGCTACTGATAACTTTAGTGAAAA  
GAATGTTCTTGGACAAGGAGGTTTTGGCAAGGTTTATAAAGGAGTGCTCA

>M6-PGSC0003DMG400016164M6LRR-RLK\_2318

TAGTGAAAAGAATGTTCTTGGACAAGGAGGTTTTGGCAAGGTTTATAAAGGAGTGCTCAGTGACAGCA  
CTAAAGTTGCTGTGAAACGCTTAACTGACTATGAGAGTCCTGGGGGAGATGC

>M6-PGSC0003DMG400016164M6LRR-RLK\_2379

GACAGCACTAAAGTTGCTGTGAAACGCTTAACTGACTATGAGAGTCCTGGGGGAGATGCTGCATTTAG  
CGTGAAGTTGAGATGATTAGTGTTGCTGTTTCATAGAAATCTTTTGC GGCTT

>M6-PGSC0003DMG400016164M6LRR-RLK\_244

TTTAAGTTAATAATTAGGAAACAACATTCTTGAGTGTTGGTCATGCTTTTGCCAGAGTGTTGGATATTC  
ATCTTCATTTCTTGTCCGTTATCACATTATTCTCGTAGTGCCTCTGATA

>M6-PGSC0003DMG400016164M6LRR-RLK\_2440

CATTTAGCGTGAAGTTGAGATGATTAGTGTTGCTGTTTCATAGAAATCTTTTGC GGCTTATAGGATTTG  
CACCACACCGACTGAACGCTTGCTAGTGTACCCGTATATGCAGAACCTAA

>M6-PGSC0003DMG400016164M6LRR-RLK\_2501

AGGATTTTGCACCACACCGACTGAACGCTTGCTAGTGTACCCGTATATGCAGAACCTAAGTGTTGCCTAT  
CGTCTACGAGGTA CTATTTTTCCACAATAGTGCTTAGATCTTGGTTTGC

>M6-PGSC0003DMG400016164M6LRR-RLK\_2562

GTTGCCTATCGTCTACGAGGTA CTATTTTTCCACAATAGTGCTTAGATCTTGGTTTGCAGTTTTCCAAG  
GCTTTCCTTGTTTATCTCAATATCAAATTTTCTGGGATCACTTATTTT

>M6-PGSC0003DMG400016164M6LRR-RLK\_2623

TTTTCCAAGGCTTTCCTTGTTTATCTCAATATCAAATTTTCTGGGATCACTTATTTCTTTTGCCTCAA  
CAGCTGAATTTCTATAGAAGTCTGGAATTTTATGGTCAAATGCTTAT

>M6-PGSC0003DMG400016164M6LRR-RLK\_2684

TTGCTCCAAACTCAGCTGAATTTCTATAGAAGTCTGGAATTTTATGGTCAAATGCTTATGTCAATAGTCTA

ACTGTCTAATAGCCTATTTGGCCAAGCTTCTAAAATCAGCTTATTTTGA

>M6-PGSC0003DMG400016164M6LRR-RLK\_2745

CAATAGTCTAACTGTCTAATAGCCTATTTGGCCAAGCTTCTAAAATCAGCTTATTTTGATTTTAGGCTATT  
AGACTCCTATCAAAGGTCTAATCACCTACTTTTTCTAGTGATCTTTAG

>M6-PGSC0003DMG400016164M6LRR-RLK\_2806

TTAGGCTATTAGACTCCTATCAAAGGTCTAATCACCTACTTTTTCTAGTGATCTTTAGTAGAGTAGACAA  
GTTGAACAGATAATAAAGGAGGGTATTTGCGTAGGTACTCGTATTCCTA

>M6-PGSC0003DMG400016164M6LRR-RLK\_2867

GAGTAGACAAGTTGAACAGATAATAAAGGAGGGTATTTGCGTAGGTACTCGTATTCCTAATATTCTTAG  
AAGTGTGTGAGTTCTTGAAAATTTGGTTCTCTTCAGTCTTCAAGAGCCATA

>M6-PGSC0003DMG400016164M6LRR-RLK\_2928

ATTCTTAGAAGTGTGTGAGTTCTTGAAAATTTGGTTCTCTTCAGTCTTCAAGAGCCATAGTTGGATTGTAC  
CTCGTCACGAGGGAACCTCCATCACGTATGAATTGACCGATATCCATAA

>M6-PGSC0003DMG400016164M6LRR-RLK\_2989

TGGATTGTACCTCGTCACGAGGGAACCTCCATCACGTATGAATTGACCGATATCCATAATGAGAGCTTAA  
ATGAGTTCATGAATTCATTCTTGCGCATTATCATTCCCCCGAGGTGAC

>M6-PGSC0003DMG400016164M6LRR-RLK\_305

TGGATATTTTATCTTCAATTTCTTGCCGTTATCACATTATTCTCGTAGTGCCTCTGATAAGCATTCTAAGGT  
CATAACTGGTAACATTTGCTAAGAAGATCTCCTAAAATAAGTTTTCA

>M6-PGSC0003DMG400016164M6LRR-RLK\_3050

AGAGCTTAAATGAGTTCATGAATTCATTCTTGCGCATTATCATTCCCCCGAGGTGACTTTTTTGAAAAC  
CTTGATGAATTGAAGATGACACATGCAGTAGTCGGTCAAACCTTTAAAA

>M6-PGSC0003DMG400016164M6LRR-RLK\_3111

TTTTGAAAACCTTGATGAATTGAAGATGACACATGCAGTAGTCGGTCAAACCTTTAAAATTCAGCATTTA  
TCTCCAGAGATGATGAGATTTTGGTGGCTTCTTATTTGTAGTATTTTGT

>M6-PGSC0003DMG400016164M6LRR-RLK\_3172

CAGCATTATCTCCAGAGATGATGAGATTTTGGTGGCTTCTTATTTGTAGTATTTTGTAAATGCAGAAC  
TTAAACCTGGGGAGTCTGTTTTAATTTGGCCAACCAGAAAGCGTGTGGC

>M6-PGSC0003DMG400016164M6LRR-RLK\_3233



AATGCAGAACTTAAACCTGGGGAGTCTGTTTTAATTTGGCCAACCAGAAAGCGTGTGGCACTGGGCACT  
GCACGTGGACTTGAATACCTGCACGAACACTGTAATCCAAAAATTATTCAC

>M6-PGSC0003DMG400016164M6LRR-RLK\_3294

TGGGCACTGCACGTGGACTTGAATACCTGCACGAACACTGTAATCCAAAAATTATTCACCGTGATGTTAA  
AGCAGCCAATGTTTTACTGGATGAAGATTTTCGAGGCTGTAGTTGGTGATT

>M6-PGSC0003DMG400016164M6LRR-RLK\_3355

TGATGTTAAAGCAGCCAATGTTTTACTGGATGAAGATTTTCGAGGCTGTAGTTGGTGATTTTGGCCTGGCA  
AAGTTAGTTGATGTTAGGAAAACCAACGTGACAACGCAAGTTTCGGGGTAC

>M6-PGSC0003DMG400016164M6LRR-RLK\_3416

GGCCTGGCAAAGTTAGTTGATGTTAGGAAAACCAACGTGACAACGCAAGTTTCGGGGTACTATGGGCCA  
TATAGCTCCTGAATATTTGTCCACTGGGAAATCATCAGAAAAAACTGATGTT

>M6-PGSC0003DMG400016164M6LRR-RLK\_3477

TGGGCCATATAGCTCCTGAATATTTGTCCACTGGGAAATCATCAGAAAAAACTGATGTTTTTGGATATGG  
AATCACGCTTTTGGAGATTGTAACGGTCAACGCGCTATAGACTTCTCAC

>M6-PGSC0003DMG400016164M6LRR-RLK\_3538

TGGATATGGAATCACGCTTTTGGAGATTGTAACGGTCAACGCGCTATAGACTTCTCACGCCTAGAAGA  
AGAAGATGATGTCTTGTTACTTGACCATGTGAGTGTACATAACTCAACGAC

>M6-PGSC0003DMG400016164M6LRR-RLK\_3599

CTAGAAGAAGAAGATGATGTCTTGTTACTTGACCATGTGAGTGTACATAACTCAACGACTGATATTAAC  
TGTGATTCTATTGGTCTGCATATTACTTTTAAACGTGTCCTCTAAAATTAT

>M6-PGSC0003DMG400016164M6LRR-RLK\_366

CATTCTAAGGTCATAACTGGTAACATTTGCTAAGAAGATCTCCTAAAAATAAGTTTTTCATCCTTGCAATA  
GGAAGTTCTACTTTAGCGAGATTTGTGAACTCATCAATTTTCTTGCCT

>M6-PGSC0003DMG400016164M6LRR-RLK\_3660

ATATTAACCTGTGATTCTATTGGTCTGCATATTACTTTTAAACGTGTCCTCTAAAATTATTCAGTTTCTTCTA  
AGTTTATTTTTTATCTTATACTTTCACTCTTCTCGAAGCTGCATATT

>M6-PGSC0003DMG400016164M6LRR-RLK\_3721

AGTTTCTTCTAAGTTTATTTTTTATCTTATACTTTCACTCTTCTCGAAGCTGCATATTGGTGGATGGCTCA  
TTGTCCATCACAAGACATTCTCATGAATTATATACGTAGTTCTTCTTT

>M6-PGSC0003DMG400016164M6LRR-RLK\_3782

TGGATGGCTCATTGTCCATCACAAGACATTCTCATGAATTATATACGTAGTTCTTCTTTTTTATGTTGCTTT  
CTTGGTATATGTGGTAATTTTATATTCAACAGGAAGGAGGGACAAAAA

>M6-PGSC0003DMG400016164M6LRR-RLK\_3843

TATGTTGCTTTCTTGGTATATGTGGTAATTTTATATTCAACAGGAAGGAGGGACAAAAAAGAAGTTTCAT  
TTCCATATAGCACTCTTACGCAAATTCTTTTGCATGTCAAACATAGGTC

>M6-PGSC0003DMG400016164M6LRR-RLK\_3904

AAGTTTCATTTTCCATATAGCACTCTTACGCAAATTCTTTTGCATGTCAAACATAGGTCTTAATACTCAGCC  
TCTTTTGTCTGGATACCTTTTTAGGTGTAAAGTAAATTAGTGAAAAAA

>M6-PGSC0003DMG400016164M6LRR-RLK\_3965

AATACTCAGCCTCTTTTGTCTGGATACCTTTTTAGGTGTAAAGTAAATTAGTGAAAAAAGGTGAAATAAC  
ATTGAGAGGACGCAAATTTCTTAATTAGGGTAGAAGGATAGTAGATAGT

>M6-PGSC0003DMG400016164M6LRR-RLK\_4026

TGAAATAACATTGAGAGGACGCAAATTTCTTAATTAGGGTAGAAGGATAGTAGATAGTGCATTTTCTC  
GCTATCCGTCCATTCTAGTAGTTGTAGTAGTGCTCCTTTAGTTTCTTGTCC

>M6-PGSC0003DMG400016164M6LRR-RLK\_4087

ATTTTCTCGCTATCCGTCCATTCTAGTAGTTGTAGTAGTGCTCCTTTAGTTTCTTGTCTATGGTTTTTGTTA  
CCATCTGTTGTTTCTTGTATTTCTGCTTGTCTGATTATTTTGATGTAG

>M6-PGSC0003DMG400016164M6LRR-RLK\_4148

TGGTTTTTGTACCATCTGTTGTTTCTTGTATTTCTGCTTGTCTGATTATTTTGATGTAGTTATTGTTTCAGCAT  
GCTTTGCTATGCTTTACATCCATTACTTTTTCTGGACTGCTTTTGT

>M6-PGSC0003DMG400016164M6LRR-RLK\_427

CTTGTCAATAGGAAGTTCTACTTTAGCGAGATTTGTGAACTCATCAATTTTCTTGTCTTAGTTGTGTTAT  
GTATTGAACTGACTGGGCGGTCAACATCCTGGCAGTTCTTTGCAAGGAA

>M6-PGSC0003DMG400016164M6LRR-RLK\_4392

GGTACTGAATGGCTGCATGTGCATCTTGAAGGTCAAAAACTGCAAAGGGAGAAAAGGTTGGATGC  
TATTGTCGACCGCAACCTACATAAGAACTATAACATGGATGAAGTAGAGATG

>M6-PGSC0003DMG400016164M6LRR-RLK\_4453

TGGATGCTATTGTCTGACCGCAACCTACATAAGAACTATAACATGGATGAAGTAGAGATGATGATTCAAG

TTGCGTTGCTGTGTAAGGATCACCAGAGGATCGTCCAGCAATGTCAG

>M6-PGSC0003DMG400016164M6LRR-RLK\_4514

GATTCAAGTTGCGTTGCTGTGTAAGGATCACCAGAGGATCGTCCAGCAATGTCAGAGGTAGTACG

AATGCTTGAAGGAGAAGGACTTGCTGAGCGGTGGGAAGAGTGGCAGCATGT

>M6-PGSC0003DMG400016164M6LRR-RLK\_4575

GTAGTACGAATGCTTGAAGGAGAAGGACTTGCTGAGCGGTGGGAAGAGTGGCAGCATGTCTGAAGTTA

CACGTAGGCAAGAATACGAGAGACTACAACGACGATTTGATTGGGGCGAAGAT

>M6-PGSC0003DMG400016164M6LRR-RLK\_4636

AAGTTACACGTAGGCAAGAATACGAGAGACTACAACGACGATTTGATTGGGGCGAAGATTCAATCTATA

ATCAAGATGCAGTTGAACTGTCTGGTGGGAAGATAACAAAATCTGTATCTCC

>M6-PGSC0003DMG400016164M6LRR-RLK\_4697

AATCTATAATCAAGATGCAGTTGAACTGTCTGGTGGGAAGATAACAAAATCTGTATCTCCAAACAAGTACA

TAATTTCTGTAATAGTCTCTCCTTGATACATATAACTTGTCGCTAAGTG

>M6-PGSC0003DMG400016164M6LRR-RLK\_4758

ACAAGTACATAATTTCTGTAATAGTCTCTCCTTGATACATATAACTTGTCGCTAAGTGGCAATCATTCCA

CGTTTTCATATTGCTTGTGTCATATCTTGATTGTATTGTTTTTCGTATG

>M6-PGSC0003DMG400016164M6LRR-RLK\_4819

AATCATTCCACGTTTTCATATTGCTTGTGTCATATCTTGATTGTATTGTTTTTCGTATGCTTCTCTTATTTAA

TCGATTTTTTCCCTGTATGATTGGCCTGTGCAGCGACATAATATATA

>M6-PGSC0003DMG400016164M6LRR-RLK\_4879

TTCTCTTATTTAATCGATTTTTTCCCTGTATGATTGGCCTGTGCAGCGACATAATATATATCGACTTTCTTT

TTGTTTCAATTGTAACATCAATCTTTGTTATAGTGATTTGAGTTTTGC

>M6-PGSC0003DMG400016164M6LRR-RLK\_488

GTTGTGTTATGTATTGAACTGACTGGGCGGTCAACATCCTGGCAGTTCTTTGCAAGGAAATGGAATAACT

GGTAAAATTCCTGAAGCATTAGGAAATTTAACCAGCTTGACCATGTTGGA

>M6-PGSC0003DMG400016164M6LRR-RLK\_549

GGAATAACTGGTAAAATTCCTGAAGCATTAGGAAATTTAACCAGCTTGACCATGTTGGATCTGGAAAAA

AACAGTTTGTCTGGAGAAATACCAGCTTCCCTAGGCAATCTAAAAAAGCTT

>M6-PGSC0003DMG400016164M6LRR-RLK\_61

CATGATATTGGCACATTGCTAACTGCTCTTATTTGGGGGACTGGTGATTGCTTGTATCTTTGCCCGTGCAT  
GGTTTGGGATCTTAGCCTTTTCCGATTGTACTACTTTCTACCCACACA

>M6-PGSC0003DMG400016164M6LRR-RLK\_610

TGGAAAAAACAGTTTGTCTGGAGAAATACCAGCTTCCCTAGGCAATCTAAAAAGCTTCAATTTCTGTA  
AGTAATATTATTCATTGATTGTTGTTTTTTTTAGAACTGAGTTTTACAT

>M6-PGSC0003DMG400016164M6LRR-RLK\_671

ATTTCTGTAAGTAATATTATTCATTGATTGTTGTTTTTTTTAGAACTGAGTTTTACATTTGGTGTGGACTT  
GGGAGTCTATAATGATGTTTCTTTGAACAGGTTTTTGAGTCAAAAACA

>M6-PGSC0003DMG400016164M6LRR-RLK\_732

GGTGTGGACTTGGGAGTCTATAATGATGTTTCTTTGAACAGGTTTTTGAGTCAAAAACAATCTGTCTGGG  
ACTATCCCTGAGTCACTTTCAGGCCTTCCCACTTGATTAACCTGTAAGT

>M6-PGSC0003DMG400016164M6LRR-RLK\_793

CTGTCTGGGACTATCCCTGAGTCACTTTCAGGCCTTCCCACTTGATTAACCTGTAAGTGATTCATTTAGC  
CTGATCTTTGATGTGCTTACAACGTGTGCCAAGTGATACTGACCTGACC

>M6-PGSC0003DMG400016164M6LRR-RLK\_854

TTCATTTAGCCTGATCTTTGATGTGCTTACAACGTGTGCCAAGTGATACTGACCTGACCCGGTGATATCTC  
TTTGCCAGTCAGCTTGCATTAATGATCTTACTGGAAAAGTTCTCTGACA

>M6-PGSC0003DMG400016164M6LRR-RLK\_915

GTGATATCTCTTTGCCAGTCAGCTTGCATTAATGATCTTACTGGAAAAGTTCTCTGACAGTTTGTCCAAG  
TCCCGAAATACAAGTATGCAGATCTCAATTATTGCATTTTTTAATTTGA

>M6-PGSC0003DMG400016164M6LRR-RLK\_976

TTGTTCCAAGTCCCGAAATACAAGTATGCAGATCTCAATTATTGCATTTTTTAATTTGATGATAGATTGAA  
GCTGCTTAATAATTTGAACATTTTAAAAAGTTATAATACATAAATAGAC

>M6-PGSC0003DMG400016357-(rev)M6LRR-RLP\_1240

AAAATTGGAACACAAAATTTCTTACGAGAATGAGAAGGCACAAGAAAAGACATTAGTGTGTAACCTCGA  
GGTATCAACTTAATCTCTATCCTTCAGAAGATTCCATTTTATATATCCATAA

>M6-PGSC0003DMG400016357-(rev)M6LRR-RLP\_1302

CCTCGAGGTATCAACTTAATCTCTATCCTTCAGAAGATTCCATTTTATATATCCATAAATTTCTACCTCTT  
CATCGTTAAAGCTTTTAACTTTAATTCTTCATTTTTGAAAATTGCAG

>M6-PGSC0003DMG400016357-(rev)M6LRR-RLP\_1426

CAAGTCTACTGCATCGTTGGGATGTAAAAATAGAAGCTTTTACTTTCATAGTTTGTTAATTCTGTTGCAAC  
TCAACAAAATTTGATTTCAATTTATCTGTAGTATGTAGAAATAAATTCAG

>M6-PGSC0003DMG400016357-(rev)M6LRR-RLP\_1488

TGTTGCAACTCAACAAAATTTGATTTCAATTTATCTGTAGTATGTAGAAATAAATTCAGCATTTCATTGT  
GAGGAAAAACAAGTTCATAAAATGCAAAGGGATCAAAGGGAAACACC

>M6-PGSC0003DMG400016357-(rev)M6LRR-RLP\_1550

TTCAATTGTGAGGAAAAACAAGTTCATAAAATGCAAAGGGATCAAAGGGAAACACCAGTAGAGCAA  
AAAGTTTGAAATAACAGTAGAAAGCACATTCAAATTCCTAAAACAGTTCCAA

>M6-PGSC0003DMG400016357-(rev)M6LRR-RLP\_1612

GAGCAAAAAGTTTGAAATAACAGTAGAAAGCACATTCAAATTCCTAAAACAGTTCCAAATTCATCGATAT  
ATAATAACGACGACCACAATAGAGTTGGTGTAGCAGTTGAAAAGTTTGAG

>M6-PGSC0003DMG400016357-(rev)M6LRR-RLP\_1674

ATCGATATATAATAACGACGACCACAATAGAGTTGGTGTAGCAGTTGAAAAGTTTGAGAAACAACCTTG  
GATACTAAGGTTTAAATCCTAGCAGAGATATCACATTTAGGAAGAAATCCA

>M6-PGSC0003DMG400016357-(rev)M6LRR-RLP\_1736

AACCTTGGATACTAAGGTTTAAATCCTAGCAGAGATATCACATTTAGGAAGAAATCCAGCAGAACTGCTT  
AATTTGATGAGTCATGACTTCATATCGACAATTTTACAAATTAACCTATA

>M6-PGSC0003DMG400016357-(rev)M6LRR-RLP\_1798

AACTGCTTAATTTGATGAGTCATGACTTCATATCGACAATTTTACAAATTAACCTATATTAACATAAACTG  
TGGGCTGGAACCTTGTGTATTCCAGCATCTAACATTGTTCTTTCCACC

>M6-PGSC0003DMG400016357-(rev)M6LRR-RLP\_1860

CTAAAACGTGGGCTGGAACCTTGTGTATTCCAGCATCTAACATTGTTCTTTCCACCTCTCTGCGCCAAT  
ATAAATCTTTAGAGTTGCACATAACGCCCAAATGATTCTGTTGCGAC

>M6-PGSC0003DMG400016357-(rev)M6LRR-RLP\_1984

GCAATAGTTGTGCTACTTCATTTCCAACTCAATAGCTCCACCAAGTCTACAAGCACCCATCAGAGCCCC  
CAAGACAGTAGCATCATCTTCAAAGGCATCTTCTTTATGAAGTCCTAT

>M6-PGSC0003DMG400016357-(rev)M6LRR-RLP\_2046

AGAGCCCCCAAGACAGTAGCATCATCTTCAAAGGCATCTTCTTTATGAAGTCCTATGCTTCGTGCAGT

AGATCAACCTCACAACCATAATGTTTCATCTTAGCTGCAAGTCCAAATTC

>M6-PGSC0003DMG400016357-(rev)M6LRR-RLP\_2108

CGTGCAGTAGATCAACCTCACAACCATAATGTTTCATCTTAGCTGCAAGTCCAAATTCATGTGACATTGCT  
TCAAACAATTAGAACCCGAAATCGACAAGGTTGGCACACAGACAAGCTG

>M6-PGSC0003DMG400016357-(rev)M6LRR-RLP\_2232

AACTGCCACGAAGGCAATCTCATTTGGTTGCAGCCCCTTTTACTCTCATCTTTGTTGAGAATAATAATGAAA  
TAATAGCTTAAGCTTTTAGATGAAATGGTCACACACTTCAGCAATCTTG

>M6-PGSC0003DMG400016357-(rev)M6LRR-RLP\_2294

ATAATGAAATAATAGCTTAAGCTTTTAGATGAAATGGTCACACACTTCAGCAATCTTGACATACATCGTT  
AATGCTAGGGAAGAAATCATAGCATTCCATGTGCAAACCTGCTCCATCGC

>M6-PGSC0003DMG400016357-(rev)M6LRR-RLP\_2356

ACATCGTTAATGCTAGGGAAGAAATCATAGCATTCCATGTGCAAACCTGCTCCATCGCATCAAATACCTG  
TGTTACAGCAAATGGTTAAAAATACATGCAAGGCCTCGTACTATAAAGAG

>M6-PGSC0003DMG400016357-(rev)M6LRR-RLP\_2418

AATACCTGTGTTACAGCAAATGGTTAAAAATACATGCAAGGCCTCGTACTATAAAGAGCACGCAGTTTA  
AAATACATGTAAGGCCTGCTAACAAGCTTTCATTAAATGATAAGCACGAGC

>M6-PGSC0003DMG400016357-(rev)M6LRR-RLP\_2480

CAGTTTAAAATACATGTAAGGCCTGCTAACAAGCTTTCATTAAATGATAAGCACGAGCAAAAATTAAG  
ACCATCGATTTGAGCGACAAAATCAAAGACCACCGAAATAGGGACAATCCG

>M6-PGSC0003DMG400016357-(rev)M6LRR-RLP\_2542

ATTAAAGACCATCGATTTGAGCGACAAAATCAAAGACCACCGAAATAGGGACAATCCGTGCAAAAACCT  
CTATCAATTTAGGACAGAAAATAAGACCTTTAAAATCACGAGAAGTGCAGA

>M6-PGSC0003DMG400016357-(rev)M6LRR-RLP\_2604

AAAACCTTCTATCAATTTAGGACAGAAAATAAGACCTTTAAAATCACGAGAAGTGCAGATCCAAACCAATT  
TACAGGCGAATTGTTAACATAGACATCAACTGCACAAAATTCTAAACCAA

>M6-PGSC0003DMG400016357-(rev)M6LRR-RLP\_2666

AACCAATTTACAGGCGAATTGTTAACATAGACATCAACTGCACAAAATTCTAAACCAAGAAACAATTAAT  
ATAGTGTAATATTGTTGGCTTTGGGCAAACATGCACAGTTTTCTTCCAA

>M6-PGSC0003DMG400016357-(rev)M6LRR-RLP\_2728

CAATTAATATAGTGAATATTGTTGGCTTTGGGCAAACATGCACAGTTTTCTTCCAAATGTCTCCAATCA  
TATTGCAATCAGTTTCGCTACAGCACCCGCTGCTCTAGCCTAATATGAG

>M6-PGSC0003DMG400016357-(rev)M6LRR-RLP\_2790

CTCCAATCATATTGCAATCAGTTTCGCTACAGCACCCGCTGCTCTAGCCTAATATGAGTATCACTTCACTT  
TATACACATCTTCTTTTTCTTAGGAGACAAAATGCATGTGTTATTACAA

>M6-PGSC0003DMG400016357-(rev)M6LRR-RLP\_2852

ACTTCACTTTATACACATCTTCTTTTTCTTAGGAGACAAAATGCATGTGTTATTACAAGTGTGGGACTTTC  
ATTTAAATCTTCTTAAATTGACTTGAGGATGTTATTTGACTTACAGT

>M6-PGSC0003DMG400016357-(rev)M6LRR-RLP\_2914

TGGGACTTTCATTTAAATCTTCTTAAATTGACTTGAGGATGTTATTTGACTTACAGTGCAATGACTTGAG  
AAAGATTAACAGTCTTACATATTGTGTGACACATTGAATGTGAATGT

>M6-PGSC0003DMG400016357-(rev)M6LRR-RLP\_2976

TGACTTGAGAAAGATTAACAGTCTTACATATTGTGTGACACATTGAATGTGAATGTGTAATTGACAAC  
TCTAAAAGTACTGAAATGACTAGGTGACCTTCCTGGAATTGATTATTT

>M6-PGSC0003DMG400016357-(rev)M6LRR-RLP\_3038

TTGACAACCTCTAAAAGTACTGAAATGACTAGGTGACCTTCCTGGAATTGATTATTTCAAAGCAAACCT  
TAAATGTGCTATATAGGATTTGTTATCTGACAATTTCCACCTGCATCAAA

>M6-PGSC0003DMG400016357-(rev)M6LRR-RLP\_3100

GCAAACCTTAAATGTGCTATATAGGATTTGTTATCTGACAATTTCCACCTGCATCAAACAGTCCAGAAGC  
TGTTGTGGATTGTCTGTTAAGTACTCCTTCAATTATTATTTTGTGTC

>M6-PGSC0003DMG400016357-(rev)M6LRR-RLP\_3162

CCAGAAGCTGTTGTGGATTGTCTGTTAAGTACTCCTTCAATTATTATTTTGTGTC AAGGTTTATACACC  
AATTATTCATAGTGGTAGGAAGCTCAAAGGAAAGGTGTA AAAATATCCCA

>M6-PGSC0003DMG400016357-(rev)M6LRR-RLP\_3224

TTATACACCAATTATTCATAGTGGTAGGAAGCTCAAAGGAAAGGTGTA AAAATATCCCAATAGATAGGGA  
ATGGAACAAGCTTTAAGGATTTTCGACTGGCACGAAGAGTTTGATTCTTAA

>M6-PGSC0003DMG400016357-(rev)M6LRR-RLP\_3286

ATAGGGAATGGAACAAGCTTTAAGGATTTTCGACTGGCACGAAGAGTTTGATTCTTAACTCTAACTCTAA  
GGTCTTGAATACCTGGAGTTAAGAAATTATGTT CATAACATTCAAGAACT

>M6-PGSC0003DMG400016357-(rev)M6LRR-RLP\_3348

AACTCTAAGGTCTTGAATACCTGGAGTTAAGAAATTATGTTTCATAACATTCAAGAAGCTTGAATTATTCTGT  
GCTCATGGGAACTAAATTAAGACATGGCATAACACCTTCTTTTGCTTAAA

>M6-PGSC0003DMG400016357-(rev)M6LRR-RLP\_3410

TTATTCTGTGCTCATGGGAACTAAATTAAGACATGGCATAACACCTTCTTTTGCTTAAAAAAGTCGACACTA  
CTTAAATAAAAGGACACTAATTATCAACTTGGGACAGAAAGTAAGACCT

>M6-PGSC0003DMG400016357-(rev)M6LRR-RLP\_3472

TCGACACTACTTAAATAAAAGGACACTAATTATCAACTTGGGACAGAAAGTAAGACCTTAAATCACAA  
AAAGTGCAGATCCAAACCAATTAATAAGACGAATTGTGAAAATAGACCTAC

>M6-PGSC0003DMG400016357-(rev)M6LRR-RLP\_3534

ATCACAAAAAGTGCAGATCCAAACCAATTAATAAGACGAATTGTGAAAATAGACCTACATCAATTGCAC  
AAAATTCTTAAATGGTGTGATTTGCAGATTTTAACTTGAGATCAAATAA

>M6-PGSC0003DMG400016357-(rev)M6LRR-RLP\_3596

ATTGCACAAAATTCTTAAATGGTGTGATTTGCAGATTTTAACTTGAGATCAAATAAGCTTCATGGCCC  
TATAAATGATTCAAGGACTGAGAAGCTTGTGCTAAAATTCTAGTAATAG

>M6-PGSC0003DMG400016357-(rev)M6LRR-RLP\_3658

CATGGCCCTATAAATGATTCAAGGACTGAGAAGCTTGTGCTAAAATTCTAGTAATAGATCTCTCATCCA  
ATGGATTTAGTGGAGATTTACCTGTGAGCCTTTTTGAGAATTTTCAAGCC

>M6-PGSC0003DMG400016357-(rev)M6LRR-RLP\_3782

AAATGATTGGTGAAGAATAGTGGAAACCCAGAGTATGTAGCAGAAACATATTCCACTTTATACACAAATTC  
TTTGATAGTGACAACAAAGGACTGGATCTTGAAGCTTCCCTCAAGTTTTGA

>M6-PGSC0003DMG400016357-(rev)M6LRR-RLP\_3844

ACAAATTCTTTGATAGTGACAACAAAGGACTGGATCTTGAAGCTTCCCTCAAGTTTTGACTATGGACATAA  
TTATCGATCTCTCAAGGAATAGATTTGAAGGTTTCTATCCCAAGTATTAT

>M6-PGSC0003DMG400016357-(rev)M6LRR-RLP\_3906

GGACATAATTATCGATCTCTCAAGGAATAGATTTGAAGGTTTCTATCCCAAGTATTATTGGAGATCTAAT  
TGAAGCTTCGTACGTTGAAGCTTCCCTCATAATAACTTGAAAGGTCATATAC

>M6-PGSC0003DMG400016357-(rev)M6LRR-RLP\_3968

GATCTAATTGAAGCTTCGTACGTTGAAGCTTCCCTCATAATAACTTGAAAGGTCATATACCAGCATCAATGCA



ACATTTATCTGTACTTGAATCATTGGATCTCTCATTCAACAATATCGGC

>M6-PGSC0003DMG400016357-(rev)M6LRR-RLP\_4027

AGCATCAATGCAACATTTATCTGTACTTGAATCATTGGATCTCTCATTCAACAATATCGGCGGAGAAATTC  
CACAACTTGTATCCCTCACATCACTTGAAGTCTTAAATCTCTCTCA

>M6-PGSC0003DMG400016357-(rev)M6LRR-RLP\_62

TACCTAGAAATTCTTCTCCTTTTCGCACAATAATCTCAATGGAGAGATTGCTTCACCCATATGCAATCTGAA  
AACACTACGAGTGCTAGATTTGGGCAGCAATAATTTGGAGGGAACAATC

>M6-PGSC0003DMG400016357-(rev)M6LRR-RLP\_806

TTGGAAGGTATTATACCATCATCACTGCACCAGTTATCTGTACTTGAATCATTGGATCTCTCATCCAACAA  
AATCAGCGGAGAAATTCACAACAACCTGCATCCCTCAAATCACTTGAA

>M6-PGSC0003DMG400016365-(rev)M6OtherRLKTM\_0

CTCTCTCTCTTTCTTTGTGAATGTGTAAAGTCTCCAATTGGGATATAATGGAATAGCAAAGAACACAGCA  
GCCCTATTTGGACCATCAAAGAAGAGAGTTGAGTTTTGAACTCAAAACAA

>M6-PGSC0003DMG400016365-(rev)M6OtherRLKTM\_1054

CTGTTTAAGCTACCAAGATTGACTGTATTGTCTCTACAAGAGAATCGAATCTCGGGACAGCTTAGCAGTC  
AGATTGGTAATCTGTCTAGTTTGGTTCATTTGGATATTTGTTCAAATGGA

>M6-PGSC0003DMG400016365-(rev)M6OtherRLKTM\_1116

TAGCAGTCAGATTGGTAATCTGTCTAGTTTGGTTCATTTGGATATTTGTTCAAATGGATTTTCAGGAAACA  
TTCCAGATGTGTTTGATAGATTAGGGAATTTAACATATTTGTCAGCTCA

>M6-PGSC0003DMG400016365-(rev)M6OtherRLKTM\_1178

CAGGAAACATTCCAGATGTGTTTGATAGATTAGGGAATTTAACATATTTGTCAGCTCATTCAAATAGGTT  
CTTTGGTAATATAACCAACTTCATTGGCAAATTCTGGGACTGTTAGTTCTC

>M6-PGSC0003DMG400016365-(rev)M6OtherRLKTM\_124

AAAACAAACAAAACAAGAAAATACCCCTTTTGTCTCTACCTCAAGCTTCCATTTTTTTTTCTCTCCTTG  
TGGTTCAAAGGTTTGATTTTTTTCTGTTTTTCCATTCATTCATCACT

>M6-PGSC0003DMG400016365-(rev)M6OtherRLKTM\_1240

AATAGGTTCTTTGGTAATATAACCAACTTCATTGGCAAATTCTGGGACTGTTAGTTCTCTTAGTTTGAGAAA  
TAATTCTTTAGGGGGTATCATAGAGCTTAATTGTTTCGGCAATGGTTAGT

>M6-PGSC0003DMG400016365-(rev)M6OtherRLKTM\_1302

TTTGAGAAATAATTCTTTAGGGGGTATCATAGAGCTTAATTGTTTCGGCAATGGTTAGTCTTGTTTCGCTT  
GATCTGGCTACTAACGGGTTCCGTGGGTTAGTTCCTGATTATCTTCCTAA

>M6-PGSC0003DMG400016365-(rev)M6OtherRLKTM\_1364

TTTCGCTTGATCTGGCTACTAACGGGTTCCGTGGGTTAGTTCCTGATTATCTTCCTAACTGTCAAAGGTTG  
CAAATCAATCTGGCTAGAACTCTTCACTGGACAAGTCCCGGAAA

>M6-PGSC0003DMG400016365-(rev)M6OtherRLKTM\_1426

CAAAGTTGCAAATCAATCTGGCTAGAACTCTTCACTGGACAAGTCCCGGAAAGTTTCAAGAATT  
TTCATAGTCTTTCATCCCTTTCAGTCTCGAACAACAGTATGCATAATATT

>M6-PGSC0003DMG400016365-(rev)M6OtherRLKTM\_1488

CAAGAATTTTCATAGTCTTTCATCCCTTTCAGTCTCGAACAACAGTATGCATAATATTGATGCTGCTCTCA  
GAATTTTACAGCATTGCAAGAAGTGTCTACTTTGGTCCTTACTCTGAA

>M6-PGSC0003DMG400016365-(rev)M6OtherRLKTM\_1550

CTGCTCTCAGAATTTTACAGCATTGCAAGAAGTGTCTACTTTGGTCCTTACTCTGAATTTTCGGGATGAG  
GTTTTGCCTACTGATCCTAGCCTGCAGTTTAGTGAGCTGAAAGCTCTCA

>M6-PGSC0003DMG400016365-(rev)M6OtherRLKTM\_1612

CGGGATGAGGTTTTGCCTACTGATCCTAGCCTGCAGTTTAGTGAGCTGAAAGCTCTCATTATTGCCAATT  
GCAGACTCACTGGAGTTGTTCCCTCAGTGGTTGAGAAATAGCTCAAAACTG

>M6-PGSC0003DMG400016365-(rev)M6OtherRLKTM\_1674

TGCCAATTGCAGACTCACTGGAGTTGTTCCCTCAGTGGTTGAGAAATAGCTCAAAACTGCAACTGTTGGAC  
TTGTCGTGGAACCATTTGACGGGAACACTCCACCTTGGATTGGAGATTT

>M6-PGSC0003DMG400016365-(rev)M6OtherRLKTM\_1736

TGTTGGACTTGTCGTGGAACCATTTGACGGGAACACTCCACCTTGGATTGGAGATTTCCAGTTTCTATT  
CTATCTGGATTTTTCCAACAAGTCTTTTACCGGGGAGATTCCAAAAGAAA

>M6-PGSC0003DMG400016365-(rev)M6OtherRLKTM\_1798

TTTCTATTCTATCTGGATTTTTCCAACAAGTCTTTTACCGGGGAGATTCCAAAAGAAATTACCGGATTGAA  
GAGCCTAATCTATGGCCCTGTCTCAATGAATGAGCCATCACCAGACTTT

>M6-PGSC0003DMG400016365-(rev)M6OtherRLKTM\_186

CTCTTCTTGTTGGTTCAAAGTTTGATTTTTTTCTTGTTTTTCCATTCATTCATCACTTTTGTCAAGTACCCT  
TTTCTTGTTTCTTGCCATTTGTACTTTTGTGATGTTTTCTTTGATT

>M6-PGSC0003DMG400016365-(rev)M6OtherRLKTM\_1860

CGGATTGAAGAGCCTAATCTATGGCCCTGTCTCAATGAATGAGCCATCACCAGACTTCCCTTTTTCTTGA  
AAAGAAATGTAAGTGTTAGAGGGTTGCAGTATAATCAGATTTTTAGCTT

>M6-PGSC0003DMG400016365-(rev)M6OtherRLKTM\_1922

TTTTCTTGAAAAGAAATGTAAGTGTTAGAGGGTTGCAGTATAATCAGATTTTTAGCTTCCCTCCAACACT  
GGAAGTAGGTAACAACCTTCTCACTGGAGCAATTTTGCCGGAATTTGGGA

>M6-PGSC0003DMG400016365-(rev)M6OtherRLKTM\_1984

CCAACACTGGAAGTAGGTAACAACCTTCTCACTGGAGCAATTTTGCCGGAATTTGGGAATCTGAAAAGG  
TTACATGTTTTGGATCTAAAAAGCAACAACCTTATCTGGGACAATACCAAGT

>M6-PGSC0003DMG400016365-(rev)M6OtherRLKTM\_2046

GAAAAGGTTACATGTTTTGGATCTAAAAAGCAACAACCTTATCTGGGACAATACCAAGTAGCCTGTCTGG  
TATGGCGAGCATAGAGAATTTGGATCTATCCCACAACAATCTGATTGGCAA

>M6-PGSC0003DMG400016365-(rev)M6OtherRLKTM\_2108

TGTCTGGTATGGCGAGCATAGAGAATTTGGATCTATCCCACAACAATCTGATTGGCAACATACCCTCCTC  
TTAGTCCAATGCAGCTTTATGTCAAAGTTCAGTGTTGCTTATAACAAGC

>M6-PGSC0003DMG400016365-(rev)M6OtherRLKTM\_2170

CCCTCCTCTTTAGTCCAATGCAGCTTTATGTCAAAGTTCAGTGTTGCTTATAACAAGCTCTCAGGGGAAAT  
TCCTACTGGAGGTCAGTTCCAACATTTCCAACATCAAGTTTCGAGGGGA

>M6-PGSC0003DMG400016365-(rev)M6OtherRLKTM\_2232

AGGGGAAATTCCTACTGGAGGTCAGTTCCAACATTTCCAACATCAAGTTTCGAGGGAAACCAAGGACT  
CTGCGGTGAACATGGTACCCCCTGTCAAATGGCAGCCAAGTTCCTCGTGA

>M6-PGSC0003DMG400016365-(rev)M6OtherRLKTM\_2294

AAGGACTCTGCGGTGAACATGGTACCCCCTGTCAAATGGCAGCCAAGTTCCTCGTGACTTGGTCAAAG  
GAAAGAGGCGCAAAGGAACTGTCATTGGCATGGGTATTGGTATTGGTCTTG

>M6-PGSC0003DMG400016365-(rev)M6OtherRLKTM\_2356

GTCAAAGGAAAGAGGCGCAAAGGAACTGTCATTGGCATGGGTATTGGTATTGGTCTTGGAACAATTTTT  
CTTCTTGCTCTCATGTACTTGATTGTTATACGGGCAAGCAGTCGAAAAGTA

>M6-PGSC0003DMG400016365-(rev)M6OtherRLKTM\_2418

AATTTTTCTTCTTGCTCTCATGTACTTGATTGTTATACGGGCAAGCAGTCGAAAAGTAGTTGATCAGGAA

AAGGAGTTGGATGCTTCTAACAGGGAAGTGGAGGACTTAGGCTCAAGTCT

>M6-PGSC0003DMG400016365-(rev)M6OtherRLKTM\_248

TCAAGTACCCTTTTCTTGTTTCTTGCCATTTGTACTTTTGTGATGTTTTCTTGATTTTGAAGCTTGATACA  
GATAGAAATGAACAATCTTGATGTAAAAAATTGTGTAGTTACATCAT

>M6-PGSC0003DMG400016365-(rev)M6OtherRLKTM\_2480

ATCAGGAAAAGGAGTTGGATGCTTCTAACAGGGAAGTGGAGGACTTAGGCTCAAGTCTGGTGATATTTT  
TCCATAACAAGGAGAATACTAAAGAGATGTGTCTTGATGACCTTTTGAAAT

>M6-PGSC0003DMG400016365-(rev)M6OtherRLKTM\_2542

ATATTTTTCCATAACAAGGAGAATACTAAAGAGATGTGTCTTGATGACCTTTTGAAATGTACAGACA  
TTGATCAGTCAAATATTGTTGGATGTGGGGGCTTCGGCTTGGTCTACAAG

>M6-PGSC0003DMG400016365-(rev)M6OtherRLKTM\_2604

AGACAACCTTTGATCAGTCAAATATTGTTGGATGTGGGGGCTTCGGCTTGGTCTACAAGGCCATTCTTCGT  
GATGGTAGGAAAGTTGCCATCAAGCGGCTTTCAGGTGACTACGGGCAGAT

>M6-PGSC0003DMG400016365-(rev)M6OtherRLKTM\_2666

TTCTTCGTGATGGTAGGAAAGTTGCCATCAAGCGGCTTTCAGGTGACTACGGGCAGATGGAACGAGAAT  
TCCAAGCTGAAGTTGAATCTCTTTCAAGAGCTCAGCATCCAAATCTTGTTT

>M6-PGSC0003DMG400016365-(rev)M6OtherRLKTM\_2728

CGAGAATCCAAGCTGAAGTTGAATCTCTTTCAAGAGCTCAGCATCCAAATCTTGTTTCATCTCCAAGGAT  
ATTGCAAGTACAGAACTGACCGGCTTCTAATTTATTCCTACATGGAGAAT

>M6-PGSC0003DMG400016365-(rev)M6OtherRLKTM\_2790

CCAAGGATATTGCAAGTACAGAACTGACCGGCTTCTAATTTATTCCTACATGGAGAATGGAAGCTTGGA  
TTATTGGCTGCACGAGAAAGTTGACGGACCTGCTTTATTGGACTGGGATCT

>M6-PGSC0003DMG400016365-(rev)M6OtherRLKTM\_2852

GCTTGGATTATTGGCTGCACGAGAAAGTTGACGGACCTGCTTTATTGGACTGGGATCTGAGGCTTCAGA  
TTGCTCAAGGGGCTGCAAGAGGACTTGACACTTGCACCTAGCGTGCGATC

>M6-PGSC0003DMG400016365-(rev)M6OtherRLKTM\_2914

CTTCAGATTGCTCAAGGGGCTGCAAGAGGACTTGACACTTGCACCTAGCGTGCGATCCTCATATCTTGC  
ACCGAGATATAAAGTCTAGTAACATTCTTCTTGACGAAAATTTTGAAGCT

>M6-PGSC0003DMG400016365-(rev)M6OtherRLKTM\_2976

TATCTTGCACCGAGATATAAAGTCTAGTAACATTCTTCTTGACGAAAATTTGAAGCTCACTTAGCTGATT  
TCGGTCTTGCAAGGATTATTCGGCCCTACGACACTCATGTGACCACTGA

>M6-PGSC0003DMG400016365-(rev)M6OtherRLKTM\_3038

TAGCTGATTTCCGGTCTTGCAAGGATTATTCGGCCCTACGACACTCATGTGACCACTGATGTTGTCGGAAC  
ATTAGGCTATATACCTCCTGAATATGGTCAAGCTTCCGTTGCTACCTATA

>M6-PGSC0003DMG400016365-(rev)M6OtherRLKTM\_3100

GTCGGAACATTAGGCTATATACCTCCTGAATATGGTCAAGCTTCCGTTGCTACCTATAAAGGGGACGTGT  
ATAGCTTTGGTGTGGTTCTTTTGGAGCTTCTAACATGCAAAGACCGATG

>M6-PGSC0003DMG400016365-(rev)M6OtherRLKTM\_3162

GGACGTGTATAGCTTTGGTGTGGTTCTTTTGGAGCTTCTAACATGCAAAGACCGATGGATCCGTGCAA  
GCCTAGAGCAAGCAGAGATTTAATCTCTTGGGTGATCCAAATGAAGAAACA

>M6-PGSC0003DMG400016365-(rev)M6OtherRLKTM\_3224

CGTGCAAGCCTAGAGCAAGCAGAGATTTAATCTCTTGGGTGATCCAAATGAAGAAACAGAAGAGGGAA  
ACTGAAGTCTTTGATCCTCTGATATATGACAAGCAGCACGCGAAGGAAATGT

>M6-PGSC0003DMG400016365-(rev)M6OtherRLKTM\_3286

AGGGAAACTGAAGTCTTTGATCCTCTGATATATGACAAGCAGCACGCGAAGGAAATGTTATTTGTCCTT  
GAAATTGCTTGCCTTTGTTGCATGAATCTCCTAATATAAGGCCTTCTTCG

>M6-PGSC0003DMG400016365-(rev)M6OtherRLKTM\_3348

TGTCCTTGAAATTGCTTGCCTTTGTTTGCATGAATCTCCTAATATAAGGCCTTCTTCGCAGCAGTTATTTAC  
TTGGCTCGACAACATAAACACACCACCTGATGTTTCATGTGTTTTAGAG

>M6-PGSC0003DMG400016365-(rev)M6OtherRLKTM\_3410

AGTTATTTACTTGGCTCGACAACATAAACACACCACCTGATGTTTCATGTGTTTTAGAGGAAAACCTGTTGT  
CGATAACTTATATTTTCAGCGGATGTCCTGCACATATAGCAGTGATTC

>M6-PGSC0003DMG400016365-(rev)M6OtherRLKTM\_3472

ACTTGTTGTCGATAACTTATATTTTCAGCGGATGTCCTGCACATATAGCAGTGATTCTGGTGTAATGGT  
TGTATCTTATCCCTATTTTTATCTTCTGGAATTGAAGAATATATACTA

>M6-PGSC0003DMG400016365-(rev)M6OtherRLKTM\_3534

GTAAATGGTTGTATCTTATCCCTATTTTTATCTTCTGGAATTGAAGAATATATACTATGTTTCTTCTCAA  
CATGTACAAATAACATTGTGAATTTGGATGTGACTTTATCTTACCTA

>M6-PGSC0003DMG400016365-(rev)M6OtherRLKTM\_434  
TGTTGCAACTTTGTGTGATCTTTTTGTTTCTTGGGATTTGCTTACAAGCTCAATCTCAAATCCCCAGA  
TGATATGTAATCCAAAAGATTTTAAAGCTCTGGAGGGTTTTGTGAAGA

>M6-PGSC0003DMG400016365-(rev)M6OtherRLKTM\_496  
CCCCAGAACTTGATATGTAATCCAAAAGATTTTAAAGCTCTGGAGGGTTTTGTGAAGAGTTTAGAGACA  
GTTCTTGATTCTGGTATTTGGGGAATTCTACAAATTGTTGTAATTTGGTA

>M6-PGSC0003DMG400016365-(rev)M6OtherRLKTM\_558  
AGAGACAGTTCTTGATTCTGGTATTTGGGGAATTCTACAAATTGTTGTAATTTGGTAGGTGTTACTTGT  
GATTCTGGGAGGGTGGTGAAGTTGGAGCTTGGGAAAAGAAGGTTAAATGG

>M6-PGSC0003DMG400016365-(rev)M6OtherRLKTM\_620  
TTACTTGTGATTCTGGGAGGGTGGTGAAGTTGGAGCTTGGGAAAAGAAGGTTAAATGGGAACTTTCT  
GAATCTTTAGGTAATTTGGATGAGCTAAGAACCCTTAATCTGTCTCATAATT

>M6-PGSC0003DMG400016365-(rev)M6OtherRLKTM\_682  
CTTTCTGAATCTTTAGGTAATTTGGATGAGCTAAGAACCCTTAATCTGTCTCATAATTTCTCAAAGGACC  
TGTTCCTTTTACACTGTTGCATTTGTCTAAATTGGAAGTATTTGACTTG

>M6-PGSC0003DMG400016365-(rev)M6OtherRLKTM\_744  
CAAAGGACCTGTTCTTTTACACTGTTGCATTTGTCTAAATTGGAAGTATTTGACTTGAGCAATAATGATT  
TCTTTGGATTGTTTCTAGTAGCATGAACTTGCCTTTGCTTCATGTTTT

>M6-PGSC0003DMG400016365-(rev)M6OtherRLKTM\_806  
ATAATGATTTCTTTGGATTGTTTCTAGTAGCATGAACTTGCCTTTGCTTCATGTTTTCAATATATCTGATA  
ATTCCTTTGAAGGACCAGTTCCTATGGGTATCTGTGAAAATTCAACTA

>M6-PGSC0003DMG400016365-(rev)M6OtherRLKTM\_868  
ATATCTGATAATTCCTTTGAAGGACCAGTTCCTATGGGTATCTGTGAAAATTCAACTAGAGTTTCTGTTAT  
TAAGATGGGGGTTAATTATTTAATGGTAGTCTTCTGTAGGAATTGGG

>M6-PGSC0003DMG400016365-(rev)M6OtherRLKTM\_930  
TTCTGTTATTAAGATGGGGGTTAATTATTTAATGGTAGTCTTCTGTAGGAATTGGGAATTGTGGTTCA  
TTAGAGCTTTTTTGCCTAGGCTCTAACCTTCTTTCTGGTAGTTTGCCTGA

>M6-PGSC0003DMG400016365-(rev)M6OtherRLKTM\_992  
GTGGTTCATTAGAGCTTTTTTGCCTAGGCTCTAACCTTCTTTCTGGTAGTTTGCCTGATGAACTGTTAAG

CTACCAAGATTGACTGTATTGTCTCTACAAGAGAATCGAATCTCGGGAC

>M6-PGSC0003DMG400016409M6RLKantifungi(GNK)\_0

ATGAGAAGCTAGAGGATATGGAGTAGCAGTTACCTGCACTGGACTAGATACCAACTATGCACTTGCCCAA

TGCTATAGTAATCTTTCTTTAGTCGACTGCGTCTTATGCTTCTCTGAAGCG

>M6-PGSC0003DMG400016409M6RLKantifungi(GNK)\_126

CTCCTGCCCAATGCTACCCTTATAACGGACGGAGAATTTATCTTGATGGATGCTTTTTTCGAGTGGACA

ATTACATGTTCTATGACCAGTATTTAGGTCCAGAAGACAGGCATGTATGC

>M6-PGSC0003DMG400016409M6RLKantifungi(GNK)\_252

AGGACGACAAAGGGTACATTGTTCCAACAGAATGCTAGGCGAGCCGTGCAGCAAGCAGTTGCAAATGC

ACTGAGTAATGATAGTTATGCACGTGCCGAAGTGTCAGTACCCGGTCCTTCC

>M6-PGSC0003DMG400016409M6RLKantifungi(GNK)\_315

AATGCACTGAGTAATGATAGTTATGCACGTGCCGAAGTGTCAGTACCCGGTCCTTCCAACGAGACAGCT

TATGTTCTCGCTGATTGTTGGAAGACACTAAGCGCGAATTCCTGTGCAGCG

>M6-PGSC0003DMG400016409M6RLKantifungi(GNK)\_504

GGATGCTTCATGAGGTATTCTGATACAAATTTTCTCAATGATACTTCTACCAGTGGAGGTTTCGTCATCAA

GGGGTACGTTTTGCTCTTTTTTCGTCTGGTTTACCGGTTATTTATGAACT

>M6-PGSC0003DMG400016409M6RLKantifungi(GNK)\_567

TCATCAAGGGGTACGTTTTGCTCTTTTTTCGTCTGGTTTACCGGTTATTTATGAACTAATTTTTACTTTCAA

ATCAGCATAATGCAGGAAAAGTTGTAGTCATTGTCATAGTTGTTGTAA

>M6-PGSC0003DMG400016409M6RLKantifungi(GNK)\_63

GCCCAATGCTATAGTAATCTTTCTTTAGTCGACTGCGTCTTATGCTTCTCTGAAGCGGAACTCTCCTGCC

CCAATGCTACCCTTATAACGGACGGAGAATTTATCTTGATGGATGCTTT

>M6-PGSC0003DMG400016409M6RLKantifungi(GNK)\_630

TACTTTCAAATCAGCATAATGCAGGAAAAGTTGTAGTCATTGTCATAGTTGTTGTAATTAGTTCCGTTGTC

GTTTTGGAGCAGCTTCTTTCGTTGGTTTTGGTGTGGGAAGAACAAC

>M6-PGSC0003DMG400016409M6RLKantifungi(GNK)\_693

CCGTTGTCGTTTTGGAGCAGCTTCTTTCGTTGGTTTTGGTGTGGGAAGAACAACAATCCAGAAGAA

GAGAAAAGGTAAATACTTTTGTGCCAAAATATCAATGATGTACATATTG

>M6-PGSC0003DMG400016409M6RLKantifungi(GNK)\_756

AGAAGAAGAGAAAAGGTAAATACTTTTGTGCCAAAAATATCAATGATGTACATATTGCTGAGTATATAT  
CTTGCGATTTGCACACAACACTGTACCGAGACAACCTTCAAGAATTAACCTGA

>M6-PGSC0003DMG400016409M6RLKantifungi(GNK)\_819

ATATATCTTGCGATTTGCACACAACACTGTACCGAGACAACCTTCAAGAATTAACCTGAAGCGTTATGGCCT  
ACTCATGCTTTTCCTCGGAAATTTGAACTTGTTAGGTGCAAATGATGTTG

>M6-PGSC0003DMG400016409M6RLKantifungi(GNK)\_878

CGTTATGGCCTACTCATGCTTTTCCTCGGAAATTTGAACTTGTTAGGTGCAAATGATGTTGAGAAATTGG  
TGAAGATCCTTCATCAAAACAGCTTAAACTTCAAGTATTCGACACTTGAC

>M6-PGSC0003DMG400016424-(rev)M6LRR-RLP\_0

GTTTTTTGAACATTTTAGTGCAACAATGGGCTACGTAAACCTTGATTTTTTATGCTATTTCCCTTCCTCTG  
CCATCTTTCTTTCTCCTCATCCTTACCTCATTTGTGCCCAAACATCA

>M6-PGSC0003DMG400016424-(rev)M6LRR-RLP\_128

CTCTTCTACAATTCAAGCACATGTTTACAATAAGTTCTGTTGCTTTTGATAGACGTTGTTTCACGATAACA  
GGCCAGTGGATTCAAGTCATATCCAAAACTTTTCGTGGAACAAGAGCA

>M6-PGSC0003DMG400016424-(rev)M6LRR-RLP\_192

GATAACAGGCCAGTGGATTCAAGTCATATCCAAAACTTTTCGTGGAACAAGAGCACAGATTGTTGCTC  
ATGGGATGGAGTTTATTGTGATGAGACGACAGGAGAAGTGATTGAGCTCAA

>M6-PGSC0003DMG400016424-(rev)M6LRR-RLP\_256

TGCTCATGGGATGGAGTTTATTGTGATGAGACGACAGGAGAAGTGATTGAGCTCAACCTCACTTGCAGC  
CGACTTCAAGGCAAGTTTCACTCCAACAGTAGCCTCTTTGAACTCTCCAAT

>M6-PGSC0003DMG400016424-(rev)M6LRR-RLP\_320

GCAGCCGACTTCAAGGCAAGTTTCACTCCAACAGTAGCCTCTTTGAACTCTCCAATCTCAAAGGCTTGA  
TTTGTCTAGTAATAATTTCTCTGGATCACTCATTTACCTAAATTTGGTG

>M6-PGSC0003DMG400016424-(rev)M6LRR-RLP\_384

GCTTGATTTGTCTAGTAATAATTTCTCTGGATCACTCATTTACCTAAATTTGGTGAGCTTTCTAGTTTGAC  
TCATCTTGATTTGTCGTATTCAAGTTTTACAGGTCTAATACCAGCAGA

>M6-PGSC0003DMG400016424-(rev)M6LRR-RLP\_448

AGTTTGACTCATCTTGATTTGTCGTATTCAAGTTTTACAGGTCTAATACCAGCAGAAATCTCTCGTTTTTCT  
AAATTACAAGTTCTTAGTATCCACAGTTATCCACATGAGCTTAGATTC



>M6-PGSC0003DMG400016424-(rev)M6LRR-RLP\_512

GTTTTTCTAAATTACAAGTTCTTAGTATCCACAGTTATCCACATGAGCTTAGATTTCGTACCTCACAATTTG  
AACTGCTCCTTAAGAACTTGACCCAATTAACAGAGCTCAACCTTAGGT

>M6-PGSC0003DMG400016424-(rev)M6LRR-RLP\_64

TTCCTCTGCCATCTTTCTTCTCCTCATCCTTACCTCATTTGTGCCCAAACATCAAGCTCTTGCTCTTCTAC  
AATTCAAGCACATGTTTACAATAAGTTCTGTTGCTTTTGATAGACGT

>M6-PGSC0003DMG400016424-(rev)M6LRR-RLP\_640

ATCTCTTCCACCATCCTCTGAATTTCTTCTTATTAACTACTCTACACCTTGGGAATACACAGTTATAC  
GGGATATTGCCGGAAGAGTTTTCCACCTTTCCAACCTTAGAATCTCTT

>M6-PGSC0003DMG400016424-(rev)M6LRR-RLP\_704

AGTTATACGGGATATTGCCGGAAGAGTTTTCCACCTTTCCAACCTTAGAATCTCTTCATTTATCAAAAAAT  
CCCCAGCTCACTGTTAGGTTTCCCAAACCAAATGGAACAGCAGTGCAT

>M6-PGSC0003DMG400016424-(rev)M6LRR-RLP\_768

AAAAAATCCCAGCTCACTGTTAGGTTTCCCAAACCAAATGGAACAGCAGTGCATCACTCATGGAGTTA  
GTTCTCAATGGTGTGAATGCTACTGGTAGGATACCTGAATCATTGGTCA

>M6-PGSC0003DMG400016424-(rev)M6LRR-RLP\_832

GAGTTAGTTCTCAATGGTGTGAATGCTACTGGTAGGATACCTGAATCATTGGTCATCTAACTTCACTGC  
GTACATTGAGAATAGCTTCTTCTAATCTCTCAGGCTCTATTCCCTAAACCT

>M6-PGSC0003DMG400016424-(rev)M6LRR-RLP\_896

CACTGCGTACATTGAGAATAGCTTCTTCTAATCTCTCAGGCTCTATTCCCTAAACCTCTATGGAATCTCACC  
AACATAGAGCTTTTGAACCTTGGTCATAACCATCTTGAAGGACCAATTT

>M6-PGSC0003DMG400016424-(rev)M6LRR-RLP\_954

ATGGAATCTCACCAACATAGAGCTTTTGAACCTTGGTCATAACCATCTTGAAGGACCAATTTCTGATTCT  
TTAGATTTGGAAAGCTCAGGGCGTTATCACTTGCAAAGAACAACCTTTGA

>M6-PGSC0003DMG400016433-(rev)M6LysM-RLK\_0

AAAATTCTTTGTCTCCCACTTAAAGTAATGCATAAATCAAAGCTAAAACCTTTTTGTTTCTTGGACTAGAC  
CATGTTAAAAATGCTAAAAAGTCAAAAACCTGAATCTGTCAAGTGTCAAC

>M6-PGSC0003DMG400016433-(rev)M6LysM-RLK\_1037

GATGATATAGTTTTTTTCTTTTAAATCTCTGTTTCTGAAATGTATTGCAGATCAAAATGGAACCTATCCACC

ATTAAGGACTTCTACAAGGTATTCTCCAACCCCAATGAGCTCCTAATC

>M6-PGSC0003DMG400016433-(rev)M6LysM-RLK\_1098

ACTTATCCACCATTAAGGACTTCTACAAGGTATTCTCCAACCCCAATGAGCTCCTAATCATTCTTGAATG  
CTATAATATTGGTAGCTAATTGTTGTTTCTTGCTTTTCACAGTTCAAAA

>M6-PGSC0003DMG400016433-(rev)M6LysM-RLK\_1159

TTCTTGAATGCTATAATATTGGTAGCTAATTGTTGTTTCTTGCTTTTCACAGTTCAAAAAGGTTGTCCTTTAC  
TGCTACAGTGGCATCTTTATCTACTTATCAAGTCTAAGGTATTAATAAAT

>M6-PGSC0003DMG400016433-(rev)M6LysM-RLK\_122

ACACAACCATAATTACATCCATTGGCATCTTTCATTCAAGATTCTAAAAGAGTTCAAAAATCTCAAGCCAT  
TTCTCAACTAGTACAGAGTTGAAAATCAGATGATTTTTCAAGAAAATAG

>M6-PGSC0003DMG400016433-(rev)M6LysM-RLK\_1220

TTGTCCTTTACTGCTACAGTGGCATCTTTATCTACTTATCAAGTCTAAGGTATTAATAATAGCTCTGAATGT  
GATTGTAATCTACTAAAACTATGTTATTGACAGGATTCTCAGGTGGAG

>M6-PGSC0003DMG400016433-(rev)M6LysM-RLK\_1281

CTCTGAATGTGATTGTAATCTACTAAAACTATGTTATTGACAGGATTCTCAGGTGGAGCAATAACTGGC  
ATATCAGTTGCAGCAGTTCTTGTGGTTGCCCTTTTAGCGGTTTGCATATA

>M6-PGSC0003DMG400016433-(rev)M6LysM-RLK\_1342

ATAACTGGCATATCAGTTGCAGCAGTTCTTGTGGTTGCCCTTTTAGCGGTTTGCATATACATTACCTTTTA  
TAGAGGCAGGAAAACGGAGGAAAATCTTAACTTGGAACCTTACAAACAC

>M6-PGSC0003DMG400016433-(rev)M6LysM-RLK\_1403

TTACCTTTTATAGAGGCAGGAAAACGGAGGAAAATCTTAACTTGGAACCTTACAAACACAGTAGTAATA  
AGCATGTTCTGGTAATTTTATTGTTTTGAATCTACTGATGTATGCTTAAT

>M6-PGSC0003DMG400016433-(rev)M6LysM-RLK\_1464

TAGTAATAAGCATGTTCTGGTAATTTTATTGTTTTGAATCTACTGATGTATGCTTAATTACCTGTCAAAC  
CTATGGCGGAAATTCCTGTTAGTTGTTTCTCATTTATCTTGCCTTAGG

>M6-PGSC0003DMG400016433-(rev)M6LysM-RLK\_1525

CCTGTCAAACCTCTATGGCGGAAATTCCTGTTAGTTGTTTCTCATTTATCTTGCCTTAGGCATGAGGAATCA  
TCATCATCATCATAATGACTTGTTAAAGATATTACTCTATTTTCAA

>M6-PGSC0003DMG400016433-(rev)M6LysM-RLK\_1586

TGAGGAATCATCATCATCATCATAATGACTTGTTAAAGATATTACTCTATTTTCAATTTGTTAATTAGA  
TATAAGCTTCCTGCAATCGATCCTGATTAATGATTACTGTTCTGTGGA

>M6-PGSC0003DMG400016433-(rev)M6LysM-RLK\_1647

TGTTAATTAGATATAAGCTTCCTGCAATCGATCCTGATTAATGATTACTGTTCTGTGGAAGCAATGTTTTG  
GTTTCATCCTTAGAATAAACCTTGTAGTTTCTTTAAATGACTCAGGTCAA

>M6-PGSC0003DMG400016433-(rev)M6LysM-RLK\_1708

CAATGTTTTGGTTCATCCTTAGAATAAACCTTGTAGTTTCTTTAAATGACTCAGGTCAAGCAAATTTTGAG  
AGTTCTTTAGAAGGGGGATCTCTTAATAAGGGTGCTTCTCCAGAGGTCC

>M6-PGSC0003DMG400016433-(rev)M6LysM-RLK\_1769

AAATTTTGAGAGTTCTTTAGAAGGGGGATCTCTTAATAAGGGTGCTTCTCCAGAGGTCCCGAGGATTGC  
TGTGGATAAATCTATAGAATTTTCATATGATGAACTTGCTAATGCCAGTGA

>M6-PGSC0003DMG400016433-(rev)M6LysM-RLK\_183

CTCAAGCCATTTCTCAACTAGTACAGAGTTGAAAATCAGATGATTTTTCAAGAAAATAGAAGCTTTGAGT  
TAGTTTTAGGCCTTTTATTGTTAAACATTTTGTGGGTGGGGGCTAAATCC

>M6-PGSC0003DMG400016433-(rev)M6LysM-RLK\_1891

ACTTCAGCACAGCCTACAAGATTGGCCAAGGTGGTTTTGCATCTGTTTACTATGGAGAGTTAAGAGGCG  
AGGTTTCGTTACATTATTCTTGTTAGATTGAAACGATTAGCAATTATCCGGA

>M6-PGSC0003DMG400016433-(rev)M6LysM-RLK\_1952

AAGAGGCGAGGTTTCGTTACATTATTCTTGTTAGATTGAAACGATTAGCAATTATCCGGATACTCAGATTG  
ATCAGCGGTCTAGTTCTAGCTGCTTTATTATGTCACTGTTGCACCATTCA

>M6-PGSC0003DMG400016433-(rev)M6LysM-RLK\_2013

CTCAGATTGATCAGCGGTCTAGTTCTAGCTGCTTTATTATGTCACTGTTGCACCATTACATAATTGTCTA  
GACTCAGCATGCATTTCTTTCCATAGTCAAAATTACTCATGCTGCTAA

>M6-PGSC0003DMG400016433-(rev)M6LysM-RLK\_2074

TAATTGTCTAGACTCAGCATGCATTTCTTTCCATAGTCAAAATTACTCATGCTGCTAATCTCCTTTGTCTC  
AATAAAATGCAGAAAGCTGCTATCAAGAAGATGGATATGCAAGCAACA

>M6-PGSC0003DMG400016433-(rev)M6LysM-RLK\_2135

TCCTTTGTCTCAATAAAATGCAGAAAGCTGCTATCAAGAAGATGGATATGCAAGCAACAAAAGAGTTCC  
TTGCTGAATTGAAGTTTTGACACATGTTTCATCACTTGAACCTGGTAAATT

>M6-PGSC0003DMG400016433-(rev)M6LysM-RLK\_2196

AGAGTTCCTTGCTGAATTGAAGGTTTTGACACATGTTTCATCACTTGAACCTGGTAAATTCATTA  
CTCATAC  
TGATATACTATCTTTTCTTACTTGATTATAACCTCTCTGTCAACTGATC

>M6-PGSC0003DMG400016433-(rev)M6LysM-RLK\_2257

TTACTCATACTGATATACTATCTTTTCTTACTTGATTATAACCTCTCTGTCAACTGATCTGAGTCTATGGGG  
AAAAAATCAACATCATGGACTCATGGTTGGTTGAACTTGCTCACTTCG

>M6-PGSC0003DMG400016433-(rev)M6LysM-RLK\_2318

AGTCTATGGGGAAAAAATCAACATCATGGACTCATGGTTGGTTGAACTTGCTCACTTCGGCGATCTTTGA  
ACTTATTAGTAATGCAATTTACAGAAGTGGTCTGAGCCCCTTAGCTTGAT

>M6-PGSC0003DMG400016433-(rev)M6LysM-RLK\_2379

GATCTTTGAACTTATTAGTAATGCAATTTACAGAAGTGGTCTGAGCCCCTTAGCTTGATAATGTGATACTT  
TTCATAGTGAAAGTCAGGATTGGTGATTTAGTTCTGCCATACTTGAGAT

>M6-PGSC0003DMG400016433-(rev)M6LysM-RLK\_244

GCTTTGAGTTAGTTTTAGGCCTTTTATTGTTAAACATTTTGTGGGTGGGGGCTAAATCCCAGTGTAGTGA  
TGATTGTGATGCATTAGCTTCATTTTATGTATGGAATGGTGCAAACCTCA

>M6-PGSC0003DMG400016433-(rev)M6LysM-RLK\_2440

TGTGATACTTTTCATAGTGAAAGTCAGGATTGGTGATTTAGTTCTGCCATACTTGAGATTTAGCAGATGA  
TGAATCCTTTTACCTCATATGTCATAGAGAATATGAGGTAATATTTCACT

>M6-PGSC0003DMG400016433-(rev)M6LysM-RLK\_2501

AGCAGATGATGAATCCTTTTACCTCATATGTCATAGAGAATATGAGGTAATATTTCACTTGTTGAAACCTT  
TGCAGGTACGTTTGATAGGATATTGCATTGAAGGATCCTTGTTCTTAGT

>M6-PGSC0003DMG400016433-(rev)M6LysM-RLK\_2562

TTGAAACCTTTGCAGGTACGTTTGATAGGATATTGCATTGAAGGATCCTTGTTCTTAGTATATGAATACAT  
TGAAAATGGGAACCTAAGCCAACATTTGCGCGGTTTTGGTTAGTTCAGT

>M6-PGSC0003DMG400016433-(rev)M6LysM-RLK\_2623

ATGAATACATTGAAAATGGGAACCTAAGCCAACATTTGCGCGGTTTTGGTTAGTTCAGTTCCTTCTCATTG  
CGCGAAAAATTCATGTCTAACCAAATTTTCAAATCTCTCATAGTTCCATA

>M6-PGSC0003DMG400016433-(rev)M6LysM-RLK\_2684

TTCTCATTGCGCGAAAAATTCATGTCTAACCAAATTTTCAAATCTCTCATAGTTCCATATCCATTTTGTACT

CTTCAGTTCAGGTAAGGTACCATTGCCATGGTCTACCAGGGTGAAAA

>M6-PGSC0003DMG400016433-(rev)M6LysM-RLK\_2745

CATTTTGTACTCTTCAGTTCAGGTAAGGTACCATTGCCATGGTCTACCAGGGTGAAAATTGCTCTGGAT  
GCAGCTAGAGGCCTAGAGTACATCCATGAACACACTGTTCTGTTTACAT

>M6-PGSC0003DMG400016433-(rev)M6LysM-RLK\_2806

GCTCTGGATGCAGCTAGAGGCCTAGAGTACATCCATGAACACACTGTTCTGTTTACATCCATCGCGACA  
TTAAACAGCCAACATTTTGATCGACAAAACTTTCGTGCAAAGGTATGA

>M6-PGSC0003DMG400016433-(rev)M6LysM-RLK\_2867

ATCGCGACATTAACAGCCAACATTTTGATCGACAAAACTTTCGTGCAAAGGTATGAGAGTTCCGAA  
ACTAGAACTATGAAAACAAAAACCATGTGTACTAATTCAAGATAATCTTTT

>M6-PGSC0003DMG400016433-(rev)M6LysM-RLK\_2928

GTTCCGAAACTAGAACTATGAAAACAAAAACCATGTGTACTAATTCAAGATAATCTTTTTGCCTTGCAGG  
TTGCTGACTTTGGACTCACAAAACGATTGAAACTGAAGGTGGTTCGATG

>M6-PGSC0003DMG400016433-(rev)M6LysM-RLK\_2989

CCTTGCAGGTTGCTGACTTTGGACTCACAAAACGATTGAAACTGAAGGTGGTTCGATGAACACTCGTCT  
CGTTGGTACTTTTGGTTACATGGCCCCAGAGTAAGAATTTATTTCTTAT

>M6-PGSC0003DMG400016433-(rev)M6LysM-RLK\_305

GTGTAGTGATGATTGTGATGCATTAGCTTCATTTTATGTATGGAATGGTGCAAACCTCACTTTCATATCTA  
ATACTTTTTCAACCACCATCAAGAATATTCTTAGTTATAATCCTCAGAT

>M6-PGSC0003DMG400016433-(rev)M6LysM-RLK\_3050

CACTCGTCTCGTTGGTACTTTTGGTTACATGGCCCCAGAGTAAGAATTTATTTCTTATGGTATTAGTACT  
TATTCTATATCTCTAAACAAGATCAAATTATCAATTCCTACTTGCCTTA

>M6-PGSC0003DMG400016433-(rev)M6LysM-RLK\_3111

TATTAGTACTTATTCTATATCTCTAAACAAGATCAAATTATCAATTCCTACTTGCCTTATGTGCAGGTATGG  
TCAATTTGGTGATGTTTCACCCAAAATTGATGTATATGCATTTGGGGT

>M6-PGSC0003DMG400016433-(rev)M6LysM-RLK\_3172

TGCAGGTATGGTCAATTTGGTGATGTTTCACCCAAAATTGATGTATATGCATTTGGGGTGTGCTTTATC  
AATTAATATCTGCTAAACAAGCTATTATCAAGACTAGTGAAATTGCTACT

>M6-PGSC0003DMG400016433-(rev)M6LysM-RLK\_3233

TGCTTTATCAATTAATATCTGCTAAACAAGCTATTATCAAGACTAGTGAAATTGCTACTGAATCAAAGG  
GCTTGTGGATTGGTACCTTTGAATCATTCTTCACTCACCTCTAAACCA

>M6-PGSC0003DMG400016433-(rev)M6LysM-RLK\_3294

ATCAAAGGGCTTGTGGATTGGTACCTTTGAATCATTCTTCACTCACCTCTAAACCACTAAAAGAGTC  
TAAACTTAACTTTTAATTGGCAATATTTTTGCAGTTTGAGGATGTGC

>M6-PGSC0003DMG400016433-(rev)M6LysM-RLK\_3355

AAAAGAGTCTAAACTTAACTTTTAATTGGCAATATTTTTGCAGTTTGAGGATGTGCTTAATGAGGTT  
GATCCTAGAGAAGGGATATGCAAATTGGTAGATCCAAAACCTGGTGATGA

>M6-PGSC0003DMG400016433-(rev)M6LysM-RLK\_3416

AATGAGGTTGATCCTAGAGAAGGGATATGCAAATTGGTAGATCCAAAACCTGGTGATGATTATCCCCTG  
GATTCAGTGTGGAATGTAAGAAAACAATATATTTTTACAAGTGTATTAATG

>M6-PGSC0003DMG400016433-(rev)M6LysM-RLK\_3477

ATCCCCTGGATTCAAGTGTGGAATGTAAGAAAACAATATATTTTTACAAGTGTATTAATGTTAATGCGATT  
CATATAGCTAACCTCAGCTAGTTTGAAATTTACACGTACTCAGTGAATTG

>M6-PGSC0003DMG400016433-(rev)M6LysM-RLK\_3538

AATGCGATTCATATAGCTAACCTCAGCTAGTTTGAAATTTACACGTACTCAGTGAATTGATTGATTAATGC  
GATTCATATAGGTGGCTCTTCTTGCCAAGGCCTGCACACAGGAGAATCC

>M6-PGSC0003DMG400016433-(rev)M6LysM-RLK\_3599

TGATTAATGCGATTCATATAGGTGGCTCTTCTTGCCAAGGCCTGCACACAGGAGAATCCACAATTGAGAC  
CAAGTATGAGGTCAATAGTAGTAGCTTTAATGACAATATCATCCACAAGT

>M6-PGSC0003DMG400016433-(rev)M6LysM-RLK\_366

TTCATATCTAATACTTTTTCAACCACCATCAAGAATATTCTTAGTTATAATCCTCAGATAACCAATCCAGAT  
ATTATTCAATTCCAAAGCAGAGTTAATGTTCCCTTCTCATGTAGCTGT

>M6-PGSC0003DMG400016433-(rev)M6LysM-RLK\_3660

AATTGAGACCAAGTATGAGGTCAATAGTAGTAGCTTTAATGACAATATCATCCACAAGTGCAGATTGGA  
ACCTTGGTGAATTTTATGAGAACCAGGGCCTAGCCCATCTCATTTCAGGAC

>M6-PGSC0003DMG400016433-(rev)M6LysM-RLK\_3721

AGATTGGAACCTTGGTGAATTTTATGAGAACCAGGGCCTAGCCCATCTCATTTCAGGACGGTAATAAATT  
CCAATTGGAGTTATATTGTGTTACTCACAATCAGGAAATTAGAAGCACAA

>M6-PGSC0003DMG400016433-(rev)M6LysM-RLK\_3782

TAATAAATTCCAATTGGAGTTATATTGTGTTACTCACAAATCAGGAAATTAGAAGCACAAGTTTACAGAAG  
TAACACTTGTACATTTGTTTACATCAACCATATGATACACTATAGGTACT

>M6-PGSC0003DMG400016433-(rev)M6LysM-RLK\_3829

TTAGAAGCACAAGTTTACAGAAGTAACACTTGTACATTTGTTTACATCAACCATATGATACACTATAGGT  
ACTTTGCCAAAAAAGGAACCCTGTATATCTCTCCTTTGAGTAGGCACTTG

>M6-PGSC0003DMG400016433-(rev)M6LysM-RLK\_427

CCAATCCAGATATTATTCAATTCCAAAGCAGAGTTAATGTTCCCTTCTCATGTAGCTGTGTTGATGGGAA  
ATTCATGGGCCATCAATTTGATGTGCAGGTCAAGACTAGTACTACTTATC

>M6-PGSC0003DMG400016433-(rev)M6LysM-RLK\_488

TGATGGGAAATTCATGGGCCATCAATTTGATGTGCAGGTCAAGACTAGTACTACTTATCCGAGAATTGCT  
CGTCTTTACTGTTTCAACCTTACAACAGTTGAAAAGTTGCAGGAGTCTAA

>M6-PGSC0003DMG400016433-(rev)M6LysM-RLK\_549

AGAATTGCTCGTCTTTACTGTTTCAACCTTACAACAGTTGAAAAGTTGCAGGAGTCTAACAGTTATGATC  
CTAACAAATGTTCTGTAAATGCAATAGTAAAGGTTACTGTCAACTGCTCT

>M6-PGSC0003DMG400016433-(rev)M6LysM-RLK\_61

TGGACTAGACCATGTTAAAAATGCTAAAAAGTCAAAAAGTGAATCTGTCAAGTGTCAACTAACACAACC  
ATAATTACATCCATTGGCATCTTTCATTCAAGATTCTAAAAGAGTTCAAAA

>M6-PGSC0003DMG400016433-(rev)M6LysM-RLK\_610

GTTATGATCCTAACAAATGTTCTGTAAATGCAATAGTAAAGGTTACTGTCAACTGCTCTTGC GGGAATAG  
TCATGTGTCAAAGATTATGGACTATTTATAACTTATCCTCTTCGCCCTG

>M6-PGSC0003DMG400016433-(rev)M6LysM-RLK\_671

CGGGAATAGTCATGTGTCAAAGATTATGGACTATTTATAACTTATCCTCTTCGCCCTGGCGAGAATTTG  
GTTACAGTAGCCAATGATTTTAATCTACCACAGAAGTTGTTGGAAGACTA

>M6-PGSC0003DMG400016433-(rev)M6LysM-RLK\_732

GAGAATTTGGTTACAGTAGCCAATGATTTTAATCTACCACAGAAGTTGTTGGAAGACTATAATCCTGAAG  
CAAATTCAGCAGGGGTAGTGGTCTGGTTTTTCATTCTGGAAAAGGTAAT

>M6-PGSC0003DMG400016433-(rev)M6LysM-RLK\_793

ATCCTGAAGCAAATTCAGCAGGGGTAGTGGTCTGGTTTTTCATTCTGGAAAAGGTAATTGATCTCTTTA

CCAAGGGTTCTGTACTIONTCTTTGCATATTTTAAGTACACAATCAGT

>M6-PGSC0003DMG400016433-(rev)M6LysM-RLK\_854

ATCTCTTTACCAAGGGTTCTGTACTIONTCTTTGCATATTTTAAGTACACAATCAGTCGAATTCAGATG

AGTTTGCACACTACAATCATAGTGAATTTTCGGATGATTTGACTTGTAT

>M6-PGSC0003DMG400016433-(rev)M6LysM-RLK\_915

AATTCAGATGAGTTTGCACACTACAATCATAGTGAATTTTCGGATGATTTGACTTGTATGACAAATAGGT

TGGAAGCTCGGGATTGTCACCTGAATATCTGTTACTATATGCCAAAGTGT

>M6-PGSC0003DMG400016433-(rev)M6LysM-RLK\_976

CAAATAGGTTGGAAGCTCGGGATTGTCACCTGAATATCTGTTACTATATGCCAAAGTGTGGATGATATA

GTTTTTCTTTTAAATCTCTGTTTCTGAAATGTATTGCAGATCAAATG

>M6-PGSC0003DMG400016653M6LRR-RLP\_0

ATGCTTACCCAGGATTTGACATCCAAATCGAAAATTGACCCTGAGCTGATTCAGAACTCGAGAGTTGGG

TCTCCCATCAAAGTTGTGAGTTTGGTGGCGAATTGAGAATTATTAGTCGGA

>M6-PGSC0003DMG400016653M6LRR-RLP\_2225

CTCTTGCTCGATTTGGTTCAGAACCTTCAGGGCTTGAACATACAGCAATGTCCCAACATCAGCTTTAGAA

CTGTTGATGCACTTGTAGAGATAAATCCAGGTTGTAATATACTTTTCTAA

>M6-PGSC0003DMG400016653M6LRR-RLP\_372

TTCTCCCCCTTTCAAATCATAGTTTATATAGGTTGGTGATAAGAAAACATGATGGGTATATTATGTATATA

AGTTTCTATTTTGATCTTTGTCTGATGTTTTATATCTTCTGATTTTCAG

>M6-PGSC0003DMG400016653M6LRR-RLP\_434

ATGTATATAAGTTTCTATTTTGATCTTTGTCTGATGTTTTATATCTTCTGATTTTCAGAAAATGGTGCTTTTT

TCAAAGCTTCATATCTAAGTTCAAGATAATCATCTTTGCTTTTATCA

>M6-PGSC0003DMG400016653M6LRR-RLP\_496

TGGTGCTTTTTTCAAAGCTTCATATCTAAGTTCAAGATAATCATCTTTGCTTTTATCACATGGGCAAAATA

GGAATGTAAATTTTTCTCCTAGGAAGAGGATTTGTGTCACTACCGCTTC

>M6-PGSC0003DMG400016653M6LRR-RLP\_558

GGCAAATAGGAATGTAAATTTTTCTCCTAGGAAGAGGATTTGTGTCACTACCGCTTCTAAAAATTTTGA

GCAGAGGAATCATCCTTCCATTGAAATCCTTCTTGATAAATGCCTCTTTG

>M6-PGSC0003DMG400016653M6LRR-RLP\_62



AGTTGGGTCTCCCATCAAAGTTGTGAGTTTGGTGGCGAATTGAGAATTATTAGTCGGATTCCAATTAGTA  
TCGGAATCGATAACCGAAATTTGATTTAGGGTGGAAAGTTTAGGTGTGA

>M6-PGSC0003DMG400016653M6LRR-RLP\_620

AATTTTGAGCAGAGGAATCATCCTTCCATTGAAATCCTTCTTGATAAATGCCTCTTTGAGGTATTCAAACG  
TCTCCGAGTGGCCAAAAGAGAAGTGTATGTGCTTGTGTTTCCAAGCGC

>M6-PGSC0003DMG400016653M6LRR-RLP\_682

ATTCAAACGTCTTCCGAGTGGCCAAAAGAGAAGTGTATGTGCTTGTGTTTCCAAGCGCTGGCTTACACTT  
TTAAGCAGCATTCAAGGATGAGATTGCAGAGTTTAATGGTATAGAAGG

>M6-PGSC0003DMG400016653M6LRR-RLP\_744

TTACACTTTTAAGCAGCATTCAAGGATGAGATTGCAGAGTTTAATGGTATAGAAGGTGAGGGATCTC  
TTTTAAGTCCCTTGTGGTAGGGAAGCCACAGATGTTAGACTTGCTGCTA

>M6-PGSC0003DMG400016654M6LRR-RLK\_0

CTCCCACTCACACCAGAGAGAGAGAGCGCTTTAATAAATGTTTAACTGACTCGCGGTCGCCGAAAAC  
CATTCTCCCTCCGGTGGATTTTTGTCTTAATTTCATTTTGGATAAGGACA

>M6-PGSC0003DMG400016654M6LRR-RLK\_1037

CCTGTGTACACTTGCCTTAAATGTATCGTCAAATCAGTTTTCAGGGTTGGTGCCTTCTGGGATTTGG  
TCTTTGAATGGACTAAGGTCTTGTGATTTGTCAAACAATTTATTGGACG

>M6-PGSC0003DMG400016654M6LRR-RLK\_1098

TGGGATTTGGTCTTTGAATGGACTAAGGTCTTGTGATTTGTCAAACAATTTATTGGACGGCGAAATTCCA  
GTGGACATTCAGGGTCTGAGTAATTTGAGAGCATTAACTTGGGGAGAAA

>M6-PGSC0003DMG400016654M6LRR-RLK\_1159

GAAATTCCAGTGGACATTCAGGGTCTGAGTAATTTGAGAGCATTAACTTGGGGAGAAATAATTTCAAG  
GGTGAATTCGGATGAAATTGGAGGTTGTTTGTCTTTGAGGTCAATTGAT

>M6-PGSC0003DMG400016654M6LRR-RLK\_122

TATCCGGCGCCGGTGGTTTCTTTCCCGGAAAAAATCTCAGCTCACATTTGTGCTGCTTTTAGTTTGGAG  
GTTGAAACTTCTCTTCTCGCTAAATTAACCTCAACCGAGCTGTTTTT

>M6-PGSC0003DMG400016654M6LRR-RLK\_1220

ATTTCAAGGGTGAATTCGGATGAAATTGGAGGTTGTTTGTCTTTGAGGTCAATTGATTTGAGTGAAA  
ATTCTCTCAGGAGAGCTTCCAAGCACAATGCAGAAGCTTAGCTTGTGTA

>M6-PGSC0003DMG400016654M6LRR-RLK\_1281

GAGTGA AAAATTCTCTCTCAGGAGAGCTTCCAAGCACAATGCAGAAGCTTAGCTTGTGTAGTGAATTCATT  
TTGAGACGTAATGCTTTTGTGGGCATTGTTCTAAATGGATTGGAGAAAT

>M6-PGSC0003DMG400016654M6LRR-RLK\_1342

GAATTCATTTTGAGACGTAATGCTTTTGTGGGCATTGTTCTAAATGGATTGGAGAAATGAAAAGCCTTC  
AGATTCTTGACGTTTCTGAGAACAACCTCTCTGGTATCATTCCAACCTCA

>M6-PGSC0003DMG400016654M6LRR-RLK\_1403

AAAGCCTTCAGATTCTTGACGTTTCTGAGAACAACCTCTCTGGTATCATTCCAACCTCAATAGGGGAACTT  
GAGTCACTGAAAGTATTAAGGTGTCACGGAACGGGATTTCTGGAAGCT

>M6-PGSC0003DMG400016654M6LRR-RLK\_1464

AGGGGAACTTGAGTCACTGAAAGTATTAAGGTGTCACGGAACGGGATTTCTGGAAGCTTGCCTGAGT  
CCTTGAGCAGTTGTGTTAAGCTTCTGGAATTGGATGTTAGTCATAACTCTTT

>M6-PGSC0003DMG400016654M6LRR-RLK\_1525

CCTGAGTCCTTGAGCAGTTGTGTTAAGCTTCTGGAATTGGATGTTAGTCATAACTCTTTGGCGGGTAATC  
TTTCTACTTGGGAATTTAAATTGCAATTAATTCAGGTTATGTTTTCCGTG

>M6-PGSC0003DMG400016654M6LRR-RLK\_1586

CGGGTAATCTTTCTACTTGGGAATTTAAATTGCAATTAATTCAGGTTATGTTTTCCGTGAATAAAATTAAC  
TGCCAATCTAAATAATGCATTGCTACACAACCTTATCACAATCTTGTA

>M6-PGSC0003DMG400016654M6LRR-RLK\_1708

AGTGAGAGTTATCTGGTGAAATTTAATTAACCTCTGAAACTTCTCTTGCAGGCACCATTCTAAGACTGT  
CGGCCAATTGAAATCCTTGAATATTCTTGATTTGAGTGAAAATCGCTTA

>M6-PGSC0003DMG400016654M6LRR-RLK\_1769

CTAAGACTGTCGGCCAATTGAAATCCTTGAATATTCTTGATTTGAGTGAAAATCGCTTATATGGTATTGTC  
CCTGTGGAAATTGGAGGAGCAAAATCTCTCATGGAACCTTAGTCTGGAGA

>M6-PGSC0003DMG400016654M6LRR-RLK\_183

AGTTTGGAGGTTGAAACTTCTCTTTCTCGCTAAATTAACCTCCAACCGAGCTGTTTTTTTTCAGTGAATTCG  
TAGGTTTATGCGTTTTTTTATTTGTCTGTTCTTCGTTTGGGTCTTTTATA

>M6-PGSC0003DMG400016654M6LRR-RLK\_1830

TGGTATTGTCCCTGTGGAAATTGGAGGAGCAAAATCTCTCATGGAACCTTAGTCTGGAGAAAAATTCCTT

GACTGGAGAAATTCCTAGTTC AATTGGCTATTGTTCTTCATTAGTATCCTT

>M6-PGSC0003DMG400016654M6LRR-RLK\_1891

AATTCCTTGACTGGAGAAATTCCTAGTTC AATTGGCTATTGTTCTTCATTAGTATCCTTGT AAGTTCTCGA  
ACCTCCTTATGTTTCATTAATTTGTTTTTGGACATTGCCTTTCTCTGCT

>M6-PGSC0003DMG400016654M6LRR-RLK\_1952

AAGTTCTCGAACCTCCTTATGTTTCATTAATTTGTTTTTGGACATTGCCTTTCTCTGCTTGAAGATTCTTAG  
AGGATAGTATAGTGGTATCTGGTGT TTAAGTTCTCTATAGTTTT CAGG

>M6-PGSC0003DMG400016654M6LRR-RLK\_2013

AAGATTCTTAGAGGATAGTATAGTGGTATCTGGTGT TTAAGTTCTCTATAGTTTT CAGGCCAGGGAATAT  
TGTGTTAGAGGCAAGTTCAAATACGAAACCATGTTTGATATTCTCAATCA

>M6-PGSC0003DMG400016654M6LRR-RLK\_2074

AGGGAATATTGTGTTAGAGGCAAGTTCAAATACGAAACCATGTTTGATATTCTCAATCATTTTCTGCTGA  
AATTTAGTGGCTCTAGTAATCATGTAGAGTTTATAATTTGCAATGACAAT

>M6-PGSC0003DMG400016654M6LRR-RLK\_2135

TTCTGCTGAAATTTAGTGGCTCTAGTAATCATGTAGAGTTTATAATTTGCAATGACAATAAAATGGGATT  
ATCAGCTTCTATTATAAAAGCTAATTGCAGAGTAGTATTAGTGGTAATGT

>M6-PGSC0003DMG400016654M6LRR-RLK\_2196

AATGGGATTATCAGCTTCTATTATAAAAGCTAATTGCAGAGTAGTATTAGTGGTAATGTGCCTAACTGTA  
TCTGAATATAATTTGAGTGGTTATGACAGTAATATCTTACATGAGGCATG

>M6-PGSC0003DMG400016654M6LRR-RLK\_2257

CTAACTGTATCTGAATATAATTTGAGTGGTTATGACAGTAATATCTTACATGAGGCATGAAAGTAACAAC  
AATAATATATTAATAGGCTCTCAATGATCTATCTATTTATATCCATTATG

>M6-PGSC0003DMG400016654M6LRR-RLK\_2318

AGTAACAACAATAATATATTAATAGGCTCTCAATGATCTATCTATTTATATCCATTATGTTTTGGCTGGTG  
TTACCTGAATACGAATTTTTTGCTACAATTAGTTAATGTTTTACTTCAA

>M6-PGSC0003DMG400016654M6LRR-RLK\_2379

TTGGCTGGTGT TACCTGAATACGAATTTTTTGCTACAATTAGTTAATGTTTTACTTCAATCAACTTGGCAG  
GTCTTTATCACATAACGGTCTAACTGGTCCTGTACCTGAAGCCCTAGCA

>M6-PGSC0003DMG400016654M6LRR-RLK\_244



>M6-PGSC0003DMG400016654M6LRR-RLK\_2989

GTAAGCTTGTCATGTTTTCTGGTGATCCCGACTTCAGCACAGGGGCACATGCTCTGCTTAACAAAGATTG  
TGAGCTTGGGCGAGGTGGTTTTGGAGCAGTGTATCGCACTGTCCTTGGGG

>M6-PGSC0003DMG400016654M6LRR-RLK\_305

TTACTCTTTTTTAGCAGATTTGCACAACTTTTTCCAGTTTCAGCTGTATTTAGAATTCTAGGGTTTTGG  
GTTGAATTTTACCACCTGGACCCATTGCGTGCTTATTTAGTTGTAAC

>M6-PGSC0003DMG400016654M6LRR-RLK\_3050

CAAAGATTGTGAGCTTGGGCGAGGTGGTTTTGGAGCAGTGTATCGCACTGTCCTTGGGGATGGGCATC  
CAGTGGCCATTAAGAAGCTTACCGTTTCCAGTCTTGTTAAGTCTCAGGAAGA

>M6-PGSC0003DMG400016654M6LRR-RLK\_3111

GGGCATCCAGTGGCCATTAAGAAGCTTACCGTTTCCAGTCTTGTTAAGTCTCAGGAAGATTTTGAGAGG  
GAGGTTAGGAAATTGGGAAAAGTACGTCACCATAATCTGGTCACCCTTGAA

>M6-PGSC0003DMG400016654M6LRR-RLK\_3172

TTGAGAGGGAGGTTAGGAAATTGGGAAAAGTACGTCACCATAATCTGGTCACCCTTGAAGGTTATTATT  
GGACACCATCTTTACAGTTACTTATATATGAATTTGTGGCTGGTGGAAATT

>M6-PGSC0003DMG400016654M6LRR-RLK\_3233

TTATTATTGGACACCATCTTTACAGTTACTTATATATGAATTTGTGGCTGGTGGAAATTTGTACAAGCATC  
TCCATGAAGGATCTGGTGGGTGTTTCTCTCATGGAATGAGCGGTTTAA

>M6-PGSC0003DMG400016654M6LRR-RLK\_3294

TACAAGCATCTCCATGAAGGATCTGGTGGGTGTTTCTCTCATGGAATGAGCGGTTTAAACATCATTCTCG  
GGACAGCAAAAAGCTTGGCTCACTTGCACCAAATGAATGTAATCCACTAC

>M6-PGSC0003DMG400016654M6LRR-RLK\_3355

TCATTCTCGGGACAGCAAAAAGCTTGGCTCACTTGCACCAAATGAATGTAATCCACTACAACCTAAAGTC  
CAGCAATGTCCTAATTGATAGCTCAGGTGAGCCTAAAGTTGCAGATTATG

>M6-PGSC0003DMG400016654M6LRR-RLK\_3416

CCTAAAGTCCAGCAATGTCCTAATTGATAGCTCAGGTGAGCCTAAAGTTGCAGATTATGGCTTAGCAAG  
ACTATTACCCATGCTTGATCGATATGTCTTGAGTAGCAAATTCAGAGTGC

>M6-PGSC0003DMG400016654M6LRR-RLK\_3477

TTAGCAAGACTATTACCCATGCTTGATCGATATGTCTTGAGTAGCAAATTCAGAGTGCCTCGGTTACA

TGGCACCTGAATTTGCATGCAAACTGTGAAGATAACCGAGAAGTGTGAT

>M6-PGSC0003DMG400016654M6LRR-RLK\_3538

TCGGTTACATGGCACCTGAATTTGCATGCAAACTGTGAAGATAACCGAGAAGTGTGATGTGTATGGAT

TTGGAGTTCTTGTCTGGAGGTAGTCACTGGAAAGAGGCCAGTTGAGTATA

>M6-PGSC0003DMG400016654M6LRR-RLK\_3599

GTATGGATTTGGAGTTCTTGTCTGGAGGTAGTCACTGGAAAGAGGCCAGTTGAGTATATGGAAGACG

ACGTGGTAGTACTGTGTGACATGGTACGTGGAGCATTAGAAGAAGGCAGGGT

>M6-PGSC0003DMG400016654M6LRR-RLK\_366

TAGGGTTTTGGGTTGAATTTTTCACTGGACCCATTGCGTGCTTATTTAGTTGTAAGTGGTCATTTCAA

CTCCTATTTTGAAGTTGATTTTTTTTTGTCTTGAAAAACAAGTAGGGC

>M6-PGSC0003DMG400016654M6LRR-RLK\_3660

GAAGACGACGTGGTAGTACTGTGTGACATGGTACGTGGAGCATTAGAAGAAGGCAGGGTAGAAGACT

GTATAGATGCAAGGTTGCAAGGAAAATTTCCAGCAGATGAGGTGATTCCTGTG

>M6-PGSC0003DMG400016654M6LRR-RLK\_3721

AAGACTGTATAGATGCAAGGTTGCAAGGAAAATTTCCAGCAGATGAGGTGATTCCTGTGATGAAGTTAG

GATTAATCTGCACATCACAAGTCCCATCAAACCGGCCTGATATGGGAGAAG

>M6-PGSC0003DMG400016654M6LRR-RLK\_3782

GAAGTTAGGATTAATCTGCACATCACAAGTCCCATCAAACCGGCCTGATATGGGAGAAGTGGTTAACAT

TTTGGAGCTGATTCGATGTCCTTCAGAAGGCCAGGATGAACTTGTATGATG

>M6-PGSC0003DMG400016654M6LRR-RLK\_3843

GTTAACATTTTGGAGCTGATTCGATGTCCTTCAGAAGGCCAGGATGAACTTGTATGATGTTCACTAGATA

AACACAGATTGTAAGATAAATGTCTCATCATGGCAAAGAAGAATGCGGTT

>M6-PGSC0003DMG400016654M6LRR-RLK\_3904

CACTAGATAAACACAGATTGTAAGATAAATGTCTCATCATGGCAAAGAAGAATGCGGTTCAATTTATTCAG

AGAAGTTGGAATTTGTTGTTGTAGAATTTTTGCTCTTAATTGCTATAAAA

>M6-PGSC0003DMG400016654M6LRR-RLK\_3965

TTTATTCAGAGAAGTTGGAATTTGTTGTTGTAGAATTTTTGCTCTTAATTGCTATAAAAATCCCTCCTTTG

AATTACATCATTTGTTATTTGCTTCTCTATGCCACTCATGGATTCCTT

>M6-PGSC0003DMG400016654M6LRR-RLK\_4026

TCCCTCCTTTGAATTACATCATTTGTTATTTGCTTCTCTATGCCACTCATGGATTCCTTTTCACCTGGTTCCA  
ATGTTGGACTCACATGCTTATTACTCTTTTCTTTCTTCTCAGGG

>M6-PGSC0003DMG400016654M6LRR-RLK\_4078

ATTCCTTTTCACCTGGTTCCAATGTTGGACTCACATGCTTATTACTCTTTTCTTTCTTCTCAGGGTTTAA  
GTCATCTGCCGCTCCTTAAAATTGTGCTCATGTTTCACTTAGACACA

>M6-PGSC0003DMG400016654M6LRR-RLK\_427

GTCATTTCAACTCCTATTTTGAAGTTGATTTTTTTTTGTCTTGAAAAACAAGTAGGGCCTCAACATTGTC  
TTCAGCTGACCTTGTCTATGGAATTATAAGCAACATTGTTTTGGAAATG

>M6-PGSC0003DMG400016654M6LRR-RLK\_61

GGAAAACCTATTCTCCCTCCGGTGGATTTTTGTCTTAATTTCATTTTTGGATAAGGACAAGTATCCGGCGC  
CGGTGGTTTTCTTTCCCGGAAAAAATCTCAGCTCACATTTTGTGCTGCTT

>M6-PGSC0003DMG400016654M6LRR-RLK\_610

AACCCATCTTTGAATGATGATGTAAGTGGGATTAATTGTGTTCAAATCGGACGTTCAAGATCCATATGGAA  
AGCTGAAATCTTGGAATGAAGAGGATGATAGTCCTTGTAAGTGGGACGGA

>M6-PGSC0003DMG400016654M6LRR-RLK\_671

CATATGGAAAGCTGAAATCTTGGAATGAAGAGGATGATAGTCCTTGTAAGTGGGACGGAATCAACTGTA  
ACCCAGATCCAATAGGGTGAAGTTGTTCTTGACGGGTTTGGTTTAT

>M6-PGSC0003DMG400016654M6LRR-RLK\_732

CAACTGTAACCCAGATCCAATAGGGTGAAGTTGTTCTTGACGGGTTTGGTTTATCTGGAAGGAT  
AAGCAGAGGCCTTTTACGCTTGCAGTTTCTTACAGACTTTCACTAGCAAA

>M6-PGSC0003DMG400016654M6LRR-RLK\_793

GGAAGGATAAGCAGAGGCCTTTTACGCTTGCAGTTTCTTACAGACTTTCACTAGCAAAGAACAATCTTA  
CAGGTAGCATTAGTGTTAGTCTTGCTCAACTTGCTTATCTCAAGTTTCTT

>M6-PGSC0003DMG400016654M6LRR-RLK\_854

ACAATCTTACAGGTAGCATTAGTGTTAGTCTTGCTCAACTTGCTTATCTCAAGTTTCTTGACTTGAGTGAA  
AATAACTTATCTGGTAACATTCCTGGCGATTACTTTCAACAATGTGGGC

>M6-PGSC0003DMG400016654M6LRR-RLK\_915

CTTGAGTGAAAATAACTTATCTGGTAACATTCCTGGCGATTACTTTCAACAATGTGGGCCGCTTAGATCA  
ATTTCTTTGGCTAACAACAAAATTTTCAGGGCAGATCCCAGAAAGTTTGAG

>M6-PGSC0003DMG400016654M6LRR-RLK\_976

CTTAGATCAATTTCTTTGGCTAACAAACAAAATTTTCAGGGCAGATCCCAGAAAGTTTGAGCTCCTGTGTTA  
CACTTGCGTCCCTTAATGTATCGTCAAATCAGTTTTTCAGGGTTGGTGCCT

>M6-PGSC0003DMG400016685-(rev)M6LRR-RLK\_0

GAACATTTCTTCTTTCTTTCCACCATTTCTGCTCTGCTCACTCTTTCCCCTCCACCATTGAAGAAACATGCG  
TTTTCTTCTCCTCTTCTTCTTTCCCTTATTCACCATTTCCATCTCCT

>M6-PGSC0003DMG400016685-(rev)M6LRR-RLK\_1037

ACGGGTCGATACCGGAGTTCATAGAAGATTTGCCGAAACTGGAAGTATTGCAGCTTTGGGAAAACAACT  
TTACCGGAAGTATTCCACAGGGTTTAGGCAGAAACAGTAAGTTAACAAACG

>M6-PGSC0003DMG400016685-(rev)M6LRR-RLK\_1098

AAACAACCTTTACCGGAAGTATTCCACAGGGTTTAGGCAGAAACAGTAAGTTAACAAACGTTGACATCAG  
TACCAACAAATTAACCGGCAATTTGCCCCAAACATGTGTTCCGGCAACAA

>M6-PGSC0003DMG400016685-(rev)M6LRR-RLK\_1159

GACATCAGTACCAACAAATTAACCGGCAATTTGCCCCAAACATGTGTTCCGGCAACAAGCTACAGACGT  
TGATCACTCTCGGAACTTCTTGTTTGGCCCAATTCCAGAATCTTTAGGT

>M6-PGSC0003DMG400016685-(rev)M6LRR-RLK\_122

ACTTCACCACCGCAAAACCACCTTACGTGCCGGAATACCGGGCATTACTCTCCCTGAAAACCTGCCATTAC  
CGATGACCCACAATCTGCTCTTCTTTCATGGAATATCTCAACAAGTCATT

>M6-PGSC0003DMG400016685-(rev)M6LRR-RLK\_1220

TACAGACGTTGATCACTCTCGGAACTTCTTGTTTGGCCCAATTCCAGAATCTTTAGGTGAGTGTCAATCA  
CTTAATAGGATTAGAATGGGAGAAAATTTCTAAATGGGTCTATTCCAA

>M6-PGSC0003DMG400016685-(rev)M6LRR-RLK\_1281

GTGTCAATCACTTAATAGGATTAGAATGGGAGAAAATTTCTAAATGGGTCTATTCCAAAAGGGCTATTA  
AGTTTGCCGAAGCTTTCACAAGTAGAACTTCAAGATAATCTTCTCACTGG

>M6-PGSC0003DMG400016685-(rev)M6LRR-RLK\_1342

GGGCTATTAAGTTTGCCGAAGCTTTCACAAGTAGAACTTCAAGATAATCTTCTCACTGGTACATTTCCAGT  
GACTGGTTCTGTTTCAGCTAGTCTTGGACAGATTTGTCTTTTGAATAAT

>M6-PGSC0003DMG400016685-(rev)M6LRR-RLK\_1403

CATTTCCAGTGACTGGTTCTGTTTCAGCTAGTCTTGGACAGATTTGTCTTTTGAATAATCATTTTACGGGG



CCTCTACCATCGAGCATTGGTAATTTTATTGGTGTTCAAAAGTTGCTTC

>M6-PGSC0003DMG400016685-(rev)M6LRR-RLK\_1464

TTTTACGGGGCCTCTACCATCGAGCATTGGTAATTTTATTGGTGTTCAAAAGTTGCTTCTTGATGGGAAC

AAGTTTTCTGGTCAAATTCAGCTGAATTAGGGAAATTGCAGCAGCTGTC

>M6-PGSC0003DMG400016685-(rev)M6LRR-RLK\_1525

GATGGGAACAAGTTTTCTGGTCAAATTCAGCTGAATTAGGGAAATTGCAGCAGCTGTGCGAAAATGGAT

TTTAGTGGTAACACTTTTTTCAGGCCTGATTCCACCGGAGATAAGCCGGTGC

>M6-PGSC0003DMG400016685-(rev)M6LRR-RLK\_1586

AAATGGATTTTAGTGGTAACACTTTTTTCAGGCCTGATTCCACCGGAGATAAGCCGGTGCAAGGCTTTAAC

TTATGTTGATCTTAGTAGGAATAAGTTATCTGGTGAAGTTCCTACTGAGA

>M6-PGSC0003DMG400016685-(rev)M6LRR-RLK\_1647

GGCTTAACTTATGTTGATCTTAGTAGGAATAAGTTATCTGGTGAAGTTCCTACTGAGATCACTGGTATG

AGGATACTGAATTACTTGAATGTATCTCGGAATCAGTTAGTTGGGAGTAT

>M6-PGSC0003DMG400016685-(rev)M6LRR-RLK\_1708

ACTGGTATGAGGATACTGAATTACTTGAATGTATCTCGGAATCAGTTAGTTGGGAGTATTCCTGCACCTA

TTGCTGCAATGCAGAGTTTAACTTCGGTTGATTTTTCGTATAACAACCTTA

>M6-PGSC0003DMG400016685-(rev)M6LRR-RLK\_1769

CTGCACCTATTGCTGCAATGCAGAGTTTAACTTCGGTTGATTTTTCGTATAACAACCTTATCTGGATTAGTT

CCGGGTACTGGTCAGTTCAGTTACTTCAATTACACATCATTTATTGGTA

>M6-PGSC0003DMG400016685-(rev)M6LRR-RLK\_183

TGCCATTACCGATGACCCACAATCTGCTCTTCTTTCATGGAATATCTCAACAAGTCATTGTACATGGAGAG

GTGTCACGTGCGACCGGTATCGTCACGTGACTTCTCTCGACATCTCTGG

>M6-PGSC0003DMG400016685-(rev)M6LRR-RLK\_1830

TGGATTAGTTCCGGGTACTGGTCAGTTCAGTTACTTCAATTACACATCATTTATTGGTAATCCAGATCTTT

GCGGACCCTATTTGGGTCCTTGCAAAGAAGGTATTGTTGATGGGGTTAG

>M6-PGSC0003DMG400016685-(rev)M6LRR-RLK\_1891

CCAGATCTTTGCGGACCCTATTTGGGTCCTTGCAAAGAAGGTATTGTTGATGGGGTTAGTCGACCTCATG

AGAGAGGTGCATTTTCGCCTTCTATGAAGCTTTTACTTGTTATCGGATTG

>M6-PGSC0003DMG400016685-(rev)M6LRR-RLK\_1952

GACCTCATGAGAGAGGTGCATTTTCGCCTTCTATGAAGCTTTTACTTGTTATCGGATTGCTTGTTTGCTCG  
ATTGTGTTTGCTATTGCTGCAATTATTAAGCTAGATCGTTAAAGAAGG

>M6-PGSC0003DMG400016685-(rev)M6LRR-RLK\_2013

TGTTTGCTCGATTGTGTTTGCTATTGCTGCAATTATTAAGCTAGATCGTTAAAGAAGGCGAGTCAGGCT  
CGTGCCTGGAAGCTTACTGCTTTCCAACGCCTGGATTTTACTTGTGATGA

>M6-PGSC0003DMG400016685-(rev)M6LRR-RLK\_2074

AGTCAGGCTCGTGCCTGGAAGCTTACTGCTTTCCAACGCCTGGATTTTACTTGTGATGATGTATTGGAAT  
GTTTGAAAGAGGATAACATTATTGGTAAAGGAGGTGCTGGAATAGTATAC

>M6-PGSC0003DMG400016685-(rev)M6LRR-RLK\_2135

TATTGGAATGTTTGAAAGAGGATAACATTATTGGTAAAGGAGGTGCTGGAATAGTATACAAGGGGGTA  
ATGCCAAATGGTGAACCTTGTGCTGTTAAAAGATTGCCGGTTATGAGCCGTG

>M6-PGSC0003DMG400016685-(rev)M6LRR-RLK\_2196

GGGGGTAATGCCAAATGGTGAACCTGTTGCTGTTAAAAGATTGCCGGTTATGAGCCGTGGTTCTTCCCA  
TGATCATGGGTTTAATGCCGAGATACAGACACTTGGGAGTATTCGACATAG

>M6-PGSC0003DMG400016685-(rev)M6LRR-RLK\_2257

TCTTCCCATGATCATGGGTTTAATGCCGAGATACAGACACTTGGGAGTATTCGACATAGACATATTGTTA  
GATTATTGGGATTTTGCTCAAATCATGAAACAAATCTTTTGGTTTATGAG

>M6-PGSC0003DMG400016685-(rev)M6LRR-RLK\_2318

ATATTGTTAGATTATTGGGATTTTGCTCAAATCATGAAACAAATCTTTTGGTTTATGAGTACATGCCTAAT  
GGAAGCCTTGGTGAATGCTTCATGGAAAGAAAGGGGGTCACTTGCATT

>M6-PGSC0003DMG400016685-(rev)M6LRR-RLK\_2379

CATGCCTAATGGAAGCCTTGGTGAATGCTTCATGGAAAGAAAGGGGGTCACTTGCATTGGGATACCA  
GGTATAAGATAGCACTGGAAGCTGCAAAGGGACTTTGTTATCTTCATCACGA

>M6-PGSC0003DMG400016685-(rev)M6LRR-RLK\_244

ACATGGAGAGGTGTCACGTGCGACCGGTATCGTCACGTGACTTCTCTCGACATCTCTGGTTTTAATCTCA  
CCGGTACTCTCACGCCGAAGTTGGTCATCTCCCTTTTTTGTCAATCTT

>M6-PGSC0003DMG400016685-(rev)M6LRR-RLK\_2440

GATACCAGGTATAAGATAGCACTGGAAGCTGCAAAGGGACTTTGTTATCTTCATCACGATTGCTCGCCTT  
TGATCCTCCATCGTGATGTAAAATCAAACAACATTCTTCTGGATTCCAGC

>M6-PGSC0003DMG400016685-(rev)M6LRR-RLK\_2501

GCTCGCCTTTGATCCTCCATCGTGATGTAAAATCAAACAACATTCTTCTGGATTCCAGCTTCGAAGCTCAC  
GTTGCTGATTTTGGGCTTGCCAAGTTTTTGCAAGACTCGGGAACATCAG

>M6-PGSC0003DMG400016685-(rev)M6LRR-RLK\_2562

CGAAGCTCACGTTGCTGATTTTGGGCTTGCCAAGTTTTTGCAAGACTCGGGAACATCAGAATGCATGTCT  
GCTATTGCTGGTTCTTATGGCTACATTGCACCAGGTATGCTCTCAAATTT

>M6-PGSC0003DMG400016685-(rev)M6LRR-RLK\_2623

TGCATGTCTGCTATTGCTGGTTCTTATGGCTACATTGCACCAGGTATGCTCTCAAATTTTTACTTCTTTGTA  
GTCTTGGTTTTGATGTGTGTTGTTCTTTCAAAGAAGTTTATTATTG

>M6-PGSC0003DMG400016685-(rev)M6LRR-RLK\_2684

ACTTCTTTGTAGTCTTGGTTTTGATGTGTGTTGTTCTTTCAAAGAAGTTTATTATTGTTGTAAGTTGTCA  
ACTAAAATTGTGATTTATCAGTCTCTTCAAGTGTTTATATGGTACTTC

>M6-PGSC0003DMG400016685-(rev)M6LRR-RLK\_2745

GTAAGTTGTCAACTAAAATTGTGATTTATCAGTCTCTTCAAGTGTTTATATGGTACTTCTTGGTGCTAGTA  
ATGATCAGTGTCTTGTATAACACGGAAGAACAACATGACACGAATAT

>M6-PGSC0003DMG400016685-(rev)M6LRR-RLK\_2806

GGTGCTAGTAATGATCAGTGTCTTGTATAACACGGAAGAACAACATGACACGAATATGTCCTTGATTG  
GTAATCTACAAGAACAACAACAACAATGATAACTACGTGTTGAAAAT

>M6-PGSC0003DMG400016685-(rev)M6LRR-RLK\_2867

CCTTGATTGGTAATCTACAAGAACAACAACAACAATGATAACTACGTGTTGAAAATGAATGCCTCTG  
TTCATAGATGAGCCTTGTAACTCTTTCTTTAATATGATAAACAGCCGTCA

>M6-PGSC0003DMG400016685-(rev)M6LRR-RLK\_2928

ATGCCTCTGTTTCATAGATGAGCCTTGTAACTCTTTCTTTAATATGATAAACAGCCGTCAACTGGTGCTTTG  
ATGAATCAAATTTGGTTTCTTGCTGTTTGGCGATAAGTTTTTTCATTT

>M6-PGSC0003DMG400016685-(rev)M6LRR-RLK\_2989

TGGTGCTTTGATGAATTCAAATTTGGTTTCTTGCTGTTTGGCGATAAGTTTTTTCATTTTGACTTACAAAGT  
TTGCTTATTGCTTGAATACAATCTCTATTTTTTTGTATGCGCCTAA

>M6-PGSC0003DMG400016685-(rev)M6LRR-RLK\_305

TTAATCTCACCGGTACTCTCACGCCGGAAGTTGGTCATCTCCCTTTTTGTTCAATCTTCTGTAGCTGTTA

ACCAGTTCTCTGGACCCATTCTATAGAGCTCTCGTTTATACCAAATC

>M6-PGSC0003DMG400016685-(rev)M6LRR-RLK\_3050

ACTTACAAAGTTTGCTTATTGCTTGAAATACAATCTCTATTTTTTTGTATGCGCCTAATTTTCGTTTTTCATAT  
AAACTGTGCAGAATATGCATACACACTCAAGGTAGATGAGAAGAGTG

>M6-PGSC0003DMG400016685-(rev)M6LRR-RLK\_3111

TCGTTTTTCATATAAACTGTGCAGAATATGCATACACACTCAAGGTAGATGAGAAGAGTGATGTATACAG  
CTTTGGTGTGGTTCTGTTAGAATTGGTGAGTGGGAAAAAGCCGGTTGGAGA

>M6-PGSC0003DMG400016685-(rev)M6LRR-RLK\_3172

GTATACAGCTTTGGTGTGGTTCTGTTAGAATTGGTGAGTGGGAAAAAGCCGGTTGGAGAATTTGGTGAT  
GGCGTTGACATAGTCCAATGGGTAAGGAGAATGACAGATGGGAAAAAGGAA

>M6-PGSC0003DMG400016685-(rev)M6LRR-RLK\_3233

TTGGTGATGGCGTTGACATAGTCCAATGGGTAAGGAGAATGACAGATGGGAAAAAGGAAGGAGTTCTC  
AAAATCCTTGATCCAAGACTCTCAACAGTTCCCCTTCATGAGGTGATGCATG

>M6-PGSC0003DMG400016685-(rev)M6LRR-RLK\_3294

AGTTCTCAAATCCTTGATCCAAGACTCTCAACAGTTCCCCTTCATGAGGTGATGCATGTGTTCTATGTGCG  
CAATGCTGTGTGTCGAAGAGCAAGCTGTTGAACGCCCAAATGCGCGA

>M6-PGSC0003DMG400016685-(rev)M6LRR-RLK\_3355

TTCTATGTCGCAATGCTGTGTGTCGAAGAGCAAGCTGTTGAACGCCCAAATGCGCGAGGTTGTGCAA  
ATGCTAACTGAGCTTCCCAAGCCATCTGGTCCAAAAACAGAAGATTCAACA

>M6-PGSC0003DMG400016685-(rev)M6LRR-RLK\_3416

TTGTGCAAATGCTAACTGAGCTTCCCAAGCCATCTGGTCCAAAAACAGAAGATTCAACAATCACTGAGTC  
GCCCCATCATCAGGTCCTGCATTAGAGTCTCCCACTTCGACTCCTGGAG

>M6-PGSC0003DMG400016685-(rev)M6LRR-RLK\_3477

CACTGAGTCGCCCCATCATCAGGTCCTGCATTAGAGTCTCCCACTTCGACTCCTGGAGACACGAAAGAC  
CAGTACCATCATCAGCCATCACCTCAATCTCCTCCACCTGACCTACTCAG

>M6-PGSC0003DMG400016685-(rev)M6LRR-RLK\_3538

ACGAAAGACCAGTACCATCATCAGCCATCACCTCAATCTCCTCCACCTGACCTACTCAGCATATGACCTAC  
AATGTTCCCTTCTAATAGAGGGTGAATTCTCTTCCTTTAGTTTTATTA

>M6-PGSC0003DMG400016685-(rev)M6LRR-RLK\_3599

TATGACCTACAATGTTCCCTTCTAATAGAGGGTGTAAATTCTCTTCCTTTAGTTTTATTATCAGTTTTATTGG  
GGGTTGGTTTTATTGTTTAGGCAATAAGCTTTTACTAGGAAGTGAGTTT

>M6-PGSC0003DMG400016685-(rev)M6LRR-RLK\_366

TGTAGCTGTTAACCAGTTCTCTGGACCCATTCTATAGAGCTCTCGTTTATACCAAATCTGCGTTACCTTA  
ACCTCTCTAACAAACATTTTCAATTTGAGTTTCCCTTCCCAGCTTACCCA

>M6-PGSC0003DMG400016685-(rev)M6LRR-RLK\_3660

AGTTTTATTGGGGGTTGGTTTATTGTTTAGGCAATAAGCTTTTACTAGGAAGTGAGTTTCATTGTACAGT  
AACATTGGCTAAGGTATCTGAGTAACATTATCCTTCAAATTTTCCCATT

>M6-PGSC0003DMG400016685-(rev)M6LRR-RLK\_427

CGTTACCTTAACCTCTCTAACAAACATTTTCAATTTGAGTTTCCCTTCCCAGCTTACCCATCTCCGGTACTTG  
AAAGTTCTCGATATTTATAATAACAATATGACCGGTGACCTTCCGGTT

>M6-PGSC0003DMG400016685-(rev)M6LRR-RLK\_488

TCCGGTACTTGAAAGTTCTCGATATTTATAATAACAATATGACCGGTGACCTTCCGGTTGGGGTTTACAA  
TTTGACAAATCTTCGACATCTTCATTTGGGTGGCAATTTTTTTAGTGGCA

>M6-PGSC0003DMG400016685-(rev)M6LRR-RLK\_549

GGTTTACAATTTGACAAATCTTCGACATCTTCATTTGGGTGGCAATTTTTTTAGTGGCAGTATTCCACCGG  
AGTATGGTAGATTCCCATTCTAGAAATACCTTGCAGTTTCTGGAAATGC

>M6-PGSC0003DMG400016685-(rev)M6LRR-RLK\_61

AGAAACATGCGTTTTCTTCTCTCTTCTTCCCTTATTACCATTCCATCTCCTCCACTTCACCACCG  
CAAAACCACCTTACGTGCCGGAATACCGGGCATTACTCTCCCTGAAA

>M6-PGSC0003DMG400016685-(rev)M6LRR-RLK\_610

ATTCCACCGGAGTATGGTAGATTCCCATTCTAGAAATACCTTGCAGTTTCTGGAAATGCGCTCGTCGGTA  
TGATACCTCCGGAGATCGGGAATATTACCACACTTCGTGAGCTTTACATT

>M6-PGSC0003DMG400016685-(rev)M6LRR-RLK\_671

TCGTCGGTATGATACCTCCGGAGATCGGGAATATTACCACACTTCGTGAGCTTTACATTGGATACTACAA  
CACGTTTTCCGGTGGGTTACCGGCGGAAATAGGGAAGTTGTCGGAGCTCA

>M6-PGSC0003DMG400016685-(rev)M6LRR-RLK\_732

ATACTACAACACGTTTTCCGGTGGGTTACCGGCGGAAATAGGGAAGTTGTCGGAGCTCATTCCGGTTAGA  
TGCTGCAAAGTGTGGACTTTCCGGTGAGATTCCGCCGGAGATAGGGAAGCT

>M6-PGSC0003DMG400016685-(rev)M6LRR-RLK\_793

CGGTTAGATGCTGCAAAGTGTGGACTTTCCGGTGAGATCCGCCGGAGATAGGGAAGCTTCAGAAATTA  
GATACACTGTTCTTGCAAGTGAATGGTCTTTCTGGGTATGTTACACCGGAA

>M6-PGSC0003DMG400016685-(rev)M6LRR-RLK\_854

AGAAATTAGATACACTGTTCTTGCAAGTGAATGGTCTTTCTGGGTATGTTACACCGGAATTGGGGAATTT  
AAAAAGCTTGAAATCTTTAGATCTATCAAACAATATGCTCTCCGGTGAAA

>M6-PGSC0003DMG400016685-(rev)M6LRR-RLK\_915

GGGGAATTTAAAAAGCTTGAAATCTTTAGATCTATCAAACAATATGCTCTCCGGTGAAATACCGTTCACA  
TTCACAGAGCTGAAGAATCTAACTCTGCTAAATCTTTCCGTAACAAGCT

>M6-PGSC0003DMG400016685-(rev)M6LRR-RLK\_976

CCGTTACATTACAGAGCTGAAGAATCTAACTCTGCTAAATCTTTCCGTAACAAGCTTTACGGGTCGAT  
ACCGGAGTTCATAGAAGATTTGCCGAAACTGGAAGTATTGCAGCTTTGG

>M6-PGSC0003DMG400016709M6LRR-RLK\_0

CGACACCTGTAGATACACACTGCCAGTGGAGTCTTCTTATATAAATTTCTCTCTCTCTCCATTA AAAAAGAA  
AGCTTGGAATCGGAGAGTCTCTTAACGATGGTGACACCTACCACTAGTG

>M6-PGSC0003DMG400016709M6LRR-RLK\_1037

TCACAGCTCTCTAATTGGAAGTCAAATGGTGGCGATCCCTGTGGTGAGTCTTGGAAAGGAATCACTTGT  
CAGGCCTCTTCTGTTGTTTCAATGTAAGTTTGCATAGCATTAACTTTGTGC

>M6-PGSC0003DMG400016709M6LRR-RLK\_1098

TCACTTGT CAGGCCTCTTCTGTTGTTTCAATGTAAGTTTGCATAGCATTAACTTTGTGCGCATCATTATACA  
TTTTAGTTATGATTTGATTGATATAATGGTTGGTTCTTGCTGAAACAG

>M6-PGSC0003DMG400016709M6LRR-RLK\_1159

ATCATTATACATTTTAGTTATGATTTGATTGATATAATGGTTGGTTCTTGCTGAAACAGTCAAATTCCTGA  
TTTGGGACTCAATGGAACGTTGGGATACATGCTAAATGGTCTTACCTCA

>M6-PGSC0003DMG400016709M6LRR-RLK\_122

GACGTTACCTTCTTGTCATTTCCCTGTCTTTCTTTCCCATGCTTCTTCTTCTTCTTACCTCTGTCTCTGC  
ACAACCCCTTTAATTCTTGACTAACAAGAACA AAAACAGAAAATGAA

>M6-PGSC0003DMG400016709M6LRR-RLK\_1220

AAATTCCTGATTTGGGACTCAATGGAACGTTGGGATACATGCTAAATGGTCTTACCTCATTAAAGAACTT

GTAAGAGCTTGTCTTTTAGTGGTAAAGGGTAATTTAGAGGACCTACTAT

>M6-PGSC0003DMG400016709M6LRR-RLK\_1281

AAAGAACTTGTAAGAGCTTGTCTTTTAGTGGTAAAGGGTAATTTAGAGGACCTACTATCACAATAAAAT

TGAACTTCTGCTATCTGTTGTCTTCAGGGATATGAGCGGCAACAACATTC

>M6-PGSC0003DMG400016709M6LRR-RLK\_1342

CAATAAAATTGAACTTCTGCTATCTGTTGTCTTCAGGGATATGAGCGGCAACAACATTCATGATTCTATTC

CATATCAGCTTCCACCCAATCTCACTAGCCTGTAATGTTGACTCCTTGT

>M6-PGSC0003DMG400016709M6LRR-RLK\_1403

GATTCTATTCCATATCAGCTTCCACCCAATCTCACTAGCCTGTAATGTTGACTCCTTGTATGTGTTTGTT

TGTTTGAAAACCTCCCGGTTTATGATTGTCTCACTGGAECTATAATCA

>M6-PGSC0003DMG400016709M6LRR-RLK\_1464

TGTGTTTGTTTTGTTTGAAAACCTCCCGGTTTATGATTGTCTCACTGGAECTATAATCATTGTCAATGCAG

GAATCTTGCAAACAACAATATAAGTGGCAACATTCCGTATTCCTTTGCT

>M6-PGSC0003DMG400016709M6LRR-RLK\_1525

GTCAATGCAGGAATCTTGCAAACAACAATATAAGTGGCAACATTCCGTATTCCTTTGCTGGCATGGTTAC

ACTTAGCTATCTGTGAGTGGCCAGATTCCTAGGCACTTTCCAAAACAAA

>M6-PGSC0003DMG400016709M6LRR-RLK\_1586

CATGGTTACTTAGCTATCTGTGAGTGGCCAGATTCCTAGGCACTTTCCAAAACAAAATAGCATTG

CCTGGTCTTCTTTATTCTATTGAATCATTCTGGCAACTATTTAAAAT

>M6-PGSC0003DMG400016709M6LRR-RLK\_1647

TAGCATTGCTTGGTCTTCTTTATTCTATTGAATCATTCTGGCAACTATTTAAAATAGCTTACCCTACG

ATTCATTTTTAGGAATCTTAGCCATAATTCCTCTCTCAAACAATTG

>M6-PGSC0003DMG400016709M6LRR-RLK\_1708

CTTACCCTACGATTCATTTTTAGGAATCTTAGCCATAATTCCTCTCTCAAACAATTGGAGAATTGTTAC

CAACCACTCCGATCTGGGAGCCTGTAAGTGTCTACTTAATCTTTAC

>M6-PGSC0003DMG400016709M6LRR-RLK\_1769

GAATTGTTACCAACCACTCCGATCTGGGAGCCTGTAAGTGTCTACTTAATCTTTACTTGATTGATCCT

TTCTGGTAATTTTTTTTTCTTTTCTTTTTTCTAATAGAGTTCATTC

>M6-PGSC0003DMG400016709M6LRR-RLK\_183

CCTCTGTCTCTGCACAACCCCTTTAATTCTTGACTAACAAGAACAAAACAGAAAATGAATAGAAATAGCT  
GTAAGCAAGACACCCTTTACCCCTTTTGCCAGTAGTGGTGATTGTGGCA

>M6-PGSC0003DMG400016709M6LRR-RLK\_1830

GATTGATCCTTTCTGGTAATTTTTTTTTCTTTTTCTTTTTCTAATAGAGTTCATTCATTGCCACACTTGA  
AGGGCTTCTTTTCTACACCAGTCCAATTAGTTACTAGCTTGAATTC

>M6-PGSC0003DMG400016709M6LRR-RLK\_1891

TGCCACACTTGAAGGGCTTCTTTTCTACACCAGTCCAATTAGTTACTAGCTTGAATTCATAACACCATGG  
TGTCTCCGACCCACAGTAGCTGGCCCTTCATTTGTTTTGACGTGCCTGC

>M6-PGSC0003DMG400016709M6LRR-RLK\_1952

AACACCATGGTGTCTCCGACCCACAGTAGCTGGCCCTTCATTTGTTTTGACGTGCCTGCAATGTACAGAC  
ATGACTGCTTCCAAATATGTTCTCAAACAAATATAGGATCTAATCATAC

>M6-PGSC0003DMG400016709M6LRR-RLK\_2013

TGTACAGACATGACTGCTTCCAAATATGTTCTCAAACAAATATAGGATCTAATCATACACAAATGCCTTT  
TCAGAATCATTATCTGCTTAATTTAATGAACAATGAAGTCTGGAGGCT

>M6-PGSC0003DMG400016709M6LRR-RLK\_2074

AAATGCCTTTTCAGAATCATTATCTGCTTAATTTAATGAACAATGAAGTCTGGAGGCTTGTAAGTCCTA  
CATTTTATTTTCTTCGTAGCTTTTTTATGTGGAAATTCGTTTTGATTG

>M6-PGSC0003DMG400016709M6LRR-RLK\_2135

TAAAGTCCTACATTTTATTTTCTTCGTAGCTTTTTTATGTGGAAATTCGTTTTGATTGTATTAGGATAGGT  
GCCCTGCTCCTCTTTGAAGCTTTGTAAACCTACATTAGAGCTCAGTAC

>M6-PGSC0003DMG400016709M6LRR-RLK\_2196

TTAGGATAGGTGCCCTGCTCCTCTTTGAAGCTTTGTAAACCTACATTAGAGCTCAGTACCCCTGCTACAAA  
GAGCTTTCTGGCTATATTGATTCTCATGTCTTTTGAACATCTGTTTCA

>M6-PGSC0003DMG400016709M6LRR-RLK\_2257

CTGCTACAAAGAGCTTTCTGGCTATATTGATTCTCATGTCTTTTGAACATCTGTTTCACTAGTTAATAGTT  
ATAACTTTTCACTGATTTGCTGCTACTTCAGGGATCTGTCCTCGAATA

>M6-PGSC0003DMG400016709M6LRR-RLK\_2318

AGTTAATAGTTATAACTTTTCACTGATTTGCTGCTACTTCAGGGATCTGTCCTCGAATAATTTTCTGGAG  
ATCTCCCCTCTTCATTCAGTTCGTTGACCAATCTTTCCACACTGTAAGC



>M6-PGSC0003DMG400016709M6LRR-RLK\_2379

TTTTCTGGAGATCTCCCCTCTTCATTCAGTTCGTTGACCAATCTTTCCACACTGTAAGCATAATAACTTTCT  
ACTAATAGGATTTGCTGTTCCGCTACTTTACTTACCCATGAAATTGGC

>M6-PGSC0003DMG400016709M6LRR-RLK\_244

GAAATAGCTGTAAGCAAGACACCCTTTACCCCTTTTGCCAGTAGTGGTGATTGTGGCAGTGGGGTTTTA  
CTCATCTTTTGTGCGGAAGGAAACACTGATCCGAATGACTGTGAGTTTC

>M6-PGSC0003DMG400016709M6LRR-RLK\_2440

AATAACTTTCTACTAATAGGATTTGCTGTTCCGCTACTTTACTTACCCATGAAATTGGCATCCCCTGTAGTC  
ATCTGGAAAACAATCAGCTAAGTGGCCCTCTCAATATCCTGGTTGGTC

>M6-PGSC0003DMG400016709M6LRR-RLK\_2501

CCCCTGTAGTCATCTGGAAAACAATCAGCTAAGTGGCCCTCTCAATATCCTGGTTGGTCTACCTTTGACTA  
ATTTGTAAGTTTCAATACCTCTTCTTGAATTAATGGGCTTAGCTAGTTT

>M6-PGSC0003DMG400016709M6LRR-RLK\_2562

CCTTTGACTAATTTGTAAGTTTCAATACCTCTTCTTGAATTAATGGGCTTAGCTAGTTTGATTCAATGCCA  
GTAGAGTGTTTTATGGGCAAAACAAAACCTTTTTGCAGAAATGTTGCAA

>M6-PGSC0003DMG400016709M6LRR-RLK\_2623

TTCAATGCCAGTAGAGTGTTTTATGGGCAAAACAAAACCTTTTTGCAGAAATGTTGCAAAGAATCATTTTC  
AATGGATGGATCCCGAATGAGCTCCAATCTATCCCTAACTTCATGTAAGT

>M6-PGSC0003DMG400016709M6LRR-RLK\_2684

AATCATTTCAATGGATGGATCCCGAATGAGCTCCAATCTATCCCTAACTTCATGTAAGTAATGTCACATCC  
TATATATTCTTACATGGTTTAGAATGTTACGGACTTACAGTTTCAAGGG

>M6-PGSC0003DMG400016709M6LRR-RLK\_2745

TGTCACATCCTATATATTCTTACATGGTTTAGAATGTTACGGACTTACAGTTTCAAGGGGTGTGACATAAC  
ATCTAATATGACAGATACGATGGGAATTCCTTTGCAAATGGTCCAGCTC

>M6-PGSC0003DMG400016709M6LRR-RLK\_2806

GTGACATAACATCTAATATGACAGATACGATGGGAATTCCTTTGCAAATGGTCCAGCTCCTCCCCACCA  
CCATACACTGCACCTCCTCCTGGAAGATCTCGCAACAATCGTAGCCATTC

>M6-PGSC0003DMG400016709M6LRR-RLK\_2867

CCCCACCACCATACTGACCTCCTCCTGGAAGATCTCGCAACAATCGTAGCCATTCTCCTCCTAGTTC

ACGTGCAAGACCAGGTTCTGATGGCCAGCCATCTCCAGAAAATGGTGAT

>M6-PGSC0003DMG400016709M6LRR-RLK\_2928

CTCCTAGTTCACGTGCAAGACCAGGTTCTGATGGCCAGCCATCTCCAGAAAATGGTGATAAAAAAAGG  
GATTGACAACTGGAGCTATCATTGGCATAGCTCTTGGATCTTCTCTTGCAA

>M6-PGSC0003DMG400016709M6LRR-RLK\_2989

AAAAAAGGGATTGACAACTGGAGCTATCATTGGCATAGCTCTTGGATCTTCTCTTGCAATTCTTTTGTCTC  
TGGTAGCGCTTGTATTTTGTCTCCGGAGGGGCAAGGGCAAGGAAATTGC

>M6-PGSC0003DMG400016709M6LRR-RLK\_305

GGGGTTTTACTCATCTTTTGTGCGGAAGGAAACTGATCCGAATGACTGTGAGTTTCTTCACTGGTTG  
AAAATCTTGGATCCGTTTTAGAGCTTCATTAGTGATTTTGTGCTTAGTG

>M6-PGSC0003DMG400016709M6LRR-RLK\_3050

CTTTTGTCTCTGGTAGCGCTTGTATTTTGTCTCCGGAGGGGCAAGGGCAAGGAAATTGCTACAAGACCCT  
CTACAGGAAGTCTCCAGTTGGCACCGATAAAGGTGTGTTCCCTTAAACT

>M6-PGSC0003DMG400016709M6LRR-RLK\_3111

CAAGACCCTCTACAGGAAGTCTCCAGTTGGCACCGATAAAGGTGTGTTCCCTTAAACTTTTTTCTTCTCT  
GACTCAATATTGTCATTGGTGCTAATACCCTCAGATGACTAACAGTTGT

>M6-PGSC0003DMG400016709M6LRR-RLK\_3172

TTTCTTCTGACTCAATATTGTCATTGGTGCTAATACCCTCAGATGACTAACAGTTGTGGTGTGATGTGG  
CATCTTAATTTGGAAATTGGTACGAACTTGGTTGATTTCTCATGTACTC

>M6-PGSC0003DMG400016709M6LRR-RLK\_3233

TGTGATGTGGCATCTTAATTTGGAAATTGGTACGAACTTGGTTGATTTCTCATGTACTCTGTTTAATCTTA  
GTGAATATGGAGGTACAAGAGCAAAGGGCGAAGCCTGTGGCAGCTGTTG

>M6-PGSC0003DMG400016709M6LRR-RLK\_3294

TTTAATCTTAGTGAATATGGAGGTACAAGAGCAAAGGGCGAAGCCTGTGGCAGCTGTTGCTGACTTGAA  
GCCCCACCTACCGAAAAGGTGACTGTTGAAATGATACAAGGGAAGAATGG

>M6-PGSC0003DMG400016709M6LRR-RLK\_3355

GACTTGAAGCCCCACCTACCGAAAAGGTGACTGTTGAAATGATACAAGGGAAGAATGGATCTGTCAG  
GAGAGGGAAGTCTCCAATAACTGCATCTGCTTATACTGTTGCTGCATTGCAA

>M6-PGSC0003DMG400016709M6LRR-RLK\_3416

CTGTCAGGAGAGGGAAGTCTCCAATAACTGCATCTGCTTATACTGTTGCTGCATTGCAAACAGCAACAA  
ACAGCTTCAGTCAAGAAAATCTCATTGGTGAAGGATCTCTTGGGCGTGTTT

>M6-PGSC0003DMG400016709M6LRR-RLK\_3477

AGCAACAAACAGCTTCAGTCAAGAAAATCTCATTGGTGAAGGATCTCTTGGGCGTGTTTATAGGGCAGA  
GTTTCCTAATGGGAAGGTAATTTTCAGATGTTTAAACGTTGTAACCTTCTTACC

>M6-PGSC0003DMG400016709M6LRR-RLK\_3538

AGGGCAGAGTTTCCTAATGGGAAGGTAATTTTCAGATGTTTAAACGTTGTAACCTTCTTACCTTTCCTACTCAT  
GATGTGCATTCAAACCTATTTGAAGCTGAACAATATTGAATAAATTTAA

>M6-PGSC0003DMG400016709M6LRR-RLK\_3599

TCCTACTCATGATGTGCATTCAAACCTATTTGAAGCTGAACAATATTGAATAAATTTAATCTGTCTCTCAT  
GGACATCTTTCATTTTTGATGCTTCAGAGAATCACATACTTGTGAGTTG

>M6-PGSC0003DMG400016709M6LRR-RLK\_366

CACTGGTTGAAAATCTTGATCCGTTTTTAGAGCTTCATTAGTGATTTTGTGCTTAGTGGGTTTAGGTGTT  
TTTTCTGTTTTCTTGAATGTGTTGAAGGAGGAGGCTTTTTTTGTTTTTTG

>M6-PGSC0003DMG400016709M6LRR-RLK\_3660

TGTCTCTCATGGACATCTTTCATTTTTGATGCTTCAGAGAATCACATACTTGTGAGTTGTATAACGTTTCAT  
CAGATACATAAGGACATCAAAGGGGTATATCAAGATGTTGGCCACTCC

>M6-PGSC0003DMG400016709M6LRR-RLK\_3721

TAACGTTTCATCAGATACATAAGGACATCAAAGGGGTATATCAAGATGTTGGCCACTCCACCTATCACCC  
TATTGCTAAGACGCTATAGCATAGTATCAAGCCGTTACACGTGTGGGACA

>M6-PGSC0003DMG400016709M6LRR-RLK\_3782

CTATCACCTATTGCTAAGACGCTATAGCATAGTATCAAGCCGTTACACGTGTGGGACAGTGTTGCATTA  
CCTAATGTCCAACCTCGGGTAAATGAGGCCATAAAGATATGGTAACTCAA

>M6-PGSC0003DMG400016709M6LRR-RLK\_4209

AGTAGTAAATAAGGTTCTTGTCTTACTATATCCATTGCCTTAACGTTATGGTTGAACCCTTAGATCCTTTC  
ACAATATTTGTCAAACCGGGCAAACACTAAAGGCTACATACTTGTGATCTA

>M6-PGSC0003DMG400016709M6LRR-RLK\_427

TTTAGGTGTTTTCTGTTTTCTTGAATGTGTTGAAGGAGGAGGCTTTTTTTGTTTTTTGTTTTTTGTTACTAG  
GTGAATCTTGTGATATAAGAACGCCTTCTTGTGATTATTTGAATGCC

>M6-PGSC0003DMG400016709M6LRR-RLK\_4270

AGATCCTTTCACAATATTTGTCAAACCGGGCAAACACTAAAGGCTACATACTTGATCTATGTGTTACTAA  
ACCTGAGTAGAAGTTAGTAGACTTCTTGATACTCTGCTCGCATGGGAGTT

>M6-PGSC0003DMG400016709M6LRR-RLK\_4331

TGTTACTAAACCTGAGTAGAAGTTAGTAGACTTCTTGATACTCTGCTCGCATGGGAGTTAAAGTATTTCC  
TCTTGCTAGTACATAATCTGTTTTGAGTGATTCTCTTAACTGAGATTAAG

>M6-PGSC0003DMG400016709M6LRR-RLK\_4392

AGTATTTCTCTTGCTAGTACATAATCTGTTTTGAGTGATTCTCTTAACTGAGATTAAGTCCTTGATACTCT  
TTGATTCAACTTGCTCTTTTAGATCTTTCACAAAGTTGATTGCCACACA

>M6-PGSC0003DMG400016709M6LRR-RLK\_4453

CTTGATACTCTTTGATTCAACTTGCTCTTTTAGATCTTTCACAAAGTTGATTGCCACAGTAGGCTCACATT  
CTGATGAACACATGTCAATTGTTCACTCCTCTGGTTGGTCTGGTCACA

>M6-PGSC0003DMG400016709M6LRR-RLK\_4514

AGGCTCACATTCTGATGAACACATGTCAATTGTTCACTCCTCTGGTTGGTCTGGTCACATCTTTGCTTTTA  
TCTGTCTTGTGATGTTTGATGGGTGTAATTATATGGTCACTTTGATGGT

>M6-PGSC0003DMG400016709M6LRR-RLK\_4575

TTTGCTTTTATCTGTCTTGTGATGTTTGATGGGTGTAATTATATGGTCACTTTGATGGTCATCTCACTTCTC  
TTCTCAGCCTGAATTA ACTATGATACTATAATCTTGTCTTTGGTTAC

>M6-PGSC0003DMG400016709M6LRR-RLK\_4636

TCTCACTTCTCTTCTCAGCCTGAATTA ACTATGATACTATAATCTTGTCTTTGGTTACATGATGCAGTCTC  
AAGCAAAAATATTCTTAGCAGTTTCAAAGTTTGACATTATATATCTTC

>M6-PGSC0003DMG400016709M6LRR-RLK\_4697

GATGCAGTCCTAAGCAAAAATATTCTTAGCAGTTTCAAAGTTTGACATTATATATCTTCTACTTTGTGGTT  
TATTATTGGATGTGCTACTGGTTATTTCTTTTTGAATGAACCAATTGTG

>M6-PGSC0003DMG400016709M6LRR-RLK\_4758

CTTTGTGGTTTATTATTGGATGTGCTACTGGTTATTTCTTTTTGAATGAACCAATTGTGTTGACTATTTCTC  
TGCTCCAACTTGATGCCAACTGTGTTCCAATGAATGATTTAAGAATT

>M6-PGSC0003DMG400016709M6LRR-RLK\_4819

GACTATTTCTCTGCTCCAACTTGATGCCAACTGTGTTCCAATGAATGATTTAAGAATTTTCATGTGTCAAC

AACATTTTTGATGAGGAACTTTTAGTTTTTCATTCATGTAGTTTCTAC

>M6-PGSC0003DMG400016709M6LRR-RLK\_488

TTTGTTACTAGGTGAATCTTGTGATATAAGAACGCCTTCTTGTGATTATTTGAATGCCTGATTGGTTAA  
TGGGGTAATGTATTTGTTGCCCTTCTTCTGGGGTTCTTTTTCTTCCCT

>M6-PGSC0003DMG400016709M6LRR-RLK\_4880

ATGTGTCAACAACATTTTTGATGAGGAACTTTTAGTTTTTCATTCATGTAGTTTCTACGGAAGGTGCCAA  
CTGAAAATCTCAATTGATCTTTTGAAGTGCCTTACCAGATAATGGTCA

>M6-PGSC0003DMG400016709M6LRR-RLK\_4941

AAGGTGCCAACTGAAAATCTCAATTGATCTTTTGAAGTGCCTTACCAGATAATGGTCATCAAAAAGATC  
GACAGTGCAGCACTGTCGCTGCAGGAGGAAGATAACTTTCTTGAAGCTGT

>M6-PGSC0003DMG400016709M6LRR-RLK\_5002

AAAAAGATCGACAGTGCAGCACTGTCGCTGCAGGAGGAAGATAACTTTCTTGAAGCTGTCTCAAATATG  
TCAAGGCTGAGACACCCAAACATTGTTCAATTGATAGGATATTGTGCTGAG

>M6-PGSC0003DMG400016709M6LRR-RLK\_5063

CAAATATGTCAAGGCTGAGACACCCAAACATTGTTCAATTGATAGGATATTGTGCTGAGCATGGACAGC  
GTCTTCTGGTTTATGACCATGTTGCAAATGGTAGCTTGCATGATATGCTGC

>M6-PGSC0003DMG400016709M6LRR-RLK\_5124

TGGACAGCGTCTTCTGGTTTATGACCATGTTGCAAATGGTAGCTTGCATGATATGCTGCACTTTGCTGAT  
GAGAGGAGCGAATTGCTTACTTGAACGCCCGGGTTAGAGTAGCGCTTGG

>M6-PGSC0003DMG400016709M6LRR-RLK\_5185

TTTGCTGATGAGAGGAGCGAATTGCTTACTTGAACGCCCGGGTTAGAGTAGCGCTTGGCACTGCTCGA  
GCTTTAGAGTATGTTATAGCTGTATAGTATTTTACCTGTCTTGCCCGTTTC

>M6-PGSC0003DMG400016709M6LRR-RLK\_5246

CTGCTCGAGCTTTAGAGTATGTTATAGCTGTATAGTATTTTACCTGTCTTGCCCGTTTCTTGTGGGTTAG  
CTTAAACTTGACCGTCTTCTTTTCAGGTAAGTCTGTCTA

>M6-PGSC0003DMG400016709M6LRR-RLK\_5307

GTTGGGTTAGCTTAAACTTGACCGTCTTCTTTTCAGGTAAGTCTGTCTACCTTCTGTTGTA  
CATAGAACTTCAAATCCGCAAATATTTTACTAGATGAAGAGCTCAATC

>M6-PGSC0003DMG400016709M6LRR-RLK\_5368

TTCTGTTGTACATAGAACTTCAAATCCGCAAATATTTTACTAGATGAAGAGCTCAATCCCCATTTATCAG  
ATTGTGGGTTAGCAGCTTTGACTCCAAACACAGAACGCCAGGTGAGTGA

>M6-PGSC0003DMG400016709M6LRR-RLK\_5429

CATTTATCAGATTGTGGGTTAGCAGCTTTGACTCCAAACACAGAACGCCAGGTGAGTGAGTAAAGAAGA  
TTAATCTACGTCGTCGTTTTAACAGAGGGTGTGATAATATTGGGTGGTA

>M6-PGSC0003DMG400016709M6LRR-RLK\_549

ATTTGGTTAATGGGGTAATGTATTTGTTGCCCTTCTTCTGGGGTCTTTTTCTCCCTTTTTGTTGGGTTT  
CCCAGTCAATGCAAGTCAAAGATTGATACGTTAGTACAAAAAATATGG

>M6-PGSC0003DMG400016709M6LRR-RLK\_5490

AAAGAAGATTTAATCTACGTCGTCGTTTTAACAGAGGGTGTGATAATATTGGGTGGTACGTGATGCAT  
ATCATGTTTATGAGATGATGTCAATCAACTTACCTAGTACTGTAGTAGGAG

>M6-PGSC0003DMG400016709M6LRR-RLK\_5551

TGATGCATATCATGTTTATGAGATGATGTCAATCAACTTACCTAGTACTGTAGTAGGAGCAATATTAATG  
AGCAACTATTTCTAGGTAGATCTTTACAGACTCGGTCATGAAATTGGAGA

>M6-PGSC0003DMG400016709M6LRR-RLK\_5612

ATATTAATGAGCAACTATTTCTAGGTAGATCTTTACAGACTCGGTCATGAAATTGGAGATTCTGATTGTG  
GCAGCTTAGTTTTGTTTTCTAATTCTTCTGGAGCAATCTTGTTAGATGCT

>M6-PGSC0003DMG400016709M6LRR-RLK\_5673

CTGATTGTGGCAGCTTAGTTTTGTTTTCTAATTCTTCTGGAGCAATCTTGTTAGATGCTTAAACACTTGGC  
TTACCATAGTGCACAACTTTAAGGAAGACCCCTTCCCCCTGCCTGAAA

>M6-PGSC0003DMG400016709M6LRR-RLK\_5734

AACACTTGGCTTACCATAGTGCACAACTTTAAGGAAGACCCCTTCCCCCTGCCTGAAATTCGATTTAGTT  
CTGTGAATTATTTTTGTGAAAAGAGAACCTTCTTGTACTGAAGTTCGGG

>M6-PGSC0003DMG400016709M6LRR-RLK\_5795

CGATTTAGTTCTGTGAATTATTTTTGTGAAAAGAGAACCTTCTTGTACTGAAGTTCGGGTGAAGGAAGCT  
AATGTGGGAAGGCTAATTGACGCTGTTAAGGGCATTGCCTAAAATTGTAA

>M6-PGSC0003DMG400016709M6LRR-RLK\_5856

AAGGAAGCTAATGTGGGAAGGCTAATTGACGCTGTTAAGGGCATTGCCTAAAATTGTAATTACTTCTGA  
ATGTTGACAGGTGTCATCCACACAAATGATTGGTTCATTCGGTTATAGCGC

>M6-PGSC0003DMG400016709M6LRR-RLK\_5917

ACTTCTGAATGTTGACAGGTGTCATCCACACAAATGATTGGTTCATTCGGTTATAGCGCTCCTGAATTTGC  
TTTATCTGGAATATACACGGTAAAAAGTGATGTATATAGTTTTGGTGTG

>M6-PGSC0003DMG400016709M6LRR-RLK\_5978

CTGAATTTGCTTTATCTGGAATATACACGGTAAAAAGTGATGTATATAGTTTTGGTGTGGTGATGTTGGA  
ATTGTTGACAGGAAGGAAGCCACTTGATAGGTAACTAGATCTTTTTACA

>M6-PGSC0003DMG400016709M6LRR-RLK\_6039

GATGTTGGAATTGTTGACAGGAAGGAAGCCACTTGATAGGTAACTAGATCTTTTTACATTGCTAGTCAA  
CTTTTACACTATTGAATTCTTTTAATGACTTGATTCTTGTTAACAATCAT

>M6-PGSC0003DMG400016709M6LRR-RLK\_61

TTAAAAAGAAAGCTTGGAATCGGAGAGTCTCTTAACGATGGTGACACCTACCACTAGTGACGACGTTAC  
CTTCTTGTCATTTCCCTGTCTTTCTTCGCCATGCTTCTTCTTCTCCTCT

>M6-PGSC0003DMG400016709M6LRR-RLK\_610

TTGTTGGGTTTTCCAGTCAATGCAAGTCAAAGATTGATACGTTAGTACAAAAAATATGGATTCTTGATCT  
TTGTACTAAAAATTATATGACTGGGATTTTCTGTGATTATAATGCGAGGA

>M6-PGSC0003DMG400016709M6LRR-RLK\_6100

GCTAGTCAACTTTTACACTATTGAATTCTTTTAATGACTTGATTCTTGTTAACAATCATATAGTTCAAGGGT  
GAGATCGGAACAGTCCCTTGTGAGATGGGCTACGCCTCAACTCCATGA

>M6-PGSC0003DMG400016709M6LRR-RLK\_6161

AGTTCAAGGGTGAGATCGGAACAGTCCCTTGTGAGATGGGCTACGCCTCAACTCCATGATATAGATGCC  
TTGTCAAAAATGGTTGATCCTTCACTAAATGGCATGTATCCTGCAAAGTCT

>M6-PGSC0003DMG400016709M6LRR-RLK\_6222

TAGATGCCTTGTCAAAAATGGTTGATCCTTCACTAAATGGCATGTATCCTGCAAAGTCTTTGTCCCGTTTT  
GCTGATATTATTGCACTCTGTGTTGAGGTGAGCTTTACTTGATGTTCT

>M6-PGSC0003DMG400016709M6LRR-RLK\_6283

GTCCCGTTTTGCTGATATTATTGCACTCTGTGTTGAGGTGAGCTTTACTTGATGTTCTTTTCATTTGGAGC  
ATAACAGTTGTTAACATGTGAAGCTTAAAAGATGAAACCACTTCTAAAA

>M6-PGSC0003DMG400016709M6LRR-RLK\_6344

CATTTGGAGCATAACAGTTGTTAACATGTGAAGCTTAAAAGATGAAACCACTTCTAAAATATCTTTGATG

GAAGCGAAAGTCAATGATAATAGGGAATTTACACACTTAAGGACCAAAC

>M6-PGSC0003DMG400016709M6LRR-RLK\_6405

TCTTTGATGGAAGCGAAAGTCAATGATAATAGGGAATTTACACACTTAAGGACCAAACCTCGACATTCTAA  
CCCGTCAAATAAATGATACTCTACCAGTTTTTGCATTCTATATAAGTCCA

>M6-PGSC0003DMG400016709M6LRR-RLK\_6466

ACATTCTAACCCGTCAAATAAATGATACTCTACCAGTTTTTGCATTCTATATAAGTCCAAATTCAGGGGCG  
TGGATAGATTGGGACCACCTGCACTCTGAGTTTGCTCATGGCTCAGTGC

>M6-PGSC0003DMG400016709M6LRR-RLK\_6527

TTCAGGGGCGTGGATAGATTGGGACCACCTGCACTCTGAGTTTGCTCATGGCTCAGTGCTGAAGTGAAT  
TGATGTGCTTCAGCAAATAGATGACCTTTCTTACACATACTCGGTGAGTCT

>M6-PGSC0003DMG400016709M6LRR-RLK\_6588

AAGTGAATTGATGTGCTTCAGCAAATAGATGACCTTTCTTACACATACTCGGTGAGTCTTGAATGGCGA  
GAGCACCCATCTTGTTAAAGTTAGTTGGGAACTTCCAAGGCGTAAGTC

>M6-PGSC0003DMG400016709M6LRR-RLK\_6649

GAATGGCGAGAGCACCCATCTTGTTAAAGTTAGTTGGGAACTTCCAAGGCGTAAGTCCTTGCACACC  
ATGGTCCATAGTGGCTTTGGGGCTTAGTCTTTAAATGAGAAGTTCTTAAT

>M6-PGSC0003DMG400016709M6LRR-RLK\_671

TCTTGATCTTTGTAATAAAATTATATGACTGGGATTTTCTGTGATTATAATGCGAGGACGCATGCAATTG  
AATTCGAATGCTAAACTGTTTGATTGATAAGATAATATGTTTTCTTG

>M6-PGSC0003DMG400016709M6LRR-RLK\_6710

TGCACACCATGGTCCATAGTGGCTTTGGGGCTTAGTCTTTAAATGAGAAGTTCTTAATTAAGCTTTTCTT  
GATCTAAGGTGACTTCAAGACTCACTCAACTCACGAAGAAAAGTCAGAT

>M6-PGSC0003DMG400016709M6LRR-RLK\_6771

AGCTTTTCTTGATCTAAGGTGACTTCAAGACTCACTCAACTCACGAAGAAAAGTCAGATGGACTCAACAA  
AATTATAATGAATACTTGCTCATTGACATATCTGAAGTGAATTACTTTAA

>M6-PGSC0003DMG400016709M6LRR-RLK\_6832

ACTCAACAAAATTATAATGAATACTTGCTCATTGACATATCTGAAGTGAATTACTTTAATTGCAATAATTT  
GAATGCGAGTGTTTTCTCCTTGGTAATAACATTTAACATGTATTTCTG

>M6-PGSC0003DMG400016709M6LRR-RLK\_6893



GCAATAATTTGAATGCGAGTGTTTTCTCCTTGGTAATAACATTTAACATGTATTTCTGTACAGCCTGAAC  
CAGAGTTTCGACCCCAATGTCTGAAGTTGTGCAAGCACTGGTTCGGTT

>M6-PGSC0003DMG400016709M6LRR-RLK\_6954

CAGCCTGAACCAGAGTTTCGACCCCAATGTCTGAAGTTGTGCAAGCACTGGTTCGGTTAATGCAAAGG  
GCGAGTGTGGTCAAAGGCGATCCAGTGATGAATCAGCTTTCACATACAAG

>M6-PGSC0003DMG400016709M6LRR-RLK\_7015

TGCAAAGGGCGAGTGTGGTCAAAGGCGATCCAGTGATGAATCAGCTTTCACATACAAGACTCCGGATC  
ATGAGACGGTTGACATGCCATAGATAAACATACACGACGAAGCAGCCTTTG

>M6-PGSC0003DMG400016709M6LRR-RLK\_7076

TCCGGATCATGAGACGGTTGACATGCCATAGATAAACATACACGACGAAGCAGCCTTTGCAATTTTGTA  
AGTAACTTCTGTGAAGGTCAAGAGCAACTATGGCAGATAAAACTCGGAGGT

>M6-PGSC0003DMG400016709M6LRR-RLK\_7137

ATTTTGTAAGTAACTTCTGTGAAGGTCAAGAGCAACTATGGCAGATAAAACTCGGAGGTGTCAATACCA  
GGGACATTA AAAATGTAATTATTTTTCACATCTTCCTCGTTAAAAAAAAA

>M6-PGSC0003DMG400016709M6LRR-RLK\_7198

CAATACCAGGGACATTA AAAATGTAATTATTTTTCACATCTTCCTCGTTAAAAAAAAAAGAAGCTTTTTTG  
CATCCCAATTTGAGGTACATAATTCAGTACATAATTCCTCCAGAGTATA

>M6-PGSC0003DMG400016709M6LRR-RLK\_7259

AGCTTTTTTGCATCCCAATTTGAGGTACATAATTCAGTACATAATTCCTCCAGAGTATATTTACAAACCAT  
CTTGGGATACTGGATATAATTTATTGTCAATAACAACATTGCTACACAT

>M6-PGSC0003DMG400016709M6LRR-RLK\_732

CATGCAATTGAATTCGAATGCTAAACTGTTTGATTTGATAAGATAATATGTTTTCTTGCCCTTCTTGGT  
GTCTTTCTTGATTTAATTAGTTTCAGAGCCAACACTAGCTTAAGATTG

>M6-PGSC0003DMG400016709M6LRR-RLK\_7320

TACAAACCATCTTGGGATACTGGATATAATTTATTGTCAATAACAACATTGCTACACATTATCCTTCTGTG  
TTGTTTATATTACAGTTTTTCCAATAACTTTTGGCTAGCCTAAGAGCTA

>M6-PGSC0003DMG400016709M6LRR-RLK\_793

CTTTCTTGGTGTCTTTCTTGATTTAATTAGTTTCAGAGCCAACACTAGCTTAAGATTGAGGCTGTACTTTA  
TTCTCAAAAAAAAAAAGATTGAGGCTGTACTTGTTGAATCTTGATA

>M6-PGSC0003DMG400016709M6LRR-RLK\_854

GCTGTACTTTATTCTCAAAAAAAAAAAAAAGATTGAGGCTGTACTTGTTGAATCTTGATAAGATATATATT  
GAATCATGGTTTTCTTGTTGGAGAGATGTTCTGGCTTTGGCTTTGTCGTT

>M6-PGSC0003DMG400016709M6LRR-RLK\_915

ATATATATTGAATCATGGTTTTCTTGTTGGAGAGATGTTCTGGCTTTGGCTTTGTCGTTGCCTGACTCTTG  
TAATCTGCAGTGCAAGCTCTTCAGGTCTTGTATGCTTCACTGAATAGTC

>M6-PGSC0003DMG400016808-(rev)M6LRR-RLP\_504

GTATTTGGTAATGGGTGAGTTAAACTGAAATCAACGGAATAATTTATGATGACTAGCTACACATAATTAT  
ATTTTACTATAGAACAAAGAATCTCTACTTCAAAAATGATAAACAAAATC

>M6-PGSC0003DMG400016808-(rev)M6LRR-RLP\_567

TAATTATATTTTACTATAGAACAAAGAATCTCTACTTCAAAAATGATAAACAAAATCATAACTAATTATT  
CACATTTTCTGAAAATAGAATGATGGTTGATTATATATGTTTCTATCTG

>M6-PGSC0003DMG400016808-(rev)M6LRR-RLP\_630

AACTTATTCACATTTTCTGAAAATAGAATGATGGTTGATTATATATGTTTCTATCTGTAAGAGTTTGGTTT  
CCAAGCATAGTCCTTATTCTTAAAATCATAATTATGGACTCTACAATGC

>M6-PGSC0003DMG400016872-(rev)M6LRR-RLK\_0

ATGTCTGGAGTATATGACTCAAGAAGTGGTCTAATTCTGATTTGGATAGTTATCTTGTTGGCTTCCGTGA  
CGATGGTTTGTCTCTGCAGAAGGATTGAATGCTGAAGGAATGTACCTACTT

>M6-PGSC0003DMG400016872-(rev)M6LRR-RLK\_1054

AGCTCAATGGTGTGATACCTCGGGAACCTTCTAGTTTAAAGAAAGTTGGAACGTCTTGATCTGTGCGATTAA  
CTACTTATATGGCTCTATTCCATTTTCATTTTCAGTATCTCACTGAATTGG

>M6-PGSC0003DMG400016872-(rev)M6LRR-RLK\_1116

TCGATTAACACTTATATGGCTCTATTCCATTTTCATTTTCAGTATCTCACTGAATTGGTTCAGTTACAGCTC  
TTTCAGAATTCTTTAAGTGGAACCTATTCTCAAGGTCTCGGTAACCTAT

>M6-PGSC0003DMG400016872-(rev)M6LRR-RLK\_1178

GTTACAGCTCTTTTCAGAATTCTTTAAGTGGAACCTATTCTCAAGGTCTCGGTAACCTATAGCCGACTTTGGG  
TGGTTGATTTTTCTGACAACTACCTCACAGGAGGAATTCCTCCTAATAT

>M6-PGSC0003DMG400016872-(rev)M6LRR-RLK\_124

TGAAGAAGAACTTAAAGGATGAGTTTAAACAATCTTGAAAATTGGAATCCTAGTGATGAGACGGCGTGTA

GATGGAAAGGCGTAAATTGCACTTCTGATTATAATCCGGTTGTGCAATCTC

>M6-PGSC0003DMG400016872-(rev)M6LRR-RLK\_1240

GACTTTGGGTGGTTGATTTTTCTGACAACTACCTCACAGGAGGAATTCCTCCTAATATTTGTAGGAATTCA  
AATTTGATTTGGCTAAATCTTGGTTCAAACAACTTGCATGGAGTCATTC

>M6-PGSC0003DMG400016872-(rev)M6LRR-RLK\_1302

AGGAATTCAAATTTGATTTGGCTAAATCTTGGTTCAAACAACTTGCATGGAGTCATTCCATCTGGTGTTAT  
TAAGTGTGACTCATTGGTACAACCTTCGTCTTGACGGTAACTGGCTACAA

>M6-PGSC0003DMG400016872-(rev)M6LRR-RLK\_1364

TGGTGTTATTAAGTGTGACTCATTGGTACAACCTTCGTCTTGACGGTAACTGGCTACAAGGGAGTTTTCT  
TCTGACTTGTGCAAACCTGAGTAATCTATCTGCTCTTGAATTAGGACAGAA

>M6-PGSC0003DMG400016872-(rev)M6LRR-RLK\_1426

GTTTTCTTCTGACTTGTGCAAACCTGAGTAATCTATCTGCTCTTGAATTAGGACAGAACACGTTCCGGTGGT  
CTAATTCCTCCTGAGATTGGAACTGTCAAAGTTGCAAAGACTTGATC

>M6-PGSC0003DMG400016872-(rev)M6LRR-RLK\_1488

TTCGGTGGTCTAATTCCTCCTGAGATTGGAACTGTCAAAGTTGCAAAGACTTGATCTTTCAGGCAATT  
ATTTACACATGAATTGCCTCAAGAGATAGGGAATCTTGAAACACTTGTG

>M6-PGSC0003DMG400016872-(rev)M6LRR-RLK\_1550

AGGCAATTATTTACACATGAATTGCCTCAAGAGATAGGGAATCTTGAAACACTTGTGACGTTAATGTC  
TCGTCTAATTTGCTGACAGGTCAAGTACCACAAGAAATTCTGAAATGCAA

>M6-PGSC0003DMG400016872-(rev)M6LRR-RLK\_1612

TTAATGTCTCGTCTAATTTGCTGACAGGTCAAGTACCACAAGAAATTCTGAAATGCAAGGCGTTGCAACG  
ACTTGATCTCAGTAGGAACAGCTTTAGTGGTGCTATACCTGATGAAATTG

>M6-PGSC0003DMG400016872-(rev)M6LRR-RLK\_1674

TTGCAACGACTTGATCTCAGTAGGAACAGCTTTAGTGGTGCTATACCTGATGAAATTGGAAAACCTAGCA  
CAGCTTGAACGTCTTTTGGTTTCGGATAATAAGTTCTCTGGAAAGATACCA

>M6-PGSC0003DMG400016872-(rev)M6LRR-RLK\_1736

ACTAGCACAGCTTGAACGTCTTTTGGTTTCGGATAATAAGTTCTCTGGAAAGATACCAGTAGCATTGGGG  
AGGCTTTCTCGTTTGAACGAGCTGCAGATGGGTGGAAATTCATTTTCAGG

>M6-PGSC0003DMG400016872-(rev)M6LRR-RLK\_1798

CATTGGGGAGGCTTTCTCGTTTGAACGAGCTGCAGATGGGTGGAAATTCATTTTCAGGTGAAATACCAT  
CAGAATTGGGTGATCTTACTGGTCTACAGATCGCGATGGATCTTAGTGACA

>M6-PGSC0003DMG400016872-(rev)M6LRR-RLK\_186

GCGTGTAGATGGAAAGGCGTAAATTGCACTTCTGATTATAATCCGGTTGTGCAATCTCTTGATTTGAGTT  
TTATGAATCTGTCAGGCACTTTGAGTTCTAGCATTGGTGGTCTCGTAAGT

>M6-PGSC0003DMG400016872-(rev)M6LRR-RLK\_1860

ATACCATCAGAATTGGGTGATCTTACTGGTCTACAGATCGCGATGGATCTTAGTGACAACAATCTCTCTG  
GTTCAATACCACCTAAGCTTGGAAATCTTATTCTACTAGAGTGTCTCAAT

>M6-PGSC0003DMG400016872-(rev)M6LRR-RLK\_1922

TCTCTCTGGTTCAATACCACCTAAGCTTGGAAATCTTATTCTACTAGAGTGTCTCAATCTCAACAATAATC  
ATCTGAGTGGTGAATACCAATCACATTCGGAAACTTGACGAGTCTAAT

>M6-PGSC0003DMG400016872-(rev)M6LRR-RLK\_1984

ACAATAATCATCTGAGTGGTGAATACCAATCACATTCGGAAACTTGACGAGTCTAATGAGCTGTAACCT  
TTCATAACAATAACCTCACTGGACCATTGCCGGATATACCACTCTTTCAGA

>M6-PGSC0003DMG400016872-(rev)M6LRR-RLK\_2046

TGTAACTTTTCATACAATAACCTCACTGGACCATTGCCGGATATACCACTCTTTCAGAATATGGATGTCAG  
CAGCTTTATTGGAAACAACGGGCTTTGTGGTGGTCGTTTAGGTGGATGT

>M6-PGSC0003DMG400016872-(rev)M6LRR-RLK\_2108

GGATGTCAGCAGCTTTATTGGAAACAACGGGCTTTGTGGTGGTCGTTTAGGTGGATGTAACAAATCTCC  
TCCGTTCAATTCTGATCCTCCAACCAAAAATGCAGGTGCTCCAAGAGGGAA

>M6-PGSC0003DMG400016872-(rev)M6LRR-RLK\_2294

TGTGATGAAGCGGAAACCAGTTGATCAGATGGTTGCATCAGTAAAAGATAAGAATGCGTCATTTCCAGC  
TTCGGACATATATTTCCCTCCCGAAGAGGAGTTCACCTTCCAAGACTTAGT

>M6-PGSC0003DMG400016872-(rev)M6LRR-RLK\_2356

TTCCAGCTTCGGACATATATTTCCCTCCCGAAGAGGAGTTCACCTTCCAAGACTTAGTTGAGGCTACAAA  
CAGTTTTTCATGACAGTTATGTTGTTGGAAGAGGAGCTGTTGGGACAGTAT

>M6-PGSC0003DMG400016872-(rev)M6LRR-RLK\_2418

GCTACAAACAGTTTTTCATGACAGTTATGTTGTTGGAAGAGGAGCTGTTGGGACAGTATACAAAGCAGTC  
ATGCAATCTGGACGAAAAATCGCTGTTAAGAAGTTGGCTTCTAACAGAGAG

>M6-PGSC0003DMG400016872-(rev)M6LRR-RLK\_248

TTTGAGTTTTATGAATCTGTCAGGCACTTTGAGTTCTAGCATTGGTGGTCTCGTAAGTTAAACCGTTCTTG  
ACTTGTCTTTCAATGGATTCACAGGAATATTCCGAAAGAAATAGGGAA

>M6-PGSC0003DMG400016872-(rev)M6LRR-RLK\_2480

AGCAGTCATGCAATCTGGACGAAAAATCGCTGTTAAGAAGTTGGCTTCTAACAGAGAGGGTAATAACAT  
AGAAAAGAGTTTCCGAGCAGAAATTTCAACTCTCGGAAAGATTAGGCATCG

>M6-PGSC0003DMG400016872-(rev)M6LRR-RLK\_2542

ATAACATAGAAAAGAGTTTCCGAGCAGAAATTTCAACTCTCGGAAAGATTAGGCATCGTAACATTGTAA  
AACTGTATGGCTTTTGCTATCATCAAGGTTCTAATCTGCTTCTTTACGAGT

>M6-PGSC0003DMG400016872-(rev)M6LRR-RLK\_2604

ATTGTAAACTGTATGGCTTTTGCTATCATCAAGGTTCTAATCTGCTTCTTTACGAGTACATGGACAAAGG  
TAGCTTGGGTGAATTGCTTACGGTGCATCTTGTAGCTTGGATTGGCCT

>M6-PGSC0003DMG400016872-(rev)M6LRR-RLK\_2666

GGACAAAGGTAGCTTGGGTGAATTGCTTACGGTGCATCTTGTAGCTTGGATTGGCCTCAACGCTTCAT  
GATAGCTCTTGGGGCAGCTGAAGGACTTTCTTACTTACATCATGATTGCAA

>M6-PGSC0003DMG400016872-(rev)M6LRR-RLK\_2728

GCTTCATGATAGCTCTTGGGGCAGCTGAAGGACTTTCTTACTTACATCATGATTGCAAACCACAGATCAT  
CCACCGCGATATAAAGTCCAATAATATTTTGCTCGATGAGAAGTTGGAAG

>M6-PGSC0003DMG400016872-(rev)M6LRR-RLK\_2790

CAGATCATCCACCGCGATATAAAGTCCAATAATATTTTGCTCGATGAGAAGTTGGAAGCTCATGTTGGTG  
ATTTTGGTCTTGCTAAAGTTATCGACATGCCTCAAATAAGTCGATGTCT

>M6-PGSC0003DMG400016872-(rev)M6LRR-RLK\_2852

TGTTGGTGATTTTGGTCTTGCTAAAGTTATCGACATGCCTCAAATAAGTCGATGTCTGCAATTGCTGGA  
TCATATGGCTACATAGCCCCTGGTATGTACATTTTATTATTTTTCATTA

>M6-PGSC0003DMG400016872-(rev)M6LRR-RLK\_2914

TTGCTGGATCATATGGCTACATAGCCCCTGGTATGTACATTTTATTATTTTTCATTAGAACTTGTGTAGT  
ATTGCCTGTCTACTGTCTGCGAATAATGTCAAGAAACATATGGCCGGCT

>M6-PGSC0003DMG400016872-(rev)M6LRR-RLK\_2976

TTGTGTAGTATTGCCTGTCTACTGTCTGCGAATAATGTCAAGAAACATATGGCCGGCTAGATTGCTCTAA

CAAGACTAATATATTTTAGATAAGCAATGACTATAACTCTTCATCGAAAA

>M6-PGSC0003DMG400016872-(rev)M6LRR-RLK\_3038

TGCTCTAACAAGACTAATATATTTTAGATAAGCAATGACTATAACTCTTCATCGAAAAATCAGTGAACCTA  
CACGAAAAATCTCAAGTATAGTTCCTCCCATGAGCTGACTAGTGTATGT

>M6-PGSC0003DMG400016872-(rev)M6LRR-RLK\_310

CCGTTCTTGACTTGTCTTTCAATGGATTCACAGGGAATATCCGAAAGAAATAGGGAAGCTCAAAAAAT  
GCAGAGTCTTCAGCTCCATGATAATGAGTTTTATGGGCAGATTCCTGATG

>M6-PGSC0003DMG400016872-(rev)M6LRR-RLK\_3100

GTGAACTTACACGAAAAATCTCAAGTATAGTTCCTCCCATGAGCTGACTAGTGTATGTTAGTTTTCTCAC  
ACTTTGACTAGCAAATAGTACTAGTGTTCCTTGGTGAACGTTTTTGCT

>M6-PGSC0003DMG400016872-(rev)M6LRR-RLK\_3472

TTTGAAGTAAGGGTAATACTATTTGATGAACTATTTGAAGAGAGTAAGCAGAAGCGTCTACTTTGTTTAA  
CGGTTCTGCTTTTCCATTGCAGAATATGCTTACACCATGAAGGTAACAG

>M6-PGSC0003DMG400016872-(rev)M6LRR-RLK\_3534

TTGTTTAAACGGTTCTGCTTTTCCATTGCAGAATATGCTTACACCATGAAGGTAACAGAAAAATGTGATA  
TCTATAGTTACGGAGTAGTCCTTTTGGAGTTGCTAACAGGAAGAACACCG

>M6-PGSC0003DMG400016872-(rev)M6LRR-RLK\_3596

ATGTGATATCTATAGTTACGGAGTAGTCCTTTTGGAGTTGCTAACAGGAAGAACACCGGTGCAGCCACT  
CGATCAAGGAGGTGATCTTGTCACTTGTGTAAGGCATTATATCCGGGACAA

>M6-PGSC0003DMG400016872-(rev)M6LRR-RLK\_3658

AGCCACTCGATCAAGGAGGTGATCTTGTCACTTGTGTAAGGCATTATATCCGGGACAATTCGTTGACACC  
AGGGGTACTCGATATCCGATTGGATTTGACAGATAAACTACTGTTAGTC

>M6-PGSC0003DMG400016872-(rev)M6LRR-RLK\_372

TCAAAAATGCAGAGTCTTCAGCTCCATGATAATGAGTTTTATGGGCAGATTCCTGATGAATTGTATAACC  
TTTCTCATTTGAAAGACTTGAATTTGTTCAATAACATGATATCTGGTCCT

>M6-PGSC0003DMG400016872-(rev)M6LRR-RLK\_3720

TTGACACCAGGGGTACTCGATATCCGATTGGATTTGACAGATAAACTACTGTTAGTCACATGCTTACAG  
TCTTGAAAATTGGTCTAGTATGCACTTGTGTTGTCCTCCGGCTGATCGCCCT

>M6-PGSC0003DMG400016872-(rev)M6LRR-RLK\_3782

GCTTACAGTCTTGAAAATTGGTCTAGTATGCACTTGTTTGTCCCCGGCTGATCGCCCTTCAATGCGCGAA  
GTTGTGTCAATGTTGATGGAGTCTGATGAGCAAGAAGGTAACCTCATCTT

>M6-PGSC0003DMG400016872-(rev)M6LRR-RLK\_434

GTATAACCTTTCTCATTTGAAAGACTTGAATTTGTTCAATAACATGATATCTGGTCCTATATCAGAGGAGT  
TTGGGAGACTCTCTTCTTTAATTTCTTTTGTTCATACACCAATAATCT

>M6-PGSC0003DMG400016872-(rev)M6LRR-RLK\_496

CAGAGGAGTTTGGGAGACTCTCTTCTTTAATTTCTTTTGTTCATACACCAATAATCTCACTGGTTCACCTC  
CCTCGATCACTCGGGAAGCTAAAAAATTGGAAACATTTTCGTGTGGGGC

>M6-PGSC0003DMG400016872-(rev)M6LRR-RLK\_558

GGTTCACCTCCCTCGATCACTCGGGAAGCTAAAAAATTGGAAACATTTTCGTGTGGGGCAGAATCCGCTT  
TCTGGAACCTTACCTGCTGAGATTGGTGATTGCAAGAGTTTACAAGTTCTT

>M6-PGSC0003DMG400016872-(rev)M6LRR-RLK\_62

TTCCGTGACGATGGTTTGTCTGCAGAAAGGATTGAATGCTGAAGGAATGTACCTACTTGAGTTGAAGAA  
GAACTTAAAGGATGAGTTTAAACAATCTTGAAAATTGGAATCCTAGTGATGA

>M6-PGSC0003DMG400016872-(rev)M6LRR-RLK\_620

TCCGCTTTCTGGAACCTTACCTGCTGAGATTGGTGATTGCAAGAGTTTACAAGTTCTTGGTCTAGCACAA  
AACAATATAGGAGGAAATATACCCAAAGAGGTCGGTATGCTTAGAAGATT

>M6-PGSC0003DMG400016872-(rev)M6LRR-RLK\_682

TAGCACAAAACAATATAGGAGGAAATATACCCAAAGAGGTCGGTATGCTTAGAAGATTGAAACAACCTTG  
TACTTTGGGACAATCAACTCTCGGGCTATATCCCGAAGGAACTTGGAAACT

>M6-PGSC0003DMG400016872-(rev)M6LRR-RLK\_744

CAACTTGACTTTGGGACAATCAACTCTCGGGCTATATCCCGAAGGAACTTGGAAACTGTACAAAACCTTG  
AACTGCTTGCTTTATACCAGAACAACCTGGTTGGAGAAATTCCTGCTGCA

>M6-PGSC0003DMG400016872-(rev)M6LRR-RLK\_806

AAAACCTGAACTGCTTGCTTTATACCAGAACAACCTGGTTGGAGAAATTCCTGCTGCAATAGGTAAGCTC  
AAATCTCTCAAGAGGTTATACCTATACCGGAATGGATTAACGGTACAAT

>M6-PGSC0003DMG400016872-(rev)M6LRR-RLK\_868

GTAAGCTCAAATCTCTCAAGAGGTTATACCTATACCGGAATGGATTAACGGTACAATCCAAGGGTCAT  
TGGAATCTTTTCGTCAGCGATAGAGATTGACTTCTCAGAGAATTATCTAA

>M6-PGSC0003DMG400016872-(rev)M6LRR-RLK\_930

AGGGTCATTGGGAATCTTTCGTCAGCGATAGAGATTGACTTCTCAGAGAATTATCTAATAGGAGACATA  
CCAATTGAGTTCAGTCAAATAAAGGGACTGATGTTGTTGTATCTGTTTCAT

>M6-PGSC0003DMG400016872-(rev)M6LRR-RLK\_992

AGACATACCAATTGAGTTCAGTCAAATAAAGGGACTGATGTTGTTGTATCTGTTTCATAACCAGCTCAAT  
GGTGTGATACCTCGGGAACCTTCTAGTTTAAGAAAGTTGGAACGTCTTGA

>M6-PGSC0003DMG400016882-(rev)M6LRR-RLP\_0

TGATAGAGTCCTAATTTGCTGTTTCAGCAAGAAAATTGTAATCTTTTTCTTGCCCCATTGTGTTGAAGTTCC  
ATTTTAGGTTAATTTTGGTGTGATTTGAATCATTGATAGAGTCTATAAA

>M6-PGSC0003DMG400016882-(rev)M6LRR-RLP\_1037

AACATGCAAGCCGAATAGCTTCTATAAATTTCTGTAATGAAAACATTAATAATTGATGAAATTAGTAAT  
TAGAGCATCTCTTTTCAAACCAACATTTAAAGTGTTCATCTGTTGATG

>M6-PGSC0003DMG400016882-(rev)M6LRR-RLP\_1098

ATTAGTAATTAGAGCATCTCTTTTCAAACCAACATTTAAAGTGTTCATCTGTTGATGGATGAATTCAAT  
ATGCTAATGAATTCTAACTCAGCATTTTTGGAAGATCAGCTTTCGTGGT

>M6-PGSC0003DMG400016882-(rev)M6LRR-RLP\_1159

TGAATTCAATATGCTAATGAATTCTAACTCAGCATTTTTGGAAGATCAGCTTTCGTGGTGAAGGAATAAG  
CAGTTCTTTTGGAAAATAGTAAGGAGCTATGGCTTGAATGTTTATGCGAA

>M6-PGSC0003DMG400016882-(rev)M6LRR-RLP\_122

AAAGGGTGTTCGCGTGATGTTTTTTGAGTTCTTATTTGTGTTAATTTCAATTTCTAGGTTATTAGCCCT  
ATAAAGTTTGTGTTTTTTGGGCTATTGATGTGTTTTGTAAGACATTGT

>M6-PGSC0003DMG400016882-(rev)M6LRR-RLP\_1220

AGGAATAAGCAGTTCCTTTTGGAAAATAGTAAGGAGCTATGGCTTGAATGTTTATGCGAAGCGAATGTGT  
ACCTTCTGTTTACTCTATGGATGCTAAAAAATTCTGCTAGTTGCTAAAACA

>M6-PGSC0003DMG400016882-(rev)M6LRR-RLP\_1281

GAATGTGTACCTTCTGTTTACTCTATGGATGCTAAAAAATTCTGCTAGTTGCTAAAACAGGATGAGGGCT  
ATGGGAAATAACTTATTTTGTGTTGATCCACTCATTCTTCTACCACTGCT

>M6-PGSC0003DMG400016882-(rev)M6LRR-RLP\_1342

ATGAGGGCTATGGGAAATAACTTATTTTGTGTTGATCCACTCATTCTTCTACCACTGCTCTCTGTAAAGTG



ATTTAGGTGCACCACTTTATTATCCATGTTATAAGCATCTGTCTAGGTG

>M6-PGSC0003DMG400016882-(rev)M6LRR-RLP\_1403

CTGTAAAGTGATTTAGGTGCACCACTTTATTATCCATGTTATAAGCATCTGTCTAGGTGCCCCATTATGT  
TTCTAGGATAAGTAGAAGTTCTTGCAATTGACTAGCTGCCACTGATTGA

>M6-PGSC0003DMG400016882-(rev)M6LRR-RLP\_1464

CCCATTATGTTTCTAGGATAAGTAGAAGTTCTTGCAATTGACTAGCTGCCACTGATTGATGGTAAATACTT  
ACCCACATCGGGTGTTTATACTTAAATAAACAGTTAACCTTTAGAATTA

>M6-PGSC0003DMG400016882-(rev)M6LRR-RLP\_1525

GTAAATACTTACCCACATCGGGTGTTTATACTTAAATAAACAGTTAACCTTTAGAATTAGCAAATTAAGT  
GAAAATGCATATCACTTAACCGTGTTTAAGTGTTACTAAGTGTATATGC

>M6-PGSC0003DMG400016882-(rev)M6LRR-RLP\_1586

AAATTAAGTGAAAATGCATATCACTTAACCGTGTTTAAGTGTTACTAAGTGTATATGCAAGATATATGT  
GTATATTCATTGTCTTGGTGTAAAGCACCCATTCGGGTAAAGATTTTACCT

>M6-PGSC0003DMG400016882-(rev)M6LRR-RLP\_1647

GATATATGTGTATATTCATTGTCTTGGTGTAAAGCACCCATTCGGGTAAAGATTTTACCTGATTTAGTGCCT  
CTCGGAAGCTTTTAATTGCGATTTATGTTAGGGATTATCCATAAATGTT

>M6-PGSC0003DMG400016882-(rev)M6LRR-RLP\_1708

TTTAGTGCCTCTCGGAAGCTTTTAATTGCGATTTATGTTAGGGATTATCCATAAATGTTGATCAATTGAAT  
GTCACAGTGGGATTTGAAGTACTTAAGTGTCAAAATCAAATGATTCACT

>M6-PGSC0003DMG400016882-(rev)M6LRR-RLP\_1769

TCAATTGAATGTCACAGTGGGATTTGAAGTACTTAAGTGTCAAAATCAAATGATTCACTTGAAGACCGTG  
CATCAATTAGGAGAAGAACAAGCATAACACACTTATTACAATAAATAAA

>M6-PGSC0003DMG400016882-(rev)M6LRR-RLP\_183

TTATTAGCCCTATAAAGTTTGTGTTTTTTGGGCTATTGATGTGTTTTGTAAGACATTGTTGAAAATTTATAT  
GATTCTAATTTTTTTTTTCCAGAATTAATGATGGTTAATTAGAGGGTT

>M6-PGSC0003DMG400016882-(rev)M6LRR-RLP\_1830

AAGACCGTGCATCAATTAGGAGAAGAACAAGCATAACACACTTATTACAATAAATAAAGAAATATCTA  
AGGTGTTTGTGTGAAAGTTTCTTTGAGATCTTGAAGAAGTTTTGAAAAA

>M6-PGSC0003DMG400016882-(rev)M6LRR-RLP\_1891

AATATCTAAGGTGTTTGTGTGAAAGTTTCTTTGAGATCTTGGAAGAAGTTTTGAAAATGTGTTTCTTT  
GGAGTCTTCAGAAAAGCTATTTCTTGAGCAAGTATTTTAGGGTGTCT

>M6-PGSC0003DMG400016882-(rev)M6LRR-RLP\_1952

TGTTTCTTTGGAGTCTTCAGAAAAGCTATTTCTTGAGCAAGTATTTTAGGGTGTCTCCATTCACAAAT  
CTTCAAACCAACTATCCAAACACATTTTCTGTTTGCATGGTTTTAAAG

>M6-PGSC0003DMG400016882-(rev)M6LRR-RLP\_2013

ATTCACAAATCTTCAAACCAACTATCCAAACACATTTTCTGTTTGCATGGTTTTAAAGAAAGGATTTTC  
AGAAAATTCTTTCAAAGTTATCCGTTCAACTCTTATAAACTTTGCG

>M6-PGSC0003DMG400016882-(rev)M6LRR-RLP\_2074

AGGATTTTTCAGAAAATTCTTTCAAAGTTATCCGTTCAACTCTTATAAACTTTGCGATGAATATATTA  
GCTAATTGTTGAAGTTTGTATTAGACCATCTGTTTTCAAACCACATTT

>M6-PGSC0003DMG400016882-(rev)M6LRR-RLP\_2135

GAATATATTAGCTAATTGTTGAAGTTTGTATTAGACCATCTGTTTTCAAACCACATTTAAAGTGTGGCTT  
CTGATGATGGGTGAGTTCAACATATTAACAAATTCTTACACAACATTT

>M6-PGSC0003DMG400016882-(rev)M6LRR-RLP\_2196

AGTGTGGCTTCTGATGATGGGTGAGTTCAACATATTAACAAATTCTTACACAACATTTTTAGACCATACG  
AGTTTGTGGTGAAGGAATGCACAGTTCTTATGGAAAATAATAAAGAGC

>M6-PGSC0003DMG400016882-(rev)M6LRR-RLP\_2257

AGACCATACGAGTTTGTGGTGAAGGAATGCACAGTTCTTATGGAAAATAATAAAGAGCACAGTTGAAT  
GGATATGCAAAGTGCGGTGTGTCTTCTGTTACTCTATGGATGCTAAAAAG

>M6-PGSC0003DMG400016882-(rev)M6LRR-RLP\_2318

AGTTGAATGGATATGCAAAGTGCGGTGTGTCTTCTGTTACTCTATGGATGCTAAAAAGTTTTCTACTT  
GGTGGCATATTGTTACATTTGTCCCTTTTATATGAATCAGGTGGACCGGC

>M6-PGSC0003DMG400016882-(rev)M6LRR-RLP\_2379

TTTCTACTTGGTGGCATATTGTTACATTTGTCCCTTTTATATGAATCAGGTGGACCGGCAAAAATCCTCAA  
AAAGAGCCTTATTTGGACATTTGAGGCATGACATCTTTACAATCTCAT

>M6-PGSC0003DMG400016882-(rev)M6LRR-RLP\_244

AAAATTTATATGATTCTAATTTTTTTTTCCAGAATTAATGATGGTTAATTAGAGGGTTATAGCTTCTTATG  
TATAACTTGTTTCGTGATCCACAGCCATTTGTTCTGCCATTGCTCTATG

>M6-PGSC0003DMG400016882-(rev)M6LRR-RLP\_2440

AAATCCTCAAAAAGAGCCTTATTTGGACATTTGAGGCATGACATCTTTTACAATCTCATTACAAAAAAT  
GAGTGTTATGGTAAGTCACGTGCTTCTTTCATAGTAACTGTGTAATGTGA

>M6-PGSC0003DMG400016882-(rev)M6LRR-RLP\_2501

CAAAAAAATGAGTGTTATGGTAAGTCACGTGCTTCTTTCATAGTAACTGTGTAATGTGATAAAATGAACC  
ATTTAATCTACTTTCTTTCATTGTTTTCACTGATGTGTGCTTCTTTCGAC

>M6-PGSC0003DMG400016882-(rev)M6LRR-RLP\_2562

AAATGAACCATTTAATCTACTTTCTTTCATTGTTTTCACTGATGTGTGCTTCTTTCGACATTTTCTGACGAT  
AATTAGTCCCCTAGTTTTCAATTTATGTGCTACAGTGCTTGACAGAGT

>M6-PGSC0003DMG400016882-(rev)M6LRR-RLP\_2623

TTTCTGACGATAATTAGTCCCCTAGTTTTCAATTTATGTGCTACAGTGCTTGACAGAGTAAAGTACTGCAT  
TTACCTTTTCAGTTAATTTACTATATTTTCTGGCCCAATTTTAGTGGTC

>M6-PGSC0003DMG400016882-(rev)M6LRR-RLP\_2684

AGTACTGCATTTACCTTTTCAGTTAATTTACTATATTTTCTGGCCCAATTTTAGTGGTCAACATCAAACACT  
CGGCCTTGATTGCATGATGACGTTGTGCAATGGGAAAAATAATTGCAA

>M6-PGSC0003DMG400016882-(rev)M6LRR-RLP\_2745

CATCAAACACTCGGCCTTGATTGCATGATGACGTTGTGCAATGGGAAAAATAATTGCAATAGCTAAATG  
GTGATGTGAAAGATCAGCCATCCCTTAACTCTGTGTTTGTGGATGAAATCC

>M6-PGSC0003DMG400016882-(rev)M6LRR-RLP\_2867

TCTCAGAAGAGTTCGAATGGCCATTCTGCCCTTGAGCATTACCAAGTAAATGACTACTTAAATCATAG  
ACATTGCTCATAATTGGTCGAAAATTTGCCAGCATATCTGTA ACTATTCT

>M6-PGSC0003DMG400016882-(rev)M6LRR-RLP\_2928

AAATCATAGACATTGCTCATAATTGGTCGAAAATTTGCCAGCATATCTGTA ACTATTCTCTTAACACAAAT  
TATAGTAGCATCATTTAAAGAAAAACAGAACTCTGAGTGCTCTTACCCT

>M6-PGSC0003DMG400016882-(rev)M6LRR-RLP\_2989

TAACACAAATTATAGTAGCATCATTTAAAGAAAAACAGAACTCTGAGTGCTCTTACCCTATGTCGTTCTTT  
GTCAGTAAACCACAGTGATAATTTCTCTCTCTTGGGTTGTCACATTGAC

>M6-PGSC0003DMG400016882-(rev)M6LRR-RLP\_3036

TGCTCTTACCCTATGTCGTTCTTTGTCAGTAAACCACAGTGATAATTTCTCTCTCTTGGGTTGTCACATTGA

CATCTTTGCATTTTTGTAAGCACTCTTGTATGCATGTATGTATTTTAT

>M6-PGSC0003DMG400016882-(rev)M6LRR-RLP\_305

AGCTTCTTATGTATAACTTGTCGTGATCCACAGCCATTTGTTCTGCCATTGCTCTATGTGAAGTGATTTA

GGTGAGTCATAAGCAGATGTCTAAGTGCTACTCTTTCTTTTCATTGACT

>M6-PGSC0003DMG400016882-(rev)M6LRR-RLP\_366

AAGTGATTTAGGTGAGTCATAAGCAGATGTCTAAGTGCTACTCTTTCTTTTCATTGACTAATTGCTACTGA

TTTACTGTCAGTCAGAAGCTGCGAGTTGCTTCATTTGCCTTGTATCTTG

>M6-PGSC0003DMG400016882-(rev)M6LRR-RLP\_61

TTGAAGTTCCATTTTAGGTTAATTTTGGTGTGATTTGAATCATTGATAGAGTCTATAAAACAAAGGGTGT

TTGTCGGTGATGTTTTTTGAGTTCTTATTTGTGTTAATTTCATTTTCTA

>M6-PGSC0003DMG400016882-(rev)M6LRR-RLP\_671

AATGATGATAAATTGAGTGGCACAATGTAAGTGGAAAGTATTTTAGTGTCAAATCAAATGATCCATTTGAA

GATTGTGTTTCAATTAGTAGAATAACAAGCACACACCTATTACAACCTGA

>M6-PGSC0003DMG400016882-(rev)M6LRR-RLP\_732

CCATTTGAAGATTGTGTTTCAATTAGTAGAATAACAAGCACACACCTATTACAACCTGAATAAAGAAAAT

TTTAAGGCGTTTTGTTTTCTGAAGTTCTTTTGAATCTTGCGAAGAAAT

>M6-PGSC0003DMG400016882-(rev)M6LRR-RLP\_793

AAAGAAAATTTAAGGCGTTTTGTTTTCTGAAGTTCTTTTGAATCTTGCGAAGAAATTTTCCAAAAT

GTGTTTCTTTGAATCTTCTGAAACGCTTTTTTAAAAAATGTTTTTTT

>M6-PGSC0003DMG400016882-(rev)M6LRR-RLP\_854

TCCAAAATTTGTGTTTCTTTGAATCTTCTGAAACGCTTTTTTAAAAAATGTTTTTTTATGAAGTGTTTTT

AGGGTGCTCCCACTCACAGATCTTCAATAACCAACTATCCATAAACAT

>M6-PGSC0003DMG400016882-(rev)M6LRR-RLP\_915

GAAGTGTTTTTAGGGTGCTCCCACTCACAGATCTTCAATAACCAACTATCCATAAACATTTAGTCTTTGCA

TGTTTTAAAAAGAAAGATTTTTTGAGAAAACCTTTCCAAGATCATCTC

>M6-PGSC0003DMG400016882-(rev)M6LRR-RLP\_976

AGTCTTTGCATGTTTTAAAAAGAAAGATTTTTTGAGAAAACCTTTCCAAGATCATCTCTAAACATGCAAG

CCGAATAGCTTCTATAAATTTCTGTAATGAAAACATTAACCTAATTGATG

>M6-PGSC0003DMG400016899M6LRR-RLP\_0

TTGCAATTGCAATTGCAATGCTGAGTGTATTAATATGTAGTGAAAACGAGAGTAGCAATAAACCTCTC  
ATTGAAGAAGCATCAACTAAACCCACATCGTCTCTCATCAATGCTACAAT

>M6-PGSC0003DMG400016899M6LRR-RLP\_1024

GGGCATTTGCCTGATACCCTTTCTTGTTTGAGTGGCATTGAGGTTCTCAACTTGGGACATAACAAGTTAT  
CTGGAGATTTACCAGACTTGGTTTGCTCACTAAGAAACCTTGTGAATTTG

>M6-PGSC0003DMG400016899M6LRR-RLP\_1088

AGTTATCTGGAGATTTACCAGACTTGGTTTGCTCACTAAGAAACCTTGTGAATTTGACTCTTGCTTACAAT  
TTCTTCTCTGAGTTGAGCCAGGATTGTGACAAACTTCCTTTGAGAAATG

>M6-PGSC0003DMG400016899M6LRR-RLP\_1152

TTACAATTTCTTCTCTGAGTTGAGCCAGGATTGTGACAAACTTCCTTTGAGAAATGTGGGTATTGATTCT  
CATTGAACTGTATTCCAGGAAGACAAATGCAAAGGCCTCAACCTGAATG

>M6-PGSC0003DMG400016899M6LRR-RLP\_1216

GATTTCTCATTGAACTGTATTCCAGGAAGACAAATGCAAAGGCCTCAACCTGAATGCTCTGTCATTCCAG  
GTGGAAGTCTCAGTTGCCTTAGAGTACCTGCAGTAAAGCCTCTTGTTTGT

>M6-PGSC0003DMG400016899M6LRR-RLP\_128

GTGCAACCTTGCAAAAAACGAAACGCCTCTTGTTTGAGCAAAAATGGGGGAATTTGCTTTGTGGTTT  
TGCTCCTTCAAATCATAGTTACTGAAGTTGTTGGTGCTGGTGTGGTGTG

>M6-PGSC0003DMG400016899M6LRR-RLP\_1280

TTCCAGGTGGAAGTCTCAGTTGCCTTAGAGTACCTGCAGTAAAGCCTCTTGTTTGTGGATGAAAAACTG  
CTACTGCCAGACTTAGTCGGACTCCAACGTGGGTATCAAACACCCGGTGG

>M6-PGSC0003DMG400016899M6LRR-RLP\_1344

AAACTGCTACTGCCAGACTTAGTCGGACTCCAACGTGGGTATCAAACACCCGGTGGAAAACCAAAAAA  
AAAAACTACTACTACTACTATTTTATTTATTTATGAGTGACAACAATTGAG

>M6-PGSC0003DMG400016899M6LRR-RLP\_1408

AAAAAAAACACTACTACTACTACTATTTTATTTATTTATGAGTGACAACAATTGAGCACTATCATCAATGC  
ACACGCAAGTTATGACTTGTACCTTTCAAATTTATTTCTCTTCCTTATT

>M6-PGSC0003DMG400016899M6LRR-RLP\_1472

TCAATGCACACGCAAGTTATGACTTGTACCTTTCAAATTTATTTCTCTTCCTTATTTCTTTATGTTGCATTAT  
GAATTGTAAATACTAGTATTAATTAGGACACTTATGGGTTTCACCC

>M6-PGSC0003DMG400016899M6LRR-RLP\_1516

CTCTTCCTTATTTCTTTATGTTGCATTATGAATTGTAAATACTAGTATTAATAATTAGGACACTTATGGGTTTC  
ACCCACCTCTAGTAATCATAATTCCTCATCAGTAGTCGGGAATTCTCA

>M6-PGSC0003DMG400016899M6LRR-RLP\_256

GTTGGTGTGGACCTGGAGGTGTTTGGTTTGGTGGAGGGATCAACAGCCCAAGCCCAGGTGTTGTCCCA  
AGTCAAATTCGGCTTACACTGCTCTTCAAGCATGGAAATCTGCAATCACT

>M6-PGSC0003DMG400016899M6LRR-RLP\_320

TCCCAAGTCAAATTCGGCTTACACTGCTCTTCAAGCATGGAAATCTGCAATCACTGATGATCCAATGGG  
GATTTTGAAGAATTGGGTGGGTCCAAATGTGTGTACTTACAGAGGAATTT

>M6-PGSC0003DMG400016899M6LRR-RLP\_384

AATGGGGATTTTGAAGAATTGGGTGGGTCCAAATGTGTGTACTTACAGAGGAATTTTCTGCACAAACTC  
TCAAGATTACATGGGCAACCCAACAGACCCAGTTGTTACAGGTATAGATCT

>M6-PGSC0003DMG400016899M6LRR-RLP\_448

AACTCTCAAGATTACATGGGCAACCCAACAGACCCAGTTGTTACAGGTATAGATCTCAATCATGCAAATC  
TTCAAGGCACTCTTGTTAAAGAACTGTCTTACTTAAACAGATATTTCTCTC

>M6-PGSC0003DMG400016899M6LRR-RLP\_512

CAAATCTTCAAGGCACTCTTGTTAAAGAACTGTCTTACTTAAACAGATATTTCTCTCATTACCTCAATACCA  
ACAGATTTTCAGGTATAATTCCACAAACATTCAGAGATCTGTCTTCAC

>M6-PGSC0003DMG400016899M6LRR-RLP\_576

CAATACCAACAGATTTTCAGGTATAATTCCACAAACATTCAGAGATCTGTCTTCACTCGTTGAATTAGACC  
TTAGTAACAACCATTTCTCTGGTCCATTTCTACTACAGTACTATTTCAT

>M6-PGSC0003DMG400016899M6LRR-RLP\_64

CCTCTCATTGAAGAAGCATCAACTAAACCCACATCGTCTCTCATCAATGCTACAATCACATTTTGTGCAAC  
CTTGCAAAAAACGAAACGCCTCTTGTTTGGAGCAAAAATGGGGGGAATT

>M6-PGSC0003DMG400016899M6LRR-RLP\_640

TTAGACCTTAGTAACAACCATTTCTCTGGTCCATTTCTACTACAGTACTATTTCATCCCAAATCTTCTTTATT  
TAGATCTCAGATTCAACAGTTTACAGGGCCAATTCCTGAGGATCTG

>M6-PGSC0003DMG400016899M6LRR-RLP\_704

TTCTTTATTTAGATCTCAGATTCAACAGTTTACAGGGCCAATTCCTGAGGATCTGTTCAACAGAAAACCT

GATGCTATTTTTCTTAATAATAACCAGTTTGATGGTGAACCTACCTCAGA

>M6-PGSC0003DMG400016899M6LRR-RLP\_768

AAAACTTGATGCTATTTTTCTTAATAATAACCAGTTTGATGGTGAACCTACCTCAGAGTTTAGGGGAATTCCC  
CTGCTTCAGTGATTAATTTTGCTAATAATAAGTTTAGTGGGAACATTCC

>M6-PGSC0003DMG400016899M6LRR-RLP\_832

AATTCCCCTGCTTCAGTGATTAATTTTGCTAATAATAAGTTTAGTGGGAACATTCTTTTAGTTTAGGGTA  
CATGGGTCCGAGAATTAAGGAGATTTTGTCTTAAACAACGACTTAAAT

>M6-PGSC0003DMG400016899M6LRR-RLP\_896

TAGGGTACATGGGTCCGAGAATTAAGGAGATTTTGTCTTAAACAACGACTTAAATGGTTGTATACCAG  
AAGGCGTAGGATTGTGGACGGATTTGCAAGTTCTAGATGTGAGTTTCAATT

>M6-PGSC0003DMG400016899M6LRR-RLP\_960

ACCAGAAGGCGTAGGATTGTGGACGGATTTGCAAGTTCTAGATGTGAGTTTCAATTCATAATGGGGCA  
TTTGCTGATACCCTTTCTTGTGGAGTGGCATTGAGGTTCTCAACTGGG

>M6-PGSC0003DMG400016983M6LRR-RLP\_1798

TAGTATTCATAATTCAAAGATATATATATATATACCTTGAGTAAATTTTTATAAAAATAAAATTAAGGAG  
GGCCAAAACCTAACCATAACCAGTTCACTTGATCATTGATTAGTTTTTTT

>M6-PGSC0003DMG400016983M6LRR-RLP\_1860

ATTAAGGAGGGCCAAAACCTAACCATAACCAGTTCACTTGATCATTGATTAGTTTTTTTTTTGGAATTAAAAC  
TAGCATTTTATTACCAAATATCAGATCTGTACATAGTCTAGAAAAGCTG

>M6-PGSC0003DMG400016983M6LRR-RLP\_1922

AATTAAACTAGCATTTTATTACCAAATATCAGATCTGTACATAGTCTAGAAAAGCTGTGATGGTATGGC  
ATTCACACAGCTGCAAACCAAACAACCTAGACATCAAAAACCTATGTGCTA

>M6-PGSC0003DMG400016983M6LRR-RLP\_1984

GGTATGGCATTACACAGCTGCAAACCAAACAACCTAGACATCAAAAACCTATGTGCTAGTGGTAAACTA  
TAGCTAACTATGGGTAGAAATTAAGGCTATTTAGTCTTCTCGCAAGCTTCT

>M6-PGSC0003DMG400016983M6LRR-RLP\_2604

TTTGACAAATCACTAACTTGTAACCAATGTCCTGTAGGCATAACTTCACCTTCAAATCTTTTGTGTTGG  
GTTGGATTCCCATATTGGCCTTCTTTTATATAGTAACAATGCACCCAT

>M6-PGSC0003DMG400016983M6LRR-RLP\_2728

CCCATAATGTACCTTTTTAGAGCACAGGTTCCAGAGCAATTTGCTAATGGCTGCTCTGTTCCACACTGTA  
ATATCAAGAATGTGTAGGCCACCAGCAGTTCTTGTAACCACACCTTAT

>M6-PGSC0003DMG400016983M6LRR-RLP\_2790

CACACTGTAATATCAAGAATGTGTAGGCCACCAGCAGTTCTTGTAACCACACCTTATCCCAGGCTTGCA  
AAGCCTTCTTTGTTACTTCTGTACCTCCCGTCCACAAGAACCTCTTACAA

>M6-PGSC0003DMG400016983M6LRR-RLP\_2852

GGCTTGCAAAGCCTTCTTTGTTACTTCTGTACCTCCCGTCCACAAGAACCTTACAAGTTGATTCTATAA  
GTTTGATCACCTTGCGGGTAACACAAAAATTTGCGACCAATAAATATG

>M6-PGSC0003DMG400016983M6LRR-RLP\_2914

ATTCTATAAGTTTGATCACCTTGCGGGTAACACAAAAATTTGCGACCAATAAATATGGATAGAGAATAA  
TACAGATTTAATTAGCTGCTCTCTGCCTGCGTAAGATAGAACTTTGTTG

>M6-PGSC0003DMG400016983M6LRR-RLP\_2976

GAGAATAATACAGATTTAATTAGCTGCTCTCTGCCTGCGTAAGATAGAACTTTGTTGTCCAACATGTTA  
TTCTTCTAGCATCTTGTCAATCAAGGGTTGGCATTGGGTGATTGATAGT

>M6-PGSC0003DMG400016983M6LRR-RLP\_3038

ACATGTTATTCTTCTAGCATCTTGTCAATCAAGGGTTGGCATTGGGTGATTGATAGTCGTTTAGTACTTA  
GAGGCCCTAAGTATCTAAAAGGTATCTCACCTCTAGTAAATCCAAGAAT

>M6-PGSC0003DMG400016983M6LRR-RLP\_3100

TAGTACTTAGAGGCCCTAAGTATCTAAAAGGTATCTCACCTCTAGTAAATCCAAGAATATTCAAGATAGC  
TGTCTGATTTATGACATTCACCCCTCCAAAATATACAACATTTTTGTCTT

>M6-PGSC0003DMG400016983M6LRR-RLP\_3162

AAGATAGCTGTCTGATTTATGACATTCACCCCTCCAAAATATACAACATTTTTGTCTTTGTTTGCAATCAG  
ACCAGAAGCATGAGAAAATTGTTGAAAATAATCAAACAACAGCTGTACA

>M6-PGSC0003DMG400016983M6LRR-RLP\_3224

TGCAATCAGACCAGAAGCATGAGAAAATTGTTGAAAATAATCAAACAACAGCTGTACAGACCTTATGTC  
ACCCTTGCAAATAATAATAAGTCATCAGCAAATTGAATAAGTTTTACCT

>M6-PGSC0003DMG400016983M6LRR-RLP\_3286

TTATGTCACCCTTGCAAATAATAATAAGTCATCAGCAAATTGAATAAGTTTTACCTTTGAGCACCTGG  
GGTGAAACTTAAATTCAGGACAGGTCATTAGGCTCTTCAATAATCGTGAG



>M6-PGSC0003DMG400016983M6LRR-RLP\_3534

CTCCATTATCTAGTGTATGAATTTTGTAGGGAAATTCAGATGTGTCATTACTTGCTTGACAAAGATCCATT  
CTAGTGAATCATATGCTTTTTGCATATCTACTTTAAGCATAACATCTAGG

>M6-PGSC0003DMG400016983M6LRR-RLP\_3596

AGATCCATTCTAGTGAATCATATGCTTTTTGCATATCTACTTTAAGCATAACATCTAGGAGAGACCCCTTT  
CTCCATAGCCCTTAACCAAGTTCATGACTTAAGATAATATTGACATGCA

>M6-PGSC0003DMG400016983M6LRR-RLP\_3658

ACCCCTTTCTCCATAGCCCTTAACCAAGTTCATGACTTAAGATAATATTGACATGCAAATTTTATACAGA  
CATTTGAAGTTATACTTTGTAGACTAATGAACCTTTTAACAGGGAAACCA

>M6-PGSC0003DMG400016983M6LRR-RLP\_4092

CGTACATAGATAGACTCTCAAATTTTAAATAAATTTTGGTCTAAAGTTGTTGGGGTGGTCCAATTAGAGT  
CAAACTGAGGGACCAGTTTCGTTGGCTATTTTGTATCGAGAATTTGAAT

>M6-PGSC0003DMG400016983M6LRR-RLP\_4154

ATTAGAGTCAAACTGAGGGACCAGTTTCGTTGGCTATTTTGTATCGAGAATTTGAATTTGATGAAACGA  
ATGAAAATTAGTTGTTGAGCTTATTAATTTTAACAACATAAAAATACTTA

>M6-PGSC0003DMG400016983M6LRR-RLP\_4216

TGAAACGAATGAAAATTAGTTGTTGAGCTTATTAATTTTAACAACATAAAAATACTTAGCTTAGTTGAAA  
TAAAAGATAATTTTATATAAATTGGGTTGGAGCAAATTTGATTCAATGAG

>M6-PGSC0003DMG400016983M6LRR-RLP\_4278

AGTTGAAATAAAAAGATAATTTTATATAAATTGGGTTGGAGCAAATTTGATTCAATGAGAGTAAGATATTT  
TTTATTGGTCCACTAGCCAAATCTTAATTATCCTGGGCAGCATCCTAATT

>M6-PGSC0003DMG400017034M6G-LecRK\_0

TGGAAGAAAAGGATTCCAATTGTGGTAGGACAGGTTTCATGGAGTTGTACTATTACTTGTTTTAGGAGGG  
ATTGGTGATACTATGTAATCCAAAAGAGAAAATAGTTGTGCACAGATACTT

>M6-PGSC0003DMG400017034M6G-LecRK\_43

TTGTACTATTACTTGTTTTAGGAGGGATTGGTGATACTATGTAATCCAAAAGAGAAAATAGTTGTGCACA  
GATACTTGTACAGCCATTGACATTGTATAGATGAGAATTTTTTTCAAGA

>M6-PGSC0003DMG400017034M6G-LecRK\_85

AATCCAAAAGAGAAAATAGTTGTGCACAGATACTTGTACAGCCATTGACATTGTATAGATGAGAATTTT

TTCAAGATAGCATTTTCTTCATGGAGATACTAATTGACTCTCTGAAAAA

>M6-PGSC0003DMG400017062M6LRR-RLP\_0

TATTATTTATAGTGAACAAAAATAACTACATCATAATAATAAGATTTCAAATACAATTCTTTGGTTTTTCC

TATACATGAAAGTAATAATTACTTTTTTGAACTTTATAATACAAAATG

>M6-PGSC0003DMG400017062M6LRR-RLP\_1037

TTTGAGCACCTAGAAGAAATAAATCCTAACCTTGAGGCTATCGGAAAGGAGATTGTGAAAAAATGTGGT

GGTGTACCCCTAGCAGCCAAGACTCTCGGAGGTATTTTGCCTTCAAGAGA

>M6-PGSC0003DMG400017062M6LRR-RLP\_1098

AATGTGGTGGTGTACCCCTAGCAGCCAAGACTCTCGGAGGTATTTTGCCTTCAAGAGAGAAGAAAGA

GAATGGAAACATGTGAGAGATAGCAAGATTTGGAATTTGCCTCAAGATGAAA

>M6-PGSC0003DMG400017062M6LRR-RLP\_1159

AGAAAGAGAATGGAAACATGTGAGAGATAGCAAGATTTGGAATTTGCCTCAAGATGAAAGTTCTATTCT

GCCTGCCCTGAGACTGAGTTATCATCATCTTCCACTTGATTTGAGACAATG

>M6-PGSC0003DMG400017062M6LRR-RLP\_122

CATAAATTTTCATAAAGTTAAATACTACTACATTAATTAAGTTATTCAAATTAATTTAGAGAAGGGGAAA

AGGTTTAGTTAAGTATTTAGATACATGTTTTCATGTACCAAATAAATGCA

>M6-PGSC0003DMG400017062M6LRR-RLP\_1220

TCTATTCTGCCTGCCCTGAGACTGAGTTATCATCATCTTCCACTTGATTTGAGACAATGCTTTGCATATTGT

GCGGTGTTCCCAAAGGACACCAAATGGTAAAGGAAAATCTAATCTCT

>M6-PGSC0003DMG400017062M6LRR-RLP\_1281

TTGCATATTGTGCGGTGTTCCCAAAGGACACCAAATGGTAAAGGAAAATCTAATCTCTCTTTGGATAGC

GCACAGTTTTCTTTCATCGAAAGGAACTTGGAGCTAGAGGATGTGGGTA

>M6-PGSC0003DMG400017062M6LRR-RLP\_1342

TTGGATAGCGCACAGTTTTCTTTCATCGAAAGGAACTTGGAGCTAGAGGATGTGGGTAATGAAGTATG

GAATGAATTATATTTGAGGTCTTTCTTCCAAGAGATTGAAGTTGAATCTGG

>M6-PGSC0003DMG400017062M6LRR-RLP\_1403

GAAGTATGGAATGAATTATATTTGAGGTCTTTCTTCCAAGAGATTGAAGTTGAATCTGGTAAAATCTATT

TCAAGATGCATGATCTCATCCATGATTTGGCTACATCTCTGTTTTCAGAA

>M6-PGSC0003DMG400017062M6LRR-RLP\_1464

AAACTTATTTCAAGATGCATGATCTCATCCATGATTTGGCTACATCTCTGTTTTTCAGAAAGAGCATCAAGC  
AGCAATATCCGTGAAATAAATGTAAAAAATACTCACATATAAAGTCCA

>M6-PGSC0003DMG400017062M6LRR-RLP\_1525

AGCATCAAGCAGCAATATCCGTGAAATAAATGTAAAAAATACTCACATATAAAGTCCATTGGTTTTGTT  
AAAGTGGAGTCTTCCTACTCTCATTTGCTCGTGGAGAAGTTTGTCTCGTT

>M6-PGSC0003DMG400017062M6LRR-RLP\_1586

GGTTTTGTAAAGTGGAGTCTTCCTACTCTCATTTGCTCGTGGAGAAGTTTGTCTCGTTGAGGTTGCTTAA  
TTTGAGTAACCTAGAAGCAATCAGTTACCGTCTTCATTGGAGATCTA

>M6-PGSC0003DMG400017062M6LRR-RLP\_1891

GAAGTCTACGCCACCAAGGATAGGATCTTTGACATGCCTTAAGACTCTAGGTCAATTTGTTGTTGGAAG  
GAAGAAAGGTTTTCAACTTGGGGAAGTACGAAACCTGAATCTCTATGGCTC

>M6-PGSC0003DMG400017062M6LRR-RLP\_1952

GTTGGAAGGAAGAAAGGTTTTCAACTTGGGGAAGTACGAAACCTGAATCTCTATGGCTCAATTGAAATC  
AGACATCTTGAGAGAGTGAAGAATGATAAGGATGCAAAAGAAGCCAATATA

>M6-PGSC0003DMG400017062M6LRR-RLP\_2013

TTGAAATCAGACATCTTGAGAGAGTGAAGAATGATAAGGATGCAAAAGAAGCCAATATATCTGCAAAA  
GAGAATCTGCAATCTTTAATCATAGAGTGGGATTGGCTTGAACGACGTAGAT

>M6-PGSC0003DMG400017062M6LRR-RLP\_2074

TGCAAAAGAGAATCTGCAATCTTTAATCATAGAGTGGGATTGGCTTGAACGACGTAGATATGAATCAGA  
AGAAGTTAGAGTGATTGAAGCCCTCAAACCCACACCCCAATCTGACCTCTTT

>M6-PGSC0003DMG400017062M6LRR-RLP\_2135

GAATCAGAAGAAGTTAGAGTGATTGAAGCCCTCAAACCCACACCCCAATCTGACCTCTTTAACAATCAACG  
ACTTCAGAGGATCCCGTTTCCCTGAGTGGATGAATCACTCAGTTTTGAAA

>M6-PGSC0003DMG400017062M6LRR-RLP\_2196

CAATCAACGACTTCAGAGGATCCCGTTTCCCTGAGTGGATGAATCACTCAGTTTTGAAAAATGTTGTCTC  
TATTGTAATTAAGAACTGCATAAACTGCTCGTGCTTACCACCCTTTGGTG

>M6-PGSC0003DMG400017062M6LRR-RLP\_2318

CTGCCTTGCTAGAAAGTCTAGAGTTATGGAATGGTTGTGTGGAGTATGTTGATGTTGATTCTGGGAGG  
TTTCCATCCTTGAGGAACTTGTTATAGTGCACCTTAATAATCTAAAAGGA

>M6-PGSC0003DMG400017062M6LRR-RLP\_2379

CTGGGAGGTTTCCATCCTTGAGGAACTTGTATAGTGCACTTAATAATCTAAAAGGATTGCTGAAAA  
GGAAGGAGAAAAGCAATTCCTGTGCTTGAAGAGATGACAATCCGCCACT

>M6-PGSC0003DMG400017062M6LRR-RLP\_2440

GCTGAAAAGGAAGGAGAAAAGCAATTCCTGTGCTTGAAGAGATGACAATCCGCCACTGCTCTATGTT  
TGTTATTCCGAACCTCCCTTTGAAAGTTTATGCGACAGATGCCTCAAGTTT

>M6-PGSC0003DMG400017062M6LRR-RLP\_2501

TCTATGTTTGTATTCCGAACCTCCCTTTGAAAGTTTATGCGACAGATGCCTCAAGTTTGGGGTCCACATC  
TAATCTTAGTGCTCTTACTTCCCTCAACATAAGCCATAACTATGAAGCT

>M6-PGSC0003DMG400017062M6LRR-RLP\_2562

GGTCCACATCTAATCTTAGTGCTCTTACTTCCCTCAACATAAGCCATAACTATGAAGCTACTTCACTCCCA  
GAAGAGATGTTCAAAGCCTTGCAAATCTCAAACACTTGAATATCTCTA

>M6-PGSC0003DMG400017062M6LRR-RLP\_2623

TTCACTCCCAGAAGAGATGTTCAAAGCCTTGCAAATCTCAAACACTTGAATATCTCTAGTTACAACAATC  
TCAAAGAGTTGCCTACCAGCCTGGCTAGTCTCAATGCTTTGAAGAGTCT

>M6-PGSC0003DMG400017062M6LRR-RLP\_2684

TACAACAATCTCAAAGAGTTGCCTACCAGCCTGGCTAGTCTCAATGCTTTGAAGAGTCTGGATATTGAAA  
GTTGTCATGCACTAGAGAGTCTCCCCGAGGAAGGGGTGAAAGGTTTAACT

>M6-PGSC0003DMG400017062M6LRR-RLP\_2745

ATATTGAAAGTTGTCATGCACTAGAGAGTCTCCCCGAGGAAGGGGTGAAAGGTTTAACTTCACTACCA  
AGTTGTCTGTCCGTTGCTGTAAGATGCTAAAATGTTTACCGGAGGGATTGC

>M6-PGSC0003DMG400017062M6LRR-RLP\_2851

ACCGGAGGGATTGCAGCACCTAACAGCCCTCACAACCTTAATAATTACTCGATGTCCAACACTGGAAAA  
GCGGTGCGAGAAGGAAATAGGAGAAGACTGGCACAAAATTGCTCACATACC

>M6-PGSC0003DMG400017062M6LRR-RLP\_366

TATAATATTGGAATTAATGTAGGGGTAAAATGCTACTCTTTCTCTTTATTGTTCAAATTCTCTTTGGTTTT  
TGCGGACTCCTACCGAGCTTGAATTTATAACAATATTCTCATGTGAA

>M6-PGSC0003DMG400017062M6LRR-RLP\_427

TCTTTGGTTTTTGCGGACTCCTACCGAGCTTGAATTTATAACAATATTCTCATGTGAACATTACTTGTACC

AGGTTCTGTATTAAGTAAAAACAAGTTTATGGAAGGGGCAAAGAGAA

>M6-PGSC0003DMG400017062M6LRR-RLP\_488

TACTTGTACCAGTTCTGTATTAAGTAAAAACAAGTTTATGGAAGGGGCAAAGAGAAAGATGAGATA  
GTGAAAATCTTGATAAACAATGCCCAAGAACTTTCAGTCCTCCCAATACTT

>M6-PGSC0003DMG400017062M6LRR-RLP\_549

ATGAGATAGTAAAATCTTGATAAACAATGCCCAAGAACTTTCAGTCCTCCCAATACTTGGTTTGGGGG  
GACTAGGAAAGACAACTCTTGACAAATGGTCTACAATGATCCGAGAGTTA

>M6-PGSC0003DMG400017062M6LRR-RLP\_61

TTGGTTTTTCTATACATGAAAGTAATAATTACTTTTTTGAACCTTATAATACAAAATGCACATAAATTTTC  
ATAAAGTTAAATACTACTACATTAATTAAGTTATTCAAATTAATTTAG

>M6-PGSC0003DMG400017062M6LRR-RLP\_610

TTTGGGGGGACTAGGAAAGACAACTCTTGACAAATGGTCTACAATGATCCGAGAGTTACTGAGCATTT  
CCATCCCAAATATGGATTTGTGTCTCAGATGAATTTGATGAGAAGAGGTT

>M6-PGSC0003DMG400017062M6LRR-RLP\_671

GAGCATTTCCATCCCAAATATGGATTTGTGTCTCAGATGAATTTGATGAGAAGAGGTTGATAAAGGCA  
ATCGTAGAATCTATTGAAAGAAAGTCACTCAATGACATGGACTTGGATCCA

>M6-PGSC0003DMG400017062M6LRR-RLP\_732

TAAAGGCAATCGTAGAATCTATTGAAAGAAAGTCACTCAATGACATGGACTTGGATCCACTTCAAAGA  
AGCTTCAGAAGTTGCTGAATAGAGAAAGATACTTGCTTGTCTTAGATGATG

>M6-PGSC0003DMG400017062M6LRR-RLP\_793

TCAAAGAAGCTTCAGAAGTTGCTGAATAGAGAAAGATACTTGCTTGTCTTAGATGATGTTTGGAAATGA  
AGATCAACAGAAGTGGGATAATTTAAGAGCTGTCTTGAAGGTTGGAGCAAC

>M6-PGSC0003DMG400017062M6LRR-RLP\_854

TGGAATGAAGATCAACAGAAGTGGGATAATTTAAGAGCTGTCTTGAAGGTTGGAGCAACTGGCGCTTCT  
ATTCTAACCACTACTCGTCTTCAAAGGTTTGTTCATTATGCAAACCTTG

>M6-PGSC0003DMG400017062M6LRR-RLP\_915

GCGCTTCTATTCTAACCACTACTCGTCTTCAAAGGTTTGTTCATTATGCAAACCTTGCACCCATATGAA  
TTGTCAAATCTGTCTCAAGAAGATTGTTTGTCTGTTCAACCAACGTG

>M6-PGSC0003DMG400017072M6LRR-RLP\_1008

AACAGCCCTCACAAATTTATCAGTTACGTATTGTCCAACACTGGCCAAGCGATGTGAGAAGGGAATAGG  
AGAAGACTGGTACAAAATTGCTCACATTCCTAATGTGTTTATCCGTTAAGT

>M6-PGSC0003DMG400017072M6LRR-RLP\_1068

GGGAATAGGAGAAGACTGGTACAAAATTGCTCACATTCCTAATGTGTTTATCCGTTAAGTCTTATTCCTA  
ATTGGATGTAATTTTCTGATTTTCTTTTGGAAACAAATCAACTAATTGTA

>M6-PGSC0003DMG400017072M6LRR-RLP\_252

AGTTGAAGTGCTGAAGCCCTCAAACCACACTCCAATCTGACTTGTTAACAATCAGTGGCTTCAGAGGA  
ATCCGTCTCCAGACAGGATGAATCGCTCAGTTTTGAAAAATGTTGTCTC

>M6-PGSC0003DMG400017072M6LRR-RLP\_315

CAGAGGAATCCGTCTCCAGACAGGATGAATCGCTCAGTTTTGAAAAATGTTGTCTCTATTGAAATCAGG  
GGTTGCAAAAAGTCTCATGCTTACCACCCTTTGGTGAGCTGCCTTGTCT

>M6-PGSC0003DMG400017072M6LRR-RLP\_378

AATCAGGGGTTGCAAAAAGTCTCATGCTTACCACCCTTTGGTGAGCTGCCTTGTCTAAAAAGTCTAGAG  
TTAAGAACGGGTCTGCGGAATTGGAGTATGTTTATTCTGGATTCCCTAC

>M6-PGSC0003DMG400017072M6LRR-RLP\_441

TCTAGAGTTAAGAACGGGTCTGCGGAATTGGAGTATGTTTATTCTGGATTCCCTACAAGAAGAAGTT  
TCCATCTCTGAGAAAAGTCTTATTATAGGCAAATTTGATAATCTGAAAGGATT

>M6-PGSC0003DMG400017072M6LRR-RLP\_567

AAAGGAAGGAGAAGAGCAATCCCTGTGCTTGAAGAGATGTCGATTGAGTGGTGCCTATGTTTGTAT  
TCCGACCTTTTCTTCTGTGAAGAAATTGGTAGCTTATGGGGACAAGTCAGA

>M6-PGSC0003DMG400017072M6LRR-RLP\_63

GAAGAAAAGTTCTCAACTTGGTGAATTACGAAACCTGAATCTCTACGGTTCAATTGAAATCACGCATCTT  
GAGAGAGTGAAGAATGATATGGATGCAAAAAGAAGCCAATTTATCTGCAAA

>M6-PGSC0003DMG400017072M6LRR-RLP\_630

TGTTATCCGACCTTTTCTTCTGTGAAGAAATTGGTAGCTTATGGGGACAAGTCAGATGCAATAGGTTTC  
AGTTCCATATCTAATCTCAGGGCTCTTACTTCCCTCTACATTCGCAATAA

>M6-PGSC0003DMG400017072M6LRR-RLP\_693

AGGTTTCAGTTCCATATCTAATCTCAGGGCTCTTACTTCCCTCTACATTCGCAATAACTATGAAGCTTCACT  
CCCAGAAGAGATGTTCAAAAAGCCTTGCGAATCTCAAATACTTGCAAAAT

>M6-PGSC0003DMG400017072M6LRR-RLP\_756

AGCTTCACTCCCAGAAGAGATGTTCAAAGCCTTGCGAATCTCAAATACTTGCAAATCTCTCTCTGCTGC  
AATCTTAAAGAGCTGCCTATCAGCCTGGCTAGTCTCAATGCTTTGAAGCA

>M6-PGSC0003DMG400017072M6LRR-RLP\_819

CTGCTGCAATCTTAAAGAGCTGCCTATCAGCCTGGCTAGTCTCAATGCTTTGAAGCATCTGGATATTTATT  
TATGTGTAGCACTAGAGAGTCTCCCAAGGAAGGGGTGAAAGGTTTAAC

>M6-PGSC0003DMG400017072M6LRR-RLP\_882

TATTTATTTATGTGTAGCACTAGAGAGTCTCCCAAGGAAGGGGTGAAAGGTTTAACTTCACTCACACAG  
TTATCCACAACAGACTGTGAGATGCTACAATGTTTACCGGAGGGATTGCA

>M6-PGSC0003DMG400017081M6LRR-RLP\_0

TAACGCATTATTGATCACACTGTATGTATATAAATATATGGGGTACAAGTTCCTAGCTAGTTAGATATATT  
CAATGGAGTACCAAAAATTGCTAATAGCTTTCTGCTTCTATTACATTT

>M6-PGSC0003DMG400017087-(rev)M6LRR-RLP\_0

TCTTGTGACAGGGATGCCAAATCTAGAGGAATTTTACAGTATTTCTTACAATAGTTGTACAAATGAAGTC  
TTTTCTAGCATCCCAATTTAAAGAGATTGACCATTGCGACACCTTTCAG

>M6-PGSC0003DMG400017087-(rev)M6LRR-RLP\_1024

AATATGCATTGCCTATGGAGTATAGTTTCACTTTGAATCTGTTTTCTCTGTTAATGTATAATACATGTT  
TTTCGTTGATGGACGGTGCTTTATGTGATTGATATCGATAACATTTCT

>M6-PGSC0003DMG400017087-(rev)M6LRR-RLP\_128

ATGTTCCATCTCATCCCTTGGATATGTGCGAGCTTGAGAAACTTGAGGCATTCAAGATTTCTGGAGATA  
TGGTTTTGTAACGCCCATCAAAGATTTGTTTTTCCAACCTTACTTAGGA

>M6-PGSC0003DMG400017087-(rev)M6LRR-RLP\_192

GAGATATGGTTTTGTAACGCCCATCAAAGATTTGTTTTTCCAACCTTACTTAGGAAGTTGACTTTAGCTT  
TCTTTGGTCATTTTATTTGGGAAGATATATCATCAACTTTTATCATGTT

>M6-PGSC0003DMG400017087-(rev)M6LRR-RLP\_256

TTAGCTTTCTTTGGTCATTTTATTTGGGAAGATATATCATCAACTTTTATCATGTTGCCAAATCTTGAAGA  
GCTCAAACCTTAAACATTGTCAAGCCAAAGATAATGTATGGAGATTGAGT

>M6-PGSC0003DMG400017087-(rev)M6LRR-RLP\_320

TTGAAGAGCTCAAACCTTAAACATTGTCAAGCCAAAGATAATGTATGGAGATTGAGTGACAAAGACATAC

TCAAAGCTTGAAGTTGTTGTTACTGTACTACACAAATATTAAGTGTGGG

>M6-PGSC0003DMG400017087-(rev)M6LRR-RLP\_384

CATACTCAAAGCTTGAAGTTGTTGTTACTGTACTACACAAATATTAAGTGTGGGAAGCTAGCAGTGAT  
AACTTCCCAAATCTAAAACGTCTTGTCTGAAGAGTTGCAAGGACCTGCA

>M6-PGSC0003DMG400017087-(rev)M6LRR-RLP\_64

GAAGTCTTTTCTAGCATCCCAATTTAAAGAGATTGACCATTGCGACACCTTTCAGGATAAACAATGTTCC  
ATCTCATCCCTTGATATGTCGAGCTTGAGAAAATTGAGGCATTCAAG

>M6-PGSC0003DMG400017087-(rev)M6LRR-RLP\_640

TACATCCATAACAGCCACAGTAAGTTATAATTCTCTCTGAAAAGTTCTTCGATTCTTCACATTATTTAAAC  
CTCATTTTTTTTAAATCATACTTCTTTGAAATTAAGTTGATGACTTGT

>M6-PGSC0003DMG400017087-(rev)M6LRR-RLP\_704

TTTAAACCTCATTTTTTTTAAATCATACTTCTTTGAAATTAAGTTGATGACTTGTGCTTTTTATCTTGCATA  
TGCAGGGAATTGAAGCATATTTTGAGGGATCATCTAATGCTATCTTC

>M6-PGSC0003DMG400017087-(rev)M6LRR-RLP\_768

TCTTGCATATGCAGGGAATTGAAGCATATTTTGAGGGATCATCTAATGCTATCTTCCGAATTCAGAACCT  
TGTAAGTTCATATTTTTGTTTTATATTCTGATCGTTTGTTAATTTTCATGT

>M6-PGSC0003DMG400017087-(rev)M6LRR-RLP\_832

GAACCTTGTAGTTCATATTTTTGTTTTATATTCTGATCGTTTGTTAATTTTCATGTTTTAGGAATAAGCATG  
TTTAATACATGTCTCGGCAATTGTGTTTTGTATTTGTGAACACTA

>M6-PGSC0003DMG400017087-(rev)M6LRR-RLP\_896

TAAGCATGTTTAATACATGTCTCGGCAATTGTGTTTTGTATTTGTGAACACTAACTAGTGATGTACTC  
ATGTAACATCTATTTTGTATTATGTGATAGTTCGAAATAATTGAGGATG

>M6-PGSC0003DMG400017087-(rev)M6LRR-RLP\_960

TGTACTCATGTAACATCTATTTGTTTTATGTGATAGTTCGAAATAATTGAGGATGTTCAATCTAATATGC  
ATTGCCTATGGAGTATAGTTTACACTTTGAATCTGTTTTCTCTGTTA

>M6-PGSC0003DMG400017105M6RLKWAX-EGF\_0

ATGTCCATGTGCAATAGTATTGATGATGATACATGTTCTGGGGTTGGTTGTTGCATAACATCCATCCCTA  
ATGAGTAATGGGGCATGGAATGTTACTATAACACTAAGGAGCTATTATAA

>M6-PGSC0003DMG400017105M6RLKWAX-EGF\_120



TCATACTTATGTGAAAGATAACCCCTAGTTGCAGCTATGCTTTTGTAGTTCAAGAAGCTAATTTTAGCTATT  
CTAAGAATTACCGTAGAAGTTTGGAGGACAAGGAGGAGCTTCCTCTTGT

>M6-PGSC0003DMG400017105M6RLKWAX-EGF\_180

TTTTAGCTATTCTAAGAATTACCGTAGAAGTTTGGAGGACAAGGAGGAGCTTCCTCTTGTGCTAGATTGC  
GTAATTGGTGAAGAAACATGTGAAATAGCTAAGACAAACTCGACTACATA

>M6-PGSC0003DMG400017105M6RLKWAX-EGF\_240

GCTAGATTGCGTAATTGGTGAAGAAACATGTGAAATAGCTAAGACAAACTCGACTACATATGGATGTAA  
GAGTAACAATAGTGATTGTCTTGATAATTCAATTGGTTATCGATGTTCTTG

>M6-PGSC0003DMG400017105M6RLKWAX-EGF\_299

ATGGATGTAAGAGTAACAATAGTGATTGTCTTGATAATTCAATTGGTTATCGATGTTCTTGCATGCAAGG  
ATATGATGGGAATCCATAACTGAAAGACGGCTACCAAGGTATGTATATGT

>M6-PGSC0003DMG400017105M6RLKWAX-EGF\_60

TCCATCCCTAATGAGTAATGGGGCATGGAATGTTACTATAACACTAAGGAGCTATTATAATCATACTTAT  
GTGAAAGATAACCCCTAGTTGCAGCTATGCTTTTGTAGTTCAAGAAGCTAA

>M6-PGSC0003DMG400017277M6G-LecRK\_0

ATGATTGCAGAGCAGAGAGTGATCTTCCTATCCTTCTCTTCATTTGTCTCCACTTTTTTTCATCCCGGTTT  
GCTTTCTCGCAACCTTTCTGGAECTATAATGTCAGTTTTTTGAATTCT

>M6-PGSC0003DMG400017277M6G-LecRK\_1008

TGTTACAGCTAACATCCATTTCTTCAACTCTTACATTATCATAGTCTTATAGAGCTCAGCTACACCACA  
TATTTTGCATTTGAGATCAACTTTTACGCAAGTTCAAACATGTGGCTT

>M6-PGSC0003DMG400017277M6G-LecRK\_1071

TACACCACATATTTTGCATTTGAGATCAACTTTTACGCAAGTTCAAACATGTGGCTTGAGGGAACAAAGA  
TGAAAATTGCAAAGCTGCCTGTTTGAGTAACTGTTCTGCAAAGTTGCT

>M6-PGSC0003DMG400017277M6G-LecRK\_1134

ACAAAGATGGAAAATTGCAAAGCTGCCTGTTTGAGTAACTGTTCTGCAAAGTTGCTGTTTGGTCTAAAA  
CTCTTAGAAAAAACTGCTTATTACTGAATGAAGTCTTCTCTCTTAAGGAC

>M6-PGSC0003DMG400017277M6G-LecRK\_1197

TCTAAACTCTTAGAAAAAACTGCTTATTACTGAATGAAGTCTTCTCTCTTAAGGACAACCTGGTCTGGTA  
GTGACAACACAAAAGTTTTTCTTAAGGTGCAGAATTTACAAAAGGCTCAG

>M6-PGSC0003DMG400017277M6G-LecRK\_126

GGACTTTCCAATTATTGGATCAATATTCCGTATGTTAGAGTTTACAATACCTCCGAGCCTTCTGAAATGAC  
GCCTATTATTTGGAGCAGAAAGGATAGCCCTCAGTTTCTCTTTGCCTTC

>M6-PGSC0003DMG400017277M6G-LecRK\_1260

TCTGGTAGTGACAACACAAAAGTTTTTCTTAAGGTGCAGAATTCACAAAGGCTCAGTATCAGCCGACAA  
TCGTTTCTCAAAGAAAGCAATCAAGACCTCTGAAAGTGATTGTAGCATCT

>M6-PGSC0003DMG400017277M6G-LecRK\_1386

GCTGCTTTAGTGGGAATAATTTAAGTATTAGTGCATGGTTTGTCTTTTCAAAAAGAGGGTTGTCTGTC  
AAGGCTAGGGATCTTCTGGATTTAGCACCAATCTTACCGGGAATCCTAAC

>M6-PGSC0003DMG400017277M6G-LecRK\_1449

GTCTGTCAAGGCTAGGGATCTTCTGGATTTAGCACCAATCTTACCGGGAATCCTAACTCGATTCTTTACA  
ATGAGTTGAAAATAATTACACAAGATTTTCAGCAGAAAGCTCAGGGAAGG

>M6-PGSC0003DMG400017277M6G-LecRK\_1575

TGGCTCAGTATATGAAGGAACACTGAGTAATGGCAACAAAATAGCTGTGAAGCGTCTGAATGGTTTAG  
GTCAAGTAAAGGATTCATTCTTAACAGAGGTAAAGATAGTTGGTAGCATTCA

>M6-PGSC0003DMG400017277M6G-LecRK\_1638

TTTAGGTCAAGTAAAGGATTCATTCTTAACAGAGGTAAAGATAGTTGGTAGCATTACCATGTCAACTTG  
GTAAAACCTCATCGGCTTTTGTGCTGAAAAGATCACCGGGTTGTGATCTA

>M6-PGSC0003DMG400017277M6G-LecRK\_1701

CAACTTGGTAAAACCTCATCGGCTTTTGTGCTGAAAAGATCACCGGGTTGTGATCTATGAGTACATGGTA  
AATGGATCATTGGATAGGTGGATTTCTCATGAAAAGCAAGAAAATGGGCT

>M6-PGSC0003DMG400017277M6G-LecRK\_1764

CATGGTAAATGGATCATTGGATAGGTGGATTTCTCATGAAAAGCAAGAAAATGGGCTTGGCTTACGAG  
GCAAAGGATAATATCGGATATTGCAAAGGATTAGCTTATCTTCATGATGAA

>M6-PGSC0003DMG400017277M6G-LecRK\_1827

ACGAGGCAAAGGATAATATCGGATATTGCAAAGGATTAGCTTATCTTCATGATGAATGCAGCTAGAAG  
ATAATTCATTTGGACATCAAACCACACAACATCCTCTTAGATCAAAAATTC

>M6-PGSC0003DMG400017277M6G-LecRK\_189

GAAATGACGCCTATTATTTGGAGCAGAAAGGATAGCCCTCAGTTTCTCTTTGCCTTCTATTGCCCCCTTCT

AACTAACAGTACCACAGAATGCCTTCTTGGTATCCTTTTGTATCACAAC

>M6-PGSC0003DMG400017277M6G-LecRK\_1890

TAGAAGATAATTCATTTGGACATCAAACCACACAACATCCTCTTAGATCAAATTTCAATGCTAAGATATC  
TGATTTTGGGTTGTCGAAACTAATAGAGAAAGACAAAAGCAAAGTTGTG

>M6-PGSC0003DMG400017277M6G-LecRK\_1953

AAGATATCTGATTTTGGGTTGTCGAAACTAATAGAGAAAGACAAAAGCAAAGTTGTGACTAGAATTAGA  
GGAACACCCTGTATTTAGCTCCTGAATGGTTGAGGTCGGTGATCACTGATA

>M6-PGSC0003DMG400017277M6G-LecRK\_2016

ATTAGAGGAACACCCTGTATTTAGCTCCTGAATGGTTGAGGTCGGTGATCACTGATAAAGTAGACGTAT  
ATGCCTTTGGAATTGTGCTCTTGGAAAGTTTTCTGTGGGCGAAAGAATTTGG

>M6-PGSC0003DMG400017277M6G-LecRK\_2079

ACGTATATGCCTTTGGAATTGTGCTCTTGGAAAGTTTTCTGTGGGCGAAAGAATTTGGATTGGTTCGCAGG  
CTGATGAAGATCATGTCCATTTGCTTAGTGTTTTTAAGAGAAAAGCAGAAC

>M6-PGSC0003DMG400017277M6G-LecRK\_2142

CGCAGGCTGATGAAGATCATGTCCATTTGCTTAGTGTTTTTAAGAGAAAAGCAGAACCAGAGCAGCTCA  
TGGATATGGTTTACACAAACAATGAGGATATGCAGCTCCACAGAGAAGAAG

>M6-PGSC0003DMG400017277M6G-LecRK\_2205

AGCTCATGGATATGGTTTACACAAACAATGAGGATATGCAGCTCCACAGAGAAGAAGAGACAGAAATG  
ATGAGCCTCACAAATGGTGTCTACAAGGCAATTTCAACAAGAGGCTGTCCA

>M6-PGSC0003DMG400017277M6G-LecRK\_2249

CACAGAGAAGAAGAGACAGAAATGATGAGCCTCACAAATGGTGTCTACAAGGCAATTTCAACAAGAG  
GCTGTCCATGTCAGTGGTGGTAAGTATTGGCAGGTTTAGTGTCTGTTGAAAC

>M6-PGSC0003DMG400017277M6G-LecRK\_252

CCCCTTCTAACTAACAGTACCACAGAATGCCTTCTTGGTATCCTTTTGTATCACAACAGATCCGATGGGGT  
TTCAAGTATCCCAATTAGTTTGGTCTGCTAACAGGAACCATCCAGTG

>M6-PGSC0003DMG400017277M6G-LecRK\_378

AATGCAACGTTGCAACTAGGTCAAATGGCGACTTGGTCTTGACAGACTCTGATGGCACTCTTGTTTGGT  
CCACTAATACTACTGGAAAATCTGTTTAAGGCTTAAACATCACAGAAATG

>M6-PGSC0003DMG400017277M6G-LecRK\_441

GTTTGGTCCACTAATACTACTGGAAAATCTGTTTAAGGCTTAAACATCACAGAAATGGGAAATCTTGTGC  
TCTTTGATAAGAGAAAGCAAGCAATTTGGCAGTCTTTTGATCATCCAACA

>M6-PGSC0003DMG400017277M6G-LecRK\_504

CTTGTGCTCTTTGATAAGAGAAAGCAAGCAATTTGGCAGTCTTTTGATCATCCAACAGATTGTTTGCTTTC  
GGGGCAGAAGTTGATTTTGGGGCGGAAGCTGATAGCAAGCATTTCAGAA

>M6-PGSC0003DMG400017277M6G-LecRK\_567

TTGCTTTCGGGGCAGAAGTTGATTTTGGGGCGGAAGCTGATAGCAAGCATTTCAGAATCCAATCAGTCC  
TTTTCTTTTACTATTCTTAATGGAAGGCTGGTGTCTTCCATAGATGCCAGC

>M6-PGSC0003DMG400017277M6G-LecRK\_63

TCCCGGTTTGCTTCTCGCAACCTTCTGGAECTATAATGTCAGTTTTTTGAATTCTACTACTGGACTTTCC  
AATTATTGGATCAATATTCCGTATGTTAGAGTTTACAATACCTCCGAG

>M6-PGSC0003DMG400017277M6G-LecRK\_630

CAGTCCTTTTCTTTTACTATTCTTAATGGAAGGCTGGTGTCTTCCATAGATGCCAGCCCACCTCAGTATTA  
TATCGCTTCAAGTGGGGATGATGCTCAAATAGTCCTTTTTTACAATTTT

>M6-PGSC0003DMG400017277M6G-LecRK\_693

CAGTATTATATCGCTTCAAGTGGGGATGATGCTCAAATAGTCCTTTTTTACAATTTTGACGGTTGAACATT  
TACTGCTCTACAAGACCCTTATACATCCCAATTCATAAAGCTTGGGCCT

>M6-PGSC0003DMG400017277M6G-LecRK\_756

TGAACATTTACTGCTCTACAAGACCCTTATACATCCCAATTCATAAAGCTTGGGCCTGATGGACATTTAAG  
GTTATACCAGTCGGGTGCATATGATTGGAAACAATTAGATGAGGTCATG

>M6-PGSC0003DMG400017277M6G-LecRK\_819

CATTTAAGGTTATAACCAGTCGGGTGCATATGATTGGAAACAATTAGATGAGGTCATGGATTCATATCTAG  
GGAECTGTGGGTATCCAATGGTGTGTGGAAGATATAGCATTGTACAAAT

>M6-PGSC0003DMG400017277M6G-LecRK\_882

TATCTAGGGAECTGTGGGTATCCAATGGTGTGTGGAAGATATAGCATTGTACAAATGATGGGCAATGT  
AATTGTCTGGTAGAAGGAACTTCTTTAGGCCAATAAATAGGAACCCGGAT

>M6-PGSC0003DMG400017277M6G-LecRK\_945

CAATGTAATTGTCTGGTAGAAGGAACTTCTTTAGGCCAATAAATAGGAACCCGGATCTCGGATGTTCA  
CAGCTAACATCCATTTCTTTCAACTCTTCACATTATCATAGTCTTATAGAG

>M6-PGSC0003DMG400017278M6G-LecRK\_0

CAGAATTTGGTTTAAGGGCAGAAGCTCATAGCAAGCGATTCAACAACCAATCAGAGTCAAGGTTTGATT  
ACTCTTACTGTTCTCAATGGAAGCTGGGCAACTTACACAGATACAGATCCA

>M6-PGSC0003DMG400017278M6G-LecRK\_1008

GGGGAAGGAGGATTTGGCTGTGTTTATGAAGGAACACTGAGAAATGGCACTAAAATAGCTGTGAAGCA  
TCTGGATGGTGTAGGTCAAGTAAAGGAATCATTCTTAACAGAAGTAAAGGCA

>M6-PGSC0003DMG400017278M6G-LecRK\_1197

CTAATCTATGAGTACATGGTGAATGGATCGCTGGATAGGTGGATTACTCATGAAAATAAAGAAAATGGG  
CTTACATGGAACACAAGGCAGAGGATAATATCAGATATTGCGAAAGGATTA

>M6-PGSC0003DMG400017278M6G-LecRK\_126

TAATACTACAAATCATAATATAAAGAAAGACCTTATTACAGTTTTGATGGTCAAACCTTTAATGCTTTACA  
AAATCCTAATAAATCAACAGCTCAATTCATGAAGATAGGGCCAGATGGA

>M6-PGSC0003DMG400017278M6G-LecRK\_1260

AATGGGCTTACATGGAACACAAGGCAGAGGATAATATCAGATATTGCGAAAGGATTAGCTTATCTACAT  
GAGGATTGCAGCCATAAGATAATTCATTTGGACATCAAACCACAAAACATC

>M6-PGSC0003DMG400017278M6G-LecRK\_1386

GATCAATATCTCAATGCTAAGATATCAGATTTTGGGCTGTGGAAGCTAATTGAGAAAGACAAAAGCAAA  
GTTCTGACTAGAATGAGAGGAACACGGGGTTATTTAGCTCCTGAATGGTTG

>M6-PGSC0003DMG400017278M6G-LecRK\_1449

AGCAAAGTTCTGACTAGAATGAGAGGAACACGGGGTTATTTAGCTCCTGAATGGTTGAGCTCGGTAATC  
ACTGAGAAAGTTGATGTTTATGCTTTTGGAAATTGCCTTTTGGAAATTCTC

>M6-PGSC0003DMG400017278M6G-LecRK\_1512

GTAATCACTGAGAAAGTTGATGTTTATGCTTTTGGAAATTGCCTTTTGGAAATTCTCTGTGGGCGAAAGA  
ATTTGGATTGGTCTCAACCTGATGAAGAAGATGTCCATTTGCTGAGTGTA

>M6-PGSC0003DMG400017278M6G-LecRK\_1575

CGAAAGAATTTGGATTGGTCTCAACCTGATGAAGAAGATGTCCATTTGCTGAGTGATTTAGGAGAAAA  
GCGGAACAAGATCAGCTCATTGATATGGTTGACAAAATGAGGATATGCAG

>M6-PGSC0003DMG400017278M6G-LecRK\_1817

AACCAACTTGAATTATGATTTACACATGTACCTGAGGTTGGAGCAGGCAACCAAGAGAGGGAAGCCAT

TAGCAGTTCAAATTTCTTCAATTTTATCGGGACCAAGGTAAACAATATG

>M6-PGSC0003DMG400017278M6G-LecRK\_189

GCTTTACAAAATCCTAATAAATCAACAGCTCAATTCATGAAGATAGGGCCAGATGGACATTTAAAGGTAT  
ACCGATGGTTTATAGATGATTGGAACGAAGTATCTGACATTTTGTGCGCA

>M6-PGSC0003DMG400017278M6G-LecRK\_252

AAGGTATACCGATGGTTTATAGATGATTGGAACGAAGTATCTGACATTTTGTGCGCCATATGTAGAAA  
GTGGGTAACCAATGGTATGTGGAAGTTAAAGCATTGTACAAATAACGGG

>M6-PGSC0003DMG400017278M6G-LecRK\_315

GAAAACGTGGGTAACCAATGGTATGTGGAAGTTAAAGCATTGTACAAATAACGGGCAATGTACTTGT  
CCGCAACAGGAAAACCTTCTTAAGACCATTTCTGAGAGGAAACCAGATCTT

>M6-PGSC0003DMG400017278M6G-LecRK\_378

ACTTGTCCGCAACAGGAAAACCTTCTTAAGACCATTTCTGAGAGGAAACCAGATCTTGGATGTTACAGC  
TAACTTCCATTTACTGCAACTCTTCGCAGTATCATAGTTTCGTAGAGCTC

>M6-PGSC0003DMG400017278M6G-LecRK\_441

TCACAGCTAACTTCCATTTACTGCAACTCTTCGCAGTATCATAGTTTCGTAGAGCTCAAGAATACTACATA  
TTTTTCATTTAACATTGATCAGGAACTAAATTCGAGCAGATTAAGGCTT

>M6-PGSC0003DMG400017278M6G-LecRK\_504

ACTACATATTTTTCATTTAACATTGATCAGGAACTAAATTCGAGCAGATTAAGGCTTGGGCAGACAAAGT  
TGGAAGATTGCAAAGGGCCTGTCTGAATAACTGTTCTTGCAAAGCTGCT

>M6-PGSC0003DMG400017278M6G-LecRK\_567

ACAAAGTTGGAAGATTGCAAAGGGCCTGTCTGAATAACTGTTCTTGCAAAGCTGCTGTTTTAGAATATA  
ATTGGAATGGGACTCGAAGAGGGAAGTGTGTTACTGAATGAAGTTTTTC

>M6-PGSC0003DMG400017278M6G-LecRK\_63

TTGATTACTTACTGTTCTCAATGGAAGCTGGGCAACTTACACAGATACAGATCCACCTCAATAACTA  
CAAATCATAATATAAAGAAAGACCTTATTACAGTTTTGATGGTCAAACC

>M6-PGSC0003DMG400017278M6G-LecRK\_630

GAATATAATTGGAATGGGACTCGAAGAGGGAAGTGTGTTACTGAATGAAGTTTTCTCTCTCAAAGAC  
AGCGAAGAAGGAAAAGGCAAACAGTATTTCTTAAGGTGCAAATACTCA

>M6-PGSC0003DMG400017278M6G-LecRK\_693

AAAGACAGCGAAGAAGGAAAAGGCAAAACAGTATTTCTTAAGGTGCAAATACCTCAAAGACACAGAC  
TCAGTCTCTAATCATTCTGGAGGAAAGAAATCAAGACCTTCAAAGTGATA

>M6-PGSC0003DMG400017278M6G-LecRK\_882

AAGAGGACACATGAGTCCAGAAAGGCTGCGGATATTGTGGATCTAGCACCAATCTTACCGGGAATACTA  
ACACGATTCTCTTACAATGAACTGAAAATAAATACAGATGATTTTCAGTAGA

>M6-PGSC0003DMG400017278M6G-LecRK\_945

ATACTAACACGATTCTCTTACAATGAACTGAAAATAAATACAGATGATTTTCAGTAGAAAGCTCGGGGAA  
GGAGGATTTGGCTGTGTTTATGAAGGAACACTGAGAAATGGCACTAAAATA

>M6-PGSC0003DMG400017282M6G-LecRK\_0

GAAAAAACTACTCAAATAAAAGGATGAATTTTAAGATTGAGACTGATCAATCAAACAGAGCCTTCTTTCT  
GAAAAAAATAGTACAATGGCGCTTAATTATAGTGCCATTCTTTTCATGGC

>M6-PGSC0003DMG400017282M6G-LecRK\_1054

GTTGATCAGACTAACTTTCTCCAGCAAAAAAATTACAGGCAGCCAAACCAAGGGTGTGTCCTTATCACAC  
CTATCTCTTGTAATAATCCCAATATCATATTTTTATGGAGCTCAAGTAC

>M6-PGSC0003DMG400017282M6G-LecRK\_1116

TATCACACCTATCTCTTGTAATAATCCCAATATCATATTTTTATGGAGCTCAAGTACATAGCTTATATTCC  
CCTCTATTTGCAATATGGTACAAACAAAACAGATTTGGAGAATTGCAA

>M6-PGSC0003DMG400017282M6G-LecRK\_1178

CTTATATCCCTCTATTTGCAATATGGTACAAACAAAACAGATTTGGAGAATTGCAAAGGTCTTGCTTA  
AGCAATTGTTCTTGCAAAGCAGCTCAATTTCAATTTAGTGGTCCTGGTA

>M6-PGSC0003DMG400017282M6G-LecRK\_124

CTCCTCTTCATTTCTTCACAGCATCTAATTAGTTGTCAACCTCCTGAAACATTTATCACCAATTCCTCCATT  
CCTGGATCAATAGCCGCGCCCGCTCCTATGTAGTGAATTCCACAGAT

>M6-PGSC0003DMG400017282M6G-LecRK\_1240

TCTTGCTTAAGCAATTGTTCTTGCAAAGCAGCTCAATTTCAATTTAGTGGTCCTGGTAACACAATGGGTCA  
CTGCGCATTGTTGAATGATGTATTTTCGCTCACATACGATTATGGAGCA

>M6-PGSC0003DMG400017282M6G-LecRK\_1302

AATGGGTCACTGCGCATTGTTGAATGATGTATTTTCGCTCACATACGATTATGGAGCACCCAACAAGACC  
ACTCTTTTCATCAAGGTGCAGAGCTCTTCTAACTTACAAGCCTCTCCATC

>M6-PGSC0003DMG400017282M6G-LecRK\_1364

ACAAGACCACTCTTTTCATCAAGGTGCAGAGCTCTTCTAACTTACAAGCCTCTCCATCACTTTTCTCTTCAG  
AGAAGAAATCAAAGCGTGTCCAGCAATTGTAGGATCCACCATCGGAG

>M6-PGSC0003DMG400017282M6G-LecRK\_1426

TTCTCTTCAGAGAAGAAATCAAAGCGTGTCCAGCAATTGTAGGATCCACCATCGGAGCTTCATTTGGTT  
TGCTTCTCATGGTTTTAACTTGCTTGCCTATATTTTCAGAAGGAGAAAA

>M6-PGSC0003DMG400017282M6G-LecRK\_1488

ATTTGGTTTGCTTCTCATGGTTTTAACTTGCTTGCCTATATTTTCAGAAGGAGAAAAGGGCTCGAGGAA  
GACGAGGAGGAGTTCCTTGATCAAATACCAGGAATGCCTACTAGATTTTC

>M6-PGSC0003DMG400017282M6G-LecRK\_1550

TCGAGGAAGACGAGGAGGAGTTCCTTGATCAAATACCAGGAATGCCTACTAGATTTTCCTATGAGGAAC  
TCACTGTGATGACAGAAAATTTTCAGTGAGAACTTGGGGAAGGGGGATTTG

>M6-PGSC0003DMG400017282M6G-LecRK\_1612

GAGGAACCTCACTGTGATGACAGAAAATTTTCAGTGAGAACTTGGGGAAGGGGGATTTGGTTCTGTATTT  
GAAGGAACAATGAGTGATGGCACCAAATAGCGGTGAAGCGTCTGCAAGGT

>M6-PGSC0003DMG400017282M6G-LecRK\_1736

GTAATGTGAAGAAATCATTCTTAGCTGAGGTAGCAACAATCGGTAGCATTACGCATGTCAATTTGGTGC  
AACTTGTTGGATTTTGTGCTGAGAAATCACACAGACTTCTGGTTTATGAAT

>M6-PGSC0003DMG400017282M6G-LecRK\_1798

TTGGTGCAACTTGTTGGATTTTGTGCTGAGAAATCACACAGACTTCTGGTTTATGAATATATGGCCAATG  
GCTCTTTAGATAGGTGGATTTTTCACGGAAAGCAGGAACGATCTCTCACA

>M6-PGSC0003DMG400017282M6G-LecRK\_1860

GGCCAATGGCTCTTTAGATAGGTGGATTTTTCACGGAAAGCAGGAACGATCTCTCACATGGGATATCAG  
GAAAAAGATCATATCAGACGTTGCCAAGGGCCTAGCTTACCTACATGAAGA

>M6-PGSC0003DMG400017282M6G-LecRK\_1922

ATATCAGGAAAAAGATCATATCAGACGTTGCCAAGGGCCTAGCTTACCTACATGAAGACTGTAACAACA  
AAATTATTCATTTGGATATTAACCTCAGAACATTCTTCTTGATCATAATC

>M6-PGSC0003DMG400017282M6G-LecRK\_1984

AACAACAAAATTATTCATTTGGATATTAACCTCAGAACATTCTTCTTGATCATAATCTCAATGCAAAAAGT



ATCAGATTTTGGGTTATCAAAGCTTGTGGGGAAAGATGAAAGTAAGATA

>M6-PGSC0003DMG400017282M6G-LecRK\_2046

TGCAAAAGTATCAGATTTTGGGTTATCAAAGCTTGTGGGGAAAGATGAAAGTAAGATAGTTACAACAAT  
GAGAGGAACACCAGGCTATTTAGCACCTGAATGGTTACATGAGGTCATTAC

>M6-PGSC0003DMG400017282M6G-LecRK\_2108

CAACAATGAGAGGAACACCAGGCTATTTAGCACCTGAATGGTTACATGAGGTCATTACTGAGAAAGTGG  
ATGTTTATAGCTTTGGGGTTGTGATCTTGGAATCATCTGCGGCCGGAAGA

>M6-PGSC0003DMG400017282M6G-LecRK\_2232

GGATCGTCATCAAGATGAGGATGATATGCATTTGCTTAGTTTGTTCATGAGAAAGGCAGTGGAGAGACA  
ACTCTTGGAATGGTGGACAAGAAGAGCGAAGACATGCAGCTACATAGAAA

>M6-PGSC0003DMG400017282M6G-LecRK\_2294

AGAGACAACCTTGGAATGGTGGACAAGAAGAGCGAAGACATGCAGCTACATAGAAAAGAGGCTGT  
GGAAATGATGAAGATTGCAGCCTGGTGTTCACAAAGTGATTATACTAAGAGGC

>M6-PGSC0003DMG400017282M6G-LecRK\_2356

GCTGTGGAATGATGAAGATTGCAGCCTGGTGTTCACAAAGTGATTATACTAAGAGGCCTTCCATGTCA  
TTGGTAGTTAAGGTGTTTCAGGGTTTAGTGGCTGTTGAAACCGACTTGGAT

>M6-PGSC0003DMG400017282M6G-LecRK\_2418

CATGTCATTGGTAGTTAAGGTGTTTCAGGGTTTAGTGGCTGTTGAAACCGACTTGGATTACAGCTTCACA  
TTTCCAACAATGACGAGAAGAGTTGCCGGAATAATCAAGAAAGGGAATC

>M6-PGSC0003DMG400017282M6G-LecRK\_248

CCCACTGACACCCATCCTATCGAGAGAAAGGAACGAGACTCTCTTTGTCTGTGGTTTCTTATGTGATTA  
CAATGGTACTGCTTGCCTTTTTGGTGTCTTTTATCCCCAAAGATCAGTA

>M6-PGSC0003DMG400017282M6G-LecRK\_2480

GCTTCACATTTCCAACAATGACGAGAAGAGTTGCCGGAATAATCAAGAAAGGGAATCTGTGGTTGGTA  
TCAGTTTTCCAATTCCATCACAGTTGTCAGGACCTAGGTAAATTCTTAGTA

>M6-PGSC0003DMG400017282M6G-LecRK\_2542

GTTGGTATCAGTTTTCCAATTCCATCACAGTTGTCAGGACCTAGGTAAATTCTTAGTAGTATTATCATCA  
AGACTGAATAGCTAATAAGTCACAGCCATATGTCCATACCTTTGAGTTA

>M6-PGSC0003DMG400017282M6G-LecRK\_2604

TTATCATCAAGACTGAATAGCTAATAAGTCACAGCCATATGTCCATACCTTTGAGTTATTACTTGTTATTT  
GCTGCGAAAAGACATTTTGTGTTTTTCATAATCCTTATTATATCAATAC

>M6-PGSC0003DMG400017282M6G-LecRK\_2666

TTGTTATTTGCTGCGAAAAGACATTTTGTGTTTTTCATAATCCTTATTATATCAATACTATTTTCAGAAACAT  
AATTTAGAAAAGTAGAACACACTGTCTACTATAGAAATGTTAGTTTTTC

>M6-PGSC0003DMG400017282M6G-LecRK\_310

TGTGATTACAATGGTACTGCTTGCCTTTTTGGTGTCTTTTATCCCCAAGATCAGTAGCAACAATTCTTA  
TCTATATTACGCTAGATTAGTTTGGTCAGCAAATCGGAATAATCCAGTT

>M6-PGSC0003DMG400017282M6G-LecRK\_372

CAATTCTTATCTATATTACGCTAGATTAGTTTGGTCAGCAAATCGGAATAATCCAGTTAGAGCTAATGCA  
ACCTTGCAACTTAGGCAAGATGGAGGCTTATTCTTGATGGACTCAGATGG

>M6-PGSC0003DMG400017282M6G-LecRK\_434

CTAATGCAACCTTGCAACTTAGGCAAGATGGAGGCTTATTCTTGATGGACTCAGATGGCACTTTGATTTG  
GAGTACAAGCACAAGCATAAGAGGAAAGGTTGTTACGGGATTCAAATTGA

>M6-PGSC0003DMG400017282M6G-LecRK\_496

TTGATTTGGAGTACAAGCACAAGCATAAGAGGAAAGGTTGTTACGGGATTCAAATTGACAGTACTGGG  
AAATATTGTTCTCTTTGACAAAAGTAACAACATCATTTGGCAGTCTTTTGAT

>M6-PGSC0003DMG400017282M6G-LecRK\_558

ACTGGGAAATATTGTTCTCTTTGACAAAAGTAACAACATCATTTGGCAGTCTTTTGATCATCCTACAGACA  
CTTTGGTTCCTGGACAAATGACAAATGCTGGACAAAAGCTGAGATCCAG

>M6-PGSC0003DMG400017282M6G-LecRK\_62

TTCTTTCTGAAAAAATAGTACAATGGCGCTTAATTATAGTGCCATTCTTTTCATGGCCAGTCTCCTCTTCA  
TTTCTTCACAGCATCTAATTAGTTGTCAACCTCCTGAAACATTTATCA

>M6-PGSC0003DMG400017282M6G-LecRK\_620

CTACAGACACTTTGGTTCCTGGACAAATGACAAATGCTGGACAAAAGCTGAGATCCAGTGTATCAGCAA  
CAAATTGGAGTGAAGGTTTGTTCACATTTGAAGTTCAACTATTTGGCTTTT

>M6-PGSC0003DMG400017282M6G-LecRK\_682

TCAGCAACAAATTGGAGTGAAGGTTTGTTCACATTTGAAGTTCAACTATTTGGCTTTTTAGCATAATTGA  
GTCAAATCCACGTCAACTCTATGTCTCAAGACTTGGGGATAAAGGTTTC

>M6-PGSC0003DMG400017282M6G-LecRK\_744

ATACATTGAGTCAAATCCACGTCAACTCTATGTCTCAAGACTTGGGGATAAAGGTTTCCCGTTTCCTGGA  
CTATTCTTTGATTTCGAAAATAATGATTTTCAACGGGACATTATTCCTAAA

>M6-PGSC0003DMG400017282M6G-LecRK\_806

TTCCTGGACTATTCTTTGATTTCGAAAATAATGATTTTCAACGGGACATTATTCCTAAATTTTGCATTTTCAA  
ATACTAGATTCATGAGGTTTGGGGATGATGGGCATTTAAGGGTGTATC

>M6-PGSC0003DMG400017282M6G-LecRK\_868

GCATTTTCAAATACTAGATTCATGAGGTTTGGGGATGATGGGCATTTAAGGGTGTATCACTGGAGAGGA  
TCTTGGTTAGAGGAGGCTGATCTATTGACAGACTACATTGGTGAGTGTGGG

>M6-PGSC0003DMG400017282M6G-LecRK\_930

GAGAGGATCTTGTTAGAGGAGGCTGATCTATTGACAGACTACATTGGTGAGTGTGGGTATCCAAGTGT  
GTGTGGGAATTACTCTGTTTGTGCAAATAGGCAGTGTACTTGTCTCAAAC

>M6-PGSC0003DMG400017282M6G-LecRK\_992

CAACTGTGTGTGGGAATTACTCTGTTTGTGCAAATAGGCAGTGTACTTGTCTCAAACCGCGGTTGATCA  
GACTAACTTTCTCCAGCAAAAAAATTACAGGCAGCCAAACCAAGGGTGTG

>M6-PGSC0003DMG400017283M6LRR-RLP\_0

ATGCAGATGACCAGTCTGAGGTTTCTCAAATCCGGAATGCATATGTTTGTCTGGGACCTGAATTTCTTC  
CTGATGAGTTGAGGTGGCTTGATTGGCATGGATATCCTTCAAAAAGTCTG

>M6-PGSC0003DMG400017283M6LRR-RLP\_1054

TGGCTGGTTGTAGGAGGCTTGAGAGTTTACCAGAACTTCCCTCCAGGTATAGAAAGGATATATGCTGATG  
AATGCACATCTTTGATGAGCATTGATCAGCTAACCAATATCCAATGTTGC

>M6-PGSC0003DMG400017283M6LRR-RLP\_1116

GCTGATGAATGCACATCTTTGATGAGCATTGATCAGCTAACCAATATCCAATGTTGCGTGGAGTTTCAT  
TTACAAAATGTCATCAACTTGTA AAAAATAAACGGCATGCCTCTGTGGTT

>M6-PGSC0003DMG400017283M6LRR-RLP\_1178

AGTTTCATTTACAAAATGTCATCAACTTGTA AAAAATAAACGGCATGCCTCTGTGGTTGATTCATTGTTGA  
AGCAGTTGCTCAAGGTAAGTATGCTTCCAAGCCACA ACTCTACTATATC

>M6-PGSC0003DMG400017283M6LRR-RLP\_1240

CATTGTTGAAGCAGTTGCTCAAGGTAAGTATGCTTCCAAGCCACA ACTCTACTATATCCACATGAAAATA

TAAATGAACTTCTTTTTATATAACTGGAAGGGCTTTTGTATTTGTACTCC

>M6-PGSC0003DMG400017283M6LRR-RLP\_1302

TGAAAATATAAATGAACTTCTTTTTATATAACTGGAAGGGCTTTTGTATTTGTACTCCAATTAGCTAAGGT  
CGCTTATGAATCTAGGTAAATAACATTCTTTTCACGGTGCATGCAGAGA

>M6-PGSC0003DMG400017283M6LRR-RLP\_1364

AGCTAAGGTCGCTTATGAATCTAGGTAAATAACATTCTTTTCACGGTGCATGCAGAGACTATACATGAAT  
GGCGCATTTTATATGTATCTCCCTGGTGTGGAGATTCCTGAGTGGTTTAC

>M6-PGSC0003DMG400017283M6LRR-RLP\_1426

ACATGAATGGCGCATTTTATATGTATCTCCCTGGTGTGGAGATTCCTGAGTGGTTTACATACAAGAAGT  
GGGGACCGAATCCATCTCAGTGGCCCTGCCCCAAAATTGGTTCACACCCA

>M6-PGSC0003DMG400017283M6LRR-RLP\_1488

AAGAACTGGGGGACCGAATCCATCTCAGTGGCCCTGCCCCAAAATTGGTTCACACCCACATTCAGGGGG  
CTTACTGTTTGTGTTGTTTTGACATGATGACTCCTTTTATTTTAGGGAAA

>M6-PGSC0003DMG400017283M6LRR-RLP\_1550

CAGGGGGCTTACTGTTTGTGTTGTTTTGACATGATGACTCCTTTTATTTTAGGGAAATTAATGTCTGAATG  
ATCCCTCAATTTTCATACTACCAAATGGCTAAAAATTTTCCAACATT

>M6-PGSC0003DMG400017283M6LRR-RLP\_1612

TGTCGAATGATCCCTTCAATTTTCATACTACCAAATGGCTAAAAATTTTCCAACATTTTGGGATATGGTCA  
AGGTTACAAGACATGATGGTTTGCAGCACGAATATAGAGTATGTGTCTG

>M6-PGSC0003DMG400017283M6LRR-RLP\_1674

ATATGGTCAAGGTTACAAGACATGATGGTTTGCAGCACGAATATAGAGTATGTGTCTGGGCCAATAGGA  
AGTGAAAAACCTGTTGGTTTGGTAATACTTTCTAGCCCATGTACCATT

>M6-PGSC0003DMG400017283M6LRR-RLP\_1736

AATAGGAAGTGAAAAACCTGTTGGTTTGGTAATACTTTCTAGCCCATGTACCATTTGGAAGTTATTGC  
CTGCCAAAATGACTTCATTCAGCTTGAGGTTGGTGTCTCTGAGCATT

>M6-PGSC0003DMG400017283M6LRR-RLP\_1791

TTTGAAGTTATTGCCTGCCCCAAAATGACTTCATTCAGCTTGAGGTTGGTGTCTCTGAGCATTATCATAA  
GGATCTGGTGGTCAAAGGTTTGGGAGTGCATCTTGTGTATGAGAATTGA

>M6-PGSC0003DMG400017283M6LRR-RLP\_186

TGAAAAACCTCAAAGGATCTGGGAAAACCTGAAGTACATGAACCTTAGCCATTCACAGAAGCTAATAAGG  
ATGCCAGATTTTTTCAGTTACGCCTAATCTTGAAAGGCTGGTTCTTGAAGAA

>M6-PGSC0003DMG400017283M6LRR-RLP\_248

AATAAGGATGCCAGATTTTTTCAGTTACGCCTAATCTTGAAAGGCTGGTTCTTGAAGAATGCACAAGTTTG  
GTAGAAATCAATTTTTCTATTGGAGATCTTGAAAAGCTAGTCTTGCTGAA

>M6-PGSC0003DMG400017283M6LRR-RLP\_310

CAAGTTTGGTAGAAATCAATTTTTCTATTGGAGATCTTGAAAAGCTAGTCTTGCTGAATCTGAAGAACTG  
CAGAAATTTGAAGACCCTACCAAAGAGAATTCGATTGGAAAAGCTTGAAA

>M6-PGSC0003DMG400017283M6LRR-RLP\_372

AAGAACTGCAGAAATTTGAAGACCCTACCAAAGAGAATTCGATTGGAAAAGCTTGAAATTCTCATTCTTT  
CAGGGTGCTCAAAGTTAAGAGCATTCCCAGAAATAGAAGAGAAAATGAAT

>M6-PGSC0003DMG400017283M6LRR-RLP\_434

CATTCTTTCAGGGTGCTCAAAGTTAAGAGCATTCCCAGAAATAGAAGAGAAAATGAATAGTTTAGCAGA  
ACTGTATTTGGGCGCGACTGCTTTGAGTGAACCTACCTGCATCAGTTGAGAA

>M6-PGSC0003DMG400017283M6LRR-RLP\_558

TCAGGAGTTGGTGTATTAATATAAGTTACTGCAAGCATCTTGAGAGTCTACCTAGCAGTATTTCTAGGT  
TGAAATGTCTGAAAACACTCGATGTGTCCGGCTGCTCTAAACTTAAAAAT

>M6-PGSC0003DMG400017283M6LRR-RLP\_62

ATTTCTTCTGATGAGTTGAGGTGGCTTGATTGGCATGGATATCCTTCAAAAAGTCTGCCAAATAGCTTT  
AAGGGAGACCAACTTGTTAGTTTGAAATTGAAAAAAGCCGCATCATACA

>M6-PGSC0003DMG400017283M6LRR-RLP\_620

TTCTAGGTTGAAATGTCTGAAAACACTCGATGTGTCCGGCTGCTCTAAACTTAAAAATTTACCAGATAAT  
TTGGTACTTTTAGTTGGTTTAGAGGAGCTCCACTGCACTCACACAGCCAT

>M6-PGSC0003DMG400017283M6LRR-RLP\_682

CAGATAATTTGGTACTTTTAGTTGGTTTAGAGGAGCTCCACTGCACTCACACAGCCATCCAAACAATTCC  
GTCTTCTATATCTTCTTAAAAACCTTAAGCACTTATCTCTCCGTGGAT

>M6-PGSC0003DMG400017283M6LRR-RLP\_744

ACAATTCCGTCTTCTATATCTTCTTAAAAACCTTAAGCACTTATCTCTCCGTGGATGTAGTGCTATGAGT  
TCACAAGTAAGTAGCTCAAGTCATGGCCAGAAGTCTATGGGTGTAAT

>M6-PGSC0003DMG400017283M6LRR-RLP\_806

TGCTATGAGTTCACAAGTAAGTAGCTCAAGTCATGGCCAGAAGTCTATGGGTGTAAATTTTCAGAATTTG  
TCGGGTCTTTGTTCAATTGATCATGTTGGATCTTAGTGACTGCAACATTTTC

>M6-PGSC0003DMG400017283M6LRR-RLP\_930

GGAGGCATTTTAAGTAATCTTGGGTTCTTACCTTCTTTGGAGGGATTGATTCTCGATGGTAACAATTTTTC  
CAATATTCCAGCTGCAAGCATAAGTCGTCTCACTCGACTTAAAGCCCTT

>M6-PGSC0003DMG400017283M6LRR-RLP\_992

CAATTTTCCAATATTCCAGCTGCAAGCATAAGTCGTCTCACTCGACTTAAAGCCCTTGCATTGGCTGGTT  
GTAGGAGGCTTGAGAGTTTACCAGAACTTCTCCAGGTATAGAAAGGAT

>M6-PGSC0003DMG400017284M6G-LecRK\_0

CCTCTGCTGTTTCGTCTCGATTTGCTATATCGCAACCTTTACAGGACTACAACCTCACTCTTTCGAATTCTAC  
TGCAGGGCTTGCCGGGCTTTCCTCTTCTGGATCAACAGGCCCTCTCT

>M6-PGSC0003DMG400017284M6G-LecRK\_1054

TTTTCATTTAACATTGATCAGGAAATAAATTCGAGCAAATTAAGGCTTGGGCAGAAAAAGATGGAAGAT  
TGCAAAAGGGCCTGTCTGAATAACTGTTCTTGCAAAGCTGCTGTTTTAGAA

>M6-PGSC0003DMG400017284M6G-LecRK\_124

CTTAATTCCACCGACGACTCCTTTGGTTTGGTGACACCCATACTTCAGCGAAGAAATGCTGGCACACGAT  
TCCTCTGTGGCTTCTACTGCAAATACAATGAAAAAAAATGCCTTCTTGGT

>M6-PGSC0003DMG400017284M6G-LecRK\_1240

AGCGAAGAAGGAAAAGGCAAGACAGTATTTCTTAAGGTGCAGAATTCCTCAAAGCCACAGACTCGGTCT  
CTAATCATTCTGGAGGAAAGAAATCAAGACCTTTCAAAGTGATAATAGGA

>M6-PGSC0003DMG400017284M6G-LecRK\_1426

AGGACACATGAGTCCAGAAAGGCTGCGGATATTTTGGATCTAGCACCAATCTTACCGGGAATTCTAACA  
CGATTCTTACAATGACCTGAAAATAACTACAGATGATTTTCAGTAGAAAG

>M6-PGSC0003DMG400017284M6G-LecRK\_1488

TCTAACACGATTCTCTTACAATGACCTGAAAATAACTACAGATGATTTTCAGTAGAAAGCTCGGGGAAGG  
AGGATTTGGCTGTGTTTATGAAGGAACACTGAGAAATGGAACATAAATAGC

>M6-PGSC0003DMG400017284M6G-LecRK\_1736

TTCTAATCTATGAGTACATGGTGAATGGATCGCTGGATAGGTGGATTACACATGAAAATCAAGAAAATG

GGCTTACATGGAACACAAGGCAGAGGATAATATCAGACATCGCCAAAGGGT

>M6-PGSC0003DMG400017284M6G-LecRK\_1798

GAAAATGGGCTTACATGGAACACAAGGCAGAGGATAATATCAGACATCGCCAAAGGGTTAGCATATCT  
ACATGAGGATTGCAGCCATAAGATAATTCATTTGGACATCAAACCACAAAAC

>M6-PGSC0003DMG400017284M6G-LecRK\_186

CACACGATTCTCTGTGGCTTCTACTGCAAATACAATGAAAAAAAATGCCTTCTTGGTATCCTTTTGAACC  
ACAACAAATACAACAAAAAAAACAGTATAATAATAAACCCAGTTAGT

>M6-PGSC0003DMG400017284M6G-LecRK\_1984

GACAAAAGCAAAGTTGTGACTAGAAATGAGAGGAACACGGGGTATTTAGCCCTTGAATGGTTAAGCTC  
AGTAATTACTGAGAAAGTTGATGTGTATGCTTTTGGATTTGTGCTCTTGAA

>M6-PGSC0003DMG400017284M6G-LecRK\_2046

AAGCTCAGTAATTACTGAGAAAGTTGATGTGTATGCTTTTGGATTTGTGCTCTTGAAATTCTCTGTGGG  
CGAAAGAATTTGGATTGGTCACAACTGATGAAGAAAATGTCCATTTGCT

>M6-PGSC0003DMG400017284M6G-LecRK\_2108

TCTGTGGGCGAAAGAATTTGGATTGGTCACAACTGATGAAGAAAATGTCCATTTGCTAAGTGATTTA  
GGAGAAAAGCGGAACAAGAGCAGCTCATGGATATGGTTGACAAAATGAGG

>M6-PGSC0003DMG400017284M6G-LecRK\_2418

GGAAGTCATTATCAGTTCAAATTTCTTCAATTTTATCTGGACCAAGGTAACAATATGCTTAAGATTTT  
GTCTTTGAAGGAACCAACATATGGTTGCGTAATGTCAAATATCGCAACA

>M6-PGSC0003DMG400017284M6G-LecRK\_248

TTTTGAACCACAACAAATACAACAAAAAAAACAGTATAATAATAAACCCAGTTAGTTTGGTCTGCTAA  
CAGGAACCATCCAGTGAAATTCATGCAACCTTGCAACTAGGCCATGATG

>M6-PGSC0003DMG400017284M6G-LecRK\_2480

TAAGATTTTGTCTTTGAAGGAACCAACATATGGTTGCGTAATGTCAAATATCGCAACATTTTCAATTCTAG  
CATAACTTTTTTACCGTGTATGGGATTATAATTCATGAAATGTAATGTT

>M6-PGSC0003DMG400017284M6G-LecRK\_2542

CAATTCTAGCATAACTTTTTTACCGTGTATGGGATTATAATTCATGAAATGTAATGTTTCACTTCTATA  
TTAAATTTTTGAGCTTCATGTTACTATCATGTAGAGGCTTTTCAATTC

>M6-PGSC0003DMG400017284M6G-LecRK\_2597

G TTCAGT TACTTCTATATTA AATTTTTGAGCTTCATGTTACTATCATGTAGAGGCTTTTCAATTCATGTGTG  
AAAATAAGTAATGATATTGTACGTGGTGGTGCAGCTACTGAATTCAAA

>M6-PGSC0003DMG400017284M6G-LecRK\_372

CTTGGTCTTGACAGACTCCGATGGCACTCTTGTTTGGTCCACTGATACAATTGGAAAATCTGTTTCTGGCT  
TAAACTTAACAGAAATGGGAAATCTTGACTCTTTGATAAGAGAAAACG

>M6-PGSC0003DMG400017284M6G-LecRK\_434

TTTCTGGCTTAAACTTAACAGAAATGGGAAATCTTGACTCTTTGATAAGAGAAAACGAACAATTTGGCA  
GTCTTTTGATCATCCTACAGAATCTTTGCTTCCAGGGCAGAATTTGGTTT

>M6-PGSC0003DMG400017284M6G-LecRK\_496

ATTTGGCAGTCTTTTGATCATCCTACAGAATCTTTGCTTCCAGGGCAGAATTTGGTTTAAGGGCAGAAGC  
TCATAGCAAGCGATTCAACAACCAATCAGAGTCAAGGTTTGATTACTCTT

>M6-PGSC0003DMG400017284M6G-LecRK\_62

CGAATTCTACTGCAGGGCTTGCCGGGCTTTCCTCTTTCTGGATCAACAGGCCCTCTTTAGGCTTAATTCC  
ACCGACGACTCCTTTGGTTTGGTGACACCCATACTTCAGCGAAGAAATG

>M6-PGSC0003DMG400017284M6G-LecRK\_744

TAATAAATCAACAGCTCAATTCATGAAGATAGGGCCAGATGGACATTTAAAGGTATACCAATGGTCTGT  
AGTTGATTGGAATGAAGTTTCTGACATTTTGTGCCATATGTAGAAAACCTG

>M6-PGSC0003DMG400017284M6G-LecRK\_806

GGTCTGTAGTTGATTGGAATGAAGTTTCTGACATTTTGTGCCATATGTAGAAAACCTGTGGGTAACCAAT  
GGTATGTGGAAGTTAAAGCATTGTACAAATAACGGGCAATGTACTTGTC

>M6-PGSC0003DMG400017284M6G-LecRK\_930

ACAGGAAAACCTCTTAAGACCATTTTCTGAGAGGAAACCAGATCTTGGATGTTACAGCTGACTTCCGTT  
AACTGCAACTCTTTGCGGTATCATAGTTTCATAGAGCTCAAGAATACTAC

>M6-PGSC0003DMG400017284M6G-LecRK\_992

CTTCCGTTAACTGCAACTCTTTGCGGTATCATAGTTTCATAGAGCTCAAGAATACTACATATTTTTCATTTA  
ACATTGATCAGGAAATAAATTCGAGCAAATTAAGGCTTGGGCAGAAAA

>M6-PGSC0003DMG400017286M6G-LecRK\_0

TACAAGTACAGATATCACTTTGGATATTCTGTATGCTCATTTCTTTCTTCAACTATAGACAACAAAATTCCA  
TATATTTTATTGATTTTATTAGGAAACAATGTTAGCAGAAAAGAGAC



>M6-PGSC0003DMG400017286M6G-LecRK\_1426

GGTGCAAATACCTCAAAGACACAGACTCAGTCTCTAATCATTCTGGAGGAAAGAAATCAAGACCTTTC  
AAAGTGATAATAGGATCTACTCTTGACGCTTTCTTTGGGATAATTTAAG

>M6-PGSC0003DMG400017286M6G-LecRK\_186

CTTTACAGGACTACAACCTCACTCTTTTGAATTCTACTGCAGGGCTTGCCGGGCTTCTCTTTCTGGATC  
AACAGGCCCTCTTATTATTAATTCCACCGCCGACTTCTTTGGTTTGG

>M6-PGSC0003DMG400017286M6G-LecRK\_1984

AATATCAGATATTGCGAAAGGATTAGCTTATCTACATGAGGATTGCAGCCATAAGATAATTCATTTGGAC  
ATCAAACCACAAAACATCCTTCTAGATCAATATCTCAATGCTAAGATATC

>M6-PGSC0003DMG400017286M6G-LecRK\_2046

ATTTGGACATCAAACCACAAAACATCCTTCTAGATCAATATCTCAATGCTAAGATATCAGATTTTGGGCT  
GTCGAAGCTAATTGAGAAAGACAAAAGCAAAGTTCTGACTAGAATGAGAG

>M6-PGSC0003DMG400017286M6G-LecRK\_248

TTCTGGATCAACAGGCCCTCTTATTATTAATTCCACCGCCGACTTCTTTGGTTTGGTGACACCCATACTT  
CAGCGAAGAAATGCTGGCACACGATTCTCTGTGGCTTCTACTGCAA

>M6-PGSC0003DMG400017286M6G-LecRK\_2542

TGAGGTTGGAGCAGGCAACCAAGAGAGGGAAGCCATTAGCAGTTCAAATTTCTTCAATTTTATCGGG  
ACCAAGGTAAACAATATGCTTAAGATTTTGTCAATTGAAGGAACCAACACAT

>M6-PGSC0003DMG400017286M6G-LecRK\_2604

TATCGGGACCAAGGTAAACAATATGCTTAAGATTTTGTCAATTGAAGGAACCAACACATGGTTGCGTAAT  
ATCAAATATTGCAACATTTCCGATTCTAGCATAACTTTTTATAATTCATGA

>M6-PGSC0003DMG400017286M6G-LecRK\_2666

GCGTAATATCAAATATTGCAACATTTCCGATTCTAGCATAACTTTTTATAATTCATGAAATGTAATGTTCA  
GTAACCTCTATATTGAATTTTGGAGCTTCATGTTACTATCATATAGAGG

>M6-PGSC0003DMG400017286M6G-LecRK\_496

AACCTTGCAACTAGGCCATGATGGCAACTTGGTCTTGACGGATTTTGTGGCACTCTTGTGGTCCACT  
GATACAATTGGAAAATCTGTTTCTGGCTTAACTTAACAGAAATGGGAAA

>M6-PGSC0003DMG400017286M6G-LecRK\_62

CAAAATTCATATATTTTATTGATTTTATTAGGAAACAATGTTAGCAGAAAAGAGACTGTATTTTCTAT

CCTTCTCTTCATTTATCTCCTCTGTTGTTGCTAGATTTGCTATATCG

>M6-PGSC0003DMG400017291M6LRR-RLK\_0

TAAATGATCATCTCTAAGCTTCAAAAAATTATTAATATTATGGACTTGCTAAACTTCTAGTCTAATTTTGT  
GACTATTTTGTTCACAGAGATGTTTCAAATAACAATTTTACATGGGA

>M6-PGSC0003DMG400017291M6LRR-RLK\_1037

TATTCAAGACATAACTGGGCGTTTAGCAGCACAGGAAATTTATGGACAACGACGTTGAGTCTGATGTC  
TATATCAATACCAATGTCTCTGCCCTGCAAATGTCAAGGTCCCTGAACTG

>M6-PGSC0003DMG400017291M6LRR-RLK\_1098

CTGATGTCTATATCAATACCAATGTCTCTGCCCTGCAAATGTCAAGGTCCCTGAACTGGAACATACACT  
ACTGCACGTATATCTCCCCTCTCCCTCACATATTATGGACAATGTCTAA

>M6-PGSC0003DMG400017291M6LRR-RLK\_1159

ACTATACTACTGCACGTATATCTCCCCTCTCCCTCACATATTATGGACAATGTCTAATGAATGGAACT  
ACACTGTCAAGCTCCATTTTGC GGAGATAATATTCACAAATGATACTTC

>M6-PGSC0003DMG400017291M6LRR-RLK\_122

CCTCACCTTTTGAATGTCCCGTGGAAATCAGTAAGTTGTTTGATAAAATTGTTTTCTTCATTTGACTTAT  
TTGTTTGTGATAATTTTCTAACATCAAGACGATTTATTCAGAACTTG

>M6-PGSC0003DMG400017291M6LRR-RLK\_1220

AATGGAACTACTGTCAAGCTCCATTTTGC GGAGATAATATTCACAAATGATACTTCATTCAACAGCC  
TTGGAGAGCGTATATTTGATGTCTACTTGCAGGTAAATTCATGCTCTGGG

>M6-PGSC0003DMG400017291M6LRR-RLK\_1281

TCAACAGCCTTGGAGAGCGTATATTTGATGTCTACTTGCAGGTAAATTCATGCTCTGGGAGAAAGTGAA  
TTTCATGTTTGTGCCACCAGTGCATTTATTCAATCTTCTTGAGACAGGAA

>M6-PGSC0003DMG400017291M6LRR-RLK\_1342

AAAGTGAATTTTCATGTTTGTGCCACCAGTGCATTTATTCAATCTTCTTGAGACAGGAAAATTTGGTGTTG  
AAGGATTTTAACATTGCAAAGAGGCTGGTGGGCCTGGTAAGCCAATTG

>M6-PGSC0003DMG400017291M6LRR-RLK\_1403

TTTGGTGTTGAAGGATTTTAACATTGCAAAGAGGCTGGTGGGCCTGGTAAGCCAATTGTGAAGACGTT  
CACTGTGAATGTGACAAGCCACACGCTGAAGATACATTTTACTGGGCAGG

>M6-PGSC0003DMG400017291M6LRR-RLK\_1464

AAGACGTTCACTGTGAATGTGACAAGCCACACGCTGAAGATACATTTTTACTGGGCAGGAAGAGGGACT  
ACAGGAATTCCATTTAGAGGGGTTTATGGTCCTCTAATTTAGCTATATCA

>M6-PGSC0003DMG400017291M6LRR-RLK\_1525

GAGGGACTACAGGAATTCCATTTAGAGGGGTTTATGGTCCTCTAATTTAGCTATATCAGTTGTTAATAG  
TATGTTCTTTACTCTCTTCAAGTTTATATCTGTCTTGCTTACAGTTGTA

>M6-PGSC0003DMG400017291M6LRR-RLK\_1586

TGTTAATAGTATGTTCTTTACTCTCTTCAAGTTTATATCTGTCTTGCTTACAGTTGTATGCTCAATTCTTCT  
TTAATGAATGCCATAGGGAACATAGGACATTATTCTGACGTACTAGT

>M6-PGSC0003DMG400017291M6LRR-RLK\_1647

CTCAATTCTTCTTTAATGAATGCCATAGGGAACATAGGACATTATTCTGACGTACTAGTCCTTAAAAAAC  
CTTTCCGAGACCAAATGACTCTACATACCAAGGCTTAATAAGTTTTGTT

>M6-PGSC0003DMG400017291M6LRR-RLK\_1708

TTAAAAAACCTTTCCGAGACCAAATGACTCTACATACCAAGGCTTAATAAGTTTTGTTAACCATCTTGAT  
GTTATAAATTCTATTCTACTGATTCATTATGCATCTAAAAGTCTGTC

>M6-PGSC0003DMG400017291M6LRR-RLK\_1769

CCATCTTGATGTTATAAATTCTATTCTACTGATTCATTATGCATCTAAAAGTCTGTC AACATATTCTTTC  
AGGAAGTTAATGTGTATCAGAACCTAAGAACTTCATATACCCTTAAA

>M6-PGSC0003DMG400017291M6LRR-RLK\_183

ATTTGACTTATTTGTTTGTGATAATTTTCTAACATCAAGACGATTTATTCAGAACTTGGTGGAGAGCTAT  
TCTGCATTGGGACAAGAATCGTAAGACTAATATGCCTATAATAAATTTA

>M6-PGSC0003DMG400017291M6LRR-RLK\_1830

CATATTCTTTCAGGAAGTTAATGTGTATCAGAACCTAAGAACTTCATATACCCTTAAATTTTCATGATGCA  
TTTCAAATACAGTGGGGAGACCACTTATAGTGTCCCAGTTCAGTTCCT

>M6-PGSC0003DMG400017291M6LRR-RLK\_1891

TCATGATGCATTTCAAATACAGTGGGGAGACCACTTATAGTGTCCCAGTTCAGTTCCTTAATCTTGTCTG  
GTAGTGGAAAGCATCAAGACTTATACTAAGACTTCAAAGAAAATGTTTC

>M6-PGSC0003DMG400017291M6LRR-RLK\_1952

ATCTTGTCTGGTAGTGGAAGCATCAAGACTTATACTAAGACTTCAAAGAAAATGTTTCAAATTGCATAT  
GCAAGTCAATTAAAGCTTGCTAAAATCATCACAAGTTTTGAGATGTCATA

>M6-PGSC0003DMG400017291M6LRR-RLK\_2013

ATTGCATATGCAAGTCAATTAAGCTTGCTAAAATCATCACAAGTTTTGAGATGTCATATTATTTTTTCCTT  
TCCGTGCAGATTTTCCCCCTCCTCTGCCTGCTCGTCTGCCTGCTCATC

>M6-PGSC0003DMG400017291M6LRR-RLK\_2074

ATTTTTTCCTTTCCGTGCAGATTTTCCCCCTCCTCTGCCTGCTCGTCTGCCTGCTCATCTGCCTGCAGATCA  
AAAGAGTAAAATTAATGTTGGCATAATTGCCGGCATAATCGCTGGATC

>M6-PGSC0003DMG400017291M6LRR-RLK\_2135

CCTGCAGATCAAAGAGTAAAATTAATGTTGGCATAATTGCCGGCATAATCGCTGGATCAGTATTTCTTG  
TCCTTCTGATTATTGGTATCTTGTACAAGGGAGGCTATCTAGGCAAAAAT

>M6-PGSC0003DMG400017291M6LRR-RLK\_2196

TATTTCTTGTCTTCTGATTATTGGTATCTTGTACAAGGGAGGCTATCTAGGCAAAAATGTATCTACTGAT  
AGAGGTAATAACTACAAGTATTTACTTTTGAAAGTTTAGTATCCATTT

>M6-PGSC0003DMG400017291M6LRR-RLK\_2257

ATCTACTGATAGAGGTAATAACTACAAGTATTTACTTTTGAAAGTTTAGTATCCATTTATTTGACCTATG  
AGTCAGCAATAATGTTCTCAAGTTAAATGCTAAACTACATAATTACTTT

>M6-PGSC0003DMG400017291M6LRR-RLK\_2318

TTGACCTATGAGTCAGCAATAATGTTCTCAAGTTAAATGCTAAACTACATAATTACTTTCTAGCCAGTATT  
TCAGTTCATACCAAATTATATCAGCTCAAATACTTGAAGTTATGCTTTA

>M6-PGSC0003DMG400017291M6LRR-RLK\_2379

AGCCAGTATTTAGTTCATACCAAATTATATCAGCTCAAATACTTGAAGTTATGCTTTACGTTCTATTGAC  
TTGCTTGTTTCATCTCATCAATCATTTATTCATTTTAGGCTTTCAAAAAT

>M6-PGSC0003DMG400017291M6LRR-RLK\_244

GGAGAGCTATTCTGCATTGGGACAAGAATCGTAAGACTAATATGCCTATAATAAATTTATCTGTTGCACT  
GATCTTACAGAGGAAATTATTGTTTCCTTGAGTTCACCTATAACTAAGAGT

>M6-PGSC0003DMG400017291M6LRR-RLK\_2440

TTCTATTGACTTGCTTGTTTCATCTCATCAATCATTTATTCATTTTAGGCTTTCAAAAATCATTAAATGGTCTG  
AAGCACTTGACCAAAGTTTATATGAACCTTGAAGAAACATAGTGTTAT

>M6-PGSC0003DMG400017291M6LRR-RLK\_2501

TTAATGGTCTGAAGCACTTGACCAAAGTTTATATGAACCTTGAAGAAACATAGTGTTATAGCCATTAGCT

TCCACTGAGATACTTTTCCTCTTGAACAGAACTTAAAGGACTGGATCTAC

>M6-PGSC0003DMG400017291M6LRR-RLK\_2562

CCATTAGCTTCCACTGAGATACTTTTCCTCTTGAACAGAACTTAAAGGACTGGATCTACAAGCTGGACTA

TTTACTCTCAGACAGATCAAAGCCGCGACAAAGAATTTTGACCCAGCAAA

>M6-PGSC0003DMG400017291M6LRR-RLK\_2623

GCTGGACTATTTACTCTCAGACAGATCAAAGCCGCGACAAAGAATTTTGACCCAGCAAACAAGATAGGG

GAAGGTGGTTTTGGTTCAGTTTATAAGGTAATCATCTTTTCCTTGTCTATT

>M6-PGSC0003DMG400017291M6LRR-RLK\_2684

AGATAGGGGAAGGTGGTTTTGGTTCAGTTTATAAGGTAATCATCTTTTCCTTGTCTATTTTAAATCAAACA

CATAACTATAAATGTCATTATATTAGCATGAGAAGGATCATAATGGCAT

>M6-PGSC0003DMG400017291M6LRR-RLK\_2745

AAATCAAACACATAACTATAAATGTCATTATATTAGCATGAGAAGGATCATAATGGCATAGTGCAGATGT

CTCTTAAGAGAGAAAATGAAAGACTAAAATCTTAAATTTTCATAAACCTTC

>M6-PGSC0003DMG400017291M6LRR-RLK\_2806

TGCAGATGTCTCTTAAGAGAGAAAATGAAAGACTAAAATCTTAAATTTTCATAAACCTTCAAAGGAAGTGT

GAATTTTCACCTGTAATGAGGAGACTGCACAGGAAATGCTCTATTACCAT

>M6-PGSC0003DMG400017291M6LRR-RLK\_2867

AGGAAGTGTGAATTTTCACCTGTAATGAGGAGACTGCACAGGAAATGCTCTATTACCATATGTGTTTATA

TATATCTGAGAAGTGGAGTAATTTACTGATCTTTTTCCATTCAACTAAGA

>M6-PGSC0003DMG400017291M6LRR-RLK\_2928

GTGTTTATATATATCTGAGAAGTGGAGTAATTTACTGATCTTTTTCCATTCAACTAAGATGGAGATTTCTT

ATCTTCGCGACATAGGATTCAATCTATTATAATCTTACTTGCTGATCAT

>M6-PGSC0003DMG400017291M6LRR-RLK\_2989

GAGATTTCTTATCTTCGCGACATAGGATTCAATCTATTATAATCTTACTTGCTGATCATAAGCTGCAGAAG

TCTGAATAGAGTTTTGAATCATGACTTTTGTACACAGGGTCTATTATCT

>M6-PGSC0003DMG400017291M6LRR-RLK\_305

TGTTGCACTGATCTTACAGAGGAAATTATTGTTCTTGAGTTCACCTATAACTAAGAGTGAAGTCTTACCT

ACCATAGAAAATTTTGTAGCACTCTTAACAATTTTTCTTTTGTTTTC

>M6-PGSC0003DMG400017291M6LRR-RLK\_3050

GCTGCAGAAGTCTGAATAGAGTTTTGAATCATGACTTTTGTACACAGGGTCTATTATCTGATGGAACAGT  
AATTGCGGTGAAGCAACTTTCTGCAAAGTCAAACAAGGAACTCGAGAAT

>M6-PGSC0003DMG400017291M6LRR-RLK\_3111

TGGAACAGTAATTGCGGTGAAGCAACTTTCTGCAAAGTCAAACAAGGAACTCGAGAATTTTTGAATGA  
AATAGGGATGATCTCTGCTGTACAACATCCAAATCTTGTAAGCTTTATGG

>M6-PGSC0003DMG400017291M6LRR-RLK\_3172

TTGAATGAAATAGGGATGATCTCTGCTGTACAACATCCAAATCTTGTAAGCTTTATGGATGCTGCATTC  
AAGGAAACCAATTATTGCTAGTCTATGAGTACATGGAAAATAACTGTGTA

>M6-PGSC0003DMG400017291M6LRR-RLK\_3233

GCTGCATTCAAGGAAACCAATTATTGCTAGTCTATGAGTACATGGAAAATAACTGTGTATCTCGTGTTCT  
TTTTGGTAAATACTTCCTAACTCCGATCAATCAAATATGTCTGCTTCTT

>M6-PGSC0003DMG400017291M6LRR-RLK\_3294

TCGTGTTCTTTTTGGTAAATACTTCCTAACTCCGATCAATCAAATATGTCTGCTTCTTATGCACTTGACAT  
TGTTTATCTAACGGAGCTGGTATATACAACTTTTTCTTTTTGTTTGTC

>M6-PGSC0003DMG400017291M6LRR-RLK\_3355

GCACTTGACATTGTTTATCTAACGGAGCTGGTATATACAACTTTTTCTTTTTGTTTGTCTTCTCTTTCAGG  
CAAAGGTCCAATTGGCAAATGAAATTAGACTGGTCTACTCGGAAAAA

>M6-PGSC0003DMG400017291M6LRR-RLK\_3416

TCTCTTTCAGGCAAAGGTCCAATTGGCAAATGAAATTAGACTGGTCTACTCGGAAAAAATTTGCCTAG  
GAATTGCAAGAGGTTTAGCATATCTCCATGAGGAGTCGAGCCTGAAGATA

>M6-PGSC0003DMG400017291M6LRR-RLK\_3477

TTTGCCTAGGAATTGCAAGAGGTTTAGCATATCTCCATGAGGAGTCGAGCCTGAAGATAGTCCACAGAG  
ACATCAAGACCAGTAATATTTTGCTTGACAAGGACTTCAATCCAAAAATAT

>M6-PGSC0003DMG400017291M6LRR-RLK\_3538

CCACAGAGACATCAAGACCAGTAATATTTTGCTTGACAAGGACTTCAATCCAAAAATATCTGATTTTGGC  
TTGGCAAACACTACATGAGGATGATACTACCCACATTAGTACCAGGATTGC

>M6-PGSC0003DMG400017291M6LRR-RLK\_3599

GATTTTGGCTTGGCAAACACTACATGAGGATGATACTACCCACATTAGTACCAGGATTGCAGGAACTGTG  
TAAGTATTATGAAACTAGTTCCTCTTGTTCCGATCCATTAGCAACAACAT

>M6-PGSC0003DMG400017291M6LRR-RLK\_366

ACTCTTACCTACCATAGAAAACCTTTTGTAGCACTCTTAACAACCTTTTCTTTTGTGTTTCTGTGTTGCAGAAA  
CAAAATTCATCCTTGCCTGAAGCAGAATTTCCCTTGTTCTGAGCCAAT

>M6-PGSC0003DMG400017291M6LRR-RLK\_3660

GAACTGTGTAAGTATTATGAAACTAGTTCCTCTTGTCCGATCCCATTAGCAACAACATTTGGTTGATATG  
TTTCATAGAAAATGGCTCAACATTTAATCCACTCATTTATCTTGAAACA

>M6-PGSC0003DMG400017291M6LRR-RLK\_3721

GGTTGATATGTTTCATAGAAAATGGCTCAACATTTAATCCACTCATTTATCTTGAAACACTCGTGGTACTG  
TTCTCATCCGAAAGCAACTTTGCAGGTATAATCTGCCAAAAGTAAAGCA

>M6-PGSC0003DMG400017291M6LRR-RLK\_3782

CGTGGTACTGTTCTCATCCGAAAGCAACTTTGCAGGTATAATCTGCCAAAAGTAAAGCAAGCCAAGAAC  
TTATTACCTGCCTAAAGAACTTAACTTTTATAGATATTAACAGCCTTTG

>M6-PGSC0003DMG400017291M6LRR-RLK\_3843

CCAAGAACTTATTACCTGCCTAAAGAACTTAACTTTTATAGATATTAACAGCCTTTGTAGAACAGTAAC  
ATAGAATTTTATTCGTCAATGGTAAAACACCTCTCTTTCCTTACCATA

>M6-PGSC0003DMG400017291M6LRR-RLK\_3904

GAACAGTAACATAGAATTTTATTCGTCAATGGTAAAACACCTCTCTTTCCTTACCATAGTTGTAACATCAT  
TGTTTTGCTAATTATTAGCACCTCAACGTCTCACTTCGGTCATAATTTT

>M6-PGSC0003DMG400017291M6LRR-RLK\_3965

TGTAACCTATTGGTTTGCTAATTATTAGCACCTCAACGTCTCACTTCGGTCATAATTTTACATTTTGCAATT  
CAACATAGCTATAGGTGAACTTTCAAGAAAATATTTTCTTGCTACTTC

>M6-PGSC0003DMG400017291M6LRR-RLK\_4026

ATTTTGCAATTCAACATAGCTATAGGTGAACTTTCAAGAAAATATTTTCTTGCTACTTCAAATTTTAAGAA  
ATGTGAAGATTGTTTGTATCAGAATTCTCTGTAATTAGCAAGTAACTGT

>M6-PGSC0003DMG400017291M6LRR-RLK\_4087

ATTTTAAGAAATGTGAAGATTGTTTGTATCAGAATTCTCTGTAATTAGCAAGTAACTGTATTAATGATGA  
GGAAACCAAGATCTAATAAGTTGGAACATCTTTGGTATTTGGTGGTACAG

>M6-PGSC0003DMG400017291M6LRR-RLK\_4148

TAATGATGAGGAAACCAAGATCTAATAAGTTGGAACATCTTTGGTATTTGGTGGTACAGGGGTTACATG

GCTCCAGAATATGCAATGCGAGGCTACTTAACTAGCAAAGCAGATATTTAC

>M6-PGSC0003DMG400017291M6LRR-RLK\_4209

GTTACATGGCTCCAGAATATGCAATGCGAGGCTACTTAACTAGCAAAGCAGATATTTACAGCTATGGAG  
TTGTTGCATTGGAGATTATTAGTGGGAAAAGCAATACAAATTATAGGCCAA

>M6-PGSC0003DMG400017291M6LRR-RLK\_427

TGTTGCAGAAACAAAATTCATCCTTGCCTGAAGCAGAATTTCCCTTGTCTGAGCCAATAGATCGGCGTA  
AGTAAACTTTTTATGTGTCCATTTCTGTAATTGATAGCACAAACAAAATCTG

>M6-PGSC0003DMG400017291M6LRR-RLK\_4270

CTATGGAGTTGTTGCATTGGAGATTATTAGTGGGAAAAGCAATACAAATTATAGGCCAACGGAAGATTG  
TGTTTATCTTCTTACTGGGTAATTTAATATCTCTCTACAACAATAAACC

>M6-PGSC0003DMG400017291M6LRR-RLK\_4331

GAAGATTGTGTTTATCTTCTTACTGGGTAATTTAATATCTCTCTACAACAATAAACCCAATGTAGTCCC  
AAAAGCGGGGAATTTCACTACTTCTCTCTATTGACCAAATATCTGGGC

>M6-PGSC0003DMG400017291M6LRR-RLK\_4392

ATGTAGTCCCAAAGCGGGGAATTTCACTACTTCTCTCTATTGACCAAATATCTGGGCTTCCATCATCCT  
TAAATCACTTCCCCTTCTAGTTTCATCTCAACCAGAGAACGTTTTATCA

>M6-PGSC0003DMG400017291M6LRR-RLK\_4453

CCATCATCCTTAAATCACTTCCCCTTCTAGTTTCATCTCAACCAGAGAACGTTTTATCAACATTCCGAGTAA  
TGCTAATAGCATCTTATTAATCTTCCCCTGCATCAACTTGTACATTTA

>M6-PGSC0003DMG400017291M6LRR-RLK\_4514

ATTCCGAGTAATGCTAATAGCATCTTATTAATCTTCCCCTGCATCAACTTGTACATTTAGAGCCAAAGTAC  
TTTAAAATTGGCTTTGGCAAATGAACATGTCATACTTTTTTAGTACATT

>M6-PGSC0003DMG400017291M6LRR-RLK\_4575

GCCAAAGTACTTTAAAATTGGCTTTGGCAAATGAACATGTCATACTTTTTTAGTACATTAAGTCTTCA  
TTTTCTGTTTTGATTAGGCTTATGTTTTGCAAGAGCGCGGGAGTATATT

>M6-PGSC0003DMG400017291M6LRR-RLK\_4636

CTGTTCTTCATTTTCTGTTTTGATTAGGCTTATGTTTTGCAAGAGCGCGGGAGTATATTGGAATTGGTTGA  
TCCAGACTTGGGTTCTGACTACTCGTCACAAGAAGCAATTGTGTTACTG

>M6-PGSC0003DMG400017291M6LRR-RLK\_4697



AATTGGTTGATCCAGACTTGGGTTCTGACTACTCGTCACAAGAAGCAATTGTGTTACTGAATGTTGCCCT  
TTTATGCACTAATGCAGCTCCAACACTTAGACCAATAATGTCTCAAGTGG

>M6-PGSC0003DMG400017291M6LRR-RLK\_4758

TGTTGCCCTTTTATGCACTAATGCAGCTCCAACACTTAGACCAATAATGTCTCAAGTGGTAAGCATGCTCC  
AAGGCCAAACTCTTGTTCAAGGATGTCCTTTCTGATCCTGGGGTGTCAAC

>M6-PGSC0003DMG400017291M6LRR-RLK\_4819

AGCATGCTCCAAGGCCAAACTCTTGTTCAAGGATGTCCTTTCTGATCCTGGGGTGTCAACAAGCGGTTCCG  
GATTCAGATCAACGAGAAGTCACTTCTGGCAAACCTCAAAGCCTAACTGAT

>M6-PGSC0003DMG400017291M6LRR-RLK\_488

ATCGGCGTAAGTAAACTTTTATGTGTCCATTTCTGTAATTGATAGCACAAACAAAATCTGTCTCCTGTCACA  
TAAATAGGTGTACTTGTAGTGTGAGGTCAGCTAGTGGCAGAAAATATAA

>M6-PGSC0003DMG400017291M6LRR-RLK\_4880

GCGGTTCCGGGATTCAGATCAACGAGAAGTCACTTCTGGCAAACCTCAAAGCCTAACTGATGGTACGCTTA  
CTGATTCCACTCTCTCAACTGGAAATGCGGAAGAAATTGGCATTCTTCAA

>M6-PGSC0003DMG400017291M6LRR-RLK\_4941

TACGCTTACTGATTCCACTCTCTCAACTGGAAATGCGGAAGAAATTGGCATTCTTCAAAGAGTAGAGCCT  
AATGTATCTAACAGTTAAACAAAATGTCTGTTAACACAAGCAAGTGTATA

>M6-PGSC0003DMG400017291M6LRR-RLK\_5002

GTAGAGCCTAATGTATCTAACAGTTAAACAAAATGTCTGTTAACACAAGCAAGTGTATATATGAACATCA  
AAATGTTTAATGAAGATTAAGTTTAGTCTTTACAAAACCTGCTAACTGGTC

>M6-PGSC0003DMG400017291M6LRR-RLK\_5063

TGAACATCAAATGTTTAATGAAGATTAAGTTTAGTCTTTACAAAACCTGCTAACTGGTCCTCCTTTTATAG  
TACTTCATTTGTTTATTTTCTAAGCCAACCTCATTGTTTCATAGTTCTA

>M6-PGSC0003DMG400017291M6LRR-RLK\_61

CTAATTTTGTGACTATTTTGCTTCACAGAGATGTTTCAAATAACAATTTTACATGGGAAACCTCACCTTTT  
GAATGTCCCCGTGGAAATCAGTAAGTTGTTTGATAAAAATTGTTTTTCT

>M6-PGSC0003DMG400017291M6LRR-RLK\_793

GGTGTATATCTGACTCCTAGTAACAACAATAATACAATTTAAGAGTTTGGGACTGACTGCTGTCTTCT  
GATCTGTCCATTGTGATTTTCTGCTGAATTCTTGTTAAGAGTGCCCTTGT

>M6-PGSC0003DMG400017291M6LRR-RLK\_854

CTGTCTTCTGATCTGTCCATTGTGATTTTCTGCTGAATTCTTGTTAAGAGTGCCCTTGTCTACTGGTTTGCA  
GAACAATATTCTATGCACATTAATTGTGGAGGCAAAGAGGTAACCATC

>M6-PGSC0003DMG400017291M6LRR-RLK\_915

ACTGGTTTGCAGAACAATATTCTATGCACATTAATTGTGGAGGCAAAGAGGTAACCATCAAGAATGGTA  
CAAAATACGCAAATATGAAGCTGATTTAGAACCCAGAGGTGCTTCTATGT

>M6-PGSC0003DMG400017291M6LRR-RLK\_976

GAATGGTACAAAATACGCAAATATGAAGCTGATTTAGAACCCAGAGGTGCTTCTATGTATTATTCAAGA  
CATAACTGGGCGTTTAGCAGCACAGGAAATTTTATGGACAACGACGTTGA

>M6-PGSC0003DMG400017293M6RLKANKrepeat\_0

CACAAAGTCAAAATCAAGAACGACCATGCATCAAAATAGTATAATTGATGGTTAAGTATCAACAAAGTA  
CTAAATACAAGGATGTTAACGACTTAACAAATCATGCATATTATTTTCATCA

>M6-PGSC0003DMG400017293M6RLKANKrepeat\_1054

ATATCCCAGCATTTTAGGCTGTTGAAGAAATATATTCACACTAATGATTTGTTACTGTTACTTTGTTGTCAT  
TTTTTGTACTCTTCTATTTTGCTCCTTTTTCTTTATGCAAAGTGT

>M6-PGSC0003DMG400017293M6RLKANKrepeat\_1116

TTGTTGTCATTTTTTGTACTCTTCTATTTTGCTCCTTTTTCTTTATGCAAAGTGTGTATGAACAATGGCT  
TTAGGCTCAAAGTCTCATGGTTCTACTTTTCCTTTAATTTTGATG

>M6-PGSC0003DMG400017293M6RLKANKrepeat\_1178

GAACAATGGCTTTAGGCTCAAAGTCTCATGGTTCTACTTTTCCTTTAATTTTGATGAAACACATTTTCAC  
CTCCAGTTTCCTCTCTAAGATTCAGCATATGGTCCTTGAATCTTTTTT

>M6-PGSC0003DMG400017293M6RLKANKrepeat\_124

AGCCATGGTTCTGTTTTGTTGTTGATCAAAGGAAATATCCCATTATTTATGTCAACTAAATTCATTAA  
AGTCGTTGAGAAAGCCTTTGAAGTCCCTGCCGATCTAAAGTATACCGTT

>M6-PGSC0003DMG400017293M6RLKANKrepeat\_1240

ACATTTTCACCTCCAGTTTCCTCTCTAAGATTCAGCATATGGTCCTTGAATCTTTTTTTTTTTTTGAAACTGA  
AAATGTTTATATGGTCCTTGTATCTTTTGCCAGCAAATACTAAACAG

>M6-PGSC0003DMG400017293M6RLKANKrepeat\_1302

TTTGAAACTGAAAATGTTTATATGGTCCTTGTATCTTTTGCCAGCAAATACTAAACAGTTCACGTTTAGAC

ACTTAAATGGCTGTGCTAGTGAATGAACTCTAGGATTTGGAATAGAAG

>M6-PGSC0003DMG400017293M6RLKANKrepeat\_1364

CGTTTAGACACTTAAATGGCTGTGCTAGTGAATGAACTCTAGGATTTGGAATAGAAGGAGTATCTTGA  
TTTTTTTTGTTTCATCAAAGAATTATTCTCTTGAACATTTGGCAATAGAAT

>M6-PGSC0003DMG400017293M6RLKANKrepeat\_1426

ATCTTGATTTTTTTTTGTTTCATCAAAGAATTATTCTCTTGAACATTTGGCAATAGAATTTGAAGAAGGGTA  
TTAATTAGTTATTTAGAAAAAATATGCATAAGCTGGTTCCTCAAAT

>M6-PGSC0003DMG400017293M6RLKANKrepeat\_1488

AGAAGGGTATTAATTAGTTATTTAGAAAAAATATGCATAAGCTGGTTCCTCAAATTTAGTTGATAAC  
ACTCCTATTTAATCATTGTAGACTATGGGTCTTTATATGCATGTTTTTAA

>M6-PGSC0003DMG400017293M6RLKANKrepeat\_1550

TTGATAACACTCCTATTTAATCATTGTAGACTATGGGTCTTTATATGCATGTTTTTAAACAAGGCAATTGGT  
GTGATATAAAATTCTAATGTTTTAGTTTATGAGAATAACAAGTTGAATT

>M6-PGSC0003DMG400017293M6RLKANKrepeat\_1612

GCAATTGGTGTGATATAAAATTCTAATGTTTTAGTTTATGAGAATAACAAGTTGAATTGACCTCTTGTTTT  
ACAGGGAGATATGTTGCTCCAGAAGTTCTTAAGCATGAGGAGTATGATA

>M6-PGSC0003DMG400017293M6RLKANKrepeat\_1674

TCTTGGTTTACAGGGAGATATGTTGCTCCAGAAGTTCTTAAGCATGAGGAGTATGATACCAAGGTGGAT  
GTTTTCTCATTTGCTTTGATATTGCAAGAGGTAAGCTCTTCTAATTCTTAA

>M6-PGSC0003DMG400017293M6RLKANKrepeat\_1736

GGTGGATGTTTTCTCATTTGCTTTGATATTGCAAGAGGTAAGCTCTTCTAATTCTTAATACTTTCTCTCAT  
GCATAAACTACTGAATAAGGCTCTCCAGTTGTGTCCTGTCTGGAAGAA

>M6-PGSC0003DMG400017293M6RLKANKrepeat\_1798

TTCTCTCATGCATAAACTACTGAATAAGGCTCTCCAGTTGTGTCCTGTCTGGAAGAAAAAATGTTAGTTT  
GTTTCGTGGGCAGCTGGCTATCACTTCTTGCTTCGTAGTTATTTTCAGTT

>M6-PGSC0003DMG400017293M6RLKANKrepeat\_186

ATTCATTAAAGTCGTTGAGAAAGCCTTTGAAGTCCCTGCCGATCTAAAGTATACCGTTGATTCTGTTCTGT  
ATGCAGGGAGATCTTCGTGCATTCTGAAACGGAAAGGTGCATTAAAGC

>M6-PGSC0003DMG400017293M6RLKANKrepeat\_1860

TGTTAGTTTGTTCGTGGGCAGCTGGCTATCACTTCTTGCTTCGTAGTTATTTTCAGTTTTTTTACTTCATGT  
AACTGAAATTTGATGTATAATGTGTGCTAATGGGCATGATATCAGTCT

>M6-PGSC0003DMG400017293M6RLKANKrepeat\_1922

TACTTCATGTAAGTAAATTTGATGTATAATGTGTGCTAATGGGCATGATATCAGTCTGATAGCCACCAA  
CAGGTTGGTATTGTATGCGTTCTAGATCTCATCTCATGGAGGAAAAAGGC

>M6-PGSC0003DMG400017293M6RLKANKrepeat\_1984

GCCACCAACAGGTTGGTATTGTATGCGTTCTAGATCTCATCTCATGGAGGAAAAAGGCAACGGGGTCTC  
CCATATTTGCAGTCAATGTTAGTTGGGCCTAAAAAGATTGTATTGCCATC

>M6-PGSC0003DMG400017293M6RLKANKrepeat\_2046

GGGTCCTCCATATTTGCAGTCAATGTTAGTTGGGCCTAAAAAGATTGTATTGCCATCTACTGTCTCCTAT  
TCTTATTTCTTGCAAATTATGCTTATTCTACTTTATTAATTCACTCGGA

>M6-PGSC0003DMG400017293M6RLKANKrepeat\_2108

GTCTCCTATTCTTATTTCTTGCAAATTATGCTTATTCTACTTTATTAATTCACTCGGAACATCTTGACTGTTC  
CAGCATGTTTGTAATTTCTTAATATTTAAGAAGGCCGTTGGGTTAG

>M6-PGSC0003DMG400017293M6RLKANKrepeat\_2170

CTTGACTGTTCCAGCATGTTTGTAATTTCTTAATATTTAAGAAGGCCGTTGGGTTAGACATGTATACGCC  
TTAATGCTTTCCGTTCCACAGATGATTGAAGGCCGTTCCACCATTTTCCA

>M6-PGSC0003DMG400017293M6RLKANKrepeat\_2232

GTATACGCCTTAATGCTTTCCGTTCCACAGATGATTGAAGGCCGTTCCACCATTTTCCATGAAGCAGGAAA  
TTGAGGTGGCCAAAGCATATGTTGCAAATGAACGCCCTCCCTTTAGTGCT

>M6-PGSC0003DMG400017293M6RLKANKrepeat\_2294

GCAGGAAATTGAGGTGGCCAAAGCATATGTTGCAAATGAACGCCCTCCCTTTAGTGCTTCACAAAAGTT  
GTATGCTCATGGATTGAGAGAGTAAGTAAGTCCATGTGTTTCTTTAATTT

>M6-PGSC0003DMG400017293M6RLKANKrepeat\_2356

AAAAGTTGTATGCTCATGGATTGAGAGAGTAAGTAAGTCCATGTGTTTCTTTAATTTCTTCAATTGTAT  
TTAAAGTGATTATTTCAACAGGTTAATTGAGGATTGCTGGGAGGAGCAA

>M6-PGSC0003DMG400017293M6RLKANKrepeat\_2418

CAATTGATTTAAAGTGATTATTTCAACAGGTTAATTGAGGATTGCTGGGAGGAGCAACCATCAAAAAG  
ACCAACTTTTCAGCGAATAATTATCAGGTTGGAAGAAATCAGCCGCATTCT

>M6-PGSC0003DMG400017293M6RLKANKrepeat\_248

CTGTTCTGTATGCAGGGAGATCTTCGTGCATTCTGAAACGGAAAGGTGCATTAAGCCAATAATGGCT  
GTGAAGTTTGCACCTGGATATTGCAAGGTCAGTTTACTGGCTGATGTCCTGA

>M6-PGSC0003DMG400017293M6RLKANKrepeat\_2480

CAAAAAGACCAACTTTTCAGCGAATAATTATCAGGTTGGAAGAAATCAGCCGCATTCTTTGCATAGAAG  
ACGTTGGAAGGTACGAACCTCTCTACCCGATCCCCTTCAGTTCGGTATT

>M6-PGSC0003DMG400017293M6RLKANKrepeat\_2542

CATAGAAGACGTTGGAAGGTACGAACCTCTCTACCCGATCCCCTTCAGTTCGGTATTTCCAAAGTTCGG  
TCATGTATAGTAAATCAAGCTTCGGTACGGTAAATTCTGGTTCAGTAATT

>M6-PGSC0003DMG400017293M6RLKANKrepeat\_2604

AAGTTCGGTCATGTATAGTAAATCAAGCTTCGGTACGGTAAATTCTGGTTCAGTAATTCGGTAATTACGT  
ATTGAAGGTGGAGTTGGCATGGCCGTATAAATCTCGGAAAACAGTAAGTC

>M6-PGSC0003DMG400017293M6RLKANKrepeat\_2666

AATTACGTATTGAAGGTGGAGTTGGCATGGCCGTATAAATCTCGGAAAACAGTAAGTCCAAATTCAGCC  
CAAAATTAAGATTGAGATTCTTTTGAATCCAAAAGCATGAAAAGTTTTAA

>M6-PGSC0003DMG400017293M6RLKANKrepeat\_2728

TTCAGCCAAAATTAAGATTGAGATTCTTTTGAATCCAAAAGCATGAAAAGTTTTAAAGACTAGATCTG  
AAACTCGATTACTAGGATGTAGGTAAGTACTAGCTTTGACAATTGCTCCTAAA

>M6-PGSC0003DMG400017293M6RLKANKrepeat\_2790

TAGATCTGAAACTCGATTACTAGGATGTAGGTAAGTACTAGCTTTGACAATTGCTCCTAAATTGTTTGCCTGG  
AGCATGAGAAATTAAGTCTTGAGTTGTTTTCTGAAACACGGAATTCATTC

>M6-PGSC0003DMG400017293M6RLKANKrepeat\_2852

TTGCCTGGAGCATGAGAAATTAAGTCTTGAGTTGTTTTCTGAAACACGGAATTCATTCATTAATATAATGA  
CTTTACCCACTCCTCTTATATACTTTTAGGCGAAGTGTATCATTAAAAA

>M6-PGSC0003DMG400017293M6RLKANKrepeat\_2914

ATATAATGACTTTACCCACTCCTCTTATATACTTTTAGGCGAAGTGTATCATTAAAAAGTAGAAGGGAGG  
TACTGGTAAAACATGTACCTTATTGTCAGTACTGGTGAATCTTGCTCAA

>M6-PGSC0003DMG400017293M6RLKANKrepeat\_2976

AAGGGAGGTACTGGTAAAACATGTACCTTATTGTCAGTACTGGTGAATCTTGCTCAAAGGCTGATAAA

GTTAGATACTTAGCTATTAGGTAGTACCGTTACCGAACTACCACACCGAGT

>M6-PGSC0003DMG400017293M6RLKANKrepeat\_3038

TGATAAAGTTAGATACTTAGCTATTAGGTAGTACCGTTACCGAACTACCACACCGAGTACAAAAATTCTG  
AAATTTACTCCTGAATATCGTACCGGCTACTGAATACAGGATTCCCGGTT

>M6-PGSC0003DMG400017293M6RLKANKrepeat\_310

AATGGCTGTGAAGTTTGCCTGGATATTGCAAGGTCAGTTTACTGGCTGATGTCCTGAATTTCCACTTGA  
AAATCTTATTAGTATTACATGCATGCTGTTACCAGGTGCTTGAATTTGT

>M6-PGSC0003DMG400017293M6RLKANKrepeat\_3100

AAATTCTGAAATTTACTCCTGAATATCGTACCGGCTACTGAATACAGGATTCCCGGTTCCAGCCTGGTAAT  
TTGGCTCCGGTGATTTATTCCACCCTTAGCGGGGGTTATGTTTCTGTTT

>M6-PGSC0003DMG400017293M6RLKANKrepeat\_3286

GGAGGAAAAAATACCCGCATATGTCTTTGGTTTTTATTAATTTATAGTAACATTATGGGAGGAACTTTGG  
GAACAAAAAGTGAGGAAAATTCCTGTTTACCATTCCCTTCATAGTCTCTC

>M6-PGSC0003DMG400017293M6RLKANKrepeat\_3348

AACTTTGGGAACAAAAAGTGAGGAAAATTCCTGTTTACCATTCCCTTCATAGTCTCTCTAGGAAATTGAT  
TATCAATACTTGCCCTTATCTGTTTACTTCTCACTGTCATGTTTATTATTG

>M6-PGSC0003DMG400017293M6RLKANKrepeat\_3410

AAATTGATTATCAATACTTGCCCTTATCTGTTTACTTCTCACTGTCATGTTTATTATTGGAACAAATGAGGA  
ATGTTGTTACTGTTTGTACTGTCTTAAAGTATATATGAACAAAAGGATA

>M6-PGSC0003DMG400017293M6RLKANKrepeat\_372

CCACTTGAAAATCTTATTAGTATTACATGCATGCTGTTACCAGGTGCTTGAATTTGTCTAAGGTGTCTGT  
TGATAAATGGCCATTAATACAGGAACACCAACTACAGTCTCTTCAGTTC

>M6-PGSC0003DMG400017293M6RLKANKrepeat\_434

GGTGTCTGTTGATAAATGGCCATTAATACAGGAACACCAACTACAGTCTCTTCAGTTCTAAGTATAATTT  
AGAATTGTTACATTCATTTTGTATCTCTTACTTTATTGATCTCAACA

>M6-PGSC0003DMG400017293M6RLKANKrepeat\_496

TATAATTTAGAATTGTTACATTCATTTTGTATCTCTTACTTTATTGATCTCAACACAGTATAGTGCTGG  
CCTTTGGGGCTCCATGATGATTATAAATCTTCGTTAGAAAGCAAAGTA

>M6-PGSC0003DMG400017293M6RLKANKrepeat\_558

ATAGTGCTGGCCTTTGGGGCTCCATGATGATTATAAATCTTCGTTAGAAAGCAAAGTAGTGGCACAGCTT  
CACGATCAGTTGCAGAAGAAGCTGTGTACATAAATATGTTGAGAAATCTG

>M6-PGSC0003DMG400017293M6RLKANKrepeat\_62

CAAAGTACTAAATACAAGGATGTTAACGACTTAACAAATCATGCATATTATTCATCATTAAAGCCATGG  
TTCTGTTTTGTTTGTGATCAAAGGAAATATTCCCCATTATTTATGTCAA

>M6-PGSC0003DMG400017293M6RLKANKrepeat\_620

CACAGCTTCACGATCAGTTGCAGAAGAAGCTGTGTACATAAATATGTTGAGAAATCTGAATTGGTCTTTC  
TTATAGTTGCGTCTATGTGTCTCATATAGTCATATTTGTATACATTTTGC

>M6-PGSC0003DMG400017293M6RLKANKrepeat\_682

GGTCTTTCTTATAGTTGCGTCTATGTGTCTCATATAGTCATATTTGTATACATTTTGCAGAGGAATAAACT  
ACTTGCATGAGCATAAACCTGAAGCAATAATTCATCGAGACCTGGAGCC

>M6-PGSC0003DMG400017293M6RLKANKrepeat\_744

GAATAAACTACTTGCATGAGCATAAACCTGAAGCAATAATTCATCGAGACCTGGAGCCTGAGTATGTTA  
TTATAGTCTTCCTGACTGTTTCCCAGTTGCCAGTCACGTGCTTTGTTTGT

>M6-PGSC0003DMG400017293M6RLKANKrepeat\_806

TATGTTATTATAGTCTTCCTGACTGTTTCCCAGTTGCCAGTCACGTGCTTTGTTTGTCTTTAGTGGCTGAA  
GTTAGCCTGACAAATGTATGGAAAGCTTTTAATTTCTGAGTGAAATGA

>M6-PGSC0003DMG400017293M6RLKANKrepeat\_868

AGTGGCTGAAGTTAGCCTGACAAATGTATGGAAAGCTTTTAATTTCTGAGTGAAATGACAGAAACATAT  
TACGGGATGATTCTGGACTTCTGAAAGTTGCAGATTTTGGACTTAGTAAGC

>M6-PGSC0003DMG400017293M6RLKANKrepeat\_930

AACATATTACGGGATGATTCTGGACTTCTGAAAGTTGCAGATTTTGGACTTAGTAAGCTGATGAAATTTA  
CCAGAACTGTCAAGGAAGATAGACCATTGGCACGCCAAGAGGATTCATGT

>M6-PGSC0003DMG400017293M6RLKANKrepeat\_992

GAAATTTACCAGAAGTGTCAAGGAAGATAGACCATTGGCACGCCAAGAGGATTCATGTGAGTATATCCC  
AGCATTTTAGGCTGTTGAAGAAATATATTCACACTAATGATTTGTTACTGT

>M6-PGSC0003DMG400017315-(rev)M6G-LecRK\_0

ATGTTTGTAGAAACGAGACTGTATTTTCTATCCTTCTCTTCATTTATCTCCTCTGCTGTTTCGTCTCGATT  
GCTATATCGCAACCTTTACAGGACTACAACCTTCACTCTTTTGAATTCT

>M6-PGSC0003DMG400017315-(rev)M6G-LecRK\_1736

TATCAATCTGGTAAAACCTCATTGGATTTTGTGCCGAAAAAAGCCACAGGCTTCTAATCTATGAGTACATG  
GTGAATGGATCGCTGGATAGGTGGATTACACATGAAAATCAAGAAAATGG

>M6-PGSC0003DMG400017315-(rev)M6G-LecRK\_372

AACCATCCAGTGAAATTCAATGCAACCTTGCAACTAGGCCATGATGGCAACTTGGTCTTGACAGACTCCG  
ATGGCACTCTTGTGGTCCACTGATACAATTGGAAAATCTGTTTCTGGC

>M6-PGSC0003DMG400017317-(rev)M6LRR-RLP\_0

TTTGTTGTGCATGGTTTTTATTAACTTCATTTAGATCTAACTGGGAAAGATAAAAACCTCCTACTTTATTGA  
AATTTAGGCAAATACACACACACTTGTCTGAGATAATACTTATCCTTTG

>M6-PGSC0003DMG400017317-(rev)M6LRR-RLP\_1159

CAATCCAAGAATATGTAGTAGGTTGTGGAAGCGTGAAGATATTTGTCCTGTACTAGAAAGAAATTTGGT  
ACGTAGTTGTGAACTTATGACTTCTTACTTTATTTTGCTTTTCACATCCGC

>M6-PGSC0003DMG400017317-(rev)M6LRR-RLP\_122

GTATGCAGACATGAAGCTAGAGTCATAGAGAAAATTGCGGAAGATATAATGGCTAGATTGGGTAGTCA  
GAGACATGCAAGCAATGCTAGAAATCTTGTGGAAATGGAGTTACACATGCAC

>M6-PGSC0003DMG400017317-(rev)M6LRR-RLP\_1220

AATTTGGTACGTAGTTGTGAACTTATGACTTCTTACTTTATTTTGCTTTTCACATCCGCCTTTAATACTCTT  
GCTTATTAGGGCACTGACAAGATTGAAGGCATGTCGCTGCAGCTGACT

>M6-PGSC0003DMG400017317-(rev)M6LRR-RLP\_1281

TTAATACTCTTGCTTATTAGGGCACTGACAAGATTGAAGGCATGTCGCTGCAGCTGACTAATGAAGAAG  
AAGTTAATTTTGGTGGCAAGGCCTTCATGCAGATGACCAGTCTGAGGTTTC

>M6-PGSC0003DMG400017317-(rev)M6LRR-RLP\_1342

TGAAGAAGAAGTTAATTTTGGTGGCAAGGCCTTCATGCAGATGACCAGTCTGAGGTTTCTCAAATTCCG  
GAATGCATATGTTTGTCTGGGACCTGAATTTCTTCTGATGAGTTGAGGTG

>M6-PGSC0003DMG400017317-(rev)M6LRR-RLP\_1525

TAGTTTGAAATTGAAAAAAGCCGCATCATACACTTTGGAAAACCTCAAAGGATCTGGGAAAACCTGAA  
GTACATGAACCTTAGCCATTCACAGAAGCTAATAAGGATGCCAGATTTTTC

>M6-PGSC0003DMG400017317-(rev)M6LRR-RLP\_183

GTAGTCAGAGACATGCAAGCAATGCTAGAAATCTTGTGGAAATGGAGTTACACATGCACCAAGTATACA



AAATGCTTGGTGTCTGGGTCTGGTGGAGTCCGCTTCCTTGGAATATTGGGAA

>M6-PGSC0003DMG400017317-(rev)M6LRR-RLP\_1891

CGCGACTGCTTTGAGTGAACCTGCATCAGTTGAGAACCTTTCAGGAGTTGGTGTATTAATATAAGT  
TACTGCAAGCATCTTGAGAGTCTACCTAGCAGTATTTCTAGGTTGAAATG

>M6-PGSC0003DMG400017317-(rev)M6LRR-RLP\_2257

TCTTTGTTTCATTGATCATGTTGGATCTTAGTGACTGCAACATTCAGATGGAGGCATTTAAGTAATCTTG  
GGTTCTTACCTTCTTTGGAGGGATTGATTCTCGATGGTAACAATTTTTC

>M6-PGSC0003DMG400017317-(rev)M6LRR-RLP\_61

ACTTTATTGAAATTTAGGCAAATACACACACACTTGTCTGAGATAATACTTATCCTTTGTGGTATGCAGAC  
ATGAAGCTAGAGTCATAGAGAAAATTGCGGAAGATATAATGGCTAGATT

>M6-PGSC0003DMG400017318-(rev)M6G-LecRK\_1216

AAAATGTCCATTTGCTAAGTGTATTTAGGAGAAAAGCGGAACAAGAGCAGCTCATGGATATGGTTGACA  
AAAATGAGGATATGCAGCTCCACAGGGAAGCAGTGACAGAAATGATGAGCC

>M6-PGSC0003DMG400017318-(rev)M6G-LecRK\_896

GATAATATCAGACATCGCCAAAGGGTTAGCATATCTACATGAGGATTGCAGCCATAAGATAATTCATTTG  
GACATCAAACCACAAAACATCCTTCTAGATCAATATCTCAATGCTAAGAT

>M6-PGSC0003DMG400017327-(rev)M6G-LecRK\_0

AGAGACGCGTTCCCAAAGAAAGGCATTATTAGAACACAGAAGGAGTAGATTGCAAACATTTTGCTAGC  
TTTAGTAAGAAATGATTGCAGAGCAGAGATTGTATTTTCCTCATGTCCTGT

>M6-PGSC0003DMG400017327-(rev)M6G-LecRK\_1054

ATGTAGTTGTCCGCCAGAGAGAAATTTCTTCAGGCCATTAGATGAGAGGAACATAGATGTTGGATGTTT  
ACAGCTGACTTCCATTTACTGCAACTCTTCGCAGTATCATAGTTATGTAGA

>M6-PGSC0003DMG400017327-(rev)M6G-LecRK\_1116

GATGTTTACAGCTGACTTCCATTTACTGCAACTCTTCGCAGTATCATAGTTATGTAGAGCTCAAGAATACC  
ACATATTTTGCATTTGAGTTCAGTGATGAACTAATTTCGGGCATATTAC

>M6-PGSC0003DMG400017327-(rev)M6G-LecRK\_1178

AAGAATACCACATATTTTGCATTTGAGTTCAGTGATGAACTAATTTCGGGCATATTACCGTTTGAGGGGA  
AAAAGTTGGAAGATTGCAAAGGGCCTGTCTAAGAACTGTTCTGCAAA

>M6-PGSC0003DMG400017327-(rev)M6G-LecRK\_124

CATTTTTCTCCACTTTTTGTCATTCAGGTTTGCTTCATCCCAGATTCATGGTACCTAAATGGCAGTTATTT  
GAATTCTACTGCTGGACTTTCCACTTCATGGACCAATAGGCCGTTTTG

>M6-PGSC0003DMG400017327-(rev)M6G-LecRK\_1240

TGAGGGGAAAAAGTTGGAAGATTGCAAAGGGCCTGTCTAAGAACTGTTCTGCAAAGCTGTTGTCTT  
CGGATATGATTCAGATGGGGCAAGAAGTGGGAGATGTTTATTACTGAATGA

>M6-PGSC0003DMG400017327-(rev)M6G-LecRK\_1302

TTGTCTTCGGATATGATTCAGATGGGGCAAGAAGTGGGAGATGTTTATTACTGAATGAGGTCTTTTCTCT  
CATCGACACTGAGAACGGAATGGACAACAGAGTATTTCTTAAGGTGCAGA

>M6-PGSC0003DMG400017327-(rev)M6G-LecRK\_1364

TTTTCTCTCATCGACACTGAGAACGGAATGGACAACAGAGTATTTCTTAAGGTGCAGAATTCCTCAAACA  
CTCAGAATCAGTCTCCAACATTTCTGGAGGGAAAAGATCAAGACCTCAC

>M6-PGSC0003DMG400017327-(rev)M6G-LecRK\_1426

CTCAAACACTCAGAATCAGTCTCCAACATTTCTGGAGGGAAAAGATCAAGACCTCACATACTGATAATA  
GGATCCACTCTTGCAGCTTTCTTTGGGATAGTGTTAAGTATCACAGCTTT

>M6-PGSC0003DMG400017327-(rev)M6G-LecRK\_1488

TGATAATAGGATCCACTCTTGCAGCTTTCTTTGGGATAGTGTTAAGTATCACAGCTTTCTTTGTTATCTTTA  
AAAAGAGGACAAAAGATTCCAGAAAGGCTGGGGGTTTTCTGGATCTCG

>M6-PGSC0003DMG400017327-(rev)M6G-LecRK\_1550

GTTATCTTTAAAAAGAGGACAAAAGATTCCAGAAAGGCTGGGGGTTTTCTGGATCTCGAACCAATCTTTC  
CGGGAATGCTAACTCGGTTCTCTTACAATGAGCTAAGAATAATAACTGAA

>M6-PGSC0003DMG400017327-(rev)M6G-LecRK\_1612

AATCTTTCCGGGAATGCTAACTCGGTTCTCTTACAATGAGCTAAGAATAATAACTGAAGATTCAGCAGA  
AAGCTCGGGGAAGGAGGATTTGGCTCAGTATATGAAGGAACACTGAGTAA

>M6-PGSC0003DMG400017327-(rev)M6G-LecRK\_1736

ACCAAATAGCTGTGAAGCGTCTGGATGGTCTAGGTCATGTGATGGAATCATTCTTAACAGAAGTAAAG  
ATAGTCGGTGGCATTTCATCACATCAATCTGGTAAAACACTATTGGATTTTGT

>M6-PGSC0003DMG400017327-(rev)M6G-LecRK\_1798

AGTAAAGATAGTCGGTGGCATTTCATCACATCAATCTGGTAAAACACTATTGGATTTTGTGCTGAAAAGAG  
CCAAAGACTTCTGATCTATGAACACATGGTAAATGGATCACTAGATAGATG

>M6-PGSC0003DMG400017327-(rev)M6G-LecRK\_186

GCAGTTATTTGAATTCTACTGCTGGACTTCCACTTCATGGACCAATAGGCCGTTTTGGTTTGATGCAGAA  
TCCACATATGGATTGTCTCTCTTGACACCTATCCTTCTGAGTGGAATAA

>M6-PGSC0003DMG400017327-(rev)M6G-LecRK\_1860

AAAAGAGCCAAAGACTTCTGATCTATGAACACATGGTAAATGGATCACTAGATAGATGGATTTATCATA  
AACATGAAGAAAATGGGCTTAGATGGCATAACAAGGCAAAGGATTATAACAG

>M6-PGSC0003DMG400017327-(rev)M6G-LecRK\_1922

TATCATAAACATGAAGAAAATGGGCTTAGATGGCATAACAAGGCAAAGGATTATAACAGATATTGCCAAA  
GGATTAGCTTATCTTCATGACGAATGCAGCCAGAAGATAATTCATTTGGAC

>M6-PGSC0003DMG400017327-(rev)M6G-LecRK\_1984

TGCCAAAGGATTAGCTTATCTTCATGACGAATGCAGCCAGAAGATAATTCATTTGGACATCAAACCACAA  
AATATCCTTCTAGATAAAAATTTCAATGCTAAGATATCTGATTTTGGGCT

>M6-PGSC0003DMG400017327-(rev)M6G-LecRK\_2046

AACCACAAAATATCCTTCTAGATAAAAATTTCAATGCTAAGATATCTGATTTTGGGCTGTCGAAACTGAT  
CGATAAAGTCGAAAGCAAAGTTGTAAGTACTAGGATGAGAGGAACACCAGGTT

>M6-PGSC0003DMG400017327-(rev)M6G-LecRK\_2108

AAACTGATCGATAAAGTCGAAAGCAAAGTTGTAAGTACTAGGATGAGAGGAACACCAGGTTATTTGTCTCCT  
GAATGGTTGAGGTCAGTTATCACTGAGAAAGTAGATGTGTATGCCTTTGGA

>M6-PGSC0003DMG400017327-(rev)M6G-LecRK\_2170

GTCTCCTGAATGGTTGAGGTCAGTTATCACTGAGAAAGTAGATGTGTATGCCTTTGGAATTGTGCTCTTG  
GAGCTTTTGTGTGGTCGAAAGAATTTGGATCGGTCCCAAGCTGATGAGGA

>M6-PGSC0003DMG400017327-(rev)M6G-LecRK\_2232

TGCTCTTGAGCTTTTGTGTGGTCGAAAGAATTTGGATCGGTCCCAAGCTGATGAGGATGTCCATTTGCT  
AAGTGTTCGAAAGAAAATCGGAACAACAGCAGCTTATGGATATTGTTG

>M6-PGSC0003DMG400017327-(rev)M6G-LecRK\_2294

CATTTGCTAAGTGTTCGAAAGAAAATCGGAACAACAGCAGCTTATGGATATTGTTGACAAAAACAAT  
GAGGATATGCAGATCCACAAAGAAGCAGTGACAGAAATGATGAGCATTGCT

>M6-PGSC0003DMG400017327-(rev)M6G-LecRK\_248

GATGCAGAATCCACATATGGATTGTCTCTCTTGACACCTATCCTTCTGAGTGGAATAAATGGAAATAAAT

ACCACTTCTGTGGCTTCTACTGCAATAGCCAAAGTGTTGAATGCCTTCTC

>M6-PGSC0003DMG400017327-(rev)M6G-LecRK\_2480

GGTTTGGTGACTGTTGAAACAACTTGGATTACGATTTACAAGCCTACCCGAGGTTGAGGATTGCAAC  
CAACAGAGGGAAGACACTATCAGCTTAGTATTGCCTTCAATTTTATCCGGT

>M6-PGSC0003DMG400017327-(rev)M6G-LecRK\_2542

TTGCAACCAACAGAGGGAAGACACTATCAGCTTAGTATTGCCTTCAATTTTATCCGGTCCAAGGTGAACA  
ACTAGCTTAAGAGGTTGTAAGTTTTTTTTTCTTTCCCAAGTCTGTCTTT

>M6-PGSC0003DMG400017327-(rev)M6G-LecRK\_2604

GGTGAACAACACTAGCTTAAGAGGTTGTAAGTTTTTTTTTCTTTCCCAAGTCTGTCTTTCTTTTGTGAAAAT  
GTATTTCCATGATTCATCACCAGATCCATCTTTCTTGTACATAAATT

>M6-PGSC0003DMG400017327-(rev)M6G-LecRK\_2666

TGTGAAAATGTATTTCCATGATTCATCACCAGATCCATCTTTCTTGTACATAAATTTGGCTAACAGGTA  
AACTATGTCATAATGTAAAAGGTAACTTAAGTAGCTTTGATAGATAAC

>M6-PGSC0003DMG400017327-(rev)M6G-LecRK\_2728

TAACAGGTAACTATGTCATAATGTAAAAGGTAACTTAAGTAGCTTTGATAGATAACCAATTAACGTCT  
TGTGGCAGTGAGTGATATTATTTCTTTTTTAATTTGCATCTTTGTGGAT

>M6-PGSC0003DMG400017327-(rev)M6G-LecRK\_2790

TAACGTCTTGTGGCAGTGAGTGATATTATTTCTTTTTTAATTTGCATCTTTGTGGATCAATACATCTTCTT  
ATGCAGCACATTTTATATTTCTAAGAGTAAGGGGTCTACTTATTCTGT

>M6-PGSC0003DMG400017327-(rev)M6G-LecRK\_310

AAATAAATACCACTTCTGTGGCTTCTACTGCAATAGCCAAAGTGTTGAATGCCTTCTCGGGATCTTCTTTG  
CATTCCCAGACAGCTCCTCTACTGAACACAAATTAATGGATCCCCAGTT

>M6-PGSC0003DMG400017327-(rev)M6G-LecRK\_372

TCTTCTTTGCATTCCCAGACAGCTCCTCTACTGAACACAAATTAATGGATCCCCAGTTGGTTTGGTCTGCT  
AATCGAGACCGTCCAGTGAAAGCCAATGCAACCTTGCAACTAGGACAAG

>M6-PGSC0003DMG400017327-(rev)M6G-LecRK\_434

TGGTCTGCTAATCGAGACCGTCCAGTGAAAGCCAATGCAACCTTGCAACTAGGACAAGATGGCAACTTG  
GTCTTGGCAGACTCTGATGGCACTTTTGTGGTCCACTAATACTACTGGA

>M6-PGSC0003DMG400017327-(rev)M6G-LecRK\_558

CTGTTTCTGGCTTAAACATGACAGAAACGGGGAATCTCGTGCTCTTTGACAAAGCCAATCGCACAGTTTG  
GCAGTCGTTTGATCATCCTACAGATTCTTTGCTCCCGGGGCAGAGCTTGG

>M6-PGSC0003DMG400017327-(rev)M6G-LecRK\_62

TGCTAGCTTTAGTAAGAAATGATTGCAGAGCAGAGATTGTATTTTCCTCATGTCCTGTTTCATCATTTTTCT  
CCACTTTTTGTCATTCAGGTTTGCTTCATCCCAGATTTTCATGGTACCTA

>M6-PGSC0003DMG400017327-(rev)M6G-LecRK\_620

ACAGTTTGGCAGTCGTTTGATCATCCTACAGATTCTTTGCTCCCGGGGCAGAGCTTGGGTTCTGGGAGG  
AAGCTCATAGCAAGCGTCTCAGCAACCAATTGGAGTCAAAGTTTGCTTTCT

>M6-PGSC0003DMG400017327-(rev)M6G-LecRK\_682

TGGGAGGAAGCTCATAGCAAGCGTCTCAGCAACCAATTGGAGTCAAAGTTTGCTTTCTTTAACTATTATC  
AATGGAAGCTGGGCCACTTACATCGAATCTGATCCACCTCAGTTTTACTA

>M6-PGSC0003DMG400017327-(rev)M6G-LecRK\_744

CTATTATCAATGGAAGCTGGGCCACTTACATCGAATCTGATCCACCTCAGTTTTACTATGCTTCAAGTAAT  
CCGGATACTAGTACTTATTTTCAGTTTTGATGGTCAAACACTTACTGTTC

>M6-PGSC0003DMG400017327-(rev)M6G-LecRK\_806

TCAAGTAATCCGGATACTAGTACTTATTTTCAGTTTTGATGGTCAAACACTTACTGTTTCAGCAAGACCCTCC  
TAAATCACCAGCTCAATTCATGAAGCTTGGGCCTGATGGACATTTATGG

>M6-PGSC0003DMG400017327-(rev)M6G-LecRK\_868

AGACCCTCTAAATCACCAGCTCAATTCATGAAGCTTGGGCCTGATGGACATTTATGGGTATACCAATGG  
GACGAGAATGCATTAATTTGGAAAGTCATATCTGATGTTTTGTTAATGT

>M6-PGSC0003DMG400017327-(rev)M6G-LecRK\_930

ACCAATGGGACGAGAATGCATTAATTTGGAAAGTCATATCTGATGTTTTGTTAATGTACATGCAGAGA  
ACTGTGGGTACCCAACGGTGTGTGGAAGATATGGCATTGTACAAGTAATG

>M6-PGSC0003DMG400017327-(rev)M6G-LecRK\_992

GCAGAGAACTGTGGGTACCCAACGGTGTGTGGAAGATATGGCATTGTACAAGTAATGGGAAATGTAG  
TTGTCCGCCAGAGAGAAATTTCTTCAGGCCATTAGATGAGAGGAACATAGAT

>M6-PGSC0003DMG400017330-(rev)M6G-LecRK\_0

AAACAACCAAGATCTTAAATTTAAGTTCAATCATTTTTTCATCTCAATGATGAGCTAAATGCCCTTTGCCT  
TCTTTGGAAAACCAAAAATTGGTCTTTATGGCTTTATGCCAGATCTTA

>M6-PGSC0003DMG400017330-(rev)M6G-LecRK\_1054

GTGGAAGATATGGCATTGCTCAAGGGGGCAGTGTAGTTGTCCCAAATCGAGCTCTAATTCAACGACCT  
ATTTAGACAGATAGATGATAGGCAGGGTAATCTGGGTTGCTCTGAGGTCA

>M6-PGSC0003DMG400017330-(rev)M6G-LecRK\_1178

GCTGACATGTAATGCTTTAAGTAACCACAGATTTTTGGATCTTCAAGATGTGGACTATTTACGTTTACGA  
CAGATATCACAACACTAGTATGAATACCTGTAAAGATGCATGTTTGAG

>M6-PGSC0003DMG400017330-(rev)M6G-LecRK\_124

TCTTTTTGTTCTTCATTTTTTTGTTGTTCTTTTCATTTGATAACCAGCCAACCTTATGATTATCCATCTGCAA  
TCTTTCTACAACCTGGGTCAACAGCATTTCGGCAGACCATTTCAGTGG

>M6-PGSC0003DMG400017330-(rev)M6G-LecRK\_1240

CGTTTACGACAGATATCACAACACTAGTATGAATACCTGTAAAGATGCATGTTTGAGGAACTGTTCTCTG  
TAAAGCTGCTTTGTTTCGCAGTGGTTTAACTCATCCACGGGAGACTGCT

>M6-PGSC0003DMG400017330-(rev)M6G-LecRK\_1302

TGTTCTGTAAAGCTGCTTTGTTTCGCAGTGGTTTAACTCATCCACGGGAGACTGCTACCTACCATCCGA  
GATCTTTTCACTAGCGAATAATGAGAAGGACAAGACAAGGTATGATTCC

>M6-PGSC0003DMG400017330-(rev)M6G-LecRK\_1364

ACCATCCGAGATCTTTTCACTAGCGAATAATGAGAAGGACAAGACAAGGTATGATTCCCATGCATTATA  
AAAGTACAGGTTGAACCTGAAGTAGCTGCTGCTGAAGAGAAAAAGCGCGT

>M6-PGSC0003DMG400017330-(rev)M6G-LecRK\_1426

CATTTATAAAAGTACAGGTTGAACCTGAAGTAGCTGCTGCTGAAGAGAAAAAGCGCGTTAATGGTGCTA  
TACTGGGCTCTGTCATAGTAGTTTCCATCTTAGGGATCATAATTGGAATTG

>M6-PGSC0003DMG400017330-(rev)M6G-LecRK\_1488

GGTGCTATACTGGGCTCTGTCATAGTAGTTTCCATCTTAGGGATCATAATTGGAATTGCAGTTTTTCATATT  
CTGGAAGAAGAAGAGAAAGGCCAATGAAGATGAGGAGGATTATCTAGAT

>M6-PGSC0003DMG400017330-(rev)M6G-LecRK\_1550

TTTCATATTCTGGAAGAAGAAGAGAAAGGCCAATGAAGATGAGGAGGATTATCTAGATCACGTACCAG  
GAATGCCGACTAGATTTTCATACGATGATCTAAAGGCTGCAACGGGAGAACTT

>M6-PGSC0003DMG400017330-(rev)M6G-LecRK\_1612

TACCAGGAATGCCGACTAGATTTTCATACGATGATCTAAAGGCTGCAACGGGAGAACTTCACCAAGAAGC

TTGGTCAAGGAGGATTTGGGTCAAGTTTTGAAGGGTGCTTAGCAGATGGCA

>M6-PGSC0003DMG400017330-(rev)M6G-LecRK\_1674

AAGAAGCTTGGTCAAGGAGGATTTGGGTCAAGTTTTGAAGGGTGCTTAGCAGATGGCACAAAGATTGC

AGTGAAATGTCTTGATGGAATAGGACAAGTCAAACGTCATTCTTAGCTGAG

>M6-PGSC0003DMG400017330-(rev)M6G-LecRK\_1736

GATTGCAGTGAAATGTCTTGATGGAATAGGACAAGTCAAACGTCATTCTTAGCTGAGGTTGAAACTAT

TGGCAGCATAACATCATGTAACTTGGTGAATTGATTGGCTTCTGCGCTGA

>M6-PGSC0003DMG400017330-(rev)M6G-LecRK\_1798

AAACTATTGGCAGCATAACATCATGTAACTTGGTGAATTGATTGGCTTCTGCGCTGAGAAATCTCATAG

GCTTTTAGTATACGAGTGCATGAGCAACGGATCACTAGAAAAATGGATCT

>M6-PGSC0003DMG400017330-(rev)M6G-LecRK\_186

CCATCTGCAAATCTTTCTACAACCTGGGTCAACAGCATTTCGGCAGACCATTTCAGTGGATTTCACTGATG

GCTCAACAGTAAGAGCCATACTACTCAGAGGAAGTTTTGGTCCAAAATAT

>M6-PGSC0003DMG400017330-(rev)M6G-LecRK\_1860

TTCATAGGCTTTTAGTATACGAGTGCATGAGCAACGGATCACTAGAAAAATGGATCTACCATGGGAAA

CAGGAGCAAACCTAGATTGGAAGTGCAGGAGGAAGATTATTCAAGACATA

>M6-PGSC0003DMG400017330-(rev)M6G-LecRK\_1922

TGGGAAACAGGAGCAAACCTAGATTGGAAGTGCAGGAGGAAGATTATTCAAGACATAGCCAAAGGAT

TAGCTTACCTTCACGAAGAATGCAGGCAAAGATTCTGCATTTGGATATTAA

>M6-PGSC0003DMG400017330-(rev)M6G-LecRK\_1984

AAGGATTAGCTTACCTTCACGAAGAATGCAGGCAAAGATTCTGCATTTGGATATTAAGCCCCAAACAT

ACTCCTGGATGAGAAGTACAACGCTAAACTCGCTGACTTTGGGCTTTCAA

>M6-PGSC0003DMG400017330-(rev)M6G-LecRK\_2046

CCAAACATACTCCTGGATGAGAAGTACAACGCTAAACTCGCTGACTTTGGGCTTTCAAAGCTAATTGATC

GGAATCAGAGCCAAGTTATGACTCAGATGAGAGGCACTCCTGGTTATTTG

>M6-PGSC0003DMG400017330-(rev)M6G-LecRK\_2108

AATTGATCGGAATCAGAGCCAAGTTATGACTCAGATGAGAGGCACTCCTGGTTATTTGGCTCCTGAATG

GCTTAGTGGAGTAATAACAGAGAAGGTAGATGTCTACAGCTTTGGCATTGT

>M6-PGSC0003DMG400017330-(rev)M6G-LecRK\_2170

CTGAATGGCTTAGTGGAGTAATAACAGAGAAGGTAGATGTCTACAGCTTTGGCATTGTGCTCTTGAAAA  
TTTTGAGTGGAAGAAGACATTTTGAAGCATCGGAGTCTGAAGACCAACAGG

>M6-PGSC0003DMG400017330-(rev)M6G-LecRK\_2232

TTGGAAATTTTGAAGTGGGAAGAAGACATTTTGAAGCATCGGAGTCTGAAGACCAACAGGTAATGGTGAA  
CTTATTCAGGAAAAAGGCAGAGGAAGGGCAGTTGGTGGATCTTATTGATAAG

>M6-PGSC0003DMG400017330-(rev)M6G-LecRK\_2294

GGTGAACCTTATTCAGGAAAAAGGCAGAGGAAGGGCAGTTGGTGGATCTTATTGATAAGCACAGTGAAG  
ATATGCAGTTTTACAAAGAAGAAGTAGTAAAGGCGATGCAGATTGCTGCCTG

>M6-PGSC0003DMG400017330-(rev)M6G-LecRK\_2356

GTGAAGATATGCAGTTTTACAAAGAAGAAGTAGTAAAGGCGATGCAGATTGCTGCCTGGTGTTTACAAA  
GTGATTACACGAAGAGGCCATCAATGTCGATGGTGGTCAAGGCCATGGAGG

>M6-PGSC0003DMG400017330-(rev)M6G-LecRK\_2418

TTACAAAGTGATTACACGAAGAGGCCATCAATGTCGATGGTGGTCAAGGCCATGGAGGGTGTATAGA  
TGTTGACAAGGATCTAGACTACAGCTTTAGGCCACAAACCGTTTCAGCAATA

>M6-PGSC0003DMG400017330-(rev)M6G-LecRK\_248

CACTGATGGCTCAACAGTAAGAGCCATACTACTCAGAGGAAGTTTTGGTCCAAAATATGCTTGTGGTTTT  
TACTGTAATGGAAATTGTGATACTTACCTCTTTGCCATCTTCATTTTGCA

>M6-PGSC0003DMG400017330-(rev)M6G-LecRK\_2480

TATAGATGTTGACAAGGATCTAGACTACAGCTTTAGGCCACAAACCGTTTCAGCAATACCAATATCATT  
TTTGCAGATTCAACTCCTTTATTGCCTTCGATCCTATCAGGCCCAAGGTG

>M6-PGSC0003DMG400017330-(rev)M6G-LecRK\_2542

ATATCATTTTTGCAGATTCAACTCCTTTATTGCCTTCGATCCTATCAGGCCCAAGGTGAGGAGGAAGTTCC  
TTGGAATTTTTGTTAATTTCTTGTGTTTATGCTATTGCAGCTTGCTCGC

>M6-PGSC0003DMG400017330-(rev)M6G-LecRK\_2601

GGAGGAAGTTCCTTGGAAATTTTTGTTAATTTCTTGTGTTTATGCTATTGCAGCTTGCTCGCTGCTGTGTA  
ATTTCTTTTCCAATGTTACAAAGTTATGATTGTTTTCTTCAATTTATT

>M6-PGSC0003DMG400017330-(rev)M6G-LecRK\_310

GTGGTTTCTACTGTAATGGAAATTGTGATACTTACCTCTTTGCCATCTTCATTTGCAAACCAACAGTGGT  
TCCGGAATTACTCTTACCACGATTGGGTTCCACAAGTTGTTTGGTCTG



>M6-PGSC0003DMG400017330-(rev)M6G-LecRK\_372

AACAGTGGTTCCGGAATTACTCTTACCACGATTGGGTTCCACAAGTTGTTTGGTCTGCTAACAGGAATA  
AACCTGTTAGGATCAATTCTACTTTGGAACCTACAGCACAAGGAGATTTA

>M6-PGSC0003DMG400017330-(rev)M6G-LecRK\_434

CAGGAATAAACCTGTTAGGATCAATTCTACTTTGGAACCTACAGCACAAGGAGATTTAGTGCTTAGAGAT  
GCTGATGGTACTTTAGCTTGGTCAACTAACACTACTGGGAAGTCTATTGC

>M6-PGSC0003DMG400017330-(rev)M6G-LecRK\_496

TTAGAGATGCTGATGGTACTTTAGCTTGGTCAACTAACACTACTGGGAAGTCTATTGCTGGCTTAAACTT  
GACCGATGAGGGGAATCTTGTCTGTTTGATTCTGAAGAATGCAACTGTTT

>M6-PGSC0003DMG400017330-(rev)M6G-LecRK\_558

TTAAACTTGACCGATGAGGGGAATCTTGTCTGTTTGATTCTGAAGAATGCAACTGTTTGGCAATCGTTTG  
ATCACCCAACTGATGCTTTAGTTCCAGGGCAGAGGTTAGTATCAGGGATG

>M6-PGSC0003DMG400017330-(rev)M6G-LecRK\_62

CCTTTGCCTTCTTTGGAAAACCAAAAAATTGGTCTTTATGGCTTTATGCCAGATCTTACCTTTCTTTTTGTT  
CTTCATTTTTTGTGTTCTTTTCATTTGATAACCAGCCAACCTTATGA

>M6-PGSC0003DMG400017330-(rev)M6G-LecRK\_620

ATCGTTTGATCACCCAACTGATGCTTTAGTTCCAGGGCAGAGGTTAGTATCAGGGATGAAGCTGACAGC  
AAGTGTTCACGACAAATTGGACTGATGGAGGTTTGCTTACTCTCTCTGC

>M6-PGSC0003DMG400017330-(rev)M6G-LecRK\_682

TGACAGCAAGTGTTCACGACAAATTGGACTGATGGAGGTTTGCTTACTCTCTCTGCTACCGATGATGG  
TTTGGTTGCTTTGGTAGAGTCAAATCCTCCAAAAACATACTTTAAAGCGA

>M6-PGSC0003DMG400017330-(rev)M6G-LecRK\_744

GATGATGGTTTGGTTGCTTTGGTAGAGTCAAATCCTCCAAAAACATACTTTAAAGCGACTATTGGTGGAT  
TGAATGCAAGCAGAGGCTCAAATTATGTTGTGTATTTGAATGGTAGCCTA

>M6-PGSC0003DMG400017330-(rev)M6G-LecRK\_806

TGGTGGATTGAATGCAAGCAGAGGCTCAAATTATGTTGTGTATTTGAATGGTAGCCTAGCTTTACTCTCA  
AACTCTAGTAATTCCAGCAATTCACAGACACTGGTTCCACTTAATCTAGC

>M6-PGSC0003DMG400017330-(rev)M6G-LecRK\_868

TACTCTCAAACCTAGTAATTCAGCAATTCACAGACACTGGTTCCACTTAATCTAGCGACCTCAGCTCAA

TATATGAGACTGGAGTCTGATGGACACTTGAAAGTGTATGAGTGGCAA

>M6-PGSC0003DMG400017330-(rev)M6G-LecRK\_930

TCAGCTCAATATATGAGACTGGAGTCTGATGGACACTTGAAAGTGTATGAGTGGCAAAGTGGGTGGAC

TGAGGTGAATGATCTCCTCACAGGTTTTAACGGCGAGTGTTATTATCCAATG

>M6-PGSC0003DMG400017330-(rev)M6G-LecRK\_992

GTGGACTGAGGTGAATGATCTCCTCACAGGTTTTAACGGCGAGTGTTATTATCCAATGGCCTGTGGAAG

ATATGGCATTGCTCAAGGGGGCAGTGTAGTTGTCCCAAATCGAGCTCTAA

>M6-PGSC0003DMG400017331-(rev)M6G-LecRK\_0

TTTAAATCATCTTCATTCAGTGTCTTAATGGCTTTATGCAAGATTTTTCTTTTGCCTTCATCCTCCTTTGT

TGTTCTTGTTATCTGATATCGGGCCAACGTTTCGATTACCCCACTGC

>M6-PGSC0003DMG400017331-(rev)M6G-LecRK\_1008

ATGTAGTTGTCCATAAGCTCTAATTCAACCACCTATTTTCAGACCGATAAACGTTAGGCTGCCTAATCTTG

GTTGCTCTGAGGCCAAAAGCTAACTTGTAACAACTTAAAGAAACACAG

>M6-PGSC0003DMG400017331-(rev)M6G-LecRK\_1071

TAATCTTGTTGCTCTGAGGCCAAAAGCTAACTTGTAACAACTTAAAGAAACACAGACTTTTGGAAGTT

GAAGAGGTGGACTATTTACGTTTACTGCAGATATTAGTAACACAGATGT

>M6-PGSC0003DMG400017331-(rev)M6G-LecRK\_1134

GGAAGTTGAAGAGGTGGACTATTTACGTTTACTGCAGATATTAGTAACACAGATGTGAATACTTGTA

ACGCGCATGTTTGAATAAATGTTCTGTAAAGCTGCGTTCTTTCGTAGTGG

>M6-PGSC0003DMG400017331-(rev)M6G-LecRK\_1197

TTGTAAACGCGCATGTTTGAATAAATGTTCTGTAAAGCTGCGTTCTTTCGTAGTGGTTTAAATTCTTCCA

GGGCCATAGGGGAGTGCTACTTACCAACTGAGATCTTTTCACTAATGAA

>M6-PGSC0003DMG400017331-(rev)M6G-LecRK\_126

TTCTACAACCTGGATCAACAGTGTCTGACCCCATTCAGTGGATTTCACTGATGGCTCAAGAGTAAGG

GCTATACTACTCAGAGGAACTTTTGGTCCAAAATATGCTTGTGGTTTCTA

>M6-PGSC0003DMG400017331-(rev)M6G-LecRK\_1260

TTCTCCAGGGCCATAGGGGAGTGCTACTTACCAACTGAGATCTTTTCACTAATGAATAATGAGAAGGAC

AAGACAAGGTATGACTCTGTCGCGTTTATAAAAGTACAGGTTTAAAGCTAA

>M6-PGSC0003DMG400017331-(rev)M6G-LecRK\_1323

GAAGGACAAGACAAGGTATGACTCTGTCGCGTTTATAAAAAGTACAGGTTTAAGCTAAACCAGCTGCTGC  
TAAAGGGAAAAAATCGCGTTTTATGTACAAAAATGAATCTATGGGAGGACA

>M6-PGSC0003DMG400017331-(rev)M6G-LecRK\_1386

TGCTGCTAAAGGGAAAAAATCGCGTTTTATGTACAAAAATGAATCTATGGGAGGACATGGATGGAAACT  
TAGCAAATTATGCGCGGGATTATAAGTTCATGCTAGACATGAACTATATGA

>M6-PGSC0003DMG400017331-(rev)M6G-LecRK\_1449

GAACTTAGCAAATTATGCGCGGGATTATAAGTTCATGCTAGACATGAACTATATGAAGGTATTATTACA  
TAAATAAATGGTTTGATAAGCCAAATTAGTGTTAAGAGTTCTCTGTATTC

>M6-PGSC0003DMG400017331-(rev)M6G-LecRK\_1503

TGAAGGTATTATTACATAAATAAATGGTTTGATAAGCCAAATTAGTGTTAAGAGTTCTCTGTATTCCTTCA  
TTTCTCTGTGTTATCTGTAATTTCAATTCAATAGACTATAATAAAGACA

>M6-PGSC0003DMG400017331-(rev)M6G-LecRK\_189

AGTAAGGGCTATACTACTCAGAGGAACTTTGGTCCAAAATATGCTTGTGGTTTCTACTGTAATGGCAAT  
TGTGATACTTACCTCTTTGCCATTTTCATTGTGCAAATAATAGCGCGTC

>M6-PGSC0003DMG400017331-(rev)M6G-LecRK\_252

TGGCAATTGTGATACTTACCTCTTTGCCATTTTCATTGTGCAAATAATAGCGCGTCCCAAATTACTTCTCC  
CGCGATTGGATTCCCACAAGTTGTTTGGTCTGCTAACCGGAACAATCC

>M6-PGSC0003DMG400017331-(rev)M6G-LecRK\_315

TACTTCTCCCGCGATTGGATTCCCACAAGTTGTTTGGTCTGCTAACCGGAACAATCCGGTTAAGATCAATT  
CAACTTTGCAGCTAACAGCACAAGGAGACTTGGTGCTCAGAAATGCTGA

>M6-PGSC0003DMG400017331-(rev)M6G-LecRK\_378

GATCAATTCAACTTTGCAGCTAACAGCACAAGGAGACTTGGTGCTCAGAAATGCTGATGGTACTTTGGC  
TTGGTCAACTAACACTGCTGGCAAATCAGTTGCTGGTTTAAGCTTGACCGA

>M6-PGSC0003DMG400017331-(rev)M6G-LecRK\_441

TTTGGCTTGGTCAACTAACACTGCTGGCAAATCAGTTGCTGGTTTAAGCTTGACCGATGAAGGGAATCTT  
GTTCTGTTTGATTCAAAGAATGCAACTGTTTGGCAATCGTTTGATCACCC

>M6-PGSC0003DMG400017331-(rev)M6G-LecRK\_504

GAATCTTGTCTGTTTGATTCAAAGAATGCAACTGTTTGGCAATCGTTTGATCACCCGACAGATGCTTTAG  
TTCCAGGGCAGAAGTTAGTATCCGGGATGAACTAACAGCAAGTGTTTC

>M6-PGSC0003DMG400017331-(rev)M6G-LecRK\_567

TGCTTTAGTTCCAGGGCAGAAGTTAGTATCCGGGATGAACTAACAGCAAGTGTTCACAACGAATTG  
GACTGAAGGAGGCTTGTTCCTCTCTGCTATCGATAATGGTTTGTTGC

>M6-PGSC0003DMG400017331-(rev)M6G-LecRK\_63

CCTCCTTTGTTGTTCTTGTATCTGATATCGGGCCAACGTTTCGATTACCCCACTGCAAATCTTCTACAAC  
TTGGATCAACAGTGTTCCTGCACCCATTAGTGGATTCACTGATGG

>M6-PGSC0003DMG400017331-(rev)M6G-LecRK\_630

GAATTGGACTGAAGGAGGCTTGTTCCTCTCTGCTATCGATAATGGTTTGTTGCTTTCATAGAATCA  
AATCCTCCCAAACATACTTTGACGCGACTATTGGTGGATTGGATCCTAG

>M6-PGSC0003DMG400017331-(rev)M6G-LecRK\_693

AGAATCAAATCCTCCCAAACATACTTTGACGCGACTATTGGTGGATTGGATCCTAGTGGAGGATCCAAT  
TATGTTAAGTATTTGGATGGAAGCTTAACTTTCTTCACAAATTCGAGTGG

>M6-PGSC0003DMG400017331-(rev)M6G-LecRK\_756

ATCCAATTATGTTAAGTATTTGGATGGAAGCTTAACTTTCTTCACAAATTCGAGTGGTACAACCGAGTTG  
GTTCTGTTTTCTATTACTCCAGCATCCTCTGCTCAGTATATGAACTCGA

>M6-PGSC0003DMG400017331-(rev)M6G-LecRK\_819

CGAGTTGGTTCTGTTTTCTATTACTCCAGCATCCTCTGCTCAGTATATGAACTCGAGTCCAATGGACACT  
TGAAAGTGTACGAGTGGAAAAATCGATGGGGAGAGGTGGATGATCTCTT

>M6-PGSC0003DMG400017331-(rev)M6G-LecRK\_882

TGGACACTTGAAAGTGTACGAGTGGAAAAATCGATGGGGAGAGGTGGATGATCTCTTGACAGGCTTTC  
GTGGCGTGTGCAATTACCCACAGTCTGTGGAAGATATGGCATTTCACAAT

>M6-PGSC0003DMG400017331-(rev)M6G-LecRK\_945

CTTTCGTGGCGTGTGCAATTACCCACAGTCTGTGGAAGATATGGCATTTCACAATGGGGCAATGTAG  
TTGTCCATAAGCTCTAATTCAACCACCTATTCAGACCGATAAACGTTAG

>M6-PGSC0003DMG400017337-(rev)M6LRR-RLP\_0

ATGACTTCACTCCAGACACTTGACTTATCTGGGAACTCTTTCCTGGAGGGTCAGTTGCATGAGCAACTGG  
GAAATCTGTGCAACCTAAGAGAATTGGATCTTCTCTAAACAATTCACA

>M6-PGSC0003DMG400017337-(rev)M6LRR-RLP\_1008

CATCTTACCGGAGAAATCCCTGATTTTTGGGACGAAGTACCAATTTGTACACATTAGACCTGTCAAACA

ACAGTTTTATTGGCCGCGTCCCAAGCACCTTAAGTACTCTTAATTCCTC

>M6-PGSC0003DMG400017337-(rev)M6LRR-RLP\_1071

TCAAACAACAGTTTTATTGGCCGCGTCCCAAGCACCTTAAGTACTCTTAATTCCTCAGATTCTTAATGCT  
AAGCAACAATCATCTTTCTGGGGAGTTCCTCTTGGTTTCCAAAATTC

>M6-PGSC0003DMG400017337-(rev)M6LRR-RLP\_1134

TTAATGCTAAGCAACAATCATCTTTCTGGGGAGTTCCTCTTGGTTTCCAAAATTTCTCTTCAATGATCACT  
CTTGATCTTGGGAACAACCAATTTTCAGGAGAACTTCCTTCCTGGATA

>M6-PGSC0003DMG400017337-(rev)M6LRR-RLP\_1197

ATGATCACTCTTGATCTTGGGAACAACCAATTTTCAGGAGAACTTCCTTCCTGGATAGGAGAAAAGATGC  
CAGTGTGTTGGCCTTGAGCCTTCGATTGAACATGTTCAAAGGAGAGATT

>M6-PGSC0003DMG400017337-(rev)M6LRR-RLP\_126

ATAACCAAATTCATCGATGGTCTTTCTAGGTGCAACGAAAGCAAGCTAGAGAGGCTGAACTTGGGATAT  
AATGCTGGATTGGGTGGAACCTTCCAGATTCTATCGGATTCTTGAAAAAT

>M6-PGSC0003DMG400017337-(rev)M6LRR-RLP\_1260

AAGATGCCAGTGTTGTTGGCCTTGAGCCTTCGATTGAACATGTTCAAAGGAGAGATTCCAAGGGAATTC  
TGCAACATGACATCACTTCATTTTATAGATGTTGGTTCCAACAATCTCTCT

>M6-PGSC0003DMG400017337-(rev)M6LRR-RLP\_1323

GAATTCTGCAACATGACATCACTTCATTTTATAGATGTTGGTTCCAACAATCTCTCTGGAAATATCCCGTC  
TTGTTTTGGGAATCTGAAGGGCATGACTTTGGATCCAGAATCTCAACGT

>M6-PGSC0003DMG400017337-(rev)M6LRR-RLP\_1386

ATCCCGTCTTGTTTTGGGAATCTGAAGGGCATGACTTTGGATCCAGAATCTCAACGTTATGAAGGTCAAT  
TGAACGTATTCTCAAGGGGAGAGATCTTTATACAAGGATAATCTTTAT

>M6-PGSC0003DMG400017337-(rev)M6LRR-RLP\_1449

GGTCAATTGAACGTATTCTCAAGGGGAGAGATCTTTATACAAGGATAATCTTTATCTTGTGAATGGCA  
TAATCCTTTCAGGCAACCATTTAACTGGTGAGATACCAGAAGAATTGACA

>M6-PGSC0003DMG400017337-(rev)M6LRR-RLP\_1512

AATGGCATAATCCTTTCAGGCAACCATTTAACTGGTGAGATACCAGAAGAATTGACAAATCTTTCAGGA  
TGAATACCCTGAATTTGTCCATGAATCATTTGAGTGGAAAGATCCCTGAA

>M6-PGSC0003DMG400017337-(rev)M6LRR-RLP\_1575

TCCAGGATGAATACCCTGAATTTGCCATGAATCATTTGAGTGGAAAGATCCCTGAAGAAATTGAGAGG  
TTGAGACAATTGGAAACTCTTGATCTCTCTAGGAATGAGATCCATGGCACC

>M6-PGSC0003DMG400017337-(rev)M6LRR-RLP\_1638

GAGAGGTTGAGACAATTGGAAACTCTTGATCTCTCTAGGAATGAGATCCATGGCACCATCCCAGCAGGC  
ATGACAAGCTTAACATTGCTGACTCACTTGAATCTCTCGCACAATCACTTG

>M6-PGSC0003DMG400017337-(rev)M6LRR-RLP\_1701

GCAGGCATGACAAGCTTAACATTGCTGACTCACTTGAATCTCTCGCACAATCACTTGTCAGGTAGAGTTC  
CCACAGCTAACCAATTTAACACCTTCAATGACCCTTCGATATACACGGGC

>M6-PGSC0003DMG400017337-(rev)M6LRR-RLP\_1764

AGAGTTCCCACAGCTAACCAATTTAACACCTTCAATGACCCTTCGATATACACGGGCAATCCTGATCTCTG  
TGGAGATCCATTGCAAAACAAATGCAAGGATGAAACAGAAGAAGAACCT

>M6-PGSC0003DMG400017337-(rev)M6LRR-RLP\_1827

GATCTCTGTGGAGATCCATTGCAAAACAAATGCAAGGATGAAACAGAAGAAGAACCTGATCTTCATCAG  
GATCCTCCTTATCATTCTTCTCCTAGTGAATTTGGAGAAATGGGGTTCTTT

>M6-PGSC0003DMG400017337-(rev)M6LRR-RLP\_189

GGATATAATGCTGGATTGGGTGGAACCTTCCAGATTCTATCGGATTCTTGAAAAATCTCAAGTATATTG  
AGTTATGGAAGAATTCATTTGTTGGTATGATCCCTGATTGCGATTGGAAAT

>M6-PGSC0003DMG400017337-(rev)M6LRR-RLP\_1890

CATCAGGATCCTCCTTATCATTCTTCTCCTAGTGAATTTGGAGAAATGGGGTTCTTTGTCAGTATCGGAGT  
AGGATTTGTTGTGGGATTCTGGGGAGTATGCGCAATTCTAATAATAAAA

>M6-PGSC0003DMG400017337-(rev)M6LRR-RLP\_1953

ATCGGAGTAGGATTTGTTGTGGGATTCTGGGGAGTATGCGCAATTCTAATAATAAAAAGTTCATGGAGG  
CATGCCTATTTACAGTTTGTGGTTATTTGGGAGATAAGTTGTTTGCATT

>M6-PGSC0003DMG400017337-(rev)M6LRR-RLP\_1995

ATTCTAATAATAAAAAGTTCATGGAGGCATGCCTATTTACAGTTTGTGGTTATTTGGGAGATAAGTTGT  
TTGTCATTTTCATTCTGCCTTGGGCTAGTTGGAGGAGATCCAGAAGCTAG

>M6-PGSC0003DMG400017337-(rev)M6LRR-RLP\_252

TATATTGAGTTATGGAAGAATTCATTTGTTGGTATGATCCCTGATTGCGATTGGAAATTTGTCATCATTGGA  
GTATTTGATCCTTGTATGGAACCAATGAGTGGACAAATCCAGTCACT

>M6-PGSC0003DMG400017337-(rev)M6LRR-RLP\_315

TCATTGGAGTATTTGATCCTTGATGGAACCAAATGAGTGGACAAATTCCAGTCACTTTAGGGAACTTT  
CAAAGTTGGTTGTCCTAGACCTTTTTGAAAATAATTGGTGGGGTGTGCATC

>M6-PGSC0003DMG400017337-(rev)M6LRR-RLP\_378

AAACTTTCAAAGTTGGTTGTCCTAGACCTTTTTGAAAATAATTGGTGGGGTGTGCATCACAGAAGCTCACT  
TCACAACTTGACTAGTTTGAAGGAGTTGTATATATCCTCAAACCTCATTA

>M6-PGSC0003DMG400017337-(rev)M6LRR-RLP\_441

GCTCACTTCACAACTTGACTAGTTTGAAGGAGTTGTATATATCCTCAAACCTCATTACCTCCTAGTCTCCTC  
TTTGGTTGCAAACGTTGACACCGAGTGGATTCTCCTTTTTAGTCTCCAG

>M6-PGSC0003DMG400017337-(rev)M6LRR-RLP\_504

AGTCCTCCTTTGGTTGCAAACGTTGACACCGAGTGGATTCTCCTTTTTAGTCTCCAGTATCTCAAGTTCAG  
GTCATGTCGATTTGGTCCTAAATTTCTATGTGGATCAGACATTTTACT

>M6-PGSC0003DMG400017337-(rev)M6LRR-RLP\_567

AAGTTCAGGTCATGTCGATTTGGTCCTAAATTTCTATGTGGATCAGACATTTTACTGAATTGCAAACCTT  
AACATTCAGGCGTGCTGGATTTTCAGATACTCTCCCTGATTGGTTGTGG

>M6-PGSC0003DMG400017337-(rev)M6LRR-RLP\_63

CAACTGGGAAATCTGTGCAACCTAAGAGAATTGGATCTTTCTCTAAACAATTTACAGGCGATATAACCA  
AATTCATCGATGGTCTTTCTAGGTGCAACGAAAGCAAGCTAGAGAGGCTG

>M6-PGSC0003DMG400017337-(rev)M6LRR-RLP\_630

CAAACCTTAAACATTCAGGCGTGCTGGATTTTCAGATACTCTCCCTGATTGGTTGTGGGAAATGAACTGGG  
AACTGAAGAACTGGATTTTGGTTATAATCAGCTTAAGGGCAGAGTGCCA

>M6-PGSC0003DMG400017337-(rev)M6LRR-RLP\_693

AACTGGGAACTGAAGAACTGGATTTTGGTTATAATCAGCTTAAGGGCAGAGTGCCAACTACTCTAAAA  
TTTAAGCCTGGTTCCACTGTCTATTTAATGTCTAACCTTTTTGAAGGTCCA

>M6-PGSC0003DMG400017337-(rev)M6LRR-RLP\_756

CTAAAATTTAAGCCTGGTTCCACTGTCTATTTAATGTCTAACCTTTTTGAAGGTCCAATTCATCTTGGTCC  
TCAAATGTAGCCTCGATAAGCCTGAGTAACAATTCATTTTCAGGACCT

>M6-PGSC0003DMG400017337-(rev)M6LRR-RLP\_819

TCTTGGTCCTCAAATGTAGCCTCGATAAGCCTGAGTAACAATTCATTTTCAGGACCTGTTCTTTTTGATAT

TGGCTACAGATATCCAGATTTGACTGACTTGGATCTTTCTCAAACTCT

>M6-PGSC0003DMG400017337-(rev)M6LRR-RLP\_882

TTTGATATTGGCTACAGATATCCAGATTTGACTGACTTGGATCTTTCTCAAACTCTCTCAATGGAACCAT

TCCCTTGTCATTAGCAAAATCACCAACTTGGTAACTTTGGTTCTCTCG

>M6-PGSC0003DMG400017337-(rev)M6LRR-RLP\_945

GGAACCATTCCCTTGTCATTAGCAAAATCACCAACTTGGTAACTTTGGTTCTCTCGAATAATCATCTTAC

CGGAGAAATCCCTGATTTTTGGGACGAAGTACCAATTTGTACACATTA

>M6-PGSC0003DMG400017645-(rev)M6LRR-RLK\_0

TGTCACAAAATTGTACAACACTAGACTAGCTATAGACAAACACATCTGTACTCCATTATTTAATCTCATCAT

TTAAAATCACTTTTCTCTATGTATCATTACTCACTCTATTATAGATTCT

>M6-PGSC0003DMG400017645-(rev)M6LRR-RLK\_1054

GTAGCAACAATCTGAAATTTGTCGATTTTTCGAGTAATTTATTGATGGGAAAGTTGCCTGCTTGTCTTGG

ATCAAGTTCCAGAAACAGGACAGTGATTAATGTTTGGAAATTGTTTGTCAA

>M6-PGSC0003DMG400017645-(rev)M6LRR-RLK\_1116

TGTCTTGGATCAAGTTCCAGAAACAGGACAGTGATTAATGTTTGGAAATTGTTTGTCAAGTACTAGTACTA

AGTCTCAACATCCACATACATTTTTGTGAGAAACAAGCTATAGCTGTTAAG

>M6-PGSC0003DMG400017645-(rev)M6LRR-RLK\_1178

TAGTACTAAGTCTCAACATCCACATACATTTTTGTGAGAAACAAGCTATAGCTGTTAAGCCCCCTCCAAGA

ACTAGTGATGAGAAGGAACAATCCACAGTTAAGCTTGGTGTGTTGCTTAGG

>M6-PGSC0003DMG400017645-(rev)M6LRR-RLK\_124

TTATTTCAATCCACATTTCTCTTTAATCACTTCAAAAAACAAAAAAGTGCTCACTCTTTTGTGAGCTCAA

AAGATTTTTTTGGGATTTTGTGAGTCTTTTAGCTATGAAGGGTTTCTTGT

>M6-PGSC0003DMG400017645-(rev)M6LRR-RLK\_1240

CTCCAAGAACTAGTGATGAGAAGGAACAATCCACAGTTAAGCTTGGTGTGTTGCTTAGGACTCATTGCTG

GAATTGTTGTAGTTGTGGGTGCAGTTGGTTTCCTGATCTTTTTTATTGTC

>M6-PGSC0003DMG400017645-(rev)M6LRR-RLK\_1302

ATTGCTGGAATTGTTGTAGTTGTGGGTGCAGTTGGTTTCCTGATCTTTTTTATTGTCAGAAAGTTGTGA

GAAATAGAGATCAAGGATATAAAAATGACAGCTTTGCTTTTGTGAGAAGAAT

>M6-PGSC0003DMG400017645-(rev)M6LRR-RLK\_1364



AGTTGTGAGAAATAGAGATCAAGGATATAAAAATGACAGCTTTGCTTTTGAGAAGAATTCAACCCTTTCC  
AAAAGTCTGATGGAGGTAAATTTCTTAATGATTAGGGTCTATTGGAAA

>M6-PGSC0003DMG400017645-(rev)M6LRR-RLK\_1674

TACGCGGGGTTTGTGTTGAATCTTGAATAGTGATAGTGCATCATTATGACAATTTTATTGATAACTTGAT  
TTAATCAGGGAATGCAAGGAGGACAATGAGGATGGTATCATTAGGACTT

>M6-PGSC0003DMG400017645-(rev)M6LRR-RLK\_1736

TAACCTGATTTAATCAGGGAATGCAAGGAGGACAATGAGGATGGTATCATTAGGACTTCCACCATATCA  
TGTTTTCACTTTAGAGGAAATGGAAGAAGCAACAAACAGTTTTGATCCAAC

>M6-PGSC0003DMG400017645-(rev)M6LRR-RLK\_1798

CATATCATGTTTTCACTTTAGAGGAAATGGAAGAAGCAACAAACAGTTTTGATCCAATAATCTGGTTGG  
AGAAGGTTCCCAGGGTCAGGTAAATATGTTGATTCATTATAAATAGCAAA

>M6-PGSC0003DMG400017645-(rev)M6LRR-RLK\_1860

CTGGTTGGAGAAGGTTCCCAGGGTCAGGTAAATATGTTGATTCATTATAAATAGCAAAAAAAAAAAGATA  
TTTATTACTATATCCTGTCCATATTATTCGTCATTTGGGACGCCGAACAAT

>M6-PGSC0003DMG400017645-(rev)M6LRR-RLK\_2046

TCTAGTCTAGACCCAAAAAGTCAACCCGAACAACACTTGACATTTTAGAAAACTAAAGATAGTAATATG  
GATATGCTTTTCATAAATCTTGGTGAATACAACTTGTGTTTTGAACATC

>M6-PGSC0003DMG400017645-(rev)M6LRR-RLK\_2108

GTAATATGGATATGCTTTTCATAAATCTTGGTGAATACAACTTGTGTTTTGAACATCGGGATTGATGTTA  
TTATTAATGGCAGCTATATAGAGGTTGGCTTAGAGATGGATCAGTGGTC

>M6-PGSC0003DMG400017645-(rev)M6LRR-RLK\_2170

TTGATGTTATTATTAATGGCAGCTATATAGAGGTTGGCTTAGAGATGGATCAGTGGTCCTAGTGAAATGT  
CTGAAATTGAAGCAGAAGCATTACCTCAAATTCTGCAGCAGCACATGGA

>M6-PGSC0003DMG400017645-(rev)M6LRR-RLK\_2232

TGAAATGTCTGAAATTGAAGCAGAAGCATTACCTCAAATTCTGCAGCAGCACATGGAGATGATATCAA  
AGCTAAGGCATCGACATTTAGTAAGTGTACTTGGACTGTGTTGTCACTT

>M6-PGSC0003DMG400017645-(rev)M6LRR-RLK\_2294

ATATCAAAGCTAAGGCATCGACATTTAGTAAGTGTACTTGGACTGTGTTGTCACTTACCAAGATCATC  
CAAATACAGCTAGCACTGTATTTATTGTGCTTGAAAACGTCGTCAATGGA

>M6-PGSC0003DMG400017645-(rev)M6LRR-RLK\_2356

AGATCATCCAAATACAGCTAGCACTGTATTTATTGTGCTTGAAAACGTCGTCAATGGATCACTAAAGGAT  
CATCTTAGTGGTAAGCTATTACGAGTTGATTTCTCTCATGGCCACTCAAC

>M6-PGSC0003DMG400017645-(rev)M6LRR-RLK\_2418

TAAAGGATCATCTTAGTGGTAAGCTATTACGAGTTGATTTCTCTCATGGCCACTCAACTAATAGTTATTAC  
CTCAGAAGTCACTTTGAAAAGGTGACTTCTGAGATAATGACTATTAGT

>M6-PGSC0003DMG400017645-(rev)M6LRR-RLK\_2480

AGTTATTACCTCAGAAGTCACTTTGAAAAGGTGACTTCTGAGATAATGACTATTAGTTGAGTTACTATCT  
AATAGTCATTACTTTCTTCAGTCGGAACGATGAAGGACTGAATTTTATA

>M6-PGSC0003DMG400017645-(rev)M6LRR-RLK\_2542

TTACTATCTAATAGTCATTACTTTCTTCAGTCGGAACGATGAAGGACTGAATTTTATATTCTGGGATTCGT  
TCTTTGGCAGATTGGAGGAAAAGGGATGTATTGAAATGGCCACAAAGAA

>M6-PGSC0003DMG400017645-(rev)M6LRR-RLK\_2604

GGGATTCGTTCTTTGGCAGATTGGAGGAAAAGGGATGTATTGAAATGGCCACAAAGAATGGGAATAAC  
GATGGGCATTGCAAAGGAATTCAGTATTGACACTGGAGGAGTCACTGGA

>M6-PGSC0003DMG400017645-(rev)M6LRR-RLK\_2666

AATAACGATGGGCATTGCAAAGGAATTCAGTATTGACACTGGAGGAGTCACTGGAAATGATATAAA  
GCTTGAGAATGTTTTGTTGGATGAAACTCTTACTGCTAGAATAAGCAGCTA

>M6-PGSC0003DMG400017645-(rev)M6LRR-RLK\_2728

ATATAAAGCTTGAGAATGTTTTGTTGGATGAAACTCTTACTGCTAGAATAAGCAGCTACAATATATCGTT  
ACCACCTAAGGTAATGCTAGTAAATCACAACAAACAACACGTTAATCTTG

>M6-PGSC0003DMG400017645-(rev)M6LRR-RLK\_2790

ATATCGTTACCACCTAAGGTAATGCTAGTAAATCACAACAAACAACACGTTAATCTTGGAGAAAATCTCA  
TTTTTAACCATCCAAAACATTCGCAGGTTGGTTTCGAAAGTCTTCTTGCT

>M6-PGSC0003DMG400017645-(rev)M6LRR-RLK\_2852

AAATCTCATTTTTAACCATCCAAAACATTCGCAGGTTGGTTTCGAAAGTCTTCTTGCTGGACCAGACAATT  
TTACCAGGTATTATATACTCTGCAGCTACATTCACCTTAATTTCTCTG

>M6-PGSC0003DMG400017645-(rev)M6LRR-RLK\_2914

CAGACAATTTTACCAGGTATTATATACTCTGCAGCTACATTCACCTTAATTTCTCTGTTTCCTGGCTATCA

TTTCTGAATTGTCTGCTAATATAAACTTCTTATTCAGCGCGAAAGAAG

>M6-PGSC0003DMG400017645-(rev)M6LRR-RLK\_2976

CTGGCTATCATTCTGAATTGTCTGCTAATATAAACTTCTTATTCAGCGCGAAAGAAGCAGAAAAGGAAG

ACATTTATCAGTTGGGAATTATTCTACTAGAGGTTATTATTGGTAGACCA

>M6-PGSC0003DMG400017645-(rev)M6LRR-RLK\_3038

AAAGGAAGACATTTATCAGTTGGGAATTATTCTACTAGAGGTTATTATTGGTAGACCAATCAACTCTCGA

AGTGAAGCAGAAGACCTTAAGCTTCAGGTATCAATAACAATATCCTAATA

>M6-PGSC0003DMG400017645-(rev)M6LRR-RLK\_310

GAATCCTTTTTCAAATTCAACAGTTTCTTGAAAATCCACCTGTTCTTCAAGAATGGAATAAATGGACAAAT

TTTTGTTTTCTCCACAATCTCCTTCTTTGTTATCACTTGTTCTGGTA

>M6-PGSC0003DMG400017645-(rev)M6LRR-RLK\_3100

ACTCTCGAAGTGAAGCAGAAGACCTTAAGCTTCAGGTATCAATAACAATATCCTAATAACACTCTCAAAC

GATAGAAATATATCAGATGGTCACTCAACTAATAGTAATCATTTTCAGAAA

>M6-PGSC0003DMG400017645-(rev)M6LRR-RLK\_3162

TCTCAAACGATAGAAATATATCAGATGGTCACTCAACTAATAGTAATCATTTTCAGAAAGTCACATTTCTTC

TTGATTCGGACATTCTTTTACAAAGAAAGTGACTTTCTGAAATAATAAC

>M6-PGSC0003DMG400017645-(rev)M6LRR-RLK\_3286

AGTTGAGTGACCATCTGAGAAATCAACTCAAAAATAAGAGATACGCTATAAAGAATTAGAAGAATCAC

GAATTACGTGATATGAAAGAACACACATTTCTTCACATAATGCATAAGAGC

>M6-PGSC0003DMG400017645-(rev)M6LRR-RLK\_3348

GAATCACGAATTACGTGATATGAAAGAACACACATTTCTTCACATAATGCATAAGAGCCTAGTCTATTTA

CACAATCTATCAAACAACCTTGAACCAAATTGCCTTTTATGACATTCAGG

>M6-PGSC0003DMG400017645-(rev)M6LRR-RLK\_3410

TCTATTTACACAATCTATCAAACAACCTTGAACCAAATTGCCTTTTATGACATTCAGGTGGAGACTGCCTT

AGCGGAATCACCATCAAAGCTACGAGATTTAACAGATCCTTGTATACGA

>M6-PGSC0003DMG400017645-(rev)M6LRR-RLK\_3472

GACTGCCTTAGCGGAATCACCATCAAAGCTACGAGATTTAACAGATCCTTGTATACGAGGTACATTTGCA

TATGACTCATTGAAAACGACAGTCCAGATAGCAATAAACTGCCTTGAAAA

>M6-PGSC0003DMG400017645-(rev)M6LRR-RLK\_3534

CATTTGCATATGACTCATTGAAAACGACAGTCCAGATAGCAATAAACTGCCTTGAAAAAGAACCAAGCA  
GGCGGCCATCAGTCGAAGATGTTCTCTGGCATATGCAATACTCAATTCAGG

>M6-PGSC0003DMG400017645-(rev)M6LRR-RLK\_3596

CCAAGCAGGCGGCCATCAGTCGAAGATGTTCTCTGGCATATGCAATACTCAATTCAGGTTCAAGAAGGA  
ACAACCAACAGTGGAAACCTCAGTGGGAACCAAAGTGGGAAACTCAGTGGA

>M6-PGSC0003DMG400017645-(rev)M6LRR-RLK\_3658

AGAAGGAACAACCAACAGTGGAAACCTCAGTGGGAACCAAAGTGGGAAACTCAGTGGAATAAAGT  
GGAAATCTTAATAATAAGTTTTACTGATAATAGAGATCTGTCATTATATTGTT

>M6-PGSC0003DMG400017645-(rev)M6LRR-RLK\_372

TGGACAAATTTTTGTTTTCTCCACAATCTCCTTCTCTTGTTATCACTTGTTCTGGTAATCATATAACTGAG  
TTAACAATTGTTGGTAACAAAAATCCCCTTTTGAGTCTTAAAATCC

>M6-PGSC0003DMG400017645-(rev)M6LRR-RLK\_3720

TAAGTGGAAATCTTAATAATAAGTTTTACTGATAATAGAGATCTGTCATTATATTGTTATATCTTGTTGTTT  
AGTCATTTGTATGCATCCATCTTGTATAGCAAAGTTCAGTAGCTTACT

>M6-PGSC0003DMG400017645-(rev)M6LRR-RLK\_3782

CTTGTTGTTTAGTCATTTGTATGCATCCATCTTGTATAGCAAAGTTCAGTAGCTTACTGAATAAATGTTTTT  
GCTTTCTACATCACAAAAATGTACCCAAGTTTACAATACAAAGCAATT

>M6-PGSC0003DMG400017645-(rev)M6LRR-RLK\_3844

AAATGTTTTTGCTTTCTACATCACAAAAATGTACCCAAGTTTACAATACAAAGCAATTTTCATGTCGCGAA  
AAACGGTGTTTACATCAACTCAATGAAGACATAAAGTGTATCTTCATGT

>M6-PGSC0003DMG400017645-(rev)M6LRR-RLK\_3906

TGTCGCGAAAAACGGTGTTTACATCAACTCAATGAAGACATAAAGTGTATCTTCATGTGCTTTGTTATCG  
CTGAGTGTAAATCACCCCAACAACCTTCATCATCAATTATTTTCAAATAA

>M6-PGSC0003DMG400017645-(rev)M6LRR-RLK\_3968

TGTTATCGCTGAGTGTAAATCACCCCAACAACCTTCATCATCAATTATTTTCAAATAAAGTGAAGATA  
TAATTATAAGTAAACAACACTGCAGTCTCTATGGTCATGATATGATTCA

>M6-PGSC0003DMG400017645-(rev)M6LRR-RLK\_4030

CTGAAGATATAATTATAAGTAAACAACACTGCAGTCTCTATGGTCATGATATGATTCAATATCGTATCAG  
AGCAGGCAAAACCTCCCGGTTTCATGTCTCACCACCAGAAATTTCCATGTG

>M6-PGSC0003DMG400017645-(rev)M6LRR-RLK\_4092

CGTATCAGAGCAGGCAAAACCTCCCGTTCATGTCTCACCACCAGAAATTTCCATGTGCTTGGCCTATTA  
GGCCTTTACACAGAGTTATGTTGAGGATATAATTAAGTAAAAACTAAAAG

>M6-PGSC0003DMG400017645-(rev)M6LRR-RLK\_4154

GCCTATTAGGCCTTTACACAGAGTTATGTTGAGGATATAATTAAGTAAAAACTAAAAGTATTGTCTCTCC  
AGCAACTTACTTAACTTTTAGATGAAATGCTCACACGTATCTTTGTTG

>M6-PGSC0003DMG400017645-(rev)M6LRR-RLK\_4216

GTCTCTCCAGCAACTTACTTAACTTTTAGATGAAATGCTCACACGTATCTTTGTTGACTTAAAAGGGTA  
CTTTATAACATTTTCAGCAGCCGCGCCTGCCACGGTGGCTGCAGCAACA

>M6-PGSC0003DMG400017645-(rev)M6LRR-RLK\_4278

AAAAGGGTACTTTATAACATTTTCAGCAGCCGCGCCTGCCACGGTGGCTGCAGCAACAGCAGAATCTGC  
TGTTGCATTCATCGTTGGTGCTCCAAGAGCACCGACATCAATTACCAATTC

>M6-PGSC0003DMG400017645-(rev)M6LRR-RLK\_434

TATAACTGAGTTAACAATTGTTGGTAACAAAAAATCCCCTTTGAGTCTTAAAATCCTCTTCTCCACAAG  
CCCTTTCTGGGAAATTTCAATTGATTCATTTTTCACTGTTGTTACTAA

>M6-PGSC0003DMG400017645-(rev)M6LRR-RLK\_4340

AATCTGCTGTTGCATTCATCGTTGGTGCTCCAAGAGCACCGACATCAATTACCAATTCCAGCCACAACAG  
CTGAATTGGCTGATCAGGCTGCTTCTTCTATCTCTGCATTCTCCAGCACC

>M6-PGSC0003DMG400017645-(rev)M6LRR-RLK\_4402

CACAACAGCTGAATTGGCTGATCAGGCTGCTTCTTCTATCTCTGCATTCTCCAGCACCCAAAGAACAATA  
ACAGAGTAGTTAAGTATTCCAAGTATCTTTCTCTCCAGCCATTACTTTG

>M6-PGSC0003DMG400017645-(rev)M6LRR-RLK\_4464

GAACAATAACAGAGTAGTTAAGTATTCCAAGTATCTTTCTCTCCAGCCATTACTTTGTCGACACTACTAA  
AAAATCACTATTTTCTCCAAGAAATTTTCACTGATATTTTGATTGAAT

>M6-PGSC0003DMG400017645-(rev)M6LRR-RLK\_4526

CACTACTAAAAAATCACTATTTTCTCCAAGAAATTTTCACTGATATTTTGATTGAATCGGTGAGAAAAGA  
GTAATGTTCTCGTACAAAAAACTAGAAAGTTTACCACTATTTTATTGA

>M6-PGSC0003DMG400017645-(rev)M6LRR-RLK\_4650

CTGTTTTCCACCATGCATATTCCCAGTGAAGTATTTGGTGAAAAACATGTTCTATAACACAAATTTCTC

ACTAATTCACCGTGGAAAAATCTATTACTACTACTCATCATTAGTACT

>M6-PGSC0003DMG400017645-(rev)M6LRR-RLK\_4712

AAATTTCTCACTAATTCACCGTGGAAAAATCTATTACTACTACTCATCATTAGTACTTCATCCGTTTCCTC  
TTATGTTGAACTTGATTGATTAGGCGCGGCTAAGAGCAACATGGGAGG

>M6-PGSC0003DMG400017645-(rev)M6LRR-RLK\_4764

AGTACTTCATCCGTTTCCTCTTATGTTGAACTTGATTGATTAGGCGCGGCTAAGAGCAACATGGGAGGTT  
TTAAAGTTCAATTTTTTCCAAATATAGAAAAAGACACTTTTTATAACGTAC

>M6-PGSC0003DMG400017645-(rev)M6LRR-RLK\_496

CTCCACAAGCCCTTTCTGGGAAATTTTCAATTGATTCAATTTTTCACTGTTGTTACTAAGCTTTCTAGTTTAA  
AAAAGTTGTCTTTAGTTTCTCTTGTTTGTGGGGTTCATTGCCTGCTA

>M6-PGSC0003DMG400017645-(rev)M6LRR-RLK\_558

TCTAGTTTAAAAAAGTTGTCTTTAGTTTCTCTTGTTTGTGGGGTTCATTGCCTGCTAAGATTAGTAGGTT  
ACATTCACCTGAGGTACTTAATATAACTTCAAATTTCACTCTTGTTGAG

>M6-PGSC0003DMG400017645-(rev)M6LRR-RLK\_62

TCTCATCATTTAAAATCACTTTTCTCTATGTATCATTACTCACTCTATTATAGATTCTTGAATTATTTCACTC  
CACATTTCTCTTAAATCACTTCAAAAAACAAAAAAGTGCTCACTC

>M6-PGSC0003DMG400017645-(rev)M6LRR-RLK\_620

TAGTAGGTTACATTCACCTTGAGGTACTTAATATAACTTCAAATTTCACTCTTGTTGAGATTCCATCATCTAT  
AGTGAATTTCAAGAACCTGAAATCTCTTGTTTGGCTAGAAATTTGTT

>M6-PGSC0003DMG400017645-(rev)M6LRR-RLK\_682

CATCATCTATAGTGAATTTCAAGAACCTGAAATCTCTTGTTTGGCTAGAAATTTGTTTAAATGGAAGTGTA  
CCAGATCTGAAAGGGTTAAAAATACTTGAAGAGTTGGATTTGAGTGGTA

>M6-PGSC0003DMG400017645-(rev)M6LRR-RLK\_744

GGAAGTGTACCAGATCTGAAAGGGTTAAAAATACTTGAAGAGTTGGATTTGAGTGGTAATAATTTAGGA  
CCAAAGTTTCCATCTTTAGGTGATAACAACAACAATCTTGTTTCACTGAAT

>M6-PGSC0003DMG400017645-(rev)M6LRR-RLK\_806

TTTAGGACCAAAGTTTCCATCTTTAGGTGATAACAACAACAATCTTGTTTCACTGAATTTGAGTAACAATC  
TCTTTAGATCAGAAATACCTAATGGACTCAACAAGTTTACACATTTGCA

>M6-PGSC0003DMG400017645-(rev)M6LRR-RLK\_868

GTAACAATCTCTTTAGATCAGAAATACCTAATGGACTCAACAAGTTTACACATTTGCAAATCTTGATTTG  
TCTTCTAACAAACTAGTTGGTCCAATGCCTTCTTTCCTGTTTTCACTTC

>M6-PGSC0003DMG400017645-(rev)M6LRR-RLK\_930

CTTGATTTGTCTTCTAACAAACTAGTTGGTCCAATGCCTTCTTTCCTGTTTTCACTTCCAGCAATTCAGTCT  
ATTAGTATTGCTAAGAATCAGCTTAGTGGTGCCCTTCCAGGAAGTGTG

>M6-PGSC0003DMG400017645-(rev)M6LRR-RLK\_992

AATTCAGTCTATTAGTATTGCTAAGAATCAGCTTAGTGGTGCCCTTCCAGGAAGTGTGTCTTGTAGCAAC  
AATCTGAAATTTGTCGATTTTTCGAGTAATTTATTGATGGGAAAGTTGCC

>M6-PGSC0003DMG400017662M6RLKmalectin\_0

CTAAACATGCACTTTTTCTAATTCTAGGAACTGCAGCAGAAATGAAAACTGGAATGCTGCAAAGTAT  
TTTCATACAAAGAAATCAAAGCTGCTACAAACAATTCAAAGAGGTTATT

>M6-PGSC0003DMG400017662M6RLKmalectin\_1037

ACCACTTAGCCACTCGGGGTCTCCAGATTCTTCAATTTAGTTCTATGGGTAATAACTAGTCTTATAATGT  
TTTACACACAAAAGCATTTCATTGACTTCTATAATACTCACATGTTGT

>M6-PGSC0003DMG400017662M6RLKmalectin\_1098

CTTATAATGTTTTACACACAAAAGCATTTCATTGACTTCTATAATACTCACATGTTGTAAACTAAATGTG  
AAAATTCAGGCAAAGCCGTACTTGCATGCTGGTGCATTTGAGATAGTA

>M6-PGSC0003DMG400017662M6RLKmalectin\_1159

ACTAAATGTGAAAATTTAGGCAAAGCCGTACTTGCATGCTGGTGCATTTGAGATAGTAGATGAGAGCA  
TAAAAGGAACATTTGACACAGAAAGCATGAGAAAAGCTGCTTTAATCGCCT

>M6-PGSC0003DMG400017662M6RLKmalectin\_122

CCGTGGTAGTTTTGGATCTGTTTATCTTGGGAAGCTTCTGATGGTAAACAAGTTGCTGTTAAAGTTCGA  
TTCGATAAACTCAACTGGGTGCTGATTCTTTTATCAATGAGGTTTCGTCA

>M6-PGSC0003DMG400017662M6RLKmalectin\_1220

TGAGAGCATAAAAGGAACATTTGACACAGAAAGCATGAGAAAAGCTGCTTTAATCGCCTCAAGGTCAGT  
GGAGAGGGATGCATTGCGAAGGCCGAGTATTGCAGAAGTATTAGCTGAGCT

>M6-PGSC0003DMG400017662M6RLKmalectin\_1281

AGGTCAGTGGAGAGGGATGCATTGCGAAGGCCGAGTATTGCAGAAGTATTAGCTGAGCTCAAAGATGC  
ATACAGCATTCAACTTCTTCTATTTAACATCTGAAGGACTAGCCAATTGATAA

>M6-PGSC0003DMG400017662M6RLKmalectin\_1342

AAGATGCATACAGCATTCAACTTTCCTATTTAACATCTGAAGGACTAGCCAATTGATAAATTAGACCTTCA  
CTACTGCAGCTCACAATTTGCAAATATAAGGTTTCTCTAGTTGAATCAA

>M6-PGSC0003DMG400017662M6RLKmalectin\_1403

TAGACCTTCACTACTGCAGCTCACAATTTGCAAATATAAGGTTTCTCTAGTTGAATCAAATGTTACTGTAA  
CTTTATGACAACCTTTAAAATTTGAGCTCGGAAATGTTTTAAGTTATTGA

>M6-PGSC0003DMG400017662M6RLKmalectin\_1464

GTTACTGTAACCTTTATGACAACCTTTAAAATTTGAGCTCGGAAATGTTTTAAGTTATTGATATATATTACAT  
TTAAAGGTCTCCTTTCCCCTTGGAAGATAGGGGAAGTCGTGGATGATTT

>M6-PGSC0003DMG400017662M6RLKmalectin\_1525

TATATTACATTTAAAGGTCTCCTTTCCCCTTGGAAGATAGGGGAAGTCGTGGATGATTTTCAACAAATAA  
TAACAATGTCCATCCAGGCTTGCATCAGTGCTCGCCTCTACATTCTTTAC

>M6-PGSC0003DMG400017662M6RLKmalectin\_1586

AACAAATAATAACAATGTCCATCCAGGCTTGCATCAGTGCTCGCCTCTACATTCTTTACGACTTGTGAACC  
AATCATAAAAGTAATGAGTTGGCCTAACCCAGAAAAGTGGCGCCGTAGAT

>M6-PGSC0003DMG400017662M6RLKmalectin\_1647

CTTGTGAACCAATCATAAAAGTAATGAGTTGGCCTAACCCAGAAAAGTGGCGCCGTAGATATAGGAATAA  
TGCTGTAGAAGCAGCCACTGCATAGGGGAATATAGTCCAGATTCCTGCAC

>M6-PGSC0003DMG400017662M6RLKmalectin\_1708

AGGAATAATGCTGTAGAAGCAGCCACTGCATAGGGGAATATAGTCCAGATTCCTGCACATTTTCATAGG  
AACCAGAATTGGATTCTTTGGTAATAAATGCAAAATTGGACAGAGCAAAG

>M6-PGSC0003DMG400017662M6RLKmalectin\_1769

TTCATAGGAACCCAGAATTGGATTCTTTGGTAATAAATGCAAAATTGGACAGAGCAAAGAATTATGCTG  
TACCACTACAGTAGCAACTGTTGCAATGGCAAATACTGGACGCTCTCTTAG

>M6-PGSC0003DMG400017662M6RLKmalectin\_183

AAAGTTCGATTCGATAAAACTCAACTGGGTGCTGATTCTTTTATCAATGAGGTTTCGTCCTATAACCCATGC  
TAGTTCAGTTCAGTCTACAAAGAAAAAGAGATTCAAGAGCTCTCTTT

>M6-PGSC0003DMG400017662M6RLKmalectin\_1830

TTATGCTGTACCACTACAGTAGCAACTGTTGCAATGGCAAATACTGGACGCTCTCTTAGTAAAAATCCAA



TTGTCAACTGCATTTTGGAGTAAAAGAAAAGGAGATAAGGCATGAACAGC

>M6-PGSC0003DMG400017662M6RLKmalectin\_1891

AAAATCCAATTGTCAACTGCATTTTGGAGTAAAAGAAAAGGAGATAAGGCATGAACAGCAGGTAAACTT

AAAAGTGGAAATCTGTTTCAAACACAATACTAGTAACCTGAATTGGAAGAG

>M6-PGSC0003DMG400017662M6RLKmalectin\_1952

GTAAACTTAAAAGTGGAAATCTGTTTCAAACACAATACTAGTAACCTGAATTGGAAGAGTTATCAAGCCG

CCACAACAGACACCAGCAAAGAAACACTCTGGTGATATATCCTGCAATAT

>M6-PGSC0003DMG400017662M6RLKmalectin\_2013

ATCAAGCCGCCACAACAGACACCAGCAAAGAAACACTCTGGTGATATATCCTGCAATATTTATGAGCAG

AGAAATGATTGAAACAGTTATAAATATCTGTTTACCGCGGGAGAATGCATT

>M6-PGSC0003DMG400017662M6RLKmalectin\_2074

ATGAGCAGAGAAATGATTGAAACAGTTATAAATATCTGTTTACCGCGGGAGAATGCATTGAGTTGCTAA

CAATTTCTATATAGGGTTATAGCTACAACATAACACCATCATAAGATTTAT

>M6-PGSC0003DMG400017662M6RLKmalectin\_2135

GTTGCTAACAATTTCTATATAGGGTTATAGCTACAACATAACACCATCATAAGATTTATGCATATAGACAT

AAGGAAATTGGTTGCATTGCATTCTTAGTGATTGAATTTCTAGTCAGAG

>M6-PGSC0003DMG400017662M6RLKmalectin\_2196

ATATAGACATAAGGAAATTGGTTGCATTGCATTCTTAGTGATTGAATTTCTAGTCAGAGTAGGCTCAGAA

TTAGCAAAGGAAAGTTGTAAGTACGGAACGGGGTCTGTCTATCTTCTGT

>M6-PGSC0003DMG400017662M6RLKmalectin\_2257

GGCTCAGAATTAGCAAAGGAAAGTTGTAAGTACGGAACGGGGTCTGTCTATCTTCTGTTTTATAGCAG

GACTTCTACACTAAATATATCAATCGTTTCAAAGATGAAATGAAATTATCA

>M6-PGSC0003DMG400017662M6RLKmalectin\_2318

TATAGCAGGACTTCTACACTAAATATATCAATCGTTTCAAAGATGAAATGAAATTATCAGAAGTTCTAAG

CATTGTTATTGACCATCCTAACATATCTGACACTTTTGTCTGTAGGTAA

>M6-PGSC0003DMG400017662M6RLKmalectin\_2379

ACTTCTAAGCATTGTTATTGACCATCCTAACATATCTGACACTTTTGTCTGTAGGTAAACAGTATCATGCCT

CAAAGTGTAGTACCCAAAAGAGGGAACAAGAAAGTAGCAGAAGACA

>M6-PGSC0003DMG400017662M6RLKmalectin\_244

ATACCCATGCTAGTTCAGTTCAGTCTACAAAGAAAAAGAGATTCAAGAGCTCTCTTTATTATCTGTAG  
GTAACCCTTCTATCACAAATCAGTCATCCAACCTTGTGTGTCGTTAGAAGG

>M6-PGSC0003DMG400017662M6RLKmalectin\_2440

GTATCATGCCTCAAACTTGTAGTACCCAAAAGAGGGAACAAGAAAGTAGCAGAAGACAGTTAAGCTG  
ATCGAACCTCAGCATGTTAAGAAGGAAAACAGAAAAAAATCACTCACCAG

>M6-PGSC0003DMG400017662M6RLKmalectin\_2501

TAAGCTGATCGAACCTCAGCATGTTAAGAAGGAAAACAGAAAAAAATCACTCACCAGAGCCCCTGCA  
AGGAAAGCAGTGGGATTTCTTACTCCAAGAGAAAACCGTTCCACTGCATCA

>M6-PGSC0003DMG400017662M6RLKmalectin\_2562

CCCCTGCAAGGAAAGCAGTGGGATTTCTTACTCCAAGAGAAAACCGTTCCACTGCATCAGCATAGGAAA  
ATCCACCAGTAAGCAATTAAGAAGTCAAGGAACAAGAAGATCATATTTGT

>M6-PGSC0003DMG400017662M6RLKmalectin\_2623

ATAGGAAAATCCACCAGTAAGCAATTAAGAAGTCAAGGAACAAGAAGATCATATTTGTTAGAACAAGT  
ATTTTCCAGAAATATGATAGCACACAAGAAACATCAGCTTTTTTGAATG

>M6-PGSC0003DMG400017662M6RLKmalectin\_2684

GAACAAGTATTTTCCAGAAATATGATAGCACACAAGAAACATCAGCTTTTTTGAATGTGAAGAAAAG  
TTCAGAGATTTAGGCATATAGACATAAGGATTAAGATGGACTAGAACTATG

>M6-PGSC0003DMG400017662M6RLKmalectin\_2745

AAGAAAAGTTCAGAGATTTAGGCATATAGACATAAGGATTAAGATGGACTAGAACTATGCAAACCTTTA  
CGATAGAGGATAAATTTTGAGGTAGATCACTAATTTCAATCTGACATTTCC

>M6-PGSC0003DMG400017662M6RLKmalectin\_2806

AACTCTTACGATAGAGGATAAATTTTGAGGTAGATCACTAATTTCAATCTGACATTTCCAGCAAATAGAG  
AATCTTAACAAATAATTAATTGTACTCCTCCAGTACCAACATAGATATG

>M6-PGSC0003DMG400017662M6RLKmalectin\_2867

CAAATAGAGAATCTTAACAAATAATTAATTGTACTCCTCCAGTACCAACATAGATATGTGATAGTACTG  
ATGCTACATTATGATCATAGTAATAAGTGTGCGCATATCCAATGAAGAGG

>M6-PGSC0003DMG400017662M6RLKmalectin\_305

TATCTGTAGGTAACCCTTCTATCACAAATCAGTCATCCAACCTTGTGTGTCGTTAGAAGGATTCTGCCATGA  
GTCAAAGCAACAAATTCTAGTTTATGAGTATTTACCTGGAGGATCACTG

>M6-PGSC0003DMG400017662M6RLKmalectin\_3172

AAAGAAAGAAAAGTGTGAGCATATCAGTGGAAGCAAGGGTTTCACAATGATTAAGTTTTTACAATGC  
AAGAGACATTGGATTAATTCAGCATCTTTGTTGCAACTCACCAAACCAA

>M6-PGSC0003DMG400017662M6RLKmalectin\_3233

CACAATGCAAGAGACATTGGATTAATTCAGCATCTTTGTTGCAACTCACCAAACCAATGAGATTCCCA  
TGTTTTTGTACAGCGTTTGTAATATCTCTTGCCTTCTGATTCCGATCCC

>M6-PGSC0003DMG400017662M6RLKmalectin\_3294

AGATTCCCATGTTTTTGTACAGCGTTTGTAATATCTCTTGCCTTCTGATTCCGATCCCTAACTACAACCAA  
ATTGACTCTGAATTTCCAAAATCAAGTTCATATATTTTTAAGTAAGGC

>M6-PGSC0003DMG400017662M6RLKmalectin\_3355

ACTACAACCAAATTGACTCTGAATTTCCAAAATCAAGTTCATATATTTTTAAGTAAGGCAAGGAGGCTGA  
ATATTTTAACATGAATAATATGCTAGTAGCCAAAACAAACCTTTGAGCAA

>M6-PGSC0003DMG400017662M6RLKmalectin\_3416

GGAGGCTGAATATTTTAACATGAATAATATGCTAGTAGCCAAAACAAACCTTTGAGCAAACATCATCGG  
ATGCACCAGATTGCTTAAAAAGCTTCCAAGGTAAAAAGGTATCATATCGC

>M6-PGSC0003DMG400017662M6RLKmalectin\_3477

ATCATCGGATGCACCAGATTGCTTAAAAAGCTTCCAAGGTAAAAAGGTATCATATCGCTGATGCAAAC  
ACCCCTGAATATTCAGGATCCACAACAATATTAACATTGTGGAAATCACTG

>M6-PGSC0003DMG400017662M6RLKmalectin\_3538

ATGCAAACACCCCTGAATATTCAGGATCCACAACAATATTAACATTGTGGAAATCACTGTTTCTACATAAT  
CAATTTTTACTGGCACTGAAGGTGCATAAAATCTTTTAATACAACAAAA

>M6-PGSC0003DMG400017662M6RLKmalectin\_3599

TCTACATAATCAATTTTTACTGGCACTGAAGGTGCATAAAATCTTTTAATACAACAAAAGAAAAAGAAGG  
TTGTGTGTACTGCAGAATCATGAAAGGTTGGTCTGCACGTGCATTATCA

>M6-PGSC0003DMG400017662M6RLKmalectin\_366

TCTGCCATGAGTCAAAGCAACAAATTCTAGTTTATGAGTATTTACCTGGAGGATCACTGGCTGATAACCT  
CTATGGTACGTACGCGTGATCTACCCATATTCACACTTTAAATCCATC

>M6-PGSC0003DMG400017662M6RLKmalectin\_3660

AAAAGAAGGTTGTGTGTACTGCAGAATCATGAAAGGTTGGTCTGCACGTGCATTATCAAAATTACTCA

GAGGACACAGTTTCAACTTACCAGTACACCCAAAGAATAGTGGATGTTATA

>M6-PGSC0003DMG400017662M6RLKmalectin\_3721

ATTACTCAGAGGACACAGTTTCAACTTACCAGTACACCCAAAGAATAGTGGATGTTATATATGGAGCATT  
CCTGGAAAAGGAGTTCACTAGTGATTGCCACGTCCCATCTAGAACAAGCA

>M6-PGSC0003DMG400017662M6RLKmalectin\_3782

TGGAGCATTCTGGAAAAGGAGTTCACTAGTGATTGCCACGTCCCATCTAGAACAAGCAACCGTGCTAT  
AGAGATTCCAACCTACACCATTCAATGAATTTGACTATAATAGTGAAC

>M6-PGSC0003DMG400017662M6RLKmalectin\_3843

CGTGCTATAGAGATTCCAACCTACACCATTCAATGAATTTGACTATAATAGTGAACATCATGAAGAA  
GGATAACAAGCCATTTTAGTGCCTACTTAAATGAATATAATAGTGAACAT

>M6-PGSC0003DMG400017662M6RLKmalectin\_3904

CATGAAGAAGGATAACAAGCCATTTTAGTGCCTACTTAAATGAATATAATAGTGAACATCATGAATAAG  
ATAACAAGCCAACCTTAGTGCCTATTCAAATGACTATAATAGTGAACATCAT

>M6-PGSC0003DMG400017662M6RLKmalectin\_3965

TGAATAAGATAACAAGCCAACCTTAGTGCCTATTCAAATGACTATAATAGTGAACATCATGAAGAAGGAT  
AACAAGCCAACCTTAGTGCCTATTCAATGACTATAATAGTGAACATCAT

>M6-PGSC0003DMG400017662M6RLKmalectin\_4026

AGAAGGATAACAAGCCAACCTTAGTGCCTATTCAATGACTATAATAGTGAACATCATGAAGAAGGAT  
TTTTTAGACAGGGTTCTAGCTTTTAACTTTTTTAGACAGGGTTCTAGCTT

>M6-PGSC0003DMG400017662M6RLKmalectin\_4087

CTTTAACTTTTTTAGACAGGGTTCTAGCTTTTAACTTTTTTAGACAGGGTTCTAGCTTTTAACTTTATAA  
AATTTGAAGCTTCTTCACTCTTTTCTCCACATGGCCTCTCACTT

>M6-PGSC0003DMG400017662M6RLKmalectin\_4148

TAACTTTATAAAATTTTGAAGCTTCTTCACTCTTTTCTCCACATGGCCTCTCACTTTTCTCACATCAC  
TAAAGAACAACCTAAAGTCACTAATTTTAAAGCAATGTCAAATCA

>M6-PGSC0003DMG400017662M6RLKmalectin\_4209

TCCTCACATCACTAAAGAACAACCTCTAAAGTCACTAATTTTAAAGCAATGTCAAATCAAAGAAGAAAA  
ATAATCGCAGGAAACTATACTATCTGCTACGTGGCCATCAATCAGAAGA

>M6-PGSC0003DMG400017662M6RLKmalectin\_427

TGATAACCTCTATGGTACGTCACGCGTGATCTCACCCATATTCACACTTTAAATCCATCATCCTCTTCTGTG  
ACTTATCGTTTTCTAACTCTTAATAACTGTCTCAGGAGCAATGAGCAA

>M6-PGSC0003DMG400017662M6RLKmalectin\_4270

AGAAGAAAAATAATCGCAGGAAACTATACTATCTGCTACGTGGCCATCAATCAGAAGACCTGTTAGCA  
GGGTAGTTCATGAACAGAAGTACCAGCAAAGGAGACGGACCCATATATTCA

>M6-PGSC0003DMG400017662M6RLKmalectin\_4331

TGTTAGCAGGGTAGTTCATGAACAGAAGTACCAGCAAAGGAGACGGACCCATATATTCAAAGCCTCCTC  
ACTGATAAAAAGTCCAAAACCAGCTGCCATCAGAAGCCAAAAGTAGATCCA

>M6-PGSC0003DMG400017662M6RLKmalectin\_4392

GCCTCCTCACTGATAAAAAGTCCAAAACCAGCTGCCATCAGAAGCCAAAAGTAGATCCATCTGAAGAAT  
GAGAAGTACAAGGGCTTAATATCACATCCGAGTACGCTAATAGATAAGAGA

>M6-PGSC0003DMG400017662M6RLKmalectin\_4453

TGAAGAATGAGAAGTACAAGGGCTTAATATCACATCCGAGTACGCTAATAGATAAGAGATCCAGGATAT  
CAATTATATATTAAGCATCTATCATAGTAGTCGAATAAAGTATAATAAACA

>M6-PGSC0003DMG400017662M6RLKmalectin\_4514

CAGGATATCAATTATATATTAAGCATCTATCATAGTAGTCGAATAAAGTATAATAAACATAAGGTTGATC  
TTGTTTTCTTCTTAGATCATGGTGAAACCCCTGATGAATGAAAAGTCGCA

>M6-PGSC0003DMG400017662M6RLKmalectin\_4575

AGGTTGATCTTGTTTTCTTCTTAGATCATGGTGAAACCCCTGATGAATGAAAAGTCGCAAGGATAATTAG  
TTGCTTACCCTGGAGCATATTCTGGCAGCATGACTCTATAGCCAAAAGCT

>M6-PGSC0003DMG400017662M6RLKmalectin\_4636

GATAATTAGTTGCTTACCCTGGAGCATATTCTGGCAGCATGACTCTATAGCCAAAAGCTTTGAAAGAAAA  
ACCAGGAGCAGGTGTAGAAATTGTGGAAGATGATGATCCATCAACCAGAT

>M6-PGSC0003DMG400017662M6RLKmalectin\_4697

GAAAGAAAAACCAGGAGCAGGTGTAGAAATTGTGGAAGATGATGATCCATCAACCAGATATTGAATTC  
CAAAATTTGATCCTTGATTAGGCTGCTTAAGGCCTATGGATAGAAATGTAAT

>M6-PGSC0003DMG400017662M6RLKmalectin\_4758

TGAATTCCAAAATTTGATCCTTGATTAGGCTGCTTAAGGCCTATGGATAGAAATGTAATAGTAGCAGCTA  
TACCTAATGCTATTGCCAGTTTTGCCAAAATGAACTTCCTGTGCGAACA

>M6-PGSC0003DMG400017662M6RLKmalectin\_4819

TAGCAGCTATACCTAATGCTATTGCCAGTTTTGCCAAAAATGAACTTCCTGTGCGAACAGTTTTATCTTCC  
AGACTACCAGTTAAGTCATCAGAAGCCTTGTGCACCATCTCCTCAGCAT

>M6-PGSC0003DMG400017662M6RLKmalectin\_488

CCTCTTCTGTCACTTATCGTTTTCTAACTCTAATAACTGTCTCAGGAGCAATGAGCAAGAAATTGACACT  
AAGCTGGGTGCGCAGACTGAAAATTGCAGTTGATGCTGCAAAAGGTATG

>M6-PGSC0003DMG400017662M6RLKmalectin\_4880

TTTATCTTCCAGACTACCAGTTAAGTCATCAGAAGCCTTGTGCACCATCTCCTCAGCATCCTCCGACTGTC  
CAGCTTCATAATTTTTAGCACTCACAAGCTGAAATCTTTTGATCCTACA

>M6-PGSC0003DMG400017662M6RLKmalectin\_4941

TCCGACTGTCCAGCTTCATAATTTTTAGCACTCACAAGCTGAAATCTTTTGATCCTACACTTTGAATAGAG  
AATTTGCCATCATTATACAAGGCCCTTACAGTGCATAGATAAGCTCG

>M6-PGSC0003DMG400017662M6RLKmalectin\_5002

TTGAATAGAGAATTTGCCATCATTATACAAGGCCCTTACAGTGCATAGATAAGCTCGGTACACTGAAT  
GTCTTCATTAGCTGTTTAAGGAGAGATCTCTTGAATTTCTAGGTGATACA

>M6-PGSC0003DMG400017662M6RLKmalectin\_5063

ACACTGAATGTCTTCATTAGCTGTTTAAGGAGAGATCTCTTGAATTTCTAGGTGATACATAAATAATAAT  
ATAATCAAATAACAAATAGCATTAGATAAGACATCTCCTTGTACATTCAA

>M6-PGSC0003DMG400017662M6RLKmalectin\_5124

AATAATAATATAATCAAATAACAAATAGCATTAGATAAGACATCTCCTTGTACATTCAATTCACAAAATGT  
ACAGGCGTCTATGATGTTGTATATGTTAGCACTAAGTTGGAAGCGAACA

>M6-PGSC0003DMG400017662M6RLKmalectin\_5185

CACAAAATGTACAGGCGTCTATGATGTTGTATATGTTAGCACTAAGTTGGAAGCGAACATAAAAGGGGT  
TTACAATTCTACTCTAAGAATTTAAAGAGTATATATCAACTGCCCTAGGA

>M6-PGSC0003DMG400017662M6RLKmalectin\_5246

AAAGGGGTTTACAATTCTACTCTAAGAATTTAAAGAGTATATATCAACTGCCCTAGGACTTCAGTCTAG  
TGGTAAGTGCAGCATGTAACGTGTAGGTTAGGCGCACATCACAAGTTTGA

>M6-PGSC0003DMG400017662M6RLKmalectin\_5307

TCAGTCTAGTGGTAAGTGCAGCATGTAACGTGTAGGTTAGGCGCACATCACAAGTTTGACCTGCCACAT

ACAAAAGTCTGATGATTAAGTGGAAAAGGATAGAGGGAGGACTCTTTAGTT

>M6-PGSC0003DMG400017662M6RLKmalectin\_5368

TGCCACATACAAAAGTCTGATGATTAAGTGGAAAAGGATAGAGGGAGGACTCTTTAGTTATCCAACGAG  
TTTCAAACCGTGTGCCCTCGAGGATCTCTCGGTTATTAATAAAGTAGTT

>M6-PGSC0003DMG400017662M6RLKmalectin\_5429

CCAACGAGTTTCAAACCGTGTGCCCTCGAGGATCTCTCGGTTATTAATAAAGTAGTTTCAGATCTACCT  
TCTTTCATCTGATCTGCCACTGCTCTTAGCATAGGTTTATTTTACATAG

>M6-PGSC0003DMG400017662M6RLKmalectin\_549

AATTGACACTAAGCTGGGTGCGCAGACTGAAAATTGCAGTTGATGCTGCAAAAGGTATGAGTAAAGAG  
AGGCATTATCATTACTTAAGTTTTATATAGTTTTTAATGTTTGATTATATAA

>M6-PGSC0003DMG400017662M6RLKmalectin\_5490

GATCTACCTTCTTTCATCTGATCTGCCACTGCTCTTAGCATAGGTTTATTTTACATAGCCATAGATGTTTT  
CAACATCTTATGTTGGTGAACAAAGACTTGGGTGACATTCCGACATT

>M6-PGSC0003DMG400017662M6RLKmalectin\_5673

GAAATTTCACTGGGTATGTTGTCGTCGTTGCTGGTCCATGCTACGAAATTAGTGATGTCCTATATGACA  
AAAAATGCTGCACTGCATATTACAAATAGAGATTTTAGGGACATCCAAG

>M6-PGSC0003DMG400017662M6RLKmalectin\_61

CAAAAGTATTTTCATACAAAGAAATCAAAGCTGCTACAAACAACCTCAAAGAGGTTATTGGCCGTGGTA  
GTTTTGGATCTGTTTATCTTGGGAAGCTCCTGATGGTAAACAAGTTGCTG

>M6-PGSC0003DMG400017662M6RLKmalectin\_610

TAAAGAGAGGCATTATCATTACTTAAGTTTTATATAGTTTTTAATGTTTGATTATATAACTTGTAAGGTT  
TGGATTACTTGACAATGGAAGTGAGCCAAGAATCATACACCGTGATGT

>M6-PGSC0003DMG400017662M6RLKmalectin\_6222

AATATATAAATTTTGTTCAAAAAATTGAAGATTCCTAGCCCGAATTCAGGCTCAAATTTGTGACACAA  
ATTGAGACAAAGAGAGTATGATGAAAATATTGAATAGAGAAAAGTAGTCA

>M6-PGSC0003DMG400017662M6RLKmalectin\_6283

GTGACACAAATTGAGACAAAGAGAGTATGATGAAAATATTGAATAGAGAAAAGTAGTCATAGTAAAGA  
TAACCAAATTAATGAAACAACAACGAAATTTCAAACGACTAAATGAATCCAT

>M6-PGSC0003DMG400017662M6RLKmalectin\_6344

GTAAAGATAACCAAATTAATGAAACAACAACGAAATTTCAAACGACTAAATGAATCCATTTGTATCTATT  
CCACTCTATTAATGCAGTAGAATTCCGTATCATCATAGTTAAACCATATT

>M6-PGSC0003DMG400017662M6RLKmalectin\_6405

GTATCTATTCCACTCTATTAATGCAGTAGAATTCCGTATCATCATAGTTAAACCATATTTACACATACAGC  
AACCATCTCCTATGTAGGAAGTTAGATATTGAGTATATTTTGAACCTA

>M6-PGSC0003DMG400017662M6RLKmalectin\_6466

CACATACAGCAACCATTCTCCTATGTAGGAAGTTAGATATTGAGTATATTTTGAACCTACAGCAATACCTA  
GAGTATGAAGAGTAATTGTAAGTACTGCTGCTGCGGTGCACTACGGAGTTTCC

>M6-PGSC0003DMG400017662M6RLKmalectin\_6527

GCAATACCTAGAGTATGAAGAGTAATTGTAAGTACTGCTGCTGCGGTGCACTACGGAGTTTCCACCGTCTACG  
AGTAAAACCGGCGAGGTGGTTAAGTTCTCGTAGAGTTGCAGATTGAGATGA

>M6-PGSC0003DMG400017662M6RLKmalectin\_6588

CGTCTACGAGTAAAACCGGCGAGGTGGTTAAGTTCTCGTAGAGTTGCAGATTGAGATGAAGATTATGAA  
AGAGATAGCAATATTTGATTATTACATAGAGTCACCATTATCTCTTCTCTA

>M6-PGSC0003DMG400017662M6RLKmalectin\_6649

ATTATGAAAGAGATAGCAATATTTGATTATTACATAGAGTCACCATTATCTCTTCTCTAGCGGCGTTGTTG  
TGGTGGAAGTTGTTTGTGTTACCGGGCGGGAATATTGTTATTGGTTTGGT

>M6-PGSC0003DMG400017662M6RLKmalectin\_671

TGTAAGGTTTGGATTACTTGCACAATGGAAGTGAGCCAAGAATCATAACCGTGATGTGAAGAGCAGC  
AATATACTTCTGGATGCAGACATTAATGCTAAGGTATCTGATTTTGGCCTT

>M6-PGSC0003DMG400017662M6RLKmalectin\_6710

GGCGTTGTTGTGGTGAAGTTGTTTGTGTTACCGGGCGGGAATATTGTTATTGGTTTGGTAAGGAGTATA  
TGCTCCTCGGGATTGAAAATCTTCAAGTCCTGTACAGTTGACACGTGTCA

>M6-PGSC0003DMG400017662M6RLKmalectin\_6771

GGAGTATATGCTCCTCGGGATTGAAAATCTTCAAGTCCTGTACAGTTGACACGTGTCAGATCTGATTAG  
ATGTTTGTGGACCAATGAATTGATAGTCTTATAGTTGTATCCCTAGCGT

>M6-PGSC0003DMG400017662M6RLKmalectin\_732

AGAGCAGCAATATACTTCTGGATGCAGACATTAATGCTAAGGTATCTGATTTTGGCCTTTCTAAGCAAGT  
AACTCAATCAGATGCAACTCATGTTAGCACTGTTGTCAAAGGCACTGCTG



>M6-PGSC0003DMG400017662M6RLKmalectin\_793

TAAGCAAGTAACTCAATCAGATGCAACTCATGTTAGCACTGTTGTCAAAGGCACTGCTGGCTATCTTGAC  
CCTGAGTAAGCTTCAAGTCATTTATCATCCAGTTTAATATTTGGTCCTTC

>M6-PGSC0003DMG400017662M6RLKmalectin\_854

TATCTTGACCCTGAGTAAGCTTCAAGTCATTTATCATCCAGTTTAATATTTGGTCCTTCCTATCCTAATTCC  
TAAACCTCTCTTACTACCTGTCCTCAGATACTATTCCATTCGACAGCT

>M6-PGSC0003DMG400017662M6RLKmalectin\_915

ATCCTAATTCCTAAACCTCTTACTACCTGTCCTCAGATACTATTCCATTCGACAGCTCACAGAAAAGAG  
TGACATATACAGTTTTGGAGTCGTTCTTCTTGAACCTATTTGTGGCCGA

>M6-PGSC0003DMG400017662M6RLKmalectin\_976

CAGAAAAGAGTGACATATACAGTTTTGGAGTCGTTCTTCTTGAACCTATTTGTGGCCGAGAACCACTTAG  
CCACTCGGGGTCTCCAGATTCTTCAATTTAGTTCTATGGGTAATAACTA

>M6-PGSC0003DMG400017666-(rev)M6LRR-RLP\_1037

CAAAGGACGAAAAATTGACTCTTCTGTCCCTCCTGCTTCTAGATTGGAGATTGAAATCAGGCTAAGAAA  
TCTCACGCATTTTTTTGAAAAATTTCTCGATACACGAGAGTGCCTCGTCA

>M6-PGSC0003DMG400017666-(rev)M6LRR-RLP\_1098

GCTAAGAAATCTCACGCATTTTTTTGAAAAATTTCTCGATACACGAGAGTGCCTCGTCAGTTTACAGTAG  
ATTATTACGCAATTTCTCTCCTGCATAGCGTTCAAATGGAACAGTTCAAA

>M6-PGSC0003DMG400017666-(rev)M6LRR-RLP\_1159

TTACAGTAGATTATTACGCAATTTCTCTCCTGCATAGCGTTCAAATGGAACAGTTCAAACCTGAGTCATTTG  
CCTCAGTGCTGGACTAGTTTTTAGGATTTCACTTCAGCTTATAATCAGT

>M6-PGSC0003DMG400017666-(rev)M6LRR-RLP\_122

TCTTTGACAAATATAGTTGCCAAATCTTTGACAAATATTGCTACCAAATTTCCACATTTGTGGCTTCCAAA  
TCTTTCACAAAAGAAAGATAAAATAACTTTCTTTCATCAAACAAAAGC

>M6-PGSC0003DMG400017666-(rev)M6LRR-RLP\_1220

GAGTCATTTGCCTCAGTGCTGGACTAGTTTTTAGGATTTCACTTCAGCTTATAATCAGTTTCCTTGTAATG  
ACCATTTTCTTTATAATCTGAAAAACAGTTGATATTTCTTTTTAATATT

>M6-PGSC0003DMG400017666-(rev)M6LRR-RLP\_1281

CCTTGTAATGACCATTTTCTTTATAATCTGAAAAACAGTTGATATTTCTTTTTAATATTTCTTTAGAAAACC

TTATGATAGAACACCACAAAATTCACCTTTTCGGTATTTAATGTTCCCT

>M6-PGSC0003DMG400017666-(rev)M6LRR-RLP\_1342

TTTAGAAAACCTTATGATAGAACACCACAAAATTCACCTTTTCGGTATTTAATGTTCCCTTATGTTACATGT

TCTTCTATTTTTCCCTCTTTTCTTTATTTTTGAAGTTAATCATCAAT

>M6-PGSC0003DMG400017666-(rev)M6LRR-RLP\_1403

ATGTTACATGTTCTTCTATTTTTCCCTCTTTTCTTTATTTTTGAAGTTAATCATCAATTGGGACATGGACCC

AGATAATCAAATAGGCTATGATCCCACATTCAGCAACTTGACCTATT

>M6-PGSC0003DMG400017666-(rev)M6LRR-RLP\_1464

GGACATGGACCCAGATAATCAAATAGGCTATGATCCCACATTCAGCAACTTGACCTATTCTTAGGACTAT

TAACTATACAAAACAAGGCAAGCGTTGTAATGAATAACCTACAGTTCCC

>M6-PGSC0003DMG400017666-(rev)M6LRR-RLP\_1525

TAGGACTATTA ACTATACAAAACAAGGCAAGCGTTGTAATGAATAACCTACAGTTCCCTCCAACACTAT

CTTCATTTATCTTTATCCCCGGCAAATTTAGAAAGTAGAAAATGTAAAA

>M6-PGSC0003DMG400017666-(rev)M6LRR-RLP\_1586

CAACACTATCTTCATTTATCTTTATCCCCGGCAAATTTAGAAAGTAGAAAATGTAAAACAGAGAAAATG

ACATGGAAGAAAGTGTGAAGATTTACCAAATGTAAATTCAAAATTC AAG

>M6-PGSC0003DMG400017666-(rev)M6LRR-RLP\_1647

GAGAAAATGACATGGAAGAAAGTGTGAAGATTTACCAAATGTAAATTCAAAATTC AAGAATGATTTCT

TTTTTTTATAAGAACA AATTTGGAGTCCCCACCCCCACCCCCTCTCTTGC

>M6-PGSC0003DMG400017666-(rev)M6LRR-RLP\_1708

TGATTTCTTTTTTTTATAAAGAACA AATTTGGAGTCCCCACCCCCACCCCCTCTCTTGCTTCAATTATTGAA

TTGCAAAGTAATAAACAGTCAAGAAACCAGACTCACAGACTCCATTA

>M6-PGSC0003DMG400017666-(rev)M6LRR-RLP\_1769

CAATTATTGAATTGCAAAGTAATAAACAGTCAAGAAACCAGACTCACAGACTCCATTATTTTTTTTCTAT

GGCTGTGAGCTGCAGACTGTAGATAAACATAGTTGTACCAATTACAAG

>M6-PGSC0003DMG400017666-(rev)M6LRR-RLP\_183

GGCTTCAAATCTTTCACAAAAGAAAGATAAAATAACTTTCTTTCATCAAACAAAAGCCACATTACAAC T

ATTATGATTTGTTCTAGCAAATCAACTGCTACTTGGGGAAAAATTGAT

>M6-PGSC0003DMG400017666-(rev)M6LRR-RLP\_1830

TTTTTCTATGGCTGTGAGCTGCAGACTGTAGATAAAACATAGTTGTACCAATTACAAGCAAAAGAGACA  
TAAATCATTCTTGATTACTCATCACTCTTAGCTCTTAGCATTCAACAGGT

>M6-PGSC0003DMG400017666-(rev)M6LRR-RLP\_1891

AAAGAGACATAAATCATTCTTGATTACTCATCACTCTTAGCTCTTAGCATTCAACAGGTAAAATAAAGTTG  
TTAGTAATTGAAGTTTGAACATTTATCTTCTTAAAATCATTTTGTGTT

>M6-PGSC0003DMG400017666-(rev)M6LRR-RLP\_1952

AATAAAGTTGTTAGTAATTGAAGTTTGAACATTTATCTTCTTAAAATCATTTTGTGTTTCCTTGTTTTGCT  
TGCACATTTAGAAATGGAGGTTGGCTTAGCAGTTGGTGGTGCATTTT

>M6-PGSC0003DMG400017666-(rev)M6LRR-RLP\_2074

TCTTCAGCTTTGAATGTTTTCTTTGATAGGCTTTCTCCTCATGGTGATCTGCTCAACATGTTTTGGAAGCAT  
AAGGATCATGTTTCACTCTTACAAAAGTTGGAGGACATTTTGTGTTT

>M6-PGSC0003DMG400017666-(rev)M6LRR-RLP\_2135

TTTGAAGCATAAAGGATCATGTTTCACTCTTACAAAAGTTGGAGGACATTTTGTGTTGGTCTTCAGATTGT  
GCTAAGTGATGCAGAGAATAAGCAAACATCAAATCGACACGTGAGCCAGT

>M6-PGSC0003DMG400017666-(rev)M6LRR-RLP\_2257

TTTAATAAGCTTCAGAGTGCTGTGGACGGCGCTGAAAAGTTGATAGAACAAGTCAATTATGAAGCTTTG  
AGGCTTAAGGTGGAAGGCCAGCATAAAAAATGGGCGGCCTGGGTAAGACAA

>M6-PGSC0003DMG400017666-(rev)M6LRR-RLP\_2379

CTTGCTAAAGCCGTTTACAATGATGAGAAGGTGAAGGACCATTTTGGTTTGCAAGCTTGGTTTTGTGTTT  
CTGACGCATATGATGCTTTTCAAGATAACAAAAGGTTTACTTCAAGAAGTT

>M6-PGSC0003DMG400017666-(rev)M6LRR-RLP\_244

CATTACAACACTATTATGATTTGTTCTAGCAAAATCAACTGCTACTTGGGGAAAAATTGATCATTGAACACA  
CTTTTGTGTACATGACATTAACATCTCTCATTTTCAAGATGTGAAGTTGGC

>M6-PGSC0003DMG400017666-(rev)M6LRR-RLP\_2440

TTTGTGTTTCTGACGCATATGATGCTTTTCAAGATAACAAAAGGTTTACTTCAAGAAGTTGGCTCATTGAC  
TTGAAGGCTGATGACAATCTTAATCAGCTAAAAGTCAAATTAAGGAAA

>M6-PGSC0003DMG400017666-(rev)M6LRR-RLP\_2501

CTCATTTGACTTGAAGGCTGATGACAATCTTAATCAGCTAAAAGTCAAATTAAGGAAAGCTTAAAGGG  
GAAGAAGTTTCTTATTGTTCTGGATGATGTGTGGAATGACAACTACAATGA

>M6-PGSC0003DMG400017666-(rev)M6LRR-RLP\_2562

TTAAAGGGGAAGAAGTTTCTTATTGTTCTGGATGATGTGTGGAATGACAACACTACAATGAGTGGGATGAC  
TTGAGAAATGTTTTTGTACAAGGAGATATAGGAAGTAAGATCATTGTGACG

>M6-PGSC0003DMG400017666-(rev)M6LRR-RLP\_2745

GATGAAGCCTCTTGGGATCTATTCAAACGACATTCCTAGAAAACAGGGATCCTAAAGAACATCCATAA  
CTTGAAGAAATTGGAAAACAAATTGCAGACAAGTGCAAAGGGTTGCCTTTA

>M6-PGSC0003DMG400017666-(rev)M6LRR-RLP\_2867

TCTAAAGGCACTTGCTGGTGTTTTATGCTGCAAATCAGAGGTGGATGAGTGGAGAGACATTTTAAGAAG  
TGACATATGGGAGCTGCCAAGTTGTTTGAATGGTATATTACCAGCGTTGAT

>M6-PGSC0003DMG400017666-(rev)M6LRR-RLP\_2928

TTAAGAAGTGACATATGGGAGCTGCCAAGTTGTTTGAATGGTATATTACCAGCGTTGATGTTGAGCTAC  
AATGATCTTCATGCACATTTGAAGCAATGTTTTGCTTATTGTGCAATATAT

>M6-PGSC0003DMG400017666-(rev)M6LRR-RLP\_2989

TGAGCTACAATGATCTTCATGCACATTTGAAGCAATGTTTTGCTTATTGTGCAATATATCCCAAAGATTAT  
CAATTCGCAAAGACCAAGTTATTCACCTTTGGATTGCTAATGGTCTTG

>M6-PGSC0003DMG400017666-(rev)M6LRR-RLP\_305

TTGAACACACTTTTGTGTACATGACATTAACATCTCTCATTTTCAGATGTGAAGTTGGCATCCAAGAAGTT  
CCAAAAGATTCTGCATTGGCCGGGAAGATTAAGAGGAAGTGATAATGTG

>M6-PGSC0003DMG400017666-(rev)M6LRR-RLP\_3050

CAAAGATTATCAATTCGCAAAGACCAAGTTATTCACCTTTGGATTGCTAATGGTCTTGTACATCAGTTGC  
ATTCTGGTAACCAATACTTTCTCGAGTTGAGATCAAGATCACTGTTCAA

>M6-PGSC0003DMG400017666-(rev)M6LRR-RLP\_3111

CATCAGTTGCATTCTGGTAACCAATACTTTCTCGAGTTGAGATCAAGATCACTGTTCAAATGGCCTCAG  
AGTCTTCTGAAAGAGATGTAGAGGAATTCTTAATGCATGACCTTGTCAT

>M6-PGSC0003DMG400017666-(rev)M6LRR-RLP\_3172

TGGCCTCAGAGTCTTCTGAAAGAGATGTAGAGGAATTCTTAATGCATGACCTTGTCATGATTTGGCCCA  
AATTGCATCTTCAAATCTTTGTATAAGTTTGAAGAGAACAAGGATCGC

>M6-PGSC0003DMG400017666-(rev)M6LRR-RLP\_3294

ATGTTGGAACAATGTCGGCACATGTCCTATTCAATAGGAAATAATGGTGAATTTGAGAAATTGAAATCA

CTCTTTAAATCAGAGCAGCTGAGGACATTAGTTCTAATCAATATCCAACCTC

>M6-PGSC0003DMG400017666-(rev)M6LRR-RLP\_3355

TGAAATCACTCTTTAAATCAGAGCAGCTGAGGACATTAGTTCTAATCAATATCCAACCTCTATTATTACAAC  
ATTAAGCTAAGCAAGAGGGTGCTGCATAACATATTGCCAAGACTAACAT

>M6-PGSC0003DMG400017666-(rev)M6LRR-RLP\_3416

TTATTACAACATTAAGCTAAGCAAGAGGGTGCTGCATAACATATTGCCAAGACTAACATCCTTAAGGGCA  
TTATCATTGTCACACTATGAGATTGTTGAGTTGCCAAATGACTTGTTTCAT

>M6-PGSC0003DMG400017666-(rev)M6LRR-RLP\_3538

AATTAACCTCTTGAGATTTTTGGATATTTCTCGGACAAAGATTAAGAGGTTGCCAGATTCCATTTGTGTG  
TTGTATAACCTAGAGACACTTCTCCTATCATCTTGTTGCTGATCTGGAG

>M6-PGSC0003DMG400017666-(rev)M6LRR-RLP\_3599

CATTTGTGTGTTGTATAACCTAGAGACACTTCTCCTATCATCTTGTTGCTGATCTGGAGGAGCTACCGCTG  
TAGATGGAGAAGTTGATTAACCTGCGTCATCTTGACATAAGCAACACTT

>M6-PGSC0003DMG400017666-(rev)M6LRR-RLP\_366

CCAAGAAGTTCCAAAAGATTCTGCATTGGCCGGGAAGATTAAGAGGAAGTGATAATGTGGTATGTATTG  
TTCACCTTCACCTCCCATTTTGCTGTTTCTTTGGTCCCTCTTCTTCTTGT

>M6-PGSC0003DMG400017666-(rev)M6LRR-RLP\_3843

GTATGGATCTGTATCAGTTGTAGAGTTGCAAATGTAGTTGATAGAAGGGAAGCTGTGAAGGCAAAGA  
TGAGGGAGAAGAATCATGTTGACAAGTTATCATTGGAGTGGGGTGAAAGTAT

>M6-PGSC0003DMG400017666-(rev)M6LRR-RLP\_3904

GCAAAGATGAGGGAGAAGAATCATGTTGACAAGTTATCATTGGAGTGGGGTGAAAGTATTAGTGCTGA  
CAATTCACAAACAGAAAGAGACATACTTGATGAGTTACGCCACATAAGAAC

>M6-PGSC0003DMG400017666-(rev)M6LRR-RLP\_3965

GTGCTGACAATTCACAAACAGAAAGAGACATACTTGATGAGTTACGCCACATAAGAACATAAAAGAAG  
TCAAATCACTGGATATAGAGTGACAACTTTCCAATTGGCTAGCTGATC

>M6-PGSC0003DMG400017666-(rev)M6LRR-RLP\_4026

AAAAGAAGTCAAATCACTGGATATAGAGTGACAACTTTCCAATTGGCTAGCTGATCCTTTGTTTCTT  
AAGCTAGTATTGTTGTCTATTAATAACTGCAAGAACTGCTATTCCTTGCC

>M6-PGSC0003DMG400017666-(rev)M6LRR-RLP\_4087

TTGTTTCTTAAGCTAGTATTGTTGTCTATTAATAACTGCAAGAAGCTGCTATTCCTTGCCAGCACTAGGACA  
ACTCCCTTGTTTAAACTCCTTCGATTAGAGGGATGCATGGAATAACA

>M6-PGSC0003DMG400017666-(rev)M6LRR-RLP\_4148

CACTAGGACAACCTCCCTTGTTTAAACTCCTTCGATTAGAGGGATGCATGGAATAACAGAGGTAACGG  
AAGAATTCTATGGTAGTTTGTCTCCAAAAGCCTTTAACTCTCTTGTGG

>M6-PGSC0003DMG400017666-(rev)M6LRR-RLP\_427

ATGTATTGTTCACTTTCACCTCCATTTGCTGTTTCTTTGGTCCCTCTTCTTCTTGTCCATTACTTTGTTTT  
CCATTGGGAATTTCTTTAACTGCTATGGAGGTTCAACCATATCA

>M6-PGSC0003DMG400017666-(rev)M6LRR-RLP\_4270

CTTAGATTTGAAGATATGCCGGAGTGAAGCAATGACACCTACTAGGAAGTGGAGAGTTTCTACACTT  
GAGAACTTTTCATTAATAAATTGCCCTGAACTCAGTTTGGAGATACCCATC

>M6-PGSC0003DMG400017666-(rev)M6LRR-RLP\_4331

CTCACTTGAGAACTTTTCATTAATAAATTGCCCTGAACTCAGTTTGGAGATACCCATCCAACCTTTCAAGT  
TTAAAAAGTTTTGAAGTTATTGGTTGTCCAAAGGTTGGAGTTCTTTTTT

>M6-PGSC0003DMG400017666-(rev)M6LRR-RLP\_4392

ACTTTCAAGTTTAAAAAGTTTTGAAGTTATTGGTTGTCCAAAGGTTGGAGTTCTTTTTTATGATGCTCAAC  
TGTTTACCTCCCAACTTGAGGGAATGAAGGGGATTGAGGAATTAGCTAT

>M6-PGSC0003DMG400017666-(rev)M6LRR-RLP\_4453

GATGCTCAACTGTTTACCTCCCAACTTGAGGGAATGAAGGGGATTGAGGAATTAGCTATTTGGGATTGT  
AACTCTGTTACCTCCTTACCTTTTAGCATACTGCCACTACCTGAAGACA

>M6-PGSC0003DMG400017666-(rev)M6LRR-RLP\_4514

GGGATTGTAACCTCTGTTACCTCCTTACCTTTTAGCATACTGCCACTACCTTGAAGACAATATGCATATCT  
GGTTGCCAGATATTGAAATTAGATACCCAGTTGGTGAGATGAGTATGT

>M6-PGSC0003DMG400017666-(rev)M6LRR-RLP\_4549

ATACTGCCACTACCTTGAAGACAATATGCATATCTGGTTGCCAGATATTGAAATTAGATACCCAGTTG  
GTGAGATGAGTATGTTTCTCGAGTTTTGATAGTGAATGCATGTGATTAT

>M6-PGSC0003DMG400017666-(rev)M6LRR-RLP\_488

ATTACTTTGTTTTCCATTGGGAATTTCTTTAACTGCTATGGAGGTTCAACCATATCATACGCGTCGCCA  
ATGTTTAAAGCCCTTTTGTGATGTCATTTAGTGTGTGATGTCATTTAG

>M6-PGSC0003DMG400017666-(rev)M6LRR-RLP\_549

CGCGTCGCCAATGTTTAAAGCCCTTTGTGATGTCATTTAGTGTTGTGATGTCATTTAGTGTAGTGATGTA  
TACTTCATGCTGTGATTTTAAAGAATTGCTTATCTTTTACCCATGCCT

>M6-PGSC0003DMG400017666-(rev)M6LRR-RLP\_61

TTGGAAGATGCAAATATTCAACATCTCAATGTGAATATATCAAATATGGTGGCTTCAAATCTTTGACA  
AATATAGTTGCCAAATCTTTGACAAATATTGCTACCAAATTTCCACATTT

>M6-PGSC0003DMG400017666-(rev)M6LRR-RLP\_610

TAGTGATGTATTACTTCATGCTGTGATTTTAAAGAATTGCTTATCTTTTACCCATGCCTAGGCTGACGCCT  
TACTTTGTCTTTACTCTTTACGCATCATCTAGTGTCGCCCTGAAAAAAT

>M6-PGSC0003DMG400017666-(rev)M6LRR-RLP\_671

GCTGACGCCTTACTTTGTCTTTACTCTTTACGCATCATCTAGTGTCGCCCTGAAAAAATTTATGCAGTTAA  
GGTCTTTGATTCTACCTTAATCATAAATGTATCCCTTGTACTTAGGAGG

>M6-PGSC0003DMG400017666-(rev)M6LRR-RLP\_732

ATGCAGTTAAGGTCTTTGATTCTACCTTAATCATAAATGTATCCCTTGTACTTAGGAGGTCATACAATCAG  
TAAGATTAATGACTTGCTTTTGTGCGAAGAATGACTATGATGATTGAACG

>M6-PGSC0003DMG400017666-(rev)M6LRR-RLP\_793

ATACAATCAGTAAGATTAATGACTTGCTTTTGTGCGAAGAATGACTATGATGATTGAACGTCTGCAATTCCG  
TTTGTCTACAGGTGGAGATATACCGCCGTTGTTACGAGAAACAACCTTTG

>M6-PGSC0003DMG400017666-(rev)M6LRR-RLP\_976

GACATTCAAGATTTATTCCCTTGACTGAGTATTATACACTGAGATACAAACATTCGATCCTCAAAGGACG  
AAAAATTGACTCTTCTTGCCCTCCTGCTTCTAGATTGGAGATTGAAATC

>M6-PGSC0003DMG400017690-(rev)M6LRR-RLK\_0

CACATGTTAGTTGGCATGTCTCATCTTAAGCGGCATGGTCTGCAAATTCTCAGAATAACTTGCTAATGAT  
CTCTTTTTTTAATTTACAGGGAACCTTATAGTAATAACATAAGCGGAAGAA

>M6-PGSC0003DMG400017690-(rev)M6LRR-RLK\_1037

TGGAAATTTATGGTTAAACGCTAGCTAAATCATGCAAATGGGGTTGTAGTTTCTAATTCTCTAAGCAAAT  
CTGTATGATGTTCTGTAACCTTTCTGTTAATTATGTTTACATTGATGGGT

>M6-PGSC0003DMG400017690-(rev)M6LRR-RLK\_1098

TAAGCAAATCTGTATGATGTTCTGTAACCTTTCTGTTAATTATGTTTACATTGATGGGTTCTGTCCAAAAA

AAATTGATGTGTGGAAGCATTATGAAAATCACTACTCCTGTCAGCGAAT

>M6-PGSC0003DMG400017690-(rev)M6LRR-RLK\_1159

TGTCCAAAAAATTGATGTGTGGAAGCATTATGAAAATCACTACTCCTGTCAGCGAATAAACCTTTGTA  
GTTTGAGAGGTCAACAGGGAATATATCTGTATGATTCATTCTGTCTTTAC

>M6-PGSC0003DMG400017690-(rev)M6LRR-RLK\_122

CCAAATGAATTGGGGAACCTTGACAGAGTTGGTTAGTTGGATCTTTACCTGAACAACCTAAATGGTCCTA  
TCCCTCCCTCATTGGGCAAGCTTCAGAACTACGCTTCCTGTACGAGTTA

>M6-PGSC0003DMG400017690-(rev)M6LRR-RLK\_1220

ACCTTTGTAGTTTGAGAGGTCAACAGGGAATATATCTGTATGATTCATTCTGTCTTTACTCTGTAGTGAA  
AGTTAGTTGATATGCTTGGCAAACCTTGTTCTTGTTCCTTCCCAAATACTGT

>M6-PGSC0003DMG400017690-(rev)M6LRR-RLK\_1281

TGTAGTGGAAAGTTAGTTGATATGCTTGGCAAACCTTGTTCTTGTTCCTTCCCAAATACTGTATGGTTGCTGA  
GTGAAGACCAGGTGACTGGACTGGACTCTTTTTTTGTACGACAAACAGAG

>M6-PGSC0003DMG400017690-(rev)M6LRR-RLK\_1464

TAAAAGTATTCAATTATTATCTGATTAACAAAGTTGTGCTTGCTTGGTCTCTCTCGATATAGACTCACAGC  
CGTGCAGCTCAACTGAAAGTGACAATTCTGAGATACTTCTCATCTTATC

>M6-PGSC0003DMG400017690-(rev)M6LRR-RLK\_1525

GACTCACAGCCGTGCAGCTCAACTGAAAGTGACAATTCTGAGATACTTCTCATCTTATCAGGAAAATGGC  
CTGTGGATTTAGTTCATTGCTAAAATACTTTATGTATGAACGGTGATTCT

>M6-PGSC0003DMG400017690-(rev)M6LRR-RLK\_1586

GAAAATGGCCTGTGGATTTAGTTCATTGCTAAAATACTTTATGTATGAACGGTGATTCTCAACCTGCAAA  
CACTATCAGCAAGTTTTTCCTAGCATATTGGAATTAATCTTTCTGGAGTA

>M6-PGSC0003DMG400017690-(rev)M6LRR-RLK\_1647

ACCTGCAAACACTATCAGCAAGTTTTTCCTAGCATATTGGAATTAATCTTTCTGGAGTATCTTGTCTATA  
TATATAAATGTATTTGTCTTTGTCTACCTTTAGCACATGTACGCTACAT

>M6-PGSC0003DMG400017690-(rev)M6LRR-RLK\_1708

TTGTCCTATATATAAATGTATTTGTCTTTGTCTACCTTTAGCACATGTACGCTACATTTAGCACATGTAC  
TGAGTAATGAGATCTAGACCAGTATTCGCTTTGACGAACTTCTTTTCC

>M6-PGSC0003DMG400017690-(rev)M6LRR-RLK\_1769



AGCACATGTAAGTAAAGATCTAGACCAGTATTCGCTTTGACGAACTTCTTTTCCTGTCTTGCTTAC  
TCTTGATCAACTTCCTTTTATCCTTTTTTTTTCTTTGCTGAATTGAAGG

>M6-PGSC0003DMG400017690-(rev)M6LRR-RLK\_183

ATGGTCCTATCCCTCCCTCATTGGGCAAGCTTCAGAACTACGCTTCCTGTACGAGTTATACATTCTTTTTC  
CTCCGTTTTTTTTCTTCTCTTTTTGTTCTTTTTCGGTTTGTTATT

>M6-PGSC0003DMG400017690-(rev)M6LRR-RLK\_1830

TCTTGCTTACTCTTGATCAACTTCCTTTTATCCTTTTTTTTTCTTTGCTGAATTGAAGGAGGCTCAATAATAA  
CAGTTTGAATGAAGGTATTCCCGTGTCTCTAACCACCATTGTTGCAC

>M6-PGSC0003DMG400017690-(rev)M6LRR-RLK\_1891

GCTCAATAATAACAGTTTGAATGAAGGTATTCCCGTGTCTCTAACCACCATTGTTGCACTTCAAGTACTGT  
AAGTATAAAGTTGTTCTTTATTTATCAATGCTGTATGTTGTCTGTGTT

>M6-PGSC0003DMG400017690-(rev)M6LRR-RLK\_1952

CAAGTACTGTAAGTATAAAGTTGTTCTTTATTTATCAATGCTGTATGTTGTCTGTGTTGTCTAGTTCTTCT  
GGGTTACTTATTGTCATTGCCTTTCAATGCAGTGATCTCTCAAACAAC

>M6-PGSC0003DMG400017690-(rev)M6LRR-RLK\_2013

CTAGTTCTTCTGGGTTACTTATTGTCATTGCCTTTCAATGCAGTGATCTCTCAAACAACCATTTGACAGGA  
CCAGTTCCAGTCAACGGTTCTTTTCACTTTTTACTCCTATAAGGTGTG

>M6-PGSC0003DMG400017690-(rev)M6LRR-RLK\_2074

TTTGACAGGACCAGTTCAGTCAACGGTTCTTTTCACTTTTTACTCCTATAAGGTGTGTTGGAAGCATAA  
ATTTGTAGTTCCTTCTGTTCTGAAGTTACAATAGTGAATATCTAAAGA

>M6-PGSC0003DMG400017690-(rev)M6LRR-RLK\_2135

GGAAGCATAAATTTGTAGTTCCTTCTGTTCTGAAGTTACAATAGTGAATATCTAAAGATTGAGTACCTA  
TATTTAGTTTTGCTAATAATCAGTTGGAAGTTCCTCCAGTTTCTCCACC

>M6-PGSC0003DMG400017690-(rev)M6LRR-RLK\_2318

GCTGTTATGAAATTGTGCTACCTCTCCTTTTTCCCTATTCCAATTTAGTTTTCATGAAAATCCCTTAAGTTA  
TTCACAATAAGGGGAGATGGCAATGGTAAGAAAGGAAAGGCCTGGTTG

>M6-PGSC0003DMG400017690-(rev)M6LRR-RLK\_2379

CCCTTAAGTTATTCACAATAAGGGGAGATGGCAATGGTAAGAAAGGAAAGGCCTGGTTGCCTGGGGAA  
AGCTGAAGAGATGAGCCCCAGACTGGATTCCCTTATGAAAGCACTTTCTTTA

>M6-PGSC0003DMG400017690-(rev)M6LRR-RLK\_244

CATTCTTTTTCTTCCGTTTTTTTTCTTCTTTTTGTTCTTTTTCGGTTTGGTTATTTTTTTTCAATGTTTCA  
AATCTTTAGCATATATATCTGAAGTTTAGTTGAATCAGAAATGAT

>M6-PGSC0003DMG400017690-(rev)M6LRR-RLK\_2440

TGGGGAAAGCTGAAGAGATGAGCCCCAGACTGGATTCCCTTATGAAAGCACTTTCTTTATGAAAAAAC  
TACCATTACTGTAGGCACTGTAAATTACTTTTTTAGATCAATTATACAG

>M6-PGSC0003DMG400017690-(rev)M6LRR-RLK\_2501

AAAAAACTACCATTACTGTAGGCACTGTAAATTACTTTTTTAGATCAATTATACAGGTATTGGGGTCT  
TGTGGTTATCCAGCATTGACTTTCCAAAATAAAAAATTCAAGTAAG

>M6-PGSC0003DMG400017690-(rev)M6LRR-RLK\_2562

ATTGGGGTCTTGTGGTTATCCAGCATTGACTTTCCAAAATAAAAAATTCAAGTAAGCTTGGAGATAC  
TATCAACATTTTTTTCTTTGTTGGAAATTAGATTTACTGTAAACTCTGAA

>M6-PGSC0003DMG400017690-(rev)M6LRR-RLK\_2623

TGGAGATACTATCAACATTTTTTTCTTTGTTGGAAATTAGATTTACTGTAAACTCTGAAGTTCGAGTGATA  
CGTGTGTCAAAGTACCATATATTTTTTAGAATTGCCTGTATTTAAAA

>M6-PGSC0003DMG400017690-(rev)M6LRR-RLK\_2684

TCGAGTGATACGTGTGTCAAAGTACCATATATTTTTTAGAATTGCCTGTATTTAAAAATTTAGGTCATAC  
AAATAAAAAGTTAACTCAATCATCTTTTCAGTGGGCAACAGCGCAACTG

>M6-PGSC0003DMG400017690-(rev)M6LRR-RLK\_2745

TAGGTCATACAAATAAAAAGTTAACTCAATCATCTTTTCAGTGGGCAACAGCGCAACTGGAGCTATCGCT  
GGAGGAGTTGCTGCAGGCGCTGCTCTTCTATTTGCAGCTCCTGCAATTTT

>M6-PGSC0003DMG400017690-(rev)M6LRR-RLK\_2806

GCTATCGCTGGAGGAGTTGCTGCAGGCGCTGCTCTTCTATTTGCAGCTCCTGCAATTTTTATTGCTTGGT  
GGCGTCGGAGGAAACCGCAAGACCACTTCTTTGATGTTCTGGTTTGGCA

>M6-PGSC0003DMG400017690-(rev)M6LRR-RLK\_2867

TTGCTTGGTGGCGTCGGAGGAAACCGCAAGACCACTTCTTTGATGTTCTGGTTTGGCAAACACATTGA  
ATCTGAGTTAATTGACTTTCAACTTGATGTGTTCTCACTCATTATAACT

>M6-PGSC0003DMG400017690-(rev)M6LRR-RLK\_2928

ACACATTGAATCTGAGTTAATTGACTTTCAACTTGATGTGTTCTCACTCATTATAACTGCTTTTGCAGCTG

AGGAGGATCCAGAAGTTCATCTGGGACAACCTCAAAGGTTTTCTTG

>M6-PGSC0003DMG400017690-(rev)M6LRR-RLK\_2989

TTTTGCAGCTGAGGAGGATCCAGAAGTTCATCTGGGACAACCTCAAAGGTTTTCTTGCGTGAACACTACA  
AGTTGCCTCGGATAATTTTAGCAACAGAAATATACTCGGTAGAGGTGGATT

>M6-PGSC0003DMG400017690-(rev)M6LRR-RLK\_305

TTTTCAATGTTTCAAATCTTTAGCATATATATCTGAAGTTTAGTTGAATCAGAAATGATCACCTTCTATTTT  
TATTTTTATCAAGAAAGCAGCGTCTATGTTAAGGATCCGTTTGGCTAT

>M6-PGSC0003DMG400017690-(rev)M6LRR-RLK\_3050

GAACTACAAGTTGCCTCGGATAATTTTAGCAACAGAAATATACTCGGTAGAGGTGGATTTGGTAAGGTT  
TATAAGGGCCGGTTAGCTGATGGCTCTTTAGTTGCAGTGAAAAGACTAAAA

>M6-PGSC0003DMG400017690-(rev)M6LRR-RLK\_3111

GTAAGGTTTATAAGGGCCGGTTAGCTGATGGCTCTTTAGTTGCAGTGAAAAGACTAAAAGAGGAACGT  
ACTCAAGGTGGAGAGTTACAGTTTCAGACAGAAGTAGAAATGATCAGCATGG

>M6-PGSC0003DMG400017690-(rev)M6LRR-RLK\_3172

GGAACGTACTCAAGGTGGAGAGTTACAGTTTCAGACAGAAGTAGAAATGATCAGCATGGCTGTACACC  
GAAACCTACTTCGTTTACGGGGATTTTGCATGACACCCACTGAGCGGGTGCT

>M6-PGSC0003DMG400017690-(rev)M6LRR-RLK\_3233

GTACACCGAAACCTACTTCGTTTACGGGGATTTTGCATGACACCCACTGAGCGGGTGCTTGTATCCGT  
ACATGGAGAATGGAAGTGTTCATCACGTTTAAGAGGTATCTCTTTTTTA

>M6-PGSC0003DMG400017690-(rev)M6LRR-RLK\_3294

TTTATCCGTACATGGAGAATGGAAGTGTTCATCACGTTTAAGAGGTATCTCTTTTTTAATTTTCATGTGC  
TTGCCTCTACTTTTTGCTCACCTTTAGGCACGCTCACAACAACGACAAC

>M6-PGSC0003DMG400017690-(rev)M6LRR-RLK\_4148

GAAAAAAGCCAATAGCTAATGTTAATGATAAGCCTTTAGTCTTTAACTTTTCTTCATAAATTTGTAAC  
AAATTGAAAAAGTTACTGCAGAAGTGTAAGCCAGTGGTGAATCTTCAC

>M6-PGSC0003DMG400017690-(rev)M6LRR-RLK\_4209

AATTTGTAACAAATTGAAAAAGTTACTGCAGAAGTGTAAGCCAGTGGTGAATCTTCACATCAATTCAT  
TGTGCTATTAGTTATTATAGTGATTGAGTTTTTATGAGTTCTCATGATG

>M6-PGSC0003DMG400017690-(rev)M6LRR-RLK\_4270

CAATTCATTGTGCTATTAGTTATTATAGTGATTGAGTTTTTTATGAGTTCTCATGATGGGTATGTATATTT  
AACAAAGATGTCAATGTTGTTTATGATTTTGCTTGTGTTCTATGGACCA

>M6-PGSC0003DMG400017690-(rev)M6LRR-RLK\_4331

TATGTATATTTAACAAGATGTCAATGTTGTTTATGATTTTGCTTGTGTTCTATGGACCAATTTACAAGTG  
GTGCTATCCTTGATATCTTACTGAATATAGAGACTGCAGTTCATGATAA

>M6-PGSC0003DMG400017690-(rev)M6LRR-RLK\_4392

TTCACAAGTGGTGCTATCCTTGATATCTTACTGAATATAGAGACTGCAGTTCATGATAAAATTTATTTAAT  
GAGCACATCTGAAAGTCAAAAAGAATTAATGTCTTGAAAGAGAATTCA

>M6-PGSC0003DMG400017690-(rev)M6LRR-RLK\_4453

TTTATTTAATGAGCACATCTGAAAGTCAAAAAGAATTAATGTCTTGAAAGAGAATTCATATTTTTATTAT  
TGTATGAAACTGGATAAGTAATGCCTCATGACTTGGCGTTTCATGATTT

>M6-PGSC0003DMG400017690-(rev)M6LRR-RLK\_4514

TTTTTATTATTGTATGAAACTGGATAAGTAATGCCTCATGACTTGGCGTTTCATGATTTAGAGTGATATTG  
ACCCAAAAGATCAGTTTTCTTTTTATAACTTATTCAAGCTTAAATAGG

>M6-PGSC0003DMG400017690-(rev)M6LRR-RLK\_4575

AGTGATATTGACCCAAAAGATCAGTTTTCTTTTTATAACTTATTCAAGCTTAAATAGGAACCTGTTTCCA  
GTTTGCTGAATAGCTTGAATTTATGCTCATGGGATAATTTACATTTTTTC

>M6-PGSC0003DMG400017690-(rev)M6LRR-RLK\_4636

CCTGTTTCCAGTTTGCTGAATAGCTTGAATTTATGCTCATGGGATAATTTACATTTTTCTAGAGAGGCCTG  
AATCAGAGCCCCACTTGACTGGCCAAAAGGAAGCGTATTGCACTTGG

>M6-PGSC0003DMG400017690-(rev)M6LRR-RLK\_4697

GAGAGGCCTGAATCAGAGCCCCACTTGACTGGCCAAAAGGAAGCGTATTGCACTTGGATCTGCAAG  
AGGCCTTGCTTACTTGCATGATCATTGTGATCCTAAAATTATTCATCGTGAC

>M6-PGSC0003DMG400017690-(rev)M6LRR-RLK\_4758

CTGCAAGAGGCCTTGCTTACTTGCATGATCATTGTGATCCTAAAATTATTCATCGTGACGTCAAAGCCGC  
AAATATCTTGTTGGATGAGGAGTTTGAAGCAGTTGTTGGGGATTTGGGT

>M6-PGSC0003DMG400017690-(rev)M6LRR-RLK\_4819

CAAAGCCGCAAATATCTTGTTGGATGAGGAGTTTGAAGCAGTTGTTGGGGATTTGGGTTAGCTAAACT  
CATGGACTACAAGGATACTCATGTTACCACTGCTGTACGTGGTACAATTGG

>M6-PGSC0003DMG400017690-(rev)M6LRR-RLK\_4880

GCTAAACTCATGGACTACAAGGATACTCATGTTACCACTGCTGTACGTGGTACAATTGGGCATATTGCC  
CTGAATATTTATCTACTGGTAAATCTTCTGAGAAAAGTATGTGTTTGGC

>M6-PGSC0003DMG400017690-(rev)M6LRR-RLK\_4941

ATATTGCCCTGAATATTTATCTACTGGTAAATCTTCTGAGAAAAGTATGTGTTTGGCTATGGGGTTATG  
CTTCTAGAGCTCATAACTGGGCAAAGGGCTTTTGATCTTGCTCGACTTG

>M6-PGSC0003DMG400017690-(rev)M6LRR-RLK\_5002

TGGGGTTATGCTTCTAGAGCTCATAACTGGGCAAAGGGCTTTTGATCTTGCTCGACTTGCGAATGATGAT  
GATGTCATGCTGCTAGATTGGGTAAGCATTTATACTGTCCTGTATGCTTA

>M6-PGSC0003DMG400017690-(rev)M6LRR-RLK\_5063

AATGATGATGATGTCATGCTGCTAGATTGGGTAAGCATTTATACTGTCCTGTATGCTTAAGTTATTTGCT  
TCTGCTATCAATCAGCAATTTGGATTTGCTTAAAGATCAAGTCACTTCT

>M6-PGSC0003DMG400017690-(rev)M6LRR-RLK\_5124

TTATTTTGCTTCTGCTATCAATCAGCAATTTGGATTTGCTTAAAGATCAAGTCACTTCTGCTATCATTGAAC  
AGTCTTGGAATGTTCTGAAAAGATCAAGTCAACTCTCTCTTCTTCT

>M6-PGSC0003DMG400017690-(rev)M6LRR-RLK\_5185

TATCATTGAACAGTCTTGGAATGTTCTGAAAAGATCAAGTCAACTCTCTCTTCTTCTATAAGTCAAAGT  
TTGATGTCTTTTCTACTGTAGTGTTATTTGTTGAACACTGATGTGCTC

>M6-PGSC0003DMG400017690-(rev)M6LRR-RLK\_5246

AAGTCAAAGTTTGATGTCTTTTCTACTGTAGTGTTATTTGTTGAACACTGATGTGCTCATCCTGAAGAAA  
TGGTGTGGTACGAGACCTGCATCGTTGCTTATTATTTATTGTGGTTTTG

>M6-PGSC0003DMG400017690-(rev)M6LRR-RLK\_5307

CCTGAAGAAATGGTGTGGTACGAGACCTGCATCGTTGCTTATTATTTATTGTGGTTTTGTGGTGTGAAAG  
TAACATTCGTTGCAGTCCCTGTGAGTAATTTTTTAAAAAAGGTTTAG

>M6-PGSC0003DMG400017690-(rev)M6LRR-RLK\_5368

GTGTGAAAGTAACATTCGTTGCAGTCCCTGTGAGTAATTTTTTAAAAAAGGTTTAGATGTTTCAGGA  
GGATTAACCATTCACTACTAAAATTGCACGAGCATGTAGGTTATAATTT

>M6-PGSC0003DMG400017690-(rev)M6LRR-RLK\_5429

GTTTCAGGAGGATTTAACCATTCATTACTAAAATTGCACGAGCATGTAGGTTATAATTTGAGTGGATTAC

TTTCATTATCTTATTCTTGCAGGTGCTTCAACAACCTAGGTTGCCAAATTC

>M6-PGSC0003DMG400017690-(rev)M6LRR-RLK\_5490

GTGGATTACTTTTATTATCTTATTCTTGCAGGTGCTTCAACAACCTAGGTTGCCAAATTCGTCCCCTCAATTT

GTGACTAATCTAGAAAATGTGCATCTCCACTTCTCATTCTGATGCTA

>M6-PGSC0003DMG400017690-(rev)M6LRR-RLK\_5551

CCCCTCAATTTGTGACTAATCTAGAAAATGTGCATCTCCACTTCTCATTCTGATGCTATCTGAAGATTAG

AAAAATATACTTTTTTTCATTTTCATTCAAATAAGCTAAGGTGTATCTGC

>M6-PGSC0003DMG400017690-(rev)M6LRR-RLK\_5612

TGAAGATTAGAAAAATATACTTTTTTTCATTTTCATTCAAATAAGCTAAGGTGTATCTGCAACTGCCATATT

AATGTCACCTCAGTCATGTTGTATTGGGGGTAGATATAGTATACTTTAG

>M6-PGSC0003DMG400017690-(rev)M6LRR-RLK\_5673

CTGCCATATTAATGTCACCTCAGTCATGTTGTATTGGGGGTAGATATAGTATACTTTAGGACAGGTACTC

ATTGAGGAGCATCCTTTAGAAAGGCTAGTCTTACGTGGGATCGCCATCCT

>M6-PGSC0003DMG400017690-(rev)M6LRR-RLK\_5734

CAGGTACTCATTGAGGAGCATCCTTTAGAAAGGCTAGTCTTACGTGGGATCGCCATCCTGGAGAAGGAA

AAGGAGATGGTCAAACCTGTTAGGAAGTACTATTAATAATAAAGCTTTTC

>M6-PGSC0003DMG400017690-(rev)M6LRR-RLK\_5795

AGAAGGAAAAGGAGATGGTCAAACCTGTTAGGAAGTACTATTAATAATAAAGCTTTTCTGAACCTCTT

GTGTCTCTGAAACTGTAATAGCAACATGAACACTAATAGACAGCAATGCCA

>M6-PGSC0003DMG400017690-(rev)M6LRR-RLK\_5856

AACCTCTTGTGTCTCTGAAACTGTAATAGCAACATGAACACTAATAGACAGCAATGCCACTAATGTCAAT

CAGAAACACTTGGCTGTGTTTGAGCCTCATGCACTGATGTGCTGTTTTTT

>M6-PGSC0003DMG400017690-(rev)M6LRR-RLK\_5917

AATGTCAATCAGAAACACTTGGCTGTGTTTGAGCCTCATGCACTGATGTGCTGTTTTTTTAGTCTCCCTTC

AGATCTTAGTAGCTTTTCTAGTACTGTGCTCTTAGAGATGGCACATAT

>M6-PGSC0003DMG400017690-(rev)M6LRR-RLK\_5978

GTCTCCCTCAGATCTTAGTAGCTTTTCTAGTACTGTGCTCTTAGAGATGGCACATATGGTTGCATGCAT

GGCTATTATTTGACTTGTAAACATTCCACTGGATATTCAGGTGAAGGGAC

>M6-PGSC0003DMG400017690-(rev)M6LRR-RLK\_6039

TTGCATGCATGGCTATTATTTGACTTGTAACATTCCACTGGATATTCAGGTGAAGGGACTCCTGAAGGAC  
AAGAAATATGAAACATTAGTTGATGCAGATCTTCAAGGTAATTACAATGA

>M6-PGSC0003DMG400017690-(rev)M6LRR-RLK\_61

GCTAATGATCTCTTTTTTAATTTCAAGGAACTTTATAGTAATAACATAAGCGGAAGAATTCCAAATGAAT  
TGGGGAACTTGACAGAGTTGGTTAGTTTGGATCTTTACCTGAACAACCTT

>M6-PGSC0003DMG400017690-(rev)M6LRR-RLK\_6100

CTGAAGGACAAGAAATATGAAACATTAGTTGATGCAGATCTTCAAGGTAATTACAATGAAGAAGAGGT  
GGAACAGCTTATTCAGGTAGCTCTACTTTGCACGCAGAGTACGCCTACCGAA

>M6-PGSC0003DMG400017690-(rev)M6LRR-RLK\_6161

AAGAGGTGGAACAGCTTATTCAGGTAGCTCTACTTTGCACGCAGAGTACGCCTACCGAACGTCCAAAGA  
TGTCAGAAGTTGTAAGAATGCTTGAAGGTGATGGCCTTGCTGAGAGGTGGG

>M6-PGSC0003DMG400017690-(rev)M6LRR-RLK\_6222

TCCAAAGATGTCAGAAGTTGTAAGAATGCTTGAAGGTGATGGCCTTGCTGAGAGGTGGGAGGAATGGC  
AAAAGGAGGAGATGTTCCGGCAAGATTTCAACCATGTCCACCACCACCATAC

>M6-PGSC0003DMG400017690-(rev)M6LRR-RLK\_6283

GAATGGCAAAGGAGGAGATGTTCCGGCAAGATTTCAACCATGTCCACCACCACCATACTGATTGGATA  
ATAGCTGACTCCACTTCAAATATCCGACCGGATGAGTTGTCAGGGCCAAGA

>M6-PGSC0003DMG400017690-(rev)M6LRR-RLK\_6344

ATTGGATAATAGCTGACTCCACTTCAAATATCCGACCGGATGAGTTGTCAGGGCCAAGATGATCTTTCAT  
TTATTCTGCCGGTAGCACATATAGGACCGACTCTTTTGAGGGAAAATCCG

>M6-PGSC0003DMG400017690-(rev)M6LRR-RLK\_6405

ATCTTTCATTTATTCTGCCGGTAGCACATATAGGACCGACTCTTTTGAGGGAAAATCCGCTTTGTATCCTT  
GTATCTGTAATCGGTATATGCCATCTTCTTTCTTTTTTTTTTTTTTTTT

>M6-PGSC0003DMG400017690-(rev)M6LRR-RLK\_6466

TTGTATCCTTGATCTGTAATCGGTATATGCCATCTTCTTTCTTTTTTTTTTTTTTTTTGGGTTAATTGGTAT  
ATGTCATCTTTGTGCATACCATTTCTTCTTTTTTTGTTTCAGTC

>M6-PGSC0003DMG400017690-(rev)M6LRR-RLK\_6527

GGTTAATTGGTATATGTCATCTTTGTGCATACCATTTCTTCTTTTTTTGTTTCAGTCAGTTATATTGTATT  
TGATTATGTCCAAATGTGTATAGGTGATTGGGTCATTACAACAGGTC

>M6-PGSC0003DMG400017690-(rev)M6LRR-RLK\_6588

TTATATTGTATTTGATTATGTCCAAATGTGTATAGGTGATTGGGTCATTACAACAGGTCTGAACATGAAA  
ATCAACTTATAGCAGGAATGGCTGTAGAAAGCATCTTTGCACCTTCTCTT

>M6-PGSC0003DMG400017690-(rev)M6LRR-RLK\_6649

AACATGAAAATCAACTTATAGCAGGAATGGCTGTAGAAAGCATCTTTGCACCTTCTCTTTTTCTAATGTAT  
CAGATAGAGTGGCGTTTGTAAAGAATAAACACTTTGTAAACTTAAAGT

>M6-PGSC0003DMG400017690-(rev)M6LRR-RLK\_6710

TCTAATGTATCAGATAGAGTGGCGTTTGTAAAGAATAAACACTTTGTAAACTTAAAGTAATCATAGTTT  
CTTTCATGTTTCAGTGACAGTTTGTACCTCCTCTTGATGGCTGAATTTTG

>M6-PGSC0003DMG400017713M6LRR-RLK\_2480

AACATTGTGAAACTCTATGCCTTCTGTACAAATGCACAACACTCATTCTTGGTTTACGAGTACATGGAGA  
AGGGGAGCTTGTCTAGTATTTTGAGCAATGAAGTAGAGTCCAAGAAATTG

>M6-PGSC0003DMG400017713M6LRR-RLK\_310

CACACTGTATGATTTTCCATTTTCATCACTCCCATTTCTTGAATATGTTGATCTTAGTATGAACCAGCTCTC  
TGGCACCATCCACCTGAAATTGGTAAGCTCGCTAATCTTGTCTACCT

>M6-PGSC0003DMG400017713M6LRR-RLK\_3162

CAAAATCAAGGCCAACAATGCACTTCATCTCCAGTATGTTGTCAATGGATCCACCTGTTTCTCAAATAACT  
TCTATGAAGGCGAAAAGAGTCCCCGAGATGTAAGGTGTCAGTGTATGAA

>M6-PGSC0003DMG400017716-(rev)M6LRR-RLP\_1008

TACAGAACTTGATACTTTGACTGGTTTGCAGGATGTCATATTGTCATAACAATGAGTTGGAAGGTCCAATC  
CCTAATAATAAGGCTTTTATCAATGCCTCATTGGAGGGTAATAAAGGTCT

>M6-PGSC0003DMG400017716-(rev)M6LRR-RLP\_1197

GAAGGGACGTAAACTCATCCTCATCACTGTACTTCTGTTATGGGAGCATTAGTACTGCTCTGTGTTTTCA  
TTGGTGTTCATTATGTGTAATAAAAGAAGGAGAGTTAGAGATGTTGA

>M6-PGSC0003DMG400017716-(rev)M6LRR-RLP\_126

ACTTACTGGTCCAATTCCTGCTTCCTTTGGCAATTTGAGAAAGTTACAATTTTTGTATCTCCGTGCCAACA  
AACTTTCTGGTTCTATTCTAAAGAACTTGCATATATGGATAACTTGGT

>M6-PGSC0003DMG400017716-(rev)M6LRR-RLP\_1260

TGTTTTATTGGTGTTCATTATGTGTAATAAAAGAAGGAGAGTTAGAGATGTTGAAAGAAGGGATGG



TGTTGGTTGGCTTTTCGATATCCATGTTAGATGGGAAGGCATTGTACAGGGA

>M6-PGSC0003DMG400017716-(rev)M6LRR-RLP\_1701

AAGGGTGAATATCATCAAGGGTGTGCTTTTGCTTTATCTTACATGCACCAAGACTGTTCAACCACCGATT

GTTTCATCGAGACATATCAAGCAGTAATGTGTTGCTTGATTCTGAGTATGA

>M6-PGSC0003DMG400017716-(rev)M6LRR-RLP\_1764

ACCGATTGTTTCATCGAGACATATCAAGCAGTAATGTGTTGCTTGATTCTGAGTATGAAGCTCGTGTTGCA

GATTTTGGAAATAGCAAAGATTCTCAAGCCAGACTCATCCAATCGCACTGC

>M6-PGSC0003DMG400017716-(rev)M6LRR-RLP\_1807

GATTCTGAGTATGAAGCTCGTGTTGCAGATTTTGGAAATAGCAAAGATTCTCAAGCCAGACTCATCCAATC

GCACTGCGCTTGCAGGCACATTTGGTTATGTCGCACCTGGTAAGTTTTAA

>M6-PGSC0003DMG400017716-(rev)M6LRR-RLP\_189

TGCCAACAACTTTCTGGTTCTATTCTAAAGAACTTGCATATATGGATAACTTGGTAGAGCTGATACTA

AGTGAAAATCAGTTTTTCAGGCCATTTGCCTGAGCATCTTTGCCAAGGTGG

>M6-PGSC0003DMG400017716-(rev)M6LRR-RLP\_315

TGAGAACTTCACGGTGGCCAGTAACAAGTTAACAGGACCAATACCAAGAACTTGAGCAATTGCTCCAG

TTTTAAATGGGTCCGCTTTAACAACAACAGTTTCACTGGGAATTTATCTGA

>M6-PGSC0003DMG400017716-(rev)M6LRR-RLP\_378

CTCCAGTTTTAAATGGGTCCGCTTTAACAACAACAGTTTCACTGGGAATTTATCTGAAGCTTTTGGTATCT

ATCCGAAGTTGCTGTTCAATTTGAGCGATAATGATTTTCATGGTGA

>M6-PGSC0003DMG400017716-(rev)M6LRR-RLP\_441

TGGTATCTATCCGAAGTTGCTGTTCAATTTGAGCGATAATGATTTTCATGGTGAAGTCAAGCAGCAAG

TGGGGGAAATGCAAGAATTTGACTGATTTTCGGATTGCCAGAAATAACAT

>M6-PGSC0003DMG400017716-(rev)M6LRR-RLP\_504

CAGCAAGTGGGGGAAATGCAAGAATTTGACTGATTTTCGGATTGCCAGAAATAACATTAGTGGTAGCAT

ACCACCAGAGATTGGAAATGTCAAAGGCCTTTTAGGACTTGATCTTTCATC

>M6-PGSC0003DMG400017716-(rev)M6LRR-RLP\_567

TAGCATACCACCAGAGATTGGAAATGTCAAAGGCCTTTTAGGACTTGATCTTTCATCGAATCATTGATT

GGGCAGATTCCAAAGGAATTTGGAAAATTAACCTCTCTAGTTAATCTTTT

>M6-PGSC0003DMG400017716-(rev)M6LRR-RLP\_630

TTTGATTGGGCAGATTCCAAAGGAATTTGGAAAATTAACCTCTCTAGTTAATCTTTTTCTGCAAACAACC  
GAATTTCTGGCAATATACCTGAGGATTTTGGGTCACTAACAAAGTTAGA

>M6-PGSC0003DMG400017716-(rev)M6LRR-RLP\_693

AAACAACCGAATTTCTGGCAATATACCTGAGGATTTTGGGTCACTAACAAAGTTAGAGTCCCTCGATCTA  
TCAGACAACAGATTGAATGGGTCAATCCCGATGTGTATAGTAGATTTTCGT

>M6-PGSC0003DMG400017716-(rev)M6LRR-RLP\_756

CGATCTATCAGACAACAGATTGAATGGGTCAATCCCGATGTGTATAGTAGATTTTCGTACTTGTTCAG  
TTGAACCTGAGCAACAACAAGTTTGGGCAGAAAATTCCAAAGGAGATAGG

>M6-PGSC0003DMG400017716-(rev)M6LRR-RLP\_819

GTTTCAGTTGAACCTGAGCAACAACAAGTTTGGGCAGAAAATTCCAAAGGAGATAGGGAGGATAACTC  
AGCTTAATGTACTTGATTTGAGCTATAATCTTCTGGTTGGAGATATACCCCC

>M6-PGSC0003DMG400017716-(rev)M6LRR-RLP\_945

AGCCAATTTGAAGGTCTTGGTAAACTTAAATCTTCCACAATGGCCTATCTGGGCACATTCCTACAGAA  
CTTGATACTTTGACTGGTTTGCAGGATGTCATATTGTCATACAATGAGTT

>M6-PGSC0003DMG400017718-(rev)M6LRR-RLP\_2046

ACTGCGCTTGCAGGCACATTTGGTTATGTCGCACCTGGTAAGTTTTAAATAGTTCATGAACTATAACCAA  
ACACTCCATTGTTTTTATCTCATTACATGTTTAAATTCTTAATATTGTT

>M6-PGSC0003DMG400017718-(rev)M6LRR-RLP\_2108

ATAACCAAACACTCCATTGTTTTTATCTCATTACATGTTTAAATTCTTAATATTGTTCTGGAAATTGTATT  
GTTTCAGAGCTTGCATATAACAATGATGGTTACGGAAATGTGTGATGTGT

>M6-PGSC0003DMG400017718-(rev)M6LRR-RLP\_2170

AAATTGTATTGTTTCAGAGCTTGCATATAACAATGATGGTTACGGAAATGTGTGATGTGTATAGCTTTGGAG  
TATTATCATTGGAGATAGTCAAAGGAAAGCATCTTGGGGAACACATTTCT

>M6-PGSC0003DMG400017718-(rev)M6LRR-RLP\_2294

TAGCAAATTCATCGACTATAGATCCTGAGCAGCTTAGCGATTTGCTGGATGAGCGCCTTTCGTATCCTGA  
AGAAAGAGTAAAAGATGTTTTGGTTTTTATCATCAAGCTAGCATGCTCTT

>M6-PGSC0003DMG400017718-(rev)M6LRR-RLP\_2356

TATCCTGAAGAAAGAGTAAAAGATGTTTTGGTTTTTATCATCAAGCTAGCATGCTCTTGTTCCTTGAATC  
TCCAAAATCAAGGCCAACAAATGCACTTCATCTCTCATAAGTTATCATCA

>M6-PGSC0003DMG400017718-(rev)M6LRR-RLP\_248

GGGGAATTTGAAAAACCTCAATGATTTGGATCTACAAGAAAATCAACTTACTGGTCCAATTCCTGCTTCC  
TTTGCAATTTGAGAAAGTTACAATTTTTGTATCTCCGTGCCAACAAACT

>M6-PGSC0003DMG400017718-(rev)M6LRR-RLP\_2480

ATTCACGTCCACCTATTCATCAGAGAAACCCCATGTAAGGCGAGCAATATATAATCCTTGATATGTATG  
GAAATGTCACTAGTGTGAAGTAAGTATTTCAATTGCTGGGACTAGTATTT

>M6-PGSC0003DMG400017718-(rev)M6LRR-RLP\_2542

TATGTATGGAAATGTCCTAGTGTGAAGTAAGTATTTCAATTGCTGGGACTAGTATTTTTAGGGTGCTCA  
TTTTGTTTGCTGTATTTAAGACCTTATATAGAAGTTTTTCATTGATTCA

>M6-PGSC0003DMG400017718-(rev)M6LRR-RLP\_2604

GGTGCTCATTTTGTTTGCTGTATTTAAGACCTTATATAGAAGTTTTTCATTGATTCAAAGATTTTACCTGT  
ATGTATAGAAGCTAGTAAATGACCCTTTCTGCTCAAGCTTTTTTCCTA

>M6-PGSC0003DMG400017728-(rev)M6RLKWAX-EGF\_0

ATTTCTGAGAAGAATAGAACGGTCGGCATAAGAAAAAGACATTTCTATGAAATATTGGCTCAAGAGGAA  
GTTAACTTTATGACTTCTTAATCTTGACGCGTATTCGAGCGCAAATTTGT

>M6-PGSC0003DMG400017728-(rev)M6RLKWAX-EGF\_1105

GAAGTACCTCCTCAGCCTCTTCAATCTCAACCGATTGTTTCATCAGATGATGGGAAGTCCATGACATTTTC  
GTCTGATTCAATAGCTTTGTTAGAAAATTCTGCAGATAATCCCGTTGAA

>M6-PGSC0003DMG400017728-(rev)M6RLKWAX-EGF\_1170

ATTTTCGTCTGATTCAATAGCTTTGTTAGAAAATTCTGCAGATAATCCCGTTGAATTAGACATATGTTTTG  
ATTGACTCATAGTTGATGTAATGTTTTTGTGTAGTAACAAATATAGCCC

>M6-PGSC0003DMG400017728-(rev)M6RLKWAX-EGF\_1226

TAGACATATGTTTTGATTGACTCATAGTTGATGTAATGTTTTTGTGTAGTAACAAATATAGCCCACCCAAT  
AATGTTGCGGAATGAGGTGTTGTTATTGTGGTACGTACTAGTTCTGCAA

>M6-PGSC0003DMG400017728-(rev)M6RLKWAX-EGF\_130

CCGTTGGTAATTGCATTTCTGGTGATCAAATCAAAGGAGGCATTTGTCCATGTATGATGCCATTGAAG  
GCTTTTTGCAAACACAAAACAATTTTCATGCCAATCAGATATAACTACTCC

>M6-PGSC0003DMG400017728-(rev)M6RLKWAX-EGF\_260

GAATGACCAGAGGATTCAAAGAGAAATTAGGTGAGGGAGGTTACGGCAGTGTATACAAAGGAAAGCTT

CAAAGTGAAGAGATGTAGCAGTGAAGATGTTGAACAAGACTAAAGCTGGTG

>M6-PGSC0003DMG400017728-(rev)M6RLKWAX-EGF\_65

GGAAGTTAACTTTATGACTTCTTAATCTTGCAGCGTATTCGAGCGCAAATTTGTAATAGGCCTTCCGTTG  
GTAATTGCATTTCTGGTGATCAAATTCAAAAGGAGGCATTTGTCCATGT

>M6-PGSC0003DMG400017728-(rev)M6RLKWAX-EGF\_715

TTATATCCAACAGATAATAGCATTGTGAACCTCACAGCTGCTCGTGGAACTATTGGATATGTAGCTCCAG  
AGTTGATCAGCAGAAGCATTGGGACAATCTCTTACAAAGCTGATGTTTAC

>M6-PGSC0003DMG400017728-(rev)M6RLKWAX-EGF\_780

TCCAGAGTTGATCAGCAGAAGCATTGGGACAATCTCTTACAAAGCTGATGTTTACAGCTTTGGAATGCTG  
CTAATGGAAATGCTGGACTTGAATAGACATGAAGTTGCAAATGAAGAGAA

>M6-PGSC0003DMG400017728-(rev)M6RLKWAX-EGF\_845

TGCTGCTAATGGAAATGCTGGACTTGAATAGACATGAAGTTGCAAATGAAGAGAATTCCAGCCAATATT  
TTCCTTATTATATTTACAATAAGTTCAACAAGGGGAAGGAGATTGTTGTGG

>M6-PGSC0003DMG400017728-(rev)M6RLKWAX-EGF\_910

TATTTTCCTTATTATATTTACAATAAGTTCAACAAGGGGAAGGAGATTGTTGTGGATGAAGAAACAAATG  
ATGATGAAAAGAAGATGGCTAGAAAGCTGACTTTAGTTGCGCTATGGTGC

>M6-PGSC0003DMG400017728-(rev)M6RLKWAX-EGF\_975

AAATGATGATGAAAAGAAGATGGCTAGAAAGCTGACTTTAGTTGCGCTATGGTGCATACAAACAAATCC  
GTTACAACGCCCTTCGATGAGTAGAGTATTAGAAATGCTTGAAGGTGAAGT

>M6-PGSC0003DMG400017836-(rev)M6OtherRLKTM\_0

AGGGTGTTTGTGTTTTTAGTTAAAAGCTTATTAGTTTAGCTTTAATAGTTTAATTGCTCACTCACATGCTA  
CCTGAAACGCCTGTGTATAGCATGTTAATCTCACAACACACCTTCTTA

>M6-PGSC0003DMG400017836-(rev)M6OtherRLKTM\_1037

TAATATAATTTTTTGGAAATCATTTTAGGCGTCAGTTTATTGCCCTCTCCGTCAGCATCCTCTGCAGTTCC  
TCCTGTTGAAGAGGGAATACCCTCTTTGTCTCTCATGGGAATGCATC

>M6-PGSC0003DMG400017836-(rev)M6OtherRLKTM\_1098

TCTGCAGTTCCTCCTGTTGAAGAGGGAATACCCTCTTTGTCTCTCATGGGAATGCATCCACAAGTAATG  
CACTTGCTCCTGGATTTGAGTTAAATGGTCAGACCGTGATTCTTGGCTTC

>M6-PGSC0003DMG400017836-(rev)M6OtherRLKTM\_1159

CAAGTAATGCACTTGCTCCTGGATTTGAGTTAAATGGTCAGACCGTGATTCTTGGCTTCCAAATCTATTA  
CCAAATTTGATGCTTTATGTTATTCATCTTATGTTTTTTTTTTTTAACT

>M6-PGSC0003DMG400017836-(rev)M6OtherRLKTM\_122

CTCCCTCTTACACCCCATTTTTGGGCGTTTCTGCCTCTTCATTGCTTCTTTCTCAATTTTCCTTTTTTTCTTT  
GTTATTGCTTCAACTTATCTAATTTTATCTCCTTTTTTTTGGTACA

>M6-PGSC0003DMG400017836-(rev)M6OtherRLKTM\_1220

AATCTATTAACCAAATTTGATGCTTTATGTTATTCATCTTATGTTTTTTTTTTTTAACTCAGTAGCATCTCCT  
CCTGCAAATGTCTTTCCACCACTGACGTCCCCCCTGTCCCTCCACC

>M6-PGSC0003DMG400017836-(rev)M6OtherRLKTM\_1281

GTAGCATCTCCTCCTGCAAATGTCTTTCCACCACTGACGTCCCCCCTGTCCCTCCACCGAGAGAAGTTCT  
TACACTGTCTCTGCAACCAAGTGCTCCATAATATTGCCACCACCTAGT

>M6-PGSC0003DMG400017836-(rev)M6OtherRLKTM\_1342

GAGAAGTTCTTACACTGTCTCTGCAACCAAGTGCTCCATAATATTGCCACCACCTAGTTCAGCTCCACCC  
GCAATCAATTCAGCCCCACCACAAATTGTTTCTCTACCATCTCCTCCTC

>M6-PGSC0003DMG400017836-(rev)M6OtherRLKTM\_1403

AGCTCCACCCGCAATCAATTCAGCCCCACCACAAATTGTTTCTCTACCATCTCCTCCTCCTCCAATAGT  
GTGGAATGATCCCGCTCCAGTTCTGCCTCCGAGTGCTCCTAAGAGAGA

>M6-PGSC0003DMG400017836-(rev)M6OtherRLKTM\_1464

CCTCCAATAGTGTGGAATGATCCCGCTCCAGTTCTGCCTCCGAGTGCTCCTAAGAGAGAGCATCGACATA  
CTGAACAGCCTGTTGTTGTTCCAGAAGCTCCAGGTATGTGGCTGACTGTA

>M6-PGSC0003DMG400017836-(rev)M6OtherRLKTM\_1525

ATCGACATACTGAACAGCCTGTTGTTGTTCCAGAAGCTCCAGGTATGTGGCTGACTGTAGTCATAATGTT  
GAAATGACTTGATTTCTGTTTAAGTTGATAATTTTTTTGGAGAGCAGCAC

>M6-PGSC0003DMG400017836-(rev)M6OtherRLKTM\_1586

CATAATGTTGAAATGACTTGATTTCTGTTTAAGTTGATAATTTTTTTGGAGAGCAGCACCAGTCTCGTCAC  
CTGGAAGGAAATCTACTGAAGATGCACCAACTAAAGCTCCACCTCTACC

>M6-PGSC0003DMG400017836-(rev)M6OtherRLKTM\_1647

GTCTCGTCACCTGGAAGGAAATCTACTGAAGATGCACCAACTAAAGCTCCACCTCTACCTGGATCTATGC  
CACCCAGTGAGAGCAAGTCTCCAGAGGGTCTCTCCCCTCAATTGCCCCG

>M6-PGSC0003DMG400017836-(rev)M6OtherRLKTM\_1708  
GATCTATGCCACCCAGTGAGAGCAAGTCTCCAGAGGGTCTCTCCCTCAATTGCCCCGGGTAATAATTG  
GCTGACGATAATTATGGTTTTGACACAGTATCTTAAGATAGAAAATGATT

>M6-PGSC0003DMG400017836-(rev)M6OtherRLKTM\_1769  
TAATAATTGGCTGACGATAATTATGGTTTTGACACAGTATCTTAAGATAGAAAATGATTTATCACATTATT  
TTGTTTTGCTGTTATTTAACTCAGTCCTGAATGCGCCTGCTCCAAGGGG

>M6-PGSC0003DMG400017836-(rev)M6OtherRLKTM\_183  
CTTTTTTTCTTTGTTATTGCTTCAACTTATCTAATTTTATCTCCTTTTTTTGGTACATATTTTCTGCTTTTAT  
GTTGTGAGGTTTATGGGATGGGTGGAGTGAAGCTGCAACTTGTTT

>M6-PGSC0003DMG400017836-(rev)M6OtherRLKTM\_1830  
TCACATTATTTGTTTTGCTGTTATTTAACTCAGTCCTGAATGCGCCTGCTCCAAGGGGAAAGCCGCGAA  
ATTCAGTCCCACCTTCCCAAGAAATCCAGAAATTTACCATTCCATTCCA

>M6-PGSC0003DMG400017836-(rev)M6OtherRLKTM\_1891  
AGCCGCGAAATCACTGCCACCTTCCCAAGAAATCCAGAAATTTACCATTCCATTCCACCAGGTATCCTT  
GTCTTTTTTCTAAAAGAAATTGTGACATTCATGTTAGAATGAAGTTCAG

>M6-PGSC0003DMG400017836-(rev)M6OtherRLKTM\_1952  
AGGTATCCTTGCTTTTTTCTAAAAGAAATTGTGACATTCATGTTAGAATGAAGTTCAGAGTAAATTAGAT  
CTGATCATGGATGCCATTAAATTTGTACATTATTTGCTCAGTCCTGA

>M6-PGSC0003DMG400017836-(rev)M6OtherRLKTM\_2013  
TAAATTAGATCTGATCATGGATGCCATTAAATTTGTACATTATTTGCTCAGTCCTGAATGCACCTTCTCC  
AAGGGGAAAGCCACAAAATCCTCTGCCACCCACCCAATCATTCCAGA

>M6-PGSC0003DMG400017836-(rev)M6OtherRLKTM\_2074  
GCACCTTCTCCAAGGGGAAAGCCACAAAATCCTCTGCCACCCACCCAATCATTCCAGAAGTTTCACCAT  
CTATTCCACCAGGTTTTCACTATATTTATCTTGTACTCCCTCCGTTTC

>M6-PGSC0003DMG400017836-(rev)M6OtherRLKTM\_244  
TTTTCTGCTTTTATGTTGTGAGGTTTATGGGATGGGTGGAGTGAAGCTGCAACTTGTTTGGTGCTG  
GAATTATGTGCCTTTGCTTTCTAAGGGATCTGCAGGTAAATTCCTTCTC

>M6-PGSC0003DMG400017836-(rev)M6OtherRLKTM\_2440  
AAGGAAGTATGTGATACTTCGTAAGGAAAAAATAAAGTGTAATAGATGTGATCATGAATGCATGAAT

TTTTACATTATAGAGCTTTCTCTCATTGCATTAGTCCTTAATGCGCCTTC

>M6-PGSC0003DMG400017836-(rev)M6OtherRLKTM\_2501

GCATGAATTTTACATTATAGAGCTTTCTCTCATTGCATTAGTCCTTAATGCGCCTTCTCCAAGGGAAAA

GCCGCAAATCCACTGCCCGCCCGCCAACCAATCCAAAAGTTTCACCA

>M6-PGSC0003DMG400017836-(rev)M6OtherRLKTM\_2562

CAAGGGAAAAGCCGCAAATCCACTGCCCGCCCGCCAACCAATCCAAAAGTTTCACCATCTATTCCACC

AGGTATATTTCTCCGTGTATTTTGTGAGTGATATTTCTGCAAATAAATT

>M6-PGSC0003DMG400017836-(rev)M6OtherRLKTM\_2623

TATTCCACCAGGTATATTTCTCCGTGTATTTTGTGAGTGATATTTCTGCAAATAAATTGTTTGTAACAA

GATCTGATCATCTATGCGTTGAATTTGCAGCGACAGTTGCACCACCTCC

>M6-PGSC0003DMG400017836-(rev)M6OtherRLKTM\_2684

TTGTAACAAGATCTGATCATCTATGCGTTGAATTTGCAGCGACAGTTGCACCACCTCCGAGGAGGTTGC

CTAACAAATCCACCACCCAGCCATCCAAGACATCCTCTAAAACCTCCATCC

>M6-PGSC0003DMG400017836-(rev)M6OtherRLKTM\_2745

GGAGGTTGCCTAACAAATCCACCACCCAGCCATCCAAGACATCCTCTAAAACCTCCATCCGTTTCACCAGG

TAACAGTGCTTGCTAGTGTTGCTCATGTACATGTACTTTAATATTTCAAC

>M6-PGSC0003DMG400017836-(rev)M6OtherRLKTM\_2806

TTCACCAGGTAACAGTGCTTGCTAGTGTTGCTCATGTACATGTACTTTAATATTTCAACCAAATATTTTTTG

GCTTGATGCAATCTACACATATTCTTGCAATTGTACCTCAAGTAGTC

>M6-PGSC0003DMG400017836-(rev)M6OtherRLKTM\_2867

AATATTTTTTGGCTTGATGCAATCTACACATATTCTTGCAATTGTACCTCAAGTAGTCACCTCCTCAAGT

AAAAAACCAAATCAATAGAATCTTAACTAGAGGCTTGCTTGCTTCCAAA

>M6-PGSC0003DMG400017836-(rev)M6OtherRLKTM\_2928

CTCCTCAAGTAAAAACCAAATCAATAGAATCTTAACTAGAGGCTTGCTTGCTTCCAAATTGTTAATGATT

TTCAATGTAGAACTAGCTAAGAAAAATGAACTGATGCCTACTGAATGTG

>M6-PGSC0003DMG400017836-(rev)M6OtherRLKTM\_2989

GTTAATGATTTTCAATGTAGAACTAGCTAAGAAAAATGAACTGATGCCTACTGAATGTGTTTGAAGTTGA

AATAGTCAGTGCTCCTCTTTTTGGATTGTCCTTACCTCAGAAAGATATA

>M6-PGSC0003DMG400017836-(rev)M6OtherRLKTM\_305

TTGGTGCTGGAATTATGTGCCTTTGCTTTCTCTAAGGGATCTGCAGGTAAATTCCTTCTTTCTCTACTTCT  
TCAACTACCTAATTATTTATTTATTTATGAGTTTTGTGCTCAGTAAGT

>M6-PGSC0003DMG400017836-(rev)M6OtherRLKTM\_3050

CGAAGTTGAAATAGTCAGTGCTCCTCTTTTTGGATTGTCCTTACCTTCAGAAAGATATAAGAATGTGTTTT  
ATTTGTTTTCCATTTTTTCTGTAAATAGCTACTTGGTTTATAAAGT

>M6-PGSC0003DMG400017836-(rev)M6OtherRLKTM\_3111

AATGTGTTTTATTTGTTTTCCATTTTTTCTGTAAATAGCTACTTGGTTTATAAAGTGGCATTGTTAGCA  
TATTTAATTTGAGTCATTGTTATTACTGTAGTTAAGCATGATATATCC

>M6-PGSC0003DMG400017836-(rev)M6OtherRLKTM\_3172

CATTGTTAGCATATTTAATTTGAGTCATTGTTATTACTGTAGTTAAGCATGATATATCCCCTGTATCAACTC  
CGTGGCCAAGCATCAACCGTAAAAGAGCAATTGCTCCAACCTGTTGCAC

>M6-PGSC0003DMG400017836-(rev)M6OtherRLKTM\_3233

TGTATCAACTCCGTGGCCAAGCATCAACCGTAAAAGAGCAATTGCTCCAACCTGTTGCACCTACTAAGGG  
AATGAACCATCAGCATCCAGCAAAGGTATATCAATATTTTTCTGCTATCA

>M6-PGSC0003DMG400017836-(rev)M6OtherRLKTM\_3294

ACTAAGGGAATGAACCATCAGCATCCAGCAAAGGTATATCAATATTTTTCTGCTATCATTCTTTTCATC  
AGCAGCACGAGGAATGGCCAATTATGTCACCGAAGGATTTCTTCTCCTC

>M6-PGSC0003DMG400017836-(rev)M6OtherRLKTM\_3355

TCTTTTCATCAGCAGCACGAGGAATGGCCAATTATGTCACCGAAGGATTTCTTCTCCTCTTGTCGCTCATA  
CTGAACACAAAGCCATGGGGTGCTCTACTAATGCTCCTCCTCATAAATT

>M6-PGSC0003DMG400017836-(rev)M6OtherRLKTM\_3416

GTCGCTCATACTGAACACAAAGCCATGGGGTGCTCTACTAATGCTCCTCCTCATAAATCCCTAACTCTCC  
CCCTGTGGAAGGATCATATCCTCCCTTATCTGCACCTTCAATCTCATTT

>M6-PGSC0003DMG400017836-(rev)M6OtherRLKTM\_3477

CTAACTCTCCCCCTGTGGAAGGATCATATCCTCCCTTATCTGCACCTTCAATCTCATTTTCAGAGGGATCAC  
TACCTAAAAGATAATATGACAGAAATCACTCCGTCATCCTATGAAGTTT

>M6-PGSC0003DMG400017836-(rev)M6OtherRLKTM\_3538

GAGGGATCACTACCTAAAAGATAATATGACAGAAATCACTCCGTCATCCTATGAAGTTTATCCTCCTGGT  
TCAACTGAACTAGGTTCTGTATCTTACTTGAGAAATGTCAGTTGATATCC



>M6-PGSC0003DMG400017836-(rev)M6OtherRLKTM\_3599

CCTCCTGGTTCAACTGAACTAGGTTCTGTATCTTACTTGAGAAATGTCAGTTGATATCCTCATTCTGATAT  
ACGACACTAACCAGAATTCAGTCAATATTTAATGAAGGTCCATTGATTT

>M6-PGSC0003DMG400017836-(rev)M6OtherRLKTM\_366

TCTCTACTTCTTCAACTACCTAATTATTTATTTATTTATGAGTTTTGTGCTCAGTAAGTCCAGTATTGGTAA  
TTTTGAGTTCTGAATTTTGGTCCCAGATTTGATAATTTTGTAGCACTC

>M6-PGSC0003DMG400017836-(rev)M6OtherRLKTM\_3660

ATTCTGATATACGACACTAACCAGAATTCAGTCAATATTTAATGAAGGTCCATTGATTTCTCCATCTCCTT  
CGTTTCACTCAAATCATATCCAAAGACTAACCTTAGGCACAAGTCTCA

>M6-PGSC0003DMG400017836-(rev)M6OtherRLKTM\_3721

CCATCTCCTTCGTTTCACTCAAATCATATCCAAAGACTAACCTTAGGCACAAGTCTCATTACCGTTAAC  
TGCAGGTTTGTGGTCATTCTAGTCATCCTCAGTTGACCATCCGTTTGCC

>M6-PGSC0003DMG400017836-(rev)M6OtherRLKTM\_3782

CACCGTAACTGCAGGTTTGTGGTCATTCTAGTCATCCTCAGTTGACCATCCGTTTGCCTCTCTGAAAGAA  
AAATGAATAGTGAAAAGTAAAAAAGTGATTCTGATAACTCCTACTTTAC

>M6-PGSC0003DMG400017836-(rev)M6OtherRLKTM\_3843

TCTGAAAGAAAAATGAATAGTGAAAAGTAAAAAAGTGATTCTGATAACTCCTACTTTACAGGATTGTCA  
GTACCACCGATGCTTGCGCCTTTAACTTCTCCAGAAAGTCATGATTCTCCT

>M6-PGSC0003DMG400017836-(rev)M6OtherRLKTM\_3904

GATTGTCAGTACCACCGATGCTTGCGCCTTTAACTTCTCCAGAAAGTCATGATTCTCCTGCAATATCACCG  
TCTCCAAGTGCTTCATCTAGACCAACAAAAGTAAGAGTAAGGCATATG

>M6-PGSC0003DMG400017836-(rev)M6OtherRLKTM\_3965

AATATCACCGTCTCCAAGTGCTTCATCTAGACCAACAAAAGTAAGAGTAAGGCATATGTTCCCTTTTCA  
TGCAATCCATAGTCAAGGCATTAACCTTATATTTTATTTTCATTCTCTATA

>M6-PGSC0003DMG400017836-(rev)M6OtherRLKTM\_4026

CCCTTTTCATGCAATCCATAGTCAAGGCATTAACCTTATATTTTATTTTCATTCTCTATACATAGTTAATGCTT  
ATCTCTATATCATCTTTGTCATTGCAAGAGCCATTTCTTTCCCCTAA

>M6-PGSC0003DMG400017836-(rev)M6OtherRLKTM\_4087

TAGTTAATGCTTATCTCTATATCATCTTTGTCATTGCAAGAGCCATTTCTTTCCCCTAAAATGTCTCCCTCT

GGGTCTTCACCAAGGCATCCAAAGATACCGCATTCAATTTCAAGCACTA

>M6-PGSC0003DMG400017836-(rev)M6OtherRLKTM\_4148

TGTCTCCCTCTGGGTCTTCACCAAGGCATCCAAAGATACCGCATTCAATTTCAAGCACTACCACCTCCACCT  
CCTAATGAAGGTATGTTTTATCTGCCTCTGATTTCTCCTCTAAATGATA

>M6-PGSC0003DMG400017836-(rev)M6OtherRLKTM\_4209

ACCTCCACCTCCTAATGAAGGTATGTTTTATCTGCCTCTGATTTCTCCTCTAAATGATATAGATTTTACTTG  
CACAAGTTGCCAGGTTTTGCCCCATTGACTATTCTATACATGACATTG

>M6-PGSC0003DMG400017836-(rev)M6OtherRLKTM\_427

AGTATTGGTAATTTTGAGTTCTGAATTTTGGTCCCAGATTTGATAATTTTGTAGCACTCAAATCAGATTGA  
TGCATCTGGTGTGTGTGTGAGAGGGAATGAGACTATTACATTCTGAATT

>M6-PGSC0003DMG400017836-(rev)M6OtherRLKTM\_4270

GATTTTACTTGACAAGTTGCCAGGTTTTGCCCCATTGACTATTCTATACATGACATTGATGTTGCAGATT  
GCGCTTCATTGGCTTGTGTGGAGCCTTTCACAAATGGTCCACCCAAAGC

>M6-PGSC0003DMG400017836-(rev)M6OtherRLKTM\_4331

GTTGCAGATTGCGCTTCATTGGCTTGTGTGGAGCCTTTCACAAATGGTCCACCCAAAGCACCTTGTGTTT  
GTGTCTTGCCCATGCGAATTGGACTACGCCTTAGTGTAGCACTCTACACA

>M6-PGSC0003DMG400017836-(rev)M6OtherRLKTM\_4392

CTTGTGTTTGTGTCTTGCCCATGCGAATTGGACTACGCCTTAGTGTAGCACTCTACACATTCTCCCTTTG  
GTTTCAGAGTTAGCTACAGAAGTTTCTGTTGGGGTATTTATGGATCCAA

>M6-PGSC0003DMG400017836-(rev)M6OtherRLKTM\_4453

CTTCCCTTTGGTTTCAGAGTTAGCTACAGAAGTTTCTGTTGGGGTATTTATGGATCCAAGTCAAGTTCGTA  
TAATGGGAGCAAATTCAGCCAGCCAGTATCCAGAAAAGACCATTGTCCT

>M6-PGSC0003DMG400017836-(rev)M6OtherRLKTM\_4514

CAAGTTCGTATAATGGGAGCAAATTCAGCCAGCCAGTATCCAGAAAAGACCATTGTCCTTATTGATTTGG  
TACCCCTCGGAGAAAAATTTGATAAACTACAGCATTGTGACATCACAA

>M6-PGSC0003DMG400017836-(rev)M6OtherRLKTM\_4575

TTGATTTGGTACCCCTCGGAGAAAAATTTGATAAACTACAGCATTGTGACATCACAAAGATTCTGGCA  
CAAACAAGTTGTTATAAAATCACTTTTTGGTGATTATGATGTATTATATG

>M6-PGSC0003DMG400017836-(rev)M6OtherRLKTM\_4636

ATTCTGGCACAAACAAGTTGTTATAAAATCACTTTTTGGTGATTATGATGTATTATATGTGCAATATCCAG  
GTATAGAATCATTCTAATGCCATTGTGTCATCTTGATGCCACATGCTA

>M6-PGSC0003DMG400017836-(rev)M6OtherRLKTM\_4697

CAATATCCAGGTATAGAATCATTCTAATGCCATTGTGTCATCTTGATGCCACATGCTATGTCCCGAGTAA  
CTAAATAGAATTGTTATATGTACAGGTTTTCTCCCTCTCCACCTCAG

>M6-PGSC0003DMG400017836-(rev)M6OtherRLKTM\_4758

TCCCGAGTAACTAAATAGAATTGTTATATGTACAGGTTTTCTCCCTCTCCACCTCAGCAGCTTCAGACA  
TTGATACCATAGGTAGCCAACCATATCCTGGTGATAATAACGGAAGGAC

>M6-PGSC0003DMG400017836-(rev)M6OtherRLKTM\_4819

GCTTCAGACATTGATACCATAGGTAGCCAACCATATCCTGGTGATAATAACGGAAGGACCATACAGCCC  
CTTGAGTTGATGTGAGGGGGCAACAGCACAAAAGTGGGCCGAATCGGAGT

>M6-PGSC0003DMG400017836-(rev)M6OtherRLKTM\_488

ATCAGATTGATGCATCTGGTGTGTGTGTGAGAGGGAATGAGACTATTACATTCTGAATTTTGTTACTCAT  
GTTTTTATGCCAACTGAAATTTTTGCCTTGAGTTCTCTAGCTTGTTTT

>M6-PGSC0003DMG400017836-(rev)M6OtherRLKTM\_4880

TACAGCCCCTTGAGTTGATGTGAGGGGGCAACAGCACAAAAGTGGGCCGAATCGGAGTGTTCATAGCA  
GTAATTGTGTTGTCAGCCTCTGTGCGAGTTATTTTATGTTGTGCCATTGCAT

>M6-PGSC0003DMG400017836-(rev)M6OtherRLKTM\_4941

CATAGCAGTAATTGTGTTGTCAGCCTCTGTGCGAGTTATTTTATGTTGTGCCATTGCATGGGTTTTGCTTT  
TCAGACATAGAGATCACGGATATCAGTTAGAACCAACTCCACCAACTAC

>M6-PGSC0003DMG400017836-(rev)M6OtherRLKTM\_5002

GTTTTGCTTTTCAGACATAGAGATCACGGATATCAGTTAGAACCAACTCCACCAACTACATTACCATCCCT  
TGCAAAGTCATCAGGTGAAATCCTTCTCTTGACATTTAAATGATCTACT

>M6-PGSC0003DMG400017836-(rev)M6OtherRLKTM\_5063

TACCATCCCTTGCAAAGTCATCAGGTGAAATCCTTCTCTTGACATTTAAATGATCTACTGCCATGTGGTTT  
GCCTAGTGTTTCGATTCTCTGTGTTAGTTTTCTTCTTTTCATGCTGAAAA

>M6-PGSC0003DMG400017836-(rev)M6OtherRLKTM\_5124

CATGTGGTTTGCCTAGTGTTTCGATTCTCTGTGTTAGTTTTCTTCTTTTCATGCTGAAAAAGACATTCAAAC  
AGTAAACTTCAGAAGCCTAGCCTTTCATTATCGCCATGCCTTTGTAGCA

>M6-PGSC0003DMG400017836-(rev)M6OtherRLKTM\_5185

ACATTCAAACAGTAAACTTCAGAAGCCTAGCCTTTCATTATCGCCATGCCTTTGTAGCATGCCAGGTAAA  
TACTATGTTAGGGGAAAGTAAATCATATTGGAGTTTTGAATATGCTATAT

>M6-PGSC0003DMG400017836-(rev)M6OtherRLKTM\_5246

CCAGGTAAATACTATGTTAGGGGAAAGTAAATCATATTGGAGTTTTGAATATGCTATATGTTGCTCAACT  
CGGTTACTTTTACTACTCATCCTGAGCATAACAATGGAATGAAATGTCCAA

>M6-PGSC0003DMG400017836-(rev)M6OtherRLKTM\_5307

TGCTCAACTCGGTTACTTTTACTACTCATCCTGAGCATAACAATGGAATGAAATGTCCAAAATTATGAAAT  
GGAATATAGGAAAAGTTATCTGGTTAGTCGCATAATGTTAATATGGTGAG

>M6-PGSC0003DMG400017836-(rev)M6OtherRLKTM\_5368

TTATGAAATGGAATATAGGAAAAGTTATCTGGTTAGTCGCATAATGTTAATATGGTGAGTCATCCAATAT  
CTTTTGACTGGAATATCTTGAAGTATCAACTCTTAATGGGTGCATTCAGG

>M6-PGSC0003DMG400017836-(rev)M6OtherRLKTM\_5429

ATCCAATATCTTTTGACTGGAATATCTTGAAGTATCAACTCTTAATGGGTGCATTCAGGAACCTTTAAACT  
TCACAAATTTATTAATATGCATCTAAAATGTGTACAAATATGTGATTCT

>M6-PGSC0003DMG400017836-(rev)M6OtherRLKTM\_549

GTTACTCATGTTTTTATGCCAAACTGAAATTTTTGCCTTGAGTTCTCTAGCTTGGTTTTGTTTTGCAATTT  
AACTGTTTCATTGATCACTGATTTTCCCTTTTAGAGTCCCTACTTATT

>M6-PGSC0003DMG400017836-(rev)M6OtherRLKTM\_5490

CCTTTAAACTTCACAAATTTATTAATATGCATCTAAAATGTGTACAAATATGTGATTCTCACGAGTCTTGT  
GTAATAAAGACTTAATACAATTTTTTTTTCTGATCTTTATGCATGGTGTA

>M6-PGSC0003DMG400017836-(rev)M6OtherRLKTM\_5551

CGAGTCTTGTAATAAAGACTTAATACAATTTTTTTTTCTGATCTTTATGCATGGTGTAGGGATTGCAGCC  
TCCATGATTGGGAGTAGGCCTAACTCTCCTACATTGTCCTTTAGTTCAA

>M6-PGSC0003DMG400017836-(rev)M6OtherRLKTM\_5612

GATTGCAGCCTCCATGATTGGGAGTAGGCCTAACTCTCCTACATTGTCCTTTAGTTCAAGCTTTGCTGCTT  
ATACTGGTTCAGCTAGAACATTTTCTTCAAAGGAAATTGATAGAGCAAC

>M6-PGSC0003DMG400017836-(rev)M6OtherRLKTM\_5673

TTTGCTGCTTATACTGGTTCAGCTAGAACATTTTCTTCAAAGGAAATTGATAGAGCAACTGACAGCTTCA

ATGAAGCAAGAGTACTAGGTGAAGGGGATTTGGTCGTGTTTATAGTGGT

>M6-PGSC0003DMG400017836-(rev)M6OtherRLKTM\_5734

ACAGCTTCAATGAAGCAAGAGTACTAGGTGAAGGGGATTTGGTCGTGTTTATAGTGGTGTGCTTGATG

ATGGGATGAAAGTGGCAGTGAAAGTCCTGAAGAGAGATGACCAACAGGGTG

>M6-PGSC0003DMG400017836-(rev)M6OtherRLKTM\_5795

GCTTGATGATGGGATGAAAGTGGCAGTGAAAGTCCTGAAGAGAGATGACCAACAGGGTGGTCGTGAA

TTTTTGGCTGAAGTAGAGATGCTTAGCCGCCTCCATCATAGGAACTTGGTCAA

>M6-PGSC0003DMG400017836-(rev)M6OtherRLKTM\_5856

CGTGAATTTTTGGCTGAAGTAGAGATGCTTAGCCGCCTCCATCATAGGAACTTGGTCAAGTTGATAGGT

ATATGTCTTGAGGAGCGCAGTCGCTGTTTACTTTATGAGCTCATCCCAAAT

>M6-PGSC0003DMG400017836-(rev)M6OtherRLKTM\_5917

TGATAGGTATATGTCTTGAGGAGCGCAGTCGCTGTTTACTTTATGAGCTCATCCCAAATGGCAGCGTGG

AATCTCACCTTCATGGTAATATTCAATTTAGATCACTCGTAACTTTTTTGG

>M6-PGSC0003DMG400017836-(rev)M6OtherRLKTM\_5978

CAGCGTGGAATCTCACCTTCATGGTAATATTCAATTTAGATCACTCGTAACTTTTTTGGTTGAAGTCATGT

GTATTTAGATTTAGACTGGCTAAAAACCCATCTTTCAGGTGTTGACAA

>M6-PGSC0003DMG400017836-(rev)M6OtherRLKTM\_6039

GAAGTCATGTGATTTAGATTTAGACTGGCTAAAAACCCATCTTTCAGGTGTTGACAAGGAAAGTTCTC

CACTTGATTGGAATGCCCGAATGAAAATAGCACTTGGTGCTGCCCCGAGGC

>M6-PGSC0003DMG400017836-(rev)M6OtherRLKTM\_61

TCACATGCTACCTGAAACGCCTGTGTATAGCATGTTAATCTCACAAACACACCTTCTTATGCTCCCTCTTA

CACCCCATTTTTGGGCGTTTCTGCCTCTTCATTGCTTCTTTCTCAATTT

>M6-PGSC0003DMG400017836-(rev)M6OtherRLKTM\_610

TTTTGCAATTTAACTGTTTCATTGATCACTGATTTTCCCTTTTAGAGTCCCTACTTATTTCAATTCTAATAAA

GCTTCTTACCGTTGGTTGCAAATTGATGCTGCAATGACTATATTA

>M6-PGSC0003DMG400017836-(rev)M6OtherRLKTM\_6100

AAAGTTCTCCACTTGATTGGAATGCCCGAATGAAAATAGCACTTGGTGCTGCCCCGAGGCCTGGCCTATTT

ACATGAAGATTCCAGTCCCCGTGCATACACAGGGATTTTAAGTCTAGTA

>M6-PGSC0003DMG400017836-(rev)M6OtherRLKTM\_6161

GGCCTATTTACATGAAGATTCCAGTCCCCGTGCATACACAGGGATTTTAAGTCTAGTAACATCTTACTG  
GAACATGATTTACCCCCGAAAGTGTCTGATTTTGGTTTGGCTAGAGCTGC

>M6-PGSC0003DMG400017836-(rev)M6OtherRLKTM\_6222

ATCTTACTGGAACATGATTTACCCCCGAAAGTGTCTGATTTTGGTTTGGCTAGAGCTGCATTAGATGAAG  
GAGAAAGACACATATCCACTCGAGTCATGGGAACTTTTGGGTAAAATATT

>M6-PGSC0003DMG400017836-(rev)M6OtherRLKTM\_6283

TAGATGAAGGAGAAAGACACATATCCACTCGAGTCATGGGAACTTTTGGGTAAAATATTCATCTGACTT  
AATATTTGCATTTTCATTAGGCCAGCCTTCGTCCTGTTTATGACTGACAAA

>M6-PGSC0003DMG400017836-(rev)M6OtherRLKTM\_6344

TCTGACTTAATATTTGCATTTTCATTAGGCCAGCCTTCGTCCTGTTTATGACTGACAAAGTCCCAAACCCCT  
TAAACAGATCAGCTGCTTCATGCTGGTCTGCTTTCCTGGAGTATAATT

>M6-PGSC0003DMG400017836-(rev)M6OtherRLKTM\_6405

CCCAAACCCCTTAAACAGATCAGCTGCTTCATGCTGGTCTGCTTTCCTGGAGTATAATTTTTTTTCTTTTG  
AATGCCTTATTTATTTTTACTCGATTGTCCTCAATCAATTGAAACTGA

>M6-PGSC0003DMG400017836-(rev)M6OtherRLKTM\_6466

TTTTCTTTTGAATGCCTTATTTATTTTTACTCGATTGTCCTCAATCAATTGAAACTGACTATGCATAACAA  
AACCCATTCTCTTAACATTTTGTCTTCTGTTGTACACTTCTGACTTT

>M6-PGSC0003DMG400017836-(rev)M6OtherRLKTM\_6527

ATGCATAACAAAACCCATTCTCTTAACATTTTGTCTTCTGTTGTACACTTCTGACTTTGTTATTTTACCAG  
GTACGTAGCTCCAGAATATGCTATGACAGGGCATCTACTTGTAAGAG

>M6-PGSC0003DMG400017836-(rev)M6OtherRLKTM\_6588

TATTTTACCAGGTACGTAGCTCCAGAATATGCTATGACAGGGCATCTACTTGTAAGAGTGATGTTTACA  
GCTATGGTGTGTCCTTCTGAGCTGCTAACTGGAAAAAAGCCAGTGGAT

>M6-PGSC0003DMG400017836-(rev)M6OtherRLKTM\_6649

ATGTTTACAGCTATGGTGTGTCCTTCTGAGCTGCTAACTGGAAAAAAGCCAGTGGATATGTCTCAGCC  
ACCAGGTCAAGAGAATTTAGTGGCTTGGGCACGCCACTCCTAACGAGTG

>M6-PGSC0003DMG400017836-(rev)M6OtherRLKTM\_671

ATTCTAATTAAGCTTCTTACCGTTGGTTGCAAATTGATGCTGCAATGACTATATTAATCCGCCATGGG  
ATAATTAGCCTGGTTTTATTCAATGACGTGCCATCTTGTGGGATGTAT

>M6-PGSC0003DMG400017836-(rev)M6OtherRLKTM\_6710  
GTCTCAGCCACCAGGTCAAGAGAATTTAGTGGCTTGGGCACGCCACTCCTAACGAGTGAAGAAGGTCT  
GGAGTTGATTGTGGACCATAATTTGGGGCCTGATTTCCCTTTTCGATGACAT

>M6-PGSC0003DMG400017836-(rev)M6OtherRLKTM\_6771  
GAAGGTCTGGAGTTGATTGTGGACCATAATTTGGGGCCTGATTTCCCTTTTCGATGACATTGTAAGTAG  
CTGCTATTGCGTCAATGTGTGTTCAACCAGAGGTATCACACAGACCTTTC

>M6-PGSC0003DMG400017836-(rev)M6OtherRLKTM\_6832  
TAAAGTAGCTGCTATTGCGTCAATGTGTGTTCAACCAGAGGTATCACACAGACCTTTCATGGGTGAGG  
TTGTCCAGGCCTTAAAGCTGGTATGTAACGAATGCGGACAGACAAAAGACG

>M6-PGSC0003DMG400017836-(rev)M6OtherRLKTM\_6893  
GGGTGAGGTTGTCCAGGCCTTAAAGCTGGTATGTAACGAATGCGGACAGACAAAAGACGTAGTGTCTC  
GAAGTTGTAGCCAAGATAATCTGTCTATTGACATGGATACTAGGATTAGTAC

>M6-PGSC0003DMG400017836-(rev)M6OtherRLKTM\_6954  
GTGTCTCGAAGTTGTAGCCAAGATAATCTGTCTATTGACATGGATACTAGGATTAGTACAACCTCAAGCC  
AAGTCCTGAACCTATACAACCTCAATCCCCAGTTTCTAACTCTGACAGT

>M6-PGSC0003DMG400017836-(rev)M6OtherRLKTM\_7015  
CTTCAAGCCAAGTCCTGAACCTATACAACCTCAATCCCCAGTTTCTAACTCTGACAGTGAGCTGGATGTT  
GAGAGGGGACTTTCAATGTCAGATTTACTGAGTCCGTTAGCAAGATACG

>M6-PGSC0003DMG400017836-(rev)M6OtherRLKTM\_7076  
GCTGGATGTTGAGAGGGGACTTTCAATGTCAGATTTACTGAGTCCGTTAGCAAGATACGGAAGGCAAG  
AATCTGATTCATTTAGGAGGTATTCTAGCTCAGGTCCTCTGAGAAAAGGAAA

>M6-PGSC0003DMG400017836-(rev)M6OtherRLKTM\_7137  
AGGCAAGAATCTGATTCATTTAGGAGGTATTCTAGCTCAGGTCCTCTGAGAAAAGGAAAAACCAGGAG  
GCTATGGCAGAAAATGAGAAGATTATCTGGAGGTAGTTTGAGCGAGCACGGC

>M6-PGSC0003DMG400017836-(rev)M6OtherRLKTM\_7198  
CCAGGAGGCTATGGCAGAAAATGAGAAGATTATCTGGAGGTAGTTTGAGCGAGCACGGCGTGATGTTT  
GGGTTACGGCCTGGATCCCACTAATTGAGGTTTTTCATCTTTGATTTTGATAA

>M6-PGSC0003DMG400017836-(rev)M6OtherRLKTM\_7259  
GATGTTTGGGTTACGGCCTGGATCCCACTAATTGAGGTTTTTCATCTTTGATTTTGATAAATGTTTCTGAAA

AATGTCAATTTTCGCCATCCATGCTGGATATACTAGATTGAGCATGGAA

>M6-PGSC0003DMG400017836-(rev)M6OtherRLKTM\_732

CGCCATGGGATAATTAGCCTGGTTTTATTCAATGACGTGCCATCTTGTTGGGATGTATTGCCTTGTCGAT  
TTATTTGCAAATAAGTTACTCAGACATGTAATGTAAGACCATGGTAAAA

>M6-PGSC0003DMG400017836-(rev)M6OtherRLKTM\_7320

GTTTCTGAAAATGTCAATTTTCGCCATCCATGCTGGATATACTAGATTGAGCATGGAATTGTACAGCAC  
CTTCTTTATCAAGACATAGAATGAGGAAGCAAACACCAACACACTCAAAT

>M6-PGSC0003DMG400017836-(rev)M6OtherRLKTM\_7381

GTACAGCACCTTCTTTATCAAGACATAGAATGAGGAAGCAAACACCAACACACTCAAATTGTCCTGAATG  
CTATCGCGTAATCCATGAGTATGATAAACCTCCGCCAAAAGCTGGGAAG

>M6-PGSC0003DMG400017836-(rev)M6OtherRLKTM\_7442

TCCTGAATGCTATCGCGTAATCCATGAGTATGATAAACCTCCGCCAAAAGCTGGGAAGAAGTGTGCGC  
GACAAGATATCTGAATAGAGATTTTCATCTTGTGTAAGAAGATTGTATTTAT

>M6-PGSC0003DMG400017836-(rev)M6OtherRLKTM\_7503

CTGTGCGCGACAAGATATCTGAATAGAGATTTTCATCTTGTGTAAGAAGATTGTATTTATTGTAACATGCT  
AATTGTTCATAAAAGGAATCATAGTTCTTTATCTTCTGGTATTGAGTTTG

>M6-PGSC0003DMG400017836-(rev)M6OtherRLKTM\_7564

TAACATGCTAATTGTTTATAAAAGGAATCATAGTTCTTTATCTTCTGGTATTGAGTTTGAACCTTGGAGGC  
AAACGAGTGATCTGCTGCTAAGATCTCATCCTTTGAACTTTCTCTTCC

>M6-PGSC0003DMG400017836-(rev)M6OtherRLKTM\_7625

CCTTGGAGGCAAACGAGTGATCTGCTGCTAAGATCTCATCCTTTGAACTTTCTCTTCCACAGTGCCATT  
TCATTAATAATCAGCATGGGTTTACTAGGCTTCACCCCATCCTTCAACT

>M6-PGSC0003DMG400017836-(rev)M6OtherRLKTM\_7686

AGTGCCATTTTCATTAATAATCAGCATGGGTTTACTAGGCTTCACCCCATCCTTCAACTTATCATTACTCT  
CTTATCACACACAACATTTTTGTGTTTATTACCCACACCTTCAAGTA

>M6-PGSC0003DMG400017836-(rev)M6OtherRLKTM\_7747

TCATTACTCTTCTTATCACACACAACATTTTTGTGTTTATTACCCACACCTTCAAGTACTTTTCCACTTCTA  
GTAACAAATGGCCATCATTCTATGGATTAAGAAAAGTGTCTTCTAT

>M6-PGSC0003DMG400017836-(rev)M6OtherRLKTM\_7808



TTTCCACTTCTAGTAACAAATGGCCATCATTCTATGGATTAAGAAAAGTGTCTTCCTATCTTTCATCCAAT  
GATTCATTTGAGATGACAAGTGATTCATTTGTGCCTCAAGATGCTTGAT

>M6-PGSC0003DMG400017836-(rev)M6OtherRLKTM\_7869

TTCATCCAATGATTCATTTGAGATGACAAGTGATTCATTTGTGCCTCAAGATGCTTGATTAATGCTGAATG  
GAAACTCAAATAATGAGGGATATTTTAGGTATGAAACTCATATTCTCA

>M6-PGSC0003DMG400017836-(rev)M6OtherRLKTM\_793

CCTTGTGATTTATTTGCAAATAAGTTACTCAGACATGTAATGTAAGACCATGGTAAAAAATGATAAACT  
GTTTCATGTTTCATCATCCCCTCCGTATACGCTTTATGATTGTAATTAATCT

>M6-PGSC0003DMG400017836-(rev)M6OtherRLKTM\_854

TGATAAACTGTTTCATGTTTCATCATCCCCTCCGTATACGCTTTATGATTGTAATTAATCTAAGTACGTTGAA  
AAGGAGGGAAATGATTTTGCTAATGTCTTTTTATCTGTGTTTCGACCTGT

>M6-PGSC0003DMG400017836-(rev)M6OtherRLKTM\_915

GTACGTTGAAAAGGAGGGAAATGATTTTGCTAATGTCTTTTTATCTGTGTTTCGACCTGTCATTTCCACTAA  
GTTTTTTGTGAAATGGAGAATCTTTTCTAATGAAGAACTGCATATCTAA

>M6-PGSC0003DMG400017836-(rev)M6OtherRLKTM\_976

TTTCCACTAAGTTTTTTGTGAAATGGAGAATCTTTTCTAATGAAGAACTGCATATCTAACCTAATATAATT  
TTTTTGGAATTCATTTTAGGCGTCAGTTTATTGCCCTCTCCGTCAGCAT

>M6-PGSC0003DMG400017864-(rev)M6LRR-RLK\_0

ATGAATATGAAGAAGTTGGAAAGAAGAAATACTATTGTTATTGTTATATTAGTTGTTGCATTTGATCACT  
TACTGCTTGTGGCTAACATTGCCACAGATGAAGCTGCTCTTCTTGCC

>M6-PGSC0003DMG400017864-(rev)M6LRR-RLK\_1098

AAATTAAGAAAAAAGACAACTGACTAAAAAGGGAAGTAAGACAAACAAATTGAAACGGAGGAAGT  
GTATCTTTATGCTTTTGTGTTTATTTAAGATTTCTCAAAGCTAAGCAATAT

>M6-PGSC0003DMG400017864-(rev)M6LRR-RLK\_1159

GGAAGTGATCTTTATGCTTTTGTGTTTATTTAAGATTTCTCAAAGCTAAGCAATATCAATATGTACTA  
ATGTTTATGCATTTTACTCTAATTGACAGGAGAGTTATCGGTCGAGATA

>M6-PGSC0003DMG400017864-(rev)M6LRR-RLK\_122

CAAATCTCACATTTCTTCTTCTTCTGATCCCAACAACGTAGTTGTCTTGCAAACCAACTGGTCTTCTTC  
AATTCCATCATCAGTTTGCACCTGGATAGGGATCACTTGCAACGGGCG

>M6-PGSC0003DMG400017864-(rev)M6LRR-RLK\_1220

ATATGTACTAATGTTTATGCATTTTACTCTAATTGACAGGAGAGTTATCGGTTCGAGATAGGTAACCTACA  
AAACCTCCAAGTACTTGGGTTAAGAAATAATAAGTTAAATGGTACTATTC

>M6-PGSC0003DMG400017864-(rev)M6LRR-RLK\_1281

TAACCTACAAAACCTCCAAGTACTTGGGTTAAGAAATAATAAGTTAAATGGTACTATTCTGCAGAAATT  
TTCAACATTTTCAGCATTGCAGATATTGACAATGTATGGAAATCAGTTATC

>M6-PGSC0003DMG400017864-(rev)M6LRR-RLK\_1342

GCAGAAATTTTCAACATTTTCAGCATTGCAGATATTGACAATGTATGGAAATCAGTTATCAGGTAGTTTAC  
CTTCAGATTTAGGCGTTGGAATGCCTAGTCTTGAAGAACTTTACCTTGGA

>M6-PGSC0003DMG400017864-(rev)M6LRR-RLK\_1403

GTAGTTTACCTTCAGATTTAGGCGTTGGAATGCCTAGTCTTGAAGAACTTTACCTTGGATCAAATGAACT  
CAGTGGACGAATTGCTCCTACCATCTCGAATTCTTCAAAGCTAACACTTC

>M6-PGSC0003DMG400017864-(rev)M6LRR-RLK\_1464

AAATGAACTCAGTGGACGAATTGCTCCTACCATCTCGAATTCTTCAAAGCTAACACTTCTAGACCTTGCA  
GACAACAAGTTTACAGGTCCAATTCCTGATTCACCTGGTTCATTAGAGTT

>M6-PGSC0003DMG400017864-(rev)M6LRR-RLK\_1525

GACCTTGCAGACAACAAGTTTACAGGTCCAATTCCTGATTCACCTGGTTCATTAGAGTTTCTTGAAGTCCT  
ATTCTTGGGAGGTAACAATTTTCATTGATGAGCCATCTTCTTCTGAGTTA

>M6-PGSC0003DMG400017864-(rev)M6LRR-RLK\_1586

TTGAAGTCCTATTCTTGGGAGGTAACAATTTTCATTGATGAGCCATCTTCTTCTGAGTTAAGATTCGTCTCG  
TCCCTGACTAATTGTAGATATTTAAGAGAAGTAGTCATTGAAGATAATC

>M6-PGSC0003DMG400017864-(rev)M6LRR-RLK\_1647

ATTCGTCTCGTCCCTGACTAATTGTAGATATTTAAGAGAAGTAGTCATTGAAGATAATCCTTTGAATGGTT  
TTCTTCCATCTTCTATTGGAACTTTTCTGATTCTTTTCGGATGTTTGT

>M6-PGSC0003DMG400017864-(rev)M6LRR-RLK\_1708

TTGAATGGTTTTCTTCCATCTTCTATTGGAACTTTTCTGATTCTTTTCGGATGTTTGTGACGTAGAACC  
AAACTGAAGGGTACAATCCCGGAAGAAATTGGAAACCTGAGTAGCTTA

>M6-PGSC0003DMG400017864-(rev)M6LRR-RLK\_1769

CACGTAGAACCAAACTGAAGGGTACAATCCCGGAAGAAATTGGAAACCTGAGTAGCTTAGGTGTGCTA

GCTCTCTCTCATAATGACTTCACTGGTTCGATACCTGAGAAGTTGAGAACCA

>M6-PGSC0003DMG400017864-(rev)M6LRR-RLK\_183

TGGTCTTCTTCAATTCCATCATCAGTTTGCACCTGGATAGGGATCACTTGCAACGGGCGCCACAGAGTCA  
CTGCTTTAGACATATCTAGCATGCAACTTCATGGTACCATTCTCCGCAC

>M6-PGSC0003DMG400017864-(rev)M6LRR-RLK\_1830

TGTGCTAGCTCTCTCATAATGACTTCACTGGTTCGATACCTGAGAAGTTGAGAACCATGAAGAATCTC  
CAAGAATTTTACTTGAAAATAACAGCCTAAGTGGAACAATACCTGATGA

>M6-PGSC0003DMG400017864-(rev)M6LRR-RLK\_1891

AAGAATCTCCAAGAATTTTACTTGAAAATAACAGCCTAAGTGGAACAATACCTGATGATATCTGCAGTT  
TACGAAATCTTGGAGCTTTAAAATTGACTGGAAATCAAATATCTGGTTCA

>M6-PGSC0003DMG400017864-(rev)M6LRR-RLK\_1952

TCTGCAGTTTACGAAATCTTGGAGCTTTAAAATTGACTGGAAATCAAATATCTGGTTCAATTCCAGCATG  
TTTAGGAAATGTTTCTACTTTAAGATATCTTCATTTAGCTTTCAACAGAT

>M6-PGSC0003DMG400017864-(rev)M6LRR-RLK\_2013

TCCAGCATGTTTAGGAAATGTTTCTACTTTAAGATATCTTCATTTAGCTTTCAACAGATTGACTTCAACCTT  
ACCTGAAACCTTGTGGAGCCTTCAAGATCTCTTGGAACTCAATGCATC

>M6-PGSC0003DMG400017864-(rev)M6LRR-RLK\_2074

ACTTCAACCTTACCTGAAACCTTGTGGAGCCTTCAAGATCTCTTGGAACTCAATGCATCAGCAAATCTGTT  
TAGCGGGCGTATACCTCTGAGGTTGGTACTCTAAAGGCTGTGTCACTA

>M6-PGSC0003DMG400017864-(rev)M6LRR-RLK\_2135

CAAATCTGTTTAGCGGGCGTATACCTCCTGAGGTTGGTACTCTAAAGGCTGTGTCACTAATTGAAAAGTT  
GATTAGTCTTTCCATGGCACACAATAAATTGGAAGGGCCTATTCCGAGTT

>M6-PGSC0003DMG400017864-(rev)M6LRR-RLK\_2196

TGAAAAGTTGATTAGTCTTTCCATGGCACACAATAAATTGGAAGGGCCTATTCCGAGTTCATTCGGGAAA  
ATGGTGAGCTTGGAAATCTTGGATTTTTCTTACAACAATCTTACTAGTGA

>M6-PGSC0003DMG400017864-(rev)M6LRR-RLK\_2257

TTCGGGAAAATGGTGAGCTTGGAAATCTTGGATTTTTCTTACAACAATCTTACTAGTGAAATTCCAAAGT  
CACTTGAAACACTTTACATCTCAACTACTTTAACATCTCTTTTAACAAA

>M6-PGSC0003DMG400017864-(rev)M6LRR-RLK\_2318

TTCCAAAGTCACTTGAAACACTTTACATCTCAACTACTTTAACATCTCTTTTAACAAATTAAGAGGAGTA  
ATTCCTAGTAGTGGTCCATTTGCAAACCTCACCAGTCAATCTTTCATTT

>M6-PGSC0003DMG400017864-(rev)M6LRR-RLK\_2379

AAGAGGAGTAATTCCTAGTAGTGGTCCATTTGCAAACCTCACCAGTCAATCTTTCATTTCCAATTCTGCAC  
TCTGTGGTGCTCCTCGCTTTAATGTGTGCGCCATGCCTCATCAAATCCAC

>M6-PGSC0003DMG400017864-(rev)M6LRR-RLK\_244

ACAGAGTCACTGCTTTAGACATATCTAGCATGCAACTTCATGGTACCATTCTCCGCACCTTGGAACCTC  
TCATTTCTCGTATCCCTTGACATTAGTAACAACACTTCCATGGAGATC

>M6-PGSC0003DMG400017864-(rev)M6LRR-RLK\_2440

AATTCTGCACTCTGTGGTGCTCCTCGCTTTAATGTGTGCGCCATGCCTCATCAAATCCACCAAGAAATCAAG  
GAGACACAGAGTTCTAACAAGTCTGTATATCATATTAGGTATTGGATCG

>M6-PGSC0003DMG400017864-(rev)M6LRR-RLK\_2501

AGAAATCAAGGAGACACAGAGTTCTAACAAGTCTGTATATCATATTAGGTATTGGATCGATGATTCTCAC  
ATTGGTTCTAGGATATGTTTTGTTAAGGTGGCAAAGAGAAGGAAGAATC

>M6-PGSC0003DMG400017864-(rev)M6LRR-RLK\_2562

GATTCTCACATTGGTTCTAGGATATGTTTTGTTAAGGTGGCAAAGAGAAGGAAGAATCCAGGTCAAAC  
AGATGCATCTTTGGTTAAAAGACATGAAAGAATCTCTTATTATGAACTTCA

>M6-PGSC0003DMG400017864-(rev)M6LRR-RLK\_2623

GGTCAAACAGATGCATCTTTGGTTAAAAGACATGAAAGAATCTCTTATTATGAACTTCAGCAAGCAACG  
GAAGGATTCAGCGAGAGCAATTTGCTTGGTACCGGAAGTTTCAGTATGGTA

>M6-PGSC0003DMG400017864-(rev)M6LRR-RLK\_2684

AAGCAACGGAAGGATTCAGCGAGAGCAATTTGCTTGGTACCGGAAGTTTCAGTATGGTATACAAAGGG  
ATACTTAAAGATGGGAATCTTTTGGCAGCTAAGGTATTCAATGTGCAATTGG

>M6-PGSC0003DMG400017864-(rev)M6LRR-RLK\_2806

GGAGCATTCAAGAGCTTTGAAACAGAATGTGAGATACTACGCAACCTTCGCCATAGAAATCTAACAAGA  
GTGATCACTAGCTGTTCCAATCCAGACTTCAAAGGCTTAGTATTGGAATAC

>M6-PGSC0003DMG400017864-(rev)M6LRR-RLK\_2867

TAACAAGAGTGATCACTAGCTGTTCCAATCCAGACTTCAAAGGCTTAGTATTGGAATACATGCCCAATGG  
AACACTTGATAACTGGCTACACTCTCATGATTTGTTCTTAGACATGTTGA

>M6-PGSC0003DMG400017864-(rev)M6LRR-RLK\_2928

GCCCAATGGAACACTTGATAACTGGCTACACTCTCATGATTTGTTCTTAGACATGTTGAAGAGGTTGGAC  
ATTATGATAGACGTGGCATCGGCATTAGATTATCTCCACAACGGGTATCC

>M6-PGSC0003DMG400017864-(rev)M6LRR-RLK\_2989

AGGTTGGACATTATGATAGACGTGGCATCGGCATTAGATTATCTCCACAACGGGTATCCAACACCCGTG  
GTGCATTGTGACTTGAAGCCAAGCAACGTCTTGCTTGATCAAGACATGGTT

>M6-PGSC0003DMG400017864-(rev)M6LRR-RLK\_305

TGGAAACCTCTCATTCTCGTATCCCTTGACATTAGTAACAACACTTCCATGGAGATCTCCCCGAAGAGT  
TGAATCATTGCGGAGGTTGAAATTGATTGATGTTACAAGAAACAATTT

>M6-PGSC0003DMG400017864-(rev)M6LRR-RLK\_3050

CACCCGTGGTGCATTGTGACTTGAAGCCAAGCAACGTCTTGCTTGATCAAGACATGGTTGGTCATGTGA  
GTGATTTTGGCATTTCAAAATTGCTAGGTGATGGGGAGACTTTTGTACAAA

>M6-PGSC0003DMG400017864-(rev)M6LRR-RLK\_3111

TCATGTGAGTGATTTTGGCATTTCAAAATTGCTAGGTGATGGGGAGACTTTTGTACAAACAAGGACTATT  
GCAACCATTGGATACATTGCTCCAGGTAATTGAAATTTCAAACCTTGACAT

>M6-PGSC0003DMG400017864-(rev)M6LRR-RLK\_3172

AGGACTATTGCAACCATTGGATACATTGCTCCAGGTAATTGAAATTTCAAACCTTGACATCCTTTAGATTTT  
CACATTTCAAACCTTTATCTAACAAGATTTCTCCCATGATTGCAGAGTAT

>M6-PGSC0003DMG400017864-(rev)M6LRR-RLK\_3233

TTTAGATTTTCACATTTCAAACCTTTATCTAACAAGATTTCTCCCATGATTGCAGAGTATGGACAGGACGGA  
ATAGTATCCAAATGTTGTGTTGTTTATAGTTTCGGTATCATGATGATGG

>M6-PGSC0003DMG400017864-(rev)M6LRR-RLK\_3294

ACAGGACGGAATAGTATCCAAATGTTGTGTTGTTTATAGTTTCGGTATCATGATGATGGAAACATTTACA  
GGTATGAGGCCAAGTGATAAAATGTTTACGGGAGATTTGAGCCTAAGATG

>M6-PGSC0003DMG400017864-(rev)M6LRR-RLK\_3355

ACATTTACAGGTATGAGGCCAAGTGATAAAATGTTTACGGGAGATTTGAGCCTAAGATGTTGGATTAAT  
GATTCTTTTCTAATGGAGTTGTGGATGGCAATTTGTTAAGGCCAGAGGAA

>M6-PGSC0003DMG400017864-(rev)M6LRR-RLK\_3416

GGATTAATGATTCTTTTCTAATGGAGTTGTGGATGGCAATTTGTTAAGGCCAGAGGAAGAACATATTA

AAGAGAAAATGCAATGTGTATTATCTATCATGGAATTGGCTTTGAGTTGCA

>M6-PGSC0003DMG400017864-(rev)M6LRR-RLK\_3477

ACATATTAAGAGAAAATGCAATGTGTATTATCTATCATGGAATTGGCTTTGAGTTGCACTTTAGTGCA

CCTGATGCAAGAGTTAACATTGAAGATGCTCTTTCAGCCCTCCAGAAAAT

>M6-PGSC0003DMG400017864-(rev)M6LRR-RLK\_3514

ATGGAATTGGCTTTGAGTTGCACTTTAGTGTCACCTGATGCAAGAGTTAACATTGAAGATGCTCTTTCAG

CCCTCCAGAAAATAAGACATCAGTTTGTCAATAGTTGTGCAAGGACTTAA

>M6-PGSC0003DMG400017864-(rev)M6LRR-RLK\_366

CCCGAAGAGTTGACTCATTTCGCGAGGTTGAAATTGATTGATGTTACAAGAAACAATTTTAGTGGTACC

ATTCCATCATTCTTAAGTTTGTACCTAACCTTCGATTCGTTTACCTTTCA

>M6-PGSC0003DMG400017864-(rev)M6LRR-RLK\_427

GTGGTACCATTCCATCATTCTTAAGTTTGTACCTAACCTTCGATTCGTTTACCTTTCAAACAACCAATATT

CAGGGGAAATTCCATCTTCCCTTCCAATCTAACAAATCTTCAAGAGT

>M6-PGSC0003DMG400017864-(rev)M6LRR-RLK\_488

CAACCAATATTCAGGGGAAATTCCATCTTCCCTTCCAATCTAACAAATCTTCAAGAGTTAAGAATACAGA

GGAATTTTCTTCAAGGAAAAATCCCTCCTGAAATTGGCAATCTTCATTA

>M6-PGSC0003DMG400017864-(rev)M6LRR-RLK\_549

AGAATACAGAGGAATTTTCTTCAAGGAAAAATCCCTCCTGAAATTGGCAATCTTCATTAATTGACTTTTTT

AGACCTGCAAGGTAATAGACTTACTGGCTCTATACCATCGTCAATCTTC

>M6-PGSC0003DMG400017864-(rev)M6LRR-RLK\_61

TTGATCACTTTACTGCTTGTTTGGCTAACATTGCCACAGATGAAGCTGCTCTTCTTGCCTTCAAATCTCACA

TTTCTTCTTCTTCTGATCCCAACAACGTAGTTGTCTTGCAAACCA

>M6-PGSC0003DMG400017864-(rev)M6LRR-RLK\_610

TGACTTTTTTAGACCTGCAAGGTAATAGACTTACTGGCTCTATACCATCGTCAATCTTCAACATGACTTCC

TTGACAACACTTGCTATAATACACAATCGTCTTGTTCGGTAAACTTCCTC

>M6-PGSC0003DMG400017864-(rev)M6LRR-RLK\_671

CATGACTTCCTTGACAACACTTGCTATAATACACAATCGTCTTGTTCGGTAAACTTCCTCTAGATATTTGTG

ACAATCTACCAAATCTTGAAGTTCTTTTACTATCAACAAACAACCTGGA

>M6-PGSC0003DMG400017864-(rev)M6LRR-RLK\_732

GATATTTGTGACAATCTACCAAATCTTGAAGTTCTTTTACTATCAACAAACAACCTGGATGGCCTAATCCC  
ACCAAATTTACAGAAATGCTCAAACCTACAACCTGTTGACATTGTCTGGC

>M6-PGSC0003DMG400017864-(rev)M6LRR-RLK\_793

GCCTAATCCCACCAAATTTACAGAAATGCTCAAACCTACAACCTGTTGACATTGTCTGGCAATGAGTTCAC  
TGGACCTATACCAAGAGAAGTGGGAACCTAACTATGCTCACAGTCTTGC

>M6-PGSC0003DMG400017864-(rev)M6LRR-RLK\_854

TGAGTTCACTGGACCTATACCAAGAGAAGTGGGAACCTAACTATGCTCACAGTCTTGCATCTTGGAGAA  
AACCATTTAGAAGGTACGTCGTATGAATTACTCCCTCTGTTTCAATTTGT

>M6-PGSC0003DMG400017941M6LRR-RLP\_0

AAGGAGACAAGATCCATCGATCTGAATAAGTCTGGTACACCTTTCTCAAGTCCAGCTAACAAATAATTCT  
TGCTACTTTAATTCTATTTAAGTCTCCAAGAATTCATTTTCTAATAACAC

>M6-PGSC0003DMG400017941M6LRR-RLP\_1116

TTGACACCTCTAGTATGTTGTCTCATTCAATTAACCAGAAACACCTCAATTGTTGTTTCCAATATGTTTTT  
AGCATTGATTATTTGTTCCAGTCTTCTACTAAGTGGTCTTTTAGGC

>M6-PGSC0003DMG400017941M6LRR-RLP\_1178

TATGTTTTTTAGCATTGATTATTTGTTCCAGTCTTCTACTAAGTGGTCTTTTAGGCTTTTCGTTTTTCTAT  
ATCCATCCACCCTTTTCTGATCATACTTACCAATCCAGCAATCTGAT

>M6-PGSC0003DMG400017941M6LRR-RLP\_124

TCTATAGTTTGTCTTCCCTTTACAAATACATGCATTTTTTGGACCTTGATATCTACTTGCCAATACTTGTTTC  
ATCCTTGTTGTTAGGACTCCAGTAGTAATCTCATCCTTGACCTTGT

>M6-PGSC0003DMG400017941M6LRR-RLP\_1240

CGTTTTTCTATATCCATCCACCCTTTTCTGATCATACTTACCAATCCAGCAATCTGATTATGTATAATTCTTC  
GACATGCATTGTTGTTGAACTCAAAGTCTGCCTTTAAGTTCAGTTT

>M6-PGSC0003DMG400017941M6LRR-RLP\_1302

TATAATCTTCGACATGCATTGTTGTTGAACTCAAAGTCTGCCTTTAAGTTCAGTTTCCTTTCTATTAACC  
ATAATCAGATTGCCTACACTATCATACGATTGCTATTGCTGTTCCGCT

>M6-PGSC0003DMG400017941M6LRR-RLP\_1426

CAATGAATCCCTCTATAGCTTTTTTCAATTTCTCGAATTTGCATTAAGATTCGCCATTCCCAAGTCTGCAC  
TCTGCTGGAATGGATGTATGATTGGTAATCATCATATGCTTTGAAAAC

>M6-PGSC0003DMG400017941M6LRR-RLP\_1488

AAGTCTGCACTCTGCTGGAATGGATGTATGATTGGTAATCATCATATGCTTTGAAAACCTGAATATCACA  
TTCAAAGAAATTGTATACACAAATTTCTGTGTATTCCACCTCATAAGTT

>M6-PGSC0003DMG400017941M6LRR-RLP\_1550

ATATCACATTCCAAAGAAATTGTATACACAAATTTCTGTGTATTCCACCTCATAAGTTTACTGTACATTCTA  
TTGTATTTATACAAAACCTAAGTCTAAATTCTGTACCAAATAAATGAA

>M6-PGSC0003DMG400017941M6LRR-RLP\_1612

GTACATTCTATTGTATTTATACAAAACCTAAGTCTAAATTCTGTACCAAATAAATGAATTAACAAAGATT  
ATTTATACACTTGGCACCTAATTATTGGACTAATTTGTAACAAACACTA

>M6-PGSC0003DMG400017941M6LRR-RLP\_1674

ACAAAGATTATTTATACACTTGGCACCTAATTATTGGACTAATTTGTAACAAACACTAACAGCCATTTTGC  
TCTTCACGTGCCTTCCTTGTGCCTAGGTTGAGAATCTTCTAGACCTTGT

>M6-PGSC0003DMG400017941M6LRR-RLP\_186

ATACTTGTTTCATCCTTGTTGTTAGGACTCCAGTAGTAATCTCATCCTTGTACCTTGTCTTAAGAACCAAT  
GCTGTGAATATTGCAGTCCAGCCTCTTGTAAAGAATTTCTGTCTCGTGA

>M6-PGSC0003DMG400017941M6LRR-RLP\_1922

TTCGGTTTGCAAGTCCGGCATGCAGCTCGAATATGTCTATATGATAAGTCACTTATGTTTCTTTTGTTC  
TAATTTCTCCAAGTTAAGATTTTCTCACAGGGAGTCTAGTCTAGATCA

>M6-PGSC0003DMG400017941M6LRR-RLP\_1984

TTTGTTCCTAATTTCTCCAAGTTAAGATTTTCTCACAGGGAGTCTAGTCTAGATCATGGATAATGAGTA  
GTGGTGATTGAATATTGTTGAATTAGTCAACTTAACTAGGAGGCATCTT

>M6-PGSC0003DMG400017941M6LRR-RLP\_2108

GATAATGGGAAGTTTTTCATTCAGTCGATCAAGGAACCCATATCCCGAATCTTAAAATTTAGATCCACAAC  
CGATTCCGAGCAACTTAGTCTAAATTAAGTCGACCCAAACATGTTGAAAG

>M6-PGSC0003DMG400017941M6LRR-RLP\_2170

TCCACAACCGATTCCGAGCAACTTAGTCTAAATTAAGTCGACCCAAACATGTTGAAAGAAGTTGCAATTC  
TCTCAGAAAATTGACTTTTCATTTGCACTCCACGTCTGTAATATTCTTGT

>M6-PGSC0003DMG400017941M6LRR-RLP\_2232

TGCAATTCTCTCAGAAAATTGACTTTTCATTTGCACTCCACGTCTGTAATATTCTTGTCCATATTCCCCACT



TTCCTTCCTCCGTGTGGTAATACTTTAGGGAATTTGTAGAAGAACAAA

>M6-PGSC0003DMG400017941M6LRR-RLP\_2294

ATTCCCCACTTTCCTTCCTCCGTGTGGTAATACTTTAGGGAATTTGTAGAAGAACAAAGTAGTAGGAGAA  
GTCAAATGACTTGAGCGATTGATACAATCATGGTTCATCAGTGATTGTTA

>M6-PGSC0003DMG400017941M6LRR-RLP\_2356

TAGGAGAAGTCAAATGACTTGAGCGATTGATACAATCATGGTTCATCAGTGATTGTTACATAGTTTTATG  
TTTTACTGATTCGCCAAAGTTTAATCTTTTCATTTAACCTGTGTCCTGT

>M6-PGSC0003DMG400017941M6LRR-RLP\_248

AAGAACCAATGCTGTGAATATTGCAGTCCAGCCTCTTGTAGAATTTCTGTCTCGTGAAAGAAGTGCAAT  
GCACTGATAATGTCCCTTCCAAAAAGTTCCTAGATTTCTGGTAAGAAGA

>M6-PGSC0003DMG400017941M6LRR-RLP\_2542

TGCTGTATATATTTACGGCAGTTGATGTCAAGCCCCTTCAAGGCAAAGAAAGAGTGTAAGAAAGCAGCC  
ATAAAATGCCCACTCCATCACCTCAAAGTGGTCAAATTTTCGGGGTTTTAT

>M6-PGSC0003DMG400017941M6LRR-RLP\_2790

CACGCAAACCTTCAAGAAATCTTGCCAAGCTCCAGGTTGAACGTGAAGTGCCTCCGGCTATTGAGTTGGT  
CATACTTTAATGAAAATAATAATGTTATTAGGGTTAAATTTGTGATACATA

>M6-PGSC0003DMG400017941M6LRR-RLP\_2914

AGGTGAATTTTTATTTCTTAGTAGATGTTCCCTCATGCTTTGTTTCATAATTGGGTGATTTTCACTTTTTGTG  
AGGTTTATATTGCTATATGAAATATGGGGATTTTCAAATGAAAATGT

>M6-PGSC0003DMG400017941M6LRR-RLP\_310

AGTGCAATGCACTGATAATGTCCCTTCCAAAAAGTTCCTAGATTTCTGGTAAGAAGACATTATCTACCC  
ATCTGGCCCTAAAGTTGTTATCACCACTAGACCATCCCGAGAAAATTTCT

>M6-PGSC0003DMG400017941M6LRR-RLP\_434

AGCCAACACTCTTCCCGTGATAATAGCTCAAGGTCATTGTAGCTGGAAGGCGCCTTCATGCTCAGTTTTA  
CTAAATAACTTGTATAGCATTACCTCATCTGATGACCTTTGGATTTGG

>M6-PGSC0003DMG400017941M6LRR-RLP\_62

ATAATTCTTGCTACTTTAATTCTATTTAAGTCTCCAAGAATTCATTTTCTAATAACACTAGATCTATAGTTT  
GTCCTTCCCTTACAAATACATGCATTTTTTGACCTTGATATCTACTT

>M6-PGSC0003DMG400017943M6LRR-RLK\_0

AAGAATTAATAGTGGGAATTTCCACTTCGGAGGGTTGCCAATTGTGTGTGCCTTATGAATGACAGCCAA  
TGAGTAGTTGCAGAAGGTGAATGTTATAGTTAAGCTAGCATAAATGGTTGA

>M6-PGSC0003DMG400017943M6LRR-RLK\_1054

CATTGTTACTAGGTGATGCAAATGGATGACATACAAAGTTGATATCTTATGGCAACTTGAGTTGACTTGG  
CAAGTCCAGGAGAAAATAGATTTAAATGATGAAGCTACACCCAATAATAG

>M6-PGSC0003DMG400017943M6LRR-RLK\_1116

TGACTTGGCCAAGTCCAGGAGAAAATAGATTTAAATGATGAAGCTACACCCAATAATAGATCTACTTCCTC  
TTTCTCTCTTCTATTTTTGCTCCTCTCCCAAATGTTATTGCTGACCTT

>M6-PGSC0003DMG400017943M6LRR-RLK\_1178

ACTTCCTCTTTCTCTCTTCTATTTTTGCTCCTCTCCCAAATGTTATTGCTGACCTTAGCTCAGATAGACAA  
GCACTACTTGACTTTGCTTCTGCAGTACCTCATCTTCGAAACTTCAA

>M6-PGSC0003DMG400017943M6LRR-RLK\_124

GATAAGCAAGAAGTAGTTGGAGAGGTAACCTCGAGATCTGTGCTAGGATAGCAGAGATTCCGTTTGCTT  
CACGAAGAAGCTCAAACATTATTCTTTATTTCTTTTGAAGAAAAGTTTT

>M6-PGSC0003DMG400017943M6LRR-RLK\_1240

CAGATAGACAAGCACTACTTGACTTTGCTTCTGCAGTACCTCATCTTCGAAACTTCAAGTGGAACACTAA  
CTCTTCCATTTGCACATGGCATGGCGTAAGTTGCAGCTCAGATGGCACTC

>M6-PGSC0003DMG400017943M6LRR-RLK\_1302

AACACTAACTCTTCCATTTGCACATGGCATGGCGTAAGTTGCAGCTCAGATGGCACTCGTGTAGTTGCAC  
TTCGGCTTCTGGTATTGGACTTTATGGTCCTATTCCAGACAATACCATA

>M6-PGSC0003DMG400017943M6LRR-RLK\_1364

AGTTGCACTTCGGCTTCTGGTATTGGACTTTATGGTCCTATTCCAGACAATACCATAGGAAGACTGGAT  
GCACTAACAACCCTCAGCCTTCATTCCAATGCCCTCACTGGAAATCTTCC

>M6-PGSC0003DMG400017943M6LRR-RLK\_1426

GACTGGATGCACTAACAACCCTCAGCCTTCATTCCAATGCCCTCACTGGAAATCTTCTTCCAGACATCATC  
TCTATTCCGTCCTCCATTTTCATATTTATAACAACAAAACAAATTTTCTG

>M6-PGSC0003DMG400017943M6LRR-RLK\_1488

GACATCATCTCTATTCCGTCCTCCATTTTCATATTTATAACAACAAAACAAATTTTCTGGTGAATACCTTCT  
TCTCTATCTCTACAGCTTAACTTCATTGATCTCTCTTTCAACTCCTTC

>M6-PGSC0003DMG400017943M6LRR-RLK\_1550

AATACCTTCTTCTATCTCTACAGCTTAACTTCATTGATCTCTCTTTCAACTCCTTCTCAGGGGAAATTCCA  
ACAACAATTCAAATCTGACACATCTTACTGGTTTAAACCTACAAAA

>M6-PGSC0003DMG400017943M6LRR-RLK\_1612

GGGAAATTCCAACAACAATTCAAATCTGACACATCTTACTGGTTTAAACCTACAAAACAACCTCCCTCAC  
AGGATCCATTCTAATGTAAACCTACCAAGGCTTAAGCAATTGAATATGA

>M6-PGSC0003DMG400017943M6LRR-RLK\_1674

TCCCTCACAGGATCCATTCTAATGTAAACCTACCAAGGCTTAAGCAATTGAATATGAGTAATAATCAAC  
TCAATGGTTCAATTCCACCATCCCTTGCAAAGTTTTCTGCTTCTTCATTT

>M6-PGSC0003DMG400017943M6LRR-RLK\_1736

TAATCAACTCAATGGTTCAATTCCACCATCCCTTGCAAAGTTTTCTGCTTCTTCATTTCAAGGAAATTCTCT  
ATTATGTGGACAACCCTTGACTCAATGCCCTTCTTTTGCGCCTTCACC

>M6-PGSC0003DMG400017943M6LRR-RLK\_1798

GAAATTCTCTATTATGTGGACAACCCTTGACTCAATGCCCTTCTTTTGCGCCTTCACCATCTCCATTCCCTT  
CAATTCCACCTTCTCCTTTGAGTCTAACACCACCATCTCGTTCTCCGA

>M6-PGSC0003DMG400017943M6LRR-RLK\_186

TTTGCTTACGAAGAAGCTCAAACATTATTCTTTATTTCTTTTGAAAAGAAAAGTTTTTTCCTTCTACTGC  
TTTGTTTTTCTACCGGTACCACCAGCTGCTGCTGCAGAGGGAAGTA

>M6-PGSC0003DMG400017943M6LRR-RLK\_1860

CCATTCCCTTCAATTCCACCTTCTCCTTTGAGTCTAACACCACCATCTCGTTCTCCGAGCGTCCTGCCAGCC  
TCACCAACAATTCTGAAAACCATAAAGGCAAGAAAAGCTTGAGTACA

>M6-PGSC0003DMG400017943M6LRR-RLK\_1922

CCTGCCAGCCTCACCAACAATTCTGAAAACCATAAAGGCAAGAAAAGCTTGAGTACACGGGTTATCATT  
GGCATTGTTGAAGGAGGTGTTGGAGGGATCCTATGTCTAGCTGTGTTGAT

>M6-PGSC0003DMG400017943M6LRR-RLK\_1984

TTATCATTGGCATTGTTGAAGGAGGTGTTGGAGGGATCCTATGTCTAGCTGTGTTGATTTTCTGTGTTG  
TATGAAGCGATATTATACTAAGAGAGGTGTACAGCAAAGAAAAGACTTTA

>M6-PGSC0003DMG400017943M6LRR-RLK\_2046

TTGTGTTGTATGAAGCGATATTATACTAAGAGAGGTGTACAGCAAAGAAAAGACTTTAATGGAGGAGG

AAGTCCGAAGCAAACAGAGGACTTCAGTAGTGGAGTACAAGCAGCTGAAAAG

>M6-PGSC0003DMG400017943M6LRR-RLK\_2108

AGGAGGAAGTCCGAAGCAAACAGAGGACTTCAGTAGTGGAGTACAAGCAGCTGAAAAGAACAAATTG  
GTTTTCTTTGAGGGTTGTTCTTTCAATTTTGACCTTGAAGATTTGTTGAGAGC

>M6-PGSC0003DMG400017943M6LRR-RLK\_2170

AATTGGTTTTCTTTGAGGGTTGTTCTTTCAATTTTGACCTTGAAGATTTGTTGAGAGCCTCAGCTGAGGTT  
TTGGGTAAAGGGAGCTATGGAACAACCTACAAGGCCATCTTGGAGGAGG

>M6-PGSC0003DMG400017943M6LRR-RLK\_2232

GCTGAGGTTTTGGGTAAAGGGAGCTATGGAACAACCTACAAGGCCATCTTGGAGGAGGGAACGACTGT  
TGTTGTGAAACGGCTGAAGGAAGTTGTTGTTGGGAAACGAGAGTTTGACCAA

>M6-PGSC0003DMG400017943M6LRR-RLK\_2294

GACTGTTGTTGTGAAACGGCTGAAGGAAGTTGTTGTTGGGAAACGAGAGTTTGACCAACAGATGGAGA  
CAATTGGCACTGTGGATCAGCATCGAAATGTTGTTGCTCTTCGTGCTTATTA

>M6-PGSC0003DMG400017943M6LRR-RLK\_2356

TGGAGACAATTGGCACTGTGGATCAGCATCGAAATGTTGTTGCTCTTCGTGCTTATTACTTTTCCAAAGA  
TGAAAACTTCTTGTCTATGATCATGTACCGGCAGGCAGTTTATCCACTC

>M6-PGSC0003DMG400017943M6LRR-RLK\_2418

TCCAAAGATGAAAACTTCTTGTCTATGATCATGTACCGGCAGGCAGTTTATCCACTCGAATGCATGGTA  
ACATTTCTTCTTCTTTTGTCTCCATTCTTTTAGCTGTCATACCCATC

>M6-PGSC0003DMG400017943M6LRR-RLK\_248

TTCCTACTGCTTTGTTTTTCTACCGGTACCACCAGCTGCTGCTGCAGAGGGAAGTAAAAAGAATAATC  
TGATTTTGCAAAGTAAACAAAATGCCGTACGTTGGAGTAGCAAGTTTAGA

>M6-PGSC0003DMG400017943M6LRR-RLK\_2480

GCATGGTAACATTTCTTCTTCTTTTGTCTCCATTCTTTTAGCTGTCATACCCATCCAGGTGCTTGGGAA  
TATCCTTAGTACTCTGACTGGCAAGAAAATCAGCTGTAAAAGTTGCA

>M6-PGSC0003DMG400017943M6LRR-RLK\_2542

TGCTTGGGAATATCCTTAGTACTCTGACTGGCAAGAAAATCAGCTGTAAAAGTTGCACGAGATCATAG  
ATTCCGAATGTGAAATGAAGTACCTATATTCTTTAGAAAAGCCCCTAGACA

>M6-PGSC0003DMG400017943M6LRR-RLK\_2604

ATCATAGATTCCGAATGTGAAATGAAGTACCTATATTCTTTAGAAAAGCCCCTAGACAAGCATTATAAAT  
AAACACTCCTGAAATAGGCATGCAAGTTTGTCTTGAAGACTTTATAACAT

>M6-PGSC0003DMG400017943M6LRR-RLK\_2666

TTATAAATAAACACTCCTGAAATAGGCATGCAAGTTTGTCTTGAAGACTTTATAACATGTGATATTGGTTT  
CATGCACTAATAGTTCTCCATATTATTTTGAAGCAAGATGCAACTTGCA

>M6-PGSC0003DMG400017943M6LRR-RLK\_2728

TATTGGTTTCATGCACTAATAGTTCTCCATATTATTTTGAAGCAAGATGCAACTTGCAAGTTGTTGAATGT  
CAGATTAGTTGTTTCGGTGCTATACATAATTTTCAAAGTGTTCACAAGAA

>M6-PGSC0003DMG400017943M6LRR-RLK\_2790

GTTGAATGTCAGATTAGTTGTTTCGGTGCTATACATAATTTTCAAAGTGTTCACAAGAAAGTTCTTTTCTTT  
CATTGCTCCTTGTATTGATTATAGGCAACAAGGACTTGGGAAGAACA

>M6-PGSC0003DMG400017943M6LRR-RLK\_2852

CTTTTCTTTTCATTGCTCCTTGTATTGATTATAGGCAACAAGGACTTGGGAAGAACAAGTGTTCACAAGAA  
TCTAGATTGAGGATTGCCCATGGAGCTGCAAGTGGTATTGCCCATATCCA

>M6-PGSC0003DMG400017943M6LRR-RLK\_2914

ATTGGGAATCTAGATTGAGGATTGCCCATGGAGCTGCAAGTGGTATTGCCCATATCCATGCTGTTTCTGG  
TGGCAAATTAATTCATGGAAATATCAAGTCATCCAATGTGCTTCTCACCC

>M6-PGSC0003DMG400017943M6LRR-RLK\_2976

GTTTCTGGTGGCAAATTAATTCATGGAAATATCAAGTCATCCAATGTGCTTCTCACCCACGATAATAATG  
GATGCATCTCAGATGTTGGTCTTAAACCTTTAATGGGTTTTCTACTATC

>M6-PGSC0003DMG400017943M6LRR-RLK\_3038

TAATAATGGATGCATCTCAGATGTTGGTCTTAAACCTTTAATGGGTTTTCTACTATCCCATCAAGGAGTG  
CAGGATATAGAGCACCCGAGGTGATAGAGACCAAGAAATGAACTCAGAA

>M6-PGSC0003DMG400017943M6LRR-RLK\_310

GAATAATCTGATTTTCAAAGTAAACAAAATGCCGTACGTTGGAGTAGCAAGTTTAGAGGGGAATTGTA  
AGGCACAAGACTTCGACCTTTTTTCTCAATTCTCAACCGTTATATATTAAG

>M6-PGSC0003DMG400017943M6LRR-RLK\_3100

CAAGGAGTGCAGGATATAGAGCACCCGAGGTGATAGAGACCAAGAAATGAACTCAGAAATCCGATGTT  
TACAGCTTTGGTGTCTGCTTCTTGAGCTCCTTACTGGGAAAGCACCAAGTGC

>M6-PGSC0003DMG400017943M6LRR-RLK\_3162

GATGTTTACAGCTTTGGTGTCTGCTTCTTGAGCTCCTTACTGGGAAAGCACCAGTGCAGCCACCTGGCC  
ATGATGAGGTGGTAGACTTACCAAGATGGGTGCAGTCTGTTGTGAGGGAG

>M6-PGSC0003DMG400017943M6LRR-RLK\_3224

ACCTGGCCATGATGAGGTGGTAGACTTACCAAGATGGGTGCAGTCTGTTGTGAGGGAGGAATGGACTG  
CTGAGGTATTTGATGATGAGCTCATCAAGTTTCAAATATCGAAGACGAAAT

>M6-PGSC0003DMG400017943M6LRR-RLK\_3286

GGACTGCTGAGGTATTTGATGATGAGCTCATCAAGTTTCAAATATCGAAGACGAAATGGTGCAGATGC  
TGCAGATTGCAATGACTTGTGTGGAAAACGTGCCTGAAACAAGGCCTGACA

>M6-PGSC0003DMG400017943M6LRR-RLK\_3348

CAGATGCTGCAGATTGCAATGACTTGTGTGGAAAACGTGCCTGAAACAAGGCCTGACATGAGTCAAGTT  
GTCCAGATGATCGAAGATATCCAACAAATTGATTCTGGAAACAGGCCATCA

>M6-PGSC0003DMG400017943M6LRR-RLK\_3410

TCAAGTTGTCCAGATGATCGAAGATATCCAACAAATTGATTCTGGAAACAGGCCATCATCTGAAGATAAC  
AAGTCTAGGAGCCCAACTAGTCCAACACCATGATAACTCATGCATTTCTT

>M6-PGSC0003DMG400017943M6LRR-RLK\_3472

AAGATAACAAGTCTAGGAGCCCAACTAGTCCAACACCATGATAACTCATGCATTTCTTACTACTCAATTCT  
ATTACCAAATGTGTATTTGAACGTCTTTTCTTGTTTTAAAGTATAATTC

>M6-PGSC0003DMG400017943M6LRR-RLK\_3534

CTCAATTCTATTACCAAATGTGTATTTGAACGTCTTTTCTTGTTTTAAAGTATAATTCAGACCTTTTAGATA  
CTATCATTCTTCATCACTGCCTATATCTAAAAATTCAATCCTATTATG

>M6-PGSC0003DMG400017943M6LRR-RLK\_372

AATTGTAAGGCACAAGACTTCGACCTTTTTTCTCAATTCTCAACCGTTATATATTAAGCTCTCACCCATTTT  
CTTCATTGCAGTAGAGTTCACCATTATTCAAGGTATACTCTTTCCCCT

>M6-PGSC0003DMG400017943M6LRR-RLK\_434

CACCCATTTTCTTCATTGCAGTAGAGTTCACCATTATTCAAGGTATACTCTTTCCCCTATTATTTCAACTCTC  
TACTACCTTTGCTTACATTAGTGTTGATACTCCATTTTTCAAGGCAC

>M6-PGSC0003DMG400017943M6LRR-RLK\_496

TTTCAACTCTCTACTACCTTTGCTTACATTAGTGTTGATACTCCATTTTTCAAGGCACACCCCTCTGGCTCT

GGCCATAGATTGTGTGTGGTAAGTGTGGTTCATCAAATTTACTCATT

>M6-PGSC0003DMG400017943M6LRR-RLK\_558

CTCTGGCTCTGGCCATAGATTGTGTGTGGTAAGTGTGGTTCATCAAATTTACTCATTATTTCAACTTCAT

TCAAACATGTTTTCACTCATGTCCTAACACAACAACTTTCAAATTTT

>M6-PGSC0003DMG400017943M6LRR-RLK\_62

CAGCCAATGAGTAGTTGCAGAAGGTGAATGTTATAGTTAAGCTAGCATAAATGGTTGAAAATGATAAGC

AAGAAGTAGTTGGAGAGGTAACCTCGAGATCTGTGCTAGGATAGCAGAGAT

>M6-PGSC0003DMG400017943M6LRR-RLK\_620

CAACTTCATTCAAACATGTTTTCACTCATGTCCTAACACAACAACTTTCAAATTTTGGATATGACAACC

AATTTCTCAACTTAAGACATTTAACTACTTTCTTTGTCTAATGCTATG

>M6-PGSC0003DMG400017943M6LRR-RLK\_682

ATGACAACCAATTTCTCAACTTAAGACATTTAACTACTTTCTTTGTCTAATGCTATGATGGAATGTTGAA

ATTAGGAAATAGAGGGTGGTAATGCAGAAAAATCAAATCTTTTTCATAC

>M6-PGSC0003DMG400017943M6LRR-RLK\_744

AATGTTGAAATTAGGAAATAGAGGGTGGTAATGCAGAAAAATCAAATCTTTTTCATACATGTCCGGTCT

GCTCGGTATGGGATGCATCTAATAAGTTCATAGGGCTTCAGAATTTAGGAT

>M6-PGSC0003DMG400017943M6LRR-RLK\_806

CCGGTCTGCTCGGTATGGGATGCATCTAATAAGTTCATAGGGCTTCAGAATTTAGGATGTTTATCTCTAA

ACAAGTTTTTTACTCTTATTATGAATCCAAGCTAAGCTTCTTTTCGCC

>M6-PGSC0003DMG400017943M6LRR-RLK\_868

ATCTCTAAACAAGTTTTTTACTCTTATTATGAATCCAAGCTAAGCTTCTTTTCGCCTTGGTTGACTACAT

ATGAGAACGCCACAAAGTGCCTTTGCTCTACGGGGAATTAATTGTCT

>M6-PGSC0003DMG400017943M6LRR-RLK\_930

TTGACTACATATGAGAACGCCACAAAGTGCCTTTGCTCTACGGGGAATTAATTGTCTCTTCATTTTCATAC

TGTGATGGGGATATTTTCCATATATCTAACTTCTCTGCCACATTTTTGT

>M6-PGSC0003DMG400017943M6LRR-RLK\_992

ATTTCACTACTGTGATGGGGATATTTTCCATATATCTAACTTCTCTGCCACATTTTTGTTTACCATTGTTACT

AGGTGATGCAAATGGATGACATACAAAGTTGATATCTTATGGCAACTT

>M6-PGSC0003DMG400017946M6G-LecRK\_0

AGCTATGCAAAATTTCCACGCGACTATGTTTTTATGTCAACCGTAGCAAATAGATTATGAAGCTTCATATT  
CTGAACATCTCCATGACTCCATCTGCAAGTGAAATCAAATTCCATCTGC

>M6-PGSC0003DMG400017946M6G-LecRK\_1037

CAATCCCCAATCTGCAGATGTTTGGATAAATTTGAACCCAAAGATCCAACAGAATGGGCAAGGGGAAA  
TTGGTCTGGTGGCTGTGTTAGAAAGACAGCAATATTGAATTGCCAAAAGGA

>M6-PGSC0003DMG400017946M6G-LecRK\_1098

AGGGGAAATTGGTCTGGTGGCTGTGTTAGAAAGACAGCAATATTGAATTGCCAAAAGGAAGTTAAATT  
CTTCAAGTATCAAGGCATCAAGTTGCCAGACACTCGTTTTTCCTGGTACAGT

>M6-PGSC0003DMG400017946M6G-LecRK\_1159

TTAAATTCTTCAAGTATCAAGGCATCAAGTTGCCAGACACTCGTTTTTCCTGGTACAGTGGAGGAGTGAC  
TCTTAATGCATGCGAAGAATTGTGCTTGAGAACTGCTCGTGTATGGCTT

>M6-PGSC0003DMG400017946M6G-LecRK\_122

TCTCATTTAATGGAGGCCATAAACATACTTTACTTCTTGTCCATCCATATGGATTCTGTGAGTGTGAGTG  
CTCAACATACCATACCTGCAAATCAACCTCTAACAGATGGAAGCACCAT

>M6-PGSC0003DMG400017946M6G-LecRK\_1220

AGGAGTGACTCTTAATGCATGCGAAGAATTGTGCTTGAGAACTGCTCGTGTATGGCTTATGCAAATCC  
AGACATAACAGGGACAAATGAAGACTGCTTGCTTTGGTTTGATGAGCTGAT

>M6-PGSC0003DMG400017946M6G-LecRK\_1281

GCAAATCCAGACATAACAGGGACAAATGAAGACTGCTTGCTTTGGTTTGATGAGCTGATGGACATCAGA  
GAGTTTGGCGCTACTGGGCAAGATATCTATGTAAAGTTGGACTCTTCTGAG

>M6-PGSC0003DMG400017946M6G-LecRK\_1342

ACATCAGAGAGTTTGGCGCTACTGGGCAAGATATCTATGTAAAGTTGGACTCTTCTGAGTTTGGTATAAA  
TCTGTTTCTATACTTTTTCATGTTAGGCTGTTAAGTATGCCACATTAGAT

>M6-PGSC0003DMG400017946M6G-LecRK\_1403

TGGTATAAATCTGTTTCTATACTTTTTCATGTTAGGCTGTTAAGTATGCCACATTAGATTTGAGTATTCTA  
GACCAAATTAATGCCATTTAGTGAGCAAGTTGAGGTTTCTCTACATT

>M6-PGSC0003DMG400017946M6G-LecRK\_1464

TGAGTATTCTAGACCAAATTAATGCCATTTAGTGAGCAAGTTGAGGTTTCTCTACATTATTTGAAAACC  
AAAACAGTTTTTTTTTTTTCGTCTTACGAATTTATTTCTGTCCATCAGGTAA



>M6-PGSC0003DMG400017946M6G-LecRK\_1525

TTGAAAACCAAACAGTTTTTTTTTTTCGTCTTACGAATTTATTTCTGTCATCAGGTAACCTCAGTACAGG  
GAAAGTAAACAACTGACAATCAGCTTGCCACTGGCAGCATTAGGTCTG

>M6-PGSC0003DMG400017946M6G-LecRK\_1586

CCAGTACAGGGAAAGTAAACAACTGACAATCAGCTTGCCACTGGCAGCATTAGGTCTGCTCCTAGTAC  
TATGCTTAATCATGTACATAAGGCAAATAAGAAGAATCAGCAATATTTTA

>M6-PGSC0003DMG400017946M6G-LecRK\_1647

CCTAGTACTATGCTTAATCATGTACATAAGGCAAATAAGAAGAATCAGCAATATTTTAGAAAAGGTAA  
ACCTCAGAGGTTTTGCTGCTTTGAATTTGTGGTTTTGTTTTTCTAGAGT

>M6-PGSC0003DMG400017946M6G-LecRK\_1708

AAAGGTAAACCTCAGAGGTTTTGCTGCTTTGAATTTGTGGTTTTGTTTTTCTAGAGTTACATTTGGTAA  
ATATCAGAATTTCTTTACATCCAATTAAGTCCTTATTTAACAGGAA

>M6-PGSC0003DMG400017946M6G-LecRK\_1769

CATTTGGTAAATATCAGAATTTCTTTACATCCAATTAAGTCCTTATTTAACAGGAAGAAGAACAATAA  
TCTCTGAAATGTTCTGCACTAAAGAAAGGAAAGATAAAGAGCTAGATTT

>M6-PGSC0003DMG400017946M6G-LecRK\_183

AGTGTGAGTGCTCAACATACCATACCTGCAAATCAACCTCTAACAGATGGAAGCACCATTATTTTCATCAG  
ATGGCAAGTTTAAGTTGGAATTTTTTTCCCTGGGACATCCGGGAAACGC

>M6-PGSC0003DMG400017946M6G-LecRK\_1830

AGAACAATAATCTCTGAAATGTTCTGCACTAAAGAAAGGAAAGATAAAGAGCTAGATTTACCGTTGTTT  
GATTTTGAACTGTATCTCATGCTACCAATAACTTTTCATTGAACAACAAG

>M6-PGSC0003DMG400017946M6G-LecRK\_1891

CGTTGTTTGATTTTGAACTGTATCTCATGCTACCAATAACTTTTCATTGAACAACAAGCTTGGAGAGGGT  
GGTTTTGGACCTGTTTACAAGGTAACATTTTAACTTCAGCTCTTTCTA

>M6-PGSC0003DMG400017946M6G-LecRK\_1952

TGGAGAGGGTGGTTTTGGACCTGTTTACAAGGTAACATTTTAACTTCAGCTCTTTCTATTTTCATCCAAA  
TAACTGCCTAAAAGGAATTTCCGAACTTTAAAACGAAAACACATGTT

>M6-PGSC0003DMG400017946M6G-LecRK\_2013

TCATCCAAAATAACTGCCTAAAAGGAATTTCCGAACTTTAAAACGAAAACACATGTTTCGGTAAGAAA

ATTGATATGTCATTCTCCTATTTTCATCTAAACAGCAATGTCAAATCTAG

>M6-PGSC0003DMG400017946M6G-LecRK\_2074

GGTAAGAAAATTGATATGTCATTCTCCTATTTTCATCTAAACAGCAATGTCAAATCTAGTTTATTGTTTGT  
CAGTAAAATATTCTGGAGAAGCTCATTCAACTAATTTACTGGATATCTA

>M6-PGSC0003DMG400017946M6G-LecRK\_2135

TATTGTTTGTTCAGTAAAATATTCTGGAGAAGCTCATTCAACTAATTTACTGGATATCTAGGGTATGCTGA  
AAGATGGACAAGAAATAGCAGTAAAGAGACTTTCAAGATACTCAGCACAG

>M6-PGSC0003DMG400017946M6G-LecRK\_2196

GTATGCTGAAAGATGGACAAGAAATAGCAGTAAAGAGACTTTCAAGATACTCAGCACAGGGAGCTGAC  
GAGTTCAAGAATGAGGTTATCTTCATTGCTAAACTCCAGCATAGGAATCTTG

>M6-PGSC0003DMG400017946M6G-LecRK\_2257

AGCTGACGAGTTCAAGAATGAGGTTATCTTCATTGCTAAACTCCAGCATAGGAATCTTGTGAAGCTTCTT  
GGTTGTTGTATCCAAGCAGAAGAAAAAATGTTGGTTTATGAGTACATGCC

>M6-PGSC0003DMG400017946M6G-LecRK\_2318

AAGCTTCTTGGTTGTTGTATCCAAGCAGAAGAAAAAATGTTGGTTTATGAGTACATGCCTAATAATAGCT  
TGGATTGGTTCCTTTTTGGTTGTTCTCACTTCTCTCAACTCTTAACACA

>M6-PGSC0003DMG400017946M6G-LecRK\_2379

ATAATAGCTTGGATTGGTTCCTTTTTGGTTGTTCTCACTTCTCTCAACTCTTAACACATTTAGTTATCTGT  
AGTAATAGTTCAATCGTCAGCTGAATTTTGTATCTGTTCTTTGATTT

>M6-PGSC0003DMG400017946M6G-LecRK\_244

TTTCATCAGATGGCAAGTTTAAGTTGGAATTTTTTTCCCCTGGGACATCCGGGAAACGCTACTTAGGAAT  
ATTGTTAATAAAGTTACTGTACAGACAGTGGTATGGGTTGCTAATAGAG

>M6-PGSC0003DMG400017946M6G-LecRK\_2440

TAGTTATCTGTAGTAATAGTTCAATCGTCAGCTGAATTTTGTATCTGTTCTTTGATTTGAAATATCTGAA  
GTGTTCTACTATAAGCTCAGAATTTTTGCAGATACAGATAGGAGGTCAC

>M6-PGSC0003DMG400017946M6G-LecRK\_2501

AATATCTGAAGTGTCTACTATAAGCTCAGAATTTTTGCAGATACAGATAGGAGGTCAGCTGCTTGATTGG  
CCTAAGTGCTTCATATTATTAATGGAATTGCTCGCGGACTTCTCTATCT

>M6-PGSC0003DMG400017946M6G-LecRK\_2623

ATCAAGACTCAAGATTGCGGATAATCCACAGAGATCTTAAACCTAGCAATGTTTTGCTAGACATAGATAT  
GAACCCAAAGATATCCGACTTTGGCATGGCAAGAAGTTTTGGAGGAAATG

>M6-PGSC0003DMG400017946M6G-LecRK\_2684

CATAGATATGAACCCAAAGATATCCGACTTTGGCATGGCAAGAAGTTTTGGAGGAAATGAGACTGCAGC  
CAAGACAAAAACAGTGGTTGGGACATAGTAAGAATCTTTAAACCGATGAAG

>M6-PGSC0003DMG400017946M6G-LecRK\_2745

ACTGCAGCCAAGACAAAAACAGTGGTTGGGACATAGTAAGAATCTTTAAACCGATGAAGTATTTGCAGT  
CTACTAAAAAGCTACTTACTTTGTTTATTTGACATTATCCTACAGTGGATA

>M6-PGSC0003DMG400017946M6G-LecRK\_2806

TTTGCAGTCTACTAAAAAGCTACTTACTTTGTTTATTTGACATTATCCTACAGTGGATACATGTCCCCGGA  
GTATGCAGAAAAAGGAGCATTTTCAGTGAAATCAGATGTATTTAGCTTT

>M6-PGSC0003DMG400017946M6G-LecRK\_2867

TGTCCCCGGAGTATGCAGAAAAAGGAGCATTTTCAGTGAAATCAGATGTATTTAGCTTTGGAGTTGTAG  
TACTGGAGATTTTAAGCGGGAAGAGAAATAGAGGGTCTTGCATCCAGACC

>M6-PGSC0003DMG400017946M6G-LecRK\_2928

AGTTGTAGTACTGGAGATTTTAAGCGGGAAGAGAAATAGAGGGTCTTGCATCCAGACCATAACCATAA  
TCTTCTAGGACATGTAGGTGATCTTCTGTCTATCTTATATGTTTAAGTAA

>M6-PGSC0003DMG400017946M6G-LecRK\_2989

AACCATAATCTTCTAGGACATGTAGGTGATCTTCTGTCTATCTTATATGTTTAAGTAAACTTATAGCAT  
CTAACTGCATGATAGTAAATGTTTCAGGTGTGGATCCTTTTCAAAGAAGG

>M6-PGSC0003DMG400017946M6G-LecRK\_305

CTTAGGAATATTGTTTAATAAAGTTACTGTACAGACAGTGGTATGGGTTGCTAATAGAGACAATCCACTC  
AATGACACATCGAGTGTGCTAAATTTTACCAGACAAGGAATTCTTACTCT

>M6-PGSC0003DMG400017946M6G-LecRK\_3050

CTTATAGCATCTAACTGCATGATAGTAAATGTTTCAGGTGTGGATCCTTTTCAAAGAAGGCAGGGTTATGG  
AAGTAATTGATACACAATAAGGCAGTCATGCAATCAGTCTGAAGTTCAA

>M6-PGSC0003DMG400017946M6G-LecRK\_3111

GGGTTATGGAAGTAATTGATACACAATAAGGCAGTCATGCAATCAGTCTGAAGTTCAAAGATCAGTTC  
ATGTAGGTCTGTTATGTGTGCAGCAGTGTCCAGAAGATAGGCCGAATTTGG

>M6-PGSC0003DMG400017946M6G-LecRK\_3172

ATCAGTTCATGTAGGTCTGTTATGTGTGCAGCAGTGTCCAGAAGATAGGCCGAATTTGGCATCAGTTGT  
ACTCATGTTGGGTAGTGATGTCGCACTACCCTCGCCTAAAGAGCCAGGCTT

>M6-PGSC0003DMG400017946M6G-LecRK\_3233

TCAGTTGTACTIONCATGTTGGGTAGTGATGTCGCACTACCCTCGCCTAAAGAGCCAGGCTTTTTCAATGGCA  
GGAACCAATTCATTGAAGCTGACAGTTCATCTAGCAAGCATGGAGAAACT

>M6-PGSC0003DMG400017946M6G-LecRK\_3294

TCAATGGCAGGAACCAATTCATTGAAGCTGACAGTTCATCTAGCAAGCATGGAGAAACTTCAGTGAATG  
AATTAAGCATCACACAGTTGGATGCCAGATAGGAGATAAATTTTCAGGTCA

>M6-PGSC0003DMG400017946M6G-LecRK\_3355

AGTGAATGAATTAAGCATCACACAGTTGGATGCCAGATAGGAGATAAATTTTCAGGTCATGGATGTTTT  
CTGTACGCTATATTAACCTAATTGTTGCGGTCATATAGAACAAGAACTACT

>M6-PGSC0003DMG400017946M6G-LecRK\_3416

GATGTTTTCTGTACGCTATATTAACCTAATTGTTGCGGTCATATAGAACAAGAACTACTGGTTGTTCAACT  
AAATAGTTTTACTCAAAAATCTGTGGCATGGTATTAAGCATGACAACCTT

>M6-PGSC0003DMG400017946M6G-LecRK\_3477

TTGTTCAACTAAATAGTTTTACTCAAAAATCTGTGGCATGGTATTAAGCATGACAACCTTGACACTCAGTTT  
GCTGTATATAAAGATAGGAGCAGAGTTGTGAAAAGAGATAAAAATATTC

>M6-PGSC0003DMG400017946M6G-LecRK\_3538

CACTCAGTTTGCTGTATATAAAGATAGGAGCAGAGTTGTGAAAAGAGATAAAAATATTCTCTACATACA  
AAAGCACCTAGTACATTTGCTTATTTAAGAAGAACAGCTTATTCTGTAAAA

>M6-PGSC0003DMG400017946M6G-LecRK\_3599

TACATACAAAAGCACCTAGTACATTTGCTTATTTAAGAAGAACAGCTTATTCTGTAAAAAACTTTTAGCCT  
CCCTTGGGGAAGTAAGAACAATTTTCTTCGTTGGCTTGTATGAGTCC

>M6-PGSC0003DMG400017946M6G-LecRK\_366

AATCCACTIONCAATGACACATCGAGTGTGCTAAATTTTACCAGACAAGGAATTCTTACTCTTCTAAATGGTTC  
TGGCAGAGTCATTTGGTCCTCCAATTCCACTIONTAGACATGGGCAAAATCCA

>M6-PGSC0003DMG400017946M6G-LecRK\_3843

CTGTCACACAGGATTTCTCAAACTCCAGTAACTTCAAGTAACTTGTGAGTACTGGCTCTAGTAATCACA

AGGATTAATATCTTAATCCTACAAACCTTTAAACACCTTTATTACAAAAC

>M6-PGSC0003DMG400017946M6G-LecRK\_3904

GTAATCACAAGGATTAATATCTTAATCCTACAAACCTTTAAACACCTTTATTACAAAACACAAAGCAATAA  
CCCTATTGTCCACTTTATCAACTACCTCTAAGTAGTATAAACTTCAACA

>M6-PGSC0003DMG400017946M6G-LecRK\_3965

AAAGCAATAACCCTATTGTCCACTTTATCAACTACCTCTAAGTAGTATAAACTTCAACAAATACCACTCAG  
CTAACTCAAGCCGCAAACCTTAACTAACACTAATATGATATGGCATGATC

>M6-PGSC0003DMG400017946M6G-LecRK\_4026

TACCACTCAGCTAACTCAAGCCGCAAACCTTAACTAACACTAATATGATATGGCATGATCTATATTCCCGTA  
TAACATAGGAATATATTCTTAATAAAAGACCATAAGACACTAGACTCAA

>M6-PGSC0003DMG400017946M6G-LecRK\_4087

TATTCCCGTATAACATAGGAATATATTCTTAATAAAAGACCATAAGACACTAGACTCAAATAACAACCTC  
AGACTCTGCAAGACTAAACCGGGTCCCTCATTGTGTGTCAGAGTAGTTCT

>M6-PGSC0003DMG400017946M6G-LecRK\_4148

AACAACCTCAGACTCTGCAAGACTAAACCGGGTCCCTCATTGTGTGTCAGAGTAGTTCTTTCTTTAAAAC  
GGGTTTTGCTTTTGAATAATCCTAATTGCAAATAGTAGGTTGTTTCTTGT

>M6-PGSC0003DMG400017946M6G-LecRK\_4209

CTTTAAAACGGGTTTTGCTTTTGAATAATCCTAATTGCAAATAGTAGGTTGTTTCTTGTCAACATTTTCAAT  
ATATAAGAGACACAAAACAACCTTAGCAGCATGTCATTGGTTCGAGGACT

>M6-PGSC0003DMG400017946M6G-LecRK\_427

TAAATGGTTCTGGCAGAGTCATTTGGTCTCCAATCCACTAGACATGGGCAAATCCAGTAGCACAACT  
CCTTGATTCAGGCAATCTTGTTGTTTCGAGATGCAGCCGAGGATAAGCCTC

>M6-PGSC0003DMG400017946M6G-LecRK\_4270

ACATTTTCAATATATAAGAGACACAAAACAACCTTAGCAGCATGTCATTGGTCGAGGACTGTTGTCCTTTC  
TGCGCCTCTACTATAGTGCCACCAACCACTGTAGTTTCTACAACTTTAC

>M6-PGSC0003DMG400017946M6G-LecRK\_4331

TGTCCTTTCTGCGCCTCTACTATAGTGCCACCAACCACTGTAGTTTCTACAACTTTACAACTACGCTTCAT  
TGACTTGTCTTTACGACAAAACACAGAGGACCAGGTCCCTTTACTA

>M6-PGSC0003DMG400017946M6G-LecRK\_4514

TTGATGATGATAAACTATTGCCCATGTCTACATATCTTTTGCTTGCACATTCCCCCTATCAACATGCTTCCC  
TTGTGGAAAGACCTGATCCCTTGATCTGAACTGGCATAACATGTTATC

>M6-PGSC0003DMG400017946M6G-LecRK\_4697

GCATTCTGGGTAAATTCATGGCCACTAGGCAATACTAATATGAACAAACAGACAGAAAGAAAGGAGCG  
AGAAACAAACATTCTTGTTTTCCAACCTCCGCCCTCTCACTTTTCCATTGTT

>M6-PGSC0003DMG400017946M6G-LecRK\_549

AACTACCTGTGGCAAAGTTTTGACAATCCAGGTGACACGGCTTTACCTGGAATGAAGGTTGGGATTAAT  
CTGAAAACCTGGTTTTTCATCGTTCCCTTTTCGTCATGGAAGAGTACAAATGAT

>M6-PGSC0003DMG400017946M6G-LecRK\_61

GCTTCATATTCTGAACATCTCCATGACTCCATCTGCAAGTGAAATCAAATTCATCTGCTATCTCATTTTAA  
TGGAGGCCATAAACATACTTTACTTCTTGTCATCCATATGGATTCTGT

>M6-PGSC0003DMG400017946M6G-LecRK\_610

GGATTAATCTGAAAACCTGGTTTTTCATCGTTCCCTTTTCGTCATGGAAGAGTACAAATGATCCTTCCAGGGG  
TCAGTTTACCTGGACATTTGATACTGGTGGATTCTACAAACATTCGTTA

>M6-PGSC0003DMG400017946M6G-LecRK\_671

TTCCAGGGGTCAGTTTACCTGGACATTTGATACTGGTGGATTCTACAAACATTCGTTATGAATGGTTCC  
ATTGAACTCTACAGAGCTGGACCATGGAATGGCCGAGTCTTTCCTAATGC

>M6-PGSC0003DMG400017946M6G-LecRK\_732

AATGGTTCCATTGAACTCTACAGAGCTGGACCATGGAATGGCCGAGTCTTTCCTAATGCACCATCTCGTG  
ACACATCGTGGAAATGGTTATAACTATACTTATCTGATCCTAATGAA

>M6-PGSC0003DMG400017946M6G-LecRK\_793

CATCTCGTGACACATCGTGGAAATGGTTATAACTATACTTATCTGATCCTAATGAAATATCATTTCATG  
TATGAACTTACAGACAGCTCTATCATTGCAAGGGTAGTGATGCAACTAA

>M6-PGSC0003DMG400017946M6G-LecRK\_854

ATCATTTCATGTATGAACTTACAGACAGCTCTATCATTGCAAGGGTAGTGATGCAACTAAATGGATTTTTA  
CAGCTTTCAGAATGGAATAATCGGACCCAAAATTGGGACGATGTTGTCAG

>M6-PGSC0003DMG400017946M6G-LecRK\_915

GGATTTTTACAGCTTTCAGAATGGAATAATCGGACCCAAAATTGGGACGATGTTGTCAGTGCACCAGCT  
GATAACTGTGACATTTATGGCCAGTGTCATTCATATGGTTTGTGCAACAGC

>M6-PGSC0003DMG400017946M6G-LecRK\_976

CACCAGCTGATAACTGTGACATTTATGGCCAGTGTTCATTCATATGGTTTGTGCAACAGCGGCAATTCCCC  
AATCTGCAGATGTTTGGATAAATTTGAACCCAAAGATCCAACAGAATGGG

>M6-PGSC0003DMG400017949-(rev)M6G-LecRK\_0

TATATATGAGCTATTTTCATCAATAATCCCTGCCGACTATTGAAGGAGAATCCTGCAATATTTTCCTTTAGT  
AAAACAAGGATGATGGAAAGCAGACATGTTTCATTTGTTATTATTATTAT

>M6-PGSC0003DMG400017949-(rev)M6G-LecRK\_1037

CCCAAAGATCCAACAGAATGGGCAAGGGGAAATTGGTCAGGTGGCTGTGTTAGAAAGACAACAATATT  
GAATTGCCAAAAGGAAGTTAAATTCTTAAAGTATTCAGGGATCAAGTTGCCA

>M6-PGSC0003DMG400017949-(rev)M6G-LecRK\_1098

CAATATTGAATTGCCAAAAGGAAGTTAAATTCTTAAAGTATTCAGGGATCAAGTTGCCAGACACTCGATT  
TTCCTGGTACGGTCGAGGAGTAACCTTAATTCATGTGAGGAATTGTGCT

>M6-PGSC0003DMG400017949-(rev)M6G-LecRK\_1159

CACTCGATTTTCCTGGTACGGTCGAGGAGTAACCTTAATTCATGTGAGGAATTGTGCTTGAGAAACTGT  
TCATGTGTGGCCTATGCAAACTAGACACAACAGGGACAAATGAAGATTG

>M6-PGSC0003DMG400017949-(rev)M6G-LecRK\_122

TGTTACATGTTTTGTGTTTTGATTCTTACTAGAGCTGCAGATAATATAGCTAGAGATGAACCTTTAAGAG  
ATGGAAAACGATTGTTTCGTCAGGTGGAAATTTTGAGTTGGGATTTTTTC

>M6-PGSC0003DMG400017949-(rev)M6G-LecRK\_1220

AGAAACTGTTTCATGTGTGGCCTATGCAAACTAGACACAACAGGGACAAATGAAGATTGCTTGCTTTGG  
TTTGATGAGCTGATGGACATCAGAGAGTTTGGTTCTAGTGGGCAAGATATC

>M6-PGSC0003DMG400017949-(rev)M6G-LecRK\_1281

TGCTTTGGTTTGATGAGCTGATGGACATCAGAGAGTTTGGTTCTAGTGGGCAAGATATCTATATAAAGTT  
GGACTCCTCTGAGACAGATATAAGTACAGGTTGGTATGCTTCTTTACATT

>M6-PGSC0003DMG400017949-(rev)M6G-LecRK\_1342

TATAAAGTTGGACTCCTCTGAGACAGATATAAGTACAGGTTGGTATGCTTCTTTACATTAGTCTTGAGTTT  
TCTAGACCAAATTGAACTGTCTATTAATAAATTTGATAAGACTAAGATGA

>M6-PGSC0003DMG400017949-(rev)M6G-LecRK\_1403

TCTTGAGTTTTCTAGACCAAATTGAACTGTCTATTAATAAATTTGATAAGACTAAGATGAATTTATATGAAT

CATCAGGAAACTCCAGTAAAGAGATATTAAGAAATTGAGAATCTGCTT

>M6-PGSC0003DMG400017949-(rev)M6G-LecRK\_1464

TTATATGAATCATCAGGAAACTCCAGTAAAGAGATATTAAGAAATTGAGAATCTGCTTGCCATTGGCA  
GCATTAAGTCTTCTCTCAATGCTATGCTTGATCTTGTACATTAGGCATACG

>M6-PGSC0003DMG400017949-(rev)M6G-LecRK\_1647

GATGTTTTGCTACTTTGAAATTTGAAATAAGTGGCTTGAATTGATGGTAAATCTTAGAAATTCCTCTTAAC  
AGGAAGCTCTGAAATGTTGTACATTAATAAGAGCAAAAATGATGATCTA

>M6-PGSC0003DMG400017949-(rev)M6G-LecRK\_1708

TCCTCTTAACAGGAAGCTCTGAAATGTTGTACATTAATAAGAGCAAAAATGATGATCTAGATTTACCATT  
GTTTGATTTTGCCACTATCTTGGAGGCTACCAATAACCTTTCTTTGAGCA

>M6-PGSC0003DMG400017949-(rev)M6G-LecRK\_1769

TTTACCATTGTTTGATTTTGCCACTATCTTGGAGGCTACCAATAACCTTTCTTTGAGCAACAAGCTTGGAG  
AGGGTGGTTTTGGACCTGTTTACAAGGTAACGCTGTAACTACAACCTCT

>M6-PGSC0003DMG400017949-(rev)M6G-LecRK\_183

CTTTAAGAGATGGAAAAACGATTGTTTCGTCAGGTGGAAATTTGAGTTGGGATTTTTCTCCCCAACTCC  
AACATCGAGTAAACGATACCTGGGAATATGGTTCAACAAAGTATCTGTAC

>M6-PGSC0003DMG400017949-(rev)M6G-LecRK\_1830

AAGCTTGGAGAGGGTGGTTTTGGACCTGTTTACAAGGTAACGCTGTAACTACAACCTTTCTTTTTCTCT  
AAACAACTGCTTATCTTCAATATATTATATATGCTGGAACATTGACAA

>M6-PGSC0003DMG400017949-(rev)M6G-LecRK\_1891

CTTTTTCTCTAAACAACTGCTTATCTTCAATATATTATATATGCTGGAACATTGACAACTTTCCGGAACCT  
TTAAAAGGAAACAAGTTCCCGATTAGAAAATATGTCTCCGATTCTCCA

>M6-PGSC0003DMG400017949-(rev)M6G-LecRK\_1952

TTTCGGAACCTTTAAAAGGAAACAAGTTCCCGATTAGAAAATATGTCTCCGATTCTCCAGAAATGTCATT  
AAAAGTTAATTCCACTTCAAACAAGCTATCTAAAAAAGTTTACTCAGAAT

>M6-PGSC0003DMG400017949-(rev)M6G-LecRK\_2013

AATGTCATTAAGTTAATTCCACTTCAAACAAGCTATCTAAAAAAGTTTACTCAGAATTTTTCAATCGAA  
AAACTAGAGAAGCTAATTGCCTGAGGATATGTAGGGTGCCTGAAAGAT

>M6-PGSC0003DMG400017949-(rev)M6G-LecRK\_2074



TTCAATCGAAAACTAGAGAAGCTAATTGCCTGAGGATATGTAGGGTGCGCTGAAAGATGGACAAGAA  
ATAGCAGTAAAGAGACTTTCAAGATACTCTGCACAAGGAACTGATGAGTTCA

>M6-PGSC0003DMG400017949-(rev)M6G-LecRK\_2135

ACAAGAAATAGCAGTAAAGAGACTTTCAAGATACTCTGCACAAGGAACTGATGAGTTCAAGAATGAGG  
TTATCTTCATTGCTAAACTCCAGCATAGGAATCTTGTTAAGCTTCTTGTTG

>M6-PGSC0003DMG400017949-(rev)M6G-LecRK\_2318

GTTCTTTTTGGTTGGTTCTCACTTCTCTCAACTCTTAATACATTTTGTTATCTGTAGTAATAGTTCAATCA  
GCTGCAGATGGAGTTGGTTATCACTTCTCTGAACTTTTGATTTTTGCA

>M6-PGSC0003DMG400017949-(rev)M6G-LecRK\_2379

TAGTTCAATCAGCTGCAGATGGAGTTGGTTATCACTTCTCTGAACTTTTGATTTTTGCACATACAGATAGG  
AGGTCAGTCTTGATTGGCCCAAGTGCTTCCATATTATAAATGGAATTG

>M6-PGSC0003DMG400017949-(rev)M6G-LecRK\_244

CCCAACTCCAACATCGAGTAAACGATACCTGGGAATATGGTTCAACAAAGTATCTGTACAGACGGTGGT  
ATGGGTTGCTAATAGAGACTCCACTGAATGATAAAAATGGTATGCTCAA

>M6-PGSC0003DMG400017949-(rev)M6G-LecRK\_2440

TACAGATAGGAGGTCAGTCTGCTTGATTGGCCCAAGTGCTTCCATATTATAAATGGAATTGCTCGAGGACT  
CTCTATCTTCATCAAGACTCAAGATTGCGAATAATCCACAGAGATCTTAA

>M6-PGSC0003DMG400017949-(rev)M6G-LecRK\_2501

CGAGGACTTCTCTATCTTCATCAAGACTCAAGATTGCGAATAATCCACAGAGATCTTAAACCTAGCAATG  
TTTTGCTAGACATTGATATGAACCCGAAGATATCTGACTTTGGCATGGCA

>M6-PGSC0003DMG400017949-(rev)M6G-LecRK\_2623

AAGTTTCGGAGGAAATGAGACTGGAGCCATGACAACAAGAGTGGTTGGAACATAGTAAAGATCTTTAA  
ACCAAAGAGCTACTTACTCTACTAAAAAGCTAACTTTCTTTATTTGTGAT

>M6-PGSC0003DMG400017949-(rev)M6G-LecRK\_2684

TCTTTAAACCAAAGAGCTACTTACTCTACTAAAAAGCTAACTTTCTTTATTTGTGATTTTTTTTAAAAAA  
AGAGATACTTACTTTCTTTGTTTGACATTATCCTACAGCGGCTACATG

>M6-PGSC0003DMG400017949-(rev)M6G-LecRK\_2745

TTTTTAAAAAAGAGATACTTACTTTCTTTGTTTGACATTATCCTACAGCGGCTACATGTCTCCGGAGTAT  
GCAGAAGAAGGGAAATTCTCAGTGAAATCAGATGTTTTTAGCTTTGGAG

>M6-PGSC0003DMG400017949-(rev)M6G-LecRK\_2806

TCCGGAGTATGCAGAAGAAGGAAATTCTCAGTGAAATCAGATGTTTTAGCTTTGGAGTTGTAATTCT  
GGAAATTTTAAGCGGGAAGAGAAATAGAGGGTTCATTCATCCAGACCATCA

>M6-PGSC0003DMG400017949-(rev)M6G-LecRK\_2867

GTAATTCTGGAAATTTTAAGCGGGAAGAGAAATAGAGGGTTCATTCATCCAGACCATCACCATAATCTTC  
TAGGACATGTAGGAACTCATCTTAGTACTTAAATAGTGTA AAAACCATGT

>M6-PGSC0003DMG400017949-(rev)M6G-LecRK\_2928

ATAATCTTCTAGGACATGTAGGAACTCATCTTAGTACTTAAATAGTGTA AAAACCATGT  
TAGTTAAAATT  
ATAGCATCTAACTGCATGATGTGAAATGTATGTTTCAGGTGTGGATCCACT

>M6-PGSC0003DMG400017949-(rev)M6G-LecRK\_2989

GTTAAAATTATAGCATCTAACTGCATGATGTGAAATGTATGTTTCAGGTGTGGATCCACTTCAAAGAAGG  
AAGGGTTATGGAAGTAATAAATACACATCTAAAGGAGTTATGCAACCTATG

>M6-PGSC0003DMG400017949-(rev)M6G-LecRK\_305

ACGGTGGTATGGGTTGCTAATAGAGACACTCCACTGAATGATAAAAATGGTATGCTCAATTTTACAACA  
CAAGGAAATCTTATTCTTGTAATGGTTCTGGCAGTGTGGTTTGGTCTTCC

>M6-PGSC0003DMG400017949-(rev)M6G-LecRK\_3050

AAAGAAGGAAGGGTTATGGAAGTAATAAATACACATCTAAAGGAGTTATGCAACCTATGTGAAGTGCA  
AAGATCAGTCCATTTAGGTCTATTGTGTGTGCAGCAGTGTCCAGAAGATAGG

>M6-PGSC0003DMG400017949-(rev)M6G-LecRK\_3111

AAGTGCAAAGATCAGTCCATTTAGGTCTATTGTGTGTGCAGCAGTGTCCAGAAGATAGGCCTAGCATGT  
CATCAGTTGTGCTGATGTTGTCTAGCGATGTTCCATTGCCCTTACCTAAAG

>M6-PGSC0003DMG400017949-(rev)M6G-LecRK\_3172

TAGCATGTCATCAGTTGTGCTGATGTTGTCTAGCGATGTTCCATTGCCCTTACCTAAAGAACCTGGTTTTT  
TTACTAGCAGAAGCCGATTCCGGTGAAGTTAATAGTTCATCTAGCAAGCT

>M6-PGSC0003DMG400017949-(rev)M6G-LecRK\_3233

CCTGGTTTTTTTACTAGCAGAAGCCGATTCCGGTGAAGTTAATAGTTCATCTAGCAAGCTTGGCGAACATT  
CTGGAAATCAATTAAGCATCACACTATTGGATGCTAGATAGGATATATAT

>M6-PGSC0003DMG400017949-(rev)M6G-LecRK\_3477

ACAGGAATCTAATTATAGTGGCGGGACATGCCACTAGGCTTTATTTACTTAATTCTTTAGCTTCCAGTTGT

ACAACCAAACAACCTAAAGTGAATTTGTCAAATGTACAAGTGCTTTCTC

>M6-PGSC0003DMG400017949-(rev)M6G-LecRK\_3538

TTCCAGTTGTACAACCAAACAACCTAAAGTGAATTTGTCAAATGTACAAGTGCTTTCTCAGTCTAATAATT  
CTTCATAATCTATATTGTCCTCACTCCTCAGATTGTGAAATGAGTTAAG

>M6-PGSC0003DMG400017949-(rev)M6G-LecRK\_3599

TCTAATAATTCTTCATAATCTATATTGTCCTCACTCCTCAGATTGTGAAATGAGTTAAGACAATTTGTCATA  
ATTGTACAAAGGGCATGGACAGCTCTTTTTCAAAGCAAGTACAGTTGA

>M6-PGSC0003DMG400017949-(rev)M6G-LecRK\_3646

AAATGAGTTAAGACAATTTGTCATAATTGTACAAAGGGCATGGACAGCTCTTTTTCAAAGCAAGTACAGT  
TGATAGTATTTTAATTAACAACCTTGACGGTGATCAACAGGCTGGTCAATC

>M6-PGSC0003DMG400017949-(rev)M6G-LecRK\_366

TTACAACACAAGGAAATCTTATTCTTGTAATGGTTCTGGCAGTGTGGTTTGGTCTTCCAATACCACAAG  
AGGAGGCGTGCAAAATCCAATAGCACAGCTTCTAGATTCAGGCAACCTTG

>M6-PGSC0003DMG400017949-(rev)M6G-LecRK\_427

TACCACAAGAGGAGGCGTGCAAAATCCAATAGCACAGCTTCTAGATTCAGGCAACCTTGTTGTTAGAGA  
AGATGCAACTGAGAATTCGAATTATGTATGGCAGAGTTTTGACTATCCTGG

>M6-PGSC0003DMG400017949-(rev)M6G-LecRK\_488

GTTAGAGAAGATGCAACTGAGAATTCGAATTATGTATGGCAGAGTTTTGACTATCCTGGTGACACAGCT  
TTGCCTGGAGTTAAGATTGGGATCGATCTTAAGACTGGTTTTCGTCGTTTC

>M6-PGSC0003DMG400017949-(rev)M6G-LecRK\_549

ACACAGCTTTGCCTGGAGTTAAGATTGGGATCGATCTTAAGACTGGTTTTCGTCGTTTCCTCTGGTCATG  
GAAGAGCAGAAATGACCCTTCTAATGGTCAATATAGTTTCATATTTGATC

>M6-PGSC0003DMG400017949-(rev)M6G-LecRK\_61

TTCCTTTAGTAAAACAAGGATGATGGAAAGCAGACATGTTCAATTTGTTATTATTATTATTATGTTACATGT  
TTTGTGTTTTGATTCTTACTAGAGCTGCAGATAATATAGCTAGAGATGA

>M6-PGSC0003DMG400017949-(rev)M6G-LecRK\_610

CTGGTCATGGAAGAGCAGAAATGACCCTTCTAATGGTCAATATAGTTTCATATTTGATCCTAATGGATTC  
CCACAGCCATTTCTCATGAACGGTTCCATCCAACGCTTCAGGGGTGGAGC

>M6-PGSC0003DMG400017949-(rev)M6G-LecRK\_671

AATGGATTCCCACAGCCATTTCTCATGAACGGTTCATCCAACGCTTCAGGGGTGGAGCATGGAATGGT  
CAAAGCTTTGCTAATTCACCATCTCTACTACCAAGTCCTTCTTATAAATAC

>M6-PGSC0003DMG400017949-(rev)M6G-LecRK\_732

GGAATGGTCAAAGCTTTGCTAATTCACCATCTCTACTACCAAGTCCTTCTTATAAATACATATTTGCATCC  
GATCCAGATCAAGTATACTTTACTTATGAGCTCATTGACACTTCTGCTA

>M6-PGSC0003DMG400017949-(rev)M6G-LecRK\_793

ATTTGCATCCGATCCAGATCAAGTATACTTTACTTATGAGCTCATTGACACTTCTGCTATTGCAAGGGTAG  
TGATGCAACTAAATGGGTTTCTAGAGCTTTTCGACGTGGAATAATCTAAC

>M6-PGSC0003DMG400017949-(rev)M6G-LecRK\_854

GCAAGGGTAGTGATGCAACTAAATGGGTTTCTAGAGCTTTTCGACGTGGAATAATCTAACTCAGAATTGG  
GATAACTTTGGTAGCGCACCAGCAGACAACTGTGACATTTATGCCCAGTGT

>M6-PGSC0003DMG400017949-(rev)M6G-LecRK\_915

AGAATTGGGATAACTTTGGTAGCGCACCAGCAGACAACTGTGACATTTATGCCCAGTGTAACGCATATG  
GTTTGTGCAACAGTGGAAGCTCTCCAATCTGCAGTTGTTTGGATAAATTTG

>M6-PGSC0003DMG400017966-(rev)M6LRR-RLP\_0

AATTTGACCCTATTAAGAGTGCTTGATCTTAGTGGTGTAAAGCATCTCTCCACCATTCTATTAATTTTTCT  
TCTCATTTTACAACGCTGGTGCTTGGGCATTCAGAGTTGTATGGTGTA

>M6-PGSC0003DMG400017966-(rev)M6LRR-RLP\_1116

GCAATTCTGCAATGTTTGGGTAATATCAGTAGCCTCCAGGTTCTGGATATGAACCACAACAGTCTTACAG  
GGACTCTTCCAACAACCTTTTAGATTTGGAAGTTCTCTGAGAAGCCTCAAC

>M6-PGSC0003DMG400017966-(rev)M6LRR-RLP\_124

CGGAGAGTATTTTTACCTTCCCAAACATAAAATACTTGACTTATCCATCAATTATCAGCTTAATGGTTAT  
TTCCCAAAGACCAAATGGAACAGCAGCGCATCTCTCACAGATTTAAATC

>M6-PGSC0003DMG400017966-(rev)M6LRR-RLP\_1364

GCTGCAAGTATTAAGCTTGAGATCCAATGAATTGCATGGGTCCATTAGAACTCCAACGATTGAAAACAT  
ATTTCTAATCTTCGAATGTTAGATCTCTCTTCCAATGCCTTCACCGAAAA

>M6-PGSC0003DMG400017966-(rev)M6LRR-RLP\_1488

CCAACGGGTTTGTTCACATTTGAAAGCCATGAGGACAATTGATCAAACCTATGAATGCACCACATTATG  
AAGGAACTGATGGATATTACCAAGACTCGGTAGCTGTCGTATCCAAGGGA

>M6-PGSC0003DMG400017966-(rev)M6LRR-RLP\_1550

ACATTATGAAGGAACTGATGGATATTACCAAGACTCGGTAGCTGTCGTATCCAAGGGATTTGAGCGTGA  
AATAGTGAGAATCTTGTATTTGTACACCGTTATCGATCTTTCAAGTAATAA

>M6-PGSC0003DMG400017966-(rev)M6LRR-RLP\_1612

AGCGTGAAATAGTGAGAATCTTGTATTTGTACACCGTTATCGATCTTTCAAGTAATAAATTTGGAGGGCA  
GATTCCAAGTATCATGGGGGAACTCATTGCAGTTCACATATTGAATATAT

>M6-PGSC0003DMG400017966-(rev)M6LRR-RLP\_248

AGGAGTGAATTTTTCTGGTTATTTGCCTGAGTCTCTTGGTTATCTAACGTCACTGAATAATTTGTTTCTTAT  
TTTCTGCAATATCTGGGGGCCTATTCCTGAATCTCTTTCTAATCTCAC

>M6-PGSC0003DMG400017966-(rev)M6LRR-RLP\_310

TGTTTCTTATTTTCTGCAATATCTGGGGGCCTATTCCTGAATCTCTTTCTAATCTCACTCACATAGAGTATA  
TGTTCTTGCAGGTAACCTCCTAAATGGAACAATACCATCATCGATAT

>M6-PGSC0003DMG400017966-(rev)M6LRR-RLP\_372

ATAGAGTATATGTTCTTGCAGGTAACCTCCTAAATGGAACAATACCATCATCGATATTCTCCCTTCCTTC  
ACTAACTGATTTAGAATTGAGTAACAACCATTTTTCTGGTAAGCTTGAG

>M6-PGSC0003DMG400017966-(rev)M6LRR-RLP\_434

CCTTCCTTCACTAACTGATTTAGAATTGAGTAACAACCATTTTTCTGGTAAGCTTGAGGATATCAAGTCCA  
ATTCATATTATCTATTGATCTAGGCAATAATCAGCTGCAAGGCCATCT

>M6-PGSC0003DMG400017966-(rev)M6LRR-RLP\_558

GAGTCAATTCAAAACCTTGTGAACCTCACAACCTTTTGATCTTTCTTTCAATAATTTTAGTGGTAGTGTGGA  
TGTCAGCTTCTTTTCAGACCTCAAACATCTTTTCATCTCTTGGTATTTCA

>M6-PGSC0003DMG400017966-(rev)M6LRR-RLP\_62

TAATTTTTCTTCTCATTTTACAACGCTGGTGCTTGGGCATTGAGAGTTGTATGGTGAATAACCGGAGAGT  
ATTTTTCACCTTCCCAAATAAAAATACTTGACTTATCCATCAATTATCA

>M6-PGSC0003DMG400017966-(rev)M6LRR-RLP\_620

TAGTGTGGATGTCAGCTTCTTTTCAGACCTCAAACATCTTTTCATCTCTTGGTATTTTCATATAATAGTATTTT  
ATTCACAAATGAAAACAAAGTTAATTTACTTTGCCTGAATCACTTGT

>M6-PGSC0003DMG400017966-(rev)M6LRR-RLP\_682

ATAGTATTTCAATTCACAAATGAAAACAAAGTTAATTTACTTTGCCTGAATCACTTGTGTACTTACAGTTG

GCTGCCTGTGAAGTGAAAGAATTGGAGTTTCTAAGATCCGCCAAGAAGC

>M6-PGSC0003DMG400017966-(rev)M6LRR-RLP\_744

TTACAGTTGGCTGCCTGTGAAGTGAAAGAATTGGAGTTTCTAAGATCCGCCAAGAAGCTTGAGCACTTG  
GATCTTTCTAATAATAAGCTTCAAGGAAGATTTCCAGATTGGGCATCATCT

>M6-PGSC0003DMG400017966-(rev)M6LRR-RLP\_806

GCACTTGGATCTTTCTAATAATAAGCTTCAAGGAAGATTTCCAGATTGGGCATCATCTAACTGGATGTTTT  
CATTGAACAGTCTTAATCTATCCCACAACATGCTGACAAGTGTGGACTT

>M6-PGSC0003DMG400017966-(rev)M6LRR-RLP\_868

GGATGTTTTATTGAACAGTCTTAATCTATCCCACAACATGCTGACAAGTGTGGACTTAACTCCTTTTCAA  
TCTCTAAAAACAATTAATTTGCGATCCAATTCTCTTCAAGGGTCCCTAT

>M6-PGSC0003DMG400017966-(rev)M6LRR-RLP\_930

CCTTTTCAATCTCTAAAAACAATTAATTTGCGATCCAATTCTCTTCAAGGGTCCCTATCTATGCCACCAAAT  
TCCACAACATACTTCTTCATATCAGAAAATAATCTTAGTGGAGAAATT

>M6-PGSC0003DMG400017966-(rev)M6LRR-RLP\_992

GCCACCAAATTCACAACATACTTCTTCATATCAGAAAATAATCTTAGTGGAGAAATTCCTTCATCTATTT  
GCAACTTCACATCATTGGTAATGCTAGATTTGGCGAGAAACAACCTTGAA

>M6-PGSC0003DMG400017967-(rev)M6LRR-RLP\_1008

TCCTAAGTTGAGAATTTAAGCTTGAGATCGAATAAGTTGCATGGACCGATTAGAACTTTAGGAAGTGA  
AAACATTTTTAATGAGCTTCGAATGTTGGATATCTCTTCCAATGCCTTCAC

>M6-PGSC0003DMG400017967-(rev)M6LRR-RLP\_1071

AAGTGAAAACATTTTTAATGAGCTTCGAATGTTGGATATCTCTTCCAATGCCTTCACGGAAAACCTTACCG  
ATGAGTCTGTTACAACATTTAAAAGCCATGAGGACAATTGATCAAACGAT

>M6-PGSC0003DMG400017967-(rev)M6LRR-RLP\_1134

CTTACCGATGAGTCTGTTACAACATTTAAAAGCCATGAGGACAATTGATCAAACGATGAATGCACCAAGT  
GATGAAGGAGGTGAATATTACCAAGACTCGGTAGCTGTCGTAACAAAGGG

>M6-PGSC0003DMG400017967-(rev)M6LRR-RLP\_1197

ACCAAGTGATGAAGGAGGTGAATATTACCAAGACTCGGTAGCTGTCGTAACAAAGGGATTGGAGCTTG  
AAGTTGTGAGAATCTTGTTTTGTATAACCACTATCGATTTTTCAGACAATAA

>M6-PGSC0003DMG400017967-(rev)M6LRR-RLP\_1575

TGACAACAATTCATATGTAGGTAATGATGGATTACGTGGATTCCCACATTTGAAAGGCTGTGGTACTGA  
AGGTAATGATTCAGAATCAGAGAAAACCTGATACCGGATCTGAGCTTGATGA

>M6-PGSC0003DMG400017967-(rev)M6LRR-RLP\_504

GAGAACTTGCAAGTTCTGTCTCTCCAACAAAACAATCTGATTGAGGAAATTCCTTCATCTATTTGCAATT  
TAACATCACTGACAATCCTGTATTTGTCGAGAAACAACCTTGAAAGGAAA

>M6-PGSC0003DMG400017967-(rev)M6LRR-RLP\_567

TTGCAATTTAACATCACTGACAATCCTGTATTTGTCGAGAAACAACCTTGAAAGGAAAAAATCTGCAATGC  
TTGGGTAATATCAGTGCCCTCCAGTATGTGATAATGTCACATAATAATCT

>M6-PGSC0003DMG400017967-(rev)M6LRR-RLP\_819

GCAACACAACAATCTTTCTGGAACCTATTCCAACGACTTTTAGAGCTGGAACACTTAGAAGCTTCAACTTG  
CATGGCAATAAACTTAAGGGGAAAATCCCAATCTTTGGTCAATTGCAA

>M6-PGSC0003DMG400017968-(rev)M6LRR-RLP\_0

ATGTTCTCCCTCCATCACTAAGTTATTTAAGCTTGGGTTTTAACCAATTTTCTGGTCAGCTTGAGGATTTT  
AAGTCCAATACACTAGTCTGGATTACAGTTACAGGGCAATCGGCTGCAA

>M6-PGSC0003DMG400017968-(rev)M6LRR-RLP\_128

TCCAAGTCAATTCAAACCTTGTGAACCTAAAATATCTTGATCTTTCTTTCAATAATTTTAGTGGTAGTGT  
GGATGTCAGCCTCTTTTCAGACCTCAAACAGCTTTTCGTATCTTAGTCT

>M6-PGSC0003DMG400017968-(rev)M6LRR-RLP\_192

GGTAGTGTGGATGTCAGCCTCTTTTCAGACCTCAAACAGCTTTTCGTATCTTAGTCTTTTCATACAACAGTAT  
CTCATTGACTAATGAAAAGGAAGTTAAATCTAGTTTGCCGGAGTCACTT

>M6-PGSC0003DMG400017968-(rev)M6LRR-RLP\_256

ACAGTATCTCATTGACTAATGAAAAGGAAGTTAAATCTAGTTTGCCGGAGTCACTTGAGTACTTACGTTT  
GGCTGCATGTGATGTGAAAAGAATTGGAGTTTCTAAGATCCGCAAAGAAG

>M6-PGSC0003DMG400017968-(rev)M6LRR-RLP\_320

ACGTTTGGCTGCATGTGATGTGAAAAGAATTGGAGTTTCTAAGATCCGCAAAGAAGCTATCTGACTTGG  
ATCTTTCAAATAATAAGGTTCAAGGAAGAGTTCCTGATTGGGCATGGTCTA

>M6-PGSC0003DMG400017968-(rev)M6LRR-RLP\_384

CTTGATCTTTCAAATAATAAGGTTCAAGGAAGAGTTCCTGATTGGGCATGGTCTACTTGGAAATTTTCA  
GTGTCAAATCTTAATCTATCCACAATATGCTGACAAGCATGGACTCAAT

>M6-PGSC0003DMG400017968-(rev)M6LRR-RLP\_448

TTTTCAGTGTCAAATCTTAATCTATCCCACAATATGCTGACAAGCATGGACTCAATTCCTCTTCAATCTGG  
ATATATTATTGATTTGCGGTCCAATTTTCTTAAAGGGTCACTACCTATT

>M6-PGSC0003DMG400017968-(rev)M6LRR-RLP\_512

AATCTGGATATATTATTGATTTGCGGTCCAATTTTCTTAAAGGGTCACTACCTATTCCAGGGAATTCACAG  
CATTTTTCTTCATATCAGAAAATAATCTTAGTGGGGAAATTCCTTCATC

>M6-PGSC0003DMG400017968-(rev)M6LRR-RLP\_576

TTCACAGCATTTTTCTTCATATCAGAAAATAATCTTAGTGGGGAAATTCCTTCATCTATTTGCAATTTGAA  
ATCAGTGCAACTTCTAGATTTGGCGAGAAACAACCTTGATGGGAGCAATT

>M6-PGSC0003DMG400017968-(rev)M6LRR-RLP\_64

AGGATTTCAAGTCCAATACACTAGTCTGGATTCAGTTACAGGGCAATCGGCTGCAAGGCCATCTTCCCAA  
GTCAATTCAAAACCTTGTGAACCTAAAATATCTTGATCTTTCTTTCAATA

>M6-PGSC0003DMG400017968-(rev)M6LRR-RLP\_704

TTTCGGTAATATCAGTGGCCTCCTGGTTTTGGATATGTACAACAACAATCTTTCTGGGACTCTCTCAATGG  
CTTTTGAATCGTAAGTGAACCTAGAAGCCTCAACTTTCATGGAAATGA

>M6-PGSC0003DMG400017969-(rev)M6LRR-RLP\_0

AACTTTTTGAATTGCTTAAACAATATGGGGCTCTCAGTTGTGTTCTTAATTTTCTTTCTTTATCAGCTTTCTT  
GTTCTTCATCCATATTTCTGTGTCCCAAACATCAAAGCATTTCCCTT

>M6-PGSC0003DMG400017969-(rev)M6LRR-RLP\_1054

TGAGCTTGAGGATTTCAAGTCCAATTCACTAGAAGAGATTATTTTAGAAGGCAATCAGCTGCAAGGTCA  
AATTCCCAAGTCAATTCAAACCTTGAGAACCTAAAAGGGCTTGATCTTTC

>M6-PGSC0003DMG400017969-(rev)M6LRR-RLP\_1116

AAGGTCAAATTCCTCAAGTCAATTCAAACCTTGAGAACCTAAAAGGGCTTGATCTTTCCTTCAATAATTTT  
AGTGGCAATGTGGATATCAGCTTGTTTTCAAACCTCAAACAACCTTTTGG

>M6-PGSC0003DMG400017969-(rev)M6LRR-RLP\_1178

AATAATTTTAGTGGCAATGTGGATATCAGCTTGTTTTCAAACCTCAAACAACCTTTTGGGTCTTAGTCTTTC  
ATATAATAAGATATCATTGATCAATGAGAACAAAATTAATTTTACATGG

>M6-PGSC0003DMG400017969-(rev)M6LRR-RLP\_124

AATTCAAGGAAACATTTACTATAAATCCCTATGCTTCTTCTAGATGTTATTTCCGCGGTGAGTAGCCTTAT



CCAAAACTAGTTCATGGAACATGAGCAGAGAATGTAGTTTATGGGATG

>M6-PGSC0003DMG400017969-(rev)M6LRR-RLP\_1240

TAGTCTTTCATATAATAAGATATCATTGATCAATGAGAACAAAATTAATTTTACATGGCCCAAATCTCTTA

ATGTGTTGCAATTTGCTGCATGTGAAGTGAAAGAATTGGAGTTTCTAAG

>M6-PGSC0003DMG400017969-(rev)M6LRR-RLP\_1302

AATCTCTTAATGTGTTGCAATTTGCTGCATGTGAAGTGAAAGAATTGGAGTTTCTAAGATCCGCAAACCA

GCTTTTGGTGTGGATCTTTCACATAATAAGATTCAAGGAAGAATTCCTG

>M6-PGSC0003DMG400017969-(rev)M6LRR-RLP\_1364

GCAAACCAGCTTTTGGTGTGGATCTTTCACATAATAAGATTCAAGGAAGAATTCCTGATTGGGCATGGT

CAAACCTGGATGTCATTGATGACTCTTGATATATCCCACAACATGTTGACG

>M6-PGSC0003DMG400017969-(rev)M6LRR-RLP\_1426

GGCATGGTCAAACCTGGATGTCATTGATGACTCTTGATATATCCCACAACATGTTGACGAGTGTGGAGCC

AATTCCTCTTCAGACTGTAGATACTATTGATTTACGGTCCAATTTGCTTCA

>M6-PGSC0003DMG400017969-(rev)M6LRR-RLP\_1488

TGGAGCCAATTCCTCTTCAGACTGTAGATACTATTGATTTACGGTCCAATTTGCTTCAAGGTTCACTACCT

ATTCCACCAATTTCCACAAGATACTTCTTAATATCCCAAATAATCTCA

>M6-PGSC0003DMG400017969-(rev)M6LRR-RLP\_1550

TCACTACCTATTCCACCAATTTCCACAAGATACTTCTTAATATCCCAAATAATCTCACTGAAGAAATTCCT

CCATCTATTTGCAATTTGACATCACTGGTAATGCTAGATTTGGCGAGA

>M6-PGSC0003DMG400017969-(rev)M6LRR-RLP\_1736

CACAACAACAACTTTCTGGGAATATTCCAACAATTTTCAGCAATGGAAGTTCACTGAGAAGCCTCAACT

TGCATGGAAGTAACTTGAGGGGAAAATTCCTGATCTTTGGCCAATTGT

>M6-PGSC0003DMG400017969-(rev)M6LRR-RLP\_186

TAGCCTTATCCAAAACCTAGTTCATGGAACATGAGCAGAGAATGTAGTTTATGGGATGGAGTCATATGC

GATGAGATGACTGGCCATGTCATTGAACTTGACCTCGGCTGCAGCCGTCTT

>M6-PGSC0003DMG400017969-(rev)M6LRR-RLP\_1922

ACTCTTCAAAGCTACAAGTTTTAAGCTTGAGATCATATACATTGCATGGGTCCATTAAACCTCCAAGGA

TTGAAACTATTTTTCCCGAGCTTCAAATCATAGATCTCTCTTACAATGCC

>M6-PGSC0003DMG400017969-(rev)M6LRR-RLP\_2046

CCGGAAACTTACCTACGAGTTTGTTC AACATCTGAAAGCCATGAGGACAATCGATTCATCAATGGAAGC  
ACCAAGATATCGTGGAGATACATATTACCAAGATTCTATTACAGTTACAA

>M6-PGSC0003DMG400017969-(rev)M6LRR-RLP\_2108

ATGGAAGCACCAAGATATCGTGGAGATACATATTACCAAGATTCTATTACAGTTACAACCAAGGGATTTA  
TGCGTGAAATTGTGAGAATCTTGTATTTGTACACCGTTATCGATCTTTCA

>M6-PGSC0003DMG400017969-(rev)M6LRR-RLP\_2170

GGGATTTATGCGTGAAATTGTGAGAATCTTGTATTTGTACACCGTTATCGATCTTTCAAGTAATAAATTTG  
GAGGGCAAATTCCAAGTATCATGGGAGATCTCATTGCAGTTCACACATT

>M6-PGSC0003DMG400017969-(rev)M6LRR-RLP\_2480

CAATTTCACTTTTGTAGAGCAATTCATGTGAAGGCAATGATGGACTACGTGGATTTCTGTTCAAAAA  
GTTGTGGCGATGCTCGGGTATTAGATACAAATGATACCGTATCTGAACTA

>M6-PGSC0003DMG400017969-(rev)M6LRR-RLP\_2728

GCTTGCAAGAATCATTGTAGAGATGGAACACAAAATAATGATGGGAAGGAAAAAGAATCAGCGAAGG  
AAAAAGAATTGCAGAAGAAGAAATATGTAACATTTTAATGTATTCAATGAAAT

>M6-PGSC0003DMG400017969-(rev)M6LRR-RLP\_2790

GAAGGAAAAAGAATTGCAGAAGAAGAAATATGTAACATTTTAATGTATTCAATGAAATGTATGCATTTT  
TTGTTTCAGTGAAGTGTATAATTTACAAATGTATGCAGTTTATTGCATCTT

>M6-PGSC0003DMG400017969-(rev)M6LRR-RLP\_2852

GCATTTCTGTTTCAGTGAAGTGTATAATTTACAAATGTATGCAGTTTATTGCATCTTCTCAACAACATCGC  
GTAATTTTTCCATTTATCATCAAGTGAACAAGGTAGGAACTCTTAAAT

>M6-PGSC0003DMG400017969-(rev)M6LRR-RLP\_2914

ACAACATCGCGTAATTTTTCCATTTATCATCAAGTGAACAAGGTAGGAACTCTTAAATCTTCTCATCAATG  
CATTCTGCTGACACAACCTTTGACATCTCTGCTCTCCTGGAGCTAAAAA

>M6-PGSC0003DMG400017969-(rev)M6LRR-RLP\_2976

TCATCAATGCATTCTGCTGACACAACCTTTGACATCTCTGCTCTCCTGGAGCTAAAAACAGGTCATTGTCT  
GTTCTATGAAGGGAGACGGATATGTTTTCCGTTAAACATTTAGTGACAA

>M6-PGSC0003DMG400017969-(rev)M6LRR-RLP\_3038

TCATTGTCTGTTCTATGAAGGGAGACGGATATGTTTTCCGTTAAACATTTAGTGACAATAAATTTTCCTTT  
CACAAAAACATATAGCGGTAATTGAGTTAATGTCATTGCATTCTAAATA

>M6-PGSC0003DMG400017969-(rev)M6LRR-RLP\_310

GAAAGATTGATTCCAATAGCAGCCTATTCCAACCTCTCATCTCCAAAGACTCAACCTTTCTTGGGAATGAA  
TTCCACGGTTCTCATATCTCGCCTGAATTTGGCAAGTTCTCGAGCTTGA

>M6-PGSC0003DMG400017969-(rev)M6LRR-RLP\_3100

TTTTCTTTTCAAAAAACATATAGCGGTAATTGAGTTAATGTCATTGCATTCTAAATATCATAGAAACTGG  
TCTCTTTTGGTTGTGCTGACTTCATTGACCATTAAACCGCACCTATAA

>M6-PGSC0003DMG400017969-(rev)M6LRR-RLP\_3162

AGAAACTGGTCTCTTTTGGTTGTGCTGACTTCATTGACCATTAAACCGCACCTATAACTCTCATTATAGG  
CACAGTAGTATGTGAACATGTACACTTTCATTGAAATTTCCACTACAA

>M6-PGSC0003DMG400017969-(rev)M6LRR-RLP\_3202

ATTAAACCGCACCTATAACTCTCATTATAGGCACAGTAGTATGTGAACATGTACACTTTCATTGAAATTT  
CCACTACAAGACTTTGAAAAACAATACCAGTATTTAAGTTGTTACTAGA

>M6-PGSC0003DMG400017969-(rev)M6LRR-RLP\_372

TGGAATGAATTCCACGGTTCTCATATCTCGCCTGAATTTGGCAAGTTCTCGAGCTTGACACATCTTGATCT  
TTACAACTCCAATTTCTCAGGTCAAATTCCTTCTGAAATCTCTCATCTT

>M6-PGSC0003DMG400017969-(rev)M6LRR-RLP\_434

TCTTGATCTTTACAACTCCAATTTCTCAGGTCAAATTCCTTCTGAAATCTCTCATCTTTTCAAGTTACTCT  
CTTCGTCTCTCTGGTACTGGTCGTCTACGACTCGTAGCTCACGATTT

>M6-PGSC0003DMG400017969-(rev)M6LRR-RLP\_496

AGTTACTCTCTTCGTCTCTCTGGTACTGGTCGTCTACGACTCGTAGCTCACGATTTTAAATTGCTTCTTC  
AGAACTTGACTCAATTAAGAGAGCTTGATCTTACTTTCATAAACATCT

>M6-PGSC0003DMG400017969-(rev)M6LRR-RLP\_62

TCAGCTTTCTTGTCTTCATCCATATTTCTGTGTCCCAAACATCAAAGCATTTCCTTCTAAAATTCAAGGA  
AACATTTACTATAAATCCCTATGCTTCTTCTAGATGTTATTTCCGCGG

>M6-PGSC0003DMG400017969-(rev)M6LRR-RLP\_620

CACCATTCTCTGAATTTTTCTTCTAATTTAACAACCTCTGAATCTGGGATTTTCAGGATTGTATGGGATAAT  
ACCGGAGAGTATTTTTCATCTTCTAATCTGGAAACACTTGACTTAAG

>M6-PGSC0003DMG400017969-(rev)M6LRR-RLP\_682

ATGGGATAATACCGGAGAGTATTTTTTCATCTTCTAATCTGGAAACACTTGACTTAAGTTACAACCTATAA

GCTCAATGGTTATTTTCCAAAACCAAATGGAACAGCAGTGCATCCTCAT

>M6-PGSC0003DMG400017969-(rev)M6LRR-RLP\_806

TTAGATCTCAGTCGCGTGAATTTTTCTGATAATTTGCCTAAGTCTATTGGCTATCTAACTTCGGTGCATTCT

TTGTCTCTTCCAAATTGCAACCTTAGAGGGCCTATTCCTGAATCTCTT

>M6-PGSC0003DMG400017969-(rev)M6LRR-RLP\_868

GGTGCATTCTTTGTCTCTTCCAAATTGCAACCTTAGAGGGCCTATTCCTGAATCTCTTTCGAATCTCACCC

GCATAGAGCATTGTACCTTCAAGATAACTCCCTGAATGGAACAATACC

>M6-PGSC0003DMG400017969-(rev)M6LRR-RLP\_930

ATCTCACCCGCATAGAGCATTGTACCTTCAAGATAACTCCCTGAATGGAACAATACCATCAGGGATGTT

CTCCCGGCTTCCATCACTAAGTCGTTTACACTTGAGTAATAACCACTTTT

>M6-PGSC0003DMG400017969-(rev)M6LRR-RLP\_992

GGGATGTTCTCCCGGCTTCCATCACTAAGTCGTTTACACTTGAGTAATAACCACTTTTCTGGTGAGCTTGA

GGATTTCAAGTCCAATTCACTAGAAGAGATTATTTTAGAAGGCAATCAG

>M6-PGSC0003DMG400018024M6LRR-RLK\_0

GTTTCACTATGGAGGAACAATCTCAAGGGATCCTTACCACGCGAGATTGGCAACTTAACCAAGATGCAA

GTTTTAAATCTAGAGGAGAATAGGTTTACTGGTACGTATACATTCAAATTA

>M6-PGSC0003DMG400018024M6LRR-RLK\_1008

CAAGCTTAGGAAATCTTAAAGATCTAATGGAGCTTGACTTATCGTCAAACAACATGGTTGGTTCTTTACC

TCCGGAAATTGGAAATCTAAAGACTGCGACATATATGGATCTATCAATGA

>M6-PGSC0003DMG400018024M6LRR-RLK\_1071

CTTTACCTCCGGAAATTGGAAATCTAAAGACTGCGACATATATGGATCTATCAATGAATCAATTCGCAAA

TGGTATTCTAGAGAAATTGGAGGATTGCAAATTTGGAGTACCTTTCTT

>M6-PGSC0003DMG400018024M6LRR-RLK\_1134

TCGCAAATGGTATTCCTAGAGAAATTGGAGGATTGCAAATTTGGAGTACCTTTCTTTGAGGCACAACA

AGTTGCTAGGATCTATTCCTGACTCAGTGAGCAACATGGTAGGTTTGAAT

>M6-PGSC0003DMG400018024M6LRR-RLK\_126

AGCAATCTGAACAGTTTAAACAGTGATTCATTTTAGTTAAACTCATTCTTTCTTCAGGTGAAATACCCAAA

GAGATAAGAAATCTCGTTGAGTTGGAGGAACTTGGTCTTGCGTTGAATA

>M6-PGSC0003DMG400018024M6LRR-RLK\_252

GTGGTTCACTTCCAATGGAGATCTTCAACATATCACGACTGACAATAATTTCTCTTTCAGCCAATAATCTA  
TCAGCAACTCTACCACCAAACATAGGTTCTACCTTACCCAACATTGAAA

>M6-PGSC0003DMG400018024M6LRR-RLK\_315

ATAATCTATCAGCAACTCTACCACCAAACATAGGTTCTACCTTACCCAACATTGAAAGACTTTATCTGCAT  
AGCTTAACCAATCTTGTGGGACTATTCCTCATTCTATCTCCAATTGTT

>M6-PGSC0003DMG400018024M6LRR-RLK\_441

TTACTAGACTAGAGCTTTCAGATAACAACTCACAGGATTGATTCCCAATTCTCTGGATATTTGACTCAT  
CTACAATTCCTAAACTTGGCCACAAACAATTTAACCAGTGATTCATTTT

>M6-PGSC0003DMG400018024M6LRR-RLK\_504

TGACTCATCTACAATTCCTAAACTTGGCCACAAACAATTTAACCAGTGATTCATTTTTAAGCTTCCTCACT  
CCTTATCCAATTGTAGAAATTTAATAGATCTTCTCTATCTTTGAACC

>M6-PGSC0003DMG400018024M6LRR-RLK\_567

TCCTCACTTCCTTATCCAATTGTAGAAATTTAATAGATCTTCTCTATCTTTGAACCCTCTAAATGCCATGC  
TTCCGGTCTCCGTAGGGAAGTCTCCATATCTCTTATAAAGTTTGGTG

>M6-PGSC0003DMG400018024M6LRR-RLK\_63

ATGCAAGTTTTAAATCTAGAGGAGAATAGGTTTACTGGTACGTATACATTCAAATTAAGTGATAGCAATC  
TGAACAGTTTAACCAGTGATTCATTTTAGTTAAACTCATTCTTTCTTCAG

>M6-PGSC0003DMG400018024M6LRR-RLK\_630

ATGCCATGCTTCCGGTCTCCGTAGGGAAGTCTCCATATCTCTTATAAAGTTTGGTGCCAGTGCTTGCAAC  
ATCAAAGGCAAGATTCCAAATGAAGTTGGAACTTAAGCAACTTATTAG

>M6-PGSC0003DMG400018024M6LRR-RLK\_693

CTTGCAACATCAAAGGCAAGATTCCAAATGAAGTTGGAACTTAAGCAACTTATTAGACCTTGATCTTTC  
TAATAATAACTTGATCGGATCAATTCCTACATCAATTCACAACTTGAGAA

>M6-PGSC0003DMG400018024M6LRR-RLK\_756

ATCTTTCTAATAATAACTTGATCGGATCAATTCCTACATCAATTCACAACTTGAGAAACCTTCAGCGCTTG  
TACTTGAACAACAACAACTTACAGGATTTATTGGAGATCATATCTGTA

>M6-PGSC0003DMG400018024M6LRR-RLK\_819

AGCGCTTGACTTGAACAACAACAACTTACAGGATTTATTGGAGATCATATCTGTAAATTGCAGCATT  
GGGTGATACTGATTTGGGTCAAATCAACTTTCAGGATCTCTTCCTAATT

>M6-PGSC0003DMG400018024M6LRR-RLK\_882

AGCATTGGGTGATACTGATTTGGGTCAAAATCAACTTTTCAGGATCTCTTCCTAATTGTTTAGGGAATGTT  
ACTTCCCTTAGATTGATATATATGGATTCCAATAAATTGAATTCCAATA

>M6-PGSC0003DMG400018024M6LRR-RLK\_945

GGAATGTTACTTCCCTTAGATTGATATATATGGATTCCAATAAATTGAATTCCAATATACCAACAAGCTTA  
GGAAATCTTAAAGATCTAATGGAGCTTGAATTATCGTCAAACAACATGG

>M6-PGSC0003DMG400018045M6LRR-RLP\_0

ATCTTGATCTGAAATTTAATTCCCTTCAGGGTCCACTACCTTCGGCCATTTGTAACATGAGGAACTTATC  
TTATTAGATTTATCACACAACACTTTCAGTAACTCAGTTCCACATTGCT

>M6-PGSC0003DMG400018045M6LRR-RLP\_1008

GTGATTCATCACATGTTCCCTCAACCAGAAGATGAAGGCGAGTCATATTTTTAAGTGGATTTACGTGGGA  
ATCAGTAGTCATAGGCTACAGTTTTGGTCTAGTTGTTGGAACTTTCATGT

>M6-PGSC0003DMG400018045M6LRR-RLP\_189

TATGTGCACACAGCACTTCATTGAGTACCATTGTCGTAAATGGTAATCAATTTGAAGGACATCTTCCTGT  
GTCGTTGCTCAATTGTAATGGTCTACAAGCCCTTGATGTGGGGAACAATG

>M6-PGSC0003DMG400018045M6LRR-RLP\_315

ATGACACGTTTCCAGCTTGGCTCGGAACTCTACAAGAGCTGCAGGTCCTTATATTAAGTCGAACAAGTT  
TCATGGACCTATAAGTACGTGTCAAATAAGTTTTGGTTTTCCCGAGTTGC

>M6-PGSC0003DMG400018045M6LRR-RLP\_378

ACAAGTTTCATGGACCTATAAGTACGTGTCAAATAAGTTTTGGTTTTCCCGAGTTGCGAATTTTTGATCTT  
TCTCGTAATGATTTTCAGTGGCTCACTTCCTGCAAAGTTTTTCGAAACT

>M6-PGSC0003DMG400018045M6LRR-RLP\_441

TTGATCTTCTCGTAATGATTTTCAGTGGCTCACTTCCTGCAAAAAGTTTTTCGAAACTTCAAGGCAATGATT  
AAATTAGATGACGAAGACACAAGAGGGATCACGTACATGGAATCTAAGT

>M6-PGSC0003DMG400018045M6LRR-RLP\_504

CAATGATTAATTAGATGACGAAGACACAAGAGGGATCACGTACATGGAATCTAAGTCAAATAATTTTT  
CATTTCAAACATCGTATGAGGATTCAGCGAGTTTGGTAATCAAAGGGCACG

>M6-PGSC0003DMG400018045M6LRR-RLP\_567

ATTTTTCATTTCAAACATCGTATGAGGATTCAGCGAGTTTGGTAATCAAAGGGCACGATATTGAGCTACA

AAGAATCAGCACAATAATGACAACCATAGATCTCTCAAGCAACCATTTTG

>M6-PGSC0003DMG400018045M6LRR-RLP\_63

AACTTATCTTATTAGATTTATCACACAACACTACTTCAGTAACTCAGTCCACATTGCTTGGGAAGCATGGCT  
TTACTAACGGTGCTGGACTTAAGAAGGAACAATTTACAGGGAGTCTTC

>M6-PGSC0003DMG400018045M6LRR-RLP\_756

TCATAGGTCATATCCAGTGGAATTGGGGCAATTGAATAAGCTGGAAGCTTTAGATCTCTCTTGGAAATCG  
GCTCACTGGAAAGATTCCGCAAGAATTGACAAGAATAAACTTTCTGGCAG

>M6-PGSC0003DMG400018045M6LRR-RLP\_819

GGAATCGGCTCACTGGAAAGATTCCGCAAGAATTGACAAGAATAAACTTTCTGGCAGTCTTAAACATCT  
CTCAAATCATCTCGTCGGACCAATTCCTCAAGGTCCACAATTCAACACAT

>M6-PGSC0003DMG400018101M6RLKantifungi(GNK)\_0

GCCGTTTATATTATTATCTCAACTCAACTCTCGAACAAAATCGAATCGAAAATCATTGACATTACTTTCAA  
TTTTCCCAAACGGGGTAGTCCCGTTATTTTCTTCTCCCTTCCTCTGCG

>M6-PGSC0003DMG400018101M6RLKantifungi(GNK)\_1037

GCACTATGTGTTTGAATAATGCTGGAGATATGCTAAGGAAATGTTTGCCTGCTGCAGAGGGAAAAGCTA  
TGAATGCTGGTTGCTATTTGAGATACTCTTCTAATAAATTCTTCGATGATG

>M6-PGSC0003DMG400018101M6RLKantifungi(GNK)\_1098

AAAAGCTATGAATGCTGGTTGCTATTTGAGATACTCTTCTAATAAATTCTTCGATGATGGAGCTCTAGTCC  
TCGCTGATAAAGGTAACGCCAAAGAATTTCTTGTTAATTAGTCTCTGGA

>M6-PGSC0003DMG400018101M6RLKantifungi(GNK)\_122

AAAAATTAATTTTTACAACACATTTATGCATTCTCATGTGTGTTTGCATAAAATAAAAAGAGAAAGGAA  
GAAGAAGAAGGAAAGGTGGAGAAAATTGAAAATAAGTCCACTTTTAGATA

>M6-PGSC0003DMG400018101M6RLKantifungi(GNK)\_1281

TCCATGGCTTGTCTATTTCTAGCAAAGTATGAAGGAAATATTTGTTACTTAGTATAAATATTTTTTAGCTA  
ACATTTGGTCCGGTGTTCAATATTTTTTTTCAGGACCAACAAAGTGTAAG

>M6-PGSC0003DMG400018101M6RLKantifungi(GNK)\_1342

TTTTAGCTAACATTTGGTCCGGTGTTCAATATTTTTTTTCAGGACCAACAAAGTGTAAGAATGTATGGATA  
ATTGCAGCGATTGTATTATCGTCTATCTTGGGAGTATTTGCTATTTTAG

>M6-PGSC0003DMG400018101M6RLKantifungi(GNK)\_1403

TGTATGGATAATTGCAGCGATTGTATTATCGTCTATCTTGGGAGTATTTGCTATTTTAGGAGCTTTTTTAG  
GCTATAGAAGATATTCTCAGGATAAAGGAGGTATACTTTCAAATCTTGA

>M6-PGSC0003DMG400018101M6RLKantifungi(GNK)\_1464

GCTTTTTTAGGCTATAGAAGATATTCTCAGGATAAAGGAGGTATACTTTCAAATCTTGAATTCCATAAATC  
AGTATCTGTTTGTTTCATGTTCTGATGGATCTTCTGCTTATCGCGATATC

>M6-PGSC0003DMG400018101M6RLKantifungi(GNK)\_1525

TCCATAAATCAGTATCTGTTTGTTTCATGTTCTGATGGATCTTCTGCTTATCGCGATATCTATATATATAGGT  
ACAAATATGATTCATAAAGATTCCACTGGCTCTTGAGACGTCGAAACTA

>M6-PGSC0003DMG400018101M6RLKantifungi(GNK)\_1586

TATATATAGGTACAAATATGATTCATAAAGATTCCACTGGCTCTTGAGACGTCGAAACTAAATTTCAAGTA  
TGAAATGCTAGAACAAAGCAACAGGGGGTTTTGATCCTTTAAACAAGTTAG

>M6-PGSC0003DMG400018101M6RLKantifungi(GNK)\_1647

TTTCAAGTATGAAATGCTAGAACAAAGCAACAGGGGGTTTTGATCCTTTAAACAAGTTAGGCCAAGGTGG  
ATCTGGCTCAGTATACAAAGGGATTCTTCTGATGGCAAAAAAATTGCTGT

>M6-PGSC0003DMG400018101M6RLKantifungi(GNK)\_1708

CAAGGTGGATCTGGCTCAGTATACAAAGGGATTCTTCTGATGGCAAAAAAATTGCTGTGAAAAGATTA  
TTGTACAATACGCGTCAATGGGCAGAGGAGTTCTTCAATGATGTCAATTTG

>M6-PGSC0003DMG400018101M6RLKantifungi(GNK)\_1769

AAAGATTATTGTACAATACGCGTCAATGGGCAGAGGAGTTCTTCAATGATGTCAATTTGATCAGTGGTAT  
TCAGCACAAAAATGTTGTGAAACTCTTGGGATGTAGCATAGAAGGACCAG

>M6-PGSC0003DMG400018101M6RLKantifungi(GNK)\_183

AGAAAGGAAGAAGAAGAAGGAAAGGTGGAGAAAATTGAAAATAAGTCCACTTTTAGATATTTTTCCAT  
AACATATTTCAATCCTTTACAAATATGTTTTATTTGTTACAGAAATACCAA

>M6-PGSC0003DMG400018101M6RLKantifungi(GNK)\_1830

CAGTGGTATTCAGCACAAAAATGTTGTGAAACTCTTGGGATGTAGCATAGAAGGACCAGAGAGTCTTCT  
GGTTTTCGATCATGTATCTAACAGGAACCTTGATCAATTGCTTTTCGGTAA

>M6-PGSC0003DMG400018101M6RLKantifungi(GNK)\_1891

AGTCTTCTGGTTTTCGATCATGTATCTAACAGGAACCTTGATCAATTGCTTTTCGGTAACTATTCTACAAG  
TTCAATCTAACTAGTAGTAGTAATTTACTATACTTTTGTAGGGACGGAT



>M6-PGSC0003DMG400018101M6RLKantifungi(GNK)\_1952  
ATTCTACAAGTTCAATCTAACTAGTAGTAGTAATTTACTATACTTTTTGTAGGGACGGATTCAAAAATTTGA  
TTGCTTTTTCTTGAAGTTAAGAACAACGTCAATTTTTAAGCTGGAAGG

>M6-PGSC0003DMG400018101M6RLKantifungi(GNK)\_2013  
AAAAATTTGATTGCTTTTTCTTGAAGTTAAGAACAACGTCAATTTTTAAGCTGGAAGGAGCGATTTGAT  
ATTATATTGGGAATAGCAGAAGGGATAGCACATCTTCATGAAGGAAGCAA

>M6-PGSC0003DMG400018101M6RLKantifungi(GNK)\_2074  
CGATTTGATATTATATTGGGAATAGCAGAAGGGATAGCACATCTTCATGAAGGAAGCAAAGCAAAGATC  
ATCCATAGAGATATTA AAAACAGTAATATTCTAGTTGATGATGAACTCGTC

>M6-PGSC0003DMG400018101M6RLKantifungi(GNK)\_2135  
CAAAGATCATCCATAGAGATATTA AAAACAGTAATATTCTAGTTGATGATGAACTCGTCCCAAAAATTGC  
TGATTTTGGACTTGCTCGACGTTTTGCTCCCATAAACTCATGTCAGCA

>M6-PGSC0003DMG400018101M6RLKantifungi(GNK)\_2196  
AAAAATTGCTGATTTTGGACTTGCTCGACGTTTTGCTCCCATAAACTCATGTCAGCACCGGAGTTGCA  
GGAACGTTGTAAGTTATCAATGTTTTGAAATTGGTTTTCTCCAAGAATA

>M6-PGSC0003DMG400018101M6RLKantifungi(GNK)\_2257  
GGAGTTGCAGGAACGTTGTAAGTTATCAATGTTTTGAAATTGGTTTTCTCCAAGAATACTTGTAGTCTAT  
AATATGATTA ACTCTGTTGTAGGGGATATCTAGCTCCTGAATATCTTCT

>M6-PGSC0003DMG400018101M6RLKantifungi(GNK)\_2318  
TGTAGTCTATAATATGATTA ACTCTGTTGTAGGGGATATCTAGCTCCTGAATATCTTCTTCAAGGATGTTT  
AACAGAGAAAGCAGATGTTTATTCATTTGGAGTGGTGGCCATAGAGGTT

>M6-PGSC0003DMG400018101M6RLKantifungi(GNK)\_2379  
AAGGATGTTTAACAGAGAAAGCAGATGTTTATTCATTTGGAGTGGTGGCCATAGAGGTTGCGTGTTGTA  
TAAAGAACAACGTCTTTGTGAGTGATAACGGATCAGTTCTACAGTCTGTAA

>M6-PGSC0003DMG400018101M6RLKantifungi(GNK)\_244  
TTTCATAACATATTTCAATCCTTTACAAATATGTTTTATTTGTTACAGAAATACCAAATTGTTTCATTGTAC  
AAATGGAAAATAGCTTAGGATCAATCTTTGTCCTGTTTCGTTTTGTTA

>M6-PGSC0003DMG400018101M6RLKantifungi(GNK)\_2440  
GTGTTGTATAAAGAACAACGTCTTTGTGAGTGATAACGGATCAGTTCTACAGTCTGTAAGTTTCAAACC

ATCCTTATTCAGTAACAACCTTAAGCTTTTAGACGATCAGTTGGTCATATA

>M6-PGSC0003DMG400018101M6RLKantifungi(GNK)\_2501

TTCAAACCATCCTTATTCAGTAACAACCTTAAGCTTTTAGACGATCAGTTGGTCATATAGTTTGTGCTTTT  
TAACTCTTGTAATAGGTGTGGAGAAATTACAAGTTGAATAAGATTACG

>M6-PGSC0003DMG400018101M6RLKantifungi(GNK)\_2562

TTGTGCTTTTTTAACTCTTGTAATAGGTGTGGAGAAATTACAAGTTGAATAAGATTACGGAGTCAATTGA  
CAGTAGGCTGATGAGTGACTTTCAAGAAGAGGAGGCATCGCGTGTGCTTC

>M6-PGSC0003DMG400018101M6RLKantifungi(GNK)\_2623

GTCAATTGACAGTAGGCTGATGAGTGACTTTCAAGAAGAGGAGGCATCGCGTGTGCTTCAGCTAGGACT  
ATTGTGCACACAACTAGAAGATTTTCGCGACCATCTATGTCTCAAGTGGT

>M6-PGSC0003DMG400018101M6RLKantifungi(GNK)\_2684

CTAGGACTATTGTGCACACAACTAGAAGATTTTCGCGACCATCTATGTCTCAAGTGGTAACAATCCTAA  
GAAACGAAGAAATTGAAATTCCAACACCAATGCAACCTCCTTTCCAGAAC

>M6-PGSC0003DMG400018101M6RLKantifungi(GNK)\_2745

CAATCCTAAGAAACGAAGAAATTGAAATTCCAACACCAATGCAACCTCCTTTCCAGAACTCAAGTTTACT  
AGCTCCTCCAGATAACAAGCAGTTCATCCATAACTAAAGATAGTTTCTGCT

>M6-PGSC0003DMG400018101M6RLKantifungi(GNK)\_2806

AAGTTTACTAGCTCCTCCAGATAACAAGCAGTTCATCCATAACTAAAGATAGTTTCTGCTCAGAATGGTATT  
CCACAGATGGAATTTCTATTCTTCTGAGTTTGCTAGCATTCTAG

>M6-PGSC0003DMG400018101M6RLKantifungi(GNK)\_2867

GAATGGTATTCCACAGATGGAATTTCTATTCTTCTGAGTTTGCTAGCATTCTAGCTCTCAATCAGG  
TGATTTTTTGACGTGTGAAAACAGTAGACTTTTGAAAATTGCTTGAGGA

>M6-PGSC0003DMG400018101M6RLKantifungi(GNK)\_2928

CTCAATCAGGTGATTTTTTGACGTGTGAAAACAGTAGACTTTTGAAAATTGCTTGAGGATTTTGGTTGCT  
TGCCATTAGGTCTCTGAACCAAAGATCAAATGATTTGGAAGTATCCTAT

>M6-PGSC0003DMG400018101M6RLKantifungi(GNK)\_2989

TTGGTTGCTTGCCATTAGGTCTCTGAACCAAAGATCAAATGATTTGGAAGTATCCTATTTGCACGTATGT  
AAAATTTAATAGCAGAGTCATGACTTGTAATCACGGCAGCATTGCTTT

>M6-PGSC0003DMG400018101M6RLKantifungi(GNK)\_305

G TTCATTGTACAAATGGAAAATAGCTTAGGATCAATCTTTGTCCTGTTTCGTTTTGTTTAAAAAAAACG  
AAGAAAATTGAATTCTTATTTTAATTTAATGCCTTATGCACCAAGATACC

>M6-PGSC0003DMG400018101M6RLKantifungi(GNK)\_3050

GCACGTATGTAAAATTTAATAGCAGAGTCATGACTTGTAATCACGGCAGCATTGCTTTCGTTGGTGTA  
CTGTA ACTATAACAATTCAAGAGGATGAAATAGATTGAATCGATAGAGCTG

>M6-PGSC0003DMG400018101M6RLKantifungi(GNK)\_3099

GCATTGCTTTCGTTGGTGTA ACTGTA ACTATAACAATTCAAGAGGATGAAATAGATTGAATCGATAGAGCT  
GTTTATGGAAATGTTACATTGCCAGTACTGGAAAATGTTATGCAGTTTCT

>M6-PGSC0003DMG400018101M6RLKantifungi(GNK)\_366

AAAAAACGAAGAAAATTGAATTCTTATTTTAATTTAATGCCTTATGCACCAAGATACCTTGAACATGTTA  
CGTTCATCTCTTTAATTATCTTCATATTTATGATTTCTTCGTCTCTTTG

>M6-PGSC0003DMG400018101M6RLKantifungi(GNK)\_427

GAACATGTTACGTTTCATCTCTTTAATTATCTTCATATTTATGATTTCTTCGTCTCTTTGTGATCCGAGAACTT  
CTGTTGCTAATATTTCTTGCAAGTCTCGAGCAAATGTGGCGACTAAT

>M6-PGSC0003DMG400018101M6RLKantifungi(GNK)\_488

ATCCGAGAACTTCTGTTGCTAATATTTCTTGCAAGTCTCGAGCAAATGTGGCGACTAATGTTGATTTAATA  
CCAAAATTTACACAAGTTATGGAGACTCTCCATGATTTCATAATGGAAA

>M6-PGSC0003DMG400018101M6RLKantifungi(GNK)\_549

TGATTTAATACCAAATTTACACAAGTTATGGAGACTCTCCATGATTTCATAATGGAAAATAAGTCTGCA  
ACATATGAAATGAATACGAATGCACCTGATATTTATGGAATGGCGAAATG

>M6-PGSC0003DMG400018101M6RLKantifungi(GNK)\_61

TTACTTTCAATTTTCCCAAACGGGGTAGTCCC GTTATTTTCTTCTCCCTTCTCTGCGAAAAAATTAATT  
TTTCAACACATTTATGCATTCTCATGTGTGTTTGCATAAAATAAAA

>M6-PGSC0003DMG400018101M6RLKantifungi(GNK)\_610

AAGTCTGCAACATATGAAATGAATACGAATGCACCTGATATTTATGGAATGGCGAAATGCCATAATGAT  
CTTCTCAGGATGATTGCAAGCTCTGTTTTGAAGAAGCTAAAATTAAGCTA

>M6-PGSC0003DMG400018101M6RLKantifungi(GNK)\_671

ATAATGATCTTCTCAGGATGATTGCAAGCTCTGTTTTGAAGAAGCTAAAATTAAGCTAACAAAATGTAT  
TCCTGCTCCTGGTGGCTCTGTTTATCTAGACGGTTGTTTTCTCAGATATG

>M6-PGSC0003DMG400018101M6RLKantifungi(GNK)\_732

AAAATGTATTCCTGCTCCTGGTGGCTCTGTTTATCTAGACGGTTGTTTTCTCAGATATGAAGATTATAATT  
TTTTCGATGAGAGTATACTGAAGAATTCATCTATTTATGTTTGTGGTGC

>M6-PGSC0003DMG400018101M6RLKantifungi(GNK)\_793

GATTATAATTTTTTCGATGAGAGTATACTGAAGAATTCATCTATTTATGTTTGTGGTGTCTCCACGGATAT  
AACGAATGATCAGTACATGAAGAGGGATTTTGCTGCAAGAGTTGATCGT

>M6-PGSC0003DMG400018101M6RLKantifungi(GNK)\_854

CCACGGATATAACGAATGATCAGTACATGAAGAGGGATTTTGCTGCAAGAGTTGATCGTGCAATTGTGA  
ATGTTACAAGCATGTTCGATAGTGAATGGTGGATTTGGGGCAACGATTGTGA

>M6-PGSC0003DMG400018101M6RLKantifungi(GNK)\_915

AATTGTGAATGTTACAAGCATGTTCGATAGTGAATGGTGGATTTGGGGCAACGATTGTGAAAAGTGGATT  
GCTTGCTATTTATGCATTAGGACAATGTTGGGTTTATTTGCAACCCGAAAT

>M6-PGSC0003DMG400018101M6RLKantifungi(GNK)\_976

AGTGGATTGCTTGCTATTTATGCATTAGGACAATGTTGGGTTTATTTGCAACCCGAAATATGCACTATGT  
GTTTGAATAATGCTGGAGATATGCTAAGGAAATGTTTGCCTGCTGCAGAG

>M6-PGSC0003DMG400018117M6LRR-RLP\_0

AGTTATAGAGATATAAAAGAGAGAGGTAGAGGAGGAGAAAAAAGGGAAAAAATATCGAGAT  
GCGATCTTAACGTGTAATCAGTTATTCATGGATTAGTTCGTCAGCCTGCCTG

>M6-PGSC0003DMG400018117M6LRR-RLP\_1008

GGTTCTTGCTTCGACTCGTTTTACTTGGATTTGAACTTATGGTGTGTATTAATTTCAACTGCATGATGTC  
TTGTTGCATTTTCGTGCTACTTGATATACGGTAAATTGAACTTCTAATG

>M6-PGSC0003DMG400018117M6LRR-RLP\_1071

CATGATGTCTTGTTGCATTTTCGTGCTACTTGATATACGGTAAATTGAACTTCTAATGATACTTTTAGCCCT  
ATATTGTTGGCACATCCATGTCAAATGCGTAGTTTGATATTTCAATTTCA

>M6-PGSC0003DMG400018117M6LRR-RLP\_1134

TTAGCCCTATATTGTTGGCACATCCATGTCAAATGCGTAGTTTGATATTTCAATTTACATGTGGAAGTAGT  
AGAAGTTTGATGGAGATCATATTGTAGAGGAGCTATATAAACTGTGGT

>M6-PGSC0003DMG400018117M6LRR-RLP\_1197

GAAGTAGTAGAAGTTTGATGGAGATCATATTGTAGAGGAGCTATATAAACTGTGGTGTCTTTTTCTT

TTTTTTTTCTCCTTTGGGGTGAGGGTTAGTTTCAACCTATGATTGGACT

>M6-PGSC0003DMG400018117M6LRR-RLP\_126

TCTTATAGTTGACGAAAAAGCTAGAGCTCACTGATCTTCACAACTCAATAACCTCCCTTCCCAATTTTCATT

TGATAATCTCCAGTAGCCATGGATCCAAACCCTACCAATTTCCCAATTC

>M6-PGSC0003DMG400018117M6LRR-RLP\_1260

TTTTCTTTTTTTTTCTCCTTTGGGGTGAGGGTTAGTTTCAACCTATGATTGGACTGTGAACTGCCAAACT

ACAGGTCCTTTGGGTTTAATTAAGCGTATATTTTCATCTCAATGAC

>M6-PGSC0003DMG400018117M6LRR-RLP\_1323

TGCCAAACTACAGGTCCTTTGGGTTTAATTAAGCGTATATTTTCATCTCAATGACTTGATGCATGGTAA

AAGTTTGATAACTCTTTCTGGTTGCTGCCAGCATAATTTGAGGTACCA

>M6-PGSC0003DMG400018117M6LRR-RLP\_1386

CATGGTAAAAGTTTGATAACTCTTTCTGGTTGCTGCCAGCATAATTTGAGGTACCACAAATTTACTGTCA

CGTGCTGGGACAAGTTGCGCTTAGAGGTTCTGAACATGGAGTTTTGCAC

>M6-PGSC0003DMG400018117M6LRR-RLP\_1449

TACTGTCACGTGCTGGGACAAGTTGCGCTTAGAGTTCTGAACATGGAGTTTTGCACCTTCCCATGCTT

TACTCGGAGCACTCATCTAAGTTATTTATTTTTTCACAATCAGAAGCTT

>M6-PGSC0003DMG400018117M6LRR-RLP\_1512

CATGCTTACTCGGAGCACTCATCTAAGTTATTTATTTTTTCACAATCAGAAGCTTTTATCAAACCTCTGT

TACATTGTTTACTGCTTCTTACTATTGTAACTGATCATCTTTTGGCT

>M6-PGSC0003DMG400018117M6LRR-RLP\_1575

AAACTCTGTTACATTGTTTACTGCTTCTTACTATTGTAACTGATCATCTTTTGGCTTTTTGAGATGCCTTTT

CTTTTATGAAACAAGACTCAAACCTCAAAGAATGACTATCAGTA

>M6-PGSC0003DMG400018117M6LRR-RLP\_1638

GATGCCTTTTCTTTATGAAACAAGACTCAAACCTCAAAGAATGACTATCAGTACTGGGGAGTCGGT

AGTTCTTTCTTACTTTCAAAGTTAGGAAATCAATATCCATATCCACAAAG

>M6-PGSC0003DMG400018117M6LRR-RLP\_1701

AGTCGGTAGTTCTTTCTTACTTTCAAAGTTAGGAAATCAATATCCATATCCACAAAGAATCAAGTGCTGC

ACTGAGCTGGGTACTTTGAACCTCACCATGCTTGAAGTTGCAATTTTGTA

>M6-PGSC0003DMG400018117M6LRR-RLP\_1764

GTGCTGCACTGAGCTGGGTACTTTGAACCTCACCATGCTTGAAGTTGCAATTTTGTACCTTCACTATGATT  
TGATCATAGAACGGAACCCCAATGCATATGATTAAAGGGGGTACTAGGT

>M6-PGSC0003DMG400018117M6LRR-RLP\_1827

CTATGATTTGATCATAGAACGGAACCCCAATGCATATGATTAAAGGGGGTACTAGGTTTCTTTTGACTTG  
TAAGGTGCAAGAACCTTCTGAACCTACTCTAATATCTGATTATGCTAAAT

>M6-PGSC0003DMG400018117M6LRR-RLP\_189

ATTTCAATTTGATAATCTCCAGTAGCCATGGATCCAAACCCTACCAATTTCCCAATTCTCTCCTACGTCATTT  
CCAAGTACCCAGTATGGGCCGTAGAACCACCGCCACCGCCGATGAAT

>M6-PGSC0003DMG400018117M6LRR-RLP\_1890

TGACTTGTAAGGTGCAAGAACCTTCTGAACCTACTCTAATATCTGATTATGCTAAATGTTTATCGAGCACC  
GGTTCCTCTTCTTGCCCTTTATCTCTTCTAGGAGAGGAACATTACTTGT

>M6-PGSC0003DMG400018117M6LRR-RLP\_1953

CGAGCACCGGTTCTCTTCTTGCCCTTTATCTCTTCTAGGAGAGGAACATTACTTGTGCGCATTATTTTCTCA  
TTCCTGGTTCCTTTCGTTTCTTGAATTATAACAGTGTTCTGCACTTT

>M6-PGSC0003DMG400018117M6LRR-RLP\_2016

ATTTTCTCATTCTGTTCCACTTCGTTTCTTGAATTATAACAGTGTTCTGCACTTTCGCCTCCTGATAGCT  
GTCTTCCAGGATCCAAAGTCTCCCAAATATAGTATTGTACTTCTCTCC

>M6-PGSC0003DMG400018117M6LRR-RLP\_2079

CTGATAGCTGTCTTCCAGGATCCAAAGTCTCCCAAATATAGTATTGTACTTCTCCTCATTCCAATTTATCTA  
TCTATTTTTGCTTCTGCTTATTGATTGACCACTTCCAAAGTTAAATC

>M6-PGSC0003DMG400018117M6LRR-RLP\_2120

GTATTGACTTCTCCTCATTCCAATTTATCTATCTATTTTTGCTTCTGCTTATTGATTGACCACTTCCAAAGT  
TAAATCTGAAATTGATTAGTTTATATATGGAAAAATGTAAGTTAGCT

>M6-PGSC0003DMG400018117M6LRR-RLP\_252

ACGTCATTTCCAAGTACCCAGTATGGGCCGTAGAACCACCGCCACCGCCGATGAATTCGACATTGAAC  
AGCCCCAGAACCACCCTCAGCCTCCTCCAGAACCTCACTTCGACATCACCG

>M6-PGSC0003DMG400018117M6LRR-RLP\_315

TTGAACAGCCCCAGAACCACCCTCAGCCTCCTCCAGAACCTCACTTCGACATCACCGAGCGTATGCCTCA  
TCTCACTGACCCTAAGGTTGTCAACGCTATGCGATCAGCCGTTGCTGACG

>M6-PGSC0003DMG400018117M6LRR-RLP\_378

TGCCTCATCTCACTGACCCTAAGGTTGTCAACGCTATGCGATCAGCCGTTGCTGACGTGTACAGACCCG  
GTCAATGCTCAAAACCCTGGGTGAGCGGCCTTTTCACGAGCTTGTTGATA

>M6-PGSC0003DMG400018117M6LRR-RLP\_441

AGACCCGGTCAATGCTCAAAACCCTGGGTGAGCGGCCTTTTCACGAGCTTGTTGATACTGCCAGGGTGA  
AGTTAGCTGAGATCGAGGTGGACATGTCCAAGCGTCTCGAGGAGATTGTTT

>M6-PGSC0003DMG400018117M6LRR-RLP\_63

AGATGCGATCTTAACGTGTAAATCAGTTATTCATGGATTAGTTCGTCAGCCTGCCTGGCCTGCTCTTATA  
GTTGACGAAAAAGCTAGAGCTCACTGATCTTCACAACCTCAATAACCTCCC

>M6-PGSC0003DMG400018117M6LRR-RLP\_693

ACGAGGCGTATGAGAAGATGTTGAAGGATGCGGAACAGAGGTTGGAGAAGATTTATGAGACTGCTGTT  
GCTGGTGGTATGTGGTATCAATTGGAGAGTCTTCTGGTGAGAAGAGTTCTG

>M6-PGSC0003DMG400018117M6LRR-RLP\_756

CTGTTGCTGGTGGTATGTGGTATCAATTGGAGAGTCTTCTGGTGAGAAGAGTTCTGAGTTGAAAGAG  
GAAGTGAATGAGGAAGTGATCGGGATTTTGCAGGAGGCATCAGGTAAGAGTG

>M6-PGSC0003DMG400018117M6LRR-RLP\_819

AAGAGGAAGTGAATGAGGAAGTGATCGGGATTTTGCAGGAGGCATCAGGTAAGAGTGTGGAAAGGGT  
TGATTTGTCAGGCAGGCAACTGAGGATGCTGCCTGAAGCTTTTGGGAAGATTC

>M6-PGSC0003DMG400018117M6LRR-RLP\_882

GGGTTGATTTGTCAGGCAGGCAACTGAGGATGCTGCCTGAAGCTTTTGGGAAGATTCCTCCTTAATTG  
TGCTTAATTTGTCCAACAACCAGCTTATGGTATGCCCTAGTTCAGATAATC

>M6-PGSC0003DMG400018117M6LRR-RLP\_945

TAATTGTGCTTAATTTGTCCAACAACCAGCTTATGGTATGCCCTAGTTCAGATAATCTTTCATGGTTCTTG  
TCTTCGACTCGTTTTACTTGGATTTGAACTTATGGTGTGTATTAATTTT

>M6-PGSC0003DMG400018163-(rev)M6LRR-RLP\_0

GTCAACTTAGGACTGTTAACTTTTCTCCTATCTCTTAGCAAATTTTTAGCTTCATGCTACTCATAGT  
TTCCATTTTAAGTAAAAACAGCACCACAAATTTCTTTCATAAATTAT

>M6-PGSC0003DMG400018163-(rev)M6LRR-RLP\_1054

CAACAACCTTTCAGGAACCATAAGGCTTCTCAACACTCAGCTGAAGAATCTTGAGACTTTATCACTCTCTG

GCAACTTCTTAACAGGAAGCATCCCGAGTAATTTCTGTCTCCGTGATTC

>M6-PGSC0003DMG400018163-(rev)M6LRR-RLP\_1116

CACTCTCTGGCAACTTCTTAACAGGAAGCATCCCGAGTAATTTCTGTCTCCGTGATTCAAGCTTAAGCCTA  
CTCATTCTGGCTGACAATAAGCTGTCTGGGAAGTCCCCTTGGAGTTAC

>M6-PGSC0003DMG400018163-(rev)M6LRR-RLP\_1178

TTAAGCCTACTCATTCTGGCTGACAATAAGCTGTCTGGGAAGTCCCCTTGGAGTTACTGAACTGCACGT  
CCATACGACAAGTGGATCTCTCCGGTAACAGCTTTGGAGGAATGCTGCCA

>M6-PGSC0003DMG400018163-(rev)M6LRR-RLP\_124

TTGTCAATTTAAGTTCCAAGTTGTGTTCCATTCACAAATATTAGCATGGGAAGTGTTCTTTTTTCTTATCT  
GCTGTTTTTCTTGACAGTAGTTGATGTTGTTCTTGCTGTTTCTTCAGC

>M6-PGSC0003DMG400018163-(rev)M6LRR-RLP\_1240

CTGCACGTCCATACGACAAGTGGATCTCTCCGGTAACAGCTTTGGAGGAATGCTGCCACGAGGCCTCGA  
CAGGCTAGAAAGTCTCACAGACCTCTTGCTCAACAATAACAGCTTTACTGG

>M6-PGSC0003DMG400018163-(rev)M6LRR-RLP\_1302

GCCTCGACAGGCTAGAAAGTCTCACAGACCTCTTGCTCAACAATAACAGCTTTACTGGAAGTATAACCTC  
TGAAATAGGAACTTGACTAACTTGAAGATTTGTACCTGTTTCATAACA

>M6-PGSC0003DMG400018163-(rev)M6LRR-RLP\_1364

ATACCCTCTGAAATAGGAACTTGACTAACTTGAAGATTTGTACCTGTTTCATAACATGCTCTCTGGGG  
GAATCCCAGTTGAAATAGGAAAGCTTCAAAGGCTGCGTGACCTATACCTC

>M6-PGSC0003DMG400018163-(rev)M6LRR-RLP\_1426

CTCTGGGGGAATCCCAGTTGAAATAGGAAAGCTTCAAAGGCTGCGTGACCTATACCTCTACGAAAACCA  
GTTGTCAGGAAGTATTCCAAGAGAGTTGACAACTGCTCCAGCATAACAAG

>M6-PGSC0003DMG400018163-(rev)M6LRR-RLP\_1488

AAAACCAGTTGTCAGGAAGTATTCCAAGAGAGTTGACAACTGCTCCAGCATAACAAGCGTTGATTTCTT  
TGGTAACCAACTTTCAGGATCTATTCTGATAACATTGGGAGGCTTAAGA

>M6-PGSC0003DMG400018163-(rev)M6LRR-RLP\_1550

GATTTCTTTGGTAACCAACTTTCAGGATCTATTCTGATAACATTGGGAGGCTTAAGAATCTTGTTATTCT  
TCAGCTAAGGCAGAATGAGTTGTCAGGTCCGATTCCATCAAGCTTAGGC

>M6-PGSC0003DMG400018163-(rev)M6LRR-RLP\_1612



TGTTATTCTTCAGCTAAGGCAGAATGAGTTGTCAGGTCCGATTCCATCAAGCTTAGGCTACTGCAGGAAG  
CTTCAAAAAGCTGGCTTTGGCTGATAACAACTTTTCAGGATCATTGCCACC

>M6-PGSC0003DMG400018163-(rev)M6LRR-RLP\_1674

GCAGGAAGCTTCAAAAAGCTGGCTTTGGCTGATAACAACTTTTCAGGATCATTGCCACCAACTTTTCGATT  
CCTCTCAGAGATGGACCTGATTACTCTTTACAACAATTCCTTGAAGGTC

>M6-PGSC0003DMG400018163-(rev)M6LRR-RLP\_1736

TTTCGATTCCTCTCAGAGATGGACCTGATTACTCTTTACAACAATTCCTTGAAGGTCCACTTCTGAATCT  
CTTCCCTTCTGAAAATCTCAGCAAAATTAACCTTTTCTCACAAAAAG

>M6-PGSC0003DMG400018163-(rev)M6LRR-RLP\_1798

TCCTGAATCTCTTCCCTTCTGAAAATCTCAGCAAAATTAACCTTTTCTCACAAAAAGTTCAGTGGAAAA  
TTTCCCTTAGCTGGTTTAGATTCTCTGACAGCTCTTGACTTAACAAA

>M6-PGSC0003DMG400018163-(rev)M6LRR-RLP\_186

TTTCTTATCTGCTGTTTTTCTTGACAGTAGTTGATGTTGTTCTTGCTGTTTCTTCAGCAGATGGTTCATCTG  
ATTGATATCGGCTTTTGAGAATAAAGTCAGAACTTGTTGATCCATATG

>M6-PGSC0003DMG400018163-(rev)M6LRR-RLP\_1860

GTGGAAAAATTTCCCTTAGCTGGTTTAGATTCTCTGACAGCTCTTGACTTAACAAACAACAGTTTCTCT  
GGTCCTATTCCCTCTGAGTTAGGTTTGTCAAAAAATCTAACCCGTCTTC

>M6-PGSC0003DMG400018163-(rev)M6LRR-RLP\_1922

AGTTTCTCTGGTCCTATTCCCTCTGAGTTAGGTTTGTCAAAAAATCTAACCCGTCTTCGCCTTGCTAATAAT  
TTTTTCACTGGAGAACTCCCTTCTGAATTCGGACAACCTGAAGATCTC

>M6-PGSC0003DMG400018163-(rev)M6LRR-RLP\_1984

TGCTAATAATTTTTTCACTGGAGAACTCCCTTCTGAATTCGGACAACCTGAAGATCTCAGGTTTCTTGATT  
TATCATTCAACAATTTGACCGGAAATCTAGCACCTTCCCTTGCTGGTCT

>M6-PGSC0003DMG400018163-(rev)M6LRR-RLP\_2046

TTCTTGATTTATCATTCAACAATTTGACCGGAAATCTAGCACCTTCCCTTGCTGGTCTAAAAAACCTTGGT  
CATTTTCTCCTTAGCTCTAACCAATTCTCGGGTGAAATCCCACATGGT

>M6-PGSC0003DMG400018163-(rev)M6LRR-RLP\_2108

AACCTTGGTCATTTTCTCCTTAGCTCTAACCAATTCTCGGGTGAAATCCCACATGGTTAGGAGGCATAG  
AAGATCTTGGTGAACCTCGATCTTTCGTTCAACAACCTCACTGGAACAGTT

>M6-PGSC0003DMG400018163-(rev)M6LRR-RLP\_2170

AGGCATAGAAGATCTTGGTGAACCTCGATCTTTCGTTCAACAACCTTCACTGGAACAGTTCCAACAGAACTT  
GGAAACTCTCCAAAATTGCTCAAACCTTCTCTCAGTTACAACAGATTATC

>M6-PGSC0003DMG400018163-(rev)M6LRR-RLP\_2232

CAGAACTTGGAACCTCTCCAAAATTGCTCAAACCTTCTCTCAGTTACAACAGATTATCAGGCCCCATACCA  
CCAGAATTAGGCAATCTCACAAGTCTAAATGTCTTGAATCTTCGAAGAA

>M6-PGSC0003DMG400018163-(rev)M6LRR-RLP\_2294

CCCATACCACCAGAATTAGGCAATCTCACAAGTCTAAATGTCTTGAATCTTCGAAGAAACAATCTTTCTG  
GTTCCATCCCTTCAACTCTTCAAAAATGCCAAAAGCTCTATGAGCTAAGG

>M6-PGSC0003DMG400018163-(rev)M6LRR-RLP\_2356

TCTTTCTGGTTCATCCCTTCAACTCTTCAAAAATGCCAAAAGCTCTATGAGCTAAGGCTCTCTGAAAACA  
ACTTAACAGGCTCAATCCCTTACGAACTTGGTTCTTTATCCGAATTACA

>M6-PGSC0003DMG400018163-(rev)M6LRR-RLP\_2418

CTGAAAACAACCTTAACAGGCTCAATCCCTTACGAACTTGGTTCTTTATCCGAATTACAAGTAATACTAGAC  
CTCAGCAAGAATCACATTTCAAGTGAATCCCTTCATCACTTGGAAACC

>M6-PGSC0003DMG400018163-(rev)M6LRR-RLP\_248

GGTTCATCTGATTCGTATCGGCTTTTGAGAATAAAGTCAGAACTTGTTGATCCATATGGAGTTCTTGAAA  
ACTGGTCTGAAGGGACTAACATGTGTACCTGGAATGGAGTGGCATGTTCA

>M6-PGSC0003DMG400018163-(rev)M6LRR-RLP\_2480

ATACTAGACCTCAGCAAGAATCACATTTCAAGTGAATCCCTTCATCACTTGGAAACCTTGTAAGTTAG  
AAAGATTGAATCTTTCAATCAACTTCAAGGAAAAGTCCCACCATCA

>M6-PGSC0003DMG400018163-(rev)M6LRR-RLP\_2542

AAAGTTAGAAAGATTGAATCTTTCATTCAATCAACTTCAAGGAAAAGTCCCACCATCACTTGGAAAGGTTA  
TCAAGTTTACATAGACTCAATCTTTCATATAATCATCTCCAAGGCCAAAT

>M6-PGSC0003DMG400018163-(rev)M6LRR-RLP\_2604

GAAGGTTATCAAGTTTACATAGACTCAATCTTTCATATAATCATCTCCAAGGCCAAATCCCTTCCACATTT  
TCAGGATTCCTACTAAGTTCTTTCATGGGAAACAATCATAACCTATGTG

>M6-PGSC0003DMG400018163-(rev)M6LRR-RLP\_2666

TCCACATTTTCAGGATTCCCACTAAGTTCTTTCATGGGAAACAATCATAACCTATGTGGCCACCATTACT

ATCTTGTTCTGAATTAAGGAACATGAGAGAATATGGGAGTTGTCAAAA

>M6-PGSC0003DMG400018163-(rev)M6LRR-RLP\_2728

ACCATTACTATCTTGTTCTGAATTAAGGAACATGAGAGAATATGGGAGTTGTCAAAAAGCAAGTGTGT  
AGGGATAACAGTGGCTATTGTGTTAACAGCAACAGTTATATGCATGGTTCT

>M6-PGSC0003DMG400018163-(rev)M6LRR-RLP\_2790

GTGTTGTAGGGATAACAGTGGCTATTGTGTTAACAGCAACAGTTATATGCATGGTTCTGCTTTATATCAT  
GCTGAGGATTTGGTGCAATTGGAGAAAAGTTACAATTTCTTGCTCAGAGA

>M6-PGSC0003DMG400018163-(rev)M6LRR-RLP\_2852

TATATCATGCTGAGGATTTGGTGCAATTGGAGAAAAGTTACAATTTCTTGCTCAGAGAATGGTGAATT  
GAGAGTAAAAGTAGACAAGGGGAAAATTGGGTATATGGAGAAGAGATCAAA

>M6-PGSC0003DMG400018163-(rev)M6LRR-RLP\_2914

TGGAATTGAGAGTAAAAGTAGACAAGGGGAAAATTGGGTATATGGAGAAGAGATCAAAAAGTGGACAA  
TATTGAATACAACATCATTAGTTTCATCAAAAGAGAAGCAAATATCTAAAGG

>M6-PGSC0003DMG400018163-(rev)M6LRR-RLP\_2976

GACAATATTGGAATACAACATCATTAGTTTCATCAAAAGAGAAGCAAATATCTAAAGGGACTTGCATGTT  
TAATCTTAGTGTAAGTTCATCAGATAGCACAGAAAAACCTTTAGTTTAAA

>M6-PGSC0003DMG400018163-(rev)M6LRR-RLP\_3038

TGCATGTTTAATCTTAGTGTAAGTTCATCAGATAGCACAGAAAAACCTTTAGTTTAAATTAAGAGGTGTT  
TTGTTTTAATTTGTCTCTCTACTTTGTAAATTTCTTTTGTTCATGTGTTGAG

>M6-PGSC0003DMG400018163-(rev)M6LRR-RLP\_310

TCTTGAAAACCTGGTCTGAAGGGACTAACATGTGTACCTGGAATGGAGTGGCATGTTTCAGATGATAAATC  
TCATATTGTGAGGCTCAATCTTACTAGTTCAGGACTAGGAGGTCAAATATC

>M6-PGSC0003DMG400018163-(rev)M6LRR-RLP\_3100

GAGGTGTTTTGTTTTAATTTGTCTCTCTACTTTGTAAATTTCTTTTGTTCATGTGTTGAGATTAATTTGTTTAT  
GTGGGGGTTTACATGTAAAGAACAATCACCTTATGAAAAATCTCATCA

>M6-PGSC0003DMG400018163-(rev)M6LRR-RLP\_372

ATAAATCTCATATTGTGAGGCTCAATCTTACTAGTTCAGGACTAGGAGGTCAAATATCTCAAGAATTCGC  
GCATCTCACTTCTCTTCGAGTGATTGATCTTTCGGATAATTTCTTAATG

>M6-PGSC0003DMG400018163-(rev)M6LRR-RLP\_434

GAATTCGCGCATCTCACTTCTCTTCGAGTGATTGATCTTTCGGATAATTTTCTTAATGGAACAATCCCTCCT  
GCATTAGGAGAGCTTCATAACTTGGAGGAATTGCTTCTTTTCTCTAAT

>M6-PGSC0003DMG400018163-(rev)M6LRR-RLP\_496

AATCCCTCCTGCATTAGGAGAGCTTCATAACTTGGAGGAATTGCTTCTTTTCTCTAATTTTCTCACTGGTG  
AGATTCCTTCGGATATCGGTCATTTGAGAAAGCTGCAAGTTCTTAGAAT

>M6-PGSC0003DMG400018163-(rev)M6LRR-RLP\_558

TCACTGGTGAGATTCCTTCGGATATCGGTCATTTGAGAAAGCTGCAAGTTCTTAGAATTGGAGCCAACAT  
GCTGACAGGACAAGTGATACCAGAAATTGGTAACTTTCTGAGTTGAGAG

>M6-PGSC0003DMG400018163-(rev)M6LRR-RLP\_62

TACTCATAGTTTTCCATTTTAAGTAAAAACAGCACCACAAATTTCTTTCATAAATTATGCATTTGTCAATTT  
AAGTTCCAAGGTTGTGTTCCATTCACAAATATTAGCATGGGAAGTGTT

>M6-PGSC0003DMG400018163-(rev)M6LRR-RLP\_620

GCCAACATGCTGACAGGACAAGTGATACCAGAAATTGGTAACTTTCTGAGTTGAGAGTGTTGGCTGTT  
GCTTATTGACAATTCAGTGGAAAGATACCAAAAAGAGATTGGTAATTTGAAG

>M6-PGSC0003DMG400018163-(rev)M6LRR-RLP\_682

GGCTGTTGCTTATTGACAATTCAGTGGAAAGATACCAAAAAGAGATTGGTAATTTGAAGCAGCTGATAAA  
TCTAGACTTGCAGCAAAAACAGTCTTAGTGGCCCCATACCAGAAGCAATTGG

>M6-PGSC0003DMG400018163-(rev)M6LRR-RLP\_744

TGATAAATCTAGACTTGCAGCAAAAACAGTCTTAGTGGCCCCATACCAGAAGCAATTGGCGGCTGCAAAA  
ATCTTCAAAAATTTTGCAGCATCAAACAACAGGATTGATGGAAAGATTCTCTG

>M6-PGSC0003DMG400018163-(rev)M6LRR-RLP\_806

TGCAAAAATCTTCAAAAATTTTGCAGCATCAAACAACAGGATTGATGGAAAGATTCTCTGCTTCAATTGGTC  
AGCTCGAATCACTCGAAATCTTGAACCTGGCAAACAACAGTTTTTCTGGT

>M6-PGSC0003DMG400018163-(rev)M6LRR-RLP\_868

AATTGGTCAGCTCGAATCACTCGAAATCTTGAACCTGGCAAACAACAGTTTTTCTGGTTCGATTCTCTGTTG  
AGCTGAGCCATCTTCCAATTTGAAGTACTTGAACCTGTTTGGCAATGA

>M6-PGSC0003DMG400018163-(rev)M6LRR-RLP\_930

TTCCTGTTGAGCTGAGCCATCTTCCAATTTGAAGTACTTGAACCTGTTTGGCAATGAATTGGAAGGCCGA  
AATTCCTTTTGGAGCTTAACAAGTTGGTTCTGGTTGAAACATTGGATTTAT

>M6-PGSC0003DMG400018163-(rev)M6LRR-RLP\_992

GAAGGCGAAATTCCTTTTGAGCTTAACAAGTTGGTTCTGGTTGAAACATTGGATTTATCAAACAACAACC  
TTTCAGGAACCATAAGGCTTCTCAACACTCAGCTGAAGAATCTTGAGACT

>M6-PGSC0003DMG400018171-(rev)M6LRR-RLK\_0

TAAACAAATCCGAAAAAACACCCATCTAAAATTCCTCCCCACTCTCTTACATAATGGCCTAGCTGTTC  
TTGGATCCGGAGATTCTGGCAACTTTTTCAAATTTTATATGTAACCTA

>M6-PGSC0003DMG400018171-(rev)M6LRR-RLK\_1037

CGGGGATTGCTCCAAGCTCCAAAACATTTATCTTTATGAAAATTCACTCACTGGTTCAATCCCAGCTCGGC  
TTGGTAACCTCAAGAACCTTCAAACCTCCTTTTGTGGCAGAATAATTT

>M6-PGSC0003DMG400018171-(rev)M6LRR-RLK\_1098

CCAGCTCGGCTTGGTAACCTCAAGAACCTTCAAACCTCCTTTTGTGGCAGAATAATTTGGTTGGAACAA  
TCCCTCCCGAGCTTGGGAAGTGTCAACAATTACAAGTCATTGACATTTCA

>M6-PGSC0003DMG400018171-(rev)M6LRR-RLK\_1159

TTGGAACAATCCCTCCCGAGCTTGGGAAGTGTCAACAATTACAAGTCATTGACATTTCAATGAATTCATT  
AACCGGAAGCATTCCGGAATCATTGGGAGATTGAATTCATGCAAGAGT

>M6-PGSC0003DMG400018171-(rev)M6LRR-RLK\_122

TAAAATCCATTAGCCCACAAGACATGATTTGGTTTTCTCTGTCTCTCCTCCCTAGGCTTAAACCTCTAC  
ACCAAACCAAGAACAAGGCTTCCTTTCTCTGCTTAATCTTGAAGTTT

>M6-PGSC0003DMG400018171-(rev)M6LRR-RLK\_1220

GAATTCATTAACCGGAAGCATTCCGGAATCATTGGGAGATTGAATTCATGCAAGAGTTACAGCTGAG  
TGTTAATCAGATTTAGGTCGGATTCCAGCACAAATTGGCAACTGCACTGG

>M6-PGSC0003DMG400018171-(rev)M6LRR-RLK\_1281

CAGCTGAGTGTTAATCAGATTTAGGTCGGATTCCAGCACAAATTGGCAACTGCACTGGTCTTACTCACA  
TTGAGCTCGACAACAATGAGATAACCGGTTCCATACCATCGGAATTCGGA

>M6-PGSC0003DMG400018171-(rev)M6LRR-RLK\_1342

TTACTCACATTGAGCTCGACAACAATGAGATAACCGGTTCCATACCATCGGAATTCGGAAACTTGTCGAA  
CTTAACCTTTGCTGTTCTTGTGGCAAATCGTCTTGAAGGGGAAATTCCTT

>M6-PGSC0003DMG400018171-(rev)M6LRR-RLK\_1403

CTTGTCGAACCTTAACCTTTGCTGTTCTTGTGGCAAATCGTCTTGAAGGGGAAATTCCTTCTCAATTCCT

TGTGCCATAATCTCGAGGCTGTTGACTTGTCACAGAATGCATTGACTGG

>M6-PGSC0003DMG400018171-(rev)M6LRR-RLK\_1464

TCAATTTCTTGTGCCATAATCTCGAGGCTGTTGACTTGTCACAGAATGCATTGACTGGTTTCGATTCCTAA  
AGAGATATTCGATCTTCAGAAGCTGAACAAGCTACTCCTACTGTCTAAT

>M6-PGSC0003DMG400018171-(rev)M6LRR-RLK\_1525

CGATTCCTAAAGAGATATTCGATCTTCAGAAGCTGAACAAGCTACTCCTACTGTCTAATAATTTCTCTGGT  
CCCATTCCACCAGAGATAGGGAAATGTTTCATCGCTGATTGACTTCGGG

>M6-PGSC0003DMG400018171-(rev)M6LRR-RLK\_1586

TTTCTCTGGTCCCATTCCACCAGAGATAGGGAAATGTTTCATCGCTGATTGACTTCGGGCAAATGATAAC  
AAGCTGACCGGATCACTGCCACCGGAGATTGGGAAATTGAAGAACTTGAA

>M6-PGSC0003DMG400018171-(rev)M6LRR-RLK\_1647

AATGATAACAAGCTGACCGGATCACTGCCACCGGAGATTGGGAAATTGAAGAACTTGAATTTCTTGAT  
GTCGGATCCAATCACCTACCGGGATCATTCCACCGGAATTATCTGGATGC

>M6-PGSC0003DMG400018171-(rev)M6LRR-RLK\_1708

TCCTTGATGTCGGATCCAATCACCTACCGGGATCATTCCACCGGAATTATCTGGATGCCGGAATCTGAC  
ATTTCTAGACTTGCATTCCAATCAATCAGTGGCAATTTACCGGAGAATT

>M6-PGSC0003DMG400018171-(rev)M6LRR-RLK\_1769

GAATCTGACATTTCTAGACTTGCATTCCAATCAATCAGTGGCAATTTACCGGAGAATTTGAATCAGCTT  
GGAATCCTCCAGTTCATTGATGTTTCCGATAATTTAATTGAAGGCATTT

>M6-PGSC0003DMG400018171-(rev)M6LRR-RLK\_183

TAAACCTCTACACCAAACCAAGAACAAGGCTTCCTTTCTCTGCTTAATCTTGAAGTTTGTAGCAGCAGTC  
ACATATTTGTTCTAATCTAATGCCTGTTTATTCATGGACCCTCTTTTC

>M6-PGSC0003DMG400018171-(rev)M6LRR-RLK\_1830

AATCAGCTTGGAATCCTCCAGTTCATTGATGTTTCCGATAATTTAATTGAAGGCATTTGAGTCCGAGTTT  
CGGCTCACTGACTTCACTACCAAACCTGTTCTGGGTAAGAACAGGTTT

>M6-PGSC0003DMG400018171-(rev)M6LRR-RLK\_1891

GTCCGAGTTTTCGGCTCACTGACTTCACTACCAAACCTGTTCTGGGTAAGAACAGGTTTCTGGTCCTATT  
CCAATCAACTCGGTTCTGCATGAAGCTTCAGTTGATTGACTTGAGTG

>M6-PGSC0003DMG400018171-(rev)M6LRR-RLK\_1952

TGGTCCTATTCCAACCTCAACTCGGTTCTGCATGAAGCTTCAGTTGATTGACTTGAGTGGTAACCAACTCT  
CCGGCAAGATTCCGGCGAGTGTTGGTAAAATCCCTGGTCTAGAAATTGC

>M6-PGSC0003DMG400018171-(rev)M6LRR-RLK\_2013

AACCAACTCTCCGGCAAGATTCCGGCGAGTGTTGGTAAAATCCCTGGTCTAGAAATTGCACTGAACCTCA  
GCTGGAATCAACTTTCCGGTGAAATTCCGGCAGAGTTCGCCGCATTGGAC

>M6-PGSC0003DMG400018171-(rev)M6LRR-RLK\_2074

TGAACCTCAGCTGGAATCAACTTTCCGGTGAAATTCCGGCAGAGTTCGCCGCATTGGACAAGCTTGGAG  
TGCTTGATCTTTCTCATAATCAGCTCTCGGGGGACCTCCATTTTCTCGCGG

>M6-PGSC0003DMG400018171-(rev)M6LRR-RLK\_2135

GCTTGGAGTGCTTGATCTTTCTCATAATCAGCTCTCGGGGGACCTCCATTTTCTCGCGGACCTACAAAATC  
TCGTGGTTCTGAATGTCTCGCACACAATTTATCGGGGCACGTGCCTGA

>M6-PGSC0003DMG400018171-(rev)M6LRR-RLK\_2196

CTACAAAATCTCGTGGTTCTGAATGTCTCGCACACAATTTATCGGGGCACGTGCCTGACACCTCATTCTT  
CTCTAAGCTCCCACTCAGTGTACTTGCTGGCAATCCAGATCTATGCTTT

>M6-PGSC0003DMG400018171-(rev)M6LRR-RLK\_2257

CCTCATTCTTCTCTAAGCTCCCACTCAGTGTACTTGCTGGCAATCCAGATCTATGCTTTCCCGGCAACCAG  
TGCTCCGCCGATAAGGGCGGCGGTGTCCGTCTACCAAAGCGGCGAGGG

>M6-PGSC0003DMG400018171-(rev)M6LRR-RLK\_2318

CGGCAACCAGTGCTCCGCCGATAAGGGCGGCGGTGTCCGTCTACCAAAGCGGCGAGGGTGGCGATG  
GTGGTGTGCTTTGCGCAGCTTGCCTCTCCTTGTGGCAGCTCTCTACATCAT

>M6-PGSC0003DMG400018171-(rev)M6LRR-RLK\_2379

GCGATGGTGGTGTGCTTTGCGCAGCTTGCCTCTCCTTGTGGCAGCTCTCTACATCATCCTCAGCGGCA  
AAATACGGAACCGCAAGGCCACGATTACGATCTAGATGGCGACAATGAC

>M6-PGSC0003DMG400018171-(rev)M6LRR-RLK\_244

AGCAGCAGTCACATATTTGTTCTAATCTAATGCCTGTTTATTCATGGACCCTCTTTTTCTTTTTCTCCTTCTT  
TCTCTTTAATACCTCCTCTGCTCTCAACCCTCAAGGTCAGGCTCTTC

>M6-PGSC0003DMG400018171-(rev)M6LRR-RLK\_2440

TCAGCGGCAAAAATACGGAACCGCAAGGCCACGATTACGATCTAGATGGCGACAATGACGTTGAACTTG  
GCCACCATGGGAGGTCACAGTATAACAAAACTCGACTTATCTATAACTG

>M6-PGSC0003DMG400018171-(rev)M6LRR-RLK\_2501

TGAACTTGGCCACCATGGGAGGTCACAGTATACAAAACTCGACTTATCTATAACTGACGTCGCAAAA  
TGTTTAACCGTTGGTAACGTCTCGGCCGTGGTCGGTCCGGAGTTGTGTA

>M6-PGSC0003DMG400018171-(rev)M6LRR-RLK\_2562

GTCGCAAATGTTTAACCGTTGGTAACGTCTCGGCCGTGGTCGGTCCGGAGTTGTGTATAAAGTGAAT  
ATTCCGTCAGGATTGACGATCGCTGTGAAAAGATTCCGAGCATCGGACAAG

>M6-PGSC0003DMG400018171-(rev)M6LRR-RLK\_2623

AAGTGAATATTCCGTCAGGATTGACGATCGCTGTGAAAAGATTCCGAGCATCGGACAAGCACTCGATGT  
CGGCATTCTCGTCGGAGATTGCCACGCTGGCACGAATTCGACATCGGAACA

>M6-PGSC0003DMG400018171-(rev)M6LRR-RLK\_2684

CTCGATGTCGGCATTCTCGTCGGAGATTGCCACGCTGGCACGAATTCGACATCGGAACATTGTTAGATTA  
CTTGATGGGCAGCAAATAGAAAGACTAAGCTAATGTTCTATGATTATTT

>M6-PGSC0003DMG400018171-(rev)M6LRR-RLK\_2745

GTTAGATTACTTGGATGGGCAGCAAATAGAAAGACTAAGCTAATGTTCTATGATTATTTACCAAATGGTA  
CATTAGGTTCATTTTACATGAAGGTTTTGGAGGGTTAATTGAGTGGGAA

>M6-PGSC0003DMG400018171-(rev)M6LRR-RLK\_2806

CAAATGGTACATTAGGTTCATTTTACATGAAGGTTTTGGAGGGTTAATTGAGTGGGAAACCAGATTCA  
AGATTGCATTAGGGGTGGCTGAGGGCTTAGCTTACTTGCACCACGACTGCG

>M6-PGSC0003DMG400018171-(rev)M6LRR-RLK\_2867

CAGATTCAAGATTGCATTAGGGGTGGCTGAGGGCTTAGCTTACTTGCACCACGACTGCGTCCGCCCATC  
CTCCACCGCGATGTCAAAGCTCAGAACATTTTGTAGGTGATCGTTACGA

>M6-PGSC0003DMG400018171-(rev)M6LRR-RLK\_2928

CCGCCATCCTCCACCGCGATGTCAAAGCTCAGAACATTTTGTAGGTGATCGTTACGAGCCGTGTTTAG  
CTGATTTTGGACTTGCTAGACTCATGGAGGAGGAAAATTCTTCAGTTACA

>M6-PGSC0003DMG400018171-(rev)M6LRR-RLK\_2989

CGTGTTAGCTGATTTTGGACTTGCTAGACTCATGGAGGAGGAAAATTCTTCAGTTACAGCAAATCCTCA  
GTTTGCTGGATCTTATGGCTACTTTGCCCCAGGTAGATATTTCTCTTCTT

>M6-PGSC0003DMG400018171-(rev)M6LRR-RLK\_305

TTTCTCCTTCTTTCTTTAATACCTCCTCTGCTCTCAACCCTCAAGGTCAGGCTCTTCTTTCATGGAAGAC



AAGCTTAAATGGATCATTAGATGTGTTGAGTAATTGGGATCCTACTGA

>M6-PGSC0003DMG400018171-(rev)M6LRR-RLK\_3050

AAATCCTCAGTTTGCTGGATCTTATGGCTACTTTGCCCCAGGTAGATATTTCTCTTCTCCTAGTTCAAGTT  
CATTTCTTTAAAAAATCGACTAGTTATGATTCATTTATTACTTTAGTT

>M6-PGSC0003DMG400018171-(rev)M6LRR-RLK\_3111

TAGTTCAAGTTCATTTCTTTAAAAAATCGACTAGTTATGATTCATTTATTACTTTAGTTATTAGAGGAATTC  
TCCTCTAATGCAATTATGTGAGGTTTCATTTATCACTTAGTTCAAGTC

>M6-PGSC0003DMG400018171-(rev)M6LRR-RLK\_3172

TAGAGGAATTCTCCTCTAATGCAATTATGTGAGGTTTCATTTATCACTTAGTTCAAGTCCATGGTGGAGCT  
AGAGGGTGGGAAGGGAGTTCCTTTGAACCCTCTTCGTCACAAAATCACAC

>M6-PGSC0003DMG400018171-(rev)M6LRR-RLK\_3233

TGGTGGAGCTAGAGGGTGGGAAGGGAGTTCCTTTGAACCCTCTTCGTCACAAAATCACACACATATATAA  
GAACTATTTTTTCAATATATGTATGGAAATTGGAAGGAAGTAATCTCAAAT

>M6-PGSC0003DMG400018171-(rev)M6LRR-RLK\_3477

ATTATATATTTATATTTTTAACATATTTTTTTTACTTTATGATGATGATATGATGTGAGCTTAAATGAAATT  
AGGATTCATATAGCGACCCAAGTTTGCCTTTGGATTTTTTCCGCTTTT

>M6-PGSC0003DMG400018171-(rev)M6LRR-RLK\_3538

TAAATGAAATTAGGATTCATATAGCGACCCAAGTTTGCCTTTGGATTTTTTCCGCTTTTTTCTTTATAGAAA  
AAAAAGAACTGAATGCGAGGTAGCAGAAGAGAATAGATATAAAGCACT

>M6-PGSC0003DMG400018171-(rev)M6LRR-RLK\_3599

CTTTATAGAAAAAAGAAGTGAATGCGAGGTAGCAGAAGAGAATAGATATAAAGCACTGCAAACACA  
GAACAAGAAGGAGAATTCAGATGAAGTTGCTTCCATACGGATGGAATTGGGT

>M6-PGSC0003DMG400018171-(rev)M6LRR-RLK\_366

TCATGGAAGACAAGCTTAAATGGATCATTAGATGTGTTGAGTAATTGGGATCCTACTGATGAAACTCCAT  
GTGGTTGGTTTGGTCTTACTTGCAACTTCAATAAGGAAGTTGTTGAATTG

>M6-PGSC0003DMG400018171-(rev)M6LRR-RLK\_3660

AAACACAGAACAAGAAGGAGAATTCAGATGAAGTTGCTTCCATACGGATGGAATTGGGTCATTATTTTG  
ACAATATATGCATGTGAAGCCATGTGCTAGCTTTAACTATGTGCAAAACCA

>M6-PGSC0003DMG400018171-(rev)M6LRR-RLK\_3721

TTATTTTGACAATATATGCATGTGAAGCCATGTGCTAGCTTTAACTATGTGCAAACCAAGTTTGTGCATGA  
CATACTTGGCAGCTACAGTGCTATTTCCCATCTTTTTGCCTGTGTATG

>M6-PGSC0003DMG400018171-(rev)M6LRR-RLK\_3782

TTTGTGCATGACATACTTGGCAGCTACAGTGCTATTTCCCATCTTTTTGCCTGTGTATGGCCCCCACTAA  
AGATACTTAGGATGGGGGATACTCTAAAAAAACCATAACCTAAGTTAGT

>M6-PGSC0003DMG400018171-(rev)M6LRR-RLK\_3843

CCCCACTAAAGATACTTAGGATGGGGGATACTCTAAAAAAACCATAACCTAAGTTAGTGGTCACACTTT  
CACCAGCCAAGCATGGACACATTGCTGCTGTCTCCATATCCCTTTGGCCA

>M6-PGSC0003DMG400018171-(rev)M6LRR-RLK\_3904

TCACACTTTCACCAGCCAAGCATGGACACATTGCTGCTGTCTCCATATCCCTTTGGCCATTGCTTGTTGTC  
CGATTGCGATATGTGAAAAATAATCGCCCAACAAATGCCTTTGTTATGT

>M6-PGSC0003DMG400018171-(rev)M6LRR-RLK\_3965

GCTTGTTGTCCGATTGCGATATGTGAAAAATAATCGCCCAACAAATGCCTTTGTTATGTTTCAAAAAACA  
TCAAGATCAAATAGGTGATAAATATCTGGCATGAAAAGGACTAAACTCTG

>M6-PGSC0003DMG400018171-(rev)M6LRR-RLK\_4026

CAAAAAACATCAAGATCAAATAGGTGATAAATATCTGGCATGAAAAGGACTAAACTCTGTTCTATTGTTT  
TGTCTTTTGCAGAGTACGCTTGATGCTAAAGATTACAGAGAAGAGCGAT

>M6-PGSC0003DMG400018171-(rev)M6LRR-RLK\_4087

CTATTGTTTTGTCTTTTGCAGAGTACGCTTGATGCTAAAGATTACAGAGAAGAGCGATGTTTTTAGCTTT  
GGAGTTGTGTTGCTAGAAATCATTACTGGGAAAAAACCAGCCGACCCAT

>M6-PGSC0003DMG400018171-(rev)M6LRR-RLK\_4148

TTTTAGCTTTGGAGTTGTGTTGCTAGAAATCATTACTGGGAAAAAACCAGCCGACCCATCCTTCCCTGAT  
GGCCAACATGTTATACAATGGGTTTCGCGACCACCTAAAGAGCAAGAAAGA

>M6-PGSC0003DMG400018171-(rev)M6LRR-RLK\_4209

TTCCCTGATGGCCAACATGTTATACAATGGGTTTCGCGACCACCTAAAGAGCAAGAAAGATCCAGTTGAC  
GTAATTGATCCAAGGTTACAAGGACATCCTGATACACAAATTCAGGAAATG

>M6-PGSC0003DMG400018171-(rev)M6LRR-RLK\_427

AAACTCCATGTGGTTGGTTTGGTCTTACTTGCAACTTCAATAAGGAAGTTGTTGAATTGGAATTGAAGTA  
TGTGGATTTGCTTGGGATTGTTCCCTTCTAATTTTAGCTCATTGGTGTGCAT

>M6-PGSC0003DMG400018171-(rev)M6LRR-RLK\_4270

CAGTTGACGTAATTGATCCAAGGTTACAAGGACATCCTGATACACAAATTCAGGAAATGCTTCAAGCCCT  
TGGAATAGCCTTGTTGTGTACTAGTAACCGGGCAGAAGATCGTCCAACAA

>M6-PGSC0003DMG400018171-(rev)M6LRR-RLK\_4331

TCAAGCCCTTGGAATAGCCTTGTTGTGTACTAGTAACCGGGCAGAAGATCGTCCAACAATGAAAGATGT  
GGTGGCATTACTCAAGGAGATTATCCATGAGCATGCAACAGGAAATGAAGC

>M6-PGSC0003DMG400018171-(rev)M6LRR-RLK\_4392

AAAGATGTGGTGGCATTACTCAAGGAGATTATCCATGAGCATGCAACAGGAAATGAAGCTAAAAAGAC  
ATTGAACAACCTCTCAAAAATGTCCGATACTTCATCATATTCCTACTCGTCT

>M6-PGSC0003DMG400018171-(rev)M6LRR-RLK\_4453

AAAAGACATTGAACAACCTCTCAAAAATGTCCGATACTTCATCATATTCCTACTCGTCTTCATCTGTCACT  
CCAGCTCAGTTGCTACGCCTCCAAGGGTCGTTTAATTGCTCTCTGACTC

>M6-PGSC0003DMG400018171-(rev)M6LRR-RLK\_4514

ATCTGTCACTCCAGCTCAGTTGCTACGCCTCCAAGGGTCGTTTAATTGCTCTCTGACTCACTCATCCTCCTC  
CGTTAGCTATAGCACCAGCAACCAATAATAATGTAGCGATAGTCATGA

>M6-PGSC0003DMG400018171-(rev)M6LRR-RLK\_4575

TCATCCTCCTCCGTTAGCTATAGCACCAGCAACCAATAATAATGTAGCGATAGTCATGATAGATCTGTTAT  
TCTTTTGAAGTAGATAGTATTAGCAACCGTAAAGAGCTAGGTAGAGGGA

>M6-PGSC0003DMG400018171-(rev)M6LRR-RLK\_4636

GATCTGTTATTCTTTTGAAGTAGATAGTATTAGCAACCGTAAAGAGCTAGGTAGAGGGAACCTTATTGTC  
AATTTAATTGTTAAGCAAATGAAAATGAAATCCATTGTACAGCAAAGTCA

>M6-PGSC0003DMG400018171-(rev)M6LRR-RLK\_488

ATTGAAGTATGTGGATTTGCTTGGGATTGTTCTTCTAATTTTAGCTCATTGGTGTTCATTGAACAAGCTTG  
TTTTGTCAGGGACTAATCTTACTGGTGAATTCCAAAAGAGATTGGGAT

>M6-PGSC0003DMG400018171-(rev)M6LRR-RLK\_549

AACAAGCTTGTTTTGTCAGGGACTAATCTTACTGGTGAATTCCAAAAGAGATTGGGATGCTTCAGGGA  
CTTAAGTTCTTGGACTTGAGTGACAATGCATTGACAGGTGAAATTCCAAGT

>M6-PGSC0003DMG400018171-(rev)M6LRR-RLK\_61

CTAGCTGTTCTTGGATCCGGAGATTCTGGCAACTTTTTCAAATTTTTATATGTAACCTACATAAAATCCATT

AGCCCACAAGACATGATTTGGTTTTCTCTCTGTCTCTCCTCCCTAGG

>M6-PGSC0003DMG400018171-(rev)M6LRR-RLK\_610

TTCAGGGACTTAAGTTCTTGGACTTGAGTGACAATGCATTGACAGGTGAAATTCCAAGTAAAATTTTCA  
CTTGCCAAAGTTGGAGCAACTTCATATCAATTCAAACCGGCTGGTCGGAT

>M6-PGSC0003DMG400018171-(rev)M6LRR-RLK\_671

AATTTTTCACTTGCCAAAGTTGGAGCAACTTCATATCAATTCAAACCGGCTGGTCGGATCGATCCCAGAG  
GACATTGGTAACCTCACAAGCTTGGTGTGGCTTATATTCTATGATAATCA

>M6-PGSC0003DMG400018171-(rev)M6LRR-RLK\_732

ATCCCAGAGGACATTGGTAACCTCACAAGCTTGGTGTGGCTTATATTCTATGATAATCAGCTGAGTGGTG  
GAATCCAAGTAGTATTGGGAATTTGAAAAAACTGGAGATTATTAGAGGA

>M6-PGSC0003DMG400018171-(rev)M6LRR-RLK\_793

TGAGTGGTGGAATTCCAAGTAGTATTGGGAATTTGAAAAAACTGGAGATTATTAGAGGAGGTGGAAAC  
AAGAATCTTGAAGGTCCATTGCCTCAAGAAATTGGCAACTGTAATAATTTGG

>M6-PGSC0003DMG400018171-(rev)M6LRR-RLK\_854

TGGAAACAAGAATCTTGAAGGTCCATTGCCTCAAGAAATTGGCAACTGTAATAATTTGGTTATGTTAGG  
ATTGGCAGAAACCAGCATTCTGGTTTTCTACCTTCTTCTTTGGCCAGCT

>M6-PGSC0003DMG400018171-(rev)M6LRR-RLK\_915

ATGTTAGGATTGGCAGAAACCAGCATTCTGGTTTTCTACCTTCTTCTTTGGCCAGCTGAAAAGACTCG  
AAACGCTTGCTGTTTACACCTCCTTGCTCTCTGGACAAATCCCACCAGAG

>M6-PGSC0003DMG400018171-(rev)M6LRR-RLK\_976

AAAGACTCGAAACGCTTGCTGTTTACACCTCCTTGCTCTCTGGACAAATCCCACCAGAGCTCGGGGATTG  
CTCCAAGCTCCAAAACATTTATCTTTATGAAAATCACTCACTGGTTCAA

>M6-PGSC0003DMG400018184-(rev)M6L-LecRK\_0

TAGGAATTAATAATTAGTCAAAGGATGAGTCATCTGCATCATTTTCAGAGAAACAGCACTCATCTCTA  
ATTCCCTTCAAAGTACCATGTAATTAACACATAATTTCCAGTTTCCTC

>M6-PGSC0003DMG400018184-(rev)M6L-LecRK\_1037

CCGGTGCTATTGCTGGGATTGTTATTAGTTCTGTGTTTGGTGTGTTGGGTTGTTTATTATATTTTATTGGT  
TTTGGTGGCGTAAGAAGGAAGAAGATGATGTTATTGAAGATTGGGAAC

>M6-PGSC0003DMG400018184-(rev)M6L-LecRK\_1098

ATTTTATTGGTTTTGGTGGCGTAAGAAGGAAGAAGATGATGTTATTGAAGATTGGGAACTTGAGTACTG  
GCCTCATAGATTTTCATATGAAGAACTTAGCCAAGCTACAAAAGGGTTTTTC

>M6-PGSC0003DMG400018184-(rev)M6L-LecRK\_1159

GAGTACTGGCCTCATAGATTTTCATATGAAGAACTTAGCCAAGCTACAAAAGGGTTTTCTAAAGATGAG  
CTACTTGGGGCTGGTGGTTTTCGGTAAAGTATAACAAGGGAACATTTGCTAAT

>M6-PGSC0003DMG400018184-(rev)M6L-LecRK\_122

AAAATTCTCTTCTTCTTTCATGCAAACCCCAACAATATGCCACCATTATCACTGTTCTTCATTCTAATCA  
ACCTTACAATCTTCCCATCCATTTCCGCCGTGGAATTTCTCTTCAACT

>M6-PGSC0003DMG400018184-(rev)M6L-LecRK\_1220

AAGATGAGCTACTTGGGGCTGGTGGTTTTCGGTAAAGTATAACAAGGGAACATTTGCTAATAACACAGAA  
GTGGCAGTGAAATGTGTGAACCATGACTCAAGACAAGGAATTAGGGAATTCA

>M6-PGSC0003DMG400018184-(rev)M6L-LecRK\_1281

CACAGAAGTGGCAGTGAAATGTGTGAACCATGACTCAAGACAAGGAATTAGGGAATTCATGGCTGAGA  
TATCTACTATTGGAAGGCTTCAACATAAGAATTTAGTACAAATGAGAGGGTG

>M6-PGSC0003DMG400018184-(rev)M6L-LecRK\_1342

GCTGAGATATCTACTATTGGAAGGCTTCAACATAAGAATTTAGTACAAATGAGAGGGTGGTGTAGGAA  
GGGGAATGAACTTATGATTGTGTATGATTACATGCCTAATGGGAGTTTGAAT

>M6-PGSC0003DMG400018184-(rev)M6L-LecRK\_1403

GTAGGAAGGGGAATGAACTTATGATTGTGTATGATTACATGCCTAATGGGAGTTTGAATAAATGGATAT  
TCGATAAGCCGGAGAAGGTTATGAATTGGGTAGACCGGAGGAGGGTCCTAG

>M6-PGSC0003DMG400018184-(rev)M6L-LecRK\_1464

ATGGATATTCGATAAGCCGGAGAAGGTTATGAATTGGGTAGACCGGAGGAGGGTCCTAGCTGATGTTG  
CAGAGGGGTTGAACTATTTGCATCATGGTTGGGAACAAGTTGTTGTACATAG

>M6-PGSC0003DMG400018184-(rev)M6L-LecRK\_1525

GATGTTGCAGAGGGGTTGAACTATTTGCATCATGGTTGGGAACAAGTTGTTGTACATAGGGATATTA  
TCTAGAAATGTTTTGTTAGATAGTGAAATGAGAGGGAGATTGGGTGATTTT

>M6-PGSC0003DMG400018184-(rev)M6L-LecRK\_1586

ATATTAAATCTAGAAATGTTTTGTTAGATAGTGAAATGAGAGGGAGATTGGGTGATTTTGGCCTAGCTA  
AGTTGTATACTCATGGTGGTGTCCCTAATACTACTAGGGTAGTAGGTACAT

>M6-PGSC0003DMG400018184-(rev)M6L-LecRK\_1647

CCTAGCTAAGTTGTATACTCATGGTGGTGTCCCTAATACTACTAGGGTAGTAGGTACATTAGGGTACTTG  
GCACCTGAAGTGGTGACAAGGGCTAACCCAAGTCTGCTAGTGATGTTTA

>M6-PGSC0003DMG400018184-(rev)M6L-LecRK\_1708

GGGTAAGTGGCACCTGAAGTGGTGACAAGGGCTAACCCAAGTCTGCTAGTGATGTTTATAGTTTTGGG  
GTGGTGGTTTTGGAGGTGGCATGTGGGCGAAGGCCGATTGACTTTGGGATT

>M6-PGSC0003DMG400018184-(rev)M6L-LecRK\_1769

GTTTTGGGGTGGTGGTTTTGGAGGTGGCATGTGGGCGAAGGCCGATTGACTTTGGGATTGTGTTGGAG  
GAAGAGGAAGTGTGATTGATTGGGTTAGACAAAAGTACAGGGAAGGGCGAT

>M6-PGSC0003DMG400018184-(rev)M6L-LecRK\_183

CATTCTAATCAACCTTACAATCTCCCATCCATTTCCGCCGTCGAATTTCTCTTCAACTCCTTTACTGCTAAC  
ACCACTCCTGCCCTCAACCTCATCGAGGATGCCCGCCTTGAGCCACC

>M6-PGSC0003DMG400018184-(rev)M6L-LecRK\_1830

GTTGGAGGAAGAGGAAGTGTGATTGATTGGGTTAGACAAAAGTACAGGGAAGGGCGATTATGTGAG  
GCAGCAGATAAAAGGATTAAGGGGCAATGTTCAGAGGAAGAAATGGAAGCTAT

>M6-PGSC0003DMG400018184-(rev)M6L-LecRK\_1891

TGTGAGGCAGCAGATAAAAGGATTAAGGGGCAATGTTCAGAGGAAGAAATGGAAGCTATGTTGAAACT  
AGGACTTACATGTTGTACCCTGATCCTCTCCGTCGACCTACTATGGGAGAG

>M6-PGSC0003DMG400018184-(rev)M6L-LecRK\_1952

TGAAACTAGGACTTACATGTTGTCACCCTGATCCTCTCCGTCGACCTACTATGGGAGAGGTTGTTGCTGT  
ATTGCTTGGTGAGAATGTGGATGCAACGCCAAATGAGTTGATCGTTGAAT

>M6-PGSC0003DMG400018184-(rev)M6L-LecRK\_2013

TGTTGCTGTATTGCTTGGTGAGAATGTGGATGCAACGCCAAATGAGTTGATCGTTGAATTAGCACCTAGT  
GAAAGGAACACGAGAGATAGAAGCGACTGGTCAACTGAGGAATCAGAACC

>M6-PGSC0003DMG400018184-(rev)M6L-LecRK\_2074

GCACCTAGTGAAAGGAACACGAGAGATAGAAGCGACTGGTCAACTGAGGAATCAGAACCACTTTCCGGC  
TGTGTAGATATTATACTTTTGTTCCTTTATTGTTGAATCTTTTTCATCCCT

>M6-PGSC0003DMG400018184-(rev)M6L-LecRK\_2135

TTTCGGCTGTGTAGATATTATACTTTTGTTCCTTTATTGTTGAATCTTTTTCATCCCTGAAATTATTGTTT

AAGGTTTGTTCTTTGTATTGTTCTTACATGCTTTTGAACTCTAAACT

>M6-PGSC0003DMG400018184-(rev)M6L-LecRK\_2196

AAATTATTGTTTAAGGTTTGTATTGTTCTTACATGCTTTTGAACTCTAAACTTAGCATTAGTTGC

AAATAGTTATGGATATGCTGCTATGCCTTTGCGCTACCTTAAAGGGTC

>M6-PGSC0003DMG400018184-(rev)M6L-LecRK\_2256

AGCATTAGTTGCAAATAGTTATGGATATGCTGCTATGCCTTTGCGCTACCTTAAAGGGTCAACATCCATG

GCAATTAGCAAACGTCTATACGCATTAAGATTCACCTCGGTGGAATAACG

>M6-PGSC0003DMG400018184-(rev)M6L-LecRK\_244

TTTACTGCTAACACCACTCCTGCCCTCAACCTCATCGAGGATGCCCCCTTGAGCCACCAGTTATCCGCCT

CACAAATGACTCCAACCAATTTCCCTTGCCGAGCTTTTTACCCATCT

>M6-PGSC0003DMG400018184-(rev)M6L-LecRK\_305

TTATCCGCCTCACAAATGACTCCAACCAATTTCCCTTGCCGAGCTTTTTACCCATCTCAAATTCCTATAA

AATCCACTTCAAATCCACTTCAATTTCTCCTCTTTCTCTACTCAGT

>M6-PGSC0003DMG400018184-(rev)M6L-LecRK\_366

AATTCCTATAAAATCCACTTCAAATCCACTTCAATTTCTCCTCTTTCTCTACTCAGTTCATCTTCTCTGTA

CTTCTGATGATTCTCTAGTCCCGGATTCGGAATTGCTTTTGTCT

>M6-PGSC0003DMG400018184-(rev)M6L-LecRK\_427

ATCTTCTGTACTTCTGATGATTCTCTAGTCCCGGATTCGGAATTGCTTTTGTCTCTCTGCTTCAACA

TCCCCACCTAATGCCCTCTCCAGTCAATACTTTGGACTTTTCTCTAAC

>M6-PGSC0003DMG400018184-(rev)M6L-LecRK\_488

CTGCTTCAACATCCCCACCTAATGCCCTCTCCAGTCAATACTTTGGACTTTTCTCTAACGCCACCGTACACA

CGGTGGCCCCACTTCTCGCCGTCGAGTTTGATACGGGTCGTAACCCGG

>M6-PGSC0003DMG400018184-(rev)M6L-LecRK\_549

CACCGTACACACGGTGGCCCCACTTCTCGCCGTCGAGTTTGATACGGGTCGTAACCCGGAATTCAATGA

ACCAGATAGAAATCATATCGGGATTGATCTTAACAGCATTGAATCTATTGT

>M6-PGSC0003DMG400018184-(rev)M6L-LecRK\_61

TCATCTCTAATTCCTTCAAAGTACCATGTAATTAACACATAATTTCCAGTTTCTTCACAAAATTCTCTTC

TTCTTCTTCATGCAAACCCCAACAATATGCCACCATTATCACTGTTC

>M6-PGSC0003DMG400018184-(rev)M6L-LecRK\_610

TTCAATGAACCAGATAGAAATCATATCGGGATTGATCTTAACAGCATTGAATCTATTGTTACCCAAACGG  
CTGGGTATTATAGTTCTTCTGGTAATGATAATGATTCTTTTGTGCCTTTA

>M6-PGSC0003DMG400018184-(rev)M6L-LecRK\_671

CCCAAACGGCTGGGTATTATAGTTCTTCTGGTAATGATAATGATTCTTTTGTGCCTTTAAATTTGCGGTCT  
GGGGAAAATATACATGCTTGGATCGAGTTTAATGGACCTGAATTCGAGA

>M6-PGSC0003DMG400018184-(rev)M6L-LecRK\_732

TTTGCGGTCTGGGGAAAATATACATGCTTGGATCGAGTTTAATGGACCTGAATTCGAGATTAATGTTACT  
ATAGCTCCGGCTGGTATGTCACGGCCTGTTAGGACTTTGTTGAGTTATAG

>M6-PGSC0003DMG400018184-(rev)M6L-LecRK\_793

AATGTTACTATAGCTCCGGCTGGTATGTCACGGCCTGTTAGGACTTTGTTGAGTTATAGAAACCCATAA  
TTGCGAATTACACGTCTGCCAGATGTATATGGGGTTCTCTGCTTCCAAG

>M6-PGSC0003DMG400018184-(rev)M6L-LecRK\_854

ACCCATAATTGCGAATTACACGTCTGCCAGATGTATATGGGGTTCTCTGCTTCCAAGACTCAATGGGT  
TGAGGCGCAAAGACTTCTAGCTTGGAGTTTCAGTGATTCTGGAGTTGCAA

>M6-PGSC0003DMG400018184-(rev)M6L-LecRK\_915

TCAATGGGTTGAGGCGCAAAGACTTCTAGCTTGGAGTTTCAGTGATTCTGGAGTTGCAAGGGATATTAA  
TACTACGAATTTGCCGTTTTTCAGCTGGAAAATTCCGGGTCTTCGCTATC

>M6-PGSC0003DMG400018184-(rev)M6L-LecRK\_976

GATATTAATACTACGAATTTGCCGTTTTTCAGCTGGAAAATTCCGGGTCTTCGCTATCTCCCGGTGCTAT  
TGCTGGGATTGTTATTAGTTCTGTGTTTGCTGTGTTGGGTTGTTTATTT

>M6-PGSC0003DMG400018253-(rev)M6LRR-RLK\_0

ATCTGTTCTTGATCTTTCGCGTAATAACTTAACTGGAGAACTCAATGATCTTGATTTTGGGACTTGTCAAA  
ATCTCACTGTCCTAAATTTGTCTTTCAACAACCTTACCTCAGTTGAGTT

>M6-PGSC0003DMG400018253-(rev)M6LRR-RLK\_1024

TGCAGGAACCTGATATGGCTAGATTTGAATAGCAATGCTCTAACAGGTTCAATCCCTCTTGAGCTTGCTG  
ATCAAGCTGGCCATGTTAATCCGGGAATGGCTTCTGGAAAACAGTTTGCT

>M6-PGSC0003DMG400018253-(rev)M6LRR-RLK\_1152

AAATGAGGGTGGAACCTGAATGCAGGGGTGCTGGTGGACTGGTTGAGTTTCGAGGGTATCCGCGAAGAG  
AGGCTTGCAATTTTACCTATGGTTCACTTCTGTCCATCAACTAGGATCTACTC



>M6-PGSC0003DMG400018253-(rev)M6LRR-RLK\_1216

GAGAGGCTTGCAATTTTACCTATGGTTCACCTTCTGTCCATCAACTAGGATCTACTCTGGTAGGACGATGT  
ACACCTTCACGAGCAATGGAAGCATGATTTACCTTGATCTTTCTACAAT

>M6-PGSC0003DMG400018253-(rev)M6LRR-RLK\_128

CTTTGGCAAATTGCCAGAGCCTCAATACACTGAACATTGCCATAATTTCGATCCGAATGGAGATTCTAG  
CGAGTTATTGGTGAAGTTGAAGAGCTTGAAGCGATTGGTGCTAGCCCACA

>M6-PGSC0003DMG400018253-(rev)M6LRR-RLK\_1280

CGATGTACACCTTCACGAGCAATGGAAGCATGATTTACCTTGATCTTTCCTACAATTCTTTTTCAGGAACC  
ATTCCTGATAATTTAGGTTTCATTGAGCTTCCTTCAAGTTCTGAATTTGG

>M6-PGSC0003DMG400018253-(rev)M6LRR-RLK\_1344

AGGAACCATTCTGATAATTTAGGTTTCATTGAGCTTCCTTCAAGTTCTGAATTTGGGACACAACAATTTTA  
CCGGAACCATTCCATTCAACTTTGGAGGTCTAAAGATAGTTGGAGTTCT

>M6-PGSC0003DMG400018253-(rev)M6LRR-RLK\_1408

AATTTTACCGGAACCATTCCATTCAACTTTGGAGGTCTAAAGATAGTTGGAGTTCTTGATCTATCACATAA  
CAGCCTACAGGGATTTCATTCCACCCTCGTTAGGAGGCCTTTCATTTCTT

>M6-PGSC0003DMG400018253-(rev)M6LRR-RLK\_1472

CACATAACAGCCTACAGGGATTTCATTCCACCCTCGTTAGGAGGCCTTTCATTTCTTAGTGATCTTGATGT  
TCAAACAACAACCTTATCGGGAACGATTCTTCTGGTGGACAGCTGACTA

>M6-PGSC0003DMG400018253-(rev)M6LRR-RLK\_1536

TGATGTTTCAAACAACAACCTTATCGGGAACGATTCTTCTGGTGGACAGCTGACTACATTTCCAGCTTCA  
AGATACGAAAACAATTCAGGCCTTTGTGGCGTCCCCCTTCTCCTTGTGG

>M6-PGSC0003DMG400018253-(rev)M6LRR-RLK\_1600

GCTTCAAGATACGAAAACAATTCAGGCCTTTGTGGCGTCCCCCTTCTCCTTGTGGCTCGGGCAATGGAC  
ACCATTCATCGAGTATTTACCATCATGGGAATAAGAAGCCTACAATA

>M6-PGSC0003DMG400018253-(rev)M6LRR-RLK\_1640

CCCTTCTCCTTGTGGCTCGGGCAATGGACACCATTTCATCGAGTATTTACCATCATGGGAATAAGAAGCC  
TACAATAAGGAATGGTGGTTGGTATTATGGTCTCTTTTGTATGTATTA

>M6-PGSC0003DMG400018253-(rev)M6LRR-RLK\_192

TCCTAGCGAGTTATTGGTGAAGTTGAAGAGCTTGAAGCGATTGGTGCTAGCCCACAATCAGTTTTTTGAT

AAAATTCCATCAGAATTGGGGCAGAGTTGCAGCACACTTGAGGAGCTTGA

>M6-PGSC0003DMG400018253-(rev)M6LRR-RLK\_256

TTTGATAAAATTCCATCAGAATTGGGGCAGAGTTGCAGCACACTTGAGGAGCTTGATCTTTCTGGAAACC  
GGCTGACTGGTGAACCTCCTTCAACTTTTAAATTGTGCTCCTCACTTTTC

>M6-PGSC0003DMG400018253-(rev)M6LRR-RLK\_384

TCTTGGTAACAATGAGCTATCGGGTGATTTCTTGAATACTGTTATCAGTTCATTGACAAATCTTAGGTATC  
TTTACTTGCCATTCAATAACATAACTGGTCATGTACCAAGGTCTTTGGT

>M6-PGSC0003DMG400018253-(rev)M6LRR-RLK\_448

AGGTATCTTTACTTGCCATTCAATAACATAACTGGTCATGTACCAAGGTCTTTGGTGAACCTGTACAAAAC  
TCAGGTAICTGACCTTAGTTCGAATGCGTTTATTGGGAATGTACCTTTT

>M6-PGSC0003DMG400018253-(rev)M6LRR-RLK\_512

CAAACTTCAGGTAICTGACCTTAGTTCGAATGCGTTTATTGGGAATGTACCTTTTGAGTTGTGTTTAGCT  
GCCTCAGGCTTTCCACTGGAGATGATGTTGTTAGCCAGTAATTATCTTA

>M6-PGSC0003DMG400018253-(rev)M6LRR-RLK\_576

TTTAGCTGCCTCAGGCTTTCCACTGGAGATGATGTTGTTAGCCAGTAATTATCTTACTGGAACCTGTGCCTA  
AACAGCTTGGACATTGTAGGAACCTCAGGAAGATTGATCTCAGCTTCAA

>M6-PGSC0003DMG400018253-(rev)M6LRR-RLK\_64

TGTCAAATCTCACTGTCCTAAATTTGTCTTTCAACAACCTTACCTCAGTTGAGTTTCCACCCTCTTTGGCA  
AATTGCCAGAGCCTCAATACTGAACATTGCCATAATTCGATCCGA

>M6-PGSC0003DMG400018253-(rev)M6LRR-RLK\_640

GTGCCTAACAGCTTGGACATTGTAGGAACCTCAGGAAGATTGATCTCAGCTTCAATTACCTGACTGGTT  
TGGTCCCATTGGAGATTTGGACCCTTCAAATCTTTGGGAATTGGTAATG

>M6-PGSC0003DMG400018253-(rev)M6LRR-RLK\_704

CTGGTTTGGTCCCATTGGAGATTTGGACCCTTCAAATCTTTGGGAATTGGTAATGTGGGCTAATAATCT  
CACAGGTGAAATTCCTGAGGGCATTTCATCAATGGAGGAAACCTTCAA

>M6-PGSC0003DMG400018253-(rev)M6LRR-RLK\_832

CTCAATAACAATTTTCATCTCAGGGGCACTTCCACAGTCCATTTCCAATTGTACCAACTTGGTTTGGGTTTC  
GTTGTCTAGCAATCGACTGTCTGGAGAGATACCACAAGGAATTGGGAAT

>M6-PGSC0003DMG400018253-(rev)M6LRR-RLK\_896

GGGTTTCGTTGTCTAGCAATCGACTGTCTGGAGAGATACCACAAGGAATTGGGAATCTTGCAAATCTTG  
CTATCCTTCAGTTAGGTAATAACTCACTTACTGGATCGATCCCTCGGGAAT

>M6-PGSC0003DMG400018253-(rev)M6LRR-RLK\_960

TCTTGCTATCCTTCAGTTAGGTAATAACTCACTTACTGGATCGATCCCTCGGGAATTAGGTTTCGTGCAGG  
AACTTGATATGGCTAGATTTGAATAGCAATGCTCTAACAGGTTCAATCCC

>M6-PGSC0003DMG400018263-(rev)M6LRR-RLK\_1037

TTATGCCAGCTAAATAATATCTTCGATTTTTTAAAAAAAAAAAAAAAAATCTTCAATTTTTTTAAACACTAGAAT  
AAATAAGGAATTATTTCCAAAAAACAGCAAATATTTTTTTTCTTAA

>M6-PGSC0003DMG400018263-(rev)M6LRR-RLK\_1098

AACACTAGAATAAATAAGGAATTATTTCCAAAAAACAGCAAATATTTTTTTTCTTAAAAATTCTTAATT  
AGTAAGAAAAGTACAAAAATATGTAAGTACTGTTACTGTATTTACTCTTCCA

>M6-PGSC0003DMG400018263-(rev)M6LRR-RLK\_1159

ATTCTTAATTAGTAAGAAAAGTACAAAAATATGTAAGTACTGTTACTGTATTTACTCTTCCATTTTGGTCAGTT  
CATGTGTATATATAATAGAAAATAAACTAAAATGCTTATTATCTAATG

>M6-PGSC0003DMG400018263-(rev)M6LRR-RLK\_122

TCTAAGAAGAACTAAGGTTGCATGGTGGTGGATTAAACAATGGTCCAAACAAGAACAATCCAAGTGA  
TCATCTTTTGTCTGCTTATTATTTCTATGCAAGTTTTGGTGCAGCTGGGAG

>M6-PGSC0003DMG400018263-(rev)M6LRR-RLK\_1220

TTGGTCAGTTCATGTGTATATATAATAGAAAATAAACTAAAATGCTTATTATCTAATGAACTAGGTTA  
AAATTAATCATATTAATTTTGTTAAATGACATTGCTAATTGTAATTTGA

>M6-PGSC0003DMG400018263-(rev)M6LRR-RLK\_1281

ACTAGGTTAAATTAATCATATTAATTTTGTTAAATGACATTGCTAATTGTAATTTGAGGTTACTAATTAA  
TGATTGTGAATTTAGAAAATTATCAAGCATTAACTGAAAGGGGAGCT

>M6-PGSC0003DMG400018263-(rev)M6LRR-RLK\_1342

TACTAATTAATGATTGTGAATTTAGAAAATTATCAAGCATTAACTGAAAGGGGAGCTATCTGGAGATA  
TCGAAGGCTTGTCTGAATTGCAGATATTGTATGTCTTCTACTCATCATAA

>M6-PGSC0003DMG400018263-(rev)M6LRR-RLK\_1403

CTGGAGATATCGAAGGCTTGTCTGAATTGCAGATATTGTATGTCTTCTACTCATCATAATTGAAAGTGTT  
AAAATTTGGAGAAAAAAAAAATTGTCTTAATTATGTTTCGCTCTGTTTCAAT

>M6-PGSC0003DMG400018263-(rev)M6LRR-RLK\_1586

TGTGGTAATATGACCATTTTTGTTTTGTGCTCGCCAAAGTGTCCTAAAGGATTCATTACAAAAAATAAT  
AGTTTAATGATTTTATTTGGTGCATAAAATGAAAGTTGAGTGATCATC

>M6-PGSC0003DMG400018263-(rev)M6LRR-RLK\_1647

AAAAAATAATAGTTTAATGATTTTATTTGGTGCATAAAATGAAAGTTGAGTGATCATCTGTGAAATTAT  
TCCTGTTCTTGAAGCACCATTTGCTTGTGATCATGCATTGCATGCACAC

>M6-PGSC0003DMG400018263-(rev)M6LRR-RLK\_1708

TGAAATTATTCCTGTTCTTGAAGCACCATTTGCTTGTGATCATGCATTGCATGCACACAAATATTTTTGA  
CTGTTGAAAGTTTTAAATTTATGTTCTGATTATCTGTTTCCTTAATAGG

>M6-PGSC0003DMG400018263-(rev)M6LRR-RLK\_1769

ATATTTTTGACTGTTGAAAGTTTTAAATTTATGTTCTGATTATCTGTTTCCTTAATAGGGATCTATCATACA  
ACAAAGGCATGACAGGTTCACTCCCTCAATCAATTGGAAATTTGAAGA

>M6-PGSC0003DMG400018263-(rev)M6LRR-RLK\_1830

TCTATCATACAACAAAGGCATGACAGGTTCACTCCCTCAATCAATTGGAAATTTGAAGAGTTTATCAATT  
CTGTAAGGGTATTATTATATGATAATGATTAAATGTTGTTAAATTCACCA

>M6-PGSC0003DMG400018263-(rev)M6LRR-RLK\_1891

TTATCAATTCTGTAAGGGTATTATTATATGATAATGATTAAATGTTGTTAAATTCACCAGCTGTTTTCATTA  
GAGTAATTGCTCCGAGCTGCCTCGCAGGATCCTTGTGGTTGTGGGTT

>M6-PGSC0003DMG400018263-(rev)M6LRR-RLK\_2013

CTGGACTGATACCAAACACAATTGGATCCCTTAGCCAGCTGGAATTTCTGTAAGGATATCAATTTCTTCT  
GTTTGCAACTTTTTATGCTTAACGAATTCAAGATATGGAGTATTTGAAGA

>M6-PGSC0003DMG400018263-(rev)M6LRR-RLK\_2074

ATTTCTTCTGTTTGCAACTTTTTATGCTTAACGAATTCAAGATATGGAGTATTTGAAGAACTTTTAGTCCTT  
TATGTTTTGTATAAAATTGGAAATTTGGCATGAGATGAGTTGGATGGA

>M6-PGSC0003DMG400018263-(rev)M6LRR-RLK\_2196

AACTGGTCAGTGAGGATTTATATAGCTGACCTCAACTGTTTGGGGACTGACGCTTAGTAATTTTTGTT  
GTTGTAGTAATTCTTGTATCCCTTACTTTGTCAAAGTCTTAG

>M6-PGSC0003DMG400018263-(rev)M6LRR-RLK\_2257

ATTTTTGTTGTTGTAGTAATTCTTGTATCCCTTACTTTGTCAAAGTCTTAGAGCTTCAGGTCAC

TAGATATGTTATACTAGATTGAAATATTTTTCTGTTTCTTCTACTGG

>M6-PGSC0003DMG400018263-(rev)M6LRR-RLK\_2318

CTTCAGGTCCTAGATATGTTATACTAGATTGAAATATTTTTCTGTTTCTTCTACTGGGCTACATTTCTAA

AATACTATCTGAATCATGCAGATCTTTGAATTTAAACAACCTTATCGG

>M6-PGSC0003DMG400018263-(rev)M6LRR-RLK\_2379

TACATTTCTAAAATACTATCTGAATCATGCAGATCTTTGAATTTAAACAACCTTATCGGACCGATACCAGC

TTCTGTTGGTAATTTATCAAAGCTACGTTGGCTGGACTTAGCTGATAAT

>M6-PGSC0003DMG400018263-(rev)M6LRR-RLK\_244

TCAACAAATTCTGGTGACTGTAAGTCCTACTTATCACATCTCTTTGTTGTTTTTTAACTCTATAATTATG

AATTTAACTTATATACACCATATCGCGAATAAAAAATAAAGTTATACT

>M6-PGSC0003DMG400018263-(rev)M6LRR-RLK\_2440

CGATACCAGCTTCTGTTGGTAATTTATCAAAGCTACGTTGGCTGGACTTAGCTGATAATAAGCTCAGTGG

ACCTCTCCAGTTTCCCATGGAAGCACACCTGGTCTAGACATGCTTGTTTC

>M6-PGSC0003DMG400018263-(rev)M6LRR-RLK\_2501

GCTCAGTGGACCTCTCCAGTTTCCCATGGAAGCACACCTGGTCTAGACATGCTTGTTCCACACAAAGCAT

TTGTGAGTAATACTGATTACTGTCAGTTCCTTAAGTAACACCTTCGTCTC

>M6-PGSC0003DMG400018263-(rev)M6LRR-RLK\_2562

ACAAAGCATTGTGAGTAATACTGATTACTGTCAGTTCCTTAAGTAACACCTTCGTCTCTCATTTTCATCTG

ATATACTTACCTCGCAGTCACCTGGGGAGAAATCAGTTCTCAGGT

>M6-PGSC0003DMG400018263-(rev)M6LRR-RLK\_2684

GATTCCAGATCAGCTATTCAGCTCAAATATGACTCTCAAACATTTGTAAGTTCCACTAACTGGAAGTGT

ATATATTTTTGAGAATTATTTGATGGATCAACTTCATTATTGTCCCACTC

>M6-PGSC0003DMG400018263-(rev)M6LRR-RLK\_2745

TGGAAGTGTATATATTTTTGAGAATTATTTGATGGATCAACTTCATTATTGTCCCACTCCAACGCTATGGT

GCTAGCTCTGACACTTGTTGCAAACCTACACCCGTTTGGCTAATGGTTTC

>M6-PGSC0003DMG400018263-(rev)M6LRR-RLK\_2806

ACGCTATGGTGCTAGCTCTGACACTTGTTGCAAACCTACACCCGTTTGGCTAATGGTTTCTTCTGTTTGGGT

CTTGTAATTGCACAGGCTGCTTGAGCAAACCTACTGGAAAAATA

>M6-PGSC0003DMG400018263-(rev)M6LRR-RLK\_2928

CCCTTCATTGGCACTTGTGCAGACTCTGGAGGTGGTGTAAAGTATTTCCAAAATCCATCATGCTCTTAAAA  
AATTCTAATAAGTGTCCATCTTTCTTGCTTTTCGATTACCTGGTGAAGTTT

>M6-PGSC0003DMG400018263-(rev)M6LRR-RLK\_2989

CTCTTAAAAAATTCTAATAAGTGTCCATCTTTCTTGCTTTTCGATTACCTGGTGAAGTTTTATTAAGTAGATA  
CCCATGTCCACTGTAGTCGTCTAGACAGGAATTCATTAGACGGATCGA

>M6-PGSC0003DMG400018263-(rev)M6LRR-RLK\_305

CTATAATTATGAATTTAACTTATATACACCATATCGCGAATAAAAAATAAAGTTATACTAGTACCTAGCAC  
AGTTTAAACATGTTATATCGTAAGTTACTTATTGTAAATAGTTCTTTTTT

>M6-PGSC0003DMG400018263-(rev)M6LRR-RLK\_3050

TAACTAGATACCCATGTCCACTGTAGTCGTCTAGACAGGAATTCATTAGACGGATCGATTCCATCAACC  
CTCAAAAATCTCACACTTATGAGTGAAGTGTGAGTAGACAAGCATTATGC

>M6-PGSC0003DMG400018263-(rev)M6LRR-RLK\_3111

CCATCAACCCTCAAAAATCTCACACTTATGAGTGAAGTGTGAGTAGACAAGCATTATGCTAATATAAAAA  
ATCCTTTTTATGAGTGTATCAGACCATCTATAAATTTCCGTATCACTTG

>M6-PGSC0003DMG400018263-(rev)M6LRR-RLK\_3172

ATATAAAAAATCCTTTTTATGAGTGTATCAGACCATCTATAAATTTCCGTATCACTTGCAGCTTCTTATCA  
AACAATAAATTCAGTGGCCCCTTGCCCAATCTTGCTGGCATGAATGCC

>M6-PGSC0003DMG400018263-(rev)M6LRR-RLK\_3233

GCTTCTTATCAAACAATAAATTCAGTGGCCCCTTGCCCAATCTTGCTGGCATGAATGCCCTCTACTACTTG  
TAAGTTCCTGAAACTCTTTTCTGCTAAGAAAATGCAGCAATCTTGATA

>M6-PGSC0003DMG400018263-(rev)M6LRR-RLK\_3294

CTACTACTGTAAAGTTCCTTGAAACTCTTTTCTGCTAAGAAAATGCAGCAATCTTGATATTGTGATAATTA  
CAGATTATGTCTTTCAGTACTTTAATTTGATTCTGTGGCCTATGGTCA

>M6-PGSC0003DMG400018263-(rev)M6LRR-RLK\_3355

GTGATAATTACAGATTATGTCTTTCAGTACTTTAATTTGATTCTGTGGCCTATGGTCATGTTTTGCAGAG  
ATATGAGCAATAATACATTAGCTCAGCTGATTTTCCGCAGTGGTTTTT

>M6-PGSC0003DMG400018263-(rev)M6LRR-RLK\_3416

TTTTGCAGAGATATGAGCAATAATACATTAGCTCAGCTGATTTTCCGCAGTGGTTTTCAACTTTGCAGTC  
ATTGACGACTCTGTATCTATCTCTCTCGCTTTCTCTTTATCTCTTAA

>M6-PGSC0003DMG400018263-(rev)M6LRR-RLK\_3477

CTTTGCAGTCATTGACGACTCTGTATCTATCTCTCTCTCGCTTTCTCTTTATCTCTTAAACATGCATGTGTGTA  
TCTGTCCCTGAGTTCACGTGCCTCAGCAGAACTCACATGCGTCTGAG

>M6-PGSC0003DMG400018263-(rev)M6LRR-RLK\_3538

TGCATGTGTGTATCTGTCCCTGAGTTCACGTGCCTCAGCAGAACTCACATGCGTCTGAGTGTATATGTTA  
TCCTAATGAAGTGGTTCATAGAATTTGTTATGCACCTCATTTGTATTTGT

>M6-PGSC0003DMG400018263-(rev)M6LRR-RLK\_3599

TATATGTTATCCTAATGAAGTGGTTCATAGAATTTGTTATGCACCTCATTTGTATTTGTTCTGCTCATAGG  
GTAATGGAGAACTCAACTTCAAGGAGAAATTCGCAAACCCTCTTCA

>M6-PGSC0003DMG400018263-(rev)M6LRR-RLK\_366

TACCTAGCACAGTTTAAACATGTTATATCGTAAGTTACTTATTGTAAATAGTTCTTTTTTTAGATGATCTGAG  
TTATGAAAGCAAATTGTTTTCGTTTTTTTTACTAGGGAATATATTAG

>M6-PGSC0003DMG400018263-(rev)M6LRR-RLK\_3660

TGCTCATAGGGTAATGGAGAACTCAACTTCAAGGAGAAATTCGCAAACCCTCTTCAGTCTTTTTTCAG  
TTGCAGACTGTGTGAGTGTCTGTACTTTTAGTACATGGTTCATGTCAT

>M6-PGSC0003DMG400018263-(rev)M6LRR-RLK\_3721

CTTTTTAGTTGCAGACTGTGTGAGTGTCTGTACTTTTAGTACATGGTTCATGTCATGCAACTATTCTCA  
TTTTCGCTGTGTGCTAGTCTTGTACAAAGTTTGAAAGGTAGTACAAAG

>M6-PGSC0003DMG400018263-(rev)M6LRR-RLK\_3782

AACTATTCTCATTTTCGCTGTGTGCTAGTCTTGTACAAAGTTTGAAAGGTAGTACAAAGTGACCTAGTAT  
ATAATTCTATGTTTTGCATTTTCGATTTTACGACAATGAGGTGGTTATTTA

>M6-PGSC0003DMG400018263-(rev)M6LRR-RLK\_3843

ACCTAGTATATAATTCTATGTTTTGCATTTTCGATTTTACGACAATGAGGTGGTTATTTATGACAGCAACTT  
GAGGGGAAACAAGATCAATGGAACCCTGAATATTGCATCCAACCTATAGC

>M6-PGSC0003DMG400018263-(rev)M6LRR-RLK\_3965

TCAATTAATAACTGATTGATTTGCAGAACAATTCATCGATTTCATATACAGTAAGACCTGGATTTCTTTTC  
AAATAATGTAAGTCCTCAAGCCACTTTTTCTCCACTTTAGCAATGAGAA

>M6-PGSC0003DMG400018263-(rev)M6LRR-RLK\_4026

TTTCCTTTTCAAATAATGTAAGTCCTCAAGCCACTTTTTCTCCACTTTAGCAATGAGAAAGAAATAATGGA

TCATTCATGTTAGGACATTTGATTTCGTCTGAATACAATTTAGTCATTTA

>M6-PGSC0003DMG400018263-(rev)M6LRR-RLK\_4087

AAATAATGGATCATTTCATGTTAGGACATTTGATTTCGTCTGAATACAATTTAGTCATTTAACAATCTCAGTT  
TTCTACTTGGTCACTTGGCAGACTTATGCATAATCCAGTTTGTATGAA

>M6-PGSC0003DMG400018263-(rev)M6LRR-RLK\_4148

AATCTCAGTTTTCTACTTGGTCACTTGGCAGACTTATGCATAATCCAGTTTGTATGAAGAAGGATCAGA  
AGACTATTGTGGCATTTCCTCAAACGAACTTTGGATATGCAACTCCACAAG

>M6-PGSC0003DMG400018263-(rev)M6LRR-RLK\_4209

AGGATCAGAAGACTATTGTGGCATTTCCTCAAACGAACTTTGGATATGCAACTCCACAAGATAATTGCCTT  
AAAACACAATGCAGTTCTGATCAAATTCTTAGCCCTACCTGTAAATGTGC

>M6-PGSC0003DMG400018263-(rev)M6LRR-RLK\_427

GATGATCTGAGTTATGAAAGCAAATTGTTTTCGTTTTTTTTACTAGGGAATATATTAGTGTCCACTATTT  
TAACTCCAATTTATTTTATGATCCCTTTTCAAGTTCATTACTTAAAAGGT

>M6-PGSC0003DMG400018263-(rev)M6LRR-RLK\_4270

AATTGCCTTAAAACACAATGCAGTTCTGATCAAATTCTTAGCCCTACCTGTAAATGTGCTTATCCGTACAC  
AGGCGACTTATTCTTCAGAGCTCCTTCCTTTTCTGACTTGACAAACACA

>M6-PGSC0003DMG400018263-(rev)M6LRR-RLK\_4392

CATTTATGAGTCACTTCAGAAGTCTATGCTATCTTCTTTTAGCCCAAATCAGGTGCCAGTAGATTCAGTTT  
CCTTGAGTAATCCAAAAAGAATTCAGAGTACTACCTTGTGTTACACCT

>M6-PGSC0003DMG400018263-(rev)M6LRR-RLK\_4453

GATTCAGTTTCCTTGAGTAATCCAAAAAGAATTCAGAGTACTACCTTGTGTTACACCTGCAAGTTTTTCC  
ATTTGGCCAAGATCATTTCACCGTACAGGGATTGCCACAATTGGATTT

>M6-PGSC0003DMG400018263-(rev)M6LRR-RLK\_4575

ACTTAGCAACCAGACTTACAAACCCCAACAAATTTGGACCATTCTTTTTTCAGTGGTGAAAGCTACAAAT  
ACTTCGAAGGTGATTGGTCATTTCAATTCATTGATATGTAAATGTATTT

>M6-PGSC0003DMG400018263-(rev)M6LRR-RLK\_4636

AGCTACAAATACTTCGAAGGTGATTGGTCATTTCAATTCATTGATATGTAAATGTATTTCTTATGCACAAG  
TTTCATCTGTTAGCCGACTATTAGTCGTGGTATTACTCTTGTAGTTTC

>M6-PGSC0003DMG400018263-(rev)M6LRR-RLK\_4697



TATGCACAAGTTTCATCTGTTAGCCGTA CTATTAGTCGTGGTATTACTCTTG TAGTTTCTTGTCCTTTAAGT  
TAGGTTATCGTCTATAGTTTTTTTACACTTCGATATATTGTTTTCAGT

>M6-PGSC0003DMG400018263-(rev)M6LRR-RLK\_4819

GATCAAGAGGAACTCACAAAGTCAATCACTAAAGGAATTATAATTGGAGCAGCTGCTGGTGGTGCTGTCC  
TTTTAATTTTATCAGTAATAATAGGAGTTTTAGTTTGCCAAAAGAAAAGAG

>M6-PGSC0003DMG400018263-(rev)M6LRR-RLK\_488

TCCACTATTTTAACTCCAATTTATTTTGATCCCTTTTCAAGTTCATTACTTAAAAGGTCATTTCAACTATTG  
AACATAGTAATGCTTTTCATTGTTTTGTATCAGAAAAGTCAAATATG

>M6-PGSC0003DMG400018263-(rev)M6LRR-RLK\_4880

TGCTGTCCTTTTAATTTTATCAGTAATAATAGGAGTTTTAGTTTGCCAAAAGAAAAGAGATCAAGAAGCT  
GTTAGAAAGAGTAACCCTTTCGGTGAGTTCTGTTACTGTTCTTTAGTGTT

>M6-PGSC0003DMG400018263-(rev)M6LRR-RLK\_4941

CAAGAAGCTGTTAGAAAGAGTAACCCTTTCGGTGAGTTCTGTTACTGTTCTTTAGTGTTGCTTCTAACTTT  
TTATTTTCGCTGATGGTTATCGTCTTTTTTATCTGTCCAGCTACATGGGA

>M6-PGSC0003DMG400018263-(rev)M6LRR-RLK\_5002

TTCTAACTTTTTATTTTCGCTGATGGTTATCGTCTTTTTTATCTGTCCAGCTACATGGGATTCTATAAAAGAC  
AGTGGTGGTGTCCACAATTTAAAAGGTGTCAAATGTTTCACATTTGAA

>M6-PGSC0003DMG400018263-(rev)M6LRR-RLK\_5063

CTATAAAAGACAGTGGTGGTGTCCACAATTTAAAAGGTGTCAAATGTTTCACATTTGAAGAGCTGAAAA  
AATACACCAATAATTTTTCAGAAAGCAATTACATTGGATCTGGTGGTTATG

>M6-PGSC0003DMG400018263-(rev)M6LRR-RLK\_5124

GCTGAAAAAATACACCAATAATTTTTCAGAAAGCAATTACATTGGATCTGGTGGTTATGGGAAGGTTGG  
TTTCTATTGACTTTTGATAATAACAATGTTATATTATAATGACTGGTTAAAA

>M6-PGSC0003DMG400018263-(rev)M6LRR-RLK\_5185

AAGGTTGGTTTCTATTGACTTTTGATAATAACAATGTTATATTATAATGACTGGTTAAAAGCTGTTGCTTT  
AATTCTATCCATACTATCTGCACCATCTTTCGGGCAAGCTAAAGTTAGT

>M6-PGSC0003DMG400018263-(rev)M6LRR-RLK\_5246

CTGTTGCTTTAATTCTATCCATACTATCTGCACCATCTTTCGGGCAAGCTAAAGTTAGTCGATCACTTAAA  
ACTTCTCGCGAACTTACAGGTATACAAAGGCACACTTCCAGATGGACAA

>M6-PGSC0003DMG400018263-(rev)M6LRR-RLK\_5307

ATCACTTAAAACCTTCTCGCGAACTTACAGGTATACAAAGGCACACTTCCAGATGGACAACCTATTGCAAT  
TAAAAGAGCAGAACAAGCATCTAAGCAAGGCGCCCTCGAGTTTAAAACCTG

>M6-PGSC0003DMG400018263-(rev)M6LRR-RLK\_5368

TATTGCAATTTAAAAGAGCAGAACAAGCATCTAAGCAAGGCGCCCTCGAGTTTAAAACCTGAGATTGAGAT  
TCTTTCAAGGTTTCATCACAAAATGTTGTCAGCCTTGTAGGATTTTGTTT

>M6-PGSC0003DMG400018263-(rev)M6LRR-RLK\_5429

ATTGAGATTCTTTCAAGGTTTCATCACAAAATGTTGTCAGCCTTGTAGGATTTTGTTTCAGGCAAGGTG  
AACAGATGCTGGTCTATGAGTTTATACCAAATGGATCCTTGAAAGAGAGT

>M6-PGSC0003DMG400018263-(rev)M6LRR-RLK\_549

TTTCAACTATTGAACATAGTAATGCTTTTCATTGTTTGTATCAGAAAAGTCAAATATGATTTTCTTCATCA  
ATTTCAATTCCGATGTTCCGAATTATTTTAAAATAATTAGTGTTTGG

>M6-PGSC0003DMG400018263-(rev)M6LRR-RLK\_5490

GGCAAGGTGAACAGATGCTGGTCTATGAGTTTATACCAAATGGATCCTTGAAAGAGAGTCTTTCAGGTA  
TTTTGAACTCTCATCGACTGTTGTTTTGAAAATCAGCTGTAGGTTGGAATG

>M6-PGSC0003DMG400018263-(rev)M6LRR-RLK\_5551

TTCAGGTATTTTGAACCTCTCATCGACTGTTGTTTTGAAAATCAGCTGTAGGTTGGAATGTCTGGGCATTG  
ATAAGTTAGTGTTAACTTCTGCAGGAAAGTCCGGGATTAAGTTAGATTGG

>M6-PGSC0003DMG400018263-(rev)M6LRR-RLK\_5612

TGGGCATTGATAAGTTAGTGTTAACTTCTGCAGGAAAGTCCGGGATTAAGTTAGATTGGAAGAGGAGA  
CTTCGGATAGCCCTTGGAGCAGCCAGAGGTTTGAATATCTTCATGATCATG

>M6-PGSC0003DMG400018263-(rev)M6LRR-RLK\_5673

GAGGAGACTTCGGATAGCCCTTGGAGCAGCCAGAGGTTTGAATATCTTCATGATCATGTTGACCCTCCT  
ATCATCCACAGAGATATCAAATCGAATAACATCTTGCTGGATGAGCGCTT

>M6-PGSC0003DMG400018263-(rev)M6LRR-RLK\_5734

GACCCTCCTATCATCCACAGAGATATCAAATCGAATAACATCTTGCTGGATGAGCGCTTACTGCAAAAG  
TTGCTGATTTTGGTCTTTCCAAGACGATGTATGAGCCAGACAAGGGTTAC

>M6-PGSC0003DMG400018263-(rev)M6LRR-RLK\_5795

CTGCAAAAGTTGCTGATTTTGGTCTTTCCAAGACGATGTATGAGCCAGACAAGGGTTACGTCAGCACTCA

GGTTAAAGGAACAATGGTAAGTCCAGACTTTACAAATGTTGTCATATGGT

>M6-PGSC0003DMG400018263-(rev)M6LRR-RLK\_5856

CAGCACTCAGGTAAAGGAACAATGGTAAGTCCAGACTTTACAAATGTTGTCATATGGTAGCATTCTCA  
GTTTCTATATTTCTTAAGTCACTGGAAACTCCTGTCCTTTAATAGTTATA

>M6-PGSC0003DMG400018263-(rev)M6LRR-RLK\_5917

CATTTCTCAGTTTCTATATTTCTTAAGTCACTGGAAACTCCTGTCCTTTAATAGTTATAGACTGGTGATCGT  
CTTGGTTCAATTCTTAAAGTTAACTGAAGTTGCGTCCTGATCAAT

>M6-PGSC0003DMG400018263-(rev)M6LRR-RLK\_5978

CTGGTGATCGTCTTGGTTCAATTCTTAAAGTTAACTGAAGTTGCGTCCTGATCAATTACACATTGTGC  
TGAAGTTATGTATGTAAGTTCATACAATGAAAGGAGTTCATTGGTTAAA

>M6-PGSC0003DMG400018263-(rev)M6LRR-RLK\_6039

CACATTGTGCTGAACTTATGTATGTAAGTTCATACAATGAAAGGAGTTCATTGGTTAACTGCTTAAAA  
GACTAAAACAACAGTTGATTTGTAATTTTCGCAGAGTAGAAAAGTTGAAA

>M6-PGSC0003DMG400018263-(rev)M6LRR-RLK\_610

TTTCTTCATCAATTTCAATCCGTATGTTCCGAATTATTTTAAAAATAATTAGTGTGGTATTTTTGTTCAA  
AATAAAATGATTGGTGCAGATGTTGTGTTAGAGTCACTGAAGGAAGA

>M6-PGSC0003DMG400018263-(rev)M6LRR-RLK\_6100

GCTTAAAAGACTAAAACAACAGTTGATTTGTAATTTTCGCAGAGTAGAAAAGTTGAAACCCTTGAACAC  
TTGCTATCAACTTTGTTGAAGAATCTGTAAGTGAACATTTAATTAATAC

>M6-PGSC0003DMG400018263-(rev)M6LRR-RLK\_6161

CTTGAACACTTGCTATCAACTTTGTTGAAGAATCTGTAAGTGAACATTTAATTAATACGAGCTGCTTTGT  
ACATTTATCGGCTTAGGGCTACATGGATCCAGAGTACTACACAACACAA

>M6-PGSC0003DMG400018263-(rev)M6LRR-RLK\_6222

GCTGCTTTGTACATTTATCGGCTTAGGGCTACATGGATCCAGAGTACTACACAACACAACAGTTGACTGA  
GAAGAGTGATGTCTATAGCTTCGGAGTTCTGCTGCTAGAGCTTATAACAG

>M6-PGSC0003DMG400018263-(rev)M6LRR-RLK\_6283

GTTGACTGAGAAGAGTGATGTCTATAGCTTCGGAGTTCTGCTGCTAGAGCTTATAACAGCACGGAGTCC  
TATTGTGAGAGGAAAATACATTGTGAAGGAATTGAGGCAAGCGATAGACAA

>M6-PGSC0003DMG400018263-(rev)M6LRR-RLK\_6344

CGGAGTCCTATTGTGAGAGGAAAATACATTGTGAAGGAATTGAGGCAAGCGATAGACAAGTCTAAAGA  
CATGTACAACATTGATGAGTTTGTGATCCTGCTATCCCCTCAAACATGACA

>M6-PGSC0003DMG400018263-(rev)M6LRR-RLK\_6405

CTAAAGACATGTACAACATTGATGAGTTTGTGATCCTGCTATCCCCTCAAACATGACACCTATAAGCTTC  
AGGAAGTTTGTGGATCTAGCTTTCACATGCCTCGAAGATGCAGGAGCTA

>M6-PGSC0003DMG400018263-(rev)M6LRR-RLK\_6466

TATAAGCTTCAGGAAGTTTGTGGATCTAGCTTTCACATGCCTCGAAGATGCAGGAGCTAATAGGCCAAC  
AATGGCTGAGGTAGTGAAAGAGATTGAGAATATCATGGAAATAGATGGATT

>M6-PGSC0003DMG400018263-(rev)M6LRR-RLK\_6527

AGGCCAACAAATGGCTGAGGTAGTGAAAGAGATTGAGAATATCATGGAAATAGATGGATTGAACAGTTG  
TGCTGAATCCAGATCAACTTCTGTGAGCCACGAAGGAACCAGCGCAACCTTT

>M6-PGSC0003DMG400018263-(rev)M6LRR-RLK\_6588

ACAGTTGTGCTGAATCCAGATCAACTTCTGTGAGCCACGAAGGAACCAGCGCAACCTTTGATCATCCTTA  
CAGTGAGGAAAGCCTAAATCGTTACAATGGGGTCACCAATTCGCGATAAA

>M6-PGSC0003DMG400018263-(rev)M6LRR-RLK\_6649

TCATCCTTACAGTGAGGAAAGCCTAAATCGTTACAATGGGGTCACCAATTCGCGATAAACACCAACTCTT  
CTCCTGAAACCAGGTACATTGTCATAGAAATGGAAAGTGTATTCAAGCAA

>M6-PGSC0003DMG400018263-(rev)M6LRR-RLK\_671

TTTTTGTTCAAAAATAAAATGATTGGTGCAGATGTTGTGTTAGAGTCACTGAAGGAAGAGTGGGAAAAC  
ATACCTCCAAGTTGGGATGGGTCTGATCCTTGTAACGATCCATGGGAAGGC

>M6-PGSC0003DMG400018263-(rev)M6LRR-RLK\_6710

CCAACTCTTCTCCTGAAACCAGGTACATTGTCATAGAAATGGAAAGTGTATTCAAGCAACTGTTGTGCTT  
TTGTGTTAGCTGTGTACATTCTGTGAACCTCTGTGTGCGGCGTAAATTGC

>M6-PGSC0003DMG400018263-(rev)M6LRR-RLK\_6771

GTTGTGCTTTTGTGTTAGCTGTGTACATTCTGTGAACCTCTGTGTGCGGCGTAAATTGCCTTATACTAGAA  
ATGATTCAAAGTCCATCTAAGGATTTTATAAACAGCCTTGTATGTTT

>M6-PGSC0003DMG400018263-(rev)M6LRR-RLK\_6832

TATACTAGAAATGATTCAAAGTCCATCTAAGGATTTTATAAACAGCCTTGTATGTTTCAACTGTTTGCT  
TCTGATAATCCAGGAGCTAGACTCCGTGGATTCAAATGAGTGATTTTA



GATCTTTGAACTCTAACCGATTTACTGGAAGCATACTGCTAGCATTG

>M6-PGSC0003DMG400018264-(rev)M6LRR-RLK\_1302

GTATTATGCAGATCTTTGAACTCTAACCGATTTACTGGAAGCATACTGCTAGCATTGGCTATCTGACAG  
AGCTTCATTGGCTCGATTTATCTGACAATCAGATAGAAGGAAACATTCCA

>M6-PGSC0003DMG400018264-(rev)M6LRR-RLK\_1426

CTAATGGGAGCAACCCTGGTCTTGATAAGCTTGTTAACTAAACGCTTGACGCATCTCCTTTTTCTTGA  
TGTTTTTTGTCTCTCAACTGCATTTTCTAAGATTATTTACATTTCTTC

>M6-PGSC0003DMG400018264-(rev)M6LRR-RLK\_1488

TTTTCTTGATGTTTTTTGTCTCTCAACTGCATTTTCTAAGATTATTTACATTTCTTCAGTCACTTTGGGAAG  
AATCAGCTATCCGGTGAAATTCCAGCTAGTCTTTTCCATTCTAATAT

>M6-PGSC0003DMG400018264-(rev)M6LRR-RLK\_1550

ACTTTGGGAAGAATCAGCTATCCGGTGAAATTCCAGCTAGTCTTTTCCATTCTAATATGACTCTGACACAT  
CTGTAAGTTCCATCGAATTGGAGAATGGAGTGAATGAATAATTTTGTCC

>M6-PGSC0003DMG400018264-(rev)M6LRR-RLK\_1612

CTGACACATCTGTAAGTTCCATCGAATTGGAGAATGGAGTGAATGAATAATTTTGTCCGTAATGGAGAC  
CTCACTTGTAGTTGAGCTTGCCTTTTGATATTCTTGTTAGTGCATGTTTTT

>M6-PGSC0003DMG400018264-(rev)M6LRR-RLK\_1674

TGGAGACCTCACTTGTAGTTGAGCTTGCCTTTTGATATTCTTGTTAGTGCATGTTTTTACTTCTGAGAGTA  
GTCATGTGAAAGAAGCTTGATAATTATATCACAAACAACCTTTCTTTTG

>M6-PGSC0003DMG400018264-(rev)M6LRR-RLK\_1736

CTGAGAGTAGTCATGTGAAAGAAGCTTGATAATTATATCACAAACAACCTTTCTTTTGATCATGCTTTACA  
GTTTCCTCATGCTTGTATATTCTAACTTGTAGGCTAGTTGAGAATAACA

>M6-PGSC0003DMG400018264-(rev)M6LRR-RLK\_1798

TGCTTTACAGTTTCCTCATGCTTGTATATTCTAACTTGTAGGCTAGTTGAGAATAACAAATTTACCGGGGT  
AATCCCGGATACATTAGGATTTGTCCAGACGATGAAAATGCTGTAAGTA

>M6-PGSC0003DMG400018264-(rev)M6LRR-RLK\_186

CTTAGGTTTCCTTTTTGTAAATAATATGAAGAAGTTGTCTCTTAAAAAAGTACTCCAATAAATAATCCAG  
AGATTATGGAAAATATTCAATAATCTTGAGGGAACATTATATTAACAT

>M6-PGSC0003DMG400018264-(rev)M6LRR-RLK\_1860

TACCGGGTAATCCCGGATACATTAGGATTTGTCCAGACGATGAAAATGCTGTAAGTATTGTTATCTTGT  
GCTTCCCTTTATAATCTAGTAAAATTTCTTGCTCTCTATGCCTTATAAA

>M6-PGSC0003DMG400018264-(rev)M6LRR-RLK\_1898

CGATGAAAATGCTGTAAGTATTGTTATCTTGTGCTTCCCTTTATAATCTAGTAAAATTTCTTGCTCTCTAT  
GCCTTATAAATTGTTTCTGGTATTGTAATAGTCGTCTTGACAGGAATT

>M6-PGSC0003DMG400018264-(rev)M6LRR-RLK\_248

ATAATCCAGAGATTATGGAAAATATTCAATAATCTTGAGGGAACATTATATTAACATTTCTGCTCTCTT  
CTAGATATGGTCAATTAAGTGTCTAGTATAGAAGAACTGATTCAATAT

>M6-PGSC0003DMG400018264-(rev)M6LRR-RLK\_310

TGCTCTCTTAGATATGGTCAATTAAGTGTCTAGTATAGAAGAACTGATTCAATATTTTATACAGCTGC  
TGCTTTAAAGTCTCTCACGAATTACTGGTATGGTCCTCCGATTGGAAT

>M6-PGSC0003DMG400018264-(rev)M6LRR-RLK\_372

TACAGCTGCTGCTTTAAAGTCTCTCACGAATTACTGGTATGGTCCTCCGATTGGAATGGAGAAGATCCC  
TGTGGGAGTAGTTGGGAAGGAGTTGGATGCAGAGATTCACGAGTGATTC

>M6-PGSC0003DMG400018264-(rev)M6LRR-RLK\_434

AAGATCCCTGTGGGAGTAGTTGGGAAGGAGTTGGATGCAGAGATTCACGAGTGATTTCCATGTAAGAA  
TTCGACGTGTATCCCTGCTTAAAATTACAGAAATCATATGGTTGATGCCATC

>M6-PGSC0003DMG400018264-(rev)M6LRR-RLK\_496

TAAGAATTCGACGTGTATCCCTGCTTAAAATTACAGAAATCATATGGTTGATGCCATCTTTCTCAATTTCA  
GAACATTGTCAAGTATACGTTTGAAAGGTCAGCTATCTGGAGACGTCCA

>M6-PGSC0003DMG400018264-(rev)M6LRR-RLK\_558

TCAATTCAGAACATTGTCAAGTATACGTTTGAAAGGTCAGCTATCTGGAGACGTCCAAGGATTATCTGA  
ACTGGAAACTTTGTAGGTTTTCTTTAACATTTTCATGTTTCTCCTGCACA

>M6-PGSC0003DMG400018264-(rev)M6LRR-RLK\_62

TGTTCTGTCAATAGCAGCATATACTAATCCTGTTGATGGTAAGTTGCTTTTATTCTTCTGTATCAAATGCTT  
CTTAACCAAGTGTACACTAATATTTGATTTTCTGTGAGTACTAGTGTTT

>M6-PGSC0003DMG400018264-(rev)M6LRR-RLK\_620

TTATCTGAACTGGAAACTTTGTAGGTTTTCTTTAACATTTTCATGTTTCTCCTGCACACCCTTTTTTCTTATG  
ACTGAGCAATACTTTGGGATAATTTTTCAATTCTAATTATTGACTGT

>M6-PGSC0003DMG400018264-(rev)M6LRR-RLK\_682

TTTTTCTTATGACTGAGCAATACTTTGGGATAATTTTTCAATTCTAATTATTGACTGTGTCTTATAGGGATC  
TATCATATAACAAAGATTTGACAGGATCTCTTCCTCAGTCTATTGGAA

>M6-PGSC0003DMG400018264-(rev)M6LRR-RLK\_744

TATAGGGATCTATCATATAACAAAGATTTGACAGGATCTCTTCCTCAGTCTATTGGAAAATTGACAAAGT  
TATCAAATTTGTAAGTGAAGGTGAATAATCATCGCTCAAGTATTCACCTA

>M6-PGSC0003DMG400018264-(rev)M6LRR-RLK\_806

GACAAAGTTATCAAATTTGTAAGTGAAGGTGAATAATCATCGCTCAAGTATTCACCTACCAGCTAATCTC  
ATGATAATATGCTGGTGTCTTTCTTAATTTTATGACAGGATCCTTGTTGGT

>M6-PGSC0003DMG400018264-(rev)M6LRR-RLK\_868

CTAATCTCATGATAATATGCTGGTGTCTTTCTTAATTTTATGACAGGATCCTTGTTGGTTGTGGATTTCCG  
GACCAATACCAGAATCCATAGGAGATCTGAGGCGGCTGGCTTTTCTGTA

>M6-PGSC0003DMG400018264-(rev)M6LRR-RLK\_930

GATTTTCCGGACCAATACCAGAATCCATAGGAGATCTGAGGCGGCTGGCTTTTCTGTAAGCATTCTGTGG  
AACTCTTTGTACTTTGAACGCGCGACCAGTACGTGACATATTTTACCAGA

>M6-PGSC0003DMG400018264-(rev)M6LRR-RLK\_992

TTCTGTGGAACCTTTTGTACTTTGAACGCGCGACCAGTACGTGACATATTTTACCAGAACTCCAAAGGTC  
ATATATGAGCTTCTTAAAATGGTTAACGTAATGTGTGGCTTTTGGTGCTA

>M6-PGSC0003DMG400018308M6LRR-RLP\_0

GTTGTTAGACTTTTCAGATTTTTCATTTGATCTTTGTCTGTACTTTGATCAATATTCTGAAGATGAGTGTATC  
GAAAAAATTCATTCAACAGCTTATTGTGTTTGACATTTTCGTCGCGCT

>M6-PGSC0003DMG400018308M6LRR-RLP\_1054

AATGAATCCATCCCGGGAGCTGTTGGAAAACCTACCAAGTCTTGTTCTTTTGGATTTATCTTGGAACAGAA  
TCACGGGATCAGTCCCTGATCTTTTTCTGTTATCGTCGTTGAGGGAATTA

>M6-PGSC0003DMG400018308M6LRR-RLP\_1178

TTTCTCATAATCAGTTAACTGGTGTAAACGGAGAGTATTGGACGTCTTTCCAAACTTGAGAAGTTATACCTT  
GACTTCAATCAGCTTGAAGGCACAATATCTGAAGCTCATTTGTTCAAGC

>M6-PGSC0003DMG400018308M6LRR-RLP\_124

GTTACCTGTGGTGTGTTGTTTCAGTTCAGGAGTTGTTGATGGGAATATCAAGTGCCTTCAAAGGAATTA



GAAGCTCTTCTCAGTTTCAAACGGGAGTTGTTAGATGTCCGTGGACGTCTT

>M6-PGSC0003DMG400018308M6LRR-RLP\_1240

TTATACCTTGACTTCAATCAGCTTGAAGGCACAATATCTGAAGCTCATTGTTCAAGCTCTCGAAATTACG  
TGAGCTGGACCTCTTATAAACTCAACTACATATTCGAGTCAGTTCA

>M6-PGSC0003DMG400018308M6LRR-RLP\_1302

GAAATTACGTGAGCTGGACCTCTTATAAACTCAACTACATATTCGAGTCAGTTCAGATTGGATCCCG  
CCTTTTCAGTTGGATTTCAATCGTTTTACCCACTGCAAATTGGGTCCTCA

>M6-PGSC0003DMG400018308M6LRR-RLP\_1426

CCAAACTGGCTGAGGAATCAAACAACATTTCCGAGCTTGATTTTTAGCTTCTGGAATTTCCGGGTGACG  
TTCCTAGTTGGTTCTGGGAGCAGTTGCCTGGATTGACCTTCTTAAACCTT

>M6-PGSC0003DMG400018308M6LRR-RLP\_1488

GGGTGACGTTCTAGTTGGTTCTGGGAGCAGTTGCCTGGATTGACCTTCTTAAACCTTTCTTACAATGAT  
ATAGGAGGAAATGTACCAGATCTCTCAAAGAAGATGAGTGATCTTCTTTG

>M6-PGSC0003DMG400018308M6LRR-RLP\_1550

ACAATGATATAGGAGGAAATGTACCAGATCTCTCAAAGAAGATGAGTGATCTTCTTTGCATAGATTGG  
CTACAAACAAATTCATCGGTCCAGTACCACGTTTTCTACCAGTGTTATAA

>M6-PGSC0003DMG400018308M6LRR-RLP\_1612

GATTTGGCTACAAACAAATTCATCGGTCCAGTACCACGTTTTCTACCAGTGTTATAACAGTTGATCTCTC  
CAACAACATGTTTTCCGGTACCATCTCCTTCATTTGTGACAATTTTGAT

>M6-PGSC0003DMG400018308M6LRR-RLP\_1674

TGATCTCTCCAACAACATGTTTTCCGGTACCATCTCCTTCATTTGTGACAATTTTGATTACTTGGGATATCT  
TAACCTCTCAGACAACAGATTGTCTGGAGAGCTTCTCACTGCTGGAC

>M6-PGSC0003DMG400018308M6LRR-RLP\_1736

TGGGATATCTTAACCTCTCAGACAACAGATTGTCTGGAGAGCTTCTCACTGCTGGACGCTTAGAAGTAT  
CGTGCATCTTAACCTTAGGGACTAATAACTTCTTCGGGGAGATACCTGATT

>M6-PGSC0003DMG400018308M6LRR-RLP\_1798

AGAAGTATCGTGCATCTTAACCTTAGGGACTAATAACTTCTTCGGGGAGATACCTGATTGATAGGCTCAT  
TGGAGACGATGGGAATGCTGCATCTTCAAACAATCATTGACAGGAGAA

>M6-PGSC0003DMG400018308M6LRR-RLP\_186

GGAATTAGAAGCTCTTCTCAGTTTCAAACGGGAGTTGTTAGATGTCCGTGGACGTCTTTCTTCATGGGGA  
AATGAAGGATTTAATCAAGATTGTTGCACATGGAGAGGTGTCCAGTGTGA

>M6-PGSC0003DMG400018308M6LRR-RLP\_1922

CTCAGTCCCTGGCAAATTGCAAAAAGTTGAGGGTTATAGACGTTCCGGTCTAATAACTTGTCTGGTGAAAT  
TCCAGAATGGATTGGGAGTAACATATCTGATATCATTATTGTTATCTTAA

>M6-PGSC0003DMG400018308M6LRR-RLP\_1984

GGTGAAATTCCAGAATGGATTGGGAGTAACATATCTGATATCATTATTGTTATCTTAAAATCCAACAGGT  
TTAGTGGAATCATACCTTCAACCATATGCCAGCTAAAAGAACTTCAAATC

>M6-PGSC0003DMG400018308M6LRR-RLP\_2046

CAACAGGTTTAGTGGAATCATACCTTCAACCATATGCCAGCTAAAAGAACTTCAAATCTTGGACTTATCT  
GAAAATAAGATATCCGGGATCATACCAAATGTATCAACAACCTCACTGC

>M6-PGSC0003DMG400018308M6LRR-RLP\_2170

ACGGATGAAGAGAGCACAATGCACCAAATCAAGAGTTGGTATTTTCAGGTCGATGATCAAGGTGATGTC  
AAAATAAATGCCTCATACGATGAACTGCAGTTTTGATGTGGAAGGGACGA

>M6-PGSC0003DMG400018308M6LRR-RLP\_2232

TGATGTCAAATAAATGCCTCATACGATGAACTGCAGTTTTGATGTGGAAGGGACGACAATTTGAATA  
CAGCAGCATACTTGGTATGGTAAAGAGCCTCGATCTTTCAAGCAACAACAT

>M6-PGSC0003DMG400018308M6LRR-RLP\_2294

TTGAATACAGCAGCATACTTGGTATGGTAAAGAGCCTCGATCTTTCAAGCAACAACATGGTGGGAGAAA  
TCCCGGTTGAAATTACATCTCTTGTAGGTTTGCACGGTTTGAACCTGTCTGA

>M6-PGSC0003DMG400018308M6LRR-RLP\_2418

CAACTTAACCGGCAGCATCCCTCTGAGGATTGGTCAAATGAGGGCACTAAATTTCTTGACTTGAGCATA  
AATGATCTTACAGGGGAAATTCCTACTAGCGTTTACAGTTAAGTCACCT

>M6-PGSC0003DMG400018308M6LRR-RLP\_2480

TGAGCATAAATGATCTTACAGGGGAAATTCCTACTAGCGTTTACAGTTAAGTCACCTGGGGGTCTTGAA  
CTTGCTTACAACAACCTTGTCTGGTCTGAATCCCTTTAGGCGAACACTTAC

>M6-PGSC0003DMG400018308M6LRR-RLP\_2542

GTCTTGAACCTTGTCTTACAACAACCTTGTCTGGTCTGAATCCCTTTAGGCGAACACTTACTGACTTTCAACAA  
CAGATCTTACATTGAAATCATGGACTTTGCGGCTATCCACTAACAGAA

>M6-PGSC0003DMG400018308M6LRR-RLP\_2604

TTTCAACAACAGATCTTACATTGGAAATCATGGACTTTGCGGCTATCCACTAACAGAAGCTTGCTCTCTG  
GAGGAACTTCCTCGAGACTCAACGTTGAGTGATGAGGACGAGTTTATAAC

>M6-PGSC0003DMG400018308M6LRR-RLP\_2666

GCTCTCTGGAGGAACTTCCTCGAGACTCAACGTTGAGTGATGAGGACGAGTTTATAACTCCAGAATTTTA  
TATTAGTATGGGAATCAGCTTTATTTCTGCATTTTTGGGAGTCTCAGCTA

>M6-PGSC0003DMG400018308M6LRR-RLP\_2728

GAATTTTATATTAGTATGGGAATCAGCTTTATTTCTGCATTTTTGGGAGTCTCAGCTATGATGTTGAATAG  
AAGGTGGACTTACGGATACTAGGAAATCAATAATGTAACATCACACAGT

>M6-PGSC0003DMG400018308M6LRR-RLP\_2790

GTTGAATAGAAGGTGGACTTACGGATACTAGGAAATCAATAATGTAACATCACACAGTTAAATGTAGGT  
TTACTTAAATACCATGATAAGGAGCTATGTAATCTCGAGTTCTTGAAACTT

>M6-PGSC0003DMG400018308M6LRR-RLP\_2846

GTTAAATGTAGGTTTACTTAAATACCATGATAAGGAGCTATGTAATCTCGAGTTCTTGAAACTTTGCACTT  
GCCTGAATTTTTATTCCATGTGCATTGTACACCACACGAATCAGCTGAT

>M6-PGSC0003DMG400018308M6LRR-RLP\_310

CAAACCAGTAATGTCATTAGACTCGACCTTCGTGGTCCTTCTAGTCTCAATGCATCCGTTGCCATTGCGCC  
ATTGATAGGTAAGATAAGTCCTGCCTTACAAGAATTGAAGCAATTAAG

>M6-PGSC0003DMG400018308M6LRR-RLP\_372

CATTGCGCCATTGATAGGTAAGATAAGTCCTGCCTTACAAGAATTGAAGCAATTAAGTATTTGGATCTT  
AGTTACAATCGAATTCAGGAGGTATACAGGACTTTCTTGTTCTCTAAG

>M6-PGSC0003DMG400018308M6LRR-RLP\_434

TGGATCTTAGTTACAATCGAATTCAGGAGGTATACAGGACTTTCTTGTTCTCTAAGTAAGTTGGAATA  
CCTAACTTATCTTGTGTTGGTGATGATTTTACGACAGTTCCTCCTAATC

>M6-PGSC0003DMG400018308M6LRR-RLP\_496

TTGGAATACCTAACTTATCTTGTGTTGGTGATGATTTTACGACAGTTCCTCCTAATCTTGCGATCTTTCT  
AGCTTAAACACCTTGATTTGAGCTATAATGATTTCTATCTGTGAAT

>M6-PGSC0003DMG400018308M6LRR-RLP\_558

CGATCTTCTAGCTTAAACACCCTTGATTTGAGCTATAATGATTTCTATCTGTGAATAACCTTGAATGGA

TTTCGAGTCTTCATCAATTGAGATACCTAGCTATAGGTTATGCTAATAA

>M6-PGSC0003DMG400018308M6LRR-RLP\_62

TGAGTGTATCGAAAAAATTCATTCAACAGCTTATTGTGTTTGACATTTTCGTCGCGCTGTCAGTTACCTGT  
GGTGTGTGTTCAAGTTCAGGAGTTGTTGATGGGAATATCAAGTGCCTTC

>M6-PGSC0003DMG400018308M6LRR-RLP\_620

TTGAATGGATTTTCGAGTCTTCATCAATTGAGATACCTAGCTATAGGTTATGCTAATAATCTGAATAATTCT  
GTATATACCTGGCTGTTTAAGTTAAGCAATCTGACTCACCTTGATCTCT

>M6-PGSC0003DMG400018308M6LRR-RLP\_682

AATAATTCTGTATATACCTGGCTGTTTAAGTTAAGCAATCTGACTCACCTTGATCTCTCTGGTAATACTTTA  
TATGGTCAAATTCCTGATGCTTTTTGGAATATGAAATCCTTAAACAC

>M6-PGSC0003DMG400018308M6LRR-RLP\_744

TAATACTTTATATGGTCAAATTCCTGATGCTTTTTGGAATATGAAATCCTTAAACACTTTGATCTGTCTCG  
GAATGCGCTTGGAGGTGGCTTCCCTAGATGTCTTGGTAACAGTAGCAA

>M6-PGSC0003DMG400018308M6LRR-RLP\_806

ATCTGTCTCGGAATGCGCTTGGAGGTGGCTTCCCTAGATGTCTTGGTAACAGTAGCAATTTGAAGTTGTT  
GCGACTGTCCTCCAACAATCTAGATGGGCAGCTACCTGAGATAATGAATA

>M6-PGSC0003DMG400018308M6LRR-RLP\_868

AAGTTGTTGCGACTGTCCTCCAACAATCTAGATGGGCAGCTACCTGAGATAATGAATAACTTGTCATGCG  
TGTCACATTCTCTCGAGTACCTGAACCTAGAAGAGAATCACATTGGTGGT

>M6-PGSC0003DMG400018308M6LRR-RLP\_930

GTCATGCGTGTCACATTCTCTCGAGTACCTGAACCTAGAAGAGAATCACATTGGTGGTTCCTGACTGAT  
GTTGTAGCTAAGTTTGCATCTCTGAGAGAGCTGAGGCTCGGGCGTAACAA

>M6-PGSC0003DMG400018308M6LRR-RLP\_992

TGACTGATGTTGTAGCTAAGTTTGCATCTCTGAGAGAGCTGAGGCTCGGGCGTAACAAGTTGAATGAAT  
CCATCCGGGAGCTGTTGGAAAACCTACCAAGTCTTGTTCTTTTGGATTTAT

>M6-PGSC0003DMG400018367-(rev)M6LRR-RLK\_0

CTCTGTTAAACAATGCTTTGCTTGCATTTTTAGTTTTGTTCTTTTGTTCAGCTCAATTATATGAAATC  
ATGATGTTTTTCTCAGCTTCTTCTCATTATTTCTTCATAATTCAC

>M6-PGSC0003DMG400018367-(rev)M6LRR-RLK\_10004

ACAGAAATCGATACTGATAAGTTAAAAGGAACCAAGTAGTTGGTGTA ACTCCAATGTGAAGCCTGTTCA  
CAGTGCCTCCCCATTATCATCTTTCAGCTACCCTTCTAGCAATGACAGAG

>M6-PGSC0003DMG400018367-(rev)M6LRR-RLK\_10065

CCTGTTACAGTGTCTCCCCATTATCATCTTTCAGCTACCCTTCTAGCAATGACAGAGAAGAGATTAAAT  
GCATCATATGATTTCTTAGGGACTATTTCCATTTGGCTCCACCTTCCAT

>M6-PGSC0003DMG400018367-(rev)M6LRR-RLK\_10126

GAGATTAAATGCATCATATGATTTCTTAGGGACTATTTCCATTTGGCTCCACCTTCCATATCCTATTCCCGC  
TATCTTATAGATTGATCGTACTACAATTGTGTGCAGGACA ACTAGTA

>M6-PGSC0003DMG400018367-(rev)M6LRR-RLK\_10187

CCTATTCCCGCTATCTTATAGATTGATCGTACTACAATTGTGTGCAGGACA ACTAGTACAGAGTACTATA  
TTACTGTTAATCAAGGAAGAGTGAAGTAGTTTTCGTGTGGCTGTTTTCT

>M6-PGSC0003DMG400018367-(rev)M6LRR-RLK\_10248

GAGTACTATATTACTGTTAATCAAGGAAGAGTGAAGTAGTTTTCGTGTGGCTGTTTTCTGAAGCCCATCT  
CATATCTCTTCTAGCATGACTAAGATTTAGCTGTTGTATAGGATTTGCC

>M6-PGSC0003DMG400018367-(rev)M6LRR-RLK\_10309

AGCCCATCTCATATCTCTTCTAGCATGACTAAGATTTAGCTGTTGTATAGGATTTGCCTTGCGCATTTTG  
TTGTA ACTATCTTTAATATTTCTTGCAGCCTGAGCCTGAATACAGGCC

>M6-PGSC0003DMG400018367-(rev)M6LRR-RLK\_10370

GCGCATTTTGTGTAACTATCTTTAATATTTCTTGCAGCCTGAGCCTGAATACAGGCCACAAATGTCAGA  
AGTGGTTCAAGACCTCATACAAATGATAAGAAGAGAATCTCCCAGTAGA

>M6-PGSC0003DMG400018367-(rev)M6LRR-RLK\_10431

AAATGTCAGAAGTGGTTCAAGACCTCATACAAATGATAAGAAGAGAATCTCCCAGTAGATCCGATGAAG  
AATGATTTGAACCAGACATGCATGCTATAGCAGATTCAGGCATGGAGTAAC

>M6-PGSC0003DMG400018367-(rev)M6LRR-RLK\_10492

CGATGAAGAATGATTTGAACCAGACATGCATGCTATAGCAGATTCAGGCATGGAGTAACCAAGACTTCC  
AAGATTTTTTTACTTTTGCAAAGAACTTAACTCGAACTGAGATACTTGAA

>M6-PGSC0003DMG400018367-(rev)M6LRR-RLK\_10553

AGACTTCCAAGATTTTTTTACTTTTGCAAAGAACTTAACTCGAACTGAGATACTTGGAACCAAGATTTTG  
AGGCTGTAGATGCAGTGCCCTGCCAGCAAACCTTCATACCTCCAAGACA

>M6-PGSC0003DMG400018367-(rev)M6LRR-RLK\_10614  
AAAGATTTTGAGGCTGTAGATGCAGTGCCCTGCCAGCAAACCTTCATACCTCCAAGACAAAGGGCTGGC  
TAGAAACTGCGCGATTTCAACCAACACAGCTCGGGTTATCCTGATTCTTAG

>M6-PGSC0003DMG400018367-(rev)M6LRR-RLK\_10675  
GGGCTGGCTAGAACTGCGCGATTTCAACCAACACAGCTCGGGTTATCCTGATTCTTAGTACAATTTTT  
GCAATCATTCTAATGTTCAATTTATAGTCCAAACAGAAACCACAATGCATA

>M6-PGSC0003DMG400018367-(rev)M6LRR-RLK\_10736  
CAATTTTTTGCAATCATTCTAATGTTCAATTTATAGTCCAAACAGAAACCACAATGCATAAAATGCACTAAC  
CCCATTGTTTTGAAAGCTTATTTATGGTTGTTAATTGGTATATCTGAAG

>M6-PGSC0003DMG400018367-(rev)M6LRR-RLK\_10797  
ATGCACTAACCCCATTTGTTTTGAAAGCTTATTTATGGTTGTTAATTGGTATATCTGAAGTTGTAAATCTTT  
ATTTGTTCTGCTGTACATTTTCAATTGTTGTACAAGAATATTCTTCAC

>M6-PGSC0003DMG400018367-(rev)M6LRR-RLK\_10858  
GTAAATCTTTATTTGTTCTGCTGTACATTTTCAATTGTTGTACAAGAATATTCTTCACACTTTCAACATGG  
ACTTTCTGTAGCACATTTTTCAGCCTTCAGTATCATCATGGATATATT

>M6-PGSC0003DMG400018367-(rev)M6LRR-RLK\_1159  
TATGTTATTGTTGTTTGAAGTAATTTACAAACAACCTCCATCATACACAAACAAAAACGTTAAAAATAACC  
TAATCGTTTCACTTACATTCTCAAAAACTTGCATGCCATAGTTACCAA

>M6-PGSC0003DMG400018367-(rev)M6LRR-RLK\_122  
CATATTTGGTGGGTTTTTCTTCTTGTACTGTACTTCAATTTTTACTTCTCCTTCTTCAACTGTCCAGAGTT  
AGTTTTTTTTTTTTTTTTTTTTTTTTTTTTGTTTCTAGATTTGTTCTATCCTTTT

>M6-PGSC0003DMG400018367-(rev)M6LRR-RLK\_1220  
AAAAATAACCTAATCGTTTCACTTACATTCTCAAAAACTTGCATGCCATAGTTACCAATTCTACTAACAG  
TGGACAAGCTGTCATTATTTAGAAAAAAGAAAAGAAAAAGAGACAGTC

>M6-PGSC0003DMG400018367-(rev)M6LRR-RLK\_1281  
CTACTAACAGTGGACAAGCTGTCATTATTTAGAAAAAAGAAAAGAAAAAGAGACAGTCCCAGGAAATT  
GAAGGGGGGAGAAGAGGAAATGAAGTACTGACTCCTAGGATGCTAGTCAAG

>M6-PGSC0003DMG400018367-(rev)M6LRR-RLK\_1342  
AGGAAATTGAAGGGGGGAGAAGAGGAAATGAAGTACTGACTCCTAGGATGCTAGTCAAGTGTAGGGG

GCTATGGCCTCGTCAAGTGATATGTGAATTCAACACATATTATTGTCCTAAAT

>M6-PGSC0003DMG400018367-(rev)M6LRR-RLK\_1403

TAGGGGGCTATGGCCTCGTCAAGTGATATGTGAATTCAACACATATTATTGTCCTAAATATCTACTAAAT

TGCCATCTTGATCGTATAAACTTTGCTTGGTTTGAAGTTAGCATGCTTTA

>M6-PGSC0003DMG400018367-(rev)M6LRR-RLK\_1464

CTACTAAATTGCCATCTTGATCGTATAAACTTTGCTTGGTTTGAAGTTAGCATGCTTTAAATGTTTGAAT

CAAATTTTCTAGTTCATTCATGATCAATATCAACAATATTCTTATATGG

>M6-PGSC0003DMG400018367-(rev)M6LRR-RLK\_1525

TGTTTGAATCAAATTTTCTAGTTCATTCATGATCAATATCAACAATATTCTTATATGGTTTGAATTTCTA

ACTCTGGCATTTCCTTTCTGCTGGTCTAGTTGCTGCAATTAATGCCT

>M6-PGSC0003DMG400018367-(rev)M6LRR-RLK\_1586

TGAAATTTCTAACTCTGGCATTTCCTTTCTGCTGGTCTAGTTGCTGCAATTAATGCCTTACATGCTTCCCT

GGGATCACCTCCCCTTCTGGCTGGGGTGTGAGTGCAGACCCATGTGA

>M6-PGSC0003DMG400018367-(rev)M6LRR-RLK\_1647

CATGCTTCCCTGGGATCACCTCCCCTTCTGGCTGGGGTGTGAGTGCAGACCCATGTGATGGACAATGGC

AAGGGGTCGTATGCCAGGAGACAAATATAATATCCATGTAACCTACCTCTT

>M6-PGSC0003DMG400018367-(rev)M6LRR-RLK\_1708

GACAATGGCAAGGGTTCGTATGCCAGGAGACAAATATAATATCCATGTAACCTACCTCTTATTCGTTGCA

GCATTTTCATGGATATTTGGAAGTCGTAATGTTAATCCTTCTAATCATCTTC

>M6-PGSC0003DMG400018367-(rev)M6LRR-RLK\_1769

TCGTTGCAGCATTTTCATGGATATTTGGAAGTCGTAATGTTAATCCTTCTAATCATCTTCTTTGCAGTCAATT

AAATGCTGCTAACTTGGCAGGTGAACTAGGGGATAACTTAGCATCATT

>M6-PGSC0003DMG400018367-(rev)M6LRR-RLK\_183

CTGTCCAGAGTTAGTTTTTTTTTTTTTTTTTTTTTTTGTCTAGATTTGTTCTATCCTTTTCTCAATTTTGAATA

CCCATTTTGTATCAGTTGGGTGTCATTGATTGCTTCTTTTGGT

>M6-PGSC0003DMG400018367-(rev)M6LRR-RLK\_1830

TGCAGTCAATTAATGCTGCTAACTTGGCAGGTGAACTAGGGGATAACTTAGCATCATTTTCTTCTCTCA

AAACGATGTACGTGTACCCACAGATATATCTCCTTTGACATATATTTGG

>M6-PGSC0003DMG400018367-(rev)M6LRR-RLK\_1891

CTTCTCTCAAACGATGTACGTGTACCCACAGATATATCTCCTTTGACATATATTTGGTTGTGTTTTCTGT  
GCATGTGCTGCATATATTATGTGGATGCTTCCTTTCTAGAGGTTTCT

>M6-PGSC0003DMG400018367-(rev)M6LRR-RLK\_1952

GTGTTTTCTGTGCATGTGCTGCATATATTATGTGGATGCTTCCTTTCTAGAGGTTTCTTTTATTGTGTGAC  
ATGTGAACAATAATTGTGGAACTTCTTGTGGCAGAGATCTGAGTAAC

>M6-PGSC0003DMG400018367-(rev)M6LRR-RLK\_2013

TATTGTGTGACATGTGAACAATAATTGTGGAACTTCTTGTGGCAGAGATCTGAGTAACAATCACATCG  
GTGGAACCTTCCCATCCAGTCTGCCAGTTACATTGCAGAATATGTATGTAT

>M6-PGSC0003DMG400018367-(rev)M6LRR-RLK\_2074

TCACATCGGTGGAACCTTCCCATCCAGTCTGCCAGTTACATTGCAGAATATGTATGTATTATCATTATCCT  
AGAAGGGGAAGCAGAGAATGAAGCTTGAAGTATCACAGCTTACCTTTTG

>M6-PGSC0003DMG400018367-(rev)M6LRR-RLK\_2135

TCATTATCCTAGAAGGGGAAGCAGAGAATGAAGCTTGAAGTATCACAGCTTACCTTTTGAGCAAACCATT  
TGATAGTCTTTACCTTTTGGCAGTTTTCTTTCAGATAATGATTTAGCCGG

>M6-PGSC0003DMG400018367-(rev)M6LRR-RLK\_2196

CAAACCATTTGATAGTCTTTACCTTTTGGCAGTTTTCTTTCAGATAATGATTTAGCCGGAAGTATCCCCAG  
TTCTTTATCTTCCCTAAGTCAACTGTCAGCAATGTGAGTTTCAGCTTAT

>M6-PGSC0003DMG400018367-(rev)M6LRR-RLK\_2257

GTATCCCCAGTTCTTTATCTTCCCTAAGTCAACTGTCAGCAATGTGAGTTTCAGCTTATATTTTAGATTGG  
AGATTTCCCGTTACCGTAATCATGGTTCCAGTCAGCTATACTTCTCTTT

>M6-PGSC0003DMG400018367-(rev)M6LRR-RLK\_2318

TTTAGATTGGAGATTTCCCGTTACCGTAATCATGGTTCCAGTCAGCTATACTTCTCTTTTGTTCAGGTCTC  
TCAATGGAAACCAACTGACTGGAGAACTTCTGATTCTTTCAAGGCC

>M6-PGSC0003DMG400018367-(rev)M6LRR-RLK\_2379

TTTCAGGTCTCTCAATGGAAACCAACTGACTGGAGAACTTCTGATTCTTTCAAGGCCTTACAGCATTG  
GTTAATCTGTATGACACCAAACAAAAGCATTTCATATTTCCATAGAGG

>M6-PGSC0003DMG400018367-(rev)M6LRR-RLK\_244

CAATTTTTGAATACCCATTTTGTATCAGTTGGGTGTCATTGATTTGCTTCTTTTTGGTTGTGTTATGATGA  
ATTTTGGGTTTGATTGAAGTACTGATTTTTATTTTTGGGCTCTTTCAG



>M6-PGSC0003DMG400018367-(rev)M6LRR-RLK\_2440

ACAGCATTGGTTAATCTGTATGACACCAAACAAAAGCATTTCATATTTCCATAGAGGTTTTTAATTGTC  
CATAACTGGTGGATTATTTGTATTCTTGCAGTGATTTGTCAAGTAACAG

>M6-PGSC0003DMG400018367-(rev)M6LRR-RLK\_2501

TTTAATTGTCCATAACTGGTGGATTATTTGTATTCTTGCAGTGATTTGTCAAGTAACAGTTTCAGCGGAGC  
TTTGCCGTCATCAGTAGGAACTTGTCCCTCCCTGACCACTCTGTGAGTG

>M6-PGSC0003DMG400018367-(rev)M6LRR-RLK\_2562

TCAGCGGAGCTTTGCCGTCATCAGTAGGAACTTGTCCCTCCCTGACCACTCTGTGAGTGATTCTACATATT  
GTTGAATTGGTTTGTAAATTTATGACCAATAGAAAAGCAGCTTATTTCTT

>M6-PGSC0003DMG400018367-(rev)M6LRR-RLK\_2623

TCTACATATTGTTGAATTGGTTTGTAAATTTATGACCAATAGAAAAGCAGCTTATTTCTTTATCTCCAGACA  
TGTGCAGAATAACCAGCTTTCTGGAECTTTGATGTTTTACAAGATCTT

>M6-PGSC0003DMG400018367-(rev)M6LRR-RLK\_2684

TCTCCAGACATGTGCAGAATAACCAGCTTTCTGGAECTTTGATGTTTTACAAGATCTTCCCCTCGCAGAT  
TTGTAATCTTCGTCACCATTTTTACTCAAATATTAATTCCAGGTCCAT

>M6-PGSC0003DMG400018367-(rev)M6LRR-RLK\_2745

CCTCGCAGATTTGTAATCTTCGTCACCATTTTTACTCAAATATTAATTCCAGGTCCATAGAATGATATAGT  
ATCGTACTAATAGCTCCCATCTTTTGTGTCCCTCCAGGAATGTGGAAA

>M6-PGSC0003DMG400018367-(rev)M6LRR-RLK\_2806

AATGATATAGTATCGTACTAATAGCTCCCATCTTTTGTGTCCCTCCAGGAATGTGGAAAATAACCTGTTTT  
CTGGGCCCATACCTCAGAAGTTGTTATCTATTCCCAATTTCAAGTAAGT

>M6-PGSC0003DMG400018367-(rev)M6LRR-RLK\_2867

AACCTGTTTTCTGGGCCCATACCTCAGAAGTTGTTATCTATTCCCAATTTCAAGTAAGTACATTTCACTTTC  
TGCTTCTAATATTGTTGTTTATCTTCCAGCATGTAATCTACAATATAT

>M6-PGSC0003DMG400018367-(rev)M6LRR-RLK\_2928

ATTTCACTTTCTGCTTCTAATATTGTTGTTTATCTTCCAGCATGTAATCTACAATATATTCTTGGCCGCCTAT  
TACATTCTTGTGCAGTAGTGCCTCTTTGTTTCGACACAATCTGCTAGA

>M6-PGSC0003DMG400018367-(rev)M6LRR-RLK\_2989

TTGGCCGCCTATTACATTCTTGTGCAGTAGTGCCTCTTTGTTTCGACACAATCTGCTAGACAGATATTCAGA

AACTATGGAGACAGATTCCTTGTTGAAGTTCGATTATTACATGCCAAAC

>M6-PGSC0003DMG400018367-(rev)M6LRR-RLK\_305

TGTTATGATGAATTTTGGGTTTGATTGAAGTACTGATTTTTATTTTTGGGCTCTTTCAGATTGGAGGTTTA

TGTATTGGTTATGCAGAGTGTGTTTCCAAAGAAAGAGTAGATTGAAGAT

>M6-PGSC0003DMG400018367-(rev)M6LRR-RLK\_3050

GATATTCAGAACTATGGAGACAGATTCCTTGTTGAAGTTCGATTATTACATGCCAACTGCTCTGTACTT

TTTGTTAATACTTAATACCCTCTTCTTAAATCTGAGTGACAACCTTGA

>M6-PGSC0003DMG400018367-(rev)M6LRR-RLK\_3111

CTCTGTACTTTTTGTTAATACTTAATACCCTCTTCTTAAATCTGAGTGACAACCTTGATCAGCTTGTTATT

CATGGACAATTAAGGCAGATAAGATCTGAAGGGCTACAATCGTTAACA

>M6-PGSC0003DMG400018367-(rev)M6LRR-RLK\_3172

AGCTTGTTATTCATGGACAATTAAGGCAGATAAGATCTGAAGGGCTACAATCGTTAACATAAACAACAA

TTGTACTCCACACTCCTAAAGCTGCAGCACATGTATCATCTGTACTCAGCT

>M6-PGSC0003DMG400018367-(rev)M6LRR-RLK\_3233

AACAACAATTGTACTCCACACTCCTAAAGCTGCAGCACATGTATCATCTGTACTCAGCTTCATATTCCTA

CCCCTTCAGACCATACTAACTTTTAGTTAACATACTGGTGAATATCA

>M6-PGSC0003DMG400018367-(rev)M6LRR-RLK\_3294

ATATTCCTACCCACTTCAGACCATACTAACTTTTAGTTAACATACTGGTGAATATCAAACCTTCACTAAA

GGGGAGAGTTTCTGTGCAAATGACAAGACTTGAATAGGCTTCATCATC

>M6-PGSC0003DMG400018367-(rev)M6LRR-RLK\_3355

CTTCACTAAAGGGGAGAGTTTCTGTGCAAATGACAAGACTTGAATAGGCTTCATCATCTCATTAAAGTAT

AGATCAGCGGAAGAGTTCAGAGTGGCTTCTTTATTACACCCAAGTTTGT

>M6-PGSC0003DMG400018367-(rev)M6LRR-RLK\_3416

ATTAAGTATAGATCAGCGGAAGAGTTCAGAGTGGCTTCTTTATTACACCCAAGTTTGTGGTTGGCAAAA

AAATGCAATTGCTTTTGGCAAACCTTCTCAATTTTCTGAACCTATATGTTT

>M6-PGSC0003DMG400018367-(rev)M6LRR-RLK\_3599

GTTTGTGAATGCAAGACCTCGTTAAATCCTATAAGCTAGAAGAAACCTTGATCTGAACTACATTACTCTT

GTCATAAGCAGGAAAAATATTATGAAATGTGTGTCGTGCTAGTCTGTAT

>M6-PGSC0003DMG400018367-(rev)M6LRR-RLK\_366

TGGAGGTTTATGTATTGGTTATGCAGAGTGTGTTTCCAAAGAAAGAGTAGATTGAAGATAAGGGTTACA  
GTTTGGATCAATGGGTTGGAAGAGATCTGTGTTAGGGTGCTTGAATTTGGA

>M6-PGSC0003DMG400018367-(rev)M6LRR-RLK\_3660

ATTACTCTTTGTCATAAGCAGGAAAAATATTATGAAATGTGTGTCGTGCTAGTCTGTATGTTAGCTGCAC  
CATCTTTAACAATAGTATTTTAGAAAATTGTTGAGTCCCACATCGTGTAG

>M6-PGSC0003DMG400018367-(rev)M6LRR-RLK\_3904

TTTATGTTGCAAACCAGATTATGCTTACAGTTTATGGCACTGACTTAGATTAGAATTGCTAGTGGGCA  
CACTGCATATCAACAGTTTGAGTCCTAAATGTTAGAATAATTTCAAATTA

>M6-PGSC0003DMG400018367-(rev)M6LRR-RLK\_3965

TAGTGGGCACACTGCATATCAACAGTTTGAGTCCTAAATGTTAGAATAATTTCAAATTACATTAGGTAAA  
GTAGCCAAATTTTGATATCATCAGCACAATTACCTAAAAAAGAATAATC

>M6-PGSC0003DMG400018367-(rev)M6LRR-RLK\_4026

TTAGGTAAAGTAGCCAAATTTTGATATCATCAGCACAATTACCTAAAAAAGAATAATCCTAACACTATA  
CTGCTCAATTTGCCTACACAATAAATTGGAAAAAATGTGACGTATAACAAG

>M6-PGSC0003DMG400018367-(rev)M6LRR-RLK\_4087

AACACTATACTGCTCAATTTGCCTACACAATAAATTGGAAAAAATGTGACGTATAACAAGCTAAAGGATTA  
TAGTAGCACAAAAACCATATGACACCGATATATGATGTATATGTCACGCT

>M6-PGSC0003DMG400018367-(rev)M6LRR-RLK\_4148

AAAGGATTATAGTAGCACAAAAACCATATGACACCGATATATGATGTATATGTCACGCTGGACCATGGA  
CTGCCAAGCTGGATCATGGACTGCATTTTGGTCATATTTAATAATTTAAGT

>M6-PGSC0003DMG400018367-(rev)M6LRR-RLK\_4209

ACCATGGACTGCCAAGCTGGATCATGGACTGCATTTTGGTCATATTTAATAATTTAAGTTCACTAGCGGG  
CTAACATTTATTTAAGTTTTGAACACAGGCGTGATTTTCATATCATATTG

>M6-PGSC0003DMG400018367-(rev)M6LRR-RLK\_427

GGGTTACAGTTTGGATCAATGGGTTGGAAGAGATCTGTGTTAGGGTGCTTGAATTTGGAGATCTTGGTG  
GGGATTTTGTTAATTTTGGCTGTTTCAGCTTTCAGATGAAACTGACCCCGGA

>M6-PGSC0003DMG400018367-(rev)M6LRR-RLK\_4270

ACTAGCGGGCTAACATTTATTTAAGTTTTGAACACAGGCGTGATTTTCATATCATATTGTTCTATAAGATT  
TGTTTGCCGGGAAGTTTTATTATTGAACAATATTGGTGAGGGTACATA

>M6-PGSC0003DMG400018367-(rev)M6LRR-RLK\_4331

CTATAAGATTTGTTTGCCGGGAAGTTTTATTGAACAATATTGGTGAGGGTACATATTGATCCATGCT  
AGGAAGATGTATCAGTTGTTTCATTATTTTTTTCAAGTGTCTTATATAG

>M6-PGSC0003DMG400018367-(rev)M6LRR-RLK\_4392

GATCCATGCTAGGAAGATGTATCAGTTGTTTCATTATTTTTTTCAAGTGTCTTATATAGGTTTTGACTCTTG  
ATTGACTTTAATTATGAGAATTGATGGCTAATGCTTTCATGTACTTAC

>M6-PGSC0003DMG400018367-(rev)M6LRR-RLK\_4453

TTTGACTCTTGATTGACTTTAATTATGAGAATTGATGGCTAATGCTTTCATGTACTTACTAATTTTGTCTT  
GACGTGCAGAAACACTGGAAATCCTTTCAACAGTGTCTCTCCTTTGTC

>M6-PGSC0003DMG400018367-(rev)M6LRR-RLK\_4514

ATTTTGTCTTGACGTGCAGAAACACTGGAAATCCTTTCAACAGTGTCTCTCCTTTGTCTCCACCCAACAG  
TAGTACCGCCCCTTTGTCTCCACCTACTTCATTTACGAGACCCCCTCCA

>M6-PGSC0003DMG400018367-(rev)M6LRR-RLK\_4575

CACCCAACAGTAGTACCGCCCCTTTGTCTCCACCTACTTCATTTACGAGACCCCCTCCAGCACCACCAGGA  
CCACCCTTTTTTAAGCCTCCAACCTCAACACAGACACCGCCGACTTCAG

>M6-PGSC0003DMG400018367-(rev)M6LRR-RLK\_4636

ACCACCAGGACCACCCTTTTTTAAGCCTCCAACCTCAACACAGACACCGCCGACTTCAGACAGAAAACCT  
GGACAAAAAGCTGATGGACCATCAGCAACTGCAGAATCTAGTTCAAAGG

>M6-PGSC0003DMG400018367-(rev)M6LRR-RLK\_4697

AGAAAACCTGGACAAAAAGCTGATGGACCATCAGCAACTGCAGAATCTAGTTCAAAGGAAGCAAAAA  
GTCTGTAAAGAGGGTAGTCTGGATATCCATTGCATCAGTTTTGTCATTTATA

>M6-PGSC0003DMG400018367-(rev)M6LRR-RLK\_4758

GCAAAAAGTCTGTAAAGAGGGTAGTCTGGATATCCATTGCATCAGTTTTGTCATTTATAATATTGGTAAT  
AGCAATCCTGCTCTTTCTGCCAAGATGCTTTAGGGAAAGGCAAGAGACTA

>M6-PGSC0003DMG400018367-(rev)M6LRR-RLK\_4819

ATTGGTAATAGCAATCCTGCTCTTTCTGCCAAGATGCTTTAGGGAAAGGCAAGAGACTAATTGGTCCAG  
ACGGCACGAAATAGCTCCTGATGTGGGCTCCAGGGAGAATCGTAGGGATAA

>M6-PGSC0003DMG400018367-(rev)M6LRR-RLK\_488

TCTTGGTGGGGATTTTGTAAATTTTTGCTGTTTCAGCTTTCAGATGAAACTGACCCCGGAGATGGTAAGGA

ACAACAAATATTAGTATTATCTTTTCGAGTTGTTTTGCGTTGAAGGAGAGG

>M6-PGSC0003DMG400018367-(rev)M6LRR-RLK\_4880

TGGTCCAGACGGCACGAAATAGCTCCTGATGTGGGCTCCAGGGAGAATCGTAGGGATAATGGTTTATT  
GGTCCTACCTGGACATGATGTAGAGAAAGGTAAGTACTGCAAATTATTAACCTCT

>M6-PGSC0003DMG400018367-(rev)M6LRR-RLK\_4941

GTTTATTGGTCCTACCTGGACATGATGTAGAGAAAGGTAAGTACTGCAAATTATTAACCTCTCAACTTTTATAT  
CGTGTGTATTGTTGCTAGTATTTGTTAGTCTGGCTTTTTTTCCTTAGTTC

>M6-PGSC0003DMG400018367-(rev)M6LRR-RLK\_5002

ACTTTTATATCGTGTGTATTGTTGCTAGTATTTGTTAGTCTGGCTTTTTTTCCTTAGTTCCTTACAGGGAAAAC  
TAGTACTCTTTAATTTAGGCTCTATTTAAATCTGCAGTCTTGACATCT

>M6-PGSC0003DMG400018367-(rev)M6LRR-RLK\_5063

ACAGGGAAAAGTACTCTTTAATTTAGGCTCTATTTAAATCTGCAGTCTTGACATCTAAGTATGCAGCT  
AAATATATAGTGGTTATCCATGTGCCAGGGGCGGACCTACCCTTACCC

>M6-PGSC0003DMG400018367-(rev)M6LRR-RLK\_5124

GTATGCAGCTAAATATATAGTGGTTATCCATGTGCCAGGGGCGGACCTACCCTTACCCAAGGCCTTCGT  
CAGAAAATTACATGGTATATAGAGGTCAAATTTTGATTTAATAAAATATA

>M6-PGSC0003DMG400018367-(rev)M6LRR-RLK\_5246

CAAGTATTGACACCTCTTGACACAAGTTAAAGGTTCAAGTCTAGTGGTTAAGACATTGCTTAATGACTACA  
ACCATTGACACCCCTTAATGACAATGGCCGCTACAGTATTGTCAAATTCT

>M6-PGSC0003DMG400018367-(rev)M6LRR-RLK\_5307

ATGACTACAACCATTGACACCCCTTAATGACAATGGCCGCTACAGTATTGTCAAATTCTCTATTACAATCA  
TAAATGCCCTACAAAAGATTCGTGAATTTGATATCTGTTTTTGCAACAT

>M6-PGSC0003DMG400018367-(rev)M6LRR-RLK\_5368

ATTACAATCATAAATGCCCTACAAAAGATTCGTGAATTTGATATCTGTTTTTGCAACATTCATAACTAAAA  
AGCTATGACTCTTAACCTCTTCTACTCTTTGATGATAAGTGAACCTTCAT

>M6-PGSC0003DMG400018367-(rev)M6LRR-RLK\_5429

ATAACTAAAAAGCTATGACTCTTAACCTCTTCTACTCTTTGATGATAAGTGAACCTTCATATGTTTTGAACA  
GCTCCTCCTCTGGTGAGGCCAAAGGAAGAGCAACAACCAAGGAGACTGG

>M6-PGSC0003DMG400018367-(rev)M6LRR-RLK\_549

TGGTAAGGAACAACAAATATTAGTATTATCTTTGAGTTGTTTTGCGTTGAAGGAGAGGAATGCTAATTT  
TCATGTTTTGGGCAATGCTGGTTATGAGGGACTGAATTATGAGCTGAGCT

>M6-PGSC0003DMG400018367-(rev)M6LRR-RLK\_5490

GTTTTGAACAGCTCCTCCTCTGGTGAGGCCAAAGGAAGAGCAACAACCAAGGAGACTGGCCCCGACTCC  
CATGCCACAGCAGGAGCAGGAGTTAAATGTGCAAAACCTGAGGGCAGTACC

>M6-PGSC0003DMG400018367-(rev)M6LRR-RLK\_5551

CGCACTCCCATGCCACAGCAGGAGCAGGAGTTAAATGTGCAAAACCTGAGGGCAGTACCAAAGAAGGA  
TACTAGTGAGATAAACCTAAGCAGAATTGATATTGATTGATCGATGTTGCCACCA

>M6-PGSC0003DMG400018367-(rev)M6LRR-RLK\_5734

AAGCCAATTCCACCTGCCGACAATACTTCAATGAAGTTTCCCCACAGGCCACTTCCACTAACTTCTGTGAA  
ATCTTACACAATCGCATCTCTTCAGCATTACACCAACAGCTTTTCTCAA

>M6-PGSC0003DMG400018367-(rev)M6LRR-RLK\_5795

CTTCTGTGAAATCTTACACAATCGCATCTCTTCAGCATTACACCAACAGCTTTTCTCAAGATAATCTGATA  
GGATCAGGAATGCTGGGAACTGTGTACAGGGCAGAGCTTCCAAAAGGGA

>M6-PGSC0003DMG400018367-(rev)M6LRR-RLK\_5856

TAATCTGATAGGATCAGGAATGCTGGGAACTGTGTACAGGGCAGAGCTTCCAAAAGGGAAGGTATAAG  
TTATGAATGATATATAATGTACTGTAATTTGATACTCGAAATTACCAACTGT

>M6-PGSC0003DMG400018367-(rev)M6LRR-RLK\_5917

GTATAAGTTATGAATGATATATAATGTACTGTAATTTGATACTCGAAATTACCAACTGTGTTTTCTACCC  
TGCTGTATTCTCTTGAACCTAGATTGTCAGCTTTTCTCTTCTTATAATT

>M6-PGSC0003DMG400018367-(rev)M6LRR-RLK\_5978

TTTCTACCCTGCTGTATTCTCTTGAACCTAGATTGTCAGCTTTTCTCTTCTTATAAATTTCTTTTTTGGGGG  
TCTTTACGGTGTCTGTGAGCACTAAAGATGCCTCTTATCTGTTGTT

>M6-PGSC0003DMG400018367-(rev)M6LRR-RLK\_6039

CTTTTTGGGGGTCTTACGGTGTCTGTGAGCACTAAAGATGCCTCTTATCTGTTGTTGCATTACGTATC  
TTGCTCTTGCATTTCTATGCTTAATTGCTTAAGAATGATTCACGGTCTG

>M6-PGSC0003DMG400018367-(rev)M6LRR-RLK\_61

TTATATGAAATCATGATGTTTTTCTCAGCTTCTTCTCATTATTTCTTCATAATTCATTTGTTGGG  
GTTTTTCTTCTTGTACTGTACTTCAATTTTACTTCTCCTTCTTC

>M6-PGSC0003DMG400018367-(rev)M6LRR-RLK\_610

TGCTAATTTTCATGTTTTGGGCAATGCTGGTTATGAGGGACTGAATTATGAGCTGAGCTAGTTGTTAACT  
TGAAC TTTATTTTGGGCAAACGTTTTCAAGTCGGGGGGGAGCTGGAGTTA

>M6-PGSC0003DMG400018367-(rev)M6LRR-RLK\_6100

ATTACGTATCTTGCTCTTGCATTTCTATGCTTAATTGCTTAAGAATGATTCACGGTCTGATCGAATCGTAT  
GTAAATATGGTTTTGTTGGTGGAAATCCAAAGTCATATATATTAGGGTA

>M6-PGSC0003DMG400018367-(rev)M6LRR-RLK\_6161

CGAATCGTATGTAAATATGGTTTTGTTGGTGGAAATCCAAAGTCATATATATTAGGGTAAACTGTATTTT  
ATAAATACAGATAAAAGCAAATGACTTCCAATTGCTGCATAAGATATTT

>M6-PGSC0003DMG400018367-(rev)M6LRR-RLK\_6222

CTGTATTTTCATAAATACAGATAAAAGCAAATGACTTCCAATTGCTGCATAAGATATTTCTTGTAAC TTA  
ATTTTCTTTAGGACGTTTTTTGGTTCTTATCCTATATAATCTTTAAGTG

>M6-PGSC0003DMG400018367-(rev)M6LRR-RLK\_6283

TGTAAC TTAATTTTCTTTAGGACGTTTTTTGGTTCTTATCCTATATAATCTTTAAGTGGCATT TTTCTTCCAA  
ATAGCCAACACCATTGATCAACTGTTGTAATAGAACAATCAACATTC

>M6-PGSC0003DMG400018367-(rev)M6LRR-RLK\_6344

ATTTTCTTCCAAATAGCCAACACCATTGATCAACTGTTGTAATAGAACAATCAACATTCAAGTTGCATGAG  
CTTATCATTCTGATTTGTGCCTTAGTTTTGTCATTTGCTGTATAGCAGG

>M6-PGSC0003DMG400018367-(rev)M6LRR-RLK\_6405

GTTGCATGAGCTTATCATTCTGATTTGTGCCTTAGTTTTGTCATTTGCTGTATAGCAGGATCTGCCAAATA  
CTGATGCATCATTCTAATGAGAACTATTTTATAATCAGAATATACAA

>M6-PGSC0003DMG400018367-(rev)M6LRR-RLK\_6466

CTGCCAAATACTGATGCATCATTCTAATGAGAACTATTTTATAATCAGAATATACAATGTCCCTGTTTT  
ATTTTCAGTGTACATTTATTTATCTGGCATGCAATCTTAACTCTCATCC

>M6-PGSC0003DMG400018367-(rev)M6LRR-RLK\_6527

TCCCTGTTTTATTTTCAGTGTACATTTATTTATCTGGCATGCAATCTTAACTCTCATCCCATTGCTAACATTA  
TTTGAATCATTGGTGGTCACATTGTGTTACTTCTGACACTTGACCC

>M6-PGSC0003DMG400018367-(rev)M6LRR-RLK\_6588

TTGCTAACATTATTTGAATCATTGGTGGTCACATTGTGTTACTTCTGACACTTGACCCTTTGAATGCTTGT

GCAGTTACTTGCTGTCAAGAAGCTGGACAGAAGAGTTTCCAATCAACA

>M6-PGSC0003DMG400018367-(rev)M6LRR-RLK\_6649

TGAATGCTTGTGCAGTTACTTGCTGTCAAGAAGCTGGACAGAAGAGTTTCCAATCAACAGAAGGATGAT  
GAGTTTCTTGACCTAGTAAACAATATTGACAGAATTCGTCATGCTAACGTT

>M6-PGSC0003DMG400018367-(rev)M6LRR-RLK\_671

TTGTTAACTTGAACTTTATTTTGGGCAAACGTTTTCAAGTCGGGGGGGAGCTGGAGTTATCGAAATTGGT  
CGGTAAATGAACAGTCTCTATCCATTTCCGGAATTAAGTTAGGGCATGA

>M6-PGSC0003DMG400018367-(rev)M6LRR-RLK\_6710

AGGATGATGAGTTTCTTGACCTAGTAAACAATATTGACAGAATTCGTCATGCTAACGTTGTCGAGTTGAT  
GGGCTATTGTGCAGAGCATGGTCAAAGGCTTCTGGTTTATGAGTATTGCA

>M6-PGSC0003DMG400018367-(rev)M6LRR-RLK\_6771

CGAGTTGATGGGCTATTGTGCAGAGCATGGTCAAAGGCTTCTGGTTTATGAGTATTGCAGTAGTGGGAC  
ACTACAAGATGCGCTGCACTCTTATGATGAATTCAAGCAACAACCTTTCATG

>M6-PGSC0003DMG400018367-(rev)M6LRR-RLK\_6832

AGTGGGACACTACAAGATGCGCTGCACTCTTATGATGAATTCAAGCAACAACCTTTCATGGGATACACGG  
ATCCGGATGGCTCTTGGAGCTGCAAGAGGCTTGGAGTAAGTAAAATAACCA

>M6-PGSC0003DMG400018367-(rev)M6LRR-RLK\_6893

ATACACGGATCCGGATGGCTCTTGGAGCTGCAAGAGGCTTGGAGTAAGTAAAATAACCAGTCACATATA  
CATAGAAACCACATGCAAATATACGAGTATATACATATGAGCTATGGAAAA

>M6-PGSC0003DMG400018367-(rev)M6LRR-RLK\_6954

CACATATACATAGAAACCACATGCAAATATACGAGTATATACATATGAGCTATGGAAAATCTGATGTTGA  
AGAGTTATTTGGCAGTGATCTATAAGAAATTTCTGTAAGCAGTACTAATA

>M6-PGSC0003DMG400018367-(rev)M6LRR-RLK\_7015

TGATGTTGAAGAGTTATTTGGCAGTGATCTATAAGAAATTTCTGTAAGCAGTACTAATAATAATTTAACA  
CTGGAAGGTAGCAAAGTACTCAAATCACAACTCGTCCTGAACTTTCATG

>M6-PGSC0003DMG400018367-(rev)M6LRR-RLK\_7076

AATTTAACTGGAAGGTAGCAAAGTACTCAAATCACAACTCGTCCTGAACTTTCATGCTATGTACATA  
CTACATGACATAAAATGATAAAATACTGTTGGGAGATGGTCTTTATAAGT

>M6-PGSC0003DMG400018367-(rev)M6LRR-RLK\_7137



ATGTACATACTACATGACATAAAATGATAAAATACTGTTGGGAGATGGTCTTTATAAGTATATGTTAACA  
TTATATTTGGTGCTGTATTTTCGGTTTATACTACTTTCCATTCTCCTCCA

>M6-PGSC0003DMG400018367-(rev)M6LRR-RLK\_7198

ATGTTAACATTATATTTGGTGCTGTATTTTCGGTTTATACTACTTTCCATTCTCCTCCACATGAGTTCATAC  
AAGGGATGCTGAACACGATTGTTGAAAGAAAATATCCTCATAGTCATC

>M6-PGSC0003DMG400018367-(rev)M6LRR-RLK\_7259

TGAGTTCATACAAGGGATGCTGAACACGATTGTTGAAAGAAAATATCCTCATAGTCATCCCAGCCGTGA  
ATTATTATTAGTGGGATTGCTAGGTGATCTAATTCTTAGATTTGCATGACA

>M6-PGSC0003DMG400018367-(rev)M6LRR-RLK\_732

GAAATTGGTCGGTTAAATGAACAGTCTCTATCCATTTCCGGAATTAAGTTAGGGCATGACTTTAGATATG  
AGGTTGCGTAGGAAATAGATTAGGTAGAAGATTAGTAGGTAATGGAGTGT

>M6-PGSC0003DMG400018367-(rev)M6LRR-RLK\_7320

AGCCGTGAATTATTATTAGTGGGATTGCTAGGTGATCTAATTCTTAGATTTGCATGACAAGCGAGTTAAA  
GCAAATTTTAAATCTCATGTATTAATTATTTGTTCTTTTATGCAATGAAG

>M6-PGSC0003DMG400018367-(rev)M6LRR-RLK\_7381

CGAGTTAAAGCAAATTTTAAATCTCATGTATTAATTATTTGTTCTTTTATGCAATGAAGGTATCTCCATGA  
GGTCTGCGAGCCACCTATTATCCACAGAACTTCAAATCTGTCAATCTT

>M6-PGSC0003DMG400018367-(rev)M6LRR-RLK\_7442

ATCTCCATGAGGTCTGCGAGCCACCTATTATCCACAGAACTTCAAATCTGTCAATCTTCTCCTTGATGAA  
GAGTTGGCTGTGCATATCTCTGACTGTGGTTTAGCTCCACTGGTATCAT

>M6-PGSC0003DMG400018367-(rev)M6LRR-RLK\_7503

CCTTGATGAAGAGTTGGCTGTGCATATCTCTGACTGTGGTTTAGCTCCACTGGTATCATCAGGTGCCGTG  
AGCCAGGTAACCTACCATCCAAATATTCTGGATTAGAAGTGTGGAACAAG

>M6-PGSC0003DMG400018367-(rev)M6LRR-RLK\_7564

GGTGCCGTGAGCCAGGTAACCTACCATCCAAATATTCTGGATTAGAAGTGTGGAACAAGCTGACATTTA  
CCTCTTGGGGTGGGATGGTCATTTTCTGCTTGCATTTCCAGTTGAAAGAAA

>M6-PGSC0003DMG400018367-(rev)M6LRR-RLK\_7625

GACATTTACCTCTTGGGGTGGGATGGTCATTTTCTGCTTGCATTTCCAGTTGAAAGAAAAGCAAGTTCCA  
GGTTTATGATGGAAGTGAAAATGTGAACTAAGTAGTAGTTGTTAAGAAAG

>M6-PGSC0003DMG400018367-(rev)M6LRR-RLK\_7686

CAAGTTCAGGTTTATGATGGAAGTGAAAATGTGAACTAAGTAGTAGTTGTTAAGAAAGGAGTGTAATG  
ATGATCAAATGCTTCCAAGTAACACAACGGAGTAGAGCAGTAATTAATA

>M6-PGSC0003DMG400018367-(rev)M6LRR-RLK\_7747

GTGTAATGATGATCAAATGCTTCCAAGTAACACAACGGAGTAGAGCAGTAATTAATACTACAAATGCAGT  
TTCTCTTAAATGGATAACTTATTGTTTAGAAATAGTTGATTTTGTAGTAGT

>M6-PGSC0003DMG400018367-(rev)M6LRR-RLK\_7808

AATGCAGTTTCTCTTAAATGGATAACTTATTGTTTAGAAATAGTTGATTTTGTAGTAGTGCCAGAAGTTAT  
ACGGTCAATTTCAGAAGGGTTAAGTCTTTTTCCCTGTAAATCTGGAAAT

>M6-PGSC0003DMG400018367-(rev)M6LRR-RLK\_7869

CAGAAGTTATACGGTCAATTTCAGAAGGGTTAAGTCTTTTTCCCTGTAAATCTGGAAATCAGGAAACAAA  
TCTAGCTAGTCTGAGACTACCTGGTTGCCAGCTAGTCTGAAGTATTTGT

>M6-PGSC0003DMG400018367-(rev)M6LRR-RLK\_793

TTAGATATGAGGTTGCGTAGGAAATAGATTAGGTAGAAGATTAGTAGGTAATGGAGTGTTGTCTTGCTT  
ATCCTTTGATGCTGGTAGTCCTAGTATTTCCCTGGTAGTTTCTTGTCTT

>M6-PGSC0003DMG400018367-(rev)M6LRR-RLK\_7930

GGAAACAAATCTAGCTAGTCTGAGACTACCTGGTTGCCAGCTAGTCTGAAGTATTTGTCATGTTTTAGG  
CTTTTATAACATTTCAATGCTTCACGAGATCTAATAGACACTAGTAGAAT

>M6-PGSC0003DMG400018367-(rev)M6LRR-RLK\_7991

TGTTTTAGGCTTTTATAACATTTCAATGCTTCACGAGATCTAATAGACACTAGTAGAATTTGTAAGCGGG  
AGAGTAGATCCTTTCCAACATATGCTGGACTTGCCTTCTCATCTTCACCC

>M6-PGSC0003DMG400018367-(rev)M6LRR-RLK\_8052

GTAAGCGGGAGAGTAGATCCTTTCCAACATATGCTGGACTTGCCTTCTCATCTTCACCCCTTGACAAAGA  
GATGAAATTTAGTAATCCTTGAAACTGTTCCAACATTCTTCAGAAGTAG

>M6-PGSC0003DMG400018367-(rev)M6LRR-RLK\_8113

TGACAAAGAGATGAAATTTAGTAATCCTTGAAACTGTTCCAACATTCTTCAGAAGTAGTTTTGCCGCTG  
CACATTTAGTATGATGGTGACTAGCTCCTGTATTTTTTTCCCTGTTGGAG

>M6-PGSC0003DMG400018367-(rev)M6LRR-RLK\_8174

TTGCCGCTGCACATTTAGTATGATGGTGACTAGCTCCTGTATTTTTTTCCCTGTTGGAGAATTTGACTTCT

AAAGATGTGGGAAGAAGAACAGTTTCACTATGTTAGTTTGACCTAGTCATA

>M6-PGSC0003DMG400018367-(rev)M6LRR-RLK\_8235

TTTTGACTTCTAAAGATGTGGGAAGAAGAACAGTTTCACTATGTTAGTTTGACCTAGTCATACATAAAGACAC

TCTACAGGTGCTTTTGTAGATGGGTTTTTCAGAACTGAAAATTCTATTT

>M6-PGSC0003DMG400018367-(rev)M6LRR-RLK\_8296

TAAAGACTCTACAGGTGCTTTTGTAGATGGGTTTTTCAGAACTGAAAATTCTATTTTATTTTATGAA

GTCCACATTGTCTCCTCTCATTAATAAGAAACAGTAAAACACAAGATTG

>M6-PGSC0003DMG400018367-(rev)M6LRR-RLK\_8357

TTTTTATGAAGTCCACATTGTCTCCTCTCATTAATAAGAAACAGTAAAACACAAGATTGAACTAAACAAG

ACATCACGGATATGACTGTTTTTTTCACTTGTACTTCATATGATTATAGA

>M6-PGSC0003DMG400018367-(rev)M6LRR-RLK\_8418

CTAAACAAGACATCACGGATATGACTGTTTTTTTCACTTGTACTTCATATGATTATAGATCTGCTACTCTA

GGAGCATGTGGATCATCAATCTTTGCTGAAACCTTACCTTTTTTGT

>M6-PGSC0003DMG400018367-(rev)M6LRR-RLK\_8479

TGCTACTCTAGGAGCATGTGGATCATCAATCTTTGCTGAAACCTTACCTTTTTTGT

GCTGAAGAATTTGAAATTGAATAAGTGAAGTTGTACTTGATTTTCAGT

>M6-PGSC0003DMG400018367-(rev)M6LRR-RLK\_854

TCTTGCTTATCCTTTGATGCTGGTAGTCCTAGTATTTCCCTTGGTAGTTTCTTGTCTTGGATTTGTGTTAC

TATTATTGCACTGTTTTGTTGCGGTTACCGTTGCTTGT

>M6-PGSC0003DMG400018367-(rev)M6LRR-RLK\_8540

TTATGCACTGTGCTGAAGAATTTGAAATTGAATAAGTGAAGTTGTACTTGATTTTCAGTTGTCAGGACAA

CTTCTTACAACCTATGGCTATGGTGCCCCAGAATTTGAGTCAGGGATTTA

>M6-PGSC0003DMG400018367-(rev)M6LRR-RLK\_8601

TCAGGACAACCTTCTTACAACCTATGGCTATGGTGCCCCAGAATTTGAGTCAGGGATTTACTTCTCAGA

GTGATGTTTACAGTTTTGGCGTGGTGATGCTGGAACCTTAACGGGCAGA

>M6-PGSC0003DMG400018367-(rev)M6LRR-RLK\_8662

CTTCTCAGAGTGATGTTTACAGTTTTGGCGTGGTGATGCTGGAACCTTAACGGGCAGAATGTCATATGA

CCGGTAAAGCCATTTGCATCTCATTGAATAAATTTGTTGTCATGTTTTC

>M6-PGSC0003DMG400018367-(rev)M6LRR-RLK\_8723

GTCATATGACCGGTAAAGCCATTTGCATCTCATTGAATAAATTTTGTGTCATGTTTTCTCCCAGCTTTATC  
ATTACCTATATATCATATTCAGAAGCTCGAAGTCGAGGAGAGCAATTCT

>M6-PGSC0003DMG400018367-(rev)M6LRR-RLK\_8784

CCAGCTTTATCATTACCTATATATCATATTCAGAAGCTCGAAGTCGAGGAGAGCAATTCTTGGTCAGATGG  
GCAATCCCTCAGCTACATGATATTGATGCCTTGACAAGAATGGTTGATCC

>M6-PGSC0003DMG400018367-(rev)M6LRR-RLK\_8845

GTCAGATGGGCAATCCCTCAGCTACATGATATTGATGCCTTGACAAGAATGGTTGATCCTTCTCTCAAAG  
GAAAGTACCCACTTAAGTCATTATCACATTTTGCTGACATAATTTCCCGC

>M6-PGSC0003DMG400018367-(rev)M6LRR-RLK\_8906

CTCTCAAAGGAAAGTACCCACTTAAGTCATTATCACATTTTGCTGACATAATTTCCCGCTGCGTTTTGGTG  
AGTTTTTAATCCTTTCTTTTATTACAAGCGAGTAATTTGTCCAAATCT

>M6-PGSC0003DMG400018367-(rev)M6LRR-RLK\_8967

CGTTTTGGTGAGTTTTTAATCCTTTCTTTTATTACAAGCGAGTAATTTGTCCAAATCTCCATTTTCTTCAAT  
CCTTCATCAAACCTTTGGGTACAAATGAGGAAAAAGGTAACATGGAAA

>M6-PGSC0003DMG400018367-(rev)M6LRR-RLK\_9028

ATTTTCTTCAATCCTTCATCAAACCTTTGGGTACAAATGAGGAAAAAGGTAACATGGAAAATGATTTATTT  
CTTGTCACAGAAATTAATAAGAAGTAAGTAAAAGGAAGGAGCTGTACT

>M6-PGSC0003DMG400018367-(rev)M6LRR-RLK\_9089

GATTTATTTCTTGTCACAGAAATTAATAAGAAGTAAGTAAAAGGAAGGAGCTGTACTGTGTCAAAT  
AGGAACTCTACACATGGTGTCTTTTGTTCATAGCCACTAGATTATGAA

>M6-PGSC0003DMG400018367-(rev)M6LRR-RLK\_915

ATTTGTGTTACTATTATTGCACTGTTTTGTTGCGGTTACCGTTGCTTGTTTTTTCTTCTCAGAATGCTTTGT  
CATGCTTTCTACAGTATTTGCGCACTATTATTTCACTTCTGTTATTT

>M6-PGSC0003DMG400018367-(rev)M6LRR-RLK\_9150

GTCAAATAGGAACTCTACACATGGTGTCTTTTGTTCATAGCCACTAGATTATGAATTATTTACCAGT  
TTAAGGACATCTGTGAATCTGTAGTATGAGATGTACCAGGTTTATAGGT

>M6-PGSC0003DMG400018367-(rev)M6LRR-RLK\_9211

ATTTACCAGTTTAAGGACATCTGTGAATCTGTAGTATGAGATGTACCAGGTTTATAGGTATAGTTAAAAG  
TTACAGGGAGCGGAAACATCCCATGTCGATGTTCCGATATCGTTTTCTGC

>M6-PGSC0003DMG400018367-(rev)M6LRR-RLK\_9272

AGTTAAAAGTTACAGGGAGCGGAAACATCCCATGTCGATGTTCCGATATCGTTTTCTGCTCAGGTGTCTG  
AATGCCTTTTCATGACTCGTTGAAGAGTGTGTGTATGTTGTAGTTGAAGC

>M6-PGSC0003DMG400018367-(rev)M6LRR-RLK\_9333

AGGTGTCTGAATGCCTTTTCATGACTCGTTGAAGAGTGTGTGTATGTTGTAGTTGAAGCAAACAACACTA  
GGAAAGTCTGGATCAATGAGCAATTTACCCATAATACCCTATTCACCAAA

>M6-PGSC0003DMG400018367-(rev)M6LRR-RLK\_9394

ACAACACTAGGAAAGTCTGGATCAATGAGCAATTTACCCATAATACCCTATTCACCAAATTAATCTTGT  
GGCAGAATACGCGTGGTTAACTAGCACACAATCACACACCAAACAATAA

>M6-PGSC0003DMG400018367-(rev)M6LRR-RLK\_9455

AAATCTTGTGGCAGAATACGCGTGGTTAACTAGCACACAATCACACACCAAACAATAAATAAAAA  
TAACACAGGGAATTTACTAGTTTGTCAAACCCATTTCTCGGGGAAGAA

>M6-PGSC0003DMG400018367-(rev)M6LRR-RLK\_9516

AATAAAAATAACACAGGGAATTTACTAGGTTTGTCAAACCCATTTCTCGGGGAAGAAGCGGAGAGAA  
TTTTCCACTATAAAAGATAAGAAAACAGTACCAAGAGATCCCCTATTACAA

>M6-PGSC0003DMG400018367-(rev)M6LRR-RLK\_9577

GGAGAGAATTTTCCACTATAAAAGATAAGAAAACAGTACCAAGAGATCCCCTATTACAACCCTTTTAAAT  
ACCCAAGTGTGGCCCAATCCAAGTCCCCAGCCTAACAATATAAGCAAA

>M6-PGSC0003DMG400018367-(rev)M6LRR-RLK\_9638

CTTTTAAATACCCAAGTGTGGCCCAATCCAAGTCCCCAGCCTAACAATATAAGCAAATAATAGTGGTTC  
AAAGCTTTTCGGGGTTGGGTCACAATTCGGATCTGCCAGAATCCAGACA

>M6-PGSC0003DMG400018367-(rev)M6LRR-RLK\_9699

ATAGTGGTTCAAAGCTTTTCGGGGTTGGGTCACAATTCGGATCTGCCAGAATCCAGACACAAAGCTGTA  
GAAGCAACAGATATATTATATTTGCTTTCCTTCTTCTGCTTATTGTTCTCC

>M6-PGSC0003DMG400018367-(rev)M6LRR-RLK\_9760

AAGCTGTAGAAGCAACAGATATATTATATTTGCTTTCCTTCTTCTGCTTATTGTTCTCCTGTCTTTTGT  
TTCGGTGGGTGTTGTATTTTTCACTAGGTAATATGCAATTTTTTGTA

>M6-PGSC0003DMG400018367-(rev)M6LRR-RLK\_9821

TCTTTTGTATTTCGGTGGGTGTTGTATTTTTCACTAGGTAATATGCAATTTTTGTACAACCAAATGCTT

GTGTATGTGGGGGAGAAGAAGAATGAGGCACACTCTATTGATTGGATA

>M6-PGSC0003DMG400018367-(rev)M6LRR-RLK\_9882

ACCAAATGCTTGTGTATGTGGGGGAGAAGAAGAATGAGGCACACTCTATTGATTGGATATTTGATTGCA  
ACTGATAGATCCATTGTATTTATATAATGGTCAAATTTTCAATGTTTCAAT

>M6-PGSC0003DMG400018367-(rev)M6LRR-RLK\_9943

TGATTGCAACTGATAGATCCATTGTATTTATATAATGGTCAAATTTTCAATGTTTCAATGAACAGAAATCG  
ATACTGATAAGTTAAAAGGAACCAAGTAGTTGGTGTAACCTCAATGTGA

>M6-PGSC0003DMG400018452-(rev)M6G-LecRK\_0

CTTCAACCATGTTAGCAGTTAGAAGTTGTCCTTCTTTCTCCCCATTGATATCATGACTCTCTATTTCTTACT  
TGTGCTGCTTATCTTTGGATCCGCTAGAGCTCAATCAAATCCACCTA

>M6-PGSC0003DMG400018452-(rev)M6G-LecRK\_1054

GAAAGAAGATGTAAGTGTCTACAAGATTACTACCACAACCAATTTGACCTGGGAGGATCCTCCTTACTTT  
GTTACATCACTTCTAGGAAAAGAAGATTGTGGTAAATCTTGTTTGGAGGA

>M6-PGSC0003DMG400018452-(rev)M6G-LecRK\_1116

CTTACTTTGTTACATCACTTCTAGGAAAAGAAGATTGTGGTAAATCTTGTTTGGAGGACTGTGATTGTGA  
TGCTGCTCTTTTTGATGAAACTGGCCAGTGTATGAAACACAAGCTGCCTC

>M6-PGSC0003DMG400018452-(rev)M6G-LecRK\_1178

GATTGTGATGCTGCTCTTTTTGATGAAACTGGCCAGTGTATGAAACACAAGCTGCCTCTGAGGTATGTCA  
AAGGTGCTCCTGAAGGATCTCACACAGCTTACTTCAAAGTCAGCAATCTA

>M6-PGSC0003DMG400018452-(rev)M6G-LecRK\_124

AATAAGATTAGGATCTTCTTTCATCCCACTGGACAATCTACAGCATGGTACTCAGCTTCAGGTCATTTTCG  
CCTTCGGCTTTTATCCACAAGGAAGTGGTTACAAGGTGGGAATTTGGTT

>M6-PGSC0003DMG400018452-(rev)M6G-LecRK\_1240

GTATGTCAAAGGTGCTCCTGAAGGATCTCACACAGCTTACTTCAAAGTCAGCAATCTAGCAGTGCAAAAT  
CCAACAACGGATTCAAGTGAAGCCACCATGGGTGGTGATCTTGGTTTTATC

>M6-PGSC0003DMG400018452-(rev)M6G-LecRK\_1302

TGCAAAATCCAACAACGGATTCAAGTGAAGCCACCATGGGTGGTGATCTTGGTTTTATCGATAAGTTTCGT  
TATGTATTCAGGTAAGTCTTGCATTTTCAGGCTTTTATGTCTTCAAAT

>M6-PGSC0003DMG400018452-(rev)M6G-LecRK\_1364

AGTTTCGTTATGTATTCAGGTAAGTCTTGCATTTTCAGGCTTTTATGTCTTCAAATTCCGGATAATAAA  
GTACAGGAAGCTACTTCAGACAGGAACACAGGCTTAACGAAGGATTTTC

>M6-PGSC0003DMG400018452-(rev)M6G-LecRK\_1426

GATAATAAAGTACAGGAAGCTACTTCAGACAGGAACACAGGCTTAACGAAGGATTTTCATACTCAAAC  
TTGCTCTTACAAGGAGCTAAACAGGCAACGGATGGTTTCAAAGAGGAATT

>M6-PGSC0003DMG400018452-(rev)M6G-LecRK\_186

GTCATTTTCGCTTCGGCTTTTATCCACAAGGAAGTGGTTACAAGGTGGGAATTTGGTTAGTGGGAGGCC  
CCAATAACACTATTGTGTGGACCGTGTCTCGTGATGATCCAGAAATATCTG

>M6-PGSC0003DMG400018452-(rev)M6G-LecRK\_2294

CTTCGTCCTTCCATGAAAAAAGTATTACACATGTTGCAGGGAATTATTGATATTCCAATTCCTCCATGTCC  
AAGTCCCAGTAGTTAATTTAGTAGTTGTAAGTGGTTTGGTTTATTATA

>M6-PGSC0003DMG400018452-(rev)M6G-LecRK\_2356

TCCATGTCCAAGTCCCAGTAGTTAATTTAGTAGTTGTAAGTGGTTTGGTTTATTATATTGTTGTTTTCTTC  
AATAACATCTAGTGAGGATATATAGTTAATTCAACATACATGAGTTCA

>M6-PGSC0003DMG400018452-(rev)M6G-LecRK\_2418

TGTTTTCTTCAATAACATCTAGTGAGGATATATAGTTAATTCAACATACATGAGTTCAGATTATGTTTTATT  
TTAATGAGATCATTTGCAGGCCCTATGGGTGTAATCTTGAAAGATATT

>M6-PGSC0003DMG400018452-(rev)M6G-LecRK\_248

GGAGGCCCAATAACACTATTGTGTGGACCGTGTCTCGTGATGATCCAGAAATATCTGCTGATTCTACCT  
TGGCTTTCATTGATGGAATTGTAGTTTTGAAAACAAATAACAGTGAGGAT

>M6-PGSC0003DMG400018452-(rev)M6G-LecRK\_2480

ATGTTTTATTTAATGAGATCATTTGCAGGCCCTATGGGTGTAATCTTGAAAGATATTACTCAAAAATGA  
GAATGTTTTGATGTGTCAGAGTATCAAATACTCAACTATTACACTAGGA

>M6-PGSC0003DMG400018452-(rev)M6G-LecRK\_2542

AAAAATGAGAATGTTTTGATGTGTCAGAGTATCAAATACTCAACTATTACACTAGGAGATTATCAAAT  
TATGCTTTCATCATATGTTGGGAGTTGCGAAAATTTAGACATATATACA

>M6-PGSC0003DMG400018452-(rev)M6G-LecRK\_2604

ATCAAATTATGCTTTCATCATATGTTGGGAGTTGCGAAAATTTAGACATATATACATGTGGGAATATT  
TAAGGTGTTGAGAGCCACTAGATTTGGAGCTTCTAATTAAGGTGGATAAC

>M6-PGSC0003DMG400018452-(rev)M6G-LecRK\_2666

GGAATATTTAAGGTGTTGAGAGCCACTAGATTTGGAGCTTCTAATTAAGGTGGATAAACACTTCAATATA  
GTGCTGATATTATGCAGGGAAAGGGTATTCCTTCCTGGCACCTTGATAGTA

>M6-PGSC0003DMG400018452-(rev)M6G-LecRK\_2728

CAATATAGTGCTGATATTATGCAGGGAAAGGGTATTCCTTCCTGGCACCTTGATAGTATTGTGGTTAAAG  
GCTTAAAGCAAGGAAGACTCTTTATCAAACCAATGGCATTATTTATTGCT

>M6-PGSC0003DMG400018452-(rev)M6G-LecRK\_2790

GGTTAAAGGCTTAAAGCAAGGAAGACTCTTTATCAAACCAATGGCATTATTTATTGCTGTAGAAAAGGA  
AATTAATAGTGGATGCAATGGCTAACTGGAGTTTAAAGGGGCATACATCT

>M6-PGSC0003DMG400018452-(rev)M6G-LecRK\_2852

AAAAGGAAATTAATAGTGGATGCAATGGCTAACTGGAGTTTAAAGGGGCATACATCTATCAGTTCAAT  
GATCTACTACAAGAAGCTAAAGCTGCATACAACAAATTGTACAAAATTCAG

>M6-PGSC0003DMG400018452-(rev)M6G-LecRK\_2914

GTTCAATGATCTACTACAAGAAGCTAAAGCTGCATACAACAAATTGTACAAAATTCAGATGCTTAGTCAA  
AGGTGCAGAGTATGCAACAAGATTCTTGTAAGAACTTCATGCATCAAGAC

>M6-PGSC0003DMG400018452-(rev)M6G-LecRK\_2976

TTAGTCAAAGGTGCAGAGTATGCAACAAGATTCTTGTAAGAACTTCATGCATCAAGACATGATAAACCA  
CTTCATATTTTGTACGTTCTTATAAAATCAGATAGAAAAGTAGTCGAAAG

>M6-PGSC0003DMG400018452-(rev)M6G-LecRK\_310

TTCTACCTTGGCTTTCATTGATGGAATTGTAGTTTTGAAAACAAATAACAGTGAGGATAAAGACTGTTGCA  
GCTAGTTCATCAGAATCTGCTTCTTATGCCAACTTGCTTGATAACGGTAA

>M6-PGSC0003DMG400018452-(rev)M6G-LecRK\_372

CTGTTGCAGCTAGTTCATCAGAATCTGCTTCTTATGCCAACTTGCTTGATAACGGTAACTTTGTTCTTTAC  
AATCAAGATCATGAAGCTATCTATGAGAGCTTCAGGTCTCCTACTGATA

>M6-PGSC0003DMG400018452-(rev)M6G-LecRK\_434

GTTCTTTACAATCAAGATCATGAAGCTATCTATGAGAGCTTCAGGTCTCCTACTGATACAATTTTAGGTG  
GCCAGAAATTAACAAGTGGGGGTAAATTGGTTTCTAGTTTCTCCTCCACA

>M6-PGSC0003DMG400018452-(rev)M6G-LecRK\_496

TTTAGGTGGCCAGAAATTAACAAGTGGGGGTAAATTGGTTTCTAGTTTCTCCTCCACAAATCATTCTCA



GGGCGATTTGCGCTCTTGATGCAGGATGATGGGAACCTTGTTGCATACCC

>M6-PGSC0003DMG400018452-(rev)M6G-LecRK\_558

ATTCCTCAGGGCGATTTGCGCTCTTGATGCAGGATGATGGGAACCTTGTTGCATACCCAGATACTTGTT

TCGGCCAGTGGATGCCTATTGGTCTTCACAAATTTATTGTGATGGTTGCA

>M6-PGSC0003DMG400018452-(rev)M6G-LecRK\_62

TATTTCTTACTTGTGCTGCTTATCTTTGGATCCGCTAGAGCTCAATCAAATCCACCTAATACAATAAGATT

AGGATCTTCTTTCATCCCACTGGACAATCTACAGCATGGTACTCAGCT

>M6-PGSC0003DMG400018452-(rev)M6G-LecRK\_620

TACTTGTTCGCGCCAGTGGATGCCTATTGGTCTTCACAAATTTATTGTGATGGTTGCAGAAATCTCCTGCT

TCTTAACAGCACTGGCATCTTATTTCTGATCAATGACACCGATTTCATCA

>M6-PGSC0003DMG400018452-(rev)M6G-LecRK\_682

TCTCCTGCTTCTTAACAGCACTGGCATCTTATTTCTGATCAATGACACCGATTTCATCAGTACTTCGACAATT

ATACACTCCACTTGTGCAGAATGACAGAGCTATTTATCGGGCCACTCT

>M6-PGSC0003DMG400018452-(rev)M6G-LecRK\_744

TTCGACAATTATACACTCCACTTGTGCAGAATGACAGAGCTATTTATCGGGCCACTCTAGATTATGATGG

GAATTTTCGACTCTATTCTCACGAATTCAACTCCAATGGGAATTCTAAAA

>M6-PGSC0003DMG400018452-(rev)M6G-LecRK\_806

TATGATGGGAATTTTCGACTCTATTCTCACGAATTCAACTCCAATGGGAATTCTAAAATGGTAATGGAGT

GGGAGGCAATTGATGATATTTGTCTTGTGAAGGGTTTCTGTGGCCTTAAT

>M6-PGSC0003DMG400018452-(rev)M6G-LecRK\_868

AATGGAGTGGGAGGCAATTGATGATATTTGTCTTGTGAAGGGTTTCTGTGGCCTTAATGGCTATTGTGTT

GGAAGTAATCACAATGCACCGTCTTGTATGTGTCTACCAGGGTCATACTT

>M6-PGSC0003DMG400018452-(rev)M6G-LecRK\_930

ATTGTGTTGGAAGTAATCACAATGCACCGTCTTGTATGTGTCTACCAGGGTCATACTTGAGAGAGAATG

ATCCAAGCTTTGGTGATTGTCAAAGGAACCTCACCAGAGGAAAGTGCATTA

>M6-PGSC0003DMG400018452-(rev)M6G-LecRK\_992

GAGAATGATCCAAGCTTTGGTGATTGTCAAAGGAACCTCACCAGAGGAAAGTGCATTAATGGGAAAGA

AGATGTAAGTGTCTACAAGATTACTACCACAACCAATTTGACCTGGGAGGAT

>M6-PGSC0003DMG400018457-(rev)M6G-LecRK\_0

GGAGTAATACTACCATTTAAAATTGGAGATGTCCAAGTTAGTATACAAAAGAATACTTATCAAAGAGTGT  
ATCCATATCCCATCCTTGTGTCATGGCTAACTTAGCATTACTTTTCATG

>M6-PGSC0003DMG400018457-(rev)M6G-LecRK\_1054

CATATGTCAACCGTGCAATGAAATTCCAAGGCTGCTATCGGGGATTCGTTTATGAAGAGTCTTGTGGAA  
GCAGCATAGACTCAACATTGGCCTACAATGTCACGGCGATTCAACACTTGA

>M6-PGSC0003DMG400018457-(rev)M6G-LecRK\_1116

TGTGGAAGCAGCATAGACTCAACATTGGCCTACAATGTCACGGCGATTCAACACTTGAAAGTTGGAGGA  
TATCCATTTTCTCAGTTTTCAATGGTTGAGCAGGACTGTAGAAATTCTTGC

>M6-PGSC0003DMG400018457-(rev)M6G-LecRK\_1178

TGGAGGATATCCATTTTCTCAGTTTTCAATGGTTGAGCAGGACTGTAGAAATTCTTGCTTGGATGATTGT  
ACTTGTGGGCTGCTCTATACATGAATGGATTGTGCAGCAAATTTAAGCT

>M6-PGSC0003DMG400018457-(rev)M6G-LecRK\_124

TGATGCTTCCATTTGTATTTGCAGCTATTCAAGTTGGAGCTCAGCAACAGCCCTCCAACATAACCTTAGGT  
TCTTTTCTTTATCCGAACCGAAATCCAAGCTATTGGCCATCTTCTTCAG

>M6-PGSC0003DMG400018457-(rev)M6G-LecRK\_1240

ATGATTGTACTTGTGGGCTGCTCTATACATGAATGGATTGTGCAGCAAATTTAAGCTTCCATTAATTGAT  
TCGACAATTGAACAAAATGATGAGTCCATCAAGAGTTTCGTCAAGCAGA

>M6-PGSC0003DMG400018457-(rev)M6G-LecRK\_1302

TTAATTGATTGACAATTGAACAAAATGATGAGTCCATCAAGAGTTTCGTCAAGCAGAGCTATAACATCT  
CCCAAATGGCAGGTCACTCTATTCCCTATCCTGGAAAAACAGGGAATAGA

>M6-PGSC0003DMG400018457-(rev)M6G-LecRK\_1364

TAACATCTCCCAAATGGCAGGTCACTCTATTCCCTATCCTGGAAAAACAGGGAATAGAAATGAAAGTCG  
GAAAGAGATAATATTGATTCTATCCCTGGTTCTTGGTTCTGTAGCATTCT

>M6-PGSC0003DMG400018457-(rev)M6G-LecRK\_1426

AAAGTCGAAAGAGATAATATTGATTCTATCCCTGGTTCTTGGTTCTGTAGCATTCTGTTCACTGTTTT  
GCAATTTTCAGTTATATTTTCTACAGAAGCAGAGCGGACGAATACCAA

>M6-PGSC0003DMG400018457-(rev)M6G-LecRK\_1488

ACTGTTTTTGCAATTTTCAGTTATATTTTCTACAGAAGCAGAGCGGACGAATACCAAAGCTATTGGAAA  
ATCCATATTTGGGGCCAAATGAGGAGTTCACTCTTCGATCATTTTCTTAC

>M6-PGSC0003DMG400018457-(rev)M6G-LecRK\_1550

ATTGGAAAATCCATATTTGGGGCCAAATGAGGAGTTCCTTCTCGATCATTCTTACAGTGAGCTTGAG  
AAAGCCACTGAGCATTCAAGGAAGAGGTAAGGCATGGTTCATTCGGGAA

>M6-PGSC0003DMG400018457-(rev)M6G-LecRK\_1612

AGCTTGAGAAAGCCACTGAGCATTCAAGGAAGAGGTAAGGCATGGTTCATTCGGGAACGTCTATAAA  
GGAATTCTATCAGAAGGTAACAGAACAGTTTCTGTAAAACGACTGGAGAAAA

>M6-PGSC0003DMG400018457-(rev)M6G-LecRK\_1674

TATAAAGGAATTCTATCAGAAGGTAACAGAACAGTTTCTGTAAAACGACTGGAGAAAATCGGGGATGA  
AGGAGAAAGGGAATTTAAAGCAGAAATGACTGCGATTGGGCAAGCTCGTCAC

>M6-PGSC0003DMG400018457-(rev)M6G-LecRK\_1736

GGATGAAGGAGAAAGGGAATTTAAAGCAGAAATGACTGCGATTGGGCAAGCTCGTCACAAAAACTTGG  
TTCATTTGCTTGTTTTGCTTGGAGGGATCAGAAAAAATTCTTGTGTATGA

>M6-PGSC0003DMG400018457-(rev)M6G-LecRK\_1798

ACTTGTTTCATTTGCTTGGTTTTGCTTGGAGGGATCAGAAAAAATTCTTGTGTATGAGTACATGAGCAA  
CGGGTCACTCGCAGATATCATATTCAATTCAGAAACAAGACCTTCTTGGG

>M6-PGSC0003DMG400018457-(rev)M6G-LecRK\_186

ACCTTAGTTCTTTTCTTTATCCGAACCGAAATCCAAGCTATTGGCCATCTTCTTCAGGCCTTTTCTCATTT  
GGTTTCTACAAAAAGGGGATGGATTTCAAGTTGGCATATGGCTACCT

>M6-PGSC0003DMG400018457-(rev)M6G-LecRK\_1860

ATGAGCAACGGGTCACTCGCAGATATCATATTCAATTCAGAAACAAGACCTTCTTGGGAGCAAAGGATG  
AGACTTGCACTGGACATATCAAGGGGAATACTTTATCTGCATAAAAAATGT

>M6-PGSC0003DMG400018457-(rev)M6G-LecRK\_1922

AAGGATGAGACTTGCACTGGACATATCAAGGGGAATACTTTATCTGCATAAAAAATGTGAGACTTGCAT  
AATTCAGTCAACATAAAGCCACACAATATCCTAGTAGATGATTCGTGGAC

>M6-PGSC0003DMG400018457-(rev)M6G-LecRK\_1984

CTTGCATAATTCAGTCAACATAAAGCCACACAATATCCTAGTAGATGATTCGTGGACGGCTAAAATCTC  
TGAATTTGGGCTTGCAAAGTTTCTGGTGCCTGATCAAGTAGGAAACCAAC

>M6-PGSC0003DMG400018457-(rev)M6G-LecRK\_2046

AAAATCTCTGAATTTGGGCTTGCAAAGTTTCTGGTGCCTGATCAAGTAGGAAACCAACTTCAGCTTAAAG

GAACAAGAGGATATTCGGCACCCAGAGTTGCAGAATAGTGCATTGATCTCC

>M6-PGSC0003DMG400018457-(rev)M6G-LecRK\_2108

GCTTAAAGGAACAAGAGGATATTCGGCACCCAGAGTTGCAGAATAGTGCATTGATCTCCGATAAGGTAG  
ATGTTTATAGCTATGGAGTAATGCTCTTGGAGATCATATGCTGTAGAAGTAA

>M6-PGSC0003DMG400018457-(rev)M6G-LecRK\_2170

AGGTAGATGTTTATAGCTATGGAGTAATGCTCTTGGAGATCATATGCTGTAGAAGTAATATGGATGTCA  
ACGTCTCAACCGAGGATGAAATCTTCTCCTAATTGGGTACACAAATGCT

>M6-PGSC0003DMG400018457-(rev)M6G-LecRK\_2232

GATGTCAACGTCTCAACCGAGGATGAAATCTTCTCCTAATTGGGTACACAAATGCTTTGTCGAGAATG  
ATATCATTAAAGCTAGTGGGAGATGAGGAAGTAGATGTGAAGTCCTTGGAG

>M6-PGSC0003DMG400018457-(rev)M6G-LecRK\_2294

CGAGAATGATATCATTAAAGCTAGTGGGAGATGAGGAAGTAGATGTGAAGTCCTTGGAGAGGATGGTGA  
AGGTTGGATTGTTATGCATTCACGATAATCCTGATCTGCGCCCTTCTATGAG

>M6-PGSC0003DMG400018457-(rev)M6G-LecRK\_2356

TGGTGAAGGTTGGATTGTTATGCATTCACGATAATCCTGATCTGCGCCCTTCTATGAGGAATGTAGTTCT  
CATGTTAGAAGGTAATGATATACCATTTTTGGCATGGTATTAAGTCT

>M6-PGSC0003DMG400018457-(rev)M6G-LecRK\_2418

GTAGTTCTCATGTTAGAAGGTAATGATATACCATTTTTGGCATGGTATTAAGTCTTTTACACTTCGTT  
TGGCTGGTTGCTACATCTCATTCAAATGTATCATATTATATTGTATTG

>M6-PGSC0003DMG400018457-(rev)M6G-LecRK\_248

TTTCTCATTTGGTTTCTACCAAAAAGGGGATGGATTTCAAGTTGGCATATGGCTACCTGATAAACTGTT  
GTTTGGACTGCGAATAGAGATGATCCTCCACTTCATTCCGGATGCATATAT

>M6-PGSC0003DMG400018457-(rev)M6G-LecRK\_310

AAACTGTTGTTTGGACTGCGAATAGAGATGATCCTCCACTTCATTCCGGATGCATATATCGAGTTCACAAA  
GGAAGGCAAATGTTACTATGGACAAAACAGAACAAGAAAGTCATTGCAG

>M6-PGSC0003DMG400018457-(rev)M6G-LecRK\_372

TTCACAAAGGAAGGCAAATGTTACTATGGACAAAACAGAACAAGAAAGTCATTGCAGAATCTCCAAAG  
CCAGTAACTTCAGCATCCATGCTTGATTCTGGTAACTTTGTTATCTATAAC

>M6-PGSC0003DMG400018457-(rev)M6G-LecRK\_434

TCCAAAGCCAGTAACTTCAGCATCCATGCTTGATTCTGGTAACTTTGTTATCTATAACAAAACAAATGTTG  
TTTGGGAAAGTTTTGACTATCCAACAGACACCATCCTAGCCGGTCAGCG

>M6-PGSC0003DMG400018457-(rev)M6G-LecRK\_496

CAAATGTTGTTTGGGAAAGTTTTGACTATCCAACAGACACCATCCTAGCCGGTCAGCGTCTAACATTAGG  
CCAGAGCCTTGTCTCTAGTGTTACTGAAGTTGATCATTCAAGTGGAAGAT

>M6-PGSC0003DMG400018457-(rev)M6G-LecRK\_558

ACATTAGGCCAGAGCCTTGTCTCTAGTGTTACTGAAGTTGATCATTCAAGTGGAAGATTTTATCTTAGTAT  
GCAGGCTGATGGGAACCTTGTGCCTACCCAACCAATTATCTAAATGGA

>M6-PGSC0003DMG400018457-(rev)M6G-LecRK\_62

AAGAGTGTATCCATATCCCATCCTTGTGTCATGGCTAACTTAGCATTACTTTTCATGTTGTTGATGCTTCC  
ATTTGTATTTGCAGCTATTCAAGTTGGAGCTCAGCAACAGCCCTCAA

>M6-PGSC0003DMG400018457-(rev)M6G-LecRK\_620

TCTTAGTATGCAGGCTGATGGGAACCTTGTGCCTACCCAACCAATTATCTAAATGGACCTGAGGCTTCC  
TATTGGGGTTTTATGCTACAAACCAGAGGTGAATTTGGTGAGGTTAGCTC

>M6-PGSC0003DMG400018457-(rev)M6G-LecRK\_682

AGGCTTCCTATTGGGGTTTTATGCTACAAACCAGAGGTGAATTTGGTGAGGTTAGCTCAGTTTTTCATAGG  
TCTTACTCCAACAGGCCAACTCTTTCGGAATGCTTCTAATGGTTTTTCGTT

>M6-PGSC0003DMG400018457-(rev)M6G-LecRK\_744

TTCATAGGTCTTACTCCAACAGGCCAACTCTTTCGGAATGCTTCTAATGGTTTTTCGTTTCCAAGTCAATAC  
CATAGCGAATACCTCTAATCAATCATCAACCAACAAAGCAGCAGCAATT

>M6-PGSC0003DMG400018457-(rev)M6G-LecRK\_806

AGTCAATACCATAGCGAATACCTCTAATCAATCATCAACCAACAAAGCAGCAGCAATTTATCGCGCAACT  
CTTGATCCTGATGGGATTTTTAGGCTTTATACATAACTTCGACAACCTC

>M6-PGSC0003DMG400018457-(rev)M6G-LecRK\_868

GCGCAACTCTTGATCCTGATGGGATTTTTAGGCTTTATACATAACTTCGACAACCTCAAGCTTGGAAT  
CAATTGGTCAGCGCTGGAAAATCAATGCAAAGCCAGGGGATTCTGTGGTT

>M6-PGSC0003DMG400018457-(rev)M6G-LecRK\_930

TTGGAAATCAATTGGTCAGCGCTGGAAAATCAATGCAAAGCCAGGGGATTCTGTGGTTTAAACAGTTAT  
TGTAAGCAAAAAATGGCAGCAGCATAGGCGATTGTTCTTGTTCCTGGA

>M6-PGSC0003DMG400018457-(rev)M6G-LecRK\_992

CAGTTATTGTACTGCAAAAAATGGCAGCAGCATAGGCGATTGTTCTTGTTCCTGGATTTTCATATGTCA  
ACCGTGCAATGAAATTCCAAGGCTGCTATCGGGGATTCGTTTATGAAGA

>M6-PGSC0003DMG400018574M6LRR-RLP\_0

CCAACCTGAGGGAATGAAGCAGATTGTTGAATTAGATATACATGATTGTAACCTCTTACCTTCTTTCCTT  
TTAGCATACTGCCACTACCTTGAAGAGAATAGACATATCTGGTTGCCA

>M6-PGSC0003DMG400018574M6LRR-RLP\_1024

ACCATCTATAATTGCCCTAAGCTCCAATCTCTCCAGTAAAAGGGATGCCCTCTACCCTCTCTAAACTAGT  
TATTGACAACTGCCATTGCTCAGACCACTACTAGAATTTGATAAGGGG

>M6-PGSC0003DMG400018574M6LRR-RLP\_1082

TCTCTAAACTAGTTATTGACAACTGCCATTGCTCAGACCACTACTAGAATTTGATAAGGGGGAATACTG  
GCCAGATATTGCTCTAATTCCCGTCATATATATTGATGATAAATACCAGT

>M6-PGSC0003DMG400018574M6LRR-RLP\_640

TGGGAGTTGCCTTCTCTATTCAAACACTCTATATAAAGAATCTGAAAACATTAAGCAGCCAACATCTCA  
AACACCTCACCTCTTCAATATCTAGACATTGCGGGTAATTTACCTCAA

>M6-PGSC0003DMG400018577M6LRR-RLP\_0

TTTCCCAATTGGCTAGCTGATCCTTTGTTTCTTAAGCTGGTGAAATTGTCTCTTAGCAACTGCAAGGACTG  
TTATTCTTTGCCAGCACTAGGACAACCTTGTGTTGAAAATCCTTTCC

>M6-PGSC0003DMG400018577M6LRR-RLP\_1054

CTATTCAAACACTTTATATAGAGAATGTGAAAACATTAAGCAGCCAACATCTCAAAGCCTCACCTCTCTT  
CAACATCTTTGTATTGAGGGTAATTTACCTCAAATTCAGTCAATGCTGG

>M6-PGSC0003DMG400018577M6LRR-RLP\_1116

ACCTCTCTTCAACATCTTTGTATTGAGGGTAATTTACCTCAAATTCAGTCAATGCTGGAACAAGGCCAGTT  
TTCGCACCTCACTTCGCTTCAAAGTCTACAAATCAGGAATTTCCCTAAT

>M6-PGSC0003DMG400018577M6LRR-RLP\_124

AAGGGATGCATGGAATAACAGAGGTGACAGAAGAATTCTATGGCAGTTTGTCTCCGAAAAGCCTTTTA  
ACTGTCTTGAGAAGCTTGAATTTGTAGATATGCCAGAGTGGAAGCAATGGC

>M6-PGSC0003DMG400018577M6LRR-RLP\_1302

AATCTTCAATCCCTTCCGGTAAAAGGGATGCCATCTCCCTCTCTAAACTTTCTATTTTAGAATGTCCGTTG

CTCACACCACTACTAGAATTTGACAAGGGGGAATACTGGCCAAAATT

>M6-PGSC0003DMG400018577M6LRR-RLP\_1352

TTCTATTTTAGAATGTCCGTTGCTCACACCACTACTAGAATTTGACAAGGGGGAATACTGGCCAAAATT

ACTAATATCTCCACCATAAAGATCGATCAGGAATGCATGTGATGATTA

>M6-PGSC0003DMG400018577M6LRR-RLP\_248

ACTAGGAAATGGAGAGTTCCTACACTTGAGAACTTTTGATTAAAATTGCCCTGAAGTCAGTTTGA

GACACCCATCCAACCTTCAAGTTTAAAAGGTTTGTGTTATTGGTTGTCC

>M6-PGSC0003DMG400018577M6LRR-RLP\_310

GTTTGGAGACACCCATCCAACCTTCAAGTTTAAAAGGTTTGTGTTATTGGTTGTCCTAAGTTGGAGA

TGCTCAAGTGTAAATCCCAACTTGAGGGAATGAAGCAGATTGTTGAAT

>M6-PGSC0003DMG400018577M6LRR-RLP\_372

GTTGGAGATGCTCAAGTGTAAATCCCAACTTGAGGGAATGAAGCAGATTGTTGAATTAGGTATTAGT

AACTGTAACCTCTGTTACCTCCTTTCCTTTTAGCATACTCCCACTACCTG

>M6-PGSC0003DMG400018577M6LRR-RLP\_434

TATTAGTAACTGTAACCTCTGTTACCTCCTTTCCTTTTAGCATACTCCCACTACCTGAAGAGAATAACCAT

ATCTAGTTGCCAGAAATTGAAATTGGAGGCGCCAGTTGGGGAGATGAG

>M6-PGSC0003DMG400018577M6LRR-RLP\_496

GAATAACCATATCTAGTTGCCAGAAATTGAAATTGGAGGCGCCAGTTGGGGAGATGAGTTATTGTAACA

TATTTCTGGAGTATTTGAGATTGGAAGAATGTGATTGTATAGAACATGATT

>M6-PGSC0003DMG400018577M6LRR-RLP\_558

TGTAACATATTTCTGGAGTATTTGAGATTGGAAGAATGTGATTGTATAGAACATGATTTGCTCCCAAGAG

CACGCTCTTTGTCTGTAGCCAATTGGCACAACCATACTAGGTTTTTTGATT

>M6-PGSC0003DMG400018577M6LRR-RLP\_62

CAAGGACTGTTATTCTTTGCCAGCACTAGGACAACCTCCTTGTGTTGAAAATCCTTTCCATTAAAGGGATGC

ATGGAATAACAGAGGTGACAGAAGAATTCTATGGCAGTTTGTCTCCGA

>M6-PGSC0003DMG400018577M6LRR-RLP\_620

CCCAAGAGCACGCTCTTTGTCTGTAGCCAATTGGCACAACCATACTAGGTTTTTTGATTCCTACTGCCACTG

AACTTTCAATATTAGGAATTGTGAGAATGTTGAAATACTTTCCGGTGGC

>M6-PGSC0003DMG400018577M6LRR-RLP\_682

CTGCCACTGAAACTTTCAATATTAGGAATTGTGAGAATGTTGAAATACTTTGGTGGCATGTGGGGGGA  
CCCAGATGACGTATTTGTATATTAGTGACTGCAAGAAGCTGAAGTGGCTGC

>M6-PGSC0003DMG400018577M6LRR-RLP\_806

ACGTATGCAGGAACTCCTTCCATCTCTTAAGGATCTGGATCTGCGTAATTGTCCAGAAATAGAGTCCTTT  
CCTGAAGGAGGATTGCCCTTCAATCTACAATTCCTTTCAATCTGGAACTG

>M6-PGSC0003DMG400018577M6LRR-RLP\_868

AGTCCTTTCCTGAAGGAGGATTGCCCTTCAATCTACAATTCCTTTCAATCTGGAACTGCAAGAACTGGT  
GAACGGACGAAAGGAGTGGCATTACAGAGACTCCCCTGTCTCAGAGAAT

>M6-PGSC0003DMG400018577M6LRR-RLP\_992

CATCTACCATAATGGCAGTGACGAAGAGATTGTTGGTGGTGAGAATTGGGAGTTTCCTTCTCTATTCAA  
ACACTTTATATAGAGAATGTGAAAACATTAAGCAGCCAACATCTCAAAAG

>M6-PGSC0003DMG400018677-(rev)M6L-LecRK\_0

ATTTTACACAACCTCCAACATGCTTCAAAATAGCTTCTTTTATTGACCCTTCCTCTTATTTAAATCCCTTACAT  
CTCTATACTTCTTTTCACTACACAATATGGAATTTTTGACACCAAAA

>M6-PGSC0003DMG400018677-(rev)M6L-LecRK\_1037

AAAAAGGGATGATAGGTCACAATCTAATATATTAGGGGCATTAAAGAGTTTACCTGGAATGCCTAGGGA  
TTTTGAGTTTAAAGAATTGAAAAAAGCTACTAATAATTTTGATGAAAAGAA

>M6-PGSC0003DMG400018677-(rev)M6L-LecRK\_1098

CCTAGGGATTTTGGAGTTTAAAGAATTGAAAAAAGCTACTAATAATTTTGATGAAAAGAATAAACTTGGTG  
AAGGTGGATTTGGAGTTGTGTACAAAGGGTATTTAGTTGGTGAAAATTTG

>M6-PGSC0003DMG400018677-(rev)M6L-LecRK\_1159

AACTTGGTGAAGGTGGATTTGGAGTTGTGTACAAAGGGTATTTAGTTGGTGAAAATTTGGAAATTGCTG  
TGAAGTGGTTTTCTAGGGAAAGTATCAAGGGTCAAGATGATTTTTTGGCTG

>M6-PGSC0003DMG400018677-(rev)M6L-LecRK\_122

CTTCATATTTTTCTCTTGTCTTCTACTCATATCACAAAGCCAAAATCATAAAATTTGACCAACAATATGGTGA  
CCCTTTTGATCATAATATGTTCCCTTACTTCAAATCAAACATCCTGC

>M6-PGSC0003DMG400018677-(rev)M6L-LecRK\_1220

AATTGCTGTGAAGTGGTTTTCTAGGGAAAGTATCAAGGGTCAAGATGATTTTTTGGCTGAGTTGACAATT  
ATCAACCGTTTAAAGCATAAACATCTTGTCAAACACTTGGTAAGTATTT



>M6-PGSC0003DMG400018677-(rev)M6L-LecRK\_1281

TTGACAATTATCAACCGTTTAAGGCATAAACATCTTGTCAAACACTACTTGGTAAGTATTTTGAACCTCTTTAC  
TCTTATGGTTTTTTTTTTGAGTATTTGTTTTTTGTTCAAGCTCGGATAA

>M6-PGSC0003DMG400018677-(rev)M6L-LecRK\_1342

AACTCTTACTCTTATGGTTTTTTTTTTGAGTATTTGTTTTTTGTTCAAGCTCGGATAAAGGAGGAATGTTA  
TGACTACCAGCAAAAGAATAATCAAAGTTTTTTGAGTGGATATAAAGA

>M6-PGSC0003DMG400018677-(rev)M6L-LecRK\_1403

GAGGAATGTTATGACTACCAGCAAAAGAATAATCAAAGTTTTTTGAGTGGATATAAAGATTTTGATATAT  
ATGCTTATTGAGTTGAAGTGTAATTGGTTGATAGATTTGTCCTGTCTTTG

>M6-PGSC0003DMG400018677-(rev)M6L-LecRK\_1464

TTGATATATATGCTTATTGAGTTGAAGTGTAATTGGTTGATAGATTTGTCCTGTCTTTGGAATTTTATCCA  
TGTTTTATGTATAGGTAGCAAAATCTACTAAGATTTTATGGAGAAAAAA

>M6-PGSC0003DMG400018677-(rev)M6L-LecRK\_1525

ATTTTATCCATGTTTTATGTATAGGTAGCAAAATCTACTAAGATTTTATGGAGAAAAAAAAAAGAGACAG  
GTTTTACACAGTCATTTCTCCGTTTTGAGGACACTTTTTATTTATTGAGT

>M6-PGSC0003DMG400018677-(rev)M6L-LecRK\_1586

AAGAGACAGGTTTTACACAGTCATTTCTCCGTTTTGAGGACACTTTTTATTTATTGAGTCGTGTTTCTTATC  
CTTCCTCGACATAGTAACCGCTTTCATATTTTTTATAACTTTTCGAGTA

>M6-PGSC0003DMG400018677-(rev)M6L-LecRK\_1647

TGTTTCTTATCCTTCCTCGACATAGTAACCGCTTTCATATTTTTTATAACTTTTCGAGTACAAGTGCATGTTC  
ATCCATCTTCATAGTCATTTCTTTGTTCCTTTAGTCGTTTTGATTGCA

>M6-PGSC0003DMG400018677-(rev)M6L-LecRK\_1708

AGTGCATGTTTCATCCATCTTCATAGTCATTTCTTTGTTCCTTTAGTCGTTTTGATTGCACTTTTTTTATTGAG  
TCGTATTTCTTCTCCTTCTCAACATAGTGATTTGTTTTATGTTTTT

>M6-PGSC0003DMG400018677-(rev)M6L-LecRK\_1769

TTTTTTATTGAGTCGTATTTCTTCTCCTTCTTCAACATAGTGATTTGTTTTATGTTTTTTTTTTCAAATTTCA  
TAACTTTTCGATCACAAGTGCATGTTTCATCCATCTTCGTTTTGAACT

>M6-PGSC0003DMG400018677-(rev)M6L-LecRK\_183

CAATATGGTGACCCTTTTGATCATAACATATGTTCCCTTACTTGAAATCAAACATCCTGCACAAATAAGCAA

TCAAGCACTTCAAATCACCCCAGACTCAGCTTCCTCTGCTTACCAAATG

>M6-PGSC0003DMG400018677-(rev)M6L-LecRK\_1830

TTTTCAAATTTTCATAACTTTTCGATCACAAGTGCATGTTTCATCCATCTTCGTTTTGAACTAAAGCTTGAATTA  
AATTTTATTAATTAAGGTACCAAGAATATTTTCTTGTGTTCTAAGGAG

>M6-PGSC0003DMG400018677-(rev)M6L-LecRK\_1891

AGCTTGAATTAATTTTATTAATTAAGGTACCAAGAATATTTTCTTGTGTTCTAAGGAGTTCCATTTTGAC  
TCATGTTAGGCCCATCTCCATCTTGAAAACGGTCCCAATAATTATATCC

>M6-PGSC0003DMG400018677-(rev)M6L-LecRK\_1952

CCATTTTGACTCATGTTAGGCCCATCTCCATCTTGAAAACGGTCCCAATAATTATATCCAACACTACTATAAG  
ATAAGTGAAAAAGTTAAAAGCTTTGATGCAACTTGCAAGTGCAAAAAT

>M6-PGSC0003DMG400018677-(rev)M6L-LecRK\_2013

CTACTATAAGATAAGTGAAAAAGTTAAAAGCTTTGATGCAACTTGCAAGTGCAAAAATGGTGTGCTCAT  
GTACCTTTTACAATAGTTTGAAAGTGATAAACATATACTTTTTTCGTCTCA

>M6-PGSC0003DMG400018677-(rev)M6L-LecRK\_2074

TGTGCTCATGTACCTTTTACAATAGTTTGAAAGTGATAAACATATACTTTTTTCGTCTCAAATATTTATTTA  
TATATTTTTTATACGCTTTTTGAGAAAACATTAATTAGTAAAGATATT

>M6-PGSC0003DMG400018677-(rev)M6L-LecRK\_2135

ATATTTATTTATATATTTTTTATACGCTTTTTGAGAAAACATTAATTAGTAAAGATATTTAATTATTTCCCCC  
TTATTTATATTTAAAACATAATCTCTATTTATATGTCATATTTGAG

>M6-PGSC0003DMG400018677-(rev)M6L-LecRK\_2318

TTTTAACTTGAATTTTTAAAATATAATCCAAAGTTTCTTGGAGGACCTACTAACTAATAATTTAATGCCCT  
CTGGATGAAAAATCTAAAGTTAATAAATATTAATTTCTTAGCTGGAAG

>M6-PGSC0003DMG400018677-(rev)M6L-LecRK\_2379

TTTAATGCCCTCTGGATGAAAAATCTAAAGTTAATAAATATTAATTTCTTAGCTGGAAGACAGAAGAGCA  
CTGATTCCATTTCTTTGTGTCTTTTTGGTTTTCTATACCACCAATTTG

>M6-PGSC0003DMG400018677-(rev)M6L-LecRK\_244

AAATAAGCAATCAAGCACTTCAAATCACCCCAGACTCAGCTTCCTCTGCTTACCAAATGTTCAATAATTCA  
GGCAGAATCCTATTAAGCAGCCTTTCAAACCTATGGGTAGACAATGATA

>M6-PGSC0003DMG400018677-(rev)M6L-LecRK\_2440

AGAAGAGCACTGATTCCATTTCTTTGTGTCTTTTTGGTTTTCTATACCACCAATTTTGAACATAGGGTCC  
CACACTCTTTTGTCTTTGTTAGCTTCGGTATAAATATCGAGTAATTCT

>M6-PGSC0003DMG400018677-(rev)M6L-LecRK\_2501

CATAGGGTCCCACACTCTTTTGTCTTTGTTAGCTTCGGTATAAATATCGAGTAATTCTGATCATTTAAATT  
AATTATATGAAAAAAATTGTCTAGTATTTTTATTTTCGATTAATTTGA

>M6-PGSC0003DMG400018677-(rev)M6L-LecRK\_2562

TCATTTAAATTAATTATATGAAAAAAATTGTCTAGTATTTTTATTTTCGATTAATTTGAATCATTGTTTGAA  
CAAACCTTTTCTTTTTTAGGGAAGCTTCCTGTCTTTGAAAATCACTTTC

>M6-PGSC0003DMG400018677-(rev)M6L-LecRK\_2623

CATTGTTTGAACAAACTTTTTCTTTTTTAGGGAAGCTTCCTGTCTTTGAAAATCACTTTCATTCAAATGTCAC  
CTATTATGATAAGTTTGGTACTTTCTAATATTAATTAATATAATAT

>M6-PGSC0003DMG400018677-(rev)M6L-LecRK\_2684

TCAAATGTCACCTATTATGATAAGTTTGGTACTTTCTAATATTAATTAATATAATATAATTGGACAATT  
GCTTCAAGATGCACTCAACTCCAATAAGACTAAGATTGTAACCCTACA

>M6-PGSC0003DMG400018677-(rev)M6L-LecRK\_2745

TTGGACAATTGCTTCAAGATGCACTCAACTCCAATAAGACTAAGATTGTAACCCTACAACATGTCATCAT  
AATTGAGAGAGGTCCAGATATTCCAAAATTAGGTCCTACAAAAAAGTTG

>M6-PGSC0003DMG400018677-(rev)M6L-LecRK\_2806

ATGTCATCATAATTGAGAGAGGTCCAGATATTCCAAAATTAGGTCCTACAAAAAAGTTGATTGGAACAC  
ATACAACCCAACCTTTTTTGCCTTGTAAGATTGATATCCTCAAAATAGT

>M6-PGSC0003DMG400018677-(rev)M6L-LecRK\_2867

TGGAACACATACAACCCAACCTTTTTTGCCTTGTAAGATTGATATCCTCAAAATAGTATTGATTAGATA  
TATTTATAGATTATTATTATTGTAGTAACAATTTAGCTTATATATGCAT

>M6-PGSC0003DMG400018677-(rev)M6L-LecRK\_2928

TGATTAGATATATTTATAGATTATTATTATTGTAGTAACAATTTAGCTTATATATGCATTAACAATTTAAC  
TCCACCCATGTGAGCTCGCTCAAATTGTCTGTCTTAATCCGAATAAA

>M6-PGSC0003DMG400018677-(rev)M6L-LecRK\_2989

ACAATTTTAACTCCACCCATGTGAGCTCGCTCAAATTGTCTGTCTTAATCCGAATAAAGAAGGAGGGTT  
GTTGAGGATCACTCAGAAACACCATTCTCTATCCCATAAGAGTAGGAGTA

>M6-PGSC0003DMG400018677-(rev)M6L-LecRK\_305

CAATAATTCAGGCAGAATCCTATTAAGCAGCCTTTCAAATATGGGTAGACAATGATATTTCAAGGACA  
GCGTCTTTCAACACATCATTCTAGTAAACATTTTTAGACCGGACAACAA

>M6-PGSC0003DMG400018677-(rev)M6L-LecRK\_3050

AGGAGGGTTGTTGAGGATCACTCAGAAACACCATTCTCTATCCCATAAGAGTAGGAGTAAGGCTGCATC  
AATTCATAGATCATTATTATTGTAGTCATAATTTGGCCTATATATATGTAC

>M6-PGSC0003DMG400018677-(rev)M6L-LecRK\_3111

GCTGCATCAATTCATAGATCATTATTATTGTAGTCATAATTTGGCCTATATATATGTACTAATAACAATTT  
AACTCTGTCATCAGTGTGATCTCGCTCACATTGTCCGGTCTCAAGATTG

>M6-PGSC0003DMG400018677-(rev)M6L-LecRK\_3355

TGTTGTTATTATTGTTGCACTAACAATTTCAAGTGATCTAAAGTAATTTTTGAACCTCCTTACCTTCTAAT  
GAGAACGTAACCTAGATGTTACATGTAGTTATCATTTAGGTGACCTAA

>M6-PGSC0003DMG400018677-(rev)M6L-LecRK\_3416

TACCTTCTAATGAGAACGTAACCTAGATGTTACATGTAGTTATCATTTAGGTGACCTAATGGTATAAAAAG  
TTCTTTTACGCTGTCAGTGTATATATATATGCTAATCACATGCATATTAT

>M6-PGSC0003DMG400018677-(rev)M6L-LecRK\_3477

GTATAAAAGTTCTTTTACGCTGTCAGTGTATATATATATGCTAATCACATGCATATTATTGTGACAGGATG  
GAGCCATAAGCATGGTAAGCTACTACTTGTATATGAATACATGCCAAAT

>M6-PGSC0003DMG400018677-(rev)M6L-LecRK\_3538

TGACAGGATGGAGCCATAAGCATGGTAAGCTACTACTTGTATATGAATACATGCCAAATGGTAGCCTGG  
ACAAACATCTCTTCTCATCAGAGCAAGAAAAAGAGCCACTCAGCTGGAGTG

>M6-PGSC0003DMG400018677-(rev)M6L-LecRK\_3599

TAGCCTGGACAAACATCTCTTCTCATCAGAGCAAGAAAAAGAGCCACTCAGCTGGAGTGTGAGGTACAA  
CATTGTATCGGGAGTCGCGTCAGCTCTGCACTATCTTCACAACGAATACGA

>M6-PGSC0003DMG400018677-(rev)M6L-LecRK\_366

TCAAGGACAGCGTCTTTCAACACATCATTCTAGTAAACATTTTTAGACCGGACAACAATACACCAGCTG  
AAGGTCTAGCTTTCTTGATATGTCCAAATTTGATTTGCCACTAAATAGC

>M6-PGSC0003DMG400018677-(rev)M6L-LecRK\_3660

AGGTACAACATTGTATCGGGAGTCGCGTCAGCTCTGCACTATCTTCACAACGAATACGAGCAGAAGGTA

GTCCATCGCGATCTCAAGGCAAACAACATCATGCTCGACTCAAACCTTCAAT

>M6-PGSC0003DMG400018677-(rev)M6L-LecRK\_3721

AGAAGGTAGTCCATCGCGATCTCAAGGCAAACAACATCATGCTCGACTCAAACCTTCAATGCACGTTTAG

GTGATTTTGGATTAGCACGAGCAATTGACAATGAAAAGACCTCATATGCTG

>M6-PGSC0003DMG400018677-(rev)M6L-LecRK\_3782

ACGTTTAGGTGATTTTGGATTAGCACGAGCAATTGACAATGAAAAGACCTCATATGCTGATGAAGCTGA

AGGTGTACTTGGCACGATGGGATACATCGCGCCAGAATGCTTCCACACAGG

>M6-PGSC0003DMG400018677-(rev)M6L-LecRK\_3843

GAAGCTGAAGGTGTACTTGGCACGATGGGATACATCGCGCCAGAATGCTTCCACACAGGAAAAGCCAC

TCAACATTCTGATGTCTATGCATTCGGAGCTGTGTTGTTGGAGCTAATATGT

>M6-PGSC0003DMG400018677-(rev)M6L-LecRK\_3904

AAGCCACTCAACATTCTGATGTCTATGCATTCGGAGCTGTGTTGTTGGAGCTAATATGTGGCCAAAGACC

TGGAACTAAAGTTAATGGCTTTCAACTCTTTCTTGATTGGGTTTGGTTCT

>M6-PGSC0003DMG400018677-(rev)M6L-LecRK\_3965

CCAAAGACCTGGAACTAAAGTTAATGGCTTTCAACTCTTTCTTGATTGGGTTTGGTTCTTGCATCGCGATG

GGAGAATCCTTGAAGCCGTTGACAAGAGGCTCGAGGATCAATACGTGGT

>M6-PGSC0003DMG400018677-(rev)M6L-LecRK\_4026

CATCGCGATGGGAGAATCCTTGAAGCCGTTGACAAGAGGCTCGAGGATCAATACGTGGTTGAAGAAGC

AGAGAGATTGTTACTACTTGCTCTGGCTTGCTCCCATCCAATTGCCAATGAA

>M6-PGSC0003DMG400018677-(rev)M6L-LecRK\_4087

AAGAAGCAGAGAGATTGTTACTACTTGCTCTGGCTTGCTCCCATCCAATTGCCAATGAAAGGCCTAAAAC

ACAAACAATAGTTCAAGTTATATCAGGATCAGTACCAGCGCCACAAGTAC

>M6-PGSC0003DMG400018677-(rev)M6L-LecRK\_4148

GCCTAAAACACAAACAATAGTTCAAGTTATATCAGGATCAGTACCAGCGCCACAAGTACCACCATTCAA

CCATCATTGTATGGCCTTCTATGGTTCCAATTGACATAGATTTCATCGAG

>M6-PGSC0003DMG400018677-(rev)M6L-LecRK\_4209

CCATTCAAACCATCATTTGTATGGCCTTCTATGGTTCCAATTGACATAGATTTCATCGAGCATTGTGCGATAC

AATATCCATCACAACCTCCTCAGTACAGTTCAGAGAACAACAGTATTGAA

>M6-PGSC0003DMG400018677-(rev)M6L-LecRK\_427

CACCAGCTGAAGGTCTAGCTTTCTTGATATGTCCAAATTTTGATTTGCCACTAAATAGCCAGGGCCAGTA  
TTTGGCCTAACGAATGCTACAACAGATGGTGAATTATCCAACAGAATAA

>M6-PGSC0003DMG400018677-(rev)M6L-LecRK\_4270

TTGTGATACAATATCCATCACAACCTCCTCAGTACAGTTCAGAGAACAACAGTATTGAATATCAAAGCAA  
GTAGAGATAGCAATAGCTTGATTTAGGCCACTAAGAGATTTTTTTTTGCT

>M6-PGSC0003DMG400018677-(rev)M6L-LecRK\_4331

TCAAAGCAAGTAGAGATAGCAATAGCTTGATTTAGGCCACTAAGAGATTTTTTTTTGCTTATTGTGTAAT  
GACAAGAATAGCAGCTCATGTATATATTTCTCAGCCTTTTATGTTAAATT

>M6-PGSC0003DMG400018677-(rev)M6L-LecRK\_4392

TTGTGTAATGACAAGAATAGCAGCTCATGTATATATTTCTCAGCCTTTTATGTTAAATTCCATCCTATACAT  
TGTTCTTCTACGGTTTGACTGTTTGGTTTGTGTATTAATAAATGATG

>M6-PGSC0003DMG400018677-(rev)M6L-LecRK\_4425

TATTTCTCAGCCTTTTATGTTAAATCCATCCTATACATTGTTCTTCTACGGTTTGACTGTTTGGTTTGTG  
TATTAATAAATGATGTGTATTGCATAATTTATAAAAAGAAGTTGTTTCG

>M6-PGSC0003DMG400018677-(rev)M6L-LecRK\_488

GGGCCAGTATTTGGCCTAACGAATGCTACAACAGATGGTGAATTATCCAACAGAATAATCGCGATTGA  
GCTAGATACATTCAAACAAGAATTCGATATTGATGATAACCATATTGGGAT

>M6-PGSC0003DMG400018677-(rev)M6L-LecRK\_549

GCGATTGAGCTAGATACATTCAAACAAGAATTCGATATTGATGATAACCATATTGGGATTGATATAAACA  
GTGTAAATCCGTTAAGTCGGAACCTTTAACACCACATGGAATTGAACTA

>M6-PGSC0003DMG400018677-(rev)M6L-LecRK\_61

AATCCCTTACATCTCTATACTTCTTTTCACTACACAATATGGAATTTTTGACACCAAAAATCTTCATATTTT  
CTCTTGTCTTCTACTCATATCACAAGCCAAAATCATAAAATTTGACC

>M6-PGSC0003DMG400018677-(rev)M6L-LecRK\_610

ATATAACAGTGTTAAATCCGTTAAGTCGGAACCTTTAACACCACATGGAATTGAACTAGCTCCAATAGG  
TGAAAGAGTTTACAATATATGGATACACTATGACGGATTCAAGAAAGTAC

>M6-PGSC0003DMG400018677-(rev)M6L-LecRK\_671

TCCAATAGGTGAAAGAGTTTACAATATATGGATACACTATGACGGATTCAAGAAAGTACTTGATGTGTA  
CATTATTGAACAAATGAGGAAAAATGGGACAACACCAACAAGGCCAAAAGT

>M6-PGSC0003DMG400018677-(rev)M6L-LecRK\_732

GATGTGTACATTATTGAACAAATGAGGAAAAATGGGACAACACCAACAAGGCCAAAAGTACCAATACTA  
ACACACAATGTTGATTTGAGAGAATTTGTAAATCAAGAATCATATTTTGGGA

>M6-PGSC0003DMG400018677-(rev)M6L-LecRK\_793

CAATACTAACACACAATGTTGATTTGAGAGAATTTGTAAATCAAGAATCATATTTTGGATTTTCAGCTTCA  
ACAGGACATTTCAATCAGTTGAATTGTGTGTTGAGATGGAATTTAACAG

>M6-PGSC0003DMG400018677-(rev)M6L-LecRK\_854

TTCAGCTTCAACAGGACATTTCAATCAGTTGAATTGTGTGTTGAGATGGAATTTAACAGTTGAGTATTTTC  
AAGAAAAGAATGATCAAGAAAAGGTTACTAATAATAAGTCTAAGTGTGG

>M6-PGSC0003DMG400018677-(rev)M6L-LecRK\_915

GAGTATTTTCAAGAAAAGAATGATCAAGAAAAGGTTACTAATAATAAGTCTAAGTGTGGTGTATCAGTA  
TTGGTTGTTTTATTGATTTTGTGAGGGTATTTTGGGTATTTTTTTTATAAG

>M6-PGSC0003DMG400018677-(rev)M6L-LecRK\_976

TATCAGTATTGGTTGTTTTATTGATTTTGTGAGGGTATTTTGGGTATTTTTTTTATAAGAAAAAAGGGAT  
GATAGGTCACAATCTAATATATTAGGGGCATTAAGAGTTTACCTGGAA

>M6-PGSC0003DMG400018694M6LRR-RLP\_1054

AAATTGGATCCGCCAGTTGGTGAGATGAGTATGTTTCTCGAGGAATTGGAAGTGCATAAATGTGATTGT  
ATAGATGATATATCACCTGAGTTACTCCCAAGAGCACGCACATTGAATGTA

>M6-PGSC0003DMG400018694M6LRR-RLP\_1116

TGATTGTATAGATGATATATCACCTGAGTTACTCCCAAGAGCACGCACATTGAATGTATTTAATTGCCAC  
AACCTTACTAGGTTTTTGTTCCTACTGCCACTGAAAGTCTCTTTATTCT

>M6-PGSC0003DMG400018694M6LRR-RLP\_124

CTTTCATCTTGTGGTTATCTCAAGGAGCTACCACTGCAGATGGAGAAGTTGATAAACCTGCGTCATCTTG  
ACATAAGCAACACTTGGTGCTTGAAGATGCCGCTACATCTGAGCAAGTTG

>M6-PGSC0003DMG400018694M6LRR-RLP\_1364

AGGATCTGTATCTGATTAATTGTCCAGAAATAGAGTCCTTTCTGAAGGAGGATTGCCCTCAATTTACA  
ACTCCTTTGGATCAGTAATTGCAAGAACTGGTGAATGGCCGAAAGGAGT

>M6-PGSC0003DMG400018694M6LRR-RLP\_1488

TTTACAGAGACTCCCCTGTCTCACACAGTTAATCATCTCTCATGATGGCAGTGACGAAGAGATTGTTGGT

GGTGAGAATTGGGAGTTGCCTTCCTCTATAACAAGACTTGAGGTATACAA

>M6-PGSC0003DMG400018694M6LRR-RLP\_1550

TTGTTGGTGGTGAGAATTGGGAGTTGCCTTCCTCTATAACAAGACTTGAGGTATACAATCTGAAAACATT  
AAGCAGCCAACATCTCAAAGCCTCACCTCTCTTCAATATCTATCTATTG

>M6-PGSC0003DMG400018694M6LRR-RLP\_1612

AAAACATTAAGCAGCCAACATCTCAAAGCCTCACCTCTCTTCAATATCTATCTATTGTGGAACAAGGCC  
AGTTTTCGCACCTCACTTCTCTCAAAGTCTAGAAATCATGAATTTCCCT

>M6-PGSC0003DMG400018694M6LRR-RLP\_1922

CCATCTATAATTGCCCTAAGCTCCAATCTCTTCCAGTAAAGGGATGCCCTCTCCCTCTCTAAACTATCTA  
TGTCCAAATGCCATTGCTCACACCACTACTAGAATTTGACAAGGGGG

>M6-PGSC0003DMG400018694M6LRR-RLP\_2046

CTGGCCAAATATTGCTCAATTTCCACCATAAAGATCGATGATGAATGCATGTGATGATTAAAACGAATG  
GCTCTTCAACTGATGTAAGCTATTCTTTCCCTTGGAAGCTTTTTATTTC

>M6-PGSC0003DMG400018694M6LRR-RLP\_248

GCCTCCAAGTGCTAGTGGGAGCCAAGTTTCTTCTCGGTGTTTGAGAATGGAAGATTTGGGTGAAGCAC  
AGAACTTGTATGGATCTGTATCAGTTGTAGAGTTGCAAATGTAGTTGATA

>M6-PGSC0003DMG400018694M6LRR-RLP\_62

AGACAGAGATTAAGGTTGCCAGATTCCATTTGTGTGTTGTATAACTTAGAGACACTTCTCCTTTCATCT  
TGTGGTTATCTCAAGGAGCTACCACTGCAGATGGAGAAGTTGATAAACC

>M6-PGSC0003DMG400018694M6LRR-RLP\_620

CCTTGCCAGCACTAGGACAGCTTCTTGTGTTGAAAATCCTTTGGATTAGAGGGATGCATGGAATAACAG  
GGGTGACGGAAGAATTCTATGGCAGTTTGTCTCTAAAAAGCCTTTTAACT

>M6-PGSC0003DMG400018694M6LRR-RLP\_682

ATAACAGGGGTGACGGAAGAATTCTATGGCAGTTTGTCTCTAAAAAGCCTTTTAACTGTCTTGAGGAAC  
TTATATTTGAAGATATGCCGGAGTGGAAGCAATGGCACGTACTAGGAAGT

>M6-PGSC0003DMG400018694M6LRR-RLP\_806

AGTTCCTATACTTGAGAAGCTTAAAATTATAAATTGCCCTGAACTCAGTTTGGAGACAGTACCCATCCA  
ACTTTCAAGTTTAAAAAGATTTGAAGTAATTGGTTCTCGCACGGTTGGAG

>M6-PGSC0003DMG400018694M6LRR-RLP\_868



CCCATCCAAC TTTCAAGTTTAAAAAGATTTGAAGTAATTGGTTCTCGCACGGTTGGAGTTGTTTTTGAGG  
GAATGAAGCAGATTGAGGAATTATATATTGGTGATTGTA ACTCTCTTGCC

>M6-PGSC0003DMG400018694M6LRR-RLP\_930

TTTTGAGGGAATGAAGCAGATTGAGGAATTATATATTGGTGATTGTA ACTCTCTTGCCCTTCTTTCTTTTA  
GCATACTGCCACTACCTTGAAGACAATAAGGATATCTGGTTGCCAGAA

>M6-PGSC0003DMG400018694M6LRR-RLP\_992

TTCCTTTTAGCATACTGCCACTACCTTGAAGACAATAAGGATATCTGGTTGCCAGAAATTGAAATTGGA  
TCCGCCAGTTGGTGAGATGAGTATGTTTCTCGAGGAATTGGA ACTGCATA

>M6-PGSC0003DMG400018722M6LRR-RLP\_122

AAATCTTTGTATAAGGTTGGAAGAGAAACAAAGCATCGCATATGTTGGAACAATGTCGGCACTTATCTTAT  
TCAATGGGAGAACGTGACTTTGAGAAATTGAAATCACTCTTTAAATCAGA

>M6-PGSC0003DMG400018722M6LRR-RLP\_183

TTATCTTATTCAATGGGAGAACGTGACTTTGAGAAATTGAAATCACTCTTTAAATCAGAGCAGCTGAGAA  
CATTACTTGCAATCAATATCCTTAAGCACTATTATTACAACATTAAGCTA

>M6-PGSC0003DMG400018722M6LRR-RLP\_1830

CTTTCAATCTGGA ACTGCAAGAACTGGTGAACGGACGAAAGGAGTGGCATTACAGAGACTCCCCTGT  
CTCAGAGAATTAAGCATCTACCATAATGGCAGTGACGAAGAGATTGTTGGT

>M6-PGSC0003DMG400018722M6LRR-RLP\_2318

CAAGGGGGAATACTGGCCAAAAATTACTAATATCTCCACCATAAAGATCGATCAGGAATGCATGTGATG  
ATTAACGAATGGCTCTCCA ACTGATGTAAGTTATTCTTTCCCTCGGAA

>M6-PGSC0003DMG400018722M6LRR-RLP\_2372

GGAATGCATGTGATGATTAAAACGAATGGCTCTCCA ACTGATGTAAGTTATTCTTTCCCTCGGAAGCTT  
TTTATTTCCGTTTACTTCACTTTGCTTTTTTTGTTGATTCTTTTCATATTT

>M6-PGSC0003DMG400018722M6LRR-RLP\_244

AGCTGAGAACATTACTTGCAATCAATATCCTTAAGCACTATTATTACAACATTAAGCTAAGCAAGAGGGT  
GCTGCATAACATACTGCCAAGACTAAGATCCTTAAGGGCATTATCATTGT

>M6-PGSC0003DMG400018722M6LRR-RLP\_305

CAAGAGGGTGCTGCATAACATACTGCCAAGACTAAGATCCTTAAGGGCATTATCATTGTCAGGTTATAG  
GATTAAGGAGTTGCCAAATGACTTGTTTATCAAATTAAGCTCCTCAGATT

>M6-PGSC0003DMG400018722M6LRR-RLP\_610

TGTGCAAGTTGAAAAGCCTCCAAGTGCTAATGGGAGCCAAGTTTCTTCTAGGTGGTTGGAGAATGGAAG  
ATTTGGGTGAAGCACAGAATTTGTATGGATCTGTATCAGTTGTAGAGTTGC

>M6-PGSC0003DMG400018722M6LRR-RLP\_671

AATGGAAGATTTGGGTGAAGCACAGAATTTGTATGGATCTGTATCAGTTGTAGAGTTGCAAAATGTGGT  
TGATAGAAGGGAAGCTGTGAAGGCAAAGATGATGGAGAAGATTCATGTTGA

>M6-PGSC0003DMG400018722M6LRR-RLP\_793

AGCTATCTATGGAGTGGAGTGAAAGTAGTAGTGCAGACAATTCACAACTGAAAGAGACATACTTGATG  
AGCTACGCCACATAAAAACATAAAACAACCTCAAATCACCGGATATAGAG

>M6-PGSC0003DMG400018722M6LRR-RLP\_854

ACTTGATGAGCTACGCCACATAAAAACATAAAACAACCTCAAATCACCGGATATAGAGGGACAAAATT  
TCCCAATTGGCTAGCTGATCCTTTGTTTCTTAAGCTGGTGAAATTGTCTCT

>M6-PGSC0003DMG400018752-(rev)M6LRR-RLK\_0

TTAAGAAGTTGGTCAATCTGGTTCAAATCACGAATTTCTTGAGAAAAACAATCCTTGACAAGATGGAGA  
AAAGCTATGTTCTTTTCTTATCTTATTAGTATTTCAAGAATCAATTTTTT

>M6-PGSC0003DMG400018752-(rev)M6LRR-RLK\_1054

TATCTTCAATATATCTTCTTTGGAGTACATTGCTTTCAGTGATAACGATCTCTCAGGGCGAATCCAACCA  
CTCTTGGACTTAACTTCAAACCTTAAAGGAATTTTCTTGCCAGAAAA

>M6-PGSC0003DMG400018752-(rev)M6LRR-RLK\_1116

TTCCAACCACTCTTGGACTTAACTTCAAACCTTAAAGGAATTTTCTTGCCAGAAAATCAACTGAAGGA  
CAAATCCAATGTATATCACAAATGCTTCTAACCTTATTGAGCTAGAGC

>M6-PGSC0003DMG400018752-(rev)M6LRR-RLK\_1178

CTTGAAGGACAAATCCAATGTATATCACAAATGCTTCTAACCTTATTGAGCTAGAGCTGTCCTATAACT  
GTTACAGGCATAGTTCCAAGTGATTTGGGAAATCTACACCAGCTCGAG

>M6-PGSC0003DMG400018752-(rev)M6LRR-RLK\_124

ATATGCAACTTCCACAAATGAAACAGACATAGAACTTTGTTATCTTTTAAACAACCTCATTACAAATAACT  
CTTCTTTCCTTCCAAGAATTGGACATCAAATACTTCATTTTGCTCATG

>M6-PGSC0003DMG400018752-(rev)M6LRR-RLK\_1240

CTATAACTTGTTACAGGCATAGTTCCAAGTGATTTGGGAAATCTACACCAGCTCGAGTTCTTGAATCTT

GGTGGTAATCAGCTTACAAATGAACCAGGACAACAAGAGCTTGGATTCTT

>M6-PGSC0003DMG400018752-(rev)M6LRR-RLK\_1302

TGAATCTTGGTGGTAATCAGCTTACAAATGAACCAGGACAACAAGAGCTTGGATTCTTGA

ACTCTTTGGTGGATTGTAGGAGGCTGCAGTTTCTGATATTGGCTAACAAACCCCTTGAATG

>M6-PGSC0003DMG400018752-(rev)M6LRR-RLK\_1364

TCTTTGGTGGATTGTAGGAGGCTGCAGTTTCTGATATTGGCTAACAAACCCCTTGAATGG

CATCTTGCCTGATTTCGGTTAGTAATCTTTCGTCTACTATTGAAATGTTTAACATAGAGAAT

>M6-PGSC0003DMG400018752-(rev)M6LRR-RLK\_1426

CTTGCCTGATTTCGGTTAGTAATCTTTCGTCTACTATTGAAATGTTTAACATAGAGAATGG

TCAGATAAATGACAAATCCAAGAGGAGTAGGCAATATAAGCAGCATGTTATCGCTAGT

>M6-PGSC0003DMG400018752-(rev)M6LRR-RLK\_1488

AGATAAATGGACAAATCCAAGAGGAGTAGGCAATATAAGCAGCATGTTATCGCTAGTCTTGA

ACGGTAACCAATTGACAGGAACCAATTCCACCAGAGATTGGTGAGCTAAAGCAACTTC

>M6-PGSC0003DMG400018752-(rev)M6LRR-RLK\_1550

AACGGTAACCAATTGACAGGAACCAATTCCACCAGAGATTGGTGAGCTAAAGCAACTTCAG

AGGCTTTATCTAAGCAAAAACAAGCTACAAGGTTCAATTCCAGAGGAAATATGTGACTTG

>M6-PGSC0003DMG400018752-(rev)M6LRR-RLK\_1612

GCTTTATCTAAGCAAAAACAAGCTACAAGGTTCAATTCCAGAGGAAATATGTGACTTGGTAA

ACTTGGGAGATACTTTCTACATGAAAACGAGCTCTCTGGGGCAATTCCAAGTTGCAT

>M6-PGSC0003DMG400018752-(rev)M6LRR-RLK\_1674

ACTTGGGAGATACTTTCTACATGAAAACGAGCTCTCTGGGGCAATTCCAAGTTGCATTGG

AAAACCTCAC TAGGCTGCAAAGGCTTTCATTTGGCTTCAATAAGTTCACCTCAAGCCTAC

>M6-PGSC0003DMG400018752-(rev)M6LRR-RLK\_1736

AAACTACTAGGCTGCAAAGGCTTTCATTTGGCTTCAATAAGTTCACCTCAAGCCTACCTTCA

AGTCTATGGAAATGGATAGCCTGATTTTTCTAAACGTGACGCAAACTCAATACAA

>M6-PGSC0003DMG400018752-(rev)M6LRR-RLK\_1798

AAGTCTATGGGAAATGGATAGCCTGATTTTTCTAAACGTGACGCAAACTCAATACAAGGG

GAACTTCTTTGACATTGGAAAATTGAAATCTATTGAAGGTATAGATTTTTCAAGCAA

>M6-PGSC0003DMG400018752-(rev)M6LRR-RLK\_186

CAAATAACTCTTCTTTCCCTTTCCAAGAATTGGACATCAAATACTTCATTTTGCTCATGGTTTGGTATCACTT  
GTAATCCAAAAACCAAAGAGTCATAGCTTTAAATCTCCCAAACATGA

>M6-PGSC0003DMG400018752-(rev)M6LRR-RLK\_1860

AACTTCCTCTTGACATTGGAAAATTGAAATCTATTGAAGGTATAGATTTTTCAAGCAACCAACTTTCCAGT  
GTGATTCCAAGTACATTTGGAGACCTTATAGGCCTTAGTTATCTTTTAC

>M6-PGSC0003DMG400018752-(rev)M6LRR-RLK\_1922

CTTTCCAGTGTGATTCCAAGTACATTTGGAGACCTTATAGGCCTTAGTTATCTTTCACTCTCAAACAACCTC  
GTTACGGAGTGCAATTCCTTCATCATTGGCAGTTTGTTAAGTTTGGAG

>M6-PGSC0003DMG400018752-(rev)M6LRR-RLK\_1984

AAACAACCTCGTTACGGAGTGCAATTCCTTCATCATTGGCAGTTTGTTAAGTTTGGAGTTCTTGGATTTAT  
CTTCAAATGCGTTATCAGGAAGCATCCCAAAGTCCTTAGAAAACTTCA

>M6-PGSC0003DMG400018752-(rev)M6LRR-RLK\_2046

TGGATTTATCTTCAAATGCGTTATCAGGAAGCATCCCAAAGTCCTTAGAAAACTTCAGTTCCTTAAAGA  
AATCAATTTTTCTACAACCATTTAGAAGGTGAAATACCTACTAGTGGTG

>M6-PGSC0003DMG400018752-(rev)M6LRR-RLK\_2108

CTTAAAGAAATCAATTTTTCTACAACCATTTAGAAGGTGAAATACCTACTAGTGGTGTGTTTGCAAACCTC  
TTCTTCTCAATCTTTTGTGGAAATAGAGGTTTATGTGGAAAACCTATA

>M6-PGSC0003DMG400018752-(rev)M6LRR-RLK\_2170

TGCAAACCTCTTCTTCTCAATCTTTTGTGGAAATAGAGGTTTATGTGGAAAACCTATATCAGAAGTTTCTC  
AATGTGCTACGGATAGTGCAACGAAACGATCAAAGTCTAGAAAACATGT

>M6-PGSC0003DMG400018752-(rev)M6LRR-RLK\_2232

AAGTTTCTCAATGTGCTACGGATAGTGCAACGAAACGATCAAAGTCTAGAAAACATGTGCTAGTAGTTG  
TCATTCTGTGATTGCATCAATTCTCCTCATATTTGTTGTTCTGTTTCGTAT

>M6-PGSC0003DMG400018752-(rev)M6LRR-RLK\_2294

GTAGTTGTCATTCTGTGATTGCATCAATTCTCCTCATATTTGTTGTTCTGTTTCGTATGGATTAAGCGAAG  
ATCAAGAAGAACAACAACTTCAAGGCCATGATCAAGAGTTAACAGAAATC

>M6-PGSC0003DMG400018752-(rev)M6LRR-RLK\_2356

TAAGCGAAGATCAAGAAGAACAACAACTTCAAGGCCATGATCAAGAGTTAACAGAAATCACAACACACCA  
GTTGATCACATACCGTGAACCTTCAACAAGCAACGGATAGTTTCAGTGGCTC

>M6-PGSC0003DMG400018752-(rev)M6LRR-RLK\_2418

CACACCAGTTGATCACATACCGTGAACCTCAACAAGCAACGGATAGTTTCAGTGGCTCTAACATGATTGG  
TTCAGGAGGTTCTGGTTCTGTTTACAAGGGCATATTGGCTAACGGAACAA

>M6-PGSC0003DMG400018752-(rev)M6LRR-RLK\_248

GGTATCACTTGTAATCCAAAAACCAAAGAGTCATAGCTTTAAATCTCCCAAACATGAATCTTCAAGGCA  
AAATTCACCATCAATAGGTAACCTTATCCTATCTTACTATACTTAACTTT

>M6-PGSC0003DMG400018752-(rev)M6LRR-RLK\_2480

ATGATTGGTTCAGGAGGTTCTGGTTCTGTTTACAAGGGCATATTGGCTAACGGAACAATGGTCGCGATA  
AAGGTTCTAAATATGCAAATGAGGAAGGATGCAAGAGGTTTGATACCGAA

>M6-PGSC0003DMG400018752-(rev)M6LRR-RLK\_2604

AAGTGATGAGAAGCATTAAACATAGAAATCTTGTCAAGGTGATCACTACATGTTCCAATCAATACGTTAG  
AGCCATCGTTCTCGAGTATATGCCAAATGGAAGCCTTGAAAGTTGGTTGT

>M6-PGSC0003DMG400018752-(rev)M6LRR-RLK\_2666

TACGTTAGAGCCATCGTTCTCGAGTATATGCCAAATGGAAGCCTTGAAAGTTGGTTGTATGATAAGGAA  
CATCAAGTCTTAGACATGTTTCAAAGAGTTAGCATAATGCTTGATGTTGCA

>M6-PGSC0003DMG400018752-(rev)M6LRR-RLK\_2728

TAAGGAACATCAAGTCTTAGACATGTTTCAAAGAGTTAGCATAATGCTTGATGTTGCAATGGCATTGGA  
ATATCTTCACTATGGTTATGATACACCTATAGTCCATTGTGACTTGAAGCC

>M6-PGSC0003DMG400018752-(rev)M6LRR-RLK\_2790

CATTGGAATATCTTCACTATGGTTATGATACACCTATAGTCCATTGTGACTTGAAGCCTCAAATGTTTTA  
TTAGATGCTGACTTGGTGGCACATGTTGGTGATTTTGGCATTTCAAAGA

>M6-PGSC0003DMG400018752-(rev)M6LRR-RLK\_2914

AGGTGAAAACAACCTCCATGGCACAACTAACACATTGGGTACTATTGGCTACATTGCACCAGGTAAACA  
GTTCTTCTCTGACTACTCTTCTAATATAAGGCATATTTTCGGTCATCTTC

>M6-PGSC0003DMG400018752-(rev)M6LRR-RLK\_2976

GTAAACAGTTCTTCTCTGACTACTCTTCTAATATAAGGCATATTTTCGGTCATCTTCTCTCTGAAAAATAG  
AATATTGGTCAATTAAGTTGATTTAGGTGCTACTTACTATGCCTGAAT

>M6-PGSC0003DMG400018752-(rev)M6LRR-RLK\_3038

TGAAAAATAGAATATTGGTCAATTAAGTTGATTTAGGTGCTACTTACTATGCCTGAATCTAGTTTCACTAA

CGCTAGGCTAAGTCTTGAACCTTTGAGCTGACCGTTCACCTTTCTTTGTA

>M6-PGSC0003DMG400018752-(rev)M6LRR-RLK\_310

TCAAGGCAAAATTCACCATCAATAGGTAACCTATCCTATCTTACTATACTTAACTTTAGTAACAACATTTT

TCAAGGCACTCTTCCTTATGAACTTGAAATTTGCCTCTTTTGGAAAGT

>M6-PGSC0003DMG400018752-(rev)M6LRR-RLK\_3100

TTTCACTAACGCTAGGCTAAGTCTTGAACCTTTGAGCTGACCGTTCACCTTTCTTTGTAGCAAGAGGGCTTC

TCTTTGCCCTTTATTGGTTGTATCAACTAACTGCCCTTTCATATAGA

>M6-PGSC0003DMG400018752-(rev)M6LRR-RLK\_3162

GAGGGCTTCTCTTTGCCCTTTATTGGTTGTATCAACTAACTGCCCTTTCATATAGATCGTCGCAGCATG

AAACTATTAATAGATTCCTAGCTTCTATTAATCTTGAAAAGTTCTAGC

>M6-PGSC0003DMG400018752-(rev)M6LRR-RLK\_3224

CGCAGCATGAACTATTAATAGATTCCTAGCTTCTATTAATCTTGAAAAGTTCTAGCTTAGTTCTTTTTTT

TTGTTAGAATTATCTTTTTAATTAGACCGGACCCACTTTTATACTTAT

>M6-PGSC0003DMG400018752-(rev)M6LRR-RLK\_3286

TTCTTTTTTTTTGTTAGAATTATCTTTTTAATTAGACCGGACCCACTTTTATACTTATCCTACAAGTGCTATT

GGGGACCCACTCAAAAAAAAAAAAACTTAACTAAGAAAAATCCACC

>M6-PGSC0003DMG400018752-(rev)M6LRR-RLK\_3348

CAAGTGCTATTGGGGACCCACTCAAAAAAAAAAAAACTTAACTAAGAAAAATCCACCCTTTAATAGATT

AGGGCAGAATCAACTGGATTTAACTTATATCTACTGATAGTATAGAACT

>M6-PGSC0003DMG400018752-(rev)M6LRR-RLK\_3410

AATAGATTAGGGCAGAATCAACTGGATTTAACTTATATCTACTGATAGTATAGAACTATGTTTAATTCCG

TTATAACATATTAATTTCTTTCTTTTTGTGTTTTTAGAATATGGCTCA

>M6-PGSC0003DMG400018752-(rev)M6LRR-RLK\_3534

GAATAGTGCCACGAGTGGTGATGTTTATAGTTATGGTATAATGTTAATAGAGATATTGACAAGAAGAA

GACCAACAAATGAGTTTCTCAATGAAAACATGAACTTGAGGCAATGGGTCA

>M6-PGSC0003DMG400018752-(rev)M6LRR-RLK\_3596

AGAAGAAGACCAACAAATGAGTTTCTCAATGAAAACATGAACTTGAGGCAATGGGTGAGTGAATCATT

CCAAGTTCTTTGAAGACAGTTGTTGATGAAAATATTTTATTTGGAGAAAAT

>M6-PGSC0003DMG400018752-(rev)M6LRR-RLK\_3658

ATCATTTC AAGTTCTTTGAAGACAGTTGTTGATGAAAATATTTTATTTGGAGAAAATGAGATTTTCATAT  
TTAGTATGATGGAGTTGGCTTTGGAATGCACAAAAGAAAGACAAGAAGA

>M6-PGSC0003DMG400018752-(rev)M6LRR-RLK\_372

ACAACATTTTTCAAGGCACTCTTCCTTATGAACTTGGAAATTTGCCTCTTTTGGAAAGTCATTGATGTTTCAT  
AACAACTCAACTAGAAGGAACTCTTCATCCTTTTGTGGTAACATTACAA

>M6-PGSC0003DMG400018752-(rev)M6LRR-RLK\_3720

TTTTCATATTTAGTATGATGGAGTTGGCTTTGGAATGCACAAAAGAAAGACAAGAAGAGAGGGTAAATA  
TGAAAGATATAGTGAATAGACTTGGTAAACTAAAGAGGACCTCTTCTTGG

>M6-PGSC0003DMG400018752-(rev)M6LRR-RLK\_3782

GTAAATATGAAAGATATAGTGAATAGACTTGGTAAACTAAAGAGGACCTCTTCTTGGAAACAAAGAAG  
AAAAAATCTTATGAGTAAAATTTTATTTATTTTATTTAGTTTATGGTTTAGTTA

>M6-PGSC0003DMG400018752-(rev)M6LRR-RLK\_434

GATGTTCATAACAATCAACTAGAAGGAACTCTTCATCCTTTTGTGGTAACATTACAAAGTTAGAGAGAT  
TGAGGTTAGATGGAAATAGATTTAGTGGTAAAATTCCTACTGAGATTGGG

>M6-PGSC0003DMG400018752-(rev)M6LRR-RLK\_496

AGAGAGATTGAGGTTAGATGGAAATAGATTTAGTGGTAAAATTCCTACTGAGATTGGGAATCTAAGCCA  
ACTTGTGAGTTAGATTTGTCACATAATCAGCTTTCAGGTTCAATCCCTGG

>M6-PGSC0003DMG400018752-(rev)M6LRR-RLK\_558

TAAGCCAACCTGTTGAGTTAGATTTGTCACATAATCAGCTTTCAGGTTCAATCCCTGGATTGATCTTCAGC  
ATGTCATCGTTACGTGCTGTGTATTTGGTTAACAATAGTCTTTCTGGTT

>M6-PGSC0003DMG400018752-(rev)M6LRR-RLK\_62

ATGGAGAAAAGCTATGTTCTTTTCCTTATCTTATTAGTATTTCAAGAATCAATTTTTTCCCTATATGCAACT  
TCCACAAATGAAACAGACATAGAACTTTGTTATCTTTTAAACAACTC

>M6-PGSC0003DMG400018752-(rev)M6LRR-RLK\_620

ATCTTCAGCATGTCATCGTTACGTGCTGTGTATTTGGTTAACAATAGTCTTTCTGGTTCATTCTTGGTTGAT  
GAAATAAATGGTGTGATGAATCTTGAAGTTATAGACCTTAGTTATAAT

>M6-PGSC0003DMG400018752-(rev)M6LRR-RLK\_682

CTTGGTTGATGAAATAAATGGTGTGATGAATCTTGAAGTTATAGACCTTAGTTATAATCGAATCATCGGT  
GAGATTCCTTCAAGACTTTGTCAATTCAGTAAGCTAAGAAGCTCTTGTCT

>M6-PGSC0003DMG400018752-(rev)M6LRR-RLK\_744

TCATCGGTGAGATTCCTTCAAGACTTTGTCAATTCAGTAAGCTAAGAACTCTTGTTCTGTCTTACAACAAT  
TTAACAGGTCAAATCCGAGAAATCTTGGTTGTTTATCAAGGCTTGAGA

>M6-PGSC0003DMG400018752-(rev)M6LRR-RLK\_806

TACAACAATTTAACAGGTCAAATCCGAGAAATCTTGGTTGTTTATCAAGGCTTGAGAGTTTTTATATAAC  
TCAGAATGCAATAAGTGGTACAATCCACTTTCATTGAGTAATATTTCC

>M6-PGSC0003DMG400018752-(rev)M6LRR-RLK\_868

TTATATAACTCAGAATGCAATAAGTGGTACAATCCACTTTCATTGAGTAATATTTCCACTTTTCAATTTCT  
TGGTTGTGTGAACAACCATATAAGTGGTACAATCCTCAAGAACTTGG

>M6-PGSC0003DMG400018752-(rev)M6LRR-RLK\_930

TTCAATTTCTTGGTTGTGTGAACAACCATATAAGTGGTACAATCCTCAAGAACTTGGAAATTTACCAAAC  
TTGAAGATGTTGGGATTTGATTTCAATAATCTTACTGGTGTAAATACCAG

>M6-PGSC0003DMG400018752-(rev)M6LRR-RLK\_992

TTACCAAACCTGAAGATGTTGGGATTTGATTTCAATAATCTTACTGGTGTAAATACCAGAATCTATCTTCAA  
TATATCTTCTTTGGAGTACATTGCTTTCAGTGATAACGATCTCTCAGGG

>M6-PGSC0003DMG400018806-(rev)M6LRR-RLP\_0

CATAGACAGACATATATAAGGTGAAAAGAAGTAGCTCCATTGTCTGTAGTATTATTTTTCCACAAATCT  
CCATTTGCCGATCTTTCAAAGCTCAATCCCAGAAAAGCGTCACCACTGC

>M6-PGSC0003DMG400018806-(rev)M6LRR-RLP\_1037

AAGGACTCTTGATTATTTCTCGTGTGTACAGTTTTACATGTGGTCAAGAGTGTTACACTACTCACTGAGTT  
TTGGAGAAAGTACATTCTCACATAATTCTTTTAGAGAAAAGAACATAGT

>M6-PGSC0003DMG400018806-(rev)M6LRR-RLP\_1098

TCACTGAGTTTTGGAGAAAGTACATTCTCACATAATTCTTTTAGAGAAAAGAACATAGTATATTAACATG  
GAGTAGAATTATTTCTAAAGCTAGTTATATTTGGAATTTCAAAGCTTGA

>M6-PGSC0003DMG400018806-(rev)M6LRR-RLP\_1159

ATTAACATGGAGTAGAATTATTTCTAAAGCTAGTTATATTTGGAATTTCAAAGCTTGACCTAATATATAA  
TGTTACTCTTTAATTTGATATAATCAAATTGTCTTTTGAGTTTTGAAGT

>M6-PGSC0003DMG400018806-(rev)M6LRR-RLP\_1220

TAATATATAATGTTACTCTTTAATTTGATATAATCAAATTGTCTTTTGAGTTTTGAAGTAAGCCCTAAATGT



AGGCCAACAACTCAAAAATGAAGACTGATTGATTAATATTCTTGCAGG

>M6-PGSC0003DMG400018806-(rev)M6LRR-RLP\_1281

GCCCTAAATGTAGGCCAACAACTCAAAAATGAAGACTGATTGATTAATATTCTTGCAGGGATTGGGACA  
ACCACTTGTTGCAGGAAACCAGTTACCTATGTCCAATGAACGAGGGCGGTG

>M6-PGSC0003DMG400018806-(rev)M6LRR-RLP\_1342

TTGGGACAACCACTTGTTGCAGGAAACCAGTTACCTATGTCCAATGAACGAGGGCGGTGGAGATATGA  
GTTTATCAAACCTACTTGGTGCAACAGATGCTGAGGGGAAAGATTCTAAAAT

>M6-PGSC0003DMG400018806-(rev)M6LRR-RLP\_1403

GATATGAGTTTATCAAACCTACTTGGTGCAACAGATGCTGAGGGGAAAGATTCTAAAATGGAGGATTTA  
GATGTGCGGATGGATCTTACTGATGACTTGTTCATATGGTATTTACTAGT

>M6-PGSC0003DMG400018806-(rev)M6LRR-RLP\_1464

AGGATTTAGATGTGCGGATGGATCTTACTGATGACTTGTTCATATGGTATTTACTAGTTGCCACATCCG  
CTCCTTCTGAGTTGCTTAATCAATAAGTGTTTATACTAAGTTTCTGATTA

>M6-PGSC0003DMG400018806-(rev)M6LRR-RLP\_1525

CCACATCCGCTCCTTCTGAGTTGCTTAATCAATAAGTGTTTATACTAAGTTTCTGATTAAGGGAATATATG  
CCTCATCTGTTGCCAGGTGTTCTCCTTTTTGGACCATATTGATCTTTGT

>M6-PGSC0003DMG400018806-(rev)M6LRR-RLP\_1586

GGAATATATGCCTCATCTGTTGCCAGGTGTTCTCCTTTTTGGACCATATTGATCTTTGTGCGAGCTGCAAGT  
GTTTGTAGCCAGTGGAGAGCAGCTAGCTCTCACGAAGACTTTTTGGCGGT

>M6-PGSC0003DMG400018806-(rev)M6LRR-RLP\_1647

AGCTGCAAGTGTGGTAGCCAGTGGAGAGCAGCTAGCTCTCACGAAGACTTTTTGGCGGTATCTGAATTT  
TGAGAACAACAGATATCCTCAAACCAATGTGAGTATCTTTTCCTCATATC

>M6-PGSC0003DMG400018806-(rev)M6LRR-RLP\_1708

CTGAATTTGAGAACAACAGATATCCTCAAACCAATGTGAGTATCTTTTCCTCATATCCGTTCCCTCCAC  
ACTACTATGATCACTTACATAAAATTCATGTTTCAATTAATTGCAACT

>M6-PGSC0003DMG400018806-(rev)M6LRR-RLP\_1769

TTCCTTCCACACTACTATGATCACTTACATAAAATTCATGTTTCAATTAATTGCAACTTTTTGTTTCATGTAT  
GATGTAGTTGAGGACATGTGTCGGCGATACCCAAATGCAACAACAAT

>M6-PGSC0003DMG400018806-(rev)M6LRR-RLP\_183

TTCTGTTTTCTTTCTCTCTACACACATACCTTTTTCTGCAACTCCATTCTCCGGTTTGTGCGAAGATTCTGGAA  
CAAGAATTTGTTAGATTCTGTGAACTATGTAATTTGTGTGCTTTCTT

>M6-PGSC0003DMG400018806-(rev)M6LRR-RLP\_1830

TTGTTTCATGTATGATGTAGTTGAGGACATGTGTGCGGCGATACCCAAATGCAACAACAATCAACTTATATG  
GAACTCCTAATATTCACCCACTAGCAATGAAAGCTGTTTCTTCTTTAAGG

>M6-PGSC0003DMG400018806-(rev)M6LRR-RLP\_1891

ACTTATATGGAACCTCCTAATATTCACCCACTAGCAATGAAAGCTGTTTCTTCTTTAAGGTAATAGTTTTTTT  
TATGTTGTTGTCACTACTCTAGGAATGAATCACTATAAGTGACTAATT

>M6-PGSC0003DMG400018806-(rev)M6LRR-RLP\_1952

ATAGTTTTTTTTTATGTTGTTGTCACTACTCTAGGAATGAATCACTATAAGTGACTAATTTGATACATTTTCAT  
TGTTGCCAGGAATCTTGAGACTCTGTCATTGGGCAGAGGTCAATTGGG

>M6-PGSC0003DMG400018806-(rev)M6LRR-RLP\_2013

ATACATTTTCATTGTTGCCAGGAATCTTGAGACTCTGTCATTGGGCAGAGGTCAATTGGGGGAAACATTTT  
TTCAAGCCTTAACAGATTGCCATGTGTTGAGGAGTTTGACCATTAATGAT

>M6-PGSC0003DMG400018806-(rev)M6LRR-RLP\_2074

AAACATTTTTTCAAGCCTTAACAGATTGCCATGTGTTGAGGAGTTTGACCATTAATGATGCCACTCTTGG  
AAATGGCATTCAAGAGATACCAATTTCTCATGATAGCTTGCGTCTTCTGC

>M6-PGSC0003DMG400018806-(rev)M6LRR-RLP\_2135

CACTCTTGGAATGGCATTCAAGAGATACCAATTTCTCATGATAGCTTGCGTCTTCTGCAGCTAGTGAAG  
TGTCGTGTGCTTCGAGTTTCTATCAGGTTGTATAATATTAGTCAACAATG

>M6-PGSC0003DMG400018806-(rev)M6LRR-RLP\_2196

CTAGTGAAGTGTCGTGTGCTTCGAGTTTCTATCAGGTTGTATAATATTAGTCAACAATGTTAATTTGTTAA  
AGTAGTTAGCGTCCAATTGTGCTTAATTGTTTGTATTCTTGCAGATGTC

>M6-PGSC0003DMG400018806-(rev)M6LRR-RLP\_2257

AATTTGTTAAAGTAGTTAGCGTCCAATTGTGCTTAATTGTTTGTATTCTTGCAGATGTCCACAACCTTGAAA  
CGTTGTCACTTAAGCGCAGTAGCATGCCACATGCGGTGCTTAATTGCC

>M6-PGSC0003DMG400018806-(rev)M6LRR-RLP\_2318

CAACTTGAAACGTTGTCACCTAAGCGCAGTAGCATGCCACATGCGGTGCTTAATTGCCCTCTTTTACATG  
ACCTTGATATTGCTTCATGTCAAACTTTCCGACGCTGCTATTCGTTTCG

>M6-PGSC0003DMG400018806-(rev)M6LRR-RLP\_2379

TTTTACATGACCTTGATATTGCTTCATGTCACAACTTTCCGACGCTGCTATTCGTTCCGGCTGCCACAGCA  
TGCCCTCTTTAGAGTCTTTGGATATGTCAAATTGTTTCATGTGTCAGTG

>M6-PGSC0003DMG400018806-(rev)M6LRR-RLP\_244

AAGATTCTGGAACAAGAATTTGTTAGATTCTGTGAACTATGTAATTTGTGTGCTTTCTTGTGAAAAAGGA  
GTCGTTTTGGTGTAGTTTGTGTAAGTTAGGGTTTTTTTTTGGGGAAAG

>M6-PGSC0003DMG400018806-(rev)M6LRR-RLP\_2440

TGCCACAGCATGCCCTCTTTAGAGTCTTTGGATATGTCAAATTGTTTCATGTGTCAGTGATGAAACACTGC  
GTGATATAGCTCAAACCTGTGGAAATCTTCGAGTTTTGGATGCTTCATA

>M6-PGSC0003DMG400018806-(rev)M6LRR-RLP\_2501

GAAACACTGCGTGATATAGCTCAAACCTGTGGAAATCTTCGAGTTTTGGATGCTTCATACTGCCCAAACA  
TTTCTTTGAGGTATGTTTCATTAATAATTACCTAGTACCTGAAATTGACAT

>M6-PGSC0003DMG400018806-(rev)M6LRR-RLP\_2562

GCCCAAACATTTCTTTGAGGTATGTTTCATTAATAATTACCTAGTACCTGAAATTGACATAGTTGGTTTTATA  
TACTAACACTTGTTACTTGTGGAAGTCTGTGAGGCTGGTTATGTTGACT

>M6-PGSC0003DMG400018806-(rev)M6LRR-RLP\_2623

TTGGTTTATATACTAACACTTGTTACTTGTGGAAGTCTGTGAGGCTGGTTATGTTGACTGTTCTCAAGCTT  
CATAGTTGTGAGGGCATAACATCAGCTTCCATGGCTGCCATAGCCCATA

>M6-PGSC0003DMG400018806-(rev)M6LRR-RLP\_2684

TCTCAAGCTTCATAGTTGTGAGGGCATAACATCAGCTTCCATGGCTGCCATAGCCCATAGCTATATGTTA  
GAGGTTTGAGTCTTTCCTCACCTTTTCATACTGGTAGCCATGCTGTAAT

>M6-PGSC0003DMG400018806-(rev)M6LRR-RLP\_2745

TATATGTTAGAGGTTTGAGTCTTTCCTCACCTTTTCATACTGGTAGCCATGCTGTAATCAGGAGTCCTTA  
AATCTCATATTGAACAGTGAATTTCACTTTTTTTCAGGTTCTGGAGCTT

>M6-PGSC0003DMG400018806-(rev)M6LRR-RLP\_2806

GGAGTCCTTAAATCTCATATTGAACAGTGAATTTCACTTTTTTTCAGGTTCTGGAGCTTGATAATTGCAGT  
TTATTGACATCAGTGTCTTGGATCTTCTCGCCTTCAGAGCATCAGAC

>M6-PGSC0003DMG400018806-(rev)M6LRR-RLP\_2867

TAATTGCAGTTTATTGACATCAGTGTCTTGGATCTTCTCGCCTTCAGAGCATCAGACTAGTACATTGTC

GCAAGTATGATACAGGCTTTATAGTTTCCATATCCTGTCTCAAGGGAAC

>M6-PGSC0003DMG400018806-(rev)M6LRR-RLP\_2928

GTACATTGTCGCAAGTATGATACAGGCTTTATAGTTTCCATATCCTGTCTCAAGGGAACCTTCTTTCCATCC  
CTTGATTGCCGTCACCTCTTTTGTGCAGTAACCTACTGTTTATATTGAAA

>M6-PGSC0003DMG400018806-(rev)M6LRR-RLP\_2989

CTTTCCATCCCTTGATTGCCGTCACCTCTTTTGTGCAGTAACCTACTGTTTATATTGAAACAGGTTTATTGAC  
CTTAACTTGCATTGTGGAATGTTATCGTCAATTACTGTTTCTAATTGC

>M6-PGSC0003DMG400018806-(rev)M6LRR-RLP\_305

GAAAAAGGAGTCGTTTTGGTGTAGTTTGTGTAAGTTAGGGTTTTTTTTTTGGGGAAAGTTTTAGATCGT  
GAGCTAGGGTTTCTGAAGATCAGAAATTGATAAAATTTGGGGTTTATTCT

>M6-PGSC0003DMG400018806-(rev)M6LRR-RLP\_3050

GGTTTATTGACCTTAACTTGCATTGTGGAATGTTATCGTCAATTACTGTTTCTAATTGCCATTGCTTCATC  
GAATCAATATAACTTCAAGTGCACCTCAAAGTAAGTTTATTCTAGATG

>M6-PGSC0003DMG400018806-(rev)M6LRR-RLP\_3111

ATTGCTTCATCGAATCAATATAACTTCAAGTGCACCTCAAAGTAAGTTTATTCTAGATGTTATATATTGTC  
ACCTTATTTTATTGACTAGAATTATTCTATTCTATTGGATAATAGTTCTC

>M6-PGSC0003DMG400018806-(rev)M6LRR-RLP\_3172

ATATATTGTCACCTTATTTTATTGACTAGAATTATTCTATTCTATTGGATAATAGTTCTCTCTTTATTATTCC  
ACAGAAATTAGTTTTGCAGAAGCAGGAAAGCTTGACAACAATTGCAT

>M6-PGSC0003DMG400018806-(rev)M6LRR-RLP\_3233

CTTTATTATTCCACAGAAATTAGTTTTGCAGAAGCAGGAAAGCTTGACAACAATTGCATTACAGTGTCCG  
AATTTGCTAGAAGTAGACCTTACTGAGTGTGAATCGCTCACCAATTCTAT

>M6-PGSC0003DMG400018806-(rev)M6LRR-RLP\_3294

CAGTGTCCGAATTTGCTAGAAGTAGACCTTACTGAGTGTGAATCGCTCACCAATTCTATTTGTGAAGTTTT  
CAGTGATGGTGGTGGCTGTCCTGTGCTTAAATCCTTAGTTCTAGATAAC

>M6-PGSC0003DMG400018806-(rev)M6LRR-RLP\_3355

GTGAAGTTTTAGTGTGATGGTGGTGGCTGTCCTGTGCTTAAATCCTTAGTTCTAGATAACTGTGAGGTTGG  
CAATTTAGTTCTCGTTGTTAACTTGTGCATTCTTGGTTGTTAACTAGA

>M6-PGSC0003DMG400018806-(rev)M6LRR-RLP\_3416

TGAGGTTGGCAATTTAGTTCCTCGTTGTTAACTTGTGCATTCTTGGTTGTTAACTAGAGGATGTGTTGCT  
GAACATGATTTTTCTAAATCTAATTATGATATATATGATCTCTTCTTAG

>M6-PGSC0003DMG400018806-(rev)M6LRR-RLP\_3477

ATGTGTTGCTGAACATGATTTTTCTAAATCTAATTATGATATATATGATCTCTTCTTAGTTTTGCTTGCTCAA  
CGGAAGGTGGTTCACCTAAAATCTTGGCAGTTGATCCGTGCAGTGTAC

>M6-PGSC0003DMG400018806-(rev)M6LRR-RLP\_3538

TTGCTTGCAACGGAAGGTGGTTCACCTAAAATCTTGGCAGTTGATCCGTGCAGTGTACATTTTTCATTAA  
GAGCTTGTTTTTGTCCTCACGTATGTCAATGTGGTTATGGACCTATGAT

>M6-PGSC0003DMG400018806-(rev)M6LRR-RLP\_3599

TTTTCATTAAGAGCTTGTTTTGTCCTCACGTATGTCAATGTGGTTATGGACCTATGATCATAGTGCCATT  
TTTGCTTTTCTTGTAACAGATACTTGTGATTCTTTTTATGCATGTTTC

>M6-PGSC0003DMG400018806-(rev)M6LRR-RLP\_366

TTAGATCGTGAGCTAGGGTTTCTGAAGATCAGAAATTGATAAAATTTGGGGTTTATTCTTTATTTTTCTTG  
GTGTGGTGTGAGTGAGTGTATGAGGATTTGGTGTGTTTATGTTTTGGA

>M6-PGSC0003DMG400018806-(rev)M6LRR-RLP\_3660

TAGTGCCATTTTTGCTTTTCTTGTAACAGATACTTGTGATTCTTTTTATGCATGTTTCCAAGTAAATAAAT  
CTAGTACTGAATTCTGACAATCAATGATCAGGTATTTAATGAGTAAT

>M6-PGSC0003DMG400018806-(rev)M6LRR-RLP\_3721

AGTAAATAAATCTAGTACTGAATTCTGACAATCAATGATCAGGTATTTAATGAGTAATCATGAAAGATG  
ATGAAAGGAAAAAGTATGATCCAAGTGTACTGACTGTTGTGTCATCTGGT

>M6-PGSC0003DMG400018806-(rev)M6LRR-RLP\_3782

TGAAAGATGATGAAAGGAAAAAGTATGATCCAAGTGTACTGACTGTTGTGTCATCTGGTTGTGCTTTCTT  
GTTTGCCGTAAGCCTGGGAAGCTGTGCTACTGGGTGCACTAAGGGCTTGT

>M6-PGSC0003DMG400018806-(rev)M6LRR-RLP\_4087

ACAAGTTAAAAAATATTAATAATTGTTCAAGAGGTGAAGTGGGAAAGATGAAAAGTTCTAATTCCTTGG  
TTTTGGCATTAAAGGATAGTGATTATGTATTCCTAGATTTACCAGTAGTATT

>M6-PGSC0003DMG400018806-(rev)M6LRR-RLP\_4148

TTCCTTTGTTTTGGCATTAAAGGATAGTGATTATGTATTCCTAGATTTACCAGTAGTATTTATTTTATACTCA  
CATTTCCAAATTAACCTGGAAGTATTTTTATCTTGTCAAAAAATAACT

>M6-PGSC0003DMG400018806-(rev)M6LRR-RLP\_4209

TTTTATACTCACATTTCCAAATTAAGTATTTTTATCTTGTCAAAAAATAACTATTAGGGAAAAC  
GTCTTTCTTGGTATCATAAGCTCTAAGTTTCTTTCAACATTTTGATTAG

>M6-PGSC0003DMG400018806-(rev)M6LRR-RLP\_427

ATTTTTCTTGGTGTGGTGTGAGTGAGTGTATGAGGATTTGGTGTGTTTATGTTTTGGAGAAGAAGAGG  
ATAGTAAGAAGGGCTACAAGAGTATGAGGGACCCGATTTTGGGGAATAACG

>M6-PGSC0003DMG400018806-(rev)M6LRR-RLP\_4270

TAGGGAAAACGTCTTTCTTGGTATCATAAGCTCTAAGTTTCTTTCAACATTTTGATTAGATACATGGGAGT  
TCTTAAGGGGACGGTGTAAAGGCTTTAAGCTGAAGTAGAACATGAGAACT

>M6-PGSC0003DMG400018806-(rev)M6LRR-RLP\_4331

ACATGGGAGTTCTTAAGGGGACGGTGTAAAGGCTTTAAGCTGAAGTAGAACATGAGAACTATTGCCAG  
ATGGGAGAAGAAAATAGTTCACCTTTTTTTCTGATTCAATGCTAGAGCTG

>M6-PGSC0003DMG400018806-(rev)M6LRR-RLP\_4392

TGCCAGATGGGAGAAGAAAATAGTTCACCTTTTTTTCTGATTCAATGCTAGAGCTGAAGTCGCGCCA  
TTTAAAAAAAATGTCAAATCGGAATTTTCTTTGAAGCTTGACGAAA

>M6-PGSC0003DMG400018806-(rev)M6LRR-RLP\_4453

GTCGCGCCATTTAAAAAAAATGTCAAATCGGAATTTTCTTTGAAGCTTGACGAAAATATGACTCCT  
CTCCAATCAAGATTCCCTTTTATTGATTTGGTGATCAAGAAAAGCAAGG

>M6-PGSC0003DMG400018806-(rev)M6LRR-RLP\_4514

TGTACTCCTCTCCAATCAAGATTCCCTTTTATTGATTTGGTGATCAAGAAAAGCAAGGCTGAATTAGGTT  
TGGGTTTGACATTTTGGAGAGATGTACAAAATAATGAACTAAATTTGTC

>M6-PGSC0003DMG400018806-(rev)M6LRR-RLP\_4575

GAATTAGGTTTGGGTTTGACATTTTGGAGAGATGTACAAAATAATGAACTAAATTTGTCAATATTGTGAT  
AGACTATTGAAGAAATTCACAACAAATCAAGTATTATTTTCGGTTACCC

>M6-PGSC0003DMG400018806-(rev)M6LRR-RLP\_4636

TATTGTGATAGACTATTGAAGAAATTCACAACAAATCAAGTATTATTTTCGGTTACCCATTCTCCCTCCC  
CCGTGCCCCCTCCCTCCTCCTGGGAAAAGGGGGGAGGGACCAGGTGAGA

>M6-PGSC0003DMG400018806-(rev)M6LRR-RLP\_4697

TCTCCCTCCCCGTGCCCCCTCCCTCCTCCTGGGAAAAGGGGGGAGGGACCAGGTGAGAGAAAGAGTA

ATATATTCAAGTTGCACCCTCCCGGGGAAAAGGGGGCTGAGAGAGGGGAAAGG

>M6-PGSC0003DMG400018806-(rev)M6LRR-RLP\_4758

AAGAGTAATATATTCAAGTTGCACCCTCCCGGGGAAAAGGGGGCTGAGAGAGGGGAAAGGTTTCCACTG  
TTTTAGAATGGGTCTGATTAGCATTGCCTTCTGTGTTCTCTTTTCTGCCA

>M6-PGSC0003DMG400018806-(rev)M6LRR-RLP\_4819

TCCACTGTTTTAGAATGGGTCTGATTAGCATTGCCTTCTGTGTTCTCTTTTCTGCCAGATCTGTTTTAGG  
CTAACACCTATTCAGAAAAGTTTTTTTTTTTTTAATATTGGAAGTGAA

>M6-PGSC0003DMG400018806-(rev)M6LRR-RLP\_488

AGAAGAGGATAGTAAGAAGGGCTACAAGAGTATGAGGGACCCGATTTTGGGGAATAACGGCGACGAA  
TCTCCAGATGAAAATTCGGCATTGACTGGAGGAATGTTTTTGAAGGTGTCAA

>M6-PGSC0003DMG400018806-(rev)M6LRR-RLP\_4880

TCTGTTTTAGGCTAACACCTATTCAGAAAAGTTTTTTTTTTTTTAATATTGGAAGTGAATAATGATATATT  
CTGCCTATTCAACTTGAAAAATCCGGCTGTATCTATGTAACATTTGTA

>M6-PGSC0003DMG400018806-(rev)M6LRR-RLP\_4941

ATGATATATTTCTGCCTATTCAACTTGAAAAATCCGGCTGTATCTATGTAACATTTGTATGTGTTGTTATG  
GTCTAAATCTAATTACGGTCTTTTCTTTTTTTCAGAGCTTGACACTTGT

>M6-PGSC0003DMG400018806-(rev)M6LRR-RLP\_5002

TGTTGTTATGGTCTAAATCTAATTACGGTCTTTTCTTTTTTTCAGAGCTTGACACTTGTGGCTTTCTGCAGC  
ACTTCTTTGGTTTCTTTTCACTTGGTGGTTGCCGTGCTTTAATTTCT

>M6-PGSC0003DMG400018806-(rev)M6LRR-RLP\_5063

CTTTCTGCAGCACTTCTTTGGTTTCTTTTCACTTGGTGGTTGCCGTGCTTTAATTTCTTCTTGCACCTAGGT  
GCCCATATCTTGAACAAGTCTCTTTAGATGGTTGTGATCATCTTGAAG

>M6-PGSC0003DMG400018806-(rev)M6LRR-RLP\_5124

TGCACTTAGGTGCCCATATCTTGAACAAGTCTCTTTAGATGGTTGTGATCATCTTGAAGTAGCATCATTTT  
GCCCAGTAAGTGATCATCGGCTCCTTCTTTTCTTTTACATCATCTCT

>M6-PGSC0003DMG400018806-(rev)M6LRR-RLP\_5185

GCATCATTTTGCCAGTAAGTGATCATCGGCTCCTTCTTTTCTTTTACATCATCTCTGGGTTTGAGACTG  
GAGTTGTATGTTACCTGCTGATTTTATGATTGTTAATTTGTTACACA

>M6-PGSC0003DMG400018806-(rev)M6LRR-RLP\_5246

GTTTGAGACTGGAGTTGTATGTTACCTGCTGATTTTATGATTGTTAATTTGTTACACATGCATTTTTTTCT  
TTATTTATAACCCAAATGGTTGATAAATGTGTTCTCTTATTCCAGGTTG

>M6-PGSC0003DMG400018806-(rev)M6LRR-RLP\_5307

CATTTTTTTCTTTATTTATAACCCAAATGGTTGATAAATGTGTTCTCTTATTCCAGGTTGGTCTTAGGTCACT  
TAATCTTGGTATATGCCCAAATGAATATGCTCCATATTGAAGCTCC

>M6-PGSC0003DMG400018806-(rev)M6LRR-RLP\_5368

CTTAGTCACTTAATCTTGGTATATGCCCAAATGAATATGCTCCATATTGAAGCTCCACAAATTGCTTC  
ACTTGAGCTGAAGGGCTGTGGTGTGCTATCTGAAGCATCTATTAATTGC

>M6-PGSC0003DMG400018806-(rev)M6LRR-RLP\_5429

AAATTGCTTCACTTGAGCTGAAGGGCTGTGGTGTGCTATCTGAAGCATCTATTAATTGCCCCCTGTTAAC  
CTCTTTTGATGCTTCATTCTGCAGGTTGCTTACTTTCTCTCGCTTGTAC

>M6-PGSC0003DMG400018806-(rev)M6LRR-RLP\_549

GACGAATCTCCAGATGAAAATTCGGCATTGACTGGAGGAATGTTTTTGAAGGTGTCAATGTTGCAGCA  
GTGGTGAGTCCACAAGCGGGCGCTGCAGGTGATCTTGGTGTCCCAAGAAT

>M6-PGSC0003DMG400018806-(rev)M6LRR-RLP\_5490

CCTGTTAACCTCTTTTGATGCTTCATTCTGCAGGTTGCTTACTTTCTCTCGCTTGTACACGTGCATATTTG  
TTTTAGTTCTGTACATCTCATTAAATTTCTTTCCATATATGCAGCCAA

>M6-PGSC0003DMG400018806-(rev)M6LRR-RLP\_5551

GTGCATATTTGTTTTAGTTCTGTACATCTCATTAAATTTCTTTCCATATATGCAGCCAACTCAAGGATGATT  
GTTTATCTGCCACGACTTCGTCTGCCCCCTCATCGAGTCATTAGTAT

>M6-PGSC0003DMG400018806-(rev)M6LRR-RLP\_5612

CAAGGATGATTGTTTATCTGCCACGACTTCGTCTGCCCCCTCATCGAGTCATTAGTATTAATGTCATGTC  
CATCTGTTGGCTGTGCTGGACTCCTCTCTTTGCAGTCCCTCCCAAATT

>M6-PGSC0003DMG400018806-(rev)M6LRR-RLP\_5673

ATGTCATGTCCATCTGTTGGCTGTGCTGGACTCCTCTCTTTGCAGTCCCTCCCAAATTGACCTACCTTGA  
TCTATCCTATACGTTTTTGGTTACCTTGCAACCTGTTTATGAATCATGC

>M6-PGSC0003DMG400018806-(rev)M6LRR-RLP\_5734

CCTACCTTGATCTATCCTATACGTTTTTGGTTACCTTGCAACCTGTTTATGAATCATGCTTGCAGTTAAAG  
GTAACCTCTATCGCCTAAGCATATTATCACTTTCTCCATTACAGTGGGA



>M6-PGSC0003DMG400018806-(rev)M6LRR-RLP\_5795

GCAGTTAAAGGTAACCTTCTATCGCCTAAGCATATTATCACTTTCTCCATTACAGTGGGAAGCTAGATGAA  
CTTGATTTAACATGCTCTATTTTGTGGAAAAAGTATGCCTATTTATCCAG

>M6-PGSC0003DMG400018806-(rev)M6LRR-RLP\_5856

CTAGATGAACTTGATTTAACATGCTCTATTTTGTGGAAAAAGTATGCCTATTTATCCAGTCTGGACTTGCA  
CTCTTCTAGATATATGGGCCACTTTCCTATCTTTTTTTTTTATGGGTAT

>M6-PGSC0003DMG400018806-(rev)M6LRR-RLP\_5917

TGGACTTGCCTCTTCTAGATATATGGGCCACTTTCCTATCTTTTTTTTTTATGGGTATCAAAGGGATGGG  
TTGGCTTAAGTTTGTGCTGGTCAAATACCTAACTACAAAATTTACTCT

>M6-PGSC0003DMG400018806-(rev)M6LRR-RLP\_5978

AAGGGATGGGTTGGCTTAAGTTTGTGCTGGTCAAATACCTAACTACAAAATTTACTCTTGTTAAGATGG  
GATGAACACAGGGTCATAAGCCAATTACTTTAATCTCTCCTTTTCCTTTT

>M6-PGSC0003DMG400018806-(rev)M6LRR-RLP\_6039

TTAAGATGGGATGAACACAGGGTCATAAGCCAATTACTTTAATCTCTCCTTTTCCTTTTCTGTTCTCCTTT  
TTTCCCACTTGCAGTAAAAGCTAAAACACCAGGATGCATTTAACAATT

>M6-PGSC0003DMG400018806-(rev)M6LRR-RLP\_61

CACAAATCTCATTGCGGATCTTTCAAAGCTCAATCCCAGAAAAGCGTCACCACTGCCAGCCTTCGATC  
CTTCGAAAGATCCGATCAGATCTTTGTCTTTCTCTCACTGCACTTCT

>M6-PGSC0003DMG400018806-(rev)M6LRR-RLP\_610

TTGCAGCAGTGGTGAGTCCACAAGCGGGCGCTGCAGGTGATCTTGGTGTTCCCAAGAATGAGGAGATT  
GATTTTGATAGCAACTGGTTATCCAGTGAAGTGGAGGTGAAGAATGAAAATT

>M6-PGSC0003DMG400018806-(rev)M6LRR-RLP\_6100

TGTTCTCCTTTTTTCCCACTTGCAGTAAAAGCTAAAACACCAGGATGCATTTAACAATTTGTGAATCAGTT  
CTGACTGATTGAAAGTTTACTTCAGTAGAACTGTGATTCTATTTTGACT

>M6-PGSC0003DMG400018806-(rev)M6LRR-RLP\_6161

TGAATCAGTTCTGACTGATTGAAAGTTTACTTCAGTAGAACTGTGATTCTATTTTGACTATTACAAATTTA  
ATAATCATTGTTTGTGGCCATATTTTTGGGGAAGTAGAAGTGCTTTTTT

>M6-PGSC0003DMG400018806-(rev)M6LRR-RLP\_6222

TACAAATTTAATAATCATTGTTTGTGGCCATATTTTTGGGGAAGTAGAAGTGCTTTTTTTTTTCTTCAGTT

TTTTGGCAGTTAAGGTGTTTGACCATTCTTCTTGAAAAGAAATGTGA

>M6-PGSC0003DMG400018806-(rev)M6LRR-RLP\_6283

TTCCTTCAGTTTTTTGGCAGTTAAGGTGTTTGACCATTCTTCTTGAAAAGAAATGTGATCTTTAGTACCA

TAAGCTGTTTCTCTGTTGTTGTGGCGAAGAAGTCAAATTTGAAGCTTTT

>M6-PGSC0003DMG400018806-(rev)M6LRR-RLP\_6344

TTTAGTACCATAAGCTGTTTCTCTGTTGTTGTGGCGAAGAAGTCAAATTTGAAGCTTTTCATTAAGCAGA

ACCAAAAGTTTAATTTTTCAATACAAAATACCATTATAATTTTTCTTACCA

>M6-PGSC0003DMG400018806-(rev)M6LRR-RLP\_6405

TTAAGCAGAACCAAAAGTTTAATTTTTCAATACAAAATACCATTATAATTTTTCTTACCAAGTTATACCACA

GTTCTGACAAGTGACAAGTGTATTAATTTAAAGAGGGAAGCCCGGTGCA

>M6-PGSC0003DMG400018806-(rev)M6LRR-RLP\_6649

ATGCCAAGGCTCCCCTTCGACAACACTATATTGATTTATTATTGAAAAGCATTCTGTTTTCAAAGTGAATC

ATCAGCTCTGTACAAAGAATAAGAAGTAAATTAAGCCAATGCATTAGAT

>M6-PGSC0003DMG400018806-(rev)M6LRR-RLP\_671

GGAGATTGATTTTGATAGCAACTGGTTATCCAGTGAAGTGGAGGTGAAGAATGAAAATTATAGTGGTG

AGAAAATGTTGGATGTTAATTTGAATTTGGGTTTGAGTGGAGAGGCTTCATC

>M6-PGSC0003DMG400018806-(rev)M6LRR-RLP\_6710

AAAGTGAATCATCAGCTCTGTACAAAGAATAAGAAGTAAATTAAGCCAATGCATTAGATCAAGTGTAAG

TGATAACACAGATTTAAAGTAACATCAGTAGAATAGAAAGCTGACAATCAT

>M6-PGSC0003DMG400018806-(rev)M6LRR-RLP\_6771

AGTGTAAGTGATAACACAGATTTAAAGTAACATCAGTAGAATAGAAAGCTGACAATCATGGATAACCAGA

AAGAGCTAGGAAACAGCTAAAAGCAAGCTTAGGCTTTAGCTTTTACCTGCT

>M6-PGSC0003DMG400018806-(rev)M6LRR-RLP\_6832

ATACCAGAAAGAGCTAGGAAACAGCTAAAAGCAAGCTTAGGCTTTAGCTTTTACCTGCTCTGGAGGATC

TGGAGCAACAGAACTGTAAAGAGCAATCAGAAAACCTTGTAAGAGGTTTCC

>M6-PGSC0003DMG400018806-(rev)M6LRR-RLP\_6893

GGAGGATCTGGAGCAACAGAACTGTAAAGAGCAATCAGAAAACCTTGTAAGAGGTTTCCATTTTGCATT

GAAAAGAACTCTAGTCGAGGGCAAGGGAAAGAGAGTCAACAAAGTATAGAA

>M6-PGSC0003DMG400018806-(rev)M6LRR-RLP\_6954

TTTGCATTGAAAAGAACTCTAGTCGAGGGCAAGGGAAAGAGAGTCAACAAAGTATAGAATAAGATTGT  
AGATTTGTTGGACTTCTAAAATCTACAATTATATTAGGTGTTGATGGAGTAG

>M6-PGSC0003DMG400018806-(rev)M6LRR-RLP\_7015

AGATTGTAGATTTGTTGGACTTCTAAAATCTACAATTATATTAGGTGTTGATGGAGTAGGATATTCTAAT  
GCCATTCCAGGACTGATGATGTTGTCTCTGTTCTCAAATAGTTCTGTGCC

>M6-PGSC0003DMG400018806-(rev)M6LRR-RLP\_7076

TATTCTAATGCCATTCCAGGACTGATGATGTTGTCTCTGTTCTCAAATAGTTCTGTGCCACTTGGTTGGGT  
TGTTTATAAATGCACTTGTTAAATATTACGAAACTGTAGACTAGAATTG

>M6-PGSC0003DMG400018806-(rev)M6LRR-RLP\_7137

TTGGTTGGGTTGTTTATAAATGCACTTGTTAAATATTACGAAACTGTAGACTAGAATTGCCACCTTAACTC  
TTTCATTATTGGCCCTCCTTTTTAGACCCTTGAAGATGGCCGGCGTGGA

>M6-PGSC0003DMG400018806-(rev)M6LRR-RLP\_7198

ACCTTAACTCTTTCATTATTGGCCCTCCTTTTTAGACCCTTGAAGATGGCCGGCGTGGAATTGTGGAGATC  
CAGTTACTTTAGGCATTCTGTCATTCTTTTTATTTTGGAGCGTAACAT

>M6-PGSC0003DMG400018806-(rev)M6LRR-RLP\_7259

TGTGGAGATCCAGTTACTTTAGGCATTCTGTCATTCTTTTTATTTTGGAGCGTAACATCTGAATATTTCTA  
CTTTCCAACAGATGCTATAATTTTTGTTTCATATCCAATGTTTGCCATT

>M6-PGSC0003DMG400018806-(rev)M6LRR-RLP\_732

AGTGGTGAGAAAATGTTGGATGTTAATTTGAATTTGGGTTTGGAGAGGCTTCATCCTCAACAGTG  
CTGAAAGAGGATTCTGATCGTGATACCTGTAGTAAAAGGCCCAAAGTTAAC

>M6-PGSC0003DMG400018806-(rev)M6LRR-RLP\_7320

GAATATTTCTACTTTCCAACAGATGCTATAATTTTTGTTTCATATCCAATGTTTGCCATTGTCTTGCCCAA  
TTTGTTCAGTGCAAGGGCATGAGTTCCTTGATGCAGAATTTCTAGT

>M6-PGSC0003DMG400018806-(rev)M6LRR-RLP\_7381

CTTGTGCCCAATTTGTTTCAGTGCAAGGGCATGAGTTCCTTGATGCAGAATTTCTAGTGCTATATCTGAA  
ATTTTCTGATGAGACTCTAGTTTAGTAACACAAGTGTGTTTCTCTTTCT

>M6-PGSC0003DMG400018806-(rev)M6LRR-RLP\_7442

TATATCTGAAATTTTCTGATGAGACTCTAGTTTAGTAACACAAGTGTGTTTCTCTTTCTCGCTGCACTAGG  
CACATCCTTATTGCGTTTGGGATAAACTTTTTGGATCTGCATGATACAT

>M6-PGSC0003DMG400018806-(rev)M6LRR-RLP\_7503

CTGCACTAGGCACATCCTTATTGCGTTTGGGATAAACTTTTTGGATCTGCATGATACATTGATGGGCTTTT  
TTGGCTTACTGCCCCCCCACCCCCACCCCTCCTCCTTTCTTTTTTTTTAA

>M6-PGSC0003DMG400018806-(rev)M6LRR-RLP\_7564

ATGGGCTTTTTTGGCTTACTGCCCCCCCACCCCCACCCCTCCTCCTTTCTTTTTTTAAACCCCTCTCTAAGCT  
TATATATATATGTTATGTTGTAGGTCCTAAAGTTGCAAGCATGCAAG

>M6-PGSC0003DMG400018806-(rev)M6LRR-RLP\_7625

CCTCTCTAAGCTTATATATATATGTTATGTTGTAGGTCCTAAAGTTGCAAGCATGCAAGTATCTCACTGAT  
ACATCTTTGGAACCCCTCTATAAAGAAAATGCTCTCCCAGCCCTTTGTG

>M6-PGSC0003DMG400018806-(rev)M6LRR-RLP\_7686

TCTCACTGATACATCTTTGGAACCCCTCTATAAAGAAAATGCTCTCCCAGCCCTTTGTGAGTTGGATTTGT  
CGTATGGGACCTTATGCCAATCAGCCATTGAGGAATTGCTTGCTTACTG

>M6-PGSC0003DMG400018806-(rev)M6LRR-RLP\_7747

TTGGATTTGTCGTATGGGACCTTATGCCAATCAGCCATTGAGGAATTGCTTGCTTACTGCACACATTTGA  
GTCATGTCAGCTTGAATGGATGTATTAATATGCATGATTTAAATTGGGGA

>M6-PGSC0003DMG400018806-(rev)M6LRR-RLP\_7808

CACATTTGAGTCATGTCAGCTTGAATGGATGTATTAATATGCATGATTTAAATTGGGGATTTACTGGAGA  
TCAACTGTCGCATATACCCAGTGTTAGTATACCTCATGGATCTTCCCTGG

>M6-PGSC0003DMG400018806-(rev)M6LRR-RLP\_7869

TACTGGAGATCAACTGTCGCATATACCCAGTGTTAGTATACCTCATGGATCTTCCCTGGGAGAACAGCAG  
TTGCCAAATGAACAACCAAGCGTTTGCTAGAGAACCTCAACTGTGTAGG

>M6-PGSC0003DMG400018806-(rev)M6LRR-RLP\_793

CAACAGTGCTGAAAGAGGATTCTGATCGTGATACCTGTAGTAAAAGGCCCAAAGTTAACTCCTTTTCGCT  
GTAAGACCTGCTACTGCACCTTCATTTACAATATTTTTTTTTCCAATTAGT

>M6-PGSC0003DMG400018806-(rev)M6LRR-RLP\_7930

GAACAGCAGTTGCCAAATGAACAACCAAGCGTTTGCTAGAGAACCTCAACTGTGTAGGCTGCCCAAAT  
ATAAAAAAGGTGTTTATTCCTATGGCACAAGGTTTCCTTTTGTTCATCATTAA

>M6-PGSC0003DMG400018806-(rev)M6LRR-RLP\_7991

GCCCAAATATAAAAAAGGTGTTTATTCCTATGGCACAAGGTTTCCTTTTGTTCATCATTAAACCTTTCCCTG

TCTGCGAATTTGAAGGAGGTTGATATAGCTTGTTACAACCTGTGCGTTC

>M6-PGSC0003DMG400018806-(rev)M6LRR-RLP\_8052

CCTTCCCTGTCTGCGAATTTGAAGGAGGTTGATATAGCTTGTTACAACCTGTGCGTTCCTCAATTTGAGGT  
ATTTTCTTTAGCAATATGATTTTCGTAGGTTAATGTTGTATCAATGGCTT

>M6-PGSC0003DMG400018806-(rev)M6LRR-RLP\_8113

AATTTGAGGTATTTTCTTTAGCAATATGATTTTCGTAGGTTAATGTTGTATCAATGGCTTTATTTTCATGATC  
ATAGTTGTTACTTAATTATATTCTTGTTCAGCAATTGCTGTTTCATT

>M6-PGSC0003DMG400018806-(rev)M6LRR-RLP\_8174

TTTTCATGATCATAGTTGTTACTTAATTATATTCTTGTTCAGCAATTGCTGTTTCATTGGAATCATTGCAA  
CTGGAATGTCCAAGATTAAGTAGCCTCTTTCTTCAGGTATTTTTGTAT

>M6-PGSC0003DMG400018806-(rev)M6LRR-RLP\_8235

AATCATTGCAACTGGAATGTCCAAGATTAAGTAGCCTCTTTCTTCAGGTATTTTTGTATCTTCAATTTGGC  
ATTTTCTTTGCTGGCTTTTTAATTATTGTAGTGGCAGCTTTGCTGCAAA

>M6-PGSC0003DMG400018806-(rev)M6LRR-RLP\_8296

TCAATTTGGCATTTTCTTTGCTGGCTTTTTAATTATTGTAGTGGCAGCTTTGCTGCAAAAGTGTTCTTTCTA  
GTTGGTCTTTATCATTTCGCTTGTGCTTTTTTCCCCTGTTGAGGTAG

>M6-PGSC0003DMG400018806-(rev)M6LRR-RLP\_8357

TGTTCTTTCTAGTTGGTCTTTATCATTTCGCTTGTGCTTTTTTCCCCTGTTGAGGTAGTATAGTTTTTTACC  
TTAGCACGAAGGATATGCAAACCTGTACAACCATTACAAATGTCAGTC

>M6-PGSC0003DMG400018806-(rev)M6LRR-RLP\_8418

TAGTTTTTTACCTTAGCACGAAGGATATGCAAACCTGTACAACCATTACAAATGTCAGTCCCCTTCTACCT  
TGTAGGGACTTTATGAGTTCTATCAATGATTCAACTTCATTTACAATTT

>M6-PGSC0003DMG400018806-(rev)M6LRR-RLP\_8479

CTTCCTACCTTGTAGGGACTTTATGAGTTCTATCAATGATTCAACTTCATTTACAATTTCTTTTTACATCTA  
AGACTCATCCATTTAGGATAGGATGATCCTTGTGTCTGTTTTACA

>M6-PGSC0003DMG400018806-(rev)M6LRR-RLP\_854

CTTTTCGCTGTAAGACCTGCTACTGCACCTTCATTTACAATATTTTTTTTCCAATTAGTCAAATTCTATTGA  
ATATTAGAGTGAAGTTGGCCATAGTAAAGAACTAATACAGAGTTCATT

>M6-PGSC0003DMG400018806-(rev)M6LRR-RLP\_8540

TTTTACATCTAAGACTCATCCATTTAGGATAGGATGATCCTTGTGGTCTGTTTTACAAAACATTCTCGTC  
TGCCTCTGGTTCAGTAGGTTGGTATGGAGAATATGCATACCCTTAAGC

>M6-PGSC0003DMG400018806-(rev)M6LRR-RLP\_8601

ACATTCTCGTCTGCCTCTGGTTCAGTAGGTTGGTATGGAGAATATGCATACCCTTAAGCTTGATATTCTGT  
AGAGAGAACTTGAGCTCCTAATCAAGTCGCTAATGTGATTGTATTGTAA

>M6-PGSC0003DMG400018806-(rev)M6LRR-RLP\_8662

GATATTCTGTAGAGAGAACTTGAGCTCCTAATCAAGTCGCTAATGTGATTGTATTGTAAGATCTAATAGC  
TACCTGCATATTGTCTTAGGAGTACTCAAATTAACACAATGGTCTACTAA

>M6-PGSC0003DMG400018806-(rev)M6LRR-RLP\_8723

TCTAATAGCTACCTGCATATTGTCTTAGGAGTACTCAAATTAACACAATGGTCTACTAAAATAACAAGTA  
ATCCTAATACTCTTCATGGTCTCCTAGGCATTCATGTGGATAGATAATA

>M6-PGSC0003DMG400018806-(rev)M6LRR-RLP\_8784

TAACAAGTAATCCTAATACTCTTCATGGTCTCCTAGGCATTCATGTGGATAGATAATAAACATTTTTCAA  
ATTTGGAAGTGTTAGAAGTCCTTAGGGATGGCATGTAGTTTGGGGGCAT

>M6-PGSC0003DMG400018806-(rev)M6LRR-RLP\_8845

CATTTTTCAAATTTGGAAGTGTTAGAAGTCCTTAGGGATGGCATGTAGTTTGGGGGCATCGTGCCTATAT  
TTCGTGGAGCATGATGTACTTGGGCTAAAATTACTGAAATGAGAATTTGA

>M6-PGSC0003DMG400018806-(rev)M6LRR-RLP\_8906

TGCCTATATTCGTGGAGCATGATGTACTTGGGCTAAAATTACTGAAATGAGAATTTGAACTCTTAACTG  
GTGCTTATTTGCTTGAATATTGGAAGTCAAGTGAGAAGTGAAGTCTTAG

>M6-PGSC0003DMG400018806-(rev)M6LRR-RLP\_8967

TCTTAACTGGTGCTTATTTGCTTGAATATTGGAAGTCAAGTGAGAAGTGAAGTCTTAGTTTTTTTTTTTT  
TTTAGAAGAAGTTTTTGCTTCTCTGAGCTGTTTTCCGTTGTTGCTT

>M6-PGSC0003DMG400018806-(rev)M6LRR-RLP\_9028

TTTTTTTTTTTTTTAGAAGAAGTTTTTGCTTCTCTGAGCTGTTTTCCGTTGTTGCTTCTATCATTACACGC  
CTCAGGCTTACCTCAAAGACATGCCACTTTCTAGTGTAGAGCTCGTG

>M6-PGSC0003DMG400018806-(rev)M6LRR-RLP\_9089

ATCATTACACGCCTCAGGCTTACCTCAAAGACATGCCACTTTCTAGTGTAGAGCTCGTGAAATTGATTGC  
CTTCTTTCTATCATGTCTTGTAATAAACTACTTTGATGAACTCCCTTGA

>M6-PGSC0003DMG400018806-(rev)M6LRR-RLP\_915

AATTCTATTGAATATTAGAGTGAAGTTGGCCATAGTAAAGAACTAATACAGAGTTCATTTAAGCAACCCA  
AGCCTAATTACAAGGATCAGTTGTTGTTATAGGGGCGGCTCACTAATTAA

>M6-PGSC0003DMG400018806-(rev)M6LRR-RLP\_9150

ATTGATTGCCTTTCTTTCTATCATGTCTTGTAATAAACTACTTTGATGAACTCCCTTGAAAAATCGTTGGCA  
CACCCAGAAGGTGCTTGTGCAATTGAAATCCTTGTGACACAATTGTGA

>M6-PGSC0003DMG400018806-(rev)M6LRR-RLP\_9211

AATCGTTGGCACACCCAGAAGGTGCTTGTGCAATTGAAATCCTTGTGACACAATTGTGATGTGGAGTTAT  
TCTGTACTCTTGCTTTTGTGCTTACAGTCCTGCAACATTGATGAGGAA

>M6-PGSC0003DMG400018806-(rev)M6LRR-RLP\_9272

TGGAGTTATTCTGTACTCTTGCTTTTGTGCTTACAGTCCTGCAACATTGATGAGGAAGCTGTTGAAGCT  
GCCGTATCACGATGTACGATGCTTGAGACGCTTGACGTTTCGTTTTTGTGTC

>M6-PGSC0003DMG400018806-(rev)M6LRR-RLP\_9333

TGTTGAAGCTGCCGTATCACGATGTACGATGCTTGAGACGCTTGACGTTTCGTTTTTGTCCCAAGGTCAGG  
AGTACTTTTGTGATGTTAAGAATATGCCCTGTATTGATTTTTATGTATCATT

>M6-PGSC0003DMG400018806-(rev)M6LRR-RLP\_9394

AAGGTCAGGAGTACTTTTGTGATGTTAAGAATATGCCCTGTATTGATTTTTATGTATCATTATTGATACAA  
GAGCTCTTTTGTGAATTTGCTGATAATCCTTTTTTCCACTTAACAGATT

>M6-PGSC0003DMG400018806-(rev)M6LRR-RLP\_9455

ATTGATACAAGAGCTCTTTTGTGAATTTGCTGATAATCCTTTTTTCCACTTAACAGATTTGTCCACTGAACA  
TGACGAGGTTGCGGGTTGCATGTCCCAGTTTGAAACGCATCTTCAGCA

>M6-PGSC0003DMG400018806-(rev)M6LRR-RLP\_9516

TCCACTGAACATGACGAGGTTGCGGGTTGCATGTCCCAGTTTGAAACGCATCTTCAGCAGCCTAGTCCCA  
TCGTGAGGCAAAATGAAATATTTGATATGTTTGTGTAGGCTGGCTAGGGA

>M6-PGSC0003DMG400018806-(rev)M6LRR-RLP\_9577

CTAGTCCCATCGTGAGGCAAAATGAAATATTTGATATGTTTGTGTAGGCTGGCTAGGGACATAATATTTG  
ACTACAGAGGTTTCATATTTTATGTATAGTTAGCTATTTATGTTGCTGTGA

>M6-PGSC0003DMG400018806-(rev)M6LRR-RLP\_9638

TAATATTTGACTACAGAGGTTTCATATTTTATGTATAGTTAGCTATTTATGTTGCTGTGATTGGTGAAACGT

ACAGCGAGCTTCATACATGTAACACCTTAAATATTTTGGTGTGGCTTT

>M6-PGSC0003DMG400018806-(rev)M6LRR-RLP\_9699

GGTGAAACGTACAGCGAGCTTCATACATGTAACACCTTAAATATTTTGGTGTGGCTTTCACATTTTATGA  
TTTGGTTAGCGCACTTAATGCAACTTTATTTAGATCTCATGGATGAAGA

>M6-PGSC0003DMG400018806-(rev)M6LRR-RLP\_976

AGCAACCCAAGCCTAATTACAAGGATCAGTTGTTGTTATAGGGGCGGCTCACTAATTAATTAAGGACTCT  
TGATTATTTCTCGTGTGTACAGTTTTACATGTGGTCAAGAGTGTTACACT

>M6-PGSC0003DMG400018806-(rev)M6LRR-RLP\_9760

CATTTTATGATTTGGTTAGCGCACTTAATGCAACTTTATTTAGATCTCATGGATGAAGAAAATAAACTAG  
AGCCTTGTAAGGGAAATATTAGTTAATAGTGGCCTGCTTGCCCTTTTCA

>M6-PGSC0003DMG400018806-(rev)M6LRR-RLP\_9821

ATAAACTAGAGCCTTGTAAGGGAAATATTAGTTAATAGTGGCCTGCTTGCCCTTTTCAGTTAATGGAAA  
AAAACGCAGGTTGTCAGGCTCGAGTGTGAATTTTGGTTGCCCTAAAAAT

>M6-PGSC0003DMG400018806-(rev)M6LRR-RLP\_9878

CAGTTAATGGAAAAAACGCAGGTTGTCAGGCTCGAGTGTGAATTTTGGTTGCCCTAAAAATAAGGTT  
ACAAAAAATAGCCCAAAAATAGAGTAGTCAGTCGGCTTATGTCTTTGGGAT

>M6-PGSC0003DMG400018849M6LRR-RLK\_0

ACTTAACCCACTAAAATCATCATGAAACACACTCTATTTTTCCAGCACTCCTAAAAAGCATTTTCTCTCAA  
TTTACCTCTCTTTACATACCCATTTCTCAACCATTTCCACCATAAAC

>M6-PGSC0003DMG400018849M6LRR-RLK\_1054

GAACAATCCCGAAGGGTTTTTCAGGATTCAAGGAGCTTACAGTGTGAATTTGATGAACAATAACTTAA  
CAGGTGAAATCCCACAAGGCATTGGTGAGCTTCTAATCTTGAATTATTGG

>M6-PGSC0003DMG400018849M6LRR-RLK\_1116

AACTTAACAGGTGAAATCCCACAAGGCATTGGTGAGCTTCTAATCTTGAATTATTGGCTCTATGGAACA  
ACTCACTCACTGGGATTTTACCACAGAAGTTGGGTTCAAATGCAAAGCTA

>M6-PGSC0003DMG400018849M6LRR-RLK\_1178

ATGGAACAACCTCACTCACTGGGATTTTACCACAGAAGTTGGGTTCAAATGCAAAGCTACAAAACTTGAT  
GTCTCTCAAATTATCTCTCAGGTCCCATTTCCACCAAATCTTTGTCTCAG

>M6-PGSC0003DMG400018849M6LRR-RLK\_124



TCACCATGAGACACTTGTTTCCTTTCTTTCTTACTACAGTTTTCTTCTCCTAACAAGAATTTCACTTGTTTT  
CTCCATTACCAATCTACCTCTACAACCTATATCTCTTTTGACTTTAA

>M6-PGSC0003DMG400018849M6LRR-RLK\_1240

AACTTGATGTCTCTTCAAATTATCTCTCAGGTCCCATTCCACCAAATCTTTGTCTCAGCAATAGCTTAGTGA  
AACTTATCCTGTTTTCAAATCAGTTTATTGGTGAGCTCCCTTCTTCTCT

>M6-PGSC0003DMG400018849M6LRR-RLK\_1302

AGCTTAGTGAAACTTATCCTGTTTTCAAATCAGTTTATTGGTGAGCTCCCTTCTTCTTAGCAAATTGCACT  
GCATTATTCAGGTTTAGAATTCAAACAACAGACTCAACGGGTCAATA

>M6-PGSC0003DMG400018849M6LRR-RLK\_1364

AAATTGCACTGCATTATTCAGGTTTAGAATTCAAACAACAGACTCAACGGGTCAATACCATTAGGCTTC  
GGTATTTTGCCCAATTTAGCTTACTGGGACTTGAGCAAAAACAATTTTAC

>M6-PGSC0003DMG400018849M6LRR-RLK\_1426

TAGGCTTCGGTATTTTGCCCAATTTAGCTTACTGGGACTTGAGCAAAAACAATTTCACTGGTCCAATTCCA  
GAAGATTTAGGGAATGCCGCGACATTGGCGTATTTGAACATATCGGAGA

>M6-PGSC0003DMG400018849M6LRR-RLK\_1488

CCAATTCCAGAAGATTTAGGGAATGCCGCGACATTGGCGTATTTGAACATATCGGAGAATTCATTCAAC  
AGTGAATTACCGGAGAGTATCTGGACTTCACCATCTCTACAGATCTTTTCA

>M6-PGSC0003DMG400018849M6LRR-RLK\_1550

ATTCAACAGTGAATTACCGGAGAGTATCTGGACTTCACCATCTCTACAGATCTTTTCAGCTAGTTACAGT  
GGTCTTGTCGGGAAAATCCCCAATTTCAAAGGGTGTAAGCTTTCTACAG

>M6-PGSC0003DMG400018849M6LRR-RLK\_1612

GTTACAGTGGTCTTGTCGGGAAAATCCCCAATTTCAAAGGGTGTAAGCTTTCTACAGAATCGAACTGG  
AAGGAAATAATCTCACAGGAAGCATTCCATGGGATATAGAACATTGTGAGA

>M6-PGSC0003DMG400018849M6LRR-RLK\_1674

GAACTGGAAGGAAATAATCTCACAGGAAGCATTCCATGGGATATAGAACATTGTGAGAAGCTCATTGTC  
ATGAATTTTCGACGAAATTCGCTAACGGGAATCATTCTTGGGAAATTTCT

>M6-PGSC0003DMG400018849M6LRR-RLK\_1736

CATTTGCATGAATTTTCGACGAAATTCGCTAACGGGAATCATTCTTGGGAAATTTCTGCAATTCCTTCTC  
TAACAGAGGTTGATTTGTCTCACAATTTTCTTACAGGAACAATCCCTTC

>M6-PGSC0003DMG400018849M6LRR-RLK\_1798

TTCCTTCCTTAACAGAGGTTGATTTGTCTCACAATTTTCTTACAGGAACAATCCCTTCGAATTTGCCAATT  
CCACTACCATAGAAAACCTTCAACGTATCCTACAATCAGCTCACTGGTC

>M6-PGSC0003DMG400018849M6LRR-RLK\_186

TCACTTGTTTTCTCCATTACCAATCTACCTCTACAACCTTATATCTCTTTTGACTTTAAAATCTTCTTTGCATG  
ATCACCACAATACCTTCAATGACTGGGATCCCACCCTCGCCTTCGCT

>M6-PGSC0003DMG400018849M6LRR-RLK\_1860

TTCGCCAATTCCTACTACCATAGAAAACCTTCAACGTATCCTACAATCAGCTCACTGGTCCAGTTCCTTCTTC  
AGGCTCTATTTTCTCCAGCCTACATTCTCTTCTTCATCGGAAACGAA

>M6-PGSC0003DMG400018849M6LRR-RLK\_1922

TCCTTCTTCAGGCTCTATTTTCTCCAGCCTACATTCTCTTCTTCATCGGAAACGAAGGCCTGTGTGGTAC  
TGTCATTCAAAGCCTTGCGGGACTGACGGACTCGCAGCCGGGGCAGC

>M6-PGSC0003DMG400018849M6LRR-RLK\_1984

TGTGTGGTACTGTCATTCAAAGCCTTGCGGGACTGACGGACTCGCAGCCGGGGCAGCGGAAATCAAG  
CCACAGCCGAAAAAACAGCTGGCGCTATTGTCTGGATCATGGCAGCAGCAT

>M6-PGSC0003DMG400018849M6LRR-RLK\_2046

ATCAAGCCACAGCCGAAAAAACAGCTGGCGCTATTGTCTGGATCATGGCAGCAGCATTTCGGTATTGGT  
TTATTCGTCCTCATCGCCGGTAGCCGCTGTTTCCACGCGAAATACAGCCAG

>M6-PGSC0003DMG400018849M6LRR-RLK\_2108

TATTGGTTTATTCGTCCTCATCGCCGGTAGCCGCTGTTTCCACGCGAAATACAGCCAGCGATTTTCAGTA  
GAGAGAGAAGTTGGGCCATGGAAATTAACCGCATTTCAAAGGTTAACTT

>M6-PGSC0003DMG400018849M6LRR-RLK\_2170

TTTCAGTAGAGAGAGAAGTTGGGCCATGGAAATTAACCGCATTTCAAAGGTTAACTTCTCGGCGGATG  
ATGTACTTGAGAGTTTGACAATGACAGATAAGATCCTGGGAATGGGTTCAA

>M6-PGSC0003DMG400018849M6LRR-RLK\_2232

GCGGATGATGTACTTGAGAGTTTGACAATGACAGATAAGATCCTGGGAATGGGTTCAACAGGGACAGT  
GTACAAGGCGGAAATGCCAGGCGGAGAGACTATAGCAGTAAAGAAATTATGG

>M6-PGSC0003DMG400018849M6LRR-RLK\_2294

GACAGTGTACAAGGCGGAAATGCCAGGCGGAGAGACTATAGCAGTAAAGAAATTATGGGGAAAACAG

AAGGAAACGATCAGGAAAAGGCAAGGCGTTTTAGCTGAGGTGGATGTGTTAGG

>M6-PGSC0003DMG400018849M6LRR-RLK\_2356

AACAGAAGGAAACGATCAGGAAAAGGCAAGGCGTTTTAGCTGAGGTGGATGTGTTAGGCAATGTGAG  
GCACAGGAACATCGTGAGGTTGTTCCGGCTGTTGCAGCAACAACGAGTGCACCA

>M6-PGSC0003DMG400018849M6LRR-RLK\_2418

GTGAGGCACAGGAACATCGTGAGGTTGTTCCGGCTGTTGCAGCAACAACGAGTGCACCATGTTGCTGTAT  
GAGTACATGCCTAATGGTAGCCTGGATGATCTGTTGCATGGTAAGAATAAG

>M6-PGSC0003DMG400018849M6LRR-RLK\_248

TTCTTTGCATGATCACCACAATACCTTCAATGACTGGGATCCCACCCTCGCCTTCGCTAGACCGGGTTCTC  
ACATTTGGTGTTCCTGGTCTGGTATCAAATGTGACAAGAAAATAACCA

>M6-PGSC0003DMG400018849M6LRR-RLK\_2480

GCTGTATGAGTACATGCCTAATGGTAGCCTGGATGATCTGTTGCATGGTAAGAATAAGGATGATAATTT  
GGTGGCTGATTGGCTCACTAGGTACAAAATTGCTCTTGGGGTTCGCTCATGG

>M6-PGSC0003DMG400018849M6LRR-RLK\_2542

ATAATTTGGTGGCTGATTGGCTCACTAGGTACAAAATTGCTCTTGGGGTTCGCTCATGGAATTTGTTATCT  
TCATCATGATTGTGATCCCGTCATTGTTTCATCGTGATCTTAAGCCTAGTA

>M6-PGSC0003DMG400018849M6LRR-RLK\_2604

TGTTATCTTCATCATGATTGTGATCCCGTCATTGTTTCATCGTGATCTTAAGCCTAGTAATATTCTTCTGGAC  
GGTGATCTGGAGGCTAGAGTAGCTGATTTTGGTGTGGCCAAGTTGATT

>M6-PGSC0003DMG400018849M6LRR-RLK\_2666

TCTTCTGGACGGTGATCTGGAGGCTAGAGTAGCTGATTTTGGTGTGGCCAAGTTGATTCAGTGTGATGA  
ATCTATGTCCGTGATTGCTGGATCCTATGGCTACATCGCACCTGGTAAGTT

>M6-PGSC0003DMG400018849M6LRR-RLK\_2728

GTGATGAATCTATGTCCGTGATTGCTGGATCCTATGGCTACATCGCACCTGGTAAGTTAATACTCCCTCC  
GTTTTAATTTTACATGAAATTTAAGAAAGTAATTCGTAATATTCAACTTT

>M6-PGSC0003DMG400018849M6LRR-RLK\_2790

CTCCCTCCGTTTTAATTTTACATGAAATTTAAGAAAGTAATTCGTAATATTCAACTTTTTATCGTGTTCTTT  
AATTTAGTTAGTTATTAATGGCAGGAATATTTGTCTGTTTGCTTGATG

>M6-PGSC0003DMG400018849M6LRR-RLK\_2852

CGTGTTCTTTAATTTAGTTAGTTATTAATGGCAGGAATATTTGTCTGTTTGCTTGATGGAATTACATGATT  
GTTTTGGAGTTCAAGTTTTTTTCTTGTGCGGCTTATTGCTATCCAAAAT

>M6-PGSC0003DMG400018849M6LRR-RLK\_2914

TACATGATTGTTTTGGAGTTCAAGTTTTTTTCTTGTGCGGCTTATTGCTATCCAAAATTATTTTGTTTCAGAT  
CAGTTTAGTTCGTTCTGTAGGGTGACGAAAAAGAGTTCACCTTGCCTGC

>M6-PGSC0003DMG400018849M6LRR-RLK\_2976

TTGTTTCAGATCAGTTTAGTTCGTTCTGTAGGGTGACGAAAAAGAGTTCACCTTGCCTGCTAAAACGTGGTG  
TCATGTCAATAGCATGATGCATTTTTTTAGTGAAAGCATGATGTATATTG

>M6-PGSC0003DMG400018849M6LRR-RLK\_3038

ACGTGGTGTTCATGTCAATAGCATGATGCATTTTTTTAGTGAAAGCATGATGTATATTGTTTTTTTTTCGT  
CCACTATCGTCATTAAATCTTCTTTGCCACACAATTGTCAAATTCCTC

>M6-PGSC0003DMG400018849M6LRR-RLK\_310

CGGGTTCTCACATTTGGTGTTCCTGGTCTGGTATCAAATGTGACAAGAAAATAACCAAATCACCTCTCTT  
GATCTATCGAAGCGCAATCTTCTGGTACAATTCCAGAAGATATCAGAA

>M6-PGSC0003DMG400018849M6LRR-RLK\_3100

TTTTTTCGTCCACTATCGTCATTAAATCTTCTTTGCCACACAATTGTCAAATTCCTCAACTGATTCATACTA  
GTGGAATCTTCTTTAATCATAAACAGATCTTGAAGGCACTAATTCA

>M6-PGSC0003DMG400018849M6LRR-RLK\_3162

GATTCATACTAGTGAATCTTCTTTAATCATAAACAGATCTTGAAGGCACTAATTCATTTTTTGAATTTG  
AGCGCCACAATATGATATAAATATCTAAATGTTGAACTTTTATTAGGA

>M6-PGSC0003DMG400018849M6LRR-RLK\_3224

TTGAATTTGAGCGCCACAATATGATATAAATATCTAAATGTTGAACTTTTATTAGGAAGTTAAAATAAT  
ATTCTTATGAAGATTCTAATATTAGTGTAGTGAAACAGTTAATATAATTT

>M6-PGSC0003DMG400018849M6LRR-RLK\_3286

AAAATAATATTCTTATGAAGATTCTAATATTAGTGTAGTGAAACAGTTAATATAATTTTCTTAATAAAAGG  
TATCAAGTATTTCTTTTCTCATACTTCTTTATGACAATTGGTGCAAATA

>M6-PGSC0003DMG400018849M6LRR-RLK\_3348

AATAAAAGGTATCAAGTATTTCTTTTCTCATACTTCTTTATGACAATTGGTGCAAATATTTATTCTCTTTGT  
TTTTGTCCATGATTTTGTGGTGCTTAAAGAGGGCATGGCGCACTAGCT

>M6-PGSC0003DMG400018849M6LRR-RLK\_3410

TTCTCTTTGTTTTGTCCATGATTTTGTGGTGCTTAAAGAGGGCATGGCGCACTAGCTGCGCGTGAATAG  
CTCCATTAGCCTTTAAGCTTTTATTTTACACTTTTTGTTATTCTTTGGAC

>M6-PGSC0003DMG400018849M6LRR-RLK\_3472

GTGAATAGCTCCATTAGCCTTTAAGCTTTTATTTTACACTTTTTGTTATTCTTTGGACCCACCAAGATTTTG  
TCTTAGTACTTATCTGTGATTAACCCTTTGATTTAATTAGTATATAA

>M6-PGSC0003DMG400018849M6LRR-RLK\_3534

CAAGATTTTGTCTTAGTACTTATCTGTGATTAACCCTTTGATTTAATTAGTATATAATATAGTACTAGTAC  
TACATTCTAATGCTTAAAGTCAACCATTTTGGGCACTAGTAGACAGAG

>M6-PGSC0003DMG400018849M6LRR-RLK\_3596

GTACTAGTACTACATTCTAATGCTTAAAGTCAACCATTTTGGGCACTAGTAGACAGAGTGTTATGATAAC  
AAATTAATGATCTTATCTTTTTCTTTTTTTAATATAGTTATTGTAC

>M6-PGSC0003DMG400018849M6LRR-RLK\_3658

ATGATAACAAATTAATGATCTTATCTTTTTCTTTTTTTAATATAGTTATTGTACTAAATATGTTTGTG  
ATACAGAATATGCATACACATTGCAAGTTGATGAGAAGAGTGACATC

>M6-PGSC0003DMG400018849M6LRR-RLK\_372

ACCTCTCTTGATCTATCGAAGCGCAATCTTCTGGTACAATTCCAGAAGATATCAGAACTTGGTACACCT  
TCATCACTTGAATTTGAGTGGAATGCTTTGGAGGGTCCTCTTCAAACA

>M6-PGSC0003DMG400018849M6LRR-RLK\_3720

TATGTTTGTGATACAGAATATGCATACACATTGCAAGTTGATGAGAAGAGTGACATCTACAGCTACGG  
GGTTGTGTTACTTGAAATTTATCAGGGAAAAGATCGGTGGAACCAGAATT

>M6-PGSC0003DMG400018849M6LRR-RLK\_3782

GCTACGGGGTTGTGTTACTTGAAATTTATCAGGGAAAAGATCGGTGGAACCAGAATTTGGCGATGGAA  
ACAGCATTGTGGATTGGGTTAAGTCAAGATCAAGACTAAAAATGGCATAA

>M6-PGSC0003DMG400018849M6LRR-RLK\_3844

GATGGAAACAGCATTGTGGATTGGGTTAAGTCAAGATCAAGACTAAAAATGGCATAAATGATGTGTT  
GGATAAAAATGCTGGCGCTTCATGTCTTTAGTTAGGGAGGAAATGATGTTG

>M6-PGSC0003DMG400018849M6LRR-RLK\_3906

TGTGTTGGATAAAAATGCTGGCGCTTCATGTCTTTAGTTAGGGAGGAAATGATGTTGTTGCTGAGGGT

GGCATTGCTGTGTACTAGTCGTAACCCGGCTGACAGGCCATCGATGAGGGA

>M6-PGSC0003DMG400018849M6LRR-RLK\_3968

TGAGGGTGGCATTGCTGTGTACTAGTCGTAACCCGGCTGACAGGCCATCGATGAGGGATGTTATATCTA

TGTTGCAAGAGGCTAAGCCCAACAGGAAGTTGCCTGGAAGTGGTGATAATG

>M6-PGSC0003DMG400018849M6LRR-RLK\_4030

ATATCTATGTTGCAAGAGGCTAAGCCCAACAGGAAGTTGCCTGGAAGTGGTGATAATGCAATTGCTGCT

ATTCCTTTGGCACAAAATGCTAATGTGGAGTGTGATATTATAGGAGGAGA

>M6-PGSC0003DMG400018849M6LRR-RLK\_4092

TGCTGCTATTCCTTTGGCACAAAATGCTAATGTGGAGTGTGATATTATAGGAGGAGATTTGGGGTTGTT

TTGATTTTACAACCTACTAATGAATTGTGGGGGAAATTGGTATAGGAGAA

>M6-PGSC0003DMG400018849M6LRR-RLK\_4154

GGGTTGTTTTGATTTTACAACCTACTAATGAATTGTGGGGGAAATTGGTATAGGAGAAGATTAAATAGTT

TTATTTGCTTCTTAAATTTTGCATAGTAGGAAATTCTCCAGTGTGTCA

>M6-PGSC0003DMG400018849M6LRR-RLK\_4216

AAATAGTTTTATTTGCTTCTTAAATTTTGCATAGTAGGAAATTCTCCAGTGTGTCAATCCAATGTTGTGA

TGAAATGGGTATCTTTTCCAACAAATTAATCTTCAATAGCGTACTTGT

>M6-PGSC0003DMG400018849M6LRR-RLK\_434

GGTACACCTTCATCACTTGAATTTGAGTGGAAATGCTTTGGAGGGTCCTCTTCAAACAGTCATTTTTGAAT

TGCCTTTTCTCAAGACACTTGATATTAGTCACAACCTGTTTAATTCAAC

>M6-PGSC0003DMG400018849M6LRR-RLK\_496

TTTTGAATTGCCTTTTCTCAAGACACTTGATATTAGTCACAACCTGTTTAATTCAACTTTTCCCTCTGGTG

TGTCAAGGCTCAAGTCTCTAACATACCTAAATGCTTATAGTAATGACT

>M6-PGSC0003DMG400018849M6LRR-RLK\_558

CCCTCTGGTGTGTCAAGGCTCAAGTCTCTAACATACCTAAATGCTTATAGTAATGACTTCATAGGCCCTTT

GCCTGAAGAAGTTGCTCAAATCCCAAATCTTGAGTACCTTAACTTTGGG

>M6-PGSC0003DMG400018849M6LRR-RLK\_62

TTCTCTCAAATTTACCTCTCTTTACATACCCCATTTCTCAACCATTTCCACCATAAACACATCACCATGAG

ACACTTGTTTCCTTTCTTCTTACTACAGTTTTCTTCTTCTAACAAG

>M6-PGSC0003DMG400018849M6LRR-RLK\_620

AGGCCCTTGCCTGAAGAAGTTGCTCAAATCCCAAATCTTGAGTACCTTAACTTTGGGGGAAACTATTTCAACGGTGTGATTCCAAAAAGTTATGGTGGCTTAGCAAACTGAAGTTTTT

>M6-PGSC0003DMG400018849M6LRR-RLK\_682

ACTATTTCAACGGTGTGATTCCAAAAAGTTATGGTGGCTTAGCAAACTGAAGTTTTTGCCTTGGCTGGAATTTATTGAATGGTCCTGTTTTGCCCGAGTTGGGTTTCTTGAAACAGC

>M6-PGSC0003DMG400018849M6LRR-RLK\_744

TTGGCTGGAAATTTATTGAATGGTCCTGTTTTGCCCGAGTTGGGTTTCTTGAAACAGCTTGAACATGTAGAAATTGGTTACCAGAATTTCACTGGAGTTGTCCCTGCTGAATTTTCTTCT

>M6-PGSC0003DMG400018849M6LRR-RLK\_806

ACATGTAGAAATTGGTTACCAGAATTTCACTGGAGTTGTCCCTGCTGAATTTTCTTCTTTGTCAAAGTTGA  
ACTATCTTGATATCTCATTAGCCAATCTTTCTGGTAATCTCCCTGTTGG

>M6-PGSC0003DMG400018849M6LRR-RLK\_868

CAAAGTTGAACTATCTTGATATCTCATTAGCCAATCTTTCTGGTAATCTCCCTGTTGGACTAGGCAACTTG  
ACAAACCTTGAACTCTGCTTCTTTTCAAGAACCATTTGTATGGTACAA

>M6-PGSC0003DMG400018849M6LRR-RLK\_930

GGCAACTTGACAAACCTTGAACTCTGCTTCTTTTCAAGAACCATTTGTATGGTACAATCCATTGTCTTTT  
GCCAGACTGACATCCTTGAAATCATTGGATTTGTCTGACAACCATCTC

>M6-PGSC0003DMG400018849M6LRR-RLK\_992

ATTGTCTTTTGCCAGACTGACATCCTTGAAATCATTGGATTTGTCTGACAACCATCTCTCCGGAACAATCC  
CCGAAGGGTTTTTCAGGATTCAAGGAGCTTACAGTGTGAATTTGATGAA

>M6-PGSC0003DMG400018861M6LRR-RLP\_0

ATGAGCATTCTCTCGAAAACATGGCTACAAGCGTGGTTGACTCTCCCAACTGGAATTTCTTTGTTAATTG  
TTGGCGAGGCTGGGAAGCGCATATAAATATAGTGGACACAACCATGGAG

>M6-PGSC0003DMG400018861M6LRR-RLP\_126

GGGAAGGGGAAAATTCCTATACAAAAGTTTGAATTATCAGAGATTTTGTGATTCTCCCAACTCTTCC  
CTCTAATTGATAAGTGGCTTCTCATTGCACTTCAGAATGGTGTAAAACAA

>M6-PGSC0003DMG400018861M6LRR-RLP\_189

CTCTTCCCTCTAATTGATAAGTGGCTTCTCATTGCACTTCAGAATGGTGTAAAACAACCTGTACTTCACTTT  
ACAGCATACCCGGCGCCTATTTTAAACAATCTTGACAGCAAAATCTTTA

>M6-PGSC0003DMG400018861M6LRR-RLP\_252

CTTCACTTTACAGCATACCCGGCGCCTATTTTAAACAATCTTGACAGCAAAATCTTTAAGAGAATTGGTTCT  
GTACAATTGTA CTCTTATGCCTGTTTCATTATCTAGTGGGGTTGTGAGT

>M6-PGSC0003DMG400018861M6LRR-RLP\_315

TTGGTTCTGTACAATTGTA CTCTTATGCCTGTTTCATTATCTAGTGGGGTTGTGAGTTGCAATTCTCTGAG  
AAAGATTTCTCTATCTTATGTAACATTAGATGAAAACATGCTTCAGACT

>M6-PGSC0003DMG400018861M6LRR-RLP\_441

AATAGCTGTCCCTTTATTGTCTCTTTCATACTTGAGTATTGTTGGGGTTGACTATGAAGCTTATAAAGAT  
CAAGTCGGATTCCCTGAAGGTCTTGAAGATTCATCAATATTGCGGGATA

>M6-PGSC0003DMG400018861M6LRR-RLP\_504

ATAAAGATCAAGTCGGATTCCCTGAAGGTCTTGAAGATTCATCAATATTGCGGGATATGGGAGATTGAT  
GCTCCAGATTTGGTATCACTTGACTATACAGGGAATGAAATTCCTGAACTC

>M6-PGSC0003DMG400018861M6LRR-RLP\_567

ATTGATGCTCCAGATTTGGTATCACTTGACTATACAGGGAATGAAATTCCTGAACTCAACATTGTAAGAG  
AGTCTAGCCAATTGGAGAACTCAAAAATTATTCTTCATTGCATCTCCAGA

>M6-PGSC0003DMG400018861M6LRR-RLP\_63

GTTAATTGTTGGCGAGGCTGGGAAGCGCATATAAATATAGTGGACACAACCATGGAGAGATATGGGAA  
GGGGAAAATTCCTATACAAAAGTTTGAATTATCAGAGATTTTTGCTGATTCT

>M6-PGSC0003DMG400018861M6LRR-RLP\_630

GTAAGAGAGTCTAGCCAATTGGAGAACTCAAAAATTATTCTTCATTGCATCTCCAGATTAATACGTCAT  
GGTTTTGTAAGTTGAGGAAGTTTCTATCAAATTCATCCTCTTGGTCTGAA

>M6-PGSC0003DMG400018861M6LRR-RLP\_686

ATTAATACGTCATGGTTTTGTAAGTTGAGGAAGTTTCTATCAAATTCATCCTCTTGGTCTGAAGTTAACC  
TTTGTATTATTCAAATGCGATGAGATCAACATGACAGATTTGCAAATGGA

>M6-PGSC0003DMG400018865-(rev)M6LRR-RLP\_0

AGCTAAATATGGGCTATGCAGTTGTGCTCTCTTGTCTTTCTCTGTGCATGAAGTATTTACTGTTTCTTCAT  
CCATACTACCTCATCTCTCTCAAAAACATCAAAAACATTTCCCTTCTAA

>M6-PGSC0003DMG400018865-(rev)M6LRR-RLP\_1037

CTTGACGATCTCAAGTCCAATTCATAATCTGGATTAATTTAGGTGACAACCAATTGCAAGGCTATCTCC



CAAGTCAATTCAAACCTTGTGAACCTCACAAGTCTTTATCTTTCCTTC

>M6-PGSC0003DMG400018865-(rev)M6LRR-RLP\_1098

GCTATCTTCCCAAGTCAATTCAAACCTTGTGAACCTCACAAGTCTTTATCTTTCCTTCAATAATTTTAGTG

GTCGTGTGGATGTCAGCCTCTTTTCAAACCTGAAAAGGCTTTCGGATC

>M6-PGSC0003DMG400018865-(rev)M6LRR-RLP\_1159

TAATTTTAGTGGTCGTGTGGATGTCAGCCTCTTTTCAAACCTGAAAAGGCTTTCGGATCTTACTCTTTCAA

ATAATAAGGTCTCATTGACCAATGAGAACAGAGTTACTTTGCCTGAATC

>M6-PGSC0003DMG400018865-(rev)M6LRR-RLP\_122

TTCAAGCAGTCGTTACTATAAATACCTCAGCCTCTTATAGTTGTGAGAATCCTTATCCAAAAACGAGTTC

ATGAAACATGAGCAGAGATTGCTGCTCATGGGATGGAGTCGTATGCAAT

>M6-PGSC0003DMG400018865-(rev)M6LRR-RLP\_1220

ACTCTTTCAAATAATAAGGTCTCATTGACCAATGAGAACAGAGTTACTTTGCCTGAATCTCTTCAAACGTT

ATAATTAACCGCATGTGAAGTGAAAGAATTGGAGTTTCTAAGATCTGCA

>M6-PGSC0003DMG400018865-(rev)M6LRR-RLP\_1281

TTCAAACGTTATAATTAACCGCATGTGAAGTGAAAGAATTGGAGTTTCTAAGATCTGCAAAGCAGCTCG

AGGTGTTGGATCTTTCAAATAATAAGATTCAAGGAAGAATTCCAGATTGGG

>M6-PGSC0003DMG400018865-(rev)M6LRR-RLP\_1342

GCAGCTCGAGGTGTTGGATCTTTCAAATAATAAGATTCAAGGAAGAATTCCAGATTGGGCATGGTCTAA

CTGGATTATTTCAATTGAAGAGTCTTAATATATCCCACAATATGCTGACGAG

>M6-PGSC0003DMG400018865-(rev)M6LRR-RLP\_1403

TGGTCTAACTGGATTATTTCAATTGAAGAGTCTTAATATATCCCACAATATGCTGACGAGTGTGGATTCAA

TTCCTCTTCAGACTGTATATACTATTGATTTACGGTCCAATTTGCTTCAA

>M6-PGSC0003DMG400018865-(rev)M6LRR-RLP\_1464

TGGATTCAATTCCTCTTCAGACTGTATATACTATTGATTTACGGTCCAATTTGCTTCAAGGTTCACTACCTA

TGCCACCAAATTCACAAGATACTTCTTCATCTCCCAAATAATCTCA

>M6-PGSC0003DMG400018865-(rev)M6LRR-RLP\_1525

TTCACTACCTATGCCACCAAATTCACAAGATACTTCTTCATCTCCCAAATAATCTCACTAAAGAAATTCC

TTCATCTATTTGCAATTTGACATCACTGGTAATGCTAGATTTGGCAAG

>M6-PGSC0003DMG400018865-(rev)M6LRR-RLP\_1647

ACAACCTTGACGGGAGAAATTCGCAATGTTGGGTAATATTAGTGGTCTCAAGGTTCTTGATATGCAGC  
ACAACAGGCTTATTGGTACTCTTCCAACAATTTAAGCATTAAATGGAAGTT

>M6-PGSC0003DMG400018865-(rev)M6LRR-RLP\_1708

TATGCAGCACAAACAGGCTTATTGGTACTCTTCCAACAATTTAAGCATTAAATGGAAGTTCACTGAAAAGC  
CTCAACTTGCATAGCAATAAATTAGAGGGGAGAATCCCCGATCATTGGC

>M6-PGSC0003DMG400018865-(rev)M6LRR-RLP\_183

AAACGAGTTCATGAAACATGAGCAGAGATTGCTGCTCATGGGATGGAGTCGTATGCAATAACATGACTG  
GAAATGTCATTGAGCTTAACCTCAGTTGCAGCGGGATTGTAGGAAAGATTG

>M6-PGSC0003DMG400018865-(rev)M6LRR-RLP\_1891

GTGGTTGGGAACTCTTCAAAGCTAAAAGTTTTAAGCTTGAGATCAAATACATTGCATGGGACCATTCAA  
CCTCCAAGGATTGAAACTATTTTTCCCGAGCTTCAAATCTTGATCTCTC

>M6-PGSC0003DMG400018865-(rev)M6LRR-RLP\_1952

ACCATTCAACCTCCAAGGATTGAAACTATTTTTCCCGAGCTTCAAATCTTGATCTCTCTTACAATGCCTTC  
TCGGGAAACTTACCTTCGAATCTATTTCAACATCTAAAAGCTATGAGG

>M6-PGSC0003DMG400018865-(rev)M6LRR-RLP\_2013

ACAATGCCTTCTCGGGAACTTACCTTCGAATCTATTTCAACATCTAAAAGCTATGAGGACAAATGATCC  
ATCAACGGAAGCACCAAGATATCCTGGAAGTACATATTACGAAGATTCTGA

>M6-PGSC0003DMG400018865-(rev)M6LRR-RLP\_2074

AAATGATCCATCAACGGAAGCACCAAGATATCCTGGAAGTACATATTACGAAGATTTCGATTACAGTTAC  
AACCAAGGGATTTGTGCGTGAAATTGTGAGAATCTTGATCCTAGAAAGTAC

>M6-PGSC0003DMG400018865-(rev)M6LRR-RLP\_2135

ACAGTTACAACCAAGGGATTTGTGCGTGAAATTGTGAGAATCTTGATCCTAGAAGTACATATTACAAA  
GATTCGATTACAGTTACAACCAAGGGATTTGTACGTGAAATTGTGAGAATC

>M6-PGSC0003DMG400018865-(rev)M6LRR-RLP\_2196

ATTACAAAGATTTCGATTACAGTTACAACCAAGGGATTTGTACGTGAAATTGTGAGAATCTTGATCTGTA  
CACTGTTATCGATTTTTCAAGTAATAAATTTGAAGGGCAAATTTCCAAGTA

>M6-PGSC0003DMG400018865-(rev)M6LRR-RLP\_2257

GTATCTGTACTGTTATCGATTTTTCAAGTAATAAATTTGAAGGGCAAATTTCCAAGTATCATGGGGGAT  
CTCATTGCAGTTCACACATTAATTTATCTCGTAATGGATTAAAAGGTCA

>M6-PGSC0003DMG400018865-(rev)M6LRR-RLP\_2318

ATGGGGGATCTCATTGCAGTTCACACATTAATTTATCTCGTAATGGATTAAGGTCATATACCACCAT  
CATTAGGAGATTTATCTTCAGTTGAATCATTGGATCTATCAGGAAACCAG

>M6-PGSC0003DMG400018865-(rev)M6LRR-RLP\_2562

CATATGAAGGGAATGATGGATTACGTGGATTTCTGTTTCAAAAATTGTGGAGATGCTGGGGTGTTAG  
ATAAAAATGATACCGTATCTGGACAAGATGATGAAGAAAGCGATTCTGAAT

>M6-PGSC0003DMG400018865-(rev)M6LRR-RLP\_2745

CCATAATATATTTTCATGATTTCAACTGGAAACCCAAAATGGCTTGCAAGAATCATTGTAGAGCTGGAGCA  
CAAATAATAATGGGAAGGAGAAAGAAGCAGCGAAGGCAAAGGAACTATA

>M6-PGSC0003DMG400018865-(rev)M6LRR-RLP\_2806

GCTGGAGCACAAAATAATAATGGGAAGGAGAAAGAAGCAGCGAAGGCAAAGGAACTATAGAAGAAGA  
TAGTCAGATGAAGGTGGGGTGGAAGTATCAAAGATGCATCTGCTGTG

>M6-PGSC0003DMG400018865-(rev)M6LRR-RLP\_2867

AGAAGATAGTCAGATGAAGGTGGGGTGGAACTGAAGTTATCAAAGATGCATCTGCTGTGAAAATGATA  
ACATTTTGTAACCTTGAATTGATATATAATTTAATTATTTTCTAATGAGAT

>M6-PGSC0003DMG400018865-(rev)M6LRR-RLP\_2925

GAAAATGATAACATTTTGTAACCTTGAATTGATATATAATTTAATTATTTTCTAATGAGATCTGGTGGGT  
TAGTGCTGGTATGATCGTATCCTATTTATGAATGATTTGATATGAAGGC

>M6-PGSC0003DMG400018865-(rev)M6LRR-RLP\_305

TCCAATAGCAGCCTCTCCAACCTCTCATCTCCAAAGGCTTGATCTCTCTTATAATAACTTCTCTAAATCT  
CACATCTCACCTGAATTCGGTAGATTCTCAAACCTTAACAAATTTTGAT

>M6-PGSC0003DMG400018865-(rev)M6LRR-RLP\_366

TCTCTAAATCTCACATCTCACCTGAATTCGGTAGATTCTCAAACCTTAACAAATTTTGATCTTTCATAGGCA  
GATTTCTCAGGTCAAATTCCTTCTGAAATCTCTCATCTTCCAAGTTAC

>M6-PGSC0003DMG400018865-(rev)M6LRR-RLP\_427

TTCATAGGCAGATTTCTCAGGTCAAATTCCTTCTGAAATCTCTCATCTTCCAAGTTACTCTCTCAGTCT  
CTACAATTCTATTGGTCTACGACTCGTAGCCCATGATTTTAAATTGCT

>M6-PGSC0003DMG400018865-(rev)M6LRR-RLP\_488

TCTCTCAGTCTCTACAATTCTATTGGTCTACGACTCGTAGCCCATGATTTTAAATTGCTCCTTCAAATTTG

ACTCAATTAAGAGAGCTTGATCTTAGTAACATAAACATCTCTTCCACC

>M6-PGSC0003DMG400018865-(rev)M6LRR-RLP\_61

TGTTTCTTCATCCATACTACCTCATCTCTCTCAAAAACATCAAAACATTTCCCTTCTAAAATTCAAGCAGTC  
GCTTACTATAAATACCTCAGCCTCTTATAGTTGTGAGAATCCTTATCC

>M6-PGSC0003DMG400018865-(rev)M6LRR-RLP\_610

TCCTCTGAATTTTTCTTCTCATTTGACAACCTCTGAGACTGATAGATACAGGATTGTATGGGATAATACCTG  
AGAGTATATTTACCTACCCAACCTGGAAACACTGTACTTAGGTTTCAG

>M6-PGSC0003DMG400018865-(rev)M6LRR-RLP\_671

ATAATACCTGAGAGTATATTTACCTACCCAACCTGGAAACACTGTACTTAGGTTTCAGTGATCTCCGTG  
GTTATTTTCAAAGACCAAATGGAACAGCAGTGCATCTCTAGTAGAGTTA

>M6-PGSC0003DMG400018865-(rev)M6LRR-RLP\_732

ATCTCCGTGGTTATTTTCAAAGACCAAATGGAACAGCAGTGCATCTCTAGTAGAGTTAGATCTCCTTGG  
AGTGAATTTTTCTGATAGTTTTCTGAGTCTAATGGCTATCTAACTTCGG

>M6-PGSC0003DMG400018865-(rev)M6LRR-RLP\_793

TCTCCTTGGAGTGAATTTTTCTGATAGTTTTCTGAGTCTAATGGCTATCTAACTTCGGTTCGTTCTTTGTG  
TCTTCAAAGTTGCAACCTTAGAGGGCCTATTCTGAATCTATTTCTAA

>M6-PGSC0003DMG400018865-(rev)M6LRR-RLP\_854

CGTTCTTTGTCTCTTCAAAGTTGCAACCTTAGAGGGCCTATTCTGAATCTATTTCTAATCTCAATCATATA  
GAATATTTGCACAATCAAATAACTCCCTGAATGGAACAATACCATCA

>M6-PGSC0003DMG400018865-(rev)M6LRR-RLP\_915

TCAATCATATAGAATATTTGCACAATCAAATAACTCCCTGAATGGAACAATACCATCAGGGGTGTTCTC  
CCTTCCATCACTAAGATATTTACTCTTGGGTAAGAACCACTTTTCTGGTC

>M6-PGSC0003DMG400018865-(rev)M6LRR-RLP\_976

GGTGTCTCCCTTCCATCACTAAGATATTTACTCTTGGGTAAGAACCACTTTTCTGGTCATCTTGACGATC  
TCAAGTCCAATCACTAATCTGGATTAATTTAGGTGACAACCAATTGCA

>M6-PGSC0003DMG400018866-(rev)M6LRR-RLP\_0

ATGGCTGACATATTGCCGGGATGTCTCGTTCAAAAATACTCAGTTTTCTTCTAGTTATAATCAAGCATC  
CAAGATGAGTATTCTCTCCAAAACATGGCTGCAAGCGTGGTCGACTCTT

>M6-PGSC0003DMG400018866-(rev)M6LRR-RLP\_1008

ACACGTTTAATTGATCGGTTAATGTATATGAAGAATTCGAGTCATTCTACATATTCTCATGGTTGGAATAA  
TCAATTAAGAAATAAAAGCTTTTGATGGAAAAATCAGTTGCTGCAA

>M6-PGSC0003DMG400018866-(rev)M6LRR-RLP\_1071

TGGAATAATCAATTAAGAAATAAAAGCTTTTGATGGAAAAATCAGTTGCTGCAACTAGGAAGTGAG  
GAGCTTGCAAAAAAGATTATGGAGGGGAAGAAACCTTATTTTATATTAGAT

>M6-PGSC0003DMG400018866-(rev)M6LRR-RLP\_1134

AGTGAGGAGCTTGCAAAAAAGATTATGGAGGGGAAGAAACCTTATTTTATATTAGATTGGTGATGGAG  
TTAAGTTGTCTCTATTTTGAATTGAATTCAAAAGTTTATTACTTCATTTGTT

>M6-PGSC0003DMG400018866-(rev)M6LRR-RLP\_1197

TGGAGTTAAGTTGTCTCTATTTTGAATTGAATTCAAAAGTTTATTACTTCATTTGTTTTCCACATCTAGCTT  
TAAATCTTGCAAGTTCCGAAAATATGTTTCGCTGTTTTCTTCTTCTG

>M6-PGSC0003DMG400018866-(rev)M6LRR-RLP\_126

TTGAAATCTTTTTATTTTGCTGGGAAGGCTGGTAAAGCCGTACAAAGATAGTGGACACAATCATGGAG  
AGATATGGGAAGGGGAAAATTCCTATAGAAAAGTTTGAATTATCAGAGATT

>M6-PGSC0003DMG400018866-(rev)M6LRR-RLP\_1260

ATCTAGCTTTAAATTCTTGCAAGTTCCGAAAATATGTTTCGCTGTTTTCTTCTTCTGAGTTTGAGGGATTTT  
TCATTTCTCAATTATCCTACTAACAGCACAACTTATATACCAGTTTTT

>M6-PGSC0003DMG400018866-(rev)M6LRR-RLP\_1323

AGGGATTTTTTCAATTTCTCAATTATCCTACTAACAGCACAACTTATATACCAGTTTTTAAATCAGAAAGAGG  
GACTCTGTACTTCCCTTTCAATACCATAGAAAAACAATCCCCCTCCCTA

>M6-PGSC0003DMG400018866-(rev)M6LRR-RLP\_1449

CATTAATTCATACTGCCTGCTGCTGGTTGATACCAAATGAAATAAGAGTTTCCCATGAAATGGTTATTC  
ATCTCTTACTTGGTGATGCATAACCATAGCACCTACGAATTCTGAAAAA

>M6-PGSC0003DMG400018866-(rev)M6LRR-RLP\_1512

GGTTATTCATCTTACTTGGTGATGCATAACCATAGCACCTACGAATTCTGAAAAAAGTTCCAAGTTAGT  
TGAAGAAGCCATGATGAACAAAAATGTAACATAATGAAAGATAAAGGAA

>M6-PGSC0003DMG400018866-(rev)M6LRR-RLP\_1575

AAGTTAGTTGAAGAAGCCATGATGAACAAAAATGTAACATAATGAAAGATAAAGGAAAAATCAACATTA  
AGACTGGATAGTATCTTACTTTAACTCCTATTCATAATTCCATACTTCCTT

>M6-PGSC0003DMG400018866-(rev)M6LRR-RLP\_1638

CATTAAGACTGGATAGTATCTTACTTTAACTCCTATTCATAATCCCATACTTCCTTTTTTCCATATCATGT  
TTCACTATAAAGGTTGTGGTGCCTCAGCCACTTATAATCTTCATAA

>M6-PGSC0003DMG400018866-(rev)M6LRR-RLP\_1701

CATATCATGTTTCACTATAAAGGTTGTGGTGCCTCAGCCACTTATAATCTTCATAAACTTGATTCATCATT  
GGAGTAATTTTACGAGTATTACTTAAAATTAATAACAATGTTATATT

>M6-PGSC0003DMG400018866-(rev)M6LRR-RLP\_1764

TTCATCATTGGAGTAATTTTACGAGTATTACTTAAAATTAATAACAATGTTATATTCAAGGAAAATTTAT  
GTGTCTGCCTTCATACATATGTACTTCTCCATGATTTTGGCTAAAAACA

>M6-PGSC0003DMG400018866-(rev)M6LRR-RLP\_1827

AAATTTATGTGTCTGCCTTCATACATATGTACTTCTCCATGATTTTGGCTAAAAACATCCATATGTTATACT  
CATAATCTAAAGTCTAACTGCATCTTTAAAACTATTCATGTGAACA

>M6-PGSC0003DMG400018866-(rev)M6LRR-RLP\_189

ATGGAGAGATATGGGAAGGGGAAAATTCCTATAGAAAAGTTTGAATTATCAGAGATTTTGTCTGATTCT  
CTCCAATTTTCCCTGTGGTTGATAAGTGGCTTCTGATTGCACTTCAGAAT

>M6-PGSC0003DMG400018866-(rev)M6LRR-RLP\_1890

TGTTATACTCATAATCTAAAGTCTAACTGCATCTTTAAAACTATTCATGTGAACATAACACATCCCTAT  
ATACAAGAAAACGTTAAGCTAGGAAAAGCAGTACGGCCAAGTTAATTAC

>M6-PGSC0003DMG400018866-(rev)M6LRR-RLP\_1953

ATCCCTATATACAAGAAAACGTTAAGCTAGGAAAAGCAGTACGGCCAAGTTAATTACATGAACAATTTTA  
CAATATAAAATTGATGAAGAAGCAACGAATCACTTCCCAGTATCACATCA

>M6-PGSC0003DMG400018866-(rev)M6LRR-RLP\_2016

AATTTTACAATATAAAATTGATGAAGAAGCAACGAATCACTTCCCAGTATCACATCACATGTGAATAGGG  
GTCTCAAATGGATGGTTTGGATGATGAACTAGTCGGGTCCAAATGATCC

>M6-PGSC0003DMG400018866-(rev)M6LRR-RLP\_2079

AATAGGGGTCTCAAATGGATGGTTTGGATGATGAACTAGTCGGGTCCAAATGATCCGACTCAGTGACT  
CGCCCAAGAGCTACTTAGGCCAAATTGGATTGGGCTGAAATGAACTAAAAA

>M6-PGSC0003DMG400018866-(rev)M6LRR-RLP\_2142

GTGACTCGCCCAAGAGCTACTTAGGCCAAATTGGATTGGGCTGAAATGAACTAAAAAACGAATCATATT

TCAACCCACTCAATTCTTACTAAGTTTTAATTTTCGCTTTATATAGAAACCA

>M6-PGSC0003DMG400018866-(rev)M6LRR-RLP\_2205

CATATTTCAACCCACTCAATTCTTACTAAGTTTTAATTTTCGCTTTATATAGAAACCATGACCCTCTCTTGCT

CAAACAGATAGTCGTCTTGACATTAGCGAGCTAATATGTCAGGGTCT

>M6-PGSC0003DMG400018866-(rev)M6LRR-RLP\_2268

TCTCTTGCTCAAACAGATAGTCGTCTTGACATTAGCGAGCTAATATGTCAGGGTCTCCATGATGTAGCT

CAAATTCTTGATAATGTGTTGGATTGATTGTTATCCACGGACAGTACATG

>M6-PGSC0003DMG400018866-(rev)M6LRR-RLP\_2331

TGTAGCTCAAATTCTTGATAATGTGTTGGATTGATTGTTATCCACGGACAGTACATGTGATTGTTAAGAG

TCAAACAACAACAAGATCGTACATGTGTATCTCACAGTCTTGGTGAAC

>M6-PGSC0003DMG400018866-(rev)M6LRR-RLP\_2366

TGTTATCCACGGACAGTACATGTGATTGTTAAGAGTCAAACAACAACAAGATCGTACATGTGTATCTC

ACAGTCTTGGTGAACAATTTGATTCAGTACGACTTCATTCGAGAGAATGA

>M6-PGSC0003DMG400018866-(rev)M6LRR-RLP\_252

GATTCTCTCCAACCTTTCCCTGTGTTGATAAGTGGCTTCTGATTGCACTTCAGAATGGTGTAAGAAGAACT

TGTACTCCACTTTAAATCATACCCGGTGCCTATTTTAAACAATCTTGGCA

>M6-PGSC0003DMG400018866-(rev)M6LRR-RLP\_315

AAAGAACTTGTACTCCACTTTAAATCATACCCGGTGCCTATTTTAAACAATCTTGGCAGCCAAATCTTTAAG

AAAATTGGTTCTGCACGATTGTACTCTTATGTCTGTTTCATTATCTAGT

>M6-PGSC0003DMG400018866-(rev)M6LRR-RLP\_378

TCTTTAAGAAAATTGGTTCTGCACGATTGTACTCTTATGTCTGTTTCATTATCTAGTGGGGTTGTGAATTG

CAATTCTTTGAGAAAGCTTTCTCTATCTAATGTAACATTAGACGAAAAC

>M6-PGSC0003DMG400018866-(rev)M6LRR-RLP\_504

CAGACTCTACTTAATAGCTGTCCCTTGATTGTCTCTTTCATCGTTGAGAATTGTTTCGGGACTGAATGTTCT

TAAGATCAAATCGGATTCCTGAAGGTCTTGAAGATTATACAATATTGC

>M6-PGSC0003DMG400018866-(rev)M6LRR-RLP\_567

AATGTTCTTAAGATCAAATCGGATTCCTGAAGGTCTTGAAGATTATACAATATTGCAATATATGTAACA

TTGATGCTCCAAATTTGGTATCCCTTGAAGGTATGAAATTCCT

>M6-PGSC0003DMG400018866-(rev)M6LRR-RLP\_63

CAAGCATCCAAGATGAGTATTCTCTCCAAAACATGGCTGCAAGCGTGGTTCGACTCTTCCCAACTTGAAAT  
TCTTTTTATTTTGGCTGGGAAGGCTGGTAAAGCCGTACAAAGATAGTGGAC

>M6-PGSC0003DMG400018866-(rev)M6LRR-RLP\_630

TGTAACATTGATGCTCCAAATTTGGTATCCCTTGACTATAAAGGGTATGAAATTCCTGAACTTAACATTGC  
AAGAGAGTCAAAAATCATTCTTCATTGTCTCCTCAGTTTAAATACGGCA

>M6-PGSC0003DMG400018866-(rev)M6LRR-RLP\_693

AACATTGCAAGAGAGTCAAAAATCATTCTTCATTGTCTCCTCAGTTTAAATACGGCATGGTTTTGTAAGTT  
GAGGAAGTTTCTATCAAATCCGTCCTCTTGGTCTGAAGTTAGCCTTTGT

>M6-PGSC0003DMG400018866-(rev)M6LRR-RLP\_756

TGTAAGTTGAGGAAGTTTCTATCAAATCCGTCCTCTTGGTCTGAAGTTAGCCTTTGTATATTAATAATGCGA  
TGAGATCAACATGACAGATTTGCAAATGGACCACATAGGTTCTAGTGGA

>M6-PGSC0003DMG400018866-(rev)M6LRR-RLP\_882

GACGTTTTAAATCTCAATATGCTACTGATGGATGAAATTATAGAGTGCCCAACTTTTGTGGATGCTTTGCT  
ATGGAGTTGTCATCCTGGGAGACTTAACTTAATCTCAATTGATATTGAA

>M6-PGSC0003DMG400018866-(rev)M6LRR-RLP\_945

GCTTTGCTATGGAGTTGTCATCCTGGGAGACTTAACTTAATCTCAATTGATATTGAAACAGTTACACGTTT  
AATTGATCGGTTAATGTATATGAAGAATTCGAGTCATTCTACATATTCT

>M6-PGSC0003DMG400018900-(rev)M6LRR-RLP\_0

CTATTTTAAATGAGTTGAGTACCCAACACATTTTAAAATGGGTTAATTTGTATAGGTTCTCATATAAATTA  
TCCATTCGGTCACCCCTAGGCGAAACTGCAATCTTGTAACCCAAGGGCT

>M6-PGSC0003DMG400018900-(rev)M6LRR-RLP\_124

TGAACCAATAGTTTTTGCCTTGAGACTTAAATTTGTATTATTAATATCTAGTGATACCTTGATTATGAAC  
GTGATTGTTATTGGATAATATCCTGAGGATTTAGAGATATCTATAAATT

>M6-PGSC0003DMG400018900-(rev)M6LRR-RLP\_186

ATTATGAACGTGATTGTTATTGGATAATATCCTGAGGATTTAGAGATATCTATAAATTTCAAATTCTGAAT  
CTGCATCTCATCCTAAATACTTTATATTTTGGCTCTTCATTAGGATTAAT

>M6-PGSC0003DMG400018900-(rev)M6LRR-RLP\_248

ATTCTGAATCTGCATCTCATCCTAAATACTTTATATTTTGGCTCTTCATTAGGATTAATAAGGTAAGACATAT  
TCCCTTGCTTGACTTTTTCTTTTGAATTTTATTTTATTATATATAC



>M6-PGSC0003DMG400018900-(rev)M6LRR-RLP\_62

TATAAATTATCCATTCGGTCACCCCTAGGCGAAACTGCAATCTTGTAACCCAAGGGCTCACGTGAACCCA  
ATAGTTTTTGCCTTGAGACTTTAATTTGTATTATTAATATCTAGTGATAC

>M6-PGSC0003DMG400018901-(rev)M6LRR-RLP\_124

CCCTGTTGGAAGAGCTGAAGCTTGATAAACTGCCTAACTTGGGGCATTCTTTCTGACGGAGCATACTCT  
TCAAGCTCTTCAAATTCATTTCTTAGAGAAGTGAAGATATCTGACTGCC

>M6-PGSC0003DMG400018901-(rev)M6LRR-RLP\_248

AATGAAGACATTTGTCCAACAGGGAATATCTGTGAGTCTTGAAAGTGATGATGAGGTGAAAGTAATGTT  
CAATTCTAAGGTTTGTCTAGTAAATAGTAATAGTTATTTCTGTTCCACTTC

>M6-PGSC0003DMG400018901-(rev)M6LRR-RLP\_310

TAATGTTCAATTCTAAGGTTTGTCTAGTAAATAGTAATAGTTATTTCTGTTCCACTTCCTGTTACCTTGACG  
TAAGATGATATATGGTTCATTTTTGGATTTCTACTTGAAGCTATATAT

>M6-PGSC0003DMG400018901-(rev)M6LRR-RLP\_372

TACCTTGACGTAAGATGATATATGGTTCATTTTTGGATTTCTACTTGAAGCTATATATATTCAATTTTCATA  
CCTTCAACATTTGCAGGTTTCTGTCCCAACTTGGAAGAGCTATATAT

>M6-PGSC0003DMG400018994-(rev)M6LRR-RLP\_0

AGGATAAAAATTGTTTGGCTTTAATTTCAATCATGGATACTTCATGATAGTTGAAAAATCATTCTATTTT  
ATTATGACTTTTTGAGATAATAACTAACTATTAGTTGAGTGAACATATG

>M6-PGSC0003DMG400018994-(rev)M6LRR-RLP\_1037

AAAGAAGTTGGGTCAAAGATTTTAATTGGGTTTCCGGTCTGTCTTCTTTGAAGTATCTTTATCTTTCTTAT  
GTGAACCTTTCTTCGGCAACACATTGGCTTGATTCTATTATTAAGCTGC

>M6-PGSC0003DMG400018994-(rev)M6LRR-RLP\_1098

TCTTTCTTATGTGAACCTTTCTTCGGCAACACATTGGCTTGATTCTATTATTAAGCTGCCATCTTTAGTGAC  
TCTCAGTTTGCAAACTGTAGTCTTCACTATCTTCCTTATTCCTCCC

>M6-PGSC0003DMG400018994-(rev)M6LRR-RLP\_1159

TCTTTAGTGACTCTCAGTTTGCAAACTGTAGTCTTCACTATCTTCCTTATTCCTCCCCTTCCAACTGGAATATG  
ACTTCTCTTTCTTATCTCTCCCTTTCACAGAATAAGTTTGTTAATTCT

>M6-PGSC0003DMG400018994-(rev)M6LRR-RLP\_122

AAATCAAAGTCGTGATTGTCTCTAGTCTCTCCAATAAGGTATGCAGAGGACCACAATTAACGCTAATTT

TTGCCTTCCATTTTCGGCTACTTAATTAGCACTATTATTCCACAGGACTT

>M6-PGSC0003DMG400018994-(rev)M6LRR-RLP\_1220

ACTGGAATATGACTTCTCTTTCTTATCTCTCCCTTTCACAGAATAAGTTTGTTAATTCTGAGTTGCCTAAAT  
GGTTGTCTAATGCCACCACCATTGAGACACTTTATATGGTATACATCA

>M6-PGSC0003DMG400018994-(rev)M6LRR-RLP\_1281

GTTGCCTAAATGGTTGTCTAATGCCACCACCATTGAGACACTTTATATGGTATACATCAACATCCAAGGC  
CCAATATCAAATGTTGAATGGGGTAAACTCTGTAATTTGCAGAAGTTGTA

>M6-PGSC0003DMG400018994-(rev)M6LRR-RLP\_1342

ATCCAAGGCCCAATATCAAATGTTGAATGGGGTAAACTCTGTAATTTGCAGAAGTTGTATCTAGTGTAGA  
ACAACTTAATGGAGATATAAGTCGAGTGGTGAAGGATTGTCCAAGTGC

>M6-PGSC0003DMG400018994-(rev)M6LRR-RLP\_1403

TAGTGTAGAACAACTTAATGGAGATATAAGTCGAGTGGTGAAGGATTGTCCAAGTGCAGCAACCCTA  
CGATAGAGGTATTATCTCTTGGCGAAAATGTGTTGACAGGGGAATTGCCAA

>M6-PGSC0003DMG400018994-(rev)M6LRR-RLP\_1464

CAACCCTACGATAGAGGTATTATCTCTTGGCGAAAATGTGTTGACAGGGGAATTGCCAAATTCATTAGG  
ACATCTGAAGAACTTAAGGATTCTTAGTATTTCTTTAATATGATCTCTGG

>M6-PGSC0003DMG400018994-(rev)M6LRR-RLP\_1525

TCATTAGGACATCTGAAGAACTTAAGGATTCTTAGTATTTCTTTAATATGATCTCTGGTACTATTCCAGC  
ATCTATTGAGCAACTTTCACAATTGGAAATTTGTACTTGGGAGAGAAT

>M6-PGSC0003DMG400018994-(rev)M6LRR-RLP\_1586

CTATTCCAGCATCTATTGAGCAACTTTCACAATTGGAAATTTGTACTTGGGAGAGAATCAACTGAAGGG  
AGCCTTGCCTGAGAGTATTTTAATTTTTCAGAATTAAGTACTGAGTTGCGGC

>M6-PGSC0003DMG400018994-(rev)M6LRR-RLP\_1647

ACTGAAGGGAGCCTTGCCTGAGAGTATTTTAATTTTTCAGAATTAAGTACTGAGTTGCGGCTGACAACAAAT  
GCTTTGGAAAGCAATCTTTCACAAAATCGCTTTGAAAGACTCCATCAACT

>M6-PGSC0003DMG400018994-(rev)M6LRR-RLP\_1708

ACAACAAATGCTTTGGAAAGCAATCTTTCACAAAATCGCTTTGAAAGACTCCATCAACTGAAAGTTTTAT  
CCCTATCTTGTGGAAGAAGTTTTTCAGTCAACTGAGCAATGAATGGGTT

>M6-PGSC0003DMG400018994-(rev)M6LRR-RLP\_1769

AAGTTTTATCCCTATCTTGTGGAAGAAGTTTTTCAGTCAACTTGAGCAATGAATGGGTTCTCCATTTAGC  
CTCTATGCTATCGAGCTCAGAAGGTGCAGTTTGGGTCCCAAGTTTCCAA

>M6-PGSC0003DMG400018994-(rev)M6LRR-RLP\_183

CGCTAATTTTTGCCTTCCATTTTCGGCTACTTAATTAGCACTATTATTCCACAGGACTTGACTTGACTTGAC  
CTTCAAATATTTGTCTCATTTCATTACGCAAACACTACAAGTTACTT

>M6-PGSC0003DMG400018994-(rev)M6LRR-RLP\_1830

TCCATTTAGCCTCTATGCTATCGAGCTCAGAAGGTGCAGTTTGGGTCCCAAGTTTCCAACATGGCTAAAG  
ATTCAAAGCAACTTCAGTGGGTCACTCTACCAATGGCTCCATTTTCAGA

>M6-PGSC0003DMG400018994-(rev)M6LRR-RLP\_1891

TGGCTAAAGATTCAAAGCAACTTCAGTGGGTCACTCTACCAATGGCTCCATTTTCAGAACCTATACCTC  
CTTGGCTTTGGATGATGTGCTCACAATTTCAATTTGCTCGATCTATCAAAT

>M6-PGSC0003DMG400018994-(rev)M6LRR-RLP\_1952

CTATACCTCCTTGGCTTTGGATGATGTGCTCACAATTTCAATTTGCTCGATCTATCAAATAATTAATGGT  
GGAAGTCTACCGAGGATAGTAGATTTTCCATCGACATACCAAATCTGGA

>M6-PGSC0003DMG400018994-(rev)M6LRR-RLP\_2013

TTAAATTGGTGGAAGTCTACCGAGGATAGTAGATTTTCCATCGACATACCAAATCTGGACGGTGGGTTTC  
TATTTTAGTTACTATTATGGTGTCTGGTGGACTTGAGTTCCAATCACTT

>M6-PGSC0003DMG400018994-(rev)M6LRR-RLP\_2074

GTGGGTTTCTATTTTAGTTACTATTATGGTGTCTGGTGGACTTGAGTTCCAATCACTTCCATGGTTCTGTT  
ACCTCTTTGGCCAACTGTGACACATTTGAATCTTGCTAACAACACTGGTTT

>M6-PGSC0003DMG400018994-(rev)M6LRR-RLP\_2135

ATGGTTCGTTACCTCTTTGGCCAACTGTGACACATTTGAATCTTGCTAACAACACTGGTTTTTCAGGATACATA  
CCCTTAAACATTGGTCATGTGATGACAAAACACTTCAAGTGTTAGATCTTT

>M6-PGSC0003DMG400018994-(rev)M6LRR-RLP\_2196

AGGATACATACCTTAAACATTGGTCATGTGATGACAAAACACTTCAAGTGTTAGATCTTTCTGGAAATGCT  
TTTATAGGAACTATAACCATATTCCATAACAAGAGTCAAGCAGCTATTGAG

>M6-PGSC0003DMG400018994-(rev)M6LRR-RLP\_2257

GGAAATGCTTTTATAGGAACTATACCATATTCCATAACAAGAGTCAAGCAGCTATTGAGATTGGACCTTT  
CAGACAATCATTGTCTGGGAAGATTCTGATTGGTGGTATGATTTGCAA

>M6-PGSC0003DMG400018994-(rev)M6LRR-RLP\_2318

TGGACCTTTCAGACAATCATTGTCTGGGAAGATTCTGATTGGTGGTATGATTTGCAACAACCTCAAGT  
CATAGATTTGTCAGGGAATAATCTTTCAGGTACTATTCCTCCTTCAGTTT

>M6-PGSC0003DMG400018994-(rev)M6LRR-RLP\_2379

ACTTCAAGTCATAGATTTGTCAGGGAATAATCTTTCAGGTACTATTCCTCCTTCAGTTTGTTCACCACTTTC  
ACTTTTTTGGTTGAGATTATGCCGCAATAACCTTCTGGAGGGCTTCC

>M6-PGSC0003DMG400018994-(rev)M6LRR-RLP\_244

CTTGACTTGACCTTCAAATATTTGTCCTCATTTC AATTACGCAAAC TACAAGTTACTTGTAAGACAGTAG  
TGAAGCTGAATCATAAGGAGAAATATATGGTCCTCTGTTATGGGTTATC

>M6-PGSC0003DMG400018994-(rev)M6LRR-RLP\_2440

TCACCACTTTCACTTTTTGGTTGAGATTATGCCGCAATAACCTTCTGGAGGGCTTCCAAAATCATTGAG  
GAATTGCAATAGCTTGCTTGCCCTTGATATTGGAGAGAACAAAATCACT

>M6-PGSC0003DMG400018994-(rev)M6LRR-RLP\_2501

AATCATTGAGGAATTGCAATAGCTTGCTTGCCCTTGATATTGGAGAGAACAAAATCACTGGCACCATAACC  
GGAGTGGTTCGGAGAAAGTCTCTTATCTCTGCAAAGCTCAGAATGACAG

>M6-PGSC0003DMG400018994-(rev)M6LRR-RLP\_2562

CACCATACCGGAGTGGTTCGGAGAAAGTCTCTTATCTCTGCAAAGCTCAGAATGACAGGTAACATGAT  
TCATGGACGCATTCCACCACAAC TATGCCAACTTTCTAACCTCCAAATTCT

>M6-PGSC0003DMG400018994-(rev)M6LRR-RLP\_2623

AACATGATTCATGGACGCATTCCACCACAAC TATGCCAACTTTCTAACCTCCAAATTCTCCATCTTTCACAT  
AACAACTGACAGGTTCTATCCCTTCTTGCTGGGAACCTTGAGAGGT

>M6-PGSC0003DMG400018994-(rev)M6LRR-RLP\_2684

ATCTTTCACATAACAATCTGACAGGTTCTATCCCTTCTTGCTGGGAACCTTGAGAGGTCTCAAGTTGGTG  
AAATTTTACAAGTGGTTTCCCAACTACCTTTATTTTCAGTTATGTTTTTA

>M6-PGSC0003DMG400018994-(rev)M6LRR-RLP\_2745

CAAGTTGGTGAAATTTTACAAGTGGTTTCCCAACTACCTTTATTTTCAGTTATGTTTTTACACCCAAGATGG  
AGTTGGTTGAGAAAGGAACAAAGCAGACTTACACTTTTACCTTAGATCA

>M6-PGSC0003DMG400018994-(rev)M6LRR-RLP\_2806

CCCAAGATGGAGTTGGTTGAGAAAGGAACAAAGCAGACTTACACTTTTACCTTAGATCAAGTGAATCTT

ATTGATCTTTCCTGCAACAATCTTCAGGGTGAAATCCCAAATGAGATAATA

>M6-PGSC0003DMG400018994-(rev)M6LRR-RLP\_2867

TGAATCTTATTGATCTTTCCTGCAACAATCTTCAGGGTGAAATCCCAAATGAGATAATAGCTCTGTCAGCC

TTGAGCACTCTGAATTTATCTTGGAAACCAATTATCAGGAAGAATTCCAG

>M6-PGSC0003DMG400018994-(rev)M6LRR-RLP\_2989

GACATAGGGAGCATGCAACAATTGGAGACACTAGACCTTTCATCTAACCATCTCTCAGGTCCTATCCCAT

TAAGCATGGCATCCATCACTTCATTGAGTTATCTTAACTTGTCACATAAC

>M6-PGSC0003DMG400018994-(rev)M6LRR-RLP\_305

AAGACAGTAGTGAAGCTGAATCATAAGGAGAAATATATGGTCCTCTGTTATGGGTTATCTTTCTATATAA

ACAGGCCCAAATAACTAATGCTAGCAATATACAGTGCTTTAACTATAACC

>M6-PGSC0003DMG400018994-(rev)M6LRR-RLP\_3050

CTATCCCATTAAGCATGGCATCCATCACTTCATTGAGTTATCTTAACTTGTCACATAACAACCTTCATGGC

CCTATCCCATCAACAAACCAATTTGGAACCTTTACTGATCCTTCGTGTT

>M6-PGSC0003DMG400018994-(rev)M6LRR-RLP\_3111

CCTTCATGGCCCTATCCCATCAACAAACCAATTTGGAACCTTTACTGATCCTTCGTGTTTGAAGGTAATC

CAGAACTCTGTGGGAAACCATTGACCACCAATTGCTCCTTACCCAGGAA

>M6-PGSC0003DMG400018994-(rev)M6LRR-RLP\_3233

GAGAAATAGAAGAAGAAGATGATGATGAAATAAGGCTTTGTTTTTTGTGAGCGCGGGAGTGGGATTC

GTTGCCATGTTTTTGGCGACATTTATAAGCTTGACGATAAAGAAGTCGTGGG

>M6-PGSC0003DMG400018994-(rev)M6LRR-RLP\_3294

GGGATTCGTTGCCATGTTTTTGGCGACATTTATAAGCTTGACGATAAAGAAGTCGTGGGGATACTGCTG

CTTCATTTTCATGGAGGAAGTTGGAGAAAGAATTATCAGGTGCTGTATGGG

>M6-PGSC0003DMG400018994-(rev)M6LRR-RLP\_3355

TACTGCTGCTCCATTTTCATGGAGGAAGTTGGAGAAAGAATTATCAGGTGCTGTATGGGTTTCATGAATA

GGATTTTCAGCGTCACAAGGAACTAATTTCCATTGCATTATTGTTCTTTC

>M6-PGSC0003DMG400018994-(rev)M6LRR-RLP\_3399

CAGGTGCTGTATGGGTTTCATGAATAGGATTTTCAGCGTCACAAGGAACTAATTTCCATTGCATTATTGT

TCTTTCTGTTTTGATACTGTTGCAGTGAAAATATGGCAATCTTTGAAATT

>M6-PGSC0003DMG400018994-(rev)M6LRR-RLP\_366

TCTATATAAACAGGCCCAAATAACTAATGCTAGCAATATACAGTGCTTTAAACTATACCCATCGATCTCTA  
TTAGTATAAGATCAACTAAAATGGCATGTTGGAAAATTTTAGTTGCTCT

>M6-PGSC0003DMG400018994-(rev)M6LRR-RLP\_427

TCGATCTCTATTAGTATAAGATCAACTAAAATGGCATGTTGGAAAATTTAGTTGCTCTACTTGTTTTATT  
CTTCTTTCCTTCTCTACCTGTTTCAGTCAAAGCCATAAAAAGCTGTA

>M6-PGSC0003DMG400018994-(rev)M6LRR-RLP\_488

TTGTTTTATTTCTTCTTCTTCTCTACCTGTTTCAGTCAAAGCCATAAAAAGCTGTATCTTTACCTCTCAC  
AAACACTACTGAAGCCAAAGTGAGATGTGTTAAAAGTGAGAGGAATG

>M6-PGSC0003DMG400018994-(rev)M6LRR-RLP\_549

TTTACCTCTCACAAACTACTGAAGCCAAAGTGAGATGTGTTAAAAGTGAGAGGAATGCTCTATTAAG  
ATTCAAACAAGGTTTCACTGATCCCTCTGATCGACTGGCTTCTTGGGTTGG

>M6-PGSC0003DMG400018994-(rev)M6LRR-RLP\_61

TTTCTATTTTATTATGACTTTTTGAGATAATAACTAACTATTAGTTGAGTGAACATATGAGAAATCAAAGT  
CGTGATTGTCTCTAGTCTCTCCAATAAGGTATGCAGAGGACCACAATT

>M6-PGSC0003DMG400018994-(rev)M6LRR-RLP\_610

CTATTAAGATTCAAACAAGGTTTCACTGATCCCTCTGATCGACTGGCTTCTTGGGTTGGCAAAGAATGCT  
GCATCTGGAAAGGCATTTTTTTGTGACGCTGGTTATAATGTCATCAGGCTT

>M6-PGSC0003DMG400018994-(rev)M6LRR-RLP\_671

AAGAATGCTGCATCTGGAAAGGCATTTTTTTGTGACGCTGGTTATAATGTCATCAGGCTTGATCTCAATGA  
TAGAACAAACAATTGCTATTGGAAGAAAGTGGGATACTTGATTCCAGGCA

>M6-PGSC0003DMG400018994-(rev)M6LRR-RLP\_732

TCTCAATGATAGAACAACAATTGCTATTGGAAGAAAGTGGGATACTTGATTCCAGGCAATTCAACATG  
CTTGGGTGGCAACATAAGTTTTGATTTACTCGATTTGCATCACTTGGAGTA

>M6-PGSC0003DMG400018994-(rev)M6LRR-RLP\_793

TCAACATGCTTGGGTGGCAACATAAGTTTTGATTTACTCGATTTGCATCACTTGGAGTATTTAGACCTTGG  
TGGTAATGACTTCCAAGGACTTACCACTCCAATTTCTTGTCTTCTCTA

>M6-PGSC0003DMG400018994-(rev)M6LRR-RLP\_854

TAGACCTTGGTGGTAATGACTTCCAAGGACTTACCACTCCAATTTCTTGTCTTCTCTAAAGAAATTACAG  
TATCTTAACCTTTCTTTTTCATCTCTTATTGGTGTTCCTCCTTCACTTG

>M6-PGSC0003DMG400018994-(rev)M6LRR-RLP\_915

GAAATTACAGTATCTTAACCTTTCTTTTTTCATCTCTTATTGGTGTTCCCTCCTTCACTTGGAAATCTATCAAAT  
TTGCAGTATCTAAACTTCCGTGCGTGTTCCCTATCCTTTTCGATATTGT

>M6-PGSC0003DMG400018994-(rev)M6LRR-RLP\_976

AATCTATCAAATTTGCAGTATCTAAACTTCCGTGCGTGTTCCCTATCCTTTTCGATATTGTTGAAAGAAGTTG  
GGTCAAAGATTTTAATTGGGTTTCCGGTCTGTCTTCTTTGAAGTATCTT

>M6-PGSC0003DMG400019051-(rev)M6LRR-RLK\_1323

AACGTTCTTTTGGATGAAGATATGATGGCTCATGTTGGTGATTTTGAATATCTAAAATTTTAGCCATAA  
GCAAGTCCATGGCTTATACAGAGACATTGGGCACTCTTGGATATATTGCA

>M6-PGSC0003DMG400019062M6G-LecRK\_0

ATGGTTCTGTGTGGTATTATTTATATAATTTATCTGAAAAGAGTGGCAAGAAGTAAAGGTAACAATGTA  
GAATTTTCATCTGCTTTTTCTCAACTACTCCAACCTTTTGGATATCGTAATC

>M6-PGSC0003DMG400019062M6G-LecRK\_1008

TTTTCACCTTTGATTTGGTGGGTAAAAGATAGATATATATACATCTAAAACCTGGTATTAGTTCACTATAT  
GTATTGGTTTACACAAATTAGATGCTAAAATAACCTATTCTGGAACACT

>M6-PGSC0003DMG400019062M6G-LecRK\_1071

CACTATATGTATTGGTTTACACAAATTAGATGCTAAAATAACCTATTCTGGAACACTAAAAACAGTGGCT  
ATATGTCTCCGGAGTATGCATTGGAGGGACTCTTTTCAATCAAGTCTGAT

>M6-PGSC0003DMG400019062M6G-LecRK\_1134

AGTGGCTATATGTCTCCGGAGTATGCATTGGAGGGACTCTTTTCAATCAAGTCTGATGTATTTGCCTTCG  
GAGTAGTCCTACTCGAGATCATAAGTGGGAGGAGAAACATGGAATTTTTC

>M6-PGSC0003DMG400019062M6G-LecRK\_126

ATTGTTTTGATTATAGAAGCCAGAGAAATTGTTTTGGGAATGCCTATGGAGTACTTGCCTCATAGAGATA  
GTTTTGATGAAGATTTAATCACGGAAGATGATAAGAAACGGATTGATGTC

>M6-PGSC0003DMG400019062M6G-LecRK\_1260

GTAAACCTCATTGGTCATGTAAGTACCAAAATTTCCCCCATTAAATAAACATCTCATTCTGTTTAAAGCTTT  
CATTGACTCAAATTACTTATCACACACAGGTATGGAGACTGTGGATG

>M6-PGSC0003DMG400019062M6G-LecRK\_1323

TAAAGCTTTCATTGACTCAAATTACTTATCACACACAGGTATGGAGACTGTGGATGAAAGATAGTGCAT

TAGAAATGATGGATCAAACCATAGTTGAGTCGTGCGATGAAAGTGAAGTG

>M6-PGSC0003DMG400019062M6G-LecRK\_1386

AGTGCATTAGAAATGATGGATCAAACCATAGTTGAGTCGTGCGATGAAAGTGAAGTGCTAAAGTGCCT  
GAATGTGGCACTCCTATGTGTTCAAGAAGATCCAGCTGAGCGTCCTGTAATG

>M6-PGSC0003DMG400019062M6G-LecRK\_1512

GTTGTTTTTATGCTTGGAGGTGAAAGCATAACACTACCAAGACCAAATCAACCAGCTTTTATAGCACGAA  
GAAATAGTGCTGGTGAAGTACATCTTCTTCGTCTTCTAAGCTATAACAAC

>M6-PGSC0003DMG400019062M6G-LecRK\_1557

AATCAACCAGCTTTTATAGCACGAAGAAATAGTGCTGGTGAAGTACATCTTCTTCGTCTTCTAAGCTAT  
ACAACACTTCCAACAATGGGTTGACAATAACTCAACAAGTAGGCCGATGA

>M6-PGSC0003DMG400019062M6G-LecRK\_189

AGAGATAGTTTTGATGAAGATTTAATCACGGAAGATGATAAGAAACGGATTGATGTCCCGTTTTTCAGC  
TTCAATAGCATACTAGTTGCTACCGAAAATTCTCAAATGCAAGTAAGCTC

>M6-PGSC0003DMG400019062M6G-LecRK\_252

TTCAGCTTCAATAGCATACTAGTTGCTACCGAAAATTCTCAAATGCAAGTAAGCTCGGGAGAGGTGGA  
TTTGGACCTGTTTATAAGGTTTTTGCAACTTTCTTTTTTTTTCTTCTTCT

>M6-PGSC0003DMG400019062M6G-LecRK\_315

GGTGGATTTGGACCTGTTTATAAGGTTTTTGCAACTTTCTTTTTTTTTCTTCTTCTGTTCTAAGTTGTTTTA  
CCATTCAGATTTTTTTCTTTCGTTTTCGTTATATAACAGTCTGGAGA

>M6-PGSC0003DMG400019062M6G-LecRK\_378

AGTTGTTTTACCATTCAGATTTTTTTCTTTCGTTTTCGTTATATAACAGTCTGGAGATATATTTATGCAGGG  
TACGTTTCTCGGAGGTACAGATATGGCAGTTAAAAGGTTGTCAAGTAA

>M6-PGSC0003DMG400019062M6G-LecRK\_441

TATGCAGGGTACGTTTCTCGGAGGTACAGATATGGCAGTTAAAAGGTTGTCAAGTAATTCTGGACAAGG  
TGTTGAAGAATTTAAACTGAAGTAATGTTGATTGCCAAACTGCAGCACAG

>M6-PGSC0003DMG400019062M6G-LecRK\_504

ACAAGGTGTTGAAGAATTTAAACTGAAGTAATGTTGATTGCCAAACTGCAGCACAGAAATTTAGTTAG  
GCTTCTAGGCTATTGTGTTGAGAGAAATGAAAAGATTTTGTATATGAATA

>M6-PGSC0003DMG400019062M6G-LecRK\_63



AATGTAGAATTTTCATCTGCTTTTTCTCAACTACTCCAACCTTTGGATATCGTAATCACTTCAATTGTTTTG  
ATTATAGAAGCCAGAGAAATTGTTTTGGGAATGCCTATGGAGTACTTG

>M6-PGSC0003DMG400019062M6G-LecRK\_630

CAACAAAAGCTTGGATACGTTTCTATTTCGGTTAGTATACTTCCCTCCCTACCATGAAGCTCGTTGCAGTAA  
TAGTTTTATGATTGATTCTCTCTGAATTTATCTTACAAATCTTGAAATT

>M6-PGSC0003DMG400019062M6G-LecRK\_693

TGCAGTAATAGTTTTATGATTGATTCTCTCTGAATTTATCTTACAAATCTTGAAATTAGATCATGCATTCTG  
TCGATTACTGGACTGGAGGATTCTTTTTGAAATTATATTGGGTATTGC

>M6-PGSC0003DMG400019062M6G-LecRK\_819

GTTACTTTATCTTCACCAAGACTCGAGGCTAAGGATCATTATAGAGATCTAAAGACGAGTAACATATTG  
TTAGACCAAGAAATGAATGCCAAAATATCAGATTTTGGCTTGGCAAGGAT

>M6-PGSC0003DMG400019062M6G-LecRK\_882

CATATTGTTAGACCAAGAAATGAATGCCAAAATATCAGATTTTGGCTTGGCAAGGATCGTTGAAGGCAA  
AAATACAGAAGCCAATACTAACAAGTCGTTGGAACATAGTAAGTCTCTCG

>M6-PGSC0003DMG400019062M6G-LecRK\_945

AGGCAAAAATACAGAAGCCAATACTAACAAGTCGTTGGAACATAGTAAGTCTCTCGGTTCTGTTTTAC  
CTTTGATTTGGTGGGTAAAAGATAGATATATATACATCTAAAACCTGGTA

>M6-PGSC0003DMG400019072-(rev)M6LRR-RLP\_124

AAGTAGATGATCCCTTGGATATCCCTCTTCTTGGGTTGTCGAAAAGATTGTTGTGAATGGGATGGAGT  
TGTGTGCAACAATCTAACTCGTCGTGTGATTGAACTACGCATAAGTTATC

>M6-PGSC0003DMG400019072-(rev)M6LRR-RLP\_2108

TGATGAGTTAAATTATCCTACTTTTTGGGAGTTTTGAGAGAGAGTGCCATAGTGACGAATAAAGGCAA  
CAGGTACCAGTATGACACCATTTTGGCGTTGTTTACAAGTATGGACATGTC

>M6-PGSC0003DMG400019167-(rev)M6RLKWAX-EGF\_0

TACACAGGTATAGGAGCTGTTGGCTTTATATCCCTAGTGGTTGTAACAATTTGGCTCTGTTTCAGAATAA  
GGAAAAGGAAATTGATTGAAGTCAGGGAGAAATTCTTCTACAAAATGGT

>M6-PGSC0003DMG400019167-(rev)M6RLKWAX-EGF\_1008

GAAGGAAGTGGCTATTCAACTTGAAGTTTGGAGGAAGGTAAGTGGAGTTTCTTGGTCTAATCAACATGT  
ACACGAAGATAATGATTTATCAGATCTTTACACAGTTCCAATGGACGCCTA

>M6-PGSC0003DMG400019167-(rev)M6RLKWAX-EGF\_1069  
CAACATGTACACGAAGATAATGATTTATCAGATCTTTACACAGTTCCAATGGACGCCTATGGAAAAAAC  
CCCAATTCAGATAGTTATCAATCATGCATCCTACTTACAATCTAAGTTGA

>M6-PGSC0003DMG400019167-(rev)M6RLKWAX-EGF\_126  
TTATTGAAACACAGAATCTCCACTAACGACGGTGGTGTGAAAGCAATAAAAATTTTCACAGCTGAGGAG  
CTCAAGAAAGCTACAGACAATTATGCACATGACAAAATTCTTGGTCGCGGT

>M6-PGSC0003DMG400019167-(rev)M6RLKWAX-EGF\_189  
GAGGAGCTCAAGAAAGCTACAGACAATTATGCACATGACAAAATTCTTGGTCGCGGTGGCAATGCGATT  
GTATATAGAGGTGTGCGAAGTGATAATCGCATAGTTGCAATTAaaaaaATC

>M6-PGSC0003DMG400019167-(rev)M6RLKWAX-EGF\_252  
GCGATTGTATATAGAGGTGTGCGAAGTGATAATCGCATAGTTGCAATTAaaaaaATCTAGAATTGTGGA  
TGAGAGCCAAATTGAGCAGTTTATCAATGAGGTGCTTATTCTCACTCAAAT

>M6-PGSC0003DMG400019167-(rev)M6RLKWAX-EGF\_378  
TCGAAAAGTGGTGAAGCTCTTTGGGTGTTGTTTGAAGATGAAGTTCCTTTATTGGTTTATGAGTATGTA  
TCTGAAGGAACTCTTTACGAGCACATTCACAATCAACGTGGAGGGGGTTG

>M6-PGSC0003DMG400019167-(rev)M6RLKWAX-EGF\_441  
GTATGTATCTGAAGGAACTCTTTACGAGCACATTCACAATCAACGTGGAGGGGGTTGGTTAAATTGGCA  
AAATCGGTTGAGAATTGCCATAGAGACAGCCACTGCACTTGCTTACCTTCA

>M6-PGSC0003DMG400019167-(rev)M6RLKWAX-EGF\_504  
TTGGCAAATCGGTTGAGAATTGCCATAGAGACAGCCACTGCACTTGCTTACCTTCATTCATTTGCCTCG  
ATGCCTATAATTCATCGCGATGTCAAGTCTTCCAACATATTGTTAGATGA

>M6-PGSC0003DMG400019167-(rev)M6RLKWAX-EGF\_567  
TGCCTCGATGCCTATAATTCATCGCGATGTCAAGTCTTCCAACATATTGTTAGATGAATTTCCACAGCTA  
AAGTGGCTGATTTTGGAGCTTCAAGGCTCATCCCTTTGGATCAAACACG

>M6-PGSC0003DMG400019167-(rev)M6RLKWAX-EGF\_63  
AGAATAAGGAAAAGGAAATTGATTGAAGTCAGGGAGAAATTCTTCTACAAAATGGTGGTTTATTATTG  
AAACACAGAATCTCCACTAACGACGGTGGTGTGAAAGCAATAAAAATTTTC

>M6-PGSC0003DMG400019167-(rev)M6RLKWAX-EGF\_630  
CACAGCTAAAGTGGCTGATTTTGGAGCTTCAAGGCTCATCCCTTTGGATCAAACACGTGTGGCTACATTA

GTTCAAGGTACATTTGGGTA CTTGGATCCTGAATATTTTTTCAAAGTCA

>M6-PGSC0003DMG400019167-(rev)M6RLKWAX-EGF\_693

TACATTAGTTCAAGGTACATTTGGGTA CTTGGATCCTGAATATTTTTTCAAAGTCAATTGACGGATAAA

AGTGATGTTTACAGCTTTGGAGTAGTTCTGGCATAACTTCTAACAGGGTT

>M6-PGSC0003DMG400019167-(rev)M6RLKWAX-EGF\_756

GGATAAAAGTGATGTTTACAGCTTTGGAGTAGTTCTGGCATAACTTCTAACAGGGTTAAAGCCAGTTTCT

GGAGATAGAAAACGATGATCAAAAAGATTTGGCTGATTATTTGTTTCATC

>M6-PGSC0003DMG400019167-(rev)M6RLKWAX-EGF\_819

AGTTTCTGGAGATAGAAAACGATGATCAAAAAGATTTGGCTGATTATTTGTTTCATCCATAGATAATAAT

CGCTTATTTCAAATTCTTGATCGTCGTGTTTTGCGAGAAGGAAATCTTGA

>M6-PGSC0003DMG400019167-(rev)M6RLKWAX-EGF\_882

TAATAATCGCTTATTTCAAATTCTTGATCGTCGTGTTTTGCGAGAAGGAAATCTTGAGCAACTTCAACAG

ATGGCTGAGCTGGTGAAGAATTGTCTTCAATTGCAGGGAGAAGATAGGCC

>M6-PGSC0003DMG400019167-(rev)M6RLKWAX-EGF\_945

TCAACAGATGGCTGAGCTGGTGAAGAATTGTCTTCAATTGCAGGGAGAAGATAGGCCTACAATGAAGG

AAGTGGCTATTCAACTTGAAGGTTTGAGGAAGGTA ACTGGAGTTTCTTGCTC

>M6-PGSC0003DMG400019170-(rev)M6RLKWAX-EGF\_0

AGAAAATGTCTGGGAAGCTTGGAAAGTCTATTTCAA ACTATTTTTTGCTCACTGATAATTACTTTATTTATC

CAAATTTGAATATTACATTTTTCTCTTATATAACAGTACATCATATCC

>M6-PGSC0003DMG400019170-(rev)M6RLKWAX-EGF\_1008

GTCCATGCCTATCATT CATAGAGACGTTAAGTCTGCCAACATATTGTTGGATAATGTTTACACAGCTAAG

GTGGCAGATTTTGGAGCATCAAGGTTAATTCCTCTAGATCAGACACATGT

>M6-PGSC0003DMG400019170-(rev)M6RLKWAX-EGF\_1071

AGCTAAGGTGGCAGATTTTGGAGCATCAAGGTTAATTCCTCTAGATCAGACACATGTGGCTACATTGGTT

CTAGGGACATCAGGTTATTTGGATCCAGAATATTCTCGCACGAGTCAATT

>M6-PGSC0003DMG400019170-(rev)M6RLKWAX-EGF\_1134

ATTGGTTCTAGGGACATCAGGTTATTTGGATCCAGAATATTCTCGCACGAGTCAATTAACGGAGAAAAG

TGATGTTTACAGCTTTGGAGTAGTTCTGGCAGAACTTTTGACAGGGTTGAA

>M6-PGSC0003DMG400019170-(rev)M6RLKWAX-EGF\_1197

GAAAAGTGATGTTTACAGCTTTGGAGTAGTTCTGGCAGAACTTTTGACAGGGTTGAAACCTATTATTAGA  
GCTAGAAGTGAAGAGAACAAGAATTTGGCCGATTTTTTTGTGTTGTCCAT

>M6-PGSC0003DMG400019170-(rev)M6RLKWAX-EGF\_126

CATAAGTGACAAAACAGTACTTTTGTTCACATATTCTTATGTATTTTTTTATTATGAATGTGGGAAAAC  
CCAATATTTTCGTATATATGATTATTATGATCTATGACCAAGAACAAC

>M6-PGSC0003DMG400019170-(rev)M6RLKWAX-EGF\_1260

TATTAGAGCTAGAAGTGAAGAGAACAAGAATTTGGCCGATTTTTTTGTGTTGTCCATGAACTCGAATAGC  
TTGTTTCATATTATTGATCATCGTGTTCGCGGAAGGGAGTCTTGAGCA

>M6-PGSC0003DMG400019170-(rev)M6RLKWAX-EGF\_1323

GAATAGCTTGTTTCATATTATTGATCATCGTGTTCGCGGAAGGGAGTCTTGAGCAACTCCAAAAGATG  
GCTGAGCTGGTGAAGAACTGCCTTCAGCCGCATGGAGAAGATAGGCCTAC

>M6-PGSC0003DMG400019170-(rev)M6RLKWAX-EGF\_1449

GGATGTGTCTATTGAACTTGAAGTTTGAGGAAGGTAACCGGAATCTCTTCATCTAGTCAACATGAACA  
GGAAGAATATGATCAGGATGAAAGTTCAGATCTGTACACAGTCCCATTA

>M6-PGSC0003DMG400019170-(rev)M6RLKWAX-EGF\_1506

TCAACATGAACAGGAAGAATATGATCAGGATGAAAGTTCAGATCTGTACACAGTCCCATTAACCTCTAT  
GAAAATACCCCAATTCAGATAGTTCTCGTATAATGCATCCTACATACAG

>M6-PGSC0003DMG400019170-(rev)M6RLKWAX-EGF\_189

GGGAAAACCTCCAATATTTTCGTATATATGATTATTATGATCTATGACCAAGAACAACCTCAATTTTATTTTT  
ACAGAAATCCAGATTCCAGACTATGTTTGAATAATACAGAACTTGCTTT

>M6-PGSC0003DMG400019170-(rev)M6RLKWAX-EGF\_252

TATTTTTTACAGAAATCCAGATTCCAGACTATGTTTGAATAATACAGAACTTGCTTTTCATATGTTTGAAA  
AAGCCTCTAGGAACACCAATATGTTAGCATGTAAATTCAACAGTAAAAT

>M6-PGSC0003DMG400019170-(rev)M6RLKWAX-EGF\_315

GTTTGAAAAAGCCTCTAGGAACACCAATATGTTAGCATGTAAATTCAACAGTAAAATGGAAGTGTACAA  
TCCTGAGCTTTTGTTCAGCTTAGTTGAAATAGGCAATAAATGTTGAACTC

>M6-PGSC0003DMG400019170-(rev)M6RLKWAX-EGF\_378

GTACAATCCTGAGCTTTTGTTCAGCTTAGTTGAAATAGGCAATAAATGTTGAACTCTTCTACTTACACAG  
GTACTGGAGTTGGGTCAATCTCCCTAGTGGTTGTGATAACATTGCTCTA

>M6-PGSC0003DMG400019170-(rev)M6RLKWAX-EGF\_441

TTACACAGGTACTGGAGTTGGGTCAATCTCCCTAGTGGTTGTGATAACATTGCTCTACTTTTGCATCAAG  
AAAAGAAAGTTGATTCAAGCCAGGGAGAAGTTTTTCCAACAAAACGGTGG

>M6-PGSC0003DMG400019170-(rev)M6RLKWAX-EGF\_504

CATCAAGAAAAGAAAGTTGATTCAAGCCAGGGAGAAGTTTTTCCAACAAAACGGTGGTTTACTATTGAA  
GGAAAGGATATCCACAAAAGAGGGCGCTGTGGAAGCAACAAGAATTTTTAC

>M6-PGSC0003DMG400019170-(rev)M6RLKWAX-EGF\_567

ATTGAAGGAAAGGATATCCACAAAAGAGGGCGCTGTGGAAGCAACAAGAATTTTTACAGCTGAGGAGC  
TCAAGAAAGCTACAAACAATTATGCCAATGACAGAATTCTTGGTCATGGTGG

>M6-PGSC0003DMG400019170-(rev)M6RLKWAX-EGF\_63

TATTTATCCAAAATTTGAATATTACATTTTTCTTTATATAACAGTACATCATATCCGCACCACATAAGTGA  
CAAACAGTACTTTTGTTCACATATTCTTATGTATTTTTTTATTAT

>M6-PGSC0003DMG400019170-(rev)M6RLKWAX-EGF\_693

GATTGTATATAGAGGTGTGCTACGTGATACTCGCATAGTTGCCATTAAGAAATCTAGAACTGTGGATGA  
GAGTCAAATTGAGCAGTTTATCAATGAGGTGCTTATTCTCACTCAAATCAA

>M6-PGSC0003DMG400019170-(rev)M6RLKWAX-EGF\_756

GGATGAGAGTCAAATTGAGCAGTTTATCAATGAGGTGCTTATTCTCACTCAAATCAACCATCGAAATGTG  
GTGAAGTTCTTTGGGTGTTGTTTGAAGATGAAGTTCCTTTATTGGTTTA

>M6-PGSC0003DMG400019170-(rev)M6RLKWAX-EGF\_945

GCAAACCGTTTGAGAATTGCAGCAGAGATAGCCACTACACTTGCTTATCTTCATTCATTTGCGTCCATG  
CCTATCATTATAGAGACGTTAAGTCTGCCAACATATTGTTGGATAATGT

>M6-PGSC0003DMG400019171-(rev)M6RLKWAX-EGF\_0

TTCCAACAAATTTTCAGAATCAAGTCCGTATAGTTTCTCTGCGCTGAACAAGTTTACTGTAGTTGGTTGCG  
ATGACTACGGTTCATCTTGGGGCCTAACAACTTTGAGTATGGCTGCAA

>M6-PGSC0003DMG400019171-(rev)M6RLKWAX-EGF\_1054

TATTGTTTTCTGTGCTAGAAATGACTGGAGTGGGGAGCTTGAGTTATATTTCCAACATTTTTGCAAAC  
TTATTTCTTTATTTAACCAAGCTTTGAGAATTACTTTTGTTCCTCCATAA

>M6-PGSC0003DMG400019171-(rev)M6RLKWAX-EGF\_1116

TTGCAAACCTATTTCTTTATTTAACCAAGCTTTGAGAATTACTTTTGTTCCTCCATAATCTTTTGTTCCTTT

ATTATGAATTAAGAACTCCAAATTTGGTATTTATATGGATGATT

>M6-PGSC0003DMG400019171-(rev)M6RLKWAX-EGF\_1178

TTGTTTTTTTTATTATGAATTAAGAACTCCAAATTTGGTATTTATATGGATGATTATGGTCTAAGACC

AAGATCAAACCTCAATTCTATTTCTTCTGAAATCCGGACTACGTTTGAA

>M6-PGSC0003DMG400019171-(rev)M6RLKWAX-EGF\_1240

TCTAAGACCAAGATCAAACCTCAATTCTATTTCTTCTGAAATCCGGACTACGTTTGAATATGACATAATGT

GTTGTGACTTAAAAGTTTTATTCCACTGATTATTCAGGTATCGGAATCG

>M6-PGSC0003DMG400019171-(rev)M6RLKWAX-EGF\_1302

ACATAATGTGTTGTGACTTAAAAGTTTTATTCCACTGATTATTCAGGTATCGGAATCGGCTTTATCTGCCT

AGTGGTTGGGGTAACCTGGCTCTATTTTCATCATCAATAAAAGAAAATTG

>M6-PGSC0003DMG400019171-(rev)M6RLKWAX-EGF\_1364

TATCTGCCTAGTGGTTGGGGTAACCTGGCTCTATTTTCATCATCAATAAAAGAAAATTGGTTAAAGTCAGA

GAGAAGTTCTTCCAACAAAATGGTGGTTTATTATTGAAACACAGAATGTC

>M6-PGSC0003DMG400019171-(rev)M6RLKWAX-EGF\_1426

AAGTCAGAGAGAAGTTCTTCCAACAAAATGGTGGTTTATTATTGAAACACAGAATGTCTGCTAAAGAAA

GCGGTGTGGAAGAAACAAAATATTTACAGCTGAGGAGCTTGTGGCGGCAA

>M6-PGSC0003DMG400019171-(rev)M6RLKWAX-EGF\_1488

AAAGAAAGCGGTGTGGAAGAAACAAAATATTTACAGCTGAGGAGCTTGTGGCGGCAATGGGATTGTG

TATAAAGGTGTGCTACATGATACTCACGTAGTTGCCATTAATAAATCTAGAA

>M6-PGSC0003DMG400019171-(rev)M6RLKWAX-EGF\_1550

ATTGTGTATAAAGGTGTGCTACATGATACTCACGTAGTTGCCATTAATAAATCTAGAAATTGTGGACGAG

AGTCAAATTGACCAATTTATCAATGAGGTAGTCATTCTTACTCAAATCAAC

>M6-PGSC0003DMG400019171-(rev)M6RLKWAX-EGF\_1612

GGACGAGAGTCAAATTGACCAATTTATCAATGAGGTAGTCATTCTTACTCAAATCAACCATCGAAACGTG

GTAAGACTCTTTGGATGTTGTTTGAAGATGAAGTTCCTTTATTGGTTTA

>M6-PGSC0003DMG400019171-(rev)M6RLKWAX-EGF\_1674

GAAACGTGGTAAGACTCTTTGGATGTTGTTTGAAGATGAAGTTCCTTTATTGGTTTATGAGTATGTCTC

TGAAGGAAATCTTTTCGAGCACATTCACAACCAACGTGGAGCGGCTTGGT

>M6-PGSC0003DMG400019171-(rev)M6RLKWAX-EGF\_1798

TTGGCAAACCGTTTGAGAATTGCAGCAGAGATAGCCACTACACTTGCTTATCTTCATTCATTTGCGTCCA  
TGTCCATGCCTATAATTCATAGGGATGTCAAGTCCGCCAATATATTGAT

>M6-PGSC0003DMG400019171-(rev)M6RLKWAX-EGF\_186

GAAACAGATACCCAAGGGCTTGAAATACTATAGCACAACCATGTCTAGCACGAGAAACCATACCGATGT  
TTTGTCTTCAATTTATGTGGGTATGCGTTTCTGGGCGAGGCAGATAGCTT

>M6-PGSC0003DMG400019171-(rev)M6RLKWAX-EGF\_1860

TTGCGTCCATGTCCATGCCTATAATTCATAGGGATGTCAAGTCCGCCAATATATTGATAGATAATGTTTAC  
ACAGCTAAAGTGGCAGATTTTGGAGCTTCAAGATTAATTCCTTTGGATC

>M6-PGSC0003DMG400019171-(rev)M6RLKWAX-EGF\_1922

AATGTTTACACAGCTAAAGTGGCAGATTTTGGAGCTTCAAGATTAATTCCTTTGGATCAAACACGTGTGG  
CTACTTTGGTTCTAGGGACAACAGGGTACTTGGATCCTGAATATTTTCGC

>M6-PGSC0003DMG400019171-(rev)M6RLKWAX-EGF\_1984

ACGTGTGGCTACTTTGGTTCTAGGGACAACAGGGTACTTGGATCCTGAATATTTTCGCACAAGTCAACTG  
ACTGAGAAAAGTGATGTTTACAGCTTTGGAGTAGTTCTTGCAGAACTTGT

>M6-PGSC0003DMG400019171-(rev)M6RLKWAX-EGF\_2046

GTCAACTGACTGAGAAAAGTGATGTTTACAGCTTTGGAGTAGTTCTTGCAGAACTTGTGACAGGGTTGA  
AACCTATATTTAAAGGCAGAAACGATGAGCAAAGAATTTGGCTGATTATT

>M6-PGSC0003DMG400019171-(rev)M6RLKWAX-EGF\_2108

GGGTTGAAACCTATATTTAAAGGCAGAAACGATGAGCAAAGAATTTGGCTGATTATTTGTTTCATCTG  
TGAATAACAATTGCTTATTTCAAATTCTTGATCATGTTTTGCAAGAAGAG

>M6-PGSC0003DMG400019171-(rev)M6RLKWAX-EGF\_2170

TTCATCTGTGAATAACAATTGCTTATTTCAAATTCTTGATCATGTTTTGCAAGAAGAGAATCTCGAGCAAC  
TCCAAAAGATGGCTGAGCTGGTGAAGAACTGTCTTCTGCCGCTTGGAGA

>M6-PGSC0003DMG400019171-(rev)M6RLKWAX-EGF\_2232

TCGAGCAACTCCAAAAGATGGCTGAGCTGGTGAAGAACTGTCTTCTGCCGCTTGGAGAAGAAAGGCCT  
ACAATCAAGGAAGTGGCTATTGAACTTGAAGGTTTGGAGGAAGTAACTGGGA

>M6-PGSC0003DMG400019171-(rev)M6RLKWAX-EGF\_2294

AGGCCTACAATCAAGGAAGTGGCTATTGAACTTGAAGGTTTGGAGGAAGTAACTGGGATCTCTTCGTTT  
AATCAACATAGGCAGGGAGATAATGATCAGGATGAACCAGTTACTTACACA

>M6-PGSC0003DMG400019171-(rev)M6RLKWAX-EGF\_248

CCGATGTTTTGTCCTTCAATTTATGTGGGTATGCGTTTCTGGGCGAGGCAGATAGCTTCCATTTCCGGGG  
CTTGCCAGATCTAGGTGATAATTATACTATTGATATTTTTTTATGAGAGG

>M6-PGSC0003DMG400019171-(rev)M6RLKWAX-EGF\_310

TTCCGGGGCTTGCCAGATCTAGGTGATAATTATACTATTGATATTTTTTTATGAGAGGTTAAAGCCACTG  
TTCCCATTGTGCTGGATTGGGCTATCAGGAATCTTACTAGCGCGCAAGC

>M6-PGSC0003DMG400019171-(rev)M6RLKWAX-EGF\_372

AAGCCACTGTTCCATTGTGCTGGATTGGGCTATCAGGAATCTTACTAGCGCGCAAGCTCTGAAAAGCG  
TGGATTATGCTTGCAGTAAAAATAGCCACTGTGTTGATTCAGATACTGGTC

>M6-PGSC0003DMG400019171-(rev)M6RLKWAX-EGF\_496

TGGCTACCGCTGCAGCTGTAATACAGGTTATCATGGCAATCGTTATCTCAATCAAGGCTGCCAAGGTATA  
TATATATATATAAAGGATCATTTCCTCAATGAAAGCTATTTTATGCCATT

>M6-PGSC0003DMG400019171-(rev)M6RLKWAX-EGF\_558

AAGGTATATATATATATAAAGGATCATTTCCTCAATGAAAGCTATTTTATGCCATTGATCAACTTATC  
ACAAGCTTTGATATAACGGTGTCTATTTATTTGTTTTTTTTTCAGATA

>M6-PGSC0003DMG400019171-(rev)M6RLKWAX-EGF\_620

CAACTTATCACAAGCTTTGATATAACGGTGTCTATTTATTTGTTTTTTTTTCAGATATTGATGAATGTGCT  
GATCCAAGCACCAATTCGTGTGAAAAGATCTGCACAAACACCCCAGGG

>M6-PGSC0003DMG400019171-(rev)M6RLKWAX-EGF\_744

TCTATTGTTCTTGCCCCGATGGATATACCGATGATGGCAGCAAGGATGGTCGTAGTTGTATTCTCCCAA  
TAATCAGTTCCCATGGATCAAGTTCTCTCTAGGTAATATCTTGAAAACC

>M6-PGSC0003DMG400019171-(rev)M6RLKWAX-EGF\_806

CCTCCAATAATCAGTTCCCATGGATCAAGTTCTCTCTAGGTAATATCTTGAAAACCATAACCACAAATA  
TCCATTTTACGTGATTTTGTGACGACCAAAAAAATCGTGGTCCAAAA

>M6-PGSC0003DMG400019172-(rev)M6RLKWAX-EGF\_0

GTATTTCTTATAGAGAATTAAGAAGAACTCCAAATTTGGTATTTATACTGATGATTATGGTCTAAGACCAA  
GATCAAACCTCAACTCTTTTTCTTCTGAAATCTGGACTATGTTTGAATTA

>M6-PGSC0003DMG400019172-(rev)M6RLKWAX-EGF\_1024

TTGCTTCATCCATGAATAAGAATAGCTTATTTCAAATCTTGATCGCCGTGTTTTGCAAGAAGGGAATTTT



GAGCAACTTCAAAAGATGGCTGAGCTGGTGAAGAACTGTCTTCACTTGC

>M6-PGSC0003DMG400019172-(rev)M6RLKWAX-EGF\_1152

GATAGGCCTACAATGAAGGAAGTGGCTATTGAACTGAAGGTTTGAGGACGTTTACTGGAATCTCTTTG

TTAATCAACATGGACAGAGAGATAATAATCAGGATGAATTATCAGATCTT

>M6-PGSC0003DMG400019172-(rev)M6RLKWAX-EGF\_1216

CTTTGTTTAATCAACATGGACAGAGAGATAATAATCAGGATGAATTATCAGATCTTTACGCAGTTCGCTT

AGACTCCATACCCCAATTTAGATAGTTCTCACACAATGCATCCTACATA

>M6-PGSC0003DMG400019172-(rev)M6RLKWAX-EGF\_128

ATGTTTGAAGCTATGAAAGTTAAATTCCAATAATTATCAGGTAGTGAATCGGCTTTATCTCCTTAGTG

GTTGGGATAACCTGGCTCTATTTGAGCATCAAGAAAAGAAAATTGATTAG

>M6-PGSC0003DMG400019172-(rev)M6RLKWAX-EGF\_1280

TCGCTTAGACTCCATACCCCAATTTAGATAGTTCTCACACAATGCATCCTACATACAGTCCAAGTTGATG

TTATGTAGGCTCCTTTCTTTTTCTCTCAAATTTAGATTTTTCTTTAA

>M6-PGSC0003DMG400019172-(rev)M6RLKWAX-EGF\_1335

ACAGTCCAAGTTGATGTTATGTAGGCTCCTTTCTTTTTCTCTCAAATTTAGATTTTTCTTTAAGATACAA

TGTTGGAGATTTTTGCAGATATCATATATAGAACCTTTTGATGATAAG

>M6-PGSC0003DMG400019172-(rev)M6RLKWAX-EGF\_192

TTAGTGGTTGGGATAACCTGGCTCTATTTGAGCATCAAGAAAAGAAAATTGATTAGAGTCAGAGAGAAG

TTCTTCCAACAAAATGGTGGTTTATTATTGAAACAGAGAATCTCCACTAAA

>M6-PGSC0003DMG400019172-(rev)M6RLKWAX-EGF\_256

AGAAGTTCTTCCAACAAAATGGTGGTTTATTATTGAAACAGAGAATCTCCACTAAAGAGGGCGGTGTGG

AAGCTACAAGAATATTTACAGCTGAGGAGCTCAAGAAAGCTACAAACAATT

>M6-PGSC0003DMG400019172-(rev)M6RLKWAX-EGF\_320

TGTGGAAGCTACAAGAATATTTACAGCTGAGGAGCTCAAGAAAGCTACAAACAATTATGCCAATGATAG

AATTCTTGGTCGTGGTGGTAATGGGATTGTATATAAAGGTGTGCTACGTGA

>M6-PGSC0003DMG400019172-(rev)M6RLKWAX-EGF\_384

GATAGAATTCTTGGTCGTGGTGGTAATGGGATTGTATATAAAGGTGTGCTACGTGACACTCGCATAGTT

GCCATTAAGAAATCTAGAATTGTGGACGAGAGTCAAATTGACCAATTTATC

>M6-PGSC0003DMG400019172-(rev)M6RLKWAX-EGF\_448

TAGTTGCCATTAAGAAATCTAGAATTGTGGACGAGAGTCAAATTGACCAATTTATCAATGAAGTGGTCAT  
TCTTACACAAATCAACCATCGAAATGTGGTAAGATTCGTTGGGTGTTGTT

>M6-PGSC0003DMG400019172-(rev)M6RLKWAX-EGF\_512

GGTCATTCTTACACAAATCAACCATCGAAATGTGGTAAGATTCGTTGGGTGTTGTTTGGGAAGATGAAGTT  
CCTTTACTGGTTTATGAGTATGTCTCTGAAGGAACTCTTTACGAGCACAT

>M6-PGSC0003DMG400019172-(rev)M6RLKWAX-EGF\_64

AGACCAAGATCAAACCTCAACTCTTTTTCTTCTGAAATCTGGACTATGTTTGAATTATACATAATATGTTTG  
AAGCTATGAAAGTTAAATTCCACTAATTATTCAGGTAGTGGAATCGGCT

>M6-PGSC0003DMG400019172-(rev)M6RLKWAX-EGF\_704

ACTTGCTTACCTTCACTCATTTCGTCCTATGCCTATAATTCATAGGGATGTTAAGTCTGCCAACATATTGTT  
AGATAATGTTTACACAGCTAAAGTGGCAGATTTTGGGGCTTCAAAGTT

>M6-PGSC0003DMG400019172-(rev)M6RLKWAX-EGF\_768

ATATTGTTAGATAATGTTTACACAGCTAAAGTGGCAGATTTTGGGGCTTCAAAGTTAATTCCTCTGGATC  
AGTCACATGTGGCTACATCAGTTCTAGGGACATCAGGGTACTTGGATCCT

>M6-PGSC0003DMG400019172-(rev)M6RLKWAX-EGF\_832

TGGATCAGTCACATGTGGCTACATCAGTTCTAGGGACATCAGGGTACTTGGATCCTGAATATTTTCGTAC  
AAGTCAACTGACTGAGAAAAGTGATGTTTACAGCTTTGGAGTAGTTCTGG

>M6-PGSC0003DMG400019172-(rev)M6RLKWAX-EGF\_896

TCGTACAAGTCAAACCTGACTGAGAAAAGTGATGTTTACAGCTTTGGAGTAGTTCTGGCAGAACTTTTGACA  
GGGTTGAAACCTGTAATTAAGATGGAAACGATGAGCAAAGAATTTGGC

>M6-PGSC0003DMG400019172-(rev)M6RLKWAX-EGF\_960

TTGACAGGGTTGAAACCTGTAATTAAGATGGAAACGATGAGCAAAGAATTTGGCTGATTATTTTGCT  
TCATCCATGAATAAGAATAGCTTATTTCAAATTCTTGATCGCCGTGTTTTG

>M6-PGSC0003DMG400019173-(rev)M6RLKWAX-EGF\_640

GGCAAACCGTTTGAGAATTGCAGCAGAGATAGCCACTACACTTGCTTACCTTCACTCATTTCGTCAT  
GCCTATAATTCATAGGGATGTTAAGTCTGCCAACATATTGTTAGATAATG

>M6-PGSC0003DMG400019237M6G-LecRK\_0

GCCAAGTGTAATTCAAGAAGTGGACAACCTTTGTCAAATTCAAAATTGTCCAAAATCTTGCAAGCCCCAC  
TTTGTCTTCCAAGTAATTCAGTCACAAAAATGAAGTCTTGGTCATATTGA

>M6-PGSC0003DMG400019237M6G-LecRK\_1054

TCTGCTGATGCAGATGACTGTGACACTTACAAATTATGTGGTGCATATGGGACTTGTAACATTTTGAGTG  
ATCCTGTGTGTCATTGTTTAGATAAATTTGAGCCAAAGCATCAGGATGAT

>M6-PGSC0003DMG400019237M6G-LecRK\_1116

TTTGAGTGATCCTGTGTGTCATTGTTTAGATAAATTTGAGCCAAAGCATCAGGATGATTGGAATAGAGCT  
GATTGGACGAGTGGTTGTGTCCGGAAAACCCCATTTGAATTGTACTIONGAGAGA

>M6-PGSC0003DMG400019237M6G-LecRK\_1178

ATAGAGCTGATTGGACGAGTGGTTGTGTCCGGAAAACCCCATTTGAATTGTACTIONGAGATGGATTTATTA  
TGTATTCTGGTGTAAACTGCCTGATACACGAACTTCTTGTTCAATGAGA

>M6-PGSC0003DMG400019237M6G-LecRK\_124

TTATCACAGCACCAACACCTTTTAATATTTTTAAATTTTTTTTTGCCTATTTTGTATAACCAAGAAATGAA  
AAAGGGGTAGTAGCTATGGAGAAATTTCTACCTTTTTTGCTTCTTTGC

>M6-PGSC0003DMG400019237M6G-LecRK\_1240

TTTATTATGTATTCTGGTGTAAACTGCCTGATACACGAACTTCTTGTTCAATGAGACCATGAGTTTAGA  
TGAATGCAGGGCGGTTTGCTTGAGGAATTGTTTCGTGTATGGGTTATACT

>M6-PGSC0003DMG400019237M6G-LecRK\_1302

GAGTTTAGATGAATGCAGGGCGGTTTGCTTGAGGAATTGTTTCGTGTATGGGTTATACTAATCTGGATAT  
ACGCAATGGAGGAAGCGGGTGCTTGATATGGATTGAGGAGCTGGTTGACAT

>M6-PGSC0003DMG400019237M6G-LecRK\_1364

TGGATATACGCAATGGAGGAAGCGGGTGCTTGATATGGATTGAGGAGCTGGTTGACATCAGACAGCTA  
TCTCAATCAGGACAGGATATCTACATTAGGATGTCTGCTTCAGAAATAGGTA

>M6-PGSC0003DMG400019237M6G-LecRK\_1426

CAGCTATCTCAATCAGGACAGGATATCTACATTAGGATGTCTGCTTCAGAAATAGGTAATATGCAATTTA  
CTGAGGTTTTCTTTATCACACAATGCTTGTTATCAAGAATGATGTATTGA

>M6-PGSC0003DMG400019237M6G-LecRK\_1488

GCAATTTACTGAGGTTTTCTTTATCACACAATGCTTGTTATCAAGAATGATGTATTGAATAGTTCAATTCT  
ATAAGGCTGATTAACGAACGAAGAGTAATGCATTTACAGGGAATTTAGG

>M6-PGSC0003DMG400019237M6G-LecRK\_1550

TTCAATTCTATAAGGCTGATTAACGAACGAAGAGTAATGCATTTACAGGGAATTTAGGTGTAAACATCCT

CAAGCAATGGATCCTTTTGTGAGAATAAGACTTATATGACCATCTTGTT

>M6-PGSC0003DMG400019237M6G-LecRK\_1612

AACATCCTCAAGCAATGGATCCTTTTGTGAGAATAAGACTTATATGACCATCTTGTTCTACAATAAAATA  
ATTTGCACAGGATTTAAAAGTTTATCGGAAATTCTAATTCAAACAACT

>M6-PGSC0003DMG400019237M6G-LecRK\_1674

AATAAAATAATTTGCACAGGATTTAAAAGTTTATCGGAAATTCTAATTCAAACAACTACCTGAAGAAAC  
TTTTGGATGGAAAATGTTGCAGGTTCTGCTGGATCAAGTTCAAAGGGAGA

>M6-PGSC0003DMG400019237M6G-LecRK\_1736

GAAGAACTTTTGGATGGAAAATGTTGCAGGTTCTGCTGGATCAAGTTCAAAGGGAGATAAATCTGTTA  
TACTTGCAGTAGCTTTGCCACTATTGTTTGCGTTGATTCTTCTAGGTTTAG

>M6-PGSC0003DMG400019237M6G-LecRK\_1798

TCTGTTATACTTGCAGTAGCTTTGCCACTATTGTTTGCGTTGATTCTTCTAGGTTTAGGTGTTGGCCTGATT  
CTTTATAAACGGAGAAGGAGAGAGGATCCAGTGGTTACGACAAGGGGT

>M6-PGSC0003DMG400019237M6G-LecRK\_186

AAGAAATGAAAAGGGGTAGTAGCTATGGAGAAATTTCTACCTTTTTGCTTCTTTGCTTTTTAATTTTC  
TTCGAAAAGTTAATGGACAAGGAGATATGATAACTACCACTAAGTTTGT

>M6-PGSC0003DMG400019237M6G-LecRK\_1922

GAACATAACAAGTTTTTATCTGTTGAAAAGCCGGAAGTAATTAATGGTTATTAGTTCTGTATTCCATTAGT  
ATCTCTTTTCAAGCTCGTTGTTTGAACAAAGTCTGCTTGGTTGTTCAA

>M6-PGSC0003DMG400019237M6G-LecRK\_1984

TCCATTAGTATCTCTTTTCAAGCTCGTTGTTTGAACAAAGTCTGCTTGGTTGTTCAAATTGCAGGGAGATT  
TAGTGGTCACAACAACAAGAATGATAACAGTAATCAAAGTCACCATGAA

>M6-PGSC0003DMG400019237M6G-LecRK\_2046

AGGGAGATTTAGTGGTCACAACAACAAGAATGATAACAGTAATCAAAGTCACCATGAAGATTTTGAGCT  
ACCACTTCTGATTTGCTTACATTAATCAATGCTACTGACAACTTTTCAAT

>M6-PGSC0003DMG400019237M6G-LecRK\_2108

TTGAGCTACCACTTCTTGATTTGCTTACATTAATCAATGCTACTGACAACTTTTCAATTGCGAACAAGATT  
GGAGAGGGTGGCTTTGGACTAGTTTACAAGGTAGAAACATTTGATCCTT

>M6-PGSC0003DMG400019237M6G-LecRK\_2170

AACAAGATTGGAGAGGGTGGCTTTGGACTAGTTTACAAGGTAGAAACATTTGATCCTTGAGAGCACATT  
GAAACCTTAAATCGATTTAACTTTTTTGGTTGAAATGAAAGTAAGTTCTAC

>M6-PGSC0003DMG400019237M6G-LecRK\_2232

GCACATTGAAACCTTAAATCGATTTAACTTTTTTGGTTGAAATGAAAGTAAGTTCTACTTTTACAGGGTGT  
GTTAGAAGGGGGGCAAGAAGTAGCAGTGAAGCGGCTATCAGAAACATCA

>M6-PGSC0003DMG400019237M6G-LecRK\_2294

ACAGGGTGTGTTAGAAGGGGGGCAAGAAGTAGCAGTGAAGCGGCTATCAGAAACATCAAAGCAAGGA  
TTTCACGAGTTCAAGAATGAAGTAACTGCATTGCTAACTTCAGCATCGAAA

>M6-PGSC0003DMG400019237M6G-LecRK\_2356

AAGGATTTACGAGTTCAAGAATGAAGTAACTGCATTGCTAACTTCAGCATCGAAATCTTGTAAGCT  
TCTAGGATGCTGCGTTCAAGGAGAAGAGAAGATGTTGGTCTACGAATACT

>M6-PGSC0003DMG400019237M6G-LecRK\_2418

GTAAAGCTTCTAGGATGCTGCGTTCAAGGAGAAGAGAAGATGTTGGTCTACGAATACTTGCAAAACAA  
GAGCCTTGATATATATATATTTGGTTAGTCTTTCACATCCAGTGTGCATCCA

>M6-PGSC0003DMG400019237M6G-LecRK\_248

TAATTTTTCTTCGAAAAGTTAATGGACAAGGAGATATGATAACTACCACTAAGTTTGTCAAAGATGGTGA  
AACTATTGTTTCTTCTGATGGAACTTTTGAGTTGGGATTTTTTCAGTCCTG

>M6-PGSC0003DMG400019237M6G-LecRK\_2480

AAACAAGAGCCTTGATATATATATATTTGGTTAGTCTTTCACATCCAGTGTGCATCCATTTCTTCAAGTG  
AACTTCTGATGTGATTTCACTGAGCTTTGTTTCGTGTTTAGGAGAAATT

>M6-PGSC0003DMG400019237M6G-LecRK\_2542

TTTCAAGTGAACCTTCTGATGTGATTTCACTGAGCTTTGTTTCGTGTTTAGGAGAAATTATAATAAGTTGAA  
AACATTTGGCAGATGAAGAAAGGAGCGCATTACTTGATTGGCCAAAGCG

>M6-PGSC0003DMG400019237M6G-LecRK\_2604

TAAGTTGAAACATTTGGCAGATGAAGAAAGGAGCGCATTACTTGATTGGCCAAAGCGCTTCAACATTA  
TCAATGGAATTGCTCGTGGACTGATGTACCTCCATCAAGATTCGAGGCTCA

>M6-PGSC0003DMG400019237M6G-LecRK\_2666

AACATTATCAATGGAATTGCTCGTGGACTGATGTACCTCCATCAAGATTCGAGGCTCAGAATCATCCACA  
GAGACTTGAAAGCTAGCAATGTCTTACTTGATACTGAAATGAACCCAAAG

>M6-PGSC0003DMG400019237M6G-LecRK\_2728

CATCCACAGAGACTTGAAAGCTAGCAATGTCTTACTTGATACTGAAATGAACCCAAAGATATCAGATTTT  
GGGATGGCTAGAAGTTTCGGAGGAGATGAGACAGGAGCCAATACACGTCG

>M6-PGSC0003DMG400019237M6G-LecRK\_2789

TCAGATTTTGGGATGGCTAGAAGTTTCGGAGGAGATGAGACAGGAGCCAATACACGTCGTGTTGTTGG  
AACATAGTAAGATTTAAATCTTTGATTATACATATAGTTATGCACATTCACA

>M6-PGSC0003DMG400019237M6G-LecRK\_310

GATGGTGAAACTATTGTTTCTTCTGATGGAACCTTTGAGTTGGGATTTTTTCAGTCCTGGAAATACTTCTAC  
AAATCGTTATGTTGGAATTTGGTACAAGAAAATTTCTGTTGTTACTCCT

>M6-PGSC0003DMG400019237M6G-LecRK\_372

TACTTCTACAAATCGTTATGTTGGAATTTGGTACAAGAAAATTTCTGTTGTTACTCCTGTTTGGGTTGCTA  
ATAGGTTGGTTCCACTTACTAATAAATCCGGGGTTTTGAAAGTTATTCA

>M6-PGSC0003DMG400019237M6G-LecRK\_434

GGGTTGCTAATAGGTTGGTTCCACTTACTAATAAATCCGGGGTTTTGAAAGTTATTCAATCGGGCGGTGT  
TGCTCTTCAAATGCTACAAATTCAACAATTTGGTCGACAAATTCATCGA

>M6-PGSC0003DMG400019237M6G-LecRK\_496

GGCGGTGTTGCTCTTCAAATGCTACAAATTCAACAATTTGGTCGACAAATTCATCGAGATCCGTGCAAA  
ACCCGTTGCGCAGTTGCTGGACACGGGGAATTTTGTGTTGAGGGATGCT

>M6-PGSC0003DMG400019237M6G-LecRK\_558

CGTGCAAACCCCGTTGCGCAGTTGCTGGACACGGGGAATTTTGTGTTGAGGGATGCTAATGATACGAA  
CCCAGAGAATTTCTCTGGCAGAGTTTTGATTACCCTACTGATACGTTGAT

>M6-PGSC0003DMG400019237M6G-LecRK\_62

AGCCCCACTTTGTCTTCCAAGTAATTCAGTCACAAAAATGAAGTCTTGGTCATATTGACATGTTATCACAG  
CACCAACACCTTTTAATATTTTTAAATTTTTTTTTGCCTTATTTTGTAT

>M6-PGSC0003DMG400019237M6G-LecRK\_620

ATACGAACCCAGAGAATTTCTCTGGCAGAGTTTTGATTACCCTACTGATACGTTGATTGCGAATATGAA  
ACTTGAAGGGATTTGGTTACTGGTTTTGAAAGGTATCTTAGTTCATGGA

>M6-PGSC0003DMG400019237M6G-LecRK\_682

AATATGAAACTTGGAAGGGATTTGGTTACTGGTTTTGAAAGGTATCTTAGTTCATGGAAAAGCAGTGAT

GATCCTGCCCCGGGGGATTATACTTATCATTGTGATCCAACGGGTTATCCA

>M6-PGSC0003DMG400019237M6G-LecRK\_744

CAGTGATGATCCTGCCCCGGGGGATTATACTTATCATTGTGATCCAACGGGTTATCCACAAGACGTTATG  
CGAAAAGGGGCTGATGTGATTTATAGAGCAGGGCCATGGAATGGTTTAAG

>M6-PGSC0003DMG400019237M6G-LecRK\_806

ACGTTATGCGAAAAGGGGCTGATGTGATTTATAGAGCAGGGCCATGGAATGGTTTAAGGTGGAGTGGT  
GCACCTAATATGGTGAACAATTCAATCACTTCGTTTGGTTTGGTAATGAACA

>M6-PGSC0003DMG400019237M6G-LecRK\_868

AGTGGTGCACCTAATATGGTGAACAATTCAATCACTTCGTTTGGTTTGGTAATGAACAATAAGGAAATTT  
ATTATAAATATGAACTTGTGAACAAATCTGTAGTTTCAGCTCTAGTAGTA

>M6-PGSC0003DMG400019237M6G-LecRK\_930

GGAAATTTATTATAAATATGAACTTGTGAACAAATCTGTAGTTTCAGCTCTAGTAGTAAAGCCTAATGGG  
AACACTATGCGTTTGATTTGGATTGCGAAGACTCAGGGTTGGGTTAATTA

>M6-PGSC0003DMG400019237M6G-LecRK\_992

CTAATGGGAACACTATGCGTTTGATTTGGATTGCGAAGACTCAGGGTTGGGTTAATTACCATTCTGCTGA  
TGCAGATGACTGTGACACTTACAAATTATGTGGTGCATATGGGACTTGTA

>M6-PGSC0003DMG400019238M6G-LecRK\_0

TATATATATGTATAGCTAGGAACTAAAACCTTTAGTAGAATAAAAGGCTACTACTTAGATTGAGGTGTTGA  
ATTTTAAAGCTAAATCTATAAGCATAATGAGTTATTGCATCTGTCAGCTA

>M6-PGSC0003DMG400019238M6G-LecRK\_1178

TGTTGTTGTACAATATGTAAAATATTTAACTTGCAGATTTTGTGTTTAGGGAATACTTGAAAAAGGACG  
AGAAATAGCTGTGAAGCGGCTGTCTAAAACATCCACGCAAGGAGAAGATG

>M6-PGSC0003DMG400019238M6G-LecRK\_124

TCTAAGACGAAATAAAAGAGGAATTTAGTTGGAAAACTCATTGAGAATAAACATATGATTTGCAGTA  
CTTCAAATGTTTGCAGAACACCTCTACTAAATGTCAACAAATTAATAATGA

>M6-PGSC0003DMG400019238M6G-LecRK\_1240

AAAGGACGAGAAATAGCTGTGAAGCGGCTGTCTAAAACATCCACGCAAGGAGAAGATGAGTTCAAGAA  
CGAAGTGGTATATATTGCCAACTTCAGCATAGAAATCTTGTGAAGATTCTA

>M6-PGSC0003DMG400019238M6G-LecRK\_1302

CAAGAACGAAGTGGTATATATTGCCAACTTCAGCATAGAAATCTTGTGAAGATTCTAGGATGTTGCATT  
GAAGGAGAAGAAAAAATGTTGATATATGAGTACTTGTCAAACGGAAGTCT

>M6-PGSC0003DMG400019238M6G-LecRK\_1364

GTTGCATTGAAGGAGAAGAAAAAATGTTGATATATGAGTACTTGTCAAACGGAAGTCTTGATTCAATTTAT  
ATTTGGTAACAAATCCCATACCAATATTGTATATACTGAATTATCTTCT

>M6-PGSC0003DMG400019238M6G-LecRK\_1426

TCATTTATATTTGGTAACAAATCCCATACCAATATTGTATATACTGAATTATCTTCTCCAGTTTCGAATC  
TCCCATCAAATAAGAAAAAAAAAAAAACATGTAAGGAGTGAACCTAAGACC

>M6-PGSC0003DMG400019238M6G-LecRK\_1488

GTTTCGAATCTCCCATCAAATAAGAAAAAAAAAAAAACATGTAAGGAGTGAACCTAAGACCTCAGCTTTATTA  
GAGCCTAATAATAATGTACACAGTAGCCCAAATTGATCTTTACGTTCAAT

>M6-PGSC0003DMG400019238M6G-LecRK\_1550

CTTTATTAGAGCCTAATAATAATGTACACAGTAGCCCAAATTGATCTTTACGTTCAATACGTGAATGGACT  
GATTTAGTTTGATGTTTTAGAACTACTTTCTATCTATAGCTTAGTGAAC

>M6-PGSC0003DMG400019238M6G-LecRK\_1612

GAATGGACTGATTTAGTTTGATGTTTTAGAACTACTTTCTATCTATAGCTTAGTGAACCAACAAAATTTGG  
CAGGTGGCAGACAAAGCAGGATATTAGACTGGTCTGAGCGATTTACAT

>M6-PGSC0003DMG400019238M6G-LecRK\_1674

AAAATTTGGCAGGTGGCAGACAAAGCAGGATATTAGACTGGTCTGAGCGATTTACATCATCAATGGGA  
TTGCTCGGGGACTTGTGTATCTGCATCAAGATTCTCAACTGCGGATAATTC

>M6-PGSC0003DMG400019238M6G-LecRK\_1736

AATGGGATTGCTCGGGGACTTGTGTATCTGCATCAAGATTCTCAACTGCGGATAATTCATAGAGACCTG  
AAAGCTAATAACATCTTGCTAGACAATGATATGAATGCAAAGATATCAGAC

>M6-PGSC0003DMG400019238M6G-LecRK\_1798

AGACCTGAAAGCTAATAACATCTTGCTAGACAATGATATGAATGCAAAGATATCAGACTTTGGCATAGC  
AAGATGCCATGAAGAGGATGGTAATGAAGCCATGACAAACCGAGTTATTGG

>M6-PGSC0003DMG400019238M6G-LecRK\_186

TGCAGTACTTCAAATGTTTGCAGAACACCTCTACTAAATGTCAACAAATTAATAAATGACGTACCGTACTTC  
AAAATCCAGCAGAATGTTGCAACTCAATATCAGTTATCAACTCCCCCAA



>M6-PGSC0003DMG400019238M6G-LecRK\_1860

GCATAGCAAGATGCCATGAAGAGGATGGTAATGAAGCCATGACAAACCGAGTTATTGGAACATAGTAA  
GAATCTATTACTGGGTAGTAGGAAATGCTTGAGATAGTTATGTTTTCCAGCA

>M6-PGSC0003DMG400019238M6G-LecRK\_1922

TAGTAAGAATCTATTACTGGGTAGTAGGAAATGCTTGAGATAGTTATGTTTTCCAGCATTAGTAACTATA  
TTTTGTGTACATTTTCTGCAGCGGGTACCTCTCACCAGAATATGCGCTAT

>M6-PGSC0003DMG400019238M6G-LecRK\_1984

TAACTATATTTTGTGTACATTTTCTGCAGCGGGTACCTCTCACCAGAATATGCGCTATATGGGCAATACTC  
TGTAATAATCAGATGTGTATAGCTTTGGTATCTTAGTACTGGAAATTGTG

>M6-PGSC0003DMG400019238M6G-LecRK\_2046

GCAATACTCTGTAAAATCAGATGTGTATAGCTTTGGTATCTTAGTACTGGAAATTGTGAGTGGAAAAAG  
CAACAGACGATTCGCTCCTTCAAACCTTAACCGTAGTCTAATCGGGCATGT

>M6-PGSC0003DMG400019238M6G-LecRK\_2108

GAAAAAGCAACAGACGATTCGCTCCTTCAAACCTTAACCGTAGTCTAATCGGGCATGTAAGATTTTTATG  
TATTTTTCTTATCTATTCATTGGTGTATCAACTAACAAGTATCTTGTA

>M6-PGSC0003DMG400019238M6G-LecRK\_2170

TTTTTATGTATTTTTCTTATCTATTCATTGGTGTATCAACTAACAAGTATCTTGTAAGGCTAGTGATGCTT  
ATAAGCTTGTAAACTGCAGGCATGGGAGCTCAACAAGGAAGGGAGGT

>M6-PGSC0003DMG400019238M6G-LecRK\_2232

AGTGATGCTTATAAGCTTGTAAACTGCAGGCATGGGAGCTCAACAAGGAAGGGAGGTCAATAGAACT  
ACTTGATGAACGTGTAGGTGATTCTTGTTCTACACCTCAAGAAGTGGTACGA

>M6-PGSC0003DMG400019238M6G-LecRK\_2294

AGAACTACTTGATGAACGTGTAGGTGATTCTTGTTCTACACCTCAAGAAGTGGTACGATCAATTGGTGT  
GGTCTATTATGTGTCCAAGAACGTCCAGATGATCGTCCAAGTATGTCTTC

>M6-PGSC0003DMG400019238M6G-LecRK\_2356

TTGGTGTGGTCTATTATGTGTCCAAGAACGTCCAGATGATCGTCCAAGTATGTCTTCCGTAGTTCTAAT  
GTTAAACAATGAAGGTACGCTGCCTCAGGCTAAACTACCAGCTTTTTACA

>M6-PGSC0003DMG400019238M6G-LecRK\_2418

GTTCTAATGTAAACAATGAAGGTACGCTGCCTCAGGCTAAACTACCAGCTTTTTACATGGAAGGAGAT

GTATCAGATACTGAATTACTTTCTACCCAATTTGCACATATTACAACGGAT

>M6-PGSC0003DMG400019238M6G-LecRK\_248

CCGTA CTTC AAAATCCAGCAGAATGTTGCAACTCAATATCAGTTATCAACTCCCCAAGTGATCAACAGG  
TAGAGACAGTCAAATTTATTGATTACTTTGTTGGAATGGACCTTGCAGAT

>M6-PGSC0003DMG400019238M6G-LecRK\_310

TCAACAGGTAGAGACAGTCAAATTTATTGATTACTTTGTTGGAATGGACCTTGCAGATAGTCTGGAGAA  
ATCAGATGGTGAAAAAGGAAGAGCACTATGCTGGATTCTTCCATTATCCGT

>M6-PGSC0003DMG400019238M6G-LecRK\_372

TGGAGAAATCAGATGGTGAAAAAGGAAGAGCACTATGCTGGATTCTTCCATTATCCGTTGTTTAGTTCT  
GGTAATCCTTAGCATATTGCTGATATGCCACAGGAGAAGGAAGAAGGCTT

>M6-PGSC0003DMG400019238M6G-LecRK\_434

TTAGTTCTGGTAATCCTTAGCATATTGCTGATATGCCACAGGAGAAGGAAGAAGGCTTTAAAGCTTAAA  
ACGAAAGGTAAGCTGGATAGGTCACTTTTTTGCCTGATCGTTGAGCAAAAT

>M6-PGSC0003DMG400019238M6G-LecRK\_496

GCTTAAAACGAAAGGTAAGCTGGATAGGTCACTTTTTTGCCTGATCGTTGAGCAAAATAGAGGAAGTGA  
AATTCAATTAGACGGTCTTTGCTGCTTTAACACAATTCAATCAATTCCTT

>M6-PGSC0003DMG400019238M6G-LecRK\_558

GAAGTGAAATTCAATTAGACGGTCTTTGCTGCTTTAACACAATTCAATCAATTCCTTTTAGCTGCAGAAA  
AATCGAGATACAGCGGAAGTATCAAGCAGGATTACAACAGTGGTAGTTG

>M6-PGSC0003DMG400019238M6G-LecRK\_62

GGTGTGAATTTTAAAGCTAAATCTATAAGCATAATGAGTTATTGCATCTGTCAGCTAAAAATCTAAGAC  
GAAATAAAAGAGGAATTTAGTTGGAAAACTCATTGAGAACTAAACATAT

>M6-PGSC0003DMG400019238M6G-LecRK\_620

CTGCAGAAAAATCGAGATACAGCGGAAGTATCAAGCAGGATTACAACAGTGGTAGTTGCACTGAAGAA  
TTTGAGATACCACTGTTTGACTTATCTACCATAACTAAGGCTACCGATAACT

>M6-PGSC0003DMG400019238M6G-LecRK\_682

GAAGAATTTGAGATACCACTGTTTGACTTATCTACCATAACTAAGGCTACCGATAACTTTTCAGTAAACA  
GAAAGATTGGAGAGGGGGGCTTTGGTCCTGTTTATAAGGTAAAAACACTT

>M6-PGSC0003DMG400019238M6G-LecRK\_744

AGTAAACAGAAAGATTGGAGAGGGGGGCTTTGGTCCTGTTTATAAGGTAAAAACACTTGTTTCATGGGC  
AATTTTGTACAAGAAAAATACCAGCTTATCACACAAAGTCTAGATGACTGA

>M6-PGSC0003DMG400019238M6G-LecRK\_806

CATGGGCAATTTTGTACAAGAAAAATACCAGCTTATCACACAAAGTCTAGATGACTGACAGAAGCTTCCT  
GGTCCTCCAGAGCAAAGCCTTCATCTTTAGTAGGCAAATGTAATGAATT

>M6-PGSC0003DMG400019238M6G-LecRK\_868

AGCTTCCTGGTCCTCCAGAGCAAAGCCTTCATCTTTAGTAGGCAAATGTAATGAATTAAGTATATGCTG  
GAGCGTTTTTTGACCTAACTATACTTAACTGATTCTCGTAATTCCTCC

>M6-PGSC0003DMG400019238M6G-LecRK\_930

ATATGCTGGAGCGTTTTTTGACCTAACTATACTTAACTGATTCTCGTAATTCCTCCAGTCCTTTTTCGTG  
GGAAGCAGCTTACTTTGTACCTTATACTTTCAATTTAGATATTATTTA

>M6-PGSC0003DMG400019241M6G-LecRK\_0

TTGATTTTTACATTTTCCCAAATATTCCAAAAGGACTAAACAATTTCCATGAAACGCTTTATCTTTTTCTA  
TTTCTGTTCTCTAATATAGTGTCATTTCTATTCATATTTTCCACTGC

>M6-PGSC0003DMG400019241M6G-LecRK\_1037

GTGGGTGTGTACGAAGAACTCCGTTGACATGTGGGACAAGTGACAGGTTTCTGAAGTATTCTAGTGTGA  
AATTGCCAGATACACGCCATTCCTGGTTTGACAAAAGCATTGGCCTCGAGG

>M6-PGSC0003DMG400019241M6G-LecRK\_1098

TAGTGTGAAATTGCCAGATACACGCCATTCCTGGTTTGACAAAAGCATTGGCCTCGAGGAATGCCAAAG  
GCTGTGTCTGAAAACTGTTTCGTGTACAGCATATTCCAATCTTGATGTAA

>M6-PGSC0003DMG400019241M6G-LecRK\_1159

TGCCAAAGGCTGTGTCTGAAAACTGTTTCGTGTACAGCATATTCCAATCTTGATGTAAAAATGGCGGG  
AGTGGATGCTTACTTTGGTTTAATGAACTCGTTGATATCAGGGAATATGCT

>M6-PGSC0003DMG400019241M6G-LecRK\_122

TAGACTATATCGAACGATAGCCCCATAAAAGATGGACATACCATAGTTTCAGCTGGTGGAACTTTG  
AGCTTGGATTTTTAGCCCTGGAAATCCAAGAATCGGTATATCGGTATAT

>M6-PGSC0003DMG400019241M6G-LecRK\_1220

ATGGCGGGAGTGGATGCTTACTTTGGTTTAATGAACTCGTTGATATCAGGGAATATGCTGAACTTGATC  
AAGATCTCTATGTAAGGATGGCTGCATCAGAATTAGGTAAGTCTCCTTATG

>M6-PGSC0003DMG400019241M6G-LecRK\_1281

ACTTGATCAAGATCTCTATGTAAGGATGGCTGCATCAGAATTAGGTAAGTCTCCTTATGCTAAGATGAAT  
CATAACACAGGGAATCTTAGTAACTCAATTGATTGACTATCTGAACTTTC

>M6-PGSC0003DMG400019241M6G-LecRK\_1342

AAGATGAATCATACCACAGGGAATCTTAGTAACTCAATTGATTGACTATCTGAACTTTCACCTTGTTAAC  
GAGGGTTGGGTTTCCAACCTTGTTAACGAGGGTTGGGTTCCCAACCTTGT

>M6-PGSC0003DMG400019241M6G-LecRK\_1525

TCATAACGGAAGGTTTTACAAGTCATAATGAACTTTTCACAGGTTTCAGGCTATATGGGAAACACAAGA  
ATATCAGTCATTGCAATTATATTAACAGTTTCAGCAATCATCCTTGTTGGT

>M6-PGSC0003DMG400019241M6G-LecRK\_1586

ACACAAGAATATCAGTCATTGCAATTATATTAACAGTTTCAGCAATCATCCTTGTTGGTTTTCTATTTTGGT  
TTGCTATGCAGAGAAAGAAAGGGGAAAGAGGTTAGAAAATTTGTCCGT

>M6-PGSC0003DMG400019241M6G-LecRK\_1647

TCTATTTTGGTTTGCTATGCAGAGAAAGAAAGGGGAAAGAGGTTAGAAAATTTGTCCGTGGCGTTGAAA  
GTAAAGTAATTTCAATTCAGCTCAATATCTTTACAAAAAAAAGTTCAATTTT

>M6-PGSC0003DMG400019241M6G-LecRK\_1708

CGTTGAAAGTAAAGTAATTTCAATTCAGCTCAATATCTTTACAAAAAAAAGTTCAATTTTACAGGAGTAGG  
AGAAGGAGAAGGAAAGGAAGATATGGAATTACCTTTGTTTGATGTGATGA

>M6-PGSC0003DMG400019241M6G-LecRK\_1769

AGGAGTAGGAGAAGGAGAAGGAAAGGAAGATATGGAATTACCTTTGTTTGATGTGATGACTGTTTCTG  
CTGCAACTAATAATTTCTCATCTGCTAATATCATTGGAGAGGGTGGTTTTGG

>M6-PGSC0003DMG400019241M6G-LecRK\_183

AAACTTTGAGCTTGATTTTTTCAGCCCTGGAAATCCAAGAATCGGTATATCGGTATATGGTACAACAAT  
TTACCTAAAGGCAGAGAAGTAGTGTGGGTTGCCAATAGAGTGAACCCACT

>M6-PGSC0003DMG400019241M6G-LecRK\_1830

GTTTCTGCTGCAACTAATAATTTCTCATCTGCTAATATCATTGGAGAGGGTGGTTTTGGATCTGTATATCG  
GGTAACTAGAATTATATTCTCTCTGTATCTTAGTCAAATATATGAATGA

>M6-PGSC0003DMG400019241M6G-LecRK\_1891

CTGTATATCGGGTAACTAGAAATTATATTCTCTCTGTATCTTAGTCAAATATATGAATGATTCTCTTGTGGC

TTAGACTTCGCGTGGATTATGTGACAGGGAAAACATCAACAGGACCAG

>M6-PGSC0003DMG400019241M6G-LecRK\_1952

CTCTTGTGGCTTAGACTTCGCGTGGATTATGTGACAGGGAAAACATCAACAGGACCAGAAATAGCAGT  
AAAGAAGCTCTCCAAACATTCCGGACAAGGTTTCGAAGAGTTGAAGAATGA

>M6-PGSC0003DMG400019241M6G-LecRK\_2013

ATAGCAGTAAAGAAGCTCTCCAAACATTCCGGACAAGGTTTCGAAGAGTTGAAGAATGAAGTTGTTCTG  
ATTTCCAAACTTCAGCATAGAAATCTAGTTAGGCTTCTAGGCTGTTGTCTT

>M6-PGSC0003DMG400019241M6G-LecRK\_2074

TTGTTCTGATTTCCAAACTTCAGCATAGAAATCTAGTTAGGCTTCTAGGCTGTTGTCTTGAAGGGGAAGA  
AAGGATGCTAATTTATGAATATATGCCAAACAATAGCTTGGACTTCTTCA

>M6-PGSC0003DMG400019241M6G-LecRK\_2135

AGGGGAAGAAAGGATGCTAATTTATGAATATATGCCAAACAATAGCTTGGACTTCTTCATCTTTGGTTCCG  
ATTCTCTTGACTCATTTTCATCAAAAGATTCATCTTATCATATCAGCATTG

>M6-PGSC0003DMG400019241M6G-LecRK\_2196

TTTGGTTGATTCTCTTGACTCATTTTCATCAAAAGATTCATCTTATCATATCAGCATTGTTCTGCTAATGCA  
AAATGAACTGATGTTTCTGCAGATGAATGCAGGAAGAAACAACCTCCC

>M6-PGSC0003DMG400019241M6G-LecRK\_2257

CTGCTAATGCAAAATGAACTGATGTTTCTGCAGATGAATGCAGGAAGAAACAACCTCCCTGGGAAAATC  
GTTTTCGTATTGCAATGGGAATATCAAGGGGCATTCTTTATCTTCACCAGG

>M6-PGSC0003DMG400019241M6G-LecRK\_2318

GGAAAATCGTTTTCGTATTGCAATGGGAATATCAAGGGGCATTCTTTATCTTCACCAGGACTCCAGATTA  
AGGATCATAACAGAGATCTAAAGACCAGCAACATTTTACTGGACAGTGA

>M6-PGSC0003DMG400019241M6G-LecRK\_2379

TCCAGATTAAGGATCATAACAGAGATCTAAAGACCAGCAACATTTTACTGGACAGTGAATTGAATCCCA  
AAATTTCTGACTTTGGACTGGCCAGGATTATTGGTGGTGACCAAACGAA

>M6-PGSC0003DMG400019241M6G-LecRK\_244

TACAACAATTTACCTAAAGGCAGAGAAGTAGTGTGGGTTGCCAATAGAGTGAACCCACTGAATGACACT  
TCTGGCATATTAACAGTCAGTAGCAAAGGGATTGTACTACTCAATGGAAAC

>M6-PGSC0003DMG400019241M6G-LecRK\_2440

TGAATCCCAAATTTCTGACTTTGGACTGGCCAGGATTATTGGTGGTGACCAAACGAAGCAAGAACAA  
AGCGAGTAATAGGGACATAGTAAGTTCAATTAGATAACTCATTGATGTTTT

>M6-PGSC0003DMG400019241M6G-LecRK\_2806

TCTTTACAACCTCCATAAAATCATTAAACCCATATTAAACATTATATGTCTTTGTGCAGTGGCTATATGTCT  
CCAGAATACGCAGTTGATGGGAAATTTTCAGTGAAATCAGATGTCTTC

>M6-PGSC0003DMG400019241M6G-LecRK\_2867

GCTATATGTCTCCAGAATACGCAGTTGATGGGAAATTTTCAGTGAAATCAGATGTCTTCAGTCTTGGTGT  
TCTTCTACTAGAAATAGTCAGCGGAAGAAAGAACAGAACATTTTCATCATC

>M6-PGSC0003DMG400019241M6G-LecRK\_2928

TCTTGGTGTCTTCTACTAGAAATAGTCAGCGGAAGAAAGAACAGAACATTTTCATCATCCAGATCACCAT  
CATAGTCTTATAGGACATGTAAGCAAGATACAAATCCAGACATTTGCTTT

>M6-PGSC0003DMG400019241M6G-LecRK\_2989

GATCACCATCATAGTCTTATAGGACATGTAAGCAAGATACAAATCCAGACATTTGCTTTTGTCAATTCATA  
CTACATTTGTATTTCTACATATCATTGAAAACATACTTGATTTTTCT

>M6-PGSC0003DMG400019241M6G-LecRK\_305

ATGACACTTCTGGCATATTAACAGTCAGTAGCAAAGGGATTGTACTACTCAATGGAAACCAAGATGTGA  
TTTGGTCATCAAATTCATCGAAACGTTTGATGAATCCAGTGGCTCAGCTTT

>M6-PGSC0003DMG400019241M6G-LecRK\_3050

TCATTTCACTACTACATTTGTATTTCTACATATCATTGAAAACATACTTGATTTTTCTATAGGCTTGGTTAT  
TATGGAATAAAGGGAAGGCTTTGGAAGTAATCGATGATTGTTTAAAA

>M6-PGSC0003DMG400019241M6G-LecRK\_3111

AGGCTTGGTTATTATGGAATAAAGGGAAGGCTTTGGAAGTAATCGATGATTGTTTAAAAGAATCGTTTG  
TGGAATCCCAAGTCCTAAGATGTGTTTCATGTGGCACTGTTATGTGTTCAAC

>M6-PGSC0003DMG400019241M6G-LecRK\_3172

ATCGTTTGTGGAATCCCAAGTCCTAAGATGTGTTTCATGTGGCACTGTTATGTGTTCAACGACTAACAGAT  
GAAAGACCAACAATGTCATCAGTGGTTTTTCATGTTAAGCCATGAAGAAGT

>M6-PGSC0003DMG400019241M6G-LecRK\_3233

CTAACAGATGAAAGACCAACAATGTCATCAGTGGTTTTTCATGTTAAGCCATGAAGAAGTGGCATTACCTC  
AACCAAAGGAGCCTGGTTTCTTCATAGAGAGAAGTACAGCTGAAACAGAT

>M6-PGSC0003DMG400019241M6G-LecRK\_3294

CATTACCTCAACCAAAGGAGCCTGGTTTCTTCATAGAGAGAAGTACAGCTGAAACAGATTATTCAAATGA  
GAAAAGATGTATCAGTGACAATGATTTGACATTAACAATTCTTCAACCAA

>M6-PGSC0003DMG400019241M6G-LecRK\_3355

TTCAAATGAGAAAAGATGTATCAGTGACAATGATTTGACATTAACAATTCTTCAACCAAGATAGCAATGG  
TGGAACCAGAAATTCAAGAACCTTCTATTGTATAAAGGTGATTCAACAAC

>M6-PGSC0003DMG400019241M6G-LecRK\_3599

GAGCATTTACTAACATGCTTACACGGAACAATTGTGTATATCTTTCCGATATTTGATTAAGACTCAAGAG  
CCATCGGGACCATTGTGTCAAGTTGTGCAAATTGTCAGAACATGATGGAA

>M6-PGSC0003DMG400019241M6G-LecRK\_366

AGATGTGATTTGGTCATCAAATTCATCGAAACGTTTGATGAATCCAGTGGCTCAGCTTTTGGACTGGA  
AATCTTGTCTTAAAAGATGACAGTTTGGTAAATCAAGAAGACTATGATTG

>M6-PGSC0003DMG400019241M6G-LecRK\_3660

ACTCAAGAGCCATCGGGACCATTGTGTCAAGTTGTGCAAATTGTCAGAACATGATGGAAATGGACATAT  
AAGTTGTTACACAGTATAATGACTAATAGTAGATCTGAATGGCTAAATGAT

>M6-PGSC0003DMG400019241M6G-LecRK\_3721

GGACATATAAGTTGTTACACAGTATAATGACTAATAGTAGATCTGAATGGCTAAATGATAGCCACTGACT  
TTGTTGAGCAATTATTTTTCTCAGGACTACAAATCAACATCATGTCCTG

>M6-PGSC0003DMG400019241M6G-LecRK\_3782

CCACTGACTTTGTTGAGCAATTATTTTTCTCAGGACTACAAATCAACATCATGTCCTGGGGGAGTGTATC  
TTTGCAATCACATTCATCATATCTTTTTCCACATCTCTATCACCAAAT

>M6-PGSC0003DMG400019241M6G-LecRK\_3842

GGGAGTGTATCTTTGCAATCACATTCATCATATCTTTTTCCACATCTCTATCACCAAATCAAGTTTTGTGC  
AAACTTTTTCTGATTTTTCTACCCGGTGTTTCAGTACCAGCTTTGGGG

>M6-PGSC0003DMG400019241M6G-LecRK\_427

GAACTGGAAATCTTGTCTTAAAAGATGACAGTTTGGTAAATCAAGAAGACTATGATTGGCAGAGTTTT  
GATTATCCAGACAGTACTTTGTTACCTGGCATGAAATTAGGCCTTAACTTG

>M6-PGSC0003DMG400019241M6G-LecRK\_488

AGAGTTTTGATTATCCAGACAGTACTTTGTTACCTGGCATGAAATTAGGCCTTAACTTGGTCACGGGCAA

GTATTGGACTATGTCGTCGTGGAAGAGCAGTGATGATCCTTCTCCAGGAG

>M6-PGSC0003DMG400019241M6G-LecRK\_549

CACGGGCAAGTATTGGACTATGTCGTCGTGGAAGAGCAGTGATGATCCTTCTCCAGGAGAATATTTGGA  
TCGCCTCGACACCAGTGGTTATCCTCAATTCTTTGTGTGGGAAGGTCCTGC

>M6-PGSC0003DMG400019241M6G-LecRK\_61

ATCTTTTTCTATTTCTGTTCTTAATATAGTGTCAATTTCTATTCATATTTTCCACTGCTTTAGACACTATATC  
GAACGATAGCCCCATAAAAGATGGACATACCATAGTTTCAGCTGGT

>M6-PGSC0003DMG400019241M6G-LecRK\_610

TATTTGGATCGCCTCGACACCAGTGGTTATCCTCAATTTCTTTGTGTGGGAAGGTCCTGCAATAAAGTTTA  
GCTCAGGAATATGGAATGGACATTTATTTGTTGGAGACCAAATTTGAAA

>M6-PGSC0003DMG400019241M6G-LecRK\_671

TAAAGTTTAGCTCAGGAATATGGAATGGACATTTATTTGTTGGAGACCAAATTTGAAACCAAATCCTTA  
TTATACATTTGAGTTTGTGAACAATGACAAGGAGATCTACTATAAATATG

>M6-PGSC0003DMG400019241M6G-LecRK\_732

AAATCCTTATTATACATTTGAGTTTGTGAACAATGACAAGGAGATCTACTATAAATATGAGCTTATCAAT  
ACTTCTCTTCTACCAGGTTGGTCTTGAATCCAGCAGGCCTGCTTCAACG

>M6-PGSC0003DMG400019241M6G-LecRK\_793

CTTATCAATACTTCTCTTCTACCAGGTTGGTCTTGAATCCAGCAGGCCTGCTTCAACGACTTTTGTGGAT  
CGAACGGAACCAGAACTGGTTCCTTTACTCCACTGGACAGATGGATAAT

>M6-PGSC0003DMG400019241M6G-LecRK\_854

TTTTGTGGATCGAACGGAACCAGAACTGGTTCCTTTACTCCACTGGACAGATGGATAATTGTGATCGTTA  
TGCCTTGTGTGGTCAATTTGCGCGGTGCAACATCAATGACTCACCTCCAT

>M6-PGSC0003DMG400019241M6G-LecRK\_915

TGATCGTTATGCCTTGTGTGGTCAATTTGCGCGGTGCAACATCAATGACTCACCTCCATGTGATTGTTTG  
AGAGGATTTGAGCCTAAAAATCAACAAGGATGGGATGCAGCAGATTGGTC

>M6-PGSC0003DMG400019241M6G-LecRK\_976

GATTGTTTGAGAGGATTTGAGCCTAAAAATCAACAAGGATGGGATGCAGCAGATTGGTCTAGTGGGTGT  
GTACGAAGAACTCCGTTGACATGTGGGACAAGTGACAGGTTTCTGAAGTAT

>M6-PGSC0003DMG400019275-(rev)M6G-LecRK\_0



AAACTTGCTAGGACATAAAAATTATTACAATTTCTAACAAAGATACTAAAATATTATCTAATTCTTTCATGCT  
CAAAAAGTCAAGAAGTATTGACCACCTATAATATTTCTTAATTCCACAA

>M6-PGSC0003DMG400019275-(rev)M6G-LecRK\_1037

GGAACCTTTGTAAGTGGCAGAGAGGTGTACTTGTTCATCATGGAAGAATGAGGAGGATCCAGCTCCTGGT  
GATTCTACATATCACTGCGATCCTTCTGGTTACCCGCAGAATATCCTGAAGA

>M6-PGSC0003DMG400019275-(rev)M6G-LecRK\_1098

TCCTGGTGATTCTACATATCACTGCGATCCTTCTGGTTACCCGCAGAATATCCTGAAGAAGGGGTCGGAT  
GTAGTATACCGCTCTGGACCATGGAATGGTCGCTCTTTCAGTGGGAACCG

>M6-PGSC0003DMG400019275-(rev)M6G-LecRK\_1159

GGGTCGGATGTAGTATACCGCTCTGGACCATGGAATGGTCGCTCTTTCAGTGGGAACCGAAACTCAAGA  
GAAGGTCCTTCTATACATATGGAGTATATTCAAGTAAGACAGAGGTGTAT

>M6-PGSC0003DMG400019275-(rev)M6G-LecRK\_122

GCTCCCGTTTAGTCTTGGTTATTATCCAGTCAGATCTTATAGCAATCTATGAAGACCTCATTATCTTTGAA  
CTGCAGCAACATTTTCTCATGTTTGATACTGCTCAGAGCAGATATGCC

>M6-PGSC0003DMG400019275-(rev)M6G-LecRK\_1220

ACTCAAGAGAAGGTCCTTCTATACATATGGAGTATATTCAAGTAAGACAGAGGTGTATTTTGGATATAA  
CCTCACAACCTTCAATTCTCGTGAGGTTGACATTAAGTCACAATGGAGTCC

>M6-PGSC0003DMG400019275-(rev)M6G-LecRK\_1281

TGGATATAACCTCACAACCTTCAATTCTCGTGAGGTTGACATTAAGTCACAATGGAGTCCTACAGGTTTGG  
ACTTGGGGTGATGGAGACCAAGGTTGGATCCCTTCTCTTAATACCCGC

>M6-PGSC0003DMG400019275-(rev)M6G-LecRK\_1342

CAGGTTTGGACTTGGGGTGATGGAGACCAAGGTTGGATCCCTTCTCTTAATACCCGCTGATAATTGTG  
ATATGTATAAGTTGTGTGGCGCATATGGCAGCTGCAACAGTCAAGATTCT

>M6-PGSC0003DMG400019275-(rev)M6G-LecRK\_1464

AGAATGTGGATGCTTAGACAAATTTGTGCCCAACAATAGTGATGCTTGGGAAGAGGAAAGACTGGTCAG  
GTGGCTGTGTTTCGGAGAAGTGAAGTAAATTGCCTCCAAGAAGATGTATTTTT

>M6-PGSC0003DMG400019275-(rev)M6G-LecRK\_1525

TGGTCAGGTGGCTGTGTTTCGGAGAAGTGAAGTAAATTGCCTCCAAGAAGATGTATTTTTGAAGTATTCGC  
ATATCAAATTGCCAGACACACGGAATTCCTGGTCCAATGTGACTATGACA

>M6-PGSC0003DMG400019275-(rev)M6G-LecRK\_1586

AGTATTCGCATATCAAATTGCCAGACACACGGAATTCCTGGTCCAATGTGACTATGACACTAGAAGAAT  
GCAAGAACACCTGCTCTAAAAATTGTTCTTGTATGGCTTACTCCAATTCTG

>M6-PGSC0003DMG400019275-(rev)M6G-LecRK\_1647

AGAAGAATGCAAGAACACCTGCTCTAAAAATTGTTCTTGTATGGCTTACTCCAATTCTGACATACTCAAC  
GGAGGAAGTGGATGCTTATTGTGGTTCAAGGATCTGCTTGACATTCGGCA

>M6-PGSC0003DMG400019275-(rev)M6G-LecRK\_1708

ATACTCAACGGAGGAAGTGGATGCTTATTGTGGTTCAAGGATCTGCTTGACATTCGGCAGGCGCCCAAC  
GGAGGGCAAGATATCTACATTAGAATGGCTTCTTCTGAATCAGGTTGGCTT

>M6-PGSC0003DMG400019275-(rev)M6G-LecRK\_1769

CGCCCAACGGAGGGCAAGATATCTACATTAGAATGGCTTCTTCTGAATCAGGTTGGCTTGTGCAACTTA  
ATTTATTTATTTTTTTGATAGATTGCCTGAAGCTAGTAAAGGAATTTAAG

>M6-PGSC0003DMG400019275-(rev)M6G-LecRK\_183

TATCTTTGAACTGCAGCAACATTTTCCTCATGTTTGATACTGCTCAGAGCAGATATGCCTTTTACTAAATT  
ATTCGTAATAATATACTCAAAGTCCAAAGCAGCCATTAACTTTTTTTT

>M6-PGSC0003DMG400019275-(rev)M6G-LecRK\_1830

TGCAACTTAATTTATTTATTTTTTTGATAGATTGCCTGAAGCTAGTAAAGGAATTTAAGGTTGCAGGCACT  
TTAATAAAGCAGACTGTAGTTTTGTGCCTATGCTTACTATGATACTATC

>M6-PGSC0003DMG400019275-(rev)M6G-LecRK\_1891

TGCAGGCACTTTAATAAAGCAGACTGTAGTTTTGTGCCTATGCTTACTATGATACTATCTACTGCCAACTC  
CTACCATATATAGCCCGTAACTACCAAATAATAGCAGTACAGAAAGCAA

>M6-PGSC0003DMG400019275-(rev)M6G-LecRK\_1952

CTGCCAACTCCTACCATATATAGCCCGTAACTACCAAATAATAGCAGTACAGAAAGCAATTATTTTTGAG  
TGAAGTTGGTATGAATTTACAAGCCAAATCTGCAAGCATGATGACTATAG

>M6-PGSC0003DMG400019275-(rev)M6G-LecRK\_2013

ATTTTTGAGTGAAGTTGGTATGAATTTACAAGCCAAATCTGCAAGCATGATGACTATAGAACAAGCATT  
GATATGACTTGCATTACACAAGGAATTGAAGAACCTTGACAACCTCAACCT

>M6-PGSC0003DMG400019275-(rev)M6G-LecRK\_2074

CAAGCATTGATATGACTTGCATTACACAAGGAATTGAAGAACCTTGACAACCTCAACCTCAACAAACTAA

AAAGGATGTGCAGTACTCCAAAGGCTTGCAGAGACTTTTAAACTCAAAA

>M6-PGSC0003DMG400019275-(rev)M6G-LecRK\_2135

ACAAACTAAAAGGATGTGCAGTACTCCAAAGGCTTGCAGAGACTTTTAAACTCAAATAAAAATCAT  
CTCCGATGGATAGGATAATTGCAATTTATTATTTATGTTTGTGAATTGAT

>M6-PGSC0003DMG400019275-(rev)M6G-LecRK\_2196

AAAATCATCTCCGATGGATAGGATAATTGCAATTTATTATTTATGTTTGTGAATTGATACTTGCAGATAG  
TCTGGAGCAATCAGATGGAAAGAAAAGGAAAGTACTTTTCTGGATTCTA

>M6-PGSC0003DMG400019275-(rev)M6G-LecRK\_2257

TTGCAGATAGTCTGGAGCAATCAGATGGAAAGAAAAGGAAAGTACTTTTCTGGATTCTACCATTATCAG  
TTTGTGGATTCTGGTATTCTTACTCTGGTGGTCTACCATAGAAGAAGGA

>M6-PGSC0003DMG400019275-(rev)M6G-LecRK\_2318

ATTATCAGTTTGTGGATTCTGGTATTCTTACTCTGGTGGTCTACCATAGAAGAAGGAAGAAGGCTTTA  
GAGCTCAAAAACAAAGGTAAGCTGGATACCCCTTAATTTTTTCTTGACAT

>M6-PGSC0003DMG400019275-(rev)M6G-LecRK\_2379

AAGGCTTTAGAGCTCAAAAACAAAGGTAAGCTGGATACCCCTTAATTTTTTCTTGACATCTAAAGTCTAA  
GCAAATAGAGGAAAAGACATTTAAATTATACTGAAAAGAACTTTCACTT

>M6-PGSC0003DMG400019275-(rev)M6G-LecRK\_244

TTACTAAATTATTCGTAAAATATACTCAAAAGTCCAAAGCAGCCATTAACTTTTTTATAAGCAGCCAT  
GACTTGAAGCAGCCTCAACTCTCATTACAAAGCTAAGACTTTTCATAGT

>M6-PGSC0003DMG400019275-(rev)M6G-LecRK\_2440

AAAGTCTAAGCAAATAGAGGAAAAGACATTTAAATTATACTGAAAAGAACTTTCACTTCATTCGCTTTC  
TCTTATAGGCAAATTATGTCATTTGGTTTTGGCAGGAAGGTCAGGATAC

>M6-PGSC0003DMG400019275-(rev)M6G-LecRK\_2501

TTCGCTTTCTCTTATAGGCAAATTATGTCATTTGGTTTTGGCAGGAAGGTCAGGATACAGTGGCAATTA  
CAAGATGAATTACAACCGTGGCAATTGCACTGAAGAATTTGAAATACCAC

>M6-PGSC0003DMG400019275-(rev)M6G-LecRK\_2562

TGGCAATTACAAGATGAATTACAACCGTGGCAATTGCACTGAAGAATTTGAAATACCACTGTTGACTTA  
TCTACCATAGCAAAGGCTACCAATAACTTTTCAATTGACAGACAGATTGG

>M6-PGSC0003DMG400019275-(rev)M6G-LecRK\_2623

TTCGACTTATCTACCATAGCAAAGGCTACCAATAACTTTTCAATTGACAGACAGATTGGAGAGGGGGGC  
TTTGGACCTGTTTACAAGGTATATACACTTAAGACCTGGGTCTTCAGAGTA

>M6-PGSC0003DMG400019275-(rev)M6G-LecRK\_2684

AGGGGGGCTTTGGACCTGTTTACAAGGTATATACACTTAAGACCTGGGTCTTCAGAGTAAACCTTCTTCT  
TTAAATACAATATAGGAGTTGTATGATCAAAGGTATAAGCCTTTGCTTTG

>M6-PGSC0003DMG400019275-(rev)M6G-LecRK\_2745

CCTTCTTCTTTAAATACAATATAGGAGTTGTATGATCAAAGGTATAAGCCTTTGCTTTGTGAAACCAAAA  
GGAGACCTATACAATAGCTAAGGGAAGAAAGGTTGGGATATGGGGGATAT

>M6-PGSC0003DMG400019275-(rev)M6G-LecRK\_2806

AAACCAAAGGAGACCTATACAATAGCTAAGGGAAGAAAGGTTGGGATATGGGGGATATCCTTCTCAG  
AATGTATCCAAGAACCACTAGTCTAGCTTTTCAATAAGTGTTGTCCCAAGTT

>M6-PGSC0003DMG400019275-(rev)M6G-LecRK\_2867

TTCTCAGAATGTATCCAAGAACCACTAGTCTAGCTTTTCAATAAGTGTTGTCCCAAGTTAGTCAATATAGA  
GCCTTTAGCATTTCAGAAAAAGCTGCAAGAGTAACCCATCACCTTT

>M6-PGSC0003DMG400019275-(rev)M6G-LecRK\_2928

TCAATATAGAGCCTTTAGCATTTCAGAAAAAGCTGCAAGAGTAACCCATCACCTTTGGGTGGAAGT  
CAGATTAAAGTGTTGAGGATATAGTTTGTAAAGAAGAGAGTCATTTGTT

>M6-PGSC0003DMG400019275-(rev)M6G-LecRK\_2989

GTGGAAGTGCAGATTAAAGTGTTGAGGATATAGTTTGTAAAGAAGAGAGTCATTTGTTCTTTGTAGTCA  
TTTATTTGTTTCATCTTTCCATGGTGACAAGTGGCAACTAATCCCAAATC

>M6-PGSC0003DMG400019275-(rev)M6G-LecRK\_305

AAGCAGCCATGACTTGAAGCAGCCTCAACTCTCATTACAAAGCTAAGACTTTTCATAGTCATAGACCTTT  
CACTCCTTTCAAATAATACTCTTTTCATATGTTAGAAAGCTCAAGTGATGG

>M6-PGSC0003DMG400019275-(rev)M6G-LecRK\_3050

TTGTAGTCATTTATTTGTTTCATCTTTCCATGGTGACAAGTGGCAACTAATCCCAAATCAAAGGGCGAAT  
ATTTCTTATAGACTTTAGTTTTAGTTTTAAAGAAGATTATCATAGGGCT

>M6-PGSC0003DMG400019275-(rev)M6G-LecRK\_3111

AAGGGCGAATATTTCTTATAGACTTTAGTTTTAGTTTTAAAGAAGATTATCATAGGGCTAAACTGAAAAT  
ATAATGAACTTATAATAGGGATTTGGCACATTTGACCTAAATTTGTTAAC

>M6-PGSC0003DMG400019275-(rev)M6G-LecRK\_3172

ACTGAAAATATAATGAACTTATAATAGGGATTTGGCACATTTGACCTAAATTTGTTAACGGAGATTTTGA  
TCAACTTAGGTATTGAAAATATTAACATGCAGAGATTGTGATGTTTAGGG

>M6-PGSC0003DMG400019275-(rev)M6G-LecRK\_3233

AGATTTTGATCAACTTAGGTATTGAAAATATTAACATGCAGAGATTGTGATGTTTAGGGCATACTTGAAG  
GACAGGAAATAGCCGTCAAGCGGTTGTCTAAACTTCTACACAAGGAGAA

>M6-PGSC0003DMG400019275-(rev)M6G-LecRK\_3294

TACTTGAAGGACAGGAAATAGCCGTCAAGCGGTTGTCTAAACTTCTACACAAGGAGAAAAAGAGTTCA  
AAAATGAAGTTTTATATATTGCTAAACTTCAGCAAAGGAATCTGGTGAAGA

>M6-PGSC0003DMG400019275-(rev)M6G-LecRK\_3355

AGAGTTCAAAAATGAAGTTTTATATATTGCTAAACTTCAGCAAAGGAATCTGGTGAAGATTCTTGGCTGT  
TGCATTGAAGGGGAAGAAAAAATGTTGATTTATGAGTACTTGCCAAATGG

>M6-PGSC0003DMG400019275-(rev)M6G-LecRK\_3416

CTTGGCTGTTGCATTGAAGGGGAAGAAAAAATGTTGATTTATGAGTACTTGCCAAATGGGAGTCTTGAT  
TCATTTATATTTGGTACAACCTTCTCAATCCAATATCATGCATTTGAATAAT

>M6-PGSC0003DMG400019275-(rev)M6G-LecRK\_3477

GTCTTGATTCATTTATATTTGGTACAACCTTCTCAATCCAATATCATGCATTTGAATAATAATTGCATTTTCA  
TTAATTGATGCCTATAGGCATACACTGATTTTCTTCCAACCTTCAAAAT

>M6-PGSC0003DMG400019275-(rev)M6G-LecRK\_3538

TTGCATTTTCAAGTTAATTGATGCCTATAGGCATACACTGATTTTCTTCCAACCTTCAAAATCCCCATAAAGCA  
GGGAAAAAAAATGTAAGGAGAGAACTAAGACCCCGATTGTATACGAGCC

>M6-PGSC0003DMG400019275-(rev)M6G-LecRK\_3599

CCATAAAGCAGGGAAAAAAAATGTAAGGAGAGAACTAAGACCCCGATTGTATACGAGCCTAATAATTA  
CATACTTGGTAGTTCAAACCTTCTCGTATTATGTTTCCATCAGCAAGGAACTG

>M6-PGSC0003DMG400019275-(rev)M6G-LecRK\_366

TAGACCTTTCACCTCTTTCAAATAATACTCTTTCATATGTTAGAAAGCTCAAGTGATGGCTATTTTAACT  
CGTTTGTTCAGTTTCTTCTTGTAAAGATTCACTGTCTGAAAACAAATTA

>M6-PGSC0003DMG400019275-(rev)M6G-LecRK\_3660

ATAATTACATACTTGGTAGTTCAAACCTTCTCGTATTATGTTTCCATCAGCAAGGAACTGATTTTGTTTTAG

GTTTTAATACTACCTTCCACTAAACCTATTTAGTGTGTTAATGACCCAA

>M6-PGSC0003DMG400019275-(rev)M6G-LecRK\_3721

TTTGTTTTAGGTTTTAATACTACCTTCCACTAAACCTATTTAGTGTGTTAATGACCCAACATTATTTGGCAG  
ATGACATACAAAGCAAGGTATTAGACTGGCCTAAACGATTTACATTA

>M6-PGSC0003DMG400019275-(rev)M6G-LecRK\_3782

TTATTTGGCAGATGACATACAAAGCAAGGTATTAGACTGGCCTAAACGATTTACATTATCAATGGCATA  
GCTCGGGGACTTATGTATCTGCATCAAGATTCTCAATTGAGGATAATCCA

>M6-PGSC0003DMG400019275-(rev)M6G-LecRK\_3843

AATGGCATAGCTCGGGGACTTATGTATCTGCATCAAGATTCTCAATTGAGGATAATCCACAGAGATCTG  
AAAGCTAACAAATATCTTGTTAGACAAGGACATGAATCCAAAGATATCAGAC

>M6-PGSC0003DMG400019275-(rev)M6G-LecRK\_3904

GAGATCTGAAAGCTAACAAATATCTTGTTAGACAAGGACATGAATCCAAAGATATCAGACTTTGGCATTG  
CAAAAATATGTGATGGGAATGACATTGGGGACAAGACAAACCAAGTTGTTG

>M6-PGSC0003DMG400019275-(rev)M6G-LecRK\_3965

TGGCATTGCAAAAATATGTGATGGGAATGACATTGGGGACAAGACAAACCAAGTTGTTGGAACACAGT  
AAGAACCTTATACTTGATAGCTAGAAATTTGAACCTAAGAAGAGTTTTGAGA

>M6-PGSC0003DMG400019275-(rev)M6G-LecRK\_4026

ACACAGTAAGAACCTTATACTTGATAGCTAGAAATTTGAACCTAAGAAGAGTTTTGAGATATTAGGTACG  
TTTTCCAGCATTAGTAATTCTATTTTTTTGTTTACATTTCTATGCAGTGGG

>M6-PGSC0003DMG400019275-(rev)M6G-LecRK\_4087

TTAGGTACGTTTTCCAGCATTAGTAATTCTATTTTTTTGTTTACATTTCTATGCAGTGGGTACCTCTCACCGG  
AATATGCATTGCACGGGAGATACTCAGTAAAATCAGATGTATTTAGCT

>M6-PGSC0003DMG400019275-(rev)M6G-LecRK\_4209

GGTATCTTAATATTGGAAATTGTAAGTGGGAAAAGCAACAGAAGATTCTCTCATCCAGACCACAACCTTA  
ATCTACTTGGACTTGTAAGATTTGATGAGTTTCATTTTACTTATCCTTTG

>M6-PGSC0003DMG400019275-(rev)M6G-LecRK\_427

ATTTTAACACTCGTTTGTTTCAGTTTCTTCTTGTAAGATTCAGTGTCTGAAAACAAATTAAGTGTCATTACT  
ATGCAGCATTGACATAGAAAAAATTGGATCTCAAAGCATGAAGGCA

>M6-PGSC0003DMG400019275-(rev)M6G-LecRK\_4270

ACAACCTTAATCTACTTGGACTTGTAAGATTTGATGAGTTTCATTTTACTTATCCTTTGGTCTTATGTTATC  
TTCTAGTAACAGATATCTGCAAATCTAGTCAGCGTTAATAAATCGTGT

>M6-PGSC0003DMG400019275-(rev)M6G-LecRK\_4331

CTTATGTTATCTTCTAGTAACAGATATCTGCAAATCTAGTCAGCGTTAATAAATCGTGTAACTACAGGCA  
TGGAAACTCTATAAAGAAGGCAGGTCAACAGAACTACTTGATGAATACC

>M6-PGSC0003DMG400019275-(rev)M6G-LecRK\_4392

TCTACAGGCATGGAACTCTATAAAGAAGGCAGGTCAACAGAACTACTTGATGAATACCTAGGGAATTC  
TTGTTCAACACCTGAAGTGGAACGATCAATCTGTGTTGGTCTATTATGTGT

>M6-PGSC0003DMG400019275-(rev)M6G-LecRK\_4453

GGGAATTCTTGTTCAACACCTGAAGTGGAACGATCAATCTGTGTTGGTCTATTATGTGTCCAACAATGTC  
CAGAAGATCGTCCAAGTATGTCTTCTGTGGTTATGATGTTAAACAATAAA

>M6-PGSC0003DMG400019275-(rev)M6G-LecRK\_4514

AACAATGTCCAGAAGATCGTCCAAGTATGTCTTCTGTGGTTATGATGTTAAACAATAAAGGTGTATTGCC  
ACAGGCTAAACGGCCAGGTTTTTACATTGAAACAGATGCACCGGATGGTG

>M6-PGSC0003DMG400019275-(rev)M6G-LecRK\_4575

TGTATTGCCACAGGCTAAACGGCCAGGTTTTTACATTGAAACAGATGCACCGGATGGTGAACCTCTCGTCT  
AGCCATACTGAGACCCCCATCACAATATTGGTAGCCCGATAAGAAAATAT

>M6-PGSC0003DMG400019275-(rev)M6G-LecRK\_4636

CTCTCGTCTAGCCATACTGAGACCCCCATCACAATATTGGTAGCCCGATAAGAAAATATTGTTTCACTTGC  
TTTTCAACAAGCTTGCAGTTGTAAAAAATCTTTTCTTTTATTCTTTGTAG

>M6-PGSC0003DMG400019275-(rev)M6G-LecRK\_4678

GCCCGATAAGAAAATATTGTTTCACTTGCTTCAACAAGCTTGCAGTTGTAAAAAATCTTTTCTTTTATTCT  
TTGTAGAAATGTGGTAAAAAATATTTGGTATATCAGCTATTTCGAAC

>M6-PGSC0003DMG400019275-(rev)M6G-LecRK\_488

GTGTCATTAATGATGCAGCATTTGACATAGAAAAAATTGGATCTCAAAGCATGAAGGCATTAATAAGGG  
AAAGTTTTTACTTATCTTTGCTCTTGTGTTTGTGTTTCATCAACCGAAGCT

>M6-PGSC0003DMG400019275-(rev)M6G-LecRK\_549

ACTAAGGGAAAGTTTTTACTTATCTTTGCTCTTGTGTTTGTGTTTCATCAACCGAAGCTTTGGCGCTACAG  
ATACAATAACTACACCTCATTTTCTGAAAGATGGTGATGAAAATGTTGC

>M6-PGSC0003DMG400019275-(rev)M6G-LecRK\_61

CTTTCATGCTCAAAAAGTCAAGAACTATTGACCACCTATAATATTTCTTAATTCCACAACAGCTCCCGTTT  
AGTCTTGGTTATTATCCAGTCAGATCTTATAGCAATCTATGAAGACCTC

>M6-PGSC0003DMG400019275-(rev)M6G-LecRK\_610

GGCGCTACAGATACAATAACTACACCTCATTTTCTGAAAGATGGTGATGAAAATGTTGCTTCAACTGGTG  
GAATATTCGAAATGGGGTTCTTCAGTCCAGGTAATTCGAAAAATCGCTAT

>M6-PGSC0003DMG400019275-(rev)M6G-LecRK\_671

CAACTGGTGGGAATATTCGAAATGGGGTTCTTCAGTCCAGGTAATTCGAAAAATCGCTATGTGGGTATGT  
GGTATAAGAACACATCTGTTAGGACAGTGGTGTGGGTTGCCAACAGAGAAG

>M6-PGSC0003DMG400019275-(rev)M6G-LecRK\_732

GGGTATGTGGTATAAGAACACATCTGTTAGGACAGTGGTGTGGGTTGCCAACAGAGAAGCTCCTTTGAC  
TGGTGGATCAGGTATCTTGAAAATAATCAAGCCAGGAATTCTTGTCTTGT

>M6-PGSC0003DMG400019275-(rev)M6G-LecRK\_793

CCTTTGACTGGTGGATCAGGTATCTTGAAAATAATCAAGCCAGGAATTCTTGTCTTGTCAATGGCACTA  
GCCATGTTGTGTGGTCAACTAATACCACTAGATCTGTGCAGAATCCTGTA

>M6-PGSC0003DMG400019275-(rev)M6G-LecRK\_854

ATGGCACTAGCCATGTTGTGTGGTCAACTAATACCACTAGATCTGTGCAGAATCCTGTAGCGCAGTTGCT  
AGATTCTGGAAATCTTATTGTCAAAGAAGCTAGTGATGATAGCCCGGGGA

>M6-PGSC0003DMG400019275-(rev)M6G-LecRK\_915

GCAGTTGCTAGATTCTGGAAATCTTATTGTCAAAGAAGCTAGTGATGATAGCCCGGGGAATTTGATATG  
GCAGAGCTTTGATCACCAACGGATACGCTATTAGCAGGCATGAAGCTTGG

>M6-PGSC0003DMG400019276-(rev)M6G-LecRK\_0

AAAAAATGAAGTCTTGGTCATCTCTGAGACAATCTTACTGAAAAGAATACCACAAGAGATGGAATATGA  
TAAATCTTTTTAACAATTTTGAAGAAGAATGCAATGCAACAAAAGGTAAA

>M6-PGSC0003DMG400019276-(rev)M6G-LecRK\_1054

TTTTGTCAATGTTTAGATAAATTCAAGCCAAAACATCCTGATGATTGGGAAAGATCTGACTGGTCTAGTG  
GTTGTGTCCGGAAGATCCCACTGAATTGCACAGGAGATGGATTTATTAAG

>M6-PGSC0003DMG400019276-(rev)M6G-LecRK\_1116

GTCTAGTGGTTGTGTCCGGAAGATCCCACTGAATTGCACAGGAGATGGATTTATTAAGTATTCTGGTGT



AAACTGCCTGATACGCGAAATTCTTGTTCAATGAGACAATGACACTAGA

>M6-PGSC0003DMG400019276-(rev)M6G-LecRK\_1178

CTGGTGTTAAACTGCCTGATACGCGAAATTCTTGTTCAATGAGACAATGACACTAGATGAATGCAGGG  
TAGTTTGCTTGAGAAATTGTTTCGTGTATGGGTTATACTAATCTGGATATAC

>M6-PGSC0003DMG400019276-(rev)M6G-LecRK\_124

ACTATCATGGATATAACAATATTTCAATTTATTCTACTTCTTGTATTTTGTGTTTCTCAAATGCTAGT  
GGTCAAGGAGATACCATAACTACAACCTCAATTCATTAACATGGTGAT

>M6-PGSC0003DMG400019276-(rev)M6G-LecRK\_1240

TGCAGGGTAGTTTGCTTGAGAAATTGTTTCGTGTATGGGTTATACTAATCTGGATATACGCAATGGAGGA  
AGCGGGTGCTTGCTATGGATTTGGGAGCTGGTTGACATCAGACAGCTACCT

>M6-PGSC0003DMG400019276-(rev)M6G-LecRK\_1302

TGGAGGAAGCGGGTGCTTGCTATGGATTTGGGAGCTGGTTGACATCAGACAGCTACCTGCATCAGGAC  
AGGATATCTACATTAGGATGTCTGCTTCAGACATAGGTAATTAATAATTAAT

>M6-PGSC0003DMG400019276-(rev)M6G-LecRK\_1364

CAGGACAGGATATCTACATTAGGATGTCTGCTTCAGACATAGGTAATTAATAATTAATATGCGAGTTCAT  
AAATCATAACCATGTCAATTGTACTTCAATGCCAGAAAGTCAACTCATAT

>M6-PGSC0003DMG400019276-(rev)M6G-LecRK\_1426

GAGTTCATAAATCATAACCATGTCAATTGTACTTCAATGCCAGAAAGTCAACTCATATGAGGGACAAAG  
GTAATCCAAGTCCACATTATGGGAATAAGACTTCAAGGACCGTCCTGTTTT

>M6-PGSC0003DMG400019276-(rev)M6G-LecRK\_1488

GACAAAGGTAATCCAAGTCCACATTATGGGAATAAGACTTCAAGGACCGTCCTGTTTTCTCGACATAAA  
TACAACAAATATAAAAAGAAAAAACTTCTAGCATTACTAGAAACAACT

>M6-PGSC0003DMG400019276-(rev)M6G-LecRK\_1550

GACATAAATACAACAAATATAAAAAGAAAAAACTTCTAGCATTACTAGAAACAACTATTGATAATATT  
TCGGTGGGAAATGTTGCAGGTTCTGCTGGATCAAAGGAAAGATAGCTGT

>M6-PGSC0003DMG400019276-(rev)M6G-LecRK\_1612

ATAATATTTGGTGGGAAATGTTGCAGGTTCTGCTGGATCAAAGGAAAGATAGCTGTCATACTTGCAA  
TAGCTTTGCCACTATTGGTTGCATTGATTCTGCTCGGTTTAGGTGTAGGCC

>M6-PGSC0003DMG400019276-(rev)M6G-LecRK\_1674

CTTGCAATAGCTTTGCCACTATTGGTTGCATTGATTCTGCTCGGTTTAGGTGTAGGCCTGATTCTTTGTAA  
ACGAAAAAGGAGAAAGGATCCAGTGGTTACAACAACAGGTAAGTGGAAG

>M6-PGSC0003DMG400019276-(rev)M6G-LecRK\_1736

TCTTTGTAAACGAAAAAGGAGAAAGGATCCAGTGGTTACAACAACAGGTAAGTGGAAGTACCAATTCTA  
TCTATTGTAAACTGGAAGCACCTAGTGGTCATTAGTTCTGTATACCACTA

>M6-PGSC0003DMG400019276-(rev)M6G-LecRK\_1798

AATTCTATCTATTGTAAACTGGAAGCACCTAGTGGTCATTAGTTCTGTATACCACTAGTATTTCTTTTCG  
AGCTCCTTATTTGAGCAAGGTCTACTTGTATGTTCAAATTGCAGGGAGA

>M6-PGSC0003DMG400019276-(rev)M6G-LecRK\_186

AAATGCTAGTGGTCAAGGAGATACCATAACTACAACCAATTCAATTAACATGGTGATACTATTGTTTCG  
TCTCGTGGAACGTTTCGAGTTAGGATTCTTCAGTCCTGGAGATACTTCTAC

>M6-PGSC0003DMG400019276-(rev)M6G-LecRK\_1860

TTCTTTTCGAGCTCCTTATTTGAGCAAGGTCTACTTGTATGTTCAAATTGCAGGGAGATTAGGTGGTCAC  
AGCAACAAGAATGATAACAGTAATCAAATTCACCAGGAAAATTTTGAGCT

>M6-PGSC0003DMG400019276-(rev)M6G-LecRK\_1922

GTGGTCACAGCAACAAGAATGATAACAGTAATCAAATTCACCAGGAAAATTTTGAGCTTCCACTTTTTGA  
CTTATTAACGTTAACCCATGCTACCAACAACCTTTTCATTTGCAAACAAGA

>M6-PGSC0003DMG400019276-(rev)M6G-LecRK\_1984

CTTTTTGACTTATTAACGTTAACCCATGCTACCAACAACCTTTTCATTTGCAAACAAGATTGGAGAGGGTG  
GCTTTGGACAAGTTTACAAGGTAGAAACATTCCTCAGACCCCAAGTAATG

>M6-PGSC0003DMG400019276-(rev)M6G-LecRK\_2046

AGAGGGTGGCTTTGGACAAGTTTACAAGGTAGAAACATTCCTCAGACCCCAAGTAATGATACTCGAGAC  
TTAATTTCTTTGCTTTTCTTGAAAGGAATATTAACCTTTGGAGTCCGTACA

>M6-PGSC0003DMG400019276-(rev)M6G-LecRK\_2108

TCGAGACTTAATTTCTTTGCTTTTCTTGAAAGGAATATTAACCTTTGGAGTCCGTACATACAGCAGTGTTT  
GCTAGTATGATGAGCGGAATGAGTGTTAAGTTGAGAGCCTTGTTTCAAG

>M6-PGSC0003DMG400019276-(rev)M6G-LecRK\_2170

GCAGTGTGCTAGTATGATGAGCGGAATGAGTGTTAAGTTGAGAGCCTTGTTTCAAGACCGATAATGT  
TTTATAAAATAAAGTTTCAAATTCAAAGAAAAGGAATATCAGCTGGAAAG

>M6-PGSC0003DMG400019276-(rev)M6G-LecRK\_2232

ATAATGTTTTATAAAATAAAGGTTTCAAATTCAAAGAAAAGGAATATCAGCTGGAAAGATTACCAACCAT  
GGGAGAAGCTGTGGAATAAAATGTGCAAGTAGATGCTGCCTGAACAAGAA

>M6-PGSC0003DMG400019276-(rev)M6G-LecRK\_2294

CCAACCATGGGAGAAGCTGTGGAATAAAATGTGCAAGTAGATGCTGCCTGAACAAGAAGCTTGATTGCA  
ATAGTAAGGAAAAAATGACGATTCCTCCATCGAATTTCTAACAGGAGTGCT

>M6-PGSC0003DMG400019276-(rev)M6G-LecRK\_2356

ATTGCAATAGTAAGGAAAAAATGACGATTCCTCCATCGAATTTCTAACAGGAGTGCTACTTTTACAGGG  
TGTATTAGAAGGTGGACAAGAAGTAGCAGTGAAGCGGCTTTCAGAAACAT

>M6-PGSC0003DMG400019276-(rev)M6G-LecRK\_2418

TTACAGGGTGTATTAGAAGGTGGACAAGAAGTAGCAGTGAAGCGGCTTTCAGAAACATCAGAGCAAGG  
ACTTCACGAGTTCAAGAATGAAGTTAAGTGCATCGCAAACTTCAGCATCGG

>M6-PGSC0003DMG400019276-(rev)M6G-LecRK\_248

TTGTTTCGTCTCGTGGAACGTTTCGAGTTAGGATTCCTCAGTCCTGGAGATACTTCTACAAATCACTATGTT  
GGAATATGGTACAAGAAAACCTCTGCTACTACTCCTGTTTGGGTTGCCA

>M6-PGSC0003DMG400019276-(rev)M6G-LecRK\_2480

GCAAGGACTTCACGAGTTCAAGAATGAAGTTAAGTGCATCGCAAACTTCAGCATCGGAATCTTGTA  
GCTTCTCGGATGCTGTATTCAAGGAGAAGAGAAGATGTTGGTGTATGAGTA

>M6-PGSC0003DMG400019276-(rev)M6G-LecRK\_2542

TTGTAAAGCTTCTCGGATGCTGTATTCAAGGAGAAGAGAAGATGTTGGTGTATGAGTACTTGCCAAACA  
AAAGCCTGGAATTATATATATTTGGTTAGTCTTTCACATCTACTGAGCGGC

>M6-PGSC0003DMG400019276-(rev)M6G-LecRK\_2604

CCAAACAAAAGCCTGGAATTATATATATTTGGTTAGTCTTTCACATCTACTGAGCGGCCATTTCTTTCAAT  
GCAATCAATTGTGATTTACGAAGTTTGGTTTCGCTGTTATAGAAAAC

>M6-PGSC0003DMG400019276-(rev)M6G-LecRK\_2666

TCTTTCAATGCAATCAATTGTGATTTACGAAGTTTGGTTTCGCTGTTATAGAAAACCTTTAGTAATAAGTT  
GAGAACATTTGACAGACGAAGAAAGGAGTGCATTAATTGATTGGCCTAA

>M6-PGSC0003DMG400019276-(rev)M6G-LecRK\_2728

TAATAAGTTGAGAACATTTGACAGACGAAGAAAGGAGTGCATTAATTGATTGGCCTAAGCGCTTCAATA

TTATCAATGGAATTGCTCGAGGACTGATGTATCTTCATCAAGATTCTAGGC

>M6-PGSC0003DMG400019276-(rev)M6G-LecRK\_2790

TTCAATATTATCAATGGAATTGCTCGAGGACTGATGTATCTTCATCAAGATTCTAGGCTCAGAATCATCCA  
CAGAGACTTGAAAGCTAGCAATGTCTTACTTGATATTGAAATGAATCCA

>M6-PGSC0003DMG400019276-(rev)M6G-LecRK\_2852

AATCATCCACAGAGACTTGAAAGCTAGCAATGTCTTACTTGATATTGAAATGAATCCAAAAATATCAGAT  
TTTGGGATGGCTAGAAGTTTCAGAGGAGATGAGACAGGAGACAATACACG

>M6-PGSC0003DMG400019276-(rev)M6G-LecRK\_2914

TATCAGATTTTGGGATGGCTAGAAGTTTCAGAGGAGATGAGACAGGAGACAATACACGCCGTGTTGTT  
GGAACATAGTAAGGTTTAATATTTGATTATATATGTAGTCATGAACACATGG

>M6-PGSC0003DMG400019276-(rev)M6G-LecRK\_2976

GTTGTTGGAACATAGTAAGGTTTAATATTTGATTATATATGTAGTCATGAACACATGGTGCATTATATAA  
TCCTGTAGTTTCTTTATTGCAGTGGTTACATGTCCCCGGAATATGCAGTC

>M6-PGSC0003DMG400019276-(rev)M6G-LecRK\_310

CACTATGTTGGAATATGGTACAAGAAAACCTCTGCTACTACTCCTGTTTGGGTTGCCAATAGACTAGCTC  
CTGTCACTAATAAATATGGGGTGTGAAAGTCATTCAGCCAGGTCTGATT

>M6-PGSC0003DMG400019276-(rev)M6G-LecRK\_3100

GGATATTCTCAGTGAAATCAGATGTCTTTAGCTTTGGGGTATTAGTACTAGAGATTGTGAGTGGAAAGA  
AGAACCGACGATTTGTTTCATCCAGACCACCACCTCAACCTTCTTGGACATG

>M6-PGSC0003DMG400019276-(rev)M6G-LecRK\_3162

GGAAAGAAGAACCGACGATTTGTTTCATCCAGACCACCACCTCAACCTTCTTGGACATGTAAGTACAGTAA  
CTCCTAACGGTAAAACTCAGAAAAAGTGTGTTGTTAATGCATTTAAGTTT

>M6-PGSC0003DMG400019276-(rev)M6G-LecRK\_3224

TACAGTAACTCCTAACGGTAAAACTCAGAAAAAGTGTGTTGTTAATGCATTTAAGTTTTATGTGCCGACA  
GTAAATTACATGTAAATCTCTTTTATAAGAGCTTGTTAACTAACCTACTA

>M6-PGSC0003DMG400019276-(rev)M6G-LecRK\_3286

TGCCGACAGTAAATTACATGTAAATCTCTTTTATAAGAGCTTGTTAACTAACCTACTATCCCAAGTTAAAC  
CACAATGCTAGAGTAAAAAGTCTTTGTACTATTACTGGTATAAGTTAAA

>M6-PGSC0003DMG400019276-(rev)M6G-LecRK\_3348

AAGTTAAACCAATGCTAGAGTAAAAAGTCTTTGTTACTATTACTGGTATAAGTTAAATCCTTTGTTGAT  
GGAGGGATCGTTTCATGCAGGCATGGATTCTTCATAATGAAGAACGGGCA

>M6-PGSC0003DMG400019276-(rev)M6G-LecRK\_3410

TTGTTGATGGAGGGATCGTTTCATGCAGGCATGGATTCTTCATAATGAAGAACGGGCATTGGAAGTACTAGT  
AGATCCATATCTCGTAAACTCATACTATATATCAGAAATACTAAGATCAGT

>M6-PGSC0003DMG400019276-(rev)M6G-LecRK\_3472

AACTAGTAGATCCATATCTCGTAAACTCATACTATATATCAGAAATACTAAGATCAGTCCATGTGGGATT  
GTTATGTGTTCAACAAAATCCAGAGGACAGGCCAAGCATGTCAACTGTGA

>M6-PGSC0003DMG400019276-(rev)M6G-LecRK\_3596

GATGCTGAGCAATGAAGGCATTTTGCCATTGCCTAAACATCCCGGTTTCTTCACGGAAAGGAAAGTTGA  
AGATGTTGATCAATTGTCTTGGAGTACACAAACACCAAGTTCTATAAACGA

>M6-PGSC0003DMG400019276-(rev)M6G-LecRK\_3658

AAGTTGAAGATGTTGATCAATTGTCTTGGAGTACACAAACACCAAGTTCTATAAACGAAGTTACCATCAC  
GCAGTTGAATGCTCGATAGAAGCATGTCCATGTCCATAGTCAGTGGCAAA

>M6-PGSC0003DMG400019276-(rev)M6G-LecRK\_372

ACTAGCTCCTGTCACTAATAAATATGGGGTGTTGAAAGTCATTCAGCCAGGTCTGATTGTACTTCTGAAT  
GATACTAATGCAACTGTTTGGTCGACAAATTCATCCAAATCTGTGCAGAA

>M6-PGSC0003DMG400019276-(rev)M6G-LecRK\_3968

CATTCATTTCTCAGAATTGTATTAATAATCCTCCCTTTTTTTCTTTAAGAAATTAATAAAGCAAAATCTGCAGG  
AATTGTATTGAAGTATGTCTAAATTTAAGGCCTTGAATTCAATTTCA

>M6-PGSC0003DMG400019276-(rev)M6G-LecRK\_434

TTCTGAATGATACTAATGCAACTGTTTGGTCGACAAATTCATCCAAATCTGTGCAGAATCCTGTTGCTCAG  
TTGTTGGACACAGGGAATTTTGTGGTGAGGGATGCTAATGATCCGAATC

>M6-PGSC0003DMG400019276-(rev)M6G-LecRK\_496

GTTGCTCAGTTGTTGGACACAGGGAATTTTGTGGTGAGGGATGCTAATGATCCGAATCCAGAGAATTTTC  
CTCTGGCAAAGTTTTGATTATCCTAGTGATACGTTGTTGGAAGGTATGAAA

>M6-PGSC0003DMG400019276-(rev)M6G-LecRK\_558

GAATTCCTCTGGCAAAGTTTTGATTATCCTAGTGATACGTTGTTGGAAGGTATGAACTTGGGACGGAC  
TTGGTGAAGTGGATTAGAAAGGTATCTTACTTCTTGGAGAAGTAGTGATGA

>M6-PGSC0003DMG400019276-(rev)M6G-LecRK\_62

AATATGATAAATTCTTTTTAACAATTTTGAAGAAGAATGCAATGCAACAAAAGGTAAATATAACTATCAT  
GGATATAACAATATTTCAATTTATTCTACTTCTCTTGTATTTTGTGTTTC

>M6-PGSC0003DMG400019276-(rev)M6G-LecRK\_620

GGACGGACTTGGTGACTGGATTAGAAAGGTATCTTACTTCTTGGAGAAGTAGTGATGATCCTGCTCCGG  
GGGATTATACTTATCATTGTGATCCTACGGGTTATCCACAAAACCTTATGC

>M6-PGSC0003DMG400019276-(rev)M6G-LecRK\_682

GCTCCGGGGGATTATACTTATCATTGTGATCCTACGGGTTATCCACAAAACCTTATGCGAAAAGGGGCTA  
ATGTGACATTTAGAGCAGGGCCGTGGAATGGTATCAGGTGGAGTGGTGCA

>M6-PGSC0003DMG400019276-(rev)M6G-LecRK\_744

AGGGGCTAATGTGACATTTAGAGCAGGGCCGTGGAATGGTATCAGGTGGAGTGGTGCACCAAATCTGG  
TGAACAACCTCTATCATTCTTTTCGGTGTGGTTATGAATAGTAGGGAAATTTA

>M6-PGSC0003DMG400019276-(rev)M6G-LecRK\_806

ATCTGGTGAACAACTCTATCATTCTTTTCGGTGTGGTTATGAATAGTAGGGAAATTTACTACAAGTATGA  
GATGGTGAACAAATCCGTTATTTCAACATTTGTTTTAGAGCCTTACGGGA

>M6-PGSC0003DMG400019276-(rev)M6G-LecRK\_868

AAGTATGAGATGGTGAACAAATCCGTTATTTCAACATTTGTTTTAGAGCCTTACGGGAAAGCTATGCGTA  
TCATCTGGATTGGAAAGGTTACGGGATGGGTAAATTACCACTCTGCAGTT

>M6-PGSC0003DMG400019276-(rev)M6G-LecRK\_930

TATGCGTATCATCTGGATTGGAAAGGTTACGGGATGGGTAAATTACCACTCTGCAGTTGTGGATGACTG  
TGACACCTACAAATTATGTGGTGCATATGGGACTTGCAACATTTTCGAGTGA

>M6-PGSC0003DMG400019276-(rev)M6G-LecRK\_992

ATGACTGTGACACCTACAAATTATGTGGTGCATATGGGACTTGCAACATTTTCGAGTGATCCTTTTTGTCA  
ATGTTTAGATAAATTCAAGCCAAAACATCCTGATGATTGGGAAAGATCTG

>M6-PGSC0003DMG400019278-(rev)M6G-LecRK\_0

TATGCCTTCACACGACTCCTCTGTCTGTTCTATACCATGTTAATTCGTTAATTGTGTATTACAGGTATCC  
TGAACAATGGTATGCAGTGGACTGGTCTAATGGTTGTGTAAGGAAAAC

>M6-PGSC0003DMG400019278-(rev)M6G-LecRK\_1037

CTACCAGATGGACTAGAGATAGCAGTAAAGAAGCTATCAACGTATTCTGGACAAGGCGTTCAAGAGTTA

AAAAATGAAATTGCTCTCATTTCCAAGCTGCAACATAGGAACCTTGTC AAG

>M6-PGSC0003DMG400019278-(rev)M6G-LecRK\_1098

AAGAGTTAAAAAATGAAATTGCTCTCATTTCCAAGCTGCAACATAGGAACCTTGTC AAGCTTTTGGGTTG  
CTGCCTTGAAGGAGAAGAAAATATGCTAATCTATGAGTTTATGCCCAACT

>M6-PGSC0003DMG400019278-(rev)M6G-LecRK\_1159

TTTGGGTTGCTGCCTTGAAGGAGAAGAAAATATGCTAATCTATGAGTTTATGCCCAACTCTAGCTTGGAC  
TGTTTCATTTTTGGTCTGCTTTTAGTGATTCATTAATAAATATTACTAC

>M6-PGSC0003DMG400019278-(rev)M6G-LecRK\_122

CTTTGTCTTGTAACCAAGATGGTTTTCTTAAATTTAGGAATATCAAGATGCCGAATTCTAGACACTCCTGG  
TATAATGTAAGCATTAACTTGAAGAATGCAAGAATATGTGCTTGGCTG

>M6-PGSC0003DMG400019278-(rev)M6G-LecRK\_1220

AGCTTGGACTGTTTCATTTTTGGTCTGCTTTTAGTGATTCATTAATAAATATTACTACTTGATAAGTCCTC  
AATATCTCTGTATCACTCAAGAGTTGAATTTACATTGTGCAGATCCAA

>M6-PGSC0003DMG400019278-(rev)M6G-LecRK\_1281

GATAAGTCCTCAATATCTCTGTATCACTCAAGAGTTGAATTTACATTGTGCAGATCCAAGCAGAAAAGCT  
TCACTTGCATGGAAGAATCGCTTTGAAATTTCTGTGGGAATATCTCGAGG

>M6-PGSC0003DMG400019278-(rev)M6G-LecRK\_1342

AGAAAAGCTTCACTTGCATGGAAGAATCGCTTTGAAATTTCTGTGGGAATATCTCGAGGTCTTCTTTACC  
TTCACCAGGACTCAAGATTTAGAATTATTCATAGAGACCTCAAGACCAGC

>M6-PGSC0003DMG400019278-(rev)M6G-LecRK\_1403

TTCTTTACCTTACCAGGACTCAAGATTTAGAATTATTCATAGAGACCTCAAGACCAGCAACATTTTACTA  
GATGGCGGCATGAATGCCAAAATTGCTGACTTTGGCCTTGCCAAAATTT

>M6-PGSC0003DMG400019278-(rev)M6G-LecRK\_1464

CATTTTACTAGATGGCGGCATGAATGCCAAAATTGCTGACTTTGGCCTTGCCAAAATTTTTGGCGGAGAA  
CAAGTGGAAGGAAATACTAAGAGAGTGATAGGGACATAGTAAGTTCTACA

>M6-PGSC0003DMG400019278-(rev)M6G-LecRK\_1525

GGCGGAGAACAAGTGGAAGGAAATACTAAGAGAGTGATAGGGACATAGTAAGTTCTACAAATCTTTAT  
GATAGACATTCATACAGTACATGCACTTAAATTTGATGTTGATGCAGTGGAT

>M6-PGSC0003DMG400019278-(rev)M6G-LecRK\_1586

TCTTTATGATAGACATTCATACAGTACATGCACTTAAATTTGATGTTGATGCAGTGGATATATGTCACCTG  
AGTATGCTGTTGATGGGAAATATTCAGTAAAATCCGATGTATTTAGTAT

>M6-PGSC0003DMG400019278-(rev)M6G-LecRK\_1647

ATGTCACCTGAGTATGCTGTTGATGGGAAATATTCAGTAAAATCCGATGTATTTAGTATCGGCGTTATCA  
TTCTAGAGCTAGTCAGTGGCAGAAGGAACAGGAAATTTGTCATTTGGAA

>M6-PGSC0003DMG400019278-(rev)M6G-LecRK\_1708

GCGTTATCATTCTAGAGCTAGTCAGTGGCAGAAGGAACAGGAAATTTGTCATTTGGAACATCATCACA  
ATCTTTTGGGACATGTAAGCACATGCAACACTAACTTCGTTCCCTTAAGT

>M6-PGSC0003DMG400019278-(rev)M6G-LecRK\_1769

TCATCACAATCTTTTGGGACATGTAAGCACATGCAACACTAACTTCGTTCCCTTAAGTCACTTTTTCTTTA  
GTGAATGCATTTGTATAAATGTGTTCTGTTTGTAAATTTAGGCATGGAT

>M6-PGSC0003DMG400019278-(rev)M6G-LecRK\_183

ACACTCCTGGTATAATGTAAGCATTAACTTGAAGAATGCAAGAATATGTGCTTGGCTGATTGCAATTGT  
ACAGCCTACTCAAATCTTGATATAAGAAATGGCGGAAGTGGATGCTTACT

>M6-PGSC0003DMG400019278-(rev)M6G-LecRK\_1830

CTTTTTCTTTAGTGAATGCATTTGTATAAATGTGTTCTGTTTGTAAATTTAGGCATGGATACTTTGGAATGA  
AGACAAAGCGTTGGAAGTATGGACGAATGTTTGAAGAATCATTTTCA

>M6-PGSC0003DMG400019278-(rev)M6G-LecRK\_1891

TTTGGAATGAAGACAAAGCGTTGGAAGTATGGACGAATGTTTGAAGAATCATTTTCAGAATCTCAAG  
TGTTGAGATGCATCCAGGTTGGTTTGTGCGCCCAAAAACACCCTGAGG

>M6-PGSC0003DMG400019278-(rev)M6G-LecRK\_2013

AGGCCTACAATGGCATCAGTAGTTTTCTGGTTGGGAAATGAAGGCCTGGTTCTTCTCAACCAAAGCAG  
CCTGGATTTTTATAGAAAGGAATTCAATGGATTCAACAGAATCAGCTCAA

>M6-PGSC0003DMG400019278-(rev)M6G-LecRK\_2074

CAAAGCAGCCTGGATTTTTATAGAAAGGAATTCAATGGATTCAACAGAATCAGCTCAATTGATCGTTAG  
CTCGTTGTAATCGGGCAAGGGCATTGTGAATTCAAGTTCAATCAACACAT

>M6-PGSC0003DMG400019278-(rev)M6G-LecRK\_2135

GATCGTTAGCTCGTTGTAATCGGGCAAGGGCATTGTGAATTCAAGTTCAATCAACACATATAATATCTAA  
TTAATGAGAAGAAAATCTGAAAGTGTGTATACACATTTAGCACACGCTT



>M6-PGSC0003DMG400019278-(rev)M6G-LecRK\_2196

AATATCTAATTAATGAGAAGAAAATCTGAAAGTGTGTATACACATTTTCAGCACACGCTTTGTAGCACAAT  
TAATCCGGATTACACTGGAAACTACAACCTTTTTGAGAGAACTTAAGTC

>M6-PGSC0003DMG400019278-(rev)M6G-LecRK\_2257

TAGCACAATTAATCCGGATTACACTGGAAACTACAACCTTTTTGAGAGAACTTAAGTCTCCTCATCAAA  
AGTGACTCCATTCAAGAAGTTGAAGATTCTTCTTGTAGCATGGCAAACCTA

>M6-PGSC0003DMG400019278-(rev)M6G-LecRK\_2318

CTCATCAAAAAGTGACTCCATTCAAGAAGTTGAAGATTCTTCTTGTAGCATGGCAAACCTATTCTTTATATTT  
TTTCTCTCAGTTGAATATTAGATGGTGACTTCACAACCTTTATAAAATAA

>M6-PGSC0003DMG400019278-(rev)M6G-LecRK\_2379

CTTTATATTTTTCTCTCAGTTGAATATTAGATGGTGACTTCACAACCTTTATAAAATAAATGCATTAATATT  
AATAGAAAATAAAAAAGACATCAGTTCCTTTTTCTTAGTTCTGCTAT

>M6-PGSC0003DMG400019278-(rev)M6G-LecRK\_244

TGCAATTGTACAGCCTACTCAAATCTTGATATAAGAAATGGCGGAAGTGGATGCTTACTATGGTTCGGT  
GAACTCATTGATATTAGAGAGTACAACAAAATGAGCAACACCTGTTTGTG

>M6-PGSC0003DMG400019278-(rev)M6G-LecRK\_2440

GCATTAATATTAATAGAAAATAAAAAAGACATCAGTTCCTTTTTCTTAGTTCTGCTATTACTAGTCCAAG  
ATGACACATCGTCATTACTACTAACTCATTTTAGGAAGACTTTAGGCAA

>M6-PGSC0003DMG400019278-(rev)M6G-LecRK\_2501

CTAGTCCAAGATGACACATCGTCATTACTACTAACTCATTTTAGGAAGACTTTAGGCAATTTGCTCCAATA  
CATTTTCATGTGTTTACACCAAGAAAATAACCGCATGCCATATGTTTGTGTA

>M6-PGSC0003DMG400019278-(rev)M6G-LecRK\_2562

TGCTCCAATACATTTTCATGTGTTTACACCAAGAAAATAACCGCATGCCATATGTTTGTATGAATAGTTCTA  
TAGCGTGCAATTGCAAACACCAGGTTAATGGTGGAAATGGGAAGTCAAA

>M6-PGSC0003DMG400019278-(rev)M6G-LecRK\_2623

AATAGTTCTATAGCGTGCAATTGCAAACACCAGGTTAATGGTGGAAATGGGAAGTCAAAGGCATACAAC  
TTTTGACAAGTTCAAACCTTTGACATCTAATTCTTGGCAGCAGTTGTTGGCC

>M6-PGSC0003DMG400019278-(rev)M6G-LecRK\_2684

CATACAACCTTTGACAAGTTCAAACCTTTGACATCTAATTCTTGGCAGCAGTTGTTGGCCTTTCATTCAAAA

AAGTATTTTTTTTCATTTTATTTATATAAAACATTTTTAGGCATGGTTG

>M6-PGSC0003DMG400019278-(rev)M6G-LecRK\_2745

TCATTCAAAAAGTATTTTTTTTCATTTTATTTATATAAAACATTTTTAGGCATGGTTGTTAATTCTAAACT

GAGAAAACAAGAAGTTATCAGTATCTTTTCTGTGTCAAGGCTTTTTTG

>M6-PGSC0003DMG400019278-(rev)M6G-LecRK\_2806

AATTCTAAACTGAGAAAACAAGAAGTTATCAGTATCTTTTCTGTGTCAAGGCTTTTTTGAACCTGTCAATC

AAAACATGAGTCAGAATCTATCAAAGGGCTACTGTTTTTATTCTTTT

>M6-PGSC0003DMG400019278-(rev)M6G-LecRK\_2867

CTTGTCATCAAAAACATGAGTCAGAATCTATCAAAGGGCTACTGTTTTTATTCTTTTGTCTCACATTTTTT

CTTCATCTTACTAATTTCCGCTGCATTAGACACGATCACAACAGATAA

>M6-PGSC0003DMG400019278-(rev)M6G-LecRK\_2928

TCACATTTTTTCTTCATCTTACTAATTTCCGCTGCATTAGACACGATCACAACAGATAAATCCATTAGAGAT

GGTGACACAATTGTTTCAGCTGGTGGGATTTATGAGCTTGGATTTTTT

>M6-PGSC0003DMG400019278-(rev)M6G-LecRK\_2989

CCATTAGAGATGGTGACACAATTGTTTCAGCTGGTGGGATTTATGAGCTTGGATTTTTTAGTCCTGGAAA

TCCGAAGAATCGTTACGTTGGCATATGGTACAAGAAGATATCACCTAGAA

>M6-PGSC0003DMG400019278-(rev)M6G-LecRK\_305

GGTTCGGTGAACCTATTGATATTAGAGAGTACAACAAAATGAGCAACACCTGTTTGTGAGAGTTGCTG

CTTCAGAATTAGGTAATGACCCTACTCTATACCATTTTCGTGTTCTTTTGC

>M6-PGSC0003DMG400019278-(rev)M6G-LecRK\_3050

TCCTGGAAATCCGAAGAATCGTTACGTTGGCATATGGTACAAGAAGATATCACCTAGAACTGTTGTGTG

GGTTGCAAACAGAGATATTCCACTTAATGACACATCAGGAGTTTTAACACT

>M6-PGSC0003DMG400019278-(rev)M6G-LecRK\_3111

GTTGTGTGGGTTGCAAACAGAGATATTCCACTTAATGACACATCAGGAGTTTTAACACTCAAACCCAATG

GGATTCTGTACTTGTGATAATTCCAATATCTCAATTTGGTCATCAAAC

>M6-PGSC0003DMG400019278-(rev)M6G-LecRK\_3172

AACCCAATGGGATTCTGTACTTGTGATAATTCCAATATCTCAATTTGGTCATCAAACCTCATCAAGATCC

TTAAAGGATCCAAAAGCACGGATCCTGGATTCCGGGAACCTTGTTGTCA

>M6-PGSC0003DMG400019278-(rev)M6G-LecRK\_3233

ATCAAGATCCTTAAAGGATCCAAAAGCACGGATCCTGGATTCCGGGAACCTTGTTGTCAATGATGTAAA  
TGAAAGAGACCTGGAAATTAATTTTCGCGTGGCAGAGTTTTGATTATCCAGG

>M6-PGSC0003DMG400019278-(rev)M6G-LecRK\_3294

GATGTAAATGAAAGAGACCTGGAAATTAATTTTCGCGTGGCAGAGTTTTGATTATCCAGGAAATACTTTTA  
TACCTGGCATGAAACTTGGACGTAATTTGGTCACGGGCATGGATTGGTAC

>M6-PGSC0003DMG400019278-(rev)M6G-LecRK\_3355

ATACTTTTATACCTGGCATGAAACTTGGACGTAATTTGGTCACGGGCATGGATTGGTACATGTCATCATG  
GAAGAGCATTGATGATCCTTCTCCTGGTGAATATATAAACCGTCTTGATT

>M6-PGSC0003DMG400019278-(rev)M6G-LecRK\_3416

GTCATCATGGAAGAGCATTGATGATCCTTCTCCTGGTGAATATATAAACCGTCTTGATTCTCATGGATAC  
CCGCAATTGTTTGTGTGGAAAAATTCAACTATAGTGTCTAGCTCAGGGAT

>M6-PGSC0003DMG400019278-(rev)M6G-LecRK\_3477

CATGGATACCCGCAATTGTTTGTGTGGAAAAATTCAACTATAGTGTCTAGCTCAGGGATGTGGAAAGGT  
AATGCATTTAGTGTTAGTGCAAATAGTAAACCAAATACACATTACACTTCC

>M6-PGSC0003DMG400019278-(rev)M6G-LecRK\_3538

GGAAAGGTAATGCATTTAGTGTTAGTGCAAATAGTAAACCAAATACACATTACACTTCCGAGTTTATTAT  
TGATCAGCAGCAAATTTACTACCAATTCAAGCTTAAGAATGAGTCACTGC

>M6-PGSC0003DMG400019278-(rev)M6G-LecRK\_3599

GTTTATTATTGATCAGCAGCAAATTTACTACCAATTCAAGCTTAAGAATGAGTCACTGCCAGCAGGATG  
GTGCTTAACCCGGAAGGTCTGATAGAACACATAACATGGATTGAGAGCAG

>M6-PGSC0003DMG400019278-(rev)M6G-LecRK\_366

AGTTGCTGCTTCAGAATTAGGTAATGACCCTACTCTATACCATTTTCGTGTTCTTTTGCACAATATAAGCA  
CAACTCTTTAGAATTTAAGGAACTTTACTATCTGATGTCACTGATAGTA

>M6-PGSC0003DMG400019278-(rev)M6G-LecRK\_3660

AGCAGGATGGTGCTTAACCCGGAAGGTCTGATAGAACACATAACATGGATTGAGAGCAGTCAGAGTTG  
GTTTCTCTACTCAACAGTACAATTTGATAACTGTGGTCGTTTTGCTTTATGC

>M6-PGSC0003DMG400019278-(rev)M6G-LecRK\_3721

AGAGTTGGTTTCTCTACTCAACAGTACAATTTGATAACTGTGGTCGTTTTGCTTTATGCGGTCCTTATGCA  
AGTTGCAACATCAATAACTCCCCTCCATGTGACTGCTTGCAAGGTTTCA

>M6-PGSC0003DMG400019278-(rev)M6G-LecRK\_3782

TCCTTATGCAAGTTGCAACATCAATAACTCCCCTCCATGTGACTGCTTGCAAGGTTTCAATCCTAGGTATT  
GTTAAAATGAGTGATCATCAAACCTTAAGCTATTAGAGATAACACACTT

>M6-PGSC0003DMG400019278-(rev)M6G-LecRK\_3843

CCTAGGTATTGTTAAAATGAGTGATCATCAAACCTTAAGCTATTAGAGATAACACACTTGATTACTTAGTT  
ATGATTTTACACTCCCCCTCATGTGTGTGCTTGATTCTATTTCTTGGGC

>M6-PGSC0003DMG400019278-(rev)M6G-LecRK\_3904

TTACTTAGTTATGATTTTACACTCCCCCTCATGTGTGTGCTTGATTCTATTTCTTGGGCCAAGCACATAGAT  
ATTATATTGATTACTTAATAATGACTTCACAGGGTTCCTCAACAGTCT

>M6-PGSC0003DMG400019278-(rev)M6G-LecRK\_3965

AGCACATAGATATTATATTGATTACTTAATAATGACTTCACAGGGTTCCTCAACAGTCTGCAGCAGATTG  
GTCTACTGGTTGTGTTAGGAGAACTTCTTTGGATTGTAACCAAGATGGTT

>M6-PGSC0003DMG400019278-(rev)M6G-LecRK\_4026

AGCAGATTGGTCTACTGGTTGTGTTAGGAGAACTTCTTTGGATTGTAACCAAGATGGTTTTCTTAAATTT  
ACGGGCATCAAGATGCCTGATTCTAGAACTCCTGGTTTAATGAGAGCAT

>M6-PGSC0003DMG400019278-(rev)M6G-LecRK\_4087

CTTAAATTTACGGGCATCAAGATGCCTGATTCTAGAACTCCTGGTTTAATGAGAGCATTAACTTGAAG  
AATGTGAGAAATTATGCTTAGCTGATTGCAACTGTACAGCCTACTCAAAT

>M6-PGSC0003DMG400019278-(rev)M6G-LecRK\_4148

ACCTTGAAGAATGTGAGAAATTATGCTTAGCTGATTGCAACTGTACAGCCTACTCAAATCTTGATGTTAG  
AAATGGGGGAAGTGGATGCTTACTATGGTTTGGAGAACTCATTGATATTC

>M6-PGSC0003DMG400019278-(rev)M6G-LecRK\_4209

TGATGTTAGAAATGGGGGAAGTGGATGCTTACTATGGTTTGGAGAACTCATTGATATTCGAGAATTGAG  
CCAAAATGAGCAAACCTGTTTGTGAGAGTTGCTGCTTCAGAAATAGGTAA

>M6-PGSC0003DMG400019278-(rev)M6G-LecRK\_427

AATATAAGCACAACCTCTTTAGAATTTAAGGAACTTACTATCTGATGTCACTGATAGTAACATATGATAGT  
CGCGGAAGCTATTCATACTGATATTGCCAATTCATATGTCAATTGAAAA

>M6-PGSC0003DMG400019278-(rev)M6G-LecRK\_4270

GAATTGAGCCAAAATGAGCAAACCTGTTTGTGAGAGTTGCTGCTTCAGAAATAGGTAATAATCCTACT

CTGCACCATTTCTCATTGTTGTTCAATATAAATGCACAGCTCTTTAAA

>M6-PGSC0003DMG400019278-(rev)M6G-LecRK\_4331

ATCCTACTCTGCACCATTTCTCATTGTTGTTCAATATAAATGCACAGCTCTTTAAA  
ACTGAAGAAGCTC  
TGGTCAGCAAGTCACTCATTGTTGTTCAATATAAATGCACAGCTCTTTAAA  
ACTGAAGAAGCTC

>M6-PGSC0003DMG400019278-(rev)M6G-LecRK\_4392

TGAAGAAGCTCTGGTCAGCAAGTCACTCATTGTTGTTCAATATAAATGCACAGCTCTTTAAA  
ACTGAAGAAGCTC  
ATGAAGCTCTGGTCAGCAAGTCACTCATTGTTGTTCAATATAAATGCACAGCTCTTTAAA  
ACTGAAGAAGCTC

>M6-PGSC0003DMG400019278-(rev)M6G-LecRK\_4453

AGACTGCTTATGAAGCTCTGGTCAGCAAGTCACTCATTGTTGTTCAATATAAATGCACAGCTCTTTAAA  
ACTGAAGAAGCTC  
TGGTGTGTTGTTGTTCAATATAAATGCACAGCTCTTTAAA  
ACTGAAGAAGCTC

>M6-PGSC0003DMG400019278-(rev)M6G-LecRK\_4514

GTCCTGATTGGTGTGTTGTTGTTCAATATAAATGCACAGCTCTTTAAA  
ACTGAAGAAGCTC  
AGAAGCTCTGGTCAGCAAGTCACTCATTGTTGTTCAATATAAATGCACAGCTCTTTAAA  
ACTGAAGAAGCTC

>M6-PGSC0003DMG400019278-(rev)M6G-LecRK\_4575

TTTCTTCAAAGAAGCTCTGGTCAGCAAGTCACTCATTGTTGTTCAATATAAATGCACAGCTCTTTAAA  
ACTGAAGAAGCTC  
GAAAATTGTTGTTGTTCAATATAAATGCACAGCTCTTTAAA  
ACTGAAGAAGCTC

>M6-PGSC0003DMG400019278-(rev)M6G-LecRK\_4636

ACTTTATAAGAAATTGTTGTTGTTCAATATAAATGCACAGCTCTTTAAA  
ACTGAAGAAGCTC  
TGCCTTACATAATTCTCATTGTTGTTCAATATAAATGCACAGCTCTTTAAA  
ACTGAAGAAGCTC

>M6-PGSC0003DMG400019278-(rev)M6G-LecRK\_4697

TGACATTGTTGTTGTTGTTCAATATAAATGCACAGCTCTTTAAA  
ACTGAAGAAGCTC  
CATCTGTTGTTGTTGTTCAATATAAATGCACAGCTCTTTAAA  
ACTGAAGAAGCTC

>M6-PGSC0003DMG400019278-(rev)M6G-LecRK\_4758

TTGACAGGTCCATCTGTTGTTGTTCAATATAAATGCACAGCTCTTTAAA  
ACTGAAGAAGCTC  
CCACTGGGAATTCTCTGTTGTTGTTCAATATAAATGCACAGCTCTTTAAA  
ACTGAAGAAGCTC

>M6-PGSC0003DMG400019278-(rev)M6G-LecRK\_4819

TTACTAGTGCCACTGGGAATTCTCTGTTGTTGTTCAATATAAATGCACAGCTCTTTAAA  
ACTGAAGAAGCTC  
AGGTAAATCAACTTTGATCTCAACGTCTAACTGTTGTTGTTCAATATAAATGCACAGCTCTTTAAA  
ACTGAAGAAGCTC

>M6-PGSC0003DMG400019278-(rev)M6G-LecRK\_488

ATATGATAGTCGCGGAAGCTATTCATACTGATATTGCCAATTCATATGTCAATTGAAAACCTGCTTATGGA  
CTTTTTATTAACAGATTCAGTCAGGAATCGGAGGGGAAAGAGGTCAGCC

>M6-PGSC0003DMG400019278-(rev)M6G-LecRK\_4880

GGTTTACAAGGTAAATCAACTTTGATCCTCAACGTCTAACTTGAAATGGCATCTTTGACCCTTGACATAAA  
TCTCAGGGTATCCTACCAAATGGACAAGAGATAGCAGTAAAGCGGCTAT

>M6-PGSC0003DMG400019278-(rev)M6G-LecRK\_4941

TTGACATAAATCTCAGGGTATCCTACCAAATGGACAAGAGATAGCAGTAAAGCGGCTATCAAAGCATTC  
TGGACAAGGCTTTCAAGAGTTAAAAAATGAATTCGTTCTCATTCCAAGCT

>M6-PGSC0003DMG400019278-(rev)M6G-LecRK\_5002

AAGCATTCTGGACAAGGCTTTCAAGAGTTAAAAAATGAATTCGTTCTCATTCCAAGCTGCAACACAGGA  
ACCTTGTTAAGCTTTTGGGTTGCTGCCTTGAAAGAGAAGAAAGGATGCTA

>M6-PGSC0003DMG400019278-(rev)M6G-LecRK\_5063

AACACAGGAACCTTGTTAAGCTTTTGGGTTGCTGCCTTGAAAGAGAAGAAAGGATGCTAATCTATGAGT  
TTATGCCCAATGCTAGCTTGACTATTTCAATTTTGGTCTGCTTTTCATGA

>M6-PGSC0003DMG400019278-(rev)M6G-LecRK\_5124

CTATGAGTTTATGCCCAATGCTAGCTTGACTATTTCAATTTTGGTCTGCTTTTCATGATCCATTAATAAAT  
AGTACTTGATATAAGTCCTCAATATCTCTGCATCACTCAATGATTAGT

>M6-PGSC0003DMG400019278-(rev)M6G-LecRK\_5185

CATTAATAAATAGTACTTGATATAAGTCCTCAATATCTCTGCATCACTCAATGATTAGTTCTACATTGTGC  
AGATCCAAGCAGAAAACTTCACTTTTCATGGAAGAACCGCTTTGAAATT

>M6-PGSC0003DMG400019278-(rev)M6G-LecRK\_5246

TACATTGTGCAGATCCAAGCAGAAAACTTCACTTTTCATGGAAGAACCGCTTTGAAATTGCTATAGGAAT  
ATCTCGAGGTCTTCTTTACCTTCACCAGGACTCAAGATTAAGAATTATTC

>M6-PGSC0003DMG400019278-(rev)M6G-LecRK\_5307

TATAGGAATATCTCGAGGTCTTCTTTACCTTCACCAGGACTCAAGATTAAGAATTATTCACAGAGATCTCA  
AGACCAGCAACATTTTATTAGATACTAACATGAATGCCAAAATTTCTGA

>M6-PGSC0003DMG400019278-(rev)M6G-LecRK\_5368

AGAGATCTCAAGACCAGCAACATTTTATTAGATACTAACATGAATGCCAAAATTTCTGACTTCGGCCTTG  
CCAAAATATTTGGTGGAGATCAAGTGAAGGAGAACTAAGAGTATAGTT

>M6-PGSC0003DMG400019278-(rev)M6G-LecRK\_5429

TCGGCCTTGCCAAAATATTTGGTGGAGATCAAGTGGAAAGGAGAACTAAGAGTATAGTTGGGACATTG  
TAAGTTTCTACACATCTTTAAATCGTATAATCTTTATTATATTAGATCAGTA

>M6-PGSC0003DMG400019278-(rev)M6G-LecRK\_549

GCTTATGGACTTTTTATTAACAGATTTCAGTCAGGAATCGGAGGGGAAAGAGGTCAGCCCTGATTGCGG  
TCATTGCAGCACTAGTAGCAACTTCTATCCTCATCTTTGTAGCTTGGTTTA

>M6-PGSC0003DMG400019278-(rev)M6G-LecRK\_5490

GACATTGTAAGTTTCTACACATCTTTAAATCGTATAATCTTTATTATATTAGATCAGTACATGAGCGTAAA  
CTTATTGAATTGATGTAGTGGATATATGTCCCCGGAGTATATTGTTGAT

>M6-PGSC0003DMG400019278-(rev)M6G-LecRK\_5551

TGAGCGTAAACTTATTGAATTGATGTAGTGGATATATGTCCCCGGAGTATATTGTTGATGGGAAGTATTC  
AGTAAAATCAGATGTATACAGCATCGGCGTAATCATTCTTGAAATAGTTA

>M6-PGSC0003DMG400019278-(rev)M6G-LecRK\_5612

GAAGTATTCAGTAAAATCAGATGTATACAGCATCGGCGTAATCATTCTTGAAATAGTTAGTGGCAGAAG  
GAACAGGAAATTCATCATTGGAACATCTTCACAATCTTTGGGACATGT

>M6-PGSC0003DMG400019278-(rev)M6G-LecRK\_5673

GGCAGAAGGAACAGGAAATTCATCATTGGAACATCTTCACAATCTTTGGGACATGTAAGCATATACA  
TTACACAACCTTCATTCCCTTAATTCGCTCTTAGCTTGCTATTGCGAATAC

>M6-PGSC0003DMG400019278-(rev)M6G-LecRK\_5734

GCATATACATTACACAACCTTCATTCCCTTAATTCGCTCTTAGCTTGCTATTGCGAATACATTTGTATAAATG  
TGTTCTGTTTGTAATATAGGCATGGTTACTTTGGACTGAAGGCAACGC

>M6-PGSC0003DMG400019278-(rev)M6G-LecRK\_5795

TTGTATAAATGTGTTCTGTTTGTAATATAGGCATGGTTACTTTGGACTGAAGGCAACGCGTTGGAACCTGA  
TGGATGAATGTTTGAAAGAATCATTTTCAGAATCTCAAGTGTGAGATGC

>M6-PGSC0003DMG400019278-(rev)M6G-LecRK\_5856

TGGAACCTGATGGATGAATGTTTGAAAGAATCATTTTCAGAATCTCAAGTGTGAGATGCATCCAGGTCG  
GTTTGTATGCGTCCAAAACTCCAGAGGATAGGCCTATAATGGCATCAG

>M6-PGSC0003DMG400019278-(rev)M6G-LecRK\_5917

CCAGGTTCGGTTTGTATGCGTCCAAAACTCCAGAGGATAGGCCTATAATGGCATCAGTGGTTTTTTGG

TTGGGAAATGAAGGTCTGGTTCCTCAACCAAAGCATCCAGGTTTTTT

>M6-PGSC0003DMG400019278-(rev)M6G-LecRK\_5978

GTTTTTTGGTTGGGAAATGAAGGTCTGGTTCCTCAACCAAAGCATCCAGGTTTTTTTACAGAGAGGA  
ATCCAATGGAATCTACTGATGAAGAATGTCTAAGTAACAACGCGACGTTA

>M6-PGSC0003DMG400019278-(rev)M6G-LecRK\_6039

CAGAGAGGAATCCAATGGAATCTACTGATGAAGAATGTCTAAGTAACAACGCGACGTTAACAGTTCTTG  
AGCCAAGATAGACAAGTAATCACTATTGGATGTTTTGAAATGTATTTACTT

>M6-PGSC0003DMG400019278-(rev)M6G-LecRK\_61

CACAGGTATCCTGAACAATGGTATGCAGTGGACTGGTCTAATGGTTGTGTAAGGAAAACCTCTTTGTCTT  
GTAACCAAGATGGTTTTCTTAAATTTAGGAATATCAAGATGCCGAATTCT

>M6-PGSC0003DMG400019278-(rev)M6G-LecRK\_610

GATTGCGGTCATTGCAGCACTAGTAGCAACTTCTATCCTCATCTTTGTAGCTTGGTTTACCTTCCAAAGAA  
AGAACAACAAAAACAGATAAACATACTGGAGGTATTAGAAAATTGTTAAC

>M6-PGSC0003DMG400019278-(rev)M6G-LecRK\_6100

AGTTCTTGAGCCAAGATAGACAAGTAATCACTATTGGATGTTTTGAAATGTATTTACTTTGTCTTGTTTGT  
CAAACAGTACTAGTGTATATATGATAGAATATACTAAAAGAGATAGTTT

>M6-PGSC0003DMG400019278-(rev)M6G-LecRK\_6161

TCTTGTGTTGTCAAACAGTACTAGTGTATATATGATAGAATATACTAAAAGAGATAGTTTAATGCCAGTGT  
TCATATCAAGGCAGGGCAAATAATTGATATACAATTCTTGCTTTGATAA

>M6-PGSC0003DMG400019278-(rev)M6G-LecRK\_6222

TGCCAGTGTTTCATATCAAGGCAGGGCAAATAATTGATATACAATTCTTGCTTTGATAATTGAGCAATCA  
ATGGACTAATTATTGGCAAATTTGTAAGCATAAGTAGTTAGAGGAATCT

>M6-PGSC0003DMG400019278-(rev)M6G-LecRK\_6283

GAGCAATCAATGGACTAATTATTGGCAAATTTGTAAGCATAAGTAGTTAGAGGAATCTATATCATGCAT  
TACTTTTTTTGGGGGACAATGAATATATTCATCAAACATAGTTTGCTATAC

>M6-PGSC0003DMG400019278-(rev)M6G-LecRK\_6344

ATCATGCATTAATTTTTTTGGGGGACAATGAATATATTCATCAAACATAGTTTGCTATACATGATACATAAG  
CCCTATTCTATATGAAGTATTTTTTTTTGTTTCCCACTCGGTGTTTGGA

>M6-PGSC0003DMG400019278-(rev)M6G-LecRK\_6387



ACATAGTTTGCTATACATGATACATAAGCCCTATTCTATATGAAGTATTTTTTTTTGTTTCCCACTCGGTGT  
TTGGAGCCCACATTGGAGCTCCGGTTAAATTCGAGTTGCCCATAGCAG

>M6-PGSC0003DMG400019278-(rev)M6G-LecRK\_671

TTCCAAAGAAAGAACAAAAAACAGATAAACATACTGGAGGTATTAGAAAATTGTTAACTGTGAATGCT  
TTTTTACCTCCATCCAGCTAACATTGTTGACTTTATCAAATGATTGAGGA

>M6-PGSC0003DMG400019278-(rev)M6G-LecRK\_732

TGAATGCTTTTTTACCTCCATCCAGCTAACATTGTTGACTTTATCAAATGATTGAGGAAAAGTTCAATTA  
TATCATGTCTGTGATTGGAAAATATATGTTGACAGGTTCAGAAGTTGGA

>M6-PGSC0003DMG400019278-(rev)M6G-LecRK\_793

AGTTCAATTATATCATGTCTGTGATTGGAAAATATATGTTGACAGGTTCAGAAGTTGGAAACAAGGACCT  
CGAGTTGCCATTGTTTGATTTAGTTACTGTTACTACTGCCACTGAAAATT

>M6-PGSC0003DMG400019278-(rev)M6G-LecRK\_854

CAAGGACCTCGAGTTGCCATTGTTTGATTTAGTTACTGTTACTACTGCCACTGAAAATTTCTCTTCTGCGA  
ATGTGATTGGTGAGGGTGGCTTTGGACAGGTTTACAAGGTAAATCAACT

>M6-PGSC0003DMG400019278-(rev)M6G-LecRK\_915

TCTTCTGCGAATGTGATTGGTGAGGGTGGCTTTGGACAGGTTTACAAGGTAAATCAACTTTGATCTTCAA  
CTAAAAGCTAGAAGGGACATATTTGACCCTTGAGAGAAAATCGCAGGGTA

>M6-PGSC0003DMG400019278-(rev)M6G-LecRK\_976

GATCTTCAACTAAAAGCTAGAAGGGACATATTTGACCCTTGAGAGAAAATCGCAGGGTATTCTACCAGA  
TGGACTAGAGATAGCAGTAAAGAAGCTATCAACGTATTCTGGACAAGGCGT

>M6-PGSC0003DMG400019415-(rev)M6LRR-RLK\_1708

ACTTGGAAGGATTTGCCTTGCAATTTCTTAACTTATCGTTTAATGATTTTGAAGGTGGCCTTCCACAACGA  
GGCATCTTTGAGAACGCGAGTGTAGACTCTTTCGTTGGAAATCTTAGAA

>M6-PGSC0003DMG400019415-(rev)M6LRR-RLK\_2013

AACCAACTCATAGCTATGTCCTATCAAAGTATTCTCAAAGTTACCAACGGGTTTTCTACGAGCAACTTGAT  
TGGTGTGGGAGTCATGGATATGTTTACAAGGGAATTTAGAAACGGAT

>M6-PGSC0003DMG400019698M6LRR-RLK\_0

TCTTCACATTCTACTACTCCTTCCCTTCTCTATTTGTCTGTTTAAACTTCTACTAATCCTATCTTCTTTT  
CAGAAAAATATGGAACCCCTCAAGAACTCAAGCTATAGATTCAAG

>M6-PGSC0003DMG400019698M6LRR-RLK\_1054

TACAAAGTGAAAGCCTACAGTATTTGTACTTAAGAGGGAATGATTTTCAGGGTGTGTACCCAAACCAGC  
TTGCTGATTTGTGCAAACTGTGGTGGAAATTGGACTTGTGCATACAATAATT

>M6-PGSC0003DMG400019698M6LRR-RLK\_1116

AACCAGCTTGCTGATTTGTGCAAACTGTGGTGGAAATTGGACTTGTGCATACAATAATTTCTCAGGTATGG  
TTCCTGAGAGCCTTGGTGAATGTTCAAGTTTGGAACTTGTGATATTTCC

>M6-PGSC0003DMG400019698M6LRR-RLK\_1178

AGGTATGGTTCCTGAGAGCCTTGGTGAATGTTCAAGTTTGGAACTTGTGATATTTCCAACAATAATTTCT  
CTGGTAAGTTGCCTGTTGATACTCTCTTGAAGTTGAGTAATATGAAGAC

>M6-PGSC0003DMG400019698M6LRR-RLK\_1240

ATAATTTCTCTGGTAAGTTGCCTGTTGATACTCTCTTGAAGTTGAGTAATATGAAGACTATGGTCTTATCA  
TTCAACAAATTTGTTGGTGTTCCTGATTCTTTCTCTAATTTGCTGA

>M6-PGSC0003DMG400019698M6LRR-RLK\_1302

GTCTTATCATTCAACAAATTTGTTGGTGTTCCTGATTCTTTCTCTAATTTGCTGAAATTGGAGACTTTG  
GATGTGAGTTCTAATAATCTCACAGGGGTATTCCATCTGGGATTTGC

>M6-PGSC0003DMG400019698M6LRR-RLK\_1364

GGAGACTTTGGATGTGAGTTCTAATAATCTCACAGGGGTATTCCATCTGGGATTTGCAAAGATCCTATG  
AATAACTTAAAAGTGTGTACCTTCAGAATAACTTGTTCGAAGGTCCTAT

>M6-PGSC0003DMG400019698M6LRR-RLK\_1426

ATCCTATGAATAACTTAAAAGTGTGTACCTTCAGAATAACTTGTTCGAAGGTCCTATACCTTCCAGTCTA  
AGCAACTGTTACAGCTGGTGTCACTTGATCTTAGCTTTAATTACTTGA

>M6-PGSC0003DMG400019698M6LRR-RLK\_1488

TCCAGTCTAAGCAACTGTTACAGCTGGTGTCACTTGATCTTAGCTTTAATTACTTGACTGGGAGAATACC  
ATCTAGTTTGGGGTCATTGTCAAAGTTGAAGGATCTCATCCTTTGGTTG

>M6-PGSC0003DMG400019698M6LRR-RLK\_1550

GAGAATACCATCTAGTTTGGGGTCATTGTCAAAGTTGAAGGATCTCATCCTTTGGTTGAATCAGCTTTCA  
GGGGAAATCCACAGGAGTTGATGTACTTGCAGGCTTTAGAGAATTTGAT

>M6-PGSC0003DMG400019698M6LRR-RLK\_1612

AGCTTTCAGGGGAAATCCACAGGAGTTGATGTACTTGCAGGCTTTAGAGAATTTGATTCTTGATTTTAA

TGACTTAACTGGACCAATACCTGCAAGTCTTAGCAACTGTACCAAGTTGA

>M6-PGSC0003DMG400019698M6LRR-RLK\_1674

GATTTTAATGACTTAACTGGACCAATACCTGCAAGTCTTAGCAACTGTACCAAGTTGAATTGGATTCATT  
GTCAAATAACCAATTGAGTGGTGAGATACCGGCTTCTCTTGGTCGTTTG

>M6-PGSC0003DMG400019698M6LRR-RLK\_1736

GATTTTCATTGTCAAATAACCAATTGAGTGGTGAGATACCGGCTTCTCTTGGTCGTTTGTCAAATCTAGCC  
ATTCTTAAGCTTGAAACAACCTCAATCTCAGGGAATATACCTGCTGAGTT

>M6-PGSC0003DMG400019698M6LRR-RLK\_1798

ATCTAGCCATTCTTAAGCTTGAAACAACCTCAATCTCAGGGAATATACCTGCTGAGTTGGGTAATTGCCA  
GAGCTTGATATGGTTGGATCTCAATACTAATTTCTGAATGGCTCCATTC

>M6-PGSC0003DMG400019698M6LRR-RLK\_1860

AATTGCCAGAGCTTGATATGGTTGGATCTCAATACTAATTTCTGAATGGCTCCATTCGCCGCCTTTGTT  
CAAGCAATCTGGCAATATTGCAGTGGCATTACTGACCGGGAAGCGATAC

>M6-PGSC0003DMG400019698M6LRR-RLK\_1922

GCCTTTGTTCAAGCAATCTGGCAATATTGCAGTGGCATTACTGACCGGGAAGCGATACGTGTATATCAA  
GAATGATGGGAGTAAGGAGTGCCATGGAGCAGGGAATTTGCTGGAGTTTGG

>M6-PGSC0003DMG400019698M6LRR-RLK\_1984

ATATCAAGAATGATGGGAGTAAGGAGTGCCATGGAGCAGGGAATTTGCTGGAGTTTGGAGGGATTAG  
ACAAGAACAGCTGGATAGAATCTCAACAAGGCATCCTTGCAATTTACAAGAG

>M6-PGSC0003DMG400019698M6LRR-RLK\_2046

ATTAGACAAGAACAGCTGGATAGAATCTCAACAAGGCATCCTTGCAATTTACAAGAGTTTATAGAGGT  
ATCACTCAGCCAACATTTAACCACAATGGCTCTATGATATTTCTTGATTTA

>M6-PGSC0003DMG400019698M6LRR-RLK\_2108

TAGAGGTATCACTCAGCCAACATTTAACCACAATGGCTCTATGATATTTCTTGATTTATCTTATAATAAGT  
TGGAAGGTAGTATCCCAAAGGAATTAGGGACCATGTACTATCTGTCTAT

>M6-PGSC0003DMG400019698M6LRR-RLK\_2170

ATAATAAGTTGGAAGGTAGTATCCCAAAGGAATTAGGGACCATGTACTATCTGTCTATATTGAATTTGG  
GGCATAATGATCTGTCTGGTATGATTCCTCAAGATCTTGGAGGCTTGAAGA

>M6-PGSC0003DMG400019698M6LRR-RLK\_2232

AATTTGGGGCATAATGATCTGTCTGGTATGATTCCTCAAGATCTTGGAGGCTGAAGAATGTTGCAATTC  
TTGATCTGTCATATAATAGGTTAAATGGCCCGATCCCGAATTCCCTCACC

>M6-PGSC0003DMG400019698M6LRR-RLK\_2294

TGCAATTCTTGATCTGTCATATAATAGGTTAAATGGCCCGATCCCGAATTCCCTCACCAGTCTTACATTGC  
TTGGAGAGATTGACCTGTCAAACAATAATCTCAGTGGAATGATTCTGA

>M6-PGSC0003DMG400019698M6LRR-RLK\_2356

TTACATTGCTTGGAGAGATTGACCTGTCAAACAATAATCTCAGTGGAATGATTCTGAATCTGCACCATT  
TGATACATTCCCTGATTATAGGTTTGCAAATAATTCTCTCTGTGGGTATC

>M6-PGSC0003DMG400019698M6LRR-RLK\_2418

GCACCATTTGATACATTCCCTGATTATAGGTTTGCAAATAATTCTCTCTGTGGGTATCCTCTCCCCCTACCT  
TGTAGCTCGGGGCCGAAATCGGATGCAAATCAGCATCAGAAATCTCAC

>M6-PGSC0003DMG400019698M6LRR-RLK\_248

AGCTTCACCAGCTTCTGTTAATGGTCTTTTTAAAGACTCCCAACAGCTTATTTCCTTTAAAGCTGCACTTCC  
ACCAACCCCAACTCTGCTCAGGACTGGTTGTCATCTACTGACCCTTG

>M6-PGSC0003DMG400019698M6LRR-RLK\_2480

CCCCCTACCTTGATAGCTCGGGGCCGAAATCGGATGCAAATCAGCATCAGAAATCTCACCGCAGACAAGC  
ATCGTTGGCAGGGAGTGTGGCGATGGGTTTGTATTTCCCTCTTTTGTAT

>M6-PGSC0003DMG400019698M6LRR-RLK\_2542

GACAAGCATCGTTGGCAGGGAGTGTGGCGATGGGTTTGTATTTCCCTCTTTTGTATCTTTGGTTTGATT  
ATTGTTGCCATAGAGACGAAGAAGAGGAGGAAGAAGAAGGAGGCTGCTC

>M6-PGSC0003DMG400019698M6LRR-RLK\_2604

GGTTTGATTATTGTTGCCATAGAGACGAAGAAGAGGAGGAAGAAGAAGGAGGCTGCTCTTGAAGCTTA  
TATGGATGGTCATTACATTCTGCAACTGCAAACAGTGCCTGGAAGTTTACG

>M6-PGSC0003DMG400019698M6LRR-RLK\_2666

AGCTTATATGGATGGTCATTACATTCTGCAACTGCAAACAGTGCCTGGAAGTTTACGAGTGCTCGTGAG  
GCGTTAAGCATTAACTCGCAGCATTTGAGAAGCCTCTCAGGAAGCTCAC

>M6-PGSC0003DMG400019698M6LRR-RLK\_2728

CTCGTGAGGCGTTAAGCATTAACTCGCAGCATTTGAGAAGCCTCTCAGGAAGCTCACATTTGCTGATCT  
TCTCGAAGCCACCAATGGTTTCCACAACGACAGTCTTGTAGGCTCTGGTG

>M6-PGSC0003DMG400019698M6LRR-RLK\_2790

GCTGATCTTCTCGAAGCCACCAATGGTTTCCACAACGACAGTCTTGTAGGCTCTGGTGGTTTTGGTGATG  
TCTACAAAGCTCAGTTGAAGGATGGCAGTGTTGTGGCCATTAAGAAGTTG

>M6-PGSC0003DMG400019698M6LRR-RLK\_2852

TGGTGATGTCTACAAAGCTCAGTTGAAGGATGGCAGTGTTGTGGCCATTAAGAAGTTGATACACGTCAG  
CGGACAGGGTGATCGAGAATTCAGTCTGAAATGGAAACCATAGGGAAGAT

>M6-PGSC0003DMG400019698M6LRR-RLK\_2914

ACGTCAGCGGACAGGGTGATCGAGAATTCAGTCTGAAATGGAAACCATAGGGAAGATCAAGCACCGG  
AACCTTGTCCTCTTTTGGGCTACTGCAAAGTAGGGGAAGAAAGACTACTGG

>M6-PGSC0003DMG400019698M6LRR-RLK\_2976

CACCGGAACCTTGTCCTCTTTTGGGCTACTGCAAAGTAGGGGAAGAAAGACTACTGGTTTACGAATAC  
ATGAAGTATGGAAGTCTTGAAGATGTCCTGCACGATCGGAAGAAAATCGGG

>M6-PGSC0003DMG400019698M6LRR-RLK\_3038

CGAATACATGAAGTATGGAAGTCTTGAAGATGTCCTGCACGATCGGAAGAAAATCGGGATCAAGCTGA  
ATTGGCCTGCAAGAAGGAAAATCGCCATTGGAGCTGCGAGAGGGTTGGCTTT

>M6-PGSC0003DMG400019698M6LRR-RLK\_310

CTGCACTTCCACCAACCCCAACTCTGCTTCAGGACTGGTTGTCATCTACTGACCCTTGTAGTTTCACTGGT  
GTTTCATGCAAGAATTCTAGAGTTTCTTCTATAGATCTCAGTAACACTT

>M6-PGSC0003DMG400019698M6LRR-RLK\_3100

AGCTGAATTGGCCTGCAAGAAGGAAAATCGCCATTGGAGCTGCGAGAGGGTTGGCTTTCTACACCATA  
ACTGCATTCCACACATCATTACCGGGACATGAAATCAAGTAATGTCTTGC

>M6-PGSC0003DMG400019698M6LRR-RLK\_3162

CACCATAACTGCATTCCACACATCATTACCGGGACATGAAATCAAGTAATGTCTTGCTTGATGAAAATT  
TGGAAGCCAGAGTATCTGATTTTGGAAATGGCAAGGTTAATGAGTGCTATG

>M6-PGSC0003DMG400019698M6LRR-RLK\_3224

TGAAAATTTGGAAGCCAGAGTATCTGATTTTGGAAATGGCAAGGTTAATGAGTGCTATGGACACTCATT  
GAGTGTGAGCACTCTTGCAGGCACTCCCGGATAAGTTCCTCCTGAATATTA

>M6-PGSC0003DMG400019698M6LRR-RLK\_3286

CTCATTGAGTGTGAGCACTCTTGCAGGCACTCCCGGATAAGTTCCTCCTGAATATTACCAAAGCTTTAGA

TGTTTCGACAAAAGGAGACGTTTATAGTTATGGTGTCTGATTACTTGAGC

>M6-PGSC0003DMG400019698M6LRR-RLK\_3348

AGCTTTAGATGTTTCGACAAAAGGAGACGTTTATAGTTATGGTGTCTGATTACTTGAGCTTCTAACCGGCA  
AACAGCCAACAGATTCAGCTGATTTTGGTGACAACAATCTTGTCGGATGG

>M6-PGSC0003DMG400019698M6LRR-RLK\_3410

AACCGGCAAACAGCCAACAGATTCAGCTGATTTTGGTGACAACAATCTTGTCGGATGGGTAAAGTTGCA  
CGCTAAAGGAAAAATAACTGATGTCTTTGATCGAGAGCTATTGAAAGAGGA

>M6-PGSC0003DMG400019698M6LRR-RLK\_3472

AGTTGCACGCTAAAGGAAAAATAACTGATGTCTTTGATCGAGAGCTATTGAAAGAGGATCCAAGCATTG  
AGATTGAACTTCTACAACACTTAAAGGTAGCTTGTGCTTGCTTAGATGATC

>M6-PGSC0003DMG400019698M6LRR-RLK\_3534

AGCATTGAGATTGAACTTCTACAACACTTAAAGGTAGCTTGTGCTTGCTTAGATGATCGACATTGGAAAC  
GTCCCACGATGATACAAGTTATGGCTATGTTTAAGGAGATTCAAGCAGGG

>M6-PGSC0003DMG400019698M6LRR-RLK\_3596

TTGGAAACGTCCCACGATGATACAAGTTATGGCTATGTTTAAGGAGATTCAAGCAGGGTCAGGCATGGA  
TTCGACATCCACAATCGGAGCTGATGATGTCAATTTTAGTGCAGTTGAAGG

>M6-PGSC0003DMG400019698M6LRR-RLK\_3658

GCATGGATTCGACATCCACAATCGGAGCTGATGATGTCAATTTTAGTGCAGTTGAAGGAGGGATAGAAA  
TGGGGATAAATGAAAGTATAAAGAAGGCAATGAGCTAAGCAAACACCTTT

>M6-PGSC0003DMG400019698M6LRR-RLK\_372

TTCACTGGTGTTCATGCAAGAATTCTAGAGTTTCTTCTATAGATCTCAGTAACACTTTTTTAAGTGTGGA  
TTTCAGTTTGGTCACTTCTTATTTGCTTCCTCTTTCTAATTTGGAGTCT

>M6-PGSC0003DMG400019698M6LRR-RLK\_3720

ATAGAAATGGGGATAAATGAAAGTATAAAGAAGGCAATGAGCTAAGCAAACACCTTTGAATGCACTA  
AATCAAGAGTTTGTGAAAGCTCACAAATTTTCCAAAATCATATGCAAAGAA

>M6-PGSC0003DMG400019698M6LRR-RLK\_3782

GCACTAAATCAAGAGTTTGTGAAAGCTCACAAATTTTCCAAAATCATATGCAAAGAATTGCCAGTGTA  
TTTTTAGCCAATTATTGTATGTACCACTAGTTCCCATCCATAAAATCTTG

>M6-PGSC0003DMG400019698M6LRR-RLK\_3844

CAGTGTAATTTTTAGCCAATTATTGTATGTACCACTAGTTCCCATCCATAAAATCTTGTGTTATTATACATA  
AAAGGAAGGATGTTTTCTTTTTAAAACATGTAACAGTGTTGTATAT

>M6-PGSC0003DMG400019698M6LRR-RLK\_434

AAGTGTGGATTTCAAGTTGGTCACTTCTTATTTGCTTCTCTTTCTAATTTGGAGTCTTTAGTGTTAAAGAA  
TGCTAATCTTAGTGGTTCTTAACTTCTGCTGCTAAATCCCAATGTGG

>M6-PGSC0003DMG400019698M6LRR-RLK\_496

TGTTAAAGAATGCTAATCTTAGTGGTTCTTAACTTCTGCTGCTAAATCCCAATGTGGGGTTTCTTTAGAC  
TCCATAGATCTAGCTGAAAACACAATTTCAAGGACCTATTTCTGATATCT

>M6-PGSC0003DMG400019698M6LRR-RLK\_558

TCTTTAGACTCCATAGATCTAGCTGAAAACACAATTTCAAGGACCTATTTCTGATATCTCTAGCTTTGGTGT  
TTGTTCAAACCTTAAGTCTCTTAATCTTTCTAAGAATTTCTTGGACCCT

>M6-PGSC0003DMG400019698M6LRR-RLK\_62

TATCTTTCTTTTCAGAAAAATATGGAACCCCTTCAAGAACTCAAGCTATAGATTCAAGAAAATCTCCATTT  
AAGCTATAAAGTTTCAATCTTTGAAGATGAAAGCTCACAAAACCTGTGTT

>M6-PGSC0003DMG400019698M6LRR-RLK\_620

CTTTGGTGTGTTGTTCAAACCTTAAGTCTCTTAATCTTTCTAAGAATTTCTTGGACCCTCCTGGTAAAGAAAT  
ACTTAAAGGTGCAACCTTTAGCCTCCAAGTTCTTGATCTTTCTTACAA

>M6-PGSC0003DMG400019698M6LRR-RLK\_682

GTAAAGAAATACTTAAAGGTGCAACCTTTAGCCTCCAAGTTCTTGATCTTTCTTACAATAATATCTCAGGT  
TTCAACTTGTTCCATGGGTTTCATCCATGGGGTTTGGTGAACCTTGAGT

>M6-PGSC0003DMG400019698M6LRR-RLK\_744

ATCTCAGGTTTCAACTTGTTCCATGGGTTTCATCCATGGGGTTTGGTGAACCTTGAGTTCTTTCTCTCAA  
GGGTAACAACTAGCTGGAAGTATTCCTGAATTAGACTTCAAGAATTTG

>M6-PGSC0003DMG400019698M6LRR-RLK\_806

TTCTCTCAAGGGTAACAACTAGCTGGAAGTATTCCTGAATTAGACTTCAAGAATTTGTCACATTTGGAT  
CTTTCTGCAAATAATTTCTCAACTGTTTTCTTCATTCAAAGATTGCTC

>M6-PGSC0003DMG400019698M6LRR-RLK\_868

ATTTGGATCTTTCTGCAAATAATTTCTCAACTGTTTTCTTCATTCAAAGATTGCTCCAATTTGCAGCACT  
TGGATTTGTCATCCAACAAGTTTTATGGTGATATTGGTTCTTCACTTT

>M6-PGSC0003DMG400019698M6LRR-RLK\_930

TTGCAGCACTTGGATTTGTCATCCAACAAGTTTTATGGTGATATTGGTTCTTCACTTTCTTCATGTGGAAA  
GCTTAGTTTTCTCAACCTTACCAATAACCAGTTTGTAGGTTTGGTCCCT

>M6-PGSC0003DMG400019698M6LRR-RLK\_992

ATGTGGAAAGCTTAGTTTTCTCAACCTTACCAATAACCAGTTTGTAGGTTTGGTCCCTAAACTACAAAGT  
GAAAGCCTACAGTATTTGTACTIONAAGAGGGAATGATTTTCAGGGTGTGTA

>M6-PGSC0003DMG400019720M6RLKWAX-EGF\_1008

TCTCAACCGATTGTTTCATCAGATGATGGGAAGTTCTATGACATTTTCGTCTGATTCAATGGCTTTGTTAGA  
AAATTCTGCTGATAATTCCGTCAAAGTAGACATTTTTTCTGATTGATTA

>M6-PGSC0003DMG400019720M6RLKWAX-EGF\_1071

TTGTTAGAAAATTCTGCTGATAATTCCGTCAAAGTAGACATTTTTTCTGATTGATTATAGTTGTGTATTGT  
TAATTTAAAATGACATATATGTGAGAAGGGCTTCACATTTTATGAAGGG

>M6-PGSC0003DMG400019720M6RLKWAX-EGF\_1127

ATAGTTGTGTATTGTTAATTTAAAATGACATATATGTGAGAAGGGCTTCACATTTTATGAAGGGTCGGGT  
CTGAGTTGGTCCGTCTCATTATTGTGTTTACGCTGAACAAATACATATG

>M6-PGSC0003DMG400019720M6RLKWAX-EGF\_189

GTATACAAAGGAAAGCTTCAAAGTGGAAGAGATGTAGCAGTGAAGATGTTGAACAAGCCTAAAGCTGG  
TTGTCAAGACTTCATGAATGAAGTGGCTACCATTGGAAGGATCCATCATGTC

>M6-PGSC0003DMG400019720M6RLKWAX-EGF\_567

AAGATTTCTGACTTTGGGCTTGCAAATTATATACAACAGATAATAGCATTGTGAACCTCACAGCTGCTC  
GTGGAACAATTGGATATGTAGCTCCAGAGTTGATCAGCAGAAGAATTGGA

>M6-PGSC0003DMG400019720M6RLKWAX-EGF\_63

TATGATGCGATTGAAGGCTTTTTGCAAACACAAAACAATTTTCATGCCAATCAGATATAAATACTCCCACAT  
AAAAAGAATGACCAGAGCATTCAAAGAGAAATTAGGTGAAGGAGGTTAC

>M6-PGSC0003DMG400019720M6RLKWAX-EGF\_693

TCTTACAAAGCTGATGTTTACAGCTTTGGAATGCTGCTAATGGAAATGCTGGACTTGAATAGACATGAA  
GTTGCAAATGAAGAGAATTCCAGCCAATTTTTCTTATTATATTTACGAT

>M6-PGSC0003DMG400019720M6RLKWAX-EGF\_756

CATGAAGTTGCAAATGAAGAGAATTCCAGCCAATTTTTCTTATTATATTTACGATAAGTTCAACAAGG



GGAAGGAGATTTTTGTGGATGAAGAAGCTATTGATGATGAAAAGAAGATG

>M6-PGSC0003DMG400019720M6RLKWAX-EGF\_819

AACAAGGGGAAGGAGATTTTTGTGGATGAAGAAGCTATTGATGATGAAAAGAAGATGGCTACAAAGCT  
GAGTTTAGTTGCATTATGGTGCATTCAAATGAATCCAATACAGCGCCCTTCA

>M6-PGSC0003DMG400019721M6OtherRLKTM\_0

TCAATTATTGTAGGTGTAGTTTTAGGTACATCGCTTGTTCATTATTGTCTTCTCACTTTATCAGCTATAT  
TTGACAAGTACAAATGAAAGAGAGAGTTCGAGTTAGACTTGAAAAGTTT

>M6-PGSC0003DMG400019721M6OtherRLKTM\_390

GCTCTGATCTACGAATACCTACCAAATGATTCACCTTGAAAGGTTTATTTTACCATTGAGCTCAAGCCTGG  
GTAGTGTCTCACTCATCAGCTGGAACAAGCTTCAACATATTGCTCTGGGT

>M6-PGSC0003DMG400019721M6OtherRLKTM\_65

GCTATATTTGACAAGTACAAATGAAAGAGAGAGTCGAGTTAGACTTGAAAAGTTTTTGGATGACTACAA  
GGCCATCAGACCAACACGATATTCTTATGCTGATATTAAGAAGATAACAGA

>M6-PGSC0003DMG400019721M6OtherRLKTM\_715

TATCAAGAACTTTGGTAAAGTTTCTCATAAGTCTGATATTTATAGCTTTGGGATGCTCTTGTTAGAAATG  
GTTGATGGGAGGATAAAGATGGATTCTAAGACAAATAATCACAGCAAAG

>M6-PGSC0003DMG400019721M6OtherRLKTM\_780

GAAATGGTTGATGGGAGGATAAAGATGGATTCTAAGACAAATAATCACAGCAAAGTGAATTCCTTTGGA  
ATGGATATATAGACATTTGGAGAAAGGGGAAGAATTAAGATTTCGTATAGAG

>M6-PGSC0003DMG400019721M6OtherRLKTM\_845

GGAATGGATATATAGACATTTGGAGAAAGGGGAAGAATTAAGATTTCGTATAGAGGAAGAAGGAGAT  
AATACAATTGTGAGAAAGTTAGCTATTGTTGGACTTTGGTGCATACAGTGGCA

>M6-PGSC0003DMG400019721M6OtherRLKTM\_910

ATAATACAATTGTGAGAAAGTTAGCTATTGTTGGACTTTGGTGCATACAGTGGCATCCCAATGATAGACC  
TTCAATAAAAGAAGTTACTCAGATGCTGGAAGGAGATGGAAGCCATCTCA

>M6-PGSC0003DMG400019721M6OtherRLKTM\_972

GATAGACCTTCAATAAAAGAAGTTACTCAGATGCTGGAAGGAGATGGAAGCCATCTCAACTTGTCCCCA  
AATCCTTTTATGGCTACTAATACGCCTAAGTTAAATGCAAGTCCTCTCAGT

>M6-PGSC0003DMG400019801M6LRR-RLK\_0

ATGGTTTCCATGACTATTATTATAGAATTGCTAGTTTTGTTAACGTACCTCTTGGATACTAATGCATCGAA  
CATTTCAACTGATGAGGCTGCTCTTTTAGCTTTCAAAGTCATATAACT

>M6-PGSC0003DMG400019801M6LRR-RLK\_1054

GCTCTTTGTTCTTCATTTTCAAACAACAACAGCAACTACTCCATCGGTTCAATGCTAGTTTGTGATGTGAA  
TCCTCATTATCCATGTTGATCCATTTAGTCCCATCTTCAAGAGGACGTT

>M6-PGSC0003DMG400019801M6LRR-RLK\_1178

CAGATTGCGAGGATTGCTGAACTATTTAAAAGGCATACAACACTAACAGTTTTCTGTTATTTATAGTAACTTA  
GTGACTGTAAAGCTGTTATACAGTATTGGACATTTCAAGTGTAGTAACCA

>M6-PGSC0003DMG400019801M6LRR-RLK\_1240

AGTAACTTAGTGACTGTAAAGCTGTTATACAGTATTGGACATTTCAAGTGTAGTAACCAACACAATTCGACA  
TATATTTTACAGGACATATACCAAGTGAAATTGATAACCTATCAGCAATT

>M6-PGSC0003DMG400019801M6LRR-RLK\_1302

ATTGACATATATTTTACAGGACATATACCAAGTGAAATTGATAACCTATCAGCAATTCGAAGATTAAGT  
CTACGACGGAACAATTTGGTGGGAAGTCTTCCACCAACTATTGGAAATTT

>M6-PGSC0003DMG400019801M6LRR-RLK\_1364

GATTAAGTCTACGACGGAACAATTTGGTGGGAAGTCTTCCACCAACTATTGGAAATTTGTCAAATCTAGA  
GATGATAGACCTAGGTGACAACAGACTATATGGTGGCATTCTCAGGAGT

>M6-PGSC0003DMG400019801M6LRR-RLK\_1426

AATCTAGAGATGATAGACCTAGGTGACAACAGACTATATGGTGGCATTCTCAGGAGTTTGAACATCTT  
GTAAATTTGAAAGAAGTGTATCTTGGTACAAACAGATTATCGGGTGAAGTT

>M6-PGSC0003DMG400019801M6LRR-RLK\_1488

ACATCTTGTAATTTGAAAGAAGTGTATCTTGGTACAAACAGATTATCGGGTGAAGTTCCAAGGCGTAT  
GTACAACATTTCTGGACTAAAAAAGATTTCAATTTGTAGCAAATACGCTTTC

>M6-PGSC0003DMG400019801M6LRR-RLK\_1550

GCGTATGTACAACATTTCTGGACTAAAAAAGATTTCAATTTGTAGCAAATACGCTTTCAGGAACACTTCC  
CCCAAACATAGGCCATACTCTTCCAAATCTTGAAGGCCTTTACCTTGGGT

>M6-PGSC0003DMG400019801M6LRR-RLK\_1612

ACACTTCCCCAAACATAGGCCATACTCTTCCAAATCTTGAAGGCCTTTACCTTGGGTAAAACCAGTTCAC  
CGGGCTGATTCTACCTCCATTGTGAATTCCACCAAGCTTATCCAGCTT

>M6-PGSC0003DMG400019801M6LRR-RLK\_1736

TTGGTCGCAATCTGTTTAGTGGACCTGTACCTATGAATCTTGAAAGCTACAACAGCTTCAATTCATCAA  
CTTGCAAGTAAACCAATTGAGGAATGATCAATCTACAGGCGAGTTAAGTT

>M6-PGSC0003DMG400019801M6LRR-RLK\_1798

TTCATCAACTTGCAAGTAAACCAATTGAGGAATGATCAATCTACAGGCGAGTTAAGTTTCTGACTTCAT  
TATCTAATTGCAAGTATTTGAAAAGTGTTCAAATAGGAGGTAATCAATTT

>M6-PGSC0003DMG400019801M6LRR-RLK\_186

TATCTTGCAGTAGAAGGCATCAAAGAGTGACATCACTAGACCTCAACGGCCTTAGACTAAGAGGTTCAA  
TCGCCACAGAAATCGGGAACCTCTCCTTTCTTAGTTTTCTGGACATTGGCA

>M6-PGSC0003DMG400019801M6LRR-RLK\_1860

GACTTCATTATCTAATTGCAAGTATTTGAAAAGTGTTCAAATAGGAGGTAATCAATTTAATGGAAGTCTT  
CCAAAATCTCTAGGTTTCAGGAAACTGGTCCTTTTCCCTTGAATATTTTCAT

>M6-PGSC0003DMG400019801M6LRR-RLK\_1922

GAAGTCTTCCAAAATCTCTAGGTTTCAGGAAACTGGTCCTTTTCCCTTGAATATTTTCATTGCCCTTCAAAGT  
GGTATCACAGGAAAAATACCAACTAACATCAGTAACTTTAGGAACCTGG

>M6-PGSC0003DMG400019801M6LRR-RLK\_2046

GTTAAGCTTGGGAGAGAATAAGCTTATAGGTTCTATTCCTCCAGATTTGGGGAAGTTGAGGAATTTGAA  
AAGATTTAGCCTGGAGAAAAACAATTTAGATGGAATTATACCAACTAGCTT

>M6-PGSC0003DMG400019801M6LRR-RLK\_2108

ATTTGAAAAGATTTAGCCTGGAGAAAAACAATTTAGATGGAATTATACCAACTAGCTTGTGTAACATGG  
AAAAGTTGTACCAAATTATCTTGGGAAAAATCAACTTTCTGGCGAATTAC

>M6-PGSC0003DMG400019801M6LRR-RLK\_2170

AACATGGAAAAGTTGTACCAAATTATCTTGGGAAAAATCAACTTTCTGGCGAATTACCAAGTTGTTTTG  
GAAATCTTTCTTTAAGAGAACTCTACTTAGATTCCAATGCACTAATT

>M6-PGSC0003DMG400019801M6LRR-RLK\_2232

TTGTTTTGAAAATCTTTCTTTAAGAGAACTCTACTTAGATTCCAATGCACTAATTTCCCATATTCCATC  
AACTTTTTGGAGGAACAGAGATATTTCAATTCTCACTTTGTCTCTCAA

>M6-PGSC0003DMG400019801M6LRR-RLK\_2294

ATATTCCATCAACTTTTTGGAGGAACAGAGATATTTCAATTCTCACTTTGTCTCTCAAATTTGCTGAATGGG

TCTCTTGCAGTAGAAATGGGGAATTTAAGGAGTTTGCGGATATTACATT

>M6-PGSC0003DMG400019801M6LRR-RLK\_2356

CTGAATGGGTCTCTTGCAGTAGAAATGGGGAATTTAAGGAGTTTGCGGATATTACATTTACATGGTAAT  
CAGTTCTCTGGTCAGATTCCTAGCACAAATTGGCCAACACTACAAAATTTGGTT

>M6-PGSC0003DMG400019801M6LRR-RLK\_248

GGTTCAATCGCCACAGAAATCGGGAACCTCTCCTTTCTTAGTTTCTGGACATTGGCAACAACAGCATCC  
ACGGCGAAATCCCTGATGAACTCGGCTATTTGAGGAGGCTGAAATACTTG

>M6-PGSC0003DMG400019801M6LRR-RLK\_2480

TTTCATTGTCAAAGAATATGTTAGATGGTTCCATACCTGAACTATTTGAAGATTTGGTTTCATTGGAACAC  
TTGGATCTATCTAGCAACAATCTATCAGGCATGATCCCCAAGTCCTTGA

>M6-PGSC0003DMG400019801M6LRR-RLK\_2604

TCTTGAACATCTCATGTATTTCAATGTCTCGTTCAATGGGCTCATGGGTGAAATTCCAGATGGAGGGCCA  
TTCGTAATTTTACAGCTGAATCATTGATGGGTAACCCTGCATTATGTGG

>M6-PGSC0003DMG400019801M6LRR-RLK\_2728

TCACGCTTCCATGTGATGCAATGCAGAGTCACAAGTCTTGAAAGGAAAAGAAAGAGTAGAGTCTTAACT  
TCTGTTCTTGCATCAGTTTCTCAGGAGTTGTAGTCACAACCATTTTCATC

>M6-PGSC0003DMG400019801M6LRR-RLK\_3038

CAATAAAGGTATTCAATACAGAACTGCAACATGCATTTAGAAGTTTCGAGGTGGAGTGTCAAGTTTTAC  
GTAGCATTTCGACACAGAAACCTTGTTAAGGTGATAAGTAGTTGTGCCAATT

>M6-PGSC0003DMG400019801M6LRR-RLK\_310

CAGCATCCACGGCGAAATCCCTGATGAACTCGGCTATTTGAGGAGGCTGAAATACTTGTCTTGTCAATG  
AATAATCTCACAGGTCAAATTCAGCTAGTCTAGGATTACTGAGAAGGCT

>M6-PGSC0003DMG400019801M6LRR-RLK\_3224

CTGACAAATTTTTGGATTTAACTCAAAGACTAAAGGTGATGATTGATGTGGCTTCCGCTGTGGAGTATTT  
ACATGGAGGTCATTTGTTTGTAGTCGTCCATTGTGATTTGAAACCAAGTA

>M6-PGSC0003DMG400019801M6LRR-RLK\_3410

CTGAGACGCTAATAGCACATACCAAGACTTTGGGTAATATAGGCTACATGGCACCAGGTAAATGTTATT  
ATCAAGTTCATTTGAAGATTTTAAATGACGTTAATTATTTTCACTAATGAT

>M6-PGSC0003DMG400019801M6LRR-RLK\_3472

TGTTATTATCAAGTTCATTTGAAGATTTTAAATGACGTTAATTATTTTCACTAATGATTGCGTGATTTTTTG  
CAGAGTATGGATCAGAAGGCAAAGTATCAACCAAGGGAGATGTTTATA

>M6-PGSC0003DMG400019801M6LRR-RLK\_3658

ACTTCACCTTGAAAAGATGGACATGCCAATCATTACCAAACCGATTGGTGGATGTAGTGGACATTAATCT  
ATTTTCACTGGACGAAGAAAATTTACTTCTAAAGAGAGATGCTTCAAAT

>M6-PGSC0003DMG400019801M6LRR-RLK\_372

TGTCAATGAATAATCTCACAGGTCAAATTCAGCTAGTCTAGGATTACTGAGAAGGCTCGAATCACTTGA  
TCTTTCTGAAAATGATCTCCTTGGATCTGTTCTTCGTCTATCTTCAATG

>M6-PGSC0003DMG400019801M6LRR-RLK\_3720

ATTAATCTATTTTCACTGGACGAAGAAAATTTACTTCTAAAGAGAGATGCTTCAAATCAATCATGGAATT  
AGCTCTTGAATGCACAAACGATTTGCCTGAAGAGAGAATTCGCATAGAA

>M6-PGSC0003DMG400019801M6LRR-RLK\_3782

CATGGAATTAGCTCTTGAATGCACAAACGATTTGCCTGAAGAGAGAATTCGCATAGAAGATATTACTCT  
GCGACTCAAGAAGATCCTAACTCAATTTCTGTAAAATGTTGTAACAAACTA

>M6-PGSC0003DMG400019801M6LRR-RLK\_434

TCACTTGATCTTTCTGAAAATGATCTCCTTGGATCTGTTCTTCGTCTATCTTCAATGTCTCTTCTTTGAAG  
GTCATCAATTTGATTTATAATGCACTGTCTGGGACTTTGCCGAATGAC

>M6-PGSC0003DMG400019801M6LRR-RLK\_496

TTCTTTGAAGGTCATCAATTTGATTTATAATGCACTGTCTGGGACTTTGCCGAATGACATTTTCCATAATC  
TTCCGCGGCTGGAGGGCTTACAAATAGCAAGAAATCGACTCTCTAGCCA

>M6-PGSC0003DMG400019801M6LRR-RLK\_62

TGCATCGAACATTTCAACTGATGAGGCTGCTCTTTTAGCTTTCAAAGCTCATATAACTTCAGATCCAATGG  
AATGCTGTGAAAAACTGGACAAAAGGGACTCACGTTTGCAATTGGATA

>M6-PGSC0003DMG400019801M6LRR-RLK\_620

CCAAGCAACTTAGACAAATGCAAAGAGCTTACATACTTGTCTTGTTCATATAACCAGTTCACAGGTAAAA  
ATACTGAACCAATTTCTTTTTCTGCTACTTTTGGTTCATATTGACAATAA

>M6-PGSC0003DMG400019801M6LRR-RLK\_682

AGGTAAAAATACTGAACCAATTTCTTTTTCTGCTACTTTTGGTTCATATTGACAATAAAGATTGCAGCAAT  
TTTTAGTGAAAACAATGATAGGCTGTTGAGAGGTATAACTTATTGTAAC



ATTGTCTTGATAATCTTGTACATTTAACTCAGCTTGAGAAGCTCAAAGTT

>M6-PGSC0003DMG400019970-(rev)M6LRR-RLP\_1178

GAAGTGTTATTGTCTTGATAATCTTGTACATTTAACTCAGCTTGAGAAGCTCAAAGTTAAGTTCTGCGATT

ATCTGCTAGGGTTAAGTTGGTTCTTAGAAGCTCAAAGCTTAGGTTGGGT

>M6-PGSC0003DMG400019970-(rev)M6LRR-RLP\_1240

TCTGCGATTATCTGCTAGGGTTAAGTTGGTTCTTAGAAGCTCAAAGCTTAGGTTGGGTGGACCTTTCTTG

GCTACACATTCCACATTGTGACAATTTCCACCAAACCTCAAGAAGTTAA

>M6-PGSC0003DMG400019970-(rev)M6LRR-RLP\_1364

GTGCAGAACAAACCTACAATGGGAAGACATGAACATTCTCAGAAAATTACCTAATCTTGAGGTGCTCAA

ACTTAAACGTCGTGCCTTTGACGGACTAATTTGGAACTAAGCGATGAAGA

>M6-PGSC0003DMG400019970-(rev)M6LRR-RLP\_1426

TGCTCAAACCTTAAACGTCGTGCCTTTGACGGACTAATTTGGAACTAAGCGATGAAGACGAAGATGGAT

TCTTGAAGCTAAAGTTTTTACTTCTTGAGAACATGAATCTGATGCAATGGG

>M6-PGSC0003DMG400019970-(rev)M6LRR-RLP\_1488

GATGGATTCTTGAAGCTAAAGTTTTTACTTCTTGAGAACATGAATCTGATGCAATGGGAAGCAACAAGTT

ATCATTTTCCAAGCCTTGAGCACTTAGTTTTAACAGATTGCGGGTACTTG

>M6-PGSC0003DMG400019970-(rev)M6LRR-RLP\_1550

AACAAGTTATCATTTTTCCAAGCCTTGAGCACTTAGTTTTAACAGATTGCGGGTACTTGAAACAAATTCCTT

TCGACTTTGCGGAGATTGAGCACTACAGCTGATTGAACTAGACAAATG

>M6-PGSC0003DMG400019970-(rev)M6LRR-RLP\_1674

CGTTCTGTTCTTGTTCAGCAGAGCAAATACAAGCGGAGCAACAAAGCTTGGGAAATGATGACCTCGTT

ATTCATGCGAACTATATACGTGAGTAAACATTAATAAAAAAGGTATAGACT

>M6-PGSC0003DMG400019970-(rev)M6LRR-RLP\_1736

CCTCGTTATTCATGCGAACTATATACGTGAGTAAACATTAATAAAAAAGGTATAGACTTCTTAAAAGCAT

AAAGAATTTTTATTAGATAGATTGTTTCGAAATCTGAAAATGTTTTTTAT

>M6-PGSC0003DMG400019970-(rev)M6LRR-RLP\_1798

AAAAGCATAAAGAATTTTTATTAGATAGATTGTTTCGAAATCTGAAAATGTTTTTTATATTCATCATTTTC

ACTTATTTATACTATAAAAGGTGCTAATTACAATTGGTTTGTGCATTGC

>M6-PGSC0003DMG400019970-(rev)M6LRR-RLP\_186

ATTGGTGGACTACTTTCCAAGATGAGCAAGGAAACAAGTTCTTGGGAGAACGTTGCAGAAAAAGTAGG  
ATCACTTATGACCAGTGACACTATGGATTGTTTGAACATACTTTCTTTGAGC

>M6-PGSC0003DMG400019970-(rev)M6LRR-RLP\_1860

ATCATTTTCACTTATTTATACTATAAAAGGTGCTAATTACAATTGGTTTGTGCATTGCAGACGTAACGACT  
AGCTGATGGAGAGTACCATATACTCAAGCAAATTTGCAGAAGTTCATGA

>M6-PGSC0003DMG400019970-(rev)M6LRR-RLP\_1922

GTAACGACTAGCTGATGGAGAGTACCATATACTCAAGCAAATTTGCAGAAGTTCATGATCTTTCTTTCT  
CTGTATTTCAATTTCTTTTTTGCAAATTCAGCGAAGTTAGTTAGTGAAA

>M6-PGSC0003DMG400019970-(rev)M6LRR-RLP\_1984

TCCTTTCTCTGTATTTCAATTTCTTTTTTGCAAATTCAGCGAAGTTAGTTAGTGAAATAGTCATGTTTCAA  
CTTGTTTAGGACTGAGACGTAGTTTAGTGAATCTGATATCTATATACA

>M6-PGSC0003DMG400019970-(rev)M6LRR-RLP\_2046

CATGTTTCAACTTGTTTAGGACTGAGACGTAGTTTAGTGAATCTGATATCTATATACATTCATCAGAAAG  
AATGCATTACCTTTGGAACGTGTATATAGTTGAATAACTTCTCTTTTTAT

>M6-PGSC0003DMG400019970-(rev)M6LRR-RLP\_2103

ATTCATCAGAAAGAATGCATTACCTTTGGAACGTGTATATAGTTGAATAACTTCTCTTTTTATTGAAATTG  
ATTCTATAAATCAGTTCTCCTCAACAAAACCTTTTCGTCCATACCAAAC

>M6-PGSC0003DMG400019970-(rev)M6LRR-RLP\_248

AGTAGGATCACTTATGACCAGTGACACTATGGATTGTTTGAACATACTTTCTTTGAGCTACAACCACTTGC  
CTCAGTACTTGAAAACATGCTTCCTTTATATGGGAGTTTTTGCAGAAAC

>M6-PGSC0003DMG400019970-(rev)M6LRR-RLP\_372

GAGATTCCGGTCTGGAAGTTAATAAAATTATGGATTGCTGAGGGCTTCGTCAAGAAAGTTAATCATAAA  
AATCTAGAAGATGTGGCAGAGGAAAATTTGAGGGAGTTGGTTGATAGAAGT

>M6-PGSC0003DMG400019970-(rev)M6LRR-RLP\_496

TTTTGGTGGGAAGCATACTCCCTAGGAAAAATCAAGACTTATAAGATGCATGATCTCATTTCGAGATAT  
ATGTTTGAGAGAAGCCCAATATGAGAATTTTATACACTTCAAACAAGGT

>M6-PGSC0003DMG400019970-(rev)M6LRR-RLP\_558

CGAGATATATGTTTGAGAGAAGCCCAATATGAGAATTTTATACACTTCAAACAAGGTATGACTATGATG  
ATCTTCTAGAAAACAATAGTTGTCTACGTCGTGTAGCAGATTTCCATAAG



>M6-PGSC0003DMG400019970-(rev)M6LRR-RLP\_620

CTATGATGATCTTCTAGAAAACAATAGTTGTCTACGTCGTGTAGCAGATTTCCATAAGTATACAAACAGT  
AGACTTTCTAAACTTAAACCACTCACACGTTTCAGTTTTCTTCAAATATCC

>M6-PGSC0003DMG400019970-(rev)M6LRR-RLP\_682

CAAACAGTAGACTTTCTAAACTTAAACCACTCACACGTTTCAGTTTTCTTCAAATATCCATACTTTAATTGAT  
ACCTCTCACAGTCGAGCTTTAGACTTAGGATATTAGATGTTTGCT

>M6-PGSC0003DMG400019970-(rev)M6LRR-RLP\_744

TTTAATTGATACCTCTCACAGTCGAGCTTTAGACTTAGGATATTAGATGTTTGCTTTACTACTTCTTTG  
TTCTGTGAACAGTCCATATCAGAACTTGTTTCATTTGAGGTATCTTGCT

>M6-PGSC0003DMG400019970-(rev)M6LRR-RLP\_806

TACTTCTTTGTTCTGTGAACAGTCCATATCAGAACTTGTTTCATTTGAGGTATCTTGCTTGTCTGTTCTTCGA  
TGGTTTTGTGCAATCACTATGCAAGCTACAGAATATACAGAACTTAGT

>M6-PGSC0003DMG400019970-(rev)M6LRR-RLP\_868

TGTTCTTCGATGGTTTTGTGCAATCACTATGCAAGCTACAGAATATACAGAACTTAGTTATTCATGATTTA  
GATATGAGAACCCAGTTCCTACCATGGGAAGTTGTGAATATGCCTCAAC

>M6-PGSC0003DMG400019970-(rev)M6LRR-RLP\_930

CATGATTTAGATATGAGAACCCAGTTCCTACCATGGGAAGTTGTGAATATGCCTCAACTAAGACATATCC  
ATACAAAAAACTTTAATCTTTTCATACCCCCACCTACATCCCTAATTGCT

>M6-PGSC0003DMG400019970-(rev)M6LRR-RLP\_992

ACATATCCATACAAAAAACTTTAATCTTTTCATACCCCCACCTACATCCCTAATTGCTGAGAGGGAGAATC  
ACTTACAAACATTAACCGGATTGATTCCTCATCTTGTAATGAAGAGGT

>M6-PGSC0003DMG400020178M6LRR-RLP\_0

AAGAAAGTGACCGTAGAACTATCTGCTACTCAATTCATCCATCTTCTTCTTCTCTCCTAAACCAT  
TAATTTGTTTCAGCCATAACCAAAAAAGCTTTTGCTTTCTTGTGAAGA

>M6-PGSC0003DMG400020178M6LRR-RLP\_1386

CGGCTTGTCCGTTGAAAGCCGGAAGCAGAAGAGTAGGCCTACAAATCAGTGTGTGGAGTGGAAGGG  
GCAAAAGAGTGAAAAAACAACAATAATAATATTACTACTAATATGGCTTAAT

>M6-PGSC0003DMG400020178M6LRR-RLP\_1449

AGGGGCAAAAGAGTGAAAAAACAACAATAATAATATTACTACTAATATGGCTTAATTTTTCTAGATTCT

TTCATTTTCATTTTCCTTCCTGATTATGGGCTGATGGGCTAAGTAATAGTA

>M6-PGSC0003DMG400020178M6LRR-RLP\_1512

AGATTCTTTTCATTTTCATTTTCCTTCCTGATTATGGGCTGATGGGCTAAGTAATAGTAGTAAAAAAGAGTA

AATGTGCATAATAAAGGAGAGAAAAATAGAGTTAAAAGGTGTACGAGTCA

>M6-PGSC0003DMG400020178M6LRR-RLP\_1575

AAGAGTAAATGTGCATAATAAAGGAGAGAAAAATAGAGTTAAAAGGTGTACGAGTCATCCTCCTATTGT

TTTTCTTTTGTATTAAGCCAAAACAATTTTGGCATTCTTTTTTGTAAATTAG

>M6-PGSC0003DMG400020178M6LRR-RLP\_1628

GTCATCCTCCTATTGTTTTCTTTTGTATTAAGCCAAAACAATTTTGGCATTCTTTTTTGTAAATTAGGTA

CTAGTATAATATATTCAATTACTTGGATTTACGGATCTCAAGTTGAA

>M6-PGSC0003DMG400020178M6LRR-RLP\_189

TCTCACGGAAAAGAAAACCAAAAAAGTTCCATTTTTTTTTTACCTTATATAAGCCAGCCTTTTCTATCATT

TTCTCTTCAGCTATACGGTAATTATGATACCATTCTTTGTATTCTTTT

>M6-PGSC0003DMG400020178M6LRR-RLP\_252

CTATCATTCTTCTCTTCAGCTATACGGTAATTATGATACCATTCTTTGTATTCTTTTTTCTTCTTCTGCAGAA

TAGTTTCGCCATTTTAGACCCAATTGATTTCTTAGCTTTACAAGCGA

>M6-PGSC0003DMG400020178M6LRR-RLP\_567

CTGAGTTCACGGTGGTTCCGGGTCGGATAACCGGTGCATTGCCGAAAGTTTTTCTCAGTTGAAGAACC

TGAGATTTCTAGGAGTTAGCCGGAACCTTCTCTCCGGTGATATTCCGGCGT

>M6-PGSC0003DMG400020178M6LRR-RLP\_630

AGAACCTGAGATTTCTAGGAGTTAGCCGGAACCTTCTCTCCGGTGATATTCCGGCGTCATTAGGCCTGCT

CCGGGAGCTACAACTCTTGATCTTAGTTTCAATCAGCTGACTGGGAGTA

>M6-PGSC0003DMG400020178M6LRR-RLP\_693

GCCTGCTCCGGGAGCTACAACTCTTGATCTTAGTTTCAATCAGCTGACTGGGAGTATCCCTTGGGCTAT

TGGAGCTCTTCCGGCATTGTCCAACATTATACTCTGTCACAATCATTGT

>M6-PGSC0003DMG400020326M6L-LecRK\_0

CAACAATAGAACAAATTAGCATATTTTCTCTCCACCAAGAAAATATTACCAATGTTGTTAAATTTTGCAT

ACTAGTGTCTCTTCTTTGCACCAACTTCTTGTGAAGTTGATGGATTC

>M6-PGSC0003DMG400020326M6L-LecRK\_1054

CTAAAGGATTCAGAGAAAAGGAGCTGTTGGGAGCTGGAGGATTTGGTAAAGTTTATAAAGGAGTGATG  
CCTGTAACCAAACCTTGAGATAGCTGTAAAGAAGATATCTCATGAATCAAGAC

>M6-PGSC0003DMG400020326M6L-LecRK\_1116

GTGATGCCTGTAACCAAACCTTGAGATAGCTGTAAAGAAGATATCTCATGAATCAAGACAAGGGATGAAG  
GAATTTGTTTCGGAGATTGTAAGTATAGGCCGTATACAACATAGGAATGTA

>M6-PGSC0003DMG400020326M6L-LecRK\_1178

GATGAAGGAATTTGTTTCGGAGATTGTAAGTATAGGCCGTATACAACATAGGAATGTAGTACCACTTTT  
GGGCTATTGTAGGCGAAAAGGGGAATTACTTTTGGTTTATGAATTCATGTC

>M6-PGSC0003DMG400020326M6L-LecRK\_124

ACAATGGATTCAAATCAAGTAATCTTAGCTTTGATGGCATTGCTAATATTACATCCAATGGTCTTTTGTGCG  
TTAACAGATTCCAAAACACAAGATCAAGGCCATGCTTTCTATCCAAATC

>M6-PGSC0003DMG400020326M6L-LecRK\_1240

CACTTTTGGGCTATTGTAGGCGAAAAGGGGAATTACTTTTGGTTTATGAATTCATGTCTAATGGAAGTCT  
AGACAAGTATTTATACGACCAACCAAGACTCACCTCGATTGGAACCAAA

>M6-PGSC0003DMG400020326M6L-LecRK\_1302

GGAAGTCTAGACAAGTATTTATACGACCAACCAAGACTCACCTCGATTGGAACCAAAGATTCAGAGTT  
ATTCGAGGTGTAGCATCAGGACTATTTTCTACATGAAGAATGTGACCAT

>M6-PGSC0003DMG400020326M6L-LecRK\_1364

CAGAGTTATTCGAGGTGTAGCATCAGGACTATTTTCTACATGAAGAATGTGACCATGTAGTGGTTCAT  
AGGGATATTAAGGCTAGTAATGTCTTGTGGATGGTGAACATAAATGGCAG

>M6-PGSC0003DMG400020326M6L-LecRK\_1426

TGGTTCATAGGGATATTAAGGCTAGTAATGTCTTGTGGATGGTGAACATAAATGGCAGGCTAGGAGACT  
TTGGAICTCGCGAGGCTATATGGTCATGGGACCGATCCTCAATCAACTCGTG

>M6-PGSC0003DMG400020326M6L-LecRK\_1488

GGAGACTTTGGACTCGCGAGGCTATATGGTCATGGGACCGATCCTCAATCAACTCGTGTCGTTGGTACT  
CTTGGTTATCTTGCACCAGAGCATACTAGAACTGGCAGGGCAACACCTAGT

>M6-PGSC0003DMG400020326M6L-LecRK\_1612

ATGTATTTTCTTTGGGGCTTTTTTACTTGAAGTTGCATGTGGTAGGAGGCCGATAGAGCCAAGACAAGC  
CGGTGATGATCTGATTTTAGTGGATTGGGTGTTTTCGTGCTGGAATAGAG

>M6-PGSC0003DMG400020326M6L-LecRK\_1674

AGACAAGCCGGTGATGATCTGATTTTAGTGGATTGGGTGTTTTCGTGCTGGAATAGAGGTAATATTCTT  
GAGGCAGTTGATCCAAACTTAGGCAATGATTTTGTTCCAGGGCAAGTGGAG

>M6-PGSC0003DMG400020326M6L-LecRK\_1736

TATTCTTGAGGCAGTTGATCCAAACTTAGGCAATGATTTTGTTCCAGGGCAAGTGGAGTTGGTCTTAAGT  
CTAGGCTTGTTCTGCTCTCATTAGAGCCCTCATTTAGGCCAACAATGCG

>M6-PGSC0003DMG400020326M6L-LecRK\_1798

TCTTAAGTCTAGGCTTGTTCTGCTCTCATTAGAGCCCTCATTTAGGCCAACAATGCGACAAAACGTGTTG  
TTCTTGATGGTGTGTGGCCTTGCCAGAGTTATCAGCCCTCGGTGTTT

>M6-PGSC0003DMG400020326M6L-LecRK\_186

CTTTTGTGTTAACAGATTCCAAAACACAAGATCAAGGCCATGCTTTCTATCCAAATCCAATTCATTTCAA  
GAATTCACCTAATGGTAATGCATTTTCATTCTCTACAACATTTGTGTTT

>M6-PGSC0003DMG400020326M6L-LecRK\_1860

AACGTGTTGTTCTTGATGGTGTGTGGCCTTGCCAGAGTTATCAGCCCTCGGTGTTTCATCTGCTGGTC  
TAACATTTGACCATCGCGGAGGTTTTGATGATTTTATCAAGTCGTATCCA

>M6-PGSC0003DMG400020326M6L-LecRK\_1922

TGCTGGTCTAACATTTGACCATCGCGGAGGTTTTGATGATTTTATCAAGTCGTATCCAGCTTCTTCTGTTA  
ATGCACATTTCCCGCTTCATCCGTAGCAGAATCACTCCTTTCTGATCC

>M6-PGSC0003DMG400020326M6L-LecRK\_1984

CTTCTGTTAATGCACATTTCCCGCTTCATCCGTAGCAGAATCACTCCTTTCTGATCCCGATGAGTTGGA  
CATATCTTCTTTGGTGTATTATTGATATACTGATCCTGGTAAATATAAC

>M6-PGSC0003DMG400020326M6L-LecRK\_2046

TGAGTTGGACATATCTTCTTTGGTGTATTATTGATATACTGATCCTGGTAAATATAACATGATTTTAGTGA  
TTATGTACTTCTGATAAATTATCGCAATTCATACACCTGAAATATATTG

>M6-PGSC0003DMG400020326M6L-LecRK\_2108

TTTTAGTGATTATGTACTTCTGATAAATTATCGCAATTCATACACCTGAAATATATTGTGACATATCTTAA  
GATATCTGCTATGGTATCCTGATCTTATTGTTTACTTCCAATGCTAAAT

>M6-PGSC0003DMG400020326M6L-LecRK\_248

TCATTTCAAGAATTCACCTAATGGTAATGCATTTTCATTCTCTACAACATTTGTGTTTCGCGATAAGGTCTG

ATTATAGACCATTGGATGGTCATGGACTAGTTTTTGTATCGCGCCACA

>M6-PGSC0003DMG400020326M6L-LecRK\_310

TAAGGTCTGATTATAGACCATTGGATGGTCATGGACTAGTTTTTGTATCGCGCCACAGAGAGGAATTCA  
GAAGGCTTTGGCAAACCACTATCTTGGCCTTTTAACTCAACTAATAATG

>M6-PGSC0003DMG400020326M6L-LecRK\_372

GGAATTCAGAAGGCTTTGGCAAACCACTATCTTGGCCTTTTAACTCAACTAATAATGGGGATAAATCAA  
ACCATGTTGTTGGAGTTGAGTTTGATACAATAATTAGCGCGGATTTTGGT

>M6-PGSC0003DMG400020326M6L-LecRK\_434

TAAATCAAACCATGTTGTTGGAGTTGAGTTTGATACAATAATTAGCGCGGATTTTGGTGATATGAATAAC  
AATCATGTTGGAATTGATATAAATGGATTGAGGTCTGTGGCAAATCACAC

>M6-PGSC0003DMG400020326M6L-LecRK\_496

TGAATAACAATCATGTTGGAATTGATATAAATGGATTGAGGTCTGTGGCAAATCACACAGCAGGTTATTT  
TGATGATACTGGTTTGTAAACAACCTGATTCTAGTTAGTTGGCAAGGCAA

>M6-PGSC0003DMG400020326M6L-LecRK\_558

GGTATTTTGTATGATACTGGTTTGTAAACAACCTGATTCTAGTTAGTTGGCAAGGCAATGCAAGTTTGGG  
TGGATTATGATGGCAGAACTAAGCTAATCAATGTGACAGTAGCTCCATTA

>M6-PGSC0003DMG400020326M6L-LecRK\_62

TTTTGTCATACTAGTGTCTCTCTTTTGCACCAACTTCTTGTGAAGTTGATGGATTCATTTACAATGGATT  
CAATCAAGTAATCTTAGCTTTGATGGCATTGCTAATATTACATCCAA

>M6-PGSC0003DMG400020326M6L-LecRK\_620

AGTTTGGGTGGATTATGATGGCAGAACTAAGCTAATCAATGTGACAGTAGCTCCATTACATATGGAAAA  
ACCAGTTAATCCACTTTTGGCTTTGAAATATGATCTTTCGCCGATTCTTAA

>M6-PGSC0003DMG400020326M6L-LecRK\_682

TGGAAAAACCAGTTAATCCACTTTTGGCTTTGAAATATGATCTTTCGCCGATTCTTAATCAGATTATGTAT  
GTTGGTTTTTTCATCATCAACTGGTTCAGTCCCAACACATCATTATATCT

>M6-PGSC0003DMG400020326M6L-LecRK\_744

ATTATGTATGTTGGTTTTTTCATCATCAACTGGTTCAGTCCCAACACATCATTATATCTTGGGATGGAGCTT  
TAAGGCAAATGGGAAAGCTCAAGAACTTTCTCAACTTCCTAGTCTTCCT

>M6-PGSC0003DMG400020326M6L-LecRK\_806

ATGGAGCTTTAAGGCAAATGGGAAAGCTCAAGAACTTTCTCAACTCCTAGTCTTCCTCGTGTTGGGCGC  
AAAGGAACTTCAAGATTTGTAACGATTGGTTTACCGGTGATCTCTTTGGT

>M6-PGSC0003DMG400020326M6L-LecRK\_868

TTGGGCGCAAAGGAACTTCAAGATTTGTAACGATTGGTTTACCGGTGATCTCTTTGGTGTCAATTGTTGT  
AGCAACCTTAGTGGTGGTTTACTATGTAAGAAGGAAGAAGTATGAAGAAG

>M6-PGSC0003DMG400020326M6L-LecRK\_930

ATTGTTGTAGCAACCTTAGTGGTGGTTTACTATGTAAGAAGGAAGAAGTATGAAGAAGTTCTTGAAGAT  
TGGGAACGTGAGTATAGACCGCAAAGGTTTCAGTTATAAAGATTTGTACT

>M6-PGSC0003DMG400020326M6L-LecRK\_992

TGAAGATTGGGAACGTGAGTATAGACCGCAAAGGTTTCAGTTATAAAGATTTGTACTGCTACTAAAGG  
ATTCAGAGAAAAGGAGCTGTTGGGAGCTGGAGGATTTGGTAAAGTTTATAA

>M6-PGSC0003DMG400020327M6L-LecRK\_0

AAAAAATGGATAAAAAAGATCATTTTTTTGTCATATCAAGAAATGTATAAACAGTAGAACAAATTAGCTT  
TATTTGGTCACAAATCACAATATTATCTCTCAATCAAGAAAATATTGGCA

>M6-PGSC0003DMG400020327M6L-LecRK\_1008

CTTGTTGTAGCAACCTCAATGGTGGTTTATTATGTAAGAAGGAAGAAGTATGAAGAAGTTCTTGAAGATT  
GGGAACGCGAGTACAGACCACAGAGGTTTCATGTACAAAGATTTGTACT

>M6-PGSC0003DMG400020327M6L-LecRK\_1071

GAAGATTGGGAACGCGAGTACAGACCACAGAGGTTTCATGTACAAAGATTTGTACTGCCACTAAAGG  
ATTCAGAGAAAAGGAGCTGTTGGGAGCTGGAGGATTCGGAAAAGTTTACAAA

>M6-PGSC0003DMG400020327M6L-LecRK\_1134

AAAGGATTCAGAGAAAAGGAGCTGTTGGGAGCTGGAGGATTCGGAAAAGTTTACAAAGGAGTGATGC  
CTATCACCAATCTTGAGATAGCTGTAAAGAAGATATCTCATGAATCAAGACAA

>M6-PGSC0003DMG400020327M6L-LecRK\_1197

ATGCCTATCACCAATCTTGAGATAGCTGTAAAGAAGATATCTCATGAATCAAGACAAGGGATGAAGGAA  
TTTGTTCGGAGATTGTGATCATAGGTCGTCTACAACACCGGAATGTAGTA

>M6-PGSC0003DMG400020327M6L-LecRK\_126

TTCAATCTTGTCATACTAGTGTCTCTTTTCTTAGTTGGTATTGCACCAGCTTCTTGTGAAGTTGATGCATTC  
ATTTACAAAGGATTCCAATCAAAGAATCTTAGCTTGGATGGCATAGCA

>M6-PGSC0003DMG400020327M6L-LecRK\_1260

AAGGAATTTGTTTCGGAGATTGTGATCATAGGTCGTCTACAACACCGGAATGTAGTACCACTTTTGGGT  
ATTGCAGGCGGAAAGGAGAGTTACTTTTGGTTTATGAATACATGTCTGGT

>M6-PGSC0003DMG400020327M6L-LecRK\_1323

TTGGGTTATTGCAGGCGGAAAGGAGAGTTACTTTTGGTTTATGAATACATGTCTGGTGGAAAGTCTAGAC  
AAGTATTTATAACAACAAACCAAGATTCACCCTTGATTGGAGCCAAAGATTC

>M6-PGSC0003DMG400020327M6L-LecRK\_1386

CTAGACAAGTATTTATAACAACAAACCAAGATTCACCCTTGATTGGAGCCAAAGATTCAGAGTTATTAGAG  
GTGTAGCATCAGGACTATTTTTCTACACGAAGAATGTGACCATGTAGTG

>M6-PGSC0003DMG400020327M6L-LecRK\_1449

ATTAGAGGTGTAGCATCAGGACTATTTTTCTACACGAAGAATGTGACCATGTAGTGGTTCATAGGGAC  
ATTAAGGCCAGTAATGTGTTGTTGGATGGTGAATAAATGGTAGGCTAGGA

>M6-PGSC0003DMG400020327M6L-LecRK\_1512

AGGGACATTAAGGCCAGTAATGTGTTGTTGGATGGTGAATAAATGGTAGGCTAGGAGACTTTGGACTT  
GCGAGGCTATATAGTCATGGTACCGATCCTCAGTCTACTCGTGTCGTTGGT

>M6-PGSC0003DMG400020327M6L-LecRK\_1575

GGACTTGCGAGGCTATATAGTCATGGTACCGATCCTCAGTCTACTCGTGTCGTTGGTACTCTTGTTACC  
TTGCCCCAGAGCATACTAGAACTGGCAGGGCAACGCCTAGTAGTGATGTA

>M6-PGSC0003DMG400020327M6L-LecRK\_1701

TTTGGTGCTTTTCTGCTTGAAGTTGCCTGTGGTAGGAGGCCAATAGAGCCAAGACAAGACGATGATGAT  
CTGATTTTAGTCGATTGGGTGTTCTCATGCTGGAATAGGGGTAATATTCTT

>M6-PGSC0003DMG400020327M6L-LecRK\_1764

GATGATCTGATTTTAGTCGATTGGGTGTTCTCATGCTGGAATAGGGGTAATATTCTTGAGGCTGTTGATC  
CAAACATAGGATTGATTTTGTCCAGGGAAAGTGGAGTTGGTCTTAAAG

>M6-PGSC0003DMG400020327M6L-LecRK\_1827

GTTGATCCAAACATAGGGATTGATTTTGTCCAGGGAAAGTGGAGTTGGTCTTAAAGCTAGGCTTGATC  
TGCTCTCATTAGAGCCCTCGTATAGGCCAACCATGCGACAAATCTTGTTG

>M6-PGSC0003DMG400020327M6L-LecRK\_189

GATGCATTCATTTACAAAGGATTCCAATCAAAGAATCTTAGCTTGGATGGCATAGCAGAGTTTACGCCCCG

ATGGTCTTTTGCTGTAAACAGATTCTGAAACTCAAGATCAGGGCCATGCT

>M6-PGSC0003DMG400020327M6L-LecRK\_1890

TTGATCTGCTCTCATTAGAGCCCTCGTATAGGCCAACCATGCGACAAATCTTGTTGTTCTTAGATGGTGT

TGTGGCCTTACCAGAGTTATCATCACTCGGTATTTTCATCAGCTGGCCTA

>M6-PGSC0003DMG400020327M6L-LecRK\_1953

GATGGTGTGTTGGCCTTACCAGAGTTATCATCACTCGGTATTTTCATCAGCTGGCCTAACGTTTGACCATC

ATGGAGGTTTTGATGATTTTGTACAGTCCTATTCATCTTCGATTAATGCA

>M6-PGSC0003DMG400020327M6L-LecRK\_2016

GACCATCATGGAGGTTTTGATGATTTTGTACAGTCCTATTCATCTTCGATTAATGCACATTCCCGCTCTCC

ATCTGTAACAGACTCCTTTCTCTCTGGTGGCCGATGATTCTTACATTAA

>M6-PGSC0003DMG400020327M6L-LecRK\_2079

CGCTCTCCATCTGTAACAGACTCCTTTCTCTCTGGTGGCCGATGATTCTTACATTAAATATGTTAGTAACTT

TAACTTGTAAGTTGTAATCATGATTAGCACCTTATCTTAGTTTTAATT

>M6-PGSC0003DMG400020327M6L-LecRK\_2120

ATGATTCTTACATTAAATATGTTAGTAACTTTAACTTGTAAGTTGTAATCATGATTAGCACCTTATCTTAGT

TTTAATTGAATCTCTATACTACTGCACCTCAAATAAGATGGAAATGCA

>M6-PGSC0003DMG400020327M6L-LecRK\_252

ACGCCCCGATGGTCTTTTGCTGTAAACAGATTCTGAAACTCAAGATCAGGGCCATGCTTTCTATCCGAATC

CAATTCATTTCAAGAATTCAACTAATGGTACTGTAGTATCATTCTCCACA

>M6-PGSC0003DMG400020327M6L-LecRK\_315

CCGAATCCAATTCATTTCAAGAATTCAACTAATGGTACTGTAGTATCATTCTCCACAACATTTGTGTTTGC

TATAAGGTCTGATTATGGAATTTTGTAGTGGTCATGGACTGGTTTTTTGTT

>M6-PGSC0003DMG400020327M6L-LecRK\_378

GTGTTTGCTATAAGGTCTGATTATGGAATTTTGTAGTGGTCATGGACTGGTTTTTTGTTATCGTGCCACAGA

GAAGAATTCAGGAGCTTTGGCATACCACTATCTTGGCCTTTTTTAACTCA

>M6-PGSC0003DMG400020327M6L-LecRK\_441

CCACAGAGAAGAATTCAGGAGCTTTGGCATACCACTATCTTGGCCTTTTTTAACTCAACTAATAATGGGG

ATAGATCAAACCATGTTGTTGGAGTTGAGCTCGATACAATCTACAGCGAA

>M6-PGSC0003DMG400020327M6L-LecRK\_504



AATGGGGATAGATCAAACCATGTTGTTGGAGTTGAGCTCGATACAATCTACAGCGAAGAATTTGGTGAT  
ATCAATGCCAATCATGTTGGAATTGATATAAATGGATTAAGGTCTGTAGCA

>M6-PGSC0003DMG400020327M6L-LecRK\_567

GGTGATATCAATGCCAATCATGTTGGAATTGATATAAATGGATTAAGGTCTGTAGCAGTTGAAACAGCA  
GGTATTTTGATAATACTGGCTTGTTTCATAATTTGACTTTGATAAGTGCC

>M6-PGSC0003DMG400020327M6L-LecRK\_63

TTAGCTTTATTTGGTCACAAATCACAATATTATCTCTCAATCAAGAAAATATTGGCAATGTTGTTCAATCTT  
GTCATACTAGTGTCTCTTTTCTTAGTTGGTATTGCACCAGCTTCTTGT

>M6-PGSC0003DMG400020327M6L-LecRK\_630

ACAGCAGGTTATTTTGATAATACTGGCTTGTTTCATAATTTGACTTTGATAAGTGGCCAGCCAATGCAAG  
TTTGGGTGGATTATGATGGCAGCACTACGCAAATTAATGTAACAGTAGCT

>M6-PGSC0003DMG400020327M6L-LecRK\_693

ATGCAAGTTTGGGTGGATTATGATGGCAGCACTACGCAAATTAATGTAACAGTAGCTCCATTACATGTG  
GAAAAACCAGTTAATCCACTTTTGTCTTTGAAAAGTACTTTTCGCCGATT

>M6-PGSC0003DMG400020327M6L-LecRK\_756

CATGTGGAAAAACCAGTTAATCCACTTTTGTCTTTGAAAAGTACTTTTCGCCGATTCTTGATCAGACCAT  
GTATGTTGGTTTTTTCATCATCAATTGGTTCAGTCCCAACACATCATTAT

>M6-PGSC0003DMG400020327M6L-LecRK\_819

CAGACCATGTATGTTGGTTTTTTCATCATCAATTGGTTCAGTCCCAACACATCATTATATCTTGGGATGGAG  
CTTCAAGATAAATGGGAAAGCTCAAGAACTCTCTCAACTTCCTAATCTT

>M6-PGSC0003DMG400020327M6L-LecRK\_882

GGATGGAGCTTCAAGATAAATGGGAAAGCTCAAGAACTCTCTCAACTTCCTAATCTTCTCCTCGTCTTGGAC  
GCAAAGGGACATCAAGATTTGTAAAGATTGGTTTGCATTAATCTCTTTG

>M6-PGSC0003DMG400020327M6L-LecRK\_945

CTTGGACGCAAAGGGACATCAAGATTTGTAAAGATTGGTTTGCATTAATCTCTTTGGTTTTACTTGTGTG  
AGCAACCTCAATGGTGGTTTATTATGTAAGAAGGAAGAAGTATGAAGAA

>M6-PGSC0003DMG400020328M6L-LecRK\_0

AAAAAAAATTAGCCATGTTTTTCAAGATTGTGTCCTTGATTGTGTCTTCTCTTTTTGTTGTTACAAATTCTG  
AAGACTTTGGATTCATTTACAATGGGTTCAATAGAGCAAATTTGAGTC

>M6-PGSC0003DMG400020328M6L-LecRK\_1008

TTTATATCGCGACAAAGGGATTGCTAACAAAGAGTTGTTAGGTTGTGGCGGTTTTGACAGAGTTTACA  
AAGGAGTATTACCAACTTCTTCAATTGAGGTAGCAGTCAAGAAGGTGTCTC

>M6-PGSC0003DMG400020328M6L-LecRK\_1071

TTTACAAAGGAGTATTACCAACTTCTTCAATTGAGGTAGCAGTCAAGAAGGTGTCTCATGACTCAAACA  
AGGATTGAGGGAATTTGTAGCAGAAATTGTTAGTATTGGTCGTCTACGCC

>M6-PGSC0003DMG400020328M6L-LecRK\_1134

CAAACAAGGATTGAGGGAATTTGTAGCAGAAATTGTTAGTATTGGTCGTCTACGCCACAGGAATTTAG  
TGCCACTTTTGGGTTATTGCAGGCGTAAAGGAGAGTTGCTTTTGGTTTACG

>M6-PGSC0003DMG400020328M6L-LecRK\_1197

ATTTAGTGCCACTTTTGGGTTATTGCAGGCGTAAAGGAGAGTTGCTTTTGGTTTACGAATACATGCCTAA  
TGGAAGTCTTGATAAGTTCCTATATGACAAACCAATATGTGCTCTCAGTT

>M6-PGSC0003DMG400020328M6L-LecRK\_126

GCATTGCACAATTGACATCAAATGGCTTATTAGAGTTAACAAATACTTCTAGGCTACAAAAGGGACATGC  
TTTTTATCCTACACCAATTAATTTCAAGAACTTAACAAATGGTTCAAATT

>M6-PGSC0003DMG400020328M6L-LecRK\_1260

TGCCTAATGGAAGTCTTGATAAGTTCCTATATGACAAACCAATATGTGCTCTCAGTTGGAACCAAAGATT  
TCGAGTCATCAAAGGCGTAGCATCAGCACTAGTCTATCTACATGAAGAAT

>M6-PGSC0003DMG400020328M6L-LecRK\_1323

AAAGATTTTCGAGTCATCAAAGGCGTAGCATCAGCACTAGTCTATCTACATGAAGAATGGGAACAAGTTG  
TAATACACAGAGATGTGAAGGCTAGTAATGTGTTGTTAGACAGTGAATTGA

>M6-PGSC0003DMG400020328M6L-LecRK\_1386

AAGTTGTAATACACAGAGATGTGAAGGCTAGTAATGTGTTGTTAGACAGTGAATTGAACGCGAAGTTG  
GGAGATTTTGGACTAGCAAGATTGTATGATCACGGGAGCGATCCTCTCACTA

>M6-PGSC0003DMG400020328M6L-LecRK\_1449

AGTTGGGAGATTTTGGACTAGCAAGATTGTATGATCACGGGAGCGATCCTCTCACTACACATGTAGTTG  
GAACTGTAGTTACCTTGCCCCTGAGCAAACAAGAACAGGCCAAAGCCACAA

>M6-PGSC0003DMG400020328M6L-LecRK\_1512

TAGTTGGAAGTGTAGGTTACCTTGCCCCTGAGCAAACAAGAACAGGCCAAAGCCACAACCATTAGTGATG

TATATGCTTTTGGTGCATTTTTGCTTGAGGTGGCTTGTGGGAGAAGGCCAA

>M6-PGSC0003DMG400020328M6L-LecRK\_1575

GTGATGTATATGCTTTTGGTGCATTTTTGCTTGAGGTGGCTTGTGGGAGAAGGCCAATAGATCCACGAG

TATTGGATGAGGACATTGTGTTGGTTGATTACGTGTTTTCTTGTTGGAGTA

>M6-PGSC0003DMG400020328M6L-LecRK\_1638

CACGAGTATTGGATGAGGACATTGTGTTGGTTGATTACGTGTTTTCTTGTTGGAGTAGAGGTGATATTCT

TCAATCCATTGATCAAAATTTGGGGAATGAATATGTTAAAGAGGAAGTTG

>M6-PGSC0003DMG400020328M6L-LecRK\_1701

ATATTCTTCAATCCATTGATCAAAATTTGGGGAATGAATATGTTAAAGAGGAAGTTGAATTGGTACTAAA

ACTCGGACTTGTTTGCTCTCAGACAGAACCAACAACGAGGCCAAGTATGA

>M6-PGSC0003DMG400020328M6L-LecRK\_1764

TACTAAAACCTCGGACTTGTTTGCTCTCAGACAGAACCAACAACGAGGCCAAGTATGAGGCAAGTTTTAA

TTTACTTGGAAGATATCGTGCCTCCACCATTGCCAGAGTTGTCATTGTTACAAAGTTCTGCCCAT

>M6-PGSC0003DMG400020328M6L-LecRK\_1827

TTTTAATTTACTTGGAAGATATCGTGCCTCCACCATTGCCAGAGTTGTCATTGTTACAAAGTTCTGCCCAT

TATTTTTCAATTCAGGTTCTGATCATCACTTGTCTATGTCTTCATCAT

>M6-PGSC0003DMG400020328M6L-LecRK\_189

GACATGCTTTTTATCCTACACCAATTAATTTCAAGAACTTAACAAATGGTTCAAATTTCTCTTTTTCTACCA

CTTTTGTCTTTGTTATTGCGCCTTCTGTTTTGCCTGGTCATGGTATGG

>M6-PGSC0003DMG400020328M6L-LecRK\_1890

CTGCCATTATTTTTCAATTCAGGTTCTGATCATCACTTGTCTATGTCTTCATCATTTTTCTCCAGAGAAAG

TACTTTCATATCCCTCCACCGATTTCGAACTCTCTTCCATTACATGTC

>M6-PGSC0003DMG400020328M6L-LecRK\_1953

CAGAGAAAGTACTTTCATATCCCTCCACCGATTTCGAACTCTCTTCCATTACATGTCCACGATTAGAACTC

TTTCTGTATTGCCTTGATGAATTGTGATTCCAATCCCAACTGCAACAAC

>M6-PGSC0003DMG400020328M6L-LecRK\_2016

TAGAACTCTTCTGTATTGCCTTGATGAATTGTGATTCCAATCCCAACTGCAACAACAACACTGTAATTCAAT

TCCAAACAAGTCCGTGTTAGCTATGTGAATTCTTACTGTCTATATCGTT

>M6-PGSC0003DMG400020328M6L-LecRK\_2079

ACTTCAATCCAAACAAGTCCGTGTTAGCTATGTGAATTCTTACTGTCTATATCGTTTCAATTAAGCATGT  
AATATTTGTTACGATACAAATAATGGACTAATGTACACTTAGAATGATC

>M6-PGSC0003DMG400020328M6L-LecRK\_2120

TACTGTCTATATCGTTTCAATTAAGCATGTAATATTTGTTACGATACAAATAATGGACTAATGTACACTTA  
GAATGATCCGATTTCTTTTGATCTATAATGTTGTGCGACATGTATTGCTA

>M6-PGSC0003DMG400020328M6L-LecRK\_252

TTTCTACCACTTTTGTCTTTGTTATTGCGCCTTCTGTTTTGCCTGGTCATGGTATGGCTTTTGTAAATTGCAC  
CTGTTGGTGGTCTAGTAGATGCACTTCCAAGCCATTTTTAGGCCTTT

>M6-PGSC0003DMG400020328M6L-LecRK\_315

TAATTGCACCTGTTGGTGGTCTAGTAGATGCACTTCCAAGCCATTTTTAGGCCTTTTCAATGATAACACT  
ACTGGGAGAGTCAGTAACCATGTTTTCGCGGTCGAGTTTGATACTTTAC

>M6-PGSC0003DMG400020328M6L-LecRK\_378

ATAACACTACTGGGAGAGTCAGTAACCATGTTTTCGCGGTCGAGTTTGATACTTTACAGAACAGAGAATT  
CAATGATATTGATGGTAACCATGTTGGAATTGATATCAATGGATTGAAAT

>M6-PGSC0003DMG400020328M6L-LecRK\_441

GAGAATTCAATGATATTGATGGTAACCATGTTGGAATTGATATCAATGGATTGAAATCCGTTGAATTGAA  
AACAGCAGGTTATTATCATGGCGTTAAATTCGATAACATGACTCTTGCTA

>M6-PGSC0003DMG400020328M6L-LecRK\_504

AATTGAAAACAGCAGGTTATTATCATGGCGTTAAATTCGATAACATGACTCTTGCTAGTGGTCAGCCAAT  
GCAGGGTTGGGTGGACTATGATGGTGTGGCTAAGCAAATTAATGTAACTC

>M6-PGSC0003DMG400020328M6L-LecRK\_567

AGCCAATGCAGGGTTGGGTGGACTATGATGGTGTGGCTAAGCAAATTAATGTAACTCTGGCTCCAATGA  
ATGTAGCAAAACCAAATGCACCACTTTTGTGATTGTTGTATGATCTTTTAC

>M6-PGSC0003DMG400020328M6L-LecRK\_63

CAAATTCTGAAGACTTTGGATTCAATTACAATGGGTTCAATAGAGCAAATTTGAGTCTTGATGGCATTGC  
ACAATTGACATCAAATGGCTTATTAGAGTTAACAAATACTTCTAGGCTAC

>M6-PGSC0003DMG400020328M6L-LecRK\_630

CAATGAATGTAGCAAAACCAAATGCACCACTTTTGTGATTGTTGTATGATCTTTACCAATCTTGAATGAA  
ACCATGTATATCGGCTTCTCTGGATCGACCTGCTCGGTTGTTTCAACAC

>M6-PGSC0003DMG400020328M6L-LecRK\_693

TGAATGAAACCATGTATATCGGCTTCTCTGGATCGACCTGCTCGGTTGTTTCAACACAATATGTTCTAGG  
ATGGAGCTTTGAAATGAATGGAATAGCTCAAGGTCTTGATCTTGCTAGAC

>M6-PGSC0003DMG400020328M6L-LecRK\_756

TTCTAGGATGGAGCTTTGAAATGAATGGAATAGCTCAAGGTCTTGATCTTGCTAGACTTCCTAAGCTTCC  
TCGAGTTGGACCGAAGAAACAATCTAACTTTTGTGATTGCTTTGCCAA

>M6-PGSC0003DMG400020328M6L-LecRK\_819

AGCTTCCTCGAGTTGGACCGAAGAAACAATCTAACTTTTGTGATTGCTTTGCCAATGATATCGGCAGT  
TGTTGTAGTAATAGCCTTTTCTGTGTTGATTTACTATGTCGGAAGGAAGA

>M6-PGSC0003DMG400020328M6L-LecRK\_882

CGGCAGTTGTTGTAGTAATAGCCTTTTCTGTGTTGATTTACTATGTCGGAAGGAAGAGGAAGTTTGCGG  
AATTGCTTGAAGATTGGGAGCTTGAATATGGACCTCATCGGTTCAAGTACA

>M6-PGSC0003DMG400020328M6L-LecRK\_945

TTGCGGAATTGCTTGAAGATTGGGAGCTTGAATATGGACCTCATCGGTTCAAGTACAAAGATCTTTATAT  
CGCGACAAAGGGATTTGCTAACAAAGAGTTGTTAGGTTGTGGCGGTTTTG

>M6-PGSC0003DMG400020330M6LRR-RLP\_0

ATGACAACCTCTGTACTTTTTGTGGCTTTTCTTGATTCCCTGTTTCAAATCTTATCAGGATATCACATTTTCT  
TGGTCTCCTCTCAATGTCATCACGATCAAAAGTCACAGTTGCTGCAG

>M6-PGSC0003DMG400020330M6LRR-RLP\_1037

CAGTTCCTCCACAATGGGAAACCTTATCAATCTTGTTCAATTTGGACCTCTCTTTGAACAACCTTCACTGGTT  
CTATCCCATATTTCAAAGATCCAAGAACTCGCCCACTTAGACCTCT

>M6-PGSC0003DMG400020330M6LRR-RLP\_1098

CTTCACTGGTTCTATCCCATATTTCAAAGATCCAAGAACTCGCCCACTTAGACCTCTCTCGTAATGGTT  
TAACTGGTCTCCTCTCCCGACTCATTTTGAAGGACTCTCAGAGCATGT

>M6-PGSC0003DMG400020330M6LRR-RLP\_1159

CGTAATGGTTTAACTGGTCTCCTCTCCCGACTCATTTTGAAGGACTCTCAGAGCATGTCTACATAAATTT  
AGGGAACAACCTTACTCAACGGGATACTTCTGAATGTATCTTTGAGCTC

>M6-PGSC0003DMG400020330M6LRR-RLP\_122

GAAGAGCAGCCTTCAGTATGATTCTACTTTGTCAAATATTTGGCAAGATGGAACCATAACACAAGTGAAT

GTTGCAATTGGGATGGGGTTACATGTAATCTCTCTGGTCATATGATTGCC

>M6-PGSC0003DMG400020330M6LRR-RLP\_1220

ACATAAATTTAGGGAACAACCTTACTCAACGGGATACTTCCTGAATGTATCTTTGAGCTCCCTCCTTGCAA  
ACGCTTTTACTTAACAGCAATCAATTTGTTGGCCAAGTCAACGATTTTC

>M6-PGSC0003DMG400020330M6LRR-RLP\_1281

CTCCTTGCAAACGCTTTTACTTAACAGCAATCAATTTGTTGGCCAAGTCAACGATTTTCACAATGCATCCT  
CCTCTCTCAATGAAATTGATTTGAGCAACAACCAACTGAATGGTTCAAT

>M6-PGSC0003DMG400020330M6LRR-RLP\_1342

AATGCATCCTCCTCTCTCAATGAAATTGATTTGAGCAACAACCAACTGAATGGTTCAATCCCAAGTCCAT  
GTTTGAAGTTGGGAGGCTTAAGGTACTCTCACTTTCTTCCAACCTTCTTT

>M6-PGSC0003DMG400020330M6LRR-RLP\_1403

CCAAGTCCATGTTTGAAGTTGGGAGGCTTAAGGTACTCTCACTTTCTTCCAACCTTCTTTAGCGGGACAGT  
GACCCTTGATCTCATTAGGAGGCTGAGCAACCTTTCAAGACTGGAGCTTT

>M6-PGSC0003DMG400020330M6LRR-RLP\_1464

CGGGACAGTGACCCTTGATCTCATTAGGAGGCTGAGCAACCTTTCAAGACTGGAGCTTTCTTACAATAAC  
TTGACTGTTGATGCAAGTAGCAGTAATTCAACCTTTTCAATTTCCCA

>M6-PGSC0003DMG400020330M6LRR-RLP\_1525

TACAATAACTTGACTGTTGATGCAAGTAGCAGTAATTCAACCTTTTCAATTTCCCCAGTTGAACATATT  
GAAACTAGCTTCTTGTCGGCTGCAAAGTTTCTGATCTTAAAAATCAG

>M6-PGSC0003DMG400020330M6LRR-RLP\_1647

AAGGATGATCCAGTTAGACCTTTCTGACAACAAAATACAGGGGGCAATACCAAATTGGATTTGGGGAAAT  
TGGTGACGGAGCTCTGACTCACCTGAATCTTTCCTTCAATCAGCTGGAGTA

>M6-PGSC0003DMG400020330M6LRR-RLP\_183

CAAGTGAATGTTGCAATTGGGATGGGGTTACATGTAATCTCTCTGGTCATATGATTGCCTTGGAAGTGA  
TAATCAGACTATTTCTAGTGGAATTGAGAATTCAAGTGCTCTTTTCAGTC

>M6-PGSC0003DMG400020330M6LRR-RLP\_1891

TTCAGCAATTCCATCCCACTAGATATTGGCAATTATCTTGGTTTTGCCTCCTTTTTCTCGGTAGAAAACAAT  
GGCATTACTGGAAGAATTCCCGAATCCATATGCAATGTCAGCTACCTT

>M6-PGSC0003DMG400020330M6LRR-RLP\_2196

GCTGCCAAAATCGCTTGTGAACTGCGAGTTGTTGGAGGTCCTGAATGTTGGAAATAACAACTTGTGGA  
TCATTTCCCATGCATGTTGAGGAACTCAAAGAGTCTGAGGGTCCTTGTCTT

>M6-PGSC0003DMG400020330M6LRR-RLP\_2257

CTTGTTGATCATTTCCCATGCATGTTGAGGAACTCAAAGAGTCTGAGGGTCCTTGTCTTGCCTCCAATC  
AATTCAATGGAAATCTTACGTGTAATGTAACCATAAATAGCTGGCAGAAT

>M6-PGSC0003DMG400020330M6LRR-RLP\_2318

GCTCCAATCAATTCAATGGAAATCTTACGTGTAATGTAACCATAAATAGCTGGCAGAATCTCCAGATCAT  
AGATATAGCTTCCAACAATTTTACTGGTATGTTGAATGCAGAATGCTTTA

>M6-PGSC0003DMG400020330M6LRR-RLP\_2379

CCAGATCATAGATATAGCTTCCAACAATTTTACTGGTATGTTGAATGCAGAATGCTTTATAACTTGGAGA  
GGAATGATGGTTGCAGATGACTATGTAGAGACAGGACGTAATCGCATCCA

>M6-PGSC0003DMG400020330M6LRR-RLP\_2440

ACTTGGAGAGGAATGATGGTTGCAGATGACTATGTAGAGACAGGACGTAATCGCATCCAGTATAAGTTC  
CTCCAATAAGTAACTTATACTATCAGGACACAGTGACAATAACCAACAAA

>M6-PGSC0003DMG400020330M6LRR-RLP\_2501

ATAAGTTCCTCCAATAAGTAACTTATACTATCAGGACACAGTGACAATAACCAACAAAGGGATGGAGA  
TGAAGCTTGTGAAAATTCTCAGTCTACACAGCTATTGATTTCTCTTCAAAT

>M6-PGSC0003DMG400020330M6LRR-RLP\_2562

GATGGAGATGAAGCTTGTGAAAATTCTCAGTCTACACAGCTATTGATTTCTCTTCAAATAGATTTCAAGG  
CATGATACCAGATACTGTTGGGGATGTTAGCTCCCTTTATGTTCTGAACC

>M6-PGSC0003DMG400020330M6LRR-RLP\_2623

ATTTCAAGGCATGATACCAGATACTGTTGGGGATGTTAGCTCCCTTTATGTTCTGAACCAGTCACACAAT  
GCCCTGAAGGACCAATTCCAAAATCAATTGGGATGCTACAAATGCTTGA

>M6-PGSC0003DMG400020330M6LRR-RLP\_2684

TCACACAATGCCCTTGAAGGACCAATTCCAAAATCAATTGGGATGCTACAAATGCTTGAATCACTAGACC  
TGTCAACAAACCACCTGTCCGGAGAGATCCCCTCAGAGCTTGAAGTCTC

>M6-PGSC0003DMG400020330M6LRR-RLP\_2806

ATTCTTAGCAGCTTTGAACTTATCGTTCAACAAATTGTTTGGAAAAATCCCATCGATTAATCAATTTCTAA  
CATTCTCAGCAGATTCTTTGAAGGAAACAGAGGCCTATGCGGGTCCC

>M6-PGSC0003DMG400020330M6LRR-RLP\_2867

CAATTTCTAACATTCTCAGCAGATTCTTTGAAGGAAACAGAGGCCTATGCGGGTTCCTCTCAACAACA  
ATTGTGAAAGCAATGGCTCAGAGTCCCTCTCCCTGCTGCCACCAACTTCG

>M6-PGSC0003DMG400020330M6LRR-RLP\_2928

TCAACAACAATTGTGAAAGCAATGGCTCAGAGTCCCTCTCCCTGCTGCCACCAACTTCGGTACCAGACTC  
AGACTCAGATTATGAATGGAAGTTCATTTTTGCGGCTGTTGGATACATAG

>M6-PGSC0003DMG400020330M6LRR-RLP\_305

CAGTATCTTGAGAGGCTAAATTTGGCTTACAACAAGTTCAATGTTGGCATAACCACTTGGTATAGACAACC  
TCACGAATTTGAAGTACCTGAGTTTATCCAATGCTGGTTTTGTCGGGCAA

>M6-PGSC0003DMG400020330M6LRR-RLP\_366

TAGACAACCTCACGAATTTGAAGTACCTGAGTTTATCCAATGCTGGTTTTGTCGGGCAAATTCCTATGAT  
GTTATCAAGATTAACAAAGCTAGTTACTCTCGATCTCTCAACTCTTTTCC

>M6-PGSC0003DMG400020330M6LRR-RLP\_427

TCCTATGATGTTATCAAGATTAACAAAGCTAGTTACTCTCGATCTCTCAACTCTTTCCCTGACTTGATAAG  
CCACTAAAACCTTGAGAATCCCACTTTGAGTCATTTCAATTGAGAACTCA

>M6-PGSC0003DMG400020330M6LRR-RLP\_488

GACTTGATAAGCCACTAAAACCTTGAGAATCCCACTTTGAGTCATTTCAATTGAGAACTCAACAGAGCTTAG  
AGAGCTTTACCTTGATGGTGTGATCTTTCAGCTCAGGGGACGGAGTGGT

>M6-PGSC0003DMG400020330M6LRR-RLP\_549

AGAGCTTAGAGAGCTTTACCTTGATGGTGTGATCTTTCAGCTCAGGGGACGGAGTGGTGTCAATCTTT  
ATCTTCATATTTGCCTAACTTGACCGTCTTGAGCTTGCGTGATTGTGCGAAT

>M6-PGSC0003DMG400020330M6LRR-RLP\_61

ATCACATTTTCTTGGTCTCCTCTCAATGTCATCACGATCAAAAGTCACAGTTGCTGCAGTTGAAGAGCAG  
CCTTCAGTATGATTCTACTTTGTCAAATATTTGGCAAGATGGAACCATAA

>M6-PGSC0003DMG400020330M6LRR-RLP\_610

CAATCTTTATCTTCATATTTGCCTAACTTGACCGTCTTGAGCTTGCGTGATTGTGCGAATTTAGGCCATATT  
CATGAATCACTTTCTAAGCTTAACTTTCTCTTTTCATCAATCTTGGC

>M6-PGSC0003DMG400020330M6LRR-RLP\_671

CAGGCCATATTCATGAATCACTTTCTAAGCTTAACTTTCTCTTTTCATCAATCTTGGCCGGAACAATCTCT



CTACCACAGTTCCTGAATATTTTGCCAATTTCTCGAGCATGACTACCT

>M6-PGSC0003DMG400020330M6LRR-RLP\_732

GAACAATCTCTCTACCACAGTTCCTGAATATTTTGCCAATTTCTCGAGCATGACTACCTTGAACCTTGCCT  
CTTGTAATTTGCAAGGAACATTTCTGAAAGAATATTTTCAGGTATCAGT

>M6-PGSC0003DMG400020330M6LRR-RLP\_793

AACCTTGCCTCTTGTAATTTGCAAGGAACATTTCTGAAAGAATATTTTCAGGTATCAGTTTTAGAGAGTTT  
GAACTTGTCAACTAACGAGTTGCTTCATGGTAGTATTCCGATTTTTCTT

>M6-PGSC0003DMG400020330M6LRR-RLP\_854

TAGAGAGTTTGAACCTTGTCAACTAACGAGTTGCTTCATGGTAGTATTCCGATTTTTCTTCGAAATAGATCT  
TTCAGGAGGATATCACTAAGAAACACCAACTTTTCGGGTTTCATTACCAG

>M6-PGSC0003DMG400020330M6LRR-RLP\_915

AAATAGATCTTTCAGGAGGATATCACTAAGAAACACCAACTTTTCGGGTTTCATTACCAGAGTCCATTTTCG  
AACCTTCAGAACCTATCCAGGTTAGAGCTATCCAATTGCAATTTCACTGG

>M6-PGSC0003DMG400020330M6LRR-RLP\_976

TCCATTTTGAACCTTCAGAACCTATCCAGGTTAGAGCTATCCAATTGCAATTTCACTGGACCAGTTCCTTC  
CACAATGGGAAACCTTATCAATCTTGTTTCATTTGGACCTCTCTTTGAAC

>M6-PGSC0003DMG400020370M6RLKANKrepeat\_1037

AGAAAAAGAAATTGCTGTTGTTTTAGTTAATTTTTGAATTAATGTAATTTTCATCAAAAAAATTTAATTGAA  
ATATAATGATAATTAGAGATTAAGGCCCTAACTGTATTTTCAGCAGAAA

>M6-PGSC0003DMG400020370M6RLKANKrepeat\_1098

TTTAATTGAAATATAATGATAATTAGAGATTAAGGCCCTAACTGTATTTTCAGCAGAAAATGTTTAAAGC  
TTTTTCCCTTATCTTCAAACCTTGACTGCTATAAGAGGCTGTGACAGGCG

>M6-PGSC0003DMG400020370M6RLKANKrepeat\_1159

GTTTAAAGCTTTTTCCCTTATCTTCAAACCTTGACTGCTATAAGAGGCTGTGACAGGCGGCAGCTGATGC  
CAAACACTATGGTAATGCTGAAATTTACGAAATGTTGAAGGCCCGTGGAG

>M6-PGSC0003DMG400020370M6RLKANKrepeat\_1220

AGCTGATGCCAAACACTATGGTAATGCTGAAATTTACGAAATGTTGAAGGCCCGTGGAGCCAAAGTCCC  
GGTAAGTAGGTAGAAAGTCCTAATTAGCCTGAGGTTCTTATGTTCTGACA

>M6-PGSC0003DMG400020370M6RLKANKrepeat\_1281

AAAGTCCCGGTAAGTAGGTAGAAAGTCCTAATTAGCCTGAGGTTCTTATGTTCTGACACTCATAGATGT  
ATATGTTATGTTGGTAGAAAGTCAGAAAGACGCCAATGGCTGTAGCAAAT

>M6-PGSC0003DMG400020370M6RLKANKrepeat\_1342

CATAGATGTATATGTTATGTTGGTAGAAAGTCAGAAAGACGCCAATGGCTGTAGCAAATCTACGAGAAG  
TTCCAGAATATGAACTTAACCCTCTGGAGCTTCAAATCCGCAAAAAGTGATG

>M6-PGSC0003DMG400020370M6RLKANKrepeat\_1403

ACGAGAAGTTCAGAATATGAACTTAACCCTCTGGAGCTTCAAATCCGCAAAAAGTGATGGAATCTCAA  
GGCAAGTGTCTATGTTTTGTTACTCAGCACTGTGATGTTTCAATTATGAT

>M6-PGSC0003DMG400020370M6RLKANKrepeat\_1464

ATCTCAAAGGCAAGTGTCTATGTTTTGTTACTCAGCACTGTGATGTTTCAATTATGATTGAGTGATGAAA  
GCACAATCGGCCTTAAATTGAAATACTTACCTTCCGCTTTAACCATTGT

>M6-PGSC0003DMG400020370M6RLKANKrepeat\_1525

AGTGATGAAAGCACAATCGGCCTTAAATTGAAATACTTACCTTCCGCTTTAACCATTGTATTTCTTTCTTA  
GCTTCCTGAATGAAGCCTGAGACACCAGGCCACTTTCATTTTCATGTGA

>M6-PGSC0003DMG400020370M6RLKANKrepeat\_1586

TTCTTTCTTAGCTTCCTGAATGAAGCCTGAGACACCAGGCCACTTTCATTTTCATGTGATGCTTTTGGGTG  
CCTAAACTTTTTGAATTTATCCCAAGAATTTGTCTATAATTTTCCTTTT

>M6-PGSC0003DMG400020370M6RLKANKrepeat\_1647

CTTTTGGGTGCCTAAACTTTTTGAATTTATCCCAAGAATTTGTCTATAATTTTCCTTTTAACTTTTGACAG  
GGTTCATATCAAGTTGCCAATGGAATGGAACGAAAGTTTCGGTAAAA

>M6-PGSC0003DMG400020370M6RLKANKrepeat\_1708

ACTTTTGACAGGGTTCATATCAAGTTGCCAATGGAATGGAACGAAAGTTTCGGTAAAAATACTTGACA  
AGGATAGCTATAAAGATCCTGAAAGCATGTATGTTTTAGCTGCTCTGCGAC

>M6-PGSC0003DMG400020370M6RLKANKrepeat\_1769

ACTTGACAAGGATAGCTATAAAGATCCTGAAAGCATGTATGTTTTAGCTGCTCTGCGACTCTCATTTCAC  
ATGTGATGCTTATTGGCTTTTGTAGATACTCTGTATTTTTTCTTGTGTCC

>M6-PGSC0003DMG400020370M6RLKANKrepeat\_1830

TCATTTACATGTGATGCTTATTGGCTTTTGTAGATACTCTGTATTTTTTCTTGTGTCCTGTATCATGAGGG  
GCCTCGTATCAAATGTTTATTGGATTATGCAATCTACAAGGCAAAGC

>M6-PGSC0003DMG400020370M6RLKANKrepeat\_1891

TATCATGAGGGCCTCGTATCAAATGTTTATTGGATTATGCAATCTACAAGGCAAAGCCCCTTCTGGCA  
ATTTAATATGGACTTGTATTGGATCCTCTAACCTGGTTAAAGTCTGTT

>M6-PGSC0003DMG400020370M6RLKANKrepeat\_1952

CTTCTGGCAATTTAATATGGACTTGTATTGGATCCTCTAACCTGGTTAAAGTCTGTTTGAATGTGGCCT  
TCCTTGGTTTACTTAAGCAGATGATTAATAATTTTTCTCTTAACAAG

>M6-PGSC0003DMG400020370M6RLKANKrepeat\_2013

AATGTGGCCTTCCTTGGTTTACTTAAGCAGATGATTAATAATTTTTCTCTTAACAAGTGTGTGCGAAA  
TATATGGGTCCATAAATTAGACTTTGGATTTAATATCTAACTTTGCGTT

>M6-PGSC0003DMG400020370M6RLKANKrepeat\_2074

TTGTGCGAAATATATGGGTCCATAAATTAGACTTTGGATTTAATATCTAACTTTGCGTTGTTCCACGATT  
GCATGCAGAAACGCTTTC AACATGAATTA ACTTTGCTAGAAAAAGTGC

>M6-PGSC0003DMG400020370M6RLKANKrepeat\_2135

TTCCACGATTGCATGCAGAAACGCTTTC AACATGAATTA ACTTTGCTAGAAAAAGTGC  
GCGCATCCAAAT  
ATAGTTCAGTTTGTGGAGCAGTTACACAAAATATACCGATGATGATAGT

>M6-PGSC0003DMG400020370M6RLKANKrepeat\_2196

CATCCAAATATAGTTCAGTTTGTGGAGCAGTTACACAAAATATACCGATGATGATAGTCTCAGAGTATC  
ATCCAAGGGTAGGCTCTGTCAATCTTCCACACTGCCTGTCACACAGCAA

>M6-PGSC0003DMG400020370M6RLKANKrepeat\_2257

CAGAGTATCATCCAAGGGTAGGCTCTGTCAATCTTCCACACTGCCTGTCACACAGCAATGTAGCTTGT  
CACCTTTTTATCAATTCAACTTATGTTAATATTCCTTATTATAATGGACA

>M6-PGSC0003DMG400020370M6RLKANKrepeat\_2318

TAGCTTGTTACCTTTTTATCAATTCAACTTATGTTAATATTCCTTATTATAATGGACTCAACATTGGTT  
AAAAATTTAGCTAGCGTTGGCAATAGATTCAACTTCTTTGTTGTAGAG

>M6-PGSC0003DMG400020370M6RLKANKrepeat\_2379

CAACATTGGTTAAAAATTTAGCTAGCGTTGGCAATAGATTCAACTTCTTTGTTGTAGAGATCTTGATGCTT  
ATGGATTTTGTATGTCGTTGGTCTCAATTCTTACCTTAGCCTTGCAATT

>M6-PGSC0003DMG400020370M6RLKANKrepeat\_2440

CTTGATGCTTATGGATTTTGTATGTCGTTGGTCTCAATTCTTACCTTAGCCTTGCAATTATGAAATTTGGC

ATTAAATGCTTTGCAATTTTTTCAGGGTGATCTAGGTAGCTATCTTCAGA

>M6-PGSC0003DMG400020370M6RLKANKrepeat\_2501

GAAATTTGGCATTAAATGCTTTGCAATTTTTTCAGGGTGATCTAGGTAGCTATCTTCAGAAAAAGGGACGT  
ATATCTCCTTCTAAGGCGCTTAAATATGCTCTTGATGTTGCTAGGCAAGT

>M6-PGSC0003DMG400020370M6RLKANKrepeat\_2562

AAGGGACGTATATCTCCTTCTAAGGCGCTTAAATATGCTCTTGATGTTGCTAGGCAAGTCGTTCTTTGTCA  
TAAAAGTGAAATGATCTCTCATGCTTGAATCTGTCCTTCGCCAATTCT

>M6-PGSC0003DMG400020370M6RLKANKrepeat\_2623

TTCTTTGTCATAAAAGTGAAATGATCTCTCATGCTTGAATCTGTCCTTCGCCAATTCCTCTACTCTTTGGTG  
ACTTGTGATTGTTTCAGTTACTTCTTTTATCTAAACATATCTATGTTG

>M6-PGSC0003DMG400020370M6RLKANKrepeat\_2684

ACTCTTTGGTGACTIONTGTGATTGTTTCAGTTACTTCTTTTATCTAAACATATCTATGTTGTATCATGTTGGTT  
GATTTTCAGGGGTATGAACTACCTTCACGAATGCAAACCAGACCCAAT

>M6-PGSC0003DMG400020370M6RLKANKrepeat\_2745

TCATGTTGGTTGATTTTCAGGGGTATGAACTACCTTCACGAATGCAAACCAGACCCAATTATACATTGTA  
ATCTAAATCCAAAGTAAGACAACCTATATGCTTTAGTTCTCTAATGATGTT

>M6-PGSC0003DMG400020370M6RLKANKrepeat\_2806

TACATTGTAATCTAAATCCAAAGTAAGACAACCTATATGCTTTAGTTCTCTAATGATGTTAACTGATCATTT  
TGACTGTACTCATTGGGATTTCTAGTGTTTTTAATATTCGGAATTTGG

>M6-PGSC0003DMG400020370M6RLKANKrepeat\_2867

CTGATCATTTTGACTGTACTCATTGGGATTTCTAGTGTTTTTAATATTCGGAATTTGGTAAGGTGCCAGA  
AATATTTTGCTTGACAATGGAGATCACCTGAAAGTTGCCGGATTTGGTC

>M6-PGSC0003DMG400020370M6RLKANKrepeat\_2928

AGGTGCCAGAAATATTTTGCTTGACAATGGAGATCACCTGAAAGTTGCCGGATTTGGTCTGATTAAATTG  
TCAAAAATTTACCTGACAAAGCAAAGTTGGTGCAGCCGGAGGGTTTTGA

>M6-PGSC0003DMG400020370M6RLKANKrepeat\_2989

ATTAAATTGTCAAAAATTTACCTGACAAAGCAAAGTTGGTGCAGCCGGAGGGTTTTGATCGTTCAAGT  
AAGTTTTTCAAATTTGAGTAATAAACACTAAATCATAATTTTCTACTC

>M6-PGSC0003DMG400020370M6RLKANKrepeat\_3050

GTTCAAGTAAGTTTTCAAACCTTTGAGTAATAAACACTAAATCATAATATTTCTACTCTGAAAGAAATCA  
ATTCTCATGTGGTACTAATTTTTGATAGATCAGAAGCTTCTGGTATGTT

>M6-PGSC0003DMG400020370M6RLKANKrepeat\_3111

AAAGAAATCAATTCTCATGTGGTACTAATTTTTGATAGATCAGAAGCTTCTGGTATGTTACCAGTTTCAA  
AACAAAAAAAAAACTTCTGGTGATGAGTTGCCAATTGCATGAAAGGAT

>M6-PGSC0003DMG400020370M6RLKANKrepeat\_3172

CAGTTTCAAAAACAAAAAAACTTCTGGTGATGAGTTGCCAATTGCATGAAAGGATTCACCTTTATG  
TGTTTATGTTTATTACGTTACTCATTTTCTTTTCACTTGTAGGTCCTAT

>M6-PGSC0003DMG400020370M6RLKANKrepeat\_3233

ACCTTTATGTGTTTATGTTTATTACGTTACTCATTTTCTTTTCACTTGTAGGTCCTATGTGGCACCTGAGA  
TTTATAAAGATGAAATATTTGACCGGAATGCGGACATATATTCATTTG

>M6-PGSC0003DMG400020370M6RLKANKrepeat\_3294

GGCACCTGAGATTTATAAAGATGAAATATTTGACCGGAATGCGGACATATATTCATTTGGCATTTTACTC  
TATGAGGTATGATTTCTTTTGTGAGATACTTCATTTAATGCTGTAGCTT

>M6-PGSC0003DMG400020370M6RLKANKrepeat\_3355

ATTTTACTCTATGAGGTATGATTTCTTTTGTGAGATACTTCATTTAATGCTGTAGCTTAATTCAAAAATAG  
TGTAGACTTCTTGATTTCCCATTTCCGGTGCAATACTTTTCTAGAACT

>M6-PGSC0003DMG400020370M6RLKANKrepeat\_366

AGGGGTATAAAAATAACATTTGATGATAGCTCAAGCATGAAACTCAAAAATCGGAATACTTTATGTGT  
GTATTTGACCCTCAACTCTAGTAGAAACTATAAGCAGATAGGTTGGCCTC

>M6-PGSC0003DMG400020370M6RLKANKrepeat\_3904

CATCTGTCTCATTGGTTGGAGCTGGACTCTCCATAAGTTTCTCCATATTTTTGGTTGCCCTCTGTAGTATA  
CCCTTCTTCCATTCTATAAACCTTTTAATAGAGAATTGCGCATCAA

>M6-PGSC0003DMG400020370M6RLKANKrepeat\_3965

TCTGTAGTATACCCTTCTTCCATTCTATAAACCTTTTAATAGAGAATTGCGCATCAATACTTTATGATAC  
TTGGATGATCTTATCTTCTTAATATGCAATTCTGTCCTCCATTTATCC

>M6-PGSC0003DMG400020370M6RLKANKrepeat\_4026

CTTTATGATACTTGGATGATCTTATCTTCTTAATATGCAATTCTGTCCTCCATTTATCCTGTTTATCGGCCTA  
TCAGCATTCTAGAAGCGTGAATGATTTATGGCTCTTTTCTTTCTGCT

>M6-PGSC0003DMG400020370M6RLKANKrepeat\_4087

TTTATCGGCCTATCAGCATTCTAGAAGCGTGAATGATTTATGGCTCTTTTCTTTCTGCTCTATGCAATTTAT  
TTTACTTTGTTGGGCTCAGATGCTGGAGGGAACACCACCTTTTAATAC

>M6-PGSC0003DMG400020370M6RLKANKrepeat\_4148

ATGCAATTTATTTTACTTTGTTGGGCTCAGATGCTGGAGGGAACACCACCTTTTAATACCAAGTCTCCTGA  
AGAGGCTACCAGATTGATGTGCTTAGAAGGCCAAAGACCAGCATTCAAA

>M6-PGSC0003DMG400020370M6RLKANKrepeat\_4209

AGTCTCCTGAAGAGGCTACCAGATTGATGTGCTTAGAAGGCCAAAGACCAGCATTCAAATCGAAATCCA  
AATATCCTCCAGAGCTTAGAGAGTATGTTTGTATCATTCTTGCGGGTAT

>M6-PGSC0003DMG400020370M6RLKANKrepeat\_427

TTATGTGTGTATTTGACCCTCAACTCTAGTAGAAAATAAGCAGATAGGTTGGCCTCCCAAGTTAAAA  
CTCCTGAGAACTTTGTTGCATGAACTTGTTACTTATGAATAGGGTTAGAG

>M6-PGSC0003DMG400020370M6RLKANKrepeat\_4270

GAAATCCAAATATCCTCCAGAGCTTAGAGAGTATGTTTGTATCATTCTTGCGGGTATAATCATGTTGT  
GCAGTTCATATGCGCTTATGTATTAGCTACATATTTTGTGAGTTTAGCAT

>M6-PGSC0003DMG400020370M6RLKANKrepeat\_4331

TCATGTTGTGCAGTTCATATGCGCTTATGTATTAGCTACATATTTTGTGAGTTTAGCATGATGTTCTATTCT  
TACTGCCAGCCATTGAAGTGCATCATGAATTCTTTTTGAAATGCCTC

>M6-PGSC0003DMG400020370M6RLKANKrepeat\_4392

TGTTCTATTCTTTACTGCCAGCCATTGAAGTGCATCATGAATTCTTTTTGAAATGCCTCAGAGATGATTC  
CATTCTGCTTCTTTGGTTTTCTTTCTTAATAATACATGTATGCTTTCAA

>M6-PGSC0003DMG400020370M6RLKANKrepeat\_4453

AGATGATTTCCATTCTGCTTCTTTGGTTTTCTTTCTTAATAATACATGTATGCTTTCAATTTCTTCAGCTATA  
GGCTTTTTCTTGGCTTGGTGATTTAGTACAACTCTAGCCATGTGAA

>M6-PGSC0003DMG400020370M6RLKANKrepeat\_4514

TCTTCAGCTATAGGCTTTTTCTTGGCTTGGTGATTTAGTACAACTCTAGCCATGTGAAACCCAATTGCA  
TGTTGTTAAGCTCATGTTATTTCTACAATTTCTAGTACCCTTTTTTTTT

>M6-PGSC0003DMG400020370M6RLKANKrepeat\_488

AAGTTAAAACCTCTGAGAACTTTGTTGCATGAACTTGTTACTTATGAATAGGGTTAGAGAAAGAACAGA

TCACAAATATAAAACGAGAAAGAACTCTATAAATGGGAATAAGTCAATCTT

>M6-PGSC0003DMG400020370M6RLKANKrepeat\_549

AGAACAGATCACAAATATAAAACGAGAAAGAACTCTATAAATGGGAATAAGTCAATCTTGTAACCTAGC

GAGAAAGAACTCGGTAAAAATGAGGAAGCATTGTTTTGCTTTCTTCTTCT

>M6-PGSC0003DMG400020370M6RLKANKrepeat\_610

AACTTAGCGAGAAAGAACTCGGTAAAAATGAGGAAGCATTGTTTTGCTTTCTTCTTCTCCTTTCTTCCAT

CATATCCAAATACTTTACAGTTGGATGCTCTTCTTTGAGAAAATATTTA

>M6-PGSC0003DMG400020370M6RLKANKrepeat\_671

TTTCTTCCATCATATCCAAATACTTTACAGTTGGATGCTCTTCTTTGAGAAAATATTTACATCCTGCTTGTT

ATTCTTATGATGAACAAGATTTGTACGCGCATTTCCTTCTCATGTAC

>M6-PGSC0003DMG400020370M6RLKANKrepeat\_732

TCCTGCTTGTTATTCTTATGATGAACAAGATTTGTACGCGCATTTCCTTCTCATGTACAATCAGATTTAGA

TCCTTGAATGTGCAAAATGCTATCATAAACTACGGACAAGAAACCAAC

>M6-PGSC0003DMG400020370M6RLKANKrepeat\_793

TCAGATTTAGATCCTTGAATGTGCAAAATGCTATCATAAACTACGGACAAGAAACCAACCAAAAAGTA

ATTAATGAGTCTGGCTTTAGTAGTAATGAATATCTAAATGTAAATCTTGAT

>M6-PGSC0003DMG400020370M6RLKANKrepeat\_854

CAAAAGTAATTAATGAGTCTGGCTTTAGTAGTAATGAATATCTAAATGTAAATCTTGATGTTGTATGCTCT

CCGAACTCATTAGCTTAAGTAACTATGGTGCTTCCTTTTCTTTTCTCT

>M6-PGSC0003DMG400020370M6RLKANKrepeat\_915

TGTATGCTCTCCGAACTCATTAGCTTAAGTAACTATGGTGCTTCCTTTTCTTTTCTCTCCCTAAATGCACT

ATTTTCTTTGTCTATTCCTTCTATATTCACAGAAATGGCCAATAAAGA

>M6-PGSC0003DMG400020370M6RLKANKrepeat\_976

CTAAATGCACTATTTTCTTTGTCTATTCCTTCTATATTCACAGAAATGGCCAATAAAGAAAAGAAAAGAA

ATTGCTGTTGTTTTAGTTAATTTTTGAATTAATGTAATTTTCATCAAAAA

>M6-PGSC0003DMG400020520-(rev)M6LRR-RLP\_0

GGCTACTCCAATAACAAAAACCCCATCACCTGCCTGTACAAAAATCATAGAAGAAATCACAAGAATTTAC

AAATCACTCCCACCAAGACCATCCATTTTAGAAATTGAAGCTTCAATTC

>M6-PGSC0003DMG400020520-(rev)M6LRR-RLP\_1054

CTTTTCCTTTTATAGTGATGGCACTAGCTTGCTACGTATGTTGACTAATCTACTAGGTTCCAGTTATAGGT  
CAGTATGTGTGGCAGTGGCGGAGCTATTGATAACCCTTTGTTTGGGAT

>M6-PGSC0003DMG400020520-(rev)M6LRR-RLP\_1116

AGTTATAGGTCAGTATGTGTGGCAGTGGCGGAGCTATTGATAACCCTTTGTTTGGGATTGGGGCGTAGT  
TGTTGTTGGCCGTCAATGTTTAGATTGTGGAAAACATCATTTAGAGTTTTT

>M6-PGSC0003DMG400020520-(rev)M6LRR-RLP\_1178

GCGTAGTTGTTGTTGGCCGTCAATGTTTAGATTGTGGAAAACATCATTTAGAGTTTTTCTTTCGGGTGTCT  
CTCTTGGAACCTAAATCGTAGTTAGCATTATTCGTTTTCTTTTTAGTG

>M6-PGSC0003DMG400020520-(rev)M6LRR-RLP\_124

ATAAAATCAGTAGAAACAGAAGAAAAAATAGAACTTGATGAAATTTCCAAGAAAGTAGTGGAGATAGA  
AGAAAATGTTCCAGCTGAGCTTTTCTCTGTGTTACAACAAGTGAGAAAAGCT

>M6-PGSC0003DMG400020520-(rev)M6LRR-RLP\_1240

CGGGTGTCTCTCTTGGAACCTAAATCGTAGTTAGCATTATTCGTTTTCTTTTTAGTGATGGCACTAGCTT  
GCTATGTACGTCAACTAATCTACTAGGTTCCAGCATTTCGTTTCAGTATG

>M6-PGSC0003DMG400020520-(rev)M6LRR-RLP\_1302

CACTAGCTTGCTATGTACGTCAACTAATCTACTAGGTTCCAGCATTTCGTTTCAGTATGTGTGGATCCCTTC  
ATCGGAAAATTATAATGTGCAAATAGGTCAATTTCTTTTTTATGTATAA

>M6-PGSC0003DMG400020520-(rev)M6LRR-RLP\_1364

GATCCCTTCATCGGAAAATTATAATGTGCAAATAGGTCAATTTCTTTTTTATGTATAAATACTATATATGTT  
GTTTGGGACAGAGACATAGTTGTTGTTGTTGTATAAACTATATGTTTA

>M6-PGSC0003DMG400020520-(rev)M6LRR-RLP\_1550

GTTACTGATATGGCATTCAACTATACTATATCTTAATTGTTGTGTAATTGCCTTTAGGGATCAAGCACAAA  
GAGAAATACAGTTTAATGAAAGTAGCTGCCCTAATTGAAAATGCTGCCA

>M6-PGSC0003DMG400020520-(rev)M6LRR-RLP\_1612

AAGCACAAAGAGAAATACAGTTTAATGAAAGTAGCTGCCCTAATTGAAAATGCTGCCAAAACCTCGAGCA  
AGAGTTGTCGATCTTCACAACAAGTTAATGGACAAGATTGAATGGCTTCCG

>M6-PGSC0003DMG400020520-(rev)M6LRR-RLP\_1674

TCGAGCAAGAGTTGTCGATCTTCACAACAAGTTAATGGACAAGATTGAATGGCTTCCGTTGCTCACTTGG  
GAAATTGGTGAATGTCACTGAGCTAAACGTTGCCGATAACCAAATTATGGC



>M6-PGSC0003DMG400020520-(rev)M6LRR-RLP\_1736

CACTTGGGAAATTGGTGAATGTCCTGAGCTAAACGTTGCCGATAACCAAATTATGGCTCTTCCAACCTAC  
AATTGGTAGCCTTAATGCCTTAACAAAGCTCGATCTTCACTCCAACCAAAA

>M6-PGSC0003DMG400020520-(rev)M6LRR-RLP\_1798

CCAACCTACAATTGGTAGCCTTAATGCCTTAACAAAGCTCGATCTTCACTCCAACCAAATTATAAACCTTCC  
TGATTCCTTTGGTGAGCTAATCAATTTGACTGATCTCGACCTTACGCG

>M6-PGSC0003DMG400020520-(rev)M6LRR-RLP\_186

GATAGAAGAAAATGTTCCAGCTGAGCTTTTCTCTGTGTTACAACAAGTGAGAAAAGCTATGGTTTTGTTT  
CAAAGCAAAGAACAGAGGAAAGAGGCTGTTCAAGTTAATTGAACTTGATAA

>M6-PGSC0003DMG400020520-(rev)M6LRR-RLP\_1860

AAACCTTCCTGATTCCTTTGGTGAGCTAATCAATTTGACTGATCTCGACCTTACGCGAACAGGTTGAAAT  
CGCTGCCAGCTTCTTTCAGGAACTTAGTTAATCTGATTGATCTTGATTT

>M6-PGSC0003DMG400020520-(rev)M6LRR-RLP\_1922

GGTTGAAATCGCTGCCAGCTTCTTTCAGGAACTTAGTTAATCTGATTGATCTTGATTTGGGTTTGAATAG  
GTTTCGCTCATTGCTGATTTGTTGGGAACTTAACCTCCTTGAAGAGAC

>M6-PGSC0003DMG400020520-(rev)M6LRR-RLP\_1984

TCGAATAGGTTTCGCTCATTGCTGATTTGTTGGGAACTTAACCTCCTTGAAGAGACTAAACATGGAAA  
CAAATCAGCTCGAGGAACTTCTTACACAATAGGATTTTGTCTTCCCTT

>M6-PGSC0003DMG400020520-(rev)M6LRR-RLP\_2046

CATGGAACAAATCAGCTCGAGGAACTTCTTACACAATAGGATTTTGTCTTCCCTTGTAGAACTGAGA  
TTGGATTTAATCAGCTTAAAGCTCTCCCCGAGGCAATGGGAATGCTCGA

>M6-PGSC0003DMG400020520-(rev)M6LRR-RLP\_2108

AACTGAGATTGGATTTAATCAGCTTAAAGCTCTCCCCGAGGCAATGGGAATGCTCGAACACTTGGAGA  
TTCTTACACTGCACATCAACAGAGTTAAAGGATTACCAACGACAATGGGGA

>M6-PGSC0003DMG400020520-(rev)M6LRR-RLP\_2170

TTGGAGATTCTTACACTGCACATCAACAGAGTTAAAGGATTACCAACGACAATGGGGAATCTTCTCACC  
TCAGGGAACCTTGATGTTAGCTTCAACGAAGTTGAGAACATACCCGAAACA

>M6-PGSC0003DMG400020520-(rev)M6LRR-RLP\_2232

TTCTCACCTCAGGGAACCTTGATGTTAGCTTCAACGAAGTTGAGAACATACCCGAAACATTCTGTTTTGCT

GTCAGCTTGGAAAAGCTTAATCTTGCAAACAACCTTGCAGACTTGAAAAC

>M6-PGSC0003DMG400020520-(rev)M6LRR-RLP\_2294

GTTTTGCTGTCAGCTTGGAAAAGCTTAATCTTGCAAACAACCTTGCAGACTTGAAAACCTTACCAAGATC

AATCGGGAACCTTGAGAATCTTGAAGAGCTTGATATTAGCAACAGTCAA

>M6-PGSC0003DMG400020520-(rev)M6LRR-RLP\_2356

CCAAGATCAATCGGGAACCTTGAGAATCTTGAAGAGCTTGATATTAGCAACAGTCAAATAAGAACGTTG

CCCGACTCCTTCAGGCTCTTGTCAAAGTTGAAAACCTTTTCGAGCTGATGAG

>M6-PGSC0003DMG400020520-(rev)M6LRR-RLP\_2418

AACGTTGCCCGACTCCTTCAGGCTCTTGTCAAAGTTGAAAACCTTTTCGAGCTGATGAGACTCCACTAGAA

GTACCACCAAGGCAAATTATAAAGCTAGGGGCTCAGGTGATTTTTATGCT

>M6-PGSC0003DMG400020520-(rev)M6LRR-RLP\_248

TTTTGTTTCAAAGCAAAGAACAGAGGAAAGAGGCTGTTTCAGTTAATTGAACTTGATAAGACTTATCAAG

ATTTTGATGTGTTGATTCAGGAAGCTACACAGTTGATTTCTGGAGATACCC

>M6-PGSC0003DMG400020520-(rev)M6LRR-RLP\_2480

CACTAGAAGTACCACCAAGGCAAATTATAAAGCTAGGGGCTCAGGTGATTTTTATGCTTACTGTGTTTCC

TGTCAATCAATCTTTAGACTTTATGGTAGTTTTTAGAGTTGATAGTTAAA

>M6-PGSC0003DMG400020520-(rev)M6LRR-RLP\_2542

GTGTTTCCTGTCAATCAATCTTTAGACTTTATGGTAGTTTTTAGAGTTGATAGTTAAAAACATACTTGAAC

TATCGCCTTTTCCCGAGTTTACACCCTACACTATCAACTCTTCCCTTT

>M6-PGSC0003DMG400020520-(rev)M6LRR-RLP\_2604

TACTTGAAGTATCGCCTTTTCCCGAGTTTACACCCTACACTATCAACTCTTCCCTTTTCTACATGAACTAT

CAATATCTATGTATTAAGCACACCTCAACTATCACGTAGGAAAAGG

>M6-PGSC0003DMG400020520-(rev)M6LRR-RLP\_2666

ACATGAACTATCAATATCTATGTATTAAGCACACCTCAACTATCACGTAGGAAAAGGAAAAAACAG

ACGGCTGAGCCGTTGAAGTGTGTTTTAATACATATATGGTGATAGTTCAAG

>M6-PGSC0003DMG400020520-(rev)M6LRR-RLP\_2728

AAAACAGACGGCTGAGCCGTTGAAGTGTGTTTTAATACATATATGGTGATAGTTCAAGCAGGAAAAGG

GAAAAGGGAACATCTGATAGTTGAGGTGTGAACTCGTAAAAACAATTGT

>M6-PGSC0003DMG400020520-(rev)M6LRR-RLP\_2790

AAAAGGGAAAAAGGGAACATCTGATAGTTGAGGTGTGAAACTCGTAAAAACAATTGTTTGACCATAAT  
CTCTACATTTTCTAACTTGTTTCGTTTTCTTCTTTTTCTTGCCATCAGGT

>M6-PGSC0003DMG400020520-(rev)M6LRR-RLP\_2852

CCATAATCTCTACATTTTCTAACTTGTTTCGTTTTCTTCTTTTTCTTGCCATCAGGTGTTGTAGAGTACAT  
GGCTGAATTCGTCGCTAAGAACGAGCTTCAATTGCAGCGGCCAAAGA

>M6-PGSC0003DMG400020520-(rev)M6LRR-RLP\_2914

GTAGAGTACATGGCTGAATTCGTCGCTAAGAACGAGCTTCAATTGCAGCGGCCAAAGAGAAGGAGAGC  
TTTTTTTTCTCTGAGTGCCTATTTCTAACACCGAGAGGAAGAGGCGGATC

>M6-PGSC0003DMG400020520-(rev)M6LRR-RLP\_2976

GAGAGCTTTCTTTTCTCTGAGTTGCCTATTTCTAACACCGAGAGGAAGAGGCGGATCTAGAGCAGGTA  
CTGTGGGTTGAACTGAACCTAATGCTCGCGGATCGAACTACTTGTACATCC

>M6-PGSC0003DMG400020520-(rev)M6LRR-RLP\_3038

GCAGGTACTGTGGGTTGAACTGAACCTAATGCTCGCGGATCGAACTACTTGTACATCCTGCAAAAAACA  
TTTGAAAACATATACATATTATAGGATCTCACTCATTCTGAATCCACTAAC

>M6-PGSC0003DMG400020520-(rev)M6LRR-RLP\_310

TATCAAGATTTTGATGTGTTGATTCAGGAAGCTACACAGTTGATTTCTGGAGATACCCAAATGGGAAAA  
ATCAATTCTTTGAGGACCCAATTGGTGAATTGGAAAAAAGATGAGATT

>M6-PGSC0003DMG400020520-(rev)M6LRR-RLP\_3100

AAAAACATTTGAAAACATATACATATTATAGGATCTCACTCATTCTGAATCCACTAACTCTAGATCCTGGA  
TTCGCCTTGGTGAGAGGTGTCGGATACCTCAGAATCCGTCAAAGCAAT

>M6-PGSC0003DMG400020520-(rev)M6LRR-RLP\_3134

CTCACTCATTCTGAATCCACTAACTCTAGATCCTGGATTCGCCTTGGTGAGAGGTGTCGGATACCTCAG  
AATCCGTCAAAGCAATTATATATATATATATATGAAAAGTTGCTCCAAAC

>M6-PGSC0003DMG400020520-(rev)M6LRR-RLP\_372

GGGAAAAATCAATTCTTTTGAGGACCCAATTGGTGAATTGGAAAAAAGATGAGATTTTGATGAAGG  
GTTTGTTACAAGTTGTGAATTGATTACTGTTTCTTCTTCAGGTTTGGGTAT

>M6-PGSC0003DMG400020520-(rev)M6LRR-RLP\_434

TGAAGGGTTTGGTTACAAGTTGTGAATTGATTACTGTTTCTTCTTCAGGTTTGGGTATTTGCTTCTCCTTT  
TGCTTTTTTTGTGTCCAAGATTTCACTTTTTGCTTGCTTGTGAGTTG

>M6-PGSC0003DMG400020520-(rev)M6LRR-RLP\_496

TTCTCCTTTTTGCTTTTTTGTGTCCAAGATTTCAACTTTTTGCTTGCTTGAGTTGTGGAGGTAGTGTGT  
TGTCTTTCTATCTGTCCATACTAATAGTTGTAGTATTGCTTATGTTAC

>M6-PGSC0003DMG400020520-(rev)M6LRR-RLP\_558

GGTAGTGTGTTGTCTTTCTATCTGTCCATACTAATAGTTGTAGTATTGCTTATGTTACCATTTGTTGTTCCCT  
TGTACTIONGATTATTTTATTATTTTGTGTAGCTAATGTTCCAGAATGC

>M6-PGSC0003DMG400020520-(rev)M6LRR-RLP\_62

GAATTTACAAATCACTCCCACCAAGACCATCCATTTTAGAAATTGAAGCTTCAATTTCTGTAATAAAATCA  
GTAGAAACAGAAGAAAAAATAGAACTTGATGAAATTTCCAAGAAAGTAG

>M6-PGSC0003DMG400020520-(rev)M6LRR-RLP\_682

TTATGCTTTCACTCCGTTTATTCTTTTTGTGTGTGCATCCAAGATTTCAACTTTTTGCTTGCTTGAGTTG  
TGGAGGTTGTGGAGAGCATGGATTAGGCTAGAGGTTAGTAGGTA

>M6-PGSC0003DMG400020520-(rev)M6LRR-RLP\_744

CTTGTGAGTTGTGGAGGTTGTGGAGAGCATGGATTAGGCTAGAGGTTAGTAGGTA

>M6-PGSC0003DMG400020520-(rev)M6LRR-RLP\_806

TCCTAGTATTGCTTATCTGGTTTCTGTCTTCTGTTACTTTGTGTTGTTGTAGTATGTAGTTTGATTATCG  
CATTATTTTATTGGAAATCTTAGAATAAAATATGTATCCAAACACAAC

>M6-PGSC0003DMG400020520-(rev)M6LRR-RLP\_868

TTGATTATCGCATTATTTTATTGGAAATCTTAGAATAAAATATGTATCCAAACACA

>M6-PGSC0003DMG400020520-(rev)M6LRR-RLP\_930

AAAATCGTTCAAGTTTCTAACTTCTAGAAATCTATGGCAAACGCTAGCTTAGATTGATGGAAAAACATCAT  
TTATAGTTTCTCCTTTTGGTCTTTCTTGGAACTTGAGCTCTAGTTTGCAA

>M6-PGSC0003DMG400020520-(rev)M6LRR-RLP\_992

AACATCATTATAGTTTCTCCTTTTGGTCTTTCTTGGAACTTGAGCTCTAGTTTGCAAGATTCTTTTCTTT  
TTAGTGATGGCACTAGCTTGCTACGTATGTTGACTAATCTACTAGGT

>M6-PGSC0003DMG400020546M6LRR-RLP\_0

TTTACGTTTACCAAGGAATGATAAATAATTTGTCAAAAGGAATAATTGTTGTTTGAATTCAGAGATCG

GCGGCGAGTAAAGAGAAATGGAGAAAGAGGGAAAAAGCGACGCCGATAAC

>M6-PGSC0003DMG400020546M6LRR-RLP\_1037

CTTTGTCCAATGATTTAGAACTTGTTCTTACTGTGAACAATCGCTATTGACGGGACAAGAGATACAATTG  
TTGAACTGGAACACTCACTTTGATCCCAATCATATGCATATTGGAGTTGACC

>M6-PGSC0003DMG400020546M6LRR-RLP\_1098

ATACAATTGTTGAACTGGAACACTCACTTTGATCCCAATCATATGCATATTGGAGTTGACCTAAAAATAGAA  
TTGTTTGGTCTTTTCCTTTTCCTTCTAATTCATTTTTTTAATTTTATAT

>M6-PGSC0003DMG400020546M6LRR-RLP\_122

GAGTACAATCACAGTGAATGTTAAGTTCAGTGGTCGATCGATACCGGTGGAAATCTCCGACGAGTGCAC  
TGTCAAACACCTCAAGTCTCTCCTTCAACCACTCACAAATGTCCTCTCTCG

>M6-PGSC0003DMG400020546M6LRR-RLP\_1281

ATATGGGAAAAACCACTAAAGAAAAGAATCCATAAATTTATAAAAGTGGTCTAAGGGATTTGAACCTTT  
GATTGTTCTTCATTCTGGCTATAATATCAGTTTCAGTAATGGAGCTGTAA

>M6-PGSC0003DMG400020546M6LRR-RLP\_1342

GAACCTTTGATTGTTCTTCATTCTGGCTATAATATCAGTTTCAGTAATGGAGCTGTAAACAACTCATCCAT  
CTGTATGGAGACTAATTTTGCAGTTTTACTCCAAATAGAACATGGCCTT

>M6-PGSC0003DMG400020546M6LRR-RLP\_1403

ACTCATCCATCTGTATGGAGACTAATTTTGCAGTTTTACTCCAAATAGAACATGGCCTTTGGAGTAGATCC  
CCAGTATCTTTAGAAAGATCTTAGGTGTGAGTTGTAACCTCCACCAGTTG

>M6-PGSC0003DMG400020546M6LRR-RLP\_1464

GAGTAGATCCCCAGTATCTTTAGAAAGATCTTAGGTGTGAGTTGTAACCTCCACCAGTTGTGCAGTCTAAA  
CAAAAAACAAAATTCTATTTCCCTCTACTATGAATAAAACTGCCAAAAG

>M6-PGSC0003DMG400020546M6LRR-RLP\_1525

CAGTCTAAACAAAAACAAAATTCTATTTCCCTCTACTATGAATAAAACTGCCAAAAGAGAGGAGTATT  
GTCAAATAGATTCAATACATTTGGAATAAAACAAAATCCTTCCCTGACAT

>M6-PGSC0003DMG400020546M6LRR-RLP\_1586

AGGAGTATTGTCAAATAGATTCAATACATTTGGAATAAAACAAAATCCTTCCCTGACATGTTTTATTCCAA  
TTTAAACATTGGCTGATAGATAGGCTGAATATTGTTTCAATTTTTGGGAA

>M6-PGSC0003DMG400020546M6LRR-RLP\_1647

TTTATTCCAATTTAAAACATTGGCTGATAGATAGGCTGAATATTGTTTCATTTTTGGGAAATTGGAGGACC  
AAGTGTGCATGACCTTCCTCATAGGCCATAGCTTGTGACAAAATGTTGTAT

>M6-PGSC0003DMG400020546M6LRR-RLP\_1708

TGGAGGACCAAGTGTGCATGACCTTCCTCATAGGCCATAGCTTGTGACAAAATGTTGTATCTCCATTTTGT  
CATCTTTTGAAATTATTTATTGCATCACCAAAACCAAAATGACCACCCC

>M6-PGSC0003DMG400020546M6LRR-RLP\_183

GAGTGCCTGTCAAACACCTCAAGTCTCTCCTTCAACCACTCACAAATGTCCTCTCTCGCGGCCAGAACT  
CATCTTCAAAGGTATTTTTCTTTCAACTCTAACCTATCAGCATTATTT

>M6-PGSC0003DMG400020546M6LRR-RLP\_244

GCCAGAAACTCATCTTCAAAGGTATTTTTCTTTCAACTCTAACCTATCAGCATTATTTTCGTATACAATCGG  
AGCTCCAAAGAACTGAATATCAATGAATTTGATAGATGACATAATTTT

>M6-PGSC0003DMG400020546M6LRR-RLP\_2623

CCACCCAAAGTTTCTCATTTGCAAGACTAAGTTTAAATTTAAGACCCAAAAAGATGCAGTCATGTAGAG  
AAAAGAAAAAAGAAAAAAATACTACTGTGCAGTTCAAACCTTATTGAATG

>M6-PGSC0003DMG400020546M6LRR-RLP\_2684

CATGTAGAGAAAAGAAAAAAGAAAAAAATACTACTGTGCAGTTCAAACCTTATTGAATGAATGTTGGGT  
TAGTCTGAGAGCACATTTAGCCTGCATTAATCAGATAAAATCCCTCTATAT

>M6-PGSC0003DMG400020546M6LRR-RLP\_2745

TGTTGGGTTAGTCTGAGAGCACATTTAGCCTGCATTAATCAGATAAAATCCCTCTATATATCATTGTGCA  
TGTACATATTGTGTATCCAGTATGAGAGTATACTATGGTCAAATGGTAA

>M6-PGSC0003DMG400020546M6LRR-RLP\_2806

CATTTGTGCATGTACATATTGTGTATCCAGTATGAGAGTATACTATGGTCAAATGGTAAATTCATCTTAGC  
CAAGTAGTAGGACCAAGTTTGATTCTTCTATCACCCAAGAGTTATTTA

>M6-PGSC0003DMG400020546M6LRR-RLP\_2867

TCATCTTAGCCAAGTAGTAGGACCAAGTTTGATTCTTCTATCACCCAAGAGTTATTTATCTACTTGTGTT  
AAATCGTAAATAGCATTATGTACGTCCTGAAACTACGTTTCGCAGCCGAT

>M6-PGSC0003DMG400020546M6LRR-RLP\_2928

TACTTGTGTTAAATCGTAAATAGCATTATGTACGTCCTGAAACTACGTTTCGCAGCCGATTCTTTTTGCTTT  
TTCCTCCTCTTGAAGATATTGCTCTCATTACATATTGGAACCTTGATAGG

>M6-PGSC0003DMG400020546M6LRR-RLP\_2989

TTTTTGCTTTTTCTCCTCTTGAAGATATTGCTCTCATTACATATTGGAACCTTGATAGGTCTTGCCTGATGA  
AGTGTTGACCTGCGGACCTTCCGCTAGAGTCCTGGATCTCAGCCACAA

>M6-PGSC0003DMG400020546M6LRR-RLP\_305

TATACAATCGGAGCTCCAAAGAACTGAATATCAATGAATTTGATAGATGACATAATTTTTTTCATGAATA  
GGGAAAGTTTTGGTGGATGAAATAACATTGAAGTCATCGGAGGTTGGAAA

>M6-PGSC0003DMG400020546M6LRR-RLP\_3050

TTGCCTGATGAAGTGTTGACCTGCGGACCTTCCGCTAGAGTCCTGGATCTCAGCCACAACGCCATACAGC  
ATCTTCCAGCCGCAATTAATAGCTTGAGTTCTCTTCAGGTCAGTAGAGTT

>M6-PGSC0003DMG400020546M6LRR-RLP\_3111

CCATACAGCATCTTCCAGCCGCAATTAATAGCTTGAGTTCTCTTCAGGTCAGTAGAGTTGACTTCTTTATA  
TTTCTTTGAAATTGCGATTTATCACTTGTTTGAGGCAGAAATTTATTT

>M6-PGSC0003DMG400020546M6LRR-RLP\_3172

CTTCTTTATATTTCTTTGAAATTGCGATTTATCACTTGTTTGAGGCAGAAATTTATTTTGGTATTGTTTCT  
GCTTCCAGAAATTGATCCTCAATGGGAATGAAATTATGGATAATTCC

>M6-PGSC0003DMG400020546M6LRR-RLP\_3233

GTATTGTTTCTGCTTCCAGAAATTGATCCTCAATGGGAATGAAATTATGGATAATTCCTTAAGCTGGGA  
AGAGCTAGCTTCTATAAAGAGTCTTATGGTTATCTCACTGAACCAAAAACC

>M6-PGSC0003DMG400020546M6LRR-RLP\_3294

AAGCTGGGAAGAGCTAGCTTCTATAAAGAGTCTTATGGTTATCTCACTGAACCAAAAACCAGTAAGTCCCC  
CTTCATCAGCATATTACTCTCCAAGCTGAATTGGATTACCAATATATTG

>M6-PGSC0003DMG400020546M6LRR-RLP\_3355

TAAGTCCCCCTTCATCAGCATATTACTCTCCAAGCTGAATTGGATTACCAATATATTGCATCGTCTCTATT  
TAATTGAAGTAGAAACGTATTCTTTCCTGCACCATTAAATGATGGCTA

>M6-PGSC0003DMG400020546M6LRR-RLP\_3416

TCGTCTCTATTTAATTGAAGTAGAAACGTATTCTTTCCTGCACCATTAAATGATGGCTACACCAAACATGT  
ATGTACATTTGAGTGTGAGGGACAATAATTGCAATGTCATAGTTCTCAT

>M6-PGSC0003DMG400020546M6LRR-RLP\_3477

CCAAACATGTATGTACATTTGAGTGTGAGGGACAATAATTGCAATGTCATAGTTCTCATTTATTGTTTTCA

TAAAATTTAAAATATGAAAACCTGAAGTATATCAATGAGTAATATAAGTTG

>M6-PGSC0003DMG400020546M6LRR-RLP\_3538

ATTGTTTTTCATAAAATTTAAAATATGAAAACCTGAAGTATATCAATGAGTAATATAAGTTGTTGAATTTCTAG  
TATTCAAATGTTAAGTTGCATCATTGGAATGTTAGTCATTCCAAGTTTT

>M6-PGSC0003DMG400020546M6LRR-RLP\_3599

GAATTTCTAGTATTCAAATGTTAAGTTGCATCATTGGAATGTTAGTCATTCCAAGTTTTCTTTGACATAC  
AGCTTGAAAACCTAAATTGTAAAATTCACCTCACAGTTTTCTGTCTTATATA

>M6-PGSC0003DMG400020546M6LRR-RLP\_366

TCATGAATAGGGAAAGTTTTGGTGGATGAAATAACATTGAAGTCATCGGAGGTTGGAAATGGTGCGAA  
GATCATGCTTATGGCTTCCCAGGGCTTACATCAAGGGGTAATTCTTTATTTT

>M6-PGSC0003DMG400020546M6LRR-RLP\_3660

TTTGACATACAGCTTGAAAACCTAAATTGTAAAATTCACCTCACAGTTTTCTGTCTTATATACTTGTTTTCTTG  
CACTTTTATGAGTATATATTTATTTAAAAGTTACTTTTCTCAGAATAGTCGA

>M6-PGSC0003DMG400020546M6LRR-RLP\_3721

TGTTTTCTTGCACTTTTATGAGTATATATTTATTTAAAAGTTACTTTTCTCAGAATAGTCGAATACTTACAAAAA  
CATAATTGAAAAATTGTCAATTGTCATGGTCTCTCAAATGTTTGAATA

>M6-PGSC0003DMG400020546M6LRR-RLP\_3782

ACTTACAAAAACATAATTGAAAACCTGTCAATTGTCATGGTCTCTCAAATGTTTGAATAGGTTGGCTTTTA  
CATATCAGTTTATAGTTTATTTGAACTAGTGATTGGGTATTGGCAATTT

>M6-PGSC0003DMG400020546M6LRR-RLP\_3843

TTGGCTTTTACATATCAGTTTATAGTTTATTTGAACTAGTGATTGGGTATTGGCAATTTCTATGTTAACTCA  
ATTTGTTCTTACAGAAATATTATAAAGCTTTTAATCGGTTCTTTAGTT

>M6-PGSC0003DMG400020546M6LRR-RLP\_3904

ATGTTAACTCAATTTGTTCTTACAGAAATATTATAAAGCTTTTAATCGGTTCTTTAGTTACTCAGTTTTAAC  
TTGTAAGTGCCAAATTGGTTATCAGACAACCCATTTGCTAAAGTATAA

>M6-PGSC0003DMG400020546M6LRR-RLP\_3965

TCAGTTTTAACTTGTAAGTGCCAAATTGGTTATCAGACAACCCATTTGCTAAAGTATAAAAACCGTTCCAA  
TGTATAAGATTCACATATAACTTAAGACAGTTGGACGATGGATATAAGC

>M6-PGSC0003DMG400020546M6LRR-RLP\_4026



ACCGTTCCAATGTATAAGATTCACATATAACTTAAGACAGTTGGACGATGGATATAAGCCCAAATACTGC  
TTTTGGCAGAGGGGAGAGACCAATTCTTCATGCTTGTAGTGTGGTGGGA

>M6-PGSC0003DMG400020546M6LRR-RLP\_4087

AAATACTGCTTTTGGCAGAGGGGAGAGACCAATTCTTCATGCTTGTAGTGTGGTGGATTGTAAATTGT  
ACCAAGGCAAGTCTAATCATAAAACAACATTATTTATTGACTGACCCTCT

>M6-PGSC0003DMG400020546M6LRR-RLP\_4148

GTAAATTGTACCAAGGCAAGTCTAATCATAAAACAACATTATTTATTGACTGACCCTCTCAAACATGCAT  
GAAAACCTGAAAATAAAGCTGTCTATCTTTCAATCACAAAATACATGGTAT

>M6-PGSC0003DMG400020546M6LRR-RLP\_4209

AACATGCATGAAAACCTGAAAATAAAGCTGTCTATCTTTCAATCACAAAATACATGGTATTAATTTTTTGGT  
CAGTGACATTCAGATGTCGTTTTGTGTTGCAATTTTATTTTCTGATACA

>M6-PGSC0003DMG400020546M6LRR-RLP\_427

GTGCGAAGATCATGCTTATGGCTTCCCAGGGCTTACATCAAGGGGTAATTCTTTATTTTCCTTTACATTAT  
ACTCTATTGAGCATAACTATTTGGGATTAGTACTTATATGTGTTACTAT

>M6-PGSC0003DMG400020546M6LRR-RLP\_4270

ATTTTTTGGTCAGTGACATTCAGATGTCGTTTTGTGTTGCAATTTTATTTTCTGATACATCTTACTCTGTTT  
ACCAACCTCAATCATTTATCATATGCCATTATTTCTGATAAAGGTTTC

>M6-PGSC0003DMG400020546M6LRR-RLP\_4331

TACTCTGTTTACCAACCTCAATCATTTATCATATGCCATTATTTCTGATAAAGGTTTCTTGTATGATTGTA  
TCAAGTAGTCTTCTTTGGTATGCAGCATAGCAACGCTGCCTCCTGAGG

>M6-PGSC0003DMG400020546M6LRR-RLP\_4392

GTATGATTGTATCAAGTAGTCTTCTTTGGTATGCAGCATAGCAACGCTGCCTCCTGAGGTCGGCATTTTG  
ACCGGTCTGAGACAACCTTCATATTGCACATAACGAGTTAACAGGTCTCCC

>M6-PGSC0003DMG400020546M6LRR-RLP\_4453

GGCATTGACCGGTCTGAGACAACCTTCATATTGCACATAACGAGTTAACAGGTCTCCCATCTGAGATAG  
GTCTGCTGACCAGCCTTGAGGTTCTGAAAGTTAACAACAACAGGTAATTT

>M6-PGSC0003DMG400020546M6LRR-RLP\_4697

CCAAACACCTACTTAGTGTTTTACGTTATTGTTCCCTCTCCTCCTTTTCTGGAGGTCATGGATGTTTCGGA  
GTCTGTTGATTTTCTTTTATCTTTTATTTTCTTTGAAGTGATAAGGA

>M6-PGSC0003DMG400020546M6LRR-RLP\_4758

ATGTTTCGGAGTCTGTTGATTTTCTTTTTATCTTTTATTTTTCTTTGAAGTGATAAGGACCTAAGTTAGGTT  
TGTAAGCTTAACCTTTTAATTGCAGGATACGCTCTATTCCGGAAAGTA

>M6-PGSC0003DMG400020546M6LRR-RLP\_4819

TAAGTTAGGTTTGTAAGCTTAACCTTTTAATTGCAGGATACGCTCTATTCCGGAAAGTATAGGGGGTTGT  
GTTTCTCTTATTGAGGTAAAAAAGGGCATATTTTCCTCTACCCACTTGTC

>M6-PGSC0003DMG400020546M6LRR-RLP\_488

TTTACATTATACTCTATTGAGCATAACTATTTGGGATTAGTACTTATATGTGTTACTATACTTAGTTTGTTT  
ATGGATTTGTACATAACTAGAAAATGGAGAGAACCTCTAGTATTGATA

>M6-PGSC0003DMG400020546M6LRR-RLP\_4880

GGGGGTTGTGTTTCTCTTATTGAGGTAAAAAAGGGCATATTTTCCTCTACCCACTTGCTTCTCTTCTCTTT  
CATTAACTGGAATCATGAAATCCAAAATATAGGCTGAAACCTGCAATA

>M6-PGSC0003DMG400020546M6LRR-RLP\_4941

CTCTTCTCTTTCATTAACCTGGAATCATGAAATCCAAAATATAGGCTGAAACCTGCAATAAGTTCCAGCGTT  
TATTGTTTCTTGTGATTTTATTACCTATATACAGATAACGTGATTCTAT

>M6-PGSC0003DMG400020546M6LRR-RLP\_5002

TTCCAGCGTTTATTGTTTCTTGTGATTTTATTACCTATATACAGATAACGTGATTCTATATGGTGTAGGTTG  
ATCTTTCATCTAATCTTTTGGTAGAGCTGCCAGAAACAATTAGCAAAC

>M6-PGSC0003DMG400020546M6LRR-RLP\_5063

GGTGTAGGTTGATCTTTCATCTAATCTTTTGGTAGAGCTGCCAGAAACAATTAGCAAACCTAAAGGACTTA  
AAGGTCTGTCTTCATCTATACATTTTTCGTTTTCTTTTTGAAGTCATTC

>M6-PGSC0003DMG400020546M6LRR-RLP\_5124

AAGGACTTAAAGGTCTGTCTTCATCTATACATTTTTCGTTTTCTTTTTGAAGTCATTCTTCAAATACCAC  
TTCAGTTTACAGCTTTTTATATGCAATATAAAAAAAAAAATCTTTTTTT

>M6-PGSC0003DMG400020546M6LRR-RLP\_5185

CAAATACCACTTCAGTTTACAGCTTTTTATATGCAATATAAAAAAAAAAATCTTTTTTTTTTATAAATGCC  
GTACAGAAAAGAACTTGCAAACGTTTTACGAAATTAGCTATATATGCT

>M6-PGSC0003DMG400020546M6LRR-RLP\_5246

TTATAAATGCCGTACAGAAAAGAACTTGCAAACGTTTTACGAAATTAGCTATATATGCTCTAGTACTGGT

TGTTAGACATTGGTAAAGAATGTAACATAGTTTTCTAAGATAGGGCATAG

>M6-PGSC0003DMG400020546M6LRR-RLP\_5307

AGTACTGGTTGTTAGACATTGGTAAAGAATGTAACATAGTTTTCTAAGATAGGGCATAGCCTGGATGAA  
CATTTATGTATCAGCTCTAGAACATTCAGCTATGACATTTTAAACCAA

>M6-PGSC0003DMG400020546M6LRR-RLP\_5368

TGGATGAACATTTATGTATCAGCTCTAGAACATTCAGCTATGACATTTTAAACCAA

>M6-PGSC0003DMG400020546M6LRR-RLP\_5429

AGGATTTAGTGCCATAATCTGCTGGACCGACACCATTTGCTTGGATAAAAGCACAGCACATGATAGGTA  
AAATTTAATCATGGTTAAGCGAAAACTTGGTTTTATCAATTGGCGCTAGT

>M6-PGSC0003DMG400020546M6LRR-RLP\_549

TTAGTTTGTATGGATTTGTACATAACTAGAAAATGGAGAGAACCTCTAGTATTGATAAGCTTCTCAGTT  
GTGTTAAAGGATAACATATTGATTACTAGAATGAATTAAGGCTACGCAG

>M6-PGSC0003DMG400020546M6LRR-RLP\_5490

GATAGGTAATAATTTAATCATGGTTAAGCGAAAACTTGGTTTTATCAATTGGCGCTAGTAAGTTTATACT  
GCACATTATAGGGGCATGTCACGAGTTTAAATGTTGCCACAGAAATATTC

>M6-PGSC0003DMG400020546M6LRR-RLP\_5551

GTTTATACTGCACATTATAGGGGCATGTCACGAGTTTAAATGTTGCCACAGAAATATTCAAGTGGAGAA  
GGATAGATGGTAGTCCATTATCACATAGTGTGCGAACTGTGTGCCAAGTGCC

>M6-PGSC0003DMG400020546M6LRR-RLP\_5612

GTGGAGAAGGATAGATGGTAGTCCATTATCACATAGTGTGCGAACTGTGTGCCAAGTGCCAACCAACTCC  
GAAGGATCTCTCAGTTATCAAAGGGAAAAAATGTTGTTTTCTTTGCAAGG

>M6-PGSC0003DMG400020546M6LRR-RLP\_5673

CCAACTCCGAAGGATCTCTCAGTTATCAAAGGGAAAAAATGTTGTTTTCTTTGCAAGGCACGACACAAA  
TTTCTTTAGTCAACAATGTTTTCTGAAACATCTAGCATCATGTGATGGCC

>M6-PGSC0003DMG400020546M6LRR-RLP\_5734

CGACACAAATTTCTTTAGTCAACAATGTTTTCTGAAACATCTAGCATCATGTGATGGCCTCTTTTACCTGA  
CAGTATGCTTTTGCCCAATTATTTGTGTGGTTCATGTCCGATTACTGG

>M6-PGSC0003DMG400020546M6LRR-RLP\_5795

TTTTACCTGACAGTATGCTTTTGCCCAATTATTTGTGTGGTTCATGTCCGATTACTGGTGCAGGCACTTT  
ATCTTAGGAACAACGGACTCAAATCCCTTCCTAGCAGCATTTTTAAACA

>M6-PGSC0003DMG400020546M6LRR-RLP\_5856

CAGGCACTTTATCTTAGGAACAACGGACTCAAATCCCTTCCTAGCAGCATTTTTAAACAGTGCTGTCAACT  
CTCTACACTAGATCTCCATGGAAGTAAATAACTATAGATGTTATCTGC

>M6-PGSC0003DMG400020546M6LRR-RLP\_5917

GCTGTCAACTCTCTACACTAGATCTCCATGGAAGTAAATAACTATAGATGTTATCTGCCAGGTAGTAAA  
TCATTTACTACTTAATAACAGTAACATGCCCTAGCTAGTCTGCCTCTTAC

>M6-PGSC0003DMG400020546M6LRR-RLP\_5978

GGTAGTAAATCATTTACTACTTAATAACAGTAACATGCCCTAGCTAGTCTGCCTCTTACGATTTTCAAACG  
ATCACAGATTGAAGGATGGGAGAATTTTGATGAGAGAAGACGGTCAAG

>M6-PGSC0003DMG400020546M6LRR-RLP\_6039

TTTTCAAACGATCACAGATTGAAGGATGGGAGAATTTTGATGAGAGAAGACGGTCAAGCATCAGAAA  
CAACTGGACTTCAGAGTGAGCAGCTCTGGCAAATTTGACGAAGGAGCTGATC

>M6-PGSC0003DMG400020546M6LRR-RLP\_61

CAGAGATCGGCGGCGAGTAAAGAGAAATGGAGAAAGAGGGAAAAAGCGACGCCGATAACCGGAGTA  
CAATCACAGTGAATGTTAAGTTCAGTGGTCGATCGATACCGGTGGAAATCTCCG

>M6-PGSC0003DMG400020546M6LRR-RLP\_610

CTTCTCAGTTGTGTTAAAGGATAACATATTGATTACTAGAATGAATTAAGGCTACGCAGAGTAGAATGTA  
TATTTAGATATAGGAGACTACAACCTGATTTGGATTGAGGTGTAATTGATT

>M6-PGSC0003DMG400020546M6LRR-RLP\_6100

TCAGAAACAACCTGGACTTCAGAGTGAGCAGCTCTGGCAAATTTGACGAAGGAGCTGATCAAAGCTGATA  
AGGCCTGATACAACTACTCGGTAACCTCGGTTTATATACATCCTGAAATAC

>M6-PGSC0003DMG400020546M6LRR-RLP\_6161

AGCTGATAAGGCCTGATACAACTACTCGGTAACCTCGGTTTATATACATCCTGAAATACATTTGCATAGT  
GATCCCTAGCAAACCTCACAGAAGAATCTTGTAGTACCTGTTAAGATACA

>M6-PGSC0003DMG400020546M6LRR-RLP\_6222

TTGCATAGTGATCCCTAGCAAACCTCACAGAAGAATCTTGTAGTACCTGTTAAGATACATCAAGAAATTA  
TAATGAGCATACTGCTCCACTGTGCACTCCCTAAAGATGATTAATTTTC

>M6-PGSC0003DMG400020546M6LRR-RLP\_6283

AAGAAATTATAATGAGCATACTGCTCCACTGTGCACTCCCTAAAGATGATTAAATTTTCTGAAGGCTTAC  
TATAAAGCTTTCTGCATCTTCTCAAACCTGTTACATATATAGTTGAATGAA

>M6-PGSC0003DMG400020546M6LRR-RLP\_6326

AGATGATTAAATTTTCTGAAGGCTTACTATAAAGCTTTCTGCATCTTCTCAAACCTGTTACATATATAGTTG  
AATGAAAATTCCCTTTTAAGGATACATATTACAAATTGCTGTACCCCTA

>M6-PGSC0003DMG400020546M6LRR-RLP\_671

TAGAATGTATATTTAGATATAGGAGACTACAACCTGATTTGGATTGAGGTGTAATTGATTGAGCCGTGCTT  
GTGACTTTCAAATTTTGTAAAATTAATAAACCAGAAATTCCACTGAATT

>M6-PGSC0003DMG400020546M6LRR-RLP\_732

GCCGTGCTTGTGACTTTCAAATTTTGTAAAATTAATAAACCAGAAATTCCACTGAATTTATCCCAGTTAG  
GTCCTGAACCTTCTGCTTTCTTAAAGCTTATTTGTGTATATTGGATAGGA

>M6-PGSC0003DMG400020546M6LRR-RLP\_793

TCCCAGTTAGGTCCTGAACTTCTGCTTTCTTAAAGCTTATTTGTGTATATTGGATAGGATGGACCAATAAG  
AAAGGAAGCTTCCAACCTGCCCACAGCGAGGAGGATGCCTGAAGCTATG

>M6-PGSC0003DMG400020546M6LRR-RLP\_854

GACCAATAAGAAAGGAAGCTTCCAACCTGCCCACAGCGAGGAGGATGCCTGAAGCTATGAGACCTAAA  
AGGGATGTTCCCTCAAGTTCTGTTGTGAAGAGCCAACCTGAACGGTGGAAGG

>M6-PGSC0003DMG400020546M6LRR-RLP\_915

ACCTAAAAGGGATGTTCCCTCAAGTTCTGTTGTGAAGAGCCAACCTGAACGGTGGAAGGCCACTGGGGT  
TGTTGCATTATCAGAATGCAATCTGAAGGTAAGACGAGAAGTAACTGACTT

>M6-PGSC0003DMG400020546M6LRR-RLP\_976

ACTGGGGTTGTTGCATTATCAGAATGCAATCTGAAGGTAAGACGAGAAGTAACTGACTTTGCTTTGTCC  
AATGATTTAGAACTTGTTCTTACTGTGAACAATCGCTATTGACGGGACAAG

>M6-PGSC0003DMG400020594M6LRR-RLK\_1054

CAGGTCCTGCACTTCTTGATGTGGCTGGTGGTTTTGGATATCCATTGTCTTTGGCTGAGTCTTGAAAG  
GGAATGATGCTTGAATGGTTGGAGTTTTATAAGTTGTGATACAACAGGG

>M6-PGSC0003DMG400020594M6LRR-RLK\_1116

TTGGAAAGGGAATGATGCTTGAATGGTTGGAGTTTTATAAGTTGTGATACAACAGGGAAGAATGTAG

CTGTTGTTACCTTAGGTAAGAGGGGATTTTCGGGTACTATTTACCTGCTTT

>M6-PGSC0003DMG400020594M6LRR-RLK\_1178

ATGTAGCTGTTGTTACCTTAGGTAAGAGGGGATTTTCGGGTACTATTTACCTGCTTTTGCGAATTTAACT

TCGTTGAGGAGCTTGTTTTGAATGACAATAATCTTACTGGTACAATCC

>M6-PGSC0003DMG400020594M6LRR-RLK\_124

CTCCTTTTCTTCTTCCCTTTCTTTCACCTTCTCAGATGATGCTGATGTTATGTCCAAGCTTCTGCAGCTC

TTTCTCCAACCTCTTCTGGTTGGTCAACTTCTAAGCCTTTCTGTTCT

>M6-PGSC0003DMG400020594M6LRR-RLK\_1240

AATTTAACTTCGTTGAGGAGCTTGTTTTGAATGACAATAATCTTACTGGTACAATCCCAGAGAGTTTGA

CAACTTTGCCTAATTTACAAGTTCTTGATGTGTCTAATAATAATTTGTCT

>M6-PGSC0003DMG400020594M6LRR-RLK\_1302

GAGTTTGACAACCTTGCCTAATTTACAAGTTCTTGATGTGTCTAATAATAATTTGTCTGGACCTATACCAT

TGTTTCCACCTAGGGTGAAGTTTACTCATACTGGTAACTTGTTTCTTGG

>M6-PGSC0003DMG400020594M6LRR-RLK\_1364

CTATACCATTGTTTCCACCTAGGGTGAAGTTTACTCATACTGGTAACTTGTTTCTTGGGAAAAATATAACT

ACTGGTGGTGATGGTGGCGGAAGTGGTTCGGATGGTTCTGGATCGAATT

>M6-PGSC0003DMG400020594M6LRR-RLK\_1426

AATATAACTACTGGTGGTGATGGTGGCGGAAGTGGTTCGGATGGTTCTGGATCGAATCCAGTGGTTCGA

GGTGGAAAGTTCATCTGGTGGTTCGAAAGGGCCTTCAGTTGGAATGATTGTT

>M6-PGSC0003DMG400020594M6LRR-RLK\_1612

AAGAGACGCCATAAGAGATTTGGAAGGGTAGAGACTCCGGAGAAAAGCAATGAAATGGTTAAGCCTA

GTCTACCTAGTGTGTCGGTGGTCAAATGGATATACTGGTGGCACCAGTGAG

>M6-PGSC0003DMG400020594M6LRR-RLK\_1674

GCCTAGTCTACCTAGTGTGTCGGTGGTCAAATGGATATACTGGTGGCACCAGTGAGTTACAAAGTCA

GAGCAGTGGTGATCATAGTGAGATACCAGTTTTTGAAAATGGAAACGTTGC

>M6-PGSC0003DMG400020594M6LRR-RLK\_1736

AAAGTCAGAGCAGTGGTGATCATAGTGAGATACCAGTTTTTGAAAATGGAAACGTTGCCATTTCCATCC

AGGTCCTTCGACAAGTGACGAACAACCTCAGTGAAGAAAATATCCTGGGGA

>M6-PGSC0003DMG400020594M6LRR-RLK\_1798

TCCATCCAGGTCCTTCGACAAGTGACGAACAACCTCAGTGAAGAAAATATCCTGGGGAGAGGAGGGTTC  
GGAGTTGTTTATAAGGGCGAACTACACGATGGGACTAAAATCGCGGTGAAG

>M6-PGSC0003DMG400020594M6LRR-RLK\_186

TCTTGCAGCTCTTTCTCCAACCTCTTCTGGTTGGTCAACTTCTAAGCCTTTCTGTTCTTGGACTAATGTCAT  
TTGTGACAAGTCTTCAGCTACTGTAACCTCAATTAATCTTGATTCTCA

>M6-PGSC0003DMG400020594M6LRR-RLK\_1860

AGGGTTCGGAGTTGTTTATAAGGGCGAACTACACGATGGGACTAAAATCGCGGTGAAGAGGATGGAAT  
CTGGGGCAATGGGTACCAAAGGAATGAACGAGTTCCAAGCAGAAATTGCGGT

>M6-PGSC0003DMG400020594M6LRR-RLK\_1922

TGGAATCTGGGGCAATGGGTACCAAAGGAATGAACGAGTTCCAAGCAGAAATTGCGGTCCTTACCAA  
GTCAGACATAGGCATTTGGTTGCTCTACTTGGTTCATGTGTTAATGGCAATG

>M6-PGSC0003DMG400020594M6LRR-RLK\_1984

ACCAAAGTCAGACATAGGCATTTGGTTGCTCTACTTGGTTCATGTGTTAATGGCAATGAGAGACTTTTGG  
TGTATGAGTATATGCCGCAAGGAACTTTGAGTCAGCATTGTTTGAATGG

>M6-PGSC0003DMG400020594M6LRR-RLK\_2046

ACTTTTGGTGTATGAGTATATGCCGCAAGGAACTTTGAGTCAGCATTGTTTGAATGGCAAGAATTAGGC  
TACAAACCGCTTACTTGGAAAGCAAAGGGTAACGATAGCATTGGATGTGGC

>M6-PGSC0003DMG400020594M6LRR-RLK\_2108

AATTAGGCTACAAACCGCTTACTTGGAAAGCAAAGGGTAACGATAGCATTGGATGTGGCTAGAGGGGTT  
GAATACCTACATAGCTTGGCACAACAAAGTTTCATTCATAGAGATTTAAAAC

>M6-PGSC0003DMG400020594M6LRR-RLK\_2170

GGGGTTGAATACCTACATAGCTTGGCACAACAAAGTTTCATTCATAGAGATTTAAAACCATCAAACATCC  
TTTTGGGAGACGACATGAGAGCCAAGGTTGCAGATTTTGGTTTGGTTAGA

>M6-PGSC0003DMG400020594M6LRR-RLK\_2232

AAACATCCTTTTGGGAGACGACATGAGAGCCAAGGTTGCAGATTTTGGTTTGGTTAGAAATGCCCTGA  
TGAAAATATTCTGTGGAGACACGTTTGGCTGGAACCTTTGGCTATCTTGC

>M6-PGSC0003DMG400020594M6LRR-RLK\_2294

CCCCTGATGGAAAATATTCTGTGGAGACACGTTTGGCTGGAACCTTTGGCTATCTTGCACCTGAATACGC  
AGGTAAGCATTCTACTCCTTGTATCATTACGTCTTTTTTAACTGAGAA

>M6-PGSC0003DMG400020594M6LRR-RLK\_2356

GAATACGCAGGTAAGCATTCTACTCCTTGATCATTACGTCTTTTTTAACTGAGAAGCTGATTTGTATGC  
CCCTAGCTATAAACTTTAGATTTTTGCAAATTTTCAAATTATTTCGATCA

>M6-PGSC0003DMG400020594M6LRR-RLK\_2418

TTTGTATGCCCTAGCTATAAACTTTAGATTTTTGCAAATTTTCAAATTATTTCGATCATCTGCATTGCTAGG  
CATTGTTATCTTCATTACATTAGAGAGACATTTGGGTTATAATGTTAT

>M6-PGSC0003DMG400020594M6LRR-RLK\_248

CTAATGTCATTTGTGACAAGTCTTCAGCTACTGTAAGTTCAATTAATCTTGATTCTCAATCTGTTTCTGGTT  
CTTTACCTTCTGAAATACTCAACTTTCCAATCTTAAAACCTTTCTC

>M6-PGSC0003DMG400020594M6LRR-RLK\_2480

CATTGCTAGGCATTGTTATCTTCATTACATTAGAGAGACATTTGGGTTATAATGTTATTACTGAGGCAATC  
TCCACGCATAAATGCTGCTTTGTCATTTTTATCGAACCCATGAACTATA

>M6-PGSC0003DMG400020594M6LRR-RLK\_2542

GAGGCAATCTCCACGCATAAATGCTGCTTTGTCATTTTTATCGAACCCATGAACTATATACTACTATTATA  
AAAGATAAGTTTCCATTTTCGTGTGGATTAGCATCTGAATTATCCTATTA

>M6-PGSC0003DMG400020594M6LRR-RLK\_2604

ACTATTATAAAAGATAAGTTTCCATTTTCGTGTGGATTAGCATCTGAATTATCCTATTACATCTCCTCTTTGT  
TACAGCTACTGGACGAGTCACAACCAAAGTAGACGTTTACGCCTTTGG

>M6-PGSC0003DMG400020594M6LRR-RLK\_2666

TCCTCTTTGTTACAGCTACTGGACGAGTCACAACCAAAGTAGACGTTTACGCCTTTGGCGTTGTTTTGATG  
GAGATCATTACTGGTAGAAAAGCTTTAGATGAAACAATGCCAGATGAGA

>M6-PGSC0003DMG400020594M6LRR-RLK\_2728

GTTTTGATGGAGATCATTACTGGTAGAAAAGCTTTAGATGAAACAATGCCAGATGAGAGGTCTCATTG  
GTTACATGGTTCCGCAGAGTCCTTATCAACAAAGAAAACCTCCGAAAGGCT

>M6-PGSC0003DMG400020594M6LRR-RLK\_2790

TCATTTGGTTACATGGTTCCGCAGAGTCCTTATCAACAAAGAAAACCTCCGAAAGGCTATTGACTCGACA  
CTTGATCCTGATGATGAAACATATGAGAGCATTCCAAGGTTGCTGAGTT

>M6-PGSC0003DMG400020594M6LRR-RLK\_2852

ACTCGACACTTGATCCTGATGATGAAACATATGAGAGCATTCCAAGGTTGCTGAGTTAGCTGGCCATTG



CACTGCTCGGGAACCTTTTCAGCGACCTGATATGGGACATGCTGTTAATG

>M6-PGSC0003DMG400020594M6LRR-RLK\_2914

GGCCATTGCACTGCTCGGGAACCTTTTCAGCGACCTGATATGGGACATGCTGTTAATGTCCTTGGTCCCC

TTGTAGAGCAGTGGAAGCCTACAACAAGTGAAGATGATGACGGCTATGGC

>M6-PGSC0003DMG400020594M6LRR-RLK\_2976

TGGTCCCCTTGTAGAGCAGTGGAAGCCTACAACAAGTGAAGATGATGACGGCTATGGCATTATTGACCT

CGACATGAGCCTTCTCAAGCCCTTCAAAGGTGGCAAGCTGATGAAGGAAC

>M6-PGSC0003DMG400020594M6LRR-RLK\_3038

TTGACCTCGACATGAGCCTTCTCAAGCCCTTCAAAGGTGGCAAGCTGATGAAGGAACTTCAAGAATGT

TCGATGACTTCTCGATCAGTCACTCGCAGTCGAGCATACCCTCAAAACCTT

>M6-PGSC0003DMG400020594M6LRR-RLK\_310

GTTTCTGGTTCTTTACCTTCTGAAATACTCAACTTTCCAATCTTAAACCCTTTCTCTTCAAAAAACAAA

CTTTCTGGCCCCTTACCTTCTTTTGCCAACATGTCAAATAGCTGAA

>M6-PGSC0003DMG400020594M6LRR-RLK\_3100

AGAATGTTTCGATGACTTCTCGATCAGTCACTCGCAGTCGAGCATACCCTCAAAACCTTCCGGATTTGCAG

ATACTTTCAGTTCAACAGATTGCAGATGATATCCAAAAGAATTGACAACA

>M6-PGSC0003DMG400020594M6LRR-RLK\_3162

ATTTGCAGATACTTTTCAGTTCAACAGATTGCAGATGATATCCAAAAGAATTGACAACAGTTCAAGCCACG

CCACGCCACACGCGGTTTTAATCCTTTGTGGATCAACATAGAGTATGCCA

>M6-PGSC0003DMG400020594M6LRR-RLK\_3224

AAGCCACGCCACGCCACACGCGGTTTTAATCCTTTGTGGATCAACATAGAGTATGCCAATATTCATTTGA

TTAATTGGTTTCTTCTTGTCAATGTCATTTACTTTTTATGTGATTACATA

>M6-PGSC0003DMG400020594M6LRR-RLK\_3286

TCATTTGATTAATTGGTTTCTTCTTGTCAATGTCATTTACTTTTTATGTGATTACATATTTAAGTTAATATAG

TCTTGATGTAAGGTGTGATAACAGTTAAAAAGTCAGGTGAATGTCAC

>M6-PGSC0003DMG400020594M6LRR-RLK\_3348

AGTTAATATAGTCTTGATGTAAGGTGTGATAACAGTTAAAAAGTCAGGTGAATGTCACATTTTTCTTTT

GCCTCTTTGGAGACAACAGAAAATTGTAACAAATTCTTTCATATTACATT

>M6-PGSC0003DMG400020594M6LRR-RLK\_372

AAAAACAACCTTTCTGGCCCTTACCTTCTTTTGCCAACATGTCAAATTAGCTGAACTTTTCTTGGACA  
ATAACCAATTCACCTTCTGTTCCCTCAAGATTTCTTTTGGGGGTCCCAA

>M6-PGSC0003DMG400020594M6LRR-RLK\_434

TCTTGGACAATAACCAATTCACCTTCTGTTCCCTCAAGATTTCTTTTGGGGGTCCCAATTTAGTAACTTTAA  
GCATTAGTGAAAATGGGAGACTCTCCCCTGGCAAATTCCTATGTATT

>M6-PGSC0003DMG400020594M6LRR-RLK\_496

GTAACCTTAAGCATTAGTGAAAATGGGAGACTCTCCCCTGGCAAATTCCTATGTATTTGACTGAAAGTA  
CAAATTTGGGATCTTTATATGCTAGCAATGCTAGTATTGTTGGTGTCAAT

>M6-PGSC0003DMG400020594M6LRR-RLK\_558

TGAAAGTACAAATTTGGGATCTTTATATGCTAGCAATGCTAGTATTGTTGGTGTCAATCCTGATTTCTTTG  
ATGTTTTTCTAATTTACAGAACTTAAGGTTGTCTTATAATAATCTTAC

>M6-PGSC0003DMG400020594M6LRR-RLK\_620

ATTTCTTTGATGTTTTTCTAATTTACAGAACTTAAGGTTGTCTTATAATAATCTTACTGGTTCTTTGCCTG  
CTTCTTTTGGTGGTTCTGAAATTATGAATCTTTGGTTGAATAATCAAG

>M6-PGSC0003DMG400020594M6LRR-RLK\_682

TCTTGCCTGCTTCTTTTGGTGGTTCTGAAATTATGAATCTTTGGTTGAATAATCAAGTTAAAGGGTTATC  
AGGTAGTATTGATGTGATTGGAAGTATGACACAATTGTCTCAAGTTTGG

>M6-PGSC0003DMG400020594M6LRR-RLK\_744

AGGGTTATCAGGTAGTATTGATGTGATTGGAAGTATGACACAATTGTCTCAAGTTTGGTTACATGCTAAT  
TCTTTTACTGGTAGTATTCTGATTTGTCAAATGTGAGAATATATTTGA

>M6-PGSC0003DMG400020594M6LRR-RLK\_806

ATGCTAATCTTTTACTGGTAGTATTCTGATTTGTCAAATGTGAGAATATATTTGATTTGCAGTTGAGG  
GACAATCAGTTTACTGGTATTGTTCTGAGTCTGTGATGTCTCTTCCCA

>M6-PGSC0003DMG400020594M6LRR-RLK\_868

CAGTTGAGGGACAATCAGTTTACTGGTATTGTTCTGAGTCTGTGATGTCTCTTCCCAAATTGTTGAATAT  
TACTTTACAGAACAATAGGTTGCAGGGTCCAATACCTCAGTTTAAAGAT

>M6-PGSC0003DMG400020594M6LRR-RLK\_930

GTTGAATATTACTTTACAGAACAATAGGTTGCAGGGTCCAATACCTCAGTTTAAAGATGGGGTTGAGTTT  
AAACTTGGAACCTACTAATAGTTTCTGTAAGGACACTCCGGGACCGTGTGA

>M6-PGSC0003DMG400020594M6LRR-RLK\_992

TTGAGTTTAAACTTGGA ACTACTAATAGTTTCTGTAAGGACTCCGGGACCGTGTGATCAACAGGTCAC  
TGCACTTCTTGATGTGGCTGGTGGTTTTGGATATCCATTGTCTTTGGCTG

>M6-PGSC0003DMG400020641M6LRR-RLP\_1054

AGCTATCTGTAGTTTACAAAATATTTCAAGTTAGAATGGGAATAAAGGAACTCTTTTGGGTTTGTATTTG  
CTGCTCCTTATGTATTGAGCTTACTTCAAAGTTGATTTCTTTTTCGACC

>M6-PGSC0003DMG400020641M6LRR-RLP\_1116

TGTATTTGCTGCTCCTTATGTATTGAGCTTACTTCAAAGTTGATTTCTTTTTCGACCCCTAATCCAACCTC  
TTAGTGCCATTTGGTTCAACGAATTAGGTGGGCTATCCGAGAACAAT

>M6-PGSC0003DMG400020641M6LRR-RLP\_1178

ATCCAACCTCTTAGTGCCATTTGGTTCAACGAATTAGGTGGGCTATCCGAGAACAATTTTGTGATTA  
TTTATCCCGTGTGGTTGGAGGTATTAGCTAAAATTAGTATTATTTTTT

>M6-PGSC0003DMG400020641M6LRR-RLP\_124

TATAAATCCGATGCTGATGTGAGTGATTAACAATAGTTTCAATTTCTTATCTTCGCCTCTCTCAGGTACG  
GCCTTCGGATTTTGAATTTTTTTTTTAAGTCTGGAAACACCTTTATCTT

>M6-PGSC0003DMG400020641M6LRR-RLP\_1240

TGATTAATTTATCCCGTGTGGTTGGAGGTATTAGCTAAAATTAGTATTATTTTTTACCAAAATCTTAG  
TATGACTTATCCCATATAGAAGGTGGATTAATTATAATCTTGAGATATT

>M6-PGSC0003DMG400020641M6LRR-RLP\_1302

AAATCTTAGTATGACTTATCCCATATAGAAGGTGGATTAATTATAATCTTGAGATATTATGGTTTGAACCA  
ATGACACACCCCTTAGGAGAGGTTTTTGTACAAGCTATTATCAAGCGTG

>M6-PGSC0003DMG400020641M6LRR-RLP\_1364

TTTGAACCAATGACACACCCCTTAGGAGAGGTTTTTGTACAAGCTATTATCAAGCGTGTTTGCAGAATAA  
CTAGTGCTTTTGAACCTCATCTTCCAAGATGAATTGTACATCTATTCCTT

>M6-PGSC0003DMG400020641M6LRR-RLP\_1426

CAGAATAACTAGTGCTTTTGAACCTCATCTTCCAAGATGAATTGTACATCTATTCCTTATGATACCATATA  
CATATGTTTATGCCTGTGGATTATAATGTGGATCATTGGAAGACAGA

>M6-PGSC0003DMG400020641M6LRR-RLP\_1488

TACCATATACATATGTTTATGCCTGTGGATTATAATGTGGATCATTGGAAGACAGAAATAGGAGGCTT

TTGAAGGGGTGGAGATGAACTTCGCTCGATTGAGTAGTAGTCTTCAATCC

>M6-PGSC0003DMG400020641M6LRR-RLP\_1674

GAACCATATATTGTAGGTTTCTCCTTTTAGGTATATTTCTGTATATTGCCAAGTTGGCCTTGATATTACA  
ATGAAATACTTTAACTGAGAAAAAATATTCCAAGTAACACTACTATCAC

>M6-PGSC0003DMG400020641M6LRR-RLP\_1736

GATATTACAATGAAATACTTTAACTGAGAAAAAATATTCCAAGTAACACTACTATCACAGTTGGGGATAT  
TTTCAAGACTTCACCAAATGTAGGATACTTTTCTATATCCAGATAGTCCG

>M6-PGSC0003DMG400020641M6LRR-RLP\_1798

GGGGATATTTTCAAGACTTCACCAAATGTAGGATACTTTTCTATATCCAGATAGTCCGGGCTCGAGATGA  
AGCTAAGCATAACACATCAGTCTTGAAATATTTTGTATCCTCGCTAAGAT

>M6-PGSC0003DMG400020641M6LRR-RLP\_186

TCAGGTACGGCCTTCGGATTTTGATTTTTTTTTTAAAGTCTGGAAACACCTTTATCTTCCCGAATTTGATAA  
ATTTTGTGGATTTTTTGGTGAGATTTTGATGAAATTGTAGTTTTATA

>M6-PGSC0003DMG400020641M6LRR-RLP\_1860

CGAGATGAAGCTAAGCATAACACATCAGTCTTGAAATATTTTGTATCCTCGCTAAGATGTGCATGGCATA  
ATTCTGAGAAAATAGCTCCCGATGGTTTTATTGTCTAGCTACACCTTGGC

>M6-PGSC0003DMG400020641M6LRR-RLP\_1922

ATGGCATAATTCTGAGAAAATAGCTCCCGATGGTTTTATTGTCTAGCTACACCTTGGCATGCATAAAGTA  
CAATTAAGTAGCTTTCATTAAGTTTTTTTTTTATTTCTTCTGTTTTTT

>M6-PGSC0003DMG400020641M6LRR-RLP\_1984

ATAAAGTACAATTAAGTAGCTTTCATTAAGTTTTTTTTTTATTTCTTCTGTTTTTTCTTGCATCCTTTGAC  
TTAGGTCGCTATAAATCTATCTATCTTATGAGTCTACCTAGTATGCA

>M6-PGSC0003DMG400020641M6LRR-RLP\_2046

CATCCTTTGACTTAGGTCGCTATAAATCTATCTATCTTATGAGTCTACCTAGTATGCATTAGTAGTACTGC  
AGAAATTTGAGGTTATGTATTCATATTGAAGTGGACATATGCATGCACA

>M6-PGSC0003DMG400020641M6LRR-RLP\_2108

TAGTACTGCAGAAATTTGAGGTTATGTATTCATATTGAAGTGGACATATGCATGCACAAAGCATCTTATA  
ATATATTGATGAGGTTACAATTTACCTTTATTAATTTTGTAAATGCTTGAA

>M6-PGSC0003DMG400020641M6LRR-RLP\_2356

CAAGATATTCATGTATGGTATGCTCAATGCTGTATAATGTCAACTAATATGTGGTTTTTCTTATTCTTTGC  
AGTGTGGTTTTGTGTGGCTAACCTCTCAAGTTAACATCCTCCAATCATT

>M6-PGSC0003DMG400020641M6LRR-RLP\_2418

ATTCTTTGCAGTGTTGGTTTGTGTGGCTAACCTCTCAAGTTAACATCCTCCAATCATTCTCTTTTGGTATT  
GGTACCAAAGACGGTAAGTATAGTTAAACTGACCATTGGGAACATTG

>M6-PGSC0003DMG400020641M6LRR-RLP\_248

AATTTGATAAATTTTGTGGATTTTTTGGTGAGATTTTATGAAATTGTAGTTTTATAGAACCCAGATTTG  
TTAGATGTAGCATGTCTACAATGAGTTCAATTGAATCCTGTGTTTTTCG

>M6-PGSC0003DMG400020641M6LRR-RLP\_2480

TTTTGGTATTGGTACCAAAGACGGTAAGTATAGTTAAACTGACCATTGGGAACATTGACATTTTACTCT  
GGTTGATAAGTAACTATCTTCCTAGTTCCTACTTCTTAGGGGACTTCAT

>M6-PGSC0003DMG400020641M6LRR-RLP\_2542

TTTACTCTGGTTGATAAGTAACTATCTTCCTAGTTCCTACTTCTTAGGGGACTTCATAGTTCAAAAACCA  
GATTTCTTTGCCATAAGTCAGTGATCTCATAGGTCATGCGTTTGGAGAC

>M6-PGSC0003DMG400020641M6LRR-RLP\_2604

CAAAAACCCAGATTTCTTTGCCATAAGTCAGTGATCTCATAGGTCATGCGTTTGGAGACTTGCTCTTTCTTT  
TTTCGAGTCGTCTACCTCTTCTAAGACTCTAGCATGTCTTTTAATAAAA

>M6-PGSC0003DMG400020641M6LRR-RLP\_2666

TCTTTCTTTTTTCGAGTCGTCTACCTCTTCTAAGACTCTAGCATGTCTTTTAATAAAAATTATTGGGAAGTCC  
TAATAAAAAAAAAAAGTTTATTGTGAACTATAGAGCTTCACACCCTTGC

>M6-PGSC0003DMG400020641M6LRR-RLP\_2728

TGGGAAGTCCTAATAAAAAAAAAAAGTTTATTGTGAACTATAGAGCTTCACACCCTTGCTGGAGTGTTAAC  
TTGGTAGAAATGGATAATCCATCAGATGACTTCTCTGGATATATCATGCA

>M6-PGSC0003DMG400020641M6LRR-RLP\_2790

GTGTTAACTTGGTAGAAATGGATAATCCATCAGATGACTTCTCTGGATATATCATGCAGCTTCCTGACGA  
TTGTTTACTCTTTATTTTCCAACACCTTGACTGTGGATCTGACCGTGAAT

>M6-PGSC0003DMG400020641M6LRR-RLP\_2852

CCTGACGATTGTTTACTCTTTATTTTCCAACACCTTGACTGTGGATCTGACCGTGAATCATTGGTTTAAACC  
TGTCGTCGCTGGCTTCAAATTCAAATCTAAATAGAAGATCTTTACAG

>M6-PGSC0003DMG400020641M6LRR-RLP\_2914

TGGTTAACCTGTCGTCGCTGGCTTCAAATTCAAAATCTAAATAGAAGATCTTTACAGTTTCAATGCTCTT  
TCTCTATGCTTAATTTTTTCATCGTTATCTCAAACCTAACACCCGAATCAG

>M6-PGSC0003DMG400020641M6LRR-RLP\_2976

AATGCTCTTTCTCTATGCTTAATTTTTTCATCGTTATCTCAAACCTAACACCCGAATCAGTACATTACACTTAT  
ATAGGCTTCTGAACCGTTTCCAGAACCTAGAATCATTGTCCTTGTCTG

>M6-PGSC0003DMG400020641M6LRR-RLP\_3038

TTACACTTATATAGGCTTCTGAACCGTTTCCAGAACCTAGAATCATTGTCCTTGTCTGGATGCACCGAGCT  
TCCAGATTTGGGGTTGTCTTTGTTACCACGTCATGGATCGAAACTGCAA

>M6-PGSC0003DMG400020641M6LRR-RLP\_310

CCAGATTTGTTAGATGTAGCATGTCTACAATGAGTTCAATTGAATCCTGTGTTTTTCGGCAGATAAATAG  
GTAAAAAATCACTAGAAGCTCAAAAAATATTGTTTTAGAATCTATTATT

>M6-PGSC0003DMG400020641M6LRR-RLP\_3100

CACCGAGCTTCCAGATTTGGGGTTGTCTTTGTTACCACGTCATGGATCGAAACTGCAAAGTCTTCATCTA  
GACTGCTGTTTTGGGATAACTGATAGTGGTCTTTCCTGCGTGGCATCTGG

>M6-PGSC0003DMG400020641M6LRR-RLP\_3162

TTCATCTAGACTGCTGTTTTGGGATAACTGATAGTGGTCTTTCCTGCGTGGCATCTGGCTGTTCTTTGTTG  
GTAATACTAAGTCTTTACCGGTGTAATGTTACAGATTATGGGTTAGAGG

>M6-PGSC0003DMG400020641M6LRR-RLP\_3224

TCTTTGTTGGTAATACTAAGTCTTTACCGGTGTAATGTTACAGATTATGGGTTAGAGGCCTTATCTAATTC  
TTGCCTAGCTTTAGAAGATCTGAATCTCTCGTATTGCTCTCGAATCTCT

>M6-PGSC0003DMG400020641M6LRR-RLP\_3286

ATCTAATTCTTGCCTAGCTTTAGAAGATCTGAATCTCTCGTATTGCTCTCGAATCTCTGATTATGGTGTAA  
GAGCTATTTCAAAAACCTGTCGTCGTCTTAGAGCAATCAGGATATCCTA

>M6-PGSC0003DMG400020641M6LRR-RLP\_3348

ATGGTGTAAGAGCTATTTCAAAAACCTGTCGTCGTCTTAGAGCAATCAGGATATCCTACTGTAGAAATCT  
AACTGGTGCTGGCTTTCAAGGATGTTCTCAAACCTCTGACTCATTTGGAAG

>M6-PGSC0003DMG400020641M6LRR-RLP\_3410

AGAAATCTAACTGGTGCTGGCTTTCAAGGATGTTCTCAAACCTCTGACTCATTTGGAAGCCGATTACTGTA

GGCTTGAAACTAATGGAATACGGAGTATCCTAAGTGGAGGTGGTATTGAA

>M6-PGSC0003DMG400020641M6LRR-RLP\_3472

TACTGTAGGCTTGAAACTAATGGAATACGGAGTATCCTAAGTGGAGGTGGTATTGAATACTTGAGTGT

GTCTAACTTGATCTGGTGCCTCGTGTGAATGGTCTGGTGGCTATTAGCGT

>M6-PGSC0003DMG400020641M6LRR-RLP\_3596

TTTGCTGCAAAGTTAAGAGTGTGAATTTTCGTTCCAGCAGAACGATTGGCGATGATTGTATCATGACAA

TAGCAAAGGGTTGTCCGACACTTCAGGAATGGAAGTTAGCAATATGTCAT

>M6-PGSC0003DMG400020641M6LRR-RLP\_3658

CATGACAATAGCAAAGGGTTGTCCGACACTTCAGGAATGGAAGTTAGCAATATGTCATGAGGTCAAGAT

AGCAGGTTGGGAATCTATCGCATCACATTGTCATAACTTGAAAACACTACA

>M6-PGSC0003DMG400020641M6LRR-RLP\_372

ATAAATAGGTAAAAAATCACTAGAAGCTCAAAAAATATTGTTTTAGAATCTATTATTTGTTTTTCTCTC

GGAGTTTTTCATGTGTAAGTTGAGGGTTGAAGAATTCAGAACAATTTTT

>M6-PGSC0003DMG400020641M6LRR-RLP\_3720

TCAAGATAGCAGGTTGGGAATCTATCGCATCACATTGTCATAACTTGAAAACACTACATGTGAATCGGTG

TAGAAATCTTTGTGACCGTGGACTGCAGGCATTGAGAACCGGATGCAAAC

>M6-PGSC0003DMG400020641M6LRR-RLP\_3844

CTCAATCTTTACATCACCAGAAGTTCTCAGATCAGTGGTGTAGCGTTGGAAATTTTTAACTTGCTAGA

GGTAATGTAGAGGTCAAAGAAGAAGAAGTAATGTGTATTTGCCCTCATGG

>M6-PGSC0003DMG400020641M6LRR-RLP\_3906

TTGCTAGAGGTAATGTAGAGGTCAAAGAAGAAGAAGTAATGTGTATTTGCCCTCATGGAGCCTTCAGGT

TTAATAGGTGGCAATAATCTTCAGTTCTTAAGCTGTCAGGTCTCAGTAGA

>M6-PGSC0003DMG400020641M6LRR-RLP\_4154

ATGAACGACAGTTGAGCCCACTGCACACTAGTATCAAGCTGCGTATAATTTCTTGAATGTTTTCTTCCCA

TAAGAAAAAAGTGATTCTAATAAATGCATGTACATAAATGAAACAGT

>M6-PGSC0003DMG400020641M6LRR-RLP\_4216

TTCTTCCATAAGAAAAAAGTGATTCTAATAAATGCATGTACATAAATGAAACAGTTGCTTGGTGCAA

ATTGCAGAACCCCACTCAGAGGTGTAGCTTTCATGTGGCATGTAGGCC

>M6-PGSC0003DMG400020641M6LRR-RLP\_4278

TGGTGCAAATTGCAGAACCCCACTCAGAGGTGTAGCTCTTCATGTGGCATGTAGGCCACAATGCAGAA  
CAATTGTTTGCATGATAAATGGAAGGATTGGTATAGAAGAATAGTAGG

>M6-PGSC0003DMG400020641M6LRR-RLP\_434

TTTTCTCTCGGAGTTTTTCATGTGTAAGTTGAGGGTTGAAGAATTCCAGAACAATTTTTGTAGAGGGAAA  
TGCTCTATATTTCACTTTGTTTCAGCTAATCATTATACTGAGTTTTATGT

>M6-PGSC0003DMG400020641M6LRR-RLP\_496

GAGGGAAATGCTCTATATTTCACTTTGTTTCAGCTAATCATTATACTGAGTTTTATGTAGTCTGTTTGAAA  
TTGTCAATGTGAAGAACAATTGCAAACCTTAGGTGTACTGTATTATCTA

>M6-PGSC0003DMG400020641M6LRR-RLP\_558

TGTTTGAAATTGTCAATGTGAAGAACAATTGCAAACCTTAGGTGTACTGTATTATCTATTTGATTCAAATT  
ATCTAAAATCTACGATGTGTATTTTTAAGTGCTCACCCACGACTCAGGC

>M6-PGSC0003DMG400020641M6LRR-RLP\_62

AAACCTCCCATCATCAAACCGCACATATCACTAAATTTGCATCACATCGAAACAAGGTGTTATAAATTC  
CGATGCTGATGTGAGTGATTAACAATAGTTTCAATTTCTTATCTTCGCC

>M6-PGSC0003DMG400020641M6LRR-RLP\_620

ATTCAAATTATCTAAAATCTACGATGTGTATTTTTAAGTGCTCACCCACGACTCAGGCCAGGGGCGGGGT  
CGTGGAGCTAGGTGGATTCAAGAGGTTTCAGTTGAATCTCATTGTCAGAT

>M6-PGSC0003DMG400020641M6LRR-RLP\_682

GGCGGGGTCGTGGAGCTAGGTGGATTCAAGAGGTTTCAGTTGAATCTCATTGTCAGATGATTATGATAG  
GTAAATAGGGGGAAACAATGTTTTGTGTATACGTCAAATGTTTATCTA

>M6-PGSC0003DMG400020641M6LRR-RLP\_868

ACTGGGTATTATGTTGTTGTTGTTTCATCATATCCATTGACATAGGTCTGCATACATTCTTGCATTTTT  
TTGAATACCTTTGTTAGAATCCCTTGCTCTGCCTCTGGTCATTCAAGC

>M6-PGSC0003DMG400020641M6LRR-RLP\_930

TGCATTTTTTTGAATACCTTTGTTAGAATCCCTTGCTCTGCCTCTGGTCATTCAAGCGTTGTTAAATACTC  
TTAGAATATCTAAACCCAAAATGCTGACTTATTGGAGCAAGGGGGACC

>M6-PGSC0003DMG400020641M6LRR-RLP\_992

TAAATACTCTTAGAATATCTAAACCCAAAATGCTGACTTATTGGAGCAAGGGGGACCTTAGAGCTATCT  
GTAGTTTACAAAATATTTCAAGTTAGAATGGGAATAAAGGAACTCTTTTG



>M6-PGSC0003DMG400020697-(rev)M6LRR-RLK\_0

ATAATGGAGAAAAGCTTCACATATTTTCACTTAATAGCACTCATGTTGCTTTACTTGTGTGTGGCTAGTTT  
AGCCATGACTCAAACGAACATTACAACCTGATCAATCCACTCTTCTTTCC

>M6-PGSC0003DMG400020697-(rev)M6LRR-RLK\_124

AATTCCAAATCATTTCGGATCCCTTTCACTTATTGGATGAAAGTTGGTCTCCAGCTATTTCTGTTTGTCATT  
GGGTTGGAGTCACTTGTGGTTCTCGTCACAAAAGAGTGACATCATTGA

>M6-PGSC0003DMG400020697-(rev)M6LRR-RLK\_186

GTTTGTCAATTGGGTTGGAGTCACTTGTGGTTCTCGTCACAAAAGAGTGACATCATTGAATATTTCCAACA  
TGAATCTTATAGGCAGAATTCCTTGTGATTTTGGGAATCTCACATTTCTT

>M6-PGSC0003DMG400020697-(rev)M6LRR-RLK\_248

TTCCAACATGAATCTTATAGGCAGAATTCCTTGTGATTTTGGGAATCTCACATTTCTTGTTTCTTTGACTT  
GAGTAGCAACAATTTCTACGGAAAATTGCCTCAAGAAATGGCACATCT

>M6-PGSC0003DMG400020697-(rev)M6LRR-RLK\_310

CTCTTGACTTGAGTAGCAACAATTTCTACGGAAAATTGCCTCAAGAAATGGCACATCTTCGTAGGTTAAG  
GTTTGTAAACTTAGTTTTAACTTTAGCGGAGAGGTTCTTCTCTGGT

>M6-PGSC0003DMG400020697-(rev)M6LRR-RLK\_3224

GAATTTCAAAGTTGCTTTCTGAAGATGAGAGTTCTTATACACTAAAACATTAGCAACGTTTGGTTATATT  
GCACCAGGTACGTGATCTCTTAATCAATTGCTTTTGATTATTTCTCTTT

>M6-PGSC0003DMG400020697-(rev)M6LRR-RLK\_372

AGGTTAAGGTTTGTTAACTTAGTTTTAACTTTAGCGGAGAGGTTCTTCTGTTTCGGGGTCTTAC  
ACCAACTTCAAGTTCTGACTCTAAGGAATAACAGTTTCAATGGTCCCATC

>M6-PGSC0003DMG400020697-(rev)M6LRR-RLK\_3844

AGAATTGATGGGCATGTATACTTCTTAGGTCTTGAATTTGTAAAGTGGTTTTGGCCTAATACCTCTACTTT  
TTCCATCTTTTAACTTTAACAATGTAAAACATAGAACTCTCAATATTG

>M6-PGSC0003DMG400020697-(rev)M6LRR-RLK\_434

GGTCTTACACCAACTTCAAGTTCTGACTCTAAGGAATAACAGTTTCAATGGTCCCATCACCTCTCTTTAT  
TTTCTAATATCTCCACACTTCAAACCTTTGGATTTGACATACAATTCCTT

>M6-PGSC0003DMG400020697-(rev)M6LRR-RLK\_496

TCTCTTTATTTTCTAATATCTCCACACTTCAAACCTTTGGATTTGACATACAATTCCTTAGAGGGCCAAATAC

CAAAAGAAATAGGAAATCTTGAAAACCTGAGGGTTTTAAGATTATCTG

>M6-PGSC0003DMG400020697-(rev)M6LRR-RLK\_558

GGCCAAATACCAAAGAAATAGGAAATCTTGAAAACCTGAGGGTTTTAAGATTATCTGGCAACAAGTTT  
ATAGGTTTTATCCCTCCGTCTCTCTCGAACGCCTCAATGTTGATGACATTA

>M6-PGSC0003DMG400020697-(rev)M6LRR-RLK\_62

GGCTAGTTTAGCCATGACTCAAACGAACATTACAACCTGATCAATCCACTCTTCTTTCTTAAAATTCCAAA  
TCATTTGGATCCCTTTCACTTATTGGATGAAAGTTGGTCTCCAGCTAT

>M6-PGSC0003DMG400020697-(rev)M6LRR-RLK\_620

CAAGTTTATAGGTTTTATCCCTCCGTCTCTCTCGAACGCCTCAATGTTGATGACATTAGAACTATCTCTCA  
ATTTCTTGGAGGAAACATTCCAGAAGAGATTGGAAAACCTCAAACCT

>M6-PGSC0003DMG400020697-(rev)M6LRR-RLK\_682

TATCTCTCAATTTCTTGGAGGAAACATTCCAGAAGAGATTGGAAAACCTCAAACCTAAAACCTTTTGTC  
AATAGAATCCAATCAACTTACAGGCTCTATACCATTCTCGATCTTCAACA

>M6-PGSC0003DMG400020697-(rev)M6LRR-RLK\_744

CTTTGTCAATAGAATCCAATCAACTTACAGGCTCTATACCATTCTCGATCTTCAACAATATTTCTGGAATT  
GAGATCATTGCATTTACAAATAATACCTTATCAGGAAATCTTCTTAT

>M6-PGSC0003DMG400020697-(rev)M6LRR-RLK\_806

TTCTGGAATTGAGATCATTGCATTTACAAATAATACCTTATCAGGAAATCTTCTTATGATATGTGTAATT  
GTCTTCCAATGCTCGAAATGCTCTATCTAAGTGACAACAAGCTATATGG

>M6-PGSC0003DMG400020697-(rev)M6LRR-RLK\_868

TGTGTAATTGTCTTCCAATGCTCGAAATGCTCTATCTAAGTGACAACAAGCTATATGGTCATATGCCTGTA  
AGCTTGCCAAATTGTTTGAACCTTCAAATATTGTCTTTATCTAATAACA

>M6-PGSC0003DMG400020697-(rev)M6LRR-RLK\_930

ATGCCTGTAAGCTTGCCAAATTGTTTGAACCTTCAAATATTGTCTTTATCTAATAACAAGTTTGACGGACC  
CATACATAGTGAAATCGGGATTCTTAATAATTTGGTGATTTTAGCACTG

>M6-PGSC0003DMG400020729M6LRR-RLP\_0

CGGTCTTGAGGAGATCGCGTAAGGAACTTCAAGAGCTTAGGGTGTTCCTTCTGATCCATTTTCTCGAGG  
ACCGAATGTATCCTTGAGAGAGCAAGGCCTGTAGCTGTCTCAGTGGGCT

>M6-PGSC0003DMG400020729M6LRR-RLP\_126

AGCTTAAGTCAGTTTTATACTTCTGCTGCATAATGACAAATGACGCCTTAGTTACTATTGGAAGGAACCG  
TCCTAACATGATCCAATTTCAATTTGTGTATTATCAAGCCTCAAACCTCCTG

>M6-PGSC0003DMG400020729M6LRR-RLP\_189

GGAACCGTCCTAACATGATCCAATTTCAATTTGTGTATTATCAAGCCTCAAACCTCCTGATTACTTAACCCTT  
GAACCACTTGATGCTGATCTTGGGGGCCATTGTGCAACACTGCAAGGAA

>M6-PGSC0003DMG400020729M6LRR-RLP\_315

CGACTTTCTCTTTTCTGGCCTCCTTACAGATCGTGTGTTGAGTACATCGGGTTCATGCTAAGTAGTTAG  
AGATGATTTCTTAGCTTTTGTGGGGGATAGCAATCTAGAAACGAAGCC

>M6-PGSC0003DMG400020729M6LRR-RLP\_378

GTAGTTAGAGATGATTTCTTAGCTTTTGTGGGGGATAGCAATCTAGAAACGAAGCCTATCGCCACGCC  
GACCATCAAATATGCGAGTGCCTCCGTAAGTTGGAGATTGGAGACTGCCCC

>M6-PGSC0003DMG400020729M6LRR-RLP\_504

GATGAGGCTCTGTTGGCTAATGCTGCAAAGCTGGAGACAATGTGATCCCTTCAGATGTCTAATTGTTTCAG  
TAAATTTTGATACATGTAAGTTGCCAGGGCTTAATGTTGAAGTTATAGAC

>M6-PGSC0003DMG400020729M6LRR-RLP\_625

AGAGGGGTCATCTGGATACGAGACCAGAAAGTTGCCCTGTTGAGAACTTTATACATACAAGACAGTGT  
CAAGAAGGAGGTTTCGACACTCGTGGTTTTGTTGGATAATTGACGAAAATG

>M6-PGSC0003DMG400020729M6LRR-RLP\_63

CTCGAGGACCGAATGTATCCTTGAGAGAGCAAGGCCTGTAGCTGTCTCAGTGGGCTGCCATAAGCTTA  
AGTCAGTTTTATACTTCTGCTGCATAATGACAAATGACGCCTTAGTTACTA

>M6-PGSC0003DMG400020744-(rev)M6LRR-RLK\_1088

TTTCTTTGTAGCTTACAACAGATTTACGGTGAAATTCGGTCTGAAATTGGTGATCTGATATATTTGCAAG  
AGCTGGCTTTACTTGAAATCAGTTCTCTGGCAAAATCCAATCTCATT

>M6-PGSC0003DMG400020744-(rev)M6LRR-RLK\_640

ATGTTGGAACAAACCATTTAGAAGGAAAATTGCCTCCATTGCTTGGTATTACTCTTCCTAATTTAGAGTTC  
CTTAGCATTTATAGAAACAATGTAAGTGGAAATATTCCGGTAACATTGT

>M6-PGSC0003DMG400020832-(rev)M6LRR-RLK\_0

AGATACCAATGGAGCTAGGTAATCATAAGAACTTCAGGTATTGGTATTATCACAGAATGAGTTTACTG  
GCTCTATCCCTGACAGCATTTTCAACATGTCAACACTGCAGTTCCTAACAT

>M6-PGSC0003DMG400020832-(rev)M6LRR-RLK\_1054

GCATTGGAATTCTTGGATTTGTCCTATAACAATCTTAGTGGTGATATTCCAGAGTCATTAGAAGCTCTTGT  
GTATCTCAAATACATGAATTTCTCATTCAATAAACTCATTGGAGAAATT

>M6-PGSC0003DMG400020832-(rev)M6LRR-RLK\_1116

AGCTCTTGTGTATCTCAAATACATGAATTTCTCATTCAATAAACTCATTGGAGAAATCCCATTGGCGGCC  
CTTTTGCAAATGTCACTAGTCAATCTTTTTGTCCAATGATGCACTCTG

>M6-PGSC0003DMG400020832-(rev)M6LRR-RLK\_1178

TTGGCGGCCCTTTTGCAAATGTCACTAGTCAATCTTTTTGTCCAATGATGCACTCTGTGGTACTATCGG  
CTTAACGTAAAACCATGTGCAACCAAATCTACAAAGAAAAAGAAGTCAA

>M6-PGSC0003DMG400020832-(rev)M6LRR-RLK\_124

AGAAAACAAGCTTTCAGGTACTCTACCTTCAAATGTAGGTCGTAGAATGCCAACCTAGAAGTATTTATT  
TGTGAAGGAAATAATCTGAGTGGTTTTATCTCTGATTCAATCTCTAATTC

>M6-PGSC0003DMG400020832-(rev)M6LRR-RLK\_1240

GACTATCGGCTTAACGTAAAACCATGTGCAACCAAATCTACAAAGAAAAAGAAGTCAAGAAGAAAAAG  
AGCGCTGATAGGTTTATATACGCTGTTAGGGATTGTGTCACCTTGTGTTG

>M6-PGSC0003DMG400020832-(rev)M6LRR-RLK\_1302

AAAAAGAGCGCTGATAGGTTTATATACGCTGTTAGGGATTGTGTCACCTTGTGTTGGTAGTTGGATAT  
GTGGTGTTAAGATTGAGAAAGACAAAGAAGAATGCAAGTCAAGCAGATGT

>M6-PGSC0003DMG400020832-(rev)M6LRR-RLK\_1364

TTGGATATGTGGTGTTAAGATTGAGAAAGACAAAGAAGAATGCAAGTCAAGCAGATGTGTCTCTGGTA  
AAAGAACATGAAAGAATTCCTATTATGAACTTGAACATGCAACAGAAGGAT

>M6-PGSC0003DMG400020832-(rev)M6LRR-RLK\_1426

CTGGTAAAAGAACATGAAAGAATTCCTATTATGAACTTGAACATGCAACAGAAGGATTCGACGAAAGC  
AACTTGCTTGGTACAGGGAGTTTTAGCATGGTCTACAAAGGGATACTTAAG

>M6-PGSC0003DMG400020832-(rev)M6LRR-RLK\_1488

CGAAAGCAACTTGCTTGGTACAGGGAGTTTTAGCATGGTCTACAAAGGGATACTTAAGGATGGTACTCT  
TTTGCAACAAAGATATTCAATGTGCAATTGGAGGGTGCATTTAAAAGTTT

>M6-PGSC0003DMG400020832-(rev)M6LRR-RLK\_1612

ACGGAATGTGAGATACTCCGGAACCTTCGCCACAGAAATCTGACCAAAGTTATTACAAGCTGTGTCAAC

CTTGATTACAAGGCCCTGGTGTGGAATACATGCCCAATGGGACACTTGAT

>M6-PGSC0003DMG400020832-(rev)M6LRR-RLK\_1674

TGTCAACCTTGATTACAAGGCCCTGGTGTGGAATACATGCCCAATGGGACACTTGATAAATGGTTATAC

TCCCACAACCTGTTCTTGAACCTTATTACAGAGACTGGATATAATGATAGA

>M6-PGSC0003DMG400020832-(rev)M6LRR-RLK\_1736

GGTTATACTCCACAACCTGTTCTTGAACCTTATTACAGAGACTGGATATAATGATAGATGTTGCATCTGCA

ATTGACTATCTCCACAATGGCTATAACAATGTCTGTGGTTCATTGTGACT

>M6-PGSC0003DMG400020832-(rev)M6LRR-RLK\_1798

GCATCTGCAATTGACTATCTCCACAATGGCTATAACAATGTCTGTGGTTCATTGTGACTTGAAGCCAAGTA

ATGTCTTGCTAGATCAGAAAATGGTTGGTCATGTCAGTGATTTTGGCATT

>M6-PGSC0003DMG400020832-(rev)M6LRR-RLK\_186

TATTTATTTGTGAAGGAAATAATCTGAGTGGTTTTATCTCTGATTCAATCTCTAATTCTTCAAGACTAGCA

ATATTGGAACCTCATTCAACAGTTTCACAGGTCCAATTCCTAAATCAT

>M6-PGSC0003DMG400020832-(rev)M6LRR-RLK\_1860

GCCAAGTAATGTCTTGCTAGATCAGAAAATGGTTGGTCATGTCAGTGATTTTGGCATTGCGAAATTGCTA

GGTGAAGGGGAGGCTTCTGTTCAAACAAGGACTATTTCAACCATTGGATA

>M6-PGSC0003DMG400020832-(rev)M6LRR-RLK\_1922

AATTGCTAGGTGAAGGGGAGGCTTCTGTTCAAACAAGGACTATTTCAACCATTGGATATATTGCTCCAG

GTATATTAGAACCTCTTAAAGTTTTTCTGTTTCTCATTTCAGTTTTGGCA

>M6-PGSC0003DMG400020832-(rev)M6LRR-RLK\_1984

GCTCCAGGTATATTAGAACCTCTTAAAGTTTTTCTGTTTCTCATTTCAGTTTTGGCATATTCCATTTAACT

AGGAAGCTTTTATGATAAATTTTTAAAAATAATCGTAGAGTATGGAC

>M6-PGSC0003DMG400020832-(rev)M6LRR-RLK\_2046

CCATTTTAACTAGGAAGCTTTTATGATAAATTTTTAAAAATAATCGTAGAGTATGGACAAGATGGAATAG

TATCCACGAGTTGTGATGTTTATAGTTTTGGCATCCTGATGATGGAGACG

>M6-PGSC0003DMG400020832-(rev)M6LRR-RLK\_2108

TGGAATAGTATCCACGAGTTGTGATGTTTATAGTTTTGGCATCCTGATGATGGAGACGTTCAACAAGAACA

AGACCAAGTGATGAAACATTTACCGGTGAATTGAGCATAACATCGTTGGGT

>M6-PGSC0003DMG400020832-(rev)M6LRR-RLK\_2170

CAAGAACAAGACCAAGTGATGAAACATTTACCGGTGAATTGAGCATACATCGTTGGGTTAGTGATTCTT  
TTCCTGATGAAATTCATAAGGTGGTGGATTACTATTTGGTTCAGCCAGGGG

>M6-PGSC0003DMG400020832-(rev)M6LRR-RLK\_2232

GATTCCTTTCCTGATGAAATTCATAAGGTGGTGGATTACTATTTGGTTCAGCCAGGGGATGAACAAATTG  
ATGCAAAGATGCGATGTTTGTATATATCATGGAATTAGCTTTGTACTGC

>M6-PGSC0003DMG400020832-(rev)M6LRR-RLK\_2294

ACAAATTGATGCAAAGATGCGATGTTTGTATATATCATGGAATTAGCTTTGTACTGCACTTTAGTGAGA  
CCTGATGCAAGAATTAGCATGAAAGATGCTCTTCAACACTCAAAAAGAT

>M6-PGSC0003DMG400020832-(rev)M6LRR-RLK\_2325

TATATCATGGAATTAGCTTTGTACTGCACTTTAGTGAGACCTGATGCAAGAATTAGCATGAAAGATGCTC  
TTTCAACACTCAAAAAGATCAGGCTACAACCTGTCAATAATCGGCACTAG

>M6-PGSC0003DMG400020832-(rev)M6LRR-RLK\_248

AGACTAGCAATATTGGAACCTCATTCAACAGTTTCACAGGTCCAATTCCTAAATCATTGGTAACTTAGA  
ATACCTTGAGGTTCTGAACTTAGGGTTGAATAATTTTATCAGTGATTCA

>M6-PGSC0003DMG400020832-(rev)M6LRR-RLK\_310

TAACTTAGAATACCTTGAGGTTCTGAACTTAGGGTTGAATAATTTTATCAGTGATTCATCATTGAGCTCC  
TTACATCATTAAACAACTGTAGGAACTAAGATCACTCTGGTTTAATGA

>M6-PGSC0003DMG400020832-(rev)M6LRR-RLK\_372

TGAGCTTCCTTACATCATTAAACAACTGTAGGAACTAAGATCACTCTGGTTTAATGAGAATGCATTGGA  
TGGGGCTTTATCAGCGTCTGTTGGTAATTTCTCAAAGTCGATGCAAAT

>M6-PGSC0003DMG400020832-(rev)M6LRR-RLK\_496

AGGAAATGGCTGTAAGCTAAAGGGTGTCAATTCCTCGAGAAATTGGTAATCTTACTGGAGTGATACATAT  
GAGTTTGTATAGCAATAAGTTGACTGGACATATTCCAATACTGTCCAAGA

>M6-PGSC0003DMG400020832-(rev)M6LRR-RLK\_558

TACATATGAGTTTGTATAGCAATAAGTTGACTGGACATATTCCAATACTGTCCAAGACATGTTGAACCT  
CCAAGAATTTTATCTACATAGTAACGAGATTAAGGTACCATACCAAATG

>M6-PGSC0003DMG400020832-(rev)M6LRR-RLK\_62

TTTACTGGCTCTATCCCTGACAGCATTTTCAACATGTCAACACTGCAGTTCCTAACATTGTCAGAAAACAA  
GCTTTCAGGTA CTACCTCAAATGTAGGTCGTAGAATGCCCAACCTA

>M6-PGSC0003DMG400020832-(rev)M6LRR-RLK\_620

TTGAACCTCCAAGAATTTTATCTACATAGTAACGAGATTAAGGTACCATACCAAATGTTATATGCAGTTT  
AAAGAATCTTGGTGCATTAGACTTGTGAGGAAATCATTTTTCTGGTTTG

>M6-PGSC0003DMG400020832-(rev)M6LRR-RLK\_682

ATGCAGTTTAAAGAATCTTGGTGCATTAGACTTGTGAGGAAATCATTTTTCTGGTTTGGTACCCTCATGCT  
TAGGGAATGTTACAAGTTTGAGGTATCTTAATCTAGTTTACAACAGGCT

>M6-PGSC0003DMG400020832-(rev)M6LRR-RLK\_744

CCTCATGCTTAGGGAATGTTACAAGTTTGAGGTATCTTAATCTAGTTTACAACAGGCTGAATTCAAGATT  
ACCTGCAAACCTGGGAGCCTTCAAGATCTCATTGAATTTAATGTTTCATC

>M6-PGSC0003DMG400020832-(rev)M6LRR-RLK\_806

TCAAGATTACCTGCAAACCTGGGAGCCTTCAAGATCTCATTGAATTTAATGTTTCATCCAATTCATTAAGT  
GGTCATATTCTCCGGAGTTGGGAAATTTAAAGGCAGTGGCACTAATTG

>M6-PGSC0003DMG400020832-(rev)M6LRR-RLK\_868

TCATTAAGTGGTCATATTCTCCGGAGTTGGGAAATTTAAAGGCAGTGGCACTAATTGATTTGTCAAAAA  
ATGATTTTTCTGGTAAAATTCCTAGCACTTTAGGAGGTCTAGCTGAATTG

>M6-PGSC0003DMG400020832-(rev)M6LRR-RLK\_930

GTCAAAAAATGATTTTTCTGGTAAAATTCCTAGCACTTTAGGAGGTCTAGCTGAATTGATTAATCTTTTTCT  
TAGCACATAATAGATTAGAGGGGCCTATTCCAGATTCATTTGGCAAATT

>M6-PGSC0003DMG400020832-(rev)M6LRR-RLK\_992

ATCTTTTTCTAGCACATAATAGATTAGAGGGGCCTATTCCAGATTCATTTGGCAAATTGTTGGCATTGGA  
ATTCTTGGATTTGTCCTATAACAATCTTAGTGGTGATATTCCAGAGTCAT

>M6-PGSC0003DMG400020848M6LRR-RLK\_0

ATGGGAAGAAGTTGCAATCTTCTTTGCTCTTGCAAGTTTTATTCTACTCCATCACCATGCTTTACTTTCT  
ACTGTTCTAATAAGCACCGATGAAGCTGCTCTTCTTGCACTGAAA

>M6-PGSC0003DMG400020848M6LRR-RLK\_1037

AACTACAGCTGCTGATGTTAGACCAGAATGAGTTTACAGGTTCTATCCCTGAAAGCATTTTCAATATATC  
AGCAATGCAGAGCCTAGATTTTTCAATAAACAAGCTTTCAGGTCCTCTAC

>M6-PGSC0003DMG400020848M6LRR-RLK\_1098

CAATATATCAGCAATGCAGAGCCTAGATTTTTCAATAAACAAGCTTTCAGGTCCTCTACCTTCGGATTAG

GTCGTGGAATGCCCAATCTAGAAGAACTTTATTGTGGAGGAAATAGTCT

>M6-PGSC0003DMG400020848M6LRR-RLK\_1159

TCGGATTTAGGTCGTGGAATGCCCAATCTAGAAGAACTTTATTGTGGAGGAAATAGTCTGAGTGGTTTT

ATATCTGATTCAATCTCAAATTCTTCAAGACTCAGAATGGTTGAACTCTCA

>M6-PGSC0003DMG400020848M6LRR-RLK\_1220

GTGGTTTTATATCTGATTCAATCTCAAATTCTTCAAGACTCAGAATGGTTGAACTCTCAGACAACAGTTTC

ACCGGTGTAATTCCTGAATCACTAGGTAACCTTAGAGTACCTTGAGGTTC

>M6-PGSC0003DMG400020848M6LRR-RLK\_1281

CAACAGTTTCACCGGTGTAATTCCTGAATCACTAGGTAACCTTAGAGTACCTTGAGGTTCTGAACTTGGAG

CTGAATAATTTTATCAGCGATTCATCATTGAGCTTCCTTACATCATTAAC

>M6-PGSC0003DMG400020848M6LRR-RLK\_1403

ACTGTAGGAACTAAGAGCACTCCGGTTTAATGAGAATGCATTGGATGGGGCCTTATCGGCGTCTGTTG

GTAATTTCTCAAACCTTGCTGCAAATTTTCAAGGAAATGGCTGTAAGCTAA

>M6-PGSC0003DMG400020848M6LRR-RLK\_1464

GTCTGTTGGTAATTTCTCAAACCTTGCTGCAAATTTTCAAGGAAATGGCTGTAAGCTAAAGGGCGTCATT

CCTCGAGAAATTGGTAATCTTACAGGAGTGATATATATGAGTTTGTATAA

>M6-PGSC0003DMG400020848M6LRR-RLK\_1525

GGCGTCATTCTCGAGAAATTGGTAATCTTACAGGAGTGATATATATGAGTTTGTATAAGAATGAGTTG

ACTGGACATATTCCAAATACTATCCAAGACATGTTTAACCTTCAAGAATTT

>M6-PGSC0003DMG400020848M6LRR-RLK\_1586

ATGAGTTGACTGGACATATTCCAAATACTATCCAAGACATGTTTAACCTTCAAGAATTTTATCTACAAAGC

AACGAGATTGAAGGAACCATAACCAATGTTTTATGCAGTTTAAAGGATC

>M6-PGSC0003DMG400020848M6LRR-RLK\_1647

TCTACAAAGCAACGAGATTGAAGGAACCATAACCAATGTTTTATGCAGTTTAAAGGATCTTGGTGCATTA

GACTTGTCAGGAAATCATATTTCTGGTTTGGTGCCCTCATGCTTAGGGAA

>M6-PGSC0003DMG400020848M6LRR-RLK\_1708

GGTGCATTAGACTTGTGAGGAAATCATATTTCTGGTTTGGTGCCCTCATGCTTAGGGAAATGTTACTAGTT

TGAGGAACTTAATCTAGCTTACAACAGGCTGAATTCTAGATTATCTGCA

>M6-PGSC0003DMG400020848M6LRR-RLK\_1769



TTACTAGTTTGAGGAACTTAATCTAGCTTACAACAGGCTGAATTCTAGATTATCTGCAAACCTTGGGGAA  
CCTTCAAGACCTCATAGAATTCAATGTTTCATCCAATTCATTAAGTGGTC

>M6-PGSC0003DMG400020848M6LRR-RLK\_1830

CTTGGGGAACCTTCAAGACCTCATAGAATTCAATGTTTCATCCAATTCATTAAGTGGTCATATTCCTCTGG  
AGTTGGGAAATTTAAAGGCAGTGACACTCATTGATTTGTCAAAAAATGA

>M6-PGSC0003DMG400020848M6LRR-RLK\_1891

ATTCCTCTGGAGTTGGGAAATTTAAAGGCAGTGACACTCATTGATTTGTCAAAAAATGATTTTACTGGTA  
AAATTCCTAGCACTTTAGGGGTCTAGCTGAATTGACTGATCTTTCTCTA

>M6-PGSC0003DMG400020848M6LRR-RLK\_1952

TTACTGGTAAAATTCCTAGCACTTTAGGGGTCTAGCTGAATTGACTGATCTTTCTCTAGCAAATAATAG  
ATTAGATGGGGCTATTCCAGATTCATTTGGCAAATGTTGTCACTGGAAT

>M6-PGSC0003DMG400020848M6LRR-RLK\_2013

AAATAATAGATTAGATGGGGCTATTCCAGATTCATTTGGCAAATGTTGTCACTGGAATACTTGGATTTA  
TCGTATAACAATCTTAGTGGTGAAATTCCAAAGTCATTAGAAGCTCTTGT

>M6-PGSC0003DMG400020848M6LRR-RLK\_2074

TTGGATTTATCGTATAACAATCTTAGTGGTGAAATTCCAAAGTCATTAGAAGCTCTTGTGTATCTCAAATA  
CATGAATTTCTCATTCAATAAACTCAGTGGAGAAATCCCACTGGTGGT

>M6-PGSC0003DMG400020848M6LRR-RLK\_2135

ATCTCAAATACATGAATTTCTCATTCAATAAACTCAGTGGAGAAATCCCACTGGTGGTCTTTTAAAAAT  
GTCACCAGTCAATCTTTCCTATCCAATGATGCACTCTGTGGTGTCTCCT

>M6-PGSC0003DMG400020848M6LRR-RLK\_2196

TTTTAAAAATGTCACCAGTCAATCTTTCCTATCCAATGATGCACTCTGTGGTGTCTCCTGGTTTAAACGTAA  
AACCATGTCAAACCAAGTCAACAGAGAAGCCAAGAGGAAAAAGAGTGCT

>M6-PGSC0003DMG400020848M6LRR-RLK\_2257

TTTAACGTAAAACCATGTCAAACCAAGTCAACAGAGAAGCCAAGAGGAAAAAGAGTGCTTATCGGTTTA  
TATACATTGTTAGGGATTGGATCACTCCTTGTGTTGGCCGTTGGATATGTG

>M6-PGSC0003DMG400020848M6LRR-RLK\_2318

TCGGTTTATATACATTGTTAGGGATTGGATCACTCCTTGTGTTGGCCGTTGGATATGTGGTGTAAAGATT  
GAGAAAGACAAAGAAGAATGAAAGTCAAGCAGATGTGTCTTTAGTAAAAG

>M6-PGSC0003DMG400020848M6LRR-RLK\_2379

GTTAAGATTGAGAAAGACAAAGAAGAATGAAAGTCAAGCAGATGTGTCTTTAGTAAAAGAGCATGAAA  
GGATTCCTATTATGAACTTGAACATGCAACAGAAGGATTCGATGAAAGCAA

>M6-PGSC0003DMG400020848M6LRR-RLK\_244

CTAGCATGCAACTTCGTGGTACCATTCCCTCCACACCTTGGAAACCTCTCATTCTCGTCTCCCTTGACATCA  
GTAACAACACTTTCCATGGAGATTTGCCAGTAGAGTTGGCTCATTGTC

>M6-PGSC0003DMG400020848M6LRR-RLK\_2440

CATGAAAGGATTCCTATTATGAACTTGAACATGCAACAGAAGGATTCGATGAAAGCAACTTGCTTGGT  
ACCGGAAGTTTTAGCATGGTCTACAAAGGGATACTTAAGGATGGTACTCTT

>M6-PGSC0003DMG400020848M6LRR-RLK\_2501

TGCTTGGTACCGGAAGTTTTAGCATGGTCTACAAAGGGATACTTAAGGATGGTACTCTTTTGGCAGTAA  
AGGTATTCAATGTGCAATTGGAGGGTGCATTCAAAAGTTTTGACACGGAGT

>M6-PGSC0003DMG400020848M6LRR-RLK\_2562

GGCAGTAAAGGTATTCAATGTGCAATTGGAGGGTGCATTCAAAAGTTTTGACACGGAGTGTGGGATACT  
CCGGAACCTTCGCCACAGAAATCTGACCAAAGTCATAACAAGCTGCTCCAA

>M6-PGSC0003DMG400020848M6LRR-RLK\_2684

TTGATTTCAAGGCCCTAGTGTTGGAATACATACCCAATGGGACACTTGATAAATGGTTATACTCTCACAA  
CTTGTTCTTGAATTTATTGCAGAGATTAGACATAATGTTAGATGTTGCAT

>M6-PGSC0003DMG400020848M6LRR-RLK\_2745

CTCTCACAACCTGTTCTTGAATTTATTGCAGAGATTAGACATAATGTTAGATGTTGCATCTGCAATGGACT  
ATCTCCACAATGGCTATTCAACGCCTGTTGTGCATTGTGACTTGAAGCC

>M6-PGSC0003DMG400020848M6LRR-RLK\_2867

GCAATGTCTTGCTAGATCAAGAAATGGTTGGTCATGTCAGTGATTTTGGCATTGCAAAATTGTTAGATGC  
AGGGGAGGCTTTCATTCAAACAAGAACAATTGCAACCATCGGATATATTG

>M6-PGSC0003DMG400020848M6LRR-RLK\_2928

GTTAGATGCAGGGGAGGCTTTCATTCAAACAAGAACAATTGCAACCATCGGATATATTGCTCCAGGTAT  
ATTAGTTAAGCATTCTTTCCCTTAGATATGGATTGATGCTTTCAGTTTTG

>M6-PGSC0003DMG400020848M6LRR-RLK\_2989

CCAGGTATATTAGTTAAGCATTCTTTCCCTTAGATATGGATTGATGCTTTCAGTTTTGGCATATTCCATTT

TAAGTAGGAGGCTTTTATGATCATTTTTTACTATGATTACAGAGTATG

>M6-PGSC0003DMG400020848M6LRR-RLK\_305

CCTTGACATCAGTAACAACACTTTCCATGGAGATTTGCCAGTAGAGTTGGCTCATTGCAGAGGTTGAAA  
TTGATTAATGTCAGAAGCAATAACTTCACCGGAACCATTCCATCATTTTT

>M6-PGSC0003DMG400020848M6LRR-RLK\_3050

ATATTCCATTTTAACTAGGAGGCTTTTATGATCATTTTTTACTATGATTACAGAGTATGGACAAGATGGAA  
TAGTATCCACAAGTTGTGATGTTTATAGTTTTGGAATTCTGATGATGGA

>M6-PGSC0003DMG400020848M6LRR-RLK\_3111

CAAGATGGAATAGTATCCACAAGTTGTGATGTTTATAGTTTTGGAATTCTGATGATGGAGACATTCACAA  
GAAGAAGACCAAGTGATGAAATATTTACCGGAGAATTGAGCATACAACGT

>M6-PGSC0003DMG400020848M6LRR-RLK\_3172

CATTCACAAGAAGAAGACCAAGTGATGAAATATTTACCGGAGAATTGAGCATACAACGTTGGATTAGTG  
ATTCTTCCCAAGTGAATTCATAAGGTGGTGGATTACTATTTGGTACAGC

>M6-PGSC0003DMG400020848M6LRR-RLK\_3233

GATTAGTGATTCTTCCCAAGTGAATTCATAAGGTGGTGGATTACTATTTGGTACAGCCAGGGGATGA  
ACAAATTGATGCAAAGATGCAATGTTTGTATCAATTATAGAATTAGCTTT

>M6-PGSC0003DMG400020848M6LRR-RLK\_3294

GGGGATGAACAAATTGATGCAAAGATGCAATGTTTGTATCAATTATAGAATTAGCTTTGAGTTGCACTT  
TAGTGACACCTAATGCAAGAAGTAGCATGAAAGATGCACTTTCAACACTC

>M6-PGSC0003DMG400020848M6LRR-RLK\_3333

TCAATTATAGAATTAGCTTTGAGTTGCACTTTAGTGACACCTAATGCAAGAAGTAGCATGAAAGATGCAC  
TTTCAACACTCCAAAAGATTAGGCTCCAGCTTGTCAGTAGTCAACACTAG

>M6-PGSC0003DMG400020848M6LRR-RLK\_366

AGGTTGAAATTGATTAATGTCAGAAGCAATAACTTCACCGGAACCATTCCATCATTTTTAAGTTTGTACC  
AAACCTACGCTTTGTGTACCTCTCGAGCAACCAATTTTCGGGGAAAATT

>M6-PGSC0003DMG400020848M6LRR-RLK\_427

GTTTGTACCAAACCTACGCTTTGTGTACCTCTCGAGCAACCAATTTTCGGGGAAAATTCCTTCTTCTATT  
CCAATCTGACAAAGCTGGAATTGTTGACAATACACACAAATTTTCTTG

>M6-PGSC0003DMG400020848M6LRR-RLK\_488

TTCTTCTATTTCCAATCTGACAAAGCTGGAATTGTTGACAATACACACAAATTTTCTTGAAGGAGAGATCC  
CTAAAGAAATCGGTGATCTTCGTTACTTGATTGTCCTAAACCTGCAAGA

>M6-PGSC0003DMG400020848M6LRR-RLK\_549

GGAGAGATCCCTAAAGAAATCGGTGATCTTCGTTACTTGATTGTCCTAAACCTGCAAGATAATCAGCTTA  
CTGGCTCTATACCACCCTCAATCTTTAACATTACTACAATGCAAGTAATT

>M6-PGSC0003DMG400020848M6LRR-RLK\_61

CTTTACTTTTCTACTGTTCCCTAATATAAGCACCGATGAAGCTGCTCTTCTTGCACTGAAATCACACATTTCTT  
CTCATCCTAACAAACATCTTATTAAGCAACTGGTCTTCTTCGACCCCGG

>M6-PGSC0003DMG400020848M6LRR-RLK\_610

ATCAGCTTACTGGCTCTATACCACCCTCAATCTTTAACATTACTACAATGCAAGTAATTGCTCTTACTGAC  
AACAACTGACCGGAAATCTTCCAAAACTTTATGTGACCGTCTTCCAA

>M6-PGSC0003DMG400020848M6LRR-RLK\_671

TCTTACTGACAACAATCTGACCGGAAATCTTCCAAAACTTTATGTGACCGTCTTCCAACTTGGAAGGG  
CTTCACCTCTCAAGCAACTCCCTAGGTGGAGTTATTCCACCAAACCTGGA

>M6-PGSC0003DMG400020848M6LRR-RLK\_732

TTGGAAGGGCTTCACCTCTCAAGCAACTCCCTAGGTGGAGTTATTCCACCAAACCTGGAGAAATGCCGA  
AAACTTCAAATATTGTCTTTGTCTTACAATGAGTTTATTGGAACCTGTACCA

>M6-PGSC0003DMG400020848M6LRR-RLK\_793

AATGCCGAAAACCTCAAATATTGTCTTTGTCTTACAATGAGTTTATTGGAACCTGTACCAAGAAAGCTAGC  
CAACTTAACAGCTCTTACAGAATTATATCTTGGATTGCAACAGTTGGAAG

>M6-PGSC0003DMG400020848M6LRR-RLK\_854

AAAGCTAGCCAACTTAACAGCTCTTACAGAATTATATCTTGGATTGCAACAGTTGGAAGGTAGTATGCTA  
TTTCCTCACAAGATATCTGAAATTTTCTTCCTTTCTCTCTTCACCAAAC

>M6-PGSC0003DMG400020848M6LRR-RLK\_915

AGTATGCTATTTCTCACAAGATATCTGAAATTTTCTTCCTTTCTCTCTTCACCAAACCTGTAATCATATAT  
TTCCTGAAATTGACAGGAGAGATACCAGCGGAGCTAGGTAATCTTAA

>M6-PGSC0003DMG400020848M6LRR-RLK\_976

GTAATCATATATTTCTGAAATTGACAGGAGAGATACCAGCGGAGCTAGGTAATCTTAACAAACTACAG  
CTGCTGATGTTAGACCAGAATGAGTTTACAGGTTCTATCCCTGAAAGCATT

>M6-PGSC0003DMG400020898M6RLKWAX-EGF\_0

AATTTTTGCACGTCTTTGTAGGTTTATTGGGTTTGATTTCCGGTGAGGACTCAAGGCTTTTATCTACATAT  
ACTTTTAATTCTCCATTGATTTCTCATTCTAAAATATTTGCACTTTAAT

>M6-PGSC0003DMG400020898M6RLKWAX-EGF\_64

TACATATACTTTTAATTCTCCATTGATTTCTCATTCTAAAATATTTGCACTTTAATCTATCCAGATATCAGTA  
ATTGGCTGCTTCTGTTTTTCATGTGTAAGCTCCTATATATCCCTTTA

>M6-PGSC0003DMG400020899M6RLKWAX-EGF\_1157

TTATAGTCGATGTAATGTTTATGTGAAATAAACATAGCCAACCCAATAATGTTTGGGACAAAGAATCGTG  
TTGTTATTGTTGTACTAGTTATATTATAGACATAATACATAAAAATGCC

>M6-PGSC0003DMG400020899M6RLKWAX-EGF\_390

CAAAGCTTGCTCTTGTATACGACTTCATGCCCAACGGATCACTTGATAAGTACATCAGCACGAGTCAAGA  
AGGAAGTCCTCCGTTAAGTTGGCAGAGGAAGTATGACATTATTCTTGGAG

>M6-PGSC0003DMG400020918-(rev)M6LRR-RLP\_0

TATAATTGGCCACGGCGATGACCAGTTCTTTCTTTACTTCTTCTACTACATATTTAAATCGTCCCCATTTT  
TCTCTCTCAAAGCTCCATTAGAATCAGCTAGCAGCGCCGCCCTAACAT

>M6-PGSC0003DMG400020918-(rev)M6LRR-RLP\_1037

CATTTAGAGAGGGTTCAAGTGAGTGACATTGGACTCAGGGCGATATCCAAGTTTTCAGACTTGGAGATT  
CTTCATTTGGTGAAAGCTCCTGAATGTACAGATGCTGGAGTTGTTGATGTG

>M6-PGSC0003DMG400020918-(rev)M6LRR-RLP\_1098

TGGAGATTCTTCATTTGGTGAAAGCTCCTGAATGTACAGATGCTGGAGTTGTTGATGTGGCTAGACATTG  
TAAGTTGTTGAGGAAGGTTACATTGATGGATGGAGGACGAATCGAATAG

>M6-PGSC0003DMG400020918-(rev)M6LRR-RLP\_1159

TAGACATTGTAAGTTGTTGAGGAAGGTTACATTGATGGATGGAGGACGAATCGAATAGGTGATGTTG  
GTTTGGGTGCCATCGGCGAATATAGTGTAACCTCAAGGAATTGGTAATTAT

>M6-PGSC0003DMG400020918-(rev)M6LRR-RLP\_122

CTATTTTTTACGGCGGCGTCTACAATTCCGGTAGACCATTACGACGACGTTTACTAGTTTCTTCATTCTA  
AATGGGCCAATCTTCTCAGCTCACGGCTTCTCCCCACCGATTCCAAG

>M6-PGSC0003DMG400020918-(rev)M6LRR-RLP\_1220

GATGTTGGTTTGGGTGCCATCGGCGAATATAGTGTAACCTCAAGGAATTGGTAATTATGGGTTTGAAT

CCTACGGTGA CTAGTTTATTAGCCATTGCTTCTAATTGTCAAAAGTTAGAA

>M6-PGSC0003DMG400020918-(rev)M6LRR-RLP\_1281

GTTTGAATCCTACGGTGA CTAGTTTATTAGCCATTGCTTCTAATTGTCAAAAGTTAGAAAGATTAGCACTT  
TGTGGTAGTGAGAGTATTGGGGATGCTGAAGTAACTTGTATTGCTACAA

>M6-PGSC0003DMG400020918-(rev)M6LRR-RLP\_1342

ATTAGCACTTTGTGGTAGTGAGAGTATTGGGGATGCTGAAGTAACTTGTATTGCTACAAAATGTATGGC  
TTTGAAGAAGCTTTGTATCAAGGGATGTGAGGTAACAGATGAAGGGATTGT

>M6-PGSC0003DMG400020918-(rev)M6LRR-RLP\_1403

TGTATGGCTTTGAAGAAGCTTTGTATCAAGGGATGTGAGGTAACAGATGAAGGGATTGTGTCTTTTCGCG  
TGGGGATGTCCTAATTTGGTGAAAATTAAGGTTAAGAAGTGCAAGAACGTA

>M6-PGSC0003DMG400020918-(rev)M6LRR-RLP\_1464

CTTTTCGCGTGGGGATGTCCTAATTTGGTGAAAATTAAGGTTAAGAAGTGCAAGAACGTAACCTGGTGAAG  
TTGCAGATTTGTTGAGATCAAGAAGGGGATCTTTGACGGTGAATCTTGATG

>M6-PGSC0003DMG400020918-(rev)M6LRR-RLP\_1525

TGGTGAAGTTGCAGATTTGTTGAGATCAAGAAGGGGATCTTTGACGGTGAATCTTGATGTTGGGGAAGT  
TGATGTGGAGGTTGTGGATGGTAGTGCTAGTGATGGTGGAGCATTAGAAGA

>M6-PGSC0003DMG400020918-(rev)M6LRR-RLP\_1586

GGGGAAGTTGATGTGGAGGTTGTGGATGGTAGTGCTAGTGATGGTGGAGCATTAGAAGAAGGCATAG  
AGTTTCCACCGATTGCAAGA ACTGTTCCCATCCTTGGTGCTGGTGGTGTCTGTT

>M6-PGSC0003DMG400020918-(rev)M6LRR-RLP\_1647

GCATAGAGTTTCCACCGATTGCAAGA ACTGTTCCCATCCTTGGTGCTGGTGGTGTCTGTTGATATTGATAC  
CCCATCGACCAGTAATTTTGGTCGATCACCAGCATCTACTTCAAGGATTG

>M6-PGSC0003DMG400020918-(rev)M6LRR-RLP\_1708

TATTGATACCCCATCGACCAGTAATTTTGGTCGATCACCAGCATCTACTTCAAGGATTGGCTTTCTTGGAG  
GAAGGGGCTTCGTTGCTTGCAC TTTTCGTAGGTGGTCAAATGGTAACGC

>M6-PGSC0003DMG400020918-(rev)M6LRR-RLP\_1769

TTTCTTGGAGGAAGGGGCTTCGTTGCTTGCAC TTTTCGTAGGTGGTCAAATGGTAACGCCAATGAGAAC  
TTATGAAAATTGTGAACACAAGTTAGAACAGAGAAAACACTCTGTTCAACT

>M6-PGSC0003DMG400020918-(rev)M6LRR-RLP\_183

CTTCATTCTAAATGGGCCAATCTTCCTCAGCTCACGGCTTCTCCCCACCGATTCCAAGTATCCCCACCAC  
CGTTGTTCCGGCACCAGCCATTCCCAATCGGAATTTTTCTACCCTACAC

>M6-PGSC0003DMG400020918-(rev)M6LRR-RLP\_1830

ATGAGAACTTATGAAAATTGTGAACACAAGTTAGAACAGAGAAAACACTCTGTTCAACTTCATTTTAAAT  
TGAATCAATAGAAAAGTGTGGATGTGCGACTTATCTCTCCTTCATTTGTG

>M6-PGSC0003DMG400020918-(rev)M6LRR-RLP\_1891

ATTTTAAATTGAATCAATAGAAAAGTGTGGATGTGCGACTTATCTCTCCTTCATTTGTGTGTTTGATATTT  
GCTTTTTGAAAATTTGATATGTAACCATAGATGCATTTAGAATCTTAGA

>M6-PGSC0003DMG400020918-(rev)M6LRR-RLP\_1952

TTTGATATTTGCTTTTTGAAAATTTGATATGTAACCATAGATGCATTTAGAATCTTAGAAGTCACTTCTTG  
GATGATGAAATCTATCCCTGCTCTATTGACAATTGCATTATAGAGTGCT

>M6-PGSC0003DMG400020918-(rev)M6LRR-RLP\_2074

CTTGAACCATGTATACTGTTGCTTCTGGTATGTGAATCAAATAGATATTGTTCCATCGACTAAATGTCATC  
AAGGACAGTGATCATTATGCATGTTCAATTGTCATTTTGCTACAAGAATG

>M6-PGSC0003DMG400020918-(rev)M6LRR-RLP\_2135

AAATGTCATCAAGGACAGTGATCATTATGCATGTTCAATTGTCATTTTGCTACAAGAATGGAGTAATACAT  
GTCAAAGCACCTTTCTATATTACCAGGAATGCACATATTACCTCGACTCC

>M6-PGSC0003DMG400020918-(rev)M6LRR-RLP\_2193

GGAGTAATACATGTCAAAGCACCTTTCTATATTACCAGGAATGCACATATTACCTCGACTCCTAGACCCTC  
CTCTTCCCTCTTTTTTATTTTTCCGAGAAAAGATCGATCTCCAAGATTC

>M6-PGSC0003DMG400020918-(rev)M6LRR-RLP\_244

TCCCCACCACCGTTGTTCCGGCACCAGCCATTCCCAATCGGAATTTTTCTACCCTACACTTTCCGAAGAAG  
ACGATTTCCCTATTTACAACCCTGTGAAAACCGAGATTACACTGATGG

>M6-PGSC0003DMG400020918-(rev)M6LRR-RLP\_305

TCCGAAGAAGACGATTTCCCTATTTACAACCCTGTGAAAACCGAGATTACACTGATGGTCTTCCTGATG  
AATGTTTAGCCCTAATTTTCCAGTCCTTAAGCTCCGGTGATCGGAAAAGA

>M6-PGSC0003DMG400020918-(rev)M6LRR-RLP\_366

TTCCTGATGAATGTTTAGCCCTAATTTTCCAGTCCTTAAGCTCCGGTGATCGGAAAAGATCTTCCCTTGTC  
TGCCGGAGATGGCTTCTGGTTGAAGGGATTAGCCGTCACCGGCTTTCTC

>M6-PGSC0003DMG400020918-(rev)M6LRR-RLP\_427

TTCCCTTGTCTGCCGGAGATGGCTTCTGGTTGAAGGGATTAGCCGTCACCGGCTTTCTCTCAACGCAAAA  
ACTGAAATCATTCCGGATATAACCCACCATCTTCTCTCGTTTCGATTCCGT

>M6-PGSC0003DMG400020918-(rev)M6LRR-RLP\_488

AACGCAAAAACCTGAAATCATTCCGGATATAACCCACCATCTTCTCTCGTTTCGATTCCGTCACCAAACCTCGC  
TCTCCGATGTGACCGAAGATCGGTGAGCATCAACGATGAAGCTTTGATC

>M6-PGSC0003DMG400020918-(rev)M6LRR-RLP\_549

CCAAACTCGCTCTCCGATGTGACCGAAGATCGGTGAGCATCAACGATGAAGCTTTGATCCTCATCTCCCA  
CCGGTGCGTTAACCTAACGGGCCTAAAGCTTCGTGGTTGCCGAGATATCA

>M6-PGSC0003DMG400020918-(rev)M6LRR-RLP\_61

GTCCCCATTTCTCTCTCAAAGCTCCATTAGAATCAGCTAGCAGCGCCGCCCTAACATCCCTATTTTTTAC  
GGCGGCGTCTACAATTCCGGTAGACCATTACGACGACGTTTACTAGTT

>M6-PGSC0003DMG400020918-(rev)M6LRR-RLP\_610

CATCTCCCACCGGTGCGTTAACCTAACGGGCCTAAAGCTTCGTGGTTGCCGAGATATCACCGATTTGGGA  
ATGGCTTGTTTGGCAAAAATTGTGAGAAATTGAAGAAATTCTCTTGTGG

>M6-PGSC0003DMG400020918-(rev)M6LRR-RLP\_671

GATTTGGGAATGGCTTGTTTGGCAAAAATTGTGAGAAATTGAAGAAATTCTCTTGTGGGTCTTGTATGT  
TTGGCGCTGAAGGTATGAATGCTTTGCTTATTAACAGCATTTCACCTCGAA

>M6-PGSC0003DMG400020918-(rev)M6LRR-RLP\_732

CTTGATGTTTGGCGCTGAAGGTATGAATGCTTTGCTTATTAACAGCATTTCACCTCGAAGAACTCTCTGTT  
AAACGTTTACGGTGTATGAATCATACTGTATCTGTTGAACCGATTAGCA

>M6-PGSC0003DMG400020918-(rev)M6LRR-RLP\_793

ACTCTCTGTAAACGTTTACGGTGTATGAATCATACTGTATCTGTTGAACCGATTAGCATTGGATCTAATG  
CTGCTTGTTGCTTAAATCTATATGTTTGAAGAGCTTTATAATGGACA

>M6-PGSC0003DMG400020918-(rev)M6LRR-RLP\_854

GGATCTAATGCTGCTTGTTGCTTAAATCTATATGTTTGAAGAGCTTTATAATGGACAATGTTTTGGACC  
TTTGATCATGGGATCGAAGAATTTGAAGACGTTGAAATTGTTGCGATGT

>M6-PGSC0003DMG400020918-(rev)M6LRR-RLP\_915

GTTTTGGACCTTTGATCATGGGATCGAAGAATTTGAAGACGTTGAAATTGTTGCGATGTTTGGGTGATT



GGGATAGAGTCTTGGAGACGATTGCAAGTAGGGAGAATCATTTAGTTGAGA

>M6-PGSC0003DMG400020918-(rev)M6LRR-RLP\_976

GGGTGATTGGGATAGAGTCTTGGAGACGATTGCAAGTAGGGAGAATCATTTAGTTGAGATTCATTTAGA

GAGGGTTCAAGTGAGTGACATTGGACTCAGGGCGATATCCAAGTTTTCAGA

>M6-PGSC0003DMG400021008-(rev)M6LRR-RLK\_0

TATTTGTAGTTGTTGTAATCAAGGTGTAAGTACTGATATTGATTTCTTGTGTAAGTGAACCCATTTTACATTG

TGGTGTTAGAATGAAGTACTCAAGTCTTGATGGTTTTTGTCTTTAT

>M6-PGSC0003DMG400021008-(rev)M6LRR-RLK\_1054

ACAACCTATTTTCCGGATTTATTCCGAATGATCTTTTGAAAGGAGATGCATTGCTTCTCACTGAGTTGGAT

TTGAGTGGAACAACCTCACTGGTAAATACATGAAACCCTTTGGTAAAT

>M6-PGSC0003DMG400021008-(rev)M6LRR-RLK\_1116

GAGTTGGATTTGAGTGGAACAACCTCACTGGTAAATACATGAAACCCTTTGGTAAATAACTCTTTTAC

TGTTTTCTCAATCTCTTCATTTTGCAAGTCCAATAAGCATGATAACATC

>M6-PGSC0003DMG400021008-(rev)M6LRR-RLK\_1178

CTTTTCACTGTTTTCTCAATCTCTTCATTTTGCAAGTCCAATAAGCATGATAACATCCACAACATTGCGAA

CTCTTAACCTATCATCCAATGCTCTTTCTGGTGAACCTCCCTTTGTGA

>M6-PGSC0003DMG400021008-(rev)M6LRR-RLK\_124

GCTCTGTCAATTGGGCAGCTTCCGTCTCCGGATATATTGGCTTTGCTCGAGTTTAAGAAAGGTGTCAATA

TGATCCAACGGGTTTCTTCTTGAATCTTGAATGAGGAGTCTATTGATT

>M6-PGSC0003DMG400021008-(rev)M6LRR-RLK\_1240

ACATTGCGAACTCTTAACCTATCATCCAATGCTCTTTCTGGTGAACCTCCCTTTGTGACTGGAACCTCTGC

GGTGCTTGATCTCTCGAAAAATCAGTTCAAAGGTAATCTAACTAGAATG

>M6-PGSC0003DMG400021008-(rev)M6LRR-RLK\_1302

AACTTCTGCGGTGCTTGATCTCTCGAAAAATCAGTTCAAAGGTAATCTAACTAGAATGCTGAAATGGGG

GAATATTGAATTTCTTGACCTTAGCCAAAACCGTTTGACTGGAAACATCCC

>M6-PGSC0003DMG400021008-(rev)M6LRR-RLK\_1364

AATGGGGGAATATTGAATTTCTTGACCTTAGCCAAAACCGTTTGACTGGAAACATCCCTGAGGTTACGTC

TCAGTTTCTGCGTTTATATCACCTCAACCTTTGAGCAATACCTTGACAG

>M6-PGSC0003DMG400021008-(rev)M6LRR-RLK\_1426

GTTACGTCTCAGTTTCTGCGTTTATATCACCTCAACCTTTCGAGCAATACCTTGACAGGATCTATCCCGAA  
AGTTATTTACAGTTTCCTAAGATCACTGTCCTTGATCTCAGTTTCAAC

>M6-PGSC0003DMG400021008-(rev)M6LRR-RLK\_1488

TATCCCGAAAGTTATTTACAGTTTCCTAAGATCACTGTCCTTGATCTCAGTTTCAACCAGCTGGATGGGC  
CTCTTCTTACTTCTCTACTAACTATGCCCACTATTGAAGAACTTCACCT

>M6-PGSC0003DMG400021008-(rev)M6LRR-RLK\_1550

TGGATGGGCCTTCTTACTTCTCTACTAACTATGCCCACTATTGAAGAACTTCACCTACAAAACAATGCA  
TTTGTTGGAAGCATTGATTTCTCTCCTCCGGCTAGTACTCCTAAGCTTC

>M6-PGSC0003DMG400021008-(rev)M6LRR-RLK\_1612

AACAATGCATTTGTTGGAAGCATTGATTTCTCTCCTCCGGCTAGTACTCCTAAGCTTCGTGTTCTAGATCT  
TTCTCATAATCAGCTTGCTGGTACTTTCTGATGGATTTGGGTCACTG

>M6-PGSC0003DMG400021008-(rev)M6LRR-RLK\_1674

TCTAGATCTTCTCATAATCAGCTTGCTGGTACTTTCTGATGGATTTGGGTCACTGATTGCACTTCAAG  
TACTCGATATATCAGGAAATAATTTCTCTGGATCTTTGCCAACTTCCAT

>M6-PGSC0003DMG400021008-(rev)M6LRR-RLK\_1736

CACTTCAAGTACTCGATATATCAGGAAATAATTTCTCTGGATCTTTGCCAACTTCCATGGGTAATGTTAGC  
TCTCTTACTTCTTTAGATGTTTCAGAGAATCATTCTCAGGTGAACTGC

>M6-PGSC0003DMG400021008-(rev)M6LRR-RLK\_1798

AATGTTAGCTCTTACTTCTTTAGATGTTTCAGAGAATCATTCTCAGGTGAACTGCCAAAAACCTGCC  
TAACAGCCTCAAAGCTTTAATGCATCACTCAATGACTTCTCTGGTGTC

>M6-PGSC0003DMG400021008-(rev)M6LRR-RLK\_186

GTCGAATATGATCCAACGGGGTTTCTTCTGAATCTTGAATGAGGAGTCTATTGATTTCAATGGATGTC  
CTTCATCTTGAATGGGATAATGTGTAATGGTGGTAATGTTGCAGGAGTT

>M6-PGSC0003DMG400021008-(rev)M6LRR-RLK\_1860

AAACCTGCCTAACAGCCTCAAAGCTTTAATGCATCACTCAATGACTTCTCTGGTGTCGTGCCTGAGAATT  
TGAGAAAATTTTCTTATCATCTTTCTACCCGGGAACTCTCAACTTCA

>M6-PGSC0003DMG400021008-(rev)M6LRR-RLK\_1922

CTGAGAATTTGAGAAAATTTTCTTATCATCTTTCTACCCGGGAACTCTCAACTTCAATTTCCGAATCCTC  
CTTCAGGATCTGGTCAAGCTTCAACAGAGAAGCATAAGAGCAGGCAAC

>M6-PGSC0003DMG400021008-(rev)M6LRR-RLK\_1984

CCGAATCCTCCTTCAGGATCTGGTCAAGCTTCAACAGAGAAGCATAAGAGCAGGCAACTTAAACTATT  
ATTAAGTGGTGATCATTGTTGCTTGTGTGGTTGTTCTTGTTGTTTTAATC

>M6-PGSC0003DMG400021008-(rev)M6LRR-RLK\_2046

AACTATTATTAAGTGGTGATCATTGTTGCTTGTGTGGTTGTTCTTGTTGTTTTAATCATGCTAGCCATTTT  
TGTATTTTACTTGCGGGCATCGAAGAACTCTCAGGCACATGTTACTGA

>M6-PGSC0003DMG400021008-(rev)M6LRR-RLK\_2108

TAGCCATTTTTGTATTTTACTTGCGGGCATCGAAGAACTCTCAGGCACATGTTACTGACAAAGACATCCG  
CCATCAAACCCAATCAAATCCTTCTGGTTTTAGCAGTAGAGAAGGTGCAG

>M6-PGSC0003DMG400021008-(rev)M6LRR-RLK\_2170

GACATCCGCCATCAAACCCAATCAAATCCTTCTGGTTTTAGCAGTAGAGAAGGTGCAGTAGTTTCAGCAC  
AAGATGTTACAGCTGCTTCACGGAAAGCATCATCATCAGAAGTAATTAGT

>M6-PGSC0003DMG400021008-(rev)M6LRR-RLK\_2232

TTCAGCACAAGATGTTACAGCTGCTTCACGGAAAGCATCATCATCAGAAGTAATTAGTGCTGATGAGAA  
AACGACAGGTTTCTCCCCTTCGAAAACAAGTCATTTCACTTGGTCACCAGA

>M6-PGSC0003DMG400021008-(rev)M6LRR-RLK\_2294

ATGAGAAAACGACAGGTTTCTCCCCTTCGAAAACAAGTCATTTCACTTGGTCACCAGAGTCAGGGGAAT  
CATATACTGCAGAAAGCCTTGCCGATAATTTGGCTGGAGAGCTGTTCTTCC

>M6-PGSC0003DMG400021008-(rev)M6LRR-RLK\_2356

GGGGAATCATATACTGCAGAAAGCCTTGCCGATAATTTGGCTGGAGAGCTGTTCTTCTTGATGATACA  
ATCTCTTTTACAGCTGAGGAACTATCTAGGGCCCCAGCTGAAGTCTTAGGC

>M6-PGSC0003DMG400021008-(rev)M6LRR-RLK\_2418

TGATACAATCTCTTTTACAGCTGAGGAACTATCTAGGGCCCCAGCTGAAGTCTTAGGCAGAAGCAGCCA  
TGGGACATCTTACAGGGCAACACTAGATAACGGGTTGCTCTTGACTGTGAA

>M6-PGSC0003DMG400021008-(rev)M6LRR-RLK\_248

TGGATGTCCTTCATCTTGGAATGGGATAATGTGTAATGGTGGTAATGTTGCAGGAGTTGTTCTTGACAAC  
TTGGGTTTAATTGCTCATGTTGATTTGAGTGTATTTGCTAATCTTACAAA

>M6-PGSC0003DMG400021008-(rev)M6LRR-RLK\_2480

GCAGCCATGGGACATCTTACAGGGCAACACTAGATAACGGGTTGCTCTTGACTGTGAAATGGTTGAGAG

AAGGAGTGGCCAAACAGAGAAAGGATTTACAAAGGAGGCTAAAAAGTTTG

>M6-PGSC0003DMG400021008-(rev)M6LRR-RLK\_2542

TTGAGAGAAGGAGTGGCCAAACAGAGAAAGGATTTACAAAGGAGGCTAAAAAGTTTGCCAACATTAG  
ACATCCAAATGTGGTGGGATTAAGAGGTTACTACTGGGGTCCCACACAACAT

>M6-PGSC0003DMG400021008-(rev)M6LRR-RLK\_2604

CATTAGACATCCAAATGTGGTGGGATTAAGAGGTTACTACTGGGGTCCCACACAACATGAGAAGCTTAT  
TCTTTCAGATTACATATCTCCCGGAAGTCTATCAAGTTTTCTATATGGTAA

>M6-PGSC0003DMG400021008-(rev)M6LRR-RLK\_2666

AGCTTATTCTTTCAGATTACATATCTCCCGGAAGTCTATCAAGTTTTCTATATGGTAACTTTATCTTCTCG  
CATCAACCTTGCAGTTCGTCTTATGCATATCGTTTGCTATAACACTTT

>M6-PGSC0003DMG400021008-(rev)M6LRR-RLK\_2728

TATCTTCTCGCATCAACCTTGCAGTTCGTCTTATGCATATCGTTTGCTATAACACTTTGAACTCATAAAACA  
CTTATAATCTTTCCTTCTTTTGATATTTTTTAGTATTTTATGGCAAAC

>M6-PGSC0003DMG400021008-(rev)M6LRR-RLK\_2790

TCATAAAACACTTATAATCTTTCCTTCTTTTGATATTTTTTAGTATTTTATGGCAAACAATTTGTCAGTTTGA  
TATCTTGACTGTTCTTGTGGGGAATGAATTTTCTCAGTCTGTGATAC

>M6-PGSC0003DMG400021008-(rev)M6LRR-RLK\_2852

TGTCAGTTTGATATCTTACTGTTCTTGTGGGGAATGAATTTTCTCAGTCTGTGATACACGAATTAAGGA  
TAAGAAGCCATTTCAATTTTTAGTTAGCATAGTGAGTCCAGCTAATTCAT

>M6-PGSC0003DMG400021008-(rev)M6LRR-RLK\_2976

TCATTATACAGCTTGAATCAGTTCATTCACAATCATATATGAACTACACTCTTCTCTTCTGAATCTATT  
CTCTCAATATTTCTCCTTCTTTAGCTGTTCTTCTTGAGGGAACCTCCTG

>M6-PGSC0003DMG400021008-(rev)M6LRR-RLK\_3038

TGAATCTATTCTCTCAATATTTCTCCTTCTTTAGCTGTTCTTCTTGAGGGAACCTCCTGAAACAGTCACTTGA  
TCCTCAAATTCCTTGTGAATTCCTGCAATCAAGTAACAGTTTGTATTA

>M6-PGSC0003DMG400021008-(rev)M6LRR-RLK\_310

TTGACAACCTGGGTTTAATTGCTCATGTTGATTTGAGTGTATTTGCTAATCTTACAAAGCTTGTTAAGCTT  
TCAATGGCTAACAATTCAATTGCTGGGAAAATGCCTAATAACATAGATA

>M6-PGSC0003DMG400021008-(rev)M6LRR-RLK\_3100

AGTCACTTGATCCTCAAATTCCTTGTGAATTCTTGCAATCAAGTAACAGTTTGTATTATCATGAAATATAG  
TATCACTTTCCTGTGGAATTCTTCAACTTAACTGCTGATGTCTAGAT

>M6-PGSC0003DMG400021008-(rev)M6LRR-RLK\_3162

GAAATATAGTATCACTTTCCTGTGGAATTCTTCAACTTAACTGCTGATGTCTAGATTCTGATTTATTGTT  
GGAAAACCTTTAACTTGTCCAAGGCCCTATACACTACGTATGTCTTTG

>M6-PGSC0003DMG400021008-(rev)M6LRR-RLK\_3224

ATTTATTGTTGGAAAACCTTTAACTTGTCCAAGGCCCTATACACTACGTATGTCTTTGTTACCTGGTCCGA  
CTGGACGTGTAAGCAGGCCTTACTTGGTTAATATACCTGCACTGGCAG

>M6-PGSC0003DMG400021008-(rev)M6LRR-RLK\_3286

CTGGTCCGACTGGACGTGTAAGCAGGCCTTACTTGGTTAATATACCTGCACTGGCAGTAAGGTTTCAGC  
AATAGTTGTGGTACTTTGCTCATAAAAAGGTCACAATGAACTGCAAATTCT

>M6-PGSC0003DMG400021008-(rev)M6LRR-RLK\_3348

GTTTCAGCAATAGTTGTGGTACTTTGCTCATAAAAAGGTCACAATGAACTGCAAATTCTTCAGTGCTCAA  
TACCTTATTTTCGATTGGTGATTCTACCTGCTCAACTTCTCTACTATTTT

>M6-PGSC0003DMG400021008-(rev)M6LRR-RLK\_3410

TGCTCAAATACCTTATTTTCGATTGGTGATTCTACCTGCTCAACTTCTCTACTATTTTGTATGCTTTTGTGTA  
GTTTGTATAGTGTAAAGATTCTGTATATACATTTAACGTGCGACACC

>M6-PGSC0003DMG400021008-(rev)M6LRR-RLK\_3472

GCTTTTGTGTAGTTTGTATAGTGTAAAGATTCTGTATATACATTTAACGTGCGACACCTTTCAGATCGAC  
CTGGAAGAAAAGGTCCACCACTAACCTGGCCCCAAAGACTCAAATATC

>M6-PGSC0003DMG400021008-(rev)M6LRR-RLK\_3534

CAGATCGACCTGGAAGAAAAGGTCCACCACTAACCTGGCCCCAAAGACTCAAATATCAGTTGATATTG  
CGCGTGGCCTGAATTATCTCCATTTTGACCGCGAGGTTCTCATGGAAACC

>M6-PGSC0003DMG400021008-(rev)M6LRR-RLK\_3596

GATATTGCGGTGGCCTGAATTATCTCCATTTTGACCGCGAGGTTCTCATGGAAACCTTAAAGCAACCA  
ACATCTTGTGGATGGTCCTGATCTTAATGCACGAGTTGGTGATTACTGC

>M6-PGSC0003DMG400021008-(rev)M6LRR-RLK\_3658

AGCAACCAACATCTTGTGGATGGTCCTGATCTTAATGCACGAGTTGGTGATTACTGCCTTCACCGTCTTA  
TGACTCAAGCGGGGACAATTGAACAAATTCTTGATGCTGGAGTGTTAGG

>M6-PGSC0003DMG400021008-(rev)M6LRR-RLK\_372

GTTAAGCTTTCAATGGCTAACAATTCAATTGCTGGGAAAATGCCTAATAACATAGATAGATTTAAGAGCC  
TTCAGTATCTAGATCTCTCAAGTAATCTATTCAACTCTTCTTTACCCCA

>M6-PGSC0003DMG400021008-(rev)M6LRR-RLK\_3720

ACCGTCTTATGACTCAAGCGGGACAATTGAACAAATTCTTGATGCTGGAGTGTTAGGTTATCGTGCACC  
AGAGTTGGCTGCATCGAAGAAACCAGTGCCTTCTTCAAATCAGATGTAT

>M6-PGSC0003DMG400021008-(rev)M6LRR-RLK\_3782

CGTGCACCAGAGTTGGCTGCATCGAAGAAACCAGTGCCTTCTTCAAATCAGATGTATACGCTTTGGA  
GTCATTTTGTGGAGGTCCTAACTGGGAAATGTGCAGGTGATGTTGTTTCT

>M6-PGSC0003DMG400021008-(rev)M6LRR-RLK\_3844

TTTCGGAGTCATTTTGTGGAGGTCCTAACTGGGAAATGTGCAGGTGATGTTGTTTCTGGTGAAGATGG  
TGGTGTAGACTTGACTGATTGGGTAAGGTTGAAAGTGGCAGAAGGTGGAGG

>M6-PGSC0003DMG400021008-(rev)M6LRR-RLK\_3906

AAGATGGTGGTGTAGACTTGACTGATTGGGTAAGGTTGAAAGTGGCAGAAGGTGGAGGATTCGATTGT  
TTTGATAATGCATTGTCATCTGAGATGGGAAATCAAACAATAGAGAAGCAAA

>M6-PGSC0003DMG400021008-(rev)M6LRR-RLK\_3968

GATTGTTTTGATAATGCATTGTCATCTGAGATGGGAAATCAAACAATAGAGAAGCAAATGAAGGAGGTT  
CTTGCAATAGCTCTAAGATGCATACGTTCCGGTATCTGAGAGGCCAGGTATC

>M6-PGSC0003DMG400021008-(rev)M6LRR-RLK\_4030

GGAGGTTCTTGCAATAGCTCTAAGATGCATACGTTCCGGTATCTGAGAGGCCAGGTATCAAGACTGTATA  
TGAGGACCTTTTCATCTATTTAGTTTTCTCATTGCTTTGCTTGGGAA

>M6-PGSC0003DMG400021008-(rev)M6LRR-RLK\_4092

CTGTATATGAGGACCTTTTCATCTATTTAGTTTTCTCATTGCTTTGCTTGGGAATCAAATAGCTCATT  
GGTTCCCTTGAGTTTGTAGAATTAGCAAGTTTGTGTGAATGGTC

>M6-PGSC0003DMG400021008-(rev)M6LRR-RLK\_4154

ATAGCTCATTGGTTTCCCTTGAGTTTGTAGAATTAGCAAGTTTGTGTGAATGGTCTAGTTTTATTAAC  
CATTGTTTGTGTAAATTGGGGCATATTTATAATGTATACAACCTTTCAC

>M6-PGSC0003DMG400021008-(rev)M6LRR-RLK\_434

TAAGAGCCTTCAGTATCTAGATCTCTCAAGTAATCTATTCAACTCTTCTTTACCCCAAGAGGTTGGACAGT

TAGGGAGGTTAAAGAATCTGTCATTAGCTGGTAATAACTTCTCTGGTAT

>M6-PGSC0003DMG400021008-(rev)M6LRR-RLK\_496

TTGGACAGTTAGGGAGGTTAAAGAATCTGTCATTAGCTGGTAATAACTTCTCTGGTATGATACCGGAGA  
CAATTCAGGGCTTGTGTCTATGCAATCTTTGGACTTGAGTCACAATTCTT

>M6-PGSC0003DMG400021008-(rev)M6LRR-RLK\_558

CCGGAGACAATTCAGGGCTTGTGTCTATGCAATCTTTGGACTTGAGTCACAATTCTTTTTCTGGGGCTCT  
ATCTTCATCTCTGATGAAATTGACTGGTTTGGTATACCTGAATCTATCT

>M6-PGSC0003DMG400021008-(rev)M6LRR-RLK\_62

TTTACATTGTGGTGTTAGAATGAAGTTACTCAAGTCTTGATGGTTTTTGTCTTTATTTGGCTCTGTCAT  
TGGGCAGCTCCGTCTCCGGATATATTGGCTTTGCTCGAGTTTAAGAA

>M6-PGSC0003DMG400021008-(rev)M6LRR-RLK\_620

TGGGGCTCTATCTTCATCTCTGATGAAATTGACTGGTTTGGTATACCTGAATCTATCTGTTAATGTATTCA  
CAAAGGAAATTCCTAAAGGATTTGAGCTGATGGAAAATCTTGAAGTGCT

>M6-PGSC0003DMG400021008-(rev)M6LRR-RLK\_682

ATGTATTCACAAAGGAAATTCCTAAAGGATTTGAGCTGATGGAAAATCTTGAAGTGCTTGATTTGCACG  
GAAATATGTTTGATGGCAATTTGGATGCAGAAATGTTGCTGCTTACCACTG

>M6-PGSC0003DMG400021008-(rev)M6LRR-RLK\_744

TTGCACGGAAATATGTTTGATGGCAATTTGGATGCAGAAATGTTGCTGCTTACCACTGCAACTCATGTTG  
ACTTGAGTGAAATTTGCTAGTGAACACTGCTTCTCAGCAGCAGAAATTT

>M6-PGSC0003DMG400021008-(rev)M6LRR-RLK\_806

TCATGTTGACTTGAGTGAAATTTGCTAGTGAACACTGCTTCTCAGCAGCAGAAATTTTTGCCAGGTTTA  
TCGGAGTCGGTGAAGTATTTAAATCTTAGCCATAATCAGCTAAAGGGTTC

>M6-PGSC0003DMG400021008-(rev)M6LRR-RLK\_868

CAGGTTTATCGGAGTCGGTGAAGTATTTAAATCTTAGCCATAATCAGCTAAAGGGTTCACCTGTAAGTGG  
AAATGAAGCTCAGACTTTTGGCAACTTGAAGGTCTTGGATTTGAGCTACA

>M6-PGSC0003DMG400021008-(rev)M6LRR-RLK\_930

GTAAGTGAAATGAAGCTCAGACTTTTGGCAACTTGAAGGTCTTGGATTTGAGCTACAATCAGCTCTCA  
GGGGAATTGCCTAGTTTCAATTTGTTTATGATCTACAGGTGCTTAAACTT

>M6-PGSC0003DMG400021008-(rev)M6LRR-RLK\_992

GCTCTCAGGGGAATTGCCTAGTTTCAATTTTGTATGATCTACAGGTGCTTAACTTGCCAACAACCTTAT  
TTCCGGATTTATTCCGAATGATCTTTTGAAAGGAGATGCATTGCTTCT

>M6-PGSC0003DMG400021017-(rev)M6LRR-RLK\_0

ATGGAGAAGCACATTTTCTTATTGATTCTTCTATTTTTTATTCAATTTTCTGTATCATTGCTACCTCAAATG  
AGACAGACCAACAAGCTCTACTAGCTTTCCAAAATCTTATTACAACT

>M6-PGSC0003DMG400021017-(rev)M6LRR-RLK\_1037

GGGGCAAATTCCTCCGAATTAGGGAAGCTATCAAATTTGAGGCAATTAGGCTTTGACCATAATTTTAAT  
CTTATTGGTCAAATTCCAGAGGCTATTTTCAACATATCTTCTTTTCGAAAG

>M6-PGSC0003DMG400021017-(rev)M6LRR-RLK\_1098

AATTTTAATCTTATTGGTCAAATTCCAGAGGCTATTTTCAACATATCTTCTTTTCGAAAGGATTGATTTTCAGT  
TTCAATAACCTCTCGGGGAGAATTCCAACCACTGCAGGTCTTCATCTT

>M6-PGSC0003DMG400021017-(rev)M6LRR-RLK\_1159

TTGATTTTCAGTTTCAATAACCTCTCGGGGAGAATTCCAACCACTGCAGGTCTTCATCTTCCGAACCTTAAA  
GGACTTACCTTGGGATTCAATCAGCTCGAAGGAGAAATTCATTGTTCA

>M6-PGSC0003DMG400021017-(rev)M6LRR-RLK\_122

CAATCATTTTTTGGCCAATAATTGGACCAAAAATACTTCATTTTGCTTTTGGTTTCGGCGTCACTTGCAGTC  
CAAAAAGGCAAAGGGTTGTAGCCTTACTCTTCTAATTTGCAACTTCA

>M6-PGSC0003DMG400021017-(rev)M6LRR-RLK\_1220

GAACCTTAAAGGACTTACCTTGGGATTCAATCAGCTCGAAGGAGAAATTCATTGTTTCATAACAAATGCT  
TCCAAGCTTGAGATACTGGGGCTAAATAATAACTTTCTCACAGGAACTAT

>M6-PGSC0003DMG400021017-(rev)M6LRR-RLK\_1281

ACAAATGCTTCCAAGCTTGAGATACTGGGGCTAAATAATAACTTTCTCACAGGAACTATTCTACTAATTT  
GGGAAATCTTCATGAGCTGCGATATCTGTTCTACATGATAATCAACTT

>M6-PGSC0003DMG400021017-(rev)M6LRR-RLK\_1342

CTACTAATTTGGGAAATCTTCATGAGCTGCGATATCTGTTCTACATGATAATCAACTTACCAATGAACCA  
AGAGAGCATGAGTTGCGATTCTTCAATTCTTTGGCAGACTGTAGAATGT

>M6-PGSC0003DMG400021017-(rev)M6LRR-RLK\_1403

CAATGAACCAAGAGAGCATGAGTTGCGATTCTTCAATTCTTTGGCAGACTGTAGAATGTTGCGATATCTA  
CAAGTGGGTAACAATCCGTTGAATGGCACTCTGCCAATTCAATTGGGAA



>M6-PGSC0003DMG400021017-(rev)M6LRR-RLK\_1464

CGATATCTACAAGTGGGTAACAATCCGTTGAATGGCACTCTGCCAATTCAATTGGGAATTTTTCATCTA  
CTATCGAAAACCTTTAATATAGTAGATGCACACATCAATGGCCTCATCCCC

>M6-PGSC0003DMG400021017-(rev)M6LRR-RLK\_1586

AAGTATAGGCAACATGAGTGGTCTTACAGTCCTAAGCCTTGGAGGAAACAACCTTGATGGGAAATATTCC  
TCCTGAGATTGGTAAGCTTAAACAACCTCCAAGGTCTGTATCTACGTTACAA

>M6-PGSC0003DMG400021017-(rev)M6LRR-RLK\_1647

AATATTCCTCCTGAGATTGGTAAGCTTAAACAACCTCCAAGGTCTGTATCTACGTTACAATAAATTGCAGG  
GACATATTTCTGAGGCAGTATGCAATTTATCTAATTTGGTTGAATTATAT

>M6-PGSC0003DMG400021017-(rev)M6LRR-RLK\_1830

CTGCTTTATTTAAATTCTAATAGATTTTCATCAAAATTTCCATTGAGCCTTTGGAAAATGAGTGGTCTTCTC  
TTACTAGATGTGTCACTAAATTCTATAGAGGGAGAAGTTCCATCAGAT

>M6-PGSC0003DMG400021017-(rev)M6LRR-RLK\_1891

GTGGTCTTCTCTTACTAGATGTGTCACTAAATTCTATAGAGGGAGAAGTTCCATCAGATATTGTAAGATT  
GAAAGCCATTGTAGAACTATATCTTTACGGTAACCACTTTTCAGGCATGA

>M6-PGSC0003DMG400021017-(rev)M6LRR-RLK\_1952

TGTAAGATTGAAAGCCATTGTAGAACTATATCTTTACGGTAACCACTTTTCAGGCATGATACCGACCAGA  
TTGGGGGAACTCCAAAACCTGTTGTCTCTTGACCTATCAAACAATTCATT

>M6-PGSC0003DMG400021017-(rev)M6LRR-RLK\_2013

CCGACCAGATTGGGGGAACTCCAAAACCTGTTGTCTCTTGACCTATCAAACAATTCATTTTTTGGACAAA  
TTCCATTATCCATTGTCAACTTGATAAGCTTGGAATTCTTGGATTGTCT

>M6-PGSC0003DMG400021017-(rev)M6LRR-RLK\_2074

TTGGACAAATTCCATTATCCATTGTCAACTTGATAAGCTTGGAATTCTTGGATTGTCTTCAAATGCATTG  
TCAGGTACTATTCTAAGTCATTGGAAAACTCTTACCTTGAAAGCA

>M6-PGSC0003DMG400021017-(rev)M6LRR-RLK\_2135

AAATGCATTGTCAGGTACTATTCTAAGTCATTGGAAAACTCTTACCTTGAAAGCATTAAATGTTTCAT  
TTAATGATTTAGAAGGTGTAATACCGAGTGGTGGTGTGTTTGCAAATTC

>M6-PGSC0003DMG400021017-(rev)M6LRR-RLK\_2257

CTCTGCAATCATTCTTGGTAACAAAGGTCTTTGCGGAATGCACATATTTGGGATTCTGCTTGTGCTATC

AATAATCCTGGAAAACAATCAAAGCTTAAGGAGGTTGTGATAAAAATTG

>M6-PGSC0003DMG400021017-(rev)M6LRR-RLK\_2318

TTGTGCTATCAATAATCCTGGAAAACAATCAAAGCTTAAGGAGGTTGTGATAAAAATTGTTACTCCAATG  
GTTATTTTCATCTTTTATGATATTCTTGTTCAATTTGGATAATGAA

>M6-PGSC0003DMG400021017-(rev)M6LRR-RLK\_2501

AGTTTCTTATCACGAGATTCAACAAGCAACAATAATTTTGATGATGAATCAAATTTAATTGGTGAGGGA  
AGCTCTGGCTCTGTGTACAAAGGCATTTTATCTAGTGGAAGTGTAGTGGC

>M6-PGSC0003DMG400021017-(rev)M6LRR-RLK\_2623

TAAAGGTTCTGGATTTGGAAAATGAGCAAGTATGCAAGAGGTTTGATACCGAATGCAAAGTGATGAGA  
AATGTTAGACACAGAAATCTTGTTCCAGTGATCACTACGTGTTCTAGTGACT

>M6-PGSC0003DMG400021017-(rev)M6LRR-RLK\_2684

GATGAGAAATGTTAGACACAGAAATCTTGTTCCAGTGATCACTACGTGTTCTAGTGACTATATAAGAGG  
CTTTGTTATGCCAATTATGCCCAATGGAAGTCTTGAGAATTGGCTGTACAA

>M6-PGSC0003DMG400021017-(rev)M6LRR-RLK\_2745

ATAAGAGGCTTTGTTATGCCAATTATGCCCAATGGAAGTCTTGAGAATTGGCTGTACAAAGAAGATCGC  
CACTTGAACCTTCATCAAAGAATAACTGTTATGCTTGATGCAGCTATGGCA

>M6-PGSC0003DMG400021017-(rev)M6LRR-RLK\_2989

CTATAAGCAAGTCCATGGCCTATACCGAGACATTGGGTAATCTTGATACATTGCACCAGGTATAAAAA  
ATCTACCCTCTTTGATTTTCTTATCATAATTAAGCCTCTCCAAATTCTA

>M6-PGSC0003DMG400021017-(rev)M6LRR-RLK\_3050

TATAAAAAATCTACCCTCTTTGATTTTCTTATCATAATTAAGCCTCTCCAAATTCTACAAGTAAGAAAAA  
GCAAGGATTTATTTATGCAGAATTATTGTTGTATTTCAATTGAGTAAC

>M6-PGSC0003DMG400021017-(rev)M6LRR-RLK\_3111

AGTAAGAAAAAGCAAGGATTTATTTATGCAGAATTATTGTTGTATTTCAATTGAGTAACCTTTTCTTCAATC  
CTTTTCTAAGAATATGGCTCGGAGGGAATAGTGTCCGCTAGTGGTGATG

>M6-PGSC0003DMG400021017-(rev)M6LRR-RLK\_3172

TTCTTCAATCCTTTTCTAAGAATATGGCTCGGAGGGAATAGTGTCCGCTAGTGGTGATGTTTATAGTTAT  
GGCATTATGTTGATGGAGGTTTTGACCAAAAAGACGACCAACAGATGAAGA

>M6-PGSC0003DMG400021017-(rev)M6LRR-RLK\_366

GTAAAAACAATCAGCTCAACGGAAGTATACCAACAAGTCTATTTCAACACCGTAGAATTCAAGTAATTT  
CATTGGCTTTGAATGAATTCAGTGGTGAGATGTGGAGAGGGCCATGGTAT

>M6-PGSC0003DMG400021017-(rev)M6LRR-RLK\_488

ACCCCAACTCAGAGTCTTAAATCTCAGGAATAATAGCCTCACCGGTATAATCCCTCCTTCTGTTGGAAAT  
GCCACGAAGTTGCTGAACTTCAGTTTGTATGGGAATAAAGTTGGTGGCAA

>M6-PGSC0003DMG400021017-(rev)M6LRR-RLK\_549

GTTGGAAATGCCACGAAGTTGCTGAACTTCAGTTTGTATGGGAATAAAGTTGGTGGCAACATTCCAAAG  
GAAATTGGTAATCTGAGCCAGCTTGCATTTTTGTTCTTGTTCATAATCAA

>M6-PGSC0003DMG400021017-(rev)M6LRR-RLK\_61

CTACCTCAAATGAGACAGACCAACAAGCTCTACTAGCTTTCCAAAATCTTATTACAACCTCCCAATCATTTT  
TTGGCCAATAATTGGACCAAAAATACTTCATTTTGCTTTTGGTTCGGCG

>M6-PGSC0003DMG400021017-(rev)M6LRR-RLK\_610

TTCCAAAGGAAATTGGTAATCTGAGCCAGCTTGCATTTTTGTTCTTGTTCATAATCAATTAACAGGTTTC  
ATTCTGCAACATTGTTAATATTCATCACTTGTTCCTATCTCTTG

>M6-PGSC0003DMG400021017-(rev)M6LRR-RLK\_732

ACCAATAGCCTTTCCGGTCTCTTGTGATAAAGGAAATAGTGTCTCAAATCTCAAATTTTTAAGTAT  
ATATGACAACCAAATTTCTGGTTGCATTCCTACCAACATATGCCAACTC

>M6-PGSC0003DMG400021017-(rev)M6LRR-RLK\_793

TTTTAAGTATATATGACAACCAAATTTCTGGTTGCATTCCTACCAACATATGCCAACTCGCAGAGCTCAAA  
TTTTTGTCCATATCTTTCAACAACATAACCGGAGACATACCCAAAATA

>M6-PGSC0003DMG400021017-(rev)M6LRR-RLK\_854

AGAGCTCAAATTTTTGTCCATATCTTTCAACAACATAACCGGAGACATACCCAAAATATTGATTGTTTAT  
CTAAGCTCAAGGGTTCTATATTGGCGATAATCCAATAAAAGGGACTAT

>M6-PGSC0003DMG400021017-(rev)M6LRR-RLK\_915

GATTGTTTATCTAAGCTCAAGGGTTCTATATTGGCGATAATCCAATAAAAGGGACTATTCCCACTTCATT  
GGGAAATATTTCCACTCTGCAATATCTTTATTGTGGAAACAATCGCATA

>M6-PGSC0003DMG400021017-(rev)M6LRR-RLK\_976

CCACTTCATTGGGAAATATTTCCACTCTGCAATATCTTTATTGTGGAAACAATCGCATAGTGGGGCAAAT  
TCCTCCGAATTAGGGAAGCTATCAAATTTGAGGCAATTAGGCTTTGACC

>M6-PGSC0003DMG400021018-(rev)M6LRR-RLK\_1152

GCACCAGGTATACTAGTCTCTTTCTATATATTTTCACAAAAATCAGAATTTAGCCCTTCCAAAAATCATAAA  
AGCAAGTGTCTGTTAGTACATAATTATGTTATATTTAAATGAGTAATTC

>M6-PGSC0003DMG400021018-(rev)M6LRR-RLK\_832

TTACTACATGTTCTAGTGACTATATAAGAGCCTTTGTTCTGCAATTTATGCCCAATGGAAGTCTAGAAAAAT  
TGGCTGTACAAAGAAGATCACCACCTTGAACCTTCATCAAAGGGTCACTG

>M6-PGSC0003DMG400021051M6LRR-RLP\_0

AAATTATTGAATAGAGACACAAAGCAAGAATTGGAAAACCTTAATACTTTTGATATATATTTTGAGGCGCG  
AAATGGGCATTGGAAAACCTTGCATTGTTTCTGCTATACGCGTTTCTCTGT

>M6-PGSC0003DMG400021051M6LRR-RLP\_1116

GTCGCAACTGGAATCATTAGTGTTTTCAATTTCTAACTGGTCCGATTCCTTCTAATGTAAGTGGTA  
TGCAAAACCTACAACGTCTTTACTTGTTCATCAAACCTCTTGAATGGGAC

>M6-PGSC0003DMG400021051M6LRR-RLP\_1178

TAAGTGGTATGCAAAACCTACAACGTCTTTACTTGTTCATCAAACCTCTTGAATGGGACTATACCTTCCTGG  
ATATTCTCCCTCCCTTCACTTAAATGGTTAGACTTGAGTGATAACCATT

>M6-PGSC0003DMG400021051M6LRR-RLP\_124

TTATTTTCTCCTCATCTTTACCTCATTGTGCCCAATGATCAAGCCCTTGCTCTTCTCAATTCAACAACAC  
GTTTACTATAAATCTTGATGCTTCTTCTAGTGATTACGATCCTAAAA

>M6-PGSC0003DMG400021051M6LRR-RLP\_1240

CCTTCCTGGATATTCTCCCTCCCTTCACTTAAATGGTTAGACTTGAGTGATAACCATTTTCAGTGGAACAT  
TTTGGAGTTCAAGTCTAAAACATTAGATCGAGTTGTTGTAAGACAAAAT

>M6-PGSC0003DMG400021051M6LRR-RLP\_1302

TGGAAACATTTTGGAGTTCAAGTCTAAAACATTAGATCGAGTTGTTGTAAGACAAAATCACCTGCAAGG  
TCCTATTCCAAAGTCACTCCTAAACCAGCGTGATCTATATTATCTTCTCCT

>M6-PGSC0003DMG400021051M6LRR-RLP\_1364

TGCAAGGTCTATTCCAAAGTCACTCCTAAACCAGCGTGATCTATATTATCTTCTCCTTTCTCACAATAATC  
TCAGTGGACAGATTGCTTCAACCATCTGCAATCTGAAAACATTACGAA

>M6-PGSC0003DMG400021051M6LRR-RLP\_1426

CACAATAATCTCAGTGGACAGATTGCTTCAACCATCTGCAATCTGAAAACATTACGAATGCTATATTTTCG

GCAGCAATAATTTGGGGGGAACAATCCCACTATGTTTGGGTGAAATGAGT

>M6-PGSC0003DMG400021051M6LRR-RLP\_1488

ATATTTTCGGCAGCAATAATTTGGGGGGAACAATCCCACTATGTTTGGGTGAAATGAGTGAACCTTCAGTT  
TTAGATTTAAGCAACAATAGTCTTAGCGGGACAATTAATACAAGTTTTAG

>M6-PGSC0003DMG400021051M6LRR-RLP\_1550

TTTCAGTTTTAGATTTAAGCAACAATAGTCTTAGCGGGACAATTAATACAAGTTTTAGTATAGGAAACCA  
ACTTGAGGTCATTAACTTGACGGGAATAAGCTAGAGGGGAAATTCCCGC

>M6-PGSC0003DMG400021051M6LRR-RLP\_1674

TTTGATCAATTGCAAATATTTAGAAGTTCTTGATTTAGGTAACAATGAATTGAAAGACACATTTCTAAAT  
GGTTGGGAGCCCTACCTTATTTGAAGATTTTGAACCTTGAGATCAAATAA

>M6-PGSC0003DMG400021051M6LRR-RLP\_1736

TTCTAAATGGTTGGGAGCCCTACCTTATTTGAAGATTTTGAACCTTGAGATCAAATAAGTTCTATGGCCCC  
ATAAAAGATTCAAGGACTGACAACCTTGTTTGCTCAAATTATAGTCATAG

>M6-PGSC0003DMG400021051M6LRR-RLP\_1798

TATGGCCCCATAAAAGATTCAAGGACTGACAACCTTGTTTGCTCAAATTATAGTCATAGATCTCTCATCCAA  
TAGATTTAGTGGAGATTTACCGGTGAGCCTTTGAGAATCTTGAAGCCAT

>M6-PGSC0003DMG400021051M6LRR-RLP\_186

TTCAACAACACGTTTACTATAAATCTTGATGCTTCTTCTAGTGATTACGATCCTAAAACAGTTAAATGGAA  
TAGGAGCACAGATTGTTGTTTCATGGGATGGAGTCAAGTGTGACGAGACG

>M6-PGSC0003DMG400021051M6LRR-RLP\_1860

CTCATCCAATAGATTTAGTGGAGATTTACCGGTGAGCCTTTGAGAATCTTGAAGCCATGAAAATAATTGG  
TGAGAATAGTGGAAACCCGAGAGTATGTAGGTGCTATAAATTCTTATTATT

>M6-PGSC0003DMG400021051M6LRR-RLP\_1922

ATAATTGGTGAGAATAGTGGAAACCCGAGAGTATGTAGGTGCTATAAATTCTTATTATTACACAAATTCCT  
TGATAGTGACAACAAAGGGACTGGAACCTTGAACCTCCTCAAGTTTTAACT

>M6-PGSC0003DMG400021051M6LRR-RLP\_1984

AAATTCCTTGATAGTGACAACAAAGGGACTGGAACCTTGAACCTCCTCAAGTTTTAACTACAAACATAATC  
ATAAATCTCTCTAACAACAGATTTGAAGGTCATACCACAAGCATTATTGG

>M6-PGSC0003DMG400021051M6LRR-RLP\_2046

ACATAATCATAAATCTCTCTAACAACAGATTTGAAGGTCATACCACAAGCATTATTGGAGATCTCGTTGG  
GCTTCGCACGCTGAACTTATCTCATAATTGCTTGGAAGGTGATATACCAG

>M6-PGSC0003DMG400021051M6LRR-RLP\_2108

CTCGTTGGGCTTCGCACGCTGAACTTATCTCATAATTGCTTGGAAGGTGATATACCAGCATCACTGCACC  
AATTATATGTACTTGAATCATTGTATCTCTCATCAAACAAAATCAGCGGA

>M6-PGSC0003DMG400021051M6LRR-RLP\_2170

ACTGCACCAATTATATGTACTTGAATCATTGTATCTCTCATCAAACAAAATCAGCGGAGGAATTCCACAA  
CAACTTGCATTCTCACATTTCTTGCAGTCTTAAATCTCTCTCACAATCA

>M6-PGSC0003DMG400021051M6LRR-RLP\_2356

TGATGGGTTACGTGGATTGCCACTCTCAAATGATTGTGGTGGTGGTGGTGGTACCACAAGCAACAAC  
TCTATTTGGGCTAGATCAAGAAGAAGAAGAAGAAGGAGATTCAGCAATTAT

>M6-PGSC0003DMG400021051M6LRR-RLP\_2418

CAACAACCTCTATTTGGGCTAGATCAAGAAGAAGAAGAAGAAGGAGATTCAGCAATTATAAGTTGGAAG  
GCAGTTCTCATGGGTTATGGTTGTGGACTTGTATTGGACTGTCCATAATAT

>M6-PGSC0003DMG400021051M6LRR-RLP\_248

TAAATGGAATAGGAGCACAGATTGTTGTTTCATGGGATGGAGTCAAGTGTGACGAGACGACAAGACAAG  
TGATTGAGCTTGATCTCAGTAGCAGCCAACTTCGAGGCAAGTTTCATTCCAA

>M6-PGSC0003DMG400021051M6LRR-RLP\_2480

TGGAAGGCAGTTCTCATGGGTTATGGTTGTGGACTTGTATTGGACTGTCCATAATATACATAATGTTGT  
CAACTCAATATCCAGAATGGTTTTTCGAGGATGGATGTAAAATTGGAACAC

>M6-PGSC0003DMG400021051M6LRR-RLP\_2604

TTATTACAAGAATGAAAAAGCACAAGAAAAGATATTAGTTTGTACCTTCAGGTATTCAATTTGATCTTTA  
ATTATCAATGAATTTGCTCACCTCCTTCATCCTTAAAGCTCTTAACTTT

>M6-PGSC0003DMG400021051M6LRR-RLP\_310

GACAAGTGATTGAGCTTGATCTCAGTAGCAGCCAACTTCGAGGCAAGTTTCATTCCAACAGTAGCCTCTT  
TAAACTATCTAATCTCAAAAAGCTTGATTTGTCTTATAATGATTTTTCCG

>M6-PGSC0003DMG400021051M6LRR-RLP\_372

AGCCTCTTAAACTATCTAATCTCAAAAAGCTTGATTTGTCTTATAATGATTTTTCCGGATCGCTCATTCA  
CCTAAATTTGGTGAGCTTTCTAGTTTGACGCATCTTGATTTGTCGTAT

>M6-PGSC0003DMG400021051M6LRR-RLP\_434

GCTCATTTCACCTAAATTTGGTGAGCTTTCTAGTTTGACGCATCTTGATTTGTCGTATTCAAGTTTTACAG  
GCCTAATCCCAGCAGAAATCTCTCGTCTTTCTAAATTACAAGTTCTTAG

>M6-PGSC0003DMG400021051M6LRR-RLP\_496

GTTTTACAGGCCTAATCCCAGCAGAAATCTCTCGTCTTTCTAAATTACAAGTTCTTAGTATATAGAGTAGT  
CTATTAAGATTTCGAAACCCACAATTTTGAAGTCTCCTTAAGAAGTTGA

>M6-PGSC0003DMG400021051M6LRR-RLP\_558

TAGAGTAGTCTATTAAGATTTCGAAACCCACAATTTTGAAGTCTCCTTAAGAAGTTGACCCGATTAAGAG  
AGCTCCACCTTAGATCTGTGAATATCTCTCCACCATTCTTTGAATTC

>M6-PGSC0003DMG400021051M6LRR-RLP\_62

GAGGCGCGAAATGGGCATTGGAAACTTGCATTGTTTCTGCTATACGCGTTTCTCTGTCGACTTATTTTCT  
CCTCATCTTTACCTCATTTGTGCCCAATGATCAAGCCCTTGCTCTTCT

>M6-PGSC0003DMG400021051M6LRR-RLP\_620

ATTAAGAGAGCTCCACCTTAGATCTGTGAATATCTCTCCACCATTCTTTGAATTTCTCTTCTTATTTAAC  
TAATCCAGAACTTTCAAACACGCAGATATACGGGATATTGCCCGAAGG

>M6-PGSC0003DMG400021051M6LRR-RLP\_682

CTTATTTAACTAATCCAGAACTTTCAAACACGCAGATATACGGGATATTGCCCGAAGGAGTTTTCCACCTT  
TCCAAGTTGGAATCTCTTGATTTATCGGACAATCCCAGCTCACTGTTA

>M6-PGSC0003DMG400021051M6LRR-RLP\_806

TCCCACATCCAAATGGAATAGCAGTGCATCACTAACGAAGTTAAATCTCAGTAGTGTGAATGCTACTGGT  
AGGATACTGAATCATTTGGTCATCTAACTTCACTGCGTACATTGAGAATA

>M6-PGSC0003DMG400021051M6LRR-RLP\_930

CTTGTAATCTCTCAGGCTCTATTCCTAAACCTCTACGGAATCTCACTAACATAGAGGAATTGTTCTTGGGA  
GATAACCATCTTGAAGGACCAATTTCTGATTTCTTTAGATTTGGAAAGC

>M6-PGSC0003DMG400021051M6LRR-RLP\_992

TTCCTTGGAGATAACCATCTTGAAGGACCAATTTCTGATTTCTTTAGATTTGGAAAGCTCAGGTCGTTATC  
ACTTGGAAATAACAACCTTTGATGGCCAAGTTGAGTTTTATCCTTTAGC

>M6-PGSC0003DMG400021067-(rev)M6LRR-RLP\_0

GTTTGAAGCTAAAAATGGGGTATGCAGTTATTATTCTCTTAATTGTGTTTCTCTGTCATGAAGTTTCTTCA

ATATCCATATTACCTCACAAACATCAAACCATTTTGCTTCTAAAATTCA

>M6-PGSC0003DMG400021067-(rev)M6LRR-RLP\_1008

TCTTGAGTAATAATCACTTATCTGGTCCGCTTGAAGATTCAAGTCGAATCACTAATCTCGATAGATTTA  
GAGAGCAATCAGCTGCAGGGTCATCTTCCCCACTCAATCCAAAACCTTG

>M6-PGSC0003DMG400021067-(rev)M6LRR-RLP\_1071

TAGATTTAGAGAGCAATCAGCTGCAGGGTCATCTTCCCCACTCAATCCAAAACCTTGTGAACCTAACATC  
GCTTGGTCTTTCCTTCAATAATTTTAGTGGTTTTGTGGATGTCAGCCTCT

>M6-PGSC0003DMG400021067-(rev)M6LRR-RLP\_126

CCCTTACTATAGATCCGTCAGCGTTTTATCCAAAACGAGTTCATGGAACATGAGCAGAGATTGTTGCTC  
ATGGGATGGAATCATATGCGATGACATCACTGGCCATGTCATTGAACCTG

>M6-PGSC0003DMG400021067-(rev)M6LRR-RLP\_252

GCCGCAGCGGACTGGATGGCACCATTGATTCCAATAGCAGCTTATTCCAACCTCTCTCATCTCCAAAGGCT  
CGATCTTTCTATGAATTACTTCTCCAATTCTCATATCTCCCCTGAATTCA

>M6-PGSC0003DMG400021067-(rev)M6LRR-RLP\_315

AAAGGCTCGATCTTTCTATGAATTACTTCTCCAATTCTCATATCTCCCCTGAATTCAGCAAGTTTTCGAGCT  
TGACGCATCTTGATCTTTCTGACTCCTATTTCTCAGGTCAAATTCCTT

>M6-PGSC0003DMG400021067-(rev)M6LRR-RLP\_378

TTTCGAGCTTGACGCATCTTGATCTTTCTGACTCCTATTTCTCAGGTCAAATTCCTTCTGAAATCTCTCATC  
TTTCCAAGTTACAGTCTCTTCGTATCTCCACAACTTTTACTTTTTATG

>M6-PGSC0003DMG400021067-(rev)M6LRR-RLP\_441

TCTCTCATCTTTCCAAGTTACAGTCTTTCGTATCTCCACAACTTTTACTTTTTATGGTAGTAAGAAGCTAA  
GACTCACAACCCATGATTTTAAATCGCTTCTTCAGAACTTGACCCAAT

>M6-PGSC0003DMG400021067-(rev)M6LRR-RLP\_567

AGCTTGATCTTAGTCAAGTAAACATCTTCCACCATTCTCTGAATTTTTCTTCTCATTTAACAACTCTGA  
GTCTGACATATACAGGATTGTATGGGATAATACCTGAGAGTATATTTT

>M6-PGSC0003DMG400021067-(rev)M6LRR-RLP\_63

TTTCTTCAATATCCATATTACCTCACAAACATCAAACCATTTTGCTTCTAAAATTCAAGAACACCCTTACTA  
TAGATCCGTCAGCGTTTTATCCAAAACGAGTTCATGGAACATGAGCA

>M6-PGSC0003DMG400021067-(rev)M6LRR-RLP\_630



CAACTCTGAGTCTGACATATACAGGATTGTATGGGATAATACCTGAGAGTATATTTACCTGCCAACCT  
GGAAACACTTTACTTAGGGATCAATCATGAGCTCAATGGTTATTTTCCAA

>M6-PGSC0003DMG400021067-(rev)M6LRR-RLP\_693

CCAACCTGGAAACACTTTACTTAGGGATCAATCATGAGCTCAATGGTTATTTTCCAAAAACCAAATGGAA  
CAGCAGTGCATCTCTCATAACAGTTAGATCTCAGTGGCATGAACTTTCCTG

>M6-PGSC0003DMG400021067-(rev)M6LRR-RLP\_756

AATGGAACAGCAGTGCATCTCTCATAACAGTTAGATCTCAGTGGCATGAACTTTCCTGATAATTTGCCTGA  
GTCTCTTGGCTATCATCTAACTTCACTGCGTTCTTTGGACCTTGCATATT

>M6-PGSC0003DMG400021067-(rev)M6LRR-RLP\_819

TGCCTGAGTCTCTTGGCTATCATCTAACTTCACTGCGTTCTTTGGACCTTGCATATTGCAACCTTAGAGGG  
CCTATTCTGAATCTTTTTCAAATCTCACCCGCATTGAGTATTTGGACC

>M6-PGSC0003DMG400021067-(rev)M6LRR-RLP\_945

ATAACTCCCTGAATGGAACAATACCACCAGGGATGTTATCCCTTCCATCACTAAATACAATAGTCTTGAG  
TAATAATCACTTATCTGGTCCGCTTGAAGATTTCAAGTCGAATTCATAA

>M6-PGSC0003DMG400021184-(rev)M6LRR-RLK\_0

TTTTTTTTAGAGAGAGAAGATGAGTTGTAAGAGAGAGAAAATATATGTCTGCAAGAAGACAAATGTTGA  
GTGTCCTGCAATTTCTGGGAGCTGTGAGGTTTCTTTTCATTCATATACA

>M6-PGSC0003DMG400021184-(rev)M6LRR-RLK\_1037

TGCTGATGCAGATTTGAGTGTGTTTGCTAACCTCACAAATGCTTGAAACTCTCTATGGCTAACAAATCAA  
TTGCTGGACAAATGCCAAAGAAAATTGGTGATTTTAAGAGTCTTGAATA

>M6-PGSC0003DMG400021184-(rev)M6LRR-RLK\_1098

AACAATTCAATTGCTGGACAAATGCCAAAGAAAATTGGTGATTTTAAGAGTCTTGAATATCTGGATATTT  
CAAACAATCTATTCAACTCCTCTTTACCACCAGAGATTGGGAAAATAGGA

>M6-PGSC0003DMG400021184-(rev)M6LRR-RLK\_1159

TGGATATTTCAAACAATCTATTCAACTCCTCTTTACCACCAGAGATTGGGAAAATAGGAAGCTTGAAGAA  
TCTGTCACTTGCTGGTAACAATCTCTGCCCCAATCCCTGATACTATTT

>M6-PGSC0003DMG400021184-(rev)M6LRR-RLK\_122

ACAAGACTAGGGTTTTACCATTGTGGTTTGGTTTTTACCTGAGCAGATAGAAATTTTGAACCTTCATTTAT  
CAAGATTTCTAAAGGGCTAAATACTTTGCTGGCCCATTTTCATTTTCTTG

>M6-PGSC0003DMG400021184-(rev)M6LRR-RLK\_1220

CTTGAAGAATCTGTCACTTGCTGGTAACAACCTCTCTGGCCCAATCCCTGATACTATTTTCAGAGCTCATGT  
CAATTCAATCTTTGGATTTGAGTCACAATTCTCTTTCTGGGCTACTTCC

>M6-PGSC0003DMG400021184-(rev)M6LRR-RLK\_1281

GAGCTCATGTCAATTCAATCTTTGGATTTGAGTCACAATTCTCTTTCTGGGCTACTTCCTTCTTCTTTAACC  
AAGTTAAATAATTTAATATACCTCAATCTTTCTCGTAATGGATTACA

>M6-PGSC0003DMG400021184-(rev)M6LRR-RLK\_1342

CTTCTTTAACCAAGTTAAATAATTTAATATACCTCAATCTTTCTCGTAATGGATTTACAAAGAAAATCCCTA  
AAGTTTTGAGCTAATGGCTAACCTTGAAGTTCTTGACTTGCATGGAA

>M6-PGSC0003DMG400021184-(rev)M6LRR-RLK\_1403

GAAAATCCCTAAAGTTTTGAGCTAATGGCTAACCTTGAAGTTCTTGACTTGCATGGAAATATGCTTGAT  
GGTACTTTGGATCCAGAGTTCTTACTGCTTACTACTGCAACTTATGTTGA

>M6-PGSC0003DMG400021184-(rev)M6LRR-RLK\_1464

ATGCTTGATGGTACTTTGGATCCAGAGTTCTTACTGCTTACTACTGCAACTTATGTTGACCTAAGTGGAAA  
TTTACTCGCGAGTGCCGCTTCTCAACATGAGAAATTTTTACCAGGCATG

>M6-PGSC0003DMG400021184-(rev)M6LRR-RLK\_1525

TAAGTGGAAATTTACTCGCGAGTGCCGCTTCTCAACATGAGAAATTTTTACCAGGCATGTCCTCGTCAGT  
CAAGTACTTGAGTCTTAGCCATAATCAGCTTACGGGGTCACTAGTAAGTG

>M6-PGSC0003DMG400021184-(rev)M6LRR-RLK\_1586

CTCGTCAGTCAAGTACTTGAGTCTTAGCCATAATCAGCTTACGGGGTCACTAGTAAGTGGCGGTGAAGC  
TCAGGCATTTGGAACTTGAAGGTTCTGGATTTGAGCTATAATCAGTTGTC

>M6-PGSC0003DMG400021184-(rev)M6LRR-RLK\_1647

GGTGAAGCTCAGGCATTTGGAACTTGAAGGTTCTGGATTTGAGCTATAATCAGTTGTCCGGGGAATTA  
CCTGGCTTCAATTTGTTTATGATCTTCAGGTCCTGAACTCAGCAACAAC

>M6-PGSC0003DMG400021184-(rev)M6LRR-RLK\_1708

GGGAATTACCTGGCTTCAATTTGTTTATGATCTTCAGGTCCTGAACTCAGCAACAACAGATTTTCTGGT  
TTCGTTCCAAATGATCTTTTGAAGGAGATACTTTAGTTCTCGCAGAAT

>M6-PGSC0003DMG400021184-(rev)M6LRR-RLK\_1769

ATTTTCTGGTTTCGTTCCAAATGATCTTTTGAAGGAGATACTTTAGTTCTCGCAGAATTGGATTTAAGTG

GAAACAACCTCACAGGTATATTCCAAACTGCTCTCTGAAATTCATTTTG

>M6-PGSC0003DMG400021184-(rev)M6LRR-RLK\_183

CTTCATTTATCAAGATTTCTAAAGGGCTAAATACTTTGCTGGCCATTTTCATTTTCTTGACTTTAATGCAA  
ATTTTTTTTGAGGCCACCAGTTGAGTGCATTAAAGAACTTGAGGTTCC

>M6-PGSC0003DMG400021184-(rev)M6LRR-RLK\_1830

GATTTAAGTGGAAACAACCTCACAGGTATATTCCAAACTGCTCTCTGAAATTCATTTTGCAAATTAATA  
GTATTCGTTGTGTTGAACTTGAGTTACAACAAAGTAGTTAATTTCTGAT

>M6-PGSC0003DMG400021184-(rev)M6LRR-RLK\_1891

AATTAATAGTATTTTCGTTGTGTTGAACTTGAGTTACAACAAAGTAGTTAATTTCTGATCATTTTGTTAGT  
GTGCTTACTCAGTCCCTTCATTTTACAGGGTCGATAAGCATGATTACA

>M6-PGSC0003DMG400021184-(rev)M6LRR-RLK\_1952

TTTTGTTAGTGTGCTTACTCAGTCCCTTCATTTTACAGGGTCGATAAGCATGATTACATCAACAACTCTG  
CGGTTCTTAACTTATCCTCCAATGCTCTTTCTGGTGAACCTTCCACTGG

>M6-PGSC0003DMG400021184-(rev)M6LRR-RLK\_2013

AACAACCTCTGCGGTTCTTAACTTATCCTCCAATGCTCTTTCTGGTGAACCTTCCACTGGTGACAGGTAGTA  
CTGCAGTTCTTGATCTCTCAAAAACCAATTAGAGGGGAATCTAACTAG

>M6-PGSC0003DMG400021184-(rev)M6LRR-RLK\_2074

ACAGGTAGTACTGCAGTTCTTGATCTCTCAAAAACCAATTAGAGGGGAATCTAACTAGAATTCAGAAAT  
GGGGAAATGTTGAATTTCTTGACCTCAGCCAGAACCAATTGACTGGAAAC

>M6-PGSC0003DMG400021184-(rev)M6LRR-RLK\_2135

TTCAGAAATGGGGAAATGTTGAATTTCTTGACCTCAGCCAGAACCAATTGACTGGAAACATCCCTGAGG  
TTACAGCTCAGTTTCTGCGATTAATCGTCTAAACCTTTCTCACAATGCTC

>M6-PGSC0003DMG400021184-(rev)M6LRR-RLK\_2196

CCCTGAGGTTACAGCTCAGTTTCTGCGATTAATCGTCTAAACCTTTCTCACAATGCTCTTACTGGATCTC  
TCCAAAAGTTATCACACAGTTTCCCAAGATCACAGTCCTTGATCTTAG

>M6-PGSC0003DMG400021184-(rev)M6LRR-RLK\_2257

ACTGGATCTCTCCAAAAGTTATCACACAGTTTCCCAAGATCACAGTCCTTGATCTTAGTTTCAACCAGCT  
GAATGGACCTCTTCTCACTTCTCTGCTAACATTACCACTATTGAAGAA

>M6-PGSC0003DMG400021184-(rev)M6LRR-RLK\_2318

TCAACCAGCTGAATGGACCTCTTCTCACTTCTCTGCTAACATTACCCACTATTGAAGAACTTCACCTTCAA  
AACAAATGCACTTGTTGGAAATATTGATTCGCTGCCCCCTCTGCTACAC

>M6-PGSC0003DMG400021184-(rev)M6LRR-RLK\_2379

TCACCTTCAAACAATGCACTTGTTGGAAATATTGATTCGCTGCCCCCTCTGCTACACCACCCAATCTCC  
GCGTCTTGATCTTTCTCATAATCAGCTTGCTGGTCTTTTCCTGAAGG

>M6-PGSC0003DMG400021184-(rev)M6LRR-RLK\_244

CTTTAATGCAAATTTTTTTGAGGCCACCAGTTGAGTGCATTAAGAAGTGGAGTTCCAAGATAACATG  
AAGCTGTAATCATTACAAGAAGTTGAATTTCTTCAGTAAATCTTTGAAAA

>M6-PGSC0003DMG400021184-(rev)M6LRR-RLK\_2440

CCCAATCTCCGCGTTCTTGATCTTTCTCATAATCAGCTTGCTGGTCTTTTCCTGAAGGGTTTGGTTTTTG  
ACTGCGCTTCAAGTACTTGATATAGCTGGAAATAATTTCACTGGGTCT

>M6-PGSC0003DMG400021184-(rev)M6LRR-RLK\_2501

TTGGTTTTTTGACTGCGCTTCAAGTACTTGATATAGCTGGAAATAATTTCACTGGGTCTCTGCCTACATTG  
ATTGGTCAAGTTGGTTCGCTCACTTCTCTAGACATTTACAGAATCATT

>M6-PGSC0003DMG400021184-(rev)M6LRR-RLK\_2562

GCCTACATTGATTGGTCAAGTTGGTTCGCTCACTTCTCTAGACATTTACAGAATCATTTTACTGGTCCTC  
TGCCGATGAACCTGACTGATGGCCTCCAAAGCTTCAATGCATCACTCAA

>M6-PGSC0003DMG400021184-(rev)M6LRR-RLK\_2623

ACTGGTCTCTGCCGATGAACCTGACTGATGGCCTCCAAAGCTTCAATGCATCACTCAATGACTTATCTG  
GTGTTGTCCCTGATAATTTGAGAAAGTTTCCTTTATCATCTTTCTACCCT

>M6-PGSC0003DMG400021184-(rev)M6LRR-RLK\_2684

ACTTATCTGGTGTGTCCTGATAATTTGAGAAAGTTTCCTTTATCATCTTTCTACCCTGGAAACTCTGAAC  
TTCAATTTCAAATCCTCCCTCAGGATCTGGCCAAGCTTCACCAGAAA

>M6-PGSC0003DMG400021184-(rev)M6LRR-RLK\_2745

AAACTCTGAACCTCAATTTCAAATCCTCCCTCAGGATCTGGCCAAGCTTCACCAGAAAACCAGAAAAGT  
CGATCACTTAAACTATAATCAAGGTGGTAATAATAGTTTCTTGTAAT

>M6-PGSC0003DMG400021184-(rev)M6LRR-RLK\_2806

CAGAAAAGTCGATCACTTAAACTATAATCAAGGTGGTAATAATAGTTTCTTGTAATTGCTCTTATTAT  
TTTGGTCTTGCTAGCCATTTCTTTTATTATATACGAGCTTCAAGGAAG

>M6-PGSC0003DMG400021184-(rev)M6LRR-RLK\_2867

CTCTTATTATTTTGGTCTTGCTAGCCATTTCTTTTATTATATACGAGCTTCAAGGAAGCGTCATCCTCGTG  
TTGCTGAAAAAGTTGTTTCATCGCCAAGCCACATCAAATCCTTCTGGCT

>M6-PGSC0003DMG400021184-(rev)M6LRR-RLK\_2928

TCATCCTCGTGTTGCTGAAAAAGTTGTTTCATCGCCAAGCCACATCAAATCCTTCTGGCTTTAGCAGTAGG  
GAGGGTGCCGGTGGTGCAGTTGTTTCAGCTGAAGATCTTATGACTTCACG

>M6-PGSC0003DMG400021184-(rev)M6LRR-RLK\_2989

AGCAGTAGGGAGGGTGCCGGTGGTGCAGTTGTTTCAGCTGAAGATCTTATGACTTCACGGAAAGGATC  
ATCAGAAATAATTAGTCCAGATGAGAAAATGGCTGCTATAACTGGTTTCTCC

>M6-PGSC0003DMG400021184-(rev)M6LRR-RLK\_305

GATAACATGAAGCTGTAATCATTACAAGAAGTTGAATTTCTTCAGTAAATCTTTGAAAAAGACTCTTCTTT  
TTTTGTTTTTCTTCTAGTTGAGCTGATGTTCTTGGTAAGGGAATACTGA

>M6-PGSC0003DMG400021184-(rev)M6LRR-RLK\_3050

AAGGATCATCAGAAATAATTAGTCCAGATGAGAAAATGGCTGCTATAACTGGTTTCTCCCCTTCAAAG  
GTAGCCATTTCTTGGTCACCAGAGTCTGGAGATTCGTATACTGCAGAAA

>M6-PGSC0003DMG400021184-(rev)M6LRR-RLK\_3111

TTCAAAGGTAGCCATTTCTTGGTCACCAGAGTCTGGAGATTCGTATACTGCAGAACTTTTGCAAGA  
TTGGATGTGAAGTCTCCGGATCGTCTGGCTGGAGAGCTGTACTTCCTTGA

>M6-PGSC0003DMG400021184-(rev)M6LRR-RLK\_3172

TTTGCAAGATTGGATGTGAAGTCTCCGGATCGTCTGGCTGGAGAGCTGTACTTCCTTGATGATACAATCT  
CTTTTACACCTGAGGAACTTTCCAGGGCTCCGGCTGAAGTCTTAGGCAGA

>M6-PGSC0003DMG400021184-(rev)M6LRR-RLK\_3233

ATACAATCTCTTTTACACCTGAGGAACTTTCCAGGGCTCCGGCTGAAGTCTTAGGCAGAAGCAGCCATG  
GTACATCATAAGGGCAACACTGGAGAATGGGTTGCTCCTGACTGTGAAAT

>M6-PGSC0003DMG400021184-(rev)M6LRR-RLK\_3294

CAGCCATGGTACATCATAAGGGCAACACTGGAGAATGGGTTGCTCCTGACTGTGAAATGGTTGAGAG  
AAGGAGTAGCGAAGCAGAGGAAGGATTTGCAAAGGAGGCTAAAAAGTTTGC

>M6-PGSC0003DMG400021184-(rev)M6LRR-RLK\_3355

TTGAGAGAAGGAGTAGCGAAGCAGAGGAAGGATTTGCAAAGGAGGCTAAAAAGTTTGCCAATATTAG

GCATCCTAATGTAGTAGGATTAAGAGGTTACTACTGGGGTCCCACACAGCAT

>M6-PGSC0003DMG400021184-(rev)M6LRR-RLK\_3416

ATATTAGGCATCCTAATGTAGTAGGATTAAGAGGTTACTACTGGGGTCCCACACAGCATGAGAAGCTCA  
TTCTTTCCGATTATATATCTCCTGGAAGTCTTGCAAGTTTCCTCTATGGTA

>M6-PGSC0003DMG400021184-(rev)M6LRR-RLK\_3477

GAAGCTCATTCTTTCCGATTATATATCTCCTGGAAGTCTTGCAAGTTTCCTCTATGGTAAGCTTCATGTAT  
TCTAAACTCTCATATTATGTTTTGCTAATACTTTGTAAAGGCTTTGTGT

>M6-PGSC0003DMG400021184-(rev)M6LRR-RLK\_3538

CTTCATGTATTCTAAACTCTCATATTATGTTTTGCTAATACTTTGTAAAGGCTTTGTGTCCCTGTTCTTTAAT  
CTAGTCATTTTCCTCTGACTGTGTGATATATCTTACAGTTCATATGG

>M6-PGSC0003DMG400021184-(rev)M6LRR-RLK\_3599

CTGTTCTTTAATCTAGTCATTTTCCTCTGACTGTGTGATATATCTTACAGTTCATATGGTTTTTCCATGCAC  
ATTATATATGAGCACTTTAAGCTGTGTGATCCTGTAGTGGGAATTTGT

>M6-PGSC0003DMG400021184-(rev)M6LRR-RLK\_366

ACTCTTCTTTTTTTGTTTTTCTTCTAGTTGAGCTGATGTTCTTGGTAAGGGAATACTGAACTTGTTTTACTA  
TCTTGAATATTTGAAAGTTCAGTCTGTACTTTGTTTTTGCACTCATT

>M6-PGSC0003DMG400021184-(rev)M6LRR-RLK\_3660

TTTCCATGCACATTATATATGAGCACTTTAAGCTGTGTGATCCTGTAGTGGGAATTTGTGTGAACGCAGT  
ATTTAGTCCTTGGTTTGATGTGGTAATACTTTAGTACATCTAGAGCCCAA

>M6-PGSC0003DMG400021184-(rev)M6LRR-RLK\_3721

GAACGCAGTATTTAGTCCTTGGTTTGATGTGGTAATACTTTAGTACATCTAGAGCCCAATATATTATGCAT  
GTCTTTTGTTTATGTAACCTTTACACCAAGTAGTAATACACCATCACCA

>M6-PGSC0003DMG400021184-(rev)M6LRR-RLK\_3782

TATTATGCATGTCTTTTGTATGTAACCTTTACACCAAGTAGTAATACACCATCACCATGTGCTCTTCGTA  
TCAGGTCACATAGGCTGTGAGGGATTTGCAGTATGGTACTTATTA

>M6-PGSC0003DMG400021184-(rev)M6LRR-RLK\_3843

TGCTCTTCGTATCAGGTCACATAGGCTGTGAGGGATTTGCAGTATGGTACTTATTATTTCCAGTAGC  
TAAAATTCTGTATGTTTGAGTTCTTAATGGATCTGAAAATTGTGATGTTT

>M6-PGSC0003DMG400021184-(rev)M6LRR-RLK\_3904

TCCAGTAGCTAAAATTCTGTATGTTTGAGTTCTTAATGGATCTGAAAATTGTGATGTTTAGCTTTTGTTTC  
ATGATTAACCTTTGTTAGAAATCAGCTAGAATATGATACATTTTCCTTCT

>M6-PGSC0003DMG400021184-(rev)M6LRR-RLK\_3965

CTTTTGTTTCATGATTAACCTTTGTTAGAAATCAGCTAGAATATGATACATTTTCCTTCTTATATGAATCCTT  
CAAATGGACGTGCTTTCTATTCATTTGACTAACCAAATGTTTTCATTC

>M6-PGSC0003DMG400021184-(rev)M6LRR-RLK\_4026

TATGAATCCTTCAAATGGACGTGCTTTCTATTCATTTGACTAACCAAATGTTTTCATTCAGTTGATAATTAT  
ATATGTGGTCATTCTCAATATACTTCTCTAATGTGCTGCACGTTTGTA

>M6-PGSC0003DMG400021184-(rev)M6LRR-RLK\_4087

TTGATAATTATATATGTGGTCATTCTCAATATACTTCTCTAATGTGCTGCACGTTTGTAGATCGGCCTGGT  
AGAAAAGGTCCTCCACTAACCTGGCCCCAAAGACTCAAAAATATCAGTTG

>M6-PGSC0003DMG400021184-(rev)M6LRR-RLK\_4148

TCGGCCTGGTAGAAAAGGTCCTCCACTAACCTGGCCCCAAAGACTCAAAAATATCAGTTGATGTTGCACGT  
GGCTTGAACCTCCATTTTGATCGTGAGGTTCCACACGGAAACCTTAA

>M6-PGSC0003DMG400021184-(rev)M6LRR-RLK\_4209

GTTGCACGTGGCTTGAACCTCCATTTTGATCGTGAGGTTCCACACGGAAACCTTAAAGCAACCAACA  
TCTTGTTGGATGGCCTGACCTTAATGCAAGGTTGCAGATTACTGCCTT

>M6-PGSC0003DMG400021184-(rev)M6LRR-RLK\_427

TTGTTTTACTATCTTGAATATTTGAAAGTTCAGTCTGTACTTTGTTTTGTCACTCATTGTCTCCTTTCAGCT  
TGTATACCTAGAAAAGTTTCTATTTTTAGTTGTATCTGTCTTGTATT

>M6-PGSC0003DMG400021184-(rev)M6LRR-RLK\_4270

CAACCAACATCTTGTTGGATGGCCTGACCTTAATGCAAGGTTGCAGATTACTGCCTTCACCGCCTCAT  
GACTCAAGCCGGCACAATAGAACAGATTCTTGATGCAGGAGTGTAGGTT

>M6-PGSC0003DMG400021184-(rev)M6LRR-RLK\_4331

CCGCCTCATGACTCAAGCCGGCACAATAGAACAGATTCTTGATGCAGGAGTGTAGGTTATCGTGCCCCCT  
GAGTTGGCTGCGTCGAAGAAACCACTGCCTTCCTTCAAATCAGATGTATA

>M6-PGSC0003DMG400021184-(rev)M6LRR-RLK\_4392

CGTGCCCCTGAGTTGGCTGCGTCGAAGAAACCACTGCCTTCCTTCAAATCAGATGTATATGCTTTTGGAG  
TTATTTTGTGGAGCTGCTAAGTGGGAAGTGTGCAGGTGATGTTGTCTCT

>M6-PGSC0003DMG400021184-(rev)M6LRR-RLK\_4453

CTTTTGGAGTTATTTTGTGGAGCTGCTAAGTGGGAAGTGTGCAGGTGATGTTGTCTCTGGCGAAGATG  
GTGGAGTAGACTTGA CTGACTGGGTAAGGTTGAAGGTGGCAGAAGGTCGTA

>M6-PGSC0003DMG400021184-(rev)M6LRR-RLK\_4514

CGAAGATGGTGGAGTAGACTTGA CTGACTGGGTAAGGTTGAAGGTGGCAGAAGGTCGTAGTGCTGATT  
GTTTTGATAGCGTGTTGTACCTGAGTTGGGAAATCCGGCAATGGAGAAGCA

>M6-PGSC0003DMG400021184-(rev)M6LRR-RLK\_4575

GCTGATTGTTTTGATAGCGTGTTGTACCTGAGTTGGGAAATCCGGCAATGGAGAAGCAAATGAAGGA  
GGTCTTGGTATAGCCGTGCGATGCATTCTTCTATATCTGAGAGACCTGGT

>M6-PGSC0003DMG400021184-(rev)M6LRR-RLK\_4636

TGAAGGAGGTTCTTGGTATAGCCGTGCGATGCATTCTTCTATATCTGAGAGACCTGGTATCAAACTAT  
TTACGAGGACCTTTCTTCTATATAGTTTGTACTCATTTTGGTTTTGGTAA

>M6-PGSC0003DMG400021184-(rev)M6LRR-RLK\_4697

CAAACTATTTACGAGGACCTTTCTTCTATATAGTTTGTACTCATTTTGGTTTTGGTAAACCATATGTTTTG  
CTCTACTTTGGGAATCAAATAGCTCATTGACTTCCCTTTGAGTAGTA

>M6-PGSC0003DMG400021184-(rev)M6LRR-RLK\_4758

CATATGTTTTGCTCTACTTTGGGAATCAAATAGCTCATTGACTTCCCTTTGAGTAGTAGAATTAGCACAG  
TTAGTGTGTGAATGGGGCTAGTTTTATTGACCATTGTTTGTGTAAT

>M6-PGSC0003DMG400021184-(rev)M6LRR-RLK\_4819

ATTAGCACAGTTAGTGTGTGAATGGGGCTAGTTTTATTGACCATTGTTTGTGTAATTTGGTGCATATTT  
AATGTGTAACAACACTTTTCTCCCTTTTGGCCTATGAGCTATCAATGTT

>M6-PGSC0003DMG400021184-(rev)M6LRR-RLK\_488

CTCCTTTCAGCTTGTATACCTAGAAAAGTTTCTATTTTGTAGTTGTATCTGTCTTGTATTGCTGTTGAAGGAG  
GACTCTGGTGATTTTGGGTTGAAGTTGTGACTTTTTTCCCTGTTGT

>M6-PGSC0003DMG400021184-(rev)M6LRR-RLK\_4880

TGCATATTTAATGTGTAAACAACACTTTTCTCCCTTTTGGCCTATGAGCTATCAATGTTTGTGAGTTTTTG  
GAGTAAATACTTGTGACTTTATTTCCAAGTTTTGCAGCACAGTTTCA

>M6-PGSC0003DMG400021184-(rev)M6LRR-RLK\_4941

TCAGTTTTTTGGAGTAAATACTTGTGACTTTATTTCCAAGTTTTGCAGCACAGTTTCACAGAACATTCTCA



GATGGTCAATCAAACACAATGCTGACATCAACATTGCAGTGCAAAGT

>M6-PGSC0003DMG400021184-(rev)M6LRR-RLK\_5002

GAACATTCTCAGATGGTCAATCAAACACAATGCTGACATCAACATTGCAGTGCAAAGTACCGAAAAAG

GTGTTCAAGAGAAAGTGCCAGGTTATGAACAAATGATACTGGTTTTTCTTG

>M6-PGSC0003DMG400021184-(rev)M6LRR-RLK\_5063

CGAAAAAGGTGTTCAAGAGAAAGTGCCAGGTTATGAACAAATGATACTGGTTTTTCTGTCCACTTTTCA

TAAAAAGTTAAATTGCAACATCATTATAAGACACCTAAGGTGGAAAAAGG

>M6-PGSC0003DMG400021184-(rev)M6LRR-RLK\_5124

CACTTTTCATAAAAAGTTAAATTGCAACATCATTATAAGACACCTAAGGTGGAAAAAGGAAATGTTACAA

AAACCTACGGATGCCACTAGTTACTATGCAAGTGAGGAGAGGGGTGGGAT

>M6-PGSC0003DMG400021184-(rev)M6LRR-RLK\_5185

ATGTTACAAAACCTACGGATGCCACTAGTTACTATGCAAGTGAGGAGAGGGGTGGGATAAGGGTATG

AATTTAAACAACAGGAACTCTAAATTACAGGAAAATATATCATAAGATGCAA

>M6-PGSC0003DMG400021184-(rev)M6LRR-RLK\_5246

GGGTATGAATTTAAACAACAGGAACTCTAAATTACAGGAAAATATATCATAAGATGCAACATATTTTATT

GTTGCAACTTTAAACAATGTATGTTTCGTCAAACCTGAATCCAGCCATCTCT

>M6-PGSC0003DMG400021184-(rev)M6LRR-RLK\_5307

TATTTTATTGTTGCAACTTTAAACAATGTATGTTTCGTCAAACCTGAATCCAGCCATCTCTGCCTCCTTGCAGA

TATCCTTGCACTTAGCCACCCTCCAGAAGCCATATAAACTTTGATCA

>M6-PGSC0003DMG400021184-(rev)M6LRR-RLK\_5368

CTCCTTGCAAGATATCCTTGCACTTAGCCACCCTCCAGAAGCCATATAAACTTTGATCAAGCAGCAGTATA

TGTCAAAAGTTGGACTAAAACCTGCTTCCTTAAGTTTAGAGAAATAGCG

>M6-PGSC0003DMG400021184-(rev)M6LRR-RLK\_5429

CAGCAGTATATGTCAAAGTTGGACTAAAACCTGCTTCCTTAAGTTTAGAGAAATAGCGTACAGCCCTTG

AGAGATCGTTCAAAGCAACAAAAGCTTAATAACTACACGATAAGCTGGA

>M6-PGSC0003DMG400021184-(rev)M6LRR-RLK\_5490

CAGCCCTTGAGAGATCGTTCAAAGCAACAAAAGCTTAATAACTACACGATAAGCTGGAAGATCAAAAA

GGCAATTTGAAGCCTCCATTTCCCATAGCATGTCTATTGCCTCTCTATATT

>M6-PGSC0003DMG400021184-(rev)M6LRR-RLK\_5551

ATCAAAAAGGCAATTTGAAGCCTCCATTTCCCATAGCATGTCTATTGCCTCTCTATATTTGTTGCTGAAT  
AACGACAGTGAATCAGAGTAGTATACATAACTACACTTGGATTACCACC

>M6-PGSC0003DMG400021184-(rev)M6LRR-RLK\_5612

TTCGCTGAATAACGACAGTGAATCAGAGTAGTATACATAACTACACTTGGATTACCACCAGATTTCTGA  
ACCAGTCATATAGTCCCTCCACGATCTCAAATCTTCCCAGCCTAATGCAA

>M6-PGSC0003DMG400021184-(rev)M6LRR-RLK\_5673

ATTTCTGAACCAGTCATATAGTCCCTCCACGATCTCAAATCTTCCCAGCCTAATGCAAATCTTCATGATA  
GCTGTACAGTCCTGTGGTGTCAAATTCAGATCATCTCTCACAGCAAGCT

>M6-PGSC0003DMG400021184-(rev)M6LRR-RLK\_5734

CTTCATGATAGCTGTACAGTCCTGTGGTGTCAAATTCAGATCATCTCTCACAGCAAGCTCCTTAATAATA  
CCAAGACAAGTGTGCTTTTATCAGGATCCTTACCAAGCTCTAAGATTAG

>M6-PGSC0003DMG400021184-(rev)M6LRR-RLK\_5795

TCTAATAATACCAAGACAAGTGTGCTTTTATCAGGATCCTTACCAAGCTCTAAGATTAGCTTAGCATACAC  
CCTAGTATCAAGCACTCTGTTAGATTCCCTTAGCCATTGAAAGTAGCTTC

>M6-PGSC0003DMG400021184-(rev)M6LRR-RLK\_5856

TAGCATACACCCTAGTATCAAGCACTCTGTTAGATTCCCTTAGCCATTGAAAGTAGCTTCAAAGCAAGCTT  
CAGGCTTCCTCCTTTAATATAACCCCTTAACATTGCTTCATACACACCCC

>M6-PGSC0003DMG400021184-(rev)M6LRR-RLK\_5917

AGCAAGCTTCAGGCTTCCTCCTTTAATATAACCCCTTAACATTGCTTCATACACACCCCGACTAGCCAAGC  
CAGTGAACCTGTCCAAATCAAATGGCAATTTCAACTCATTTGACCCCGC

>M6-PGSC0003DMG400021184-(rev)M6LRR-RLK\_5978

CTAGCCAAGCCAGTGAACCTGTCCAAATCAAATGGCAATTTCAACTCATTTGACCCCGCCAAAACCTCAA  
TGGTAGAACCAAGAATATGATCATCTGGGAAAAGATGGGGTTGTTTCTTC

>M6-PGSC0003DMG400021184-(rev)M6LRR-RLK\_6039

AAACTTCAATGGTAGAACCAAGAATATGATCATCTGGGAAAAGATGGGGTTGTTTCTTCACCCAACAGA  
ATGTTTCAAGAGCTCTCTCCGGAAGCCCAAGTAACCCAACCTCTCGGATTG

>M6-PGSC0003DMG400021184-(rev)M6LRR-RLK\_61

AATGTTGAGTGTCACTGCCATTTCTGGGAGCTGTGAGGTTTCTTTTCATTCATATACAAAACAAGACTA  
GGGTTTTACCATTGTGGTTTGGTTTTTTACCTGAGCAGATAGAAATTTTG

>M6-PGSC0003DMG400021184-(rev)M6LRR-RLK\_610

TACTGCTTTGAACTGTGATGGTTGTTGTGAAAGATGGTTTTTCATATGTTGAGGTTTTGCTTAAAGTGATTC  
TCATACTTAAAGCTGCTCCTTTTGAATTTCTTGGAAAGGTTGAAGATTTA

>M6-PGSC0003DMG400021184-(rev)M6LRR-RLK\_6100

CCAACAGAATGTTTCAAGAGCTCTCTCCGGAAGCCCCAAGTAACCCAACCTCTCGGATTGTCAACGACAAC  
GATCCTTTCCTAAGAAATGGACTCCATTTACTGAGAACCTTTGATACATT

>M6-PGSC0003DMG400021184-(rev)M6LRR-RLK\_6161

AACGACAACGATCCTTTCCTAAGAAATGGACTCCATTTACTGAGAACCTTTGATACATTTTCCTCAGTTGA  
AAGGCCTTGTATATCTTTCGCCAAACCAATCAAGAAAGTAGGATTCTTG

>M6-PGSC0003DMG400021184-(rev)M6LRR-RLK\_6222

CCTCAGTTGAAAGGCCTTGTATATCTTTCGCCAAACCAATCAAGAAAGTAGGATTCTTGTACACTTGCCT  
TGATATGGATTGCCTTGAACGATTTGTGAATCCCTTTTGTGTAGGAAGTC

>M6-PGSC0003DMG400021184-(rev)M6LRR-RLK\_6283

CACTTGCCTTGATATGGATTGCCTTGAACGATTTGTGAATCCCTTTTGTGTAGGAAGTCCTAAAGGTCGA  
ATCTTGTAAAGGAAGGGGCAGAGGTAGAGGCCTCTTCTATCCGATTTTCC

>M6-PGSC0003DMG400021184-(rev)M6LRR-RLK\_6344

AAAGGTGGAATCTTGTAAAGGAAGGGGCAGAGGTAGAGGCCTCTTCTATCCGATTTTCCAGGCTTCTGA  
GGGATCCTCCCTTTGAAAAGAGATGAAATTGCTTCCATCTCATCAGACTCC

>M6-PGSC0003DMG400021184-(rev)M6LRR-RLK\_6405

GCTTCTGAGGGATCCTCCCTTTGAAAAGAGATGAAATTGCTTCCATCTCATCAGACTCCAATATAATTCCC  
TCATCATCATCACACATCCTTCCCTTTTCTACTTCCAGCTCCAATTCTT

>M6-PGSC0003DMG400021184-(rev)M6LRR-RLK\_6466

TATAATCCCTCATCATCATCACACATCCTTCCCTTTTCTACTTCCAGCTCCAATTCTTCCATTCCATCA  
GAACAAGCCTCAGTTGCAACTCCCTCATCCTCCTCGTACAAGACCCT

>M6-PGSC0003DMG400021184-(rev)M6LRR-RLK\_6527

TCCATTCCATCAGAACAAGCCTCAGTTGCAACTCCCTCATCCTCCTCGTACAAGACCCTTTTAAACTATA  
GTCCACATCTGGTGGTAGCTTGGGTCGTCGAGGATTTCTAAGGTTCTTT

>M6-PGSC0003DMG400021184-(rev)M6LRR-RLK\_6588

TAAACTATAGTCCACATCTGGTGGTAGCTTGGGTCGTCGAGGATTTCTAAGGTTCTTTGGAAGTTTTCT

ATGATTAGCTCTGTTATTAGATACAGCCATGAAAACAACTCTTCCCTTTC

>M6-PGSC0003DMG400021184-(rev)M6LRR-RLK\_6649

AAGTTTTCTATGATTAGCTCTGTTATTAGATACAGCCATGAAAACAACTCTTCCCTTCTTCTTCCAAAAC

TAAAGGTGTTCCAGAAGCAGCTGTACTGGCACTACTAGACTGCGAGAT

>M6-PGSC0003DMG400021184-(rev)M6LRR-RLK\_671

AAAGTGATTCTCATACTTAAAGCTGCTCCTTTTGAATTTCTTGGAAGGTTGAAGATTTAGTTGTATTTTG

GGAGTGAGTTTGTGTCACCTGGGCTAGTAAAGCTTTTTCTGGTGTGTC

>M6-PGSC0003DMG400021184-(rev)M6LRR-RLK\_6710

CTTCCAAAACCTTAAAGGTGTTCCAGAAGCAGCTGTACTGGCACTACTAGACTGCGAGATAGAATATGTG

GGTGAAGACCAAGTAGAGGACTCATAAGTGGCCGAGAACATGCAATAACTC

>M6-PGSC0003DMG400021184-(rev)M6LRR-RLK\_6771

AATATGTGGGTGAAGACCAAGTAGAGGACTCATAAGTGGCCGAGAACATGCAATAACTCCTGCTGAGC

ATTTGGTCGAGCAGCTGGTCGGCACAAATTTGTAAACAAAGGGATATGAGAG

>M6-PGSC0003DMG400021184-(rev)M6LRR-RLK\_6832

GCTGAGCATTGTTGTCGAGCAGCTGGTCGGCACAAATTTGTAAACAAAGGGATATGAGAGACCTTATAGT

GTGACGGAGTATAAAACCAACTGTTAAATGAAAGTAGAGCAGTTTTTTTTGA

>M6-PGSC0003DMG400021184-(rev)M6LRR-RLK\_732

TGTATTTTTGGGAGTGAGTTTGTGTCACCTGGGCTAGTAAAGCTTTTTCTGGTGTGCAATGAACCTATT

TAGGTTTTTGATGCTTGTGCTTTGTTTTGGTTCTGCAATGGGGCAGCTT

>M6-PGSC0003DMG400021184-(rev)M6LRR-RLK\_854

TTCCAGGACATTTTGGCCCTGCTTGAATTTAGGAAGGGTATCAACCACGATCCAACCTGGTTATGTACTG

CAGTCATGGAATGAGGAGTCCATTGATTTCAATGGTTGCCCTTCATCTTG

>M6-PGSC0003DMG400021184-(rev)M6LRR-RLK\_915

TATGTAAGTGCAGTCATGGAATGAGGAGTCCATTGATTTCAATGGTTGCCCTTCATCTTGGAAATGGTATAA

TGTGCAATGGTGGTAATGTTGCAGCAGTTGTCCTTGATAACATGGGTTTA

>M6-PGSC0003DMG400021184-(rev)M6LRR-RLK\_976

ATGGTATAATGTGCAATGGTGGTAATGTTGCAGCAGTTGTCCTTGATAACATGGGTTTATCTGCTGATGC

AGATTTGAGTGTGTTTGCTAACCTCACAATGCTTGTGAAACTCTCTATGG

>M6-PGSC0003DMG400021186-(rev)M6RLKmalectin\_0

CCCATCTTCCTTTATTATCTAAAAAAGTGAACCTTTTTCCCTATAATCACCATTTTTAGGTGATCTG  
TTAAAGACTTAATTCTTCACCATTCTGAAAATTTGAGTTTTTTCTT

>M6-PGSC0003DMG400021186-(rev)M6RLKmalectin\_1037

GTGAAGGAGTATTTGTGACTTCTGATATCGATGTCTTTGTGCTCGAGTTTATTCCGAATAAGGATTCGTT  
TGGATTTGTTAATGCCATTGAGATCATCCCTGTGACTGATAAGCTATTT

>M6-PGSC0003DMG400021186-(rev)M6RLKmalectin\_1098

AGGATTCGTTTGGATTTGTTAATGCCATTGAGATCATCCCTGTGACTGATAAGCTATTTGTTGACTCCATC  
AGTAAAGTTGGTGGCAATGGTGCTAACAGTTCTTTAAATTTGAGTAAAC

>M6-PGSC0003DMG400021186-(rev)M6RLKmalectin\_1159

TGACTCCATCAGTAAAGTTGGTGGCAATGGTGCTAACAGTTCTTTAAATTTGAGTAAACGAGGGATTCA  
GACTATGTACAGGTTGAACATTGGTGGTTCAGCAATTAATCCACTCAAGA

>M6-PGSC0003DMG400021186-(rev)M6RLKmalectin\_122

TTTTTGCTTACCATTGTCTCCAAGATTGGAGCTTTTGACCATTTTATTGGTCTCAGATCTGTTTGCTGATTT  
GCGGTTTTTCTGCACTGAAGGTGTTCAATTTGAAGACATATTCTTGT

>M6-PGSC0003DMG400021186-(rev)M6RLKmalectin\_1220

GGGATTCAGACTATGTACAGGTTGAACATTGGTGGTTCAGCAATTAATCCACTCAAGATTCAGGGTTC  
AGGAGGAAGTGGGAGGCGGATTCAAGCTATATGATCATTGCAGATGCAGGT

>M6-PGSC0003DMG400021186-(rev)M6RLKmalectin\_1342

AGAAGCTAAAACCATTCCAACATTACTTATGCTTCCCCGAATGACACCTCTGTTGCTCCGCTTCTTGTGT  
ATGAAACAGCAAGAATTATGAGCAACACAGATGTCATGGAGAAGCGGTT

>M6-PGSC0003DMG400021186-(rev)M6RLKmalectin\_1403

CTTCTTGTGTATGAAACAGCAAGAATTATGAGCAACACAGATGTCATGGAGAAGCGGTTGAACATGTCA  
TGAAATTGGATGTGGATCCAGATTTTGATTATGTAATCCGCTTACATTTT

>M6-PGSC0003DMG400021186-(rev)M6RLKmalectin\_1464

ACATGTCATGGAAATTGGATGTGGATCCAGATTTTGATTATGTAATCCGCTTACATTTCTGTGAGTTTGAC  
TATAATAAACCAAATCAAAGGATCTTCAAATTTATATAAATAACAAAA

>M6-PGSC0003DMG400021186-(rev)M6RLKmalectin\_1525

TGAGTTTGACTATAATAAACCAAATCAAAGGATCTTCAAATTTATATAAATAACAAAACACTGCAGCAGAC  
AACTACGACATTTTCTCAAGAGCTGGGGGAATGAACAAGGCATACCATGA

>M6-PGSC0003DMG400021186-(rev)M6RLKmalectin\_1586

GCAGCAGACAACTACGACATTTTCTCAAGAGCTGGGGGAATGAACAAGGCATACCATGAGGATTACTTT  
GATGCGATATCCTCGAAAAGCAGTAGTCTTTGGGTTCAACTTGGTCCAGAT

>M6-PGSC0003DMG400021186-(rev)M6RLKmalectin\_1647

ATTACTTTGATGCGATATCCTCGAAAAGCAGTAGTCTTTGGGTTCAACTTGGTCCAGATACAACGACTGG  
TTCTGCAGGCACTGATGCTCTTTTGAATGGTTTGGAGGTTTTCAAGTTGA

>M6-PGSC0003DMG400021186-(rev)M6RLKmalectin\_1708

AACGACTGGTTCTGCAGGCACTGATGCTCTTTTGAATGGTTTGGAGGTTTTCAAGTTGAGTCGGAATGG  
TAATCTTGCCTATATACAGAAATATGAGGATGTTCCAGAAAAATCGACTTC

>M6-PGSC0003DMG400021186-(rev)M6RLKmalectin\_1769

CGGAATGGTAATCTTGCCTATATACAGAAATATGAGGATGTTCCAGAAAAATCGACTTCGAAAAATTTAA  
TCCTGTGGGTAGGAATTGGAGCAGGTGTTGCATCCATTATCTTTCTTGCA

>M6-PGSC0003DMG400021186-(rev)M6RLKmalectin\_183

TTTGCTGATTGCGGTTTTTCTGCACTGAAGGTGTTCATTTTGAAGACATATTCTTGTTGGGTTTGGTTA  
ATTTCTCATGTTGTTGAAGCTTTTTGAGTTGCCTATGAGAGATAGATTT

>M6-PGSC0003DMG400021186-(rev)M6RLKmalectin\_1830

AAAATTTAATCCTGTGGGTAGGAATTGGAGCAGGTGTTGCATCCATTATCTTTCTTGCAGGATTAGTCAT  
GCTTATTATATGGCTATGTAGAAGGCGGAGTAGCAAAGATGACACAAAGA

>M6-PGSC0003DMG400021186-(rev)M6RLKmalectin\_1891

ATTAGTCATGCTTATTATATGGCTATGTAGAAGGCGGAGTAGCAAAGATGACACAAAGAAAACCTCACC  
TGGATGGAGGCCTTTATTCCTTCATGCAGCCGCTGTGACCAATACTGGTAA

>M6-PGSC0003DMG400021186-(rev)M6RLKmalectin\_1952

ACCTCACCTGGATGGAGGCCTTTATTCCTTCATGCAGCCGCTGTGACCAATACTGGTAATGGTAAGGGAT  
CTATACAATATCAAATCTTGGAACCTTAAGATCTGGAAGGCGGTTTACT

>M6-PGSC0003DMG400021186-(rev)M6RLKmalectin\_2013

GTAAGGGATCTATACAATATCAAATCTTGGAACCTTAAGATCTGGAAGGCGGTTTACTCTAGCAGAGA  
TTAAAGGAGCTACAAACAACCTTTGATGAAAGCTTAGTGATTGGAGTGGGAG

>M6-PGSC0003DMG400021186-(rev)M6RLKmalectin\_2074

AGCAGAGATTAAAGGAGCTACAAACAACCTTTGATGAAAGCTTAGTGATTGGAGTGGGAGGATTTGGTA

AGGTTTTCAAAGCAGAACTCGATGATGGCACCCCTTGCTGCAATCAAGCGAGC

>M6-PGSC0003DMG400021186-(rev)M6RLKmalectin\_2135

TTTGGTAAGGTTTTCAAAGCAGAACTCGATGATGGCACCCCTTGCTGCAATCAAGCGAGCCAATCCTCAAT  
CTCAGCAAGGACTGAAAGAATTTGAAACAGAAATCGAAATGCTTTCTAAG

>M6-PGSC0003DMG400021186-(rev)M6RLKmalectin\_2196

ATCCTCAATCTCAGCAAGGACTGAAAGAATTTGAAACAGAAATCGAAATGCTTTCTAAGCTAAGGCATA  
GGCATTGGTCTCCATGATAGGTTTCTGTGATGAACAGAATGAAATGATTT

>M6-PGSC0003DMG400021186-(rev)M6RLKmalectin\_2257

AAGGCATAGGCATTTGGTCTCCATGATAGGTTTCTGTGATGAACAGAATGAAATGATTTTGGTCTATGA  
GTACATGGCCAATGGA ACTCTCAGGAGTCATCTCTTTGGCAGTGATCTACC

>M6-PGSC0003DMG400021186-(rev)M6RLKmalectin\_2318

GTCTATGAGTACATGGCCAATGGA ACTCTCAGGAGTCATCTCTTTGGCAGTGATCTACCATCCCTAAGCT  
GGAAGCAAAGACTAGAGGCGTGCATTGGTTCAGCTCGTGGTCTGCATTAC

>M6-PGSC0003DMG400021186-(rev)M6RLKmalectin\_244

GGTTTGGTTAATTTCTCATGTTGTTGAAGCTTTTTGAGTTGCCTATGAGAGATAGATTTGTGAAGGTATTC  
TTTTAATGTTTATGCTTCACTTTGATGTTTCTTGAGATATATAGATTG

>M6-PGSC0003DMG400021186-(rev)M6RLKmalectin\_2440

TCACACAGGGTCAGAGCGGGGAATTATCCATAGGGATATCAAGACAACCAACATATTGTTAGACGAGA  
ATTTTGTGGCGAAAATGGCTGATTTTGGGCTGTCTAAA ACTGGCCCTTCTTT

>M6-PGSC0003DMG400021186-(rev)M6RLKmalectin\_2501

GACGAGAATTTTGTGGCGAAAATGGCTGATTTTGGGCTGTCTAAA ACTGGCCCTTCTTTGGAGCATACTC  
ATGTCAGTACAGCAGTGAAAGGAAGTTTTGGTTATCTGGATCCTGAGTAT

>M6-PGSC0003DMG400021186-(rev)M6RLKmalectin\_2562

AGCATACTCATGTCAGTACAGCAGTGAAAGGAAGTTTTGGTTATCTGGATCCTGAGTATTTAGGCGGC  
AGCAGTTGACTGAGAAATCTGATGTTTACTCCTTTGGGGTTGTGCTGTTG

>M6-PGSC0003DMG400021186-(rev)M6RLKmalectin\_2623

CAGGCGGCAGCAGTTGACTGAGAAATCTGATGTTTACTCCTTTGGGGTTGTGCTGTTTGAAGTTATATGT  
GCACGCCCTGTTATAAATCCAAGCTTACCAAGAGATCAGATCAATCTTGC

>M6-PGSC0003DMG400021186-(rev)M6RLKmalectin\_2684

GTTATATGTGCACGCCCTGTTATAAATCCAAGCTTACCAAGAGATCAGATCAATCTTGCAGAATGGGCAA  
TGCGGTTTCAACGAAAAAGATCTCTTGAAACCATCATTGACGAACAACCTC

>M6-PGSC0003DMG400021186-(rev)M6RLKmalectin\_2745

AATGGGCAATGCGGTTTCAACGAAAAAGATCTCTTGAAACCATCATTGACGAACAACCTCGCAGGACAAT  
ATTCCACAGAATCGTTGATGAAATTTGGAGAAATTGCTGAGAAATGTCTGT

>M6-PGSC0003DMG400021186-(rev)M6RLKmalectin\_2806

AGGACAATATTCCACAGAATCGTTGATGAAATTTGGAGAAATTGCTGAGAAATGTCTGTGACGAGGG  
AAAGTTGAGACCAACAATGGGAGAAGTCCTATGGCATCTGGAATATGTTTT

>M6-PGSC0003DMG400021186-(rev)M6RLKmalectin\_2867

GACGAGGGAAAGTTGAGACCAACAATGGGAGAAGTCCTATGGCATCTGGAATATGTTTTGCAAATTCAT  
GAGGCTTGGCTGCGGAAGAATGCAGGGGAAGACTCTGCTTCTGATATTCGT

>M6-PGSC0003DMG400021186-(rev)M6RLKmalectin\_2928

AAATTCATGAGGCTTGGCTGCGGAAGAATGCAGGGGAAGACTCTGCTTCTGATATTCGTGTTCTAGAGA  
CTGTTGAGGAGAGAGGAACTGAACTTCTGAAGACCAGACTCATGTTGAAT

>M6-PGSC0003DMG400021186-(rev)M6RLKmalectin\_2989

TCTAGAGACTGTTGAGGAGAGAGGAACTGAACTTCTGAAGACCAGACTCATGTTGAATCAAAAACAA  
AGAAGAGGGTGAACCTGCAACAAGTACCAGTGGCACTACAGATGCCATGGC

>M6-PGSC0003DMG400021186-(rev)M6RLKmalectin\_305

GAAGGTATTCTTTAATGTTTATGCTTCACTTTTGATGTTTCTTGAGATATATAGATTGTTTTGGTTCTGG  
GGTAGAAAGTAAGGGGTTTTTCTTATTTGAGAATTTGTCTAGTTTTGA

>M6-PGSC0003DMG400021186-(rev)M6RLKmalectin\_3050

AAAAACAAAGAAGAGGGTGAACCTGCAACAAGTACCAGTGGCACTACAGATGCCATGGCTAATGGAGT  
AGATGATTTTTCACAATTTCTCGGTCAAACGGAAGGTGAGATCCAAAACAA

>M6-PGSC0003DMG400021186-(rev)M6RLKmalectin\_3111

ATGGAGTAGATGATTTTTCACAATTTCTCGGTCAAACGGAAGGTGAGATCCAAAACAACAGACAGTTG  
ATTGTAATGTCTGGACCATTATAGGCCTGAATTCTTTCCATTTTTGTCACA

>M6-PGSC0003DMG400021186-(rev)M6RLKmalectin\_3172

GACAGTTGATTGTAATGTCTGGACCATTATAGGCCTGAATTCTTTCCATTTTTGTCACATGCGTCTGTGAG  
GACTTCACGATAACCTCAATCAGCTTTGACAGTGCTCATTAAGCATAAA



>M6-PGSC0003DMG400021186-(rev)M6RLKmalectin\_3233

CGTCTGTGAGGACTTCACGATAACCTCAATCAGCTTTGACAGTGCTCATTAAGCATAAAGAGCTTAGAAT  
GGAGAATGTGAAGATCTTGGTAATACCTTCATGCTGTATTCTTTTACTCA

>M6-PGSC0003DMG400021186-(rev)M6RLKmalectin\_3294

GCTTAGAATGGAGAATGTGAAGATCTTGGTAATACCTTCATGCTGTATTCTTTTACTCAGATTAGACTTAA  
ATCTTTTTCTGCTGAATCCTTGTTGCTCAGGATTTAGTGATTCTTTTA

>M6-PGSC0003DMG400021186-(rev)M6RLKmalectin\_3355

TTAGACTTAAATCTTTTTCTGCTGAATCCTTGTTGCTCAGGATTTAGTGATTCTTTTATTATTGTATGTAC  
TTCATGTTTGATAGAATGCCACTAAGTTAATGAATTGGAATGTAATAT

>M6-PGSC0003DMG400021186-(rev)M6RLKmalectin\_3396

GATTTAGTGATTCTTTTATTATTGTATGTACTTCATGTTTGATAGAATGCCACTAAGTTAATGAATTGGAA  
TGTAATATATATTTCACTTCTATTTCAATGGAAATATGAAATCTTGTTT

>M6-PGSC0003DMG400021186-(rev)M6RLKmalectin\_366

TTTGGTTCTGGGGTAGAAAAGTAAGGGGTTTTTCTATTTGAGAATTTGTCTAGTTTTGAAACAATTACTG  
GTGGGGTTTTGGGGTTTTTAGTTTTGTAATTGAATTTGGAAGAGTGTGTA

>M6-PGSC0003DMG400021186-(rev)M6RLKmalectin\_427

CAATTACTGGTGGGGTTTTGGGGTTTTTAGTTTTGTAATTGAATTTGGAAGAGTGTGTAGGTAGTATCAA  
AAAAAGGAAGAACTTTTTGGGGGAGTTATTGCCTTATTGGGGGATAGTGA

>M6-PGSC0003DMG400021186-(rev)M6RLKmalectin\_488

TAGTATCAAAAAAGGAAGAACTTTTTGGGGGAGTTATTGCCTTATTGGGGGATAGTGAAGTTATGAAA  
GTCAAAGGGAGGGAGGTGTTTGTGATAATTCCTCTTTTGGTATTAGTTGTG

>M6-PGSC0003DMG400021186-(rev)M6RLKmalectin\_549

TTATGAAAGTCAAAGGGAGGGAGGTGTTTGTGATAATTCCTCTTTTGGTATTAGTTGTGTTTGTGAAAT  
TGGGGAAGCTCAAACAAAGACTTTGCTGGTAAATTGTGGTACAAATTCTA

>M6-PGSC0003DMG400021186-(rev)M6RLKmalectin\_61

TAGGTGATCTGTTAAAGACTTAATTCCTCACCATTCTTGAAAATTTGAGTTTTTTTTCTTCTTTTTTGCTTACC  
ATTGTCTCCAAGATTGGAGCTTTTGACCATTTTATTGGTCTCAGATC

>M6-PGSC0003DMG400021186-(rev)M6RLKmalectin\_610

TGTTGAAATTGGGGAAGCTCAAACAAAGACTTTGCTGGTAAATTGTGGTACAAATTCTAGTGTGAATGC

AGATGGTAGCAAATGGATAGGTGATTCTGATCCTGGTAGTAATGTCACTTT

>M6-PGSC0003DMG400021186-(rev)M6RLKmalectin\_671

GTGAATGCAGATGGTAGCAAATGGATAGGTGATTCTGATCCTGGTAGTAATGTCACTTTGGAGTTCATCA  
GGTATTGAGGCATCTACTGACTCATTTAATGGTGATCCATCTTATGAGTCA

>M6-PGSC0003DMG400021186-(rev)M6RLKmalectin\_732

GTTTCATCAGGTATTGAGGCATCTACTGACTCATTTAATGGTGATCCATCTTATGAGTCACTCTACAAA  
GTTTCCAGATTTTTTCGGGAAGTTTTAACTATACTTTCAAAGGATCACCTG

>M6-PGSC0003DMG400021186-(rev)M6RLKmalectin\_793

CTACAAAAGTCCAGATTTTTTCGGGAAGTTTTAACTATACTTTCAAAGGATCACCTGGTAGTTATTTCC  
TTAGGCTCCATTTCTATCCCTTACATTTGGGAATCGCGATGCGAATGA

>M6-PGSC0003DMG400021186-(rev)M6RLKmalectin\_854

AGTTATTTCTTAGGCTCCATTTCTATCCCTTACATTTGGGAATCGCGATGCGAATGAGTCATATTTTGC  
TGTTGCTGCAAATGGTTTGAAGTTGGTTTCAGAGTTAATGTTGCTGGT

>M6-PGSC0003DMG400021186-(rev)M6RLKmalectin\_915

CATATTTTGCTGTTGCTGCAAATGGTTTGAAGTTGGTTTCAGAGTTAATGTTGCTGGTGAGATTTTCTC  
AAGAACTCGCTCTTGAAGTTCTGGAGGCAATTCCAGTATCTTTTCAT

>M6-PGSC0003DMG400021186-(rev)M6RLKmalectin\_976

GATTTTGCTCAAGAACTCGCTCTTGAAGTTCTGGAGGCAATTCCAGTATCTTTTCATTGGTGAAGGAG  
TATTTTGACTTCTGATATCGATGTCTTTGTGCTCGAGTTTATTCCGAA

>M6-PGSC0003DMG400021279-(rev)M6LRR-RLP\_0

TGATTCTATTCTCACTAAAGATCATGTCCCACTCTCCCCACCCATCATATCAGTCACATCTCTAAGCCTA  
ACCCCCCCCCCTCAACCACCACTAAACCCTCAAATAGTTCTTGC

>M6-PGSC0003DMG400021279-(rev)M6LRR-RLP\_1054

AGCACTTCAATATTTTCTCATGGATGACAATCCAATGATGTTTCATAACATTGCCTGATGAATTGAGTCAAT  
TACATAAACTTCAAGAATTGAGCCTTTCAAGTTCAGGTTACTCAGGGGA

>M6-PGSC0003DMG400021279-(rev)M6LRR-RLP\_1116

TGAGTCAATTACATAAACTTCAAGAATTGAGCCTTTCAAGTTCAGGTTACTCAGGGGAAATACCATCAAG  
TTACTCACAACCTTGTGAACCTGACTACGTTGTCTTTACAAAACAATCGAT

>M6-PGSC0003DMG400021279-(rev)M6LRR-RLP\_1178

CCATCAAGTTACTCACAACCTGTGAACTTGACTACGTTGTCTTTACAAAACAATCGATTAACAGGTGAGA  
TACCGGTGGAATTTTCAAGATTATCACATATGTATCACTTGAATTTGAGT

>M6-PGSC0003DMG400021279-(rev)M6LRR-RLP\_124

AAATGATTCTTTTCTTAAAAAATCAAATAGAACTCCAACAATTGATCAGAAGAAACCTTTACAACAAAT  
ACAATGTATCCATTCAAACCTTTTTATTCCTCTACTACTCATGTTTTT

>M6-PGSC0003DMG400021279-(rev)M6LRR-RLP\_1240

AGGTGAGATACCGGTGGAATTTTCAAGATTATCACATATGTATCACTTGAATTTGAGTAGAAATTTGTTA  
GATGGTGTGTGCCATTCAATTCAAGTTTTTTGAAAAGACTTGGAAGGAA

>M6-PGSC0003DMG400021279-(rev)M6LRR-RLP\_1302

ATTTGTTAGATGGTGTGTGCCATTCAATTCAAGTTTTTTGAAAAGACTTGGAAGGAATTTGGACTTAAG  
TGAAATCCAGGGCTATGTTTGATGAATCAACATGAAGGGGTTTATGTTG

>M6-PGSC0003DMG400021279-(rev)M6LRR-RLP\_1364

GACTTAAGTGGAATCCAGGGCTATGTTTGATGAATCAACATGAAGGGGTTTATGTTGGAGTTAATGTG  
TGTGGGAGTAGTAGTAATACTATAACTATGCCATTGAAGAAGAATAGA

>M6-PGSC0003DMG400021279-(rev)M6LRR-RLP\_1426

TAATGTGTGTGGGAGTAGTAGTAATACTATAACTATGCCATTGAAGAAGAATAGATCATGTGAAGC  
TTCATGTGGAGTTGTTAGATCATTGTTTCTGTTTGTATTTTGTGTGTTTT

>M6-PGSC0003DMG400021279-(rev)M6LRR-RLP\_1472

AAGAAGAATAGATCATGTGAAGCTTCATGTGGAGTTGTTAGATCATTGTTTCTGTTTGTATTTTGTGTGT  
TTTAGAATTGTTGTTTTGTGTTTAGGAGTTTTTAGGCTTTTGGTTGTAT

>M6-PGSC0003DMG400021279-(rev)M6LRR-RLP\_186

CAACAAATACAATGTATCCATTCAAACCTTTTTATTCCTCTACTACTCATGTTTTTCTATCTACCACCCC  
CCCTTCTATCTCCTCAACCAATGTAGCAAACATCAACAATCTCACAC

>M6-PGSC0003DMG400021279-(rev)M6LRR-RLP\_248

TCTACCACCCCCCTTCTATCTCCTCAACCAATGTAGCAAACATCAACAATCTCACACAACCAAACATGAA  
TCCTCATGAACTAGAACTCTTTACAAGATCATGGAATCAATTTCCAGT

>M6-PGSC0003DMG400021279-(rev)M6LRR-RLP\_310

AAACATGAATCCTCATGAACTAGAACTCTTTACAAGATCATGGAATCAATTTCCAGTGACCAAAGTTGG  
AGAAAATCATATCCAAATCCATGCCAACAAAGTTCATCTTGGCTTGGAAT

>M6-PGSC0003DMG400021279-(rev)M6LRR-RLP\_372

AAAGTTGGAGAAAATCATATCCAAATCCATGCCAACAAAGTTCATCTTGGCTTGGGAATTGAGTGCAAAA  
AAAACACCAACAACATTTACCATGTCACTAGGCTTGATTTTGGGACATATC

>M6-PGSC0003DMG400021279-(rev)M6LRR-RLP\_434

TGCAAAAAAACACCAACAACATTTACCATGTCACTAGGCTTGATTTTGGGACATATCCAAACCCCATTT  
GCAAGAAAACAGCAACATTCCTTCACTCATTTTCCAACCTCCCAAATCTT

>M6-PGSC0003DMG400021279-(rev)M6LRR-RLP\_496

CCCCATTTGCAAGAAAACAGCAACATTCCTTCACTCATTTTCCAACCTCCCAAATCTTGAATCTCTCTTCTT  
TATCCAATGCTTACACACACAAAAACAACAATCTCTATTCAAGAAAA

>M6-PGSC0003DMG400021279-(rev)M6LRR-RLP\_558

CTCTCTTCTTTATCCAATGCTTACACACACAAAAACAACAATCTCTATTCAAGAAAACAGAATTCTCCAA  
CAACTTAGTATAAGATCAAATCCATCATTAAATTGGCACAATCCCACCTC

>M6-PGSC0003DMG400021279-(rev)M6LRR-RLP\_62

TCTAAGCCTAACCCCCCCCCCTCAACCACCTAAACCCTCCAAATAGTTCTTGCATAAAAAATGATTC  
TTTTCTTAAAAATCAAATAGAACTCCAACAATTGATCAGAAGAAACC

>M6-PGSC0003DMG400021279-(rev)M6LRR-RLP\_620

ATTCTCCAACAACCTTAGTATAAGATCAAATCCATCATTAAATTGGCACAATCCCACCTCAAATTTTCATCTCTT  
AAATCACTTCAAATCCTCACATTGTACAAAACAATCTTCTTGGACAA

>M6-PGSC0003DMG400021279-(rev)M6LRR-RLP\_682

TTCATCTCTTAAATCACTTCAAATCCTCACATTGTACAAAACAATCTTCTTGGACAAATCCCACCACAAAT  
CTTCACTCAACTCACTTATTCATCTTGATTTAAGCTACAACAACCT

>M6-PGSC0003DMG400021279-(rev)M6LRR-RLP\_744

CACCACAAATCTTCACTCAACTCACTTATTCATCTTGATTTAAGCTACAACAACCTCACAGGCCAAATC  
CCAAACCAAATTGGCAATCTCATCAATCTTATAGGCTTAGACTTAAGCT

>M6-PGSC0003DMG400021279-(rev)M6LRR-RLP\_806

GGCCAAATCCCAAACCAAATTGGCAATCTCATCAATCTTATAGGCTTAGACTTAAGCTACAATTCATTAAC  
AAATCCAATCCCATCCACTATTGGCCTTCTCAAATCTCTTCAAAAACCTT

>M6-PGSC0003DMG400021279-(rev)M6LRR-RLP\_868

TTCATTAACAAATCCAATCCCATCCACTATTGGCCTTCTCAAATCTCTTCAAAAACCTTGACTTAAGCTCAAA

TTCATTAACAGGCAAAATCCCTCAAACAATAGAAAAGTTACAATCTTT

>M6-PGSC0003DMG400021279-(rev)M6LRR-RLP\_930

TAAGCTCAAATTCATTAACAGGCAAAATCCCTCAAACAATAGAAAAGTTACAATCTTTAAACTTCTTAGCA  
CTTAGTAACAACAAGTTAAGTGGCAATTTCCCAAAGGGATACATAAAC

>M6-PGSC0003DMG400021279-(rev)M6LRR-RLP\_992

TTCTTAGCACTTAGTAACAACAAGTTAAGTGGCAATTTCCCAAAGGGATACATAAACTTCAAGCACTTC  
AATATTTTCTCATGGATGACAATCCAATGATGTTTCATAACATTGCCTGAT

>M6-PGSC0003DMG400021353M6LRR-RLK\_0

AGCATTCCATATGAAAAATCCACTCTTTATGGTCATTTCTTGCTACTAAATCTTCACTTATAAAAAAAAAA  
GATTACATTTTTTGGATTACTCTGTGAAAATACTGTGTTGTCAGCAA

>M6-PGSC0003DMG400021353M6LRR-RLK\_1037

AGGATGCAGTGCTCAAGATGCTTTGGTTGAACGATCAGTCGGGTGATGGTATGAGTGGTCCAATAGAT  
GTTGTTGCAACAATGGTGTCACTTACACATCTTTGGCTTCATGGGAACCAAT

>M6-PGSC0003DMG400021353M6LRR-RLK\_1098

AATAGATGTTGTTGCAACAATGGTGTCACTTACACATCTTTGGCTTCATGGGAACCAATTTTCAGGTAAA  
ATCCCAGTAGAGATTGGTAATTTAACAATCTGAAGGATCTCAATGTGAA

>M6-PGSC0003DMG400021353M6LRR-RLK\_1159

TCAGGTAAAATCCCAGTAGAGATTGGTAATTTAACAATCTGAAGGATCTCAATGTGAATACAAATAACC  
TTGTTGGATTAATCCCTGAAAGTTTAGCAAATATGCCATTAGACAATCTT

>M6-PGSC0003DMG400021353M6LRR-RLK\_122

ACAACACCATAGTAGTAGCAACTAGCAAGCATTGTGCTTTTTCTCACTCCAATTATCACTCTCTTTCTCCTT  
TTTTGTTTTGGGGTTTAGTGATCTGAACCCCATGTTTTCCACCTCTT

>M6-PGSC0003DMG400021353M6LRR-RLK\_1220

CAAATAACCTTGTTGGATTAATCCCTGAAAGTTTAGCAAATATGCCATTAGACAATCTTGATTTGAATAAT  
AATCATTTTATGGGACCAGTTCCTAAGTTCAAGGCTACTATTGTTAGTT

>M6-PGSC0003DMG400021353M6LRR-RLK\_1281

TTTGAATAATAATCATTTTATGGGACCAGTTCCTAAGTTCAAGGCTACTATTGTTAGTTTTATGTCCAAC  
CTTTTTGTCAAACCAACAAGGAGCAGTATGTGCCCTGAGGTTATGGC

>M6-PGSC0003DMG400021353M6LRR-RLK\_1342

ATGTCCAACCTCTTTTTGTCAAACCAAACAAGGAGCAGTATGTGCCCTGAGGTTATGGCACTTTTAGAGT  
TTCTTGATGGTGTGAATTATCCTTCTAGGCTTGTGAATCATGGTCTGGA

>M6-PGSC0003DMG400021353M6LRR-RLK\_1403

TTTTAGAGTTTCTTGATGGTGTGAATTATCCTTCTAGGCTTGTGAATCATGGTCTGGAAACAACCCTTGC  
AATGGACGTTGGTGGGGAATTAGCTGTGATGATAACCAAAAAGTTAGTG

>M6-PGSC0003DMG400021353M6LRR-RLK\_1464

CAACCCTTGCAATGGACGTTGGTGGGGAATTAGCTGTGATGATAACCAAAAAGTTAGTGCATAAACTT  
GCCTAAGTCTAATCTTCCGGGACCTTGAGTCCTTCAATCGCGAACCTTGA

>M6-PGSC0003DMG400021353M6LRR-RLK\_1525

ATAAACTTGCCTAAGTCTAATCTTCCGGGACCTTGAGTCCTTCAATCGCGAACCTTGAATCCGTTACTCG  
CATTTATCTTGAATCAAATAATCTTCTGGTTTTGTTCCATCTAGTTGG

>M6-PGSC0003DMG400021353M6LRR-RLK\_1586

CCGTTACTCGCATTTATCTTGAATCAAATAATCTTCTGGTTTTGTTCCATCTAGTTGGACTAGTTTGAAAT  
CTCTGTCTATTCTTGATTTGAGTAATAACAATATTTCTCCACCTCTAC

>M6-PGSC0003DMG400021353M6LRR-RLK\_1647

TAGTTTGAAATCTCTGTCTATTCTTGATTTGAGTAATAACAATATTTCTCCACCTCTACCTAAATTTACCAC  
CTCTTTGAAACTTGTTCTAAATGGAAATCCAAACCTGACTTCTAGTCC

>M6-PGSC0003DMG400021353M6LRR-RLK\_1708

AAATTTACCACCTCTTTGAAACTTGTTCTAAATGGAAATCCAAACCTGACTTCTAGTCCTCCTGGAGTAAA  
CCCTTACCAAACAACAGCACAACTCCCGCAGCTTCACCCGCGTCGTCT

>M6-PGSC0003DMG400021353M6LRR-RLK\_1769

CTGGAGTAAACCCTTACCAAACAACAGCACAACTCCCGCAGCTTCACCCGCGTCGTCTGTACCATCTTC  
ACGACCCAACAGTTCAAGCTCTGTGATCTTTAAACCCGGTGAACAGTCAC

>M6-PGSC0003DMG400021353M6LRR-RLK\_183

TCTTCTCCTTTTTTTGTTTTGGGGTTTGTGATCTGAACCCCATGTTTTCCACCTCTTATTGTCTCAAGATT  
TGACATGGGGGTCTTCAAGAATCAACCTCATTAGGTGGCAAAGATTG

>M6-PGSC0003DMG400021353M6LRR-RLK\_1830

ACCATCTTACGACCCAACAGTTCAAGCTCTGTGATCTTTAAACCCGGTGAACAGTCACCCGAAAAAAG  
GACTCAAAGTCAAAGATAGCCATAGTTGTGGTTCCTATTGCTGGTTTTCT

>M6-PGSC0003DMG400021353M6LRR-RLK\_1891

GAAAAAAGGACTCAAAGTCAAAGATAGCCATAGTTGTGGTTCCTATTGCTGGTTTTCTACTTTTGGTTT  
TTCTTGCTATTCCACTGTACATTTATGTCTGTAAGAAGAGTAAAGATAAT

>M6-PGSC0003DMG400021353M6LRR-RLK\_1952

TTTTGGTTTTTCTTGCTATTCCACTGTACATTTATGTCTGTAAGAAGAGTAAAGATAATCATCAAGCTCCA  
ACTGCTCTTGTGGTTCATCCTAGAGATCCATCTGATTCGGATAATGTGG

>M6-PGSC0003DMG400021353M6LRR-RLK\_2013

TCAAGTCCAACTGCTCTTGTGGTTCATCCTAGAGATCCATCTGATTCGGATAATGTGGTCAAGATTGCG  
ATCGCCAATCAGACTAATGGAAGTCTTCCACAGTAAATGCAAGTGGTTC

>M6-PGSC0003DMG400021353M6LRR-RLK\_2074

AAGATTGCGATCGCCAATCAGACTAATGGAAGTCTTCCACAGTAAATGCAAGTGGTTCTGCTAGCATA  
ACAGTGGTGAATCCCATATGATCGAAGCTGGGAATTTGCTTATATCGGTT

>M6-PGSC0003DMG400021353M6LRR-RLK\_2135

CTAGCATAACAGTGGTGAATCCCATATGATCGAAGCTGGGAATTTGCTTATATCGGTTCAAGTACTTAG  
GAATGTGACTAAGAATTTTTCTCCGAAAATGAACTTGGGCGTGGTGGTT

>M6-PGSC0003DMG400021353M6LRR-RLK\_2196

AGTACTTAGGAATGTGACTAAGAATTTTTCTCCGAAAATGAACTTGGGCGTGGTGGTTTTGGTGTGGT  
TTATAAGGGAGAATTAGATGATGGGACACAAATAGCTGTCAAAGAATGGA

>M6-PGSC0003DMG400021353M6LRR-RLK\_2257

GGTGTGGTTTATAAGGGAGAATTAGATGATGGGACACAAATAGCTGTCAAAGAATGGAGGCTGGTAT  
CGTTAGCAACAAAGCTTTGGATGAATTTGATCAGAAATTGATGTTCTCTCA

>M6-PGSC0003DMG400021353M6LRR-RLK\_2318

CTGGTATCGTTAGCAACAAAGCTTTGGATGAATTTGATCAGAAATTGATGTTCTCTCAAAGTCCGGCA  
TCGGCATTAGTGTCTCTACTGGGATACTCTGTTGAAGGTAGTGAAAGAA

>M6-PGSC0003DMG400021353M6LRR-RLK\_2379

AGTCCGGCATCGGCATTTAGTGTCTCTACTGGGATACTCTGTTGAAGGTAGTGAAAGAATTCTGGTTTAT  
GAGTACATGCCACAAGGTGCACTTAGTAGACATCTTTCCGCTGGAAAAA

>M6-PGSC0003DMG400021353M6LRR-RLK\_244

TGTCTCAAGATTTGACATGGGGGTCTTCAAGAATCAACCTCATTAGGTGGCAAAGATTGTAGCTTTCTTG

ATTTTTGTTGTTAGTGGGGGTTTGTTTTTTTTTTTTGTGAATGTTAATGCA

>M6-PGSC0003DMG400021353M6LRR-RLK\_2440

CTGGTTTATGAGTACATGCCACAAGGTGCACTTAGTAGACATCTTTCCGCTGGAAAAAGTTCAAGTTGG

AGCCTCTCTCTTGAAGAAAAGGCTTAATATTGCCTTAGATGTTGCTAGA

>M6-PGSC0003DMG400021353M6LRR-RLK\_2501

TCAAGTTGGAGCCTCTCTCTTGAAGAAAAGGCTTAATATTGCCTTAGATGTTGCTAGAGGTGTGGAGT

ATCTACACACACTAGCACATCAGAGCTTCATTCATAGAGATCTCAAATCCT

>M6-PGSC0003DMG400021353M6LRR-RLK\_2562

TGTGGAGTATCTACACACACTAGCACATCAGAGCTTCATTCATAGAGATCTCAAATCCTCAAATATCTTGC

TGGGTGATGATTTCCGAGCAAAGTATCCGACTTTGGACTCGTGAAACT

>M6-PGSC0003DMG400021353M6LRR-RLK\_2623

AATATCTTGCTGGGTGATGATTTCCGAGCAAAGTATCCGACTTTGGACTCGTGAAACTTGCTCCTGATA

AAGAGAAATCTGTGGTCACCAGGCTGGCCGGAACTTTTGGATATCTGGCA

>M6-PGSC0003DMG400021353M6LRR-RLK\_2684

CTCCTGATAAAGAGAAATCTGTGGTCACCAGGCTGGCCGGAACTTTTGGATATCTGGCACCTGAATATG

CTGGTAAGCAATTTTTGCTTACTTTGTCAAAGAGAACAGATGATTTTTTA

>M6-PGSC0003DMG400021353M6LRR-RLK\_2745

TGAATATGCTGGTAAGCAATTTTTGCTTACTTTGTCAAAGAGAACAGATGATTTTTTAAAATGCATGTTT

ATATGACAATTTTTACTTTGCAGACACCTAGAGTTTGCTCAACTCAAT

>M6-PGSC0003DMG400021353M6LRR-RLK\_2806

ATGCATGTTTATATGACAATTTTTACTTTGCAGACACCTAGAGTTTGCTCAACTCAATTCTGATGTATAG

CATTTATTTTTTGCATACCAATGTACTGTTTTCCGAACTAACATGAG

>M6-PGSC0003DMG400021353M6LRR-RLK\_2867

TGATGTATAGCATTTTATTTTTTGCATACCAATGTACTGTTTTCCGAACTAACATGAGATGTTTATTTGGT

CCAGTTACGGGTAAAATCACCACGAAAGCAGATGTCTTTAGCTTTGGT

>M6-PGSC0003DMG400021353M6LRR-RLK\_2928

GTTTATTTGGTCCAGTTACGGGTAAAATCACCACGAAAGCAGATGTCTTTAGCTTTGGTGTGTGCTAAT

GGAGTTGTTAACTGGGATGATGGCACTTGATGAGGATAGACCTGAGGAAA

>M6-PGSC0003DMG400021353M6LRR-RLK\_2989



TGTGCTAATGGAGTTGTTAACTGGGATGATGGCACTTGATGAGGATAGACCTGAGGAAAGCCAGTACTT  
GGTTTCGTGGTTCTGGAATGCCAAATCCTCTAATGAGAAGCTTATGACAGT

>M6-PGSC0003DMG400021353M6LRR-RLK\_305

GCTTTCTTGATTTTTGTTGTAGTGGGGGTTTGTTTTTTTTTTTTGTGAATGTTAATGCAAATGCTCAAATGT  
TGTTGCTTTGTGGATCATCTATGGAGTTTTATTTTCACTACATATGGT

>M6-PGSC0003DMG400021353M6LRR-RLK\_3050

CAGTACTTGTTTTCGTGGTTCTGGAATGCCAAATCCTCTAATGAGAAGCTTATGACAGTCATTGATCCAG  
CTCTAGACGTGAAAGATGAGATAACTAAGAGCATTTCACCTTAGCTGAA

>M6-PGSC0003DMG400021353M6LRR-RLK\_3111

TTGATCCAGCTCTAGACGTGAAAGATGAGATAACTAAGAGCATTTCACCTTAGCTGAACTTGCTGGTCA  
TTGCACTGCAAGAGAACCTGGTCAACGGCCAGATATGGGCCACGCTGTAA

>M6-PGSC0003DMG400021353M6LRR-RLK\_3172

TGCTGGTCATTGCACTGCAAGAGAACCTGGTCAACGGCCAGATATGGGCCACGCTGTAAACGTGCTCTC  
CCCCTTGTGAGAAATGGAAGCCTCTTGAGGATGATCCAGAGGACTATTG

>M6-PGSC0003DMG400021353M6LRR-RLK\_3233

GTGCTCTCCCCACTTGTTGAGAAATGGAAGCCTCTTGAGGATGATCCAGAGGACTATTGTGGTATCGACT  
ACAGTCTTCCCCTCAATCAAATGGTCAAGGGCTGGCAAGAATCGGAAGGA

>M6-PGSC0003DMG400021353M6LRR-RLK\_3294

GTATCGACTACAGTCTTCCCCTCAATCAAATGGTCAAGGGCTGGCAAGAATCGGAAGGAAAAGACTTAA  
GTTATGTGGATCTCGAGGACAGTAAGGGTAGTATCCCTGCAAGACCAACTG

>M6-PGSC0003DMG400021353M6LRR-RLK\_3355

AGACTTAAGTTATGTGGATCTCGAGGACAGTAAGGGTAGTATCCCTGCAAGACCAACTGGATTTGCAGA  
TTCATTTACATCAGCTGATGGTAGATAATGGAGGTACTTCTATGTAGTAGA

>M6-PGSC0003DMG400021353M6LRR-RLK\_3416

TTTGCAGATTCATTTACATCAGCTGATGGTAGATAATGGAGGTACTTCTATGTAGTAGATGTAGATATCA  
ATTTTCTTTGTATTGTGTGAGATTTTGATCGTATTTTCCACGTGCCTTCG

>M6-PGSC0003DMG400021353M6LRR-RLK\_3477

TAGATATCAATTTCTTTGTATTGTGTGAGATTTTGATCGTATTTTCCACGTGCCTTCGTTCAATTTCTCCCC  
TTCAATGTGAATGTATTAGAAATTCAAACCTATGTGTTGCCTCAGTTC

>M6-PGSC0003DMG400021353M6LRR-RLK\_3538

CATTTCTCCCCCTTCAATGTGAATGTATTAGAAAATTCAAACATGTGTTGCCTCAGTTCCTTCTGTAGATAC  
AAAATAGTGATGAAGGAGAACTATACATCGGTTAAACTCCTCGCTCAG

>M6-PGSC0003DMG400021353M6LRR-RLK\_3599

TCTGTAGATACAAAATAGTGATGAAGGAGAACTATACATCGGTTAAACTCCTCGCTCAGTCACTATTTTC  
ATCTTCTACTATGGTGAGATTTAAGATCATTTCATACAACCTTGCTTATT

>M6-PGSC0003DMG400021353M6LRR-RLK\_366

TGCTCAAATGTTGTTGCTTTGTGGATCATCTATGGAGTTTTATTTTCACTACATATGGTTTGTTGTAGCTCT  
GTTTCTTGCTTTTGCTTCACTTGTTTTCACTGTCACTGACCCTAATGA

>M6-PGSC0003DMG400021353M6LRR-RLK\_3660

ACTATTTTCATCTTCTACTATGGTGAGATTTAAGATCATTTCATACAACCTTGCTTATTTTCGTGCTTTAGTT  
TGCTGCTTCAGAAGTTCTGTGTTGAGAAACATACTGACGTTGAAATA

>M6-PGSC0003DMG400021353M6LRR-RLK\_3691

AAGATCATTTCATACAACCTTGCTTATTTTCGTGCTTTAGTTTGCTGCTTCAGAAGTTCTGTGTTGAGAAA  
CATACTGACGTTGAAATAGCCCGGTAATAGAATATGTCGTTTGATTCTGA

>M6-PGSC0003DMG400021353M6LRR-RLK\_427

GTTGTAGCTCTGTTTCTTGCTTTTGCTTCACTTGTTTTCACTGTCACTGACCCTAATGACTTGTCTGTTATTA  
ATGAGTTGAGAAAAGGGTTGGAAAATCCTGAGGTCTTGAAATGGCCT

>M6-PGSC0003DMG400021353M6LRR-RLK\_488

TGTCTGTTATTAATGAGTTGAGAAAAGGGTTGGAAAATCCTGAGGTCTTGAAATGGCCTGAAAATGGTG  
GAGACCCTTGTTGTTCTCCAGTTTGCCACATATTGTGTGTAGTGGTAGTA

>M6-PGSC0003DMG400021353M6LRR-RLK\_549

AAATGGTGGAGACCCTTGTTGTTCTCCAGTTTGCCACATATTGTGTGTAGTGGTAGTAGAATTCAGCA  
GATTCAAGTTATGGGGTTAGGGTTAAAAGGCCCTTTACCTCAAACCTTGAA

>M6-PGSC0003DMG400021353M6LRR-RLK\_61

ATAAAAAAAAAAGATTACATTTTTTGATTACTCTGTGAAAACACTGTGTTGTCAGCAAGAACAACACCA  
TAGTAGTAGCAACTAGCAAGCATTGTGCTTTTTCTCACTCCAATTATCAC

>M6-PGSC0003DMG400021353M6LRR-RLK\_610

ATTCAGCAGATTCAAGTTATGGGGTTAGGGTTAAAAGGCCCTTTACCTCAAACCTTGAATAAGTTGTCTA

GGTTGACACATTTGGGGTTGCAAAGAATCAATTTAGTGGAAAGTTGCCA

>M6-PGSC0003DMG400021353M6LRR-RLK\_671

AGTTGTCTAGGTTGACACATTTGGGGTTGCAAAGAATCAATTTAGTGGAAAGTTGCCATCTTTTAGTGG  
TTTGTCTGAATTGAGCTTTGCTTACTTGGATTTCAATCAGTTTGACACAA

>M6-PGSC0003DMG400021353M6LRR-RLK\_732

TTTTAGTGGTTTGTCTGAATTGAGCTTTGCTTACTTGGATTTCAATCAGTTTGACACAATCCCACTAGATTT  
CTTTGATGGACTTGTGAATCTACAAGTTTTGGCTTTGGATGAAAATCC

>M6-PGSC0003DMG400021353M6LRR-RLK\_793

CCACTAGATTTCTTTGATGGACTTGTGAATCTACAAGTTTTGGCTTTGGATGAAAATCCTCTAAATGCCAC  
TAGTGGTTGGTCATTGCCAAATGGGCTTCGAGATTCAGCTCAGTTGATC

>M6-PGSC0003DMG400021353M6LRR-RLK\_854

TAAATGCCACTAGTGGTTGGTCATTGCCAAATGGGCTTCGAGATTCAGCTCAGTTGATCAATTTAACAAT  
GATAAACTGCAATTTAGCTGGTCCTTTGCCTGAATTCCTTGGAACACTATGT

>M6-PGSC0003DMG400021353M6LRR-RLK\_915

TTTAAACAATGATAAACTGCAATTTAGCTGGTCCTTTGCCTGAATTCCTTGGAACACTATGTCTTCTTTAGAGG  
TTTTGTTGTTGTCTACAAATAGGCTTTCAGGGCCTATTCCAGGTACTTT

>M6-PGSC0003DMG400021353M6LRR-RLK\_976

TCTTTAGAGGTTTTGTTGTTGTCTACAAATAGGCTTTCAGGGCCTATTCCAGGTACTTTCAAGGATGCAGT  
GCTCAAGATGCTTTGGTTGAACGATCAGTCGGGTGATGGTATGAGTGGT

>M6-PGSC0003DMG400021394-(rev)M6LRR-RLK\_0

ACTTCTAATTGAGTTGTTGAATTTTTGTTGTAGATAAGGACAAGGTAAAGATTCTAAGTTGGGAAGAAC  
GTTTCCGTATTATAGTTGGAACAGCACAAGGCATTGATTCCTTCATGGAG

>M6-PGSC0003DMG400021394-(rev)M6LRR-RLK\_132

GAATCATCCATAGGGACATCAAGAGCTCCAATGTACTTCTTGATGAAAATCTTGAAGCAAAAATTGCTGA  
TTTTGGACTTGCTCGGTGTTTTGGAGCTGACAAAACATCTCAGTACTG

>M6-PGSC0003DMG400021394-(rev)M6LRR-RLK\_198

CTGATTTTGGACTTGCTCGGTGTTTTGGAGCTGACAAAACATCTCAGTACTGGAATTGCTGGAACATT  
GTAAGTCAACAATTCACAAATACGTATCAATACAGTTCACAAACACTTGT

>M6-PGSC0003DMG400021394-(rev)M6LRR-RLK\_264

CATTGTAAGTCAACAATTCACAAATACGTATCAATACAGTTCACAAACACTTGTCCGTATCTTAAACTTAA  
TCTGTGATTTTCGGTGTACAGAGGATATATGGCTCCTGAATACCTCGTA

>M6-PGSC0003DMG400021394-(rev)M6LRR-RLK\_330

CTTAATCTGTGATTTTCGGTGTACAGAGGATATATGGCTCCTGAATACCTCGTAAAAGGACAGCTAACAG  
AGAAGGCTGATGTCTATAGCTATGGGGTGCTTGTCTTCAAATCGTTAGT

>M6-PGSC0003DMG400021394-(rev)M6LRR-RLK\_396

ACAGAGAAGGCTGATGTCTATAGCTATGGGGTGCTTGTCTTCAAATCGTTAGTGGCAGAAAAAGTATT  
GCCTTTCAGAGGACTCTGGCTCTCTACTACAAACAGTAAGAATGCTATAG

>M6-PGSC0003DMG400021394-(rev)M6LRR-RLK\_462

ATTGCCTTTCAGAGGACTCTGGCTCTCTACTACAAACAGTAAGAATGCTATAGATTTCTCTTTATCATGG  
TCATTATATGAATATCATTGAACTTTAGTAGTAAAGTAAAAAAAATA

>M6-PGSC0003DMG400021394-(rev)M6LRR-RLK\_528

CATGGTCATTATATGAATATCATTGAACTTTAGTAGTAAAGTAAAAAAAATAATTTTATCATATAACTC  
AGTATATTGTCATTTTGGTTTCAGGTGTGGAAGCTGTACACAACAAATC

>M6-PGSC0003DMG400021394-(rev)M6LRR-RLK\_594

AACTCAGTATATTGTCATTTTGGTTTCAGGTGTGGAAGCTGTACACAACAAATCAGGTAAGTGAAGCATT  
AGATCCTCTATTGAAAGGCGATTTTCCACCAGAAGAGGCATCAAAGGTAC

>M6-PGSC0003DMG400021394-(rev)M6LRR-RLK\_66

AACGTTTCCGTATTATAGTTGGAACAGCACAAGGCATTGATTTCTTCATGGAGGTTTCAGAGATCAGAAT  
CATCCATAGGGACATCAAGAGCTCCAATGTAATCTTCTGATGAAAATCTTG

>M6-PGSC0003DMG400021394-(rev)M6LRR-RLK\_660

CATTAGATCCTCTATTGAAAGGCGATTTTCCACCAGAAGAGGCATCAAAGGTACTAAAAGTGGGGTTGT  
TGTGCACTCAAGCTTCTGTCGCTTTAAGACCATCAATGAGTGAAGTTGTCC

>M6-PGSC0003DMG400021394-(rev)M6LRR-RLK\_716

AAAGTGGGGTTGTTGTGCACTCAAGCTTCTGTCGCTTTAAGACCATCAATGAGTGAAGTTGTCAAATGC  
TAACGTGTGAGGGCTATCAAATCCAGAACCATGCCAACCACCATTCTTA

>M6-PGSC0003DMG400021415M6LRR-RLP\_0

AAATGTGCCTGCATTTAAAGTCAAATTATAATTAAGATAGACTGAACAAAGTCAGAATACTAAGGGGGT  
AAAATGACTGACACAGTAACAAAAAGAAAAAGGTTCAATCTAGACAGCTC

>M6-PGSC0003DMG400021415M6LRR-RLP\_1054

GGTGTGGACTAGCCAAGCATCCTCCCAGAACTGTCTCCTTCCCATTCCAACCTGAAGAGGTGATGG  
CGAAAAATAATTTAGTGGACTCTAATATCCTCCATATACCATAGGGA

>M6-PGSC0003DMG400021415M6LRR-RLP\_124

TCTGCAGAAGAACTTAAACAATATAGAGAAAATTGAGAGCACGATGATGCAGGTGTAAAACCTGTCTCT  
GTAAGATGTATTGCTCTACAGTAAAACAGACATAAAAAGGTAAAATTGAAA

>M6-PGSC0003DMG400021415M6LRR-RLP\_1426

TGTCCAACCTTTTTGTCACTGAAAACATGCAGTGGAGCAAAGAGATAGGGTATATGGGATATTATTCTG  
AACTTAAAACAGCTTTGGTTGGATGTTATCATCACACAGTAGCTTTGTAAC

>M6-PGSC0003DMG400021415M6LRR-RLP\_1488

TATTCTGAACTTAAAACAGCTTTGGTTGGATGTTATCATCACACAGTAGCTTTGTAACCTGAATTCCTTGT  
AACTATGTTTGTCTAATATATTATAGAACTATTGGGAAGTTCTGA

>M6-PGSC0003DMG400021415M6LRR-RLP\_1550

TTCCTTGTTAACTATGTTTGTCTAATATATTATAGAACTATTGGGAAGTTCTGAGGCTAGAAAAAGA  
TCAAATTAAGACCATAGTTTCAAGCATTCTCTTGTCTGGGTGAAGGGGTG

>M6-PGSC0003DMG400021415M6LRR-RLP\_1612

AGAAAAAGATCAAATTAAGACCATAGTTTCAAGCATTCTCTTGTCTGGGTGAAGGGGTGTGAAGGTTGAA  
ACTTTAACCCATGAGTTTGGGATATTTTAGGCCCTATAAAATTTGATATT

>M6-PGSC0003DMG400021415M6LRR-RLP\_1674

GGTTGAACTTTAACCCATGAGTTTGGGATATTTTAGGCCCTATAAAATTTGATATTGTGATACTTAATG  
TACTTACCTTCTACTCTGCTTCTCTCTCCATTTAGATGATTTATGTGT

>M6-PGSC0003DMG400021415M6LRR-RLP\_1736

TACTTAATGTACTTACCTTCTACTCTGCTTCTCTCTCCATTTAGATGATTTATGTGTCTGGTGTAGAAAAG  
AAGAAAGATGTTCCATTGCTGATGCTGAAGTGCAAACAGTTGACGATA

>M6-PGSC0003DMG400021415M6LRR-RLP\_1798

GTTAGAAAAGAAGAAAGATGTTCCATTGCTGATGCTGAAGTGCAAACAGTTGACGATAAATCTTGGAT  
TTCAAGAAATGCCATTCTCGGCATAGGTGTTCTCTTAAAGTCAACTCCTTA

>M6-PGSC0003DMG400021415M6LRR-RLP\_186

TGTCTCTGTAAGATGTATTGCTCTACAGTAAAACAGACATAAAAAGGTAAAATTGAAATAGGATAGAAG

GTCTACCTAATCTTGGAGCTGGATACCAAGGAAACACTTCTCTAGGCTAAA

>M6-PGSC0003DMG400021415M6LRR-RLP\_1860

CTTGGATTCAAGAAATGCCATTCTCGGCATAGGTGTTCTCTTAAAGTCAACTCCTTATCTGGAGAATTTG  
ATGATACTTCATGAAGAGGTATGTTTTCAATTGATTCTTGCTTTGAGAT

>M6-PGSC0003DMG400021415M6LRR-RLP\_2046

TCAGTATCACATTTTGAGGCATAATATAGCCTTGGATGTCAAGCTGTTTTATGTATAGCGCCCTTTATTAC  
TGAAATTGTTGCCCATCAGACCTACATTTTCTAATTTCTAAATATATGC

>M6-PGSC0003DMG400021415M6LRR-RLP\_2108

CTTTATTACTGAAATTGTTGCCCATCAGACCTACATTTTCTAATTTCTAAATATATGCGACCATAGTGTTAC  
TGCACTGAAGACTCTTCTCCTTTTACAATGAGTTATTAGCTTCTTGC

>M6-PGSC0003DMG400021415M6LRR-RLP\_2170

ATAGTGTTACTGCACTGAAGACTCTTCTCCTTTTACAATGAGTTATTAGCTTCTTGCTTTTGTGGCATA  
AAATATTACATTCAATCGTCTATTGATCTCCTACGACATCAATGGGAA

>M6-PGSC0003DMG400021415M6LRR-RLP\_2232

GTTTGGCATAAAATATTACATTCAATCGTCTATTGATCTCCTACGACATCAATGGGAAGTCTTCAACATTT  
TAGTACTTTCCACTAAATTACTATCAGTGGTCTATCTCAATATTATACA

>M6-PGSC0003DMG400021415M6LRR-RLP\_2294

TCAACATTTTAGTACTTTCCACTAAATTACTATCAGTGGTCTATCTCAATATTATACACCTTCTGACTAAAA  
AGTATTTTCATCTGTTTGTCTATTGTTGACTACTATGTTGCTTATAT

>M6-PGSC0003DMG400021415M6LRR-RLP\_2356

CTGACTAAAAAGTATTTTCATCTGTTTGTCTATTGTTGACTACTATGTTGCTTATATCTCGTTTCGGATTC  
TTTTGTGTGTTGTTCTGCAATTTAGTACCATAAAATTCCATTCTAAA

>M6-PGSC0003DMG400021415M6LRR-RLP\_2418

TTTCGGATTCTTTTGTGTGTTGTTCTGCAATTTAGTACCATAAAATTCCATTCTAAAATCCAAACATTTAC  
TTAAGTATCTTCTAGCTGTTACTTACTTAACTGATTTGTGGTT

>M6-PGSC0003DMG400021415M6LRR-RLP\_248

ATAGAAGGTCTACCTAATCTTGGAGCTGGATACCAAGGAAACACTTCTCTAGGCTAAAAGGCAAGTAAT  
GGTAATAATCACTACATTAAGTAAAGCATAGAGTGGCTAGTTGAAGAGCAT

>M6-PGSC0003DMG400021415M6LRR-RLP\_2480

AAACATTTACTTAAGTATCTTCTAGCTGTTACACTTACACTTAACCTGATTTGTGGTTCTTCTGTATCCGTA  
GGGAGATTTCTTTGTCTGGGATGAAGACTTGAAGACGAAGAGTTTGA

>M6-PGSC0003DMG400021415M6LRR-RLP\_2542

TGTATCCGTAGGGAGATTTCTTTGTCTGGGATGAAGACTTGAAGACGAAGAGTTTGATTGGTCAGGAG  
ACAATCCCTCTCCTTGCATGAAAACATATTTAAAGGCTCCTTACAGAATT

>M6-PGSC0003DMG400021415M6LRR-RLP\_2604

TCAGGAGACAATCCCTCTCCTTGCATGAAAACATATTTAAAGGCTCCTTACAGAATTTGAAGCATGTTG  
AGGTTTCTTCAAAGTGTGTTAGTTGTCAACACAAAGCTGACGCAACAGAG

>M6-PGSC0003DMG400021415M6LRR-RLP\_2666

GCATGTTGAGGTTTCTTCAAAGTGTGTTAGTTGTCAACACAAAGCTGACGCAACAGAGCGCCTTTCAGAA  
TTTTTGAAGTCTTTGCTTGAGCATGCAAAAAATCTTGAGAACTGGTTAT

>M6-PGSC0003DMG400021415M6LRR-RLP\_2728

TTTCAGAAATTTTTGAAGTCTTTGCTTGAGCATGCAAAAAATCTTGAGAACTGGTTATAGCGCCATGGCA  
CAATGGATGCGATATCTCTTCTGCCAATATCTCAAAGTGATTAAGAAGT

>M6-PGSC0003DMG400021415M6LRR-RLP\_2790

CCATGGCACAATGGATGCGATATCTCTTCTGCCAATATCTCAAAGTGATTAAGAAGTGGCTAGCTTTTCC  
AGGAGCTTCTAATATTGCAGTTGTTTCCTTAGGATCGGTCTCCGGTGT

>M6-PGSC0003DMG400021415M6LRR-RLP\_2852

AGCTTTTCCAGGAGCTTCTAATATTGCAGTTGTTTCCTTAGGATCGGTCTCCGGTGTGACTTTTTCAGGGG  
AGTAGAACTTTTATATTGACCTTGTGTTCTAATATTTTGTTCAACT

>M6-PGSC0003DMG400021415M6LRR-RLP\_2914

TTTCAGGGGAGTAGAACTTTTATATTGACCTTGTGTTCTAATATTTTGTTCAACTACTTTTGGAACTCT  
TATATTTTTGTATGTCAGTGTAATAAATGTTGATCATCAAGTTACTG

>M6-PGSC0003DMG400021415M6LRR-RLP\_2976

TTGGAAGTCTTATATTTTTGTATGTCAGTGTAATAAATGTTGATCATCAAGTTACTGTGTAAGTAAAGAA  
GGAGATGTAATCTGCTATAATTGATTAAGTACTGTGGTATTATTCAA

>M6-PGSC0003DMG400021415M6LRR-RLP\_3008

AAAAAATGTTGATCATCAAGTTACTGTGTAAGTAAAGAGGAGATGTAATCTGCTATAATTGATTAAGT  
ACTGTGGTATTATTCAAAGTGTGTTTGCATTATCAATGTATAATATGCCG

>M6-PGSC0003DMG400021415M6LRR-RLP\_310

AAGTAATGGTAATAATCACTACATTAAGTAAAGCATAGAGTGGCTAGTTGAAGAGCATTCTTTGAATAA  
GGAGCTTTTTAGATGAGCCAAATGCACCCAAACAAATCAATAGCCAAATGG

>M6-PGSC0003DMG400021415M6LRR-RLP\_372

TGAATAAGGAGCTTTTTAGATGAGCCAAATGCACCCAAACAAATCAATAGCCAAATGGCCACTCGTTATT  
AGGATTGAGTGAGTGAGAAGGAGAAGGGACACTTGCATATATAGGTACTC

>M6-PGSC0003DMG400021415M6LRR-RLP\_434

TCGTTATTAGGATTGAGTGAGTGAGAAGGAGAAGGGACACTTGCATATATAGGTACTCTTTTGGTGCAT  
AAATGAGTAATCACTCGTTGTTGATGTCAAATCCTCTGTTGTCGTTGGCAT

>M6-PGSC0003DMG400021415M6LRR-RLP\_496

GGTGCATAAATGAGTAATCACTCGTTGTTGATGTCAAATCCTCTGTTGTCGTTGGCATAGGCCCCACAC  
TACTCAAATAAGTCCCTGATTTGCTGTGACTGAAAAGGTGGTTCATATCC

>M6-PGSC0003DMG400021415M6LRR-RLP\_558

CCCCACACTACTCAAATAAGTCCCTGATTTGCTGTGACTGAAAAGGTGGTTCATATCCTCTATGTGCCTCT  
CACATTATGATCACCTACTACAGATGTTGACGCTCTTCTTTGGAGGTTT

>M6-PGSC0003DMG400021415M6LRR-RLP\_62

AGGGGGTAAAATGACTGACACAGTAACAAAAAGAAAAAGGTTCAATCTAGACAGCTCTGAATCTGCA  
GAAGAACTTAAACAATATAGAGAAAATTGAGAGCACGATGATGCAGGTGTAA

>M6-PGSC0003DMG400021415M6LRR-RLP\_806

AGATAGAGAATACTAGTCTTTGATCTTGACGTTACCTACTGTGTTTGCTTCCACAAAAGAGATTCAGCTC  
TGGAAGATAAAGGGGGGCAGCTATGCAGCTTATTTAAAAGTGAGGACAC

>M6-PGSC0003DMG400021415M6LRR-RLP\_868

ATTCAGCTCTGGAAGATAAAGGGGGGCAGCTATGCAGCTTATTTAAAAGTGAGGACACCGTTAAATTCA  
CAATCATTTTTGCTGCACCAGAGACCAAAAACACAGTCCTGTTTCAGACCAC

>M6-PGSC0003DMG400021415M6LRR-RLP\_930

AAATTCACAATCATTTTTGCTGCACCAGAGACCAAAAACACAGTCCTGTTTCAGACCACATTTCTGAAATTG  
TAGCATCTTGTGTTTGTGCAATACTGTAAATATATGGATACTGCATCTT

>M6-PGSC0003DMG400021415M6LRR-RLP\_992

CTGAAATTGTAGCATCTTGTGTTTGTGCAATACTGTAAATATATGGATACTGCATCTTCGGTGGTGTGTTG



GACTAGCCAAGCATCCTCCCAGAACTTGTCTCCTTCCCATTTCCTCAACTTG

>M6-PGSC0003DMG400021609M6LRR-RLK\_0

CACAAAACACACAAGCCCACTACACTACCAATCTTAGTCATTATTTCTCTATCTACTATCACTCCTGTGAAT  
GCAGTTACTTCATTTTCCTTTCCACCTTGTACACATGAATATCTAACA

>M6-PGSC0003DMG400021609M6LRR-RLK\_1054

TCAGTGGAGATTACCAGCTGATATTGGATATTGTCCACATTTGAATAGATTAGATTGAGTAATAATCA  
ATTCACAGGACAAATCCAATGTCACCTCAAAGGTGAATGTTCTTTCTT

>M6-PGSC0003DMG400021609M6LRR-RLK\_1116

AATAATCAATTCACAGGACAAATCCAATGTCACCTCAAAGGTGAATGTTCTTTCTTTTCTCAGTTTATC  
AAACAACTTGATAAATGGAGACTTCCCTCAATGGATAAGTAACATGAGC

>M6-PGSC0003DMG400021609M6LRR-RLK\_1178

CAGTTTATCAAACAACTTGATAAATGGAGACTTCCCTCAATGGATAAGTAACATGAGCAGCTTGAATAC  
TTGGATTTTTTCAGGCAATAGTTTAGAAGGAGCATTGCCTGATTCAATAGG

>M6-PGSC0003DMG400021609M6LRR-RLK\_124

TCCCAAACCTCAACATTCATTCAATGAACTTGTACTCCATTACCTAAAATTCACACCTTTTTCCCTTTTCAT  
TTCCATTCCCTTCTCTAACTACTCTGAAAAAACATTTGTTTGCTTC

>M6-PGSC0003DMG400021609M6LRR-RLK\_1240

TGGAATACTTGGATTTTTTCAGGCAATAGTTTAGAAGGAGCATTGCCTGATTCAATAGGGGATTTGAAAA  
TGTTGAAGTACTTGAGTTTATCTGGTAACAAATTGAGTGGAAACATTCCAA

>M6-PGSC0003DMG400021609M6LRR-RLK\_1302

TTGAAAATGTTGAAGTACTTGAGTTTATCTGGTAACAAATTGAGTGGAAACATTCCAAAGTCTATGGTGT  
ATTGTACTAGTTTATCGACTATTCGGATAAAAGAAAATGCATTGACTGGT

>M6-PGSC0003DMG400021609M6LRR-RLK\_1364

TATGGTGTATTGTACTAGTTTATCGACTATTCGGATAAAAGAAAATGCATTGACTGGTTGCATTCCTGAA  
GGATTGTTTGGTATAGGATTGGAAGAAGCAGATTTTTCAAGAAATGAGTT

>M6-PGSC0003DMG400021609M6LRR-RLK\_1426

TTCCTGAAGGATTGTTTGGTATAGGATTGGAAGAAGCAGATTTTTCAAGAAATGAGTTAACTGGTTCCAT  
CCCTCCTGGTTCTGGTAAATTCTTTGAATCACTTCAATTTCTTGATCTGT

>M6-PGSC0003DMG400021609M6LRR-RLK\_1488

GGTTCATCCCTCCTGGTTCTGGTAAATTCTTTGAATCACTTCAATTTCTTGATCTGTCAGGAAACAATCTT  
ACTGGAAACATTCCAGCTGAGGTGGGACTTTTCTCCAAGTTGAGATAT

>M6-PGSC0003DMG400021609M6LRR-RLK\_1550

AAACAATCTTACTGGAAACATTCCAGCTGAGGTGGGACTTTTCTCCAAGTTGAGATATTTGAATCTTTCTT  
GGAACAATTTTCAATCAAGATTGCCTCCTGAAGTTGGATACTTTCAGAA

>M6-PGSC0003DMG400021609M6LRR-RLK\_1612

ATCTTTCTTGGAACAATTTTCAATCAAGATTGCCTCCTGAAGTTGGATACTTTCAGAATCTAACGGTGTTG  
GATCTTCGACACAGTGCTTTAGTTGGATCAATTCCTGGTGATATATGTG

>M6-PGSC0003DMG400021609M6LRR-RLK\_1674

ACGGTGTTGGATCTTCGACACAGTGCTTTAGTTGGATCAATTCCTGGTGATATATGTGATTCTGGTAGCT  
TGGGAATTCTTCAACTTGATGGAAATTCATTCCTGGACCTATTCTGAT

>M6-PGSC0003DMG400021609M6LRR-RLK\_1736

TGGTAGCTTGGGAATTCTTCAACTTGATGGAAATTCATTCCTGGACCTATTCTGATGAGATTGGAAAT  
TGTTTCATCCCTCTACTTGTTGTAAGTATATTTATTCTGATTTATCTCATT

>M6-PGSC0003DMG400021609M6LRR-RLK\_1798

TTGGAAATTGTTTCATCCCTCTACTTGTTGTAAGTATATTTATTCTGATTTATCTCATTATAGTTTGGTCCAG  
CCTCTCTATAACATTCATTTACCATGAGAACCATGTTTTCTGTGGAA

>M6-PGSC0003DMG400021609M6LRR-RLK\_186

CCCCTTTTCAATTCATCCCTTCTCTAACTACTCTGAAAAAACATTTGTTTGCTTCTCTTGTGTAGGAAC  
TAAAAAAAAACACCATCATAAAAATGAGATCTTTTAGTCCTTTTTTA

>M6-PGSC0003DMG400021609M6LRR-RLK\_1984

AGCAGCAAAAATAATATTGGAACAAACAATGCTGTTATAGAGAGGTAGTAAGGGATATGTTTATTTGAA  
AATGAGGTTCTGTATCACTTTTGCTTTGTCTATATCCCTGTAGTTCTTGA

>M6-PGSC0003DMG400021609M6LRR-RLK\_2046

ATTTGAAAATGAGGTTCTGTATCACTTTTGCTTTGTCTATATCCCTGTAGTTCTTGAATTGAATGTCAAAT  
TTGTTAAATGCAGGAGTTTGTACATAATAATTTAAGTGGGTCAATAC

>M6-PGSC0003DMG400021609M6LRR-RLK\_2108

AATGTCAAATTTGTTAAATGCAGGAGTTTGTACATAATAATTTAAGTGGGTCAATACCAAGGTCCCTTT  
CAATGTTGAAGAAGCTCAAGATTTTGAAGCTAGAGTATAACCAATTGAGT

>M6-PGSC0003DMG400021609M6LRR-RLK\_2170

GTCCCTTTCAATGTTGAAGAAGCTCAAGATTTTGAAGCTAGAGTATAACCAATTGAGTGGTGAAATACCA  
CAAGATCTTGGCAAGTTAGAAAATCTTTTGGCTGTTAATATATCCTACAA

>M6-PGSC0003DMG400021609M6LRR-RLK\_2232

AAATACCACAAGATCTTGGCAAGTTAGAAAATCTTTTGGCTGTTAATATATCCTACAACAGGCTCGTTGG  
ACGCCTTCCAATGAGTAGTATATTCCAGAATTTAGACCAGAGTTCATTGG

>M6-PGSC0003DMG400021609M6LRR-RLK\_2294

CTCGTTGGACGCCTTCCAATGAGTAGTATATTCCAGAATTTAGACCAGAGTTCATTGGAAGGGAATTTGG  
GTATTTGTTACCCTTGTTGAAAGGTCCTTGTAAGATGAATGTGCCAAAG

>M6-PGSC0003DMG400021609M6LRR-RLK\_2356

GAATTTGGGTATTTGTTACCCTTGTTGAAAGGTCCTTGTAAGATGAATGTGCCAAAGCCTTTGGTTCTT  
GATCCTTATGCCTATGGAAACCAGAGGGGAGGTCAAACCGGGACGATGG

>M6-PGSC0003DMG400021609M6LRR-RLK\_2418

TGGTCTTGATCCTTATGCCTATGGAAACCAGAGGGGAGGTCAAACCGGGACGATGGAACTTCAAGA  
AGCAATAACAAAAGTTTCAAGAACCATAGATTCTCAGTGTTTCATCCATTG

>M6-PGSC0003DMG400021609M6LRR-RLK\_248

GTTGTAGGAACTAAAAAAAAACCATCATAAAAATGAGATCTTTTAGTCCTTTTTTAGTTCTAATACTTC  
ATTTTGGCTTATTGTATGGATCTTTATTAGCTGATGATAATACTATGCA

>M6-PGSC0003DMG400021609M6LRR-RLK\_2480

TCAAGAAGCAATAACAAAAGTTTCAAGAACCATAGATTCTCAGTGTTTCATCCATTGTTGCAATCTCTGC  
TGCAGCTGTGATCGCGGTTGGAGTCATGATAATAACCTTACTCAATGCT

>M6-PGSC0003DMG400021609M6LRR-RLK\_2542

AATCTCTGCTGCAGCTGTGATCGCGGTTGGAGTCATGATAATAACCTTACTCAATGCTTCTGTTCGAAGG  
AGGATCACATTCGTTGACAATGCCTTGGAAAGCATGTGCTCAAGTTCTTC

>M6-PGSC0003DMG400021609M6LRR-RLK\_2604

TTCGAAGGAGGATCACATTCGTTGACAATGCCTTGGAAAGCATGTGCTCAAGTTCTTCTAAGTCAGGGA  
ACCTAGCCACTGGAAAGCTTGTGTTACTGGACACCAAATCGTCCCCGGATT

>M6-PGSC0003DMG400021609M6LRR-RLK\_2666

TCAGGGAACCTAGCCACTGGAAAGCTTGTGTTACTGGACACCAAATCGTCCCCGGATTGGACTAGTAGC

AGTCTTGAATCAATCCTAAACAAGGCATCTCAAATCGGTGAAGGTGTCTTC

>M6-PGSC0003DMG400021609M6LRR-RLK\_2728

TAGTAGCAGTCTTGAATCAATCCTAAACAAGGCATCTCAAATCGGTGAAGGTGTCTTCGGAAGTGTTC  
AAGGTTCCATTGGGAGGGGAAGGAAGAATAGTAGCTATCAAGAAGCTTGT

>M6-PGSC0003DMG400021609M6LRR-RLK\_2790

CTGTTTACAAGGTTCCATTGGGAGGGGAAGGAAGAATAGTAGCTATCAAGAAGCTTGTAACATCAAAAA  
TCCTCCAATATCCTGAGGATTTGATAGAGAAGTTAGAGTTTTAGCAAAG

>M6-PGSC0003DMG400021609M6LRR-RLK\_2852

TCAAAAATCCTCCAATATCCTGAGGATTTGATAGAGAAGTTAGAGTTTTAGCAAAGCAAGGCATCCAA  
ATCTAATATCCTTAAAAGGGTATTACTGGACTCCTCAACTTCAGCTTCTA

>M6-PGSC0003DMG400021609M6LRR-RLK\_2914

GCATCCAAATCTAATATCCTTAAAAGGGTATTACTGGACTCCTCAACTTCAGCTTCTAGTATCAGATTATG  
CACCAGAAGGAAGTTTACAAACCATACTGCACGAAAGGCCTTCGTCTTC

>M6-PGSC0003DMG400021609M6LRR-RLK\_2976

CAGATTATGCACCAGAAGGAAGTTTACAAACCATACTGCACGAAAGGCCTTCGTCTTCAACTTCCCTTCC  
CCTGTCTTGGTCCACCCGATTCAACATTGTGCTTGGAACAGCCAAGGGAC

>M6-PGSC0003DMG400021609M6LRR-RLK\_3038

TCCCTTCCCCTGTCTTGGTCCACCCGATTCAACATTGTGCTTGGAACAGCCAAGGGACTTGCACATTTGCA  
CCACGCGTTTAGGCCAGCAATCATACTACAACATAAAGCCTAGCAAC

>M6-PGSC0003DMG400021609M6LRR-RLK\_310

TAATACTTCATTTTGGCTTATTGTATGGATCTTTATTAGCTGATGATAATACTATGCAGCTTAATGATGAT  
GTTTTAGGCCTCATTGTGTTCAAATCAGCTCTTCTTGATCCTTACTCAA

>M6-PGSC0003DMG400021609M6LRR-RLK\_3100

ACATTTGCACCACGCGTTTAGGCCAGCAATCATACTACAACATAAAGCCTAGCAACATCCTCCTTGAT  
GAAAACCTCAACCCGAGAATATCAGATTTGGGCTGGCAAGGCTAGTGAC

>M6-PGSC0003DMG400021609M6LRR-RLK\_3162

TCCTTGATGAAAACCTCAACCCGAGAATATCAGATTTGGGCTGGCAAGGCTAGTGACAAAACCTCGATA  
AGCACATGATAAGCAACAGGTTCCAGAGTGCACTAGGCTATGTAGCACCTG

>M6-PGSC0003DMG400021609M6LRR-RLK\_3224

CTCGATAAGCACATGATAAGCAACAGGTTCCAGAGTGCCTAGGCTATGTAGCACCTGAATTGGCATGC  
CAGAGCTTAAGGGTGAACGAAAAGTGCACGTGTATGGTTTTGGAATGTTG

>M6-PGSC0003DMG400021609M6LRR-RLK\_3286

GGCATGCCAGAGCTTAAGGGTGAACGAAAAGTGCACGTGTATGGTTTTGGAATGTTGATTCTTGAAAT  
TGTACAGGTAGAAGGCCAGTTGAGTATGGAGAGGACAATGTGTTTATACT

>M6-PGSC0003DMG400021609M6LRR-RLK\_3348

TTGAAATTGTCACAGGTAGAAGGCCAGTTGAGTATGGAGAGGACAATGTGTTTATACTCAATGATCATG  
TGAGAGTTTTGCTTGAGCAAGGCAATGTGTTGGAATGTGTTGATCCAACTA

>M6-PGSC0003DMG400021609M6LRR-RLK\_3410

GATCATGTGAGAGTTTTGCTTGAGCAAGGCAATGTGTTGGAATGTGTTGATCCAACTATGAATACTTATC  
CTGAAGAGGAAGTTTTGCCTGTTTTGAAGTTGGCATTGGTGTGCACTTCT

>M6-PGSC0003DMG400021609M6LRR-RLK\_3472

TACTTATCCTGAAGAGGAAGTTTTGCCTGTTTTGAAGTTGGCATTGGTGTGCACTTCTCAAATACCATCAA  
GTAGGCCTTCAATGGCTGAAGTGGTTCAAATCTTGCAGGTCATCAAAAC

>M6-PGSC0003DMG400021609M6LRR-RLK\_3534

TACCATCAAGTAGGCCTTCAATGGCTGAAGTGGTTCAAATCTTGCAGGTCATCAAAACACCTGTTCTCA  
AAGAATGGCAGCATACTAAAACATGTCACAACTTGATGAATTTCCCTTT

>M6-PGSC0003DMG400021609M6LRR-RLK\_3596

GTTCTTCAAAGAATGGCAGCATACTAAAACATGTCACAACTTGATGAATTTCCCTTTCTTTGGCTTTC  
TATCATCCTATTGTTGTTATGTTAACCTCCTAATTTGATGTTTTTGGAC

>M6-PGSC0003DMG400021609M6LRR-RLK\_3658

TTGGCTTTCTATCATCCTATTGTTGTTATGTTAACCTCCTAATTTGATGTTTTTGGACTAGATAGTGATAGA  
GAGAGTTTTGTACTTCTCTGTCATTTGATGAAATATATGAGAGGTTGG

>M6-PGSC0003DMG400021609M6LRR-RLK\_372

AATGATGATGTTTTAGGCCTCATTGTGTTCAAATCAGCTCTTCTTGATCCTTACTCAAACCTTATCATGG  
AGTGAAGATGATAACTCTCCTTGTGCATGGGAGTTCATTAAATGCAAT

>M6-PGSC0003DMG400021609M6LRR-RLK\_434

CTTATCATGGAGTGAAGATGATAACTCTCCTTGTGCATGGGAGTTCATTAAATGCAATCCAATGAATGGT  
AGAGTCACTGAGCTCAACTTAAATGGCTTGAGTTTATCAGGAAAGATCGG

>M6-PGSC0003DMG400021609M6LRR-RLK\_496

TGAATGGTAGAGTCACTGAGCTCAACTTAAATGGCTTGAGTTTATCAGGAAAGATCGGTAGGGGGCTCG  
AGAAGTTGCAATCTTTAAAGGTAATCTTTGTCAAACAACAACCTTACTG

>M6-PGSC0003DMG400021609M6LRR-RLK\_558

GGGCTCGAGAAGTTGCAATCTTTAAAGGTAATCTTTGTCAAACAACAACCTTACTGGTGCAATTAGCC  
CTGAGGTAGCCTTGTTGACAAATCTTGAAAATCTCAACTTTAGTCATAAT

>M6-PGSC0003DMG400021609M6LRR-RLK\_62

TCCTGTGAATGCAGTACTTCATTTTCTTTCCACCTTGACACATGAATATCTAACAATAATCCCAAACCTC  
AACATTCATTCAATGAAACTTGTAATCCATTACCTAAAATTCACACCT

>M6-PGSC0003DMG400021609M6LRR-RLK\_620

AATTAGCCCTGAGGTAGCCTTGTTGACAAATCTTGAAAATCTCAACTTTAGTCATAATGGCTTATCAGGG  
AATATCCCTGGATCTTTTTCGAATATGTCATCTTTACAGTTTCTTGATCT

>M6-PGSC0003DMG400021609M6LRR-RLK\_682

TATCAGGGAATATCCCTGGATCTTTTTCGAATATGTCATCTTTACAGTTTCTTGATCTGTCTGAGAATGCG  
TTATCTGGACCTGTCTCTGATACCATGTTTGATAACTGTGGTGATTTCGT

>M6-PGSC0003DMG400021609M6LRR-RLK\_744

GAGAATGCGTTATCTGGACCTGTCTCTGATACCATGTTTGATAACTGTGGTGATTTCGTTACGTTATCTTTC  
TCTATCCGGGAATTATCTTGAAGGTTCAATTTCTAAAACAGTTTCAAAA

>M6-PGSC0003DMG400021609M6LRR-RLK\_806

TTATCTTTCTCTATCCGGGAATTATCTTGAAGGTTCAATTTCTAAAACAGTTTCAAAAATGCACTAGTTTGA  
ATCATCTCAATCTTTCAAGAAACCATTTTTCTGGTGACCCTGGATTTTC

>M6-PGSC0003DMG400021609M6LRR-RLK\_868

CTAGTTTGAATCATCTCAATCTTTCAAGAAACCATTTTTCTGGTGACCCTGGATTTTCCGGGGGTATCTGG  
GGATTGACAAGGCTTAGAACATTAGATCTTTCACATAATGAACTCTCTG

>M6-PGSC0003DMG400021609M6LRR-RLK\_930

GGTATCTGGGGATTGACAAGGCTTAGAACATTAGATCTTTCACATAATGAACTCTCTGGATTAGTACCAA  
TTGGTGTTTCAGTTTACATCAGTTGAAAGAGTGTTTGTACAAGGGAAT

>M6-PGSC0003DMG400021609M6LRR-RLK\_992

AGTACCAATTGGTGTTTCAGTTTACATCAGTTGAAAGAGTGTTTGTACAAGGGAATCATTTCAAGTGA

GATTTACCAGCTGATATTGGATATTGTCCACATTTGAATAGATTAGATTT

>M6-PGSC0003DMG400021622-(rev)M6OtherRLKTM\_0

ATGGAGTTACTGAAGGCCCTACGAAATCTCTTGTCTGAAAGGGAGGTTATTCCCAGTTGGTTTGATA

CAAAGACTCCATGCAATTGGACCGGCATAAAGTGTGAAGGTGAACGTGTC

>M6-PGSC0003DMG400021622-(rev)M6OtherRLKTM\_1037

GTGGATTTCCAAGTGGACGCAGGTAGAGTCAATAATGGTGTCAAAGAATTTCTAAGTGGACCTCTCCC

ACCACTGTATCTCTTTGCTATCTGTTCTTGATGTCAGTGCTAACAGTCT

>M6-PGSC0003DMG400021622-(rev)M6OtherRLKTM\_1098

CCTCTCCCACCACTGTATCTCTTTGCTATCTGTTCTTGATGTCAGTGCTAACAGTCTATCTGGTGAGTTG

TCTTCAGAGATATGTGGTGCCAAATCATTGAGCGTGCTGGTGTGTCG

>M6-PGSC0003DMG400021622-(rev)M6OtherRLKTM\_1159

CTGGTGAGTTGTCTTCAGAGATATGTGGTGCCAAATCATTGAGCGTGCTGGTGTGTCGGATAACAATTT

CACTGGTGACATCCAAAGTACTTTCACGAACTGTTTCATGCCTCACAGACT

>M6-PGSC0003DMG400021622-(rev)M6OtherRLKTM\_122

CCAGATTAACTTTCCATGTACAGGATCACCGCTAAATGTACCATTTCTGGAAATATTGGGAAATTTAGG

TTCCTCAAGCACCTGAACCTCAGCCATTGTGCCCTCACTGGTACAATACC

>M6-PGSC0003DMG400021622-(rev)M6OtherRLKTM\_1220

TAACAATTTCACTGGTGACATCCAAAGTACTTTCACGAACTGTTTCATGCCTCACAGACTTGGTGTGCTG

GAAACAATCTCTCAGGTAACTGCCTTCTTATCTAGGGGAGCTTCAGCT

>M6-PGSC0003DMG400021622-(rev)M6OtherRLKTM\_1281

GTGTTGTCTGGAAACAATCTCTCAGGTAACTGCCTTCTTATCTAGGGGAGCTTCAGCTCATTACTCTTGA

GCTATCGAAAACCAATTCTCTGGGATGGTACCAGATGAACTATGGGAG

>M6-PGSC0003DMG400021622-(rev)M6OtherRLKTM\_1342

TTACTCTTGAGCTATCGAAAACCAATTCTCTGGGATGGTACCAGATGAACTATGGGAGTCAAAAACATT

AATGGGGATCTCACTCGGCAACAATATGCTTGAAGGTCCAATTCCAGCGA

>M6-PGSC0003DMG400021622-(rev)M6OtherRLKTM\_1403

AAAAACATTAATGGGGATCTCACTCGGCAACAATATGCTTGAAGGTCCAATTCCAGCGACTATTGCAA

ACTTTCAACCCTCCAGAGATTGCAACTTGATAATAATCAGTTTGAAGGAAG

>M6-PGSC0003DMG400021622-(rev)M6OtherRLKTM\_1464

ATTGCAAACTTTCAACCCTCCAGAGATTGCAACTTGATAATAATCAGTTTGAAGGAAGCATACCGCGTA  
CCATTGGTAACTTGAAGAACCTGACCAATCTCTCTTCATGGTAACAAG

>M6-PGSC0003DMG400021622-(rev)M6OtherRLKTM\_1525

TACCGCGTACCATTGGTAACTTGAAGAACCTGACCAATCTCTCTTCATGGTAACAAGTTAACTGGAGG  
TATTCCAATGGAGCTTTTTGAATGTACAAAGTTGGTATCTCTTGATCTTG

>M6-PGSC0003DMG400021622-(rev)M6OtherRLKTM\_1586

AACTGGAGGTATTCCAATGGAGCTTTTTGAATGTACAAAGTTGGTATCTCTTGATCTTGGTGCAAACAGT  
CTTTCAGGTGAAATTCCAAGATCAATAGCTAAGCTGAAATTGCTAGACAA

>M6-PGSC0003DMG400021622-(rev)M6OtherRLKTM\_1647

GCAAACAGTCTTTCAGGTGAAATTCCAAGATCAATAGCTAAGCTGAAATTGCTAGACAATTTGGTTCTGT  
CTAACAATCAGTTTTCTGGCCCTATACCTGAGGAAATTTGTTCTGGGTTC

>M6-PGSC0003DMG400021622-(rev)M6OtherRLKTM\_1708

TGGTTCTGTCTAACAATCAGTTTTCTGGCCCTATACCTGAGGAAATTTGTTCTGGGTTCAGAAATATGCCT  
TTACCAGACTCTGAGTTCACCCAGCATTATGGCATGCTTGATTTGTCCA

>M6-PGSC0003DMG400021622-(rev)M6OtherRLKTM\_1769

GAATATGCCTTTACCAGACTCTGAGTTCACCCAGCATTATGGCATGCTTGATTTGTCCAACAATGAACTA  
GCTGGGTCCATCCCACACTCAATTAAGGATTGCATAGTTGTGACAGAACT

>M6-PGSC0003DMG400021622-(rev)M6OtherRLKTM\_183

AAATTTAGGTTCTCAAGCACCTGAACCTCAGCCATTGTGCCCTCACTGGTACAATACCTACAGATGTTTG  
GAGTTTGGAGAAAATGGAGACACTAGACTTGACTGACAACAGGTAACT

>M6-PGSC0003DMG400021622-(rev)M6OtherRLKTM\_1830

AATGAACTAGCTGGGTCCATCCCACACTCAATTAAGGATTGCATAGTTGTGACAGAACTACTTCTACAGG  
GAAATAAGCTCACGGGAAGCATTCTCCTGAAATTTCTCAGCTCGGTAAT

>M6-PGSC0003DMG400021622-(rev)M6OtherRLKTM\_1891

TTCTACAGGGAAATAAGCTCACGGGAAGCATTCTCCTGAAATTTCTCAGCTCGGTAATTTAACAATGCT  
TGATCTATCTTTCAATTCCTTGACAGGTCCAGTGTTTCCTCAGTTGTTTC

>M6-PGSC0003DMG400021622-(rev)M6OtherRLKTM\_1952

AACAATGCTTGATCTATCTTTCAATTCCTTGACAGGTCCAGTGTTTCCTCAGTTGTTTCCAATGTCAAGCCT  
CCAAGGTCTCATACTTTCTCATAACCAGATAAGTGGATCTATTCCTGA



>M6-PGSC0003DMG400021622-(rev)M6OtherRLKTM\_2013  
ATGTCAAGCCTCCAAGGTCTCATACTTTCTCATAACCAGATAAGTGGATCTATTCTGATAATCTCGACTC  
TATGATGCCAAGTTTAGTCAAGCTAGACCTTTCAAATAACTGGTTGAGT

>M6-PGSC0003DMG400021622-(rev)M6OtherRLKTM\_2074  
ATCTCGACTCTATGATGCCAAGTTTAGTCAAGCTAGACCTTTCAAATAACTGGTTGAGTGGCTCATTGCC  
GCCTTCTGCATTTAGGCTCAAAGTTTGACTTACCTGGACATCAGCATGA

>M6-PGSC0003DMG400021622-(rev)M6OtherRLKTM\_2135  
CTCATTGCCGCCTTCTGCATTTAGGCTCAAAGTTTGACTTACCTGGACATCAGCATGAATTCTTTCTCAG  
GCTCTCTGTCTTTAAAGTTGGAACCTCCAGCTCTTTGTTGGTCTTAAA

>M6-PGSC0003DMG400021622-(rev)M6OtherRLKTM\_2196  
TCTTTCTCAGGCTCTCTGTCTTTAAAGTTGGAACCTCCAGCTCTTTGTTGGTCTTAAATGCTAGCAACAA  
CCAACCTCTCTGGTGTCTTGATGATTCTCTCTCTAATCTCACATCCTTG

>M6-PGSC0003DMG400021622-(rev)M6OtherRLKTM\_2257  
CTAGCAACAACCAACTCTCTGGTGCTCTTGATGATTCTCTCTCTAATCTCACATCCTTGCCAAGCTAGATC  
TCCATAACAACCTCAATCACAGACAACCTGCCACCATCACTTTCAGCTC

>M6-PGSC0003DMG400021622-(rev)M6OtherRLKTM\_2318  
CAAGCTAGATCTCCATAACAACCTCAATCACAGACAACCTGCCACCATCACTTTCAGCTCTTGCTTCCCTGA  
TATATCTTGACTTATCCAGCAACAGTTTTCAAAGTCCTTTCCTTGTAG

>M6-PGSC0003DMG400021622-(rev)M6OtherRLKTM\_2379  
GCTTCCCTGATATATCTTGACTTATCCAGCAACAGTTTTCAAAGTCCTTTCCTTGTAGTATTTGTGACATA  
GAAGGCCTTGTTTTTCCAATTTCTCTGGAAACAAATTCATTGGCCTA

>M6-PGSC0003DMG400021622-(rev)M6OtherRLKTM\_244  
CAGATGTTTGGAGTTTGGAGAAAATGGAGACACTAGACTTGACTGACAACAGGTTAACTGGCGAGCTG  
CCTCCAACCTATATCTAACCTGAGAAACCTGAGATATCTTGACTCGACGATA

>M6-PGSC0003DMG400021622-(rev)M6OtherRLKTM\_2440  
TTTGTGACATAGAAGGCCTTGTTTTTCCAATTTCTCTGGAAACAAATTCATTGGCCTATCCCCTGATGTG  
TGCACTAAGGCTAGGAAATGCATACCAAGTGAACCTGTTCTACCTCCAA

>M6-PGSC0003DMG400021622-(rev)M6OtherRLKTM\_2501  
CCCTGATGTGTGCACTAAGGCTAGGAAATGCATACCAAGTGAACCTGTTCTACCTCCAAGGGAAAACCTA

TCCATCTGCACCAGTTCTAAGCCATGCATCTGTCTTGGGCATTGCCTTGGG

>M6-PGSC0003DMG400021622-(rev)M6OtherRLKTM\_2562

GAAAACTATCCATCTGCACCAGTTCTAAGCCATGCATCTGTCTTGGGCATTGCCTTGGGTGCATCAATCCT  
TTCTCTTGTGGTGCTAATTGTAGTTCTCAGATGGAGAATGCTGAGACAA

>M6-PGSC0003DMG400021622-(rev)M6OtherRLKTM\_2623

CATCAATCCTTTCTCTTGTGGTGCTAATTGTAGTTCTCAGATGGAGAATGCTGAGACAAGAAGCTGTACT  
TGTTGACAGAGATAAAGGTAAGCAAGGAAAGAAAAGTACCCACATCTA

>M6-PGSC0003DMG400021622-(rev)M6OtherRLKTM\_2684

AGCTGTACTTGTGACAGAGATAAAGGTAAGCAAGGAAAGAAAAGTACCCACATCTACTGATGAGCT  
TTTGATTAAGAAGCCAAAGGAGCATCTGAGTATCAACATTGCAACCTTTGA

>M6-PGSC0003DMG400021622-(rev)M6OtherRLKTM\_305

CGAGCTGCCTCCAATATCTAACCTGAGAACCTGAGATATCTTGTACTCGACGATAATGGTTTCTCA  
GGCAGTTTACCATTAACAATTTGTGAGCTAAAGGAGCTCAGGGAAGTATC

>M6-PGSC0003DMG400021622-(rev)M6OtherRLKTM\_3172

TAGGGTCAGCTGTCTGGACTTTCCTTTCTACACCATGGTTTTGTTCCACACATCATCCACAGAGACATCAAG  
TCAAGCAACATACTCCTAGACAAGAACTTTGAACCACGAGTCTCTGACT

>M6-PGSC0003DMG400021622-(rev)M6OtherRLKTM\_3477

GTTGAAGGAGGCAATCTTGTGGCTGGGTGAGATGGATGGTTTCAAATGGCAGGGAGATTGAAACGTT  
GGATCCATTTATTTCTGGTTCAGGATTATTGAAGGATCAAATGCTGCGCGTT

>M6-PGSC0003DMG400021622-(rev)M6OtherRLKTM\_3538

AAACGTTGGATCCATTTATTTCTGGTTCAGGATTATTGAAGGATCAAATGCTGCGCGTTCTTGCCATTGC  
AAGGTTATGCACCAGAGATGAGCCATGGAAGCGACCATCAATGCTTGAAG

>M6-PGSC0003DMG400021622-(rev)M6OtherRLKTM\_3588

CTGCGCGTTCTTGCCATTGCAAGTTATGCACCAGAGATGAGCCATGGAAGCGACCATCAATGCTTGAA  
GTGGTGAAACTGTTGAAGGAGGCAAAGAACAATGGTGCTTGTGGAGTGTGA

>M6-PGSC0003DMG400021622-(rev)M6OtherRLKTM\_366

GGTTTCTCAGGCAGTTTACCATTAACAATTTGTGAGCTAAAGGAGCTCAGGGAAGTATCAGTTCATGCAA  
ACTCTTTTACTGGCAATCTTCTGGTGAGATTGGAACATGGAGAAGTTG

>M6-PGSC0003DMG400021622-(rev)M6OtherRLKTM\_427

TTCATGCAAACCTCTTTTACTGGCAATCTTCCTGGTGAGATTGGAAACATGGAGAAGTTGCAGTCTCTTGA  
TTTCAGTTCAAATTTCTTCTCTGGTAATCTACCTTCCAGTCTAGGTAATT

>M6-PGSC0003DMG400021622-(rev)M6OtherRLKTM\_488

GTCTCTTGATTTCAAGTTCAAATTTCTTCTCTGGTAATCTACCTTCCAGTCTAGGTAATTTGATGGAGCTTCT  
ATTTGTTGATGCCAGTCAAACAACCTTACTGGATTGATATTTCCAGA

>M6-PGSC0003DMG400021622-(rev)M6OtherRLKTM\_549

ATGGAGCTTCTATTTGTTGATGCCAGTCAAACAACCTTACTGGATTGATATTTCCAGAAATTGGAAAAC  
TAGGGATGCTTAGAATTCTCTCTCTCATCCAACATGTTGTCTGGACCT

>M6-PGSC0003DMG400021622-(rev)M6OtherRLKTM\_61

GGTTTGATACAAAGACTCCATGCAATTGGACCGGCATAAAGTGTGAAGGTGAACGTGTCATCCAGATTA  
ACTTTCCATGTACAGGATCACCGCTAAATGTACCATTTCTGGAAATATTG

>M6-PGSC0003DMG400021622-(rev)M6OtherRLKTM\_610

TTGGAAAACCTAGGGATGCTTAGAATTCTCTCTCTCATCCAACATGTTGTCTGGACCTATACCTTCAACA  
ATTGGCCATCTGAAGCAGCTGGAGGTAATTGATCTCCAAAACCTGCAAAT

>M6-PGSC0003DMG400021622-(rev)M6OtherRLKTM\_671

ACCTTCAACAATTGGCCATCTGAAGCAGCTGGAGGTAATTGATCTCCAAAACCTGCAAATTCCTGGAAGT  
ATTCCTGAAGAGATTTCTGAATTGAGTAATTTGAATTACTTGAATGTAGC

>M6-PGSC0003DMG400021622-(rev)M6OtherRLKTM\_732

ACTGGAAGTATTCCTGAAGAGATTTCTGAATTGAGTAATTTGAATTACTTGAATGTAGCACAGAATGAAT  
TTGACGGAGAGCTTCCCTCAAGCATTGGAAAAGCTAGAAAATTTGCTTTAC

>M6-PGSC0003DMG400021622-(rev)M6OtherRLKTM\_793

AGAATGAATTTGACGGAGAGCTTCCCTCAAGCATTGGAAAAGCTAGAAAATTTGCTTTACCTTATTGCTTC  
AAATGCAGGATTGTCTGGAACAATCCCTTCAGAGTTAGGGAACCTGCAAAA

>M6-PGSC0003DMG400021622-(rev)M6OtherRLKTM\_854

TATTGCTTCAAATGCAGGATTGTCTGGAACAATCCCTTCAGAGTTAGGGAACCTGCAAAAAGGCTCAAATC  
AATAAATTTGTCCTTTAACTCATTTTCAGGGGCATTACCTGATGAACTTTC

>M6-PGSC0003DMG400021622-(rev)M6OtherRLKTM\_915

CTCAAATCAATAAATTTGTCCTTTAACTCATTTTCAGGGGCATTACCTGATGAACTTTCTGAGTTGGATTC  
ACTTAAATCACTTGTGCTTGATTCAAACCGCTTATCAGGCCCCCTGCCT

>M6-PGSC0003DMG400021622-(rev)M6OtherRLKTM\_976

AGTTGGATTCACTTAAATCACTTGTGCTTGATTCAAACCGCTTATCAGGCCCCCTGCCTATGTGGATTCC  
AACTGGACGCAGGTAGAGTCAATAATGGTGTCAAAGAATTCCTAAGTG

>M6-PGSC0003DMG400021789M6LRR-RLK\_0

CTTTAATGTTTTGTAGACATATTTTCATGGAAGATGGTGTCTTATGTCACAGTGATAAATTGCAACAAGG  
ATACTTGACATAAAGTGCTATATCCGAAAGATGGTACTGTTCTTTGCAAT

>M6-PGSC0003DMG400021789M6LRR-RLK\_1037

AACAGCTTTAAGAGAGATGGAAGCTGTATGAACTGATCTAGCAAAAAGGGAGTCTCTGTTCCGGATGGCT  
GTCTTTTTTCTTGTGGTAACTGTGTGGTGTCTCTACACCTGTAAGTCTGG

>M6-PGSC0003DMG400021789M6LRR-RLK\_1098

GGATGGCTGTCTTTTTCTTGTGGTAACTGTGTGGTGTCTCTACACCTGTAAGTCTGGTCCGTTGGACT  
AAGAGCAACCTAAGCCATTTACGAAGACTAGAAATGTGAACTATACAA

>M6-PGSC0003DMG400021789M6LRR-RLK\_1159

CCGTTGGACTAAGAGCAACCTAAGCCATTTACGAAGACTAGAAATGTGAACTATACAAGATTAGTCCTC  
AGTATCAGTGACTTTATCTTTTTCTGAGTGGTCATTCCGTCACATTGG

>M6-PGSC0003DMG400021789M6LRR-RLK\_122

TGATATTGGCATGTCTCCACTCATTTGTCTTACCTGATGGGCAAGGTACCTGGTCTTCCAGTTTTACATC  
ATAAAAACAACTTTGTTTTATTTATCTACTCAAATGGATAAATAATA

>M6-PGSC0003DMG400021789M6LRR-RLK\_1220

TTAGTCCTCAGTATCAGTGACTTTATCTTTTTCTGAGTGGTCATTCCGTCACATTGGTATTTGCACTTTG  
TCTACTTCTTAGGGTCTATTTTTGTATTTGACTTATATATATTTCAA

>M6-PGSC0003DMG400021789M6LRR-RLK\_1281

TTTGCACTTTGTCTACTTCTTAGGGTCTATTTTTGTATTTGACTTATATATATTTCAAATCAATAATTTGGA  
TGCATAACCATACGGAAGGGTACATAGTTCTTTGATGTAGCTCTTGA

>M6-PGSC0003DMG400021789M6LRR-RLK\_1342

CAATAATTTGGATGCATAACCATACGGAAGGGTACATAGTTCTTTGATGTAGCTCTTGGATGAACTTTGAT  
TTGTTAGTATGTTGTTGAGCTCAAAATTGTTAGGTCTACGACTAAAATTT

>M6-PGSC0003DMG400021789M6LRR-RLK\_1403

AACTTTGATTTGTTAGTATGTTGTTGAGCTCAAAATTGTTAGGTCTACGACTAAAATTTTTGGGATGATTT

CTTGTCTTCTTAGATCCACGACTAAAATTTTTGGGATGATTTCTTGTTT

>M6-PGSC0003DMG400021789M6LRR-RLK\_1464

GGGATGATTTCTTGTCTTCTTAGATCCACGACTAAAATTTTTGGGATGATTTCTTGTTTTCTGCTACTTACC  
TAGCTCACTATGTCGTATACTCCCTGCAGGTCCTTGCAAGGAAATC

>M6-PGSC0003DMG400021789M6LRR-RLK\_1525

TGCTACTTACCTAGCTCACTATGTCGTATACTCCCTGCAGGTCCTTGCAAGGAAATCGTATAACTGGT  
GAAATTCCCAAAGAGATTGGAGATTTAACAAGCTTGACAATGTTGGATTT

>M6-PGSC0003DMG400021789M6LRR-RLK\_1586

ATAACTGGTGAAATTCCCAAAGAGATTGGAGATTTAACAAGCTTGACAATGTTGGATTTAGAAAATAAC  
CGTCTTTCCGGAGAAATACCAGCTTCGTTGGGCAATCTTAAAAAGCTTCAG

>M6-PGSC0003DMG400021789M6LRR-RLK\_1647

AAAATAACCGTCTTTCCGGAGAAATACCAGCTTCGTTGGGCAATCTTAAAAAGCTTCAGTCTCTGTAAGT  
CATATTATTTCAATTAATCATTTGAGGATAGAACTTAGTTTACTTGGTGA

>M6-PGSC0003DMG400021789M6LRR-RLK\_1708

TCTGTAAGTCATATTATTTCAATTAATCATTTGAGGATAGAACTTAGTTTACTTGGTGAAGTGGTATAGGTG  
TGAAGTCTATTATCCATTGAGCAGGTTTTTGAGTCGAAACAATCTCAC

>M6-PGSC0003DMG400021789M6LRR-RLK\_1769

GGTATAGGTGTGAACTCTATTATCCATTGAGCAGGTTTTTGAGTCGAAACAATCTCACGGGGACTATCC  
CTCAGTCACTTTCCGGTCTTCCAACTTGATGAACCTGTAAGTTATTTAT

>M6-PGSC0003DMG400021789M6LRR-RLK\_183

GTTTTACATCATAAAAACAACTTTGTTTTTATTTATCTACTCAAATGGATAAATAATAATTTAGATGTGA  
CCACTATATCTTGTTTACATTTTGCTTCTGCCGGTCAAATGATGTCTTT

>M6-PGSC0003DMG400021789M6LRR-RLK\_1830

GGACTATCCCTCAGTCACTTTCCGGTCTTCCAACTTGATGAACCTGTAAGTTATTTATCTTGCCTTTTCCT  
TATTCCAAGTATAAATTAATTTCTCTGAATAGGAGAATAATACATTTTC

>M6-PGSC0003DMG400021789M6LRR-RLK\_1891

TGCCTTTTCCTTATTCCAAGTATAAATTAATTTCTCTGAATAGGAGAATAATACATTTTCTTTTGGGATGTCA  
ATTCAGACTTCAGTGATCCTTAACCTGTTACCTGTATCATTTCGATATT

>M6-PGSC0003DMG400021789M6LRR-RLK\_1952

TTGGGATGTCAATTCAGACTTCAGTGATCCTTAACCTGTTACCTGTATCATTTCGATATTTGACTTGATTCTC  
TGATTCCGCTTTGCAGTCAGCTTGGTTCCAACGGTCTTACTGGCCAAA

>M6-PGSC0003DMG400021789M6LRR-RLK\_2013

ACTTGATTCTCTGATTCCGCTTTGCAGTCAGCTTGGTTCCAACGGTCTTACTGGCCAAAATTCCTGAACAGT  
TGTTCCAAGTTCCAAAATACAAGTACGATTACAGTTCTTACTTTAGACA

>M6-PGSC0003DMG400021789M6LRR-RLK\_2074

CCTGAACAGTTGTTCCAAGTTCCAAAATACAAGTACGATTACAGTTCTTACTTTAGACAGTAGCTCAAGG  
CTTCTTAGTTTTTGCCTTCTTACTAATGCATAATATTTAATGTTAGTAT

>M6-PGSC0003DMG400021789M6LRR-RLK\_2135

AGCTCAAGGCTTCTTAGTTTTTGCCTTCTTACTAATGCATAATATTTAATGTTAGTATAACTTCGTTTTAT  
TCTAGTTTTACAGGGAATCATTGAATTGTGGCTTAAATCTCACTCAT

>M6-PGSC0003DMG400021789M6LRR-RLK\_2196

CTTCGTTTTATTCTAGTTTTACAGGGAATCATTGAATTGTGGCTTAAATCTCACTCATCATTGTGAATCTG  
CTAGTGGAGGTAAGTTCTACCAGCAAATATGTGAATTTTTGAACTGTA

>M6-PGSC0003DMG400021789M6LRR-RLK\_2257

TTGTGAATCTGCTAGTGGAGGTAAGTTCTACCAGCAAATATGTGAATTTTTGAACTGTATATACTTCATG  
CTTCTCTGTATTCTGGAAGAATGAAAGTAATGTAGCTAAAAATTTTGAAT

>M6-PGSC0003DMG400021789M6LRR-RLK\_2318

TACTTCATGCTTCTCTGTATTCTGGAAGAATGAAAGTAATGTAGCTAAAAATTTTGAATTTTACTACCATT  
ATCTTGATTTTATTTATTATTATCTTTTAGCTATAAAGGAGGCTTTATC

>M6-PGSC0003DMG400021789M6LRR-RLK\_2379

TACTACCATTATCTTGATTTTATTTATTATTATCTTTTAGCTATAAAGGAGGCTTTATCTTTAGTTTACTTT  
ATTAGAGAAAAAATTTAGTATTTTCAAGAGGTCTAGCTTGTTAGGG

>M6-PGSC0003DMG400021789M6LRR-RLK\_244

TTAGATGTGACCACTATATCTTGTTTACATTTTGCTTCTGCCGGTGAATGATGTCTTTGTTCTTCTAATAA  
AGTAGGGTGACATTTGTTTTTTTATACTCTGGCCATTTTAGGAGATG

>M6-PGSC0003DMG400021789M6LRR-RLK\_2440

TTAGTTTACTTTATTAGAGAAAAAATTTAGTATTTTCAAGAGGTCTAGCTTGTTAGGGGTTTCATATACT  
ATATCTAGTATAAGTGTGTACTTTGTTTGAACGACACTTGATGAATAG

>M6-PGSC0003DMG400021789M6LRR-RLK\_2501

TTCATATACTATATCTAGTATAAGTGTGACTTTGTTTGAACGACACTTGATGAATAGACTCTATTAATT  
TCCTTAATATGTCATCTATTTTTCTTGTTTCTTTCCGTTCCCATCTT

>M6-PGSC0003DMG400021789M6LRR-RLK\_2562

TCTATTAATTTCTTAATATGTCATCTATTTTTCTTGTTTCTTTCCGTTCCCATCTTACTTAGTTCCTTCTCC  
CTTTTCTTGGTGCTATTTCTCTTGTACGCAAGACATGGAACAA

>M6-PGSC0003DMG400021789M6LRR-RLK\_2623

TTAGTTCCTTCTCCCTTTTCTTGGTGCTATTTCTCTTGTACGCAAGACATGGAACAAGATTAAGTTATT  
AGTGTTATTTAGAGTTATACTTGCCATTGGCTGTGGGATATGGTTGTT

>M6-PGSC0003DMG400021789M6LRR-RLK\_2684

TTAAAGTTATTAGTGTTATTTAGAGTTATACTTGCCATTGGCTGTGGGATATGGTTGTTGTGTGGTATACT  
GGTATCTAATTTAATGGATGGAAGAATCAAGCACCTCATGGTGCTGCCT

>M6-PGSC0003DMG400021789M6LRR-RLK\_2745

GTGGTATACTGGTATCTAATTTAATGGATGGAAGAATCAAGCACCTCATGGTGCTGCCTGCACTAAAAA  
GGATGAGTTTCTTTCCATTAGTCCTAATCTTGGAGAGGTGTAACCTATAAC

>M6-PGSC0003DMG400021789M6LRR-RLK\_2806

ACTAAAAAGGATGAGTTTCTTTCCATTAGTCCTAATCTTGGAGAGGTGTAACCTATAACACTGTCTTACTT  
GTAGGTGCCAAGCATTCTTAACGGAGGGATAATGATGTAGCTGAAAAAT

>M6-PGSC0003DMG400021789M6LRR-RLK\_2867

TGTCTTACTTGTAGGTGCCAAGCATTCTTAACGGAGGGATAATGATGTAGCTGAAAAATATAGCATTATT  
TACTACCTTTACTGTTGATCTATTGTCGTCATCTTTTAGTTAAAGTTTGA

>M6-PGSC0003DMG400021789M6LRR-RLK\_2928

AGCATTATTTACTACCTTTACTGTTGATCTATTGTCGTCATCTTTTAGTTAAAGTTTGAAGTTTGATATATA  
TTTTTTTAGAAATACTATCATATTATAGTAGGAGAGAATTTTAATAAT

>M6-PGSC0003DMG400021789M6LRR-RLK\_2989

TTTGATATATATTTTTTTAGAAATACTATCATATTATAGTAGGAGAGAATTTTAATAATTTTAGGTGTTGT  
AATGCTTAAAAAAAAGAATTTAGTAATTCTAAGAGTTGTAATGATTCTA

>M6-PGSC0003DMG400021789M6LRR-RLK\_305

TCTTCTAATAAAGTAGGGTGACATTTGTTTTTTTATACTCTGGCCATTTTAGGAGATGCACTGTACACAT

TGAAGAACTCACTAAATGCTTCAAATGGTCAACTTGCTGATTGGAACCA

>M6-PGSC0003DMG400021789M6LRR-RLK\_3050

TAGGTGTTGTAATGCTTAAAAAAGAATTTAGTAATTCTAAGAGTTGTAATGATTCTAAAAAAGAATT

TTTTAACTCTAAGAGTTGTAATGATTAAAAAAAGAATTTTAACAATTC

>M6-PGSC0003DMG400021789M6LRR-RLK\_3111

AAAAGAATTTTTTAACTCTAAGAGTTGTAATGATTAAAAAAAGAATTTTAACAATTCTAAGAGTTATA

GTTATCTAGGTTCCCTAATCTATAATTAGAGTCCATAATTCCTTTGCTTG

>M6-PGSC0003DMG400021789M6LRR-RLK\_3172

AGAGTTATAGTTATCTAGGTTCCCTAATCTATAATTAGAGTCCATAATTCCTTTGCTTGGAACAACATTTG

ATGAGTAAATATTGTTGATCTCTTATTATATCTCTCGTCCCCGTTTCTT

>M6-PGSC0003DMG400021789M6LRR-RLK\_3233

ACAACATTTGATGAGTAAATATTGTTGATCTCTTATTATATCTCTCGTCCCCGTTTCTTCTCGTCCTCTCCCT

TAATCATCATGCTCATTCTCTCTCTTTTGGTGCTACATCTCAGAAA

>M6-PGSC0003DMG400021789M6LRR-RLK\_3294

CGTCCTCTCCCTTAATCATCATGCTCATTCTCTCTCTTTTGGTGCTACATCTCAGAAAGTTTCTGAAGTTG

ATAAAGCTGTTGATTACCTATCCGATGTATTACTATTCATTTAGCAAG

>M6-PGSC0003DMG400021789M6LRR-RLK\_3355

TTCTGAAGTTGATAAAGCTGTTGATTACCTATCCGATGTATTACTATTCATTTAGCAAGGAAATCGTCATT

TAACATATGCACCTTGTTGACTTTCTGGACAAACCAAATTCTAAAGTT

>M6-PGSC0003DMG400021789M6LRR-RLK\_3416

AATCGTCATTTAACATATGCACCTTGTTGACTTTCTGGACAAACCAAATTCTAAAGTTGAATTTCTTGCA

GGTTCTCCTAGTAAACCAAAGACTGGTCTCATAGTTGGTATTGCTGTTG

>M6-PGSC0003DMG400021789M6LRR-RLK\_3477

ATTTCTTGCAGGTTCTCCTAGTAAACCAAAGACTGGTCTCATAGTTGGTATTGCTGTTGGATTTCTTGGAC

TTCTCGTTCTTGGAGGATCTGTGTTATTGTTCTGTAGGAGACGGCACAA

>M6-PGSC0003DMG400021789M6LRR-RLK\_3538

TTTCTTGGACTTCTCGTTCTTGGAGGATCTGTGTTATTGTTCTGTAGGAGACGGCACAAAGGCTATAGTC

GTGAAGTCTTTGTTGACGTTGTAGGTTTGTGTCACATTTTTTGACAATA

>M6-PGSC0003DMG400021789M6LRR-RLK\_3599



GCTATAGTCGTGAAGTCTTTGTTGACGTTGTAGGTTTGTGTCACATTTTTTTGACAATAATTTTCATCAGTT  
TAAATCACCTGTTATTCTTCGTAAGGGAAGAAGATATTCTGGCCATGCA

>M6-PGSC0003DMG400021789M6LRR-RLK\_366

CTGTACACATTGAAGAACTCACTAAATGCTTCAAATGGTCAACTTGCTGATTGGAACCAGAATCAAGTTA  
GTCCTTGTACTIONGGTCCAAGATCACTTGTGATGATAAAGGCAATGTCATT

>M6-PGSC0003DMG400021789M6LRR-RLK\_3660

TTCATCAGTTTAAATCACCTGTTATTCTTCGTAAGGGAAGAAGATATTCTGGCCATGCATTGTTGTATCTT  
GTAATTCCATCTTAAGTTAGTGACCTCATTCTTTATACACCAGTACTTA

>M6-PGSC0003DMG400021789M6LRR-RLK\_3721

GTTGTATCTTGTAATTCATCTTAAGTTAGTGACCTCATTCTTTATACACCAGTACTTAGTTTTTCATTTACCT  
TCAAGATGGTATGATTCCCTTTGAGTATATTATGATATTATATTTTTAT

>M6-PGSC0003DMG400021789M6LRR-RLK\_3782

TTTCATTTACCTTCAAGATGGTATGATTCCCTTTGAGTATATTATGATATTATATTTTTATGTTTTATTTGGCG  
CACTCAGGTGAGGTTGATCGACGAATTCCATTTGGTCAATTGAGGAGA

>M6-PGSC0003DMG400021789M6LRR-RLK\_3843

TTTATTTGGCGCACTCAGGTGAGGTTGATCGACGAATTCCATTTGGTCAATTGAGGAGATTTTCATGGAG  
GGAATTGCAGCTTGCTACTGATAACTTCAGTGAAAAGAATGTTCTTGGAC

>M6-PGSC0003DMG400021789M6LRR-RLK\_3904

TTCATGGAGGGAATTGCAGCTTGCTACTGATAACTTCAGTGAAAAGAATGTTCTTGGACAGGGGGGTTT  
CGGCAAGGTCTATAAAGGAGTGCTCAATGACGGCATTAAAGTTGCCGTGAA

>M6-PGSC0003DMG400021789M6LRR-RLK\_3965

GGGGGTTTCGGCAAGGTCTATAAAGGAGTGCTCAATGACGGCATTAAAGTTGCCGTGAAACGGTTAAC  
TGATTATGAGAGTCCTGGGGGAGATGCTGCATTTAGCGGAGAAGTTGAGATG

>M6-PGSC0003DMG400021789M6LRR-RLK\_4026

GGTAACTGATTATGAGAGTCCTGGGGGAGATGCTGCATTTAGCGGAGAAGTTGAGATGATAAGTGTG  
GCTGTTATAGGAATCTCTTACGGCTTATAGGATTTTGCACCACACCGACTG

>M6-PGSC0003DMG400021789M6LRR-RLK\_4087

AAGTGTGGCTGTTATAGGAATCTCTTACGGCTTATAGGATTTTGCACCACACCGACTGAACGCCTGCTA  
GTATACCCATATATGCAGAATCTAAGTGTTGCTTATCGTCTACGAGGTAT

>M6-PGSC0003DMG400021789M6LRR-RLK\_4148

CGCCTGCTAGTATACCCATATATGCAGAATCTAAGTGTTGCTTATCGTCTACGAGGTATTGTTTCTTCATA  
GCATTGCTTTTATTCATTGTAGTTTCTTTTACATCCTGAGCATGCTATT

>M6-PGSC0003DMG400021789M6LRR-RLK\_4209

TTTCTTCATAGCATTGCTTTTATTCATTGTAGTTTCTTTTACATCCTGAGCATGCTATTTTCCCTTACTGTGC  
CTGTTTCATCTAATTTATTTTATCCCAATCAATAGATCCTTCATTTT

>M6-PGSC0003DMG400021789M6LRR-RLK\_427

ATCAAGTTAGTCCTTGTACTTGGTCCAAGATCACTTGTGATGATAAAGGCAATGTCATTATGGTGTAAGT  
ACTATTGTTAGAGCCATTAGAATCACCGTGTGCATATACTATGATGATAC

>M6-PGSC0003DMG400021789M6LRR-RLK\_4270

CCCTTACTGTGCCTGTTTCATCTAATTTATTTTATCCCAATCAATAGATCCTTCATTTTATTAGTCTTACATC  
TCCTGCGGCGCATATTTTGATTTTGTGAGCTTGATTGTAAACAATCA

>M6-PGSC0003DMG400021789M6LRR-RLK\_4331

TAGTCTTACATCTCCTGCGGCGCATATTTTGATTTTGTGAGCTTGATTGTAAACAATCATGAGTCATTTCC  
CCGTTGATCTGTGAAAAAGTGTGCATTTGTGATTGTACGGTCTAAATT

>M6-PGSC0003DMG400021789M6LRR-RLK\_4392

AGTCATTTCCCGTTGATCTGTGAAAAAGTGTGCATTTGTGATTGTACGGTCTAAATTGACTATTAAAGT  
ACTGTAGAAGTGTGATCTGGTAAAAGAACTTGTACATGGCATCAAGTT

>M6-PGSC0003DMG400021789M6LRR-RLK\_4453

CTATTAAAGTACTGTAGAAGTGTGATCTGGTAAAAGAACTTGTACATGGCATCAAGTTGAGGGGCAT  
GCTTATAGAGCTAATGTGTGTAGCTTAATTGGCAGAAGCATAAACCCTTTA

>M6-PGSC0003DMG400021789M6LRR-RLK\_4514

AGGGGCATGCTTATAGAGCTAATGTGTGTAGCTTAATTGGCAGAAGCATAAACCCTTTAATTTGTGTTTT  
CATGCTTCAGAATCTTATTCTTTTTCTTCTCACAAAAGAATCTTATTCT

>M6-PGSC0003DMG400021789M6LRR-RLK\_4575

TTGTGTTTTCATGCTTCAGAATCTTATTCTTTTTCTTCTCACAAAAGAATCTTATTCTTTCAACTTTGAATG  
AAGTGCTAGAAGTTAATGCCTTAGGGTTGCATCACCATGAGTAAAA

>M6-PGSC0003DMG400021789M6LRR-RLK\_4636

CAACTTTGAATGAAGTGCTAGAAGTTAATGCCTTAGGGTTGCATCACCATGAGTAAAATTTGCATGCTT

CCTTTTTTCTCCCAGAATATGGTAGGGAAAGACAAGTTCTGAGCAGATTT

>M6-PGSC0003DMG400021789M6LRR-RLK\_4697

TGCATGCTTCCTTTTTTCTCCCAGAATATGGTAGGGAAAGACAAGTTCTGAGCAGATTTAAGGGTTCTGT

AGAATTATTTTCTGATATTCATTAAAGGGGTTGAGTGTTCCGGAGATTGCA

>M6-PGSC0003DMG400021789M6LRR-RLK\_4758

GGGTTCTGTAGAATTATTTTCTGATATTCATTAAAGGGGTTGAGTGTTCCGGAGATTGCAATTTTCTTTGGT

CAAATGGCAATACTCAAATCATACCTCATTAATCATTAATAGATGTATT

>M6-PGSC0003DMG400021789M6LRR-RLK\_4819

TTTCTTTGGTCAAATGGCAATACTCAAATCATACCTCATTAATCATTAATAGATGTATTCAGTTTTTTTTTT

AAATCATTAAGATGTATGTGCGTTAAGTTGGTATCACAGATCGTGA

>M6-PGSC0003DMG400021789M6LRR-RLK\_488

GGTGTAAGTACTATTGTTAGAGCCATTAGAATCACCGTGTGCATATACTATGATGATACTTGTTTTTATGC

ACTAGAAAGGTTAATCTTTGGTTGGTCAACTTCCTTTACTGGATGTGAT

>M6-PGSC0003DMG400021789M6LRR-RLK\_4880

GTTTTTTTTTTAAATCATTAAGATGTATGTGCGTTAAGTTGGTATCACAGATCGTGATAAGAAAGAGC

TATGTGACTTCATAAATTGATTCTTGTGATCCTGGCTTGAAGTAGAAGGT

>M6-PGSC0003DMG400021789M6LRR-RLK\_4941

AGAAAGAGCTATGTGACTTCATAAATTGATTCTTGTGATCCTGGCTTGAAGTAGAAGGTGTTACATGAAG

TAGTTGGTGCAGCTTAAGATTTTCAGCAGTTTTCTGCTGGAGTTGATCTGT

>M6-PGSC0003DMG400021789M6LRR-RLK\_5002

TACATGAAGTAGTTGGTGCAGCTTAAGATTTTCAGCAGTTTTCTGCTGGAGTTGATCTGTCTGTTATTAGTT

TTCAGTGGTGTCTAATTAAGTTTTTAATCACTTACAGAACTTAAACCTG

>M6-PGSC0003DMG400021789M6LRR-RLK\_5063

GTTATTAGTTTTAGTGGTGTCTAATTAAGTTTTTAATCACTTACAGAACTTAAACCTGGGGAGCCTGTTT

TGAATTGGCCAACTAGGAAGCGTGTGGCAGTGGGTACTGCACGTGGACT

>M6-PGSC0003DMG400021789M6LRR-RLK\_5124

GAGCCTGTTTTGAATTGGCCAACTAGGAAGCGTGTGGCAGTGGGTACTGCACGTGGACTTGAATACCTA

CATGAACACTGTAACCCAAAGATTATTCACCGTGATGTTAAAGCAGCTAAT

>M6-PGSC0003DMG400021789M6LRR-RLK\_5185

AATACCTACATGAACACTGTAACCCAAAGATTATTCACCGTGATGTTAAAGCAGCTAATGTGTTACTAGA  
TGAAGATTTTGAAGCTGTAGTTGGTGATTTTGGCCTGGCAAAGCTAGTTG

>M6-PGSC0003DMG400021789M6LRR-RLK\_5246

GTTACTAGATGAAGATTTTGAAGCTGTAGTTGGTGATTTTGGCCTGGCAAAGCTAGTTGACGTTAAGAA  
AACCAATGTGACAACTCAAGTTCGTGGTACAATGGGCCATATAGCTCCTGA

>M6-PGSC0003DMG400021789M6LRR-RLK\_5307

GTTAAGAAAACCAATGTGACAACTCAAGTTCGTGGTACAATGGGCCATATAGCTCCTGAATACTTATCCA  
CTGGCAAATCATCAGAAAAAACTGATGTTTTTGGCTATGGAATCATGCTT

>M6-PGSC0003DMG400021789M6LRR-RLK\_5368

ACTTATCCACTGGCAAATCATCAGAAAAAACTGATGTTTTTGGCTATGGAATCATGCTTTTGGAAATTGT  
AACCGGCCAACGTGCAATAGACTTCTCACGCCTAGAAGATGAAGATGATG

>M6-PGSC0003DMG400021789M6LRR-RLK\_5429

GGAAATTGTAACCGGCCAACGTGCAATAGACTTCTCACGCCTAGAAGATGAAGATGATGTCTTGTTGCT  
TGACCATGTGAGTGACTTAACTCAATGATCTTCATATATTTTCAAATGGG

>M6-PGSC0003DMG400021789M6LRR-RLK\_549

GTTTTTATGCACTAGAAAGGTTAATCTTTGGTTGGTCAACTTCCTTTACTGGATGTGATTTTGATAATGTC  
TGAATCTGTATTTGCAGGTCATTATCAAGTTTGGGATTCTCGGGCACTT

>M6-PGSC0003DMG400021789M6LRR-RLK\_5490

TTGTTGCTTGACCATGTGAGTGACTTAACTCAATGATCTTCATATATTTTCAAATGGGCATCAAATTATT  
GCATCAAACCTTTTCATATATCTTATCTCTACTGACCAATCTTTGTTTCT

>M6-PGSC0003DMG400021789M6LRR-RLK\_5551

TCAAATTATTGCATCAAACCTTTTCATATATCTTATCTCTACTGACCAATCTTTGTTTCTCTCCATATTCTATT  
GGGACGACTCATTGTCTTTGCATGAGAGCCTCTTGGATGGATATA

>M6-PGSC0003DMG400021789M6LRR-RLK\_5612

CCATATTCTATTGGGACGACTCATTGTCTTTGCATGAGAGCCTCTTGGATGGATATACATTCGTTTATC  
TTTCTCCTATTGGTGAAACTGCTGCAATTATTCTATGATAATTGAAATG

>M6-PGSC0003DMG400021789M6LRR-RLK\_5673

TTCGTTTATCTTTCTCCTATTGGTGAAACTGCTGCAATTATTCTATGATAATTGAAATGGTGAAACAATT  
ATTATTTTTTACGTAGCACCAGGGTACAAATGCTTTGAATATGAGCTAG

>M6-PGSC0003DMG400021789M6LRR-RLK\_5734

GTAAACAATTATTATTTTTACGTAGCACCAGGGTACAAATGCTTTGAATATGAGCTAGGTCTTAATATT  
GAGCCTTTTAGGCACAAGAAATATGATGACTAATATATATTTGATGCTAA

>M6-PGSC0003DMG400021789M6LRR-RLK\_5795

CTTAATATTGAGCCTTTTAGGCACAAGAAATATGATGACTAATATATATTTGATGCTAATTTTTCTCTTTCA  
AAAGTGTGGATATGTGGACCCTGAGTCTCTTATAACTTTACATGAT

>M6-PGSC0003DMG400021789M6LRR-RLK\_5856

TTTCTCTTTCAAAGTGTGGATATGTGGACCCTGAGTCTCTTATAACTTTACATGATTATTCTTTAAGCT  
TCATAGGACCTTTATGTAGTATTAGTTGCTAAAAAGAGATCATCTTGA

>M6-PGSC0003DMG400021789M6LRR-RLK\_5917

TTCTTTAAGCTTCATAGGACCTTTATGTAGTATTAGTTGCTAAAAAGAGATCATCTTGAAGGTCAGAAAA  
CTGCAAAGGGATAAAAGACTGGATGCAATTGTAGACCGTAACCTGAATAA

>M6-PGSC0003DMG400021789M6LRR-RLK\_5978

GTCAGAAAAGTCAAAGGGATAAAAGACTGGATGCAATTGTAGACCGTAACCTGAATAAGAACTACGA  
GCTGGATGAAGTGGAGATGATGATTCAGGTGGCATTGCTGTGCACTCAGGCA

>M6-PGSC0003DMG400021789M6LRR-RLK\_6039

ACTACGAGCTGGATGAAGTGGAGATGATGATTCAGGTGGCATTGCTGTGCACTCAGGCATCACCAGAG  
GACCGTCCAGCAATGTCAGAGGTGGTGAAGGATGCTGGAAGGAGAAGGGCTTG

>M6-PGSC0003DMG400021789M6LRR-RLK\_61

GCAACAAGGATACTTGACATAAAGTGCTATATCCGAAAGATGGTACTGTTCTTTGCAATTGTGATATTGG  
CATGTCTCCACTCATTTGTCTTACCTGATGGGCAAGGTACCTGGTTCTTC

>M6-PGSC0003DMG400021789M6LRR-RLK\_610

TGATAATGTCTGAATCTGTATTTGCAGGTCATTATCAAGTTTGGGATTCTCGGGCACTTTAACTCCCAGAA  
TAGGTGTTCTAAAGAATGTGAATACACTGTACGTTTAAAGTACTCGGGC

>M6-PGSC0003DMG400021789M6LRR-RLK\_6100

ACCAGAGGACCGTCCAGCAATGTCAGAGGTGGTGAAGGATGCTGGAAGGAGAAGGGCTTGCTGAGAGA  
TGGGAAGAGTGGCAACACGTTGAAGTCAACCGTAGACAAGAATACGAGAGACT

>M6-PGSC0003DMG400021789M6LRR-RLK\_6161

GAGAGATGGGAAGAGTGGCAACACGTTGAAGTCAACCGTAGACAAGAATACGAGAGACTTCAGAGAC

GATTTGATTGGGGAGAAGATACAATGTTTAATCATGATGCTGTTGAGTTGTCT

>M6-PGSC0003DMG400021789M6LRR-RLK\_6222

AGAGACGATTTGATTGGGGAGAAGATACAATGTTTAATCATGATGCTGTTGAGTTGTCTGGTGAAGAT  
GACACATGAGTAATAACTTTGAACCACAAAAATGTTTCTTGATATATAGAT

>M6-PGSC0003DMG400021789M6LRR-RLK\_6283

TGGAAGATGACACATGAGTAATAACTTTGAACCACAAAAATGTTTCTTGATATATAGATGCCTGGTTGCT  
AAATGTTTTTTTTTTTTTACTTTTTATGGAAAACCCCTTGTTCTAACTAG

>M6-PGSC0003DMG400021789M6LRR-RLK\_6344

CTGGTTGCTAAATGTTTTTTTTTTTTTACTTTTTATGGAAAACCCCTTGTTCTAACTAGGCAGATCAACAGT  
GGACTCTGTATTTATGTAAGTTTTAGTCATTATTTTCATGTTCCATCA

>M6-PGSC0003DMG400021789M6LRR-RLK\_6405

AGATCAACAGTGGACTCTGTATTTATGTAAGTTTTAGTCATTATTTTCATGTTCCATCAACTCCTGGGAGT  
GGGAATTTGATTCCTCAAATTGTTACATATTTTTCCTCACTAACTATT

>M6-PGSC0003DMG400021789M6LRR-RLK\_671

ACTCCCAGAATAGGTGTTCTAAAGAATGTGAATACACTGTACGTTTAAAGTACTCGGGCTGAGTTATTAT  
TGATAGAATGATGTCTTGAATGCTGCCCACTTATAATTTTCTAGATGCTA

>M6-PGSC0003DMG400021789M6LRR-RLK\_732

AGTTATTATTGATAGAATGATGTCTTGAATGCTGCCCACTTATAATTTTCTAGATGCTATTTATTGCTACTT  
TAAAATGTTTATTTAAATTTTGTCTGAATATACAAGTTTGATGTCA

>M6-PGSC0003DMG400021789M6LRR-RLK\_793

TATTGCTACTTTAAAATGTTTATTTAAATTTTGTCTGAATATACAAGTTTGATGTGCATGGCGTTGCACTA  
GAACAGAAATCCCTTCAAATCATCAGATGTTAACTAAAAGTTGAGAAC

>M6-PGSC0003DMG400021789M6LRR-RLK\_854

GCGTTGCACTAGAACAGAAATCCCTTCAAATCATCAGATGTTAACTAAAAGTTGAGAACACAATGATTAA  
TATTTTCAAGGGAGCTTCACTTAGCGGAAGGGGGGAATAAGAAAAAGAAA

>M6-PGSC0003DMG400021789M6LRR-RLK\_915

AATGATTAATATTTTCAAGGGAGCTTCACTTAGCGGAAGGGGGGAATAAGAAAAAGAAAGTACCTACAT  
ATTGTGGTGTATAAATGAACAAGGAGAAATATTTGGCCATTTCAAAAGG

>M6-PGSC0003DMG400021789M6LRR-RLK\_976

ACCTACATATTGTGGTGTATAAATGAACAAGGAGAAATATTTGGCCATTTACAAAAGGCAAACAGCTTT  
AAGAGAGATGGAAGCTGTATGAACTGATCTAGCAAAAAGGGAGTCTCTGT

>M6-PGSC0003DMG400021804M6G-LecRK\_0

TATGCTGAACCGGTGACCATGATGTCTAGACAAATAAAAGAGCTCTAATGTTGTCCTGTCTAACAAGCTG  
ATGGAGAAAAGTCGAACTGATTACCTATATTTGGGTTGAATAGTTGCAGCT

>M6-PGSC0003DMG400021804M6G-LecRK\_1008

TATATTTGGTAAGGATTTCAAAAAAAGAAAAAATTGTGCTTAATAGTTACATTTAGTTGATAGAT  
GCCTTGTAGGAGTACCCAAATAATCCTCTTGGCCAAAGTTATGTTTTTT

>M6-PGSC0003DMG400021804M6G-LecRK\_1071

GATAGATGCCTTGTAGGAGTACCCAAATAATCCTCTTGGCCAAAGTTATGTTTTTTATTGTTACTTTTCC  
GATTTAGTTTCGATGTTTAAATCCTACTCTCAGTTTTACCTGATTTGTGT

>M6-PGSC0003DMG400021804M6G-LecRK\_1134

ACTTTTCCGATTTAGTTTCGATGTTTAAATCCTACTCTCAGTTTTACCTGATTTGTGTGAATTAATGCTCCAA  
CTATGAAACTTTTAAACAGATGACACACGAAGCACGGTATTAGACTGGT

>M6-PGSC0003DMG400021804M6G-LecRK\_1197

ATGCTCCAACATGAAACTTTTAAACAGATGACACACGAAGCACGGTATTAGACTGGTCTAAGCGCTTTCA  
CATAATCAATGGGATAGCTCGGGGACTTATGTATCTGCATCAAGATTCTC

>M6-PGSC0003DMG400021804M6G-LecRK\_126

GTGAAATCAAATGGACACAAAGGAAAATTACTCTCTGGATTATCCCGTTATCGGCTGGAGTGATTTTGA  
TAATCCTAAGCCTAGTGATCTGGATTAGAAGAAGGAAGATATGTTCAAAG

>M6-PGSC0003DMG400021804M6G-LecRK\_1260

GCTTTCACATAATCAATGGGATAGCTCGGGGACTTATGTATCTGCATCAAGATTCTCAGTTGAGGATCAT  
TCACAGGGACCTGAAAGCTAACAAACATTTTACTAGACAATGACATGAATC

>M6-PGSC0003DMG400021804M6G-LecRK\_1323

GGATCATTACAGGGACCTGAAAGCTAACAAACATTTTACTAGACAATGACATGAATCCAAAGATATCAG  
ACTTCGGTATAGCAAGAAGTTGTGAAGACGACAAGTTTGGAGCCAAGACAC

>M6-PGSC0003DMG400021804M6G-LecRK\_1386

TATCAGACTTCGGTATAGCAAGAAGTTGTGAAGACGACAAGTTTGGAGCCAAGACACACCCGAGTAGTT  
GGAACATAGTAAGAATCTTAAGATGATATTTTACTGAATCATTCAAAACTGG

>M6-PGSC0003DMG400021804M6G-LecRK\_1449

TAGTTGGAACATAGTAAGAATCTTAAGATGATATTTTACTGAATCATTCAAACCTGGAATAGAAGAAGA  
GCCTTGAGATTATCGTAGTATGTTTACCCAGTATTAGTAACGCTAATTTCT

>M6-PGSC0003DMG400021804M6G-LecRK\_1512

AGAAGAGCCTTGAGATTATCGTAGTATGTTTACCCAGTATTAGTAACGCTAATTTCTTTTACGTTTTATG  
CAGTGGCTACCTCTCACCGGAATATGCTGTACATGGTGTCTACTCGGTG

>M6-PGSC0003DMG400021804M6G-LecRK\_1575

GTTTTATGCAGTGGCTACCTCTCACCGGAATATGCTGTACATGGTGTCTACTCGGTGAAGTCAGATGTAT  
TTAGCTTTGGTGTCTTAGTTCTTGAAATTGTGAGTGGGAAAGGGAACAGA

>M6-PGSC0003DMG400021804M6G-LecRK\_1638

GATGTATTTAGCTTTGGTGTCTTAGTTCTTGAAATTGTGAGTGGGAAAGGGAACAGAAAATTCTCTCATC  
CGGACCATAACCTTAACCTCCTCGGACATGTAAGGGTTGTGTTTTTCATT

>M6-PGSC0003DMG400021804M6G-LecRK\_1701

TCTCATCCGGACCATAACCTTAACCTCCTCGGACATGTAAGGGTTGTGTTTTTCATTGTCTATCAGTAAAT  
TATCTCGTAAACCTGGTCATGCTAACACGATACTAATATCTACAGGCAT

>M6-PGSC0003DMG400021804M6G-LecRK\_1764

CAGTAAATTATCTCGTAAACCTGGTCATGCTAACACGATACTAATATCTACAGGCATGGCACTCTATAA  
AGAAGGTAGATCAATGGAATTAATCGGGGATTTCCCTCATTGATGTTTCATT

>M6-PGSC0003DMG400021804M6G-LecRK\_1827

TCTATAAAGAAGGTAGATCAATGGAATTAATCGGGGATTTCCCTCATTGATGTTTCATTCTACACCTGAAGT  
TATACGATCAATCCATGTTGGTCTATTGTGTGTTCAACATCGTCCAGAAG

>M6-PGSC0003DMG400021804M6G-LecRK\_189

ATTTTGATAATCCTAAGCCTAGTGATCTGGATTAGAAGAAGGAAGATATGTTCAAAGAAAAAGAAAGGT  
AACCTCGACAAGTCATTATGTTCCGAATATAATTAGTAGATGAACTCAAAT

>M6-PGSC0003DMG400021804M6G-LecRK\_1890

CTGAAGTTATACGATCAATCCATGTTGGTCTATTGTGTGTTCAACATCGTCCAGAAGATCGTCCAAGTAT  
GTCTTCAGTGGTTATGATGTTAAACAATGAAGGTGTACTGCCACCTGCTA

>M6-PGSC0003DMG400021804M6G-LecRK\_1953

CAAGTATGTCTTCAGTGGTTATGATGTTAAACAATGAAGGTGTACTGCCACCTGCTAAACAGCCAGCTTT



CTTCGTAGAAACAAATACACCAGATAATGAATTCTTCTTAGTCAATATG

>M6-PGSC0003DMG400021804M6G-LecRK\_2016

CAGCTTCTTCGTAGAAACAAATACACCAGATAATGAATTCTTCTTAGTCAATATGCACATAGTACAGT

GAATCAGATCACCATCACAACATTAGAAGCCAGATAGTAAATTCTTCATT

>M6-PGSC0003DMG400021804M6G-LecRK\_2063

AGTCAATATGCACATAGTACAGTGAATCAGATCACCATCACAACATTAGAAGCCAGATAGTAAATTCTTC

ATTGCAAATAGCAATCTATTATACTCTTCATTCTTTCTTCTTTGTAGCA

>M6-PGSC0003DMG400021804M6G-LecRK\_252

AAAGGTAACCTCGACAAGTCATTATGTTCCGAATATAATTAGTAGATGAACTCAAATTCAAAGGAAAAT

CTTTCTTGTCTAGTATTTGCCAAACTGAATTTGGGACATTGGTCTTTTGGC

>M6-PGSC0003DMG400021804M6G-LecRK\_315

GAAAATCTTTCTTGTCTAGTATTTGCCAAACTGAATTTGGGACATTGGTCTTTTGGCAGGATGCTGGGGG

CGCAATGGCAATTACAAGATGGATTACCTCAACGGAAACCTCAGTGAAGA

>M6-PGSC0003DMG400021804M6G-LecRK\_378

CTGGGGGCGCAATGGCAATTACAAGATGGATTACCTCAACGGAAACCTCAGTGAAGAATATGAGTTACC

ACTGTTGACTTATCTACAATAGCTAAATCTACGAACAACCTTTTCAGGGAT

>M6-PGSC0003DMG400021804M6G-LecRK\_441

GTTACCACTGTTGACTTATCTACAATAGCTAAATCTACGAACAACCTTTTCAGGGATGAGCAAAATTGGA

GAAGGTGGATATGGACCTGTTTACAAGGTAATCACTTATAGCATTTCAG

>M6-PGSC0003DMG400021804M6G-LecRK\_504

AATTGGAGAAGGTGGATATGGACCTGTTTACAAGGTAATCACTTATAGCATTTCAGTGGTTTACATGAA

ATAAGCAATTCACAGCCCACATAATTGAGCATAGAGTGATTCGGGAAGAC

>M6-PGSC0003DMG400021804M6G-LecRK\_567

ACATGAAATAAGCAATTCACAGCCCACATAATTGAGCATAGAGTGATTCGGGAAGACTGACAGTAAGG

AATGATTTAATGACTTTATAGTTTTGGAAGAGTTTTATAAACATTAGCTAAA

>M6-PGSC0003DMG400021804M6G-LecRK\_63

CAAGCTGATGGAGAAAGTCGAACTGATTACCTATATTTGGGTTGAATAGTTGCAGCTAGTCCGGTGAAA

TCAAATGGACACAAAGGAAAATTACTCTCCTGGATTATCCCGTTATCGGCT

>M6-PGSC0003DMG400021804M6G-LecRK\_630

TAAGGAATGATTTAATGACTTTATAGTTTTGGAAGAGTTTTATAAACATTAGCTAAACTTGATTGAATGT  
ATAATAGTTGCTTCATAATTTGAGCTTCTACCTTTTGGTGGAAAGTATAAT

>M6-PGSC0003DMG400021804M6G-LecRK\_693

TGAATGTATAATAGTTGCTTCATAATTTGAGCTTCTACCTTTTGGTGGAAAGTATAATTTAACTTTCATGTTCC  
GGTGTGAAAAAACTTAACGTGTAGATATATGATGTTTAGGGCGTGCT

>M6-PGSC0003DMG400021804M6G-LecRK\_756

TTCATGTTCCGGTGTGAAAAAACTTAACGTGTAGATATATGATGTTTAGGGCGTGCTTGAACACGGACA  
GGAAATAGCTGTGAAGCGGCTGTCTAGGACTTCCACACAAGGACAAGATGA

>M6-PGSC0003DMG400021804M6G-LecRK\_819

CGGACAGGAAATAGCTGTGAAGCGGCTGTCTAGGACTTCCACACAAGGACAAGATGAGTTCATGAATG  
AAGTGATGTATATTGTGAACTTCAGCATAGAAATCTGGTGAAGATTCTCGG

>M6-PGSC0003DMG400021804M6G-LecRK\_882

GAATGAAGTGATGTATATTGTGAACTTCAGCATAGAAATCTGGTGAAGATTCTCGGATGCTGCATCGA  
AGGAGAAGAAAAAATGTTGATCTATGAGTACATGCCAAATGGAAGTCTTGA

>M6-PGSC0003DMG400021804M6G-LecRK\_945

CATCGAAGGAGAAGAAAAAATGTTGATCTATGAGTACATGCCAAATGGAAGTCTTGATTCAATTTATATT  
GGTAAGGATTTCAAAAAAAGAAAAAATTGTGCTTAATAGTTACATT

>M6-PGSC0003DMG400021842-(rev)M6RLKmalectin\_0

TTTAACTTAATGGCTAATAAAATAGCCATTATATGAAAATATCTATTGCATGTACTTTGATAATCAACAA  
TGAAATTTTACACATTTTTGGTTATCATAACCACATTTTGTCCCTCTT

>M6-PGSC0003DMG400021842-(rev)M6RLKmalectin\_1054

TTCAAGATATTTCTTAATAATCAGACTGCTTTAGAAGAAGCTGATGTAATTGCGTGGTCTTCTGCTCAAAA  
TGTGCCAGCATAACAAGGACTTTGTAATATATCAAACCTGGTGATGATGAA

>M6-PGSC0003DMG400021842-(rev)M6RLKmalectin\_1116

TGCTCAAAATGTGCCAGCATAACAAGGACTTTGTAATATATCAAACCTGGTGATGATGAAATGTGGGTAGC  
TTTACATCCTACTGATGAAACGAAGACCGAGTTTTATGATGCAATCCTCAA

>M6-PGSC0003DMG400021842-(rev)M6RLKmalectin\_1178

GGGTAGCTTTACATCCTACTGATGAAACGAAGACCGAGTTTTATGATGCAATCCTCAATGGATTAGAGAT  
TTTTAAGATCAATGACACAACGGGGAATTTGGCAGGGCCTAATCCTGTAC

>M6-PGSC0003DMG400021842-(rev)M6RLKmalectin\_124

AAGGTATATTCATTAACAAATGTTACAAATCCTTATTCTTTTGTCTTGTGGAGCTACAAATAATGCT  
ACAGATGCAGATGGAAGGATTTGGAGTCCAGATTCTTCATATTTCCCT

>M6-PGSC0003DMG400021842-(rev)M6RLKmalectin\_1240

TTAGAGATTTTTAAGATCAATGACACAACGGGGAATTTGGCAGGGCCTAATCCTGTACCATCACCACCCC  
TAACAGCTACAGACACTGATTCTCAGTCAAACCAGCATTTCATCAAAC

>M6-PGSC0003DMG400021842-(rev)M6RLKmalectin\_1302

ACCACCCCTAACAGCTACAGACACTGATTCTCAGTCAAACCAGCATTTCATCAAACAAAACACTAGTAAG  
AAAGGAATCATAGTTGGTTCGGTGGCAGGAATGACAGCTGGCCTTAGTAT

>M6-PGSC0003DMG400021842-(rev)M6RLKmalectin\_1364

CTAGTAAGAAAGGAATCATAGTTGGTTCGGTGGCAGGAATGACAGCTGGCCTTAGTATTGTTGTTGTGC  
TACTTACTTTTGTCAAGCGAAGGAAGACTATAAACAATGGAGGGAATAAGT

>M6-PGSC0003DMG400021842-(rev)M6RLKmalectin\_1426

GTTGTCGTACTTACTTTTGTCAAGCGAAGGAAGACTATAAACAATGGAGGGAATAAGTCTAGCAGAGGT  
GGATGGTTACCTATTTATAGTTCTAGGAGTACAGAACTACAACAACACTATC

>M6-PGSC0003DMG400021842-(rev)M6RLKmalectin\_1488

CAGAGGTGGATGGTTACCTATTTATAGTTCTAGGAGTACAGAACTACAACAACACTATCTCAGGTAAAAG  
CAGTGGCAGTAGTCACATTTCCAACATTGGTGGAGGCCTTTGTAGGTACTT

>M6-PGSC0003DMG400021842-(rev)M6RLKmalectin\_1550

GTAAAAGCAGTGGCAGTAGTCACATTTCCAACATTGGTGGAGGCCTTTGTAGGTACTTCACCTTAGCTGA  
GATAAAACAAGGTACAAAGAATTTTGACGAGTCACGAGTTATTGGAGTTG

>M6-PGSC0003DMG400021842-(rev)M6RLKmalectin\_1612

TTAGCTGAGATAAAACAAGGTACAAAGAATTTTGACGAGTCACGAGTTATTGGAGTTGGAGGATTTGGT  
AAAGTCTATAGAGGGGAGATTGATGGAGGGACTACGGTTGCTATTAAGAGA

>M6-PGSC0003DMG400021842-(rev)M6RLKmalectin\_1674

ATTTGGTAAAGTCTATAGAGGGGAGATTGATGGAGGGACTACGGTTGCTATTAAGAGAGCAAACCCTTC  
TTCTGAACAAGGTCTTCATGAGTTCCAAACTGAGATAGAATTGCTTTCAA

>M6-PGSC0003DMG400021842-(rev)M6RLKmalectin\_1736

ACCCTTCTTCTGAACAAGGTCTTCATGAGTTCCAAACTGAGATAGAATTGCTTTCAAACCTTAGACATAG

ACACTTAGTCTCACTGATTGGGGCTTGTGAAGAGAATGATGAGATGATAT

>M6-PGSC0003DMG400021842-(rev)M6RLKmalectin\_1798

AGACATAGACACTTAGTCTCACTGATTGGGGCTTGTGAAGAGAATGATGAGATGATATTAGTCTATGAT

TACATGGCTAATGGGACATTGAGAGAGCACCTTTACAAGCACAACAAGCCA

>M6-PGSC0003DMG400021842-(rev)M6RLKmalectin\_186

AAATAATGCTACAGATGCAGATGGAAGGATTTGGAGTCCAGATTCTTCATATTTCCCTTCTTCTTCTGGTA

ATTCAATCACATCTAAAGCTAAATATCAAGACCCTTCATTGATTTCTGA

>M6-PGSC0003DMG400021842-(rev)M6RLKmalectin\_1860

CTATGATTACATGGCTAATGGGACATTGAGAGAGCACCTTTACAAGCACAACAAGCCACCCTTATCATG

GAAGCAAAGGTTGGAAATTTGTATTGGTGCAGCCAGAGGTCTTCACTATCT

>M6-PGSC0003DMG400021842-(rev)M6RLKmalectin\_1984

ACTGGTGCAAGGTACACTATCATCCATAGGGATGTGAAAACACTACAAACATTTTGGTCGATGACAAATGG

GTGGCAAAGGTTTCTGATTTCTGGTCTCTCAAAAACGGGACCTAATCTCCAA

>M6-PGSC0003DMG400021842-(rev)M6RLKmalectin\_2046

CAAATGGGTGGCAAAGGTTTCTGATTTCTGGTCTCTCAAAAACGGGACCTAATCTCCAACAAACTCATGTT

AGTACAATGGTAAAAGGAAGTTTTGGATACTTGGATCCAGAGTATTTTCAG

>M6-PGSC0003DMG400021842-(rev)M6RLKmalectin\_2108

CTCATGTTAGTACAATGGTAAAAGGAAGTTTTGGATACTTGGATCCAGAGTATTTTCAGAAGACAGCAAC

TGACAGAAAAGTCTGATGTCTACTCTTTTGGGGTTGTCCTATTTGAAGTAC

>M6-PGSC0003DMG400021842-(rev)M6RLKmalectin\_2170

CAGCAACTGACAGAAAAGTCTGATGTCTACTCTTTTGGGGTTGTCCTATTTGAAGTACTGTCTGGAAGGC

CAGCTCTAAATGCTAGTCTTCCAAGGAACAAGTCAGTCTAGCAGATTGG

>M6-PGSC0003DMG400021842-(rev)M6RLKmalectin\_2232

TGGAAGGCCAGCTCTAAATGCTAGTCTTCCAAGGAACAAGTCAGTCTAGCAGATTGGGCATTACACTG

CCATAGGAAAATACTACCAAGGAAATTATGGATCCACATATTAAGGGGGA

>M6-PGSC0003DMG400021842-(rev)M6RLKmalectin\_2294

TACACTGCCATAGGAAAATACTACCAAGGAAATTATGGATCCACATATTAAGGGGGAGATAATACAAG

AATGTTTGAAGCAATTCATCGATACAGCAGTGAGTTGCTTGTCTGATCACG

>M6-PGSC0003DMG400021842-(rev)M6RLKmalectin\_2418

TGATCGTCCTTCAATGGGTTCAAGTGTGCTGTGGAATCTTGAGTACTGCCTTCAGTTGCAAAGTGATCCTGAT  
GAACCAAAAATGGTGGCGGAACGGAAAGCTAATGATGCCTATGCTATGCA

>M6-PGSC0003DMG400021842-(rev)M6RLKmalectin\_248

CTTCTGGTAATTCAATCACATCTAAAGCTAAATATCAAGACCCTTCATTGATTTCTGATATTCCTTATATGA  
CTGCTAGAATTTTCAAGAATCAAACCACCTATTCCTTCCCTGTTTCTC

>M6-PGSC0003DMG400021842-(rev)M6RLKmalectin\_2480

ATCCTGATGAACCAAAAATGGTGGCGGAACGGAAAGCTAATGATGCCTATGCTATGCATACAGAGTTGT  
TAACGGTTGCCGAAGAAGGTAAGGAGTCAGAGGAGCACAGCACGGACGCTG

>M6-PGSC0003DMG400021842-(rev)M6RLKmalectin\_2542

GAGTTGTTAACGGTTGCCGAAGAAGGTAAGGAGTCAGAGGAGCACAGCACGGACGCTGTCTTCTCACA  
AATTGTAACCACAAGGTAGATAGTTGCTTAGTTCTACCGTTGTTCTTTTG

>M6-PGSC0003DMG400021842-(rev)M6RLKmalectin\_2604

CTCACAAATTGTAACCACAAGGTAGATAGTTGCTTAGTTCTACCGTTGTTCTTTTGTTTTGTTTAGATT  
TTTACTGTCAGGGTTAGCAATTATGAAGAGAGTTTATAATTGACAATG

>M6-PGSC0003DMG400021842-(rev)M6RLKmalectin\_2666

TGTTTAGATTTTTACTGTCAGGGTTAGCAATTATGAAGAGAGTTTATAATTGACAATGAGGCTTGCTTAG  
TTTGTAGCGCACCTCCATCTCCCACCGGTAGGTTGAGTGTTTCGAGTCATG

>M6-PGSC0003DMG400021842-(rev)M6RLKmalectin\_2728

TTGCTTAGTTTGTAGCGCACCTCCATCTCCCACCGGTAGGTTGAGTGTTTCGAGTCATGTGGATGGTACAT  
GGAAGTACTAATAATCCTGCTAGACTGGGGGTGAAAAACAAATACACTTG

>M6-PGSC0003DMG400021842-(rev)M6RLKmalectin\_2790

TGGTACATGGAAGTACTAATAATCCTGCTAGACTGGGGGTGAAAAACAAATACACTTGTAGCATGTACT  
CTGTCATTCTTAGTGCCTTCATTATTGCTTCCCCGCGAGTGAAGCAGGTTC

>M6-PGSC0003DMG400021842-(rev)M6RLKmalectin\_2852

ATGTACTCTGTCATTCTTAGTGCCTTCATTATTGCTTCCCCGCGAGTGAAGCAGGTTCAATGTTATAACTG  
CATTGCTTATGATTAGCACAACTCTTATTTTCTGAGATTGAATCTATAA

>M6-PGSC0003DMG400021842-(rev)M6RLKmalectin\_2897

GTGAAGCAGGTTCAATGTTATAACTGCATTGCTTATGATTAGCACAACTCTTATTTTCTGAGATTGAATCT  
ATAATAGTCTGCGTTATTATTCAAGAAAAGGTAAACAGATCAACTAGTA

>M6-PGSC0003DMG400021842-(rev)M6RLKmalectin\_310

CCTTATATGACTGCTAGAATTTTCAAGAATCAAACCACCTATTCCTCCCTGTTTCTCCGAAATCTCGTCAT  
TGGATCAGACTTCATTTTTATCCTTCTTCTTATGACAATTTCAATTGC

>M6-PGSC0003DMG400021842-(rev)M6RLKmalectin\_372

ATCTCGTCATTGGATCAGACTTCATTTTTATCCTTCTTCTTATGACAATTTCAATTGCTCTAATTCATTCTTT  
TCTGTAAACATCGCGGGTTTTACTCTTCTAAACAACCTTAGTGCTTC

>M6-PGSC0003DMG400021842-(rev)M6RLKmalectin\_434

ATTCATTCTTTTCTGTAAACATCGCGGGTTTTACTCTTCTAAACAACCTTAGTGCTTCAATCACAGCACAG  
GCACTAACACAGGCTTATATCATAAGAGAATTCACTCTTGTCCCTCTCC

>M6-PGSC0003DMG400021842-(rev)M6RLKmalectin\_496

ACAGCACAGGCACTAACACAGGCTTATATCATAAGAGAATTCACTCTTGTCCCTCTCCAAACAGCTACAC  
TTAACATAACATTTACCCCTTCTCCGCGTATAATGACTCATTTCGATT

>M6-PGSC0003DMG400021842-(rev)M6RLKmalectin\_558

AGCTACACTTAACATAACATTTACCCCTTCTCCGCGTATAATGACTCATTTCGATTTCATCAATGGGATTG  
AGATTGTTTCAATGCCTGAAATATTTGAACCCGCGCCTATGGTGGGGTT

>M6-PGSC0003DMG400021842-(rev)M6RLKmalectin\_62

AATCAACAATGAAATTTTACACATTTTTGGTTATCATAACCACATTTTGTCCCTCTTAGGTAAGGTATATT  
CATTAAACAATGTTACAAATTCTTATTCTTTTGTGTTTGTCTTGTGGAG

>M6-PGSC0003DMG400021842-(rev)M6RLKmalectin\_620

ATGGGATTGAGATTGTTTCAATGCCTGAAATATTTGAACCCGCGCCTATGGTGGGGTTCTCAGATCAGAC  
TACGGAAACACAAGCTTCTTCTATGCAAACCTATGTTTCAGGTTAAATGTTG

>M6-PGSC0003DMG400021842-(rev)M6RLKmalectin\_682

GATCAGACTACGGAAACACAAGCTTCTTCTATGCAAACCTATGTTTCAGGTTAAATGTTGGTGGACAGTATA  
TTCCAGCTAATAATGACTCAGGGCTGGGGAGAATATGGTATGATGACGCG

>M6-PGSC0003DMG400021842-(rev)M6RLKmalectin\_744

ACAGTATATTCCAGCTAATAATGACTCAGGGCTGGGGAGAATATGGTATGATGACGCGCCATATTTGTT  
TGGTGCATCTTTTGGTATCACATCTGCAGCTAATAACAGTATGAAAATTC

>M6-PGSC0003DMG400021842-(rev)M6RLKmalectin\_806

ATTTGTTTGGTGCATCTTTTGGTATCACATCTGCAGCTAATAACAGTATGAAAATTCATATCCTTCTAATT

TACCTAATTACATTGCTCCGGAGGATGTTTATAGGACAGCACGATCGA

>M6-PGSC0003DMG400021842-(rev)M6RLKmalectin\_868

CCTTCTAATTTACCTAATTACATTGCTCCGGAGGATGTTTATAGGACAGCACGATCGATGGGGCCAAATC

CTGATGTTAATAGGAATTATAATCTCACTTGGATCTTTCAAGTTGATACA

>M6-PGSC0003DMG400021842-(rev)M6RLKmalectin\_930

GCCAAATCCTGATGTTAATAGGAATTATAATCTCACTTGGATCTTTCAAGTTGATACAAATTTCACTTATC

TTGTGAGGTTACATTTTTGTGATTTTCAAATGAAAAGGATGAATCAGAG

>M6-PGSC0003DMG400021842-(rev)M6RLKmalectin\_992

TCACTTATCTTGTGAGGTTACATTTTTGTGATTTTCAAATGAAAAGGATGAATCAGAGGGTGTTCAGAT

ATTTCTTAATAATCAGACTGCTTTAGAAGAAGCTGATGTAATTGCGTGGT

>M6-PGSC0003DMG400021962M6LRR-RLP\_0

CCAATTCCATATATTATGCCTTCTTTTCAAACCCTTACTTTGCTTGAGGAAACAATTCGAAATTAGATCCA

ATTCCAATGACCGGAGTTGGAGAAACCCTAGAGGACCGTATCAGTTCCG

>M6-PGSC0003DMG400021962M6LRR-RLP\_1037

TTATCTCAGAGTACTTTTCTTGGACAGTTGAGAATTAACCTTTGTACAAATTTACAAACTCAACTGGAT

GAGTTGCAGAACTTGTGGCTTTTTTGTGTTTTTTGTCAACTTTCGAA

>M6-PGSC0003DMG400021962M6LRR-RLP\_1098

TCAACTGGATGAGTTGCAGAACTTGTGGCTTTTTTGTGTTTTTTGTCAACTTTCGAATGTCGGGTATTT

TTTTGTCAATATCTGCAATACATGTATCTGAAATCACGGATTCTTCTGTG

>M6-PGSC0003DMG400021962M6LRR-RLP\_1159

TCCGGTATTTTTTGTGCATATCTGCAATACATGTATCTGAAATCACGGATTCTTCTGTGTCGATTGTTGCTT

AAAGTGTTAGATGATTAGGTTGCTACTTGAAGATAATAGAAAAAAG

>M6-PGSC0003DMG400021962M6LRR-RLP\_122

GCCGGATGAACTTCTGATCAAATTCTGTCTTGTTCGGCGACAAAGGATGCATACACAACATGTTTTCTC

TCTAATAGGTGGCTTTATCTCTGGATTTCCATTCGTATCTTTAGTTTTGC

>M6-PGSC0003DMG400021962M6LRR-RLP\_1220

GATTGTTGCTTAAAGTGTTAGATGATTAGGTTGCTACTTGAAGATAATAGAAAAAAGTGGATATCAG

GCTCTTCTTGGGTGCGGTATATTACCATGGCTGGTGAATATGAGTTGAGA

>M6-PGSC0003DMG400021962M6LRR-RLP\_1342

TGCGTAAAACCACTCCGAGATGATGATCCAATCCAAATAAGTTTTGCTTGAGGCTCATATAACTCATCCA  
ATGCTTTGAGCTCCTTTGCAGGAGATGAACTGGTTTAGCTCATAGATTTG

>M6-PGSC0003DMG400021962M6LRR-RLP\_1403

ACTCATCCAATGCTTTGAGCTCCTTTGCAGGAGATGAACTGGTTTAGCTCATAGATTTGAAGCAAATTGT  
TTTGTGTGCCAATTTTTGTTATTATTGTATTTGACTTTTTTTCTTATAT

>M6-PGSC0003DMG400021962M6LRR-RLP\_1464

GCAAATTGTTTTGTTGTGCCAATTTTTGTTATTATTGTATTTGACTTTTTTTCTTATATGTTACCCACATTTT  
CTTGATAAAGATGTCTGCTGATTACTTTCGTGTTGCATATACTGTT

>M6-PGSC0003DMG400021962M6LRR-RLP\_1525

TACCCACATTTTCTTGATAAAGATGTCTGCTGATTACTTTCGTGTTGCATATACTGTTAAAGAAATTCAAT  
AGATTTGTCACACAACCTTATGTTGCCATGGAGTTCTTTCTTTTTGTAC

>M6-PGSC0003DMG400021962M6LRR-RLP\_1586

AGAAATCAATAGATTTGTCACACAACCTTATGTTGCCATGGAGTTCTTTCTTTTTGTACTTATTGCTTTCTC  
CATTCTTTATATACTAGTTTTATTGGGATTATTGCAACAGGTTCTGT

>M6-PGSC0003DMG400021962M6LRR-RLP\_1647

ATTGCTTTCTCCATTCTTTATATACTAGTTTTATTGGGATTATTGCAACAGGTTCTGTGCATGTTGCTGTT  
CAAAGGGACTGTACTTCCAGAAATGAAATGCAAATATCTGATGCTGGA

>M6-PGSC0003DMG400021962M6LRR-RLP\_1708

ATGTTGCTGTTCAAAGGGACTGTACTTCCAGAAATGAAATGCAAATATCTGATGCTGGAGTTGCATGTTA  
AGAGGTTTAATTTGTATGGAGTAGCTGGTCTTCTGCGAGCATCTAGTCAT

>M6-PGSC0003DMG400021962M6LRR-RLP\_1769

TGCATGTTAAGAGGTTTAATTTGTATGGAGTAGCTGGTCTTCTGCGAGCATCTAGTCATGTAGAGACACT  
CAACATAAATATATATACGGAGGCACTAGACATAGAGGGACGCGACATAG

>M6-PGSC0003DMG400021962M6LRR-RLP\_183

TGTTTTCTCTCTAATAGGTGGCTTTATCTCTGGATTTCCATTTCGTATCTTTAGTTTTGCTAATAACAATTAC  
CGAGAAAATTTACATCTTTTGTAACTATATATTATCTCGTTCTGTT

>M6-PGSC0003DMG400021962M6LRR-RLP\_1830

AGAGACTCAACATAAATATATATACGGAGGCACTAGACATAGAGGGACGCGACATAGATTTATCAAC  
AAAATCTGTAACCTCCTCTCTTTTAAATCCATTCATTTTATGAGTTTA



>M6-PGSC0003DMG400021962M6LRR-RLP\_1891

TTATCAACAAAATCTGTAACCTCCTCTCTCTTTTAAATCCATTCATTTTATGAGTTTAATCACCCCTCCTT  
GAATTTTTCTTTTGTGCATGGCAAAGCTTAACATTATTTGGTTGGTGT

>M6-PGSC0003DMG400021962M6LRR-RLP\_1952

CACCCCTCCTTTGAATTTTTCTTTTGTGCATGGCAAAGCTTAACATTATTTGGTTGGTGTGTTGCTTTCTTT  
GAGGCAAATGAGGTCTGAAACGGAAAGGGTTGGGTGCCATCCACTCTT

>M6-PGSC0003DMG400021962M6LRR-RLP\_2013

TTGCTTTCTTTGAGGCAAATGAGGTCTGAAACGGAAAGGGTTGGGTGCCATCCACTCTTTGCTTGGTTTA  
CGTAGGCCATGAATCTTTAAGATATGAACAATCATCATAATCTGTTTAAA

>M6-PGSC0003DMG400021962M6LRR-RLP\_2074

CTTGGTTTACGTAGGCCATGAATCTTTAAGATATGAACAATCATCATAATCTGTTTAAAAAGTACCAATA  
AGATTTGTTGGTTCTGAAATCATTTTTTCCCACTTTTGTGCAATATCCA

>M6-PGSC0003DMG400021962M6LRR-RLP\_2135

GTACCAATAAGATTTGTTGGTTCTGAAATCATTTTTTCCCACTTTTGTGCAATATCCATGAGGCTAACTT  
GAATTTAGTCCTGATTAAATTCTCTTTCTCCAGCTTGTAGATACCCACT

>M6-PGSC0003DMG400021962M6LRR-RLP\_2196

AGGCTAACTTGAATTTAGTCCTGATTAAATTCTCTTTCTCCAGCTTGTAGATACCCACTGCCACTTTGAGTT  
ATCATATTTGGTCAAAGGAGATGATATTGATTTGCAAATTTGGATTTT

>M6-PGSC0003DMG400021962M6LRR-RLP\_2257

CACTTTGAGTTATCATATTTGGTCAAAGGAGATGATATTGATTTGCAAATTTGGATTTTATTTGGGTTTCC  
CAACCTCAAGAATGTTAAGATTATCAACTCCCCTGGAGAGCGGTGCTTT

>M6-PGSC0003DMG400021962M6LRR-RLP\_2318

TTGGGTTTCCCAACCTCAAGAATGTTAAGATTATCAACTCCCCTGGAGAGCGGTGCTTTAAGGATCATT  
CAAACAGGGCTTTGACAAGCTTTTGAACCTTTCAGAATTTCTGTTAAACA

>M6-PGSC0003DMG400021962M6LRR-RLP\_2379

GGATCATTTCAAACAGGGCTTTGACAAGCTTTTGAACCTTTCAGAATTTCTGTTAAACAATGCAACATTTT  
TGGAGAAGTTCGTGATATCAAAGGAATAATGTGCAAGATATGTTCAAC

>M6-PGSC0003DMG400021962M6LRR-RLP\_244

ATACAAATTACCGAGAAAATTTACATCTTTTGTAACTATATATTATCTCGTTCTGTTTCTCCCAAATAC

AAAAATTCGAACTCGACTACAGTTATTGCGATGTTGAAAGCCGCTGGC

>M6-PGSC0003DMG400021962M6LRR-RLP\_2440

GCAACATTTTTGGAGAAGTTCGTGATATCAAAGGGAATAATGTGCAAGATATGTTCAACCAACTGTGTG

TCCACATTTTTATTTCAATTGGCTGAGAAATTGTTTTGTTGCCCAAGATCC

>M6-PGSC0003DMG400021962M6LRR-RLP\_2501

ACTGTGTGTCCACATTTTTATTTCAATTGGCTGAGAAATTGTTTTGTTGCCCAAGATCCTCTACAAATTGT

GTGATTATCTACTAGTAGTGAGCTTGTAAATGATTAGACTGCAAGTAGTT

>M6-PGSC0003DMG400021962M6LRR-RLP\_2562

TACAAATTGTGTGATTATCTACTAGTAGTGAGCTTGTAAATGATTAGACTGCAAGTAGTTTTCTATCTTAGG

ATACACGAGATGTTGCCTTATATTGAGTTTTTGGTGAATACTCATACAA

>M6-PGSC0003DMG400021962M6LRR-RLP\_2623

CTATCTTAGGATACACGAGATGTTGCCTTATATTGAGTTTTTGGTGAATACTCATACAATCATGACACTTT

AACTTGTCTATGCAACTAATTACTTATCTTGTGGCATAACCAAATGTTAT

>M6-PGSC0003DMG400021962M6LRR-RLP\_2684

ATGACACTTTAACTTGTCTATGCAACTAATTACTTATCTTGTGGCATAACCAAATGTTATGATTTCTTAGTTT

CTCATTCTTGAAGCTTTCAGTTCTGATGAATCATTATATTTAAGTCAT

>M6-PGSC0003DMG400021962M6LRR-RLP\_2745

TTTCTTAGTTTCTCATTCTTGAAGCTTTCAGTTCTGATGAATCATTATATTTAAGTCATATAAGAATGTATG

GTTTGATCTCTTTTTTTGATTCGTCTGAAATATCCATTCTTCAGGCAA

>M6-PGSC0003DMG400021962M6LRR-RLP\_2805

TAAGAATGTATGGTTTGATCTCTTTTTTTGATTCGTCTGAAATATCCATTCTTCAGGCAAATTTAGATGA

CGATAAGGGGTTTCTAGAAATAGTTTCTGTTTTACCTTTGTTGCAATAG

>M6-PGSC0003DMG400021962M6LRR-RLP\_305

TCCAAAATACAAAATTCGAACTCGACTACAGTTATTGCGATGTTGAAAGCCGCTGGCAAATCACCGAA

TGGCTTAATTTTGCTGCTACTAGAAAAGTGGAACATCTTCTACTCTGGTC

>M6-PGSC0003DMG400021962M6LRR-RLP\_366

ATCACCGAATGGCTTAATTTTGCTGCTACTAGAAAAGTGGAACATCTTCTACTCTGGTCTACTGATTTTAT

CACTTCCCCTTTCCATTGCCTCAATCTTTCTGCGAATGTTTGTCATTG

>M6-PGSC0003DMG400021962M6LRR-RLP\_427

CTGATTTTATCACTTCCCCTTTCCATTGCCTCAATCTTTCTGCGAATGTTTGTTCATTGATAACATTAGCAA  
TAGTTTTGGGTCGTTTTAACTTTGATGACACAGTCATTGCCTGGAAGT

>M6-PGSC0003DMG400021962M6LRR-RLP\_488

AACATTAGCAATAGTTTTGGGTCGTTTTAACTTTGATGACACAGTCATTGCCTGGAAGTCTTTAAAGAGC  
CTAAAATTGGGGAATTTTCTTATAGATGATTACAAAATTGCAAAAATATT

>M6-PGSC0003DMG400021962M6LRR-RLP\_549

TTAAAGAGCCTAAAATTGGGGAATTTTCTTATAGATGATTACAAAATTGCAAAAATATTGTCAGGCTGTC  
CTGTATTGGAAGATATGGAATTACATGATTTAGTTGTGCTTAATGGTCCT

>M6-PGSC0003DMG400021962M6LRR-RLP\_61

AATTAGATCCAATTCCAATGACCGGAGTTGGAGAAACCCTAGAGGACCGTATCAGTTCGTTGCCGGATG  
AACTTCTGATCAAAAATTCTGTCTTGTTTCGGCGACAAAGGATGCATACACAA

>M6-PGSC0003DMG400021962M6LRR-RLP\_610

CAGGCTGTCCTGTATTGGAAGATATGGAATTACATGATTTAGTTGTGCTTAATGGTCCTCATCGCTTGGA  
ATTTATGTCTTCAAAGTTAAAGACACTGAAGCTGAATGGTCAATGGTTGA

>M6-PGSC0003DMG400021962M6LRR-RLP\_671

TCGCTTGGAATTTATGTCTTCAAAGTTAAAGACACTGAAGCTGAATGGTCAATGGTTGATTAATGATGGA  
AGTCTTCGTTGTGTGGAATTTTTGCTCCGTACATTCAGCATTGGAAAT

>M6-PGSC0003DMG400021962M6LRR-RLP\_732

AATGATGGAAGTCTTCGTTGTGTGGAATTTTTGCTCCGTACATTCAGCATTGGAAATTCAGGAGGTC  
TTTATGATCTCAAGTGTATTCTCGTAGATGTGTCTGCTGTGGTTACTGCG

>M6-PGSC0003DMG400021962M6LRR-RLP\_793

CAGGAGGTCTTTATGATCTCAAGTGTATTCTCGTAGATGTGTCTGCTGTGGTTACTGCGAATCTTACTTTC  
AACATTATGTGTATCAAAGACATCAACGATGATTATGGTCTACATTTTG

>M6-PGSC0003DMG400021962M6LRR-RLP\_854

TCTTACTTTCAACATTATGTGTATCAAAGACATCAACGATGATTATGGTCTACATTTTGATCCTGAGGAAA  
ACAGTTGTAGTGGCTATCATCAATTCTTTGGTCCCTCGTCCATGGTTA

>M6-PGSC0003DMG400021962M6LRR-RLP\_915

CCTGAGGAAAACAGTTGTAGTGGCTATCATCAATTCTTTGGTCCCTCGTCCATGGTTACCTTCTAACGTT  
CCGTAATGTAAAGGAGTTAACCATTGGAACCTGGTTAACAGAGGTCTGT

>M6-PGSC0003DMG400021962M6LRR-RLP\_976

TTCTAACGTTCCGTAATGTAAAGGAGTTAACCATTGGAACCTGGTTAACAGAGGTCTGTTTTATCTCAG  
AGTACTTTTCCTTGGACAGTTGAGAATTAACCTTTGTACAAATTCACAA

>M6-PGSC0003DMG400021993-(rev)M6G-LecRK\_0

AAAAGTATGAAAATTTTATGATGATGAATTGATGGAGGACAAAAAAGTTTATTCCCTTAGCCCTTTTACTT  
GTGATTTTATTGATCACACTCATCGTTATCGCACGTATAACGTTGAAATA

>M6-PGSC0003DMG400021993-(rev)M6G-LecRK\_1054

GACGAGAGGCTCGTCCACGAGGCAGCTACAGGAGGTGTAGCTGTAGAAATGCAAGTGAAAAGATTGG  
CGTGTGTGGCGTTGTCTTGCATCCAAGAACGGCCTAGTCTTAGGCCAACAATG

>M6-PGSC0003DMG400021993-(rev)M6G-LecRK\_1178

GAGTCGTGGAAATGTTGGAAGGTCGTGTGCCAGTAGAAGCGCCTACACAAACGACAATGTTGATCCTC  
GATCTATTAGACGAGGGTGTGATCATCATCCCGGGATACCTAGGGTTGCTG

>M6-PGSC0003DMG400021993-(rev)M6G-LecRK\_124

GAGACATTTTTCTTATTTTCGGAGCTGATATCGCGTTGATTATTGGTGTTTTTGCTGGTGTTTTGATCCG  
AAGGAAGTTCAACAACAGGAGGTTATTGCTAGAAAATCAGTTAGACTCT

>M6-PGSC0003DMG400021993-(rev)M6G-LecRK\_1240

ATCCTCGATCTATTAGACGAGGGTGTGATCATCATCCCGGGATACCTAGGGTTGCTGCAGCCATGGCA  
AGATCTAGTGATACTAATTCGCTTCGCTCTTATACAATGTCTATCCTCTCA

>M6-PGSC0003DMG400021993-(rev)M6G-LecRK\_1302

CATGGCAAGATCTAGTGATACTAATTCGCTTCGCTCTTATACAATGTCTATCCTCTCAGGGAGGTAGTAC  
CTACATAATACATAACGGATTTGTTTTGCTTTCTATCAAATTTTTCAATA

>M6-PGSC0003DMG400021993-(rev)M6G-LecRK\_1364

GGTAGTACCTACATAATACATAACGGATTTGTTTTGCTTTCTATCAAATTTTTCAATATCAATAGGTTGAT  
TGTTTTCTCTGGTGTGATCCTGAATCCGAAAGTGAGTACTTGAATTCT

>M6-PGSC0003DMG400021993-(rev)M6G-LecRK\_186

TTTGATCCGAAGGAAGTTCAACAACAGGAGGTTATTGCTAGAAAATCAGTTAGACTCTGATGGACGCGA  
GCTGAGGATCGAGTATAGTTTCTAAGGAAAGTAGCTGGTGTCCAACAAG

>M6-PGSC0003DMG400021993-(rev)M6G-LecRK\_248

GACGCGAGCTGAGGATCGAGTATAGTTTCTAAGGAAAGTAGCTGGTGTCCAACAAGATTTAAGCTGA

AAGAGCTCGAAGAAGCAACCAATAACTTTGGATCGTTGGTAGGACGTGGAT

>M6-PGSC0003DMG400021993-(rev)M6G-LecRK\_310

AAGCTGAAAGAGCTCGAAGAAGCAACCAATAACTTTGGATCGTTGGTAGGACGTGGATCATCAGCTTGT  
GTTTTCAAAGGCGTGCTTAGTGATGGTGCATCAGTAGCTGTAAAAGGATC

>M6-PGSC0003DMG400021993-(rev)M6G-LecRK\_372

AGCTTGTGTTTTCAAAGGCGTGCTTAGTGATGGTGCATCAGTAGCTGTAAAAGGATCGATGGAGAGGA  
ACTTGGCGATAAGGAATTCAAATCAGAAGTTGCAGCTATTGCTAGTGTTCA

>M6-PGSC0003DMG400021993-(rev)M6G-LecRK\_434

GAGAGGAACTTGGCGATAAGGAATTCAAATCAGAAGTTGCAGCTATTGCTAGTGTTCAACATGTTAATC  
TTGTACGTTTACTTGGATACTCTAGTGTTCCCTCCATCAGGACCTCGATTTT

>M6-PGSC0003DMG400021993-(rev)M6G-LecRK\_496

GTTAATCTTGTACGTTTACTTGGATACTCTAGTGTTCCCTCCATCAGGACCTCGATTTTTGGTTTACGAGTA  
TATAGTTAATGGATCACTTGATAATTGGATTTTTCGAAAAAGGGGAATT

>M6-PGSC0003DMG400021993-(rev)M6G-LecRK\_558

TTACGAGTATATAGTTAATGGATCACTTGATAATTGGATTTTTCGAAAAAGGGGAATTCGAGGTTGTTTG  
TCTTTGGATTTGAGGTGTAGAGTTGGTCTAGATGTGGCTAAGGCACTTTC

>M6-PGSC0003DMG400021993-(rev)M6G-LecRK\_62

TTTTACTTGTGATTTTATTGATCACACTCATCGTTATCGCACGTATAACGTTGAAATATTCGGAGACATTTT  
TTCTATTTTCGGAGCTGATATCGCGTTGATTATTGGTGTTTTTGCTG

>M6-PGSC0003DMG400021993-(rev)M6G-LecRK\_620

GTTGTTTGTCTTTGGATTTGAGGTGTAGAGTTGGTCTAGATGTGGCTAAGGCACTTTCTTATTTGCATCAT  
GATTGTAGATCGTGTATTTTACATCTCGATGTCAAGCCTGAGAATATAC

>M6-PGSC0003DMG400021993-(rev)M6G-LecRK\_682

TTGCATCATGATTGTAGATCGTGTATTTTACATCTCGATGTCAAGCCTGAGAATATACTTCTAGACGAGA  
ATCATCGTGCTATTCTAGCTGATTTTCGGGTTGTCTAAGTTGATGGGGAAA

>M6-PGSC0003DMG400021993-(rev)M6G-LecRK\_744

AGACGAGAATCATCGTGCTATTCTAGCTGATTTTCGGGTTGTCTAAGTTGATGGGGAAAGATGAGAGTAG  
AGTTGTTACAACGATTAGAGGTAAGGTTGATTTAGCCCCGAGTGCT

>M6-PGSC0003DMG400021993-(rev)M6G-LecRK\_868

GAGAACGGGATTTCTGAGAAAAGTGATGTTTATAGCTACGGAATGGTGCTATTGGAGATGATTGGAGG  
GAGGAGAAATATTACTTTAGCTGAAAATGGAAAGAGTACCAATTCAAAGAGT

>M6-PGSC0003DMG400021993-(rev)M6G-LecRK\_930

TGGAGGGAGGAGAAATATTACTTTAGCTGAAAATGGAAAGAGTACCAATTCAAAGAGTAAGTTCAGCT  
ATTTTCCTAAGATTGTGAGTGAGAAATTGGAGCAGGGAAAGATCATGGAAGT

>M6-PGSC0003DMG400021993-(rev)M6G-LecRK\_992

TCAGCTATTTTCCTAAGATTGTGAGTGAGAAATTGGAGCAGGGAAAGATCATGGAAGTCGTGGACGAG  
AGGCTCGTCCACGAGGCAGCTACAGGAGGTGTAGCTGTAGAAATGCAAGTGA

>M6-PGSC0003DMG400021996M6LRR-RLP\_0

CCCCTGTCTCACAAGTCTTCAAACCCACCTACCCCCATTCAAACCCACCCACCCCCATCTCCTCTTCTCAGC  
TCCCACACATTCCCTCTCTAGTCTCCACAGATCTGAACTTTCATTACT

>M6-PGSC0003DMG400021996M6LRR-RLP\_1054

AGAAGTCTTACTCTTTGCATCTGGGGTTAGCTGTTCTTGTGTTGTAAGTGGGGTTGAGGAAAATTTTAA  
TCTTTGCATTTGGGGTTGACTGTATTTGTTGTAATTGAGGGTGGTTGAG

>M6-PGSC0003DMG400021996M6LRR-RLP\_1116

AATTTTAATCTTTGCATTTGGGGTTGACTGTATTTGTTGTAATTGAGGGTGGTTGAGGAAATGGCATGT  
TTTTTTTTAGAGCATTGTTGTCTGAGTACTTTAGTCGTTAATGGTGAAAA

>M6-PGSC0003DMG400021996M6LRR-RLP\_1178

TGGCATGTTTTTTTTAGAGCATTGTTGTCTGAGTACTTTAGTCGTTAATGGTGAAAAGAAGTCTTAATCT  
TTGCATCTGGGGTTAGCTGTACTCGTTTGTAAATTGCGGGGTTGAGGAAA

>M6-PGSC0003DMG400021996M6LRR-RLP\_124

ATTTAAAGATTCTTGAAATTCTTGAAAAAATGTCAACTTTAGCACCCCATTTTCGTACAGTAATGGTGA  
ACTCACTCCCTTAGAAGTTCTTGAACACATCTTCTCCGACATAACTTC

>M6-PGSC0003DMG400021996M6LRR-RLP\_1240

TCTTAATCTTTGCATCTGGGGTTAGCTGTACTCGTTTGTAAATTGCGGGGTTGAGGAAATGGTATGTTTTG  
TAGAACATTGCTGTCTGAGTACTTTAGTCCTTATTGGTGAAAAAGTCTT

>M6-PGSC0003DMG400021996M6LRR-RLP\_1302

ATGTTTTGTAGAACATTGCTGTCTGAGTACTTTAGTCCTTATTGGTGAAAAAGTCTTAATCTTTGCATCT  
GGGGTTTACTGTACTTGTGCAATTGAGGGGTTGATGAAAGTTTTAAT

>M6-PGSC0003DMG400021996M6LRR-RLP\_1364

TTTGCATCTGGGGTTACTGTACTTGTGGCAATTGAGGGGTTGATGAAAGTTTAAATCTTGCATCTGG  
GGTTAAGTATTTGTTTGTAAATTGAGGGGCTGAGGAATTTAGTCTTAAGAG

>M6-PGSC0003DMG400021996M6LRR-RLP\_1426

GCATCTGGGGTTAAGTATTTGTTTGTAAATTGAGGGGCTGAGGAATTTAGTCTTAAGAGAATGGTTTTTTT  
GTCATGAGTCATTGGAGCTGATCTCAAAGTCATTTATTCGAAGTCTTGGT

>M6-PGSC0003DMG400021996M6LRR-RLP\_1488

GTTTTTTTGCATGAGTCATTGGAGCTGATCTCAAAGTCATTTATTCGAAGTCTTGGTTTTACAGTCTTGT  
GAAGGACTTACTACTGATGGACTTGTGCCATTTCTGCTAACTGCAGGT

>M6-PGSC0003DMG400021996M6LRR-RLP\_1550

CAGTCTTGTGAAGGACTTACTACTGATGGACTTGTGCCATTTCTGCTAACTGCAGGTTTATCTAGCACTT  
TTTAGCTGTGTTTTCTTTGTAGATTACCCTTTTCTGGTAATGGTGAAA

>M6-PGSC0003DMG400021996M6LRR-RLP\_1612

CTAGCACTTTTTAGCTGTGTTTTCTTTGTAGATTACCCTTTTCTGGTAATGGTGAAAAAATCTTTAATCTT  
TGCATTTGGGGTTAGCTGTACATTTTTGAAACTGAGGGGTGAAGAAAG

>M6-PGSC0003DMG400021996M6LRR-RLP\_1674

CTTTAATCTTTGCATTTGGGGTTAGCTGTACATTTTTGAAACTGAGGGGTGAAGAAAGTTTTATTCTTTGC  
ATCTGGGGTTGACTGTATTTGTTTGGTAGTGTGGGGTTGAGGAAATGAT

>M6-PGSC0003DMG400021996M6LRR-RLP\_1736

ATTCTTTGCATCTGGGGTTGACTGTATTTGTTTGGTAGTGTGGGGTTGAGGAAATGATATGTTTTTTTGT  
AGAGCATTGATGTCAGAGTACTTTAGTTGTTAATGGTGAAAAGAAGTTTT

>M6-PGSC0003DMG400021996M6LRR-RLP\_1798

TTTTTTGTAGAGCATTGATGTCAGAGTACTTTAGTTGTTAATGGTGAAAAGAAGTTTTAATCTTTGCATCT  
GGGGTTAACTGACTTGTGTTGTAAGTGGTTGAGGAAAGTTTTAAT

>M6-PGSC0003DMG400021996M6LRR-RLP\_186

TAATGGTGAACCTCACTCCCTTAGAAGTTCTTGAACACATCTTCTCCGACATAACTTCAGATAAGGACAG  
GAACTCAATATCCTTGGTTTGTAAATCTTGGTATGAAGCTGAGAGGTGTT

>M6-PGSC0003DMG400021996M6LRR-RLP\_1860

TTTGCATCTGGGGTTAACTGTACTTGTGTTGTAAGTGGTTGAGGAAAGTTTTAATCTTTGCATCTGG

GGTTAATAACTGTATTTGCTTGTAATTGAGGGGTTGAGGAAATGGTAGGT

>M6-PGSC0003DMG400021996M6LRR-RLP\_1922

GCATCTGGGGTTAATAACTGTATTTGCTTGTAATTGAGGGGTTGAGGAAATGGTAGGTTTTGTAGAGAT

TGTTGCTTGAGTTCTTTAGTCTTTACTGGTGAAAAAGAGTTCAAATCTTTG

>M6-PGSC0003DMG400021996M6LRR-RLP\_1984

TAGAGATTGTTGCTTGAGTTCTTTAGTCTTTACTGGTGAAAAAGAGTTCAAATCTTTGCATCTGTGGGGT

AACTGTTTCGAGGAAATACTAGAAGGTTTTGTTGAGCACTGTTGTCTAAG

>M6-PGSC0003DMG400021996M6LRR-RLP\_2046

TGTGGGGTAACTGTTTCGAGGAAATACTAGAAGGTTTTGTTGAGCACTGTTGTCTAAGTACTTTAGCCCT

TACCGGTGACTTCATTAAATTATTTCTAATCTGGGATTAAGTATTGAC

>M6-PGSC0003DMG400021996M6LRR-RLP\_2108

TTAGCCCTTACCGGTGACTTCATTAAATTATTTCTAATCTGGGATTAAGTATTGACGGAATAGTAGGTT

TTGTGGAACATTGTTGTCAGAGTACTTCAGCCCTTACTGGTTAGGATAA

>M6-PGSC0003DMG400021996M6LRR-RLP\_2170

TAGTAGGTTTTGTGGAACATTGTTGTCAGAGTACTTCAGCCCTTACTGGTTAGGATAAGTTTTAATCTAT

GCATCTGAGAACTGTTCTTGTTTGTAATTGAGGCATTGGGGAAGCAGTG

>M6-PGSC0003DMG400021996M6LRR-RLP\_2232

TAATCTATGCATCTGAGAACTGTTCTTGTTTGTAATTGAGGCATTGGGGAAGCAGTGGGATTTTTGTGGA

GCATTGTTGTCTGAGTACTTTATTCTTACTGGTGAGAAAAGTTCTAATCT

>M6-PGSC0003DMG400021996M6LRR-RLP\_2294

TTTGTGGAGCATTGTTGTCTGAGTACTTTATTCTTACTGGTGAGAAAAGTTCTAATCTTTGCATCTGGGG

GTTGAATGTTTCTTGTTTGTAATTGAGGGCTTGAAGAAGCAGTAGGTTTT

>M6-PGSC0003DMG400021996M6LRR-RLP\_248

AAGGACAGGAACTCAATATCCTTGGTTTGTAATCTTGGTATGAAGCTGAGAGGTGTTGTAGGAAAAGT

GTGTTTATTGGGAACTGTTATGCTGTAAGCCCTTCAATCTTGATTAGACGT

>M6-PGSC0003DMG400021996M6LRR-RLP\_2542

CTCTCTCTGGTTGGTCGCTGATATTAAGTTGGGGTTGTTATTACAAAAAATTAGGGTAAAATTTGAAA

ATAAAATATAATTCCAACATTCGAAAGAGAGTTGGAAAACATGTTATAAG

>M6-PGSC0003DMG400021996M6LRR-RLP\_2604



ATTTGAAAATAAAATATAATTCCAACATTCGAAAGAGAGTTGGAAAACATGTTATAAGTTGTTTTCCAAA  
TTTGATTTACAACCTCAAGTAGGCTTTGAACTTTTCATGACCAAACACTG

>M6-PGSC0003DMG400021996M6LRR-RLP\_2666

TTTCCAAATTTGATTTACAACCTCAAGTAGGCTTTGAACTTTTCATGACCAAACACTGGTTTTCAAATAAA  
GTGAAACATAATTCCGGAAAAAAGTAAATAATGTTTATGGCCAAATGGG

>M6-PGSC0003DMG400021996M6LRR-RLP\_2728

TCAAATAAAGTGAAACATAATTCCGGAAAAAAGTAAATAATGTTTATGGCCAAATGGGTCTTAGTTATG  
TCTGTCAGTTCATTCTCTGTTTTGCTTGATTGGATGGTATTTACGGTA

>M6-PGSC0003DMG400021996M6LRR-RLP\_2790

TAGTTATGTCTGTCAGTTCATTCTCTGTTTTGCTTGATTGGATGGTATTTACGGTAGTTGGTGGAAAGA  
GTAGCAAGAATACCATAGCGAAGAAATGCCTTATTACTTTGATCCGCTT

>M6-PGSC0003DMG400021996M6LRR-RLP\_2852

GTGGAAAGAGTAGCAAGAATACCATAGCGAAGAAATGCCTTATTACTTTGATCCGCTTACTGGGCAAAG  
ATTCAAGAGCATATACTTTTATAACTTGGCTACAACAAACGAAAGGGACGT

>M6-PGSC0003DMG400021996M6LRR-RLP\_310

GAAAAGTGTGTTTATTGGGAACTGTTATGCTGTAAGCCCTCAATCTTGATTAGACGTTTCCCAGACCTC  
AGATCTGTAACGATTAAAGGGAAGCCACATTTTGCTGATTTGATCTTGT

>M6-PGSC0003DMG400021996M6LRR-RLP\_372

CAGACCTCAGATCTGTAACGATTAAAGGGAAGCCACATTTTGCTGATTTGATCTTGTACCTGAAGGTTG  
GGGTGCATATTTCTATCCATGGGCTGTTTCAATGGCGAAAGCTTATCCAT

>M6-PGSC0003DMG400021996M6LRR-RLP\_434

GAAGGTTGGGGTGCATATTTCTATCCATGGGCTGTTTCAATGGCGAAAGCTTATCCATTTCTTGAGGAAA  
TTAGGCTTAAGAGAATGGTTGTTTGTGATGAGTCATTGGAGCTGATTTG

>M6-PGSC0003DMG400021996M6LRR-RLP\_496

TGAGGAAATTAGGCTTAAGAGAATGGTTGTTTGTGATGAGTCATTGGAGCTGATTTGGAAGTCGTTTAA  
GAATTTAGAGTCTTGGTTTTACAGTCTTGTGAAGGATTTACTACCGATGG

>M6-PGSC0003DMG400021996M6LRR-RLP\_62

CTTCTTCAGCTCCCACACATTCCTCTCTAGTCTCCACAGATCTGAACTTTCATTACTCAAGATTTAAAGAT  
TCTTGAAATTCTTGAAAAAAAATGTCAACTTTAGCACCCCATTTTCGT

>M6-PGSC0003DMG400021996M6LRR-RLP\_620

GCTGCCATTGCTGCTAACTGCAGGTTTATCTAGCATTTTTAGCTGTTTTCTTGGGTAGATTACCCTTTTCTG  
AGTAATGGTGAAAAAAGTCTTAATCTTTGCATCTGGGGTAACTGTGC

>M6-PGSC0003DMG400021996M6LRR-RLP\_682

CCCTTTTCTGAGTAATGGTGAAAAAAGTCTTAATCTTTGCATCTGGGGTAACTGTGCTTGTTTGTAGCTG  
AGGGGTTGAGGAAAGTTTTAATCTTTGCATCTGGGGTTTACTGTATTTG

>M6-PGSC0003DMG400021996M6LRR-RLP\_744

TTGTAGCTGAGGGGTTGAGGAAAGTTTTAATCTTTGCATCTGGGGTTTACTGTATTTGTTTGTAAAGGGTG  
GTTGAGGAAATGGTATGTTTTTTAGAGCATTGTTGTCTGAGTACTCTAGT

>M6-PGSC0003DMG400021996M6LRR-RLP\_806

TAAGGGTGGTTGAGGAAATGGTATGTTTTTTAGAGCATTGTTGTCTGAGTACTCTAGTCGTTAATGGTGA  
AAAGAAGTCTTAACCTTTGCGTCTGGGGTAACTATACTTGTGTTGTA

>M6-PGSC0003DMG400021996M6LRR-RLP\_868

AATGGTGAAAAGAAGTCTTAACCTTTGCGTCTGGGGTAACTATACTTGTGTTGTAAGGTTGAG  
GAAAGTTTTAATCTTTGTATCTGGGGTAACTGTATTTGTTTGGTATTGAG

>M6-PGSC0003DMG400021996M6LRR-RLP\_930

GGTTGAGGAAAGTTTTAATCTTTGTATCTGGGGTAACTGTATTTGTTTGGTATTGAGGGGTTGAAGAAT  
TGGTGTGTTTTGTAGAGTATTGTTGTCTGAGTACTTTATTTGTTAATGGT

>M6-PGSC0003DMG400021996M6LRR-RLP\_992

TGAAGAATTGGTGTGTTTTGTAGAGTATTGTTGTCTGAGTACTTTATTTGTTAATGGTGAAAAGAAGTCT  
TACTCTTTGCATCTGGGGTTAGCTGTTCTTGTTTGTAACTGAGGGGTTGA

>M6-PGSC0003DMG400022000M6LRR-RLK\_0

ATGGTTTCCAGGACTATAATTATAGCATTCCCTAGTTTTGTTAATGTACCTCTCAGTTACAAATGCATCGAA  
CATTTCAACTGATGAGGCTTCTCTTTTAGCTTTCAAAGCACAGATAACT

>M6-PGSC0003DMG400022000M6LRR-RLK\_1037

CCATTTAGTCCCATCTCAGTCCAAGGTTCAATAATTTAAGTTTTCTAACATTAATAATTTCTCTATATTTTCT  
GTTAACATACAAATATCTAACAAGATTAAGCATCCTAGCGAACAT

>M6-PGSC0003DMG400022000M6LRR-RLK\_122

AGACCCCAATGGAATATTGTCAAAAAACTGGACAAAAGGAACTCACATTTGCAATTGGATAGGCATATC

TTGCAGTAAAAAGCATCAAAGAGTGACATCATTAGTCCTCATAAGCTTTGG

>M6-PGSC0003DMG400022000M6LRR-RLK\_1464

CTCAAGTGACTCACACATCCATCTTAATATAGATAATTGACTGACGATTTTAAGTTTCCTTTCTTCAGTTAC  
CATATAAGAAGAGAGGAAAAGAGAATAGCAGAAGTAAATGAATAGTTC

>M6-PGSC0003DMG400022000M6LRR-RLK\_1525

TCTTCAGTTACCATATAAGAAGAGAGGAAAAGAGAATAGCAGAAGTAAATGAATAGTTCTCATGTTGCC  
AATATTTAAAATTTAAATGCCCTAATTAATAGAAAACCTTTCCTAGGCTTG

>M6-PGSC0003DMG400022000M6LRR-RLK\_1647

ATTGTTTCGTCTTCAAGAGGACGTTGAAACAGAATACAAGGATTGCCGAAGTATCCGGGATTCTAATTCTC  
TTACACAATATTGTACGTTTTAGTGTTGTAACCACACAATTTAATATATA

>M6-PGSC0003DMG400022000M6LRR-RLK\_1708

CTAATTCTCTTACACAATATTGTACGTTTTAGTGTTGTAACCACACAATTTAATATATATTTTACAGGACAT  
ATCCCAAGTGAAATTGATAACCTATCAGCAATTCGAAGATTAAGTCTA

>M6-PGSC0003DMG400022000M6LRR-RLK\_1769

TTACAGGACATATCCCAAGTGAAATTGATAACCTATCAGCAATTCGAAGATTAAGTCTACCACGGAAACAA  
TTTGGTGGGAATTTTCCACCATCTATGGGAAATTTGTCAAATCTAGAGT

>M6-PGSC0003DMG400022000M6LRR-RLK\_183

GGCATATCTTGCAGTAAAAAGCATCAAAGAGTGACATCATTAGTCCTCATAAGCTTTGGATTTAGAGGTT  
CAATAGCAAAGAAATTGGGAATCTCTCCTTCCCTTAACAAGTTGGATGTT

>M6-PGSC0003DMG400022000M6LRR-RLK\_1830

ACGGAACAATTTGGTGGGAATTTTCCACCATCTATGGGAAATTTGTCAAATCTAGAGTTGATAGACCTA  
GGTCTGAACAGTCTACATGGTGGCATTCCACAAGAATTTAAACATCTTGT

>M6-PGSC0003DMG400022000M6LRR-RLK\_1891

ATAGACCTAGGTCTGAACAGTCTACATGGTGGCATTCCACAAGAATTTAAACATCTTGTAATTTGAAAG  
GATTGTTTCTTGGTCAAACAGATTATCGGGTGAAGTTCCAGGGCCTATG

>M6-PGSC0003DMG400022000M6LRR-RLK\_1952

ATTTGAAAGGATTGTTTCTTGGTCAAACAGATTATCGGGTGAAGTTCCAGGGCCTATGTACAACATTTT  
TGGACTAGAAATGATTTCAATTTGTAGGAAACGGGCTCTCAGGAACACTTC

>M6-PGSC0003DMG400022000M6LRR-RLK\_2196

CAATCTGTTTAGTGGACCTGTACCTATGAATCTTGTAAGCTACAACAGCTTCAATTCATCAGCTTGCATT  
TTAATCAATTGACGAATGATCCATCTACGGTTGAGTTAAGTTTTCTTAC

>M6-PGSC0003DMG400022000M6LRR-RLK\_2257

AGCTTGCATTTAATCAATTGACGAATGATCCATCTACGGTTGAGTTAAGTTTTCTTACTTCATTATCTAAT  
TGCAAGTATTTGATGACAGTTCAAATAGGAGGTAACCAATTTAATGGA

>M6-PGSC0003DMG400022000M6LRR-RLK\_2318

CATTATCTAATTGCAAGTATTTGATGACAGTTCAAATAGGAGGTAACCAATTTAATGGAAGTCTTCCAAA  
GTCCTTAGGATCAGGCAACTGGTCCTTTTCCCTTGAATATTTCTTTGCCT

>M6-PGSC0003DMG400022000M6LRR-RLK\_2379

TCTTCAAAGTCCTTAGGATCAGGCAACTGGTCCTTTTCCCTTGAATATTTCTTTGCCTTTTATAGTGGTAT  
CACAGGAAAAATACCAACTAACATCAGTAACTTTAGGAACCTGGAGTG

>M6-PGSC0003DMG400022000M6LRR-RLK\_2440

TATAGTGGTATCACAGGAAAAATACCAACTAACATCAGTAACTTTAGGAACCTGGAGTGGTTAAGCTTG  
GGAGAGAATAAGCTTATAGTTCTATTCTCCAGATTTGGGGAACCTGAAG

>M6-PGSC0003DMG400022000M6LRR-RLK\_2501

TAAGCTTGGGAGAGAATAAGCTTATAGTTCTATTCTCCAGATTTGGGGAACCTGAAGAATTTGCAAA  
AGTTTTACCTGCAGATAAACAATTTAGATGGAATTATACCAACTAGCTTGT

>M6-PGSC0003DMG400022000M6LRR-RLK\_2623

AACATGGAAAGCTTGTACCAAGTTATCTTGGGCAAAAATCAACTTTCTGGGGAAATACCAAGTTGCTTTG  
GAAATATTTCTTCTTTAAGAGAACTCTACTTAGATTCTAATGCACTAGTT

>M6-PGSC0003DMG400022000M6LRR-RLK\_2684

GTTGCTTTGGAAATATTTCTTCTTTAAGAGAACTCTACTTAGATTCTAATGCACTAGTTTCCCATATTCCAT  
CAACATTTTGGAGAAACAAAGATCTTTCAGTTCTCTATTTGTCCTCCA

>M6-PGSC0003DMG400022000M6LRR-RLK\_2745

CCATATCCATCAACATTTTGGAGAAACAAAGATCTTTCAGTTCTCTATTTGTCCTCCAATTTGCTGAATG  
GATCTCTGCAGTAGAAATAGGAAACACAAGGAGTTTGTGGATGTTAGA

>M6-PGSC0003DMG400022000M6LRR-RLK\_2806

TTGCTGAATGGATCTCTTGCAGTAGAAATAGGAAACACAAGGAGTTTGTGGATGTTAGATTTATCTGGC  
AATCAGTTCTCAGGTCAGATTCCTAGCACTATTGGCCAACTACAAAGCTTG

>M6-PGSC0003DMG400022000M6LRR-RLK\_2928

TAGCCTTTCATTGTCAAAGAATATGTTAGATGGTCCTATACCTGAACTATTTGAAGATTTGGTTTCATTGG  
AATATTTGGATCTATCTAGCAACAATCTAACAGGCATGATCCCCAAGTC

>M6-PGSC0003DMG400022000M6LRR-RLK\_2989

GTTTCATTGGAATATTTGGATCTATCTAGCAACAATCTAACAGGCATGATCCCCAAGTCCTTGAGACATCT  
TGAACATCTCATGTATTTCAATGTCTCGTTCAATGGGCTCATGGGTGAA

>M6-PGSC0003DMG400022000M6LRR-RLK\_3599

GTTGTGCCAATTTTGATTATAAAGTGTTGGTGCTAGAGTACATGCCCAATGAAAACCTCGAATGTTGGCT  
TCACTCTACTGACAAATTTTTGGATTTAACTCAAAGACTAAAGGTGATGA

>M6-PGSC0003DMG400022000M6LRR-RLK\_366

TTGTCTTTGCAAATGAATAATCTCACTGGTCAAATCCCAGAAAGCCTTGATTCTCACAAAGCTTCAACT  
TCTTGATCTTTCTGAAAATGATCTATTTGGAAATGTTCCATTTTCCATT

>M6-PGSC0003DMG400022000M6LRR-RLK\_3965

ATTATTTTCACTAATGATTGCGTGATTTTTTTGCAGAGTATGGATCAGAAGGCCAAAGTATCAACCAAGGG  
AGATGTTTATAGCTTTGGTATTTTGTAAATGGAGACTTTTACAAGTAAGA

>M6-PGSC0003DMG400022000M6LRR-RLK\_4087

CCCGTGGATGATCTATTCGTTGGAACTTCACCTTGAAAAGATGGATATGCCAATCATTACCAGACCGAT  
TGGTGGATGTAGTGGACATTAATCTATTTTCACTGGGTGAAGAAAATTTT

>M6-PGSC0003DMG400022000M6LRR-RLK\_4148

CAGACCGATTGGTGGATGTAGTGGACATTAATCTATTTTCACTGGGTGAAGAAAATTTTACTTCTAAAGA  
GAGATGCTTCAAATCAATCATGGAATTAGCTCTTGAATGCACAAATGATC

>M6-PGSC0003DMG400022000M6LRR-RLK\_4209

TTCTAAAGAGAGATGCTTCAAATCAATCATGGAATTAGCTCTTGAATGCACAAATGATCTGCTGGAAGA  
GAGAATCTGCATGGAAGATATTACTCTGCGACTCAAGAAGATCCTAACTCA

>M6-PGSC0003DMG400022000M6LRR-RLK\_427

AGCTTCAACTTCTTGATCTTTCTGAAAATGATCTATTTGGAAATGTTCCATTTTCCATTTCCAATGTGTCTT  
CCTTAAAGATCATTGATTTTGGATTTAATCGGTTTAGTGGGAATCTCC

>M6-PGSC0003DMG400022000M6LRR-RLK\_488

CAATGTGTCTTCCTTAAAGATCATTGATTTTGGATTTAATCGGTTTAGTGGGAATCTCCAAGGGGATTTT

GTACTAGGCTTCCAAATCTGCAAGGTTTATTTCTCTCAAAAAATCAATT

>M6-PGSC0003DMG400022000M6LRR-RLK\_61

ATGCATCGAACATTTCAACTGATGAGGCTTCTTTTTAGCTTTCAAAGCACAGATAACTTCAGACCCCAAT

GGAATATTGTCAAAAACTGGACAAAAGGAACTCACATTTGCAATTGGA

>M6-PGSC0003DMG400022000M6LRR-RLK\_671

TAATCAGCTCACAGGTAATTAGTAATGTTAATTCAATTCTTGGACTATATATACTTGATTCAGAATCATT

AATCCTTCTACAATGTTATGATGCTATCTGATTGTGTTTCATATATGTAT

>M6-PGSC0003DMG400022000M6LRR-RLK\_732

AGAATCATTTAATCCTTCTACAATGTTATGATGCTATCTGATTGTGTTTCATATATGTATTAACAGGAAGTT

TGCCAAGAGACATGTGGAATTTGACAAAGCTTCGAGAATTATATCTTGG

>M6-PGSC0003DMG400022000M6LRR-RLK\_793

ACAGGAAGTTTGCCAAGAGACATGTGGAATTTGACAAAGCTTCGAGAATTATATCTTGGATGGAATAAC

ATAACAGGTATCTTGGTTCTAAGTCTAATAATTTCTAGTTAATTAGAAATT

>M6-PGSC0003DMG400022000M6LRR-RLK\_854

GGAATAACATAACAGGTATCTTGGTTCTAAGTCTAATAATTTCTAGTTAATTAGAAATTGTAGTAGCAGC

AAAAAATGTTTCATATAGCTCCTTGTATTTCATTTTCAAACAACAATGACT

>M6-PGSC0003DMG400022000M6LRR-RLK\_915

AGTAGCAGCAAAAAATGTTTCATATAGCTCCTTGTATTTCATTTTCAAACAACAATGACTACTACTACATCG

GCTCAATGCTAGTTTGTGTCAACTTTATGAATCCTCATTATCCGCGTTA

>M6-PGSC0003DMG400022000M6LRR-RLK\_976

TACTACATCGGCTCAATGCTAGTTTGTGTCAACTTTATGAATCCTCATTATCCGCGTTAATCCATTTAGTCC

CCATCTCAGTCCAAGGTTCAATAATTTAAGTTTTCTAACATTAAAATT

>M6-PGSC0003DMG400022067-(rev)M6LRR-RLP\_0

ATGGCCTCGTTGCTTAAATTGAAGCATGAACTTACATTTGATTCTTCATGCCAAAGAAAATAGTTAGGT

GGAATAGAAACACTGATTGCTGCTTGTGGCCGGGTGTAAGTTGTGACGAA

>M6-PGSC0003DMG400022067-(rev)M6LRR-RLP\_1054

ACATCGACATTTCTAATAACAATGGTCAACTTTCTTCTGCTCAAACCTCAATTAGCCGTTCTCCTTTCCCTCC

CGTCATTGCAGTACCTTTTTCTTTATACTAGTCATTTGAGTGGAGAAA

>M6-PGSC0003DMG400022067-(rev)M6LRR-RLP\_1116

CTTCCCTCCCGTCATTGCAGTACCTTTTCTTATACTAGTCATTTGAGTGGAGAAATCCATGAATTTCCA  
AATGCATCCTCCTCTGTTCTGGAAATACTTTATTTGAGCAATAACCAT

>M6-PGSC0003DMG400022067-(rev)M6LRR-RLP\_1178

TGAATTTCCAAATGCATCCTCCTCTGTTCTGGAAATACTTTATTTGAGCAATAACCATCTAAAAGGATCGA  
TCCCCGGTCTATCTTTAACTCAATAGGCTTTCACAACTCTCACTTTC

>M6-PGSC0003DMG400022067-(rev)M6LRR-RLP\_124

GTCACGTGCTTGTCTGGAGTTGGACAACGAAGCCATTTCTGGCGGAGTTGAGAACTCAAGCAGTCTCT  
TCAATCTTCAACATCTTGAGAAGCTCAATCTGGCTTATAACGACCTACGTT

>M6-PGSC0003DMG400022067-(rev)M6LRR-RLP\_1302

AACTCCTTCAGTGGGACCATTATTATCGAAGCGGTAAATGGACTTCCTAGGCTAACCACCCTTGACCTTT  
CAGACAACAAAATTGAAGGGGAAATACCAAATTGGGTTTGGACAACCTGCA

>M6-PGSC0003DMG400022067-(rev)M6LRR-RLP\_1364

TGACCTTTCAGACAACAAAATTGAAGGGGAAATACCAAATTGGGTTTGGACAACCTGCAAAGCTGAATCT  
TTCTACAATCTGCTGGAGTCTGTAGAAAAACCTTATTATATATCTACTAC

>M6-PGSC0003DMG400022067-(rev)M6LRR-RLP\_1426

TGAATCTTTCACAATCTGCTGGAGTCTGTAGAAAAACCTTATTATATATCTACTACTTCTATTGTCATTG  
ACTTGAGTTTCAACAGGATCAAGGGCAATCCACCATTTCTACCAGATC

>M6-PGSC0003DMG400022067-(rev)M6LRR-RLP\_1488

ATTGTCATTGACTTGAGTTTCAACAGGATCAAGGGCAATCCACCATTTCTACCAGATCGCTTTGCAAAC  
GGAAAAGTAGTATTACTTACTTTTCAATTGCCAATAATCAATTTACAGGA

>M6-PGSC0003DMG400022067-(rev)M6LRR-RLP\_1550

TGCAAACCTGGAAAAGTAGTATTACTTACTTTTCAATTGCCAATAATCAATTTACAGGATCAATATCCTCTT  
CCATATGCAGTCTAGATCAGCTTCAATTCCTTGATATGTCAAATAACTC

>M6-PGSC0003DMG400022067-(rev)M6LRR-RLP\_1612

TATCCTCTTCCATATGCAGTCTAGATCAGCTTCAATTCCTTGATATGTCAAATAACTCCATAAGCGGAAAA  
ATACCTCCCTGTCTAATCCAAATGCTGGCTACGAGTCTCGTAGTGTTGA

>M6-PGSC0003DMG400022067-(rev)M6LRR-RLP\_1674

AGCGGAAAAATACCTCCCTGTCTAATCCAAATGCTGGCTACGAGTCTCGTAGTGTTGAATATAGCGAGA  
AACAACTAAGTGGTACTATTCTGATAAATTTCCGCTGAATTGTAGCTTG

>M6-PGSC0003DMG400022067-(rev)M6LRR-RLP\_1736

AGCGAGAAACAATCTAAGTGGTACTATTCCTGATAAATTTCCGCTGAATTGTAGCTTGAAACTTTAGAT  
CTCAGCAACAATATGTTAGAAGGGAAAGTTCCAAGCTCCCTGAAAACTG

>M6-PGSC0003DMG400022067-(rev)M6LRR-RLP\_1798

CTTTAGATCTCAGCAACAATATGTTAGAAGGGAAAGTTCCAAGCTCCCTGAAAACTGTCAACCTTTGCA  
AGTTTTGAATATTGGAAACAACAAGATCAAAGATACATTCCCGTGCATGT

>M6-PGSC0003DMG400022067-(rev)M6LRR-RLP\_186

AGTCTCTTCAATCTTCAACATCTTGAGAAGCTCAATCTGGCTTATAACGACCTACGTTCTCTTCCAATACC  
AACAGATATTTATAAGCTTGCAAACCTTGACGTACCTGAATTTGTCACAA

>M6-PGSC0003DMG400022067-(rev)M6LRR-RLP\_1860

CCTTTGCAAGTTTTGAATATTGGAAACAACAAGATCAAAGATACATTCCCGTGCATGTTGAAGAAATTAT  
ACAGTTTTCATGTCCTAGTCATAAGGTGCAACAAGTTCTACGGGAATCTC

>M6-PGSC0003DMG400022067-(rev)M6LRR-RLP\_1922

GAAATTATACAGTTTTCATGTCCTAGTCATAAGGTGCAACAAGTTCTACGGGAATCTCCAGTGTCTGTT  
GCTAATCAAACCTGGTCAAGGCTTCAAATTGTGGATCTTGCTTACAATAA

>M6-PGSC0003DMG400022067-(rev)M6LRR-RLP\_1984

GTTCTGTTGCTAATCAAACCTGGTCAAGGCTTCAAATTGTGGATCTTGCTTACAATAATTCAGCGGTGCT  
CTGCTACCACAATACTTCTCGAGCTAGGAAGGCATGATGCAGGGCAACA

>M6-PGSC0003DMG400022067-(rev)M6LRR-RLP\_2046

AGCGGTGCTCTGCTACCACAATACTTCTCGAGCTAGGAAGGCATGATGCAGGGCAACAATCCATACCCA  
TGGGAGCAGTACTTAATGCTGATAATCTGTATCAAGACAAGGTGACTTTAA

>M6-PGSC0003DMG400022067-(rev)M6LRR-RLP\_2108

ATACCCATGGGAGCAGTACTTAATGCTGATAATCTGTATCAAGACAAGGTGACTTTAACTATCAAAGGTT  
TAACAGTGGAAATATGTGAAAATTCTTGTAGTTTTAACTTCCATCGATTC

>M6-PGSC0003DMG400022067-(rev)M6LRR-RLP\_2170

CAAAGGTTTAAACAGTGGAAATATGTGAAAATTCTTGTAGTTTTAACTTCCATCGATTTCTCTTGCAACAACT  
TTCAAGGGGAGATACCTGAGACATTGGGAGATCTCAAATCACTAATCCA

>M6-PGSC0003DMG400022067-(rev)M6LRR-RLP\_2232

GCAACAACCTTCAAGGGGAGATACCTGAGACATTGGGAGATCTCAAATCACTAATCCATCTTAACTTCTC



GCACAATGCTTTGACCGGAAAAATACCAAATGCCCTTGGAATTTGACTC

>M6-PGSC0003DMG400022067-(rev)M6LRR-RLP\_2294

AACTTCTCGCACAAATGCTTTGACCGGAAAAATACCAAATGCCCTTGGAATTTGACTCAGCTTGAATCCT  
TAGATTTCTCAGTTAACCATTTACGTGGGAGGATTCCAGACGAGCTCGTG

>M6-PGSC0003DMG400022067-(rev)M6LRR-RLP\_2356

TGAATCCTTAGATTTCTCAGTTAACCATTTACGTGGGAGGATTCCAGACGAGCTCGTGAGTCTCACATTT  
CTTGCTTTCTTGAACCTATCTTTAATCAACTATCTGGTAGGATTCCAAG

>M6-PGSC0003DMG400022067-(rev)M6LRR-RLP\_2418

TCACATTTCTTGCTTTCTTGAACCTATCTTTAATCAACTATCTGGTAGGATTCCAAGTGGTAACCAACTTC  
AGACGTTCTCAGCGAATTCCTTCGAAGGGAACACAGGGTTGTGCGATT

>M6-PGSC0003DMG400022067-(rev)M6LRR-RLP\_248

TCCAATACCAACAGATATTTATAAGCTTGCAAACCTTGACGTACCTGAATTTGTCAACAAGCTGGTTTTGAA  
GGGCAGATTCCAGTGAATTGTCAAGATTGACGAAGTTAGTAGTTCTTGA

>M6-PGSC0003DMG400022067-(rev)M6LRR-RLP\_2480

AACCAACTTCAGACGTTCTCAGCGAATTCCTTCGAAGGGAACACAGGGTTGTGCGATTTACCTTTAAAGA  
AAACGTGCAGTGAAACCAAAGTGAATGGATCATCACAGTTACTTAGCAGC

>M6-PGSC0003DMG400022067-(rev)M6LRR-RLP\_2542

TTTAAAGAAAACGTGCAGTGAAACCAAAGTGAATGGATCATCACAGTTACTTAGCAGCCATTCTGAACA  
TGAAATTGAAGGGAAATATATAAGTTTTTTCTTGGGATCTTCTGTTGGCTT

>M6-PGSC0003DMG400022067-(rev)M6LRR-RLP\_2604

CTGAACATGAAATTGAAGGGAATATATAAGTTTTTTCTTGGGATCTTCTGTTGGCTTTGGCATCATAATC  
TGGCTGCTTTTGCATAGTCAAAGATACAATGAGCTCCTTGATAGACTTC

>M6-PGSC0003DMG400022067-(rev)M6LRR-RLP\_2666

ATCATAATCTGGCTGCTTTTGCATAGTCAAAGATACAATGAGCTCCTTGATAGACTTCTTTTCAGAATGTT  
GGATCGACACAAAAAAGGCACATGAATAAAATCTTTGAAGGTGTACAA

>M6-PGSC0003DMG400022067-(rev)M6LRR-RLP\_2728

CAGAATGTTGGATCGACACAAAAAAGGCACATGAATAAAATCTTTGAAGGTGTACAAGTATAGCTTTG  
ATGTTTGATCTTTTACGTTCTGTTTGAAGGAGTTCATAATACTAATGTTCA

>M6-PGSC0003DMG400022067-(rev)M6LRR-RLP\_2790

AGCTTTGATGTTTGATCTTTTACGTTCTGTTTGAAGGAGTTCATAATACTAATGTTCACTTTGTTTTCTT  
TGTTTTCTGTATGGTGAAGAGTGGTGTGTTGAATTTAATGTAAGGAAT

>M6-PGSC0003DMG400022067-(rev)M6LRR-RLP\_2852

GTTTTCTCTTTGTTTTCTGTATGGTGAAGAGTGGTGTGTTGAATTTAATGTAAGGAATAATTTTCATGATG  
ATCTGTTTATCATTTTTCAATTATTTGGCTCTTTACTTATTTGCAAAC

>M6-PGSC0003DMG400022067-(rev)M6LRR-RLP\_2914

TTCATGATGATCTGTTTATCATTTTTCAATTATTTGGCTCTTTACTTATTTGCAAACATTACTGCTAGAGTC  
CTTATTTCTTCTCTATTGTTTACAATCATTTTTCCAACATCAATA

>M6-PGSC0003DMG400022067-(rev)M6LRR-RLP\_310

GTTTTGAAGGGCAGATTCCAGTGGAATTGTCAAGATTGACGAAGTTAGTAGTTCTTGACATTTCTACTTA  
TAATGACATTGTAGGTTTTCTTACTCTTTATTAAGTCTAGAGAGCCCCG

>M6-PGSC0003DMG400022067-(rev)M6LRR-RLP\_372

TCTACTTATAATGACATTGTAGTTTTCTTACTCTTTATTAAGTCTAGAGAGCCCCGATTTGGGGACT  
CGTTGGAAGTCTAGCAACTCTTAGAGAACTTTACCTTGATGGCGTGAAC

>M6-PGSC0003DMG400022067-(rev)M6LRR-RLP\_434

GGGGACTCGTTGGAAGTCTAGCAACTCTTAGAGAACTTTACCTTGATGGCGTGAACGTTTCATTGAA  
GGGGAGTGAGTGGTGCTCGGCGTTATCTTCATCTCTACCTCAATTGAGAGT

>M6-PGSC0003DMG400022067-(rev)M6LRR-RLP\_496

CATTGAAGGGGAGTGAGTGGTGCTCGGCGTTATCTTCATCTCTACCTCAATTGAGAGTCTTGTCATGAG  
ATACTGTGAAATTTCAAGTTCAATTGATCCTGTCCTGGTAAATCTTCCTT

>M6-PGSC0003DMG400022067-(rev)M6LRR-RLP\_558

TCAATGAGATACTGTGAAATTTCAAGTTCAATTGATCCTGTCCTGGTAAATCTTCCTTTCTTTTCAGTTATT  
CATCTCGATATGAATAACTTGTCCACTATGGTTCCAGAATTTTTGGCA

>M6-PGSC0003DMG400022067-(rev)M6LRR-RLP\_62

AGTTAGGTGGAATAGAAACTGATTGCTGCTTGTTGGCCGGGTGTAAGTTGTGACGAAAAAGGTCACG  
TGCTTGTCTGGAGTTGGACAACGAAGCCATTTCTGGCGGAGTTGAGAACTC

>M6-PGSC0003DMG400022067-(rev)M6LRR-RLP\_620

TTCAGTTATTCATCTCGATATGAATAACTTGTCCACTATGGTTCCAGAATTTTTGGCAGATTTTACGAAAT  
TGACAACCTTAAGTGTTCGATGGTGCAATTTGTTTGGTCCATTTCCAG

>M6-PGSC0003DMG400022067-(rev)M6LRR-RLP\_682

TTACGAAATTGACAACCTTTAAGTGTCGATGGTGCAATTTGTTTGGTCCATTTCCAGTAAAATCTTTCAG  
GTACCAACTCTACAACAACCTTGATCTGTTAGGCAACGTAAACCTTACCG

>M6-PGSC0003DMG400022067-(rev)M6LRR-RLP\_744

ATCTTTCAGGTACCAACTCTACAACAACCTTGATCTGTTAGGCAACGTAAACCTTACCGGCACTTTACCTGA  
ATTTCCACATAAAAATGCATTTAGGGAGTTGAGGCTATCTGAGACGAGT

>M6-PGSC0003DMG400022067-(rev)M6LRR-RLP\_806

TTTACCTGAATTTCCACATAAAAATGCATTTAGGGAGTTGAGGCTATCTGAGACGAGTTTCACAGGTTTG  
CTTCAAATTCAATTGCTAACCTTCGAAGTTTGATTACACTAGACTTATA

>M6-PGSC0003DMG400022067-(rev)M6LRR-RLP\_868

CAGGTTTGCTTCAAATTCAATTGCTAACCTTCGAAGTTTGATTACACTAGACTTATATGATTGCAATTT  
AGAGGACCTATTCCGTCAACAATGGGAAATTTAACGAACCTAGTTTCAT

>M6-PGSC0003DMG400022067-(rev)M6LRR-RLP\_930

TGCAATTTAGAGGACCTATTCCGTCAACAATGGGAAATTTAACGAACCTAGTTTCATTAGACTTGTC  
ACAACAACCTTTACTGGCTCAATCCCGCTGTTCCATGAGGCTAACAAAGCTC

>M6-PGSC0003DMG400022067-(rev)M6LRR-RLP\_992

CTTGTCAAACAACAACCTTTACTGGCTCAATCCCGCTGTTCCATGAGGCTAACAAAGCTCAATTACATCGAC  
ATTTCTAATAACAATGGTCAACTTTCTTCTGCTCAAACCTCAATTAGCCGT

>M6-PGSC0003DMG400022068-(rev)M6LRR-RLP\_0

ATGAAAATATCACTCCTGCTACAGTTTTCTTTCATCACCATGCAGGTGCTTTTTTTGATTAATTCTCCAGTG  
TATGGTCATTGTTTAGGCGATCAAAGGCGTTGTTGCTTAAACTCAAG

>M6-PGSC0003DMG400022068-(rev)M6LRR-RLP\_1054

TTTAGACTTTTCATCCAATAGCTTTACTGGCTCAATCCCACTATTTTCATAAGGCAAATAAGCTCAATTACAT  
TGACCTTTCTCATAACAATCTTACAGGTCCACTTTCTTCTACTCATTT

>M6-PGSC0003DMG400022068-(rev)M6LRR-RLP\_1116

TCAATTACATTGACCTTTCTCATAACAATCTTACAGGTCCACTTTCTTCTACTCATTTTGGAGGTCTTTCAG  
AGCTTGAGTATCTATACTTGGAAGACAATTCTATCGGTGGGACCCTTC

>M6-PGSC0003DMG400022068-(rev)M6LRR-RLP\_1178

GGTCTTTCAGAGCTTGAGTATCTATACTTGGAAGACAATTCTATCGGTGGGACCCTTCCGACAGTTGTGT

TTTCCATTCCATCATTGCAGGTGCTTGAACCTCAGAATAATCACTTCAGT

>M6-PGSC0003DMG400022068-(rev)M6LRR-RLP\_124

GCCTTACATTGATTTCATCTTTGTCAACCAAACTGGTAAGATGGGATCAAACACTGACTGTTGCCAGTG

GCCAGGTGTAAGTTGTGATCTGAAAGGTCATGTGCTTGTGTTTGGAACTGG

>M6-PGSC0003DMG400022068-(rev)M6LRR-RLP\_1302

AAGTCCATGAATTTGCTAGCGCTCCTCCTTATTTGTATAAACTTGACTTGAGCAATAACTATCTAAAT

GGATCGATCCCCGGTCTATCTTTAACTCAATAGGCTTTTGCAACTCT

>M6-PGSC0003DMG400022068-(rev)M6LRR-RLP\_1364

TATCTAAATGGATCGATCCCCGGTCTATCTTTAACTCAATAGGCTTTTGCAACTCTTACTTTCTTCCAAC

TCCTTCAGTGGGACCATTAATATTGAAGCGATAAAGGGACTTCCTAGG

>M6-PGSC0003DMG400022068-(rev)M6LRR-RLP\_1426

TTCTTCCAACCTTCAGTGGGACCATTAATATTGAAGCGATAAAGGGACTTCCTAGGCTCAAAAAGCTT

GACCTTTCTTACAACAATTTGAGAATTGATGTACAAGGTAGTAATTCAAC

>M6-PGSC0003DMG400022068-(rev)M6LRR-RLP\_1488

AAAAGCTTGACCTTTCTTACAACAATTTGAGAATTGATGTACAAGGTAGTAATTCAACCTCGTTTCCCTTT

CCCCAAATGAGTGAACCTGAACCTGGCATCATGCCAGTTGCAAAGTTCC

>M6-PGSC0003DMG400022068-(rev)M6LRR-RLP\_1612

ACTCAAAAACCAAGTCACTCATGATTGCATTAGACCTTTCATACAACAATATTTAGGACAAGTACCCAGCT

GGATTTGGAGTATTAGTTAAGTTATCTGAATCTTTCTTGCAATTTCT

>M6-PGSC0003DMG400022068-(rev)M6LRR-RLP\_1674

TACCCAGCTGGATTTGGAGTATTAGTTAAGTTATCTGAATCTTTCTTGCAATTTCTCGAGGCTCTGGAA

GAACCTTACGACACATCTTCAGAATTATGGAGTGTAATTGACTTGCATA

>M6-PGSC0003DMG400022068-(rev)M6LRR-RLP\_1736

GCTCTGGAAGAACCTTACGACACATCTTCAGAATTATGGAGTGTAATTGACTTGCATAACAACAGGATCA

AGGGCAATATACCCATTGTACCTACTTCTTATCTACCTTTCAATTGCC

>M6-PGSC0003DMG400022068-(rev)M6LRR-RLP\_1798

CAGGATCAAGGGCAATATACCCATTGTACCTACTTCTTATCTACCTTTCAATTGCCAATAATAAACTTA

CGGGATCAATACCCTCTTCATATGCAATCTATATCAGCTTCAATTTCT

>M6-PGSC0003DMG400022068-(rev)M6LRR-RLP\_1860

ATAAACTTACGGGATCAATACCCTCTCCATATGCAATCTATATCAGCTTCAATTTCTTGATATGTCAAAC  
AATTCCATAAACATCAAACCTCCATGTCTATTTCAAATGTTTGACT

>M6-PGSC0003DMG400022068-(rev)M6LRR-RLP\_1922

ATGTCAAACAATTCCATAAACATCAAACCTCCATGTCTATTTCAAATGTTTGACTATCTCTCAGTGCT  
GAATCTAGGTAGAAACAGACTAAGTGGCATTATTCTTGATACATTTTTG

>M6-PGSC0003DMG400022068-(rev)M6LRR-RLP\_1984

CTCAGTGCTGAATCTAGGTAGAAACAGACTAAGTGGCATTATTCTTGATACATTTTTGTCAAACCTGCAGT  
TTGAAAACCTTTAGACCTCAGCAACAATAACTTAGAAGGAAAAGTACCAAG

>M6-PGSC0003DMG400022068-(rev)M6LRR-RLP\_2046

ACTGCAGTTTGAAAACCTTTAGACCTCAGCAACAATAACTTAGAAGGAAAAGTACCAAGATCCCTGCAA  
GATGTGCATTTATGGAGGTTTTGGACATTCGAAACAACAAGATTAGAGATA

>M6-PGSC0003DMG400022068-(rev)M6LRR-RLP\_2108

CTGCAAAGATGTGCATTTATGGAGGTTTTGGACATTCGAAACAACAAGATTAGAGATACATTCCCATGTA  
TGTTGAAAACATTACCCAGTTTGCACATCCTAGTCCTAAGGTGGAACAAG

>M6-PGSC0003DMG400022068-(rev)M6LRR-RLP\_2170

CCCATGTATGTTGAAAACATTACCCAGTTTGCACATCCTAGTCCTAAGGTGGAACAAGTTTTATGGAGAT  
CTCCAGTGTCGTATAGCTAATCAAACATGGTCGAAGCTTCAAATTATAGA

>M6-PGSC0003DMG400022068-(rev)M6LRR-RLP\_2232

ATGGAGATCTCCAGTGTGCTATAGCTAATCAAACATGGTCGAAGCTTCAAATTATAGATATTGCTTCCAA  
CAATTCAGGGGAGCACTGCTACCACATTACTTCTCGAGCTTGGAAGGCA

>M6-PGSC0003DMG400022068-(rev)M6LRR-RLP\_2356

GAAGAGCAGAAATCCAGAGCCACGACTACACTACTTGGAAGTTGAATTCATCAACTATGGCCTCTACTAT  
CGAAACAGAGTGACTTTAACTCTCAAAGGTCAGGAGATGGAGATTGAGAA

>M6-PGSC0003DMG400022068-(rev)M6LRR-RLP\_2418

TCTACTATCGAAACAGAGTGACTTTAACTCTCAAAGGTCAGGAGATGGAGATTGAGAATATTCTTGAAG  
TTTTTACATCCATCGATTTCTCTGCAACAACCTTTGAAGGAGAGATACCAG

>M6-PGSC0003DMG400022068-(rev)M6LRR-RLP\_248

CGAAACAATTTTCAGTGGACTTGAGAATCCAACCAAGTCTATTCGATCTTCAGTATCTTGAGAAGCTGAAT  
TTGGCTTATAATCATTTAACTCTGTTCAAATACCGAGAGAAGTTTATAA

>M6-PGSC0003DMG400022068-(rev)M6LRR-RLP\_2480

CTTGAAGTTTTTACATCCATCGATTTCTCCTGCAACAACCTTTGAAGGAGAGATACCAGAGGTATTGGGAG  
ATCTCAAATTGCTTTACCTTCTTAACTTATCGCACAATGCTTTGACAGGA

>M6-PGSC0003DMG400022068-(rev)M6LRR-RLP\_2542

ATTGGGAGATCTCAAATTGCTTTACCTTCTTAACTTATCGCACAATGCTTTGACAGGAAGAATACCAAAG  
GCCCTCGGAAAGTTGACTCAGCTTGGATCCTTAGATCTTTCCGGTAAACCA

>M6-PGSC0003DMG400022068-(rev)M6LRR-RLP\_2666

AGTGGGAGAATTCCAGACGAGCTCGCGAGTCTCACATTCCTTACTTTCTTGAACCTATCTTTTAATCAACT  
TTCCGGTAGGATTCCAAGAGGAAACCAACTTCAGACATTCTCAGCAGAA

>M6-PGSC0003DMG400022068-(rev)M6LRR-RLP\_2728

TAATCAACTTTCCGGTAGGATTCCAAGAGGAAACCAACTTCAGACATTCTCAGCAGAATCCTTTGAAGGG  
AACACAGGGCTGTGTGATTTTCCGCTGAAGAACTTTGCAGTGACACCAA

>M6-PGSC0003DMG400022068-(rev)M6LRR-RLP\_2790

TTGAAGGGAACACAGGGCTGTGTGATTTTCCGCTGAAGAACTTTGCAGTGACACCAAATGAATGGAT  
CGTCACAACCAAGAAGCCATTCTGACGATGAAACAGTTGATGGGAAATATA

>M6-PGSC0003DMG400022068-(rev)M6LRR-RLP\_2852

AATGGATCGTCACAACCAAGAAGCCATTCTGACGATGAAACAGTTGATGGGAAATATATAAGTTTTGCA  
TTGGGATCTTCATTGTGTTTTGGTATCGTTACCTGGCTGTTTTTGCATAGC

>M6-PGSC0003DMG400022068-(rev)M6LRR-RLP\_2914

TTTTGCATTGGGATCTTCATTGTGTTTTGGTATCGTTACCTGGCTGTTTTTGCATAGCACAAGATAACAATG  
AGCTCGTTGACAGACTTCTTTTCAGAATTTTTGGTGAGCACAAAAAGGC

>M6-PGSC0003DMG400022068-(rev)M6LRR-RLP\_2948

GTTACCTGGCTGTTTTTGCATAGCACAAGATAACAATGAGCTCGTTGACAGACTTCTTTTCAGAATTTTTGG  
TGAGCACAAAAAGGCAGGCAGAAATAGAAACAGAAGGAGGTCAAGGTAA

>M6-PGSC0003DMG400022068-(rev)M6LRR-RLP\_310

AGCTGAATTTGGCTTATAATCATTTAACTCTGTTCAAATACCGAGAGAAGTTTATAAGCTCACAACTTA  
ACATACCTGAATTTGTCATATGCTGGTTTTGGTGGGCAGATTCCAATGG

>M6-PGSC0003DMG400022068-(rev)M6LRR-RLP\_372

ACAAACTTAACATACCTGAATTTGTCATATGCTGGTTTTGGTGGGCAGATTCCAATGGAATTGTCAAGAT

TGACGAAGTTAACGTTTCTTGACCTTTCTAATGTTCGCATTAAAGCTTGAG

>M6-PGSC0003DMG400022068-(rev)M6LRR-RLP\_434

GTCAAGATTGACGAAGTTAACGTTTCTTGACCTTTCTAATGTTCGCATTAAAGCTTGAGAGCGGAGATCTG  
AAGACACTGGTTAGAAACCTGCCAAATCTTAGAGAACTCCATCTTGATGA

>M6-PGSC0003DMG400022068-(rev)M6LRR-RLP\_496

GAGATCTGAAGACACTGGTTAGAAACCTGCCAAATCTTAGAGAACTCCATCTTGATGAAGTGAACATAT  
CATTTAAGGGGATTGAGTGGTGCTCAACTTTATCTTCATCTCTGCCTCAGT

>M6-PGSC0003DMG400022068-(rev)M6LRR-RLP\_62

TTCTCCAGTGTATGGTCATTGTTTAGGCGATCAAAGGCGTTGTTGCTTAAACTCAAGAATGGCCTTACA  
TTCGATTCATCTTTGTCAACCAAACCTGGTAAGATGGGATCAAACACTGA

>M6-PGSC0003DMG400022068-(rev)M6LRR-RLP\_620

AGTGTTAAGCATGACAGATTGTGGCATTTCAGCCCTTTTGATCCTGTCCTCTTAAATCTTCATTCCTTTC  
AGTCATTCGTCTTGAGGCAACAACCTGTCCACTATAGTTCCTGAATTT

>M6-PGSC0003DMG400022068-(rev)M6LRR-RLP\_682

ATTTCTTTTCAGTCATTCGTCTTGAGGCAACAACCTGTCCACTATAGTTCCTGAATTTCTAGCAAATTTTAC  
AAAATTGACAACCCTCAGTCTCAGTAACTGCAACTTGAGAGGTGAATT

>M6-PGSC0003DMG400022068-(rev)M6LRR-RLP\_744

CAAATTTTACAAAATTGACAACCCTCAGTCTCAGTAACTGCAACTTGAGAGGTGAATTTCCGAATAAGAT  
CTTTCAGGTACCAACTCTACAGGAGCTTGATTTATATGGTAATGAAAAAC

>M6-PGSC0003DMG400022068-(rev)M6LRR-RLP\_806

AATAAGATCTTTCAGGTACCAACTCTACAGGAGCTTGATTTATATGGTAATGAAAAACTCACTGGCACTT  
TACCTGACTTTTACAGAATGGTTCATTAAGGGAGTTAGGTCTTGGCAGC

>M6-PGSC0003DMG400022068-(rev)M6LRR-RLP\_930

ATTTACAGGTTCACTTCCGGATTCAATTGCTAACCTCACAACTTAACCAAGATTGACTTAAGTTCATGC  
AATTTCTTTGGACCTATATCATCAAAAATGGAAAATCTAAGAGATTTAG

>M6-PGSC0003DMG400022068-(rev)M6LRR-RLP\_992

AGTTCATGCAATTTCTTTGGACCTATATCATCAAAAATGGAAAATCTAAGAGATTTAGTTTATTTAGACTT  
TTCATCCAATAGCTTTACTGGCTCAATCCCACTATTTCATAAGGCAAAT

>M6-PGSC0003DMG400022139M6LRR-RLK\_0





>M6-PGSC0003DMG400022139M6LRR-RLK\_2867

TGGTGAAGTCTACAAGGCTAAGCTGAGAGATGGCAGTACTGTTGCAATCAAGAAGCTCGTGACGTAA  
CAGGTCAAGGAGACAGAGAATTCATGGCTGAAATGGAGACTATTGGAAAAAT

>M6-PGSC0003DMG400022139M6LRR-RLK\_2928

CACGTAACAGGTCAAGGAGACAGAGAATTCATGGCTGAAATGGAGACTATTGGAAAAATCAAACATAG  
AAACCTTGTCCCTTTGTTGGGATATTGCAAGATTGGGGAGGAAAGGCTTCTT

>M6-PGSC0003DMG400022139M6LRR-RLK\_2989

AACATAGAAACCTTGTCCCTTTGTTGGGATATTGCAAGATTGGGGAGGAAAGGCTTCTTGTATACGAAT  
ACATGAAATGGGGAAGTCTTGAATCTGTTCTTCATGATGGGGGGAAAGGAG

>M6-PGSC0003DMG400022139M6LRR-RLK\_305

AGGGAAGTTATTAGCCTTCAAGAAGTCCTCTGTTGAATCTGATCCAAATGGATTCTTGAATGAATGGACT  
TCATCTTCTTCAAGTCCTTGCACCTTGAATGGGATTTTCATGTTCAAATGG

>M6-PGSC0003DMG400022139M6LRR-RLK\_3050

ATACGAATACATGAAATGGGGAAGTCTTGAATCTGTTCTTCATGATGGGGGGAAAGGAGGGATGTTTCT  
TGATTGGCCAGCTAGAAAGAAAATCGCGATAGGATCAGCGAGAGGATTAGC

>M6-PGSC0003DMG400022139M6LRR-RLK\_3111

ATGTTTCTTGATTGGCCAGCTAGAAAGAAAATCGCGATAGGATCAGCGAGAGGATTAGCATTCTTCAC  
CACAGCTGCATACCACACATAATTCATCGCGATATGAAGTCCAGTAATGTA

>M6-PGSC0003DMG400022139M6LRR-RLK\_3172

TTCTTACCACAGCTGCATACCACACATAATTCATCGCGATATGAAGTCCAGTAATGTACTTTTAGACGAA  
AACTTTGAGGCACGAGTTTCTGATTTTGAATGGCAAGGCTGGTAAATG

>M6-PGSC0003DMG400022139M6LRR-RLK\_3233

TTTAGACGAAAACCTTTGAGGCACGAGTTTCTGATTTTGAATGGCAAGGCTGGTAAATGCTCTGGATAC  
TCATTTAAGTGTGAGTACACTTGTGTTACTCCAGGTTATGTTCTCCAGA

>M6-PGSC0003DMG400022139M6LRR-RLK\_3294

CTGGATACTCATTTAAGTGTGAGTACACTTGTGTTACTCCAGGTTATGTTCTCCAGAGTACTACCAA  
GTTTCAGGTGCACCGCAAAGGGGACGTGTACAGTTATGGTGTACTACTG

>M6-PGSC0003DMG400022139M6LRR-RLK\_3355

ACTACCAAAGTTTCAGGTGCACCGCAAAGGGGACGTGTACAGTTATGGTGTACTACTGTTGGAGCTTC

TTTCAGGGAAACGGCCAATAGATCCCCGTGTATTCGGTGATGATAACAATC

>M6-PGSC0003DMG400022139M6LRR-RLK\_3416

GGAGCTTCTTTCAGGGAAACGGCCAATAGATCCCCGTGTATTCGGTGATGATAACAATCTTGTTGGATG

GGCAAAGCAACTTCATAACGAGAAACAAAGTCACGAGATTCTTGATCCTGA

>M6-PGSC0003DMG400022139M6LRR-RLK\_3477

GTTGGATGGGCAAAGCAACTTCATAACGAGAAACAAAGTCACGAGATTCTTGATCCTGAGCTAATAACA

AATCTATCTGGTGATGCTGAACTCTATCATTACTTGAAAGTTGCATTTGAA

>M6-PGSC0003DMG400022139M6LRR-RLK\_3538

TAATAACAAATCTATCTGGTGATGCTGAACTCTATCATTACTTGAAAGTTGCATTTGAATGCCTTGATGAG

AAATCTTACAAAAGGCCAACAAATGATACAAGTGATGACCAAGTTTAAAG

>M6-PGSC0003DMG400022139M6LRR-RLK\_3599

CCTTGATGAGAAATCTTACAAAAGGCCAACAAATGATACAAGTGATGACCAAGTTTAAAGAAGCTACAAAC

TGATTCAGAAAGCGATATTCTTGATGGCATTTCAGTGAAAGGTTCTATACT

>M6-PGSC0003DMG400022139M6LRR-RLK\_3660

CTACAAACTGATTCAGAAAGCGATATTCTTGATGGCATTTCAGTGAAAGGTTCTATACTCGAGGAATCGC

AAGAAAGGGAACCGTAAATCAATGATATTCATCTTTTTGTGGTTAGAAT

>M6-PGSC0003DMG400022139M6LRR-RLK\_3721

AGGAATCGCAAGAAAGGGAACCGTAAATCAATGATATTCATCTTTTTGTGGTTAGAATTCTGTTCTTTTT

TTCTCTTTTTTTGGATTGCCTCATGGATAGTAGTAAAACTTTTATCTT

>M6-PGSC0003DMG400022139M6LRR-RLK\_3782

TGTTCTTTTTTTCTCTTTTTTTGGATTGCCTCATGGATAGTAGTAAAACTTTTATCTTTAATGGTTCTTCAC

CATTGAGATTGATAAGAGTTTATACTTCAGATTTTGCCTACTGTGTA

>M6-PGSC0003DMG400022139M6LRR-RLK\_3817

GATAGTAGTAAAACTTTTATCTTTAATGGTTCTTCACCATTGAGATTGATAAGAGTTTATACTTCAGATT

TTGCCTACTGTGTAAATATTAGAACACGACGATGAATGGGAGATGTGAA

>M6-PGSC0003DMG400022139M6LRR-RLK\_427

AAGTTGTTGAGCTTAATCTGTCTAGTGTTGGGCTCAGTGGTCTACTTCACCTAACTGATCTCATTGCCTTG

CCTTCTTTGCTCAGAGTTAATTTCTATGGCAACCATTTCTATGGCAATC

>M6-PGSC0003DMG400022139M6LRR-RLK\_488



>M6-PGSC0003DMG400022189M6LRR-RLK\_124

ACAATGTACTAAACGTTGATCGAAATGCTTTGTTTTCTTACCCTTGTTACTACAAATTACATGGTGTTAAG  
TGTGATTTACGTTCCGGTGAAGTCATAGAAATAAGACTTGAGAACATGA

>M6-PGSC0003DMG400022189M6LRR-RLK\_1240

GAGGTTTCGCGTACTTATACAGAAGTTCAAAGAAAGGCAATGTCATTCCTCATGGCAACATTAAGCCATC  
AAACATTCTATTAACGAAAACGGGGAGCCATTGATAAGTGAGTATGGAT

>M6-PGSC0003DMG400022189M6LRR-RLK\_1302

AAGCCATCAAACATTCTATTAACGAAAACGGGGAGCCATTGATAAGTGAGTATGGATATTACAAATTT  
CTAGACCCTGACAAAAGTTGCCTCTATAAAGACAATGGTTATACAGCCCCT

>M6-PGSC0003DMG400022189M6LRR-RLK\_1364

CAAATTTCTAGACCCTGACAAAAGTTGCCTCTATAAAGACAATGGTTATACAGCCCCTGAGAAAACGTTG  
ACAGAAGAACTGATGTCTATAGCTTCGGGGTGATTCTGCTGGAAGTCTGCT

>M6-PGSC0003DMG400022189M6LRR-RLK\_1426

AAACGTTGACAGAAGAACTGATGTCTATAGCTTCGGGGTGATTCTGCTGGAAGTCTAACCGGTAAAG  
TTGTGGAGAAGACAGGACTAGACCTTGTCAAATGGGTGAAATCTATAGTGA

>M6-PGSC0003DMG400022189M6LRR-RLK\_1488

GGTAAAGTTGTGGAGAAGACAGGACTAGACCTTGTCAAATGGGTGAAATCTATAGTGAGGGAAGAATG  
GACTGGAGAAGTGTGTTGATAGTGAAGTTTCCAATGAAATGTATGCTTTCCCTCTACTAAAC

>M6-PGSC0003DMG400022189M6LRR-RLK\_1550

AGAATGGACTGGAGAAGTGTGTTGATAGTGAAGTTTCCAATGAAATGTATGCTTTCCCTCTACTAAAC  
GTTGCACTCAAGTGTGTGGATCGTTTGCCTGAGGAACGACCTACTATGAC

>M6-PGSC0003DMG400022189M6LRR-RLK\_1612

TACTAAACGTTGCACTCAAGTGTGTGGATCGTTTGCCTGAGGAACGACCTACTATGACAGAGGTTTTGG  
AGATAATCGAAGAAATTGTGAATGATCAAGAAGACATTTCTCCTTCTTCTA

>M6-PGSC0003DMG400022189M6LRR-RLK\_1665

ATGACAGAGGTTTTGGAGATAATCGAAGAAATTGTGAATGATCAAGAAGACATTTCTCCTTCTTCTATGA  
CTTCTTTTGAATCCACCCCTGGTTCAATGAAGCATGTGTATGCTCTTTAG

>M6-PGSC0003DMG400022189M6LRR-RLK\_186

GGTGTTAAGTGTGATTTACGTTCCGGTGAAGTCATAGAAATAAGACTTGAGAACATGAATCTTAGTGGT

GTAATTGATGCAGAGTCACTCTGTAACTCTCAAACCTTGAGAGTTCTTAGC

>M6-PGSC0003DMG400022189M6LRR-RLK\_248

TAGTGGTGTAAATTGATGCAGAGTCACTCTGTAACTCTCAAACCTTGAGAGTTCTTAGCTTAGCTAGGAAT  
AAGATTGAGGGAACCTGTTCTGAATCAATATCATCGTGTAAGTTTAAAC

>M6-PGSC0003DMG400022189M6LRR-RLK\_310

CTAGGAATAAGATTGAGGGAACCTGTTCTGAATCAATATCATCGTGTAAGTTTAACTGTTCTTGATCT  
AAGCAGCAACTTTCTTAGTGGAACCTCATTAGTACTAATGCAGTCATTGA

>M6-PGSC0003DMG400022189M6LRR-RLK\_372

CTTGATCTAAGCAGCAACTTTCTTAGTGGAACCTCATTAGTACTAATGCAGTCATTGACAAGGATCAAGA  
ATCTTAAAAAACTTAACATTTCTAAAAACAATTTCACTTACTCACAACGT

>M6-PGSC0003DMG400022189M6LRR-RLK\_434

GATCAAGAATCTTAAAAAACTTAACATTTCTAAAAACAATTTCACTTACTCACAACGTATGATGAGTCTAC  
ACGCGTTGAGACGTGTAACCTATTAAGAATCTTCATCTTCAACTACAGT

>M6-PGSC0003DMG400022189M6LRR-RLK\_496

TGAGTCTACACGCGTTGAGACGTGTAACCTATTAAGAATCTTCATCTTCAACTACAGTAAGTGATGATAA  
GAAGACAAAGAATCATCATGTGAGTCTGATGGTTTGGGTTCTCATATCTC

>M6-PGSC0003DMG400022189M6LRR-RLK\_558

GATGATAAGAAGACAAAGAATCATCATGTGAGTCTGATGGTTTGGGTTCTCATATCTCTTGGAACCTGTG  
ATTGTGTTTGTAGTTTTAGTATTCTTGTATATGAGATGTGTTGGGACAACCT

>M6-PGSC0003DMG400022189M6LRR-RLK\_62

TAATGGAGGCGAGTTTATCGAATCCAAATCATTATCAGTTTTCTTGTTGCTATTGATCCAAACAATGTAC  
TAAACGTTGATCGAAATGCTTTGTTTTCTTACCCTTGTTACTACAAATT

>M6-PGSC0003DMG400022189M6LRR-RLK\_620

AACTGTGATTGTGTTTGTAGTTTTAGTATTCTTGTATATGAGATGTGTTGGGACAACCTAAGGAGAAGGA  
GGTTATAAAGAAGTAGTTGATTACCCGTCTCCTCAAAAACTCCCTCAGA

>M6-PGSC0003DMG400022189M6LRR-RLK\_682

AGAAGGAGGTTATAAAGAAGTAGTTGATTACCCGTCTCCTCAAAAACTCCCTCAGATGAAGTTGTGG  
ATGGAGTGTGTAACCTGAAGAGAAAAGCTCAGAACCTTACTTCTTCATGG

>M6-PGSC0003DMG400022189M6LRR-RLK\_744

GTTGTGGATGGAGTGTGTAACACTGAAGAGAAAAGCTCAGAACTTTACTTCTTCATGGAAGATGTTGAG  
AAGTTTACGATGGACGATCTTCTTGAAGCAACTGCTAACTTAACAAAACAA

>M6-PGSC0003DMG400022189M6LRR-RLK\_806

TGTTGAGAAGTTTACGATGGACGATCTTCTTGAAGCAACTGCTAACTTAACAAAACAAGGCATTTGCAGC  
AGCCTTTATAAGGTTTCATATCAGTAGAAGTGGTGTGTTTGCTGTCAAGAG

>M6-PGSC0003DMG400022189M6LRR-RLK\_868

TTTGCAGCAGCCTTTATAAGGTTTCATATCAGTAGAAGTGGTGTGTTTGCTGTCAAGAGACTGAAGAACT  
ACAAGTGGGGTTCAAGGAGTTCTCGCGAACGATGAAAAAGATAGGGAACT

>M6-PGSC0003DMG400022189M6LRR-RLK\_930

AAGAACTACAAGTGGGGTTCAAGGAGTTCTCGCGAACGATGAAAAAGATAGGGAACTTGAAGCATCA  
AAATGTACTTCCACTTGTTGCTTATTACTCTAGCAATGATGAAAAATGCTC

>M6-PGSC0003DMG400022189M6LRR-RLK\_992

GCATCAAATGTACTTCCACTTGTTGCTTATTACTCTAGCAATGATGAAAAATGCTCATCTACAAATATC  
AGAACAGTGGAAGTCTACTAACACTTTTCGAAAGTAAGTAGTCAAGAAC

>M6-PGSC0003DMG400022264-(rev)M6LRR-RLK\_0

GTTCAATAATAATAATAGAAAAATTCAAAGTGCTCTTGATCCAGATCTTCTTCTGTTTTCTCTATAAA  
CAAACATGGGGTTCCCCATTTACAATCCCAAAGTCCTCAACTTTCTC

>M6-PGSC0003DMG400022264-(rev)M6LRR-RLK\_1054

GAGCTTGGGAATTGTAAGGCTATTACAGTTATTGACTTGTCTGAGAATCTCTTAACAGGTAGTATTCTA  
CAAGCTTTGGTGAACCTTCAAGTCTTGAAGAGTTGCAGTTGAGTGTCAAT

>M6-PGSC0003DMG400022264-(rev)M6LRR-RLK\_1116

TATTCCTACAAGCTTTGGTGAACCTTCAAGTCTTGAAGAGTTGCAGTTGAGTGTCAATAAGTTATCAGGT  
ACAATACCTACTGAAATATCAAATTGACTAAATTGTCTCATTTGGAAGT

>M6-PGSC0003DMG400022264-(rev)M6LRR-RLK\_1178

TATCAGGTACAATACCTACTGAAATATCAAATTGACTAAATTGTCTCATTTGGAAGTTGACAATAATGG  
CATATCAGGGGAAATTCCTAATGAAATAGGTAAGTTAAAGAGCTTGACTC

>M6-PGSC0003DMG400022264-(rev)M6LRR-RLK\_1240

AATAATGGCATATCAGGGGAAATTCCTAATGAAATAGGTAAGTTAAAGAGCTTGACTCTATTCTTTGCTT  
GGCAAATAATTTAACAGGTGAAATTCCTGTTACATTATCTAACTGTGAG

>M6-PGSC0003DMG400022264-(rev)M6LRR-RLK\_1302

CTTTGCTTGGCAAATAATTTAACAGGTGAAATCCTGTTACATTATCTAACTGTGAGAATCTTCAGGCTA  
TAGACCTTTCTTATAACAATCTTTTTGGTTCATACCAAAGAAATCTT

>M6-PGSC0003DMG400022264-(rev)M6LRR-RLK\_1364

TTCAGGCTATAGACCTTTCTTATAACAATCTTTTTGGTTCATACCAAAGAAATCTTTAGTTTGAAAAAT  
CTAACAAAGTTGTTGCTTCTTCCAATGATTTGTCTGGTTTTATACCAA

>M6-PGSC0003DMG400022264-(rev)M6LRR-RLK\_1426

TTGAAAAATCTAACAAAGTTGTTGCTTCTTCCAATGATTTGTCTGGTTTTATACCAACTGATGTTGGAAA  
CTGCACAAATTTGTACAGATTTAGAGTGAATAGGAATAGGCTAGGGGGT

>M6-PGSC0003DMG400022264-(rev)M6LRR-RLK\_1488

TGTTGGAAACTGCACAAATTTGTACAGATTTAGAGTGAATAGGAATAGGCTAGGGGGTACTGTTCCATC  
AGAAATAGGGAAGTTGAGTAATTTGAATTTTCTTGACATGAGTGGAAATCA

>M6-PGSC0003DMG400022264-(rev)M6LRR-RLK\_1550

TTCCATCAGAAATAGGGAAGTTGAGTAATTTGAATTTTCTTGACATGAGTGGAAATCATTTTATGGGAGA  
AATTCCATCATCAATATCAGGATGTCAAATCTTGAGTTTCTTGATCTCC

>M6-PGSC0003DMG400022264-(rev)M6LRR-RLK\_1612

ATGGGAGAAATCCATCATCAATATCAGGATGTCAAATCTTGAGTTTCTTGATCTCCATTCGAATGCGTT  
TACTGGTTCTTTGCCAGAGAACTGCCAGGGAGTCTACAGTATGTGGAT

>M6-PGSC0003DMG400022264-(rev)M6LRR-RLK\_1674

GAATGCGTTTACTGGTTCTTTGCCAGAGAACTGCCAGGGAGTCTACAGTATGTGGATATTTAGACAA  
CAGGCTTTCCGGTTCGTTAAGTTCAAGTGTGGTTCTTTAACAGAATTAAC

>M6-PGSC0003DMG400022264-(rev)M6LRR-RLK\_1736

CAGACAACAGGCTTTCCGGTTCGTTAAGTTCAAGTGTGGTTCTTTAACAGAATTAACAAAATTGAATCT  
TGGGAAGAATCAACTTTCTGGTAGAATTCAGCTGAGATAGTTTCTTGTA

>M6-PGSC0003DMG400022264-(rev)M6LRR-RLK\_1798

TTGAATCTTGGGAAGAATCAACTTTCTGGTAGAATTCAGCTGAGATAGTTTCTTGTAAGCTTCAGC  
TGTTAGATCTCCGGTACAATGGCTTATCAGGTGATATACCTAAAGAGTTG

>M6-PGSC0003DMG400022264-(rev)M6LRR-RLK\_186

TTTACTTTTCTCTCTTCTTGTATTCACTTGATGTACAACTCAAACACTTCTTGCATGGAAAAAACATT

AAACATAACTTCCAATGATGCTTTAACATCATGGGATTCTTTAGATAA

>M6-PGSC0003DMG400022264-(rev)M6LRR-RLK\_1860

GCTTCAGCTGTTAGATCTCGGGTACAATGGCTTATCAGGTGATATACCTAAAGAGTTGGGTCTGAATACC  
ATCCCTTGAAATCTCTCTTAACCTTAGTTGTAACCAGTTTACAGGAGTGAT

>M6-PGSC0003DMG400022264-(rev)M6LRR-RLK\_1922

GAATACCATCCCTTGAAATCTCTCTTAACCTTAGTTGTAACCAGTTTACAGGAGTGATTCCAAGTGAGTTT  
TCAGGTCTTAGTAAATTAGGAAACCTTGATCTTTCCACAACAAACTCA

>M6-PGSC0003DMG400022264-(rev)M6LRR-RLK\_1984

AGTGAGTTTTTCAGGTCTTAGTAAATTAGGAAACCTTGATCTTTCCACAACAAACTCACCGGGAATTTGG  
ACGTTCTCACGAACCTTCAAACCTTGTTTCACTCAATATATCATTCAAT

>M6-PGSC0003DMG400022264-(rev)M6LRR-RLK\_2046

GAATTTGGACGTTCTCACGAACCTTCAAACCTTGTTTCACTCAATATATCATTCAATGACTTCTATGGAA  
AACTCCCAATGTTCCATTCTTTCATAAGCTTCCTTTGAGTGATCTTAC

>M6-PGSC0003DMG400022264-(rev)M6LRR-RLK\_2108

TCTATGGAAAACCTTCCAATGTTCCATTCTTTCATAAGCTTCCTTTGAGTGATCTTACTGGAAACCAAGCT  
CTATACATTTCTGGTGGGGATGTGATCCAAACGGGGCCTGCTGGACATG

>M6-PGSC0003DMG400022264-(rev)M6LRR-RLK\_2170

AACCAAGCTCTATACATTTCTGGTGGGGATGTGATCCAAACGGGGCCTGCTGGACATGCTAAAACCACC  
ATGAAGCTTGCTATGTCAATCCTAGTCAGTATAAGTGCTGTGCTGGTGCTG

>M6-PGSC0003DMG400022264-(rev)M6LRR-RLK\_2232

AACCACCATGAAGCTTGCTATGTCAATCCTAGTCAGTATAAGTGCTGTGCTGGTGCTGCTAGCCATCTAC  
ACATTGATCAGGATGCGAATGGCGGCTAAGTATGGACCGGAAGTTGATAC

>M6-PGSC0003DMG400022264-(rev)M6LRR-RLK\_2294

CCATCTACACATTGATCAGGATGCGAATGGCGGCTAAGTATGGACCGGAAGTTGATACTTGGGAAATGA  
CTCTTTACAAAAGCTGGACTTTTCGATAGATGACATTGTTTCATAATTTAA

>M6-PGSC0003DMG400022264-(rev)M6LRR-RLK\_2356

GAAATGACTCTTTACAAAAGCTGGACTTTTCGATAGATGACATTGTTTCATAATTTAACATCAGCTAATGT  
CATTGGCACTGGGAGCTCCGGGGTTGTCTACAGAATAATGACCGAAAAT

>M6-PGSC0003DMG400022264-(rev)M6LRR-RLK\_2418



AGCTAATGTCATTGGCACTGGGAGCTCCGGGGTGTCTACAGAATAATGACCGAAAATGGGGCGACTTT  
AGCAGTCAAGAAAATGTGGTCATCAGAAGGATCAGGAGCATTTGGTTCAGA

>M6-PGSC0003DMG400022264-(rev)M6LRR-RLK\_248

AAAAACATTAAACATAACTTCCAATGATGCTTTAACATCATGGGATTCTTTAGATAAAAGTCCTTGTAAT  
TGGTTTGGCATAAGTTGCAATTCCAATGGTCATGTTGTTAGTATAAATC

>M6-PGSC0003DMG400022264-(rev)M6LRR-RLK\_2480

CGACTTTAGCAGTCAAGAAAATGTGGTCATCAGAAGGATCAGGAGCATTTGGTTCAGAAATTCAAACAC  
TTGGTTCAATCCGGCACAAGAACATCGTACGCCTTCTCGGTTGGGCTTCAA

>M6-PGSC0003DMG400022264-(rev)M6LRR-RLK\_2542

CAAACACTTGGTTCAATCCGGCACAAGAACATCGTACGCCTTCTCGGTTGGGCTTCAAACCAGAACATGA  
AGCTTCTGTTCTATGACTACCTTCCAATGGGAGTTTGAGCTCATTACTC

>M6-PGSC0003DMG400022264-(rev)M6LRR-RLK\_2604

GAACATGAAGCTTCTGTTCTATGACTACCTTCCAATGGGAGTTTGAGCTCATTACTCCATGGTGTGGC  
AAAGGAGCAGCAGAATGGGAGAACAGATTTGATGTGGTCCTTGGAGTAGC

>M6-PGSC0003DMG400022264-(rev)M6LRR-RLK\_2666

GTGTTGGCAAAGGAGCAGCAGAATGGGAGAACAGATTTGATGTGGTCCTTGGAGTAGCTCATGCTCTTT  
CATACTACATCATGACTGTGTACCCCTATAATGCATGGAGATGTCAAAG

>M6-PGSC0003DMG400022264-(rev)M6LRR-RLK\_2728

GCTCTTTCATACCTACATCATGACTGTGTACCCCTATAATGCATGGAGATGTCAAAGCAATGAATGTATT  
GTTAGGCTCTAGAATGGAGCCTTACCTGGCCGATTTGGGTTGGCAAGG

>M6-PGSC0003DMG400022264-(rev)M6LRR-RLK\_2790

GAATGTATTGTTAGGCTCTAGAATGGAGCCTTACCTGGCCGATTTGGGTTGGCAAGGATTGTCAACAC  
TGATGTTGATGCAGACTTGTGAAGGAGAGCCAAAGGCCTCATCTTGCTGG

>M6-PGSC0003DMG400022264-(rev)M6LRR-RLK\_2852

TCAACACTGATGTTGATGCAGACTTGTGAAGGAGAGCCAAAGGCCTCATCTTGCTGGTTCCTATGGATA  
TATGGCTCCAGGTAATTATTTTTACTGCATTTTTACTCACTATCTTAGAT

>M6-PGSC0003DMG400022264-(rev)M6LRR-RLK\_2914

TATGGATATATGGCTCCAGGTAATTATTTTTACTGCATTTTTACTCACTATCTTAGATTGATGACGGAGAA  
CGTAAAAGTAGTCAATTTATGATGAATCCTCACAATACAAAAGATATTG

>M6-PGSC0003DMG400022264-(rev)M6LRR-RLK\_2976

GACGGAGAACGTAAAAGTAGTCAATTTATGATGAATCCTCACAATACAAAAGATATTGTTGGTGTGTA  
CTCATTAGTCCTTATATCAGCTTGATTAGTTGCATCAACTTTTCTTGAATT

>M6-PGSC0003DMG400022264-(rev)M6LRR-RLK\_3038

TGTTGTACTCATTAGTCCTTATATCAGCTTGATTAGTTGCATCAACTTTTCTTGAATTGACAAAGACTCTTG  
CTTATTATGTGTCCACAGAACATGCTTCGATGCAACGGATCACAGAAA

>M6-PGSC0003DMG400022264-(rev)M6LRR-RLK\_310

CCTTGTAATTGTTTTGGCATAAGTTGCAATTCCAATGGTCATGTTGTTAGTATAAATCTTAAATCAGTTGA  
TTTACAAGGTTCAATTGCCTTCAAATTTTCAGCCTCTTAAATTCTTGAGC

>M6-PGSC0003DMG400022264-(rev)M6LRR-RLK\_3100

AAGACTCTTGCTTATTATGTGTCCACAGAACATGCTTCGATGCAACGGATCACAGAAAAGAGTGATGTAT  
ACAGCTTTGGTGTGGTCTCTTGGAGGTAACAGGAAGGCATCCACTG

>M6-PGSC0003DMG400022264-(rev)M6LRR-RLK\_3162

TGATGTATACAGCTTTGGTGTGGTCTCTTGGAGGTAACAGGAAGGCATCCACTGGACCCAACGTT  
GCCCGGGGGTGCACACTTAGTACAATGGATACGCGATCACTTACAAAGCAA

>M6-PGSC0003DMG400022264-(rev)M6LRR-RLK\_3224

CAACGTTGCCCGGGGGTGCACACTTAGTACAATGGATACGCGATCACTTACAAAGCAAGCGCGATCCAA  
ATGACATTCTTGATCCAAAGCTTAGAGGCAGAGCTGACCCTGAGATGCATG

>M6-PGSC0003DMG400022264-(rev)M6LRR-RLK\_3286

GATCCAAATGACATTCTTGATCCAAAGCTTAGAGGCAGAGCTGACCCTGAGATGCATGAAATGCTGCAA  
ACTTTAGCTGTTTCATTCTGTGTGTGAGCACGAAAGCTGATGATCGTCCG

>M6-PGSC0003DMG400022264-(rev)M6LRR-RLK\_3348

GCTGCAAACCTTTAGCTGTTTCATTCTGTGTGTGAGCACGAAAGCTGATGATCGTCCGATGATGAGGGA  
TGTTGTAGCCATGCTCAAGGAAATTCGGAATGTTGATCCTGTTGTGTCCGA

>M6-PGSC0003DMG400022264-(rev)M6LRR-RLK\_3410

TGAGGGATGTTGTAGCCATGCTCAAGGAAATTCGGAATGTTGATCCTGTTGTGTCCGAATCCGACTTGTT  
GAAGAAAAATGCAAGTGTAACACCTCTTCCAAAATCACCTGGCACCAAGA

>M6-PGSC0003DMG400022264-(rev)M6LRR-RLK\_3472

GACTTGTTGAAGAAAAATGCAAGTGTAACACCTCTTCCAAAATCACCTGGCACCAAGAATGTGGATTCTC

AAATGTCTGTAGCTGCTCTTTTGTATTTTCTGATAACTCTATCTCCAAA

>M6-PGSC0003DMG400022264-(rev)M6LRR-RLK\_3534

GGATTCTCAAATGTCTGTAGCTGCTCTTTTGTATTTTCTGATAACTCTATCTCCAAATAAGGCATCAAAT

AGTAAACAAATTTGTGAATATAGCATGGTTTATTAGCAGTATGAGTTA

>M6-PGSC0003DMG400022264-(rev)M6LRR-RLK\_3596

GCATCAAATAGTAAACAAATTTGTGAATATAGCATGGTTTATTAGCAGTATGAGTTAGAGCAGATTATA

GATTTTAAAAGGAAATCATGTATTCTATTAAGAAGTTTTCAATTTAGCA

>M6-PGSC0003DMG400022264-(rev)M6LRR-RLK\_372

ATCAGTTGATTTACAAGGTTCAATGCCTTCAAATTTTCAGCCTCTTAAATTCTTGAGCAGTCTTGTTCTTTC

ATCTGTTAATCTTAGTGGTCCAATCCCAAAGAGTTTGGAGATTATCT

>M6-PGSC0003DMG400022264-(rev)M6LRR-RLK\_434

TTGTTCTTTCATCTGTTAATCTTAGTGGTCCAATCCCAAAGAGTTTGGAGATTATCTTGAACCTAAGTTC

ATTGATATTAGTGATAATTCAATCACTGGTGTCAATCCTCAAGAACTTT

>M6-PGSC0003DMG400022264-(rev)M6LRR-RLK\_496

CTTAAGTTCATTGATATTAGTGATAATTCAATCACTGGTGTCAATCCTCAAGAACTTTGTAAGCTTATAAA

GTTACAACTTTATCACTTAGTTCAAATTTTCTTGAAGGTGATATCCCT

>M6-PGSC0003DMG400022264-(rev)M6LRR-RLK\_558

GCTTATAAAGTTACAACTTTATCACTTAGTTCAAATTTTCTTGAAGGTGATATCCCTTCAGACATTGGGA

ACTTGTCTGATCTTAAGAAGTTCTTGATTTATGACAATCAACTTAGTGG

>M6-PGSC0003DMG400022264-(rev)M6LRR-RLK\_62

CTCTATAAACAAAACATGGGGTCCCCATTTACAATCCCAAAGTCCTCAACTTTCTCTCTTCTCCCTCTA

AGCAGCAGCAAACAATGCCTGCTCCTTCAACATATCCCTTTCTTCTC

>M6-PGSC0003DMG400022264-(rev)M6LRR-RLK\_620

ACATTGGGAACCTGTCTGATCTTAAGAAGTTCTTGATTTATGACAATCAACTTAGTGGTGAATTCCAA

GGGTATTGGAAAGTTGAAGAATCTTGACGAATTTAGAGCTGGAGGGAATC

>M6-PGSC0003DMG400022264-(rev)M6LRR-RLK\_682

ATTCAAAGGGTATTGGAAAGTTGAAGAATCTTGACGAATTTAGAGCTGGAGGGAATCAAATCTTAAA

GGGGAACCTCCTTATGAGATTGGAAACTGTTTGAACCTGGTTTTTTTAGGC

>M6-PGSC0003DMG400022264-(rev)M6LRR-RLK\_744

TCTTAAAGGGGAACTCCCTTATGAGATTGGAACTGTTTGAACCTGGTTTTTTTAGGCCTTGCTGAAACA  
AGCATTTCAGGGAATTTGCCAGTGACAATTGGAAACCTGAAAAAGATTCA

>M6-PGSC0003DMG400022264-(rev)M6LRR-RLK\_806

CTGAAACAAGCATTTCAGGGAATTTGCCAGTGACAATTGGAAACCTGAAAAAGATTTCAGACAATTGCAA  
TATATACAGCTCTTTTGTCTGGACCAATTCCAGAAGAGATTGGGAATTGTA

>M6-PGSC0003DMG400022264-(rev)M6LRR-RLK\_868

ATTGCAATATATACAGCTCTTTTGTCTGGACCAATTCCAGAAGAGATTGGGAATTGTAGTGAACACTACAGA  
ACTTGTATTTGTATCAGAATTCGATCTCCGGTTCGATTCCAAGGAGTATA

>M6-PGSC0003DMG400022264-(rev)M6LRR-RLK\_930

ACTACAGAACTTGTATTTGTATCAGAATTCGATCTCCGGTTCGATTCCAAGGAGTATAGGGGAACTCAGG  
AAGCTTCAAAGTTTGTGCTTTGGCAGAATAGTATAGTTGGTGTGATTCC

>M6-PGSC0003DMG400022264-(rev)M6LRR-RLK\_992

AACTCAGGAAGCTTCAAAGTTTGTGCTTTGGCAGAATAGTATAGTTGGTGTGATTCCAAATGAGCTTGG  
GAATTGTAAGGCTATTACAGTTATTGACTTGTCTGAGAATCTCTTAACAG

>M6-PGSC0003DMG400022391M6G-LecRK\_0

AAAGATAACATTCAAAGCATAACGAAAAGAGAAAGAAGTGTGAGCAAATAGTATTGCAGGCTGCAGCT  
ATAGGTATTCTCCATTTTAGCTTATACAGAATTAATCCACATGCAAATTGGC

>M6-PGSC0003DMG400022391M6G-LecRK\_1054

TCTGTTCTTGTTTAGAGGGATTTAAGCCGACAAGTGAAGAGGAATGGGGGAAAGGAAACTGGACTCGT  
GGATGCAACAGAAAGTCCACGTTAGCGAGCGAAAGAAACAGTTCTAACCTTG

>M6-PGSC0003DMG400022391M6G-LecRK\_1116

ACTCGTGGATGCAACAGAAAGTCCACGTTAGCGAGCGAAAGAAACAGTTCTAACCTTGAGCAAGGGAA  
GCAAGATTGGTTTCTGAAGCTGCAGTCAATGAAAGTGCCGGATTATGCTATT

>M6-PGSC0003DMG400022391M6G-LecRK\_1178

AGGGAAGCAAGATTGGTTTCTGAAGCTGCAGTCAATGAAAGTGCCGGATTATGCTATTTGGGTACCTTT  
TGTAGATGAAGATTGTGTTAACAATTGCTTGAGGAATACTTCTGCATAGC

>M6-PGSC0003DMG400022391M6G-LecRK\_124

TAAAACTTCATAAGCAATGAAATTAAGCACAAGAGAGATACTTCTATTTCCAGCTGTTCTTGTTCTGTTT  
CTTTCTATATCAACTGCTTCAGGTATCATTAGCACCAATAAATTCCTGC

>M6-PGSC0003DMG400022391M6G-LecRK\_1240

TACCTTTTGTAGATGAAGATTGTGTTAACAATTGCTTGAGGAATACTTCCTGCATAGCTTATTCATACTAC  
ACAGGCATAGGATGCATGCATTGGGAAGGAAGCTTACTTGATGTTTCAGA

>M6-PGSC0003DMG400022391M6G-LecRK\_1302

TCATACTACACAGGCATAGGATGCATGCATTGGGAAGGAAGCTTACTTGATGTTTCAGAAATTCTCTATG  
GGTGGGGCAGATTTATTCCTTCGCCTTTCATATTCTGAGCGTGGTAAGACC

>M6-PGSC0003DMG400022391M6G-LecRK\_1364

CTCTATGGGTGGGGCAGATTTATTCCTTCGCCTTTCATATTCTGAGCGTGGTAAGACCTGCATTTTCAGAA  
CTATAATATAAGCTATAAAACTCTGCTTGCCAATGACATATGTATAATGG

>M6-PGSC0003DMG400022391M6G-LecRK\_1426

TTTCAGAACTATAATATAAGCTATAAAACTCTGCTTGCCAATGACATATGTATAATGGACACTTATTTTCGT  
AATGCAGATCAAAGAGAGAATATAAAGTAGTCATTGCCATCATAGTCC

>M6-PGSC0003DMG400022391M6G-LecRK\_1488

TTATTTTCGTAATGCAGATCAAAGAGAGAATATAAAGTAGTCATTGCCATCATAGTCCCAGTAGGCTCAA  
TAATTCTTGCCATTTTCGGATACATTTCTGCAGATATGTAGCTAAGCGC

>M6-PGSC0003DMG400022391M6G-LecRK\_1550

AGGCTCAATAATTCTTGCCATTTTCGGATACATTTCTGCAGATATGTAGCTAAGCGCAGAGGTAACAAG  
CTTATCTGAAACATTAGAAAATTCATAGTAGCTTTAATCATACGAATCAC

>M6-PGSC0003DMG400022391M6G-LecRK\_1612

GTAACAAGCTTATCTGAAACATTAGAAAATTCATAGTAGCTTTAATCATACGAATCACTTTATCTCTAATG  
TCTGTCCTCTTGAATCAGGATGGAAGAGAATGAGTAAGATCTTATTAAG

>M6-PGSC0003DMG400022391M6G-LecRK\_1674

TCTCTAATGTCTGTCCTCTTGAATCAGGATGGAAGAGAATGAGTAAGATCTTATTAAGTGAATCATCGCC  
AAACTATTACAAGGAAGACAAGATAACAGAGGACATCAATCAAGCTAAAT

>M6-PGSC0003DMG400022391M6G-LecRK\_1736

TCATCGCCAAACTATTACAAGGAAGACAAGATAACAGAGGACATCAATCAAGCTAAATTGGAAGAACTG  
CTTGATACAACGTTGATATCTTAGCAAACGCAACTGAGAATTTTCATCTG

>M6-PGSC0003DMG400022391M6G-LecRK\_1798

AGAACTGCTTGTATACAACGTTGATATCTTAGCAAACGCAACTGAGAATTTTCATCTGTCCAGCAAGCTT

GGACAGGGAGGTTTTGGTCCAGTTTACAAAGTAAGGATTTGTTTGATTGA

>M6-PGSC0003DMG400022391M6G-LecRK\_186

GTTCTGTTTCTTTCTATATCAACTGCTTCAGGTATCATTAGCACCAATAAATTCCTGCGAGATTCAGAAAC

TTTAGTCTCCAATGACAAAAGATTCATAATCGGGTCTTTAGTCCTGAA

>M6-PGSC0003DMG400022391M6G-LecRK\_1860

GCAAGCTTGGACAGGGAGGTTTTGGTCCAGTTTACAAAGTAAGGATTTGTTTGATTGAGTGTCTTGTAAT

TGTTTTTAAGAAAAGATATCTAAGTATATGATATGATTGCAGGGGAAATT

>M6-PGSC0003DMG400022391M6G-LecRK\_1922

CTTGTAATTGTTTTAAGAAAAGATATCTAAGTATATGATATGATTGCAGGGGAAATTGCCAGATGGACA

AGAGATTGCTGTGAAAAGGCTTTCACAGTCTTCTGGTCAGGGGCTACAGG

>M6-PGSC0003DMG400022391M6G-LecRK\_1984

GATGGACAAGAGATTGCTGTGAAAAGGCTTTCACAGTCTTCTGGTCAGGGGCTACAGGAGTTCATGAAT

GAGTTGTGGTGATTTCAAACCTCAACATCGTAATCTTGTTAGACTTTTT

>M6-PGSC0003DMG400022391M6G-LecRK\_2046

CATGAATGAGGTTGTGGTGATTTCAAACCTCAACATCGTAATCTTGTTAGACTTTTTGGTTGCTGCATAG

AAAGAGGGGAAAAGATGCTGGTTTATGAATACATGCCAAAAGAAGCTT

>M6-PGSC0003DMG400022391M6G-LecRK\_2108

GCTGCATAGAAAGAGGGGAAAAGATGCTGGTTTATGAATACATGCCAAAAGAAGCTTGGATGCCTAT

CTCTTTGGTTCGTTATGATTAGTTTTCTTTATTTTCCATAGAGTCTAACTA

>M6-PGSC0003DMG400022391M6G-LecRK\_2170

GCCTATCTCTTTGGTTCGTTATGATTAGTTTTCTTTATTTTCCATAGAGTCTAACTAAAACAACTTTTCTT

TGATTTAACTTGTCAAATTCGCAATGTATTTTCAGGGTCACAACAA

>M6-PGSC0003DMG400022391M6G-LecRK\_2232

AACTTTTCTTTGATTTAACTTGTCAAATTCGCAATGTATTTTCAGGGTCACAACAACAAGAGGAAGAG

TTCCTTGATTGGAGTAAACGTGTGATCATCATTGAGGGAATTGGTCGAGG

>M6-PGSC0003DMG400022391M6G-LecRK\_2294

AGGAAGAGTTCCTTGATTGGAGTAAACGTGTGATCATCATTGAGGGAATTGGTCGAGGCCTTCTTTACC

TTCACAGGGATTCAAGACTACGGATTATTCACAGGGACTTAAAGGCCAGCA

>M6-PGSC0003DMG400022391M6G-LecRK\_2356

CTTTACCTTCACAGGGATTCAAGACTACGGATTATTCACAGGGACTTAAAGGCCAGCAACATATTGTTGG  
ATGAATACCTAAACCCCAAATTTTCAGATTTTGGGATGGCAAGGATTTTT

>M6-PGSC0003DMG400022391M6G-LecRK\_248

TTCAGAACTTTAGTCTCCAATGACAAAAGATTCATAATCGGGTCTTTAGTCCTGAAAATTCGACGAAT  
CGTTATGTTGGTGTATGTTAATGTCCAACCACCAACTGTTGTATGGGT

>M6-PGSC0003DMG400022391M6G-LecRK\_2480

GCAACCAAGATCAGGCCAACACAAGCAGAGTTGTTGGAACCTAGTAAGTTCTTGATCTTTCCCTTTTAT  
CTTTTCATGAATGAAAAGAACACAACAAGTAAACATTCAAATTATAACA

>M6-PGSC0003DMG400022391M6G-LecRK\_2542

CCTTTTATCTTTTCATGAATGAAAAGAACACAACAAGTAAACATTCAAATTATAACATGATGCAGTGGT  
TACATGGCACCTGAATATGCAATGGAAGGAAGATTCTCAGAAAAATCAGA

>M6-PGSC0003DMG400022391M6G-LecRK\_2604

GCAGTGGTTACATGGCACCTGAATATGCAATGGAAGGAAGATTCTCAGAAAAATCAGATGTTTATAGCT  
TTGGAGTATTGTTATTGGAATTACAAGTGAAGGAGGAACACTAGCTTTC

>M6-PGSC0003DMG400022391M6G-LecRK\_2728

AGATGATGGTGCATTAAGCCTGCTAGCATTGGTAAGTTTTTATGAAAATTAAGCTCCAATTCATATGAAA  
TGCCAACTTTTCATAGTTCAAGTTTTCAATGTTTTGTCAATGTGCTTGCT

>M6-PGSC0003DMG400022391M6G-LecRK\_2790

ATATGAAATGCCAACTTTTCATAGTTCAAGTTTTCAATGTTTTGTCAATGTGCTTGCTCTTCAGGCGTGGA  
AATGTTGGATTGGAACAAGATTGTGGAATTGGTTGATCCCAAGATAAC

>M6-PGSC0003DMG400022391M6G-LecRK\_2852

AGGCGTGGAATGTTGGATTGGAACAAGATTGTGGAATTGGTTGATCCCAAGATAACTGACCTGCACC  
TTGAAAAGGAAATGGTGAGATGTGTACAAGTTGGATTATTATGTGTACAAG

>M6-PGSC0003DMG400022391M6G-LecRK\_2903

AGATAACTGACCTGCACCTTGAAAAGGAAATGGTGAGATGTGTACAAGTTGGATTATTATGTGTACAAG  
AATATGCAGAAGACAGACCAAATGTCTCCACAATTTTGTCTATGCTCACCA

>M6-PGSC0003DMG400022391M6G-LecRK\_310

CGACGAATCGTTATGTTGGTGTATGTTAATGTCCAACCACCAACTGTTGTATGGGTTGCCAACAGAGA  
GAAACCTTTACAGGATTCTAGTGAAGAGTGACAATATCTGATGATGGAA

>M6-PGSC0003DMG400022391M6G-LecRK\_372

AACAGAGAGAAACCTTTACAGGATTCTAGTGGAAGAGTGACAATATCTGATGATGGAAATCTTGTAATC  
TTGAACTCACAGAATAGGAGTATATGGTCATCAAATATTTACCAGCTGTT

>M6-PGSC0003DMG400022391M6G-LecRK\_434

TGTAATCTTGAACCTCACAGAATAGGAGTATATGGTCATCAAATATTTACCAGCTGTTAGAAATTCTACA  
GCGCAGCTCTTGGATACTGGTAACTTAGTTTTGAACGATAGCTCCAACGG

>M6-PGSC0003DMG400022391M6G-LecRK\_496

ATTCTACAGCGCAGCTCTTGGATACTGGTAACTTAGTTTTGAACGATAGCTCCAACGGGAGGGTTCTCTG  
GGAAAGTTTTCGGGATCCTTCAGATTGCTTCTTGCAGACAATGAAAATTG

>M6-PGSC0003DMG400022391M6G-LecRK\_558

GTTCTCTGGGAAAGTTTTCGGGATCCTTCAGATTGCTTCTTGCAGACAATGAAAATTGGCGTTGATGTAA  
GTACTAACACGACAAATCTGCTGAAATCATGGATAAGTCCTTCAGATCCA

>M6-PGSC0003DMG400022391M6G-LecRK\_62

GCAGCTATAGGTATTCTCCATTTTAGCTTATACAGAATTAATCCACATGCAAATTGGCAGAATAAAAACT  
TCATAAGCAATGAAATTAAGCACAAGAGAGATACTTCTATTTCCAGCTGT

>M6-PGSC0003DMG400022391M6G-LecRK\_620

TGATGTAAGTACTAACACGACAAATCTGCTGAAATCATGGATAAGTCCTTCAGATCCATCTGTTGGGAGT  
TTCTCAGTTGGTATTCAACCTGAAACAGTTCCTCAGATTTCCATATGGAA

>M6-PGSC0003DMG400022391M6G-LecRK\_682

TTGGGAGTTTCTCAGTTGGTATTCAACCTGAAACAGTTCCTCAGATTTCCATATGGAAGAATGGGAAACC  
TCATTGGCGTAGCGGTCCATGGAATAAACAGGTTTTTCATTGGGGTACCAG

>M6-PGSC0003DMG400022391M6G-LecRK\_744

GGGAAACCTCATTGGCGTAGCGGTCCATGGAATAAACAGGTTTTTCATTGGGGTACCAGACATGACTTCA  
TTCTATCTCAATGGATTTGATCTAGTTAATGACAACAAGGGCACCGTGTAC

>M6-PGSC0003DMG400022391M6G-LecRK\_806

GACTTCATTCTATCTCAATGGATTTGATCTAGTTAATGACAACAAGGGCACCGTGTACCTTACCTATTTAT  
ATGCAAATCAGATTGAGCTGACGTTTTTACCTTGAACCTCAACAGGGTT

>M6-PGSC0003DMG400022391M6G-LecRK\_868

CCTATTTATATGCAAATCAGATTGAGCTGACGTTTTTACCTTGAACCTCAACAGGGTTTTTGCAGCAGAA



ATATATGGATCCTAGTAAGAATGATTGGGAAGTAACATGGGAATTCCTG

>M6-PGSC0003DMG400022391M6G-LecRK\_930

CAGCAGAAATATATGGATCCTAGTAAGAATGATTGGGAAGTAACATGGGAATTCCTGCAACTGAGTGT  
GATTTTTATGGAAAATGTGGACCTTTTGGGAAGCTGTGATCCTACAAGCTCA

>M6-PGSC0003DMG400022391M6G-LecRK\_992

TGAGTGTGATTTTTATGGAAAATGTGGACCTTTTGGGAAGCTGTGATCCTACAAGCTCACCAATCTGTTCTT  
GTTTAGAGGGATTTAAGCCGACAAGTGAAGAGGAATGGGGGAAAGGAAA

>M6-PGSC0003DMG400022404M6LRR-RLP\_0

CTTGAGAGTTTCTTTGGCTCTTCTGGTGCACCAAAGAGTCCACATTTTTCCACCATTCTCAAGACTGAGGTA  
TGCAATAAAAATAAGAAAAAATGCCAACAGCTTTTTCAATTCTTGTTT

>M6-PGSC0003DMG400022404M6LRR-RLP\_1037

GAGAGTTTGGAGTTTTTGGCAAATCATTCTTGATTTAAGGCTCTGTCATTGTTGAGTTGTGATGGTT  
TTAGCACTGATGGGATCAGTAGCATTGCTGCTCACTGCAAGTAAGATGAT

>M6-PGSC0003DMG400022404M6LRR-RLP\_1098

GTGATGGTTTTAGCACTGATGGGATCAGTAGCATTGCTGCTCACTGCAAGTAAGATGATCTTTTCACTCG  
TGTTAACTTTTGGTGGTTATTTTTAATATCAGTTAATGTTTCAGATATGG

>M6-PGSC0003DMG400022404M6LRR-RLP\_1159

TTTCACTCGTGTTAACTTTTGGTGGTTATTTTTAATATCAGTTAATGTTTCAGATATGGGTGTTGTTTTGAT  
TGGATAAAAAATCTATCTTTTTTTCAAGAAATAGTTTTTATTTGATTG

>M6-PGSC0003DMG400022404M6LRR-RLP\_122

TTCCAGTTTGTTTTTTCTCTTACAACCTCACGCTTTTCTCCCTGTTTTCTTGTAATTGTTCTGAAATTTACT  
GATTCTTTTCTCTTTTTCTTTGTTTTTTCTGTGTGTTAAATTG

>M6-PGSC0003DMG400022404M6LRR-RLP\_1220

GTTGTTTTGATTGGATAAAAAATCTATCTTTTTTTCAAGAAATAGTTTTTATTTGATTGTAAGTGGTATATT  
ATCTAGCATCTGACTTCAAGATCTTAGCTTTCTGTTATGGTGGATTTA

>M6-PGSC0003DMG400022404M6LRR-RLP\_1281

ACTGGTATATTATCTAGCATCTGACTTCAAGATCTTAGCTTTCTGTTATGGTGGATTTAGAATTCTTTCAA  
GGCAGATTGAGGAAAAACAGTACTGTTTACAAGGTGGTCCATGCTAATT

>M6-PGSC0003DMG400022404M6LRR-RLP\_1342

ATTCTTTCAAGGCAGATTGAGGAAAAACAGTACTGTTTACAAGGTGGTCCATGCTAATTATTGTAGTAAT  
GGAGGACAAAACAGTAGACCCATGTGTCTGGATGTGGAATGGTTAAGAAA

>M6-PGSC0003DMG400022404M6LRR-RLP\_1403

TGTAGTAATGGAGGACAAAACAGTAGACCCATGTGTCTGGATGTGGAATGGTTAAGAACTTGTATTTT  
TCATTTGAAGTGGCCATGTGGGTGAAGAAATAAAAAAGTGACATGTTCTGG

>M6-PGSC0003DMG400022404M6LRR-RLP\_1464

TGTATTTTTTCATTTGAAGTGGCCATGTGGGTGAAGAAATAAAAAAGTGACATGTTCTGGGCTGGGGACA  
TGTTAGGCTGTTTATCTTGTTATCACACCTTGTCTTACCACACATTAATAA

>M6-PGSC0003DMG400022404M6LRR-RLP\_1525

TGGGGACATGTTAGGCTGTTTATCTTGTTATCACACCTTGTCTTACCACACATTAATAAAGAAAGAAGAA  
AAAAGTATAAGTGGAAATTGAAATGGTTCCACTTTATGAATTCTTTTTCT

>M6-PGSC0003DMG400022404M6LRR-RLP\_1586

AAAGAAGAAAAAAGTATAAGTGGAAATTGAAATGGTTCCACTTTATGAATTCTTTTTCTGTTCTTTTTTA  
TGTTACTTTCATGATGTGACATTGACCTGTTAATGAGCATTAAATTGAGG

>M6-PGSC0003DMG400022404M6LRR-RLP\_1647

TCCTTTTTTATGTTACTTTCATGATGTGACATTGACCTGTTAATGAGCATTAAATTGAGGGAATTCTTTGAT  
GTCATTGTTAGGCATAAATAACTCTTCTTATTGGTCAAGAAAGAGTTTC

>M6-PGSC0003DMG400022404M6LRR-RLP\_1708

ATTCTTTGATGTCATTGTTAGGCATAAATAACTCTTCTTATTGGTCAAGAAAGAGTTTCTACATTAAGTTG  
GATTGTGTAACAAATATTTGATCTCTGAACCTTTTAATGTCTATTAGAC

>M6-PGSC0003DMG400022404M6LRR-RLP\_1769

CATTAAGTTGGATTGTGTAACAAATATTTGATCTCTGAACCTTTTAATGTCTATTAGACCTGTTCAATGTAT  
GGAGCTTCAACTAGTATATCACTATGTATATGTTGTCAAATTGTTGTC

>M6-PGSC0003DMG400022404M6LRR-RLP\_183

CTGAAATTTTACTGATTCTTTTCTCTTTTCTTTTCTTTTCTGTGTGTTAAATTGATATAAGCATGGTT  
TTTCTGGGTCATTTTTTTTATCTGCTTTTTCAGTAGCATTTTCAGAAA

>M6-PGSC0003DMG400022404M6LRR-RLP\_1830

GTTCAATGTATGGAGCTTCAACTAGTATATCACTATGTATATGTTGTCAAATTGTTGTCTAGTTTTGCAGC  
ACCACTAGGTTATTATGGTTCATGAGGCTTTCAGGTTGGTTGTTGTCTT

>M6-PGSC0003DMG400022404M6LRR-RLP\_1891

GTTTTGCAGCACCCTAGGTTATTATGGTTCATGAGGCTTTCAGGTTGGTTGTTGTCTTGGCAAATAAGG  
AATACCATCACAAAGGTGTATAGGTCGCATGCCAAGATTTTGCTTGTGTA

>M6-PGSC0003DMG400022404M6LRR-RLP\_1952

CAAATAAGGAATACCATCACAAAGGTGTATAGGTCGCATGCCAAGATTTTGCTTGTGTAGTTTTAAACGT  
AGAAGTTGGCATCTTTGCAATTTTAAGTTACGATAATCTGAACCAAAAAG

>M6-PGSC0003DMG400022404M6LRR-RLP\_2013

TTTAAACGTAGAAGTTGGCATCTTTGCAATTTTAAGTTACGATAATCTGAACCAAAAAGAATGTGAGAAT  
GTGGGATCTTTGGTTGTTCTGGTCCGCAATCGTTCCAAAGAAATGTAGTT

>M6-PGSC0003DMG400022404M6LRR-RLP\_2074

TGTGAGAATGTGGGATCTTTGGTTGTTCTGGTCCGCAATCGTTCCAAAGAAATGTAGTTGAAGGATGG  
CTCTAATGTCATATCCACAATTCAACATACTACAGAAGTTGGACTTGTATA

>M6-PGSC0003DMG400022404M6LRR-RLP\_2135

AAGGATGGCTCTAATGTCATATCCACAATTCAACATACTACAGAAGTTGGACTTGTATATAACAAATGTC  
TTCATGTACTATCTAAATGATGCATACAAGGAGGTTCTATTTATGTTATG

>M6-PGSC0003DMG400022404M6LRR-RLP\_2196

ACAAATGTCTTCATGTACTATCTAAATGATGCATACAAGGAGGTTCTATTTATGTTATGATAACAAGATT  
CGTTTGAGTAATATTCCAAGGTATAGAAAAGCAAACATGCTTTTCTTC

>M6-PGSC0003DMG400022404M6LRR-RLP\_2257

AACAAGATTTGTTTTGAGTAATATTCCAAGGTATAGAAAAGCAAACATGCTTTTCTTCATAGGCAGCAG  
AAATGTGCGTTTTGTTTTGTGGCTCTTAATTGATGCTTATCAGCATGAAAC

>M6-PGSC0003DMG400022404M6LRR-RLP\_2318

AGGCAGCAGAAATGTCGTTTTGTTTTGTGGCTCTTAATTGATGCTTATCAGCATGAAACCAAGTTATCTT  
AATTGCTATACCAATCTAAATGTTGGTTTCCTTCACAGGAACTTGACAGA

>M6-PGSC0003DMG400022404M6LRR-RLP\_2379

AGTTATCTTAATTGCTATACCAATCTAAATGTTGGTTTCCTTCACAGGAACTTGACAGAGCTGGACATTCA  
GGAGAATGGCATGGATGATATTTGTGGTAGTTGGCTAAGTTGTTTTCCG

>M6-PGSC0003DMG400022404M6LRR-RLP\_244

ATAAGCATGGTTTTTCTGGGTCATTTTTTTATCTGCTTTTTTCAGTAGCATTTTCAGAAATTTCTCAGCCTTTT

CTCTCTTTAGAGTTTAGACCCATATCTCTTGCTCTGTTTTCTTGAAG

>M6-PGSC0003DMG400022404M6LRR-RLP\_2440

TGGACATTCAGGAGAATGGCATGGATGATATTTGTGGTAGTTGGCTAAGTTGTTTTCCGGATGACTTTAC

ATCACTGGAGGTGCTTAACTTTGCCTGTATGAACACTGAGATCAGTAAGG

>M6-PGSC0003DMG400022404M6LRR-RLP\_2501

TGACTTTACATCACTGGAGGTGCTTAACTTTGCCTGTATGAACACTGAGATCAGTAAGGATGCTTTAGAG

AGACTTGTCCGGTAGATGCAAATCACTGAGGGTTCTGAAGGTTAACAAGAA

>M6-PGSC0003DMG400022404M6LRR-RLP\_2562

GCTTTAGAGAGACTTGTCCGGTAGATGCAAATCACTGAGGGTTCTGAAGGTTAACAAGAACGTCACCTTG

CCTCAGTTGCAACGCCTGCTCGTCCGAGCTCCTCAGCTGATGGAGCTGGGT

>M6-PGSC0003DMG400022404M6LRR-RLP\_2623

TCACCTTGCCTCAGTTGCAACGCCTGCTCGTCCGAGCTCCTCAGCTGATGGAGCTGGGTACAGGATGCTT

TCTTCCAGATCAACTCACAAGTCGGCAGTATGCAGAACTTGAAAGTGCAT

>M6-PGSC0003DMG400022404M6LRR-RLP\_2684

AGGATGCTTTCTTCCAGATCAACTCACAAGTCGGCAGTATGCAGAACTTGAAAGTGCATTCAGCAACTGC

AAGCATCTGCACTCTCTTTCAGGCTTTTGGGAAGCAAATCGTCGATATTT

>M6-PGSC0003DMG400022404M6LRR-RLP\_2745

AGCAACTGCAAGCATCTGCACTCTCTTTCAGGCTTTTGGGAAGCAAATCGTCGATATTTACCATCTCTTTA

TGCAGCCTGTGCTAGGCTGACTTTCCTCAACTTGAGCTATGAAGCCATT

>M6-PGSC0003DMG400022404M6LRR-RLP\_2806

CATCTCTTTATGCAGCCTGTGCTAGGCTGACTTTCCTCAACTTGAGCTATGAAGCCATTAGGAGTGGTGA

ATTTTCGAAGCTTCTTGCTCATTGCCCAAATTAAGGCGCCTTTGGGTAA

>M6-PGSC0003DMG400022404M6LRR-RLP\_2867

GAGTGGTGAATTTTCGAAGCTTCTTGCTCATTGCCCAAATTAAGGCGCCTTTGGGTAAAGAATCTACCTC

AGGCTTTAACATTTACGTGATAAATCCTTTCATGATGAGGTCTTAGGTAT

>M6-PGSC0003DMG400022404M6LRR-RLP\_2928

ATCTACCTCAGGCTTTAACATTTACGTGATAAATCCTTTCATGATGAGGTCTTAGGTATTGATCTCCTAAC

ATTTGACATTTTGTGCGAGGAACTGAAAGTTACCACTAATTCGTCTTTTA

>M6-PGSC0003DMG400022404M6LRR-RLP\_2989

ATCTCCTAACATTTGACATTTTGTCTGAGGAACTGAAAGTTACCACTAATTCGTCTTTTAAGTTTGAAGTGC  
TCTATGGTTGTTTTCTCTAGGGATAAGTATTCAAGAGATGCTAATCACC

>M6-PGSC0003DMG400022404M6LRR-RLP\_305

TCTCAGCCTTTTCTCTCTTTAGAGTTTAGACCCATATCTCTTGCTCTGTTTTCTTGAAGCTCTAAAATGGAG  
TG TAGTACA ACTGATTGCAGATGATGTTTTCTTTTTGAAATTCAGGTG

>M6-PGSC0003DMG400022404M6LRR-RLP\_3050

TTTGAAGTCTCTATGGTTGTTTTCTCTAGGGATAAGTATTCAAGAGATGCTAATCACCTTTTTTTTCATAT  
CATGGTAATCCATTTTTCTACTTTCAAGGTCTTCATGCCTAATCTTTC

>M6-PGSC0003DMG400022404M6LRR-RLP\_3111

TTTTTTCATATCATGGTAATCCATTTTTCTACTTTCAAGGTCTTCATGCCTAATCTTCTGTTATAGGTCCTA  
GACTGTCAAAGATAAGGGGTTAGAGGCTGTTGGAACCAGCTGCCC

>M6-PGSC0003DMG400022404M6LRR-RLP\_3172

TTATAGGTCCTAGACTGTCAAAGATAAGGGGTTAGAGGCTGTTGGAACCAGCTGCCCATTTGCTTGAA  
GAATTGCGAGTCTTTCCTGCTGACCCATTTGAAGAGGATATGGACCATGGA

>M6-PGSC0003DMG400022404M6LRR-RLP\_3233

TGCTTGAAGAATTGCGAGTCTTTCCTGCTGACCCATTTGAAGAGGATATGGACCATGGAGTGACTGAGT  
CAGGCTTTGTGGCTGTGTCTGCTGGTTGTCCTAAGCTTCAATATGTTCTCT

>M6-PGSC0003DMG400022404M6LRR-RLP\_3294

GACTGAGTCAGGCTTTGTGGCTGTGTCTGCTGGTTGTCCTAAGCTTCAATATGTTCTCTATTTCTGCCGGC  
AAATGACTAATGCTGCTGTTGCAACAATAGTGCGTAAGTGCCTAATTT

>M6-PGSC0003DMG400022404M6LRR-RLP\_3355

TTCTGCCGGCAAATGACTAATGCTGCTGTTGCAACAATAGTGCGTAAGTGCCTAATTTACCCATTTTCG  
TCTCTGCATAATGAATCCTGGCCAGCCAGATTACTTGACAAATGAACCC

>M6-PGSC0003DMG400022404M6LRR-RLP\_3416

CCCATTTTCGTCTCTGCATAATGAATCCTGGCCAGCCAGATTACTTGACAAATGAACCCATGGATGAGGC  
ATTTGGTGCAGTGGTCAAGACTTGTA AAAAGCTCCAGAGGCTTTCTGTTT

>M6-PGSC0003DMG400022404M6LRR-RLP\_3477

GGATGAGGCATTTGGTGCAGTGGTCAAGACTTGTA AAAAGCTCCAGAGGCTTTCTGTTTCTGGACTGTT  
GACTGACCTGACCTTTGAGTATATTGGAAAGTATGCCAAAACCTTGAGAC

>M6-PGSC0003DMG400022404M6LRR-RLP\_3538

GGACTGTTGACTGACCTGACCTTTGAGTATATTGGAAAGTATGCCAAAACCTTGAGACACTTTCAGTGG  
CTTTTGCTGGCAGCAGTGACTGGGGTATGCAGTGTGTGCTCGACGGCTGT

>M6-PGSC0003DMG400022404M6LRR-RLP\_3599

TTTCAGTGGCTTTTGCTGGCAGCAGTGACTGGGGTATGCAGTGTGTGCTCGACGGCTGTTCTAAGCTGA  
GGAAGCTGGAGATAAGGGATTCTCCATTTGGAAATGCAGCACTTCTTTCTG

>M6-PGSC0003DMG400022404M6LRR-RLP\_366

CTAAAATGGAGTGTAGTACAACCTGATTGCAGATGATGTTTTCTTTTTGAAATTCAGGTGACTCAAGATGG  
TTTTTTGTTTGTTTACAAATCTTGAAAGCTAGTATTTTTTTTTTTATAAC

>M6-PGSC0003DMG400022404M6LRR-RLP\_3660

TAAGCTGAGGAAGCTGGAGATAAGGGATTCTCCATTTGGAAATGCAGCACTTCTTTCTGGAATGGGGAA  
GTATGAATCAATGCGGTGTCTTTGGATGTCAGCTTGCAGGGTCACCATGAA

>M6-PGSC0003DMG400022404M6LRR-RLP\_3721

ATGGGGAAGTATGAATCAATGCGGTGTCTTTGGATGTCAGCTTGCAGGGTCACCATGAATGGTTGTAGA  
ATACTTGCACAAGAGAGGCCTAGGTTGAATGTCGAGGTAATCAAAGATGAG

>M6-PGSC0003DMG400022404M6LRR-RLP\_3782

GTTGTAGAATACTTGCACAAGAGAGGCCTAGGTTGAATGTCGAGGTAATCAAAGATGAGCACAGCGAT  
GATTATGCTGATAAATTATACGTCTATCGCTCTGTAGCAGGGCCACGAAAGG

>M6-PGSC0003DMG400022404M6LRR-RLP\_3843

CAGCGATGATTATGCTGATAAATTATACGTCTATCGCTCTGTAGCAGGGCCACGAAAGGATGCCCCACCT  
TTTGTTGTAACCTCTAGCACAAAGAAACAGGAACTTTGGTAAGCTCCTT

>M6-PGSC0003DMG400022404M6LRR-RLP\_3904

GCCCCACCTTTTGTTGTAACCTCTAGCACAAAGAAACAGGAACTTTGGTAAGCTCCTTCCCTTGCTCTCC  
TCTGTCCTATGCTTGCCAAAATAGCGTGGAGTGGAAAGATGATATGCTG

>M6-PGSC0003DMG400022404M6LRR-RLP\_3965

CTTGCTCTCCTCTGTCCTATGCTTGCCAAAATAGCGTGGAGTGGAAAGATGATATGCTGATAATGCTAAG  
TTTTATTTTTATCTGTAGGTGTGCACTGGGATACCCTTCTATTTTCAGCTA

>M6-PGSC0003DMG400022404M6LRR-RLP\_4026

AATGCTAAGTTTTATTTTTATCTGTAGGTGTGCACTGGGATACCCTTCTATTTTCAGCTAGTTTTATCTGCTA

CATGCATGATGTTTCGTAAAGGTGAACGAGAGAAAGTAAGTAAATGAAT

>M6-PGSC0003DMG400022404M6LRR-RLP\_4087

TTTATCTGCTACATGCATGATGTTTCGTAAAGGTGAACGAGAGAAAGTAAGTAAATGAATACCTCTCCTTA  
TGCTGCATTTACTATGTTTTACTTGGAGAAGCTTGAAATTTTCAAGGAAG

>M6-PGSC0003DMG400022404M6LRR-RLP\_4148

CTCTCCTTATGCTGCATTTACTATGTTTTACTTGGAGAAGCTTGAAATTTTCAAGGAAGATCAACAAAAG  
GGATGTTTGTGTGCGCTCTTACTGAACTAATGCATTATGAGAAAGAAACC

>M6-PGSC0003DMG400022404M6LRR-RLP\_4209

CAACAAAAGGGATGTTTGTGTGCGCTCTTACTGAACTAATGCATTATGAGAAAGAAACCATGCGAAGAT  
TCTCTTACAGTTAGTGAGACCAAATGATCATCACTCGTGGAGAAGCAGGAA

>M6-PGSC0003DMG400022404M6LRR-RLP\_427

TCAAGATGGTTTTTTGTTTGTTCACAAATCTTGAAAGCTAGTATTTTTTTTTTATAACCAGCAGAGTTGTT  
GACTATGTTTATTCAACTGAGGGGGTTAAAGCTGGAATCTTGCTGTTG

>M6-PGSC0003DMG400022404M6LRR-RLP\_4270

GCGAAGATTCTCTTACAGTTAGTGAGACCAAATGATCATCACTCGTGGAGAAGCAGGAACTGCAACGAA  
TGATCACATGACGGAGTTGATTATGTCTCAGAAAACTATCAGCAGATGAA

>M6-PGSC0003DMG400022404M6LRR-RLP\_4331

GCAACGAATGATCACATGACGGAGTTGATTATGTCTCAGAAAACTATCAGCAGATGAAGAGTCCTGAA  
TCTCACAAGAACAAGCAAGATGAAGAACGCTGGTTTGTGATTTCGCGGAGT

>M6-PGSC0003DMG400022404M6LRR-RLP\_4392

GTCCTGAATCTCACAAGAACAAGCAAGATGAAGAACGCTGGTTTGTGATTTCGCGGAGTTTTTTCTTTTT  
CTTTTTCAAAACAATAAGTAGCATAAACATAAAGAAAGAAAAATGAAATG

>M6-PGSC0003DMG400022404M6LRR-RLP\_4453

TTTCTTTTTCTTTTTCAAAACAATAAGTAGCATAAACATAAAGAAAGAAAAATGAAATGAGTCTCATGTA  
ACTTGAATGATGGTGATTAGGTTTCACAGACATAAGTTATTTGGCCAAAC

>M6-PGSC0003DMG400022404M6LRR-RLP\_4514

TTCATGTAACCTGAATGATGGTGATTAGGTTTCACAGACATAAGTTATTTGGCCAACTGGGAATGCAA  
AAGAAAAAAGAAACCATGGTATTCTTTTTTTACAATGTGATTGCTGTG

>M6-PGSC0003DMG400022404M6LRR-RLP\_4552

ACATAAGTTATTTGGCCAACTGGGAATGCAAAGAAAAAAGAAACCATGGTATTCTTTTTTTTACAAT  
GTGATTGCTGTGCTTCATCAAATAATTTAGTGTGACATTTACTATGTTG

>M6-PGSC0003DMG400022404M6LRR-RLP\_488

GCAGAGTTGTTGACTATGTTTATTCAACTGAGGGGGTTAAAGCTGGAATCTTGCTGTTGAAAATTTTGTC  
AGCGTGTGAAAAATAGGATAAAGATTTGAACTTTCAGTTGTTTTGATTT

>M6-PGSC0003DMG400022404M6LRR-RLP\_549

AATTTTGTGAGCGTGTGAAAAATAGGATAAAGATTTGAACTTTCAGTTGTTTTGATTTCAATTCAGTTTT  
GTTGAGATGGAAATGAATCCGAGCTTGAAAAACCGAGGGAATCTGTAG

>M6-PGSC0003DMG400022404M6LRR-RLP\_61

GACTGAGGTATGCAATAAAAAATAAGAAAAAATGCCAACAGCTTTTTCAATTCTTGTTCAATTCAGTTT  
GTTTTTTTCTCTTACAACCTCACGCTTTTCTCCCTGTTTTCTTGTAAATTG

>M6-PGSC0003DMG400022404M6LRR-RLP\_610

ATTCAGTTTTGTTGAGATGGAAATGAATCCGAGCTTGAAAAACCGAGGGAATCTGTAGATTTATCGAA  
CTCATCGGAGTTAACTCCGTGAGCATTCCAGATGAGGTGTTGGAGAAGGT

>M6-PGSC0003DMG400022404M6LRR-RLP\_671

TTATCGAACTCATCGGAGTTAACTCCGTGAGCATTCCAGATGAGGTGTTGGAGAAGGTGTTGTCTCTTG  
TTCAGTCTCATAAAGATAGAAATTCAGCATCACTGGTGTGCAAGGATTGG

>M6-PGSC0003DMG400022404M6LRR-RLP\_732

TGTCTCTTGTTGAGTCTCATAAAGATAGAAATTCAGCATCACTGGTGTGCAAGGATTGGTATAATGCAGA  
GCGTTGGACAAGGACTAAGCTGTTTATTGGGAATTGCTATTCAGTTACTC

>M6-PGSC0003DMG400022404M6LRR-RLP\_793

TAATGCAGAGCGTTGGACAAGGACTAAGCTGTTTATTGGGAATTGCTATTCAGTTACTCCTGAGATTGTA  
GCAAGAAGATTCCCAAAGATTAAGAGTGTACCCTTAAAGGGAAACCAAG

>M6-PGSC0003DMG400022404M6LRR-RLP\_854

GAGATTGTAGCAAGAAGATTCCCAAAGATTAAGAGTGTACCCTTAAAGGGAAACCAAGATTTTCTGAC  
TTAATTTGGTACCAGAGAATTGGGGTGCTGATATTCAGGCTTGGCTTGAT

>M6-PGSC0003DMG400022404M6LRR-RLP\_915

TTTCTGACTTTAATTTGGTACCAGAGAATTGGGGTGCTGATATTCAGGCTTGGCTTGATGTTTTTGCCAA  
AGTTTACCCTTTCTTGAGGAGTTGAGATTGAAAAGAATGGCTGTTAGTG



>M6-PGSC0003DMG400022404M6LRR-RLP\_976

TTTTGCCAAAGTTTACCCCTTCTTGAGGAGTTGAGATTGAAAAGAATGGCTGTTAGTGATGAGAGTTTG  
GAGTTTTTGGCAAATCATTCTTGATTAAAGGCTCTGTCATTGTTGAG

>M6-PGSC0003DMG400022425M6LRR-RLK\_0

CTTTTGGTTGTTGGAGATTTGTCTGTTGTTTATGTTAAAGTGAAGATCTTAGTGTGTTTTGCAGAGTGTTT  
TCTTTTGTCTGGAAGTGTGAAGCAAAGATTTGAAGGAAAAAGGACAGAG

>M6-PGSC0003DMG400022425M6LRR-RLK\_1037

CATAAATCCACATTTTTAATCCTATTATGGTATTTGTGTATATACAGGTCTATCTCTGGTAACCAGCTTACT  
GGGAGCATTCCAGAAAACATATCCTCGTTAGGGCAATTAACAGACTTG

>M6-PGSC0003DMG400022425M6LRR-RLK\_1098

ACCAGCTTACTGGGAGCATTCCAGAAAACATATCCTCGTTAGGGCAATTAACAGACTTGTGAGTTATATT  
TGACTTATCTTGATATACTTTTCTATGACCATGCTTTTGTGCCATTACA

>M6-PGSC0003DMG400022425M6LRR-RLK\_1159

AGTTATATTTGACTTATCTTGATATACTTTTCTATGACCATGCTTTTGTGCCATTACATTTAATTCCTTCTT  
TGTAGGTCGTTGAACAACAATCATCTCAATGGAGTCATTCCAGATGC

>M6-PGSC0003DMG400022425M6LRR-RLK\_122

AGAGGAAGCAGGAAATTTGTGTTCTTGGAGTGCCCTTGGTGATGATTGGTCACAAGATGTGTGGACTA  
TATATGAAGATTTTGTGTTGATTTGCAGTTTTTGTCTGTTCAAAATTGCCAG

>M6-PGSC0003DMG400022425M6LRR-RLK\_1220

TAATTCCTTCTTGTAGGTCGTTGAACAACAATCATCTCAATGGAGTCATTCCAGATGCCTTTATGCAACT  
TAAGACTTTGATTAACGTGTACTCATACTTCTTTTAGCTTTTTACCTTT

>M6-PGSC0003DMG400022425M6LRR-RLK\_1281

TTATGCAACTTAAGACTTTGATTAACGTGTACTCATACTTCTTTTAGCTTTTTACCTTTTCGCAGTGATGAA  
ACTACTATTCTTGGTGTGTTTGTATTTATGGCTTCATGCTCTTATTT

>M6-PGSC0003DMG400022425M6LRR-RLK\_1342

GCAGTGATGAACTACTATTCTTGGTGTGTTTGTATTTATGGCTTCATGCTCTTATTTTGCAGGGACTTA  
TCTGGGAACAGTTTAAAGTGGTCAGCTGCCTCCTTCAGTGGGGACTTTGT

>M6-PGSC0003DMG400022425M6LRR-RLK\_1403

CAGGGACTTATCTGGGAACAGTTTAAAGTGGTCAGCTGCCTCCTTCAGTGGGGACTTTGTCGTCCTAACT

ACCTTGATGTATTTCTCCTTGTTGGTATGATAATTAGGGAAATATTAGG

>M6-PGSC0003DMG400022425M6LRR-RLK\_1464

TCACTAACTACCTTGATGTATTTCTCCTTGTTGGTATGATAATTAGGGAAATATTAGGAAATGAAACTAC  
TTTTCTGGCTATGAGGAATGTGAGTGCTTTCCTCTCTCTAGACACTGAA

>M6-PGSC0003DMG400022425M6LRR-RLK\_1525

ATGAAACTACTTTTCTGGCTATGAGGAATGTGAGTGCTTTCCTCTCTCTAGACACTGAATAGAAGTTCAA  
ATAAGTCCTTAATTCCTTCAGAAATTTAACATAAGTTCTGCTCATAACATA

>M6-PGSC0003DMG400022425M6LRR-RLK\_1586

GAAGTTCAAATAAGTCCTTAATTCCTTCAGAAATTTAACATAAGTTCTGCTCATAACATAATTTAACTGAT  
AAATTTTGTAAGATAAATATAGTTTTTGACATTTTCATTGCATATGTAA

>M6-PGSC0003DMG400022425M6LRR-RLK\_1647

TTAAACTGATAAATTTTGTAAGATAAATATAGTTTTTGACATTTTCATTGCATATGTAAGTATTGTATGGT  
TGTGCTGTATGTTGGTTTGTCAAGATGTGTTTTCTGTGAACAAGCTAGA

>M6-PGSC0003DMG400022425M6LRR-RLK\_1708

ATTGTATGGTTGTGCTGTATGTTGGTTTGTCAAGATGTGTTTTCTGTGAACAAGCTAGAGGAATGATATT  
TGAGGATAAATACTTCACAAAGTTGATTAATTTTGTCTAGAATCTCAATTT

>M6-PGSC0003DMG400022425M6LRR-RLK\_1769

AATGATATTTGAGGATAAATACTTCACAAAGTTGATTAATTTTGTCTAGAATCTCAATTTGCAACCATTCAA  
CTTAATATACTTGGATGGTAAAAGGATGTTAACATAATTTCTCAACTGA

>M6-PGSC0003DMG400022425M6LRR-RLK\_183

GTGGACTATATATGAAGATTTTGTGTTGATTTGCAGTTTTTGCTGTTCAAATTTGCCAGGGGTTTACTGAT  
CCTCGTGATGGTATTAATAATCTCTCTGTGGTTTGAATTTTGTGTATTA

>M6-PGSC0003DMG400022425M6LRR-RLK\_1830

AACCATTCAACTTAATACTTGGATGGTAAAAGGATGTTAACATAATTTCTCAACTGAACTTGTGAATAT  
ACTTGTATTTATGGTGAATTGTGATACTCTAGTTTTGATTTTTGAATAT

>M6-PGSC0003DMG400022425M6LRR-RLK\_1891

TTGTGAATATACTTGTATTTATGGTGAATTGTGATACTCTAGTTTTGATTTTTGAATATATACTTTTGGCTC  
TATGCAGACACTTACAGAACAATCAGCTTCTGGGATCCTTGACGTTT

>M6-PGSC0003DMG400022425M6LRR-RLK\_1952

ACTTTTGGCTCTATGCAGACACTTACAGAACAATCAGCTTTCTGGGATCCTTGACGTTTTGCAAGATCTTG  
CTCTAACGGATTTGTAATCTCCTGGACTAATAAATTTTCCATCATTATA

>M6-PGSC0003DMG400022425M6LRR-RLK\_2013

CAAGATCTTGCTCTAACGGATTTGTAATCTCCTGGACTAATAAATTTTCCATCATTATAGATAATGTCATC  
AACTATGTCATTTTCTGCTCAATGTGTGCTTAAATTTGGTCACTTTCTT

>M6-PGSC0003DMG400022425M6LRR-RLK\_2074

TAATGTCATCAACTATGTCATTTTCTGCTCAATGTGTGCTTAAATTTGGTCACTTTCTTGTCTGCAGAAAC  
ATAGAGAATAATTTGTTCTCTGGGCCTATACCACCAAATTGTTGAGC

>M6-PGSC0003DMG400022425M6LRR-RLK\_2135

TCTGCAGAAACATAGAGAATAATTTGTTCTCTGGGCCTATACCACCAAATTGTTGAGCATCCCGACCTT  
CAGGTAAAAACCTAGGAATTTTTTGGCCTCTTTAGTTTGAGTTTTCTTT

>M6-PGSC0003DMG400022425M6LRR-RLK\_2196

CCCGACCTTCAGGTAAAAACCTAGGAATTTTTTGGCCTCTTTAGTTTGAGTTTTCTTTAAGCTGATGAA  
ATCCATTTTATTCTATCTTCAACTTCTGTAATATGAAATGGAGTATCTT

>M6-PGSC0003DMG400022425M6LRR-RLK\_2257

AGCTGATGAAATCCATTTTATTCTATCTTCAACTTCTGTAATATGAAATGGAGTATCTTATTTCTCTTTGTT  
TTAATTTGGCTTCATCTCTCTGAGTACTTCCATCAATTTAAAATTGGA

>M6-PGSC0003DMG400022425M6LRR-RLK\_2318

TTCTCTTTGTTTTAATTTGGCTTCATCTCTCTGAGTACTTCCATCAATTTAAAATTGGATAAGCATTGGTCA  
CTGTGGTAATGGGACAATGTGACTTAAAAAATTTAAAACAAAAGGGAG

>M6-PGSC0003DMG400022425M6LRR-RLK\_2379

AGCATTGGTCACTGTGGTAATGGGACAATGTGACTTAAAAAATTTAAAACAAAAGGGAGTTGTCTCTTT  
GGCTAGACTCTAAAGATTGCACTATTTAGATCTAATTTCAATGCCAATTGT

>M6-PGSC0003DMG400022425M6LRR-RLK\_244

GTTTACTGATCCTCGTGATGGTATTAATAATCTCTCTGTGGTTTGAATTTTGTGTATTATACGGTATAGAA  
TGTCTCAATAGTTTGAATTTGTTATCTTTTCTATTAGCTTTAATGAAAT

>M6-PGSC0003DMG400022425M6LRR-RLK\_2440

GTCTCTTTGGCTAGACTCTAAAGATTGCACTATTTAGATCTAATTTCAATGCCAATTGTGCTTGCAATGAA  
TTTTTATGGGAAGCCAGTATAACTGTTGTTTCTAATAAACTTGACACCA

>M6-PGSC0003DMG400022425M6LRR-RLK\_2501

TTGCAATGAATTTTTATGGGAAGCCAGTATAACTGTTGTTTCTAATAAACTTGACACCATTCCATGAGCTG  
ACCATGAAAATGTTGGTTTTACAAGTTTTAGTTTCTATAACTTTGTCAT

>M6-PGSC0003DMG400022425M6LRR-RLK\_2562

CCATGAGCTGACCATGAAAATGTTGGTTTTACAAGTTTTAGTTTCTATAACTTTGTCATGCATCGATCTGA  
TAAATAAATCAGTACACTGGCTGATAAATGGGTAAAGTAGCAAACCTGA

>M6-PGSC0003DMG400022425M6LRR-RLK\_2623

ATCGATCTGATAAATAAATCAGTACACTGGCTGATAAATGGGTAAAGTAGCAAACCTGAAGATATGGCA  
TGTAACGATATTACTAAATAGTATGGTTATATGGCATGTAATGATATTACT

>M6-PGSC0003DMG400022425M6LRR-RLK\_2684

ATATGGCATGTAACGATATTACTAAATAGTATGGTTATATGGCATGTAATGATATTACTAAATAGTATGG  
TCTTTTTGATGAAGACTGCATAGTACACCTTATGAACCAGTTCTTTACTC

>M6-PGSC0003DMG400022425M6LRR-RLK\_2745

ATAGTATGGTCTTTTTGATGAAGACTGCATAGTACACCTTATGAACCAGTTCTTTACTCCATCAATCAACC  
ATCCTCAATCCCAAATTAATTGTGGATGACTATATGAATCCTCTTTATC

>M6-PGSC0003DMG400022425M6LRR-RLK\_2806

TCAATCAACCATCCTCAATCCCAAATTAATTGTGGATGACTATATGAATCCTCTTTATCCGTTCTACCTTAT  
GCATCATCCTACATGTCACCTTAACTTTATCTAAAATTCTATTTTGT

>M6-PGSC0003DMG400022425M6LRR-RLK\_2867

TTCTACCTTATGCATCATCCTACATGTCACCTTAACTTTATCTAAAATTCTATTTTGTGCAAGATTGATAA  
TAGATATTTAGTTGATGTTTGTGTGAAAGCTTTTTGGAGTTCTTTT

>M6-PGSC0003DMG400022425M6LRR-RLK\_2928

AAGATTGATAATAGATATTTAGTTGATGTTTGTGTGAAAGCTTTTTGGAGTTCTTTTAAAGACCTTATT  
GAAACCATGTTTGCTTAAGTTCTTATAAGAAAATTTTCATTTTCATCAAT

>M6-PGSC0003DMG400022425M6LRR-RLK\_2989

AGACCTTATTGAAACCATGTTTGTCTTAAGTTCTTATAAGAAAATTTTCATTTTCATCAATGAAGAAGGGGG  
TTTGAGGGATTTTCATTAATAAACAATTCTTCTTCCACTTATAAAAAGTGC

>M6-PGSC0003DMG400022425M6LRR-RLK\_305

CGGTATAGAATGTCTCAATAGTTTGAATTTGTTATCTTTTCTATTAGCTTTAATGAAATTACAGTTTGATGT

TTTGTGTAAAAGAAAGGTGAAGTTTATGACTTTGTGTACTTTTCTTGC

>M6-PGSC0003DMG400022425M6LRR-RLK\_3050

AGAAGGGGGTTTGAGGGATTTTCATTA AAAACAATTCTTCTCCACTTATAAAAAGTGCTCACAAATCTT  
CAAAAGATCAACTGTGTAAACACATTTGTTTTGCACATCTACAAAATAT

>M6-PGSC0003DMG400022425M6LRR-RLK\_3111

ACAAATCTTCAAAGATCAACTGTGTAAACACATTTGTTTTGCACATCTACAAAATATTTCTCCAGAACC  
ATTTGATTGGTTAAAATGAAATTACAATGGATAACCAATCAACATGATG

>M6-PGSC0003DMG400022425M6LRR-RLK\_3172

CTCCAGAACCATTTGATTGGTTAAAATGAAATTACAATGGATAACCAATCAACATGATGCATTTTTGTGA  
TAGACTAGCCTTAGTCATGGCCTCAATTGTTTAGTTGATACTCTTTGGGG

>M6-PGSC0003DMG400022425M6LRR-RLK\_3233

TTTTTGTGATAGACTAGCCTTAGTCATGGCCTCAATTGTTTAGTTGATACTCTTTGGGGGAAGCGAACTA  
TGGTAATCTTTTCTTCTTCATGAAAGGTTTCAGTTGTATACTTGTAATTT

>M6-PGSC0003DMG400022425M6LRR-RLK\_3294

AGCGAACTATGGTAATCTTTTCTTCTTCATGAAAGGTTTCAGTTGTATACTTGTAATTTTGTTCCTTACAT  
GGTGAAATCTATGTTTTTATCAGACGTGCAGGGAATCCTTTTAATAC

>M6-PGSC0003DMG400022425M6LRR-RLK\_3355

TTGCCTTACATGGTGAAATCTATGTTTTTATCAGACGTGCAGGGAATCCTTTTAATACTACTATCATCCCT  
TCACCACCATGATAACGCCTTCTCCAGCACCATTTGCGCTTCTCCA

>M6-PGSC0003DMG400022425M6LRR-RLK\_3477

TTTAGCCCCTTCACTGCCATATATTGTACCGCCAGGACAGGAATTACAGCCCTCTGGAAGGCAAAGAGT  
AGTAATTCAACCAAACATGTCAAATTGATTGCTATAGCAGGATTAGTATC

>M6-PGSC0003DMG400022425M6LRR-RLK\_3538

CAAAAGAGTAGTAATTCAACCAAACATGTCAAATTGATTGCTATAGCAGGATTAGTATCCCTTGTCATAC  
TTGGATTGGGTGTTTGCCTATTGATGTCACGATTCTGCAAAGAAGAAGA

>M6-PGSC0003DMG400022425M6LRR-RLK\_3599

TTGTCATACTTGGATTGGGTGTTTGCCTATTGATGTCACGATTCTGCAAAGAAGAAGAGAGACCCAAA  
AAGAAACCAAGAGACATGAAACATATGATCATAGTTTGCCCAAGGCAAGG

>M6-PGSC0003DMG400022425M6LRR-RLK\_366

CAGTTTGATGTTTTGTGTAAGAAAGGTGAAGTTTATGACTTTGTGTACTTTTCTTGCTCTCCAGTATTT  
GCCATAAATAGTTTATATACTAGTCTGGGCTACCCCTTGCTTCCTGGAT

>M6-PGSC0003DMG400022425M6LRR-RLK\_3660

GACCCAAAAGAAACCAAGAGACATGAAACATATGATCATAGTTTGCCCAAGGCCAAGGGTAACCCTAA  
GCATGATCAATCCCTGCAAAAACCATATTATGATGCAGAAAAAGGTAAATA

>M6-PGSC0003DMG400022425M6LRR-RLK\_3721

AACCCTAAGCATGATCAATCCCTGCAAAAACCATATTATGATGCAGAAAAAGGTAAATAGTTCATATGTG  
TACTTTCTTCTTATAGATTTATGTTTATCGTCAGTTACCTGTTGTTTTTA

>M6-PGSC0003DMG400022425M6LRR-RLK\_3782

TCATATGTGTACTTTCTTCTTATAGATTTATGTTTATCGTCAGTTACCTGTTGTTTTTAATGGCATTATGAT  
GACAAAATGGATATGTCCAAAAGAAGCAGGTTTGAGGCCAGTGGCTGG

>M6-PGSC0003DMG400022425M6LRR-RLK\_3843

GGCATTATGATGACAAAATGGATATGTCCAAAAGAAGCAGGTTTGAGGCCAGTGGCTGGAAATGGGAA  
AGCTCAGGGTAGGAACATGTCAATGAATACTTCAGAGGCTGTGCAGCAGAAA

>M6-PGSC0003DMG400022425M6LRR-RLK\_3904

ATGGGAAAGCTCAGGGTAGGAACATGTCAATGAATACTTCAGAGGCTGTGCAGCAGAAAGACGTGAAG  
AGCACTATATCATATACAGACGATGAGCTGGGCTCGGAGATGGAGTCAATGA

>M6-PGSC0003DMG400022425M6LRR-RLK\_3965

CGTGAAGAGCACTATATCATATACAGACGATGAGCTGGGCTCGGAGATGGAGTCAATGATATCAGATG  
TTCTTCCACCACCGCCACCACCTTTTCTTCAAACCTTTTCTGCTGAGAGGAT

>M6-PGSC0003DMG400022425M6LRR-RLK\_4026

TCAGATGTTCTTCCACCACCGCCACCACCTTTTCTTCAAACCTTTTCTGCTGAGAGGATGGTTGTAATCC  
AATTGTTCCACAATTACCTCAGGCAAGCATGCTATGAAGAATGTAAAC

>M6-PGSC0003DMG400022425M6LRR-RLK\_4087

TTGTAAATCCAATTGTTCCACAATTACCTCAGGCAAGCATGCTATGAAGAATGTAAACTCTGCAGAGTT  
CTTACCATTGCCTCTCTTTCAGCAGTATACAAATAGCTTTTCTCAAGATA

>M6-PGSC0003DMG400022425M6LRR-RLK\_4148

TGCAGAGTTCTTACCATTGCCTCTCTTTCAGCAGTATACAAATAGCTTTTCTCAAGATAATCTTATTGGAG  
GAGGCATGCTTGAACAGTCTACAGAGCTGAGTCTCCAAAAAAGTAAG

>M6-PGSC0003DMG400022425M6LRR-RLK\_4209

CTTATTGGAGGAGGCATGCTTGGAACAGTCTACAGAGCTGAGTCTCCCAAAAAAGTAAGCATCTTTATTT  
TCACGAGCTTCAAATCAGTAAATACTGTGTGCTTGCATGCATTGTGACTG

>M6-PGSC0003DMG400022425M6LRR-RLK\_427

TCCAGTATTTGCCATAAATAGTTTATATACTAGTCTGGGCTACCCCTTGCTTCCTGGATGGGTGCCATATG  
GATTAGACCCTTGTGGTGATCTATGGCATGGTGTACTCTGTGTCAATTC

>M6-PGSC0003DMG400022425M6LRR-RLK\_4270

TCTTTATTTTTCACGAGCTTCAAATCAGTAAATACTGTGTGCTTGCATGCATTGTGACTGCATCAGTACCAC  
ATCTTGAACCTTCATTTCACTTTTTTAAAGGTGGAAATTACTCGTTATTT

>M6-PGSC0003DMG400022425M6LRR-RLK\_4331

TCAGTACCACATCTTGAACCTTCATTTCACTTTTTTAAAGGTGGAAATTACTCGTTATTTTTTTATTTAAAGC  
ATGGTTTTCTGTGACAGACATTATATCTATTTTACATTGAACTTGTAG

>M6-PGSC0003DMG400022425M6LRR-RLK\_4392

TTATTTAAAGCATGGTTTTCTGTGACAGACATTATATCTATTTTACATTGAACTTGTAGATGTTTTGTGGG  
TCTGTAATGTTTGACTCGAGTTTTGCATAATAGAAGTAGTCCAACCTTG

>M6-PGSC0003DMG400022425M6LRR-RLK\_4453

GTTTTGTGGGTCTGTAATGTTTGACTCGAGTTTTGCATAATAGAAGTAGTCCAACCTTGTAGATGGCAAC  
AGTTTCCATTAGTAGACTGTGTAGATATACCTGACATGCCTCCTGATTCA

>M6-PGSC0003DMG400022425M6LRR-RLK\_4514

GATGGCAACAGTTTCCATTAGTAGACTGTGTAGATATACCTGACATGCCTCCTGATTCATTAATAGTTT  
CCTGTTTTACAATAACCACTTGTACTTGTGCATGTTTGTATATAACCTA

>M6-PGSC0003DMG400022425M6LRR-RLK\_4575

AAATTAGTTTCCTGTTTTACAATAACCACTTGTACTTGTGCATGTTTGTATATAACCTATTTAGTTGCCGTA  
CAAGGGTAGAAGGTGCTGAGACTTTGCTATTTCTTGATGCCTTTTGT

>M6-PGSC0003DMG400022425M6LRR-RLK\_4636

TAGTTGCCGTACAAGGGTAGAAGGTGCTGAGACTTTGCTATTTCTTGATGCCTTTTGTGTTTGTAGCTATT  
GGCGGTCAAGAACTAGACACTGCTATGACCAAGCGTCAAAGTGATCAA

>M6-PGSC0003DMG400022425M6LRR-RLK\_4697

GTTAGCTATTGGCGGTCAAGAACTAGACACTGCTATGACCAAGCGTCAAAGTGATCAAGAATTTGTTG

AAATGGTTTCCAATATCTCTAAACTTCAGCATGAAAACATTGTCAAACCTTG

>M6-PGSC0003DMG400022425M6LRR-RLK\_4758

ATTTGTTGAAATGGTTTCCAATATCTCTAAACTTCAGCATGAAAACATTGTCAAACCTTGTTGGGTTACTGTT  
CAGAGCATGGACAACGGTTGCTTGTCTACGAGTATTGTAGAAATGGTAC

>M6-PGSC0003DMG400022425M6LRR-RLK\_4819

GGTACTGTTTCAGAGCATGGACAACGGTTGCTTGTCTACGAGTATTGTAGAAATGGTACCCTCCACGAA  
GCATTACACTTAGATGATCAGATCCACAGAAAACCTTCTGGAGTACACGT

>M6-PGSC0003DMG400022425M6LRR-RLK\_488

GTGCCATATGGATTAGACCCTTGTGGTGATCTATGGCATGGTGTACTCTGTGTCAATTCCAATGTAACCTG  
GAATGTAAGATTTCTTCTTTTTTTTTTTTTGCTTGTGTTTCTCACATGG

>M6-PGSC0003DMG400022425M6LRR-RLK\_4880

TCCACGAAGCATTACACTTAGATGATCAGATCCACAGAAAACCTTCTGGAGTACACGTGTACGCATTGC  
ACTTCAAGCAGCAAGAGCATTAGAGTAAGTACGAAAAAAGCTAAATGAT

>M6-PGSC0003DMG400022425M6LRR-RLK\_4941

ACGCATTGCACTTCAAGCAGCAAGAGCATTAGAGTAAGTACGAAAAAAGCTAAATGATATTAGTTTAG  
AAGTGCTTGTAACCTGTTTTAATGAATTGTGATGGTTAAATAAATTATAAA

>M6-PGSC0003DMG400022425M6LRR-RLK\_5002

TAGTTTAGAAGTGCTTGTAACCTGTTTTAATGAATTGTGATGGTTAAATAAATTATAAATTGGCTGTTAAA  
GTCAGCTCTGCATGTTTCCCGGGCTTAATGTTTGCTACACCACAATTAA

>M6-PGSC0003DMG400022425M6LRR-RLK\_5063

GGCTGTTAAAGTCAGCTCTGCATGTTTCCCGGGCTTAATGTTTGCTACACCACAATTAATTTGTAGTTTT  
ATCCTTAGCTTGTAACCGTTTAGAGATTGAGTTGCTTCCAGTTTCACTG

>M6-PGSC0003DMG400022425M6LRR-RLK\_5124

TTGTAGTTTTATCCTTAGCTTGTAACCGTTTAGAGATTGAGTTGCTTCCAGTTTCACTGAAAGGTACTTGC  
ATGAAGTTTGTCAACCACCTATTGTCCACCTGAACTTCAAGTCCACTAA

>M6-PGSC0003DMG400022425M6LRR-RLK\_5185

AGTACTTGTCATGAAGTTTGTCAACCACCTATTGTCCACCTGAACTTCAAGTCCACTAATGTTCTCCTTGA  
TGATGAACTTGCTGTACATATGTCAGATTGTGGTTTGGCACCTCTGATG

>M6-PGSC0003DMG400022425M6LRR-RLK\_5246



TTCTCCTTGATGATGAACTTGCTGTACATATGTCAGATTGTGGTTTGGCACCTCTGATGTCATCTGATTCC  
ATAAGACAGGTAATCCCTTCAATCCTCAAACCTAGAAACAAGAATAACAG

>M6-PGSC0003DMG400022425M6LRR-RLK\_5307

ATCTGATTCCATAAGACAGGTAATCCCTTCAATCCTCAAACCTAGAAACAAGAATAACAGGAGATTTGACT  
TGCAAACCTGTAGTTATTCTGAATTCGTAATGGGAAAATTTATCCTTTTGG

>M6-PGSC0003DMG400022425M6LRR-RLK\_5368

GATTTGACTTGCAAACCTGTAGTTATTCTGAATTCGTAATGGGAAAATTTATCCTTTTGGACTGTGATCTTC  
ATTGAACTTGTAACACTTCCTTCTCAACTTCTAGAACTGCATCATT

>M6-PGSC0003DMG400022425M6LRR-RLK\_5429

TGTGATCTTCATTGAACTTGTAACACTTCCTTCTCAACTTCTAGAACTGCATCATTATTCATTAGTATGA  
AAACTAGGTGCCAATTGGCTGCTAAAAATTGGTGCATTCTGTTTAGAA

>M6-PGSC0003DMG400022425M6LRR-RLK\_549

ATGTAACCTGGAATGTAAGATTTCTTCTTTTTTTTTTTTTGCTTGTGTTTCTCACATGGTTTGTATACTTTAT  
AATAGATTTCTTTTCTTTTTTTGGCAGAGTACTAAATGATTCAAATT

>M6-PGSC0003DMG400022425M6LRR-RLK\_5490

CATTAGTATGAAAACCTAGGTGCCAATTGGCTGCTAAAAATTGGTGCATTCTGTTTAGAAATGGTTGTATG  
TTTCTATTTGAGGGGATTAATGAAAGGACAAGACCTGGTATTTCTGC

>M6-PGSC0003DMG400022425M6LRR-RLK\_5551

GGTTGTATGTTTCTATTTGAGGGGATTAATGAAAGGACAAGACCTGGTATTTCTGCTAATTTTGGTT  
TGCATCAAAAAGCTGTCCATCTCATATTGCATTTATCGATGAATAAAGTG

>M6-PGSC0003DMG400022425M6LRR-RLK\_5612

ATTTTGGTTTGCATCAAAAAGCTGTCCATCTCATATTGCATTTATCGATGAATAAAGTGTTGATAACTTCA  
GTATAACTTTGAGTTGCAAGGATCCGGCTATGGTGTCTCCTGAACTTGAA

>M6-PGSC0003DMG400022425M6LRR-RLK\_5673

GATAACTTCAGTATAACTTTGAGTTGCAAGGATCCGGCTATGGTGTCTCCTGAACTTGAATTGGGAAACTA  
TACTTGTGAGAGTGATGTTTATAGCTTTGGAGTTGTTATGCTAGAACTTC

>M6-PGSC0003DMG400022425M6LRR-RLK\_5734

GGGAAACTATACTTGTGAGAGTGATGTTTATAGCTTTGGAGTTGTTATGCTAGAACTTCTCACAGGAAGA  
CAATCTTAAGACAGGTTAATTTCTTTTCTGACAGATATATTTTAACACCT

>M6-PGSC0003DMG400022425M6LRR-RLK\_5795

ACAGGAAGACAATCTTAAGACAGGTTAATTTCTTTTCTGACAGATATATTTTAACACCTTGCTAGTTGTTA  
TTGTTGCAACTACATATTTTTCTAAAATTATACGACTCCTGACTTTGAG

>M6-PGSC0003DMG400022425M6LRR-RLK\_5856

CTAGTTGTTATTGTTGCAACTACATATTTTTCTAAAATTATACGACTCCTGACTTTGAGCCATTAAAATAT  
GATTTCCAGGTCCCGGCCTAGAGGGGAGCAGTTGCTGGTTTCGATGGGC

>M6-PGSC0003DMG400022425M6LRR-RLK\_5978

TTCCACGGCTGCATGATATAGATGCATTATCAAGAATGGTTGATCCTTCCCTAAATGGTTGTTATCCATCC  
AAGTCTTTGTCTCGGTTTGCTGACATAATTCCTTGTGTATTCAGGTTA

>M6-PGSC0003DMG400022425M6LRR-RLK\_6039

TTATCCATCCAAGTCTTTGTCTCGGTTTGCTGACATAATTCCTTGTGTATTCAGGTTAGTCTCTTCCTTTA  
CAGGTTCCCTCATAGCTCTTTAATGAAGTATAAAAATCCCACTTACAGTT

>M6-PGSC0003DMG400022425M6LRR-RLK\_610

TGTATACTTTATAATAGATTTCTTTTCTTTTTTTGGCAGAGTACTAAATGATTCAAATTTGGGAGGTGAAT  
TAAGTGAGGGCATAGGAAGCTTTGCTTCAATCATACAAATGTTGGTACC

>M6-PGSC0003DMG400022425M6LRR-RLK\_6100

CTCTTCCTTTACAGGTTCTCATAGCTCTTTAATGAAGTATAAAAATCCCACTTACAGTTTTGAGTTACCACG  
TGTGAGAAACTTTACTGGTTATTCTTCATAAAAATGAGACTTTAATCCA

>M6-PGSC0003DMG400022425M6LRR-RLK\_6161

GAGTTACCACGTGTGAGAACTTTACTGGTTATTCTTCATAAAAATGAGACTTTAATCCAGTTAAATCCAG  
GGATTTGGTAAATGTCTGTTTTGGATAAACCTACTTTACAGGCTGCATA

>M6-PGSC0003DMG400022425M6LRR-RLK\_6222

TAAATTCAGGGATTTGGTAAATGTCTGTTTTGGATAAACCTACTTTACAGGCTGCATATAACTATGTCCA  
ACAAGAAAACAACTCACATTTGAGCTATTTAGGCTTAAGTAAATTTTA

>M6-PGSC0003DMG400022425M6LRR-RLK\_6283

ACTATGTCCAACAAGAAAACAACTCACATTTGAGCTATTTAGGCTTAAGTAAATTTTAGAATCAACTCA  
GTCTAGGGAGAGAAGAGGTTCTTTGTTAGTAAATTCGCCATTCTGCTATA

>M6-PGSC0003DMG400022425M6LRR-RLK\_6344

ATCAACTCAGTCTAGGGAGAGAAGAGGTTCTTTGTTAGTAAATTCGCCATTCTGCTATAGCTAAAAACA

CACACATAATATTTGAACTGATGTTTTTCGAGCTGTCGCCTTTCATACTT

>M6-PGSC0003DMG400022425M6LRR-RLK\_6405

TAAAAAACACACACATAATATTTGAACTGATGTTTTTCGAGCTGTCGCCTTTCATACTTTTCTCATGTCTTC  
TTACTTTTTTGTGGGAAGTCGGAACCTGAATTCAGGCCACCAATGTC

>M6-PGSC0003DMG400022425M6LRR-RLK\_6466

CTCATGTCTTCTTACTTTTTTGTGGGAAGTCGGAACCTGAATTCAGGCCACCAATGTCCGAAATCGTGCA  
GAATCTTCTGCAGATGATCTAAAGATATCATCAAGACTGAGTCTTTTAG

>M6-PGSC0003DMG400022425M6LRR-RLK\_6527

AAATCGTGCAGAATCTTCTGCAGATGATCTAAAGATATCATCAAGACTGAGTCTTTTAGCATAGATGGCA  
AGGATTCAAGGAGAAATCTTACACAACATTTTCATTAAAGCTCAAATAT

>M6-PGSC0003DMG400022425M6LRR-RLK\_6588

TAGATGGCAAGGATTCAAGGAGAAATCTTACACAACATTTTCATTAAAGCTCAAATATTGTGTGCTAAC  
ATGAGTAATGTAATGTAAATAGCATTATTATGTTTTGCAACATTTTCATG

>M6-PGSC0003DMG400022425M6LRR-RLK\_6649

TGTGCTAACATGAGTAATGTAATGTAAATAGCATTATTATGTTTTGCAACATTTTCATGTGTGATTCTTTTT  
GACATATCTATGAAAAAGTAGAAAAAGACTCTCATTCTTTTAGTGTA

>M6-PGSC0003DMG400022425M6LRR-RLK\_671

GGAGGTGAATTAAGTGAGGGCATAGGAAGCTTTGCTTCAATCATACAAATGTTGGTACCATCTTATCTT  
CATCATTGCATTGATTTAACTTATGTTGCTGAAATTTGCCTTGTCATTTG

>M6-PGSC0003DMG400022425M6LRR-RLK\_6710

TGATTCTTTTTGACATATCTATGAAAAAGTAGAAAAAGACTCTCATTCTTTTAGTGTAATCGAGGAGTTTG  
TAATATATTATCAGCCAATTCTTTATGCAAGTTTTGTGATCATTGAAG

>M6-PGSC0003DMG400022425M6LRR-RLK\_732

CTTTATCTTCATCATTGCATTGATTTAACTTATGTTGCTGAAATTTGCCTTGTCATTTGGTTCTGTGCACTTT  
GTCATTCCCTGCATCATTGGCACCCTATTACATTGTTTAATTCTA

>M6-PGSC0003DMG400022425M6LRR-RLK\_793

TCTGTGCACTTTGTCATTCCCTGCATCATTGGCACCCTATTACATTGTTTAATTCTATGGATTTAGTTAA  
CTGCTACGTATTAATGTCTACGCTTTGTGTAATGATCAAACCAGAGA

>M6-PGSC0003DMG400022425M6LRR-RLK\_854

GATTTAGTTAACTGCTACGTATTAATGTCTACGCTTTGTGTAATGATCAAACCAGAGATCTCAGCAACA  
ACCATATTGGAGGCAGTATACCATCCAATTTGCCTGTCACCCTCAAACC

>M6-PGSC0003DMG400022425M6LRR-RLK\_915

TCAGCAACAACCATATTGGAGGCAGTATACCATCCAATTTGCCTGTCACCCTCAAACCTTGTAAGTTAA  
TAATCTTTGTCCTTACTGAGCTTCTCACCCTTTATAAGTTATTTGCTC

>M6-PGSC0003DMG400022425M6LRR-RLK\_976

GTAAGTTAATAATCTTTGTCCTTACTGAGCTTCTCACCCTTTATAAGTTATTTGCTCCACATAAATCCAC  
ATTTTTAATCCTATTATGGTATTTGTGTATATACAGGTCTATCTCTGG

>M6-PGSC0003DMG400022426M6G-LecRK\_1159

AGTGAACAAGTAATTAGGGACAGAGGAAATAAATAAATAAGCCTTTTTTTTCTTTCCAACCAATAAGGTT  
TCATCTTCCTCACACCCACCACCTTCTCTGCCACAACCCACCCTTAC

>M6-PGSC0003DMG400022426M6G-LecRK\_122

TTGTAAGCAAACATATTTGATTTCTAAAAAACTGCTACCTTCAATTGTTCTTTTGATCATCAATTGGTTTCG  
TTTTTGCTAATGTTGTGATTTTCTACTTGTTTTGCAAGATCATAGTG

>M6-PGSC0003DMG400022426M6G-LecRK\_1220

AATAAGGTTTCATCTTCCTCACACCCACCACCTTCTCTGCCACAACCCACCCTTACGCCTCGAACCCCC  
CACCTGCACCTCTCTTTCCCTATTTGGAACCCTGCCGCCACCCACAC

>M6-PGSC0003DMG400022426M6G-LecRK\_1281

CTCGAACCCCCACCTGCACCTCTCTTTCCCTATTTGGAACCCTGCCGCCACCCACACTTGCCTCACCCCT  
TTCTTCTTCTTCTCGAGCACCCGTCCTGCCACGTTTTTTCTTCTTT

>M6-PGSC0003DMG400022426M6G-LecRK\_1342

GCCTCACCCCTTCTTCTTCTTCTCGAGCACCCGTCCTGCCACGTTTTTTCTTCTTTTCAAACACTCCC  
ACACATTCCTTCATTTCAAATTATTCTTGCTTATTCTTAGAAATGAT

>M6-PGSC0003DMG400022426M6G-LecRK\_1403

CAAACACTCCACACATTCCTTCATTTCAAATTATTCTTGCTTATTCTTAGAAATGATGAATAGGAAAAA  
AAATGAAAAAACCAACAACCTATTATTGCTTCAAGATCTTACTTTTGGA

>M6-PGSC0003DMG400022426M6G-LecRK\_1464

ATAGGAAAAAAATGAAAAACCAACAACCTATTATTGCTTCAAGATCTTACTTTTGGAAGGGTTGTTGA  
TTGTGATGAACTTGAAGTTTTTTAATAAAAATAATATAATTTCTTCATC

>M6-PGSC0003DMG400022426M6G-LecRK\_1525

GGTTGTTGATTGTGATGAACTTGAAGTTTTTTTAAATAAAAATAATATAATTTCTTCATCTCAAATTAGTTTT  
TTAATTTGTACTCCTATTATTTATTTATTTTGATAATGTGCTTTAAA

>M6-PGSC0003DMG400022426M6G-LecRK\_1586

AAATTAGTTTTTTAATTTGTACTCCTATTATTTATTTATTTTGATAATGTGCTTTAAAAATTGAATGTTTT  
TAGTCTTGATCCATAGAGTTTGATTTATTTTATAATCTTAGATT

>M6-PGSC0003DMG400022426M6G-LecRK\_1647

TTGAATGTTTTCTAGTCTTGATCCATAGAGTTTGATTTATTTTATAATCTTAGATTAATTCTCAATTTTT  
TTTCTATTTTTTACCTTTCTAAAATTGTATAAATAAAAAGAAACAAA

>M6-PGSC0003DMG400022426M6G-LecRK\_183

AATTGGTTTCGTTTTTGTCTAATGTTGTGATTTTCTACTTGTGTTTGCAAGATCATAGTGACGCCATTGTT  
GAATTGGAATATCCGCTTCGAAATCATATTGGGCATTGCTCGTGGACT

>M6-PGSC0003DMG400022426M6G-LecRK\_2257

GTTTTTTTCATTTATTTTTCATGTAATTTTCATATTTAAAATATTATTAGTTGGTATAAGTTTCTTCTCAATTG  
AATATACTAGAAGTGACGTTTGTGCGAAACTTCCCCTTCTAATAATG

>M6-PGSC0003DMG400022426M6G-LecRK\_244

CGCCATTGTTGAATTGGAATATCCGCTTCGAAATCATATTGGGCATTGCTCGTGGACTTCTTTATCTACA  
CCACGACTCCAGATTACGTATCATTTCATAGAGATCTAAAAACGGGCAAT

>M6-PGSC0003DMG400022426M6G-LecRK\_2806

TATAGCATAAGGATGTTTTTGACCAAACTTTGATATTGTTTCCCGGTAGTATTTTTCCCAATTGAGTTG  
TGCTATCATGGGCCGAGCCGCTTTTACCCGAAAATTATGCGGTGAATAG

>M6-PGSC0003DMG400022426M6G-LecRK\_2867

AATTGAGTTGTGCTATCATGGGCCGAGCCGCTTTTACCCGAAAATTATGCGGTGAATAGAGGTAAATG  
TTAATTATTATGAATATATATTTAATTTTGTATATTATTCACCTAACTAAA

>M6-PGSC0003DMG400022426M6G-LecRK\_2928

GTTAAATGTTAATTATTATGAATATATATTTAATTTTGTATATTATTCACCTAACTAAAAGAAAATTTGCA  
AATCCTCGCCACAGGCGTTTACTGATCATGTATTTCATTCATCTACTCA

>M6-PGSC0003DMG400022426M6G-LecRK\_305

TTTATCTACACCACGACTCCAGATTACGTATCATTTCATAGAGATCTAAAAACGGGCAATATTTTATTAGAC

GAAGAGATGAATGCCAAAATATCAGATTTAGGCTTGGCCAGGAATGTTG

>M6-PGSC0003DMG400022426M6G-LecRK\_3172

GTGATATACAGCGGCTATCTTGCACCAGAATATGCATTGGAAGGACTTTTTTCAATCAAGTCTGATGTTT

TTGCTTTTGGAGTGGTTGTTACTGGAAATCATTAGTGGAAACAAAACTTG

>M6-PGSC0003DMG400022426M6G-LecRK\_3233

CTGATGTTTTGCTTTTGGAGTGGTTGTTACTGGAAATCATTAGTGGAAACAAAACTTGGATGTTCTTGA

AGACACAAACCTCTTGGGTCATGTAAGTACCAAATACTTTCTCTATTTA

>M6-PGSC0003DMG400022426M6G-LecRK\_3294

TGTTCTTGAAGACACAAACCTCTTGGGTCATGTAAGTACCAAATACTTTCTCTATTTAGAACATGTAATC

TTAAGACATAAACGAAATGTGAAGATTGACATATAAAGTAGGCCTTCTG

>M6-PGSC0003DMG400022426M6G-LecRK\_3355

ACATGTAATCTTAAGACATAAACGAAATGTGAAGATTGACATATAAAGTAGGCCTTCTGTCCCAATTTAT

ATGAATATTGGGCATCGTTGATAACTCGAAATTAATATAATTACAGGCT

>M6-PGSC0003DMG400022426M6G-LecRK\_3416

CCAATTTATATGAATATTGGGCATCGTTGATAACTCGAAATTAATATAATTACAGGCTTGGAAACTATG

GATGGAAAATAAGGCATTGGACATAATGGAACAAAGTCTAGTGGATACAT

>M6-PGSC0003DMG400022426M6G-LecRK\_3477

GAAACTATGGATGGAAAATAAGGCATTGGACATAATGGAACAAAGTCTAGTGGATACATTCAATGAAAT

TGAAGTAGTAAAGTGCATAAACATAGAACTTTTATGTGTGCAAGAAGATCC

>M6-PGSC0003DMG400022426M6G-LecRK\_3538

AATGAAATTGAAGTAGTAAAGTGCATAAACATAGAACTTTTATGTGTGCAAGAAGATCCAGGTGATAGG

CCAATTATGTCAAATGTGATAATTATGCTTGGAAAGTATAGCATGCCTCTT

>M6-PGSC0003DMG400022426M6G-LecRK\_3599

GTGATAGGCCAATTATGTCAAATGTGATAATTATGCTTGGAAAGTATAGCATGCCTCTTCCAAGACCCAA

TCAACCAGCTTATGTCACAAGGAAAAATTACACAATAGGAGCAAGCACAT

>M6-PGSC0003DMG400022426M6G-LecRK\_366

TTTATTAGACGAAGAGATGAATGCCAAAATATCAGATTTAGGCTTGGCCAGGAATGTTGAAGGCAAAAA

TATTGATGCTAAGACGCAAAAAGTTGCCGGAAGTGTAGTAAGTATATATATG

>M6-PGSC0003DMG400022426M6G-LecRK\_3782

ATGAGTTGACCATCACTGATATGCAAGGCCGATAAATATTATATAATAGTAGTAAGTTTTGCACGATATG  
GACATGTTAAATACGTATTCTAAGCTTAGTGTGAATGACAATATTTATGT

>M6-PGSC0003DMG400022426M6G-LecRK\_4026

TTAGCATATATTGAATGTAAATATAGTAATTTGTATATTATGATAAATATAGGGCTAATAGGTTAGGGTT  
AGCACTACTATTGTCGACTATTCTCTTGTATGGAGCACACAATTGAAGCA

>M6-PGSC0003DMG400022426M6G-LecRK\_4087

GTTAGGGTTAGCACTACTATTGTCGACTATTCTCTTGTATGGAGCACACAATTGAAGCAGATATGTTGAT  
GCTCAGCTTTGTGCTTATAGTAATTCTTGGATAGTACTAATACTTTGTAC

>M6-PGSC0003DMG400022426M6G-LecRK\_4133

CACAATTGAAGCAGATATGTTGATGCTCAGCTTTGTGCTTATAGTAATTCTTGGATAGTACTAATACTTTG  
TACTGGTAATAAAATCCTTGATAATCCTCTAAATGTTGCATTAGTTTTTC

>M6-PGSC0003DMG400022426M6G-LecRK\_427

GGCAAAAATATTGATGCTAAGACGCAAAAAGTTGCCGGAACCTAGTAAGTATATATATGCGCTTTCAGT  
TTAACTTTCTGCAAAATATATAATCGCAAAAAGCTTATGAAAATACAAGT

>M6-PGSC0003DMG400022426M6G-LecRK\_488

CTTTCAGTTTAACTTTCTGCAAAATATATAATCGCAAAAAGCTTATGAAAATACAAGTACATGGTGCTA  
ATCGGAAAATTGTGCAATCACCTGTTTATAGAGAGCAGCCTTGTTTCATG

>M6-PGSC0003DMG400022426M6G-LecRK\_549

ATGGTGCTAATCGGAAAATTGTGCAATCACCTGTTTATAGAGAGCAGCCTTGTTTCATGAACTAGCCCCCT  
CTCAAATCCCCACTTGATCAGGAATTCTTCATTGACAGTGTACCCGGAGC

>M6-PGSC0003DMG400022426M6G-LecRK\_610

CTAGCCCCTCTCAAATCCCCACTTGATCAGGAATTCTTCATTGACAGTGTACCCGGAGCTAGATGGATCTT  
AATTACTGGTGTGATATTATTGAATTTTTAGTCAAATCATTCTTAAAA

>M6-PGSC0003DMG400022452-(rev)M6LRR-RLP\_0

TCAGTGGTACCCTCCCGAGCTTAAGACTAATTCAATAGAAATACTTGATTTGTCTCGTAATCAATTCTCT  
GGTCCCATACCTCAATCGCTTAGACATCTTCTCAACCTAACTGTTGTCT

>M6-PGSC0003DMG400022452-(rev)M6LRR-RLP\_1008

ATGTCGAGGAAAATTTAAGAAGTTACTATGTCGATAAGCTTTTGTATAGTGGATTGTATGTGGAATCAGT  
GATATTGGTGTGATGAAAAATCAAGAGACTAAATTCAACAAAATCTTGAAGA

>M6-PGSC0003DMG400022452-(rev)M6LRR-RLP\_1071

AATCAGTGATATTGGTGATGAAAAATCAAGAGACTAAATTCAACAAAATCTTGAAGATGTTCACTACAAT  
CGATTTATCAAGGAACAAGTTTGAGGGAGAAATCCCGAAGTTCATTGGGA

>M6-PGSC0003DMG400022452-(rev)M6LRR-RLP\_1134

CTACAATCGATTTATCAAGGAACAAGTTTGAGGGAGAAATCCCGAAGTTCATTGGGAATTTAATTCACT  
TCTGCTGCTGAATTTATCTCACAACAACCTCACTGGGCATATTCCTATTG

>M6-PGSC0003DMG400022452-(rev)M6LRR-RLP\_1197

ATTCACTTCTGCTGCTGAATTTATCTCACAACAACCTCACTGGGCATATTCCTATTGAAATGAAGAACATG  
AGCACTCTTGAAGCTTTGGACCTTTCATTTAACCATCTTACCGGTAAAA

>M6-PGSC0003DMG400022452-(rev)M6LRR-RLP\_126

GACAAAATAAGTTGAGCGGCGAGATTGGAGCAGAAATGTTTTCAAGCATGACAAACCTCTTAATTCTTG  
ATCTTTCTAATAGTGGTTTATCATGGAGTGGCAATATCAACACCACTTTTC

>M6-PGSC0003DMG400022452-(rev)M6LRR-RLP\_1260

AGAACATGAGCACTCTTGAAGCTTTGGACCTTTCATTTAACCATCTTACCGGTAAAATTCCAGTGGAATT  
GGCAATTCTCACATTTCTTGAGGTCCTAAATCTGTCACACAACCATCTTG

>M6-PGSC0003DMG400022452-(rev)M6LRR-RLP\_1323

TGGAATTGGCAATTCTCACATTTCTTGAGGTCCTAAATCTGTCACACAACCATCTTGTTGGACCTATTCT  
CAGAGTAATCAGTTCAATACATTTCCAAATGATTCCTATTTAGGAAACT

>M6-PGSC0003DMG400022452-(rev)M6LRR-RLP\_1386

CTATTCCTCAGAGTAATCAGTTCAATACATTTCCAAATGATTCCTATTTAGGAAACTCTGAATTGTGTGGA  
TTTCCACTGTCAAATGAATGTGGGAAGCATAAGAGTGCATCAGTACCAG

>M6-PGSC0003DMG400022452-(rev)M6LRR-RLP\_1449

TGTGTGGATTTCCACTGTCAAATGAATGTGGGAAGCATAAGAGTGCATCAGTACCAGTTGAACAGGAAG  
AAGATGAACCAAGTTTTCTTAGCGAAATGACTTGGCAGTCTGTGCTAATTG

>M6-PGSC0003DMG400022452-(rev)M6LRR-RLP\_1575

GTTGTGGCTTGTCTTTTGGTTTTGGCATAGTGTATCTCATATACCTCTTTGAATGGCCAAGATGGTTCATA  
CACTCTTTTGAACCTATCACTCGTGACATGATATACATAGTACTGAGGG

>M6-PGSC0003DMG400022452-(rev)M6LRR-RLP\_1628

TGGCCAAGATGGTTCATACACTCTTTTGAACCTATCACTCGTGACATGATATACATAGTACTGAGGGCAC



GTAAAAGGCGCAGGAGGAATTTTCACAGAACAAGACACTGAAAATCTATG

>M6-PGSC0003DMG400022452-(rev)M6LRR-RLP\_189

TTCTTGATCTTTCTAATAGTGGTTTATCATGGAGTGGCAATATCAACACCACTTTTCCCCTTCTTTATTATT  
TAGCTTTACGCTCTTGTCGTGTGAAAGATTTCCAGATTTTCATATTCA

>M6-PGSC0003DMG400022452-(rev)M6LRR-RLP\_252

TTTATTATTTAGCTTTACGCTCTTGTCGTGTGAAAGATTTCCAGATTTTCATATTCAACTCTAAGAACTTAT  
GGATTTTGGATCTCTCGGAGAATGAAATTCACGGGCAGTTACCGAAAT

>M6-PGSC0003DMG400022452-(rev)M6LRR-RLP\_315

AGAACTTATGGATTTTGGATCTCTCGGAGAATGAAATTCACGGGCAGTTACCGAAATGGTTTGGGGGTT  
TGGGTGCATTGGCAAACCTTAACCTCTCTCACAACCTCCTTACAAGCTTAG

>M6-PGSC0003DMG400022452-(rev)M6LRR-RLP\_378

GGGGTTTGGGTGCATTGGCAAACCTTAACCTCTCTCACAACCTCCTTACAAGCTTAGACCATCTACCTTGG  
GAGACAATCATGGTACTTGATCTTCAATCAAATTCACTCACAGGACCTT

>M6-PGSC0003DMG400022452-(rev)M6LRR-RLP\_441

TACCTTGGGAGACAATCATGGTACTTGATCTTCAATCAAATTCACTCACAGGACCTTTGCCATCCCCCATT  
TGCACATCAACTTTCCTTTATATAATAAATTTGTCTTACAATAATTTGA

>M6-PGSC0003DMG400022452-(rev)M6LRR-RLP\_504

CCCCATTTGCACATCAACTTTCCTTTATATAATAAATTTGTCTTACAATAATTTGAGTGCCGAAATTTCCCA  
ATTGCTTGTACTTTTTCTCGCTCATGGTCTTAGACTTACGAGCTA

>M6-PGSC0003DMG400022452-(rev)M6LRR-RLP\_567

AAATTTCCAATTGCTTGTACTTTTTCTCGCTCATGGTCTTAGACTTACGAGCTAATAACTTCCAAGGAC  
CCATCCCAAACAATTTCCAAAAGAACAGTCAGCTAATTCATATTAGTT

>M6-PGSC0003DMG400022452-(rev)M6LRR-RLP\_63

AATTCTCTGGTCCCATACCTCAATCGCTTAGACATCTTCTCAACCTAACTGTTGTCTTTCTTGGACAAAATA  
AGTTGAGCGGCGAGATTGGAGCAGAAATGTTTTCAAGCATGACAAACC

>M6-PGSC0003DMG400022452-(rev)M6LRR-RLP\_630

TCCAAGGACCCATCCCAAACAATTTCCAAAAGAACAGTCAGCTAATTCATATTAGTTTGGACAAAATCA  
ATTGGAAGGTCCCATCCCAACATCCCTAGCCAACCTGTACATCCTTAAGAG

>M6-PGSC0003DMG400022452-(rev)M6LRR-RLP\_693

AAAATCAATTGGAAGGTCCCATCCCAACATCCCTAGCCAAGTACATCCTTAAGAGTCCTTGATTTGGG  
AAACAATAAAATCCATTCTACATTTCCCTCCTGGTTGGAAACATTGCAAG

>M6-PGSC0003DMG400022452-(rev)M6LRR-RLP\_756

ATTTGGGAAACAATAAAATCCATTCTACATTTCCCTCCTGGTTGGAAACATTGCAAGAGTTAGAGCTTCT  
CATACTGAAATCTAATAGATTTTACGGACCCATCGTTTCTTTCCAAACAA

>M6-PGSC0003DMG400022452-(rev)M6LRR-RLP\_819

AGCTTCTCATACTGAAATCTAATAGATTTTACGGACCCATCGTTTCTTTCCAAACAAAATTGCCATTTCCA  
AATATGAGGATCTTTGACCTCTCCAACAATTCATTTACCGGCTCTTTAC

>M6-PGSC0003DMG400022452-(rev)M6LRR-RLP\_882

CATTTCCAAATATGAGGATCTTTGACCTCTCCAACAATTCATTTACCGGCTCTTTACCTATGGAGGTTCTA  
AAAGGTTTCAAAGCTATGATGTACATGGATGCACACAAATCAGGAGTGG

>M6-PGSC0003DMG400022452-(rev)M6LRR-RLP\_945

AGGTTCTAAAAGGTTTCAAAGCTATGATGTACATGGATGCACACAAATCAGGAGTGGAGTACTATGTCTG  
AGGAAAATTTAAGAAGTTACTATGTCTGATAAGCTTTTGTATAGTGGATTGT

>M6-PGSC0003DMG400022565-(rev)M6LRR-RLK\_1037

GGATATTCAACACAATCAGATACATGGAGATTTCCCTTTTTTCTTGACAGACAATTCTGCATTGTCGTCT  
TGGACTTGTCAGGGAATTTGTTTTCGGGTACAATCCCGAGTTCCATTGG

>M6-PGSC0003DMG400022565-(rev)M6LRR-RLK\_1098

TTGTCGTCCTTGGACTTGTCAGGGAATTTGTTTTCGGGTACAATCCCGAGTTCCATTGGGAATTTGTTGA  
GGTTGGAGCAACTGAGAATTGGAAATAATTCATTCGAAGGTAATATACCG

>M6-PGSC0003DMG400022565-(rev)M6LRR-RLK\_1159

ATTTGTTGAGGTTGGAGCAACTGAGAATTGGAAATAATTCATTCGAAGGTAATATACCGTTGGGATAA  
CGAAATGTAGTAGTTTGAATGTTCTTGATCTTGAAGGGAACAGATTCATAG

>M6-PGSC0003DMG400022565-(rev)M6LRR-RLK\_1220

TGGGATAACGAAATGTAGTAGTTTGAATGTTCTTGATCTTGAAGGGAACAGATTCATAGGGGAAATTCC  
AGCTTTTATAGGTGAACTTAAAAGCTTGAAGATTTTGTTCATGGGAAGAAA

>M6-PGSC0003DMG400022565-(rev)M6LRR-RLK\_1281

GAAATTCCAGCTTTTATAGGTGAACTTAAAAGCTTGAAGATTTTGTTCATGGGAAGAAATCAGTTTTCGG  
GTTCAATCCCTTCTAGTTTTAGCAATATCACTAGTCTTGAAAGTTTGAAT

>M6-PGSC0003DMG400022565-(rev)M6LRR-RLK\_1342

AGTTTTCGGGTTCAATCCCTTCTAGTTTTAGCAATATCACTAGTCTTGAAAGTTTGAATTTGGAAGGAAAC  
CATCTTACGGGAAGCTTGCCTGAGGAGTTGATGTTTTTGGAGCAATTTAA

>M6-PGSC0003DMG400022565-(rev)M6LRR-RLK\_1403

GGAAGGAAACCATCTTACGGGAAGCTTGCCTGAGGAGTTGATGTTTTTGGAGCAATTTAAGCACATTGAA  
TCTTAGTGGGAACAAGTTTTAGGTAGTATTCTGTTGGTATTGAGAACCT

>M6-PGSC0003DMG400022565-(rev)M6LRR-RLK\_1464

ACATTGAATCTTAGTGGGAACAAGTTTTAGGTAGTATTCTGTTGGTATTGAGAACCTTCAGCAGTTAT  
CGTTCTAAATCTGAGTAAGAATGGCTTCTCAGGGACTATCCCGTCTAGC

>M6-PGSC0003DMG400022565-(rev)M6LRR-RLK\_1525

AGCAGTTATCGGTTCTAAATCTGAGTAAGAATGGCTTCTCAGGGACTATCCCGTCTAGCATTGGAACTTT  
GTATAAGCTGGTAGCTCTTGATTTGAGTGGACAGAATTTATCAGGCGAAT

>M6-PGSC0003DMG400022565-(rev)M6LRR-RLK\_1586

TGGAACTTTGTATAAGCTGGTAGCTCTTGATTTGAGTGGACAGAATTTATCAGGCGAATTGCCATCTGTT  
CTTGGTGGTTTGCCTAGTTTACAAGTGATTGCTTTGCAAGAAAACAACCT

>M6-PGSC0003DMG400022565-(rev)M6LRR-RLK\_1647

CCATCTGTTCTTGGTGGTTTGCCTAGTTTACAAGTGATTGCTTTGCAAGAAAACAACCTGTCTGGAAATGT  
TCCTGAAGGTTTTAGTAGCTTAATGGGTTTACAGTTCTTGAATCTATCT

>M6-PGSC0003DMG400022565-(rev)M6LRR-RLK\_1708

CTGGAAATGTTCTGAAGGTTTTAGTAGCTTAATGGGTTTACAGTTCTTGAATCTATCTTCCAATTCATTT  
TCAGGTCATATAACCATCTACGTTTGGGTTCTTGACATCGTTAGTTGTCC

>M6-PGSC0003DMG400022565-(rev)M6LRR-RLK\_1769

CAATTCATTTTCAGGTCATATAACCATCTACGTTTGGGTTCTTGACATCGTTAGTTGCCTCTCGTTGTCTAA  
GAATCACATATCTGGTTCAATACCTCCTGACTTGGGTAATAAACTGC

>M6-PGSC0003DMG400022565-(rev)M6LRR-RLK\_183

TCCTTCAAACCTTAGTATTCATGACCCACTTGGAGCACTCACAAGTTGGGATTCTACATCTCCTTCTGCTCC  
ATGCGATTGGCGAGGAATTTTTGTTCAAATGATTCCTATGTGAGTGAA

>M6-PGSC0003DMG400022565-(rev)M6LRR-RLK\_1830

TCGTTGTCTAAGAATCACATATCTGGTTCAATACCTCCTGACTTGGGTAATAAACTGCTCTGAAGATTTT

AAATCTGAGGTCAAATTCATTGAGTGGCCAAATTCCTTCTGATCTTGCA

>M6-PGSC0003DMG400022565-(rev)M6LRR-RLK\_1891

TGAAGATTTTAAATCTGAGGTCAAATTCATTGAGTGGCCAAATTCCTTCTGATCTTGACACGTCTCTCCCGT  
TTGAGTGTGTTGGATTTGGGTAGAAATACCCTGACAGGTGAAATTCCAG

>M6-PGSC0003DMG400022565-(rev)M6LRR-RLK\_1952

TCTCTCCCGTTTGGAGTGTGTTGGATTTGGGTAGAAATACCCTGACAGGTGAAATTCCAGAAGTTATTTCC  
AATTGTTTCATCCCTCACATCAGTTGTGATGGACACGAACCATCTTTCGGG

>M6-PGSC0003DMG400022565-(rev)M6LRR-RLK\_2013

GTTATTTCCAATTGTTTCATCCCTCACATCAGTTGTGATGGACACGAACCATCTTTCGGGAAACATTCCAGC  
ATCACTCTCCAGCTTATCAAGCTTAATTACCCTTGACCTCTCCGAAAC

>M6-PGSC0003DMG400022565-(rev)M6LRR-RLK\_2074

ACATTCCAGCATCACTCTCCAGCTTATCAAGCTTAATTACCCTTGACCTCTCCGAAACAACCTTGAGTGGA  
AAAATCCCAGAAAATCTGACAGTGCTCCCAAAGTTGGTGAACCTTCAATG

>M6-PGSC0003DMG400022565-(rev)M6LRR-RLK\_2135

CTTGAGTGGAAAAATCCCAGAAAATCTGACAGTGCTCCCAAAGTTGGTGAACCTTCAATGTATCGAACAA  
TAAGTTGGAAGGCCAGATACCAGTGAAGCTCGGTTCTCATTTTAACGATCC

>M6-PGSC0003DMG400022565-(rev)M6LRR-RLK\_2196

TCGAACAATAAGTTGGAAGGCCAGATACCAGTGAAGCTCGGTTCTCATTTTAACGATCCATCGGATTTCA  
GTGGCAACCAGGGTTTGTGTGGGGAGCCATTGAATAGAAAATGTGAGCGG

>M6-PGSC0003DMG400022565-(rev)M6LRR-RLK\_2257

CGGATTTCACTGGCAACCAGGGTTTGTGTGGGGAGCCATTGAATAGAAAATGTGAGCGGACTGGTAAT  
GATAAGAATAGACTGATTATGTTTATTGCAGTGTCTGCTAGTGGAGGTCTTC

>M6-PGSC0003DMG400022565-(rev)M6LRR-RLK\_2318

TGGTAATGATAAGAATAGACTGATTATGTTTATTGCAGTGTCTGCTAGTGGAGGTCTTCTCCTTGCATCA  
TGCTGCTGTTTTTACATATACGCCTTGCTGAGATGGCGTAGGAAGCTCAA

>M6-PGSC0003DMG400022565-(rev)M6LRR-RLK\_2379

CTTGCATCATGCTGCTGTTTTTACATATACGCCTTGCTGAGATGGCGTAGGAAGCTCAAAGAAAAGGCA  
GCTGGAGAGAAGAAGCATAGCCCTGCAAGGGTTAGTTCGAGGACCAGTGGT

>M6-PGSC0003DMG400022565-(rev)M6LRR-RLK\_244

CTTCTGCTCCATGCGATTGGCGAGGAATTTTTGTTCAAATGATTCCTATGTGAGTGAAATTCGTCTTCCA  
CATTACAGCTTAGTGGGTCTCTCACTACCCAGATTTCTGATTTGCGAA

>M6-PGSC0003DMG400022565-(rev)M6LRR-RLK\_2440

AAAAGGCAGCTGGAGAGAAGAAGCATAGCCCTGCAAGGGTTAGTTCGAGGACCAGTGGTTCTCGTGGC  
AGTGGCAACAATGCTGGACCAAACTTGTATGTTCAATAACAGAATTACAG

>M6-PGSC0003DMG400022565-(rev)M6LRR-RLK\_2501

TCGTGGCAGTGGCAACAATGCTGGACCAAACTTGTATGTTCAATAACAGAATTACAGTTGCTGAAAC  
AATCGAAGCAACTAGGGAATTTGATGAGGAAAATGTTCTTAGCAGAACACG

>M6-PGSC0003DMG400022565-(rev)M6LRR-RLK\_2562

GCTGAAACAATCGAAGCAACTAGGGAATTTGATGAGGAAAATGTTCTTAGCAGAACACGCCACGGAGT  
GCTGTTCAAGGCCTGTTACAGTGATGGAATGTTGCTCTCAATCTGTAGACTA

>M6-PGSC0003DMG400022565-(rev)M6LRR-RLK\_2623

ACGGAGTGCTGTTCAAGGCCTGTTACAGTGATGGAATGTTGCTCTCAATCTGTAGACTACCAGATAGATC  
ACTAGATGAAAACACATTCAGAAAAGAGGCTGAATCGCTTGGCAGAGTGA

>M6-PGSC0003DMG400022565-(rev)M6LRR-RLK\_2684

AGATAGATCACTAGATGAAAACACATTCAGAAAAGAGGCTGAATCGCTTGGCAGAGTGAAGCACAGAA  
ACCTAACTGTTCTCCGTGGGTACTATGCTGGACCTCCAGACCTTAGACTACT

>M6-PGSC0003DMG400022565-(rev)M6LRR-RLK\_2745

CACAGAAACCTAACTGTTCTCCGTGGGTACTATGCTGGACCTCCAGACCTTAGACTACTTGCATATGATT  
ACATGCCAAACGGGAACCTTGCAACACTTCTCAAGAAGCATCCCATCAA

>M6-PGSC0003DMG400022565-(rev)M6LRR-RLK\_2867

TGGTGGTCATGTTCTCAATTGGCCAATGCGACACCTCGTTGCACTTGGCATTGCCCGTGGGCTTGCTTTC  
CTCCACGCAGCCTCTATCATTATGGAGATGTTAAACCACAAAATGTACT

>M6-PGSC0003DMG400022565-(rev)M6LRR-RLK\_2928

CTTGCTTTCCTCCACGCAGCCTCTATCATTATGGAGATGTTAAACCACAAAATGTACTGTTTCGATGCAGA  
CTTTGAAGCCCATCTTTCAGACTTTGGCTTAGACAAGCTTACTGTAGCC

>M6-PGSC0003DMG400022565-(rev)M6LRR-RLK\_2989

TCGATGCAGACTTTGAAGCCCATCTTTCAGACTTTGGCTTAGACAAGCTTACTGTAGCCACACCAATCGA  
ACCTTCCTCTTCAACATCAGTTGGGACTATAGGCTATGTAGCGCCAGAAG

>M6-PGSC0003DMG400022565-(rev)M6LRR-RLK\_305

TCGTCTTCCACATTTACAGCTTAGTGGGTCTCTCACTACCCAGATTTCTGATTTGCGAATGTTGCGTAAGA  
TTAGTCTTCGTTCAAATTTCTTTAATGGAACATACTGCTTCAATCTC

>M6-PGSC0003DMG400022565-(rev)M6LRR-RLK\_3050

ACCAATCGAACCTTCTCTTCAACATCAGTTGGGACTATAGGCTATGTAGCGCCAGAAGCAACATTAACC  
GGAGAAGCCACAAGACAATCAGATATTTATAGCTTTGGCATTGTATTACT

>M6-PGSC0003DMG400022565-(rev)M6LRR-RLK\_3111

ACATTAACCGGAGAAGCCACAAGACAATCAGATATTTATAGCTTTGGCATTGTATTACTGGAAGTCTAA  
CAGGGAAAAAGTCGTTAATGTTCTCGCAGGATGAGGACATTGTGAAATGG

>M6-PGSC0003DMG400022565-(rev)M6LRR-RLK\_3172

AACTGCTAACAGGGAAAAAGTCGTTAATGTTCTCGCAGGATGAGGACATTGTGAAATGGGTAAAGAGG  
CAATTACAGAGAGGGCAAATTTTCAAGAATTGTTAGAGCCAGGATTGCTTGAAC

>M6-PGSC0003DMG400022565-(rev)M6LRR-RLK\_3233

AAAGAGGCAATTACAGAGAGGGCAAATTTTCAAGAATTGTTAGAGCCAGGATTGCTTGAAGTGGACCCTG  
AATCATCAGAATGGGAAGAGTTTTTATTAGGAGTAAAAGTAGGCTTGCTTTG

>M6-PGSC0003DMG400022565-(rev)M6LRR-RLK\_3294

GACCCTGAATCATCAGAATGGGAAGAGTTTTTATTAGGAGTAAAAGTAGGCTTGCTTTGCACAGCACCG  
GACCCCTTGATCGTCCCACCATGACCGACACTGTGTTTCATGCTCGAAGGT

>M6-PGSC0003DMG400022565-(rev)M6LRR-RLK\_3355

CAGCACCGGACCCCTTGATCGTCCCACCATGACCGACACTGTGTTTCATGCTCGAAGGTTGTCGTGTTGA  
TCAAATTTCACTCTCCTGAAGAACCACGACCGGCAATGGTGACACGTAAA

>M6-PGSC0003DMG400022565-(rev)M6LRR-RLK\_3416

TCGTGTTGATCAAATTTCACTCTCCTGAAGAACCACGACCGGCAATGGTGACACGTAAAACCCAAGGTCT  
CATCCTAATTCTTGCCTTTCCTATTGACTCTTTGATATTTTGAGGAGTT

>M6-PGSC0003DMG400022565-(rev)M6LRR-RLK\_3477

CCAAGGTCTCATCCTAATTCTTGCCTTTCCTATTGACTCTTTGATATTTTGAGGAGTTGCATTGCAATGCA  
ACAATAGCTAGCACTAGCACTTAAGTTTTTTGTTTAAGGAAAAGAACA

>M6-PGSC0003DMG400022565-(rev)M6LRR-RLK\_3538

ATTGCAATGCAACAATAGCTAGCACTAGCACTTAAGTTTTTTGTTTAAGGAAAAGAACAAAAAGAAAAT

ATTCTCAATTTTTTTTTAGCTATAGCTATTTTATTGATTTTGGTTTTCTAT

>M6-PGSC0003DMG400022565-(rev)M6LRR-RLK\_3596

AAAAAGAAAATATTCTCAATTTTTTTTTAGCTATAGCTATTTTATTGATTTTGGTTTTCTATTACAAAAGTG  
CCTCTTGAGTTGAAAACAATGAAATGAATCTTTTTAAGTAATTCAAG

>M6-PGSC0003DMG400022565-(rev)M6LRR-RLK\_366

TTGCGTAAGATTAGTCTTCGTTCAAATTTCTTTAATGGAACCTACCTGCTTCAATCTCCAAATGCAAACCT  
CTGGATACTGTTTTCTTACAGTATAACTCTTTTTCCGGTGAAATCCCG

>M6-PGSC0003DMG400022565-(rev)M6LRR-RLK\_427

AATGCAAACCTTCTGGATACTGTTTTCTTACAGTATAACTCTTTTTCCGGTGAAATCCCGCCGGAGATTATG  
AATTTGACTGAGCTTGAAACGTTTAATGTGGCTGGAAATCAGATGTATG

>M6-PGSC0003DMG400022565-(rev)M6LRR-RLK\_488

GGAGATTATGAATTTGACTGAGCTTGAAACGTTTAATGTGGCTGGAAATCAGATGTATGGTGAAATACT  
CAGTGAGTTGCCGGTGAATCTGAGATATTTTGATGTCTCGGAGAACTTGTT

>M6-PGSC0003DMG400022565-(rev)M6LRR-RLK\_549

GAAATACTCAGTGAGTTGCCGGTGAATCTGAGATATTTTGATGTCTCGGAGAACTTGTTTTCCGGTGTA  
TACCGGAGAAAATATCGGACCTCTCTCAGGTTATTCTGCTTAATCTGTCTG

>M6-PGSC0003DMG400022565-(rev)M6LRR-RLK\_610

CCGGTGGTATACCGGAGAAAATATCGGACCTCTCTCAGGTTATTCTGCTTAATCTGTCTGACAAATCGATT  
CTCCGGTGATATCCGGCGAGTTTAGGTAGGCTTCAACAACCTTCAGTATC

>M6-PGSC0003DMG400022565-(rev)M6LRR-RLK\_671

CAATCGATTCTCCGGTGAATTTCCGGCGAGTTTAGGTAGGCTTCAACAACCTTCAGTATCTTATGCTTGACT  
ACAATGAGTTAGAAGGAACAGTTCCTTCTGCAATTTGAACTGTTTCGTC

>M6-PGSC0003DMG400022565-(rev)M6LRR-RLK\_732

ATGCTTGACTACAATGAGTTAGAAGGAACAGTTCCTTCTGCAATTTGAACTGTTTCGTCGTTGGTGCATT  
TGAGTGCCGAAGGGAATGGTATTACTGGTGTATACCGGCGGGGATTGCT

>M6-PGSC0003DMG400022565-(rev)M6LRR-RLK\_793

TGGTGCATTTGAGTGCCGAAGGGAATGGTATTACTGGTGTATACCGGCGGGGATTGCTGCTCTCCGA  
AGATTCAGGTGATAAATTTATCGCATAATAAGCTTTCTGGATACTTAGCAA

>M6-PGSC0003DMG400022565-(rev)M6LRR-RLK\_854

TCTTCCGAAGATTCAGGTGATAAATTTATCGCATAATAAGCTTTCTGGATACTTAGCAACTTCATTTTTCT  
GCAATGGTTCTGTGTATCCTCCTTCCCTTCAGATTGTTGAGTTGGGTTT

>M6-PGSC0003DMG400022565-(rev)M6LRR-RLK\_915

TCATTTTTCTGCAATGGTTCTGTGTATCCTCCTTCCCTTCAGATTGTTGAGTTGGGTTTCAATGCCTTCGCT  
GAGATTCTTCACCCACAATCGTCTAGATGTTTTAGTTCATTGCGAGTT

>M6-PGSC0003DMG400022565-(rev)M6LRR-RLK\_976

ATGCCTTCGCTGAGATTCTTCACCCACAATCGTCTAGATGTTTTAGTTCATTGCGAGTTTTGGATATTCAA  
CACAATCAGATACATGGAGATTCCCTTTTTTCTTGACAGACAATTCTG

>M6-PGSC0003DMG400022599-(rev)M6LRR-RLP\_0

ATGGCTTCTCAACTTCTTTGTTTTCTTGTATTGCTAACTCTCACAATTTGTAAAAGTAAATCTTGTCAT  
CCAAATGATTTAAAAGTCTTCAAGATTTCAAGTCTGGAATTCATTCA

>M6-PGSC0003DMG400022599-(rev)M6LRR-RLP\_1054

TAGTCATAACATGATTGAAGGACCGTTGCCTCATGAAATTTCTTCCCTTCAAATCTTCAATCGCTGGAT  
CTTTCATTCAACCGTTTGAATATGTCAACCATTCCCAAGTGGCTCATGC

>M6-PGSC0003DMG400022599-(rev)M6LRR-RLP\_1116

TCGCTGGATCTTTCATTCAACCGTTTGAATATGTCAACCATTCCCAAGTGGCTCATGCAGTTGCCATCACT  
ATCACAAATTTACTTGGCAGGATGTGAAATTCATGGTGAAATGCCAGAT

>M6-PGSC0003DMG400022599-(rev)M6LRR-RLP\_1178

GCCATCACTATCACAAATTTACTTGGCAGGATGTGAAATTCATGGTGAAATGCCAGATTACATACCCAAG  
TCATTGCTGGAAGTACTTGTCCGCTAACCATCTTTCAGGAAGGATACC

>M6-PGSC0003DMG400022599-(rev)M6LRR-RLP\_124

CTTCTGGTAGACTAAGTAAATGGATTGGCCGCGATTGTTGTAATGGGAAGGTATTTTTGTAGTAATGT  
AACTAAAAGAGTTGTAAGTATAAGTCTACCAGGTCTCTATACTGCAGATG

>M6-PGSC0003DMG400022599-(rev)M6LRR-RLP\_1240

TACCAAGTCATTGCTGGAAGTACTTGTCCGCTAACCATCTTTCAGGAAGGATACCAGCTTGGATTGG  
CAGCTTTTCGCAGCTTTATTCTTTAAACCTTTCTAAGAACAAGTTTGTGT

>M6-PGSC0003DMG400022599-(rev)M6LRR-RLP\_1302

TGGATTGGCAGCTTTTCGCAGCTTTATTCTTTAAACCTTTCTAAGAACAAGTTTGTGTCTGAGATTCTTC  
AACTGTCACAAATCTCGGCATTCTGGGAGTGTTAGACCTTCACTCAAAC



>M6-PGSC0003DMG400022599-(rev)M6LRR-RLP\_1364

GATTCCTTCAACTGTCACAAATCTCGGCATTCTGGGAGTGTAGACCTTCACTCAAACAAGCTAGAAGGC  
AGTGTGAATGCAGTTTTCCAGATAAAGAGCAGGTTTGCAGAAGGATCATT

>M6-PGSC0003DMG400022599-(rev)M6LRR-RLP\_1426

TAGAAGGCAGTGTGAATGCAGTTTTCCAGATAAAGAGCAGGTTTGCAGAAGGATCATTGACATATCTTG  
ATCTGTCTGATAACAATTTCTCAACTGGTGTGAGCAGATTGGCATAGGAG

>M6-PGSC0003DMG400022599-(rev)M6LRR-RLP\_1488

TATCTTGATCTGTCTGATAACAATTTCTCAACTGGTGTGAGCAGATTGGCATAGGAGGACAAGAATATA  
TCCAACACTTAAATTTATCGCATAACTTTCTCAAAGGTAGATTACCAACC

>M6-PGSC0003DMG400022599-(rev)M6LRR-RLP\_1550

AGAATATATCCAACACTTAAATTTATCGCATAACTTTCTCAAAGGTAGATTACCAACCTCTGTAGGAACAT  
TGAAAACACTACAGACTTTGGATCTCAGTTACAATGGATTAGGAGCTAA

>M6-PGSC0003DMG400022599-(rev)M6LRR-RLP\_1612

TAGGAACATTGAAAACACTACAGACTTTGGATCTCAGTTACAATGGATTAGGAGCTAACCTGCCAACATC  
ACTGGCCAACGTGACCATTCTGGAGAGACTGATGCTGCACAAAAATCAAT

>M6-PGSC0003DMG400022599-(rev)M6LRR-RLP\_1674

CCAACATCACTGGCCAACGTGACCATTCTGGAGAGACTGATGCTGCACAAAAATCAATTCACCGGCAGA  
ATCCCTGAGGAGTTTTTGAAGCTGAATAAACTGAAAGAATTGAACCTTTCA

>M6-PGSC0003DMG400022599-(rev)M6LRR-RLP\_1736

CGGCAGAATCCCTGAGGAGTTTTTGAAGCTGAATAAACTGAAAGAATTGAACCTTTCAGATAATCTTCTT  
GAAGGAAAAATACCTTATGGGAAGCCATTTCTTGATTTTCCGCAGAGCTC

>M6-PGSC0003DMG400022599-(rev)M6LRR-RLP\_1791

TCAGATAATCTTCTTGAAGGAAAAATACCTTATGGGAAGCCATTTCTTGATTTTCCGCAGAGCTCATTCTC  
TGAAACAGAGATTTATGTGGGAAACCCCTTCTCCCTGTAAATCTTGA

>M6-PGSC0003DMG400022599-(rev)M6LRR-RLP\_186

AGTAATGTAATAAAAGAGTTGTAAGTATAAGTCTACCAGGTCTCTATACTGCAGATGATGCACCAATTC  
AATCTGCTATGGAAGGGGAATTGTCACCTTCAATCACACTCATCAACTAT

>M6-PGSC0003DMG400022599-(rev)M6LRR-RLP\_248

ACCAATTCAATCTGCTATGGAAGGGGAATTGTCACCTTCAATCACACTCATCAACTATCTTGAAGTTATCG

ATATAGGTGATCTCCTTGGTATAACGGGGAAAATCCCCTTATCGATTGG

>M6-PGSC0003DMG400022599-(rev)M6LRR-RLP\_310

AAGTTATCGATATAGGTGATCTCCTTGGTATAACGGGGAAAATCCCCTTATCGATTGGTTTACATCTACC

AAATCTCAGAAAACACTCAACTTTGTTAGAAACAAGTTTACTGGTGCATTAC

>M6-PGSC0003DMG400022599-(rev)M6LRR-RLP\_372

CATCTACCAAATCTCAGAAAACACTCAACTTTGTTAGAAACAAGTTTACTGGTGCATTACCAGAAAGCATT

GTATGTTGTCTAAACTGGAAGAATTGTATCTCCAAGAAAATGGTTTTTCG

>M6-PGSC0003DMG400022599-(rev)M6LRR-RLP\_434

AAGCATTTGTATGTTGTCTAAACTGGAAGAATTGTATCTCCAAGAAAATGGTTTTTCGGGTTTTATTCCCT

CGTGTATAGGAGGTGTCAAGAATCTAAGAAGAATGGATGTACATTCAA

>M6-PGSC0003DMG400022599-(rev)M6LRR-RLP\_496

TTATCCCTCGTGTATAGGAGGTGTCAAGAATCTAAGAAGAATGGATGTACATTCAAATAAACTTTCTGG

TGTAATTCCTGAGTCTATAACAAAGTTGAAAAAATTGGAAAGTTTGTGTC

>M6-PGSC0003DMG400022599-(rev)M6LRR-RLP\_558

CTTTCTGGTGAATTCCTGAGTCTATAACAAAGTTGAAAAAATTGGAAAGTTTGTGTCTTCAAGAGAATG

TCTTGACAGGGGATATAACCAGAAAACATTGGTAATTTGCAAGAATTGAAA

>M6-PGSC0003DMG400022599-(rev)M6LRR-RLP\_62

ATCTTGTCATCCAAATGATTTAAAAGGTCTTCAAGATTTCAAGTCTGGAATTCATTCAGACACTTCTGGTA

GACTAAGTAAATGGATTGGCCGCGATTGTTGTAAATGGGAAGGTATTTT

>M6-PGSC0003DMG400022599-(rev)M6LRR-RLP\_620

AGAGAATGTCTTGACAGGGGATATAACCAGAAAACATTGGTAATTTGCAAGAATTGAAAGAGGTTGATT

GTCTAATAACTTGTTAACGGGGATAATCCCTCGTTCTATTTCTAGACTAAA

>M6-PGSC0003DMG400022599-(rev)M6LRR-RLP\_682

TTGATTTGTCTAATAACTTGTTAACGGGGATAATCCCTCGTTCTATTTCTAGACTAAAGTTTATGTCAGTT

CTTTACCTGAACTCCAATCAGCTCGAGGGGGACATACCGTTGCCTTCAA

>M6-PGSC0003DMG400022599-(rev)M6LRR-RLP\_744

ATGTCAGTTCTTTACCTGAACTCCAATCAGCTCGAGGGGGACATACCGTTGCCTTCAAACCTGGGAAAT

TGTCTTCTCTGAGCTTTGTAAGACTGCAGAACAATCGGCTTAGTGGAACG

>M6-PGSC0003DMG400022599-(rev)M6LRR-RLP\_806

TGGGAAATTGTCTTCTCTGAGCTTTGTAAGACTGCAGAACAATCGGCTTAGTGGAACGATACCTTCATCT  
ATTGGCTACTTGACCTCCCTTCAGAGAGTTTCACTTGCAAACAATCAGCT

>M6-PGSC0003DMG400022599-(rev)M6LRR-RLP\_868

CTTCATCTATTGGCTACTTGACCTCCCTTCAGAGAGTTTCACTTGCAAACAATCAGCTAAAGGGTTCTATT  
CCTTCGAGTATAGGTAATTTGAAGTTATTGGAAATGTTATATCTCAGTT

>M6-PGSC0003DMG400022599-(rev)M6LRR-RLP\_930

GGTTCTATTCCTTCGAGTATAGGTAATTTGAAGTTATTGGAAATGTTATATCTCAGTTGCAACCAATTATC  
TGGTCAGTTGCCAAGATCAGTAGGCGGGATTTCAAAGCTTCTTTACCTG

>M6-PGSC0003DMG400022599-(rev)M6LRR-RLP\_992

CCAATTATCTGGTCAGTTGCCAAGATCAGTAGGCGGGATTTCAAAGCTTCTTTACCTGAGTATAGCTCAT  
AACATGATTGAAGGACCGTTGCCTCATGAAATTTCTCCCTTTCAAATCT

>M6-PGSC0003DMG400022632M6LRR-RLK\_1054

ATTGTTATTTCAACTAGAACTGGTATTTCTTATAGAGCTATGTTGATTGATGGATCAGCATTGGCTATTAA  
AAGGTTGAGTAGTTGTAAGTTAAGTGAAAAACAGTTTAGGTCTGAGATG

>M6-PGSC0003DMG400022632M6LRR-RLK\_1116

GGCTATTAAGGTTGAGTAGTTGTAAGTTAAGTGAAAAACAGTTTAGGTCTGAGATGAATCGATTAGG  
ACAGCTTAGACACCCGAATTTAGTCCCATTATTGGGATTTTGTATTGTTGA

>M6-PGSC0003DMG400022632M6LRR-RLK\_1178

GATTAGGACAGCTTAGACACCCGAATTTAGTCCCATTATTGGGATTTTGTATTGTTGATACTGAAAGGCT  
TTTGGTTTATAAGCATATGCAGAATGGAAGTTTGTATTCGCTTTTACATG

>M6-PGSC0003DMG400022632M6LRR-RLK\_124

ATGGCAGTAAAATCAACTAACCCCATCTTCTTCTTCACTCTTTTCTTCTCATTTCACATTAACCCCATCTT  
TTTCCATTGAAAATGATGTTAAATGTCTTGAAGGTATCAAATCTGCA

>M6-PGSC0003DMG400022632M6LRR-RLK\_1240

GAAAGGCTTTTGGTTTATAAGCATATGCAGAATGGAAGTTTGTATTCGCTTTTACATGGTAATCTTAGTA  
CTGGTATTAGAAATGATAGTTCTGAGCTTGGTTGGTTAGCAAGGGTGCGG

>M6-PGSC0003DMG400022632M6LRR-RLK\_1302

TCTTAGTACTGGTATTAGAAATGATAGTTCTGAGCTTGGTTGGTTAGCAAGGGTGCGGGTTGCTGCTGG  
TGCAGCTAGAGGATTAGCTTGGCTTCATCATGGGTGTCAACCGCCATATGT

>M6-PGSC0003DMG400022632M6LRR-RLK\_1364

CTGCTGGTGCAGCTAGAGGATTAGCTTGGCTTCATCATGGGTGTCAACCGCCATATGTGCATCAATACCT  
TAGCTCGAATGTGATTCTTGTAGACGATGATTTTGATGCTAGGATCACGG

>M6-PGSC0003DMG400022632M6LRR-RLK\_1426

CAATACCTTAGCTCGAATGTGATTCTTGTAGACGATGATTTTGATGCTAGGATCACGGATTTTGGGCTTG  
CAAGGCTTATTGGTTCTGCTGACTCGAATGATAGTTCGTTTGTGAATGGG

>M6-PGSC0003DMG400022632M6LRR-RLK\_1488

TGGGCTTGAAGGCTTATTGGTTCTGCTGACTCGAATGATAGTTCGTTTGTGAATGGGGATTTGGGAGA  
GTTTGGGTATGTAGCTCCTGAGTATTCGAGCACGTTGGTTGCTTCAATGAA

>M6-PGSC0003DMG400022632M6LRR-RLK\_1550

TGGGAGAGTTTGGGTATGTAGCTCCTGAGTATTCGAGCACGTTGGTTGCTTCAATGAAAGGGGATGTGT  
ATAGTTTTGGAGTAGTGCTGCTTGGTGGTACAGGGCGGAAGCCTCTTG

>M6-PGSC0003DMG400022632M6LRR-RLK\_1612

GATGTGTATAGTTTTGGAGTAGTGCTGCTTGGTGGTACAGGGCGGAAGCCTCTTGGTGCGGGTAAT  
GCAGAGGAGGGATTCAAAGGTAGTTTAGTCGATTGGGTAAATCAGCTTTTCG

>M6-PGSC0003DMG400022632M6LRR-RLK\_1674

GGGTAATGCAGAGGAGGGATTCAAAGGTAGTTTAGTCGATTGGGTAAATCAGCTTTTCGAGCTCAGGTCA  
TAGTAAGGACGCGATCGACAAAGCTTTTGCTGGAAGTGGTCAAGATGATGA

>M6-PGSC0003DMG400022632M6LRR-RLK\_1736

CAGGTCATAGTAAGGACGCGATCGACAAAGCTTTTGCTGGAAGTGGTCAAGATGATGAAATTTTGCGA  
GTTCTTCAAATTGCATGTTTCGTGTGTGTTTCAAGGCCGAAAGATAGACCTT

>M6-PGSC0003DMG400022632M6LRR-RLK\_1798

TTGCGAGTTCTTCAAATTGCATGTTTCGTGTGTGGTTTCAAGGCCGAAAGATAGACCTTCGATGTACACAG  
TGTATCAGTCCTTGAAGAGCATGGTGAAGAACATTGTTTCTCTGAACAC

>M6-PGSC0003DMG400022632M6LRR-RLK\_186

AACCCCATCTTTTTCCATTGAAAATGATGTTAAATGTCTTGAAGGTATCAAATCTGCACTTTCTGACCCTTT  
AAACAAGCTCTCATCTTGGTCATTCTCAAACACTTCTGTAGCTTCAAT

>M6-PGSC0003DMG400022632M6LRR-RLK\_1860

GTACACAGTGTATCAGTCCTTGAAGAGCATGGTGAAGAACATTGTTTCTCTGAACACTTTGATGAGTTT

CCAATCAACTTGACCAAAGAAAACCATGATCATAAAGATTAGGTTATAGC

>M6-PGSC0003DMG400022632M6LRR-RLK\_1922

ATGAGTTTCCAATCAACTTGACCAAAGAAAACCATGATCATAAAGATTAGGTTATAGCATTGAAATGATT  
AGACAAATGTTTATGAATTTTGAATATTCTAGTTATGGCATTGTGATTTTC

>M6-PGSC0003DMG400022632M6LRR-RLK\_1984

AAATGATTAGACAAATGTTTATGAATTTTGAATATTCTAGTTATGGCATTGTGATTTCTTGATAACTCTGT  
ATAGTTTGAGAAGTAAATGCATGATCTTTGTACTTTCTTGACACATTTT

>M6-PGSC0003DMG400022632M6LRR-RLK\_248

CTGACCCTTTAAACAAGCTCTCATCTTGGTCATTCTCAAACACTTCTGTAGCTTCAATTTGTAAACTTGTTG  
GTGTTTCTTGCTGGAATGAGAAAGAAAACCGCCTTCTTTCTCTTCAAC

>M6-PGSC0003DMG400022632M6LRR-RLK\_310

AAACTTGTTGGTGTTTCTTGCTGGAATGAGAAAGAAAACCGCCTTCTTTCTCTTCAACTCCTTCAATGTC  
TTTATCCGGTTCCTCCACCTGCCCTTCAGTTCTGTACTTCTCTTCAA

>M6-PGSC0003DMG400022632M6LRR-RLK\_372

TTCAATGTCTTTATCCGGTTCCTCCACCTGCCCTTCAGTTCTGTACTTCTCTTCAATCTCTTGATCTCTCT  
GGTAACTCTTTTTCCGGTCCAATCCCGGTTCAAATCTGTTCTTGGTT

>M6-PGSC0003DMG400022632M6LRR-RLK\_434

TTGATCTCTCTGGTAACTCTTTTTCCGGTCCAATCCCGGTTCAAATCTGTTCTTGGTTACCTTATCTCGTCA  
ATCTCGATCTCTCCAGCAACTCTTCTCCGGTTCATACCCCTGAGT

>M6-PGSC0003DMG400022632M6LRR-RLK\_496

TATCTCGTCAATCTCGATCTCTCCAGCAACTCTTCTCCGGTTCATACCCCTGAGTTTATTAAGTCAAA  
TTCTTGAACACCCTTATTCTAAATGACAACAACTTACTGGGTGATC

>M6-PGSC0003DMG400022632M6LRR-RLK\_558

TAACTGCAAATTCTTGAACACCCTTATTCTAAATGACAACAACTTACTGGGTGATCCCATTTGAGATCG  
GCCGGCTCGACCGGTTGAAACGGTTCAGTGTGTCCAACAATGGCCTTTC

>M6-PGSC0003DMG400022632M6LRR-RLK\_620

TTGAGATCGGCCGGCTCGACCGGTTGAAACGGTTCAGTGTGTCCAACAATGGCCTTCCGGTTCATTTCC  
TGATGATTTAGACCGGTTTTCGAAAGATGATTTTCGATGGGAATGATGGGC

>M6-PGSC0003DMG400022632M6LRR-RLK\_682

TCAATTCCTGATGATTTAGACCGGTTTTCGAAAGATGATTTTCGATGGGAATGATGGGCTTTGTGGGAATC  
CAATTGGATCTAAATGTAGTAATTTGAGTAACAAAAATCTTGTTATTATT

>M6-PGSC0003DMG400022632M6LRR-RLK\_744

TGGGAATCCAATTGGATCTAAATGTAGTAATTTGAGTAACAAAAATCTTGTTATTATTATAGCTGCTGGT  
GTTTTTGGTGCTGCTGCATCACTGATTCTTGGATTTGGGATTTGGAGATG

>M6-PGSC0003DMG400022632M6LRR-RLK\_806

CTGCTGGTGTTTTTGGTGCTGCTGCATCACTGATTCTTGGATTTGGGATTTGGAGATGGTTTTTAGTTCAG  
CCTAGTAAGAAAGATAGAGAATTCGGTGACGGTAAAGGTGGTGGTGGTA

>M6-PGSC0003DMG400022632M6LRR-RLK\_868

TTAGTTCAGCCTAGTAAGAAAGATAGAGAATTCGGTGACGGTAAAGGTGGTGGTGGTATCAGTGATTAT  
TGGGTCGATAAATTGAGAGCTTACAAGCTTGTTTCAGGTGACATTGTTTCAA

>M6-PGSC0003DMG400022632M6LRR-RLK\_930

TGATTATTGGGTCGATAAATTGAGAGCTTACAAGCTTGTTTCAGGTGACATTGTTTCAAAAACCTATTAAT  
AAGATTAAGCTGAATGATTTACTAGTAGCTACAAATTCATTTGCTAGTGA

>M6-PGSC0003DMG400022632M6LRR-RLK\_992

CTATTAATAAGATTAAGCTGAATGATTTACTAGTAGCTACAAATTCATTTGCTAGTGAAAATATTGTTATT  
TCAACTAGAACTGGTATTTCTTATAGAGCTATGTTGATTGATGGATCAG

>M6-PGSC0003DMG400022785-(rev)M6LRR-RLP\_0

CAAAATCTCACATTCAAGAGATACTTCCTCACTGCTCCCTTTGGATCAAAAAGATATAATCGTTGGACTG  
GATGAAGACTTGCTGAAGATAAAAGAACGACTCACCGTGCAATCGTCAAG

>M6-PGSC0003DMG400022785-(rev)M6LRR-RLP\_1054

TGTAAGATGCATGATCTCGTTTCGAGATATGTGTTTGAGAGAAGCCAAATATGAGAATTTTATACACTTCG  
AAACAAGGTATAACCACGATGATCTTCTAGAAAACATTAATTGTCTACGC

>M6-PGSC0003DMG400022785-(rev)M6LRR-RLP\_1116

ACACTTCGAAACAAGGTATAACCACGATGATCTTCTAGAAAACATTAATTGTCTACGCCGTGTAGTTGAT  
TTCAATAAGTATAGATACAGTTTTGATATTCCTAAACTTATGCCACTCAC

>M6-PGSC0003DMG400022785-(rev)M6LRR-RLP\_1178

TAGTTGATTTCAATAAGTATAGATACAGTTTTGATATTCCTAAACTTATGCCACTCACACGTTCTCTTTTCT  
TGAAATATCCATACTCTGTTTGTCCCTCTCACAGTCAAGCTTTAGAT

>M6-PGSC0003DMG400022785-(rev)M6LRR-RLP\_1240

TCTCTTTTCTTGAAATATCCATACTCTGTTTGTCCCTCTCACAGTCAAGCTTTAGATTACTTAGGATATTA  
GATGTTTGCTTTACATCTCGTTTGTACCGTAGTATGTCCATAACAGAA

>M6-PGSC0003DMG400022785-(rev)M6LRR-RLP\_1302

TAGGATATTAGATGTTTGCTTTACATCTCGTTTGTACCGTAGTATGTCCATAACAGAACTTGTTCAATTGA  
GGTATCTTGCTTGCCATCCTTCAATGGTCTTGTGCAATCACTATGCAA

>M6-PGSC0003DMG400022785-(rev)M6LRR-RLP\_1364

TTCATTTGAGGTATCTTGCTTGCCATCCTTCAATGGTCTTGTGCAATCACTATGCAAGCTACGGAATATA  
CAGAACTTAGTTATTCAGGATTTACGTTTCATCTGGTTTACATAGGAGAA

>M6-PGSC0003DMG400022785-(rev)M6LRR-RLP\_1426

CGGAATATACAGAACTTAGTTATTCAGGATTTACGTTTCATCTGGTTTACATAGGAGAACCCAGTTCCTAC  
CATGGGAAGTTGTGAATATGCCTAACTAAGACATATCCATACAAAAAAG

>M6-PGSC0003DMG400022785-(rev)M6LRR-RLP\_1488

GTTCCCTACCATGGGAAGTTGTGAATATGCCTAACTAAGACATATCCATACAAAAAAGTTTAGTCTTTTC  
ATACCCCCTACATCACTAATTGCTGAGAGGGAGAATCATTTACAAACGTT

>M6-PGSC0003DMG400022785-(rev)M6LRR-RLP\_1550

GTCTTTTCATACCCCCTACATCACTAATTGCTGAGAGGGAGAATCATTTACAAACGTTAACCGGATTGAT  
GCCCTCATCTTGTAATGAAGAGGTGTTTCTAAGAATTCCAAATTTGAAGA

>M6-PGSC0003DMG400022785-(rev)M6LRR-RLP\_1612

GGATTGATGCCCTCATCTTGTAATGAAGAGGTGTTTCTAAGAATTCCAAATTTGAAGAAGTTGGGAATTT  
TAATTATTGATGATTCAGACACTATTCAGAAGTGTTATTGCCTTGATAAT

>M6-PGSC0003DMG400022785-(rev)M6LRR-RLP\_1674

GGGAATTTTAATTATTGATGATTCAGACACTATTCAGAAGTGTTATTGCCTTGATAATCTTGACATTTAA  
CTCAGCTTGAGAAGCTCAAAGTAGAGGTCAGAGAGAGTTGGCTAATTTT

>M6-PGSC0003DMG400022785-(rev)M6LRR-RLP\_1736

TACATTTAACTCAGCTTGAGAAGCTCAAAGTAGAGGTCAGAGAGAGTTGGCTAATTTTATAGGCCGACTA  
TCAAAGGTTGGGTGGACATTCCACATTGTGACAATTTCCACCAAACCTTA

>M6-PGSC0003DMG400022785-(rev)M6LRR-RLP\_1798

CCGACTATCAAAGGTTGGGTGGACATTCCACATTGTGACAATTTCCACCAAACCTTAAGAAGTTAACAT

TGTGCACAACACACCTAGAAATGGGAAGACATGAACATTCTTAGTAAGTTA

>M6-PGSC0003DMG400022785-(rev)M6LRR-RLP\_186

TGATGATTCCTTGATTGCATACCATTTTTATGTCCGAGCATGGGCAAATGTATCTCAAGAATTTGACACTA  
GAGAAATTTTTCTTGGTATTCTTCGCTCCATTGGCATGGTCAACGATGA

>M6-PGSC0003DMG400022785-(rev)M6LRR-RLP\_1860

GTTAACATTGTGCACAACACACCTAGAAATGGGAAGACATGAACATTCTTAGTAAGTTACCTAACCTTGAG  
GTGCTCAAACCTTAAAGATCATGCCTTTCGCGGACATATTTGGAACTAAG

>M6-PGSC0003DMG400022785-(rev)M6LRR-RLP\_1922

ACCTTGAGGTGCTCAAACCTTAAAGATCATGCCTTTCGCGGACATATTTGGAACTAAGCGATGAAGACG  
AAGATGGATTCTTGAAGCTAAAGTTTTTACTTCTTGAGAGCTTGCATCTGA

>M6-PGSC0003DMG400022785-(rev)M6LRR-RLP\_1984

GAAGACGAAGATGGATTCTTGAAGCTAAAGTTTTTACTTCTTGAGAGCTTGCATCTGATGCAATGGGAA  
GCAACAAGTTATCATTTTTCCAAGCCTTGAGCACTTAGTCCTAACAAATTGC

>M6-PGSC0003DMG400022785-(rev)M6LRR-RLP\_2046

ATGGGAAGCAACAAGTTATCATTTTTCCAAGCCTTGAGCACTTAGTCCTAACAAATTGCCGGTACTTGGAA  
CAAATTCCTTTCGACTTTGCGGAGATTCAGACACTACAGCTGATTGAACT

>M6-PGSC0003DMG400022785-(rev)M6LRR-RLP\_2170

GAATGTATGCGTTCTGTTCTTGTTCAGCAGAGCAAATACAAGAGGAGCAACAAAGCTTTGGAAATGAT  
GACCTCATTATTCGTGTGAACTCTATCTATACTAGAGTAAACATTAATAAA

>M6-PGSC0003DMG400022785-(rev)M6LRR-RLP\_2232

AAATGATGACCTCATTATTCGTGTGAACTCTATCTATACTAGAGTAAACATTAATAAAAAAAGGTATACAC  
TTTTTTTAAAAGCATAAAAAAATTTGATTAGCTAGATTCCTTCGAAATCT

>M6-PGSC0003DMG400022785-(rev)M6LRR-RLP\_2293

GGTATACACTTTTTTTAAAAGCATAAAAAAATTTGATTAGCTAGATTCCTTCGAAATCTGAAAATGATTTT  
TATATTCATCATTTTTCACTTATTTATACTATAAAAGGTGCTAATTACAA

>M6-PGSC0003DMG400022785-(rev)M6LRR-RLP\_248

TTGACACTAGAGAAATTTTTCTTGGTATTCTTCGCTCCATTGGCATGGTCAACGATGAAGAAGAAAGAAA  
CAGTACTACTGAGCAATTGGCTGAAAGAGAAAGAAACAGTACTACTGAGC

>M6-PGSC0003DMG400022785-(rev)M6LRR-RLP\_310



GAAAGAAACAGTACTACTGAGCAATTGGCTGAAAGAGAAAGAAACAGTACTACTGAGCAATTGGCTGA  
AAGAGTTTATCGAAATTTAAAAGGGAGGAAGTATCTTATTGTCCTAGATGAT

>M6-PGSC0003DMG400022785-(rev)M6LRR-RLP\_372

GGCTGAAAGAGTTTATCGAAATTTAAAAGGGAGGAAGTATCTTATTGTCCTAGATGATATGTGGTCTAT  
CAAGGCTTGGCAGCATGTGAGGAGATCATTCCAGATGATCGTAATGGAAG

>M6-PGSC0003DMG400022785-(rev)M6LRR-RLP\_930

GGGCTTCGTCAAGAAAGTTAATCATAAAAATCTAGAAGATGTGGCAGAGGAAAATTTGAGGGAGTTGG  
TTGATAGAAGTTTGGTTTTGGTGGGGAAGCATACTTCACTAGGAAAAATCAA

>M6-PGSC0003DMG400022787M6G-LecRK\_128

CTTAGGACTTTGCTTATCAATATGTAACATTAATAGCACTCAATATCTAAAAAGATCCAGCAACTTTATGG  
TGCCTGATAACATGTTCAAGTTGGGATTTTTTCAGTCCTGGAAATACTA

>M6-PGSC0003DMG400022787M6G-LecRK\_192

TTTATGGTGTCTGATAACATGTTCAAGTTGGGATTTTTTCAGTCCTGGAAATACTACGAATCGTTACGTTG  
GTATTTGGTACAACCTCTCAGAAACAACCTGTTGTTTGGGTAGCAAATAG

>M6-PGSC0003DMG400022787M6G-LecRK\_256

TACGTTGGTATTTGGTACAACCTCTCAGAAACAACCTGTTGTTTGGGTAGCAAATAGAGTTAAACCATTGA  
AAGATTCATTTGGTGTTCAAAATTTCTGAGGATGGAAATCTTGTTGTG

>M6-PGSC0003DMG400022787M6G-LecRK\_320

CATTGAAAGATTCATTTGGTGTTCAAAATTTCTGAGGATGGAAATCTTGTTGTGATGAATGGAATGAA  
AGATGTTATTTGGACATCGAACATTTTCATCTACTTCACACGTTGTTACGA

>M6-PGSC0003DMG400022787M6G-LecRK\_384

AATGAAAGATGTTATTTGGACATCGAACATTTTCATCTACTTCACACGTTGTTACGAGTTCTATTGCTCAGT  
TACGAGGAGGGAACCTTGTTTTACTTGACAACCTCGAAAAATAGGAACAT

>M6-PGSC0003DMG400022787M6G-LecRK\_448

GCTCAGTTACGAGGAGGGAACCTTGTTTTACTTGACAACCTCGAAAAATAGGAACATTATATGGCAAAGT  
TACCAACATCCTAGTGATAACATTTTTGCCTAAAATGAAAATACCTATTAAC

>M6-PGSC0003DMG400022787M6G-LecRK\_511

CAAAGTTACCAACATCCTAGTGATAACATTTTTGCCTAAAATGAAAATACCTATTAACCTCTGTAAAGCAGG  
GGAGAAAACAGGGCTAAGATCTTGAAAAGTCCTTTGGATCCAAGTTTT

>M6-PGSC0003DMG400022787M6G-LecRK\_64

AAAAAAAAAAAAACCAAAGTGATGATCACTAGTCTACAATATTTGCTTGTTCTTCATCTTTCTTACTTAGGA  
CTTTGCTTATCAATATGTAACATTAATAGCACTCAATATCTAAAAAGAT

>M6-PGSC0003DMG400022900-(rev)M6LRR-RLK\_0

AAAAATTATACTAATTCTACCTAACAAAAAACAGAAATCAACCAAACAAGTAAATTTTTCTTTTGTTATC  
TCTTAGTTAACAAATGAAAAATCCAGAAATTTACTTCATAACGGGGACG

>M6-PGSC0003DMG400022900-(rev)M6LRR-RLK\_1054

GAGCCATCACTTGGGAGGCGAATTTGAGTGATAGCAAGAAGTCATTTGAACTAAGTAGACGTGGCAG  
TTCGATTAGAAAAGGATCGATAATGGGAAAACGTGTTGGAGATTTGACAATG

>M6-PGSC0003DMG400022900-(rev)M6LRR-RLK\_1116

TGGCAGTTCGATTAGAAAAGGATCGATAATGGGAAAACGTGTTGGAGATTTGACAATGGTGAATGATG  
ATAAAGGTGAGTTTGGTTTAGCAGATTTGATGAAAGCTGCTGCAGAGGTGTT

>M6-PGSC0003DMG400022900-(rev)M6LRR-RLK\_1178

ATGATGATAAAGGTGAGTTTGGTTTAGCAGATTTGATGAAAGCTGCTGCAGAGGTGTTAGGGAATGGG  
CCATTGGGTTCTTCTTATAAGGCTATGATGTCAAATGGATTGACAGTTGTGG

>M6-PGSC0003DMG400022900-(rev)M6LRR-RLK\_124

TAGTAATTTGAAGAAATAACATGGACATTTTTCGTGTTATGATCAAACATTCTTCTTTGCATCGTCTTC  
TTGATCAATTACCCCGTGAAAATAATTCAGTTTCCGATACTGATGCT

>M6-PGSC0003DMG400022900-(rev)M6LRR-RLK\_1240

AATGGGCCATTGGGTTCTTCTTATAAGGCTATGATGTCAAATGGATTGACAGTTGTGGTAAAGAGGATC  
AAAGAAATGAACAAGATCGGAAAAGATGGTTTCGATGCAGAGGTTATACGT

>M6-PGSC0003DMG400022900-(rev)M6LRR-RLK\_1302

GAGGATCAAAGAAATGAACAAGATCGGAAAAGATGGTTTCGATGCAGAGGTTATACGTTTAGGAAGAT  
TGAGACATAAAAATATTCTAACACTTTTGGCTTACCATCATCGCAAGGAAGA

>M6-PGSC0003DMG400022900-(rev)M6LRR-RLK\_1364

GAAGATTGAGACATAAAAATATTCTAACACTTTTGGCTTACCATCATCGCAAGGAAGAGAAGTTGTTTGT  
GTATGAGTACATTCCTAAAGGAAGCTTGCTATACATATTGCACGGTAAAG

>M6-PGSC0003DMG400022900-(rev)M6LRR-RLK\_1550

TTTTTGTTAATTTTGTGCATGTGCTTAGAATAGGAGGCCAAAACTTCTACAAGTCGTATGTTTACATTGT

ATTAGTAGTCTAATCGTCAAGTGTTTCATATTAGGTGAGGAACAGAAAG

>M6-PGSC0003DMG400022900-(rev)M6LRR-RLK\_1612

TTACATTGTATTAGTAGTCTAATCGTCAAGTGTTTCATATTAGGTGAGGAACAGAAAGTAGTCTCCTTGT

ATAATCTTGCCAACTATACGTCTATATCCATGAACTAGCTTTGAAGTTG

>M6-PGSC0003DMG400022900-(rev)M6LRR-RLK\_1674

CTCCTTGTATAATCTTGCCAACTATACGTCTATATCCATGAACTAGCTTTGAAGTTGTGTGAGGTCTAAA

GGTCCGTTTGCTTCAACAAGTTATCAAAGCCAGACTCATCTGTACTCTTG

>M6-PGSC0003DMG400022900-(rev)M6LRR-RLK\_1736

AGGTCTAAAGGTCCGTTTGCTTCAACAAGTTATCAAAGCCAGACTCATCTGTACTCTTGACATGTAGGCC

CCATGTTATATTGGGATTATTCTCACCTTATGGTCTTTTTCAAGGCCACT

>M6-PGSC0003DMG400022900-(rev)M6LRR-RLK\_1798

GTAGGCCCCCATGTTATATTGGGATTATTCTCACCTTATGGTCTTTTTCAAGGCCACTTTTTGAATTATGTT

CCCGTTAGCCCAGTGGGTTAAGGGGAACATAAGTTAAATAGAGACCTC

>M6-PGSC0003DMG400022900-(rev)M6LRR-RLK\_186

CATCGTCTTCTTGATCAATTACCCCGTGAAAATAATTTTCAGTTCCGATACTGATGCTTTGTTGAAGCTGA

AACAATCATTTACAAATGCAGCGTCATTGGAATCCTGGAAACCTGGAAC

>M6-PGSC0003DMG400022900-(rev)M6LRR-RLK\_1860

GAATTATGTTCCCGTTAGCCCAGTGGGTTAAGGGGAACATAAGTTAAATAGAGACCTCAAGAAAGGTCA

TTTCTATAGTTGCTCTGTTATTTTCTCCATGTTAATTAGTTGAGGGACGGA

>M6-PGSC0003DMG400022900-(rev)M6LRR-RLK\_1922

AAGGTCATTTCTATAGTTGCTCTGTTATTTTCTCCATGTTAATTAGTTGAGGGACGGATTTGGGCTACGCT

TAACTCATGAACTAGTTTTCGAGGTTAATTAGGCATAATATTCATTTT

>M6-PGSC0003DMG400022900-(rev)M6LRR-RLK\_1984

GGCTACGCTTAACTCATGAACTAGTTTTCGAGGTTAATTAGGCATAATATTCATTTTCTTCGCGCTAATT

AGTCTGTGCATGATTACTTATAAAGATATGAATGATCACAGGTGAAAGA

>M6-PGSC0003DMG400022900-(rev)M6LRR-RLK\_2046

GCGCTAATTAGTCTGTGCATGATTACTTATAAAGATATGAATGATCACAGGTGAAAGAGGGCTGCCCA

TGCTGAGCTCACCTGGCCAGTGCCTCTAAATATTATACAAGGAGTAGCTCA

>M6-PGSC0003DMG400022900-(rev)M6LRR-RLK\_2108

TGCCCCATGCTGAGCTCACCTGGCCAGTGCCTCTAAATATTATACAAGGAGTAGCTCAAGGACTAAATTA  
TCTTCACACTGAACTTGCTTCTTCTGATTTGCCCATGGCGATTTGAAAT

>M6-PGSC0003DMG400022900-(rev)M6LRR-RLK\_2170

CTAAATTATCTTCACACTGAACTTGCTTCTTCTGATTTGCCCATGGCGATTTGAAATCGAGCAATATACT  
CATAAGCACAAACCACGAGCCATTACTACTGGTTACGGATTCTGCACC

>M6-PGSC0003DMG400022900-(rev)M6LRR-RLK\_2232

CAATATACTCATAAGCACAAACCACGAGCCATTACTACTGGTTACGGATTCTGCACCTTAATGAACAAC  
GCGCATGCAGTTCAAGCACTAATCGCGTTCAAGTCACCAGAAGCAGTACA

>M6-PGSC0003DMG400022900-(rev)M6LRR-RLK\_2294

TGAACAACGCGCATGCAGTTCAAGCACTAATCGCGTTCAAGTCACCAGAAGCAGTACAAAATAACCAAG  
TTACACCCAAATGCGACGTTTATTGCCTTGAATTGTGATTCTTGAGATAA

>M6-PGSC0003DMG400022900-(rev)M6LRR-RLK\_2356

AACCAAGTTACACCCAAATGCGACGTTTATTGCCTTGAATTGTGATTCTTGAGATAATAACAGGGAAGT  
ACCCGTCTATATATCTTAATACCGGTAAAGGAGGGATAGACATAGCACAA

>M6-PGSC0003DMG400022900-(rev)M6LRR-RLK\_2418

AGGGAAGTACCCGTCTATATATCTTAATACCGGTAAAGGAGGGATAGACATAGCACAAATGGGCAAATC  
CGCGATTGCTGAGGGAAGAGAACTGAATTATGTGATCCACATATAATAGC

>M6-PGSC0003DMG400022900-(rev)M6LRR-RLK\_248

TGAAGCTGAAACAATCATTTACAAATGCAGCGTCATTGGAATCCTGGAAACCTGGAACGGATCCGTGTG  
ACAAAAATATACGTTGGTTGGGTGTTTTTTGTCAGAAAAAAATGGTACTG

>M6-PGSC0003DMG400022900-(rev)M6LRR-RLK\_2480

CAAAATCCGCGATTGCTGAGGGAAGAGAACTGAATTATGTGATCCACATATAATAGCAAGCGCGAAA  
GATTCAATGAGTTCAATTAAGGAACTAATTCACATTAGTGCAGCATGTGTAG

>M6-PGSC0003DMG400022900-(rev)M6LRR-RLK\_2542

GCGAAAGATTCAATGAGTTCAATTAAGGAACTAATTCACATTAGTGCAGCATGTGTAGAGAGTAATCCG  
CAACAGAGGATAAATATTAGAGAAGTCATTAGGAGGATTGAAGAAATACAA

>M6-PGSC0003DMG400022900-(rev)M6LRR-RLK\_2604

TAATCCGCAACAGAGGATAAATATTAGAGAAGTCATTAGGAGGATTGAAGAAATACAACAACAAAACG  
GAGTAGGCCAAACAGGACAAACAACAACAACGCCTCAGTCTCAAACGGG

>M6-PGSC0003DMG400022900-(rev)M6LRR-RLK\_2666

AAAACGGAGTAGGCCAAACAGGACAAACAACAACAACGCCTCAGTCTCAAACGGGACAAGCAATT  
GAGATAATGCCGTCTCCAAGAGATGGAGATGCTGAAATACAAGTGTGAGAAT

>M6-PGSC0003DMG400022900-(rev)M6LRR-RLK\_2728

GCAATTGAGATAATGCCGTCTCCAAGAGATGGAGATGCTGAAATACAAGTGTGAGAATCCTAACAAGGA  
ACAACAAATCATTAGGAATTTTAGCAGACTCCGGTAATTCAAGGCGTGGTT

>M6-PGSC0003DMG400022900-(rev)M6LRR-RLK\_2790

ACAAGGAACAACAATCATTAGGAATTTTAGCAGACTCCGGTAATTCAAGGCGTGGTTAATATCACAGC  
TTCTCTATGGTCATCAGACTAATGATAGTGCTTTTTTTTTCTTCATTTTT

>M6-PGSC0003DMG400022900-(rev)M6LRR-RLK\_2852

TCACAGCTTCTCCTATGGTCATCAGACTAATGATAGTGCTTTTTTTTTCTTCATTTTTTAAGGTTTCGTTAAC  
TAGGGATAGTACATATATTACTGACTAAGTTTTAGTTTCATTTTGTGT

>M6-PGSC0003DMG400022900-(rev)M6LRR-RLK\_2914

GTTTCGTTAACTAGGGATAGTACATATATTACTGACTAAGTTTTAGTTTCATTTTGTGTATTTTCCCCCTTCT  
TTTAGATGCCCCATTATCTCCCCTAGTAGAACAAGAAATGAGAGGAGA

>M6-PGSC0003DMG400022900-(rev)M6LRR-RLK\_2976

TCCCCCTTCTTTTAGATGCCCCATTATCTCCCCTAGTAGAACAAGAAATGAGAGGAGAAGCTGTATCCTG  
TG TAGAGATGAAAGAGCTTAATGCTTGCTTTAGAATTTTATATGCAATAC

>M6-PGSC0003DMG400022900-(rev)M6LRR-RLK\_3038

GTATCCTGTGTAGAGATGAAAGAGCTTAATGCTTGCTTTAGAATTTTATATGCAATACAATTTCTGTTTC  
TACCATGTTGAGTAGTACTTAACTCTTGTAGACCAAAAATTCCTCAATT

>M6-PGSC0003DMG400022900-(rev)M6LRR-RLK\_310

CCGTGTGACAAAAATATACGTTGGTTGGGTGTTTTTTGTCAGAAAAAATGGTTACTGGACTTCTTCTTG  
CAGAAACGAATTTATCTGGAATTATAGACGTTGAGGCATTATCACAAATG

>M6-PGSC0003DMG400022900-(rev)M6LRR-RLK\_3100

TCCTGTTTCTACCATGTTGAGTAGTACTTAACTCTTGTAGACCAAAAATTCCTCAATTACAAAATACAATT  
ATTGACCATGTCACAAGTACGCTAGCTTGCCGTGCTTTGACTAATTCC

>M6-PGSC0003DMG400022900-(rev)M6LRR-RLK\_372

TCTTCTTGACGAAACGAATTTATCTGGAATTATAGACGTTGAGGCATTATCACAAATGCCTGCTCTGCGT

ACACTTAGTTTTCAAAGCAATTTATTTTCTGGACCAATTCCGGAATTCAA

>M6-PGSC0003DMG400022900-(rev)M6LRR-RLK\_434

CTCTGCGTACACTTAGTTTTCAAAGCAATTTATTTTCTGGACCAATTCCGGAATTCATCGAATGGGTGCT

TTAAAAGGTCTTTATTTGTGCGGAAAATCAATTTTCTGGTGAAATTCCAT

>M6-PGSC0003DMG400022900-(rev)M6LRR-RLK\_496

ATGGGTGCTTTAAAAGGTCTTTATTTGTGCGGAAAATCAATTTTCTGGTGAAATTCCATCAAATTACTTCGA

AAAAATGTTGTCGTTGAAGAAGTTATGGCTCTCTGACAACAAATTTTCG

>M6-PGSC0003DMG400022900-(rev)M6LRR-RLK\_558

TTACTTCGAAAAAATGTTGTCGTTGAAGAAGTTATGGCTCTCTGACAACAAATTTTCGGGTGAAATTCCA

TCTTCATTAATGGAGCTGCAATATCTCATTGAATTGCACCTGGAGAACAA

>M6-PGSC0003DMG400022900-(rev)M6LRR-RLK\_62

TTTGTTATCTCTTAGTTAACAATGAAAAATCCAGAAATTTACTTCATAACGGGGACGAATATAGTAATTT

TGAAGAAATAACATGGACATTTTTCTGTTATGATCAAAACATTCCTTC

>M6-PGSC0003DMG400022900-(rev)M6LRR-RLK\_620

AAATTCATCTTCATTAATGGAGCTGCAATATCTCATTGAATTGCACCTGGAGAACAATCAGTTCACAGG

TCCAATACCGCCAATCTCGAAGTAGTCAACATTAGAATCAATCGATCTTT

>M6-PGSC0003DMG400022900-(rev)M6LRR-RLK\_682

TTCACAGGTCCAATACCGCCAATCTCGAAGTAGTCAACATTAGAATCAATCGATCTTTCTAATAATAACTT

GAAAGGGGAAATCCCTGTTTCTTTATCAAGATTCAATGAGAGTTCGTTT

>M6-PGSC0003DMG400022900-(rev)M6LRR-RLK\_744

TAATAACTTGAAAGGGGAAATCCCTGTTTCTTTATCAAGATTCAATGAGAGTTCGTTTAAGGGGAATTCC

GAGCTTTGTGGTGAAAAATTAGGCAAAGCTTGTAATCCAACCATAAATAG

>M6-PGSC0003DMG400022900-(rev)M6LRR-RLK\_806

GGAATTCCGAGCTTTGTGGTGAAAATTAGGCAAAGCTTGTAATCCAACCATAAATAGCAGCAACGACA

ACAACACTAATAAACGCAAATAATGGCACTCAACAAAGTCCGGATAGTA

>M6-PGSC0003DMG400022900-(rev)M6LRR-RLK\_868

AACGACAACAACACTAATAATAACGCAAATAATGGCACTCAACAAAGTCCGGATAGTAATTCGAATAAA

TGCATCTCAATGTGGATTATGATATCATCAGTTGTTCTTTTATTGATCATG

>M6-PGSC0003DMG400022900-(rev)M6LRR-RLK\_930

GAATAAATGCATCTCAATGTGGATTATGATATCATCAGTTGTTCTTTTATTGATCATGATCATAGTAATAT  
ACCTCATATGTCGCTACCATCAAATCGTCTTGCTTCAATTGAAAGTTT

>M6-PGSC0003DMG400022900-(rev)M6LRR-RLK\_992

TAGTAATATACCTCATATGTCGCTACCATCAAATCGTCTTGCTTCAATTGAAAGTTTTGATGAGCCATCA  
CTTGGGAGGCGAATTTGAGTGATAGCAAGAAGTCATTTGAACTAAGTA

>M6-PGSC0003DMG400022977-(rev)M6LRR-RLP\_0

CTTTATTATATCTAAAGACTATTGACTTTCAAGTAATGAATCTGTTAGAGTCATTTTTGAAAAATAGCTAA  
GATAAGAGGATTGAAATCTTTGAATCTTTTATCTCAATGGAAGTGTCAT

>M6-PGSC0003DMG400022977-(rev)M6LRR-RLP\_33

TAATGAATCTGTTAGAGTCATTTTTGAAAAATAGCTAAGATAAGAGGATTGAAATCTTTGAATCTTTTATC  
TCAATGGAAGTGTCATTAAGGAATTGGTCAAATGAAGTTGTTAGAGTC

>M6-PGSC0003DMG400022978-(rev)M6LRR-RLP\_0

TTGAAAGGTAATATTACTCCTTCATTGCTTGAATTGCAGCATTGAAGTACTTGGACCTTAGTAACAATGA  
TTTTGGTACAAGTCAAATACCGGATTCATTGGTTCATTTCCAAGACTA

>M6-PGSC0003DMG400022988M6LRR-RLP\_0

CATGGGAGATGCATTAGTTCAATGGAAAAATAGTGAATTTGTGTACAATAAAACACTCGGATTGTTGAA  
GATCATTGATTTTTCAAGTAACAAATTAGTTGGAAGAGTTCCTGATGAAAT

>M6-PGSC0003DMG400022988M6LRR-RLP\_112

GATGAAATCACACAATTAGATGGACTACTTTCACTAAACCTTTCACGAAACAACCTAACAGGACACATCA  
TACAAGGAATTGGGATGATGGAAATGTTAGAGTCTCTTGATCTGTCTCGA

>M6-PGSC0003DMG400022988M6LRR-RLP\_168

AACAGGACACATCATAAAGGAATTGGGATGATGGAAATGTTAGAGTCTCTTGATCTGTCTCGAAATCA  
GTTAACAGGACGAATTCCAGCAAGTCTTGCTCGATTAAATTTCTAAGTGT

>M6-PGSC0003DMG400022988M6LRR-RLP\_224

TGTCTCGAAATCAGTTAACAGGACGAATTCCAGCAAGTCTTGCTCGATTAAATTTCTAAGTGTTTTAGA  
CTTATCGAGTAACAATTTGTCAGGGGAAATTCCTTCGAGCACTCAATTGC

>M6-PGSC0003DMG400022988M6LRR-RLP\_279

CCTAAGTGTTTTAGACTTATCGAGTAACAATTTGTCAGGGGAAATTCCTTCGAGCACTCAATTGCAAAGT  
TTAATCCTTCGTCATATGCAGGCAACAATGAACTTTGTAGTCCACCACT

>M6-PGSC0003DMG400022988M6LRR-RLP\_56

TCGGATTGTTGAAGATCATTGATTTTTCAAGTAACAAATTAGTTGGAAGAGTTCCTGATGAAATCACACA  
ATTAGATGGACTACTTTCCTAAACCTTTCACGAAACAACCTAACAGGAC

>M6-PGSC0003DMG400022989M6LRR-RLP\_1449

GTGGTCCAATTAGAGTCAAACTGAGGGACCAGTTTCGTTGGCTATTTTGTATCAAGAATTCGAATTTGA  
TGAAATAGTTGTTGAGCTTTTTAATTTTAGCATAAAAATACTTAGTTTAG

>M6-PGSC0003DMG400022989M6LRR-RLP\_1512

AATTTGATGAAATAGTTGTTGAGCTTTTTAATTTTAGCATAAAAATACTTAGTTTAGTTGACATAAAGGAT  
AATTTTATATAAATTGGGTTAGAGCAAATTTGATTCAATGACTATGAGA

>M6-PGSC0003DMG400022989M6LRR-RLP\_1575

TAAAGGATAATTTTATATAAATTGGGTTAGAGCAAATTTGATTCAATGACTATGAGAGTAAGATATTTTT  
TATTGGTCTACTAGCCAAATCAAATTATCCTGGGCAGCATCCTAATTCT

>M6-PGSC0003DMG400023004-(rev)M6LRR-RLK\_1054

TGCAGCGGAAATGCCTGCACAACGTCGTCTAAACCTCACAGGCATCTGTTGTTGTAGGGGTTATTGTG  
GTTACTATTATTGCATCTGCTATAGGAATTCTTTCCTTCACACACTATAGA

>M6-PGSC0003DMG400023004-(rev)M6LRR-RLK\_1116

TATTGTGGTACTATTATTGCATCTGCTATAGGAATTCTTTCCTTCACACACTATAGAAGACGAAAGCAGA  
AACTTGGAGGTGGACTGGAAATGTGTGATAGCCGTCTCAGTATCGACCA

>M6-PGSC0003DMG400023004-(rev)M6LRR-RLK\_1178

GAAAGCAGAACTTGGAGGTGGACTGGAAATGTGTGATAGCCGTCTCAGTATCGACCAGGCCAAGGAA  
GTTAATAGGAAGAATGGTTCTCCCCTAGTCAGCCTTGAGTACTCGATTGGCT

>M6-PGSC0003DMG400023004-(rev)M6LRR-RLK\_124

TGTAGTTCATCCCCGTTGCTCTAAAGGTGGCTTTAAGTTTGTTTTTGGGTGTCTATTTATAACCTCATTTTG  
ATAATGGAGTCTGTCTCACTTTAGTTTATTGTCTTGTTCCTTATTGTA

>M6-PGSC0003DMG400023004-(rev)M6LRR-RLK\_1240

AAGGAAGTTAATAGGAAGAATGGTTCTCCCCTAGTCAGCCTTGAGTACTCGATTGGCTGGGATCCGTTG  
GCTGAGGGCCGGCGTTATGGTGGAGTTTCCAAGAGATTCTGCAGAGATAC

>M6-PGSC0003DMG400023004-(rev)M6LRR-RLK\_1302

TCCGTTGGCTGAGGGCCGGCGTTATGGTGGAGTTTCCAAGAGATTCTGCAGAGATACAGATTCAATTT



GGAAGAGGTGGAGTCAGCTACACAGTACTTTGCTGATAAGAATCTATTGGC

>M6-PGSC0003DMG400023004-(rev)M6LRR-RLK\_1364

TCAATTTGGAAGAGGTGGAGTCAGCTACACAGTACTTTGCTGATAAGAATCTATTGGCTAAGAGCAACT

TTTCAACTACATATAGAGGGACTCTAAGAGATGGATCACTTGTTGCTGTTA

>M6-PGSC0003DMG400023004-(rev)M6LRR-RLK\_1426

AGCAACTTTTCAACTACATATAGAGGGACTCTAAGAGATGGATCACTTGTTGCTGTTACGAGAATTGCCA

AAATTAGCTGCAAGTCAGAAGAAGCTGAGTTTTTAAGAGGACTAAACATT

>M6-PGSC0003DMG400023004-(rev)M6LRR-RLK\_1488

AATTGCCAAAATTAGCTGCAAGTCAGAAGAAGCTGAGTTTTTAAGAGGACTAAACATTTTGACGTCTCTG

AGACATGATAATTTAGTTAGGCTGAGAGGTTTCTGTTGCTCTAAAAGCCG

>M6-PGSC0003DMG400023004-(rev)M6LRR-RLK\_1550

CGTCTCTGAGACATGATAATTTAGTTAGGCTGAGAGGTTTCTGTTGCTCTAAAAGCCGGGAGAAATGTTT

TCTTGTATGATTTTGTGCCAAGAGGAACTTGTTCACCTACCTAGATT

>M6-PGSC0003DMG400023004-(rev)M6LRR-RLK\_1612

GAATGTTTTCTGTTTATGATTTTGTGCCAAGAGGAACTTGTTCACCTACCTAGATTTGAAGGAGGACG

AAACTCGTGCTCTTGAATGGTCCACGAGGGTATCTATCATTAGTGGCACT

>M6-PGSC0003DMG400023004-(rev)M6LRR-RLK\_1674

GGAGGACGAACTCGTGCTCTTGAATGGTCCACGAGGGTATCTATCATTAGTGGCACTGCAAAAGGTCA

GTTTTTGAATCAACTCTATCTTGTAAAGATATAAAGTACAGTAATTTGACAT

>M6-PGSC0003DMG400023004-(rev)M6LRR-RLK\_1736

AAGGTCAGTTTTTGAATCAACTCTATCTTGTAAAGATATAAAGTACAGTAATTTGACATTATATTACTTTTTC

TGAGCTTACTGTCAACAATTCAATCATGCCTTTTTATCTATCTTGAGC

>M6-PGSC0003DMG400023004-(rev)M6LRR-RLK\_1798

TTACTTTTTCTGAGCTTACTGTCAACAATTCAATCATGCCTTTTTATCTATCTTGAGCAGGCGTTGAGTATT

TGCACGGGTGCAAGGTGAATAAGCCAGCTCTAGTGCATCAGAATATCT

>M6-PGSC0003DMG400023004-(rev)M6LRR-RLK\_186

CCTCATTTTGATAATGGAGTCTGTCTCACTTTAGTTTATTGTCTTGTTTCTTATTGTACAGTTTTGCAACTA

TGCTATAACCATTTTACTGGTAGCATAACCACTCAACTAGGGACTCTA

>M6-PGSC0003DMG400023004-(rev)M6LRR-RLK\_1860

GTTGAGTATTTGCACGGGTGCAAGGTGAATAAGCCAGCTCTAGTGCATCAGAATATCTGTGCTGAAAAC  
TTGCTCCTTGACCAACGATTCAAACCATTGCTTTCAAATTCAGGCCTGCAT

>M6-PGSC0003DMG400023004-(rev)M6LRR-RLK\_1922

TGAAAACCTTGCTCCTTGACCAACGATTCAAACCATTGCTTTCAAATTCAGGCCTGCATAAGCTCCTCACAA  
ATGATACCGTCTTTTCAACACTCAAGGCAAGTGCTGCCATGGGATATTT

>M6-PGSC0003DMG400023004-(rev)M6LRR-RLK\_1984

TCCTCACAAATGATACCGTCTTTTCAACACTCAAGGCAAGTGCTGCCATGGGATATTTAGCTCCAGAGTA  
CTCCACTACAGGCCGATTTACTGAGAGGAGTGATATTTATGCCTTTGGAG

>M6-PGSC0003DMG400023004-(rev)M6LRR-RLK\_2046

CCAGAGTACTCCACTACAGGCCGATTTACTGAGAGGAGTGATATTTATGCCTTTGGAGTGCTCATTTTCC  
AAATTTTATCTGGCAAGCGAAAATTCACCAGTTCAATGCGTGCTGCTGCT

>M6-PGSC0003DMG400023004-(rev)M6LRR-RLK\_2108

CATTTTCAAATTTTATCTGGCAAGCGAAAATTCACCAGTTCAATGCGTGCTGCTGCTGAATTGTCCAAAT  
TCCACGACTTGATGGACGTGAATCTCCGTGGAAGGTTCTCTGAGTCTGA

>M6-PGSC0003DMG400023004-(rev)M6LRR-RLK\_2170

TGTCCAAATTCACGACTTGATGGACGTGAATCTCCGTGGAAGGTTCTCTGAGTCTGAAGCAACAAAAC  
AGCGAAAATCGCTTTGTTATGTACACATGAATGTCCAGAGGAGAGACCAA

>M6-PGSC0003DMG400023004-(rev)M6LRR-RLK\_2232

ACAAAACCTAGCGAAAATCGCTTTGTTATGTACACATGAATGTCCAGAGGAGAGACCAACCATGGAAACA  
ATCGTACGAGAAATTGGTAATTTAGGTAGTCCTTCCTAATGCTAATGATCT

>M6-PGSC0003DMG400023004-(rev)M6LRR-RLK\_2294

GGAAACAATCGTACGAGAAATTGGTAATTTAGGTAGTCCTTCCTAATGCTAATGATCTTCTCCATCAACT  
ATTGCCTGTGGCAAATTTCAATCCTCCTAACTTATTAGCTGGAGATAG

>M6-PGSC0003DMG400023004-(rev)M6LRR-RLK\_2356

CCATCAACTATTGCCTGTGGCAAATTTCAATCCTCCTAACTTATTAGCTGGAGATAGATTCGCACTAACC  
TCTCACGAGTATTGGAGCTTCAAATATTTAGTCAGTCTGAGAACTTCTT

>M6-PGSC0003DMG400023004-(rev)M6LRR-RLK\_2418

GCACTAACCTCTCACGAGTATTGGAGCTTCAAATATTTAGTCAGTCTGAGAACTTCTTCGACTGAGGACT  
TGACCATTTTGTGAATGTTTGCATCTCGTATGCCATTTAACCTTAGGATT

>M6-PGSC0003DMG400023004-(rev)M6LRR-RLK\_248

TTTGCAACTATGCTATAACCATTTTACTGGTAGCATACCCACTCAACTAGGGACTCTAACAAAGCTCAATG  
TCCTGGCTCTGCAATCCAATCAGTTAACTGGTGCGATCCCCGCTAGCTT

>M6-PGSC0003DMG400023004-(rev)M6LRR-RLK\_2480

TGAGGACTTGACCATTTTGTGAATGTTTGCATCTCGTATGCCATTTAACCTTAGGATTTCTCATGTTGGAA  
AATTTTCTCTGTTTATCTCATGGATTCTAATTAATCTGTTTGTAAAAA

>M6-PGSC0003DMG400023004-(rev)M6LRR-RLK\_2534

GATTTCTCATGTTGGAAAATTTTCTCTGTTTATCTCATGGATTCTAATTAATCTGTTTGTAAAAAGATGAA  
TGTTCTTCCATTTACCTAGGATCATTGCTTCGTTTTCATTTTGTGCCT

>M6-PGSC0003DMG400023004-(rev)M6LRR-RLK\_310

AGCTCAATGTCCTGGCTCTGCAATCCAATCAGTTAACTGGTGCGATCCCCGCTAGCTTGGGTGACTTGGG  
AGTGTGATGAGGGTGGACTTGAGTTATAATAGTCTTTTCGGTTCAATTC

>M6-PGSC0003DMG400023004-(rev)M6LRR-RLK\_372

GACTTGGGAGTGTTGATGAGGGTGGACTTGAGTTATAATAGTCTTTTCGGTTCAATTCCTTCAAACCTTG  
CGGATGCTCCCCTACTTGAAGTCTTGATATCCGAAACAACAAGATTTCT

>M6-PGSC0003DMG400023004-(rev)M6LRR-RLK\_434

AAAACCTTGCGGATGCTCCCCTACTTGAAGTCTTGATATCCGAAACAACAAGATTTCTGGCAATGTGCCT  
CTTGGTAATGAATTTTCTCGCCCTACATTGTAATCTCTTCAATTGGAATTT

>M6-PGSC0003DMG400023004-(rev)M6LRR-RLK\_496

ATGTGCCTCTTGGTAATGAATTTTCTCGCCCTACATTGTAATCTCTTCAATTGGAATTTGAGAGTTAACCA  
ATTTTTTTTTTTTTTTTTATGACATTTCCGTATATGCCTTTTAGATAAT

>M6-PGSC0003DMG400023004-(rev)M6LRR-RLK\_558

AGTTAACCAATTTTTTTTTTTTTTTTTATGACATTTCCGTATATGCCTTTTAGATAATTTAGTTGTTAATTAT  
TGTGTTTCATAGTACTTATTACGTAGTTTTCAAATATATAAGTCTTT

>M6-PGSC0003DMG400023004-(rev)M6LRR-RLK\_620

TTGTTAATTATTGTGTTTCATAGTACTTATTACGTAGTTTTCAAATATATAAGTCTTTTCAAAAACCTTAA  
AGCTTCTATGTCCGATTCATGGTCAAAGTTTAGACGTTTGAATCTTGA

>M6-PGSC0003DMG400023004-(rev)M6LRR-RLK\_682

AAAACCTTAAAGCTTCTATGTCCGATTCATGGTCAAAGTTTAGACGTTTGAATCTTGAAATTCAACTGTG

CCACATAAGTTTGAGACAAAGGGAGTTATGTATATGTAGCCCCATAAGA

>M6-PGSC0003DMG400023004-(rev)M6LRR-RLK\_744

CCAAGTGTGCCACATAAGTTTGAGACAAAGGGAGTTATGTATATGTAGCCCCATAAGAGTCGTACGTAT  
AGTTTCTTGGTAAATTATATCTTATCTGGTCTTTTGTTTTCTGTCTTATGA

>M6-PGSC0003DMG400023004-(rev)M6LRR-RLK\_806

TACGTATAGTTTCTTGGTAAATTATATCTTATCTGGTCTTTTGTTTTCTGTCTTATGAAGCTTTGAAGAGAT  
TAGTTGGAGTTTCCAGTATGAGAACAATCCAGGACTATGCGGTGTGG

>M6-PGSC0003DMG400023004-(rev)M6LRR-RLK\_868

TTGAAGAGATTAGTTGGAGTTTCCAGTATGAGAACAATCCAGGACTATGCGGTGTGGGTTTCCCATCC  
TTGCGAATTTGTACATCTTTGGATCGCTCGAATCCTAATAGACCAGAGCCC

>M6-PGSC0003DMG400023004-(rev)M6LRR-RLK\_930

CCCATCCTTGCGAATTTGTACATCTTTGGATCGCTCGAATCCTAATAGACCAGAGCCCTATGGAGTTGGC  
TCAAGTGGTTTATCTACTAGAGATATTCCAGAAACAGCTAATCTCAATCT

>M6-PGSC0003DMG400023004-(rev)M6LRR-RLK\_992

GAGTTGGCTCAAGTGGTTTATCTACTAGAGATATTCCAGAAACAGCTAATCTCAATCTAAATTGCAGCGG  
AAATGCCTGCACAACGTCGTCTAAACCTCACAGGCATCTGTTGTTGTAG

>M6-PGSC0003DMG400023018M6LRR-RLP\_0

ATGATCTTGCGTAAGTAAAGCATTAGTTCTAATCTTGAAGTACTAGATTCAAGGTGCTCTTACTACAGTTT  
CTCGTACTTTCTGAATAAAAGAACTAGGTAACAAAGAGATACACACAAA

>M6-PGSC0003DMG400023018M6LRR-RLP\_1008

CATTTGGGAATTTTCAGGAAGTTTTCATGGTCTCAAGTGTAAGCTTGTAGACATATCCTCCATGGTTAATA  
CTAATTAAGCTTACGTTTCGACATTACATGTATCAAAGACATGTAACATGC

>M6-PGSC0003DMG400023018M6LRR-RLP\_1071

GTTAATACTAATTAAGCTTACGTTTCGACATTACATGTATCAAAGACATGTAACATGCGGTATAATATTGG  
ATGTCTTTGATGGATGTAATGTGCAATATAAGCTTAGTACTAACCACATA

>M6-PGSC0003DMG400023018M6LRR-RLP\_1134

ATATTGGATGTCTTTGATGGATGTAATGTGCAATATAAGCTTAGTACTAACCACATATGATATGGCTACA  
AACCTACACTTAAAAAGATGATGACTTCCTGAAATCTCTGAATAATGAAT

>M6-PGSC0003DMG400023018M6LRR-RLP\_1197

GGCTACAAACCTACACTTAAAAAGATGATGACTTCCTGAAATCTCTGAATAATGAATGTACTATAGGAGA  
CAACAATTTCCACAAAATGATCAATTTCTTCATCATCATTATATGATATC

>M6-PGSC0003DMG400023018M6LRR-RLP\_126

TTCTACTTGTCAGTTCAATGAGGGAGAGTATGTATAAGTTGGAGTGTGCAGAGTCACAAGATATAAAAC  
ATGCCAAGTAAATCCAAAAATATTTTGTATTATACTTTCTATTACTACTAA

>M6-PGSC0003DMG400023018M6LRR-RLP\_1260

TAGGAGACAACAATTTCCACAAAATGATCAATTTCTTCATCATCATTATATGATATCAAATTCCTCTTCAAT  
TTCGAAGACCTAATTTTGAAGCGACTAAAATCCTTAAAACGGAATGAT

>M6-PGSC0003DMG400023018M6LRR-RLP\_1323

CTCTTCAATTTTGAAGACCTAATTTTGAAGCGACTAAAATCCTTAAAACGGAATGATTCCAGAGTTTCTA  
ATGGAGAACAACCAACAATAAATTCGCAATATGGTCCTTAGATATTACC

>M6-PGSC0003DMG400023018M6LRR-RLP\_1386

GTTTCTAATGGAGAACAACCAACAATAAATTCGCAATATGGTCCTTAGATATTACCATCCACTTCAATTT  
TATACTATACGGAGATTTTGAATTTATATCCACATGCACATCAAAATCT

>M6-PGSC0003DMG400023018M6LRR-RLP\_1449

TTCAATTTTATACTATACGGAGATTTTGAATTTATATCCACATGCACATCAAAATCTCAAATTAGTATTA  
TCAAATGAATGTGTATAAACATTACGGCAATGCACAAATCTCTTTTTTG

>M6-PGSC0003DMG400023018M6LRR-RLP\_1512

TAGTATTATCAAATGAATGTGTATAAACATTACGGCAATGCACAAATCTCTTTTTTGAAGTACCTGAGT  
TTCACATTTTCTTTGATCAAAGTTCTAAGTTGAATTTTTTTAATTTGG

>M6-PGSC0003DMG400023018M6LRR-RLP\_1575

ACCTGAGTTTACATTTTCTTTGATCAAAGTTCTAAGTTGAATTTTTTTAATTTGGGAGAGAAACAAAAT  
TACCTAAGCCATAATCAACCTAGGATACATATCCTTTGTGATAATTAAA

>M6-PGSC0003DMG400023018M6LRR-RLP\_1638

AACAAAATTACCTAAGCCATAATCAACCTAGGATACATATCCTTTGTGATAATTAAGTTACTAAAAGAG  
AAGATATCAAGTAAATTTCAAAGATAAAGCTACCTGTTTGAAGAGAGCACT

>M6-PGSC0003DMG400023018M6LRR-RLP\_1701

AAAAGAGAAGATATCAAGTAAATTTCAAAGATAAAGCTACCTGTTTGAAGAGAGCACTTGTTACGGATAT  
CTGATTTCTGTTAGAATAATAGAGAGACTGTGAAGAAAAAGAGCTTCAGGCA

>M6-PGSC0003DMG400023018M6LRR-RLP\_1764

GGATATCTGATTTGTTAGATAAATAGAGAGACTGTGAAGAAAAAGAGCTTCAGGCAACTAACTGATCG  
GTCTACCGTTGTTGTTTCTTCTGTCTTTTCGCCGGAATCCATGGTTGGTTT

>M6-PGSC0003DMG400023018M6LRR-RLP\_1827

TGATCGGTCTACCGTTGTTGTTTCTTCTGTCTTTTCGCCGGAATCCATGGTTGGTTTTGGTTACAGCTATT  
GTTTCTTCTATTTTCTCAGCTGGAATCCATGGTTTGTGTTGGTCTAC

>M6-PGSC0003DMG400023018M6LRR-RLP\_189

TAAAACATGCCAAGTAAATCCAAAAATATTTTGTATTATACTTTCTATTTCATACTAAGTAAAGGAAATTAA  
AGGGAGAGAGCAGTGATAAATGACAAATGGAAGAAATGAAAATGAATGA

>M6-PGSC0003DMG400023018M6LRR-RLP\_1890

ACAGCTATTGTTTCTTCTATTTTCTCAGCTGGAATCCATGGTTTGTGTTGGTCTACAAGTGTGTTTCTTT  
TATCTTCTCGCCGGAATCCAAATGTTGTTTGTGCGGAATCCGGCAACTG

>M6-PGSC0003DMG400023018M6LRR-RLP\_1953

TGTTTCTTTTATCTTCTCGCCGGAATCCAAATGTTGTTTGTGCGGAATCCGGCAACTGATTGGTCGATCCAG  
CAACTGATCGGTTCGATCCGGCAACTGATTGGTCGATCTACATCTGTTGT

>M6-PGSC0003DMG400023018M6LRR-RLP\_2016

CGATCCAGCAACTGATCGGTTCGATCCGGCAACTGATTGGTCGATCTACATCTGTTGTTTGCTGGAATCCA  
GAAATGCTTAGAAGGTATCGCCCCCTTTCCCTTCAGTTTTAACTTAGGC

>M6-PGSC0003DMG400023018M6LRR-RLP\_2056

CGATCTACATCTGTTGTTTGTGCTGGAATCCAGAAATGCTTAGAAGGTATCGCCCCCTTTCCCTTCAGTTTT  
AACTTAGGCACAAAATGAGCAAATTGAGTAATATATTGGCATAAATTTG

>M6-PGSC0003DMG400023018M6LRR-RLP\_252

GAAATTAAGGGAGAGAGCAGTGATAAATGACAAATGGAAGAAATGAAAATGAATGAAGAGAAACGT  
AAGACTTTGACGATTTGGGAACCTAAAAGAGTAAAATGCGGTATAATTAATGT

>M6-PGSC0003DMG400023018M6LRR-RLP\_315

ACGTAAGACTTTGACGATTTGGGAACCTAAAAGAGTAAAATGCGGTATAATTAATGTGAAACTCCAAGA  
GCTCCTTTGGTCGTTCAAGACCTAAAGTTGTATACCAAATCAGTCAATT

>M6-PGSC0003DMG400023018M6LRR-RLP\_378

CCAAGAGCTCCTTTGGTCGTTCAAGACCTAAAGTTGTATACCAAATCAGTCAATTGCCGGATGCTCTT

CTCCTTTGCTCTCTTATATCGACTGATCAAACACTCGTAATAACCGCTCT

>M6-PGSC0003DMG400023018M6LRR-RLP\_441

TGCTCTTCTCCTTTGCTCTCTTATATCGACTGATCAAACACTCGTAATAACCGCTCTCTCAAAAACGTGGC

ACTATCTCTGGAATTGACTTGATACCTTTTGTTTTAGTACTTTTAATTA

>M6-PGSC0003DMG400023018M6LRR-RLP\_504

AACGTGGCACTATCTCTGGAATTGACTTGATACCTTTTGTTTTAGTACTTTTAATTACCATGAGCGTTATG

TATCCTATGTTCAATTATGTATTAGGTTATTATATTTCTTCCAAAATTA

>M6-PGSC0003DMG400023018M6LRR-RLP\_567

GCGTTATGTATCCTATGTTCAATTATGTATTAGGTTATTATATTTCTTCCAAAATTAATAATCCTACTTGAT

AGCCTTGAGTCGGATGCACACGGGTGGAAAATATGAAACTCCGATTAG

>M6-PGSC0003DMG400023018M6LRR-RLP\_63

TACAGTTTCTCGTACTTTCTGAATAAAAGAACTAGGTAACAAAGAGATACACACAAAATCCATTTCTACTT

GTCAGTTCAATGAGGGAGAGTATGTATAAGTTGGAGTGTGCAGAGTCAC

>M6-PGSC0003DMG400023018M6LRR-RLP\_630

CTACTTGATAGCCTTGAGTCGGATGCACACGGGTGGAAAATATGAAACTCCGATTAGTTTCTGAAGAAG

AGGTTTGTGCCTTGCCTGAATGTTTATGCACTTGTTTCATCGTTTATAACAC

>M6-PGSC0003DMG400023018M6LRR-RLP\_693

AAGAAGAGGTTTGTGCCTTGCCTGAATGTTTATGCACTTGTTTCATCGTTTATAACACTAATTTTGGGATTT

TGATGCTAATGTGTCCATAGCATGAAAGTCTCTAAAACATAAAATTGA

>M6-PGSC0003DMG400023018M6LRR-RLP\_756

TGGGATTTTGATGCTAATGTGTCCATAGCATGAAAGTCTCTAAAACATAAAATTGAAGTGGATAGTGTT

ATCCAATGACCATATTGTGACTGTTGGATTGCCTGCATTAGAAACTATG

>M6-PGSC0003DMG400023018M6LRR-RLP\_819

TAGTGTTATCCAATGACCATATTGTGACTGTTGGATTGCCTGCATTAGAACTATGAAATTATCTTGTTT

TAAAGTTTTAGTTGCATGGAAATTAGGTCTTCAAATTAAGAGACTG

>M6-PGSC0003DMG400023018M6LRR-RLP\_882

TCTTGTTTTAAAGTTTTAGTTGCATGGAAATTAGGTCTTCAAATTAAGAGACTGAATTTGATATCATA

CAATGAAGATGAAGAAATTGATCATTCTTGGAAATTGTTGCCCTTAT

>M6-PGSC0003DMG400023018M6LRR-RLP\_945

ATATCATACAATGAAGATGAAGAAATTGATCATTCTTGAAATTGTTGCCCTTATCTTCATCATTGGG  
AATTCAGGAAGTTTCATGGTCTCAAGTGTAAAGCTGTAGACATATCC

>M6-PGSC0003DMG400023057M6LRR-RLK\_0

ATGTCGATGTTTAAACAAATTGTTGTTGGTTTGGTTTTTTGTTGTAACACTGGTTCTGGATATGTGTTTTCT  
GAAACAGAGCTTGAGGTTCTGTTAGAGATAAAGAAGTCATTTCTTGAT

>M6-PGSC0003DMG400023057M6LRR-RLK\_1054

AGATTCCTGTGGAGTTGAGAGAATGCATTTCACTAAAGCTGCTGGATTTGTCTAATAACACGCTTAATGG  
TTCGATACCAGTTGAGTTGTATGAGTTGGTTGAGTTAACTGATCTCCTAC

>M6-PGSC0003DMG400023057M6LRR-RLK\_1116

CTTAATGGTTTCGATACCAGTTGAGTTGTATGAGTTGGTTGAGTTAACTGATCTCCTACTTAACAACAACA  
CATTGGTTGGTTTCAGTTTCTCCGTTGATTGCAAATCTTACCAATCTTCAA

>M6-PGSC0003DMG400023057M6LRR-RLK\_1178

CAACAACACATTGGTTGGTTTCAGTTTCTCCGTTGATTGCAAATCTTACCAATCTTCAAACATTGGCATTGT  
CGCACAATAGTCTTCATGGCAATATACCGAAAGAGATTGGGATGGTCTGA

>M6-PGSC0003DMG400023057M6LRR-RLK\_124

CTGAAAATGTTTTGTCAAATTGGTCTGATAAAAATCAAATTTCTGTCAATGGAGTGGTGTTTCATGTGA  
AGAAGATACATTGAAAGTTGTGAGATTAAATCTTTCTGATTGTTCAATTA

>M6-PGSC0003DMG400023057M6LRR-RLK\_1240

TGGCATTGTCTGCACAATAGTCTTCATGGCAATATACCGAAAGAGATTGGGATGGTCTGAAAATCTTGAGA  
TTCTGTTTCTATATGAGAATCAGTTCTCTGGAGAAATACCAATGGAGATAG

>M6-PGSC0003DMG400023057M6LRR-RLK\_1302

CTTGAGATTCTGTTTCTATATGAGAATCAGTTCTCTGGAGAAATACCAATGGAGATAGGCAATTGCTCCA  
GATTGCAAATGATCGATTTTTATGGGAATGCATTCTCAGGACGCATTCCC

>M6-PGSC0003DMG400023057M6LRR-RLK\_1364

TTGCTCCAGATTGCAAATGATCGATTTTTATGGGAATGCATTCTCAGGACGCATTCCCATTACAATTGGA  
GGGCTGAAGGAGCTGAATTTTCATTGATTTTAGACAGAATGATCTCTCTGG

>M6-PGSC0003DMG400023057M6LRR-RLK\_1426

CAATTGGAGGGCTGAAGGAGCTGAATTTTCATTGATTTTAGACAGAATGATCTCTCTGGTGAGATTCTGCTGC  
CAGTTTGGGAACTGTCATCAGCTGAAGATCCTTGATTTGGCGGATAATC



>M6-PGSC0003DMG400023057M6LRR-RLK\_1488

ATTCTGCCAGTTTGGGAAACTGTCATCAGCTGAAGATCCTTGATTGGCGGATAATCGTCTATCTGGTA  
GCGTTCCTGCTACGTTTGGTTATCTTCGAGCATTGGAGCAGCTTATGCTT

>M6-PGSC0003DMG400023057M6LRR-RLK\_1550

ATCTGGTAGCGTTCCTGCTACGTTTGGTTATCTTCGAGCATTGGAGCAGCTTATGCTTTATAACAACTCAC  
TTGAAGGTAATCTTCCTGATGAACTGATCAATCTTTCAAACTTGACAAG

>M6-PGSC0003DMG400023057M6LRR-RLK\_1612

ACAACTCACTTGAAGGTAATCTTCCTGATGAACTGATCAATCTTTCAAACTTGACAAGAATAAAATTTTCT  
CATAACAACTGAATGGTAGTATAGTTTCCCTGTGTAGTTCGATGTCTT

>M6-PGSC0003DMG400023057M6LRR-RLK\_1674

AATTTTTCTCATAACAACTGAATGGTAGTATAGTTTCCCTGTGTAGTTCGATGTCTTTTCTTTCGTTTGAT  
GTTACAAATAATGCATTTGATCATGAGGTTCCACCTCATTTAGGATAT

>M6-PGSC0003DMG400023057M6LRR-RLK\_1736

TTCGTTTGATGTTACAAATAATGCATTTGATCATGAGGTTCCACCTCATTTAGGATATTCACCATTCTTGA  
AAGGTTAAGGCTAGGAAACAATCGTTTCACCGGAGAAATCCCTTGGAC

>M6-PGSC0003DMG400023057M6LRR-RLK\_1798

CATTTCTTGAAAGGTTAAGGCTAGGAAACAATCGTTTCACCGGAGAAATCCCTTGGACATTGGGATTAAT  
CCGTGAGTTATCACTGCTCGATCTCTCTGGAAATGAATTGACTGGTTTAA

>M6-PGSC0003DMG400023057M6LRR-RLK\_186

TCATGTGAAGAAGATACATTGAAAGTTGTGAGATTAAATCTTCTGATTGTTCAATTAGTGGTTCAATTC  
ACCTTCTATTGGCTTTTTGCATGACCTACTCCATCTTGATCTTCTTCT

>M6-PGSC0003DMG400023057M6LRR-RLK\_1860

GGATTAATCCGTGAGTTATCACTGCTCGATCTCTCTGGAAATGAATTGACTGGTTTAATACCTCCACAGCT  
TTCATATGTAGAAAGCTCACACATCTCGATCTCAATAACAACCGGCTT

>M6-PGSC0003DMG400023057M6LRR-RLK\_1922

TCCACAGCTTTCATATGTAGAAAGCTCACACATCTCGATCTCAATAACAACCGGCTTAATGGATCAATTC  
CATCTTGGCTCGGAAACTTGCCACTCTTAGGTGAGCTTAAGCTGTCCTC

>M6-PGSC0003DMG400023057M6LRR-RLK\_1984

GATCAATTCCATCTTGGCTCGGAAACTTGCCACTCTTAGGTGAGCTTAAGCTGTCCTCAATAAGTTCTCG

GGACCTCTCCTCGAGAATTGTTAACTGCTCAAAGCTTTTAGTGCTAT

>M6-PGSC0003DMG400023057M6LRR-RLK\_2046

AAGTTCTCGGGACCTCTCCTCGAGAATTGTTAACTGCTCAAAGCTTTTAGTGCTATCTCTAGAAGAGA  
ATTCAATCAATGGAAGCTCTGCCCCTTGAAATAGGTGAACTCAAGTCCCTA

>M6-PGSC0003DMG400023057M6LRR-RLK\_2108

AGAAGAGAATTCAATCAATGGAAGCTCTGCCCCTTGAAATAGGTGAACTCAAGTCCCTAAATATCCTAAAT  
TTCGACAAAAACCAACTCTCTGGTCCCATTCCATCTACCATTGGCAACTT

>M6-PGSC0003DMG400023057M6LRR-RLK\_2170

TCCTAAATTCGACAAAAACCAACTCTCTGGTCCCATTCCATCTACCATTGGCAACTTGAGCAAGCTATAT  
ATACTCCGTCTCTCGGGAAACAACCTTAACCGGTGAAATACCAAGTGAGC

>M6-PGSC0003DMG400023057M6LRR-RLK\_2232

AAGCTATATACTCCGTCTCTCGGGAAACAACCTTAACCGGTGAAATACCAAGTGAGCTTGGAGAACTC  
AAAAATCTTCAAAGCATACTGGATTTGAGTTTCAACAACATCAGTGGTCAA

>M6-PGSC0003DMG400023057M6LRR-RLK\_2294

AGAACTCAAAAATCTTCAAAGCATACTGGATTTGAGTTTCAACAACATCAGTGGTCAAATTCCTCCTTCTG  
TTGGGACACTCACGAAGCTTGAAGCACTTGATCTATCTCATAACCATCT

>M6-PGSC0003DMG400023057M6LRR-RLK\_2356

CTCCTTCTGTTGGGACACTCACGAAGCTTGAAGCACTTGATCTATCTCATAACCATCTCACCGGAGAAGT  
TCCTCCTCAAGTCGGTGAATGAGTAGCTTGGGAAAGCTTAACCTCTCCT

>M6-PGSC0003DMG400023057M6LRR-RLK\_2418

GGAGAAGTTCCTCCTCAAGTCGGTGAATGAGTAGCTTGGGAAAGCTTAACCTCTCCTACAACAACCTTC  
AAGGCAAATTGGACAAACAGTATGCACATTGGCCAGCTGATGCATTCACG

>M6-PGSC0003DMG400023057M6LRR-RLK\_248

TTCAATTCACCTTCTATTGGCTTTTTGCATGACCTACTCCATCTTGATCTTTCTTCTAATCTATTATCAGGT  
CCCATTCCACTACTCTGTCTAATCTTTCTTTTACAATCTCTTCT

>M6-PGSC0003DMG400023057M6LRR-RLK\_2480

CAACCTCAAGGCAAATTGGACAAACAGTATGCACATTGGCCAGCTGATGCATTCACGGGGAATCCACG  
TCTTTGTGGAAGTCTCTACAAAATTGTGAAGTCTCTAAGTCCAACAATCG

>M6-PGSC0003DMG400023057M6LRR-RLK\_2542

ATCCACGTCTTTGTGGAAGTCCTCTACAAAATTGTGAAGTCTCTAAGTCCAACAATCGGGGTTTCAGGACT  
AAGTAACTCGACAGTTGTGATCATTTTCAGTGATATCGACTACTGTGGCGA

>M6-PGSC0003DMG400023057M6LRR-RLK\_2604

TCAGGACTAAGTAACTCGACAGTTGTGATCATTTTCAGTGATATCGACTACTGTGGCGATCATACTTATGT  
TGCTTGGAGCTGCACTCTTTTTCAAGCAAAGGCGAGAAGCCTTTAGAAGA

>M6-PGSC0003DMG400023057M6LRR-RLK\_2666

ACTTATGTTGCTTGGAGCTGCACTCTTTTTCAAGCAAAGGCGAGAAGCCTTTAGAAGAGGAAGCGAAGT  
AAATAGTGCTTACTCATCCAGCTCTTCCCAAGGACAAAAGAGACCACTTTT

>M6-PGSC0003DMG400023057M6LRR-RLK\_2728

GCGAAGTAAATAGTGCTTACTCATCCAGCTCTTCCCAAGGACAAAAGAGACCACTTTTCGCAAGTGTGG  
CTGCTAAGCGTGATATCAGGTGGGATGACATCATGGAAGCAACAAATAATC

>M6-PGSC0003DMG400023057M6LRR-RLK\_2790

AGTGTGGCTGCTAAGCGTGATATCAGGTGGGATGACATCATGGAAGCAACAAATAATCTAAGCAACGA  
CTTCATAATCGGATCTGGTGGTTCAGGAACTGTCTATAAAGCTGAGCTGTTT

>M6-PGSC0003DMG400023057M6LRR-RLK\_2852

CAACGACTTCATAATCGGATCTGGTGGTTCAGGAACTGTCTATAAAGCTGAGCTGTTTAACGGAGAGAT  
CGTGGCAATCAAGAGAATACCAAGCAAGGATGATCTCTTGCTAGACAAAAG

>M6-PGSC0003DMG400023057M6LRR-RLK\_2914

GAGAGATCGTGGCAATCAAGAGAATACCAAGCAAGGATGATCTCTTGCTAGACAAAAGCTTTGCAAGA  
GAAATCAAGACACTTTGGAGGATAAGGCACAGGCACTTGGTGAGGCTACTTG

>M6-PGSC0003DMG400023057M6LRR-RLK\_2976

GCAAGAGAAATCAAGACACTTTGGAGGATAAGGCACAGGCACTTGGTGAGGCTACTTGGATACTGTAA  
CAACAGCGGAGAAGGTTCAAATGTATTGATCTATGAGTACATGGAGAACGGA

>M6-PGSC0003DMG400023057M6LRR-RLK\_3038

CTGTAACAACAGCGGAGAAGGTTCAAATGTATTGATCTATGAGTACATGGAGAACGGAAGTGTGTGGG  
ATTGGCTTACAAGCAGCCAGCTAATAATAACAAGAGGAAAACATGCCTCGA

>M6-PGSC0003DMG400023057M6LRR-RLK\_310

TATTATCAGGTCCATTCCACCTACTCTGTCTAATCTTTCTTCTTACAATCTTTCTTCTTTATTCTAACCA  
CTCACTGGCCCCATTCCCAATGAAATTGGCTTGTGAAGAATCTCC

>M6-PGSC0003DMG400023057M6LRR-RLK\_3100

TGTGGGATTGGCTTCACAAGCAGCCAGCTAATAATAACAAGAGGAAAACATGCCTCGATTGGGAGGCA  
AGGCTGAAGATAGCGGTGGGATTAGCACAAAGGAGTTGAGTACCTTCATCATG

>M6-PGSC0003DMG400023057M6LRR-RLK\_3162

GAGGCAAGGCTGAAGATAGCGGTGGGATTAGCACAAAGGAGTTGAGTACCTTCATCATGATTGTGTACC  
CAAGATCATTATAGGGACATCAAATCAAGCAACATTCTACTAGACTCAAAC

>M6-PGSC0003DMG400023057M6LRR-RLK\_3224

TGTACCCAAGATCATTATAGGGACATCAAATCAAGCAACATTCTACTAGACTCAAACATGGAGGCACAT  
TTGGGAGATTTCTGGGCTGGCTAAAGCCGTTTATGATAACTATAATTCCTA

>M6-PGSC0003DMG400023057M6LRR-RLK\_3286

AGGCACATTTGGGAGATTTCTGGGCTGGCTAAAGCCGTTTATGATAACTATAATTCCTACAACACTGAATC  
AAACTTGTGGCTTGCTGGTTTATTTGTTATATTGCTCCAGGTATATATC

>M6-PGSC0003DMG400023057M6LRR-RLK\_3348

ACTGAATCAAACCTTGTGGCTTGCTGGTTTATTTGTTATATTGCTCCAGGTATATATCATTCTGAATTCT  
CGAGTATTAGCATTGAAAATATTTTTTTCTTTTTTATACTAAGTTGCT

>M6-PGSC0003DMG400023057M6LRR-RLK\_3410

CTGAATTCTCGAGTATTAGCATTGAAAATATTTTTTTCTTTTTTATACTAAGTTGCTTATTTGTTTCGAGA  
GTATGCTTATTCTCGAAGGCAACTGAGAAGAGTGATGTTTATAGCAT

>M6-PGSC0003DMG400023057M6LRR-RLK\_3472

TGTTTCGAGAGTATGCTTATTCTTCGAAGGCAACTGAGAAGAGTGATGTTTATAGCATGGGGATTGTAC  
TGATGGAGCTAGTGAGTGGAAGGATGCCAACTGATGGGAGTTTCTGGAGAAA

>M6-PGSC0003DMG400023057M6LRR-RLK\_3534

ATTGTAATGATGGAGCTAGTGAGTGGAAGGATGCCAACTGATGGGAGTTTCTGGAGAAAACATGGACAT  
GGTGAGGTGGGTTGAATCATGTATCGAAATGTCTGGGACAATTAGGGAAGAG

>M6-PGSC0003DMG400023057M6LRR-RLK\_3596

GGACATGGTGAGGTGGGTTGAATCATGTATCGAAATGTCTGGGACAATTAGGGAAGAGCTCATTGATC  
CTGTTTTGAAACCATTGTTACCTAATGAAGAAAGTGCTGCACTTCAGGTGCT

>M6-PGSC0003DMG400023057M6LRR-RLK\_3658

TTGATCCTGTTTTGAAACCATTGTTACCTAATGAAGAAAGTGCTGCACTTCAGGTGCTGGAAATAGCACT

TGAATGCACCAAACTGCACCTGCTGAAAGGCCATCTTCGCGTAAAGTTT

>M6-PGSC0003DMG400023057M6LRR-RLK\_372

TATTCTAACCAACTCACTGGCCCCATTCCCAATGAAATTGGCTTGTTGAAGAATCTCCAAGTTCTTAGAAT

TGGTGATAATGTTGGCTTAACAGGGCTGATTCCAAGTACTCTTGGTGAT

>M6-PGSC0003DMG400023057M6LRR-RLK\_3720

ATAGCACTTGAATGCACCAAACTGCACCTGCTGAAAGGCCATCTTCGCGTAAAGTTTGTGATCTGTTGC

TACATGCATTCAACGACAAGGTGGTTCATTCTGATAAGATGAGTCCAGAC

>M6-PGSC0003DMG400023057M6LRR-RLK\_434

TCTTAGAATTGGTGATAATGTTGGCTTAACAGGGCTGATTCCAAGTACTCTTGGTGATCTTGAAAATTTG

GTTACTCTTGGTTTGGCTTCATGTAGTTTGAGTGGTATGATTCCCTCCTGA

>M6-PGSC0003DMG400023057M6LRR-RLK\_496

AAAATTTGGTTACTCTTGGTTTGGCTTCATGTAGTTTGAGTGGTATGATTCCCTCCTGAATTGGGAAAACCTC

GGGCGGGTTGAGAATATGAATCTGCAAGAAAATAATCTTGAAAATGGAA

>M6-PGSC0003DMG400023057M6LRR-RLK\_558

GGAAAACCTCGGGCGGGTTGAGAATATGAATCTGCAAGAAAATAATCTTGAAAATGGAATTCCTGCTGA

GATTGGTAACTGCTCTAGTCTTGTGCGTTCAGTGTTCAGTTAACAATCTC

>M6-PGSC0003DMG400023057M6LRR-RLK\_62

TGTGTTTTCTGAAACAGAGCTTGAGGTTCTGTTAGAGATAAAGAAGTCATTTCTTGATGACCCTGAAAAT

GTTTTGTCAAATTGGTCTGATAAAAATCAAATTTCTGTCAATGGAGTGG

>M6-PGSC0003DMG400023057M6LRR-RLK\_620

TGCTGAGATTGGTAACTGCTCTAGTCTTGTGCGTTCAGTGTTCAGTTAACAATCTCAATGGATCAATCC

CGGAGGAATTATCCATGCTGAAAAACCTTCAAGTTATGAATTTAGCGAA

>M6-PGSC0003DMG400023057M6LRR-RLK\_682

GATCAATCCCGGAGGAATTATCCATGCTGAAAAACCTTCAAGTTATGAATTTAGCGAATAATAGTCTTTC

AGGACAGATTCCTACTCAGCTTGGTGAATGAATGAGTTGCAGTATCTCA

>M6-PGSC0003DMG400023057M6LRR-RLK\_744

AGTCTTTCAGGACAGATTCCTACTCAGCTTGGTGAATGAATGAGTTGCAGTATCTCAATTTGCTTGGTA

ATCAGTTGGAAGTTTCGATACCAAAGTCGTTGGCGAAGTTGAGTAATGTT

>M6-PGSC0003DMG400023057M6LRR-RLK\_806

GCTTGGTAATCAGTTGGAAGGTTGATAACCAAAGTCGTTGGCGAAGTTGAGTAATGTTGGAATTTAGA  
CTTGTCTGGTAATAGACTTACTGGTGAAATTCCTGGAGAATTTGGGAGCAT

>M6-PGSC0003DMG400023057M6LRR-RLK\_868

ATTTAGACTTGTCTGGTAATAGACTTACTGGTGAAATTCCTGGAGAATTTGGGAGCATGAATCAGCTACA  
GTTCTTGGTTCTGACTAGCAATAATCTTTCGGGTAGCATACCGAAAACAA

>M6-PGSC0003DMG400023057M6LRR-RLK\_930

CAGCTACAGTTCTTGGTTCTGACTAGCAATAATCTTTCGGGTAGCATACCGAAAACAATATGTAGTTCTA  
ATCGAAACAGTAGTTTGGAACACATGATGCTATCTGAAAACCAACTTTCT

>M6-PGSC0003DMG400023057M6LRR-RLK\_992

TAGTTCTAATCGAAACAGTAGTTTGGAACACATGATGCTATCTGAAAACCAACTTTCTGGTGAGATTCT  
GTGGAGTTGAGAGAATGCATTTCACTAAAGCTGCTGGATTTGTCTAATAA

>M6-PGSC0003DMG400023192M6LRR-RLK\_0

ATGACAACCTTTGTCATATTTTTTCATTATATTCTTCTTGTAAAGTTGTTGAGTCCAAGAAGAGTGAECTCT  
CTGTCTTCTGATGGAAAAGCTTTGCTCTCTCTTCTCAAAGCAACTTAT

>M6-PGSC0003DMG400023192M6LRR-RLK\_1054

TTAGTGGGGCTATTCCAATGCAGTTGAGTAATTGTAGCAGCTTAACAGCTCTTCAGTTGGATAAGAACCT  
TTTCTCCGGCACGATTCTGAGCAAGTTGGTGAGTTGACGTACTIONGCAGA

>M6-PGSC0003DMG400023192M6LRR-RLK\_1116

AAGAACCTTTTCTCCGGCACGATTCTGAGCAAGTTGGTGAGTTGACGTACTIONGCAGATTTTCTTGTGT  
GGGGGAATTCGGTTTCAGGAACTATCCCGGCTGCTTTCGGAAACTGTACT

>M6-PGSC0003DMG400023192M6LRR-RLK\_1178

CTTGTTGTGGGGGAATTCGGTTTCAGGAACTATCCCGGCTGCTTTCGGAAACTGTACTGAACTGTATTCC  
CTTGACCTCTCAAGGAACAATCTCACTGGTTCAATACCTGAAGAGATATT

>M6-PGSC0003DMG400023192M6LRR-RLK\_124

CTTATGCTAAATCATCATCATCTTTTGTACTTTCTTCTTGGAAATGCTTCAACTTCAACTCCATGTTCTTGGC  
AAGGCATTTCTTGTCTCTCAACAAAGAGTTATTTCTGTTTCTATTC

>M6-PGSC0003DMG400023192M6LRR-RLK\_1240

TGTATTCGCTTGACCTCTCAAGGAACAATCTCACTGGTTCAATACCTGAAGAGATATTCAGTTTGAAGAA  
GCTGAGTAGGTTGTTGCTTCTTGGGAATTCGTTAACGGGAAGATTGTCTC

>M6-PGSC0003DMG400023192M6LRR-RLK\_1302

TTGAAGAAGCTGAGTAGGTTGTTGCTTCTTGGGAATTCGTTAACGGGAAGATTGTCTCCAAGTGTGGCA  
AAATGCCAGTCTCTGGTCAGGTTGAGGATTGGCGAAAACCAAGTTTTCTGGA

>M6-PGSC0003DMG400023192M6LRR-RLK\_1364

TGTGGCAAAATGCCAGTCTCTGGTCAGGTTGAGGATTGGCGAAAACCAAGTTTTCTGGACCAATACCTGA  
TGAGATAGGACAGCTGCAGAATCTTGTGTTTCTTGATTTATACATGAACCA

>M6-PGSC0003DMG400023192M6LRR-RLK\_1426

TACCTGATGAGATAGGACAGCTGCAGAATCTTGTGTTTCTTGATTTATACATGAACCATTTCTCTGGTGA  
ATTGCCTTCTGAAATTGCCAACATTACGGTCTTGAGCTGTTGGATGTGC

>M6-PGSC0003DMG400023192M6LRR-RLK\_1488

TCTGGTGAATTGCCTTCTGAAATTGCCAACATTACGGTCTTGAGCTGTTGGATGTGCATAACAATTACCT  
AACCGGGGAAATACCATCATCGCTGGGAGAGCTTGTGAATTTAGAGCAG

>M6-PGSC0003DMG400023192M6LRR-RLK\_1550

CAATTACCTAACCGGGGAAATACCATCATCGCTGGGAGAGCTTGTGAATTTAGAGCAGCTTGATCTCAG  
CAAGAACAGCTTCACTGGTGAGATTCCGTGGAGTTTTGGTAATCTCAGTTA

>M6-PGSC0003DMG400023192M6LRR-RLK\_1612

ATCTCAGCAAGAACAGCTTCACTGGTGAGATTCCGTGGAGTTTTGGTAATCTCAGTTACTTGAACAACT  
TATTCTTAGCAATAATCTGCTTACTGGTCCAATTCCAAAGTCATTTAGCA

>M6-PGSC0003DMG400023192M6LRR-RLK\_1674

AACAACTTATTCTTAGCAATAATCTGCTTACTGGTCCAATTCCAAAGTCATTTAGCAACTTGCAGAAGTT  
AACTCTACTTGATTTGAGCTCCAATAGTTTTTCTGGTGCAATTTACCT

>M6-PGSC0003DMG400023192M6LRR-RLK\_1736

GCAGAAGTTAACTCTACTTGATTTGAGCTCCAATAGTTTTTCTGGTGCAATTTACCTGAGATTGGTTACA  
TGACAAGCTTAACAATCAGTTTAGATTTGAGCTCAAACCGATTACAGG

>M6-PGSC0003DMG400023192M6LRR-RLK\_1798

TTGGTTACATGACAAGCTTAACAATCAGTTTAGATTTGAGCTCAAACCGATTACAGGTGAACTCCCTGA  
GACGTTATCCGGATTGACACTGTTGCAATCTCTTGATATTTCTCATAATA

>M6-PGSC0003DMG400023192M6LRR-RLK\_186

TGTTCTTGGCAAGGCATTTCTTGTTCCTCAACAAAGAGTTATTTCTGTTTCTATTCCAAATACATTCCTC

AATCTTTCTTCTTTTCCCTTTGAGCTTTTTTCACTTTCATCTCTTCAG

>M6-PGSC0003DMG400023192M6LRR-RLK\_1860

CTCCCTGAGACGTTATCCGGATTGACTGTTGCAATCTCTTGATATTTCTCATAATATGTTGAGTGGAAAG

AATCACAACCTAAGCCTCTTAACCAGTCTCGCTACTCTAAATGTATCG

>M6-PGSC0003DMG400023192M6LRR-RLK\_1922

GAGTGGAAAGAATCACAACCTAAGCCTCTTAACCAGTCTCGCTACTCTAAATGTATCGTATAATAATTTCT

CAGGGCCTATTCTGTAAACACCTTCTTTAGAACTCTAACATCAAACCTC

>M6-PGSC0003DMG400023192M6LRR-RLK\_1984

ATAATTTCTCAGGGCCTATTCTGTAAACACCTTCTTTAGAACTCTAACATCAAACCTTTTTCTTGAGAACT

CACTCCTTTGTGAATCAATTGATGGCTTCACTTGTCTGCACATATAA

>M6-PGSC0003DMG400023192M6LRR-RLK\_2046

CTTGAGAACTCACTCCTTTGTGAATCAATTGATGGCTTCACTTGTCTGCACATATAACTAGAAGGAACG

GATTGAAGTCTGCAAAAACCATAGCTTTGGCTGCAGTGATTGTGACTTCT

>M6-PGSC0003DMG400023192M6LRR-RLK\_2108

AAGGAACGGATTGAAGTCTGCAAAAACCATAGCTTTGGCTGCAGTGATTGTGACTTCTGCATCCATAAC

AGTCGTGGCAACGTGGTATCTTGTGACAAGGAAGCATAGATATGAATTTGA

>M6-PGSC0003DMG400023192M6LRR-RLK\_2170

CCATAACAGTCGTGGCAACGTGGTATCTTGTGACAAGGAAGCATAGATATGAATTTGAGAAATCACCTG

GCATGTCGGTCTCTGTAATAGGGACAGAAGATTTTCTATCCGTGGACTT

>M6-PGSC0003DMG400023192M6LRR-RLK\_2232

TCACCTGGCATGTCGGTCTCTGTAATAGGGACAGAAGATTTTCTATCCGTGGACTTTCATCCCTTTCCA

GAAGCTCAATTGCACCGTTGACAACATCTTGGATACCTTGAAAGATGAA

>M6-PGSC0003DMG400023192M6LRR-RLK\_2294

CCCTTTCCAGAAGCTCAATTGCACCGTTGACAACATCTTGGATACCTTGAAAGATGAAAACATTATAGGG

AAAGGCTGTTCTGGGGGTTGTTTATAGAGCAGAAATGCCAAATGGCGAGTT

>M6-PGSC0003DMG400023192M6LRR-RLK\_2356

TTATAGGGAAAGGCTGTTCTGGGGGTTGTTTATAGAGCAGAAATGCCAAATGGCGAGTTGATTGCAGTG

AAGAAGCTCTGGAAAACGAAGAAAGATGAGGAACCAATAGATTCTTTCGCTG

>M6-PGSC0003DMG400023192M6LRR-RLK\_2418



GCAGTGAAGAAGCTCTGGAAAACGAAGAAAGATGAGGAACCAATAGATTCTTTGCTGCTGAAATTCA  
GATTCTCGGTCACATTAGGCATCGAAACATAGTGAAGCTCCTTGGATATTGT

>M6-PGSC0003DMG400023192M6LRR-RLK\_248

TACATTCCTCAATCTTTCTTCTTTCCCTTTGAGCTTTTTTCACTTTCATCTCTTCAGCTTCTAAATCTTTCTTC  
TACTAATATATCTGGCTCAATACCTTCATCTTTTGGTTTGTTTAC

>M6-PGSC0003DMG400023192M6LRR-RLK\_2480

AATTCAGATTCTCGGTCACATTAGGCATCGAAACATAGTGAAGCTCCTTGGATATTGTTCAAACAAGAGT  
GTTAAGCTTCTTCTCTACAACACTACATCTCAAATGGTAATCTTCAACAGCT

>M6-PGSC0003DMG400023192M6LRR-RLK\_2542

ACAAGAGTGTTAAGCTTCTTCTCTACAACACTACATCTCAAATGGTAATCTTCAACAGCTCTTGCAAAGTAAC  
AGGAACTTGGATTGGGAAATCAGGTACAAGATTGCGGTTGGATCAGCTC

>M6-PGSC0003DMG400023192M6LRR-RLK\_2604

CAAAGTAACAGGAACTTGGATTGGGAAATCAGGTACAAGATTGCGGTTGGATCAGCTCAAGGCCTTGCT  
TATCTTCACAATGACTGTGTGCCAGCAATTCTTCATAGAGATGTCAAGTGC

>M6-PGSC0003DMG400023192M6LRR-RLK\_2666

CCTTGCTTATCTTCACAATGACTGTGTGCCAGCAATTCTTCATAGAGATGTCAAGTGCAACAACATACTCC  
TCGACTCTAAATTCGAGGCTTATTTAGCAGATTTTGGACTTGCAAAGCT

>M6-PGSC0003DMG400023192M6LRR-RLK\_2728

ACATACTCCTCGACTCTAAATTCGAGGCTTATTTAGCAGATTTTGGACTTGCAAAGCTGATGAATTCTCCA  
AATTATCATCAAGCTATGTCCAGAGTAGCAGGCTTATGGCTATATAG

>M6-PGSC0003DMG400023192M6LRR-RLK\_2790

AATTCTCCAAATTATCATCAAGCTATGTCCAGAGTAGCAGGCTTATGGCTATATAGCTCCAGGCAAGT  
ATCTTTCAACTTTATTTTCTCATCTTAACCTAAATGTTGTGCAGCTATAT

>M6-PGSC0003DMG400023192M6LRR-RLK\_2852

AGGCAAGTATCTTCAACTTTATTTTCTCATCTTAACCTAAATGTTGTGCAGCTATATGATTCTTTGAATCC  
TTGTGTTGAATCGTGTGATCATCGCATCTCTAAAAGCTTAAGTTATTA

>M6-PGSC0003DMG400023192M6LRR-RLK\_2914

CTTTGAATCCTTGTGTTGAATCGTGTGATCATCGCATCTCTAAAAGCTTAAGTTATTAGAGAAAGGATAC  
GCTTTTGTATACACTTTTCTCTACTAAATCATATCTTCAACACATGTGGC

>M6-PGSC0003DMG400023192M6LRR-RLK\_2976

AAGGATACGCTTTTGTATACACTTTTCTCTACTAAATCATATCTTCAACACATGTGGCTCTGATTCTTGCCA  
AGCACGTGGATAATGGGTGACGCTTAGACTTCAACCTAGGATACCATG

>M6-PGSC0003DMG400023192M6LRR-RLK\_3038

ATTCTTGCCAAGCACGTGGATAATGGGTGACGCTTAGACTTCAACCTAGGATACCATGTTGAAATGTGT  
GACTCTCTCATTTAGTTTAAGTTATTAGAGATGGTACACATTTATTTACTT

>M6-PGSC0003DMG400023192M6LRR-RLK\_310

TAAATCTTTCTTCTACTAATATATCTGGCTCAATACCTTCATCTTTTGTTTTGTTTACACATCTTAGGCTTCT  
TGATCTTTCTTCTAACTCTCTTTCAGGACCTGTTCCCTTCAGAACTTG

>M6-PGSC0003DMG400023192M6LRR-RLK\_3100

AATGTGTGACTCTCTCATTTAGTTTAAGTTATTAGAGATGGTACACATTTATTTACTTCATTATATCGTCAA  
CAGTCCCAGATATAGGTCAAACGAGAGTCACAACGTTATGAGCTAT

>M6-PGSC0003DMG400023192M6LRR-RLK\_3162

ATATCGTCAACAGTCCCAGATATAGGTCAAACGAGAGTCACAACGTTATGAGCTATAGTCAAATTTG  
GAAGGATAAACTAAACAAGTTATGCTTCATAGATGTTAACACTATATTTTA

>M6-PGSC0003DMG400023192M6LRR-RLK\_3224

AAATTTGGAAGGATAAACTAAACAAGTTATGCTTCATAGATGTTAACACTATATTTTACCACTATGGTTG  
CAGAATATGGATACACAGTAAATATAACAGAAAAGAGCGATGTCTACAGT

>M6-PGSC0003DMG400023192M6LRR-RLK\_3286

TATGGTTGCAGAATATGGATACACAGTAAATATAACAGAAAAGAGCGATGTCTACAGTTATGGAGTGGT  
GCTGCTGGAAATATTGAGTGGACGTAGTGCGATTGAGCCTCAGATTGGTGA

>M6-PGSC0003DMG400023192M6LRR-RLK\_3348

GAGTGGTGCTGCTGGAAATATTGAGTGGACGTAGTGCGATTGAGCCTCAGATTGGTGATGGACAACAC  
ATTGTCGAGTGGGTGAAGAAGAAGATGGGAAGCTTTGAACCAGCTGTTACAA

>M6-PGSC0003DMG400023192M6LRR-RLK\_3410

CAACACATTGTCGAGTGGGTGAAGAAGAAGATGGGAAGCTTTGAACCAGCTGTTACAATTCTTGATTTG  
AAGCTACAGAGTTTACCGGATCAAATGGTGCAAGAAATGCTTCAAACACTT

>M6-PGSC0003DMG400023192M6LRR-RLK\_3472

TGATTTGAAGCTACAGAGTTTACCGGATCAAATGGTGCAAGAAATGCTTCAAACACTTGGAAATAGCTAT

GTTCTGTGTGAATTCATCACCCACTGAAAGGCCAACTATGAAGGAAGTAGT

>M6-PGSC0003DMG400023192M6LRR-RLK\_3534

TAGCTATGTTCTGTGTGAATTCATCACCCACTGAAAGGCCAACTATGAAGGAAGTAGTGACACTTCTAAT  
GGAAGTGAAGAGCCCAACTGAAGAATTTGGAAAACTTCTCAGCCTTTAA

>M6-PGSC0003DMG400023192M6LRR-RLK\_372

CTTAGGCTTCTTGATCTTTCTTCTAACTCTTTTCAGGACCTGTTCCCTTCAGAACTTGGTGGACTTACCTCA  
CTTCAGTTCCTTTCTTGAATTCAAACAGATTGAGTGGAAGAATCCCA

>M6-PGSC0003DMG400023192M6LRR-RLK\_434

ACTTACCTCACTTCAGTTCCTTTCTTGAATTCAAACAGATTGAGTGGAAGAATCCCATATCAACTTGCTA  
ATCTTTCTTCACTAGAAATCCTCTGTCTTCAAGATAATCTCCTTAACGG

>M6-PGSC0003DMG400023192M6LRR-RLK\_496

AACTTGCTAATCTTTCTTCACTAGAAATCCTCTGTCTTCAAGATAATCTCCTTAACGGGTCAATTCCGAAA  
GATTTAGGCTCATTGGTATCACTCCAACAGTTCAGGATTGGAGGGAATC

>M6-PGSC0003DMG400023192M6LRR-RLK\_558

ATTCCGAAAGATTTAGGCTCATTGGTATCACTCCAACAGTTCAGGATTGGAGGGAATCTAGAGTTGAGT  
GGTGAAATACCTGCAGAGCTAGGAATGCTCACCAATCTTACGACATTTGGT

>M6-PGSC0003DMG400023192M6LRR-RLK\_62

AGTGAACTCTCTGTCTTCTGATGGAAAAGCTTTGCTCTCTCTTCTCAAAGCAACTTATGACCCTTATGCTA  
AATCATCATCATCTTTTGTACTTTCTTCTTGGAAATGCTTCAACTTCAAC

>M6-PGSC0003DMG400023192M6LRR-RLK\_620

GTTGAGTGGTGAATACTGCAGAGCTAGGAATGCTCACCAATCTTACGACATTTGGTGTGCGGGCTAC  
TGGACTTTCAGGGGTTATTCCACATACATTTGGTAATTTGATCAGTCTACA

>M6-PGSC0003DMG400023192M6LRR-RLK\_682

CGGCTACTGGACTTTCAGGGGTTATTCCACATACATTTGGTAATTTGATCAGTCTACAACTCTGGCAGT  
GTATGATACTGAAGTGTGGTTCAATACCACCTGAACTTGGGATGTGTT

>M6-PGSC0003DMG400023192M6LRR-RLK\_744

CTGGCAGTGTATGATACTGAAGTGTGGTTCAATACCACCTGAACTTGGGATGTGTTTCAGAGCTCAGG  
AACTTGATTTGCACATGAATAAGCTCACCGGTCCAATCCCTCGTCAGTTG

>M6-PGSC0003DMG400023192M6LRR-RLK\_806

GCTCAGGAACTTGTATTTGCACATGAATAAGCTCACCGGTCCAATCCCTCGTCAGTTGGGTAAGTTACAA  
AAGATTACTAGCTTGCTTTTATGGGGAAATTCGCTTACTGGCCCTGTCCC

>M6-PGSC0003DMG400023192M6LRR-RLK\_868

AGTTACAAAAGATTACTAGCTTGCTTTTATGGGGAAATTCGCTTACTGGCCCTGTCCCGGCTGAGTTATC  
GAATTGTTTCATCCCTTGTGGTTCTTGATGTCTCTGCAAATGACTTGTCTG

>M6-PGSC0003DMG400023192M6LRR-RLK\_930

GAGTTATCGAATTGTTTCATCCCTTGTGGTTCTTGATGTCTCTGCAAATGACTTGTCTGGCGAAATCCGG  
GTGATTTAGGGAAGCTTGAAGTTCTTGAACAGCTTCACTTATCTGATAAT

>M6-PGSC0003DMG400023192M6LRR-RLK\_992

AATCCGGGTGATTTAGGGAAGCTTGAAGTTCTTGAACAGCTTCACTTATCTGATAATGCACTTAGTGGG  
GCTATTCCAATGCAGTTGAGTAATTGTAGCAGCTTAACAGCTCTTCAGTT

>M6-PGSC0003DMG400023198-(rev)M6LRR-RLP\_0

GCTAATAATACATCAACCTACCATTTCTAGCAACAACAGGTAACAGCTGTGGAGACTTTTTTTTTTTTTGT  
ATAAATAAATTGTAACCCCTTCGATGGATTTATGGTTGGATTTTCCATC

>M6-PGSC0003DMG400023198-(rev)M6LRR-RLP\_1054

TTCGTCGAGCTTTTATAGTGAGAAAGAGCCTGTAAAGTGTCTGAACTTGTTACAAGAGACGACAGTTAC  
TTGAAGAAGCCGACAACCTGCGTTTCAAATGGATGGAATCAGTGTTGGGCT

>M6-PGSC0003DMG400023198-(rev)M6LRR-RLP\_1116

ACAGTTACTTGAAGAAGCCGACAACCTGCGTTTCAAATGGATGGAATCAGTGTTGGGCTTCGATCTGGGA  
ACGCTTCTTCTGCTCCCCAGATTGTCGATAACCACTTTGAAGCGTAGTACTG

>M6-PGSC0003DMG400023198-(rev)M6LRR-RLP\_1178

TCTGGGAACGCTTCTTCTGCTCCCCAGATTGTCGATAACCACTTTGAAGCGTAGTACTGGTAAGTTAATCT  
ATTTCTGTAACATATTGCTTGTGACCAATGTGTTTTTTTTATACTTTG

>M6-PGSC0003DMG400023198-(rev)M6LRR-RLP\_124

CAAAAACCTCTCCATTTTCTCTCTCACACAACCTCTTCTTATAGCTCCAGTTTCTTGTTAAAGAAAAAATG  
TCAGTGAATAGTATAACTGAGTTCTGTTCTGAATCCTAAGTGGGGTT

>M6-PGSC0003DMG400023198-(rev)M6LRR-RLP\_1240

GTTAATCTATTTCTGTAACATATTGCTTGTGACCAATGTGTTTTTTTTATACTTTGTTAGCTTAATTGGA  
TAAATTTGTTTCTATAATATGAAAATTATTAGTTAATGGAGAAGC

>M6-PGSC0003DMG400023198-(rev)M6LRR-RLP\_1302

CTTAATTGGATAAATTTTGTTCCTATAATATGAAAATTATTAGTTAATGGAGAAGCCATTTATCTGTAG  
GTCAAAATGATGAAAAAATGAGCTTGATAAAGCTTGCTAGTTTGATAGA

>M6-PGSC0003DMG400023198-(rev)M6LRR-RLP\_1364

TATCTGTAGGTCAAAATGATGAAAAAATGAGCTTGATAAAGCTTGCTAGTTTGATAGAAGTTTCAGCCA  
AAAAAGGAACCAAGGAGCTAATTCTTCGAAGAAAAGTGCAGACCAATTAG

>M6-PGSC0003DMG400023198-(rev)M6LRR-RLP\_1426

TCAGCCAAAAAAGGAACCAAGGAGCTAATTCTTCGAAGAAAAGTGCAGACCAATTAGAATGGATTCCA  
GATTCACTTGGGAAGCTATCAAATTTGGTGACTTTGGATTTGTCTGAGAAT

>M6-PGSC0003DMG400023198-(rev)M6LRR-RLP\_1488

GATTCCAGATTCACTTGGGAAGCTATCAAATTTGGTGACTTTGGATTTGTCTGAGAATCGAATTGCTGTG  
CTGCCAACTACCATCGGGGTCTTTCATCGTTGCAAAAAGTGCAGACCAATTAGAATGGATTCCA

>M6-PGSC0003DMG400023198-(rev)M6LRR-RLP\_1550

TTGCTGTGCTGCCAACTACCATCGGGGTCTTTCATCGTTGCAAAAAGTGCAGACCAATTAGAATGGATTCCA  
GATTCACTTGGGAAGCTATCAAATTTGGTGACTTTGGATTTGTCTGAGAATCGAATTGCTGTG

>M6-PGSC0003DMG400023198-(rev)M6LRR-RLP\_1612

AATAGAATTGTTGAACTTCTGATTCAATAGGAGATCTGCTTAACTTGGTCTATCTTGATCTAAATGGCAA  
TAACCTGAAGACATTGCCTTTGACTTTAGCGAGGTTAACTCACCTTGAG

>M6-PGSC0003DMG400023198-(rev)M6LRR-RLP\_1674

AAATGGCAATAACCTGAAGACATTGCCTTTGACTTTAGCGAGGTTAACTCACCTTGAGGAAGTCGATCTA  
AGCTCTAACATGCTATCTATACTCCCTGAGGCAGTGGGATCCCTTGTCAG

>M6-PGSC0003DMG400023198-(rev)M6LRR-RLP\_1736

TCGATCTAAGCTCTAACATGCTATCTATACTCCCTGAGGCAGTGGGATCCCTTGTCAGTCTCAAAAAACT  
GATCGTTGAGACTAATGACCTAGAGGAACTTCTCACACTATTGGTCAAT

>M6-PGSC0003DMG400023198-(rev)M6LRR-RLP\_1798

AAAAAACTGATCGTTGAGACTAATGACCTAGAGGAACTTCTCACACTATTGGTCAATGTAAGTTCGCTGA  
AAGAGCTCCGTGCTGACTATAACCGTCTTAAAGCTCTTCTGAAGCCTTG

>M6-PGSC0003DMG400023198-(rev)M6LRR-RLP\_186

AGAAAAAATGTCAGTGAATAGTATAACTGAGTTCTGTTCTGAATCCTAAGTGGGGTTTGCTTTTCTCAT

CTTTTTTTTTATGCTGCCCTGTTTCCTTAAACACTCGTTTTTCACTGTA

>M6-PGSC0003DMG400023198-(rev)M6LRR-RLP\_1860

TTCGCTGAAAGAGCTCCGTGCTGACTATAACCGTCTTAAAGCTCTTCCTGAAGCCTGGGGCGAATGGGT

TCTTTGGAGATTCTATCCGTGCGGTACAATAACATCAGGCAATTGCCTAC

>M6-PGSC0003DMG400023198-(rev)M6LRR-RLP\_1922

GAATGGGTTCTTTGGAGATTCTATCCGTGCGGTACAATAACATCAGGCAATTGCCTACAACCTATGGCATC

CTTAACAAGTTTGAAAGAGCTCAATGTTAGTTTCAATGAGCTTGAGTCAG

>M6-PGSC0003DMG400023198-(rev)M6LRR-RLP\_1984

ATGGCATCCTTAACAAGTTTGAAAGAGCTCAATGTTAGTTTCAATGAGCTTGAGTCAGTGCCTGAGAGCC

TGTGCTTTGCCACTACACTCATAAACTGAACATTAGCAACAACCTTTGCG

>M6-PGSC0003DMG400023198-(rev)M6LRR-RLP\_2046

TGAGAGCCTGTGCTTTGCCACTACACTCATAAACTGAACATTAGCAACAACCTTTGCGGACCTGCAATCA

CTCCCTAGATCCATAGGAAACCTTGAGATGCTTGAGGAGCTGGATATGAG

>M6-PGSC0003DMG400023198-(rev)M6LRR-RLP\_2108

TGCAATCACTCCCTAGATCCATAGGAAACCTTGAGATGCTTGAGGAGCTGGATATGAGTAACAACCAGA

TACGAATTCTACCAGATTCATTTAGGATGCTTTCGCATTTGCGTGTACTAA

>M6-PGSC0003DMG400023198-(rev)M6LRR-RLP\_2170

AACCAGATACGAATTCTACCAGATTCATTTAGGATGCTTTCGCATTTGCGTGTACTAAAGACAGAAGGAA

ATCCTCTTGAAGTGCCACCAGGAAACATTATCGAGATGGGAGCACAGGTG

>M6-PGSC0003DMG400023198-(rev)M6LRR-RLP\_2232

AGAAGGAAATCCTCTTGAAGTGCCACCAGGAAACATTATCGAGATGGGAGCACAGGTGTGTTTGAGTTT

TATTTTTACTATACTATCATTATGCTCTCTGAATTTTTAATTGTTTGT

>M6-PGSC0003DMG400023198-(rev)M6LRR-RLP\_2294

TGAGTTTTATTTTTACTATACTATCATTATGCTCTCTGAATTTTTAATTGTTTGT

CTCATGAACTTTTTATTTGCTCATCAGGCTGTTGTGCAGCATATGGC

>M6-PGSC0003DMG400023198-(rev)M6LRR-RLP\_2356

TTGATATTTGACTCATGAACTTTTTATTTGCTCATCAGGCTGTTGTGCAGCATATGGCTGATCTTATTGAA

AAGAGGGATGCGAAGCCACAGCCCGTTAAACAGAAGAAATCATGGGCTC

>M6-PGSC0003DMG400023198-(rev)M6LRR-RLP\_2418

CTTATTGAAAAGAGGGATGCGAAGCCACAGCCCGTTAAACAGAAGAAATCATGGGCTCAGATATGCTG  
CTTTTCAAGATCCAACAAACGTAAGCGCAATGGTATAGACTATGTCGTCCAA

>M6-PGSC0003DMG400023198-(rev)M6LRR-RLP\_248

TTTCTCATCTTTTTTTTTATGCTGCCCTGTTTCCTTAAACACTCGTTTTTCACTGTATAAAACACGAAAAAC  
AAGTAAAGTTTTGTTCTTAACTACTATTATTTTGATTTGATTTGATT

>M6-PGSC0003DMG400023198-(rev)M6LRR-RLP\_2480

ATGCTGCTTTTCAAGATCCAACAAACGTAAGCGCAATGGTATAGACTATGTCGTCCAAGCGTGACACACT  
TAAAACTCTTGACCCTATATTTATCTGGTAAGTTTGTCTCTTTACTAC

>M6-PGSC0003DMG400023198-(rev)M6LRR-RLP\_2542

GACACACTTAAAACTCTTGACCCTATATTTATCTGGTAAGTTTGTCTCTTTACTACCTCTGCTTCCAGCT  
ATTAGTCTGTTGGCGAAAGAAAACAAGAAGTCTTTTATTAAGGGGAAA

>M6-PGSC0003DMG400023198-(rev)M6LRR-RLP\_2728

GGATAGTTCTTAGCTCTTACACATTTGTTGTTTATTAATTATCCTCAATTCTTGCCTTTGATTTTGTGAGTT  
AATAAATGTATATGGCGCACGAGACATGTTTGCTGCATTAATTACAA

>M6-PGSC0003DMG400023198-(rev)M6LRR-RLP\_2790

TTTTGTGAGTTAATAAATGTATATGGCGCACGAGACATGTTTGCTGCATTAATTACAATAATAAAATGTT  
GGGTTGTAAGGGAATGGCTCACATGCTTTTGTATCCCTCGTTCAGTGAA

>M6-PGSC0003DMG400023198-(rev)M6LRR-RLP\_2852

AAAATGTTGGGTTGTAAGGGAATGGCTCACATGCTTTTGTATCCCTCGTTCAGTGAAATTGAGCTGTGA  
TTGTGCTGGAAGTGAGCTCTGCCATTCTTCTTCAATTCCAACCTCTGCCAA

>M6-PGSC0003DMG400023198-(rev)M6LRR-RLP\_2914

AGCTGTGATTGTGCTGGAAGTGAGCTCTGCCATTCTTCTTCAATTCCAACCTCTGCCAACAGAATTATCAGT  
ATTTTTTTGTTACCACATGTTTCTTTTTGCCAGTTGGTTCTATTTATCA

>M6-PGSC0003DMG400023198-(rev)M6LRR-RLP\_2976

ATTATCAGTATTTTTTTGTTACCACATGTTTCTTTTTGCCAGTTGGTTCTATTTATCATCTTCTTTGTAATATT  
TGCTTGTAATTTTATAATGTATGTTCTAAAATCAGTTGTAAAAATC

>M6-PGSC0003DMG400023198-(rev)M6LRR-RLP\_3038

CTTTGTAATATTTGCTTGTAATTTTATAATGTATGTTCTAAAATCAGTTGTAAAAATCGATATCACACGGTT  
ATGAAGAGGGAGGAAATATCTGTTGTTGTGCAATCCCTCAATGTTAA

>M6-PGSC0003DMG400023198-(rev)M6LRR-RLP\_310

ACACGAAAAACAAGTAAAGTTTTGTTCTTA ACTACTATTATTTTGATTTGATTTGATTTGATTGGATTAAC  
GTTTGTATTCTTGTCAATATTGATCGGCGCTTCTAGAAGTTGTACAGAA

>M6-PGSC0003DMG400023198-(rev)M6LRR-RLP\_372

TGGATTAACGTTTGTATTCTTGTCAATATTGATCGGCGCTTCTAGAAGTTGTACAGAAGAAGAACTCAAT  
TATGGCTTTCTCAATATTTTTCGTTTTTTTGATCTAGGACTCTTGGAAC

>M6-PGSC0003DMG400023198-(rev)M6LRR-RLP\_434

AACTCAATTATGGCTTTCTCAATATTTTTCGTTTTTTTGATCTAGGACTCTTGGAAC TAACCCCAAACAA  
AGTGTATTCAAATCTGGATACTGTGGGTGGTTTCTGTGTGTAGCTGTG

>M6-PGSC0003DMG400023198-(rev)M6LRR-RLP\_558

TGTGTGTGTTTTCCGACGAAATTGAGGGTGAAATGGGATCCTCCGCAATGTCTGTTGACGAGATTGTGG  
AAGAGATGATGAGGCTTAACAAATCTCTACCAATAAGGCCAGGGATAGATG

>M6-PGSC0003DMG400023198-(rev)M6LRR-RLP\_62

TTTTTTGTATAAATAAATTGTAACCCCTTCGATGGATTTATGGTTGGATTTTCCATCAAACCAAAA ACTCT  
CCATTTTCTCTCTCACACA ACTCTTCTTATAGCTCCAGTTTCTTG

>M6-PGSC0003DMG400023198-(rev)M6LRR-RLP\_620

ATTGTGGAAGAGATGATGAGGCTTAACAAATCTCTACCAATAAGGCCAGGGATAGATGAAGTGGAAGC  
AGCAAAGTTTTAATTATGAATATGGAGAAGGAGGAACAAATGAAGTTAGAG

>M6-PGSC0003DMG400023198-(rev)M6LRR-RLP\_682

GGAAGCAGCAAAGTTTTAATTATGAATATGGAGAAGGAGGAACAAATGAAGTTAGAGACAATTGCGC  
GGCAAACAAAAGAAAAGATGTACCAGAAGAGGTATTCAAATATTGCAAGA

>M6-PGSC0003DMG400023198-(rev)M6LRR-RLP\_744

TTGCGCGGCAAAACAAAAGAAAAGATGTACCAGAAGAGGTATTCAAATATTGCAAGAGATGCAGAGG  
AATTTAGTTTGTTCAGAGTAAAGAACAGAAGAGAGAGGCATTAAAATTGT

>M6-PGSC0003DMG400023198-(rev)M6LRR-RLP\_806

CAGAGGAATTTAGTTTGTTCAGAGTAAAGAACAGAAGAGAGAGGCATTAAAATTGTTAGATCTCGAA  
AATGTTCACTACCTGTTGATGAATTGATTCAAAGAGCTTCGAAATGCTTG

>M6-PGSC0003DMG400023198-(rev)M6LRR-RLP\_868

TCTCGAAAATGTTCACTACCTGTTGATGAATTGATTCAAAGAGCTTCGAAATGCTTGTCATCTAATCCTC



AAGCTAATAATACTTCTTCAGCTTCTTCAAGGAATTCCAGCAATTTGTC

>M6-PGSC0003DMG400023198-(rev)M6LRR-RLP\_930

CTAATCCTCAAGCTAATAATACTTCTTCAGCTTCTTCAAGGAATTCCAGCAATTTGTCTCTGGCGAATTCA  
TCTTCCTTCAACGGTAGCAGTTTCAATTCTCCGGCAACTACTACGACTA

>M6-PGSC0003DMG400023198-(rev)M6LRR-RLP\_992

GCGAATTCATCTTCTTCAACGGTAGCAGTTTCAATTCTCCGGCAACTACTACGACTATGTCTTCGTCGAG  
CTTTTATAGTGAGAAAGAGCCTGTAAAGTGTCTGAACTTGTTACAAGA

>M6-PGSC0003DMG400023274M6LRR-RLP\_0

GAGGGTTTCATACCCAGAGAACAAGAAAGAACGGAGGATGTCGCTGAAGGCTTCTTGAATGAACTGAC  
AAGACGAAGCTTGGTTCAAGTGGCTTATACATATTGGGATAGAGTTACTAAA

>M6-PGSC0003DMG400023274M6LRR-RLP\_1024

GCAGTGATAACAGCTTCAGTCAACTGGAGTTCCTTCAACTTAGTGAACCTTGAGAAGCTAGAAAGATGGC  
ATTTAGGCACAAGTGCCATGCCTCTGATTAAAGGTCTTCATATCCATGCCT

>M6-PGSC0003DMG400023274M6LRR-RLP\_1152

TTAAAGGAGATTCCAGAGAGAATGATAGACGTGGAGCTGTTGAAGAGGAATTATATGCGGTGAGCTTT  
TCAAGCATATATCATGTCTTCATAATCGTAGAGGTATTGATGGGGGCATTTT

>M6-PGSC0003DMG400023274M6LRR-RLP\_1216

CTTTTCAAGCATATATCATGTCTTCATAATCGTAGAGGTATTGATGGGGGCATTTCTGCCAAGCACATTG  
GTTATTAATTTACAGGGCTGTCAATGAGAGTGGTTTGAAGATAATTGTTTT

>M6-PGSC0003DMG400023274M6LRR-RLP\_128

TCGTGATTTACTCCGTGATCTTGCGATAGAAAAGGCATTGGAGGTAACTTCTTTAACATTTATGATCCA  
AGAAGCCACTCCATATCCTCTTTATGTATCAGACATGTGATTCATAGTCA

>M6-PGSC0003DMG400023274M6LRR-RLP\_1280

ACATTGGTTATTAATTTACAGGGCTGTCAATGAGAGTGGTTTGAAGATAATTGTTTTTGCCAAAATGATT  
TTGTGATGTTTTAATTAATTGGTCTATTGTATGATCTCTTACCACATTTA

>M6-PGSC0003DMG400023274M6LRR-RLP\_1334

TTTGCCAAAATGATTTTGTGATGTTTTAATTAATTGGTCTATTGTATGATCTCTTACCACATTTAAGACAA  
TGCTTTATATGTTAAAATGAAATTAATAAATATTATATGGTACTCTCTC

>M6-PGSC0003DMG400023274M6LRR-RLP\_192

GATCCAAGAAGCCACTCCATATCCTCTTTATGTATCAGACATGTGATTCATAGTCAAGGAGAAAGGTACC  
TCTCACTTGATCTTTCTAACTTAAAGTTGAGGTCAATTATGTTCTTCGAT

>M6-PGSC0003DMG400023274M6LRR-RLP\_256

GGTACCTCTCACTTGATCTTTCTAACTTAAAGTTGAGGTCAATTATGTTCTTCGATCCCGATTTTCGTAAG  
ATGAGTCATATAAACTTCAGGAGTGTGTTCCAACATCTACATGTGTTGT

>M6-PGSC0003DMG400023274M6LRR-RLP\_320

TCGTAAGATGAGTCATATAAACTTCAGGAGTGTGTTCCAACATCTACATGTGTTGTACTTGGATATGCAT  
GTTGGGAATGTGTCTATAGTACCTGATGCCATAGGAAGTTTGTACCACCT

>M6-PGSC0003DMG400023274M6LRR-RLP\_384

ATGCATGTTGGGAATGTGTCTATAGTACCTGATGCCATAGGAAGTTTGTACCACCTCAAGCTGTTAAGAT  
TGATCCATATCCGTGATGTTCTTCTTTTCATTGGCAACCTCAAGAATCTA

>M6-PGSC0003DMG400023274M6LRR-RLP\_448

TAAGATTGATCCATATCCGTGATGTTCTTCTTTTCATTGGCAACCTCAAGAATCTAAATACACTTGTTGTC  
AATGAGGGGGCATACTCTTGCAAACCTACCCCGCGAGACAGCTGACCTGA

>M6-PGSC0003DMG400023274M6LRR-RLP\_512

TGTTGTCAATGAGGGGGCATACTCTTGCAAACCTACCCCGCGAGACAGCTGACCTGATAAATCTAAGACA  
TTTAGTTGCTCGGTATACAAAACCTCTGGTACATATAAGAAAACCTCACTAG

>M6-PGSC0003DMG400023274M6LRR-RLP\_576

AGACATTTAGTTGCTCGGTATACAAAACCTCTGGTACATATAAGAAAACCTCACTAGTCTTCAAGTTGTTG  
ATGGCATTGTTGTGATCAATGGAAAGATGTTGACCCTGTTGATTTAGTC

>M6-PGSC0003DMG400023274M6LRR-RLP\_64

TGACAAGACGAAGCTTGGTTCAAGTGGCTTATACATATTGGGATAGAGTTACTAAATGTAGGGTTCGTG  
ATTTACTCCGTGATCTTGCATAGAAAAGGCATTGGAGGTAACTTCTTTA

>M6-PGSC0003DMG400023274M6LRR-RLP\_640

TTGTTGATGGCATTGTTGTGATCAATGGAAAGATGTTGACCCTGTTGATTTAGTCAATCTTCAAGAATTA  
AGCATGGATCATATGAATAAATCTTACTCCTTAAACAACATTAGGAGCT

>M6-PGSC0003DMG400023274M6LRR-RLP\_704

AGAATTAAGCATGGATCATATGAATAAATCTTACTCCTTAAACAACATTAGGAGCTTGAAAAACCTTAGC  
ACTCTCAGATTGCTTTGTAAGTATGATGGATCATTCCATCGCTTGAATT

>M6-PGSC0003DMG400023274M6LRR-RLP\_768

CTTAGCACTCTCAGATTGCTTTGTAAGTATGATGGATCATTCCATCGCTTGAATTTGTTAATTGTTGTGA  
AAAGCTCCAGAAATTGTGGTTAAGTGGGAGAATAGAGAACTGCCTCAT

>M6-PGSC0003DMG400023274M6LRR-RLP\_832

GTTGTGAAAAGCTCCAGAAATTGTGGTTAAGTGGGAGAATAGAGAACTGCCTCATCTGTTTCAAATT  
CCATCACAATGATGCTTCTGAATTTCTCAGTACTGACAGAAGATCCGATGC

>M6-PGSC0003DMG400023274M6LRR-RLP\_896

AAATTCATCACAATGATGCTTCTGAATTTCTCAGTACTGACAGAAGATCCGATGCCTATTTTGGGAATG  
TTGCCAAACCTAAGGAATCTCGACTTGGTTAGAGCTTATGAAGGAAAAGA

>M6-PGSC0003DMG400023274M6LRR-RLP\_960

GGAATGTTGCCAAACCTAAGGAATCTCGACTTGGTTAGAGCTTATGAAGGAAAAGAAATAATGTGCAGT  
GATAACAGCTTCAGTCAACTGGAGTTCCTTCAACTTAGTGAAGTGGAGAAG

>M6-PGSC0003DMG400023282M6LRR-RLK\_1037

GTCCTCAAAGCATTACTTCTCTAGTGCTTCCTCAAATCACCTGTCTGGAAATCTTCCAAGTGAATTGGC  
GGATTGCGCCAATCTCAAAGTATTGAATGTTACTGACAATAACATGAAC

>M6-PGSC0003DMG400023282M6LRR-RLK\_1098

GTGAATTGGCGGATTGCGCCAATCTCAAAGTATTGAATGTTACTGACAATAACATGAACGGTGCGATAC  
CTGATTTATCTAGCTTGGCTGAGTTGGAGGTGTTAGACTTGTGAGATAACT

>M6-PGSC0003DMG400023282M6LRR-RLK\_1159

TGCGATACCTGATTTATCTAGCTTGGCTGAGTTGGAGGTGTTAGACTTGTGAGATAACTGTTTTTCTGGA  
AAGTTTCCAGCTTGGTTTGGAAAGTTGACTAGTTTGGTTGCATTAGGCCT

>M6-PGSC0003DMG400023282M6LRR-RLK\_1220

TTTTCTGGAAAGTTTCCAGCTTGGTTTGGAAAGTTGACTAGTTTGGTTGCATTAGGCCTTGGTGGAAATA  
AGTATGATGAAGGTAACTTCTGATTTGTTTGGGAAGTTGAAGAAAGTT

>M6-PGSC0003DMG400023282M6LRR-RLK\_1281

GTGGAAATAAGTATGATGAAGGTAACTTCTGATTTGTTTGGGAAGTTGAAGAAAGTTTATTGGCTTTT  
CTTGGCAGGGTCAAATTTGACAGGACAAATCCCGGAATCTATTTTCGAAA

>M6-PGSC0003DMG400023282M6LRR-RLK\_1342

TTGGCTTTTCTTGGCAGGGTCAAATTTGACAGGACAAATCCCGGAATCTATTTTCGAAATGGAGGCACTA

GGTACATTAGATATTTTCGAAAAACCAGATATCCGGGAATTTTCCAAAGTC

>M6-PGSC0003DMG400023282M6LRR-RLK\_1403

GAGGCACTAGGTACATTAGATATTTTCGAAAAACCAGATATCCGGGAATTTTCCAAAGTCGATAAACAAG  
CTGCGAAATCTCTTCAAGATTGAACTTTATCAAACAATTTGACCGGGGAA

>M6-PGSC0003DMG400023282M6LRR-RLK\_1464

TAAACAAGCTGCGAAATCTCTTCAAGATTGAACTTTATCAAACAATTTGACCGGGGAATTGCCAGTAGA  
ACTTGTAGACCTTATACATCTGCAGGAAATTGATGTATCTAGAAACCAGC

>M6-PGSC0003DMG400023282M6LRR-RLK\_1525

GCCAGTAGAACTTGTAGACCTTATACATCTGCAGGAAATTGATGTATCTAGAAACCAGCTGCATGGGAC  
TTTGCCTAAGGGGATTGACAACCTGAAGAATATAACGGTTTTTCAAATATT

>M6-PGSC0003DMG400023282M6LRR-RLK\_1586

CATGGGACTTTGCCTAAGGGGATTGACAACCTGAAGAATATAACGGTTTTTCAAATATTCAAGAACAATT  
TCTCTGGGGAAATCCCTCCAGGATTTGGAGATTTGCAGCATCTTAATGGC

>M6-PGSC0003DMG400023282M6LRR-RLK\_1647

AGAACAATTTCTCTGGGGAAATCCCTCCAGGATTTGGAGATTTGCAGCATCTTAATGGCTTTGCTGTGTA  
CAACAACAGTTTTACTGGAGAAATTCCAGCTAATCTTGGCCGGTTTTTCGC

>M6-PGSC0003DMG400023282M6LRR-RLK\_1708

TGCTGTGTACAACAACAGTTTTACTGGAGAAATTCCAGCTAATCTTGGCCGGTTTTTCGCCACTGAATAGC  
ATAGACATATCTGAGAACAAGTTTAGTGGTGCATTTCCAAAATATTTATG

>M6-PGSC0003DMG400023282M6LRR-RLK\_1769

CTGAATAGCATAGACATATCTGAGAACAAGTTTAGTGGTGCATTTCCAAAATATTTATGTCAAACAACA  
ACTTGCAAATTTGCTTGCTGTTGAAAACAGTTTCACAGGGGAGTTTCCA

>M6-PGSC0003DMG400023282M6LRR-RLK\_183

ACTTTAATCTTTTCTGGTGTTATTTTCTATCCCACTATAGTCAGATCCTTCCTGTGCTTCAGATATGGAGAA  
TTTGATTGTAGGAAAGATGAAAAACAAGGCCGCTCTTTAGTATCTT

>M6-PGSC0003DMG400023282M6LRR-RLK\_1830

AAAACAACAACCTTGCAAATTTGCTTGCTGTTGAAAACAGTTTCACAGGGGAGTTTCCAGGTAATTATGC  
TTCTTGCAAGACTTTAATGAGATTGAGGGTGAGTCAGAATCAACTCTCTG

>M6-PGSC0003DMG400023282M6LRR-RLK\_1891

TAATTATGCTTCTTGCAAGACTTTAATGAGATTGAGGGTGAGTCAGAATCAACTCTCTGGGAGAATTGCT  
GAGGGTTTATGGGGGCTTCCAGAAGTCACAATGATAGATTTTCAGTGATAA

>M6-PGSC0003DMG400023282M6LRR-RLK\_1952

AGAATTGCTGAGGGTTTATGGGGGCTTCCAGAAGTCACAATGATAGATTTTCAGTGATAACAACCTTCACT  
GGAAGTGTATCTCCTGGAATCGGCGCTGCGACTAAGTTGAATCAGTTGGTA

>M6-PGSC0003DMG400023282M6LRR-RLK\_2013

ACTTCACTGGAAGTGTATCTCCTGGAATCGGCGCTGCGACTAAGTTGAATCAGTTGGTATTATCAAACAA  
CAGATTTTCAGGTGAGCTTCCAAAAGAACTTGGAAAGCTCACACAGTTGG

>M6-PGSC0003DMG400023282M6LRR-RLK\_2074

ATCAAACAACAGATTTTCAGGTGAGCTTCCAAAAGAACTTGGAAAGCTCACACAGTTGGAAAGGCTATA  
TTTGGATAACAATGATTTCTCTGGCATAATACCATCTGAACTTGGCACATT

>M6-PGSC0003DMG400023282M6LRR-RLK\_2135

AGGCTATATTTGGATAACAATGATTTCTCTGGCATAATACCATCTGAACTTGGCACATTGAAGCAAATTT  
CATCTTTGTATTTAGAGAAAACTCACTTTCCGGGTCGATACCATCGGAG

>M6-PGSC0003DMG400023282M6LRR-RLK\_2196

AGCAAATTTTCATCTTTGTATTTAGAGAAAACTCACTTTCCGGGTCGATACCATCGGAGTTGGGTGAGTT  
CCCAAGGTTGGCAAAGTGAATCTTGCTTCAAATCTTCTCACAGGCAACA

>M6-PGSC0003DMG400023282M6LRR-RLK\_2257

GGGTGAGTTCCCAAGGTTGGCAAAGTGAATCTTGCTTCAAATCTTCTCACAGGCAACATACCGAATTCG  
TTGTCAATGATGGCCTCGTTGAACTCTCTGAATCTTTTCGAGTAACAAACT

>M6-PGSC0003DMG400023282M6LRR-RLK\_2318

CCGAATTCGTTGTCAATGATGGCCTCGTTGAACTCTCTGAATCTTTTCGAGTAACAAACTCAATGGCTCAAT  
TCCAACAAGCTTGGATGACCTGAAGTTATCTTCATTAGACCTCTCTAAC

>M6-PGSC0003DMG400023282M6LRR-RLK\_2379

ATGGCTCAATCCAACAAGCTTGGATGACCTGAAGTTATCTTCATTAGACCTCTCTAACAAATCTGCTAACT  
GGAAGAGTTCCTACAGATCTTTTGACGGTGGGAGGAGAAAAGGCATTTG

>M6-PGSC0003DMG400023282M6LRR-RLK\_244

GATATGGAGAATTTGATTGTAGGAAAGATGAAAAACAAAGGCCGCTCTTTAGTATCTTTCTTGTAACC  
AAGACTATAAAGTCAAGTGAACATTATATACTTGAGTCACTTCAAAGAA

>M6-PGSC0003DMG400023282M6LRR-RLK\_2440

TCTGCTAACTGGAAGAGTTCCTACAGATCTTTTGACGGTGGGAGGAGAAAAGGCATTTGTAGGAAACAA  
GGGGCTTTGTGTTGATCAAAGCATCAGGAATGTCCGAAGGAACTCAGGCAT

>M6-PGSC0003DMG400023282M6LRR-RLK\_2501

GGAAACAAGGGGCTTTGTGTTGATCAAAGCATCAGGAATGTCCGAAGGAACTCAGGCATTGGCGCTTG  
TAGTGGAAGGCTGCTCAGGAAGTGTTCATGAAGAGCAAAGTGTGCTT

>M6-PGSC0003DMG400023282M6LRR-RLK\_2562

GCGCTTGTAGTGGAAGGCTGCTCAGGAAGTGTTCATGAAGAGCAAAGTGTGCTTGCATTGTAT  
TACTTTCTTTGGCTGTTCTAATGGGTGTTTTCATGCTTTTGAGTTACTGGA

>M6-PGSC0003DMG400023282M6LRR-RLK\_2623

CATTGTATTACTTTCTTTGGCTGTTCTAATGGGTGTTTTCATGCTTTTGAGTTACTGGAAGTACAAGTGCA  
ACGCTGAAGCTGATTCAGAAAAGTGTCTGGGACATGCAAATGGAATGAA

>M6-PGSC0003DMG400023282M6LRR-RLK\_2684

TACAAGTGCAACGCTGAAGCTGATTCAGAAAAGTGTCTGGGACATGCAAATGGAATGAATCCAAAATG  
GAAGCTTGAAAGCTTCCAACATGTGGAACCTTGATGTAGATGAAATATGTGAT

>M6-PGSC0003DMG400023282M6LRR-RLK\_2745

CAAAATGGAAGCTTGAAAGCTTCCAACATGTGGAACCTTGATGTAGATGAAATATGTGATGTTGGTGAGG  
ACAAGCTGGTAGGAAGTGGAGGCACAGGAAAAGTTTATCGGTTAGATTTGA

>M6-PGSC0003DMG400023282M6LRR-RLK\_2806

TGGTGAGGACAAGCTGGTAGGAAGTGGAGGCACAGGAAAAGTTTATCGGTTAGATTTGAAGAAAGGTT  
GTGGCACAGTGGCAGTAAAGCAGCTTTGGAAAGGAAATGAGGTGAAAGTTTT

>M6-PGSC0003DMG400023282M6LRR-RLK\_2867

AAAGGTTGTGGCACAGTGGCAGTAAAGCAGCTTTGGAAAGGAAATGAGGTGAAAGTTTTGACAAGGG  
AAATAGACATTCTAGGAAAGATCAGGCATCGAAATATAGTTAAACTGTATGCC

>M6-PGSC0003DMG400023282M6LRR-RLK\_2928

CAAGGGAAATAGACATTCTAGGAAAGATCAGGCATCGAAATATAGTTAAACTGTATGCCAGTCTAATGA  
GAGAAGGTTTGAATATGTTGGTTTTGAGTACTTGCCAAATGGTAATTTAT

>M6-PGSC0003DMG400023282M6LRR-RLK\_2989

TCTAATGAGAGAAGGTTTGAATATGTTGGTTTTGAGTACTTGCCAAATGGTAATTTATTCGAGGCACTA

CACCGGGAAGTCAAGGCTGGGAAGACAGAATTAGATTGGTACCAGAGGTA

>M6-PGSC0003DMG400023282M6LRR-RLK\_305

CTTGTAACCAAGACTATAAAGTCAAGTGAAACATTATATACTTGAGTCACTTCAAAGAAAGATGTAAATT

CATTGGCAATATAGTAAATCCACAATAAATACAAATTGACATGTAAAC

>M6-PGSC0003DMG400023282M6LRR-RLK\_3050

GAGGCACTACACCGGGAAGTCAAGGCTGGGAAGACAGAATTAGATTGGTACCAGAGGTATAAAATTGC

AGTTGGAAGTCAAAGGGAATTGCTTATTTGCACCATGATTGTGTCCCTCCT

>M6-PGSC0003DMG400023282M6LRR-RLK\_3111

AAATTGCAGTTGGAAGTCAAAGGGAATTGCTTATTTGCACCATGATTGTGTCCCTCCTATTATTCATAG

AGATATCAAGTCAACAAACATTCTACTTGATGAGGAGTATGAAGCGAAAG

>M6-PGSC0003DMG400023282M6LRR-RLK\_3172

TATTCATAGAGATATCAAGTCAACAAACATTCTACTTGATGAGGAGTATGAAGCGAAAGTTTCTGATTC

GGGGTTGCAAAGTTTCAGAAATTTCTCTAGAGTCTCCGAGTTCAGCTG

>M6-PGSC0003DMG400023282M6LRR-RLK\_3233

TCTGATTCGGGGTTGCAAAGTTTCAGAAATTTCTCTAGAGTCTCCGAGTTCAGCTGCTTTGCAGGCA

CTCACGGCTATTTAGCTCCTGGTATGTTTCAAAGAGGAAAAACCAAATAC

>M6-PGSC0003DMG400023282M6LRR-RLK\_3294

TTGCAGGCACTCACGGCTATTTAGCTCCTGGTATGTTTCAAAGAGGAAAAACCAAATACTATGTTCCAC

TTCTTTCTATTTTCACTCTTGCTAGTTTCTAACATCACATTTGAATTTG

>M6-PGSC0003DMG400023282M6LRR-RLK\_3355

TGTTCCCACTTCTTTCTATTTTCACTCTTGCTAGTTTCTAACATCACATTTGAATTTGTTTTATTGACAGAG

CTAGCATATACTTCCAGAGTGACAGAAAAGAGCGATGTATACAGCTT

>M6-PGSC0003DMG400023282M6LRR-RLK\_3416

TTATTGACAGAGCTAGCATATACTTCCAGAGTGACAGAAAAGAGCGATGTATACAGCTTTGGAGTTGTT

CTATTAGAATTAGTAACTGGAAGGAAACCAATAGAGGAAGCCTATGGAGAA

>M6-PGSC0003DMG400023282M6LRR-RLK\_3477

GAGTTGTTCTATTAGAATTAGTAACTGGAAGGAAACCAATAGAGGAAGCCTATGGAGAAGGCAAAGAC

TTGGTTTATTGGGCATCAACTCATCTAAATGACAAAGGAAGCGTTCTGAATA

>M6-PGSC0003DMG400023282M6LRR-RLK\_3538

CAAAGACTTGGTTTATTGGGCATCAACTCATCTAAATGACAAAGGAAGCGTTCTGAATATTCTTGATCAA  
AAGGTGGTTTCCGAGCTTGTCCAAGATGACATGATCAAAGTGTTGAGGAT

>M6-PGSC0003DMG400023282M6LRR-RLK\_3599

CTTGATCAAAGGTGGTTTCCGAGCTTGTCCAAGATGACATGATCAAAGTGTTGAGGATTTCTGCCCTAT  
GTACGACTAAGCTTCCTCATTACGCCCCAGCATGAAAGAAGTAGTAAAG

>M6-PGSC0003DMG400023282M6LRR-RLK\_366

ATGTAAATTCATTGGCAATATAGTAAATCCACAATAAATACAAATTGACATGTTAAACACATCAGCTAA  
TCACCCAACATCCTGTATGTGTTTGTGTATATCTGTTAACATCTTTCAT

>M6-PGSC0003DMG400023282M6LRR-RLK\_3660

CTGCCCTATGTACGACTAAGCTTCCTCATTACGCCCCAGCATGAAAGAAGTAGTAAAGATGCTTGTTGA  
TGCTGAACCTTGAACATTTAGTTTTCAAGCAAATGTGAGAAAAATGAGAA

>M6-PGSC0003DMG400023282M6LRR-RLK\_3721

GCTTGTTGATGCTGAACCTTGAACATTTAGTTTTCAAGCAAATGTGAGAAAAATGAGAAAGATCCTTTGT  
AGTTTTCTCCTTTCCCTCTTACCATATAGTTTAAATCCAATCTTCAGT

>M6-PGSC0003DMG400023282M6LRR-RLK\_3782

ATCCTTTGTAGTTTTCTCCTTTCCCTCTTACCATATAGTTTAAATCCAATCTTCAGTATAGTTTTGTTTTA  
TGATTATGCATATGCCATGTAAAATTGTATCCAACCTTTGTCTGTAC

>M6-PGSC0003DMG400023282M6LRR-RLK\_3829

CCAATCTTCAGTATAGTTTTGTTTTATGATTATGCATATGCCATGTAAAATTGTATCCAACCTTTGTCTGTA  
CAAGTTCATTTGTAAAATGGAATGCATTTTTCTGGTTGAGCTTATAA

>M6-PGSC0003DMG400023282M6LRR-RLK\_427

ATCAGCTAATCACCCAACATCCTGTATGTGTTTGTGTATATCTGTTAACATCTTTCATATGTGCTTTACTG  
AATTCCTAAGTTATCTTATTCTTTAAGTAAAATTTTTAGTTTCTTAT

>M6-PGSC0003DMG400023282M6LRR-RLK\_488

GTGCTTACTGAATTCCTAAGTTATCTTATTCTTTAAGTAAAATTTTTAGTTTCTTATAATAGATAAATTA  
TACAACAAACATTTGATTAGGTATACATTGCTTTTAAGTAAAAGGGGT

>M6-PGSC0003DMG400023282M6LRR-RLK\_549

TAGATAAATTATACAACAAACATTTGATTAGGTATACATTGCTTTTAAGTAAAAGGGGTTTGTTATATGT  
ATATTCTTGTTTCTATACTTTATTGTTTGGTACTGATTGCTACTTTTCT



>M6-PGSC0003DMG400023282M6LRR-RLK\_610

GTTATATGTATATTCTTGTCTATACTTTATTGTTGGTTACTGATTGCTACTTTTCTTCTTTTCAGTTTCTCA  
TTAAGAATGGGCATCCATCATATCTGTTATGGAGTTTGTTCATCCCC

>M6-PGSC0003DMG400023282M6LRR-RLK\_671

TTTCAGTTTCTCATTAAAGAATGGGCATCCATCATATCTGTTATGGAGTTTGTTCATCCCCCTTGTGAAATGAC  
TGTTTAGCCCTTCCCATAATCAATCATGTCTAGAATCCAAACTCTCCAT

>M6-PGSC0003DMG400023282M6LRR-RLK\_732

GTGAAATGACTGTTTAGCCCTTCCCATAATCAATCATGTCTAGAATCCAAACTCTCCATTCCCTCCAAATC  
GTTGTTATTTTCTGAAGTTTCTTGTCTCTAATTCATTGTCTGTTG

>M6-PGSC0003DMG400023282M6LRR-RLK\_793

CCTCCAAATCGTTGTTATTTTCTTGAAGTTTCTTGTCTCTAATTCATTGTCTGTTGAGACAGAAGCACT  
TCTTGAATTTAAAAGCATCTTGTGACCCTTGAATGTCTTGAATC

>M6-PGSC0003DMG400023282M6LRR-RLK\_854

ACAGAAGCACTTCTGAATTTAAAAGCATCTTGTGACCCTTGAATGTCTTGAATCTTGGAAATATTC  
AGATCCCTTGTAATTTCTATGGCATTCAATGTGACAAACACACTGGC

>M6-PGSC0003DMG400023282M6LRR-RLK\_915

GGAAATATTCAGATTCCCCTTGTAATTTCTATGGCATTCAATGTGACAAACACACTGGCTTGGTCACTGA  
AATTTCACTTGACAATAAGTCCCTTATGGATTTATTTCCCCTTCAATAT

>M6-PGSC0003DMG400023282M6LRR-RLK\_976

GGTCACTGAAATTTCACTTGACAATAAGTCCCTTATGGATTTATTTCCCCTTCAATATGTGTCTCCAAA  
GCATTA CTCTAGTGCTTCTTCAAATCACCTGTCTGGAAATCTTCC

>M6-PGSC0003DMG400023283-(rev)M6LRR-RLK\_0

ATGATTGTCTTGAACCTAGTGAATTGTTGGTCCATTGTCACCAGCAGTTGGTAATCTTAGTTTCCTCAG  
GGTACTTTGGCTCAGCAGAAACAGTTTCACTGGCAAAATCCCTGGAGAG

>M6-PGSC0003DMG400023283-(rev)M6LRR-RLK\_1054

CAGGTGAGATTCCACATTCTTGGAAATTTGACGAGGTTGATTGAACTCGATTTGGGATCAAACAACCTT  
GCAAGGTA CTGTGCCTTCAAGTCTTGGAAAGCTGCAAGTTCTTATCACTCT

>M6-PGSC0003DMG400023283-(rev)M6LRR-RLK\_1116

AACAACCTGCAAGGTA CTGTGCCTTCAAGTCTTGGAAAGCTGCAAGTTCTTATCACTCTTGTATCTGAATG

GAAATCAACTTAGTGGTCTTATAACCAAAGAAGTGTGGGCTCTCCCTT

>M6-PGSC0003DMG400023283-(rev)M6LRR-RLK\_1178

TCTGAATGGAAATCAACTTAGTGGTCTTATAACCAAAGAAGTGTGGGCTCTCCCTTATAGAGTTTGAC  
CTCTCAAACAACCACTTGACGGGGTATTTTCCTGTAGGGATTGGCTCTGG

>M6-PGSC0003DMG400023283-(rev)M6LRR-RLK\_124

GAAAGCTATCGAGATTACAGAGGTTGAACTTAGCAAACAATTCATTTTCTGGTGAAATACCAAGAAACA  
TATCGCGGTGCTCCAATCTTAATTATATTCATTTAGGTAATAACAATCTGA

>M6-PGSC0003DMG400023283-(rev)M6LRR-RLK\_1240

AGTTTGACCTCTCAAACAACCACTTGACGGGGTATTTTCCTGTAGGGATTGGCTCTGGAACTTGACTGG  
ACTGATAAACTTGATCTACATGAACCATTCATACAACAATTTATCAGGTG

>M6-PGSC0003DMG400023283-(rev)M6LRR-RLK\_1302

TTGACTGGACTGATAAACTTGATCTACATGAACCATTCATACAACAATTTATCAGGTGAAATACCAAGCA  
GCTTTGGCACTTTGACTAGTTTGAGGGAGCTATACCTTGGTAACAATGCC

>M6-PGSC0003DMG400023283-(rev)M6LRR-RLK\_1364

ACCAAGCAGCTTTGGCACTTTGACTAGTTTGAGGGAGCTATACCTTGGTAACAATGCCCTTCAGGGAGTT  
ATTCCTGCATCCTTTAGTTCTTTGAGAAGTCTTGAATATATTGATCTTTC

>M6-PGSC0003DMG400023283-(rev)M6LRR-RLK\_1426

AGGGAGTTATTCCTGCATCCTTTAGTTCTTTGAGAAGTCTTGAATATATTGATCTTCTCATAACCACTTTG  
TAGGGAGGATTCCAAAGTTTCTGGATGAACTTGTCTCCTTGAAGTTCT

>M6-PGSC0003DMG400023283-(rev)M6LRR-RLK\_1488

AACCACTTTGTAGGGAGGATTCCAAAGTTTCTGGATGAACTTGTCTCCTTGAAGTTCTTAAATTTGTCTTA  
TAATGATTTGGAGGGTGAGGTACCTTTGAAAGGAGCTTTCAGAAACATG

>M6-PGSC0003DMG400023283-(rev)M6LRR-RLK\_1550

TTTGTCTTATAATGATTTGGAGGGTGAGGTACCTTTGAAAGGAGCTTTCAGAAACATGAGTGCTGTTTCA  
CTTGTTGGGAACAGTGAGCTCTGTGGGGGTATTCCAGAGTTCAAATGCC

>M6-PGSC0003DMG400023283-(rev)M6LRR-RLK\_1612

CTGTTTCACTTGTTGGGAACAGTGAGCTCTGTGGGGGTATTCCAGAGTTCAAATGCCAAAGTGCAGCA  
ACAAAGTAGCGTCAAGAAGACGAAGGTTATCTCATAGATTGATAATAGTAA

>M6-PGSC0003DMG400023283-(rev)M6LRR-RLK\_1674

TGCAGCAACAAAGTAGCGTCAAGAAGACGAAGGTTATCTCATAGATTGATAATAGTAATGCTGGTTATT  
GGAGGATTATTGGCAGCAACAACAGTGGCCATTCTTATTTTCTTGTGTGCT

>M6-PGSC0003DMG400023283-(rev)M6LRR-RLK\_1736

GGTTATTGGAGGATTATTGGCAGCAACAACAGTGGCCATTCTTATTTTCTTGTGTGCTAGAAGAAAAA  
GAGGTCTACTTCATCAGAGAATTCATCGTTGGACGTGATCCCAAGAGTGAC

>M6-PGSC0003DMG400023283-(rev)M6LRR-RLK\_1798

GAAAAAGAGGTCTACTTCATCAGAGAATTCATCGTTGGACGTGATCCCAAGAGTGACTTACAATAGTC  
TTTACAAAGAACTAATGGCTTCTCTACGTCAAACATGATTGGTTCGGGTG

>M6-PGSC0003DMG400023283-(rev)M6LRR-RLK\_186

AGAAACATATCGCGGTGCTCCAATCTTAATTATATTCATTTAGGTAATAACAATCTGAGTGGAAGCATTC  
CAACAGAGTTGAGATCATTGAATAAACTTGAGAATTTACTACTTCAGTTG

>M6-PGSC0003DMG400023283-(rev)M6LRR-RLK\_1860

AATAGTCTTTACAAAGAACTAATGGCTTCTCTACGTCAAACATGATTGGTTCGGGTGCATTTAGCTTCG  
TGTACAGAGGCATTCTAGAGGAAAATGGAAAATTTGTTGCCATAAAGGTG

>M6-PGSC0003DMG400023283-(rev)M6LRR-RLK\_1922

TAGCTTCGTGTACAGAGGCATTCTAGAGGAAAATGGAAAATTTGTTGCCATAAAGGTGCTCAAACCTCA  
AGTTAGGGGAGCTTCTAAGAGCTTTCTTACTGAATGTGAAGCACTAAGGCA

>M6-PGSC0003DMG400023283-(rev)M6LRR-RLK\_1984

AACTCCAAGTTAGGGGAGCTTCTAAGAGCTTTCTTACTGAATGTGAAGCACTAAGGCATATCAAGCATA  
GAAACCTGGTAAAACCTCTTAACATCATGTTCAAGCATTGATTACCAAGGTA

>M6-PGSC0003DMG400023283-(rev)M6LRR-RLK\_2046

AAGCATAGAAACCTGGTAAAACCTCTTAACATCATGTTCAAGCATTGATTACCAAGGTAACGACTTCAAGG  
CTCTCATTTATGAATACATGGCCAATGGTAATTTGGCAAATTGGTTGCAC

>M6-PGSC0003DMG400023283-(rev)M6LRR-RLK\_2108

CTTCAAGGCTCTCATTTATGAATACATGGCCAATGGTAATTTGGCAAATTGGTTGCACAATAGAAGTACA  
GATGGTGAAGAAAATCATGAGCCTAAAACCTTTGCACATGCTACAGAGACT

>M6-PGSC0003DMG400023283-(rev)M6LRR-RLK\_2170

GAAGTACAGATGGTGAAGAAAATCATGAGCCTAAAACCTTTGCACATGCTACAGAGACTCAATGTAATAA  
TTGATGTGGCTTCTGCATTAGATTATCTTCATCATCAATCTGGAACGCCAT

>M6-PGSC0003DMG400023283-(rev)M6LRR-RLK\_2232

GTAATAATTGATGTGGCTTCTGCATTAGATTATCTTCATCATCAATCTGGAACGCCATTGACACATTGCGA  
TATCAAACCAAATAATGTGCTTTTGGATGAAGATTTTGTGCTCATTTA

>M6-PGSC0003DMG400023283-(rev)M6LRR-RLK\_2294

ACATTGCGATATCAAACCAAATAATGTGCTTTTGGATGAAGATTTTGTGCTCATTTAGGTGACTTTGGA  
CTGGCAAGGTTTCTGCCTGATGCTGCAAATCTGCTCTCCTTAAGCCAATC

>M6-PGSC0003DMG400023283-(rev)M6LRR-RLK\_2356

ACTTTGGACTGGCAAGGTTTCTGCCTGATGCTGCAAATCTGCTCTCCTTAAGCCAATCAGCCAGCTCTCTC  
AATATAAGAGGAACTATTGGATATGTTCCACCTGGTAATTAECTCTTCT

>M6-PGSC0003DMG400023283-(rev)M6LRR-RLK\_2418

AGCTCTCTCAATATAAGAGGAACTATTGGATATGTTCCACCTGGTAATTAECTCTTCTCCCTCTCTAAACA  
TCATTTTATATTTATGAAGTCCTTACTTATCAAGTTTGTCAATTTA

>M6-PGSC0003DMG400023283-(rev)M6LRR-RLK\_248

AAGCATTCCAACAGAGTTGAGATCATTGAATAAACTTGAGAATTTACTACTTCAGTTGAATAAATTGACT  
GGAGAAGTTCCAGCTTATCTAGGTAATCATTCTTCACTCTTGGCAATTGC

>M6-PGSC0003DMG400023283-(rev)M6LRR-RLK\_2480

CTCTAAACATCATTTTATATTTATGAAGTCCTTACTTATCAAGTTTGTCAATTTATGTATGTGCAGAAT  
ATGCTACAGGTAATACGTTTTCGACCTATGGAGATGTCTATAGTTATG

>M6-PGSC0003DMG400023283-(rev)M6LRR-RLK\_2542

TGTGCAGAATATGCTACAGGTAATACGTTTTCGACCTATGGAGATGTCTATAGTTATGGAATTCTACTTTT  
GGAAACATTTACTGGAAGAAGTCCAAGTATGAGATTTTCAAGGATGGT

>M6-PGSC0003DMG400023283-(rev)M6LRR-RLK\_2604

TCTACTTTTGGAAACATTTACTGGAAGAAGTCCAAGTATGAGATTTTCAAGGATGGTCTAAACCTTCAT  
GATTTTGTAAAGAGAGCCATACCTGAGCAAGCGAAAGATGTTTCTGATCC

>M6-PGSC0003DMG400023283-(rev)M6LRR-RLK\_2666

ACCTTCATGATTTTGTAAAGAGAGCCATACCTGAGCAAGCGAAAGATGTTTCTGATCCTAAACTTGTCTA  
TGATGAAACGGGCAGACTGATCAGCAACAATAAAACAATCGAGTGCCTCA

>M6-PGSC0003DMG400023283-(rev)M6LRR-RLK\_2728

CTTGTCTATGATGAAACGGGCAGACTGATCAGCAACAATAAAACAATCGAGTGCCTCACATTGATTTTTC

GAGTTGGGATTGCTTGTTTCAGTGGACTCTGCAAAGATCGCATGGACATT

>M6-PGSC0003DMG400023283-(rev)M6LRR-RLK\_2790

GATTTTTTCGAGTTGGGATTGCTTGTTTCAGTGGACTCTGCAAAGATCGCATGGACATTGCCAATGTTGTT  
AATGAACTGAATGTAATCAAAGATGCCTTCTTGAGGAACTAGCAATATTG

>M6-PGSC0003DMG400023283-(rev)M6LRR-RLK\_2852

ATGTTGTTAATGAACTGAATGTAATCAAAGATGCCTTCTTGAGGAACTAGCAATATTGGCTATGAAGTTT  
TTGAGTTTCATAATAAAGATACTACTTGTATAAGTTATATTCTCACTATC

>M6-PGSC0003DMG400023283-(rev)M6LRR-RLK\_2897

ACTAGCAATATTGGCTATGAAGTTTTTGAGTTTCATAATAAAGATACTACTTGTATAAGTTATATTCTCAC  
TATCCACTTTTCCCTTCCCCTTTTCTGCTTCTTCTTATGTAATGGAAA

>M6-PGSC0003DMG400023283-(rev)M6LRR-RLK\_310

AATTGACTGGAGAAGTTCCAGCTTATCTAGGTAATCATTCTTCACTCTTGGCAATTGCATTAGGAGATAA  
TCAATTACATGGAAAGATACCTGATATTTTTGGTGGACTCAAACATTTGG

>M6-PGSC0003DMG400023283-(rev)M6LRR-RLK\_372

GGAGATAATCAATTACATGGAAAGATACCTGATATTTTTGGTGGACTCAAACATTTGGTGTTCCTTGATT  
TTGCTTTGAATTATTTGTCTGGAGAGATTCCTATGTTCGATTTTCAACTTG

>M6-PGSC0003DMG400023283-(rev)M6LRR-RLK\_434

TCTTGATTTTGCTTTGAATTATTTGTCTGGAGAGATTCCTATGTTCGATTTTCAACTTGTCATCATTGCACAC  
ACTTCAGATAACTTTTAATAAACTTGAAGGGGGTCTTCCATCAGATAT

>M6-PGSC0003DMG400023283-(rev)M6LRR-RLK\_496

CATTGCACACACTTCAGATAACTTTTAATAAACTTGAAGGGGGTCTTCCATCAGATATGGGGTTCAATCT  
TCCAAGTTTAAAGTTCTTTCTCCTTGTGGGAAATCAACTGACAGGAAAGG

>M6-PGSC0003DMG400023283-(rev)M6LRR-RLK\_558

TTCAATCTTCCAAGTTTAAAGTTCTTTCTCCTTGTGGGAAATCAACTGACAGGAAAGGTTCTACTTCAGT  
ACTGAATTCTACATCACTTATGGAATTTGGTATCGACGGGAATAATTTT

>M6-PGSC0003DMG400023283-(rev)M6LRR-RLK\_62

TTTCTCAGGGTACTTTGGCTCAGCAGAAACAGTTTCACTGGCAAATCCCTGGAGAGATAGGAAAGCT  
ATCGAGATTACAGAGGTTGAACTTAGCAAACAATTCATTTTCTGGTGAAT

>M6-PGSC0003DMG400023283-(rev)M6LRR-RLK\_620

TACTTCAGTACTGAATTCTACATCACTTATGGAATTTGGTATCGACGGGAATAATTTCACTGGACAAGTA  
CCAGCCTTTGGAAACCAAAGGATTTGACTGGCTTGGACTTGCTGAAAA

>M6-PGSC0003DMG400023283-(rev)M6LRR-RLK\_682

GACAAGTACCAGCCTTTGGAAACCAAAGGATTTGACTGGCTTGGACTTGCTGAAAATCATTTTGGAA  
ATGGAATGTTGGATGATTTGAAGTTTATGACTCCCTACAAAATTGTACTA

>M6-PGSC0003DMG400023283-(rev)M6LRR-RLK\_744

TTTGGAAATGGAATGTTGGATGATTTGAAGTTTATGACTCCCTACAAAATTGACTAGTTTLAGAGCAGC  
TAATACTGGAAAACAACAATCTTGGAGGAGTACTGCCAAGCTATATAGGC

>M6-PGSC0003DMG400023283-(rev)M6LRR-RLK\_806

AGAGCAGCTAATACTGGAAAACAACAATCTTGGAGGAGTACTGCCAAGCTATATAGGCAACATGTCCAA  
TCTTTTGC GGCTTTCTGTAGGGGGGAATCTCATCCAAGGAAACATTCCCAC

>M6-PGSC0003DMG400023283-(rev)M6LRR-RLK\_868

TGTCCAATCTTTTGC GGCTTTCTGTAGGGGGGAATCTCATCCAAGGAAACATTCCCACAGAGATTTTACA  
GCTTGAAAACCTGCAAGTACTTGGTCTCGATAAAAATAATTTTACTGGTA

>M6-PGSC0003DMG400023283-(rev)M6LRR-RLK\_930

ATTTTACAGCTTGAAAACCTGCAAGTACTTGGTCTCGATAAAAATAATTTTACTGGTATGATTCCTGAGTC  
TATTGGACAATAAGCCAACCTTAGTAGGTTATACATTCACCACAACAGA

>M6-PGSC0003DMG400023283-(rev)M6LRR-RLK\_992

TCCTGAGTCTATTGGACAATAAGCCAACCTTAGTAGGTTATACATTCACCACAACAGATTTTCAGGTGAG  
ATTCCACATTCTCTTGGAAATTTGACGAGGTTGATTGAACTCGATTTGGG

>M6-PGSC0003DMG400023329M6LRR-RLK\_0

CAAAATTGTTCTATTCTACTTTCTTGAATGCTTTGTGTGTCCCACTTTACACATTACACTAAACCCCCAA  
TTGCCATTTGAATCTCACCTATTCATCATCATGTCATCAATTATCTAC

>M6-PGSC0003DMG400023329M6LRR-RLK\_1037

CAGCTACAAGGCCTATTTCTTTGACATCATATTCTCCGACCTAGACTTGTTTGAGATTGAGGCGTAATTGT  
TGTTGTTATATAGAGTATCGGAAACAAGGAGAAGGATCAACTGGAAGCT

>M6-PGSC0003DMG400023329M6LRR-RLK\_1098

GCGTAATTGTTGTTGTTATATAGAGTATCGGAAACAAGGAGAAGGATCAACTGGAAGCTCTCCTCTGGT  
TGATAGAGAAAATTCAATGTTTACAGCCTTTTCGTTCCGGAATTTTCACTT

>M6-PGSC0003DMG400023329M6LRR-RLK\_1159

CCTCTGGTTGATAGAGAAAATTCAATGTTTACAGCCTTTTCGTTCCGGAATTTTCACTTGAACCTGCTGAT  
ATTCTACTTTTTATGCAGCAATGGTCTCTCCTCAAATGATTATGATGTT

>M6-PGSC0003DMG400023329M6LRR-RLK\_122

TTACTCTTCCTTGTATATCTTAATCATTCTACTCTTCAAATCCATGGCTATTAGTCCAGGTCACCTTT  
CTTACTAACTTGTATATTTACATATTACTATTTGCATATATACATGT

>M6-PGSC0003DMG400023329M6LRR-RLK\_1220

ACTTGCTGATATTCTACTTTTTATGCAGCAATGGTCTCTCCTCAAATGATTATGATGTTGAAGGTATGGAG  
TTATAGGTTTTGGTTACTGTACCTGTGAAAATTTTCATATGCTTGCAAAA

>M6-PGSC0003DMG400023329M6LRR-RLK\_1281

AGGTATGGAGTTATAGGTTTTGGTTACTGTACCTGTGAAAATTTTCATATGCTTGCAAATAATGTGCTAA  
TAAAATCGCGATAACTGTTATTCTTTATTGAAATCATATATCATATATAC

>M6-PGSC0003DMG400023329M6LRR-RLK\_1342

ATGTGCTAATAAAAATCGCGATAACTGTTATTCTTTATTGAAATCATATATCATATATACATCATTTTCAGGT  
CATGCTTTAATTGAGTTGCTGAGGGCTCTGAATGATTCACACAATAGAA

>M6-PGSC0003DMG400023329M6LRR-RLK\_1403

CATTTTCAGGTCATGCTTTAATTGAGTTGCTGAGGGCTCTGAATGATTCACACAATAGAATCAAAGATTGG  
AACATTGATTTTGTGACTCCATGTTTCAGTTGGTCTCATGTTACATGTAA

>M6-PGSC0003DMG400023329M6LRR-RLK\_1464

AAAGATTGGAACATTGATTTTGTGACTCCATGTTTCAGTTGGTCTCATGTTACATGTAAAAATGGAAATG  
TCATATCCCTGTAAGACTAATTCTTTCTTTCTGTTATAAGTAAATCAAG

>M6-PGSC0003DMG400023329M6LRR-RLK\_1525

ATGGAAATGTCATATCCCTGTAAGACTAATTCTTTCTTTCTGTTATAAGTAAATCAAGTAGATTCATATA  
GTCGACCTCAACTTGTTTAGGACTGAGACATAACTATTGTTGTAATCAA

>M6-PGSC0003DMG400023329M6LRR-RLK\_1586

GATTCATATAGTCGACCTCAACTTGTTTAGGACTGAGACATAACTATTGTTGTAATCAAACAGGAACTTA  
GCTTCTAATGGATTCTCAGGAACACTTTCACCGTCGATAACCAAATTGAA

>M6-PGSC0003DMG400023329M6LRR-RLK\_1647

AGGAACTTAGCTTCTAATGGATTCTCAGGAACACTTTCACCGTCGATAACCAAATTGAAATTTTTGGTTA

GCTTGTAAGTATACTGCACTTTGTATTAAAATTAGAGTTGCTGGTAAAAA

>M6-PGSC0003DMG400023329M6LRR-RLK\_1708

TTTTGGTTAGCTTGTAAGTATACTGCACTTTGTATTAAAATTAGAGTTGCTGGTAAAAATCACACCTATAG  
TATCCCCTTTTTTCGAGTTCCTATCACCAACTATTTATCAAAAACACA

>M6-PGSC0003DMG400023329M6LRR-RLK\_183

CAGGTCACTTTTCTACTAACTTGTATATTTACATATACTATTTGCATATATACATGTTGTGAACCTCATA  
TAGTCGACCTCAACTTGTTAGGGACTGAGGCGTAGTAGTTCTTATACA

>M6-PGSC0003DMG400023329M6LRR-RLK\_1830

TCAACTATTAGTTGTTCCCTTTTTCTACCTGAGATATCACCATCGTTCAGGCAGGAAAAATGAAATGTTG  
CTATTACTCTATGTCTCGCGAACCTAGGAAAATTTGTGAAGTGTTGCT

>M6-PGSC0003DMG400023329M6LRR-RLK\_1891

TGAAATGTTGCTATACTCTATGTCTCGCGAACCTAGGAAAATTTGTGAAGTGTTGCTAAAATGTTAAT  
GGAAGTGTGCAGGGATTTACAGAACAATGATCTATCTGGTTCCTTACCTG

>M6-PGSC0003DMG400023329M6LRR-RLK\_1952

AATGTTAATGGAAGTGTGCAGGGATTTACAGAACAATGATCTATCTGGTTCCTTACCTGATTACCTTAGC  
AGCATGTCAAATCTACAAAACCTGAATCTTGCAAACAATAATTTCAATGG

>M6-PGSC0003DMG400023329M6LRR-RLK\_2013

TACCTTAGCAGCATGTCAAATCTACAAAACCTGAATCTTGCAAACAATAATTTCAATGGCCCTATTCCACC  
AGATTGGGGTCAGCTCTACAAAACCTAAATATTTGTAAGTACTTGTTTTT

>M6-PGSC0003DMG400023329M6LRR-RLK\_2074

CTATTCCACCAGATTGGGGTCAGCTCTACAAAACCTAAATATTTGTAAGTACTTGTTTTTCTTTGTTTCTTTG  
TTCTCTCCGTTTTCTAAAATATCAAGGAATGTCACCTCGGACTCTTCA

>M6-PGSC0003DMG400023329M6LRR-RLK\_2257

GGTGTGACAACATTTTTTGAGAGTCCTAGCAGACCTAACATAGCTCTTATTAATAGTTCTTGTAACAAA  
GTCTTTCTATGATATGCCTTTTGTCTGCATCAGGGTCATGAGAGGAA

>M6-PGSC0003DMG400023329M6LRR-RLK\_2318

TTGTAACAAAGTCTTTCTATGATATGCCTTTTGTCTGCATCAGGGTCATGAGAGGAAATCACATAACT  
GGAAGTGTCCAAATTCACCTATAAACATCACAGGCTTAAAAGAACTGTA

>M6-PGSC0003DMG400023329M6LRR-RLK\_2379



CACATAACTGGAAGTGTCCAAATTCACCTATAAACATCACAGGCTTAAAAGAACTGTAAGAACTATGTT  
TACCTTACGGGCGTAATTTACTGTTTCGTTTCAAATTTTCGGTTGGATTGA

>M6-PGSC0003DMG400023329M6LRR-RLK\_244

TGAACCTCATATAGTCGACCTCAACTTGTTAGGGACTGAGGCGTAGTAGTTCTTATACATGTTGTGAAGC  
TTATATAGTCGACCTCAACTTGTCAGTACTGAGGCGTAGTAGTTGTTAT

>M6-PGSC0003DMG400023329M6LRR-RLK\_2440

AACTATGTTTACCTTACGGGCGTAATTTACTGTTTCGTTTCAAATTTTCGGTTGGATTGAGGCCTATGTTGC  
TCAGACTCTTCAAACACTACTATAGTATGTGTGTCGGACCCTTCAAAGG

>M6-PGSC0003DMG400023329M6LRR-RLK\_2501

CCTATGTTGCTCAGACTCTTCAAACACTACTATAGTATGTGTGTCGGACCCTTCAAAGGTACCATTTTGGGA  
AAGCCGAGCAACATAGAATGAGTTGTTATTTGATGTTTTCAATTTATTT

>M6-PGSC0003DMG400023329M6LRR-RLK\_2562

CCATTTTGGAAAGTCCGAGCAACATAGAATGAGTTGTTATTTGATGTTTTCAATTTATTTCTGGTTGTAGTT  
CTTACTTGCTTTAATTCTTACAGGGACCTGTCCTCCAATGATCTGACT

>M6-PGSC0003DMG400023329M6LRR-RLK\_2623

GGTTGTAGTTCTTACTTGCTTTAATTCTTACAGGGACCTGTCCTCCAATGATCTGACTGGAGGTATCCCA  
CTGCAGTTGTTTTCAATACCAACATACAGGTAATGTCATCATTATTTCT

>M6-PGSC0003DMG400023329M6LRR-RLK\_2684

AGGTATCCCCTGCAGTTGTTTTCAATACCAACATACAGGTAATGTCATCATTATTTCTTTCTTGCCAA  
CTTGTAGCTTTCCATTTTGTGTTGAGCTCTCAAAAAGGGCTACT

>M6-PGSC0003DMG400023329M6LRR-RLK\_2928

AGGCTCCCTTCAACTGATAAAAAAATGAATTTGTTACTCATGACTGCATTAATCAACTGAAGCTATTA  
TTATTGACTTAGTTGCTTAACTATGTTGTTTTAACAATCATTCTATACG

>M6-PGSC0003DMG400023329M6LRR-RLK\_2989

GAAGCTATTATTGACTTAGTTGCTTAACTATGTTGTTTTAACAATCATTCTATACGTCGTAATCAGTTT  
TTCAGGAACTCATCTTGCTTGTGGCAATAGATTTTCAGAAACCCTGTGT

>M6-PGSC0003DMG400023329M6LRR-RLK\_305

TTGTGAAGCTTATATAGTCGACCTCAACTTGTCAGTACTGAGGCGTAGTAGTTGTTATACATGTTGTAA  
AGCTTATATAGTCGACCTCAACCTGTCAGGGACTAGTATTTGTTATACAT

>M6-PGSC0003DMG400023329M6LRR-RLK\_3050

GTAATCAGTTTTTCAGGAACTCATCTTGCTTGTGGCAATAGATTTTCAGAAACCCTGTGTTTCTAGTTCCTC  
TGCTCCAGGTTAATAGTCTTGTACCAATGCATCTTTTAGTTCTTAAAT

>M6-PGSC0003DMG400023329M6LRR-RLK\_3111

CTAGTTCCTCTGCTCCAGGTTAATAGTCTTGTACCAATGCATCTTTTAGTTCTTAAATCTTAGCCAACCAA  
ATGATTATTGCTCAAGTGATATTTTTTCAACAGCTTCTAGCAGAAGA

>M6-PGSC0003DMG400023329M6LRR-RLK\_3172

TAGCCAACCAAATGATTATTGCTCAAGTGATATTTTTTCAACAGCTTCTAGCAGAAGACCAAAACTTGA  
GGTTGCTATTACTGGTGCAAGTTGTGGTGCATTCCTTCTTCTTAGTTG

>M6-PGSC0003DMG400023329M6LRR-RLK\_3233

AAAACCTTGAGGTTGCTATTACTGGTGCAAGTTGTGGTGCATTCCTTCTTCTTAGTTGGGGCTATCATCA  
CATATCGTTGTAATTATAAACGTAAACTCAAACAAGATCAATTTTTTGA

>M6-PGSC0003DMG400023329M6LRR-RLK\_3294

GCTATCATCATATCGTTGTAATTATAAACGTAAACTCAAACAAGATCAATTTTTTGATGTGGAAGGTA  
TATGCTTTACTCCTATTTCTTCAACAGAAAGAGTACATGGTTTTTCTGTA

>M6-PGSC0003DMG400023329M6LRR-RLK\_3355

TGGAAGGTATATGCTTTACTCCTATTTCTTCAACAGAAAGAGTACATGGTTTTTCTGTACTGAACAAATTT  
CACTTCAAATGCCATCTACTCATATGGCATTTTAGGTGACATTGAGCGC

>M6-PGSC0003DMG400023329M6LRR-RLK\_3416

GAACAAATTTCACTTCAAATGCCATCTACTCATATGGCATTTTAGGTGACATTGAGCGCAACATTTTCATTA  
GGACAATAAGAAGATTCTCATGGCGCGAACTTCAGATTGCAACAGACA

>M6-PGSC0003DMG400023329M6LRR-RLK\_3477

CATTTCATTAGGACAATAAGAAGATTCTCATGGCGCGAACTTCAGATTGCAACAGACAATTTTCAGTGAA  
AGCAACATTATAGGACAAGGAGGTTTTGGTAAAGTTTACAAGGGCTATCT

>M6-PGSC0003DMG400023329M6LRR-RLK\_3538

TTCAGTGAAAGCAACATTATAGGACAAGGAGGTTTTGGTAAAGTTTACAAGGGCTATCTTTTCAGACAAC  
ACAAAAGTGGCAGTGAAAAGACTCACTGATTACCACAATCCTGGTGGAGAG

>M6-PGSC0003DMG400023329M6LRR-RLK\_3599

CAGACAACACAAAAGTGGCAGTGAAAAGACTCACTGATTACCACAATCCTGGTGGAGAGGCTGCATTTTC

TAAGGGAAGTGCAGCTGATTAGTGTTCAGTTCATCGAAATCTCCTACGTT

>M6-PGSC0003DMG400023329M6LRR-RLK\_366

ATGTTGTAAAGCTTATATAGTCGACCTCAACCTGTCAGGGACTAGTATTTGTTATACATGTTGTGAAGCTT

ATATAGTCGACCTCAACTTGTTAGGGACTGAAGCATGGTAGTTGTTATA

>M6-PGSC0003DMG400023329M6LRR-RLK\_3660

TGCATTTCTAAGGGAAGTGCAGCTGATTAGTGTTCAGTTCATCGAAATCTCCTACGTTTGATCGGGTTC

TGTACAACCTCTTCTGAGAGAATTCTTGTTTATCCATTTATGCAGAATCT

>M6-PGSC0003DMG400023329M6LRR-RLK\_3721

ATCGGGTTCTGTACAACCTCTTCTGAGAGAATTCTTGTTTATCCATTTATGCAGAATCTTAGTGTTCATA

TCGGTTAAGAGGTATGCCCCCTATCACTCAACCACTTTTTTTGACATTC

>M6-PGSC0003DMG400023329M6LRR-RLK\_3782

GTGTTGCATATCGGTTAAGAGGTATGCCCCCTATCACTCAACCACTTTTTTTGACATTCTTGATACTATTCA

GTCTGTAAAGTCTGTGTTTGTGTTTTTTTCTCTCTTTTCGACAGATT

>M6-PGSC0003DMG400023329M6LRR-RLK\_3843

GATACTATTCAGTCTGTTAAGTCTGTGTTTGTGTTTTTTTCTCTCTTTTCGACAGATTTAAACCTGGAGA

GAAAGCTCTGGATTGGCCAACGAGGAGACGGATAGCATTGGAGCAGC

>M6-PGSC0003DMG400023329M6LRR-RLK\_3904

AAACCTGGAGAGAAAGCTCTGGATTGGCCAACGAGGAGACGGATAGCATTGGAGCAGCACATGGTCT

AGAGTACCTACATGAGCATTGTGATCCTAAGATCATTATAGAGATCTAAAA

>M6-PGSC0003DMG400023329M6LRR-RLK\_3965

ATGGTCTAGAGTACCTACATGAGCATTGTGATCCTAAGATCATTATAGAGATCTAAAAGCAGCAAACAT

CCTCCTAGATGATAACTTTGAACCTGTTCTTGGAGATTTGGACTAGCAA

>M6-PGSC0003DMG400023329M6LRR-RLK\_4026

AGCAAACATCCTCCTAGATGATAACTTTGAACCTGTTCTTGGAGATTTGGACTAGCAAAGCTAGTTGAT

ACAAAAGTACTCATATTACAACCTCAAGTTCGCGGAACAATGGGCCACAT

>M6-PGSC0003DMG400023329M6LRR-RLK\_4087

CTAGTTGATACAAAAGTACTCATATTACAACCTCAAGTTCGCGGAACAATGGGCCACATTGCTCCAGAAT

ACTTGTCTACCGGAAAATCATCTGAGAAAACAGATGTATTTGGATATGGT

>M6-PGSC0003DMG400023329M6LRR-RLK\_4148

CTCCAGAATACTTGTCTACCGGAAAATCATCTGAGAAAACAGATGTATTTGGATATGGTATTACTCTTTTA  
GAACTTGTAACAGGGCAACGTGCAATTGATTTTTCGCGTCTTGAAGAAG

>M6-PGSC0003DMG400023329M6LRR-RLK\_4209

TACTCTTTTAGAACTTGTAACAGGGCAACGTGCAATTGATTTTTCGCGTCTTGAAGAAGAGGAAGATGTC  
TTGCTACTGGATCATGTAAGTCCCTACTTCCACACTTTCCAATTTTTGAA

>M6-PGSC0003DMG400023329M6LRR-RLK\_427

TGTGAAGCTTATATAGTCGACCTCAACTTGTTAGGGACTGAAGCATGGTAGTTGTTATACATGTTGTGAA  
GCTTATATAGTCGACCTCAACTTGTTAGGGACTGAAGCATGGTAGTTGTT

>M6-PGSC0003DMG400023329M6LRR-RLK\_4270

GAAGATGTCTTGCTACTGGATCATGTAAGTCCCTACTTCCACACTTTCCAATTTTTGAAGAGTCATAACGG  
ATACCTTTTTACTTCTACAGATCAAGAACTACTAAGAGAGAAAAGGCT

>M6-PGSC0003DMG400023329M6LRR-RLK\_4331

GTCATAACGGATACCTTTTTACTTCTACAGATCAAGAACTACTAAGAGAGAAAAGGCTAGGTGACATT  
GTGGATGGAAACATGAAAACCTTATGAACCCAAAGAAGTTGAGACAATCCTT

>M6-PGSC0003DMG400023329M6LRR-RLK\_4392

GTGACATTGTGGATGGAAACATGAAAACCTTATGAACCCAAAGAAGTTGAGACAATCCTTCAAGTTGCAT  
TGCTTTGCACCCAAAGTTCACCTGAGGAACGTCCGAAAATGGCACAAGTAA

>M6-PGSC0003DMG400023329M6LRR-RLK\_4453

AGTTGCATTGCTTTGCACCCAAAGTTCACCTGAGGAACGTCCGAAAATGGCACAAGTAATCACCATGCTA  
AAGGGTGTAGGTTTAGCTGAAAAATGGGCAGAGTGGGAGCAACTTGAAGA

>M6-PGSC0003DMG400023329M6LRR-RLK\_4514

ACCATGCTAAAGGGTGTAGGTTTAGCTGAAAAATGGGCAGAGTGGGAGCAACTTGAAGAAGTAAGAAT  
TCAACAATTTTCGCTCATGTGCGGACAGTTTATGTGGGCTGAAGACTCAACA

>M6-PGSC0003DMG400023329M6LRR-RLK\_4575

TAAGAATTCAACAATTTTCGCTCATGTGCGGACAGTTTATGTGGGCTGAAGACTCAACACATGATCAAGA  
AGCTATAACAATTGTCTCAAGCAAGATAAACAAAAAGAAGATGCAGAGAAA

>M6-PGSC0003DMG400023329M6LRR-RLK\_4636

TGATCAAGAAGCTATAACAATTGTCTCAAGCAAGATAAACAAAAAGAAGATGCAGAGAAATGTATGCATA  
AGTACTTCTGCAATAAAAATTTAAGAGTAGTTTTAGCTTCTGCTGCAGCTAT

>M6-PGSC0003DMG400023329M6LRR-RLK\_4697

TATGCATAAGTACTTCTGCAATAAAAATTTAAGAGTAGTTTTAGCTTCTGCTGCAGCTATAGCTAGTTATGT  
AACATGTAAGAGTAATTTTATCATAACATCTAGCTAGTTATGTATCATGT

>M6-PGSC0003DMG400023329M6LRR-RLK\_4758

CTAGTTATGTAACATGTAAGAGTAATTTTATCATAACATCTAGCTAGTTATGTATCATGTAAGAGTAATTTT  
ATCATATACGTATATAAGGCACTAAGGTGTCTTGTTAATTTTACAATG

>M6-PGSC0003DMG400023329M6LRR-RLK\_4819

GAGTAATTTTATCATATACGTATATAAGGCACTAAGGTGTCTTGTTAATTTTACAATGTATATATATATA  
GAGAGATAGAGAGACCATCTATTACTGAATTTACTCGATTCCCTAGCTCG

>M6-PGSC0003DMG400023329M6LRR-RLK\_4859

CTTGTTAATTTTACAATGTATATATATATAGAGAGATAGAGAGACCATCTATTACTGAATTTACTCGATT  
CCTAGCTCGTTGTAATAAATTCCTGCTCGATATTTATATTTAAGTTCC

>M6-PGSC0003DMG400023329M6LRR-RLK\_549

ACATGTTGTGAAGCTTATATAGTCGACCTCAACTTGTTAGGGACTGAGGCGTAGTAGTTATTATACATGC  
TTTTATATAATTTTCTTGATATTTTTTTGGGTATATTGAACTAAGTTAAT

>M6-PGSC0003DMG400023329M6LRR-RLK\_61

AAACCCCCAATTGCCATTTGAATCTCACCTATTCATCATCATGTCATCAATTATCTACTATTACTCTTCCTT  
GTATATCTTAATCATTCTACTCTTCAAATCCATGGCTATTAG

>M6-PGSC0003DMG400023329M6LRR-RLK\_610

TATACATGCTTTTATATAATTTTCTTGATATTTTTTTGGGTATATTGAACTAAGTTAATTTTGCCTTAGCTTT  
TAAATGAACTTATGTTAAGGGGATTCAACAGTCTAATATATATATATAT

>M6-PGSC0003DMG400023329M6LRR-RLK\_671

TGCCTTAGCTTTTAAATGAACTTATGTTAAGGGGATTCAACAGTCTAATATATATATATATGTGCCTATCATT  
TAACATACGTATGTCATGTATTTTTGTACCTTTGTCGTCCCTCAACCC

>M6-PGSC0003DMG400023329M6LRR-RLK\_732

GCCTATCATTTAACATACGTATGTCATGTATTTTTGTACCTTTGTCGTCCCTCAACCCCTCTCCAATCTTTT  
CTATCTATCATTAGAAGTAGGACGAGTAATATTCCGGTGAAGGGAAT

>M6-PGSC0003DMG400023329M6LRR-RLK\_793

CTCCAATCTTTTCTATCTATCATTAGAAGTAGGACGAGTAATATTCCGGTGAAGGGAATAAAAATTAGTT

TAAAGCCTTTATGTTTTGATGATCATTTGAGAAATTAACCTCCTAGGAAGA

>M6-PGSC0003DMG400023329M6LRR-RLK\_854

AAATTAGTTTAAAGCCTTTATGTTTTGATGATCATTTGAGAAATTAACCTCCTAGGAAGACTAGTCACTCAG

AAATAGTCATTTTGGTTCTTTTGTCTTGCTGAGTATGAGCATGAAATA

>M6-PGSC0003DMG400023329M6LRR-RLK\_915

AGTCACTCAGAAATAGTCATTTTGGTTCTTTTGTCTTGCTGAGTATGAGCATGAAATATATTGGTAGCAC

AAAAAGAAGTGGATACTTCTTGAACCTAATTGGTAATATTTTCATTGTGT

>M6-PGSC0003DMG400023329M6LRR-RLK\_976

TTGGTAGCACAAAAAGAAGTGGATACTTCTTGAACCTAATTGGTAATATTTTCATTGTGTTGCAGCTACAA

GGCCTATTTCTTTGACATCATATTCTCCGACCTAGACTTGTTTGAGATTG

>M6-PGSC0003DMG400023396M6LRR-RLP\_0

ATGTGGTTAAAGAAAGATTTTCATTATATTTGCTACTCTATTTTACCATTTTTCGATCGTTTATAGCTGTCAT

GAAACAGAAAGATCAGCTCTGTTAAGCTTCAAATCCTTGCTGACTGAT

>M6-PGSC0003DMG400023396M6LRR-RLP\_1054

TAGCTGGAATGATTCCCTCCTTCTTTAAGCAACTCATCTTCATTATCCTTTTTCCGAGCTGATGGATGTTCGA

TCCAAGGGTCAATACCTTCTTCTGTACAAAACCTTAAGAAATTAAGTG

>M6-PGSC0003DMG400023396M6LRR-RLP\_1116

GGATGTTTCGATCCAAGGGTCAATACCTTCTTCTGTACAAAACCTTAAGAAATTAAGTGTACTGATGCTGA

ATGACAACGATATCACAGGCCAACTTCTGTATCCATGTCTAGTTTAGTA

>M6-PGSC0003DMG400023396M6LRR-RLP\_1178

GATGCTGAATGACAACGATATCACAGGCCAACTTCTGTATCCATGTCTAGTTTAGTAAGCCTTCAATAC

TTATCTATGTCTCAGAACAGATTAGAAGGTCACATACCCATTTCAATCTG

>M6-PGSC0003DMG400023396M6LRR-RLP\_124

CTAATCGGTTAACTTCATGGCAAGGGGAAATTGTTGCAATTGGAAAGGAATCAAGTGCTCGAGTTCAG

GTCATGTTGTAGTTGTCAACCTCCGGAATCCTAATCCCCTTGAAGTCATGA

>M6-PGSC0003DMG400023396M6LRR-RLP\_1240

TTCAATACTTATCTATGTCTCAGAACAGATTAGAAGGTCACATACCCATTTCAATCTGTCAAATCGCCTCC

CTCAAGTACCTGAATTTAGAATGGAACGATCTAACAGGACGTTTTCCGT

>M6-PGSC0003DMG400023396M6LRR-RLP\_1302

ATCGCCTCCCTCAAGTACCTGAATTTAGAATGGAACGATCTAACAGGACGTTTTCCGTTGTGCATACTTC  
AGCTTCCGAAACTTTCATCTCTTTATATTAGAGGAATAGACTGAATGGT

>M6-PGSC0003DMG400023396M6LRR-RLP\_1364

CATACTTCAGCTTCCGAAACTTTCATCTCTTTATATTAGAGGAATAGACTGAATGGTAATATGCCATTGT  
CTTTGTTCCGAAAGTCTAGATTAGATGAAATTAGTTTAGGAACTAGTGG

>M6-PGSC0003DMG400023396M6LRR-RLP\_1426

TGCCATTGTCTTTGTTCCGAAAGTCTAGATTAGATGAAATTAGTTTAGGAACTAGTGGATTGTCATTGGA  
AATCAATGATCAAGATCAACTCTTCGTGCAAACGTTCCAGCCCAAGATTT

>M6-PGSC0003DMG400023396M6LRR-RLP\_1488

TCATTGGAATCAATGATCAAGATCAACTCTTCGTGCAAACGTTCCAGCCCAAGATTTTGGATTTACATC  
TTGCAACATGAGAGGAGAAATCCCGGATTTCTTTTCGAATTTTACAAGC

>M6-PGSC0003DMG400023396M6LRR-RLP\_1550

TTTACATCTTGCAACATGAGAGGAGAAATCCCGGATTTCTTTTCGAATTTTACAAGCCTCGTGGTTTTGA  
ATTTGCTAACAAACAGTCTATCGGGAGCCATACCACACTGGTTGTTCAA

>M6-PGSC0003DMG400023396M6LRR-RLP\_1612

TGGTTTTGAATTTGCTAACAAACAGTCTATCGGGAGCCATACCACACTGGTTGTTCAATCTCCCTTCCCTC  
TCTATACTATCTTGCCTATGAATAACTTCAGGGGAATTATACCTCCAA

>M6-PGSC0003DMG400023396M6LRR-RLP\_1674

CCTTCCCTCTCTATACTATCTTGCCTATGAATAACTTCAGGGGAATTATACCTCCAATGATTCAGCTGAA  
ATCTTCTCATTTCCCAACAATAGTAAATTTAGCCAGAAACAAACTTCAA

>M6-PGSC0003DMG400023396M6LRR-RLP\_1736

TCAGCTGAAATCTTCTCATTTCCCAACAATAGTAAATTTAGCCAGAAACAAACTTCAAGGTCCTCTCCCTT  
CTCAGCTAGAGAATGTTAACGTCATCGATCTGTCACTTAACAATTTTGT

>M6-PGSC0003DMG400023396M6LRR-RLP\_1798

CTCTCCCTTCTCAGCTAGAGAATGTTAACGTCATCGATCTGTCACTTAACAATTTTGTAGGCTCGATTCCA  
TCACGGATAGGAGAAGTTCCCGGTATCAGGTCCATATCTTTATCCGGAA

>M6-PGSC0003DMG400023396M6LRR-RLP\_186

AGTTCAGGTCATGTTGTAGTTGTCAACCTCCGGAATCCTAATCCCGTTGAAGTCATGATCACTATCAATA  
AGGAAGTTGTTCAAATTTTAAAACACGTCTGATTTTCTCTTAAAGGT

>M6-PGSC0003DMG400023396M6LRR-RLP\_1860

TCGATTCCATCACGGATAGGAGAAGTTCCCGGTATCAGGTCCATATCTTTATCCGGAAACACAATTCATG  
GTCTAATACCTGAATCATTTTGCCAAGCGACTAACGTTCTCCAGGTTCTT

>M6-PGSC0003DMG400023396M6LRR-RLP\_1922

AATTCATGGTCTAATACCTGAATCATTTTGCCAAGCGACTAACGTTCTCCAGGTTCTTGATCTCTAATA  
ATAGCTTGTGAGGCACCATTCAACGTAATATGGGAAACTGCAAGTCTCT

>M6-PGSC0003DMG400023396M6LRR-RLP\_1984

TCTCTAATAATAGCTTGTGAGGCACCATTCAACGTAATATGGGAAACTGCAAGTCTCTCATTTACCTTAAT  
CTTGACAAAACAAGCTCACTGGAAGTGTCCAAAAGAACTTGAACGCG

>M6-PGSC0003DMG400023396M6LRR-RLP\_2046

TACCTTAATCTTGACAAAACAAGCTCACTGGAAGTGTCCAAAAGAACTTGAACGCGTTACAAGCCTTC  
GTTACCTTGACCTGAATGGAAATAAGCTAGAAGGATCTTTTCCAAAATG

>M6-PGSC0003DMG400023396M6LRR-RLP\_2108

AAGCCTTCGTTACCTTGACCTGAATGGAAATAAGCTAGAAGGATCTTTTCCAAAATGATTGAAAACCTT  
CAAGATTTGGAGATTCTGATCTTGGCAGGCAATTTATTTGAAGGACCGAT

>M6-PGSC0003DMG400023396M6LRR-RLP\_2170

AAAACCTTCAAGATTTGGAGATTCTGATCTTGGCAGGCAATTTATTTGAAGGACCGATACCAAACCTTCAT  
CGGTGAGCTACACGGCCTCCGTATACTCGTTCTTTTCATCCAACATTTTCA

>M6-PGSC0003DMG400023396M6LRR-RLP\_2232

AACTTCATCGGTGAGCTACACGGCCTCCGTATACTCGTTCTTTTCATCCAACATTTTCAATGAATCTATCCC  
AGAAGGGCTAATGAAGTTGGAAAATCTACAATATATCGGTTTGTCCAGG

>M6-PGSC0003DMG400023396M6LRR-RLP\_2294

ATCTATCCCAGAAGGGCTAATGAAGTTGGAAAATCTACAATATATCGGTTTGTCCAGGAACAATCTGTCC  
GGTCCCATTCCTGAGAATCTCGATGGCTTGGAAAATGATGACGAAAAGGAA

>M6-PGSC0003DMG400023396M6LRR-RLP\_2356

ATCTGTCCGGTCCCATTCCTGAGAATCTCGATGGCTTGGAAAATGATGACGAAAAGGAAAAATGAGGCAA  
CCATCTTAGGTTATGTTTACTCCCTCAAGTTCACTGGTGCACAGCTAGAAA

>M6-PGSC0003DMG400023396M6LRR-RLP\_2418

GAGGCAACCATCTTAGGTTATGTTTACTCCCTCAAGTTCACTGGTGCACAGCTAGAAAATAGTCACCAAAG



GACAGATACATTGGCTTGAAACAGTATATTCCTACAACACTGGATTTCGAC

>M6-PGSC0003DMG400023396M6LRR-RLP\_248

TATCAATAAGGAAGTTGTTTCAAATTTTAAAAACACGTCTGATTTTTCTCTTAAAGGTAATATATCTCCATT  
GCTCTTTACTCTTGACCATATGCGACATCTCGACCTGAGTTTCAACAA

>M6-PGSC0003DMG400023396M6LRR-RLP\_2542

CGAGCAATGCTCTTACTGGTAAAATCCCTGAAAAAATTGGCCTTTTAAAGTGAATCCCATTCTGAATCT  
CTCACATAACAATCTGTTTGGACTGATCCCAAAGACAATCGGCGATATGA

>M6-PGSC0003DMG400023396M6LRR-RLP\_2604

CTGAATCTCTCACATAACAATCTGTTTGGACTGATCCCAAAGACAATCGGCGATATGATTTCACTCGAGT  
CGTTGGATCTTAGCTACAACCATTTTCAGAGGTGAAATTCCAGTGACATTG

>M6-PGSC0003DMG400023396M6LRR-RLP\_2666

ACTCGAGTCGTTGGATCTTAGCTACAACCATTTTCAGAGGTGAAATTCCAGTGACATTGGCATTGTTAGAT  
TTTCTCCAACATCTCAACATGTCCTACAACAATTTGAGCGGACGGGTTCC

>M6-PGSC0003DMG400023396M6LRR-RLP\_2728

TGTTAGATTTTCTCCAACATCTCAACATGTCCTACAACAATTTGAGCGGACGGGTTCCAAGGAATCCACA  
TTTCGACACTTTGTATCAAGACGGAGCAGCATATATCGGAAACAAATACC

>M6-PGSC0003DMG400023396M6LRR-RLP\_2790

AATCCACATTTTCGACACTTTGTATCAAGACGGAGCAGCATATATCGGAAACAAATACCTATGTGGTACTC  
CTGATGGGATGAACTGCAGTAGCAATGGTCCCTCTATCATCACTGAAACT

>M6-PGSC0003DMG400023396M6LRR-RLP\_2852

TGGTACTCCTGATGGGATGAACTGCAGTAGCAATGGTCCCTCTATCATCACTGAAACTACAGAGAACGA  
ATATGATCAAGAAAATGTCCTGTTTGTCTAGTTATATTTTTGGCTATGT

>M6-PGSC0003DMG400023396M6LRR-RLP\_2914

AGAACGAATATGATCAAGAAAATGTCCTGTTTGTCTAGTTATATTTTTGGCTATGTAACAGGCATTTCT  
GGATTGTTTTGCTCTTATATTTGATGAAGGACAATTGGAGGAACAAAT

>M6-PGSC0003DMG400023396M6LRR-RLP\_2958

TTTTTTGGCTATGTAACAGGCATTTCTGGATTGTTTTGCTCTTATATTTGATGAAGGACAATTGGAGGAA  
CAAATACTGGAGGGCAATAGACAGAATTGTGTTAAAAATAGTAAAATAG

>M6-PGSC0003DMG400023396M6LRR-RLP\_310

TATCTCCATTGCTCTTTACTCTTGACCATATGCGACATCTCGACCTGAGTTTCAACAACCTTCATGTA  
CTCAA  
AGTTACCTGTTGAGATATCGAACTTAACAAAGTTGACTTATCTCAATC

>M6-PGSC0003DMG400023396M6LRR-RLP\_372

ATGTA  
CTCAAAGTTACCTGTTGAGATATCGAACTTAACAAAGTTGACTTATCTCAATCTGT  
CGAATGCCAT  
GTTTCAAGATTCCATAGCCACGCAATTCTCAAACCTTACATCTCTGAGG

>M6-PGSC0003DMG400023396M6LRR-RLP\_434

GAATGCCATGTTTCAAGATTCCATAGCCACGCAATTCTCAAACCTTACATCTCTGAGGTCTCTT  
GATCTTT  
CGTGTGCTAATTTAGTACCTGATTTTTCTTCTGTTTCTGTTAGCTTGAC

>M6-PGSC0003DMG400023396M6LRR-RLP\_496

TTGATCTTTCGTGTGCTAATTTAGTACCTGATTTTTCTTCTGTTTCTGTTAGCTTGACATTTCC  
ACTGAAGTT  
GGATTTTGGCTCATTGTTTTCTTTATAAGCTATGGTTATTTGTCTA

>M6-PGSC0003DMG400023396M6LRR-RLP\_558

CCACTGAAGTTGGATTTTGGCTCATTGTTTTCTTTATAAGCTATGGTTATTTGTCTAGTCCAA  
ATCTTAGG  
TGGTTACAAGGACTCCGACGTCTCAGATATCTAGTATTGACTGGTGTT

>M6-PGSC0003DMG400023396M6LRR-RLP\_62

TAGCTGTCATGAAACAGAAAGATCAGCTCTGTTAAGCTTCAAATCCTTGCTGACTGATCCATCT  
AATCGG  
TTAACTTCATGGCAAGGGGAAATTGTTGCAATTGGAAAGGAATCAAGTG

>M6-PGSC0003DMG400023396M6LRR-RLP\_620

AAATCTTAGGTGGTTACAAGGACTCCGACGTCTCAGATATCTAGTATTGACTGGTGTTGATCTT  
TCAAAG  
GCGTCCGAATCATTTCATTGGGCTAAACCAATATCAAGCCTTTCAAATCT

>M6-PGSC0003DMG400023396M6LRR-RLP\_682

TTTCAAAGGCGTCCGAATCATTTCATTGGGCTAAACCAATATCAAGCCTTTCAAATCTCAAGT  
CACTTCAT  
TTGTCCAGCTGCAGCATTTCAGGAAGAATTCCGGTAGGGCAGTTACTTA

>M6-PGSC0003DMG400023396M6LRR-RLP\_744

TCACTTCATTTGTCCAGCTGCAGCATTTCAGGAAGAATTCCGGTAGGGCAGTTACTTAACCTT  
ACTAATCT  
TGCTACTCTAGATATGAGTTCTAACGTTCTAACATCCTCGATACCTGAT

>M6-PGSC0003DMG400023396M6LRR-RLP\_806

TACTAATCTTGCTACTCTAGATATGAGTTCTAACGTTCTAACATCCTCGATACCTGATCTTCT  
ATCGAACCT  
CAGTACCCTCTCGGTTCTTGATTTTAGTAGCAATGATTTAGATGGTCA

>M6-PGSC0003DMG400023396M6LRR-RLP\_868

TATCGAACCTCAGTACCCTCTCGGTTCTTGATTTAGTAGCAATGATTTAGATGGTCATGTCTCTTATATTC  
CTCAACTCAAAGAACTTTCTGTTTCTGGCAATCCTGCTATGACCATAG

>M6-PGSC0003DMG400023396M6LRR-RLP\_930

TCTTATATTCCTCAACTCAAAGAACTTTCTGTTTCTGGCAATCCTGCTATGACCATAGATCTTGTTTCAATG  
TTTTCTGTTCCGTGGCCGCAGTTGACATTTCTTGACATAAGCTTCGTT

>M6-PGSC0003DMG400023396M6LRR-RLP\_992

TGTTTCAATGTTTTCTGTTCCGTGGCCGCAGTTGACATTTCTTGACATAAGCTTCGTTTCGTGTAGCTGGAA  
TGATTCCTCCTTCTTAAGCAACTCATCTTCATTATCCTTTTTCCGAGC

>M6-PGSC0003DMG400023419M6RLKmalectin\_0

AAAAATTCATTACTACACACTCACTCACCTCAACAGACCTAAAAGTTCCAAAATCTTGAAAAACACAA  
AAACCCCATCTTCAAATCACACTCTCATTACCTTTTTCCCAAATTTTA

>M6-PGSC0003DMG400023419M6RLKmalectin\_1037

TATCAATGGGATAGAGGTGGTCTCTATGCCTGAGGGTCAGTTTGATTTAGTGTGTTGCCAATTCGAGG  
GGGCCAGGTTTTGTTGTTCCGTCCCTCGGTTGCTTTAGAGACAGCTTATAG

>M6-PGSC0003DMG400023419M6RLKmalectin\_1098

ATTCCGAGGGGGCCAGGTTTTGTTGTTCCGTCCCTCGGTTGCTTTAGAGACAGCTTATAGAGTGAATATG  
GGAGGTCCAAAATTGACACCAAGAAATGACACTTTGTGGAGGATGTGGAAT

>M6-PGSC0003DMG400023419M6RLKmalectin\_1159

TGAATATGGGAGGTCCAAAATTGACACCAAGAAATGACACTTTGTGGAGGATGTGGAATTCAGATCATA  
CATTTCTTGTTAATCCTGCTAGTGCTCGGAAGGTCAGTACGGATCCGAAAT

>M6-PGSC0003DMG400023419M6RLKmalectin\_122

TTTTTGTTTCATCTTGACACATCAGGTATGACCTTTTTGGCTTTGTTTCAGCTCAATTTGACAAGAAAATG  
AGTTTTTTCCATATGGGATTTTTGTTTCAGTCTTGTAATGTTGTATT

>M6-PGSC0003DMG400023419M6RLKmalectin\_1220

AGATCATACATTTCTTGTTAATCCTGCTAGTGCTCGGAAGGTCAGTACGGATCCGAAATCAGTCAAGTAT  
CCAGCGGGTGAGTCGGTTGATATTGCACCGAATTGGGTGTATGCCACTGC

>M6-PGSC0003DMG400023419M6RLKmalectin\_1281

GTCAAGTATCCAGCGGGTGAGTCGGTTGATATTGCACCGAATTGGGTGTATGCCACTGCACAAGAAAATG

GCAGATGCCAAAGTAATAGATCAAAAGTTCAACATTACATGGACGTTTCCA

>M6-PGSC0003DMG400023419M6RLKmalectin\_1342

AAGAAATGGCAGATGCCAAAGTAATAGATCAAAAGTTCAACATTACATGGACGTTTCCAGTCGAAGATG  
GATTTATTTACTTCGTTAGGATGCATTTCTGTGATTTTGTTAGTCTCTCTC

>M6-PGSC0003DMG400023419M6RLKmalectin\_1403

CGAAGATGGATTTATTTACTTCGTTAGGATGCATTTCTGTGATTTTGTTAGTCTCTCTCTTAACAATTTGAT  
CTTCGATGTGTACATCAATAACCAAACTGCTGTGGAATCATTGGATAT

>M6-PGSC0003DMG400023419M6RLKmalectin\_1464

AACAATTTGATCTTCGATGTGTACATCAATAACCAAACTGCTGTGGAATCATTGGATATCTCAACAAAGA  
CAATGGCTTTGTCAGCTGCTTATTTGTGGATTTTGTTAGTGAATATGTCA

>M6-PGSC0003DMG400023419M6RLKmalectin\_1525

CAACAAAGACAATGGCTTTGTCAGCTGCTTATTTGTGGATTTTGTTAGTGAATATGTCAACAGGCTCGAA  
TAAATTTTCGTTCAAGTTGGTCCTTCTAATTTGAGGATTACTCCATCCA

>M6-PGSC0003DMG400023419M6RLKmalectin\_1586

AGGCTCGAATAAAATTTTCGTTCAAGTTGGTCCTTCTAATTTGAGGATTACTCCATCCAATGCTATTCTAA  
ATGGTTTGGAGATAATGAAAATGAGCAATCCCAGTAGCAGCCTCGATGG

>M6-PGSC0003DMG400023419M6RLKmalectin\_1647

GCTATTCTAAATGGTTTGGAGATAATGAAAATGAGCAATCCCAGTAGCAGCCTCGATGGAAAATTTGTC  
GGATATTCCAGCAATCCGAAAGATCAAATACTAAGAGACATGTAATGCTA

>M6-PGSC0003DMG400023419M6RLKmalectin\_1708

AATTTGTCGGATATTCCAGCAATTCCGAAAGATCAAATACTAAGAGACATGTAATGCTAGTAATTTTGC  
TATCTTAGGAAGTTTAGCTGGTTTATTGCTCATTGCAGCGTCCTGTTTTC

>M6-PGSC0003DMG400023419M6RLKmalectin\_1769

AATTTTTGCTATCTTAGGAAGTTTAGCTGGTTTATTGCTCATTGCAGCGTCCTGTTTTCTCTGTTTCGTTTG  
TTCCGTAAGCCAAAGATGGTGAAACAAAAATCTTTATCATGGTTATC

>M6-PGSC0003DMG400023419M6RLKmalectin\_183

ACAAGAAAATGAGTTTTTCCATATGGGATTTTTGTTTTAGTCTTGTAAATGTTGTATTTTTGAGTAAAAA  
TGTGTTCTTGATAAAGGGTTGTTCTTGTCTTCTGCTAGCATTGTGTCTG

>M6-PGSC0003DMG400023419M6RLKmalectin\_1830

TGTTTCGTTTGTTCGTAAGCCAAAGATGGTGAAACAAAATCTTTATCATGGTTATCTTTTCCAAATCA  
TATTGGAATTCAGAACTAAAATCTCAGCAGGTAGTTTTGCTTCAACA

>M6-PGSC0003DMG400023419M6RLKmalectin\_1891

TTCCAAATCATATTGGAATTCAGAACTAAAATCTCAGCAGGTAGTTTTGCTTCAACAACACCTTCACGG  
ACGTTGGGGCGTATCTTCGCATTCTCTGAGATTCGTGAAGCTACGAAGG

>M6-PGSC0003DMG400023419M6RLKmalectin\_1952

ACCTTCACGGACGTTGGGGCGTATCTTCGCATTCTCTGAGATTCGTGAAGCTACGAAGGACTTTGATGA  
GAGCTTGGTCATTGGTGTGGTGGCTTTGGCAAAGTTTATAAAGGAGTGCT

>M6-PGSC0003DMG400023419M6RLKmalectin\_2013

TTTGATGAGAGCTTGGTCATTGGTGTGGTGGCTTTGGCAAAGTTTATAAAGGAGTGCTAGAAAATGGG  
GTAATGGTTGCTGTAAAGAGGGGAAATAGCAAGTCTCAACAAGGACTTGTC

>M6-PGSC0003DMG400023419M6RLKmalectin\_2074

AAAATGGGGTAATGGTTGCTGTAAAGAGGGGAAATAGCAAGTCTCAACAAGGACTTGTCGAATTCAGG  
ACAGAAATCGAGATGTTATCTAAGCTACGCCACAGACACCTGGTTTCTTTAA

>M6-PGSC0003DMG400023419M6RLKmalectin\_2135

ATTCAGGACAGAAATCGAGATGTTATCTAAGCTACGCCACAGACACCTGGTTTCTTTAATTGGCTACTGT  
GAGGAGCTAAATGAGATGATCCTTGTATATGAATTCATGGCAGGCGGACC

>M6-PGSC0003DMG400023419M6RLKmalectin\_2196

GGCTACTGTGAGGAGCTAAATGAGATGATCCTTGTATATGAATTCATGGCAGGCGGACCGCTCAGAAA  
GCACTTATACGGATCAGATTTTCTCATCTTTCTTGAAACAAAGACTAGAA

>M6-PGSC0003DMG400023419M6RLKmalectin\_2257

TCAGAAAGCACTTATACGGATCAGATTTTCTCATCTTTCTTGAAACAAAGACTAGAAATTTGCATCGG  
AGCTGCGAAAGGATTGCATTATCTTCACACTGGTGCAGCTGAGTGATCA

>M6-PGSC0003DMG400023419M6RLKmalectin\_2318

TTGCATCGGAGCTGCGAAAGGATTGCATTATCTTCACACTGGTGCAGCTGAGTGATCATCCACCGTGAT  
GTCAAGACTACCAACATTTTATTGGATGAGAATCTCACAGCAAAAGTGGC

>M6-PGSC0003DMG400023419M6RLKmalectin\_2379

CACCGTGATGTCAAGACTACCAACATTTTATTGGATGAGAATCTCACAGCAAAAGTGGCTGATTTTGGTT  
TATCAAAATTTGGCCCCGCGTTGGATCAAACCTCATGTGAGCACAGCCGTG

>M6-PGSC0003DMG400023419M6RLKmalectin\_244

TGAGTAAAAATGTGTTCTTGATAAAGGGTTGTTCTGTTTTCTGCTAGCATTGTGTCTGATTTCTCTGTTTT  
TGGTCATTGGATTTTGTCTTTTGTCTTGATTTCTGAGCTGTATTTT

>M6-PGSC0003DMG400023419M6RLKmalectin\_2440

ATTTTGGTTTATCAAAATTTGGCCCCGCGTTGGATCAAACCTCATGTGAGCACAGCCGTGAAGGGAAGTTT  
TGGTTACCTCGATCCAGAGTATTATCGTAGACAGCAACTGACAGAGAAGT

>M6-PGSC0003DMG400023419M6RLKmalectin\_2501

GGGAAGTTTTGGTTACCTCGATCCAGAGTATTATCGTAGACAGCAACTGACAGAGAAGTCTGATGTCTA  
TTCATTTGGAGTAGTACTCATGGAAGTCCTATGTGCACGGTCAGCAATCAA

>M6-PGSC0003DMG400023419M6RLKmalectin\_2562

GATGTCTATTCATTTGGAGTAGTACTCATGGAAGTCCTATGTGCACGGTCAGCAATCAATCCTTCACTCCC  
ACGAGAACAAGTAAACATAGCTGAGTGGGCAATGCATTGGCAAAGAAG

>M6-PGSC0003DMG400023419M6RLKmalectin\_2623

CTTCACTCCCACGAGAACAAGTAAACATAGCTGAGTGGGCAATGCATTGGCAAAGAAGGGACAATTG  
GAGCACATAATCGATCCTTATCTTGCAGGAAAAGTGAGCATTGATTCACTCA

>M6-PGSC0003DMG400023419M6RLKmalectin\_2684

ACAATTGGAGCACATAATCGATCCTTATCTTGCAGGAAAAGTGAGCATTGATTCACTCAGGAAATATGG  
TGAAACCGCGGAGAAGTGTTTGGCTGAGTATGGTGTGAAAGACCATCGAT

>M6-PGSC0003DMG400023419M6RLKmalectin\_2745

AAATATGGTGAAACCGCGGAGAAGTGTTTGGCTGAGTATGGTGTGAAAGACCATCGATGGGGGACGT  
TCTTTGGAATCTTGAATACGTTCTTAACTTGCAAGCAGCTGCCAGACAATCT

>M6-PGSC0003DMG400023419M6RLKmalectin\_2806

GGGACGTTCTTTGGAATCTTGAATACGTTCTTAACTTGCAAGCAGCTGCCAGACAATCTTTAGAAGATGA  
AAACAGCAATGCCATACCAGATATACCTTACTCAATCCCCGTGTTGAGT

>M6-PGSC0003DMG400023419M6RLKmalectin\_2867

AGAAGATGAAAACAGCAATGCCATACCAGATATACCTTACTCAATCCCCGTGTTGAGTCAGGCGAGGC  
TGATGAAATCGACATTGTTAGCCATGGTGAATCAGATGTAACAACCTTCATC

>M6-PGSC0003DMG400023419M6RLKmalectin\_2928

GGCGAGGCTGATGAAATCGACATTGTTAGCCATGGTGAATCAGATGTAACAACCTTCATCTGGAGTGTTT

TCTCAGATAATGAATCCAAAAGGAAGGTAAAGAAGAAGCTTGTGTTTGTGA

>M6-PGSC0003DMG400023419M6RLKmalectin\_2989

GAGTGTCTCTCAGATAATGAATCCAAAAGGAAGGTAAAGAAGAAGCTTGTGTTTGTGAAGAAAAAAA  
AAGATTGAAATTGTGGTTATAGTATTTTTTTTTCCATACTATAAGTAGATTT

>M6-PGSC0003DMG400023419M6RLKmalectin\_3040

GTTTGTGAAGAAAAAAAAGATTGAAATTGTGGTTATAGTATTTTTTTTTCCATACTATAAGTAGATTTAT  
ACCTTATATTATCAATCTCAGGATGAAAATCCCTTGATGCATTTTTATG

>M6-PGSC0003DMG400023419M6RLKmalectin\_305

TTCTCTGTTTTTGGTCATTGGATTTTGTCTTTTGTCTTGATTTCTGAGCTGTATTTTTGAGTAAAAATGT  
GTTCTTGAAAAGGGTTGTTCTTGTCTTTCTGCTAGCTTTGTGTGATTT

>M6-PGSC0003DMG400023419M6RLKmalectin\_366

AGTAAAAATGTGTTCTTGAAAAGGGTTGTTCTTGTCTTTCTGCTAGCTTTGTGTGATTTCTCAGTTTTTGG  
TCATTGGATTTTGTCTTTTGTCCCAATAGACTGTTTCTGAGTTGTAT

>M6-PGSC0003DMG400023419M6RLKmalectin\_427

CAGTTTTTGGTCATTGGATTTTGTCTTTTGTCCCAATAGACTGTTTCTGAGTTGTATATTTGAATAAAAA  
TGGTTTCTTAAAAGGGTTGTTGTTGTTTCTGCTAGCATTTTGTGTT

>M6-PGSC0003DMG400023419M6RLKmalectin\_488

TTGAATAAAAATGGTTTCTTAAAAGGGTTGTTGTTGTTTCTGCTAGCATTTTGTGTTTTCTCAGTTTTTC  
ATCATTGGGTTTTGCTTCTTTACCCCAATAGACTGTTTCTTGATTAG

>M6-PGSC0003DMG400023419M6RLKmalectin\_549

CTCAGTTTTTCATCATTGGGTTTTGCTTCTTTACCCCAATAGACTGTTTCTTGATTAGCTGTGGTGGAAAT  
AAATCTATAACAAGTTGAAGATGGAAGGGTTTTTGAATCTGATTTTGGG

>M6-PGSC0003DMG400023419M6RLKmalectin\_61

AAAACACAAAACCCCATCTTCAAATCACACTCTCATTACCTTTTTCCCAAATTTTACTTTTTTGTTCATC  
TTGTACACATCAGGTATGACCTTTTTTGGCTTTGTTTCAGCTCAATT

>M6-PGSC0003DMG400023419M6RLKmalectin\_610

GTGGTGGAAATAAATCTATAACAAGTTGAAGATGGAAGGGTTTTTGAATCTGATTTTGGGGATTCTGATG  
TGGTGTGTCTACAAATCACTTATAACTGTGTCAAATAATGAAAATGGTT

>M6-PGSC0003DMG400023419M6RLKmalectin\_671

TTCTGATGTGGTGTGTCTACAAATTCACCTATAACTGTGTCAAATAATGAAAATGGTTTGTCTGAAC  
TTCATAATTCTGCTAGATTGTTTACTAAAAGTTCAGTGTATACTATTAG

>M6-PGSC0003DMG400023419M6RLKmalectin\_732

TTTTCTGAACTTCATAATTCTGCTAGATTGTTTACTAAAAGTTCAGTGTATACTATTAGTACAAAGCAGAT  
TGGTAGACATTGGTTAAGGTTGCATTTTTATCCTGTTAAGAATAATGAG

>M6-PGSC0003DMG400023419M6RLKmalectin\_793

CAAAGCAGATTGGTAGACATTGGTTAAGGTTGCATTTTTATCCTGTTAAGAATAATGAGCACAACCTAAA  
ATCAGCTGTTTTTCTGTTGTGGCTAATGGGATTACATTGCTCCATGAGT

>M6-PGSC0003DMG400023419M6RLKmalectin\_854

CAACCTAAAATCAGCTGTTTTTCTGTTGTGGCTAATGGGATTACATTGCTCCATGAGTTTTCTTTTCAA  
GATTGGGGAAAAAGGAACCTTTGTTGAAGGAATACGTAATCGAAATAGG

>M6-PGSC0003DMG400023419M6RLKmalectin\_915

TCCTTTTCAAGATTGGGGAAAAAGGAACCTTTGTTGAAGGAATACGTAATCGAAATAGGTGGATCGAGT  
AGTTCGGGTGATTTAGTACTTACATTATCTCCAGTTAGTGGCTCAGTTGCA

>M6-PGSC0003DMG400023419M6RLKmalectin\_976

GATCGAGTAGTTCGGGTGATTTAGTACTTACATTATCTCCAGTTAGTGGCTCAGTTGCATTTATCAATGG  
GATAGAGGTGGTCTCTATGCCTGAGGGTCAGTTTGATTTAGTGTGTTGTC

>M6-PGSC0003DMG400023498-(rev)M6LRR-RLP\_0

ATGTATTCAAAGTTACCTGTTGAGATATCTAACTTAACAAAGTTGACTTATCTCAATCTGTCAAATGCTAT  
GTTTCAAGATTCCATCACTACACAATTCTCAAACCTTACATCTCTAAGG

>M6-PGSC0003DMG400023498-(rev)M6LRR-RLP\_1054

TGCCACTGTCATTGCTCCAGAAGTCTGGATTGGATCAAATCAGTTTCGGAGTTAGTGGATTGTCCGTGGA  
ACTCGATGATCAAGATCAATCCTTTGTGCAAACCTTCCAGCCCACAGTTT

>M6-PGSC0003DMG400023498-(rev)M6LRR-RLP\_1116

TCCGTGGAACCTCGATGATCAAGATCAATCCTTTGTGCAAACCTTCCAGCCCACAGTTTTGGAATTTACATC  
TTGCAACATGAGAGGAGAAATCCCGGAGTTCTTTTCAAATCTGACGAGT

>M6-PGSC0003DMG400023498-(rev)M6LRR-RLP\_1178

ATTTACATCTTGCAACATGAGAGGAGAAATCCCGGAGTTCTTTTCAAATCTGACGAGTCTCGAGATTTTG  
ATTTTGGCTAACAAACAGTCTATCAGGAGCCATACCATACTGGTTGTTCAA



>M6-PGSC0003DMG400023498-(rev)M6LRR-RLP\_124

TTGATCTTTCGTGTGCTTATTTAGTACCCGATTTGTCTTCTATTACTATTAGTTTGACATTACCACCAAAGT  
TGGATTTTGGCTCATTGTTATCTTTTATAAGCTATGGTTATTTGTCTA

>M6-PGSC0003DMG400023498-(rev)M6LRR-RLP\_1240

AGATTTTGATTTTGGCTAACAAACAGTCTATCAGGAGCCATACCATACTGGTTGTTCAATCTCCCATCCCTC  
TCTGTACTAGATTTGTCAATGAATAACTTCAAGGGAGTTATACCTCCAA

>M6-PGSC0003DMG400023498-(rev)M6LRR-RLP\_1302

CCATCCCTCTCTGTACTAGATTTGTCAATGAATAACTTCAAGGGAGTTATACCTCCAATGATTCAGATGAA  
ATCTTCTGTTTTTCCAACGGTAGTAAATTTAGCCAGAAACAACTTGAA

>M6-PGSC0003DMG400023498-(rev)M6LRR-RLP\_1364

TCAGATGAAATCTTCTGTTTTTCCAACGGTAGTAAATTTAGCCAGAAACAACTTGAAGGTCCTATCCCTA  
CTCAGCTCGAGAATGTTAATGTCATCAATTTGTCATTTAACAATTTTGT

>M6-PGSC0003DMG400023498-(rev)M6LRR-RLP\_1426

CTATCCCTACTCAGCTCGAGAATGTTAATGTCATCAATTTGTCATTTAACAATTTTGTAGGCTCAATTCCA  
ACACAGATAGGGGAAGTTCATGGTATCAGGTCCATATCATTATCAGGAA

>M6-PGSC0003DMG400023498-(rev)M6LRR-RLP\_1488

TCAATTCCAACACAGATAGGGGAAGTTCATGGTATCAGGTCCATATCATTATCAGGAAACAAAATCCATG  
GTCCAATACCTGAATCATTTTGCCAAGCGACTAACGTTCTCCAGGTTCTT

>M6-PGSC0003DMG400023498-(rev)M6LRR-RLP\_1550

AATCCATGGTCCAATACCTGAATCATTTTCCAAGCGACTAACGTTCTCCAGGTTCTTGATCTCTCTAATA  
ACAGTTTGTGAGGCACCATTCGACGTAATTTGGGAAACCGCAAGTCTCT

>M6-PGSC0003DMG400023498-(rev)M6LRR-RLP\_1612

TCTCTAATAACAGTTTGTGAGGCACCATTCGACGTAATTTGGGAAACCGCAAGTCTCTCATTTACCTTGGT  
CTTGAAAAAACAAGCTCAGTGGAAAGTGTCCAAAAGAAGTTGAACGCG

>M6-PGSC0003DMG400023498-(rev)M6LRR-RLP\_1674

TACCTTGGTCTTGAAAAAACAAGCTCAGTGGAAAGTGTCCAAAAGAAGTTGAACGCGTTACAAGCCTT  
CATTACCTTGACCTGAATGGAAATGAGTTTGAAGGTTCTTTTCCAACAGTG

>M6-PGSC0003DMG400023498-(rev)M6LRR-RLP\_1736

AAGCCTTCATTACCTTGACCTGAATGGAAATGAGTTTGAAGGTTCTTTTCCAACAGTGATTGGAAAGTTT

AAAGATTTGGAGATTCTGAACTTGGCAGGCAATAGATTTGAAGGAAGGAT

>M6-PGSC0003DMG400023498-(rev)M6LRR-RLP\_186

CCACCAAAGTTGGATTTTGGCTCATTGTTATCTTTATAAGCTATGGTTATTTGTCTAGTCCAAATCTAAG  
GTGGTTAGAAGGACTTCGACGTCTAAGATATCTAGTATTGACAGGTGTT

>M6-PGSC0003DMG400023498-(rev)M6LRR-RLP\_1860

AAGTTCATCGGTGAGCTACACAGCCTCCGTATACTCATGCTTGCATCAAACCTTTTCAATGAGTCTATAACC  
GGAAGGGGTAATGAAGTTGGAAAATCTACAATATATTGGTTTATCCAGG

>M6-PGSC0003DMG400023498-(rev)M6LRR-RLP\_1922

GTCTATACCGGAAGGGGTAATGAAGTTGGAAAATCTACAATATATTGGTTTATCCAGGAACAATCTGTC  
CGGTCCCATTCCCGAGAATCTTGATGGCTTGAAAATGATGATGAAAACACA

>M6-PGSC0003DMG400023498-(rev)M6LRR-RLP\_1984

ATCTGTCCGGTCCCATTCCCGAGAATCTTGATGGCTTGAAAATGATGATGAAAACACAAAATCAAACAAC  
TATCTTAGGTTATGTTTACTCCCTCAAGTTCACTGGTGCTCAGATAGAAA

>M6-PGSC0003DMG400023498-(rev)M6LRR-RLP\_2046

CAAACAATCTTAGGTTATGTTTACTCCCTCAAGTTCACTGGTGCTCAGATAGAAATTGTCACCAAAG  
GACAGACACATTTTCTTGTCAGTGTATTCCTACAACAGTGGATTTCGAC

>M6-PGSC0003DMG400023498-(rev)M6LRR-RLP\_2108

CACCAAAGGACAGACACATTTTCTTGTCAGTGTATTCCTACAACAGTGGATTTCGACGTCTCAAGCAAT  
GCTCTTACTGGTAAAATCCCTGAGAAAATTGGCCTTTTAAGTGGAAATACC

>M6-PGSC0003DMG400023498-(rev)M6LRR-RLP\_2170

CAAGCAATGCTCTTACTGGTAAAATCCCTGAGAAAATTGGCCTTTTAAGTGGAAATACCATTTCCTGAATCT  
CTCACATAATAATCTTACCGGGGTTATCCCAACGACTATTGGCGAAATGA

>M6-PGSC0003DMG400023498-(rev)M6LRR-RLP\_2232

CTGAATCTCTCACATAATAATCTTACCGGGGTTATCCCAACGACTATTGGCGAAATGATTTCCCTCGAGTC  
GTTGGATCTCAGCTATAACCAACTAACAGGTGAAATTCCAGTGACATTG

>M6-PGSC0003DMG400023498-(rev)M6LRR-RLP\_2294

CCTCGAGTCGTTGGATCTCAGCTATAACCAACTAACAGGTGAAATTCCAGTGACATTGGCACCCCTTGGAT  
TTTCTTGCATATCTCAACTTGCTTATAACAATTTGAGCGGACGGATTCC

>M6-PGSC0003DMG400023498-(rev)M6LRR-RLP\_2356

CCTTGGATTTTCTTGCATATCTCAACTTGTCTTATAACAATTTGAGCGGACGGATTCCAAGAAATCCACAT  
TTTGACACTTTATATCAAGACGGAACAGCATATATCGGAAACAAATACT

>M6-PGSC0003DMG400023498-(rev)M6LRR-RLP\_2418

AATCCACATTTTGACACTTTATATCAAGACGGAACAGCATATATCGGAAACAAATACTTATGTGGTACTC  
CTAATGGGATGAACTGCAGTAACAATGGTCCCTCTATCATCACTGAAACT

>M6-PGSC0003DMG400023498-(rev)M6LRR-RLP\_248

AAATCTAAGGTGGTTAGAAGGACTTCGACGTCTAAGATATCTAGTATTGACAGGTGTTGATCTATCAAA  
GGCCTCGGAATCATTTCATTGGGCTAAACCAATATCAAGTCTTTCAAATCT

>M6-PGSC0003DMG400023498-(rev)M6LRR-RLP\_2480

TGGTACTCCTAATGGGATGAACTGCAGTAACAATGGTCCCTCTATCATCACTGAAACTACAGAGAATGG  
ATACGATCAAGAAAATGTCCTGTTTGTGTTTAGTTATATTCTTGGGATTTGT

>M6-PGSC0003DMG400023498-(rev)M6LRR-RLP\_2542

AGAATGGATACGATCAAGAAAATGTCCTGTTTGTGTTTAGTTATATTCTTGGGATTTGTAACAGGAGTTGC  
TGGTGTATTTCTGCTGTTACATTTGATAGATGAGAATTGGAGGAACAGGT

>M6-PGSC0003DMG400023498-(rev)M6LRR-RLP\_2595

TTTGTAACAGGAGTTGCTGGTGTATTTCTGCTGTTACATTTGATAGATGAGAATTGGAGGAACAGGTATT  
GGATTGCAGTAGACAGAATTGTGTTGAAAATAGTGAAGTGTAAACTATGA

>M6-PGSC0003DMG400023498-(rev)M6LRR-RLP\_310

TATCAAAGGCCTCGGAATCATTTCATTGGGCTAAACCAATATCAAGTCTTTCAAATCTCATGTCACTTGAA  
TTGTCTAGCTGCAACATTTAGGAAGAATTCCATTAGAACAATTGCTTA

>M6-PGSC0003DMG400023498-(rev)M6LRR-RLP\_372

TCACTTGAATTGTCTAGCTGCAACATTTAGGAAGAATTCCATTAGAACAATTGCTTAACCTTACTAGTCT  
TTCTACTCTAGATATGCGTTCTAACGTTCTAACATCCATGATACCTGAT

>M6-PGSC0003DMG400023498-(rev)M6LRR-RLP\_434

TACTAGTCTTCTACTCTAGATATGCGTTCTAACGTTCTAACATCCATGATACCTGATATGATATCGAATCT  
CACAAACCCTCTCAGTTGTTAATTTTCGTGGCAACAATTTAGATGGTCA

>M6-PGSC0003DMG400023498-(rev)M6LRR-RLP\_496

TATCGAATCTCACAACCCTCTCAGTTGTTAATTTTCGTGGCAACAATTTAGATGGTCATATCCCTTACCTTC  
CACAACTCGAAAGACTTTCTGTTTCTAGCAATCCTGCTATGACCATAG

>M6-PGSC0003DMG400023498-(rev)M6LRR-RLP\_558

CCTTACCTTCCACAACCTCGAAAGACTTTCTGTTTCTAGCAATCCTGCTATGACCATAGATCTTGTTTCAATG  
TTTTAGCCCATGGCCAAAGTTGGCATTCTTGACATAAGCTTCACT

>M6-PGSC0003DMG400023498-(rev)M6LRR-RLP\_62

AAATGCTATGTTTCAAGATTCCATCACTACACAATTCTCAAACCTTACATCTCTAAGGTATCTTGATCTTTC  
GTGTGCTTATTTAGTACCCGATTTGTCTTCTATTACTATTAGTTTGAC

>M6-PGSC0003DMG400023498-(rev)M6LRR-RLP\_620

TGTTTCAATGTTTTAGCCCATGGCCAAAGTTGGCATTCTTGACATAAGCTTCACTCGGGTAGGTGGA  
CCGATTCCTCCTTCTTTAAGCAACTCAACTTTATTATCCTTTTTCCGAGC

>M6-PGSC0003DMG400023498-(rev)M6LRR-RLP\_682

TAGGTGGACCGATTCTCCTTCTTTAAGCAACTCAACTTTATTATCCTTTTTCCGAGCTGATGGATGCTCG  
ATCCAAGGGTCGATACCTTCTTCCATTACAAAACCTCAGAAATTAAGTA

>M6-PGSC0003DMG400023498-(rev)M6LRR-RLP\_744

GGATGCTCGATCCAAGGGTCGATACCTTCTTCCATTACAAAACCTCAGAAATTAAGTATATTGATGCTCA  
ATAACAATGATATCACAGGTCAACTTCTGTTTCCATGTCCAGTTTAGTA

>M6-PGSC0003DMG400023498-(rev)M6LRR-RLP\_806

GATGCTCAATAACAATGATATCACAGGTCAACTTCTGTTTCCATGTCCAGTTTAGTAAGCCTTCAATACT  
TATCTTTGTTCCAGAATAGCTTACAAGGGTATATTCCAAATTCGATTTG

>M6-PGSC0003DMG400023498-(rev)M6LRR-RLP\_868

TTCAATACTTATCTTTGTTCCAGAATAGCTTACAAGGGTATATTCCAAATTCGATTTGTCAAGTCCCCTCCC  
TGGAGTACCTGAATTTACAATGGAACGATCTAACAGGACGTCTTCCCT

>M6-PGSC0003DMG400023498-(rev)M6LRR-RLP\_930

GTCCCCTCCCTGGAGTACCTGAATTTACAATGGAACGATCTAACAGGACGTCTTCCCTCGTGCATACTTC  
AGCTTCTAAGCTTTCAATTTCTTTATGTTTCAGATGAATAACCTTAATGGT

>M6-PGSC0003DMG400023498-(rev)M6LRR-RLP\_992

CATACTTCAGCTTCTAAGCTTTCAATTTCTTTATGTTTCAGATGAATAACCTTAATGGTAATATGCCACTGTC  
ATTGCTCCAGAAGTCTGGATTGGATCAAATCAGTTTCGGAGTTAGTGG

>M6-PGSC0003DMG400023508-(rev)M6RLKmalectin\_0

CAAATTGAACATAGAACCATTTTTCTCCATTCTTAAATTAGACTTCAAATCTTGAATGCTAAGTGCAAC

ACAATTACACAAAGTTGACAACCTTTTTTTTTCTTTAAAGTTTAGTCCAT

>M6-PGSC0003DMG400023508-(rev)M6RLKmalectin\_1054

AATTACACACGAGGAGGGACTTCTAGGAATATTGCCCTCCATCGGTGTATGGGACCGCTACGAGGCTG  
CAAGTGGATGATCCCACTGTTTCTGTAAACATCACGTGGTTGTTTGATGTT

>M6-PGSC0003DMG400023508-(rev)M6RLKmalectin\_1116

GAGGCTGCAAGTGGATGATCCCACTGTTTCTGTAAACATCACGTGGTTGTTTGATGTTGATCCTGGCTTC  
GACTATTTTCATCAGGTTCCACTTTTGTGACATAGTAACTGGCCACAATGA

>M6-PGSC0003DMG400023508-(rev)M6RLKmalectin\_1178

CTGGCTTCGACTATTTTCATCAGGTTCCACTTTTGTGACATAGTAACTGGCCACAATGATCCAAACAAAGT  
AGGTGGTGACCATGAACTATTATTCAATGTTTACATCAATTCCCAATTTG

>M6-PGSC0003DMG400023508-(rev)M6RLKmalectin\_124

TGAGTTGGGGTTGTTGATATCACATATTAAGTTCATTTCAAGATTTCAAAGTTTGTTTTTTTTTTAACTTT  
CTTGAAAGTTTAGTCCATTTGGTGTGTGGGGTTCTAGTGAAATCAA

>M6-PGSC0003DMG400023508-(rev)M6RLKmalectin\_1240

AACAAAGTAGGTGGTGACCATGAACTATTATTCAATGTTTACATCAATTCCAATTTGCTTCGAGGGACC  
TTGATCTTAAAAACAAGACATCAAATGTCCTTGGTTCTCCGTATTACATG

>M6-PGSC0003DMG400023508-(rev)M6RLKmalectin\_1302

GAGGGACCTTGATCTTAAAAACAAGACATCAAATGTCCTTGGTTCTCCGTATTACATGGATGTTTTTACA  
AGGTTAGAGAGCATTACAGCATTGGCATTAGCATTGGTCCAGCAGGTAT

>M6-PGSC0003DMG400023508-(rev)M6RLKmalectin\_1364

TTTTTACAAGGTTAGAGAGCATTACAGCATTGGCATTAGCATTGGTCCAGCAGGTATACGTAATGCATA  
TCCGGATGGCCTCCTGAATGGTCTCGAGATCATGAAAATAAGCAATGTCA

>M6-PGSC0003DMG400023508-(rev)M6RLKmalectin\_1426

AATGCATATCCGGATGGCCTCCTGAATGGTCTCGAGATCATGAAAATAAGCAATGTCAAGGGAAGTCTT  
GATGCCTCAGATGCTGAGATTCAGTCCTCGGTGCCTACTTCAAAGAAGACT

>M6-PGSC0003DMG400023508-(rev)M6RLKmalectin\_1488

AAGTCTTGATGCCTCAGATGCTGAGATTCAGTCCTCGGTGCCTACTTCAAAGAAGACTAAAACATGGTTG  
ATCATTGGATCAACTATTGGAGGATCGATCATTTGCATCGTTTTGGTTGT

>M6-PGSC0003DMG400023508-(rev)M6RLKmalectin\_1550

CATGGTTGATCATTGGATCAACTATTGGAGGATCGATCATTTGCATCGTTTTGGTTGTGGTGTCTATTCTC  
TTTTGCAGAAGTAGAATACGGACAACACTGTTGATGATTCAACAGAGGAAA

>M6-PGSC0003DMG400023508-(rev)M6RLKmalectin\_1612

TCTATTCTCTTTTGCAGAAGTAGAATACGGACAACACTGTTGATGATTCAACAGAGGAAAATCATACAGCAG  
TTGGAGCTAAAGAAGCATCTCTCATTGCAAGTCTAATATGGGGTACCTG

>M6-PGSC0003DMG400023508-(rev)M6RLKmalectin\_1674

TACAGCAGTTGGAGCTAAAGAAGCATCTCTCATTGCAAGTCTAATATGGGGTACCTGTTCCCTCTTGTA  
GCAGTTCAGGAAGCAACCGATCACTTCAGTGAAAGCATGATCATAGGCTT

>M6-PGSC0003DMG400023508-(rev)M6RLKmalectin\_1736

CTCTTGTAGCAGTTCAGGAAGCAACCGATCACTTCAGTGAAAGCATGATCATAGGCTTTGGTGGTTTTGG  
AAAAGTTTACAAGGGAATTTTGAAGGATAACACAAAGGTGGCAGTGAAGA

>M6-PGSC0003DMG400023508-(rev)M6RLKmalectin\_1798

GGTTTTGGAAAAGTTTACAAGGGAATTTTGAAGGATAACACAAAGGTGGCAGTGAAGAGAGGATTTCA  
TCAATCACAACAAGGTCTTGCCGAGTTCATGACTGAAGTCGAAATGCTGTCT

>M6-PGSC0003DMG400023508-(rev)M6RLKmalectin\_186

TTTTAACTTTCTTGAAAGTTTAGTCCATTTGGTGTGTGGGGTTCTAGTGAAATCAAATTTAAGTATATT  
TCAAGATTGCATTTTTTGAACAATGACTTAAAAATTGAGTCTTTTTTAG

>M6-PGSC0003DMG400023508-(rev)M6RLKmalectin\_1860

ATTTTCATCAATCACAACAAGGTCTTGCCGAGTTCATGACTGAAGTCGAAATGCTGTCTCAGTTTAGACAT  
CGCCATTTGGTCTCACTGATCGGTTACTGTAATGAAAAGAATGAGATGAT

>M6-PGSC0003DMG400023508-(rev)M6RLKmalectin\_1922

TTAGACATCGCCATTTGGTCTCACTGATCGGTTACTGTAATGAAAAGAATGAGATGATAATCATTACGA  
GTACATGGAGAATGGAACCTTAAGGATCATCTGTATGGTTCGGACCTTC

>M6-PGSC0003DMG400023508-(rev)M6RLKmalectin\_1984

ATTTACGAGTACATGGAGAATGGAACCTTAAGGATCATCTGTATGGTTCGGACCTCCGAATTTGAATT  
GGACACAAAGGCTTGAAATTTGCATAGGATCAGCAAAGGACTTCACTAT

>M6-PGSC0003DMG400023508-(rev)M6RLKmalectin\_2046

TTTGAATTGGACACAAAGGCTTGAAATTTGCATAGGATCAGCAAAGGACTTCACTATCTTCATACTGGT  
TCTCAAAGGCAATCATACACCGAGATGTCAAGTCTCGAATATACTTCT

>M6-PGSC0003DMG400023508-(rev)M6RLKmalectin\_2108

ATACTGGTTCTCAAAGGCAATCATAACCGAGATGTCAAGTCTCGAATATACTTCTAGATGAAAATCT  
CCAGGCTAAAGTTTCTGATTTTGGACTATCGAAAATTGGTCCAGAAATTG

>M6-PGSC0003DMG400023508-(rev)M6RLKmalectin\_2170

GAAAATCTCCAGGCTAAAGTTTCTGATTTTGGACTATCGAAAATTGGTCCAGAAATTGATCAAACACATG  
TTAGTACTGCAGTGAAAGGAAGTTTTGGATATCTTGATCCAGAGTATTTG

>M6-PGSC0003DMG400023508-(rev)M6RLKmalectin\_2232

AACACATGTTAGTACTGCAGTGAAAGGAAGTTTTGGATATCTTGATCCAGAGTATTTGACAAGGCAACA  
ACTAACCGATAAATCTGATGTCTATTCCTTTGGTGTTGTTATGTTTGAAGT

>M6-PGSC0003DMG400023508-(rev)M6RLKmalectin\_2294

GGCAACAATAACCGATAAATCTGATGTCTATTCCTTTGGTGTTGTTATGTTTGAAGTCCTCTGTGGAAG  
GCCCGTTATCGATCCCTCTCTCCAGAGAATCAGTAAACTTGGTTGAAT

>M6-PGSC0003DMG400023508-(rev)M6RLKmalectin\_2356

TGTGGAAGGCCCGTTATCGATCCCTCTCTCCAGAGAATCAGTAAACTTGGTTGAATATGTGATGAAAT  
GTTTAATGACAGGAGAATCGGAGGCAATCGTTGATCCTAGGATTGCACAC

>M6-PGSC0003DMG400023508-(rev)M6RLKmalectin\_2418

GATGAAATGTTTAATGACAGGAGAATCGGAGGCAATCGTTGATCCTAGGATTGCACACGAGATTACACC  
AGAATCTCTGATGAAGTTTGTAGAGACTGCTGAGAAATGCGTGGCTGAATA

>M6-PGSC0003DMG400023508-(rev)M6RLKmalectin\_248

AAGTATATTTCAAGATTGCATTTTTGAACAATGACTTAAAAATTGAGTCTTTTTTAGCTCCTCATTACAA  
GAAATGAAAACCATTATGGATTTTGAATACTTCATTTGTTTGGTTTGG

>M6-PGSC0003DMG400023508-(rev)M6RLKmalectin\_2480

TTACACCAGAATCTCTGATGAAGTTTGTAGAGACTGCTGAGAAATGCGTGGCTGAATATGGTGCAGACA  
GGCCGACTATGGGAGAAGTTTTGTGGAACCTTGAATATGCATTGAACTTC

>M6-PGSC0003DMG400023508-(rev)M6RLKmalectin\_2542

GCAGACAGGCCGACTATGGGAGAAGTTTTGTGGAACCTTGAATATGCATTGAACTTCAAGGGAAAGA  
TGAAAAACAACACAAGAGAACGAGATATCGGATAATCAGTTGGGTAATAGT

>M6-PGSC0003DMG400023508-(rev)M6RLKmalectin\_2604

GAAAGATGAAAAACAACACAAGAGAACGAGATATCGGATAATCAGTTGGGTAATAGTGTCTTAAGTA

CTGAATACAGCATGGGGAGTATGGCTGATCTTGCTGGTGTTCATGAGCAA

>M6-PGSC0003DMG400023508-(rev)M6RLKmalectin\_2666

TAAGTACTGAATACAGCATGGGGAGTATGGCTGATCTTGCTGGTGTTCATGAGCAAAGTTTTTTGCCA

AATGGTAAAATCTGAAAACAAAGACTCATGTGATGTATGTTAGGATAAAA

>M6-PGSC0003DMG400023508-(rev)M6RLKmalectin\_2728

TTTTGCCAAATGGTAAAATCTGAAAACAAAGACTCATGTGATGTATGTTAGGATAAAAATGCAGGTCCATC

TAATGAACTCTGCCTTTGGATTGTAAATTTGTATTCTCCTTTCTTTAGAT

>M6-PGSC0003DMG400023508-(rev)M6RLKmalectin\_2790

GGTCCATCTAATGAACTCTGCCTTTGGATTGTAAATTTGTATTCTCCTTTCTTTAGATTTCTATGTTATAAC

AGATACTTGTGTTGCTTCAATTGATTTGAAGCCGCGGTTATACTATAC

>M6-PGSC0003DMG400023508-(rev)M6RLKmalectin\_2849

TCTATGTTATAACAGATACTTGTGTTGCTTCAATTGATTTGAAGCCGCGGTTATACTATACATACATAAGT

TTTCATTAGGGATTTTTTACCGAGTTGTTCACTAGCACGATAGAGCAAT

>M6-PGSC0003DMG400023508-(rev)M6RLKmalectin\_310

TCATTACAAGAAATGAAAACCATTATGGATTTTGAATACTTCATTTGTTTGGTATTGTCTGTCTTG

TGTTTGATGATATGTGGCTTAGAGTTTGATCCTGTTGATAACTATCTC

>M6-PGSC0003DMG400023508-(rev)M6RLKmalectin\_372

GTCTGTCTTGTGTTTGATGATATGTGGCTTAGAGTTTGATCCTGTTGATAACTATCTCATAAACTGTGGTT

CATTTAAAATACTACTATAGGTGATAGAGTTTTCTTAGCTGATAACTT

>M6-PGSC0003DMG400023508-(rev)M6RLKmalectin\_434

ACTGTGGTTCATTTAAAATACTACTATAGGTGATAGAGTTTTCTTAGCTGATAACTTGAATTCCCCTCAA

AGGGTATTTGTTAATACTACTAGAGTCTATTCCATCTAGTTATAGTT

>M6-PGSC0003DMG400023508-(rev)M6RLKmalectin\_496

TCCCCTCAAAGGGTATTTGTTAATACTACTAGAGTCTATTCCATCTAGTTATAGTTCAAATCTTTATCAA

ACTGCTAGAATTCTTAATGAGACCTCAAATTCACATTTTCAATCAAG

>M6-PGSC0003DMG400023508-(rev)M6RLKmalectin\_558

TCTTTATCAAAGTCTAGAAATCTTAATGAGACCTCAAATTCACATTTTCAATCAAGAAACAAGGGCGCC

ATTGGATTCGCCTGTATTTCTATCCGTTTTCGTATGGAAATTTCAATCT

>M6-PGSC0003DMG400023508-(rev)M6RLKmalectin\_62



AAGTGCAACACAATTACACAAAGTTGACAACCTTTTTTTTTCTTTAAAGTTTAGTCCATTTGGTGAGTTGGG  
GTTGTTGATATCACATATTAAGTTCATTTCAAGATTTCAAAGTTTGTTT

>M6-PGSC0003DMG400023508-(rev)M6RLKmalectin\_620

AAGGGCGCCATTGGATTGCGCTGTATTTCTATCCGTTTTCGTATGGAAATTTCAATCTTAGTTCTGCTAAG  
TTCTCTGTTTCTATTCAGAACTTCACTTTGATCAAGAGCTTTCAATCAT

>M6-PGSC0003DMG400023508-(rev)M6RLKmalectin\_682

TCTGCTAAGTTCTCTGTTTCTATTCAGAACTTCACTTTGATCAAGAGCTTTCAATCATTGAGTGGTCCTTTA  
GTAAAAGAGTACACTTTGAACATTACTAGTACTAGTCTTGTTCTTACG

>M6-PGSC0003DMG400023508-(rev)M6RLKmalectin\_744

TGGTCCTTTAGTAAAAGAGTACACTTTGAACATTACTAGTACTAGTCTTGTTCTTACGTTTACGCCTTTTTT  
TAGCTCGTTTGCCTTTGTAAACGCGTTGGAAATCATTTCACTTCCTGA

>M6-PGSC0003DMG400023508-(rev)M6RLKmalectin\_806

CGCCTTTTTCTAGCTCGTTTGCCTTTGTAAACGCGTTGGAAATCATTTCACTTCCTGATGAGCTCATTCT  
GTTGGTATTGGAACATAGTTTGTAGGGAACAAGCTTTAGAAACAGTTG

>M6-PGSC0003DMG400023508-(rev)M6RLKmalectin\_868

CTCATTCTGTTGGTATTGGAACATAGTTTGTAGGGAACAAGCTTTAGAAACAGTTGTGAGGGTGAAT  
ATGGGGAATGTTTCAGTGTTCCTCAAATGATACCTCGTGGCGATCTTGG

>M6-PGSC0003DMG400023508-(rev)M6RLKmalectin\_930

GGTGAATATGGGGAATGTTTCAGTGTTCCTCAAATGATACCTCGTGGCGATCTTGGGAATCTGATGA  
AAGATACTTAACAAGCAGGAATGTTTTTCAGTTTGAATCGAGGATACAAGC

>M6-PGSC0003DMG400023508-(rev)M6RLKmalectin\_992

CTGATGAAAGATACTTAACAAGCAGGAATGTTTTTCAGTTTGAATCGAGGATACAAGCTGTGAATTACA  
CACGAGGAGGGACTTCTAGGAATATTGCCCTCCATCGGTGTATGGGACCG

>M6-PGSC0003DMG400023554-(rev)M6LRR-RLK\_372

CCTCCAGAATTAGGGAAGCTATCAAATTTGAGGCAATTAATTTTTCCAATAATTCTAATCTTATTGGTCA  
AATTCCAGAGGCTATTTCAACATATCTTCTTTGGAATTAATCAATTTT

>M6-PGSC0003DMG400023554-(rev)M6LRR-RLK\_434

TATTGGTCAAATTCCAGAGGCTATTTCAACATATCTTCTTTGGAATTAATCAATTTCAATTTCAATACCT  
GTCGGGTAGAATTCCAACCACTACAGGTCTTCATCTTCCGAACCTTAA

>M6-PGSC0003DMG400023587-(rev)M6LRR-RLK\_0

ATGGAGAAGCACATTTTCTTATTGATTCTTCTACTTGTAATTCAATATTACTCTGTTGCTTCCTCAAATGAG  
ACTGACCAACAAGCTCTATTACTTTTCCAAAATCTTATTACAAGTCCT

>M6-PGSC0003DMG400023587-(rev)M6LRR-RLK\_1037

GAAAATTCCTCCGGAATTAGGGAAGCTATCAAAGTTGAGGCAATTAGTCATTTTGGATAATTCTAATCTT  
ATTGGTCAAATTCCAGAGGCTATTTTCAACATATCTTCTTTGGAAGTGAT

>M6-PGSC0003DMG400023587-(rev)M6LRR-RLK\_1098

TCTAATCTTATTGGTCAAATTCCAGAGGCTATTTTCAACATATCTTCTTTGGAAGTGATTGATTTTCAGTTTC  
AATAACCTCTTGGGGAGAATTCCAACAACACTACAGGTCTTCATCTTCCA

>M6-PGSC0003DMG400023587-(rev)M6LRR-RLK\_1159

ATTTTCAGTTTCAATAACCTCTTGGGGAGAATTCCAACAACACTACAGGTCTTCATCTTCCAAACGTTAAGGA  
ACTTAGCTTGGCAGTCAATCAGCTGGAAGGGGAAATTCCATTGTTTCATAA

>M6-PGSC0003DMG400023587-(rev)M6LRR-RLK\_122

TCATTTTTTGGCAAATAATTGGACCAAAAATACTTCTTTTTGCACTTGGTTTGGTGTCACCTGCAGTCCAA  
AAAGGCTAAGGGTTGTAGCCTTGACTCTTCCTAATTTGCAACTTCAAGG

>M6-PGSC0003DMG400023587-(rev)M6LRR-RLK\_1220

CGTTAAGGAACTTAGCTTGGCAGTCAATCAGCTGGAAGGGGAAATTCCATTGTTTCATAACAAATGCTTCC  
AAGCTTGAATTACTGGAGCTAAATGAAAACCTTCTGACAGGAACTATTCC

>M6-PGSC0003DMG400023587-(rev)M6LRR-RLK\_1281

AATGCTTCCAAGCTTGAATTACTGGAGCTAAATGAAAACCTTCTGACAGGAACTATTCCTACTAATTTGG  
GAAATCTTCGTGAGCTGCGAGCACTGCTCCTACATACTAATCAACTAACC

>M6-PGSC0003DMG400023587-(rev)M6LRR-RLK\_1342

CTAATTTGGGAAATCTTCGTGAGCTGCGAGCACTGCTCCTACATACTAATCAACTAACCAATGAACCAAG  
AGAGCGTGAGTTTTTATTCTTTAATTCATTGGCTGACTGTAAGATGTTGA

>M6-PGSC0003DMG400023587-(rev)M6LRR-RLK\_1403

TGAACCAAGAGAGCGTGAGTTTTTATTCTTTAATTCATTGGCTGACTGTAAGATGTTGAAATATCTACTA  
GTGGGTTCCAATCTGTTGAATGGTGTCTGCCAAATTCTATTGGGAATCT

>M6-PGSC0003DMG400023587-(rev)M6LRR-RLK\_1464

TATCTACTAGTGGGTTCCAATCTGTTGAATGGTGTCTGCCAAATTCTATTGGGAATCTTTCATCTACTAT

TCAAAACTTTTATATAGGACATGCACACATCAACGGCCTCATCCCCACA

>M6-PGSC0003DMG400023587-(rev)M6LRR-RLK\_1525

CATCTACTATTCAAAACTTTTATATAGGACATGCACACATCAACGGCCTCATCCCCACAGGTATAAGCAAC

ATGAGCGGTCTAATGACCCTAGACTTTCAAGGAAACAACCTTGGCAGGGA

>M6-PGSC0003DMG400023587-(rev)M6LRR-RLK\_1586

TATAAGCAACATGAGCGGTCTAATGACCCTAGACTTTCAAGGAAACAACCTTGGCAGGGAGTATTCCTCC

TGAGATTGGTAAGCTTAAACAACCTCCAGGGGCTGTATCTAACTAACAATAA

>M6-PGSC0003DMG400023587-(rev)M6LRR-RLK\_1647

ATTCCTCCTGAGATTGGTAAGCTTAAACAACCTCCAGGGGCTGTATCTAACTAACAATAAATTGCAGGGAC

ATGTTCCAGAGGCGGTATGCCATTTATCTAATTTGGTTCTATTATTTCTG

>M6-PGSC0003DMG400023587-(rev)M6LRR-RLK\_1708

TGCAGGGACATGTTCCAGAGGCGGTATGCCATTTATCTAATTTGGTTCTATTATTTCTGAATGGTAATGA

GCTCTCTGGATTAATTCAGAAATGCTTAGGAAATCTTAGCATGCTACAAA

>M6-PGSC0003DMG400023587-(rev)M6LRR-RLK\_1769

TGGTAATGAGCTCTCTGGATTAATTCAGAAATGCTTAGGAAATCTTAGCATGCTACAAATGCTTAATTTG

GGTTCTAATAAATTTTCATCAAATTTCCGTTGCTCCTTTGGAAAATGAG

>M6-PGSC0003DMG400023587-(rev)M6LRR-RLK\_1830

CTTAATTTGGGTTCTAATAAATTTTCATCAAATTTCCGTTGCTCCTTTGGAAAATGAGTGGTCTTCTCTAT

CTAGACATGTCACAAAATTCAATAGAGGGAGAAGTTCCAACAGATATT

>M6-PGSC0003DMG400023587-(rev)M6LRR-RLK\_1891

GTCTTCTCTATCTAGACATGTCACAAAATTCAATAGAGGGAGAAGTTCCAACAGATATTGGAGGACTGA

AAGCCATTGTAGCTCTAAATCTTTCCGTAACCACTTTTCAGGCATGATAC

>M6-PGSC0003DMG400023587-(rev)M6LRR-RLK\_2013

ACCAGATTGGGAGAACTCCTAAACCTGCAGTATCTTGACCTATCAAACAATTCATTTTTGGCCAAATTCC

ATTATCCTTTGCCAACTTGATAAGCCTGGAAATCTTGAATTTGTCTTTA

>M6-PGSC0003DMG400023587-(rev)M6LRR-RLK\_2074

GCCAAATTCATTATCCTTTGCCAACTTGATAAGCCTGGAAATCTTGAATTTGTCTTTAAATTCCTTGTCAG

GTAATTCCTAAGTCTTTGGAAAACTTTCATACCTTAAAAACATTA

>M6-PGSC0003DMG400023587-(rev)M6LRR-RLK\_2135

TTCCTTGTCAGGTAATTCCTAAGTCTTTGGAAAACTTTCATACCTTAAAAACATTAATGTTTCATTTAA  
TGATTTAGAAGGTGAAATACCGAGTGGTGGCGTGGTTCGAAATCCAC

>M6-PGSC0003DMG400023587-(rev)M6LRR-RLK\_2257

TGCAATCATTCTCGAGAACAAAGGTCTATGTGGAATGCACATATTGGAGATTCTGCTTGCCTATCAA  
TAATCCTGGAAAACAATCAAAGCTTAAGAAGGTTCTGCTAAAAATTGTTA

>M6-PGSC0003DMG400023587-(rev)M6LRR-RLK\_2318

CGCTATCAATAATCCTGGAAAACAATCAAAGCTTAAGAAGGTTCTGCTAAAAATTGTTACTCCAGTGGTT  
ATATCATCCTTTCTGATATTCTTGGTTTCAATTTTGATATTGATACG

>M6-PGSC0003DMG400023587-(rev)M6LRR-RLK\_2440

AGAAGAAAGGAAAGTCGAAAGATGTTGAAAAGGTAAGTGGAGATCGGGACTCATCAATTAGTTTCTTATC  
ACGAGATTCAAAGAGCAACAATAATTTTGATGAATCCAATTTAATTGGTG

>M6-PGSC0003DMG400023587-(rev)M6LRR-RLK\_2623

TTCTGGATTTGAAAATTGAGCAAGTATGCAAAAGGTTTGATACCGAATGCAAAGTGATGAGAAATGTTA  
GACACAGAAATCTTGTTCAGTGATTACTACTTGTCTAGTGACTATATAA

>M6-PGSC0003DMG400023587-(rev)M6LRR-RLK\_2684

AAATGTTAGACACAGAAATCTTGTTCAGTGATTACTACTTGTCTAGTGACTATATAAGAGCCTTTGTTT  
TGCAATTTATGCCAACGGAAGTCTTGAGAATTGGTTGTACAGAGAAGA

>M6-PGSC0003DMG400023587-(rev)M6LRR-RLK\_2745

GCCTTTGTTCTGCAATTTATGCCAACGGAAGTCTTGAGAATTGGTTGTACAGAGAAGATCTCCACTTAA  
ACCTTCATCAAAGAGTCACTGTAATGCTTGATGCAGCTATGGCAGTTGAA

>M6-PGSC0003DMG400023587-(rev)M6LRR-RLK\_2989

GCAAGTCCATGGCTTATACCGAGACGTTGGGCACTCTTGGATATATTTACCAGGTATAAAAAAATCTAT  
TCTCTTTGATTTCTCTTATCATTATTAAGCCTCTTCAAATTCTAGAAGT

>M6-PGSC0003DMG400023587-(rev)M6LRR-RLK\_3050

AAAATCTATTCTTTGATTTCTTATCATTATTAAGCCTCTTCAAATTCTAGAAGTAAAAAAGCAGGT  
CTTTAATTATGCATAACTATTGTTGTATTTCAATTGAGTAACTTTTCT

>M6-PGSC0003DMG400023587-(rev)M6LRR-RLK\_3111

AAAAAGCAGGTCTTTAATTATGCATAACTATTGTTGTATTTCAATTGAGTAACTTTTCTTCAATCCTTTTCT  
AAGAATATGGCTCGGAGGGAATAGTGTCTGCTAGTGGTGATGTTTATA

>M6-PGSC0003DMG400023587-(rev)M6LRR-RLK\_3355

TGTGGATGCCAATCTTTTTCTGAGGAAGAACAATCACTAGCAAAGTGAAATGTGCATAGCCTCCATG  
ATAGAATTGGCTTTAGACTGCACAAAGGAAATGCCAGAATCCAGAATAAC

>M6-PGSC0003DMG400023587-(rev)M6LRR-RLK\_488

TGAACTCAGAGTCTTAAATCTCAGGAACAATAGCCTCACGGGTATAATCCCTCCTTCGGTTGGAAATGCC  
ACAAATTTGTTGAACTTCAGTTTGTGGGAATAGATTCAGCGGCAACAT

>M6-PGSC0003DMG400023587-(rev)M6LRR-RLK\_549

GGAAATGCCACAAATTTGTTGAACTTCAGTTTGTGGGAATAGATTCAGCGGCAACATTCCAAAGGAA  
ATTGGTAATCTGAGCCAACTTGACAAATGTCCTTGACTGATAATCAGTTA

>M6-PGSC0003DMG400023587-(rev)M6LRR-RLK\_61

CCTCAAATGAGACTGACCAACAAGCTCTATTACTTTTCCAAAATCTTATTACAAGTCCTAATCATTTTTTGG  
CAAATAATTGGACCAAAAATACTTCTTTTTGCACTTGGTTTGGTGTCA

>M6-PGSC0003DMG400023587-(rev)M6LRR-RLK\_610

CAAAGGAAATTGGTAATCTGAGCCAACTTGACAAATGTCCTTGACTGATAATCAGTTAACAGGTTCCAT  
TCCCGTAGAACTGTTTAATATCTCGTCACTACTGTCCATACATCTGCGAT

>M6-PGSC0003DMG400023587-(rev)M6LRR-RLK\_671

AGGTTCCATTCCCGTAGAACTGTTTAATATCTCGTCACTACTGTCCATACATCTGCGATAACAATAGCCTTT  
CCGGCCCTCTCTTGCTTGATCAAGGGAATATTGTATCAAATCTGGAGCA

>M6-PGSC0003DMG400023587-(rev)M6LRR-RLK\_732

AATAGCCTTTCCGGCCCTCTCTTGCTTGATCAAGGGAATATTGTATCAAATCTGGAGCATTAAAGTATTTT  
TTCAACCAAATTTCTGGTTGCATTCTTTCCAACATATGCCAACTCACA

>M6-PGSC0003DMG400023587-(rev)M6LRR-RLK\_793

TAAGTATTTCTTTCAACCAAATTTCTGGTTGCATTCTTTCCAACATATGCCAACTCACAGAGCTCAAAGTA  
TTGTCCATAGCTTACAACAACATAACTGGAGAAATACCCAGAAATATTG

>M6-PGSC0003DMG400023587-(rev)M6LRR-RLK\_854

GCTCAAAGTATTGTCCATAGCTTACAACAACATAACTGGAGAAATACCCAGAAATATTGATTGTTTATCC  
AAACTCGAGATGTTTCTTATTGGTGTTAATCCAATAAAAGGGACTATCCC

>M6-PGSC0003DMG400023587-(rev)M6LRR-RLK\_915

TGTTTATCCAAACTCGAGATGTTTCTTATTGGTGTTAATCCAATAAAAGGGACTATCCCCACTTCATTGGG

AAATATTTCCACTCTGCAATATCTTTATTGTGGAGAAAATCACATAGTA

>M6-PGSC0003DMG400023587-(rev)M6LRR-RLK\_976

CTTCATTGGGAAATATTTCCACTCTGCAATATCTTTATTGTGGAGAAAATCACATAGTAGGGAAAATTCCT  
CCGGAATTAGGGAAGCTATCAAAGTTGAGGCAATTAGTCATTTTGGATA

>M6-PGSC0003DMG400023599-(rev)M6LRR-RLP\_1240

GATTTCCCAGAGGATTTTCAAGTTGATACTTGGAGATTGATCCAATTATGGATCGCAGAAGGTTTCATAA  
GGATGTCTTCTGGAAGTCATGGAAGCTTGAAGAAGTGGCTAAAGATTAT

>M6-PGSC0003DMG400023599-(rev)M6LRR-RLP\_1302

TTTCATAAGGATGTCTTCTGGAAGTCATGGAAGCTTGAAGAAGTGGCTAAAGATTATTTGGAGGATCT  
TATCAGCAGGAACCTTGATAATGGCTAGAAAAAAGAGATTCAATGGTGAGGT

>M6-PGSC0003DMG400023599-(rev)M6LRR-RLP\_1550

TTCAAGAGTATTATTCTGTTGAGGATTCTTATAAGCTCTTACCCGCTGTAGCCAGATCTATGTACTGCTTT  
TCTTACTTGGATCTACCTTTACAACCCCGTATTATGGTTCTCTCTATAT

>M6-PGSC0003DMG400023599-(rev)M6LRR-RLP\_1612

TACTGCTTTTCTTACTTGGATCTACCTTTACAACCCCGTATTATGGTTCTCTCTATATTGCCCATCTATTGTC  
ATGATCCTATAATACATGGATTTTTCTTTGTTTCAACCATCTCAGG

>M6-PGSC0003DMG400023599-(rev)M6LRR-RLP\_1674

CATCTATTGTCATGATCCTATAATACATGGATTTTTCTTTGTTTCAACCATCTCAGGGTATTGGCCATCTT  
CCTTCCATTGTTCAAGCTCATTCCAGTTGTGATTACAAATTTATTTCA

>M6-PGSC0003DMG400023599-(rev)M6LRR-RLP\_1736

TGGCCATCTTCCTTCCATTGTTCAAGCTCATTTCAGTTGTGATTACAAATTTATTTCAATTTGAGATATCTTT  
AAGTTGGATGTTTTGACAACAATATTCCTGAATCAATCTCAGAGCTTC

>M6-PGSC0003DMG400023599-(rev)M6LRR-RLP\_1798

AGATATCTTTAAGTTGGATGTTTTGACAACAATATTCCTGAATCAATCTCAGAGCTTCTGAATTTGCAAAC  
TCTAATTTGTGATGGTCATTCTTCAAAGACAACCTTACCTAGGAAGATA

>M6-PGSC0003DMG400023599-(rev)M6LRR-RLP\_1860

TTTGCAAACCTAATTTGTGATGGTCATTCTTCAAAGACAACCTTACCTAGGAAGATATGGATGATGAAG  
AACTTGAAGTATATATCTTTAGGGGGTATCACTTATTTACCAAGTCCTAG

>M6-PGSC0003DMG400023599-(rev)M6LRR-RLP\_1922

TGATGAAGAACTGAAGTATATATCTTTAGGGGGTATCACTTATTTACCAAGTCCTAGAATATATAAGAA  
TCTTGTGACAGGGATGCCAAATCTAGAGAAATTTTTCAGTCTTTGTTACT

>M6-PGSC0003DMG400023599-(rev)M6LRR-RLP\_1984

TATAAGAATCTTGTGACAGGGATGCCAAATCTAGAGAAATTTTTCAGTCTTTGTTACTCTAGTTGTACAA  
ATGAAGTCTTTTCTAGCATTCCCAATCTAAAGATATTGACTATTAGTGCA

>M6-PGSC0003DMG400023599-(rev)M6LRR-RLP\_2046

TTGTACAAATGAAGTCTTTTCTAGCATTCCCAATCTAAAGATATTGACTATTAGTGCATCTTTCAAAAAA  
ATATTCCCAATCGTCTCTTGGATATGTGCGAGCTTGAGAAAACCTTCAGGC

>M6-PGSC0003DMG400023599-(rev)M6LRR-RLP\_2108

TCAAAAAAATATTCCCAATCGTCTCTTGGATATGTGCGAGCTTGAGAAAACCTTCAGGCATTAAAGATTTCC  
CTGGGACCGTTATTTGGAATACCCCTTCAAGAGATTTGTTTTTCCAACAT

>M6-PGSC0003DMG400023599-(rev)M6LRR-RLP\_2170

AAGATTTCTGGGACCGTTATTTGGAATACCCCTTCAAGAGATTTGTTTTTCCAACATCACTTAGGAGGTT  
GACTTTAACTTGGCATTCTGAGTTTATTTGGGAAGAGATATCATCAACT

>M6-PGSC0003DMG400023599-(rev)M6LRR-RLP\_2232

TAGGAGGTTGACTTTAACTTGGCATTCTGAGTTTATTTGGGAAGAGATATCATCAACTTTTATCATGTTGC  
CACATCTGAAGAGCTCAAACCTAAATATTGTCAAGCCGAAGATGATAT

>M6-PGSC0003DMG400023599-(rev)M6LRR-RLP\_2294

TCATGTTGCCACATCTTGAAGAGCTCAAACCTAAATATTGTCAAGCCGAAGATGATATATGGAGATTGAC  
TGAAAAAGACATATTCAGAAGCTTGAAGTTGTTATTACTGAGGTACCCAA

>M6-PGSC0003DMG400023599-(rev)M6LRR-RLP\_2356

AGATTGACTGAAAAAGACATATTCAGAAGCTTGAAGTTGTTATTACTGAGGTACCCAAATCTTAAGGGTT  
GGGAAGCAAGCAGCGATAACTTCCCTAATCTAGAACGCCTTGTTCTGAAG

>M6-PGSC0003DMG400023599-(rev)M6LRR-RLP\_2666

TGAAAAGTTCTTCGATTCTTCACATTATTTAAACCTCATTTTTATTAATCATACTTCTTTGAGATTAAGA  
TGATGACTTGTACTTTTTATCTTGCATATGCAGGTAATTGAAGCTTAT

>M6-PGSC0003DMG400023599-(rev)M6LRR-RLP\_2728

GAGATTAAGATGATGACTTGTACTTTTTATCTTGCATATGCAGGTAATTGAAGCTTATTTGAGGGATCA  
TCTAATGCTATCTTCCCAATTCAGAACCTTGTACTTCATATTTTTGTTTT

>M6-PGSC0003DMG400023599-(rev)M6LRR-RLP\_2782

TTATTTTGAGGGATCATCTAATGCTATCTTCCCAATTCAGAACCTTGACTTCATATTTTTGTTTTATATTC  
TGATCGTTTGTTAATTTTCATGTTTTAGGTATAAGCGTGTTTAATACA

>M6-PGSC0003DMG400023599-(rev)M6LRR-RLP\_62

ATATTTTCAGAACTTTTTTCATGATCACAGTACTGAAATGCTCGATTCTCTTCGTGCTACAGCTGAATATTTTC  
AAGATGTTCTTGATAACATTATCAATGAGAAAATCAAATCTTTTGAGG

>M6-PGSC0003DMG400023599-(rev)M6LRR-RLP\_682

AAGCAAAGAGTTATTGTGAACACAAAAGATTATGTTAATATGAATGACAGTGAGTTAGCTGATCTGGTG  
CAAAGCGTCTAAAGGGTCCAAGATACCTTGTTGTTGTTGATGATATTTGG

>M6-PGSC0003DMG400023599-(rev)M6LRR-RLP\_806

GGGATGTTTGGGATAGCATATCACAAATATTTCTAATCGCAACAATGGGAGTCGAGTTTTATTGACTAC  
TAGGGAAACTGATGTAGCAATATATGCAAATACTAGTAGCCCTCATAAGA

>M6-PGSC0003DMG400023599-(rev)M6LRR-RLP\_868

TTGACTACTAGGGAAACTGATGTAGCAATATATGCAAATACTAGTAGCCCTCATAAGATGAACCTCTTGG  
ATTTAGATAATAGTTGGAAGTTACTCCGTGATAAGGTGTTTGGACTAGAA

>M6-PGSC0003DMG400023599-(rev)M6LRR-RLP\_930

CCTCTTGATTTAGATAATAGTTGGAAGTTACTCCGTGATAAGGTGTTTGGACTAGAACACAATCATCCT  
CCTGAGTTGGAAGAAATTGGAAAAAAATAGCAGAAAAATGTCAAGGACT

>M6-PGSC0003DMG400023599-(rev)M6LRR-RLP\_992

ATCATCCTCCTGAGTTGGAAGAAATTGGAAAAAAATAGCAGAAAAATGTCAAGGACTTCCCTTAATAA  
TTTCAGTGATTGCAGGGCATCTCTCTAAAACGGTGCCCAAGACATTAGAAA

>M6-PGSC0003DMG400023612M6LRR-RLK\_1403

GAAACGACAGAAGAAAGGGAAGTCCAAAGATATTGAAAAGGTATTGGAGATCGGGACTCATCAATTAG  
TTTCTTATCACGAGATTCAACAAGCAACAAATAATTTTGATGAATCCAATTT

>M6-PGSC0003DMG400023612M6LRR-RLK\_1586

CATTAAGGTTCTGGATTTGGAAAACGAGCAAGTATGCAAGAGGTTTGATACCGAATGTGAAGTGATGA  
GAAATGTTAGACACAGAAATCTTGTTTCAGTGATTACTACATGTTCTAGTGA

>M6-PGSC0003DMG400023612M6LRR-RLK\_1830

GTTGAATATCTACACCATGGTCATAACACTCCAATAGTTCATTGCGACCTGAAGCCAGCCAACGTTCTTTT



GGATGAAGATATGATGGCTCATGTTGGTGATTTTGAATATCTAAAATT

>M6-PGSC0003DMG400023612M6LRR-RLK\_2318

CAATCTTTTCTCCGAGGAAGAACAGATCACTTCAGAAAGTGAAATCTGCATTGCGTCCATGATAGAATTG  
GGTTTAGACTGCACAAAGGAAATGCCAGAATCAAGAATAAGCATGAAAGA

>M6-PGSC0003DMG400023613M6LRR-RLP\_310

TTGGCCACATGCCTCACTTGCAGAGTGATTGATGTAAAAACAATCAGCTCAACGGAAGTATACCAACAA  
GTCTATTTCAACACCGTAGAATTCAAGTAATTTTCATTGGCTTTGAATGAAT

>M6-PGSC0003DMG400023613M6LRR-RLP\_620

ATTTTTGTTCTTGTTCATAATCAATTAACAGTTTTTCATTCTGCAACATTGTTTAATATTTTCATCACTTGT  
GCCCTATCTCTTGGAACCAATAGCCTTTCCGGTCCTCTCTTGCTTGA

>M6-PGSC0003DMG400023614M6LRR-RLK\_2418

AATGGATAACACAATCATTTTCAGGGAGTATGATGGACATTGTGGATGCCAATCTTTTTTCTGAGGAAGA  
ACAAATCACTAGCAAAAGTGAAATGTGCATAGCCTCCATGATAGAATTGG

>M6-PGSC0003DMG400023638M6LRR-RLK\_0

ATGAAGAAGCACATTTTTATATTGACTCTTCTTTCTAGTTCAATTTTCTCTATCAATTGCCTCCTCAAAT  
GAGACGGACCAAGAAGCTCTACTAGCTTTCCAAAATCTTATTACAAGT

>M6-PGSC0003DMG400023638M6LRR-RLK\_1054

AATTGGGGAAGCTATCAAATTTGAGGCAAATTAGCTTTGTCCAAAATAATAATCTTATAGGTCATATTCC  
AAAGGCTATATTTAATATATCTTCTTTGAAATAATCGATTTTCAGTTACA

>M6-PGSC0003DMG400023638M6LRR-RLK\_1116

CATATTCCAAAGGCTATATTTAATATATCTTCTTTGAAATAATCGATTTTCAGTTACAATAACCTCTCGGG  
GAGAATTCCAACCACTACAGGTCTTCATCTTCCAAACCTTAAAGAACTT

>M6-PGSC0003DMG400023638M6LRR-RLK\_1178

CCTCTCGGGGAGAATTCCAACCACTACAGGTCTTCATCTTCCAAACCTTAAAGAACTTTTCTGGGAGTCA  
ATAAGATCAAAGGGGAAATTCCATTGTTTCATATCAAATGCTTCCATGCT

>M6-PGSC0003DMG400023638M6LRR-RLK\_124

GTCATTTTTTGGCCAATAATTGGACCAAAAATACTTCTTTTTGCTCTTGGTTTGGTGTCACTTGCAGTCCA  
AAAAGGCAAAGGGTACAAACCTTGACTCTTCTGATTTGCAACTTCAAG

>M6-PGSC0003DMG400023638M6LRR-RLK\_1302

ATACTGGGGCTAAACAGGAACTTCCTCACAGGCAATATTCCTACCAATTTAGGAAATCTTCGTGACCTGC  
GACGCTTATACTTAGAGGGTAATCAACTTACCAATGAACCAAATAATCAT

>M6-PGSC0003DMG400023638M6LRR-RLK\_1364

TGACCTGCGACGCTTATACTTAGAGGGTAATCAACTTACCAATGAACCAAATAATCATGAGTTGCAATTC  
TTAATTCTTTAGTGGACTGTAGGAAGCTGCAATATCTAACAGTGGGTAA

>M6-PGSC0003DMG400023638M6LRR-RLK\_1426

TGCAATTCCTTAATTCTTTAGTGGACTGTAGGAAGCTGCAATATCTAACAGTGGGTAAACAATCCATTAAA  
TGATATTTTGCCCGATACTATTGGAAATCTTTCATCTACTATTGAATCAA

>M6-PGSC0003DMG400023638M6LRR-RLK\_1550

CATGGGAAATGCACAAATCAGTGGCCTCACTCCCACAGGTATAGGAACTTAAGCGGTCTAATGTCACT  
AGCTTTTGTGGAAAACAATTGATGGGAACCATTCCGTCTGAAGTCAGTAA

>M6-PGSC0003DMG400023638M6LRR-RLK\_1612

TGCTACTAGCTTTTGTGGAAAACAATTGATGGGAACCATTCCGTCTGAAGTCAGTAAGCTTGAACATCT  
CCAAGGTCTGTATCTATATAGCAACAAATTGCAAGGGAATATTCCAGAGG

>M6-PGSC0003DMG400023638M6LRR-RLK\_1674

GAACATCTCCAAGGTCTGTATCTATATAGCAACAAATTGCAAGGGAATATTCCAGAGGTAGTTTGTCAAT  
TACCTTATTTGGTTACATTATCTTTCATGTTAATGAGCTCTCTGGGGTG

>M6-PGSC0003DMG400023638M6LRR-RLK\_1736

TTGTCATTTACCTTATTTGGTTACATTATCTTTCATGTTAATGAGCTCTCTGGGGTGATCCCAAATGTTT  
AGAAAATCTTACCACGCTACGAGTTCTTTCATTGAGTTCTAACAATTTTCATCAAAGCTT

>M6-PGSC0003DMG400023638M6LRR-RLK\_1798

CAAAATGTTTAGAAAATCTTACCACGCTACGAGTTCTTTCATTGAGTTCTAACAATTTTCATCAAAGCTT  
CCTTTGAGTCTTTGGAAGATGAGTGGACTTCTCTATCTTTTCATGTCAC

>M6-PGSC0003DMG400023638M6LRR-RLK\_186

TGCAGTCCAAAAAGGCAAAGGGTACAAACCTTGACTCTTCTGATTTGCAACTTCAAGGCACAATTTCCC  
CGTCTTTAGCTAATTTGCCTTCTCAGCGTGCTCACTCTCCGGAACAAC

>M6-PGSC0003DMG400023638M6LRR-RLK\_1860

TCAAAGCTTCCTTTGAGTCTTTGGAAGATGAGTGGACTTCTCTATCTTTTCATGTCACGAAATTCTATAGA  
GGGAGAAGTTCCACAGGACATTGGAGGAATGAAGGCCATTGTAAAATA

>M6-PGSC0003DMG400023638M6LRR-RLK\_1922

TTCTATAGAGGGAGAAGTTCCACAGGACATTGGAGGAATGAAGGCCATTGTAAAACCTAGATCTTTCTGG  
TAACCACTTTTCCGGCATGATACCAAGCCAATTGGGGGACCTCCAAAACAT

>M6-PGSC0003DMG400023638M6LRR-RLK\_1984

TTTCTGGTAACCACTTTTCCGGCATGATACCAAGCCAATTGGGGGACCTCCAAAACATGAAAGTTCTTGA  
CCTGTCAAACAATTCATTTTCAGGCTCAATTCCTTATCCATTGCCAATT

>M6-PGSC0003DMG400023638M6LRR-RLK\_2046

GTTCTTGACCTGTCAAACAATTCATTTTCAGGCTCAATTCCTTATCCATTGCCAATTTGATAAGTCTAGAA  
TACTTGAAATTGTCTTTCAAAGCATTGTCAGGTAATTCCTAAGTCT

>M6-PGSC0003DMG400023638M6LRR-RLK\_2108

AAGTCTAGAATACTTGAAATTGTCTTTCAAAGCATTGTCAGGTAATTCCTAAGTCTTTGGAAAAGCTTT  
CATACCTTAAAAGCATCAATGTCTCATTTAATGATTTAGATGGTGAGAT

>M6-PGSC0003DMG400023638M6LRR-RLK\_2170

AAAAGCTTTTCATACCTTAAAAGCATCAATGTCTCATTTAATGATTTAGATGGTGAGATACCTAGTGATGG  
TGTGTTTTCAAATTCACCTTTGCAATCATTTCTTGGGAACAAAGGTCTAT

>M6-PGSC0003DMG400023638M6LRR-RLK\_2232

AGTGATGGTGTGTTTTCAAATTCACCTTTGCAATCATTTCTTGGGAACAAAGGTCTATGTGGAGTAAACA  
TATTGGAGATTCTGCTTGTGCTATCACTAATCCTAGAAAACAATCAAAG

>M6-PGSC0003DMG400023638M6LRR-RLK\_2294

AGTAAACATATTGGAGATTCTGCTTGTGCTATCACTAATCCTAGAAAACAATCAAAGACTAAGGAGCTT  
GTGCTGAAAATTGTTATTCCAGTGGTACTTCATCCTTTCTGATATTATT

>M6-PGSC0003DMG400023638M6LRR-RLK\_2356

AGGAGCTTGTGCTGAAAATTGTTATTCCAGTGGTACTTCATCCTTTCTGATATTATTGGTTGTGTCAGCT  
TGGATAATAATGAAACAAAAGATGAAAGGAAAGTCCAAAGAAGTGGAAA

>M6-PGSC0003DMG400023638M6LRR-RLK\_248

AATTTCCCGTCTTTAGCTAATTTGTCCTTTCTCAGCGTGCTCACTCTCCGGAACAACAACCTTCATGGCG  
GCATCCCTTACGAACTTGCCCACTTGCCTCGCTTGCAGTGATTGATTT

>M6-PGSC0003DMG400023638M6LRR-RLK\_2542

TTGATGGATCCAATTTAATTGGTACGGGAGGTTCTGGCTCTGTGTACAAAGGTACATTATCTAGTGGAAC

TGTGGTGGCAATAAAGGTTCTCGATTTGCAAATGAGGAAGTATGCAAGA

>M6-PGSC0003DMG400023638M6LRR-RLK\_2604

AGTGGAAGTGTGGTGGCAATAAAGGTTCTCGATTTGCAAATGAGGAAGTATGCAAGAGGTTTGATACT  
GAATGTGAAGTATGAGAAATGTTAGGCACAGAAACCTCATTTCAGTGATT

>M6-PGSC0003DMG400023638M6LRR-RLK\_2666

TGATACTGAATGTGAAGTATGAGAAATGTTAGGCACAGAAACCTCATTTCAGTGATTACTACTTGTCT  
AGTGAATACATAAGAGCCTTTGTTCTACAGTATATGCCCAATGGAAGTCT

>M6-PGSC0003DMG400023638M6LRR-RLK\_2728

CTTGTCTAGTGAATACATAAGAGCCTTTGTTCTACAGTATATGCCCAATGGAAGTCTTGATAATTGGTTG  
TACAAAGAAGATTGCCACTTGAACCTTCTTCAAAGAGTCAACATAATGC

>M6-PGSC0003DMG400023638M6LRR-RLK\_2790

AATTGGTTGTACAAAGAAGATTGCCACTTGAACCTTCTTCAAAGAGTCAACATAATGCTTGATGTGGCTG  
TGCAATTGAATATCTACACCACGGTCATGATACTCCAATAGTTCATTGC

>M6-PGSC0003DMG400023638M6LRR-RLK\_2852

TGTGGCTGTGGCAATTGAATATCTACACCACGGTCATGATACTCCAATAGTTCATTGCGACCTAAAGCCA  
GCCAACATTCTTTGGATGAAGAAATGGTGGCACATGTTGGTGATTTTGG

>M6-PGSC0003DMG400023638M6LRR-RLK\_2914

TAAAGCCAGCCAACATTCTTTGGATGAAGAAATGGTGGCACATGTTGGTGATTTTGGCATCTCTAAAAT  
ATTAGCTGTAAGCAAGTCCATGGTACATACTGAGACATTAGGCACTTTTG

>M6-PGSC0003DMG400023638M6LRR-RLK\_3038

CATTGCACCAGGTACGTACACTAGTTTCGTTCTTTTCACTTATCATTAAACCCTTCTCTTATCAGAACTAA  
GCTCTCCGAATTCTGGAACATAACAGAAACCAAGTCTTTCATTGTAC

>M6-PGSC0003DMG400023638M6LRR-RLK\_310

TCCATGGCGGCATCCCTTACGAACTTGCCACTTGCCTCGCTTGCAGAGTGATTGATTTTCAAACAATCA  
ACTCCAAGAAAGTATTCCAACAAGTCTATTTCAACACCAGAGAGTTCAA

>M6-PGSC0003DMG400023638M6LRR-RLK\_3100

TCAGAACTAAGCTCTCCGAATTCTGGAACATAACAGAAACCAAGTCTTTCATTGTACAAAACAATTATTA  
TCTTCCGATTGTAATTTATTTTCAATTTTCACTTCTTAAAGAATATGG

>M6-PGSC0003DMG400023638M6LRR-RLK\_3162

CAATTATTATCTTCCGATTGTAATTTATTTTCATTTTCATTCTTCTAAAGAATATGGCTTGGAAGGAGTAG  
TGTCCATTAGTGGTGATGTTTACAGCTATGGCATCATGATGATGGAGG

>M6-PGSC0003DMG400023638M6LRR-RLK\_3286

GACAAAAGAAGACCAACTGAAGACGAGATATTCAACGAAAATCTTGGCTTGAGGCAGTGGATAAGAC  
GAGCATTCCCAGGACAATTATGGAAGTCGTAGATGCCAATCTTTTTCAAGA

>M6-PGSC0003DMG400023638M6LRR-RLK\_3348

TAAGACGAGCATTCCCAGGACAATTATGGAAGTCGTAGATGCCAATCTTTTTCAAGAGGAAGAATCTG  
TCAATTTAAAAGTGAAATATGCATAGCCTCCATGATGGAATTGGCTTTGG

>M6-PGSC0003DMG400023638M6LRR-RLK\_372

AACAATCAACTCCAAGAAAGTATTCCAACAAGTCTATTTCAACACCAGAGAGTTCAAATCATTTATTGG  
CTTTCAATAAACTAGGTGGTGAAATGTGGAAAGGGCCATGGTATGTACCA

>M6-PGSC0003DMG400023638M6LRR-RLK\_434

TTCATTGGCTTTCAATAAACTAGGTGGTGAAATGTGGAAAGGGCCATGGTATGTACCAGAACTCACAGT  
TTTAAATCTCAGGAACAATAGCCTCACAGGTATAATACCTCCTTCTATTGG

>M6-PGSC0003DMG400023638M6LRR-RLK\_496

TCACAGTTTTAAATCTCAGGAACAATAGCCTCACAGGTATAATACCTCCTTCTATTGGAAATGCCACAAA  
GTTGCTGAACTTCAGTTTGTATGGGAATAGAGTCGGCGGGAACATTCCAA

>M6-PGSC0003DMG400023638M6LRR-RLK\_558

GCCACAAAGTTGCTGAACTTCAGTTTGTATGGGAATAGAGTCGGCGGGAACATTCCAAAGGAAATCGGT  
AATCTCAGCCAACCTGAATTTTTCTCCTTGTTGATAATCAATTAACAGGT

>M6-PGSC0003DMG400023638M6LRR-RLK\_62

CTCCTCAAATGAGACGGACCAAGAAGCTCTACTAGCTTTCCAAAATCTTATTACAAGTCCGAGTCATTTTT  
TGGCCAATAATTGGACCAAAAATACTTCTTTTTGCTCTTGGTTTGGTGT

>M6-PGSC0003DMG400023638M6LRR-RLK\_620

AATCGGTAATCTCAGCCAACCTGAATTTTTCTCCTTGTTGATAATCAATTAACAGGTTCTATTCTGCAG  
CACTATTTAATATCTCCTCGCTTCTTGTACATCTCTAGCATTCAATAG

>M6-PGSC0003DMG400023638M6LRR-RLK\_682

TTCCTGCAGCACTATTTAATATCTCCTCGCTTCTTGTACATCTCTAGCATTCAATAGCCTTTCCGGCCCTT  
TCTTGCTTGATGAAGGGAACGTAGTGTCAAATCTAGAGTCATTAATA

>M6-PGSC0003DMG400023638M6LRR-RLK\_744

TCCGGCCCTTTCTTGCTTGATGAAGGGAACGTAGTGTCAAATCTAGAGTCATTA ACTATATCTAACAACC  
AAATTTCTGGTTACATTCTTCCAACATTTGCCAACTCACAAA ACTCAA

>M6-PGSC0003DMG400023638M6LRR-RLK\_806

TAACAACCAAATTTCTGGTTACATTCTTCCAACATTTGCCAACTCACAAA ACTCAAAGCGATGTCCATAT  
CTTTCAACAAGATAACTGGAGGAATACCCAAAAATATTGGTTGTTTATC

>M6-PGSC0003DMG400023638M6LRR-RLK\_868

TGTCCATATCTTTCAACAAGATAACTGGAGGAATACCCAAAAATATTGGTTGTTTATCCAATCTCGAGGA  
GCTTTATATTGGTGACAATCCAATAAAAGGGAATATTCCCGCATCATTGG

>M6-PGSC0003DMG400023638M6LRR-RLK\_930

CTCGAGGAGCTTTATATTGGTGACAATCCAATAAAAGGGAATATTCCCGCATCATTGGGAAATATTTCCA  
CTCTGCAAATCTTTATTATGGAAGCAATCACTTGGAGGGGCCAATTCCT

>M6-PGSC0003DMG400023638M6LRR-RLK\_992

TATTTCCACTCTGCAAATCTTTATTATGGAAGCAATCACTTGGAGGGGCCAATTCCTCCAGAATTGGGG  
AAGCTATCAAATTTGAGGCAAATTAGCTTTGTCCAAAATAATAATCTTAT

>M6-PGSC0003DMG400023639M6LRR-RLK\_0

GGAGAAGCACATTTTTTTATTGACTCTCCTCTTCTAGTTCAATTTTCTATATCTTTTGCTTCCTCAAATGA  
GACAGACAAAGAAGCTCTATTAGCTTTCCAAAATCTTATTACAAGTCC

>M6-PGSC0003DMG400023639M6LRR-RLK\_1054

ATTTTTAACCTATCTTCTTTGGAAATGATTGATTGCAGTTACAGTAGCCTCTCAGGTAGAATTCCAACCAC  
ATCAGGTCTTCATGTTTCAGAACCTTAAAGAACTTTTCTTGGGACACAAT

>M6-PGSC0003DMG400023639M6LRR-RLK\_1116

TCCAACCACATCAGGTCTTCATGTTTCAGAACCTTAAAGAACTTTTCTTGGGACACAATCGGCTCGAAGGG  
GAAATTCCATTGTTTCATAACAAATGCCTCCAAGCTTGAGAGATTGGGGCT

>M6-PGSC0003DMG400023639M6LRR-RLK\_1178

TCGAAGGGGAAATTCCATTGTTTCATAACAAATGCCTCCAAGCTTGAGAGATTGGGGCTAGAAAATAACT  
TTCTCACTGGCACTATTCTACTAATTTGGGGAATCTCCGTGAGCTGCAAG

>M6-PGSC0003DMG400023639M6LRR-RLK\_1240

AATAACTTTCTCACTGGCACTATTCTACTAATTTGGGGAATCTCCGTGAGCTGCAAGAACTGTTCTTACA

TGATAATCAACTTACCAATGAACCAAGAGAGCATGAGTTGCAATTCTTC

>M6-PGSC0003DMG400023639M6LRR-RLK\_1302

GTTCTACATGATAATCAACTTACCAATGAACCAAGAGAGCATGAGTTGCAATTCTTCAATTCTTCGGCG

GA CTGTAGGATGTTGCGATATCTACAAGTGGGTTCCAATACGTTGAATGG

>M6-PGSC0003DMG400023639M6LRR-RLK\_1364

CTTCGGCGGACTGTAGGATGTTGCGATATCTACAAGTGGGTTCCAATACGTTGAATGGCATTCTGCCCAA

TTCTATTGGGAATCTTTCATATAGCAGATGCACACATCAATGGCCCCATC

>M6-PGSC0003DMG400023639M6LRR-RLK\_1426

CTGCCCAATTCTATTGGGAATCTTTCATATAGCAGATGCACACATCAATGGCCCCATCCCCAGGGGTGTA

CGCAACATGAGTGGTCTAATAGCCCTAAGCCTTGAGAAAACA ACTTGGC

>M6-PGSC0003DMG400023639M6LRR-RLK\_1488

GGGGTGTACGCAACATGAGTGGTCTAATAGCCCTAAGCCTTGAGAAAACA ACTTGGCGGGAAGTATT

CCTTCTGATGTTGTTAAGCTTGAACA ACTCCAAGGGTGTATCTACATAACA

>M6-PGSC0003DMG400023639M6LRR-RLK\_1550

AGTATTCCTTCTGATGTTGTTAAGCTTGAACA ACTCCAAGGGTGTATCTACATAACAATAAATTGCAGG

GACATATCCAGAGGCGGTATGCAATTTATCTAATTTGGTTCAATTAAGT

>M6-PGSC0003DMG400023639M6LRR-RLK\_1612

ATTGCAGGGACATATCCAGAGGCGGTATGCAATTTATCTAATTTGGTTCAATTAAGTCTGGCTGGTAAT

GAGCTCTCTGGATTAATCCAGAATGTTTAGGAAATCTTAGCAAGCTACA

>M6-PGSC0003DMG400023639M6LRR-RLK\_1674

CTGGTAATGAGCTCTCTGGATTAATCCAGAATGTTTAGGAAATCTTAGCAAGCTACAAGCCATTATATT

GAGTTCTAACCAATTTTCATCCAAGATTCCTTTGAGCATTTGGAAGATGA

>M6-PGSC0003DMG400023639M6LRR-RLK\_1736

ATTATATTGAGTTCTAACCAATTTTCATCCAAGATTCCTTTGAGCATTTGGAAGATGAGTGGTCTTCTCTA

TCTAATCATGTCACAAAATTCTATAGAGGACTGAAGGCCATTGTAGGAC

>M6-PGSC0003DMG400023639M6LRR-RLK\_1798

TCTTCTCTATCTAATCATGTCACAAAATTCTATAGAGGACTGAAGGCCATTGTAGGACCAGATCTTCTGG

TAACCACTTTTCAGGCATGATACCAAGCCAATTGGGGGACCTCCAAAAC

>M6-PGSC0003DMG400023639M6LRR-RLK\_1860

TCTTTCTGGTAACCACTTTTCAGGCATGATACCAAGCCAATTGGGGGACCTCCAAAACATGAATACTCTT  
GACCTGTGGAACAATTCATTTTCAGGCTCAATTCCATTATCCTTTGCCAA

>M6-PGSC0003DMG400023639M6LRR-RLK\_1922

ATACTCTTGACCTGTGGAACAATTCATTTTCAGGCTCAATTCCATTATCCTTTGCCAACTTGATAAGTTTAG  
AATTCATGGATTTGTCTTTAAATGCGTTATCAGGTACTATTCCCAAGT

>M6-PGSC0003DMG400023639M6LRR-RLK\_1984

ATAAGTTTAGAATTCATGGATTTGTCTTTAAATGCGTTATCAGGTACTATTCCCAAGTCTTTGGAAAAGCT  
ATTATACCTTAAAAGCATCAATGTCTCATTTAATGTTTTAGAAGGTGTA

>M6-PGSC0003DMG400023639M6LRR-RLK\_2046

GGAAAAGCTATTATACCTTAAAAGCATCAATGTCTCATTTAATGTTTTAGAAGGTGTAATACCGAGTGGT  
GGTGTGTTTCGGAATTCCACTCTGCAATCATTCTTTGGGAACAAAGGTCT

>M6-PGSC0003DMG400023639M6LRR-RLK\_2170

GGAATGCACATATTGGAGATTCCTGCTTGCTATCACTACAACCTGGGCAACGATTAAAGTCTAAGAAG  
CTTGCTTAAAATTGTTATTCCAGTGGTTGCTGCTTCTTTTCTGATATTT

>M6-PGSC0003DMG400023639M6LRR-RLK\_2232

TAAGAAGCTTGCTTAAAATTGTTATTCCAGTGGTTGCTGCTTCTTTTCTGATATTTTTGTTCTTTATAGT  
TTGGATAATGAGACGACAGAAGAAAGCAAACCTCCAAAGACGTGGAAAA

>M6-PGSC0003DMG400023639M6LRR-RLK\_2294

TCTTTATAGTTTGGATAATGAGACGACAGAAGAAAGCAAACCTCCAAAGACGTGGAAAAGGTACCAGAT  
ATCAGGACCTATCAATTGGTTACTTATCATGAGATTCAACAAGCAACAATA

>M6-PGSC0003DMG400023639M6LRR-RLK\_248

TATCCCCGTCTTTGGCCAATTTGTCCTTTCTCAGAGAGCTCAATCTCGAGAATAACTTATCCATGGTGGC  
ATCCTATACAGACTTGGCCACTTGCCTCGCTTGCAGAGTGATTAATGTTC

>M6-PGSC0003DMG400023639M6LRR-RLK\_2480

GTGGAAGTGTGGTGGCAATAAAGGTACTCGATTTGCAAATGAGGAAGTATGCAAGAGGTTTGATACT  
GAATGAAGTGATGAGAAATGTTAGGCACAGAAACCTTATTTTCAGTGATTACT

>M6-PGSC0003DMG400023639M6LRR-RLK\_2542

GATACTGAATGAAGTGATGAGAAATGTTAGGCACAGAAACCTTATTTTCAGTGATTACTACTTGTCTAGT  
GAATACATAAGAGCCTTTGTTCTGCAGTATATGCCCAATGGAAGTCTTGA



>M6-PGSC0003DMG400023639M6LRR-RLK\_2604

GTTCTAGTGAATACATAAGAGCCTTTGTTCTGCAGTATATGCCCAATGGAAGTCTTGAGAGTTGGTTGTA  
CAGAGAAGATCGCCACTTGAACCTTCTTCAAAGAGTCACCATAATGCTTG

>M6-PGSC0003DMG400023639M6LRR-RLK\_2666

TGGTTGTACAGAGAAGATCGCCACTTGAACCTTCTTCAAAGAGTCACCATAATGCTTGATGTGGCTCTGG  
CAATTGAATATCTACACCATGGTCATGAACTTTGATAGTTCATTGCGAC

>M6-PGSC0003DMG400023639M6LRR-RLK\_2728

GGCTCTGGCAATTGAATATCTACACCATGGTCATGAACTTTGATAGTTCATTGCGACCTAAAGCCAGCC  
AATGTTCTTTTGGACGAAGAAATGGTGGCACATGTCGGTGATTTTGGGAT

>M6-PGSC0003DMG400023639M6LRR-RLK\_2852

AAAATACTAGCTGTAAGCAAGTCCATAGCACATACTGAGACATTAGGCACTCTTGGTTACATTGCACCAG  
GTACGTACACTAGTCTCATTCTTTTCACTTATCATTAACTTTTCTCTA

>M6-PGSC0003DMG400023639M6LRR-RLK\_2914

TGCACCAGGTACGTACACTAGTCTCATTCTTTTCACTTATCATTAACTTTTCTCTAATCAAAAATTAAGCT  
CTTTTCGATTTCTAGAAATATTTAAAAATCAAGTCTTTGATTGTAAAAA

>M6-PGSC0003DMG400023639M6LRR-RLK\_2976

AAATTAAGCTCTTTTCGATTTCTAGAAATATTTAAAAATCAAGTCTTTGATTGTAAAAACAATTATTATCTT  
TCGACTATAATTTATATAATTTTCACTTCTTCTAAAGAATATGGCTTGG

>M6-PGSC0003DMG400023639M6LRR-RLK\_3038

TTATTATCTTTTCGACTATAATTTATATAATTTTCACTTCTTCTAAAGAATATGGCTTGGAAAGGAAAAGTGTC  
CAGTAGTGGTGAAGTTTACAGCTATGGCATCATGATGATAGAGGTATTG

>M6-PGSC0003DMG400023639M6LRR-RLK\_310

CATGGTGGCATCCTATACAGACTTGGCCACTTGCCTCGCTTGCAGTGATTAATGTTTCGAAACAATCAGC  
TAGAAGGAAGTATTCCAACAAGTCTATTTCAACACCAGAGAGTTCAAATC

>M6-PGSC0003DMG400023639M6LRR-RLK\_3100

AAAAGTGTCCAGTAGTGGTGAAGTTTACAGCTATGGCATCATGATGATAGAGGTATTGACAAAAAGAA  
GACCAACTGATGACGAGATATTCAATGAAAATCTTGGCTTGAGACAGTGGAT

>M6-PGSC0003DMG400023639M6LRR-RLK\_3162

AAAGAAGACCAACTGATGACGAGATATTCAATGAAAATCTTGGCTTGAGACAGTGGATAAGACAATCAT

TTCCAAGACAATTATGGAAGTTGTGGATGTCAATTTTATTCATGAGGAAG

>M6-PGSC0003DMG400023639M6LRR-RLK\_3224

CAATCATTCCCAAGACAATTATGGAAGTTGTGGATGTCAATTTTATTCATGAGGAAGAACATTTCAATT

CAAAAAGTGAAATATGCATAGGCTCCATGATGGAATTGGCTTTGGATTGC

>M6-PGSC0003DMG400023639M6LRR-RLK\_3348

AGGAAATGCCAGAGTCAAGGATAACAATGAGAGACGTAGTCAAGAGGCTTGACAAAATTAAGAACACA

TTTTTGGGAACATAGAAATTAGCATCTTTTAAAGTGGTGTCTTTTTTAGTT

>M6-PGSC0003DMG400023639M6LRR-RLK\_3410

AACACATTTTTGGGAACATAGAAATTAGCATCTTTTAAAGTGGTGTCTTTTTTAGTTGCAAGTTAATATG

TTGATCAGCTTTTTCTGTTTAAATGGTTTATAAGGAATGAAGTTGAGG

>M6-PGSC0003DMG400023639M6LRR-RLK\_372

CAATCAGCTAGAAGGAAGTATTCCAACAAGTCTATTTCAACACCAGAGAGTTCAAATCATTTCATTGGCT

TACAATAAACTCAGTGGTGAATGTGGAAAGGGCCATGGTATGTACCCGA

>M6-PGSC0003DMG400023639M6LRR-RLK\_434

CATTGGCTTACAATAAACTCAGTGGTGAATGTGGAAAGGGCCATGGTATGTACCCGAACTCAGAGTCC

TAAGTCTCAGGAATAATAGCCTCACAGGTATAATCCCTTCTTCTGTTGGAA

>M6-PGSC0003DMG400023639M6LRR-RLK\_496

AGAGTCCTAAGTCTCAGGAATAATAGCCTCACAGGTATAATCCCTTCTTCTGTTGGAAATGCCACAAAGT

TGCTGAACTTCAGTTTGTCTGGGAATAGAATCAATGGTATCATTCCAAT

>M6-PGSC0003DMG400023639M6LRR-RLK\_558

CACAAAGTTGCTGAACTTCAGTTTGTCTGGGAATAGAATCAATGGTATCATTCCAATGAGATTGGTAAT

CTTAGCCAACTTATAGAGTTGCATTTGTTCAATAATCAATTAGCAGGTTT

>M6-PGSC0003DMG400023639M6LRR-RLK\_62

CCTCAAATGAGACAGACAAAGAAGCTCTATTAGCTTTCCAAAATCTTATTACAAGTCCTAGTCATTTTTTG

GCCAATAATTGGACCAAAAATACTTCTTTTTATTCTTGGTTTGGTGTCA

>M6-PGSC0003DMG400023639M6LRR-RLK\_620

TTGGTAATCTTAGCCAACTTATAGAGTTGCATTTGTTCAATAATCAATTAGCAGGTTCCATTTCCGCAACA

CTGTTTAATATTTTCGTCGCTAATTAGAGCATCTCTGGCAAGCAATAGCC

>M6-PGSC0003DMG400023639M6LRR-RLK\_682

CCC GCAACACTGTTTAATATTTTCGTCGCTAATTAGAGCATCTCTGGCAAGCAATAGCCTTTCTGGTCCTCT  
CTTACTTGATGAAGGGAATATTGTGTCAAATCTGAAGTATCTAAGTATA

>M6-PGSC0003DMG400023639M6LRR-RLK\_744

TGGTCCTCTCTTACTTGATGAAGGGAATATTGTGTCAAATCTGAAGTATCTAAGTATATCTAAGAACCAA  
ATTTCTGGTTGCATTCTTCTAACATATGCCAACTCACAGAGCTCAAAAT

>M6-PGSC0003DMG400023639M6LRR-RLK\_806

AGAACCAAATTTCTGGTTGCATTCTTCTAACATATGCCAACTCACAGAGCTCAAAATTTTGTCCATATCT  
TATAACAATATGATTGGAAACATACCCAGAAATATTGGTTGTTTATCCA

>M6-PGSC0003DMG400023639M6LRR-RLK\_868

TCCATATCTTATAACAATATGATTGGAAACATACCCAGAAATATTGGTTGTTTATCCAAAATCGAGGAGT  
TTTATATTGGAAATAATCCAATAACAGGGACTATTCCCACTTCATTGGGT

>M6-PGSC0003DMG400023639M6LRR-RLK\_930

CGAGGAGTTTTATATTGGAAATAATCCAATAACAGGGACTATTCCCACTTCATTGGGTAATATTTCCACTC  
TGCGGAATCTTTATTGTGGAAACAGTCGCATAGTGGGGCAAATTCAAA

>M6-PGSC0003DMG400023639M6LRR-RLK\_992

TTTCCACTCTGCGGAATCTTTATTGTGGAAACAGTCGCATAGTGGGGCAAATTCCAAAGGATATTTTTAA  
CCTATCTTCTTTGGAAATGATTGATTGCAGTTACAGTAGCCTCTCAGGTA

>M6-PGSC0003DMG400023641M6LRR-RLP\_0

TGCATAGCAACATCATGGAGAAGCACATTTTCTTATTGATTCTTCTCTTTTTAATTCAGTTTTCTATATCAA  
CTGCTTTCTCAAATGAGACTGACCAACAAGCTCTACTAGCTTTCCAAA

>M6-PGSC0003DMG400023641M6LRR-RLP\_1037

ACCAATAGCTTGGAGGGGCCGATTCTCCAGAATTGGGGAAGCTATCAAATTTGATAGAAATAGATTTT  
GAAGAAGTTTATAATCTCATAGGTCAGATTCCGGAGGCTATTTTTAATATA

>M6-PGSC0003DMG400023641M6LRR-RLP\_1098

TAGATTTTGAAGAAGTTTATAATCTCATAGGTCAGATTCCGGAGGCTATTTTTAATATATCTTCTTTGGAA  
TACATTGCGTTAACTTCGAACAACTCTCAGGGAGAATTCCAACCTCTA

>M6-PGSC0003DMG400023641M6LRR-RLP\_1159

TTCTTTGGAATACATTGCGTTAACTTCGAACAACTCTCAGGGAGAATTCCAACCTCTACTGGTCTTCATC  
TTCCAACCTCTTAGAACTTCATTTGTCTGGCAATGAGCTTGAAGGGGA

>M6-PGSC0003DMG400023641M6LRR-RLP\_122

CTTATTACAAGTCCCAATCATTTTTGGCCAATAATTGGACCAAGACTGCGTCTTTTTGTTCTTGGTTCGG  
TGTCACGTGCAGTTCAAAAGGCAAAGGGTTGTAGCCTTGACTCTTCCT

>M6-PGSC0003DMG400023641M6LRR-RLP\_1281

TTCCTCCGCATATCACAAATGCTTCCAAGCTTGAAAGGTTGGGGCTAGCAACCAACTTCTTCAGTGAAG  
TATTCCAATAATTTGGGAAACCTTCGTGATCTGCGACTTCTTTTCCTAC

>M6-PGSC0003DMG400023641M6LRR-RLP\_1342

CAGTGAAGTATTCCAATAATTTGGGAAACCTTCGTGATCTGCGACTTCTTTTCCTACATGAAAATCAAC  
TTACCAGTGAACATGAGTTGCCATTCTTCCAATCTTTGGCAGACTGTAG

>M6-PGSC0003DMG400023641M6LRR-RLP\_1403

GAAAATCAACTTACCAGTGAACATGAGTTGCCATTCTTCCAATCTTTGGCAGACTGTAGGATGTTGCAAT  
ATCTAGATGTGGGTTACAATCCGTTGAATAGCATTGTTGCCAATTCAATA

>M6-PGSC0003DMG400023641M6LRR-RLP\_1464

TGTTGCAATATCTAGATGTGGGTTACAATCCGTTGAATAGCATTGTTGCCAATTCAATAGGTAATCTTTCA  
TCTACTATTGAATTCTTTGAAATGAGCAATGCTCACATCAATGGACTCA

>M6-PGSC0003DMG400023641M6LRR-RLP\_1525

TAATCTTTCATCTACTATTGAATTCTTTGAAATGAGCAATGCTCACATCAATGGACTCATCCCCACAAGTA  
TAGGCAACATGAGCGGTCTTATAACCTTATTCTTTCAAGATAACAACCTT

>M6-PGSC0003DMG400023641M6LRR-RLP\_1586

CCCACAAGTATAGGCAACATGAGCGGTCTTATAACCTTATTCTTTCAAGATAACAACCTTATGGGAAATA  
TTCCTCCTGAGTTTGGTAAGCTTAAACAACCTCCAAGGGCTGTATCTAAAT

>M6-PGSC0003DMG400023641M6LRR-RLP\_1647

TGGGAAATATTCCTCCTGAGTTTGGTAAGCTTAAACAACCTCCAAGGGCTGTATCTAAATAACAATAAATT  
GCAGGGACATATTCCAGAGGCGGTATGCAATATATCTCATTGTTGGGACGAT

>M6-PGSC0003DMG400023641M6LRR-RLP\_1708

CAATAAATTGCAGGGACATATTCCAGAGGCGGTATGCAATATATCTCATTGTTGGGACGATTAAATCTGGA  
AGGTAATAAGCTCTTTGGGTTAATTCCAGCATGTATAGGAAATCTTAGCAT

>M6-PGSC0003DMG400023641M6LRR-RLP\_1769

AATCTGGAAGGTAATAAGCTCTTTGGGTTAATTCCAGCATGTATAGGAAATCTTAGCATGCTACAACATC

TTTATTTGGGTTCTAATAAATTTTCATCAAATTTCCGTTGAGTCTTTGG

>M6-PGSC0003DMG400023641M6LRR-RLP\_1830

TACAACATCTTTATTTGGGTTCTAATAAATTTTCATCAAATTTCCGTTGAGTCTTTGGAAAATGAGTGGT  
CTTCTCTTTCTAAACGTGTCACAAAATTCTTTAGAGGGAGAAGTTCCAT

>M6-PGSC0003DMG400023641M6LRR-RLP\_1891

AATGAGTGGTCTTCTCTTTCTAAACGTGTCACAAAATTCTTTAGAGGGAGAAGTTCCATCAGATATTGGA  
GAACTGAAAGCCATTGTAAAAGTAGATCTTTCAGGTAACCACTTCTCAGG

>M6-PGSC0003DMG400023641M6LRR-RLP\_1952

GATATTGGAGAACTGAAAGCCATTGTAAAAGTAGATCTTTCAGGTAACCACTTCTCAGGCATGATACCAA  
GCAGATTGGGGGAACTCCAAAACCTGCAGTCCCTTGACCTATCAAACAAT

>M6-PGSC0003DMG400023641M6LRR-RLP\_2013

TGATACCAAGCAGATTGGGGGAACTCCAAAACCTGCAGTCCCTTGACCTATCAAACAATTCATTTACAGG  
CTCAATTCATTATCCTTTGCCAACTTGATAAGCTTAGAATTCTTGAATT

>M6-PGSC0003DMG400023641M6LRR-RLP\_2074

ATTTACAGGCTCAATTCATTATCCTTTGCCAACTTGATAAGCTTAGAATTCTTGAATTTGTCTATAAATGC  
CTTGTGAGTACTATTCTTAAGTCATTGGAAAACTCACCTTAAAAG

>M6-PGSC0003DMG400023641M6LRR-RLP\_2135

TCTATAAATGCCTTGTGAGTACTATTCTTAAGTCATTGGAAAACTCACCTTAAAAGCATTAAATGTTTC  
ATTTAATGAATTAGAAGGTGAAATACCCAATGGTGGTGTGTTTGTAAT

>M6-PGSC0003DMG400023641M6LRR-RLP\_2196

TTAATGTTTCATTTAATGAATTAGAAGGTGAAATACCCAATGGTGGTGTGTTTGTAATTCAACTATGCA  
ATCATTCTCGGAAACAAAGGTCTATGTGGAATGAGCATATTGGAGGTTTC

>M6-PGSC0003DMG400023641M6LRR-RLP\_2257

AACTATGCAATCATTTCTCGGAAACAAAGGTCTATGTGGAATGAGCATATTGGAGGTTCTGCTTGCCCT  
ATCAACAATAATGGAAAACAATCAAAGTCTAAGGAGCTAGTGCTGAAAAT

>M6-PGSC0003DMG400023641M6LRR-RLP\_2318

GCTTGCCCTATCAACAATAATGGAAAACAATCAAAGTCTAAGGAGCTAGTGCTGAAAATTGTTATTCCAC  
TGGTTATTTATCCTTTCTGATATTCTTGTGGTGTCAACTTGGATAATA

>M6-PGSC0003DMG400023641M6LRR-RLP\_244

TTTGCAACTTCAAGGCACAATTTCCACGTCTTTGGCTAATTTGCCTTTCTCAGTGTTCTCAATCTCGAGAA  
TAACTCATTCCATGGTGGCATCCCTTATGGACTTGGCCATTTGCCTCG

>M6-PGSC0003DMG400023641M6LRR-RLP\_2562

GTGTGGGAGGTTCTGGCTCTGTATACAAAGGCACATTATCTAGTGGAACCTTGGTGGCTATAAAAGTTCT  
GGATTTGCAAAGTGAGGAAGTATGCAAGAGGTTTGATACCGAATGTGAAG

>M6-PGSC0003DMG400023641M6LRR-RLP\_2684

ATGAGAAATATCAGGCACAGAAATCTTGTTCCGGTAATTACTACTTGTCTAGTGACTATATACGAGCCT  
TTGTTCTGCAATATATGCCCAACAGTAGTCTTGATAATTGGTTGTACAGA

>M6-PGSC0003DMG400023641M6LRR-RLP\_2745

TACGAGCCTTTGTTCTGCAATATATGCCCAACAGTAGTCTTGATAATTGGTTGTACAGAGAAGATCGCCA  
CTTGAACCTTCTTCAAAGAGTCACCATAATGCTTGATGTGGCTATGGCAA

>M6-PGSC0003DMG400023641M6LRR-RLP\_2806

AGATCGCCACTTGAACCTTCTTCAAAGAGTCACCATAATGCTTGATGTGGCTATGGCAATTGAATATCTG  
CATCATGGTCATGATACTCCGATAGTTCATTGCGACCTAAAGCCAGCCAA

>M6-PGSC0003DMG400023641M6LRR-RLP\_2928

TTCTTTTGGATGAAGATATGGTGGCTCATGTTGGTGATTTTGGCATCTCTAAAATTTTAGCTACAAGCAA  
GTTTATGGCACATACCGAGACATTAGGCACTCTTGGATATATTGCACCAG

>M6-PGSC0003DMG400023641M6LRR-RLP\_305

AATCTCGAGAATAACTCATTCCATGGTGGCATCCCTTATGGACTTGGCCATTTGCCTCGCTTGCGAGTGA  
TTGATTTTCAAACAATCAGCTCCAAGGAAGTATACCAACAAGTCTATTT

>M6-PGSC0003DMG400023641M6LRR-RLP\_3514

GTAGTCAAGCGGCTTGACAAAATGAAGAACACATTTCTGAACACATAGAAGTTAGCATCTCTTCCGGTG  
GTGTTCTTTCTCAGCTACAATTTAACATGTTGCTCTTGAATCATATATCAT

>M6-PGSC0003DMG400023641M6LRR-RLP\_366

TGCGAGTGATTGATTTTCAAACAATCAGCTCCAAGGAAGTATACCAACAAGTCTATTTCAACACCGGAG  
AGTTCAAATCATTTTATTGGCCTTCAATAAACTCGATGGTGAATGTGGA

>M6-PGSC0003DMG400023641M6LRR-RLP\_488

GGCTCATGGTATGTACCCGAACCTTAGAGTTTTAAATCTCAGGAACAATAGCCTCACAGGTATAATCCCTC  
CTTCTGTTGGAAATGCCACAAAGTTGATGAACTTTAGCTTGTCTTATAAT

>M6-PGSC0003DMG400023641M6LRR-RLP\_61

TTCTATATCAACTGCTTTCTCAAATGAGACTGACCAACAAGCTCTACTAGCTTCCAAAATCTTATTACAA  
GTCCCAATCATTTTTTGGCCAATAATTGGACCAAGACTGCGTCTTTTTG

>M6-PGSC0003DMG400023641M6LRR-RLP\_610

AATAAACGGCAACATTCTAAGGAGATCGGTAATCTGAGCCAAGTGCAGTTTTGTCCTTGGTTGATAAT  
CAAGTAACAGGTTCCATTCTACATCAATTTTTAATATCTCGTCATTACG

>M6-PGSC0003DMG400023641M6LRR-RLP\_671

GTTGATAATCAAGTAACAGGTTCCATTCTACATCAATTTTTAATATCTCGTCATTACGTTCCCTAACTCTG  
GGAAGGAATAGCCTTTCTGGTCCTCTCTTGCTTAATGAGGGAATTTTT

>M6-PGSC0003DMG400023641M6LRR-RLP\_732

CCCTAACTCTGGGAAGGAATAGCCTTTCTGGTCCTCTCTTGCTTAATGAGGGAATTTTTTATCAAATTTG  
GAGCGTTTGAGTTTAACTCGCAACCAATTTTTGGTCGCATTCTTCCA

>M6-PGSC0003DMG400023641M6LRR-RLP\_793

ATCAAATTTGGAGCGTTTGAGTTTAACTCGCAACCAATTTTTGGTCGCATTCTTCCAACATCTGCCAAC  
TCATACAACCTTAAAATACTGTCCATATCTTCCAACAACATAACTGGAGA

>M6-PGSC0003DMG400023641M6LRR-RLP\_854

ATCTGCCAACTCATACAACCTTAAAATACTGTCCATATCTTCCAACAACATAACTGGAGAAATACCCAAAA  
ATATTGGTTGTTTATCGAAGCTCGAGGAGTTTTATATTGGTAATAATCCA

>M6-PGSC0003DMG400023641M6LRR-RLP\_915

TACCCAAAAATATTGGTTGTTTATCGAAGCTCGAGGAGTTTTATATTGGTAATAATCCAATAACAGGGAC  
TATTCCCACTTCATTGGGAAATATTTCCACTCTGCGAAATCTTTACTGTG

>M6-PGSC0003DMG400023641M6LRR-RLP\_976

AACAGGGACTATTCCCACTTCATTGGGAAATATTTCCACTCTGCGAAATCTTTACTGTGAAACCAATAGCT  
TGGAGGGGCCGATTCTCCAGAATTGGGGAAGCTATCAAATTTGATAGA

>M6-PGSC0003DMG400023643M6LRR-RLK\_0

ATGGAGAAGCACATTTTCTTATTGATACTTCTTTTTAGTTCAATTTTCGTATATCAATTGCTTCTCTCAAT  
GATACTGACCAACAAGCCCTACTAGCTTCCAAAATCTTATTACAAGT

>M6-PGSC0003DMG400023643M6LRR-RLK\_1054

AATTAGGGAAGCTATCAAATTTGAGGGTGTTAACTTCCACAAGAATTTAATCTTATTGGTCAAATTCC

CAAGGCTATTTTCAATATATCTTCTTTGGAAGCGATTGATTTTCAGTTTCA

>M6-PGSC0003DMG400023643M6LRR-RLK\_1116

CAAATTCCTCAAGGCTATTTTCAATATATCTTCTTTGGAAGCGATTGATTTTCAGTTTCAATAACCTCTCAGG  
TAGAATTCCAGCCACTACCGATCTTCATCTTCCGAACCTTGAAGTGTTT

>M6-PGSC0003DMG400023643M6LRR-RLK\_1178

CCTCTCAGGTAGAATTCCAGCCACTACCGATCTTCATCTTCCGAACCTTGAAGTGTTTATGTTGGCATTCA  
ATCAGCTCGAAGGAGAAATTCCTCAATACATAGCAAATGCTTCCAAGCT

>M6-PGSC0003DMG400023643M6LRR-RLK\_124

ATCAATTTTTGGCTAATAATTGGACCAAGAATGCATCTTTTTGCTCTTGGTTTGGTGTACGTGCAGTACA  
AGAAGGCTAAGGGTTGTGGCCTTGGCTCTTCTAATTTGCAACTTCAAG

>M6-PGSC0003DMG400023643M6LRR-RLK\_1240

TGGCATTCAATCAGCTCGAAGGAGAAATTCCTCAATACATAGCAAATGCTTCCAAGCTTGAGATACTGGC  
GCTAAATTATAACTTTCTGACAGTTGCTATTCTACTAATTTAGGAAATC

>M6-PGSC0003DMG400023643M6LRR-RLK\_1302

ATACTGGCGCTAAATTATAACTTTCTGACAGTTGCTATTCTACTAATTTAGGAAATCTTCGCGAGCTGCA  
ATCACTGTTCTAGATCATAATCAACTTACCAATGAACCAAGAGAGCCT

>M6-PGSC0003DMG400023643M6LRR-RLK\_1364

CGAGCTGCAATCACTGTTCTAGATCATAATCAACTTACCAATGAACCAAGAGAGCCTAAGTTGTTATTC  
TTGAATCTTTGGTGAAGTGTAGGATGCTGAAATATGTAGATGTGGGTTT

>M6-PGSC0003DMG400023643M6LRR-RLK\_1426

TGTTATTCTTGAATTCTTTGGTGAAGTGTAGGATGCTGAAATATGTAGATGTGGGTTTCAATCCGTTGAA  
TGCGGTTCTTCCCAATTCTATTGGGAATCTTTCATCTACTATTGAAGTAT

>M6-PGSC0003DMG400023643M6LRR-RLK\_1488

CCGTTGAATGGCGTTCTTCCAATTCTATTGGGAATCTTTCATCTACTATTGAAGTATTTGATATAAGAAA  
TGCACACATCTATGGCCTCATTCCAACAAGTATAGGCAACATGAGTGGT

>M6-PGSC0003DMG400023643M6LRR-RLK\_1550

TATAAGAAATGCACACATCTATGGCCTCATTCCAACAAGTATAGGCAACATGAGTGGTCTTATATCCCTA  
GTCTTTAATGAAAACAAGTGTGACAGGATATATTCTCCAGAGATTGGTAA

>M6-PGSC0003DMG400023643M6LRR-RLK\_1612



TATCCCTAGTCTTTAATGAAAACAACCTTGACAGGATATATTCCTCCAGAGATTGGTAAGCTTAAACAACCT  
ACAAGGTCTGTACCTAAATAACAATAAATTTTCAGGGACATATTCAGAGG

>M6-PGSC0003DMG400023643M6LRR-RLK\_1674

AAACAACCTACAAGGTCTGTACCTAAATAACAATAAATTTTCAGGGACATATTCAGAGGCGGTATGACATT  
TATCTCATTTGGTCGAATTAGCTATGGATAGTAATGAACTCTCTGGATCA

>M6-PGSC0003DMG400023643M6LRR-RLK\_1736

ATGACATTTATCTCATTTGGTCGAATTAGCTATGGATAGTAATGAACTCTCTGGATCAATTCCAGAATGTT  
TAGGAAATCTTGGGATGCTACTTTATCTTTTCGTTGGGATCAAATAAATT

>M6-PGSC0003DMG400023643M6LRR-RLK\_1798

CAGAATGTTTAGGAAATCTTGGGATGCTACTTTATCTTTTCGTTGGGATCAAATAAATTTTCACCAAATTT  
CCCTCGAGTCTTTGGAAGATGAGTGGACTTCTCTACCTAAACATGTCAC

>M6-PGSC0003DMG400023643M6LRR-RLK\_1860

CCAAAATTTCCCTCGAGTCTTTGGAAGATGAGTGGACTTCTCTACCTAAACATGTCACATAATTCTATAGA  
GGGAGAAGTTCCACCAACTATTGGAGAAGTCAAAGCCATTGAAGAAGTAA

>M6-PGSC0003DMG400023643M6LRR-RLK\_1922

TTCTATAGAGGGAGAAGTTCCACCAACTATTGGAGAAGTCAAAGCCATTGAAGAAGTAAATCTTTCCGGT  
AATCACTTTTCAGGCCAGGTACCAAGCAGATTGGGAGACCTCCAAAGATT

>M6-PGSC0003DMG400023643M6LRR-RLK\_1984

TTTCCGGTAATCACTTTTCAGGCCAGGTACCAAGCAGATTGGGAGACCTCCAAAGATTGAAGACTCTTGA  
CCTATCAAACAATTCAATTTTCAGGCTCAATTCATTATCCATTACCAACT

>M6-PGSC0003DMG400023643M6LRR-RLK\_2046

ACTCTTGACCTATCAAACAATTCATTTTCAGGCTCAATTCATTATCCATTACCAACTTGATGAGCTTAGA  
AGACTTGGATTTGTCTTTAAATGCATTGTCAGGTATTATTCCTAAGTCT

>M6-PGSC0003DMG400023643M6LRR-RLK\_2108

GAGCTTAGAAGACTTGGATTTGTCTTTAAATGCATTGTCAGGTATTATTCCTAAGTCTTTGGAAAACTCT  
CATACTTACAAGCATCAATGTTTCATTTAATGATTTAGAAGGTGAAAT

>M6-PGSC0003DMG400023643M6LRR-RLK\_2170

AAAACTCTCATACTTACAAGCATCAATGTTTCATTTAATGATTTAGAAGGTGAAATACCCAGTGGTGG  
TGTGTTTGTAAATTCCTCTGCTATCATTCTCGGGAACAAAGGTCTAT

>M6-PGSC0003DMG400023643M6LRR-RLK\_2232

AGTGGTGGTGTGTTTGTAAATTCCAATCTGCTATCATTCTCGGGAACAAAGGTCTATGTGGAATGCACA  
TATTGGAGCTTCTGCTTGTCTATCACTAATCCTGGACAACAATCAGTG

>M6-PGSC0003DMG400023643M6LRR-RLK\_2294

AATGCACATATTGGAGCTTCTGCTTGTCTATCACTAATCCTGGACAACAATCAGTGTCTAAGAACTT  
GTGCTAAAATTGTTACTCCAATGGTATTTCATTGTTTCTGATATTCTT

>M6-PGSC0003DMG400023643M6LRR-RLK\_248

AATTTCCCATCTTTGGCCAATTTGTCTTTCTCAGAGAGCTCAATCTCGAGAACAACCTTATTCAATGGGG  
GCATCCCTTACGGACTTGGCCAGTTGCCTCACTTGAGAGTCATTGATTT

>M6-PGSC0003DMG400023643M6LRR-RLK\_2604

GGAACTACAGTGGCCATAAAGTTCTGGATTTGGAAAATGAGCAAGTATGCAAGAGGTTTGATACAGA  
ATGCGAAGTGATGAGAAATGTCAGACATAGAAATCTTGTTCCAGTGATTACT

>M6-PGSC0003DMG400023643M6LRR-RLK\_2666

TACAGAATGCGAAGTGATGAGAAATGTCAGACATAGAAATCTTGTTCCAGTGATTACTACTTGTCTAGT  
GACTATATAAGAGCCTTTGTTCTGAAATATATGTCAAATGGGAGTCTTGA

>M6-PGSC0003DMG400023643M6LRR-RLK\_2790

TGGTTGTACAGAGAAGCTCGCCACTTGAACCTTCTCAAAGAGTCACTGTAATGCTTGATGCGGCTATGG  
CAATTGAATATCTACATCATGGCAATGACACTGCGATAGTTCATTGCGAC

>M6-PGSC0003DMG400023643M6LRR-RLK\_2976

AAGATTTTAGCCGTAAGCAAGTCCATGACACAAACCGAGACATTGGGCACTCTTGGATACATTGCACCA  
GGTATACTAAAATTATAACCTTTCTATTTAATTTTTCTCTTATCAAATAA

>M6-PGSC0003DMG400023643M6LRR-RLK\_3038

TGCACCAGGTATACTAAAATTATAACCTTTCTATTTAATTTTTCTCTTATCAAATAAAGCCCTTGAAAATT  
CTAGGACTAAATAAAAAGCAAGTCTTTGTTAGTATGAGCATTATTGCT

>M6-PGSC0003DMG400023643M6LRR-RLK\_310

TCAATGGGGGCATCCCTTACGGACTTGGCCAGTTGCCTCACTTGAGAGTCATTGATTTTCAAACAATCA  
GCTCCAAGGAAGTATTCCAACAAGTCTATTTCAACACCAGAGAGTTCGAA

>M6-PGSC0003DMG400023643M6LRR-RLK\_3100

CTTGAAAATTCTAGGACTAAATAAAAAGCAAGTCTTTGTTAGTATGAGCATTATTGCTATATCCAAATGA

GTTAGTTCTTTTTCGTTTTCGTTCTTTTAAGAGTACGGCTCAGAAGGAAT

>M6-PGSC0003DMG400023643M6LRR-RLK\_3162

CCAAATGAGTTAGTTCTTTTTCGTTTTCGTTCTTTTAAGAGTACGGCTCAGAAGGAATAGTGTCCGGCTAG

TGGTGATGTTTACAGTTACGGCATCATGTTGATGGAGGTTTTGACGAAAA

>M6-PGSC0003DMG400023643M6LRR-RLK\_3224

TCCGCTAGTGGTGATGTTTACAGTTACGGCATCATGTTGATGGAGGTTTTGACGAAAAGAAGGCCAACA

GATGAAAAGATATGCAATGAAAATCTTGACCTGAGGAGATGGATAACACAA

>M6-PGSC0003DMG400023643M6LRR-RLK\_3286

GCCAACAGATGAAAAGATATGCAATGAAAATCTTGACCTGAGGAGATGGATAACACAATCATTTTCAGG

GAGTATGATGGACGTTGTGGATGCCAATCTTTTTCTGAGGAAGAACAAT

>M6-PGSC0003DMG400023643M6LRR-RLK\_372

AACAATCAGCTCCAAGGAAGTATTCCAACAAGTCTATTTCAACACCAGAGAGTTCGAATCATTTTCATTGG

CTTTCAATGAACTCAGTGGTGAATGTGGAAAGGGCCATGGCATGTACCA

>M6-PGSC0003DMG400023643M6LRR-RLK\_434

TTCATTGGCTTTCAATGAACTCAGTGGTGAATGTGGAAAGGGCCATGGCATGTACCAGAACTCAAAGT

CTTAGATCTCGGAACAATAGCCTCACGGGTATAATCCCTCCTTATGTTGG

>M6-PGSC0003DMG400023643M6LRR-RLK\_496

TCAAAGTCTTAGATCTCGGAACAATAGCCTCACGGGTATAATCCCTCCTTATGTTGGTAATGCCACAAA

GTTGATGAACTTCGATTTGTCTGGGAGTAGAATCAATGGTACCATTCCAA

>M6-PGSC0003DMG400023643M6LRR-RLK\_558

GCCACAAAGTTGATGAACTTCGATTTGTCTGGGAGTAGAATCAATGGTACCATTCCAATGGAAATTGGT

AATTTGAGCCAACCTGCATCTTTGTCCTTGGTTGATAATCAGTTAACAGGT

>M6-PGSC0003DMG400023643M6LRR-RLK\_62

TTCCTCAAATGATACTGACCAACAAGCCCTACTAGCTTTCCAAAATCTTATTACAAGTCCCAATCAATTTTT

GGCTAATAATTGGACCAAGAATGCATCTTTTTGCTCTTGGTTTGGTGT

>M6-PGSC0003DMG400023643M6LRR-RLK\_620

AATTGGTAATTTGAGCCAACCTGCATCTTTGTCCTTGGTTGATAATCAGTTAACAGGTTTTATTCTGGAT

CACTGTTAACATTTCACTACTTGGCGTAACTCTGGGATTGAATCA

>M6-PGSC0003DMG400023643M6LRR-RLK\_682

TTCCTGGATCACTGTTTAAACATTTCACTACTTGGCGTAACTCTGGGATTGAATCACCTTTCTGGTCCTC  
TCTTGCTTGATGAAGGGAATATTGAGTCAAATCTGAAGATACTAAGTA

>M6-PGSC0003DMG400023643M6LRR-RLK\_806

TTTCAATCAAATTTCTGGTCGCATTCCTTCTAACATATGCCAACTCACACAGCTCAAATTTTGTCCATATC  
TTTCAATAGCATAACTGGAGACATACCCAAATATATTGGTTGTCTAGC

>M6-PGSC0003DMG400023643M6LRR-RLK\_868

TGTCCATATCTTCAATAGCATAACTGGAGACATACCCAAATATATTGGTTGTCTAGCCAAGCTCGAGAT  
GTTCTTAATTAGTGAGAATGCAATAAGTGGGACTATTCCTGCTTCATTGG

>M6-PGSC0003DMG400023643M6LRR-RLK\_930

CTCGAGATGTTCTTAATTAGTGAGAATGCAATAAGTGGGACTATTCCTGCTTCATTGGGCAATATTTCCA  
CTCTGCAACATCTTGATTCGGGGGACAATCGGTTGGAGGGACAAGTTCCT

>M6-PGSC0003DMG400023643M6LRR-RLK\_992

TATTTCCACTCTGCAACATCTTGATTCGGGGGACAATCGGTTGGAGGGACAAGTTCCTCAAGAATTAGG  
GAAGCTATCAAATTTGAGGGTGTTAAACTCCACAAGAATTTAATCTTAT

>M6-PGSC0003DMG400023671-(rev)M6L-LecRK\_0

AAAAACATAGTTTTTTGTTATATGTTGATATGTATATTCTAGGCAAGATTAGTTATTTAACTAACTTTGTT  
CATCTTTTGATCATATTCATATTTTTGGTTCTTAGAGTGGATTGTATG

>M6-PGSC0003DMG400023671-(rev)M6L-LecRK\_1008

CAGAATTCAGCTACTGCACCTCAGAGATTCCAGCTGAAGGACTTGAAACGAGCAACGGGGAACTTTGAT  
CCGAAGAACATTCTTGGAAGAGGAGGATGTGGAGTAGTCCTCAAAGGGATG

>M6-PGSC0003DMG400023671-(rev)M6L-LecRK\_1071

TTTGATCCGAAGAACATTCTTGGAAGAGGAGGATGTGGAGTAGTCCTCAAAGGGATGTTAGATCAAAA  
AGAGGTGGCTGTGAAGAGATTCTTTAATGATTCAAGTCAAGGGGCAAAAAGAT

>M6-PGSC0003DMG400023671-(rev)M6L-LecRK\_1134

CAAAAAGAGGTGGCTGTGAAGAGATTCTTTAATGATTCAAGTCAAGGGGCAAAAAGATCTCATAGCAGA  
AGTCACAACCTATAGGCAATCTGCACCATAAAAACCTTGTCAAATTGATAGGA

>M6-PGSC0003DMG400023671-(rev)M6L-LecRK\_1197

GCAGAAGTCACAACCTATAGGCAATCTGCACCATAAAAACCTTGTCAAATTGATAGGATGGTGCTATGAG  
AGCAATGAACTCCTTGTGGTGTATGAGTTCATGCCAAATGGGAGCTTAGAC

>M6-PGSC0003DMG400023671-(rev)M6L-LecRK\_126

AGCTACCAAAATTTACCAAGACAAACGAAAACGATTTTCATTGCTACTGAGCATTCTACATAGCCGCTG  
ATGCTATCCAAGTAACTCGCGATGTTTCGTGGTGCTTCCATCAGTAATTTG

>M6-PGSC0003DMG400023671-(rev)M6L-LecRK\_1260

TATGAGAGCAATGAACTCCTTGTGGTGTATGAGTTCATGCCAAATGGGAGCTTAGACAAGTTGATATCTT  
GCGAAGAAAACGGAAAAGTTTGAGTCTGAATTGGGAAATAAGGCATGGT

>M6-PGSC0003DMG400023671-(rev)M6L-LecRK\_1323

ATATCTTGCGAAGAAAACGGAAAAGTTTGAGTCTGAATTGGGAAATAAGGCATGGTATCATCTGTGG  
GATTGCTCAAGCACTTGATTATCTGCACAATGGATGTCAAAAAAGAGTACTT

>M6-PGSC0003DMG400023671-(rev)M6L-LecRK\_1386

TGTGGGATTGCTCAAGCACTTGATTATCTGCACAATGGATGTCAAAAAAGAGTACTTCACAGAGACATA  
AAAGCCAGCAACATCATGCTTGACTCAGAACTCAATGCTCAGCTAGGAGAT

>M6-PGSC0003DMG400023671-(rev)M6L-LecRK\_1449

GACATAAAAGCCAGCAACATCATGCTTGACTCAGAACTCAATGCTCAGCTAGGAGATTTCCGATTAGCT  
AGGACAGTTCAAGTGAATGGAAAGACTCACCATTCAACAAAAGAGATTGCT

>M6-PGSC0003DMG400023671-(rev)M6L-LecRK\_1512

TTAGCTAGGACAGTTCAAGTGAATGGAAAGACTCACCATTCAACAAAAGAGATTGCTGGTACTATAGGC  
TATATGGCACCAGAGAGTTTCCATATAGGCCGAGCCACAGTTGAAACAGAC

>M6-PGSC0003DMG400023671-(rev)M6L-LecRK\_1575

ATAGGCTATATGGCACCAGAGAGTTTCCATATAGGCCGAGCCACAGTTGAAACAGACGTCTTTGCATTT  
GGAGTGCTAGTTCTTGAAGTTGCTTGTGGTCAAAAACCTGGAAATCGATAT

>M6-PGSC0003DMG400023671-(rev)M6L-LecRK\_1638

GCATTTGGAGTGCTAGTTCTTGAAGTTGCTTGTGGTCAAAAACCTGGAAATCGATATGAGGAGAACAAT  
TATACTAACAGAGTCATTGAATATGTATGGGACTTGTACAAGATTGGAAGG

>M6-PGSC0003DMG400023671-(rev)M6L-LecRK\_1701

AACAATTATACTAACAGAGTCATTGAATATGTATGGGACTTGTACAAGATTGGAAGGATCATTGATGCC  
ATAGATGTCAGATTGGATAGAGACTTCAATGAAGAACAAGCCGAATGTGTG

>M6-PGSC0003DMG400023671-(rev)M6L-LecRK\_1764

GATGCCATAGATGTCAGATTGGATAGAGACTTCAATGAAGAACAAGCCGAATGTGTGTTAATATTAGGA

TTGGCTTGTTGCCATCCAAATCCTTACGAAAGGCCAAGCATGAAAACCTGCT

>M6-PGSC0003DMG400023671-(rev)M6L-LecRK\_1827

TTAGGATTGGCTTGTTGCCATCCAAATCCTTACGAAAGGCCAAGCATGAAAACCTGCTTTACAGATTCTTA

CAGGGGAATCAGTTCTACCAAACATCCCAACTGAGAAACCTGCATTTGTA

>M6-PGSC0003DMG400023671-(rev)M6L-LecRK\_189

GCCGCTGATGCTATCCAAGTAACTCGCGATGTTCTGGTGCTTCCATCAGTAATTTGTCTGGAAGGATAT

GGTATTCACAGCCTATGAATCTATGGAACAGAAGGAAAAACAGAACAGCC

>M6-PGSC0003DMG400023671-(rev)M6L-LecRK\_1890

ATTCTTACAGGGGAATCAGTTCTACCAAACATCCCAACTGAGAAACCTGCATTTGTATGGCCAGCCAAAG

CTCCATCGTCCAACGAAGCTGCTAGTGGCTCTCTCCTGGATGACCAACTT

>M6-PGSC0003DMG400023671-(rev)M6L-LecRK\_1953

GCCAAAGCTCCATCGTCCAACGAAGCTGCTAGTGGCTCTCTCCTGGATGACCAACTTACACAGATTACAG

TACTCAGTGGCAGATGACTGCAGAGTATGAGGAACCTCAGCAAGGTTAGG

>M6-PGSC0003DMG400023671-(rev)M6L-LecRK\_2016

ATTACAGTACTCAGTGGCAGATGACTGCAGAGTATGAGGAACCTCAGCAAGGTTAGGTAACCTCTTTAGG

AGGCAAAGATACTGTAAATTCACATATGTAAAGGCATGAATGTCTCTTT

>M6-PGSC0003DMG400023671-(rev)M6L-LecRK\_2079

TTTAGGAGGCAAAGATACTGTAAATTCACATATGTAAAGGCATGAATGTCTCTTTATTTTTTTTCTTTC

TATGTATGTGGTGGGGAGTGGGAGATATCTTCTTCCGAGTGTTTCGTTTT

>M6-PGSC0003DMG400023671-(rev)M6L-LecRK\_2142

TTTCTTTCTATGTATGTGGTGGGGAGTGGGAGATATCTTCTTCCGAGTGTTTCGTTTTTCTGCATTATAAAT

AACTTTCTATTTAGTCAATGTCATAATCAACTTTACAAGTAAATACTGA

>M6-PGSC0003DMG400023671-(rev)M6L-LecRK\_2205

TTATAAATAACTTTCTATTTAGTCAATGTCATAATCAACTTTACAAGTAAATACTGAAAACAAAAGCAGCA

AGCATTGCAACAAAGGCAGCTAGCTACATGAGTTACTCCTACAAAACAT

>M6-PGSC0003DMG400023671-(rev)M6L-LecRK\_2268

AAGCAGCAAGCATTGCAACAAAGGCAGCTAGCTACATGAGTTACTCCTACAAAACATACATGTTCTACCA

AAATCACTAGAAGATCCATAATCATCTTCATGTTCTACCACAACAAGAAC

>M6-PGSC0003DMG400023671-(rev)M6L-LecRK\_2307

GTTACTCCTACAAAACATACATGTTCTACCAAATCACTAGAAGATCCATAATCATCTTCATGTTCTACCA  
CAACAAGAACAGTTTCTCTGGATTGTTTCATGTCTGCTACGTCCATCGTT

>M6-PGSC0003DMG400023671-(rev)M6L-LecRK\_252

AGGATATGGTATTCACAGCCTATGAATCTATGGAACAGAAGGAAAAACAGAACAGCCTCGTTTAATTCA  
ACGTTTGTGATCAATATCAAACCTGAGAGTGATCCATGGGGTGAAGGATTG

>M6-PGSC0003DMG400023671-(rev)M6L-LecRK\_315

AATTCAACGTTTGTGATCAATATCAAACCTGAGAGTGATCCATGGGGTGAAGGATTGGCTTTCATATTGA  
CTAAAGAAAGTGGTACTGACTCAATCCCGGATAACAGTTATGGACAATGG

>M6-PGSC0003DMG400023671-(rev)M6L-LecRK\_378

ATATTGACTAAAGAAAGTGGTACTGACTCAATCCCGGATAACAGTTATGGACAATGGCTTGGGATTGTG  
AATGAAAGTACTAATGGATCTTCTTCAAACAACATATTTGCAGTTGAATTT

>M6-PGSC0003DMG400023671-(rev)M6L-LecRK\_441

ATTGTGAATGAAAGTACTAATGGATCTTCTTCAAACAACATATTTGCAGTTGAATTTGATACAAGGAAAA  
GTTACCCTGATGATCTTGATGATAATCATGTTGGCATTGACATAAACAGC

>M6-PGSC0003DMG400023671-(rev)M6L-LecRK\_504

AGGAAAAGTTACCCTGATGATCTTGATGATAATCATGTTGGCATTGACATAAACAGCATCAATTCTGTCA  
AGCAAGTCTCGTTGATTGATCGTGGTGTTAACCTTTCCTAGCTGTTGAT

>M6-PGSC0003DMG400023671-(rev)M6L-LecRK\_567

TCTGTCAAGCAAGTCTCGTTGATTGATCGTGGTGTTAACCTTTCCTAGCTGTTGATGTTATAGCAAGTGT  
CCGGTACGATGGAGAATCCAAGATGTTGAAGGTTTATACATTCATGAGC

>M6-PGSC0003DMG400023671-(rev)M6L-LecRK\_63

AACTTTGTTTCATCTTTTGTATCATATTCATATTTTTGGTTCTTAGAGTGGATTGTATGAGTTTCAGCTACCAA  
AATTTACCAAGACAAACGAAAACGATTTTCATTGCTACTGAGCATTCC

>M6-PGSC0003DMG400023671-(rev)M6L-LecRK\_630

GCAAGTGTCCGGTACGATGGAGAATCCAAGATGTTGAAGGTTTATACATTCATGAGCAATCAAACCGGA  
GACAATGAGAGAAATCCCATCATTTCATGCCTCTTGATCTTTCTAATTAT

>M6-PGSC0003DMG400023671-(rev)M6L-LecRK\_693

ACCGGAGACAATGAGAGAAATCCCATCATTTCATGCCTCTTGATCTTTCTAATTATCTCCCCGAGGATGT  
TTTCGTTGGATTTTCAGCCTCAACTGGGATATATAATCAGCTGAACTGC

>M6-PGSC0003DMG400023671-(rev)M6L-LecRK\_756

GAGGATGTTTTCGTTGGATTTTCAGCCTCAACTGGGATATATAATCAGCTGAACTGCATAAAGGCATGG  
AATTTTACAAGCACAGATATTGGGAACAGTAATGAAGTTAGCCTGTTATGG

>M6-PGSC0003DMG400023671-(rev)M6L-LecRK\_819

GCATGGAATTTTACAAGCACAGATATTGGGAACAGTAATGAAGTTAGCCTGTTATGGTTGTGGATCTTG  
ATACCAGTAATGTCAGTTCTTGTATGTTCTTAGGTGGGGTTTTCGTATAT

>M6-PGSC0003DMG400023671-(rev)M6L-LecRK\_882

ATCTTGATAACCAGTAATGTCAGTTCTTGTATGTTCTTAGGTGGGGTTTTCGTATATTTTAGCTGGTGGAG  
AAAAAAGAAGAGGATGCAAGTGTAGACCAATCTGAGAATATAGAGATT

>M6-PGSC0003DMG400023671-(rev)M6L-LecRK\_945

TGGTGGAGAAAAAGAAGAGGATGCAAGTGTAGACCAATCTGAGAATATAGAGATTCAGATTCAGAA  
TTCAGCTACTGCACCTCAGAGATTCCAGCTGAAGGACTTGAAACGAGCAACG

>M6-PGSC0003DMG400023814-(rev)M6RLKantifungi(GNK)\_0

AAAACCTGCATAAGATTCAGACACAGACAATGAACCTAATATTTTGACTCTGCCAGTGGCTCAAACCTT  
CAACTACAAGACTCCACAGATAGATCATCAATCATCAAAAACACTTTTTG

>M6-PGSC0003DMG400023814-(rev)M6RLKantifungi(GNK)\_1054

GTGGAAATAGAAAGTACGGTGTCTAGGCGAAGAATGAGGCCTAATACTTCTGTTTGGTTCAAATTCAG  
GAGCTTGAAAGGGCAACAGATAGTTTTCCCAAAGAATTTTATAGGGAGA

>M6-PGSC0003DMG400023814-(rev)M6RLKantifungi(GNK)\_1116

ATTCAGGAGCTTGAAAGGGCAACAGATAGTTTTCCCAAAGAATTTTATAGGGAGAGGTGGATTTGG  
AGTAGTTTATAAAGGAACCTTTAGCAGATGGGACTAATGTTGCTGTCAAAAA

>M6-PGSC0003DMG400023814-(rev)M6RLKantifungi(GNK)\_1178

GATTTGGAGTAGTTTATAAAGGAACCTTTAGCAGATGGGACTAATGTTGCTGTCAAAAAGATTATAGAAT  
CTGATTTTCAAGGAAATGACGAGTTTTGCAATGAGGTTGACATTATTAGTA

>M6-PGSC0003DMG400023814-(rev)M6RLKantifungi(GNK)\_124

CATAATTTGGTGAACCATAAAGAAAACCCATTAATAAATGGTTTCTTGAATTAATAAATCTCATTTTTTTC  
TCTTTTCTTCTAAAGAAGTTAGGGATGAAGGGTGATTTGTGGATTGTG

>M6-PGSC0003DMG400023814-(rev)M6RLKantifungi(GNK)\_1240

ATAGAATCTGATTTTCAAGGAAATGACGAGTTTTGCAATGAGGTTGACATTATTAGTAACTTGAAGCATC



GTAATCTTGTATCACTTAGGGGGTGTGTGTGACTGATGAAAATCGGATT

>M6-PGSC0003DMG400023814-(rev)M6RLKantifungi(GNK)\_1302

GAAGCATCGTAATCTTGTATCACTTAGGGGGTGTGTGTGACTGATGAAAATCGGATTGAAAGTGGGGA

GAGTGAAAGATTCTTGTCTATGATTACATGCCCAATGGGAATCTTGAGGA

>M6-PGSC0003DMG400023814-(rev)M6RLKantifungi(GNK)\_1364

GTGGGGAGAGTGAAAGATTCTTGTCTATGATTACATGCCCAATGGGAATCTTGAGGATCATTTATTTGC

TGTAATCAAGGTGGAATACTGAAGCAACCGTTGACTTGGCCTCAGAGAA

>M6-PGSC0003DMG400023814-(rev)M6RLKantifungi(GNK)\_1426

TTATTTGCTGTAAATCAAGGTGGAATACTGAAGCAACCGTTGACTTGGCCTCAGAGAAAAACATAATTT

TGGATGTGGCAAAGGACTAGCTTATCTGCATTATGGGGTAAAGCCAGCA

>M6-PGSC0003DMG400023814-(rev)M6RLKantifungi(GNK)\_1488

CATAATTTTGGATGTGGCAAAGGACTAGCTTATCTGCATTATGGGGTAAAGCCAGCAATTTATCACAG

GGACATTAAGCTACTAATATCCTATTAGATGAAGATATGAGAGCAAGAGT

>M6-PGSC0003DMG400023814-(rev)M6RLKantifungi(GNK)\_1550

ATCACAGGGACATTAAGCTACTAATATCCTATTAGATGAAGATATGAGAGCAAGAGTTGCTGACTTTG

GGTTGGTTAAGCAAAGTAGAGAAGGACAGTCTCATCTTACCACCAGAGTGG

>M6-PGSC0003DMG400023814-(rev)M6RLKantifungi(GNK)\_1612

GACTTTGGGTTGGTTAAGCAAAGTAGAGAAGGACAGTCTCATCTTACCACCAGAGTGGCAGGAACACAT

GGATACTTAGCTCCTGAATATGCTCTCTATGGGCAATTGACTGAGAAGAGC

>M6-PGSC0003DMG400023814-(rev)M6RLKantifungi(GNK)\_1674

AACACATGGATACTTAGCTCCTGAATATGCTCTCTATGGGCAATTGACTGAGAAGAGCGATGTTTATAGC

TTTGGGGTGGTTGTTTTGGAAATAATGTGTGGAAGGAAGGTCCTTGATTT

>M6-PGSC0003DMG400023814-(rev)M6RLKantifungi(GNK)\_1736

TTTATAGCTTTGGGGTGGTTGTTTTGGAAATAATGTGTGGAAGGAAGGTCCTTGATTTCTCTTCAGGATC

ACCTCATGCTTTTCTGATCACCGATTGGGCTTGGTCGAAGGTAAAAGCTG

>M6-PGSC0003DMG400023814-(rev)M6RLKantifungi(GNK)\_1798

TCAGGATCACCTCATGCTTTTCTGATCACCGATTGGGCTTGGTCGAAGGTAAAAGCTGGAAAGATAAAT

GAAGTTTTGGATACCATCCTAGTAAAGACTGAAGATTCAGTAAGTGCAAAT

>M6-PGSC0003DMG400023814-(rev)M6RLKantifungi(GNK)\_186

ATTTTTTCTCTTTCTTTCTAAAGAAGTTAGGGATGAAGGGTGATTTGTGGATTGTGTGTTTGTGATCT  
GTCTATTTTCTTGGGTAGTTTCAATTCATCAGCTCAAAGAGCACTAA

>M6-PGSC0003DMG400023814-(rev)M6RLKantifungi(GNK)\_1860

GATAAATGAAGTTTTGGATACCATCCTAGTAAAGACTGAAGATTCAGTAAGTGCAAATCCAAGGGCTAT  
AATGGTGAGATTCTCCTTGTGGAATATTATGTGCTCACGTCATGGTGGC

>M6-PGSC0003DMG400023814-(rev)M6RLKantifungi(GNK)\_1922

GGGCTATAATGGTGAGATTTCTCCTTGTGGAATATTATGTGCTCACGTCATGGTGGCCTTGAGGCCAAC  
TATATTGGATGCACTGAAAATGTTAGAAGGAGATATTGAGGTTCTGAAA

>M6-PGSC0003DMG400023814-(rev)M6RLKantifungi(GNK)\_1984

AGGCCAACTATATTGGATGCACTGAAAATGTTAGAAGGAGATATTGAGGTTCTGAAATCCAGACAGA  
CCAGCACCTCTTGGACAACCTTCATTTTATAATGCTAGTGGTAACACATTC

>M6-PGSC0003DMG400023814-(rev)M6RLKantifungi(GNK)\_2046

AGACAGACCAGCACCTCTTGGACAACCTTCATTTTATAATGCTAGTGGTAACACATTCAGCATATCACCA  
GCCTTGAGTTGCTTGC GACTGCCTACTGGAGACATGCTCAGGTGACAATA

>M6-PGSC0003DMG400023814-(rev)M6RLKantifungi(GNK)\_2108

TATCACCAGCCTTGAGTTGCTTGC GACTGCCTACTGGAGACATGCTCAGGTGACAATATGAGGTTTTAC  
ATATTACATCCTTTTCTTACTTATTGAGATTAGGAGAAAGCTAATGAAAT

>M6-PGSC0003DMG400023814-(rev)M6RLKantifungi(GNK)\_2170

GTTTTACATATTACATCCTTTTCTTACTTATTGAGATTAGGAGAAAGCTAATGAAATTTCTGCTAGAGTT  
GAACCTGGGAACCGAGTGACTTGGGATTTTTTTTTGATCAAATAATATTA

>M6-PGSC0003DMG400023814-(rev)M6RLKantifungi(GNK)\_2232

GCTAGAGTTGAACCTGGGAACCGAGTGACTTGGGATTTTTTTTTGATCAAATAATATTAGCTCTGAGAGTT  
CTGTTGTTCCAGTTTCCTGTCAATAGGGACCTACTTAGAAATCCTAAGT

>M6-PGSC0003DMG400023814-(rev)M6RLKantifungi(GNK)\_2294

TGAGAGTTCTGTTGTTTCCAGTTTCCTGTCAATAGGGACCTACTTAGAAATCCTAAGTGTAGAAATAAAA  
CAGAAACACCATCTACTTGCCGTCCAATAAACAACCAAGAGGACATGG

>M6-PGSC0003DMG400023814-(rev)M6RLKantifungi(GNK)\_2356

AAATAAACAGAAACACCATCTACTTGCCGTCCAATAAACAACCAAGAGGACATGGAGTTCAACTAG  
ATTGTCAATTCCTTGGAAAGACATAGAGTTTCTTTGGCAGATGTAAGAGTTT

>M6-PGSC0003DMG400023814-(rev)M6RLKantifungi(GNK)\_2418

CAACTAGATTGTCAATTCCTTGGAAGACATAGAGTTTCTTTGGCAGATGTAAGAGTTTCTTCTTTCTTTCA  
TTCTTTCCAACAGCCTAGAACTTTTGACAATCTTTGTTTAGGCAA

>M6-PGSC0003DMG400023814-(rev)M6RLKantifungi(GNK)\_248

TGTTGATCTGTCTATTTTCTTGGGTAGTTTCAATTCATCAGCTCAAAAGAGCACTAACTTTTCTGCAACT  
GTCCTTTAGATTTTGGGTATGTTCTGAGAGCCCCATGGTCTAGTTCTA

>M6-PGSC0003DMG400023814-(rev)M6RLKantifungi(GNK)\_2480

TTTCTTTCATTCTTTCCAACAGCCTAGAACTTTTGACAATCTTTGTTTAGGCAAAGTTCGGAGTTTCTTT  
GCTTTCGTTTCTCAATAGGTTAATCAGATCTTGTAATAATTAGTAATA

>M6-PGSC0003DMG400023814-(rev)M6RLKantifungi(GNK)\_2542

AGTTTCTTTGCTTTCGTTTCTCAATAGGTTAATCAGATCTTGTAATAATTAGTAATAGCTGATACTCCTCT  
GTAATATATCTAGCTTACTTCATTCAAGCCATGGTTCCTGTGATGT

>M6-PGSC0003DMG400023814-(rev)M6RLKantifungi(GNK)\_2603

GATACTCCTCTGTAATATATCTAGCTTACTTCATTCAAGCCATGGTTCCTGTGATGTATGTTGCAGTTT  
GTAAATATCTATATTATTTATGTTTCAAAGTTCTCGAGACAATATTCC

>M6-PGSC0003DMG400023814-(rev)M6RLKantifungi(GNK)\_310

TCTGCAACTTGTCTTTAGATTTTGGGTATGTTCTGAGAGCCCCATGGTCTAGTTCTAACTGCAAAGTTCT  
AAATTCAACTCCTCAGCTTTCCAATGGTTCGCTATTCCCACATCAAGC

>M6-PGSC0003DMG400023814-(rev)M6RLKantifungi(GNK)\_372

CAAAGTTCTAAATTCAACTCCTCAGCTTTCCAATGGTTCGCTATTCCCACATCAAGCAAAGGCCAGTGAT  
GCCAGAACCTTTTGTCCCTCTTTGGTGTGCTATGGCACAACACCTTAA

>M6-PGSC0003DMG400023814-(rev)M6RLKantifungi(GNK)\_434

GCCAGTGATGCCAGAACCTTTTGTCCCTCTTTGGTGTGCTATGGCACAACACCTTAAAGAACTTCTCTT  
TTCCAGCTACCCAATTTGGAACTTCTGCTTCTTGCATCCAAGAATTCC

>M6-PGSC0003DMG400023814-(rev)M6RLKantifungi(GNK)\_496

ACTTCTCTTTTCCAGCTACCCAATTTGGAACTTCTGCTTCTTGCATCCAAGAATTCCAATCCAAGCTTAAT  
TCTTTGTCTTTGCCTTCAAATCTTACCTCTTTCTGTTTTGACCCTATT

>M6-PGSC0003DMG400023814-(rev)M6RLKantifungi(GNK)\_558

CAAGCTTAATTCTTTGTCTTTGCCTTCAAATCTTACCTCTTTCTGTTTTGACCCTATTCAGTTTGTCAATACA

CCATACATTTGTGCCTCAATTCAGACCATCCAAGATTGGGATAAAAA  
>M6-PGSC0003DMG400023814-(rev)M6RLKantifungi(GNK)\_62  
AAACCCTTCAACTACAAGACTCCACAGATAGATCATCAATCATCAAAAACACTTTTTGGGCACATAATTTG  
GTGAACCATAAAGAAAACCCCATTAATAATGGTTTCTTGAATTAAAAAA  
>M6-PGSC0003DMG400023814-(rev)M6RLKantifungi(GNK)\_620  
TTGTCAATACACCATAACATTTGTGCCTCAATTCAGACCATCCAAGATTGGGATAAAAAGCTGGGGAATTC  
AACTGTTTTGAATTCTGGTTGCAGGTCTGATCTTGAGGATTTAACTGCCT  
>M6-PGSC0003DMG400023814-(rev)M6RLKantifungi(GNK)\_682  
GGGAATTCAACTGTTTTGAATTCTGGTTGCAGGTCTGATCTTGAGGATTTAACTGCCTGTGATGGTTGTG  
TAGCTGCTGGCTTTAGAGTTCAGCAACAGTTGATTGCAATTGATGGTAAT  
>M6-PGSC0003DMG400023814-(rev)M6RLKantifungi(GNK)\_744  
TGGTTGTGTAGCTGCTGGCTTTAGAGTTCAGCAACAGTTGATTGCAATTGATGGTAATGCATCTCATTCC  
ACTGATTGTTTTACTTCACTATTTGTATGCTGCTGGTATTGTCAATGA  
>M6-PGSC0003DMG400023814-(rev)M6RLKantifungi(GNK)\_806  
CTCATTCCACTGATTGTTTTACTTCACTATTTGTATGCTGCTGGTATTGTCAATGAGTTTGGTCCTGAAA  
GTAAGGTTGCCATGTCATGTATTTTAGTATTGATTTGAAAAAGGATA  
>M6-PGSC0003DMG400023814-(rev)M6RLKantifungi(GNK)\_868  
GGTCCTGAAAGTACTGGTGCCATGTCATGTATTTTAGTATTGATTTGAAAAGGATAGTTCATCAAGCA  
AACGACATTTAGCGCTAATATTTGGGTTGGCTGGAGCTGGTATGGCAGTA  
>M6-PGSC0003DMG400023814-(rev)M6RLKantifungi(GNK)\_930  
ATCAAGCAAACGACATTTAGCGCTAATATTTGGGTTGGCTGGAGCTGGTATGGCAGTATTATGCATGTCT  
TTAGTGTGGGATTGTATATCTGGTGGAACAAAAGGTGGAGGAAAAATGA  
>M6-PGSC0003DMG400023814-(rev)M6RLKantifungi(GNK)\_992  
GCATGTCTTTAGTGTGGGATTGTATATCTGGTGGAACAAAAGGTGGAGGAAAAATGATGATGTGGAA  
ATAGAAAGTACGGTGTCTAGGCGAAGAATGAGGCCTAATACTTCTGTTTGGT  
>M6-PGSC0003DMG400023863-(rev)M6LRR-RLP\_0  
ATGGGAAATACAGGATTGTACGGGATAATACCTGAGAGTATTTTTCACCTTCCCAATCTGGAAACACTTG  
TCTTACAAAACAATAATCAGCTCAGTGGTTATTTCCGAAGACTAAATGG  
>M6-PGSC0003DMG400023863-(rev)M6LRR-RLP\_126

AGTGCATCTCTCATAGAGTTAGATCTCAGTGGCGTGAATTTTTCTGACAATTTGCCTGAGTCTATTGGCTA  
TCTAACTTCGGTGCATTCTTTGTCTCTTAAAAATTGCAATCTTAGAGGG

>M6-PGSC0003DMG400023863-(rev)M6LRR-RLP\_1260

ACTCTGCCAAAGCTGAAAGTTCTAAGTTTGAGATCCAATAAATTGCATGGGTCCATTAGATCTCTACCGA  
CTGGAAACATGTTTCCTCAGCTTAGAATATTAGATCTCTCCTCCAATGCC

>M6-PGSC0003DMG400023863-(rev)M6LRR-RLP\_1638

CATAATGGATTACAAGGTCATATACCGCCATCACTTGGAAGTTTATCTTCAGTTGAATCATTGGACCTGTC  
AGGTAACCATCTTGTAGGAGAGATACCAGCACGATTTGCTTCTCTTACA

>M6-PGSC0003DMG400023863-(rev)M6LRR-RLP\_189

ATTGGCTATCTAACTTCGGTGCATTCTTTGTCTCTTAAAAATTGCAATCTTAGAGGGACTATTCCTGAATC  
TCTTTTGAATCTCACTCACATAGAGGATTTGGACCTTCAATATAACTCC

>M6-PGSC0003DMG400023863-(rev)M6LRR-RLP\_1890

TGTGGTAATGATGGCAATGATTCGGAGACAAATGATACCACATCTGGACTTGACGATGAAGAAAACGAC  
TCTGAATTTCTGAATGATTTTTGGAAAGCTGCTCTTATGGGGTATGGAAGT

>M6-PGSC0003DMG400023863-(rev)M6LRR-RLP\_1953

AACGACTCTGAATTTCTGAATGATTTTTGGAAAGCTGCTCTTATGGGGTATGGAAGTGGACTATGTATTG  
GATTATCGATAATATATTTTCATGTTCTCAACTAGAAATCCGAAATGGCTT

>M6-PGSC0003DMG400023863-(rev)M6LRR-RLP\_252

CCTGAATCTCTTTTGAATCTCACTCACATAGAGGATTTGGACCTTCAATATAACTCCCTGAATGGAACAAT  
ACCATCAGGGATGTTTTCTCTTCCGTCACTAAGTCGTTTAGTCTTGAGT

>M6-PGSC0003DMG400023863-(rev)M6LRR-RLP\_504

CTTTCTTTCAATAATTTTGGTGGCCATGTGGATGTCAGCTTCTTTGCTGACCTCAAACAACCTTTATTATCTT  
GATCTTTCATATAATCGTATCTCGTTGACCAATGAGAACAAACATAAT

>M6-PGSC0003DMG400023863-(rev)M6LRR-RLP\_63

ACACTTGTCTTACAAAACAATAATCAGCTCAGTGGTTATTTTCCGAAGACTAAATGGAACAGCAGTGCAT  
CTCTCATAGAGTTAGATCTCAGTGGCGTGAATTTTTCTGACAATTTGCCT

>M6-PGSC0003DMG400023863-(rev)M6LRR-RLP\_756

GATTGGGCATGGACTAACTGGATGTTTCATATTGCAACGTCTTAATTTATCCCACAACATGCTGGAAAGTG  
TTGAGTCAATTCCTCTTCTGTTTATAGAAGCTATTGATTTGCGGTCCAAT

>M6-PGSC0003DMG400023863-(rev)M6LRR-RLP\_819

GAAAGTGTGAGTCAATTCCTCTTCTGTTTATAGAAGCTATTGATTTGCGGTCCAATTTGCTTCAAGGTTCACTACCTATTCCACCAATTTCCACAAGATTCTTCTTCATATCCCATAAT

>M6-PGSC0003DMG400023863-(rev)M6LRR-RLP\_882

CAAGGTTCACTACCTATTCCACCAATTTCCACAAGATTCTTCTTCATATCCCATAATAATCTCACTGAAGAAATTCCTTCAGATATTTGCAATTTGACATCACTGGTAATGCTTGATTTG

>M6-PGSC0003DMG400023864-(rev)M6LRR-RLP\_1024

GTGGATTCCCACATTTGAAAGGCTGTGGTACTGAAGGTAATGATTCAGAATCAGAGAAAAGTATACCGGATCTGAGCTTGATGAAGAAAGCAACTCTGAATTTCTGAATGATTTTTGGA

>M6-PGSC0003DMG400023864-(rev)M6LRR-RLP\_832

GAAGATTAACCTTTGGTTGAATCATTGGACCTGTCAAGTAACCACCTTGTAGGAGAGATACCAGCACAATTGCTTCTCTAACTTCTCTTGCAGTCTTAAATCTCTCCTACAATCATCTCG

>M6-PGSC0003DMG400023867-(rev)M6LRR-RLP\_0

ATGTTTTCTCTTCCGTCCTAAGTCGTTTAGTCTTGAGTAATAACCACTTTTCTGGTCAGTTTGAGGATTTCAATTCCAATTCCTAATCTGGATTGATTTAAGTAATAATCAGCTGCAA

>M6-PGSC0003DMG400023867-(rev)M6LRR-RLP\_124

ATCTTCCCAAGTCGATTCAAACCATGTGAACCTAACAGGCCTTATTCTTTCTTCAATAATTTTGGTGGCCATGTGGATGTCAGCTTCTTTGCTGACCTCAAACAACCTTATTATCTTG

>M6-PGSC0003DMG400023868-(rev)M6LRR-RLP\_0

ATGACTGGCTGTGTGATTGAACTTAATCTCAGTTGCAGCGGTCTTGTAGGAAAGATTGATTCCAATAGCAGTCTTCCAACCTCTCTCATCTCCAAGGCTCGACCTTTCTTCTAATAAC

>M6-PGSC0003DMG400023868-(rev)M6LRR-RLP\_122

CTCTAATTCTCACATCTCGCCTGAATTTGGAAGGTTCTCAAGCTTGACACTTCTTGATCTTTCTGACTCCTATTTCTCAGGTCATATACCTTCTGAAATCTCTCATCTTTCTCAATTACA

>M6-PGSC0003DMG400023868-(rev)M6LRR-RLP\_183

TCTGACTCCTATTTCTCAGGTCATATACCTTCTGAAATCTCTCATCTTTCTCAATTACAGTCTCTTCGCCTCTCCCCGTCATTTGAAACTATTCTAAGACTCACTGCTCATGATTTGAAA

>M6-PGSC0003DMG400023868-(rev)M6LRR-RLP\_244

CTCTTCGCCTCTCCCCGTCATTTGAAACTATTCTAAGACTCACTGCTCATGATTTGAAATTGCTCCTTCAGA

ATTTGACTCAATTAAGTGAGCTTGATCTTACTTCCATAAATATCTCTT

>M6-PGSC0003DMG400023868-(rev)M6LRR-RLP\_366

ACCATTCCTCCAAATTTTTCTTCTCATTTGACAACATGAGGATGGGAAATACAGGATTGTACGGGATAA

TACCTGAGAGTATTTTTACCTTCCCAATCTGGAAACACTTGTCTTACAA

>M6-PGSC0003DMG400023868-(rev)M6LRR-RLP\_61

CCAATAGCAGTCTTCCAACCTCTCATCTCCAAAGGCTCGACCTTTCTTCTAATAACTTCTCTAATTCTC

ACATCTCGCCTGAATTTGGAAGGTTCTCAAGCTTGACACTTCTTGATC

>M6-PGSC0003DMG400023953M6LRR-RLK\_0

AATTCTATTCTTTAAGATTGGAAATGAGAGATCAAGATCGAGTTTTTACTAGTTTTGAACCATAACCTTTT

CGAGTTGTTAACAAGTTTTTAACTCGAAAAGGAGGAGCTGGTAGATGTA

>M6-PGSC0003DMG400023953M6LRR-RLK\_124

TTCTCATCTTGCAAAAAGGTTCTTTCATTTTGCTCAACTTTTCTTGTTATTTTCAAGTTACTGATATTTGGGATT

CAGCCAACCTCAGGTGAAGATTGGGATGGGATAATTATTACTGCAGC

>M6-PGSC0003DMG400023953M6LRR-RLK\_186

TATTTGGGATTCAGCCAACCTCAGGTGAAGATTGGGATGGGATAATTATTACTGCAGCAGATTTTCAAGC

ACTTCAAGCTTTTAAACAAGAATTGGTTGATCCAAAAGGTTCTTGAAAA

>M6-PGSC0003DMG400023953M6LRR-RLK\_2604

AATTAGACCTGAAACAGCTACCAGTTCTGGGGACGACGGTGCTGCAGCTCCCTCAGCAAGCGATGATTA

GATATTAGATTTCTCATCTAAGTCATTTTTAGGCAGGTGTGTTAGGAGTTA

>M6-PGSC0003DMG400023953M6LRR-RLK\_2666

ATGATTAGATATTAGATTTCTCATCTAAGTCATTTTTAGGCAGGTGTGTTAGGAGTTAGGTGCCACAATT

CTTTCATTCTTGAATTAGGTTGATTAAGAGAGTGATTTTTGTTCTTCTAC

>M6-PGSC0003DMG400023953M6LRR-RLK\_2728

CCACAATTCTTTCATTCTTGAATTAGGTTGATTAAGAGAGTGATTTTTGTTCTTCTACTGTCTGTAGATACC

CAAGTGTGCTATTTTGTGTTGTTATTTTGTGAGCAGCAATGGAATCCTCT

>M6-PGSC0003DMG400023953M6LRR-RLK\_2772

TTTTGTTCTTCTACTGTCTGTAGATACCCAAGTGTGCTATTTTGTGTTATTTTGTGAGCAGCAATGGAATC

CTCTTAATTTCTGGCCCTAGAGACAGAAAATACACTAAAACTGCACA

>M6-PGSC0003DMG400023953M6LRR-RLK\_62

TACCCTTTTCGAGTTGTTAAACAAGTTTTTAACTCGAAAAGGAGGAGCTGGTAGATGTATAATTTCTCATCT  
TGCAAAAAGGTTCTTTCATTTTGCTCAACTTTTCTTGTTATTTTCAGTTA

>M6-PGSC0003DMG400024033M6LRR-RLP\_0

CATCCTCTTCTCTTCCCTCTTCCAGATCTGAACAACAATGTCTTCGTCGTCATTCCCTGAACAAGTGTTGAA  
GCACCTCTTCTCCTTGTTAACCTCACACAAGGACCGTAACAGTATATC

>M6-PGSC0003DMG400024033M6LRR-RLP\_1054

ACAAGCTCATAAGTCTGTGCATAATTTGCAGAGATTGTGGGTATGTTTACTTTACTTTACTTGCCTATGT  
TTTCAGTCACAGCATTCTGATAACTTAAGAGCATGATATCTTGCCTTGA

>M6-PGSC0003DMG400024033M6LRR-RLP\_1116

TGCCTATGTTTTAGTCACAGCATTCTGATAACTTAAGAGCATGATATCTTGCCTTGAAGGCAAGGGGTT  
GTTTATAAGAGAAGCACACAAAATTTTACCTGTTTATCGTCTTGTAATT

>M6-PGSC0003DMG400024033M6LRR-RLP\_1178

AAGGGGTTGTTTATAAGAGAAGCACACAAAATTTTACCTGTTTATCGTCTTGTAATTCTGTTGACGGCA  
AGGATATCTAGGATAAAAATCATGATATGCAGATACTTTCCACTCATAAG

>M6-PGSC0003DMG400024033M6LRR-RLP\_124

GTCTCTAAGTCGTGGTACGAGCTCGAGAGGCGCTCTAGGAGGAGTGTCTTCATCGGCAACTGCTACGCC  
GTTAGCCCTGAGATTATGATCACACGCTTCCCTCAACTCACATCTATCTAT

>M6-PGSC0003DMG400024033M6LRR-RLP\_1240

TGACGGCAAGGATATCTAGGATAAAAATCATGATATGCAGATACTTTCCACTCATAAGATTGGCTAAAAT  
AATTCACCTTTACCTTAAGTTGAAGTTATAGACCTGTACATGAAGTAGGA

>M6-PGSC0003DMG400024033M6LRR-RLP\_1302

GCTAAAATAATTCACCTTTACCTTAAGTTGAAGTTATAGACCTGTACATGAAGTAGGATCTAGAAGATAC  
ATTCTTTGGTTGTATAATTCTCATACGCAATGGCCATATGCAATATTTAT

>M6-PGSC0003DMG400024033M6LRR-RLP\_1364

GAAGATACATTCTTTGGTTGTATAATTCTCATACGCAATGGCCATATGCAATATTTATCAATCTTAATGCT  
GAAGACTTTTTTACGAAATAGGTAACCTTAACCTTTTATGCTGAAGACTTT

>M6-PGSC0003DMG400024033M6LRR-RLP\_1426

CTTAATGCTGAAGACTTTTTTACGAAATAGGTAACCTTAACCTTTTATGCTGAAGACTTTTTTATCTGTTCTCT  
TTTCTGTGACATTCAAAGAATTTCTGCTAATGGTTCTTTAATCTTT



>M6-PGSC0003DMG400024033M6LRR-RLP\_1488

TCTGTTCTCTTTTCTGTGACATTCAAAGAATTTCTGCTAATGGTTCTTTAATCTTTCTTGCTACAAGCTT  
GGACTAGTTGCTTAGTGTTTAAGACATTCCACTTTGAATAAATGTGAC

>M6-PGSC0003DMG400024033M6LRR-RLP\_1550

CTACAAGCTTGGACTAGTTGCTTAGTGTTTAAGACATTCCACTTTGAATAAATGTGACTACAGGTACTAG  
ACTACATTGAAGATACCGGTCTCCAGGCGCTTGCCGTTACCTGTAAAGAC

>M6-PGSC0003DMG400024033M6LRR-RLP\_1612

GGTACTAGACTACATTGAAGATACCGGTCTCCAGGCGCTTGCCGTTACCTGTAAAGACCTGCAAGAACTT  
AGGGTGTTTTCTTCTGATCCCTTTGATCCAGAACCAAATGTTTCCCTGAC

>M6-PGSC0003DMG400024033M6LRR-RLP\_1674

AAGAACTTAGGGTGTTTCTTCTGATCCCTTTGATCCAGAACCAAATGTTTCCCTGACAGAGCAGGGACT  
TG TAGCTGTTTCAGATGGCTGCCCTAAGCTCCAAACAGTTTTATACTTCT

>M6-PGSC0003DMG400024033M6LRR-RLP\_1798

CCAAATGACAAATGCCGCTTTGATTACTATTGCTAGAAACAGTCCTAACATGGTTCGTTTTCGCTTGTGTA  
TTTTGGAACCTCGAACTCCTGATTACTTGACTCTTGAACCGCTTGATGC

>M6-PGSC0003DMG400024033M6LRR-RLP\_186

CTACGCCGTTAGCCCTGAGATTATGATCACACGCTTCCCTCAACTCACATCTATCTATCTCAAAGGAAAGC  
CCCATTTTGCCGACTTTAATCTCGTTCCTGAGGGATGGGGTGCCTATCT

>M6-PGSC0003DMG400024033M6LRR-RLP\_1860

GCTTGTGTATTTTGGAACTCGAACTCCTGATTACTTGACTCTTGAACCGCTTGATGCTGGTTTTGGGGA  
AATTGTGGAACAATGCAAAGAGTTGCGGCGACTTTCTCTTTCTGGCCTTC

>M6-PGSC0003DMG400024033M6LRR-RLP\_1922

TTTGGGGAAATTGTGGAACAATGCAAAGAGTTGCGGCGACTTTCTCTTTCTGGCCTTCTTACTGACCGTG  
TGTTTGAGTACATTGGGACCCATGCTAAAAAGTTAGAGATGCTTTCCGTC

>M6-PGSC0003DMG400024033M6LRR-RLP\_1984

TGACCGTGTGTTTGGAGTACATTGGGACCCATGCTAAAAAGTTAGAGATGCTTTCCGTCGCTTTGTTGGG  
GATAGTGATATGGGCCTCCACCATGTACTCTCTGGATGTGAGAGCCTCAG

>M6-PGSC0003DMG400024033M6LRR-RLP\_2046

TTGTTGGGGATAGTGATATGGGCCTCCACCATGTACTCTCTGGATGTGAGAGCCTCAGAAAAGTAGAGA

TCAGAGACTGCCCTTTGGTGACGACGCTCTTTTGGCTAATGCTGCAAAC

>M6-PGSC0003DMG400024033M6LRR-RLP\_2108

CTAGAGATCAGAGACTGCCCTTTGGTGACGACGCTCTTTTGGCTAATGCTGCAAACCTGGAGACAATG

AGATCCCTTTGGATGTCTTCTTGTTCAGTAAGTTTTGGAGCCTGTAAGCTG

>M6-PGSC0003DMG400024033M6LRR-RLP\_2170

GACAATGAGATCCCTTTGGATGTCTTCTTGTTCAGTAAGTTTTGGAGCCTGTAAGCTGCTAAGTCAGAAG

ATGCCGAGGCTTAATATTGAAGTTATAGATGAAACGGGTCTTCTGGACAC

>M6-PGSC0003DMG400024033M6LRR-RLP\_2232

GTCAGAAGATGCCGAGGCTTAATATTGAAGTTATAGATGAAACGGGTCTTCTGGACACGCAGCCAAGA

AGCTGCCCTGTTGATAAACTTTACATATACCGAACAGTGGCTGGACCAAGGT

>M6-PGSC0003DMG400024033M6LRR-RLP\_2294

CCAAGAAGCTGCCCTGTTGATAAACTTTACATATACCGAACAGTGGCTGGACCAAGGTTTGACCTGCCTG

GTTTTGTTCCGATAATGAAAGAAGATGCTGCACATTAGCAATGGAAATTC

>M6-PGSC0003DMG400024033M6LRR-RLP\_2356

CCTGCCTGGTTTTGTTCCGATAATGAAAGAAGATGCTGCACATTAGCAATGGAAATTCACCCTCATGCTA

TTAATCCTCCTTTGTGTGGCAGGTTAAGCCATAAAGTGCTATGTCTGAAGA

>M6-PGSC0003DMG400024033M6LRR-RLP\_2418

TCATGCTATTAATCCTCCTTTGTGTGGCAGGTTAAGCCATAAAGTGCTATGTCTGAAGACCTCACATGCCA

TCAACTATTACCTCTTGGCTAAGCTAATTTACTGCATCAGCTTATAAAGT

>M6-PGSC0003DMG400024033M6LRR-RLP\_248

AAGGAAAGCCCCATTTTGCCGACTTTAATCTCGTTCCTGAGGGATGGGGTGCCTATCTTCAACCTTGAT

TGCTGCAATGTCTCCCTCTTATCCTTGGCTTGAGGAAATTAGACTCAAGC

>M6-PGSC0003DMG400024033M6LRR-RLP\_2480

ACATGCCATCAACTATTACCTCTTGGCTAAGCTAATTTACTGCATCAGCTTATAAAGTGTTAAACTCTTG

TGAGGTTTGTGGTTTGGAAATGACAGACCCAAGTTCTGTACTTATATT

>M6-PGSC0003DMG400024033M6LRR-RLP\_2542

AAACTCTTGAGGTTTGTGGTTTGGAAATGACAGACCCAAGTTCTGTACTTATATTAGTATCCTAATCC

CAGTAACCGACCCCTATGTGTTGTTATGTATCATTGGGAATAAGAATTA

>M6-PGSC0003DMG400024033M6LRR-RLP\_2604

TCCTAATCCCAGTAACCGACCCCTATGTGTTGTTATGTATCATTGGGAATAAGAATTACTACTTTGTATTT  
TGTTTTAGGGGGAAGGGGGTATGTTCAACAATGTACATGCTAGCGATTT

>M6-PGSC0003DMG400024033M6LRR-RLP\_2666

TTTGTATTTTGTTTTAGGGGGAAGGGGGTATGTTCAACAATGTACATGCTAGCGATTTGAAGACTTTGAG  
CATCGTTATGCAGCTAATTCATAATTCTTTTCTATTGACTTGTTTTTCT

>M6-PGSC0003DMG400024033M6LRR-RLP\_2728

ACTTTGAGCATCGTTATGCAGCTAATTCATAATTCTTTTCTATTGACTTGTTTTTCTGAAGAGATTATGCC  
ATCATGTACTCATAAGTCAATAAAATTCATTGCATCCATGTACTAAGA

>M6-PGSC0003DMG400024033M6LRR-RLP\_2790

AGATTATGCCATCATGTACTCATAAGTCAATAAAATTCATTGCATCCATGTACTAAGAATCTCTTCAGAAA  
ATTATTTTTGGTAATCCCATGTCAAATTTGAACTCGAGTTCAATGGA

>M6-PGSC0003DMG400024033M6LRR-RLP\_2852

CTTCAGAAAATTATTTTTGGTAATCCCATGTCAAATTTGAACTCGAGTTCAATGGAAGGATTAATTTTG  
AATTCATCTTTACAAGACAATGAGAATTCAAGACTTTGAAATACTAGTG

>M6-PGSC0003DMG400024033M6LRR-RLP\_2914

TTAATTTTGAATTCATCTTTACAAGACAATGAGAATTCAAGACTTTGAAATACTAGTGACCTACCATAGAA  
GAGCATCACTGGTACTCCTATCTAAGAAAGCAAATAAATGATAGAATAA

>M6-PGSC0003DMG400024033M6LRR-RLP\_2976

ACCATAGAAGAGCATCACTGGTACTCCTATCTAAGAAAGCAAATAAATGATAGAATAAGTAATGATGGA  
AGTTCAAACGACTTAATGAAAATATTAATTGGACAAGATGATAAACATACA

>M6-PGSC0003DMG400024033M6LRR-RLP\_3038

TGATGGAAGTTCAAACGACTTAATGAAAATATTAATTGGACAAGATGATAAACATACAGTTTTTTCTTTA  
AACTTTTACATCCATACACACTTGTGTCTTTTGCAACTGCCTCTTTGATG

>M6-PGSC0003DMG400024033M6LRR-RLP\_310

CCTTGATTGCTGCAATGTCTCCCTCTTATCCTTGCTTGAGGAAATTAGACTCAAGCGAATGGTTGTCA  
CTGATGACTCCTTGACTTGATTTCCACCTCATTTCATCATTTCAAGGTC

>M6-PGSC0003DMG400024033M6LRR-RLP\_3100

TTTCTTTAACTTTTACATCCATACACACTTGTGTCTTTTGCAACTGCCTCTTTGATGTTACTGCTCGCTCAT  
ATTCTTATACTTTTGATCCTTTAAGTGTTCCAAATATGTTCTATT

>M6-PGSC0003DMG400024033M6LRR-RLP\_3162

TGCTCGCTCATATTCTTATACTTTTGATCCTTTAAGTGTTCCAAAATATGTTCTATTCTGTACTTCATGACT  
GGTTGGCCTGATTTGGTTTTCTTGAACATTTTCTCCCTTAGTTCTTT

>M6-PGSC0003DMG400024033M6LRR-RLP\_3224

ACTTCATGACTGGTTGGCCTGATTTGGTTTTCTTGAACATTTTCTCCCTTAGTTCTTTCTTCGAGATTCAG  
CTCTCTGCCTTTCTTCTTTCTTGCTAGAATAGTGGCCTCTGTCTCCA

>M6-PGSC0003DMG400024033M6LRR-RLP\_3286

CGAGATTCAGCTCTCTGCCTTTCTTCTTTCTTGCTAGAATAGTGGCCTCTGTCTCCATCCTTGCCTTGCA  
TCCTCCTCGCGTTTTCTCTCATATATTTCTTCTTAGGCTTCTAGCACTA

>M6-PGSC0003DMG400024033M6LRR-RLP\_3317

TTGCTAGAATAGTGGCCTCTGTCTCCATCCTTGCCTTGTATCCTCCTCGCGTTTTCTCTCATATATTTCTCT  
TAGGCTTCTAGCACTATTCTTCTTATTTCTTCTCCCTTCTTCATCCT

>M6-PGSC0003DMG400024033M6LRR-RLP\_372

GGTTGTCACTGATGACTCCTTGGACTTGATTTCCACCTCATTTCATCATTTCAAGGTCTTGGTCTTGTGTC  
TTGTGAAGGCTTTACTACCGATGGACTTGCTGCCATTGCCGCTAACTG

>M6-PGSC0003DMG400024033M6LRR-RLP\_434

TCTTGTTGTCTTGTGAAGGCTTTACTACCGATGGACTTGCTGCCATTGCCGCTAACTGCAGGTCCGGTCCCT  
TTTATTGCCTTACTTATTTGATTGCTGCTTAACATAATGGGCATCTACA

>M6-PGSC0003DMG400024033M6LRR-RLP\_496

TCGGTCCCTTTTATTGCCTTACTTATTTGATTGCTGCTTAACATAATGGGCATCTACAGAAAGAATTGAAA  
TTGTTATTTGCACTTTTTTTCTCATGCAGAAATCTCACTCAACTAGACT

>M6-PGSC0003DMG400024033M6LRR-RLP\_558

GAATTGAAATTGTTATTTGCACTTTTTTTCTCATGCAGAAATCTCACTCAACTAGACTTGGGAGAAAGTGA  
AGTGGAGGACCTAAGTAGTGATTGGCTCAGTCATTTTCCTGATGGTTGT

>M6-PGSC0003DMG400024033M6LRR-RLP\_62

AAGTGTGAAGCACCTCTTCTCCTTGTTAACCTCACACAAGGACCGTAACAGTATATCCTTAGTCTCTAAG  
TCGTGGTACGAGCTCGAGAGGCGCTCTAGGAGGAGTGTCTTCATCGGCA

>M6-PGSC0003DMG400024033M6LRR-RLP\_620

AGAAAGTGAAGTGGAGGACCTAAGTAGTGATTGGCTCAGTCATTTTCTGATGGTTGTACGTCACTGGT

GTCACTTAACATTTCTTGTTTGGGTTCTGAGATCAGCTTATCACATCTGGA

>M6-PGSC0003DMG400024033M6LRR-RLP\_682

CACTGGTGTCACTTAACATTTCTTGTTTGGGTTCTGAGATCAGCTTATCACATCTGGAGAGTCTCATTGCA  
CGTTCTCCTAATTTGAAGACTTCGGCTCAGTCAAGCTGTCCCCCTTG

>M6-PGSC0003DMG400024033M6LRR-RLP\_744

CTCATTGCACGTTCTCCTAATTTGAAGACTTCGGCTCAGTCAAGCTGTCCCCCTTGAGAACTTCCACA  
CATATTGTCTTGCTTCCCAATTGGTTGAATTTGGTACAGGTGCATAC

>M6-PGSC0003DMG400024033M6LRR-RLP\_806

ACTTCCACACATATTGTCTTGCTTCCCAATTGGTTGAATTTGGTACAGGTGCATACTCTTCTGAGGTAC  
AGTTACAGTCTGATGTTTTCTCAAACCTCCAAGAAGCTTTTTTCAGGCTG

>M6-PGSC0003DMG400024033M6LRR-RLP\_868

CTGAGGTACAGTTACAGTCTGATGTTTTCTCAAACCTCCAAGAAGCTTTTTTCAGGCTGCAAGATACTTGA  
AGGCTTGTCTGGATTTTGGGATGTCATGCCAGCTTACCTTCCAGCTGTAT

>M6-PGSC0003DMG400024033M6LRR-RLP\_930

ATACTTGAAGGCTTGTCTGGATTTTGGGATGTCATGCCAGCTTACCTTCCAGCTGTATATCCAGTTTGCTC  
CAGACTCACCTCATTGAATTTAAGCTATGCTACTATTCAAACCCCTCAT

>M6-PGSC0003DMG400024033M6LRR-RLP\_992

AGTTTGCTCCAGACTCACCTCATTGAATTTAAGCTATGCTACTATTCAAACCCCTCATCTTAACAAGCTCA  
TAAGTCTGTGCATAATTTGCAGAGATTGTGGGTATGTTTACTTTACTT

>M6-PGSC0003DMG400024206-(rev)M6LRR-RLP\_1178

AATCAACTCCAGTTATTTGTTCTTCTTGCTTCATATTCTTGCAAGTACACCATTTTAGTTTTTACTTTAGTA  
GGAGAAGCAAAGTAATATAAATTTCATAACGTGGCTAGTTCATCAT

>M6-PGSC0003DMG400024258-(rev)M6G-LecRK\_0

ATGGTGTTCATCGACTCAATTCAGGAGGTTTACGTATACTGAACTTAAGAAAGCAACAAAAAACTTCAAG  
GTTGAGCTAGGAAGAGGAGGTTTCAGGAGCTGTTTATAAAGGAGTTTTAGCA

>M6-PGSC0003DMG400024258-(rev)M6G-LecRK\_126

AGAGCGGTAGCAGTCAAGAACTTGCAAATGAGTTTCAAGAAGAATTTTGGGCAGAGATGACTACCAT  
AGGAAGAATCAACCATATGCATTTGGTGAGGATGTGGGGATTTTGTCTGAA

>M6-PGSC0003DMG400024258-(rev)M6G-LecRK\_189

ACCATAGGAAGAATCAACCATATGCATTTGGTGAGGATGTGGGGATTTTGTCTGAAGGTAGACGTCAG  
CTTTTGGTCTATGAATACGTCGAGAACTCATCACTAGACAGGCATCTTTCC

>M6-PGSC0003DMG400024258-(rev)M6G-LecRK\_252

CGTCAGCTTTTGGTCTATGAATACGTCGAGAACTCATCACTAGACAGGCATCTTTCCAGGGCTGATATTC  
TTGGATGGAAACAAAGGTTTGCAGTGGCACTAGGGACAGCCAAAGGTCTG

>M6-PGSC0003DMG400024258-(rev)M6G-LecRK\_315

GATATTCTTGGATGGAAACAAAGGTTTGCAGTGGCACTAGGGACAGCCAAAGGTCTGGCATATCTTCAT  
CATGAATGTCTTGAATGGGTGATTCATTGTGATGTTAAGCCTGAAAATATA

>M6-PGSC0003DMG400024258-(rev)M6G-LecRK\_378

CTTCATCATGAATGTCTTGAATGGGTGATTCATTGTGATGTTAAGCCTGAAAATATACTTCTCGATAGTG  
AATTCGAGCCCAAGATTGCAGATTTTGGACTTGCAAAGCTGTCCCAAAGA

>M6-PGSC0003DMG400024258-(rev)M6G-LecRK\_441

GATAGTGAATTCGAGCCCAAGATTGCAGATTTTGGACTTGCAAAGCTGTCCCAAAGAGGTGGCCCTGGT  
TCAGATTCACAAAGATTCGCGGTACTAAAGGCTACATGGCTCCTGAATGG

>M6-PGSC0003DMG400024258-(rev)M6G-LecRK\_504

CCTGGTTCAGATTTACAAAGATTCGCGGTACTAAAGGCTACATGGCTCCTGAATGGGCTTTGAACCAAC  
CTATAACAGCAAAAAGTTGATGTTTATGCCTTTGGGATTGTAATACTAGAA

>M6-PGSC0003DMG400024258-(rev)M6G-LecRK\_567

AACCAACCTATAACAGCAAAAAGTTGATGTTTATGCCTTTGGGATTGTAATACTAGAAATGATCAAAGGAA  
GTAGGCTGTCAAGTTGGGTGGTGGATGATAGTGAATGTGATCATGAACAA

>M6-PGSC0003DMG400024258-(rev)M6G-LecRK\_63

TTCAAGGTTGAGCTAGGAAGAGGAGGTTTCAGGAGCTGTTTATAAAGGAGTTTTAGCAGATGGAAGAGC  
GGTAGCAGTCAAGAACTTGCAAATGAGTTTCAAGAAGAATTTTGGGCAGAG

>M6-PGSC0003DMG400024258-(rev)M6G-LecRK\_630

AAAGGAAGTAGGCTGTCAAGTTGGGTGGTGGATGATAGTGAATGTGATCATGAACAAGATTCACAGCT  
CGGAAAATTTGTCAGGATGGTGAAGAGGAAGATTCAAAGTGGAGAAGATTCT

>M6-PGSC0003DMG400024258-(rev)M6G-LecRK\_693

CAGCTCGGAAAATTTGTCAGGATGGTGAAGAGGAAGATTCAAAGTGGAGAAGATTCTTGGGTGGAGAA  
ACTTGTGATCCACGACTAGAAGGCAAATTTAGCAAGAACCAGGCAGTGACA

>M6-PGSC0003DMG400024258-(rev)M6G-LecRK\_756

GAGAAACTTGTTCGATCCACGACTAGAAGGCCAAATTTAGCAAGAACCAGGCAGTGACACTGATTGAAATA  
GGCCTTTCTTGTGTTGAGCAGGACAGAAATAAAAGGCCTACAATGGCCTCA

>M6-PGSC0003DMG400024258-(rev)M6G-LecRK\_807

GTGACACTGATTGAAATAGGCCTTTCTTGTGTTGAGCAGGACAGAAATAAAAGGCCTACAATGGCCTCA  
GTAGTCCAAACATTGCTGGATTGTGAAGATGAAACAACACATACAACATAG

>M6-PGSC0003DMG400024259-(rev)M6G-LecRK\_0

ATGAAAAGTTTGAATCTTTACCATCTTTTTCCCTTTTTAGTTTTCTTATTTCTTGTGTTTTGTCTTTCCCTTTGAT  
AACATCATCAAGAATTTTGTCTAAAGGTGATTCTTTTTCAGTTAAA

>M6-PGSC0003DMG400024259-(rev)M6G-LecRK\_1008

AAGTCTAGACATGTCAAGTTTGTGGAAGTTCCTAATGTTGATTATTGGGGTTTTGATCTCAATGCTACTAC  
TCCTTTGTCATTTGAATCTTGTAGGGAATTGTGCTTGGGTGATCCACGT

>M6-PGSC0003DMG400024259-(rev)M6G-LecRK\_1071

GCTACTACTCCTTTGTCATTTGAATCTTGTAGGGAATTGTGCTTGGGTGATCCACGTTGTCGTGCATTTGT  
CTATAGGCATACTGGGGAGGGATCATGCTATACTAAAGGCCAACTTTTC

>M6-PGSC0003DMG400024259-(rev)M6G-LecRK\_1134

GCATTTGTCTATAGGCATACTGGGGAGGGATCATGCTATACTAAAGGCCAACTTTTCAATGGATACAGG  
TCTCCTGGTTTCCCTGGAAGTGTATTCTTGAAACTCCCTATGAATCTAAGT

>M6-PGSC0003DMG400024259-(rev)M6G-LecRK\_1197

TACAGGTCTCCTGGTTTCCCTGGAAGTGTATTCTTGAAACTCCCTATGAATCTAAGTGCATCAGAATCAG  
GTCATTTGATGCTTGAAGGTACTGATGCAAAATGTGGATTGAGTCCCGAA

>M6-PGSC0003DMG400024259-(rev)M6G-LecRK\_126

TCACATTTCACTACTTCTCCACAAAAAACATTCACCTGTGGTTTTTATCCTATAGAAAGTACTAGTAATGCT  
TATTATTTTGAATTTGGTATACAAATTCAAGAGATAAACTGTTGTT

>M6-PGSC0003DMG400024259-(rev)M6G-LecRK\_1260

GAATCAGGTCATTTGATGCTTGAAGGTACTGATGCAAAATGTGGATTGAGTCCCGAAAATGTTCTTTTTG  
GTTCTCCTTCTATGTATGTATTGGATTTAAGAAGGTGAAGTGGATTAT

>M6-PGSC0003DMG400024259-(rev)M6G-LecRK\_1323

CTTTTTGGTTCTCCTTCTATGTATGTATTGGATTTAAGAAGGTGAAGTGGATTATCTTTACCTGTTTTGT

TCCACCCTTGGTGAATAGAGATTCTGTTCTTCGTGTTAGGCTGGTGG

>M6-PGSC0003DMG400024259-(rev)M6G-LecRK\_1386

CTGTTTTGTTCCACCCTTGGTGAATAGAGATTCTGTTCTTCGTGTTAGGCTGGTGGGCGTTGTTTAGTA  
AACATGGGATTCTGCTTCCATTGAGGATGGATATAAAATGGTGTTCATCG

>M6-PGSC0003DMG400024259-(rev)M6G-LecRK\_1449

TTTAGTAAACATGGGATTCTGCTTCCATTGAGGATGGATATAAAATGGTGTTCATCGACTCAATTCAGGA  
GGTTTACGTATACTGAACTTAAGAAAGCAACAAAAAATTCAGGTTGAG

>M6-PGSC0003DMG400024259-(rev)M6G-LecRK\_189

AGTAATGCTTATTATTTTGAATTTGGTATACAAATTCAGAGATAAACTGTTGTTTGAATGCTAAAC  
AAGATAGGCCTGTTAATCTCAAAGGGTCAAAGTTGACATTAAGAAAGAAT

>M6-PGSC0003DMG400024259-(rev)M6G-LecRK\_252

GCTAAACAAGATAGGCCTGTTAATCTCAAAGGGTCAAAGTTGACATTAAGAAAGAATGGAGCTTTAGTT  
TTAACAGATGTTGATGATACAATTGTTTGGCAAACAAACACAACATCATT

>M6-PGSC0003DMG400024259-(rev)M6G-LecRK\_315

TTAGTTTTAACAGATGTTGATGATACAATTGTTTGGCAAACAAACACAACATCATTGATGTTGAAAAGG  
CTGAGGTTCTTGAAACAGGAACTTAGTATTGAAGAATCCTAAAGGTGAT

>M6-PGSC0003DMG400024259-(rev)M6G-LecRK\_378

GAAAAGGCTGAGGTTCTTGAAACAGGAACTTAGTATTGAAGAATCCTAAAGGTGATGTTTTGTGGCAG  
AGTTTTGATTTGCCTACTGATACTTTGTTACCTTATCAAAGATTTACCAAG

>M6-PGSC0003DMG400024259-(rev)M6G-LecRK\_441

TGGCAGAGTTTTGATTTGCCTACTGATACTTTGTTACCTTATCAAAGATTTACCAAGAATCATAGATTAGT  
TCCTCCTTTGAGGAAAGGGAGTTTATCACCTGGATACTTTAGTTTGTAC

>M6-PGSC0003DMG400024259-(rev)M6G-LecRK\_504

AGATTAGTTCCTCCTTTGAGGAAAGGGAGTTTATCACCTGGATACTTTAGTTTGTACTTTGATAGTGATA  
ATGTATTGAGAATGATTTATGATGGTCCTTTAGTTTCGAGTATATACTGG

>M6-PGSC0003DMG400024259-(rev)M6G-LecRK\_567

AGTGATAATGTATTGAGAATGATTTATGATGGTCCTTTAGTTTCGAGTATATACTGGCCTAATCGCGATA  
GGGATGTGTATGGGAATGGTAGAACTAGTCAAATAGTAGTAGATTTGCT

>M6-PGSC0003DMG400024259-(rev)M6G-LecRK\_63



TTCCCTTTGATAACATCATCAAGAATTTTGCTTAAAGGTGATTCTTTTTTCAGTTAAAGATGATTCACATTTT  
ATTACTTCTCCACAAAAAACATTCACTTGTGGTTTTTATCCTATAGAA

>M6-PGSC0003DMG400024259-(rev)M6G-LecRK\_630

CGCGATAGGGATGTGTATGGGAATGGTAGAACTAGTCAAATAGTAGTAGATTTGCTTATTTTGATGGA  
ATGGGTAGATTTTTCTCAAGTGATATGTTGCAATTCAATGTTTCTGATATG

>M6-PGSC0003DMG400024259-(rev)M6G-LecRK\_693

GATGGAATGGGTAGATTTTTCTCAAGTGATATGTTGCAATTCAATGTTTCTGATATGGGGTTTGGGATAT  
TGAGAAGATTGACTATAAATACTGATGGGAATTTGAGGATGTATAGTTTG

>M6-PGSC0003DMG400024259-(rev)M6G-LecRK\_756

GGGATATTGAGAAGATTGACTATAAATACTGATGGGAATTTGAGGATGTATAGTTTGGATAACTCGACA  
GGGTTATGGAAGATGTCGTGGCAAGCTATTGCACAACCTTGTATTGTGCAT

>M6-PGSC0003DMG400024259-(rev)M6G-LecRK\_819

TCGACAGGGTTATGGAAGATGTCGTGGCAAGCTATTGCACAACCTTGTATTGTGCATGGAATATGTGGA  
AGATTTTCGATATGTACTTATGTATCGAAGCCTAAATGTACATGTCCTCCT

>M6-PGSC0003DMG400024259-(rev)M6G-LecRK\_882

TGTGGAAGATTTTCGATATGTACTTATGTATCGAAGCCTAAATGTACATGTCCTCCTGGATATGAGATGG  
TTGATGGAAGTGATTGGAGTAGAGTTGTAGGCCAATGTTTAGATCAAGA

>M6-PGSC0003DMG400024259-(rev)M6G-LecRK\_945

GAGATGGTTGATGGAAGTGATTGGAGTAGAGTTGTAGGCCAATGTTTAGATCAAGAAGTTTGAAGTC  
TAGACATGTCAAGTTTGTGGAAGTTCCTAATGTTGATTATTGGGGTTTTGAT

>M6-PGSC0003DMG400024260-(rev)M6G-LecRK\_1525

CGTATACTGAACTTAAGAAAGCAACAAAAAACTTCAAGGTTGAGCTAGGAAGAGGAGGTTTCAGGAGCT  
GTTTATAAAGGAGTTTTAGCAGATGGAAGAGCGGTAGCAGTCAAGAACTTG

>M6-PGSC0003DMG400024260-(rev)M6G-LecRK\_976

GTTGTAGGCCAATGTTTAGATCAAGAAGTTTGAAGTCTAGACATGTCAAGTTTGTGGAAGTTCCTAATGT  
TGATTATTGGGGTTTTGATCTCAATGCTACTACTCCTTTGTCATTTGAAT

>M6-PGSC0003DMG400024263-(rev)M6LRR-RLP\_0

AGATGTTATCTATAATTATATTTGAAGTGATGGATTTTAAACCTAGCACTGAGATATGTTATCTCATCCTG  
GTTAAAGTGTAATAAAGACATACATTTGCTAGCTAAAGATTACGAGTGT

>M6-PGSC0003DMG400024263-(rev)M6LRR-RLP\_1054

GACTGATGCCGTTGTTTTCCCTGTAACAAAAAGGGGTTCTCTGAATAACAGGGACTTAAAACATTTTTCT  
CTCCTTCTGTTGGTTCAATCCAGATCAGCCTATTTGGTGTTAATTGGTTT

>M6-PGSC0003DMG400024263-(rev)M6LRR-RLP\_1116

ATTTTTCTCTCCTTCTGTTGGTTCAATCCAGATCAGCCTATTTGGTGTTAATTGGTTTAAATTTCAACAACAT  
TCTTGGTTTTATCCCCACCCCCACCTTAATCTCTTACATTTGATTT

>M6-PGSC0003DMG400024263-(rev)M6LRR-RLP\_1178

TCAACAACATTCTTGGTTTTATCCCCACCCCCACCTTAATCTCTTACATTTGATTTGTAGGTTAATCTTT  
TTAAACCTTTTGTAAAAGTAGTTTTATGCGTTTCAGGTTGCTACTG

>M6-PGSC0003DMG400024263-(rev)M6LRR-RLP\_124

ATGTCAACAGTAAATATTTGATCATCTTTGTCTGGTTGTTACATGTGAGGATGTGAGATAATCACGCGGA  
GAATCAGCATCATTTTCTATTGTAAGTAAAGAGAACTATAAATGCA

>M6-PGSC0003DMG400024263-(rev)M6LRR-RLP\_1240

GGTTAATCTTTTTAAACCTTTTGTAAAAGTAGTTTTATGCGTTTCAGGTTGCTACTGTATTACTGGATTGT  
TGATAGAGAAGTTTGATCCAGATGGATAATTTACCAGCTGAATTACTT

>M6-PGSC0003DMG400024263-(rev)M6LRR-RLP\_1302

ACTGGATTGTTGATAGAGAAGTTTGATCCAGATGGATAATTTACCAGCTGAATTACTTCTGGAGATTTTA  
GGACGGATTAAGAAGAACTACTGATAGGAACTCTGTATCCCTAACTTGCAA

>M6-PGSC0003DMG400024263-(rev)M6LRR-RLP\_1364

AGATTTTAGGACGGATTAAGAAGAACTACTGATAGGAACTCTGTATCCCTAACTTGCAAACGCTTCCACAA  
ATTGGATAATGGGCTGAAAATATCGATGCGCGTAGGGTGTGGTTTACATC

>M6-PGSC0003DMG400024263-(rev)M6LRR-RLP\_1426

TTCCACAAATTGGATAATGGGCTGAAAATATCGATGCGCGTAGGGTGTGGTTTACATCCTGTCTGTGAT  
GCATTAAGTCTCTATGCAACAGATTCCATAACTTGGAGAAAGTGGAAATT

>M6-PGSC0003DMG400024263-(rev)M6LRR-RLP\_1488

CTGTGATGCATTAAGTCTCTATGCAACAGATTCCATAACTTGGAGAAAGTGGAAATTATTTACTCTGGT  
TGGATGTCTAAGTTAGGGAAGCAGTTGGATGATAACGGTCTTCTCATCCT

>M6-PGSC0003DMG400024263-(rev)M6LRR-RLP\_1550

ACTCTGGTTGGATGTCTAAGTTAGGGAAGCAGTTGGATGATAACGGTCTTCTCATCCTTTCACGTTGTTG

CCCTTTGCTCAAGGACCTCACATTAAGTTATTGTACTTTCATAACGGATG

>M6-PGSC0003DMG400024263-(rev)M6LRR-RLP\_1612

CGTTGTTGCCCTTTGCTCAAGGACCTCACATTAAGTTATTGTACTTTCATAACGGATGCTGGTCTTAGTTA

CTTGGCTTCTTGTTTCGAAACTTACATCCTTGAAGTTGAACTTTGCTCCC

>M6-PGSC0003DMG400024263-(rev)M6LRR-RLP\_1674

TCTTAGTACTTGGCTTCTTGTTTCGAAACTTACATCCTTGAAGTTGAACTTTGCTCCCAGAATTACTGGTT

GTGGCATCTTGTCTCTTGTTGTGGGCTGCAAAGCCCTCAGTGTGCTTCA

>M6-PGSC0003DMG400024263-(rev)M6LRR-RLP\_1736

TACTGGTTGTGGCATCTTGTCTCTTGTTGTGGGCTGCAAAGCCCTCAGTGTGCTTCACCTGATTAGATGT

CTTAGTGTCAAGTAGTATGGAGTGGCTAGAATATCTCGGAAAACATGAAA

>M6-PGSC0003DMG400024263-(rev)M6LRR-RLP\_1798

ATTAGATGTCTTAGTGTCAAGTAGTATGGAGTGGCTAGAATATCTCGGAAAACATGAAATGCTTGAAGAT

CTCTGCATCAAGAATTGTAGGGTGATTGGAGAAGGTGATTTGATTAAGCTT

>M6-PGSC0003DMG400024263-(rev)M6LRR-RLP\_186

CACGCGGAGAATCAGCATCATTTTCTATTGTAAGTAAAGAGAACTATAAATGCAATCCCTCAAATT

GCAGGTATTGTTGAAGAGTTTGAATGTTTTAAAAGAATTTCAAGTGGAC

>M6-PGSC0003DMG400024263-(rev)M6LRR-RLP\_1860

TGAAGATCTCTGCATCAAGAATTGTAGGGTGATTGGAGAAGGTGATTTGATTAAGCTTGGACCTACTTG

GAGAAAATTGAAGAGACTGCAATTTGAGGTTGATGCCAACTACAGATATAT

>M6-PGSC0003DMG400024263-(rev)M6LRR-RLP\_1922

CTACTTGGAGAAAATTGAAGAGACTGCAATTTGAGGTTGATGCCAACTACAGATATATGAAGCTTTATG

ACCGTTTAGCAGTTGACCGATGGCAAAGCAATCGATCCCATGTGAGAACA

>M6-PGSC0003DMG400024263-(rev)M6LRR-RLP\_1984

CTTTATGACCGTTTAGCAGTTGACCGATGGCAAAGCAATCGATCCCATGTGAGAACATGCTTGAACTTT

GTTTAGTGAAGTGTGTTATCAGCCCCGGGAGAGGACTTGCATGTGTAATA

>M6-PGSC0003DMG400024263-(rev)M6LRR-RLP\_2046

TGAACTTTGTTTAGTGAAGTGTGTTATCAGCCCCGGGAGAGGACTTGCATGTGTAATAGGGAAGTGCAA

GAATTTGGAAAAGATTCACTTAGACATGTGTGTTGGGGTTAGGGACTGTGA

>M6-PGSC0003DMG400024263-(rev)M6LRR-RLP\_2108

AGTGCAAGAATTTGGAAAAGATTCACCTTAGACATGTGTGTTGGGGTTAGGGACTGTGACATAGTATGTT  
TGGCCCAGAAATCAAGCAACCTTCGATCAATCTCTCTCCGAGTTCATCAG

>M6-PGSC0003DMG400024263-(rev)M6LRR-RLP\_2170

GTATGTTTGGCCCAGAAATCAAGCAACCTTCGATCAATCTCTCTCCGAGTTCATCAGACTTCTCCCTTCC  
TCTGCTACAAAACAATCCATTGCGGTTAACAGATGAAAGTCTAAAGGCA

>M6-PGSC0003DMG400024263-(rev)M6LRR-RLP\_2232

CTCCCTTCCTCTGCTACAAAACAATCCATTGCGGTTAACAGATGAAAGTCTAAAGGCAGTGGCTCAGAAC  
TGCTCTCTGCTTGATACGGTTAGGTTGTCTTTCTCTGATGGAGAGTTCCC

>M6-PGSC0003DMG400024263-(rev)M6LRR-RLP\_2294

CTCAGAACTGCTCTCTGCTTGATACGGTTAGGTTGTCTTTCTCTGATGGAGAGTTCCTTCATTTTCTTCCT  
TTACCTTAAATGGAATACTTATGTTAATAACAATGTGTCCAATAAGAG

>M6-PGSC0003DMG400024263-(rev)M6LRR-RLP\_2356

TTTTCTTCCTTTACCTTAAATGGAATACTTATGTTAATAACAATGTGTCCAATAAGAGAACTTGTCTTGAC  
CATGTGTATTCTTTTGACGATACTGGAATGCAAGCTCTTCGTTTCAGCA

>M6-PGSC0003DMG400024263-(rev)M6LRR-RLP\_2418

TGTTCTTGACCATGTGTATTCTTTTGACGATACTGGAATGCAAGCTCTTCGTTTCAGCACAATATCTCCAAA  
TCTTGGAAGTTGTAAGGTGCCAAGAAATCACTGATGACGGAATGCAGCT

>M6-PGSC0003DMG400024263-(rev)M6LRR-RLP\_248

CTCAAATTGCAGGTATTGTTGAAGAGTTTGAATGTTTTAAAGAATTTCAAGTGGACAAAGAATGCGCT  
TTCAGGATTGAAGGTTCTCACTTTATGCCTGTAGCTTATTTGTACATTA

>M6-PGSC0003DMG400024263-(rev)M6LRR-RLP\_2480

ATCTCCAAATCTTGGAAGTTGTAAGGTGCCAAGAAATCACTGATGACGGAATGCAGCTTGCTAGCCAAA  
TTCCTCAATTATGTACATTACGGTTGAGGAAGTGCTTGGGAGTGACCGATG

>M6-PGSC0003DMG400024263-(rev)M6LRR-RLP\_2542

AGCCAAATTCCTCAATTATGTACATTACGGTTGAGGAAGTGCTTGGGAGTGACCGATGATGGGTTAAAA  
CCTCTCGTTGGGTCTTACAAGTTAGACTTGTGGTTGTAGAGGATTGTCCA

>M6-PGSC0003DMG400024263-(rev)M6LRR-RLP\_2604

GTTAAAACCTCTCGTTGGGTCTTACAAGTTAGACTTGTGGTTGTAGAGGATTGTCCACAGATATCAGAA  
AGGGGTGTTCAAGGAGCTGCAAAGTTGGTCACCTTCAAGCAAGACTTGTC

>M6-PGSC0003DMG400024263-(rev)M6LRR-RLP\_2666

TATCAGAAAGGGGTGTTCAAGGAGCTGCAAAGTTGGTCACCTTCAAGCAAGACTTGTCATGGATGTACT  
AAGCTTCCCATTTTACAAGTATTTTCCAGATGTTGTACAGGTTAGGTTG

>M6-PGSC0003DMG400024263-(rev)M6LRR-RLP\_2728

ATGTACTAAGCTTCCCATTTTACAAGTATTTTCCAGATGTTGTACAGGTTAGGTTGTTCCGTCTATACG  
ACTTTTTGTACAGTCATTCTGTTTTTCATAACAATTCTGTAATCTGCAA

>M6-PGSC0003DMG400024263-(rev)M6LRR-RLP\_2790

GTCTATACGACTTTTTGTACAGTCATTCTGTTTTTCATAACAATTCTGTAATCTGCAACACAGAATTCCTA  
TGTCACATGCATGTTGCATAATAAAGGTTAATTTGAGTGTGTGTTTC

>M6-PGSC0003DMG400024263-(rev)M6LRR-RLP\_2834

TCTGTAATCTGCAACACAGAATTCCTATGTCCACATGCATGTTGCATAATAAAGGTTAATTTGAGTGTGT  
GTTTCCTATGCTTCGGCTACCATATTATTTGTTGTTGCTGTGTTTTTTC

>M6-PGSC0003DMG400024263-(rev)M6LRR-RLP\_310

AATGCGCTTTCAGGATTGAAGGTTCCCTCACTTTATGCCTGTAGCTTATTTGTACATTATGGCAGCCTGTGT  
CTACTATAGTTTTATTACAAAAGAGTATCACTGCAGGGATCTATGATCA

>M6-PGSC0003DMG400024263-(rev)M6LRR-RLP\_372

AGCCTGTGTCTACTATAGTTTTATTACAAAAGAGTATCACTGCAGGGATCTATGATCATTGTCCACCATTT  
AGTCGTGATGGTTGAAATCATTGGAGGTCATTAAGCCAATGGTTTTTCA

>M6-PGSC0003DMG400024263-(rev)M6LRR-RLP\_434

TCACCATTTAGTCGTGATGGTTGAAATCATTGGAGGTCATTAAGCCAATGGTTTTTCATCTTAAAGTGCC  
AGATTTAACTCTTTGATTGTGATGCTAAGTTGTGTAATTACTCCCCTAA

>M6-PGSC0003DMG400024263-(rev)M6LRR-RLP\_496

AAAGTGTCCAGATTTAACTCTTTGATTGTGATGCTAAGTTGTGTAATTACTCCCCTAAAGAAGGATGGAA  
ACTAAGGGTGAGAAGAACTTAAATGATTGGGTGTTAACTGCACTAACCG

>M6-PGSC0003DMG400024263-(rev)M6LRR-RLP\_558

GGATGGAACTAAGGGTGAGAAGAACTTAAATGATTGGGTGTTAACTGCACTAACCGATCTTCTTTTG  
TTCATGCAGGGTCATCGAGGTAACGCGGATGAAAGAGGTAAGAGTATGGTG

>M6-PGSC0003DMG400024263-(rev)M6LRR-RLP\_62

CTCATCCTGGTTAAAGTGTAATAAAGACATACATTTGCTAGCTAAAGATTACGAGTGTTATCATGTCAAC

AGTAAATATTTGATCATCTTTGTCTGGTTGTTACATGTGAGGATGTGAGA

>M6-PGSC0003DMG400024263-(rev)M6LRR-RLP\_620

TCTTTTGTTCATGCAGGGTCATCGAGGTAACGCGGATGAAAGAGGTAAGAGTATGGTGGATTCTAGCA  
GTGATGGTGAATTATCTGTGAGTTTGTAAAAAGACGATTCATAAGGGAGGT

>M6-PGSC0003DMG400024263-(rev)M6LRR-RLP\_682

CCTAGCAGTGATGGTGAATTATCTGTGAGTTTGTAAAAAGACGATTCATAAGGGAGGTGAAATTGTTGG  
CGAATAGCTAGAAAAACAAATCTAGGACACTAAGGTGGCCTGTTTCACGTG

>M6-PGSC0003DMG400024263-(rev)M6LRR-RLP\_744

TTGTTGGCGAATAGCTAGAAAAACAAATCTAGGACACTAAGGTGGCCTGTTTCACGTGGTTAGCATCCC  
GTCGATCTTGTTTAAACACATAAGGATTCGATTACTGGTATTTCTTAGTTCA

>M6-PGSC0003DMG400024263-(rev)M6LRR-RLP\_806

GCATCCCGTCGATCTTGTTTAAACACATAAGGATTCGATTACTGGTATTTCTTAGTTTCATTTTCGATCTAATCA  
ATTGGAAGTTCCTTCTGTTTTATCTGTTCATTATTTTCTGAAATTTTC

>M6-PGSC0003DMG400024263-(rev)M6LRR-RLP\_868

GATCTAATCAATTGGAAGTTCCTTCTGTTTTATCTGTTCATTATTTTCTGAAATTTTCCATGTAGAAATTTG  
AATATTTGGTTGAAGCCTGATTGTATTCCCTTTTGTAAAGGACTTGGAC

>M6-PGSC0003DMG400024263-(rev)M6LRR-RLP\_930

TAGAAATTTGAATATTTGTTTGAAGCCTGATTGTATTCCCTTTTGTAAAGGACTTGGACATTTCCCTTTCTTT  
AAGTTGTTAAGGTAAGCTGTAGAAATTTGACTGTTATGTTCTGAAATT

>M6-PGSC0003DMG400024263-(rev)M6LRR-RLP\_992

CCCTTTCTTTAAGTTGTTAAGGTAAGCTGTAGAAATTTGACTGTTATGTTCTGAAATTAGTCGACTGATGC  
CGTTGTTTTCCCTGTAACAAAAAGGGGTTCTCTGAATAACAGGGACTTA

>M6-PGSC0003DMG400024406M6LRR-RLP\_896

AATAATCTCAGTGGAGAACTCCCTTTGTCTATTTGCAATCTAACATCACTACAAGTTCTAAATTTGGGTAG  
AAACAATCTGAACGGAGCAATTCCGCAATGTTTTGGCAACATGAGTGGT

>M6-PGSC0003DMG400024426-(rev)M6G-LecRK\_0

CATTGTTTGGGAGAACGGCAGGGTTTAAACGACGTGTTTTGACATAAAGTGTGATCATCAAGACTTTAT  
AAAAATGTCTTCATCATCTAAGGATGATCAATCATCCAATACACCATCTTC

>M6-PGSC0003DMG400024426-(rev)M6G-LecRK\_1037

GTGCAGAGTAGTGAATATGTTTAGGTTTAAATAGTGTTAGTATTGAGAATGTATATATGGTGCAGGTAC  
TGACTIONATAACAGTGGACCATATGGGAATTGGCACAACAACAACAATAT

>M6-PGSC0003DMG400024426-(rev)M6G-LecRK\_1098

GCAGGTACTGACTACTATAACAGTGGACCATATGGGAATTGGCACAACAACAACAATATTCAATCAACG  
GATCATATGGTGAAAATGCCTAATCCACAAGCACCGAGTACTAACGTAAGT

>M6-PGSC0003DMG400024426-(rev)M6G-LecRK\_1159

AATCAACGGATCATATGGTGAAAATGCCTAATCCACAAGCACCGAGTACTAACGTAAGTTCAGAACTGA  
GTTGGCCAATAGCACCTCCACCACCACCAATGATGAGTAGCAGTGAAT

>M6-PGSC0003DMG400024426-(rev)M6G-LecRK\_122

ATTCTTCATCAAATTCACCATCATCATCTTCTTCTCGAATTCTCCACCGTCTGGCTCATCCTCAAATTCCTCGCC  
ATCCCAAGACAATTCATCTTCATCCAATGATTCAAATCCCAATCTC

>M6-PGSC0003DMG400024426-(rev)M6G-LecRK\_1220

AGAAGTGAAGTTGGCCAATAGCACCTCCACCACCACCAATGATGAGTAGCAGTGAATTAAGCTCTGC  
TGCTTTCTCTGGTCCGCAACAACCTCCATTGCCACCCCCACACCCATCAAT

>M6-PGSC0003DMG400024426-(rev)M6G-LecRK\_1281

AGCTCTGCTGCTTTCTCTGGTCCGCAACAACCTCCATTGCCACCCCCACACCCATCAATGGCTCTTGTTT  
TAACCAAAGTAGTTTTACATACGATGACTTATCTACCGCAACTGGAGGA

>M6-PGSC0003DMG400024426-(rev)M6G-LecRK\_1342

CTCTTGGTTTTAACCAAAGTAGTTTTACATACGATGACTTATCTACCGCAACTGGAGGATTTGTTAAGTCT  
AATCTATTGGGACAAGGTGGTTTTGGCTTTGTACATAAAGGGGTCTTGC

>M6-PGSC0003DMG400024426-(rev)M6G-LecRK\_1403

TGTTAAGTCTAATCTATTGGGACAAGGTGGTTTTGGCTTTGTACATAAAGGGGTCTTGCCTAATGGTAAG  
GATATAGCTGTCAAAGTCTAAAAGCTAATAGTGGACAAGGTGAACGAGA

>M6-PGSC0003DMG400024426-(rev)M6G-LecRK\_1464

AATGGTAAGGATATAGCTGTCAAAGTCTAAAAGCTAATAGTGGACAAGGTGAACGAGAATTTCAAGCT  
GAAGTTGAAATTATTAGTCGTGTACATCATCGACATCTTGTCTCTTTAGTC

>M6-PGSC0003DMG400024426-(rev)M6G-LecRK\_1525

TTCAAGCTGAAGTTGAAATTATTAGTCGTGTACATCATCGACATCTTGTCTCTTTAGTCGGTTATTGCATT  
GCTGGATCTCAAAGGTTATTGGTATATGAGTTTGTTCCTAATGGCACTC

>M6-PGSC0003DMG400024426-(rev)M6G-LecRK\_1586

TTATTGCATTGCTGGATCTCAAAGGTTATTGGTATATGAGTTTGTTCTAATGGCACTCTTGAGTATCACC  
TTCATGGTATTAACCTAATTTCTTTTTGTTATCTAAATACTCATTCTA

>M6-PGSC0003DMG400024426-(rev)M6G-LecRK\_1647

GAGTATCACCTTCATGGTATTAACCTAATTTCTTTTTGTTATCTAAATACTCATTCTACATATGTCGTATTT  
AACTCATTGATCCCTTATTTAATTAGGAACTGGTCGCCCTGTTATGG

>M6-PGSC0003DMG400024426-(rev)M6G-LecRK\_1708

TATGTCGTATTTAACTCATTGATCCCTTATTTAATTAGGAACTGGTCGCCCTGTTATGGACTTCCCTACTA  
GGCTTAAAATTGCATTAGGATCTGCCAAAGGCTTTGCGTACCTTCATGA

>M6-PGSC0003DMG400024426-(rev)M6G-LecRK\_1769

TTCCCTACTAGGCTTAAAATTGCATTAGGATCTGCCAAAGGCTTTGCGTACCTTCATGAAGATTGTAAGTT  
CATATATACTATTCTCATGTCTATATATTCTCATCACAAATTAAGTTC

>M6-PGSC0003DMG400024426-(rev)M6G-LecRK\_183

AAATTCTTCGCCATCCCAAGACAATTCATCTTCATCCAATGATTCAAAATCCCAATCTCCTCCTCAAAGTAA  
TTCATCATCTTCTCCGCCATCAGGGGATAATAATAACTCGTCTCCTTC

>M6-PGSC0003DMG400024426-(rev)M6G-LecRK\_1830

ATTGTAAGTTCATATATACTATTCTCATGTCTATATATTCTCATCACAAATTAAGTTCTATTTTCATATATA  
AATTACAGGCCACCCTCGTATTATTCACAGAGACATTAAAGCTGCTAA

>M6-PGSC0003DMG400024426-(rev)M6G-LecRK\_1891

TTTCATATATAAATTACAGGCCACCCTCGTATTATTCACAGAGACATTAAAGCTGCTAATATTTTACTGGA  
CCATAACTGTGAAGCTAAGGTATTTGGTAAAAATAGCTGAAACATTAAG

>M6-PGSC0003DMG400024426-(rev)M6G-LecRK\_1952

TTTTACTGGACCATAACTGTGAAGCTAAGGTATTTGGTAAAAATAGCTGAAACATTAAGCAAATTGATTC  
CTCATTACAGGTTTCTAACAAAGTTTATTATTACTCCCTTTGTAAGGTTGC

>M6-PGSC0003DMG400024426-(rev)M6G-LecRK\_2013

AATTGATTCCTCATTACAGGTTTCTAACAAAGTTTATTATTACTCCCTTTGTAAGGTTGCTGATTTTGGATTA  
GCTAAACTTTCCAACGACACTAATACACATGTTTCTACACGTATCATG

>M6-PGSC0003DMG400024426-(rev)M6G-LecRK\_2074

ATTTTGGATTAGCTAAACTTTCCAACGACACTAATACACATGTTTCTACACGTATCATGGGCACTTTTGGG



TGAGTTTAGTTTGATAATTTTTCAAATATATCCAATGGATTTGCATTAA

>M6-PGSC0003DMG400024426-(rev)M6G-LecRK\_2135

CACTTTTGGGTGAGTTTAGTTTGATAATTTTTCAAATATATCCAATGGATTTGCATTAATCGAAAGAGTAT  
ATTTATTTGTGTAGGTA CT TAGCACCAGAATACGCTTCAAGTGGCAAGC

>M6-PGSC0003DMG400024426-(rev)M6G-LecRK\_2196

GAAAGAGTATATTTATTTGTGTAGGTA CT TAGCACCAGAATACGCTTCAAGTGGCAAGCTGACTGAAAA  
GTCTGACGTCTATTCTTATGGTGTTATGCTGTTGGA ACTTATAACTGGGCG

>M6-PGSC0003DMG400024426-(rev)M6G-LecRK\_2257

ACTGAAAAGTCTGACGTCTATTCTTATGGTGTTATGCTGTTGGA ACTTATAACTGGGCGTCGTCCTATAG  
ACATCAGCAGTGATGATGATACTTTAGTGGAATGGGTATACCATGATGAT

>M6-PGSC0003DMG400024426-(rev)M6G-LecRK\_2318

GTCCTATAGACATCAGCAGTGATGATGATACTTTAGTGGAATGGGTATACCATGATGATTACTTTACATC  
TTCGAATGATAAAAATTAATTCAGTAGGACATCGATCAGATTATTTAAAC

>M6-PGSC0003DMG400024426-(rev)M6G-LecRK\_2379

CTTTACATCTTCGAATGATAAAAATTAATTCAGTAGGACATCGATCAGATTATTTAAACATATATGTATAT  
ATGTGCAGGCTAGGCCAATTCTGATTCGTGCAACAGAGGGTGGAAACTA

>M6-PGSC0003DMG400024426-(rev)M6G-LecRK\_2440

ATATGTATATATGTGCAGGCTAGGCCAATTCTGATTCGTGCAACAGAGGGTGGAAACTACGATGAATTA  
ATAGATCCACGTTTGGAAGGAAATTTTGATGCCCAAGAGATGCTATGTATG

>M6-PGSC0003DMG400024426-(rev)M6G-LecRK\_2501

ATGAATTAATAGATCCACGTTTGGAAGGAAATTTTGATGCCCAAGAGATGCTATGTATGGTAGCTTGTG  
CTGCTGCATCCATCAGACATTCAGCAAGAAGACGTCCCAAATGAGTCAGG

>M6-PGSC0003DMG400024426-(rev)M6G-LecRK\_2562

AGCTTGTGCTGCTGCATCCATCAGACATTCAGCAAGAAGACGTCCCAAATGAGTCAGGTTAATTTCTTC  
TTAATATTTGTCAAAGCTTTTCCTAATTCACAATTTTAAAAAGTATAGT

>M6-PGSC0003DMG400024426-(rev)M6G-LecRK\_2745

GTTGTAGATTGTACGTGCTTTAGAAGGTGATGTGTCTCTGGATGATTTAAATGAGGGAATGAAGAAGTC  
CCCGAGTACTGCAATGTTTGGTTCTAGTGAAAGTTCTGAATACGATGGAGG

>M6-PGSC0003DMG400024426-(rev)M6G-LecRK\_2806

AAGAAGTCCCCGAGTACTGCAATGTTTGGTTCTAGTGAAAGTTCTGAATACGATGGAGGTTTCATATGAC  
CTTAAGAAATTCAAGAAATCTGGAATGTCGAGTCAAGAATTCACAAGCAGT

>M6-PGSC0003DMG400024426-(rev)M6G-LecRK\_2867

CATATGACCTTAAGAAATTCAAGAAATCTGGAATGTCGAGTCAAGAATTCACAAGCAGTGAACATGGTA  
CCGGTGAATTTGTCCATTCCGGTGGTGAATCTCAAGAACATGGGCAGAAAA

>M6-PGSC0003DMG400024426-(rev)M6G-LecRK\_2928

ACATGGTACCGGTGAATTTGTCCATTCCGGTGGTGAATCTCAAGAACATGGGCAGAAAAGGCACACCCC  
TTAAGGAAAATGGATCATACTTCAACTTCTGATGGATCTATAAGTAATAA

>M6-PGSC0003DMG400024426-(rev)M6G-LecRK\_2989

CACACCCCTTAAGGAAAATGGATCATACTTCAACTTCTGATGGATCTATAAGTAATAATTACACACATTT  
GTTGGGCTTACAAGGATGCTTTAGGCATTAATAACTAGTTTTATGGGG

>M6-PGSC0003DMG400024426-(rev)M6G-LecRK\_3050

ACACACATTTGTTGGGCTTACAAGGATGCTTTAGGCATTAATAACTAGTTTTATGGGGGAAATATAATA  
ATGTATTTAAACAACAATTGTGAAGCTTTATTAGAGATTTGAATGCGGGT

>M6-PGSC0003DMG400024426-(rev)M6G-LecRK\_3111

AATATAATAATGTATTTAAACAACAATTGTGAAGCTTTATTAGAGATTTGAATGCGGGTTGTAAAGAGTA  
TCACATCCTCCTAACCATTTTGTGGTTGGCTTTGGTTGTCAGTTTGAATC

>M6-PGSC0003DMG400024426-(rev)M6G-LecRK\_3172

TAAAGAGTATCACATCCTCCTAACCATTTTGTGGTTGGCTTTGGTTGTCAGTTTGAATCATTAGTTTTGTT  
CGACTTTGGAAGTTGGGATATATACTAATTCTGAATTGTTTTCAAT

>M6-PGSC0003DMG400024426-(rev)M6G-LecRK\_3217

TGTCAGTTTGAATCATTAGTTTTGTTGACTTTGGAAGTTGGGATATATACTAATTCTGAATTGTTTTC  
AATATATTCGTCAATGTGTATGCTAATTACTAATCTTTTCTTTGTTT

>M6-PGSC0003DMG400024426-(rev)M6G-LecRK\_61

GACTTTATAAAAATGTCTTCATCATCTAAGGATGATCAATCATCCAATACACCATCTTCGGATTCTTCATC  
AAATTCACCATCATCATCTTCTCGAATTCTCCACCGTCTGGCTCATCC

>M6-PGSC0003DMG400024426-(rev)M6G-LecRK\_793

ATTGTAGGAGTTGCTGCTGCAGGAGGTCTATTACTTCTTGTCATGTTAGTTTTCTTATATCATGTTGTAA  
ACGCAAAAGGAGAAGGCCGCGACCAAATGGGCTACTACAGGGACAAT

>M6-PGSC0003DMG400024426-(rev)M6G-LecRK\_854

CATGTTGTAAACGCAAAGGAGAAGGCCGCGACCAAATGGGCTACTACAGGGACAATTCTCATGGA  
GGCAATAGTATGTTCTTTCTTCTTAACTTATACTGTATGTTTTATGTTGA

>M6-PGSC0003DMG400024426-(rev)M6G-LecRK\_915

TCATGGAGGCAATAGTATGTTCTTTCTTCTTAACTTATACTGTATGTTTTATGTTGAGAGCATACTGTTT  
TCAAATAGAATTAGCTTCAAATGCAGTAGCTATGAAGAGAACTGGTAA

>M6-PGSC0003DMG400024426-(rev)M6G-LecRK\_976

GCATACTGTTTTCAAATAGAATTAGCTTCAAATGCAGTAGCTATGAAGAGAACTGGTAAATGTGCAGAG  
TAGTGAATATGTTTAGGTTTAAATAGTGTTAGTATTGAGAATGTATATATG

>M6-PGSC0003DMG400024437-(rev)M6LRR-RLP\_0

TCTCTAACCTCCAAGAGCTACGTACTTTACATCTTTCTTATAACAGCTTCATCGGTTCAATTCGCCGTTCAA  
TTTTAAGTTTGACACATCTTCAACTTAGGATTGTGCGAGTAATTCCC

>M6-PGSC0003DMG400024437-(rev)M6LRR-RLP\_1886

AAGAGAGCTCAGAGACGAAGGACTTGATGGAAGATTGAGAGGCCTAAATTGCCTTTGTTTGATTTTGTG  
GACTGATTAGTGAAGTCTGTTTTTGTCTTTTTTAATTTCTATTTGTT

>M6-PGSC0003DMG400024438-(rev)M6LRR-RLP\_1159

AATTTCAATTAATTCCGGTAAGAAATCACAATCTCATCTTATAATGAATGATTGAAATGTGTGAACTATTA  
AAGAAAATGGTTAGTGTAGTTTATCCTATAAGAACCCCCGATCCAATG

>M6-PGSC0003DMG400024438-(rev)M6LRR-RLP\_1220

TGAACTATTAAGAAAATGGTTAGTGTAGTTTATCCTATAAGAACCCCCGATCCAATGATAGTAACATA  
TCTGACTAATCATCAAGATATTATTCAACAATGTTCTTCAGAAATATTCG

>M6-PGSC0003DMG400024438-(rev)M6LRR-RLP\_1281

AGTAACATATCTGACTAATCATCAAGATATTATTCAACAATGTTCTTCAGAAATATTCGCCACCTGATTCA  
AGAGATCGAATCAAATTTTCTCTTTTGTATTTCATTCTTTTGATTT

>M6-PGSC0003DMG400024438-(rev)M6LRR-RLP\_1342

ACCTGATTCAAGAGATCGAATCAAATTTTCTCTTTTGTATTTCATTCTTTTGATTTTATTAATTGTTTCG  
TTTATCCATTAAATTATTATTTCAGTTCTTCGATTACATATTCAGGA

>M6-PGSC0003DMG400024438-(rev)M6LRR-RLP\_1403

TTAATTGTTTCGTTTATCCATTAAATTATTATTTCAGTTCTTCGATTACATATTCAGGATTTTGGATAATATT

AGTAATTTAGTTTGTGGTTATTTGAACTTTTACCTTGTTTGTGATA

>M6-PGSC0003DMG400024438-(rev)M6LRR-RLP\_1464

TTGGATAATATTAGTAATTTAGTTTGTGGTTATTTGAACTTTTACCTTGTTTGTGATAATTTGATTCTCCA

TTCATAATCCCTTTCTTTACCCCATCTTGAAGAAAAAAAATTCAAAA

>M6-PGSC0003DMG400024438-(rev)M6LRR-RLP\_1525

TTGATTCTCCATCTCATAATCCCTTTCTTTACCCCATCTTGAAGAAAAAAAATTCAAAAATTTTATATCATT

GAATTAATTATGTTACTTTAAATCTCTTTCAATTAATTCATCTGAT

>M6-PGSC0003DMG400024438-(rev)M6LRR-RLP\_1586

TTTATATCATTTGAATTAATTATGTTACTTTAAATCTCTTTCAATTAATTCATCTGATTCTCCGAATAAATA

AATTTTACGCTAAACACTAATGTCACACCTAAGATTTTGAGGGACGA

>M6-PGSC0003DMG400024438-(rev)M6LRR-RLP\_1647

TCCGAATAAATAAATTTTACGCTAAACACTAATGTCACACCTAAGATTTTGAGGGACGAGATTGACTC

ATTATCTTAAACTTGTTTCATATTCGTTTTACCACACTCCAATTATTTTT

>M6-PGSC0003DMG400024438-(rev)M6LRR-RLP\_1708

TTGACACTCATTATCTTAAACTTGTTTCATATTCGTTTTACCACACTCCAATTATTTTTCTGATTGCGCGAG

TCTCACACACCTGAACTTATTTAATATTATCATTAAAAATTATTCAA

>M6-PGSC0003DMG400024438-(rev)M6LRR-RLP\_1769

GATTGCGCGAGTCTCACACACCTGAACTTATTTAATATTATCATTAAAAATTATTCAATTTCAAATATAA

AAACTCGTGGACTTACAATTAATATATACAATTATTTAAATATTAAG

>M6-PGSC0003DMG400024438-(rev)M6LRR-RLP\_1830

TCAAATATAAAAACCTCGTGGACTTACAATTAATATATACAATTATTTAAATATTAAGTCCGTTTCATGTA

GAAAATTATTTCTCAATGTGCTTCACATTTTGACCAAATAAAAATTTATG

>M6-PGSC0003DMG400024438-(rev)M6LRR-RLP\_1891

CGTTCATGTAGAAAATTATTTCTCAATGTGCTTCACATTTTGACCAAATAAAAATTTATGAGGTAAGAAGT

GTTGAAATAATTCATAATACAAAAAACAAAGATAAAAATATAGTTTTAA

>M6-PGSC0003DMG400024438-(rev)M6LRR-RLP\_1952

GTAAGAAGTGTTGAAATAATTCATAATACAAAAAACAAAGATAAAAATATAGTTTTAATATTCAATTGA

AATTCATTAAGTGAAAGAAATTATAACTTTGAGAATATATTTTATACGAA

>M6-PGSC0003DMG400024438-(rev)M6LRR-RLP\_2013

TTCAATTGAAATTCATTAAGTGAAAGAAATTATAACTTTGAGAATATATTTTATACGAAATTATTAGAGG  
GAAAAGAAAATAACAAATTTTACTTTCAATTAATTTTTCCCTCCACTTCA

>M6-PGSC0003DMG400024438-(rev)M6LRR-RLP\_2074

TATTAGAGGGAAAAGAAAATAACAAATTTTACTTTCAATTAATTTTTCCCTCCACTTCAATGTGTAAATTC  
CCCCTCACGCCATTTCCATTTTCTATCCAGTAACCACGCATAACGGC

>M6-PGSC0003DMG400024438-(rev)M6LRR-RLP\_2135

GTGTAAATTCCTCAGGCCATTTCCATTTTCTATCCAGTAACCACGCATAACGGCACAAGGAACTGC  
CCACTAATTTCTTTTCAATTTATTTTTTAAAATAATCAAATTTGCC

>M6-PGSC0003DMG400024438-(rev)M6LRR-RLP\_2196

AAGGAACTGCCACTAATTTCTTTTCAATTTATTTTTTAAAATAATCAAATTTGCCACTCTCTTAACT  
ATCCAAGTCCAATCAAATGCAATACATTTTTTCAAATAAAAGAGA

>M6-PGSC0003DMG400024438-(rev)M6LRR-RLP\_2257

CTCTCTTAACTATCCAAGTCCAATGCAATACATTTTTTCAAATAAAAGAGACTCCTCTGCATTT  
TCTCTCAATCTTCTTTTTCTATCTATTTTTAAAATGATGTCCATCCA

>M6-PGSC0003DMG400024438-(rev)M6LRR-RLP\_2318

CCTCTGCATTTTCTCTCAATCTTCTTTTTCTATCTATTTTTAAAATGATGTCCATCCAACATTTACCATGCT  
CTATAAGAAACAAAATATTTTCTTTGGTTAGCATAAGGAACCATTAT

>M6-PGSC0003DMG400024438-(rev)M6LRR-RLP\_2379

ATTTACCATGCTCTATAAGAAACAAAATATTTTCTTTGGTTAGCATAAGGAACCATTATTCACGAAGTTAT  
TATTCAACTCCTTACAAGGATTATCTTAATGGAAGAAGTCTTGATATTA

>M6-PGSC0003DMG400024438-(rev)M6LRR-RLP\_2440

ACGAAGTTATTATTCAACTCCTTACAAGGATTATCTTAATGGAAGAAGTCTTGATATTATCTTGTAAGGA  
GATAAGTGTTTATAAATTGTGATAATCGAATAGTTAATGATTTTGTATA

>M6-PGSC0003DMG400024438-(rev)M6LRR-RLP\_2623

TTTTGTTTAAATTATGATTTCAAAAAGTATATACTAAATTATATTTTTTTTACACAGGTCCATAAAGGTGC  
AAAAATGACTCAATGAGTGAAGATTTTAGATAAAAGAGCACGAATAGA

>M6-PGSC0003DMG400024438-(rev)M6LRR-RLP\_2684

CATAAAGGTGCAAAAATGACTCAATGAGTGAAGATTTTAGATAAAAGAGCACGAATAGACGAGGAAAC  
TACATACTTTTATCTTTTTTAAATTTATCATTGTTCCCGTACCTCATCTAGG

>M6-PGSC0003DMG400024438-(rev)M6LRR-RLP\_2745

AGGAAACTACATACTTTTATCTTTTTTAAATTTATCATTGTTCCCGTACCTCATCTAGGTCTTTTTTTTTTTTT  
GAGTGATTTCCCTTGATTTACTCAATGAATTTGTA CTCAAATGTTA

>M6-PGSC0003DMG400024438-(rev)M6LRR-RLP\_2806

TTTTTTTTTTTTTGAGTGATTTCCCTTGATTTACTCAATGAATTTGTA CTCAAATGTTATCCCTGAATAATTA  
GAAATGTAATTACTATATAGTTTCGTATGGATTTTTGGTATTATGTT

>M6-PGSC0003DMG400024438-(rev)M6LRR-RLP\_2928

TTTTTTTTTTTTTTTTTTTTTTTTTTTATTACAAAAGCTATGTACTTTTTAAAAATTGAAGTATACATGTAATTAATG  
GCAAACAGTTTAACTACATATTTAAATAATACTATTATAAAAACATTA

>M6-PGSC0003DMG400024438-(rev)M6LRR-RLP\_2989

ATGTAATTAATGGCAAACAGTTTAACTACATATTTAAATAATACTATTATAAAAACATTAATACATTCAAT  
TTGTTATAAATAATTTTATCCTTGATATTTATATAATTTTAAAAATCA

>M6-PGSC0003DMG400024438-(rev)M6LRR-RLP\_3050

TACATTCAATTTGTTATAAATAATTTTATCCTTGATATTTATATAATTTTAAAAATCATATTTTGGTCGCA  
ATGCAAATGGTATTCTTTATCTATAAAAAGTAAATCATATTACTAAT

>M6-PGSC0003DMG400024438-(rev)M6LRR-RLP\_3111

TTTTGGTCGCAATGCAAATGGTATTCTTTATCTATAAAAAGTAAATCATATTACTAATGTTTTAGTTGTC  
ACAAATTAATTTTATTCAGTGATAAAAATAATTTATTCCAAAATAGCCT

>M6-PGSC0003DMG400024438-(rev)M6LRR-RLP\_3172

TTTAGTTGTCACAAATTAATTTTATTCAGTGATAAAAATAATTTATTCCAAAATAGCCTTCAATATTGATAG  
CATAATTATTTTTAGCAAAAAATTA ACTTAAATGTATCTAATTGAG

>M6-PGSC0003DMG400024438-(rev)M6LRR-RLP\_3233

AATATTGATAGCATAATTATTTTTAGCAAAAATTA ACTTAAATGTATCTAATTGAGACAACATAGAG  
AGACAAATTATTCGT CAGTAATACCATATAGAGAGACAAATTATTCATCA

>M6-PGSC0003DMG400024438-(rev)M6LRR-RLP\_3294

AACATAGAGAGACAAATTATTCGT CAGTAATACCATATAGAGAGACAAATTATTCATCACTAATACCATA  
AAGAGAGACAAATTATTCGT CATTAAATATCGTTATATACTATATCACAAC

>M6-PGSC0003DMG400024438-(rev)M6LRR-RLP\_610

ATATCTAAGCAAACATAGCTTGTATATCTACTCAACTAACCTATAGTTTTGGAAAGGAAAAACTACCTTAT

TAGATATACATCCATACCGCATATACTTATTCTTCCAATACTTTCAAAT

>M6-PGSC0003DMG400024438-(rev)M6LRR-RLP\_732

TTAGATATCTTACCACTAATTAAGAGTTTCTACCATCTTTTGAGGAAGATATATACACCTATATATAGCG

TTTCATCTACCAGATATACTAGAATAATAGTGAGTGAATCAAGCGAGAT

>M6-PGSC0003DMG400024485M6LRR-RLK\_0

ATGTTGCTAGTACTTGCAGGTTTCAGAGACTCTGGAAGTGAGACGAGCATTAGTTAAGTTTATGAACAAG

ATATCACTTGGGAACATTTCAAAGAAGTAACTTTGGATGGGATTTATCA

>M6-PGSC0003DMG400024485M6LRR-RLK\_1008

AAACATGGAAGTGTTTACAAGGTCAATGTTGATGGAGTGACATTGGTAGTAAAGAGGATCAGTGGTTG

GAATATTTGAAAGACGATTTCAAGAAGAGGATGCAGAGAATACATAGAATG

>M6-PGSC0003DMG400024485M6LRR-RLK\_1071

GGTTGGAATATTTGAAAGACGATTTCAAGAAGAGGATGCAGAGAATACATAGAATGAAGCATCATCAT

GTATTGCCCTTGTTGCCTTCTATAGTTCAAACAAGAGAAGCTAACAGTT

>M6-PGSC0003DMG400024485M6LRR-RLK\_1134

CATCATGTATTGCCCTTGTTGCCTTCTATAGTTCAAACAAGAGAAGCTAACAGTTTACAAGTACCAACA

GAATGGCAGTCTATTCAAGCATCTCCATTGTAAGTTTTATTAGCGCAA

>M6-PGSC0003DMG400024485M6LRR-RLK\_1197

TACCAACAGAATGGCAGTCTATTCAAGCATCTCCATTGTAAGTTTTATTAGCGCAAACCTAAATATTCTCA

CTTGAATATCAAACCATAGAATGATACATGAGTAATAGGCCTTCCTGTA

>M6-PGSC0003DMG400024485M6LRR-RLK\_126

CCATGTACCAACAAATGGGAAGGGATAACTTGTGATTCAAGAAACCAACATGTAAAAAATATTGTTCTT

GATCAGAAGAATCTCACTGGAATTCTTGATGCTTCTTTGTCTGTGAGGCT

>M6-PGSC0003DMG400024485M6LRR-RLK\_1260

TATTCTCACTTGAATATCAAACCATAGAATGATACATGAGTAATAGGCCTTCCTGTAAGAACTATCAAGA

ATTGATATCAGTAAAGTAAAATGTTAGATAGAACTATAGTTCACTTACCA

>M6-PGSC0003DMG400024485M6LRR-RLK\_1323

ATCAAGAATTGATATCAGTAAAGTAAAATGTTAGATAGAACTATAGTTCACTTACCATATTCAGGGTCTA

GCTAATTCAAATCTTAAAGTATTTTATCAGTCTAAGCTGCTCTGACTCT

>M6-PGSC0003DMG400024485M6LRR-RLK\_1386

GGGTCTAGCTAATTCAAATCTTAAAGTATTTTATCAGTCTAAGCTGCTCTGACTCTCCAAAATATTGCCA  
CACCTGTGTCAGAACCTCCAGTAAAGCATTACTTTTGGAGGATCCGACA

>M6-PGSC0003DMG400024485M6LRR-RLK\_1491

TTGGAGGATCCGACAAGCACCTGTCTGAAATTTTTGAAAAGTTTGAGTAACATAGTTGTCGGTTGATGA  
AGTAAGAAAGAACTATAGTAATTAGTATTATTAGTTTGGGTAGCGAGATA

>M6-PGSC0003DMG400024485M6LRR-RLK\_189

GTTCTTGATCAGAAGAATCTCACTGGAATTCTTGATGCTTCTTTTGTCTGTGAGGCTACTTCCCTTGCTGT  
ACTGAGCTTGAACGAAAACGAAATTGTAGGAACATTACCTCAAGAAATA

>M6-PGSC0003DMG400024485M6LRR-RLK\_252

CTTGCTGTACTGAGCTTGAACGAAAACGAAATTGTAGGAACATTACCTCAAGAAATATCAAACCTGCAGA  
CGTCTCACACATTTGTATCTGCGTGGCAACAAATTATCAAGCAATCTACCA

>M6-PGSC0003DMG400024485M6LRR-RLK\_315

TGCAGACGTCTCACACATTTGTATCTGCGTGGCAACAAATTATCAAGCAATCTACCAAGCTCTCTTTCGCG  
GTTGAGCAATTTGAAAAGGTTTGTAATTTAGGCAATGCCTTCTCGGGG

>M6-PGSC0003DMG400024485M6LRR-RLK\_378

CTTTCGCGGTTGAGCAATTTGAAAAGGTTTGTAATTTAGGCAATGCCTTCTCGGGGCAGATACCGGATA  
TGTCAGAATCTCAGGGCTGATAACTTTTTTGGCTGAAAGAAATCAGCTA

>M6-PGSC0003DMG400024485M6LRR-RLK\_441

CCGGATATGTCAAGAATCTCAGGGCTGATAACTTTTTTGGCTGAAAGAAATCAGCTAACAGGGCAGATA  
CCAGAATTTGATTTTTCCAATCTTGTAGAATTCAATGTCTCATAACAATAAT

>M6-PGSC0003DMG400024485M6LRR-RLK\_504

CAGATACCAGAATTTGATTTTTCCAATCTTGTAGAATTCAATGTCTCATAACAATAATTTAACTGGTCCAAT  
TCCTGATGTCAAGGGCCAGTTTAGTTCCAGCAGTTTTTTCGGGTAATCCC

>M6-PGSC0003DMG400024485M6LRR-RLK\_567

GGTCCAATTCCTGATGTCAAGGGCCAGTTTAGTTCCAGCAGTTTTTTCGGGTAATCCCGGATTATGTGGAG  
TGCCATTGCCAAGCATATGTCCACCCTCGCCACCTCCACCTCCCCATCCA

>M6-PGSC0003DMG400024485M6LRR-RLK\_63

AACAAGATATCACTTGGGAACATTTCAAAGAAGTAACTTTGGATGGGATTTATCATCTGATCCATGTA  
CCAACAAATGGGAAGGGATAACTTGTGATTCAAGAAACCAACATGTAAAA



>M6-PGSC0003DMG400024485M6LRR-RLK\_630

TGTGGAGTGCCATTGCCAAGCATATGTCCACCCTCGCCACCTCCACCTCCCCATCCAGTTGCTAAGGAGA  
AAAAAGTTTCATACTTTATTTATCTTGGCTATGCTATTCTTGGGCTGATT

>M6-PGSC0003DMG400024485M6LRR-RLK\_693

AAGGAGAAAAAAGTTTCATACTTTATTTATCTTGGCTATGCTATTCTTGGGCTGATTATCATACTTCTACTT  
GTATGGAAGCTTTTTAAGTTCATAAGGAAGAAAAAGAGCAATAGTACT

>M6-PGSC0003DMG400024485M6LRR-RLK\_756

CTTCTACTTGTATGGAAGCTTTTTAAGTTCATAAGGAAGAAAAAGAGCAATAGTACTCCAATGGATCACA  
ACAAGACTATTAGCTCTTCTGGTGTACAAAGACTCCTAAAAATAGGTCA

>M6-PGSC0003DMG400024485M6LRR-RLK\_819

GATCACAACAAGACTATTAGCTCTTCTGGTGTACAAAGACTCCTAAAAATAGGTCAGAATATTCAATAA  
CATCTAGTCCCGAAAACCTATGCTCTCAGCATCATTTGAAATCCTTTCA

>M6-PGSC0003DMG400024485M6LRR-RLK\_882

TCAATAACATCTAGTCCCGAAAACCTATGCTCTCAGCATCATTTGAAATCCTTTCAAGTCCCCTGGCTAA  
CAAATTGAGATTCGAGGATTTGCTTCGAGCTCCAGCTGAATTGATTGGG

>M6-PGSC0003DMG400024485M6LRR-RLK\_945

CTGGCTAACAAATTGAGATTCGAGGATTTGCTTCGAGCTCCAGCTGAATTGATTGGGAAAGGAAAACAT  
GGAAGTGTTTACAAGGTCAATGTTGATGGAGTGACATTGGTAGTAAAGAGG

>M6-PGSC0003DMG400024661-(rev)M6LRR-RLK\_0

TTTGTATTA AAAAGTTTGGTTTGGTCCATTTTGCAGGCCCTCTCTTTCTGAAATTCAACTCCATTTTCCCAT  
GTTTATACCCTGCACAGAGATATTGTTTCTGAACTACCAAACCCCTT

>M6-PGSC0003DMG400024661-(rev)M6LRR-RLK\_1054

CTAAAAACAAGTGTAATGGCTCTCTGACTTCGTCTGTTTTTCACTCCAAACTGCACTTTGCAGGTGTTGGAT  
TTATCAGAAAATGGATTGTTGGAGGAGTGCCTAAAGAGATATCGAATT

>M6-PGSC0003DMG400024661-(rev)M6LRR-RLK\_1116

GTGTTGGATTTATCAGAAAATGGATTGTTGGAGGAGTGCCTAAAGAGATATCGAATTGTA AAAACTTG  
GAGGACTTGAATTTGTCTGGAAATAACTTTTCAGGGCCAATTCCTGAGGAA

>M6-PGSC0003DMG400024661-(rev)M6LRR-RLK\_1178

AAACTTGGAGGACTTGAATTTGTCTGGAAATAACTTTTCAGGGCCAATTCCTGAGGAAATTGGATCAGTT

ATGAGTCTTCAAGCACTTTACTTGGGAAGCAACAATTTTTCAAGGGATAT

>M6-PGSC0003DMG400024661-(rev)M6LRR-RLK\_124

TAATTATAGTAAAATACCATTTCTTTCTTGTGTTTGCACAAATTTCTATAACAACAACAACATCATCTGTCACA  
CAACAAAAAATAAATAAAAATAGAACAATAGTACTGGAAGAAATCA

>M6-PGSC0003DMG400024661-(rev)M6LRR-RLK\_1240

GATCAGTTATGAGTCTTCAAGCACTTTACTTGGGAAGCAACAATTTTTCAAGGGATATTCCAGAGAGTCT  
ATTAAGTTTAAGTAACTTAGTGTTTCTTGATCTTAGTAGAAACAACCTTCA

>M6-PGSC0003DMG400024661-(rev)M6LRR-RLK\_1302

GAGAGTCTATTAAGTTTAAGTAACTTAGTGTTTCTTGATCTTAGTAGAAACAACCTTCAGAGGAGAAATAC  
AAGAAATTTTCAGGCAATTTACACAGGTAAAGTTTCTTCTGTTGCATGGT

>M6-PGSC0003DMG400024661-(rev)M6LRR-RLK\_1364

AGAAATACAAGAAATTTTCAGGCAATTTACACAGGTAAAGTTTCTTCTGTTGCATGGTAATTCTTATACTG  
GAGGTATAGTTACCTCTGGAATCCCAACTTAGTGAACCTATCTCGATT

>M6-PGSC0003DMG400024661-(rev)M6LRR-RLK\_1426

CTTATACTGGAGGTATAGTTACCTCTGGAATCCCAACTTAGTGAACCTATCTCGATTGGACTTGAGCGA  
TAACCAATTCTCCGGTCCATTGCCAGTTGAACTTTCCAAGATGAAAGGCT

>M6-PGSC0003DMG400024661-(rev)M6LRR-RLK\_1488

TTGAGCGATAACCAATTCTCCGGTCCATTGCCAGTTGAACTTTCCAAGATGAAAGGCTTGAAGTTTCTGA  
TTCTTGCATATAACCACTTTAATGGAAGTATACCATCAGTATACGGGGAT

>M6-PGSC0003DMG400024661-(rev)M6LRR-RLK\_1550

GTTTCTGATTCTTGCATATAACCACTTTAATGGAAGTATACCATCAGTATACGGGGATATTCCGACACTTC  
AGGCCCTTGATCTTTCATCTAATAAGTTAACTGGCGAAATACCACCAAG

>M6-PGSC0003DMG400024661-(rev)M6LRR-RLK\_1612

CGACACTTCAGGCCCTTGATCTTTCATCTAATAAGTTAACTGGCGAAATACCACCAAGTTTAGGGAAACT  
AAGCTCACTTTTGTGGTTAATGCTTGCTAACAATTCATTGACCGGTGGAA

>M6-PGSC0003DMG400024661-(rev)M6LRR-RLK\_1674

GGGAAACTAAGCTCACTTTTGTGGTTAATGCTTGCTAACAATTCATTGACCGGTGGAATCCCACCCGAGT  
TGGGAAACTGCAGTAGCTTATTGTGGTTGAATCTTGCAAACAATCAGCTT

>M6-PGSC0003DMG400024661-(rev)M6LRR-RLK\_1736

ACCCGAGTTGGGAAACTGCAGTAGCTTATTGTGGTTGAATCTTGCAAACAATCAGCTTTCAGGTCCAATT  
CCACCTCAGTTAGCAAGAATTGGCTCAAATCCTATGCCTACTTTCTTGTC

>M6-PGSC0003DMG400024661-(rev)M6LRR-RLK\_1798

GTCCAATTCCACCTCAGTTAGCAAGAATTGGCTCAAATCCTATGCCTACTTTCTTGTCGAATAGGGCTAA  
GGATAAGGTGACTGCTGGCTCGGGGAATGCTTTGCTATGAAGAGATGGA

>M6-PGSC0003DMG400024661-(rev)M6LRR-RLK\_186

ATCTGTCACACAACAAAAAATAAATAAAAAATAGAACAATAGTACTGGAAGAAATCAAGATTCAAGAT  
TGAGTTATGTCAGAAGAGGAATCTGATATTCTTCTCCTGTTGTATTATTC

>M6-PGSC0003DMG400024661-(rev)M6LRR-RLK\_1860

AGGGCTAAGGATAAGGTGACTGCTGGCTCGGGGAATGCTTTGCTATGAAGAGATGGATAACCAGCTGA  
TTATCCTCCATTTAGCTTTGTATATCCTCTCCTTACCAGGAAGAATTGTAGA

>M6-PGSC0003DMG400024661-(rev)M6LRR-RLK\_1922

AGCTGATTATCCTCCATTTAGCTTTGTATATCCTCTCCTTACCAGGAAGAATTGTAGAAGCCTATGGGATA  
AATTGCTCAAAGGGTATGGTTTATTTCCAGTGTGTGAACCTGGTAGTAA

>M6-PGSC0003DMG400024661-(rev)M6LRR-RLK\_1984

TATGGGATAAATTGCTCAAAGGGTATGGTTTATTTCCAGTGTGTGAACCTGGTAGTAATGTTTCGTTCAAA  
TCAGATATCAGGCTATCTTCAACTTAGTATGAACAAATTTTCTGGTGGGA

>M6-PGSC0003DMG400024661-(rev)M6LRR-RLK\_2046

CGTTCAAATCAGATATCAGGCTATCTTCAACTTAGTATGAACAAATTTTCTGGTGGGATCCCTCCTGAAAT  
TGGCAACATGCAGAATTTAGTATGCTTCATTTGGGTGTAAATGAATTC

>M6-PGSC0003DMG400024661-(rev)M6LRR-RLK\_2108

TCCTGAAATTGGCAACATGCAGAATTTAGTATGCTTCATTTGGGTGTAAATGAATTCGCTGGCACGCTC  
CCTTCAGAGATTGGAAAAATGCAGCTAGTAGTACTTAATATTTACAAAA

>M6-PGSC0003DMG400024661-(rev)M6LRR-RLK\_2170

GCACGCTCCCTCAGAGATTGGAAAAATGCAGCTAGTAGTACTTAATATTTACAAAACAGAATATCTGG  
CGAGATTCCAAGCCAGATTGGCAACATTAAGTGCTTACTGAATCTTGATC

>M6-PGSC0003DMG400024661-(rev)M6LRR-RLK\_2232

ATATCTGGCGAGATTCCAAGCCAGATTGGCAACATTAAGTGCTTACTGAATCTTGATCTGTCCAGCAACA  
ATTTCTCTGGTCTGTTCCAGCTAGTTTTAGTAAATTGACTGATCTAAGC

>M6-PGSC0003DMG400024661-(rev)M6LRR-RLK\_2294

CAGCAACAATTTCTCTGGTCTGTTCCAGCTAGTTTTAGTAAATTGACTGATCTAAGCAAGTTCAATATCT  
CTTACAATGCGTACATCTATGGTACTATAACCAGAAAGTGGGCAATTAGC

>M6-PGSC0003DMG400024661-(rev)M6LRR-RLK\_2356

TCAATATCTCTTACAATGCGTACATCTATGGTACTATAACCAGAAAGTGGGCAATTAGCCACATTCGAGAA  
GTCATCATACCTTGGCGTTCCATTGCTGCACCTTCCACCTTTCATTGATA

>M6-PGSC0003DMG400024661-(rev)M6LRR-RLK\_2418

TTCGAGAAGTCATCATACCTTGGCGTTCCATTGCTGCACCTTCCACCTTTCATTGATAAACTAGGAATAA  
TACTATAAACAAAGGTGGAAGTTTCAAAGGCCTACAAAGGTTGGTACA

>M6-PGSC0003DMG400024661-(rev)M6LRR-RLK\_248

TCAAGATTGAGTTATGTCAGAAGAGGAATCTGATATTCTTCTCCTGTTGTATTATTCCACTTCTTGCTTCT  
AATCACTACTGGTAAGTCTGAGTTTTTTTTTTTTTCGAATTTTCAAGA

>M6-PGSC0003DMG400024661-(rev)M6LRR-RLK\_2480

TAGGAATAATACTATAAACAAAGGTGGAAGTTTCAAAGGCCTACAAAGGTTGGTACAGTTTTGGTAAT  
CATGGCTTTGCTACTGGCTTTGCTAGTTTGTGGACTTATGACACTTGTTAT

>M6-PGSC0003DMG400024661-(rev)M6LRR-RLK\_2542

TGGTAATCATGGCTTTGCTACTGGCTTTGCTAGTTTGTGGACTTATGACACTTGTTATCTGCCTCGTTCTA  
AAATCTCCGATAGATAAACAGGATACCTACTGGAGGATTCAAAGGGCC

>M6-PGSC0003DMG400024661-(rev)M6LRR-RLK\_2604

CTCGTTCTAAAATCTCCGATAGATAAACAGGATACCTACTGGAGGATTCAAAGGGCCGACACGATCTT  
GCATGGAGTTCAGGTGCATCCTCACCATGGTTGTCTAATGATGTTAAGGTT

>M6-PGSC0003DMG400024661-(rev)M6LRR-RLK\_2666

CGATCTTGCATGGAGTTCAGGTGCATCCTCACCATGGTTGTCTAATGATGTTAAGGTTATCCGCTTGGAC  
AAAACAAGCTTCACACATTCTGACATATTGAAGGCCACAGGCAGATTCTC

>M6-PGSC0003DMG400024661-(rev)M6LRR-RLK\_2728

GCTTGGACAAAACAAGCTTCACACATTCTGACATATTGAAGGCCACAGGCAGATTCTCGAATGACAGAA  
TTATAGGGAAAGGAGGATTTGGGACAGTTTATCGAGGAGTCTTGCCTGATG

>M6-PGSC0003DMG400024661-(rev)M6LRR-RLK\_2790

GACAGAATTATAGGGAAAGGAGGATTTGGGACAGTTTATCGAGGAGTCTTGCCTGATGGAAGGCAAGT

GGCGGTGAAAAAGCTACAAAGAGAGGGAATTGAAGGGGAAAGAGAGTTTAGA

>M6-PGSC0003DMG400024661-(rev)M6LRR-RLK\_2852

GCAAGTGGCGGTGAAAAAGCTACAAAGAGAGGGAATTGAAGGGGAAAGAGAGTTTAGAGCTGAAATG  
GAAGTACTAAGTGGAATGACTTTGGTTGGCATCCGAATCTTGTAACACTTTA

>M6-PGSC0003DMG400024661-(rev)M6LRR-RLK\_2914

AAATGGAAGTACTAAGTGGAATGACTTTGGTTGGCATCCGAATCTTGTAACACTTTACGGTTGGTGCCT  
TAATGGATCAGAGAAATTGTTAGTCTATGAATACATGGGAGGTGGAAGCT

>M6-PGSC0003DMG400024661-(rev)M6LRR-RLK\_2976

TGGTGCCTTAATGGATCAGAGAAATTGTTAGTCTATGAATACATGGGAGGTGGAAGCTTAGATGAGATC  
ATCACAGATAGAACCAAATTCACATGGAAGAAACGACTCAACGTGGCAATT

>M6-PGSC0003DMG400024661-(rev)M6LRR-RLK\_3038

TGAGATCATCACAGATAGAACCAAATTCACATGGAAGAAACGACTCAACGTGGCAATTGATGTTGCACG  
TGCTTAGTCTTCTTACACCACGAGTGTTACCCTTGTATCGTCCACAGAGA

>M6-PGSC0003DMG400024661-(rev)M6LRR-RLK\_310

TCTTGCTTCTAATCACTACTGGTAAGTCTGAGTTTTTTTTTTTTTTTCGAATTTTCAAGATTGTA  
CTCAGAAATT  
CAGATTGTTGTTTTATGAGGTGTTTTAGCTGATTTGTAATACTAAAGT

>M6-PGSC0003DMG400024661-(rev)M6LRR-RLK\_3100

TTGCACGTGCTTTAGTCTTCTTACACCACGAGTGTTACCCTTGTATCGTCCACAGAGATGTCAAGGCAAG  
CAACGTGCTGCTAGACAAAGACGGAAGGGCAAGAGTCACAGATTTTGGCC

>M6-PGSC0003DMG400024661-(rev)M6LRR-RLK\_3162

AAGGCAAGCAACGTGCTGCTAGACAAAGACGGAAGGGCAAGAGTCACAGATTTTGGCCTAGCTAGGGT  
TATGGATGCTGGAGATAGTCATGTTAGCACAATGGTTGCTGGTACAGTCGGG

>M6-PGSC0003DMG400024661-(rev)M6LRR-RLK\_3224

TAGGGTTATGGATGCTGGAGATAGTCATGTTAGCACAATGGTTGCTGGTACAGTCGGGTACGTTGCACC  
AGAATATGGACAGACATGGCAGGCCACAACAAAAGGCGATGTCTACAGTTA

>M6-PGSC0003DMG400024661-(rev)M6LRR-RLK\_3286

TTGCACCAGAATATGGACAGACATGGCAGGCCACAACAAAAGGCGATGTCTACAGTTATGGAGTGCTG  
GCAATGGAGTTAGCCACAGGGAGACGCGCTGTAGATGGAGGCGAGGAATGTC

>M6-PGSC0003DMG400024661-(rev)M6LRR-RLK\_3348

GTGCTGGCAATGGAGTTAGCCACAGGGAGACGCGCTGTAGATGGAGGCGAGGAATGTCTAGTTGAAT  
GGGCGAGACGTGTGATGGGAGACGGAAGGCAAGGATTCACCAGAGCCATAATA

>M6-PGSC0003DMG400024661-(rev)M6LRR-RLK\_3410

TGAATGGGCGAGACGTGTGATGGGAGACGGAAGGCAAGGATTCACCAGAGCCATAATACCAGTTTCTC  
TTTTGGTATCAGGCCTAGCAGAGGGAGCAGAGGAATTGTGTGAGTTGCTTAG

>M6-PGSC0003DMG400024661-(rev)M6LRR-RLK\_3472

TTTCTCTTTTGGTATCAGGCCTAGCAGAGGGAGCAGAGGAATTGTGTGAGTTGCTTAGAATAGGAATAA  
GGTGCATTGCTGATAATCCTCATGCTAGGCCTAACATGAAGGAAGTATTGG

>M6-PGSC0003DMG400024661-(rev)M6LRR-RLK\_3534

GGAATAAGGTGCATTGCTGATAATCCTCATGCTAGGCCTAACATGAAGGAAGTATTGGATTTGTTAATC  
GCGATTTGCGCGAGCCAAAGATCAGGATCCAGTCGTAGCACTTCTCCTTCA

>M6-PGSC0003DMG400024661-(rev)M6LRR-RLK\_3596

GTTAATCGCGATTTTCGCGCAGCCAAAGATCAGGATCCAGTCGTAGCACTTCTCCTTCATTTTGATCAATTT  
TTGTTTCAAATTACACAGCAAAGTGTCAATAGTTTTTTTTTTCTTCACAT

>M6-PGSC0003DMG400024661-(rev)M6LRR-RLK\_3658

GATCAATTTTTGTTTCAAATTACACAGCAAAGTGTCAATAGTTTTTTTTTTCTTCACATTTGTAACATACACA  
CATTACATTCTTCTGTAAACAGTTCTTTTTAGATTCTTTGTTTCAGGC

>M6-PGSC0003DMG400024661-(rev)M6LRR-RLK\_372

ACTCAGAATTCAGATTGTTGTTTTATGAGGTGTTTTAGCTGATTTGTAATACTAAAGTTTTGATTTTTATTT  
ATAGTTTGTGGAGATACCCTGGAGAGTGACAAGCAAGTGTTACTGAGT

>M6-PGSC0003DMG400024661-(rev)M6LRR-RLK\_434

ATTTTTATTTATAGTTTGTGGAGATACCCTGGAGAGTGACAAGCAAGTGTTACTGAGTTACAAGGATTTT  
CTTGAACATCAAAATCCGGTTAATAAAGGATACAGGCATACAGAATGGAA

>M6-PGSC0003DMG400024661-(rev)M6LRR-RLK\_496

AGGATTTTCTTGAACATCAAAATCCGGTTAATAAAGGATACAGGCATACAGAATGGAATGCTTCTGATTC  
GTCACCGTGTAATTGGCGTGGGGTTTTTTGTGATGGCGGAGTTGATCGTG

>M6-PGSC0003DMG400024661-(rev)M6LRR-RLK\_558

TCTGATTCGTCACCGTGTAATTGGCGTGGGGTTTTTTGTGATGGCGGAGTTGATCGTGTTACTCGAATTG  
ATCTCTCTGGTGATAGTTTGGCTGGAAATATGTTTTACAACCTTCTCAGCT

>M6-PGSC0003DMG400024661-(rev)M6LRR-RLK\_62

ATTTTCCCATGTTTATACCCTGCACAGAGATATTGTTTCTGAACTACCAAACCCCTTTTCTTAATTATAGT  
AAAATACCATTTCTTTCTTGTTTTGCACAAATTTCTATAACAACAACA

>M6-PGSC0003DMG400024661-(rev)M6LRR-RLK\_620

TCGAATTGATCTCTCTGGTGATAGTTTGGCTGGAAATATGTTTTACAACCTCTCAGCTATGACAGAGTTG  
ACATATATTGATTTGTCTATGAATACAATTGGAGGGTCTATTCTGCAGA

>M6-PGSC0003DMG400024661-(rev)M6LRR-RLK\_682

CAGAGTTGACATATATTGATTTGTCTATGAATACAATTGGAGGGTCTATTCTGCAGACTTAGGCCAATG  
TAAAAACCTGAGATTCTTGAATTTATCGCATAATATTATTGATGGGGAGC

>M6-PGSC0003DMG400024661-(rev)M6LRR-RLK\_744

GGCCAATGTAAAAACCTGAGATTCTTGAATTTATCGCATAATATTATTGATGGGGAGCTTAATTTGACTG  
GTTTGAACAATTTGCAAGTTCTTGATTTGACCATGAACAGGATTCATGGT

>M6-PGSC0003DMG400024661-(rev)M6LRR-RLK\_806

TTTGACTGGTTTGAACAATTTGCAAGTTCTTGATTTGACCATGAACAGGATTCATGGTGAGATCAGTTTA  
ACTTTCCCTGGAATTTGTGATAGTTTGGTGGTTGCAAACATTTCGAATAA

>M6-PGSC0003DMG400024661-(rev)M6LRR-RLK\_868

TCAGTTTAACTTTCCCTGGAATTTGTGATAGTTTGGTGGTTGCAAACATTTCGAATAACAATTTTACTGGT  
GAGATTGGAAGAACTTTTGATCAGTGCTGGAATCTTAGATATCTTGATT

>M6-PGSC0003DMG400024661-(rev)M6LRR-RLK\_930

TTTACTGGTGAGATTGGAAGAACTTTTGATCAGTGCTGGAATCTTAGATATCTTGATTTGAGCTACAATA  
ACTTGACTGGAGGATTGTCACCTGGTTTTGATAAGCTTAAGGAGTTTTCG

>M6-PGSC0003DMG400024661-(rev)M6LRR-RLK\_992

CTACAATAACTTGACTGGAGGATTGTCACCTGGTTTTGATAAGCTTAAGGAGTTTTCGGTATCTAAAAAC  
AAGTGTAATGGCTCTCTGACTTCGTCGTTTTTCACTCCAAACTGCACTTT

>M6-PGSC0003DMG400024665-(rev)M6RLKmalectin\_0

ATGTATAGATTTCTTGTTTTCAAACCAGGCAGGCATTGGGTGCGTTTGCACCTTTTATCCTATTCAACATCC  
AAATTATAATCTAGCAAGTGCTATGTTTACTGTTACTTCTGATAATATT

>M6-PGSC0003DMG400024665-(rev)M6RLKmalectin\_1037

TGTTTCGTTGGCGAAGGAAGCCAACAAAGGGTTGGGAGAAGCAGAAGACATTCTCTTCATGGCTTCCTCT

CAATGCTAGTTACTGCAGCTTCATGTCAAGCAAGAGCAAGACTAGTTGTTC

>M6-PGSC0003DMG400024665-(rev)M6RLKmalectin\_1098

CTTCTCTCAATGCTAGTTACTGCAGCTTCATGTCAAGCAAGAGCAAGACTAGTTGTTCAACAATCATATC

CTCTGGCCTCAACTTTGGCCGCGTCTTTACTTTCAATGAAATCAAGAAA

>M6-PGSC0003DMG400024665-(rev)M6RLKmalectin\_1159

CAATCATATCCTCTGGCCTCAACTTTGGCCGCGTCTTTACTTTCAATGAAATCAAGAAAACAACAAAAAAC

TTTGATGAAAAAGCAGTCATTGGTGTGGAGGCTTTGGAAAAGTGTATC

>M6-PGSC0003DMG400024665-(rev)M6RLKmalectin\_122

TTTACTTCATGATTTCTCAGTGAAAGATACTAGTAAAGTTGTGTTCAAAGAATACCTTATTAATATTACTT

CATCTCAATTCACTCTCAAATTTTCACCTTTGAAGAGATCTTTTGCTTT

>M6-PGSC0003DMG400024665-(rev)M6RLKmalectin\_1220

AACAAAAAACTTTGATGAAAAAGCAGTCATTGGTGTGGAGGCTTTGGAAAAGTGTATCTTGGTGTATC

GGAAGATGGAACAAAAGCTATAAAGCGAGGAAATCCATCATCCTCACA

>M6-PGSC0003DMG400024665-(rev)M6RLKmalectin\_1281

GGTGTATCGGAAGATGGAACAAAAGCTATAAAGCGAGGAAATCCATCATCCTCACAGGGCATCAAC

GAATTCCTAACAGAAATTGAGTTGCTATCCAAGCTTAGGCATCGACATCTT

>M6-PGSC0003DMG400024665-(rev)M6RLKmalectin\_1342

GCATCAACGAATTCCTAACAGAAATTGAGTTGCTATCCAAGCTTAGGCATCGACATCTTGTTTCACTCATT

GGTTATTGTGATGAACAATCAGAAATGATTCTAGTCTATGAGTACATGT

>M6-PGSC0003DMG400024665-(rev)M6RLKmalectin\_1403

TTCACTCATTGGTTATTGTGATGAACAATCAGAAATGATTCTAGTCTATGAGTACATGTCTAATGGTCCTT

TGCGTGACCACATTTATGGTTCCACTTTGCCAACTCTGACATGGAAACA

>M6-PGSC0003DMG400024665-(rev)M6RLKmalectin\_1464

AATGGTCCTTTGCGTGACCACATTTATGGTTCCACTTTGCCAACTCTGACATGGAAACAAAGGCTCGAAA

TCTGCATAGGAGCTGCTCGAGGACTGCACTACCTTCACACTGGTTCAACT

>M6-PGSC0003DMG400024665-(rev)M6RLKmalectin\_1525

GGCTCGAAATCTGCATAGGAGCTGCTCGAGGACTGCACTACCTTCACACTGGTTCAACTCAGGGAATAA

TACATCGAGATATAAAAAGTACAAACATCCTCCTTGATGAGGACTTTGTGCG

>M6-PGSC0003DMG400024665-(rev)M6RLKmalectin\_1586



GGGAATAATACATCGAGATATAAAAACTACAAACATCCTCCTTGATGAGGACTTTGTCGCAAAGATGGC  
TGATTTTGGCTTGTCAAAAACCTGGTCCTTCACTGGAGCAAACACATGTTAG

>M6-PGSC0003DMG400024665-(rev)M6RLKmalectin\_1647

AAGATGGCTGATTTTGGCTTGTCAAAAACCTGGTCCTTCACTGGAGCAAACACATGTTAGCACAGCAGTG  
AAGGGTAGTTTTGGTTACCTTGATCCCGAATACTTCAGAAGACAACAATA

>M6-PGSC0003DMG400024665-(rev)M6RLKmalectin\_1708

CAGCAGTGAAGGGTAGTTTTGGTTACCTTGATCCCGAATACTTCAGAAGACAACAATAACAGAAAAAT  
CTGATGTGTACTCATTGCGGGTAGTCCTTTTTGAGGTACTATGTGCAAGAC

>M6-PGSC0003DMG400024665-(rev)M6RLKmalectin\_1769

AGAAAAATCTGATGTGTACTCATTGCGGGTAGTCCTTTTTGAGGTACTATGTGCAAGACCTGCTCTTGAT  
CCTGCATTGCCAAGAGAACAAGTGAATTTGGCAGAGTGGGCAATGCAGCA

>M6-PGSC0003DMG400024665-(rev)M6RLKmalectin\_183

AATATTACTTCATCTCAATTCCTCAAAATTTTACCTTTGAAGAGATCTTTTGCTTTTATCAATGCCATTG  
AGTTTGTGTCAGCACCAGATGATCTCATTCTGATTGAGCTGCTGCA

>M6-PGSC0003DMG400024665-(rev)M6RLKmalectin\_1830

GCTCTTGATCCTGCATTGCCAAGAGAACAAGTGAATTTGGCAGAGTGGGCAATGCAGCAACACAAAAA  
GGGCACTCTGGAGAAGATCATAGACCCTCATATTGCAGGAACCATTACCCCT

>M6-PGSC0003DMG400024665-(rev)M6RLKmalectin\_1891

ACAAAAAGGGCACTCTGGAGAAGATCATAGACCCTCATATTGCAGGAACCATTACCCCTGAGGCGTTAA  
GGAAATACGTGGAAGCTGCAGAGAAATGCTTAGCAGAATATGGGGTTGATA

>M6-PGSC0003DMG400024665-(rev)M6RLKmalectin\_1952

GGCGTTAAGGAAATACGTGGAAGCTGCAGAGAAATGCTTAGCAGAATATGGGGTTGATAGGCCTGCAA  
TGGGAGATGTTTTGTGGAACCTAGAATATGCCTTGCAGCTTGAAAGTGCATC

>M6-PGSC0003DMG400024665-(rev)M6RLKmalectin\_2013

CCTGCAATGGGAGATGTTTTGTGGAACCTAGAATATGCCTTGCAGCTTGAAAGTGCATCCCCGAGTAGT  
GTTCCAGTGAAGAATGAGAATGAGAATGAAAATTCCAAGCCAAGTTCTTCA

>M6-PGSC0003DMG400024665-(rev)M6RLKmalectin\_2074

CGAGTAGTGTTCCAGTGAAGAATGAGAATGAGAATGAAAATTCCAAGCCAAGTTCTTCAGAACAGCCTG  
GAACGAATTCGAAGAGCAATAAAGAAGCTCAGCTCATTGACATTAATGATG

>M6-PGSC0003DMG400024665-(rev)M6RLKmalectin\_2130

TCAGAACAGCCTGGAACGAATTCGAAGAGCAATAAAGAAGCTCAGCTCATTGACATTAATGATGATTCT  
GGAGTGGTGGTTGGTTCTCCTATGTTCTTAGAAGGTTTTCAAGGAAGATAA

>M6-PGSC0003DMG400024665-(rev)M6RLKmalectin\_244

TCAATGCCATTGAGTTTGTGTCAGCACCCAGATGATCTCATTCTGATTGAGCTGCTGCAGTTTCCCCTGTT  
GGTGATTTTAATGGCCTGTCTCAATTCGCGTTTGAAGTAAGTTATCGGT

>M6-PGSC0003DMG400024665-(rev)M6RLKmalectin\_305

TTCCCCTGTTGGTGATTTTAATGGCCTGTCTCAATTCGCGTTTGAAGTAAGTTATCGGTTAAATGTTGGAG  
GGCCAATTGTCACACCAAAAAATGATACATTGTGGAGGACATGGTTGTC

>M6-PGSC0003DMG400024665-(rev)M6RLKmalectin\_366

AATGTTGGAGGGCCAATTGTCACACCAAAAAATGATACATTGTGGAGGACATGGTTGTCTGATAATAAG  
TACATGGCATTTCCTGAAGGGGCTCAGAATGTGTCGGTTCCTCTAACGACA

>M6-PGSC0003DMG400024665-(rev)M6RLKmalectin\_427

ATAATAAGTACATGGCATTTCCTGAAGGGGCTCAGAATGTGTCGGTTCCTCTAACGACAATCGTTTATCC  
AGATGGAGGGGGCGACACCTTTGATTGCCCAAGTTCAGTTTATGCTACGG

>M6-PGSC0003DMG400024665-(rev)M6RLKmalectin\_488

CGTTTATCCAGATGGAGGGGGCGACACCTTTGATTGCCCAAGTTCAGTTTATGCTACGGCTGATATGATG  
GCAGATTCTGGGGTGCCCAACTCGAATTTCAAGCTAACGTGGGAGATGGA

>M6-PGSC0003DMG400024665-(rev)M6RLKmalectin\_549

GATATGATGGCAGATTCTGGGGTGCCCAACTCGAATTTCAAGCTAACGTGGGAGATGGACGTTGATTCA  
AGCTTTTCTACTTTATCAGAATGCATTTCTGTGATATTGTGAGCAAAGGC

>M6-PGSC0003DMG400024665-(rev)M6RLKmalectin\_61

TTCAACATCCAAATTATAATCTAGCAAGTGCTATGTTTACTGTTACTTCTGATAATATTGTTTTACTTCATG  
ATTTCTCAGTGAAAGATACTAGTAAAGTTGTGTTCAAAGAATACCTTA

>M6-PGSC0003DMG400024665-(rev)M6RLKmalectin\_610

TTGATTCAAGCTTTTCTACTTTATCAGAATGCATTTCTGTGATATTGTGAGCAAAGGCCTAAATGAGTTG  
TACTTCAATGTCTATGTTAATGAGGTGGTGGGGTCTCTAGTCTTGACC

>M6-PGSC0003DMG400024665-(rev)M6RLKmalectin\_671

AAATGAGTTGTACTTCAATGTCTATGTTAATGAGGTGGTGGGGTCTCTAGTCTTGACCTTCAACACTG

ACTTCAGAGTTGGCCACCCCTTATTACAAAGACTTTGTGCTCAATGCCAC

>M6-PGSC0003DMG400024665-(rev)M6RLKmalectin\_732

TCAACACTGACTTCAGAGTTGGCCACCCCTTATTACAAAGACTTTGTGCTCAATGCCACAGCCATCACCA

ACGGTTCGATCATCGTGCAGGTGGGACCCGCGTCAAACGTCCAGTCTATC

>M6-PGSC0003DMG400024665-(rev)M6RLKmalectin\_793

CCATCACCAACGGTTCGATCATCGTGCAGGTGGGACCCGCGTCAAACGTCCAGTCTATCCTCCCAAATGC

CATCCTCAATGGATTGGAGGTCATGAAGATGAGCAACATGGAGGGAAGCT

>M6-PGSC0003DMG400024665-(rev)M6RLKmalectin\_854

CCCAAATGCCATCCTCAATGGATTGGAGGTCATGAAGATGAGCAACATGGAGGGAAGCTTGGATGGGC

TGTTCTCATCTGGTGGACGGCATGGTGTAAATGCCAAGATCACGCGGAATGAG

>M6-PGSC0003DMG400024665-(rev)M6RLKmalectin\_915

GATGGGCTGTTCTCATCTGGTGGACGGCATGGTGTAAATGCCAAGATCACGCGGAATGAGAATTGCTGCA

GCTTTTGGATTGGCAATGGGGTTTACAGCATTAGTATTGCTTTTGATAGGC

>M6-PGSC0003DMG400024665-(rev)M6RLKmalectin\_976

TTGCTGCAGCTTTTGGATTGGCAATGGGGTTTACAGCATTAGTATTGCTTTTGATAGGCATTGTTTCGTTG

GCGAAGGAAGCCAACAAAGGGTTGGGAGAAGCAGAAGACATTCTCTTCAT

>M6-PGSC0003DMG400024768-(rev)M6LRR-RLP\_0

GATCACTTATCAATGAAAATGCATCTCCAGCTCCATTCCAATTATCTTCCAATATCAACAATCCTTTCTTT

CTCTCTCACACGCACATTACTTGTCTTCTTTTGCCTATGGCACACCTG

>M6-PGSC0003DMG400024768-(rev)M6LRR-RLP\_1054

TGGGTGTCAATGCCTAGAGAACTTAGCTTGATGTGGTGTATTGAAATACTGATCTTGGGATTGATTTT

TTGTCCAAGAAATGTACACAAGTGAAGCAGCTTGACATTTTCATATTTAAA

>M6-PGSC0003DMG400024768-(rev)M6LRR-RLP\_1116

TTGATTTTTTGTCCAAGAAATGTACACAAGTGAAGCAGCTTGACATTTTCATATTTAAAGGTCTGTTTATCT

TACTATCCTTCTTTTGTATCGTAGCATATCAGGTGTATGTCTTTACTGT

>M6-PGSC0003DMG400024768-(rev)M6LRR-RLP\_1178

TGTTTATCTTACTATCCTTCTTTTGTATCGTAGCATATCAGGTGTATGTCTTTACTGTGTTTGTGAAAATGT

GGATTTGGTGTGTTTCAGGTTACTAGTGTGTCACTGCATTCTATAAG

>M6-PGSC0003DMG400024768-(rev)M6LRR-RLP\_124

CATAGCACCTAGGAATTTCCGATACCCACCTGACAAACATCGCCGGAGAATCAGGCATCTACCATGATCA  
TCTTTGTCTGCAAGACTCGTTTTGGTCTTTCTTGTACTCTTTCTTTTTCC

>M6-PGSC0003DMG400024768-(rev)M6LRR-RLP\_1240

GTGAAAATGTGGATTTGGTGTGTTTCAGGTTACTAGTGTGTCCTGATTCTATAAGCAGTATGGAGAA  
GTTGGAGCTTTTGGCTATGGTTGGGTGCGGCATTGTGGACGATGAAGGAC

>M6-PGSC0003DMG400024768-(rev)M6LRR-RLP\_1302

ATGGAGAAGTTGGAGCTTTTGGCTATGGTTGGGTGCGGCATTGTGGACGATGAAGGACTACATTATCTT  
GGAAAAGGGTGTCTTCGCTTCAGGTGTTAACACGTTTGTCAAACCTATTG

>M6-PGSC0003DMG400024768-(rev)M6LRR-RLP\_1364

TTATCTTGGAAAAGGGTGTCTTCGCTTCAGGTGTTAACACGTTTGTCAAACCTATTGTGATCAATTGTAG  
AAAAATATGAGATCATAGCTGTTTTTTGGAATTTTGTCTCCTCTCTTA

>M6-PGSC0003DMG400024768-(rev)M6LRR-RLP\_1426

CAATTGTAGAAAAATATGAGATCATAGCTGTTTTTTGGAATTTTGTCTCCTCTCTTAAGGTGACCCTTAC  
CATGTTGCTATCTGGTTTTTACCAATTTTAAGACTGAAAATAAACCTTG

>M6-PGSC0003DMG400024768-(rev)M6LRR-RLP\_1488

GACCCTTACCATGTTGCTATCTGGTTTTTACCAATTTTAAGACTGAAAATAAACCTTGTATGCAAACACAA  
TTGCTTCATAAATAAGCACATGTAATTTCAATTTCTTATAGCTTGTGGA

>M6-PGSC0003DMG400024768-(rev)M6LRR-RLP\_1550

CAAACACAATTGCTTCATAAATAAGCACATGTAATTTCAATTTCTTATAGCTTGTGGAATTATATTTGTTA  
TCAAATAGTGAAGATGGGCTTAAAGTTGTTTTGTTAACTTAACTCT

>M6-PGSC0003DMG400024768-(rev)M6LRR-RLP\_1798

TCTTAAACATGCCATAACATCTATGCGGCTATAAAAGCTTCTCGTTGAGTATAGAATGAGAAGTTTTACG  
TTAAAGTTGGTTCAATTGGCAAAGGTTGAGGGACTTGTGTCTTTGGTCAC

>M6-PGSC0003DMG400024768-(rev)M6LRR-RLP\_186

CATGATCATCTTTGTCTGCAAGACTCGTTTTGGTCTTTCTTGTACTCTTTCTTTTTCCACCCTTCAACCCCTT  
CTCAACGCTCGTCTCCTCTTCTCTTTGTCCCGACATAATACAGTTA

>M6-PGSC0003DMG400024768-(rev)M6LRR-RLP\_1860

GTTTTACGTAAAGTTGGTTCAATTGGCAAAGGTTGAGGGACTTGTGTCTTTGGTCACAGATTCCCGAAT  
GTCAAAGGCTGTGGTTGGCCCAAAGGATTGACTCCATATGGATTTCTCAG

>M6-PGSC0003DMG400024768-(rev)M6LRR-RLP\_1922

TCCCGAATGTCAAAGGCTGTGGTTGGCCAAAGGATTGACTCCATATGGATTTCTCAGTCACTAAAAAA  
TTATATCCAAATATAGATATGTGTCATTTTTTTTGAATAGACAAATACG

>M6-PGSC0003DMG400024768-(rev)M6LRR-RLP\_1984

TAAAAAATTATATCCAAATATAGATATGTGTCATTTTTTTTGAATAGACAAATACGAAAGTATTGTCAC  
ATAAAAAGGAACAGCATGAATGACTCGTTTCAGGTGTCATGGATGGAAT

>M6-PGSC0003DMG400024768-(rev)M6LRR-RLP\_2046

TATTGTCACATAAAAAGGAACAGCATGAATGACTCGTTTCAGGTGTCATGGATGGAATTTGAGACAGTT  
AGCGCATATGACATTTTCCTGATGACCAAATTATGCAGTAAGCACATGAAT

>M6-PGSC0003DMG400024768-(rev)M6LRR-RLP\_2108

GACAGTTAGCGCATATGACATTTTCCTGATGACCAAATTATGCAGTAAGCACATGAATCTGGAATAGAG  
GAAATACTTATTGGAAAATATGATTTATGGCTGGTGATATTTCTGGTATT

>M6-PGSC0003DMG400024768-(rev)M6LRR-RLP\_2170

AATAGAGGAAATACTTATTGGAAAATATGATTTATGGCTGGTGATATTTCTGGTATTCTGACTGTAGGC  
GAACAAATGCATCACTTGATGCTGCATGATCTAGTTCTGATCCCTCTTTA

>M6-PGSC0003DMG400024768-(rev)M6LRR-RLP\_2232

CTGTAGGCGAACAAATGCATCACTTGATGCTGCATGATCTAGTTCTGATCCCTCTTTATCTATCTATCTATT  
TGTATTTTTTATGAATCCCACTTTCAGCTTTTCTAGTGATCTTTAAGC

>M6-PGSC0003DMG400024768-(rev)M6LRR-RLP\_2294

TCTATCTATTTGTATTTTTTATGAATCCCACTTTCAGCTTTTCTAGTGATCTTTAAGCATACCAGCTGCATTC  
GTATTTCTTCTTTTTTCAAGTTATAGTTATAGTGGAAAACAATTTTC

>M6-PGSC0003DMG400024768-(rev)M6LRR-RLP\_2356

CAGCTGCATTCGTATTTCTTCTTTTTTCAAGTTATAGTTATAGTGGAAAACAATTTTCTATCCATGAATATC  
TGAAATTAGTATTCTAAAGCTCAAGCTTTAACATTTTATGTGGCTAAT

>M6-PGSC0003DMG400024768-(rev)M6LRR-RLP\_2418

CATGAATATCTGAAATTAGTATTCTAAAGCTCAAGCTTTAACATTTTATGTGGCTAATTTACCTCTTAGAA  
GAATTGGCCATGAAATTTTCGTCTGGTTAGTGAGCGTACATAAGTTTCT

>M6-PGSC0003DMG400024768-(rev)M6LRR-RLP\_248

TTCAACCCCTTCTCAACGCTCGTCTCCTCTTCTTTGTCCCGACATAATACAGTTACAACCCCTTTTCTTTT

CTTGTAGTTTTTGGTGGGAAGAAGAAGATCCGAACAGAAAGTATTGA

>M6-PGSC0003DMG400024768-(rev)M6LRR-RLP\_2480

CTCTTAGAAGAATTGGCCATGAAATTTTCGTCTGGTTAGTGAGCGTACATAAGTTTCTTGGGTTGCCATA

ACTATTCAGAACTTGTATGTTTACAGGCGCTGGATGTATCAAGGTGTGA

>M6-PGSC0003DMG400024768-(rev)M6LRR-RLP\_2542

TTGCCATAACTATTCAGAACTTGTATGTTTACAGGCGCTGGATGTATCAAGGTGTGACAGACTAAGCTC

ATCTGCCTTAGCTTTCTTGATTAATGGACATCCTTCAATGCTACAAGTCT

>M6-PGSC0003DMG400024768-(rev)M6LRR-RLP\_2604

CTAAGCTCATCTGCCTTAGCTTTCTTGATTAATGGACATCCTTCAATGCTACAAGTCTACGCTAGTCACTG

TTTCCATGTGAGTAAATTTGTTGTTAGAACCTGCATTTTGAATAATTCC

>M6-PGSC0003DMG400024768-(rev)M6LRR-RLP\_2666

TAGTCACTGTTTCCATGTGAGTAAATTTGTTGTTAGAACCTGCATTTTGAATAATTCCTTGGGGAGTTTTT

GATGTTGGTTCTGCAATTTAGATTGAGAATCTTGATGCACCAGGAGTTT

>M6-PGSC0003DMG400024768-(rev)M6LRR-RLP\_2728

GGAGTTTTTGATGTTGGTTCTGCAATTTAGATTGAGAATCTTGATGCACCAGGAGTTTCTACTAAAGTC

ATCCAAGGGCTGAAGGACCTAAAGAATCTGAAAAAGCTCATCCTTGATGG

>M6-PGSC0003DMG400024768-(rev)M6LRR-RLP\_2790

CTAAAGTCATCCAAGGGCTGAAGGACCTAAAGAATCTGAAAAAGCTCATCCTTGATGGAGCACTGGTTT

CTGAATCATTCTTCAAGATCATTAAATTTCAATTGCAAATATTTGGTCGAAA

>M6-PGSC0003DMG400024768-(rev)M6LRR-RLP\_2852

CTGGTTTCTGAATCATTCTTCAAGATCATTAAATTTCAATTGCAAATATTTGGTCGAAATAGGGCTTGGAAA

ATGCAAAGGAGTGAAGGACTGACAAGGGCATTCTCCAGCTGGTATCAGGGGGT

>M6-PGSC0003DMG400024768-(rev)M6LRR-RLP\_2914

GCTTGGAAAATGCAAAGGAGTGAAGGACTGACAAGGGCATTCTCCAGCTGGTATCAGGGGGTGTTAATTTAA

ATATCTTGAATCTCACATGCTGTAGCGAACTTACCGATAATGCAATATCAGC

>M6-PGSC0003DMG400024768-(rev)M6LRR-RLP\_2976

ATTTAAATATCTTGAATCTCACATGCTGTAGCGAACTTACCGATAATGCAATATCAGCTATAACAGATTCT

TGCCGGAGTGTGTTTGTGCCTCAAGTTGGAGTGCTGCAACTTACTCACAG

>M6-PGSC0003DMG400024768-(rev)M6LRR-RLP\_3038

ACAGATTCTTGCCGGAGTGTTTTGTGCCTCAAGTTGGAGTGCTGCAACTTACTCACAGAGAAGAGCCTAT  
ATCACCTGGGATTACATTGTTCTTACTTGAGGAGCTTGATCTTACTGAT

>M6-PGSC0003DMG400024768-(rev)M6LRR-RLP\_310

CCTTTTCTTTTCTTGAGTTTTTGGTGGGAAGAAGAAGATCCGAACAGAAAGTATTGACTAGTTGAGATT  
TTTTTTTTTTTTTTTTTACAGAGTATTCAAGATTTGTATGTCAGCGTATTG

>M6-PGSC0003DMG400024768-(rev)M6LRR-RLP\_3100

GAGCCTATATCACCTGGGATTACATTGTTCTTACTTGAGGAGCTTGATCTTACTGATATTTTTGGAGTCA  
ATGACACTGGTGAGGCTCAAGCCATTGTTCTTTTGTATTTTATTAACGTA

>M6-PGSC0003DMG400024768-(rev)M6LRR-RLP\_3162

TTGGAGTCAATGACACTGGTGAGGCTCAAGCCATTGTTCTTTTGTATTTTATTAACGTATTTATTCTGTCAC  
CATTAGATAAAGGTAAATTTCCATTTATTCTGAAGGACCCAGAGCAAG

>M6-PGSC0003DMG400024768-(rev)M6LRR-RLP\_3224

TTCTGTCACCATTAGATAAAGGTAAATTTCCATTTATTCTGAAGGACCCAGAGCAAGACATCTGATTTTC  
CCTCGTCTCATCTGGATTCTATTTCCATTTTATATTCTTCAAGTTTTG

>M6-PGSC0003DMG400024768-(rev)M6LRR-RLP\_3286

CTGATTTTCCCTCGTCTCATCTGGATTCTATTTCCATTTTATATTCTTCAAGTTTTGGGCTTTTGAGTTGGC  
TTCCATTCTTAAGAGCAAGACATCTAATTTTCTTCTTCTTCTT

>M6-PGSC0003DMG400024768-(rev)M6LRR-RLP\_3348

TTTGAGTTGGCTTCCCATCTTAAGAGCAAGACATCTAATTTTCTTCTTCTTCTTCTTCTTCTTCTTGT  
AATGACATGTGAAGCTTTGTGCATTTGTGTCTCAAAGCTCCTCGTG

>M6-PGSC0003DMG400024768-(rev)M6LRR-RLP\_3410

TTTTCTTCTTGAATGACATGTGAAGCTTTGTGCATTTGTGTCTCAAAGCTCCTCGTGTTAAGTCTTCGAT  
GATATGGTTACTCCAAAACCTTGTCAGTTGGTGACATACCTTTAAATTA

>M6-PGSC0003DMG400024768-(rev)M6LRR-RLP\_3472

GTCTTCGATGATATGGTTACTCCAAAACCTTGTCAGTTGGTGACATACCTTTAAATTAAGCATTTCAGCA  
AGGAATTCAGCTATGCTGTAGGTCTGCACTTTAATGTGTTGCATCTCAT

>M6-PGSC0003DMG400024768-(rev)M6LRR-RLP\_3534

TTTCAAGCAAGGAATTCAGCTATGCTGTAGGTCTGCACTTTAATGTGTTGCATCTCATCTTCTGCAGGA  
CTTTATTACTTGTCTAAATGTACAAAGCTTATATGCCTAAAGTTGGGAT

>M6-PGSC0003DMG400024768-(rev)M6LRR-RLP\_3596

TCTGCAGGACTTTTACTTGTCTAAATGTACAAAGCTTATATGCCTAAAGTTGGGATTATGTACTAACAT  
TACTGACAAGGGACTGTACTGTGTGGCTAGAAATTGCAGCGAGATTTCGT

>M6-PGSC0003DMG400024768-(rev)M6LRR-RLP\_3658

TACTAACATTACTGACAAGGGACTGTACTGTGTGGCTAGAAATTGCAGCGAGATTTCGTGAACTTGATCT  
ATACCGGTAAAGTGATTGCCCCATCTAACTTATCCTGTGAATTTGAAAATG

>M6-PGSC0003DMG400024768-(rev)M6LRR-RLP\_372

TTGAGATTTTTTTTTTTTTTTTTTACAGAGTATTCAAGATTTGTATGTCAGCGTATTGAATGTAAACGGAT  
TCAAATGGGCTTAAATGAGTAGTTAGAATTCATTTAATCAACCCAAGA

>M6-PGSC0003DMG400024768-(rev)M6LRR-RLP\_3720

TTGATCTATACCGGTAAAGTGATTGCCCCATCTAACTTATCCTGTGAATTTGAAAATGTCTTCTTATATTGT  
ATCTTGAAAACCATTTGCAGGTGCCAAGGAATTGGTGATGATGCACTC

>M6-PGSC0003DMG400024768-(rev)M6LRR-RLP\_3782

CTTATATTGTATCTTGAAAACCATTTGCAGGTGCCAAGGAATTGGTGATGATGCACTCTATGCTTTATCAA  
GTGGTTGCAAAGAATGCAGAAGTTAACTTGTCTTATTGCAGTGAGGT

>M6-PGSC0003DMG400024768-(rev)M6LRR-RLP\_3844

CTTTATCAAGTGGTTGCAAAGAATGCAGAAGTTAACTTGTCTTATTGCAGTGAGGTTACTGATAGAG  
GAATTGAGTGTCTCGGCCATCTACCAGTGCTCTCTGACCTCGAGATGCGGA

>M6-PGSC0003DMG400024768-(rev)M6LRR-RLP\_3906

GATAGAGGAATTGAGTGTCTCGGCCATCTACCAGTGCTCTCTGACCTCGAGATGCGGAGTCTTTTGAAT  
GTCACAAGCACTGGTTTAAACAGCACTTGCTACGGGATGCAAGAGACTTTCT

>M6-PGSC0003DMG400024768-(rev)M6LRR-RLP\_3968

TTTGAATGTCACAAGCACTGGTTTAAACAGCACTTGCTACGGGATGCAAGAGACTTTCTGAATTGGATGTG  
AAAGACTGTACTAGCATTGATGATTCAGGTTTCATGGCGCTTGCTTATTA

>M6-PGSC0003DMG400024768-(rev)M6LRR-RLP\_4030

TGGATGTGAAAGACTGTACTAGCATTGATGATTCAGGTTTCATGGCGCTTGCTTATTACTCTAGGAATTT  
GCAACAGGTATAATTTCTCAATCTTGA ACTACTCTCTACTTCTTGTA

>M6-PGSC0003DMG400024768-(rev)M6LRR-RLP\_4092

AGGAATTTGCAACAGGTATAATTTCTCAATCTTGA ACTACTCTCTACTTCTTGTAATGTATGATGCTGTT



AAATCTGCTTGGCATGTGCTTTCTGCATTACCAGTTGATTCATAATGG

>M6-PGSC0003DMG400024768-(rev)M6LRR-RLP\_4154

TGATGCTGTTAAATCTGCTTGGCATGTGCTTTCTGCATTACCAGTTGATTCATAATGGTTAAATAACTATA  
CACCTTGATCAGTTTTTATCATTTCTCGAAATCCTGAGAACAGTAATTG

>M6-PGSC0003DMG400024768-(rev)M6LRR-RLP\_4216

ATAACTATACACCTTGATCAGTTTTTATCATTTCTCGAAATCCTGAGAACAGTAATTGAGTTGTAATCTTTT  
TTCAAATTTTGTTCGATACAACATAGCTCTCTTCTCTTGGTCCACAA

>M6-PGSC0003DMG400024768-(rev)M6LRR-RLP\_4272

TGAGTTGTAATCTTTTTTCAAATTTTGTTCGATACAACATAGCTCTCTTCTCTTGGTCCACAATCACATTT  
ATATAAGTGCCAGGAATATATTTTTGTAGAAGTTATCAATAACTCTG

>M6-PGSC0003DMG400024768-(rev)M6LRR-RLP\_434

TTAAACGGATTCAAATGGGCTTAAATGAGTAGTTAGAATTCATTTAATCAACCCAAGAACTTGGAAATTG  
AGGTTTAGTACAAGTAGTTTTTGTGTTGTTGTTTCTTATAGTTTTTCATG

>M6-PGSC0003DMG400024768-(rev)M6LRR-RLP\_496

TGGAATTGAGGTTTAGTACAAGTAGTTTTTGTGTTGTTGTTTCTTATAGTTTTTCATGGATTCTGCTCTGTT  
TGTTCTTAACGAGGATCTTCTTATCAGAATTCTTTCCTTCATTACCCA

>M6-PGSC0003DMG400024768-(rev)M6LRR-RLP\_558

CTGCTCTGTTTGTCTTAACGAGGATCTTCTTATCAGAATTCTTTCCTTCATTACCCATGATTCCGACCGCA  
AAGCTTCCGTTTGGTTGTAAAGCATTCCCGGGTTGACTCTTTCC

>M6-PGSC0003DMG400024768-(rev)M6LRR-RLP\_62

TCCTTTCTTCTCTCTCACACGCACATTACTTGTCTTCTTTTGCCTATGGCACACCTGTCGTCATAGCACCTA  
GGAATTTCCGATACCCACCTGACAAACATCGCCGGAGAATCAGGCAT

>M6-PGSC0003DMG400024768-(rev)M6LRR-RLP\_620

TCCGACCGCAAAGCTTCCGTTTGGTTGTAAAGCATTCCCGGGTTGACTCTTTCACCGTACCCATCT  
CCGGATCCTTCGTCCTGAGTTCATTACAACCCTTTTCTCCAAATTCCCA

>M6-PGSC0003DMG400024768-(rev)M6LRR-RLP\_682

TACCCATCTCCGGATCCTTCGTCCTGAGTTCATTACAACCCTTTTCTCCAAATTCCCACGTATTTACTCCCTT  
GACCTTCCGTTTGGCCCCAAATTAATGACGGAGCTGTTTCCATGCT

>M6-PGSC0003DMG400024768-(rev)M6LRR-RLP\_744

TTTACTCCCTTGACCTTTCCGTTTGCCCCAAATTAATGACGGAGCTGTTTCCATGCTGATGGGTTATGGG  
TTGCCGGATTGGAGTAGGAGCTTGAGGAGGCTGGTGCTGAGTAGAACCA

>M6-PGSC0003DMG400024768-(rev)M6LRR-RLP\_806

GGTTATGGGTTGCCGGATTGGAGTAGGAGCTTGAGGAGGCTGGTGCTGAGTAGAACCACTGGGTTGAA  
ATCAGCCGGGTTAGAGATGCTTATGAAGTCTTGCCTGTTTTGGAGTCTATT

>M6-PGSC0003DMG400024768-(rev)M6LRR-RLP\_868

GTTGAAATCAGCCGGGTTAGAGATGCTTATGAAGTCTTGCCTGTTTTGGAGTCTATTGACGTGTCTTAC  
TGCTGGGGTTTTGGTGATAGGGAAGCTGCGGCTTATCTTTTGGTGGGTC

>M6-PGSC0003DMG400024768-(rev)M6LRR-RLP\_930

TGTCTTACTGCTGGGGTTTTGGTGATAGGGAAGCTGCGGCTTATCTTTTGGTGGGTCTTTAAGGGATGT  
AAAGCTCGACAGGTGTTTGGTCTTACTGATGTTGGTTTGGCGAAAATAG

>M6-PGSC0003DMG400024768-(rev)M6LRR-RLP\_992

AGGGATGTAAAGCTCGACAGGTGTTTGGGTCTTACTGATGTTGGTTTGGCGAAAATAGCAATTGGGTGT  
CAATGCCTAGAGAACTTAGCTTGATGTGGTGTATTGAAATTAAGTCTT

>M6-PGSC0003DMG400024795M6LRR-RLK\_0

CCTATGGCCAACCCTGTCCTACAACACTGTGTCAAGTGTCAATCTTGACAATGAATCTAATTGAAGACAG  
ATATATTTGGAGGAAAATCAAGATTTCTGAAAATTCCATTTGTTTCCTTT

>M6-PGSC0003DMG400024795M6LRR-RLK\_1054

TCCCTCCAGAAATTGGGAATTGCACTTCTTTAGAAGAATTGTTTGTCTATGAAAATCAAATTACAGGAGA  
AATCCCAAGTGAACCTCGGTCTCTTGAAGAATCTTAAGAAGGTTTTGCTTT

>M6-PGSC0003DMG400024795M6LRR-RLK\_1116

ACAGGAGAAATCCCAAGTGAACCTCGGTCTCTTGAAGAATCTTAAGAAGGTTTTGCTTTGGAAGAACAAT  
CTGACGGGGGAAATTCCAGGAAATCTTGAAACTGTTCAAGTTTGAAGTG

>M6-PGSC0003DMG400024795M6LRR-RLK\_1178

GAACAATCTGACGGGGGAAATTCCAGGAAATCTTGAAACTGTTCAAGTTTGAAGTGATTGATTTCTC  
TGTGAACTATCTATATGGTGAAATCCCTCCGTCTTTGAGAATTTAGGCAC

>M6-PGSC0003DMG400024795M6LRR-RLK\_124

TACATAAAATTCTCTGTTGTGCATTTCCAACACCAGTAAACCATGATAAAGAAATCATTGCAGATAACCTC  
TTTCTTATGACTACTACATTTGGTGCAAATGAAATAGAAGTACAGTAGA

>M6-PGSC0003DMG400024795M6LRR-RLK\_1240

ATTTCTCTGTGAACTATCTATATGGTGAAATCCCTCCGTCTTTGAGAAATTTAGGCACATTGGAGGAGCTT  
CTATTATCAGAAAACAGCATTCTGGAGAAATCCCATACTATATTGGCA

>M6-PGSC0003DMG400024795M6LRR-RLK\_1302

GAGGAGCTTCTATTATCAGAAAACAGCATTCTGGAGAAATCCCATACTATATTGGCAACTTTTCCAGCT  
TGAAGCAGCTTGAATTGGACAACAACAACATTTCAAGGTGTGATTCCACCT

>M6-PGSC0003DMG400024795M6LRR-RLK\_1364

TTCCAGCTTGAAGCAGCTTGAATTGGACAACAACAACATTTCAAGGTGTGATTCCACCTACCATTGGGAAA  
CTAAAGGAGCTAAATCTGTTTTTCGCTTGGCAGAATCAACTTCAAGGGAG

>M6-PGSC0003DMG400024795M6LRR-RLK\_1426

TTGGGAAACTAAAGGAGCTAAATCTGTTTTTCGCTTGGCAGAATCAACTTCAAGGGAGCATAACCGACTG  
AGCTAGCAGATTGTCAGAACTTCAGTCTTTGGATCTTTCTCACAATTTCC

>M6-PGSC0003DMG400024795M6LRR-RLK\_1488

CCGACTGAGCTAGCAGATTGTCAGAACTTCAGTCTTTGGATCTTTCTCACAATTTCTTACAGGGTCCAT  
CCCAAACACTTTATTCAATCTCAGGAACTTGACTAAGCTGCTGCTGATA

>M6-PGSC0003DMG400024795M6LRR-RLK\_1550

AGGGTCCATCCCAAACACTTTATTCAATCTCAGGAACTTGACTAAGCTGCTGCTGATATCAAATGTTCTGT  
CCGGTGGAAATCCACCTGATATTGGAAATTGCACCAGCTTGTCCAGATT

>M6-PGSC0003DMG400024795M6LRR-RLK\_1612

ATGTTCTGTCCGGTGGAAATCCACCTGATATTGGAAATTGCACCAGCTTGTCCAGATTACGCCTTGGATC  
AAACAGGTTAGATGGTCCAATTCCTCCAGAAATAGGGCGTCTACCGAGTT

>M6-PGSC0003DMG400024795M6LRR-RLK\_1674

CTTGGATCAAACAGGTTAGATGGTCCAATTCCTCCAGAAATAGGGCGTCTACCGAGTTTGAGTTATCTTG  
AACTGTGCGGAAAATCAATTCAGTGGATCAATCCCTCCAGCTATTGGTAAC

>M6-PGSC0003DMG400024795M6LRR-RLK\_1736

TTATCTTGAAGTGTGCGGAAAATCAATTCAGTGGATCAATCCCTCCAGCTATTGGTAACTGTCCGCAGCTA  
GAAATGGTTGATCTTCATGGAAACAATCTTCAAGGAACAGTTCTTCTCTC

>M6-PGSC0003DMG400024795M6LRR-RLK\_1798

CGCAGCTAGAAATGGTTGATCTTCATGGAAACAATCTTCAAGGAACAGTTCTTCTCTTTTGTGTCCCTC

ACTGGTCTTAATATATTAGACCTATCCATGAACAGAATATCAGGTAGCA

>M6-PGSC0003DMG400024795M6LRR-RLK\_186

GATAACCTCTTTCTTATGACTACTACATTTGGTGCAAATGAAATAGAAGTACAGTAGATCAGAGAGTACA  
TACACACCCTCATTGTCATCATAATCATGTCAGGCAAACACTAACAGTCATC

>M6-PGSC0003DMG400024795M6LRR-RLK\_1860

GTGTCCCTCACTGGTCTTAATATATTAGACCTATCCATGAACAGAATATCAGGTAGCATTCCAGAAGATA  
TAGGGAAACTCATATTACTGAACAACTCATACTGAATGGAAACAACATA

>M6-PGSC0003DMG400024795M6LRR-RLK\_1922

AGAAGATATAGGGAAACTCATATTACTGAACAACTCATACTGAATGGAAACAACATAAACGGAACGGT  
TCCTAAATCACTTGAACCTCTGCCAGGATTTGCAGTTGTTGGATTTAAGCAG

>M6-PGSC0003DMG400024795M6LRR-RLK\_1984

GAACGGTTCCTAAATCACTTGAACCTCTGCCAGGATTTGCAGTTGTTGGATTTAAGCAGCAACAGACTCGC  
GGGCTTAATCCCTGAAGAGATTGGTAACCTCCAAGGACTAGATATTCTGT

>M6-PGSC0003DMG400024795M6LRR-RLK\_2046

AGACTCGCGGGCTTAATCCCTGAAGAGATTGGTAACCTCCAAGGACTAGATATTCTGTTCAATGTAAGTC  
GTAATTTTCTGACCGGACAGATTCCTGAAAGCTTCTTAACCTCTCCAAG

>M6-PGSC0003DMG400024795M6LRR-RLK\_2108

TGTAAGTCGTAATTTTCTGACCGGACAGATTCCTGAAAGCTTCTTAACCTCTCCAAGCTAGCCAACATG  
GATATTTCTCATAACATGTTGACTGGAAGTCTTAGAGTACTCAGTAACCT

>M6-PGSC0003DMG400024795M6LRR-RLK\_2170

CCAACATGGATATTTCTCATAACATGTTGACTGGAAGTCTTAGAGTACTCAGTAACCTTGATAACCTTGTT  
TCTCTGAATGTTTCATAACAATAACTTTTCTGGTGTTCTTCCTAACACAA

>M6-PGSC0003DMG400024795M6LRR-RLK\_2232

AACCTTGTTTCTCTGAATGTTTCATAACAATAACTTTTCTGGTGTTCTTCCTAACACAAAATTCTTTCAAAGT  
CTCCCTCTAGCGCTTTTATTGGTAATCAAGAGCTCTGCACTGACAGA

>M6-PGSC0003DMG400024795M6LRR-RLK\_2294

CTTTCAAAGTCTCCCTCCTAGCGCTTTTATTGGTAATCAAGAGCTCTGCACTGACAGAGCTGCATGCCACT  
TAAGTGGTGATCACCATGGATTAATCCATAAAGAAGATCACCATTGC

>M6-PGSC0003DMG400024795M6LRR-RLK\_2356

CATGCCACTTAAGTGGTGATCACCATGGATTAATAATCCATAAAGAAGATCACCATTGCTATTGTAICTCAG  
CATTTTCATGACCATGCTAATTGTGACAGCTTCTATTGCCATCTTTATCC

>M6-PGSC0003DMG400024795M6LRR-RLK\_2418

GTAICTCAGCATTTCATGACCATGCTAATTGTGACAGCTTCTATTGCCATCTTTATCCGAACACAGGGAGA  
GATATGTCAGAAGGACGACGGAGAAAATGGTTTGCAGTGGGAATTCACC

>M6-PGSC0003DMG400024795M6LRR-RLK\_248

AGAGTACATACACACCCTCATTGTCATCATAATCATGTCAGGCAAACACTAACAGTCATCTTATTCTTCTTGT  
TTCTCAACATATCTTTTTTATTCCCAACATCCATTTCTGGTTTAAATCA

>M6-PGSC0003DMG400024795M6LRR-RLK\_2480

ACAGGGAGAGATATGTCAGAAGGACGACGGAGAAAATGGTTTGCAGTGGGAATTCACCCCATTCGGAA  
AGCTTAGCTTCTCTGTAAGTATGATGTAGTGCCAAGACTTAGTGAATCTAACAT

>M6-PGSC0003DMG400024795M6LRR-RLK\_2542

TCCGAAAGCTTAGCTTCTCTGTAAGTATGATGTAGTGCCAAGACTTAGTGAATCTAACATTGTTGGAAAGGG  
CTGCTCAAGCTTTGTTTATCGCGTTGAGACTCCATCAGGACAGGTGATCG

>M6-PGSC0003DMG400024795M6LRR-RLK\_2604

GGAAAGGGCTGCTCAAGCTTTGTTTATCGCGTTGAGACTCCATCAGGACAGGTGATCGCGGTGAAGAA  
ACTATTGGCTAAGAAAATCGGTGAGGTTCTCAGAGGGACTTTTTTTCTGCA

>M6-PGSC0003DMG400024795M6LRR-RLK\_2666

GAAGAACTATTGGCTAAGAAAATCGGTGAGGTTCTCAGAGGGACTTTTTTTCTGCAGAAGTTAGAAC  
ACTGGGATCAATCAGGCATAAAAACATAGTGAGGCTTCTTGGATGTTGTAA

>M6-PGSC0003DMG400024795M6LRR-RLK\_2728

TTAGAACACTGGGATCAATCAGGCATAAAAACATAGTGAGGCTTCTTGGATGTTGTAATAATGGCAAAA  
CAAGATTGTTGTTGTTGATTACATTAGTAACGGGAGTTTATCGGGACTTC

>M6-PGSC0003DMG400024795M6LRR-RLK\_2790

GGCAAAACAAGATTGTTGTTGTTGATTACATTAGTAACGGGAGTTTATCGGGACTTCTCCATGAGAAG  
AGGGTATTTCTGGATTGGGATGCTAGGTTTAATATCATATTAGGAGCAGCT

>M6-PGSC0003DMG400024795M6LRR-RLK\_2852

TGAGAAGAGGGTATTTCTGGATTGGGATGCTAGGTTTAATATCATATTAGGAGCAGCTCAGGGCTTAGC  
TTATCTTCACCATGACTGTAGTCCTCCTATAGTCCATCGCGATATCAAAC

>M6-PGSC0003DMG400024795M6LRR-RLK\_2914

GCTTAGCTTATCTTCACCATGACTGTAGTCCTCCTATAGTCCATCGCGATATCAAACCAATAACATTTTG  
GTAGGTCCACAGTTTGAAGCTTTTCTTGCAGACTTTGGACTTGCAAAGC

>M6-PGSC0003DMG400024795M6LRR-RLK\_2976

AACATTTTGGTAGGTCCACAGTTTGAAGCTTTTCTTGCAGACTTTGGACTTGCAAAGCTATTAACACATC  
ATCAGATACTTCAAGAGCTTCCACCATAATAGCTGGTTCCTATGGGTAT

>M6-PGSC0003DMG400024795M6LRR-RLK\_3038

AAACACATCATCAGATACTTCAAGAGCTTCCACCATAATAGCTGGTTCCTATGGGTATATAGCTCCGGGT  
GAGTACATTTCTCAAATTTCCGCCCTATATATTCAAATAATTATTAAGT

>M6-PGSC0003DMG400024795M6LRR-RLK\_310

TCTTCTTGTTTCTCAACATATCTTTTTTATTCCCAACATCCATTTCTGGTTTAAATCAAGAAGGGGTTTCTTT  
AATGTCATGGCTTTCCACTTTTAACTCTTCTGCTTCTGTTGCACCTT

>M6-PGSC0003DMG400024795M6LRR-RLK\_3100

CTCCGGGTGAGTACATTTCTCAAATTTCCGCCCTATATATTCAAATAATTATTAAGTGCTCAACATTTTG  
ATAACATGATTATGCTAGTACTATTGAATATTAGCTTTAAAGAAACACT

>M6-PGSC0003DMG400024795M6LRR-RLK\_3162

AACATTTTGATAACATGATTATGCTAGTACTATTGAATATTAGCTTTAAAGAAACACTTGAAAGTTCACCTA  
TATTAGTCTTGTACCCCGTGAAATTCGCTGTGCAAGACATATAGTAGGT

>M6-PGSC0003DMG400024795M6LRR-RLK\_3224

AGTTCACTATATTAGTCTTGTACCCCGTGAAATTCGCTGTGCAAGACATATAGTAGGTATATATACTATGT  
TTGGACAGCATTCTAAATGTTTTGGTCCTACATTGCAGAATATGGATAT

>M6-PGSC0003DMG400024795M6LRR-RLK\_3286

ATACTATGTTTGGACAGCATTCTAAATGTTTTGGTCCTACATTGCAGAATATGGATATAGTCTAAGAATA  
ACTGAGAAGAGTGATGTCTATAGCTATGGCATTGTGCTTCTCGAGGTCCT

>M6-PGSC0003DMG400024795M6LRR-RLK\_3348

TAAGAATAACTGAGAAGAGTGATGTCTATAGCTATGGCATTGTGCTTCTCGAGGTCCTAACGGGGATGG  
AACCAACTGATTCCCGGATAACCAGAATGCACCCACATTGTCACCTGGGTCA

>M6-PGSC0003DMG400024795M6LRR-RLK\_3410

GGGATGGAACCAACTGATTCCCGGATAACCAGAATGCACCCACATTGTCACCTGGGTCAATCAGGAGCTA

AGAGTAAACATAAGGAATTCACAACAATTCTTGATCAGCAATTACTTTTA

>M6-PGSC0003DMG400024795M6LRR-RLK\_3472

GGAGCTAAGAGTAAACATAAGGAATTCACAACAATTCTTGATCAGCAATTACTTTTAAGGTCTGGTACA  
CAAACCTCAGGAGATGCTTCAAGTTCTTGGGGTGGCACTACTTTGTGTAA

>M6-PGSC0003DMG400024795M6LRR-RLK\_3534

CTGGTACACAACTCAGGAGATGCTTCAAGTTCTTGGGGTGGCACTACTTTGTGTAAACCCATGAGCGA  
ATGAAAGACCAACAATGAAGGATGTAGCAGCAATGCTAATGGAAATCAGGC

>M6-PGSC0003DMG400024795M6LRR-RLK\_3596

TGAGCGAATGAAAGACCAACAATGAAGGATGTAGCAGCAATGCTAATGGAAATCAGGCACGAAAATGA  
AGATCTTGAGAAGCCTAATCGAGGAGTGGTACCAAATCCTAAGAAGCAATT

>M6-PGSC0003DMG400024795M6LRR-RLK\_3658

AAATGAAGATCTTGAGAAGCCTAATCGAGGAGTGGTACCAAATCCTAAGAAGCAATTAGTTGTCCTAG  
TTTCTCTGGTTCATCTCAACCTCTCATCAGATCCCCTCCTAAGTAACTCTA

>M6-PGSC0003DMG400024795M6LRR-RLK\_372

GGGGTTTCTTTAATGTCATGGCTTTCCACTTTAACTCTTCTGCTTCTGTTGCACCTTTCTCCTCATGGAAT  
CCAAGTCATGAAAATCCATGCAAATGGGATTATATCCAATGCACCAGT

>M6-PGSC0003DMG400024795M6LRR-RLK\_3720

GTCCTAGTTTCTCTGGTTCATCTCAACCTCTCATCAGATCCCCTCCTAAGTAACTCTAGTTAACTTAGCCTC  
TCTCTAGTTCTAACTAGTTGATTCTTTCAAGTAACTAATAAGGATGTA

>M6-PGSC0003DMG400024795M6LRR-RLK\_3782

ACTTAGCCTCTCTCTAGTTCTAACTAGTTGATTCTTTCAAGTAACTAATAAGGATGTATAGATTATCAATA  
TTCATTTACAAAATAAGAACATTACTCTTTCTAGTCCCGACTATAAGT

>M6-PGSC0003DMG400024795M6LRR-RLK\_434

CTCATGGAATCCAAGTCATGAAAATCCATGCAAATGGGATTATATCCAATGCACCAGTAATGGATTTGTT  
TCAGATATCAAGATCAGGTCGATCAATCTTCCCGCGATATTCCCAAGTCA

>M6-PGSC0003DMG400024795M6LRR-RLK\_496

GATTTGTTTCAGATATCAAGATCAGGTCGATCAATCTTCCCGCGATATTCCCAAGTCAAGTTCTTTCTTTTC  
ACTTTCTGGAAGTGCTAGTTTTATCAAATTGTAACCTCACTGGTGAAA

>M6-PGSC0003DMG400024795M6LRR-RLK\_558

CTTTCTTTTCACTTTCTGGAAGTGCTAGTTTTATCAAATTGTAACCTCACTGGTGAAATTCCTGCTTTTATT  
GGAAACTTGTTCATCGTCTCTGAGGATTTTGGATCTCAGTTTCAATGCT

>M6-PGSC0003DMG400024795M6LRR-RLK\_62

GAAGACAGATATATTTGGAGGAAAATCAAGATTTCTGAAAATTCCATTTGTTTCCTTTCTTTTACATAAAA  
TTCTCTGTTGTGCATTTCCAACACCAGTAAACCATGATAAAGAAATCAT

>M6-PGSC0003DMG400024795M6LRR-RLK\_620

TGCTTTTATTGGAAACTTGTTCATCGTCTCTGAGGATTTTGGATCTCAGTTTCAATGCTCTAACAGGAAGTA  
TTCCACCTGAAATAGGAAGATTATCACAGCTGAAGCAACTTTTGTGAG

>M6-PGSC0003DMG400024795M6LRR-RLK\_682

CAGGAAGTATTCCACCTGAAATAGGAAGATTATCACAGCTGAAGCAACTTTTGTGAGTTCTAATTTCTT  
TCAAGGTCAGATACCAAAGGAGATAGGAAGATGTTCTGAATTGCAGCAGC

>M6-PGSC0003DMG400024795M6LRR-RLK\_744

AATTTCTTTCAAGGTCAGATACCAAAGGAGATAGGAAGATGTTCTGAATTGCAGCAGCTTGAGCTCTTTG  
ACAATCAGTTTTCTGGAAGATACTGAAGAGATCGGTCAGTTAACGAGT

>M6-PGSC0003DMG400024795M6LRR-RLK\_806

GCTCTTTGACAATCAGTTTTCTGGAAGATACCTGAAGAGATCGGTCAGTTAACGAGTCTTGAAATCTTT  
CGTGCTGGTGGGAACGTGGGAATTCAAGGAGAAATCCCAATGCAGATATC

>M6-PGSC0003DMG400024795M6LRR-RLK\_868

AAATCTTTCTGCTGGTGGGAACGTGGGAATTCAAGGAGAAATCCCAATGCAGATATCAAGCTGCAAA  
GAGTTGGTCATTTTGGGTCTTGCAGATACCGGTGTTACGGGTCAGATTCCAC

>M6-PGSC0003DMG400024795M6LRR-RLK\_930

TGCAAAGAGTTGGTCATTTTGGGTCTTGCAGATACCGGTGTTACGGGTCAGATTCCACATAGTATAGGT  
GAACTCAAGAAGCTGCAGACTCTTGCTGTTTACACAGCTAATTTGACTGGT

>M6-PGSC0003DMG400024795M6LRR-RLK\_992

TATAGGTGAACTCAAGAAGCTGCAGACTCTTGCTGTTTACACAGCTAATTTGACTGGTGAAATCCCTCCA  
GAAATTGGGAATTGCACTTCTTTAGAAGAATTGTTTGTCTATGAAAATCA

>M6-PGSC0003DMG400024890M6LRR-RLK\_0

ACCATTTAATTTAGGCTAAAACTAATTTGATCTTCTATGTAATGTGTTGTTCTTCAGTGAGAGATAAAA  
GGAAAAAAGCAAAGAGAGGAAAAGGGGAGGCTTAGCTTCTTCCTTGAT



>M6-PGSC0003DMG400024890M6LRR-RLK\_1037

AATTAGATGGTCCGATTCTCTCTGAATTAGGGAATTTGAAATTGTTAAACACACTTTTTCTACATATAAAT  
CTTCTTTCAGGTCCAATTCCAAAGGAACTAGGCAACCTTACTGGCTTAG

>M6-PGSC0003DMG400024890M6LRR-RLK\_1098

ACATATAAATCTTCTTTCAGGTCCAATTCCAAAGGAACTAGGCAACCTTACTGGCTTAGTCAATCTTGATC  
TTTCAGCCAATGCACTTACTGGTGAAATCCCATTTGAGCTCATTAACCT

>M6-PGSC0003DMG400024890M6LRR-RLK\_1159

AATCTTGATCTTTCAGCCAATGCACTTACTGGTGAAATCCCATTTGAGCTCATTAACCTTACGAGCTAAG  
TCTTTTCAACCTGTTTCATGAACAAATTACATGGTTCTATACCGGATTTTC

>M6-PGSC0003DMG400024890M6LRR-RLK\_122

TGAAGACTCACTTTCTTTCTTTTGAAGATGTTTGATTCTTTAAATCTATCTATACCTGAAGTTTCTCAGATT  
CCCTTAACTTTTTTCTCCTTTTACATTGCCTCAAAGTCTCATAATAAC

>M6-PGSC0003DMG400024890M6LRR-RLK\_1220

AGCAGCTAAGTCTTTTCAACCTGTTTCATGAACAAATTACATGGTTCTATACCGGATTTTCATCGCTGATTAT  
CCTGACCTGAAGATTCTTGGTCTCTGGATGAACAACTTCACCGGTATAA

>M6-PGSC0003DMG400024890M6LRR-RLK\_1281

CGCTGATTATCCTGACCTGAAGATTCTTGGTCTCTGGATGAACAACTTCACCGGTATAATCCCGGAGAAG  
TTAGGCCAAAATGAGAAGCTACAAGAGCTGGATTTGTCTTCAAATAAGCT

>M6-PGSC0003DMG400024890M6LRR-RLK\_1342

CCGGAGAAGTTAGGCCAAAATGAGAAGCTACAAGAGCTGGATTTGTCTTCAAATAAGCTCACTGGTACA  
ATTCCTAAACACTTGTGTGCTTCTAAGCAACTCAGAATCTTGATTTTACTC

>M6-PGSC0003DMG400024890M6LRR-RLK\_1403

CTGGTACAATTCCTAAACACTTGTGTGCTTCTAAGCAACTCAGAATCTTGATTTTACTCAAGAATTTCTCT  
TTGGTTCAATCCAGAGGATTTAGGCACATGTTTAAGTCTTGTTAGAG

>M6-PGSC0003DMG400024890M6LRR-RLK\_1464

GAATTCCTCTTTGGTTCAATCCAGAGGATTTAGGCACATGTTTAAGTCTTGTTAGAGTGAGATTGGGA  
CAGAACTACTTGAATGGTAGTATTCCAAATGGATTCATTTACATGCCTGA

>M6-PGSC0003DMG400024890M6LRR-RLK\_1525

AGATTGGGACAGAACTACTTGAATGGTAGTATTCCAAATGGATTCATTTACATGCCTGACCTAAACTTAG

TTGAGCTTCAGAATAACTACCTGTCTGGTACCTTATCAGAAAATGGTAAC

>M6-PGSC0003DMG400024890M6LRR-RLK\_1586

TAAACTTAGTTGAGCTTCAGAATAACTACCTGTCTGGTACCTTATCAGAAAATGGTAACACTTCTTCAAA

GCCAGCCAAGTTAGGTCAATTGAATTTATCAAACAATCAACTTTCAGGTT

>M6-PGSC0003DMG400024890M6LRR-RLK\_1647

TTCTTCAAAGCCAGCCAAGTTAGGTCAATTGAATTTATCAAACAATCAACTTTCAGGTTCTTACCATTTTC

ACTTTCTAATTTCTCTTCCCTTCAAATCCTTTCACCTGGAGGGAACCA

>M6-PGSC0003DMG400024890M6LRR-RLK\_1708

TTACCATTTTCACCTTCTAATTTCTCTTCCCTTCAAATCCTTTCACCTGGAGGGAACCAATTCTCTGGTCCTA

TTCTACTTCTATAGGTCAACTCTCACAAGCTTTAAAAATTGACCTC

>M6-PGSC0003DMG400024890M6LRR-RLK\_1769

TCTCTGGTCCTATTCTACTTCTATAGGTCAACTCTCACAAGCTTTAAAAATTGACCTCAGTCAAAACTTTC

TTTCTGGTGAAATCCCCCTGAAATAGGCAACTGTGTCCACTTGACTT

>M6-PGSC0003DMG400024890M6LRR-RLK\_183

TTTCTCAGATTCCTTAACTTTTTTCTCTTTTACATTGCCTCAAAGTCTCATAATAACTCACTTTGTTTCTTC

TTCAAGTCCAAACAAATTCACCTTCTTTGAAAACTTCCAAGAAAA

>M6-PGSC0003DMG400024890M6LRR-RLK\_1830

TCAAAACTTTCTTTCTGGTGAAATCCCCCTGAAATAGGCAACTGTGTCCACTTGACTTATCTAGACTTGA

GCCAGAACAACCTTCTCTGGCTCAATTCCACCCCGAGTATCCGAAATCCG

>M6-PGSC0003DMG400024890M6LRR-RLK\_1891

CTAGACTTGAGCCAGAACAACCTTCTCTGGCTCAATTCACCCCGAGTATCCGAAATCCGAATCTTGAAC

ACTTGAACCTGTCAAGAAACCACTTGAATGAGACCATAACCAAAGTCAATT

>M6-PGSC0003DMG400024890M6LRR-RLK\_1952

TCTTGAACCTACTTGAACCTGTCAAGAAACCACTTGAATGAGACCATAACCAAAGTCAATTGGCACCATGAG

GAGTCTCACTACTGCTGATTTCTCATTCAATGATCTATCAGGCAAGCTCC

>M6-PGSC0003DMG400024890M6LRR-RLK\_2013

CACCATGAGGAGTCTCACTACTGCTGATTTCTCATTCAATGATCTATCAGGCAAGCTCCAGAAATCAGGC

CAATTTGCTTACTTCAATGCTACTTCTTTCGCGGGCAATCCTCAACTCTG

>M6-PGSC0003DMG400024890M6LRR-RLK\_2074

GAATCAGGCCAATTTGCTTACTTCAATGCTACTTCTTTTCGCGGGCAATCCTCAACTCTGTGGTTCTTTATT  
GAACAACCCTTGCAATTTTACACTAATCACTGATCCACCAGGAAAGTCT

>M6-PGSC0003DMG400024890M6LRR-RLK\_2135

GTTCTTTATTGAACAACCCTTGCAATTTTACACTAATCACTGATCCACCAGGAAAGTCTCATGGAGATTTT  
AAGCTGATCTTCGCCCTCGGATTGTTAATCTGTTCACTAGTCTTTGCAG

>M6-PGSC0003DMG400024890M6LRR-RLK\_2196

TGGAGATTTCAAGCTGATCTTCGCCCTCGGATTGTTAATCTGTTCACTAGTCTTTGCAGCTGCAGCTATCA  
TAAAGGCCAAGTCTTTCAAGAAAACAGGCGCGGACTCTTGAAAATGAC

>M6-PGSC0003DMG400024890M6LRR-RLK\_2257

GCAGCTATCATAAAGGCCAAGTCTTTCAAGAAAACAGGCGCGGACTCTTGAAAATGACAGCATTTCAG  
AAGGTTGAATTCAGTGTTGCTAATGTTCTTGAATGTGTAAAAGATGGCAAT

>M6-PGSC0003DMG400024890M6LRR-RLK\_2318

CATTTCAGAAGGTTGAATTCAGTGTTGCTAATGTTCTTGAATGTGTAAAAGATGGCAATGTGATAGGCA  
GAGGAGGAGCCGGGATTGTGTACCATGGGAAAATGCCAAATGGAGTTGAAA

>M6-PGSC0003DMG400024890M6LRR-RLK\_2379

GATAGGCAGAGGAGGAGCCGGGATTGTGTACCATGGGAAAATGCCAAATGGAGTTGAAATTGCAGTC  
AAAAAACTGCTTGGCTTTGGGAACAATAGTCATGATCATGGTTTCAGGGCGGA

>M6-PGSC0003DMG400024890M6LRR-RLK\_244

ACTTTGTTTCTTCTTCAAGTCCAAACAATTCATTTCTTTGAAAACTTCCAAGAAAATATGTTGCCACTT  
ATTCTTGTCACTCTTTACTCTTGTATGCACTTCCATTTCTCCTCT

>M6-PGSC0003DMG400024890M6LRR-RLK\_2440

GCAGTCAAAAACTGCTTGGCTTTGGGAACAATAGTCATGATCATGGTTTCAGGGCGGAGATTCCGACA  
CTAGGCAACATTGACATAGAAACATTGTAAGACTAGTTGCTTTTTGTTCC

>M6-PGSC0003DMG400024890M6LRR-RLK\_2501

TTCGGACTAGGCAACATTCGACATAGAAACATTGTAAGACTAGTTGCTTTTTGTTCCAACAAGGAAAC  
GAATCTCCTTGTGTATGAGTACATGAGGAATGGTAGTTTAGGAGAGGCGT

>M6-PGSC0003DMG400024890M6LRR-RLK\_2562

CAAGGAAACGAATCTCCTTGTGTATGAGTACATGAGGAATGGTAGTTTAGGAGAGGCGTTACACGGGA  
AAAAAGGCGGATTCTTAGCTGGAATTTGAGGTATAAAATTGCTATAGAAGC

>M6-PGSC0003DMG400024890M6LRR-RLK\_2623

CACGGGAAAAAAGGCGGATTCTTAGCTGGAATTTGAGGTATAAAATTGCTATAGAAGCTGCTAAAGG  
ATTGTGCTATCTTCACCACGACTGTTGCCATTGATCGTTCACAGAGACGTC

>M6-PGSC0003DMG400024890M6LRR-RLK\_2684

CTAAAGGATTGTGCTATCTTCACCACGACTGTTGCCATTGATCGTTCACAGAGACGTCAAATCCAACAA  
CATTTTGCTGAATTCAAACTTTGAAGCTCATGTTGCTGATTTTGGACTAG

>M6-PGSC0003DMG400024890M6LRR-RLK\_2745

ATCCAACAACATTTTGCTGAATTCAAACTTTGAAGCTCATGTTGCTGATTTTGGACTAGCAAATTTTGG  
TAGATGGTGGCGCCTCAGAATGCATGTCTGCTGTTGCTGGCTCCTATGG

>M6-PGSC0003DMG400024890M6LRR-RLK\_305

TGTTGCCACTTATTCTTGTCACACTCTTACTCTTGTATGCACTTCCATTTCTCCTCTTCTCTTCTATTAGT  
ACTGATTTTCATGCTTTGTTGAGTCTAAAAAAGGATTTGACTTCT

>M6-PGSC0003DMG400024890M6LRR-RLK\_3050

TGTACGTTGGTTAGTTAATTTAGTTAGGTATGTAGACATTACCTGACAAAGTGATTTTTGCCTGGTCGTA  
CATAACAACAATTAGTCTTATCAATTGGTCATAAAATCAAACCTTTTAA

>M6-PGSC0003DMG400024890M6LRR-RLK\_3111

CTGGTCGTACATAACAACAATTAGTCTTATCAATTGGTCATAAAATCAAACCTTTTAAGATAAATATTTT  
ATCGCATTTTGTTTTTTTTAGTTTGGAGTATGTTGAATTAGAGAGAAAT

>M6-PGSC0003DMG400024890M6LRR-RLK\_3172

TAAATATTTTATCGCATTTTGTTTTTTTTAGTTTGGAGTATGTTGAATTAGAGAGAAATTTTGGGCTAAGG  
CCCAAGATCACCCGTGATTGAAGGCATAGAGTTTAGGGCTTTGTTGGAG

>M6-PGSC0003DMG400024890M6LRR-RLK\_3233

TGGGCTAAGGCCCAAGATCACCCGTGATTGAAGGCATAGAGTTTAGGGCTTTGTTGGAGTTTTCTGGGT  
AATCGTAAATCGTATCATGGGCCGTTTTACGAGAAAGCACTTAATTTCTG

>M6-PGSC0003DMG400024890M6LRR-RLK\_3294

TTCTGGGTAATCGTAAATCGTATCATGGGCCGTTTTACGAGAAAGCACTTAATTTCTGTGCCATAGAGA  
GAGTTCTTAGTGGGGGCCCAATAGAAGATCACTCTGCTAAAGTGGGTCAA

>M6-PGSC0003DMG400024890M6LRR-RLK\_3355

CCATAGAGAGAGTTCTTAGTGGGGGCCCAATAGAAGATCACTCTGCTAAAGTGGGTCAAAAACTGACT

TGACTGACACACAAAGATAATTGGGCCCCCTCGATTGTCGTGCTTGCCAAC

>M6-PGSC0003DMG400024890M6LRR-RLK\_3416

AACTGACTTGACTGACACACAAAGATAATTGGGCCCCCTCGATTGTCGTGCTTGCCAACACTCAACATGCAC  
TTGTTCAAAGAAATTAGGCATCAACTAAATGGAATAGAGTATATAATTT

>M6-PGSC0003DMG400024890M6LRR-RLK\_3477

AACATGCACTTGTTCAAAGAAATTAGGCATCAACTAAATGGAATAGAGTATATAATTTATAGTCACAAT  
ATTACATATTTTACTGTATAACTCTTTAAAGGAGTCAACTTTTTTAAAAT

>M6-PGSC0003DMG400024890M6LRR-RLK\_3538

AGTCACAATATTACATATTTTACTGTATAACTCTTTAAAGGAGTCAACTTTTTTAAAATTAAGGAGGGA  
GAGAAAGCAATAGTGTGAATAGCAATGAAGTCAAGATATTCATTAAGGAG

>M6-PGSC0003DMG400024890M6LRR-RLK\_3599

AAGGAGGGAGAGAAAGCAATAGTGTGAATAGCAATGAAGTCAAGATATTCATTAAGGAGATTCGTCAC  
ATATATTTAAGGGGTGTTAACTGACTCCAAATATTGTTTAATGCATATATAT

>M6-PGSC0003DMG400024890M6LRR-RLK\_366

CTCTTCTATTAGTACTGATTTTCATGCTTTGTTGAGTCTAAAAAAGGATTTGACTTCTCAAATTCTGTTTT  
GAGTTCATGGGATAGTTCAAATCCTAGCTCAGTTTGTCTTGGATGGG

>M6-PGSC0003DMG400024890M6LRR-RLK\_3660

TCGTCACATATATTTAAGGGGTGTTAACTGACTCCAAATATTGTTTAATGCATATATATTAATTTGCATA  
TACATTGTCATAAATATTAACCTATTTTTTTAAAAAATGTTGCAGAAT

>M6-PGSC0003DMG400024890M6LRR-RLK\_3721

AATTTGCATATACATTGTCATAAATATTAACCTATTTTTTTAAAAAATGTTGCAGAATATGCATATACATT  
GAGAGTAGATGAAAAGAGCGATGTATATAGTTTTGGTGTGGTTCTATT

>M6-PGSC0003DMG400024890M6LRR-RLK\_3782

GCATATACATTGAGAGTAGATGAAAAGAGCGATGTATATAGTTTTGGTGTGGTTCTATTGGAGCTGATC  
ACCGGGCGTCGTCCGGTGGGTGAATTCGGTGACGGAGTGGACATAGTACAA

>M6-PGSC0003DMG400024890M6LRR-RLK\_3843

AGCTGATCACCGGGCGTCGTCCGGTGGGTGAATTCGGTGACGGAGTGGACATAGTACAATGGAGCAAG  
AAAGTGACAAATTGTAAAAGGGAACAAGTGACGCACATTGTTGATCCAAGGT

>M6-PGSC0003DMG400024890M6LRR-RLK\_3904

GAGCAAGAAAGTGACAAATTGTAAAAGGGAACAAGTGACGCACATTGTTGATCCAAGGTTAACCACTG  
TGCCTGAAGATGAAGCCATGCATTTGTTCTTTATTTCTATGCTATGTATTCA

>M6-PGSC0003DMG400024890M6LRR-RLK\_3965

ACCACTGTGCCTGAAGATGAAGCCATGCATTTGTTCTTTATTTCTATGCTATGTATTCAAGAAAATAGCGT  
AGAACGTCCAACAATGAGGGAAGTCATTCAAATGTTGTCCGAATTTCCA

>M6-PGSC0003DMG400024890M6LRR-RLK\_4026

AAAATAGCGTAGAACGTCCAACAATGAGGGAAGTCATTCAAATGTTGTCCGAATTTCCACGACAATCAT  
CAGAATATAATCAACCTTCGTCTTCAAAGTTGTTTTACGGAAGCTAAAAA

>M6-PGSC0003DMG400024890M6LRR-RLK\_4087

ACAATCATCAGAATATAATCAACCTTCGTCTTCAAAGTTGTTTTACGGAAGCTAAAAAGCCTTGAGAAT  
GACCAAATACTTGTCCGAAGATTCGGAAAGAACTTTTGGTCTAACCAAT

>M6-PGSC0003DMG400024890M6LRR-RLK\_4148

CTTGAGAATGACCAAATACTTGTCCGAAGATTCGGAAAGAACTTTTGGTCTAACCAATTTTCATTTTTAT  
ATAATATGGTCCTCTTGGCAAGTTGTTTTAATTTAACTTTGTATTATT

>M6-PGSC0003DMG400024890M6LRR-RLK\_4209

TCATTTTTATATAATATGGTCCTCTTGGCAAGTTGTTTTAATTTAACTTTGTATTATTCTTTATGCTTATT  
AAGGTTAGGGGTTTTGTGACAAAGAGAAGTAGGAATATAATTAGTAC

>M6-PGSC0003DMG400024890M6LRR-RLK\_427

AATTCTGTTTTGAGTTCATGGGATAGTTCAAATCCTAGCTCAGTTTGTCTTGGATGGGAATCAAATGCTT  
ACAAGACCGAGTTGTATCGATAAACTTATCCAATATGGAGCTTTATGGT

>M6-PGSC0003DMG400024890M6LRR-RLK\_4270

TTATGCTTATTTAAGGTTAGGGGTTTTGTGACAAAGAGAAGTAGGAATATAATTAGTACTATGTGTTATT  
AGTGGTTAATTAGTTGCTTTTGATTAGTTGTTAGGGTTGGGGGTGCTTAA

>M6-PGSC0003DMG400024890M6LRR-RLK\_4331

TGTGTTATTAGTGGTTAATTAGTTGCTTTTGATTAGTTGTTAGGGTTGGGGGTGCTTAAGTTCTTGGCAA  
AGGCAGACCAGGCCCAATTAAGTTGGTTCTGAATGCTTTTTGTATCATAT

>M6-PGSC0003DMG400024890M6LRR-RLK\_4392

TCTTGGCAAAGGCAGACCAGGCCCAATTAAGTTGGTTCTGAATGCTTTTTGTATCATATGGTTATATACA  
GGTATATATTCTTCTTTTACGGGTGAATTGATTCTCGTTCCAATAATGT

>M6-PGSC0003DMG400024890M6LRR-RLK\_4438

TTTTGTATCATATGGTTATATACAGGTATATATTCTTCCTTTTACGGGTGAATTGATTCTCGTTCCAATAAT  
GTTTAATTGTTTATTGTTGGTCATGTTGTTGCGGGTGAATTGGTTCTC

>M6-PGSC0003DMG400024890M6LRR-RLK\_488

TCAAATGCTTACAAGACCGAGTTGTATCGATAAACTTATCCAATATGGAGCTTTATGGTTCTGTTTCCCCT  
GCTATTTCAAGGTTAGATAAGCTTGTTGAGCTTTCAATTGATGGAAACA

>M6-PGSC0003DMG400024890M6LRR-RLK\_549

TGTTTCCCCTGCTATTTCAAGGTTAGATAAGCTTGTTGAGCTTTCAATTGATGGAAACAACCTTCACTGGTG  
AAATCAAGATTGAGAACATGAGGAGTCTTCAGTCACTCAACATTTCAA

>M6-PGSC0003DMG400024890M6LRR-RLK\_61

AGAGATAAAAGGAAAAAAGCAAAGAGAGGAAAAGGGGAGGCTTAGCTTCTTCCTTGATCTTGAAGAC  
TCACTTTCTTTCTTTTGAAGATGTTTGATTCTTTAAATCTATCTATACCTGA

>M6-PGSC0003DMG400024890M6LRR-RLK\_610

TTCACTGGTGAAATCAAGATTGAGAACATGAGGAGTCTTCAGTCACTCAACATTTCAAACAACATGTTTA  
GTGGGAGTCTTGATTGGAECTACACAAGTTTGGCTAATTTGGACGTTCTT

>M6-PGSC0003DMG400024890M6LRR-RLK\_671

ACATGTTTAGTGGGAGTCTTGATTGGAECTACACAAGTTTGGCTAATTTGGACGTTCTTGATGCTTACAA  
CAATAACTTCTTCTTTTCTTCCTGTTGGAGTTGTTAGCTTGGAGAAAC

>M6-PGSC0003DMG400024890M6LRR-RLK\_732

TGCTTACAACAATAACTTCTTCTTTTCTTCCTGTTGGAGTTGTTAGCTTGGAGAACTCAAGTACTTGG  
ACTTAGGTGGCAATTATTTCTATGGACGAATACCGGAGAGTTATGGGGA

>M6-PGSC0003DMG400024890M6LRR-RLK\_793

AAGTACTTGGACTTAGGTGGCAATTATTTCTATGGACGAATACCGGAGAGTTATGGGGATTTGATTGGG  
TTGGAATACTTACAACCTGCTGGGAATGACCTGCATGGAAGAATCCCTAGA

>M6-PGSC0003DMG400024890M6LRR-RLK\_854

TGATTGGGTTGGAATACTTACAACCTGCTGGGAATGACCTGCATGGAAGAATCCCTAGAGCTTTGGGGA  
ATCTTACTAACTTGAAAGAGATTTATTTGGGATATTTCAATGTTTTTGTAG

>M6-PGSC0003DMG400024890M6LRR-RLK\_915

TTTGGGGAATCTTACTAACTTGAAAGAGATTTATTTGGGATATTTCAATGTTTTTGTAGGTGGGATTCCTA

AGTAATTTGGAAAGTTGGTGAATCTTGTTACATGGATATTTCTAACTG

>M6-PGSC0003DMG400024890M6LRR-RLK\_976

GGGATTCCTAAGTAATTTGGAAAGTTGGTGAATCTTGTTACATGGATATTTCTAACTGTGAATTAGATG  
GTCCGATTCCTCCTGAATTAGGGAATTTGAAATTGTAAACACACTTTTT

>M6-PGSC0003DMG400024954M6LRR-RLK\_0

GGAAGGTTGGTTTTCGATGAGCTGTGTCTTCTTCTCTCAATATTTATAAACTCCCTTCACATGGTCC  
CCTTTTTATCATAAATCTACACTTATTCTCCTAACTTTTTTTCTATTC

>M6-PGSC0003DMG400024954M6LRR-RLK\_1037

CTGCCAAATTCCTGAACCAACTTCTTCCCAGCAATTGCAGCCATTCCGAAACCCACAGACTCAAACCC  
AGCCGCCGAATCTCCAAAAGAGGGCAAAAATGGGTTGAGAACTGGCACA

>M6-PGSC0003DMG400024954M6LRR-RLK\_1098

ACTCAAACCCAGCCGCCGAATCTCCAAAAGAGGGCAAAAATGGGTTGAGAACTGGCACAATTATAGGC  
ATAATAGCAGGGGATATTGCAGCAGTAGGAGTTTTAGCACTGATTTTCATGT

>M6-PGSC0003DMG400024954M6LRR-RLK\_1159

TATAGGCATAATAGCAGGGGATATTGCAGCAGTAGGAGTTTTAGCACTGATTTTCATGTACGTATACCG  
AGCCAAAAGAAGAAAAGGAACATAGAAAATAGCATTAAAAAAGAAGCTGA

>M6-PGSC0003DMG400024954M6LRR-RLK\_122

TTCCTAAAAAAAACAGAGATGTGGGAACATTTAGAGACGCCATGAAATTCCAAACCTTTGATCTTGTTT  
TTCTTCTTTTTCTACTACTTGAATATCAAGCTTCTGGGCTTAACAATGAT

>M6-PGSC0003DMG400024954M6LRR-RLK\_1220

GTATACCGAGCCAAAAGAAGAAAAGGAACATAGAAAATAGCATTAAAAAAGAAGCTGAAACTGCAAA  
AGATTTTGACTGGGCATCGTCAGCATCAGAAGAAGAATACAACCTGGTTAAGG

>M6-PGSC0003DMG400024954M6LRR-RLK\_1281

CTGCAAAGATTTTGACTGGGCATCGTCAGCATCAGAAGAAGAATACAACCTGGTTAAGGTCATGGACTT  
GCTTGAAAAACAAGGCACGGAGATGATGACGAATTATCAGAAGCTTCCC

>M6-PGSC0003DMG400024954M6LRR-RLK\_1342

ATGGACTTGCTTGAAAAACAAGGCACGGAGATGATGACGAATTATCAGAAGCTTCCCATTAGAAAAG  
TGAAAAATCCCAATTGGGTCATCCTCAGCAGAATCACGTGCATACAGAGCA

>M6-PGSC0003DMG400024954M6LRR-RLK\_1403



TCAGAAAGTGAAAAATCCCAATTGGGTCATCCTCAGCAGAATCACGTGCATACAGAGCAGAAAACAGGT  
GAATTAGTAACGGTTGATGGAGAAAGGGAACCTCGAATTAGAAACACTACTA

>M6-PGSC0003DMG400024954M6LRR-RLK\_1464

AAACAGGTGAATTAGTAACGGTTGATGGAGAAAGGGAACCTCGAATTAGAAACACTACTAAAAGCATCT  
GCATACATTTTGGGAGCTAGTGGGTCGAGTATAATGTACAAGGCAGTGCTAG

>M6-PGSC0003DMG400024954M6LRR-RLK\_1525

AGCATCTGCATACATTTTGGGAGCTAGTGGGTCGAGTATAATGTACAAGGCAGTGCTAGAAGACGGTAC  
TACTACTGGCGGTGCGACGAATTGGTGAAAGTGGTGTGGAACGGTTCAAAGA

>M6-PGSC0003DMG400024954M6LRR-RLK\_1586

GACGGTACTACTGGCGGTGCGACGAATTGGTGAAAGTGGTGTGGAACGGTTCAAAGATTTTCGAGAA  
TCAAGTAAAGGTAATTGCTAAATTGGTGACACAAATTTGGTTAAAATCCGT

>M6-PGSC0003DMG400024954M6LRR-RLK\_1647

TCGAGAATCAAGTAAAGGTAATTGCTAAATTGGTGACACAAATTTGGTTAAAATCCGTGGCTTCTATTG  
GGGCGCTGAAGAGAAATTGGTCATCTACGATTTTCGTTCCCTAATGGTAGCC

>M6-PGSC0003DMG400024954M6LRR-RLK\_1708

CCTTCTATTGGGCGCTGAAGAGAAATTGGTCATCTACGATTTTCGTTCCCTAATGGTAGCCTTGCCAATGCA  
CGTAACAGTAAGTCCACTTTTTCCCATATACATTATGTTTTAGATCAAAT

>M6-PGSC0003DMG400024954M6LRR-RLK\_1769

GCCAATGCACGTAACAGTAAGTCCACTTTTTCCCATATACATTATGTTTTAGATCAAATAACGTTACATCA  
ACTTTTTTATTGAGTAGAATCGCGTTTTTTGTTATTGTTTTACTATTTT

>M6-PGSC0003DMG400024954M6LRR-RLK\_183

ATCTTGTTCTTCTTCTTTTTCTACTACTTGAATATCAAGCTTCTGGGCTTAACAATGATGGACTTCTGTTAC  
TGACATTCAAGTACAATATTCTGAGTGACCCTTTAAGTGTCTGCAGA

>M6-PGSC0003DMG400024954M6LRR-RLK\_1830

CGTTACATCAACTTTTTTATTGAGTAGAATCGCGTTTTTTGTTATTGTTTTACTATTTTGCTCCTGTTTTACA  
GTGGAGAATAAATTGAAACAAAATTGACTAGTCATTATGTGTGTACA

>M6-PGSC0003DMG400024954M6LRR-RLK\_1891

TCCTGTTTTACAGTGGAGAATAAATTGAAACAAAATTGACTAGTCATTATGTGTGTACATTGTACCTAATC  
ATCTCTAATTCTTAATTTGTTTCAATAAGTATCTTTTGCATAATTGCGA

>M6-PGSC0003DMG400024954M6LRR-RLK\_1952

GTACCTAATCATCTCTAATTCTTAATTTGTTTCAATAAGTATCTTTTGCATAAATTGCGAACATTTTGAATA  
TAAAAGTTCCGGAGTAGGTTTGTACTTTAAGACATTTGGTTATGCTTAA

>M6-PGSC0003DMG400024954M6LRR-RLK\_2013

ATTTTGAATATAAAAAGTTCCGGAGTAGGTTTGTACTTTAAGACATTTGGTTATGCTTAATATTCAAAGA  
AAGACGTAACAAGTCACTCAAATTAAGTTCACACAAGTATAAATTTGTGC

>M6-PGSC0003DMG400024954M6LRR-RLK\_2074

TTCAAAGAAAGACGTAACAAGTCACTCAAATTAAGTTCACACAAGTATAAATTTGTGCGCAAATTAGAA  
AAATATTATGAATTTCTGTAAAATGCGCGGGAAGTAAAGGAGATAGTGG

>M6-PGSC0003DMG400024954M6LRR-RLK\_2135

AAATTAGAAAAATATTATGAATTTCTGTAAAATGCGCGGGAAGTAAAGGAGATAGTGGACCTTGGGGT  
GGAGTTGTTGAAACTTTAGTGTGTTTTTAATGTGGAAAATAGCAGTAGT

>M6-PGSC0003DMG400024954M6LRR-RLK\_2196

CTTGGGGTGGAGTTGTTGAAACTTTAGTGTGTTTTTAATGTGGAAAATAGCAGTAGTCCCTCACTGC  
AAGTCAACCGTGTCTGTTTCTAAATGGGCGCCTCACAATTCATAAATAC

>M6-PGSC0003DMG400024954M6LRR-RLK\_2257

CCTCACTGCAAGTCAACCGTGTCTGTTTCTAAATGGGCGCCTCACAATTCATAAATACCGCCAAACGCC  
CCCTCTTCTGCTGTCACTTACATGGAAAATGACTACCTTTTTTTTTAAAAA

>M6-PGSC0003DMG400024954M6LRR-RLK\_2318

CCAAACGCCCCCTCTTCTGCTGTCACTTACATGGAAAATGACTACCTTTTTTTTTAAAAAATATTGTACTCT  
GTAGGCCATAAGTATTCTCTTTTGTATGTCAAATTCATGCATTTCTT

>M6-PGSC0003DMG400024954M6LRR-RLK\_2379

TATTGTACTCTGTAGGCCATAAGTATTCTCTTTTGTATGTCAAATTCATGCATTTCTTTTGCCACAACAC  
CAATAATGTTAAAAGAATCTTCACCTTATTACCATTTATAGTATGTT

>M6-PGSC0003DMG400024954M6LRR-RLK\_244

ACTTCTGTACTGACATTCAAGTACAATATTCTGAGTGACCCTTTAAGTGTCTGCAGAACTGGAATTCTT  
GGGATGATACACCATGTTTCATGGAAAGGGGTAGGTTGTGGAAATCCAAA

>M6-PGSC0003DMG400024954M6LRR-RLK\_2440

GCCACAACACCAATAATGTTAAAAGAATCTTCACCTTATTACCATTTATAGTATGTTGTTTATTTTATAG

ATATTATTATTGTGAGAATCTTAGCGCTCAGTTGATTGACTAATTATA

>M6-PGSC0003DMG400024954M6LRR-RLK\_2501

TTATTTTATAGATATTATTATTGTGAGAATCTTAGCGCTCAGTTGATTGACTAATTATAACGTGCGCATT  
TGATGGTTTCAGGAAAGGCTGGTTCTTCGCCATGTCACGTACCCTGGGA

>M6-PGSC0003DMG400024954M6LRR-RLK\_2562

GTGCGCATTTTGATGGTTTCAGGAAAGGCTGGTTCTTCGCCATGTCACGTACCCTGGGAAATCCGGCTG  
AAGTTGCTAAAGGTGTGGCTCGTGGGCTCACTTACATTCATGAAAAGAAG

>M6-PGSC0003DMG400024954M6LRR-RLK\_2623

TCCGGCTGAAGGTTGCTAAAGGTGTGGCTCGTGGGCTCACTTACATTCATGAAAAGAAGCATGTCCACG  
GCAACTTGAAGCCCAGTAACATTTTACTAGGGGAAGATATGGAGCCCAAGA

>M6-PGSC0003DMG400024954M6LRR-RLK\_2684

TGTCCACGGCAACTTGAAGCCCAGTAACATTTTACTAGGGGAAGATATGGAGCCCAAGATTGGTGATTT  
TGGAATTGAAAGGCTTGTAAACAGGAGACAGTAGTCATAAGACCTATGGATC

>M6-PGSC0003DMG400024954M6LRR-RLK\_2745

GGTGATTTTGAATTGAAAGGCTTGTAAACAGGAGACAGTAGTCATAAGACCTATGGATCTGCTCGTAAT  
TTTGAAGCAAAGGTCCACAGCATCCCGTGAGAGCTTCCAGGACTTTACA

>M6-PGSC0003DMG400024954M6LRR-RLK\_2806

CTCGTAATTTTGAAGCAAAGGTCCACAGCATCCCGTGAGAGCTTCCAGGACTTTACATCTGGGCCTAC  
TCCAACCCCAAGTCCAAGTGCATTGGGCATATCTCCTTACCATGCACCCG

>M6-PGSC0003DMG400024954M6LRR-RLK\_2867

TGGGCCTACTCCAACCCCAAGTCCAAGTGCATTGGGCATATCTCCTTACCATGCACCCGAATCGCTTCGT  
AGCCTCAAGCCCAACCCGAAATGGGATGTATTCTCATTCCGGGGTAGTCTT

>M6-PGSC0003DMG400024954M6LRR-RLK\_2928

TCGCTTCGTAGCCTCAAGCCCAACCCGAAATGGGATGTATTCTCATTCCGGGGTAGTCTTGCTGGAGTTGC  
TAACTGGAAAGGTGATTGTCTCGGATGAAATGGGACCCGCATCGGTCATC

>M6-PGSC0003DMG400024954M6LRR-RLK\_2989

TGGAGTTGCTAACTGGAAAGGTGATTGTCTCGGATGAAATGGGACCCGCATCGGTCATCGGTGCTACCA  
CATCAGCAGAGGAAGAGAAGAGTAAAGTGTACGGTTGGCTGATGTGGCGA

>M6-PGSC0003DMG400024954M6LRR-RLK\_305

TGGAATTCTTGGGATGATACACCATGTTTCATGGAAAGGGGTAGGTTGTGGAAATCCAAATGCTTCAGAC  
CCAAACCTTCGAGTGACAAATTTGTCTCTTCCTAATTCTCTGCTTCTTGGT

>M6-PGSC0003DMG400024954M6LRR-RLK\_3050

TGCTACCACATCAGCAGAGGAAGAGAAGAGTAAAGTGTACGGTTGGCTGATGTGGCGATACGTGCTG  
ATGTGGAAGGGAAAGAAGATGCTTTGTTGGCACTAATGAAAGTAGGATATAG

>M6-PGSC0003DMG400024954M6LRR-RLK\_3111

CGTGCTGATGTGGAAGGGAAAGAAGATGCTTTGTTGGCACTAATGAAAGTAGGATATAGTTGTATATCA  
CCAATACCTCAGAAGAGACCAGGCATGAGAGAGGTTGTTCAAGCATTGGAA

>M6-PGSC0003DMG400024954M6LRR-RLK\_3172

GTATATCACCAATACCTCAGAAGAGACCAGGCATGAGAGAGGTTGTTCAAGCATTGGAAAAATTTCCAA  
CTAATTCAACCAGTTCATCATACTATTATGGACCTTAATTAGCACTGATTA

>M6-PGSC0003DMG400024954M6LRR-RLK\_3233

ATTTCCAATAATTCAACCAGTTCATCATACTATTATGGACCTTAATTAGCACTGATTAAGATGGACAC  
AATTGTAGAGACAAGAGACTTTGTATGTAATGAGACTGACATCTATGTT

>M6-PGSC0003DMG400024954M6LRR-RLK\_3355

TTTATTTTATTTTCAATTTTTTTTGGTTTGTCTCTTAATATAGTATTAGCCATTGGTTTTCTTTTTTAACAGTG  
ATTAGTGTAATTGTCCGCGTTTTGTTGTGTTGATTTTTCTAAACC

>M6-PGSC0003DMG400024954M6LRR-RLK\_3401

TAGCCATTGGTTTTCTTTTTTAACAGTGATTAGTGTAATTGTCCGCGTTTTGTTGTGTTGATTTTTCTAAA  
CCTTATGGTGACTTTGGATTACCAATATATATGACAACCTATTCTGTG

>M6-PGSC0003DMG400024954M6LRR-RLK\_366

CTTCAGACCCAAACCTTCGAGTGACAAATTTGTCTCTTCCTAATTCTCTGCTTCTTGGTTCTATTCCTTCTA  
GTCTTGGTATGATTCAATATCTTACAAATCTTGATCTTTCTAATAATT

>M6-PGSC0003DMG400024954M6LRR-RLK\_427

TATTCCTTCTAGTCTTGGTATGATTCAATATCTTACAAATCTTGATCTTTCTAATAATTCCATTAATGGCTCT  
ATTCCTTCTACTCTCTTTAGTGCCCCTGAGCTTCAACGCCTTGATTT

>M6-PGSC0003DMG400024954M6LRR-RLK\_488

ATTAATGGCTCTATTCCTTCTACTCTTTAGTGCCCCTGAGCTTCAACGCCTTGATTTTTCTAACAACAGA  
ATATCCGGCCAGTTGCCTGAGCTTGTGGACATTTAATAATCTTCAG

>M6-PGSC0003DMG400024954M6LRR-RLK\_549

CTAACACAGAATATCCGGCCAGTTGCCTGAGCTTGTTGGACATTTAAATAATCTTCAGTTTCTTAACCTC  
TCCGGTAATGCTTTGACGGGAAGATTACCGGCAAATCTCACTAGGCTTA

>M6-PGSC0003DMG400024954M6LRR-RLK\_61

TCACATGGTCCCCTTTTTATCATAAATCTACACTTATTCTCCTAACTTTTTTTCTATTCAATTCCTAAAAAAA  
AACAGAGATGTGGGAACATTTAGAGACGCCATGAAATTCCAAACCTT

>M6-PGSC0003DMG400024954M6LRR-RLK\_610

TCTTAACCTCTCCGGTAATGCTTTGACGGGAAGATTACCGGCAAATCTCACTAGGCTTAGTAATCTAACT  
GTTGTTTCTTTGAAAGATAATTATTTTTTTGGTGCTGTTCTTTTGGGT

>M6-PGSC0003DMG400024954M6LRR-RLK\_671

AATCTAACTGTTGTTTCTTTGAAAGATAATTATTTTTTTGGTGCTGTTCTTTTGGGTTTGATTCAAGTTCAA  
GTTTTAGATCTGTCTTCAAATTTGATTAATGGGTCATTGCCTCCTAAT

>M6-PGSC0003DMG400024954M6LRR-RLK\_732

ATTCAGTTCAAGTTTTAGATCTGTCTTCAAATTTGATTAATGGGTCATTGCCTCCTAATTTTGGGGGCAGT  
AATCTCCGTTACTTTAATGCTTCTTTTAATAGACTTTCTGAAGATATCC

>M6-PGSC0003DMG400024954M6LRR-RLK\_793

TGGGGGCAGTAATCTCCGTTACTTTAATGCTTCTTTTAATAGACTTTCTGAAGATATCCCACCGGAATTTG  
GCAGCAAAATCCCTCAAATGCAACTATAGATCTCTTACAACAATTT

>M6-PGSC0003DMG400024954M6LRR-RLK\_854

CCGGAATTTGGCAGCAAAATCCCTCAAATGCAACTATAGATCTCTTACAACAATTTCAAGCGGTGCAA  
TTCCAGAGTCAATTGTTTTATCAACCAAAATAGAAAAGCTTTTTCTGGT

>M6-PGSC0003DMG400024954M6LRR-RLK\_915

GCGGTGCAATTCCAGAGTCAATTGTTTTATCAACCAAAATAGAAAAGCTTTTTCTGGTAATCCAGAATT  
ATGTGGTGCGCCGCTGAAAAATTTATGCCCAATTCGTCAACAGTAACAA

>M6-PGSC0003DMG400024954M6LRR-RLK\_976

TCCAGAATTATGTGGTGCGCCGCTGAAAAATTTATGCCCAATTCGTCAACAGTAACAACCTGCCAAAT  
TCCCCTGAACCAACTTCTTCCCAGCAATTGCAGCCATTCCGAAACCCAC

>M6-PGSC0003DMG400024958M6LRR-RLP\_0

CGGCCATGGACGATATTGACGAGGACGCGCACATTTCTCTTCTTCTTCTTTGATATTCCACCTTTTAA

CCGGTCAAATCTCTAACTCTCCTCCTTCTTCTCCTTCTATTAATAGAT

>M6-PGSC0003DMG400024958M6LRR-RLP\_1054

TCTGAGATTCATTTGGAGAGGCTTCAAGTTGGTGATACTGGACTTACAGCAATATCTAATTGTCCAAAGT

TGGAGATTCTGCATTTGGTGAAGACACCAGAATGCACTGATGCTGGAGTT

>M6-PGSC0003DMG400024958M6LRR-RLP\_1116

TCCAAAGTTGGAGATTCTGCATTTGGTGAAGACACCAGAATGCACTGATGCTGGAGTTGTAGCAGTGGC

TAATAAGTGCAAGTTATTGAGGAAGCTTCACATTGATGGATGGAGGACAAA

>M6-PGSC0003DMG400024958M6LRR-RLP\_1178

CAGTGGCTAATAAGTGCAAGTTATTGAGGAAGCTTCACATTGATGGATGGAGGACAAATAGGATAGGG

GATGAGGGTTTAGTAGCAATTGCTGAGAATAGCTCAAATCTCAAAGAATTGG

>M6-PGSC0003DMG400024958M6LRR-RLP\_124

CTCATTTTTCTTTCTTTCCATAATCTCCATTTTTCCATTTCCAACCTCTAGATCTCTATAACCCTAAAACAA

AATGGGCCAATATTCATCCACCCACTGCGGCGGTGGGCCAAAACAT

>M6-PGSC0003DMG400024958M6LRR-RLP\_1240

ATAGGGGATGAGGGTTTAGTAGCAATTGCTGAGAATAGCTCAAATCTCAAAGAATTGGTGCTTATTGGT

CTGAATCCTACGTCGACTAGTCTATTGGCAATAGCTTCTAATTGTAAAAAG

>M6-PGSC0003DMG400024958M6LRR-RLP\_1302

TATTGGTCTGAATCCTACGTCGACTAGTCTATTGGCAATAGCTTCTAATTGTAAAAAGTTAGAAAGATTG

GCTCTTTGTGGTAGTGACACTATTGGAGATCCTGAAGTATCTTGTATTGC

>M6-PGSC0003DMG400024958M6LRR-RLP\_1364

AAAGATTGGCTCTTTGTGGTAGTGACACTATTGGAGATCCTGAAGTATCTTGTATTGCCACAAAATGTAT

GGCCTGAAGAAGCTGTGTATCAAGGGATGTGAAGTAACGGATCAAGGGA

>M6-PGSC0003DMG400024958M6LRR-RLP\_1426

AAATGTATGGCCTTGAAGAAGCTGTGTATCAAGGGATGTGAAGTAACGGATCAAGGGATTGAATCTTTC

GCTTGGGGTTGCCCTAATTTGGTGAAAATCAAGGTGAAGAAGTGCAAGCAT

>M6-PGSC0003DMG400024958M6LRR-RLP\_1488

ATCTTTCGCTTGGGGTTGCCCTAATTTGGTGAAAATCAAGGTGAAGAAGTGCAAGCATGTGACGGGTGA

TGTTGCAGATAGGTTACGAGCTAGGAGGCAATCGCTAGCAGTGAATCTTGA

>M6-PGSC0003DMG400024958M6LRR-RLP\_1550

CGGGTGATGTTGCAGATAGGTTACGAGCTAGGAGGCAATCGCTAGCAGTGAATCTTGATGGTGGGGAA  
ATTGATATTGAACCTGTGGATAGTAGTGCAAGTGATGGTGGAGCAATAGAAG

>M6-PGSC0003DMG400024958M6LRR-RLP\_1612

GGGGAAATTGATATTGAACCTGTGGATAGTAGTGCAAGTGATGGTGGAGCAATAGAAGAAGCAGCAG  
AGTTTCAACATACTGCAGCTACACTGCCATAATTGGTGCTAGTGATATTCCA

>M6-PGSC0003DMG400024958M6LRR-RLP\_1674

AGCAGAGTTTCAACATACTGCAGCTACACTGCCATAATTGGTGCTAGTGATATTCCATCTACGAGCAAT  
GTAGGACGATCATCAGCATCGAAGCCATGGTTTGGTTTTTTCGGAGGAAG

>M6-PGSC0003DMG400024958M6LRR-RLP\_1736

CGAGCAATGTAGGACGATCATCAGCATCGAAGCCATGGTTTGGTTTTTTCGGAGGAAGGGGCCTCGTTG  
CTTGCACTCTCCGTAGGTGGTCAAATGGTAATGGTGAGAGCTTATGAATAT

>M6-PGSC0003DMG400024958M6LRR-RLP\_1798

CTCGTTGCTTGCACTCTCCGTAGGTGGTCAAATGGTAATGGTGAGAGCTTATGAATATTATGAAGACTAA  
TGTTAAAATTGAGAAAACATACTGTAAATTTGTTTAGCTGTACTTGGTC

>M6-PGSC0003DMG400024958M6LRR-RLP\_186

ACCCTAAAACAAAATGGGCCAATATTCATCCACCCACTGCGGCGGTGGGCCAAAACATCGCCACCCGAG  
CCTTCATCCTACCCACTCCCAATCACCACCGTTCTGCCTCCGACCATTC

>M6-PGSC0003DMG400024958M6LRR-RLP\_1860

AAGACTAATGTTAAAATTGAGAAAACATACTGTAAATTTGTTTAGCTGTACTTGGTCCGGTTTCACTTT  
TCTCATTATCTTTTTTAGTTTTGAATTTGTCGTCTTGAATACATTGTG

>M6-PGSC0003DMG400024958M6LRR-RLP\_1922

TTCAACTTTTCTCATTATCTTTTTAGTTTTGAATTTGTCGTCTTGAATACATTGTGCAGATATACATCTCA  
CTTCCAATTTTGATGAGCTTTTGTAGATTTTGTCTTATCTTTTGT

>M6-PGSC0003DMG400024958M6LRR-RLP\_1984

TATACATCTCACTTCCCAATTTTGATGAGCTTTTGTAGATTTTGTCTTATCTTTTGTCTGTACAAGATTTG  
GTGTAGCAATAACCTTGTTTCATGTTGGTTCTTGGATGATAAAAAGTGTA

>M6-PGSC0003DMG400024958M6LRR-RLP\_2017

TGTTAGATTTTGTCTTATCTTTTGTCTGTACAAGATTTGGTGTAGCAATAACCTTGTTTCATGTTGGTTCTTG  
GATGATAAAAAGTGATCTTGCAAAGCAAATTCTCCCTCAAACATGCAT

>M6-PGSC0003DMG400024958M6LRR-RLP\_248

ACCGCAGCCTTCATCCTACCCCACTCCCAATCACCACCGTTCTGCCTCCGACCATTCCCAGTCCGATTCT  
TCTCCCTTATGAATTCAGATGAAGATGAGTCACCGATTCCGTTTGTTT

>M6-PGSC0003DMG400024958M6LRR-RLP\_310

TCCGATTCTTCTCCCTTATGAATTCAGATGAAGATGAGTCACCGATTCCGTTTGTTTTCGGGAACCGAGA  
TTATACGGATGATCTTCTGATGAATGTTGGCTTTGATTTCCAGTGT

>M6-PGSC0003DMG400024958M6LRR-RLP\_372

GAACCGAGATTATACGGATGATCTTCTGATGAATGTTGGCTTTGATTTCCAGTGTGAGTTCCGGT  
GACCGGAAAAAGTGTCCCTTGTCTCCCGGAGATGGCTTTTGGTGGAGGG

>M6-PGSC0003DMG400024958M6LRR-RLP\_434

GTTCCGGTGACCGGAAAAAGTGTCCCTTGTCTCCCGGAGATGGCTTTTGGTGGAGGGTCAAAGCCGTC  
ATCGTCTTGCCCTCAACGCGAAAGTTGAGATTCTTCCGCATGTTCCCACCA

>M6-PGSC0003DMG400024958M6LRR-RLP\_496

AGCCGTCATCGTCTTGCCCTCAACGCGAAAGTTGAGATTCTTCCGCATGTTCCCACCATCTTCACTCGTTT  
CGATTCTGTTACGAAACTTGCTCTCCGATGTGACCGGAAATCGGTAAGT

>M6-PGSC0003DMG400024958M6LRR-RLP\_558

CACTCGTTTCGATTCTGTTACGAAACTTGCTCTCCGATGTGACCGGAAATCGGTAAGTATAAATGATGAA  
GCTTTGACCCTTATCTCCCTTCGTTGTTCTAAACTTATTCGCCTAAAGCT

>M6-PGSC0003DMG400024958M6LRR-RLP\_62

ACCTTTTAACCGGTCAAATCTCTAACTCTCCTCCTTCTTCTCCTTCTATTAATAGATTCTTCTCATTTTTCTC  
TTCTTTCCATAATCTCCATTTTTTCCATTTCCAACCTCTAGATCTC

>M6-PGSC0003DMG400024958M6LRR-RLP\_620

ATGATGAAGCTTTGACCCTTATCTCCCTTCGTTGTTCTAAACTTATTCGCCTAAAGCTTCGCGGTTGCCGT  
GATGTTACTGAAGTGGGTATGTCTGCTTTTGGCTCGGAATTGTAAGAGTT

>M6-PGSC0003DMG400024958M6LRR-RLP\_682

GGTTGCCGTGATGTTACTGAAGTGGGTATGTCTGCTTTTGGCTCGGAATTGTAAGAGTTGAAGAAATTCT  
CTTGTTGGTCTTGCATGTTTGGAGCCAAAGGTATGAATGCTTTGCTTGAT

>M6-PGSC0003DMG400024958M6LRR-RLP\_744

GAAATTCTTGTGGGTCTTGCATGTTTGGAGCCAAAGGTATGAATGCTTTGCTTGATAACTGTTCTTCCC



TTGAAGAATTATCTGTGAAACGTCTTCGGGGTATCAATGATGGGTTTGC

>M6-PGSC0003DMG400024958M6LRR-RLP\_806

GTTCTTCCCTTGAAGAATTATCTGTGAAACGTCTTCGGGGTATCAATGATGGGTTTGCAGCTGACCCAAT

TGGGCCAGGAGCTGCTGCTTCATCGCTTAAATCTATATGTTTGAAAGAGT

>M6-PGSC0003DMG400024958M6LRR-RLP\_868

GACCCAATTGGGCCAGGAGCTGCTGCTTCATCGCTTAAATCTATATGTTTGAAAGAGTTATATAATGGAC

AATGTTTTGCACCTTTGATTACTGGGTCTAAGAATTTAAAGACTTTGAAG

>M6-PGSC0003DMG400024958M6LRR-RLP\_930

TAATGGACAATGTTTTGCACCTTTGATTACTGGGTCTAAGAATTTAAAGACTTTGAAGTTGTTGAGGTGT

TTAGGTGATTGGGATAGGCTTTTTGAGACAATTGGAAGTAGGGAAAATCA

>M6-PGSC0003DMG400024958M6LRR-RLP\_992

TGAGGTGTTTAGGTGATTGGGATAGGCTTTTTGAGACAATTGGAAGTAGGGAAAATCATGTTTCTGAGA

TTCATTTGGAGAGGCTTCAAGTTGGTGATACTGGACTTACAGCAATATCTA

>M6-PGSC0003DMG400024998M6G-LecRK\_1037

TGCTTGGCTGATTGTAAGTGTACAGCCTACTCAAATATGGATGTTTCGAGATGGTGGAAAGTGGATGCTTA

CTCTGGTTCGGAGACCTCATCGATATCAGAGAACTTAGTCCAAATCAGCAG

>M6-PGSC0003DMG400024998M6G-LecRK\_1098

GATGCTTACTCTGGTTCGGAGACCTCATCGATATCAGAGAACTTAGTCCAAATCAGCAGGACCTGTTTGT

GAGAGTGGCTGCTTCAGAAGTAGGTAATAACTACTTACTGTTTTTCGTTT

>M6-PGSC0003DMG400024998M6G-LecRK\_1159

CCTGTTTGTGAGAGTGGCTGCTTCAGAAGTAGGTAATAACTACTTACTGTTTTTCGTTTCTCTATCTTGAT

CTTGTTGAATGTGGCGAAAAACATGTATGTAAAATTTAGCAAGTATGT

>M6-PGSC0003DMG400024998M6G-LecRK\_122

AATATTTTCATCTTAACATTGTATTATTGCTTTTCTTCAAACCTTTTTATAAACGTTTTTCTTGAGCTGAG

GGCCTATGGGAAACAACTCTGTTTATGTTGTTGTAGTAGTAGTACT

>M6-PGSC0003DMG400024998M6G-LecRK\_1281

CTAGATAGTCAAAGTCTCGATAGTTAGCTCGTGGGGTCTTCAGTCAATAGAAAAATCATCTATGAATGT

GTGTTGGTGCATTGTTCTCTCTCACTCAAAGACGGAACGTTGCCTGTTTC

>M6-PGSC0003DMG400024998M6G-LecRK\_1342

TATGAATGTGTGTTGGTGCATTGTTCTCTCTCACTCAAAGACGGAACGTTGCCTGTTTCTTATGGTCTAAA  
ATTTTTGTTGGGAACTCATGAATGTGAATCATATTGTTATGACAATGTT

>M6-PGSC0003DMG400024998M6G-LecRK\_1403

ATGGTCTAAAATTTTTGTTGGGAACTCATGAATGTGAATCATATTGTTATGACAATGTTGGAATTTTCTGA  
TCGATTATGTACTAACTTATCGACAGACAAGAAACGAAAGAATAAGAAG

>M6-PGSC0003DMG400024998M6G-LecRK\_1464

AATTTTCTGATCGATTATGTACTAACTTATCGACAGACAAGAAACGAAAGAATAAGAAGTCAAGGCTGA  
TTGCAATCTTATCAGCAGTAGCCGCGACTTGTATCCTCAGCCTTCTAGCTT

>M6-PGSC0003DMG400024998M6G-LecRK\_1525

AAGGCTGATTGCAATCTTATCAGCAGTAGCCGCGACTTGTATCCTCAGCCTTCTAGCTTGGTGTGCATTA  
TTCCACAGAAGAAAAAAGAGTAAAGGTAAACAACTGTTGTTTATTGTTAT

>M6-PGSC0003DMG400024998M6G-LecRK\_1586

TGTGCATTATCCACAGAAGAAAAAAGAGTAAAGGTAAACAACTGTTGTTTATTGTTATCAAAGATCGT  
GTTGCTAACGTTCTATTTGTATCAGGCTAATGTATACATTTATACCAATT

>M6-PGSC0003DMG400024998M6G-LecRK\_1647

AAAGATCGTGTGCTAACGTTCTATTTGTATCAGGCTAATGTATACATTTATACCAATTGATTGCTCATTTT  
ACAGGTAGGGAAGTTGGAGCAGACGATATGGAGTTACCATTGTTTCGAT

>M6-PGSC0003DMG400024998M6G-LecRK\_1708

TTGCTCATTTTACAGGTAGGGAAGTTGGAGCAGACGATATGGAGTTACCATTGTTTCGATTTAGTAACTGT  
TGCTAACGCCACTAAGAACTTCTCTTCTGCTAATATTATTGGAGAGGGTG

>M6-PGSC0003DMG400024998M6G-LecRK\_1769

AGTAACTGTTGCTAACGCCACTAAGAACTTCTCTTCTGCTAATATTATTGGAGAGGGTGGCTTTGGACCT  
GTTTATAAGGTACAATAACTATCCCATCGTCGAATTTTAGCTAAAAAAG

>M6-PGSC0003DMG400024998M6G-LecRK\_183

TCTTGAGCTGAGGGCCTATGGGAAACAACTCTGTTTATGTTGTTGTAGTAGTACTTTTGAAGTATT  
GTAATTTTAATTTGAAATTATTGAGTTAATCTAATGTAATCTGATATCAG

>M6-PGSC0003DMG400024998M6G-LecRK\_1830

TTTGGACCTGTTTATAAGGTACAATAACTATCCCATCGTCGAATTTTAGCTAAAAAAGGCATCTTAAAC  
ACTTTGTTTTGAAAAAAATTCAGGGGAACTACGAAATGGACCTGAGAT

>M6-PGSC0003DMG400024998M6G-LecRK\_1891

ATCTTAAACACTTTGTTTTGAAAAAAATTCAGGGGAACTACGAAATGGACCTGAGATAGCTGTGAAG  
AGGCTTTCGGAATACTCAGGACAAGGTCTTCAAGAGTTAAAAAATGAACTG

>M6-PGSC0003DMG400024998M6G-LecRK\_1952

CTGTGAAGAGGCTTTCGGAATACTCAGGACAAGGTCTTCAAGAGTTAAAAAATGAACTGATACTGATAT  
CCAAACTACAACACAGGAATCTTGTCAAGCTTTTAGGTTGTTGCCTTGAAG

>M6-PGSC0003DMG400024998M6G-LecRK\_2013

ACTGATATCCAAACTACAACACAGGAATCTTGTCAAGCTTTTAGGTTGTTGCCTTGAAGGAGCAGAGAG  
GATGCTGATATATGAGTATATGCCAAACAATAGCTTGGACTATTTCAATTT

>M6-PGSC0003DMG400024998M6G-LecRK\_2074

GCAGAGAGGATGCTGATATATGAGTATATGCCAAACAATAGCTTGGACTATTTCAATTTTTGGTCCGGTTC  
TCTCGACTAGTTACCTTTATACTATGTTGCTCGTATCCTCCAAAATGAT

>M6-PGSC0003DMG400024998M6G-LecRK\_2135

GTCCGGTTCTCTCGACTAGTTACCTTTATACTATGTTGCTCGTATCCTCCAAAATGATGTTTCACCAAGTG  
TTGGATCCTCAAAGATGCACTACTTCTGGAAGATCCAACAAGGGCGCG

>M6-PGSC0003DMG400024998M6G-LecRK\_2196

TTCACCAAGTGTTGGATCCTCAAAGATGCACTACTTCTGGAAGATCCAACAAGGGCGCGGAGGCAATTT  
TGGAGGACCTGAGCAACATAGCCTAACTATTTATTTCCAATGTGCTACTAA

>M6-PGSC0003DMG400024998M6G-LecRK\_2257

GGCAATTTTTGGAGGACCTGAGCAACATAGCCTAACTATTTATTTCCAATGTGCTACTAATGAATGAATGA  
ATGAGGATTCCTGACATTTTACATATTGCAGATCCAAGCAGAAAAGAAT

>M6-PGSC0003DMG400024998M6G-LecRK\_2318

AATGAATGAATGAGGATTCCTGACATTTTACATATTGCAGATCCAAGCAGAAAAGAATCACTTACTTGG  
AGAAATCGCTATGAAATCGCGATGGGAATATCTCGAGGCCTTCTCTATCT

>M6-PGSC0003DMG400024998M6G-LecRK\_2379

CTTACTTGGAGAAATCGCTATGAAATCGCGATGGGAATATCTCGAGGCCTTCTCTATCTTCATCAGGACT  
CAAGATTAAGAATAATACACAGGGACCTGAAGGCCAGCAACATTTTGTTG

>M6-PGSC0003DMG400024998M6G-LecRK\_244

TGAACTATTGTAATTTTAATTTGAAATTATTGAGTTAATCTAATGTAATCTGATATCAGGTAATCTTGTCAT

CAGGGAAGAAAATGAAAACAGGCCTGAGTTTTTCGCCTGGAAGAGTTT

>M6-PGSC0003DMG400024998M6G-LecRK\_2440

ATCAGGACTCAAGATTAAGAATAATACACAGGGACCTGAAGGCCAGCAACATTTTGTGGATACTGACT  
TGAATCCAAGGATTTCTGACTTTGGTCTAGCTAAGATATTTGGTGCAGACC

>M6-PGSC0003DMG400024998M6G-LecRK\_2501

TACTGACTTGAATCCAAGGATTTCTGACTTTGGTCTAGCTAAGATATTTGGTGCAGACCAAATGGAAGGA  
AAAACAAAGCGAGTAATCGGAACATAGTAAGTCTTATAAACAAACTCTAT

>M6-PGSC0003DMG400024998M6G-LecRK\_2562

ATGGAAGGAAAAACAAAGCGAGTAATCGGAACATAGTAAGTCTTATAAACAAACTCTATGATAGATGTT  
TTTGTGGTTGTTGATCAACTTAAATTTGATGCATTGTGCAGCGGATAACAT

>M6-PGSC0003DMG400024998M6G-LecRK\_2623

TAGATGTTTTGTTGTTGTTGATCAACTTAAATTTGATGCATTGTGCAGCGGATAACATGTCTCCGGAGTA  
TGCTGTGCATGGGAAATATTCAGTGAAATCTGATGTCTTCAGCCTTGGC

>M6-PGSC0003DMG400024998M6G-LecRK\_2684

CTCCGGAGTATGCTGTGCATGGGAAATATTCAGTGAAATCTGATGTCTTCAGCCTTGGCGTGCTTTTACT  
CGAAATTGTCAATGGCAGAAAGAACAGGAAGTTTCATCATTGAGTCATC

>M6-PGSC0003DMG400024998M6G-LecRK\_2745

GCTTTTACTCGAAATTGTCAATGGCAGAAAGAACAGGAAGTTTCATCATTGAGTCATCATAATCTTT  
TGGGACATGTAAGTACATATAGCACTAAATTTTTACCCTTTAGCCTCTT

>M6-PGSC0003DMG400024998M6G-LecRK\_2806

CATAATCTTTTGGGACATGTAAGTACATATAGCACTAAATTTTTACCCTTTAGCCTCTTTTTTTACTAAACA  
CTCGACCCCGTTTGGAGCTTACTCACATCACCGGTCCCAAGCTCCCAT

>M6-PGSC0003DMG400024998M6G-LecRK\_2867

TTTACTAAACTCGACCCCGTTTGGAGCTTACTCACATCACCGGTCCCAAGCTCCCATAAAGGAAGAGGG  
TTGCAGCAGGGTAGCAGCCAGTATAAACTAGTCAGTTCATGTGCAATCC

>M6-PGSC0003DMG400024998M6G-LecRK\_2928

GGAAGAGGGTTGCAGCAGGGTAGCAGCCAGTATAAACTAGTCAGTTCATGTGCAATCCTCACAATACA  
GTCGGAACTGAGGCGTTGTAGTAGTTGTTATAGCCTGTTTTCCATTAATA

>M6-PGSC0003DMG400024998M6G-LecRK\_2989

ACAATACAGTCGGAAGTCTGAGGCGTTGTAGTAGTTGTTATAGCCTGTTTTCCATTAATAAAAAAACTTGACCT  
GCCTGAAGTTACTCATATTACCGGTCCCAAACCCTCATAAAGGAAGAGGA

>M6-PGSC0003DMG400024998M6G-LecRK\_305

AATCTTGTCATCAGGGAAGAAAATGAAAACAGGCCTGAGTTTTTCGCCTGGAAGAGTTTCGATTATCCA  
GGGGATACTCTGTTGCCTGGAATGAAGCTCGGGCGGAATTTGGTAACAGGC

>M6-PGSC0003DMG400024998M6G-LecRK\_3050

ACTTGACCTGCCTGAAGTTACTCATATTACCGGTCCCAAACCCTCATAAAGGAAGAGGATCACAGTAGG  
CTAGAAGCCTCTATTAAGTCAATTCATGACGAATCCTCATAATACAG

>M6-PGSC0003DMG400024998M6G-LecRK\_3111

ACAGTAGGCTAGAAGCCTCTATTAAGTCAATTCATGACGAATCCTCATAATACAGTTGGGGCCGA  
GGTGTGTAGTAGTAGTTGTTATAGCCTTACATTTCCATTCCCAAGCCCCT

>M6-PGSC0003DMG400024998M6G-LecRK\_3172

GGGGCCGAGGTGTTGTAGTAGTAGTTGTTATAGCCTTACATTTCCATTCCCAAGCCCCTACAGAAGTAAG  
AGGGTCACAATAGGCTAGCAGCCAAGCATAAAACTAGTCAATTCATGACG

>M6-PGSC0003DMG400024998M6G-LecRK\_3233

AGAAGTAAGAGGGTCACAATAGGCTAGCAGCCAAGCATAAAACTAGTCAATTCATGACGAATCCTCATA  
ATGCAGACGGGACTGAGGCGTTGTACTAGTCCACATAGCCTTTCTTTTACT

>M6-PGSC0003DMG400024998M6G-LecRK\_3294

TCCTCATAATGCAGACGGGACTGAGGCGTTGTACTAGTCCACATAGCCTTTCTTTTACTAATGCAAATGT  
ATAATTCATGATGACCGAGGCATTGTAGTAGTCACCGTTGTAGCCTCTTT

>M6-PGSC0003DMG400024998M6G-LecRK\_3355

TGCAAATGTATAATTCATGATGACCGAGGCATTGTAGTAGTCACCGTTGTAGCCTCTTTTTCTAAATGCA  
TTTGTATAACTGTGTTATCGTAAAAAAAATTTTCAGGCATGGTTACTATT

>M6-PGSC0003DMG400024998M6G-LecRK\_3416

CCTAAATGCATTTGTATAACTGTGTTATCGTAAAAAAAATTTTCAGGCATGGTTACTATTGAATGAAGGCA  
ATGCATTGGAATAATGGATGAGTGTAAAAGACTCATATGTTGAATCA

>M6-PGSC0003DMG400024998M6G-LecRK\_3477

ATGAAGGCAATGCATTGGAATAATGGATGAGTGTAAAAGACTCATATGTTGAATCACAAGTGTGA  
GATGCATTCAAGTAAGTTTATTGTGTGTACAAAAACTCCCAGAAGACAGGC

>M6-PGSC0003DMG400024998M6G-LecRK\_3538

AGTGTTGAGATGCATTCAAGTAAGTTTATTGTGTGTACAAAACTCCCAGAAGACAGGCCTATAATGGC  
ATCAGTAGTGTTCTGGTTAAGCAATGATGGTGTGGAATTGCCTCAACCAA

>M6-PGSC0003DMG400024998M6G-LecRK\_3599

ATAATGGCATCAGTAGTGTTCTGGTTAAGCAATGATGGTGTGGAATTGCCTCAACCAAAGCAGCCTGGT  
TTCTTTATAGAGAGGGATTCAACTAATCAGTCAAATGAATCAACTGATGAA

>M6-PGSC0003DMG400024998M6G-LecRK\_366

ATTATCCAGGGGATACTCTGTTGCCTGGAATGAAGCTCGGGCGGAATTTGGTAACAGGCCTGGATTGGT  
ACATGTCGTCGTGGATGAGTCCTGATGATCCTGCTATAGGTGAATTTGTTG

>M6-PGSC0003DMG400024998M6G-LecRK\_3660

AGCCTGGTTTCTTTATAGAGAGGGATTCAACTAATCAGTCAAATGAATCAACTGATGAAAGATGTGTTAC  
TGACAATGAACTTTCACTAACAATTCTTGAGGCAAGATAGACAAAATATG

>M6-PGSC0003DMG400024998M6G-LecRK\_3720

GATGTGTTACTGACAATGAACTTTCACTAACAATTCTTGAGGCAAGATAGACAAAATATGAACTTGCAGT  
CGTGTGACTAGGAGGTCAAGGGTTCAAGTCATGACAATAGCCTCTTGCGG

>M6-PGSC0003DMG400024998M6G-LecRK\_427

GGATTGGTACATGTCGTCGTGGATGAGTCCTGATGATCCTGCTATAGGTGAATTTGTTGACAGGATGGA  
TGTTACAGGGGTATCCACAGTTATTTGTATGGAAAGGTTCAATTCATT

>M6-PGSC0003DMG400024998M6G-LecRK\_488

AGGATGGATGTTACAGGGGTATCCACAGTTATTTGTATGGAAAGGTTCAATTCATTAGTTACAGGTC  
CCTGGAATGGTTTAGCATTAGTGGGAGTCCTAGTTTGCAACCGAATACG

>M6-PGSC0003DMG400024998M6G-LecRK\_549

GTTACAGGTCCCTGGAATGGTTTAGCATTAGTGGGAGTCCTAGTTTGCAACCGAATACGTATTTTACGTT  
CGTTTTGTTACTGAATCAGGAGGAAGTTTATTACAGATATGATCTTAAGA

>M6-PGSC0003DMG400024998M6G-LecRK\_61

TGTTGTTGTTTCTTTACTTTGGTTATTCTTGGTATTTGTACTGTGGATACTTTTTGTTCAATATTTTCATC  
TTAACATTGTATTATTGCTTTTCTTTCAAACCTTTTTATAAACGTT

>M6-PGSC0003DMG400024998M6G-LecRK\_610

TTTTACGTTTCGTTTTGTTACTGAATCAGGAGGAAGTTTATTACAGATATGATCTTAAGAATGGATCACTG

CTCACCAGGGTGGTACTAACCCCTGGAGGATTGATAAATCACTATACCTG

>M6-PGSC0003DMG400024998M6G-LecRK\_671

GGATCACTGCTCACCAGGGTGGTACTAACCCCTGGAGGATTGATAAATCACTATACCTGGATCGATCGT

ACGCAGAGTTGGTTCCTTTATTTGACAGCACAGTTTGATAACTGTGATCGT

>M6-PGSC0003DMG400024998M6G-LecRK\_732

TCGATCGTACGCAGAGTTGGTTCCTTTATTTGACAGCACAGTTTGATAACTGTGATCGTTTCGCGTTGTGT

GGTCCATTATGCAAGATGTGTTATTAACAACCTCGCCCCCGTGTGACTGTC

>M6-PGSC0003DMG400024998M6G-LecRK\_793

CGCGTTGTGTGGTTCCTTATGCAAGATGTGTTATTAACAACCTCGCCCCCGTGTGACTGTCTGAGGGGTTTC

GAGCCAAAGTATCCACAGGAATGGGATGCAGCTGACTGGTCTAGTGGATG

>M6-PGSC0003DMG400024998M6G-LecRK\_854

AGGGGTTTCGAGCCAAAGTATCCACAGGAATGGGATGCAGCTGACTGGTCTAGTGGATGTGTTAGGAG

GACTCCGTTGGCGTGTGCAAGATGGATTTAGGAAGTTTACAGGGATTAAA

>M6-PGSC0003DMG400024998M6G-LecRK\_915

TTAGGAGGACTCCGTTGGCGTGTGCAAGATGGATTTAGGAAGTTTACAGGGATTAAAGTGCCTGATA

CGCGGAAATCACGGTTAACGAGAGCATTGGACTTGAGGAATGCAGAATGT

>M6-PGSC0003DMG400024998M6G-LecRK\_976

GCCTGATACGCGGAAATCACGGTTAACGAGAGCATTGGACTTGAGGAATGCAGAATGTTGTGCTTGGC

TGATTGTAACTGTACAGCCTACTCAAATATGGATGTTTCGAGATGGTGGAAAG

>M6-PGSC0003DMG400025030-(rev)M6RLKmalectin\_0

TCTTGTTTCTTTCTTCTTTTGGTTCACACCCATGTCAAAGATTCAATTTTTCATATCATAATGGAATTGC

ACTAAAAGTTCTTGTTGATTGTGTTTGAATTTGGGTCTTTCTTGTTT

>M6-PGSC0003DMG400025030-(rev)M6RLKmalectin\_1037

TCATAGTTTATTGGTAGTTTCCTGTGATTTTCAGTTAAGTTTTTTTTTCTGTAGCAAGATTGCTCTAGA

TAGTTGAGAAAGATCTATAATACTACAGTGTAGGTTCTTAGTATCATC

>M6-PGSC0003DMG400025030-(rev)M6RLKmalectin\_1098

ATTGCTCTAGATAGTTGAGAAAGATCTATAATACTACAGTGTAGGTTCTTAGTATCATCTGGGAAATCAG

ACTTAGCTTATTCAGCTACTTTGATATCGAGATTGAGGCATAGTTATTGT

>M6-PGSC0003DMG400025030-(rev)M6RLKmalectin\_1159

GGAAATCAGACTTAGCTTATTCAGCTACTTTGATATCGAGATTGAGGCATAGTTATTGTTGTTGTTGTTGT  
AACAGGAGGGGTCGTCTGAAAGAAGAAATTCAAAAAGTTGTCTTAAGAG

>M6-PGSC0003DMG400025030-(rev)M6RLKmalectin\_122

GCCTTTTGGTTCACACCCATGTCAAAGATCCAATTTTTCAAGGGGAAGTTGTACTAGATAGCTCTTCTTG  
ACTGTGTTTTTATGGTGGATTTGCACTAAATAGCTCTTCTTGATTGTGT

>M6-PGSC0003DMG400025030-(rev)M6RLKmalectin\_1220

TTGTTGTTGTAACAGGAGGGGTCGTCTGAAAGAAGAAATTCAAAAAGTTGTCTTAAGAGTTTTAATTTTT  
GTGGAGAATTGGAGTCCAGTATTTAGCAATAGGCTCTTAGGACGATGGA

>M6-PGSC0003DMG400025030-(rev)M6RLKmalectin\_1281

TTAATTTTTGTGGAGAATTGGAGTCCAGTATTTAGCAATAGGCTCTTAGGACGATGGACTTGAGAGCA  
ATGTCATGGATGCCTTTAGTTCTAGCAGTAGTTGTGTCCATCTTTTTGATT

>M6-PGSC0003DMG400025030-(rev)M6RLKmalectin\_1342

TGAGAGCAATGTCATGGATGCCTTTAGTTCTAGCAGTAGTTGTGTCCATCTTTTTGATTCAGGACTCGAA  
TGCTGCCTTCGTTCTGCTGATAACTACTTGCTCGCGTGTGGATCATCAC

>M6-PGSC0003DMG400025030-(rev)M6RLKmalectin\_1403

GGACTCGAATGCTGCCTTCGTTCTGCTGATAACTACTTGCTCGCGTGTGGATCATCACAAAATGTGACC  
TATATCGGCCAGACATATGTTCTGATTCGCTACACTCTCAGCTGCTTT

>M6-PGSC0003DMG400025030-(rev)M6RLKmalectin\_1464

AATGTGACCTATATCGGCCAGACATATGTTCTGATTCGCTACACTCTCAGCTGCTTTAGAAAATAAAG  
AAAATTCTATTGCTGCAACATCCAATTCTAGTGCTCCGTTTTCGATCTAT

>M6-PGSC0003DMG400025030-(rev)M6RLKmalectin\_1525

AAAATAAAGAAAATTCTATTGCTGCAACATCCAATTCTAGTGCTCCGTTTTCGATCTATCAGTCAGCCAGA  
ATTTCCATACTACGGCGTTTTACAAGTTTGATATTAAGCAAGAAGGCC

>M6-PGSC0003DMG400025030-(rev)M6RLKmalectin\_1586

GTCAGCCAGAAATTTCCATACTACGGCGTTTTACAAGTTTGATATTAAGCAAGAAGGCCACCATTGGATC  
CGTCTCTATTTCTACCCTCTCCAGGGCACAACTTAACGTCTGCCTCAAT

>M6-PGSC0003DMG400025030-(rev)M6RLKmalectin\_1647

CATTGGATCCGTCTCTATTTCTACCCTCTCCAGGGCACAACTTAACGTCTGCCTCAATGACAGTGGTCAC  
GGAAAATTTTGTCTGTTGAACAATTCAGTTTCAAGAGCTATAATGGA



>M6-PGSC0003DMG400025030-(rev)M6RLKmalectin\_1708

CAGTGGTCACGGAAAATTTTGTCTGTTGAACAATTCAGTTTCAAGAGCTATAATGGATCATAACTTTTT  
AAGGAATACACGATCAATGCCAATTCAGATAGTTTGATTCTTGCTTTGA

>M6-PGSC0003DMG400025030-(rev)M6RLKmalectin\_1769

ATAACTTTTTAAGGAATACACGATCAATGCCAATTCAGATAGTTTGATTCTTGCTTTGATCCCTTCAAACA  
ACTCCGTTGCATTTATCAGTGCCATTGAAGTTGTATCAGTACCTGATGA

>M6-PGSC0003DMG400025030-(rev)M6RLKmalectin\_183

GCTCTTCTGACTGTGTTTTTATGGTGGATTTGCACTAAATAGCTCTTCTTGATTGTGTTTTTATTGTGGCA  
TTGAGGTAACCTGACTTGGGTCTTGTTGTTTCTTCCTTCTGGTTCACA

>M6-PGSC0003DMG400025030-(rev)M6RLKmalectin\_1830

CCTTCAAACAACCTCCGTTGCATTTATCAGTGCCATTGAAGTTGTATCAGTACCTGATGAGTTGATCCCTGA  
TCAAGCAGTGGCTGTATCTCCCGTAGCACCTTTCAGTGGCCTTTCTGGA

>M6-PGSC0003DMG400025030-(rev)M6RLKmalectin\_1891

TGATCCCTGATCAAGCAGTGGCTGTATCTCCCGTAGCACCTTTCAGTGGCCTTTCTGGACTAGCCCTCGA  
AACTGTTTATCGTCTAAACATGGGTGGTCCTCATCTCACTGCTCTGAACG

>M6-PGSC0003DMG400025030-(rev)M6RLKmalectin\_1952

AGCCCTCGAAACTGTTTATCGTCTAAACATGGGTGGTCCTCATCTCACTGCTCTGAACGACACCTTGGGA  
AGAACATGGGAGAATGATGTGAAGTACCTTCACGTCAACAGCTCTGCGGT

>M6-PGSC0003DMG400025030-(rev)M6RLKmalectin\_2013

ACCTTGGGAAGAACATGGGAGAATGATGTGAAGTACCTTCACGTCAACAGCTCTGCGGTGAGTGTTTCA  
GTTAGCCCTTCAAGCATAAAGTATCCGGCTACTATGACTCCTGAAATAGCA

>M6-PGSC0003DMG400025030-(rev)M6RLKmalectin\_2074

GTGTTTCAGTTAGCCCTTCAAGCATAAAGTATCCGGCTACTATGACTCCTGAAATAGCACCAAATTGGGT  
TTACGCTACTGCTGAAACTATGGGAGATGCAAATGTACCTAATGTGAATT

>M6-PGSC0003DMG400025030-(rev)M6RLKmalectin\_2135

AAATTGGGTTTACGCTACTGCTGAAACTATGGGAGATGCAAATGTACCTAATGTGAATTTCAATATCACC  
TGGGTGTTCCCTGTTGATCCGAACTTCATGTACTTCATCCGAGTACATTT

>M6-PGSC0003DMG400025030-(rev)M6RLKmalectin\_2196

AATATCACCTGGGTGTTCCCTGTTGATCCGAACTTCATGTACTTCATCCGAGTACATTTTTGTGATATTGT

GAGTGAATCTTTGAATAGTCTTCTGTTCAACCTATATGTTAATGATGAC

>M6-PGSC0003DMG400025030-(rev)M6RLKmalectin\_2257

GTGATATTGTGAGTGAATCTTTGAATAGTCTTCTGTTCAACCTATATGTTAATGATGACGCTGCTCTATTG

GACCTAGACTTGTCAAACCTAGCTGGAAATTTGGACGTACCGTTATACA

>M6-PGSC0003DMG400025030-(rev)M6RLKmalectin\_2318

TGCTCTATTGGACCTAGACTTGTCAAACCTAGCTGGAAATTTGGACGTACCGTTATACAAGGATTTTCGTC

TCCAATTCCTCAGTAACTCAAGTATTCTGACAGTGAGTGTTGGTCCAGA

>M6-PGSC0003DMG400025030-(rev)M6RLKmalectin\_2379

GATTTTCGCTCCAATTCCTCAGTAACTCAAGTATTCTGACAGTGAGTGTTGGTCCAGATACGAGTGCGG

ATTGGATAAATGCAATTATGAATGGACTGGAAATCATGAAGATTAGCAAT

>M6-PGSC0003DMG400025030-(rev)M6RLKmalectin\_244

TTATTGTGGCATTGAGGTAACCTGACTTGGGTCTTGTTGTTTCTTCTTCTGGTTCACACCCTTTTCAAAA

GATCCAATTTTTTTCATGGTGGAGTTGCACTAAAAAGCTGTTCTTGATTGC

>M6-PGSC0003DMG400025030-(rev)M6RLKmalectin\_2440

CGAGTGCGGATTGGATAAATGCAATTATGAATGGACTGGAAATCATGAAGATTAGCAATGAAGCTAGA

AGCTTGAGTGGGGTTCAATCTGTTGAGACTCTCTTTGTGTTGCCTCACAAAA

>M6-PGSC0003DMG400025030-(rev)M6RLKmalectin\_2501

AGCTAGAAGCTTGAGTGGGGTTCAATCTGTTGAGACTCTCTTTGTGTTGCCTCACAAAAAGAAAAAGAT

AGGTTTAATATTTGGTTCTGCCTTAGGAGCATCAGCTGTTTTGGCGCTTAT

>M6-PGSC0003DMG400025030-(rev)M6RLKmalectin\_2562

AAAAAGATAGGTTTAATATTTGGTTCTGCCTTAGGAGCATCAGCTGTTTTGGCGCTTATTGCATTGTGTT

GTTGCTTTTTTATAGCTCGAAGATCAAAGACTTCCAACCAAGGACTCA

>M6-PGSC0003DMG400025030-(rev)M6RLKmalectin\_2623

CATTGTGTTGTTGCTTTTTTATAGCTCGAAGATCAAAGACTTCCAACCAAGGACTCATGGATTCCGTCC

TTGTATGGAAACTCTTAACTTTGACGAAAACAACAGCTTCTCGGGGAA

>M6-PGSC0003DMG400025030-(rev)M6RLKmalectin\_2684

GATTCCGTCCTTGATGGAAACTCTTAACTTTGACGAAAACAACAGCTTCTCGGGGAACAGCAAGCTGC

ATCTCCTTGGCTTACCGAATGTTGGACGATTTTTTAGTTTTCCAAGAAAT

>M6-PGSC0003DMG400025030-(rev)M6RLKmalectin\_2745

GCAAGCTGCATCTCCTTGGCTTCACCGAATGTTGGACGATTTTTTAGTTTCCAAGAAATAATGGATGCAA  
CTAACAAATTCGACGAGAAGCTTGCTTCTTGGTGTGGTGGTTTCGGTAGG

>M6-PGSC0003DMG400025030-(rev)M6RLKmalectin\_2806

TGGATGCAACTAACAAATTCGACGAGAAGCTTGCTTCTTGGTGTGGTGGTTTCGGTAGGGTCTATAAAG  
GAACAATGGAAGATGGAAGCTAACTTGCTGTCAAAGAGGAAACACAGGAT

>M6-PGSC0003DMG400025030-(rev)M6RLKmalectin\_2867

CTATAAAGGAACAATGGAAGATGGAAGCTAACTTGCTGTCAAAGAGGAAACACAGGATCTGAACAAG  
GTCTAGCCGAATTTCAAAGCTGAGATTGAAATGTTGTCAAAGCTCGCCACCG

>M6-PGSC0003DMG400025030-(rev)M6RLKmalectin\_2928

GAACAAGGTCTAGCCGAATTTCAAAGCTGAGATTGAAATGTTGTCAAAGCTCGCCACCGTCACCTCGTGT  
CTTTGATTGGTTATTGCGATGAGAGGTCGGAAATGATTCTTGTATTATGAA

>M6-PGSC0003DMG400025030-(rev)M6RLKmalectin\_2989

ACCTCGTGTCTTTGATTGGTTATTGCGATGAGAGGTCGGAAATGATTCTTGTATTATGAATACATGGCAA  
TGGTCCTCTCAGAAGTCATCTTTATGGAACAGATCTCCACCTCTCTCAT

>M6-PGSC0003DMG400025030-(rev)M6RLKmalectin\_305

CTTTTCAAAGATCCAATTTTTCATGGTGGAGTTGCACTAAAAGCTGTTCTTGATTGCGTTTTTCATGGTG  
GCATTGAGGTAAGTGAATTGGTCTCTTATTTCTTCTTTTGGTTCA

>M6-PGSC0003DMG400025030-(rev)M6RLKmalectin\_3050

CATGGCAAATGGTCTCTCAGAAGTCATCTTTATGGAACAGATCTCCACCTCTCTCATGGAAGCAGCGT  
CTTGAGATTTGTATCGGTGCTGCAAGGGGGCTGCATTACCTCCATACAGG

>M6-PGSC0003DMG400025030-(rev)M6RLKmalectin\_3111

AAGCAGCGTCTTGAGATTTGTATCGGTGCTGCAAGGGGGCTGCATTACCTCCATACAGGTGCAACTCAG  
AGCATCATTACCGCGATGTCAAACCACCAACATACTTTTGGATGATAAC

>M6-PGSC0003DMG400025030-(rev)M6RLKmalectin\_3172

CAACTCAGAGCATCATTACCGCGATGTCAAACCACCAACATACTTTTGGATGATAACTTTGTGGCTAA  
AGTTGCTGACTTTGGTCTTTCAAAGCCGGACCGGCTCTTGATCAGACAC

>M6-PGSC0003DMG400025030-(rev)M6RLKmalectin\_3233

TGTGGCTAAAGTTGCTGACTTTGGTCTTTCAAAGCCGGACCGGCTCTTGATCAGACACATGTAAGTACT  
GCTGTGAAGGGTAGCTTTGGGTACCTTGATCCTGAATACTCCGGAGGCA

>M6-PGSC0003DMG400025030-(rev)M6RLKmalectin\_3294

GTAAGTACTGCTGTGAAGGGTAGCTTTGGGTACCTTGATCCTGAATACTCCGGAGGCAGCAGCTCACG  
GAGAAATCAGATGTCTACTCATTGGGTGTTGCCTAATGGAAGTTCTCTGC

>M6-PGSC0003DMG400025030-(rev)M6RLKmalectin\_3355

AGCTCACGGAGAAATCAGATGTCTACTCATTGGGTGTTGCCTAATGGAAGTTCTCTGCACCAGACCAGC  
ATTGAATCCGGTCCTTCCTCGTGAGCAAGTTAATATAGCTGAGTGGGCTA

>M6-PGSC0003DMG400025030-(rev)M6RLKmalectin\_3416

CAGACCAGCATTGAATCCGGTCCTTCCTCGTGAGCAAGTTAATATAGCTGAGTGGGCTATGATTTGGCA  
AAAGAAAGGCATGTTGGATCGGATAATGGACGAGAATCTCAAAGGGCAGGT

>M6-PGSC0003DMG400025030-(rev)M6RLKmalectin\_3477

ATTTGGCAAAGAAAGGCATGTTGGATCGGATAATGGACGAGAATCTCAAAGGGCAGGTTAACCCAGC  
CTCCCTGAAAAGTTCGGTGAGACAGCTGAAAAGTGTGGCTGAGTACGGA

>M6-PGSC0003DMG400025030-(rev)M6RLKmalectin\_3538

ACCCAGCCTCCCTGAAAAGTTCGGTGAGACAGCTGAAAAGTGTGGCTGAGTACGGAGTTGATAGAC  
CTTCAATGGGAGATGTGTTATGGAATCTAGAATACGCTCTTCAGCTTGAAG

>M6-PGSC0003DMG400025030-(rev)M6RLKmalectin\_3599

TGATAGACCTTCAATGGGAGATGTGTTATGGAATCTAGAATACGCTCTTCAGCTTGAAGAAGCCTCATCA  
GCCTTGACAGAGCCTGATGATAACAGTACAAACCATATCCCTGGCATAACC

>M6-PGSC0003DMG400025030-(rev)M6RLKmalectin\_366

TTTCATGGTGGCATTGAGGTAACCTGAATTGGGTCTCTTATTTCTTCCTTTTGGTTCACATCCTTTTCAA  
ATATTCAATTTTTCATAGTGGAGTTGCACTAACAGCTCTTCTTGACT

>M6-PGSC0003DMG400025030-(rev)M6RLKmalectin\_3660

GCCTCATCAGCCTTGACAGAGCCTGATGATAACAGTACAAACCATATCCCTGGCATAACCATTAACACCAG  
TTGAGCCATTGACAACAGTGTTAGCAATATCCAAGGTATAGTTAACTCA

>M6-PGSC0003DMG400025030-(rev)M6RLKmalectin\_3721

TAACACCAGTTGAGCCATTGACAACAGTGTTAGCAATATCCAAGGTATAGTTAACTCAGGAACAGATG  
ATGATGCAGGGGATGCTGCTACTAGTTCCGTTTTCTCTCAGCTGGTAAATC

>M6-PGSC0003DMG400025030-(rev)M6RLKmalectin\_3782

AACAGATGATGATGCAGGGGATGCTGCTACTAGTTCCGTTTTCTCTCAGCTGGTAAATCCGCGGGGAAG

ATGAGAAGAAATACTCCCTCGTATACGTGCTTGAGTATAGTATTGAATCAA

>M6-PGSC0003DMG400025030-(rev)M6RLKmalectin\_3843

CGGGGAAGATGAGAAGAAATACTCCCTCGTATACGTGCTTGAGTATAGTATTGAATCAAATTTCCCTAC  
TAAAATGTTTGAGTGTGTATTGTATATGATTGATGTACCTAACGAATACG

>M6-PGSC0003DMG400025030-(rev)M6RLKmalectin\_3904

TTCCCTACTAAAATGTTTGAGTGTGTATTGTATATGATTGATGTACCTAACGAATACGATGAAATTCATC  
GTTCAAATACTGCAAGTTGTAGTATTATTTCCATTGTTAGGTGATACAT

>M6-PGSC0003DMG400025030-(rev)M6RLKmalectin\_3965

GAAATTCATCGTTCAAATACTGCAAGTTGTAGTATTATTTCCATTGTTAGGTGATACATTGGCCTCTTTAT  
CTAATAGATAGTCATGGATATGTATTTGTAATAGCACTATAATTGTATC

>M6-PGSC0003DMG400025030-(rev)M6RLKmalectin\_3999

TTATTTCCATTGTTAGGTGATACATTGGCCTCTTTATCTAATAGATAGTCATGGATATGTATTTGTAATAG  
CACTATAATTGTATCCATTCATAGATAATAAATATTAAGCATATGTTGC

>M6-PGSC0003DMG400025030-(rev)M6RLKmalectin\_427

TCCTTTTCAAATATTCAATTTTTCATAGTGGAGTTGCACTAAACAGCTCTTCTTGACTGTGTTTTATAGT  
GGATTTGCACTAAAAGCTCTTCTTGATTGTGTTTTATGGTGGCATT

>M6-PGSC0003DMG400025030-(rev)M6RLKmalectin\_488

GTTTTTATAGTGGATTTGCACTAAAAGCTCTTCTTGATTGTGTTTTATGGTGGCATTGAGGTAATCTGA  
ATTGGGTTTTGTTCTTTCTTCTTTGGTTCACACCCTTTTCAAAGA

>M6-PGSC0003DMG400025030-(rev)M6RLKmalectin\_549

GGTAATCTGAATTGGGTTTTGTTCTTTCTTCTTTGGTTCACACCCTTTTCAAAGATTCAATTTTCATA  
GTGTAGTTGCACTAAAAGCTGTTCTTGATTGTGTTTTCATGGTGGC

>M6-PGSC0003DMG400025030-(rev)M6RLKmalectin\_61

AATGGAATTGCACTAAAAGTTCTTGTTGATTGTGTTGAATTTGGGTCTTCTTGTTTCTGCCTTTTGTT  
CACACCCATGTCAAAGATCCAATTTTCAAGGGGAAGTTGACTAGA

>M6-PGSC0003DMG400025030-(rev)M6RLKmalectin\_671

TGAGGTAACCTGACTTGGGACTTGTCTTTCTTCTTTGGTTCATACCCTTTTCAAAGATTCAATTTT  
CATTGTGGAGTTGCACTAAAAGCTCTATTTGACTGTATTTTCATGGT

>M6-PGSC0003DMG400025030-(rev)M6RLKmalectin\_732

ATTCAATTTTTCATTGTGGAGTTGCACTAAAAAGCTCTATTTGACTGTATTTTCATGGTGGCATTGAGGTA  
ACCTTTCTTCTGGTGCACAGCTCGGAACTCGGTGGATAATTGTCACACC

>M6-PGSC0003DMG400025030-(rev)M6RLKmalectin\_793

CATTGAGGTAACCTTTCTTCTGGTGCACAGCTCGGAACTCGGTGGATAATTGTCACACCCCTTGACTCTTC  
TCCACTTAAATACCAGGCTTTTTGTTACGTCCGCCTAACTCACACATCA

>M6-PGSC0003DMG400025030-(rev)M6RLKmalectin\_854

TTGACTCTTCTCCACTTAAATACCAGGCTTTTTGTTACGTCCGCCTAACTCACACATCAGGCATAGACATT  
GCACTTACCCTGAACCAAAGCCTCTAGGAGCATTCCAATCTGAAG

>M6-PGSC0003DMG400025030-(rev)M6RLKmalectin\_915

CATAGACATTGCACTTACCCTGAACCAAAGCCTCTAGGAGCATTCCAATCTGAAGTCTAGAGGAAA  
GTTGTTAGCTCAGATCTTGTCTAAACTATTTTTTTGTTCTTTTGGTGTT

>M6-PGSC0003DMG400025030-(rev)M6RLKmalectin\_976

TAGAGGAAAGTTGTTAGCTCAGATCTTGTCTAAACTATTTTTTTGTTCTTTTGGTGTTAATCATAGTTTAT  
TGGTAGTTTCTGTGATTTTTTCAGTTAAGTTTTTTTTTTTTCTGTAGCA

>M6-PGSC0003DMG400025076-(rev)M6LRR-RLK\_0

TAATCTCTTTGCTATATTTAATGTATAGTTTCATTTGTTTGTCTTTAGTTTCTCAAGAACTGCACTCTCAC  
TCAAAATCCTCTCCGCCACCGTCAACCGCCGTCAACCACCGTCAACC

>M6-PGSC0003DMG400025076-(rev)M6LRR-RLK\_1037

GTCTTCAAGATAATCTCCTTAATGGGTCAATTCCATCACAGTTAGGGTCCTTAGTGCACTCCAGCAGTTT  
AGGATTGGTGGAATCCATATTTGAGTGGTGAAATTCCTGCACAATTAG

>M6-PGSC0003DMG400025076-(rev)M6LRR-RLK\_1098

CCAGCAGTTTAGGATTGGTGGAAATCCATATTTGAGTGGTGAAATTCCTGCACAATTAGGCCTGCTCACC  
AATCTTACCATGTTTGGTGTTCGCGCGACTGGTCTTTCGGGTGTTATTCC

>M6-PGSC0003DMG400025076-(rev)M6LRR-RLK\_1159

CTGCTACCAATCTTACCATGTTTGGTGTTCGCGCGACTGGTCTTTCGGGTGTTATTCCGCCAACATTTGG  
GAATTTGATCAATCTTCAAACACTGGCAATTTATGATACTGAAGTATTT

>M6-PGSC0003DMG400025076-(rev)M6LRR-RLK\_122

CGTCATGAAAAATGCAAAATGACAAATGTGTTTGGTTCATGCTAGTGACCATTTATCTTCACCACCTTCA  
TTAGTGAGCTGCTAGCTAGCGCCCGGTGTACGGAGGAGCAAAGAGGAG

>M6-PGSC0003DMG400025076-(rev)M6LRR-RLK\_1220

CAACATTTGGGAATTTGATCAATCTTCAAACACTGGCAATTTATGATACTGAAGTATTTGGTTCGATACC  
GCCTGAACTTGGGATGATTTTCGGAGCTTAGGTAAGTACTTGTATCTGCATATGA

>M6-PGSC0003DMG400025076-(rev)M6LRR-RLK\_1281

TTCGATACCGCCTGAACTTGGGATGATTTTCGGAGCTTAGGTAAGTACTTGTATCTGCATATGAATAAGCTCACT  
GATTCGATCCCTCCTCAGTTAGGTAAGTTGCAAAAGCTTACTAGCTTGCT

>M6-PGSC0003DMG400025076-(rev)M6LRR-RLK\_1342

AAGCTCACTGATTCGATCCCTCCTCAGTTAGGTAAGTTGCAAAAGCTTACTAGCTTGCTTTTATGGGGAA  
ATTCATTAAGTGGACCTATACCAGCTGAGGTTTCGAATTGTTTCGTCCTT

>M6-PGSC0003DMG400025076-(rev)M6LRR-RLK\_1403

TATGGGGAAATTCATTAAGTGGACCTATACCAGCTGAGGTTTCGAATTGTTTCGTCCTTGTGATTCTTGAT  
GTTTCTGCGAATGAATTGTCTGGTGAATTCCTGGTGATTTGGGGAAAGC

>M6-PGSC0003DMG400025076-(rev)M6LRR-RLK\_1464

GATTCTTGATGTTTCTGCGAATGAATTGTCTGGTGAATTCCTGGTGATTTGGGGAAAGCTATTGGTTCTT  
GAACAGCTTCATTTGTCTGATAATGCACTTACCGTTCTATACCGTGGCA

>M6-PGSC0003DMG400025076-(rev)M6LRR-RLK\_1525

TTGGTTCTTGAACAGCTTCATTTGTCTGATAATGCACTTACCGTTCTATACCGTGGCAGTTAAGTAATTG  
CACTAGCCTGACAGCTCTTCAGCTAGATAAGAACCAATTATCAGGGCAA

>M6-PGSC0003DMG400025076-(rev)M6LRR-RLK\_1586

TAAGTAATTGCACTAGCCTGACAGCTCTTCAGCTAGATAAGAACCAATTATCAGGGCAAATTCCTGGCA  
AGTTGGTAAGTTGAAGTACTTGCAGAGTTTTTTCTTGTGGGGGAATTCGG

>M6-PGSC0003DMG400025076-(rev)M6LRR-RLK\_1647

TCCCTGGCAAGTTGGTAAGTTGAAGTACTTGCAGAGTTTTTTCTTGTGGGGGAATTCGGTTTCAGGAACC  
ATTCCAGCTGCTTTTGGAACTGTACTGAGCTATATGCACTTGATCTTTC

>M6-PGSC0003DMG400025076-(rev)M6LRR-RLK\_1708

TCAGGAACCATTCCAGCTGCTTTTGGAACTGTACTGAGCTATATGCACTTGATCTTTCGAGGAACAAGC  
TCACTGGATCGATCCCTGAGGAGATATTTGATTTGAAGCAGCTGAGTAAA

>M6-PGSC0003DMG400025076-(rev)M6LRR-RLK\_1769

GGAACAAGCTCACTGGATCGATCCCTGAGGAGATATTTGATTTGAAGCAGCTGAGTAAATTTGTTGCTCC

TTGGGAACTCGTTAACTGGACGATTGCCTCGAAGCGTTGCAAGATGCCAGT

>M6-PGSC0003DMG400025076-(rev)M6LRR-RLK\_183

ACCACCTTCATTAGTGAGCTGCTAGCTAGCGCCCGCGTGTACGGAGGAGCAAAGAGGAGCTGGTTTTCT

CCAGTAAGAGAACTTTAATAGTAGCAGTTTAGTAAATGTTTCATTAAAGAT

>M6-PGSC0003DMG400025076-(rev)M6LRR-RLK\_1830

GTTGCTCCTTGGGAACTCGTTAACTGGACGATTGCCTCGAAGCGTTGCAAGATGCCAGTCTCTGGTGAG

GTTGAGGCTTGGTGAGAATCAGCTTTCAGGACAGATTCCTAAGGAGATTGG

>M6-PGSC0003DMG400025076-(rev)M6LRR-RLK\_1891

CTGGTGAGGTTGAGGCTTGGTGAGAATCAGCTTTCAGGACAGATTCCTAAGGAGATTGGTCAATTGCAG

AATCTTGTGTTTCTTGATTTGTACATGAACCATTTCTCTGGAGGCTTGCCT

>M6-PGSC0003DMG400025076-(rev)M6LRR-RLK\_1952

AATTGCAGAATCTTGTGTTTCTTGATTTGTACATGAACCATTTCTCTGGAGGCTTGCCTTCTGAAATTGCC

AACATTACAGTTCTTGAGCTGTTGGATGTGCACAACAATTACCTAACTG

>M6-PGSC0003DMG400025076-(rev)M6LRR-RLK\_2013

TGAAATTGCCAACATTACAGTTCTTGAGCTGTTGGATGTGCACAACAATTACCTAACTGGGGAAATACCA

CACCAGATGGGGGAGCTTGTGAATTTAGAGCAACTTGATCTTAGCCGGAA

>M6-PGSC0003DMG400025076-(rev)M6LRR-RLK\_2074

GAAATACCACACCAGATGGGGGAGCTTGTGAATTTAGAGCAACTTGATCTTAGCCGGAACAGCTTTACC

GGTGAGATCCCTTCGAGTTTTGGCAATCTCAGTTACTTGAACAAATTTATT

>M6-PGSC0003DMG400025076-(rev)M6LRR-RLK\_2135

GCTTTACCGGTGAGATCCCTTCGAGTTTTGGCAATCTCAGTTACTTGAACAAATTTATTCTCAGTAACAAT

CTGCTTACTGGTTCAATTCCAAAGCTTTTAAGAACTTGCAGAAGTTAA

>M6-PGSC0003DMG400025076-(rev)M6LRR-RLK\_2196

CAGTAACAATCTGCTTACTGGTTCAATTCCAAAGCTTTTAAGAACTTGCAGAAGTTAACTTACTTGATT

TGAGCTCGAATAGTCTTCTGGCGAGATTCCATCTGAGCTTGGCTATGT

>M6-PGSC0003DMG400025076-(rev)M6LRR-RLK\_2257

CTACTTGATTTGAGCTCGAATAGTCTTCTGGCGAGATTCCATCTGAGCTTGGCTATGTCACAAGCTTAAC

AATCGGTTTGGATTTGAGCTTGAATTGTTTCACGGGTGAACTTCCTGAA

>M6-PGSC0003DMG400025076-(rev)M6LRR-RLK\_2318



CAAGCTTAAACAATCGGTTTGGATTTGAGCTTGAATTGTTTCACGGGTGAACTTCCTGAAACATTGTCCGG  
TTTGTACAGTTGCAATCTCTTGATATTTCTCATAATTTGTTGAGTGGAA

>M6-PGSC0003DMG400025076-(rev)M6LRR-RLK\_2379

ATTGTCCGGTTTGTACAGTTGCAATCTCTTGATATTTCTCATAATTTGTTGAGTGGAAAGGATCACAATTC  
TAAGCTCCCTGACCAGCCTTACTTCCCTGAATGTTTCAGACAACAATTT

>M6-PGSC0003DMG400025076-(rev)M6LRR-RLK\_244

GGTTTTCTCCAGTAAGAGAACTTTAATAGTAGCAGTTTAGTAAATGTTTCATTAAAGATAAACAAGAACT  
TTTTAGTTCACATGCATGGTAAGTAAATTTTTGAGTTAGTGTGAGTTTG

>M6-PGSC0003DMG400025076-(rev)M6LRR-RLK\_2440

ATCACAATTCTAAGCTCCCTGACCAGCCTTACTTCCCTGAATGTTTCAGACAACAATTTCTCGGGGCCTAT  
TCCTGTACACCATTCTTTAGAACTCTCACTTCAGATTCTTTTCTGGAG

>M6-PGSC0003DMG400025076-(rev)M6LRR-RLK\_2501

CGGGGCCTATTCTGTACACCATTCTTTAGAACTCTCACTTCAGATTCTTTTCTGGAGAATTCACTCTGTC  
AATCAGTTGATGGTTATAGTTGTTCTTCACATATAATGGGAAGGAATG

>M6-PGSC0003DMG400025076-(rev)M6LRR-RLK\_2562

TTCACTCTGTCAATCAGTTGATGGTTATAGTTGTTCTTCACATATAATGGGAAGGAATGGGTTGAAGTCA  
CCGAAAACCATAGCTCTGGTTGCGGTGATTCTGACATCTGTAGCCATAGC

>M6-PGSC0003DMG400025076-(rev)M6LRR-RLK\_2623

TTGAAGTCAACGAAAACCATAGCTCTGGTTGCGGTGATTCTGACATCTGTAGCCATAGCAGTCGTGGCTA  
CATGGATTCTTGTGACGCGAAAACACAGATATGTGTTTCAGAAGTCCCAA

>M6-PGSC0003DMG400025076-(rev)M6LRR-RLK\_2684

TCGTGGCTACATGGATTCTTGTGACGCGAAAACACAGATATGTGTTTCAGAAGTCCCAAGGCGTGTCTG  
CCTCTTCGGTAGGAGCAGAAGATTTTTCTACCCTTGGACTTTCATCCCCT

>M6-PGSC0003DMG400025076-(rev)M6LRR-RLK\_2745

CGTGTCTGCCTCTTCGGTAGGAGCAGAAGATTTTTCTACCCTTGGACTTTCATCCCCTTCAAAGTTCA  
ATTTACCATAGACAACATCTTGGATTGCTTGAAAGATGAAAACATCAT

>M6-PGSC0003DMG400025076-(rev)M6LRR-RLK\_2806

CAAAGTTCAATTTACCATAGACAACATCTTGGATTGCTTGAAAGATGAAAACATCATTGGGAAAGGA  
TGTTCCGGTGTGTATACAAAGCAGAAATGCCTAACGGTGAGGTGATTGCA

>M6-PGSC0003DMG400025076-(rev)M6LRR-RLK\_2867

GGAAAGGATGTTCCGGTGTGTATACAAAGCAGAAATGCCTAACGGTGAGGTGATTGCAGTGAAGAAG  
CTTTGGAAAACAAAGAAAGACGAGGAGCCAGTAGATTCTTTTGCAGCAGAAA

>M6-PGSC0003DMG400025076-(rev)M6LRR-RLK\_2928

GAAGAAGCTTTGGAAAACAAAGAAAGACGAGGAGCCAGTAGATTCTTTTGCAGCAGAAATTCAAATTCT  
TGGACATATTAGGCATCGAAACATTCTGAAGTTATTGGGATATTGTTCAAA

>M6-PGSC0003DMG400025076-(rev)M6LRR-RLK\_2989

CAAATTCTTGGACATATTAGGCATCGAAACATTCTGAAGTTATTGGGATATTGTTCAAACAAAAGCGTTA  
AGCTTCTTCTCTACAACACTACATTTCAAATGGCAATCTCCATCAGCTCTTG

>M6-PGSC0003DMG400025076-(rev)M6LRR-RLK\_305

ACAAGAACTTTTTAGTTCACATGCATGGTAAGTAAATTTTTTGAGTTAGTGTGAGTTGAAGCAAACCTC  
CATTAACACACCACATGTATGCTGTCTTGTTAGAGTGAACCTTCAAACAC

>M6-PGSC0003DMG400025076-(rev)M6LRR-RLK\_3050

AAAGCGTTAAGCTTCTTCTCTACAACACTACATTTCAAATGGCAATCTCCATCAGCTCTTGCAAAGTAACAGA  
AATTTGGACTGGGAAATTAGGTACAAAATAGCCATTGGATCAGCTCAAG

>M6-PGSC0003DMG400025076-(rev)M6LRR-RLK\_3111

AAGTAACAGAAATTTGGACTGGGAAATTAGGTACAAAATAGCCATTGGATCAGCTCAAGGCCTTGCTTA  
TCTTCACCATGACTGTGTTCCAGCCATTCTTCATAGAGATGTCAAGTGCAA

>M6-PGSC0003DMG400025076-(rev)M6LRR-RLK\_3172

CTTGCTTATCTTCACCATGACTGTGTTCCAGCCATTCTTCATAGAGATGTCAAGTGCAATAATACTGAT  
CGACTCCAAGTTTGACGCTTATATTGCAGACTTTGGACTAGCAAAGCTA

>M6-PGSC0003DMG400025076-(rev)M6LRR-RLK\_3233

ATATACTGATCGACTCCAAGTTTGACGCTTATATTGCAGACTTTGGACTAGCAAAGCTAATGAATTCGCC  
AAACTATCACCACGCTATGTCCAGTGTAGCAGGATCTTATGGATATATTG

>M6-PGSC0003DMG400025076-(rev)M6LRR-RLK\_3294

GAATTCGCCAAACTATCACCACGCTATGTCCAGTGTAGCAGGATCTTATGGATATATTGCTCCAGGTATG  
CATGCACTTAGAATATTTTCAATTACTAATATTTCAACATAAAAAGCCAAA

>M6-PGSC0003DMG400025076-(rev)M6LRR-RLK\_3355

CCAGGTATGCATGCACTTAGAATATTTTCAATTACTAATATTTCAACATAAAAAGCCAAATCGATCATAACA

TCTTCAAATATTTACTTTATGAGTCATAGTTCGTTGAGTGTGACACAA

>M6-PGSC0003DMG400025076-(rev)M6LRR-RLK\_3416

GATCATAACATCTTTCAAATATTTACTTTATGAGTCATAGTTCGTTGAGTGTGACACAAATATTTGTCAAC  
TATGGTTGCAGAATATGGATATACAGCGAATATAACAGAAAAGAGCGAT

>M6-PGSC0003DMG400025076-(rev)M6LRR-RLK\_3477

ATTTGTCAACTATGGTTGCAGAATATGGATATACAGCGAATATAACAGAAAAGAGCGATGTCTATAGTT  
ATGGAGTGGTGCTACTGGAAATACTTAGTGGGCGTAGCGCTGTTGATTCTC

>M6-PGSC0003DMG400025076-(rev)M6LRR-RLK\_3538

CTATAGTTATGGAGTGGTGCTACTGGAAATACTTAGTGGGCGTAGCGCTGTTGATTCTCAGATAGGTGA  
TGGGCTTCACATCGTTGAATGGGTAAAGAAGAAAATGGGAAGCTTTGAACC

>M6-PGSC0003DMG400025076-(rev)M6LRR-RLK\_3599

ATAGGTGATGGGCTTCACATCGTTGAATGGGTAAAGAAGAAAATGGGAAGCTTTGAACCAGCTGTTAC  
AGTTCTCGACACTAAGCTACAAGTTTACCCGATCAAGTAGTCCAAGAAATG

>M6-PGSC0003DMG400025076-(rev)M6LRR-RLK\_366

GCAAACCTCCATTAACACACCACATGTATGCTGTCTTGTAGAGTGAACCTTTCAAACACTATTATCATTTTT  
TTTCAACAACCCCATTTCTTGACTTTGATTTTCACTCAATAATGGAGAA

>M6-PGSC0003DMG400025076-(rev)M6LRR-RLK\_3660

CTGTTACAGTTCTCGACACTAAGCTACAAGGTTTACCCGATCAAGTAGTCCAAGAAATGCTGCAAACGCT  
TGGAATAGCGATGTTCTGTGTCAACTCATCGCCGTTGAAAGGCCAACAA

>M6-PGSC0003DMG400025076-(rev)M6LRR-RLK\_3721

GCAAACGCTTGGAATAGCGATGTTCTGTGTCAACTCATCGCCGTTGAAAGGCCAACAAATGAAGGAAGT  
TGTGGCACTTCTAATGGAAGTAAAGAGTTCACCTGATCAAGAATTTGGGAA

>M6-PGSC0003DMG400025076-(rev)M6LRR-RLK\_3782

AAGGAAGTTGTGGCACTTCTAATGGAAGTAAAGAGTTCACCTGATCAAGAATTTGGGAAAACCTTCTCAG  
CCTCTAATAAAAACAGTCCCTCAACTCAAAGTTGATTAATTTTGTATGTTTT

>M6-PGSC0003DMG400025076-(rev)M6LRR-RLK\_3904

TTTTTTGCTTTTACTAAGAGGAGTAGGAATTAGTTTTCTTTAGTTCCCAAGATATGATCAATTCATTGTT  
CCAAGCATTGGATAATGTCTTGGGGTCCATTGTGTACATATTTTCAGAA

>M6-PGSC0003DMG400025076-(rev)M6LRR-RLK\_3965

AATTCATTGTTCCAAGCATTGGATAATGTCTTGGGGTCCATTGTGTACATATTTTCAGAAACATTTATGTAG  
TTTATTTGCTTCTTCATTTCTTCCTATCCATCTCTGTGCTGAGATTTTA

>M6-PGSC0003DMG400025076-(rev)M6LRR-RLK\_4026

ATTTATGTAGTTTATTTGCTTCTTCATTTCTTCCTATCCATCTCTGTGCTGAGATTTTAGCTTTCAAATGCT  
TGCAGTTGCACCATATAATATTATAGTTTACCATAGTTTCAAAAAA

>M6-PGSC0003DMG400025076-(rev)M6LRR-RLK\_4087

TTTCAAATGCTTGCAGTTGCACCATATAATATTATAGTTTACCATAGTTTCAAAAAAAGAGAAATATAGT  
TTGACCTATTCAGAAAAATTCTATTGTTGGTGTACGAATGTGGTTTCAA

>M6-PGSC0003DMG400025076-(rev)M6LRR-RLK\_4148

GAAATATAGTTTGACCTATTCAGAAAAATTCTATTGTTGGTGTACGAATGTGGTTTCAAACCTTCCGGTG  
ATGCTAAAAGTAGTTTCAGAAAAGAGAAATATAGAAAGAAGAAATCAAAG

>M6-PGSC0003DMG400025076-(rev)M6LRR-RLK\_4209

CTTCCGGTGATGCTAAAAGTAGTTTCAGAAAAGAGAAATATAGAAAGAAGAAATCAAAGAAGGGGAAT  
ATTGAAGCAACGGTAAAATTATCTCATGGGTTCAAACCGTGGAAGCAGGCAT

>M6-PGSC0003DMG400025076-(rev)M6LRR-RLK\_427

TTATCATTTTTTTCAACAACCCCATTTCTTGACTTTGATTTTCACTCAATAATGGAGAAGAAAAGCTACCAT  
TTTTACACTTTCCCTTCATGTTATTTCTTGTTTTTTGTTGATTTCTTGG

>M6-PGSC0003DMG400025076-(rev)M6LRR-RLK\_4270

GGGGAATATTGAAGCAACGGTAAAATTATCTCATGGGTTCAAACCGTGGAAGCAGGCATTAATACATTA  
GGTTAAATTGTCTACCTCATATCCTTTGAAGTGTGGCCTTTCTCTGAGCTT

>M6-PGSC0003DMG400025076-(rev)M6LRR-RLK\_4331

ATACATTAGGTTAAATTGTCTACCTCATATCCTTTGAAGTGTGGCCTTTCTCTGAGCTTTGCTAACACATG  
ATGTTTTGTTTCATTGAGTTGTTTGTAGAAAGAAGAAAACAAACAACTCT

>M6-PGSC0003DMG400025076-(rev)M6LRR-RLK\_4392

CTAACACATGATGTTTTGTTTCATTGAGTTGTTTGTAGAAAGAAGAAAACAAACAACTCTTAAAAACAAAT  
ATAATACTCATGTAATATCATTAGAGACTATTGGTCTAGTGGTAAGAGTG

>M6-PGSC0003DMG400025076-(rev)M6LRR-RLK\_488

AAAGCTACCATTTTTACACTTTCCCTTCATGTTATTTCTTGTTTTTTGTTGATTTCTTGGTTAAGTTTGAGTCC  
AAAGATTGTATTTTTAGTGAGCTCTGTTTCTTCAGATGGACAAGCGT

>M6-PGSC0003DMG400025076-(rev)M6LRR-RLK\_549

AAGTTTGAGTCCAAAGATTGTATTTTTAGTGAGCTCTGTTTCTTCAGATGGACAAGCGTTGCTTTCTCTGC  
TTAAAGCAGCTGACCCTTACACTAAATCATCATCTTCTGTGCTTTCTTC

>M6-PGSC0003DMG400025076-(rev)M6LRR-RLK\_61

TGTCACTCTCACTCAAATCCTCTCCGCCACCGTCAACCGCCGTCAACCACCGTCAACCGCCGTCAATGAAA  
AAATGCAAATGACAAATGTGTTTGGTTCATGCTAGTGACCATTTATCT

>M6-PGSC0003DMG400025076-(rev)M6LRR-RLK\_610

CTTTCTCTGCTTAAAGCAGCTGACCCTTACACTAAATCATCATCTTCTGTGCTTTCTTCTTGGAAACCCTTCA  
AGTTTAACTCCATGTTCTTGGCAAGGGATTACTTGTCTCCTCAAGAA

>M6-PGSC0003DMG400025076-(rev)M6LRR-RLK\_671

GGAACCCCTTCAAGTTTAACTCCATGTTCTTGGCAAGGGATTACTTGTCTCCTCAAGAAAGGGTTATTCA  
CTTTCTATCCCAAATACTTTCTAAATCTCTTACTTGCCTTCTGAAC

>M6-PGSC0003DMG400025076-(rev)M6LRR-RLK\_732

GGTATTTCACTTTCTATCCCAAATACTTTCTAAATCTCTTACTTGCCTTCTGAACTCTCTCCCTTTTCAT  
CTTTGCAGCTTCTTAATCTTTCTTCTACTAATATTTCTGGAACAAT

>M6-PGSC0003DMG400025076-(rev)M6LRR-RLK\_793

TCTTCCCTTTTCATCTTTGCAGCTTCTTAATCTTTCTTCTACTAATATTTCTGGAACAATCCCTCCATCTTTTG  
GTTCTTTTTCTCATCTTAGGCTTTTGGACCTTTCTTCTAATTCACTT

>M6-PGSC0003DMG400025076-(rev)M6LRR-RLK\_854

CTCCATCTTTTGGTTCTTTTTCTCATCTTAGGCTTTTGGACCTTTCTTCTAATTCACTTTCAGGTTCTATTCCA  
TCAGAACTTGGTGGGCTTAGTTCACTTCAGTTCTTGTCTTGAATT

>M6-PGSC0003DMG400025076-(rev)M6LRR-RLK\_915

AGGTTCTATTCCATCAGAACTTGGTGGGCTTAGTTCACTTCAGTTCTTGTCTTGAATTCAAACAGATTGA  
CTGGTAAGATCCCACCAGAGTTAGCTAATCTTTCTTCTTATTAGAAATCTT

>M6-PGSC0003DMG400025076-(rev)M6LRR-RLK\_976

AACAGATTGACTGGTAAGATCCCACCAGAGTTAGCTAATCTTTCTTCTTATTAGAAATCTTTTGTCTTCAAGA  
TAATCTCCTTAATGGGTCAATTCCATCACAGTTAGGGTCCTTAGTGCA

>M6-PGSC0003DMG400025222-(rev)M6RLKANKrepeat\_0

ATAGTATTTATGATGGCCCAAGTGCATCCTTGAACCTCCTTATTATTATGGCAGGCAGCAGCTGACGCGA

AATACTATGGAAATAATGAAGTTTATAATATCTTAAAGGCCCGGGGGGCC

>M6-PGSC0003DMG400025222-(rev)M6RLKANKrepeat\_1037

TGGCTTGTCATATGTTGAAACCATTATTTTCTATTTTCTTCACTTCCACTTGGGCATATTTTCATGTATCCCT

TGTAGACTTGTTTGCTTGTTGTGTAGTGAAGCCCAGGCTGTTTATAC

>M6-PGSC0003DMG400025222-(rev)M6RLKANKrepeat\_1098

TCATGTATCCCTTGTAGACTTGTTTGCTTGTTGTGTAGTGAAGCCCAGGCTGTTTATACAAATTTTGAGGC

TCATCGTTTGGATGAATCAGGCTGAGAAAAGTTTCTAGT

>M6-PGSC0003DMG400025222-(rev)M6RLKANKrepeat\_1159

ATTTTGAGGCTCATCGTTTGGATGAATCAGGCTGAGAAAAGTTTCTAGTGTTAGTCAACA

ACTAATTTCCAGCGAAAGAAATCAGGACATATTGGAGTGCTTTCATGTT

>M6-PGSC0003DMG400025222-(rev)M6RLKANKrepeat\_122

AGTCCCGGTAAGTGGGAAGATAATTTTCTAATTAAGTGATATTTATGATTTATGGGGCTGAGTATTTGT

CACGTTGTTAGAAACTCAGAAACACACCAATGACTGTTGCAAATCCTCGA

>M6-PGSC0003DMG400025222-(rev)M6RLKANKrepeat\_1220

TAGTCAACAATAATTTCCAGCGAAAGAAATCAGGACATATTGGAGTGCTTTCATGTTTGATTAAGCAG

GATGTCCCACTAAGTTGTGTTCTGTTATATTACAGTCTTGTGAGCAGCTT

>M6-PGSC0003DMG400025222-(rev)M6RLKANKrepeat\_1281

ATTAAGCAGGATGTCCCACTAAGTTGTGTTCTGTTATATTACAGTCTTGTGAGCAGCTTGATCACATCATT

ATGTGTGCTTACATACTAACCCTTGTGTTTACAGATTGTAGATAGT

>M6-PGSC0003DMG400025222-(rev)M6RLKANKrepeat\_1342

TCACATCATTATGTGTGCTTACATACTAACCCTTGTGTTTACAGATTGTAGATAGTTCTTGTGTTTTTT

ACGCAAGGTAGATTGTGAACATGGTATTGAGATGGCTCTAATAGGTGC

>M6-PGSC0003DMG400025222-(rev)M6RLKANKrepeat\_1403

TTGTGTTTTTTACGCAAGGTAGATTGTGAACATGGTATTGAGATGGCTCTAATAGGTGCCTTATCAAGTT

CTCATTAGAAAACCAAATCCCTGAAGCAGCTGGAAATACATTTGTCAAAA

>M6-PGSC0003DMG400025222-(rev)M6RLKANKrepeat\_1464

TATCAAGTTCTCATTAGAAAACCAAATCCCTGAAGCAGCTGGAAATACATTTGTCAAAAATATTGAAGTG

TATATCCTTCTGATCATCAGGTCACACTGCTTCATGTGAATAGCAACTTC

>M6-PGSC0003DMG400025222-(rev)M6RLKANKrepeat\_1525

ATTGAAGTGTATATCCTTCTGATCATCAGGTCACACTGCTTCATGTGAATAGCAACTTCAACAGTCTTTAT  
ACATGAATCTGATCCTTTGAGCATTAAAATAAGATAGAAAGATGAAAA

>M6-PGSC0003DMG400025222-(rev)M6RLKANKrepeat\_1586

CAGTCTTTATACATGAATCTGATCCTTTGAGCATTAAAATAAGATAGAAAGATGAAAATATGCATCTCA  
AAAGGAAATTCAGCCTTCTAGGTAAAATACTCTTTATATTCACATGTTTC

>M6-PGSC0003DMG400025222-(rev)M6RLKANKrepeat\_1647

TGCATCTCAAAGGAAATTCAGCCTTCTAGGTAAAATACTCTTTATATTCACATGTTTCCAAGATGCTGGC  
AGATTGATTTGACGATGGATCTGGATCTTTGATTTGTAGTAATATGGAA

>M6-PGSC0003DMG400025222-(rev)M6RLKANKrepeat\_1708

AGATGCTGGCAGATTGATTTGACGATGGATCTGGATCTTTGATTTGTAGTAATATGGAATAAGTTGAGG  
ATCACACTTCGTCATTCTGGAGTCCTTTTTGTTAGGCACTTTTCAAGTTTC

>M6-PGSC0003DMG400025222-(rev)M6RLKANKrepeat\_1769

AGTTGAGGATCACACTTCGTCATTCTGGAGTCCTTTTTGTTAGGCACTTTTCAAGTTTCATAACAACCATTT  
CTCTAAAACCAACATTTTTTAAACAATTGTACAAGCTTCTTTGTAATTT

>M6-PGSC0003DMG400025222-(rev)M6RLKANKrepeat\_183

AGTATTTGTCACGTTGTTAGAACTCAGAAACACACCAATGACTGTTGCAAATCCTCGAGAAGTTCCAGA  
ATATGAACTAAATCCACTGGAGCTTCAAATCCGAAAAAGGGATGGAATTT

>M6-PGSC0003DMG400025222-(rev)M6RLKANKrepeat\_1830

ACAACCATTTCTCTAAAACCAACATTTTTTAAACAATTGTACAAGCTTCTTTGTAATTTTCTAATCCCTAGT  
TAAGGAGACTGGGATTCCTCTACCTCGGTTTGTAGCATAATGCATAAT

>M6-PGSC0003DMG400025222-(rev)M6RLKANKrepeat\_1891

TAATCCCTAGTTAAGGAGACTGGGATTCCTCTACCTCGGTTTGTAGCATAATGCATAATAAGTTGATTCTC  
TCATCTGTTATTTGTGATAGCCACCTTATGCAGTTTACCTCGTTTCATG

>M6-PGSC0003DMG400025222-(rev)M6RLKANKrepeat\_1952

GTTGATTCTCTCATCTGTTATTTGTGATAGCCACCTTATGCAGTTTACCTCGTTTCATGCTAACCTTTCTCT  
GAAATTCAAACCTTAGGATGCATAAAGCCCAGCTTCTTTTCAGGGTTCA

>M6-PGSC0003DMG400025222-(rev)M6RLKANKrepeat\_2013

AACCTTTCTCTGAAATTCAAACCTTAGGATGCATAAAGCCCAGCTTCTTTTCAGGGTTTCATTGTAAGAAAA  
ACTGGTAGCTCTTATCCTTTTTCTGGTGTCTTTCTAAATCAAGAAAACT

>M6-PGSC0003DMG400025222-(rev)M6RLKANKrepeat\_2074

GTAAGAAAACTGGTAGCTTATCCTTTTTCTGGTGTCTTCTAAATCAAGAAAACTTATAATCTTCAC  
TCTTGTGTGATTGCCACAAATTTCCCTCAGACATTGAAGTGATTCTGG

>M6-PGSC0003DMG400025222-(rev)M6RLKANKrepeat\_2135

TAATCTTCACTCTTGTGTGATTGCCACAAATTTCCCTCAGACATTGAAGTGATTCTGGGGAGATGCTTTA  
TTCCAAGTGTCTTGATTCATGAAAGGACAGAACTTTAGTTTTACTTCA

>M6-PGSC0003DMG400025222-(rev)M6RLKANKrepeat\_2196

AGATGCTTTATTTCCAAGTGTCTTGATTCATGAAAGGACAGAACTTTAGTTTTACTTCAACGTCATTAGAT  
CTTTAAATTATCTTCTGAAAGTGTATCTTGGTCAAATGATAGATCCA

>M6-PGSC0003DMG400025222-(rev)M6RLKANKrepeat\_2257

GTCATTAGATCTTTAAATTATCTTCTGAAAGTGTATCTTGGTCAAATGATAGATCCAGTTTTTGTATTA  
TGGTTTTAGTTTCTCATTTGAACAAATTATTTCAAGGTGTTATTTA

>M6-PGSC0003DMG400025222-(rev)M6RLKANKrepeat\_2318

TTTTGTTATTATGGTTTTTAGTTTCTCATTTGAACAAATTATTTCAAGGTGTTATTTAAGATTGTCAAAT  
CTTATTGTTTACCTAACTGTTTCTATTCTTGATGTTAAGGTCGCCTTA

>M6-PGSC0003DMG400025222-(rev)M6RLKANKrepeat\_2379

ATTGTCAAATCTTATTGTTTACCTAACTGTTTCTATTCTTGATGTTAAGGTCGCCTTAATTCCATTCCTTC  
ACATGCAGAAATGCTTTTAAGCATGAATTAACCTTTGTTGGAAAGAGT

>M6-PGSC0003DMG400025222-(rev)M6RLKANKrepeat\_244

AGTCCAGAATATGAACTAAATCCACTGGAGCTTCAAATCCGAAAAAGGGATGGAATTTCGAAGGTAAG  
GCCTTCTTTGATTTCAAATAAGCATTTGGATGTTTCAATTTGAGAAATG

>M6-PGSC0003DMG400025222-(rev)M6RLKANKrepeat\_2440

TCCATTCCTTCACATGCAGAAATGCTTTTAAGCATGAATTAACCTTTGTTGGAAAGAGTACGGCATCCTAA  
TGTGGTTCAATTTGTTGGAGCTGTTACACAAAATATACCAATGATGATA

>M6-PGSC0003DMG400025222-(rev)M6RLKANKrepeat\_2501

GGCATCCTAATGTGGTTCAATTTGTTGGAGCTGTTACACAAAATATACCAATGATGATAGTAATAGAGTA  
TCATCCGAGGGTAAGTTCTCTCTATTTCTCTATCTCACACTGCACCGCAC

>M6-PGSC0003DMG400025222-(rev)M6RLKANKrepeat\_2562

AATAGAGTATCATCCGAGGGTAAGTTCTCTCTATTTCTCTATCTCACACTGCACCGCACAAAATCCCTTCT



TCACTCTATCCACCTACACACTATATTGTGAATATTGTATGTTATTATG

>M6-PGSC0003DMG400025222-(rev)M6RLKANKrepeat\_2623

AATCCCTTCTTCACTCTATCCACCTACACACTATATTGTGAATATTGTATGTTATTATGCATACATTAATAT

TGAAAAATATTCAATCAGCTCTTACATCAAATGTGCATTCAATTTTGT

>M6-PGSC0003DMG400025222-(rev)M6RLKANKrepeat\_2684

TACATTAATATTGAAAAATATTCAATCAGCTCTTACATCAAATGTGCATTCAATTTTGTGCTGTGATTCTC

TCCTGGTGAATTTTCACTTATCGATTTTATGCGCTGTACTTCTTGT

>M6-PGSC0003DMG400025222-(rev)M6RLKANKrepeat\_2745

TGTGATTTCTCTCCTGGTGAATTTTCACTTATCGATTTTATGCGCTGTACTTCTTGTCTTGGCTTAGTTT

TCCAATGGGTACTTCATTCATGTATTGTTGATTTTTCAGGGTGACCTT

>M6-PGSC0003DMG400025222-(rev)M6RLKANKrepeat\_2806

TTGGCTTAGTTTTCCAATGGGTACTTCATTCATGTATTGTTGATTTTTCAGGGTGACCTTGGTAGCTATCTT

CAGAAGAAGGGACGTCTATCTCCTTCTAAGGTTCTAAGATTTGCTCTGG

>M6-PGSC0003DMG400025222-(rev)M6RLKANKrepeat\_2867

TAGCTATCTTCAGAAGAAGGGACGTCTATCTCCTTCTAAGGTTCTAAGATTTGCTCTGGATATTGCCAGG

CAAGTCTGTCCCTTCTATGTACTGAAAAATAATTCTGTTAGTACATC

>M6-PGSC0003DMG400025222-(rev)M6RLKANKrepeat\_2928

ATTGCCAGGCAAGTCTGTCCCTTCTATGTACTGAAAAATAATTCTGTTAGTACATCTGAGATATTTTA

TTTTTATGCTGATAAGATGTTCTAATTTTCTGTTGGTTGCATCCTGTTCC

>M6-PGSC0003DMG400025222-(rev)M6RLKANKrepeat\_2989

AGATATTTTATTTTATGCTGATAAGATGTTCTAATTTCTGTTGGTTGCATCCTGTTTCCATCATATGATCTT

ATTTTTCAGGGGCATGAATTATCTTCATGAATGTAAACCGGACCCAATC

>M6-PGSC0003DMG400025222-(rev)M6RLKANKrepeat\_305

AAGGTAAGGCCTTCTTTGATTTCAAATAAGCATTGGATGTTTCAATTTTGAGAAATGATGAAAGCATT

AAAATGGCACCAGCATAAGCAAATTCAAAAGTTATAATGGTTATCTCTT

>M6-PGSC0003DMG400025222-(rev)M6RLKANKrepeat\_3050

CATATGATCTTATTTTTCAGGGGCATGAATTATCTTCATGAATGTAAACCGGACCCAATCATCCATTGTCTT

TTAATGCCAAAGTAAGAAAATAAATGCTTTATGATTCTCATATATTA

>M6-PGSC0003DMG400025222-(rev)M6RLKANKrepeat\_3111

CCATTGTCTTTAATGCCAAAGTAAGAAAATAAAATGCTTTATGATTCTCATATATTAATGACCATTC  
TACTGTACTCGTGCATGTATCTACTTCTTTAATGTTTGTAATTTTG

>M6-PGSC0003DMG400025222-(rev)M6RLKANKrepeat\_3172

TGACCATTCTACTGTACTCGTGCATGTATCTACTTCTTTAATGTTTGTAATTTTGTAAGGTGCCAGAA  
ATATTTTGCAGGACAATGGTGGTTTATTGAAAGTTGCGGGATTTGGTT

>M6-PGSC0003DMG400025222-(rev)M6RLKANKrepeat\_3233

AGGTGCCAGAAATATTTTGCAGGACAATGGTGGTTTATTGAAAGTTGCGGGATTTGGTTGATTAGATT  
GTCAAACATTTACCTGACAAAGCTAAGTCGCTGCAACCTCAAGCCATTGA

>M6-PGSC0003DMG400025222-(rev)M6RLKANKrepeat\_3294

ATTAGATTGTCAAACATTTACCTGACAAAGCTAAGTCGCTGCAACCTCAAGCCATTGACCGTGCAAGTA  
AATACTTTAATTTGAGCACATATAGTTAAATTAATACTCCTTATAAAA

>M6-PGSC0003DMG400025222-(rev)M6RLKANKrepeat\_3355

GTGCAAGTAAATACTTTAATTTGAGCACATATAGTTAAATTAATACTCCTTATAAAAAGGCAGAAAAAG  
AGCCTTCTAGTTTGATACTAGTGTCCACTTTAAAAACTTCAGGGGATGGA

>M6-PGSC0003DMG400025222-(rev)M6RLKANKrepeat\_3416

CAGAAAAAGAGCCTTCTAGTTTGATACTAGTGTCCACTTTAAAAACTTCAGGGGATGGACTTAAAGGTAT  
TCTAATTTTACTGACTGAAGGAGTTGTAACATAAATACTGCACTCTCTTT

>M6-PGSC0003DMG400025222-(rev)M6RLKANKrepeat\_3477

TAAAGGTATTCTAATTTTACTGACTGAAGGAGTTGTAACATAAATACTGCACTCTCTTTCTTGTTACTTGT  
AGGTACCTATATAGCACCTGAGATTTATAAAGACGAAATATTCGATAGA

>M6-PGSC0003DMG400025222-(rev)M6RLKANKrepeat\_3538

TGTTACTTGTAGGTACCTATATAGCACCTGAGATTTATAAAGACGAAATATTCGATAGAAGTGTGGATGT  
ATATGCTTTTGGAGTTTACTTTATGAGGTACAGATTCAGTTTCAGATAA

>M6-PGSC0003DMG400025222-(rev)M6RLKANKrepeat\_3599

TGTGGATGTATATGCTTTTGGAGTTTACTTTATGAGGTACAGATTCAGTTTCAGATAATTTAACTTATGG  
CTGCCTTTTGTGTTACTACATAATTCTTTTAGCTAACTAGAATATCCGC

>M6-PGSC0003DMG400025222-(rev)M6RLKANKrepeat\_366

GAAAGCATTAAAATGGCACCAGCATAAGCAAAATCAAAGTTATAATGGTTATCTCTTTTATTTAACTA  
GGAAAATACTACTTTGAAGAACTTATATTCAAATGTCATCAACTATA

>M6-PGSC0003DMG400025222-(rev)M6RLKANKrepeat\_3660  
TAACTTATGGCTGCCTTTTGTGTTACTACATAATTCTTTTAGCTAACTAGAATATCCGCGTTATGAAGTAG  
AATTTTAACATTCTTCTTATCCTATGTGTTTTTGTATTTTTTTAAAA

>M6-PGSC0003DMG400025222-(rev)M6RLKANKrepeat\_3721  
TATGAAGTAGAATTTAACATTCTTCTTATCCTATGTGTTTTTGTATTTTTTTAAAAGAAGATCTAGTCA  
ATTTACTCTGTCAAATACAAAGTATTGTAGATTCTTCTTTTTTCCCC

>M6-PGSC0003DMG400025222-(rev)M6RLKANKrepeat\_3782  
AGATCTAGTCAATTTACTCTGTCAAATACAAAGTATTGTAGATTCTTCTTTTTTCCCCACTTTGCTGGATC  
ATTTTCATGATATGAATGATCTTGCTGTGCATATGCTAACTCTTTTTTT

>M6-PGSC0003DMG400025222-(rev)M6RLKANKrepeat\_3843  
TTTGCTGGATCATTTTCATGATATGAATGATCTTGCTGTGCATATGCTAACTCTTTTTTTTTCTTTTAACT  
TTTGGGGCATTTCCTGAATCAGTCTTCTCAAATGTTTTTCAGCTC

>M6-PGSC0003DMG400025222-(rev)M6RLKANKrepeat\_3904  
TCTTTTAACTTTTTGGGGCATTTCCTGAATCAGTCTTCTCAAATGTTTTTCAGCTCTTATCTTGCGCAGT  
ATACGATTTTGTACTGTTGAATTTGGCTAACTTTGTTGGGTTTA

>M6-PGSC0003DMG400025222-(rev)M6RLKANKrepeat\_3965  
ATCTTGCGCAGTATACGATTTTGTACTGTTGAATTTGGCTAACTTTGTTGGGTTTAGATGATGGAGG  
GATCACCACTTTTCATCCCAAGTCACCTGAAGAGGCTGCTAGATTGATG

>M6-PGSC0003DMG400025222-(rev)M6RLKANKrepeat\_4026  
TGATGGAGGGATCACCACTTTTCATCCCAAGTCACCTGAAGAGGCTGCTAGATTGATGTGCAAAGAGG  
GTAAAAGACCATCATTCAAGTCAAATCTAAGTATCCGCCGGACCTTAGAG

>M6-PGSC0003DMG400025222-(rev)M6RLKANKrepeat\_4087  
CAAAGAGGGTAAAAGACCATCATTCAAGTCAAATCTAAGTATCCGCCGGACCTTAGAGAGTAAGCCCT  
GCTATTCATTTATTTTCATTAATTGGATGCAATCTAGTCTTTTGCCGTTT

>M6-PGSC0003DMG400025222-(rev)M6RLKANKrepeat\_4148  
TAAGCCCTGCTATTCATTTTATTTTCATTAATTGGATGCAATCTAGTCTTTTGCCGTTTCGTATGCAGTTATA  
TAGTAGAAACATGCTACTAAATATAGCAGATGTTCCATGTCATACTCC

>M6-PGSC0003DMG400025222-(rev)M6RLKANKrepeat\_4209  
ATGCAGTTATATAGTAGAAACATGCTACTAAATATAGCAGATGTTCCATGTCATACTCCTAATCATTCAA

TGGATATGACTTCTTTTGTGAAAAGATTGCAAAAAGGATTGTTGTTTG

>M6-PGSC0003DMG400025222-(rev)M6RLKANKrepeat\_427

ATTTTAACTAGGAAAACACTATACACTTTGAAGAACTTATATTCAAATGTCATCAACTATAATTCACCTGGAA  
AAAAGTTAAGATCAACAAAAATCATCATTACCTCATAGGAGGCCTAACC

>M6-PGSC0003DMG400025222-(rev)M6RLKANKrepeat\_4270

ATCATTCAAATGGATATGACTTCTTTTGTGAAAAGATTGCAAAAAGGATTGTTGTTTGCTGTTTCGCTTT  
ACAGAAGTAATGTGTGATTTTCTTTGGCTTCTGCTATTTGGCTGCTTAG

>M6-PGSC0003DMG400025222-(rev)M6RLKANKrepeat\_4331

GTTTCGCTTTACAGAAGTAATGTGTGATTTTCTTTGGCTTCTGCTATTTGGCTGCTTAGTCCAGCATTGTG  
TTGTCGTTTTACTTTAACTTGCATTCTTCGATTTCGATGTTCTTTTCCT

>M6-PGSC0003DMG400025222-(rev)M6RLKANKrepeat\_4392

CAGCATTGTGTTGTCGTTTTACTTTAACTTGCATTCTTCGATTTCGATGTTCTTTTCCTACCAGAGATCTTG  
GGCATTCTAAGTGGACAATGATATATTCTCATGTGTCCATCCATCTG

>M6-PGSC0003DMG400025222-(rev)M6RLKANKrepeat\_4453

CAGAGATCTTGGGCATTTCTAAGTGGACAATGATATATTCTCATGTGTCCATCCATCTGATGATAAATATT  
CAACTGTACAGTGTGCATTACCTTATTTTAGATTTCTTATATTTTACT

>M6-PGSC0003DMG400025222-(rev)M6RLKANKrepeat\_4514

GATAAATATTCAACTGTACAGTGTGCATTACCTTATTTTAGATTTCTTATATTTTACTGATCTTAAAGAAT  
ATAACAAACCAATTTTGCACAGTCATGCCGCCTCCCCCACCATCATC

>M6-PGSC0003DMG400025222-(rev)M6RLKANKrepeat\_4575

TCTTAAAGAATATAACAAACCAATTTTGCACAGTCATGCCGCCTCCCCCACCATCATCTGGCAAGGCTCT  
GTCTCTCTAATATTCTTTTGTGATCTTATTGCTTAAGTATAAGTTCAG

>M6-PGSC0003DMG400025222-(rev)M6RLKANKrepeat\_4636

GCAAGGCTCTGTCTCTAATATTCTTTTGTGATCTTATTGCTTAAGTATAAGTTCAGTGGCGATTTTCAA  
GTTTCGTTGACAAAATTTGCTGAATGTCTAGGTTGATTGAAGAATGTTG

>M6-PGSC0003DMG400025222-(rev)M6RLKANKrepeat\_4697

GCGATTTTCAAGTTCGTTGACAAAATTTGCTGAATGTCTAGGTTGATTGAAGAATGTTGGAATCCAGATT  
CTTTTATACGGCCAACATTTTCGGAGATCATTGTGCGCATGAATAAAATT

>M6-PGSC0003DMG400025222-(rev)M6RLKANKrepeat\_4758

ATCCAGATTCTTTTATACGGCCAACATTTTCGGAGATCATTGTGCGCATGAATAAAAATTGTTGCAAAGCTGT  
TCAAAACACGGATGGTTGAAAGATACACTAAAGCTTCCCTGGTAATGCT

>M6-PGSC0003DMG400025222-(rev)M6RLKANKrepeat\_4819

TGCAAAGCTGTTCAAAACACGGATGGTTGAAAGATACACTAAAGCTTCCCTGGTAATGCTTCCACTATACT  
ATTTTTGCATATTTTGGATCCTTTTTCAGTTGTTTACTATATTCAAAGGT

>M6-PGSC0003DMG400025222-(rev)M6RLKANKrepeat\_488

TCACTTGGA AAAAAGTTAAGATCAACAAAAATCATCATTACCTCATAGGAGGCCTAACCTCAAATTTCTA  
ACTTCTGCAAAGTTTTGAACGTTTTTTTTCCCTTCTTTTCTCCTGAAGAA

>M6-PGSC0003DMG400025222-(rev)M6RLKANKrepeat\_4880

CACTATACTATTTTTGCATATTTTGGATCCTTTTTCAGTTGTTTACTATATTCAAAGGTCCTTGGACCAAGA  
AGAAAAGATTCAGCACAGTAGATAACTTCTACAAGAACTAAAATAGCT

>M6-PGSC0003DMG400025222-(rev)M6RLKANKrepeat\_4941

TTGGACCAAGAAGAAAAGATTCAGCACAGTAGATAACTTCTACAAGAACTAAAATAGCTTCTATAACAAC  
GTTTCAAGCATTAGAATTTTTACATTATATTTTAATCTCATTTAATTGTAG

>M6-PGSC0003DMG400025222-(rev)M6RLKANKrepeat\_5002

TATACAACGTTTCAAGCATTAGAATTTTTACATTATATTTTAATCTCATTTAATTGTAGCAACATATCCATG  
TGCAAAGCATAACTAACTTTAGTGGCGATAACTGAGCTCTATAACAAG

>M6-PGSC0003DMG400025222-(rev)M6RLKANKrepeat\_5063

ACATATCCATGTGCAAAGCATAACTAACTTTAGTGGCGATAACTGAGCTCTATAACAAGTTTGTGAAGCT  
GTAGATCAAAGTAGCTTTTAACTTTCAAGATACCTGACAACATAAAGTTT

>M6-PGSC0003DMG400025222-(rev)M6RLKANKrepeat\_5124

TGTGAAGCTGTAGATCAAAGTAGCTTTTAACTTTCAAGATACCTGACAACATAAAGTTTGTGTTTGGTATTT  
GAAATGTGTGATAATCTCATCTAAAAGTTTAAAGCTATTAGAGAAAGCAC

>M6-PGSC0003DMG400025222-(rev)M6RLKANKrepeat\_5156

TTCAAGATACCTGACAACATAAAGTTTGTGTTTGGTATTTGAAATGTGTGATAATCTCATCTAAAAGTTTAA  
GCTATTAGAGAAAGCACACTTATATTTCTTAATTATGTCTCCAACACG

>M6-PGSC0003DMG400025222-(rev)M6RLKANKrepeat\_549

AAATTTCTAACTTCTGCAAAGTTTTGAACGTTTTTTTTCCCTTCTTTTCTCCTGAAGAAAGCCATGAGACAT  
CTGCACTGACTTGCCTCTCCTCATGCAATTTGTGCTTGATTTTGCATT

>M6-PGSC0003DMG400025222-(rev)M6RLKANKrepeat\_61

CTGACGCGAAATACTATGGAAATAATGAAGTTTATAATATCTTAAAGGCCCGGGGGCCAAAGTCCCGG  
TAAGTGGGAAGATAATTTTCTAATTAAGTGATATTTATGATTTATGGGGC

>M6-PGSC0003DMG400025222-(rev)M6RLKANKrepeat\_610

CCATGAGACATCTGCACTGACTTGCCTCTCCTCATGCAATTTGTGCTTGATTTTGCATTGTTAATTTTTCAA  
TCTTCTCTTAACAACCTTTGCTGAAACTCCTTTGCCTTTCAACAGGGTT

>M6-PGSC0003DMG400025222-(rev)M6RLKANKrepeat\_671

TAATTTTTCAATCTTCTCTTAACAACCTTTGCTGAAACTCCTTTGCCTTTCAACAGGGTTCGTATCAAGTTGC  
TAAATGGAATGGGACAAAAGTTTCTGTCAAGATACTTGACAAGGATAG

>M6-PGSC0003DMG400025222-(rev)M6RLKANKrepeat\_732

TATCAAGTTGCTAAATGGAATGGGACAAAAGTTTCTGTCAAGATACTTGACAAGGATAGTTATGCAGAC  
CCTGAAATTATGTATGTTGTCAACTTATTTTCTGCTAATCTCCTGATTCAC

>M6-PGSC0003DMG400025222-(rev)M6RLKANKrepeat\_793

ATGCAGACCCTGAAATTATGTATGTTGTCAACTTATTTTCTGCTAATCTCCTGATTCCTACTACCATAATGCAC  
ATTTCTATTATTGATTTGGAAATAAGCTTACCAAAGGGATATGCATAT

>M6-PGSC0003DMG400025222-(rev)M6RLKANKrepeat\_854

CCATAATGCACATTTCTATTATTGATTTGGAAATAAGCTTACCAAAGGGATATGCATATTTTGGACTTCAG  
CTAGTTACCATGTTGTCTGATTCTCTGTGACTAGCAAAGCTTTGGCATG

>M6-PGSC0003DMG400025222-(rev)M6RLKANKrepeat\_915

TGGACTTCAGCTAGTTACCATGTTGTCTGATTCTCTGTGACTAGCAAAGCTTTGGCATGATACATTAATTT  
GGATATTAATTAGTTGTGCAGCTTTGGCGGATGATTTATGCAGCTTTG

>M6-PGSC0003DMG400025222-(rev)M6RLKANKrepeat\_976

ACATTAATTTGGATATTAATTAGTTGTGCAGCTTTGGCGGATGATTTATGCAGCTTTGGTTGGCTTGTC  
ATATGTTGAAACCATTATTTTCTATTTTCTTCACTTCCACTTGGGCATA

>M6-PGSC0003DMG400025295M6LRR-RLP\_0

GTGATGAATAACAAGAAAAACCCAATCTTTCTTCTTTTCAATTTTTTATCATAAACTATACATACATAC  
ACCTTTTGTCTTCCAAAGTCAAGATTTATTTTTTTTTCAAACCCC

>M6-PGSC0003DMG400025295M6LRR-RLP\_1008

AGTCTATTGCAGGATTACCAAATCTTTGGAACCTTAGTTTGTCTAGAAATGAACTTTTAGATCCTGTGCCT

ATTGCTTTCTCTAAAGGGCTTCCTTCACTTTTATCAATAGATTTGTCTT

>M6-PGSC0003DMG400025295M6LRR-RLP\_1071

CTGTGCCTATTGCTTTCTCTAAAGGGCTTCCTTCACTTTTATCAATAGATTTGTCTTATAACAAGTTCAATC

TTGGAATAGTACCTGAATGGATTAGGACTAGAGAGCTTTCTGATGTCA

>M6-PGSC0003DMG400025295M6LRR-RLP\_1134

AGTTCAATCTTGAATAGTACCTGAATGGATTAGGACTAGAGAGCTTTCTGATGTCAATTTAGCAGGCTG

TAAGCTTCGTGGGACGCTTCCGAATTTCACTAGGCCTGATTCATTGAACT

>M6-PGSC0003DMG400025295M6LRR-RLP\_1197

CAGGCTGTAAGCTTCGTGGGACGCTTCCGAATTTCACTAGGCCTGATTCATTGAACTCTATTGACTTGTC

GGATAACGCCTTCACAGGTGGGATATCGAGTTTCTTTGCAAGAATGTCAA

>M6-PGSC0003DMG400025295M6LRR-RLP\_126

CCAAAATGCATTTTCTGATGCTGGTTTTCAAGATTTTGTTAATTTTCATCATTCTTTCATCTGTTCTCACTAG

CCCAACAACCCCAAATTTGTGTTGAACTGATAGTCTTGCTCTTCTTG

>M6-PGSC0003DMG400025295M6LRR-RLP\_1260

ACTTGTCCGATAACGCCTTCACAGGTGGGATATCGAGTTTCTTTGCAAGAATGTCAAGCTTGCAAAAAGG

GGAAGATATCAAACAACCAGTTGAAATCTGATGTTGCTGTGATCAAATTGC

>M6-PGSC0003DMG400025295M6LRR-RLP\_1323

AAAAGGGGAAGATATCAAACAACCAGTTGAAATCTGATGTTGCTGTGATCAAATTGCCTGATGGGATTT

CATATCTTGATCTTCATTCAAACCAGCTTTTCGGGTCTCTTTCTAGGATGT

>M6-PGSC0003DMG400025295M6LRR-RLP\_1386

GGATTTCATATCTTGATCTTCATTCAAACCAGCTTTTCGGGTCTCTTTCTAGGATGTTAAGCAACAAGACA

AGCAAGTTCTTGGAAGCAATCGACGTCTCAAACAACCAACTCTCTGGGA

>M6-PGSC0003DMG400025295M6LRR-RLP\_1449

ACAAGACAAGCAAGTTCTTGGAAGCAATCGACGTCTCAAACAACCAACTCTCTGGGAGCATCCCAGAGT

TTGTCAGTGGCTTAAACCTGAAAGTTCTCAACATAGGAAACAACAAGATTG

>M6-PGSC0003DMG400025295M6LRR-RLP\_1512

CAGAGTTTGTGAGTGGCTTAAACCTGAAAGTTCTCAACATAGGAAACAACAAGATTGCAGGTCAAATCC

CAACTTCAATATCGAATCTTGATAAGCTTGAGAGGTTTGATATATCAAGAA

>M6-PGSC0003DMG400025295M6LRR-RLP\_1575

AAATCCCAACTTCAATATCGAATCTTGATAAGCTTGAGAGGTTTGATATATCAAGAAACCAGATTACTGG  
TACAATTCCAGTAAGTCTAGGATCACTAGTGAAGTTGCATTGGTTAGACT

>M6-PGSC0003DMG400025295M6LRR-RLP\_1638

TTACTGGTACAATTCCAGTAAGTCTAGGATCACTAGTGAAGTTGCATTGGTTAGACTTATCGATCAACAG  
ACTTTCAGGGAAAATACCAGATAGCTTGTGGGGATTGAAGCATTGAAAC

>M6-PGSC0003DMG400025295M6LRR-RLP\_1701

TCAACAGACTTTCAGGGAAAATACCAGATAGCTTGTGGGGATTGAAGCATTGAAACATGCAAACCTTCA  
GAGCCAACAGATTATGTGGTGAAATACCACAAGGCAGACCATTCAATATCT

>M6-PGSC0003DMG400025295M6LRR-RLP\_1764

ACTTCAGAGCCAACAGATTATGTGGTGAAATACCACAAGGCAGACCATTCAATATCTTCCCTGGAGCTGC  
CTATGCCACAATTTATGCTTGTGTGGCAAGCCTTTGCTGCCTTGTAAAGG

>M6-PGSC0003DMG400025295M6LRR-RLP\_1827

GAGCTGCCTATGCCACAATTTATGCTTGTGTGGCAAGCCTTTGCTGCCTTGTAAAGGGAACGAAACAAG  
ATAAGTTGGGCCAGTAACTGCTGACTCCATTTATAGGAATTTATGTTTGT

>M6-PGSC0003DMG400025295M6LRR-RLP\_189

TCTACTAGCCCAACAACCCCAAATTTGTGTTGAAACTGATAGTCTTGCTCTTCTTGGCTTCAAAGATAAG  
ATTTTTAAGGATACTACTGATTTTCTGTCATCATGGACAGGTAAAGATT

>M6-PGSC0003DMG400025295M6LRR-RLP\_1890

AACAAGATAAGTTGGGCCAGTAACTGCTGACTCCATTTATAGGAATTTATGTTTGTAAACAACAACAG  
TTTACTTTTCTTTTGTATTTTGAATTCTAGTACTACTTGTACAACCTCTA

>M6-PGSC0003DMG400025295M6LRR-RLP\_1939

TGTTTGTAAACAACAACAGTTTACTTTTCTTTTGTATTTTGAATTCTAGTACTACTTGTACAACCTCTATC  
ATCTAACATTGTTAGTCAGTGTACTTACATAAATTCAATATGAA

>M6-PGSC0003DMG400025295M6LRR-RLP\_252

AAGATAAGATTTTTAAGGATACTACTGATTTTCTGTCATCATGGACAGGTAAAGATTGTTGTGGAGGAG  
GTTGGGAAGGTGTAGAATGTGATGTTTCTACAGGGAGAGTGAATAGATTGG

>M6-PGSC0003DMG400025295M6LRR-RLP\_315

GAGGAGGTTGGGAAGGTGTAGAATGTGATGTTTCTACAGGGAGAGTGAATAGATTGGTGTACAAACA  
CCTTCTGAGAGAGACATTAGTGTACATGAAGGGTACTTTGTCATCATCTC



>M6-PGSC0003DMG400025295M6LRR-RLP\_378

AAACACCTTCTGAGAGAGACATTAGTGTTACATGAAGGGTACTTTGTCATCATCTCTTGGTGATTGGT  
TTTCTTGGAGACATTGATTATAAGTGGAATGAAGCATATTGCTGGTGCTA

>M6-PGSC0003DMG400025295M6LRR-RLP\_441

ATTTGGTTTTCTTGGAGACATTGATTATAAGTGGAATGAAGCATATTGCTGGTGCTATACCGGAAAGTTT  
TTCGAAACTTTCAAGATTGAAGCAGTTGATCTTGGATGGTAATCACTAC

>M6-PGSC0003DMG400025295M6LRR-RLP\_504

AAAGTTTTTCGAAACTTTCAAGATTGAAGCAGTTGATCTTGGATGGTAATCACTACAAGGAGATATACC  
TTCTGGTTTATCTCATTGGAATCACTTCAAACACTTTCACTTAGTGGA

>M6-PGSC0003DMG400025295M6LRR-RLP\_567

ATATACCTTCTGGTTTATCTCATTGGAATCACTTCAAACACTTTCACTTAGTGGAATCATTGACAGGA  
CATGTACCTTCTGTATTAGGAAATTTCAAGAATCTGCAGCAGTTGAGTT

>M6-PGSC0003DMG400025295M6LRR-RLP\_63

CATACATACACCCTTTTGTCTTCCAAAGTCAAGATTTATTTTTTTTTCAAACCCCATTTCCCAAATGCA  
TTTTCTGATGCTGGTTTTCAAGATTTGTTAATTTTCATCATTCTTC

>M6-PGSC0003DMG400025295M6LRR-RLP\_630

TGACAGGACATGTACCTTCTGTATTAGGAAATTTCAAGAATCTGCAGCAGTTGAGTTAACAGACAATAT  
GCTAATTGGGGTTATCCCAATTGTTTCAAGAATCTTGTTAACTTGCAGT

>M6-PGSC0003DMG400025295M6LRR-RLP\_693

ACAATATGCTAATTGGGGTTATCCCAATTGTTTCAAGAATCTTGTTAACTTGCAGTCCTTGGATCTGAGC  
CACAATTTACTATCCGGGGTTGTTCCGAATTTTCTTGGACAGCTTCAA

>M6-PGSC0003DMG400025295M6LRR-RLP\_756

ATCTGAGCCACAATTTACTATCCGGGGTTGTTCCGAATTTTCTTGGACAGCTTCAAATTTGACATATATT  
GATCTTTCAAGTAATTAATTTTCAGGGGAGTTTCTGTTTCCTTGTGTA

>M6-PGSC0003DMG400025295M6LRR-RLP\_819

CATATATTGATCTTTCAAGTAATTAATTTTCAGGGGAGTTTCTGTTTCCTTGTGTAGTTTGCTCAAGCTGT  
CGTTTTTTTCGATGGATCATAATCGAATAACAGGGAGAATTCCAACCTC

>M6-PGSC0003DMG400025295M6LRR-RLP\_882

TCAAGCTGTCGTTTTTTTCGATGGATCATAATCGAATAACAGGGAGAATTCCAACCTCAAATTGGGAAGAT

GAAAGCACTTACTTCATTGTCATTGAGTTCTAACAAGTTGACAGGTCATA

>M6-PGSC0003DMG400025295M6LRR-RLP\_945

GGAAGATGAAAGCACTTACTTCATTGTCATTGAGTTCTAACAAGTTGACAGGTCATATCCCTGAGTCTAT  
TGCAGGATTACCAAATCTTTGGAACCTTAGTTTGTCTAGAAATGAACTTT

>M6-PGSC0003DMG400025330M6LRR-RLK\_1054

AGATTCCACATGTTTCTTGATGAATTTGTCACAAGCTAGGCATTATTTATGTGTACAGATACCTCAGGGC  
GAATTTTCTTCAAGGAGGCATACCATCAGATATTGGAAATCTTTCAATAC

>M6-PGSC0003DMG400025330M6LRR-RLK\_1116

CTCAGGGCGAATTTTCTTCAAGGAGGCATACCATCAGATATTGGAAATCTTTCAATACTGACCATATTGT  
GAGATATATAAATTTTTTAATTCACCATCTTTTTATATAGTTAATGAGGT

>M6-PGSC0003DMG400025330M6LRR-RLK\_1178

CATATTGTGAGATATATAAATTTTTTAATTCACCATCTTTTTATATAGTTAATGAGGTTGTTGTTTAATGA  
TTGGTACCTTTAATCCTTTTTAGAGATTTATCAAGCAATTCACCTTAG

>M6-PGSC0003DMG400025330M6LRR-RLK\_124

CCCCCGCCCCCTCTTCTCTTTTTCTCACTTCGTGCTTGAAATTCATTATTATGGATTTTCCTTCTGTAA  
GAACTGTAATCATACCAATTGTTTCTATCAAAACCCACCATTTTAG

>M6-PGSC0003DMG400025330M6LRR-RLK\_1240

GTTTTAATGATTGGTACCTTTAATCCTTTTTAGAGATTTATCAAGCAATTCACCTTAGGGGTGCTATACCTT  
CTTCTCTTGGTCGTCTCAGACATCTTCGTCTTCTGTAAGTTCAATTC

>M6-PGSC0003DMG400025330M6LRR-RLK\_1302

GCTATACCTTCTTCTTGGTCGTCTCAGACATCTTCGTCTTCTGTAAGTTCAATTTCTGTTCAATTGTA  
TTAATTTGATAACTTAATGCATTACACTGATGTGTTAAACATGAAA

>M6-PGSC0003DMG400025330M6LRR-RLK\_1364

CATTGTAAATTTTTAATTTGATAACTTAATGCATTACACTGATGTGTTAAACATGAAAATCAATTCAGGAA  
CTTGTACAGCCAATTTCTTCTCGGGTGAGATCCCAGATGTTGGAATACTG

>M6-PGSC0003DMG400025330M6LRR-RLK\_1426

ATTCAGGAACTTGTACAGCCAATTTCTTCTCGGGTGAGATCCCAGATGTTGGAATACTGAGCACTTTTGGT  
AACGATTCGTAAGTTCTCCTTCCATTGGAATATAATCCCACATTTGATTT

>M6-PGSC0003DMG400025330M6LRR-RLK\_1488

CTTTGGTAACGATTCGTAAGTTCTCCTTCCATTGGAATATAATCCCACATTTGATTTTGGCCCTCTGTATTC  
ATCATTTTCTATATACTGTAAATAAATTTAGATGGCTCAAAACTCAGA

>M6-PGSC0003DMG400025330M6LRR-RLK\_1550

CTCTGTATTCATCATTTTCTATATACTGTAAATAAATTTAGATGGCTCAAAACTCAGAAAATACAATTAAT  
CGTGAATAATGCTTCACATTATATGTATAGAAGTGCAGCAAAATATTCA

>M6-PGSC0003DMG400025330M6LRR-RLK\_1612

ACAATTAATCGTGAATAATGCTTCACATTATATGTATAGAAGTGCAGCAAAATATTCACATTCCATTTGGC  
ACTACAATCACACTTATAGGAAATACAATACAAGATAAATCAGGTCTTT

>M6-PGSC0003DMG400025330M6LRR-RLK\_1674

CCATTTGGCACTACAATCACACTTATAGGAAATACAATACAAGATAAATCAGGTCTTTGCACACCAGTTTT  
CTGGTGATTAAGTCTGTTTGTCTGCATAGGCTAGGTTTGTGGCAGTGTT

>M6-PGSC0003DMG400025330M6LRR-RLK\_1736

ACCAGTTTTCTGGTGATTAAGTCTGTTTGTCTGCATAGGCTAGGTTTGTGGCAGTGTTACAATGACACCC  
AGCAAATACAACTAAGCAGAATACCCATCAAAGATCGATGTATTAACA

>M6-PGSC0003DMG400025330M6LRR-RLK\_1798

TGACACCCAGCAAATACAACTAAGCAGAATACCCATCAAAGATCGATGTATTAACATCACAAGTGCA  
GTTGAGATTTTTTACAACCTGAACAAACCGAATCTATCAATTGATAGTCCTT

>M6-PGSC0003DMG400025330M6LRR-RLK\_186

TCCTTCTGTAAGAACTGTAATCATACCAATTGTTTCTATCAAACCCCACTTTTAGCTTTACTCTTTTTTT  
TTTCAAGATCTGTATTGATTTTTGAACTTGCTACTACTCCACATTGC

>M6-PGSC0003DMG400025330M6LRR-RLK\_1860

AAGTGCAGTTGAGATTTTTTACAACCTGAACAAACCGAATCTATCAATTGATAGTCCTTTAATCATGATCCT  
AGAAGTTAAATACCATGTGATAATTGAGATGGGAACTACATTAGCAAAT

>M6-PGSC0003DMG400025330M6LRR-RLK\_1922

CATGATCCTAGAAGTTAAATACCATGTGATAATTGAGATGGGAACTACATTAGCAAATTGATGGTGCTTC  
AATTTTAAAGATGGTGATTAATTTGTAAGTATACCTGACTTAAATTTATG

>M6-PGSC0003DMG400025330M6LRR-RLK\_1984

GGTGCTTCAATTTTAAAGATGGTGATTAATTTGTAAGTATACCTGACTTAAATTTATGGTACTCCAATCAT  
GCATATGTGTTGCATATGTTGAGATAGACTTTTTGGTGTTAAATTGCCT

>M6-PGSC0003DMG400025330M6LRR-RLK\_2046

TCCAATCATGCATATGTGTTGCATATGTTGAGATAGACTTTTTGGTGTTAAATTGCCTAGTGGGTGATTG  
GCTGCTACATAGTTGAAACTAGGAATCTAGTCCTGTATCATGATCAGTTT

>M6-PGSC0003DMG400025330M6LRR-RLK\_2108

GGTGATTGGCTGCTACATAGTTGAAACTAGGAATCTAGTCCTGTATCATGATCAGTTTTACTTGTGTACCT  
TGCAAAAATTATTCTTCCCCATCATCTCAAAGGGAATTTGAAGCTTGA

>M6-PGSC0003DMG400025330M6LRR-RLK\_2170

TGTGTACCTTGCAAAAATTATTCTTCCCCATCATCTCAAAGGGAATTTGAAGCTTGATGCTCTCAAAGTC  
TCAAATAGTTAAGCTTATAAAGTATTTTCAAATGTCACAAGGGCAAGAA

>M6-PGSC0003DMG400025330M6LRR-RLK\_2232

CTCAAAGTCTCAAATAGTTAAGCTTATAAAGTATTTTCAAATGTCACAAGGGCAAGAATGTATGTGATGG  
GTCAATTCACGTAGGTTTCTTCTGGAGTAAATTCTTAGTCATCCATTGG

>M6-PGSC0003DMG400025330M6LRR-RLK\_2294

TGTGATGGGTCAATTCACGTAGGTTTCTTCTGGAGTAAATTCTTAGTCATCCATTGGTAAGGGTGTTC  
ATCACCAACACTAGCTAGAAACAACCTGTTTAACTGGAGTCTCGTGAACCT

>M6-PGSC0003DMG400025330M6LRR-RLK\_2356

GGTGTTGCATCACCAACACTAGCTAGAAACAACCTGTTTAACTGGAGTCTCGTGAACCTGACCTGCCGTTT  
ACCTTTCTTCTTCATAGTCTTGGGAGATAATATTTTCAGTGTTAAATTTT

>M6-PGSC0003DMG400025330M6LRR-RLK\_2418

TGCCGTTTACCTTTCTTCTTCATAGTCTTGGGAGATAATATTTTCAGTGTTAAATTTTCTATTAATGGCTA  
TCTTATAGCAGACTATTCTGATGAGGATAATGCTTATGCTTAGGTTTA

>M6-PGSC0003DMG400025330M6LRR-RLK\_248

ACTCTTTTTTTTTTCAAGATCTGTATTGATTTTTGAACTTGCTACTACTCCACATTGCACTTGATATTTCTAG  
TCCAAACTGAAAAAGTAAGCTCAAATTTGCATTTTTCATCGAGAAAT

>M6-PGSC0003DMG400025330M6LRR-RLK\_2480

TTAATGGCTATCTTATAGCAGACTATTCTGATGAGGATAATGCTTATGCTTAGGTTTATTGGCAATTTAGA  
TCTCTGTGGTCAACAAGTCCGCAAGCCTTGCAGAACATCTATGGGATTC

>M6-PGSC0003DMG400025330M6LRR-RLK\_2542

CAATTTAGATCTCTGTGGTCAACAAGTCCGCAAGCCTTGCAGAACATCTATGGGATTCCTGTAGTATTG

CCTCATGCTGAAAGCGATGAAGCTGCAGGTTGTTATTTGCTACTGCTTCA

>M6-PGSC0003DMG400025330M6LRR-RLK\_2604

TAGTATTGCCTCATGCTGAAAGCGATGAAGCTGCAGGTTGTTATTTGCTACTGCTTCATATCTATTTCTT

TTAGAAGTTTACTGGCTTTTGGAACTCCCTTTCCTCCACCAACTGAAT

>M6-PGSC0003DMG400025330M6LRR-RLK\_2666

TATTTCTTTTAGAAGTTTACTGGCTTTTGGAACTCCCTTTCCTCCACCAACTGAATCTATTTTTTTCTCT

TTTACTTCTATGTAGAAAGCTTGATTTGTTGCTAAATTAATGTGATT

>M6-PGSC0003DMG400025330M6LRR-RLK\_2728

TTTTTTCTCTTTTACTTCTATGTAGAAAGCTTGATTTGTTGCTAAATTAATGTGATTTCTGCAGTCCCTAC

GAAGCGATCCTCTCACTATATTAGAGCAGCAGTTATTGGTGCAATAGC

>M6-PGSC0003DMG400025330M6LRR-RLK\_2790

CAGTCCCTACGAAGCGATCCTCTCACTATATTAGAGCAGCAGTTATTGGTGCAATAGCAACATTGGGTTT

TGTACTIONATTGTGTTCTTTATTTTCTCTGGGTTTGGTTGTTATCTAAGA

>M6-PGSC0003DMG400025330M6LRR-RLK\_2852

TTGGGTTTTGTACTIONATTGTGTTCTTTATTTTCTCTGGGTTTGGTTGTTATCTAAGAAGGAAAGGACAGC

AAAAAATACACAGAAGTCAAGAAACAAGTCCACAAAGAGCCAAGTAAG

>M6-PGSC0003DMG400025330M6LRR-RLK\_2914

AAGGACAGCAAAAAAATACACAGAAGTCAAGAAACAAGTCCACAAAGAGCCAAGTAAGTGGGTGAATA

GTACAATACCATTTCTTTTCTTCTCCCAATTTTGTCTTAATTTGTCGAGG

>M6-PGSC0003DMG400025330M6LRR-RLK\_2976

TGAATAGTACAATACCATTTCTTTTCTTCTCCCAATTTTGTCTTAATTTGTCGAGGCTTCAGGTGCCAAG

CTTATTACTTTCCATGGAGATCTTCTTATCCTTCATGCGAGCTAATA

>M6-PGSC0003DMG400025330M6LRR-RLK\_3038

AGGTGCCAAGCTTATTACTTTCCATGGAGATCTTCTTATCCTTCATGCGAGCTAATAGAGAAGATTGAA

TCCCTTGATGATGAAGATGTTGTTGGGGCAGGAGGGTTTGGTACTGTATA

>M6-PGSC0003DMG400025330M6LRR-RLK\_310

GATATTTCTAGTCCAAACTGAAAAAGTAAGCTCAAATTTGCATTTTTCATCGAGAAATCGAAATGGGTGT

CTGGGAGTTGATCATTTTGGGACTATTTACAATGACCATTTTCAGTAGAA

>M6-PGSC0003DMG400025330M6LRR-RLK\_3100

AGATTGAATCCCTTGATGATGAAGATGTTGTTGGGGCAGGAGGGTTTGGTACTGTATATCGGATGGTTA  
TGAATGATTGTGGAACATTTGCTGTAAAAGAATAGACCGGAGTCGTGAAG

>M6-PGSC0003DMG400025330M6LRR-RLK\_3162

ATGGTTATGAATGATTGTGGAACATTTGCTGTAAAAGAATAGACCGGAGTCGTGAAGGCTCTGATCAA  
GTCTTTGAGAGAGAGTTAGAAATCTTGGGTAGCATCAAACACATTAATCTG

>M6-PGSC0003DMG400025330M6LRR-RLK\_3224

TGATCAAGTCTTTGAGAGAGAGTTAGAAATCTTGGGTAGCATCAAACACATTAATCTGGTCAATCTACGA  
GGTACTGCAGGCTTCTACTGCAAGGCTTCTCATCTATGATTATTTGGT

>M6-PGSC0003DMG400025330M6LRR-RLK\_3286

ATCTACGAGGTTACTGCAGGCTTCTACTGCAAGGCTTCTCATCTATGATTATTTGGTCATGGGAAGCTT  
GGACAATTTCTACATGGTATGTTTCCAACTTTTCAAATTTGTCCCCAG

>M6-PGSC0003DMG400025330M6LRR-RLK\_3348

GGAAGCTTGGACAATTTCTACATGGTATGTTTCCAACTTTTCAAATTTGTCCCCAGATCCTTCCTCCTCT  
CCACATCTCCTCTTAAGCTTATAACAAGACATCAAATATGGAAAGTGTG

>M6-PGSC0003DMG400025330M6LRR-RLK\_3410

TTCCTCCTCTCCACATCTCCTCTTAAGCTTATAACAAGACATCAAATATGGAAAGTGTGTATATTTTTGCCAT  
ACATTTTTTATTTGGTTTATCCCGAATACAACCATTATTTTCAGTCAT

>M6-PGSC0003DMG400025330M6LRR-RLK\_3472

TTTTTGCCATACATTTTTTATTTGGTTTATCCCGAATACAACCATTATTTTCAGTCATCTGTTTTTAAACTGG  
AGAGGGGGAAAAGCGCTATTGCTTTCATTTAAACAATCTGTTTTTCT

>M6-PGSC0003DMG400025330M6LRR-RLK\_3534

TTTTAAACTGGAGAGGGGGAAAAGCGCTATTGCTTTCATTTAAACAATCTGTTTTTCTGGCTATTCATTG  
CATGCATCTTTATTGTATTTTTGCAGAACGTGTGGATGATCGGTTGTTA

>M6-PGSC0003DMG400025330M6LRR-RLK\_3596

TATTCATTGCATGCATCTTTATTGTATTTTTGCAGAACGTGTGGATGATCGGTTGTTAAACTGGAATGCAC  
GTCTGAAAGTAGCTCTTGGTTCTGCAAGAGGATTGGCCTACCTACATCA

>M6-PGSC0003DMG400025330M6LRR-RLK\_3658

GGAATGCACGTCTGAAAGTAGCTCTTGGTTCTGCAAGAGGATTGGCCTACCTACATCATGACTGTTGTCC  
TAAAATAGTTCATCGAGATATCAAATCAAGCAACATACTCCTTGATGAGA

>M6-PGSC0003DMG400025330M6LRR-RLK\_372

ATGGGTGTCTGGGAGTTGATCATTTTGGGACTATTTACAATGACCATTTTCAGTAGAAGCTGTTTTTCACT  
AACCCAGATGGTAAAGTTTACTTCTTTGTCTAAGGTTTTTCAGCATTGT

>M6-PGSC0003DMG400025330M6LRR-RLK\_3720

TGTTGTCCTAAAATAGTTCATCGAGATATCAAATCAAGCAACATACTCCTTGATGAGAATCTAGAGCCTC  
GTGTTTCAGACTTTGGCCTTGCCAAGCTTTTGGTGGATGAGGAAGCTCAT

>M6-PGSC0003DMG400025330M6LRR-RLK\_3782

AGAGCCTCGTGTTTCAGACTTTGGCCTTGCCAAGCTTTTGGTGGATGAGGAAGCTCATGTCACGACTGT  
GGTTGCGGGTACTTTTGGTTATTTAGCACCAGGTATGCATATTTCACTTAAA

>M6-PGSC0003DMG400025330M6LRR-RLK\_3844

CGACTGTGGTTGCGGGTACTTTTGGTTATTTAGCACCAGGTATGCATATTTCACTTAAATCAGCAAGGCAT  
AAAGATAGATTCACATATATGTTGCCTTTTAATTGCAAGAATGGTTTATT

>M6-PGSC0003DMG400025330M6LRR-RLK\_3906

CAAGGCATAAAGATAGATTCACATATATGTTGCCTTTTAATTGCAAGAATGGTTTATTTTCTTATTTTTTCG  
CTTGATAAACCTTAACCTATTCTTCTTTTTATAATCATCTGTATGTA

>M6-PGSC0003DMG400025330M6LRR-RLK\_3968

TATTTTTTCGCTTGATAAACCTTAACCTATTCTTCTTTTTATAATCATCTGTATGTAGGTTTGATTTGCTTA  
ACCTCTATAAATTGAAATTCCAAACCTCACCTCATCTTCTAGTGAAAT

>M6-PGSC0003DMG400025330M6LRR-RLK\_4030

TGATTTGCTTAACCTCTATAAATTGAAATTCCAAACCTCACCTCATCTTCTAGTGAAATGTCTGACCAACGA  
TTTCTTGTTTGTAATTGTAATATAACCAGAGTACTTGCAAAGTGGAAAG

>M6-PGSC0003DMG400025330M6LRR-RLK\_4092

GACCAACGATTTCTTGTGTTGTAATTGTAATATAACCAGAGTACTTGCAAAGTGGAAAGAGCCACAGAGA  
AATCTGATGTGTACAGCTTTGGGGTTCTCCTTTTAGAGCTTGTGACTGGAA

>M6-PGSC0003DMG400025330M6LRR-RLK\_4154

ACAGAGAAATCTGATGTGTACAGCTTTGGGGTTCTCCTTTTAGAGCTTGTGACTGGAAAAAGGCCAACA  
GATCCATCCTTCGTAAACCGAGGCTTAAATGTGGTTGGCTGGGTATGCATG

>M6-PGSC0003DMG400025330M6LRR-RLK\_4216

GCCAACAGATCCATCCTTCGTAAACCGAGGCTTAAATGTGGTTGGCTGGGTATGCATGCTTCCCTTGAAA

CTCACCAAATTTTAGAATTTTCATGAAGACTCGTTAATTTTTTAAACTTCA

>M6-PGSC0003DMG400025330M6LRR-RLK\_4278

CCTTGAAACTCACCAAATTTTAGAATTTTCATGAAGACTCGTTAATTTTTTAAACTTCATAGGAGACACTAG  
TTCGGAAATTATGGGTGATTGTGATATGGAAGTTCCCTTTTCTGTATTT

>M6-PGSC0003DMG400025330M6LRR-RLK\_434

TTTTTCACTAACCCAGATGGTAAAGTTTACTTCTTTGTCTAAGGTTTTCAGCATTGTATGTTGTTCTTGAG  
CTGAAAAGATTCTACTTTTTTAGGTTCTGCTTTGTTGGAAATGAGAAC

>M6-PGSC0003DMG400025330M6LRR-RLK\_4340

AGACACTAGTTCGGAAATTATGGGTGATTGTGATATGGAAGTTCCCTTTTCTGTATTTAGCTGTACAATTT  
CCACATATTGATAGTGTGACAATTTGAAAAATGAACAGATGAATACCTT

>M6-PGSC0003DMG400025330M6LRR-RLK\_4402

GTACAATTTCCACATATTGATAGTGTGACAATTTGAAAAATGAACAGATGAATACCTTGCTGAAGGAGAA  
TAGACTGGAAGACATCCTAGATGCGAGTTGCAGAGATGCCGATGCAGAGA

>M6-PGSC0003DMG400025330M6LRR-RLK\_4464

AAGGAGAATAGACTGGAAGACATCCTAGATGCGAGTTGCAGAGATGCCGATGCAGAGACGGTAGAAG  
CAATTATAGAAATAGCTGCAAGATGCACTGATGCAAATCCAGATGATAGACCT

>M6-PGSC0003DMG400025330M6LRR-RLK\_4526

AGAAGCAATTATAGAAATAGCTGCAAGATGCACTGATGCAAATCCAGATGATAGACCTACAATGCAACA  
GGTGCTGCAATATTTGGAGCAAGAGGTCATGTCACCATGCCCGAGTGATTT

>M6-PGSC0003DMG400025330M6LRR-RLK\_4588

TGCAACAGGTGCTGCAATATTTGGAGCAAGAGGTCATGTCACCATGCCCGAGTGATTTCTATGACGAGT  
CTCATTGAGATTATTCTTGATGTATGGAATAATTTCTGGGACAAATATTT

>M6-PGSC0003DMG400025330M6LRR-RLK\_4650

GACGAGTCTCATTGAGATTATTCTTGATGTATGGAATAATTTCTGGGACAAATATTTAGAAACAATTTG  
CAGCCTGATACTGAAATGTGTAATCTGCCATTGCAGATACTCTGTATGCT

>M6-PGSC0003DMG400025330M6LRR-RLK\_4712

ACAATTTGCAGCCTGATACTGAAATGTGTAATCTGCCATTGCAGATACTCTGTATGCTCCTTGCTTTTGG  
GCCCTGCTGCTTTTCTTCTAATGTCTTTGTGCATCTTGTGCCTTTT

>M6-PGSC0003DMG400025330M6LRR-RLK\_4774



GCTTTTGGAGCCCTGCTGCTTTTCTCCTAATGTCTTTGTGCATCTCTTGTGCCTTTTTATGTAGATACCTG  
CAGTTAGTTTTAAAGCTACAATTATGAGTCCTAACTAGCCATGGCATT

>M6-PGSC0003DMG400025330M6LRR-RLK\_4836

TAGATACCTGCAGTTAGTTTTAAAGCTACAATTATGAGTCCTAACTAGCCATGGCATTATGTAGTATTTAT  
AATCTATTCATCACTATTGAATTTTCCTTCACCTATAATAGAGTTTAGG

>M6-PGSC0003DMG400025330M6LRR-RLK\_4898

AGTATTTATAATCTATTCATCACTATTGAATTTTCCTTCACCTATAATAGAGTTTAGGTTCCCTCCTAAGAAA  
GTTCTTTAAGAAAATTTGATGAAATATTTGAGGACACTCAACTACTGG

>M6-PGSC0003DMG400025330M6LRR-RLK\_4943

AATAGAGTTTAGGTTCCCTCCTAAGAAAGTTCTTTAAGAAAATTTGATGAAATATTTGAGGACACTCAACT  
ACTGGTGGATGTCATATCTGCAAAGCATATTGTATGCCACTCAATTATCA

>M6-PGSC0003DMG400025330M6LRR-RLK\_496

TGTTCTTGAGCTGAAAAGATTCTACTTTTTTAGGTTCTGCTTTGTTGGAAATGAGAACCCTTTTGAATGAT  
ACAAAAAATGTTTTGAGCAACTGGAATGATTCGGATGAGTCGCCTTGCA

>M6-PGSC0003DMG400025330M6LRR-RLK\_558

TTGAATGATACAAAAAATGTTTTGAGCAACTGGAATGATTCGGATGAGTCGCCTTGCAGGTGGACTGGC  
ATTTCTTGCTATCCTAATGACCAAAGAGTTCAATCTATGTATGTTTAAATC

>M6-PGSC0003DMG400025330M6LRR-RLK\_62

CTATTATACACAACCTTTCTAGACTACTTTCAAAGTAAAGTCTTCTCTTTTTCAAATACACACCCCCGCCCC  
CCCTCTTCTCTTTTTCTCACTTCGTGCTTGAAATTTCAATTATTATGG

>M6-PGSC0003DMG400025330M6LRR-RLK\_620

GACTGGCATTCTTGCTATCCTAATGACCAAAGAGTTCAATCTATGTATGTTTAAATCACTTTTTTATTTTC  
ACTATCAGTGCTTTATTCATTTGTTTGCTTGGGTTCATTTTCTGCAT

>M6-PGSC0003DMG400025330M6LRR-RLK\_682

TTTTATTTTCACTATCAGTGCTTTATTCATTTGTTTGCTTGGGTTCATTTTCTGCATTTTGTTTTTAAATTT  
CAGCAACTTACCTTATATGGAACCTGGAGGAATTATATCTCCTAGC

>M6-PGSC0003DMG400025330M6LRR-RLK\_744

TTTTTAAATTTTCACTTACCTTATATGGAACCTGGAGGAATTATATCTCCTAGCGTTGGTAAACTCA  
CCAGATTGCAGAGATTGTAAGTCCCATAGTCATTGAGGCAATGCAACAA

>M6-PGSC0003DMG400025330M6LRR-RLK\_806

GTAAACTCACCAGATTGCAGAGATTGTAAGTCCCATAGTCATTGAGGCAATGCAACAAAATTGTATTTG  
GGCTAAAGTTTCTGTCTTGCTACTTGCCTTGATAAACTATGTGTTCTTTCC

>M6-PGSC0003DMG400025330M6LRR-RLK\_868

GTATTTGGGCTAAAGTTTCTGTCTTGCTACTTGCCTTGATAAACTATGTGTTCTTTCTAAAACCAGGGCA  
CTTCACGAAAACAGTCTGCACGGTGTGATTCCCTAATGAGATTGGCAATT

>M6-PGSC0003DMG400025330M6LRR-RLK\_930

ACCAGGGCACTTCACGAAAACAGTCTGCACGGTGTGATTCCCTAATGAGATTGGCAATTGCCCTGAACTC  
AGAGCTATGTAAGTAGGAGTTTCATATATAACTGAGTGATAACATGTTTTTC

>M6-PGSC0003DMG400025330M6LRR-RLK\_992

TGAACTCAGAGCTATGTAAGTAGGAGTTTCATATATAACTGAGTGATAACATGTTTTCTTGAGATTCCA  
CATGTTTCTTGATGAATTTGTCACAAGCTAGGCATTATTTATGTGTACAG

>M6-PGSC0003DMG400025383-(rev)M6LRR-RLP\_0

AAAAAAGAGGGAAAAGAAACATGTTGAAAGGTTATCTTTGGAGTGGAGCGGAAGTTTTGCTGACAATT  
CACAACTGAAAGAGACATACTTGATGAGCTACAACCAAATACAAACATAAA

>M6-PGSC0003DMG400025383-(rev)M6LRR-RLP\_1071

ACTAGAGTCCTTTCTGAAGGAGGATTGCCCGTCAATTTACAAGTCCTTTGGATCAACAAGTGCAAGAAA  
CTGGTGAATGGCCGAAAGGAGTGGCATTACAGAGACTCCTCCTTCTCGA

>M6-PGSC0003DMG400025383-(rev)M6LRR-RLP\_1134

CAAGAACTGGTGAATGGCCGAAAGGAGTGGCATTACAGAGACTCCTCCTTCTCGAACAGTTAGAGAT  
CAGCCATGATGGCAGTGATCTTGCTGGTGAAAACCTGGGAGTTGCCTTGCTC

>M6-PGSC0003DMG400025383-(rev)M6LRR-RLP\_1197

AGAGATCAGCCATGATGGCAGTGATCTTGCTGGTGAAAACCTGGGAGTTGCCTTGCTCTATTCAAAGTCTT  
ACCATATCCAATCTGAAAACATTAAGCAGCCAACCTTCTCAAAGCCTCAC

>M6-PGSC0003DMG400025383-(rev)M6LRR-RLP\_126

CCAAATTACCGGATATAGAGGGACAAAATTTCCAAATTGGCTAGCTGATCATTCAATTCATAAGCTAATG  
GAATTGTCTCTTAGCGATTGCAAGGACTGTGATTCTTGCCAGCACTAGG

>M6-PGSC0003DMG400025383-(rev)M6LRR-RLP\_1323

TAAATATCTACGTACTTATAATTTATCTCAAATTCAGTCACTGCTGGATGAAGGGCTTCCCTCATCTCTTTG

TGAGCTACATTTAACTAGCCATCATCATCTCCATTCACTACCAACCGA

>M6-PGSC0003DMG400025383-(rev)M6LRR-RLP\_1386

ATCTCTTTGTGAGCTACATTTAACTAGCCATCATCATCTCCATTCACTACCAACCGAAGGTCTTCTGCATCT

CACCTGGCTTCGACATCTACAGATCTGGAATTGCCCTAATCTCCAATC

>M6-PGSC0003DMG400025383-(rev)M6LRR-RLP\_1449

TCTGCATCTCACCTGGCTTCGACATCTACAGATCTGGAATTGCCCTAATCTCCAATCTCTTCCCAAATCTG

GGATGCCCTCCTCCCTCTCTGTGCTGCACATTTGGGATTGTCCTAATCT

>M6-PGSC0003DMG400025383-(rev)M6LRR-RLP\_1512

CAAATCTGGGATGCCCTCCTCCCTCTCTGTGCTGCACATTTGGGATTGTCCTAATCTCCAATCTCTTCCTG

AATTGGGGATGCCCTCCTCTCTCTCTCAGCTGTACATTTTGAATTGTCT

>M6-PGSC0003DMG400025383-(rev)M6LRR-RLP\_1575

TCTTCTGAATTGGGGATGCCCTCCTCTCTCTCTCAGCTGTACATTTTGAATTGTCTTAATCTCCGATCTCT

TCCACTAAAAGGGATGCCCTCCTCATCTCTAAACTGTCTATTTACAA

>M6-PGSC0003DMG400025383-(rev)M6LRR-RLP\_1701

ATTGCTCAAACCACTCCTACAATTCGACAAGGGAGAATACTGGCCAAAAATTGCTCAGATTTCCACCATA

ATTAGTAATGGAGAATTCGAATAATGATTAAGGAAATGGTGCTTTGATA

>M6-PGSC0003DMG400025383-(rev)M6LRR-RLP\_189

GCTAATGGAATTGTCTCTTAGCGATTGCAAGGACTGTGATTCCTTGCCAGCACTAGGACAACCTTCCTTGT

TTAAAATTCCTTACCATTAGAGGGATGCATCAAATAACAGAGGTGACTGA

>M6-PGSC0003DMG400025383-(rev)M6LRR-RLP\_252

TCCTTGTTTAAAATTCCTTACCATTAGAGGGATGCATCAAATAACAGAGGTGACTGAAGAGTTCTATGGT

AGTTTGTCTCCAAAAAGCCATTTAACTCCCTTGAGAACTTGACTTTGC

>M6-PGSC0003DMG400025383-(rev)M6LRR-RLP\_378

GCCGGATTGGAAGCAGTGGCATGTACTGGGGAAAGGAGAATTCCTATACTCGAGCAACTTCCAATTGA

AGATTGCCCAAAGTTGATAGGAAAATTGCCTGAAAATCTTTCTTCTCTGAC

>M6-PGSC0003DMG400025383-(rev)M6LRR-RLP\_441

AATTGAAGATTGCCCAAAGTTGATAGGAAAATTGCCTGAAAATCTTTCTTCTCTGACAAGATTGAGAATT

TGAACTGCCCTGAACTCAGTTTGGAGACACCTATCCAATCTCAAATTC

>M6-PGSC0003DMG400025383-(rev)M6LRR-RLP\_504

GAGAATTTGAACTGCCCTGAACTCAGTTTGGAGACACCTATCCAACCTCTCAAATTCAAAAGAGTTAAAA  
GTTGCTGTTGCCCTAAGGTTGGAGTTCTTTTTGAGAATGCTCAACTGTT

>M6-PGSC0003DMG400025383-(rev)M6LRR-RLP\_567

GTTAAAAGTTGCTGTTGCCCTAAGGTTGGAGTTCTTTTTGAGAATGCTCAACTGTTTACATCTCAACTTG  
AAGGAATGAAACAAAATGTTGAATTAGTAATTACTGATTGTAAGTCTCT

>M6-PGSC0003DMG400025383-(rev)M6LRR-RLP\_63

CAATTCACAACTGAAAGAGACATACTTGATGAGCTACAACCAAATACAAACATAAAAAGTACTCCAAATT  
ACCGGATATAGAGGGACAAAATTTCCAAATTGGCTAGCTGATCATTCAAT

>M6-PGSC0003DMG400025383-(rev)M6LRR-RLP\_693

CTTACCAATTAGCATTCTGCCGAGTACCTTGAAGAGAATAAGAATATCTGGTTGCGGGAACTGAAATT  
GGAGGCGTCCATGAATGCTATGTTTCTCGAGGAACTGTCTTTAAAAGGATG

>M6-PGSC0003DMG400025383-(rev)M6LRR-RLP\_756

GAAATTGGAGGCGTCCATGAATGCTATGTTTCTCGAGGAACTGTCTTTAAAAGGATGTGATTCACCTGA  
GTTTTTTCCAAGAGCACCTATTTGAATTTAAGTAGTTGCCACAACCTTAA

>M6-PGSC0003DMG400025383-(rev)M6LRR-RLP\_819

ACCTGAGTTTTTTCCAAGAGCACCTATTTGAATTTAAGTAGTTGCCACAACCTTAATAGGCTTTTGGTTC  
CTATTGCCACTGAACGACTCAGTATTAGAGGTTTTTCATAATCTTGAGAT

>M6-PGSC0003DMG400025383-(rev)M6LRR-RLP\_882

TTTGGTTCCTATTGCCACTGAACGACTCAGTATTAGAGGTTTTTCATAATCTTGAGATACTTTCAGTGGCAT  
GTGGGACTCAGATGACATCATTGCATATTCACGACTGCAAGATGTTGAA

>M6-PGSC0003DMG400025383-(rev)M6LRR-RLP\_945

AGTGGCATGTGGGACTCAGATGACATCATTGCATATTCACGACTGCAAGATGTTGAAGTCGTTGCCAGA  
GCATATGCAGGAACTCCTTCCATCTCTTAAGGAACTGCAACTATGGCGTTG

>M6-PGSC0003DMG400025480M6LRR-RLP\_0

ATGTTGAAATTGGCATCTGTATTTGATGCTAGTAAGAATAAATTAACAGGTCCGATCCCGCAATCTTTCG  
GGTGCCTTGAGCAAATGGAAGTGATGGATCTGTCTTACAATCAATTGTAT

>M6-PGSC0003DMG400025480M6LRR-RLP\_116

GTATGGGGAAGTACCGGAAACATTGTGCAAGATCAGTAGCTTGGAGGAACTCACTTTGAAATACAACATA  
TTTACACAGATTGGACCGGAATGTCGGAAGTTGGTAAAGGAGAATGTACT

>M6-PGSC0003DMG400025480M6LRR-RLP\_174

AAATACAAC TATTT CACACAG ATTGG ACCGGA ATGTC GGAAG TTGGT AAAGG AGAAT GTACTT GATATT  
GGCATGA ATTGC ATTATTG ATCTTG AGAAC CAGAG AAAGCC GGAGGA ATGC

>M6-PGSC0003DMG400025480M6LRR-RLP\_232

TACTTGAT ATTGG CATGA ATTGC ATTATTG ATCTTG AGAAC CAGAG AAAGCC GGAGGA ATGCG AAAC TT  
TCTTTTT ACAAAA GAGAA ATTGCC GGGAC ATGAAG TCACTA AGCTAT GTAC

>M6-PGSC0003DMG400025480M6LRR-RLP\_290

ATGCGAA ACTTTCT TTTTT ACAAAA GAGAA ATTGCC GGGAC ATGAAG TCACTA AGCTAT GTACCTT GTAAG  
ATTCATG ACTTCTCTT CTAGGA ACAGTTCTTC AGGTCG AGCTC ATACCGG

>M6-PGSC0003DMG400025480M6LRR-RLP\_345

TATGTACCTT GTAAG ATTCATG ACTTCTCTT CTAGGA ACAGTTCTTC AGGTCG AGCTC ATACCGG CGATGC  
AAGGACTCG TTGACTACTT ATGCTGCC CTCAAG AAACCTC ACCACTGA

>M6-PGSC0003DMG400025480M6LRR-RLP\_58

CGCAATCTTTC GGGTGC CTTGAG CAAATG GAAGT GATGG ATCTGTCTT ACAATCA ATTGTAT GGGGAAG  
TACCGGAA ACATTGTG CAAGATC AGTAGCTT GGAGGA ACTCACTTTG AAAT

>M6-PGSC0003DMG400025546M6LRR-RLP\_0

ACTACCTAGT ACAGTTT GGGATATGG TTAATTG AGATATCTGT ATATTCCTA ACTTCAGC CCGTGA AAAATA  
AAAAAGC ATTA CTCAAGAA CTCTCAA AAAC TTGATG ATTTGG AAACCT

>M6-PGSC0003DMG400025546M6LRR-RLP\_128

CATATTT CGCTCG TGTTG AGGATGC AGAATTG ATGCTG AGAAAA ACACCTA ATCTTCG AAAACTG ACATG  
TAAAGTCG AGTGCTT AGAATA CCCCCATC AGTACCATG CGTTGA ATTTTC

>M6-PGSC0003DMG400025546M6LRR-RLP\_192

GACATGTAA AGTCG AGTGCTT AGAATA CCCCCATC AGTACCATG CGTTGA ATTTTCCA ATACGG CTTGAA  
ATACTAGAG CTTTATG GATCAA AAGCCTTCAA AACCATCCC CTTTTACAT

>M6-PGSC0003DMG400025546M6LRR-RLP\_256

CTTGAAATA CTAGAG CTTTATG GATCAA AAGCCTTCAA AACCATCCC CTTTTACATCTTTG CACCAA ATCT  
CAAATACCTG ATACTCTGTGG CTTTTACCTGG ATTCTCAGT ACTTATCA

>M6-PGSC0003DMG400025546M6LRR-RLP\_320

CAAATCTCAA ATACCTG ATACTCTGTGG CTTTTACCTGG ATTCTCAGT ACTTATCAG AAAC TTGATCAT



TATCTTTTAACAATCTAGACGGTGAGGTTTCATGTCACCGGAATATTTTCAAATTTGAGTGCAGATGTATTA  
AACTGGAACCTCCGAGCTTTTTGGTGGGATTCAAGAGCTGCATTTACGAC

>M6-PGSC0003DMG400025635M6LRR-RLK\_124

GATCCGGTTTAGGCAACTACTTCCCTAATCTCCAAATACTTGGCGAAATGTCAATTCATTGGTTCCATACC  
GTCCTCTTTGGCCAATGCTTCAAATTGCTAGAGCTTGATTTTCCTGTA

>M6-PGSC0003DMG400025635M6LRR-RLK\_1240

TGTTTATCAAAGACACGGAAGAAGCATGTACTTCCCTCAAGCATGATACTTCACAGAATGAATATCATA  
ATATGTGGCCTCTGCACTTCATTATCTTCACCATGAGTGCCAAACACCCA

>M6-PGSC0003DMG400025635M6LRR-RLK\_1302

ATATCATAATATGTGGCCTCTGCACTTCATTATCTTCACCATGAGTGCCAAACACCCATGATCCACTGTGA  
TATAAACACAGAACATTCTTCTTGATGAAGATCTCACAGCTTATTTGG

>M6-PGSC0003DMG400025635M6LRR-RLK\_1364

CCACTGTGATATAAACACAGAACATTCTTCTTGATGAAGATCTCACAGCTTATTTGGGTGATTTTGGTTT  
GGTGAGACTCATTCTTGATGAAGATCTCACAGCTCAGTTTAGCTCACTT

>M6-PGSC0003DMG400025635M6LRR-RLK\_1488

TTATGGGAACCATTGGCTATGCAGCTCCAGGTAGTGTTCCCTAGGTTAACAAAACTGTGATATGAAATTT  
CTTCAAACAATAGTTGTTTATTATAAGCTAAATTTGCTTGTTGCAGAAT

>M6-PGSC0003DMG400025635M6LRR-RLK\_1550

TGAAATTTCTTCAAACAATAGTTGTTTATTATAAGCTAAATTTGCTTGTTGCAGAATACGGCATGGTAAA  
TAAGGTCTCCGCTTTAGGAGCTATGTACAGTTTTGGGATTCTCATATTG

>M6-PGSC0003DMG400025635M6LRR-RLK\_1612

CATGGTAAATAAGGTCTCCGCTTTAGGAGCTATGTACAGTTTTGGGATTCTCATATTGGAGATATTCACT  
GGAAGAAGACCCACAGACACTTTGTTCCAAGCAAGCTCTAGTCCCCACCA

>M6-PGSC0003DMG400025635M6LRR-RLK\_1736

GTCGAAACAGCGTTGCCAGAGAAAGTTATGGAGATTCTAGACAAAACAACTTTTTCATGGTGAGATGAGT  
AAAGCAACCAACGTCAAAGAATACTGGGGCAGTATCAAGAAAGAAGAGATG

>M6-PGSC0003DMG400025635M6LRR-RLK\_1798

GATGAGTAAAGCAACCAACGTCAAAGAATACTGGGGCAGTATCAAGAAAGAAGAGATGGAATGCTTGG  
TTAGCATACTTGAGATTGGTGTGCATGTTTCAGCTGAATCCCCAAGAGACAG

>M6-PGSC0003DMG400025635M6LRR-RLK\_186

TTCCATACCGTCCTCTTTGGCCAATGCTTCAAAATTGCTAGAGCTTGATTTTCCTGTAAACAATTTCACTTG  
AAATATACCCCAAGGGTTTTGGTAACTTGCAGATTTTCTTGTGACTCA

>M6-PGSC0003DMG400025635M6LRR-RLK\_1860

GCTTGGTTAGCATACTTGAGATTGGTGTGCGCATGTTTCAGCTGAATCCCCAAGAGACAGATTGACCGTGA  
CACAAAGTTTACAGTAAGTTGACACTAATGAGAGAACAATTTCTACAAAGGG

>M6-PGSC0003DMG400025635M6LRR-RLK\_1922

ACCGTGACACAAGTTTACAGTAAGTTGACACTAATGAGAGAACAATTTCTACAAAGGGGAGGTTGAGGC  
CACAGGCTACAAGTGAAAGCATTGGATTTTCATCTAAAATGGTTTAAATTCT

>M6-PGSC0003DMG400025635M6LRR-RLK\_1984

TTGAGGCCACAGGCTACAAGTGAAAGCATTGGATTTTCATCTAAAATGGTTTAAATTCTGTCTACTTGGTA  
AGAATGGTAACATTCTGTCCAGCATGCAGAAGAATAAGGTAGTGTCAGA

>M6-PGSC0003DMG400025635M6LRR-RLK\_2046

ACTTGGTAAGAATGGTAACATTCTGTCCAGCATGCAGAAGAATAAGGTAGTGTCAGATTTCTTGTTACT  
TAATGGATTTAGTCTAGAAACATCAGATATTAGTTCTTAATGTCTACATC

>M6-PGSC0003DMG400025635M6LRR-RLK\_2108

TTGTTACTTAATGGATTTAGTCTAGAAACATCAGATATTAGTTCTTAATGTCTACATCAGATAATACGTTT  
CATTTCATGAATGTAAAGAATCAGATGTTTTAGGAGATCATAAGGCAAGA

>M6-PGSC0003DMG400025635M6LRR-RLK\_2170

AATACGTTTCATTCATGAATGTAAAGAATCAGATGTTTTAGGAGATCATAAGGCAAGATCAAATGGTCAT  
GGTGAGAATGTTCCTTAAGGTTGTGATTCTAGACACAGATGAGGTATTC

>M6-PGSC0003DMG400025635M6LRR-RLK\_2232

ATGGTCATGGTGAGAATGTTCCTTAAGGTTGTGATTCTAGACACAGATGAGGTATTCTTGTTCCCAAAGT  
TGGAGCATCATGATCAATACTTGGAGGGTTAGTGAGAACTGTTGATCT

>M6-PGSC0003DMG400025635M6LRR-RLK\_2294

CCCAAAGTTGGAGCATCATGATCAATACTTGGAGGGTTAGTGAGAACTGTTGATCTTGCATTGCTTC  
CTTAGCTTTGATTGTCGTTTGTCTTGTCTTTATTTGAATACCAATGCC

>M6-PGSC0003DMG400025635M6LRR-RLK\_2356

ATTGCTTCCTTAGCTTTGATTGTCGTTTGTCTTGTCTTTATTTGAATACCAATGCCATGCCACATGACA



TTGTTTAGCCTTCATCTTGTCAAGTCCACACCAAGTTGCCTTGCCCTC

>M6-PGSC0003DMG400025635M6LRR-RLK\_2418

CCACATGACATTGTTTAGCCTTCATCTTGTCAAGTCCACACCAAGTTGCCTTGCCCTCAAGTCCTTGGTCC

TCACTTGCCACTTTGGAATCAAGCCTTGGTGCCATTGTGCACACCTTAG

>M6-PGSC0003DMG400025635M6LRR-RLK\_248

ATTTCACTTGAAATATAACCCCAAGGGTTTTGGTAACTTGCAGATTTTCTTGTGACTCAACGTTTGGAGTAA

CCAAGTTGGATACGGTAAGCATGATGACCTTGACTTTGTAATTTCTCTT

>M6-PGSC0003DMG400025635M6LRR-RLK\_310

TTGGAGTAAACCAACTTGGATACGGTAAGCATGATGACCTTGACTTTGTAATTTCTCTTACCAACTGCCAG

CAGTCTATAAATGCTCCATTTTGGAGACACCAGTTTGTACGTGCATTACC

>M6-PGSC0003DMG400025635M6LRR-RLK\_372

ACTGCCAGCAGTCTATAAATGCTCCATTTTGGAGACACCAGTTTGTACGTGCATTACCTCATTCAACAGTC

AACCTTTCTAGTCAGTTACAACGCCTACTCTACTACGGAAACAGAATTA

>M6-PGSC0003DMG400025635M6LRR-RLK\_434

TCAACAGTCAACCTTTCTAGTCAGTTACAACGCCTACTCTACTACGGAAACAGAATTAAGGAAAGCATA

CCAGAGATATCTCCAACCTGGTGAATTTGATCTACTTGAGATGAGTAACA

>M6-PGSC0003DMG400025635M6LRR-RLK\_496

AAGCATACCCAGAGATATCTCCAACCTGGTGAATTTGATCTACTTGAGATGAGTAACAACAATCTTACAG

GTAGCACTCCAGGTTCTATTGGAAGACTGACAACTTGGGAGGTCTCAAC

>M6-PGSC0003DMG400025635M6LRR-RLK\_62

GTACAATTTGTCATCCCTGGAACATAATCACTTTCTTTAACAACCTTTCTGGTAATCTCAGATCCGGTTT

AGGCAACTACTTCCCTAATCTCCAATACTTGGCGAAATGTCAATTCA

>M6-PGSC0003DMG400025635M6LRR-RLK\_620

GTAACAGTCTCTTGACAGGGGTCATCCCTTCTTCAATAGGAAACCTCATTGAACTCGTCTATCTTTATTTG

GGACTAACAGGTTATAGGGTAACATACCTTCAACATTGGGAAACTGTA

>M6-PGSC0003DMG400025635M6LRR-RLK\_682

CTTTATTTGGGACTAACAGGTTATAGGGTAACATACCTTCAACATTGGGAAACTGTAGCCAACCTGCTAA

AATTGGGTATTTCTGAAAACAGCCTAACAGGAACTATAACCACAACAACCTT

>M6-PGSC0003DMG400025635M6LRR-RLK\_744

ACTGCTAAAATTGGGTATTTCTGAAAACAGCCTAACAGGAACTATACCACAACAACCTTTTTCTCTCAT  
CCCTCACAATATTTATGCATCTTATAACTCTTTGACTGGTCCATTACC

>M6-PGSC0003DMG400025635M6LRR-RLK\_806

CTCTCTCATCCCTCACAATATTTATGCATCTTATAACTCTTTGACTGGTCCATTACCGGTCTATATTAGTA  
ACTGAAGTTATCTTACTTATCTTGATTATTCTCACAACAATTTTTCGG

>M6-PGSC0003DMG400025635M6LRR-RLK\_868

TATATTAGTAACTGAAGTTATCTTACTTATCTTGATTATTCTCACAACAATTTTTCGGGGTTGATTCCACGA  
ACTCTTGAAAATGCTTGGCCTTGGGGGATCTATTTGAAGGGAAACTC

>M6-PGSC0003DMG400025635M6LRR-RLK\_992

CAAGGGACCATTCCCAATTTAGAAGATCTGCCGGATCTCCAATCCTTGGATCTTTCCCAAATAATCTATC  
AGGGCCAATTCCTCACTTCATTGCAAGTTTTACTTCCTTGCTCTACTTG

>M6-PGSC0003DMG400025668M6RLKWAX-EGF\_0

TCTCTTATATTTCTAATTCCAATAAATTCGTTGATAAACACAGGTATGGGAGTTGGTTTTATGTCCCTAG  
TAATTGGGACAACCTGGCTCTATTTCTGCATCAAGAAAAGAAAACCTCAG

>M6-PGSC0003DMG400025668M6RLKWAX-EGF\_1040

TGAAAGAAGTAGCAAGTGAACCTGAAAATTTGAGAAAGTTCACCAAAAATAACCCCTGGGCTAATGGAA  
ACGGACATGAAGAGAACGGAGATGAATTATCAGATCTTTATACAATTCCAA

>M6-PGSC0003DMG400025668M6RLKWAX-EGF\_1105

GGAAACGGACATGAAGAGAACGGAGATGAATTATCAGATCTTTATACAATTCCAATCGACTCTAATACA  
GACATCGACAATTTCTCTGGACAATATAGTTCGAATTCCAATACAAATAGC

>M6-PGSC0003DMG400025668M6RLKWAX-EGF\_1170

TACAGACATCGACAATTTCTCTGGACAATATAGTTCGAATTCCAATACAAATAGCAGCAATTTTTCTGGA  
CAATATAGTTCAGGTAGTACTTCTAACACAAATAGCCCATTGATCCACAA

>M6-PGSC0003DMG400025668M6RLKWAX-EGF\_1235

CTGGACAATATAGTTCAGGTAGTACTTCTAACACAAATAGCCCATTGATCCACAACAGAAGGGCAATTTG  
ATGATTGATAAAGATTATGCGCTTTGATTTTTTTGATGTAATTTTCTTGT

>M6-PGSC0003DMG400025668M6RLKWAX-EGF\_1281

GATCCACAACAGAAGGGCAATTTGATGATTGATAAAGATTATGCGCTTTGATTTTTTTGATGTAATTTTCT  
TGTTTGTGATTCACTGATTTGACTTTCATGATTTTTGTTTACATCGGA

>M6-PGSC0003DMG400025668M6RLKWAX-EGF\_130

GAGAATTTCTTCCAACAAAATGGTGGTTTGCTTATGAAACAACGAATGTCTTCTCACGAGGGTGGTGTG  
GAAGCAACCAAATTTTACAGCTGCGGAGCTGAAGAAGGCTACAAACAAC

>M6-PGSC0003DMG400025668M6RLKWAX-EGF\_195

TGTGGAAGCAACCAAATTTTACAGCTGCGGAGCTGAAGAAGGCTACAAACAACACTATGCTAGTGATAG  
AATTCTTGGTTCGTGGTGGAAATGGCATTGTCTATAAAGGTATTCTACCTGA

>M6-PGSC0003DMG400025668M6RLKWAX-EGF\_260

ATAGAATTCTTGGTTCGTGGTGGAAATGGCATTGTCTATAAAGGTATTCTACCTGATAACCGCATAGTTGC  
TATTAAGAAATCTAAGTTTATGGACGAGGAACAGGTTGAACAGTTCATTA

>M6-PGSC0003DMG400025668M6RLKWAX-EGF\_325

GTTGCTATTAAGAAATCTAAGTTTATGGACGAGGAACAGGTTGAACAGTTCATTAATGAGGTACTTATTC  
TACTCAAGTTAACCATAGAAATGTGGTGAGACTCTTTGGATGTTGTTTG

>M6-PGSC0003DMG400025668M6RLKWAX-EGF\_390

TATTCTTACTCAAGTTAACCATAGAAATGTGGTGAGACTCTTTGGATGTTGTTTGGAAAGCTGAAGTTCCTT  
TACTTGTCTACGAATACATTTCTCATGGAACTCTTACGAGCATATCCA

>M6-PGSC0003DMG400025668M6RLKWAX-EGF\_455

TTCCTTTACTTGTCTACGAATACATTTCTCATGGAACTCTTACGAGCATATCCACAATCGAAATGGAGCA  
CCTTGGTTATCTTGGGAAAATCGGCAAAGAGTTGCTAGCGAGACAGCAA

>M6-PGSC0003DMG400025668M6RLKWAX-EGF\_520

GGAGCACCTTGGTTATCTTGGGAAAATCGGCAAAGAGTTGCTAGCGAGACAGCAAGTGCACCTTCTTAC  
CTTCATTCATCCGCTCAAATGCCTATAATTCATAGAGATGTCAAGTCTGCC

>M6-PGSC0003DMG400025668M6RLKWAX-EGF\_585

TTACCTTCATTCATCCGCTCAAATGCCTATAATTCATAGAGATGTCAAGTCTGCCAATTTATTGTTGGATG  
ATGTTTACATCGCGAAAGTGGCAGATTTTGGTGCTTCAAGGTTAATCCC

>M6-PGSC0003DMG400025668M6RLKWAX-EGF\_65

CCCTAGTAATTGGGACAACCTTGGCTCTATTTCTGCATCAAGAAAAGAAAACCTCAGTAAACTTCGCGAGAA  
TTTCTTCCAACAAAATGGTGGTTTGCTTATGAAACAACGAATGTCTTCTC

>M6-PGSC0003DMG400025668M6RLKWAX-EGF\_650

TGGATGATGTTTACATCGCGAAAGTGGCAGATTTTGGTGCTTCAAGGTTAATCCCTGTTGATCAAACACA

TCTTGCTACAATGGTTCAAGGGACATTAGGATACCTAGATCCTGAATATT

>M6-PGSC0003DMG400025668M6RLKWAX-EGF\_715

ACACATCTTGCTACAATGGTTCAAGGGACATTAGGATACCTAGATCCTGAATATTTTCGCACAAGTCAAT

TGACCGAGAAAAGCGATGTTTATAGTTTTGGAGTAGTTCTTGCCGAACTA

>M6-PGSC0003DMG400025668M6RLKWAX-EGF\_780

TCAATTGACCGAGAAAAGCGATGTTTATAGTTTTGGAGTAGTTCTTGCCGAACTATTGACAGGGATGAA

ACCTATTTCCAAGGACAGAAATGAGGGGGAGAAGAATTTGGCAGAGTATTT

>M6-PGSC0003DMG400025668M6RLKWAX-EGF\_845

TGAAACCTATTTCCAAGGACAGAAATGAGGGGGAGAAGAATTTGGCAGAGTATTTTGTCTATAA

GAAGGAATCAATTGTTTCAAATCTTGATCGTAGAGTTGTAAGAGAAGGAA

>M6-PGSC0003DMG400025668M6RLKWAX-EGF\_910

ATAAGAAGGAATCAATTGTTTCAAATCTTGATCGTAGAGTTGTAAGAGAAGGAAGCCTTGAGCAGCTC

CAAAGGTGGCTGAGCTAGTGAAGAGTTGTCTTAGTTTGCACGGAGAAGAT

>M6-PGSC0003DMG400025668M6RLKWAX-EGF\_975

GCTCCAAAAGGTGGCTGAGCTAGTGAAGAGTTGTCTTAGTTTGCACGGAGAAGATAGGCCTACCATGA

AAGAAGTAGCAAGTGAACCTGAAAATTTGAGAAAGTTCACCAAAAATAACCC

>M6-PGSC0003DMG400025769-(rev)M6LRR-RLP\_0

TGAAATTCTGCAAATTGATTAAGTCAACACCCCAACATTCAATCAAATATAGCATTCTCCA

CCATCACCTCAGCCAGCCAAAAGGGAAACCTTTTTTTTCAAAGTTACCT

>M6-PGSC0003DMG400025769-(rev)M6LRR-RLP\_1054

ATTCTGACCAACTTGTTTAACTTTTGGAGTAATTAAGAGAGTGAGCACACTGCAAGGGATTAACGGAA

GCTTTTATGCGCACAAGGCTTACTTAGAAAATTAATCACAATTATAGAAGG

>M6-PGSC0003DMG400025769-(rev)M6LRR-RLP\_1116

AACGGAAGCTTTTATGCGCACAAGGCTTACTTAGAAAATTAATCACAATTATAGAAGGAATAATTATGTA

TAACTAATTCTTGGCATTAAAGAAAATAAATTATATCATAAGTAAAAGCA

>M6-PGSC0003DMG400025769-(rev)M6LRR-RLP\_1178

ATTATGTATAACTAATTCTTGGCATTAAAGAAAATAAATTATATCATAAGTAAAAGCACTTTTACCTTGA

ACAAGTCTCCTTTATTTCCAGTTGTTCTAAGAAAAAATTACTTTGCATT

>M6-PGSC0003DMG400025769-(rev)M6LRR-RLP\_124

GAAATTTGTGTGAAAGAGCTGACCATCAACTACAAAGGTGAGATATCAACCCAAAAAAAAAAAAAAAAAGGA  
AAAAACGAGCTGCAGTTACTTAGGTGCTCAAAGTAACTAGATTAGAGTACA

>M6-PGSC0003DMG400025769-(rev)M6LRR-RLP\_1240

TCACCTTGAACAAGTCTCCTTTATTTCCAGTTGTTCTAAGAAAAAATTACTTTGCATTCCAAGAACCTTTTT  
ATTTTGTCTAGACCTATCGCAGAAAACGTCTAGTAGTAGGGAAGTACTAGT

>M6-PGSC0003DMG400025769-(rev)M6LRR-RLP\_1302

GAACCTTTTTATTTTGTCTAGACCTATCGCAGAAAACGTCTAGTAGTAGGGAAGTACTAGTAATTTGCCTCAA  
CAGATGAACAATTGAAAATTGGATCCAAATGGCATAGAATGGATATTGAT

>M6-PGSC0003DMG400025769-(rev)M6LRR-RLP\_1364

TGCCTCAACAGATGAACAATTGAAAATTGGATCCAAATGGCATAGAATGGATATTGATGATTCCTACTAC  
CTAAAAAAAAACTAGTTTAGGAATGAGGTGCAGTAACAGTATAGTGGTTGT

>M6-PGSC0003DMG400025769-(rev)M6LRR-RLP\_1426

CCTACTACCTAAAAAAAAACTAGTTTAGGAATGAGGTGCAGTAACAGTATAGTGGTTGTTGCATGGTTAT  
ATCTATTCTATCCGTAAGTAAGTGGCCTATTTTATTTTTTGATAATAAACA

>M6-PGSC0003DMG400025769-(rev)M6LRR-RLP\_1488

TGGTTATATCTATTCTATCCGTAAGTAAGTGGCCTATTTTATTTTTTGATAATAAACAAGGTGATCTTTGA  
CTATACCATCAGTGTATGAAGTCAGTAAACAAGAGAAAGGAACTCATAA

>M6-PGSC0003DMG400025769-(rev)M6LRR-RLP\_1550

GATCTTTGACTATACCATCAGTGTATGAAGTCAGTAAACAAGAGAAAGGAACTCATAAATTTGCTAGATT  
TTCTAAAATAAAGTAACTAATTTTCGATGGGAAAAAAATCAAAAAAACTCT

>M6-PGSC0003DMG400025769-(rev)M6LRR-RLP\_1612

GCTAGATTTTCTAAAATAAAGTAACTAATTTTCGATGGGAAAAAAATCAAAAAAACTCTTAGGTAACCTT  
GAAAAGAAGGTAGCATGGGAAACGAGAAAGTGGAGTGGGGGAAAAAGTCA

>M6-PGSC0003DMG400025769-(rev)M6LRR-RLP\_1674

GTAACCTTTGAAAAGAAGGTAGCATGGGAAACGAGAAAGTGGAGTGGGGGAAAAAGTCAATAGGAGGT  
GGACTATAATTACACCTCTCTTTTTTGCTAACGTCCGCTACCAAAAACACAGA

>M6-PGSC0003DMG400025769-(rev)M6LRR-RLP\_1736

GAGGTGGACTATAATTACACCTCTCTTTTTTGCTAACGTCCGCTACCAAAAACACAGATTCCTCCCTTAT  
TTTTCTAAAATATTAATAAAATATGAATACTTAACTTTTGAGTCAGGAA

>M6-PGSC0003DMG400025769-(rev)M6LRR-RLP\_1798

CTCCCTTATTTTTCTAAAATATTAATAAAAATATGAATACTTAACTTTTGAGTCAGGAATTATTGAAGACTAT  
CTTTCTATTTTATAAAGATAAAGATAAAAATCTATGTATTTTTTATTCT

>M6-PGSC0003DMG400025769-(rev)M6LRR-RLP\_186

AAAGGAAAAACGAGCTGCAGTACTTAGGTGCTCAAAGTAACTAGATTAGAGTACAAATACTACGAG  
ACAAGCATAATAAAGATTCTAAATCAATAGCAAAGAGAACTCCTAGATTA

>M6-PGSC0003DMG400025769-(rev)M6LRR-RLP\_1860

TGAAGACTATCTTTCTATTTTATAAAGATAAAGATAAAAATCTATGTATTTTTTATTCTTATTCAATTTCACTT  
ATAAAAATATATTAATATTATATTGCTGTATAAATCTATAATAGAG

>M6-PGSC0003DMG400025769-(rev)M6LRR-RLP\_1922

CAATTTCACTTATAAAAATATATTAATATTATATTGCTGTATAAATCTATAATAGAGGCTCATTTCATGGT  
TTTAAATTTTCTAGGTTTAATTTTAAAGATTATGCATTGAATTCATTAC

>M6-PGSC0003DMG400025769-(rev)M6LRR-RLP\_1984

ATTCATGGTTTTAAATTTTCTAGGTTTAATTTTAAAGATTATGCATTGAATTCATTACATTATTAGAGTTCT  
TGGTTTGATAATATAGATAATTTTTTTAAGTGATCAGTATAATTTTAA

>M6-PGSC0003DMG400025769-(rev)M6LRR-RLP\_2046

TTAGAGTTCTTGGTTTGATAATATAGATAATTTTTTTAAGTGATCAGTATAATTTTAACTTGTTGTGAAAG  
GTTATTTGCCAGAGTTTTTTTTGAAACCTCAGGATAATCCGCAACCGTTA

>M6-PGSC0003DMG400025769-(rev)M6LRR-RLP\_2170

CTCAGCCGCAATCTTCGCTCTTCGAGTGAGCACTCTGTGCGCATTGGGTAAACCCCCCTCAGGTTACTAA  
TTTTACTTAATAATCATTA AAACTGACCTGATAGAGAAAAAAATTTAAC

>M6-PGSC0003DMG400025769-(rev)M6LRR-RLP\_2232

GTTACTAATTTTACTTAATAATCATTA AAACTGACCTGATAGAGAAAAAAATTTAACAATATCAGTACAA  
ATAAGTTATATTTAGAACAAAATGAAGACAGAAACAAAGTACTTCAATA

>M6-PGSC0003DMG400025769-(rev)M6LRR-RLP\_2294

TCAGTACAAATAAGTTATATTTAGAACAAAATGAAGACAGAAACAAAGTACTTCAATATTAGCCATTAC  
TTTGTTTTCCCACTTACTCAAGTACCCTTTTGCTACTACTACTATATA

>M6-PGSC0003DMG400025769-(rev)M6LRR-RLP\_2356

CCATTCACTTTGTTCCTACTTACTCAAGTACCCTTTTGCTACTACTACTATATATCAATATCAAATTAT

CAATATTATCATCTATGTAGCAGAGTGAACCAGAACACTTTTCTTTT

>M6-PGSC0003DMG400025769-(rev)M6LRR-RLP\_2418

TATCAAATTATCAATATTATCATCTATGTAGCAGAGTGAACCAGAACACTTTTCTTTTTTCTTGCCTTACAC  
TTCTACATCCCTTGCTGCCTTTTTGGTCACCAAACAACACTTCTCTAGT

>M6-PGSC0003DMG400025769-(rev)M6LRR-RLP\_248

CTACGAGACAAGCATAATAAAGATTCTAAATCAATAGCAAAAGAGAACTCCTAGATTATGCACTGGCTC  
CATTGAAATGCTTGTGGATTACCAATCAAATGACCATGCCACTATTTCAA

>M6-PGSC0003DMG400025769-(rev)M6LRR-RLP\_2480

TGCCTTACACTTCTACATCCCTTGCTGCCTTTTTGGTCACCAAACAACACTTCTCTAGTAGTTGGTTTACGTC  
TTCCTCTTTCTTCTTATGTATATAGGAGTATTATGCTGTAATCATAAA

>M6-PGSC0003DMG400025769-(rev)M6LRR-RLP\_2542

GGTTTACGTCTTCCTCTTTCTTCTTATGTATATAGGAGTATTATGCTGTAATCATAAATAATCAGTTCAAGA  
AATGATGACAGACTCAGAGCAGTACTATTCTTTCTGGTCATTTGGGGT

>M6-PGSC0003DMG400025769-(rev)M6LRR-RLP\_2604

CAGTTCAAGAAATGATGACAGACTCAGAGCAGTACTATTCTTTCTGGTCATTTGGGGTCTTTTTCTTTCTT  
TCTTTGTGTCCTTCGTTTGGTCTCAACATAGATGGAACCTCTCTTGTGT

>M6-PGSC0003DMG400025769-(rev)M6LRR-RLP\_2666

TTCTTTCTTTCTTTGTGTCCTTCGTTTGGTCTCAACATAGATGGAACCTCTTGTGTCTTTCAAATACTCTG  
TTCTTGAAGACCCTTTATCAATTATTGATAATTGGGACTATAATGAT

>M6-PGSC0003DMG400025769-(rev)M6LRR-RLP\_2728

CAAATACTCTGTTCTTGAAGACCCTTTATCAATTATTGATAATTGGGACTATAATGATGCAACCCCATGTT  
TATGGACTGGTGTAACCTGTACACCAGACATGTTTAGAGTCATTAGTTT

>M6-PGSC0003DMG400025769-(rev)M6LRR-RLP\_2790

CCCCATGTTTATGGACTGGTGTAACTGTACACCAGACATGTTTAGAGTCATTAGTTTCGTACTCCCTAAT  
TCTAAGCTTATTGGTTCTATTCCAGAAGAAATAGGATTTATTCAACATC

>M6-PGSC0003DMG400025769-(rev)M6LRR-RLP\_2852

CTCCCTAATTCTAAGCTTATTGGTTCTATTCCAGAAGAAATAGGATTTATTCAACATCTTCATACTATTGAT  
CTTTCAAATAATTTCTTGAATGGAACACTACCTGTTTCACTTCTCAAT

>M6-PGSC0003DMG400025769-(rev)M6LRR-RLP\_2914

TACTATTGATCTTTCAAATAATTTCTTGAATGGAACACTACCTGTTTCACTTCTCAATGCTTCTGAACTTCA  
AGTTCTTTCACTGTCAAACAATGCTATTTCTGGTGAGCTTACTGAGTC

>M6-PGSC0003DMG400025769-(rev)M6LRR-RLP\_2976

CTGAACTTCAAGTTCTTTCACTGTCAAACAATGCTATTTCTGGTGAGCTTACTGAGTCTATTGGAGGGTTG  
AAGAGCTTAAAGGTTCTAAATCTTTCTGTCAATGCATTTGTAGGAAATC

>M6-PGSC0003DMG400025769-(rev)M6LRR-RLP\_310

CTGGCTCCATTGAAATGCTTGTGGATTACCAATCAAATGACCATGCCACTATTTCAATGCCAATCATATA  
AACCATTACTTCATCTGCCACAGACACTTCCACTAACAAAGGTCATCGA

>M6-PGSC0003DMG400025769-(rev)M6LRR-RLP\_372

AATCATATAAACCATTACTTCATCTGCCACAGACACTTCCACTAACAAAGGTCATCGATAACCATTACAA  
AAATAAGAAAAACTAGTAAGTTCAGCCTTCTTTAAACTCTGCTTTG

>M6-PGSC0003DMG400025769-(rev)M6LRR-RLP\_434

CATTCACAAAATAAGAAAAACTAGTAAGTTCAGCCTTCTTTAAACTCTGCTTTGCAAGGCAATCAA  
ACCTCATCCCAACGATGTTGGATGATGCAATCCTACAGGTCAACCTACAA

>M6-PGSC0003DMG400025769-(rev)M6LRR-RLP\_496

GCAATCAAACCTCATCCCAACGATGTTGGATGATGCAATCCTACAGGTCAACCTACAAATCAATAAACA  
GATTCAGAAAATTTGAGAATGAAGTTTCGGTCATGAACACAGAATAAT

>M6-PGSC0003DMG400025769-(rev)M6LRR-RLP\_558

ATAAACAGATTTTCAGAAAATTTGAGAATGAAGTTTCGGTCATGAACACAGAATAATGCAGCTAGGCT  
ATCTGCTTAAATCTTACTCTACTTTCAAGGGGAAACAAAATTGAAATGGAA

>M6-PGSC0003DMG400025769-(rev)M6LRR-RLP\_62

ATTTCTCCACCATCACCTCAGCCAGCCAAAAGGGAAACCTTTTTTTTCAAAGTTACCTAAAAGAAATTTGT  
GTGAAAGAGCTGACCATCAACTACAAAGGTGAGATATCAACCCAAAAAA

>M6-PGSC0003DMG400025769-(rev)M6LRR-RLP\_620

CTAGGCTATCTGCTTTAATCTTACTCTACTTTCAAGGGGAAACAAAATTGAAATGGAAGAAAAACAGTTG  
TGCAATCAAGAAAAGGAGCAAATGGGACATATCCCTCTCATAGTTAGCA

>M6-PGSC0003DMG400025769-(rev)M6LRR-RLP\_682

AACAGTTGTGCAATCAAGAAAAGGAGCAAATGGGACATATCCCTCTCATAGTTAGCAGAAGATCGAAG  
AAGATCGAAGGTGAGGGTGGAAGCAAAAAGACCTGTACTTCTACAAGCTGC



>M6-PGSC0003DMG400025769-(rev)M6LRR-RLP\_744

ATCGAAGAAGATCGAAGGTGAGGGTGGAAGCAAAAAGACCTGTACTTCTACAAGCTGCCTTTGGATGT  
TGAGTGAAGGAATATTTCAAGAACTTAGTTCTCTATCTGGTTCATGTAAATC

>M6-PGSC0003DMG400025769-(rev)M6LRR-RLP\_806

GGATGTTGAGTGAAGGAATATTTCAAGAACTTAGTTCTCTATCTGGTTCATGTAAATCATAGCTCTAAGC  
TAAAATCAGGACACGAGATAAGGATCTCACTCCAAAAGTCATTAACAAGC

>M6-PGSC0003DMG400025769-(rev)M6LRR-RLP\_868

CTCTAAGCTAAAATCAGGACACGAGATAAGGATCTCACTCCAAAAGTCATTAACAAGCTAATTGCCCGTT  
TCACGTTTCAAACCCACAGGTATCCCTTTGAATCCAAACCCAGAACTTA

>M6-PGSC0003DMG400025769-(rev)M6LRR-RLP\_930

TGCCCGTTTCACGTTTCAAACCCACAGGTATCCCTTTGAATCCAAACCCAGAACTTATATCAGCAATTAT  
GAAGTAATCTAAAGGTTCTAAAAAATCCCAAATTAGTGTATCCTGTAA

>M6-PGSC0003DMG400025769-(rev)M6LRR-RLP\_992

AGCAATTATGAAGTAATCTAAAGGTTCTAAAAAATCCCAAATTAGTGTATCCTGTAAATCTATTCTGACC  
AACTTGTTTAACTTTTGAAGTAATTTAAGAGAGTGAGCACACTGCAAGG

>M6-PGSC0003DMG400025771M6LRR-RLK\_0

CAACACTTTCTTTTTTTTGCCTTAACAATTCTCCATCTCTTGCTGCCTTTTTGGTCACCAAAAACAACCTTCTCT  
AATAGTTGGTTTACCTCTTCTCTTTCTTCTTATGTATATAGAAAGT

>M6-PGSC0003DMG400025771M6LRR-RLK\_1008

CTTTCATCTCCACCTAATATAACCACTAATCCTCCAGCAATTGCAGCCATTCCAAAAGAAATTAACCTCAAC  
CCCCTTCAAGATTCTGATGGAACAACCTCAAACCTGCAGCTCAGAATCAA

>M6-PGSC0003DMG400025771M6LRR-RLK\_1071

AACTCAACCCCACTTCAAGATTCTGATGGAACAACCTCAAACCTGCAGCTCAGAATCAACAACAGCATGGG  
CTAAAGCCAGGTACCATAATAGGAATCATAGTTGGTGACTTAGCAGGTGTT

>M6-PGSC0003DMG400025771M6LRR-RLK\_1134

CATGGGCTAAAGCCAGGTACCATAATAGGAATCATAGTTGGTGACTTAGCAGGTGTTGGTGTTCTTGCT  
ATTGTCTTTCTTTATGTCTACAAATTGAAGAAGAAGAATAAAGCAAGTGAG

>M6-PGSC0003DMG400025771M6LRR-RLK\_1197

CTTGCTATTGTCTTTCTTTATGTCTACAAATTGAAGAAGAAGAATAAAGCAAGTGAGGCAACCATAGAAA

GCTCAATTGACAAAGATCAAAAATACAACAAAACACCAGAACCATCAATA

>M6-PGSC0003DMG400025771M6LRR-RLK\_126

GAATAATCACTTCAAGAAATGATGACTATCTCAGAACATTACTATTCTTTCTGGTCATTTGGGGTCTTTTT  
CTTTCTTTTATGTCCTTCATTTGGTCTCAACATAGATGGAACCTC

>M6-PGSC0003DMG400025771M6LRR-RLK\_1260

ATAGAAAGCTCAATTGACAAAGATCAAAAATACAACAAAACACCAGAACCATCAATACTTGTTGTA  
GAAAAGACACCATTTTTCTAGTTGGCCATGCTTGACCATAAATCAAGAA

>M6-PGSC0003DMG400025771M6LRR-RLK\_1323

GTAAAAGAAAAAGACACCATTTTTCTAGTTGGCCATGCTTGACCATAAATCAAGAAAGTTCAGATACTG  
ATGACAGCAAAAACCAAGAAAGTGAAGACCAAATTGAGTATGAAACAGAA

>M6-PGSC0003DMG400025771M6LRR-RLK\_1386

GATACTGATGACAGCAAAAACCAAGAAAGTGAAGACCAAATTGAGTATGAAACAGAACAAAAGAATGA  
GAAAAGCAAGAAAACAGAAAGGTCATTTGTAATGGTGGATGGTGAAACAGAA

>M6-PGSC0003DMG400025771M6LRR-RLK\_1449

AATGAGAAAAGCAAGAAAACAGAAAGGTCATTTGTAATGGTGGATGGTGAAACAGAATTAGAGCTAGA  
GACTTTGTTGAAAGCTTCAGCTTATTTTTGGGGTCAAGTGGAGCTAGCATA

>M6-PGSC0003DMG400025771M6LRR-RLK\_1512

CTAGAGACTTTGTTGAAAGCTTCAGCTTATTTTTGGGGTCAAGTGGAGCTAGCATAGTTTACAAAGCTG  
TGTTAGAAGATGGAAGCTTCATTTGCTGTTAGGAGAATTGGCGAGAGTGGT

>M6-PGSC0003DMG400025771M6LRR-RLK\_1575

AAAGCTGTGTTAGAAGATGGAAGCTTCATTTGCTGTTAGGAGAATTGGCGAGAGTGGTGTGATAAATTG  
AAGGATTTTGAGCAACAAATTAAGGAATTAACAAGCTAAGGCATCCAAAT

>M6-PGSC0003DMG400025771M6LRR-RLK\_1638

AAATTGAAGGATTTTGAGCAACAAATTAAGGAATTAACAAGCTAAGGCATCCAAATCTTGTTGTTGTTA  
GAGGATTCTATTGGGGAGATGATGAGAAATTAGTCATCTATGATTATGTT

>M6-PGSC0003DMG400025771M6LRR-RLK\_1701

CGTGTTAGAGGATTCTATTGGGGAGATGATGAGAAATTAGTCATCTATGATTATGTTACTAATGGAAGC  
TTAGCCAATATTGGTTACAGTAAGTTACTTTCTTTTCATCTTCATTATCTT

>M6-PGSC0003DMG400025771M6LRR-RLK\_1764

GGAAGCTTAGCCAATATTGGTTACAGTAAGTTACTTTTCCTTTCATCTTCATTATCTTATCATAATTATAGTT  
TTGATAAATCTTTTCTGTCCTTATCATAATTACCTCCAAATATTCGGA

>M6-PGSC0003DMG400025771M6LRR-RLK\_1827

ATTATAGTTTTGATAAATCTTTTCTGTCCTTATCATAATTACCTCCAAATATTCGGATTAGTCAAGTGTACT  
TGACATTTAATGTCACTGATATATTTGCAGCAACATTCCCTGATTTGT

>M6-PGSC0003DMG400025771M6LRR-RLK\_189

GTCTTTTTCTTTCTTTCTTTTATGTCCTTCATTTGGTCTCAACATAGATGGAACCTCTTGTGTCTTTCAAAT  
ACTCTGTTCTTGATGACCCTTTATCAGTTCTTGATAATTGGGACTAA

>M6-PGSC0003DMG400025771M6LRR-RLK\_1890

AAGTGTACTTGACATTTAATGTCACTGATATATTTGCAGCAACATTCCCTGATTTGTCACTTAACAAAAAC  
ATTAAGCCTATAGTTTAGCGGTAGTAATAAATACTGTACTAAGGGGTC

>M6-PGSC0003DMG400025771M6LRR-RLK\_1953

ACAAAAACATTAAAGCCTATAGTTTAGCGGTAGTAATAAATACTGTACTAAGGGGTCGTTTGATAGATG  
ATTAGAATTATGATGATATTAGTAATATAGGAATTGATATTATTTTCATGCT

>M6-PGSC0003DMG400025771M6LRR-RLK\_2016

TAGATGATTAGAATTATGATGATATTAGTAATATAGGAATTGATATTATTTTCATGCTCATATTAATTATGC  
AGTGATTAGTTATTCCACCATGTATTTGTCATGAGGGTTTTTAAATTGC

>M6-PGSC0003DMG400025771M6LRR-RLK\_2079

AATTATGCAGTGATTAGTTATTCCACCATGTATTTGTCATGAGGGTTTTTAAATTGCAAACCTAGAGCTACC  
AAACTATTACTTTTGCAGAACTTAATTAATACCTGCATAACTTACATCT

>M6-PGSC0003DMG400025771M6LRR-RLK\_2142

GAGCTACCAAACCTATTACTTTTGCAGAACTTAATTAATACCTGCATAACTTACATCTAGACCAAACCTACCAA  
ACAACCTCTTTTTTAAGTACACTGTCTGTCATTAGAAAAACAAGTAGTT

>M6-PGSC0003DMG400025771M6LRR-RLK\_2205

ACTACCAAACAACCTCTTTTTTAAGTACACTGTCTGTCATTAGAAAAACAAGTAGTTAATTTTAGTGTAC  
ATGTACTACACAGGCATGGATTTTCGTTACTCAATTTTGCAGATACTAT

>M6-PGSC0003DMG400025771M6LRR-RLK\_2268

TAGTGTACATGTACTACACAGGCATGGATTTTCGTTACTCAATTTTGCAGATACTATACTTCATATGTGGT  
TGTGTTTTGAGGCTCCAATGGTCCTCCATGTGACATTGTCATAATCCG

>M6-PGSC0003DMG400025771M6LRR-RLK\_2331

TATGTGGTTGTGTTTTGAGGCTCCCAATGGTCTCCATGTGACATTGTCATAATCCGTGAAAGTCCCCAA  
ACTATACTACAATACATATAATACGTCAAATACATGTGCACCCCTTCTC

>M6-PGSC0003DMG400025771M6LRR-RLK\_2394

TCCCCAAACTATACTACAATACATATAATACGTCAAATACATGTGCACCCCTTCTCCTCAATATTGTACTA  
CCACAAACGTTTCGGAGACTTGATTTTTCAAACCTCCACGTTTAAGAT

>M6-PGSC0003DMG400025771M6LRR-RLK\_252

TCTTTCAAATACTCTGTTCTTGATGACCCTTATCAGTTCTTGATAATTGGGACTAAAATGATGCAACCCC  
ATGTTTATGGACTGGTGTAACTTGTGCACCAGACATGTTTAGAGTCATT

>M6-PGSC0003DMG400025771M6LRR-RLK\_315

GCAACCCCATGTTTATGGACTGGTGTAACTTGTGCACCAGACATGTTTAGAGTCATTAGTTTACTACTCCC  
AAATTCTAACCTTGTTGGTTCTGTTCCACAAGAATTAGGCTATATTCAA

>M6-PGSC0003DMG400025771M6LRR-RLK\_378

CTACTCCCAAATTCTAACCTTGTTGGTTCTGTTCCACAAGAATTAGGCTATATTCAACATCTTCATACTATT  
GATCTTTCAAATAATTTCTTGAATGGAACACTTCTGTTTCACTTCTC

>M6-PGSC0003DMG400025771M6LRR-RLK\_504

TCTGAACTTCAAGTTCTTTCCTGTCAAACAATGCTATTTCTGGTGAACCTTACTGAATCTATTGGAGTGTT  
AAAGAGCTTAAAGGTTCTAAATCTTCTGTCAATGCATTTGTAGGAAAT

>M6-PGSC0003DMG400025771M6LRR-RLK\_567

GGAGTGTTAAAGAGCTTAAAGGTTCTAAATCTTCTGTCAATGCATTTGTAGGAAATATCCCACAAAAGC  
TAAGTTCTTGCAGAATCTAAAAGTTGTTTCTTGTAGTAAAAACCTATTT

>M6-PGSC0003DMG400025771M6LRR-RLK\_63

CAACTTCTCTAATAGTTGGTTTACCTCTTCTCTTCTTATGTATATAGAAAGTAATCATGAATAATCA  
CTTCAAGAAATGATGACTATCTCAGAACATTACTATTCTTCTGGTCA

>M6-PGSC0003DMG400025771M6LRR-RLK\_630

CAAAAGCTAAGTTCTTGCAGAATCTAAAAGTTGTTTCTTGTAGTAAAAACCTATTTCTGGTGCAATACC  
AACTGGATTTAGTTTGTGAAGTGTGGATCTTCTTCTAACTTGTG

>M6-PGSC0003DMG400025771M6LRR-RLK\_693

GCAATACCAACTGGATTTAGTTTGTGAAGTGTGGATCTTCTTCTAACTTGTGAAATGGAACATTACC

TGATGATTTTGGTGGTGATAGTTTGAATACTTGAACCTTTTCATCAAAC

>M6-PGSC0003DMG400025771M6LRR-RLK\_756

ACATTACCTGATGATTTTGGTGGTGATAGTTTGAATACTTGAACCTTTTCATCAAACAAGTTATCTGGTTT  
AGTGTCAACCACAATTTGCCAAGAAAATACCAACAAATGCTACAATTGAT

>M6-PGSC0003DMG400025771M6LRR-RLK\_819

TCTGGTTTAGTGTCAACCACAATTTGCCAAGAAAATACCAACAAATGCTACAATTGATCTTTCTTTCAACAG  
CTTTACAGGTGAAATCCCAGAGTCATTAGCTTTATCAAACCAGAAAACA

>M6-PGSC0003DMG400025771M6LRR-RLK\_882

TTCAACAGCTTTACAGGTGAAATCCCAGAGTCATTAGCTTTATCAAACCAGAAAACAGAATTCTTTGCAG  
GAAATACAGATCTTTGTGGCAAACCACTCAAGAACTCTGTACAATCCCT

>M6-PGSC0003DMG400025784M6OtherRLKTM\_0

ATGTTGTCGAGACATGGGAAAAAATAGAAGGAAAATGTTAAAAAGTGGGGACTGTGGGGGGTCTATAC  
AAGGTCTTGAGTCAGTCAAAGCGGCAGTGGCTGCTCCTCCTGGGACTCTGC

>M6-PGSC0003DMG400025784M6OtherRLKTM\_1037

TCGATGTTAATTCTTATAATTGGAGATATTCGGGCTGATACCCCTCCCCAAACACCCAAACGTAAATAGC  
TTTGAGCTCTTGCTTTCCACAAAAGTACTGAGATTATAACAATACAGGTACTTT

>M6-PGSC0003DMG400025784M6OtherRLKTM\_1098

GTAAATAGCTTTGAGCTCTTGCTTTCCACAAAAGTACTGAGATTATAACAATACAGGTACTTTAACATGTTGCA  
TCTAAGTAGTTCTTCAAAGTCTTTTTATCTGTATATTACTGCTAATATC

>M6-PGSC0003DMG400025784M6OtherRLKTM\_1159

ACATGTTGCATCTAAGTAGTTCTTCAAAGTCTTTTTATCTGTATATTACTGCTAATATCATTGCTGTTGTAA  
TCTATAAGTTGGTTGCTTCCCTTTTATATTTTTCTCGGTGTGTGTGGT

>M6-PGSC0003DMG400025784M6OtherRLKTM\_122

AGTTTCAATTGTTTCTAATTTTTCTAAAATAAGCTAAGGCAATTTACCACTCTTCAATCATATCTGCATC  
TGTTCTATATTGGTATTGAGTTCTGCCATGACATTGTACGGACAAGC

>M6-PGSC0003DMG400025784M6OtherRLKTM\_1220

TGCTGTTGTAATCTATAAGTTGGTTGCTTCCCTTTTATATTTTTCTCGGTGTGTGTGGTGTGGTGGGGTTC  
ATTTAGGGAGTGTACTGTAAAAGGAAGTAGAACTGGAGTAATGCAGAAA

>M6-PGSC0003DMG400025784M6OtherRLKTM\_1281

GGTGGGGTTCATTTAGGGAGTGTACTGTAAAAGGAAGTAGAACTGGAGTAATGCAGAAACATTTCTCA  
ATGAATTGAGATCTGAACAATGACTATCTATATTTTCTTCTACACATGCAGT

>M6-PGSC0003DMG400025784M6OtherRLKTM\_1342

TTTCTCAATGAATTGAGATCTGAACAATGACTATCTATATTTTCTTCTACACATGCAGTGTGCCCTTAGA  
CATGACTGGATCCAACATACTCTGACTGCCTCAATCTGCTCCAACAAA

>M6-PGSC0003DMG400025784M6OtherRLKTM\_1403

GCCCCTTAGACATGACTGGATCCAACATACTCTGACTGCCTCAATCTGCTCCAACAAAGAAGAAAGAGG  
AAAGTGTGCCGCTACATTAATGCCTTGGTTGCAATTTCTGTTGCTCGAT

>M6-PGSC0003DMG400025784M6OtherRLKTM\_1464

AGAAAGAGGAAAGTGTGCCGCTACATTAATGCCTTGGTTGCAATTTCTGTTGCTCGATATGCAAATGCA  
ACAAGCAACCTGGGGGTTAATGCTGACACATCACAGATTTGCCTAGACAA

>M6-PGSC0003DMG400025784M6OtherRLKTM\_1525

GCAAATGCAACAAGCAACCTGGGGGTTAATGCTGACACATCACAGATTTGCCTAGACAAAATAGCAGAA  
ATTTTCCAATTCCATGGAGTCAACAGAAACGCAACAGTGTCTGTGGGTTT

>M6-PGSC0003DMG400025784M6OtherRLKTM\_1586

TAGCAGAAATTTTCCAATTCCATGGAGTCAACAGAAACGCAACAGTGTCTGTGGGTTTGGAAACAAAA  
TTCCTGTCAACTATGATTGCCAAGGTCGAACAACCTGTAACCTCAGATGATTC

>M6-PGSC0003DMG400025784M6OtherRLKTM\_1647

AACAAAAATTCCTGTCAACTATGATTGCCAAGGTCGAACAACCTGTAACCTCAGATGATTCAATCTCCACAA  
TTTTCAAGTGTACTAAAACCTGCCAAGTCCCTCTCTCGGGGGAAAGTGA

>M6-PGSC0003DMG400025784M6OtherRLKTM\_1708

TCTCCACAATTTTCAAGTGTACTAAAACCTGCCAAGTCCCTCTCTCGGGGGAAAGTGAATGCAGAAAAT  
GCCTCAATGCTAGCATCTTGTATCTCCGCAATCTAGTTGGTACAGCTAAT

>M6-PGSC0003DMG400025784M6OtherRLKTM\_1769

GCAGAAAATGCCTCAATGCTAGCATCTTGTATCTCCGCAATCTAGTTGGTACAGCTAATAATATGACATT  
TAGTACTTGTAGAGATGCAACTTTTGTGCTCTTGAAGCCAAGTTGACA

>M6-PGSC0003DMG400025784M6OtherRLKTM\_183

ATATCTGCATCTGTTCTATATTGGTATTGAGGTTCTGCCATGACATTGTACGGACAAGCCATCTTTCTGGG  
TTTCTTGATCTTTCTTGAAATGCACCTTTTATCAACAACAACCTGATGCT

>M6-PGSC0003DMG400025784M6OtherRLKTM\_1830

TATGACATTTAGTACTTGTAGAGATGCAACTTTTGCTGCTCTTGCAAGCCAAGTTGACAATGCATCAGCT  
ATTGATCTTGCTCGCTGTTTCTTTGGGGTTATAGGCCTTATTATACCTCC

>M6-PGSC0003DMG400025784M6OtherRLKTM\_1891

GCATCAGCTATTGATCTTGCTCGCTGTTTCTTTGGGGTTATAGGCCTTATTATACCTCCAGGTACGTCTTA  
ACAGGGTAGTGGTGGGATTCATTATCACGGAAGCTTAGATAGAACAGTT

>M6-PGSC0003DMG400025784M6OtherRLKTM\_1952

GTACGTCTTAACAGGGTAGTGGTGGGATTCATTATCACGGAAGCTTAGATAGAACAGTTACAGGAATTG  
TACCGAATGCTTTATGCATTGGAATATTGTTACCAACATTGAATCCTTTTC

>M6-PGSC0003DMG400025784M6OtherRLKTM\_2013

AGGAATTGTACCGAATGCTTTATGCATTGGAATATTGTTACCAACATTGAATCCTTTTCTTGAAATTCTGA  
TGAGTTGCTTTTCAGTTTTCCATATTCTTTATAAGGTATTCCATTCAGGT

>M6-PGSC0003DMG400025784M6OtherRLKTM\_2074

GAAATTCTGATGAGTTGCTTTTCAGTTTTCCATATTCTTTATAAGGTATTCCATTCAGGTCTAAGTGTGAGC  
TACATAAAATTGCACAACCATTCCGTGCAGAGCCTATTCTATAACTATC

>M6-PGSC0003DMG400025784M6OtherRLKTM\_2257

TTTGTTTTCTTTGCTCTGTCATAAGCCCTGAAGTAATTTCTTCTCTACACAAGTATTCCAGTGTCTTTTAT  
ACCTTAATCATTAACCTTGCCCGGAATTAGTCATAAAATCCTTAAATC

>M6-PGSC0003DMG400025784M6OtherRLKTM\_2318

AGTGTCTTTTATACCTTAATCATTAACCTTGCCCGGAATTAGTCATAAAATCCTTAAATCTTCTATTCTAGA  
CTCGAACATTTTCAGCTTCTTTCCAGCAACATCCTCCATTGTGTCATA

>M6-PGSC0003DMG400025784M6OtherRLKTM\_2379

CTATTCTAGACTCGAACATTTTCAGCTTCTTTCCAGCAACATCCTCCATTGTGTCATATTAGCCTCACCTT  
ACACTCGGAGCAAAGTGTGTTGTGACCCTCATTTTGCACCTTTTTCT

>M6-PGSC0003DMG400025784M6OtherRLKTM\_244

TCTTTCTGGGTTTCTTGATCTTTCTTGAAATGCACCTTTTATCAACAACAAGTGTGCTTCAGGTATTACAT  
CTTTTGTGTTGTTGATTTCTTCAATTACATCTTGTTTTGGGAGCTTC

>M6-PGSC0003DMG400025784M6OtherRLKTM\_2440

AGCCTCACCTTACACTCGGAGCAAAGTGTGTTGTGACCCTCATTTTGCACCTTTTTCTGGTCCCCTGTCT

TTCTCTGGTATGTTTGCTAATGTTAATGTCTTAGGCAGGGAGTTGGTGT

>M6-PGSC0003DMG400025784M6OtherRLKTM\_2501

TCCCGTGTCTTTCTCTGGTATGTTTGCTAATGTTAATGTCTTAGGCAGGGAGTTGGTGTGTTGTTTTGTAC

TTCTGCACATAAAAACTATTTCCATGGATCATTTTAATGATGTAATGCA

>M6-PGSC0003DMG400025784M6OtherRLKTM\_2562

GTTTTGTACTTCTGCACATAAAAACTATTTCCATGGATCATTTTAATGATGTAATGCACCTTCAGCCATAT

GAAAAATTCTGACTTCCATTGTACGTCTAACCCTTCAGGACCATCT

>M6-PGSC0003DMG400025784M6OtherRLKTM\_2623

TTCAGCCATATGAAAAATTCTGACTTCCATTGTACGTCTAACCCTTCAGGACCATCTCCATCACAACCTT

CACCAGAGGTCTCTCAAACCCTCCTGTTGCTGCAAGTCCCGCTCAAC

>M6-PGSC0003DMG400025784M6OtherRLKTM\_2684

ATCACAACCTTCACCAGAGGTCTCTCAAACCCTCCTGTTGCTGCAAGTCCCGCTCAACTTTCCTTGAATA

CACCTGTGAAGGAAAATCACCATCCTTACCATCTTACATTAGTACCAGT

>M6-PGSC0003DMG400025784M6OtherRLKTM\_2745

TCCTTGAATACACCTGTGAAGGAAAATCACCATCCTTACCATCTTACATTAGTACCAGTTATTGGCATAGT

AGTTACAGTCATGGCTGTCCTGATGCTGTTTATCTTAATTGTTCTGATT

>M6-PGSC0003DMG400025784M6OtherRLKTM\_2806

TTGGCATAGTAGTTACAGTCATGGCTGTCCTGATGCTGTTTATCTTAATTGTTCTGATTTGGAGGAAAAG

CAAAGAGCTGGAAGATTCTGATGCAACTGATAAGATATCTTCAAATCCT

>M6-PGSC0003DMG400025784M6OtherRLKTM\_2867

GAGGAAAAGCAAAGAGCTGGAAGATTCTGATGCAACTGATAAGATATCTTCAAATCCTTCACACATCC

ACAAAAAGATTCCAGGAAGGTAATTTATGGTTCTTTTAGACTATTTGTGT

>M6-PGSC0003DMG400025784M6OtherRLKTM\_2928

ACACATCCACCAAAAAGATTCCAGGAAGGTAATTTATGGTTCTTTTAGACTATTTGTGTACTAATCGAAG

ACGACATTGCAAGATCTGTTCAATTTATTCTCTAGGGTTCTTATCCTGTTT

>M6-PGSC0003DMG400025784M6OtherRLKTM\_2989

TAATCGAAGACGACATTGCAAGATCTGTTCAATTTATTCTCTAGGGTTCTTATCCTGTTTACTTATTATTATG

CAAAATACACACAGGTACGGCTTCTATATTTACGAAATACAGCTATAA

>M6-PGSC0003DMG400025784M6OtherRLKTM\_305



AGGTATTACATCTTTTGTGTTGTTGATTTCTTCAATTACATCTTGTTTTGGGAGCTTCCCATTTTGTGTTCC  
AACAGTTTTGAGTTATATTCTATCTTGTGTTTGAAGTAAAGGAGAAA

>M6-PGSC0003DMG400025784M6OtherRLKTM\_3050

TTATTATTATGCAAATACACACAGGTACGGCTTCTATATTTACGAAATACAGCTATAAGGGGACAAAGA  
AAGCAACCAACAACCTTCAGCACAACCTATTGGACAGGGAGGATTTGGCACA

>M6-PGSC0003DMG400025784M6OtherRLKTM\_3111

GGACAAAGAAAGCAACCAACAACCTTCAGCACAACCTATTGGACAGGGAGGATTTGGCACAGTATACAAA  
GCTGAATTTAAGGATGGTTCCATGGTAGCAGTGAAAAGAATGAACAAGGTTT

>M6-PGSC0003DMG400025784M6OtherRLKTM\_3172

ATACAAAGCTGAATTTAAGGATGGTTCCATGGTAGCAGTGAAAAGAATGAACAAGGTTTCTGAGCAGG  
CTGAGGATGAGTTTTGCAGAGAAATAGAACTGCTTGCTCGACTGCATCATCG

>M6-PGSC0003DMG400025784M6OtherRLKTM\_3233

GAGCAGGCTGAGGATGAGTTTTGCAGAGAAATAGAACTGCTTGCTCGACTGCATCATCGTCATCTTGTT  
GCTCTAAGGGGCTTTTGCCTGAAAGGCATGAGAGGTTTGGGAATCATACT

>M6-PGSC0003DMG400025784M6OtherRLKTM\_3294

ATCTTGTTGCTCTAAGGGGCTTTTGCCTGAAAGGCATGAGAGGTTTGGGAATCATACTTGCAAATTTCT  
CTGTTCATTTTTCTACCTCGTCTCTTTGTCCAGCTTTCAATGTAAGGTG

>M6-PGSC0003DMG400025784M6OtherRLKTM\_3355

CAAATTTCTCTGTTCATTTTTCTACCTCGTCTCTTTGTCCAGCTTTCAATGTAAGGTGACCTATTAAGT  
TTCACGTATTAATATCTTCTTTTTCGATACTGAACATTTATCATGGAGC

>M6-PGSC0003DMG400025784M6OtherRLKTM\_3416

CTATTAAGTATTCACGTATTAATATCTTCTTTTTCGATACTGAACATTTATCATGGAGCAGGTTTCTCATGT  
ATGAGTATATGCCAAGTGGAAGCTTAAAGGATCAGCTTCACAGTATGC

>M6-PGSC0003DMG400025784M6OtherRLKTM\_3477

GTTTCTCATGTATGAGTATATGCCAAGTGGAAGCTTAAAGGATCAGCTTCACAGTATGCTCTTAATCTTC  
AAGTCTTATTTGCTGATTTTAATTTTAACAAAAAATTAGCCTTTAACATC

>M6-PGSC0003DMG400025784M6OtherRLKTM\_3538

TTAATCTTCAAGTCTTATTTGCTGATTTTAATTTTAACAAAAAATTAGCCTTTAACATCAGTAACTGGTCTG  
TTATTTGTTGTTGACAAATACATAGTGCATCTTTGACTACTGTTCCAT

>M6-PGSC0003DMG400025784M6OtherRLKTM\_3599

TAACTGGTCTGTTATTTGTTGTTGACAAATACATAGTGCATCTTTGACTACTGTTCCATCTTAAAGTAGTT  
GTTGATTTGCTTGATTGTTCCCTCTAAATATATGTGAAGATCCAGGTACA

>M6-PGSC0003DMG400025784M6OtherRLKTM\_366

ATTTTGTGTTCAACAGTTTTGAGTTATATTCTATCTTGTGTTTGAGGTAAAGGAGAAAAAGATGACATTT  
TTAAAATTGTAATTTGGGCTTATTTATGAGTATTTGATGATAGAAGTTA

>M6-PGSC0003DMG400025784M6OtherRLKTM\_3660

TAAAGTAGTTGTTGATTTGCTTGATTGTTCCCTCTAAATATATGTGAAGATCCAGGTACAGCTCCCCTCAGC  
TGGCGTACTAGAATTCAAGTAGCTATTGATGTTGCAAAGCTCTGGTAC

>M6-PGSC0003DMG400025784M6OtherRLKTM\_3721

TCCCCTCAGCTGGCGTACTAGAATTCAAGTAGCTATTGATGTTGCAAAGCTCTGGTACAATTTTTATTTT  
ACTCTGTCCAATTGTTATAATTTTATAAGCTGCTTACCATTCAAGTGC

>M6-PGSC0003DMG400025784M6OtherRLKTM\_3782

TTTTTATTTTACTCTGTCCAATTGTTATAATTTTATAAGCTGCTTACCATTCAAGTGCCTTATTTCTTGTTAC  
CTCCATGTAGGAATATCTTCATTTCTATTGTGATCCTCCACTGTGCC

>M6-PGSC0003DMG400025784M6OtherRLKTM\_3843

ATTTCTTGTTACCTCCATGTAGGAATATCTTCATTTCTATTGTGATCCTCCACTGTGCCATAGGGACATCAA  
ATCAAGCAATATTTTATTGGATGAAAACCTTAGTTGCAAAGGTAACCTTA

>M6-PGSC0003DMG400025784M6OtherRLKTM\_3904

AGGGACATCAAATCAAGCAATATTTTATTGGATGAAAACCTTAGTTGCAAAGGTAACCTTACATTAATTCAA  
GAGTGAACCTAGTTTCCTTTTACTACAAGGACAAACGTCAAATCTTTCTT

>M6-PGSC0003DMG400025784M6OtherRLKTM\_3965

TTAATTCAAGAGTGAACCTAGTTTCCTTTTACTACAAGGACAAACGTCAAATCTTTCTTTTGTTCCTTGCCTA  
CTGAATTGGTAAAAAATTAACCTCTAAAATATTCCCTACTGCTTTGTAA

>M6-PGSC0003DMG400025784M6OtherRLKTM\_4026

GTTCTTGCCTACTGAATTGGTAAAAAATTAACCTCTAAAATATTCCCTACTGCTTTGTAAGATCTGTTGACA  
GAGCAGATTATTCTTTTAACTCTTGTAAATATGATAGGTTGCAGATTTTG

>M6-PGSC0003DMG400025784M6OtherRLKTM\_4087

TCTGTTGACAGAGCAGATTATTCTTTTAACTCTTGTAAATATGATAGGTTGCAGATTTTGGCCTTGCACATG

CTTCAAAGGATGGTTCTATTTGCTTTGAACCCAGTAAACACAGAGATCAA

>M6-PGSC0003DMG400025784M6OtherRLKTM\_4148

CTTGCACATGCTTCAAAGGATGGTTCTATTTGCTTTGAACCCAGTAAACACAGAGATCAAGGGAACTCCAG  
GTTGGGGAAAAGTCTACTTATTTGAGTAAAATTCAAGCATCATTATTAC

>M6-PGSC0003DMG400025784M6OtherRLKTM\_4209

GAACTCCAGGTTGGGGAAAAGTCTACTTATTTGAGTAAAATTCAAGCATCATTATTACCTTGATGATGT  
AGAGGGAACTTTGCTTTGTTATTTAGGTTATATGGATCCCGAGTATGTCA

>M6-PGSC0003DMG400025784M6OtherRLKTM\_427

GATGACATTTTTAAAATTGTAATTTGGGCTTATTTATGAGTATTTGATGATAGAAGTTATAGTGAGCTTG  
AAGGCTGAAGCCGCTTTTATTTCTTGAAAATCTTATGGGTGTTTGTCTT

>M6-PGSC0003DMG400025784M6OtherRLKTM\_4270

TGATGATGTAGAGGGAACTTTGCTTTGTTATTTAGGTTATATGGATCCCGAGTATGTCATCACCCAAGAG  
CTTACAGAGAAAAGTGATGTATATAGTTATGGAGTAGTATTACTGGAATT

>M6-PGSC0003DMG400025784M6OtherRLKTM\_4331

ACCCAAGAGCTTACAGAGAAAAGTGATGTATATAGTTATGGAGTAGTATTACTGGAATTAATCACAGGG  
AGACGGGCAATTCAAGATAACAAAATTTGATAGAGTGGGCCGAAATGTTC

>M6-PGSC0003DMG400025784M6OtherRLKTM\_4392

TCACAGGGAGACGGGCAATTCAAGATAACAAAATTTGATAGAGTGGGCCGAAATGTTTCATGACATCA  
GAATCTAAGATAACTGAGCTTGTCGATCCTAACATTGGAGATTCTTATGACT

>M6-PGSC0003DMG400025784M6OtherRLKTM\_4453

GACATCAGAATCTAAGATAACTGAGCTTGTCGATCCTAACATTGGAGATTCTTATGACTTTGATCAACTTC  
AGACCCTTTTAGCAATTGTTAGATGGTGTACTCAGAAAGAAGGACGGGC

>M6-PGSC0003DMG400025784M6OtherRLKTM\_4514

GATCAACTTCAGACCCTTTTAGCAATTGTTAGATGGTGTACTCAGAAAGAAGGACGGGCTCGTCCTTCAA  
TCAAGCAGGTCCTTAGGCTTTTGTATGAGTGTGCAGACCCAATGCACAGT

>M6-PGSC0003DMG400025784M6OtherRLKTM\_4575

GTCTTCAATCAAGCAGGTCCTTAGGCTTTTGTATGAGTGTGCAGACCCAATGCACAGTGGCTTTGTTGA  
ATCCATGGACGATGAAGACTACGATGAAATTGAAGGAAAGGGAAGAACAA

>M6-PGSC0003DMG400025784M6OtherRLKTM\_4636

CTTTGTTGAATCCATGGACGATGAAGACTACGATGAAATTGAAGGAAAGGGAAGAACAAGTAGGTCTA  
GGCTGCACAAAGGTGAGGGAATATTCACAGTGGTGATGGAAGGTGTCTAGC

>M6-PGSC0003DMG400025784M6OtherRLKTM\_4697

AGGTCTAGGCTGCACAAAGGTGAGGGAATATTCACAGTGGTGATGGAAGGTGTCTAGCTTCGTCGTCA  
AGTACATCGAGGTCCTATTGTAGCAGGAGCTTCCTAATTGAAACCAGCCCT

>M6-PGSC0003DMG400025784M6OtherRLKTM\_4758

CGTCGTCAAGTACATCGAGGTCCTATTGTAGCAGGAGCTTCCTAATTGAAACCAGCCCTCCCCAGTCTCC  
ACTCTAATGTACCAGTTATTTGAGACCACTACTTTGACTGTAAAGTAACT

>M6-PGSC0003DMG400025784M6OtherRLKTM\_4819

CCAGTCTCCACTCTAATGTACCAGTTATTTGAGACCACTACTTTGACTGTAAAGTAACTTTCTTTTTTAAAT  
ATCCGAGGAATCCCCGATTGCCAGCTGATGCATGGTTCAAACCTCGGTG

>M6-PGSC0003DMG400025784M6OtherRLKTM\_488

GTGAGCTTGAAGGCTGAAGCCGCTTTTATTTTCTTGAAAATCTTATGGGTGTTTGTCTTGTACTTGGTTTT  
GATGTGTTTGGGGTTCATGAGTATTTAAGAGGGAAGTGGAAGAAGTAAG

>M6-PGSC0003DMG400025784M6OtherRLKTM\_4880

CTTTTTTAAATATCCGAGGAATCCCCGATTGCCAGCTGATGCATGGTTCAAACCTCGGTGGGTAATGGACC  
CACCCCTCCACCCTTTTACTGTTAACTATCTCTTACGCAGATTTTAACT

>M6-PGSC0003DMG400025784M6OtherRLKTM\_4941

TAATGGACCCACCCCTCCACCCTTTTACTGTTAACTATCTCTTACGCAGATTTTAACTGTAATGCCATTAC  
ATATCAGAGTTTTAAGGTTACTGACTTCACCATCCTGACATTGATAAG

>M6-PGSC0003DMG400025784M6OtherRLKTM\_5002

AATGCCATTACATATCAGAGTTTTAAGGTTACTGACTTCACCATCCTGACATTGATAAGTAGCGTGCACA  
CGATCCAGAGGCTGTAATCCATAGGTCCATGAAGTTTGCTTCATTCCAC

>M6-PGSC0003DMG400025784M6OtherRLKTM\_5063

GCGTGCACACGATCCAGAGGCTGTAATCCATAGGTCCATGAAGTTTGCTTCATTCCACCAAACAACCTTT  
TTCCTTGCAAAGAAGCCTGTGGCTATAAGAGTTGTATTCTTTTTCTCCA

>M6-PGSC0003DMG400025784M6OtherRLKTM\_5124

AACAACTTTTCTTGCAAAGAAGCCTGTGGCTATAAGAGTTGTATTCTTTTTCTCCATGAATTTTTTTTT  
GGAGAGGTAGTAACTAACAATTTTAGTTTTCTGTTCTCTTTGGTTTG

>M6-PGSC0003DMG400025784M6OtherRLKTM\_5185

AATTTTTTTTTGGAGAGGTAGTAACTAACAATTTAGTTTTCTGTTCTCTTTGGTTTGGTTTGGTTTGTG  
TGTTAACATTCTTTAGTAATTTCCAGGGCTGTTATTTCTTGTAAGTT

>M6-PGSC0003DMG400025784M6OtherRLKTM\_5246

TTGGTTTGTGTGTTAACATTCTTTAGTAATTTCCAGGGCTGTTATTTCTTGTAAGTTATTGGATTGTGAA  
TTTGTGACTTATGCTCTCTTTACCTGTATGTTTCCAACATTAGAAGA

>M6-PGSC0003DMG400025784M6OtherRLKTM\_549

ACTTGGTTTTGATGTGTTTGGGGTTCATGAGTATTTAAGAGGGAAGTGGAAGAAGTAAGGTATTTATGG  
AAATGTGATTAATGTGCCTGCATGACTATAAAGACCTACCAATTTTCAGTG

>M6-PGSC0003DMG400025784M6OtherRLKTM\_61

TCTATACAAGGTCTTGAGTCAGTCAAAAGCGGCAGTGGCTGCTCCTCCTGGGACTCTGCTCAGTTTCAAT  
TGTTTCTAATTTTTTCTAAAATAAGCTAAGGCAATTTACCACTCTTCAA

>M6-PGSC0003DMG400025784M6OtherRLKTM\_610

ATTTATGGAAATGTGATTAATGTGCCTGCATGACTATAAAGACCTACCAATTTTCAGTGACAATGTGCTTT  
TTGTTTTGTTGGAATTTGGAAATGTGTATGAAAGCTTGCCAATGTCAGT

>M6-PGSC0003DMG400025784M6OtherRLKTM\_671

AATGTGCTTTTTGTTTTGTTGGAATTTGGAAATGTGTATGAAAGCTTGCCAATGTCAGTGGTGAAGCTCA  
TACTAATCCAATTTATGTTTGCTTGTAATTTTATAACATTCAAATTCOA

>M6-PGSC0003DMG400025784M6OtherRLKTM\_732

TGAAGCTCATACTAATCCAATTTATGTTTGCTTGTAATTTTATAACATTCAAATTCOAATACGACAGCTATT  
CGTAGTTCAGTTTTAATATTGCTATATGCATTACTTCATTTAACGATG

>M6-PGSC0003DMG400025784M6OtherRLKTM\_793

CGACAGCTATTCGTAGTTCAGTTTTAATATTGCTATATGCATTACTTCATTTAACGATGGTGTACTGCAC  
GATGACTGATGTTTCTTTTGGAGTTTCAGCTATAACAATGACAGTGTA

>M6-PGSC0003DMG400025784M6OtherRLKTM\_854

GTTACTGCACGATGACTGATGTTTCTTTTGGAGTTTCAGCTATAACAATGACAGTGTAATAATTTATATT  
TATCAGTGCAATTGATGGAATGTACAATCAAACACTACGACTTGTCTCTGTC

>M6-PGSC0003DMG400025784M6OtherRLKTM\_915

AATTTATATTTATCAGTGCAATTGATGGAATGTACAATCAAACACTACGACTTGTCTCTCAAGTCTAGTG

GTCCAAGTTTTCATCTGTAGTCTAGGTGTACAAGATCAATGTGCGTATA

>M6-PGSC0003DMG400025784M6OtherRLKTM\_976

AAGTCTAGTGGTCCAAGTTTTCATCTGTAGTCTAGGTGTACAAGATCAATGTGCGTATAATTCGATGTTA

ATTCTTATAATTGGAGATATTCGGGCTGATACCCCTCCCCAACACCCAA

>M6-PGSC0003DMG400025799M6RLKmalectin\_0

CTTTCTCCCCTTTACCAGGAGCAACCAGGCCTCTGCCTTATTCTGCCAAATTATTATTTCCCAAACAAAAA

AATGTCCACTTCCATTTTCTCCTTTGGCTTGTTAGCATCCCTCTAAC

>M6-PGSC0003DMG400025799M6RLKmalectin\_1037

CTCGGTAACCCAACAACATTTTGAATATGCCACCAGAGAAGGTGTTTGAAAATTCAGTGACAGCCAG

TAGAGGGAAGTCTCTTGTGGTAAATTGGCCAAATTTTCCACTTCCTAAGAC

>M6-PGSC0003DMG400025799M6RLKmalectin\_1098

ACAGCCAGTAGAGGGAAGTCTCTTGTGGTAAATTGGCCAAATTTTCCACTTCCTAAGACTTATTACTACC

TTGCTTTGTACTTCCAAGATAACAGAACCCCAAGTCCGTATAGCTGGAGA

>M6-PGSC0003DMG400025799M6RLKmalectin\_1159

ATTACTACCTTGCTTTGTACTTCCAAGATAACAGAACCCCAAGTCCGTATAGCTGGAGAGTTTTTGATGTC

TTAGTGAATGGAGTGAAATTCTTTAGCAACCTTAATGCCACAACCAGTG

>M6-PGSC0003DMG400025799M6RLKmalectin\_122

TTCATGCCGCCATTAATGTTAATCAACCTCAAGGTAAATTAATTAACATTGCTCGTGTTCTGTGAATTCAA

CTGAACCTATTAATAATGTATACATATAATAAGATGGCGCTCATTATATA

>M6-PGSC0003DMG400025799M6RLKmalectin\_1220

TTTTGATGTCTTAGTGAATGGAGTGAAATTCTTTAGCAACCTTAATGCCACAACCAGTGGTGTAACCTGTT

ATAGCACAACCTTGGCCTCTTGAAGGGGAGACGAAGATCACATTGGTTCC

>M6-PGSC0003DMG400025799M6RLKmalectin\_1281

GTAACCTGTTTATAGCACAACCTTGGCCTCTTGAAGGGGAGACGAAGATCACATTGGTTCCAGCTAATACTA

GTCCTGTTGGTCCGTAATTGCTGCTGGTGAACCTTCCAACCTTTTGCCT

>M6-PGSC0003DMG400025799M6RLKmalectin\_1342

CTAATACTAGTCTGTTGGTCCGGTAATTGCTGCTGGTGAACCTTCCAACCTTTTGCCTCTTGCTGGAAGA

ACTCTCACTAGAGATGGTAATGGTTCTTTTTCTGCAATATTTTCTAAGC

>M6-PGSC0003DMG400025799M6RLKmalectin\_1403

TGCTGGAAGAACTCTCACTAGAGATGGTAATGGTTCTTTTTCTGCAATATTTTCTAAGCAGTCTTAACTAG  
TCAGTGACGGATCCAAAATTCTAAGTTGATAGTCAGTAAGATAGTATGT

>M6-PGSC0003DMG400025799M6RLKmalectin\_1464

TCTTAACTAGTCAGTGACGGATCCAAAATTCTAAGTTGATAGTCAGTAAGATAGTATGTCTAACTTATCT  
GTCAATTTAGGCGTTAGCTTCTCTAGTAACACATTTTTGTTGCACTTAAA

>M6-PGSC0003DMG400025799M6RLKmalectin\_1525

AACTTATCTGTCAATTTAGGCGTTAGCTTCTCTAGTAACACATTTTTGTTGCACTTAAACAGTATCAGTGA  
TGAACGATTTAACAAAAAGCTTTAACAAAAAACCTCAAGATTGGCATGG

>M6-PGSC0003DMG400025799M6RLKmalectin\_1586

GTATCAGTGATGAACGATTTAACAAAAAGCTTTAACAAAAAACCTCAAGATTGGCATGGTGATCCATGC  
CTTCCGAAGGACAAGTCATGGAGTGGAGTAATATGTTCTTCTGGCATGAAC

>M6-PGSC0003DMG400025799M6RLKmalectin\_1647

ATCCATGCCTTCCGAAGGACAAGTCATGGAGTGGAGTAATATGTTCTTCTGGCATGAACACACGAATCA  
TCTCCCTGTAAGTTTAATATTTCTGATTTGATCCACGGTTAATATTAGATC

>M6-PGSC0003DMG400025799M6RLKmalectin\_1708

ACGAATCATCTCCCTGTAAGTTTAATATTTCTGATTTGATCCACGGTTAATATTAGATCAACGATATACCA  
CTTTTTTGATGCAACATTTGTGCACTTGGTTATGTTTTCAATAAAGGA

>M6-PGSC0003DMG400025799M6RLKmalectin\_1769

CGATATACCACTTTTTTGATGCAACATTTGTGCACTTGGTTATGTTTTCAATAAAGGAATTTGACGAATG  
CTGGAATTTCTGGATCATTGCCACCAAGCATATCTAAATTAAGTCACT

>M6-PGSC0003DMG400025799M6RLKmalectin\_183

GTGAATCAACTGAACCTATTAATGTATAACATAATAAGATGGCGCTCATTATATAAATGTTGTTTCA  
GGTTTCCTCTTAAATTGTGGTGGAAATGAAAAAATCAAACAAGATTCAC

>M6-PGSC0003DMG400025799M6RLKmalectin\_1830

TTGACGAATGCTGGAATTTCTGGATCATTGCCACCAAGCATATCTAAATTAAGTCACTCAGTCATCTGTA  
AGCTATCCTTATCATATTACATTGCTTGGTTTTGTTATCTATCGATGG

>M6-PGSC0003DMG400025799M6RLKmalectin\_1891

GTCATCTGTAAGCTATCCTTATCATATTACATTGCTTGGTTTTGTTATCTATCGATGGAATATATATATAC  
TAATTGTGAATGACTCTTAAAGGTGGCTTGAAGCAATGAACTGACAG

>M6-PGSC0003DMG400025799M6RLKmalectin\_1952

TATATATACTAATTGTGAATGACTCTTAAAGGTGGCTTGGAAAGCAATGAACTGACAGGTCAAATACCT  
GATTTAAGCTCATTGCAGAATTTAGAACTCTGTAAGTCCCATTTGTTG

>M6-PGSC0003DMG400025799M6RLKmalectin\_2013

CAAATACCTGATTTAAGCTCATTGCAGAATTTAGAACTCTGTAAGTCCCATTTGTTGTTTTCTTCTCTAC  
TCTCCTTTCTAATGACCGAGAGAGTCAACTAGCTCATTGTTCCGGTAG

>M6-PGSC0003DMG400025799M6RLKmalectin\_2074

TTTCTTCTACTCTCCTTTCTAATGACCGAGAGAGTCAACTAGCTCATTGTTCCGGTAGATAATGAGCCTG  
CCTCTCTACCCTTCTCCACTTAATAATCAATTTTTTTTTCTCGAAAAGG

>M6-PGSC0003DMG400025799M6RLKmalectin\_2135

AATGAGCCTGCCTCTCTACCCTTCTCCACTTAATAATCAATTTTTTTTTCTCGAAAAGGAAAAAAACACTA  
GATTTTTCTTCTCCTACTTTACTCTAATTCTTATCCTAATTTGTATTT

>M6-PGSC0003DMG400025799M6RLKmalectin\_2196

AAAAACACTAGATTTTTCTCCTCCTACTTTACTCTAATTCTTATCCTAATTTGTATTTCTAACAAATATATT  
CATCTCCCCTGCAATGGAAAAGGCACTTGGAGAACAATCAGTTGGAA

>M6-PGSC0003DMG400025799M6RLKmalectin\_2257

AACAAATATATTCATCTCCCCTGCAATGGAAAAGGCACTTGGAGAACAATCAGTTGGAAGGATCAATCC  
CTGAATCATTAGGAAAACCTAACTTCGAGAAGTGTATGCTCCTTTGT

>M6-PGSC0003DMG400025799M6RLKmalectin\_2318

ATCAATCCCTGAATCATTAGGAAAACCTAACTTCGAGAAGTGTATGCTCCTTTGTTTTTTTTATCAA  
CCTAACTCAGTTTTTGATTTGTATATTTGATGTCAATAACTAAAATTT

>M6-PGSC0003DMG400025799M6RLKmalectin\_2379

TTTTTATCAACCTAACTCAGTTTTTGATTTGTATATTTGATGTCAATAACTAAAATTTCTGGTTTTATAGG  
TTTCTCCAAAACAACCGTCTCAAAGGGAGTGTCCAGGAAGCCTAAGA

>M6-PGSC0003DMG400025799M6RLKmalectin\_244

TGTTGTTTCAGGTTTCTCTTAAATTGTGGTGGAAATGAAAAATCAAACAAGATTCACCTTACATATGGA  
CCGGATGATAGGTTTATAAAAACAGGGAATAAAAACAGAGATCAAACAAGA

>M6-PGSC0003DMG400025799M6RLKmalectin\_2440

GGTTTTATAGGTTTCTCCAAAACAACCGTCTCAAAGGGAGTGTCCAGGAAGCCTAAGAAACAAGAATG



GCATAAACCTTAAGTAAGCAATCTGTAACTTGAATTGAAACATGTCACTA

>M6-PGSC0003DMG400025799M6RLKmalectin\_2501

CAAGAATGGCATAAACCTTAAGTAAGCAATCTGTAACTTGAATTGAAACATGTCACTATTTCCGATTTG  
ATACAACCTTCTGATCCTATTGATATTATACAAATATATGTTGTTTAGGGT

>M6-PGSC0003DMG400025799M6RLKmalectin\_2562

TCCGATTTGATACAACCTTCTGATCCTATTGATATTATACAAATATATGTTGTTTAGGGTGTGCGCCTGGAAA  
TGAAGTATCAAGTTAGGGACTGGCGTAACAAGAGAATTAATGAAGAAC

>M6-PGSC0003DMG400025799M6RLKmalectin\_2623

CGCCTGGAAATGAAGTATCAAGTTAGGGACTGGCGTAACAAGAGAATTAATGAAGAACTACCAGAAC  
TTGTTACATACTTCTGAAAGTGGACAGAGTTATTCGGGACCTCACATGAGAA

>M6-PGSC0003DMG400025799M6RLKmalectin\_2684

CCAGAACTTGTTACATACTTCTGAAAGTGGACAGAGTTATTCGGGACCTCACATGAGAAACACAAGTTAT  
AAGATGAAATGAAGGGATTCAGAAGAAGAGCTTTTTAATTCTTGCTGTAC

>M6-PGSC0003DMG400025799M6RLKmalectin\_2745

ACAAGTTATAAGATGAAATGAAGGGATTCAGAAGAAGAGCTTTTTAATTCTTGCTGTACTTTGGTCTTTG  
TGTATAGCATATAAACATTATGACATCTACTACTTAAAAACAAAATAAT

>M6-PGSC0003DMG400025799M6RLKmalectin\_2806

TGGTCTTTGTGTATAGCATATAAACATTATGACATCTACTACTTAAAAACAAAATAATTAGCAAAGTAA  
AGGTGTATTTGTACATCAGTCATGACTAGCAATCATTTAATAGAAGATAT

>M6-PGSC0003DMG400025799M6RLKmalectin\_2867

GCAAAGTAAAGGTGATTTGTACATCAGTCATGACTAGCAATCATTTAATAGAAGATATATGTAACCATG  
TTTTTTAATTTATTTATTCAAATGAGATATGTATAAGCAATTCACAAAA

>M6-PGSC0003DMG400025799M6RLKmalectin\_2928

GTAACCATGTTTTTTAATTTATTTATTCAAATGAGATATGTATAAGCAATTCACAAAACAGTGTCAAATG  
CATGCAAGATTTGATTAAACTATTTTACATTTAGTAACAGAAGAAAAT

>M6-PGSC0003DMG400025799M6RLKmalectin\_2989

GTGTCAAATGCATGCAAGATTTGATTAAACTATTTTACATTTAGTAACAGAAGAAAATTTACAGCTACA  
GAGTAAGCATTACTGTGAAATTATATCGTTACACAGTAGTTTTTGCAATA

>M6-PGSC0003DMG400025799M6RLKmalectin\_305

ACATATGGACCGGATGATAGGTTCAAAAAACAGGGAATAAAACAGAGATCAAACAAGAAGGTTTAGT  
GCCATTATTGTCCTCTGTTTCGTTATTTCCCGGATGATGCTGAAGAGAAATTT

>M6-PGSC0003DMG400025799M6RLKmalectin\_3050

ACAGCTACAGAGTAAGCATTACTGTGAAATTATATCGTTACACAGTAGTTTTTGAATAACACACATTAA  
TTAGAAAAGTGAAATCAAGCAATACATAACAGCAACAGTCACTAAAGAAAA

>M6-PGSC0003DMG400025799M6RLKmalectin\_3111

ACACATTAATTAGAAAGTGAAATCAAGCAATACATAACAGCAACAGTCACTAAAGAAAACAAAGAGAG  
GAGAGCCAGAATTGCTGCAAACCTGCATTTTCATATACAAACAGTGGATACCA

>M6-PGSC0003DMG400025799M6RLKmalectin\_3172

AAGAGAGGAGAGCCAGAATTGCTGCAAACCTGCATTTTCATATACAAACAGTGGATACCAAAGATCGAC  
CAGTTGATTAAGAACTGTGGAACCTCAAACCTAGTTATATTTGATCTATTGTC

>M6-PGSC0003DMG400025799M6RLKmalectin\_3233

AGATCGACCAGTTGATTAAGAACTGTGGAACCTCAAACCTAGTTATATTTGATCTATTGTCAATTTAGACAT  
CCACATATCTTTTACATTGCATAGACAATCTCTCCACTGCTATCGATATC

>M6-PGSC0003DMG400025799M6RLKmalectin\_3294

TTTAGACATCCACATATCTTTTACATTGCATAGACAATCTCTCCACTGCTATCGATATCGAGGTCAGGATC  
ACTCTCCAAATCTTCTTCCATGTCATCGTCAATGTCCAAGCTTCCAGTG

>M6-PGSC0003DMG400025799M6RLKmalectin\_3355

GGTCAGGATCACTCTCCAAATCTTCTTCCATGTCATCGTCAATGTCCAAGCTTCCAGTGAGGTAATGATTA  
AGGCTGTTGGTCCCAGCAGCAGGAATGGTGGCCTCAGTTATTATCTGCA

>M6-PGSC0003DMG400025799M6RLKmalectin\_3416

GTAATGATTAAGGCTGTTGGTCCCAGCAGCAGGAATGGTGGCCTCAGTTATTATCTGCATGATTTTCGTCA  
ATGCTCTGCATACGTTGATCTGGCTCCTCAAACCTGGTTGTTTGTAGTATT

>M6-PGSC0003DMG400025799M6RLKmalectin\_3477

ATTTGTCATGCTCTGCATACGTTGATCTGGCTCCTCAAACCTGGTTGTTTGTAGTATTATCCATGAGATC  
TGCAGGTAGGTTCTTCAAGAACCACTCATGGTTCTTGTATCTCGGGGATT

>M6-PGSC0003DMG400025799M6RLKmalectin\_3538

CCATGAGATCTGCAGGTAGGTTCTTCAAGAACCACTCATGGTTCTTGTATCTCGGGGATTGATATCCTCTG  
TCGCAATGCAAAAATAAAGCATGATGAAAGAAAGAAACCTCACATAAGAA

>M6-PGSC0003DMG400025799M6RLKmalectin\_3599

TATCCTCTGTCGCAATGCAAAAATAAAGCATGATGAAAGAAAGAAACCTCACATAAGAACCGAAATGAA  
GGAGTTAATATCTTATAACGTTACTGAACTATGAGAAATTTTCTAACAAAA

>M6-PGSC0003DMG400025799M6RLKmalectin\_366

GTTTAGTGCCATTATTGTCCTCTGTTTCGTTATTTCCCGGATGATGCTGAAGAGAAATTTTGTATAATTC  
CCAGTGAACAAAGGGAGGAAATTGATTATCAAACTATATATTATTATG

>M6-PGSC0003DMG400025799M6RLKmalectin\_3660

GAAATGAAGGAGTTAATATCTTATAACGTTACTGAACTATGAGAAATTTTCTAACAAAAGTCATTGAACT  
CCAGAAACACTTGAGTATAAGATTTTCTAACCAAGTCAGGATTGAAGTT

>M6-PGSC0003DMG400025799M6RLKmalectin\_3721

CATTGAACTCCAGAAACACTTGAGTATAAGATTTTCTAACCAAGTCAGGATTGAAGTTCAAATAGTTAT  
GAGCAATGCAACACAGTGTTACAACACCACAACCGACAATTACTAGAAAAG

>M6-PGSC0003DMG400025799M6RLKmalectin\_3782

AATAGTTATGAGCAATGCAACACAGTGTTACAACACCACAACCGACAATTACTAGAAAAGACCTTAAACAT  
ATTGAGACAGAAGATGACCAAAGAAAATATGAAAAAAGAACACTGAAATT

>M6-PGSC0003DMG400025799M6RLKmalectin\_3843

CTTAAACATATTGAGACAGAAGATGACCAAAGAAAATATGAAAAAAGAACACTGAAATTATTTGTGGAA  
AAGATTACCTTTGCAGGATCTGCAACAAAAATCCTTGATATTAGATGACGA

>M6-PGSC0003DMG400025799M6RLKmalectin\_3904

TTGTGGAAAAGATTACCTTTGCAGGATCTGCAACAAAAATCCTTGATATTAGATGACGACATTCAGGAG  
AGATATGTACATAATCAGGAATTGAATACTGTACGTTCAAGATTCGCTGCA

>M6-PGSC0003DMG400025799M6RLKmalectin\_3965

TTCAGGAGAGATATGTACATAATCAGGAATTGAATACTGTACGTTCAAGATTCGCTGCATAACAGGAAA  
TGATTTGAGTCAAATAAGACAGATTATGAGGATTTTGCCTAACAATATGC

>M6-PGSC0003DMG400025799M6RLKmalectin\_4026

ACAGGAAATGATTTGAGTCAAATAAGACAGATTATGAGGATTTTGCCTAACAATATGCATAAGAAGTT  
ACCTGTATTGTCTCCGAAAATTTTAGGTTCCCTCTGGGTCTTCAAAGGG

>M6-PGSC0003DMG400025799M6RLKmalectin\_4086

TAAGAAGTTACCTGTATTGTCTCCGAAAATTTTAGGTTCCCTCTGGGTCTTCAAAGGGTATGCACCCAC

CAGCATGACATACAAAGTCACTCCACAAGACCAGACATCTGCAATCTGC

>M6-PGSC0003DMG400025799M6RLKmalectin\_427

TTATAATTTCCCAGTGAACAAAGGGAGGAAATTGATTATCAAACCTATATATTATTATGGAGGTTTTGAT  
GGAGGCACAGAACCACCAATATTTGATCAAATCATTGATGGTACAAAGTG

>M6-PGSC0003DMG400025799M6RLKmalectin\_488

GGTTTTGATGGAGGCACAGAACCACCAATATTTGATCAAATCATTGATGGTACAAAGTGGAATATTAAT  
ACATCGGCGGATTATGCAGATGGCCTTAGCTCTTATTATGAGGTTGTTATG

>M6-PGSC0003DMG400025799M6RLKmalectin\_549

ATATTAATACATCGGCGGATTATGCAGATGGCCTTAGCTCTTATTATGAGGTTGTTATGGTTGCTCATAAT  
AAGGTTTTGAGTATTTGTCTTGCTAAAAATGAGCACACAACCTCCAATC

>M6-PGSC0003DMG400025799M6RLKmalectin\_61

CCCCAAAAAAAATGTCCACTTCCATTTTCCTCCTTTGGCTTGTTAGCATCCCTCTAACAATTCATGCCGCC  
ATTAATGTTAATCAACCTCAAGGTAAATTAATTAACATTGCTCGTGTT

>M6-PGSC0003DMG400025799M6RLKmalectin\_610

TGCTCATAATAAGTTTTGAGTATTTGTCTTGCTAAAAATGAGCACACAACCTCCAATCCTTTTATCTCAG  
CAATTGAAGTGTTGTATCTTGATGATTCCCTTTATAATACTACTGATTT

>M6-PGSC0003DMG400025799M6RLKmalectin\_671

TTTATCTCAGCAATTGAAGTGTTGTATCTTGATGATTCCCTTTATAATACTACTGATTTTGGGAAATATGC  
ATTGGTACTCTTGCTCGTCATAGCTTTGGATCTCATGATAAACTAACG

>M6-PGSC0003DMG400025799M6RLKmalectin\_915

TTTTTGTTACGTGCATATTAAGTACTGACATTTGATTGATGATGTTGAACTAGCTTTCCAGATGACAAATACAA  
TCGACATTGGGATCCATTAGTAGACGACAATCCAGTTGTAACAAGCCAA

>M6-PGSC0003DMG400025799M6RLKmalectin\_976

ACAAATACAATCGACATTGGGATCCATTAGTAGACGACAATCCAGTTGTAACAAGCCAAGCCTCGGTAA  
CTCCAACAACATTTTGAATATGCCACCAGAGAAGGTGTTTGAAAATTCAG

>M6-PGSC0003DMG400025848-(rev)M6LRR-RLP\_0

GTGTTGTCAAAGTTTGGTAGTTGTCTTGTCTTTCAAATAGTGCTGAACAAGGCAATCAAAGAAGGTGGCC  
AGTCGAATCTAGTTGCTTTGAAGTATTATTTAATTGGTGTCTTTCCAATTTT

>M6-PGSC0003DMG400025848-(rev)M6LRR-RLP\_1159

GTGTTATATGTTTTGTAAGCGCCCGTAATTAATTTGCGCCGACATGCAAGAAATGGAAAAATAGCCA  
ATATTAGCTTGTATGACAGAGACATTGTTGATTGATTGAATAGAGATT

>M6-PGSC0003DMG400025848-(rev)M6LRR-RLP\_1220

AAATAGCCAATATTAGCTTGTATGACAGAGACATTGTTGATTGATTGAATAGAGATTTGGTCATATGT  
TAGTCTAGAACTTACCTTTTCTGTATCTGCCATACAGGATAGATTGTAAA

>M6-PGSC0003DMG400025848-(rev)M6LRR-RLP\_1281

GTCATATGTTAGTCTAGAACTTACCTTTTCTGTATCTGCCATACAGGATAGATTGTAAAGAAGCAGAACA  
ATTGCTGATAAAGGCAGAAAAATATTCTGCAGATGCTTTTGAAGCAGCAA

>M6-PGSC0003DMG400025848-(rev)M6LRR-RLP\_1342

AGCAGAACAATTGCTGATAAAGGCAGAAAAATATTCTGCAGATGCTTTTGAAGCAGCAACAGCTATTGG  
AGTAATCTTGTATGACATTCCTGATTGCTCACAGAAGCATTACAAAATAGA

>M6-PGSC0003DMG400025848-(rev)M6LRR-RLP\_1403

GCTATTGGAGTAATCTTGTATGACATTCCTGATTGCTCACAGAAGCATTACAAAATAGAAAAGTCACCAG  
CAAAAGGAGGAGGACCCACCACTCATACTGTTAGAACATCTTTTGAAACT

>M6-PGSC0003DMG400025848-(rev)M6LRR-RLP\_1464

AGTCACCAGCAAAAGGAGGAGGACCCACCACTCATACTGTTAGAACATCTTTTGAAACTGCATTTGAGG  
TAGATAAACAAGTAGCAAGTGCAGTTAAGGCTGCCCTTCTTAAGCTTGCTA

>M6-PGSC0003DMG400025848-(rev)M6LRR-RLP\_1525

ATTTGAGGTAGATAAACAAGTAGCAAGTGCAGTTAAGGCTGCCCTTCTTAAGCTTGCTAATTGCCCTTCT  
ATGAACAAAGATGAAGTCAAGGAACTGCTGCACAGAATAAGCCAGAACCC

>M6-PGSC0003DMG400025848-(rev)M6LRR-RLP\_1586

TGCCCTTCTATGAACAAAGATGAAGTCAAGGAACTGCTGCACAGAATAAGCCAGAACCCTGAAACAGAT  
GATAATCATCAAGAAATGTCTGAGTTCTTTCAGAATGTGAATCAGATACT

>M6-PGSC0003DMG400025848-(rev)M6LRR-RLP\_1769

GAAAAGTTTAATATGCCAAATCTTGTGGAAATGATGCTGGAAAGGCTTAGATGTTTGCAAGAAGATGAA  
CTTGCATCTCTTGCTACTATAGTTGCAACGTGTGGGTTGAACGCTGCTCTA

>M6-PGSC0003DMG400025848-(rev)M6LRR-RLP\_183

AGTTTAGTTTCTTTAAACAAATCTGGATCACAATTAGAAAGCCTCCTCATCGCAAACTTCGCCTCTGAA  
TTGGTCCCTCGCAAGAAAGTGGATTCTATTTGAAGAGGAAAATAAAA

>M6-PGSC0003DMG400025848-(rev)M6LRR-RLP\_1830

AAGATGAACTTGCATCTCTTGCTACTATAGTTGCAACGTGTGGGTTGAACGCTGCTCTAGCTGAAGCGG  
AAACAGCAAAGTGAATGTTTCAGGGTCTGCTGCTGATGACAGATCAGAAT

>M6-PGSC0003DMG400025848-(rev)M6LRR-RLP\_1891

TGAAGCGGAAAACAGCAAAGTGAATGTTTCAGGGTCTGCTGCTGATGACAGATCAGAATTATCTGTAGG  
AGACGGAACAGTTAAGGGCGCTGAGGAATTTCCAAGCCTGGATAAGTTTCT

>M6-PGSC0003DMG400025848-(rev)M6LRR-RLP\_1952

TCTGTAGGAGACGGAACAGTTAAGGGCGCTGAGGAATTTCCAAGCCTGGATAAGTTTCTAGTTAAGCG  
GTTAACTAGACTTGAAAGGGAGGTATTAGAAGCCAAAATGCTAGAAGTGAA

>M6-PGSC0003DMG400025848-(rev)M6LRR-RLP\_2013

TTAAGCGTTAACTAGACTTGAAAGGGAGGTATTAGAAGCCAAAATGCTAGAAGTGAAGCTGGGGAA  
AGAAGTGAACAAAGTCAAATGAATCTTATCATAAAGTGATTCATTTCGAGAT

>M6-PGSC0003DMG400025848-(rev)M6LRR-RLP\_2074

TGGGGAAAGAAGTGAACAAAGTCAAATGAATCTTATCATAAAGTGATTCATTTCGAGATACCATACAAA  
TTCAAGCCATGATCTGGCAAGTATTCTTAAGAAACCATCTTTTTCAAAT

>M6-PGSC0003DMG400025848-(rev)M6LRR-RLP\_2135

CATACAAATTCAAGCCATGATCTGGCAAGTATTCTTAAGAAACCATCTTTTTCAAATTTGAGAAGGAAA  
TTGAAGAGGCCAAGAACAACCTCCGAACTTTGGTAAGAATAAGTGTA

>M6-PGSC0003DMG400025848-(rev)M6LRR-RLP\_2196

AGAAGGAAATTGAAGAGGCCAAGAACAACCTCCGAACTTTGGTAAGAATAAGTGTAAGCTTCAGAT  
AATTCATCTGAGGTTCCAAGCCTGGACAAGTTTTTGGTGAAGCGATTAACGA

>M6-PGSC0003DMG400025848-(rev)M6LRR-RLP\_2257

TTCAGATAATTCATCTGAGGTTCCAAGCCTGGACAAGTTTTTGGTGAAGCGATTAACGAGATTTGAAAG  
GGAGGTTTTAGAAGCCAAAATGCCAGGAGTGAAGCTGGGGAAAATGTGA

>M6-PGSC0003DMG400025848-(rev)M6LRR-RLP\_2318

TTTGAAAGGGAGGTTTTAGAAGCCAAAATGCCAGGAGTGAAGCTGGGGAAAATGTGAAAAAACAC  
GAGATAAGTCTAGTGATAAAGTGGTTCACGCAGACTACCCTACAGATACAGGC

>M6-PGSC0003DMG400025848-(rev)M6LRR-RLP\_2379

AAACACGAGATAAGTCTAGTGATAAAGTGGTTCACGCAGACTACCCTACAGATACAGGCAATGATCTGG

CAAGTATTCTCAAGAAGCGTTCTTCAAATTTGAGAAGGAAATTGAAGAGG

>M6-PGSC0003DMG400025848-(rev)M6LRR-RLP\_244

CGCCTCTGAATTGGTTCCTCGCAAGAAAGTGGATTCTATTTGAAGAGGAAAATAAAAATGCTCCAGG

TATATTTATATGCTTGAGCATTCTCTTTTTTATTGTCAATAAGTAGTAGAA

>M6-PGSC0003DMG400025848-(rev)M6LRR-RLP\_2440

TGATCTGGCAAGTATTCTCAAGAAGCGTTCTTCAAATTTGAGAAGGAAATTGAAGAGGCCAAGAACAA

CTCCGAGACGTTGTTAAAAACAAGTGTAAGCTTCAAATAGCAATGTGCA

>M6-PGSC0003DMG400025848-(rev)M6LRR-RLP\_2501

AAGAACAACCTCCGAGACGTTGTTAAAAACAAGTGTAAGCTTCAAATAGCAATGTGCATTCATTTGAG

GTTCTGACTTAGGCAGCGTGTGGTTAAGCACTCTCAAAGCTTGAGAAA

>M6-PGSC0003DMG400025848-(rev)M6LRR-RLP\_2562

CATTTGAGGTTCTGACTTAGGCAGCGTGTGGTTAAGCACTCTCAAAGCTTGAGAAAGATATTGAAG

AGGCTAAGAGGAAGAATGAAAACTTAGTGAAATAGAGGGCAAGAATTCGA

>M6-PGSC0003DMG400025848-(rev)M6LRR-RLP\_2623

TATTGAAGAGGCTAAGAGGAAGAATGAAAACTTAGTGAAATAGAGGGCAAGAATTCGAATAGATTGG

GTAAGTGTGGCAATTGGTTCGAAGAAAGAAACATGAAATGGATGTTCTAGTTT

>M6-PGSC0003DMG400025848-(rev)M6LRR-RLP\_2684

AGATTGGGTACTGTGGCAATTGGTTCGAAGAAAGAAACATGAAATGGATGTTCTAGTTTAGAAGATTAT

CTTGTAACATATGACCAAACCTGAAAAGGAAATTCAAGAAGCAAAAAAT

>M6-PGSC0003DMG400025848-(rev)M6LRR-RLP\_2745

AAGATTATCTTGTGAAACATATGACCAAACCTGAAAAGGAAATTCAAGAAGCAAAAAATAGGGAAAAC

GCTGCTGACCCTAATGCCAATGTGTCTGAGACTACCTCATTGGTAGGAAAAG

>M6-PGSC0003DMG400025848-(rev)M6LRR-RLP\_2806

GGAAAACGCTGCTGACCCTAATGCCAATGTGTCTGAGACTACCTCATTGGTAGGAAAAGAAAATGTTGA

CCACAATGTAAATCTTGTAAATGGAGAACAACCATCAAAGCCAGCAGACAC

>M6-PGSC0003DMG400025848-(rev)M6LRR-RLP\_2867

AATGTTGACCACAATGTAAATCTTGTAAATGGAGAACAACCATCAAAGCCAGCAGACACATTTGCATTTG

AGGTTGAAAACAAAGAAGCTGTGGATAGTCTGGACAAGATTCTAGTAAAG

>M6-PGSC0003DMG400025848-(rev)M6LRR-RLP\_2928

TTGCATTTGAGGTTGAAAACAAAGAAGCTGTGGATAGTCTGGACAAGATTCTAGTAAAGCCAGTTCATC  
GTCTGCAAAGACTTAAAATGCAAGAATCATCAACAAGAAGAGACTATCGTG

>M6-PGSC0003DMG400025848-(rev)M6LRR-RLP\_2989

AGTTCATCGTCTGCAAAGACTTAAAATGCAAGAATCATCAACAAGAAGAGACTATCGTGACAGAGGAC  
TCAAAGAAAGATTGAAGCTAATAGTGCCACTGATAGCGAAGGTTTGGACAA

>M6-PGSC0003DMG400025848-(rev)M6LRR-RLP\_305

GCTCCAGGTATATTTATATGCTTGAGCATTCTCTTTTTTATTGTCAATAAGTAGTAGAAGTACTGATAGTG  
TTTTTGGCCTGTTGTGAAATCTCAGGAAGTGGATGGTATGAACTCAACT

>M6-PGSC0003DMG400025848-(rev)M6LRR-RLP\_3050

CAGAGGACTCAAAGAAAGATTGAAGCTAATAGTGCCACTGATAGCGAAGGTTTGGACAAGATTTTAGT  
GAAGCATGTTTCAAAGCTTGAAAAAGAGAGAATGTCTTTTCATGCAAAGGAA

>M6-PGSC0003DMG400025848-(rev)M6LRR-RLP\_3111

TTTTAGTGAAGCATGTTTCAAAGCTTGAAAAAGAGAGAATGTCTTTTCATGCAAAGGAAGACAATTTGCT  
AAATGTAAAGAAAAGGGACACCATTGGTAAACAGTTGCAGAACAATGAAG

>M6-PGSC0003DMG400025848-(rev)M6LRR-RLP\_3172

CAATTTGCTAAATGTAAAGAAAAGGGACACCATTGGTAAACAGTTGCAGAACAATGAAGGCAGTTTGG  
ATCAGATTTTGGTGAAACACAAGTCGAGACTTGAGAGAGAAAAGATGGCTGC

>M6-PGSC0003DMG400025848-(rev)M6LRR-RLP\_3233

AGTTTGGATCAGATTTTGGTGAAACACAAGTCGAGACTTGAGAGAGAAAAGATGGCTGCTATTCAGCCA  
GAGGATGATGATGATCAGGTAAGACATTCAATTACTCGGAAAGCTATAAGG

>M6-PGSC0003DMG400025848-(rev)M6LRR-RLP\_3294

TTCAGCCAGAGGATGATGATGATCAGGTAAGACATTCAATTACTCGGAAAGCTATAAGGGAGAGGGAG  
TTGCAAGAAGCTTGGGGAGGCTTAAGTCTTGGGAACTCTATGCGTCCTCGTA

>M6-PGSC0003DMG400025848-(rev)M6LRR-RLP\_3355

GAGGGAGTTGCAAGAAGCTTGGGGAGGCTTAAGTCTTGGGAACTCTATGCGTCCTCGTATGTCTAGACT  
TCAGAGAGACAAGGCAAGTGCATTAACCTCATTCTTAAGCCATTTTATATT

>M6-PGSC0003DMG400025848-(rev)M6LRR-RLP\_3416

TCTAGACTTCAGAGAGACAAGGCAAGTGCATTAACCTCATTCTTAAGCCATTTTATATTGTTGTTCTTTTT  
CTACTTCTCACGACTTTTCTTGTTCCTTG TAGTCTGCCTGGCTT



>M6-PGSC0003DMG400025848-(rev)M6LRR-RLP\_3477

TGTTCTTTTTCTACTTCTCACGACTTTTCTCTTGTTCCTTGTAGTCTGCCTGGCTTAAAGCTGAAGAAG  
AGGAGAGGAAGGGAACCGTGGAGGAGGCGTGAAATTATGAGAACTATT

>M6-PGSC0003DMG400025848-(rev)M6LRR-RLP\_3538

AGCTGAAGAAGAGGAGAGGAAGGGAACCGTGGAGGAGGCGTGAAATTATGAGAACTATTAGATTCAA  
AATATCATAAATTCTTTGTTTTTCCCTCCCATGCTTCCGTTGGTCAACTTC

>M6-PGSC0003DMG400025848-(rev)M6LRR-RLP\_3599

ATTCAAATATCATAAATTCTTTGTTTTTCCCTCCCATGCTTCCGTTGGTCAACTTCATAACAATCAACT  
AACTTTTGAATACTTCTTCACTACTCATATAGTGATCTCGTGTGAGA

>M6-PGSC0003DMG400025848-(rev)M6LRR-RLP\_366

ACTGATAGTGTTCCTTGGCCTGTTGTGAAATCTCAGGAAGTGGATGGTATGAACTCAACTCTTGATGAGAC  
TTTGGGGGATGCAAATCCCACTATTGTAGAGTTTTGAGAGAAAAAATTG

>M6-PGSC0003DMG400025848-(rev)M6LRR-RLP\_3660

AACAATCAACTAACTTTTGAATACTTCTTCACTACTCATATAGTGATCTCGTGTGAGATGGATCTTTTTTT  
GGTTCTTTTTTGAGGTAAATAGAATTAGAATGCTATTTTTTTTCATT

>M6-PGSC0003DMG400025848-(rev)M6LRR-RLP\_3721

GATCTTTTTTTGGTTCTTTTTTGAGGTAAATAGAATTAGAATGCTATTTTTTTTCATTTTCGAATGTGTAAA  
CTGAAGGTTGCAATGTAAAGAAGAGTGCTGCAAATTTGTACATATTGC

>M6-PGSC0003DMG400025848-(rev)M6LRR-RLP\_3782

GAATGTGTAACTGAAGGTTGCAATGTAAAGAAGAGTGCTGCAAATTTGTACATATTGCTTGTCTATATA  
TTCCTTCTGTGTATATGAGTGAGCAACAAAATGTATCTGCAATATTAGAA

>M6-PGSC0003DMG400025848-(rev)M6LRR-RLP\_3843

GTCTATATATTCCTTCTGTGTATATGAGTGAGCAACAAAATGTATCTGCAATATTAGAAAGAACTATAT  
ATTGTACAAATTAATATATAAATTAACAAAGTACTTGAAATAATTGCA

>M6-PGSC0003DMG400025848-(rev)M6LRR-RLP\_3904

AAACTATATATTGTACAAATTAATATATAAATTAACAAAGTACTTGAAATAATTGCAATTACCGGACA  
TCCAAATTAACAAAGTACTTGAAAGTAATGTAAGGATAAGATGAGAGAAA

>M6-PGSC0003DMG400025848-(rev)M6LRR-RLP\_3965

TACCGGACATCCAAATTAACAAAGTACTTGAAAGTAATGTAAGGATAAGATGAGAGAAAATAGCGAAG

ATAATTTTGGCCATATTTTACCCAAGACATCCAAAATATATCATTCAATTAA

>M6-PGSC0003DMG400025848-(rev)M6LRR-RLP\_4026

AGCGAAGATAATTTTGGCCATATTTTACCCAAGACATCCAAAATATATCATTCAATTAATACATTGTTGTT  
ATTTACTAAAAATGAAGTAAATCTAAAATCATGTAGATGAAATTATCTC

>M6-PGSC0003DMG400025848-(rev)M6LRR-RLP\_4087

CATTGTTGTTATTTACTAAAAATGAAGTAAATCTAAAATCATGTAGATGAAATTATCTCAAGCGACTTATA  
GCAATCTCTTGAAATCAAACCTGGATTTATCCAAGAAAATATATTCAATT

>M6-PGSC0003DMG400025848-(rev)M6LRR-RLP\_4148

GCGACTTATAGCAATCTCTTGAAATCAAACCTGGATTTATCCAAGAAAATATATTCAATTACATGATAAAG  
CCGTAAATCCAAAAAAAAAAAAAAAAACACAATCCACACCCCCTCCCAACC

>M6-PGSC0003DMG400025848-(rev)M6LRR-RLP\_4209

ATGATAAAGCCGTAAATCCAAAAAAAAAAAAAAAAACACAATCCACACCCCCTCCCAACCCCCCAATTTTG  
TTCTTAAGCTTACATAAATTTGAATGTAATTATTGAGAGTATAGTGAAAT

>M6-PGSC0003DMG400025848-(rev)M6LRR-RLP\_427

TGATGAGACTTTGGGGGATGCAAATCCCCACTATTGTAGAGTTTTGAGAGAAAAAATTGCAGTAAGAGA  
AGCTGCTCAAAGAGCTGTGGAAGCTCGGAAGGCTGCACTTGTGAAGCATC

>M6-PGSC0003DMG400025848-(rev)M6LRR-RLP\_4270

CCAATTTTGTCTTAAGCTTACATAAATTTGAATGTAATTATTGAGAGTATAGTGAAATGGTTGAGATGTC  
ATTCAATCAACAATGTTGGATTTGAGTTCACATAAATACTTAAAAATTA

>M6-PGSC0003DMG400025848-(rev)M6LRR-RLP\_4331

TTGAGATGTCATTCAATCAACAATGTTGGATTTGAGTTCACATAAATACTTAAAAATTAGGAAATTAAT  
ACTTAACCCCTTTTAATTTTGTGGTTTGGCATTGGTAGACAATTATTC

>M6-PGSC0003DMG400025848-(rev)M6LRR-RLP\_4392

AAATTAATACTTAACCCCTTTTAATTTTGTGGTTTGGCATTGGTAGACAATTATTCAGTTGAGAGTTG  
AGACAGGAGGAAAGTCCTTGTGGAAAATCTCACAGTGATAGTGTGAACA

>M6-PGSC0003DMG400025848-(rev)M6LRR-RLP\_4453

TTGAGAGTTGAGACAGGAGGAAAGTCCTTGTGGAAAATCTCACAGTGATAGTGTGAACAACAGAACTT  
AGCAGTGAACACTGGTCTCATTACTCACTTTAATAGTAATAACTTGTACAA

>M6-PGSC0003DMG400025848-(rev)M6LRR-RLP\_4514

AGAACTTAGCAGTGAACACTGGTCTCATTACTCACTTTAATAGTAATAACTTGTACAAAGTACTCAACA  
GTTGTACAAACACTCAACAGTATTTTACAGCTTCCAAATTTGACTCTCTC

>M6-PGSC0003DMG400025848-(rev)M6LRR-RLP\_488

GTAAGAGAAGCTGCTCAAAGAGCTGTGGAAGCTCGGAAGGCTGCACTTGTTGAAGCATCATGGTGCCG  
AATACTTCAAGCCTCAAGGTGAGCAATTTAACATTCATTTATCTGTATTTGT

>M6-PGSC0003DMG400025848-(rev)M6LRR-RLP\_549

GGTGCCGAATACTTCAAGCCTCAAGGTGAGCAATTTAACATTCATTTATCTGTATTTGTTGTTACATGCAT  
TAGATCCGGTGTGTTGTCTGGAGTTTTTTTTTTCTGCTCAGGAATTCATT

>M6-PGSC0003DMG400025848-(rev)M6LRR-RLP\_61

AGGTGGCCAGTCGAATCTAGTTGCTTTGAAGTATTATTTAATTGGTGTGTTTCCAATTTTGGGTTTTTCATTT  
TGTTGTTTTGGAATAGTGCAGACTAAGGCAACGAAAGAAAGTGGCCAGT

>M6-PGSC0003DMG400025848-(rev)M6LRR-RLP\_610

TTACATGCATTAGATCCGGTGTGTTGTCTGGAGTTTTTTTTTTCTGCTCAGGAATTCATTTGCTAATTATGTG  
ATATTGGATACATTAAATTTTAGAGATAGTTAGTTACAGTTCAATGTC

>M6-PGSC0003DMG400025848-(rev)M6LRR-RLP\_671

CTAATTATGTGATATTGGATACATTAAATTTAGAGATAGTTAGTTACAGTTCAATGTCTTTTGGTGATCT  
AATTTACAAAATAGCTAGAAAATGTATAGGTTTGGTATATCTTAGTATA

>M6-PGSC0003DMG400025848-(rev)M6LRR-RLP\_732

TTGGTGATCTAATTTACAAAATAGCTAGAAAATGTATAGGTTTGGTATATCTTAGTATAAATCTACATATA  
ATATACTCACAGCTGAGAACATGCTCTTATATATAGGAAGTTATGGAGG

>M6-PGSC0003DMG400025848-(rev)M6LRR-RLP\_793

TCTACATATAATACTCACAGCTGAGAACATGCTCTTATATATAGGAAGTTATGGAGGTGGAGAATTAG  
GGTAGAAGTTACTAGGTAGTTCGAGTGTTGTTGTGCTGTAGTATGATTTAG

>M6-PGSC0003DMG400025864-(rev)M6LRR-RLP\_800

CTTTGCAGGAAATACAGATCTTTGTGGCAAACCACTCAAGAACTCTGTACAATCCCTTCAACACTTTCAT  
CTCCACCTAATATAACCACTAATCCTCCAGCAATTGCAGCCATTCCAAA

>M6-PGSC0003DMG400025867-(rev)M6LRR-RLP\_0

CATCAAAAGGCCCCACACTGTGCCTAAACCACCAGAACCCTCCATTACAAAACCAAAAAATTTTGATCAA  
ATTTGTAGTCATTTTTCAAACATGTCAAAATCAAGAACCTCTGTTTTCTT

>M6-PGSC0003DMG400025867-(rev)M6LRR-RLP\_1054

TATCTTGACGGTAATTTCTTGAATGGGTCTCCGCCGGCGGGATTTTTCGGCCGGGAACTTCAGTTACCG  
GCAGTTTAGGAGATAATTGTTTACAAAATGTCCGATTTCTTCGCAACTT

>M6-PGSC0003DMG400025867-(rev)M6LRR-RLP\_1116

AGTTACCGGCAGTTTAGGAGATAATTGTTTACAAAATGTCCGATTTCTTCGCAACTTTGCTTGAAATCAC  
AGAAATCTACGTCGATTTGTCAGCAAGCTTATGGTGGGAAACCAAAGTC

>M6-PGSC0003DMG400025867-(rev)M6LRR-RLP\_1178

TGAAATCACAGAAATCTACGTCGATTTGTCAGCAAGCTTATGGTGGGAAACCAAAGTCTTAGTTGTGTCA  
GTCAATGTTTCTGAGATTTTTTTTCATCTTGGTTTTTCATATTGTAATTGT

>M6-PGSC0003DMG400025867-(rev)M6LRR-RLP\_124

CTCTTTCTTTTTTCACTTTTCATCAGTTCAATCAATTCCTCCTTCTTCAGACATAATTGCCCTTCAAGCTTTTA  
AAGCTGCCATTAAACCTTCTCTATTCTTCATATTCTTGTTTAGGT

>M6-PGSC0003DMG400025867-(rev)M6LRR-RLP\_1240

TTGTGTCAGTCAATGTTTCTGAGATTTTTTTTCATCTTGGTTTTTCATATTGTAATTGTAGGAGTATTATATT  
ATATTCTTTAGATAAGAAATAACCCAATATAATATTTGCTCATCTGAA

>M6-PGSC0003DMG400025867-(rev)M6LRR-RLP\_1293

ATTGTAGGAGTATTATATTATATTCTTTAGATAAGAAATAACCCAATATAATATTTGCTCATCTGAATTAT  
GCCCCCTTTGTATAGAGTATAGTACTATATTCATACTAGAAAATTACGG

>M6-PGSC0003DMG400025867-(rev)M6LRR-RLP\_186

TCAAGCTTTTAAAGCTGCCATTAAACCTTCTCTATTCTTCATATTCTTGTTTAGGTACTTGGAATTTAC  
TACAGACCCTTGCTCTGTTCCCTCGTGTACCCATTTCACTTGTGGCCT

>M6-PGSC0003DMG400025867-(rev)M6LRR-RLP\_248

GGAATTTCACTACAGACCCTTGCTCTGTTCCCTCGTGTACCCATTTCACTTGTGGCCTTTCTTGCTAGCTCTG  
GAAACAGAGTAACTGAACTTACTCTTGATCCTGCTGGTTATACAGGGA

>M6-PGSC0003DMG400025867-(rev)M6LRR-RLP\_310

TGTAGCTCTGGAAACAGAGTAACTGAACTTACTCTTGATCCTGCTGGTTATACAGGGACTCTTTCTCCGT  
GATTTCTAACTCACTCAACTTGTTACTCTTGATCTTCAGAATAACAAT

>M6-PGSC0003DMG400025867-(rev)M6LRR-RLP\_372

TTCTCCGTTGATTTCTAACTCACTCAACTTGTTACTCTTGATCTTCAGAATAACAATTTTTATGGCCCAAT

TCCTTCTTCTCTGTCTTCTTTACCAAATCTCAAGAACCTGGTTCTTCG

>M6-PGSC0003DMG400025867-(rev)M6LRR-RLP\_434

ATGGCCCAATTCTTCTTCTGTCTTCTTTACCAAATCTCAAGAACCTGGTTCTTCGACTCAATTCATTTTC

TGGGTCAGTCCCACCTTCCCTCACTTCTTTAAAATCTCTACTTTCTC

>M6-PGSC0003DMG400025867-(rev)M6LRR-RLP\_496

AATTCATTTTCTGGGTCAGTCCCACCTTCCCTCACTTCTTTAAAATCTCTACTTTCTCTTGATATTTCTCATA

ATTTGATTTCTGGGTTACCAAATTCGATGAATGAGCTAACCAGCTTA

>M6-PGSC0003DMG400025867-(rev)M6LRR-RLP\_558

TATTTCTCATAATTTGATTTCTGGGTTACCAAATTCGATGAATGAGCTAACCAGCTTAAGAAGACTTGATC

TTAGTTACAATAAGCTAACTGGGTCACTCCCAAATACCCCCAAATCT

>M6-PGSC0003DMG400025867-(rev)M6LRR-RLP\_62

TTGATCAAATTTGTAGTCATTTTCAAACATGTCAAATCAAGAACCTCTGTTTTCTTCTTTCTTTCTTTT

TTCACTTTCATCAGTTCAATCAATTCCTCCTTCTTCAGACATAATTG

>M6-PGSC0003DMG400025867-(rev)M6LRR-RLP\_620

GACTTGATCTTAGTTACAATAAGCTAACTGGGTCACTCCCAAATACCCCCAAATCTACTAGAACTTGCA

GCGAAGGCTAATTCGTTATCTGGGTCTTTTTAAAATCGTCGTTTTATG

>M6-PGSC0003DMG400025867-(rev)M6LRR-RLP\_682

GAACTTGCAGCGAAGGCTAATTCGTTATCTGGGTCTTTTTAAAATCGTCGTTTTATGGGTTAAATCAACT

GGAAGTTGTGGAGCTTAGTGAAAATTCGTTATTTGGAAGCTATTGAAACT

>M6-PGSC0003DMG400025867-(rev)M6LRR-RLP\_744

AAATCAACTGGAAGTTGTGGAGCTTAGTGAAAATTCGTTATTTGGAAGCTATTGAAACTTGGTTCTTTCAG

TTACCTTCTTTACAACAAATCGACATGGCGAACAAACAGCTTTACACTCGT

>M6-PGSC0003DMG400025867-(rev)M6LRR-RLP\_806

TCTTTCAGTTACCTTCTTTACAACAAATCGACATGGCGAACAAACAGCTTTACACTCGTCAAGATTCCAAG

GTTGTTGATTTGAACAGCGACCTTGTGCGCGTTGATTTGGGTTTCAACA

>M6-PGSC0003DMG400025867-(rev)M6LRR-RLP\_868

ATTCAAAGGTTGTTGATTTGAACAGCGACCTTGTGCGCGTTGATTTGGGTTTCAACAAAATCGAAGGGT

ATTTACCGGTAAATTTGCGGATTTCCCTCGATTGTCGTCGTTGTCATTT

>M6-PGSC0003DMG400025867-(rev)M6LRR-RLP\_930

CGAAGGGTATTTACCGGTAAATTTTCGCGATTTTCCCTCGATTGTCGTCGTTGTCATTTAGGTATAACAAGT  
TCCGGGGACCGATTCCGTTGCAGTATAGCAAAAAGGCGACGTTGAAAAG

>M6-PGSC0003DMG400025867-(rev)M6LRR-RLP\_992

ATAACAAGTTCCGGGGACCGATTCCGTTGCAGTATAGCAAAAAGGCGACGTTGAAAAGGCTGTATCTTG  
ACGGTAATTTCTTGAATGGGTCTCCGCCGGCGGGATTTTTCGGCCGGGAAA

>M6-PGSC0003DMG400025921-(rev)M6LRR-RLP\_0

CTCCTACTCACTTGACTTTTTTATCCACTCTATAAAGAAAGCAAACAAAATTCCAAATTCCTAACCTTTTT  
CCTCCCTTTCTTCCCACAGTCTCCGCCGTTCAATCTGCACACCTTTTT

>M6-PGSC0003DMG400025921-(rev)M6LRR-RLP\_1054

TCACTGGTCCAGTGCCAGACTCATTGGTTAATCTTCCTTCGTTAAAGATGGTTAATTTGACAAACAACCTT  
TTTCAAGGGCCTACGCCAAAATTTCCATCTTCAGTGCTAGTGGATATGT

>M6-PGSC0003DMG400025921-(rev)M6LRR-RLP\_1178

TAATACCAATAGTTTTTGTGTTGTCACAGCCGGGTCTTGTGACTCACAAGTTAATACGCTGTTGGCTGTG  
GCTAAGGATGTGGGGTATCCCACGGTGTGTTGCTGAGAATTGGAAGGGGAA

>M6-PGSC0003DMG400025921-(rev)M6LRR-RLP\_124

GTCACACTCTGCGATTCTTCTTTATCCCCAACTTGAAGAAAACCCTAACAAACCCTTTTCTTCAAGGAAAA  
AGTTCAGTTTTTGAGTCATTCTGCAGAAATTTCTTGAACAAAATGAAGT

>M6-PGSC0003DMG400025921-(rev)M6LRR-RLP\_1240

TGGCTGTGGCTAAGGATGTGGGGTATCCCACGGTGTGTTGCTGAGAATTGGAAGGGGAATGATCCTTGTT  
CTTGGATTGGCATAACTTGTGATGGTGGGAACATTACAGTGCTGAATTTTC

>M6-PGSC0003DMG400025921-(rev)M6LRR-RLP\_1302

CCTTGTTCTTGGATTGGCATAACTTGTGATGGTGGGAACATTACAGTGCTGAATTTTCAGAAAATGGGAC  
TACTGGGACAATCTCTCCCACTACTCGTCCATTACATCATTACAGAAG

>M6-PGSC0003DMG400025921-(rev)M6LRR-RLP\_1364

AATGGGACTTACTGGGACAATCTCTCCCACTACTCGTCCATTACATCATTACAGAAGTTGATCCTAGCA  
AACAAATTTCTTACAGGAACTATTCCAAATGAGCTCGCATTGCTGCCAAA

>M6-PGSC0003DMG400025921-(rev)M6LRR-RLP\_1426

TCCTAGCAAACAATTTTCTTACAGGAACTATTCCAAATGAGCTCGCATTGCTGCCAAACCTAAAGGAATT  
CGATGTTTCTAACAAATCAAATTTACGGAAAAATCCCACCATTTAAGAGCA

>M6-PGSC0003DMG400025921-(rev)M6LRR-RLP\_1488

AAGGAATTCGATGTTTCTAACAATCAAATTTACGGAAAAATCCCACCATTTAAGAGCAATGTATTGGTTA  
AATATGATGGCAATGTCAATATTGGGAAAGATAATCCACCTCCAGTTGCA

>M6-PGSC0003DMG400025921-(rev)M6LRR-RLP\_1550

ATTGGTTAAATATGATGGCAATGTCAATATTGGGAAAGATAATCCACCTCCAGTTGCACCGTCCGGAAG  
AACTCCTAGTTCACCCGATGGGGGTGGAGGTGGACAACTCATGGGAATGG

>M6-PGSC0003DMG400025921-(rev)M6LRR-RLP\_1612

CCGGAAGAACTCCTAGTTCACCCGATGGGGGTGGAGGTGGACAACTCATGGGAATGGTAATAAAAAA  
TCTTCAACTGGAGTTGTTGTGGGCTCAGTGATAGGTGGTGTGTTGTGGTGCGG

>M6-PGSC0003DMG400025921-(rev)M6LRR-RLP\_1674

AAAAAATCTTCAACTGGAGTTGTTGTGGGCTCAGTGATAGGTGGTGTGTTGTGGTGCGGTTGCAGTTGCT  
GGATTATTTGTGTTTTGTCTTTACAGGAGTAAGCGCATGCGGTCCGGTAGA

>M6-PGSC0003DMG400025921-(rev)M6LRR-RLP\_1736

AGTTGCTGGATTATTTGTGTTTTGTCTTTACAGGAGTAAGCGCATGCGGTCCGGTAGAGTTCAGAGTCCA  
CACACAGTGGTTATTCATCCTCATCATTGAGGATCTGACCAAGATGTTGT

>M6-PGSC0003DMG400025921-(rev)M6LRR-RLP\_1798

AGAGTCCACACACAGTGGTTATTCATCCTCATCATTGAGGATCTGACCAAGATGTTGTTAAGATCACAGT  
TGCTGGTTCAAGTGTCAATGGAGGGACAACCGAAACGTACAGTTGTGGAA

>M6-PGSC0003DMG400025921-(rev)M6LRR-RLP\_186

AAGGAAAAAAGTTCAGTTTTTGTGATCATTCTGCAGAATTTTCTTGAACAAAATGAAGTTGAAGAAACCCC  
ATCTGGGTTTTGTGTGTTTCTTGATATTCTTGTCGTTTGTGTTGTCTCTGTA

>M6-PGSC0003DMG400025921-(rev)M6LRR-RLP\_1860

ATCACAGTTGCTGGTTCAAGTGTCAATGGAGGGACAACCGAAACGTACAGTTGTGGAAGCAGTGACCT  
GGGGACTTGCACATTGTTGAGGCTGGTAACATGGTGATTTCCATCCAAGTT

>M6-PGSC0003DMG400025921-(rev)M6LRR-RLP\_1922

TGCACCTGGGGACTTGCACATTGTTGAGGCTGGTAACATGGTGATTTCATCCAAGTTTTGAGGAATGTC  
ACGAACAACCTCAGCGAGGAGAATATATTGGGGAGAGGTGGATTTGGAAC

>M6-PGSC0003DMG400025921-(rev)M6LRR-RLP\_1984

GGAATGTCACGAACAACCTCAGCGAGGAGAATATATTGGGGAGAGGTGGATTTGGAAGTGTACAAG

GGGGAGTTACATGATGGAACAAAAATTGCTGTTAAGAGGATGGAATCTGGAG

>M6-PGSC0003DMG400025921-(rev)M6LRR-RLP\_2046

TACAAGGGGGAGTTACATGATGGAACAAAAATTGCTGTTAAGAGGATGGAATCTGGAGTTATGAGCGA  
GAAGGGGTTGGATGAGTTCACGTCTGAGATTGCGGTGCTTACTAAGGTCCGC

>M6-PGSC0003DMG400025921-(rev)M6LRR-RLP\_2108

GAGCGAGAAGGGGTTGGATGAGTTCACGTCTGAGATTGCGGTGCTTACTAAGGTCCGCCACAGGCATT  
TGGTGGCACTGCTAGGATATTGCTTGGATGGAAACGAGAGGTTACTTGTATA

>M6-PGSC0003DMG400025921-(rev)M6LRR-RLP\_2170

GGCATTGGTGGCACTGCTAGGATATTGCTTGGATGGAAACGAGAGGTTACTTGTATATGAATATATGC  
CACAAGGGACAGTCAGCAGGTATCTTTCAACTGGAAGGAAGAAGGGATAA

>M6-PGSC0003DMG400025921-(rev)M6LRR-RLP\_2232

TATATGCCACAAGGGACAGTCAGCAGGTATCTTTCAACTGGAAGGAAGAAGGGATAAATCCCCTCGAA  
TGGACAAGGAGGCTAATCATTGCACTGGATGTTGCAAGGGGTGTTGAATAT

>M6-PGSC0003DMG400025921-(rev)M6LRR-RLP\_2294

CCTCGAATGGACAAGGAGGCTAATCATTGCACTGGATGTTGCAAGGGGTGTTGAATATCTTCATGGTTT  
AGCTCAACAGAGCTTCATTCATAGAGATCTGAAGCCATCTAACATTCTTTT

>M6-PGSC0003DMG400025921-(rev)M6LRR-RLP\_2356

ATGTTTTAGCTCAACAGAGCTTCATTCATAGAGATCTGAAGCCATCTAACATTCTTTTGGGAGATGATAT  
GAGGGCTAAAGTTGCAGATTTTGGACTTGTTGCGCTTGCTCCTGAGGGAA

>M6-PGSC0003DMG400025921-(rev)M6LRR-RLP\_2418

GATGATATGAGGGCTAAAGTTGCAGATTTTGGACTTGTTGCGCTTGCTCCTGAGGGAAAACTTCATTG  
GTTACTAGGTTGGCTGGAACCTTTTGGCTATCTTGCACCAGAGTATGCAGGT

>M6-PGSC0003DMG400025921-(rev)M6LRR-RLP\_248

GAAACCCCATCTGGGTTTTGTGTGTTTCTTGATATTCTTGTCGTTTGTGTCTCTGTATACTCTCAGGGTA  
GTGCAGCAACAGATGCAGTAGTGATGCAAGAGTTGAAGAAGGGAACCAG

>M6-PGSC0003DMG400025921-(rev)M6LRR-RLP\_2480

TTCATTGGTTACTAGGTTGGCTGGAACCTTTTGGCTATCTTGCACCAGAGTATGCAGGTAACCTTCATCAT  
GTGACCTGTTAATTTTCTTATATTTTGCATATATTTGCTTACATAAAT

>M6-PGSC0003DMG400025921-(rev)M6LRR-RLP\_2542



TTCATCATGTGACCTGTTAATTTTCCTTATATTTTTGCATATATTTGCTTACATAAATGGACGTATGTTAGT  
GTATATAAGGCCAATAATATTAGATTAATAGGCTTAACAGGTGACAGT

>M6-PGSC0003DMG400025921-(rev)M6LRR-RLP\_2604

GTATGTTAGTGTATATAAGGCCAATAATATTAGATTAATAGGCTTAACAGGTGACAGTGGAAGTAGGAA  
CTGCTTCCTCTCTTGTTTAGTTGTTTTGGTCTGCATCTACAGACCATCAGG

>M6-PGSC0003DMG400025921-(rev)M6LRR-RLP\_2642

TAGGCTTAACAGGTGACAGTGGAAGTAGGAACTGCTTCCTCTCTTGTTTAGTTGTTTTGGTCTGCATCTA  
CAGACCATCAGGGAAGCCTATTCTAGCTGGATCTTTTGAAAAGTTGATAT

>M6-PGSC0003DMG400025921-(rev)M6LRR-RLP\_310

CTCAGGGTAGTGCAGCAACAGATGCAGTAGTGATGCAAGAGTTGAAGAAGGGAACCAGCCCACCGAGT  
TCACTCAGCTGGGACGATCCAGACCCCTGTAATTGGGGTAAAGTTAAGTGTG

>M6-PGSC0003DMG400025921-(rev)M6LRR-RLP\_372

CCGAGTTCACCTCAGCTGGGACGATCCAGACCCCTGTAATTGGGGTAAAGTTAAGTGTGCTAAAGATGGT  
CGTGTAAGTAGGATTCAAGTAGGGAATCAAGGGCTAAAAGTTCTCTACCA

>M6-PGSC0003DMG400025921-(rev)M6LRR-RLP\_434

AGATGGTCGTGTAAGTAGGATTCAAGTAGGGAATCAAGGGCTAAAAGTTCTCTACCACCAAACATGAA  
TAACCTGACGGAAGTGCAGGTGTTTGAGGTTCAACACAATGCACTTACTGG

>M6-PGSC0003DMG400025921-(rev)M6LRR-RLP\_496

ACATGAATAACCTGACGGAAGTGCAGGTGTTTGAGGTTCAACACAATGCACTTACTGGGGCGATTCCGA  
GTTTTGCTGGGATGAACTCGTTGCAGAGCATTCTTCTTAACAACAATGGGT

>M6-PGSC0003DMG400025921-(rev)M6LRR-RLP\_558

ATTCCGAGTTTTGCTGGGATGAACTCGTTGCAGAGCATTCTTCTTAACAACAATGGGTTCACTTCAATTCC  
TAGCGACTTTTTTGAGGGTATGACTAATTTACAAAATGTTAACTTGGAT

>M6-PGSC0003DMG400025921-(rev)M6LRR-RLP\_62

CAACCTTTTTCTCCCTTTCTCCACAGTCTCCGCCGTTCAATCTGCACACCTTTTTTCATTGTCACACTCTG  
CGATTCTTCTTTATCCCCAAGTGAAGAAAACCCTAACAACCCTTTT

>M6-PGSC0003DMG400025921-(rev)M6LRR-RLP\_620

TTCAATTCCTAGCGACTTTTTTGAGGGTATGACTAATTTACAAAATGTTAACTTGGATTCCAATTCCTTTTC  
GCCATGGTCTATAACCAGAGAGTTTGAAAGATGCCACTTCTCTCAAAG

>M6-PGSC0003DMG400025921-(rev)M6LRR-RLP\_682

ATTCCTTTTCGCCATGGTCTATACCAGAGAGTTTGAAAGATGCCACTTCTCTTCAAAGTTTCTCTGCTAATT  
CTGCTAATATTACTGGTAAAATCCCTGATTTCTTTGGTGGAGATACCT

>M6-PGSC0003DMG400025921-(rev)M6LRR-RLP\_744

TCTGCTAATTCTGCTAATATTACTGGTAAAATCCCTGATTTCTTTGGTGGAGATACCTTTGTTAGTTTAAAC  
AGATTTGCATCTAGCCTTAATAATTTTGAGGGTCCCCTGCCCTCGAAT

>M6-PGSC0003DMG400025921-(rev)M6LRR-RLP\_806

TAGTTTAAACAGATTTGCATCTAGCCTTAATAATTTTGAGGGTCCCCTGCCCTCGAATTTTTCGGGTCTTC  
TATCCAAACGTTGTGGTTAAATGGTCTCCATAGTAAGTTGAATGGTTC

>M6-PGSC0003DMG400025921-(rev)M6LRR-RLP\_868

CGGGTTCTTCTATCCAAACGTTGTGGTTAAATGGTCTCCATAGTAAGTTGAATGGTTCAATAGATGTGGT  
ACAGAACATGACCGCATTAAACCAACTCTGGTTTTTCAGGCAATAAGTTTA

>M6-PGSC0003DMG400025921-(rev)M6LRR-RLP\_930

GATGTGGTACAGAACATGACCGCATTAAACCAACTCTGGTTTTTCAGGCAATAAGTTTACAGGCCCTTTC  
CTGATTTTTTCGGGATTGACTCAGTTGAGAGAGTGCAATTTGAGAGACAAT

>M6-PGSC0003DMG400025921-(rev)M6LRR-RLP\_992

CCCTTTCCTGATTTTTTCGGGATTGACTCAGTTGAGAGAGTGCAATTTGAGAGACAATAGCTTCACTGGT  
CCAGTGCCAGACTCATTGGTTAATCTTCCTTCGTTAAAGATGGTTAATTT

>M6-PGSC0003DMG400025922-(rev)M6LRR-RLP\_0

ATGAATTTGAAAAAACCCATTTGAGTTTTGTGTGTTGATGATACTCTTGTCCAATGTTGTCTCTGTATA  
CTCTCAGGGAAGTGCTACTACAGATGCTGAAGTGATGCAAGAATTGAAG

>M6-PGSC0003DMG400025922-(rev)M6LRR-RLP\_1040

AGCTGAGAATTGGACGGGGAATGATCCTTGTTTCGCGTTGGCTGGGCATAACTTGTGATGGTGGAAACAT  
TACAGTGCTGAATTTTCAGAAAAGTGGACTTACTGGGACAATCTCTCCCAA

>M6-PGSC0003DMG400025922-(rev)M6LRR-RLP\_1105

ACATTACAGTGCTGAATTTTCAGAAAAGTGGACTTACTGGGACAATCTCTCCCAACTTGTGTCGATTAC  
GTCAATACAGAGGTTGATCCTAGCAGACAATTCTCTTACAGGAACTATTC

>M6-PGSC0003DMG400025922-(rev)M6LRR-RLP\_1170

ATTACGTCAATACAGAGGTTGATCCTAGCAGACAATTCTCTTACAGGAACTATTCCAAATGAGCTCACAT

TACTGCCAAACTTAACGGAATTGGATGTTTCTAACAATCAACTTTACGGA

>M6-PGSC0003DMG400025922-(rev)M6LRR-RLP\_1235

CACATTACTGCCAAACTTAACGGAATTGGATGTTTCTAACAATCAACTTTACGGAAAAATCCCACAATTTA  
AGAGCAGTGTAGTGGTTAAACTGAAGGCAACGTCAATATTGGGAAAGA

>M6-PGSC0003DMG400025922-(rev)M6LRR-RLP\_1281

CTTTACGGAAAAATCCCACAATTTAAGAGCAGTGTAGTGGTTAAACTGAAGGCAACGTCAATATTGGG  
AAAGATAAGCCACCTACATCTGCAGCTGGAAACACGTTCAAACAAATGTAG

>M6-PGSC0003DMG400025922-(rev)M6LRR-RLP\_130

TAAATCCGAATTCACTTAACTGGAACGATCCAGATCCCTGTAAATGGGATAAAGTTCAATGTACTAAGGA  
TGGTCGGGTAATTAGGATTCAAATAGGGGATCAAGGCCTAAAAGGTTCTC

>M6-PGSC0003DMG400025922-(rev)M6LRR-RLP\_195

AAGGATGGTCGGGTAATTAGGATTCAAATAGGGGATCAAGGCCTAAAAGGTTCTCTCCCATCAAACATT  
AATACCCTTTCTGAATTGCAAGTTTTTGAAGTTCAAAGAAATACATTCACT

>M6-PGSC0003DMG400025922-(rev)M6LRR-RLP\_260

CATTAATACCCTTTCTGAATTGCAAGTTTTTGAAGTTCAAAGAAATACATTCACTGGGCCGCTCCCGAGTT  
TTTCTGGATTGAACTCATTGCAGAGCATTCTTCTTAATGGCAATGGGTT

>M6-PGSC0003DMG400025922-(rev)M6LRR-RLP\_325

CGAGTTTTTCTGGATTGAACTCATTGCAGAGCATTCTTCTTAATGGCAATGGGTTCACTTCAATTCCTAAT  
GACTTTTTTCAAGGTATGACTAATTTGCAAAGTGTTTACTTAGATTCCA

>M6-PGSC0003DMG400025922-(rev)M6LRR-RLP\_390

CCTAATGACTTTTTTCAAGGTATGACTAATTTGCAAAGTGTTTACTTAGATTCCAATCCCTTTTCGTATGG  
ACTGTACCAGAAAGTCTGAAAAGTGCTACTTCTCTTCAAATTTTCTCC

>M6-PGSC0003DMG400025922-(rev)M6LRR-RLP\_455

GTCATGGACTGTACCAGAAAGTCTGAAAAGTGCTACTTCTCTTCAAATTTTCTCCGCTTATTATGCTAATA  
TACTGGTAAAATCCCTGATTTCTTTGGTGGAATAACATTTTCTAGTTT

>M6-PGSC0003DMG400025922-(rev)M6LRR-RLP\_520

CTAATATTACTGGTAAAATCCCTGATTTCTTTGGTGGAATAACATTTTCTAGTTTAACTTTGCATTGT  
CGTTAATAATTTGGAGGGTCTCTGCCCTCGAGCTTTTCGGGTTCTT

>M6-PGSC0003DMG400025922-(rev)M6LRR-RLP\_585

CATTTGTCGTTTAATAATTTGGAGGGTCTCTGCCCTCGAGCTTTTCGGGTTCTTCTATCCAATCGTTGTG  
GTTAAATGGTATTGAAGGTAAGTTGAATGGCTCAATAGATGTGATACAG

>M6-PGSC0003DMG400025922-(rev)M6LRR-RLP\_65

TGTATACTCTCAGGGAAGTGCTACTACAGATGCTGAAGTGATGCAAGAATTGAAGAAACAAATAATAAA  
TCCGAATTCACTTAACTGGAACGATCCAGATCCCTGTAAATGGGATAAAGT

>M6-PGSC0003DMG400025922-(rev)M6LRR-RLP\_650

GTTGTGGTTAAATGGTATTGAAGGTAAGTTGAATGGCTCAATAGATGTGATACAGAATATGACCAGATT  
AACACAACCTCTGGTTTTACAGGCAATGAGTTTACAGGCCCTTTGCCTGATTT

>M6-PGSC0003DMG400025922-(rev)M6LRR-RLP\_715

GATTAACACAACCTCTGGTTTTACAGGCAATGAGTTTACAGGCCCTTTGCCTGATTTTTCGGGCTTAACTCAG  
TTGCAAGATTGTAATTTGAGAGATAATAGATTCACAGGTCCAGTGCCAG

>M6-PGSC0003DMG400025922-(rev)M6LRR-RLP\_780

ACTCAGTTGCAAGATTGTAATTTGAGAGATAATAGATTCACAGGTCCAGTGCCAGACTCTTTGGTTAATC  
TTCCTTCGTTAAAAGTGGTTAATTTGACAAACAACATTTTGCAAGGGCCT

>M6-PGSC0003DMG400025922-(rev)M6LRR-RLP\_845

TAATCTTCCTTCGTTAAAAGTGGTTAATTTGACAAACAACATTTTGCAAGGGCCTACGCCACAATTTCCAT  
CTTCAGTGCTAGTGGATATGTTGGATAATACCAATAGTTTTTGTGGTTC

>M6-PGSC0003DMG400025922-(rev)M6LRR-RLP\_910

TTCCATCTTCAGTGCTAGTGGATATGTTGGATAATACCAATAGTTTTTGTGGTTCACAGCCTGGTCCTTGT  
GACTCAAGGGTTAGTACACTGTTGGATGTGGTTAAGGATGTAGGGTATC

>M6-PGSC0003DMG400025922-(rev)M6LRR-RLP\_975

CCTTGTGACTCAAGGGTTAGTACACTGTTGGATGTGGTTAAGGATGTAGGGTATCCCACGGAGTTAGCT  
GAGAATTGGACGGGGAATGATCCTTGTTCGCGTTGGCTGGGCATAACTTGT

>M6-PGSC0003DMG400025926-(rev)M6LRR-RLP\_1054

GAATTCACATTCTCTAAGAACTACTTTGAGAGCATGGATGAAACATGTACGCCATCACAGTCGAAACAA  
GTTAAGATAGATGGTAATGAGAATTGTTGGGGGGAAGATCAGAGCAGAG

>M6-PGSC0003DMG400025926-(rev)M6LRR-RLP\_1116

CGAAACAAGTTAAGATAGATGGTAATGAGAATTGTTGGGGGGAAGATCAGAGCAGAGGACGGAGAA  
AGAGTGTTCCTCAGTAGTGAGCAAGCCTGTTGATTGCAGTAAAGGTCATTGCG

>M6-PGSC0003DMG400025926-(rev)M6LRR-RLP\_1178

GAGAAAGAGTGTTCAGTAGTGAGCAAGCCTGTTGATTGCAGTAAAGGTCATTGCGGAGTTTCAAGG  
GAAGGGCAGAGTCCAAAAGATCCACCTAAAACCCTGACTCCTTCAAACCA

>M6-PGSC0003DMG400025926-(rev)M6LRR-RLP\_124

ATCATATTTTGCATTATCTGATATTGAAGCTGCTTCTATTGCCCGTCGCCAACTTTTAGGTAACAATGGCG  
AGCTTCAAATACATACGAGTCTAAAATGACCATTAACATGAAATTCGA

>M6-PGSC0003DMG400025926-(rev)M6LRR-RLP\_186

ACAATGGCGAGCTTCAAATACATACGAGTCTAAAATGACCATTAACATGAAATTCGAAAATGCCAGGT  
TGAAGAAAGCTTATGTTGCTCTTCAGGCATGGAAGAAAGCTATTTACTCTG

>M6-PGSC0003DMG400025926-(rev)M6LRR-RLP\_248

GCCAGGTTGAAGAAAGCTTATGTTGCTCTTCAGGCATGGAAGAAAGCTATTTACTCTGATCCAACAACT  
TCACAGCTAATTGGGAGGGTAATAATGTATGTGCCTATAATGGTGTCTTT

>M6-PGSC0003DMG400025926-(rev)M6LRR-RLP\_310

AACAACTTCACAGCTAATTGGGAGGGTAATAATGTATGTGCCTATAATGGTGTCTTTGTGACAATGCT  
CTTGATGATCCCAACATCTCTGTTGTTGCTGGGATTGATCTTAACCATGC

>M6-PGSC0003DMG400025926-(rev)M6LRR-RLP\_372

ACAATGCTCTTGATGATCCCAACATCTCTGTTGTTGCTGGGATTGATCTTAACCATGCAGACATAGCTGG  
ACATCTCCCTGTGGAGCTTGGCCTCTGGCTGATGTGAGTCTCATCCACA

>M6-PGSC0003DMG400025926-(rev)M6LRR-RLP\_434

ATAGCTGGACATCTCCCTGTGGAGCTTGGCCTCTGGCTGATGTGAGTCTCATCCACATTAATTCTAACC  
GATTTTGTGGAATCATTCCCAAGAGCATTAAAATCTTACGCTTTTGGAT

>M6-PGSC0003DMG400025926-(rev)M6LRR-RLP\_496

TTCTAACCGATTTTGTGGAATCATTCCCAAGAGCATTAAAATCTTACGCTTTTGGATGAGATTGATTCA  
GCAACAATCGTTTCGTGGGGCCATTCCCTGATGTTGTTCTTGAGTTGCC

>M6-PGSC0003DMG400025926-(rev)M6LRR-RLP\_558

TTGATTTAGCAACAATCGTTTCGTGGGGCCATTCCCTGATGTTGTTCTTGAGTTGCCTAACTCAACTAT  
CTTGATCTTAGGTTCAACAACCTTGAAGGTCAAGTGCCTCTGCGCTAT

>M6-PGSC0003DMG400025926-(rev)M6LRR-RLP\_620

CTCAACTATCTTGATCTTAGGTTCAACAACCTTGAAGGTCAAGTGCCTCTGCGCTATTTGAGAAGAATCT

TGATGCAATATTGATCAACAATAACCGATTCCATTCCACCATCCCTGAA

>M6-PGSC0003DMG400025926-(rev)M6LRR-RLP\_682

GAAGAATCTTGATGCAATATTGATCAACAATAACCGATTCCATTCCACCATCCCTGAAAGCTTGGGCAAT

TCCAATGCTTCCGTGGTGGTATTGGCAAATAACAAGTTCTATGGTTGCAT

>M6-PGSC0003DMG400025926-(rev)M6LRR-RLP\_744

TGGGCAATTCCAATGCTTCCGTGGTGGTATTGGCAAATAACAAGTTCTATGGTTGCATCCCGAGCAGTAT

TGGTAAAATGGGCAACTCATTAGATGAGCTTGTATTACCAACAATGCGC

>M6-PGSC0003DMG400025926-(rev)M6LRR-RLP\_806

AGCAGTATTGGTAAAATGGGCAACTCATTAGATGAGCTTGTATTACCAACAATGCGCTCTCTGGTTGTT

TGCCTGAAGAGATTACTAAGCTCACGAGCCTAACACTGTTTCGATATTAGT

>M6-PGSC0003DMG400025926-(rev)M6LRR-RLP\_868

TGGTTGTTTGCCTGAAGAGATTACTAAGCTCACGAGCCTAACACTGTTTCGATATTAGTGGAAATAAGTTT

GTTGGATCGTTACCTCAGGATTTGAAATCGATGCAGAAAGTGGAAATCTT

>M6-PGSC0003DMG400025926-(rev)M6LRR-RLP\_930

ATAAGTTTGTGGATCGTTACCTCAGGATTTGAAATCGATGCAGAAAGTGGAAATCTTTGACATTGCATC

GAACAAGTTCATGGGAAATGTTCCAAAGAACCTTTGCAAGTTGCCTAGTT

>M6-PGSC0003DMG400025926-(rev)M6LRR-RLP\_992

ATTGCATCGAACAAGTTCATGGGAAATGTTCCAAAGAACCTTTGCAAGTTGCCTAGTTTGACGAATTTCA

CATTCTCTAAGAACTACTTTGAGAGCATGGATGAAACATGTACGCCATCA

>M6-PGSC0003DMG400025939M6LRR-RLP\_0

ACTAAGTAACAAAAAAATTCCAATTCCATGAAGATCTTTTATTCCCTCATTATTTTTTCAATTCTCAACAA

TATTAATTGCCAATTACTACCACCTTACCAGCACCAAATTTAACCTT

>M6-PGSC0003DMG400025939M6LRR-RLP\_1040

CTAATCAGAGATCAATATTGGAGTGTGTATTATTTAGGATGCAAATTAATTGTGTCCATTACAGAAGAG

CTTGAGGATCATACTTGTAATATTTCTAATTTTAGTCCCATAGACCAC

>M6-PGSC0003DMG400025939M6LRR-RLP\_1105

AAGAGCTTGAGGATCATACTTGTAATATTTCTAATTTTAGTCCCATAGACCACTTAGACCAGAAAGAC

ATTTGATTTCATACTCTGCTTTGTCAAACATACAAAATTGTATTAATGA

>M6-PGSC0003DMG400025939M6LRR-RLP\_1168

GAAAGACATTTGATTCATACTCTGCTTTGTCAAACATACAAAATTGTATTAATGAAACCTTTGTTTTAG  
TGTCTTCTTGATTTTTATTTATTTCTATGTTTTCTACCTGGTGTCCG

>M6-PGSC0003DMG400025939M6LRR-RLP\_65

TCAACAATATTAATTGCCAATTACTACCACCTTTACCAGCACCAAATTTAACCTTCATAGACCAAAGTCTA  
GCTCTAATATTCCAATAATACAAAATTTCAAGAACACAATTACTCTTG

>M6-PGSC0003DMG400025939M6LRR-RLP\_715

TTGGAAATTTTATTCTTGAACAACCTTGCTCACTGGTTGCATTCCTTATGAATTAGGCCTTTTGAAAAAGC  
AATTGTGATCGACATTGGATTTAACACATTAACCTGGTCCATTACCACGT

>M6-PGSC0003DMG400025939M6LRR-RLP\_780

AAAAGCAATTGTGATCGACATTGGATTTAACACATTAACCTGGTCCATTACCACGTTTATTAGGGTGTTTG  
GAAAGTGTGGAACAATTGAATTTTGCTGGAAATTTGTTATATGGACAAGT

>M6-PGSC0003DMG400025939M6LRR-RLP\_910

ATATGTTCACTAAAAATTTAGTGAATTTACTTTGTCATATAACTATTTTACAAAAGTAGGGCCACTATG  
TAGAGAATTGATCGAGAATGGAGTTCTTAATGTTGAAAAAATTGTATT

>M6-PGSC0003DMG400025939M6LRR-RLP\_975

ACTATGTAGAGAATTGATCGAGAATGGAGTTCTTAATGTTGAAAAAATTGTATTAATGGTCTTCCTAAT  
CAGAGATCAATATTGGAGTGTGTATTATTTAGGATGCAAATTAATTGTG

>M6-PGSC0003DMG400026004-(rev)M6LRR-RLK\_0

TTCTTCACAAAAGCCAACACTCCTTTCTTGAAATTTGTCACTAAAACCAACTTTCCCTACAACTTTTCCAT  
CAATTTTTCTTGCAAAAACCAAAAATGGGTTTTCTCTCTGTTCTCTCT

>M6-PGSC0003DMG400026004-(rev)M6LRR-RLK\_1054

TGCATTTTTGGTGAATAAATCTCAAATAAAAGTAACCGAGCTCCATTTGTTTTCTGTTTTTACACAGTAC  
TGCAACTATGTTATAACCAAGTTGACTGGAAGTATACCTAATCAACTGG

>M6-PGSC0003DMG400026004-(rev)M6LRR-RLK\_1116

ACACAGTACTGCAACTATGTTATAACCAAGTTGACTGGAAGTATACCTAATCAACTGGAGCTTTGAAGAA  
ACTGAGTGTCTTGCTTTGCAAGTCAATCAGTTAACTGGAGCAATTCCTG

>M6-PGSC0003DMG400026004-(rev)M6LRR-RLK\_1178

TTGAAGAACTGAGTGTCTTGCTTTGCAAGTCAATCAGTTAACTGGAGCAATTCCTGCAAGCTTGGGG  
GATTTGGAGATGTTAACCAGGCTTGACTTGAGCTTCAATAATCTTTTCGGG

>M6-PGSC0003DMG400026004-(rev)M6LRR-RLK\_124

TTTTCTTATCATCCTTATATTAACATTCCCACAACAAAGGGTTTCTTCTGAAGCCATTAATGATAGTACTA  
AAACTTCTTTATCTTTGCTTATGACTATCAAAGCTTCTTTGGACCCAA

>M6-PGSC0003DMG400026004-(rev)M6LRR-RLK\_1240

CTTGGGGGATTTGGAGATGTTAACCAGGCTTGACTTGAGCTTCAATAATCTTTTCGGGTCGATTCCAGTG  
AAACTCGCTGATGCTCCAAAGCTAGAAGTTCTTGATATCAGAAATAATAC

>M6-PGSC0003DMG400026004-(rev)M6LRR-RLK\_1302

TTCCAGTGAAACTCGCTGATGCTCCAAAGCTAGAAGTTCTTGATATCAGAAATAATACCCTTTCTGGCAA  
TGTCCCTCAAGGTAGTTCTATTTGATTTTCTTGATAGTACCTTTAATCCT

>M6-PGSC0003DMG400026004-(rev)M6LRR-RLK\_1364

TCTGGCAATGTCCCTCAAGGTAGTTCTATTTGATTTTCTTGATAGTACCTTTAATCCTATTTTCATTGCTTAA  
TATGCTTAAGAAATGAAGAAATCTTAGGTTCTTTGATTCCCCCTAATA

>M6-PGSC0003DMG400026004-(rev)M6LRR-RLK\_1426

CATTGCTTAATATGCTTAAGAAATGAAGAAATCTTAGGTTCTTTGATTCCCCCTAATATCAATCCAAATGT  
TTACTAATATTAGACATTATAGTAGAACTAACTCTCTTTTTGGTCTTTT

>M6-PGSC0003DMG400026004-(rev)M6LRR-RLK\_1488

TCCAAATGTTTACTAATATTAGACATTATAGTAGAACTAACTCTCTTTTTGGTCTTTTTGGTTTGGGCAAT  
GGATGAAATGAAGCCTTGAAGAGACTGAATGAAGGATTTTCAGTATGCAA

>M6-PGSC0003DMG400026004-(rev)M6LRR-RLK\_1550

TTGGGCAATGGATGAAATGAAGCCTTGAAGAGACTGAATGAAGGATTTTCAGTATGCAAACAACCCAGA  
CTTGTGTGGAATTGAATTTTCTTCCTTGAAGCTCTGCACTGTATCTAGTCTA

>M6-PGSC0003DMG400026004-(rev)M6LRR-RLK\_1612

CCCAGACTTGTGTGGAATTGAATTTTCTTCCTTGAAGCTCTGCACTGTATCTAGTCTAAACCAAAACAGAC  
CACAGCCATTTGAACCTGGTTCGAATCGTCTTCCCACAAAAGACATTCC

>M6-PGSC0003DMG400026004-(rev)M6LRR-RLK\_1674

AAAACAGACCACAGCCATTTGAACCTGGTTCGAATCGTCTTCCCACAAAAGACATTCCAGAGTCTGCAAA  
TGTACAAACAAAACAAATGAGTCAGTCAAGAAAATCACAAACTGCTGTGG

>M6-PGSC0003DMG400026004-(rev)M6LRR-RLK\_1736

TCTGCAAATGTACAAACAAAACAAATGAGTCAGTCAAGAAAATCACAAACTGCTGTGGTTGTTGGTGT



ATTGCACTTTTTGTTGCAGTAGCAGTAACTGGACTTTTCACATTTTCGTTG

>M6-PGSC0003DMG400026004-(rev)M6LRR-RLK\_1798

TGGTGTTATTGCACTTTTTGTTGCAGTAGCAGTAACTGGACTTTTCACATTTTCGTTGTACCGTCGAAGGA  
AACAGAAAATTGGAGGTACTCTTGATACCTCCGATAGGCGACTCAGTAC

>M6-PGSC0003DMG400026004-(rev)M6LRR-RLK\_186

GATAGTACTAAACTTCTTTATCTTTGCTTATGACTATCAAAGCTTCTTTGGACCCAAAAGCCTCATTCTT  
TCATCATGGTCACCTACTTCTACTGACCCATGCAATGATTCTTTTGAA

>M6-PGSC0003DMG400026004-(rev)M6LRR-RLK\_1860

GTCGAAGGAAACAGAAAATTGGAGGTACTCTTGATACCTCCGATAGGCGACTCAGTACTGATGAGGTG  
AAGGAGATCTCTAGAAGAAGCGCGTCGCCCTCATCAGCCTGGAATATTCCA

>M6-PGSC0003DMG400026004-(rev)M6LRR-RLK\_1922

GAGGTGAAGGAGATCTCTAGAAGAAGCGCGTCGCCCTCATCAGCCTGGAATATTCCAATGGCTGGGA  
TCCTCTAGGCAAAGGCCGAGGTGGAAGTGCTTTCTCTCAGGAAGTATTTGAG

>M6-PGSC0003DMG400026004-(rev)M6LRR-RLK\_1984

CTGGGATCCTCTAGGCAAAGGCCGAGGTGGAAGTGCTTTCTCTCAGGAAGTATTTGAGAGCTTTATGTT  
CAATTTGGATGAAGTTGAGTCAGCTACACAGTACTTTTCAGAAGCAAACCT

>M6-PGSC0003DMG400026004-(rev)M6LRR-RLK\_2046

TTATGTTCAATTTGGATGAAGTTGAGTCAGCTACACAGTACTTTTCAGAAGCAAACCTGTTAGGCAAGAG  
TAATTTACAGCTGTTTATAAAGGGACATTGAGGGATGGGTCTGTTGTTG

>M6-PGSC0003DMG400026004-(rev)M6LRR-RLK\_2108

GGCAAGAGTAATTTACAGCTGTTTATAAAGGGACATTGAGGGATGGGTCTGTTGTTGCTATTAAGTGC  
ATTTCCAAGACTAGCTGCAAGTCAGATGAAACTGAATTTCTCAAGGGACTA

>M6-PGSC0003DMG400026004-(rev)M6LRR-RLK\_2170

TAAGTGCATTTCCAAGACTAGCTGCAAGTCAGATGAAACTGAATTTCTCAAGGGACTAAAACCTTAACC  
TCATTGAAACATGAAAATCTTCTGAGGTTGAGAGGCTTTTGTTGTTCAA

>M6-PGSC0003DMG400026004-(rev)M6LRR-RLK\_2232

TCTTAACCTCATTGAAACATGAAAATCTTCTGAGGTTGAGAGGCTTTTGTTGTTCAAAGGTAGGGGGG  
AATGCTTTCTGATCTACGATTTTCGTTCAAATGGAAATTTGTTGCAGTACC

>M6-PGSC0003DMG400026004-(rev)M6LRR-RLK\_2294

AGGGGGGAATGCTTTCTGATCTACGATTCGTTCCAAATGGAAATTTGTTGCAGTACCTTGACGTGAAG  
GATGGAAAAGGAAAGGTCCTTGATTGGTCTACCAGACTTTCTATAATCAAA

>M6-PGSC0003DMG400026004-(rev)M6LRR-RLK\_2356

CGTGAAGGATGGAAAAGGAAAGGTCCTTGATTGGTCTACCAGACTTTCTATAATCAAAGGCATCGCCAG  
AGGTGAGCTACTGTTTGGTTATTGTCCCATGTTTGATGTTTTATTTATAGC

>M6-PGSC0003DMG400026004-(rev)M6LRR-RLK\_2418

TCGCCAGAGGTGAGCTACTGTTTGGTTATTGTCCCATGTTTGATGTTTTATTTATAGCTCTTTGACGACCA  
GATTTGAATAACAACATTTGTTTTCTATTGTTTTACAGGTATTCATTAC

>M6-PGSC0003DMG400026004-(rev)M6LRR-RLK\_248

CCTCATTCTTTCATCATGGTCACCTACTTCTACTGACCCATGCAATGATTCTTTTGAAGGTATTGCTTGTA  
TGAGCTTGGTCAAGTTGTTAACATTTCTTTGCAAGGCAAAGATCTTAC

>M6-PGSC0003DMG400026004-(rev)M6LRR-RLK\_2480

TGACGACCAGATTTGAATAACAACATTTGTTTTCTATTGTTTTACAGGTATTCATTACTIONTGCATGGAAACA  
AGGGAGGCAAACCTGCTCTGGTCCATCGAAATATATCAGCTGAAAAAGT

>M6-PGSC0003DMG400026004-(rev)M6LRR-RLK\_2542

ATGGAAACAAGGGAGGCAAACCTGCTCTGGTCCATCGAAATATATCAGCTGAAAAAGTACTTGTGCGATC  
AACACTACAACCCATTGCTCTCGGATTCTGGTCTGCACAACTACTAGCAG

>M6-PGSC0003DMG400026004-(rev)M6LRR-RLK\_2604

GTCGATCAACTACAACCCATTGCTCTCGGATTCTGGTCTGCACAACTACTAGCAGATGACATTGTCTT  
CTCAACTCAAGGAAAGTGCTGCAATGGGCTACCTAGCTCCTGAATAT

>M6-PGSC0003DMG400026004-(rev)M6LRR-RLK\_2666

CATTGTCTTCTCAACTCAAGGAAAGTGCTGCAATGGGCTACCTAGCTCCTGAATATAACAACCACTGGA  
CGGTTACCGAAAAGAGTGATCTTTATGCATTTGGCATGATCATATTTCA

>M6-PGSC0003DMG400026004-(rev)M6LRR-RLK\_2728

CCACTGGACGGTTCACCGAAAAGAGTGATCTTTATGCATTTGGCATGATCATATTTAGATTCTCTCCGG  
AAGACGTAAAATCACCCCTTCTAACCATCAAGGGGCAGAGTTGTGCAGAT

>M6-PGSC0003DMG400026004-(rev)M6LRR-RLK\_2790

CTCTCCGGAAGACGTAAAATCACCCCTTCTAACCATCAAGGGGCAGAGTTGTGCAGATTTGAAGACTTC  
ATTGATCCGAATCTTTGGGGCAACTTTGTTGAAGCGGAGGCAGTTCAGATG

>M6-PGSC0003DMG400026004-(rev)M6LRR-RLK\_2852

AGACTTCATTGATCCGAATCTTTGGGGCAACTTTGTTGAAGCGGAGGCAGTTCAGATGGCAAAGGTAGC  
TCTACTTTGCACGCACGAGTCACCAAATCAGAGGCCAGACATTGAAATCGT

>M6-PGSC0003DMG400026004-(rev)M6LRR-RLK\_2914

AGGTAGCTCTACTTTGCACGCACGAGTCACCAAATCAGAGGCCAGACATTGAAATCGTCATGCAAGAAC  
TGAATGATTTAACCTCCAGCAAGTCGTGAAAGCTATTGCAAACAACATCCA

>M6-PGSC0003DMG400026004-(rev)M6LRR-RLK\_2976

CAAGAACTGAATGATTTAACCTCCAGCAAGTCGTGAAAGCTATTGCAAACAACATCCAAGTTCTCCAATG  
ACCATTAGGAGCCTGATACTAACTTCTTACTGATGCCAGGAGTAGGCACC

>M6-PGSC0003DMG400026004-(rev)M6LRR-RLK\_3038

CTCCAATGACCATTAGGAGCCTGATACTAACTTCTTACTGATGCCAGGAGTAGGCACCCTTTTCCCATCCT  
TTTGATCCTGCATGACTTGTGCCTGAGGACAACACATGAATGTCAGGTG

>M6-PGSC0003DMG400026004-(rev)M6LRR-RLK\_310

TTGCTTGTAATGAGCTTGGTCAAGTTGTTAACATTTCTTTGCAAGGCAAAGATCTTACTGGAAAAATCCC  
ACCTGAGATTGGTCAGCTTCAAAGCCTGTCTGGATTGTACTTGCACCTTA

>M6-PGSC0003DMG400026004-(rev)M6LRR-RLK\_3100

TCCCATCCTTTTGATCCTGCATGACTTGTGCCTGAGGACAACACATGAATGTCAGGTGCCTGTTCCACATA  
GTTTAGTACTAATGCACCTCGACGTAGGTAGCCTCAAGTGATCAGTTCT

>M6-PGSC0003DMG400026004-(rev)M6LRR-RLK\_3162

TTCCACATAGTTTAGTACTAATGCACCTCGACGTAGGTAGCCTCAAGTGATCAGTTCTTGTATTATGTA  
ACTTAACCATAATTCTAAGCAAGTTTTCTCCACTTGCAAACACTAGTGTAC

>M6-PGSC0003DMG400026004-(rev)M6LRR-RLK\_3204

TCAAGTGATCAGTTCTTGTATTATGTAACCTAACCATTAATTCTAAGCAAGTTTTCTCCACTTGCAAACCTA  
GTGTACCAGAAGTGCAATTTCTATTTAGTATCATATATGACCTCTTGC

>M6-PGSC0003DMG400026004-(rev)M6LRR-RLK\_372

AAAATCCCACCTGAGATTGGTCAGCTTCAAAGCCTGTCTGGATTGTACTTGCACCTTAATAAGCTACATG  
GGGTTGTACCTAAAGAAATTGCCAACTTAACTCAGCTCTCAGATTTGTAT

>M6-PGSC0003DMG400026004-(rev)M6LRR-RLK\_434

GCTACATGGGGTTGTACCTAAAGAAATTGCCAACTTAACTCAGCTCTCAGATTTGTATCTTAATGTGAAT

AATCTCTCTGGTGTATTTCCTCCTGAGGTTGGCAACATGTCTAGTCTTCA

>M6-PGSC0003DMG400026004-(rev)M6LRR-RLK\_496

ATGTGAATAATCTCTCTGGTGTATTTCCTCCTGAGGTTGGCAACATGTCTAGTCTTCAAGGTAGGTTCTTT  
TTTGCTTTCTGTTTTGGCTAGTTATGGTAAAAAGCCTCTGTCTTTATG

>M6-PGSC0003DMG400026004-(rev)M6LRR-RLK\_558

AGGTTCTTTTTGCTTTCTGTTTTGGCTAGTTATGGTAAAAAGCCTCTGTCTTTATGCTTAGTTTTGACTT  
AATTTGAATGAATGTTTGAACCTTTGCCAAATAGATCTATACCTCTATT

>M6-PGSC0003DMG400026004-(rev)M6LRR-RLK\_62

ACTTTTCCATCAATTTTTCTTGCAAAAACCAAAAATGGGTTTTCTCTCTGTTCTCTCTCCATTTTCCTTATC  
ATCCTTATATTAACATTCCCACAACAAAGGGTTTCTTCTGAAGCCAT

>M6-PGSC0003DMG400026004-(rev)M6LRR-RLK\_620

GTTTTGACTTAATTTGAATGAATGTTTGAACCTTTGCCAAATAGATCTATACCTCTATTAATGAAATGGGTA  
GCTCAATAAAGTGCCAATAAGTGATAATGCTGTTAGTTATTGAGTAAT

>M6-PGSC0003DMG400026004-(rev)M6LRR-RLK\_682

AAATGGGTAGCTCAATAAAGTGCCAATAAGTGATAATGCTGTTAGTTATTGAGTAATTCACAATGCCT  
ATGGCTTTTCTTGAAAAAGATTGGATTTTTAGTACTCATTAGTCATTGA

>M6-PGSC0003DMG400026004-(rev)M6LRR-RLK\_744

CAATGCCTATGGCTTTTCTTGAAAAAGATTGGATTTTTAGTACTCATTAGTCATTGAAAGTCTATATTA  
AAAGGTTCTTGAAGTATCTTTTATGAGGTGATTTTTGTTCCCTATGTAGC

>M6-PGSC0003DMG400026004-(rev)M6LRR-RLK\_806

CTATATTA AAAAGGTTCTTGAAGTATCTTTTATGAGGTGATTTTTGTTCCCTATGTAGCTTACAGCTAGGTG  
CTTAGAACATGAAACACTTGAAAAAGCCTCCATCTTTGGTTTTATGTTA

>M6-PGSC0003DMG400026004-(rev)M6LRR-RLK\_868

AGCTAGGTGCTTAGAACATGAAACACTTGAAAAAGCCTCCATCTTTGGTTTTATGTTAAGCTTTTCTCTGT  
CATTGTCTCTTTCCCATTGATTTGAGCTTCAATATGGGCTAATGCTT

>M6-PGSC0003DMG400026004-(rev)M6LRR-RLK\_930

TTTCTCTGTCATTTGTCTCTTTCCCATTGATTTGAGCTTCAATATGGGCTAATGCTTGAATAAAGTTTCAA  
CTTTCTGGCAAACCTTGCAAATTTCTTAGTCTCTTGTGGGTGGCTT

>M6-PGSC0003DMG400026004-(rev)M6LRR-RLK\_992

AAAGTTTCAACTTTCTGGCAAACCTTGCAAATTTCTTAGTCTCTTGTGGGGTGGCTTTTTCTGCATTTTTG  
GTGGAATAAATCTCAAATAAAAGTAACCGAGCTCCATTTGTTTTCTGT

>M6-PGSC0003DMG400026064M6LRR-RLP\_0

AAGCTTAGATCTCAGTGGATGTAATTTATGTGATAGCCAAGCTGCTGCTCTTATGAACTTAACCTCTCTAT  
TGGAAGTGAACCTGAGCAGAAATAAGTTTATTTATTTCCCTGATGTCTT

>M6-PGSC0003DMG400026064M6LRR-RLP\_1054

AAAAATATAAAAATCAATCAGATAACTTAACTTAAAATTAGATAAAAATGGTTGGCATCAAGCCAAGC  
CCAATGTCCCTAGCATAAAGTTCTTATTTTCTGGAAAAATTACATAAATGA

>M6-PGSC0003DMG400026064M6LRR-RLP\_1116

GCCAAGCCCAATGTCCCTAGCATAAAGTTCTTATTTTCTGGAAAAATTACATAAATGAATCTCTTTTATTT  
AATAATAATTACCACTTTTAAATATACTTTTATTTTATTACTATTTTTG

>M6-PGSC0003DMG400026064M6LRR-RLP\_124

CGACTTTCTCACCTTCGATATCTCAATATTACACACTGTCAGGAACTTAAGAACTGCCCGTACTTCCTAA  
GAGTATAGAGGAATTATATGTAGAAGATTTTTTGGCAAAGAAAGTATT

>M6-PGSC0003DMG400026064M6LRR-RLP\_1240

CTTTTAGCAATACTTACTTAAACAATTCTTGAATAATTTTGTTCTTTTATATATATAATTAAGAATTTTCA  
ACTTAGCAAAAATTGTTGTACCTGATCGGGAACATCGCTCATTCCCT

>M6-PGSC0003DMG400026064M6LRR-RLP\_1302

AAGAATTTTCAACTTAGCAAAAATTGTTGTACCTGATCGGGAACATCGCTCATTCCCTCTTCACTATTCTT  
TCTGCTCTTCTTTGTTTTATTTTAGGGTTTTGCCATTCTTCTTCT

>M6-PGSC0003DMG400026064M6LRR-RLP\_1364

CACTATTCTTTCTGCTCTTCTCTTTGTTTTATTTTAGGGTTTTGCCATTCTTCTTCTTCAATTTTCAGCACAG  
TATTCTAATGGAAGAAGGCAAACGAAAATCGCCTAGTAGAAGTCCG

>M6-PGSC0003DMG400026064M6LRR-RLP\_1426

TTTTCAGCACAGTATTCTAATGGAAGAAGGCAAACGAAAATCGCCTAGTAGAAGTCCGCAGATACTTAG  
TGATGTTGATACTTCAAATCAAAAAGTTTATAGAAGGAGTCGGATGAGGGG

>M6-PGSC0003DMG400026064M6LRR-RLP\_1488

TACTTAGTGATGTTGATACTTCAAATCAAAAAGTTTATAGAAGGAGTCGGATGAGGGGTCAAATTTTCAG  
CTTCTACTGCTACCGACGAAGTTAAGGATGATCCCAATTTTAATTTGGGAA

>M6-PGSC0003DMG400026064M6LRR-RLP\_1550

ATTTGAGCTTCTACTGCTACCGACGAAGTTAAGGATGATCCCAATTTTAATTTGGGAATTTACAAGTATC  
AAGTGAGCAGAACAAGGAGGAGAGAAATGCATGTTAGGTAAATAAATGA

>M6-PGSC0003DMG400026064M6LRR-RLP\_1612

ACAAGTATCAAGTGAGCAGAACAAGGAGGAGAGAAATGCATGTTAGGTAAATAAATGAGTTAAAGAG  
GTGAAAAATGTGAAAAAAGTAAAAAAGATGCGTTGATTTTGCATCTACATC

>M6-PGSC0003DMG400026064M6LRR-RLP\_1674

AAGAGGTGAAAAATGTGAAAAAAGTAAAAAAGATGCGTTGATTTTGCATCTACATCGAAGAAAATC  
GTGGACAACGATGACGATTTTGAGGATTTATCTCCTAAATTTGAGTCAAAAA

>M6-PGSC0003DMG400026064M6LRR-RLP\_1736

AAAATCGTGGACAACGATGACGATTTTGAGGATTTATCTCCTAAATTTGAGTCAAAAAAATTGAAAAATA  
AAGTTGTGTCGGAGTAGAAGAAGCAGTGAAGGATGCAAAAACGCAGATTC

>M6-PGSC0003DMG400026064M6LRR-RLP\_1785

AGTCAAAAAAATTGAAAAATAAAGTTGTGTCGGAGTAGAAGAAGCAGTGAAGGATGCAAAAACGCAG  
ATTCGATTGGCCAAAAATGTCATTCTACCGGAGAGTAGAGATCAGGTATGTGA

>M6-PGSC0003DMG400026064M6LRR-RLP\_186

ACTTCCTAAGAGTATAGAGGAATTATATGTAGAAGATTTTTGGCAAAGAAAGTATTGCAAAGCTACG  
GATGCACCCAAGGTTGAATTTGGTATCATTACCAATTATAGTTTTGATCA

>M6-PGSC0003DMG400026064M6LRR-RLP\_248

AGCTACGGATGCACCCAAGGTTGAATTTGGTATCATTACCAATTATAGTTTTGATCAACAATCTTATACA  
GAGGAGAGCAATGGTAGCTCAATTTGAGATGAGATTCTCAGTTTGTTC

>M6-PGSC0003DMG400026064M6LRR-RLP\_310

TCTTATACAGAGGAGAGCAATGGTAGCTCAATTTGAGATGAGATTCTCAGTTTGTTCATCAAACAATA  
TGGATGATGTGATCTTCCCCTCTTAACCTGATCATAGGGTAACCTGT

>M6-PGSC0003DMG400026064M6LRR-RLP\_434

TTGTCTTTCTGAACGTGCAATTTCCACATGGTTTATGCATCAGAGTGTTGAGGAAAAGATCTCGTTCAA  
ACTGCCATTAATTGGTATAATGATAAGTTCAAGGGCTTTGCTATATGTT

>M6-PGSC0003DMG400026064M6LRR-RLP\_496

TCGTTCAAACCTGCCATTAATTGGTATAATGATAAGTTCAAGGGCTTTGCTATATGTTGTGTGACTCTCAT

GGGAGCAGGTGTCTGCAGTCCTGATTCTAGGCTATCTGGGAAGTATGAT

>M6-PGSC0003DMG400026064M6LRR-RLP\_558

GACTCTCATGGGAGCAGGTGTCTGCAGTCCTGATTCTAGGCTATCTGGGAAGTATGATTATGCTTTTATC

AATGCCAAATTGATATGCAATGATCATTGAAAGACCTTAAAGTGATAGA

>M6-PGSC0003DMG400026064M6LRR-RLP\_62

CCTCTCTATTGGAACCTGAGCAGAAATAAGTTTATTTATTTCCCTGATGTCTTCAGGCGACTTTCT

CACCTTCGATATCTCAATATTACACACTGTCAGGAACTTAAGAAACTGC

>M6-PGSC0003DMG400026064M6LRR-RLP\_620

CTTTTATCAATGCCAAATTGATATGCAATGATCATTGAAAGACCTTAAAGTGATAGAGAAAGAATGTAA

AGTGGGCACAGCATCTAGAACATATGGCTGGTGTGTTTGCTTCGCCTACA

>M6-PGSC0003DMG400026064M6LRR-RLP\_744

ATTGTATTCTTCACTGCAGGTTGGAGACATTAATCAGTATTGCCTATTTGAGGCATCTATCCATGGATGCA

TTGTGAGACAGTGGGGAGTTCATTTGATCTATCAGGATAAATGAATATC

>M6-PGSC0003DMG400026064M6LRR-RLP\_806

ATGGATGCATTGTGAGACAGTGGGGAGTTCATTTGATCTATCAGGATAAATGAATATCTTTGAAGCGCA

GACTCAGAGAGATTGTATCGAGTACTCCTAAGCTGAAAAAGAGGCTAAATT

>M6-PGSC0003DMG400026064M6LRR-RLP\_868

AAGCGCAGACTCAGAGAGATTGTATCGAGTACTCCTAAGCTGAAAAAGAGGCTAAATTATGCTGGGATA

TTAAGGGGATTACCAAGAAATAGTTTAAGGTAAGTTCGAAATACCTCTTCTT

>M6-PGSC0003DMG400026064M6LRR-RLP\_930

TGGGATATTAAGGGGATTACCAAGAAATAGTTTAAGGTAAGTTCGAAATACCTCTTCTTTGTTACTAGAGT

TTCATAATTTGAATATGGTTAGATTAACAAGTTTAAACTATAAGTTTTCGA

>M6-PGSC0003DMG400026064M6LRR-RLP\_992

ACTAGAGTTTCATAATTTGAATATGGTTAGATTAACAAGTTTAAACTATAAGTTTCGATTAGAAAAATAT

AAAAATCAATCAGATAACTTAACTTAAATAGATAAAAAATGGTTGGCA

>M6-PGSC0003DMG400026072M6LRR-RLK\_0

CTAAGACCTCATTTTCTATCATCACTAAATGGACTAAAACTAACAACTCTGCATTCAGAACTTCTTTTT

CTTTTATCTATTTCTGGTGACTGACACTGCAAATCCCATTTTCCCTT

>M6-PGSC0003DMG400026072M6LRR-RLK\_1037

TGGAAAGTTATATGAAGTATATGACAAACATTTTGTAGGTATACATACAACACTTTAAAAAAGACAGC  
TTTTTTGAATTGGATATGAGTATTATCTTGTTTTTTTAATATACCACT

>M6-PGSC0003DMG400026072M6LRR-RLK\_1098

AAAGACAGCTTTTTTTGAATTGGATATGAGTATTATCTTGTTTTTTTAATATACCACTTTATCTTAGTGTT  
TGATATCTGAGTTTCCACTGTTTTTCTTCAGCTGCTTCTTGGATGGA

>M6-PGSC0003DMG400026072M6LRR-RLK\_1159

ATCTTAGTGTTTGATATCTGAGTTTCCACTGTTTTTCTTCAGCTGCTTCTTGGATGGACACCCATCATGGC  
AATAATGGAGTTCTTGATTGGATTGTGTCCCCTTTATGAAATGACCC

>M6-PGSC0003DMG400026072M6LRR-RLK\_122

GAGGGGTCTCATTCAAACTTTTGAATTTTTTTGGGTATTCAAGAAAACAAAAGTTTGAAGCTTTCTGCCT  
CTTTATGTGTGAATAAATAAGAGAAACAGAAAATCATCTTACTATTTCA

>M6-PGSC0003DMG400026072M6LRR-RLK\_1220

CCCATCATGGCAATAATGGAGTTCTTGATTGGATTGTGTCCCCTTTATGAAATGACCCTTTTGCCTTCT  
CAAATTTCAAGAATGGCCAGAATCCAAAACTTCAAACCTCTCTCTCAA

>M6-PGSC0003DMG400026072M6LRR-RLK\_1281

TTGCCCTTCTCAAATTTCAAGAATGGCCAGAATCCAAAACTTCAAACCTCTCTCTCAATTCTTGCTGTTTT  
CTTGTTTTTTGAATTTTTTTGTCCAGACATGTAAGTCCTTAACCTCAGA

>M6-PGSC0003DMG400026072M6LRR-RLK\_1342

CTTGCTGTTTTCTTGTTTTTTGAATTTTTTTGTCCAGACATGTAAGTCCTTAACCTCAGAAAGTGAGGCTCTT  
TTGCATTTCAAAGAGCAGCTTAATGACCCTTTGAATTACTTGGATTCT

>M6-PGSC0003DMG400026072M6LRR-RLK\_1403

GTGAGGCTCTTTTGCATTTCAAAGAGCAGCTTAATGACCCTTTGAATTACTTGGATTCTTGAAGGACTC  
AGAATCTCCTTGCAAGTTCTATGGAATTACATGTGATAAAAATACTGGTC

>M6-PGSC0003DMG400026072M6LRR-RLK\_1464

GAAGGACTCAGAATCTCCTTGCAAGTTCTATGGAATTACATGTGATAAAAATACTGGTCTTGTTATTGAA  
ATTTCCCTCGATAATAAGTCGCTTTCCGGGGTGATTTACCTTCAATTTT

>M6-PGSC0003DMG400026072M6LRR-RLK\_1525

GTTATTGAAATTTCCCTCGATAATAAGTCGCTTTCCGGGGTGATTTACCTTCAATTTTTTCACTCAAAGT  
CTCACTTCTTGTGCTACCTTCAAATGCACTATCAGGGAACTTCTCT



>M6-PGSC0003DMG400026072M6LRR-RLK\_1586

CACTCAAAGTCTCACTTCTCTTGCTACCTCAAATGCACTATCAGGGAACTTCCTAGTGAAGTTACC  
AACTGCACCAGTCTCAAAGTCTTGAATGTCCTGGAATAACATGAACG

>M6-PGSC0003DMG400026072M6LRR-RLK\_1647

TGAAGTTACCAACTGCACCAGTCTCAAAGTCTTGAATGTCCTGGAATAACATGAACGAAACGATACCT  
GATTTGTCTAAGTTGACTAACTTAGAAGTGTGGACTTGTGCGATTAECTA

>M6-PGSC0003DMG400026072M6LRR-RLK\_1708

ACGATACCTGATTTGTCTAAGTTGACTAACTTAGAAGTGTGGACTTGTGCGATTAECTATTTTTCCGGGG  
AATTCCCATCTTGGGTTGGAATATGACTGGTTTGGTTGCGCTAGGCCTT

>M6-PGSC0003DMG400026072M6LRR-RLK\_1769

TTTCCGGGGAATTCCCATCTTGGGTTGGAATATGACTGGTTTGGTTGCGCTAGGCCTTGGAGATAATG  
ACTTTGTTGAAGGTAATAATTCTGAGACTCTTGGGAATTTAAAGAAAGTGT

>M6-PGSC0003DMG400026072M6LRR-RLK\_183

CTTTCTGCCTCTTTATGTGTGAATAAATAAGAGAAACAGAAAATCATCTTACTATTTTCAGGTATAACTCAT  
GTTTTCTTTAAGACTTGTTCAATTTGCTAGTCTTTTAATTACATAAAAAT

>M6-PGSC0003DMG400026072M6LRR-RLK\_1830

AGATAATGACTTTGTTGAAGGTAATAATTCTGAGACTCTTGGGAATTTAAAGAAAGTGTATTGGCTTTAC  
CTGGCAGGTTCAAATTTGACAGGAGAAATCCCAGAATCCATTTTTGAAAT

>M6-PGSC0003DMG400026072M6LRR-RLK\_1891

TGGCTTTACCTGGCAGGTTCAAATTTGACAGGAGAAATCCCAGAATCCATTTTTGAAATGGAGGCACTA  
GGTACATTGGATATTTCAAGAAATCAAATTTCTGGGAATTTCTCTAAGTCA

>M6-PGSC0003DMG400026072M6LRR-RLK\_1952

AGGCACTAGGTACATTGGATATTTCAAGAAATCAAATTTCTGGGAATTTCTCTAAGTCAGTAAACAAGCT  
GAAAAATTTATGGAAAATTGAGCTGTTTCAGAATAAGTTGACAGGGGAAC

>M6-PGSC0003DMG400026072M6LRR-RLK\_2013

AAACAAGCTGAAAAATTTATGGAAAATTGAGCTGTTTCAGAATAAGTTGACAGGGGAACTTCCTGTAGA  
ACTGGCAGAGCTCTCTTTTTGCAGGAATTTGATATCTCTAGCAACCATAT

>M6-PGSC0003DMG400026072M6LRR-RLK\_2074

CCTGTAGAACTGGCAGAGCTCTCTTTTTGCAGGAATTTGATATCTCTAGCAACCATATGTATGGGAAGC

TGCCTCCAGAAATCGGGAACCTGAAGAAGTTAACAGTTTTTCATGTATTC

>M6-PGSC0003DMG400026072M6LRR-RLK\_2135

ATGGGAAGCTGCCTCCAGAAATCGGGAACCTGAAGAAGTTAACAGTTTTTCATGTATTCATGAATAACTT  
CTCTGGTGAAATTCCTCCTGGTTTTGGAGATATGCAGCATCTTAATGCCT

>M6-PGSC0003DMG400026072M6LRR-RLK\_2196

GAATAACTTCTCTGGTGAAATTCCTCCTGGTTTTGGAGATATGCAGCATCTTAATGCCTTTTCTGTGTACA  
GGAACAATTTTTCTGGGGTATTTCCAGCAAATCTTGGTCTGTTTTCCCC

>M6-PGSC0003DMG400026072M6LRR-RLK\_2257

TCTGTGTACAGGAACAATTTTTCTGGGGTATTTCCAGCAAATCTTGGTCTGTTTTCCCCCCTGAATAGCAT  
AGACATATCTGAAAACAAGTTTACTGGTGGATTCCCAAAGTACTTGTGC

>M6-PGSC0003DMG400026072M6LRR-RLK\_2318

TGAATAGCATAGACATATCTGAAAACAAGTTTACTGGTGGATTCCCAAAGTACTTGTGCCAAAATGGGA  
ACCTGCAGTTTTTGCTAGCTATTGAGAACAGTTTCTCAGGGGAGTTTCCGA

>M6-PGSC0003DMG400026072M6LRR-RLK\_2379

AAATGGGAACCTGCAGTTTTTGCTAGCTATTGAGAACAGTTTCTCAGGGGAGTTTCCGAGTACTTATTTCG  
TCGTGCAAGCCTTTACAGAGATTGAGGGTCAGTAAGAATCAACTTTCTGG

>M6-PGSC0003DMG400026072M6LRR-RLK\_244

TATAACTCATGTTTTCTTTAAGACTTGTTCAATTTGCTAGTCTTTAATTACATAAAAATCCAAACTTTATGT  
GTTATATGAGTTATCAGATGATTCTTAACAATAAGCTAGCATTTAGC

>M6-PGSC0003DMG400026072M6LRR-RLK\_2440

ACTTATTCGTCGTGCAAGCCTTTACAGAGATTGAGGGTCAGTAAGAATCAACTTTCTGGGCAAATTCCTA  
GTGGTGTATGGAGACTTCCAAATGTATTGATGATGGATTTTCAGTGATAAC

>M6-PGSC0003DMG400026072M6LRR-RLK\_2501

AAATTCCTAGTGGTGTATGGAGACTTCCAAATGTATTGATGATGGATTTTCAGTGATAACGAATTCAGTGG  
AACTATGTCCCCGGAAATTGGGGCTGCTACTAGCCTGAATCAGTTGGTAT

>M6-PGSC0003DMG400026072M6LRR-RLK\_2562

ATTCAGTGGAACATATGTCCCCGGAAATTGGGGCTGCTACTAGCCTGAATCAGTTGGTATTATCAAATAAC  
AGATTTTCAGGTGAGCTTCCAAAAGAACTTGGGAAACTCACACAATTGGA

>M6-PGSC0003DMG400026072M6LRR-RLK\_2623

TCAAATAACAGATTTTCAGGTGAGCTTCCAAAAGAACTTGGGAAACTCACACAATTGGAAAGGCTTTACT  
TGGATAACAATAACTTCTCGGGCGCAATACCTTCTGAACTTGGTAAACTA

>M6-PGSC0003DMG400026072M6LRR-RLK\_2684

GGCTTTACTTGGATAACAATAACTTCTCGGGCGCAATACCTTCTGAACTTGGTAAACTAAAGCAAATTC  
ATCTTTGCATTTGGAGAAAACTCATTCTCGGGCACTATCCCATCAGAAT

>M6-PGSC0003DMG400026072M6LRR-RLK\_2745

GCAAATTTTCATCTTTGCATTTGGAGAAAACTCATTCTCGGGCACTATCCCATCAGAATTGGGTGAATTC  
CTAGGCTTGCAGACCTGAATCTTGCTTCAAATCTTCTTACAGGTAACAT

>M6-PGSC0003DMG400026072M6LRR-RLK\_2806

GGTGAATTTCTAGGCTTGCAGACCTGAATCTTGCTTCAAATCTTCTTACAGGTAACATTCCCAATTCCTT  
ATCAACAATGACCTCTTTGAACTCTCTGAATCTTTCACACAACAGACTC

>M6-PGSC0003DMG400026072M6LRR-RLK\_2867

CCAATTCCTTATCAACAATGACCTCTTTGAACTCTCTGAATCTTTCACACAACAGACTCACTGGTACAATA  
CCAAGTAGCTTGGACAATCTGAAGCTGTCTTCATTGGATCTCTCAAACA

>M6-PGSC0003DMG400026072M6LRR-RLK\_2928

TGGTACAATACCAACTAGCTTGGACAATCTGAAGCTGTCTTCATTGGATCTCTCAAACAACCAGCTATCA  
GGAGAGGTATCATTAGATCTTTAACTGGGAGGAGACAAGGCATTAGC

>M6-PGSC0003DMG400026072M6LRR-RLK\_2989

CAGCTATCAGGAGAGGTATCATTAGATCTTTAACTGGGAGGAGACAAGGCATTAGCTGGTAACAAA  
GGACTTTGTATCGACCAAAGCATCAGATTCTCGATCAACTCAGGCTTGGGC

>M6-PGSC0003DMG400026072M6LRR-RLK\_305

AAACTTTATGTGTTATATGAGTTATCAGATGATTCTTAACAATAAGCTAGCATTTAGCCATAGATTTTAG  
ATGATATTTTGAAAATTTATATTCCTATCTGTTTGGCCATGAAATTTGA

>M6-PGSC0003DMG400026072M6LRR-RLK\_3050

GTAACAAAGGACTTTGTATCGACCAAAGCATCAGATTCTCGATCAACTCAGGCTTGGGCAGTTGTGGTG  
GAAAGGCTGCTAAACATAAGTTAAACAATACTAGTTGTGTCTTGCATTGTGT

>M6-PGSC0003DMG400026072M6LRR-RLK\_3111

TTGTGGTGGAAAGGCTGCTAAACATAAGTTAAACAATACTAGTTGTGTCTTGCATTGTGTTGCTTTCCTTA  
GCGTTCTAATGGGTGGCTTATTGCTCGTCAGTTACCTAAACTACAAGCA

>M6-PGSC0003DMG400026072M6LRR-RLK\_3172

CTTTCCTTAGCGGTTCTAATGGGTGGCTTATTGCTCGTCAGTTACCTAACTACAAGCATAGTCATGAAGT  
AGATCATGAAGAAAACTGGAGGAAGCCAAGGGAACAAATGCAAATGG

>M6-PGSC0003DMG400026072M6LRR-RLK\_3233

GTCATGAAGTAGATCATGAAGAAAACTGGAGGAAGCCAAGGGAACAAATGCAAATGGAACTTGA  
GAGTTTCCACCCTGTGGAATTTGATGCAGATGAAGTTTGTGATTTTCGATGAGG

>M6-PGSC0003DMG400026072M6LRR-RLK\_3294

ACTTGAGAGTTTCCACCCTGTGGAATTTGATGCAGATGAAGTTTGTGATTTTCGATGAGGACAATTTGATC  
GGAAGTGGAGGTACAGGAAAAGTTTATCGGTTAGACTTGAAGAAAGGTTG

>M6-PGSC0003DMG400026072M6LRR-RLK\_3355

AATTTGATCGGAAGTGGAGGTACAGGAAAAGTTTATCGGTTAGACTTGAAGAAAGGTTGTGGAACAGT  
AGCAGTGAAGCAGCTGTGGAAGGGATTGGTGTGAAAGTTTTGACAAGGGAA

>M6-PGSC0003DMG400026072M6LRR-RLK\_3416

GAACAGTAGCAGTGAAGCAGCTGTGGAAGGGATTGGTGTGAAAGTTTTGACAAGGGAAATGGAAAT  
CTTGGGAAAAATCAGGCACAGAAATATAGTTAAGTTGTATGCCAGTCTAATGA

>M6-PGSC0003DMG400026072M6LRR-RLK\_3477

GGAAATCTTGGGAAAAATCAGGCACAGAAATATAGTTAAGTTGTATGCCAGTCTAATGAAAGAAGGTTCC  
AAATATCTTGGTTTTCGAGTACATGCCAAATGGTAATCTTTTCGAGGCACT

>M6-PGSC0003DMG400026072M6LRR-RLK\_3538

GAAGGTTCAAATATCTTGGTTTTCGAGTACATGCCAAATGGTAATCTTTTCGAGGCACTACACCGAGAGA  
TCAAGGCTGGCAAGCCAGAACTAGATTGGTATCAGAGATATAAAATAGCC

>M6-PGSC0003DMG400026072M6LRR-RLK\_3599

ACCGAGAGATCAAGGCTGGCAAGCCAGAACTAGATTGGTATCAGAGATATAAAATAGCCCTTGGAGCT  
GCAAAGGAATTGCTTATCTGCATCATGATTGTTACCCTCCTATTATTCACA

>M6-PGSC0003DMG400026072M6LRR-RLK\_366

TAGATTTTAGATGATATTTTAAAATTTATATTCCTATCTGTTTGGCCATGAAATTTGACATTTTTGGAATT  
TTGGGACTTTTCGCTCTTAAACTTCAAATCTATAGCCAAACAGGACC

>M6-PGSC0003DMG400026072M6LRR-RLK\_3660

TGGAGCTGCAAAGGAATTGCTTATCTGCATCATGATTGTTACCCTCCTATTATTCACAGAGATATCAAAT

CAACCAACATTCTACTTGATGAGTATTATGAAGCAAAGTTTCAGATTT

>M6-PGSC0003DMG400026072M6LRR-RLK\_3721

GATATCAAATCAACCAACATTCTACTTGATGAGTATTATGAAGCAAAGTTTCAGATTTCTGGGGTTGCAA  
AAGTTTCAGAAATTTCTTCAAGGGGATCCGAGTTCAGTTGTTTTGCAGGC

>M6-PGSC0003DMG400026072M6LRR-RLK\_3782

GGGTTGCAAAGTTTCAGAAATTTCTTCAAGGGGATCCGAGTTCAGTTGTTTTGCAGGCACTCATGGTTA  
CATGGCTCCTGGTAAGTTTCAAGAAAACCTTAAAATGAGTGACCATTTTG

>M6-PGSC0003DMG400026072M6LRR-RLK\_3843

TCATGGTTACATGGCTCCTGGTAAGTTTCAAGAAAACCTTAAAATGAGTGACCATTTTGTCTCTCCTTGT  
ACTTTCCATTCTTGAATTTGCATTTACTTTCCTATATGTTTGCTTGACA

>M6-PGSC0003DMG400026072M6LRR-RLK\_3904

TCTCCTTGTTACTTTCCATTCTTGAATTTGCATTTACTTTCCTATATGTTTGCTTGACAGAAATGGCATA  
CACTCTCAGAGTGACCGAAAAGAACGACATTTACAGCTTTGGTGTCGTGC

>M6-PGSC0003DMG400026072M6LRR-RLK\_3965

AATGGCATACTCTCAGAGTGACCGAAAAGAACGACATTTACAGCTTTGGTGTCGTGCTATTGGAGCT  
AGTAACTGGAAGAAAACCAATAGAAGAAGCCTACGGAGAAGGAAAAGACCT

>M6-PGSC0003DMG400026072M6LRR-RLK\_4026

TTGGAGCTAGTAACTGGAAGAAAACCAATAGAAGAAGCCTACGGAGAAGGAAAAGACCTGGTCTACTG  
GACCTCAACTCATCTAAATGACAAGGAAAGTATAAACAAAGTTCTTGATCAA

>M6-PGSC0003DMG400026072M6LRR-RLK\_4087

TCTACTGGACCTCAACTCATCTAAATGACAAGGAAAGTATAAACAAAGTTCTTGATCAAAGGTGGTATC  
TGAACCTGTTTCAGGATGAAATGATCAAAGTGTTGAGAATTGCCACACTTT

>M6-PGSC0003DMG400026072M6LRR-RLK\_4148

GGTGGTATCTGAACTTGTTTCAGGATGAAATGATCAAAGTGTTGAGAATTGCCACACTTTGTACTACTAAG  
CTTCTTAATTTGCGTCCCAGCATGAAAGAGGTTGTCAATATGCTCGTCCGA

>M6-PGSC0003DMG400026072M6LRR-RLK\_4209

ACTACTAAGCTTCTTAATTTGCGTCCCAGCATGAAAGAGGTTGTCAATATGCTCGTCCGATGCTGAACCTT  
TGACGTTTAGGTCTTCAAGCAAATCTGAGAAAAAAGGGAACAATTTTTCT

>M6-PGSC0003DMG400026072M6LRR-RLK\_427

TTTTTGAATTTTGGGACTTTCGCTCTTAAACTTCAAATCTATAGCCAAACAGGACCTAAAGGATGCA  
TGTTACTTATGAGTTCTTAAGAAAGTTTACTTTTTTGTCTATGTATAT

>M6-PGSC0003DMG400026072M6LRR-RLK\_4270

CTGAACCTTTGACGTTTAGGTCTTCAAGCAAATCTGAGAAAAAGGGAACAATTTTTCTGAGGTCTAGTT  
TCTCTTTTTTTTTATTGGGTTTTCCCTGTTGATAGTTGCTCTGTAGTAT

>M6-PGSC0003DMG400026072M6LRR-RLK\_4331

GGTCTAGTTTCTCTTTTTTTTTATTGGGTTTTCCCTGTTGATAGTTGCTCTGTAGTATAATTCTCAAGTTA  
GTTTTAGGTATCTGATACATAAATTTATACCATGTGATGTGATATT

>M6-PGSC0003DMG400026072M6LRR-RLK\_4392

TTCTCAAGTTAGTTTTAGGTATCTGATACATAAATTTATACCATGTGATGTGATATTCCACTTTCTTTAT  
GTAAAAGTTTGAATTGTGTAAGATAAAATGTACTTTTTTCTGCCGTGA

>M6-PGSC0003DMG400026072M6LRR-RLK\_4453

ACTTTCTTTATGTAAAAGTTTGAATTGTGTAAGATAAAATGTACTTTTTTCTGCCGTGATTGGAAACTTCA  
GAAGTTGGATTAATCAGAAATGTGGGTAGTTAATGTCCATGATTAAGAG

>M6-PGSC0003DMG400026072M6LRR-RLK\_4514

GGAAACTTCAGAAGTTGGATTAATCAGAAATGTGGGTAGTTAATGTCCATGATTAAGAGTCCCACATCG  
GCAAAAATACATTAGATATGTTGATTATATAAATTAGCAGGCCTTACATTC

>M6-PGSC0003DMG400026072M6LRR-RLK\_4575

CCACATCGGCAAAAATACATTAGATATGTTGATTATATAAATTAGCAGGCCTTACATTCTAATAACTTTC  
TTAAAGCTGCATAGGTGTAGACTCAAAGCTAACAATATCACTAGCGAGC

>M6-PGSC0003DMG400026072M6LRR-RLK\_4636

ATAATACTTCTTAAAGCTGCATAGGTGTAGACTCAAAGCTAACAATATCACTAGCGAGCTGGGCCTTACA  
CGAAAACCTGTTTTGTTGTAACCTTTGAATCTGATTCAATGAATATCCAC

>M6-PGSC0003DMG400026072M6LRR-RLK\_4697

GGCCTTACACGAAAACCTGTTTTGTTGTAACCTTTGAATCTGATTCAATGAATATCCACATAGATAGTTGG  
AAGCAAAAATGATACATAAACATTTTCATACATTTGTATAAGAGGGAT

>M6-PGSC0003DMG400026072M6LRR-RLK\_4758

AGATAGTTGGAAGCAAAAATGATACATAAACATTTTCATACATTTGTATAAGAGGGATGGAAACCAAC  
AATATTACTTTTTATCTTTTGTGATCCTCCTCAGTATTACATGGTACAT

>M6-PGSC0003DMG400026072M6LRR-RLK\_4819

AAACCAACAATATTACTCTTTTTATCTTTTGTGATCCTCCTCAGTATTACATGGTACATTCTGCAGATTTTT  
CCTGCTCTCTATGACATTACGGTTCCAAATCTTCACTCCTTTGCTTCA

>M6-PGSC0003DMG400026072M6LRR-RLK\_4880

TGCAGATTTTTCTGCTCTCTATGACATTACGGTTCCAAATCTTCACTCCTTTGCTTCAAGAAGTTGAGTTA  
ATGCACCATCAATTTGAGCAAATACCTCCTCTTTGGAAACGCTCCCGT

>M6-PGSC0003DMG400026072M6LRR-RLK\_4941

AAGTTGAGTTAATGCACCATCAATTTGAGCAAATACCTCCTCTTTGGAAACGCTCCCGTCCACCTGAAATT  
AAAATAGCTCAGAGAAGATGGAGAAAGAAGATAGAAGTTTTAACACTGA

>M6-PGSC0003DMG400026072M6LRR-RLK\_5002

ACCTGAAATTAATAAGCTCAGAGAAGATGGAGAAAGAAGATAGAAGTTTTAACACTGAGAAATGATA  
AGAACACGTTTCATGCACGCGTATGGAAAGAAAGAACATACAGTATCCTTGTT

>M6-PGSC0003DMG400026072M6LRR-RLK\_5063

AATGATAAGAACACGTTTCATGCACGCGTATGGAAAGAAAGAACATACAGTATCCTTGTTTCAGTGAAGAA  
AAAGAGAAGGGTAAGCGAAAGGGGAGTCCTTGACTAAGTATATTTTCCCC

>M6-PGSC0003DMG400026072M6LRR-RLK\_5124

GTGAAGAAAAAGAGAAGGGTAAGCGAAAGGGGAGTCCTTGACTAAGTATATTTTCCCCCAGATTGTTT  
GGTATGAACGTAAACTCAAAGGATTTGCTCTTCCTTTATCTAATTGAGGAG

>M6-PGSC0003DMG400026072M6LRR-RLK\_5185

ATTGTTTGGTATGAACGTAAACTCAAAGGATTTGCTCTTCCTTTATCTAATTGAGGAGAGATGAATAAT  
TTTAAGATAAAAGAGGATGTATGGCCCTTTTGCTTTGGCTTCGCTTTGTT

>M6-PGSC0003DMG400026072M6LRR-RLK\_5246

ATGAATAATTTAAGATAAAAGAGGATGTATGGCCCTTTTGCTTTGGCTTCGCTTTGTTTTACAGCTGTTG  
AGAGGAAGGATCAGCCTGGATGAACTGGAAGATAATTTAAATTAATCAT

>M6-PGSC0003DMG400026072M6LRR-RLK\_5307

ACAGCTGTTGAGAGGAAGGATCAGCCTGGATGAACTGGAAGATAATTTAAATTAATCATTTTGTAACCT  
ACATGTCAAACAACATAATTTTATAACCATATCATTGTTCTTTTGCCAATT

>M6-PGSC0003DMG400026072M6LRR-RLK\_5368

TGTAACCTACATGTCAAACAACATAATTTTATAACCATATCATTGTTCTTTTGCCAATTAGAATACCAAACCT

TCTTTTTCTTCAAACCATTTCCACCCAGTCCCTTCCACATTGTCTTTT

>M6-PGSC0003DMG400026072M6LRR-RLK\_549

CTGTTTCTGTAAATTATGAAAGCTGTTTGTCTGTCAATTAGTTGATTCCATGTTCTTGTTCCTAT

TGTAGTTTGCTACAACCTTCTTGGAAGTTGTTTGTATTGTT

>M6-PGSC0003DMG400026072M6LRR-RLK\_61

AACTTCTTTTTCTTTTATCTATTTCTGGTGACTGACACTGCAAATCCCATTTCCCTTTAGAGGGGTCTCA

TTCAAACCTTTGAATTTTTTGGGTATTCAAGAAAACAAAAGTTTGA

>M6-PGSC0003DMG400026072M6LRR-RLK\_610

TTGTTTGCCTATTGTAGTTTGCTACAACCTTCTTGGAAGTTGTTTGTATTGTTACAAATATGGAA

ATCCTAGATTTCAATCTTCTTGCTTATATTCCTATAATTCTTGCAATTA

>M6-PGSC0003DMG400026072M6LRR-RLK\_671

AAATATGGAAATCCTAGATTTCAATCTTCTTGCTTATATTCCTATAATTCTTGCAATTATGTTTCGAGGGGT

CTATCGAAAAAGTCTCTACCTACCCAGATTCCACACTTGTGTTTTG

>M6-PGSC0003DMG400026072M6LRR-RLK\_732

TTTCGAGGGGTCTATCGAAAAAGTCTCTACCTACCCAGATTCCACACTTGTGTTTTGGGGTAAATGAG

TATCTTCTTTCATCTGGACAGTCTGTAAAATAAGGTGAACTATTATATT

>M6-PGSC0003DMG400026072M6LRR-RLK\_793

GTAAATGAGTATCTTCTTTCATCTGGACAGTCTGTAAAATAAGGTGAACTATTATATTTTGAGTCACTTT

AAAGGGAGATAATTTAATTTTTATATAGTGTAATTCACAACTAAATGAG

>M6-PGSC0003DMG400026072M6LRR-RLK\_854

GAGTCACTTTAAAGGGAGATAATTTAATTTTTATATAGTGTAATTCACAACTAAATGAGAAATTGACATC

TTAACATAAGTTTATTTCTTCCCAACCCACCCAACAATTCCATCTTTT

>M6-PGSC0003DMG400026072M6LRR-RLK\_915

ATTGACATCTTAACATAAGTTTATTTCTTCCCAACCCACCCAACAATTCCATCTTTTATAATCTAGACTT

CCTGTATCTGTAAGTTTTCTTTTCTTGAACACTACAATTTTTATTTCAT

>M6-PGSC0003DMG400026072M6LRR-RLK\_976

AATCTAGACTTCTGTATCTGTAAGTTTTCTTTTCTTGAACACTACAATTTTTATTTCATGTTGGAAAGTTAT

ATGAAGTATATGACAAACATTTTGTAGGTATACATACAACACTTTAA

>M6-PGSC0003DMG400026154M6G-LecRK\_0



GTCTCACTGAAATGAAATAGAGGGCAAGAGCTACCTATTTGAATTTATTATGTTCTTCATTCAAATCATCA  
ACAATTCCATAAAACAATGCAATTAAGTAATTTTCTCTTGTTGTTGTTG

>M6-PGSC0003DMG400026154M6G-LecRK\_1054

TTAGCTCTTGCAATGAAGACAATGTAGAAGTACTCGACACGTTCTTGATTGAGGTCAATGAAATTCAA  
GAGTCCAGACAAGATAATCAGTAATATTAGTACCCGTGAGGACTGCAGGA

>M6-PGSC0003DMG400026154M6G-LecRK\_1116

AAATTCAGAGTCCAGACAAGATAATCAGTAATATTAGTACCCGTGAGGACTGCAGGAGATTTTGTCTA  
GGCAACTGTACGTGCCAGGCCTATACTTACAATGATTCTGTATGCTGGATT

>M6-PGSC0003DMG400026154M6G-LecRK\_1178

TTGTCTAGGCAACTGTACGTGCCAGGCCTATACTTACAATGATTCTGTATGCTGGATTGGGACACTAGT  
CTCATGTCTCTCCAGGAGAACTATGCTGGTGGCTTCAACATCTCTGTTCG

>M6-PGSC0003DMG400026154M6G-LecRK\_124

CAGCATTGATGATTTTACATCGATGTGATGCAAGGAGGAGCACCATTGATGGAAGCAGTAAATTAGTTG  
ACAATGGCGAAACACTTGTATCTGCTGGTGAAAATTTTCAAATGGGATTCT

>M6-PGSC0003DMG400026154M6G-LecRK\_1240

ACACTAGTCTCATGTCTCTCCAGGAGAACTATGCTGGTGGCTTCAACATCTCTGTTCGTGTCAGCATTCC  
GATATTGGTAATTTCTTTTTCGATTAACTTATGTACACTGACAGTTTA

>M6-PGSC0003DMG400026154M6G-LecRK\_1302

AGCATTCCGATATTGGTAATTTCTTTTTCGATTAACTTATGTACACTGACAGTTTAAAGCTAATGTGTGA  
CCACAAATAGTACAGTAATTTGATTTTTGTGCATTGCAGAAGCAACAAG

>M6-PGSC0003DMG400026154M6G-LecRK\_1364

AATGTGTGACCACAAATAGTACAGTAATTTGATTTTTGTGCATTGCAGAAGCAACAAGGAGAAATTGCA  
AGCCTTGTGGCATAAACCTAATACCCTATCCATTAAGCAGTGGACCAAATT

>M6-PGSC0003DMG400026154M6G-LecRK\_1426

AATTGCAAGCCTTGTGGCATAAACCTAATACCCTATCCATTAAGCAGTGGACCAAATTGTGGTGACCCTC  
TGTATTATAGTTTCTCATGTGATGATTTAGCTGGTCAGGTAAGCTTCTAC

>M6-PGSC0003DMG400026154M6G-LecRK\_1488

TGACCCTCTGTATTATAGTTTCTCATGTGATGATTTAGCTGGTCAGGTAAGCTTCTACACATCGAATGGCA  
AGTATACTGTCGTTAACTTTGATAAAGATAACAAAACATTTGTTATAGA

>M6-PGSC0003DMG400026154M6G-LecRK\_1550

CGAATGGCAAGTATACTGTCGTTAACTTTGATAAAGATAACAAAACATTTGTTATAGAAGCAGCTCATAA  
AGAATCTGTTGGTACTTGTGATGACAAAGGACCGGTGACAGGAATTTCTT

>M6-PGSC0003DMG400026154M6G-LecRK\_1612

GCTCATAAAGAATCTGTTGGTACTTGTGATGACAAAGGACCGGTGACAGGAATTTCTTGGTTCAACCAG  
TCATCACCTTTTAAGGTGATAAACTGGTGTACAATCCTGAAGAGAATCTT

>M6-PGSC0003DMG400026154M6G-LecRK\_1674

CAACCAGTCATCACCTTTTAAGGTGATAAACTGGTGTACAATCCTGAAGAGAATCTTACTTCAGGACCT  
TTTAGTCGAGGGAAAGATTTAATATTGATTAGTTGGAAACCACCATTGGA

>M6-PGSC0003DMG400026154M6G-LecRK\_1736

CAGGACCTTTTAGTCGAGGGAAAGATTTAATATTGATTAGTTGGAAACCACCATTGGAGCCATTTTGCAA  
GACTTCAGAAGATTGCAATGATTGGCCAAATTCTAGTTGCAATATGACAA

>M6-PGSC0003DMG400026154M6G-LecRK\_1798

TTTTGCAAGACTTCAGAAGATTGCAATGATTGGCCAAATTCTAGTTGCAATATGACAAAACAAGGAGAA  
AGAAGATGTATATGCCAAACTGATTACAAATGGAATGGCTTGACTTTAAAT

>M6-PGSC0003DMG400026154M6G-LecRK\_186

TTAGTTGACAATGGCGAAACACTTGTATCTGCTGGTGAAAATTTTGAATGGGATTCTTTTCTGATGATG  
ACGGGTTAAACAAATATGTAGGCATATGGTATTACAAATTAAGTCCTAGA

>M6-PGSC0003DMG400026154M6G-LecRK\_1860

AGGAGAAAGAAGATGTATATGCCAAACTGATTACAAATGGAATGGCTTGACTTTAAATTGTTCCCTTGAG  
TTTAGGTATATGGATCAATGTTACTTACTACAAATGATTTTCTTGCCAATA

>M6-PGSC0003DMG400026154M6G-LecRK\_1922

CCTTGAGTTTAGGTATATGGATCAATGTTACTTACTACAAATGATTTTCTTGCCAATAGTTCAATGATACC  
TTTTTCTATGTTCTCCATTTGACCTTTTATATGACCAACACATATTTCA

>M6-PGSC0003DMG400026154M6G-LecRK\_1984

AATGATACCTTTTTCTATGTTCTCCATTTGACCTTTTATATGACCAACACATATTTCAATTTCTTAAATTTGCT  
TCAGAACTTGGAACACAAGGATCATTACATTACGAAGCTGGCATCCTC

>M6-PGSC0003DMG400026154M6G-LecRK\_2046

TTAAATTTGCTTCAGAACTTGGAACACAAGGATCATTACATTACGAAGCTGGCATCCTCACGGAATCAGAG

AACCCTTGTTATTTCCATCTCTGTAGTTCTTGGAGTTATAACTTTGTGCA

>M6-PGSC0003DMG400026154M6G-LecRK\_2093

CTGGCATCCTCACGGAATCAGAGAACCCTTGTTATTTCCATCTCTGTAGTTCTTGGAGTTATAACTTTGTG

CAGCATTAGTTATATAATTTATCAGAACACTAGAGTGACAAGAAGTAGA

>M6-PGSC0003DMG400026154M6G-LecRK\_248

TGATGATGACGGGTTAAACAAATATGTAGGCATATGGTATTACAAATTAAGTCCTAGAACTGTTGTATG

GGTTGCTAATTGGAATAATTCGATTCAGGGTAAAAGAATAATGAATGAGGA

>M6-PGSC0003DMG400026154M6G-LecRK\_310

TTGTATGGGTTGCTAATTGGAATAATTCGATTCAGGGTAAAAGAATAATGAATGAGGATAATTCGGTTG

TCGTTGAAGATGGTAATCTCAAAGTTTTAAGTAATGGGAGTACTTATTTCT

>M6-PGSC0003DMG400026154M6G-LecRK\_372

TCGGTTGTCGTTGAAGATGGTAATCTCAAAGTTTTAAGTAATGGGAGTACTTATTTCTCCACACTATTAG

GTGGTGGTTCTAACAGGAAAGTAGAGTTGTTGGATACAGGGAACTTAGTT

>M6-PGSC0003DMG400026154M6G-LecRK\_434

ACTATTAGGTGGTGGTTCTAACAGGAAAGTAGAGTTGTTGGATACAGGGAACTTAGTTTTAGTTGATGA

ATCAGGAGGTGAAATGTGGCAGAGTTTTCGCAATCCAACCGATACATTCCT

>M6-PGSC0003DMG400026154M6G-LecRK\_496

TTGATGAATCAGGAGGTGAAATGTGGCAGAGTTTTCGCAATCCAACCGATACATTCCTACCAGGTATGA

AAATGGATAGTATTTTGAATTTGATTGATTCAAATATGTGAACTACATAT

>M6-PGSC0003DMG400026154M6G-LecRK\_558

GGTATGAAAATGGATAGTATTTTGAATTTGATTGATTCAAATATGTGAACTACATATTCGAATTAGATC

AATCAAGTGACAAGGAATATGTTATAATTGCAAAGCAGGGCGGATTTTCGC

>M6-PGSC0003DMG400026154M6G-LecRK\_62

AAATCATCAACAATTCCATAAAACAATGCAATTAAGTAATTTTCTTGTGTTGTTGTTTGCAGCATTGA

TGATTTTACATCGATGTGATGCAAGGAGGAGCACCATTGATGGAAGCAG

>M6-PGSC0003DMG400026154M6G-LecRK\_620

ATTAGATCAATCAAGTGACAAGGAATATGTTATAATTGCAAAGCAGGGCGGATTTTCGCTGGAAAGGGTC

TGCGAAATCAGGAAATTTAAGATTAGGTGAGATGCCTGGTTATGTTGCCTA

>M6-PGSC0003DMG400026154M6G-LecRK\_682

AAGGGTCTGCGAAATCAGGAAATTTAAGATTAGGTGAGATGCCTGGTTATGTTGCCTACATGTTATCCA  
ACTTCACTAATAAAAAACATTGTCAATAATTCATTGGAATCGATAGGAACAT

>M6-PGSC0003DMG400026154M6G-LecRK\_744

TTATCCAACTTCACTAATAAAAAACATTGTCAATAATTCATTGGAATCGATAGGAACATTTAACAAGAGTA  
GGCTCTTAATGAACTCCTCTGGGGAAATACAATTCTACGGTTGGGATAAG

>M6-PGSC0003DMG400026154M6G-LecRK\_806

CAAGAGTAGGCTCTTAATGAACTCCTCTGGGGAAATACAATTCTACGGTTGGGATAAGGAGATCAGTGG  
ATGGTCTTTGAAGTGGTCAGCGCCAAAGGATACGTGTGATTTGTTAAGTT

>M6-PGSC0003DMG400026154M6G-LecRK\_868

TCAGTGGATGGTCTTTGAAGTGGTCAGCGCCAAAGGATACGTGTGATTTGTTAAGTTTTGTGGGAAGT  
TTAGCATTTGTAACAGCAAACATGATCCAGTATGCAAATGTTTGCCCGGGT

>M6-PGSC0003DMG400026154M6G-LecRK\_930

GGGAAGTTTAGCATTTGTAACAGCAAACATGATCCAGTATGCAAATGTTTGCCCGGGTATAAGCTCAAT  
CCTCCAGATAATTCAAAGCAGGAGATTTTTAGGTGGTTGTTCAAGGATG

>M6-PGSC0003DMG400026154M6G-LecRK\_992

GCTCAATCCTCCAGATAATTCAAAGCAGGAGATTTTTAGGTGGTTGTTCAAGGATGTCAGTTAGCTCT  
TGCAATGAAGACAATGTAGAAGTACTCGACACGTTCTTGGATTTGAGGTC

>M6-PGSC0003DMG400026155M6G-LecRK\_0

ATCTGATTGAAAGGAAAAACCAAGTCTTACCATGACTATCAACATGATCTTAATTGATGATGTGCATCT  
TCTGTTAACAATTTGGTGCAACCATGCAACTGCAACATTATTCGATTCTG

>M6-PGSC0003DMG400026155M6G-LecRK\_1054

ACACCTATATCTGATGCAGAATGGGACTTGAATGATCATTCTGGTGGCTGTGTTAGGAAGGAAAGCTTG  
CAGTGTGGTGTGATGGTAAAATGAAGGGCGGTTTTTCGGAGAATCCCCATGTG

>M6-PGSC0003DMG400026155M6G-LecRK\_1116

AAGCTTGCAAGTGTGGTGTGATGGTAAAATGAAGGGCGGTTTTTCGGAGAATCCCCATGTGACATTGCCCGG  
ATATTCTCTAACTGTGTGCGGCTGCTAGTTCTGAGGAATGCCAGTCGACTTG

>M6-PGSC0003DMG400026155M6G-LecRK\_1178

TGCCCGGATATTCTCTAACTGTGTGCGGCTGCTAGTTCTGAGGAATGCCAGTCGACTTGCTTGAGTAACTG  
TTCTTCATGTAATGCATATGCTTATGATAATAATGTGTGTTCAATTTGGA

>M6-PGSC0003DMG400026155M6G-LecRK\_124

CTTTTTGTGATCCTAACATGTTTATTTATCAGTATTCATCAGTCTCTCGGAGTTGAAATGATTTTCAGTAAAT  
CACTCTGTTTCTGGAAACCAAACACTATCGTCTCTTCGGGAGAAAACCTT

>M6-PGSC0003DMG400026155M6G-LecRK\_1240

AGTAACTGTTCTTCATGTAATGCATATGCTTATGATAATAATGTGTGTTCAATTTGGAATGAAGTTGTGA  
ATCTGAAGCAACTCTCACCAGGAGATGGTAGTGGAAGTGTGATTATACC

>M6-PGSC0003DMG400026155M6G-LecRK\_1302

AGTTGTGAATCTGAAGCAACTCTCACCAGGAGATGGTAGTGGAAGTGTGATTATACCAGACTCGCTGT  
CTCTGACGAAGCATAACGGTGAAGGTAAGTTTAAAGTTAAGAGTTGTATTTG

>M6-PGSC0003DMG400026155M6G-LecRK\_1364

TCGCTGTCTCTGACGAAGCATAACGGTGAAGGTAAGTTTAAAGTTAAGAGTTGTATTTGATAGTGTGGCC  
ATTTCTATGTATGCAATGCTCATCTCCAAATAGCTACCGATAGAGCTTTC

>M6-PGSC0003DMG400026155M6G-LecRK\_1426

TGTTTGCCATTTCTATGTATGCAATGCTCATCTCCAAATAGCTACCGATAGAGCTTTCTATGGATGTTTGT  
TTTTCTTGTCTGATGTTTCAGTTCTTTACTTCATGTCTTTCAACAGTA

>M6-PGSC0003DMG400026155M6G-LecRK\_1488

GATGTTTGTTTTTCTTGTCTGATGTTTCAGTTCTTTACTTCATGTCTTTCAACAGTACGAGTCTATACATTC  
TCTAAATCTTAGTGCTCATAAGAATTAAGGCAATTATAAGTTTA

>M6-PGSC0003DMG400026155M6G-LecRK\_1550

TCTATACATTCTCTAAATCTTAGTGCTCATAAGAATTAAGGCAATTATAAGTTTACGCAAACACCTTC  
TATGTTTTAAACAAACATCAGATAGCCACTGTCCAAATTTAAGTTTACG

>M6-PGSC0003DMG400026155M6G-LecRK\_1612

AACACCTTCTATGTTTTAAACAAACATCAGATAGCCACTGTCCAAATTTAAGTTTACGCAACATCATCTAC  
GTTATAAACACACATAAGATAGTCACTGACCAAATGTATGGTTTTTCATG

>M6-PGSC0003DMG400026155M6G-LecRK\_1674

ATCATCTACGTTATAAACACACATAAGATAGTCACTGACCAAATGTATGGTTTTTCATGTTTTGATTAGTTA  
CAACTAGCCAAAATGAGTTGAAGATCTTTTCGCCAGTAAACATTACCAGT

>M6-PGSC0003DMG400026155M6G-LecRK\_1736

GATTAGTTACAACACTAGCCAAAATGAGTTGAAGATCTTTTCGCCAGTAAACATTACCAGTTCGTTGAATTCC

CACATCAGCTCTTTAAGGATGGGATGGTCTTTTCATATGGTTTTGGACAG

>M6-PGSC0003DMG400026155M6G-LecRK\_1798

TGAATCCCACATCAGCTCTTTAAGGATGGGATGGTCTTTTCATATGGTTTTGGACAGTTCTTACCTCATA  
AACTAGCTTTTATAGTTGAGTTAGCCTCAAGGTCCATTTCTTATCACGT

>M6-PGSC0003DMG400026155M6G-LecRK\_186

TTCAGTAAATCACTCTGTTTCTGGAAACCAAATATCGTCTCTTCGGGAGAAAACCTTGAATTAGGATTCT  
TTTTTCTGGTAGTTCGAAAAATTACTATCTTGGTATATGGTATAAGAA

>M6-PGSC0003DMG400026155M6G-LecRK\_1860

TACCTCATAAACTAGCTTTTATAGTTGAGTTAGCCTCAAGGTCCATTTCTTATCACGTTATTAGAATCAGA  
CCCATCCCAAATAGTCTATTTCTTGTCAAAATTCCTTATGTTTCTTC

>M6-PGSC0003DMG400026155M6G-LecRK\_1922

AGAATCAGACCCATCCCAAATAGTCTATTTCTTGTCAAAATTCCTTATGTTTCTTCTTTCTGTCATCAGA  
TGCAAATTCAGGGAAATTGTCCCTGAAGGTTAAAGTCATCATATCTGG

>M6-PGSC0003DMG400026155M6G-LecRK\_1984

TGTCATCAGATGCAAATTCAGGGAAATTGTCCCTGAAGGTTAAAGTCATCATATCTGGCGTGGTAGCCG  
TTGCAGTTCTACTTCTATGTAGCTTTAGCTACATTTATCATAGGAGAATAA

>M6-PGSC0003DMG400026155M6G-LecRK\_2046

GTAGCCGTTGCAGTTCTACTTCTATGTAGCTTTAGCTACATTTATCATAGGAGAATAATGTCAAAGAAAA  
CAGGTACTTGTGTTGCTATTACAATCTCTGGAGTAGTTGTTTTACCACTA

>M6-PGSC0003DMG400026155M6G-LecRK\_2108

AAAGAAAACAGGTACTTGTGTTGCTATTACAATCTCTGGAGTAGTTGTTTTACCACTACCAGAAAAATTT  
CTCCTTCCATTTTTTTTTTCCGAATCAGATCAAGAGAGATATCTCAAAGG

>M6-PGSC0003DMG400026155M6G-LecRK\_2170

AAAAATTTCTCCTTCCATTTTTTTTTTCCGAATCAGATCAAGAGAGATATCTCAAAGGGCTGCTTTTTTTT  
TTTTTTTTTTATCTTAGCAAGCCAACAAAGCACAGGAGGCAATCCAGT

>M6-PGSC0003DMG400026155M6G-LecRK\_2232

CTCTTTTTTTTTTTTTTTTTATCTTAGCAAGCCAACAAAGCACAGGAGGCAATCCAGTTCACATTGGTTAA  
ACAGAGAAAGAGAAGCACAAATTCTGATTAACGAAAATGATAAGCAAA

>M6-PGSC0003DMG400026155M6G-LecRK\_2294

CATTGGTTAAACAGAGAAAGAGAAGCACAAATTCTGATTAACGAAAATGATAAGCAAACATTGCCGTT  
CCATTCTTTAGTTTGGAAAACATACTAGCAGCCACAGATCATTTCTCAGAT

>M6-PGSC0003DMG400026155M6G-LecRK\_2356

TGCCGTTCCATTCTTTAGTTTGGAAAACATACTAGCAGCCACAGATCATTTCTCAGATGTAAATAAACTTG  
GACAAGGAGGTTTTGGTCCTGTTTATAAGGTTAGCATTAAATAATTCCT

>M6-PGSC0003DMG400026155M6G-LecRK\_2418

ATAAACTTGACAAGGAGGTTTTGGTCCTGTTTATAAGGTTAGCATTAAATAATTCACITTAACATGAGTT  
CAACTTTATGTAGTCATTTATAGCATCCTAGTTTCCACATCGAAAATCT

>M6-PGSC0003DMG400026155M6G-LecRK\_248

TAGGATTCTTTTTCTGGTAGTTCGAAAAATTACTATCTTGGTATATGGTATAAGAATGTAATGCCACAA  
ACAATAGTATGGGTAGCAAACAGGGAGAAGCCACTTTCTGCTACTGATA

>M6-PGSC0003DMG400026155M6G-LecRK\_2480

CATGAGTTCAACTTTATGTAGTCATTTATAGCATCCTAGTTTCCACATCGAAAATCTTTCAGGGTATATTT  
TCAGATGGACAAGAAATTGCTGTGAAAAGGCTATCAACCCAATCTAGA

>M6-PGSC0003DMG400026155M6G-LecRK\_2604

GCATTGAAGAATTCAGGAACGAAGTCATACTGATCTCGAAACTTCAACATAGAAATCTAGTCAGACTTTT  
AGGCTACTGTATCACAGGGTATGAACAGATTCTACTTTACGAGTATATGT

>M6-PGSC0003DMG400026155M6G-LecRK\_2666

AGACTTTTAGGCTACTGTATCACAGGGTATGAACAGATTCTACTTTACGAGTATATGTCAAACAAAAGTC  
TAGACACCTTCATATTCGGTTAGTATATATATCTGAACTTATCTTATTTT

>M6-PGSC0003DMG400026155M6G-LecRK\_2728

CAAAAGTCTAGACACCTTCATATTCGGTTAGTATATATATCTGAACTTATCTTATTTCTTAATCTCTCTATT  
ACTTGATCAATGTTGCTAAATTTCTCCTTGGTTACCAAACAAGAT

>M6-PGSC0003DMG400026155M6G-LecRK\_2790

TCTCTATTTACTTGATCAATGTTGCTAAATTTCTCCTTGGTTACCAAACAAGATCCTACACTTAGCAA  
GTCATTGAATTGGAAAATCGATTTGAGATCATATTAGGAATTTCTCG

>M6-PGSC0003DMG400026155M6G-LecRK\_2852

CACTTAGCAAGTCATTGAATTGGAAAATCGATTTGAGATCATATTAGGAATTTCTCGAGGGCTTCTCTA  
TCTTCATGAAGACTCAAGGCTCAGAATCATTATAGAGATCTGAAAACAA

>M6-PGSC0003DMG400026155M6G-LecRK\_2914

CTTCTCTATCTTCATGAAGACTCAAGGCTCAGAATCATTTCATAGAGATCTGAAAACAAGTAACATTCTTT  
GGATCAACAAATGAACCCAAAAATCTCAGACTTTGGCTTGGCAAGGATA

>M6-PGSC0003DMG400026155M6G-LecRK\_2976

CATTCTTTTGGATCAACAAATGAACCCAAAAATCTCAGACTTTGGCTTGGCAAGGATAGTTGAAGAACAA  
ACAACAGAAGCAAGTACCAAAAAAGTGGTTGGAAGTCTAGTAAGTAATACA

>M6-PGSC0003DMG400026155M6G-LecRK\_3038

AAGAACAAACAACAGAAGCAAGTACCAAAAAAGTGGTTGGAAGTCTAGTAAGTAATACAAACATGACAA  
TGTTATGAACTTTGCTTAATTTTCATCGCACATCTGACTCATGATTATTCCAT

>M6-PGSC0003DMG400026155M6G-LecRK\_3100

TGACAATGTTATGAACTTTGCTTAATTTTCATCGCACATCTGACTCATGATTATTCCATCATTATTTGATTTA  
GCGGATATATGTCTCCTGAATATGCATTGGAAGGAGATTTTTCGATTA

>M6-PGSC0003DMG400026155M6G-LecRK\_3162

ATTTGATTTAGCGGATATATGTCTCCTGAATATGCATTGGAAGGAGATTTTTCGATTAAGTCAGACGTAT  
TCAGCTTAGGAGTAGTTATACTGGAGATAGTAACCGGAAGGAGAAATACA

>M6-PGSC0003DMG400026155M6G-LecRK\_3224

AGACGTATTCAGCTTAGGAGTAGTTATACTGGAGATAGTAACCGGAAGGAGAAATACAGGATTTTATCA  
ATCTAAAGAAGCATCTAACCTTTTGGTCCATGTGAGTGCCTTGAGTACACG

>M6-PGSC0003DMG400026155M6G-LecRK\_3286

TTTATCAATCTAAAGAAGCATCTAACCTTTTGGTCCATGTGAGTGCCTTGAGTACACGTTATTTTTTTCCA  
ATGTGTACGTTGATCTTCATATTCATTATTCTAAATCATGATATCACAG

>M6-PGSC0003DMG400026155M6G-LecRK\_3348

TTTTTTCCAATGTGTACGTTGATCTTCATATTCATTATTCTAAATCATGATATCACAGGCATGGAATTACTG  
GAAAGAAAAAAGAGCACTACATTTGCTGGATCATTTCATTGCTCGAATC

>M6-PGSC0003DMG400026155M6G-LecRK\_3472

AACCCGAAAGAAGCAATGACGTGCATAAACGTTGGACTCTTATGTGTGCAAGAAGATCCAGGTGATCGT  
CCTTCCATGTCAATTGTTGTTATGATGCTTCGTTGTGATAGTACGTCTCTT

>M6-PGSC0003DMG400026155M6G-LecRK\_3534

TGATCGTCCTTCCATGTCAATTGTTGTTATGATGCTTCGTTGTGATAGTACGTCTCTTCCAAAGCCTAATC



AACCTGCTTTTGTGTCTAGGTGAAATGTTTCTAATTCAACTTCTGTTTC

>M6-PGSC0003DMG400026155M6G-LecRK\_3596

AGCCTAATCAACCTGCTTTTGTGTCTAGGTGAAATGTTTCTAATTCAACTTCTGTTTCATCTGGTACACCAC  
CTAGCTTCTCCAAAATTGAGTTGACAATCACAGTTGAAGAAGGCCGAT

>M6-PGSC0003DMG400026155M6G-LecRK\_3658

GGTACACCACCTAGCTTCTCCAAAATTGAGTTGACAATCACAGTTGAAGAAGGCCGATAACGTGATGAA  
TTCATTAGTTTTTCAAATGAATTTAAACGCGAATTTAAATTATTTTTTTCAC

>M6-PGSC0003DMG400026155M6G-LecRK\_372

TTCTGTTGAGTTGAAAGTTTTGGATGGTAATTTAGTGCTTATTACTGAATCCAAAACTTGTTTTGGTCTA  
CAAATATCAGCAACACAATTAGTTCAAATACACTAATGGCAATTCTTTC

>M6-PGSC0003DMG400026155M6G-LecRK\_3720

TGATGAATTCATTAGTTTTTCAAATGAATTTAAACGCGAATTTAAATTATTTTTTTCACCTTAGATTA  
AAAAA  
CAAATTACAGGAATACTTGATCCTTTTTCTTTTTCTCAATTTTTTTGT

>M6-PGSC0003DMG400026155M6G-LecRK\_3782

GATTA  
AAAAA  
CAAATTACAGGAATACTTGATCCTTTTTCTTTTTCTCAATTTTTTTGTTGTTTAGGCAGTAG  
AAGACTTGGGACCAGTACTGCTGATATTTATAGTGAAA  
ACTGAAAGGT

>M6-PGSC0003DMG400026155M6G-LecRK\_3844

TAGGCAGTAGAAGACTTGGGACCAGTACTGCTGATATTTATAGTGAAA  
ACTGAAAGGTATATATGCTTA  
ATATTGTGTACAACATAGAATATATTGTGTTGATA  
AAAAAA  
AAGTTCATTTT

>M6-PGSC0003DMG400026155M6G-LecRK\_3906

ATGCTTAATATTGTGTACAACATAGAATATATTGTGTTGATA  
AAAAAA  
AAGTTCATTTTCTGTTTCATTTTG  
GTCTCTTCTACCTTCTTAACTTGCTTAAACAGTAAGAATGGAAGAAA

>M6-PGSC0003DMG400026155M6G-LecRK\_434

TTTGGTCTACAAATATCAGCAACACAATTAGTTCAAATACACTAATGGCAATTCTTTCTGATGATGGTAAT  
TTGATTTTTAGTGATGGATCAAATTCAACTACCACTTTGGCAAAGCT

>M6-PGSC0003DMG400026155M6G-LecRK\_496

GATGGTAATTTGATTTTTAGTGATGGATCAAATTCAACTACCACTTTGGCAAAGCTTCGATAACCCGA  
CTAATACATGGTTGCCGAATGCTAAGGTGAAGTATGACAAGCGTACAAAT

>M6-PGSC0003DMG400026155M6G-LecRK\_558

TAACCCGACTAATACATGGTTGCCGAATGCTAAGGTGAAGTATGACAAGCGTACAAATACAACAAAGAT  
TCTTACTTCTTGGAAGAACTCAGAGGATCCATCTCCGGGGATTTTTTCCGT

>M6-PGSC0003DMG400026155M6G-LecRK\_62

GTGCATCTTCTGTTAACAAATTTGGTGCAACCATGCAACTGCAACATTATTCGATTCGTCTACTTTTTGTG  
ATCCTAACATGTTTATTTATCAGTATTCATCAGTCTCTCGGAGTTGAAA

>M6-PGSC0003DMG400026155M6G-LecRK\_620

CAAAGATTCTTACTTCTTGGAAGAACTCAGAGGATCCATCTCCGGGGATTTTTTCCGTGGAAATGGATCA  
GAGTAATAAGCAGTTCTTGATAAAATGGAACAGGACTGAGATGTACTIONCAG

>M6-PGSC0003DMG400026155M6G-LecRK\_682

ATGGATCAGAGTAATAAGCAGTTCTTGATAAAATGGAACAGGACTGAGATGTACTIONCAGCTACTGGATCT  
TGGAATGGGCATATTTTCAACATGATGCCTGAGATGAGTTTGAATTCTGAT

>M6-PGSC0003DMG400026155M6G-LecRK\_744

TGGATCTTGAATGGGCATATTTTCAACATGATGCCTGAGATGAGTTTGAATTCTGATAGATACAGATTT  
TCATATGTTGATAATGAAAATGAGAGCTATTTTACTTATCCCTCCGTAA

>M6-PGSC0003DMG400026155M6G-LecRK\_806

ACAGATTTTCATATGTTGATAATGAAAATGAGAGCTATTTTACTTATCCCTCCGTAACCTCCAAAATC  
AGATTAACACTAGATGTCTCTGGGCAAATCAGGCATCTGATTTGGGCCG

>M6-PGSC0003DMG400026155M6G-LecRK\_868

TCCAAAATCAGATTAACACTAGATGTCTCTGGGCAAATCAGGCATCTGATTTGGGCCGAAAATTTAAAG  
GAATGGCAAATTTTACATCTCAACCAAGACAACCCTGTGAGGTGTATGCT

>M6-PGSC0003DMG400026155M6G-LecRK\_930

TTTAAAGGAATGGCAAATTTTACATCTCAACCAAGACAACCCTGTGAGGTGTATGCTAGTTGTGGTGCC  
TTTAGCATTTGCAATAAGGAGTCCGCGACCTTCTGTAATTGCTTGACTGG

>M6-PGSC0003DMG400026156M6G-LecRK\_0

TTAAACAGGAGCAACTTACAAGGAGGTGTACTAGGAAAAATAATGGAGTTGGATTGTGTTGTAGCTAT  
TTTAATTGTATTTTGTGTTCTTTCGTTATGCTTCTGGCAAGTGAAGAAAG

>M6-PGSC0003DMG400026156M6G-LecRK\_1037

GCTGTGATGACGGAGACATATTCTTGAAACATGACGAGGATATGAAGTTTCCGGATCATGCTATTTCCCT  
AGGACATATGAGCATTAAAGACTGTGAAACTCGCTGCATTAGGAACTGTT

>M6-PGSC0003DMG400026156M6G-LecRK\_1098

TATTTCTTAGGACATATGAGCATTAAAGGACTGTGAAACTCGCTGCATTAGGAACTGTTCTTGTTTCAGCTT  
ATGCTTATTCAAATAGCACCTGTTTAATTTGGTTTGGAGATTTACTGGA

>M6-PGSC0003DMG400026156M6G-LecRK\_1159

TGTTTCAGCTTATGCTTATTCAAATAGCACCTGTTTAATTTGGTTTGGAGATTTACTGGACCTTTCCCACAA  
CTTTCTGGTGGCAGAGTTCTCAATGTTTCGAGTTCGTGGCTCCAAGCCA

>M6-PGSC0003DMG400026156M6G-LecRK\_122

TCAAGATGGGCAAATCAATCACTGGTAATCAGAAAATGATTTTCAGCTGGTGGAAAGTTTTTCTTGGGCTT  
CTTCACTCCACGTAATTCTACATTTACCTATCTTGGCATATGGTACAACA

>M6-PGSC0003DMG400026156M6G-LecRK\_1220

TTTCCCACAACCTTCTGGTGGCAGAGTTCTCAATGTTTCGAGTTCGTGGCTCCAAGCCAGGTATTTTCACT  
TCTATCCTTACTAATTCTACTAACAATGATTCTCTACACGTCTTTGGT

>M6-PGSC0003DMG400026156M6G-LecRK\_1281

TATTTTCACTTCTATCCTTACTAATTCTACTAACAATGATTCTCTACACGTCTTTGGTCAAGAAAACATAA  
TTTATTTACTTTTTGTCTTCTGGATGCAGTTACTCATGGTGGATCTAG

>M6-PGSC0003DMG400026156M6G-LecRK\_1342

AGAAAACATAAATTTATTTACTTTTTGTCTTCTGGATGCAGTTACTCATGGTGGATCTAGGAATTTGGCTCA  
TAGACACAAAGTTTTCGTTGCGAGTATTGTTTCTGCAATATCTATCATC

>M6-PGSC0003DMG400026156M6G-LecRK\_1403

ATTTGGCTCATAGACACAAAGTTTTCGTTGCGAGTATTGTTTCTGCAATATCTATCATCTTGGTTCTTATA  
AGTATTTTTTTCTTTATCTTCAAAGAAAGCACTTGAGAAGACAAGGTA

>M6-PGSC0003DMG400026156M6G-LecRK\_1464

GGTTCTTATAAGTATTTTTTTCTTTATCTTCAAAGAAAGCACTTGAGAAGACAAGGTATGTTTAGTGTAC  
GTCTTAATTGTAAATACAAATACTGAATTCGAATTTCTGATAGATTACA

>M6-PGSC0003DMG400026156M6G-LecRK\_1525

TTTAGTGACGTCTTAATTGTAAATACAAATACTGAATTCGAATTTCTGATAGATTACACTGATTTGCTTT  
ACTGATTGCTGTTTGAATAGGCTGGAAGAATGGAAGTAAAGCTTTCA

>M6-PGSC0003DMG400026156M6G-LecRK\_1586

GATTTGCTTACTGATTGCTGTTTGAATAGGCTGGAAGAATGGAAGTAAAGCTTTCATTAGGTCCGTG

TCTGGTTTATATTCGGTTGAAAAAGCGATATGAAGTTGCTGCAGTACAA

>M6-PGSC0003DMG400026156M6G-LecRK\_1647

AGGTCCGTGTCTGGTTTATATTCGGTTGAAAAAGCGATATGAAGTTGCTGCAGTACAACCTTCAGCAA

TAAGAGAGGCTACTAACAACCTTCATGGAGAACACAACTTGGAGAAGGT

>M6-PGSC0003DMG400026156M6G-LecRK\_1708

TTCAGCAAATAAGAGAGGCTACTAACAACCTTCATGGAGAACACAACTTGGAGAAGGTGGATTTGGTC

CTGTGTTTAAGGTGCTAAACTAAATTCATTGTTGATATTTACTGCTGCT

>M6-PGSC0003DMG400026156M6G-LecRK\_1769

ATTTGGTCCTGTGTTTAAGGTGCTAAACTAAATTCATTGTTGATATTTACTGCTGCTACTTTGAGAGAG

ACGTCATACGTCTCATTTTCGTTTCATGACTATGGTGGATGTGGATTTA

>M6-PGSC0003DMG400026156M6G-LecRK\_183

CTTGGGCTTCTTCACTCCACGTAATTCTACATTTACCTATCTTGGCATATGGTACAACACGATCCCCGAAC

AAACAGTCATTTGGATTGCTAATAGAGAATCTCGAATTCCTCAGAATTC

>M6-PGSC0003DMG400026156M6G-LecRK\_1830

TTTGAGAGAGACGTCATACGTCTCATTTTCGTTTCATGACTATGGTGGATGTGGATTTACATATTCTGTTT

CAGGGGTTTTTAGCTGAATTCGGAGACGTAGCCATCAAAGGATAAGCA

>M6-PGSC0003DMG400026156M6G-LecRK\_1891

TATTCTGTTTCAGGGTTTTTAGCTGAATTCGGAGACGTAGCCATCAAAGGATAAGCAAGAGGTCATC

ACAAGGACTGGAGGAGTTTATGAATGAACTGAAGCTAATCGCGAAACTGCA

>M6-PGSC0003DMG400026156M6G-LecRK\_1952

AGGTCATCACAAGGACTGGAGGAGTTTATGAATGAACTGAAGCTAATCGCGAAACTGCAGCATAAGAA

TCTTGTGAGCCTCTTAGGATGCTGTGTTGAAGGGGAGGAGAAAATACTAATC

>M6-PGSC0003DMG400026156M6G-LecRK\_2013

ATAAGAATCTTGTGAGCCTCTTAGGATGCTGTGTTGAAGGGGAGGAGAAAATACTAATCTATGAGTATA

TGTCCAATTGCAGCTTGGACAAATTTCTGTTTGGTTTCGTCTTCTACTCCGT

>M6-PGSC0003DMG400026156M6G-LecRK\_2074

TGAGTATATGTCCAATTGCAGCTTGGACAAATTTCTGTTTGGTTTCGTCTTCTACTCCGTTTTAAGACTTCA

CATAACTTAAATTTTACTCCTCTCAATTCCTTTGGTTAATGAGATGT

>M6-PGSC0003DMG400026156M6G-LecRK\_2135

TAAGACTTCACATAACTTAAATTTTTACTCCTCTCAATTCCTTTGGTTAATGAGATGTTCAAATGTCTTTT  
TAGACCCTTCGTTGAAGGTTACTCGATTGGGTTACACGTTTGGGGA

>M6-PGSC0003DMG400026156M6G-LecRK\_2196

AAATGTCTTTTTAGACCCTTCGTTGAAGGTTACTCGATTGGGTTACACGTTTGGGGATAATAGAAGGA  
ATTGCTCAAGGAATGCTTTACTTGCATAAGTACTCGAGATTAAGTCAT

>M6-PGSC0003DMG400026156M6G-LecRK\_2257

ATAGAAGGAATTGCTCAAGGAATGCTTTACTTGCATAAGTACTCGAGATTAAGTCATCCACAGGGAC  
TTAAAGCAAGCAATATTTTGTAGATCAAGAGATGATCCCTAAAATATCA

>M6-PGSC0003DMG400026156M6G-LecRK\_2318

ACAGGGACTTAAAGCAAGCAATATTTTGTAGATCAAGAGATGATCCCTAAAATATCAGACTTTGGAA  
TGGCAAGGATTTTCGGGACTGATCAAACACAGGCCAATACAAATCGAGTCG

>M6-PGSC0003DMG400026156M6G-LecRK\_2379

CTTTGGAATGGCAAGGATTTTCGGGACTGATCAAACACAGGCCAATACAAATCGAGTCGTTGGTACATA  
GTAAGTAATAACCCCTTATGATTTGTGGTTTCCAAGCTTTACTAGCTTTTA

>M6-PGSC0003DMG400026156M6G-LecRK\_244

ATCCCCGAACAAACAGTCATTTGGATTGCTAATAGAGAATCTCGAATTCCTCAGAATTCTACTGTTGTTTT  
CACTATTGGTGAAGATGGGAATTTAGTGATTTTTGAAGTAAAAGATCAA

>M6-PGSC0003DMG400026156M6G-LecRK\_2440

GGTACATAGTAAGTAATAACCCCTTATGATTTGTGGTTTCCAAGCTTTACTAGCTTTTATGTCATTTGTGC  
ATATCTAATGGATACTTATTTATACAAATATGGCATAGCGGCTATATGT

>M6-PGSC0003DMG400026156M6G-LecRK\_2501

TCATTTGTGCATATCTAATGGATACTTATTTATACAAATATGGCATAGCGGCTATATGTCTCCAGAATACG  
TAGTATATGGCCAATTTTCAGAGAAATCAGATGTTTTCAGCTTCGGAGT

>M6-PGSC0003DMG400026156M6G-LecRK\_2562

CCAGAATACGTAGTATATGGCCAATTTTCAGAGAAATCAGATGTTTTCAGCTTCGGAGTATTGCTCTTAG  
AAATCCTGAGTGGTGAACGTAACCTCAGACTTTTTAATGACTGAAATTTCC

>M6-PGSC0003DMG400026156M6G-LecRK\_2623

TGCTCTTAGAAATCCTGAGTGGTGAACGTAACCTCAGACTTTTTAATGACTGAAATTTCCGCGTCCCTCTTA  
GGATGGGTAAGAACAACCTCAAGACTTTAATTAATTCTGTTTTCTTCACT

>M6-PGSC0003DMG400026156M6G-LecRK\_2684

GTCCCTCTTAGGATGGGTAAGAACAACACTCAAGACTTTAATTAATTCTGTTTTCTTCACTTTTTTTCGTGTTT  
TATATATATGGTGCAACTCATTGAACTTTTTTTAGGCATGGAATAAG

>M6-PGSC0003DMG400026156M6G-LecRK\_2745

TTTTCGTGTTTTATATATATGGTGCAACTCATTGAACTTTTTTTAGGCATGGAATAAGTGGAAGAAGG  
AAAAATCTTGGAGTTGATTGATCCGTCCATAAGAGAACTTGCGACAATA

>M6-PGSC0003DMG400026156M6G-LecRK\_2806

GAAAGAAGGAAAAATCTTGGAGTTGATTGATCCGTCCATAAGAGAACTTGCGACAATAACAAAGCAA  
CAAGATGTATTATAGTTGCCCTTCTTTGTGTTCAAGAAATCCCAATTGATCG

>M6-PGSC0003DMG400026156M6G-LecRK\_2867

AAAGCAACAAGATGTATTATAGTTGCCCTTCTTTGTGTTCAAGAAATCCCAATTGATCGACCAACAATGT  
CTGATGTATCTTTCATGTAAAGCAACGAAACAACGCCCATCCCTGAACCA

>M6-PGSC0003DMG400026156M6G-LecRK\_2928

CAACAATGTCTGATGTATCTTTCATGTAAAGCAACGAAACAACGCCCATCCCTGAACCAAAAAGAACCTGC  
TTTTCGTAGTAGCTGGCAATCTCAGCAGTTAAGTGTATCCATAAATG

>M6-PGSC0003DMG400026156M6G-LecRK\_2989

AGAACCTGCTTTTCGTAGTAGCTGGCAATCTCAGCAGTTAAGTGTATCCATAAATGAGATGACGATT  
ACCTTGCCAAAACCGCGATGAAATAATTTAAGTTCTCCTATTTCTTGTAG

>M6-PGSC0003DMG400026156M6G-LecRK\_305

CTGTTGTTTTCACTATTGGTGAAGATGGGAATTTAGTGATTTTTGAAGTAAAAGATCAACTTATTTGGTCA  
TCAAATGTTTCATCCATAACTTCAAATTCTACTGTAGGAGCACTACTAG

>M6-PGSC0003DMG400026156M6G-LecRK\_3050

ATGACGATTACCTTGCCAAAACCGCGATGAAATAATTTAAGTTCTCCTATTTCTTGTAGTAAATTTTTCTT  
GTTAGCATAGAGCTGTCATAAATTTTTTTTTGTTGAACTTACAAAAGCG

>M6-PGSC0003DMG400026156M6G-LecRK\_3111

AATTTTTCTTGTAGCATAGAGCTGTCATAAATTTTTTTTTGTTGAACTTACAAAAGCGTAGCTCTGGAAG  
AAATATAGACTAAATTTCTCTGTTAATTGATGTTTTTCATGTTTTTTTT

>M6-PGSC0003DMG400026156M6G-LecRK\_3170

TAGCTCTGGAAGAAATATAGACTAAATTTCTCTGTTAATTGATGTTTTTCATGTTTTTTTTCTGTTTCTAC

AGTGTATCAAGTTTGTGAAAATGTTGTTTTCAACATTCACCTGGATT

>M6-PGSC0003DMG400026156M6G-LecRK\_366

TATTTGGTCATCAAATGTTTCATCCATAACTTCAAATTCTACTGTAGGAGCACTACTAGATAATGGAAATC  
TAGTGCTCTTACATGGTGAGTCTGATATATTGTGGCAGAGCTTTGATCA

>M6-PGSC0003DMG400026156M6G-LecRK\_427

AATGGAAATCTAGTGCTCTTACATGGTGAGTCTGATATATTGTGGCAGAGCTTTGATCACCTACCGATA  
CGTTTATGCCTGATATGAAACTTGGTTATAATAGAAAAACAGGACAACGG

>M6-PGSC0003DMG400026156M6G-LecRK\_488

CTACCGATACGTTTATGCCTGATATGAAACTTGGTTATAATAGAAAAACAGGACAACGGACTCTGATCAA  
TTCGTGGACAAGTAATGAAGATCCTCGGCCTGGAAATTTCTCGTTTGGGA

>M6-PGSC0003DMG400026156M6G-LecRK\_549

TCTGATCAATTCGTGGACAAGTAATGAAGATCCTCGGCCTGGAAATTTCTCGTTTGGGATAGATCCTGAA  
GGCAGACGCGTTTTTATATATTGAAGCAGAACAGTATTTATTTTAGGTT

>M6-PGSC0003DMG400026156M6G-LecRK\_61

GTAGCTATTTTAATTGTATTTTGTGTTCTTTTCGTTATGCTTCTGGCAAGTGAAGAAAGTATCAAGATGGG  
CAAATCAATCACTGGTAATCAGAAAATGATTTTCAGCTGGTGGAAAGTTTT

>M6-PGSC0003DMG400026156M6G-LecRK\_610

GATCCTGAAGGGCAGACGCGTTTTTATATATTGAAGCAGAACAGTATTTATTTTAGGTTTGATGATAGTA  
ATGAATACACTGGAGGGAATATCGGAGGAATTGCTTGGTATATTTCTGTT

>M6-PGSC0003DMG400026156M6G-LecRK\_671

ATGATAGTAATGAATACACTGGAGGGAATATCGGAGGAATTGCTTGGTATATTTCTGTTGTTTCGGGAA  
ATGATGGAGTTTTTGTACGTATGGTTATACCAAAGGGTTGGTAACATTAA

>M6-PGSC0003DMG400026156M6G-LecRK\_732

TTCGGGAAATGATGGAGTTTTTGTACGTATGGTTATACCAAAGGGTTGGTAACATTAAGGATTGTTTTG  
CATCCTAATGGTTACATTCAGTTATTGGTATGGCGTCAAATGCTAATAA

>M6-PGSC0003DMG400026156M6G-LecRK\_793

ATTGTTTTGCATCCTAATGGTTACATTCAGTTATTGGTATGGCGTCAAATGCTAATAAGTGGATAGTTA  
AACTTCAGGCACCAGAATTTCTTTGTGAACGTTATGCGGAGTGTGGTCCA

>M6-PGSC0003DMG400026156M6G-LecRK\_854

GGATAGTTAACTTCAGGCACCAGAATTTCTTTGTGAACGTTATGCGGAGTGTGGTCCATTTGGCAGCTG  
TGATGTTTGATCAAGTGGATTATGCAGATGCTTAACTGGATTGAACCAA

>M6-PGSC0003DMG400026156M6G-LecRK\_915

TGGCAGCTGTGATGTTTGATCAAGTGGATTATGCAGATGCTTAACTGGATTGAACCAAGATTTTCGACA  
GATTGGGAGAACGGGAAATGGAATGATGGTTGTGTTAGAAAAGTAGCATT

>M6-PGSC0003DMG400026156M6G-LecRK\_976

TTTTCGACAGATTGGGAGAACGGGAAATGGAATGATGGTTGTGTTAGAAAAGTAGCATTGAGCTGTGA  
TGACGGAGACATATTCTTGAAACATGACGAGGATATGAAGTTTCCGGATCAT

>M6-PGSC0003DMG400026160M6LRR-RLP\_0

ATGGAAACAAGATCCGTTAAGAAAAAAGGCTTCTTGATGAAATCTACGCGAGTTTTTCATGTGGTGAA  
GACCGCATCAGTGATCTTCTGATGCGGTCATTCACCAAATTCTTTTCTTC

>M6-PGSC0003DMG400026160M6LRR-RLP\_1024

CTGGCCTCTCTCATTACATTTCTTAGTTCTTGAAAATCAAAGTGTGAGGTATATTTTTTATTCATTTACC  
AAGTTTTATTTGATGTGTGACATTTAATTTTTGCCTCTTCTATGGATC

>M6-PGSC0003DMG400026160M6LRR-RLP\_1088

CATTTACCAAGTTTTATTTGATGTGTGACATTTAATTTTTGCCTCTTCTATGGATCTAGCTATATGTGTGAC  
ATTTAATGTTGTCTCATAACTGGTGTTTGTCAACGGAATTGAGTAAC

>M6-PGSC0003DMG400026160M6LRR-RLP\_1152

TGTGTGACATTTAATGTTGTCTCATAACTGGTGTTTGTCAACGGAATTGAGTAACTCGGCCCATCAAGA  
CTTAAGCTATTCAGATTTGAGTCTTGATTTTTCATATGTTTTTAGTTCAG

>M6-PGSC0003DMG400026160M6LRR-RLP\_1216

TCAAGACTTAAGCTATTCAGATTTGAGTCTTGATTTTTCATATGTTTTAGTTCAGTTCATTGACTACTAGA  
TATTCTCTTGAAATATTAGTAATTGATTATTGGACCAAATGTTGTT

>M6-PGSC0003DMG400026160M6LRR-RLP\_128

CAATCCATCGCCAACTTAGTGACTTTCTAAGCGATGGAAGCACATGTGGCACACTTTCCAGATCTC  
GATTTTACAACAATCAATGTCCCATCATCATCAGGTTATAATAACTCAAT

>M6-PGSC0003DMG400026160M6LRR-RLP\_1280

CTACTAGATATTCTCTTGAAATATTAGTAATTGATTATTGGACCAAATGTTGTTGTTACATTTACCTTAG  
GACACGTTTTGTTCTCTACCATGATTTGAATTCTGATCTCCTTGTTAT



>M6-PGSC0003DMG400026160M6LRR-RLP\_1344

TACCTTAGGACACGTTTTGTTCTCTACCATGATTGAATTCTGATCTCCTTGTTATTTGTTAGCCATTATC  
CTATAAATATTTATTGATTATTAGACCAAATGTCCTTGTTACATTTA

>M6-PGSC0003DMG400026160M6LRR-RLP\_1408

CCATTATCCTATAAATATTTATTGATTATTAGACCAAATGTCCTTGTTACATTTACATTAGACCTCTTTTT  
GCTTTCTACCAAGATTATATTTGAATTCTAATCTCCCGTGATCTCCTT

>M6-PGSC0003DMG400026160M6LRR-RLP\_1472

CTCTTTTTGCTTTCTACCAAGATTATATTTGAATTCTAATCTCCCGTGATCTCCTTATTTTGCTAGATATAAT  
CCTATAAATATTTATTGATTATTGAACCAAATTGTTCTAGTTACATT

>M6-PGSC0003DMG400026160M6LRR-RLP\_1526

TTATTTTGCTAGATATAATCCTATAAATATTTATTGATTATTGAACCAAATTGTTCTAGTTACATTTACATT  
AGGCCATTTTGCTCTCCACAAGATTGAATTCTAATCTCCCATGAT

>M6-PGSC0003DMG400026160M6LRR-RLP\_192

GATCTCGATTTTACAACAATCAATGTCCCATCATCATCAGGTTATAATAACTCAATCTCAAAAAGTCAGCTC  
AAACGTTTACAAAAAATTCCATGCAAATTGTACTAGTGCTGGAGGTGCT

>M6-PGSC0003DMG400026160M6LRR-RLP\_256

TCAGCTCAAACGTTTACAAAAAATTCCATGCAAATTGTACTAGTGCTGGAGGTGCTGATTTCATAGATCA  
AGTGTTATCTTTTCGCGAAAAAATTTAGGGATCAGGGTCCTCCGTTTTTC

>M6-PGSC0003DMG400026160M6LRR-RLP\_320

AGATCAAGTGTTATCTTTTCGCGAAAAAATTTAGGGATCAGGGTCCTCCGTTTTTCGTGCAAATTTGAGT  
TTTTACATCTAAACGCCCTGATTCGTGGCGCTGTTAAGCACAATGTACA

>M6-PGSC0003DMG400026160M6LRR-RLP\_384

TTGAGTTTTTCACATCTAAACGCCCTGATTCGTGGCGCTGTTAAGCACAATGTACAAGAAGTTGACGTTG  
AAGTAGCCACTAATGATTATTTCAATTTCCCAAGAAGTGCTATAAATAGT

>M6-PGSC0003DMG400026160M6LRR-RLP\_448

ACGTTGAAGTAGCCACTAATGATTATTTCAATTTCCCAAGAAGTGCTATAAATAGTGACTCTTTAAGAGT  
TTTTAAATTAAGTCAAATATCCAGGATTTAGGTTACCTCCTTCATCAA

>M6-PGSC0003DMG400026160M6LRR-RLP\_512

AAGAGTTTTTAAATTAAGTCAAATATCCAGGATTTAGGTTACCTCCTTCATCAATTATGAAAAATGGG

TTCAAAAATTTGTTACATTGTCACCTTCGTGTCTTATTATGTACGAACA

>M6-PGSC0003DMG400026160M6LRR-RLP\_576

AATGGGTTCAAAAATTTGTTACATTGTCACCTTCGTGTCTTATTATGTACGAACAACCTTCGTTACTTGAT  
TTATTCACGGAGACATCTTCCCGTTGCTTAAGAAATTGAGTCTTGAT

>M6-PGSC0003DMG400026160M6LRR-RLP\_64

GTGAAGACCGCATCAGTGATCTTCCTGATGCGGTCATTCACCAAATTCTTTCTTCCTTCCAATCAAATCC  
ATCGCCAACTTAGTGTACTTTCTAAGCGATGGAAGCACATGTGGCACA

>M6-PGSC0003DMG400026160M6LRR-RLP\_640

TACTTGATTTATTCACGGAGACATCTTCCCGTTGCTTAAGAAATTGAGTCTTGATGGTTGTACGGGGTT  
AACTTACTTACATGTAAGTTGTCGTGTACTAGAGATTTTAATTCTTGAAA

>M6-PGSC0003DMG400026160M6LRR-RLP\_704

GGGGTTAACTTACTTACATGTAAGTTGTCGTGTACTAGAGATTTTAATTCTTGAAAATTGTTTTCAATTGG  
AGAATTTAGATATAACGTGTTTCGAAATTGGAGAAATTGAGTGTCAACAG

>M6-PGSC0003DMG400026160M6LRR-RLP\_768

CAATTGGAGAATTTAGATATAACGTGTTTCGAAATTGGAGAAATTGAGTGTCAACAGCTGCTTCGATTCTG  
ATTCTAGTGGTACTGAGGTTAAGATTGTTGGTCCGAGGCTAAAAAGTATT

>M6-PGSC0003DMG400026160M6LRR-RLP\_832

ATTCGTATTCTAGTGGTACTGAGGTTAAGATTGTTGGTCCGAGGCTAAAAAGTATTGTTTGGTTCGAATAA  
TACTATAACGGATCAAAGTTGTTTGGAGAATTTAACTTGTTTGATTGAGG

>M6-PGSC0003DMG400026160M6LRR-RLP\_896

GAATAACTATAACGGATCAAAGTTGTTTGGAGAATTTAACTTGTTTGATTGAGGCTTTTGTGGGTTT  
TTTGTCTTCTTGAGGATCTTGGTGAATGAAGCTTCGAAGTGTCAATGA

>M6-PGSC0003DMG400026160M6LRR-RLP\_960

GGGTTTTTTGTTCTTCTTGAGGATCTTGGTGAATGAAGCTTCGAAGTGTCAATGATTTCTGTCTGGCCT  
CTCTCATTACATTCTTTAGTTCTTGAAAATCAAAGTGTGAGGTATAT

>M6-PGSC0003DMG400026183-(rev)M6G-LecRK\_0

AAAACAATGGAGTTGGATAGTTTCTTACCTCTTTTACTGTAAATTTCTCATGTTCTTGCTTACCCGTTCTT  
CCTTGCCAAAATTGTGTCAAAGTTGGCAAATCAATCACTGGGAATCAG

>M6-PGSC0003DMG400026183-(rev)M6G-LecRK\_1054

AGTTGCCAGATCATGCTGTCTCTTTAGGAAATATGAGCACTGAAGAGTGTGAAACTCAGTGCATTAAGA  
ACTGCTCCTGTTTCAGCTTATGCTTGTACGAAAAACGCCTGTTTTATATGGC

>M6-PGSC0003DMG400026183-(rev)M6G-LecRK\_1116

ATTAAGAACTGCTCCTGTTTCAGCTTATGCTTGTACGAAAAACGCCTGTTTTATATGGCATGGAGATTTACT  
GGATCTTGGGCATGACACTACTAACGGCAGAGCTCTCTATGTTTCGAGTT

>M6-PGSC0003DMG400026183-(rev)M6G-LecRK\_1178

AGATTTACTGGATCTTGGGCATGACACTACTAACGGCAGAGCTCTCTATGTTTCGAGTTCACGTGTTAGAG  
CTAGGTATGTTTACTTGTATCATTGTTGGTTCTGTTAACAACAAGTGAAA

>M6-PGSC0003DMG400026183-(rev)M6G-LecRK\_124

TGGTTTCAGCTGATAGAAGTTTTGCCTTAGGATTTTTCACTCCATCAAATTCACGTACACCTATCTTGGC  
ATATGGTACAACATAATCCCTCAACAAACAGTCGTTTGGGTTGCCAACA

>M6-PGSC0003DMG400026183-(rev)M6G-LecRK\_1240

TGTTAGAGCTAGGTATGTTTACTTGTATCATTGTTGGTTCTGTTAACAACAAGTGAAAGACTAGTATAATT  
TTCGTGTTGTGGATGCAGTTACTAATAATCTATCTGGCTCAGGGAATTC

>M6-PGSC0003DMG400026183-(rev)M6G-LecRK\_1302

AGTATAATTTTCGTGTTGTGGATGCAGTTACTAATAATCTATCTGGCTCAGGGAATTCAGCTCGAAGATA  
CAAAATTCTCACTGTGAAAATTGTTTCTGCAATTTTTGCAATCTTTCTTC

>M6-PGSC0003DMG400026183-(rev)M6G-LecRK\_1364

CGAAGATACAAAATTCTCACTGTGAAAATTGTTTCTGCAATTTTTGCAATCTTTCTTCTTGTAGTATCTCT  
GCTTTTATCTTCAAAGAAAGCGCTTGAAAAGACAAGGTGAATCTAGC

>M6-PGSC0003DMG400026183-(rev)M6G-LecRK\_1426

TAGTATCTCTGCTTTTATCTTCAAAGAAAGCGCTTGAAAAGACAAGGTGAATCTAGCATTCTAGACTG  
TAATGATTCAGATTTTCATATTGTTTACGGTGCTTTCCTTACTGATGGT

>M6-PGSC0003DMG400026183-(rev)M6G-LecRK\_1488

CTAGACTGTAATGATTTTCAGATTTTCATATTGTTTACGGTGCTTTCCTTACTGATGGTTGTTTGAAACTAG  
ATAAGATGGACGGAGATTCTGCTTTAGTTAGCTCCATGCCTAGTGGATC

>M6-PGSC0003DMG400026183-(rev)M6G-LecRK\_1550

TGAAACTAGATAAGATGGACGGAGATTCTGCTTTAGTTAGCTCCATGCCTAGTGGATCTTTAGTTGGGA  
AAGATGATATGAAGTTGGTACAGTACAGCCTGCAGAATATAAGAGACGCAA

>M6-PGSC0003DMG400026183-(rev)M6G-LecRK\_1612

GTTGGGAAAGATGATATGAAGTTGGTACAGTACAGCCTGCAGAATATAAGAGACGCAACAAACAACTT  
CCATGAAAGTAACAACTTGGAGAAGGTGGTTTTGGCCCCGTGTTTAAGGTG

>M6-PGSC0003DMG400026183-(rev)M6G-LecRK\_1674

CAACTTCCATGAAAGTAACAACTTGGAGAAGGTGGTTTTGGCCCCGTGTTTAAGGTGCAAAATTCAAT  
ATTTTGATGTTTCGTATTTAATTTTCATGAATATAGAGAATTGTGGCTTTAAA

>M6-PGSC0003DMG400026183-(rev)M6G-LecRK\_1736

ATTCAATATTTTGATGTTTCGTATTTAATTTTCATGAATATAGAGAATTGTGGCTTTAAACATTCTGTTTCAG  
GGATCTTTGGCTGAATTTGGAGACGTAGCCATCAAAGGCTAAGCAGGA

>M6-PGSC0003DMG400026183-(rev)M6G-LecRK\_1798

CTGTTTCAGGGATCTTTGGCTGAATTTGGAGACGTAGCCATCAAAGGCTAAGCAGGAGGTCATCACAA  
GGACTGGAGGAGTTCATGAATGAGTTGAAGCTAATCGCGAATTTGCAGCAC

>M6-PGSC0003DMG400026183-(rev)M6G-LecRK\_186

TATCTTGGCATATGGTACAACATAATCCCTCAACAAACAGTCGTTTGGGTTGCCAACAGAGAATCTCCCA  
TCCCACAGAATGCTTCACCAGTTTTCACTATCGGCGGTGATGGAAATTTA

>M6-PGSC0003DMG400026183-(rev)M6G-LecRK\_1860

ATCACAAGGACTGGAGGAGTTCATGAATGAGTTGAAGCTAATCGCGAATTTGCAGCACAAAAATCTAGT  
CAGCCTCTTAGGATATTGCGTTGAAGGGGAGGAGAAGATATTGATCTATGA

>M6-PGSC0003DMG400026183-(rev)M6G-LecRK\_1922

ATCTAGTCAGCCTCTTAGGATATTGCGTTGAAGGGGAGGAGAAGATATTGATCTATGAGTATATGCCCA  
ATTGCAGCCTGGACAAATTTATTTCTGGTTATACTCATTAGTATTATTTTC

>M6-PGSC0003DMG400026183-(rev)M6G-LecRK\_1984

ATGCCCAATTGCAGCCTGGACAAATTTATTTCTGGTTATACTCATTAGTATTATTTTCACGAGAATCATAA  
CTTTGTTTTCTCATTTCGTTGGCTAATTGGATATTCATTTTTCTTT

>M6-PGSC0003DMG400026183-(rev)M6G-LecRK\_2046

GAATCATAACTTTGTTTTCTCATTTCGTTGGCTAATTGGATATTCATTTTTCTTTAAGACCCTTCGTTG  
AAGGTTACAATCAATTGGGATACACGTTTTGGGATAATTGAAGGAATT

>M6-PGSC0003DMG400026183-(rev)M6G-LecRK\_2108

CCCTTCGTTGAAGGTTACAATCAATTGGGATACACGTTTTGGGATAATTGAAGGAATTGCTCAAGGAAT

ACTTTACCTGCATAAGTACTCGAGATTAAGTCATCCACAGGGACTTGAA

>M6-PGSC0003DMG400026183-(rev)M6G-LecRK\_2170

AAGGAATACTTTACCTGCATAAGTACTCGAGATTAAGTCATCCACAGGGACTTGAAGGTAAGCAACA  
TTCTGCTAGATCAAGAGATGATCCCAAAAATATCAGACTTTGGAATGGCAA

>M6-PGSC0003DMG400026183-(rev)M6G-LecRK\_2232

AGCAACATTCTGCTAGATCAAGAGATGATCCCAAAAATATCAGACTTTGGAATGGCAAGGATTTTCGGG  
ACTGATCAAACACAGGCCAGTACAAAACGAGTGGTTGGTACATAGTAAGTA

>M6-PGSC0003DMG400026183-(rev)M6G-LecRK\_2294

TTTCGGGACTGATCAAACACAGGCCAGTACAAAACGAGTGGTTGGTACATAGTAAGTATAGTAGCCGCA  
TCTGTAACCAGTTTTTATGTTAATACCTCTTGTGTATAGCTACTTAAACT

>M6-PGSC0003DMG400026183-(rev)M6G-LecRK\_2356

AGCCGCATCTGTAACCAGTTTTTATGTTAATACCTCTTGTGTATAGCTACTTAAACTGATTTACGCCAAT  
ATGGCATAGTGGCTATATGTCTCCAGAATACGTAGTATATGGCCAATTC

>M6-PGSC0003DMG400026183-(rev)M6G-LecRK\_2418

TACGCCAATATGGCATAGTGGCTATATGTCTCCAGAATACGTAGTATATGGCCAATTCTCGGAGAAATCA  
GATGTATTCAGCTTTGGAGTATTGCTGTTGGAAATCTTGACTGGTGAACG

>M6-PGSC0003DMG400026183-(rev)M6G-LecRK\_248

ATCTCCCATCCACAGAATGCTTCACCAGTTTTCACTATCGGCGGTGATGGAAATTTAGTGATTTTCGATG  
AAAAAGGCAAACCTATTTGGTCATCAAATGTCTCATCAACAGCACCGGA

>M6-PGSC0003DMG400026183-(rev)M6G-LecRK\_2480

AGAAATCAGATGTATTCAGCTTTGGAGTATTGCTGTTGGAAATCTTGACTGGTGAACGAAACTCAGACTT  
CTTCATGACTGAAATTTGTATGTCTTTATTAGGATGGGTAAGTACACTCG

>M6-PGSC0003DMG400026183-(rev)M6G-LecRK\_2542

TCAGACTTCTTCATGACTGAAATTTGTATGTCTTTATTAGGATGGGTAAGTACACTCGCGCATTGAAAAC  
TCAGTCCAAGTTTCTTTTAGTTTCTTTAACATTTACGTCATTTGGCA

>M6-PGSC0003DMG400026183-(rev)M6G-LecRK\_2604

TTTGAAAACCTCAGTCCAAGTTTCTTTTAGTTTCTTTAACATTTACGTCATTTGGCATGTTAGGCATGGA  
AAATGTGGAAAGAAGGAAGAATATTGGAGCTAATAGATCCATCAATAAG

>M6-PGSC0003DMG400026183-(rev)M6G-LecRK\_2666

AGGCATGGAAAATGTGGAAAGAAGGAAGAATATTGGAGCTAATAGATCCATCAATAAGGGCGACCTGC  
GACAGTAACAAAGCAACACGGTCTGTTCTGGTTGCTCTTCTTTGCGTTCAAG

>M6-PGSC0003DMG400026183-(rev)M6G-LecRK\_2728

ACCTGCGACAGTAACAAAGCAACACGGTCTGTTCTGGTTGCTCTTCTTTGCGTTCAAGAAATTCCTACTG  
ATCGACCAACAATGTCTGATATAGTTGTCATGTTAAGCAACGAAACAACG

>M6-PGSC0003DMG400026183-(rev)M6G-LecRK\_2790

TCCTACTGATCGACCAACAATGTCTGATATAGTTGTCATGTTAAGCAACGAAACAACGCCCATCCCTGAG  
CCAAAAGAACCGGCTTTTCGCAGCAGCTGGCGACATCAAAGTTAAACAA

>M6-PGSC0003DMG400026183-(rev)M6G-LecRK\_2852

TCCCTGAGCCAAAAGAACCGGCTTTTCGCAGCAGCTGGCGACATCAAAGTTAAACAATTTTTCCATAAA  
TGAGTTGACATTTACTTTGCCAGTACCTAGATGAAAGGATTTAGCTTTCC

>M6-PGSC0003DMG400026183-(rev)M6G-LecRK\_2914

TCCATAAATGAGTTGACATTTACTTTGCCAGTACCTAGATGAAAGGATTTAGCTTTCCATATTTCTTATGG  
AATTAATCTTATTTTGAAAAGAACCATCTTTGAAAAAATGTTTAGCAC

>M6-PGSC0003DMG400026183-(rev)M6G-LecRK\_2969

TCCATATTTCTTATGGAATTAATCTTATTTGAAAAGAACCATCTTTGAAAAAATGTTTAGCACTGTAAA  
TAAAAAATCAAAAACCAATTCAATTACTACCTCTGTCCCAGTTTATATC

>M6-PGSC0003DMG400026183-(rev)M6G-LecRK\_310

TTTTCGATGAAAAGGCAAACCTCATTTGGTTCATCAAATGTCTCATCAACAGCACCGGAATCATTATTAAC  
TTCAAATTTACTATCGGAATATTGTTAGATAACGGGAACCTTGTTCTTC

>M6-PGSC0003DMG400026183-(rev)M6G-LecRK\_372

TTATTAACCTCAAATTTACTATCGGAATATTGTTAGATAACGGGAACCTTGTTCTTCGACACTACGGTGA  
GTCCAATTATTTGTGGCAGAGCTCCAGTATCCTACAGATACGTTATTA

>M6-PGSC0003DMG400026183-(rev)M6G-LecRK\_434

CTACGGTGAGTCCAATTTGTGGCAGAGCTCCAGTATCCTACAGATACGTTATTACGCCATATGAGA  
TTTGGTTTCAATAAAATTAGTGGCTTACGAAATGTGATCACTTCATGGAC

>M6-PGSC0003DMG400026183-(rev)M6G-LecRK\_496

ATATGAGATTTGGTTTCAATAAAATTAGTGGCTTACGAAATGTGATCACTTCATGGACGAGTAATGAAG  
ATGCTCGCCCCGAAATTTCTTTTTGGAATAGACCCTACTGAAGGAGTTA

>M6-PGSC0003DMG400026183-(rev)M6G-LecRK\_558

AATGAAGATGCTCGCCCCGAAATTTCTCTTTTGAATAGACCCTACTGAAGGAGTTATGCGTTTTGTCA  
TTTGAATCGAAACGGTATTTATTATAGATTTGACGATAGTTGCAGAGTG

>M6-PGSC0003DMG400026183-(rev)M6G-LecRK\_62

ACCCGTTCTTCCTTGCCAAAATTGTGTCAAAGTTGGCAAATCAATCACTGGGAATCAGAAATTGGTTTCA  
GCTGATAGAAGTTTTGCCTTAGGATTTTTCACTCCATCAAATTCAACGTA

>M6-PGSC0003DMG400026183-(rev)M6G-LecRK\_620

TTTTGTCATTTGGAATCGAAACGGTATTTATTATAGATTTGACGATAGTTGCAGAGTGTATACAGTGTGG  
TGTTTCGCTGTTGTTACTGAAAATGATAATGTATATCTTAATTTAGATTA

>M6-PGSC0003DMG400026183-(rev)M6G-LecRK\_682

CAGTGTGGTGTTCGCTGTTGTTACTGAAAATGATAATGTATATCTTAATTTAGATTACTACAGAATCTTT  
CTGAGATTAAGAATCGTTCTGAATCCGAGCGGGCACCTTCAGGTGATGG

>M6-PGSC0003DMG400026183-(rev)M6G-LecRK\_744

AGAATCTTTCTGAGATTAAGAATCGTTCTGAATCCGAGCGGGCACCTTCAGGTGATGGTGTGGAATCGG  
AATGGAAGTAACAAATGGAATGTTGAATTTGAAGCACCACAATCTAAGTGT

>M6-PGSC0003DMG400026183-(rev)M6G-LecRK\_806

GAATCGGAATGGAAGTAACAAATGGAATGTTGAATTTGAAGCACCACAATCTAAGTGTGACCTTTACGC  
GCAGTGTGGTCCGTTTGGTATCTGTGGGATCAGATCAAGTGGATTATGCAG

>M6-PGSC0003DMG400026183-(rev)M6G-LecRK\_868

TTTACGCGCAGTGTGGTCCGTTTGGTATCTGTGGGATCAGATCAAGTGGATTATGCAGTTGTTTAGACG  
GATTTGAACCTAAATTTACGACAGATTGGGTAAATGAGAAATGGAATGGAG

>M6-PGSC0003DMG400026183-(rev)M6G-LecRK\_930

TTAGACGGATTTGAACCTAAATTTACGACAGATTGGGTAAATGAGAAATGGAATGGAGGTTGTGTGAG  
AAAAATAGCGTTGGGATGTGATGGTAGAGATCAGTTTTCGAAGCACGAGAAT

>M6-PGSC0003DMG400026183-(rev)M6G-LecRK\_992

TGTGAGAAAAATAGCGTTGGGATGTGATGGTAGAGATCAGTTTTCGAAGCACGAGAATATGAAGTTGC  
CAGATCATGCTGTCTCTTTAGGAAATATGAGCACTGAAGAGTGTGAAACTCA

>M6-PGSC0003DMG400026184-(rev)M6G-LecRK\_0

ATGGCGAAGAAAACAGGTTTGTGTTGCTATTACAGCCGTTGCAATTCTACTTCTTTTTTTGCTCTATGAA

TCAGATAAAGAGAGAAATCTAAAAAGACTGCACATGTTTTCTGATCTTA

>M6-PGSC0003DMG400026184-(rev)M6G-LecRK\_186

AACCTGATTAACGAAAATGATAAGCAAAACATCGCCGTTCCATTCTTTTGTGGAAAACATATTAGCAG  
CCACAGATGATTTCTCAGATGTAAATAAGCTTGGACAAGGAGGTTTTGGT

>M6-PGSC0003DMG400026184-(rev)M6G-LecRK\_248

ATTAGCAGCCACAGATGATTTCTCAGATGTAAATAAGCTTGGACAAGGAGGTTTTGGTCCTGTATATAA  
GGTTAGCACTATTTTTCTCACTTCAATAGTTCCACTTTATGTAGTCATTTCA

>M6-PGSC0003DMG400026184-(rev)M6G-LecRK\_310

TATATAAGGTTAGCACTATTTTTCTCACTTCAATAGTTCCACTTTATGTAGTCATTTTCATAGCATCCTAGTTT  
ACACATCGAAAATCTTTCAGGGTATATTTTCAGATGGACAAGAAATTG

>M6-PGSC0003DMG400026184-(rev)M6G-LecRK\_372

ATCCTAGTTTACACATCGAAAATCTTTCAGGGTATATTTTCAGATGGACAAGAAATTGCTGTGAAAAGGC  
TATCAACTCAATCTAGACAGGGCATTGACGAATTCAGGAACGAAGTCATA

>M6-PGSC0003DMG400026184-(rev)M6G-LecRK\_434

GAAAAGGCTATCAACTCAATCTAGACAGGGCATTGACGAATTCAGGAACGAAGTCATACTGATCTCGAA  
ACTACAACATAGAAATCTAGTCAAATTTTAGGCTACTGTATCACAGGGTA

>M6-PGSC0003DMG400026184-(rev)M6G-LecRK\_62

CTCTATGAATCAGATAAAGAGAGAAATCTAAAAAGACTGCACATGTTTTCTGATCTTAGCAAGCCAACAA  
AGCACAGGAGGCAATCCAGTGCCACATTGGTTCAACAGAGAAAAAGAAGC

>M6-PGSC0003DMG400026184-(rev)M6G-LecRK\_620

TACATATCTGAACTTAGCTTATTTCTTAATCTCTCTATTTACTTGATCAATGTTGCTAAATTTTCTCCATGGT  
TACCAAAACAAGATCCAACACTTAGCAAGTCACTGAAATGGAAAAAG

>M6-PGSC0003DMG400026184-(rev)M6G-LecRK\_682

TTCTCCATGGTTACCAAAACAAGATCCAACACTTAGCAAGTCACTGAAATGGAAAAAGCGATTTGAGATC  
ATATTAGGAATTTCTCGAGAGCTTCTCTATCTTCATGAAGACTCAAGGCT

>M6-PGSC0003DMG400026185-(rev)M6G-LecRK\_0

ATGATCTCAGTAAATCACTCTGTTTCTGGAAATCAAAGTATCGTCTCTTCAGGCGAAAACCTTTGAATTAG  
GATTCTTTAAACCTGGTAGTTTCGAAAAATTACTATCTTGGTATATGGTAT

>M6-PGSC0003DMG400026185-(rev)M6G-LecRK\_1116



GAAGTAGTGAATCTGAAGCAACTCTCACCAGGAGATGGTAGTGGAAGTGTGATTTATAACCAGACTTGCT  
GTCTCTGACGAAGCATAACGAGAAAGGTAAGTTTAAAGTTAGGAGTTGTATT

>M6-PGSC0003DMG400026185-(rev)M6G-LecRK\_1178

ACTTGCTGTCTCTGACGAAGCATAACGAGAAAGGTAAGTTTAAAGTTAGGAGTTGTATTTGATAGTGTTT  
GTCATTTCTATGTATGCAATGCTCATCTCCAAATAGTTACTGACAGCTTTC

>M6-PGSC0003DMG400026185-(rev)M6G-LecRK\_124

ATGTAATTACACAAACAATAGTATGGGTAGCAAACAGGGAGAAGCCACTTTCTGCTACTGATATGAATT  
CAGTTGAGTTGAAAGTTTTGGATGGTAATTTAGTGCTTATTACTGAATCCA

>M6-PGSC0003DMG400026185-(rev)M6G-LecRK\_1240

AGTGTTTGTCAATTTCTATGTATGCAATGCTCATCTCCAAATAGTTACTGACAGCTTTCTATGGATGCTTGT  
TTTTCTTGTCTAATGTTTCTTCAGTTCTTTACCTTATGGACTTCAACA

>M6-PGSC0003DMG400026185-(rev)M6G-LecRK\_1302

GATGCTTGTTTTTTCTTGTCTAATGTTTCTTCAGTTCTTTACCTTATGGACTTCAACATTACGAGTTCTCTAA  
ATCATAGTGTTACAAGAATTAATAGGCAATTATAACTTCACATAA

>M6-PGSC0003DMG400026185-(rev)M6G-LecRK\_1364

GAGTTCTCTAAATCATAGTGTTACAAGAATTAATAGGCAATTATAACTTCACATAAACAGACCTTACG  
TTTTAAACAAACATCAGATAGTCACTGACTAAATATAAGTGCACGCAACA

>M6-PGSC0003DMG400026185-(rev)M6G-LecRK\_1426

ACCTTACGTTTTTAAACAAACATCAGATAGTCACTGACTAAATATAAGTGCACGCAACAGCCTCTATGTTAT  
AAACACACATAAGATAGTCACTGACCGAATGTATGGTTTTCATGTTTTC

>M6-PGSC0003DMG400026185-(rev)M6G-LecRK\_1488

CTATGTTATAAACACACATAAGATAGTCACTGACCGAATGTATGGTTTTCATGTTTTCATTAGTTACAAC  
AGCCAATATGAGTTGAAGACCTTTGCCAGTAACTATTACCAGTTGGTG

>M6-PGSC0003DMG400026185-(rev)M6G-LecRK\_1550

GTTACAACACTAGCCAATATGAGTTGAAGACCTTTGCCAGTAACTATTACCAGTTGGTGAGTTCCACATT  
GGCTCTTTAAGGATGGGATGGTCTCTTCACATGGTTTTCGGACAGTCCTTA

>M6-PGSC0003DMG400026185-(rev)M6G-LecRK\_1612

CCCACATTGGCTCTTTAAGGATGGGATGGTCTCTTCACATGGTTTTCGGACAGTCCTTAACTCATAAACTA  
GATTTTATAGTCGAGTTGCCTCAAGGGTCCATTTCTTATCACATTATTAG

>M6-PGSC0003DMG400026185-(rev)M6G-LecRK\_1674

ATAAACTAGATTTTATAGTCGAGTTGCCTCAAGGGTCCATTTCTTATCACATTATTAGAATCAGACCCATC  
CCGATTCTTTGTTTACCCCATATTCTGCCCATCATATTGTTACGCTC

>M6-PGSC0003DMG400026185-(rev)M6G-LecRK\_1736

AGACCCATCCCGATTCTTTGTTTACCCCATATTCTGCCCATCATATTGTTACGCTCCAGTTGGCAGGCCT  
AGGCATGAGCGATGTTGAGTTCCACATAGTCTCTTTAGGGATGAGAT

>M6-PGSC0003DMG400026185-(rev)M6G-LecRK\_1798

TGGCAGGCCTAGGCATGAGCGATGTTGAGTTCCACATAGTCTCTTTAGGGATGAGATGTTCTTTTTATA  
TGGTCTCGGACAATCATCATATCATGAAGCTAGCTTTTAGAGACAAAAGT

>M6-PGSC0003DMG400026185-(rev)M6G-LecRK\_1860

TTTTTATATGGTCTCGGACAATCATCATATCATGAAGCTAGCTTTTAGAGACAAAAGTTTATTTCTTGTC  
CAGTTTTCTTATGCTTCTTCTTTCTGTCATCAGATGCAAATCAGGGA

>M6-PGSC0003DMG400026185-(rev)M6G-LecRK\_1922

TTCTTGTCACAGTTTTCTTATGCTTCTTCTTTCTGTCATCAGATGCAAATCAGGGAAATTTCCCTGAAG  
CTTAAAGTTATCATATCTGGCGTGGTAGCAGTTGCAATTCTACTTCTA

>M6-PGSC0003DMG400026185-(rev)M6G-LecRK\_1984

TTCCCTGAAGCTTAAAGTTATCATATCTGGCGTGGTAGCAGTTGCAATTCTACTTCTATGTAGCTTTAGCT  
ACATTTATTGTAGTAGAATGATGGCGAAGAAAACAGGTTTGTGTTGCTA

>M6-PGSC0003DMG400026185-(rev)M6G-LecRK\_2790

TAGCAAGTCACTGAAATGGAAAAAGCGATTTGAGATCATATTAGGAATTTCTCGAGAGCTTCTCTATCTT  
CATGAAGACTCAAGGCTCAGAATCATTATAGAGATCTGAAAACAAGTAA

>M6-PGSC0003DMG400026185-(rev)M6G-LecRK\_2914

CTTTTGGATCAAGAAATGAACCCAAAAATCTCAGACTTTGGCTTGGCAAGGATAGTTGAAGAGCATACG  
ACAGAAGCAAATACCAATAAAGTAGTTGGAACCTAGTAAGTAATAAAAACA

>M6-PGSC0003DMG400026185-(rev)M6G-LecRK\_2976

GCATACGACAGAAGCAAATACCAATAAAGTAGTTGGAACCTAGTAAGTAATAAAAACATGACAATGTTA  
TGAACCTTGCTTAATTGCATCGCACAGCTGACTCGTGATAATTCCATCATT

>M6-PGSC0003DMG400026185-(rev)M6G-LecRK\_3038

AATGTTATGAACTTTGCTTAATTGCATCGCACAGCTGACTCGTGATAATTCCATCATTATTCGGTTGATTT

AGCGGATATATGTCACCTGAATATGCATTGGAAGGAGTATTCTCGATTA

>M6-PGSC0003DMG400026185-(rev)M6G-LecRK\_310

CTGATGATGGTAATTTGATTTTGAGTGGATCAAATCAACTACACCACATTGGCAAAGCTTTGATAA

CCCGACTGATACATGGTTACCGAATGCTAAGGTGAAGTATGACAAGCGTA

>M6-PGSC0003DMG400026185-(rev)M6G-LecRK\_3100

GGTTGATTTAGCGGATATATGTCACCTGAATATGCATTGGAAGGAGTATTCTCGATTAAGTCAGACGTAT

TCAGCTTAGGAGTAGTTATACTGGAGATAGTAACTGGAAGGAGAAACACA

>M6-PGSC0003DMG400026185-(rev)M6G-LecRK\_3162

AGACGTATTCAGCTTAGGAGTAGTTATACTGGAGATAGTAACTGGAAGGAGAAACACAGGATTTTATCA

ATCTAAAGAAGCATCTAATCTTTTGGTCCATGTGAGTGCCTAGAGTACATG

>M6-PGSC0003DMG400026185-(rev)M6G-LecRK\_3224

TTTATCAATCTAAAGAAGCATCTAATCTTTTGGTCCATGTGAGTGCCTAGAGTACATGTTAATTTTTTCCA

ATATATATGTACGTTGAACTTCATATTAATTATTCTAAATCATGATATC

>M6-PGSC0003DMG400026185-(rev)M6G-LecRK\_3286

TTTTTCCAATATATATGTACGTTGAACTTCATATTAATTATTCTAAATCATGATATCACACACAGGCATGG

AATTAAGGAAAGAAAAAGAGCACTACATTTGCTGGATCATTATTG

>M6-PGSC0003DMG400026185-(rev)M6G-LecRK\_3348

ACAGGCATGGAATTAAGGAAAGAAAAAGAGCACTACATTTGCTGGATCATTATTGCTCGAATCATG

CAACCCGAAAGAAGCAATGACGTGCATAAACGTTGGGCTCTTATGTGTGCA

>M6-PGSC0003DMG400026185-(rev)M6G-LecRK\_3472

GATCCAGGTGATCGTCCTTCCATGTCAAATGTTGTAATGATGCTTCGTAGTGATAGTACGTCTCTTCCAAA

GCCTAATCAACCTGCTTTTGTGTCAAGGAGAAATGTTTCTAATTCAACT

>M6-PGSC0003DMG400026185-(rev)M6G-LecRK\_3534

TCTTCAAAGCCTAATCAACCTGCTTTTGTGTCAAGGAGAAATGTTTCTAATTCAACTTCTGTTTCATCTG

GTACACCACCTAGCTTCACCAAAATTGAGTTGACAATCACAGTGGAAGA

>M6-PGSC0003DMG400026185-(rev)M6G-LecRK\_3596

TTTCATCTGGTACACCACCTAGCTTCACCAAAATTGAGTTGACAATCACAGTGGAAGAAGGCCGATAATG

TGATGAATTCATTAGTTTTTACGCCAATTTTCTCCGCATGAAATTATTTT

>M6-PGSC0003DMG400026185-(rev)M6G-LecRK\_3658

CGATAATGTGATGAATTCATTAGTTTTTACGCCAATTTTCTCCGCATGAAATTATTTTTTACCTTAAGAGA  
AGATAAAATACATCAAATCAACTTGATAGCAAACTTTTTTATCAGTT

>M6-PGSC0003DMG400026185-(rev)M6G-LecRK\_372

TTTGATAACCCGACTGATACATGGTTACCGAATGCTAAGGTGAAGTATGACAAGCGTACAAATACAACA  
AAGATACTTACTTCTTGAAGAAGCTCAGAGGATCCTTCTCCGGGGATTTTT

>M6-PGSC0003DMG400026185-(rev)M6G-LecRK\_496

TGGAGATGGATCAGAGTAATAAGCAGTTCTTGATAAAGTGGAACAGGACTGAGCTGTACTCAGCTTCTG  
GATCTTGAATGGGCGTATTCTCAGCTTGATGCATGAGATGAGTTTGAATT

>M6-PGSC0003DMG400026185-(rev)M6G-LecRK\_558

GCTTCTGGATCTTGAATGGGCGTATTCTCAGCTTGATGCATGAGATGAGTTTGAATTCTGATAGATACA  
GCTTTACATATGTTGATAATGAAAATGAGAGCTATTTTATGTATTCCCTT

>M6-PGSC0003DMG400026185-(rev)M6G-LecRK\_62

TGAATTAGGATTCTTTAAACCTGGTAGTTCGAAAAATTACTATCTTGGTATATGGTATAAGAATGTAATT  
ACACAAACAATAGTATGGGTAGCAAACAGGGAGAAGCCACTTTCTGCTAC

>M6-PGSC0003DMG400026185-(rev)M6G-LecRK\_620

TAGATACAGCTTTACATATGTTGATAATGAAAATGAGAGCTATTTTATGTATTCCCTTCGTAACCTTCCA  
AAATTAGATTAACACTAGATGTCTCTGGGCAAATCAGGCATCTGATTTG

>M6-PGSC0003DMG400026185-(rev)M6G-LecRK\_682

ACTCTTCCAAAATTAGATTAACACTAGATGTCTCTGGGCAAATCAGGCATCTGATTTGGGCGGAAAATTT  
AATGGAATGGCAAATTTTTACATCTCAACCAAGACAACCGTGCGAGGTGT

>M6-PGSC0003DMG400026185-(rev)M6G-LecRK\_806

TAGTTGTGGTGCCTTTAGCATTGCAATAAGGAGTCCACGACCTTCTGTAATTGCTTGACTGGTTTCACAC  
CTAAATCCAATACAGAATGGGACTTGAATGATCATTCCGGTGGCTGTGT

>M6-PGSC0003DMG400026185-(rev)M6G-LecRK\_868

GTTTCACACCTAAATCCAATACAGAATGGGACTTGAATGATCATTCCGGTGGCTGTGTAAGGAAGGAAA  
GCTTGCAGTGTGGTATGGTAAAAAGGGCAGGTTTTTATGATGAATCCCAAAG

>M6-PGSC0003DMG400026185-(rev)M6G-LecRK\_930

AAGGAAAGCTTGCAGTGTGGTATGGTAAAAAGGGCAGGTTTTTATGATGAATCCCAAAGTGACATTGCC  
CGAATATTCCATATCTGTTCCGGCTGCTAGTGCTGAGGAATGACATTCTACT

>M6-PGSC0003DMG400026185-(rev)M6G-LecRK\_992

ATTGCCCGAATATTCCATATCTGTTCCGGCTGCTAGTGCTGAGGAATGACATTCTACTTGCTTGAGTAACT  
GTTCCCTCATGTAATGCATATGCTTATGATAATAATGTGTGTTCAATTTG

>M6-PGSC0003DMG400026231M6LRR-RLP\_0

TTCCTCAAATTTTCAGTACCAACTCTTTTTTTAATTCAAACATGGGCTACATGCAACTCTCAGCTGTGCTCT  
TAATTGTTTTTCTCTGTCAAATTGCTTTTTCTTCATCTTTGTGCCCTA

>M6-PGSC0003DMG400026231M6LRR-RLP\_1037

CACAATATGTTGACAGATATGAACTCAACAAATATAAACTCAATTTCTTATCCCTCTCTATATATCATTGAT  
TTGCGGTCCAATTTTCTTCAAGGGCCACTTCCTATTCTACCAAATTCC

>M6-PGSC0003DMG400026231M6LRR-RLP\_1098

ATATCATTGATTTGCGGTCCAATTTTCTTCAAGGGCCACTTCCTATTCTACCAAATCCACACAATACTTGT  
TCATGTCAAACAATAATCTTAGTGAGGAAATTCCTTCATCTATTTGCA

>M6-PGSC0003DMG400026231M6LRR-RLP\_1159

ACAATACTTGTTTCATGTCAAACAATAATCTTAGTGAGGAAATTCCTTCATCTATTTGCAATTTGAGATCAC  
TAAAAGTCCTAGATTTGGCGAAAAACAACCTTGATGGGAGAGATACCACA

>M6-PGSC0003DMG400026231M6LRR-RLP\_122

GATCAAAGCATTTCCTTCTAAATTTCAAGAAATCACTTACTATTGATCCCTCATATGATATTTGTCATTAC  
AATTTTTCAAATTTGAGTTCATGGAATACGAGCAGTGATTGCTGCTTA

>M6-PGSC0003DMG400026231M6LRR-RLP\_1220

TTGAGATCACTAAAAGTCCTAGATTTGGCGAAAAACAACCTTGATGGGAGAGATACCACAATGCTTGGGT  
AATGTCAGTAGTAGCCTCGAGGTTTTTGATATGCATCAGAACAATCTGTCT

>M6-PGSC0003DMG400026231M6LRR-RLP\_1281

GCTTGGGTAATGTCAGTAGTAGCCTCGAGGTTTTTGATATGCATCAGAACAATCTGTCTGGGACAATTCC  
AACAACTTTTGGCATTGGAAGTTTACAAGTTAGGAGCCTCAACTTGCATG

>M6-PGSC0003DMG400026231M6LRR-RLP\_1525

GCAAGTTTTAAGTTTGAGATCAAACAGATTGCATGGTCCCATCGGAACATCAAGGATGAGGAACTTGTT  
TCCTGAGCTTCGAATCTTAGATGTCGCTTACAATGCCTTAACAGAAACCTT

>M6-PGSC0003DMG400026231M6LRR-RLP\_1647

CAACAAGTTTGTTC AACATTTGAAAGCCATGAGGACAATTAATCGAACAATGAAGGCACCGGTATACCT

TGGAGACGAGTACTACCAAGATTCTGTAACAATTGTATCCAAGGGAATGA

>M6-PGSC0003DMG400026231M6LRR-RLP\_1708

GGTATACCTTGGAGACGAGTACTACCAAGATTCTGTAACAATTGTATCCAAGGGAATGATGCTTGAACCTT

GTTAGAATTTTGACGATTTACACAGCTATCGATCTTTCAAGTAATAAATT

>M6-PGSC0003DMG400026231M6LRR-RLP\_1769

CTTGAACCTTGTTAGAATTTTGACGATTTACACAGCTATCGATCTTTCAAGTAATAAATTCAGAGGACCAAT

TCCAAGTGTCATGGGAGATTTTCATTGCACTTCACGTGTTAAACTTATCT

>M6-PGSC0003DMG400026231M6LRR-RLP\_183

TTTGTCAATTACAATTTTCAAATTGAGTTCATGGAATACGAGCAGTGATTGCTGCTTATGGGATGGGGT

AACATGCGATGAGATGAGTGTCCATGTTATTGAGCTTGACATCAGTTGCA

>M6-PGSC0003DMG400026231M6LRR-RLP\_1830

GAGGACCAATCCAAGTGTCATGGGAGATTTTCATTGCACTTCACGTGTTAAACTTATCTCATAATGGATT

GCAAGGTGAAATACCTCCATCACTCGGAGATTTATCTTCAGTTGAATCAT

>M6-PGSC0003DMG400026231M6LRR-RLP\_2074

TCACACTTTTGAGAACAGTTCATTTGCAGGCAATGACGGATTACGTGGATTACCAATTTTCGAAAGGCTGT

GGTAATGATGGTGTAAATAGACACAAATTACACAACATCCTCTCCAGATGA

>M6-PGSC0003DMG400026231M6LRR-RLP\_2318

GCAAAAATCATTTTAAAGTTGGAGCATAAACTTATGATGAGATGGAAAAAGATACAGCGATGGCATAG

GAATCACAGAAGAAATAATCGCTTCTAAGATAAGTTAAGGTATTCAAGTTAA

>M6-PGSC0003DMG400026231M6LRR-RLP\_2379

GGCATAGGAATCACAGAAGAAATAATCGCTTCTAAGATAAGTTAAGGTATTCAAGTTAACTTTTACTG

ATCTTTTATTTTTTATACTTTTCGTTATATAAACTACTAATCAATATGCT

>M6-PGSC0003DMG400026231M6LRR-RLP\_2438

ACTTTACTGATCTTTTATTTTTTATACTTTTCGTTATATAAACTACTAATCAATATGCTCTATCCTAAGCA

TATTTGATTTTGAAATGGTTCTGCCTTTGTTGATGTCTCGAGCTTGA

>M6-PGSC0003DMG400026231M6LRR-RLP\_244

GGATGGGGTAACATGCGATGAGATGAGTGTCCATGTTATTGAGCTTGACATCAGTTGCAGTCAACTTGT

TGGAGTGATTGATTCCAATAGTAGCTTATTCCAACCTCTCATCTAAAAA

>M6-PGSC0003DMG400026231M6LRR-RLP\_305

CAACTTGTTGGAGTGATTGATTCCAATAGTAGCTTATTCCAACCTCTCATCTAAAAAGCTCATTCTTTCT  
ATGAATGACTTCTCTTCTTACACATTTACCTGCATTTGGAAGGTTT

>M6-PGSC0003DMG400026231M6LRR-RLP\_366

TCATTCTTTCTATGAATGACTTCTCTTCTTACACATTTACCTGCATTTGGAAGGTTTTCAAGGTTGACCC  
ATCTTCATCTTTCTGACTCGCATTTCTCAGGTAAAATTCCTTCTGAAA

>M6-PGSC0003DMG400026231M6LRR-RLP\_427

AAGGTTGACCCATCTTCATCTTTCTGACTCGCATTTCTCAGGTAAAATTCCTTCTGAAATCTTTTCCCTGTC  
AAATCTCACTCGCATAGAGTCCTTATACCTTAGAGGAAACTCCCTGAA

>M6-PGSC0003DMG400026231M6LRR-RLP\_488

TTTTCCCTGTCAAATCTCACTCGCATAGAGTCCTTATACCTTAGAGGAAACTCCCTGAATGGAACAATACC  
ATCAGGTATGTTCTCCCTCCATCACTAATAGAATTAGACTTGAGTAAT

>M6-PGSC0003DMG400026231M6LRR-RLP\_549

GAACAATACCATCAGGTATGTTCTCCCTCCATCACTAATAGAATTAGACTTGAGTAATAACCAATTTTCT  
GGTCATCTTGAGGATTTCAAGTCCAATTCATAAGATCTATTGATTTAA

>M6-PGSC0003DMG400026231M6LRR-RLP\_61

AGCTGTGCTCTTAATTGTTTTCTCTGTCAAATTGCTTTTTCTTCATCTTTGTGCCCTAAAGATCAAAGCAT  
TTCCCTTCTAAATTTCAAGAAATCACTTACTATTGATCCCTCATATGA

>M6-PGSC0003DMG400026231M6LRR-RLP\_610

CCAATTTTCTGGTCATCTTGAGGATTTCAAGTCCAATTCATAAGATCTATTGATTTAAACAATAATCAGC  
TGCAAGGCCATCTCCCAAGTCAATTCAAACCTTGGAACCTAACGTG

>M6-PGSC0003DMG400026231M6LRR-RLP\_671

AATAATCAGCTGCAAGGCCATCTCCCAAGTCAATTCAAACCTTGGAACCTAACGTGGCTTGATCTTTC  
ATCAAATAATTTTAGTGGCGATGTGGATGTCAGCTTATTTTCAAACATA

>M6-PGSC0003DMG400026231M6LRR-RLP\_732

TTGATCTTTCATCAAATAATTTTAGTGGCGATGTGGATGTCAGCTTATTTTCAAACATAAAAAATCTTCAG  
GGTCTTGATCTTTCATATAATCGTTTCTCATTAAACCAATGAGAACAGGG

>M6-PGSC0003DMG400026231M6LRR-RLP\_793

AAATCTTCAGGGTCTTGATCTTTCATATAATCGTTTCTCATTAAACCAATGAGAACAGGGCTAATTTTACTT  
TGCCAGAATCTCTTTTTAGTTTGGCGATTGGCCGCATGTGAAGTAAAAGA

>M6-PGSC0003DMG400026231M6LRR-RLP\_854

AATTTTACTTTGCCAGAATCTCTTTTGTAGTTTGCATTGGCCGCATGTGAAGTAAAAGAATTGGAGTTTCT  
AAGACCAGTAAAGAACTTTGGGACTTGAATCTTTTGAATAATAAGATT

>M6-PGSC0003DMG400026231M6LRR-RLP\_915

TGGAGTTTCTAAGACCAGTAAAGAACTTTGGGACTTGAATCTTTTGAATAATAAGATTCAGGGAAGAA  
TTCCAGATTGGGCATGGCCTATATGGCTTAACTTGGACCGTCTTAATTTGT

>M6-PGSC0003DMG400026231M6LRR-RLP\_976

GGGAAGAATTCCAGATTGGGCATGGCCTATATGGCTTAACTTGGACCGTCTTAATTTGTCCCACAATATG  
TTGACAGATATGAACTCAACAAATATAAACTCAATTTCTTATCCCTCTCT

>M6-PGSC0003DMG400026325M6RLKmalectin\_0

AGAAAATGTGTTACGAGCCGCACTTTTCTTTGTTTACACAGTATTTTGAACAGCTCTCCTTGACATTCA  
CATTTTGTGTTACTTGAAGAATTCACTCACATCTTGTGTTAAAAAA

>M6-PGSC0003DMG400026325M6RLKmalectin\_1037

CTGTCGCTATTAAGATGCTTCCCACTTTGTTGCTTGCATTTCTGTGATATTGTTAGTTTGTACCTGGAC  
AGTTGTACTTTAATGTATATCTCAATGGCTTCACAGCATACAAAGACC

>M6-PGSC0003DMG400026325M6RLKmalectin\_1098

GTCACCTGGACAGTTGACTTTAATGTATATCTCAATGGCTTCACAGCATACAAAGACCTTGATTTATCTT  
CGCTTACATTCCGTGAGCTTGTACACCATATTACATAGATTTTGTGGT

>M6-PGSC0003DMG400026325M6RLKmalectin\_1159

GATTTATCTTCGCTTACATTCCGTGAGCTTGTACACCATATTACATAGATTTTGTGGTATACTCAGGTAG  
TTCAGGCGTTGTGCAAGTAAGCATCGATCCTTCTAACTTAAGTAGTTCA

>M6-PGSC0003DMG400026325M6RLKmalectin\_122

ATAGTAGAGTACAATAATTCTCTCATTCTTCTCCCATGAGAAGTTGTAAAGTTGTTGGTTTTTTCATCCCTT  
GTTTCTGTATCATCTATTTATCAGGTGCTTTCTCCCCACAAGATAACT

>M6-PGSC0003DMG400026325M6RLKmalectin\_1220

ACTCAGGTAGTTCAGGCGTTGTGCAAGTAAGCATCGATCCTTCTAACTTAAGTAGTTCAATGAGGAAGA  
ATGCCATTCTGAATGGTGTGAGATTATGAAAATGGTTAATTTTGTGGCTT

>M6-PGSC0003DMG400026325M6RLKmalectin\_1281

GAGGAAGAATGCCATTCTGAATGGTGTGAGATTATGAAAATGGTTAATTTTGTGGCTTCCCGGACAGG



TTCTAACAAGAGAAATGTTTGGGTTATAGTGAGTTCTGTTCTTGGAAGTTT

>M6-PGSC0003DMG400026325M6RLKmalectin\_1342

CGGACAGGTTCTAACAAGAGAAATGTTTGGGTTATAGTGAGTTCTGTTCTTGGAAGTTTTGTTCTGCTGA  
CTGTGGTGATGATTCTTGCTGCTTTGCTATTCTTTGTCTGCAGAAAGAAA

>M6-PGSC0003DMG400026325M6RLKmalectin\_1403

TTCTGCTGACTGTGGTGATGATTCTTGCTGCTTTGCTATTCTTTGTCTGCAGAAAGAAAAAGCCAAAACC  
AAAGCCCTCAGAAAGTGCTGGATGGACGCCTTTACGTTCGATATGGAAGTA

>M6-PGSC0003DMG400026325M6RLKmalectin\_1464

GCCAAAACCAAAGCCCTCAGAAAGTGCTGGATGGACGCCTTTACGTTCGATATGGAAGTAGTTCCCATGA  
TACATTGTCTGATGGGACTTCGCCTGGACCAAATGGATATCTAGGCCAGAG

>M6-PGSC0003DMG400026325M6RLKmalectin\_1525

TCCCATGATACATTGTCTGATGGGACTTCGCCTGGACCAAATGGATATCTAGGCCAGAGGATTCCCTTTG  
CCGAAATACAATTGGCTACTAATAATTTTGATAAGAGTTTGCTAGTCGGT

>M6-PGSC0003DMG400026325M6RLKmalectin\_1586

TTCCCTTTGCCGAAATACAATTGGCTACTAATAATTTTGATAAGAGTTTGCTAGTCGGTCTGGTGGCTTT  
GGGATGGTATACAGAGGTATTCTTGGAGACAACAGAAAGGTTGCTATAA

>M6-PGSC0003DMG400026325M6RLKmalectin\_1647

TGGTGGCTTTGGGATGGTATACAGAGGTATTCTTGGAGACAACAGAAAGGTTGCTATAAAGAGAGGTG  
TGCCAGGTTCCAGGCAGGGCCTACCTGAATTCAGACTGAAATCACTGTTCT

>M6-PGSC0003DMG400026325M6RLKmalectin\_1708

AGAGGTGTGCCAGGTTCCAGGCAGGGCCTACCTGAATTCAGACTGAAATCACTGTTCTTTCCAAGATTC  
GCCACCACCATCTTGTTTCACTTGTAGGTTATTGTGAAGAACAGTCTGAG

>M6-PGSC0003DMG400026325M6RLKmalectin\_1769

CCAAGATTCGCCACCACCATCTTGTTTCACTTGTAGGTTATTGTGAAGAACAGTCTGAGATGATACTTGTT  
TACGAGTATATGGAGAAGGGACCTCTTAAGAGGCATTTGTATGGTCAAG

>M6-PGSC0003DMG400026325M6RLKmalectin\_183

TTTCATCCCTTGTTTCTGTATCATCTATTTATCAGGTGCTTTCTCCCCACAAGATAACTACTTGATAAACTG  
TGGTTCAAATACAGATGTCTTAGTTGATAACAGACTCTTCCTTGGTGA

>M6-PGSC0003DMG400026325M6RLKmalectin\_1830

GATACTTGTTCACGAGTATATGGAGAAGGGACCTCTTAAGAGGCATTTGTATGGTCAAGGCATATCACC  
CTTATCTTGGAAGAAAAGGCTTGAGATATGCATAGGTGCAGCAAGAGGTCT

>M6-PGSC0003DMG400026325M6RLKmalectin\_1891

ATATCACCTTATCTTGGAAGAAAAGGCTTGAGATATGCATAGGTGCAGCAAGAGGTCTCCACTACCTTC  
ATACAGGTTTCGCTCAAGGAATCATCCATCGTGACATAAAGTCAACTAAC

>M6-PGSC0003DMG400026325M6RLKmalectin\_1952

ACTACCTTCATACAGGTTTCGCTCAAGGAATCATCCATCGTGACATAAAGTCAACTAACATCCTCCTTGAT  
GAAAATTGTGTTGCTAAGGTTGCTGATTTGCTCTCAAGGACAGGCC

>M6-PGSC0003DMG400026325M6RLKmalectin\_2013

CCTCCTTGATGAAAATTGTGTTGCTAAGGTTGCTGATTTGCTCTCAAGGACAGGCCCTTGCTTAAT  
GAGACCCATGTCAGCACTGGTGTAAGGAAGTTTTGGCTACCTTGATCC

>M6-PGSC0003DMG400026325M6RLKmalectin\_2074

TGTCTTAATGAGACCCATGTCAGCACTGGTGTAAGGAAGTTTTGGCTACCTTGATCCGGAATATTTTC  
GGAGGCAGCAGCTTACTGACAAGTCAGATGTTTACTCGTTCGGAGTTGTT

>M6-PGSC0003DMG400026325M6RLKmalectin\_2135

AATATTTTCGGAGGCAGCAGCTTACTGACAAGTCAGATGTTTACTCGTTCGGAGTTGTTCTATTTGAAGT  
CTTATGTGCTAGACCTGCAATTGATCCTCTGCTTACACGAGAGCAAGTTA

>M6-PGSC0003DMG400026325M6RLKmalectin\_2196

ATTTGAAGTCTTATGTGCTAGACCTGCAATTGATCCTCTGCTTACACGAGAGCAAGTTAATTTGGCTGAA  
TGGGCTATGCAGTGGCAGAAGGATGGACAAGATTGTTGATCC

>M6-PGSC0003DMG400026325M6RLKmalectin\_2257

TTGGCTGAATGGGCTATGCAGTGGCAGAAGGATGGACAAGATTGTTGATCCCCATATCAG  
GGCCAGATAAAGCTAAACTGTTTGAGGAAGTTCGGGGAGACTGCCGAGAAA

>M6-PGSC0003DMG400026325M6RLKmalectin\_2318

ATATCAGGGGCCAGATAAAGCTAAACTGTTTGAGGAAGTTCGGGGAGACTGCCGAGAAATGTTTGGCT  
GATTATGGCATTGATAGGCCAACAAATGGGTGACGTATTGTGGAAGTTGGAAT

>M6-PGSC0003DMG400026325M6RLKmalectin\_2379

TTTGGCTGATTATGGCATTGATAGGCCAACAAATGGGTGACGTATTGTGGAAGTTGGAATATGCATTCCA  
GCTTCAAGAATCTGGAACACTTGGAGAAGTGCCTGAGATTTCCAATGAGCT

>M6-PGSC0003DMG400026325M6RLKmalectin\_244

TTGATAAACTGTGGTTCAAATACAGATGTCTTAGTTGATAACAGACTCTTCCTTGGTGACTCTAATTCAGT  
TTATACCTCTCAAGGTAAGTCTATTGTCTTAGAAGAAAATACAAACCCA

>M6-PGSC0003DMG400026325M6RLKmalectin\_2440

GCATTCCAGCTTCAAGAATCTGGAACACTTGGAGAAGTGCCTGAGATTTCCAATGAGCTTCCAGTGCCAT  
TGCCAGAGGGTCTCCACAATGAGGTGTATAATGGTGATGGGGCTTCAGAT

>M6-PGSC0003DMG400026325M6RLKmalectin\_2501

CAGTGCCATTGCCAGAGGGTCTCCACAATGAGGTGTATAATGGTGATGGGGCTTCAGATATATCGACAA  
GCAAGGTATTTTCACAATTGATGACTAATGAAGGAAGATAACTAGTCTACA

>M6-PGSC0003DMG400026325M6RLKmalectin\_2562

ATCGACAAGCAAGGTATTTTCACAATTGATGACTAATGAAGGAAGATAACTAGTCTACAGTATAGTGTA  
CCATCAAATCATTGTTCAACAGTTTGTATCAATGTTGATTTTGGTTCACCT

>M6-PGSC0003DMG400026325M6RLKmalectin\_2623

ATAGTGTAACCATCAAATCATTGTTCAACAGTTTGTATCAATGTTGATTTTGGTTCACCTTAAACATTTTCTTT  
TTACGTTTTTCTTAATTGGCAAAGCCATCATATACTCTTTGAACTAAT

>M6-PGSC0003DMG400026325M6RLKmalectin\_2684

ACATTTTCTTTTACGTTTTTCTTAATTGGCAAAGCCATCATATACTCTTTGAACTAATATACTATAAAAAGT  
GTGTATCATGCAATAACCTGTCCTATGATGTAATCCTTGTCATGTTCA

>M6-PGSC0003DMG400026325M6RLKmalectin\_2745

ACTATAAAAGTGTGTATCATGCAATAACCTGTCCTATGATGTAATCCTTGTCATGTTTCATGCTCCTAACAA  
AGAAACATAGCGCTGGATTGATGAACATCTATAAGCAGAAATGTTCTTG

>M6-PGSC0003DMG400026325M6RLKmalectin\_2806

CTCCTAACAAAGAAACATAGCGCTGGATTGATGAACATCTATAAGCAGAAATGTTCTTGCGTACCAAATC  
CATCATAGTCTGTTTCATGCTTTCTATTACCTCAAATCCCCTAATGCCTAT

>M6-PGSC0003DMG400026325M6RLKmalectin\_2867

TACCAAATCCATCATAGTCTGTTTCATGCTTTCTATTACCTCAAATCCCCTAATGCCTATCAAATAAGGGTCC  
TACCGATCAATGACCATGGTGTCTTAGGTGTGATCTTGTACCCATAGT

>M6-PGSC0003DMG400026325M6RLKmalectin\_2928

AATAAGGGTCTACCGATCAATGACCATGGTGTCTTAGGTGTGATCTTGTACCCATAGTGCAGTACTG

AACAGCAATCCAAACTCCCTGCCCTCAGAAAAAATAAAAGACCCCTTT

>M6-PGSC0003DMG400026325M6RLKmalectin\_2989

AGTACACTGAACAGCAATCCAAACTCCCTGCCCTCAGAAAAAATAAAAGACCCCTTTGTATGATATTG  
GTCGGTTTCTATGCTTTTGGATGGTTTAGGACAAATATATCCCCGAACTA

>M6-PGSC0003DMG400026325M6RLKmalectin\_305

CTAATTCAGTTTATACCTCTCAAGGTAAGTCTATTGTCTTAGAAGAAAATACAAACCCATCTTCCAATTTA  
TCTTTCCTTTATTCTAGTGCTAGGGTTTTCAATGATGCTTCAAAGTATG

>M6-PGSC0003DMG400026325M6RLKmalectin\_366

TTCCAATTTATCTTTCCTTTATTCTAGTGCTAGGGTTTTCAATGATGCTTCAAAGTATGTGTTCAATATCAA  
CAAGATTGGGACCCATTTCTTGCGACTTCATTTCTCTCCCTTCACTTC

>M6-PGSC0003DMG400026325M6RLKmalectin\_427

TTCAATATCAACAAGATTGGGACCCATTTCTTGCGACTTCATTTCTCTCCCTTCACTTCTCACAATTATGAT  
CTCAGAAAAGCAATTTTTCAGTTTTTCTGCAAATGGGGTTTTGCTTTTT

>M6-PGSC0003DMG400026325M6RLKmalectin\_4331

TTTTTACTCTTGTGCAGTCAACTCATTTAAGCAGTTCAGACCAAGAGTTGGTTTTACGATGAGTTGGGTC  
CTAACTAAATTTACATTTACCTCCACTATATTATTTCTTTGTAATTGT

>M6-PGSC0003DMG400026325M6RLKmalectin\_4392

GAGTTGGGTCCTAACTAAATTTACATTTACCTCCACTATATTATTTCTTTGTAATTGTGGTATGAATATCT  
TAGCTTGTGACACTAGCGTAATATCTTAAGCGTAATATAAATCTTTAA

>M6-PGSC0003DMG400026325M6RLKmalectin\_488

ACAATTATGATCTCAGAAAAGCAATTTTTCAGTTTTTCTGCAAATGGGGTTTTGCTTTTTATTGTTAATACTA  
CTATACTAATACTGTGGTTAGAGAGTTCATATTGATGGTGGATAAGT

>M6-PGSC0003DMG400026325M6RLKmalectin\_549

TGTTAATACTACTATTACTAATACTGTGGTTAGAGAGTTCATATTGATGGTGGATAAGTTTGAAGTTGAA  
ATTAATTCACACCTAATCCTTATGAATCCAGTTTTGCTTTTGTAATGC

>M6-PGSC0003DMG400026325M6RLKmalectin\_61

TTGACATTCACATTTTGTGTTACTTGAAAAGAATTCACCTCACATCTTGTTGTTAAAAAAAATAGTAGAGT  
ACAATAATTCTCTCATTCTTCTCCCATGAGAAGTTGTAAAGTTGTTGGT

>M6-PGSC0003DMG400026325M6RLKmalectin\_610

GAACTTGAAATTAACCTCACACCTAATCCTTATGAATCCAGTTTTGCTTTTGTAATGCAATTGAAGTGTT  
TTCAGTCCGGATGATTCATAATTGGTGATGGGGCTAAATCAGTTGGT

>M6-PGSC0003DMG400026325M6RLKmalectin\_671

TTGAAGTGTTCAGCTCCGGATGATTCATAATTGGTGATGGGGCTAAATCAGTTGGTCCCAAAGGAAT  
TCGGGAGTTTAATCAGAATATGACGTTACAAACATTAGAGACTGTTTCATA

>M6-PGSC0003DMG400026325M6RLKmalectin\_732

CAAAGGAATTCGGGAGTTTAATCAGAATATGACGTTACAAACATTAGAGACTGTTTCATAGGATTAATGT  
TGGAGGGTTAAAGTTAACTCCTTTAATGATACTCTCTGGAGAAGTTGGAT

>M6-PGSC0003DMG400026325M6RLKmalectin\_793

ATTAATGTTGGAGGGTTAAAGTTAACTCCTTTAATGATACTCTCTGGAGAAGTTGGATTGCAGATGAAG  
ATTTTCTCATTTTGAAATATGCTGCTAAAATTGCAAGAACTTCTCATGTT

>M6-PGSC0003DMG400026325M6RLKmalectin\_854

CAGATGAAGATTTTCTCATTTTGAAATATGCTGCTAAAATTGCAAGAACTTCTCATGTTCCCAAGTATCAA  
AAGGGTGGTGCTACAAGGGAAATTGCTCCTGATAGTGTCTATATGACAG

>M6-PGSC0003DMG400026325M6RLKmalectin\_915

CAAGTATCAAAGGGTGGTGCTACAAGGGAAATTGCTCCTGATAGTGTCTATATGACAGCACAGCAGAT  
GAATACGGATAATGTAACACTACAGATTTCAAATTTAATATCACATGGAACCTT

>M6-PGSC0003DMG400026325M6RLKmalectin\_976

CAGCAGATGAATACGGATAATGTAACACTACAGATTTCAAATTTAATATCACATGGAACCTTCTGTCGCTA  
TTAAAGATGCTTCCCACTTTGTTTCGCTTGCATTTCTGTGATATTGTTAGT

>M6-PGSC0003DMG400026383M6RLKWAX-EGF\_0

ATGGAAGGCCTTTTCTCTTTTCGAATTCTAGCTTGCACAGTACTCTTCTTCATCATAATTCATCTTTCTCCTC  
TCTCTTCCGTGCGAAAACAAGTTGTTTTCCAGCTGCGGCAAGTCCTTC

>M6-PGSC0003DMG400026383M6RLKWAX-EGF\_124

GCGCAAACATAACTGAAATTACTTATCCTTTCTGGGGAAATGATCGACCGAAGGAATGCGGTTATCCTG  
GATTCGAGCTTCAATGTGACGATCAGGAAAAGACTATAATACAGATTGCGA

>M6-PGSC0003DMG400026383M6RLKWAX-EGF\_186

TATCCTGGATTCGAGCTTCAATGTGACGATCAGGAAAAGACTATAATACAGATTGCGAACATAAATTACC  
TTGTTCTGGATTAATTTGGATGCTCAAATTATTACAGTTACTAGAAAA

>M6-PGSC0003DMG400026383M6RLKWAX-EGF\_248

AAATTACCTTGTCTGGATATTAATTTGGATGCTCAAATTATTACAGTTACTAGAAAAGATCTAGGTATAG  
ATGGAATTTGTCAATTTAACTCAACTATAGATAATTCCAATACATTCGA

>M6-PGSC0003DMG400026383M6RLKWAX-EGF\_310

TAGGTATAGATGGAATTTGTCAATTTAACTCAACTATAGATAATTCCAATACATTCGAGTATGCTTCGAG  
CTTAGTGAATTTACATTCGATTACGCGTGCTCGCCTTGGATCGGATCGT

>M6-PGSC0003DMG400026383M6RLKWAX-EGF\_372

GCTTCGAGCTTAGTGAATTTACATTCGATTACGCGTGCTCGCCTTGGATCGGATCGTTCAATTGTCCGA  
TAAATGGAATGAATTATAAGAATAGTTTTACAATTGGAGGTGAAGAGGGA

>M6-PGSC0003DMG400026383M6RLKWAX-EGF\_434

TTGTCCGATAAATGGAATGAATTATAAGAATAGTTTTACAATTGGAGGTGAAGAGGGAGCTGGGACAT  
GTCATGCTAGTATAGTTGTACCAGGTGCGAAAGGAGTTACCGTCTGGAGGAAT

>M6-PGSC0003DMG400026383M6RLKWAX-EGF\_496

GGACATGTCATGCTAGTATAGTTGTACCAGGTGCGAAAGGAGTTACCGTCTGGAGGAATAATTCGAGATT  
TGGGGGATTTGAAGCAGTTGCTGGAACAGGGGTTTGATGTGAAATGGAAG

>M6-PGSC0003DMG400026383M6RLKWAX-EGF\_558

CGAGATTTGGGGGATTTGAAGCAGTTGCTGGAACAGGGGTTTGATGTGAAATGGAAGTGGATACTAG  
TCATTGTAAGGAATGTGAAAAGTTTGGGGGACGTTGTGGATTTGATGCCGGT

>M6-PGSC0003DMG400026383M6RLKWAX-EGF\_62

TCTTTCTCCTCTCTCTTCCGTCGAAAACAAGTTGTTTTCCAGCTGCGGCAAGTCCTTCAACTGCGCAAACA  
TAACTGAAATTACTTATCCTTTCTGGGGAAATGATCGACCGAAGGAATG

>M6-PGSC0003DMG400026383M6RLKWAX-EGF\_620

TACTAGTCATTGTAAGGAATGTGAAAAGTTTGGGGGACGTTGTGGATTTGATGCCGGTGCTAATGAATT  
TAGGTGTTTGTGCCCTGATGATCAATCTTCTTCTTCTCGTCGTCGTCGTC

>M6-PGSC0003DMG400026383M6RLKWAX-EGF\_735

TCGTCGTCATCGTCCAATAATGCGTGCATCAATGGACTTCCTTTCTCTGGAAGTAAAAGAGTAAACCGC  
TTTCATCCCTGGCTACACCGCCTGGTACGTTTTTCCGATTTCTTCTTAA

>M6-PGSC0003DMG400026384M6RLKWAX-EGF\_0

AATTTGTTGTTCTCTTCCAACTCCTTTCTCTGTCCCTTAAATCCTCATCTCCTTTCAGCTTAGCTCCTGAAT

AAAGCTCTTTTGCCACCACTACCAGTAAGCGCCTCTCTTTCTAGGTG

>M6-PGSC0003DMG400026384M6RLKWAX-EGF\_1037

CTAACTTAGTAAAGATTCTTTCGCAATCAGTGTAGTATCAAAAATCAGGATAACTTTGAAGGAAAAAACC

TAACCTTCTTAATTATTTTGAAAAATATTTATTTGAACTAAATATAAA

>M6-PGSC0003DMG400026384M6RLKWAX-EGF\_1098

GAAAAACCTAACCTTCTTAATTATTTTGAAAAATATTTATTTGAACTAAATATAAAAACTAAAAACAT

TATATAATATGGACCAACGGAAGTACTTTTTTGCACTGCTTACCTAGAA

>M6-PGSC0003DMG400026384M6RLKWAX-EGF\_1159

CTAAAAACATTATATAATATGGACCAACGGAAGTACTTTTTTGCACTGCTTACCTAGAAATTAACCTCTCTA

TAAAATTTGTACGGGTTAATTTGTCCAAATCCATATGAACTCTG

>M6-PGSC0003DMG400026384M6RLKWAX-EGF\_122

GCTAGTCCCTTAATCAAACAGAAATGCATCCTTATTTTTGCTCTTCACTACCACAATCTTTATCTTGATC

TATATAACGGGGTCTTCTGTCAAGATGACGAGCGATACAGGAGTTGT

>M6-PGSC0003DMG400026384M6RLKWAX-EGF\_1220

AAACTCTCTATAAAATTTGTACGGGTTAATTTGTCCAAATCCATATGAACTCTGAATACTACAGCC

TCTAGCCCTCTATCTACTTTGGTCCAGCCCCAATTCTTGAGCGTGTTAG

>M6-PGSC0003DMG400026384M6RLKWAX-EGF\_1281

TACTACAGCCTCTAGCCCTCTATCTACTTTGGTCCAGCCCCAATTCTTGAGCGTGTTAGTATAGCTCCTTTT

TTTCTTTTTTATATCAGCGTAAATAATTGTATATATTATATGCAAAG

>M6-PGSC0003DMG400026384M6RLKWAX-EGF\_1342

TAGCTCCTTTTTTCTTTTTTATATCAGCGTAAATAATTGTATATATTATATGCAAAGAATATTCGTACAC

GAACTCCTTATGTGAAATTTGAAATCTTTGAAAAATAAGATATGTTA

>M6-PGSC0003DMG400026384M6RLKWAX-EGF\_1403

TATTCGTACACGAACTTCCTTATGTGAAATTTGAAATCTTTGAAAAATAAGATATGTTATTGCTACAACAA

AATAAAAACTCGGGACCTAATTTTAGACTTAGTACTGTGTCTGTGTTT

>M6-PGSC0003DMG400026384M6RLKWAX-EGF\_1464

GCTACAACAAAATAAAAACTCGGGACCTAATTTTAGACTTAGTACTGTGTCTGTGTTTCTGCCATTGTTG

TATTGTTTACTTCTCGTCGGCAATTCAACATTTGGCATTGTCAAAACAC

>M6-PGSC0003DMG400026384M6RLKWAX-EGF\_1525

GCCATTGTTGTATTGTTTACTTCTCGTCGGCAATTCAACATTTGGCATTGTCAAAACACAAGAACTACTA  
TTCTTAATCCGAGTAGAATAAGCCTCGGATTAATAAATATTATAAATAA

>M6-PGSC0003DMG400026384M6RLKWAX-EGF\_1586

GAAACTACTATTCTTAATCCGAGTAGAATAAGCCTCGGATTAATAAATATTATAAATAATAGGAAAAGTA  
CAATAATTCTCTAACTAACCGAAAAAATACATATATTTTCATTGAACCTT

>M6-PGSC0003DMG400026384M6RLKWAX-EGF\_1647

GGAAAAGTACAATAATTCTCTAACTAACCGAAAAAATACATATATTTTCATTGAACCTTTTTATTGACAAA  
GTAAACAAGGATACAGTTCTTTATTTGTAGTTCTTTTACTTTTAGTTAG

>M6-PGSC0003DMG400026384M6RLKWAX-EGF\_1708

TATTGACAAAGTAAACAAGGATACAGTTCTTTATTTGTAGTTCTTTTACTTTTAGTTAGTTCTGTGTTATAA  
TTCAAACCTGGTTGGCGCTTGAATAAAACGCGGGAACTGAAACGATT

>M6-PGSC0003DMG400026384M6RLKWAX-EGF\_1769

CTGTGTTATAAATCAAACCTGGTTGGCGCTTGAATAAAACGCGGGAACTGAAACGATTTTTTTACTGTG  
AAATTATTGTATATATACACGTTCTACTGCCTCTTTAAAAAACACAATT

>M6-PGSC0003DMG400026384M6RLKWAX-EGF\_183

TTATCTTGATCTATATACCGGGTCTTTCTGTCAAGATGACGAGCGATACAGGAGTTGTGGTGAGCCGT  
TCAGTGCGGCAGCATGAATATAATTTACCCTTTTTGGGGAGGGAGAAAAC

>M6-PGSC0003DMG400026384M6RLKWAX-EGF\_1830

TTTACTGTGAAATTATTGTATATATACACGTTCTACTGCCTCTTTAAAAAACACAATTTGATTTTAGATAA  
TTCTATTCATTGATCAATGCATTAACATATATAAAAAAATAAAAAA

>M6-PGSC0003DMG400026384M6RLKWAX-EGF\_1891

ATTTTAGATAATTCTATTCATTGATCAATGCATTAACATATATAAAAAAATAAAAAATTACAGTTGGTA  
TTTTTTTTTTCTTGTTTCTAGTGGAATTCACACTAAACCTTTTATGATT

>M6-PGSC0003DMG400026384M6RLKWAX-EGF\_1952

ACAGTTGGTATTTTTTTTTTTCTTGTTTCTAGTGGAATTCACACTAAACCTTTTATGATTCAATTTTATTGAG  
GTTTGACCACACCAAGTTAGGTGCTACTCCCCGATTTTCATTTTACTT

>M6-PGSC0003DMG400026384M6RLKWAX-EGF\_2013

ATTTTATTGAGTTTGACCACACCAAGTTAGGTGCTACTCCCCGATTTTCATTTTACTTTAATTCATATCTA  
CTTGACATAAATATTAAGACAGTTTTGGTTAAGAATTTTTTTATTGA



>M6-PGSC0003DMG400026384M6RLKWAX-EGF\_2074

ATTCATATCTACTTGACATAAATATTAAGACAGTTTTGGTTAAGAATATTTTTTATTGAATTAATTTTTATT  
AATAATATATTGAAACCTTAACCTTAATTATTGCTAAACTAGTTTATG

>M6-PGSC0003DMG400026384M6RLKWAX-EGF\_2135

TAATTTTTATTAATAATATATTGAAACCTTAACCTTAATTATTGCTAAACTAGTTTATGTAGTTATTTAATAT  
TAAAGATAGTAATATGGGTAAAATATAATTAATAAACTTAATTTATT

>M6-PGSC0003DMG400026384M6RLKWAX-EGF\_2196

GTTATTTAATATTAAGATAGTAATATGGGTAAAATATAATTAATAAACTTAATTTATTAATAATGGACAA  
ATAATAATATCTGAAAAATTAATTTATTAATAATGGATAAATAATAATAGA

>M6-PGSC0003DMG400026384M6RLKWAX-EGF\_2257

AATGGACAAATAATAATATCTGAAAAATTAATTTATTAATAATGGATAAATAATAATAGAAAGACCAAGT  
AAAATGAAACAAAGGGAGTAATACTCTTTTGGCCTTGTTTATAAATTATA

>M6-PGSC0003DMG400026384M6RLKWAX-EGF\_2623

TTAAAATATTGTATTTATTATATTCAAAGATGATATAGTAACTTACCCTTCTATTTATAATAAATAGTTA  
TTAAATTTATATAAAATTAACAAGCAGATATACGCATCTTATATCC

>M6-PGSC0003DMG400026384M6RLKWAX-EGF\_2867

TGTATACTTAATGTCATATTAGACCAAGTTAAAATATATTAGACCAAGTTAAAATGTTTCATTAAGTTA  
GGCGTCTTTCAAACCTCTTTCTTTTCATATTCAACGTGAGTAGTAATAA

>M6-PGSC0003DMG400026384M6RLKWAX-EGF\_2928

TTAAAAGTTAGGCGTCTTTCAAACCTCTTTCTTTTCATATTCAACGTGAGTAGTAATAAATATTCAAACCTTCA  
GTCAAATCCTTTTTGTCTCTCTCTTTCAAATGTAATCTCAGATTCTCA

>M6-PGSC0003DMG400026384M6RLKWAX-EGF\_2989

TTCAAACCTTCAGTCAAATCCTTTTTGTCTCTCTCTTTCAAATGTAATCTCAGATTCTCACCATCTTCAAATT  
CCCTTTCAATAATAATATACAGATATGAATCTACAGACTACAAATAA

>M6-PGSC0003DMG400026384M6RLKWAX-EGF\_305

GAGTATTGTGGTCATCCAAGTTTTGAGATCAAGTGCAGAAAGTCGCATACCCAAAATTGCAATTGAATCA  
ACAAGATACGAAGTGATAGATATCAACACCCCTAATCGAATTGTAACCCTG

>M6-PGSC0003DMG400026384M6RLKWAX-EGF\_3050

ATCTTCAAATTCCCTTTCAATAATAATATACAGATATGAATCTACAGACTACAAATAACTCTAGCTATGA

CTCTCACTCACTCACTCATTCTCTCTTCGTATTCCAAATGACTCTCTCC

>M6-PGSC0003DMG400026384M6RLKWAX-EGF\_3111

CTAGCTATGACTCTCACTCACTCACTCATTCTCTCTTCGTATTCCAAATGACTCTCTCCTATCCTTCCACCAC

CACCAATGGCCGCGGCGGCCACCACCACAACACTCTCTCTCTTCG

>M6-PGSC0003DMG400026384M6RLKWAX-EGF\_3172

TCCTTCCACCACCACCAATGGCCGCGGCGGCCACCACCACAACACTCTCTCTTCGCCACCTTTATTC

TCACAACATCCTTCTCCTTCTCCTTCTCTGATGACAACGTCTCATTCCC

>M6-PGSC0003DMG400026384M6RLKWAX-EGF\_3233

ACCTTTATTCTCACAACATCCTTCTCCTTCTCCTTCTCTGATGACAACGTCTCATTCCCCAATTGTCATCTCA

CTTTCTCCTGTGGTTCCATCCGTAACATCACCTACCCATTACCGGC

>M6-PGSC0003DMG400026384M6RLKWAX-EGF\_3294

ATTGTCATCTCACTTTCTCCTGTGGTTCCATCCGTAACATCACCTACCCATTACCGGCGGCGATCGCCCT

AACTACTGTGGCCTCCCGGATTTCAAACCTCCGATGTGTTGACGACAAAC

>M6-PGSC0003DMG400026384M6RLKWAX-EGF\_3355

CGATCGCCCTAACTACTGTGGCCTCCCGGATTTCAAACCTCCGATGTGTTGACGACAAACACACCGAGTTC

ACTCACCAATCACTTACTTACCGTGTCTTTCTATTAATCAGTCATCAGA

>M6-PGSC0003DMG400026384M6RLKWAX-EGF\_3416

ACCGAGTTCACTCACCAATCACTTACTTACCGTGTCTTTCTATTAATCAGTCATCAGAGACCATGACCGT

ATCGAGAATCGACCTCTGGAAAAATTCCTGCCCTTCGCAATTCATCAAC

>M6-PGSC0003DMG400026384M6RLKWAX-EGF\_3477

CCATGACCGTATCGAGAATCGACCTCTGGAAAAATTCCTGCCCTTCGCAATTCATCAACACTACTTTTAAT

TCTACTCGTTTCAACGTGACCGTAACGAAGACGATGAACTTTCGTTGA

>M6-PGSC0003DMG400026384M6RLKWAX-EGF\_3538

TACTTTTAATTCTACTCGTTTCAACGTGACCGTAACGAAGACGATGAACTTTCGTTGAGCTACGGCTGC

GATGTTTCTGCATTGGTTATCACGCCTCAGAATTTGTTCAACTGTAGTGT

>M6-PGSC0003DMG400026384M6RLKWAX-EGF\_3599

TACGGCTGCGATGTTTCTGCATTGGTTATCACGCCTCAGAATTTGTTCAACTGTAGTGTAGATGGTTTGA

ATTTACCGGCGCATTTTACTTACTAGGTCCAATTCCAAGTGACCCTTTT

>M6-PGSC0003DMG400026384M6RLKWAX-EGF\_366

TTGAATCAACAAGATACGAAGTGATAGATATCAACACCCCTAATCGAATTGTAACCCTGGCTCGGGATG  
ATTTACTGAGTAGTATTTGTTTGGATAATCCCGAGAATGCCTCCTTTGATT

>M6-PGSC0003DMG400026384M6RLKWAX-EGF\_3660

ATGGTTTGAATTTACCGGCGCATTTTACTTACTAGGTCCAATTCCAAGTGACCCTTTTCTGAATGTCATA  
ACTTGTACAACATATGGTCACTGTTCCGATGTTTAGAACAGTGGGTAAAA

>M6-PGSC0003DMG400026384M6RLKWAX-EGF\_3721

GAATGTCATAACTTGTACAACATATGGTCACTGTTCCGATGTTTAGAACAGTGGGTAAAATGCTATATAGC  
AATGAGATTACTCTTGGGGAGGCATTGATGCAGGGGTTTAGTGTGAAATA

>M6-PGSC0003DMG400026384M6RLKWAX-EGF\_3782

CTATATAGCAATGAGATTACTCTTGGGGAGGCATTGATGCAGGGGTTTAGTGTGAAATATGATACCCCT  
TATGATAGGCGCTGTTCTGAGTGCAAGAGTCTGGGTGGGAATTGCGGATTT

>M6-PGSC0003DMG400026384M6RLKWAX-EGF\_3843

ATACCCCTTATGATAGGCGCTGTTCTGAGTGCAAGAGTCTGGGTGGGAATTGCGGATTTATTGTGGGGT  
TGTCTCAGCTAATTTGTATTTGTGGAGAAATGCCTTGTACATTTCTTCGAG

>M6-PGSC0003DMG400026384M6RLKWAX-EGF\_3904

TGTGGGGTTGTCTCAGCTAATTTGTATTTGTGGAGAAATGCCTTGTACATTTCTTCGAGAACATTCTCATG  
AAAGTTCCTCACAAGGTAAGTACTGACAACGAGAAGTTTATCGTTTAATTTT

>M6-PGSC0003DMG400026384M6RLKWAX-EGF\_3965

CATTCTCATGAAAGTTCCTCACAAGGTAAGTACTGACAACGAGAAGTTTATCGTTTAATTTTACTACTAATTAG  
GAGTTCTTATTATTAACATAGAAATCTACAGTTTGAATTAGGGACTG

>M6-PGSC0003DMG400026384M6RLKWAX-EGF\_4026

TACTAATTAGGAGTTCTTATTATTAACATAGAAATCTACAGTTTGAATTAGGGACTGAATGGATTTAG  
CTTAACAGTAACCCAGTTAGAGAATCGGTACATATAGGTGTCGATTGTTT

>M6-PGSC0003DMG400026384M6RLKWAX-EGF\_4087

TGGATTTAGCTTAACAGTAACCCAGTTAGAGAATCGGTACATATAGGTGTCGATTGTTCTAGTTGATGAA  
TCCTGAGTTCATGGTCTAAGACATTGTTTGTCTACTCCGACATGATTAC

>M6-PGSC0003DMG400026384M6RLKWAX-EGF\_4148

GTTGATGAATCCTGAGTTCATGGTCTAAGACATTGTTTGTCTACTCCGACATGATTACATTGCGGTTGAT  
TGGTATATGTGTAGTGATGTATCCCGTGAATCTTACAAGTGTGGTCTA

>M6-PGSC0003DMG400026384M6RLKWAX-EGF\_427

TCGGGATGATTTACTGAGTAGTATTTGTTGGATAATCCCAGAGAATGCCTCCTTTGATTTAAACACTTTCA  
GCTATGTTTCGAGTGACCTGAATATACTCTGTATTTGGCTGCACCGT

>M6-PGSC0003DMG400026384M6RLKWAX-EGF\_4331

ATAATTCATACTTTTGCATTTATATTTGTTATGACCGTATGAGTAGTTGTTATCTTATAGCGCCTATTATA  
TAGGTCTTTGATTCAAGGGAATACCTAAAAAACAATGCGACTTGCT

>M6-PGSC0003DMG400026384M6RLKWAX-EGF\_4392

CGCCTATTATATAGGTCTTTGATTCAAGGGAATACCTAAAAAACAATGCGACTTGCTAACACAAAAGT  
GAACTTGAAACGAAGTGTAATCCAATGTGATTTACTAGAATCTTCATGTT

>M6-PGSC0003DMG400026384M6RLKWAX-EGF\_4453

CACAAAAGTGAACCTGAAACGAAGTGTAATCCAATGTGATTTACTAGAATCTTCATGTTAGTTTTTAGAT  
TTCCATGGTATGTTCTCTTCAGGTATCCCTAGGAATTCTTGTTACAGTA

>M6-PGSC0003DMG400026384M6RLKWAX-EGF\_4514

TTTTTAGATTTTCCATGGTATGTTCTCTTCAGGTATCCCTAGGAATTCTTGTTACAGTATGCTTCTTTCTTAT  
AGTTTGACTTTTCAGATCTATTATTAGCGAATACACCCATTTTCATC

>M6-PGSC0003DMG400026384M6RLKWAX-EGF\_4575

CTTCTTTCTTATAGTTTGTACTTTTCAGATCTATTATTAGCGAATACACCCATTTTCATCTCGCCACATGAGT  
TTTGTTAGTTTCTCCTAATTACAGCCGGATATACCTTATGTTTACCTG

>M6-PGSC0003DMG400026384M6RLKWAX-EGF\_4636

GCCACATGAGTTTTGTTAGTTTCTCCTAATTACAGCCGGATATACCTTATGTTTACCTGAGCATCAATTGT  
AGTTACCACTTAATTGACGACATTATGACTGTTTTGCAGATAATCGAAA

>M6-PGSC0003DMG400026384M6RLKWAX-EGF\_4697

CATCAATTGTAGTTACCACTTAATTGACGACATTATGACTGTTTTGCAGATAATCGAAAGAAAAATCAGA  
CGCCACTTGCAAGTAGGTATTGTCTTTGTTCTAATGTTATACGAGTACAAC

>M6-PGSC0003DMG400026384M6RLKWAX-EGF\_4758

AAAATCAGACGCCACTTGCAAGTAGGTATTGTCTTTGTTCTAATGTTATACGAGTACAACCTCAATTGACAC  
AGTCAATGCCTTGAGAAGATTGTAACTTTCTTCTTTGATTGCAGGCAT

>M6-PGSC0003DMG400026384M6RLKWAX-EGF\_4819

AATTGACACAGTCAATGCCTTGAGAAGATTGTAACTTTCTTCTTTGATTGCAGGCATTAGCGTGGGAG

GTGCTGTA CT TGCCGGCATTGGTGTGGGTGGCTAGTCTTCTTCTGCAGA

>M6-PGSC0003DMG400026384M6RLKWAX-EGF\_4880

GCGTGGGAGGTGCTGTA CT TGCCGGCATTGGTGTGGGTGGCTAGTCTTCTTCTGCAGACAAAAGAGAA  
AGCAGATTGCATCACAGGCTTCAGCTTCCCAAACCGAAAGGAAGGATCTTC

>M6-PGSC0003DMG400026384M6RLKWAX-EGF\_4941

AAAGAGAAAGCAGATTGCATCACAGGCTTCAGCTTCCCAAACCGAAAGGAAGGATCTTCCAATTTAAG  
TTCAAGCAATGGGCTGAGTTCCTTCTACTCCTTCTTCAACCACTTTTAC

>M6-PGSC0003DMG400026384M6RLKWAX-EGF\_5002

ATTTTAAGTTCAAGCAATGGGCTGAGTTCCTTCTTACTCCTTCTTCAACCACTTTTACCAGAAGCATTCCC  
TCTTATCCCTCTTCCAAATCTGAAGCTGATTACGGGAGAGGAAGCTCC

>M6-PGSC0003DMG400026384M6RLKWAX-EGF\_5063

GAAGCATTCCCTCTTATCCCTCTTCCAAATCTGAAGCTGATTACGGGAGAGGAAGCTCCTACTTTGGGGC  
ACATGTCTTCAGTTTTGCTGAACTTGAAGAAGCCACAAATAATTTTGATC

>M6-PGSC0003DMG400026384M6RLKWAX-EGF\_5124

CTTTGGGGCACATGTCTTCAGTTTTGCTGAACTTGAAGAAGCCACAAATAATTTTGATCCATCTAAAGAA  
CTTGGGGATGGTGGTTTTGGTGTCTGTACTATGGTATGTGTATTCTCTT

>M6-PGSC0003DMG400026384M6RLKWAX-EGF\_5185

TCTAAAGAACTTGGGGATGGTGGTTTTGGTGTCTGTACTATGGTATGTGTATTCTCTTTCTTGCATTATT  
ATTACTTTGTGAGAGGGCTTCTAACAATTCCAAGTAATTTGTTATCAG

>M6-PGSC0003DMG400026384M6RLKWAX-EGF\_5246

TTGCATTATTACTTTGTGAGAGGGCTTCTAACAATTCCAAGTAATTTGTTATCAGGCAAGCTCCATG  
ATGGTCGCGTGGTTGCAGTCAAGCGCTTGTATGAGAACAATTTCAAGCG

>M6-PGSC0003DMG400026384M6RLKWAX-EGF\_5307

AAGCTCCATGATGGTTCGCGTGGTTGCAGTCAAGCGCTTGTATGAGAACAATTTCAAGCGTGTGGAGCAG  
TTCATGAATGAAGTAGAGATTTAACTCGGCTCCGCCACAAGAACCTAGTG

>M6-PGSC0003DMG400026384M6RLKWAX-EGF\_5368

TGGAGCAGTTCATGAATGAAGTAGAGATTTAACTCGGCTCCGCCACAAGAACCTAGTGATGTTGTATG  
GGTGTACATCTAAACGAAGCCGAGACTTACTGCTTGTATGAGTATATAC

>M6-PGSC0003DMG400026384M6RLKWAX-EGF\_5429

GTTGTATGGGTGTACATCTAAACGAAGCCGAGACTTACTGCTTGTGTTTATGAGTATATACCAAATGGGACA  
GTGGCAGATCATCTGCATGGTAAACGGGCCAAATCTGGCTTACTCTCTTG

>M6-PGSC0003DMG400026384M6RLKWAX-EGF\_549

GCCCTGGTTTGCAGTTACCACCTTCGTCTCCAAATAGGTTCAATTGCGATAGCAACATATTTGGTATATAC  
ACTCTGATCAACGTTCCATTCGACCTTACTCTGGTAACATGCCAGGAAG

>M6-PGSC0003DMG400026384M6RLKWAX-EGF\_5490

AATGGGACAGTGGCAGATCATCTGCATGGTAAACGGGCCAAATCTGGCTTACTCTCTTGGCCTGTCCGA  
ATGAACATAGCCATTGAGACTGCTGAAGCTCTGGCTTATCTCCACTCCTCA

>M6-PGSC0003DMG400026384M6RLKWAX-EGF\_5551

CTGTCCGAATGAACATAGCCATTGAGACTGCTGAAGCTCTGGCTTATCTCCACTCCTCAGTTATAATACAC  
CGTGACGTCAAACCAACAACATTCTGTTAGACAATGATTTCCATGTGA

>M6-PGSC0003DMG400026384M6RLKWAX-EGF\_5612

TATAATACACCGTGACGTCAAACCAACAACATTCTGTTAGACAATGATTTCCATGTGAAAGTTGCTGAT  
TTTGGGCTATCAAGACTGTTCCAATTAATGTCACACATGTCTCTACTGC

>M6-PGSC0003DMG400026384M6RLKWAX-EGF\_5673

GTTGCTGATTTTGGGCTATCAAGACTGTTCCAATTAATGTCACACATGTCTCTACTGCTCCACAGGGTAC  
ACCAGGCTACGTTGATCCTGAATACTACCAATGTTACCAGCTCACTGAA

>M6-PGSC0003DMG400026384M6RLKWAX-EGF\_5734

CACAGGGTACACCAGGCTACGTTGATCCTGAATACTACCAATGTTACCAGCTCACTGAAAAGAGTGATG  
TCTATAGTTTTGGGGTGGTCTTGGTAGAGCTGATCTCATCATTAGAAGCTG

>M6-PGSC0003DMG400026384M6RLKWAX-EGF\_5795

GAGTGATGTCTATAGTTTTGGGGTGGTCTTGGTAGAGCTGATCTCATCATTAGAAGCTGTGGATACCAA  
CAGGCACCGCCATGATATTAATTTGTCTAATATGGCTGTCAACAAGATCCA

>M6-PGSC0003DMG400026384M6RLKWAX-EGF\_5856

GATACCAACAGGCACCGCCATGATATTAATTTGTCTAATATGGCTGTCAACAAGATCCAAGGCCATTCAA  
TTCATGAATTAGTTGATCCAAGTCTTGGATACTCAACAAACAGTTCCGTG

>M6-PGSC0003DMG400026384M6RLKWAX-EGF\_5917

GCCATTCAATTCATGAATTAGTTGATCCAAGTCTTGGATACTCAACAAACAGTTCCGTGAGGAGGATGAC  
TACATTAGTTGCTGAGTTAGCTTTCCGATGTCTGCAACAAGATAGAGATC

>M6-PGSC0003DMG400026384M6RLKWAX-EGF\_5978

GAGGATGACTACATTAGTTGCTGAGTTAGCTTCCGATGTCTGCAACAAGATAGAGATCTGAGACCTCA  
ATGCAAGAAGTGCTGGAGACATTGAGAGGCATCCAGAATGGAGAGTCGAA

>M6-PGSC0003DMG400026384M6RLKWAX-EGF\_6039

AGACCTTCAATGCAAGAAGTGCTGGAGACATTGAGAGGCATCCAGAATGGAGAGTCGAAAGCACACAA  
TGCTGAGGTACTGGATATTGTGGTAGATGATGTTGGGCTCCTAAAGGACTCC

>M6-PGSC0003DMG400026384M6RLKWAX-EGF\_61

TAGCTCCTGAATAAAGCTCTTTTGCCACCACTACCAGTAAGCGCCTCTCTTTCTAGGTGGTGCTAGTCCC  
TTAATCAAACAGAAATGCATCCTTATTTTTGCTCTTCACTACCACAAT

>M6-PGSC0003DMG400026384M6RLKWAX-EGF\_610

TGGTATATACTCTGATCAACGTTCCATTCGACCTTACTCTGGTAACATGCCAGGAAGAAATAATAGCT  
AGGGTCAATCAAACGAGTGCTGTGGCATTAGCCAGTCCTACAGCTTCCGT

>M6-PGSC0003DMG400026384M6RLKWAX-EGF\_6100

CACACAATGCTGAGGTACTGGATATTGTGGTAGATGATGTTGGGCTCCTAAAGGACTCCTTTTCTTCTCC  
GGATTCAGTTGCCACTGGCAAATGAGTTGACAGCTCCACACCACATTCTA

>M6-PGSC0003DMG400026384M6RLKWAX-EGF\_6161

TTCTTCTCCGGATTCAGTTGCCACTGGCAAATGAGTTGACAGCTCCACACCACATTCTAGTGGATGAAAT  
ATGTTTTTCAGGTCGGTTGAATTCAATGCTAGATGGAGAAGCAACTACTA

>M6-PGSC0003DMG400026384M6RLKWAX-EGF\_6222

GGATGAAATATGTTTTTCAGGTCGGTTGAATTCAATGCTAGATGGAGAAGCAACTACTATTTTGGCACTT  
GTGATCAGTGTCATGTTTGGGCTAGTATCTCGCGTCTTCCATAGATAATT

>M6-PGSC0003DMG400026384M6RLKWAX-EGF\_6283

TTGGCACTTGTGATCAGTGTCATGTTTGGGCTAGTATCTCGCGTCTTCCATAGATAATTAATTTCTTATTTT  
TGCTTACATATAGTTATCTTGTTATCGTCAATATTTTCTGTGGGAGAT

>M6-PGSC0003DMG400026384M6RLKWAX-EGF\_6344

TTTCTTATTTTGGCTTACATATAGTTATCTTGTTATCGTCAATATTTTCTGTGGGAGATTATCTAAAAGTGC  
TTTTCGCATAAGGCAATGTATATAAATAGTGAATAGGGCTGCCAACAT

>M6-PGSC0003DMG400026384M6RLKWAX-EGF\_6405

TCTAAAAGTCTTTTTCGCATAAGGCAATGTATATAAATAGTGAATAGGGCTGCCAACATTCTAGTATACA

TATGCATCTTTTGCTCTTTGTACATCAGGCATCAGGTTTTGTTTCTTTAC

>M6-PGSC0003DMG400026384M6RLKWAX-EGF\_6466

TAGTATACATATGCATCTTTTGCTCTTTGTACATCAGGCATCAGGTTTTGTTTCTTTACCGACCTTCTGTTA  
CCTTAAAGTTCATTTACGCTGAGGACATGAAAATCATATGCAACAACA

>M6-PGSC0003DMG400026384M6RLKWAX-EGF\_6527

ACCTTCTGTTACCTTAAAGTTCATTTACGCTGAGGACATGAAAATCATATGCAACAACAATAATGCAGCA  
AAAATGCACTGCAGCAGAACATATTCTGAGGCTATTCGTAGCTTGGAGTG

>M6-PGSC0003DMG400026384M6RLKWAX-EGF\_6577

GCAACAACAATAATGCAGCAAAAATGCACTGCAGCAGAACATATTCTGAGGCTATTCGTAGCTTGGAGT  
GCTAGGTTTTGTCTAAGGAACATGCTCTGATATTAAATTGTAAAGAGAAAA

>M6-PGSC0003DMG400026384M6RLKWAX-EGF\_671

ATAATAGCTAGGGTCAATCAAACGAGTGCTGTGGCATTAGCCAGTCCTACAGCTTCCGTGGAAGTTCTG  
AGAAGAGCCATTGCTGGCGGTTTTTCAGTTAATTGGACGGCAGGTATTGAT

>M6-PGSC0003DMG400026384M6RLKWAX-EGF\_793

TAAGTGCCAACAATGCGACAGTTCAGGTGGAAGATGTGGATCCAATCCAGATTCTGGAGACTTTGCTTG  
CCATTGTCTAAATGGTACTCATTCAAACGACTGCAACGACGGACAAAACCA

>M6-PGSC0003DMG400026384M6RLKWAX-EGF\_854

TTTGCTTGCCATTGTCTAAATGGTACTCATTCAAACGACTGCAACGACGGACAAAACCAAGCCGGCGGT  
AATCTTCTCTACTATTACTCATAATTTACTTCGTCCATTGTTTCCAGA

>M6-PGSC0003DMG400026384M6RLKWAX-EGF\_915

CCGGCGGTAATCTTCTCTACTATTACTCATAATTTACTTCGTCCATTGTTTCCAGATAAATACATGTCC  
GATCCAAACCATCATTCCAGTCCTTTCCAAGAGATTTGAATTACATA

>M6-PGSC0003DMG400026384M6RLKWAX-EGF\_976

AATACATGTCCGATCCAAACCATCATTCCAGTCCTTTCCAAGAGATTTGAATTACATACGCTAACTTAGT  
AAAGATTCTTTCGCAATCAGTGATGATCAAAAATCAGGATAACTTTGA

>M6-PGSC0003DMG400026388M6RLKWAX-EGF\_0

ATGATAAGTTCTTGGCACATATTGCAGGTAAAGTAAAGTTTGAGATTCCGACAGCTGTAATAGGTAAAG  
CATCCCTGTGTGTTGCTGTGTCATTCCCTCAATCTGCTTTTCTGGATTTGT

>M6-PGSC0003DMG400026388M6RLKWAX-EGF\_1116



CCAAGCCCTCAGATCGACCAGCAATAGAGAAGGCAGTTGAAATGCTGGAGGGAAGCCTTCACTCCCTAC  
AAGTTCCACCAAATCCTGTCTTGTCTTCTCCAACAAGATCCATCCCAGAGT

>M6-PGSC0003DMG400026388M6RLKWAX-EGF\_1178

TCCCTACAAGTTCCACCAAATCCTGTCTTGTCTTCTCCAACAAGATCCATCCCAGAGTCATTTACATCAACA  
TCCACAACGACCTCGGAAAGGAGGTTTCGTTTCTGGAGCTAATATCACT

>M6-PGSC0003DMG400026388M6RLKWAX-EGF\_124

GATCTATTAACAATATCTATATGCAGTTGCCGCAGTTTGTATCGCAGGGCTGGCCATAATATCAGTTCCA  
ATCATCTATTGCCTCAGAAGTCGAGGGTCATCCTGTAAGTCACTGATTTG

>M6-PGSC0003DMG400026388M6RLKWAX-EGF\_1240

TACATCAACATCCACAACGACCTCGGAAAGGAGGTTTCGTTTCTGGAGCTAATATCACTTCCGAGTAAAAA  
ACAATTGATGCAAATTTATAAGTATATTCAAACGAAAGTGTTGATTAATT

>M6-PGSC0003DMG400026388M6RLKWAX-EGF\_1302

AGTAAAAACAATTGATGCAAATTTATAAGTATATTCAAACGAAAGTGTTGATTAATTTAGTGGTTATAC  
TGTCCCGAGTTTGATCACCCTGACTAAGTTTTGGAGCCATTAGTGTGTT

>M6-PGSC0003DMG400026388M6RLKWAX-EGF\_1364

GGTTATACTGTCCCGAGTTTGATCACCCTGACTAAGTTTTGGAGCCATTAGTGTGTTGATAAAATTATT  
GCCAATTGGTAACAAGCAGAGAGAGAACATAAATTTCTCATTTATGGTGG

>M6-PGSC0003DMG400026388M6RLKWAX-EGF\_1426

AAATTATTGCCAATTGGTAACAAGCAGAGAGAGAACATAAATTTCTCATTTATGGTGGCCTCACCAAACA  
TCCTAACTCATTTGGTTAATCTAGCTGTGTCATACGATGCTTGTGCCAAC

>M6-PGSC0003DMG400026388M6RLKWAX-EGF\_1488

ACCAAACATCCTAACTCATTTGGTTAATCTAGCTGTGTCATACGATGCTTGTGCCAACGTAAAATACCCAA  
GGCTGTCATCCAAATTATATATTGTCGTCTCCTGCTGTAAATGAGCAGC

>M6-PGSC0003DMG400026388M6RLKWAX-EGF\_1550

AATACCAAGGCTGTCATCCAAATTATATATTGTCGTCTCCTGCTGTAAATGAGCAGCCACAACCTGACC  
ACACTTGTCTTGTATAAATTACACTAACACCTATGTCGTAGTCTTGTGTTA

>M6-PGSC0003DMG400026388M6RLKWAX-EGF\_1612

ACCTGACCACACTTGTCTTGTATAAATTACACTAACACCTATGTCGTAGTCTTGTGTTAATGAAGGATAAA  
GCCATAGGTGCACTACACTCTGGATTGATGATCACTAAATAACAATGAA

>M6-PGSC0003DMG400026388M6RLKWAX-EGF\_1674

AAGGATAAAGCCATAGGTGCACTACACTCTGGATTGATGATCACTAAATAACAATGAATCCTCCTGGTAA  
CACCCGTCTCATGCTGCATCAGAACCATCTTTTACTGCAGAGTGGATTG

>M6-PGSC0003DMG400026388M6RLKWAX-EGF\_1736

CCTGGTAACACCCGTCTCATGCTGCATCAGAACCATCTTTTACTGCAGAGTGGATTGCCACTTCTCGATT  
AAGCTATAAAGAACTTAATTTTAAAAGTCAATGTGTGGTAAGAACAGGT

>M6-PGSC0003DMG400026388M6RLKWAX-EGF\_1798

TTCTCGATTAAGCTATAAAGAACTTAATTTTAAAAGTCAATGTGTGGTAAGAACAGGTCCTTGTAATGCA  
ATCTTCCATTGAGTGGTAACTATAAAACATTTCTGCAGTAGTTCAAACCT

>M6-PGSC0003DMG400026388M6RLKWAX-EGF\_186

CAGTTCCAATCATCTATTGCCTCAGAAGTCGAGGGTCATCCTGTAAGTCACTGATTGCTGGAAGATTGA  
ATCACAAGATCACAAAATTGAAGAATTTATGAGAAATTACGGATCTCATG

>M6-PGSC0003DMG400026388M6RLKWAX-EGF\_1860

GTAATGCAATCTTCCATTGAGTGGTAACTATAAAACATTTCTGCAGTAGTTCAAACCTGGAATTGGCACA  
ATATCACAAAGTTGCTGCACGAGAGGAGGAACAGTGTCTTAAATTCAGC

>M6-PGSC0003DMG400026388M6RLKWAX-EGF\_1922

TTGGCACAATATCACAAAGTTGCTGCACGAGAGGAGGAACAGTGTCTTAAATTCAGCAGTGCAATTAA  
TGTTTACCCACTCCGTGCTGTATGGAACAAATCCCTGTAGTATGTTTCATCT

>M6-PGSC0003DMG400026388M6RLKWAX-EGF\_1984

CAATTAATGTTTACCCACTCCGTGCTGTATGGAACAAATCCCTGTAGTATGTTTCATCTTCTCCCTCCTCAA  
ATGTCTGTTTTATTGCTTTCAAGTGTAGAGGTGGGCCTACTTAATGCT

>M6-PGSC0003DMG400026388M6RLKWAX-EGF\_2046

CCTCCTCAAATGTCTGTTTTATTGCTTTCAAGTGTAGAGGTGGGCCTACTTAATGCTTCGACAGATAATT  
CCTGTAATACAGGTCATGGGACTTGAGGTCTTAGTTCTGGAACCTAAATC

>M6-PGSC0003DMG400026388M6RLKWAX-EGF\_2108

CAGATAATTCCTGTAATACAGGTCATGGGACTTGAGGTCTTAGTTCTGGAACCTAAATCAAATAATCTTA  
AACCTTACCAGATCATGCAACAAGTATCAGTCCTTTGAAATATGTCTATT

>M6-PGSC0003DMG400026388M6RLKWAX-EGF\_2170

TAATCTTAAACCTTACCAGATCATGCAACAAGTATCAGTCCTTTGAAATATGTCTATTATGTAATGTTAGC

AATGTTACTCTATCAATCCATTGCATCTGCAGTCCACCACCATCCTGCC

>M6-PGSC0003DMG400026388M6RLKWAX-EGF\_2232

AATGTTAGCAATGTTACTCTATCAATCCATTGCATCTGCAGTCCACCACCATCCTGCCACACAAGATACAG

ATAAGTGAACACTACATCATGGTTGAGAATTCGACTGTCCCAGTTCTACAG

>M6-PGSC0003DMG400026388M6RLKWAX-EGF\_2275

CACCACCATCCTGCCACACAAGATACAGATAAGTGAACACTACATCATGGTTGAGAATTCGACTGTCCCAGT

TCTACAGCTATGGAAAAACCAATCAGAACTATTAACCTAAACTGAAGC

>M6-PGSC0003DMG400026388M6RLKWAX-EGF\_248

AAGATTGAATCACAAGATCACAAAATTGAAGAATTTATGAGAAATTACGGATCTCATGCTCCAAAGATG

TACAGCTATTCAGATCTAAAGAAAATAACATGCTCATTACAGCCATAAAATA

>M6-PGSC0003DMG400026388M6RLKWAX-EGF\_310

AAAGATGTACAGCTATTCAGATCTAAAGAAAATAACATGCTCATTACAGCCATAAAATAGGAAAGGGAGG

ATTTGGTCAGGTATACAAAGGAAAACCTGATGGTCGTGCAGTAGCTGT

>M6-PGSC0003DMG400026388M6RLKWAX-EGF\_372

AGGGAGGATTTGGTCAGGTATACAAAGGAAAACCTGATGGTCGTGCAGTAGCTGTAAAGGTCCTG

ACAGAAACTAATGGTGACGGAGAAGAATATATAAATGAGGTAGCCAGTATAA

>M6-PGSC0003DMG400026388M6RLKWAX-EGF\_434

GTCCTGACAGAACTAATGGTGACGGAGAAGAATATATAAATGAGGTAGCCAGTATAAGTAGAACTTCC

CATGTTAACATAGTAGGGCTTTTGGGATTTTGTATCAAAGAATAGGAGA

>M6-PGSC0003DMG400026388M6RLKWAX-EGF\_496

AACTTCCCATGTTAACATAGTAGGGCTTTTGGGATTTTGTATCAAAGAATAGGAGAGCCTTAATCTAT

GAATATGTGTCCAATGGTTCCTGACTGGACAAATTTCTCAACAGTGGACCATC

>M6-PGSC0003DMG400026388M6RLKWAX-EGF\_558

TAATCTATGAATATGTGTCCAATGGTTCCTGACTGGACAAATTTCTCAACAGTGGACCATCTAGCACAACCTG

TTCCTTGAATGGACAACATTGTACAGAATCGCAGTTGGGACTGCTCGAG

>M6-PGSC0003DMG400026388M6RLKWAX-EGF\_62

GGTAAAGCATCCCTGTGTGTTGCTGTGTTCATTCCCTCAATCTGCTTTTCTGGATTTGTAATTGATCTATTAA

CAATATCTATATGCAGTTGCCGCAGTTTGTATCGCAGGGCTGGCCATA

>M6-PGSC0003DMG400026388M6RLKWAX-EGF\_620

ACAACCTGTTCCCTTGAATGGACAACATTGTACAGAATCGCAGTTGGGACTGCTCGAGGTTTGAATATT  
TACACCGAGGTTGTAACACAAGAATAGTGCACCTTTGACATAAAACCTCAC

>M6-PGSC0003DMG400026388M6RLKWAX-EGF\_682

GGAATATTTACACCGAGGTTGTAACACAAGAATAGTGCACCTTTGACATAAAACCTCACACATTCTCTTG  
GACGAGGATTCTGCCCAAATATCTGACTTTGGCCTCTCTAGATTGTG

>M6-PGSC0003DMG400026388M6RLKWAX-EGF\_744

TTCTCTGGACGAGGATTTCTGCCCAAATATCTGACTTTGGCCTCTCTAGATTGTGCGAGAGAAAGGA  
GAGCATTCTATCAATGTTAGGTGCCAGGGAACTGCTGGATACATTGCTC

>M6-PGSC0003DMG400026388M6RLKWAX-EGF\_806

AGAAAGGAGAGCATTCTATCAATGTTAGGTGCCAGGGAACTGCTGGATACATTGCTCCAGAAGTGTTCC  
TCTAGAGCGTTTGGACACGTCTCTCACAATCAGATGTCTACAGCTACGGC

>M6-PGSC0003DMG400026388M6RLKWAX-EGF\_868

AGTGTTCTCTAGAGCGTTTGGACACGTCTCTCACAATCAGATGTCTACAGCTACGGCATGCTTGTCTT  
GAGATGGTTGGAGTGAGAAACAATGTTAACATGAGCCAACTAGTGAAGT

>M6-PGSC0003DMG400026388M6RLKWAX-EGF\_930

TTGTTCTTGAGATGGTTGGAGTGAGAAACAATGTTAACATGAGCCAACTAGTGAAGTATACTTTCCAA  
ATTGGATCTATGAACATCTCGAGCTGGGGAAGGATCTAAGTCTACAAGGTA

>M6-PGSC0003DMG400026646-(rev)M6L-LecRK\_0

CACAAATACTTAACAATTTGTACTTCCAACAACCTCCATGGACAATCCCTATAGCCTAGTTATTCTTGCATT  
GATCTTTTGCACATTTCTTGTAAAGAGTTCAATCTTTTGATTTTGCTTAC

>M6-PGSC0003DMG400026646-(rev)M6L-LecRK\_1054

AGGCAACTAAGGGATTCAAGGAGAGTGAACAAATTGGAGTTGGGGGATTTGGTGCTGTTTACAAGGGT  
GTTTTTCTACTAATGGAGCCGAGGTTGCAGTGAAGAAGATATCGAGCAATT

>M6-PGSC0003DMG400026646-(rev)M6L-LecRK\_1116

AAGGGTGTTTTTCTACTAATGGAGCCGAGGTTGCAGTGAAGAAGATATCGAGCAATTCTCTCCAAGGA  
ATGAGAGAATTTGCAGCGGAGATCGAAAGCTTAGGCAGGTTAAGGCACAAA

>M6-PGSC0003DMG400026646-(rev)M6L-LecRK\_124

GATTCAATAACTCAAATATCATTAGAGATGGAGTTGCAATTATCAATCCAAGTGGTGCACTTAAGCTCAC  
TAATAGATCATATAATGTTATAGGTCATGCTTTCCACCCCAATCCTGTAC

>M6-PGSC0003DMG400026646-(rev)M6L-LecRK\_1240

TGATCAACCTTCAAGGCTGGTGCAAGAACAAGAATGATCTTCTCCTAGTGATGACTTTGTCCCAAATGG  
AAGTCTTGATTCATTACTTTACAGGCAGAAAAGGGACATTGTTCTAACAT

>M6-PGSC0003DMG400026646-(rev)M6L-LecRK\_1302

CCAAATGGAAGTCTTGATTCATTACTTTACAGGCAGAAAAGGGACATTGTTCTAACATGGGAACAGAGA  
TTAACATCATCAAAGGGATTGCTGCAGGGCTTCTTACTTGCATGAAGAA

>M6-PGSC0003DMG400026646-(rev)M6L-LecRK\_1426

AACAAGTGGTAATACATCGCGATGTGAAGAGCAGTAACGTCCTAATTGATGGGGAAATGAATGGTCGG  
TTAGGGGATTTTGGGCTAGCAAGATTATATGACCATGGCAAGAATTCACACA

>M6-PGSC0003DMG400026646-(rev)M6L-LecRK\_1488

GGTCGGTTAGGGGATTTTGGGCTAGCAAGATTATATGACCATGGCAAGAATTCACACACAACAAATGTT  
GTTGGCACAATAGGGTACATTGCACCAGAATTGACACGGACAGGGGAAGGCC

>M6-PGSC0003DMG400026646-(rev)M6L-LecRK\_1550

AAATGTTGTTGGCACAATAGGGTACATTGCACCAGAATTGACACGGACAGGGGAAGGCCTCAACGAGCA  
CGGATGTGTATGCATATGGTGTACTACTTCTTGAAGTAGCTAGTGGAAGACC

>M6-PGSC0003DMG400026646-(rev)M6L-LecRK\_1674

ATTGTCTATGAACCAGGGAAAGGAGCTTTAGTACTAGCTGATTGGGTGATAGAATGTTTACAACACTAGGT  
AATATTCTTGATGCAGTTGATCAAAGGTTGAATTCAGTCTATGTAGATAAA

>M6-PGSC0003DMG400026646-(rev)M6L-LecRK\_1736

ACTAGGTAATATTCTTGATGCAGTTGATCAAAGGTTGAATTCAGTCTATGTAGATAAAGAGGTTCAAATG  
ATTTTCAGTCTTGGGCTTGTTTGTTCACACCCAAGACCAGAAGCTAGGCC

>M6-PGSC0003DMG400026646-(rev)M6L-LecRK\_186

AAGCTCACTAATAGATCATATAATGTTATAGGTCATGCTTCCACCCCAATCCTGTACCAATTTTCAACTC  
CAGTACTAAAATGTTACTTCATTTAGTACATACTTCGTCTTCGCCATT

>M6-PGSC0003DMG400026646-(rev)M6L-LecRK\_1860

ATGAGACAAATAATGAAGTATCTCAATGGAGATGAATCACTTCCAGTTTTTGAGCAGCAGTTGAGCTGT  
ATTGGGTCTGATAGGGTTGATGAAATCACAGCTAAGTTCTTGAAGTGTTT

>M6-PGSC0003DMG400026646-(rev)M6L-LecRK\_1922

GAGCTGTATTGGGTCTGATAGGGTTGATGAAATCACAGCTAAGTTCTTGAAGTGTTTTCTACTGATACA

ATCAATATATCACGTCGTTTCGCTATCCGTCGGACAGATATCATCTAGTTC

>M6-PGSC0003DMG400026646-(rev)M6L-LecRK\_1984

CTGATACAATCAATATATCACGTCGTTTCGCTATCCGTCGGACAGATATCATCTAGTTCCTCCATTCTGGT  
AGATGAAAACCTCTGTATAAAGGACATACACTCTTCTTTTGTGGTTTAA

>M6-PGSC0003DMG400026646-(rev)M6L-LecRK\_2046

CATTCTGGTAGATGAAAACCTCTGTATAAAGGACATACACTCTTCTTTTGTGGTTTAACTCCATTCTGGT  
GATTGATTAAGTAGCTTCTATTTACCCAAATCCTGTTTTTCTTCCTCAT

>M6-PGSC0003DMG400026646-(rev)M6L-LecRK\_2108

CTTTGTTGGGATTGATTAAGTAGCTTCTATTTACCCAAATCCTGTTTTTCTTCCTCATAATTCTGCAATTTA  
GATAGGTCATTTATTTTTAGGCTCATTACAGCATTACAAAGTTAACATA

>M6-PGSC0003DMG400026646-(rev)M6L-LecRK\_2169

TCTGCAATTTAGATAGGTCATTTATTTTTAGGCTCATTACAGCATTACAAAGTTAACATAATCTCACTTCTAT  
GTCTGCAATATCACTTATCACATCCTATATTTTTGTTTATGTACAAAC

>M6-PGSC0003DMG400026646-(rev)M6L-LecRK\_248

TTTCAACTCCAGTACTAAAAATGTTACTTCATTTAGTACATACTTCGTCTTCGCCATTTTCCCTCTTTAGAA  
AACCTCTGGTGGCTTTGGTTTTGCTTTCACCTTATCACCATCCCCAGG

>M6-PGSC0003DMG400026646-(rev)M6L-LecRK\_310

CTCTTTAGAAAACCTCTGGTGGCTTTGGTTTTGCTTTCACCTTATCACCATCCCCAGGTTTTCCAGGTGCT  
GAGGGAGATCACTATCTTGGAGTCGTC AACAGGATGAACGATGGCAATG

>M6-PGSC0003DMG400026646-(rev)M6L-LecRK\_372

CCAGGTGCTGAGGGAGATCACTATCTTGGAGTCGTC AACAGGATGAACGATGGCAATGATACTAACCAC  
ATCTTTATGGTTGAATTTGACACTGTGAATGGTCACAATGAAGGTGTGGAC

>M6-PGSC0003DMG400026646-(rev)M6L-LecRK\_434

TAACCACATCTTTATGGTTGAATTTGACACTGTGAATGGTCACAATGAAGGTGTGGACACAGATGGAAA  
TCACATTGGGGTCAACAGAAATGGCATGAGGTCTATAGCGTCAGAATCAGC

>M6-PGSC0003DMG400026646-(rev)M6L-LecRK\_496

ATGGAAATCACATTGGGGTCAACAGAAATGGCATGAGGTCTATAGCGTCAGAATCAGCTGACTACTATG  
TTAATGATTCTCTGTAGCAGAGCAGGTAATCTACAAAAGGGAGAATCAA

>M6-PGSC0003DMG400026646-(rev)M6L-LecRK\_558

TACTATGTTAATGATTCTCTTGTAGCAGAGCAGGTAAATCTACAAAAGGGAGAATCAATTCAGGCTTGG  
ATCGATTATGATGGAATGAGCAAAGTGGTGAATGTA ACTATATCTCCATA

>M6-PGSC0003DMG400026646-(rev)M6L-LecRK\_62

TCTTGCATTGATCTTTTGC ACTATTCTTGTAAGAGTTCAATCTTTTGATTTTGCTTACAATGGATTCAATAA  
CTCAAATATCATTAGAGATGGAGTTGCAATTATCAATCCAAGTGGTGC

>M6-PGSC0003DMG400026646-(rev)M6L-LecRK\_620

GGCTTGGATCGATTATGATGGAATGAGCAAAGTGGTGAATGTA ACTATATCTCCATAACACTTCCAAA  
GCCAAGTAGACCTCTGATCAGTGGGGTCGTAGATTTATCTACTGTGTTGGA

>M6-PGSC0003DMG400026646-(rev)M6L-LecRK\_682

TTCAAAGCCAAGTAGACCTCTGATCAGTGGGGTCGTAGATTTATCTACTGTGTTGGACGAACTATGTA  
TGCTGGTTTCTCAGCAGCCACGGGAAGAAATAAAGCGAGCTCTCATTACA

>M6-PGSC0003DMG400026646-(rev)M6L-LecRK\_806

GGGTTGGAGTTTTCGGTTGAATGGAGCTGCTGATCCTTTAGATCTTGATAACCTACCTGTTGCCCCACCT  
GAAGTGGTAAGACCCTCTAAGAATTCCCATCTCAAAGGGCCTTGATAGG

>M6-PGSC0003DMG400026646-(rev)M6L-LecRK\_868

CCCCACCTGAAGTGGTAAGACCCTCTAAGAATTCCCATCTCAAAGGGCCTTGATAGGAACATTTTGCTC  
CGTTGTTATCCTGCTCCTTGGTGCATTTTATATCTATAGAAGGATGAGGC

>M6-PGSC0003DMG400026646-(rev)M6L-LecRK\_930

TTTTGCTCCGTTGTTATCCTGCTCCTTGGTGCATTTTATATCTATAGAAGGATGAGGCTTCATGAAGTTCT  
AGAGGACTGGGAGCTGGATTGCCTCACAGGTTCCGATTTAGAGATCTT

>M6-PGSC0003DMG400026646-(rev)M6L-LecRK\_992

TGAAGTTCTAGAGGACTGGGAGCTGGATTGCCTCACAGGTTCCGATTTAGAGATCTTTATAAGGCAAC  
TAAGGGATTCAAGGAGAGTGA ACTAATTGGAGTTGGGGGATTTGGTGCTGT

>M6-PGSC0003DMG400026647-(rev)M6L-LecRK\_0

TAATTGTCTCTTTAAATTGAATATAAATATTGCACAAAACTTAACAATTTG TACTTCCAACGACTCAATG  
GACAATTCCTATAGCCTAGTTATTCTTGCA TTGATCTTTTTCCCTATTC

>M6-PGSC0003DMG400026647-(rev)M6L-LecRK\_122

GTGAGAGCTCAATCTTTTGATTTTGCTTACAATGGATTCATTA ACTCAAATATCATTAGAGATGGAGTTGC  
AATAATCAATCCAAGTGGTGC ACTTAAGCTCACTAATAGATCACAAAAT

>M6-PGSC0003DMG400026647-(rev)M6L-LecRK\_1403

TAACATCATCAAAGGGATTGCTGCAGGGCTTCTTTACTTGCATGAAGAATGGGAACAAGTGGTAATACA  
TCGCGATGTGAAGAGCAGTAACGTCCTAATTGATGGTGAATGAATGGTCG

>M6-PGSC0003DMG400026647-(rev)M6L-LecRK\_1525

TAGGGGATTTTGGGCTAGCAAGATTATACGACCATGGCAAGAATTCACACACGACAAATGTCGTTGGCA  
CAATAGGGTACATTGCACCAGAATTAACACGGACAGGGAAGGCCTCAACGA

>M6-PGSC0003DMG400026647-(rev)M6L-LecRK\_1647

ACGGATGTGTATGCATATGGTGTACTACTTCTTGAAGTAGCTAGTGGAAGACCTCCTATTGTCTTTGAAC  
CAGGGAAAGGAGCTTTAGTACTAGCTGATTGGGTGATAGAATGTTTACAA

>M6-PGSC0003DMG400026647-(rev)M6L-LecRK\_183

ATGGAGTTGCAATAATCAATCCAAGTGGTGCACCTTAAGCTCACTAATAGATCACAAAATGTTATAGGTCA  
TGCTTTCCACCCCAATCCTGTACCAATTTTCAACTCCACTACTAAAATG

>M6-PGSC0003DMG400026647-(rev)M6L-LecRK\_1830

CAAATGATTTTGGAGACTTGGGCTTGTGTTGTTACACCCAAGACCAGAAGCTAGGCCAACAATGAGACAA  
ATAATGAAGTATCTCAATGGAGATGAATCACTTCCAGTTTTTGGAGCAGCAG

>M6-PGSC0003DMG400026647-(rev)M6L-LecRK\_2013

ACTGATACAATCAATATATCACGTCGTTTCGCTATCCGTCGGACAGACATCATCTAGTTCACTCCATTCTGG  
TAGATGAATCTGTATAAAAGGACATACACTCTTCTTTTGTGTTTGGTTAA

>M6-PGSC0003DMG400026647-(rev)M6L-LecRK\_2074

TCCATTCTGGTAGATGAATCTGTATAAAAGGACATACACTCTTCTTTTGTGTTTGGTTAACCCTTTGTTGG  
GATTAATTAAGTAGCATAGAATAATATATAACTAGGAAAAAGGTAAGTC

>M6-PGSC0003DMG400026647-(rev)M6L-LecRK\_2135

ACTTTGTTGGGATTAATTAAGTAGCATAGAATAATATATAACTAGGAAAAAGGTAAGTCTCAAGTCAAC  
ATTTTCACTTAGCTGGAGTGCAAAAACCATGTAATTTTGGAGAAAGAAAAGT

>M6-PGSC0003DMG400026647-(rev)M6L-LecRK\_2196

AAGTCAACATTTTCACTTAGCTGGAGTGCAAAAACCATGTAATTTTGGAGAAAGAAAAGTTATAAAATTAG  
TCTAGAAAGTAAATTTGTAATTATAAACAAAAAAAATAAAAAAATCTAT

>M6-PGSC0003DMG400026647-(rev)M6L-LecRK\_2250

AAAGTTATAAAATTAGTCTAGAAAGTAAATTTGTAATTATAAACAAAAAAAATAAAAAAATCTATGTAG



AATATTCGTTATAAAATCTATTTGTAATAAAAATGGTGACATGATACAGA

>M6-PGSC0003DMG400026647-(rev)M6L-LecRK\_366

TTTGGATTTGCTTTCACGTTATCTCCATCCCCGGGTTTTCCGGGTGCTCAGGGAGCTCATTACTTGGAGT  
CGTCAACAGCAAGAACGATGGCAATGATAATAACCACATCTTTATGGTT

>M6-PGSC0003DMG400026647-(rev)M6L-LecRK\_427

TACTTGGAGTCGTCAACAGCAAGAACGATGGCAATGATAATAACCACATCTTTATGGTTGAATTTGACAC  
TGTGAATGGTCACGATGAAGGTGTGGACACAGATGGAAATCAAATTGGGA

>M6-PGSC0003DMG400026647-(rev)M6L-LecRK\_488

ATTTGACACTGTGAATGGTCACGATGAAGGTGTGGACACAGATGGAAATCAAATTGGGATTAACAAAA  
ATGGCATGAAGCATATCGAGTCAGAATCAGCTGATTACTATATTTATAGTAC

>M6-PGSC0003DMG400026647-(rev)M6L-LecRK\_549

AACAAAATGGCATGAAGCATATCGAGTCAGAATCAGCTGATTACTATATTTATAGTACTTCTGAAACAA  
AGCCAGTAAATCTTCAAATGGAGAATCAATTCAGGCTTGGATCGATTAT

>M6-PGSC0003DMG400026647-(rev)M6L-LecRK\_61

CGACTCAATGGACAATTCCTATAGCCTAGTTATTCTTGCATTGATCTTTTTCCCTATTCTTGTGAGAGCTCA  
ATCTTTTGATTTTGCTTACAATGGATTCATTA ACTCAAATATCATTAG

>M6-PGSC0003DMG400026647-(rev)M6L-LecRK\_610

CTGAAACAAAGCCAGTAAATCTTCAAATGGAGAATCAATTCAGGCTTGGATCGATTATGATGGAATGA  
GCAAAGTGGTAAATGTTACTATATCTCCATAAAAGTTCTTAAGCCAATTA

>M6-PGSC0003DMG400026647-(rev)M6L-LecRK\_671

TGGAATGAGCAAAGTGGTAAATGTTACTATATCTCCATAAAAGTTCTTAAGCCAATTAGACCTCTGATC  
AGTTTGGTTGTAGATTTATCTCCTGTGTTGAACGAGACTACGTATGCTGG

>M6-PGSC0003DMG400026647-(rev)M6L-LecRK\_732

CCTCTGATCAGTTTGGTTGTAGATTTATCTCCTGTGTTGAACGAGACTACGTATGCTGGTTTCTCAGCAGC  
CACGGGAGATAAAGCGAGCTCTCATTACATCTTGGGTTGGAGTTTTTCGG

>M6-PGSC0003DMG400026647-(rev)M6L-LecRK\_854

GAATGGAGCTGCTGATCCTTTAGATCTTGATAACCTACCTGTTGCCCACTGAAGTGGTAAGACCCTCC  
GAGAATTCCCATCTCAAAGTGCCTTGATAGGAACATTCTGCTCCTTCTT

>M6-PGSC0003DMG400026647-(rev)M6L-LecRK\_915

AGACCCTCCGAGAATTCCCATCTCAAAAGTGCCTTGATAGGAACATTCTGCTCCTTCTTTATCCTGCTCCT  
TGGGGCATTATATCTATAGAAGGATGAGGCTGCATGAAGTTCTAGAG

>M6-PGSC0003DMG400026743M6OtherRLKTM\_1860

TCAGTCATTGATGTTTACGTGGAGGTAGTTTGCCTGCATTACGATTTGCAACCCTTGGATGAGAGCCTTC  
TCCATATTTTCATGCATCGAGCTGTTTCTGTTTTTTTTAAATCATGTAGGC

>M6-PGSC0003DMG400026748-(rev)M6LRR-RLP\_1037

TTTTTGTAAGGTTACATACATAAATTATCAGGTGTTTGTGTTTTCTATCTGAATTATCACTATCATTAECTCT  
TCTTTCTTTAAAGGGAAAAGACCCAATATGTCATTGAACTTTGAGAA

>M6-PGSC0003DMG400026748-(rev)M6LRR-RLP\_1098

TCATTAECTCTTCTTTCTTTAAAGGGAAAAGACCCAATATGTCATTGAACTTTGAGAAAAAACTCATAA  
TCTATTCCATCCGTTTAGAAAATTAGTTTATCTATGTCATTTTCATTTG

>M6-PGSC0003DMG400026748-(rev)M6LRR-RLP\_1159

AAACTCATAATCTATTCCATCCGTTTAGAAAATTAGTTTATCTATGTCATTTTCATTTGAGAAAATGTTTCAT  
CCATGTCATTGTTAGTTAATTAATAAATAGCTTTAATTTTGCTCAGTTA

>M6-PGSC0003DMG400026748-(rev)M6LRR-RLP\_1220

AAAATGTTTCATCCATGTCATTGTTAGTTAATTAATAAATAGCTTTAATTTTGCTCAGTTATACAGCGTTTACT  
AGCTAGCTATTCATGTCTGAAATTAATACACAATTTGTTTTACAATTT

>M6-PGSC0003DMG400026748-(rev)M6LRR-RLP\_1281

CAGCGTTTACTAGCTAGCTATTCATGTCTGAAATTAATACACAATTTGTTTTACAATTTAAAAATCAACGT  
AACTAATACTTGTATAAATTATGAAGAAATTTGTACATAATGTTATCTC

>M6-PGSC0003DMG400026748-(rev)M6LRR-RLP\_1342

AAATCAACGTAACATAACTTGTATAAATTATGAAGAAATTTGTACATAATGTTATCTCAAATGGACTATC  
AATGCAATTATAGAAAATATAATAACAAAAGGATAATGACATTTGAAAA

>M6-PGSC0003DMG400026748-(rev)M6LRR-RLP\_1403

ATGGACTATCAATGCAATTATAGAAAATATAATAACAAAAGGATAATGACATTTGAAAAAAGGTAATT  
AAGAAATGATGCATAAATCAGAGGTCAAAAATATGATAGATACTAATAATA

>M6-PGSC0003DMG400026748-(rev)M6LRR-RLP\_1525

AATGAGATATAACTATATTAGGAAAACAAGTTTAGCAGAGGTCCTTTTCCAAGGTAGGTCCTACTTTTCA  
TCACACAATTCTAGAGAATATGAAAGCAAGACTATTTACAAAGAATTAAG

>M6-PGSC0003DMG400026748-(rev)M6LRR-RLP\_1586

TACTTTTCATCACACAATTCTAGAGAATATGAAAGCAAGACTATTTACAAAGAATTAAGCACACAATAAA  
TAAAGCAAACTTGGTTTACTTGCCATGTCTTAATTGAGATGTGAAAGAC

>M6-PGSC0003DMG400026748-(rev)M6LRR-RLP\_1647

CACAATAAATAAAGCAAACTTGGTTTACTTGCCATGTCTTAATTGAGATGTGAAAGACTTGATTGAATG  
GAAAAATCTCCTAAAAAGAGATCTTATTGCTATTCAAAGTCTCAAAACCA

>M6-PGSC0003DMG400026748-(rev)M6LRR-RLP\_1708

GATTGAATGGAAAAATCTCCTAAAAAGAGATCTTATTGCTATTCAAAGTCTCAAAACCACAGGTTATTAG  
TACTAATCTTGCACTAATGGACAAAACCTTCACTATTTTATTCTTAACAA

>M6-PGSC0003DMG400026748-(rev)M6LRR-RLP\_1769

GGTTATTAGTACTAATCTTGCACTAATGGACAAAACCTTCACTATTTTATTCTTAACAACACTCTTGTTGCT  
TCACTATGTTATGGCCCAAACCAACATTACGACTGATCAATTAGCTCT

>M6-PGSC0003DMG400026748-(rev)M6LRR-RLP\_1830

CTCTTGTTGCTTCACTATGTTATGGCCCAAACCAACATTACGACTGATCAATTAGCTCTTCTCTCTTTTAAA  
TCCCAAATTAGTTCCGACCCCTTCACTTCTTGAATGAAAGTTGGTCT

>M6-PGSC0003DMG400026748-(rev)M6LRR-RLP\_2196

CCTTCTTGTTTGGGTTTTTACACCAACTTCAAGTTGTAAACCTTAGGAGTAACAGTTTTACTGGTTCCAT  
TCCTCCGTCACTCTCGAATGCCTCAAGTTGGAGATTTTAGAAATATCT

>M6-PGSC0003DMG400026748-(rev)M6LRR-RLP\_2379

TCCATAGAACAAAATCAGCTTACAGTTCTATACCATTACAATATTCAATATTTCTAGAATTGAAGTCAT  
TAGATTTTCAGATAATAGCCTATCAGGAGATCTTCCCAATGGTTTATGC

>M6-PGSC0003DMG400026748-(rev)M6LRR-RLP\_2501

TGATCTCCAATACTCAAAGAGCTTTATCTATCCGGAAACAAGCTTGATGGTCATATGCCTACAAGCTTG  
TCAAATTGTTACGACTTCAAATACTGTCTCTATCCCAAATGATTTTGA

>M6-PGSC0003DMG400026748-(rev)M6LRR-RLP\_2562

ACAAGCTTGTCAAATTGTTACGACTTCAAATACTGTCTCTATCCCAAATGATTTTGGATGGACCAATACA  
TAATGAAATTGGAAGATTGAGTAACTTGCAGACATTAGAAATCGGATAC

>M6-PGSC0003DMG400026748-(rev)M6LRR-RLP\_2623

GACCAATACATAATGAAATTGGAAGATTGAGTAACTTGCAGACATTAGAAATCGGATACAACCATTTC

CAGGTATATATGTTTCATATTCTTATGAATGCTACTACTACTATATATTGT

>M6-PGSC0003DMG400026748-(rev)M6LRR-RLP\_2684

CCATTTACAGGTATATATGTTTCATATTCTTATGAATGCTACTACTACTATATATTGTATCTAATTACCTC

ACATCTTTCTTTATTACACATTGAATGCAGGTATAATTCCACAAGAAA

>M6-PGSC0003DMG400026748-(rev)M6LRR-RLP\_2745

CTAATTACCTCACATCTTTCTTTATTACACATTGAATGCAGGTATAATTCCACAAGAAATTGGAAATCTTG

TTAATTTGGTGAAATTAGACATGGGGGGAAATCAGATTACTGGCTCTAT

>M6-PGSC0003DMG400026748-(rev)M6LRR-RLP\_2806

GGAAATCTTGTTAATTTGGTGAAATTAGACATGGGGGGAAATCAGATTACTGGCTCTATCCCGATCTCTG

TATTCAATAGCTCATTACTGCAATCATTGTTACTGTGGGGCAACAATCTT

>M6-PGSC0003DMG400026748-(rev)M6LRR-RLP\_2867

CGATCTCTGTATTCAATAGCTCATTACTGCAATCATTGTTACTGTGGGGCAACAATCTTAGTGGATTTCGTA

CCACAGGAGATTGGCAACTTAACCAAGATGCAGTTCTTATATCTTAACC

>M6-PGSC0003DMG400026748-(rev)M6LRR-RLP\_2928

TGGATTTCGTACCACAGGAGATTGGCAACTTAACCAAGATGCAGTTCTTATATCTTAACCAAAAATAGGCTT

ACTGGTACGTATTCAAAGTTATAGTGATCTGTATTGAGCTAGTTAGTTAA

>M6-PGSC0003DMG400026748-(rev)M6LRR-RLP\_2989

AATAGGCTTACTGGTACGTATTCAAAGTTATAGTGATCTGTATTGAGCTAGTTAGTTAAACTCATTCTTTC

TTCACGTGATGACAGGTGAAATACCCAAAGATACAAGAAATCTCGTTGA

>M6-PGSC0003DMG400026748-(rev)M6LRR-RLP\_3050

TCATTCTTTCTTCACGTGATGACAGGTGAAATACCCAAAGATACAAGAAATCTCGTTGAGTTAAAGGAAT

TTGATGTTGGGTTTAATAGTTTTAGTGGTTCCTTCCAACGGAGATGTTC

>M6-PGSC0003DMG400026748-(rev)M6LRR-RLP\_3111

TAAAGGAATTTGATGTTGGGTTTAATAGTTTTAGTGGTTCCTTCCAACGGAGATGTTCAACATATCAGC

ACTGAGAATAATGTCTCCTTCATTCAATAATATATCAGCAACTCTACCAC

>M6-PGSC0003DMG400026748-(rev)M6LRR-RLP\_3172

CATATCAGCACTGAGAATAATGTCTCCTTCATTCAATAATATATCAGCAACTCTACCACCAAACACAGGTT

CTACCTTATCCAACATTGAAGAGCTTTATATGGGTCACTTAACCAATCT

>M6-PGSC0003DMG400026748-(rev)M6LRR-RLP\_3294

TTGGGACTATTCTCATTCTATCTCCAATTGTTCAAAGCTTAGTAACTAGATATTTTCAGGTAACAACTC  
ACTGGCTTGATTCCCAATTCTCTTGGATATTTGACTCATCTACACATCC

>M6-PGSC0003DMG400026748-(rev)M6LRR-RLP\_3355

TAACAACTCACTGGCTTGATTCCCAATTCTCTTGGATATTTGACTCATCTACACATCCTAAACATGGAGA  
GAAACAATTTAACCAGCGACTCCTCGTTAAGCTTCCTCACTTCCTTAAC

>M6-PGSC0003DMG400026748-(rev)M6LRR-RLP\_3416

AACATGGAGAGAAACAATTTAACCAGCGACTCCTCGTTAAGCTTCCTCACTTCCTTAACCAATTGCAGAA  
GATTAACAGTTCTTTCTCTATCTTTCAACCCTCTAAATGGCATGCTGCCG

>M6-PGSC0003DMG400026748-(rev)M6LRR-RLP\_3538

CTCCGTAGGGAACCTTCTCCAAATCTCTTGTAACCTTTTATGCCGCTGCTTGCAAGATTAACGGCCAGATTC  
CAAATGAAGTTGGAACTTAACCAATTTAATAGACCTTGATCTTTCTAA

>M6-PGSC0003DMG400026748-(rev)M6LRR-RLP\_3599

GGCCAGATTCCAAATGAAGTTGGAACTTAACCAATTTAATAGACCTTGATCTTTCTAATAATAACTTGAT  
TGGATCAATTCCTACCTCAACTAGTAACTTAAGAAACCTCCAACGCTTG

>M6-PGSC0003DMG400026748-(rev)M6LRR-RLP\_3660

ATAACTTGATTGGATCAATTCCTACCTCAACTAGTAACTTAAGAAACCTCCAACGCTTGACTTGAACAAA  
AACAACTTACAGGATTTATTGGAGATCATATATGTAAATTGCAGCATT

>M6-PGSC0003DMG400026748-(rev)M6LRR-RLP\_3721

CTTGAACAAAAACAACTTACAGGATTTATTGGAGATCATATATGTAAATTGCAGCATTGGGTGTTATT  
TCCTTGGGTCAAATCAACTTTCAGGATCTCTTCTAATTGTTTAGGGAA

>M6-PGSC0003DMG400026748-(rev)M6LRR-RLP\_3782

GGTGTTATTTCTTGGGTCAAATCAACTTTCAGGATCTCTTCTAATTGTTTAGGGAATGTTACTTCCCTT  
AGAGAGATACATATAAGTTCCAATAAATTGAGTTCCAATATACCACCA

>M6-PGSC0003DMG400026748-(rev)M6LRR-RLP\_3843

TTACTTCCCTTAGAGAGATACATATAAGTTCCAATAAATTGAGTTCCAATATACCACCAAGCTTAGGAAAT  
CTTAAAGATCTAATGAAGCTTGACTTATCATCAAACAACATGGTTGGCT

>M6-PGSC0003DMG400026748-(rev)M6LRR-RLP\_3965

TTACTTCCGGAAATTGGAAATCTAAAAGCGGCGACATATATCGATCTGTCCATGAATCAATTCAGAAAAG  
GAATTCCTACAGAAATTGGAGGGTTGCAAATCTAGTGCATCTTTCTTTG

>M6-PGSC0003DMG400026748-(rev)M6LRR-RLP\_4026

TCAGAAAAGGAATTCCTACAGAAATTGGAGGGTGC AAAATCTAGTGCATCTTTCTTTGAGACACAACA  
AGTTGCAAGGATCTATACCTGACTCAATCAGCAACATGGTAAGTTTGAAT

>M6-PGSC0003DMG400026748-(rev)M6LRR-RLP\_4087

ACACAACAAGTTGCAAGGATCTATACCTGACTCAATCAGCAACATGGTAAGTTTGAATTTCTAGACATT  
TCTCATAATAATATCTTGGGAACTATTCCAATGTCTTTGGAGAACTACA

>M6-PGSC0003DMG400026748-(rev)M6LRR-RLP\_4148

CTAGACATTTCTCATAATAATATCTTGGGAACTATTCCAATGTCTTTGGAGAACTACAATACCTTGAGCG  
TTTCAATGTTTCATTCAACAAGTTGCACGGTGA AATACCCTCGGGGGGT

>M6-PGSC0003DMG400026748-(rev)M6LRR-RLP\_4270

TTTCAAGAACCTCTCGAGTCAATTTTTCATCAACAATGAAGCATTGTGTGGTTTGTCAAGGTTTAATGTCC  
CACCATGCCCCACATCATCAATGCATAGATCAAATAGGAAAAAATTGCT

>M6-PGSC0003DMG400026748-(rev)M6LRR-RLP\_4331

TTTAATGTCCCACCATGCCCCACATCATCAATGCATAGATCAAATAGGAAAAAATTGCTAGTTCTATTTCT  
TTTGCTAGGAATAGCACTTGTATTTGTTCTATCGCCTTTGTGTTCTA

>M6-PGSC0003DMG400026748-(rev)M6LRR-RLP\_4392

TTCTATTTCTTTTGCTAGGAATAGCACTTGTATTTGTTCTATCGCCTTTGTGTTCTATGGATAAGGTATA  
GAAGAGGTAAAAGAACTCCTCAACAAGCTGATTCATTGCCTATGGCAA

>M6-PGSC0003DMG400026748-(rev)M6LRR-RLP\_4453

GATAAGGTATAGAAGAGGTAAAAGAACTCCTCAACAAGCTGATTCATTGCCTATGGCAACAACGGAAA  
GAATTCATACTATGAACAGCTCCAAGCAACTGATTCACCTAGCGAGAGTAC

>M6-PGSC0003DMG400026748-(rev)M6LRR-RLP\_4514

ACGGAAAGAATTCATACTATGAACAGCTCCAAGCAACTGATTCACCTAGCGAGAGTACTAATCTGATTG  
GTTCTGGAAGTTTTGGCTCTGTTTACAAAGGCGTTCTCAGGAGTGGGACT

>M6-PGSC0003DMG400026748-(rev)M6LRR-RLP\_488

ATTATGCCTTAAAAAAGTGTGATTACGTGTTTGAATAAAAGAATTGAAATTTATAATAAATATTTATGTAT  
TTGGTAAGATGTTGTATTCGTAAATTGTTCTTTTATTAATAACTAAA

>M6-PGSC0003DMG400026748-(rev)M6LRR-RLP\_549

ATTTATGTATTTGGTAAGATGTTGTATTCGTAAATTGTTCTTTTATTAATAACTAACTAAAATAACCTT

AAATTGTCTTTTTTTAGAAAGTGTAATCTAAATGTAACCTTGTA AAA

>M6-PGSC0003DMG400026748-(rev)M6LRR-RLP\_61

CTAATAAAAGGCCGCTAGACACTTTGTCTAGTGGTAAATTTGCCAAAACAAATAAATCCTTGAAAGCATC  
GACTTATTAGAATGGCAACATAAAGCACATGTGTATTGGTGGATATGTTT

>M6-PGSC0003DMG400026748-(rev)M6LRR-RLP\_610

AAAATAACCTTAAATTGTCTTTTTTTAGAAAGTGTAATCTAAATGTAACCTTGTA AAAAAAAAAAGAGGAA  
CACTATATATCTTAGTGAAGAGGAAGTTACGAGACTTATATTGGAAAAAG

>M6-PGSC0003DMG400026748-(rev)M6LRR-RLP\_671

AAAGAGGAACACTATATATCTTAGTGAAGAGGAAGTTACGAGACTTATATTGGAAAAAGTAGTTTTGAG  
AATTTAAAAAAAATGAAGGACAAAATAGTAAGAGACCGGGTCAAATCAAG

>M6-PGSC0003DMG400026748-(rev)M6LRR-RLP\_732

GTTTTGAGAATTTAAAAAAAATGAAGGACAAAATAGTAAGAGACCGGGTCAAATCAAGAGTGTTAAC  
CCAAAAATTAATAAGTTCGGAATAATCAACTTATGACTTTTGATTGGTCTTA

>M6-PGSC0003DMG400026748-(rev)M6LRR-RLP\_793

TGTTAACCCAAAAATTAATAAGTTCGGAATAATCAACTTATGACTTTTGATTGGTCTTAGTGGTTTATAAG  
TACTTTGAATGTTTACTAATTAATATGTACGTAAGCTAAAAATATTGTT

>M6-PGSC0003DMG400026748-(rev)M6LRR-RLP\_854

GGTTTATAAGTACTTTGAATGTTTACTAATTAATATGTACGTAAGCTAAAAATATTGTTTATAAGTTAGTT  
TAACGAGCCTATAAGCTTAGTCAAATACCTTCAAATATCTCACTTAAT

>M6-PGSC0003DMG400026748-(rev)M6LRR-RLP\_915

TAAGTTAGTTTAAACGAGCCTATAAGCTTAGTCAAATACCTTCAAATATCTCACTTAATTTTGTACTTTTTA  
TCTCTCAAGTGAGAAGCGATAATGATCAAGA ACTCACAAGTGTATTTT

>M6-PGSC0003DMG400026748-(rev)M6LRR-RLP\_976

TGTACTTTTTATCTCTCAAGTGAGAAGCGATAATGATCAAGA ACTCACAAGTGTATTTTTTTTTTTGTAAG  
GTTCATAACATAAATTATCAGGTGTTTGTGTTTTCTATCTGAATTATCAC

>M6-PGSC0003DMG400026749-(rev)M6LRR-RLK\_0

AGTTTTATCTCGTAATTTACTTCAAGGGAACATTCCAGAAGGGATTGGCAATCTACACAAGATGAAATTG  
TTGTCCATACAACATAAACTTGCGGGTTTTATACCGTTCACAATTTT

>M6-PGSC0003DMG400026749-(rev)M6LRR-RLK\_1054

CTTGATTCCCAATTCTCTTGATATTTGGCTAATCTACAGTTCCTAAACTTGGCAGCAAACAATTTAACA  
GTGACTCATCGTTTAGCTTCCTCACTTCCTTAACCAATTATAGAAATTT

>M6-PGSC0003DMG400026749-(rev)M6LRR-RLK\_1116

ATTTAACAAGTGACTCATCGTTTAGCTTCCTCACTTCCTTAACCAATTATAGAAATTTAACAATTCTTTTT  
TATCTTTGAACCCTCTAAACGGCATGCTTCCAGTATCTGCAGGGAACC

>M6-PGSC0003DMG400026749-(rev)M6LRR-RLK\_1178

ATTCTTTTTCTATCTTTGAACCCTCTAAACGGCATGCTTCCAGTATCTGCAGGGAACCTTTACTTCTCTT  
ACAATGTTTTATGCCAGTCTTGAATATTAAAGGGCGAATTCCAAAT

>M6-PGSC0003DMG400026749-(rev)M6LRR-RLK\_124

ATTTCTAGAATCGAATTCATTGCATTTACAGACAATAGCTTATCAGGAAATCTTCCCAATGGTTTATGTAA  
TGGTCTCCCAATACTCAAAGGGCTTTATCTATCCACAAACAACTTCGT

>M6-PGSC0003DMG400026749-(rev)M6LRR-RLK\_1240

CACTTCTTACAATGTTTTATGCCAGTCTTGAATATTAAAGGGCGAATTCCAAATGAAGTTGGGAACT  
TAAGCAACTTATTAGGGCTTGATCTTTCTGGAAACAACCTGGTTGGATC

>M6-PGSC0003DMG400026749-(rev)M6LRR-RLK\_1302

TTGGGAACTTAAGCAACTTATTAGGGCTTGATCTTTCTGGAAACAACCTGGTTGGATCAATTCCCACATC  
AATTGGCAACTTGAGAAACCTTCAGCGCTTCAACTTGAGTTACAACAAAC

>M6-PGSC0003DMG400026749-(rev)M6LRR-RLK\_1364

CCCACATCAATTGGCAACTTGAGAAACCTTCAGCGCTTCAACTTGAGTTACAACAACTTACAGGATTTA  
TTGGAGATAACATTTGTAAATTGCAGCATTTGGGTGCTATTTACTTGGGA

>M6-PGSC0003DMG400026749-(rev)M6LRR-RLK\_1426

AGGATTTATTGGAGATAACATTTGTAAATTGCAGCATTTGGGTGCTATTTACTTGGGACAAAATCAACTT  
TCAGGATCTCTTCTAATTGTTTAGGGAATGTTACTTCCCTTAGATTGAT

>M6-PGSC0003DMG400026749-(rev)M6LRR-RLK\_1488

ATCAACTTTCAGGATCTCTTCTAATTGTTTAGGGAATGTTACTTCCCTTAGATTGATACATCTTGGTTCCA  
ATAAATTGATTTCCAATATACCACCAAGTTTAGGGAATCTTAAGGATT

>M6-PGSC0003DMG400026749-(rev)M6LRR-RLK\_1550

CTTGGTTCCAATAAATTGATTTCCAATATACCACCAAGTTTAGGGAATCTTAAGGATTTAATGGAGTTTG  
ACTTATCCTCAAACAACATGGTTGGTTCTTACCACCAGAAATTGGAAAT



>M6-PGSC0003DMG400026749-(rev)M6LRR-RLK\_1612

GGAGTTTGACTTATCCTCAAACAACATGGTTGGTTCTTACCACCAGAAATTGAAATCTAAAAGCTGTG  
ACACATATGGATCTGTTCGATGAATCAATTATCAAATGGAATTCCTAGGGA

>M6-PGSC0003DMG400026749-(rev)M6LRR-RLK\_1674

AAGCTGTGACACATATGGATCTGTTCGATGAATCAATTATCAAATGGAATTCCTAGGGAAATTGGAGGAT  
TGCAAATCTGGTGCATCTTTCTTTGAGACACAACAAGTTGCAAGGATCTA

>M6-PGSC0003DMG400026749-(rev)M6LRR-RLK\_186

TTTATGTAATGGTCTCCCAATACTCAAAGGGCTTTATCTATCCACAAACAACTTCGTGGTCATATGCCTA  
CAAGCCTGTCAAATTGTTCACAACTTCAAATATTGAATTTATCAGGCAA

>M6-PGSC0003DMG400026749-(rev)M6LRR-RLK\_1860

GAACCATTCCCATGTCTATGGAGAACTTCAAACCTGAAGTATTTCAATGTTTCTGTCAACAAGCTGTAC  
GGTGAAATACCCTCGGGGGTCCTTTCAAGAACCTCTCGAGTCAATTTTT

>M6-PGSC0003DMG400026749-(rev)M6LRR-RLK\_1922

AAGCTGTACGGTAAATACCCTCGGGGGTCCTTTCAAGAACCTCTCGAGTCAATTTTTCATCGACAATGA  
AGCCTTGTGTGGTTCTTCAAGGTTTAGTGTGACAGCATGCGCCACATCAT

>M6-PGSC0003DMG400026749-(rev)M6LRR-RLK\_1984

GACAATGAAGCCTTGTGTGGTTCTTCAAGGTTTAGTGTGACAGCATGCGCCACATCATCAAAGCATAGAT  
CAAATAGGAAAAAATGCTTGTCTATTTCTTGTGCTGGGAATTGCACTT

>M6-PGSC0003DMG400026749-(rev)M6LRR-RLK\_2046

GCATAGATCAAATAGGAAAAAATGCTTGTCTATTTCTTGTGCTGGGAATTGCACTTGTATTTGTTCTTA  
TTACCTTTGTGTTTGTATGGATAAGGTATAGAAGAGGTACAAGTGATCC

>M6-PGSC0003DMG400026749-(rev)M6LRR-RLK\_2108

TTGTTCTATTACCTTTGTGTTTGTATGGATAAGGTATAGAAGAGGTACAAGTGATCCTCAACAAGCTCA  
CTCATTGTCTACCGTAACAAGAGAAATAATTTCACTACTATGAACTGCTCC

>M6-PGSC0003DMG400026749-(rev)M6LRR-RLK\_2170

CAAGCTCACTCATTGTCTACCGTAACAAGAGAAATAATTTCACTACTATGAACTGCTCCAAGCAACTGAGT  
CGCTTAGCGAGAGTAATCTGATTGGTTCTGGAGGTTTTGGCTCTGTTTAC

>M6-PGSC0003DMG400026749-(rev)M6LRR-RLK\_2232

AACTGAGTCGCTTAGCGAGAGTAATCTGATTGGTTCTGGAGGTTTTGGCTCTGTTTACAAAGGTGTTCTC

AGAAGTGGGATTGCCATTGCAGTTAAAGTGTTCAATCTGCAATTGGAAGC

>M6-PGSC0003DMG400026749-(rev)M6LRR-RLK\_2356

TTCAAGAGTTTTGATACAGAATGTGAAGTTTTGCGCAGCCTTCGCCATAGGAATCTCATGAAAGTCATCA  
CTAGTTGCTCCAACCTGGATTTAAGGCTTTAGTGCTTGAGTATATGCCT

>M6-PGSC0003DMG400026749-(rev)M6LRR-RLK\_2418

AGTCATCACTAGTTGCTCCAACCTGGATTTAAGGCTTTAGTGCTTGAGTATATGCCTAATGGAAGTCTT  
GACAAGTATTTGTATTTCGCACAACCTACTTCCTAGATATCAGCCAGAGACT

>M6-PGSC0003DMG400026749-(rev)M6LRR-RLK\_248

ATATGCCTACAAGCCTGTCAAATTGTTCACTTCAAATATTGAATTTATCAGGCAATGAGTTTGGCGG  
ACGAATACATAGTGAAATTGGAAGATTGAGTAATTTGCTGATATTGTATC

>M6-PGSC0003DMG400026749-(rev)M6LRR-RLK\_2480

GAAGTCTTGACAAGTATTTGTATTTCGCACAACCTACTTCCTAGATATCAGCCAGAGACTAAGCATTATGAT  
AGATGTGGCATGTGCGTTGGAATATCTCCATCATGGATTCTCCTCACCTG

>M6-PGSC0003DMG400026749-(rev)M6LRR-RLK\_2542

ATTATGATAGATGTGGCATGTGCGTTGGAATATCTCCATCATGGATTCTCCTCACCTGTGATTCACTGTGA  
TCTAAAGCCTAGTAACATCTTGTTAGATGAGGATATGGTTGCCACCTA

>M6-PGSC0003DMG400026749-(rev)M6LRR-RLK\_2604

TCACTGTGATCTAAAGCCTAGTAACATCTTGTTAGATGAGGATATGGTTGCCACCTAAGTGACTTTGGT  
ATTTCAAAACTGCTTGGTGACGATGAGAGTGATTTATACACAAAAACCTT

>M6-PGSC0003DMG400026749-(rev)M6LRR-RLK\_2728

ACATTTGGTTATATCGCACCAGGTACGTCTCTTTGTTTTGCTAATTTGAACATTGATTTTTCGTCTTTTTTT  
TTTCCAATCAAGAAAGTATACTGCATCTTTAAATTAATTGTTTACT

>M6-PGSC0003DMG400026749-(rev)M6LRR-RLK\_2790

CGTCTTTTTTTTTTCCAATCAAGAAAGTATACTGCATCTTTAAATTAATTGTTTACTGTAGAGTATGGATT  
GGATGGACTGGTGTGACGATAAATGCGATGTCTATAGTTACGGGATTAT

>M6-PGSC0003DMG400026749-(rev)M6LRR-RLK\_2914

CTGGAAACATTTACTAGGAGAAAGCCTAGTGATTTTGAGGGAGATCTTAACTTGAAGCAATGGATGAGT  
TATCACTCCCCGAGGCAGTAATGGATATTGTAGATGCCAATTTGGTAACA

>M6-PGSC0003DMG400026749-(rev)M6LRR-RLK\_2976

GATGAGTTATTCACCTCCCGAGGCAGTAATGGATATTGTAGATGCCAATTTGGTAAACACCAACGGATAA  
TCGCTTACAGAAGGAGCTAGATGTTGTGGCTGCAATCATGAAAGTTGCATT

>M6-PGSC0003DMG400026749-(rev)M6LRR-RLK\_3038

CGGATAATCGCTTACAGAAGGAGCTAGATGTTGTGGCTGCAATCATGAAAGTTGCATTAGATTGCTGTG  
CTGAATCTCCGGCAAGAAGGACAAACATGAAAGATGTTGTAGGGATGCTAC

>M6-PGSC0003DMG400026749-(rev)M6LRR-RLK\_310

TTTGGCGGACGAATACATAGTGAAATTGGAAGATTGAGTAATTTGCTGATATTGTATCTTGGATCTAACC  
ATTTACAGGTACGATCCTAGCCACAGAATTATTAGTTGTTTTATGGATT

>M6-PGSC0003DMG400026749-(rev)M6LRR-RLK\_3162

GATCAAGATTCAACTTCTTGCATGCTGAGCATGTTTTCAGAATCTTGTCTGAATCGATCACTTTTTCTG  
TTTTGTTTTAGCACTTGATTTGTGCATGATTCTGTTTTCAGAAATGCT

>M6-PGSC0003DMG400026749-(rev)M6LRR-RLK\_3195

TTTTCAGAATCTTGTCTGAATCGATCACTTTTTCTGTTTTGTTTTAGCACTTGATTTGTGCATGATTCTG  
TTTTCAGAAATGCTAGTTGGTTGCAATAAATGTCACCTTTTTCTCTT

>M6-PGSC0003DMG400026749-(rev)M6LRR-RLK\_372

ATCTAACCATTTACAGGTACGATCCTAGCCACAGAATTATTAGTTGTTTTATGGATTCTTTTATGAACAC  
TTGTAATATTGAACTTGAAGTGCAGGAATAATTCCACAAGAGTTAGGAA

>M6-PGSC0003DMG400026749-(rev)M6LRR-RLK\_434

TATGAACACTTGTAATATTGAACTTGAAGTGCAGGAATAATTCCACAAGAGTTAGGAAATCTTGCTAATT  
TGCGAATTTAGGCATGGAGGATAACCAGATTAGCGGCTCTATCCCGATC

>M6-PGSC0003DMG400026749-(rev)M6LRR-RLK\_496

TGCTAATTTGGCGAATTTAGGCATGGAGGATAACCAGATTAGCGGCTCTATCCCGATCAACATATTCAAT  
ATCTCCTCACTGCAACGTTTTGGACTATGGCGGAACAATCTCAAGGGATC

>M6-PGSC0003DMG400026749-(rev)M6LRR-RLK\_558

TATTCAATATCTCCTCACTGCAACGTTTTGGACTATGGCGGAACAATCTCAAGGGATCCTTACCACAAGA  
GATTGGCAACTTAACCAAGATACAGATTCTAGATCTTAGAGAAAATACAT

>M6-PGSC0003DMG400026749-(rev)M6LRR-RLK\_62

TGAAATTGTTGCCATACAACATAATAAACTTGCGGGTTTTATACCGTTCACAATTTTCAATTTTCTAGA  
ATCGAATTCATTGCATTTACAGACAATAGCTTATCAGGAAATCTTCCCA

>M6-PGSC0003DMG400026749-(rev)M6LRR-RLK\_620

CCACAAGAGATTGGCAACTTAACCAAGATACAGATTCTAGATCTTAGAGAAAATACATTTATTGGTACGT  
ATTCGAAGTGATAGGAAAATTATAAACTTATACTAGCTTGAACAACTCA

>M6-PGSC0003DMG400026749-(rev)M6LRR-RLK\_682

TGGTACGTATTCGAAGTGATAGGAAAATTATAAACTTATACTAGCTTGAACAACTCATTCTTAATTTCTT  
TAGGTGAAATACCCAAAGAGATAAGCAATATGATGGAGTTGGAGATACT

>M6-PGSC0003DMG400026749-(rev)M6LRR-RLK\_744

TAATTTCTTTAGGTGAAATACCCAAAGAGATAAGCAATATGATGGAGTTGGAGATACTTAGTCTCGGGT  
TAAATAGTTTCAGTGGTTCACCTTCAAATAGAGATGTTCAACAGTACTTCAC

>M6-PGSC0003DMG400026749-(rev)M6LRR-RLK\_806

CTCGGGTTAAATAGTTTCAGTGGTTCACCTTCAAATAGAGATGTTCAACAGTACTTCACGCTTGAGGATAA  
TTTCTTTACAAACAATAATCTATCAGGAACTCTACCATCAAACATAGAT

>M6-PGSC0003DMG400026749-(rev)M6LRR-RLK\_868

GAGGATAATTTCTCTTACAAACAATAATCTATCAGGAACTCTACCATCAAACATAGATTCTGTCTTACCCA  
ACATTGAAGAGCTTTATTTGGGTGTCTTAACCAATCTTGTTGGGACTAT

>M6-PGSC0003DMG400026749-(rev)M6LRR-RLK\_992

CATTCTATTTCCAATTGTTCAAACTTACTAATCTAGAGCTTTCAAATAATAAACTCACTGGCTTGATTCCC  
AATTCTCTTGATATTTGGCTAATCTACAGTTCCTAACTTGGCAGCA

>M6-PGSC0003DMG400026750-(rev)M6LRR-RLP\_0

GTCTCTTTTTCACTATCTTCTGTACACAACAACTTCAATACACCTCTGCTCTGTAATTGCAAACCATTTTC  
CATTTTTCTTCAACCAAAAACAACAATGGCTTCTTCTTCTCCAGA

>M6-PGSC0003DMG400026750-(rev)M6LRR-RLP\_1054

AATTTTCACGGGGTTTTACCTTTTAATGCTTCGTTTATAAAGAAATTGGCTGTGTTGAAGGTGGGAGGAA  
ATTCGAATCTTTGTTATAATCATTGACATTGTCTTCTAAAGTGAAGCTT

>M6-PGSC0003DMG400026750-(rev)M6LRR-RLP\_1116

GGGAGGAAATTCGAATCTTTGTTATAATCATTGACATTGTCTTCTAAAGTGAAGCTTGGGATTGCTCCT  
TGTGATAAACATGGGTTGCCTGTGTACCTCCAGCATCGAAGGATATAAG

>M6-PGSC0003DMG400026750-(rev)M6LRR-RLP\_124

TTTTTCTCCTCATATTTCTCACTCTTTTCTCACCATTTCCACTTCAAACCTCACTTTCTTCTTCCCCATCA

CCCCTTTCTTCTCCATCTCCAAAACCCTCTCCTATTTCAACTCCA

>M6-PGSC0003DMG400026750-(rev)M6LRR-RLP\_1302

TGGACCAAGTAAGGTTGTTCTTGGTATTTCCATTGCACTTTCCTCGATTGTATTCATAATTATTTTCTTGAT  
TCTGTTGGCTAAATGTTGTAATGAGCATAAAAATGAAATCTTGGTTC

>M6-PGSC0003DMG400026750-(rev)M6LRR-RLP\_1364

TTTTCTTGATTCTGTTGGCTAAATGTTGTAATGAGCATAAAAATGAAATCTTGGTTCGTTTAGTTTAGGA  
AATTTCTTAATTGGATTATGAAATTTGTTTAGTTAATTATACATTTGTA

>M6-PGSC0003DMG400026750-(rev)M6LRR-RLP\_1426

AGTTTAGGAAATTTCTTAATTGGATTATGAAATTTGTTTAGTTAATTATACATTTGTATCATGTTAGAAGT  
AGAAGAGGTGGCTACTTTATTTGGTGTGATTCTTTTGAACAAGTTAAAT

>M6-PGSC0003DMG400026750-(rev)M6LRR-RLP\_1488

GTTAGAAGTAGAAGAGGTGGCTACTTTATTTGGTGTGATTCTTTTGAACAAGTTAAATTGCTGGAGGAA  
GTAGGCGGCTAAATTGATCTTTAAGTGTATGATGGGAGAGATTGCCTATTA

>M6-PGSC0003DMG400026750-(rev)M6LRR-RLP\_1550

GGAGGAAGTAGGCGGCTAAATTGATCTTTAAGTGTATGATGGGAGAGATTGCCTATTAATGAAATTTTC  
TTTTATGTATGTATTTTCGATTGACGGATTGAGGTACATGGTTTTGATTTTC

>M6-PGSC0003DMG400026750-(rev)M6LRR-RLP\_1612

AATTTTCTTTTATGTATGTATTTTCGATTGACGGATTGAGGTACATGGTTTTGATTTCTGATATATGGTG  
ATATCTCAATTGCTTACGACATTTTGTGTTTGGATTACGATTTGCTT

>M6-PGSC0003DMG400026750-(rev)M6LRR-RLP\_1674

TATATGGTGATATCTCAATTGCTTACGACATTTTGTGTTTGGATTACGATTTGCTTCATTCATTTGTTGA  
TTGACAATATGAAAGATTCTTTATTTTTCATGTGTTGGTTACGAGTC

>M6-PGSC0003DMG400026750-(rev)M6LRR-RLP\_1736

CATTTGTTGATTGACAATATGAAAGATTCTTTATTTTTCATGTGTTGGTTACGAGTCATGTCTATGGATG  
AGATAATCTATGTCGTGTGGATCCTTCATTTGTCTTGATGTACCCCGTG

>M6-PGSC0003DMG400026750-(rev)M6LRR-RLP\_1798

CTATGGATGAGATAATCTATGTCGTGTGGATCCTTCATTTGTCTTGATGTACCCCGTGTCCAATGGGAAT  
GTGGTAAGGGTTAGGGTACTTTGCTGGAAAAGGTTGATATACCCATACCG

>M6-PGSC0003DMG400026750-(rev)M6LRR-RLP\_186

CTCTTCCCATCACCCCTTTCTTCTCCATCTCCAAAACCCTCTCCTATTTCAACTCCACGAACTCATTATCT  
TCATCTATTCTTGACCCAAATCAGCTCAAAGCTCTACAATCACTCAA

>M6-PGSC0003DMG400026750-(rev)M6LRR-RLP\_1860

ATGGGAATGTGGTAAGGGTTAGGGTACTTTGCTGGAAAAGGTTGATATACCCATACCGGGTGCTTCCAA  
AGAAACTGTACAGAACACATATCCGTAATAGAGTCCAAGCAACATAATGGC

>M6-PGSC0003DMG400026750-(rev)M6LRR-RLP\_1922

CTTCCAAAGAACTGTACAGAACACATATCCGTAATAGAGTCCAAGCAACATAATGGCAAGATGAAGTA  
TCTACCGAATTAGCTCAATAGTCTATCGTCCCAGTTTTAACTGCAAAGATC

>M6-PGSC0003DMG400026750-(rev)M6LRR-RLP\_1984

TGAAGTATCTACCGAATTAGCTCAATAGTCTATCGTCCCAGTTTTAACTGCAAAGATCAGTGTTTTCGCTG  
TACTTGCGTGATTTTTCGTAGTAAGTTCTTTTGCTTCTTTGTGCTCT

>M6-PGSC0003DMG400026750-(rev)M6LRR-RLP\_2046

TTTTCGCTGTTACTTGCGTGATTTTTCGTAGTAAGTTCTTTTGCTTCTTTGTGCTCTACCGGACTTCCAG  
TATTCCTCGTATGCCCTGTGATGCCAGTGTTTTATGAGATCTAACAT

>M6-PGSC0003DMG400026750-(rev)M6LRR-RLP\_2108

GACTTCCAGTATTCCTCGTATGCCCTGTGATGCCAGTGTTTTATGAGATCTAACATAATGCTGTGAAAA  
CAATATTCCATTGTAGACAAAAATGTTCAATTATCTGGCACTTCATTCA

>M6-PGSC0003DMG400026750-(rev)M6LRR-RLP\_2170

CTGTGAAAACAATATTCATTGTAGACAAAAATGTTCAATTATCTGGCACTTCATTTCAATTTGACAGAAGAA  
GCTCAATTAGTCCCCTCCTTAGCTGTTTTGCTCAGATTCTTCATAAATA

>M6-PGSC0003DMG400026750-(rev)M6LRR-RLP\_2232

ACAGAAGAAGCTCAATTAGTCCCCTCCTTAGCTGTTTTGCTCAGATTCTTCATAAATATGTTGGGGTTATG  
TGTTGGATCCTCAAAGCTATGCTTTTTGGAGGATCTTACACGGGTGG

>M6-PGSC0003DMG400026750-(rev)M6LRR-RLP\_2356

ACACTTTTGGAGGGTCCGAGTAACAAAGCTCCTTAGTCCCCTACCTGATCACCACAAAGGATAACTAGG  
GGGTGCTTCCCACTGGGTTTTCTTTCATTTTTAAATGCTTATTGTGATA

>M6-PGSC0003DMG400026750-(rev)M6LRR-RLP\_2418

AACTAGGGGGTGCTTCCCACTGGGTTTTCTTTCATTTTTAAATGCTTATTGTGATAATAGACTGGAGA  
ATTCATATAGTCGATTCTAACTTGCTTGGGACAGAGGCACGAGTTATTTT

>M6-PGSC0003DMG400026750-(rev)M6LRR-RLP\_2458

TAAATGCTTATTGTGATAATAGACTGGAGAATTCATATAGTCGATTCTAACTTGCTTGGGACAGAGGCAC  
GAGTATTTTTTTTATTGTCGTTTTAGTTATAACGTCTATTGTTTTGGCC

>M6-PGSC0003DMG400026750-(rev)M6LRR-RLP\_248

CTCATTTCATCTTCATCTATTCTTGACCCAAATCAGCTCAAAGCTCTACAATCACTCAACATCCCAACAGGC  
AAAACCCCATGTTCCCATCTCACAATACTACCACTATTTGTGATTCTT

>M6-PGSC0003DMG400026750-(rev)M6LRR-RLP\_310

CCAACAGGCAAACCCCATGTTCCCATCTCACAATACTACCACTATTTGTGATTCTTCAACCCCATTTAG  
TCACATTGTGTCATTAACTTCATTAAGTCTCAGATGATGTTGCATTA

>M6-PGSC0003DMG400026750-(rev)M6LRR-RLP\_372

CCCATTTAGTCACATTGTGTCATTAACTTCATTAAGTCTCAGATGATGTTGCATTATCACTTACTGCTTT  
GAAATCATTGTCTACAGTGAAGGATTTGGGGTTTTACAATTGCCCCAT

>M6-PGSC0003DMG400026750-(rev)M6LRR-RLP\_434

TTACTGCTTTGAAATCATTGTCTACAGTGAAGGATTTGGGGTTTTACAATTGCCCCATTTACCTATTAGG  
TTACCTTCTCAGCTTGCTTTGAATCTGAAATCTTTTACTTGTGTTAGTA

>M6-PGSC0003DMG400026750-(rev)M6LRR-RLP\_496

CCTATTAGGTTACCTTCTCAGCTTGCTTTGAATCTGAAATCTTTTACTTGTGTTAGTAGTTGAAGAAATTA  
ACTGGAGTTTGGCTTAGCAAATTGGTGAATGTTACTGATTTAACTGTT

>M6-PGSC0003DMG400026750-(rev)M6LRR-RLP\_558

GAAGAAATTAAGTGGAGTTTGGCTTAGCAAATTGGTGAATGTTACTGATTTAACTGTTTCTCATGTTTCG  
ATTGTTGCTAGTGGTCCATCTATAATCATGAATAGTATAAAGAATTTGCA

>M6-PGSC0003DMG400026750-(rev)M6LRR-RLP\_62

AACCATTTTCCATTTTTCTTCAACCAAAAACAACAACAATGGCTTCTTCTTCTCCAGATCCATTTTTTCTCCT  
CATATTTCTCACTTTTTCTCACCATTTCCACTTCAAACCTCACTTT

>M6-PGSC0003DMG400026750-(rev)M6LRR-RLP\_620

ATGTTTCGATTGTTGCTAGTGGTCCATCTATAATCATGAATAGTATAAAGAATTTGCACAGTGTACGATT  
TCGAATGCTAATCTTACTGGTACTTGCCTAACATTGGCATTCTGAATC

>M6-PGSC0003DMG400026750-(rev)M6LRR-RLP\_682

GTTACGATTTTGAATGCTAATCTTACTGGTACTTGCCTAACATTGGCATTCTGAATCTTAGTTATGTTGA

TTGTCTGGTAATAAACTGAAAGGGAGAATACCCAGCTCGTAACTGAG

>M6-PGSC0003DMG400026750-(rev)M6LRR-RLP\_744

TTATGTTGATTTGTCTGGTAATAAACTGAAAGGGAGAATACCCAGCTCGTAACTGAGCTGGAGAATCTT  
GTTTACCTCAATTTGTCTTCGAATTCACCTAATGGAACGATCCCCGCTTC

>M6-PGSC0003DMG400026750-(rev)M6LRR-RLP\_806

AGAATCTTGTTTACCTCAATTTGTCTTCGAATTCACCTAATGGAACGATCCCCGCTTCGTTTGGTGATTTG  
TCTTCTTTGCAAATGTGTCTTTGGCTTCGAATTCGTTGTCTGGATCTG

>M6-PGSC0003DMG400026750-(rev)M6LRR-RLP\_868

GGTGATTTGTCTTCTTTGCAAATGTGTCTTTGGCTTCGAATTCGTTGTCTGGATCTGTTCCGGATTTCGTT  
TGCTGCTATTCCCGGATTAGTTCATCTTGATTTGGGGTCTAATCAGCTC

>M6-PGSC0003DMG400026750-(rev)M6LRR-RLP\_930

GGATTCGTTTGCTGCTATTCCCGGATTAGTTCATCTTGATTTGGGGTCTAATCAGCTCAATGGGACTATTC  
CTAAGTTCATTTCTGATATGAAGGGATTGAAGTATTTGAATCTTGAGAG

>M6-PGSC0003DMG400026750-(rev)M6LRR-RLP\_992

GGACTATTCCTAAGTTCATTTCTGATATGAAGGGATTGAAGTATTTGAATCTTGAGAGGAATAATTTTCA  
CGGGGTTTTACCTTTAATGCTTCGTTTATAAAGAAATTGGCTGTGTTGA

>M6-PGSC0003DMG400026760-(rev)M6LRR-RLK\_0

TGAATTTTCTTGTTTCCATTCATCAATGGTGACACCCAACCAAATCAAGAATCCATTTTTGCAGACCTCTTT  
AGTCTCAAACCTCCATTTTGTCTGCACTTTGGACTTTCTTGTTTC

>M6-PGSC0003DMG400026760-(rev)M6LRR-RLK\_1037

ACTCCGGCGTTATCTCGGTTCAATGAATCATCTTTGCCGGAATGTCAATTTGTGTGGAGTACAATTGC  
ATAATAACTGTCCTTCAACTAGTCCAGCGTATCCCATCATTCCAGAAAAT

>M6-PGSC0003DMG400026760-(rev)M6LRR-RLK\_1098

TACAATTGCATAATAACTGTCCTTCAACTAGTCCAGCGTATCCCATCATTCCAGAAAATGTATCTCATCAT  
AAAAAAGCAAAAAGCTTATCATCATCATTGTCCCTGTGGTCCGCGAA

>M6-PGSC0003DMG400026760-(rev)M6LRR-RLK\_1159

ATCTCATCATAAAAAAGCAAAAAGCTTATCATCATCATTGTCCCTGTGGTCCGCGAATCTTGATCCTCT  
GTGTTTTGATGGCGATTTTTATAGCATGTGTTTCGAAAACGAAGAAGAAA

>M6-PGSC0003DMG400026760-(rev)M6LRR-RLK\_122



ATTCATCCATGGTGACACCCTACCAAATCAAGAATCCATTTTTGTAGAGACCCCTTTAGTCTCAAGACTCC  
ATTTTTAGCTCTGCATTAGATCCCTTTAGTGTTAAGACTCCATTTTTAG

>M6-PGSC0003DMG400026760-(rev)M6LRR-RLK\_1220

TTGATCCTCTGTGTTTTGATGGCGATTTTTATAGCATGTGTTTCGAAAACGAAGAAGAAAACTCAAGATG  
GAAAGAGTAAAGGAGTTGAAGCCGGTGGAGGCGGGGAGGGGGAGGGGAA

>M6-PGSC0003DMG400026760-(rev)M6LRR-RLK\_1403

GGTGGAAAAGAAGGGGCATTTTCATGGGATCAAGGAAGTGGAGGACTAGGGACATTGGTGTGTTTTGTG  
GACCAGGTGATCAACAAATGAATTACACCTTAGAGGATTTGTTGAAAGCATCA

>M6-PGSC0003DMG400026760-(rev)M6LRR-RLK\_1464

TTTGTGGACCAGGTGATCAACAAATGAATTACACCTTAGAGGATTTGTTGAAAGCATCAGCCGAGACAT  
TAGGGAGGGGTATAATAGGAAGTACATATAAAGCCGTGATGGAATCTGGCT

>M6-PGSC0003DMG400026760-(rev)M6LRR-RLK\_1525

CGAGACATTAGGGAGGGGTATAATAGGAAGTACATATAAAGCCGTGATGGAATCTGGCTACATTGTGA  
CAGTGAAGCGTTGAGGGATTGAGGTTTCCGAGGTTAGAGGAATTCCGGAG

>M6-PGSC0003DMG400026760-(rev)M6LRR-RLK\_1586

ATTGTGACAGTGAAGCGTTGAGGGATTGAGGTTTCCGAGGTTAGAGGAATTCCGGAGGCATGTGGA  
GATTATTGGTAGGCTAAGACATCCTAACTTGGTCCCCTCCGAGCATATTTT

>M6-PGSC0003DMG400026760-(rev)M6LRR-RLK\_1647

ATGTGGAGATTATTGGTAGGCTAAGACATCCTAACTTGGTCCCCTCCGAGCATATTTTCAAGCTAAGGA  
AGAACGTTTGCTTGTTTATGATTATTTCCCTAATGGCAGCCTCTTCTCCC

>M6-PGSC0003DMG400026760-(rev)M6LRR-RLK\_1708

AGCTAAGGAAGAACGTTTGCTTGTTTATGATTATTTCCCTAATGGCAGCCTCTTCTCCCTCGTTCATGGTA  
TGTATTCCGTCGTTCAATTTATTTATTTATATTAATTTTGCTTTTATCC

>M6-PGSC0003DMG400026760-(rev)M6LRR-RLK\_1769

GTTTCATGGTATGTATTCCGTCGTTCAATTTATTTATTTATTTAATTTTGCTTTTATCCATTTTTGTGTACTG  
AACTCTAGTGAGTAGTGAAAGGAGGAAAAACAGGTATAGTTGAGCT

>M6-PGSC0003DMG400026760-(rev)M6LRR-RLK\_183

TCAAGACTCCATTTTTAGCTCTGCATTAGATCCCTTTAGTGTTAAGACTCCATTTTTAGCTCTGTAAGTTGA  
GTATTTTAGTGTCAAGACTCTATTTTAGCTCTGTATTAAGCATTCA

>M6-PGSC0003DMG400026760-(rev)M6LRR-RLK\_1830

TTTTGTGTAAGTGAAGTCTAGTGAGTAGTGAAAGGAGGAAAAACAGGTATAGTTGAGCTCATGAATAGT  
GAAAGGAAGTTAAAAAGGGATAAATTTGGCAGGATGAACTTGTACTTGAGT

>M6-PGSC0003DMG400026760-(rev)M6LRR-RLK\_1891

TGAATAGTGAAAGGAAGTTAAAAAGGGATAAATTTGGCAGGATGAACTTGTACTTGAGTGGTATAAGG  
TGAATAAGATAAGGGGAGGTAAGTATTTACGTCTAGTATATGCATCGATC

>M6-PGSC0003DMG400026760-(rev)M6LRR-RLK\_1952

TATAAGGTGGAATAAGATAAGGGGAGGTAAGTATTTACGTCTAGTATATGCATCGATCGAATAGATGC  
ATTACATGTGTTTTTTACTAAATTAGTTATTGAATAGTTTATCCTCTCTT

>M6-PGSC0003DMG400026760-(rev)M6LRR-RLK\_2013

ATAGATGCATTACATGTGTTTTTTACTAAATTAGTTATTGAATAGTTTATCCTCTCTTGAGGTTACACTAG  
TTTAGTTTTGTGCAAATACCAAGTGGGGACAAATTCTTTTCATGAGAT

>M6-PGSC0003DMG400026760-(rev)M6LRR-RLK\_2074

GGTTACACTAGTTTAGTTTTGTGCAAATACCAAGTGGGGACAAATTCTTTTCATGAGATCACTAGTTTATA  
ACTCAATCTCTCGAAGATTCTGCTCCTTTATTGACATGAGTCATTTTCT

>M6-PGSC0003DMG400026760-(rev)M6LRR-RLK\_2135

CTAGTTTATAACTCAATCTCTCGAAGATTCTGCTCCTTTATTGACATGAGTCATTTTCTTATTTTGAATTCA  
AATTTGTTACCTCTTTATGCTTGGCTGTTTTGTGGGGGAGCATTGGAG

>M6-PGSC0003DMG400026760-(rev)M6LRR-RLK\_2196

TTTTGAATTCAAATTTGTTACCTCTTTATGCTTGGCTGTTTTGTGGGGGAGCATTGGAGGACTTTAGTGTC  
ACTTTATTTTCTATTTTTTTGTGTTTATATTTGTGTACTTTGCACATT

>M6-PGSC0003DMG400026760-(rev)M6LRR-RLK\_2257

CTTAGTGTCACCTTATTTTCTATTTTTTTGTGTTTATATTTGTGTACTTTGCACATTTTCTTGAATTGTTT  
ATACTTTTTAATATGTTTCTTTATCTTCTTCTCAGTATTCTGTCCCTT

>M6-PGSC0003DMG400026760-(rev)M6LRR-RLK\_2318

CCTTGAATTGTTTATACTTTTTAATATGTTTCTTTATCTTCTTCTCAGTATTCTGTCCCTTCTTAGTTTGT  
TGTTATTTTTGAATAATTTCCATATAATTGGTTTGGTAGTGTATCA

>M6-PGSC0003DMG400026760-(rev)M6LRR-RLK\_2379

TAGTTTGTTTTTTTGTTATTTTTGAATAATTTCCATATAATTGGTTTGGTAGTGTATCACTTTCTGGTCTCTC

CTGTGGGTTCTGTTTGGTGATGGTGGGGAAGAGAGGGCCAACAAAGG

>M6-PGSC0003DMG400026760-(rev)M6LRR-RLK\_244

CTGTAAGTTGAGTATTTTAGTGTCAAGACTCTATTTTCTAGCTCTGTATTAAGCATTTCAGTGCTCAAAAAT

TGTCAAGTTCAATGAAAATCAAGAACCCATTTTCTCTAGAGTTGAAC

>M6-PGSC0003DMG400026760-(rev)M6LRR-RLK\_2440

TTCTGGTCTCTCCTGTGGGTTCTGTTTGGTGATGGTGGGGAAGAGAGGGCCAACAAAGGAAGCTTGTA

GGAGCCAACAAAGAATTGAGATAGCTGGCCAAGTAGGACAAATATGTAAATT

>M6-PGSC0003DMG400026760-(rev)M6LRR-RLK\_2501

GCTTGTAGGAGCCAACAAAGAATTGAGATAGCTGGCCAAGTAGGACAAATATGTAAATTTGTAAAGGA

AGTTCCAAACTTGCTTTGGTATACTGATGTGAAGATTATAGAAAAAATTGT

>M6-PGSC0003DMG400026760-(rev)M6LRR-RLK\_2684

TTCTCTACGACTACGGATGTTATACAAAAAGAGGATAAAGAACAAAAGGGGAGTATAGTTATATATTGG

CCTTTTGAATCTTAAGAAGGATGATATTTCAATCAATGGATTCTGAAAA

>M6-PGSC0003DMG400026760-(rev)M6LRR-RLK\_305

GCTCAAAAATTGTCAAGTTCAATGAAAATCAAGAACCCATTTTCTCTAGAGTTGAACAACCTTAAATGCT

CAATCATTCAACAATGGAAATGTCAATTTCAATGGAAATCAAGAACCCT

>M6-PGSC0003DMG400026760-(rev)M6LRR-RLK\_3050

GGATTGTGAAAAAGATGGCCCTCTGGGAGGAGGAACTCAAATTAGGAACCAAAACAATGATGTCACC

GCTACACTCGCATATTTGGCCTTGTCATTTATTGCATAGAGCCAAAACAGT

>M6-PGSC0003DMG400026760-(rev)M6LRR-RLK\_3099

CCAAAACAATGATGTCACCGCTACACTCGCATATTTGGCCTTGTCATTTATTGCATAGAGCCAAAACAG

TTGTCCACCATATATGGAGATAAGGCATGATACTTTGAAATTAGAAAGAC

>M6-PGSC0003DMG400026760-(rev)M6LRR-RLK\_366

CTTAAATGCTCAATCATTCAACAATGGAAATGTCAATTTCAATGGAAATCAAGAACCCTGTTTTGTTTCATA

AGGTAAGTTCTAGTCACAAATTCTGTTTTTCATTTTCTCAATATTTT

>M6-PGSC0003DMG400026760-(rev)M6LRR-RLK\_427

TTTGTTTCATAAGGTAAGTCTAGTCACAAATTCTGTTTTTCATTTTCTCAATATTTTCCATAGTTTTACCA

CTTGTAAGATCAGATGATGCTGAAGCACTTTTAGCATTGAAATCCAC

>M6-PGSC0003DMG400026760-(rev)M6LRR-RLK\_488

ATAGTTTTACCACTTGTAAGATCAGATGATGCTGAAGCACTTTTAGCATTGAAATCCACAATAGACCCCT  
CAAATTTTCTTGATTGGAAAAAGGAACTGATTTTGGCAATGGCAAGGT

>M6-PGSC0003DMG400026760-(rev)M6LRR-RLK\_549

TAGACCCCTCAAATTTTCTTGATTGGAAAAAGGAACTGATTTTGGCAATGGCAAGGTGTTAAAGAATG  
CATGAAAGGTAGAGTTACTAAGCTTGTTGTTGAAAATCTCAATTTGAGTG

>M6-PGSC0003DMG400026760-(rev)M6LRR-RLK\_61

CAGACCTCTTAGTCTCAAACTCCATTTTGTAGCTCTGCACTTTGGACTTTCTTGTTTCCATTCCATCCATG  
GTGACACCCTACCAAATCAAGAATCCATTTTGTAGAGACCCCTTAG

>M6-PGSC0003DMG400026760-(rev)M6LRR-RLK\_610

TAAAGAATGCATGAAAGGTAGAGTTACTAAGCTTGTTGTTGAAAATCTCAATTTGAGTGGTTTATTGGAC  
CAAATGCTCTCAATCAACTAGATCAATTACGAGTTTAAAGCTTCAAAGA

>M6-PGSC0003DMG400026760-(rev)M6LRR-RLK\_671

TTATTGGACCAAATGCTCTCAATCAACTAGATCAATTACGAGTTTAAAGCTTCAAAGAAAACCTCCATTTT  
CGGCCAAATCCCAAACCTTGCCGGACTTTCCAATCTGAAATCCCTTTTC

>M6-PGSC0003DMG400026760-(rev)M6LRR-RLK\_732

ACTCCATTTCCGGCCAAATCCCAAACCTTGCCGGACTTTCCAATCTGAAATCCCTTTTCTCAACAACAAC  
AACTTTTCCGGTGAGTTTCCGGCTACCATTACCCTCCTCCACCGTATCA

>M6-PGSC0003DMG400026760-(rev)M6LRR-RLK\_793

CAACAACAACAATTTTCCGGTGAGTTTCCGGCTACCATTACCCTCCTCCACCGTATCAAAGTTGTGGTTC  
TCGCCGAAACAAACTCTCCGGTGACATTCTCCGGCGTTAACAATTT

>M6-PGSC0003DMG400026760-(rev)M6LRR-RLK\_854

GTTGTGGTTCTCGCCGAAACAAACTCTCCGGTGACATTCTCCGGCGTTAACAATTTATCCCGTTGT  
ATGTTCTTTATCTAGAAGACAATCACTTCACCGGAGAAATCCCACCGTTG

>M6-PGSC0003DMG400026760-(rev)M6LRR-RLK\_915

CCCGTTGTATGTTCTTTATCTAGAAGACAATCACTTCACCGGAGAAATCCCACCGTTGAATCAGCTCAG  
TTTAAGGTTCTTTAATGTGTCAAACAATCAACTTTCAGGTGAAATCCCGA

>M6-PGSC0003DMG400026760-(rev)M6LRR-RLK\_976

TCAGCTCAGTTTAAAGGTTCTTTAATGTGTCAAACAATCAACTTTCAGGTGAAATCCCGAATACTCCGGCG  
TTATCTCGGTTCAATGAATCATCTTTCGCCGAAATGTCAATTTGTGTGG

>M6-PGSC0003DMG400026810M6G-LecRK\_0

ATTGGAAGAGACATTATTCAAAGTGTCTGAAACCTTTTCAGACCACTCCCTTTTACTCCCAGAAAAATTTT  
GCTTTGTTGATTTTCCGGCATTCCCTTCTCTTGCTTTCCAGGGAAAGAT

>M6-PGSC0003DMG400026810M6G-LecRK\_1037

TGAATCAATTGGTAGTTTAAGAGTTTTACCTTATAGTTGATTGTGATATTTCAATTCCTTTACACAAAAGA  
ACAGTTTCTTGTTCAATTGTAAATCAGTGGAATGACTGAACATATATTTT

>M6-PGSC0003DMG400026810M6G-LecRK\_1098

ACACAAAAGAACAGTTTCTTGTTCAATTGTAAATCAGTGGAATGACTGAACATATATTTTGCTGATATGCA  
GAAGCTGGAACCGGTTTTCTGTCTTTTCATCTGCTTCCGCAAGTAGTGAC

>M6-PGSC0003DMG400026810M6G-LecRK\_1159

TGATATGCAGAAGCTGGAACCGGTTTTCTGTCTTTTCATCTGCTTCCGCAAGTAGTGACAGATATGGATA  
GAGGAGACAGAATAATAGCCTGTTATTCTAATTTGCTGCTTTCTGTCTCT

>M6-PGSC0003DMG400026810M6G-LecRK\_122

AGAGTTGAAAATTTACAATGTGAGTCATATCTCTTGTTAATTTAAGCTCACCACTCAAACCTCCCAAGA  
TACTAACTTTCTGTTTCACTCTAGCTTTTTCACTGAGATATGTTGATTT

>M6-PGSC0003DMG400026810M6G-LecRK\_1220

ATATGGATAGAGGAGACAGAATAATAGCCTGTTATTCTAATTTGCTGCTTTCTGTCTCTATCGGGTTCTTG  
CTTTTTTCAGTTGTCAGTTCACAAATTCCTTTGGGTTCCAAACTAACAG

>M6-PGSC0003DMG400026810M6G-LecRK\_1281

CGGGTTCTTGCTTTTTTTCAGTTGTCAGTTCACAAATTCCTTTGGGTTCCAAACTAACAGTAGAAGAGAACA  
ATTATTGTTTCTCATCCAATAAGGACTATGCAATTGGATTCTTGAACCTT

>M6-PGSC0003DMG400026810M6G-LecRK\_1342

GAAGAGAACAATTATTGGTTCTCATCCAATAAGGACTATGCAATTGGATTCTTGAACCTTCTCCGACCAGT  
ATAGCTTTGGTGTCCGTTTCAATGCAATTTATATACCTAGCAGTGAGCAA

>M6-PGSC0003DMG400026810M6G-LecRK\_1403

CCGACCAGTATAGCTTTGGTGTCCGTTTCAATGCAATTTATATACCTAGCAGTGAGCAAGCAGCCATTTG  
GACTGCAGGGTGGAAATGTTAAAGTTAGTAGCAAAGCATATTTTGAGCTTT

>M6-PGSC0003DMG400026810M6G-LecRK\_1464

AGCCATTTGGACTGCAGGGTGGAAATGTTAAAGTTAGTAGCAAAGCATATTTTGAGCTTTCCCTAACTGG

GGAAATGATATTGTTTGATCCAGCAAAGGGAAAAATTGTTTGGCAAAGCAA

>M6-PGSC0003DMG400026810M6G-LecRK\_1525

CTAACTGGGGAAATGATATTGTTTGATCCAGCAAAGGGAAAAATTGTTTGGCAAAGCAAACTGGCAAC  
ACATCAGTTGAATCAGCTGTTCTTCTTGATGATGGCAACTTTGTCCTGTTA

>M6-PGSC0003DMG400026810M6G-LecRK\_1586

CTGGCAACACATCAGTTGAATCAGCTGTTCTTCTTGATGATGGCAACTTTGTCCTGTAAATAGGAATAA  
GAGTGCTGTTTGGCAGAGTTTTGAAAGTCCATCTGACACAATGTTGTCTG

>M6-PGSC0003DMG400026810M6G-LecRK\_1647

TAGGAATAAGAGTGCTGTTTGGCAGAGTTTTGAAAGTCCATCTGACACAATGTTGTCTGGCCAGAGTTT  
ATCTGTTGGCCAGTCTCTTCGAGCTTCTAGCAGGGGTTCTTTAACAAGTTA

>M6-PGSC0003DMG400026810M6G-LecRK\_1708

CAGAGTTTATCTGTTGGCCAGTCTCTTCGAGCTTCTAGCAGGGGTTCTTTAACAAGTTATTACAGTCTTCA  
TATGAATGTTTCTGGTGAGATGCAGCTTAGGTGGGAGACTAGTATCATT

>M6-PGSC0003DMG400026810M6G-LecRK\_1769

ACAGTCTTCATATGAATGTTTCTGGTGAGATGCAGCTTAGGTGGGAGACTAGTATCATTACTGGACTGT  
TGGGGGTCTAAATCTGCTGTACGAGCCATTCTTGGCTCTGACGGAATCC

>M6-PGSC0003DMG400026810M6G-LecRK\_183

TTCCCCAAGATACTAACTTTCTGTTTCACTCTAGCTTTTTCACTGAGATATGTTGATTTTAAAGCTTTTTCA  
CTTTGGGGTTCTCATTTTCTCAAATCTTGAATACCCATTTAAGGA

>M6-PGSC0003DMG400026810M6G-LecRK\_1830

CTGGACTGTTGGGGTCTAAATCTGCTGTACGAGCCATTCTTGGCTCTGACGGAATCCTCCAACACTT  
GATCAGCAATCGCAAGCTGTTTGGTCAGTCTATGGTGAGGACCACAATGA

>M6-PGSC0003DMG400026810M6G-LecRK\_1891

CAACTACTTGATCAGCAATCGCAAGCTGTTTGGTCAGTCTATGGTGAGGACCACAATGATTCTGATGTGA  
AGTTTCGGTTCCTCAGACTAGATTCTGATGGTAATCTTCGGATATACTCA

>M6-PGSC0003DMG400026810M6G-LecRK\_1952

CTGATGTGAAGTTTCGGTTCCTCAGACTAGATTCTGATGGTAATCTTCGGATATACTCATGGGAAAATAA  
TGCAACGTCATGGAGAAAAGTTTGGCAAGCTATAATTAATCAGTGTGATG

>M6-PGSC0003DMG400026810M6G-LecRK\_2013

GGAAAATAATGCAACGTCATGGAGAAAAGTTTGGCAAGCTATAATTAATCAGTGTGATGTCTTCGCAAC  
CTGTGCTACCAATGGTATTTGCACCTTGAATGCATCTGACTCTTATGTTTG

>M6-PGSC0003DMG400026810M6G-LecRK\_2074

TTCGCAACCTGTGCTACCAATGGTATTTGCACCTTGAATGCATCTGACTCTTATGTTTGTTGGTGTCCATT  
TAGATCTACAAGAGACTCAAACCTCTGAATGTCTAATTCCATATAAACCA

>M6-PGSC0003DMG400026810M6G-LecRK\_2135

GGTGTCCATTTAGATCTACAAGAGACTCAAACCTCTGAATGTCTAATTCCATATAAACCAAGTTGTGAATC  
TGGTTCATCCATGATCCTTCATGAGCATATGTATTTGTACGGAATATACC

>M6-PGSC0003DMG400026810M6G-LecRK\_2196

TTGTGAATCTGGTTCATCCATGATCCTTCATGAGCATATGTATTTGTACGGAATATACCCACCAACAACA  
CAGTTGTGCAAACCAATTTGCAGCAGTGTAGAAGTCTGTGTCAGAAAGA

>M6-PGSC0003DMG400026810M6G-LecRK\_2257

CCAAACAACACAGTTGTGCAAACCAATTTGCAGCAGTGTAGAAGTCTGTGTCAGAAAGATCCATCCTGC  
CATGCTGCATCCTTTATCAACAATGGCACTCCACAATGCCACACGATGAAC

>M6-PGSC0003DMG400026810M6G-LecRK\_2318

CATCCTGCCATGCTGCATCCTTTATCAACAATGGCACTCCACAATGCCACACGATGAACTCCCGGTATGTT  
GGTGGTCAATCAGATCCTTCTTTGGGTTCCGTTACTTTTGTCAAACTT

>M6-PGSC0003DMG400026810M6G-LecRK\_2379

CCGGTATGTTGGTGGTCAATCAGATCCTTCTTTGGGTTCCGTTACTTTTGTCAAACTTGTTCAGACCCAA  
TTGCTGTTTTACCTCCGCCTGTACCTGCTCCGAGAAAGGTATCACAGAA

>M6-PGSC0003DMG400026810M6G-LecRK\_244

AAGCTTTTCACTTTTGGGGTTCTCATTTTCTCAAATCTTGAAATACCCATTTAAGGATTTCAACTTTTGG  
AGTTATGTTAGACCGAGTACTTTTGTCTACATTGTCCTTAAAATTGG

>M6-PGSC0003DMG400026810M6G-LecRK\_2440

TCAGACCCAATTGCTGTTTTACCTCCGCCTGTACCTGCTCCGAGAAAGGTATCACAGAAAATCTGTGTTG  
CTTGCTGTTAGAAGTTGCTGCTGCGTCAATCGTTGTGTTTGTGTCATGCTT

>M6-PGSC0003DMG400026810M6G-LecRK\_2501

TCTGTGTTGCTTGTCTGTTAGAAGTTGCTGCTGCGTCAATCGTTGTGTTTGTGTCATGCTTCAATTCAGCATT  
GGAGTTTACCTTTTTCAGGAGAAGGAAACATATGATGCAGAAATCTGCTT

>M6-PGSC0003DMG400026810M6G-LecRK\_2562

ATTCAGCATTGGAGTTTACCTTTTCAGGAGAAGGAAACATATGATGCAGAAATCTGCTTTACCCCATATA  
GTGCCTAATGCTACTGGCTGCATCGTGTTTTCTTACTCTGAAATCAAAGA

>M6-PGSC0003DMG400026810M6G-LecRK\_2623

CCCCATATAGTGCCTAATGCTACTGGCTGCATCGTGTTTTCTTACTCTGAAATCAAAGATCTGACTGATAA  
TTTTAAGCAACAAATTGGGCAGAATGTGTTCAAAGGTCTACTTCCATAT

>M6-PGSC0003DMG400026810M6G-LecRK\_2684

TGACTGATAATTTTAAGCAACAAATTGGGCAGAATGTGTTCAAAGGTCTACTTCCATATAATAGGCTTGT  
TGCAGTTAAAGATCTCAATGCCTCTATTGATGAAAGGAGGTTCCGGGCTG

>M6-PGSC0003DMG400026810M6G-LecRK\_2745

TAGGCTTGTTGCAGTTAAAGATCTCAATGCCTCTATTGATGAAAGGAGGTTCCGGGCTGCAGTTCTAAAA  
ATAGGAAGCATATACCACAAAATCTTTTGAGGCTGGATGGTTATTGCTG

>M6-PGSC0003DMG400026810M6G-LecRK\_2806

GTTCTAAAAATAGGAAGCATATACCACAAAATCTTTTGAGGCTGGATGGTTATTGCTGTGAGTCCGGC  
CGTAGGTTATTGGTTTATGAGCTTGCCAAATATGGTTCTGTTGACAAATGT

>M6-PGSC0003DMG400026810M6G-LecRK\_2867

AGTCCGGCCGTAGGTTATTGGTTTATGAGCTTGCCAAATATGGTTCTGTTGACAAATGTTTAGAAGAACC  
TAGAATGTGCAAGAGATTGACGTGGAGAAAAAGAATGGATATATGTTTGT

>M6-PGSC0003DMG400026810M6G-LecRK\_2928

AGAAGAACCTAGAATGTGCAAGAGATTGACGTGGAGAAAAAGAATGGATATATGTTTGTGAGTGGCAA  
GGCCATATCTTACTTGCATACAGGATGTAGGGAGTTTATTAGTCATGGAAA

>M6-PGSC0003DMG400026810M6G-LecRK\_2989

GTGGCAAGGGCCATATCTTACTTGCATACAGGATGTAGGGAGTTTATTAGTCATGGAAATCTTAAATGT  
GAAAATGTTGTCTTAGATGATGAATTAGAGGCCAAAGTTAGTGAATTTGGG

>M6-PGSC0003DMG400026810M6G-LecRK\_305

TCAACTTTTGGAGTTATGTTAGACCGAGTACTTTTGTCTACATTGTCCTTAAAATTGGGATGTAATTGTA  
AAGATTCATTCTTTCTTGCATGTTCACTTAGATTTGTTCTCTTATCTTT

>M6-PGSC0003DMG400026810M6G-LecRK\_3050

TTAAATGTGAAAATGTTGTCTTAGATGATGAATTAGAGGCCAAAGTTAGTGAATTTGGGCTGAGGACTA



TTCAAGCTGAGGCTTCCAGTAGCGGGGGGCTAGCAGAGACAGATGTAAGAG

>M6-PGSC0003DMG400026810M6G-LecRK\_3111

GAGGACTATTCAAGCTGAGGCTTCCAGTAGCGGGGGGCTAGCAGAGACAGATGTAAGAGATTTTGGCA  
AAGTGATGGTGGTATTAATCACTGGATGCCAAAATGCGGATGAAGCTTGTTA

>M6-PGSC0003DMG400026810M6G-LecRK\_3172

TTTGGCAAAGTGATGGTGGTATTAATCACTGGATGCCAAAATGCGGATGAAGCTTGTTATTGGTCCTAT  
GAAAAATGGGTGAAAGCTGATAAGGAAATGGCCATGGATCAGCGAATTGTG

>M6-PGSC0003DMG400026810M6G-LecRK\_3233

GGTCCTATGAAAAATGGGTGAAAGCTGATAAGGAAATGGCCATGGATCAGCGAATTGTGGTTGGCGCC  
GATTCAGAAGAGTTAGAACGAGCATTAGAATTGCATTTTGGTGCTTACAAG

>M6-PGSC0003DMG400026810M6G-LecRK\_3294

TGGCGCCGATTCAGAAGAGTTAGAACGAGCATTAGAATTGCATTTTGGTGCTTACAAGGTGATGAACG  
CATGAGGCCATCAATGGGAGAGGTAATCAAGGTAAGGACTGGAGGGCACTCTGAC

>M6-PGSC0003DMG400026810M6G-LecRK\_3355

GATGAACGCATGAGGCCATCAATGGGAGAGGTAATCAAGGTAAGGACTGGAGGGCACTCTGACTGTGCGATCC  
TCCACCACCTCCTTTTGCTCATAATCAACAATGGCCACCTGATGACGAATCA

>M6-PGSC0003DMG400026810M6G-LecRK\_3416

TCGATCCTCCACCACCTCCTTTTGCTCATAATCAACAATGGCCACCTGATGACGAATCACCATCTGAATCA  
TATTAAGTTCTAATTCGTATATTTTCATTCCCATTAAGTCATCTGTTTC

>M6-PGSC0003DMG400026810M6G-LecRK\_3477

ATCTGAATCATATTAAGTTCTAATTCGTATATTTTCATTCCCATTAAGTCATCTGTTTCTGTACAGAACTTA  
CCAGGCACCTTCGACTTGGCATGATGTAGAATGCCTAGTTTTTCCAGT

>M6-PGSC0003DMG400026810M6G-LecRK\_3538

TACAGAACTTACCAGGCACCTTCGACTTGGCATGATGTAGAATGCCTAGTTTTTCCAGTATGGCATGCTT  
AATCTGAAATTCAAGACGAGCATCCCACTCTGCCTCTTCTGAAACTGTAA

>M6-PGSC0003DMG400026810M6G-LecRK\_3599

GGCATGCTTAATCTGAAATTCAAGACGAGCATCCCACTCTGCCTCTTCTGAAACTGTAACCTTGGTATGT  
AACCTCCAAGTACAGTTTTGTGTTAGAAAATCCTGATTCAGAAATCCAG

>M6-PGSC0003DMG400026810M6G-LecRK\_366

TGTAATTGTAAAGATTCATTCTTTCTTGCATGTTCACTTAGATTTGTTCTTATCTTTCCTTAAAAATAATT  
TTTTCTTACCTAAATTGCTCTTTTTTGCTTAGAAAAATTGAGATA

>M6-PGSC0003DMG400026810M6G-LecRK\_3660

TTGGTATGTAACCCTCCAAGTACAGTTTTGTGTTAGAAAATCCTGATTCAGAAATCCAGGTTTCTTTTAA  
AGTTTTGATTCTGTTTCATGTTAATTATCGCTTCTTATCACATGTGTTT

>M6-PGSC0003DMG400026810M6G-LecRK\_3721

TTCTTTTTAAAGTTTTGATTCTGTTTCATGTTAATTATCGCTTCTTATCACATGTGTTTACATTTGATATTTT  
CTTGGAGGTGACTAAACTTCCTTAACTCTGCCAAAATGTCTCCTTG

>M6-PGSC0003DMG400026810M6G-LecRK\_3782

ATTTGATATTTTCTTGGAGGTGACTAAACTTCCTTAACTCTGCCAAAATGTCTCCTTGGCTTGTGCTATC  
AGTTGGCACTGGCTTTTTTACTAGGCAGTGGTCCAAGAGATCGCGGATG

>M6-PGSC0003DMG400026810M6G-LecRK\_3843

TTGTGCTATCAGTTGGCACTGGCTTTTTTACTAGGCAGTGGTCCAAGAGATCGCGGATGGGGTTTGAAC  
CTGGACATCTCTATTCTTAGGATTACTCTGACCATTAAGTCGATCCTAACT

>M6-PGSC0003DMG400026810M6G-LecRK\_3904

GTTTGAACCTGGACATCTCTATTCTTAGGATTACTCTGACCATTAAGTCGATCCTAACTTAAAATGGAAAT  
GGAAGTTTGTGTCTTTTTCTTAAACAGAGGTGGTGTCCATGCTATTTG

>M6-PGSC0003DMG400026810M6G-LecRK\_4148

ACTTGTGTTTTATATATGTTCTGTTTTGATTTTGGCTTGTCTGCACCTTTGTAGCCTGGTAAATAGGGTCATT  
TTCGGTGAACATCCATGATCAGTATTTTCAAGCAATGAACACAATTTTTCAT

>M6-PGSC0003DMG400026810M6G-LecRK\_427

TTAAAAATAATTTTTCTTACCTAAATTGCTCTTTTTTGCTTAGAAAAATTGAGATATATATGTGTGTAT  
GTGTGGACTCACGGTTTCTTTGCAACGCGTATTTTGTCAAAGGCATGT

>M6-PGSC0003DMG400026810M6G-LecRK\_488

TATGTGTGTATGTGTGGACTCACGGTTTCTTTGCAACGCGTATTTTGTCAAAGGCATGTTTGTTCGAAGT  
CTATGCGTCTATATTGACTTTTAAATAGTTAATTTTTGGGGTATTAAAC

>M6-PGSC0003DMG400026810M6G-LecRK\_549

GTTTCCAAGTCTATGCGTCTATATTGACTTTTAAATAGTTAATTTTTGGGGTATTAACTACTCCCTGATTA  
GGTTTTCAACTTTGGATGCTTGCAAAACATATTTTAGTGTCACCTTAA

>M6-PGSC0003DMG400026810M6G-LecRK\_61

GAAAAATTTTGCTTTGTTGATTTTCCGGCATTCCCTTCTCTTGCTTTCCAGGGAAAGATAAAGAGTTGAAA  
ATTTACAATGTGAGTCATATCTCTTGTTAATTTAAGCTCACCACTCAA

>M6-PGSC0003DMG400026810M6G-LecRK\_610

CTCCCTGATTAGGTTTTCAACTTTGGATGCTTGCAAACATATTTTAGTGTCACCTTAAAGTATAGAAAAG  
TGGTTGAATATGCATAAGGACCTAAATAGGGTCCCATTTGTAGTTTTGA

>M6-PGSC0003DMG400026810M6G-LecRK\_671

TATAGAAAAGTGGTTGAATATGCATAAGGACCTAAATAGGGTCCCATTTGTAGTTTTGAACCAGGATTTT  
AAACAAAAGCTGTTTTCTTTAGCCATTTTCTTTAGCCACTTTTAATTAAT

>M6-PGSC0003DMG400026810M6G-LecRK\_732

CAGGATTTCAAACAAAAGCTGTTTTCTTTAGCCATTTTCTTTAGCCACTTTTAATTAATTTTCTTTGTGTACT  
GTTTATTTTATGGTCCATCTGTAGGTCATATTTTTTTTAGTTCAATC

>M6-PGSC0003DMG400026810M6G-LecRK\_793

TCTTTGTGTACTGTTTATTTTATGGTCCATCTGTAGGTCATATTTTTTTTAGTTCAATCATAAGGTGTGGAT  
CTTTGTTTTCTCACATGGCAAGTTTCTTATAGGGAAGCATTGTCTGT

>M6-PGSC0003DMG400026810M6G-LecRK\_854

AAGGTGTGGATCTTTTGTTTTCTCACATGGCAAGTTTCTTATAGGGAAGCATTGTCTTTCAAGAAAGT  
GTCTGCAGGCAATATTCTCCAATTGATGTGGTTTGGATGTCTTTTCTGA

>M6-PGSC0003DMG400026810M6G-LecRK\_915

CAAGAAAGTGTCTGCAGGCAATATTCTTCCAATTGATGTGGTTTGGATGTCTTTTCTGAGGTTCAATGCT  
TCCCTTCTCTTTCAATCAATTTCCACCTTTTGTGATCTTGGTGTAAC

>M6-PGSC0003DMG400026810M6G-LecRK\_976

TTCAATGCTTCCCTTCTCTTTCAATCAATTTCCACCTTTTGTGATCTTGGTGTAACCTGAATCAATTGG  
TAGTTTAAGAGTTTTACCTTATAGTTGATTGTGATATTTCAATTCCT

>M6-PGSC0003DMG400026840M6LRR-RLP\_132

TCCCAATTTAAAGAGATTGATCATTCTGCACATTTTAGCATACTAAACAATATTCTGTATCGTCCCTTCG  
ATATGTCCAGCTTGACAAAACCTTGAGACATTCAAGTTTTACTGGAAAG

>M6-PGSC0003DMG400026840M6LRR-RLP\_660

AACAAGAGGTCATGGGAAATAATATCCTTAAGGTCTACATCCATAACAGCGACAGTATCCATAACAGCG

ACAGTAAGTTTAATTCTCTCTGAAAAGTTCTTCGATTCTTCACATTATTTA

>M6-PGSC0003DMG400026840M6LRR-RLP\_858

TTGAAGCTTATTTTGAGGGATCATCTAATGCTATCTTCCGAATTCAGAACCTTGACTTCATATTTTTGTTT

TTATATTCTGATGGTTTTTTAATTTTCATGTTTTAGGAATAAGCATGTT

>M6-PGSC0003DMG400026840M6LRR-RLP\_920

ATTTTTGTTTTATATTCTGATGGTTTTTTAATTTTCATGTTTTAGGAATAAGCATGTTAATACATGTATCG

GCCAATTGTGTTTTTTATTTATTTTTTAAACGGTAACTGTTGATGTA

>M6-PGSC0003DMG400027071-(rev)M6LRR-RLK\_0

CAACCATTTTTGATTCATATAACCACCAATACACACTTATAAAAAAATCCATTAACCACCACAGCCTGGTT

ACCTCATTCACTTCTTCCCTCCCTCCCTCCGTCGGCCTACCGGAA

>M6-PGSC0003DMG400027071-(rev)M6LRR-RLK\_1008

TCAAGCTTGTAATGTTCTTCGTAAGAAGGGGAAAGAACGATAATTCAAGTTTAACGATATTTAGTCCGTT

GATCAAGAAAGCGGAGGACTTGGCTTTCTTAGAGATGGAAGATGGAGTAG

>M6-PGSC0003DMG400027071-(rev)M6LRR-RLK\_1071

GTCCGTTGATCAAGAAAGCGGAGGACTTGGCTTTCTTAGAGATGGAAGATGGAGTAGCATCACTTGAA

ATGATTGAAAAGGTGGATGTGGAGAAGTTTATAGAGCCGAGTTACCAGGGA

>M6-PGSC0003DMG400027071-(rev)M6LRR-RLK\_1134

TTGAAATGATTGAAAAGGTGGATGTGGAGAAGTTTATAGAGCCGAGTTACCAGGGAGTAATGGGAA

GATTATAGCTATAAAGAAGATTATAACAATCCCAATGGATGCTGCAGAGATCA

>M6-PGSC0003DMG400027071-(rev)M6LRR-RLK\_1197

GGAAGATTATAGCTATAAAGAAGATTATAACAATCCCAATGGATGCTGCAGAGATCACGGAGGAAGAT

ACTAAGGCGTTGAACAAGAAAATGCGTCAAGTTAAATCAGAAATTCAAATTG

>M6-PGSC0003DMG400027071-(rev)M6LRR-RLK\_126

GAATCTCAATGGCTTCAAATTTCCACTTTTTCTCTTATACCTTGTGACCCTTTTCTTTTTGCTCAAGCAAG

ACTGAATCTTATCCACCAGATCATGCTGCACTTTTGCTTGTACAAA

>M6-PGSC0003DMG400027071-(rev)M6LRR-RLK\_1260

AAGATACTAAGGCGTTGAACAAGAAAATGCGTCAAGTTAAATCAGAAATTCAAATTGTAGGTCAAATCA

GACACCGGAATCTGCTTCCATTACTGGCGCATATGCCAAGGCCAGACTGTC

>M6-PGSC0003DMG400027071-(rev)M6LRR-RLK\_1323

AAATCAGACACCGGAATCTGCTTCCATTACTGGCGCATATGCCAAGGCCAGACTGTCATTACTTGGTGTA  
TGAATATATGAAAAATGGGAGTTTACAGGATATCCTGCAGCAAGTCACAG

>M6-PGSC0003DMG400027071-(rev)M6LRR-RLK\_1386

TGGTGTATGAATATATGAAAAATGGGAGTTTACAGGATATCCTGCAGCAAGTCACAGAAGGCACAAGA  
GAATTAGATTGGTTGGGACGACACAGAATTGCAGCGGGGATAGCTGCTGGTC

>M6-PGSC0003DMG400027071-(rev)M6LRR-RLK\_1449

CAAGAGAATTAGATTGGTTGGGACGACACAGAATTGCAGCGGGGATAGCTGCTGGTCTTGAGTATCTCC  
ATATAAACCATACTCAACGCATAATTCACAGAGATCTAAAGCCAGCAAATA

>M6-PGSC0003DMG400027071-(rev)M6LRR-RLK\_1512

ATCTCCATATAAACCATACTCAACGCATAATTCACAGAGATCTAAAGCCAGCAAATATCCTACTTGATGAT  
GACATGGAAGCTCGAATAGCTGATTTTGGGCTTGCAAAGGCAGTTCCAG

>M6-PGSC0003DMG400027071-(rev)M6LRR-RLK\_1575

TTGATGATGACATGGAAGCTCGAATAGCTGATTTTGGGCTTGCAAAGGCAGTTCCAGATGCTCATACAC  
ATATTACGACTTCAAATGTTGCAGGAACTGTGGGATATATTGCACCAGAAT

>M6-PGSC0003DMG400027071-(rev)M6LRR-RLK\_1638

ATACACATATTACGACTTCAAATGTTGCAGGAACTGTGGGATATATTGCACCAGAATATCATCAGACACT  
GAAGTTTACAGACAAGTGTGATATATACAGCTTCGGTGTGTGCTAGCTG

>M6-PGSC0003DMG400027071-(rev)M6LRR-RLK\_1701

AGACACTGAAGTTTACAGACAAGTGTGATATATACAGCTTCGGTGTGTGCTAGCTGTGTTGGTTATCGG  
AAAGGCTCCATCTGATGAATTTTTCCAACATACTTCTGAGATGAGTTTAG

>M6-PGSC0003DMG400027071-(rev)M6LRR-RLK\_1764

TTATCGGAAAGGCTCCATCTGATGAATTTTTCCAACATACTTCTGAGATGAGTTTAGTTAAGTGGCTGAG  
AAATGTAATGACTTCTGATGATCCTAAAATAGCAATTGATCCTAAGCTGA

>M6-PGSC0003DMG400027071-(rev)M6LRR-RLK\_1827

GGCTGAGAAATGTAATGACTTCTGATGATCCTAAAATAGCAATTGATCCTAAGCTGATAGGAAATGGAT  
ATGAGGAGCAAATGCTTTTGGTTCTCAAGATAGCTTGCTTTTGTACTCTCG

>M6-PGSC0003DMG400027071-(rev)M6LRR-RLK\_189

CTCAAGCAAGACTGAATCTTTATCCACCAGATCATGCTGCACTTTTGCTTGTACAAAAGGACTTAGGCAT  
CATTTCTCTTAACAACCCCTGTACGCTCGCAGGAATATCCTGCGAGCGTA

>M6-PGSC0003DMG400027071-(rev)M6LRR-RLK\_1890

ATGGATATGAGGAGCAAATGCTTTTGGTTCTCAAGATAGCTTGCTTTTGTACTCTCGACAATCCAAAGGA  
GAGGCCTAACAGTAAGGATGTTAGGTGCATGTTAACTCAGATCAAACATT

>M6-PGSC0003DMG400027071-(rev)M6LRR-RLK\_1953

CAAAGGAGAGGCCTAACAGTAAGGATGTTAGGTGCATGTTAACTCAGATCAAACATTAGCTAAGTCATA  
CGGGGTATACGTTGGTTATGTAACATAAGAATGTGTTCTGTATTTTCAGTTTT

>M6-PGSC0003DMG400027071-(rev)M6LRR-RLK\_2016

GTCATACGGGGTATACGTTGGTTATGTAACATAAGAATGTGTTCTGTATTTTCAGTTTTTCAAGTTGATTTTT  
TGTTGTAATTGTGTTATACATGTCAAATCTTATATGTTTACTGCAGTGT

>M6-PGSC0003DMG400027071-(rev)M6LRR-RLK\_2064

TTCAGTTTTTCAAGTTGATTTTTTGTGTAATTGTGTTATACATGTCAAATCTTATATGTTTACTGCAGTGT  
TAATAATTATGTTCTTTCCACTTTGCTACTTAATTTACTAAAACCTCTA

>M6-PGSC0003DMG400027071-(rev)M6LRR-RLK\_252

TAGGCATCATTTCTCTTAACAACCCCTGTACGCTCGCAGGAATATCCTGCGAGCGTAGACCGGGTAACAG  
AACACAAGTTCTGAGAGTTACCCGATTGTATTCAGATCCAATGGATTGA

>M6-PGSC0003DMG400027071-(rev)M6LRR-RLK\_315

GTAACAGAACACAAGTTCTGAGAGTTACCCGATTGTATTCAGATCCAATGGATTGAAGGGAACTTTGTC  
TTCTGCTATTGGCAAACCTCTGAGCTCAAAGAGCTTTCTCTTTCCGACA

>M6-PGSC0003DMG400027071-(rev)M6LRR-RLK\_378

CTTTGTCTTCTGCTATTGGCAAACCTCTGAGCTCAAAGAGCTTTCTCTTTCCGACAATCAACTATCTGAAC  
AAATCCCGATTTCAGATTCTTGATTGTCGGAAATTAGAGATTCTTGAAC

>M6-PGSC0003DMG400027071-(rev)M6LRR-RLK\_441

TATCTGAACAAATCCCGATTTCAGATTCTTGATTGTCGGAAATTAGAGATTCTTGAACCTCAAAGAAACAG  
ATTTTCTGGGAAGATTCCATATGAATTGTCATCTTTAACCCGTTTAAGGC

>M6-PGSC0003DMG400027071-(rev)M6LRR-RLK\_504

GAAACAGATTTTCTGGGAAGATTCCATATGAATTGTCATCTTTAACCCGTTTAAGGCTAGTTGACTTTTCA  
TCGAATGAGTTTTCTGGGAATCTTGATTCTTGAAGTACTTTCTAATT

>M6-PGSC0003DMG400027071-(rev)M6LRR-RLK\_567

ACTTTTCATCGAATGAGTTTTCTGGGAATCTTGATTCTTGAAGTACTTTCTAATTTGGAAAACTGTCT

CTGGCTGATAATATGTTCACTGGAAAAATACCCTTTTCATTGAAATCTT

>M6-PGSC0003DMG400027071-(rev)M6LRR-RLK\_63

GCCTGGTTACCTCATTCACTTCTTTCCTCCCTCCTCCCTCCGTCCGGCCTACCGGAAAAACAAGAATCTCA  
ATGGCTTCAAATTTCCACTTTTTTCTTATACCTTGTGACCCTTTTCC

>M6-PGSC0003DMG400027071-(rev)M6LRR-RLK\_630

AACTGTCTCTGGCTGATAATATGTTCACTGGAAAAATACCCTTTTCATTGAAATCTTTCAGGAATCTTCGT  
TTTCTCAACATTTTCAGGGAATAGTTTCCTTGAAGGTCCAGTACCTGTCA

>M6-PGSC0003DMG400027071-(rev)M6LRR-RLK\_693

ATCTTCGTTTTCTCAACATTTTCAGGGAATAGTTTCCTTGAAGGTCCAGTACCTGTCATGAGTCAAATTGAG  
CATTTATCAGCAGATTTGAATCGAAACAATGCCGTTCCCAAACGTTACA

>M6-PGSC0003DMG400027071-(rev)M6LRR-RLK\_756

AAATTGAGCATTATCAGCAGATTTGAATCGAAACAATGCCGTTCCCAAACGTTACATTCTTGCTGAGAA  
TTCAACAAGGTCAAATCAGATATCTGCAATGGTGCCTGCTCCAGCTCCAG

>M6-PGSC0003DMG400027071-(rev)M6LRR-RLK\_819

CTGAGAATTCAACAAGGTCAAATCAGATATCTGCAATGGTGCCTGCTCCAGCTCCAGCACCGGTCAATC  
GTGTTGTACCTGTGGTGCATAAACGTAACAAGAAGAAAAAGAAGTTAAGAT

>M6-PGSC0003DMG400027071-(rev)M6LRR-RLK\_882

TCAATCGTGTGTACCTGTGGTGCATAAACGTAACAAGAAGAAAAAGAAGTTAAGATCTTGTTTTCTTG  
GTTTCCTAGCTGGAACTTTTGCTGGGGGTATATCTGCTGTGATCTTTTCGT

>M6-PGSC0003DMG400027071-(rev)M6LRR-RLK\_945

TTCTTGTTTTCTAGCTGGAACTTTTGCTGGGGGTATATCTGCTGTGATCTTTTCGTTGCTATTCAAGCTT  
GTAATGTTCTTCGTAAGAAGGGGAAAGAACGATAATTCAAGTTTAACGA

>M6-PGSC0003DMG400027115M6LRR-RLK\_0

TTCTTGTTGTGTGTGTAATAAAAAAAAAAAAAACTCTCCCTATCCCATTTCTATACTTATCAAAGCCAAATAA  
AAAACAAGAATGTCAACTGAAAAATCCCATTTTTTCTAACAATAATGA

>M6-PGSC0003DMG400027115M6LRR-RLK\_1054

GAATCTTGATTTTTCTTATAATGAGATTAATGGTAGTTTGCCAGAGAGTATAACCAATCTGTCCTCCCTCA  
TGGTTCTCAACTTGAAAGTAACAATCTTGATGGTGAATCCCATTGGA

>M6-PGSC0003DMG400027115M6LRR-RLK\_1116

CCTCCCTCATGGTTCTCAACTTGGAAAGTAACAATCTTGATGGTGAAATCCCGTTGGATGTAAAGAAGTT  
GCAAAAGTTGTTGTTTCTTAAGTTGAGGAATAACCGGTTTAGAGGTGATA

>M6-PGSC0003DMG400027115M6LRR-RLK\_1178

AAGAAGTTGCAAAAGTTGTTGTTTCTTAAGTTGAGGAATAACCGGTTTAGAGGTGATATTCCAGCTGCTA  
TCGGGGACATTTCTGGTCTAGTCGAGATAGATTTGTCTCGTAACAATCTA

>M6-PGSC0003DMG400027115M6LRR-RLK\_124

TCAAGACCAAGTTCAAGATTTTAGCTGTTTTACCAGTACCCATTTGGGGTTTTTCATGTTTTTAATCCAAG  
AAAGAGATGTGGGGTGTGTTAAAAAGAAGGAAAAATGGATACCATTTAT

>M6-PGSC0003DMG400027115M6LRR-RLK\_1240

AGCTGCTATCGGGGACATTTCTGGTCTAGTCGAGATAGATTTGTCTCGTAACAATCTAACCGGAGAAATC  
CCAGAGTCTGTTAGTGAGTTACCTAATCTTAGTTCCTTTAATGTTTCATA

>M6-PGSC0003DMG400027115M6LRR-RLK\_1302

GAGAAATCCAGAGTCTGTTAGTGAGTTACCTAATCTTAGTTCCTTTAATGTTTCATATAACTCTCTGTCT  
GGTCTGTTCTACTTATCTTGCTAAGAAATTCAATTCAAGTGTTTTTG

>M6-PGSC0003DMG400027115M6LRR-RLK\_1364

TCTCTGTCTGGTCCTGTTCTACTTATCTTGCTAAGAAATTCAATTCAAGTGTTTTTGTTGGGTAATGTTTCAG  
CTATGTGGCTATAATACTTTGAATCCATGTCCTGTTACGCCTTCTCCA

>M6-PGSC0003DMG400027115M6LRR-RLK\_1426

TAATGTTTCAGCTATGTGGCTATAATACTTTGAATCCATGTCCTGTTACGCCTTCTCCAGTTACACGAGGTA  
GTAAACGAAGTATTAAGACATTATTCTCATAGTAGTAGGGTGTCTTAT

>M6-PGSC0003DMG400027115M6LRR-RLK\_1488

CACGAGGTAGTAAACGAAGTATTAAGACATTATTCTCATAGTAGTAGGGTGTCTTATAATAGTCTTGTT  
TCTACTCTGTTGCATTCTCCTCTGCTGTTTGATCAAGAAAAGAGGTGAAG

>M6-PGSC0003DMG400027115M6LRR-RLK\_1550

GTCTTGTTTCTACTCTGTTGCATTCTCCTCTGCTGTTTGATCAAGAAAAGAGGTGAAGCCAAAAAGCAA  
AAGACGTAAAGGATGTTCCCTCCAAGTCCCGGAGAAGTTGAGGCGGCTGGG

>M6-PGSC0003DMG400027115M6LRR-RLK\_1612

AAAAGCAAAAGACGTAAAGGATGTTCCCTCCAAGTCCCGGAGAAGTTGAGGCGGCTGGGGATAACGGA  
GGAAAAGTTGTCCATTTTGGTGGAGGTATGATGTTTCAGTGCAGATGATCTTCT



>M6-PGSC0003DMG400027115M6LRR-RLK\_1674

ACGGAGGAAAACCTTGCCATTTTGGTGGAGGTATGATGTTTCAGTGCAGATGATCTTCTATGTGCTACTGC  
AGATATATTGGGAAAGAGTACTTACGGTACAGTGTATAGGGCTACATTAG

>M6-PGSC0003DMG400027115M6LRR-RLK\_1736

GCTACTGCAGATATATTGGGAAAGAGTACTTACGGTACAGTGTATAGGGCTACATTAGAAGATGGAAGT  
CAAGTTGCAGTGAAAAGAATGAGAGAAAAGATCACGAAAGTTCAGAGGGAA

>M6-PGSC0003DMG400027115M6LRR-RLK\_1798

TGGAAGTCAAGTTGCAGTGAAAAGAATGAGAGAAAAGATCACGAAAGTTCAGAGGGAATTCGAGAAA  
GAAGTCAACTTTCTTGAAAGATAAGGCATCCGAATCTTCTGGCTATTAGGTC

>M6-PGSC0003DMG400027115M6LRR-RLK\_186

TAATCCAAGAAAGAGATGTGGGGTGTGTTAAAAAGAAGGAAAAATGGATACCATTTATCCAAATTTTGT  
TGTTTTTGCAGCTGATGATTTGTGGAGCTCAGTTAGCTTTAGGTCAAGTTT

>M6-PGSC0003DMG400027115M6LRR-RLK\_1860

AGAAAGAAGTCAACTTTCTTGAAAGATAAGGCATCCGAATCTTCTGGCTATTAGGTCTTATTACTTAGG  
TACGAAAGGCGAGAAGCTTCTTATTTTCGACTACATGCCTAAAGGAAGTC

>M6-PGSC0003DMG400027115M6LRR-RLK\_1922

TACTTAGGTACGAAAGGCGAGAAGCTTCTTATTTTCGACTACATGCCTAAAGGAAGTCTCTCAAATTTTC  
TTCATGGTAAGCAGAAAACAGATTTCCATTTGACATTCTTTTGCTTCTGT

>M6-PGSC0003DMG400027115M6LRR-RLK\_1984

AAATTTTCTTCATGGTAAGCAGAAAACAGATTTCCATTTGACATTCTTTTGCTTCTGTTTTTTTGAGAATCA  
GATACTTTCTGTCTCATTTTAACGTAATGAAAATTGGATTATGTAT

>M6-PGSC0003DMG400027115M6LRR-RLK\_2170

AGACCCCACTTGTGAGATCGCATGGGGAGGAAATTGTTATGGAGGGGGTAATATAGCTTTATTGTTTTT  
GTTGCAGCTCGTGGACCGGATACACCAATTGATTGGCCAACAAGGATGAGA

>M6-PGSC0003DMG400027115M6LRR-RLK\_2232

TGTTTTTGTGAGCTCGTGGACCGGATACACCAATTGATTGGCCAACAAGGATGAGAATAGCAAAGG  
GACTACGAGGGGATTGCTGTACCTTCACACTAATGCCAACATCATTATG

>M6-PGSC0003DMG400027115M6LRR-RLK\_2294

CAAAGGGACTACGAGGGGATTGCTGTACCTTCACACTAATGCCAACATCATTATGGAATCTTACATC

AAGCAATGTTCTACTTGATGAAAACACAGATGCAATAATTGCAGATTATG

>M6-PGSC0003DMG400027115M6LRR-RLK\_2356

CTTACATCAAGCAATGTTCTACTTGATGAAAACACAGATGCAATAATTGCAGATTATGGCCTTTCACGCC

TTGTAAGTCTGCTGCTGCAAATTCAAATGTTATAGCCACAGCAGGGGCACTT

>M6-PGSC0003DMG400027115M6LRR-RLK\_2418

TTCACGCCTTGTAAGTCTGCTGCTGCAAATTCAAATGTTATAGCCACAGCAGGGGCACTTGGTTATCGCGCA

CCTGAGCTTAATAAGCTCAAGAAAGCCAATGTGAAGACGGATGTCTACAG

>M6-PGSC0003DMG400027115M6LRR-RLK\_248

ATTTTGTGTTTTTGCAGCTGATGATTTGTGGAGCTCAGTTAGCTTTAGGTCAAGTTTGGGATGGTGTA

TTATCATTGAGGCAAATTATCAAGCACTTGAAGCGCTCAAACATGAGTTA

>M6-PGSC0003DMG400027115M6LRR-RLK\_2480

ATCGCGCACCTGAGCTTAATAAGCTCAAGAAAGCCAATGTGAAGACGGATGTCTACAGCCTCGGAGTCA

TTATACTTGAAGTCTAACTGGCAAGTCTCCAGGTGAGGCAGTTAATGGTG

>M6-PGSC0003DMG400027115M6LRR-RLK\_2542

GGAGTCATTATACTTGAAGTCTAACTGGCAAGTCTCCAGGTGAGGCAGTTAATGGTGTAGATTTGCCTA

GAAAGGTGGCGTCAATTGTGAAAGAGGAGGGAACAAAAGAGGTATTTCGAT

>M6-PGSC0003DMG400027115M6LRR-RLK\_2604

TTTGCCTAGAAAGGTGGCGTCAATTGTGAAAGAGGAGGGAACAAAAGAGGTATTTCGATTTGGAACATA

TGAGGGATGCATCCATAATTGGTGATGAATTGTTAGTTACACTAAAATTGGC

>M6-PGSC0003DMG400027115M6LRR-RLK\_2666

AACTAATGAGGGATGCATCCATAATTGGTGATGAATTGTTAGTTACACTAAAATTGGCTTTGCACTGTGT

TGATCCCTCGCCATCAGCTCGACCAGAACTTCAGCAAGTTCTCCGGCAAC

>M6-PGSC0003DMG400027115M6LRR-RLK\_2728

CACTGTGTTGATCCCTCGCCATCAGCTCGACCAGAACTTCAGCAAGTTCTCCGGCAACTGGAAGACATCA

GGCGTGAACGCCAACTGCAGGTCCCTCGACAAGTTACTAGATACTCAGT

>M6-PGSC0003DMG400027115M6LRR-RLK\_2790

AGACATCAGGCGTGAACGCCAACTGCAGGTCCCTCGACAAGTTACTAGATACTCAGTTTTTGATTTTAT

TAACATGATTCTTTCATTCTTGAATTCATTGCTAGAGTACTAGATCTGT

>M6-PGSC0003DMG400027115M6LRR-RLK\_2852

GATTTTATTAACATGATTCTTTCATTCTTGAATTTTCATTGCTAGAGTACTAGATCTGTTTCAAGTGTCTTTA  
AATAAACGTGTGCAACATTGTTAAAAGTGTTGAGCTTAATGGAGTTC

>M6-PGSC0003DMG400027115M6LRR-RLK\_2898

TACTAGATCTGTTTCAAGTGTCTTTAAATAAACGTGTGCAACATTGTTAAAAGTGTTGAGCTTAATGGA  
GTTCTAAATACCATCCCCTTTTGGCCTAAAGAACATAACTTGAGATTGAG

>M6-PGSC0003DMG400027115M6LRR-RLK\_310

TGGTGTAAATTATCATTGAGGCAAATTATCAAGCACTTGAAGCGCTCAAACATGAGTTAGTTGATCCTAGA  
GGGTATTTAAGTAGCTGGAATGATAGTGGTTATGGAGCTTGTTCTGGTAC

>M6-PGSC0003DMG400027115M6LRR-RLK\_372

ATCCTAGAGGGTATTTAAGTAGCTGGAATGATAGTGGTTATGGAGCTTGTTCTGGTACTTGGGTTGGCA  
TAAAATGTGCTCAAGGACAAGTTATTGTTATTCAGCTTCCGTTAAAAGGAT

>M6-PGSC0003DMG400027115M6LRR-RLK\_434

GTTGGCATAAAATGTGCTCAAGGACAAGTTATTGTTATTCAGCTTCCGTTAAAAGGATTTGGGGGAAGA  
ATCACTGAAAGTATTGGTCAATTTCAAGCACTCAGAAAACCTTAGTTTTTCAT

>M6-PGSC0003DMG400027115M6LRR-RLK\_496

GGGAAGAATCACTGAAAGTATTGGTCAATTTCAAGCACTCAGAAAACCTTAGTTTTTCATGATAATGAAATT  
GGTGGTTCAGTACCTTCATCTTTGGGTTTTTTACCCAATCTAAGAGGTGT

>M6-PGSC0003DMG400027115M6LRR-RLK\_558

ATGAAATTGGTGGTTCAGTACCTTCATCTTTGGGTTTTTTACCCAATCTAAGAGGTGTTCAATTGTACAAT  
AACAGGTTTTCTGGTCTATTCTCCTTCACTTGGTTTATGTCCAGTTC

>M6-PGSC0003DMG400027115M6LRR-RLK\_62

GCCAAATAAAAAACAAGAATGTCAACTGAAAAATCCCATTTTTTCTAACAAATAATGAAAAATCAAGACC  
AAGTTCAAGATTTTAGCTGTTTTTACCAGTACCCATTTGGGGTTTTTCATG

>M6-PGSC0003DMG400027115M6LRR-RLK\_620

TTGTACAATAACAGGTTTTCTGGTTCTATTCTCCTTCACTTGGTTTATGTCCAGTTCTTCAAACACTTGAA  
CTTAGTAACAATTCTTTATCTGGTGAATCCCTGATAGTCTTGTGAAT

>M6-PGSC0003DMG400027115M6LRR-RLK\_682

AACACTTGAACCTTAGTAACAATTCTTTATCTGGTGAATCCCTGATAGTCTTGTGAATTCATCTAAGCTTT  
ATAGACTTAATCTTAGTTACAATTTATTGTCTGGTTCATTCTGTTAG

>M6-PGSC0003DMG400027115M6LRR-RLK\_744

CTAAGCTTTATAGACTTAATCTTAGTTACAATTTATTGTCTGGTTCCATTCCCTGTTAGTATAACTCAATCAC  
GCTCTCTAGTCTTTATTGACTTGACATATAACAATTTGTCAGGGTCTA

>M6-PGSC0003DMG400027115M6LRR-RLK\_806

ACTCAATCACGCTCTCTAGTCTTTATTGACTTGACATATAACAATTTGTCAGGGTCTATTCCAGATTCTTG  
GGGTGGAAATGGAGATAGACAGTTTAAATTAGAGTCGTTGACGCTTGAT

>M6-PGSC0003DMG400027115M6LRR-RLK\_868

AGATTCTTGGGGTGGAAATGGAGATAGACAGTTTAAATTAGAGTCGTTGACGCTTGATCATAACTCTTT  
GTCTGGTGGAAATCCTGTTTCTTTGGGAAGTTGAGTGAGCTTCTTGAGAT

>M6-PGSC0003DMG400027115M6LRR-RLK\_930

ACTCTTTGTCTGGTGGAAATCCTGTTTCTTTGGGAAGTTGAGTGAGCTTCTTGAGATTCGTTGAGTCAT  
AATCGTATCGTTGGTGTTCATCCCAAATGATATTGGAAGGCTTAGTATGG

>M6-PGSC0003DMG400027115M6LRR-RLK\_992

TTGAGTCATAATCGTATCGTTGGTGTTCATCCCAAATGATATTGGAAGGCTTAGTATGGTTAGGAATCTTG  
ATTTTTCTTATAATGAGATTAATGGTAGTTTGCCAGAGAGTATAACCAAT

>M6-PGSC0003DMG400027124M6OtherRLKTM\_0

CTTAGCTACTGTTACACATATACAGTACAATCCACAATTGCTTCTTTTTTTCGGTACAAATGAGAGAAAA  
TTTCTGATGACGTTACTCATCTCCGGCGCCGGCGCCGTTATCATCACCG

>M6-PGSC0003DMG400027124M6OtherRLKTM\_1054

ATGTGTTGAGAATGTATGTGATTGTGGTGTATATCCTCAATCGAAAACGTTGTGTTCTGGGAATGGTATT  
ATTTGTAGGCCTTGTGATTTTTCGGTTGGAGTAGCTCCACCACCCTCACC

>M6-PGSC0003DMG400027124M6OtherRLKTM\_1116

ATGGTATTATTTGTAGGCCTTGTGATTTTTCGGTTGGAGTAGCTCCACCACCCTCACCACCGGTGTTTATT  
ATGGTGCCATCGTCGCCTTCTAAGGGGTTGAGAAAGGGATTGTTAGCTT

>M6-PGSC0003DMG400027124M6OtherRLKTM\_1178

GTGTTTATTATGGTGCCATCGTCGCCTTCTAAGGGGTTGAGAAAGGGATTGTTAGCTTTGTGATTGTTG  
GATCAGTTGGGGCTATTGCAGGGATTTGACTGTTGTTTATTGTTTATGG

>M6-PGSC0003DMG400027124M6OtherRLKTM\_124

TATCTCACTGATAATTTCTGTTTTACTACCATTTTCTCATGCCCTCGGTAGTTCCGCCATCACTTTGGCCGT

CGCTTACGGCGCCAACATCACTATCTGCGGCATAGTAGCTTCTCAACC

>M6-PGSC0003DMG400027124M6OtherRLKTM\_1240

GATTGTTGGATCAGTTGGGGCTATTGCAGGGATTTGACTGTTGTTTATTGTTTATGGACTGGTGTGGT  
TTTGGGAAGAAGAAAATTCATAATTCTGTTCAACCTACTATTAGTTCTAA

>M6-PGSC0003DMG400027124M6OtherRLKTM\_1302

GTGTTTGTGGGAAGAAGAAAATTCATAATTCTGTTCAACCTACTATTAGTTCTAATAATGTTGCTCAA  
CAATGTTATAGTAGTGGTCAAGTTTCAAGATCATCTACTCTTAGGGCGCC

>M6-PGSC0003DMG400027124M6OtherRLKTM\_1364

GTTGCTCAACAATGTTATAGTAGTGGTCAAGTTTCAAGATCATCTACTCTTAGGGCGCCAAGGGTTCGAGGT  
TAATGAGGCGTCAGAGGAGTGGAACCTCATCTATACATGGTGATAGGGCA

>M6-PGSC0003DMG400027124M6OtherRLKTM\_1426

GTCGAGGTTAATGAGGCGTCAGAGGAGTGGAACCTCATCTATACATGGTGATAGGGCAGAGGAGTTTC  
AGTTTTCGGATCTTGTTGCAGCTACGGACAATTTCTCTTTAAAGAATAAGAT

>M6-PGSC0003DMG400027124M6OtherRLKTM\_1488

AGTTTCAGTTTTCGGATCTTGTTGCAGCTACGGACAATTTCTCTTTAAAGAATAAGATTGGTGCTGGCAG  
CTTTGGGGTTGTTTACAAGGGAAAATTAGCTGATGGCCGTGAGGTTGCAA

>M6-PGSC0003DMG400027124M6OtherRLKTM\_1550

GCTGGCAGCTTTGGGGTTGTTTACAAGGGAAAATTAGCTGATGGCCGTGAGGTTGCAATTAAGCGTGGT  
GAAATGAGTCTGAAGATGAAGAAGTTCTTGAGAAAGAGAGGGCTTTTGAA

>M6-PGSC0003DMG400027124M6OtherRLKTM\_1612

GCGTGGTGAAATGAGTCTGAAGATGAAGAAGTTCTTGAGAAAGAGAGGGCTTTTGAATCAGAGTTGA  
CGTTCTTGTCCTGACTACACCACAAACACTTGTTAGATTGGTTGGTTATTG

>M6-PGSC0003DMG400027124M6OtherRLKTM\_1674

AGTTGACGTTCTTGTCCTGACTACACCACAAACACTTGTTAGATTGGTTGGTTATTGTGAAGAAATGGA  
TGAAAGACTCTTGTTTATGAGTTCATGAAAAATGGGGCGCTTTATGATC

>M6-PGSC0003DMG400027124M6OtherRLKTM\_1736

GAAATGGATGAAAGACTCTTGTTTATGAGTTCATGAAAAATGGGGCGCTTTATGATCATTACACGAT  
AAGAACAACGTGGAGAAGAGTAGTAGTTAATTCTTGAAAAATGAGG

>M6-PGSC0003DMG400027124M6OtherRLKTM\_1798

ACACGATAAGAACAACGTGGAGAAGAGTAGTAGTGTAGTTAATTCTTGAAAATGAGGATCAAGATTG  
CATTAGATGCTGCTCGTGGCATCGAATACCTTCACAATTATGCAGTTCACC

>M6-PGSC0003DMG400027124M6OtherRLKTM\_186

CTTTGGCCGTCGCTTACGGCGCCAACATCACTATCTGCGGCATAGTAGCTTCTCAACCAATCCAAAGAAT  
CCAATGCTGGTCAGAAAATCAGACAGCACCGATCCCCATACCTCCTAACG

>M6-PGSC0003DMG400027124M6OtherRLKTM\_1860

AGATTGCATTAGATGCTGCTCGTGGCATCGAATACCTTCACAATTATGCAGTTCACCTATAATTCACCG  
GGACATCAAGTCATCCAACATCTTGATCGATGCAAATTGGATCGCAAGAG

>M6-PGSC0003DMG400027124M6OtherRLKTM\_1922

ATTCACCGGGACATCAAGTCATCCAACATCTTGATCGATGCAAATTGGATCGCAAGAGTGTGAGATTTTG  
GATTATCCTTAATGTGGCCGGAGACTGATGCCAGTTTCAGTCAGCCAATG

>M6-PGSC0003DMG400027124M6OtherRLKTM\_1984

AGATTTTGGATTATCCTTAATGTGGCCGGAGACTGATGCCAGTTTCAGTCAGCCAATGAGGGCAGCAGG  
CACAGTTGGGTATATTGATCCAGAGTACTATGGCCTAAATGTCTTGACAGC

>M6-PGSC0003DMG400027124M6OtherRLKTM\_2046

CAGCAGGCACAGTTGGGTATATTGATCCAGAGTACTATGGCCTAAATGTCTTGACAGCAAAGAGTGATG  
TCTATGGACTTGGGGTTGTATTGTTAGAACTTTTGACCGGAAAAAGAGCCT

>M6-PGSC0003DMG400027124M6OtherRLKTM\_2108

AGTGATGTCTATGGACTTGGGGTTGTATTGTTAGAACTTTTGACCGGAAAAAGAGCCTTATTCAACTA  
GTGAAAACGGGGACATGCCAATGAGTGTTGTCGACTTTCAGTACCAGCA

>M6-PGSC0003DMG400027124M6OtherRLKTM\_2170

CAATACTAGTGAAAACGGGGACATGCCAATGAGTGTTGTCGACTTTCAGTACCAGCAATTATGGCTGG  
AGAATTGAACAAGATTTTTGATCCCAGAGTTGGGCTGCCAGAGTTGACTGA

>M6-PGSC0003DMG400027124M6OtherRLKTM\_2232

TGGCTGGAGAATTGAACAAGATTTTTGATCCCAGAGTTGGGCTGCCAGAGTTGACTGAAGCCGAGGGA  
GTAGAATTGGTGGCATATACTGCAATGCATTGTGTGCATTTGGAAGGAAAAC

>M6-PGSC0003DMG400027124M6OtherRLKTM\_2294

GAGGGAGTAGAATTGGTGGCATATACTGCAATGCATTGTGTGCATTTGGAAGGAAAACATAGACCTAC  
AATGACTGATATTGTTTCTAATTTAGAGAGAGCTTTGGCTGCATGTGATGAT

>M6-PGSC0003DMG400027124M6OtherRLKTM\_2356

ACCTACAATGACTGATATTGTTTCTAATTTAGAGAGAGCTTTGGCTGCATGTGATGATAGCCATGACAGC  
ATCTCTAGTAGTCCAGACTCCATTAATCAGATTGACATTCCACGCATAT

>M6-PGSC0003DMG400027124M6OtherRLKTM\_2418

ATGACAGCATCTCTAGTAGTCCAGACTCCATTAATCAGATTGACATTCCACGCATATGTCTGCGAAAGA  
CTCCTACCAGTATCACTAGACGATAAGTTTTGGTGATTAGAATAGTACGA

>M6-PGSC0003DMG400027124M6OtherRLKTM\_248

CAAAGAATCCAATGCTGGTCAGAAAATCAGACAGCACCGATCCCCATACCTCCTAACGTCTCCTTTAACT  
CCATCGTCGGCGGAGTTAACGGCTTTTCCGGCGTAGAAACCGGTGGGTTT

>M6-PGSC0003DMG400027124M6OtherRLKTM\_2480

GCGAAAGACTCCTACCAGTATCACTAGACGATAAGTTTTGGTGATTAGAATAGTACGATTTCGTGTAACA  
ATTGTTGTTAGTGTATACTGTAAATTATCGATAGCCGGAATGAAGTTCTTT

>M6-PGSC0003DMG400027124M6OtherRLKTM\_2542

TGTAACAATTGTTGTTAGTGTATACTGTAAATTATCGATAGCCGGAATGAAGTTCTTTTTCTTCTTAGAAG  
GATACAATCTTCACTATGTTGTGTTTAGCATCTTCTTGATAGGACTAAT

>M6-PGSC0003DMG400027124M6OtherRLKTM\_2604

TCTTAGAAGGATACAATCTTCACTATGTTGTGTTTAGCATCTTCTTGATAGGACTAATTGACTTGTTGCCA  
TTGTTCTTTTGTGTGTTCTTTTTGTAAAGGTGCTTAATGCACAAAATT

>M6-PGSC0003DMG400027124M6OtherRLKTM\_2659

AATTGACTTGTTGCCATTGTTCTTTTGTGTGTTCTTTTTGTAAAGGTGCTTAATGCACAAAATTCCAATTG  
TTGAAATGACAATTCAAGAGTCATAGCAGCAAGCCACAAGGCAAGTTG

>M6-PGSC0003DMG400027124M6OtherRLKTM\_310

CTTTAACTCCATCGTCGGCGGAGTTAACGGCTTTTCCGGCGTAGAAACCGGTGGGTTTTCCCTTCTCTTCT  
GGAAGTCAAGTTTTCAACCCAAAAGACTTTTCTTCACTTACTCAACTTT

>M6-PGSC0003DMG400027124M6OtherRLKTM\_372

TTCTCTTCTGGAAGTCAAGTTTTCAACCCAAAAGACTTTTCTTCACTTACTCAACTTTGTTAACAAGTGT  
CAATGGGAGATACTCAAATTTGCGGCTTAACAAACGGTACCCAAAATG

>M6-PGSC0003DMG400027124M6OtherRLKTM\_434

ACAAGTGTACAATGGGAGATACTCAAATTTGCGGCTTAACAAACGGTACCCAAAATGTTAAATGTTGG

AGAGATGACTCGAATTTGGCGAAACAACCAAATGGGTCGTCACAATTCATG

>M6-PGSC0003DMG400027124M6OtherRLKTM\_496

ATGTTGGAGAGATGACTCGAATTTGGCGAAACAACCAAATGGGTCGTCACAATTCATGTCAATTCATCT  
GGGTCGGGATTTTCTTGTGGAATTTGAAAAGTTCAAATAGAGTTGTATG

>M6-PGSC0003DMG400027124M6OtherRLKTM\_558

TTTCATCTGGGTCGGGATTTTCTTGTGGAATTTGAAAAGTTCAAATAGAGTTGTATGCTGGGGAAACAA  
TAGCGATATTGCTTCAGCTATTCAATCTGGTTTTGGTAATATTACAGTAG

>M6-PGSC0003DMG400027124M6OtherRLKTM\_62

GAGAGAAAATTTCTGATGACGTTACTCATCTCCGGCGCCGGCGCCGTTATCATCACCGCCGTTATCTCAC  
TGATAATTTCTGTTTTACTACCATTTTCTCATGCCCTCGGTAGTTCCGCC

>M6-PGSC0003DMG400027124M6OtherRLKTM\_620

GGAAACAATAGCGATATTGCTTCAGCTATTCAATCTGGTTTTGGTAATATTACAGTAGTGAATATATTG  
CCGGTGGAAAACATGCTTGTGGGATGAATTCTACAGGTTTTTAATTTGC

>M6-PGSC0003DMG400027124M6OtherRLKTM\_682

TATATTTGCCGGTGGAAAACATGCTTGTGGGATGAATTCTACAGGTTTTTTAATTTGCAAAGGAGATAAT  
GAAAATGGTCAATTAGATATTCCATCTAATTTTGCTTATGAGTATAATGG

>M6-PGSC0003DMG400027124M6OtherRLKTM\_744

GAGATAATGAAAATGGTCAATTAGATATTCCATCTAATTTTGCTTATGAGTATAATGGATTAGCTTTAGG  
GGTTAATCATACTTGTGGGTTTCTTAGAATGAATTATACAGTTGTTTGT

>M6-PGSC0003DMG400027124M6OtherRLKTM\_806

GCTTTAGGGGTTAATCATACTTGTGGGTTTCTTAGAATGAATTATACAGTTGTTTGTGGGGTGGGAATG  
GTGAATTTTCGATGAATTAACGAAAGGTCTTTCATTTGAATCAATTGTT

>M6-PGSC0003DMG400027124M6OtherRLKTM\_868

TGGGAATGGTGAATTTTCGATGAATTAACGAAAGGTCTTTCATTTGAATCAATTGTTGCTGGTTTAGAT  
TTTACTTGTGGATTAACAAGTGGGAATTTTCTGTTATCTGCTGGGGACC

>M6-PGSC0003DMG400027124M6OtherRLKTM\_930

GTTTAGATTTTACTTGTGGATTAACAAGTGGGAATTTTCTGTTATCTGCTGGGGACCTGGTTGGAGTAG  
TAATATGTATCCTTCAGTTCTGAGCTTCTTTACCAATGATTCTTCCAG

>M6-PGSC0003DMG400027124M6OtherRLKTM\_992



TGGAGTAGTAATATGTATCCTTCAGGTTCTGAGCTTCCTTTACCAATGATTCTCCAGGTCCATGTGTTGA  
GAATGTATGTGATTGTGGTGTATATCCTCAATCGAAAACGTTGTGTTCT

>M6-PGSC0003DMG400027140M6L-LecRK\_0

CCCCACTCTTTCTTCATTCTTTGTAATTACACAGACAAATCACGTGGCAAATCAAAGTTGAACTCTACAA  
AAAGAATGTCTAGATTCAGCTATAAATCATCACCCCACGCCGTTCTTCA

>M6-PGSC0003DMG400027140M6L-LecRK\_1054

ATTCGGACTCATTTTAGCCTTGTATGTCATTTGGAAAATCAAGAACATAGATGTGATTGAGCCTTGGGAA  
CTTGAGATAGGTCCACATAGGTTTTCTTACAAAGAGCTAAAGAAGGCTAC

>M6-PGSC0003DMG400027140M6L-LecRK\_1116

CTTGGGAACTTGAGATAGGTCCACATAGGTTTTCTTACAAAGAGCTAAAGAAGGCTACTAGGGGTTTTA  
GAGATAAAGAGTTGCTCGGGTTTGGTGGATTTGGTCGAGTTTATAAAGGAA

>M6-PGSC0003DMG400027140M6L-LecRK\_1178

GGTTTTAGAGATAAAGAGTTGCTCGGGTTTGGTGGATTTGGTCGAGTTTATAAAGGAACACTGCCTAAG  
ACGAATACCGTTGTAGCTGTGAAGCGAATACATCATGAAGCAAAACAGGGT

>M6-PGSC0003DMG400027140M6L-LecRK\_124

TACAAACAAATTTCAATCTAACTATGCCATGGCCAAACAAATTACACCAACCCTTTTCTTGATTCTCTTTAT  
TTTGCTGTCAAGAACAGTTTTTTCTGATGAATTTGTGTATAATGGCTT

>M6-PGSC0003DMG400027140M6L-LecRK\_1240

GCCTAAGACGAATACCGTTGTAGCTGTGAAGCGAATACATCATGAAGCAAAACAGGGTCTTCAAGAATT  
TGTGTCTGAAATCGCGACTATTGGTCGCCTTAGACATAGAAATTTGGTTCA

>M6-PGSC0003DMG400027140M6L-LecRK\_1302

AAGAATTTGTGTCTGAAATCGCGACTATTGGTCGCCTTAGACATAGAAATTTGGTTCAGCTCTTAGGATG  
GTGTCGGCGAAGAGGTGATTTGTTACTTGTATGACTTTATGCCTAATG

>M6-PGSC0003DMG400027140M6L-LecRK\_1364

TTAGGATGGTGTGCGCGAAGAGGTGATTTGTTACTTGTATGACTTTATGCCTAATGGAAGCTTAGACA  
AATACATTTATGATGAACCAAGAGTTACTTTAACTTGGGATCAGAGGTTC

>M6-PGSC0003DMG400027140M6L-LecRK\_1426

CTTAGACAAATACATTTATGATGAACCAAGAGTTACTTTAACTTGGGATCAGAGGTTCAAGGTTATTA  
GGTGTGGCTTCTGGTCTGTTGTATTTACATGAAGAATGGGAACAAACTGT

>M6-PGSC0003DMG400027140M6L-LecRK\_1488

TTATTAAGGTGTGGCTTCTGGTCTGTTGATTTACATGAAGAATGGGAACAACTGTGATTCATAGAGA  
TATTAAGCAGGGAATGTGTTGTTAGATTCCGATATGAATGGACGACTTG

>M6-PGSC0003DMG400027140M6L-LecRK\_1550

CATAGAGATATTAAAGCAGGGAATGTGTTGTTAGATTCCGATATGAATGGACGACTTGGAGATTTCCGGA  
CTTGCTAAGTTATACGAGCATGGAGCAAATCCTAGCACACAAGAGTAGTC

>M6-PGSC0003DMG400027140M6L-LecRK\_1612

TTTCGGACTTGCTAAGTTATACGAGCATGGAGCAAATCCTAGCACACAAGAGTAGTCGGTACGTTGGG  
CTACTTAGCTCCAGAATTAACCAAGACCGGAAAGCCCACACCAAGTTCAGA

>M6-PGSC0003DMG400027140M6L-LecRK\_1674

CGTTGGGCTACTTAGCTCCAGAATTAACCAAGACCGGAAAGCCCACACCAAGTTCAGATGTTTTTGCCTT  
TGGTGCATTGCTGCTAGAAGTTGCTTGTGGAAGGAGGCCAATTGAGGCAA

>M6-PGSC0003DMG400027140M6L-LecRK\_1736

TTTGCCTTTGGTGCATTGCTGCTAGAAGTTGCTTGTGGAAGGAGGCCAATTGAGGCAAAGGCATTGCCT  
GAGGAGTTAATCCTAGTGGATTGGGTATGGGATAAATGGAAGGAAGGTGCC

>M6-PGSC0003DMG400027140M6L-LecRK\_1798

ATTGCCTGAGGAGTTAATCCTAGTGGATTGGGTATGGGATAAATGGAAGGAAGGTGCCATTCTTGAAGT  
GGTTGACTCGAGATTAATGGCGAGTATGATGAGATGGAGGCCATAATGGT

>M6-PGSC0003DMG400027140M6L-LecRK\_186

TTCTCTTTATTTTGTGCTGCAAGAACAGTTTTTTCTGATGAATTTGTGTATAATGGCTTTAATGGGGTTGAA  
GCTAGTAATCTTACTGTAAATGGGGTTGCTCATATTTTAAAGAATGGTG

>M6-PGSC0003DMG400027140M6L-LecRK\_1860

TTGAAGTGGTTGACTCGAGATTAATGGCGAGTATGATGAGATGGAGGCCATAATGGTGCCTTAAATTAG  
GACTCATGTGTTCAAATAATACACCATCTAAGAGGCCTAGCACGAGGCTAG

>M6-PGSC0003DMG400027140M6L-LecRK\_1922

AAATTAGGACTCATGTGTTCAAATAATACACCATCTAAGAGGCCTAGCACGAGGCTAGTGGTGAGATAC  
TTGGAAGGGGAGGTGACACTCCCAGAGACGCTGGCAGCTCCCGATGAATAT

>M6-PGSC0003DMG400027140M6L-LecRK\_1984

GAGATACTTGAAGGGGAGGTGACACTCCCAGAGACGCTGGCAGCTCCCGATGAATATGATGGAAAGA

AGGGCGGTACTAGTGGTATGGAGTTAGAGGTCTTCATAGATTCCTATCCGTC

>M6-PGSC0003DMG400027140M6L-LecRK\_2046

GAAAGAAGGGCGGTACTAGTGGTATGGAGTTAGAGGTCTTCATAGATTCCTATCCGTCCTTCGTCTTATTT  
TGAGAAAGTAAGCACATGGTCATCACCTTATGACGGTGAAGGCGATATTG

>M6-PGSC0003DMG400027140M6L-LecRK\_2108

TCTTATTTTGAGAAAGTAAGCACATGGTCATCACCTTATGACGGTGAAGGCGATATTGATATTGAAGCTA  
ATTCAGTAACGCCATTAACGGATTCTGGCAGAGAGGACAACAGGTAGCCA

>M6-PGSC0003DMG400027140M6L-LecRK\_2170

TGAAGCTAATTCAGTAACGCCATTAACGGATTCTGGCAGAGAGGACAACAGGTAGCCATGCAAAATGG  
AGGGACCATTCTACTTGCCCTCCCAAACCTCCTCTATATTTTAGTACTTCTT

>M6-PGSC0003DMG400027140M6L-LecRK\_2232

AAATGGAGGGACCATTCTACTTGCCCTCCCAAACCTCCTCTATATTTTAGTACTTCTTTTTACGGTTTGATT  
TTTGACTTAAATGTAAATTATTGCTTTTTGAAATGAAATGATATTAGT

>M6-PGSC0003DMG400027140M6L-LecRK\_2294

CGGTTTGATTTTTGACTTAAATGTAAATTATTGCTTTTTGAAATGAAATGATATTAGTATCAACCATTCTT  
ATGGTTTTGAGAATATTGGTGTTAGTAGGATGTGAATATATTTTTGCAA

>M6-PGSC0003DMG400027140M6L-LecRK\_248

GGGGTTGAAGCTAGTAATCTTACTGTAAATGGGGTTGCTCATATTTTAAAGAATGGTGCTTTAAAGCTTA  
CAAATGAAACATCTAGAGTTGTTGGTCATGCTTTTTACAAAATCCAATT

>M6-PGSC0003DMG400027140M6L-LecRK\_310

AAAGCTTACAAATGAAACATCTAGAGTTGTTGGTCATGCTTTTTACAAAATCCAATTAATTCAAGAATT  
CCCAATCTGGTAAAGTTTCTCCTTTTCTACTGCTTTTGCTTTTGGGAT

>M6-PGSC0003DMG400027140M6L-LecRK\_372

TCAAGAATTCCAATCTGGTAAAGTTTCTCCTTTTCTACTGCTTTTGCTTTTGGGATTGTTCTGAATATG  
CTAAGTTAGGTGGGCATGGCTTTGCTTTTACAATTTCAAGGACTAAAG

>M6-PGSC0003DMG400027140M6L-LecRK\_434

CCTGAATATGCTAAGTTAGGTGGGCATGGCTTTGCTTTTACAATTTCAAGGACTAAAGAGATGAAAGGG  
GCTCTTCTAGTCAGTATTTAGGTCTTTTAAATTCAAGTAATATTGGGAAT

>M6-PGSC0003DMG400027140M6L-LecRK\_496

GAAAGGGGCTCTCCTAGTCAGTATTTAGGTCTTTTAAATTCAAGTAATATTGGGAATTTTTCAAATCATG  
TATTTGCTGTTGAATTTGATACTGTTCAAGATTTTGAATTTGGTGATAT

>M6-PGSC0003DMG400027140M6L-LecRK\_558

CAAATCATGTATTTGCTGTTGAATTTGATACTGTTCAAGATTTTGAATTTGGTGATATTAGTGATAATCAT  
GTTGGTATTGATGTGAATGATTTGAAGTCTAATGCTTCAGTAAATGCTA

>M6-PGSC0003DMG400027140M6L-LecRK\_62

ACTCTACAAAAGAATGTCTAGATTCAGCTATAAATCATCACCCACGCCGTTCTTCAGCTCTACAAACAA  
ATTTCAATCTAACTATGCCATGGCCAAACAAATTACACCAACCCTTTTC

>M6-PGSC0003DMG400027140M6L-LecRK\_620

GATAATCATGTTGGTATTGATGTGAATGATTTGAAGTCTAATGCTTCAGTAAATGCTAGTTACTTCTCTGA  
AGGAAGTTTTAGTAAACAAAAGCTTTTTCTTCAGAGTGGAAGACAATT

>M6-PGSC0003DMG400027140M6L-LecRK\_682

CTTCTCTGAAGGAAGTTTTAGTAAACAAAAGCTTTTTCTTCAGAGTGGAAGACAATTCAGGCTTGGATT  
GATTATGATTCAAGTAGAAATGTGTTGAATGTTACACTTTCACTTTCTTC

>M6-PGSC0003DMG400027140M6L-LecRK\_744

CTTGGATTGATTATGATTCAAGTAGAAATGTGTTGAATGTTACACTTTCACTTTCTTCAACAAAACCAACT  
TTTTCAATTTTGTCTTTCCCTTTGGACCTTTCTCTAGTTTTTGAGGAAT

>M6-PGSC0003DMG400027140M6L-LecRK\_806

AAACCAACTTTTTCAATTTTGTCTTTCCCTTTGGACCTTTCTCTAGTTTTTGAGGAATTCATGTATGTTGGA  
TTTTCTGCTTCAACTGGTTTGCTTGCTAGCTCACATTATATATTTGGT

>M6-PGSC0003DMG400027140M6L-LecRK\_868

GTATGTTGGATTTTCTGCTTCAACTGGTTTGCTTGCTAGCTCACATTATATATTTGGTTGGAGTTTCAAGA  
TGAATGGAAAAGCTCAATCTTTGGATCTTGATTGATTGCCTTCTCTCCC

>M6-PGSC0003DMG400027140M6L-LecRK\_930

GTTTCAAGATGAATGGAAAAGCTCAATCTTTGGATCTTGATTGATTGCCTTCTCTCCCTAAGCCTAAGAAG  
GATCAAACAGTCTTGATTGTAGCTACCACGATATCGGCTGTTGTGTTTC

>M6-PGSC0003DMG400027140M6L-LecRK\_992

CCTAAGAAGGATCAAACAGTCTTGATTGTAGCTACCACGATATCGGCTGTTGTGTTTCTTGATTTCGGAC  
TCATTTTAGCCTTGTATGTCATTTGGAAAATCAAGAACATAGATGTGATT

>M6-PGSC0003DMG400027233-(rev)M6G-LecRK\_1054

TCGATAGTCCTATTGATAGTTGTCATGTTGCTTTCACTTGCAAGAAGCTTGGAGTTTGTGATGAGGGGAG  
ATGTTCTTGCCACCGGATTTCTGTGTTAGTTCTGAGGTGAATGGTAGTT

>M6-PGSC0003DMG400027233-(rev)M6G-LecRK\_1116

GAGGGGAGATGTTCTTGCCACCGGATTTCTGTGTTAGTTCTGAGGTGAATGGTAGTTGTGCTCCAGTT  
GATAGAAATTTGGTAATGCCAGTTTCTGTAATGCATCTTTGAATATGAAT

>M6-PGSC0003DMG400027233-(rev)M6G-LecRK\_1178

TCCAGTTGATAGAAATTTGGTAATGCCAGTTTCTGTAATGCATCTTTGAATATGAATGTAAGTGAATTG  
GGAAATCGTGTTTCGTACTTGAGGCTAGAGAATGGTATGGACTATTTTGC

>M6-PGSC0003DMG400027233-(rev)M6G-LecRK\_124

ACGGAGCAGAGTAAGAAATGCAACTTAGTATGGTATGCAAAAAGATTCTTGATTTCAAGAACTGATTTT  
TTTTCAAGTTTTTCATTGTTGTTAAGAGCATGGGATCATCTTTCTTGTTAT

>M6-PGSC0003DMG400027233-(rev)M6G-LecRK\_1240

CTGAATTGGGAAATCGTGTTTCGTACTTGAGGCTAGAGAATGGTATGGACTATTTTGCTAATGATTTTAT  
CGAACCTGTGAAGCGTGGTGTAAATGTATCTGCTTGTCAAGATCTTTGTT

>M6-PGSC0003DMG400027233-(rev)M6G-LecRK\_1302

GATTTTATCGAACCTGTGAAGCGTGGTGTAAATGTATCTGCTTGTCAAGATCTTTGTTCTAAGAAGTGTTT  
TTGCTTGAGTGTTTTTCATGATCAGTCGTCGGGTTTCATGTTATATGATT

>M6-PGSC0003DMG400027233-(rev)M6G-LecRK\_1364

GAAGTGTTCTTGCTTGAGTGTTTTTCATGATCAGTCGTCGGGTTTCATGTTATATGATTGAAAATTTTCTTG  
GTTTCGATTTTGAGGGGTTTCGGATTCTGGTAACGGAAGAGGTAGATTGGG

>M6-PGSC0003DMG400027233-(rev)M6G-LecRK\_1426

ATTTTCTTGTTTCGATTTTGAGGGGTTTCGGATTCTGGTAACGGAAGAGGTAGATTGGGATACGTTAAGG  
TCATTTCTGAACCGTCATCATTGATCCAAATGACAACCTCAAGTGACAATA

>M6-PGSC0003DMG400027233-(rev)M6G-LecRK\_1488

GTTAAGGTCATTTCTGAACCGTCATCATTGATCCAAATGACAACCTCAAGTGACAATAGGTCAAGATTAC  
CCGTCGTTGCTTTGGTTTTACTTCCTTCTTCTGGGCTTTTACTGATCATT

>M6-PGSC0003DMG400027233-(rev)M6G-LecRK\_1550

AAGATTACCCGTCGTTGCTTTGGTTTTACTTCCTTCTTCTGGGCTTTTACTGATCATTGTGATGATGGCTG

GGATTATGTGGTTGATGAGAAGAAAAAGATTGATGCAGATTCAGGGAA

>M6-PGSC0003DMG400027233-(rev)M6G-LecRK\_1612

TGATGGCTGGGATTATGTGGTTGATGAGAAGAAAAAGATTGATGCAGATTCAGGGAAAGAGTTTGGACGGACGGATTCTTCTTCGTTTGCTGAGCTTGATAACATTTCCATACTGGGGT

>M6-PGSC0003DMG400027233-(rev)M6G-LecRK\_1674

TTTGGACGGACGGATTCTTCTTCGTTTGCTGAGCTTGATAACATTTCCATACTGGGGTTGCCTGTGAAATTGACCATGAGGAGATTCGTGTAGCCACGGAGTATTTTAGAAATCAAATT

>M6-PGSC0003DMG400027233-(rev)M6G-LecRK\_1736

TGTGAAATTTGACCATGAGGAGATTCGTGTAGCCACGGAGTATTTTAGAAATCAAATTGGTACTGGTGGATTTGGAACAGTATATAAAGGTA CTCTTTCTGATGGAGCTGTTGTTGCTGT

>M6-PGSC0003DMG400027233-(rev)M6G-LecRK\_1798

CTGGTGGATTTGGAACAGTATATAAAGGTA CTCTTTCTGATGGAGCTGTTGTTGCTGTCAAGAAGATGATGCTCTTGGGGCTCACGGAAATAGGGAGTTTTGCACTGAGATCGCGATTA

>M6-PGSC0003DMG400027233-(rev)M6G-LecRK\_186

TGATTTTTTTTTCAAGTTTTATTGTTGTTAAGAGCATGGGATCATCTTTCTTGTTATTCATTGTTGCCCTTTGTTATCTTGTGTTGTACACTCTGGTCCTCTTTCTCTTCAACCA

>M6-PGSC0003DMG400027233-(rev)M6G-LecRK\_1860

AAGATGAATGCTCTTGGGGCTCACGGAAATAGGGAGTTTTGCACTGAGATCGCGATTATTGGGAGAGTTCACCATGTTAATTTGGTTAGTTTGAAAGGATTTTGTGCACATAGGGGAGAA

>M6-PGSC0003DMG400027233-(rev)M6G-LecRK\_1922

GAGAGTTCACCATGTTAATTTGGTTAGTTTGAAAGGATTTTGTGCACATAGGGGAGAAAGGTTTCTGGTGTATGAATATATGAATCGAGGCTCATTGGATCGAACCTTTTTGGACTTGG

>M6-PGSC0003DMG400027233-(rev)M6G-LecRK\_1984

TTCTGGTGTATGAATATATGAATCGAGGCTCATTGGATCGAACCTTTTTGGACTTGGACCTGCCTTAGATTGGCATAACCAGATATGAAATCGCGCTTGGAACAGCACGTGGGCTTGCTT

>M6-PGSC0003DMG400027233-(rev)M6G-LecRK\_2046

GCCTTAGATTGGCATAACCAGATATGAAATCGCGCTTGGAACAGCACGTGGGCTTGCTTACCTGCATGGTGGTTGTGAGCAGAAGATCATACTGTTGATGTGAAGCCAGAGAACATACTC

>M6-PGSC0003DMG400027233-(rev)M6G-LecRK\_2108

GCATGGTGGTTGTGAGCAGAAGATCATACATTGTGATGTGAAGCCAGAGAACATACTCCTCCATGACAA  
CCTGCAAGTAAAAATATCAGATTCGGGCTTCCAAGCTTCTTAATTCTGA

>M6-PGSC0003DMG400027233-(rev)M6G-LecRK\_2170

ATGACAACCTGCAAGTAAAAATATCAGATTCGGGCTTCCAAGCTTCTTAATTCTGAGCAGTCTAGTTG  
GTTTACCACGATGAGAGGAACTCGAGGCTACTTAGCTCCTGAATGGCTGA

>M6-PGSC0003DMG400027233-(rev)M6G-LecRK\_2232

TCTAGTTGGTTTACCACGATGAGAGGAACTCGAGGCTACTTAGCTCCTGAATGGCTGACTAGCTCAGCC  
ATAACTGAGAAATCAGATGTCTACAGCTACGGAATGGTGCTACTAGAAATA

>M6-PGSC0003DMG400027233-(rev)M6G-LecRK\_2294

CTCAGCCATAACTGAGAAATCAGATGTCTACAGCTACGGAATGGTGCTACTAGAAATAGTACGAGGGAA  
GAAGAACTCCTCGTTCCAACCACCAAATGACACTACTTCTCAAAGCGAAAG

>M6-PGSC0003DMG400027233-(rev)M6G-LecRK\_2356

GAGGGAAGAAGAAGTCTCGTTCCAACCACCAAATGACACTACTTCTCAAAGCGAAAGTAGTGAAAGGA  
ATAGGCTTCTCCATCGTCTCTTGCTCAGCAAATCAGCCAATCTACTTCC

>M6-PGSC0003DMG400027233-(rev)M6G-LecRK\_2418

GAAAGGAATAGGCTTCTCCATCGTCTCTTGCTCAGCAAATCAGCCAATCTACTTCCCATTATTTGCGTT  
GGAAATGCATGAACAGAAAATGTACCTGGAGCTTGTGGATCCTCGTGTT

>M6-PGSC0003DMG400027233-(rev)M6G-LecRK\_248

TGTTGCCCTTTTGTTATCTTGTTTTGTTGTACACTCTGGTCTCTTCTCTTCAACCATTAACCTCAAATTC  
ACTGCTTCAAATTTCAAGTTCATTGATACTTCTGGATCATTCTTGTC

>M6-PGSC0003DMG400027233-(rev)M6G-LecRK\_2480

ATTTGCGTTGGAAATGCATGAACAGAAAATGTACCTGGAGCTTGTGGATCCTCGTGTTCTGGGGAGTGT  
CAAAATTGAGGAAGTCGAGAAGCTAGTACGTGTGGCTTTGTGTTGTTTGCA

>M6-PGSC0003DMG400027233-(rev)M6G-LecRK\_2542

GGAGTGTCAAAATTGAGGAAGTCGAGAAGCTAGTACGTGTGGCTTTGTGTTGTTTGCATGAAGAGCCA  
ACTCTGAGACCAACAATGGCCAATGTTGTTGGCATGTTAGAAGGTGTGTTGC

>M6-PGSC0003DMG400027233-(rev)M6G-LecRK\_2604

GAGCCAACCTCTGAGACCAACAATGGCCAATGTTGTTGGCATGTTAGAAGGTGTGTTGCCTTTGGCTATG  
CCACAGGTTCAATCACTCAATTTTCTACGATTTTATGGTCGTAGATTCCT

>M6-PGSC0003DMG400027233-(rev)M6G-LecRK\_2666

GGCTATGCCACAGGTTCAATCACTCAATTTTCTACGATTTTATGGTCGTAGATTCACTGAAGCATCAACG  
ATCGATGGGGATCAAGGGGTTAATGTGTTTGAGTTACATCAACAAAACAG

>M6-PGSC0003DMG400027233-(rev)M6G-LecRK\_2728

CATCAACGATCGATGGGGATCAAGGGGTTAATGTGTTTGAGTTACATCAACAAAACAGGAACCTTAGCA  
GTACTACTAGTAGCTCTTACAATTCCTTCTTATATGTCTTCACAGCAAG

>M6-PGSC0003DMG400027233-(rev)M6G-LecRK\_2790

CTTAGCAGTACTACTAGTAGCTCTTACAATTCCTTCTTATATGTCTTCACAGCAAGTCTCAGGTCCAAG  
ATAGCACTAGTAAATCTTATGTTGTTGCGAACCTCCAAAAATGTTGTCA

>M6-PGSC0003DMG400027233-(rev)M6G-LecRK\_2852

AGGTCCAAGATAGCACTAGTAAATCTTATGTTGTTGCGAACCTCCAAAAATGTTGTCACATTCATGTCTG  
GTCCTCCAAAAGTGCATTGCTTTGGGAAGATCCAACATAATTTTGACATT

>M6-PGSC0003DMG400027233-(rev)M6G-LecRK\_2914

CATGTCTGGTCCTCCAAAAGTGCATTGCTTTGGGAAGATCCAACATAATTTTGACATTATTTTTGAAGAGT  
CGGAACAACACGGAGTAAATCTGCTTTGTTAGTTCAATTTGTTATGCTA

>M6-PGSC0003DMG400027233-(rev)M6G-LecRK\_2976

TTGAAGAGTCGGAACAACACGGAGTAAATCTGCTTTGTTAGTTCAATTTGTTATGCTACTGTTTGAAAAC  
TTTAGTTGTGATGTGATGTTTGACCTCTTCTGTGAGGCAGTAGAAAGAG

>M6-PGSC0003DMG400027233-(rev)M6G-LecRK\_3007

GCTTTGTTAGTTCAATTTGTTATGCTACTGTTTGAAAACTTTAGTTGTGATGTGATGTTTGACCTCTTCTG  
TGAGGCAGTAGAAAGAGTATAAATATAAGTTGTAATTTATTCAGTTTC

>M6-PGSC0003DMG400027233-(rev)M6G-LecRK\_310

CTCCAAATTTCACTGCTTCAAATTTCAAGTTCATTGATACTTCTGGATCATTCTTGTCATCACCAAATGGAA  
CTTTTAAAGCAGCAATTACAAACACAAAATCCCAAGAAAGATCCTATT

>M6-PGSC0003DMG400027233-(rev)M6G-LecRK\_372

CCAAATGGAACTTTTAAAGCAGCAATTACAAACACAAAATCCCAAGAAAGATCCTATTACTTTGTCATCG  
TTCACCTCGGAATCTCATGTAGTTGTTTGGTCAGCAAATCGCGATATGCCT

>M6-PGSC0003DMG400027233-(rev)M6G-LecRK\_434

TGTCATCGTTCACTCGGAATCTCATGTAGTTGTTTGGTCAGCAAATCGCGATATGCCTGTATCTGATTCAG



GTGAGTTGCACCTTTCTGTTGATGGCCTTGCTCTTTTTGATGATTCAGG

>M6-PGSC0003DMG400027233-(rev)M6G-LecRK\_496

CTGATTCAGGTGAGTTGCACCTTTCTGTTGATGGCCTTGCTCTTTTTGATGATTCAGGTGACACGGTTTGG

TCAGCGAAGCGTAGTAGTACTAGTAGTTCTGTTACTTCAATGCAGCTTC

>M6-PGSC0003DMG400027233-(rev)M6G-LecRK\_558

ACGGTTTGGTCAGCGAAGCGTAGTAGTACTAGTAGTTCTGTTACTTCAATGCAGCTTCTTGAATCAGGAA

ACTTTGTGTTGGTTGATGCTTTTAATAATATTGTGTGGGAAAGTTTTGAT

>M6-PGSC0003DMG400027233-(rev)M6G-LecRK\_62

TTCTCCTTTTTCAAGTAGGTAAAGTAGGTTGACTCGCTACTTTACCTACTGTGTATAAGGAGACGGAGCA

GAGTAAGAAATGCAACTTAGTATGGTATGCAAAAAGATTCTTGATTTCAA

>M6-PGSC0003DMG400027233-(rev)M6G-LecRK\_620

ATCAGGAAACTTTGTGTTGGTTGATGCTTTTAATAATATTGTGTGGGAAAGTTTTGATTCTCCTACAGATA

CAATCGTTGTAGGCCAACGATTGCCTGTTGGGAAATCGTTGGTTAGTTC

>M6-PGSC0003DMG400027233-(rev)M6G-LecRK\_682

CTACAGATAACAATCGTTGTAGGCCAACGATTGCCTGTTGGGAAATCGTTGGTTAGTTCAGTGAACGAAG

ATGAAATTGCTAAAGGCGATTATAAACTTGTGGTTGTAGAGAATGATGCAA

>M6-PGSC0003DMG400027233-(rev)M6G-LecRK\_744

AACGAAGATGAAATTGCTAAAGGCGATTATAAACTTGTGGTTGTAGAGAATGATGCAATGTTACAATGG

AATGGAATGACTTACTGGAAGTTAAGTATGGAACCTAAGGCTTTTACTGAT

>M6-PGSC0003DMG400027233-(rev)M6G-LecRK\_806

ACAATGGAATGGAATGACTTACTGGAAGTTAAGTATGGAACCTAAGGCTTTTACTGATGCATATACTCTG

GTGGAGTATATGATGATCAGTAGCAACGGGTTGTTCTTGTAGGGGCGAA

>M6-PGSC0003DMG400027233-(rev)M6G-LecRK\_868

ATACTCTGGTGGAGTATATGATGATCAGTAGCAACGGGTTGTTCTTGTAGGGGCGAATGGGACGGAG

AGAGTGATTCAGGTTATTTGGATGAGGTGAAAGATCCTGACTTTAGGATTG

>M6-PGSC0003DMG400027233-(rev)M6G-LecRK\_930

ACGGAGAGAGTGATTCAGGTTATTTGGATGAGGTGAAAGATCCTGACTTTAGGATTGCGAAATTGGAA

GAGAATGGACAGTTCAGTGTCAAACGATTTAGTAACGGAAATTGGATATCT

>M6-PGSC0003DMG400027233-(rev)M6G-LecRK\_992

ATTGGAAGAGAATGGACAGTTCAGTGTCAAACGATTTAGTAACGGAAATTGGATATCTGAATTCGATAG  
TCCTATTGATAGTTGTCATGTTGCTTTCACTTGCAAGAAGCTTGGAGTTTG

>M6-PGSC0003DMG400027391-(rev)M6RLKWAX-EGF\_0

ATGCTTCTTAACATGGCTTTACTCCACTTGATGATACTAATATGTAGCTTGTTTTAGTTTTGTCATTACAA  
TTCACAGCAAATCCATTGCTAATGCTACTACCATAACCAAACCTGGC

>M6-PGSC0003DMG400027391-(rev)M6RLKWAX-EGF\_1054

CATTTGAGCCGAGAGTCTATCAGAAACAACCTCTTACGTTCTGATGTTTGATTAATTGACAGATATAAAT  
GAATGCGAGAACGAGAATCCTTGTGATGGAATATGCAATAACTTTCCTG

>M6-PGSC0003DMG400027391-(rev)M6RLKWAX-EGF\_1116

GATATAAATGAATGCGAGAACGAGAATCCTTGTGATGGAATATGCAATAACTTTCCTGGAGGCTACAGC  
TGCACTTGTCCACATGGTCAGATTGGTGTGATGGCAAAAAGGACGGCCACGGT

>M6-PGSC0003DMG400027391-(rev)M6RLKWAX-EGF\_124

ATAGCAAATGTGGGAGCTTAACTGTTCCATTTCTTTTGGTATTGGTAACGGAACAGGCTGCTCGATTGA  
TCCTTCATTGATATCACTTGCAACGTTTCGTTCAATCCTCCAAAGGCTT

>M6-PGSC0003DMG400027391-(rev)M6RLKWAX-EGF\_1240

TCCCTAAGAACTCTAAGTCACCCATCCTTCAACTCTCACTCGGTACGTCTACTCTGTGTCCAGTCAAACAC  
CTTCATATAAAATGAAAACGGTAAAGAGTATACTAAAGTTGCACTTTCA

>M6-PGSC0003DMG400027391-(rev)M6RLKWAX-EGF\_1302

GTCAAACACCTTCATATAAAATGAAAACGGTAAAGAGTATACTAAAGTTGCACTTTTCATTGCAGGTTTAT  
GCTTTGGCTTTCTGGCTTTGGTCATCAGTGCAACTTGGATATACTTAGGC

>M6-PGSC0003DMG400027391-(rev)M6RLKWAX-EGF\_1364

AGGTTTATGCTTTGGCTTTCTGGCTTTGGTCATCAGTGCAACTTGGATATACTTAGGCATCAAAGAAGA  
CGACTCATAAGACTCAGGGAAACATTTTTTCAGAAAAATGGTGGATTGAT

>M6-PGSC0003DMG400027391-(rev)M6RLKWAX-EGF\_1426

AAAGAAGACGACTCATAAGACTCAGGGAAACATTTTTTCAGAAAAATGGTGGATTGATGCTCACGCAGA  
AACTCCGATCAAATGAGGGTGGTATACAGTATGCAGCTAAGATATTTACAG

>M6-PGSC0003DMG400027391-(rev)M6RLKWAX-EGF\_1550

AGAACTCGAGAAATCTACCAACAATATGCTGTTGATCGTATCCTAGGCCGAGGTGGTTATGGTACTGTT  
TACAAAGGTTTCTTTCTGACAAACGTGTAGTTGCAATTAATAAAGTCTAG

>M6-PGSC0003DMG400027391-(rev)M6RLKWAX-EGF\_1612  
GTACTGTTTACAAAGGTTTCCTTTCTGACAAACGTGTAGTTGCAATTA AAAAGTCTAGAACAATGGACGT  
CAGCCAAATAGAATTGTTTCATCAATGAAGTGATCATTCTTTCAGAAGTCA

>M6-PGSC0003DMG400027391-(rev)M6RLKWAX-EGF\_1674  
ATGGACGTCAGCCAAATAGAATTGTTTCATCAATGAAGTGATCATTCTTTCAGAAGTCAATCATCGAAACG  
TGGTGAAACTCTTGGGGTGTTGTTGGAGTCTGAAGTGCCTCTACTAGTC

>M6-PGSC0003DMG400027391-(rev)M6RLKWAX-EGF\_1736  
TCGAAACGTGGTGAAACTCTTGGGGTGTTGTTGGAGTCTGAAGTGCCTCTACTAGTCTATGAATACATT  
TCCAAAGGTACTCTATTACCATATTCATGATGGTGGAGATCAAACGCG

>M6-PGSC0003DMG400027391-(rev)M6RLKWAX-EGF\_1798  
AATACATTTCCAAAGGTACTCTATTACCATATTCATGATGGTGGAGATCAAACGCGTTGGTTTTCATG  
GGAAAATCGATTAAGAATAGCATCTGAAGCTGCTGGTGCCTCGCGTATC

>M6-PGSC0003DMG400027391-(rev)M6RLKWAX-EGF\_186  
TCGATTGATCCTTCATTCGATATCACTTGCAACGTTTCGTTCAATCCTCCAAAGGCTTTTCTTCTGGCAA  
GATATTGAAGTGGTTGATTTACTAGATGATCATATACTTGTTAAGAAC

>M6-PGSC0003DMG400027391-(rev)M6RLKWAX-EGF\_1922  
TTCTGCAGCTTCTACACCTGTAATTCATTGAGATGTGAAGTCTACAAACATTCTACTCGATGAGAATTACA  
CTGCAAAAATATCAGATTTTGGGGCTTCTAGATTAGTGTCATTGGATCA

>M6-PGSC0003DMG400027391-(rev)M6RLKWAX-EGF\_1984  
AGAATTACTGCAAAAATATCAGATTTTGGGGCTTCTAGATTAGTGTCATTGGATCAAACCTCAAGTGAC  
TACATTGGTTCAAGGAACCTTAGGTTACTTAGATCCTGAATACTTCCACA

>M6-PGSC0003DMG400027391-(rev)M6RLKWAX-EGF\_2108  
TCAATTGACAGAAAAGAGTGACGTTTATAGTTTTGGTGTGCTTCTTGCAGAGCTCTAACAGTGCGAATG  
CCACTAGATACTACAGCATCCGAACAAGAGAGAAATCTATCTGCATTTTT

>M6-PGSC0003DMG400027391-(rev)M6RLKWAX-EGF\_2170  
TGCGAATGCCACTAGATACTACAGCATCCGAACAAGAGAGAAATCTATCTGCATTTTTCGTTAGGTCTAT  
TAAGGAAAATCGATTGTTTCAAGTACTTGAGACACGTGTGCTACGAGAAG

>M6-PGSC0003DMG400027391-(rev)M6RLKWAX-EGF\_2232  
AGGTCTATTAAGGAAAATCGATTGTTTCAAGTACTTGAGACACGTGTGCTACGAGAAGGAAGTTTTGAG

CAATGTCTTGGTGTGCTGAGCTCGCGAAGAGATGTTTAAGGTTAACGAGT

>M6-PGSC0003DMG400027391-(rev)M6RLKWAX-EGF\_2294

TTTTGAGCAATGTCTTGGTGTGCTGAGCTCGCGAAGAGATGTTTAAGGTTAACGAGTGATGAAAGGCC

TACGATGAAAGAAGTAGCCATGGAGCTAGAAGGACTAAGGAAGTTCACAAA

>M6-PGSC0003DMG400027391-(rev)M6RLKWAX-EGF\_2356

AAAGGCCTACGATGAAAGAAGTAGCCATGGAGCTAGAAGGACTAAGGAAGTTCACAAAACATCCATGG

TCTAAAACCTCAACAATGTCAAGATGAGGAGAGTCTTGGACTAATAACAGAAC

>M6-PGSC0003DMG400027391-(rev)M6RLKWAX-EGF\_2418

CCATGGTCTAAAACCTCAACAATGTCAAGATGAGGAGAGTCTTGGACTAATAACAGAACAAACGTTGGAC

CTTTACGCGATCAATATGAACACGAACTTCATGTCTAACGGAGAATTCTCC

>M6-PGSC0003DMG400027391-(rev)M6RLKWAX-EGF\_2472

GAACAAACGTTGGACCTTTACGCGATCAATATGAACACGAACTTCATGTCTAACGGAGAATTCTCCGGA

CAACAGAGCTTGGATAGTCGGATGATGTTACAAATTCATAGTCCCCGGTGA

>M6-PGSC0003DMG400027391-(rev)M6RLKWAX-EGF\_248

TTCTGGCAAAGATATTGAAGTGGTTGATTTACTAGATGATCATATACTTGTTAAGAACAATGTTGGGAGC

AGGTGTTATGATCAAGCAGGGGCGTTGATCAATGATGACTCGATAAACTT

>M6-PGSC0003DMG400027391-(rev)M6RLKWAX-EGF\_310

TTGGGAGCAGGTGTTATGATCAAGCAGGGGCGTTGATCAATGATGACTCGATAAACTTTAGCTTGGGAT

CGACGTCTTTCTCCTTCTCTGATCTCAATAGCTTGATGGTAATTGGCTGCG

>M6-PGSC0003DMG400027391-(rev)M6RLKWAX-EGF\_372

TTGGGATCGACGTCTTTCTCCTTCTCTGATCTCAATAGCTTGATGGTAATTGGCTGCGATGACTTAGCTCT

CATTCAAGGCTATGAAGGGAGGAACTTTACTAGTGGATGCATTTCTCTG

>M6-PGSC0003DMG400027391-(rev)M6RLKWAX-EGF\_434

CTTAGCTCTCATTCAAGGCTATGAAGGGAGGAACTTTACTAGTGGATGCATTTCTCTGTGCACGAAAAAA

GAGGATATAATTGATGGATATTGCTCGGGAATTGGATGTTGCCAGACTTC

>M6-PGSC0003DMG400027391-(rev)M6RLKWAX-EGF\_496

CGAAAAAAGAGGATATAATTGATGGATATTGCTCGGGAATTGGATGTTGCCAGACTTCAATCCCAACAG

GTTTGAAGAGTTTTGTGAGTCTAACAAGGAGTTTGAATAACCATACAAATG

>M6-PGSC0003DMG400027391-(rev)M6RLKWAX-EGF\_558

CCAACAGGTTTGAAGAGTTTTGTGAGTCTAACAAAGGAGTTTGAATAACCATACAAATGTGTCTTCTTTA  
ACCCGTGTGGCTACGTGTTTCTTGGTGAGCCTGATAAGTTCATTTTCAAG

>M6-PGSC0003DMG400027391-(rev)M6RLKWAX-EGF\_62

GTCATTACAATTCACAGCAAATCCATTGCTAATGCTACTACCATAACCAAACCTGGCTGTGATAGCAA  
TGTGGGAGCTTAACTGTTCCATTTCTTTTGGTATTGGTAACGGAACAGG

>M6-PGSC0003DMG400027391-(rev)M6RLKWAX-EGF\_620

TTCTTTTAAACCCGTGTGGCTACGTGTTTCTTGGTGAGCCTGATAAGTTCATTTTCAAGAGCTCGGATTTGT  
CAAATTCGAGTTTCAGGAACAAGTTATAGAGGAAGTCCCTGTGGTGAT

>M6-PGSC0003DMG400027391-(rev)M6RLKWAX-EGF\_682

CGGATTTGTCAAATTCGAGTTTCAGGAACAAGTTATAGAGGAAGTCCCTGTGGTGATTGATTGGGTTA  
TTGGCAATGGTAGTTGTACTGTGGCTAAGAAATCAGCAGATTATGCTTGTG

>M6-PGSC0003DMG400027391-(rev)M6RLKWAX-EGF\_744

TGGGTTATTGGCAATGGTAGTTGTACTGTGGCTAAGAAATCAGCAGATTATGCTTGTGGAGAAAATAGT  
GTTTGTGTAGATTCTAAGACAGGCCTCGGAGGTTATCGTTGCAGCTGCAA

>M6-PGSC0003DMG400027391-(rev)M6RLKWAX-EGF\_868

GATACCAGGGGAACCTTATATCAGTCCAGGTTGCATAGGTAAGACTGAATTCATGATTTGAACTTTTTG  
TGTTCAAGTTTGAATTTGCCTAACTTGGTTAGGAATCTACGATTTGTGC

>M6-PGSC0003DMG400027391-(rev)M6RLKWAX-EGF\_930

ACTTTTTGTGTTCAAGTTTGAATTTGCCTAACTTGGTTAGGAATCTACGATTTGTGCTTGTGTTAGTAAGG  
TTTGAGCCAAAGTTACTGTGTTCGAATGATGTTATATGTGTTGGTTAGT

>M6-PGSC0003DMG400027391-(rev)M6RLKWAX-EGF\_992

TTAGTAAGGTTTGAGCCAAAGTTACTGTGTTTGAATGATGTTATATGTGTTGGTTAGTGTGCAATTTGAG  
CCGAGAGTCTATCAGAAACAACCTCTTACGTTCTGATGTTTGATTAATT

>M6-PGSC0003DMG400027392-(rev)M6RLKWAX-EGF\_0

AAAAATATTTACCACTTCACCATGATCCCTCGTTGCTAGATGAAAGAATGATTCAATCTTCCATCATTCA  
TAGCCAACCCCAACCACCCACACACACCCCTCTCAAATCCACCATTAA

>M6-PGSC0003DMG400027392-(rev)M6RLKWAX-EGF\_1037

TAACTTTGACATTATTAGAGAAAAATTTGACCTTCCATTAACTTTGAATGCTCGTGATAAAATTCCTG  
AGTTTGTATTGATTTATAGGAACCAAGTTTTGGAGTATCAAAAGTGGG

>M6-PGSC0003DMG400027392-(rev)M6RLKWAX-EGF\_1098  
AAAATTCCTGAGTTTGTATTGATTTATAGGAACCAAGTTTTGGAGTATCAAAAGTGGGCTAAACCACTT  
GCTAAAAAATTGCTTGAGGTGCTATTGAAAGGTCTCAATGTCAGTGAAAT

>M6-PGSC0003DMG400027392-(rev)M6RLKWAX-EGF\_1159  
AAACCACTTGCTAAAAAATTGCTTGAGGTGCTATTGAAAGGTCTCAATGTCAGTGAAATTGACGAATCTT  
TAGAACCTCTCTTGATGGGAACCTATGTCTATAAACATCAACTATTATCCA

>M6-PGSC0003DMG400027392-(rev)M6RLKWAX-EGF\_122  
AAATCTCAAATTTCTTCTTCCATTTGTACACACTCATCAAGATTCAATACAAATGTCTTCTTCAAATTTG  
AACCAAATGATGACATACTTGATTTTGTAAATCAAGAAAGCAAATGGAC

>M6-PGSC0003DMG400027392-(rev)M6RLKWAX-EGF\_1220  
ACGAATCTTTAGAACCTCTCTTGATGGGAACCTATGTCTATAAACATCAACTATTATCCACCATGCCCAAAT  
CCAAGTATCGCCATTGGTTTTCGTAGACACTGCGACATGGGCTGCATAA

>M6-PGSC0003DMG400027392-(rev)M6RLKWAX-EGF\_1342  
TTGCTCCTCTAGGACGACACGGGAGGCCTATATATCCGAGGGACTAAAGGCAACTGGATTCACGTAAAT  
CCTATCAAAGGTGCCTTAGCGGTTAATATTGGTGACTCATTGCAGATCATG

>M6-PGSC0003DMG400027392-(rev)M6RLKWAX-EGF\_1464  
CAATGATCGATACAAGAGTATCGAGCATTGTGTAGCAGTTGATTGAGCAGGGCTCGAATATCTGTACC  
GCTATTAGTGAATCCTAGTTTTGATAGTGTGATTGGTTCATTCCCACAAAT

>M6-PGSC0003DMG400027392-(rev)M6RLKWAX-EGF\_1525  
TCTGTACCGCTATTAGTGAATCCTAGTTTTGATAGTGTGATTGGTTCATTCCCACAAATGCTAAAAGATGG  
AGAAAAACCAAGTGTACAAACATATTTTGTCTCTGATTATTGGGATCAT

>M6-PGSC0003DMG400027392-(rev)M6RLKWAX-EGF\_1586  
TAAAAGATGGAGAAAAACCAAGTGTACAAACATATTTTGTCTCTGATTATTGGGATCATTGCTTCATTAA  
GAGGCCTTCTGGTAAAGCATCACTAGATTTTGCAAAAATTTGATGCTTTA

>M6-PGSC0003DMG400027392-(rev)M6RLKWAX-EGF\_1708  
TTTCAAATTTCTTGATGCTAATGTTTTGTATTATAAATCTGTTATTGTAATGACGATAACTGTTATTTTAT  
GTAACCTGCAATTTGGTGTGATCTTGTCGGTATTTATTTATTTTTT

>M6-PGSC0003DMG400027392-(rev)M6RLKWAX-EGF\_1769  
CTGTTATTTTATGTAACCTGCAATTTGGTGTGATCTTGTCGGTATTTATTTATTTTTTCTTTATCTTGCCCT

TTCTTATTTTAAGAACAATGTTGGGAGTAAGTGTATGATCAAGCAG

>M6-PGSC0003DMG400027392-(rev)M6RLKWAX-EGF\_1830

TTATCTTGCCCTTTCTTATTTTAAGAACAATGTTGGGAGTAAGTGTATGATCAAGCAGGGGCGTTGATC

AATGATGACTCAATAAACTTTAGCTTGGGATCGACGTCTTTCTCCTTCTC

>M6-PGSC0003DMG400027392-(rev)M6RLKWAX-EGF\_1891

GCGTTGATCAATGATGACTCAATAAACTTTAGCTTGGGATCGACGTCTTTCTCCTTCTCTGATCTCAATAG

TTTGATGGTACTTGGCTGCGATGACTCAGCTCTCTATGAAGGGAGGAAC

>M6-PGSC0003DMG400027392-(rev)M6RLKWAX-EGF\_1952

ATCTCAATAGTTTGATGGTACTTGGCTGCGATGACTCAGCTCTCTATGAAGGGAGGAACTTTACTAGTGG

ATGCATTTCACTATGCGCGAAAAAAGAGGATATAATTGAAGGATATTGCT

>M6-PGSC0003DMG400027392-(rev)M6RLKWAX-EGF\_2379

CCTCGGAGGTTATCGTTGCAACTGCAAACCGGGATACCAGGGGAACCCATCAGTCCAGGTTGCATAG

GTAAGACTGAATTCATGATTTGAACTTTTTGTGTTGAGTTTGAAATTGTC

>M6-PGSC0003DMG400027392-(rev)M6RLKWAX-EGF\_244

AAAGGCCTAGTAGACACAAACCTTGAAATTATCCCAAATCAATGCATTCAACCAAAGAACATAGACTA

GACATGTCCCAAATTGATAATCAAGAATCAATCCCAACAATTGATTTATCA

>M6-PGSC0003DMG400027392-(rev)M6RLKWAX-EGF\_2440

TTGCATAGGTAAGACTGAATTCATGATTTGAACTTTTTGTGTTGAGTTTGAAATTGTCGTAACCTTGGTTA

GGAATCTACGATTTGTGCTTGTAGTAAGGTTTGAGCCAAAGTTACTG

>M6-PGSC0003DMG400027392-(rev)M6RLKWAX-EGF\_2745

AGATTGGTGATGGCAAAAAGGACAGCCACGGTTGCATCCCTAAGAACTCTAAGTCACCCGTCCTTCAAC

TCTCACTCGGTACGTCTACTCTATGTCCAATCAAACACCTTCATATAAAAT

>M6-PGSC0003DMG400027392-(rev)M6RLKWAX-EGF\_2806

CCTTCAACTCTCACTCGGTACGTCTACTCTATGTCCAATCAAACACCTTCATATAAAATGAAAACGGTTAA

GAGTATACTAAATTTGCACTTTCATTGCAGGTTTGTGCTTTGATTTTCT

>M6-PGSC0003DMG400027392-(rev)M6RLKWAX-EGF\_2867

AAACGGTTAAGAGTATACTAAATTTGCACTTTCATTGCAGGTTTGTGCTTTGATTTTCTGGCTTTGGTCAT

CAGTGCAACTTGGATATACTTAGGCATCAAAGAAGACGACTCATAAGA

>M6-PGSC0003DMG400027392-(rev)M6RLKWAX-EGF\_305

ATAGACTAGACATGTCCCAAATTGATAATCAAGAATCAATCCCAACAATTGATTTATCAAATTTTGATGAT  
TTAAATGTTGAAAAGTCAATTCAAGAAGCATCAAGCAAGTGGGGTTTCT

>M6-PGSC0003DMG400027392-(rev)M6RLKWAX-EGF\_3050

AGGGTGGTATACAGTATGCAGCTAAGATATTTACAGCAGCAGAACTCGAGAAATCCACCAACAACATG  
CTGTGGATCGTATCCTAGGCCGAGGTGGTTATGGTACAGTTTACAAAGGTA

>M6-PGSC0003DMG400027392-(rev)M6RLKWAX-EGF\_3111

CAACTATGCTGTGGATCGTATCCTAGGCCGAGGTGGTTATGGTACAGTTTACAAAGGTATCCTTGCGGA  
CAAACGTGTAGTTGCAATTA AAAAGTCTAGAACAATGGACGTCAGCCAAAT

>M6-PGSC0003DMG400027392-(rev)M6RLKWAX-EGF\_3416

ATTAAGAATAGCATCTGAAGCTGCTGGTGCCTCGCGTAACTTCATTCTGCAGCTTCTACACCTGTAATTC  
ATTGAGATGTGAAGTCTACAAACATTCTACTCGATGAGAATTACTGC

>M6-PGSC0003DMG400027392-(rev)M6RLKWAX-EGF\_3599

GGTTCAAGGAACTTTAGGTTACTTAGATCCTGAATACTTCCACACAAGTCAATTGACAGAAAAGAGTGA  
CGTTTATAGTTTTGGTGTCTGTTCTTGCAGAGCTCTTAACAGCGCGAATGCC

>M6-PGSC0003DMG400027392-(rev)M6RLKWAX-EGF\_3965

TAAACTCAACAATGTCAAGATGAGGAGAGTCTTGGACTAATAACAGAACAAACATTGGACCTTTACGC  
GATTATTATGAACGCGAACATCATGTCTAACGGAGAATTCTCCGGACAACA

>M6-PGSC0003DMG400027392-(rev)M6RLKWAX-EGF\_4026

CTTTACGCGATTATTATGAACGCGAACATCATGTCTAACGGAGAATTCTCCGGACAACAGAGCTTGGATA  
GTCAGATGATGTTACAAATTCATAGTCCCCGGTGATCGATTACTTGTGAA

>M6-PGSC0003DMG400027392-(rev)M6RLKWAX-EGF\_4087

GCTTGGATAGTCAGATGATGTTACAAATTCATAGTCCCCGGTGATCGATTACTTGTGAATGGCCTGCATT  
TGTGTGTCCTAACTTGTATGTTACATGAAAATATGATTCGTCAAATCCGT

>M6-PGSC0003DMG400027392-(rev)M6RLKWAX-EGF\_4148

GCCTGCATTTGTGTGTCCTAACTTGTATGTTACATGAAAATATGATTCGTCAAATCCGTCCAAGTTTGCC  
TAGTCATTGGTTCTAGTATAATGATTCATCAAATCCGTCCAAGTTTGCC

>M6-PGSC0003DMG400027392-(rev)M6RLKWAX-EGF\_4209

AAGTTTGGCCTAGTCATTGGTTCTAGTATAATGATTCATCAAATCCGTCCAAGTTTGGCCTAGTCATTGGT  
TCGTCTATTTACTAGCTCAACTCATTTCAACTCATTAAAAGACTAGGCT



>M6-PGSC0003DMG400027392-(rev)M6RLKWAX-EGF\_427

CAAATCATCAATCATGGGATCCCAATTGAAGTTCTTGAAGATTTGAAGGATGCTGCACACAAATTCTTTG  
AATTGCCAGCTGAAGAAAAAGTTAAGTATCATAAAGAAAACTTAGTCCT

>M6-PGSC0003DMG400027392-(rev)M6RLKWAX-EGF\_4270

AGTCATTGGTTCGTCTATTTACTAGCTCAACTCATTCAACTCATTAAAAGACTAGGCTGATATGTTGCAG  
AATGTAGTTCCCCTTATTATTTTGTGTTTATAATTTAACTTGTATAAA

>M6-PGSC0003DMG400027392-(rev)M6RLKWAX-EGF\_4331

TATGTTGCAGAATGTAGTTCCCCTTATTATTTTGTGTTTATAATTTAACTTGTATAAATTAGTGTATAATT  
CCACATTTCTTGAATTTTGAGCATTGGCATTGTTGATTTTTTTTTGT

>M6-PGSC0003DMG400027392-(rev)M6RLKWAX-EGF\_4392

AGTGATAATTCCACATTTCTGAATTTTGAGCATTGGCATTGTTGATTTTTTTTTGTATAATTTAACTTTT  
GACATTATCAAACACATTTATTTAGAGAGAGGCAAATACGTGCATTT

>M6-PGSC0003DMG400027392-(rev)M6RLKWAX-EGF\_4453

AATTTAACTTTTGACATTATCAAACACATTTATTTAGAGAGAGGCAAATACGTGCATTTTCTAGCAAATGA  
AGGACACTAAACATTTGAATTTTTTAAGTGGTAGTGCTTTTAAAAGACT

>M6-PGSC0003DMG400027392-(rev)M6RLKWAX-EGF\_4514

TAGCAAATGAAGGACTAAACATTTGAATTTTTTAAGTGGTAGTGCTTTTAAAAGACTTTTTAAAGCTTT  
TTCCTACTTAGTAAAAAATATAATCCACATTTAATATATGTCTCCATCA

>M6-PGSC0003DMG400027392-(rev)M6RLKWAX-EGF\_4575

TTAAAGCTTTTTCTACTTAGTAAAAAATATAATCCACATTTAATATATGTCTCCATCAAATTTATAGCTAT  
AAAAGTTATACTATGAAAAGTAAATAAGAAAATTAATTATATCTATT

>M6-PGSC0003DMG400027392-(rev)M6RLKWAX-EGF\_4636

TTTATAGCTATAAAAGTTATACTATGAAAAGTAAATAAGAAAATTAATTATATCTATTTTTACTGATAAT  
TTTTACGGATATAATATACAAAATTCATCATTATAACAACCGACAAAA

>M6-PGSC0003DMG400027392-(rev)M6RLKWAX-EGF\_4697

TACTGATAATTTTTACGGATATAATATACAAAATTCATCATTATAACAACCGACAAAAAAGTTATGGAT  
GTTATCTACAAACCACAATTCATCTATGGACATCAAGAAGCCACCTCACC

>M6-PGSC0003DMG400027392-(rev)M6RLKWAX-EGF\_4758

GTTATGGATGTTATCTACAAACCACAATTCATCTATGGACATCAAGAAGCCACCTACCAATTTCCAAATA

GCTATTTTATGATAATGATGTTTGATTAATAAAAAATAAAAATTCAAA

>M6-PGSC0003DMG400027392-(rev)M6RLKWAX-EGF\_488

AATTCTTTGAATTGCCAGCTGAAGAAAAGTTAAGTATCATAAAGAAAACTTAGTCCTGGTGAATCTGT

GTTTATGTTTTGGAATGCTATTGGTGAGAAAGATGAGAAAGTTTTGGAGT

>M6-PGSC0003DMG400027392-(rev)M6RLKWAX-EGF\_4880

ACTAGATAAAAAATCAATTCAAGAATTTTGTAGGTCATTAATATATCATCCACATACCCCATCCCTGCT

CCCTTCAAATAATAGATTAATCATTGCTATTTGATATTCATATTGAGT

>M6-PGSC0003DMG400027392-(rev)M6RLKWAX-EGF\_4941

CATCCCTGCTCCCTTCAAATAATAGATTAATCATTGCTATTTGATATTCATATTGAGTCCAAATAAAATTG

AATTTGCACCGAAAAATCTTATATTGAAAAGTAAAACAATCTCTAATA

>M6-PGSC0003DMG400027392-(rev)M6RLKWAX-EGF\_5002

AAATAAAATTGAATTTGCACCGAAAAATCTTATATTGAAAAGTAAAACAATCTCTAATAAGAGCAATATT

GTATTTGGAAAAATTCGAATACAAGACATTTGATTAATAATGAAAAATAT

>M6-PGSC0003DMG400027392-(rev)M6RLKWAX-EGF\_5063

AGCAATATTGTATTTGAAAAATTCGAATACAAGACATTTGATTAATAATGAAAAATATTTACCACTTCA

CCATAATCTCTCGTTGCTAGATGAAAGTATGATTCAATCTCCATCATT

>M6-PGSC0003DMG400027392-(rev)M6RLKWAX-EGF\_5124

ACCACTTACCATAATCTCTCGTTGCTAGATGAAAGTATGATTCAATCTTCCATCATTTCCATAGTCAGCCC

CCTTTTGCCCCACCCTCACTTGAATAATAGAAGAAGGAATAATATTTT

>M6-PGSC0003DMG400027392-(rev)M6RLKWAX-EGF\_5185

TAGTCAGCCCCCTTTTCCCCACCCTCACTTGAATAATAGAAGAAGGAATAATATTTTTTTTATCATCGG

AGGTTTGATATTCATTTTGAAGTCCAATGAAATTTGAATTCACACCAAAA

>M6-PGSC0003DMG400027392-(rev)M6RLKWAX-EGF\_5246

TTATCATCGGAGGTTTGAATTCATTTTGAAGTCCAATGAAATTTGAATTCACACCAAAAAGTCTCATATTA

AGAGGATGGTTTTTAAACAAGTCAATTTTGTATTCAGGGAATTTGAAT

>M6-PGSC0003DMG400027392-(rev)M6RLKWAX-EGF\_5307

TCTCATATTAAGAGGATGGTTTTTAAACAAGTCAATTTTGTATTCAGGGAATTTGAATCTAAAACATCTG

ATTAAAGACGAAAAAGTATTTACCACTTTATAATAACCCATCGATGTTA

>M6-PGSC0003DMG400027392-(rev)M6RLKWAX-EGF\_5368

AAAACATCTGATTAAAGACGAAAAAGTATTTACCACTTTATAATAACCCATCGATGTTAAAGTAATGATT  
CAATCTTTCATCATTTTCATAGTCCACTCCCCTTCTTTCCTCTCCCCCAT

>M6-PGSC0003DMG400027392-(rev)M6RLKWAX-EGF\_5429

GTAATGATTCAATCTTTCATCATTTTCATAGTCCACTCCCCTTCTTTCCTCTCCCCCATAACACACCCCTCTCA  
AACCCACCGCTAAAAAACCCCCAAATTTCTTTCCTTGCATTAGTACA

>M6-PGSC0003DMG400027392-(rev)M6RLKWAX-EGF\_549

TGAATCTGTGTTTATGTTTTGGAATGCTATTGGTGAGAAAGATGAGAAAGTTTTGGAGTGGAGGGATAG  
TATAAACATGGTTGTAATCCACAAAATGATAGCAATCTTGGCCTCCTCA

>M6-PGSC0003DMG400027392-(rev)M6RLKWAX-EGF\_5490

ACACCCCTCTCAAACCCACCGCTAAAAAACCCCCAAATTTCTTTCCTTGCATTAGTACACACTCATCAAGA  
TTCAACACAAATGCCTTCATCAAATTTGAACCAAATGATGACATACTT

>M6-PGSC0003DMG400027392-(rev)M6RLKWAX-EGF\_5551

CTCATCAAGATTCAACACAAATGCCTTCATCAAATTTGAACCAAATGATGACATACTTGATTTTGTAATC  
AAGAAAACAAATGGACTAAAAGGCCTAGTAGACACAGGCCTTGAAAATA

>M6-PGSC0003DMG400027392-(rev)M6RLKWAX-EGF\_5612

TTTTGTAATCAAGAAAACAAATGGACTAAAAGGCCTAGTAGACACAGGCCTTGAAAATATCCCAAATCA  
ATGTATTCAACAAAAGACCAAAGACTAGAAAATCTCAAATTGACAATCA

>M6-PGSC0003DMG400027392-(rev)M6RLKWAX-EGF\_5673

CCAAATCAATGTATTCAACAAAAGACCAAAGACTAGAAAATCTCAAATTGACAATCAAGAATCAATCC  
CAACAATTGATTTATCAAATTTTGATGATTTAAGTGTTGAAAAATCAATT

>M6-PGSC0003DMG400027392-(rev)M6RLKWAX-EGF\_5734

AATCAATCCCAACAATTGATTTATCAAATTTTGATGATTTAAGTGTTGAAAATCAATTCAAGATGCCGCA  
AGCAAGTGGGGTTTCTTCCAAATCATCAATCATGGCATCCCAATTGAAG

>M6-PGSC0003DMG400027392-(rev)M6RLKWAX-EGF\_5795

AGATGCCGCAAGCAAGTGGGGTTTCTTCCAAATCATCAATCATGGCATCCCAATTGAAGTTCTTGATGAT  
TTAAAGGAAGCAGGGCACAAATTTTAAATTGCCATCTGAAGAAAAAGT

>M6-PGSC0003DMG400027392-(rev)M6RLKWAX-EGF\_5856

CTTGATGATTTAAAGGAAGCAGGGCACAAATTTTAAATTGCCATCTGAAGAAAAAGTTAAGTATAAC  
AAAGAGAGCTATAATGCTGGTGAATCTGTGTTGATGTTTTTGAGTGTTATT

>M6-PGSC0003DMG400027392-(rev)M6RLKWAX-EGF\_5917

AGTATAACAAAGAGAGCTATAATGCTGGTGAATCTGTGTTGATGTTTTGAGTGTTATTGGTGAGAAAG  
ATGAAAAAGTTTTGGAGTGGAGGGATGGTATAAGACATGGTTGTAATCCAC

>M6-PGSC0003DMG400027392-(rev)M6RLKWAX-EGF\_6039

AATGATAGCAATCTTTGGCCTCCTCAAACAAGGTAACTTTTGGGGTTTTCTGCTCCATGTAATTTATAGG  
TCACGAGTTTCCAAGTATTACTTTTGCAGTTTCATATCTTTTACTATA

>M6-PGSC0003DMG400027392-(rev)M6RLKWAX-EGF\_61

CATCATTTTCATAGCCAACCCCAACCACCCACACACACCCCTCTCAAATCCACCATTAATAAAAAATCTCAA  
TTTCCTTCTTCCATTTGTACACACTCATCAAGATTCAATACAAATGTCT

>M6-PGSC0003DMG400027392-(rev)M6RLKWAX-EGF\_6100

AATTTATAGGTCACGAGTTTCCAAGTATTACTTTTGCAGTTTCATATCTTTTACTATAAAGGTGTTTGTGT  
TCTGAACTATCACCAACTATTTATCAAACACATTCCAAAACACTGACTA

>M6-PGSC0003DMG400027392-(rev)M6RLKWAX-EGF\_6161

GTGTTTGTGTTTCTGAACTATCACCAACTATTTATCAAACACATTCCAAAACACTGACTAGATCAAGTGTTT  
GAATACAGTGCGTCACAACCTTAATTTGCCCATAGAATTTTGTCCAAATG

>M6-PGSC0003DMG400027392-(rev)M6RLKWAX-EGF\_6222

TCAAGTGTTTGAATACAGTGCGTCACAACCTTAATTTGCCCATAGAATTTTGTCCAAATGGCAAAGTAATTT  
TGATGATAGTTCATATAGGAAAGGAAACTCGTGAAAACGTGATACTTTA

>M6-PGSC0003DMG400027392-(rev)M6RLKWAX-EGF\_6283

AAAGTAATTTTGTGATAGTTCATATAGGAAAGGAAACTCGTGAAAACGTGATACTTTAGATGCGTTTTT  
TTATCATTATCTCAAGACTTTTTTTATAACGGTGTATATATATCTTTTTT

>M6-PGSC0003DMG400027392-(rev)M6RLKWAX-EGF\_6527

ATTTATGACTTTGGCATTGAATCTTGAACATTATTAGCAAAATTCTTGACCTTGCCATTAATTTTGAACA  
CTCTTGGTGAAATTTCTGACTTTGATACTGTTTACAGGAATCAAGTCTT

>M6-PGSC0003DMG400027392-(rev)M6RLKWAX-EGF\_6588

ATTTTGAACACTCTTGGTGAAATTTCTGACTTTGATACTGTTTACAGGAATCAAGTCTTGGAGTATCAAAA  
GTGGGCTACACCACTTGCTAAAAAATTGCTTGAGGTGCTATTGAAAGGT

>M6-PGSC0003DMG400027392-(rev)M6RLKWAX-EGF\_6649

AGTATCAAAGTGGGCTACACCACTTGCTAAAAAATTGCTTGAGGTGCTATTGAAAGGTCTCAATGTCA

ATGAAATTGATGAATCTTTAGAACCTCTCTTGATGGGAACTATGGCTATCA

>M6-PGSC0003DMG400027392-(rev)M6RLKWAX-EGF\_671

CAAGGTAACATTTTGGGGTTTTCTACTCTGTGTAATCAATAGGTCACGGGTTTTCAAGTAGTATTACTTTT  
TGGGAAGTGCTTGCATTTCTAAACTATCCAACCTATTTATCAAAACATAT

>M6-PGSC0003DMG400027392-(rev)M6RLKWAX-EGF\_6710

CAATGTCAATGAAATTGATGAATCTTTAGAACCTCTCTTGATGGGAACTATGGCTATCAATATAAACTAC  
TATCCACCTTGCCCAAATCCAAGTATCGCCATTGGTTTTCGTAGACACTG

>M6-PGSC0003DMG400027392-(rev)M6RLKWAX-EGF\_6771

ATAAACTACTATCCACCTTGCCCAAATCCAAGTATCGCCATTGGTTTTCGTAGACACTGCGACATGTCCTG  
TATAACTCTGCTCCTCCAGGACGACATGGGAGGCCTATATGTCCGAGGG

>M6-PGSC0003DMG400027392-(rev)M6RLKWAX-EGF\_6832

ACATGTCCTGTATAACTCTGCTCCTCCAGGACGACATGGGAGGCCTATATGTCCGAGGGACTATAGGTG  
ATAACTGGATTCACGTAAATCCTATCAAAGGTGCCTTGGCGGTTAACATAG

>M6-PGSC0003DMG400027392-(rev)M6RLKWAX-EGF\_6893

TATAGGTGATAACTGGATTCACGTAAATCCTATCAAAGGTGCCTTGGCGGTTAACATAGGTAACCTATTG  
CAGATCATGAGCAACGATTGATACAAGAGTATCGAGCATTGTGTAGCAGT

>M6-PGSC0003DMG400027392-(rev)M6RLKWAX-EGF\_6954

AACTCATTGCAGATCATGAGCAACGATTGATACAAGAGTATCGAGCATTGTGTAGCAGTTGATTCTAGC  
AGGGCTCGAATATCTGTACCGCTATTTGTGAATCCTAGCCCTGATAGTGTC

>M6-PGSC0003DMG400027392-(rev)M6RLKWAX-EGF\_7015

ATTCTAGCAGGGCTCGAATATCTGTACCGCTATTTGTGAATCCTAGCCCTGATAGTGTCATTGGTCCATTC  
CCACAAATACTCAAAGATGGAGAAAAATTAGTGTACAAACATGTTTTGT

>M6-PGSC0003DMG400027392-(rev)M6RLKWAX-EGF\_7076

TGGTCCATTCCCACAAATACTCAAAGATGGAGAAAAATTAGTGTACAAACATGTTTTGTTCTCCGATTATT  
GGGATCATTACTTCAGTAAGAGGCCCTCTGGTAATGCATCACTAGATTT

>M6-PGSC0003DMG400027392-(rev)M6RLKWAX-EGF\_7198

CTAAAATTTGATGTTTTAATTCACAAATTTCTTTGTTATGCAATGACAAAAAGTATTTCTTTATGTAACCGG  
TAGTTTGTGTGATTGTATTGTTATCTTATTTTGTCTAATGATTTTCAT

>M6-PGSC0003DMG400027392-(rev)M6RLKWAX-EGF\_7259

TATGTAACCGGTAGTTTGTGTGATTGTATTGTTATCTTATTTTGTCTAATGATTCATAATCTTATTTTGC  
CCTTCATCCTACATTTTGTATAATAACTTTCCCCCATATTTTTTTT

>M6-PGSC0003DMG400027392-(rev)M6RLKWAX-EGF\_7317

TAATCTTATTTTGGCCTTCATCCTACATTTTGTATAATAACTTTCCCCCATATTTTTTTTCAATGTAATAA  
TGTCAGGGGTGGACCCACATGTTGAACCCACTCGGTTGGAAAATTT

>M6-PGSC0003DMG400027392-(rev)M6RLKWAX-EGF\_732

TATTACTTTTTGGGAAGTGCTTGCATTTCTAAACTATCCAACATTTTATCAAACATATTTAAAACTAACT  
AGATTAAGTGGTTGAATACAACCTTATCTCAAGATTTTATAATGGTGTT

>M6-PGSC0003DMG400027392-(rev)M6RLKWAX-EGF\_793

AAAACTAACTAGATTAAGTGGTTGAATACAACCTTATCTCAAGATTTTATAATGGTGTTTATAACTTAAAT  
CAAAAGTATATCGCATATGTAGGAGAAAAGTTATCATTTATACGATTAC

>M6-PGSC0003DMG400027407M6LRR-RLP\_1178

GGAGCTGCCAGACAATGACATATTACCAGCGTTGATGTTGAGCTACAATGATCTTCCCGCACATTTAAAG  
CAATGTTTTTCTTATTGTGCAATCTTCCCAAAGATTATCCATTTTCGGAA

>M6-PGSC0003DMG400027407M6LRR-RLP\_124

TTTTAAAGAAGCTGAGGATGACTTTGCTTCTTCAGGCTGTGCTAAGTGATGCAGAGAACAAGCAGA  
CATCAAATCCATATGTGAGTCAGTGGCTTAGTGAGTTTCGAGATGCTGTGG

>M6-PGSC0003DMG400027407M6LRR-RLP\_1302

CAAGTCATTCAACTGTGGATTGCTAATGGTCTATTAAAGGGGTTGCAAAAAGATGAAACAATTGAAGAC  
TTAGGCAACCTATACTTTCTCGAGTTGAGATCAAGATCACTTTTCGAAAGG

>M6-PGSC0003DMG400027407M6LRR-RLP\_1488

CAAGTTGCATCTTCAAACCTTGCATCAGGTTGGAAGATAACGAAGGATCTCATATGTTGGAAAAATGTC  
GACACCTATCATATTCATTGGGAGATGGTGTCTTTGAGAAGTTGAAACCA

>M6-PGSC0003DMG400027407M6LRR-RLP\_1550

AAAATGTCGACACCTATCATATTCATTGGGAGATGGTGTCTTTGAGAAGTTGAAACCACTCTACAAATCA  
AAGCAGCTGAGGACATTGCTTCCAATCAATATCCAGTGTGGGTACTCATT

>M6-PGSC0003DMG400027407M6LRR-RLP\_1612

ACAAATCAAAGCAGCTGAGGACATTGCTTCCAATCAATATCCAGTGTGGGTACTCATTTCCTTAAGCAA  
GAGGGTGTGTATAACATATTGCCAAGACTAACATCCTTAAGGGCTTTAT

>M6-PGSC0003DMG400027407M6LRR-RLP\_1798

TTTTGGACCTTTCTCAGACGCGATAAGAAAGTTACCAGATTCCATATGTGCATTGTATAACTTGGAGAT  
ACTCCTCTTGTCTTCTTGTATATATCTTGAGGAGTTACCGCAGCATATGG

>M6-PGSC0003DMG400027407M6LRR-RLP\_186

AAGCAGACATCAAATCCATATGTGAGTCAGTGGCTTAGTGAGTTTCGAGATGCTGTGGATGGTGCTGAA  
AACTTAATAGAAGAAGTCAACTATGAAGCTCTGAGACTTAAGGTGGAAGGT

>M6-PGSC0003DMG400027407M6LRR-RLP\_1860

TTGGAGATACTCCTCTTGTCTTCTTGTATATATCTTGAGGAGTTACCGCAGCATATGGAAAAGTTGATCA  
ACTTGCGTCACCTTGACACTACTGGCACTTCTCTCTTGAAGATGCCACTA

>M6-PGSC0003DMG400027407M6LRR-RLP\_1984

CAAGCAAGTTGAAAAACCTCCATGTGCTAGTAGGATTTAAGTTTATTCTAGGTGGCTGCAATGATTTGAG  
AATGGTAGATTTAGGTGAACTACGCAATTTGCATGGATCTATATCAGTTC

>M6-PGSC0003DMG400027407M6LRR-RLP\_2170

TTGAGATGTTGTCGTTGGAGTGGAGTGAGAGTATTGCTGACAGTTCTCAAACCTGAAGGAGACATACTCG  
ATAAACTACAACCAAATACAAACATAAAGGAACTGGAAATCGCTGGATATA

>M6-PGSC0003DMG400027407M6LRR-RLP\_2356

GCAATTGCAACAACCTGTGCTTCCTTGCCAGCACTAGGACAACCTCCTTCTTTGAAATTCCTTACCGTTAGA  
GGGATGCATCGAATAACAGAAGTGAGTGAAGAGTTCTACGGTACGTTGT

>M6-PGSC0003DMG400027407M6LRR-RLP\_2418

ACCGTTAGAGGGATGCATCGAATAACAGAAGTGAGTGAAGAGTTCTACGGTACGTTGTCATCCAAAAA  
GCCATTTAACTCTCTTGAGAAGCTTGAATTTGCAGAGATGCCGGAGTGGAAG

>M6-PGSC0003DMG400027407M6LRR-RLP\_248

TGCTGAAAACCTTAATAGAAGAAGTCAACTATGAAGCTCTGAGACTTAAGGTGGAAGGTCAGCATCAAAA  
TCTCGCAGAAACAATCACCAAGCAAGTTATTACCATAAAGGAGAAGTTGGA

>M6-PGSC0003DMG400027407M6LRR-RLP\_2542

GGCATGTACTGGGGAAGGGAGAGTTCCCTGCACTTCATGACTTCTTAATTGAAGATTGCCCAAGCTGA  
TTGGGAAGTTGCCTGAAAACTTTGCTCTCTGGGAGGATTGAGAATTTCAA

>M6-PGSC0003DMG400027407M6LRR-RLP\_2604

AAGCTGATTGGGAAGTTGCCTGAAAACCTTTGCTCTCTGGGAGGATTGAGAATTTCAAATGTCCTGAA

CTCAGTCCGGAGGCACCTATCCAACCTTTCAAATTTGAAAGAGTTTAAAGTT

>M6-PGSC0003DMG400027407M6LRR-RLP\_2666

TCCTGAACTCAGTCCGGAGGCACCTATCCAACCTTTCAAATTTGAAAGAGTTTAAAGTTGTAGGTTCTCCT  
AAAGTTGGAGTTCTTTTTGATGATGCTCAGCTGTTTACATCTCAACTTCA

>M6-PGSC0003DMG400027407M6LRR-RLP\_2728

GTTCTCCTAAAGTTGGAGTTCTTTTTGATGATGCTCAGCTGTTTACATCTCAACTTCAGGGAATGAAACAG  
ATTGTTGAATTATGTATTCATGATTGTCACTCTTTACCTTCTTACCAA

>M6-PGSC0003DMG400027407M6LRR-RLP\_2790

ATGAAACAGATTGTTGAATTATGTATTCATGATTGTCACTCTTTACCTTCTTACCAATTAGCATTCTCCG  
AGTACCTTGAAGAAAATAGAGATATATCATTGCAGGAAACTGAAATTG

>M6-PGSC0003DMG400027407M6LRR-RLP\_2852

CATTCTTCCGAGTACCTTGAAGAAAATAGAGATATATCATTGCAGGAAACTGAAATTGGAGGCGTCAAT  
GATTTCTAGAGGGGATTGTAACATGTTTCTGGAGAATTTGGTAATATATGG

>M6-PGSC0003DMG400027407M6LRR-RLP\_2914

CGTCAATGATTTCTAGAGGGGATTGTAACATGTTTCTGGAGAATTTGGTAATATATGGATGTGATTCTAT  
AGATGATATATCACCAGAGTTTGTCCCAAGATCACACTATTTGAGTGTA

>M6-PGSC0003DMG400027407M6LRR-RLP\_2976

GATTCTATAGATGATATATCACCAGAGTTTGTCCCAAGATCACACTATTTGAGTGTAACAGTTGCCCA  
ACCTAACTAGGCTTTTGATTCTACTGAGACTGAAAACTCTATATTTGG

>M6-PGSC0003DMG400027407M6LRR-RLP\_3038

TTGCCCAACCTAACTAGGCTTTTGATTCTACTGAGACTGAAAACTCTATATTTGGCATTGTAAGAATC  
TTGAAATACTTTTCAAGTGGCATCTGGAACCTCAGACAATGTTGCGTAATTT

>M6-PGSC0003DMG400027407M6LRR-RLP\_310

ATCAAAATCTCGCAGAAACAATCACCAAGCAAGTTATTACCATAAAGGAGAAGTTGGAAGACACCATTG  
AAACATTGGAGGAGTTGCAAAGCAAATTGGTCTCCTTGATCTAACAAAGT

>M6-PGSC0003DMG400027407M6LRR-RLP\_3100

GTAAGAATCTTGAAATACTTTCAAGTGGCATCTGGAACCTCAGACAATGTTGCGTAATTTGAGTATTCGTGA  
CTGTGAGAAGCTGAAGTGGCTGCCAGAATGTATGCAGGAACTCATTCCAT

>M6-PGSC0003DMG400027407M6LRR-RLP\_3162



ATTCGTGACTGTGAGAAGCTGAAGTGGCTGCCAGAATGTATGCAGGAACTCATTCCATCTCTTAAGGAA  
CTAGAACTATGGTTTTGTACAGAAATAGTGTCCTTCCGGAAGGAGGATTG

>M6-PGSC0003DMG400027407M6LRR-RLP\_3224

TAAGGAACTAGAACTATGGTTTTGTACAGAAATAGTGTCCTTCCGGAAGGAGGATTGCCCTTCAATTTA  
CAAGTCCTTCGGATCCACTATTGTAAAAAAGTGGTGAATGCGCGAAAGGG

>M6-PGSC0003DMG400027407M6LRR-RLP\_3286

TCAATTTACAAGTCCTTCGGATCCACTATTGTAAAAAAGTGGTGAATGCGCGAAAGGGGTGGCATTAC  
AGAGACTCCCCTGTCTCAGAGAGTTAACCATCTTACATGATGGCAGTGACC

>M6-PGSC0003DMG400027407M6LRR-RLP\_3348

CATTTACAGAGACTCCCCTGTCTCAGAGAGTTAACCATCTTACATGATGGCAGTGACCTTGCTGGTGAAA  
ACTGGGAGTTGCCTTGCTCTATTCGAAGGCTTACCATATCCAATCTGAAA

>M6-PGSC0003DMG400027407M6LRR-RLP\_3410

TGGTGAAAAGTGGGAGTTGCCTTGCTCTATTCGAAGGCTTACCATATCCAATCTGAAAACATTAAGCAGC  
CAACTTTTCAAAGTCTTACCTCCCTGAATATTTATCTACTGGTAACTC

>M6-PGSC0003DMG400027407M6LRR-RLP\_3534

CAAATTCAGTCACTGCTGGAAGAAGGGCTTCCCACCTCTTTCTCGTCTAACGTTATTTGGCAATCATGA  
GCTCCATTCCCTACCGATTGAAGGTCTACGACAACTCACTTCACTTCGG

>M6-PGSC0003DMG400027407M6LRR-RLP\_3596

CAATCATGAGCTCCATTCCCTACCGATTGAAGGTCTACGACAACTCACTTCACTTCGGGATCTATTCATCT  
CTTCCTGTGATCAACTCCAATCTGTTCCAGAATCAGCACTGCCCTCCTC

>M6-PGSC0003DMG400027407M6LRR-RLP\_3658

TATTCATCTCTTCTGTGATCAACTCCAATCTGTTCCAGAATCAGCACTGCCCTCCTCCTCTCTGAGCTGA  
CCATTCAGAATTGCCATAAACTCCAATACCTTCCGGTAAAAGGGATGC

>M6-PGSC0003DMG400027407M6LRR-RLP\_372

ACCATTGAAACATTGGAGGAGTTGCAAAGCAAATTGGTCTCCTTGATCTAACAAAGTATCTTGATTCAG  
GTAAACAAGAAAAAAGGACATTTTCAACTTCTGTGGTTGATGAATCTGAT

>M6-PGSC0003DMG400027407M6LRR-RLP\_434

TGATTCAGGTAAACAAGAAAAAAGGACATTTTCAACTTCTGTGGTTGATGAATCTGATATCTTTGGTAGG  
CAGAATGAAATAGAGGAATTGATTGACCGTTTATTGTCAGAGGATGCAAA

>M6-PGSC0003DMG400027407M6LRR-RLP\_496

TTGGTAGGCAGAATGAAATAGAGGAATTGATTGACCGTTTATTGTCAGAGGATGCAAATGGAAAAAAT  
CTTACTGTAGTTCCTATTGTAGGAATGGGGGGTGTGGCAAGACAACACTTG

>M6-PGSC0003DMG400027407M6LRR-RLP\_558

AAAAATCTTACTGTAGTTCCTATTGTAGGAATGGGGGGTGTGGCAAGACAACACTTGCTAAAGCTGTTT  
ACAATGATGAGAAAGTGAAAAACCATTTTAATTTGAAAGCTTGGTTTTGT

>M6-PGSC0003DMG400027407M6LRR-RLP\_62

TAGGCTTGCTCCTAACGGTGAGCTGATGAAGATGTTTCAGAGGGACAAACATGATGTTCCGGCTTTTAAA  
GAAGCTGAGGATGACTTTGCTTGCTCTTCAGGCTGTGCTAAGTGATGCAGA

>M6-PGSC0003DMG400027407M6LRR-RLP\_620

AGCTGTTTACAATGATGAGAAAGTGAAAAACCATTTTAATTTGAAAGCTTGGTTTTGTGTATCTGAACCA  
TTTGACGCTCTCAGAATAACAAAAGGGTTACTTCAAGAAATTGGCTCATT

>M6-PGSC0003DMG400027407M6LRR-RLP\_682

CTGAACCATTTGACGCTCTCAGAATAACAAAAGGGTTACTTCAAGAAATTGGCTCATTTGACTCGAAGGC  
TGATAGCAATCTTAATCAGCTACATGTCAAATTGAAGGAAATCCTAAAGG

>M6-PGSC0003DMG400027407M6LRR-RLP\_744

TCGAAGGCTGATAGCAATCTTAATCAGCTACATGTCAAATTGAAGGAAATCCTAAAGGGAAAAAGGTTT  
CTTATTGTCCTAGATGATATGTGGAATGATAACTATAATGAGTGGGATGAC

>M6-PGSC0003DMG400027407M6LRR-RLP\_806

AAGGTTTCTTATTGTCCTAGATGATATGTGGAATGATAACTATAATGAGTGGGATGACTTGAGAAATCTT  
TTTGTAAGGAGATGTAGGAAGTAAGATCATTGTGACAACACGTAAAGA

>M6-PGSC0003DMG400027407M6LRR-RLP\_868

GAAATCTTTTTGTAAAAGGAGATGTAGGAAGTAAGATCATTGTGACAACACGTAAAGAAAGTGTTCCT  
TGGTGATGGGTAAGGAGCAAATTAGCATGGGAATTTTGTCTAGTGAAGTTT

>M6-PGSC0003DMG400027407M6LRR-RLP\_930

GTTGCCTTGGTGATGGGTAAGGAGCAAATTAGCATGGGAATTTTGTCTAGTGAAGTTTCTTGGTCTTTAT  
TTAAAAGACATGCATTTGAATACATGGATCCTGAGGAACAACGAGAACTT

>M6-PGSC0003DMG400027407M6LRR-RLP\_992

GTCTTTATTTAAAAGACATGCATTTGAATACATGGATCCTGAGGAACAACGAGAACTTAAAAGGTCGG

AAAACAAATTGTAGCTAAGTGCAAAGGACTGCCTTTAGCTCTGAAGACGCT

>M6-PGSC0003DMG400027410M6LRR-RLP\_1054

TTTTCAAAGTCTTACCTCCCTTGAATATTTATCTACTGGTAACTCACTTCAAATTCAGTCACTGCTGGAAG  
AAGGGCTTCCCACCTCTCTTCTCGTCTAACGTTATTTGGCAATCATG

>M6-PGSC0003DMG400027410M6LRR-RLP\_1302

ATTCAGAATTGCCATAAACTCCAATACCTTCCGGTAAAAGGGATGCCCACTTCAATCTCTTCACTATCTAT  
TTACGACTGTCCATTGCTCAAACCACTCCTTGAATTTGACAAAGGAGAA

>M6-PGSC0003DMG400027467M6LRR-RLK\_0

ATGTGGTAATGGTAGATATGTTTATCTCCTCAGATTTTAAAGCTGGAGAAGATTGTTACAAGAATGAATT  
TTATTGAACTATCAAAGCGACTTCGAATTTAGCCAAGACAATGAAATC

>M6-PGSC0003DMG400027467M6LRR-RLK\_126

GGAATGCTGGGGAAAGTGTACAAAGCACTAGTCCCAAATGGATGGACTGTTGCCATAAAGAGGCTCCA  
AAGTTCTGAGGATTTGGAGGAAGAGTTTGTTCGAGATCACAACCTTAGGT

>M6-PGSC0003DMG400027467M6LRR-RLK\_189

CTCCAAAGTTCTGAGGATTTGGAGGAAGAGTTTGTTCGAGATCACAACCTTAGGTATTTGAGGCATC  
CGAATTTAGTGCCCCTAATTGGATTTTGTATGAGAGGGACGAGCGGATT

>M6-PGSC0003DMG400027467M6LRR-RLK\_252

AGGCATCCGAATTTAGTGCCCCTAATTGGATTTTGTATGAGAGGGACGAGCGGATTCTGGTTTACAAAT  
ACATGCCTAATGGAACTTACATGAGTGGCTACATTCAACCGACGACAGG

>M6-PGSC0003DMG400027467M6LRR-RLK\_315

TACAAATACATGCCTAATGGAACTTACATGAGTGGCTACATTCAACCGACGACAGGGCAAGACTCTTG  
GACTTCCCTCTAAGGGTTAAAATTGTTGTTGGTGTGCGGAAAGCCCTGGCT

>M6-PGSC0003DMG400027467M6LRR-RLK\_441

CATGATGGTGGAAATTTCCATGTCGTGCATAGTAACATTAGCACACAATGTATCTTGCTCGATGAAAATT  
TCGATCCCAAGTTATCCAATTTGGGAGGCAACATTTGTAGAACCAAATG

>M6-PGSC0003DMG400027467M6LRR-RLK\_504

GAAAATTTGATCCCAAGTTATCCAATTTGGGAGGCAACATTTGTAGAACCAAATGACATAGGTTCAA  
CTTGAGTCTATCGCCAATGGTTCGAGTTTTTAGACTTTACAACATACAAAA

>M6-PGSC0003DMG400027467M6LRR-RLK\_567

GTTCAAACCTTGAGTCTATCGCCAATGGTCGAGTTTTTAGACTTTACAACATACAAAAAAGATGTCTATAA  
ATTTGGGGTTGTGCTTCTCGAGATTTTAACGGGGAAGGAATCTTACGAAT

>M6-PGSC0003DMG400027467M6LRR-RLK\_63

ATGAATTTTATTGAACTATCAAAGCGACTTCGAATTCAGCCAAGACAATGAAATCGGGAATGGAATG  
CTGGGGAAAGTGTACAAAGCACTAGTCCCAAATGGATGGACTGTTGCCATA

>M6-PGSC0003DMG400027467M6LRR-RLK\_630

TCTATAAATTTGGGGTTGTGCTTCTCGAGATTTTAACGGGGAAGGAATCTTACGAATTGAGCTGCTCGAG  
TCTAAATTTATCGAGCAGCTCTTTTGCCAGTCCTCTTGATGTGGATAAAC

>M6-PGSC0003DMG400027467M6LRR-RLK\_756

TAGGCCAAGGATTTGATGATATGGTAATGCAACTACTTGAACCTGCAAGTAACTGCATGAAATTCATCCC  
GGATCAAAGGCCAACGATGCAACAAGTGTATCAGACTGTTGCTGCGATTG

>M6-PGSC0003DMG400027468M6LRR-RLK\_0

TTTCAACAATGTGTAAGTCAACATTCTTTACTTAGTACTACCATTTTTCTACTATTTTGCAGCTTTTCTCT  
AAGATGCAACGCGGTGCAGAGTGATATCGATTGCTTCAAATCGATAA

>M6-PGSC0003DMG400027468M6LRR-RLK\_132

TAGACCCTTTAAACATGTTGAATTCTACATGGAAGTTCGATAATCAGACAGAAGGTTTCATATGCAGATT  
TGCAGGAATACAATGCTGGCATCCTGATGAGAGCAAAGTTTTATCCATTA

>M6-PGSC0003DMG400027468M6LRR-RLK\_198

GATTTGCAGGAATACAATGCTGGCATCCTGATGAGAGCAAAGTTTTATCCATTAGTCTTCCAGACATGGG  
ACTAAAAGGTGAGTTTCCGCGAGGCATACAAAATTGCACTTCTTTAACTT

>M6-PGSC0003DMG400027468M6LRR-RLK\_264

TGGGACTAAAAGGTGAGTTTCCGCGAGGCATACAAAATTGCACTTCTTTAACTTCTCTAGATCTTTCAAG  
CAACGAGCTATATGGAACCATCCCTTCGGATATATCAAGATTAATTGGAT

>M6-PGSC0003DMG400027468M6LRR-RLK\_330

CAAGCAACGAGCTATATGGAACCATCCCTTCGGATATATCAAGATTAATTGGATTTATTGTAACGGTTGA  
TCTCTCAAGCAACCTATTCTCAGGCGCGATCCCAAGTGACATTTCAAATT

>M6-PGSC0003DMG400027468M6LRR-RLK\_396

TTGATCTCTCAAGCAACCTATTCTCAGGCGCGATCCCAAGTGACATTTCAAATTGCTCTCTACTCAATTCC  
CTCAAATTAGAAAACAATAAACTAGAAGGACTGATCCACCTGAAATTC

>M6-PGSC0003DMG400027468M6LRR-RLK\_462

ATTCCCTCAAATTAGAAAACAATAAACTAGAAGGACTGATCCCACCTGAAATTCGCTTGTTAAAGCGACT  
CAAGACGTTTAATGTTGCAAATAATATGTTGACAGGGCCAGTGCCAAATT

>M6-PGSC0003DMG400027468M6LRR-RLK\_528

GACTCAAGACGTTTAATGTTGCAAATAATATGTTGACAGGGCCAGTGCCAAATTTTGCACTTTTCCAGT  
TGAAAGCTATGCAAATAATCCAGGACTTTGTGGTAGTCCTCTGGAATTAT

>M6-PGSC0003DMG400027468M6LRR-RLK\_66

TTTCTCTAAGATGCAACGCGGTGCAGAGTGATATCGATTGCTTGAATCGATAAAAGATTCGTTGGTAG  
ACCCTTTAAACATGTTGAATTCTACATGGAAGTTTCGATAATCAGACAGAAG

>M6-PGSC0003DMG400027468M6LRR-RLK\_660

GCGTAGTAAGCCGTCATATTCTGTTTGCTTGTGGTTTTGTGACGGGTTGGTCGCTTCTACACTTGGT  
GTATATCTTTTTTCTTTGGTGTAAGAAGATGTTTCTATTGATCAACA

>M6-PGSC0003DMG400027468M6LRR-RLK\_722

TTACTTGGTGTATATCTTTTTTCTTTGGTGTAAGAAGATGTTTCTATTGATCAACAAGAGAACAAAAGT  
AATGGTGATTGATGGAAATAAAGTAAACAACAACCAAAGGTAATTTTG

>M6-PGSC0003DMG400027469M6LRR-RLP\_0

AAAGAAATTCCATTTCCACAATGTACAAATACAACATTCTTACTTAGTACTACCATTTTTGTAGTAGTTT  
GCAGTTTTTCTCTAATATGCAACGCGGTACAGAGTGACATAGATTGCT

>M6-PGSC0003DMG400027469M6LRR-RLP\_1134

CTACTTAATCAAACCTATTGCTAAATATGGTAGCTATGTTCTCTCCTCAGATTTTAAAGATGGAGAAGATT  
GTTACAAGAATGAGTTTTATGGAACCTATCAAAGCGACTTTGAATTTCA

>M6-PGSC0003DMG400027469M6LRR-RLP\_126

CAATAAAAGATTCATTCGAAGATCCTTTAAATTTCTTGAATACTACGTGGAAGTTCGATGATCAGACAGA  
AGTTTTCATATGCAAATTTGCAGGAATACAATGCTGGCATCCTGATGAGA

>M6-PGSC0003DMG400027469M6LRR-RLP\_1260

ACAATGAAATCGGGAACGGAATGCTAGGGAAAGTGTAACAAGCACTGGTCCCAAATGGATGGACAGTT  
GCCATAAAGAGGTTACATGTTTCAGAGGATTTGGAGGAAGAGTTTGTTTCAG

>M6-PGSC0003DMG400027469M6LRR-RLP\_1323

CAGTTGCCATAAAGAGGTTACATGTTTCAGAGGATTTGGAGGAAGAGTTTGTTTCAGAGATCACAACCTC

TGGGTAGTCTGAGGCAACCAAATTTGGTGCCTATAATAGGCTTTTGTCTG

>M6-PGSC0003DMG400027469M6LRR-RLP\_1386

CAACTCTGGGTAGTCTGAGGCAACCAAATTTGGTGCCTATAATAGGCTTTTGTCTGAGAGGAAAGAGC

GAATTCTAATTTACAAATACATGCCTAATGGAACTTACATGAGTGGTTGC

>M6-PGSC0003DMG400027469M6LRR-RLP\_1449

AAGAGCGAATTCTAATTTACAAATACATGCCTAATGGAACTTACATGAGTGGTTGCATTCAACCGACGA

CAAGGCAAGACTCTGGACTTTCCTAAGGGTTAAAATTGTTTTAGGAG

>M6-PGSC0003DMG400027469M6LRR-RLP\_1575

AAGCCCTGACTTGGCTTCATGATGGTGGAAATTTCCATGTTGTGCATAGTAACATAAGCACACAGTGTAT

CTTGCTCGATGAAAATTTCAATCCTAAGTTATCCAATTTTTGGGAGGCAA

>M6-PGSC0003DMG400027469M6LRR-RLP\_1638

AGTGTATCTTGCTCGATGAAAATTTCAATCCTAAGTTATCCAATTTTTGGGAGGCAACACTTGCAAAAAC

AAATGACATAGATTCAACTTGAGTCTATTTCCAATAGTCGAGTGTTTAG

>M6-PGSC0003DMG400027469M6LRR-RLP\_1701

CAAAAACAAATGACATAGATTCAACTTGAGTCTATTTCCAATAGTCGAGTGTTTAGACTTTACAACATAT

AAAAAAGATGTTTATCGATTTGGGGTTGTGCTTCTCGAGCTTTTAACGA

>M6-PGSC0003DMG400027469M6LRR-RLP\_1764

CAACATATAAAAAAGATGTTTATCGATTTGGGGTTGTGCTTCTCGAGCTTTTAACGAGGAAAGAATCTTA

CATATTGAGCTGCTCGAGTCAAATTTGTCGAGCAGCTCTTTTGCCAGTC

>M6-PGSC0003DMG400027469M6LRR-RLP\_1827

AATCTTACATATTGAGCTGCTCGAGTCAAATTTGTCGAGCAGCTCTTTTGCCAGTCCTCTTGATGTGGAT

AAACTACTGTTAGGCCAAGGATATGATAATATGGTAATGCAACTACTTG

>M6-PGSC0003DMG400027469M6LRR-RLP\_189

AGACAGAAGGTTTCATATGCAAATTTGCAGGAATACAATGCTGGCATCCTGATGAGAGCAGAGTTTTAT

CCATTAGTCTCCAGACATGGGACTAAAAGGTGAGTTTCCGCGAGGCATAA

>M6-PGSC0003DMG400027469M6LRR-RLP\_1890

ATGTGGATAAACTACTGTTAGGCCAAGGATATGATAATATGGTAATGCAACTACTTGAACCTGCAAGTA

ACTGCATGAAATTCATTCCGGATCAAAGGCCAACGATGCAACAAGTGTGTC

>M6-PGSC0003DMG400027469M6LRR-RLP\_2000

CAAGTGTGTCAGACTGTTGCTGCAATTGCTCGAGTCCATGACCAAACAGGGGACTATGAAATACAAGTG  
CACTTGGACTAGAAGCAGGGGAGGGGCCATCAAAGGTATCAGTAGACTTTG

>M6-PGSC0003DMG400027469M6LRR-RLP\_252

TTTTATCCATTAGTCTTCCAGACATGGGACTAAAAGGTGAGTTTCCGCGAGGCATAAAAAATTGCACTTC  
TATAACTTCTCTAAATCTTTCAAGCAACGAGATATATGGAACCATCCCTT

>M6-PGSC0003DMG400027469M6LRR-RLP\_315

GCACTTCTATAACTTCTCTAAATCTTTCAAGCAACGAGATATATGGAACCATCCCTTCGGATATATCAAGA  
TTAATTGGATTTATTGTAACGGTTGATCTCTCGAGCAACAATTTCTCAG

>M6-PGSC0003DMG400027469M6LRR-RLP\_378

TATCAAGATTAATTGGATTTATTGTAACGGTTGATCTCTCGAGCAACAATTTCTCAGGCTCGATCCCAATT  
AACATTGCAAATTGCTCTTTTCTTAATCCCTCAGATTAGACAACAATA

>M6-PGSC0003DMG400027469M6LRR-RLP\_441

TCCCAATTAACATTGCAAATTGCTCTTTTCTTAATCCCTCAGATTAGACAACAATAAACTACAAGGTCCA  
ATCCCACCCGGAATTGGCTTGTTAGGTCGACTCAAGAACTTTAATGTTG

>M6-PGSC0003DMG400027469M6LRR-RLP\_504

AAGGTCCAATCCCACCCGGAATTGGCTTGTTAGGTCGACTCAAGAACTTTAATGTTGCCAACAACATGTT  
GACAGGACCAGTGCCAAGGTTTATCAATGCCACTTTTCCACCTGAAAGTT

>M6-PGSC0003DMG400027469M6LRR-RLP\_567

ACATGTTGACAGGACCAGTGCCAAGGTTTATCAATGCCACTTTTCCACCTGAAAGTTATGCAAATAATGC  
AGGACTTTGTGGTAGTCCTCTGAAAGCATGTGCTACAAAACGCGTCGGGT

>M6-PGSC0003DMG400027469M6LRR-RLP\_63

TAGTAGTTTGCAGTTTTTCTCTAATATGCAACGCGGTACAGAGTGACATAGATTGCTTGATGTCAATAAA  
AGATTCATTGGAAGATCCTTTAAATTTCTTGAATACTACGTGGAAGTTCG

>M6-PGSC0003DMG400027469M6LRR-RLP\_630

ATAATGCAGGACTTTGTGGTAGTCCTCTGAAAGCATGTGCTACAAAACGCGTCGGGTTCCATCATATTAT  
GTTAAGTACTGTATTGAACCGTCGTGTACAGTTTGCTTGTGGTTTTGTGA

>M6-PGSC0003DMG400027469M6LRR-RLP\_693

ATATTATGTTAAGTACTGTATTGAACCGTCGTGTACAGTTTGCTTGTGGTTTTGTGACTGGTTGGTCACTT  
TTTACTGTACTTGGTATATATCTTTTTTTCTTTGGTTTACCTGGCGTAA

>M6-PGSC0003DMG400027469M6LRR-RLP\_756

GGTCACTTTTTACTGTACTTGGTATATATCTTTTTTTCTTTGGTTTACCTGGCGTAAAGAAGATGCTTCTAT  
TCATCAACAAGAGAACAAGGTAATGGTGATTGATGGAAATGAATGGC

>M6-PGSC0003DMG400027469M6LRR-RLP\_819

TGCTTCTATTCATCAACAAGAGAACAAGGTAATGGTGATTGATGGAAATGAATGGCCTCAACGAGAAG  
AAGTCAACAACGATCCAAAGGTAACATTACGCTTGCTTTCAACCGTTTTT

>M6-PGSC0003DMG400027469M6LRR-RLP\_882

GAGAAGAAGTCAACAACGATCCAAAGGTAACATTACGCTTGCTTTCAACCGTTTTTTTTCCCAATAAAG  
TGAAACATATTATGGGTAAACGCCTCCTTAAACTTATCATTTTACTCTTA

>M6-PGSC0003DMG400027482M6LRR-RLK\_122

GACTTTCCTCTAAGGGTTAAAATTGTTTTAGGTGTCGCGAAAGCCCTGACTTGGCTTCATGATGGTGGAA  
ATTTCCATGTTGTGCATAGTAACATAAGCACACAATGTATCTTGCTCGAT

>M6-PGSC0003DMG400027482M6LRR-RLK\_488

CTACTGCTAGGCCAAGGATATGATAATATGGTAATGCAACTACTTGAACCTGCAAGTGATTGCATGAAAT  
TTATTCCGGATCAAAGGCCAACGATGCAAGAAGTGTATCAGACTGTTTCT

>M6-PGSC0003DMG400027482M6LRR-RLK\_549

GCATGAAATTTATTCCGGATCAAAGGCCAACGATGCAAGAAGTGTATCAGACTGTTTCTGAGATTGCTA  
GAGTCCATGACCAAACAGGGGACTCTGAAATACAATTGCACTTGGACTAGA

>M6-PGSC0003DMG400027499-(rev)M6LRR-RLK\_0

GTGACAGTATTCTTTAAAAGTGCATGCAGCTTCTTCAACCCCAAGCATTCTTGAAGTTTACAGCTTTAAT  
TCCTGAAAAAAACCAGAAAAAAGTTGCATTTTCCATGGGAATGGCAAAA

>M6-PGSC0003DMG400027499-(rev)M6LRR-RLK\_1037

GCTTCTAAAGAATGTGACATGTAGTCAAGACCTTTCATTTGTGAATTTATCATCAAATTACTTGACAGGG  
GAGTTGCCTGATTGCTTGAAACCTAGTTCTAGTTCCAAGATTGTATTGTT

>M6-PGSC0003DMG400027499-(rev)M6LRR-RLK\_1098

TTGACAGGGGAGTTGCCTGATTGCTTGAAACCTAGTTCTAGTTCCAAGATTGTATTGTTTTCTGGGAATT  
GTCTGTGAATAAAGAGCAATGGCAGCATCCTTATTCATTTTGCCATAAT

>M6-PGSC0003DMG400027499-(rev)M6LRR-RLK\_1159

CTGGGAATTGTCTGTGAATAAAGAGCAATGGCAGCATCCTTATTCATTTTGCCATAATGAAGCTTTGGC



TGTTAGTATTGAGCCTCATAAGGGAAAGGTTAAAGGGGGAAATGGTAAAG

>M6-PGSC0003DMG400027499-(rev)M6LRR-RLK\_122

AGTGCAGGGCTCATGTTGGCTTCTGTATTCATGGTGTCTTCTGTTAATTTATCAGATGAGTTCTTAG

AACCTTCACAATCTGAAGCTATAGTGAAAATCAAGCAGCTTTTGAAGCTT

>M6-PGSC0003DMG400027499-(rev)M6LRR-RLK\_1220

AGCTTTGGCTGTTAGTATTGAGCCTCATAAGGGAAAGGTTAAAGGGGGAAATGGTAAAGCTGTTCTTGC

ATCAAGTATGATAGGAGGTTTTGTTGGAGTAGTAGCCATTGTTCGGTTTTGGC

>M6-PGSC0003DMG400027499-(rev)M6LRR-RLK\_1281

GTTCTTGCATCAAGTATGATAGGAGGTTTTGTTGGAGTAGTAGCCATTGTTCGGTTTTGGCTTTTGTGGTTG

TTAGAAGAGAGTATGCCAAGCAGAAAGCTTGCCAAGCCCCTCAAACAAGA

>M6-PGSC0003DMG400027499-(rev)M6LRR-RLK\_1342

TTGTGGTTGTTAGAAGAGAGTATGCCAAGCAGAAAGCTTGCCAAGCCCCTCAAACAAGATTGATACTTG

AAAAGGTCTCTCCTGCTCACACTCTTAAGCTGCTTAATGATGCAAGTAAGC

>M6-PGSC0003DMG400027499-(rev)M6LRR-RLK\_1403

GATACTTGAAAAGGTCTCTCCTGCTCACACTCTTAAGCTGCTTAATGATGCAAGTAAGCTCTCTCTTTCTC

TCACACAAACATATTATGTTAATGATTTCAACTTATGAAACTTTTTAGG

>M6-PGSC0003DMG400027499-(rev)M6LRR-RLK\_1647

GTAAACATTTGAATTTAAGCATTATTCCACAAAAGGAGTTTTCTTTATATATAGAATGAAAATATCAATTT

GCTTCAGGAAATTGTCCAATACTGTGTTATTGGAATAAACTCTGCTCTT

>M6-PGSC0003DMG400027499-(rev)M6LRR-RLK\_1708

ATATCAATTTGCTTCAGGAAATTGTCCAATACTGTGTTATTGGAATAAACTCTGCTCTTGTCTAAATTTCA

AGATGTATCTTGATCTTTGATTCTTGATAGGGTATCTTTCTGAAACGAG

>M6-PGSC0003DMG400027499-(rev)M6LRR-RLK\_1769

CTAAATTTCAAGATGTATCTTGATCTTTGATTCTTGATAGGGTATCTTTCTGAAACGAGGAAGTTGGGATT

GCTTGGGGCCCCTCCTTATCGAACGTTTGTCTTGGATGAGCTTCGAGAG

>M6-PGSC0003DMG400027499-(rev)M6LRR-RLK\_183

GAGTTCTTAGAACCTTCACAATCTGAAGCTATAGTGAAAATCAAGCAGCTTTTGAAGCTTCCCTCAAGATTT

GAGTAGTTGGAGTGACAATACAGACTTTTGCAATAGTGAGCCAAACT

>M6-PGSC0003DMG400027499-(rev)M6LRR-RLK\_1830

AGTTGGGATTGCTTGGGGCCCCTCCTTATCGAACGTTTGTCTTGGATGAGCTTCGAGAGGCCACTAATAA  
CTTTGATATATCAAATCTAATCGGTGCAAGCTCCAGTGGGCAGGTATGGA

>M6-PGSC0003DMG400027499-(rev)M6LRR-RLK\_1891

CACTAATAACTTTGATATATCAAATCTAATCGGTGCAAGCTCCAGTGGGCAGGTATGGATTCCTTACTA  
AATACTGTAAGACTGTTTGAACAATGTTAGTCCACATGGACTGTTTTGTA

>M6-PGSC0003DMG400027499-(rev)M6LRR-RLK\_1952

TCCTTACTAAATACTGTAAGACTGTTTGAACAATGTTAGTCCACATGGACTGTTTTGTAGTTCATTCCTCA  
ATTCTCTTGCATCTATGGTGAATGCTGATTGTGCTTTTATATATTTTGA

>M6-PGSC0003DMG400027499-(rev)M6LRR-RLK\_2013

TCATTCCTCAATTCTCTTGCATCTATGGTGAATGCTGATTGTGCTTTTATATATTTTGAACAATAGATTTAC  
AAAGGGCGTCTCACAGATGGCACTGTGGTTGCTATAAAAAGCATAAAA

>M6-PGSC0003DMG400027499-(rev)M6LRR-RLK\_2074

AATAGATTTACAAAGGGCGTCTCACAGATGGCACTGTGGTTGCTATAAAAAGCATAAAAATGAGGAAG  
AGGCATAGTGTCCAGTCTCACTACCAACTCGGGCGTATTTCAAAGATCA

>M6-PGSC0003DMG400027499-(rev)M6LRR-RLK\_2135

GAGGAAGAGGCATAGTGTCCAGTCTCACTACCAACTCGGGCGTATTTCAAAGATCAGATACTGCCA  
TTTAGTTAGTACTATTGGACTGCTTTGAGTGCTACCAAGATGACTCAAG

>M6-PGSC0003DMG400027499-(rev)M6LRR-RLK\_2196

TACTGCCATTTAGTTAGTACTATTGGACTGCTTTGAGTGCTACCAAGATGACTCAAGTGTAGCCGAA  
TATGTTTAGTCTTTGAATTCGTGCCAAATGTGACGCTGCGGGGGGTCATA

>M6-PGSC0003DMG400027499-(rev)M6LRR-RLK\_2257

TTAGCCGAATATGTTTAGTCTTTGAATTCGTGCCAAATGTGACGCTGCGGGGGGTCATATCAGGTATATA  
GTCTAGATAACTTCATCTGCTTCGCGAGTTATCATTTGGCACAACAACCTG

>M6-PGSC0003DMG400027499-(rev)M6LRR-RLK\_2318

AGGTATATAGTCTAGATAACTTCATCTGCTTCGCGAGTTATCATTTGGCACAACAACCTGCAACAGTTTATA  
ATTGAGCATTTAATTTACTTATTTGACTATTTCTACCATTTTACATAAA

>M6-PGSC0003DMG400027499-(rev)M6LRR-RLK\_2379

ACAGTTTATAATTGAGCATTTAATTTACTTATTTGACTATTTCTACCATTTTACATAAATTATACTAAGTCT  
AAGTAATTGACTTCTTGGTATGTAGACGTTATAGAAAACAAGCATCTT

>M6-PGSC0003DMG400027499-(rev)M6LRR-RLK\_244

CTCAAGATTTGAGTAGTTGGAGTGACAATACAGACTTTTGCAATAGTGAGCCAAACACTGCCTTAACACT  
CATGTGTTATGAAGATAACATAACACAGCTTCATATTTCTGGCTATAACT

>M6-PGSC0003DMG400027499-(rev)M6LRR-RLK\_2440

ATACTAAGTCTAAGTAATTGACTTCTTGGTATGTAGACGTTATAGAAAACAAGCATCTTTGCAACAATCT  
GTTCCATGTTGTTTTGATATATATACTAGATTGTCCTCAATCACGACAA

>M6-PGSC0003DMG400027499-(rev)M6LRR-RLK\_2501

CAACAATCTGTTCCATGTTGTTTTGATATATATACTAGATTGTCCTCAATCACGACAAGTACCTACTACAT  
TGTACTIONTCTGTCAAAGTGCTGATGAATTTAAGGAGACATGAAATG

>M6-PGSC0003DMG400027499-(rev)M6LRR-RLK\_2562

ACCTACTACATTGTACTIONTCTGTCAAAGTGCTGATGAATTTAAGGAGACATGAAATGCTTTTAATTACT  
TTCTCTAGATTATGCAACGCGTTGTTTCTTCTTTGCCCGATGCTTAAA

>M6-PGSC0003DMG400027499-(rev)M6LRR-RLK\_2623

TTTAATTACTTTCTCCTAGATTATGCAACGCGTTGTTTCTTCTTTGCCCGATGCTTAAATGTACAGGTGTTT  
ATTGTCTTTAAGACAGTTGTTCTGAATTCTTTGCAAATGCTCGGTTTT

>M6-PGSC0003DMG400027499-(rev)M6LRR-RLK\_2684

TACAGGTGTTTATTGTCTTTAAGACAGTTGTTCTGAATTCTTTGCAAATGCTCGGTTTTGTAGAAGCAAAT  
TCAGCTCAAAGTTTACATGGACGCAACGGATGTCAGCTGCAATAGGGA

>M6-PGSC0003DMG400027499-(rev)M6LRR-RLK\_2745

AGAAGCAAATTCAGCTCAAAGTTTACATGGACGCAACGGATGTCAGCTGCAATAGGGATAGCAAAGG  
GAATTCAGTTCCTTCATACTGGAATAGTGCCAGGGATATTCTCCAATCAATT

>M6-PGSC0003DMG400027499-(rev)M6LRR-RLK\_2806

GCAAAGGGAATTCAGTTCCTTCATACTGGAATAGTGCCAGGGATATTCTCCAATCAATTGAAGATTACAG  
ATGTATTACTGGATCAGAATTTCCACGTAAAGATTAGCAAATACAATCTG

>M6-PGSC0003DMG400027499-(rev)M6LRR-RLK\_2867

AGATTACAGATGTATTACTGGATCAGAATTTCCACGTAAAGATTAGCAAATACAATCTGTCTTTGTTAATT  
GAAAATAAGAAAATGGTATGCAAACCTCTTCTCTACTATATTCTCTA

>M6-PGSC0003DMG400027499-(rev)M6LRR-RLK\_2928

TTTGTTAATTGAAAATAAGAAAATGGTATGCAAACCTCTTCTCTACTATATTCTCTATTAATCACTCATT

TCATTCTTGAACATTCACATTTTCGTTATTGCAACTGTTCTTAGGATGC

>M6-PGSC0003DMG400027499-(rev)M6LRR-RLK\_2989

AATCACTCATTTTATTCTTGAACATTCACATTTTCGTTATTGCAACTGTTCTTAGGATGCTGGACCGTCTTCT  
AGTGGATCAAAGGGAAATGATGGGCAAAGGTAAATGATCTCATCATTC

>M6-PGSC0003DMG400027499-(rev)M6LRR-RLK\_305

CTTAACACTCATGTGTTATGAAGATAACATAACACAGCTTCATATTTCTGGCTATAACTGGTTTCCTAATT  
TGCCTCAGGGGTTTTCTACAGATACCCTTTTCTCTAATCTTGCTCTTTT

>M6-PGSC0003DMG400027499-(rev)M6LRR-RLK\_3050

GACCGTCTTCTAGTGGATCAAAGGGAAATGATGGGCAAAGGTAAATGATCTCATCATTCTCAGCTGCTA  
CTGCTACTGCTACATTTTCGGTCTTCATTACTCCACTTTTATGGTTTCGATT

>M6-PGSC0003DMG400027499-(rev)M6LRR-RLK\_3111

AGCTGCTACTGCTACTGCTACATTTTCGGTCTTCATTACTCCACTTTTATGGTTTCGATTTTCAGAAGCACCTA  
TTGGAAACTAATCTTTTTATACTTCTAAATGCAAATTGGTCTAAAAAG

>M6-PGSC0003DMG400027499-(rev)M6LRR-RLK\_3172

AGAAGCACCTATTGGAAACTAATCTTTTTATACTTCTAAATGCAAATTGGTCTAAAAAGGTTTTAGAGAA  
TCTTAAGTGTATCTCGACCAATTCTAGACAACACCTCTCCAGCCACTGCT

>M6-PGSC0003DMG400027499-(rev)M6LRR-RLK\_3233

TTTAGAGAATCTTAAGTGTATCTCGACCAATTCTAGACAACACCTCTCCAGCCACTGCTATTGGGGGTAG  
GCACCGTTATAGCATCATGCCATTCATTGGTTATGATTCTTGAAGACAAT

>M6-PGSC0003DMG400027499-(rev)M6LRR-RLK\_3294

TGGGGGTAGGCACCGTTATAGCATCATGCCATTCATTGGTTATGATTCTTGAAGACAATATATAGAGCCA  
TAGACTTGGACCGTCTTAGGAGATTCCGAGATAGTACTCTACCGTTTAGT

>M6-PGSC0003DMG400027499-(rev)M6LRR-RLK\_3355

ATAGAGCCATAGACTTGGACCGTCTTAGGAGATTCCGAGATAGTACTCTACCGTTTAGTACTATTAAT  
GAATTCCTTCTTTGTTAATATCTTCTGAATGCAGGTTAAAATACGAGG

>M6-PGSC0003DMG400027499-(rev)M6LRR-RLK\_3416

ACTATTAATGAATTCCTTCTTTGTTAATATCTTCTGAATGCAGGTTAAAATACGAGGAGAAAGATGAT  
GTGTATGACTTTGGAGTAATCTTACTCGAAATCATATCGGGAAGGACAAT

>M6-PGSC0003DMG400027499-(rev)M6LRR-RLK\_3477

AAAGATGATGTGTATGACTTTGGAGTAATCTTACTCGAAATCATATCGGGAAGGACAATCGATACAAAA  
AATGATATAGATGTTTCTAAAGACATTGTAAGAGTCACTTATGACATTTAT

>M6-PGSC0003DMG400027499-(rev)M6LRR-RLK\_3538

ATACAAAAAATGATATAGATGTTTCTAAAGACATTGTAAGAGTCACTTATGACATTTATGAGAAAATTCT  
TTCAAGTCATCAAGTTGAAGAACTATTTTGTTAAACTTTTTCTTGTTGT

>M6-PGSC0003DMG400027499-(rev)M6LRR-RLK\_3599

GAAAATTCTTTCAAGTCATCAAGTTGAAGAACTATTTTGTTAAACTTTTTCTTGTTGTTCTTATTGCAGCT  
AATAGTTAGCTTAACAGCTGACGAAATAGGTTCGGAGGAACATCATTGA

>M6-PGSC0003DMG400027499-(rev)M6LRR-RLK\_366

TTTCCTAATTTGCCTCAGGGGTTTTCTACAGATACCCTTTTCTCTAATCTTGCTCTTTTGCCTAATTTAAAG  
GTACTTTCTTTGTTTCTTTAGGTTTGAGAGGAACTTTACCTAAAAAG

>M6-PGSC0003DMG400027499-(rev)M6LRR-RLK\_3660

TTATTGCAGCTAATAGTTAGCTTAACAGCTGACGAAATAGGTTCGGAGGAACATCATTGATCCAGCTGTTCC  
GGAAGGAATGCTCAGATAGTTCTCTTAGAACATTAATGGAACTATGCATA

>M6-PGSC0003DMG400027499-(rev)M6LRR-RLK\_3721

CAGCTGTTTCGGAAGGAATGCTCAGATAGTTCTCTTAGAACATTAATGGAACTATGCATAAAATGTCTTTC  
AGATGAACCATCGCAACGTCCTTCTGTAGAAGACTTGATATGGAACTTGC

>M6-PGSC0003DMG400027499-(rev)M6LRR-RLK\_3782

ATGTCTTTCAGATGAACCATCGCAACGTCCTTCTGTAGAAGACTTGATATGGAACTTGCAGTTTGCAGCT  
CAGGTCCAAGACCCTTGAATAGAGACACTTATGGCAACCAAGAGTCCCC

>M6-PGSC0003DMG400027499-(rev)M6LRR-RLK\_3843

TTTGCAGCTCAGGTCCAAGACCCTTGAATAGAGACACTTATGGCAACCAAGAGTCCCCTGGTCATGTG  
TAAGAACTTGTGCAAATATCCAATGATCAATGGACCTTTTCTTGACAAAA

>M6-PGSC0003DMG400027499-(rev)M6LRR-RLK\_3904

GTCATGTGTAAGAAGACTTGTGCAAATATCCAATGATCAATGGACCTTTTCTTGACAAAATGTAACATTATA  
CCACTAGGATAGTAGTTTCAATTATTTAGTAGTCTCTATTGCAACACTT

>M6-PGSC0003DMG400027499-(rev)M6LRR-RLK\_3965

TAACATTATACCACTAGGATAGTAGTTTCAATTATTTAGTAGTCTCTATTGCAACACTTTTGGCTATATGA  
GGTTTCAGTACTCTTTTGGAGTTAACTCTACATTTTAGCCAAATTTTTT

>M6-PGSC0003DMG400027499-(rev)M6LRR-RLK\_4026

GGCTATATGAGGTTTCAGTACTCTTTGAGGTTAACTCTACATTTTAGCCAAATTTTTTAAGCAAATGGCT  
ATTTCTTGCACTTTTTTTTTTAACGAGCCTAAAATTTAAAAGGTGGGCC

>M6-PGSC0003DMG400027499-(rev)M6LRR-RLK\_4074

CCAAATTTTTTAAGCAAATGGCTATTTCTTGCACTTTTTTTTTTAACGAGCCTAAAATTTAAAAGGTGGGC  
CTTGACCCGACCATCCAATGGACCATGGACTAAACGGCACCCAAAAATG

>M6-PGSC0003DMG400027499-(rev)M6LRR-RLK\_427

CTAATTTAAAGGTACTTTCTTTGGTTTCTTTAGGTTGAGAGGAACTTTACCTAAAAAGATTGGATTTTTA  
TCTTCTTTGGAGATTATTAATATCAGTTCAAACCTCTTTTATGGTGAGA

>M6-PGSC0003DMG400027499-(rev)M6LRR-RLK\_488

TGGATTTTTATCTTCTTTGGAGATTATTAATATCAGTTCAAACCTCTTTTATGGTGAGATTCCAGGAGAGA  
TTTCATATTTGAAGAGTCTTCAGACACTTATATTGGATGATAATAAGTT

>M6-PGSC0003DMG400027499-(rev)M6LRR-RLK\_549

CCAGGAGAGATTTTCATATTTGAAGAGTCTTCAGACACTTATATTGGATGATAATAAGTTTACAGGTCAAG  
TTCCTGAAGGGGTTGGTTTACTTCATTCTTTGTCTGTTTTGAGTTTCAAG

>M6-PGSC0003DMG400027499-(rev)M6LRR-RLK\_61

CAGCTTTAATTCCTGAAAAAAACCAGAAAAAAGTTGCATTTTCCATGGGAATGGCAAAAACAGTGCAGG  
GCTCATGTTGGCTTCTTGTATTCATGGTGTCTTCTGTTTAATTTATCAG

>M6-PGSC0003DMG400027499-(rev)M6LRR-RLK\_610

CAGGTCAAGTTCCTGAAGGGGTTGGTTTACTTCATTCTTTGTCTGTTTTGAGTTTCAAGAACAATTCATTT  
TCAGGTTCAATGCCTAATTCTTTGTCAAATTTACAAACCCTAAGAATCC

>M6-PGSC0003DMG400027499-(rev)M6LRR-RLK\_671

CAATTCATTTTCAGGTTCAATGCCTAATTCTTTGTCAAATTTACAAACCCTAAGAATCCTTTCTATTTCTGG  
TAATAATTTTTCTGGGGTTGTTCCAAACCTTCATAATCTGTCAAATCT

>M6-PGSC0003DMG400027499-(rev)M6LRR-RLK\_732

TCTATTTCTGGTAATAATTTTTCTGGGGTGTCCAAACCTTCATAATCTGTCAAATCTTCAAGTTCTTGAT  
TTGGAAAGTAACAATCTTGACCTAATTTCCCTAATATTCCAACCAAG

>M6-PGSC0003DMG400027499-(rev)M6LRR-RLK\_793

AAGTTCTTGATTTGGAAAGTAACAATCTTGACCTAATTTCCCTAATATTCCAACCAAGTTGGTATCTTTG

GTA CTTAGGAAGAACAAGTTCAGTTTAGGGGTACCAAAGA AACTGAGTT

>M6-PGSC0003DMG400027499-(rev)M6LRR-RLK\_854

GGTATCTTTGGTACTTAGGAAGAACAAGTTCAGTTTAGGGGTACCAAAGA AACTGAGTTCATGTTATCA

GTTGAAGAAACTGGACATTTCTCCAATGAGCTTGTTGGACCCTTTTCACC

>M6-PGSC0003DMG400027499-(rev)M6LRR-RLK\_915

TGTTATCAGTTGAAGAAACTGGACATTTCTCCAATGAGCTTGTTGGACCCTTTTCACCAACAGTTTTATC

ATTGCCATCACTCAGCTATTTGGATATTTCTGGAAATAAACTAACTGGG

>M6-PGSC0003DMG400027499-(rev)M6LRR-RLK\_976

CAGTTTTATCATTGCCATCACTCAGCTATTTGGATATTTCTGGAAATAAACTAACTGGGAAGCTTCTAAAG

AATGTGACATGTAGTCAAGACCTTTCATTTGTGAATTTATCATCAAATT

>M6-PGSC0003DMG400027536M6LRR-RLK\_0

CTCTGCGCACACA AACTCAGTAGAGAGAGAAAGAGAAGCAGTACAAAATGTGAAAAGTTGTAGCAG

ATAAAAAAAAAAAGGGGTTTCATCAGAAGAAGGAGAAGAACTAACTGAACTG

>M6-PGSC0003DMG400027536M6LRR-RLK\_1037

TAATCCTTGACATGGTTTCATGTTACCTGCAACAATGACAACAGTGTTATAAGAGTGTAAGAATCTGTT

GTCTGGTTTACCTCCGTTTTAATGGATTTGCAATCCACTCTCTTGTGGT

>M6-PGSC0003DMG400027536M6LRR-RLK\_1098

GAATCTGTTGTCTGGTTTACCTCCGTTTTAATGGATTTGCAATCCACTCTCTTGTGGTGGTGAGCAAATA

TAATTGCAGTTTGTGCTCCATAACACTTGTTATATGATCAACCTTTCC

>M6-PGSC0003DMG400027536M6LRR-RLK\_1159

TGAGCAAATATAATTGCAGTTTGTGCTCCATAACACTTGTTATATGATCAACCTTTCCAGTGATTTAGGA

AATGCTGCTTTATCTGGTCTGTTAGTCCCACAGCTTGGCCTTTTGAAGA

>M6-PGSC0003DMG400027536M6LRR-RLK\_122

AAATACAAAAAAGGTTTGTTCAGTGAAGAGTAAAAGGGGTAGCAAATCTTGGAAATTAAGTGTA AAA

ATTTGATCTTTTTTTGTTGGGTTATGAGATGAGATCGATTCTTGGGTTTTGA

>M6-PGSC0003DMG400027536M6LRR-RLK\_1220

TGATTTAGGAAATGCTGCTTTATCTGGTCTGTTAGTCCCACAGCTTGGCCTTTTGAAGAATTTGCAGTACT

TGTAAGTCTCACTTCATGAACTATGTTTGG AATTATTTTATGAATTTAG

>M6-PGSC0003DMG400027536M6LRR-RLK\_1281

TTGCAGTACTTGTAAGTCTCACTTCATGAACTATGTTTGAATTATTTTATGAATTTAGACTTGGAAAAC  
GGCATTAAAGTGATTGGTTTTTCCAGATGTTGAAGATTTTTCATATTAC

>M6-PGSC0003DMG400027536M6LRR-RLK\_1342

TTGGAAAACGGCATTAAAGTGATTGGTTTTTCCAGATGTTGAAGATTTTTCATATTACCTCTAGAATTTG  
CTGCATGGAAATACCATAGATGGCTTGCATATTAACTTTTGCATAAAAC

>M6-PGSC0003DMG400027536M6LRR-RLK\_1403

CTAGAATTTGCTGCATGGAAATACCATAGATGGCTTGCATATTAACTTTTGCATAAAACAAAGCTGTTGT  
AAGTGGCAAAGCGAGCAGAGAACACTTTCTCCTCTCCATCTCTTGTTC

>M6-PGSC0003DMG400027536M6LRR-RLK\_1464

AGCTGTTGTAAGTGGCAAAGCGAGCAGAGAACACTTTCTCCTCTCCATCTCTTGTTCACCTGGTGTGTG  
AGTCTATTGCATAGTTGTTAATGTGTTCCCTGAACAACACAAATTTGAA

>M6-PGSC0003DMG400027536M6LRR-RLK\_1525

TTGGTGTGTAGTCTATTGCATAGTTGTTAATGTGTTCCCTGAACAACACAAATTTGAATGTATACTTCAT  
AAAAAAAAGATTTAAATTTGTGTTTACAATACATACTAGTAAATTAAG

>M6-PGSC0003DMG400027536M6LRR-RLK\_1586

TATACTTCATAAAAAAAGATTTAAATTTGTGTTTACAATACATACTAGTAAATTAAGGAACTCGGATAC  
TTGGATGAGACTAGCAGTGAATTAACCTTATGTGGCAAAGTAGTGTCTGT

>M6-PGSC0003DMG400027536M6LRR-RLK\_1647

ACTCGGATACTTGGATGAGACTAGCAGTGAATTAACCTTATGTGGCAAAGTAGTGTCTGTAATTGTTTGTG  
AAAACATTGTAGTTGAACCTAAATTTCTGTCATACACTCCCCTATCAAAA

>M6-PGSC0003DMG400027536M6LRR-RLK\_1708

TTGTTTGTGAAAACATTGTAGTTGAACCTAAATTTCTGTCATACACTCCCCTATCAAAAAGATAAGCATAGA  
TTCTAAATATCATTACATTAGCCAGTACCCTAAGCACTCTTTTTTTTCT

>M6-PGSC0003DMG400027536M6LRR-RLK\_183

TGTA AAAAATTTGATCTTTTTTTGTTGGGTTATGAGATGAGATCGATTCTTGGGTTTTGAGCTTTGTGGGTG  
TGTTTATCTTGGTTCATGGTAATGAGGGGTAGGGTTTTCTTGAATTTT

>M6-PGSC0003DMG400027536M6LRR-RLK\_2013

TGTTGGTACCCTAAGCACTCTTAATTTGGAATAACAACTTCAACTCATATCAAATCCTTTATCCCTCTTT  
CCTTGTCCCAGGTAGCGTCTAATCATGATTTAGGATTATGGAATAGGA



>M6-PGSC0003DMG400027536M6LRR-RLK\_2074

ATTCCCTCTTTCCTTGTCACAGGTAGCGTCTAATCATGATTTAGGATTATGGAATAGGATAAAGCAAACA  
AGAGAAACAAGTCCATTGTAAAAGTAAAGCAAATCTAGACTTAGAAAGA

>M6-PGSC0003DMG400027536M6LRR-RLK\_2135

AAGCAAACAAGAGAAACAAGTCCATTGTAAAAGTAAAGCAAATCTAGACTTAGAAAGAGGAAATATG  
GCTTGAGGGTAGGTTGATATCTTGGAGGAGAAGATCTGAAGTTTTGTGGTCA

>M6-PGSC0003DMG400027536M6LRR-RLK\_2196

AAATATGGCTTGAGGGTAGGTTGATATCTTGGAGGAGAAGATCTGAAGTTTTGTGGTCATATAACAGAT  
GCTATTCTGGTTTTACCAAGAGTTTGAATCATGATTCAATTAAGCATAGA

>M6-PGSC0003DMG400027536M6LRR-RLK\_2257

TAACAGATGCTATTCTGGTTTTACCAAGAGTTTGAATCATGATTCAATTAAGCATAGATTTTGTACATGT  
GTTAAGCTTAGTTTGGAGTTTGATAATATACCGTTCACTTAAATTGTCA

>M6-PGSC0003DMG400027536M6LRR-RLK\_2318

TTGTACATGTGTTAAGCTTAGTTTGGAGTTTGATAATATACCGTTCACTTAAATTGTCAACGTGCTATAGT  
CATATTCTGTCTCAAACCTCGCTTTCATAGTTCTTATTGTAACCCATGCT

>M6-PGSC0003DMG400027536M6LRR-RLK\_2379

GTGCTATAGTCATATTCTGTCTCAAACCTCGCTTTCATAGTTCTTATTGTAACCCATGCTCTTTTGAAGATGC  
AACTGTATGGAAGTTCACAGAGACAGTAAGTGCATGTGCACCTGGTGA

>M6-PGSC0003DMG400027536M6LRR-RLK\_244

TTTGTGGGTGTGTTTATCTTGGTTCATGGTAATGAGGGGTAGGGTTTTCTTGAATTTTTGGGTAAATGCT  
GGGTTTTTTGAGTTTGCTTACTTGGATCTACGAGATTGTTTAGTCAGCT

>M6-PGSC0003DMG400027536M6LRR-RLK\_2440

TTTGAAGATGCAACTGTATGGAAGTTCACAGAGACAGTAAGTGCATGTGCACCTGGTGAAGCTGGGCAT  
TACATGATGTATACCCATGCATCAGACAATGTTTTAATGATGGGCATAATT

>M6-PGSC0003DMG400027536M6LRR-RLK\_2501

CTGGGCATTACATGATGTATACCCATGCATCAGACAATGTTTTAATGATGGGCATAATTATTACCTAGTG  
ACTGCTTCATTCTGCTCACACATTCATATATTCCTATGGATGCCTAGATT

>M6-PGSC0003DMG400027536M6LRR-RLK\_2562

TACCTAGTGACTGCTTCATTCTGCTCACACATTCATATATTCCTATGGATGCCTAGATTTTCTGGAGGCTT

GTGTAGTATGTGTGCTAAGTATTTTCCAAGTGTATGCAAGTGACAATCA

>M6-PGSC0003DMG400027536M6LRR-RLK\_2623

CTGGAGGCTTGTGTAGTATGTGTGCTAAGTATTTTCCAAGTGTATGCAAGTGACAATCACATCAAGAATG  
AAACAATATAAAAAGAACATCAAGAATGCTGATGGAATTTAACGATCACT

>M6-PGSC0003DMG400027536M6LRR-RLK\_2684

TCAAGAATGAAACAATATAAAAAGAACATCAAGAATGCTGATGGAATTTAACGATCACTGGGCATACAC  
ACTGTTTAGATGAAGTTCGAAATTAACATAATGACAAACGTTAAATTTTTA

>M6-PGSC0003DMG400027536M6LRR-RLK\_2745

GCATACACACTGTTTAGATGAAGTTCGAAATTAACATAATGACAAACGTTAAATTTTTATTGATGAGCTA  
TAAAGATTGTATGAAATGTTTGATGAGCTGATCCTTTGCAGCACATGGGA

>M6-PGSC0003DMG400027536M6LRR-RLK\_2806

GATGAGCTATAAAGATTGTATGAAATGTTTGATGAGCTGATCCTTTGCAGCACATGGGATGACAGATTTT  
TATCTAGCAAATGCTTGTAACCAAATATAAGAAAATTCCTCCATGACAT

>M6-PGSC0003DMG400027536M6LRR-RLK\_2867

ACAGATTTTTATCTAGCAAATGCTTGTAACCAAATATAAGAAAATTCCTCCATGACATAAACATTGGTA  
ACTAGTTATAATTGTTAGCTTGGAACCTCCAGACCTTTCTCATTGTTGA

>M6-PGSC0003DMG400027536M6LRR-RLK\_2928

ACATTGGTAACTAGTTATAATTGTTAGCTTGGAACCTCCAGACCTTTCTCATTGTTGACATTTAACTGTT  
GCTTGATGCCAGTTTTGATGAATGTGTGAACCTTGCTTCATTATCTTTG

>M6-PGSC0003DMG400027536M6LRR-RLK\_2989

TTTAACTGTTGCTTGATGCCAGTTTTGATGAATGTGTGAACCTTGCTTCATTATCTTTGTTGCCCCATTATC  
CTAGGGATGTCATTGGTATGATATATTGAATTGATTCATTCTCTGGTT

>M6-PGSC0003DMG400027536M6LRR-RLK\_305

GTAAATGCTGGGTTTTTTGAGTTTGCTTTACTTGGATCTACGAGATTGTTTAGTCAGCTGGCTGCTTGATT  
TGTAATAAAAAAAAAACAGTATTTTATGATGGTGAAGGTGATGGAGAAGGATG

>M6-PGSC0003DMG400027536M6LRR-RLK\_3050

GCCCCATTATCCTAGGGATGTCATTGGTATGATATATTGAATTGATTCATTCTCTGGTTTTCTTGTCACAG  
GGAGCTTTACAGTAATAACATAAGTGGTCTAATACCTAGTGATCTTGGG

>M6-PGSC0003DMG400027536M6LRR-RLK\_3111

CTTGTCACAGGGAGCTTTACAGTAATAACATAAAGTGGTCTAATACCTAGTGATCTTGGGAATTTGACTAA  
TTTGGTCAGCTTGGATCTCTACTTGAACAACCTTCGTTGGTCCCATCCCAG

>M6-PGSC0003DMG400027536M6LRR-RLK\_3172

TTTGACTAATTTGGTCAGCTTGGATCTCTACTTGAACAACCTTCGTTGGTCCCATCCCAGATTCCTTGGGCA  
AACTGTCGAAATTGAGATTCCTGTATGTATTTTTATTCTATATTAGATT

>M6-PGSC0003DMG400027536M6LRR-RLK\_3233

TCCTTGGGCAAACCTGTCGAAATTGAGATTCCTGTATGTATTTTTATTCTATATTAGATTTATGTGGATATT  
GTGATGCCAAATGTGTATGTCATCAACCAAGATGGACCTTCTTTTGCCG

>M6-PGSC0003DMG400027536M6LRR-RLK\_3294

TGTGGATATTGTGATGCCAAATGTGTATGTCATCAACCAAGATGGACCTTCTTTTGCCGGCATGTTGAGA  
AAGGAAAGGAAGCCTGAATTCTTTTCTAGGTTTCACATAAGATTACCTCT

>M6-PGSC0003DMG400027536M6LRR-RLK\_3355

ATGTTGAGAAAGGAAAGGAAGCCTGAATTCTTTTCTAGGTTTCACATAAGATTACCTCTATTAGTATTAG  
GTTTCACACTAAGTTTTGATGGTAGAAAGGTATTTGAGGACTTTATGGGT

>M6-PGSC0003DMG400027536M6LRR-RLK\_3416

TAGTATTAGTTTTCACTAAGTTTTGATGGTAGAAAGGTATTTGAGGACTTTATGGGTCTGATATCATT  
TATAAACAGATCTTACATATAAGTCTTTTTATTTTCTCCCTTTGTTCTA

>M6-PGSC0003DMG400027536M6LRR-RLK\_3477

GATATCATTATAAACAGATCTTACATATAAGTCTTTTTATTTTCTCCCTTTGTTCTAATCCTTATATAAAG  
GAAAAGAATAGAAGCCTATGCTTTGTCTGATATTTGGCCCTGATATT

>M6-PGSC0003DMG400027536M6LRR-RLK\_3538

CCTTATATAAAGGAAAAGAATAGAAGCCTATGCTTTGTCTGATATTTGGCCCTGATATTGTAAAATTAAT  
CAGAGTTTAGTAATTGGTGTTTTTATTTTCTCCATTGTTGGGATCCTTT

>M6-PGSC0003DMG400027536M6LRR-RLK\_3599

AAAATTAATCAGAGTTTAGTAATTGGTGTTTTTATTTTCTCCATTGTTGGGATCCTTTTCTAGAAGAGAA  
AAGAAGTTACGAATCCCATGCTTCATCTTGCATTTTTCACTTCTGAAGT

>M6-PGSC0003DMG400027536M6LRR-RLK\_3660

TAGAAGAGAAAAGAAGTTACGAATCCCATGCTTCATCTTGCATTTTTCACTTCTGAAGTTTCTTGTCTTA  
ATGCTCCACAACTTCTTTCTTTTGGCTTGACTGTCTAAGAAGTGTACC

>M6-PGSC0003DMG400027536M6LRR-RLK\_3721

CTCTTGCTTAATGCTCCACAACTTCTTTCTTTGGCTTGACTGTCTAAGAAGTGTACCAAATAGGTTCTAT  
TATGCAGAATCAGCATGAAGCCTCATTAAGTGCATCTTGGGACTTACT

>M6-PGSC0003DMG400027536M6LRR-RLK\_3782

ATAGGTTCTATTATGCAGAATCAGCATGAAGCCTCATTAAGTGCATCTTGGGACTTACTATAGAACTATT  
GCAGTACTGCCAATGTTGACTGACATGATTTAGTCCAAAAAGTGTTTCAA

>M6-PGSC0003DMG400027536M6LRR-RLK\_3843

AGAACTATTGCAGTACTGCCAATGTTGACTGACATGATTTAGTCCAAAAAGTGTTTCAAGTTTCTGTTTGT  
CAGGGGGGAAATGTTTTGAGGCTGTTTATTGTTGTTCTGAACTGACAAC

>M6-PGSC0003DMG400027536M6LRR-RLK\_3904

TTCTGTTTGTGAGGGGGGAAATGTTTTGAGGCTGTTTATTGTTGTTCTGAACTGACAACCTCATTTCAGC  
TGAAGTGCCGGTTCTGGCTTGAAGTTGAATATGTTTTACATCCACATA

>M6-PGSC0003DMG400027536M6LRR-RLK\_3965

CATTTCAGCTGAAGTGCCGGTTCTGGCTTGAAGTTGAATATGTTTTACATCCACATATAAATAATTTAT  
TAAGATGATTCTCCTTGTCAATAAATAAATAAATTAAGATGATTCAATT

>M6-PGSC0003DMG400027536M6LRR-RLK\_4026

AATAATTTATTAAGATGATTCTCCTTGTCAATAAATAAATAAATTAAGATGATTCAATTAGTAACCTTTTCT  
TCTGTTTTATTCTCCAATTATTACTTTTACCAAAAGTGAAGCTCATTC

>M6-PGSC0003DMG400027536M6LRR-RLK\_4087

TAACCTTTTCTTCTGTTTTATTCTCCAATTATTACTTTTACCAAAAGTGAAGCTCATTCCTGTACACCTTTGT  
GATTTTTTTGCAAGGATAGTCGGCTCAACAATAATAGCTTGACTGGT

>M6-PGSC0003DMG400027536M6LRR-RLK\_4148

GTACACCTTTGTGATTTTTTTGCAAGGATAGTCGGCTCAACAATAATAGCTTGACTGGTAACATCCCTATG  
TCACTGACTAATATCTCATCACTACAAGTGTGTAAGTACACTAGTTAT

>M6-PGSC0003DMG400027536M6LRR-RLK\_4209

CATCCCTATGTCAGTACTGACTAATATCTCATCACTACAAGTGTGTAAGTACACTAGTTATTTTGTGACTTAA  
CTTAGATAATTCTTTCTGTCTTCCATATCTTTTCATTCATTTCTTTTC

>M6-PGSC0003DMG400027536M6LRR-RLK\_427

GTGGTGGTGTCACTGGTGGTATGGCTAATCTTGGTTGTACATCATCTTAAGCTCATTTATGCTAATATGG

AAGGTTTGTGGGTCCATCATCCTCATTAGTTAATTTTTAGGTCTATATT

>M6-PGSC0003DMG400027536M6LRR-RLK\_4270

TGTGACTTAACTTAGATAATTCTTTCTGTCTTCCATATCTTTTCATTCATTTCCTTTTCTTCTAGTGCATAT

ACAGATATACTCATACTCAATTCTTGTCTCATCTGTGTATAGGGATC

>M6-PGSC0003DMG400027536M6LRR-RLK\_4331

TCTAGTGCATATAACAGATATACTCATACTCAATTCTTGTCTCATCTGTGTATAGGGATCTGTCAAACAACC

GTCTCTCAGGTGTTGTTCCAGATAATGGTTCCTTTTCTTATTACGCC

>M6-PGSC0003DMG400027536M6LRR-RLK\_4392

TCAAACAACCGTCTCTCAGGTGTTGTTCCAGATAATGGTTCCTTTTCTTATTACGCCTATCAGGTATATT

TCATTTAAGGTGGTGCACCATCAAACCTGGCTGGTGGTTTTAGTATGCT

>M6-PGSC0003DMG400027536M6LRR-RLK\_4453

TCAGGTATATTTCAATTAAGGTGGTGCACCATCAAACCTGGCTGGTGGTTTTAGTATGCTGCTATTTGCTA

ATATATTTTGCTTGAATTTACAGTTTTGCGAATAATTTAGATCTTTGCGG

>M6-PGSC0003DMG400027536M6LRR-RLK\_4514

TATTTGCTAATATATTTTGCTTGAATTTACAGTTTTGCGAATAATTTAGATCTTTGCGGGCCTGTAACCTGG

ACGTCCTTGTCGGGATCTCCTCCATTCTCCCCTCCACCTCCATTTGTT

>M6-PGSC0003DMG400027536M6LRR-RLK\_4575

CTGTAACCTGGACGTCCTTGTCCGGGATCTCCTCCATTCTCCCCTCCACCTCCATTTGTTCCACCACCACCAA

TTTCTGCTCCAGGTGGTCTCTAAATTGGTGTGGATAAATTGTTTTCC

>M6-PGSC0003DMG400027536M6LRR-RLK\_4636

ACCACCACCAATTTCTGCTCCAGGTGGTCTCTAAATTGGTGTGGATAAATTGTTTTCTTTTTTTTTTTTGC

TTGTTTGAGTTTGGTGATTTTTGTTGGTCCATCCATCTTGCCTCTCTT

>M6-PGSC0003DMG400027536M6LRR-RLK\_4697

TTTTTTTTTGCTTGTTGAGTTTGGTGATTTTTGTTGGTCCATCCATCTTGCCTCTCTTAGTTTTTCCTAACC

TAAGTGAGAATTTGTGCTATAGAAGTACTGACAAGAAAGGGGCAGAA

>M6-PGSC0003DMG400027536M6LRR-RLK\_4758

TTTTTCCTAACCTAAGTGAGAATTTGTGCTATAGAAGTACTGACAAGAAAGGGGCAGAAGAGGAAAGCC

CATCTTAGCTAGTCAGGCATTTTGGTTAAGTAGTTCTTATGGGAAACTGGT

>M6-PGSC0003DMG400027536M6LRR-RLK\_4819

GGAAAGCCCATCTTAGCTAGTCAGGCATTTTGGTTAAGTAGTTCTTATGGGAAACTGGTATGCACGAGA  
CTACATTTAGTCTTTAAGCATTCTGGTCTTTATACAAATTTAATTCAGCAT

>M6-PGSC0003DMG400027536M6LRR-RLK\_488

CTAATATGGAAGGTTTGTGGGTCCATCATCCTCATTTAGTTAATTTTTAGGTCTATATTTGTTGTTCTGTTT  
TGTGAGATGAGTTTCAAATGTCGAAACTTTTCGTA TAGAAATTAAT

>M6-PGSC0003DMG400027536M6LRR-RLK\_4880

GCACGAGACTACATTTAGTCTTTAAGCATTCTGGTCTTTATACAAATTTAATTCAGCATTGTGGAGATCTT  
TTCTTTGGTCCCCTTGTA AATTATTATCTGTGGTATTTGAAGTTGAGTA

>M6-PGSC0003DMG400027536M6LRR-RLK\_4941

TGGAGATCTTTTCTTTGGTCCCCTTGTA AATTATTATCTGTGGTATTTGAAGTTGAGTATGTCTGAAATTA  
ATCATATTTATGCCAGA AACTTGTGAAGATTTTCTTTGCTTTGTAAAAAC

>M6-PGSC0003DMG400027536M6LRR-RLK\_5002

TCTGAAATTAATCATATTTATGCCAGA AACTTGTGAAGATTTTCTTTGCTTTGTAAAAACTGTCCTGGAAAT  
TAGATCTGAATGATAGATACAAATTTGTGTACTTCTTTCTTTTTGAAGT

>M6-PGSC0003DMG400027536M6LRR-RLK\_5063

TCCTGGAAATTAGATCTGAATGATAGATACAAATTTGTGTACTTCTTTCTTTTTGAAGTGATTTAAATAAT  
GAAGGGCCAAAATTGTGTTAAATATAGTCTGGATCATATGAAGGAAATT

>M6-PGSC0003DMG400027536M6LRR-RLK\_5124

TTTAAATAATGAAGGGCCAAAATTGTGTTAAATATAGTCTGGATCATATGAAGGAAATTAATCAAATTTA  
TGGTAACTTCAGGAGGAAATGGTGC AACTGGAGCAATTGCTGGAGGTGTA

>M6-PGSC0003DMG400027536M6LRR-RLK\_5307

AAGCCACAAGAATATTTCTTTGACGTACCAGGTTAGCAGTATTCACAAATCACAATACCCAACCATAAGT  
CCATAACTCCTACTTACTCCCTCGCGTGTTTGTGGTTTCTCTTGCATGTT

>M6-PGSC0003DMG400027536M6LRR-RLK\_5368

ACCATAAGTCCATAACTCCTACTTACTCCCTCGCGTGTTTGTGGTTTCTCTTGCATGTTTATTTTTTGGCTC  
CATAATTACCGTTTTTGTCTTAAACTTATTGCAGCTGAAGAAGATCCTG

>M6-PGSC0003DMG400027536M6LRR-RLK\_5429

TTTTTTGGCTCCATAATTACCGTTTTTGTCTTAAACTTATTGCAGCTGAAGAAGATCCTGAAGTTCACCTAG  
GTCAACTGAAAAGGTTCTCCCTCCGAGAGCTACAAGTTGCAACCGACAG

>M6-PGSC0003DMG400027536M6LRR-RLK\_549

TTGTTCTGTTTTGTGAGATGAGTTTCAAATGTGCAAACCTTTTCGTACTAGAAATTAATATTTGCTGAAAG  
TGAAATGAGTATGTGCAAATTGGATTTTGAATTTGACTAATGTGTGAG

>M6-PGSC0003DMG400027536M6LRR-RLK\_5490

GTTCACTTAGGTCAACTGAAAAGTTCTCCCTCCGAGAGCTACAAGTTGCAACCGACAGTTTTAGCAATA  
AAAATATTCTGGGTCGAGGTGGATTTGGTAAGGTATACAAAGGACGCTTA

>M6-PGSC0003DMG400027536M6LRR-RLK\_5551

TTAGCAATAAAAAATATTCTGGGTCGAGGTGGATTTGGTAAGGTATACAAAGGACGCTTAGCAGATGGAT  
CATTGGTGGCTGTAAAGCGGCTTAAGGAGGAGCGTACTCCTGGAGGGGAGT

>M6-PGSC0003DMG400027536M6LRR-RLK\_5612

AGATGGATCATTGGTGGCTGTAAAGCGGCTTAAGGAGGAGCGTACTCCTGGAGGGGAGTTGCAATTC  
AAACAGAAGTTGAGATGATTAGCATGGCAGTGCATAGGAATCTTCTACGATT

>M6-PGSC0003DMG400027536M6LRR-RLK\_5673

CAATTTCAAACAGAAGTTGAGATGATTAGCATGGCAGTGCATAGGAATCTTCTACGATTGCGTGGTTTCT  
GTATGACACCAACTGAAAGACTGCTTGTCTACCCCTACATGGCGAATGGA

>M6-PGSC0003DMG400027536M6LRR-RLK\_5734

GTGGTTTCTGTATGACACCAACTGAAAGACTGCTTGTCTACCCCTACATGGCGAATGGAAGTGTTCATC  
ATGCCTTAGAGGTGACGCCTTCTGAAATCTATCACTCCGTAACATATTTG

>M6-PGSC0003DMG400027536M6LRR-RLK\_5795

TGTTGCATCATGCCTTAGAGGTGACGCCTTCTGAAATCTATCACTCCGTAACATATTTGGATGCTCTCACC  
TTAATTTAGAGGGTATTATTACATAATGCAAGAACTTCTTTGCTGGT

>M6-PGSC0003DMG400027536M6LRR-RLK\_5856

TGCTCTCACCTTTAATTTAGAGGGTATTATTACATAATGCAAGAACTTCTTTGCTGGTTAACGTTCTATCT  
GGCATAACATACTCTTTATAATAAAACATATTCTTGTATGTTATTCCT

>M6-PGSC0003DMG400027536M6LRR-RLK\_5917

ACGTTCTATCTGGCATAACATACTCTTTATAATAAAACATATTCTTGTATGTTATTCCTGTAACCTGGTAA  
AGGTAGAAATATAATTTATTTGTATTCTCTTGACAAATTAATTTATT

>M6-PGSC0003DMG400027536M6LRR-RLK\_5978

AACTTGGTAAAAGGTAGAAATATAATTTATTTGTATTCTCTTGACAAATTAATTTATTTATCAGAACGA

CCGCCTTCTGAACCGCCACTTGATTGGCCAACGCGAAAGCGCATTGCTT

>M6-PGSC0003DMG400027536M6LRR-RLK\_6039

ATCAGAACGACCGCCTTCTGAACCGCCACTTGATTGGCCAACGCGAAAGCGCATTGCTTTGGGGTCTGC  
CAGGGGATTATCGTATTTGCATGATCATTGTGACCCTAAGATTATCCATCG

>M6-PGSC0003DMG400027536M6LRR-RLK\_61

GTAGCAGATAAAAAAAAAAAGGGGTTTCATCAGAAGAAGGAGAAGAATAACTGAACTGAGAAATAC  
AAAAAAGGTTTGTTCAGTGAAGAGTAAAAGGGGTAGCAAATCTTGAAATTA

>M6-PGSC0003DMG400027536M6LRR-RLK\_610

TTGCTGAAAGTGAAATGAGTATGTGCAAAATTGGATTTTGAATTTGACTAATGTGTGAGTTGTTGAATTT  
TCCAAAAGGGTAAGCAAGATGTGCAGTGAGCTCCCTGCATTGTTACGGT

>M6-PGSC0003DMG400027536M6LRR-RLK\_6100

GGGTCTGCCAGGGGATTATCGTATTTGCATGATCATTGTGACCCTAAGATTATCCATCGTGATGTGAAGG  
CTGCAAATATATTGCTAGATGAAGAATTTGAGGCTGTTGTTGGAGACTTT

>M6-PGSC0003DMG400027536M6LRR-RLK\_6161

ATGTGAAGGCTGCAAATATATTGCTAGATGAAGAATTTGAGGCTGTTGTTGGAGACTTTGGTTTGGCTA  
AACTTATGGACTACAAGGATACACATGTTACAACCTGCTGTGCGTGGTACAA

>M6-PGSC0003DMG400027536M6LRR-RLK\_6222

TTTGGCTAAACTTATGGACTACAAGGATACACATGTTACAACCTGCTGTGCGTGGTACAATTGGGCATATA  
GCTCCAGAATACCTGTCCACAGGGAAGTCTTCAGAAAAGACTGATGTTTT

>M6-PGSC0003DMG400027536M6LRR-RLK\_6283

GGGCATATAGCTCCAGAATACCTGTCCACAGGGAAGTCTTCAGAAAAGACTGATGTTTTGGGTATGGG  
ATCATGCTTCTGGAGCTAATCACCGGCCAACGTGCTTTTGATCTTGCTCGG

>M6-PGSC0003DMG400027536M6LRR-RLK\_6344

GGTATGGGATCATGCTTCTGGAGCTAATCACCGGCCAACGTGCTTTTGATCTTGCTCGGCTTGCAAATGA  
TGATGATGTCATGTTGCTTGACTGGGTATGTTGTCATCCTGCTTTACATG

>M6-PGSC0003DMG400027536M6LRR-RLK\_6405

TGCAAATGATGATGATGTCATGTTGCTTGACTGGGTATGTTGTCATCCTGCTTTACATGTAACATTACACG  
AGTACCATAATGTGCTCATTTTTTAATCTGTGCATCACAACACTAGCTG

>M6-PGSC0003DMG400027536M6LRR-RLK\_6466



ACATTACACGAGTACCATAATGTGCTCATTTTTTAATCTGTGCATCACAACACTAGCTGACTAATAAGTGT  
TTCTGCCTTTAGCAGGAATCTTTATGTCTATGTCTGAACTTGTTGTGGT

>M6-PGSC0003DMG400027536M6LRR-RLK\_6527

TAATAAGTGTTCCTGCCTTTAGCAGGAATCTTTATGTCTATGTCTGAACTTGTTGTGGTTCTTGTTTCAGG  
TGAAAGGACTCCTCAAAGAGAAGAAATTGGAAATGCTGGTTGACCCTGA

>M6-PGSC0003DMG400027536M6LRR-RLK\_6588

TTGTTTCAGGTGAAAGGACTCCTCAAAGAGAAGAAATTGGAAATGCTGGTTGACCCTGATCTTCAGAAC  
AAGTATGTGGAGGCTGAGGTGGAGCAACTGATCCAAGTAGCATTGCTTTGT

>M6-PGSC0003DMG400027536M6LRR-RLK\_6649

TTCAGAACAAGTATGTGGAGGCTGAGGTGGAGCAACTGATCCAAGTAGCATTGCTTTGTACACAAAGCA  
ACCCAATGGATCGGCCTAAGATGTCGGAAGTGGTGAGAATGCTTGAAGGTG

>M6-PGSC0003DMG400027536M6LRR-RLK\_671

GTTGAATTTCCCAAAGGGTAAGCAAGATGTGCAGTGAGCTCCCTGCATTGTTACGGTGGCAAGCAGT  
TTAGTTTTAATGTCAGTTAAATGTGAAAGTTTTTAGTTATCATTGCCATTC

>M6-PGSC0003DMG400027536M6LRR-RLK\_6710

ACAAAGCAACCCAATGGATCGGCCTAAGATGTCGGAAGTGGTGAGAATGCTTGAAGGTGATGGTTTGG  
CTGAAAGATGGGATGAGTGGCAGAAGGTAGAAGTTCTCCGGCAGGAAGTGA

>M6-PGSC0003DMG400027536M6LRR-RLK\_6771

GGTTTGGCTGAAAGATGGGATGAGTGGCAGAAGGTAGAAGTTCTCCGGCAGGAAGTGGAACTTGCACC  
ACATCCTGGTTCTGATTGGCTTGTGACTCAACAGAGAATTTACACGCAGTT

>M6-PGSC0003DMG400027536M6LRR-RLK\_6832

TTGCACCACATCCTGGTTCTGATTGGCTTGTGACTCAACAGAGAATTTACACGCAGTTGAATTATCGGG  
TCCAAGGTGACCGACCTCGTACTACCCAAGTAAAGAAAATCAAATCATT

>M6-PGSC0003DMG400027536M6LRR-RLK\_6893

ATTATCGGGTCCAAGGTGACCGACCTCGTACTACCCAAGTAAAGAAAATCAAATCATTAGGAACTCTTT  
ATTTTTGTTGACCTTGTGAAAGTTTTTCTTTGTGAAATTTAATGAAAATC

>M6-PGSC0003DMG400027536M6LRR-RLK\_6954

GAACTCTTATTTTTGTTGACCTTGTGAAAGTTTTTCTTTGTGAAATTTAATGAAAATCTCCAGTTGTAAGC  
CCATGAAGTGTCTGTTACATTGTGCATACAAATTTGACTGACAGGAA

>M6-PGSC0003DMG400027536M6LRR-RLK\_7015

CAGTTGTAAGCCCATGAAGTGTCTGTTACATTGTGCATACAAATTTGACTGACAGGAAATCCAAATCC  
ATTCCTGACAAGTTGGCACATAGGCGTAGTAGTTAAGTGCTTTAAAATT

>M6-PGSC0003DMG400027536M6LRR-RLK\_7076

TCCAAATCCATTCCCTGACAAGTTGGCACATAGGCGTAGTAGTTAAGTGCTTTAAAATTGTCCAACACAG  
TAAACTACTGTCAAGCAGGCTCTTGTTCAGTGTCATTGAAAATGCTAT

>M6-PGSC0003DMG400027536M6LRR-RLK\_7137

CCAACACAGTAAACTACTGTCAAGCAGGCTCTTGTTCAGTGTCATTGAAAATGCTATCAATTTGACAA  
GGTATTACAAGATTTTGGATTTTACAATCAAAGAATAGTGCTTAACAT

>M6-PGSC0003DMG400027536M6LRR-RLK\_7198

ATTTGACAAGGTTATTTACAAGATTTTGGATTTTACAATCAAAGAATAGTGCTTAACATTCTCTTACGGTT  
TTTATCATAATCTCGTGCTACAAGATAATGGCAAATATTCATCAATAG

>M6-PGSC0003DMG400027536M6LRR-RLK\_7259

TCTTACGGTTTTTATCATAATCTCGTGCTACAAGATAATGGCAAATATTCATCAATAGGCCACTTGCAGA  
GTTTGTTCGCGCTCTATGCCCAAATTTTGGGCTCTTTCTGACAATTC

>M6-PGSC0003DMG400027536M6LRR-RLK\_732

CAAGCAGTTTAGTTTTAATGTCAGTTAAATGTGAAAGTTTTTAGTTATCATTGCCATTCAACCTTAGTGCA  
TTATGTTTCCTATACAAGCTTGAATAATTTGATGTGATTTAATTTGGTT

>M6-PGSC0003DMG400027536M6LRR-RLK\_7320

CACTTGCAGAGTTTGTTCGCGCTCTATGCCCAAATTTTGGGCTCTTTCTGACAATTCAGATTAGTACCA  
GATGCTCTGATACAAGTACAAGATCTGCTCAGTGATACTTTTCGATCATT

>M6-PGSC0003DMG400027536M6LRR-RLK\_7381

ATTAGTACCAGATGCTCTGATACAAGTACAAGATCTGCTCAGTGATACTTTTCGATCATTCTGTCTACT  
TTTTACTCCAAAGAAAATTTCTTACATGCAAATTTTTTGAAGTGCATAC

>M6-PGSC0003DMG400027536M6LRR-RLK\_7442

TGTCATTACTTTTTACTCCAAAGAAAATTTCTTACATGCAAATTTTTTGAAGTGCATACTTTCAACATACA  
AGGATCCATCGAATGTACTACAGACCAAAGGGCAATAGAATAAACAGA

>M6-PGSC0003DMG400027536M6LRR-RLK\_7503

TTCAACATACAAGGATCCATCGAATGTACTACAGACCAAAGGGCAATAGAATAAACAGAAGAATCTCAA

AACTCACAATCAACAAACAAACCAGAGCCTGCAGAAGGTAGAGAAATACAC

>M6-PGSC0003DMG400027536M6LRR-RLK\_7564

AATCTCAAAACTCACAATCAACAAACAAACCAGAGCCTGCAGAAGGTAGAGAAATACACTTCACTTATC  
ATGGCTGGACCTGATATTATCTTTGAATGACTGTGAACGAGAACCAGGATT

>M6-PGSC0003DMG400027536M6LRR-RLK\_7625

CACTTATCATGGCTGGACCTGATATTATCTTTGAATGACTGTGAACGAGAACCAGGATTAGAGCCATTTG  
TTGCATTAAACAGGTTTGGATATGAATAATATGTTTCATCGTCCATGGAA

>M6-PGSC0003DMG400027536M6LRR-RLK\_7686

AGCCATTTGTTGCATTAAACAGGTTTGGATATGAATAATATGTTTCATCGTCCATGGAAGGCAATCTCTG  
TGGTTGGTGAAGACCCTGACCAGGATGATGAATATGGGAGATGGGAGACT

>M6-PGSC0003DMG400027536M6LRR-RLK\_7747

CAATCTCTGTGGTTGGTGAAGACCCTGACCAGGATGATGAATATGGGAGATGGGAGACTCAACACCCA  
CTGTTGAATCATCGTATGAAGGAATATTCGACACCTGATGTTCCAATGGACT

>M6-PGSC0003DMG400027536M6LRR-RLK\_7808

ACACCCACTGTTGAATCATCGTATGAAGGAATATTCGACACCTGATGTTCCAATGGACTGCCATGAAGTG  
GGCTGGGGATACCATCAGAGTTTGACGATTGGCGTTGGAGGTCTAAGTGA

>M6-PGSC0003DMG400027536M6LRR-RLK\_7869

CATGAAGTGGGCTGGGGATACCATCAGAGTTTGACGATTGGCGTTGGAGGTCTAAGTGAGGCTTTTCTA  
GGATGTGAGATTCTGTTTCTCAGCATAAAAGGGGTTCTCACTGGGGCTTA

>M6-PGSC0003DMG400027536M6LRR-RLK\_793

CCTTAGTGCATTATGTTTCTTATACAAGCTTGAATAATTTGATGTGATTTAATTTGGTTGTTGCCAAAATC  
TTGATAAACTGTTTTTTTTCAGTGAATAGATTAAATTTTTATGTGCATT

>M6-PGSC0003DMG400027536M6LRR-RLK\_7930

CTTTTCTAGGATGTGAGATTCTTGTTCAGCATAAAAGGGGTTCTCACTGGGGCTTACAGGCACCTCT  
TCGTCCTTTTCTGGTAAGCTCGCTGATTCTAACCTGAGCAAGGCTAGC

>M6-PGSC0003DMG400027536M6LRR-RLK\_7991

GGCACCTCTTCGCTCCTTTTCTGGTAAGCTCGCTGATTCTAACCTGAGCAAGGCTAGCTGCTGAGCGAG  
CAGCAGCAGCTGCACGTTTCGGCTGAATCAGCAGCTGCTTGGGCAGCAGCC

>M6-PGSC0003DMG400027536M6LRR-RLK\_8052

CTGAGCGAGCAGCAGCAGCTGCACGTTCCGGCTGAATCAGCAGCTGCTTGGGCAGCAGCCAATACATCTT  
GCAAATCTACATCAGTCTCAACTTTGGTCTTTGTAGTAGAGGGTGGTTGAG

>M6-PGSC0003DMG400027536M6LRR-RLK\_8113

TACATCTTGCAAATCTACATCAGTCTCAACTTTGGTCTTTGTAGTAGAGGGTGGTTGAGTACTTTGGGTT  
GTGGTTCTTTCTGTTGAGGAGAATGGAGGTGATTTTGGTGGGGGAACCAT

>M6-PGSC0003DMG400027536M6LRR-RLK\_8174

CTTTGGGTTGTGGTTCTTTCTGTTGAGGAGAATGGAGGTGATTTTGGTGGGGGAACCATGAATGGCAAA  
AACTGTTTCTTCTTCCGGTGCAGATAAACTATCAGCTGATCCAAAATCT

>M6-PGSC0003DMG400027536M6LRR-RLK\_8235

ATGGCAAAAAGTCTTCTTCTTCCGGTGCAGATAAACTATCAGCTGATCCAAAATCTTTTGAAACTACC  
TTCTCTTGCAAAAGTTCATCTCGCTCCATATCTTGTGTTGTGAGTTTTGA

>M6-PGSC0003DMG400027536M6LRR-RLK\_8296

TGAAACTACCTTCTTCTTGCAAAAGTTCATCTCGCTCCATATCTTGTGTTGTGAGTTTTGAGCTCACCGTCTTC  
AGAAGGCTTAGCTACCTCCTCATCGGAGTCAGATAGTGCAGAGGCTGG

>M6-PGSC0003DMG400027536M6LRR-RLK\_8357

TCACCGTCTTCAGAAGGCTTAGCTACCTCCTCATCGGAGTCAGATAGTGCAGAGGCTGGGAAAGGAAGC  
ATTTAGGGGCAGAACTCCACCGGTGCTAGGTCGTAGTGGCTGCTTAGGG

>M6-PGSC0003DMG400027536M6LRR-RLK\_8418

AAGGAAGCATTTCAGGGGCAGAACTCCACCGGTGCTAGGTCGTAGTGGCTGCTTAGGGACTTCTGGA  
AAATCTAAGTCAAATCAGCCTCAGATTCCGTTTGTATCAAAGACTTGAT

>M6-PGSC0003DMG400027536M6LRR-RLK\_8479

TTCTGGAAAATCTAAGTCAAATCAGCCTCAGATTCCGTTTGTATCAAAGACTTGATCTGATGCAGAG  
TGCTGCACCTCATCCAACCTTTCTTTGGGAAGTGGCACCTTAGCCCCACT

>M6-PGSC0003DMG400027536M6LRR-RLK\_854

TGCCAAAATCTTGATAAACTGTTTTTTTCAGTGAATAGATTAATTTTTATGTGCATTTTGGTGGATTA  
TATCGTCTATGTTTTCTAAATGGATACACGAACAGGTGATGCATTGCA

>M6-PGSC0003DMG400027536M6LRR-RLK\_8540

GATGCAGAGTGCTGCACCTCATCCAACCTTTCTTTGGGAAGTGGCACCTTAGCCCCACTGACAAATTGTG  
TGGGCCATTCTGCAAAGCAAAGGGAAGAAATCATGATGATTGAAAAGAG

>M6-PGSC0003DMG400027536M6LRR-RLK\_8601

CAAATTGTGTGGGCCATTCTGCAAAGCAAAGGGAAGAAATCATGATGATTGAAAAGAGGACAAAATC  
AAAGCCAGTACAGACTGAAATATACCAGCAAGTCCTCATGTGACTTCAACAG

>M6-PGSC0003DMG400027536M6LRR-RLK\_8662

CAAAATCAAAGCCAGTACAGACTGAAATATACCAGCAAGTCCTCATGTGACTTCAACAGCTCAGTTTCAG  
AAGCACTTGGATCCCAATCTAGCTGATGCTCCTCCGCAATTTCTTTAGC

>M6-PGSC0003DMG400027536M6LRR-RLK\_8723

CAGTTTCAGAAGCACTTGGATCCCAATCTAGCTGATGCTCCTCCGCAATTTCTTTAGCAGCTTCATTTTC  
ACATCAGGAGCAGGAGCTCGAATAGACAGCAACTCTATCAACTGTCAGA

>M6-PGSC0003DMG400027536M6LRR-RLK\_8906

CATAAAGGAGATCTAAGGTAACCTGGCGATTGACTCCGCATTCTGGCATGAGCTCTGTAGCAGCAGCAA  
TGAATTCCTTCCCATATTTACCAGCAAACATCATCTGAACCTGCAGCAATT

>M6-PGSC0003DMG400027536M6LRR-RLK\_8967

AGCAGCAATGAATTCCTTCCCATATTTACCAGCAAACATCATCTGAACCTGCAGCAATTCGGGAAGATCT  
GCACATCTTGGTGCAGCAAAACAAACACTTGAAATAGCTTCTTTAGATC

>M6-PGSC0003DMG400027536M6LRR-RLK\_9028

GGAAGATCTGCACATCTTGGTGCAGCAAAACAAACACTTGAAATAGCTTCTTTAGATCTAGAGGGCAT  
TCCCTGGACATTATAGAGTTTGGGGGTTTCCAGCTCTTTCCAATTATTCAAGT

>M6-PGSC0003DMG400027536M6LRR-RLK\_9089

GAGGGCATTCCCTGGACATTATAGAGTTTGGGGGTTTCCAGCTCTTTCCAATTATTCAAGTTAAGAAAATTA  
TCAACAAAATTCAACTAGAAGTCTAGAATATTAAGACTTGGAAAGAAAAC

>M6-PGSC0003DMG400027536M6LRR-RLK\_915

GTGGATTAATATCGTCTATGTTTTCTAAATGGATACACGAACAGGTGATGCATTGCATAGTCTACGCG  
TCAATTTACAAGATCCTAACAATGTGCTACAGAGCTGGGATCCTACCCTT

>M6-PGSC0003DMG400027536M6LRR-RLK\_9150

AGAAAATTATCAACAAAATTCAACTAGAAGTCTAGAATATTAAGACTTGGAAAGAAAACCTCCACATTGC  
AGGACAGTCAAGTTCAAGAGTATCAGTTTGCTTTAAAACAAATATCGAAG

>M6-PGSC0003DMG400027536M6LRR-RLK\_9211

CCACATTGCAGGACAGTCAAGTTCAAGAGTATCAGTTTGCTTTAAAACAAATATCGAAGATGAAGCGCT

TTGGGTCCATTTTGGAACTAGAGATCCACATTTATGGTCTCATGTAGATGA

>M6-PGSC0003DMG400027536M6LRR-RLK\_9272

GAAGCGCTTTGGGTCCATTTTGGAACTAGAGATCCACATTTATGGTCTCATGTAGATGATCAAATTATTTT

AAGGTTTCACACTCCCATAACACAAGCAAGAATGTATTGTTTCATTCTAT

>M6-PGSC0003DMG400027536M6LRR-RLK\_9333

AAATTATTTAAGGTTTCACACTCCCATAACACAAGCAAGAATGTATTGTTTCATTCTATGCCCTAGATACT

TCTCGGTCATATAAGCAGAAAGTTAAACGTAGTTAATCCTTGTTTGGCT

>M6-PGSC0003DMG400027536M6LRR-RLK\_9394

CCTAGATACTTCTCGGTCATATAAGCAGAAAGTTAAACGTAGTTAATCCTTGTTTGGCTAAAATTGACTTT

ATGCAAAAGGATCAAACATGCTGCTGCTCGGATACATGCACATACTTCC

>M6-PGSC0003DMG400027536M6LRR-RLK\_9455

AATTGACTTTATGCAAAAGGATCAAACATGCTGCTGCTCGGATACATGCACATACTTCCATTTAATCGAC

CTACAACCTAGACATTTCAAAGTTGGTAACTTTTTTTTCAGAATACATGAA

>M6-PGSC0003DMG400027536M6LRR-RLK\_9516

TTAATCGACCTACAACCTTAGACATTTCAAAGTTGGTAACTTTTTTTTCAGAATACATGAAATTTAGCAAATT

AAAGTACTGTGATTCATTAATTGAACTAGAGTCGCTCCATGAAAAAGTA

>M6-PGSC0003DMG400027536M6LRR-RLK\_9577

TTAGCAAATTAAGTACTGTGATTCATTAATTGAACTAGAGTCGCTCCATGAAAAAGTATCCATATCTAG

TGCAGATAATTCTCGCAAACAACAGCTAGGGTGGAGTATAGTAGATCTG

>M6-PGSC0003DMG400027536M6LRR-RLK\_9638

CATATCTAGTGCAGATAATTCTCGCAAACAACAGCTAGGGTGGAGTATAGTAGATCTGAAAGTTTGGT

ATTGAAGGAGATATGGAACCTAAATGTTAACAGCAGCATAGACAGCAAAGGC

>M6-PGSC0003DMG400027536M6LRR-RLK\_9699

AGTTTGGTATTGAAGGAGATATGGAACCTAAATGTTAACAGCAGCATAGACAGCAAAGGCTAGAGGCAA

GCAAGGAAGACAGAGAGGAACATTTGGGACCCGTTTGGCCATAGATTTCCCA

>M6-PGSC0003DMG400027536M6LRR-RLK\_976

GTCTACGCGTCAATTTACAAGATCCTAACAATGTGCTACAGAGCTGGGATCCTACCCTTGTTAATCCTTGC

ACATGGTTTCATGTTACCTGCAACAATGACAACAGTGTATAAGAGTGT

>M6-PGSC0003DMG400027581-(rev)M6LRR-RLK\_0

ATGAAACTACAAGATTTACGTGCAACTATTGTCTTTTTCTATCATTGCTAGCAATTCTCCTCACATTATT  
GCTAATCTTGATTCAGACAAACATGCTCTACTTCAATTTGCTGCATCT

>M6-PGSC0003DMG400027581-(rev)M6LRR-RLK\_1024

ATGAGGTATCGATGATAGTTGTGAAAAGGCTGAAGGAAGTAAGGGTTGTTAAAAAGGAGTTTGAACAG  
CATATGGATATTGTTGGAAAGATTACAAGGCACCCAAATATAGTGCCATTTT

>M6-PGSC0003DMG400027581-(rev)M6LRR-RLK\_1088

ACAGCATATGGATATTGTTGGAAAGATTACAAGGCACCCAAATATAGTGCCATTTCTTGCTTGTTATTAC  
TCAAAGGATGAGAACTTCTGTTTGTGAATACGTCCCTTATGGTAGTTT

>M6-PGSC0003DMG400027581-(rev)M6LRR-RLK\_1138

CATTTCTTGCTTGTTATTACTCAAAGGATGAGAACTTCTGTTTGTGAATACGTCCCTTATGGTAGTTTG  
TCATCCGCCTTATATGGTATAAGCTGCTTAACTCTTCTTAGATAAACT

>M6-PGSC0003DMG400027581-(rev)M6LRR-RLK\_128

TCTTAGAAAACACTCAACTGGAACCTGCTTTGTCAATCTGCAATTCTTGGATTGGGATCACTTGCAACAAA  
GATGGAACGACGCGAGTCGTTGCAATTCATCTGCCTGGTGTGGACTTAC

>M6-PGSC0003DMG400027581-(rev)M6LRR-RLK\_192

AACAAAGATGGAACGACGCGAGTCGTTGCAATTCATCTGCCTGGTGTGGACTTACTGGCCATATCCCA  
GCAAACAGCATTGGCAAACCTAGATGCTCTCCAAGTCCTTAGCCTAAGAGCA

>M6-PGSC0003DMG400027581-(rev)M6LRR-RLK\_256

TCCCAGCAAACAGCATTGGCAAACCTAGATGCTCTCCAAGTCCTTAGCCTAAGAGCAAACAATCTAAATGG  
AAATCTTCTTCTGATATTCTTTCAATCCCTTCTTCTCTCTATCTACC

>M6-PGSC0003DMG400027581-(rev)M6LRR-RLK\_320

AAATGGAAATCTTCTTCTGATATTCTTTCAATCCCTTCTTCTCTCTATCTACCTTCAACATAATAACTTC  
TCTGGTGATATTCTGTTTCCTTTTCATCAAACTTGGTGTAGTAGA

>M6-PGSC0003DMG400027581-(rev)M6LRR-RLK\_384

AATAACTTCTCTGGTGATATTCTGTTTCCTTTTCATCAAACTTGGTGTAGTAGATCTCTCGTTTAACTCT  
TTTACCGGAGAAATCCCCCACGATCAAGAATTTGCCTCGATTATCC

>M6-PGSC0003DMG400027581-(rev)M6LRR-RLK\_448

TTAACTCTTTTACCGGAGAAATCCCCCACGATCAAGAATTTGCCTCGATTATCCATGTTGAACCTAAAG  
TTCAATTCATTATCTGGATCAATCCCAATCTTGATGTGTCAAGGTTGA

>M6-PGSC0003DMG400027581-(rev)M6LRR-RLK\_512

CCTAAAGTTCAATTCATTATCTGGATCAATCCCAATCTTGATGTGTCAAGGTTGAGTTTTTTGAATTTGA  
GTTACAACATGTTAAATGGCTCAGTTCATATCCCTCAGGAAGTTCCC

>M6-PGSC0003DMG400027581-(rev)M6LRR-RLK\_576

AATTTGAGTTACAACATGTTAAATGGCTCAGTTCATATCCCTCAGGAAGTTCCCACTTTCTTCTTTTGTG  
GGAACTCTAATTTATGTGGAACACCTTTGAGTAGCTGTTCTTCGAGA

>M6-PGSC0003DMG400027581-(rev)M6LRR-RLK\_64

ACATTATTGCTAATCTTGATTCAGACAAACATGCTCTACTTCAATTTGCTGCATCTGTCCCACATCTTAGAA  
AACTCAACTGGAECTCTGCTTTGTCAATCTGCAATTCTTGGATTGGGA

>M6-PGSC0003DMG400027581-(rev)M6LRR-RLK\_640

CTTTTGTGGGGAECTCTAATTTATGTGGAACACCTTTGAGTAGCTGTTCTTCGAGATCTCCATCGCGTAAA  
GGTGACAACTTTAAGAACTTAGTAATGAAATTATCATTGCAATTGCAG

>M6-PGSC0003DMG400027581-(rev)M6LRR-RLK\_704

GCGTAAAGGTGACAACTTTAAGAACTTAGTAATGAAATTATCATTGCAATTGCAGTAGGTGGTCCTTCT  
GTTATAATTCTCCTTGTTTTATTCATCTACTTCTGTTATTTTAACAAGAA

>M6-PGSC0003DMG400027581-(rev)M6LRR-RLK\_768

CCTTCTGTTATAATTCTCCTTGTTTTATTCATCTACTTCTGTTATTTTAACAAGAAGGTTGATAACAACACA  
AGCATGGTTGAAGAGAAGAATGAGAAGTTAGAAGACTTTGGAAATGGG

>M6-PGSC0003DMG400027581-(rev)M6LRR-RLK\_832

ACAACACAAGCATGGTTGAAGAGAAGAATGAGAAGTTAGAAGACTTTGGAAATGGGGTTCAAGATTCT  
GAAAAGAACGAGTTAACGTTCTTTAAAGGGTGCTCTTATAACTTTGATCTTG

>M6-PGSC0003DMG400027581-(rev)M6LRR-RLK\_896

TTCTGAAAAGAACGAGTTAACGTTCTTTAAAGGGTGCTCTTATAACTTTGATCTTGAGGATCTGTTGAGT  
GCTTCTGCTGATTTTCTTGGTAAAGGGAGTTATGGAECTGCTTACAGAGT

>M6-PGSC0003DMG400027581-(rev)M6LRR-RLK\_960

TTGAGTGCTTCTGCTGATTTTCTTGGTAAAGGGAGTTATGGAECTGCTTACAGAGTTTCGTTGGATGAGG  
TATCGATGATAGTTGTGAAAAGGCTGAAGGAAGTAAGGGTTGTTAAAAAG

>M6-PGSC0003DMG400027585-(rev)M6LRR-RLK\_0

GAGAGAGAAAGATAAAGTGAACGTTAATAAATGCTCCCACTGACCCGCCGTCCCCGGTAACACTTTACT



TTTTTCTACTTTCTCCGGCTTATTCCTCCCTACCTCATCAACAACCTTCAA

>M6-PGSC0003DMG400027585-(rev)M6LRR-RLK\_1054

GGTCTTTGAATGGGCTAAGGTCACCTTGATCTGTGACAGATAATTTGCTGGATGGTGAAATCCAGTAGGTAT

TGAAGGTATGTATAATTTGAGAGCCATAAATTTGAGGAAAAATCATCTCA

>M6-PGSC0003DMG400027585-(rev)M6LRR-RLK\_1116

GTAGGTATTGAAGGTATGTATAATTTGAGAGCCATAAATTTGAGGAAAAATCATCTCAAAGGTGAAGTT

CCTGATGGAATTGGAAGTTGTTTGCTGTTGAGGTCAATTGATTTGAGTGAA

>M6-PGSC0003DMG400027585-(rev)M6LRR-RLK\_1178

TGAAGTTCCTGATGGAATTGGAAGTTGTTTGCTGTTGAGGTCAATTGATTTGAGTGAAAATTCTTTCTCT

GGAGAACTTCCTAAAACAATGCAGATGCTTAGTTTGTGCAATGAGTTGAT

>M6-PGSC0003DMG400027585-(rev)M6LRR-RLK\_124

ACCGGCGCTTTACATTTTCCGGCGAAACCCCAAATTCACTCTCATTGTCTCCTTCTTCTCCCTTCAGATTT

CCCTTTTTCTGCTGCCAAAATCAACTGTTTCTTCCACTCATTCACT

>M6-PGSC0003DMG400027585-(rev)M6LRR-RLK\_1240

CTTTCTCTGGAGAACTTCCTAAAACAATGCAGATGCTTAGTTTGTGCAATGAGTTGATTATGAAACACAA

TGCATTAGTTGGTAGTGTACCTGAATGGATTGGAGAAATGAAAAGCCTTG

>M6-PGSC0003DMG400027585-(rev)M6LRR-RLK\_1302

AAACACAATGCATTAGTTGGTAGTGTACCTGAATGGATTGGAGAAATGAAAAGCCTTGAGATGCTTGAT

CTTTCTGGGAACAACCTTCTCTGGTCAGTTCCCGAATTCAGTTGGGAAGCTT

>M6-PGSC0003DMG400027585-(rev)M6LRR-RLK\_1364

GCTTGATCTTTCTGGGAACAACCTTCTCTGGTCAGTTCCCGAATTCAGTTGGGAAGCTTCAATCACTGAAA

TTACTGAACGTGTCGCGAAATGCTATTTCTGGGGACTTTCCCAAGTCCAT

>M6-PGSC0003DMG400027585-(rev)M6LRR-RLK\_1426

CACTGAAATTAAGTGAACGTGTCGCGAAATGCTATTTCTGGGGACTTTCCCAAGTCCATGAGCAGTTGTGT

TAATCTTATGACTGATGTTAGTCACAACCTCATTGACGGGTGATCTTC

>M6-PGSC0003DMG400027585-(rev)M6LRR-RLK\_1488

AGTTGTGTTAATCTTATGACTGATGTTAGTCACAACCTCATTGACGGGTGATCTTCCTCCTTGGGTATT

CAAATTAGGATTGCGACATGTTTTGTTTTCTGAGAATAAATTAAGTAGG

>M6-PGSC0003DMG400027585-(rev)M6LRR-RLK\_1550

TTGGGTATTCAAATTAGGATTGCGACATGTTTTGTTTTCTGAGAATAAATTAAGTAGGGGCTTGAAGAAT  
GCTATTGCTTCTTCACTGGAAAACCTCTCGACAAAAGCTTCTAGTTCTCGA

>M6-PGSC0003DMG400027585-(rev)M6LRR-RLK\_1612

TGAAGAATGCTATTGCTTCTTCACTGGAAAACCTCTCGACAAAAGCTTCTAGTTCTCGATATCTCTTGCAAT  
GAGTTAGCTGGTGA AATTCCATTTGCTATTGGTGATTTTAACAGCTTGC

>M6-PGSC0003DMG400027585-(rev)M6LRR-RLK\_1674

TCTTGCAATGAGTTAGCTGGTGAAATTCATTTGCTATTGGTGATTTTAACAGCTTGCAGTCATTGAATTT  
ATCTAGAAATTCACCTGCAGGGAACATCCCTGAGACTGTTGGCCATCTA

>M6-PGSC0003DMG400027585-(rev)M6LRR-RLK\_1736

ATTGAATTTATCTAGAAATTCACCTGCAGGGAACATCCCTGAGACTGTTGGCCATCTAAAGTCACTGGAT  
GTTCTTGACTTAAGCGAGAATCAGTTAAATGGTAGTGCCCTCTGGAGCT

>M6-PGSC0003DMG400027585-(rev)M6LRR-RLK\_1798

CACTGGATGTTCTTGACTTAAGCGAGAATCAGTTAAATGGTAGTGCCCTCTGGAGCTTGGAGGAGCCT  
ATGCTCTCAGGGAACCTGAAACTGGAGAAGAATGCCTTGACAGGAGAAATTC

>M6-PGSC0003DMG400027585-(rev)M6LRR-RLK\_186

CTTCAGATTTCCCTTTTTCTGCTGCCAAAATTCAACTGTTTCTTCCACTCATTATCTACATTTTCTTCTTCTC  
CACTTTGTTTCATTA AAAATTCACCTCTTCCGGATTTCTAGGGTTT

>M6-PGSC0003DMG400027585-(rev)M6LRR-RLK\_1860

GGAGCCTATGCTCTCAGGGAACCTGAAACTGGAGAAGAATGCCTTGACAGGAGAAATTCCTACTTCTATT  
GGAAACTGTTCTGCTCTTTTGTCTTGTAAGTTCTTGTTTCTCTTTATCGT

>M6-PGSC0003DMG400027585-(rev)M6LRR-RLK\_1922

TTCTATTGAAACTGTTCTGCTCTTTTGTCTTGTAAGTTCTTGTTTCTCTTTATCGTTCATTTATATCTTTCA  
TTTGAGATAATCTCTCTGCTTGGAGTTTTTCATAAGGACAATGTAG

>M6-PGSC0003DMG400027585-(rev)M6LRR-RLK\_1984

TTATATCTTTCAATTTGAGATAATCTCTCTGCTTGGAGTTTTTCATAAGGACAATGTAGTGGTAAGTTATTG  
TACAGAAGAACCTGATTGATATATAGTTTGATAATTAAGGAACTAGCAT

>M6-PGSC0003DMG400027585-(rev)M6LRR-RLK\_2046

AAGTTATTGTACAGAAGAACCTGATTGATATATAGTTTGATAATTAAGGAACTAGCATTTCATTCTTTT  
CGCAGTTTCCTCTCAGACAACGTTGTTTTGGATTGTCAA AATTCTAGTG

>M6-PGSC0003DMG400027585-(rev)M6LRR-RLK\_2108

ATTCTTTTTTCGCAGTTTCCTCTCAGACAACGTTGTTTTGGATTGTCAAATTCTAGTGAATAATCAAGCA  
CGAATCCTTATATTAGAGATTCTTTATCATGTTCTACTAATTAGTTAGT

>M6-PGSC0003DMG400027585-(rev)M6LRR-RLK\_2170

AATCAAGCACGAATCCTTATATTAGAGATTCTTTATCATGTTCTACTAATTAGTTAGTTCTAAGCTTCTAGC  
AATCATTTAGAGTTTCCATATTGAGTTAATCAAGTAGCTTCTAGTGCA

>M6-PGSC0003DMG400027585-(rev)M6LRR-RLK\_2232

AGCTTCTAGCAATCATTAGAGTTTCCATATTGAGTTAATCAAGTAGCTTCTAGTGCATGATTTTAGATAA  
AATCCTTTTTTTTTCTAGATAAGGCAATTCCTATACTTAATATTTTA

>M6-PGSC0003DMG400027585-(rev)M6LRR-RLK\_2294

TTTAGATAAAATCCTTTTTTTTTCTAGATAAGGCAATTCCTATACTTAATATTTTACATAAAGTATAATG  
TAACAACATCACATTACCTGGTTTTTCGATGTTTTATGTGACGTAGCC

>M6-PGSC0003DMG400027585-(rev)M6LRR-RLK\_2356

AAGTATAATGTAACAACATCACATTACCTGGTTTTTCGATGTTTTATGTGACGTAGCCTGTAAATTTATTT  
ATGAAGTAGTCTTTGAATATCAGCTTTCCTCAAAGCTTGGTTAATCGGT

>M6-PGSC0003DMG400027585-(rev)M6LRR-RLK\_2418

AATTTATTTATGAAGTAGTCTTTGAATATCAGCTTTCCTCAAAGCTTGGTTAATCGGTTTTGTTTCCATCAA  
CTTGGCAGGTCTCTGTACATAATGGTTTAACTGGCCCTGTACCTGCA

>M6-PGSC0003DMG400027585-(rev)M6LRR-RLK\_248

TTTCTTCTTCTCCACTTTGTTTCATTAATAAATCACTCTTCCGGATTCTAGGGTTTTTTAAGAAGTGGGT  
GTTTTTAAAAAAAATTCTTACCATTTTATTGGCGGTTACGTTCTTC

>M6-PGSC0003DMG400027585-(rev)M6LRR-RLK\_2480

TTTCCATCAACTGGCAGGTCTCTGTACATAATGGTTTAACTGGCCCTGTACCTGCAACCCTTGCTAAAC  
TATCTAACCTACAAAATGTTGACCTTTCCTTCAACAAATTAACCGGAAT

>M6-PGSC0003DMG400027585-(rev)M6LRR-RLK\_2542

TTGCTAAACTATCTAACCTACAAAATGTTGACCTTTCCTTCAACAAATTAACCGGAATCTTACCAAAGCAG  
CTGGTAAATCTTGGTCACCTTGAGTTGTTCAACATCTCACACAACCAAGT

>M6-PGSC0003DMG400027585-(rev)M6LRR-RLK\_2604

CCAAAGCAGCTGGTAAATCTTGGTCACCTTGAGTTGTTCAACATCTCACACAACCAAGTTAAAGGGCGAAC

TGCCTTCTGGTGGTTTTTTTAACTACTATTTCTCCCTATTCAGTGTCAGCC

>M6-PGSC0003DMG400027585-(rev)M6LRR-RLK\_2666

GGGCGAACTGCCTTCTGGTGGTTTTTTTAACTACTATTTCTCCCTATTCAGTGTCAGCCAATCCATCTCTTTG

TGGAGCTGCTGCTAATAGGTCTTGTCCAAGTGCCTTCCCAAGCCGAT

>M6-PGSC0003DMG400027585-(rev)M6LRR-RLK\_2728

CATCTCTTTGTGGAGCTGCTGCTAATAGGTCTTGTCCAAGTGCCTTCCCAAGCCGATTGTTCTGAATCCC

AACTCCACAGAATCTATTCCTGGTACTATCCCTCTGACTGTGGGCCACG

>M6-PGSC0003DMG400027585-(rev)M6LRR-RLK\_2790

CTGAATCCCAACTCCACAGAATCTATTCCTGGTACTATCCCTCTGACTGTGGGCCACGAAAAGAAAATCC

TAAGCATCTCTGCCCTCATTGCCATTAGTGCAGCTGCTATTATTGTTGTT

>M6-PGSC0003DMG400027585-(rev)M6LRR-RLK\_2852

GAAAATCCTAAGCATCTCTGCCCTCATTGCCATTAGTGCAGCTGCTATTATTGTTGTTGGTGTATTGCCA

TTACTGTGCTAAATCTTCGCGTACGGTCTGCAACATCTCACTCTGCTGC

>M6-PGSC0003DMG400027585-(rev)M6LRR-RLK\_2914

TTATTGCCATTACTGTGCTAAATCTTCGCGTACGGTCTGCAACATCTCACTCTGCTGCTGCCCTTACATTTT

CTGGTGGAGATGACTATAGCCCCTCACACAGTACAGATGCAAATTCTG

>M6-PGSC0003DMG400027585-(rev)M6LRR-RLK\_2976

CTTACATTTTCTGGTGGAGATGACTATAGCCCCTCACACAGTACAGATGCAAATTCTGGTAAGCTTGCA

TGTTTTCAGGCGAACTTGACTTCAGCACAGGGTACATGCTCTGCTTAAC

>M6-PGSC0003DMG400027585-(rev)M6LRR-RLK\_3038

GCTTGTCATGTTTTCAGGCGAACTTGACTTCAGCACAGGGTACATGCTCTGCTTAACAAGGATTGTGAG

CTCGGACGTGGTGGTTTTGGAGCCGTTTATCGCACTGTCCTCGGAGATGG

>M6-PGSC0003DMG400027585-(rev)M6LRR-RLK\_310

AGAACTGGGTGTTTTTAAAAAAAATTCTTACCCATTTTATTGGCGTTACGTTCTTCTTGCTAAAGAT

TGTATCTTTTGCTTGTCTTGTATATAATTATGTATACCCATTTGGGGT

>M6-PGSC0003DMG400027585-(rev)M6LRR-RLK\_3100

ATTGTGAGCTCGGACGTGGTGGTTTTGGAGCCGTTTATCGCACTGTCCTCGGAGATGGGATGCCTGTGG

CCATTAAGAAGCTTACTGTCTCAGGTCTTGTTAAGTCTCAGGTAGACTTTG

>M6-PGSC0003DMG400027585-(rev)M6LRR-RLK\_3162

CCTGTGGCCATTAAGAAGCTTACTGTCTCAGGTCTTGTTAAGTCTCAGGTAGACTTTGAAAAGGAGGTTA  
AGAAATTGGGAAAAGTTCATCACCTAATGTTGTGGCTCTCAAGGTTAT

>M6-PGSC0003DMG400027585-(rev)M6LRR-RLK\_3224

GGAGGTTAAGAAATTGGGAAAAGTTCATCACCTAATGTTGTGGCTCTCAAGGTTATTATTGGACTCCG  
TCACTACAGCTACTTATATATGAATTCATAACTGGTGGAAATTTGTATGA

>M6-PGSC0003DMG400027585-(rev)M6LRR-RLK\_3286

GGACTCCGTCCTACTACAGCTACTTATATATGAATTCATAACTGGTGGAAATTTGTATGATCATATCCATGA  
AGGTTCTAGTAAAAGCATGCTCTCATGGAATGAGCGGTTCAACGTTATTC

>M6-PGSC0003DMG400027585-(rev)M6LRR-RLK\_3348

ATCCATGAAGGTTCTAGTAAAAGCATGCTCTCATGGAATGAGCGGTTCAACGTTATTCTTGGGACAGCA  
AAAGGCATGGCTAACTTACATCAAATGAACATAATTCATAACCTCAAG

>M6-PGSC0003DMG400027585-(rev)M6LRR-RLK\_3410

GACAGCAAAGGCATGGCTAACTTACATCAAATGAACATAATTCATAACCTCAAGTCCAGCAATATT  
TTGATTGACAGCTCTGGTGATCCTAAAGTTGCAGATTATGGGTTAGCAAG

>M6-PGSC0003DMG400027585-(rev)M6LRR-RLK\_3472

GCAATATTTTGATTGACAGCTCTGGTGATCCTAAAGTTGCAGATTATGGGTTAGCAAGGCTGTTACCGAT  
GTTAGATCGATATGTTTTGAGCAGCAAATTCAAAGTGCCTCGGTTACA

>M6-PGSC0003DMG400027585-(rev)M6LRR-RLK\_3534

TTACCGATGTTAGATCGATATGTTTTGAGCAGCAAATTCAAAGTGCCTCGGTTACATGGCACCTGAAT  
TTGCATGCAAGACTGTGAAGATAACTGATAAGTGCGATGTGTATGGGTTT

>M6-PGSC0003DMG400027585-(rev)M6LRR-RLK\_3596

ACCTGAATTTGCATGCAAGACTGTGAAGATAACTGATAAGTGCGATGTGTATGGGTTTGGAGTTCTTGT  
CTGGAGATAGTCACTGGAAAGAAACCGGTTGAGTACATGGAGGATGATGT

>M6-PGSC0003DMG400027585-(rev)M6LRR-RLK\_3658

TTCTTGTCTGGAGATAGTCACTGGAAAGAAACCGGTTGAGTACATGGAGGATGATGTTATTGTATTGT  
GTGACATGGTACGGGGTGCATTGGAAGAAGGCAAGGTGGAAGAGTGTGTTG

>M6-PGSC0003DMG400027585-(rev)M6LRR-RLK\_372

GCTAAAGATTGTATCTTTTGCTTGTCTTGTATATAATTATGTATACCATTTGGGGTTGCTGATGGGATT  
ATGAGTAACTTATATATTGCTTTGTGATTATTGAGCTGGGAGTATGGAA

>M6-PGSC0003DMG400027585-(rev)M6LRR-RLK\_3720

GTATTGTGTGACATGGTACGGGGTGCATTGGAAGAAGGCAAGGTGGAAGAGTGTGTTGACAAGAGGC  
TGCATGGAAAATTTCCAGCAGAGGAAGCGATTCTGTGATGAAGTTGGGTTTA

>M6-PGSC0003DMG400027585-(rev)M6LRR-RLK\_3782

GAGGCTGCATGGAAAATTTCCAGCAGAGGAAGCGATTCTGTGATGAAGTTGGGTTAATCTGCACATC  
ACAAGTCCCTTCAAACAGGCCTGATATGGCAGAAGTGGTTAACATATTGGA

>M6-PGSC0003DMG400027585-(rev)M6LRR-RLK\_3844

GCACATCACAAGTCCCTTCAAACAGGCCTGATATGGCAGAAGTGGTTAACATATTGGAAATGATCAGAT  
GTCCTTCAGAAGGCCAGGAGGAACTAGTATGATATCCCACTAAACTGATGG

>M6-PGSC0003DMG400027585-(rev)M6LRR-RLK\_3906

ATCAGATGTCCTTCAGAAGGCCAGGAGGAACTAGTATGATATCCCACTAAACTGATGGAAAATTTTTAA  
CATATGCTATTAGTCCCGGAGAAGAAGAATCCGCTTGATCTATTCATATTA

>M6-PGSC0003DMG400027585-(rev)M6LRR-RLK\_3968

TTTTTAACATATGCTATTAGTCCCGGAGAAGAAGAATCCGCTTGATCTATTCATATTATGGTCATTTAAAG  
TTTCAATTTTTTTTAATTATGTTATTGGTTCTCTGTTGTTCCGGGTTAC

>M6-PGSC0003DMG400027585-(rev)M6LRR-RLK\_4030

CATTTAAAGTTTCAATTTTTTTTAATTATGTTATTGGTTCTCTGTTGTTCCGGGTTACCGGATTCCTTTTCAC  
CGGTTTTAGTATGTGAGGATCCTTTTTTACGGTTCTTTTTATGTAA

>M6-PGSC0003DMG400027585-(rev)M6LRR-RLK\_4092

TTCTTTTACCGGGTTTTAGTATGTGAGGATCCTTTTTTACGGTTCTTTTATGTAACAATTGATTCTAAC  
ATGTAATTCCAGTAACCTCTTGCCTTTGTTGTTCAAATGAAGGAAGGT

>M6-PGSC0003DMG400027585-(rev)M6LRR-RLK\_4152

ATTGATTCTAACATGTAATTCCAGTAACCTCTTGCCTTTGTTGTTCAAATGAAGGAAGGTCCAAATGTTG  
ATAGTGGATGTGCCAATAAGTATATTTTCATGACAAAATGATCAAACAAGC

>M6-PGSC0003DMG400027585-(rev)M6LRR-RLK\_434

GATGGGATTATGAGTAACTTATATATTGCTTTGTGATTATTGAGCTGGGAGTATGGAAATGAGGAAGGT  
TTTTGGTATAGTAATTTTTGTATTTTAGTATCTCCTGTTTTTGTAAAGC

>M6-PGSC0003DMG400027585-(rev)M6LRR-RLK\_496

GGAAGGTTTTTGGTATAGTAATTTTTGTATTTTAGTATCTCCTGTTTTTGTAAAGCCTTGAACCTATCTT

TTAATGATGATATACTGGGGTTGATGGTATTCAAGGCTGATGTTCAAG

>M6-PGSC0003DMG400027585-(rev)M6LRR-RLK\_558

AACTTATCTTTTAATGATGATATACTGGGGTTGATGGTATTCAAGGCTGATGTTCAAGATCCACAAGGGA  
AGTTGGTGTCTTGGAATGAAGAAGATGATAGCCCCTGCGGCTGGAATGGT

>M6-PGSC0003DMG400027585-(rev)M6LRR-RLK\_62

CTTTACTTTTTTCTACTTTCTCCGGCTTATTCTCCCTACCTCATCAACAACCTTCAACTTCACCGGCGCTTT  
ACATTTTCCGGCGAAACCCCAAATTCACTCTCATTGTCTCCTTCTTC

>M6-PGSC0003DMG400027585-(rev)M6LRR-RLK\_620

ACAAGGGAAGTTGGTGTCTTGGAATGAAGAAGATGATAGCCCCTGCGGCTGGAATGGTATCCATTGCA  
ACCCAGATCCAATAGGGTCTCTCAGATTGTTCTTGATGGGTTTGGGCTTTC

>M6-PGSC0003DMG400027585-(rev)M6LRR-RLK\_682

ATTGCAACCCAGATCCAATAGGGTCTCTCAGATTGTTCTTGATGGGTTTGGGCTTTCAGGTAAGATTAG  
TAGAGGTCTTATGAGGTTGCAGTTTCTTCGAAAGCTTTCTCTTGCGAAGA

>M6-PGSC0003DMG400027585-(rev)M6LRR-RLK\_744

AAGATTAGTAGAGGTCTTATGAGGTTGCAGTTTCTTCGAAAGCTTTCTCTTGCGAAGAATAATTTTACAG  
GGAGTATAAGTAGCAGTGTGTTCAACTTGCTTATCTAAGGATTCTAGAC

>M6-PGSC0003DMG400027585-(rev)M6LRR-RLK\_806

TTTTACAGGGAGTATAAGTAGCAGTGTGTTCAACTTGCTTATCTAAGGATTCTAGACTTGAGTGAGAAC  
AACTTATTTGGGACGATTCCGGGTGATTTTTTTGAACAATGTGGGCCATT

>M6-PGSC0003DMG400027585-(rev)M6LRR-RLK\_868

GTGAGAACAACCTTATTTGGGACGATTCCGGGTGATTTTTTTGAACAATGTGGGCCATTGAGATCAATTC  
TTTGGCCAAGAATAAGTTTTTCAGGGAAAGTTCCAGAAAGTTTGAACATCAT

>M6-PGSC0003DMG400027585-(rev)M6LRR-RLK\_930

TCAATTTCTTTGGCCAAGAATAAGTTTTTCAGGGAAAGTTCCAGAAAGTTTGAACATCATGTGTGGCATTGG  
GGTCTTTAACTTGCTCTCAAATCAGTTTTTCAGGATTGTTACCTTCTGGA

>M6-PGSC0003DMG400027585-(rev)M6LRR-RLK\_992

GGCATTGGGGTCTTTAACTTGCTCTCAAATCAGTTTTTCAGGATTGTTACCTTCTGGAATTTGGTCTTTGA  
ATGGGCTAAGGTCACCTGATCTGTCAGATAATTTGCTGGATGGTGAAAT

>M6-PGSC0003DMG400027586-(rev)M6LRR-RLK\_0

GCTAAACAAGGTATATAATTAAGAACCCTTGTTGACATATATAGTTATGGGCAGAAGTTGCATTGTCC  
TCTTTGGTCTTGACAGTTTTTCATTCTGCTTCATAACCAAACCTTCACTTGCT

>M6-PGSC0003DMG400027586-(rev)M6LRR-RLK\_1037

TTCAAACAATTGACAGGAGAGATACCTGTGGAGCTAGGTAATCTTAAGAACTACAGATGCTGGGATTA  
GCTGAGAATGAGTTTACTGGTTCGGTCCCTACAAGCATTTCACATATCA

>M6-PGSC0003DMG400027586-(rev)M6LRR-RLK\_1098

TGGGATTAGCTGAGAATGAGTTTACTGGTTCGGTCCCTACAAGCATTTCACATATCAGCACTGCAGCT  
CCTATCACTTTCACTAAACAAGCTTTCAGGTA CTCTACCTTCAGATTTAG

>M6-PGSC0003DMG400027586-(rev)M6LRR-RLK\_1159

ACTGCAGCTCCTATCACTTTCACTAAACAAGCTTTCAGGTA CTCTACCTTCAGATTTAGGTCCGAACCTAG  
AAGAATTTTACTGTGGAGGAAATAATCTGAGTGGTTTTATCTCTGATTC

>M6-PGSC0003DMG400027586-(rev)M6LRR-RLK\_122

TGTTCTAATATTAGCACTGATGAAGCTGCTCTCTTTGCACTGAAATCACACATTTCTTCTCATCCTAACAA  
CATCTTAGAAAGCAACTGGTCTTCGTCCAGCCCGTTTTGCAGCTGGAT

>M6-PGSC0003DMG400027586-(rev)M6LRR-RLK\_1220

CCGAACCTAGAAGAATTTTACTGTGGAGGAAATAATCTGAGTGGTTTTATCTCTGATTCAATCTCAAATT  
CTTCGAGACTCAGAATGCTTGATCTCTCATTCAACAGTTTCACAGGTCCA

>M6-PGSC0003DMG400027586-(rev)M6LRR-RLK\_1281

TCTCAAATCTTCGAGACTCAGAATGCTTGATCTCTCATTCAACAGTTTCACAGGTCCAATTCCTAAATCA  
CTCGGTAAATTAGAATACCTTGAGGCTCTAAACTTGGGAAACAATAGTT

>M6-PGSC0003DMG400027586-(rev)M6LRR-RLK\_1342

TCCTAAATCACTCGGTAAATTAGAATACCTTGAGGCTCTAAACTTGGGAAACAATAGTTTTATCAGCGAT  
TCAACATTAAGCTTCCTTGCATCATTGAATAACTGTAGGAATCTAAGAAA

>M6-PGSC0003DMG400027586-(rev)M6LRR-RLK\_1403

ATCAGCGATTCAACATTAAGCTTCCTTGCATCATTGAATAACTGTAGGAATCTAAGAAATCTCTGGTTCTA  
TAATAATCCTTTGGATGCCATTTTTCCGGCATCTGTTGGTAATTTCTCC

>M6-PGSC0003DMG400027586-(rev)M6LRR-RLK\_1464

TCTGGTCTATAATAATCCTTTGGATGCCATTTTTCCGGCATCTGTTGGTAATTTCTCCGACTCCTTGCACG  
GTTTTGAAGCAGATGGTTGTAACTTAAGGGCATGATTCCCCAAGAAA



>M6-PGSC0003DMG400027586-(rev)M6LRR-RLK\_1525

CTCCTTGACCGTTTTGAAGCAGATGGTTGTAACTTAAGGGCATGATTCCCCAAGAAATTGGTAACTT  
ACTGGTTTGACAAAGATGAGTCTATCTAACAATGAGTTCACCGGATTTAT

>M6-PGSC0003DMG400027586-(rev)M6LRR-RLK\_1586

GGTAACTTACTGGTTTGACAAAGATGAGTCTATCTAACAATGAGTTCACCGGATTTATTCCAAATACCA  
TCCAAGGCATGTTGAGCCTTCAAGAACTTTACCTAGATAAAAACAAGATA

>M6-PGSC0003DMG400027586-(rev)M6LRR-RLK\_1647

CAAATACCATCCAAGGCATGTTGAGCCTTCAAGAACTTTACCTAGATAAAAACAAGATAGAAGGACCCA  
TACCAGATTATATGTGCAGTTTACAGAATCTTGGTGCATTGGACTTGTCAC

>M6-PGSC0003DMG400027586-(rev)M6LRR-RLK\_1708

AGGACCCATACCAGATTATATGTGCAGTTTACAGAATCTTGGTGCATTGGACTTGTCACAAAATAAATTT  
TCTGGTCCGTGCCACCATGCTTAGGAAAATTTACCAGTTTGAGGATACT

>M6-PGSC0003DMG400027586-(rev)M6LRR-RLK\_1769

AATAAATTTTCTGGTCCGTGCCACCATGCTTAGGAAAATTTACCAGTTTGAGGATACTTCATCTAGATTA  
CAATATGCTGGATTCTAGATTACCAGAAAGCTTGGGGAGCCTTAAAGAT

>M6-PGSC0003DMG400027586-(rev)M6LRR-RLK\_1830

ATCTAGATTACAATATGCTGGATTCTAGATTACCAGAAAGCTTGGGGAGCCTTAAAGATCTTTTAGAATT  
TAGTGTTTCATCCAATTTATTAAGTGGGCAAATTCATTTGAAATTGGAA

>M6-PGSC0003DMG400027586-(rev)M6LRR-RLK\_1891

TTTAGAATTTAGTGTTTCATCCAATTTATTAAGTGGGCAAATTCATTTGAAATTGGAAATTTACAGGCGG  
CAACAATCATTGATTTGTCAAAAATGATTTTTCTGGTAAGATTCTAG

>M6-PGSC0003DMG400027586-(rev)M6LRR-RLK\_1952

TTACAGGCGGCAACAATCATTGATTTGTCAAAAATGATTTTTCTGGTAAGATTCTAGCACTCTAGGGG  
GTCTAGATAAATTGATTTATCTTTCTCTAGAACATAATAGACTAGATGGG

>M6-PGSC0003DMG400027586-(rev)M6LRR-RLK\_2013

CTCTAGGGGGTCTAGATAAATTGATTTATCTTTCTCTAGAACATAATAGACTAGATGGGCCTATTCCAGA  
TTCATTTGGCAAATGTTGGCATTGGAATTCTTAGATTTATGCTATAACA

>M6-PGSC0003DMG400027586-(rev)M6LRR-RLK\_2074

TATTCCAGATTCATTTGGCAAATGTTGGCATTGGAATTCTTAGATTTATGCTATAACAATCTTGTTGGTG

AAATCCAAAGTCATTAGAAGCTCTTGTGTCTCTCAAATACCTCAACTT

>M6-PGSC0003DMG400027586-(rev)M6LRR-RLK\_2135

CTTGTTGGTCAAATCCAAAGTCATTAGAAGCTCTTGTGTCTCTCAAATACCTCAACTTTTCATTCAATAA  
ACTAATTGGAGAGATTCCCACTGGTGGTCCTTTTTCAAACGCCACAGAT

>M6-PGSC0003DMG400027586-(rev)M6LRR-RLK\_2196

CATTCAATAAACTAATTGGAGAGATTCCCACTGGTGGTCCTTTTTCAAACGCCACAGATCAATCCTTCTTG  
TCTAATGATGCACTATGTGGTGATGCCAAGTTTAATGTGACAACATGTG

>M6-PGSC0003DMG400027586-(rev)M6LRR-RLK\_2257

ATCCTTCTTGTCTAATGATGCACTATGTGGTGATGCCAAGTTTAATGTGACAACATGTGTCATCCAAACAC  
CCAAGAGGAAAAAGGCTAACTTAGTTTTGTACATCAGTTTGGGAGTGGG

>M6-PGSC0003DMG400027586-(rev)M6LRR-RLK\_2318

ATCCAAACACCCAAGAGGAAAAAGGCTAACTTAGTTTTGTACATCAGTTTGGGAGTGGGTCTGTTACTTC  
TTGTATTAGCCCTTGCATATGTATTTGTAAAATTGCGAAAGACAAAAAAG

>M6-PGSC0003DMG400027586-(rev)M6LRR-RLK\_2379

TGTTACTTCTTGTATTAGCCCTTGCATATGTATTTGTAAAATTGCGAAAGACAAAAAGAATACAGGTCA  
AACAAATGTGTCTCCGTTAAAAGAGCATGAAAGAATTCCTATTATGAAA

>M6-PGSC0003DMG400027586-(rev)M6LRR-RLK\_2440

TACAGGTCAAACAAATGTGTCTCCGTTAAAAGAGCATGAAAGAATTCCTATTATGAAATTGAACAGGC  
AACAGAAGGATTCAACGAAACCAACTTGCTTGGTAATGGGAGTTTCAGCAT

>M6-PGSC0003DMG400027586-(rev)M6LRR-RLK\_2501

GAACAGGCAACAGAAGGATTCAACGAAACCAACTTGCTTGGTAATGGGAGTTTCAGCATGGTCTACAAA  
GGGATACTTAAAGATGGTACCCTTTTTGCAGCAAAGGTATTCAATGTGCAA

>M6-PGSC0003DMG400027586-(rev)M6LRR-RLK\_2562

TCTACAAAGGGATACTTAAAGATGGTACCCTTTTTGCAGCAAAGGTATTCAATGTGCAATTGGAGCGTG  
CATTGAGAAGTTTTGACATAGAATGTGAGATACTCCGAAACCTTCGCCACA

>M6-PGSC0003DMG400027586-(rev)M6LRR-RLK\_2623

GGAGCGTGCATTCAGAAGTTTTGACATAGAATGTGAGATACTCCGAAACCTTCGCCACAGAAATTTGAC  
CAAAGTCATCACCAGCTGCTCCAACCTTGATTTCAAAGCCCTAGTGTTGGA

>M6-PGSC0003DMG400027586-(rev)M6LRR-RLK\_2745

ACATGCCCAATGGGACACTTGATAAATGGTTATATTCTCATAACTTATTCTTGAACCTTGTTGCAGAGATTA  
GATATAATGATAGATGTTGCATCTGCAATGGACTATCTCCACAATGGTC

>M6-PGSC0003DMG400027586-(rev)M6LRR-RLK\_2806

GCAGAGATTAGATATAATGATAGATGTTGCATCTGCAATGGACTATCTCCACAATGGTCATTCAACAGCT  
GTGGTGCATTGTGACTTGAAGCCAAGCAATGTCTTGCTAGATCAAGAAAT

>M6-PGSC0003DMG400027586-(rev)M6LRR-RLK\_2928

TTGGTCATGTCAGTGATTTTGGCATTTCAAAATTGTTAGGTGTAGGGGAGGCTTTTGTTCAAACAAGGAC  
AATTGCAACCATTGGATATATTGCTCCAGGTATAGTACAACCTTTTCAAAG

>M6-PGSC0003DMG400027586-(rev)M6LRR-RLK\_2989

AACAAGGACAATTGCAACCATTGGATATATTGCTCCAGGTATAGTACAACCTTTTCAAAGTTTTCTCATATC  
GTTTAAATACTCAAACAATTCTTCTCCCTAAATATAAATGGATTTT

>M6-PGSC0003DMG400027586-(rev)M6LRR-RLK\_305

TCATGGTACCATTCTCCACACATAGGAAACCTCTCATTTCTTGTTCCCTCAGGATCAGTTACAACGCTTT  
CCATGGAAATTTGCCAGCAGAGTTGGCTCATTGAAGAGGTTGAAATT

>M6-PGSC0003DMG400027586-(rev)M6LRR-RLK\_3050

TTCTCATATCGTTTAAATACTCAAACAATTCTTCTCCCTAAATATAAATGGATTTTCTTTGTTTTTTGCA  
TATTCCATTTTAACTAGGAACTTTTATAATTGTGATTTTCAGAGTAT

>M6-PGSC0003DMG400027586-(rev)M6LRR-RLK\_3111

TTGTTTTTTGCATATTCCATTTTAACTAGGAACTTTTATAATTGTGATTTTCAGAGTATGGACAAAATGGA  
ATTGTATCCACAAGCTGTGATGTTTATAGTTTTGGCATCATGATGATGG

>M6-PGSC0003DMG400027586-(rev)M6LRR-RLK\_3172

ACAAAATGGAATTGTATCCACAAGCTGTGATGTTTATAGTTTTGGCATCATGATGATGGAGATGTTTACA  
AGAACAAGACCAAGTGATGAAATATTTATCGGAGGCTTGACCATACAACG

>M6-PGSC0003DMG400027586-(rev)M6LRR-RLK\_3233

ATGTTTACAAGAACAAGACCAAGTGATGAAATATTTATCGGAGGCTTGACCATACAACGTTGGGTTAGT  
GATTCCTTTCCAGGTGAAATTCATAAGGTGGTGGATTCTAATCTGGTACAG

>M6-PGSC0003DMG400027586-(rev)M6LRR-RLK\_3294

GGGTTAGTGATTCCTTTCCAGGTGAAATTCATAAGGTGGTGGATTCTAATCTGGTACAGCCAGGGGATG  
AGCAAATTGATGCAAAGATGCAGTGCTTGTGTCTATCATGGAATTAGCTT

>M6-PGSC0003DMG400027586-(rev)M6LRR-RLK\_3355

AGGGGATGAGCAAATTGATGCAAAGATGCAGTGCTTGTGTCTATCATGGAATTAGCTTTGAGCTGCAC  
TTTCGTGACACCCGATGCAAGAATTAGTATCGAAAATGCTCTTTCAACACT

>M6-PGSC0003DMG400027586-(rev)M6LRR-RLK\_3416

AGCTGCACTTTTCGTGACACCCGATGCAAGAATTAGTATCGAAAATGCTCTTTCAACACTGAAAAAGATTA  
GGCTCCGGCTTGTGAGTAGTTGGCACTAGCTGGTGAATTGGACCGGCTA

>M6-PGSC0003DMG400027586-(rev)M6LRR-RLK\_3470

AACTGAAAAAGATTAGGCTCCGGCTTGTGAGTAGTTGGCACTAGCTGGTGAATTGGACCGGCTACTC  
TTGTATGCTATTTGATTAATACTATGCCAGTAACATTAACTTTCAATTTTGC

>M6-PGSC0003DMG400027586-(rev)M6LRR-RLK\_366

TACAACGCTTTCCATGGAAATTTGCCAGCAGAGTTGGCTCATTGAAGAGGTTGAAATTGATTAATGTTA  
GAAGCAATAACTTCACTGGAGCCATTCCATCATTTTTGAGTTTGTACCA

>M6-PGSC0003DMG400027586-(rev)M6LRR-RLK\_427

TTAATGTTAGAAGCAATAACTTCACTGGAGCCATTCCATCATTTTTGAGTTTGTACCAAACCTACGCACT  
GTGTCCCTCTGGAGCAACCAATTTTCGGGGAAAATTCCATCTTCCCTTT

>M6-PGSC0003DMG400027586-(rev)M6LRR-RLK\_488

CCTACGCACTGTGTCCCTCTGGAGCAACCAATTTTCGGGGAAAATTCCATCTTCCCTTTCAATCTAACAA  
AGCTGCAAGTGTGAGTTTACGGAGTAATTTCTCGTAGGAGAGATCCC

>M6-PGSC0003DMG400027586-(rev)M6LRR-RLK\_549

AATCTAACAAAGCTGCAAGTGTGAGTTTACGGAGTAATTTCTCGTAGGAGAGATCCCTCGAGAAATT  
GGTGATCTTCGTTACTTGACTGTCCTAGACTTGCAATTCAATCAGCTTACT

>M6-PGSC0003DMG400027586-(rev)M6LRR-RLK\_61

GCATTGCCTCTTTGGTCTTGCAGTTTTATTCTGCTTCATAACCAAACCTCACTTGCTACTGTTCCCTAATA  
TTAGCACTGATGAAGCTGCTCTCTTTGCACTGAAATCACACATTTCTT

>M6-PGSC0003DMG400027586-(rev)M6LRR-RLK\_610

GAGAAATTGGTGATCTTCGTTACTTGACTGTCCTAGACTTGCAATTCAATCAGCTTACTGGCCCTATACCA  
CCATCAATATTTAACATTACGACAATGCGAGTGATTGGTCTTACCAACA

>M6-PGSC0003DMG400027586-(rev)M6LRR-RLK\_671

CCCTATACCACCATCAATATTTAACATTACGACAATGCGAGTGATTGGTCTTACCAACAACAATCTTACTG

GAAAGCTTCCAACAACACTATATGTGACCATCTTCCAACCTTGAAGGGCT

>M6-PGSC0003DMG400027586-(rev)M6LRR-RLK\_732

AATCTTACTGGAAAGCTTCCAACAACACTATATGTGACCATCTTCCAACCTTGAAGGGCTTCAACTCTCAAGCAACTCCTTAGATGGAGTAATTCCACCAAACCTTGAGAAATGCAGAAAG

>M6-PGSC0003DMG400027586-(rev)M6LRR-RLK\_793

AACTCTCAAGCAACTCCTTAGATGGAGTAATTCCACCAAACCTTGAGAAATGCAGAAAGCTTCAAAGATTGTCATTGTCGTCCAATGAGTTTATTGGAAGTGTACCAAGAGAGCTAGGAA

>M6-PGSC0003DMG400027586-(rev)M6LRR-RLK\_854

TCAAAGATTGTCATTGTCGTCCAATGAGTTTATTGGAAGTGTACCAAGAGAGCTAGGAACTTAACGGCTCTTATAACATTATTTCTTGGACAACAAGTACACTTGAAGGTATATAGTA

>M6-PGSC0003DMG400027586-(rev)M6LRR-RLK\_915

TTAACGGCTCTTATAACATTATTTCTTGGACAACAAGTACACTTGAAGGTATATAGTATGATATTTCTTACAACATTATATCTAAAAATTTGATCTCTCTCCGCCTAACTGGTAAT

>M6-PGSC0003DMG400027586-(rev)M6LRR-RLK\_976

ATATTTCTTACAACATTATATCTAAAAATTTGATCTCTCTCCGCCTAACTGGTAATATTTCAAACAATTGACAGGAGAGATACCTGTGGAGCTAGGTAATCTTAAGAACTACAGAT

>M6-PGSC0003DMG400027683-(rev)M6LRR-RLK\_1037

GATTCGTTGTATAGCAAGTAAGGAGGGTTTCTTCAACTTCCATCTTGGAGGTGTGAAGTTTGTGCTTGTGCTTTGTAAGGTCAGATAAAATCATCTTTCAATAAAAAAATTTGCGTGTGT

>M6-PGSC0003DMG400027683-(rev)M6LRR-RLK\_1098

GTGCTTGTGGCTTTGTAAGGTCAGATAAAATCATCTTTCAATAAAAAAATTTGCGTGTGTTTTGTTTATATCAAGTAGGGGTGTTCTTTTTCTTCTTTTCAACTTCCGTGTGAAAG

>M6-PGSC0003DMG400027683-(rev)M6LRR-RLK\_1159

TGTTTATATCAAGTAGGGGTGTTCTTTTTCTTCTTTTCAACTTCCGTGTGAAAGGCGAAAACCTTTATGGTTGTCGCTGTAGATGATCAGGTGAAATCATCTTTTGAATGAAGTT

>M6-PGSC0003DMG400027683-(rev)M6LRR-RLK\_122

AATACTATCTTTTTGCCCTTTTCTTCTTTGTAATTGACCATCAAGATCCAGCATTTGATATCCTCAACTGGTTGTAAGTATCTTGCATCTGTAATTTCTTGGTCTTCTTTGATATTT

>M6-PGSC0003DMG400027683-(rev)M6LRR-RLK\_1220

GAAACTTTTATGGTTGTCGCTGTAGATGATCAGGTGAAATCATCTTTTGAATGAAGTTTTCTTTTGTTG  
ATGATAATTTTATGTAAGTGCATCTCTTAGATTGCTGTAATTGTGCTTT

>M6-PGSC0003DMG400027683-(rev)M6LRR-RLK\_1281

CCTTTTGTTGATGATAATTTTATGTAAGTGCATCTCTTAGATTGCTGTAATTGTGCTTTTTCTCTCCAGG  
TCTTTTTGCCTCCTGTTTGCTGTTTTCCATTAAAATCTGCAAGG

>M6-PGSC0003DMG400027683-(rev)M6LRR-RLK\_1342

CTCTCCAGGTCTTTTTGCCTCCTGTTTGCTGTTTTCCATTAAAATCTGCAAGGAACAGTTTTCTGC  
TTGTATCTGACTTGTTTCGATAATCTTTATTTGGTTGTCCTGTAAGTG

>M6-PGSC0003DMG400027683-(rev)M6LRR-RLK\_1403

CAGTTTTCTGCTTGTATCTGACTTGTTTCGATAATCTTTATTTGGTTGTCCTGTAAGTGTGGGACTTGAGT  
ACCTTACTTCTGGAGAATCACTAGTTTGCTTAAGAAGAAAAGTTGTCT

>M6-PGSC0003DMG400027683-(rev)M6LRR-RLK\_1464

GGACTTGAGTACCTTACTTCTGGAGAATCACTAGTTTGCTTAAGAAGAAAAGTTGTCTAGTGTTGATAT  
GAAATGAGTCCTAATTGAGCGGATGAAACGTAAATTCGTATAGTTTTTC

>M6-PGSC0003DMG400027683-(rev)M6LRR-RLK\_1525

TGTTGATATGAAATGAGTCCTAATTGAGCGGATGAAACGTAAATTCGTATAGTTTTTCCGACTAGTTTG  
GAAGTGAGGCAGCGTTGATTGATTGATAAACTGATTCATCGTCTTATTT

>M6-PGSC0003DMG400027683-(rev)M6LRR-RLK\_1586

ACTAGTTTGGAAAGTGAGGCAGCGTTGATTGATTGATAAACTGATTCATCGTCTTATTTTTTCTTGCAAG  
CCTTACATTTTGCTTTTTAACTCGGGAGAAATTGGATTTGTTCTTGCAA

>M6-PGSC0003DMG400027683-(rev)M6LRR-RLK\_1647

TTCCTTGCAAGCCTTACATTTTGCTTTTTAACTCGGGAGAAATTGGATTTGTTCTTGCAAAGGATTTTTCGG  
GGTTGCAAACACTAGTCTATACAGATCTTAAATGTTTCAGTCAACTGCTTA

>M6-PGSC0003DMG400027683-(rev)M6LRR-RLK\_1708

GATTTTTCGGGTTGCAAACACTAGTCTATACAGATCTTAAATGTTTCAGTCAACTGCTTAATTAGGACCTTT  
GATTGTTGCGGTTATGACTGGGCCTCTACCAAGATGGCTTTGGATAAC

>M6-PGSC0003DMG400027683-(rev)M6LRR-RLK\_1769

TAGGACCTTTGATTGTTGCGGTTATGACTGGGCCTCTACCAAGATGGCTTTGGATAACAGAGCTCTTAC  
TACCTTTGCTGCTATTTTATGATCTACTTGGCCTTGAGCTGTGCTGTTTGCT

>M6-PGSC0003DMG400027683-(rev)M6LRR-RLK\_183

TCCTCAACTGGGTTGTAAGTATCTTGCATCTGTAATTTCTTGGTCTTCTTTTGATATTTTTAATGCTCAATTT  
GTTTATTGGTAGAATTTCTTATTAATAAATTATTTCTTTATTATGTTG

>M6-PGSC0003DMG400027683-(rev)M6LRR-RLK\_1830

AGCTCTTACTACCTTTGCTGCTATTTTGATCTACTTGGCCTTGAGCTGTGCTGTTTGCTCTGCTGTTCAAAG  
CGACATTGACTGTCTGAAATCTATAAAAGATTCATTTGAAGATCCATT

>M6-PGSC0003DMG400027683-(rev)M6LRR-RLK\_1891

GCTGTTCAAAGCGACATTGACTGTCTGAAATCTATAAAAGATTCATTTGAAGATCCATTGAATTTCTTGA  
ACACAACATGGAGGTTTCGATAATCAGACCGAAGGTTTCATCTGCAAGTTT

>M6-PGSC0003DMG400027683-(rev)M6LRR-RLK\_1952

ATTTCTTGAACACAACATGGAGGTTTCGATAATCAGACCGAAGGTTTCATCTGCAAGTTTGCTGGGATTCA  
GTGCTGGCATCCTGATGAAACCAGGGTTCTGAGTATCAGTCTTCTGACA

>M6-PGSC0003DMG400027683-(rev)M6LRR-RLK\_2013

TGGGATTCAGTGCTGGCATCCTGATGAAACCAGGGTTCTGAGTATCAGTCTTCTGACATGGGTCTCAA  
GGGCAAGTTTCCACATGGTCTTGAGAATTGCACCTCTATTACATCATTAGA

>M6-PGSC0003DMG400027683-(rev)M6LRR-RLK\_2074

GGTCTCAAGGGCAAGTTTCCACATGGTCTTGAGAATTGCACCTCTATTACATCATTAGATCTTTGAGCA  
ACAATCTCCATGGAAGTATTCAAATAATATCTCCAAAATTATAGGTTTT

>M6-PGSC0003DMG400027683-(rev)M6LRR-RLK\_2135

TTTCGAGCAACAATCTCCATGGAAGTATTCAAATAATATCTCCAAAATTATAGGTTTTGTGGTAACGCT  
GGATCTCTCATCCAACCATCTATCAGGGGATATCCCAGTTAATCTTGCAA

>M6-PGSC0003DMG400027683-(rev)M6LRR-RLK\_2196

GGTAACGCTGGATCTCTCATCCAACCATCTATCAGGGGATATCCCAGTTAATCTTGCAAACCTGCTCTTTT  
TGAATAGCCTTAGACTTGACAACAACAGTTTACGGGTCAAATTCCTCC

>M6-PGSC0003DMG400027683-(rev)M6LRR-RLK\_2257

TGCTCTTTTTTGAATAGCCTTAGACTTGACAACAACAGTTTACGGGTCAAATTCCTCCAGAAATTGCCCT  
GCTTGGTCGGCTCAAGAATTTAATGTAGCAAACAATCAATTGTTTCGGA

>M6-PGSC0003DMG400027683-(rev)M6LRR-RLK\_2318

AAATTGCCCTGCTTGGTCGGCTCAAGAATTTAATGTAGCAAACAATCAATTGTTTCGGACCAGTCCCACG

TTTCATAAATTCAACTTTTCCTGTAGAGAGCTATGCCAATAATGCCGGAC

>M6-PGSC0003DMG400027683-(rev)M6LRR-RLK\_2379

AGTCCCACGTTTCATAAATTCAACTTTTCCTGTAGAGAGCTATGCCAATAATGCCGGACTGTGTGGACCA  
CCATTACCTCTTTGTGAGGGTTATGCTAAGAAACCCCGTACTGGAATCAT

>M6-PGSC0003DMG400027683-(rev)M6LRR-RLK\_244

AATGCTCAATTTGTTTATTGGTAGAATTTCTTATTAATAAATTATTTCTTTATTATGTTGTTGCTTGCCTTTGA  
CCAAGGACTTGGTAATTTGTTGAATTTGAAAGTTGTGTAGAAAGGG

>M6-PGSC0003DMG400027683-(rev)M6LRR-RLK\_2440

TGTGGACCACCATTACCTCTTTGTGAGGGTTATGCTAAGAAACCCCGTACTGGAATCATTGTTGGTGCAG  
CTGTTGGTGGGGTGACTTTAGGTGCTGTATTATTGACCATTGGTATGTTC

>M6-PGSC0003DMG400027683-(rev)M6LRR-RLK\_2501

TTGGTGCAGCTGTTGGTGGGGTGACTTTAGGTGCTGTATTATTGACCATTGGTATGTTCTTCTATATGAG  
AAAGATATCCAGGAAGAGGAAAAAGGAAGATGATCCTGAAGGGAATAAAT

>M6-PGSC0003DMG400027683-(rev)M6LRR-RLK\_2562

CTATATGAGAAAGATATCCAGGAAGAGGAAAAAGGAAGATGATCCTGAAGGGAATAAATGGGCGAAG  
AGTATTAAGGGTTCCAAGGCAATCCAGGTGAGAATTAATAAACTGTGTCATTA

>M6-PGSC0003DMG400027683-(rev)M6LRR-RLK\_2623

GCGAAGAGTATTAAGGGTTCCAAGGCAATCCAGGTGAGAATTAATAAACTGTGTCATTAAGGAACTTC  
TGTTGCGCTTTGTTGATAGGTCATAAATCAATTCTAGTGGGTTGTGGTTT

>M6-PGSC0003DMG400027683-(rev)M6LRR-RLK\_2684

GAAACTTCTGTTGCGCTTTGTTGATAGGTCATAAATCAATTCTAGTGGGTTGTGGTTTGTGTTTACGGG  
TTCTACTGTGGCTTTGCGATCATATTTAGAACCATAAATTCGTGTTTTCA

>M6-PGSC0003DMG400027683-(rev)M6LRR-RLK\_2745

GTTTACGGGTTCTACTGTGGCTTTGCGATCATATTTAGAACCATAAATTCGTGTTTTCATATAAGCATTTA  
ACTAATGAGTTTTTACCATAAGCTCTTGTGTGAGTTTTCTCTTGCTCA

>M6-PGSC0003DMG400027683-(rev)M6LRR-RLK\_2806

TAAGCATTTAACTAATGAGTTTTTACCATAAGCTCTTGTGTGAGTTTTCTCTTGCTCAAGCATTCTTAAT  
GACTTAAGGTGCCTTATTTTCAGCTTTCAATGTTTGAGAAATCTACTT

>M6-PGSC0003DMG400027683-(rev)M6LRR-RLK\_2867



CATTCTTAATTGACTTAAGGTGCCTTATTTTCAGCTTTCAATGTTTGAGAAATCTACTTCAAAAATGAGAC  
TAAGTGATCTCATGAAGGCCACCAACAACCTTCAGCAAGAACAATATTGT

>M6-PGSC0003DMG400027683-(rev)M6LRR-RLK\_2928

AAAATGAGACTAAGTGATCTCATGAAGGCCACCAACAACCTTCAGCAAGAACAATATTGTTGGGTCAGGA  
AGAACCGGGACATTCTACAAAGCAGTACTTGATGATGGCACTTCACTTATG

>M6-PGSC0003DMG400027683-(rev)M6LRR-RLK\_2989

GGTCAGGAAGAACCGGGACATTCTACAAAGCAGTACTTGATGATGGCACTTCACTTATGGTTAAGAGGT  
TGCAGAATACTCAACACTCAGAGAAAGAGTTTACATCCGAGATGGCTACGT

>M6-PGSC0003DMG400027683-(rev)M6LRR-RLK\_305

GCTTGCCTTTGACCAAGGACTTGGTAATTTGTTGAATTTTGAAAGTTGTGTAGAAAGGGTTGGACTTAAT  
TTATGGAAATTGAAGTTTTTTTTTGGTATTTCTTCTAGTTCTTATAAAA

>M6-PGSC0003DMG400027683-(rev)M6LRR-RLK\_3050

TAAGAGGTTGCAGAATACTCAACACTCAGAGAAAGAGTTTACATCCGAGATGGCTACGTTGGGAAATGT  
AAAGCACCGTAACCTGGTGCCTCTTTTAGGTTTCTGCATGGCTAAAAAAGA

>M6-PGSC0003DMG400027683-(rev)M6LRR-RLK\_3111

GGAAATGTAAAGCACCGTAACCTGGTGCCTCTTTTAGGTTTCTGCATGGCTAAAAAAGAAAGGCTGATG  
GTCTACAAAGACATGCCAAATGGCACCTTGCATGATAGGTTGCATTCGGTG

>M6-PGSC0003DMG400027683-(rev)M6LRR-RLK\_3172

GGCTGATGGTCTACAAAGACATGCCAAATGGCACCTTGCATGATAGGTTGCATTCGGTGAGTGAAGGG  
GAAAAAACACTTGAGTGGCCTATAAGAATGAAAATAGCCATTGGAGCAGCCA

>M6-PGSC0003DMG400027683-(rev)M6LRR-RLK\_3233

TGAAGGGGAAAAAACACTTGAGTGGCCTATAAGAATGAAAATAGCCATTGGAGCAGCCAAAGGATTTG  
CATGGCTTACCACAACCTGCAATCCTCGTATCATTACAGAAATATTAGTTC

>M6-PGSC0003DMG400027683-(rev)M6LRR-RLK\_3294

GGATTTGCATGGCTTACCACAACCTGCAATCCTCGTATCATTACAGAAATATTAGTTCTAAATGCATCTT  
GCTGGATGTGGAATATGAACCTAAAATATCGGATTTTGGACTTGCCAGG

>M6-PGSC0003DMG400027683-(rev)M6LRR-RLK\_3355

AATGCATCTTGCTGGATGTGGAATATGAACCTAAAATATCGGATTTTGGACTTGCCAGGCTCATGAATCC  
AGTTGATACTCATTTGAGTACCTTTGTAAATGGGGAATTCGGGGACTTTG

>M6-PGSC0003DMG400027683-(rev)M6LRR-RLK\_3416

CATGAATCCAGTTGATACTCATTTGAGTACCTTTGTAAATGGGAATTCGGGGACTTTGGTTATGTTGCT  
CCTGAGTATGCACGAACTCTCATGGCTACACCAAAGGTGATGTGTACAG

>M6-PGSC0003DMG400027683-(rev)M6LRR-RLK\_3477

TATGTTGCTCCTGAGTATGCACGAACTCTCATGGCTACACCAAAGGTGATGTGTACAGTTTCGGTGTTG  
TACTTCTCGAGTTAGTTACAGGTGAGACACCAACTTCTGTCGCCAAAGCT

>M6-PGSC0003DMG400027683-(rev)M6LRR-RLK\_3538

TCGGTGTTGTAATTCTCGAGTTAGTTACAGGTGAGACACCAACTTCTGTCGCCAAAGCTCCCGAGACCTT  
TAAGGGGAATTTGGTGAATGGATCACACAACTCTCTGGTGAATCTAAAC

>M6-PGSC0003DMG400027683-(rev)M6LRR-RLK\_3599

CGAGACCTTTAAGGGGAATTTGGTGAATGGATCACACAACTCTCTGGTGAATCTAACTTCAAGACGC  
GATTGACCATTATTGTCTAGTAAAGGTTATGACAGTGAGATCTTCCAGGT

>M6-PGSC0003DMG400027683-(rev)M6LRR-RLK\_366

GGACTTAATTTATGGAAATTGAAGTTTTTTTTTGGTATTTCTTCTAGTTCTTATAAAAGATTTTTTTTTTTT  
TATTGTTTTGGTAGCTGCTTTGAATAAGGACTTGGTAAATTTGTTGA

>M6-PGSC0003DMG400027683-(rev)M6LRR-RLK\_3660

CAAGACGCGATTGACCATTATTGTCTAGTAAAGGTTATGACAGTGAGATCTTCCAGGTCCTTAAAGTTG  
CTTGTCGATGTGTGTTGTCTGCTGCTCCTAAGGAGAGGCCAACAATGTTT

>M6-PGSC0003DMG400027683-(rev)M6LRR-RLK\_3721

TTAAAGTTGCTTGTGCGATGTGTGTTGTCTGCTGCTCCTAAGGAGAGGCCAACAATGTTTGAAGTGTACCA  
GCTTCTGAGAGCCATCGGAGAGCGATATCATTTCACAACTGATGATGACA

>M6-PGSC0003DMG400027683-(rev)M6LRR-RLK\_3782

ACTGTACCAGCTTCTGAGAGCCATCGGAGAGCGATATCATTTCACAACTGATGATGACATTATGATGCCT  
GAGAGTGATAGCGGATTCCAAATGGACGAGCTCATTGTTGCTCAATAAGT

>M6-PGSC0003DMG400027683-(rev)M6LRR-RLK\_3843

ATGATGCCTGAGAGTGATAGCGGATTCCAAATGGACGAGCTCATTGTTGCTCAATAAGTAAACGAGGCC  
CTTCGATAATGGTTGAGTAAGATAACAATAATTACTAGATCATTTTCTATCC

>M6-PGSC0003DMG400027683-(rev)M6LRR-RLK\_3904

ACGAGGCCCTTCGATAATGGTTGAGTAAGATAACAATAATTACTAGATCATTTTCTATCCTGTACAAATAC

CACGGTTCACTATCTATATAGATCATTCTATTTCTACTGTAAGTCCCTTA

>M6-PGSC0003DMG400027683-(rev)M6LRR-RLK\_3965

TACAAATACCACGGTTCACTATCTATATAGATCATTCTATTTCTACTGTAAGTCCCTTATTCATAACTACCC

AACTATGTAATTTGTGCTTCTTTTTCTGTATTTTAATGGTGAAGAGA

>M6-PGSC0003DMG400027683-(rev)M6LRR-RLK\_4026

CATAACTACCCAACACTATGTAATTTGTGCTTCTTTTTCTGTATTTTAATGGTGAAGAGATTCTACAGATTG

GTGTTAGTATTTTTCTCTTTTCAGATTTACTGCTTGAACAGCGTAGT

>M6-PGSC0003DMG400027683-(rev)M6LRR-RLK\_4085

TTTCTACAGATTGGTGTAGTATTTTTCTCTTTTCAGATTTACTGCTTGAACAGCGTAGTCTCATCTTCCA

GTAATTATAAAATGCAAAGTTGGAAAAAATCCACCACTCAAAGCTGAC

>M6-PGSC0003DMG400027683-(rev)M6LRR-RLK\_427

TTTTTTTTTTTTTATTGTTTTGGTAGCTGCTTTGAATAAGGACTTGGTAAATTTGTTGAATTTTGAAAGTTG

TATAGAAAAGCTCTGGACTTGTATTTCTGGAAATTGAAGTTGAATTTG

>M6-PGSC0003DMG400027683-(rev)M6LRR-RLK\_488

TTTGAAAGTTGTATAGAAAAGCTCTGGACTTGTATTTCTGGAAATTGAAGTTGAATTTGGCCTTTTGTGTG

TTGATCTTAAGAACCCTTTTTGGGTTTTGTGGATTATGTGAGATGGGGT

>M6-PGSC0003DMG400027683-(rev)M6LRR-RLK\_549

CTTTTGTTGTTTGATCTTAAGAACCCTTTTTGGGTTTTGTGGATTATGTGAGATGGGGTTTGTTTAATATC

TGGTAGGGGTCTTTTTCTTTTTGAACTTTCTTCTTGAAGGTGTGAAC

>M6-PGSC0003DMG400027683-(rev)M6LRR-RLK\_61

AGTTTTAGTTCTCACTGTTAGCCTTCTTTCTTTGACCAAAGAAAACTGTATCATCAAAAAAATACTATCTT

TTTGCCCTTTTCTTCTTTGTAATTGACCATCAAGATCCAGCATTGA

>M6-PGSC0003DMG400027683-(rev)M6LRR-RLK\_610

GTTTAATATCTGGTAGGGTCTTTTTCTTTTTGAACTTTCTTCTTGAAGGTGTGAACTTTGAGCTTTTG

GATGTGGATGTGGAAGATCAAGTAAATTCTGTATTTGGAAGAATCT

>M6-PGSC0003DMG400027683-(rev)M6LRR-RLK\_854

TTTCTTTAATACATTGGTTGCCTTCTTGAATACTTTGAAAAGGACAGTGGTTTATTATTTGTTGAAATTT

GGAAGTCGTGGTCAAAAAGCTCTCAACTTTGAACTTTCTGGAATTGGA

>M6-PGSC0003DMG400027683-(rev)M6LRR-RLK\_915

GTTGAAATTTGGAAGTCGTGGTCAAAAAGCTCTCAACTTTGAAACTTTCTGGAATTGGAATTCACCTCTGT  
TGTTGTTTGATTTTCAGAACCTTTCCTGGGTTCTACTAGCCTTGCTTGT

>M6-PGSC0003DMG400027683-(rev)M6LRR-RLK\_976

TCACTCTGTTGTTGTTTGATTTTCAGAACCTTTCCTGGGTTCTACTAGCCTTGCTTGTGGGATTCGTTGTA  
TAGCAAGTAAGGAGGGTTTCTTCAACTTCCATCTTGGAGGTGTGAAGT

>M6-PGSC0003DMG400027703-(rev)M6LRR-RLK\_0

TGAATCCTGATATTCAAGCTAAACATAAAAACAAAGGTGCTATCATAGCTATCGTTGTATCAGGTGTTTT  
TGCTGCATTTGTTTCAGCAATTTAACTGTGTTAATCAAAAAACGACATG

>M6-PGSC0003DMG400027703-(rev)M6LRR-RLK\_1037

CAAGGTTTAGGAAGATGGATCACCTCTGTTGGCGTTCCAACCTTAATTACCAAGTTTATTACTCCAAATCT  
ACCACCACTAGACCACCTTTCATGTTCTAAACAAATAGTAGCAGTAT

>M6-PGSC0003DMG400027703-(rev)M6LRR-RLK\_1098

CTCCAAATCTACCACCACTAGACCACCTTTCATGTTCTAAACAAATAGTAGCAGTATCATTGAACTGGT  
ACAGTAGACGGGTAATATATGCTCTTAGACATTGTTTTTTAAGTCTATA

>M6-PGSC0003DMG400027703-(rev)M6LRR-RLK\_1159

TTGAACTGGTACAGTAGACGGGTAATATATGCTCTTAGACATTGTTTTTTAAGTCTATAGATGGAGATCA  
GATATCAAGAAGCAAGCTTTGATCTAATAACTGTATGTCCACATGGTTAT

>M6-PGSC0003DMG400027703-(rev)M6LRR-RLK\_122

AAATACCAAAGCATCCTATCAAGGAAACGGCTATGTAAGTTCTCTCATTTTGGTTATAAGCTACCTTTACT  
TCATAAGAATATGTTTCTTTCATTTCTTCCGCAAAATTGACGAGCATA

>M6-PGSC0003DMG400027703-(rev)M6LRR-RLK\_1525

TTGATATCATTTTTTGACAGCTAATTGTAAAGGAACCTTGTCGTTTGCTACAAGATTGGAGATTGTACTAG  
GTGCAGCAAAGGGCATTCTTTACCTCCATACAGAAGCTCATCCACCTAT

>M6-PGSC0003DMG400027703-(rev)M6LRR-RLK\_1586

ATTGTAAGTGGTGCAGCAAAGGGCATTCTTTACCTCCATACAGAAGCTCATCCACCTATATTCCATAGGG  
ACATCAAAGCCAGCAATATTCTTCTTGACTCAAAAATGATAGCCAAAGTT

>M6-PGSC0003DMG400027703-(rev)M6LRR-RLK\_1647

TCCATAGGGACATCAAAGCCAGCAATATTCTTCTTGACTCAAAAATGATAGCCAAAGTTGCTGATTTTGG  
ATTATCTAGGCTTGCACCTGTTTCAGGATGATGAAGGTGTATTACCTAATC

>M6-PGSC0003DMG400027703-(rev)M6LRR-RLK\_1708

TGATTTTGGATTATCTAGGCTTGCACCTGTCAGGATGATGAAGGTGATTACCTAATCATGTTTCAACTA  
TTGTGAAGGGAACACCTGTAAGTCCTCCACTGCATCATTATGTTCTATT

>M6-PGSC0003DMG400027703-(rev)M6LRR-RLK\_1769

GTTTCAACTATTGTGAAGGGAACACCTGTAAGTCCTCCACTGCATCATTATGTTCTATTTGACCTCACTTG  
TATCATTAAAATTTAATGTATTGAGACTCTGCTTGTATATGCAGGGTTA

>M6-PGSC0003DMG400027703-(rev)M6LRR-RLK\_183

TACCTTTACTTCATAAGAATATGTTTCTTTCAATTCTTTCCGCAAATTGACGAGCATAAAAATGTTTAATTT  
CATAATGCCAGCCGCAAAGCTTTCTATAAAATTGGATGGCCTTAGAAG

>M6-PGSC0003DMG400027703-(rev)M6LRR-RLK\_1830

ACCTCACTTGTATCATTAAAATTTAATGTATTGAGACTCTGCTTGTATATGCAGGGTTATCTTGATCCCGA  
ATACTTCTTGACCCGTAAATTGACAGATAAAAGTGATGTTTATAGCCTT

>M6-PGSC0003DMG400027703-(rev)M6LRR-RLK\_1891

TTGATCCCGAATACTTCTTGACCCGTAAATTGACAGATAAAAGTGATGTTTATAGCCTTGGAGTTGTGTTT  
CTAGAAATCTTAACCGGAATGCGTCCCATCTCACATGGAAAAAACATTG

>M6-PGSC0003DMG400027703-(rev)M6LRR-RLK\_1952

AGTTGTGTTTCTAGAAATCTTAACCGGAATGCGTCCCATCTCACATGGAAAAAACATTGTCCGCGAGGTA  
TTTCTCTCATTGTCAACTTCCCGATTTCCATGTCTTATCGCGTGCATATG

>M6-PGSC0003DMG400027703-(rev)M6LRR-RLK\_2013

CGCGAGGTATTTCTCTCATTGTCAACTTCCCGATTTCCATGTCTTATCGCGTGCATATGTTTGATAGATGA  
TTTATCCGCACACACAAAGTGAAGTACTCCTGACTGATGTAAGTGTAGG

>M6-PGSC0003DMG400027703-(rev)M6LRR-RLK\_2074

TGATAGATGATTTATCCGCACACACAAAGTGAAGTACTCCTGACTGATGTAAGTGTAGGGATAGAGGCA  
GATTCACGAATTAACCTGTAATGCTCTTAGTTGTTACCATTGAACACACT

>M6-PGSC0003DMG400027703-(rev)M6LRR-RLK\_2135

TAGAGGCAGATTCACGAATTAACCTGTAATGCTCTTAGTTGTTACCATTGAACACACTACATGTTCGCAC  
TTTTGAAATGATGCTTATAGAATTTACTTTTTGTTGATACATTTTAGTGA

>M6-PGSC0003DMG400027703-(rev)M6LRR-RLK\_2196

ATGTCGCACTTTTGAATGATGCTTATAGAATTTACTTTTTGTTGATACATTTTAGTGATTTTACATATGTA

TGTTATAGAACCCAACAATTTTATGGTGCATCCTCCTCTGGGCTGAGA

>M6-PGSC0003DMG400027703-(rev)M6LRR-RLK\_2257

TTACATATGTATGTTATAGAACCCAACAATTTTATGGTGCATCCTCCTCTGGGCTGAGAAGGGCTAAGGG

GAAATGTGAACATAATTTTTACGCAATCTTTCCTTGCATTTCTGCTATGA

>M6-PGSC0003DMG400027703-(rev)M6LRR-RLK\_2318

GGCTAAGGGGAAATGTGAACATAATTTTTACGCAATCTTTCCTTGCATTTCTGCTATGAAGCTTCACCCTT

CGAATCTAGCTCCACCATGTTTAATAGTCCCTTGTACCATCAATGGCAG

>M6-PGSC0003DMG400027703-(rev)M6LRR-RLK\_2379

CTTACCCTTCGAATCTAGCTCCACCATGTTTAATAGTCCCTTGTACCATCAATGGCAGGTAAATTTGGCT

CATGGCTCTGAGAAGATGTTCTCAGTTATGGACAGTACAATGGGATCTT

>M6-PGSC0003DMG400027703-(rev)M6LRR-RLK\_244

ATGTTTAATTTATAATGCCAGCCGCAAAGCTTTCTATAAAATTGGATGGCCTTAGAAGCTTCACTTTTCAG

AGAAATGACCTTGGCCACTAACAACCTTTGATCATTCAAATCAAGTTGGT

>M6-PGSC0003DMG400027703-(rev)M6LRR-RLK\_2440

AAATTTGGCTCATGGCTCTGAGAAGATGTTCTCAGTTATGGACAGTACAATGGGATCTTATCCTTCTGAA

TGTGTGGAAAAGTTTGTAGCTTTGGCCCTCAAGTGTGCGAAGACAAACC

>M6-PGSC0003DMG400027703-(rev)M6LRR-RLK\_2501

CCTTCTGAATGTGTGGAAAAGTTTGTAGCTTTGGCCCTCAAGTGTGCGAAGACAAACCAGAAGACAGA

CCTTCAATGTTGGATGTGGTCAGGGAGCTGGAAACTATTCAGTCTATTATC

>M6-PGSC0003DMG400027703-(rev)M6LRR-RLK\_2562

AAGACAGACCTTCAATGTTGGATGTGGTCAGGGAGCTGGAAACTATTCAGTCTATTATCAATATGATGC

CAGATATTGACGCTGATTCAGTAGATTCTAAAGCAAATTTAATGAACCAA

>M6-PGSC0003DMG400027703-(rev)M6LRR-RLK\_2623

TATGATGCCAGATATTGACGCTGATTCAGTAGATTCTAAAGCAAATTTAATGAACCAAAGACATCGTCT

TCATTTTCTGATTGCACTAGCAAGGACGCGTTTTTATCGTCCTCCAATGT

>M6-PGSC0003DMG400027703-(rev)M6LRR-RLK\_2684

ACATCGTCTTCATTTTCTGATTGCACTAGCAAGGACGCGTTTTTATCGTCCTCCAATGTATCGGGAGCTTA

CAGTATCAGTGGTGTGAGTCTTACTATGCCTCGCTAACAGAATAGACAA

>M6-PGSC0003DMG400027703-(rev)M6LRR-RLK\_2745

CGGGAGCTTACAGTATCAGTGGTGTGCTAGTCTTACTATGCCTCGCTAACAGAATAGACAATAGTTGCTCAT  
CTTTTGTACTAGAGAGAAAATAGCATGTAGAATAGAGAGTTAGCTTCTGT

>M6-PGSC0003DMG400027703-(rev)M6LRR-RLK\_2806

GTTGCTCATCTTTTGTACTAGAGAGAAAATAGCATGTAGAATAGAGAGTTAGCTTCTGTTTTATATATGT  
ATATTTCAAGGATTTGTTAACAAAAACCTCTTTATCATAGCCTTCTGAGT

>M6-PGSC0003DMG400027703-(rev)M6LRR-RLK\_2867

TATATATGTATATTTCAAGGATTTGTTAACAAAAACCTCTTTATCATAGCCTTCTGAGTTCTGACAGTATG  
TGTATGTAATCAGAATCCAAAACCTTTCTACAAAATGGACTGAGATAGG

>M6-PGSC0003DMG400027703-(rev)M6LRR-RLK\_2928

TGACAGTATGTGTATGTAATCAGAATCCAAAACCTTTCTACAAAATGGACTGAGATAGGTTACTGCTATTT  
GTTTGCAAGGAGTTGCACCAACCAATTCCTCAAAACAACCTGACAACAGCG

>M6-PGSC0003DMG400027703-(rev)M6LRR-RLK\_2989

CTGCTATTTGTTTGCAAGGAGTTGCACCAACCAATTCCTCAAAACAACCTGACAACAGCGGAAGGGGGTT  
CATCGCCAGAAAATCACACTGTATATATAAAAGGTCAATCTTTTTATCTAT

>M6-PGSC0003DMG400027703-(rev)M6LRR-RLK\_305

TCACTTTCAGAGAAATGACCTTGGCCACTAACAACTTTGATCATTCAAATCAAGTTGGTGAAGGAGGATA  
TGGGGCTGTCTTTAAGGGAATTTTAGCTGACAAAACAGTTGTTGCTATCA

>M6-PGSC0003DMG400027703-(rev)M6LRR-RLK\_3050

AGGGGGTTCATCGCCAGAAAATCACACTGTATATATAAAAGGTCAATCTTTTTATCTATATAAATGATGA  
GAACCCTCTTGTAATCCAACATCATTACCAGAAATAGAAATATTATCTAA

>M6-PGSC0003DMG400027703-(rev)M6LRR-RLK\_3111

AAATGATGAGAACCCTCTTGTAATCCAACATCATTACCAGAAATAGAAATATTATCTAAGCTATGGCAAC  
AATGAGAGTCATACAACAAAACAGGCAAACTCGTTAGTTTTGAAGTAAT

>M6-PGSC0003DMG400027703-(rev)M6LRR-RLK\_3172

TATGGCAACAATGAGAGTCATACAACAAAACAGGCAAACTCGTTAGTTTTGAAGTAATGTTATCTTTAG  
ATCACATAACATGTCATTGTAAACAACACAAAGGAACAGAAAACAAATCC

>M6-PGSC0003DMG400027703-(rev)M6LRR-RLK\_3233

TATCTTTAGATCACATAACATGTCATTGTAAACAACACAAAGGAACAGAAAACAAATCCTCGAATCAATA  
TGAGCAAACTCCTATTTTGTCTATGGAACCAAGTTAGACATGGTTGAC

>M6-PGSC0003DMG400027703-(rev)M6LRR-RLK\_3294

GAATCAATATGAGCAAACCTCTATTTTGTCTATGGAACCAAAGTTAGACATGGTTGACACACTCCAAGC  
TCCTACAAGAAGTCAGAAAGACTATTTCTTGGACTAAAAAGACAGCAAAG

>M6-PGSC0003DMG400027703-(rev)M6LRR-RLK\_3355

ACTCCAAGCTCCTACAAGAAGTCAGAAAGACTATTTCTTGGACTAAAAAGACAGCAAAGTTCATTTTTAT  
TTATAGATCATAGTAAGAGAACAGCGGGTAAATGGCTCTACCGGGAGGGA

>M6-PGSC0003DMG400027703-(rev)M6LRR-RLK\_3416

CATTTTTATTTATAGATCATAGTAAGAGAACAGCGGGTAAATGGCTCTACCGGGAGGGAGGGAGGGAG  
CCGTTTTGGATTGGTGTGTATTTGAAACAAATATTGACAATCACTTTGAAG

>M6-PGSC0003DMG400027703-(rev)M6LRR-RLK\_3477

GAGGGAGCCGGTTTTGGATTGGTGTGTATTTGAAACAAATATTGACAATCACTTTGAAGCAGCATCAGC  
AGTATGCATACTGTCGTCATTCTGGTCCAGCAACCTCTTTTCTCTCCAAC

>M6-PGSC0003DMG400027703-(rev)M6LRR-RLK\_3538

GCATCAGCAGTATGCATACTGTCGTCATTCTGGTCCAGCAACCTCTTTTCTCTCCAAGTAGTGTGTCTTC  
AACACGAACAACCTTTCCTTCATCTGGTTTATCTGCTTTCTGTGATCCT

>M6-PGSC0003DMG400027703-(rev)M6LRR-RLK\_3599

GTGTGTCTTCAACACGAACAACCTTTCCTTCATCTGGTTTATCTGCTTTCTGTGATCCTGTGAACCTTGCTA  
ACATGACGAATGTCATTCCCCCAAGAATGTTATTTGCGCATCTCAAAG

>M6-PGSC0003DMG400027703-(rev)M6LRR-RLK\_366

AGGAGGATATGGGGCTGTCTTTAAGGGAATTTAGCTGACAAAACAGTTGTTGCTATCAAACGAGCAAA  
AGAAGGATCAGTACAAGGGCAAAAAGAATTTTGGACTGAGATATCTTTGTT

>M6-PGSC0003DMG400027703-(rev)M6LRR-RLK\_3660

GAACTTTGCTAACATGACGAATGTCATTCCCCCAAGAATGTTATTTGCGCATCTCAAAGCAATAACCGAG  
GTCTTAAATACCAAAGGAGGAAGACCTTTAGCTAGCACAAACTCAACACC

>M6-PGSC0003DMG400027703-(rev)M6LRR-RLK\_3721

ATAACCGAGGTCTTAAATACCAAAGGAGGAAGACCTTTAGCTAGCACAAACTCAACACCGTTAAGTGTT  
TGATATCTTAAATTACTACTGAGACCCATATGTATTGCCATGTTGCTGCA

>M6-PGSC0003DMG400027703-(rev)M6LRR-RLK\_3782

TAAGTGTGGATATCTTAAATTACTACTGAGACCCATATGTATTGCCATGTTGCTGCATTCAAAGTGTA



GGAGGTGGCTTGTTGGTGTTCGAAATTCGGATCCATCTTCTTCCTCA

>M6-PGSC0003DMG400027703-(rev)M6LRR-RLK\_3843

CAAAAGTGTAGGAGGTGGCTTGTTGGTGTTCGAAATTCGGATCCATCTTCTTCCTCAACTTGATTAAC  
CCATTAGATAATGCAGTCCCAACAAGCCCTGCTGCAAATCCAAGTGCAGC

>M6-PGSC0003DMG400027703-(rev)M6LRR-RLK\_3904

TTGATTAAACCATTAGATAATGCAGTCCCAACAAGCCCTGCTGCAAATCCAAGTGCAGCAAAGTGCAGTTC  
CTTTGTACACAAATGTACCAAGCCTACTCAATAAACATAAGAACCAGAC

>M6-PGSC0003DMG400027703-(rev)M6LRR-RLK\_3965

ACTGAGTTCCTTTGTACACAAATGTACCAAGCCTACTCAATAAACATAAGAACCAGACTGAAACATGTG  
GCTCGGTGGACAACTGGCGAACATCAAAGGGAGAGTTTGGATCGACGCAG

>M6-PGSC0003DMG400027703-(rev)M6LRR-RLK\_4026

AAACATGTGGCTCGGTGGACAACTGGCGAACATCAAAGGGAGAGTTTGGATCGACGCAGATGCCGTTG  
GTGCCAACAGATACATCAACACAAAATTCATAATCGAACCAACAACAAGCGT

>M6-PGSC0003DMG400027703-(rev)M6LRR-RLK\_4087

GCCGTTGGTGCCAACAGATACATCAACACAAAATTCATAATCGAACCAACAACAAGCGTCGAAAACACA  
AAATCTAATTCATTAAGCCCAAATAGGCCTTGATGCCATATCTCCAAGA

>M6-PGSC0003DMG400027703-(rev)M6LRR-RLK\_4148

AAAACACAAAATCTAATTCATTAAGCCCAAATAGGCCTTGATGCCATATCTCCAAGAACATTAGCACT  
TACACCAACCAATTCCTCCATAAGAACCCTAAAAGGAAACTGTGGATCTG

>M6-PGSC0003DMG400027703-(rev)M6LRR-RLK\_4209

ATTAGCACTTACACCAACCAATTCCTCCATAAGAACCCTAAAAGGAAACTGTGGATCTGCAGCCACCCTT  
GATCTCCATCCATTAACAAAAGCACCAATTGGTCCGATACTATCCCAAGA

>M6-PGSC0003DMG400027703-(rev)M6LRR-RLK\_427

CGAGCAAAGAAGGATCAGTACAAGGGCAAAGAATTTTTGACTGAGATATCTTTGTTATCAAGGGTA  
CATCACCGGAATCTAGTTTCATTGCTAGGATACTGTGATGAAGAAGGAGAA

>M6-PGSC0003DMG400027703-(rev)M6LRR-RLK\_4270

GCCACCCTTGATCTCCATCCATTAACAAAAGCACCAATTGGTCCGATACTATCCCAAGAAGACTTTGAAT  
CATTTGAATCTCCACCTTTACTCCAATCACCCTACCCCAACCCCAACCA

>M6-PGSC0003DMG400027703-(rev)M6LRR-RLK\_4453

ACTTGATACTTCAGGTGATCCAATTGTTTAAACACAGTATCCCCAGTTTTCAAAGGGTTAAAATAGACCCT  
ATTATCACAAAATCTGGCTGAAACACCAGAAAGATCACGACTTTGATTA

>M6-PGSC0003DMG400027703-(rev)M6LRR-RLK\_4514

AATAGACCCTATTATCACAAAATCTGGCTGAAACACCAGAAAGATCACGACTTTGATTATGATTCTGATA  
GTAACCCGTAAGAGGAGAACAACGAAGCTGAGACATCGCCACCATTTTCT

>M6-PGSC0003DMG400027703-(rev)M6LRR-RLK\_4575

ATTCTGATAGTAACCCGTAAGAGGAGAACAACGAAGCTGAGACATCGCCACCATTTTCTACCAACCAAC  
CTAATAAAAATGGGAAAATAGAAAGTAATGGCCATATTATTCATCACATCAA

>M6-PGSC0003DMG400027703-(rev)M6LRR-RLK\_4636

CAACCAACCTAATAAAAATGGGAAAATAGAAAGTAATGGCCATATTATTCATCACATCAACAAACAAAGA  
ATCAGATTCACTAAAAGATCAAGAAAGACTCTTTCTTTGACACAAATAATA

>M6-PGSC0003DMG400027703-(rev)M6LRR-RLK\_4697

AACAAAGAATCAGATTCACTAAAAGATCAAGAAAGACTCTTTCTTTGACACAAATAATATATATACACAC  
AACAAAAAAGATGCAACAGATTTAATAATAAATCAAGAAAAGGAAAAGGG

>M6-PGSC0003DMG400027703-(rev)M6LRR-RLK\_4758

TATACACACAACAAAAAAGATGCAACAGATTTAATAATAAATCAAGAAAAGGAAAAGGGGTTACCTTTT  
ATGAAGAGATGTGTTTCAGGGGCTGCACATCAAGTGATCTGAGCAGAGCAA

>M6-PGSC0003DMG400027703-(rev)M6LRR-RLK\_4819

TACCTTTTATGAAGAGATGTGTTTCAGGGGCTGCACATCAAGTGATCTGAGCAGAGCAAAAAAAGATGGC  
AGCAGCGGCTAAAGTGACTAAAATGGGGATCTGCATGAAAGTGGGAATCTT

>M6-PGSC0003DMG400027703-(rev)M6LRR-RLK\_4868

GCAGAGCAAAAAAAGATGGCAGCAGCGGCTAAAGTGACTAAAATGGGGATCTGCATGAAAGTGGGAA  
TCTTTATAACCTAATAAAAATACGGGCGGCAGGGCCGAAGTTAAAGAAAAAC

>M6-PGSC0003DMG400027703-(rev)M6LRR-RLK\_488

CAAGGGTACATCACCGGAATCTAGTTTCATTGCTAGGATACTGTGATGAAGAAGGAGAACAGGTATGAT  
AAACCTCAAACTTCAAATTCAAATCTTTTTGAATCTACTCATTAAAGAT

>M6-PGSC0003DMG400027703-(rev)M6LRR-RLK\_549

GGTATGATAAACCTCAAACTTCAAATTCAAATCTTTTTGAATCTACTCATTAAAGATGGAATTCATCAT  
GTTGATCCTTTCCTCGGCCATATGAGTAGTTCAGGCTCACATTGTATGC

>M6-PGSC0003DMG400027703-(rev)M6LRR-RLK\_61

AGGTGTTTTGCTGCATTTGTTTCAGCAATTTAACTGTGTTAATCAAAAAACGACATGCCAAATACCAAA  
GCATCCTATCAAGGAAACGGCTATGTAAGTTCTCTCATTTTGGTTATAA

>M6-PGSC0003DMG400027703-(rev)M6LRR-RLK\_610

AATTCATCATGTTGATCCTTTCCTCGGCCATATGAGTAGTTCAGGCTCACATTGTATGCTATAGCTTCTTA  
TTTTGCTCCGTAGCAATCTTTTGCATTCGTTCTGACATCTCTTGGTA

>M6-PGSC0003DMG400027703-(rev)M6LRR-RLK\_671

TAGCTTCTTATTTTGTCCGTAGCAATCTTTTGCATTCGTTCTGACATCTCTTGGTATATCATCTATGTG  
AAGCAATTAGTGTGTTCTGTTTATGTATTTGCAGATGCTGGTTTATG

>M6-PGSC0003DMG400027703-(rev)M6LRR-RLK\_732

TCATCTATGTGAAGCAATTAGTGTGTTCTGTTTATGTATTTGCAGATGCTGGTTTATGAATTCATGTGCA  
ATGGAACCTTTCGAAACTGGCTTCTGGTAAAGAACTGTTCCCTGGTT

>M6-PGSC0003DMG400027703-(rev)M6LRR-RLK\_793

TTCATGTGCAATGGAACCTTTCGAAACTGGCTTCTGGTAAAGAACTGTTCCCTGGTTTATTCTGATCCA  
TCATCTTCTCTGCTTATTTTTGGTTAGGGAAGCTATAGAGCCAGCAG

>M6-PGSC0003DMG400027703-(rev)M6LRR-RLK\_854

TTCTGATCCATCATCTTCTCTGCTTATTTTTGGTTAGGGAAGCTATAGAGCCAGCAGAGGAATTTGACA  
TTTATCATTCTTCTAATAATTGTGTTGTGTAAGCTAGCTTGCTTGCGCT

>M6-PGSC0003DMG400027703-(rev)M6LRR-RLK\_915

GAATTTGACATTTATCATTCTTCTAATAATTGTGTTGTGTAAGCTAGCTTGCTTGCGCTTGGACTAATCTAT  
TAAATACGTGCTACCTCCCACTAGCACAAATATCAGATAACTCCGTCC

>M6-PGSC0003DMG400027703-(rev)M6LRR-RLK\_976

GACTAATCTATTAATAACGTGCTACCTCCCACTAGCACAAATATCAGATAACTCCGTCTTCAAGGTTTAG  
GAAGATGGATCACCTCTGTTGGCGTTCCAACCTTAATTACCAAGTTTAT

>M6-PGSC0003DMG400027710-(rev)M6LRR-RLK\_0

ATGAAGTACCTGGAAGATTGGGAGAAGGGTGATCCATGTACATCTAACTGGACAGGAATTCATTGTTTT  
AACAAAGTTGGAGCCAATGGCTACTTGCATATCAAGGAACTGTATGTTATT

>M6-PGSC0003DMG400027710-(rev)M6LRR-RLK\_1054

TATCTTTATAATTCATTTCTGAAAGGAATTCATGTGGAATGATTTGACTGGGAGTATACCGGAAGAAA

TTGGAAACATCAAGTCTTTGAAACTTTTGTAAGTTGAACGAAATTTGATC

>M6-PGSC0003DMG400027710-(rev)M6LRR-RLK\_1116

GGAAGAAATTGGAAACATCAAGTCTTTGAAACTTTTGTAAGTTGAACGAAATTTGATCTGTTTTTTTTGG  
TACCATCTTCTTGATTTTGCAGTCACCCTACATGGTCCCCGAGTGCTTT

>M6-PGSC0003DMG400027710-(rev)M6LRR-RLK\_1178

TTTTTTGGTACCATCTTCTTGATTTTGCAGTCACCCTACATGGTCCCCGAGTGCTTTGAACCCTGAACTAT  
CTTATCTAGGAGATCTAGATAATCATTTGGCTATGATGGTGATATACT

>M6-PGSC0003DMG400027710-(rev)M6LRR-RLK\_1240

CCTGAACTATCTTATCTAGGAGATCTAGATAATCATTTGGCTATGATGGTGATATACTTTATGTTGGATAG  
AACAGGTGGATTTATGATTTTAAGTTTGATGGTTTCAATCTTTACGTTC

>M6-PGSC0003DMG400027710-(rev)M6LRR-RLK\_1302

GTTGGATAGAACAGGTGGATTTATGATTTTAAGTTTGATGGTTTCAATCTTTACGTTCTTATCACGGAGTC  
CATTACATTTTCAAACACTAGGGGTTCAAAGTTCAATATTTTTAAATTTA

>M6-PGSC0003DMG400027710-(rev)M6LRR-RLK\_1364

CACGGAGTCCATTACATTTTCAAACACTAGGGGTTCAAAGTTCAATATTTTTAAATTTATAGTGATTTGTCA  
TATATGTATCTGTGCTTCCCGTCGAAAATGTTGAGTTTAGTTGAACCTA

>M6-PGSC0003DMG400027710-(rev)M6LRR-RLK\_1426

GATTTGTCATATATGTATCTGTGCTTCCCGTCGAAAATGTTGAGTTTAGTTGAACCTATTAATTAGATCCT  
TCATCCGCCACTGGATAGAATTGAGGAACATTTTTTTTTCTTGAATTTCT

>M6-PGSC0003DMG400027710-(rev)M6LRR-RLK\_1488

TTAGATCCTTCATCCGCCACTGGATAGAATTGAGGAACATTTTTTTTTCTTGAATTTCTTATGAAAATTGTG  
CTTAATGTAAGATTGTTTCAAGAAGAAGTAAAACCTAATGCTTGGAAAG

>M6-PGSC0003DMG400027710-(rev)M6LRR-RLK\_1550

AAAATTGTGCTTAATGTAAGATTGTTTCAAGAAGAAGTAAAACCTAATGCTTGGAAAGATCATGACTATG  
TCGATTGGTTTAATCCCTTCAGAATTATGTTTCATGCAGGCTCTTGACTGG

>M6-PGSC0003DMG400027710-(rev)M6LRR-RLK\_1612

TGACTATGTCGATTGGTTTAATCCCTTCAGAATTATGTTTCATGCAGGCTCTTGACTGGAAACAAACTTTCA  
GGATCTTTATCTGATCAGCTTGGGTATCTCCGAACCTGAGAATATTCC

>M6-PGSC0003DMG400027710-(rev)M6LRR-RLK\_1674

AAACTTTCAGGATCTTTATCTGATCAGCTTGGGTATCTTCCGAACCTGAGAATATTCCAGATAGATGAGA  
ACCAGATTTCCGGAAGAATTCCTAAATCCTTCTCCAATTTAAACAGTGTC

>M6-PGSC0003DMG400027710-(rev)M6LRR-RLK\_1736

AGATGAGAACCAGATTTCCGGAAGAATTCCTAAATCCTTCTCCAATTTAAACAGTGTC AACATATGTAA  
GTGCAACTCATTGATTGTTTTAAACAGTGGAACAAGTCTAAGGTTCTAC

>M6-PGSC0003DMG400027710-(rev)M6LRR-RLK\_1798

ATATGTAAGTGCAACTCATTGATTGTTTTAAACAGTGGAACAAGTCTAAGGTTCTACCTTTGTAATCTTA  
TGTGATATATCATGTGTCTACAGCCACTTCAACAACAACACACTGATTG

>M6-PGSC0003DMG400027710-(rev)M6LRR-RLK\_1860

GTAATCTTATGTGATATATCATGTGTCTACAGCCACTTCAACAACAACACACTGATTGGCCAGATCCCTCC  
CGAGCTTTCCAATTTGTCCACTCTGCTTCACATGTAAGTTTCTTAGTTT

>M6-PGSC0003DMG400027710-(rev)M6LRR-RLK\_1922

GATCCCTCCCGAGCTTTCCAATTTGTCCACTCTGCTTCACATGTAAGTTTCTTAGTTTCTCTTCTTCAATAG  
ACATGCATACTCTCAGTAGAAGTTAGAGCAAAGCAAGTTTTTGTAACT

>M6-PGSC0003DMG400027710-(rev)M6LRR-RLK\_1984

TCTTCAATAGACATGCATACTCTCAGTAGAAGTTAGAGCAAAGCAAGTTTTTGTAACTTCTAAAATGACT  
TTTATCTCTACTTATGTCTGTAACTAACGGAGTAATGTTTTTGTGATGA

>M6-PGSC0003DMG400027710-(rev)M6LRR-RLK\_2046

AAATGACTTTTTATCTCTACTTATGTCTGTAACTAACGGAGTAATGTTTTTGTGATGATACTTTCTTTTTGT  
CAACAGGCTTATGGACAGCAATAATCTTTCAGGATACCTTCCTCCTGA

>M6-PGSC0003DMG400027710-(rev)M6LRR-RLK\_2108

TTCTTTTTGTCAACAGGCTTATGGACAGCAATAATCTTTCAGGATACCTTCCTCCTGAGTTTTCAATATTAC  
CACGTCTTCGAATAATGTATGTCCCTACTCACACACACATATATGATA

>M6-PGSC0003DMG400027710-(rev)M6LRR-RLK\_2170

TCAATATTACCAGTCTTCGAATAATGTATGTCCCTACTCACACACACATATATGATATGCATATATTGAA  
CCTCATATGCAACTTTCATTAGCTGTATTTTGTCAAGAGGTATAAACT

>M6-PGSC0003DMG400027710-(rev)M6LRR-RLK\_2232

TATATTGAACCTCATATGCAACTTTCATTAGCTGTATTTTGTCAAGAGGTATAAACTAACTGTTACAAAA  
AAACAATTGTTATTCAGAGGCAACTTTAACTGAACTTTCTGAAGTAAC

>M6-PGSC0003DMG400027710-(rev)M6LRR-RLK\_2294

GTTACAAAAAACAATTGTTATTCAGAGGCAACTTTAAACTGAACTTTCTGAAGTAACTAGTTATAAATTT  
GAAGGAATGCTGATTCCTTACTACCTATGAGTGAGACTGTCTATGTTTG

>M6-PGSC0003DMG400027710-(rev)M6LRR-RLK\_2356

TATAAATTTGAAGGAATGCTGATTCCTTACTACCTATGAGTGAGACTGTCTATGTTTGTCTTAGTTGAAGT  
GGCGTTATTGGCCAAATGATCGAACAACTGAAGCTGAGAACATTTTCGTT

>M6-PGSC0003DMG400027710-(rev)M6LRR-RLK\_2418

AGTTGAAGTGCGTTATTGGCCAAATGATCGAACAACTGAAGCTGAGAACATTTTCGTTACAGACCTATC  
CTCAGAACCCTCTAATTATCATCTTCAGATCTTTCTGTTGATTATAAAATT

>M6-PGSC0003DMG400027710-(rev)M6LRR-RLK\_2480

ACCTATCCTCAGAACCCTCTAATTATCATCTTCAGATCTTTCTGTTGATTATAAAATTCATCGATAATCTTT  
GCTTGTAATATCCAATGATAAAAAATTGATCTTATATAAGACAAATAT

>M6-PGSC0003DMG400027710-(rev)M6LRR-RLK\_2542

GATAATCTTTGCTTGTAATATCCAATGATAAAAAATTGATCTTATATAAGACAAATATAGTAATCCTTGTC  
ATACAATAACTGCTATGCCATTTGCAGTCCACTGAGAGGTGCATGGGT

>M6-PGSC0003DMG400027710-(rev)M6LRR-RLK\_2604

ATCCTTGTCATACAATAACTGCTATGCCATTTGCAGTCCACTGAGAGGTGCATGGGTTGAAATTTATGA  
TGAAGTTCTGAATTTTCTTATGCAGACAACCTGATAACAATAATTTTCAGC

>M6-PGSC0003DMG400027710-(rev)M6LRR-RLK\_2666

ATTTATGATGAAGTTCTGAATTTTCTTATGCAGACAACCTGATAACAATAATTTTCAGCCGTTCCGAGATTC  
CAGCTTCGTATGGGAACATGTCATCATTAGTGAAACTGTAAGTGATCCT

>M6-PGSC0003DMG400027710-(rev)M6LRR-RLK\_2728

CCGAGATTCCAGCTTCGTATGGGAACATGTCATCATTAGTGAAACTGTAAGTGATCCTTGAAAATGTTCC  
TCTCTTTTGTCTTCTCCTATTCTCTATGACTCAGCATTATAAGTTATAC

>M6-PGSC0003DMG400027710-(rev)M6LRR-RLK\_2790

AATGTTCTCTCTTTTGTCTTCTCCTATTCTCTATGACTCAGCATTATAAGTTATACATTTGAAGGACAAC  
AATGGTAAATAATATGTACAAACATAAGCATATATTCATTGTGTACAA

>M6-PGSC0003DMG400027710-(rev)M6LRR-RLK\_2852

GAAGGACAACAATGGTAAATAATATGTACAAACATAAGCATATATTCATTGTGTACAATGTATATGAAA

GAGGGAATGTTTCAGGACATCTTATTATGACGATTAGGGTAGATAGAATAAG

>M6-PGSC0003DMG400027710-(rev)M6LRR-RLK\_2914

TATGAAAGAGGGAATGTTTCAGGACATCTTATTATGACGATTAGGGTAGATAGAATAAGATGCAATAGTT  
GAATACTACTGTCACCTAATCAAATGAAGATTCAATGCTTCTGATAATATT

>M6-PGSC0003DMG400027710-(rev)M6LRR-RLK\_2976

AATAGTTGAATACTACTGTCACCTAATCAAATGAAGATTCAATGCTTCTGATAATATTGCAGAAGTCTCA  
GAAATTGCACGTTGCGAGGATCCATTCTGACCTTAGCAGAGTACCGAGT

>M6-PGSC0003DMG400027710-(rev)M6LRR-RLK\_3038

AAGTCTCAGAAATTGCACGTTGCGAGGATCCATTCTGACCTTAGCAGAGTACCGAGTCTACACTATCTG  
TAAGTTCAAGTTTTGAAATTGTTTCTTCTGTTCCCGTTGATTTGTGACCT

>M6-PGSC0003DMG400027710-(rev)M6LRR-RLK\_310

TCAAAGCCAATTTACTCTAGCGAACTTGGGTTGGTGTGTTGAAAAACCCGAACCAACCTTGCCTATGTAC  
ACCTCTACTTTGGGCCATAAAAATACCCTTGATGTTAGAAAATCTTTGTA

>M6-PGSC0003DMG400027710-(rev)M6LRR-RLK\_3100

ACTATCTGTAAGTTCAAGTTTTGAAATTGTTTCTTCTGTTCCCGTTGATTTGTGACCTTTATACTTCATGCA  
ACATGATTGTAAGATCTTCTAAAATGTTAACACTTCTTGCTTACTGTT

>M6-PGSC0003DMG400027710-(rev)M6LRR-RLK\_3162

ACTTCATGCAACATGATTGTAAGATCTTCTAAAATGTTAACACTTCTTGCTTACTGTTTGTGCAGTGATCT  
CAGCTGGAATCAACTGTCTGGATCTCTACCAAATATGCTTTCCAACAAT

>M6-PGSC0003DMG400027710-(rev)M6LRR-RLK\_3224

CAGTGATCTCAGCTGGAATCAACTGTCTGGATCTCTACCAAATATGCTTTCCAACAATATGACTGCTATGT  
ATGCTTTCTACAGATTTCTTCATATATCTAGCATCTTAGTTCAGCCATA

>M6-PGSC0003DMG400027710-(rev)M6LRR-RLK\_3286

CTGCTATGTATGCTTTCTACAGATTTCTTCATATATCTAGCATCTTAGTTCAGCCATATTTTGTGTTAGTTC  
ATTATCTCATGTTGTGAAGAGTTCTACATCAGCCCTTTAAGAAACATT

>M6-PGSC0003DMG400027710-(rev)M6LRR-RLK\_3348

GTGTTAGTTCATTATCTCATGTTGTGAAGAGTTCTACATCAGCCCTTTAAGAAACATTACTAAAGAGCTA  
GCCTTTGGGGTTGAGTTAGGCCCTACATCCATAACACAAGTTAAACATAA

>M6-PGSC0003DMG400027710-(rev)M6LRR-RLK\_3410

AAGAGCTAGCCTTTGGGGTTGAGTTAGGCCCTACATCCATAACACAAGTTAAACATAATTTTTATCATGA  
TTGCACATTTCTCTGTGTTTTTCTGTCAATTTCCCTAATCTAATGTGTT

>M6-PGSC0003DMG400027710-(rev)M6LRR-RLK\_3472

TATCATGATTGCACATTTCTCTGTGTTTTTCTGTCAATTTCCCTAATCTAATGTGTTGTTGTACATTCTCAT  
GCAGTATTCTGTACACAATCGTCTTGATGGATCTATTCCGAAGAGT

>M6-PGSC0003DMG400027710-(rev)M6LRR-RLK\_3534

TACATTCTCATGCAGTATTCTGTACACAATCGTCTTGATGGATCTATTCCGAAGAGTTTTTCATCTCTTCC  
TTTGTTGCAGAACTGTAAGGATCTTCACTGTGTCTTGTAAATACATTC

>M6-PGSC0003DMG400027710-(rev)M6LRR-RLK\_3596

CATCTCTTCTTTGTTGCAGAACTGTAAGGATCTTCACTGTGTCTTGTAAATACATTCTCTATAGTACTGGT  
TCTTTAACATTTCAAAGCTCAATTCGTGTATAACAAATTGATTTGAC

>M6-PGSC0003DMG400027710-(rev)M6LRR-RLK\_3658

TAGTACTGGTCTTTAACATTTCAAAGCTCAATTCGTGTATAACAAATTGATTTGACGGACTTGTCACAG  
GACAATGGATAACAACCTTTTGAATGGTTCCTTTTCTACCGACATTTGG

>M6-PGSC0003DMG400027710-(rev)M6LRR-RLK\_372

CTATGTACACCTCTACTTTGGGCCATAAAAATACCCTTGATGTTAGAAAATCTTTGTATCTTTAATCGAGT  
TCTAGTACGGTGGATTTACGTGTAAGAATATATCAGGAAAAAGGTCTA

>M6-PGSC0003DMG400027710-(rev)M6LRR-RLK\_3720

TTGTCACAGGACAATGGATAACAACCTTTTGAATGGTTCCTTTTCTACCGACATTTGGCAAACAAGTTTA  
CTTCAACGTCGTCACTGTTGATGTAAGACCTGAAGCTAAATTGTAACAT

>M6-PGSC0003DMG400027710-(rev)M6LRR-RLK\_3782

ACAAGTTTACTTCAACGTCGTCACTGTTGATGTAAGACCTGAAGCTAAATTGTAACATCAAATATCTGAT  
ATGAAATGTACTATCATTTACACAGAAGTCTGGGAGTCTTTTTAACCTTT

>M6-PGSC0003DMG400027710-(rev)M6LRR-RLK\_3844

TATCTGATATGAAATGTACTATCATTTACACAGAAGTCTGGGAGTCTTTTTAACCTTTCTATCTTCTTTGCA  
AAACTAGTGATCTTCAGAATAATTCATTTCCGGACATTTCCGGTACTC

>M6-PGSC0003DMG400027710-(rev)M6LRR-RLK\_3906

CTTCTTTGCAAACTAGTGATCTTCAGAATAATTCATTTCCGGACATTTCCGGTACTCTTGAACCACCTCT  
GAATGTCACTCTAAGGTAAGGTTTTTCTTCCATATTCAACGACAAAAC



>M6-PGSC0003DMG400027710-(rev)M6LRR-RLK\_3968

ACCACCTCTGAATGTCACTCTAAGGTAAGGTTTTCTTTCCATATTCAACGACAAAACCTAAGAGAAGCC  
ATTGAATTAATAATTTTATGATCTGGCTATCACTTCATGTCCACATTTTC

>M6-PGSC0003DMG400027710-(rev)M6LRR-RLK\_434

TAATCGAGTTCTAGTACGGTGGATTTCACGTGTAAGAATATATCAGGAAAAAGGTCTAAATTTACCCCTT  
TGCTTTTGGTTGTGGTTAAGAAATTACCTTTCATTATGCTTCAAGTTGGA

>M6-PGSC0003DMG400027710-(rev)M6LRR-RLK\_496

TACCCCTTTGCTTTTGGTTGTGGTTAAGAAATTACCTTTCATTATGCTTCAAGTTGGAGTTCCTCTAGCATT  
AACAGCAAAAGAAAGAGACTTGGTTCTTTCGATATCTGCATAATACTC

>M6-PGSC0003DMG400027710-(rev)M6LRR-RLK\_558

CTCTAGCATTAAACAGCAAAAGAAAGAGACTTGGTTCTTTCGATATCTGCATAATACTCCTGCAATCCAGT  
TAGCAGCATAACTAGTATCTCCAAGGGGGGACCTGGTTCTTTTGTAGTTG

>M6-PGSC0003DMG400027710-(rev)M6LRR-RLK\_620

AATCCAGTTAGCAGCATAACTAGTATCTCCAAGGGGGGACCTGGTTCTTTTGTAGTTGTTTGTGATCAT  
CAAAATCAATTTAAGCTCATCTCAACAGTTTGCTAACGACAAGGGCATGA

>M6-PGSC0003DMG400027710-(rev)M6LRR-RLK\_682

TTGATCATCAAAATCAATTTAAGCTCATCTCAACAGTTTGCTAACGACAAGGGCATGAATAACTAAGTTA  
ACTCATAAATTAGAGCACTTAGTTGTAACTCTAGCAAAAGATGTGTCTT

>M6-PGSC0003DMG400027710-(rev)M6LRR-RLK\_744

CTAAGTTAACTCATAAATTAGAGCACTTAGTTGTAACTCTAGCAAAAGATGTGTCTTACTACTTTGAGT  
TATGACTATCTTGTATTCTTGTGTGAGGGTGATGCATGACGCATTAAGC

>M6-PGSC0003DMG400027710-(rev)M6LRR-RLK\_806

ACTTTGAGTTATGACTATCTTGTATTCTTGTGTGAGGGTGATGCATGACGCATTAAGCATATTATATTCC  
CCTTTGTGCAGCCGTATGATGGCTATGAATCTTCTGGAAGTTTAACAC

>M6-PGSC0003DMG400027710-(rev)M6LRR-RLK\_868

TATATTTCCCCTTTGTGCAGCCGTATGATGGCTATGAATCTTCTGGAAGTTTAACACCTGAGCTTGGACA  
ACTATCTCATCTTCAGTTTCTGTGAGTTGTTACACATATTACTACATTG

>M6-PGSC0003DMG400027710-(rev)M6LRR-RLK\_930

GCTTGGACAACACTATCTCATCTTCAGTTTCTGTGAGTTGTTACACATATTACTACATTGTACAAATATTTTGA

TTTTAAGATATAGTAGAGTTTTACTGATTTTTCTATCTGTTTTACTTA

>M6-PGSC0003DMG400027710-(rev)M6LRR-RLK\_992

AATATTTTGATTTTAAGATATAGTAGAGTTTTACTGATTTTTCTATCTGTTTTACTTATTTTTATCTTTATAA

TTCACCTTCTGAAAGGAATTCATGTGGAATGATTTGACTGGGAGTA

>M6-PGSC0003DMG400027966M6LRR-RLP\_1037

TGTAGCCAGAAATAACATTAGTGGCAGCATACCACTAGAGATTGGAAATGTCAAAGGGCTTTTAGGACT

TGATCTTTCATCGAATCATTTGATTGGGCAGATTCCAAAGGAATTTGGAAA

>M6-PGSC0003DMG400027966M6LRR-RLP\_1098

TTAGGACTTGATCTTTCATCGAATCATTTGATTGGGCAGATTCCAAAGGAATTTGGAAAATTAAGTTCTTT

GGTTAAGCTTTCTGTGCAGAACAACAATATCTCTGGATATATACCGGAG

>M6-PGSC0003DMG400027966M6LRR-RLP\_1159

TAAGTTCTTTGGTTAAGCTTTCTGTGCAGAACAACAATATCTCTGGATATATACCGGAGGAACTTGGGTC

ACTGACAAAGTTAGAGTCCCTCGATCTATCGTACAACAGATTGAATGGAT

>M6-PGSC0003DMG400027966M6LRR-RLP\_1281

ATCCCGAAGTGTATAGGAGATTTCTGTGCACTTGTTTCAGTTGAACCTGAGCAACAACAAGTTTGGCCAG

AATATTCCAAAGGATATAAGAAGGATAACTCAGCTTAATGTACTTGATTTG

>M6-PGSC0003DMG400027966M6LRR-RLP\_1342

TTGGCCAGAATATTCCAAAGGATATAAGAAGGATAACTCAGCTTAATGTACTTGATTTGAGCTATAATCT

TCTCGTTGGAGATATACCCCCTCAGTTAGCCAATTTGAAGGTGTTGGTAA

>M6-PGSC0003DMG400027966M6LRR-RLP\_1403

CTATAATCTTCTCGTTGGAGATATACCCCCTCAGTTAGCCAATTTGAAGGTGTTGGTAAACTTAAATCTTT

CCCACAATGGCCTATCTGGACGCATTCCTAAAGAACTTGAAAGTTCATC

>M6-PGSC0003DMG400027966M6LRR-RLP\_1464

TTAAATCTTTCCACAATGGCCTATCTGGACGCATTCCTAAAGAACTTGAAAGTTCATCTGGTTTGCATGA

TGTTGTTTTGTCATACAATGAGTTGGAAGGTCTAATCCCTAATAATAATAA

>M6-PGSC0003DMG400027966M6LRR-RLP\_1525

GTTTGCATGATGTTGTTTTGTCATACAATGAGTTGGAAGGTCTAATCCCTAATAATAAAAGCTTTTATCAAT

GCCTCATTGGAGGGTAATAAAGGTCTTTGCGGAAATGTAGCAGGACTCC

>M6-PGSC0003DMG400027966M6LRR-RLP\_1708

TCCTCATCACTGTATTTCTGTTATGGGAGCACTAGTACTGCTCTGCTTTTTTCATTGGTGTCTCTTTATGT  
GTAATAAAAGAAGGAGAGTTAGAGACTTTGAAAGAAGGGATGGTGATG

>M6-PGSC0003DMG400027966M6LRR-RLP\_1769

TCTCTTTATGTGTAATAAAAGAAGGAGAGTTAGAGACTTTGAAAGAAGGGATGGTGATGATTGGCTTTC  
GATATCCATGTTAGATGGGAAGACATTGTACAGAGACATCTTAAACGCCAC

>M6-PGSC0003DMG400027966M6LRR-RLP\_183

AATGTTTTGTACCTTTATTCAAACCACTTTCTGGTCCCCTTCCCGCAGAAATAGGAAAGATGAAGTCACA  
CAAGTATTTATCCTTATGGGATAATAAATCTCTGGGTGACTTAACTAAG

>M6-PGSC0003DMG400027966M6LRR-RLP\_1830

TGGCTTTCGATATCCATGTTAGATGGGAAGACATTGTACAGAGACATCTTAAACGCCACAGAAGAGTTT  
GATGCAAAATTTTGCATCGGGCAAGGAGGTCACGGAAGTGTTTACAAGGTG

>M6-PGSC0003DMG400027966M6LRR-RLP\_1952

CCTTCCATCATTAGGGAATATAGCTGTGAAGAGACTTCATTCTTCATTTTCAGAATACTCATCCCAAAGCT  
TCATCAATGAAGTAAGGGCATTGACTGGGCTTAAGCATCGAAACATTGT

>M6-PGSC0003DMG400027966M6LRR-RLP\_2013

CCCAAAGCTTCATCAATGAAGTAAGGGCATTGACTGGGCTTAAGCATCGAAACATTGTGAACCTCTAC  
GGCTATTGTTTCGAAAGCACAACTTGTCTTGGTTTACTAGTATGTGGAG

>M6-PGSC0003DMG400027966M6LRR-RLP\_2135

GGGGAGTTTGTCTAGTATTTTGAGCAATGAAGTTGAGTCCAAGAAATTGGATTGTCTTAAAAGGGTGAA  
TATCATCAAGGGTGTGCTTTTGTCTTATCTTACATGCACTTAGACTGTTC

>M6-PGSC0003DMG400027966M6LRR-RLP\_2318

TCGTATTGCAGACTTTGGAATAGCAAAGATTCTCAAGCCGGACTCATCCAATTGCACTGCGTTTGCAGGC  
ACATATGGTTATGTGCGCACCTGGTAAGTTTTAAATAGTTTATGAACTATA

>M6-PGSC0003DMG400027966M6LRR-RLP\_2379

TTTGCAGGCACATATGGTTATGTGCGCACCTGGTAAGTTTTAAATAGTTTATGAACTATATCCAAACACTCT  
TGTTTTTATCTCATTACATGTTTAAATTCTTAATATTGTTCTGGAAAT

>M6-PGSC0003DMG400027966M6LRR-RLP\_244

TGAAGTCACACAAGTATTTATCCTTATGGGATAATAAATCTCTGGGTGACTTAACTAAGCGCAATATTTT  
GTACCTTTATGAAAACCACTTTCTGGTCCCCTTCTGCAGAAATAGGAA

>M6-PGSC0003DMG400027966M6LRR-RLP\_2440

CAAACACTCTTGTTTTATCTCATTACATGTTTAAATTCTTAATATTGTTCTGGAAATTGTGTTGTTTCAGA  
GCTTGCATATACAATGAAGGTTACACAAATGTGTGATGTGTATAGCTT

>M6-PGSC0003DMG400027966M6LRR-RLP\_2501

TGTTGTTTCAGAGCTTGCATATACAATGAAGGTTACACAAATGTGTGATGTGTATAGCTTTGGAGTATTAT  
CCTTGGAGATAGTCAAAGGAAAGCATCTTGGGGAATACATTTCTGTGCTA

>M6-PGSC0003DMG400027966M6LRR-RLP\_2684

CCTGATGATAGAGTAAAAGATGTTTTGGTTTTATCATCAATCTAGCATGCTCTTGTTTGCTTAAACTCC  
AAAATCAAGGCCAACAAATGCACTTCATCTCTCAGAAGTTATCATCAATG

>M6-PGSC0003DMG400027966M6LRR-RLP\_2745

TTAAACTCCAAAATCAAGGCCAACAAATGCACTTCATCTCTCAGAAGTTATCATCAATGGATGCACTCCC  
ACCTATTCATCAGAAAGCCCCATATAAGGCAAGCTATATAATCCCCTAA

>M6-PGSC0003DMG400027966M6LRR-RLP\_2806

TGCACTCCCACCTATTCATCAGAAAGCCCCATATAAGGCAAGCTATATAATCCCCTAACATATATGGAG  
ATGAATAACCTTTGTCGCTGAGTGGTTGTGAAGTAAGTACTGTTTCAATT

>M6-PGSC0003DMG400027966M6LRR-RLP\_2867

TATATGGAGATGAATAACCTTTGTCGCTGAGTGGTTGTGAAGTAAGTACTGTTTCAATTGCTTGGACTAG  
TGGTGGTCATTTGGTTTACTCTATTAATATGTATATTGTAAGAGGTAATT

>M6-PGSC0003DMG400027966M6LRR-RLP\_2912

GTA CTGTTTCAATTGCTTGGACTAGTGGTGGTCATTTGGTTTACTCTATTAATATGTATATTGTAAGAGGT  
AATTATTTAATCATCTGCTTCTTTGGCGTTGAGTAAATATCAAGAATTC

>M6-PGSC0003DMG400027966M6LRR-RLP\_305

CAATATTTTGTACCTTTATGAAAACCAACTTTCTGGTCCCCTTCTGCAGAAATAGGAAAGATGAAGTCA  
CTCGAGATTTATCCTTATGGAGTAATAATCTTTCTGGTCCAATTCCAGT

>M6-PGSC0003DMG400027966M6LRR-RLP\_488

CATTCTGCAGAAATAGGAAAGATGAAGTCACTTGAGTATTTATCCTTATGGAGTAATAATCTTTCCGGT  
CCAATTCCTAGTGAGTTGGGAAATTTGAAAAACCTCTCTAGATTGGATTT

>M6-PGSC0003DMG400027966M6LRR-RLP\_549

CTTTCCGGTCCAATTCTAGTGAGTTGGGAAATTTGAAAAACCTCTCTAGATTGGATTTATCCTATAATCA

GCTTACTGGTCTTGTTTCTGTTTCCTTTGGCAATTTGAGAACTTGCGAG

>M6-PGSC0003DMG400027966M6LRR-RLP\_61

AACCAACTTTCTGGTCCCATTCTGCAGAAATAGGAAAGATGAAGTCACTCAAGTATTTATCCTTATGGA

GTAATAATCTTTTGGGCCAATTCCAGTAACTCTAGGTGACTTAACTGAGC

>M6-PGSC0003DMG400027966M6LRR-RLP\_671

ACTAAATCTCGCTGCGAACGAACTTTCGGGTTCTATTCCAAAAGAATTTGCATATTTTGATAACTTGGTTT

AGTTATCAATGAGTTTCAATCACTTTTCAGGCCATTTGCCAGAGTGGCT

>M6-PGSC0003DMG400027966M6LRR-RLP\_732

AACTTGGTTTAGTTATCAATGAGTTTCAATCACTTTTCAGGCCATTTGCCAGAGTGGCTTTGCAAAGATG

GGAAACTTGAGATTTTCGTTGTGAATGGTAACAAGCTTACAGGGCAAATC

>M6-PGSC0003DMG400027966M6LRR-RLP\_793

GCAAAGATGGGAAACTTGAGATTTTCGTTGTGAATGGTAACAAGCTTACAGGGCAAATCCCAAGAAGCT

TGAGCAAGTGCTCGAGTTTCAAAGGGTTCGTTCAATAACAACAGCTTTA

>M6-PGSC0003DMG400027966M6LRR-RLP\_915

GGGGATTTATCTGAAACTTTTGGTATCTATCCAGAGCTTCTGTTCAATTGATTTGAGCGACAATGATTTTCA

TGGTGAACTCAGCAGTAACTGGGGAAAATGCAAAAATTTAATTGATCTG

>M6-PGSC0003DMG400027966M6LRR-RLP\_976

ATGATTTTCATGGTGAACCTCAGCAGTAACTGGGGAAAATGCAAAAATTTAATTGATCTGTGTGTAGCCA

GAAATAACATTAGTGGCAGCATACCACTAGAGATTGGAAATGTCAAAGGGC

>M6-PGSC0003DMG400027968M6LRR-RLP\_1798

TTCTAACCAACTTTCTGGTCCAATTCTGCTTCCTTTGGCAATTTGAGAACTTGCAATTTTGTATCTCCA

CACCAACAACTTTCTGGTTCTATTCCAAAAGAACTTGCATTTTTGGA

>M6-PGSC0003DMG400027968M6LRR-RLP\_1860

TGTATCTCCACACCAACAACTTTCTGGTTCTATTCCAAAAGAACTTGCATTTTTGGATAACTTGGTAGAG

CTGATAATAAGTGAATAACAGCTTTCAGGCCATTTGCCTGAGCATCTTT

>M6-PGSC0003DMG400027968M6LRR-RLP\_1984

AGGTGGGAACTTGAGAACTTACGGTGAATAATAACAAGCTCACAGGGCCAATACCAAGCAGCTTAA

GCAAGTGCTCGAGTTTCAAAGGCTGCGCTTCAATAATAACAGTTTTACTGG

>M6-PGSC0003DMG400027968M6LRR-RLP\_2046

GCTTAAGCAAGTGCTCGAGTTTCAAAGGCTGCGCTTCAATAATAACAGTTTTACTGGGAATTTATCTGA  
AGCTTTTGGCATCCATCCACACCTTCATTTATTGATTTGAGCGACAATG

>M6-PGSC0003DMG400027968M6LRR-RLP\_2108

TTATCTGAAGCTTTTGGCATCCATCCACACCTTCATTTATTGATTTGAGCGACAATGATTTTTATGGTGA  
ACTCAGCAGCAACTGGGGGAAATGCGAAAATTTGATTGATCTGCGTGTA

>M6-PGSC0003DMG400027968M6LRR-RLP\_2232

GAAATAACATTAGTGGTAGCATACCACCAGAGATTGGAAATGTCAAAGGGCTTTTAGGACTTGATCTTT  
CATCAAATTATTTGATTGGGCAAATTCCAAAGGAATTTGGAAAATTAACCT

>M6-PGSC0003DMG400027968M6LRR-RLP\_2294

GATCTTTCATCAAATTATTTGATTGGGCAAATTCCAAAGGAATTTGGAAAATTAACCTCTCTGGTTAATCT  
TCTTTTGCACACAACCAAATTTCTGGCAATATTCCTATGGAACCTGGG

>M6-PGSC0003DMG400027968M6LRR-RLP\_2356

GGTTAATCTTCTTTTGCACACAACCAAATTTCTGGCAATATTCCTATGGAACCTGGGTTATTGACAAAGT  
TAGATTACCTTGATCTATCAGATAATAGATTGAATGGTTCGATCCCACC

>M6-PGSC0003DMG400027968M6LRR-RLP\_2418

TGACAAAGTTAGATTACCTTGATCTATCAGATAATAGATTGAATGGTTCGATCCCACCGTTTATAGGAGA  
TTACCAGCACCTGTTTCACTTGAACCTGAGCAACAACAAATTTGGCCAAA

>M6-PGSC0003DMG400027968M6LRR-RLP\_2480

ATAGGAGATTACCAGCACCTGTTTCACTTGAACCTGAGCAACAACAAATTTGGCCAAAAAATTCGAATAG  
AGATTGGGAAGATAACTCAACTTAATGTACTGGATTTGAGCCGTAATCAT

>M6-PGSC0003DMG400027968M6LRR-RLP\_2537

AAAATTCCAATAGAGATTGGGAAGATAACTCAACTTAATGTACTGGATTTGAGCCGTAATCATCTTGTTG  
GAGAAATCCCCCTCAGTTAGCCAATTTGAAGGTGTTGGTAAACTTAAAT

>M6-PGSC0003DMG400027971M6LRR-RLK\_1054

AGTTTGATGCAAAATTTTGCATCGGGCAAGGAGGACACGGAAGCGTTTACAAGGTAAACCTTCCATCAT  
TAGGGAATATAACTGTGAAGAGACTTCATTCTTCATTTGAGAATACAGCTC

>M6-PGSC0003DMG400027971M6LRR-RLK\_1116

CCATCATTAGGGAATATAACTGTGAAGAGACTTCATTCTTCATTTGAGAATACAGCTCCCAAAAGTTTCTT  
AAATGAAGTAAGGGCATTGACTGGGATTAAGCACAGGAACATTGTGAAC

>M6-PGSC0003DMG400027971M6LRR-RLK\_1240

ATGGCTATTGTTTGAATGCACAACACTCGCTCTTGGTTTATGAGTATGTGGAGAGGGGGAGTTTGTCTA  
GCATTTTGAGCAACAAGGTTGAGTCCAAGAAATTGGATTGGTTTAAAAGAG

>M6-PGSC0003DMG400027971M6LRR-RLK\_1302

TTGTCTAGCATTTTGAGCAACAAGGTTGAGTCCAAGAAATTGGATTGGTTTAAAAGAGTGAATATCATCA  
AGGGTGTGCTTTTGCTTTATCTTACATGCACCAGGACTGTTACCCCCG

>M6-PGSC0003DMG400027971M6LRR-RLK\_1364

TATCATCAAGGGTGTGCTTTTGCTTTATCTTACATGCACCAGGACTGTTACCCCCGATTGTCCATCGAG  
ACATAAGTAGCAGTAATGTTTTGCTTGATTCTGAGTATGAAGCTTGTGT

>M6-PGSC0003DMG400027971M6LRR-RLK\_1426

TCCATCGAGACATAAGTAGCAGTAATGTTTTGCTTGATTCTGAGTATGAAGCTTGTGTTTCAGACTTTGG  
CATAGCGAAGCTACTCAAGCCAGATTCATCGAATTGCACTGCACTTGCGAG

>M6-PGSC0003DMG400027971M6LRR-RLK\_1550

ATATGGCTATGTTGCACCTGGTAAGTTTTAAATATTTTCATGAAAGCCAAACACTATTGTTTTTATCTTATT  
ACAAGTTTAAATTGATAATATTGTTCTGGAAACTGTATTGTTTCAGAGC

>M6-PGSC0003DMG400027971M6LRR-RLK\_1612

TATCTTATTTACAAGTTTAAATTGATAATATTGTTCTGGAAACTGTATTGTTTCAGAGCTTGCATATACTAT  
GAAGGTTACACAAATGTGTGATGTCTTTAGCTTTGGAGTACTATCATTG

>M6-PGSC0003DMG400027971M6LRR-RLK\_1674

ATATACTATGAAGGTTACACAAATGTGTGATGTCTTTAGCTTTGGAGTACTATCATTGGAGATAATAAAA  
GGAAAACATCTTGGGAATACATTACCGTGCTAGCAGATTCATCGACTAT

>M6-PGSC0003DMG400027971M6LRR-RLK\_1736

TAATAAAAGGAAAACATCTTGGGAATACATTACCGTGCTAGCAGATTCATCGACTATAGATCCTGAGC  
AGCTTAGCGATTTTCTGGATGAACGCCTTCCATATCCTGAAGATAGAGTAA

>M6-PGSC0003DMG400027971M6LRR-RLK\_1798

CCTGAGCAGCTTAGCGATTTTCTGGATGAACGCCTTCCATATCCTGAAGATAGAGTAAAAGAGGCTTTG  
GTTTTATCATCAAGCTAGCATGCTCTTGTGTTGCTTGAAACTCCAAAATCA

>M6-PGSC0003DMG400027971M6LRR-RLK\_620

AAACTTAAATCTTTCACACAATGGCCTATCTGGGCGCATTCTCAAGAATTTGAAAGTTCAACTGGTTTGC

AGGATGTCGTATTGTCATAACAATCTGTTGGAAGGTCCAATCCCTAATAA

>M6-PGSC0003DMG400027971M6LRR-RLK\_682

CTGGTTTGCAGGATGTCGTATTGTCATAACAATCTGTTGGAAGGTCCAATCCCTAATAATAAAGCTTTTATC  
AATGCCTCATTGGAGGGTAATAAAGGTCTTTGCGGCGATGTAGTAGGAA

>M6-PGSC0003DMG400027971M6LRR-RLK\_868

TCCTCATCACTGTA CTCTGTTATGGGAGCACTTGTCTACTCTGTGTTTTATTGGTGTCTGTTTATGT  
GTGATAGAAGAAGTAGAGTTGGAGATGTTGAAAGACGGGATAGTGATG

>M6-PGSC0003DMG400027971M6LRR-RLK\_930

CTGTTTATGTGTGATAGAAGAAGTAGAGTTGGAGATGTTGAAAGACGGGATAGTGATGGTTGGCTTTC  
GATATCCATGTTAGATGGGAAGACATTGTACAGGGACATCTTAAACGCCACA

>M6-PGSC0003DMG400028001M6LRR-RLP\_0

GCAAAAGAAGATTTGTGCAAAAACCTTTGGTGTAGAGGAAGAAGACGACTTTGTGTGAATTAAGGAGAA  
AAAATAACAATGGCCGACCCTGTAATTGGTGCTACTGTTTCAGGTTGTGCTTG

>M6-PGSC0003DMG400028001M6LRR-RLP\_1037

TTGGGGAAATTAACAGATGATCAATGTTGGTCCATTTTCAAACAACGAGCATTGTTGATGGGGAAAGTT  
CCGGAGGAAATACTGAGTGTGGAGAACAAGATTGTTGAAATGTGTCAAGGT

>M6-PGSC0003DMG400028001M6LRR-RLP\_1098

GGGAAGTTCCGGAGGAAATACTGAGTGTGGAGAACAAGATTGTTGAAATGTGTCAAGGTCTACCTTGG  
GCTGCTAGTGTGTTGGGAGGCCTATTTTGTAAACAAGGAAAAACATGAATGGC

>M6-PGSC0003DMG400028001M6LRR-RLP\_1159

ACCTTTGGCTGCTAGTGTGTTGGGAGGCCTATTTTGTAAACAAGGAAAAACATGAATGGCAGGCAATTCT  
TGATGGCAGCTCCCTTGTTCATCTGAAGATAGCATTAAAGAATATCCTAAA

>M6-PGSC0003DMG400028001M6LRR-RLP\_122

AAACTACTTTCTCTACAATTGAGGAGGCCAGAAATGTAAGGAACTGCAAGAAAAATCTCAGAATGCTG  
TCAAGATATGTAACCATGATCCAAGCTTTCATTCATGATGCTGAAAGACGA

>M6-PGSC0003DMG400028001M6LRR-RLP\_1220

GCAATTCTTGATGGCAGCTCCCTTGTTCATCTGAAGATAGCATTAAAGAATATCCTAAAACCTCAGTTATG  
ATTATCTACCATCTCCACATCTGAAGAAATGTTTTTCTTACTTTGCAATA

>M6-PGSC0003DMG400028001M6LRR-RLP\_1281



TCAGTTATGATTATCTACCATCTCCACATCTGAAGAAATGTTTTTCTTACTTTGCAATATTTCCAAAAGATT  
TTGAGTTTGAAAAGGACCAACTAATCCAACCTCTGGATGGCAGAAGGGT

>M6-PGSC0003DMG400028001M6LRR-RLP\_1403

CTTCGTCCATGTCAAGAGACCACTGTGATGGAAGACGTTGGGAACAAGTTTTTCCAACCTTGTTACAAT  
ATTCCTTGCTGCAGGATGTTAATCTAGATAAGTACAACAATACAACACAC

>M6-PGSC0003DMG400028001M6LRR-RLP\_1464

TGTTACAATATTCCTTGCTGCAGGATGTTAATCTAGATAAGTACAACAATACAACACACTGTAAGATGCA  
TGATCTTGTCATGATTTGGCTGGAGATATTTTTAAGTCTAAACTATTTG

>M6-PGSC0003DMG400028001M6LRR-RLP\_1525

TAAGATGCATGATCTTGTGCATGATTTGGCTGGAGATATTTTTAAGTCTAAACTATTTGATCAAAAAGAGT  
GTCGGAGGAGAAAATCTTTCTCAAGTTCGATACTTTGGATGGGAATCACC

>M6-PGSC0003DMG400028001M6LRR-RLP\_1586

CAAAAGAGTGTTCGGAGGAGAAAATCTTTCTCAAGTTCGATACTTTGGATGGGAATCACCAAGTGATCAA  
ATAGATAAGATTTATGAGCCAGGACGTTTGTGCACATTGTTCTGGAAGAGC

>M6-PGSC0003DMG400028001M6LRR-RLP\_1647

GTGATCAAATAGATAAGATTTATGAGCCAGGACGTTTGTGCACATTGTTCTGGAAGAGCAATATATCTG  
ATGATATGCTATTGAGCTTTCAGTTCCTTGAGAGTTTTAAATTTGTCCGGGT

>M6-PGSC0003DMG400028001M6LRR-RLP\_1708

TATATCTGATGATATGCTATTGAGCTTTCAGTTCCTTGAGAGTTTTAAATTTGTCCGGGTCAGACATCAAGG  
AGTTGTCAGCCTCAATCGTCAAGCTAATATACTTGAGATATCTTGATCT

>M6-PGSC0003DMG400028001M6LRR-RLP\_1769

GACATCAAGGAGTTGTCAGCCTCAATCGTCAAGCTAATATACTTGAGATATCTTGATCTCTCCAATACTA  
AGATGAACGACGGATATCTTGATCTCTCCAATACTGAGATGAACGACCTT

>M6-PGSC0003DMG400028001M6LRR-RLP\_1830

CCAATACTAAGATGAACGACGGATATCTTGATCTCTCCAATACTGAGATGAACGACCTTCCCAACTCCAT  
ATGCAAGCTCTACAATTTGCAAACCTTGAGATTCTATAGCAGCTGGTATC

>M6-PGSC0003DMG400028001M6LRR-RLP\_1952

CTCAGGAAGCTTCCAGAAGAAATGGCAAATATGATAAGTTTGAGACACATATGCTGCTACCATTTTTTCG  
AATCAGATTTTCAGATGCCACTTAATATGGGGCAATTGACTAGTCTTCAG

>M6-PGSC0003DMG400028001M6LRR-RLP\_2013

ATTTTTTCGAATCAGATTTTCAGATGCCACTTAATATGGGGCAATTGACTAGTCTTCAGACGCTGCCGTTT  
TTCTATGTAGGTTTCAGAGAAAGGTCGTCTGAATAGAAGAAGTGGGTTGTT

>M6-PGSC0003DMG400028001M6LRR-RLP\_2074

GCTGCCGTTTTTCTATGTAGGTTTCAGAGAAAGGTCGTCTGAATAGAAGAAGTGGGTTGTTTGAAAAATCTT  
AGAGGTGAATTGACGATCGAACGTCTACAATTAGTCGGAAATAAAGAAGA

>M6-PGSC0003DMG400028001M6LRR-RLP\_2318

CCGAACTTGAAAACCTTAGAAGTTGTGGACTATTTAGGGACTAAATTTGCTTCATGGTTCAGTGAAAAAA  
TGCTAACAAATTTGGTCATGTTGAGATTAAGAGGTTGCAAAGGTGCAA

>M6-PGSC0003DMG400028001M6LRR-RLP\_2379

GTGAAAAAATGCTAACAAATTTGGTCATGTTGAGATTAAGAGGTTGCAAAGGTGCAAAGAAATCCAT  
CACTTGGCCAACTGAAATCCCTTCGGCATCTTAAGCTGATAGGATTCCTTG

>M6-PGSC0003DMG400028001M6LRR-RLP\_244

AGTCGAAGATAGGGCTGTGGAAGAATGGCTCAAGATGCTTGAGAGAATTGCTGAAGATGCTGAAAATG  
TGTTTGACAAATTCACATATGAATCTATCAAAGCAAAGTGATGAACAACCG

>M6-PGSC0003DMG400028001M6LRR-RLP\_2440

AATTCCATCACTTGGCCAACTGAAATCCCTTCGGCATCTTAAGCTGATAGGATTCCTTGAATTGGAATGC  
ATCGGACCTACATTTTATGGTGTGATGTTAATAATAATGGATCAAGCAG

>M6-PGSC0003DMG400028001M6LRR-RLP\_2501

TTGGAATGCATCGGACCTACATTTTATGGTGTGATGTTAATAATAATGGATCAAGCAGCAATATCCAAG  
TGTTCCCGTCATTGAAAGAAGTGAATTGAACAATATGTCTAGCCTTATT

>M6-PGSC0003DMG400028001M6LRR-RLP\_2562

ATATCCAAGTGTTCCCGTCATTGAAAGAAGTGAATTGAACAATATGTCTAGCCTTATTGAGTGGAAAGG  
AGATGAAGTTGGAGTAAGAATGTTTCCTAGGCTTGAGAAGTTGACGATTA

>M6-PGSC0003DMG400028001M6LRR-RLP\_2623

GTGGAAAGGAGATGAAGTTGGAGTAAGAATGTTTCCTAGGCTTGAGAAGTTGACGATTAGAAACTGTC  
CATTGTTAAAAAGAAGTCCGAATCAATTTGAAATCCTCAGTGAATTAGAAAT

>M6-PGSC0003DMG400028001M6LRR-RLP\_2684

AACTGTCCATTGTTAAAAAGAAGTCCGAATCAATTTGAAATCCTCAGTGAATTAGAAATTGTCAAAGTTG

ACAGTGAAATGCCATTGTTGAACTTATGCAGCAACTTGCCATCTCTCGTA

>M6-PGSC0003DMG400028001M6LRR-RLP\_2745

TCAAAGTTGACAGTGAAATGCCATTGTTGAACTTATGCAGCAACTTGCCATCTCTCGTAGAGCTTGAAGT  
CGATGATATGAAAGAGCTCACTTGTTTGCCAGATGAGATGCTACGCAACA

>M6-PGSC0003DMG400028001M6LRR-RLP\_2806

GCTTGAAGTCGATGATATGAAAGAGCTCACTTGTTTGCCAGATGAGATGCTACGCAACAATGTTTCTCTT  
CAACACATATCGGTTTCCGACTGCAGAGAGTTTCATGAATTGCCACAAAG

>M6-PGSC0003DMG400028001M6LRR-RLP\_2928

TGTACAATCTCCATTCTCTTAAGACCTTAAAGATAACCAGGTGCGCCAATTTCAATTCCTTTCTGTCCCA  
GTGGAGAGAATTATTTGACTTCCCTCCAAAACTTCAGTTAAAGGATT

>M6-PGSC0003DMG400028001M6LRR-RLP\_2989

TCCTGTTCCAGTGGAGAGAATTATTTGACTTCCCTCCAAAACTTCAGTTAAAGGATTGTGAAGGATTG  
AGCAGTTTACCAAGTGAATGCTAGAGCATTGTCGGTCTCTGGAACTTT

>M6-PGSC0003DMG400028001M6LRR-RLP\_305

GAAAATGTGTTTGACAAATTCACATATGAATCTATCAAAGCAAAGTGATGAACAACCGAGCCAAACTA  
ATGGAAAAGGTCAGTCACTTCTTTTCTCATACTGCTTTCAAGTACAAAATG

>M6-PGSC0003DMG400028001M6LRR-RLP\_3111

GTGTCAGCTGCTGTGACAATTTAGTTTCATTCCCTTACATGTGGGGGAAATGCCTTCACTTTCCTATTTG  
AATATATCACGATGTCCCAAATTGATTAGTTTACCCTCCGGGGGTATTG

>M6-PGSC0003DMG400028001M6LRR-RLP\_3172

TTCCTATTTGAATATATCACGATGTCCCAAATTGATTAGTTTACCCTCCGGGGGTATTGACCATCTCACTG  
AGTTAAGTGAAGTGAATGAAAATTGGTCTTTCTCAGAGATGGTGGATTTTGA

>M6-PGSC0003DMG400028001M6LRR-RLP\_3294

CATTCCAATTGATTTTTAATGGCATTACGACAGCTGCTGTCCCTTCGTACATTGACGGTGTATGGACATGGT  
CACTGGGATTCTCTGCCCTATCAGTTTATGCAACTCTCTGGCTTAACAG

>M6-PGSC0003DMG400028001M6LRR-RLP\_3355

TGGACATGGTCACTGGGATTCTCTGCCCTATCAGTTTATGCAACTCTCTGGCTTAACAGCGATCCATATAT  
GTGGATTCGGAATCGAGGCTTCTCTCATAGATTTGGCAACCTTACTTC

>M6-PGSC0003DMG400028001M6LRR-RLP\_3416

ATCCATATATGTGGATTCGGAATCGAGGCTCTTCCTCATAGATTTGGCAACCTTACTTCTCTTGAAACATT  
AATGCTACTGAGGTGCAAACGGCTACAGAACCTGGACTTCTCATATGTC

>M6-PGSC0003DMG400028001M6LRR-RLP\_3538

GCCCAAATTACAACATCTGTATGTTTATGAATGTCCATTGTTAGAAGCTCTGTCTGGATGGGCTTGGAAC  
CTTGTTACTTTGGAAGTGTACATTTAGAAAAGTGTGAGAACTAGAGTA

>M6-PGSC0003DMG400028001M6LRR-RLP\_3599

CTTGGAACCTTGTTACTTTGGAAGTGTACATTTAGAAAAGTGTGAGAACTAGAGTATCTGCCATCTA  
GAGATACCATGCGACACCTCAAGAAATTACAGAGCCTGCAAATTAATGGC

>M6-PGSC0003DMG400028001M6LRR-RLP\_366

CCAAACTAATGGAAAAGGTCAGTCACTTCTTTTCTCATACTGCTTTCAAGTACAAAATGTCTCGAAAAATC  
AATAAGATCAATGAAGAGTTGAGGGATATCAATCAGTTAGCCAACAACC

>M6-PGSC0003DMG400028001M6LRR-RLP\_3782

TCCCATATTCAAAGAATTGAAGTTGGTAGAATCCCCCTATATCAGTGCTTGAGTAAGTCTCTGTTTCTCTT  
TCAATTTCCGAGTCGCATTTTTTAATTATTATTTCCACGAGTTAGTCT

>M6-PGSC0003DMG400028001M6LRR-RLP\_3843

TGTTTCTCTTTCAATTTCCGAGTCGCATTTTTTAATTATTATTTCCACGAGTTAGTCTTCTCCATTCTCCAA  
ACATTTTTCTATTCCACTTGAAACAAATTTATGAATATCTATATTAC

>M6-PGSC0003DMG400028001M6LRR-RLP\_3904

TCCATTCTCCAAACATTTTTCTATTCCACTTGAAACAAATTTATGAATATCTATATTACTTTAAGATATGG  
TTAATCATGAATATTTATGTATTTTTACTCATAGGTTATTAGCTCG

>M6-PGSC0003DMG400028001M6LRR-RLP\_3965

TTAAGATATGGTTAATCATGAATATTTATGTATTTTTACTCATAGGTTATTAGCTCGAAGGTCACACTA  
GAACGTTGTTGTGGCATTTTAAGCCAAAATCCATGGGCAGCAATTACAT

>M6-PGSC0003DMG400028001M6LRR-RLP\_4026

GGTCACACTAGAACGTTGTTGTGGCATTTTAAGCCAAAATCCATGGGCAGCAATTACATTAGGTGAAATT  
CCATTTAGAATTCTGTAACAATTTGTCAAGTTTTCTTTGCACTCCCCT

>M6-PGSC0003DMG400028001M6LRR-RLP\_4087

GGTGAAATTCCATTTAGAATTCTGTAACAATTTGTCAAGTTTTCTTTGCACTCCCCTTGTTTTTTCCCTC  
ATGACACAATTTTATTGTTAACAGGGTTAGTTATGTTTCGATAGAGA

>M6-PGSC0003DMG400028001M6LRR-RLP\_4148

TTTTTTCCCTCATGACACAATTTTATTGTTTAACAGGGTTAGTTATGTTTCGATAGAGAGGAACCAACACG  
TTGTTTTGTTGAAGAACAGAATCTGCAGCCGTAGACTCTTACATGAGC

>M6-PGSC0003DMG400028001M6LRR-RLP\_427

TCGAAAAATCAATAAGATCAATGAAGAGTTGAGGGATATCAATCAGTTAGCCAACAACCTCGGTCTCCA  
ATCACTGACAGATCCTTCTCGGAAAATATTACAAATCCGAGAAACAGATTC

>M6-PGSC0003DMG400028001M6LRR-RLP\_4270

TTGGTAAAGACTACTGACTACATAATCTCTCAACATTTACTCTTCATAACATGGATATATACCAACAACCTA  
TTAAGTAAAAATAATTTAGTACACAGTCGATCATTTGCCCTAGTGAAAC

>M6-PGSC0003DMG400028001M6LRR-RLP\_4331

CCAACAACCTATTAAGTAAAAATAATTTAGTACACAGTCGATCATTTGCCCTAGTGAAACTATTCTTTTATG  
TATGGGTGTCTTTTGATAATATATAACCTTTTTCTACGAGTTAATGAAA

>M6-PGSC0003DMG400028001M6LRR-RLP\_4392

TTCTTTTATGTATGGGTGTCTTTTGATAATATATAACCTTTTTCTACGAGTTAATGAAAATAAAAAGACTA  
ACAAGTAGTTTTGGGTAAATAATGAATGAGTAGTTCAACCAACCAACAA

>M6-PGSC0003DMG400028001M6LRR-RLP\_4453

AAAAAGACTAACAAGTAGTTTTGGGTAAATAATGAATGAGTAGTTCAACCAACCAACAAGTACCATGTT  
CTAGACTTCCCCTTTTGGATGTTCACTTGAAATCTATTTTTCTTCTTTTC

>M6-PGSC0003DMG400028001M6LRR-RLP\_4514

ACCATGTTCTAGACTTCCCCTTTTGGATGTTCACTTGAAATCTATTTTTCTTCTTTTCTATACAATAGAAG  
CGTAAACTCAATATCAGGTCAGGTAAGTTGGTCAGGTAGTAAAGGGTA

>M6-PGSC0003DMG400028001M6LRR-RLP\_4575

TACAATAGAAGCGTAAACTCAATATCAGGTCAGGTAAGTTGGTCAGGTAGTAAAGGGTATCCGTGGACC  
GAGCCATTGAATTCTGTTTCATGAACTATTCATAAGATGAAGTTAGGAGGTT

>M6-PGSC0003DMG400028001M6LRR-RLP\_4697

TGTGCTACCAAACTGACTTTTTACCGTCTCCTATGTTTCAGATTCTTGAATGAAACAATGGCATGAAACT  
TGTCGAGATGGTATACTGAAGCAGACTTCTCTTAGATGTGTTTAAGTGT

>M6-PGSC0003DMG400028001M6LRR-RLP\_4758

GCATGAAACTTGTTCGAGATGGTATACTGAAGCAGACTTCTCTTAGATGTGTTAAGTGTCGTGATTAGAC

AGGGAAATTACATTAGGCGGAACTGGAGAGGAGATATTATTTAATTGTAT

>M6-PGSC0003DMG400028001M6LRR-RLP\_4819

TGATTAGACAGGGAAATTACATTAGGCGGAACTGGAGAGGAGATATTATTTAATTGTATGACTAAGATT

TGACAGCAGAGGCCTTTCTTGCACAGTGTTTCATTCTTTTTGTACAAATAG

>M6-PGSC0003DMG400028001M6LRR-RLP\_488

GGTCTCCAATCACTGACAGATCCTTCTCGGAAAATATTACAAATCCGAGAAACAGATTCTGCAGTAGTTC

CTTCAGATGTTGTTGGTAGAGACAAAGATGTTGCTGAAATAAAGGAGAAG

>M6-PGSC0003DMG400028001M6LRR-RLP\_4880

CTAAGATTTGACAGCAGAGGCCTTTCTTGCACAGTGTTTCATTCTTTTTGTACAAATAGTTTTTTGTTTCCA

GCAAACATTTTCAACTTAATACTTAGTTGCTGCATCATTGCCTAGTTC

>M6-PGSC0003DMG400028001M6LRR-RLP\_549

CAGTAGTTCCTTCAGATGTTGTTGGTAGAGACAAAGATGTTGCTGAAATAAAGGAGAAGATTTTGAACA

TGAGAAAGGATGCTGTTCTGTGCACCATTCCCATAGTCGGTATGGGGGGTT

>M6-PGSC0003DMG400028001M6LRR-RLP\_61

AGGAGAAAAAATAACAATGGCCGACCCTGTAATTGGTGCTACTGTTCAGGTTGTGCTTGAGAACTACT

TTCTCTACAATTGAGGAGGCCAGAAATGTAAGGAACTGCAAGAAAAATCT

>M6-PGSC0003DMG400028001M6LRR-RLP\_671

GGGAAAACACTACTCTGGCTAAGAGGATTTTCAATGACCAACACATCGAGAAACACTTTGAAAAAGAATT

TGGTTGTGTCTACCTGAAATGTCTGAAATTAAGAACTTTCTTGAACCTGATC

>M6-PGSC0003DMG400028001M6LRR-RLP\_732

AAAGAATTTGGTTGTGTCTACCTGAAATGTCTGAAATTAAGAACTTTCTTGAACCTGATCCTCGAATCATTG

ACAGAGAGGAAAGTTGAGGTCCAGAGCAGAGATATAATAGTCAAGAAGC

>M6-PGSC0003DMG400028001M6LRR-RLP\_793

CGAATCATTGACAGAGAGGAAAGTTGAGGTCCAGAGCAGAGATATAATAGTCAAGAAGCTCCGAGATG

CATTGGGAGAAAAACAGTATTTACTTGTCTGGATGATTTGTGGCGTGATGA

>M6-PGSC0003DMG400028001M6LRR-RLP\_854

CGAGATGCATTGGGAGAAAAACAGTATTTACTTGTCTGGATGATTTGTGGCGTGATGACTATACTTAGT

GGCACGAGTTCTTGGACACCTTGAGGGGAATAAATACATCCAGAGGAAAC

>M6-PGSC0003DMG400028001M6LRR-RLP\_915

ATACTTAGTGGCACGAGTTCTTGGACACCTTGAGGGGAATAAATACATCCAGAGGAAACTGCATTCTCG  
TGACTACTCGTTCAAAGCAGGTGGCATCCATAGTAGCAGAAGATCTTCATA

>M6-PGSC0003DMG400028001M6LRR-RLP\_976

CATTCTCGTGACTACTCGTTCAAAGCAGGTGGCATCCATAGTAGCAGAAGATCTTCATAAGTTGGGGAA  
ATTAACAGATGATCAATGTTGGTCCATTTTCAAACAACGAGCATTGTGGA

>M6-PGSC0003DMG400028072-(rev)M6LRR-RLP\_0

ATGGACAACATTGTAAGGACCTTACCTTGAAGAACTTAATTAGGGAATTCCTTATGTGCAAGAACCAG  
ATGTATCCTTGACGGAGAGAGGCCTTGTTGCTTCTCAGCTGGCTCCACT

>M6-PGSC0003DMG400028072-(rev)M6LRR-RLP\_130

CTTTTGCCGCCATGGTTGTGATTGCAAGGAACTGTTCTAAGTTGATCCAATTCGTTTTTGTACTCAAG  
CCTCCAATTCTGATTACCTAACCCTGAAAAGCTCAATGCTGGTTATG

>M6-PGSC0003DMG400028072-(rev)M6LRR-RLP\_260

CCATCACTGCAAGGGATTACGGCGACTTCTCCTTCTGGCGTCCTTATGGATCACGTGTTTCATTACATCT  
GGCCCATGCTAAAAAGCTAAAGATGCTCTCCAGTGGGGAATGTAATCTA

>M6-PGSC0003DMG400028072-(rev)M6LRR-RLP\_325

ACATCTGGCCCATGCTAAAAAGCTAAAGATGCTCTCCAGTGGGGAATGTAATCTAGGCCTCCACTCTGGT  
TTTGAAAGCCATTGTAAGGTGGAGACCAGAGACAGCCCCTTCGGTGACGA

>M6-PGSC0003DMG400028072-(rev)M6LRR-RLP\_390

CTGGTTTTGAAAGCCATTGTAAGGTGGAGACCAGAGACAGCCCCTTCGGTGACGACAAGGCTCTGTTGG  
TCAGTGCTGCAAGGCTGGAGACGATGCAATATCTTTGGATGTCTTCTTGTT

>M6-PGSC0003DMG400028072-(rev)M6LRR-RLP\_455

TTGGTCAGTGCTGCAAGGCTGGAGACGATGCAATATCTTTGGATGTCTTCTTGTTCATAAAGTAATGGTG  
CATGTGAGCTGCAAGATCAGGAGATTCCGCCTAGTTTCGGGGGTATTTGT

>M6-PGSC0003DMG400028072-(rev)M6LRR-RLP\_518

AATGGTGCATGTGAGCTGCAAGATCAGGAGATTCCGCCTAGTTTCGGGGGTATTTGTTTCATTGAAAATT  
ATCAAATTGTAGAGAGCCCTCAACTTGAAGATTTCTCTATGAAGATTTAG

>M6-PGSC0003DMG400028072-(rev)M6LRR-RLP\_65

ACCAGATGTATCCTTGACGGAGAGAGGCCTTGTTGCTTCTCAGCTGGCTCCACTCGGTTCTATTCTTTTG  
CCGCCATGGTTGTGATTGCAAGGAACTGTTCTAAGTTGATCCAATTTTCG

>M6-PGSC0003DMG400028081-(rev)M6LRR-RLP\_0

AGCAAGCATAGTAGATTTTGGATAAATTGTTTATACATATTAATGAATTTTAAACACAAATACATGAC  
AAAACCCGTAGACAGGGTTGTAGCTCTGCCCTGATGCCCCAGTGAAGAA

>M6-PGSC0003DMG400028081-(rev)M6LRR-RLP\_1040

TGATAGAAACAAAATCTCAAGAAGAAACATACATATGAAAGTCTGAATCGCGATATAAATTAACACT  
CTTTAAGGAGATTTATCACAAAAACAAGAACGTCTCAAATATCTCAAACAA

>M6-PGSC0003DMG400028081-(rev)M6LRR-RLP\_1089

GCGATATAAATTAACACTCTTTAAGGAGATTTATCACAAAAACAAGAACGTCTCAAATATCTCAAACA  
AGTTGGGATCAACAATATGAATTCTAACTAATAACCATGTGCTGCTGAATTT

>M6-PGSC0003DMG400028081-(rev)M6LRR-RLP\_130

TGTATACACAAATAGCTAAACAACTATCTAAATCGCATTTCATCATCAACAACAATCCCCATTCTACATA  
AACATAAATCATTCCCAGTTATATTATGATTTCCGGATAAATAAAAAGA

>M6-PGSC0003DMG400028081-(rev)M6LRR-RLP\_195

TACATAAAACATAAATCATTCCCAGTTATATTATGATTTCCGGATAAATAAAAAGACCTCCAGAATTCAATA  
AAAAAATCATGACGATATGCAGCAGCCACCACTATTCCCACCAGAATCT

>M6-PGSC0003DMG400028081-(rev)M6LRR-RLP\_325

CGGGAGCAATTATCCTGGTCCCTTTAAGGATTATGGCTTCCATAATCAGCTCCCGGAGCTGCAATAAG  
CGTATTCTTGCTAATGATTTTATAAATTTCTGTAAAACACTATCATGAATG

>M6-PGSC0003DMG400028081-(rev)M6LRR-RLP\_390

ATAAGCGTATTCTTGCTAATGATTTTATAAATTTCTGTAAAACACTATCATGAATGCACCCTCGATGTTGTG  
GATTGAAGAGCTGATGTTTCCATAAAGAAAAGATTCTCCCTTTCTGCGA

>M6-PGSC0003DMG400028081-(rev)M6LRR-RLP\_455

GTTGTGGATTGAAGAGCTGATGTTTCCATAAAGAAAAGATTCTCCCTTTCTGCGAATTCTTGAGATTCTTC  
AACTGGTACAGCTCGAAGACTTCCTAGATCACATTTGTTTCATGATGAGC

>M6-PGSC0003DMG400028081-(rev)M6LRR-RLP\_65

ATGACAAAACCCGTAGACAGGGTTGTAGCTCTGCCCTGATGCCCCAGTGAAGA ACTTAATGAACTGTA  
TACACAAATAGCTAAACAACTATCTAAATCGCATTTCATCATCAACAACAA

>M6-PGSC0003DMG400028081-(rev)M6LRR-RLP\_650

TTTGTTAAGTCATAGACTAGCATTGCGCCAGCTGCACCTCGATAATATGCACTACTGCTTTATACCTGAGA



GAGAAATGAGAGATGATTCATTGAGTTATAAAAATTACCAAATTGGCTA

>M6-PGSC0003DMG400028081-(rev)M6LRR-RLP\_715

CTGAGAGAGAAATGAGAGATGATTCATTGAGTTATAAAAATTACCAAATTGGCTATGCTGCTCTGACTCT

TCGAAAGAGGGTCCTTTGAAAGTAGAGCGTTTTGGAGGAGCCGACACGGG

>M6-PGSC0003DMG400028081-(rev)M6LRR-RLP\_780

ACTCTTCGAAAGAGGGTCCTTTGAAAGTAGAGCGTTTTGGAGGAGCCGACACGGGTGCGGCGATATTTT

TCTCGAGAGTCCAAGCAACATAGATTAACAAAAGGAAAATGTTAGTGTTAC

>M6-PGSC0003DMG400028123M6LRR-RLK\_0

CAGTTACAAGAGAGCATAATGTCTAATGCAATGTCAAGAAAGAATGTGGTTGATCCAGCAATTAGAAAT

TCGTGCTCGGATGAATCATTGAAGACGATGATAGAAATATGTTGCAGGTGT

>M6-PGSC0003DMG400028123M6LRR-RLK\_1037

AACTCAGACATCATCTCAATGTAAACCAAACAGAATAGGAACTGAAGTCAGTTCTCTTTCTAGATGGAG

TCCTAATTTTCCCGATCTGAAGTTGATAGTTTATCGAACTGAAGTCCACC

>M6-PGSC0003DMG400028123M6LRR-RLK\_1098

TAGATGGAGTCCTAATTTTCCCGATCTGAAGTTGATAGTTTATCGAACTGAAGTCCACCACTACTAATTCA

AATGAAGTATAATCATCTCTCCCGTGGAGTCGATTACACACTGTAACCT

>M6-PGSC0003DMG400028123M6LRR-RLK\_1159

TACTAATTCAAATGAAGTATAATCATCTCTCCCGTGGAGTCGATTACACACTGTAACCTTTTAATCTTTTGT

AACTTCTACAGATAACATCCAATTCAAAAGAATGTATGTGGAATTTTA

>M6-PGSC0003DMG400028123M6LRR-RLK\_122

GGAACAAGATACAGAAGATATGCCCTCAGTTGAAGATGTAATATGGAATTTGCAGTTTGCTGCTCAAGT

TGAGGATTCATGGAGAAAAGACTCTTCAAGTAGTGATGCCTCTCCAATTC

>M6-PGSC0003DMG400028123M6LRR-RLK\_1220

TAATCTTTTGTAACTTCTACAGATAACATCCAATTCAAAAGAATGTATGTGGAATTTTAAGACATTTCTGA

TTAATTTTCTTTCTAATGAAAAGTTAACTTCAAACATCATCATAGA

>M6-PGSC0003DMG400028123M6LRR-RLK\_1281

ACATTTCTGATTAATTTTCTTTCTAATGAAAAGTTAACTTCAAACATCATCATAGAAGTCTTAATATAG

TCATTAATATTAATATATATCACACCATAATGGGGAGTTTATGCATAG

>M6-PGSC0003DMG400028123M6LRR-RLK\_1342

TCTTAATATAGTCATTAATATTAATATATATACACCATAATGGGGAGTTTATGCATAGACGTAAAGAAA  
CATCCTCCCATGCATAGCCCATGTTATAGGAGATACAACCTATGAATATGG

>M6-PGSC0003DMG400028123M6LRR-RLK\_1403

GTAAGAAACATCCTCCCATGCATAGCCCATGTTATAGGAGATACAACCTATGAATATGGAAGGTTAGAT  
TGAAGGTAAATTTTCAAGCAATCTAACTTCACTCATTTTTTCAAATGTCTT

>M6-PGSC0003DMG400028123M6LRR-RLK\_1464

GGTTAGATTGAAGGTAAATTTTCAAGCAATCTAACTTCACTCATTTTTTCAAATGTCTTTCCTGTTGAATCA  
ATAGAGCTACTGATAATATGCTAAACCACATTCTCATCCATGTGCACT

>M6-PGSC0003DMG400028123M6LRR-RLK\_1525

CTGTTGAATCAATAGAGCTACTGATAATATGCTAAACCACATTCTCATCCATGTGCACTATAAACAGCAA  
AACACAGAGATGGCTACCTGAAGATTGTACTTTGATCTCAATGTCTTTC

>M6-PGSC0003DMG400028123M6LRR-RLK\_1586

AAACAGCAAAACAACAGAGATGGCTACCTGAAGATTGTACTTTGATCTCAATGTCTTTCGATAGCCACAG  
GCATAACATGCAACAAAGCACCCAGGCAAACCCAGAAGAATGCCTTCAGT

>M6-PGSC0003DMG400028123M6LRR-RLK\_1647

TAGCCACAGGCATAACATGCAACAAAGCACCCAGGCAAACCCAGAAGAATGCCTTCAGTCAAGAAGCA  
GCAAATTGTGTTGAAAAAAGCCCACAAAATAAAGTGAGTTGTACATGATCCC

>M6-PGSC0003DMG400028123M6LRR-RLK\_1708

AGAAGCAGCAAATTGTGTTGAAAAAAGCCCACAAAATAAAGTGAGTTGTACATGATCCCATCAAGGTTC  
CTGACCCCAAGAAGTCCGCATTTTTTCCAAACAGAAAGCAAGGGCAAAGAA

>M6-PGSC0003DMG400028123M6LRR-RLK\_1769

CAAGGTTCTGACCCCAAGAAGTCCGCATTTTTTCCAAACAGAAAGCAAGGGCAAAGAAGTCCAATAAA  
ACCTGTGCTCAAAATTTTGCAATTAGTGCTAACTCGAGGTTGTCAACCAAC

>M6-PGSC0003DMG400028123M6LRR-RLK\_183

GCTCAAGTTGAGGATTCATGGAGAAAAGACTCTTCAAGTAGTGATGCCTCTCCAATTTACATCTCTACA  
GCTTCAAACCAACCTGTCGCGCAATAGCAATAGCTCGTTTGTGTGACAA

>M6-PGSC0003DMG400028123M6LRR-RLK\_1830

CCAATAAACCTGTGCTCAAAATTTTGCAATTAGTGCTAACTCGAGGTTGTCAACCAACATCTAGTGCA  
TTCCTCTGGGATGACAGAAGAGCCATTGCTTAGGAACAGGTGTTGGAATT

>M6-PGSC0003DMG400028123M6LRR-RLK\_1891

CTAGTGTCATTCTCTGGGATGACAGAAGAGCCATTGCTTAGGAACAGGTGTTGGAATTTTAAACATAA  
ACACACATAATTAACCCTCAAAGAGAAGTTCCACAATCACACTTTCATCT

>M6-PGSC0003DMG400028123M6LRR-RLK\_1952

AAACATAAACACACATAATTAACCCTCAAAGAGAAGTTCCACAATCACACTTTCATCTTATTATATGTTT  
AGAAAGGAATGATTGATCTAGTCCCATCGGCACTGCTGAAAACCAAGTTT

>M6-PGSC0003DMG400028123M6LRR-RLK\_2013

TTATATGTTTCAGAAAGGAATGATTGATCTAGTCCCATCGGCACTGCTGAAAACCAAGTTTTCAGGAAATTC  
GTCAGTTGTATTATTTATAACTTCATGAATATGACAAACAGTGAGACCAC

>M6-PGSC0003DMG400028123M6LRR-RLK\_2074

GGAAATTCGTCAGTTGTATTATTTATAACTTCATGAATATGACAAACAGTGAGACCACAAGGGGGAGC  
AAATAGCAAATAATCTGGAAACAGAATGGAAGCAGTGTTGACTGTTGAGAA

>M6-PGSC0003DMG400028123M6LRR-RLK\_2135

GGGGGAGCAAATAGCAAATAATCTGGAAACAGAATGGAAGCAGTGTTGACTGTTGAGAAAAGAAATG  
CATGAATTTTATCCAGAACTCTATGGAATTACACTACACTGGGTATGTTGTTG

>M6-PGSC0003DMG400028123M6LRR-RLK\_2196

GAAATGCATGAATTTTATCCAGAACTCTATGGAATTACACTACACTGGGTATGTTGTTGTTTCATAAGAAT  
ATATACATAAATCCTGTGGGATTACACTACACTGGGTATTATTTTGTGTTG

>M6-PGSC0003DMG400028123M6LRR-RLK\_2257

CATAAGAATATATACATAAATCCTGTGGGATTACACTACACTGGGTATTATTTTGTGTTGTTTCATAAGAA  
TATATACATATATCCTTATGGGTATACTTTTGTCCCAGCAAAGAGCAC

>M6-PGSC0003DMG400028123M6LRR-RLK\_2318

TTCATAAGAATATATACATATATCCTTATGGGTATACTTTTGTCCCAGCAAAGAGCACCAAGAAGGTTT  
TGTATATGTACAGTATACAAAACCTCAGATACCCCTTTATAAATGCAGGG

>M6-PGSC0003DMG400028123M6LRR-RLK\_2379

AGAAGGTTCTGTATATGTACAGTATACAAAACCTCAGATACCCCTTTATAAATGCAGGGCACTGAGGAA  
CTCTAGCAAGGCACCTAAATCATGCACACTTAAGCATGTTACACCATAAAT

>M6-PGSC0003DMG400028123M6LRR-RLK\_244

ATCTCTACAGCTTCAAACCCAACCTGTCGCGCAATAGCAATAGCTCGTTTGTGTGACAAGCTATTTCTAAC

GTGGATAACTAATCTCGATACTATTATTCCATCCTGTGACAAGAATAAC

>M6-PGSC0003DMG400028123M6LRR-RLK\_2440

CTGAGGAACTCTAGCAAGGCACCTAAATCATGCACACTTAAGCATGTTACACCATAAATCAAAAAAGTAC

AGGCACTTCTAAGTTCCTAAGTCTGGATAGGACTAGTTTTGCAAATTTGG

>M6-PGSC0003DMG400028123M6LRR-RLK\_2501

AAAAAGTACAGGCACTTCTAAGTTCCTAAGTCTGGATAGGACTAGTTTTGCAAATTTGGTAAGAACTGT

ATTTTCAAAGGCATACCAACTTCAAGCTAAATTTTTATCTAAGAATCATA

>M6-PGSC0003DMG400028123M6LRR-RLK\_2562

AGAAACTGTATTTTCAAAGGCATACCAACTTCAAGCTAAATTTTTATCTAAGAATCATATAAGCAGAGAA

AAATACTTCATTCCATTATAGAGCCCGAGGAAAACCTCAATTAATGTATG

>M6-PGSC0003DMG400028123M6LRR-RLK\_2623

AGCAGAGAAAATACTTCATTCCATTATAGAGCCCGAGGAAAACCTCAATTAATGTATGGCTTATAATAG

CTTCCTTAGTGGTTCACTCAGAGATTTATCATGTTTTCCATCTAATAAGA

>M6-PGSC0003DMG400028123M6LRR-RLK\_2684

TTATAATAGCTTCCTTAGTGGTTCACTCAGAGATTTATCATGTTTTCCATCTAATAAGATAAGAGGATAAT

TAATCATGAATCTTATTTTACTACCCAAAATTGCACCTTTCATTCACTT

>M6-PGSC0003DMG400028123M6LRR-RLK\_2745

AGAGGATAATTAATCATGAATCTTATTTTACTACCCAAAATTGCACCTTTCATTCACTTTTTTCCCTTCTCAT

AAAGCAAGATCACAGGGACGAGAGTAGCGTACAGCTCTGTGGATCAT

>M6-PGSC0003DMG400028123M6LRR-RLK\_2806

TTCCCTTCTCATAAAGCAAGATCACAGGGACGAGAGTAGCGTACAGCTCTGTGGATCATCAAAACAAGC

ACAGATTCCAGAACTCCACTGAGCATGGTCATCTTTTTTGGTCAGTTGAAT

>M6-PGSC0003DMG400028123M6LRR-RLK\_2867

AAACAAGCACAGATTCCAGAACTCCACTGAGCATGGTCATCTTTTTTGGTCAGTTGAATTTCTTCTGTAGT

AGAAACTTGTGGTACTTCTGCATCGGACTGATCCAGAGGAATATAAGGT

>M6-PGSC0003DMG400028123M6LRR-RLK\_2928

CTTCTGTAGTAGAACTTGTGGTACTTCTGCATCGGACTGATCCAGAGGAATATAAGGTGGAGGTGAAT

AATTCTTGTGCCCTACCATTATTAGTCAGGTGCAAACAGCAACCTGCAGCA

>M6-PGSC0003DMG400028123M6LRR-RLK\_2989

AGGTGAATAATTCTTGTGCCCTACCATTATTAGTCAGGTGCAAACAGCAACCTGCAGCACAAATTCAAGA  
GAAAGCAAAAAATATCAATTAAGAACAAGCGAGTTACACATAAACATCAA

>M6-PGSC0003DMG400028123M6LRR-RLK\_305

TATTTCTAACGTGGATAACTAATCTCGATACTATTATTCCATCCTGTGACAAGAATAACTAACTAACAAT  
TTATGTAATAATTTTCTTTGCATAGCTTATACAAAAAAGTAAGTTTTCA

>M6-PGSC0003DMG400028123M6LRR-RLK\_3050

AATTCAAGAGAAAGCAAAAAATATCAATTAAGAACAAGCGAGTTACACATAAACATCAAATCAGTTCTC  
TGATATCATGAAGGACGGTTACTTTTTGACTAAGTTGCTCGGACTCTCCAA

>M6-PGSC0003DMG400028123M6LRR-RLK\_366

AACTAACAATTTATGTAATAATTTTCTTTGCATAGCTTATACAAAAAAGTAAGTTTTCATACAATCTTTTTC  
CTAACAAGCAGATGCCATAGCAATTTCTTGTGTATATACCAACCCAA

>M6-PGSC0003DMG400028123M6LRR-RLK\_427

CAATCTTTTTCTAACAAGCAGATGCCATAGCAATTTCTTGTGTATATACCAACCCAACCTTAATAGTAC  
CTAGATATTACAAGAGCAACATATAGTGCAGAAACCTATATTAGACGTG

>M6-PGSC0003DMG400028123M6LRR-RLK\_488

TTAATAGTACCTAGATATTACAAGAGCAACATATAGTGCAGAAACCTATATTAGACGTGGACGATGAAA  
AACAAAAACAAAAGAATGCAAAGAGGGACTAGTTAATGGAAAAGGGAAGCA

>M6-PGSC0003DMG400028123M6LRR-RLK\_549

CGATGAAAAACAAAACAAAAGAATGCAAAGAGGGACTAGTTAATGGAAAAGGGAAGCATTGCAAAA  
TGATTTTTCGGACAGTAGAAACAGACTATCTATTCGTTTGCAGGAGGAGTTTC

>M6-PGSC0003DMG400028123M6LRR-RLK\_61

TTAGAAATTCGTGCTCGGATGAATCATTGAAGACGATGATAGAAATATGTTGCAGGTGTTTGAACAAG  
ATACAGAAGATATGCCCTCAGTTGAAGATGTAATATGGAATTTGCAGTTTG

>M6-PGSC0003DMG400028123M6LRR-RLK\_610

GCAAAATGATTTTTCGGACAGTAGAAACAGACTATCTATTCGTTTGCAGGAGGAGTTTCCATTTTCTGAA  
CTTGAGGGGCTGTCACTGCCACTAAGCTAAGATCAGATGAGTTCTGAATCT

>M6-PGSC0003DMG400028123M6LRR-RLK\_671

TTTTCTGAACTTGAGGGGCTGTCACTGCCACTAAGCTAAGATCAGATGAGTTCTGAATCTCCAGATCTTTC  
ACGGATCTCCCGTACTCCTGGCATATGGCACATAAGTGGCAGAAAAAGT

>M6-PGSC0003DMG400028123M6LRR-RLK\_732

AGATCTTTCACGGATCTCCCGTACTCCTGGCATATGGCACATAAGTGGCAGAAAAAGTGTGTGGCGAA  
GTCTCCACATGGAGCTTCTGCATATATATCAGGGCACACAAAATTGTAA

>M6-PGSC0003DMG400028123M6LRR-RLK\_793

GTGGCGAAGTCTCCACATGGAGCTTCTGCATATATATCAGGGCACACAAAATTGTAAATGCAGAAAT  
ACTGATGTAAGCAGTTTGCATCTTTCTATTTCAGGCATGGAACCATAGTATT

>M6-PGSC0003DMG400028123M6LRR-RLK\_854

GCAGAAATACTGATGTAAGCAGTTTGCATCTTTCTATTTCAGGCATGGAACCATAGTATTTTCGTAGAACAG  
AAAAGGGGGCAGGAGCTAATGGGAGGAGAGGAAGATGAAGAATTAAGAAT

>M6-PGSC0003DMG400028123M6LRR-RLK\_915

GTAGAACAGAAAAGGGGGCAGGAGCTAATGGGAGGAGAGGAAGATGAAGAATTAAGAATTCACGGT  
AACTGGTTATAAATGCTGCAAACCTCATCCAATAACAAACTCAAACTGAAATTT

>M6-PGSC0003DMG400028123M6LRR-RLK\_976

ACGGTAACTGGTTATAAATGCTGCAAACCTCATCCAATAACAAACTCAAACTGAAATTTCTAACTCAGAC  
ATCATCTCAATGTAAACCAAACAGAATAGGAACTGAAGTCAGTTCTCTT

>M6-PGSC0003DMG400028147-(rev)M6LRR-RLK\_0

TCTCACTCCAATTATAACTGTATATTACTGTTTCTCCATTATTCTTGGCTTTGTAGTGATCTGAATCAACCC  
ATGTTTCCCACCTCTCCTTGTCTAAATTCTAACATGGGTTTGTACAAA

>M6-PGSC0003DMG400028147-(rev)M6LRR-RLK\_1037

CAATGATCTTGTTGGTTTAATTCCTGAATCTTTAGCAAATATGCCATTAGGCCATCTTGATTTGAATAATA  
ATCATTTTATGGGGCCAATACCAAATTTCAAGGCTATAAATATTAGTTA

>M6-PGSC0003DMG400028147-(rev)M6LRR-RLK\_1098

TTGAATAATAATCATTTTTATGGGGCCAATACCAAATTTCAAGGCTATAAATATTAGTTATCAATCCAATTC  
TTTTTGTCAAGCCAAAATTTGTGCACCTGAGGTTCTTGCTCTTTTAGAA

>M6-PGSC0003DMG400028147-(rev)M6LRR-RLK\_1159

AATCCAATCTTTTTGTCAAGCCAAAATTTGTGCACCTGAGGTTCTTGCTCTTTAGAAATTCCTTGATGAG  
TTGAATTATCCATCTAACTTGTGAATCATGGTCAGGAGATAATCCTT

>M6-PGSC0003DMG400028147-(rev)M6LRR-RLK\_122

ACAGCCATTAGTTGGCACAAAGAAATCAACTTTCTTGATTATGTGATTCTTGCAATACATGCTGTCTAGT

GGTTCTTGGTGAAATCATCATCAATGGAGGCTGTTGAGCTAATGGGGTT

>M6-PGSC0003DMG400028147-(rev)M6LRR-RLK\_1220

CCTTGATGAGTTGAATTATCCATCTAACTTGTGAATCATGGTCAGGAGATAATCCTTGTGACGGGCGC

TGGTGGGGATTAAGTTGTGACATTAACCAAAAAGTTATTGTGATAAACTT

>M6-PGSC0003DMG400028147-(rev)M6LRR-RLK\_1281

GACGGGCCGTGGTGGGGATTAAGTTGTGACATTAACCAAAAAGTTATTGTGATAAACTTGCCTAAGTCC

AATCTTTCTGGTACCTTGAGTCCTCAATTGCAAATTAGATTCTCTTACT

>M6-PGSC0003DMG400028147-(rev)M6LRR-RLK\_1342

CTAAGTCCAATCTTTCTGGTACCTTGAGTCCTCAATTGCAAATTAGATTCTCTTACTCATATTTATCTTG

GATCTAACAATATTTCTGGTTCTATTCCATCTAGTTGGACTAGTTTGA

>M6-PGSC0003DMG400028147-(rev)M6LRR-RLK\_1403

TATTTATCTTGGATCTAACAATATTTCTGGTTCTATTCCATCTAGTTGGACTAGTTTGAAACATTTGGTTCT

GCTTGATTTGAGTAATAACCACATTTCCCTCCTCTGCCTGAATTTAC

>M6-PGSC0003DMG400028147-(rev)M6LRR-RLK\_1464

CATTTGGTTCTGCTTGATTTGAGTAATAACCACATTTCCCTCCTCTGCCTGAATTTACTCCCCCTTGAAA

CTCGTCCTGAGTGGAATTCATTAAGTGAAGTCTAGTCCTCTTATAGCA

>M6-PGSC0003DMG400028147-(rev)M6LRR-RLK\_1525

CCCCCTTGAAACTCGTCCTGAGTGGAATTCATTAAGTGAAGTCTAGTCCTCTTATAGCAAGCCCTTTGCAA

AAGAATAGTACATCCACTGCTGTTTCACCCTCTTTGCCGACCAATAAGT

>M6-PGSC0003DMG400028147-(rev)M6LRR-RLK\_1586

CCCTTTGCAAAGAATAGTACATCCACTGCTGTTTCACCCTCTTTGCCGACCAATAAGTCAAGCTCTTCCA

AGTCTAACTTAGTCATATTTGTGGTTCTATTGCAAGTTTCGCACCTTT

>M6-PGSC0003DMG400028147-(rev)M6LRR-RLK\_1647

AGCTCTCCAAGTCTAACTTAGTCATATTTGTGGTTCTATTGCAAGTTTCGCACCTTTAGTTTCTTTTGCT

ATGCTACTATATGTTTACGTTTCGAAAGAGGAGTATGGATAGGCACAAA

>M6-PGSC0003DMG400028147-(rev)M6LRR-RLK\_1708

TTTCTTTTGCTATGCTACTATATGTTTACGTTTCGAAAGAGGAGTATGGATAGGCACAAAAGTCCAACCTTC

TCTAGTGGTTCATCCTAGAGATCCTTCTGATTTGGATCGGATGGTCAAGA

>M6-PGSC0003DMG400028147-(rev)M6LRR-RLK\_1769

TCCAACCTTCTCTAGTGGTTCATCCTAGAGATCCTTCTGATTTGGATCGGATGGTCAAGATTGCAATTTCCG  
ATGAAACTAAAGGAAGTCTTTCGATACTGACTGGAAGGGTTCTTCTAG

>M6-PGSC0003DMG400028147-(rev)M6LRR-RLK\_183

GCTGTCTAGTGGTCTTGGTCAAATCATCAATGGAGGCTGTTGCTAATGGGGTTTGCTCTAACAC  
TCTTTATTTCACTTTTTTCAGTTGTTTACAGTGTACAGACCCTAATGAC

>M6-PGSC0003DMG400028147-(rev)M6LRR-RLK\_1830

GCAATTTCCGATGAACTAAAGGAAGTCTTTCGATACTGACTGGAAGGGTTCTTCTAGTATACACAGT  
GGTAAATACCCTGTGATGGAAGCTGACAATTTGGTCATATCAGTTCAAGTA

>M6-PGSC0003DMG400028147-(rev)M6LRR-RLK\_1891

TACACAGTGGTAAATACCCTGTGATGGAAGCTGACAATTTGGTCATATCAGTTCAAGTACTTAGGGATGT  
AACCAAGAACTTTGCTCCAGAAAATGAACTCGGGCGTGGTGGTTTTGGAG

>M6-PGSC0003DMG400028147-(rev)M6LRR-RLK\_1952

TAGGGATGTAACCAAGAACTTTGCTCCAGAAAATGAACTCGGGCGTGGTGGTTTTGGAGTGGTTTATAA  
AGGAGAATTAGACGATGGAACAAAATAGCTGTCAAAGAATGGAGTCTGG

>M6-PGSC0003DMG400028147-(rev)M6LRR-RLK\_2013

GTTTATAAAGGAGAATTAGACGATGGAACAAAATAGCTGTCAAAGAATGGAGTCTGGAGTAATTAG  
CAGCAAAGCGTTGGATGAATTTCAATCTGAAATTTCTGTTCTTTCCAAAGTC

>M6-PGSC0003DMG400028147-(rev)M6LRR-RLK\_2074

TAATTAGCAGCAAAGCGTTGGATGAATTTCAATCTGAAATTTCTGTTCTTTCCAAAGTCAGACATAGGAA  
TTTAGTGTCTCTATTGGGATATTCTGTTGAAGGCAATGAACGGATTCTGG

>M6-PGSC0003DMG400028147-(rev)M6LRR-RLK\_2135

ACATAGGAATTTAGTGTCTCTATTGGGATATTCTGTTGAAGGCAATGAACGGATTCTGGTTTACGAACAC  
ATGCCACAAGGTGCTCTTAGCACACATCTTTTCAACTGGAAAACTTGAA

>M6-PGSC0003DMG400028147-(rev)M6LRR-RLK\_2196

TACGAACACATGCCACAAGGTGCTCTTAGCACACATCTTTTCAACTGGAAAACTTGAACCTTAGAGCCTC  
TTTCATGGAAGAGGAGGCTGAATATTGCATTAGATGTTGCTAGAGGAATG

>M6-PGSC0003DMG400028147-(rev)M6LRR-RLK\_2257

TAGAGCCTCTTTCATGGAAGAGGAGGCTGAATATTGCATTAGATGTTGCTAGAGGAATGGAGTATCTAC  
ATACGTTAGCTCATCAGTGCTTCATACACAGAGATCTCAAGCCCTCAAATA



>M6-PGSC0003DMG400028147-(rev)M6LRR-RLK\_2318

GTATCTACATACGTTAGCTCATCAGTGCTTCATACACAGAGATCTCAAGCCCTCAAATATCTTGCTGACTG  
ATGATTTCCGAGCAAAAGTATCAGACTTTGGACTCGTGAAACCCGCCCC

>M6-PGSC0003DMG400028147-(rev)M6LRR-RLK\_2379

TTGCTGACTGATGATTTCCGAGCAAAAGTATCAGACTTTGGACTCGTGAAACCCGCCCTAATGGAGAG  
AAGGGCTCTGTGGTCACTAAGCTAGCTGGAACCTTCGGATATTTAGCACCT

>M6-PGSC0003DMG400028147-(rev)M6LRR-RLK\_244

CTCTAACACTCTTTATTTCACTTTTTTCAGTTGTTTACAGTGTTACAGACCCTAATGACTTAGCCATTGTCA  
ATGAGTTCAAGAAAGGGTTAGAAAATTCTGAGCTTTTAGAATGGCCAG

>M6-PGSC0003DMG400028147-(rev)M6LRR-RLK\_2440

ATGGAGAGAAGGGCTCTGTGGTCACTAAGCTAGCTGGAACCTTCGGATATTTAGCACCTGAATATGCGG  
GTAAACATTTCAATTCCTGTTGTTTTATTCCTAACATGACATTTTATTTTG

>M6-PGSC0003DMG400028147-(rev)M6LRR-RLK\_2501

ATATGCGGGTAAACATTTCAATTCCTGTTGTTTTATTCCTAACATGACATTTTATTTTGTAACAGGAAA  
CAGATGTTCTATTTGCCATTTGATGTTCTCTTTGGTATGATTACAGTTA

>M6-PGSC0003DMG400028147-(rev)M6LRR-RLK\_2562

AAACAGGAAACAGATGTTCTATTTGCCATTTGATGTTCTCTTTGGTATGATTACAGTTACATAAAACTCAA  
ATAGTTTAGTTACTGTTGTCTGTTTTGGGGTGGATAAGTTAAGGACTAT

>M6-PGSC0003DMG400028147-(rev)M6LRR-RLK\_2623

TAAAACTCAAATAGTTTAGTTACTGTTGTCTGTTTTGGGGTGGATAAGTTAAGGACTATTTTGCATAGTCT  
AATTAATCTTATGTCACCTAATAAATCTGTTCACTGATAACTAGTTAA

>M6-PGSC0003DMG400028147-(rev)M6LRR-RLK\_2684

TGCATAGTCTAATTAAATCTTATGTCACCTAATAAATCTGTTCACTGATAACTAGTTAATGACTATTCTTGT  
AGACACCTAGGATTTTCTTTAGATGATTCTGTCTTTTCCGTCTGCTGG

>M6-PGSC0003DMG400028147-(rev)M6LRR-RLK\_2745

ACTATTCTTGTAGACACCTAGGATTTTCTTTAGATGATTCTGTCTTTTCCGTCTGCTGGTTTCCCAACTCAT  
TTTGCCTGCTGTTTTAATACAGTTACTGGTAAAATCACCCTAAAGCC

>M6-PGSC0003DMG400028147-(rev)M6LRR-RLK\_2806

TCCCAACTCATTTTGCCTGCTGTTTTAATACAGTTACTGGTAAAATCACCCTAAAGCCGATGTCTTTAGT

TTCGGTGTTCCTTATGGAGTTGTTAACTGGATGGATGGCACTTGATG

>M6-PGSC0003DMG400028147-(rev)M6LRR-RLK\_2867

TGTCTTTAGTTTCGGTGTTCCTTATGGAGTTGTTAACTGGATGGATGGCACTTGATGACGACAGACCA

AATGAGAGCCAATACTTAGTTGCATGGTTCTGGAACATCAAATCCTCTAA

>M6-PGSC0003DMG400028147-(rev)M6LRR-RLK\_2928

GACAGACCAAATGAGAGCCAATACTTAGTTGCATGGTTCTGGAACATCAAATCCTCTAAAGAGAACTT

ATTGCAGCAATCGATCCAGCTCTGGATGTGAAACAAGAGAGTACATTTGAG

>M6-PGSC0003DMG400028147-(rev)M6LRR-RLK\_2989

AGAACTTATTGCAGCAATCGATCCAGCTCTGGATGTGAAACAAGAGAGTACATTTGAGAGCATCTACA

CCGTTGCAGAACTTGCTGGTCACTGCACAGCAAGAGAGCCTGGCCAACGCC

>M6-PGSC0003DMG400028147-(rev)M6LRR-RLK\_305

AGCCATTGTCAATGAGTTCAAGAAAGGGTTAGAAAATTCTGAGCTTTTAGAATGGCCAGTTAATGGTGA

TGACCCTGTGGTCTCCAGCTTGGCCTCATATAATTTGTACTGGAAACAA

>M6-PGSC0003DMG400028147-(rev)M6LRR-RLK\_3050

CATCTACACCGTTGCAGAACTTGCTGGTCACTGCACAGCAAGAGAGCCTGGCCAACGCCCCGACATGTC

CCATGCTGTGAACGTGCTCTCCCCGCTCGTTGAGAAATGGAAGCCTCTTGA

>M6-PGSC0003DMG400028147-(rev)M6LRR-RLK\_3111

GACATGTCCCATGCTGTGAACGTGCTCTCCCCGCTCGTTGAGAAATGGAAGCCTCTTGAGGAAGATTCA

GACGATGATTGTGGTATCGATTACAGTCTTCCACTCAATCAAATGGTTAAG

>M6-PGSC0003DMG400028147-(rev)M6LRR-RLK\_3172

AAGATTCAGACGATGATTGTGGTATCGATTACAGTCTTCCACTCAATCAAATGGTTAAGGGTTGGCAAG

AATCAGAAGGAAAAGACTTGAGTTGTGTCGACCTGAAGACACTAAGGGTA

>M6-PGSC0003DMG400028147-(rev)M6LRR-RLK\_3233

TTGGCAAGAATCAGAAGGAAAAGACTTGAGTTGTGTCGACCTGAAGACACTAAGGGTAGTATCCCTTC

AAGACCTACTGGATTGCGCGAGTCCTTTACATCAGTTGATGGTAGATGAAA

>M6-PGSC0003DMG400028147-(rev)M6LRR-RLK\_3294

ATCCCTCAAGACCTACTGGATTCGCCGAGTCCTTTACATCAGTTGATGGTAGATGAAAAAAAAGGTACT

GCACTACTTCTAGTGTAGTTGATCTGATATTCTTATTCAGTAAATGTGGA

>M6-PGSC0003DMG400028147-(rev)M6LRR-RLK\_3355

AAAGGTA CTGCACTACTTCTAGTGTAGTTGATCTGATATTCTTATTCAGTAAATGTGGATAGCATT TTTTGT  
TTGTTTTTGTGTGATATTTTGATCCTGTTTTTATCTATGCTTTCTTTC

>M6-PGSC0003DMG400028147-(rev)M6LRR-RLK\_3416

GCATTTTTGTTTGT TTTTGTGTGATATTTTGATCCTGTTTTTATCTATGCTTTCTTTCAC TTTTATTTGTAGA  
AAATTTTACTCCAATGTATAGTCTTTTGAAGTTATGTGGGATGTAG

>M6-PGSC0003DMG400028147-(rev)M6LRR-RLK\_3456

TTTATCTATGCTTTCTTTCAC TTTTATTTGTAGAAAATTTTACTCCAATGTATAGTCTTTTGAAGTTATGTGG  
GATGTAGATATGGTATAGTGATGATTGATGAATGAAA ACTGTTTCCA

>M6-PGSC0003DMG400028147-(rev)M6LRR-RLK\_366

AATGGTGATGACCCTTGTGGTCCTCCAGCTTGGCCTCATATAATTTG TACTGGAAACAAAATTCAACAGA  
TTCAAGTTATGGGGTTGGGGTTAAAAGGCCCTTTCCTCCGA ACTTTAAT

>M6-PGSC0003DMG400028147-(rev)M6LRR-RLK\_427

TTCAACAGATTCAAGTTATGGGGTTGGGGTTAAAAGGCCCTTTCCTCCGA ACTTTAATAAGTTGTCTAA  
ATTGACTAATTTGGGGTTGCAAAGGAACAAATTTAGTGGAAGTTACCAT

>M6-PGSC0003DMG400028147-(rev)M6LRR-RLK\_488

GTTGTCTAAATTGACTAATTTGGGGTTGCAAAGGAACAAATTTAGTGGAAGTTACCATCTTTTAGTGGT  
TTGTCTGAGTTGCGCTATGCTTTCTTGGATTTC AACATGTTTGATAGTAT

>M6-PGSC0003DMG400028147-(rev)M6LRR-RLK\_549

TTTAGTGGTTTGTCTGAGTTGCGCTATGCTTTCTTGGATTTC AACATGTTTGATAGTATTCCATTAGATTTT  
TTTAATGGGCTTGTGAGTTTAGAGGTGTTGGCATTGGATGATAATCCT

>M6-PGSC0003DMG400028147-(rev)M6LRR-RLK\_61

TGAATCAACCCATGTTTCCACCTCTCCTTGTCTAAATTCTAACATGGGTTTGTACAAAAACAGCCATTA  
GTTGGCACAAAGAAATCAACTTTCTTGATTATGTGATTCTTGTCAATAC

>M6-PGSC0003DMG400028147-(rev)M6LRR-RLK\_610

CATTAGATTTCTTTAATGGGCTTGTGAGTTTAGAGGTGTTGGCATTGGATGATAATCCTTTGAATGCAAC  
TACTGGTTGGAGTTTGCCTAATGAGTTGCAAAGTTCAGCTCAATTGACTA

>M6-PGSC0003DMG400028147-(rev)M6LRR-RLK\_671

GAATGCAACTACTGGTTGGAGTTTGCCTAATGAGTTGCAAAGTTCAGCTCAATTGACTAACTTGACTTTG  
ATGAACTGCAATTTGGTTGGTTCTTTCCTGAGTTTCTTGGAAATATGTC

>M6-PGSC0003DMG400028147-(rev)M6LRR-RLK\_732

TTGACTTTGATGAACTGCAATTTGGTTGGTTCTTGCCTGAGTTTCTTGAAATATGTCTTCTTTAGATGT  
ATTGTTGTTGTCCAAGAATCGACTTTCGGGGACTATACCAGGTACTTTT

>M6-PGSC0003DMG400028147-(rev)M6LRR-RLK\_793

CTTTAGATGTATTGTTGTTGTCCAAGAATCGACTTTCGGGGACTATACCAGGTACTTTTGAGGATTCTGA  
GCTCAAATGCTTTGGTTGAATGATCAGACTGGTGATGGCATGAGTGGTT

>M6-PGSC0003DMG400028147-(rev)M6LRR-RLK\_854

GGATTCTGAGCTCAAATGCTTTGGTTGAATGATCAGACTGGTGATGGCATGAGTGGTTCAATTGATGT  
GGTTTCAACAATGAGATCACTTACTAGTCTTTGGCTTCATGGGAACCATTT

>M6-PGSC0003DMG400028147-(rev)M6LRR-RLK\_915

ATTGATGTGGTTTCAACAATGAGATCACTTACTAGTCTTTGGCTTCATGGGAACCATTTTTTCAGGTAAAAT  
TCCACAGGAGATTGGTAATTTGACATATCTGCAGGATCTTAATGTTAAT

>M6-PGSC0003DMG400028147-(rev)M6LRR-RLK\_976

CAGGTAAAATCCACAGGAGATTGGTAATTTGACATATCTGCAGGATCTTAATGTTAATAGCAATGATCT  
TGTTGGTTTAATCCTGAATCTTTAGCAAATATGCCATTAGGCCATCTTG

>M6-PGSC0003DMG400028156-(rev)M6LRR-RLP\_0

GTTCCCTCGAACTTTGACAAAAGGGTTTCCCTGAGAAAATATGAATCAAATTCGCAGTTACCGGCGGC  
AACTAATATGGATCGAATTTGCCGGCGGCACGTAATTTGGATCGAATTT

>M6-PGSC0003DMG400028156-(rev)M6LRR-RLP\_1638

CCACTCAAATGAACTTCCTTTTGATCTGTTCCAGCACGCATATACACTGTTGATATCGAGCATTAAATTA  
CCCTCTCTAATATTGATTTCTGTGATTATTCTTCATGAAGACAGTTTTTA

>M6-PGSC0003DMG400028156-(rev)M6LRR-RLP\_1701

TTAATTAACCCTCTCTAATATTGATTTCTGTGATTATTCTTCATGAAGACAGTTTTTATCTTTATTCTTCTTCA  
ATAGTTACTGAGTTTTCTGGTTTTACAGTTTTTCATATGAAGATGCAT

>M6-PGSC0003DMG400028156-(rev)M6LRR-RLP\_1764

TTCTTCTTCAATAGTTACTGAGTTTTCTGGTTTTACAGTTTTTCATATGAAGATGCATTAGGTGAAGGTGAG  
AAGTTTTGTTGTACATCTCAACCTTGAATTGTTGGAGGCATAAGTTAA

>M6-PGSC0003DMG400028156-(rev)M6LRR-RLP\_1827

AAGGTGAGAAGTTTTGTTGTACATCTCAACCTTGAATTGTTGGAGGCATAAGTTAAAGCAAGTCAGAA

TACACAACCTTTAAACATAAGGAAGAAAAACAGAAGTTGAAAAACTATTTTT

>M6-PGSC0003DMG400028156-(rev)M6LRR-RLP\_1890

TCAGAATACACAACCTTTAAACATAAGGAAGAAAAACAGAAGTTGAAAAACTATTTTTCCACAAACACAG

ATATCTTAGAGATAATTGAGGTTCCCCGACCTAGAATGCCCTGGGAACAA

>M6-PGSC0003DMG400028156-(rev)M6LRR-RLP\_1953

ACACAGATATCTTAGAGATAATTGAGGTTCCCCGACCTAGAATGCCCTGGGAACAAGTACATAACTAA

ATGTCCATGTCCCAATTGTTCTCAGATTAATTTTGTAGCATTACATGCTT

>M6-PGSC0003DMG400028156-(rev)M6LRR-RLP\_2016

AACTAAATGTCCATGTCCCAATTGTTCTCAGATTAATTTTGTAGCATTACATGCTTGGTTTGTATAGGGG

ATTTAATATCTAGTTCTGGCATTAGCTGGCTTAGGTTTTTCCCCCTT

>M6-PGSC0003DMG400028156-(rev)M6LRR-RLP\_2079

TATAGGGGATTTAATATCTAGTTCTGGCATTAGCTGGCTTAGGTTTTTCCCCCTTCCAGCAGAGCAATA

AGCTAGGTTTTGTTTTAGGAAGATTTTATGTTAGACATTAAACTCTTA

>M6-PGSC0003DMG400028156-(rev)M6LRR-RLP\_2142

GAGCAATAAGCTAGGTTTTGTTTTAGGAAGATTTTATGTTAGACATTAAACTCTTATCTCATAGCATGAA

GAATTGTTTACTTCATTTGGAAGCTTTCTTATATTTTCGGCGAACAGTGC

>M6-PGSC0003DMG400028156-(rev)M6LRR-RLP\_2205

AGCATGAAGAATTGTTTACTTCATTTGGAAGCTTTCTTATATTTTCGGCGAACAGTGCCTTCTCAAACCTTA

AAATGCTGTTCTTCTACTTTTGTGGTGTTTACTTTTTTTGATATTGAA

>M6-PGSC0003DMG400028156-(rev)M6LRR-RLP\_2241

TTATATTTTCGGCGAACAGTGCCTTCTCAAACCTTAAATGCTGTTCTTCTACTTTTGTGGTGTTTACTTTT

TTTGATATTGAAGCTCTCAGAGCAAACAGTATTTAGAGGTTGTTTCC

>M6-PGSC0003DMG400028156-(rev)M6LRR-RLP\_63

CGGCGGCAACTAATATGGATCGAATTTCCGCGGCGGCACGTAATTTGGATCGAATTTCTCAGTTACCGG

CGGGAATGTTAGAGCACATCTGTCTTTCCTTCCGTTTGAAGAAGCTGCAC

>M6-PGSC0003DMG400028212M6LRR-RLP\_1037

CGTGTACTTTCACTTTTCGAGGAATAATTTTACTGGTGATGTACCTGATCTTAGTGGTGTGCGAAAACCTTCA

AGTTCTAGACTTGGAAGATAATTCTTGGACCGAAATTTCTCAAGTT

>M6-PGSC0003DMG400028212M6LRR-RLP\_1098

AAAACCTTCAAGTTCTAGACTTGGAAGATAATTCTCTTGGACCGAAATTCCTCAAGTTAGCAGCAAAT  
CCAAAGCATTGTGTTGAGGAACAATAAGTTCCTACTGCAGGAATTCCGGAGA

>M6-PGSC0003DMG400028212M6LRR-RLP\_1159

CAGCAAATCCAAAGCATTGTGTTGAGGAACAATAAGTTCCTACTGCAGGAATTCCGGAGAAAGTTCAATC  
TTACCATCAGCTTGAACATATGGATATTTCTTCAAACAGATTTATGGGGCC

>M6-PGSC0003DMG400028212M6LRR-RLP\_1220

GTTCAATCTTACCATCAGCTTGAACATATGGATATTTCTTCAAACAGATTTATGGGGCCATTTCTCCGTC  
TTTGCTGTCCTTGCCATCGATCACTTATATTAACGTTGCAGGAAATAAG

>M6-PGSC0003DMG400028212M6LRR-RLP\_1281

TTCCTCCGTCTTTGCTGTCCTTGCCATCGATCACTTATATTAACGTTGCAGGAAATAAGTTAACAGGAATG  
CTTTTTGATGATAATCAATGCAATGCCGGATTAGATTTTGTGGATCTAT

>M6-PGSC0003DMG400028212M6LRR-RLP\_1342

AACAGGAATGCTTTTTGATGATAATCAATGCAATGCCGGATTAGATTTTGTGGATCTATCGACTAACCTG  
TTGAGTGGAAGATTACCCAATTGCCTTCTGACTGGTCCTAAGGACAGGAT

>M6-PGSC0003DMG400028212M6LRR-RLP\_1403

ACTAACCTGTTGAGTGGAAGATTACCCAATTGCCTTCTGACTGGTCCTAAGGACAGGATCGTGCGTACT  
CTAACAATTGTTTAGCAACTGGAGACGGAACTCAACATCCATTTTCCTTC

>M6-PGSC0003DMG400028212M6LRR-RLP\_1464

TGCGTACTCTAACAATTGTTTAGCAACTGGAGACGGAACTCAACATCCATTTTCCTTCTGTCGGAATGA  
GGCGTTGGCTGTTGGTATCTTACCTCATCATATAAACATATAACCAGGTT

>M6-PGSC0003DMG400028212M6LRR-RLP\_1525

TCGGAATGAGGCGTTGGCTGTTGGTATCTTACCTCATCATATAAACATATAACCAGGTTCAAAGTGTT  
CTTGCTTTGATCATTGTGGTAGCATCATTGGTGGAGTCGTGCTAGTTTG

>M6-PGSC0003DMG400028212M6LRR-RLP\_1586

AAAGTGGTCTTGCTTTGATCATTGTGGTAGCATCATTGGTGGAGTCGTGCTAGTTTGCGCGACTATTA  
TAGTAGTAAGAAAATTTCTTGCAAAGATAGCTACACCGAGAAAAACAACA

>M6-PGSC0003DMG400028212M6LRR-RLP\_1647

CGACTATTATAGTAGTAAGAAAATTTCTTGCAAAGATAGCTACACCGAGAAAAACAACAAGATCAATAG  
TAGAAAATGCAGCATCTACATATACATCAAAGTTATTCCTGATGCAAGTA

>M6-PGSC0003DMG400028212M6LRR-RLP\_1708

ATCAATAGTAGAAAATGCAGCATCTACATATACATCAAAGTTATCACTGATGCAAGTAAGATTCCTCTCT  
TCTTTACGTCTTAGCTTTGAAGTTTCAAGCATAGTACAATAATTTTGGC

>M6-PGSC0003DMG400028212M6LRR-RLP\_1769

ATTCCTCTCTTCTTTACGTCTTAGCTTTGAAGTTTCAAGCATAGTACAATAATTTTGGCTTACCTGTGCACG  
AAATACACGATAGGAAGGCGAAAAAAGCCCAAATATACGAAGTTTCCT

>M6-PGSC0003DMG400028212M6LRR-RLP\_1830

ACCTGTGCACGAAATACACGATAGGAAGGCGAAAAAAGCCCAAATATACGAAGTTTCCTTTGATTCTTA  
ATTACTACTAATTTTCCATCTTGTGTGTTTCTTCTCCGTTTACAAGACTAT

>M6-PGSC0003DMG400028212M6LRR-RLP\_1891

GATTCCTAATTACTACTAATTTTCCATCTTGTGTGTTTCTTCTCCGTTTACAAGACTATGTTACTCGAACAA  
TGAAGCTGGGATCACTTAGTCTTCCATCTTATCGGACCTTTTCATCCG

>M6-PGSC0003DMG400028212M6LRR-RLP\_1952

TACTCGAACAAATGAAGCTGGGATCACTTAGTCTTCCATCTTATCGGACCTTTTCATCCGAAGAGCTTAAG  
GTGGCAACAAACAACCTTTGATGCAGCAACTTTTATAGGCATGAGTTCTGA

>M6-PGSC0003DMG400028212M6LRR-RLP\_2013

GAGCTTAAGGTGGCAACAAACAACCTTTGATGCAGCAACTTTTATAGGCATGAGTTCTGATGATCAGGTG  
CATTTGAGAATCACCATGTACCTTACTTTTCTTTCTTAACGTCATAATTG

>M6-PGSC0003DMG400028212M6LRR-RLP\_2074

ATCAGGTGCATTTGAGAATCACCATGTACCTTACTTTTCTTTCTTAACGTCATAAATTGAGATCCTTAAAC  
GTTTCGTTAAGAACATTTTCATGGTATTATCATCCTTCATTGTTTTGACA

>M6-PGSC0003DMG400028212M6LRR-RLP\_2135

ATCCTTAAACGTTTCGTTTAAAGAACATTTTCATGGTATTATCATCCTTCATTGTTTTGACACCACAAATGAGTC  
AGAACCTTGCAGCCTATCAAACATATTCAGTTGCCTTAGAATTCTTAA

>M6-PGSC0003DMG400028212M6LRR-RLP\_2196

ACAAATGAGTCAGAACCTTGCAGCCTATCAAACATATTCAGTTGCCTTAGAATTCTTAATCTATACCTTAT  
CCCATTGAAGGTGTTTTAGAAGATCTTCTATCATGTTACTAGTCATTCA

>M6-PGSC0003DMG400028212M6LRR-RLP\_2257

TATACCTTATCCCATTGAAGGTGTTTTAGAAGATCTTCTATCATGTTACTAGTCATTCTTTTCTTAGACGA

GTGGATATCAAACAGGTATGGTATGATAATCCTTCTTCGTCAAGATCC

>M6-PGSC0003DMG400028212M6LRR-RLP\_2318

TTCTTAGACGAGTGGATATCAAACAGGTATGGTATGATAATCCTTCTTCGTCAAGATCCATCTAGAGTTC

ATTAGTCCATAGAAAACAAATGTTGATACATACACTTCTGTGATACTCAC

>M6-PGSC0003DMG400028212M6LRR-RLP\_2379

CTAGAGTTCATTAGTCCATAGAAAACAAATGTTGATACATACACTTCTGTGATACTCACGTCTGAGCGAA

TGTAACAATAAAAGAGTAACTGCATATATTATATGACAGAATTAGTAA

>M6-PGSC0003DMG400028212M6LRR-RLP\_244

TTGAAACGGATGAAAGTACACTTTCTTGAATTGTTATCATTCTAATAACTATGGATACAGAGTTTGATGTT

TGCTTACTGAAATTTCAATTCAGCTGAAGTAGTGAAGAAGTGGCAACTA

>M6-PGSC0003DMG400028212M6LRR-RLP\_2440

CTGAGCGAATGTAACAATAAAAGAGTAACTGCATATATTATATGACAGAATTAGTAAGTATGGATGT

TAACCTACTGTTTTTTTTGGATTCAGTTATACAGAGGTCAGCTGAAAGATG

>M6-PGSC0003DMG400028212M6LRR-RLP\_2501

ATGGATGTAACTTACTGTTTTTTTTGGATTCAGTTATACAGAGGTCAGCTGAAAGATGGTTCATACATA

ACCATAAGATGCCTGCAAACGAAACGAAAAAATAGCAGTCAAATTTTAT

>M6-PGSC0003DMG400028212M6LRR-RLP\_2562

TCATACATAACCATAAGATGCCTGCAAACGAAACGAAAAAATAGCAGTCAAATTTTATGTATCATGTAG

AATTGATGTCAAACCTCAGACATCATCATCTGATCAGCACTCTTGGACAC

>M6-PGSC0003DMG400028212M6LRR-RLP\_2623

ATCATGTAGAATTGATGTCAAACCTCAGACATCATCATCTGATCAGCACTCTTGGACACTGCTTCGAGTG

TTACTTGGATGATTGAGTGTTAGCAGGATATTTCTCGTCTTTGAGTATG

>M6-PGSC0003DMG400028212M6LRR-RLP\_2684

CTTCGAGTGTTACTTGGATGATTGAGTGTTAGCAGGATATTTCTCGTCTTTGAGTATGTATCAAATGGT

ACCCTAAGAAGCTGGATCTCCGGTAATTATTCAACAAGCATTTATACTTA

>M6-PGSC0003DMG400028212M6LRR-RLP\_2745

TCAAATGGTACCCTAAGAAGCTGGATCTCCGGTAATTATTCAACAAGCATTTATACTTATCGATCCCAAG

ATTGCAGTACAACAGTAATGTGTTATCCGATTCTGCAGATAAACATGCTA

>M6-PGSC0003DMG400028212M6LRR-RLP\_2806



GATCCCAAGATTGCAGTACAACAGTAATGTGTTATCCGATTCTGCAGATAAACATGCTAAAGGAAGACT  
AACGTGGACACAACGTATAGCAGCTGCAATCGGAGTAGCAAGGGGAATGCA

>M6-PGSC0003DMG400028212M6LRR-RLP\_2867

GGAAGACTAACGTGGACACAACGTATAGCAGCTGCAATCGGAGTAGCAAGGGGAATGCAGTTTTTGCA  
TACTGGAAATGTACCTGGTGTTTTTTCAAATAACATAAAGATAACAGATATC

>M6-PGSC0003DMG400028212M6LRR-RLP\_2928

TTTTGCATACTGGAAATGTACCTGGTGTTTTTTCAAATAACATAAAGATAACAGATATCTTGTTGGATCAG  
AACTTTGTAGCCAAAATTTGCAGCTATAATTTACCTATTCTGAATGAGA

>M6-PGSC0003DMG400028212M6LRR-RLP\_2989

GTTGGATCAGAACTTTGTAGCCAAAATTTGCAGCTATAATTTACCTATTCTGAATGAGAATGTAATGGAG  
CAGAAGAGTACAAGGTATGCCTAACTGTCCAAATTCTAAGTTGCTCGGA

>M6-PGSC0003DMG400028212M6LRR-RLP\_305

GTTTGATGTTTGCTTACTGAAATTTCAATTCAGCTGAAGTAGTGAAGAAGTGGCAACTAGAGTGTTTACA  
AGAAAGCTCAAAAAAGTGTAATTTCTCAGTTCTTTTTAGTCCTTTTTTG

>M6-PGSC0003DMG400028212M6LRR-RLP\_3111

CTCCAAAACGTTGCCACACACATGTCGGATCCTTCAAAAATGCACTTCTTTGAAGGATCCAACATGCTC  
CCAATGACATGATTGTTAATATATTAGTTAATCATGTGTACTATGAAGAT

>M6-PGSC0003DMG400028212M6LRR-RLP\_3172

AACATGCTCCCAATGACATGATTGTTAATATATTAGTTAATCATGTGTACTATGAAGATCAAATATTATGC  
TAATCTCTCTATGGTAGTAGACATAATTAATAATATATTAGGTACAAA

>M6-PGSC0003DMG400028212M6LRR-RLP\_3233

AATATTATGCTAATCTCTCTATGGTAGTAGACATAATTAATAATATATTAGGTACAAAAAAGTTGTATT  
AGTTTCTTACTTCTACTAATCCACAGGGCTAATTATGAAGAAAAATTGG

>M6-PGSC0003DMG400028212M6LRR-RLP\_3294

AAGTTGTATTAGTTTCTTACTTCTACTAATCCACAGGGCTAATTATGAAGAAAAATTGGTTGTATATGATT  
TTGGAGTAATATTATTGGAGATAATTAGTGGGAAGCAGATAAATACCAA

>M6-PGSC0003DMG400028212M6LRR-RLP\_3355

GTATATGATTTTGGAGTAATATTATTGGAGATAATTAGTGGGAAGCAGATAAATACCAAGAATGAAGTG  
AGAGTTACACAAAATCAGGTATGATTTAACACTTTTTTCCACTCTTCACAA

>M6-PGSC0003DMG400028212M6LRR-RLP\_3416

ATGAAGTGAGAGTTACACAAAATCAGGTATGATTTAACACTTTTTCCACTCTTCACAACAACACTATGTCCA  
AGTCGAATGTAAGTTAGGATCAGCTATATGAATTCTCACCGACTCTTTT

>M6-PGSC0003DMG400028212M6LRR-RLP\_3477

ACTATGTCCAAGTCGAATGTAAGTTAGGATCAGCTATATGAATTCTCACCGACTCTTTACTCTTCATATT  
ATGTGCAGTTACAAGAGAGCATAATGTCTAATGCAATGTCAAGAAAGAA

>M6-PGSC0003DMG400028212M6LRR-RLP\_366

GTGTTTACAAGAAAGCTCAAAAAAGTGTAATTTCTCAGTTCTTTTTAGTCCTTTTTTGGTGATGGAAAAA  
CATTTAAGACTTAAACTCTTTTAGTTTTGCTTGTTTTATTGCTCTCAA

>M6-PGSC0003DMG400028212M6LRR-RLP\_427

GATGGAAAAACATTTAAGACTTAAACTCTTTTAGTTTTGCTTGTTTTATTGCTCTCAATTAGCATCTCAG  
AGCAACTACAATCTTCTTCACAAGCAAATATTTTATCGAGAATTCGAAA

>M6-PGSC0003DMG400028212M6LRR-RLP\_488

AGCATCTCAGAGCAACTACAATCTTCTTCACAAGCAAATATTTTATCGAGAATTCGAAATCTTCTGAACTA  
TCCAAATGTTTTGAGTAATTGGAACAATGAAACTGATTTCTGTAACACT

>M6-PGSC0003DMG400028212M6LRR-RLP\_549

TTCTGAACTATCCAAATGTTTTGAGTAATTGGAACAATGAAACTGATTTCTGTAACACTGAGCCAAGTTC  
ATCTGTTACTGTTATCTGTTATGAGGATAACATAACTCAGCTTCATATAA

>M6-PGSC0003DMG400028212M6LRR-RLP\_610

GCCAAGTTCATCTGTTACTGTTATCTGTTATGAGGATAACATAACTCAGCTTCATATAATAGGGAGCAAA  
GGGGCTTCTCAATTACATAATTTCTCGATCGATTGTTTTGTCACTACACT

>M6-PGSC0003DMG400028212M6LRR-RLP\_671

GGGAGCAAAGGGGCTTCTCAATTACATAATTTCTCGATCGATTGTTTTGTCACTACACTTGTTGAGCTTCC  
AAGTTTGAAAGTTCTAAGATTAGTTTCTCTTGGTTTATATGGACCATTG

>M6-PGSC0003DMG400028212M6LRR-RLP\_732

TTGAGCTTCCAAGTTTGAAAGTTCTAAGATTAGTTTCTCTTGGTTTATATGGACCATTGCCTAGTAACTT  
TCAAGACTTTCATCATTAGAGATACTTGACCTTAGTTCAAATTTCTTTC

>M6-PGSC0003DMG400028212M6LRR-RLP\_793

TAGTAAACTTTCAAGACTTTCATCATTAGAGATACTTGACCTTAGTTCAAATTTCTTTCATAGTAACATACC

TCGAGAAATTCATCGTTAACGAGCCTCCAGAGTTTAATACTAGATGG

>M6-PGSC0003DMG400028212M6LRR-RLP\_854

AGTAACATACCTCGAGAAATTCATCGTTAACGAGCCTCCAGAGTTTAATACTAGATGGAAATAAGTTCA  
CTGGAAGACTTCCAAATGGACTTGGTTCACTTGTTGTTTTGGCAGTTTTG

>M6-PGSC0003DMG400028212M6LRR-RLP\_915

ATAAGTTCACTGGAAGACTTCCAAATGGACTTGGTTCACTTGTTGTTTTGGCAGTTTTGAGTGTAAGAA  
CAATTCCTTAGATGGACATTTACCTGATATGCTCGGAAATTTGCATAATC

>M6-PGSC0003DMG400028212M6LRR-RLP\_976

TGTAAAGAACAATTCTTTAGATGGACATTTACCTGATATGCTCGGAAATTTGCATAATCTTCGTGTACTTT  
CACTTCGAGGAATAATTTTACTGGTGATGTACCTGATCTTAGTGGTGT

>M6-PGSC0003DMG400028312M6LRR-RLP\_0

ATTTCTGGTGATAAACAAAAGTACATGGACATAATCAACTTAAGTTTACCTAATCATTGACAAATGGCT  
TTCTTTACTTTGGAAAACATTTTGAGGATGAGATTTTGGTTTCGAGAGTTG

>M6-PGSC0003DMG400028312M6LRR-RLP\_1008

GAGGCTGAGCCACAAGGTGATCAGACAATATGCATTAGGCTTCCAGGTTTAGACTCTTTGAATAAACTC  
GAATCACTTAAATTTAAGGTCTATTTTCTAAAACATGGTGCAAAGCGACTT

>M6-PGSC0003DMG400028312M6LRR-RLP\_1071

AAACTCGAATCACTTAAATTTAAGGTCTATTTTCTAAAACATGGTGCAAAGCGACTTGAGATCAACTTTCC  
TAGGAACCTCAAGAAGTTGACCTTGTCATCATTTTCGATTACCATGGAGT

>M6-PGSC0003DMG400028312M6LRR-RLP\_1134

AACTTTCTAGGAACCTCAAGAAGTTGACCTTGTCATCATTTTCGATTACCATGGAGTGAAATTTCAACTAT  
AGGAAGATTAGAAAACCTGGAGGTGCTCAAGTTGGAGTCCAATGCTTTC

>M6-PGSC0003DMG400028312M6LRR-RLP\_1197

TCAACTATAGGAAGATTAGAAAACCTGGAGGTGCTCAAGTTGGAGTCCAATGCTTTCGAGGGAGATCAG  
CAATGGGATGTCGATAATGAGGAGTTCCAAAACCTCAAGTTCTTGATGTTT

>M6-PGSC0003DMG400028312M6LRR-RLP\_126

CTTTGGATCGCGGAAGAATTTGCAGTAGGTAACCAAGTTCAAGAGTGCAGAAGATGTAGCAAAGGACTA  
TGTGAAGGAATTAATTGATAGTAATCTTGTAATGGTTGTTTCGAAGGAATTC

>M6-PGSC0003DMG400028312M6LRR-RLP\_1260

GATCAGCAATGGGATGTCGATAATGAGGAGTTCCAAAACCTCAAGTTCTTGATGTTCTACAACATGAAT  
ATTCCACAATGGAACTTTTCTGATGATATGTTCTTTCCTAACCTTCAACAT

>M6-PGSC0003DMG400028312M6LRR-RLP\_1323

ATGAATATTCCACAATGGAACTTTTCTGATGATATGTTCTTTCCTAACCTTCAACATTTGATATTCAGAAAT  
AGTCGACTGAAAACAATTCCTCGCGACTTTGAAAACCTTACTTTTTCTG

>M6-PGSC0003DMG400028312M6LRR-RLP\_1386

TTCAGAAATAGTCGACTGAAAACAATTCCTCGCGACTTTGAAAACCTTACTTTTTCTGCAGATGATTGAGG  
TGTCTTGGTGTAATGCAGCCGTGATGCCTTGAACACTGCTGAAGAGATT

>M6-PGSC0003DMG400028312M6LRR-RLP\_1449

ATTGAGGTGTCTTGGTGTAATGCAGCCGTGATGCCTTGAACACTGCTGAAGAGATTAAGAAAACCTCAA  
ACTGATATGGGAAATCATGAATTAAGCTCATAATCAAATCTAGAGAGGAT

>M6-PGSC0003DMG400028312M6LRR-RLP\_189

GACTATGTGAAGGAATTAATTGATAGTAATCTTGTAATGGTTGTTGCGAAGGAATTTCTTTGGTGAGGTGA  
AAGCAATTGGTATGCATGATCTGTTGCGTGAGTTCTGCTTGAAGAGATT

>M6-PGSC0003DMG400028312M6LRR-RLP\_252

GAGGTGAAAGCAATTGGTATGCATGATCTGTTGCGTGAGTTCTGCTTGAAGAGTTATAGG  
TAAGATCTCATTGAATCATCGATCACAACTTTGTTACTTCCAGACTCTT

>M6-PGSC0003DMG400028312M6LRR-RLP\_315

TATAGGTAAGATCTCATTGAATCATCGATCACAACTTTGTTACTTCCAGACTCTTTAACTGGTTCTTAC  
TATTTTATTTTCTTCTTTTGGTATTTTGTCTTTCTTGCAGATCAAGT

>M6-PGSC0003DMG400028312M6LRR-RLP\_378

GGTTCTTACTATTTTATTTTCTTCTTTTGGTATTTTGTCTTTCTTGCAGATCAAGTAATTCAACAGCTGCTG  
AGCACGAACGTGGCATTTCACCTGATTTCCGTTATAATTATAAAGAA

>M6-PGSC0003DMG400028312M6LRR-RLP\_441

ACAGCTGCTGAGCACGAACGTGGCATTTCACCTGATTTCCGTTATAATTATAAAGAAGCTGAATATTTAT  
ATCCCCATTCTGCTATCTCCCGAATACCCTATTCTGTTGACGATATACTT

>M6-PGSC0003DMG400028312M6LRR-RLP\_504

TATTTATATCCCCATTCTGCTATCTCCCGAATACCCTATTCTGTTGACGATATACTTGACCACAACAACCTT  
CTCATCTTTGACTGCAAAAAGTTTGTGTTTCAAACCCAGAATTACATCA

>M6-PGSC0003DMG400028312M6LRR-RLP\_567

AACAACCTTCTCATCTTTGACTGCAAAGTTTGTGTTCAAACCCAGAATTACATCACTGAGAGTGTTGGA  
TTTGGTGTGTGTTACATCGAGCAATGCACCTTATATTCAATTCTTGATT

>M6-PGSC0003DMG400028312M6LRR-RLP\_63

AATGGCTTTCTTTACTTTGGAAAACATTTTGAGGATGAGATTTTGGTTCGAGAGTTGATTCAGCTTTGGA  
TCGCGGAAGAATTTGCAGTAGGTAACCAGTTCAAGAGTGCAGAAGATGTA

>M6-PGSC0003DMG400028312M6LRR-RLP\_630

GTGTTGGATTTGGTGTGTGTTACATCGAGCAATGCACCTTATATTCAATTCTTGATTAATTTAAGATACTT  
GTCCATGAAGGGGAATTTGAGGAAGATCCATCATGGTTATCCAACCTC

>M6-PGSC0003DMG400028312M6LRR-RLP\_693

AGATACTTGTCCATGAAGGGGAATTTGAGGAAGATCCATCATGGTTATCCAACCTCAAGTACTTAAAAA  
CATTGATACTCAGAGAATCGCGCAGATTAGATCTATCTTATGCAATATGG

>M6-PGSC0003DMG400028312M6LRR-RLP\_756

TTAAAAACATTGATACTCAGAGAATCGCGCAGATTAGATCTATCTTATGCAATATGGGGTATGGTGAGCT  
TAAACATTTGGAAGTGACTGGTAAACCAGCTGTCATCAGGTGCTATGTC

>M6-PGSC0003DMG400028312M6LRR-RLP\_819

GTGAGCTTAAAACATTTGGAAGTGACTGGTAAACCAGCTGTCATCAGGTGCTATGTCCCAGAGTTCATG  
ATGAACCGTCGTTTAAACAAAATTACAATGTCTTTCTTTGTACACTTACCT

>M6-PGSC0003DMG400028312M6LRR-RLP\_882

TTCATGATGAACCGTCGTTTAAACAAAATTACAATGTCTTTCTTTGTACACTTACCTGAAGGCGGAGAGTT  
TCAAGAGTTCATGTCAAAGTACCCAATTTAGTAAAGATGAGGTGTTTG

>M6-PGSC0003DMG400028312M6LRR-RLP\_945

GGAGAGTTTCAAGAGTTCATGTCAAAGTACCCAATTTAGTAAAGATGAGGTGTTTGGTTGATGAGGCT  
GAGCCACAAGGTGATCAGACAATATGCATTAGGCTTCCAGGTTTACTCT

>M6-PGSC0003DMG400028346M6RLKANKrepeat\_0

GAGGAGGAGAGAGACTCAAACCTAACTCTGTACACACATTCAAAGAAACGGAACACACGAGTCTAT  
TGATCCATTATCAATCCAAATGAGTGCAAGTGAAGGGAGCTCCGGCTCATCG

>M6-PGSC0003DMG400028346M6RLKANKrepeat\_1037

ATATATCATAACAGTCGTTTGCCATTTGCAAAGCTTGATTTATCAACATTTAATGCATCAACTTGTCTT

AGTTAAAAGGTATATTAGCTAGCATATTTATCAGGCTTCTAGCTCTGT

>M6-PGSC0003DMG400028346M6RLKANKrepeat\_1098

AACTTGTTCTTAGTTAAAAGGTATATTAGCTAGCATATTTATCAGGCTTCTAGCTCTGTTTCTGTACAGCC

ATCCAGGTCTTGATGAGCTAGCAAAGCTGTTTATTAATAATTAGTGAA

>M6-PGSC0003DMG400028346M6RLKANKrepeat\_1159

CTGTACAGCCATCCAGGTCTTGATGAGCTAGCAAAGCTGTTTATTAATAATTAGTGAATGAAATGTCCC

ACATCGGTAAACGAATGGAATTCTGGGCTCCTTATTAATACTAGCTAGCATA

>M6-PGSC0003DMG400028346M6RLKANKrepeat\_122

TGCCGCCGCCGTCGAAGTACCGGTGGTATCAACGGAGAAGAAGAAGGAAAAGTCAAGAGTGAGCAAG

ACATCACAATACTGTGGCACGCTCATCATAACGATGCCGCTGCCGTACGGAA

>M6-PGSC0003DMG400028346M6RLKANKrepeat\_1220

AAATGTCCCACATCGGTAAACGAATGGAATTCTGGGCTCCTTATTAATACTAGCTAGCATATTTATTAGGCT

TCTAGATTGATGGCATGATTAGGAGATCATTTACCTGAGTTGGGCAAAAA

>M6-PGSC0003DMG400028346M6RLKANKrepeat\_1281

TATTAGGCTTCTAGATTGATGGCATGATTAGGAGATCATTTACCTGAGTTGGGCAAAAAATCTTTTACTTTT

AGCAAATAACTGATTGGAGCTATCGCCTAAATAATGAGCTAAATGGTTA

>M6-PGSC0003DMG400028346M6RLKANKrepeat\_1342

TTTTACTTTTAGCAAATAACTGATTGGAGCTATCGCCTAAATAATGAGCTAAATGGTTACTGGTACTATAA

CAAGAAAATAATCTAACAGCGTTGGAAGCAGGATGTTCAATTCAATTCT

>M6-PGSC0003DMG400028346M6RLKANKrepeat\_1403

GGTACTATAACAAGAAAATAATCTAACAGCGTTGGAAGCAGGATGTTCAATTCAATTCTCCCAAGTCAC

TGAACAACCTGTTTTACCTTATGTCATGTTGTGCCACTTCAAGATTTTTCT

>M6-PGSC0003DMG400028346M6RLKANKrepeat\_1464

CCAAGTCACTGAACAACCTGTTTTACCTTATGTCATGTTGTGCCACTTCAAGATTTTTCTTTACATAATTATT

GAGAATTACTTGATTTTTTCTGAATATGCGAACGGTGTCTTTGATTTT

>M6-PGSC0003DMG400028346M6RLKANKrepeat\_1525

ACATAATTATTGAGAATTACTTGATTTTTTCTGAATATGCGAACGGTGTCTTTGATTTCTTAGGATTGGTC

TTTAAGAGCCTTTAATGTTTTAATATATGCTATAGGGACAAAATGGAAG

>M6-PGSC0003DMG400028346M6RLKANKrepeat\_1586

AGGATTGGTCTTTAAGAGCCTTTAATGTTTTAATATATGCTATAGGGACAAAATGGAAGCCATTTTGAAC  
CAAGGCCTGTCGCCCCACCTCTACCAAAGAAGTGTGATTGGGAGATTGAT

>M6-PGSC0003DMG400028346M6RLKANKrepeat\_1647

ATTTTGAACCAAGGCCTGTCGCCCCACCTCTACCAAAGAAGTGTGATTGGGAGATTGATCCTACTGAGCT  
GGACTTCTCAAATTCTGCAATCATTGGAAAGGTATGTTTTGCTATACTAG

>M6-PGSC0003DMG400028346M6RLKANKrepeat\_1708

TACTGAGCTGGACTTCTCAAATTCTGCAATCATTGGAAAGGTATGTTTTGCTATACTAGAAGTGCTGTTAT  
TTAGCTTGTGGAGGTTAATTAAGTCTGTTTAAGCTACCCTGTCCAGT

>M6-PGSC0003DMG400028346M6RLKANKrepeat\_1769

GTGCTGTTATTTAGCTTGTGGAGGTTAATTAAGTCTGTTTAAGCTACCCTGTCCAGTATCTTTTCAAAT  
GAATTGGCAACTGTAGTATACAAAGATAGCTACTCGTGTACCATTTTTT

>M6-PGSC0003DMG400028346M6RLKANKrepeat\_183

AGCAAGACATCACAATACTGTGGCACGCTCATCATAACGATGCCGCTGCCGTACGGAAGCTACTAGAA  
GAAGATCGGACGCTTGTCAAGCTAGAGATTACGATAATCGAACTCCACTC

>M6-PGSC0003DMG400028346M6RLKANKrepeat\_1830

CTTTTCAAATGAATTGGCAACTGTAGTATACAAAGATAGCTACTCGTGTACCATTTTTTGTGTTTTTCAAT  
AAAATCTTTCAATCCGTGCTGTATTAGTGCATGACTGAAAGTCTTTTG

>M6-PGSC0003DMG400028346M6RLKANKrepeat\_1891

GTTTTTCAATAAAATCTTTCAATCCGTGCTGTATTAGTGCATGACTGAAAGTCTTTTGTGAAGAGGTTTC  
TCCCAAATATAAGCAATTGAAGCGAATTTATGATGATTAAGCTAACACT

>M6-PGSC0003DMG400028346M6RLKANKrepeat\_1952

AAGAGGTTTCTCCCAAATATAAGCAATTGAAGCGAATTTATGATGATTAAGCTAACACTTGTCTATGGG  
GTGTTGATGAATGAAAAATCTCAACTAATCTAATTTTTAAAATTTTAAAA

>M6-PGSC0003DMG400028346M6RLKANKrepeat\_2013

TTCTATGGGGTGTGATGAATGAAAAATCTCAACTAATCTAATTTTTAAAATTTTAAAATGTGTGGATAGT  
TGTAGAGGAGTGAATCTGTTTAGCACTGTGTTAACATTTTATTTTCATT

>M6-PGSC0003DMG400028346M6RLKANKrepeat\_2074

TGTGGATAGTTGTAGAGGAGTGAATCTGTTTAGCACTGTGTTAACATTTTATTTTCATTCCAAAATAGAA  
AGTGTCTCATAATCAGGAAAGCTGCACAATTATTGTGCTTGGAGCTGTCTG

>M6-PGSC0003DMG400028346M6RLKANKrepeat\_2135

AAAATAGAAAGTGTCTCATAATCAGGAAAGCTGCACAATTATTGTGCTTGGAGCTGTCGTTCTTAGGTGT  
TTTTGATTGACTCTCCCTTTGGTATTTTTATATTTTGTCTATAGTTTAA

>M6-PGSC0003DMG400028346M6RLKANKrepeat\_2196

CTTAGGTGTTTTTGATTGACTCTCCCTTTGGTATTTTTATATTTTGTCTATAGTTTAAATGACTGAGATGAT  
TCTATTTCTTATTATGCGGTTACTATAATCCTAACCTACTTACAAG

>M6-PGSC0003DMG400028346M6RLKANKrepeat\_2257

ACTGAGATGATTCTATTTCTTATTATGCGGTTACTATAATCCTAACCTACTTACAAGAAAGAAGAGGG  
ACAGTCTCTGGTAACTGGCTGTCCATTTTGCTTCAACCCATTTATCTTTT

>M6-PGSC0003DMG400028346M6RLKANKrepeat\_2318

AGAAGAGGGACAGTCTCTGGTAACTGGCTGTCCATTTTGCTTCAACCCATTTATCTTTTAACTATTTAGT  
TTTGATACTGTTGTGCTTGATTCAAATTGCTTAATCTACTTTTCATCA

>M6-PGSC0003DMG400028346M6RLKANKrepeat\_2379

ACTATTTAGTTTTGATACTGTTGTGCTTGATTTCAAATTGCTTAATCTACTTTTCATCATTGATAAAAAAATT  
GCCAGCGAGGTTGCCATTTATGTATCTAATATGGAAGCTGATATTGAT

>M6-PGSC0003DMG400028346M6RLKANKrepeat\_244

TACTAGAAGAAGATCGGACGCTTGTTCAAGCTAGAGATTACGATAATCGAACTCCACTCCACGTTGCAG  
CGTTACATGGCTGGATCGATGTTGCAAAGTGCTTGATTGACTATGGCGCCG

>M6-PGSC0003DMG400028346M6RLKANKrepeat\_2440

GATAAAAAAATTGCCAGCGAGGTTGCCATTTATGTATCTAATATGGAAGCTGATATTGATAGGGGTCTTTT  
GGTGAGATCTTAAAAGCTTGCTGGCGTGGAACACCTGTAGCTGTAAACG

>M6-PGSC0003DMG400028346M6RLKANKrepeat\_2501

GGGTCTTTTGGTGAGATCTTAAAAGCTTGCTGGCGTGGAACACCTGTAGCTGTTAAACGCATCCTCCCAA  
ACCTTTCAGATGATCGATTGGTGATGTAAGCTCTATTGTGGGGTTAGCAC

>M6-PGSC0003DMG400028346M6RLKANKrepeat\_2562

TCCTCCCAAACCTTTCAGATGATCGATTGGTGATGTAAGCTCTATTGTGGGGTTAGCACTACAATATCCT  
GTATATATGATTCTGATATGTTGTGCTGTCTGCTGCTGTTATCAAGTTTC

>M6-PGSC0003DMG400028346M6RLKANKrepeat\_2623

CAATATCCTGTATATATGATTCTGATATGTTGTGCTGTCTGCTGCTGTTATCAAGTTTCACAGTTTTCTTTT



TGGGTGGGTAGGTGTGAAGGGTGAGGTTAAGGAGGACAGGAGTCTAGC

>M6-PGSC0003DMG400028346M6RLKANKrepeat\_2684

AGTTTTCTTTTTGGGTGGGTAGGTGTGAAGGGTGAGGTTAAGGAGGACAGGAGTCTAGCTTTGGTCTCC

TCTGTTATATATTGACTTTTAAAGTATTCCACATCATTGACCAAACTATA

>M6-PGSC0003DMG400028346M6RLKANKrepeat\_2745

TGGTCTCCTCTGTTATATATTGACTTTTAAAGTATTCCACATCATTGACCAAACTATAACAAGAAGATGC

TGCTTTTGCAAGCATGTCACATCCTCTAATTATCAATAAATCATATTCT

>M6-PGSC0003DMG400028346M6RLKANKrepeat\_2806

AAGAAGATGCTGCTTTTGCAAGCATGTCACATCCTCTAATTATCAATAAATCATATTCTATTTGTTAAGAA

TATTTACTCTGCTAATATTGTAAGAGGACCTGGAATTTAAGTGGGATCA

>M6-PGSC0003DMG400028346M6RLKANKrepeat\_2867

TTGTTAAGAATATTTACTCTGCTAATATTGTAAGAGGACCTGGAATTTAAGTGGGATCAAGAAGCTTCAG

ATGTTACCCAAGGCTGTCAGCATTCTCAATTCACAATTGTCTCTTTAAGC

>M6-PGSC0003DMG400028346M6RLKANKrepeat\_2928

AAGCTTCAGATGTTACCCAAGGCTGTCAGCATTCTCAATTCACAATTGTCTCTTTAAGCTTGATGCAGATT

TATATAATTATAAAAGTATGCTGTTAGTTAGACCCTTCTGCAGTAATTA

>M6-PGSC0003DMG400028346M6RLKANKrepeat\_2989

GATGCAGATTTATATAATTATAAAAGTATGCTGTTAGTTAGACCCTTCTGCAGTAATTAATTTTTGATATT

TTAATATGATACTGATCTTTTTTATTTTTTTGGGATAACCGATAAATTT

>M6-PGSC0003DMG400028346M6RLKANKrepeat\_305

CGTTGCAGCGTTACATGGCTGGATCGATGTTGCAAAGTGCTTGATTGACTATGGCGCCGATGTCAACGC

TCAGGATCGTTGGAGAAACACGGTAAAAAATTGCATTTGCTTATTTCCAG

>M6-PGSC0003DMG400028346M6RLKANKrepeat\_3050

TTTTGATATTTAATATGATACTGATCTTTTTTATTTTTTTGGGATAACCGATAAATTTGTCTGTGACCCGC

CCTTTGGAATATGATACTGATCTGCCTAATTTAATTCCTCTCATGCAG

>M6-PGSC0003DMG400028346M6RLKANKrepeat\_3111

CTGTGACCCGCCCTTTGGAATATGATACTGATCTGCCTAATTTAATTCCTCTCATGCAGTCAAGATTTGAG

GCATGAGGTAAATTTGCTGGTGAAGCTCCGTCATCCAAATATAGTGCAA

>M6-PGSC0003DMG400028346M6RLKANKrepeat\_3172

AAGATTCAGGCATGAGGTAAATTTGCTGGTGAAGCTCCGTCATCCAAATATAGTGCAATTTCTTGGAGC  
TGTTACTGAGAAAAACCCTTAATGTTAATAACTGAATACTTGAGAGGGG

>M6-PGSC0003DMG400028346M6RLKANKrepeat\_3233

TCTTGGAGCTGTTACTGAGAAAAACCCTTAATGTTAATAACTGAATACTTGAGAGGGGTATGTGGTTTT  
ATTTTTCTCTATATTTTGATTGAACATTGAATTATTTCTCTTTATCATA

>M6-PGSC0003DMG400028346M6RLKANKrepeat\_3294

TGTGGTTTTATTTTTCTCTATATTTTGATTGAACATTGAATTATTTCTCTTTATCATATGATGTACCTGTGC  
TGATTTGGTGCATATATATGTTGTAGGGCGATCTGCATCAGCACCTC

>M6-PGSC0003DMG400028346M6RLKANKrepeat\_3355

ATGTACCTGTGCTGATTTGGTGCATATATATGTTGTAGGGCGATCTGCATCAGCACCTCAAGGAAAAAG  
GTGCTTTACACCATCTACAGCAATCAATTTTGCTATGGATATAGCAAGGT

>M6-PGSC0003DMG400028346M6RLKANKrepeat\_3416

GGAAAAAGGTGCTCTTACACCATCTACAGCAATCAATTTTGCTATGGATATAGCAAGGTAGTATGAATAA  
TTGTTAGCATTTTCATACTTCATTTTCCTTGAAGAACTCAAATTCTCTTG

>M6-PGSC0003DMG400028346M6RLKANKrepeat\_3477

TATGAATAATTGTTAGCATTTTCATACTTCATTTTCCTTGAAGAACTCAAATTCTCTTGATTTTCGTCTGATT  
CTTGAAACTCTTGTAAGCTATGTTTTGAGTTGCCTATTTACACCGACT

>M6-PGSC0003DMG400028346M6RLKANKrepeat\_3538

TTCGTCTGATTCTTGAAACTCTTGTAAGCTATGTTTTGAGTTGCCTATTTACACCGACTGATGTTTTTAAGC  
ATCATTGATGGACTAAATGTGCTCAGCCTGTTGCTGTTACTTTCTGT

>M6-PGSC0003DMG400028346M6RLKANKrepeat\_3599

TGTTTTAAGCATCATTGATGGACTAAATGTGCTCAGCCTGTTGCTGTTACTTTCTGTCCAAAACATCT  
TCTTCACAGTAGCTGGTCTGTTGAATTAGCTGTAGGGAAAATACAAAA

>M6-PGSC0003DMG400028346M6RLKANKrepeat\_366

GTCAACGCTCAGGATCGTTGGAGAAACACGGTAAAAAATTGCATTTGCTTATTTCCAGTAAATCTTTAT  
ACAGTATAGGTTATGTGCCTAAGCTTGTTAGGTGTGTCTGTATATGAAAC

>M6-PGSC0003DMG400028346M6RLKANKrepeat\_3660

AAAACATCTTCTTCACAGTAGCTGGTCTGTTGAATTAGCTGTAGGGAAAATACAAAAAATGTGCATCC  
AGAAGATGGTCTGCATAACGTGAACAAGTTACTATAACTCTCGGTAGATC

>M6-PGSC0003DMG400028346M6RLKANKrepeat\_3721

TGTGCATCCAGAAGATGGTCTGCATAACGTGAACAAGTTACTATAACTCTCGGTAGATCTTTCTGATGCG  
GCATAGTTTCTGTCTGTTTTTGCCTCAGCATACCATTTTATGAGATACTGT

>M6-PGSC0003DMG400028346M6RLKANKrepeat\_3782

TCTGATGCGGCATAGTTTCTGTCTGTTTTTGCCTCAGCATACCATTTTATGAGATACTGTAGTTATCTGACA  
ATTTACCCAACATTCCAATGCCTAGTTTTACATTTTAAAAATTGCATTG

>M6-PGSC0003DMG400028346M6RLKANKrepeat\_3843

TTATCTGACAATTTACCCAACATTCCAATGCCTAGTTTTACATTTTAAAAATTGCATTGCGTAGTTACTTAT  
GCAATGTTTGATGTTTTTGTGGGCAGAGGCATGACTTATCTTCACAAT

>M6-PGSC0003DMG400028346M6RLKANKrepeat\_3904

TAGTTACTTATGCAATGTTTGATGTTTTTGTGGGCAGAGGCATGACTTATCTTCACAATGAGCCAAATGTT  
ATAATCCACAGAGATCTAAAGCCCAGGTCTGTTTTTCTCTCTTCATGGC

>M6-PGSC0003DMG400028346M6RLKANKrepeat\_3965

GCCAAATGTTATAATCCACAGAGATCTAAAGCCCAGGTCTGTTTTTCTCTCTTCATGGCTCTGCTATTGTT  
ATGATTCAATTAACTTTAATGCTGAATGTATCAATGTTTCTAGGAATGT

>M6-PGSC0003DMG400028346M6RLKANKrepeat\_4026

TGCTATTGTTATGATTCAATTAACTTTAATGCTGAATGTATCAATGTTTCTAGGAATGTTCTTCTAGTCAAT  
TCCAATGCAGACCATTTGAAAGTTGGAGATTTTGGTTTAAGCAAATA

>M6-PGSC0003DMG400028346M6RLKANKrepeat\_4087

TTCTAGTCAATTTCCAATGCAGACCATTTGAAAGTTGGAGATTTTGGTTTAAGCAAATAATCAGGGTTCA  
GAACTCCCATGATGTTTATAAAATGACTGGGGAGACAGGGAGCTGTAAGT

>M6-PGSC0003DMG400028346M6RLKANKrepeat\_4148

CAGGGTTCAGAACTCCCATGATGTTTATAAAATGACTGGGGAGACAGGGAGCTGTAAGTGACAATGCC  
ATAATTCTCCCTCAATTGATTAACATATTCTTTCAAATGTAATTATTTGTTT

>M6-PGSC0003DMG400028346M6RLKANKrepeat\_4209

CAATGCCATAATTCTCCCTCAATTGATTAACATATTCTTTCAAATGTAATTATTTGTTTGTGATATCTTTTTC  
TGTAATAAAAAAATAGACCGCTATATGGCACCTGAAGTTTTCAAGCA

>M6-PGSC0003DMG400028346M6RLKANKrepeat\_427

AATCTTTATACAGTATAGGTTATGTGCCTAAGCTTGTTAGGTGTGTCTGTATATGAAACTGATAACTGGT

AGTAGCATGGTAATTTGCTTATCTTATCCTGATTTTGGAGCAAACCTTG TG

>M6-PGSC0003DMG400028346M6RLKANKrepeat\_4270

GATATCTTTTTCTGTAATAAAAAAATAGACCGCTATATGGCACCTGAAGTTTTCAAGCACCGGAAGTATG

ACAAGAAGGTTGATGTTTTCTTTTCGCAATGATCTTATATGAGGTAATT

>M6-PGSC0003DMG400028346M6RLKANKrepeat\_4331

GGAAGTATGACAAGAAGGTTGATGTTTTCTTTTCGCAATGATCTTATATGAGGTAATTCTGACTTCTAG

GCTCTGCCTATTAGGATTGGGAATAACATGATATGAAACAAATAATGCAT

>M6-PGSC0003DMG400028346M6RLKANKrepeat\_4392

GACTTCTAGGCTCTGCCTATTAGGATTGGGAATAACATGATATGAAACAAATAATGCATCAATGAATTTT

CTATTGGTGCAGATGCTAGAGGGTGATCCACCATTATCCCCTATGAACC

>M6-PGSC0003DMG400028346M6RLKANKrepeat\_4453

ATGAATTTTCTATTGGTGCAGATGCTAGAGGGTGATCCACCATTATCCCCTATGAACCATATGAAGCAG

CCAAGTATGTGGCAGAAGGACACAGGCCTATGTTTCAGGGCAAAGGTTTT

>M6-PGSC0003DMG400028346M6RLKANKrepeat\_4514

ATGAAGCAGCCAAGTATGTGGCAGAAGGACACAGGCCTATGTTTCAGGGCAAAGGTTTTACCCCAGAA

TTGAAAGAGTAAGTCCAACTGGATCTTGATGCTCCCTTCTTTTAAAGCATC

>M6-PGSC0003DMG400028346M6RLKANKrepeat\_4575

CCCAGAATTGAAAGAGTAAGTCCAACTGGATCTTGATGCTCCCTTCTTTTAAAGCATCATAAATATACA

ATATCTTTAGCTATGTATGGTGTGGGTTTTCAACATGGACAAATGTGGC

>M6-PGSC0003DMG400028346M6RLKANKrepeat\_4636

ACAATATACAATATCTTTAGCTATGTATGGTGTGGGTTTTCAACATGGACAAATGTGGCACAGTTAGAAG

ATGAGCTATGAAAGCATTTTTACGTACTACAGCTTGAAAAGATTCAGGT

>M6-PGSC0003DMG400028346M6RLKANKrepeat\_4697

AGTTAGAAGATGAGCTATGAAAGCATTTTTACGTACTACAGCTTGAAAAGATTCAGGTAGGGGTATCT

GGGATTTCCAAAAGTGAGATTACTTGCTGTGAAGGTCCTCTTTCAGTGAGC

>M6-PGSC0003DMG400028346M6RLKANKrepeat\_4758

GGGTATCTGGGATTTCCAAAAGTGAGATTACTTGCTGTGAAGGTCCTCTTTCAGTGAGCTGTAGCCTGTA

GGCATCCTAGTTGCAGAAAAAATTGAAACATGATATATGCTTTTTTTTTCT

>M6-PGSC0003DMG400028346M6RLKANKrepeat\_4819

TAGCCTGTAGGCATCCTAGTTGCAGAAAAATTGAAACATGATATATGCTTTTTTTCTTCCTCTTGCGAC  
CTTAGGTTTTATATATGCACTGCAAAGTTTATTTCTTTTGACTATTAGC

>M6-PGSC0003DMG400028346M6RLKANKrepeat\_488

ATAACTGGTAGTAGCATGGTAATTTGCTTATCTTATCCTGATTTTGGAGCAAACCTGTGATAGCTGTTGAT  
CTCTTAAATCTTACTGAAGTTACCTCTTGTCTTGTTATGAAATGAAAAC

>M6-PGSC0003DMG400028346M6RLKANKrepeat\_4880

CTCTTGCAGACCTTAGGTTTTATATATGCACTGCAAAGTTTATTTCTTTTGACTATTAGCCAACGCAAGAAG  
ATGGTGGGCAGCGTTTTGTTTATGCTTTTCTAAAGACAAATCAATTTTT

>M6-PGSC0003DMG400028346M6RLKANKrepeat\_4941

ACGCAAGAAGATGGTGGGCAGCGTTTTGTTTATGCTTTTCTAAAGACAAATCAATTTTTGCAGGTTGGT  
AGAGGAATGCTGGGCACCAGATATGAACAAGAGACCCTCATTTTTGGATA

>M6-PGSC0003DMG400028346M6RLKANKrepeat\_5002

CAGGTTGGTAGAGGAATGCTGGGCACCAGATATGAACAAGAGACCCTCATTTTTGGATATTCTAAAAAG  
ACTTGAAAAAATTAAGATGCTCTACCCTCGGAGCATCATTGGCACCTTTT

>M6-PGSC0003DMG400028346M6RLKANKrepeat\_5063

CTAAAAAGACTTGAAAAAATTAAGATGCTCTACCCTCGGAGCATCATTGGCACCTTTTCACTTCATGAC  
ATCAAATTCCAGAGCTGACCAGATATTTGTTGAATTCTCCCATCAAACG

>M6-PGSC0003DMG400028346M6RLKANKrepeat\_5124

CTTCATGACATCAAATTCCAGAGCTGACCAGATATTTGTTGAATTCTCCCATCAAACGCACTATTTGAAA  
TTGATATGTTTGTCTGGATTGTGCATAGGATCAACTGGCAAAGGTCTGCA

>M6-PGSC0003DMG400028346M6RLKANKrepeat\_5185

CTATTTGAAATTGATATGTTTGTCTGGATTGTGCATAGGATCAACTGGCAAAGGTCTGCAAAAACCTGTTGC  
TGTACCAATTCTTTATGCCCCATTCAACATTCCAGCTATGCTTGTAGATT

>M6-PGSC0003DMG400028346M6RLKANKrepeat\_5246

AACTGTTGCTGTACCAATTCTTTATGCCCCATTCAACATTCCAGCTATGCTTGTAGATTTTATCAAGATATT  
TCCACAAAATATCAAGTAGAACTGTGTGTGCGAGAGATTTGTAACAAAT

>M6-PGSC0003DMG400028346M6RLKANKrepeat\_5307

ATCAAGATATTTCCACAAAATATCAAGTAGAACTGTGTGTGCGAGAGATTTGTAACAAATTTCTTACATTT  
GCTTCTTTTTTAAAATGTGATTCCCAGTGGTATTGAAGTGGCAAACCTGTAT

>M6-PGSC0003DMG400028346M6RLKANKrepeat\_5368

CTTACATTTGCTTCTTTTTTAAAATGTGATTCCCAGTGGTATTGAAGTGGCAACTGTATTTTTAACCTTTAT  
TATTCGTTTGTTTTATGATAAATGCAATTCTCGCTTTTTATTTAAAAG

>M6-PGSC0003DMG400028346M6RLKANKrepeat\_549

AGCTGTTGATCTCTTAAATCTTACTGAAGTTACCTCTTGTCTTGTTATGAAATGAAAACATTAGGCATCAG  
GAATTGGAATTTTAGTCTTCAGCTATTAAGTGATGTCTTGTGATCAATC

>M6-PGSC0003DMG400028346M6RLKANKrepeat\_61

AGTCTATTGATCCATTATCAATCCAAATGAGTGCAAGTGAAGGGAGCTCCGGCTCATCGGCTGCCGCCG  
CCGTCGAAGTACCGGTGGTATCAACGGAGAAGAAGAAGGAAAAGTCAAGAG

>M6-PGSC0003DMG400028346M6RLKANKrepeat\_610

TAGGCATCAGGAATTGGAATTTTAGTCTTCAGCTATTAAGTGATGTCTTGTGATCAATCAGGAGTCAAAA  
AGTGTGCGGGATGTTACCACTTACCAGTGAAATTCATGTGGCATAGGTTG

>M6-PGSC0003DMG400028346M6RLKANKrepeat\_671

GAGTCAAAAAGTGTGCGGGATGTTACCACTTACCAGTGAAATTCATGTGGCATAGGTTGATTAAGTGT  
GATAAAAAAATTAAGTGGATTTTAGATTATTGAAAATACCAGTTTGCACA

>M6-PGSC0003DMG400028346M6RLKANKrepeat\_732

TAACTGTTTGATAAAAAAATTAAGTGGATTTTAGATTATTGAAAATACCAGTTTGCACATTTCTCTGGTT  
TGCATATTTTCGTCCATGCTTTTAATGTGCCTGTTGTGACACTGACTTT

>M6-PGSC0003DMG400028346M6RLKANKrepeat\_793

TCTCTGGTTTTGCATATTTTCGTCCATGCTTTTAATGTGCCTGTTGTGACACTGACTTTTCTATGCAATCCT  
TGATTCTTGAGTGAATTTCACTAATCTGCTGCTTTGATCTAAGTTTTC

>M6-PGSC0003DMG400028346M6RLKANKrepeat\_854

TATGCAATCCTTGATTCTTGAGTGAATTTCACTAATCTGCTGCTTTGATCTAAGTTTTCAATTGTTTGTGAC  
AGCCTCTAGCCGATGCAGAAGGTGCTAAGAAATCTGCCATGATTGAAT

>M6-PGSC0003DMG400028346M6RLKANKrepeat\_915

TTGTTTGTGACAGCCTTAGCCGATGCAGAAGGTGCTAAGAAATCTGCCATGATTGAATTGTTAAAGAC  
ATATGGCGGGCTATCTTATGTGAGTTACATTCCTTTTCCTTTTGATATATC

>M6-PGSC0003DMG400028346M6RLKANKrepeat\_976

TTAAAGACATATGGCGGGCTATCTTATGTGAGTTACATTCCTTTTCCTTTTGATATATCTTATATATCATAA

CAGTCGTTTGCCATTTGCAAAGCTTGTATTTATCAACATTTAATGCA

>M6-PGSC0003DMG400028407M6RLKmalectin\_0

TCAATTAAGGAATGACAGTAGGTAGTTTTCTCTCACGTACGCAGATGATGAATTGTTTATCAACTGTG  
GTGGCAAGGAAGTTACTGTAAAGGGCAAACACTACTCTGCTGATCAGAAC

>M6-PGSC0003DMG400028407M6RLKmalectin\_1054

GTAAGTGAGGGAAGTCCTATTTCTCATTTTGAAGGGAAATGTTTTCTACCTTCTGGTTACCAAACAACAG  
AATCCGTCATATCAAACACACCCTTAACATGTATATATTTTCCACTACAA

>M6-PGSC0003DMG400028407M6RLKmalectin\_1116

AACAACAGAATCCGTCATATCAAACACACCCTTAACATGTATATATTTTCCACTACAACCAAACACCATAA  
ACCATTTTTTCCAGAAAAATATTTGTCATGGAGAACGACTTCTGTTATA

>M6-PGSC0003DMG400028407M6RLKmalectin\_1178

ACACCATAAACCATTTTTTCCAGAAAAATATTTGTCATGGAGAACGACTTCTGTTATACCAAATAGAATTG  
TAAAGGTATCATCTTTGTAGTTCTTTGAAAAGCTGTCATTGTAGGGGGA

>M6-PGSC0003DMG400028407M6RLKmalectin\_124

ATGGATCATCAACATTTTCTCGCAATGAGACAGGAGTTGGGGTTATAGTAGCATGGGTCTTACCGAGA  
GTTTGGATAAGCGACCTGAATCATTATAATCAAGGATACATGTGATCTTT

>M6-PGSC0003DMG400028407M6RLKmalectin\_1240

ATAGAATTGTAAAGGTATCATCTTTGTAGTTCTTTGAAAAGCTGTCATTGTAGGGGGAGAATGTACGGA  
AGAACTACAATATAGAAGCTGAAAAATTGAATGATGATGGGGATAAATTGG

>M6-PGSC0003DMG400028407M6RLKmalectin\_1302

GTACGGAAGAACTACAATATAGAAGCTGAAAAATTGAATGATGATGGGGATAAATTGGTGGAACATAA  
TACTTCTATAAAATCCTATCTTGAAATTCACTTGTACTGGTCTGGTAATGGC

>M6-PGSC0003DMG400028407M6RLKmalectin\_1364

ACATAAATACTTCTATAAAATCCTATCTTGAAATTCACTTGTACTGGTCTGGTAATGGCTCGGACAACACTAG  
GTCCCCTCATTTAGCTATTTCTGTAACCAAAGGTATGTTTTCTTTATC

>M6-PGSC0003DMG400028407M6RLKmalectin\_1426

ACAACACTCGGTCCCCTCATTTAGCTATTTCTGTAACCAAAGGTATGTTTTCTTTATCTGGTCTACTGTCAG  
TCATATTCTTCAGTGCCTTTCTAAGACAACAATACTTTGATGGTAGT

>M6-PGSC0003DMG400028407M6RLKmalectin\_1488

CTACTGTCAGTCATATTCTTCAGTGTCTTTCTAAGACAACAATACTTTGATGGTAGTTCGTGTACCACCA  
CCACCAAACAGCATCCGAAACTGTCTCCTGCGCTTAAGGCTGTGATAG

>M6-PGSC0003DMG400028407M6RLKmalectin\_1550

GTACCACCACCACCAAACAGCATCCGAAACTGTCTCCTGCGCTTAAGGCTGTGATAGCAGTATCATCAC  
TGTTTTTTCTTGCTCTACTTTTGCTTTTACTAAGGAAGTTGGGTTATCTT

>M6-PGSC0003DMG400028407M6RLKmalectin\_1612

ATCATCACTGTTTTTTCTTGCTCTACTTTTGCTTTTACTAAGGAAGTTGGGTTATCTTGGTGGAAAAAGAT  
CATCAAAGGAAGTTAGACCGCAGTATATATGGAGTTTGGTTTGGTTAT

>M6-PGSC0003DMG400028407M6RLKmalectin\_1674

GAAAAAGATCATCAAAGGAAGTTAGACCGCAGTATATATGGAGTTTGGTTTGGTTATTATTACAATAT  
AAATTTGTATAACTCACTAAAATAAAATTCTGTTTGATTCTTTTGTGAAAT

>M6-PGSC0003DMG400028407M6RLKmalectin\_1736

ACAATATAAATTTGTATAACTCACTAAAATAAAATTCTGTTTGATTCTTTTGTGAAATGCTAACACATATC  
AAAAGAACTAAAAGCAACTGAATTGTTCCCAGGAGGAGTTTACACCTT

>M6-PGSC0003DMG400028407M6RLKmalectin\_1798

ACACATATCAAAGAACTAAAAGCAACTGAATTGTTCCCAGGAGGAGTTTACACCTTTCGTCAAATAAAA  
GATGCCACTCAGAACTTCAATGTTGTGAACAAATTAGGTGAAGGAGGTTT

>M6-PGSC0003DMG400028407M6RLKmalectin\_186

ACCGAGAGTTTGGATAAGCGACCTGAATCATTATAATCAAGGATACATGTGATCTTCCGATACTACAG  
CAGTTCTGGTTGAAACAGCCCGTGTAGCCCTGATCTCTCTCAAGTACTAT

>M6-PGSC0003DMG400028407M6RLKmalectin\_1860

AAATAAAAGATGCCACTCAGAACTTCAATGTTGTGAACAAATTAGGTGAAGGAGGTTTTGGACCTGTTT  
ATAAGGTTAGTTTTTGTGGATTTTTAGCATTCTGTTTATTCATCAAATCA

>M6-PGSC0003DMG400028407M6RLKmalectin\_1922

CCTGTTTATAAGGTTAGTTTTTGTGGATTTTTAGCATTCTGTTTATTCATCAAATCATTCCCATGACCCTG  
GATTGAGCTGCTGCTTATGTACGCATATAGTTACGGCCTTGGTGCTTT

>M6-PGSC0003DMG400028407M6RLKmalectin\_1984

CATGACCCTGGATTGAGCTGCTGCTTATGTACGCATATAGTTACGGCCTTGGTGCTTTTTTTTCTGAAGG  
GATTTTTTGTACTTTATCTGTCACTGCTGCACATATAACATATGAAGAGC



>M6-PGSC0003DMG400028407M6RLKmalectin\_2046

CCTGAAGGGATTTTTGTACTTTATCTGTCACTGCTGCACATATAACATATGAAGAGCCCCTTATCATGTT  
CACGTTTTCGAGCCAATTCTAAATAATGGGGGGTGTCTCTCATCAATAC

>M6-PGSC0003DMG400028407M6RLKmalectin\_2108

TATCATGTTACGTTTTCGAGCCAATTCTAAATAATGGGGGGTGTCTCTCATCAATACAGGGCATGCTCC  
CTGATGGGACTACAATTGCAGTTAAACAGCTATCAGGAAAATCAAAGCAA

>M6-PGSC0003DMG400028407M6RLKmalectin\_2170

CATGCTCCCTGATGGGACTACAATTGCAGTTAAACAGCTATCAGGAAAATCAAAGCAAGGAATACGTGA  
GTTTGTAAATGAAATTGGCACGATTTAGCTCTGCAACATCCGAATCTTGT

>M6-PGSC0003DMG400028407M6RLKmalectin\_2232

TACGTGAGTTTGTAAATGAAATTGGCACGATTTAGCTCTGCAACATCCGAATCTTGTGAAGTTAATGGG  
ATGTTGTGCAGAAGACAACGAGCTCCTACTCATTTACGAATACATGGAAA

>M6-PGSC0003DMG400028407M6RLKmalectin\_2294

TTAATGGGATGTTGTGCAGAAGACAACGAGCTCCTACTCATTTACGAATACATGGAAAATAATTCTCTTG  
ACCATGCATTATTCGGTAATGATAGCAAGGCTCATATGTTTTGACAAAAA

>M6-PGSC0003DMG400028407M6RLKmalectin\_2356

TTCTCTTGACCATGCATTATTCGGTAATGATAGCAAGGCTCATATGTTTTGACAAAAAATTCTGAAGTAGT  
TAATAAAATAATGAAATTTCTTTTGCAGGTCCAGAGGAAATTAATCGA

>M6-PGSC0003DMG400028407M6RLKmalectin\_2418

TGAAGTAGTTAATAAAATAATGAAATTTCTTTTGCAGGTCCAGAGGAAATTAATCGAGACTAAATTGGT  
CGACGAGGGTCAAATTATCCTCGGGATAGCCAAAGGATTAACCTATTG

>M6-PGSC0003DMG400028407M6RLKmalectin\_248

TACTACAGCAGTTCTGGTTGAAACAGCCCGTGTAGCCCTGATCTCTCTCAAGTACTATGGATTTTGTCTTCT  
CCAATGGAAACTACACAGTCAAATATATTTTGTGAGATAGGCTCAAG

>M6-PGSC0003DMG400028407M6RLKmalectin\_2480

AAATTGGTCGACGAGGGTCAAATTATCCTCGGGATAGCCAAAGGATTAACCTATTGTCACGAAGAGTC  
CAAATTGAAGATTATCCACAGGGACATAAAGCCCACAAACATACTCTTGGA

>M6-PGSC0003DMG400028407M6RLKmalectin\_2542

AAGAGTCAAATTGAAGATTATCCACAGGGACATAAAGCCCACAAACATACTCTTGACAAAGGAGTTGA

ATGCAAAAATAACTGATTTTGGATACGCAAAGCTTAATGAAGGGGAACATA

>M6-PGSC0003DMG400028407M6RLKmalectin\_2604

GAGTTGAATGCAAAAATAACTGATTTTGGATACGCAAAGCTTAATGAAGGGGAACATACTCATGTCATC  
ACACGAATTGCTGGAACAACGTAATTTGATAATCCTGCTAATCCTCCTCCA

>M6-PGSC0003DMG400028407M6RLKmalectin\_2666

TGTCATCACACGAATTGCTGGAACAACGTAATTTGATAATCCTGCTAATCCTCCTCCACCCTGTTACCTTA  
AAGCTTATGCTACACATATAGTTTCTTTCCGGATAAGTGTATTTGTTCTC

>M6-PGSC0003DMG400028407M6RLKmalectin\_2728

GTTACCTTAAAGCTTATGCTACACATATAGTTTCTTTCCGGATAAGTGTATTTGTTCTCTCATTGGAAGTTCT  
TTTATAGAGGATATATGGCACCAGAATATGCAATGCGCGGCTACTTAA

>M6-PGSC0003DMG400028407M6RLKmalectin\_2790

TGGAAGTTCTTTTATAGAGGATATATGGCACCAGAATATGCAATGCGCGGCTACTTAACATCAAAGCA  
GACGTTTACAGCTTTGGGGTTGTTACACTTGAAATTGTGAGCGGGAGAAAC

>M6-PGSC0003DMG400028407M6RLKmalectin\_2852

AAAAGCAGACGTTTACAGCTTTGGGGTTGTTACACTTGAAATTGTGAGCGGGAGAAACAGTGCTAGTTG  
CAGGCCAAGTGATCAGACAGTTTACCTTCTTGATTCGGTAAAGCCTCAAAC

>M6-PGSC0003DMG400028407M6RLKmalectin\_2914

CTAGTTGCAGGCCAAGTGATCAGACAGTTTACCTTCTTGATTCGGTAAAGCCTCAAACAAGAAGTTTTCA  
ATTTCAATTCATTGATGCACATGCCTAATAAACAGTTGCCATTGACTTTTT

>M6-PGSC0003DMG400028407M6RLKmalectin\_2976

AGTTTTCAATTCATTCATTGATGCACATGCCTAATAAACAGTTGCCATTGACTTTTTACTTGAATGAGTTT  
GCTAATTTGATCGATGTCTGCTGGTTCGATTGCAGGCTTACGTGTTGC

>M6-PGSC0003DMG400028407M6RLKmalectin\_3038

GAATGAGTTTGCTAATTTGATCGATGTCTGCTGGTTCGATTGCAGGCTTACGTGTTGCAAGAGCAGGGA  
AATTTGATGGATCTAGTTGATCCAAAACCTTGAACAGATTATTCTTGGACA

>M6-PGSC0003DMG400028407M6RLKmalectin\_310

TTTGTTTCTCCAATGGAACTACACAGTCAAACCTATATTTTGGCTGAGATAGGCTCAAGTAAAAACATGC  
CTATCCCATCACACCTAAACGAGTTTTTGGATATTGACATCCAGGTAATAT

>M6-PGSC0003DMG400028407M6RLKmalectin\_3100

GCAGGGAAATTTGATGGATCTAGTTGATCCAAAACCTTGGAACAGATTATTCTTGGACAGAAGCTAATTC  
CATTCTGGAATTAGCAATGATGTGCACTAATCCATCACCAACTCTCAGGCC

>M6-PGSC0003DMG400028407M6RLKmalectin\_3162

CTAATTCCATTCTGGAATTAGCAATGATGTGCACTAATCCATCACCAACTCTCAGGCCAACCATGTCTGA  
GGTAGTGAAAGTTATTGAAGGAAAACTAAAATCAAGACCAAATCTTCAA

>M6-PGSC0003DMG400028407M6RLKmalectin\_3224

ATGTCTGAGGTAGTGAAAGTTATTGAAGGAAAACTAAAATCAAGACCAAATCTTCAACAGTCCGGCGT  
TCAACAGACGAGATTGCATTGACTAAGGCCATGGCTGCACTCTCTCAGACT

>M6-PGSC0003DMG400028407M6RLKmalectin\_3286

CCGGCGTTCAACAGACGAGATTGCATTGACTAAGGCCATGGCTGCACTCTCTCAGACTTCTCCATCTGAA  
AGCTATTCTACAGCAGGGCCATCAGAACTACTCCTCCCTTATCTAACAG

>M6-PGSC0003DMG400028407M6RLKmalectin\_3348

CATCTGAAAGCTATTCTACAGCAGGGCCATCAGAACTACTCCTCCCTTATCTAACAGCAACAATATTACC  
AATGAAATTTGAATCCAACATCTCCCATTTATGAATATTTCCAGATGA

>M6-PGSC0003DMG400028407M6RLKmalectin\_3410

AATATTACCAATGAAATTTGAATCCAACATCTCCCATTTATGAATATTTCCAGATGATTACTGTACTTAG  
ACAATGAAAATCAAGGAGGCAATGATGCTTCAGCATGAGTTTGAACTTC

>M6-PGSC0003DMG400028407M6RLKmalectin\_3472

TGTACTIONGACAATGAAAATCAAGGAGGCAATGATGCTTCAGCATGAGTTTGAACTTCTTTTGTCTTGT  
TTTGAATAAGGAACTTTTGGTCTGACATATCAGTGTAAGATTTTCATTT

>M6-PGSC0003DMG400028407M6RLKmalectin\_3534

GTTCTTGTTTTGAATAAGGAACTTTTGGTCTGACATATCAGTGTAAGATTTTCATTTTAGTAACCGTGTA  
CATTGTCATCAAGATTGTACCAGATGATTGATTTATGCTTTACCACTGA

>M6-PGSC0003DMG400028407M6RLKmalectin\_372

AAACATGCCTATCCCATCACACCTAAACGAGTTTTTGGATATTGACATCCAGGTAATATCTAGGAATGACG  
CAAGTCATTTTCTATATAAAGTTTTCCATAAGAAAGCCATTAACCTTTCTT

>M6-PGSC0003DMG400028407M6RLKmalectin\_434

GAATGACGCAAGTCATTTTCTATATAAAGTTTTCCATAAGAAAGCCATTAACCTTTCTTAAAAAAGTTTTCC  
ATGAGGAAGTCATTTCTAGAAAAATATTTCCAAGATCAATTTATGGTAT

>M6-PGSC0003DMG400028407M6RLKmalectin\_496

AAGTTTTCCATGAGGAAGTCATTTCTAGAAAAATTTCCAAGATCAATTTATGGTATTAGGTTAAATATC  
CAAAATGAAAAATTTATGGTGTGGTTACTAAAAAAGGCTTAGTTATC

>M6-PGSC0003DMG400028407M6RLKmalectin\_558

TTAAATATCCAAAATGAAAAATTTATGGTGTGGTTACTAAAAAAGGCTTAGTTATCAAGAAAAACAAA  
CATTTTCCATCAAAGATAGAAAAAGACTTCCTTCACTTGTGGATGGAAG

>M6-PGSC0003DMG400028407M6RLKmalectin\_62

CAACTGTGGTGGCAAGGAAGTTACTGTAAAGGGCAAACACTACTCTGCTGATCAGAACCCCAATGGATC  
ATCAACATTTTCTCGCAATGAGACAGGAGGTTGGGGTTATAGTAGCATGGG

>M6-PGSC0003DMG400028407M6RLKmalectin\_620

AAAACAAACATTTTCCATCAAAGATAGAAAAAGACTTCCTTCACTTGTGGATGGAAGTCATTTTCCTTAT  
ATAACTTTCTCAATTTTACTTGCTTCAAGTAACACTTAGACATTATTG

>M6-PGSC0003DMG400028407M6RLKmalectin\_682

TTTCCTTATATAACTTTCTCAATTTTACTTGCTTCAAGTAACACTTAGACATTATTGTTAAAAAAAATTTTA  
CTCAAAGTTGCGTCAAACATTCCCCTATATATTATCATTGATCTAT

>M6-PGSC0003DMG400028407M6RLKmalectin\_868

ATTGGTGAGTGAAAAATGCTTTTTGGAAAAAATAATTATATACAAAAATTGATTGAAACAGTA  
ACAAATGGGAGAGTGTTTTGATGAAAATTTGAGTACTAAAGATTAATTAG

>M6-PGSC0003DMG400028407M6RLKmalectin\_930

AACAGTAACAAATGGGAGAGTGTTTTGATGAAAATTTGAGTACTAAAGATTAATTAGGATGTGTA  
TATTGGAGCCAGTAATATTAAGTTAAAAAATTCTATAGAAAATTGACTTCT

>M6-PGSC0003DMG400028407M6RLKmalectin\_992

TGTAACCTATTGGAGCCAGTAATATTAAGTTAAAAAATTCTATAGAAAATTGACTTCTGTCCGTAAGTGA  
GGGAAGTCCTATTTCTCATTTTGAAGGGAAATGTTTTCTACCTTCTGGTT

>M6-PGSC0003DMG400028429M6LRR-RLK\_0

TGAATTCTAAAAGGACTTTTTCTGAAAGCTCTGCACCAAATCTTTCTTTGGGTAATTTAGCTTTTTG  
GATCCAAATGGTAACTTTGCTACTCATTTTCTCATTTTCTTCATTGG

>M6-PGSC0003DMG400028429M6LRR-RLK\_1037

TCACTGAACTGCTGACCCTTGATTTGTCTGGTAATCAGTTTGATGGAGGAATTCCTAGGGCGTTGGGTCG

CCTGATTTATTTAAATTACTTGTGAGTGTAGGCTAAACTCTTGATTTTGT

>M6-PGSC0003DMG400028429M6LRR-RLK\_1098

GTTGGGTCGCCTGATTTATTTAAATTACTTGTGAGTGTAGGCTAAACTCTTGATTTTGTCTATCTTTATTA

CTCGTATGTTACAGTCCCCTTGTGGCTGTGTATGTAATTCTTTGGT

>M6-PGSC0003DMG400028429M6LRR-RLK\_1159

TATCTTTACTCGTATGTTACAGTCCCCTTGTGGCTGTGTATGTAATTCTTTGGTGTGTCAAATTCTC

AGGAGGCTTAGCAGGAACAGATTGTCTGGACAAATTCCTAAACCTGTG

>M6-PGSC0003DMG400028429M6LRR-RLK\_122

GGCCACCACTCCAGCTTCCATGGGTTTTCTTTCACCTAAAGGTGTCAACTATGAAGGTAAAGATTTAAAC

TTTACTATAATCCAATCATTCTTGTTTTTTTTTTCCAGTGAAAAATCCA

>M6-PGSC0003DMG400028429M6LRR-RLK\_1220

GTCAAATTCTCAGGAGGCTTAGCAGGAACAGATTGTCTGGACAAATTCCTAAACCTGTGGCATACTTTC

AGGTCTTTCATTCTTGTATGTCTCCATCCATGACATTTATATGTCCAAT

>M6-PGSC0003DMG400028429M6LRR-RLK\_1281

ATACCTTTCAGGTCTTTCATTCTTGTATGTCTCCATCCATGACATTTATATGTCCAATACAAGGGCTGTAT

GAGAGTTAAATAAACTGTGGATGGTGTGTGTAGGGACTTATCATTCA

>M6-PGSC0003DMG400028429M6LRR-RLK\_1342

AAGGGCTGTATGAGAGTTAAATAAACTGTGGATGGTGTGTGTAGGGACTTATCATTCAATAACCTTAG

TGGTCCAACCTCCAAAAATTTGGCCAAAGACTACAGGTAAGATCCAAGGAA

>M6-PGSC0003DMG400028429M6LRR-RLK\_1403

AACCTTAGTGGTCCAACCTCCAAAAATTTGGCCAAAGACTACAGGTAAGATCCAAGGAAATATTATTATA

TCTGTCTCAATGTTTGGTCCTCAATAGTCGGTGAACCTGGAAGAATTCTTC

>M6-PGSC0003DMG400028429M6LRR-RLK\_1464

ATTATTATATCTGTCTCAATGTTTGGTCCTCAATAGTCGGTGAACCTGGAAGAATTCTTCGGGTCTCTAGTT

TGATGAATCAAGGAATTCAGGGTTTACACTTTTACTATGAGGAGGATGG

>M6-PGSC0003DMG400028429M6LRR-RLK\_1525

GTCTCTAGTTTGATGAATCAAGGAATTCAGGGTTTACACTTTTACTATGAGGAGGATGGTATATGCCACA

GTAAGTGTGCCAGAATCTTATTCAATGAGTTTAAAGATAAACACCTTG

>M6-PGSC0003DMG400028429M6LRR-RLK\_1586

TATGCCACAGTACTGTGCCAGAATCTTATTCATTAATGGAGTTTAAGATAAACACCTTGATCTTAAATTCA  
ACTGCAAATAGAAGCTTGATTCAATATTGTTGCATCTGCGACATGCCA

>M6-PGSC0003DMG400028429M6LRR-RLK\_1647

CTTAAATTCAACTGCAAATAGAAGCTTGATTCAATATTGTTGCATCTGCGACATGCCATATGGCGCAGT  
GCCACACATAATGTTTCTCTCGTAATAAAGTTATGCTTTCTATAGTTTTA

>M6-PGSC0003DMG400028429M6LRR-RLK\_1708

TGGCGCAGTGCCACACATAATGTTTCTCTCGTAATAAAGTTATGCTTTCTATAGTTTTAGTAACTGTTATT  
TTGCATTCCAATTTGTTGTTGTGGTATGTCCCTTCACTGGAAACCAGCA

>M6-PGSC0003DMG400028429M6LRR-RLK\_1769

AACTGTTATTTGCATTCCAATTTGTTGTTGTGGTATGTCCCTTCACTGGAAACCAGCAGTCAGTTCTTGC  
AGACCTGAAAGTAATATCTCAAATCTCATTATCAAAAAAAGAAGAAAA

>M6-PGSC0003DMG400028429M6LRR-RLK\_183

GATTAAACTTTACTATAATCCAATCATTCTTGTTTTTTTTTCCAGTGAAAAATCCAACTTTATTGCTTA  
GCACTGTTTATTTTTGTTTTCATAGTTTAGAGTGGTAAAGATGAAA

>M6-PGSC0003DMG400028429M6LRR-RLK\_1830

CAGTTCTTGCAGACCTGAAAGTAATATCTCAAATCTCATTATCAAAAAAAGAAGAAAAGAAGTA  
TATCTCAAATCTCCTTATCAAAAAAAGAAGTAATATCTCAAATCTTAT

>M6-PGSC0003DMG400028429M6LRR-RLK\_1891

AGAAGTAATATCTCAAATCTCCTTATCAAAAAAAGAAGTAATATCTCAAATCTTATCATTGAAGTATT  
GTCTTCTTACCTGGTCTAATGGAACCTCCATGATGTTTGTGGATATAA

>M6-PGSC0003DMG400028429M6LRR-RLK\_1952

TTGAAGTATTGTCTTCTTACCTGGTCTAATGGAACCTCCATGATGTTTGTGGATATAATTCCTATATTGCT  
AAATATGCTAATGTCAAGCAGAATATTTGCTTGAGATAATTTCTGATG

>M6-PGSC0003DMG400028429M6LRR-RLK\_2013

CCTATATTGCTAAATATGCTAATGTCAAGCAGAATATTTGCTTGAGATAATTTCTGATGTTATAGAAGTTT  
TCTATTCTACTTGCAATGCTTGTGTTTACCTTCCCCTGTCATCATA

>M6-PGSC0003DMG400028429M6LRR-RLK\_2074

ATAGAAGTTTTCTATTCTACTTGCAATGCTTGTGTTTACCTTCCCCTGTCATCATACTAGCAACCCTTCG  
GGTTCTTTGTATTCTATTTTCACTTATAATTTGGTTGTTGCCTTAGT

>M6-PGSC0003DMG400028429M6LRR-RLK\_2135

GCAACCCTTCGGGTTCTTTGTATTCTATTTAGCTTATAATTTGGTTGTTGCCTTAGTATTGCAGGAAAC  
AGATTTCTTTGCTCTGCATTGACCACACAAATTTGTGGGGGTGTGCCAA

>M6-PGSC0003DMG400028429M6LRR-RLK\_2196

TGCAGGAAACAGATTTCTTTGCTCTGCATTGACCACACAAATTTGTGGGGGTGTGCCAAAACCAGTAAAT  
GGTATTGTTGAAATTTTACCAGAACTTGTCATTATATTGAGGCTGATGTT

>M6-PGSC0003DMG400028429M6LRR-RLK\_2257

CCAGTAAATGGTATTGTTGAAATTTTACCAGAACTTGTCATTATATTGAGGCTGATGTTTTTAATCAAAC  
CTATTTTACCATGCAGAAACAACCTTCAGACAAGAGGATTAGCAATCAT

>M6-PGSC0003DMG400028429M6LRR-RLK\_2318

TAATCAAACCTCTATTTTTACCATGCAGAAACAACCTTCAGACAAGAGGATTAGCAATCATCATCGATGGGT  
TGTTTCTGTTAGCGTTGGGGTCAGTTGCACATTCATAGTTACAGTCTTGC

>M6-PGSC0003DMG400028429M6LRR-RLK\_2379

TCGATGGGTTGTTTCTGTTAGCGTTGGGGTCAGTTGCACATTCATAGTTACAGTCTTGCTTCTGGTTTGT  
GGGTGCATTGGTACAGATCTCGTGTCTCACAGGATATGGTAATTACAA

>M6-PGSC0003DMG400028429M6LRR-RLK\_244

CTTTATTGCTTAGCACTTGTTTATTTTTGTTTTCATAGTTTAGAGTGGTAAAGATGAAAACCTTACTACAAT  
CCAAAAATTTGTTGTTTTTTTTCCAGTGAAAAATCCAAACTTTGTTG

>M6-PGSC0003DMG400028429M6LRR-RLK\_2440

CTGGTTTGTGGGTGCATTGGTACAGATCTCGTGTCTCACAGGATATGGTAATTACAAGATTAGAAACA  
CATCTCCGATTTCTTGCACATTAAGACTAGATACATTATGAGTCTCTGAT

>M6-PGSC0003DMG400028429M6LRR-RLK\_2501

TTAGAAACACATCTCCGATTTCTTGCACATTAAGACTAGATACATTATGAGTCTCTGATCATTGATCTGC  
AGTGCAACACGATTGTGAGTTCGCCACTGGCCACCTGAAGAGATTTCA

>M6-PGSC0003DMG400028429M6LRR-RLK\_2562

TTTGATCTGCAGTGCAACACGATTGTGAGTTCGCCACTGGCCACCTGAAGAGATTTTCATTTGTTGAACT  
GCAAATTGCCACTGGAAATTTTTCAGCTCTAAGAACATACTAGGACAAGGTG

>M6-PGSC0003DMG400028429M6LRR-RLK\_2623

TCGTGAACTGCAAATTGCCACTGGAAATTTTTCAGCTCTAAGAACATACTAGGACAAGGTGGATTTGGAGT

GGTTTACAAAGGATACCTTCCAAATAGGACAGTAGTGGCTGTCAAAAGATT

>M6-PGSC0003DMG400028429M6LRR-RLK\_2684

TTTGGAGTGGTTTACAAAGGATACCTTCCAAATAGGACAGTAGTGGCTGTCAAAAGATTAAGAGATCCA  
AGTTTCACTGGAGAAGTGCAGTTTCAAACAGAAGTTGAGATGATAGGCTTG

>M6-PGSC0003DMG400028429M6LRR-RLK\_2745

GAGATCCAAGTTTCACTGGAGAAGTGCAGTTTCAAACAGAAGTTGAGATGATAGGCTTGGCTGTGCATC  
GGAACCTTCTACGTCTGTATGGATTCTGTACGACTCCCGAGGAAAGATTAC

>M6-PGSC0003DMG400028429M6LRR-RLK\_2806

TGTGCATCGGAACCTTCTACGTCTGTATGGATTCTGTACGACTCCCGAGGAAAGATTACTTATTTACCCTT  
ATATGCCAAATGGGAGCGTTGCCGATTGCTTGAGAGGTTTGCTTTGAAG

>M6-PGSC0003DMG400028429M6LRR-RLK\_2867

ATTTACCCTTATATGCCAAATGGGAGCGTTGCCGATTGCTTGAGAGGTTTGCTTTGAAGTATATTTGCTT  
GGTGCTTTTGCTGAAGCATTCTTTTTCTTTTACAATGGATTTTCGTAAA

>M6-PGSC0003DMG400028429M6LRR-RLK\_2928

TATTTGCTTGGTGCTTTTGCTGAAGCATTCTTTTTCTTTTACAATGGATTTTCGTAAACTGATCAAGTTTA  
ACATATGCATTTCAATTATTCCTAGTGCTCTCAATGTTAATCTGGCAA

>M6-PGSC0003DMG400028429M6LRR-RLK\_2989

GATCAAGTTTAACATATGCATTTCAATTATTCCTAGTGCTCTCAATGTTAATCTGGCAAAAACCTTGAAA  
GGTCATGGTTTATGGAAATCGAGGACGTTGTGCTTTATTTTTACTGTAC

>M6-PGSC0003DMG400028429M6LRR-RLK\_305

TTTACTACAATCCAAAATTTGTTGTTTTTTTTCCAGTGAAAATCCAACTTTGTTGCTTAGCACTGTTT  
ACAAGCATTATTTGTTTATGTTTTCATAGTTTAGAGTGGTAACTTTA

>M6-PGSC0003DMG400028429M6LRR-RLK\_3050

ACTCTTGAAAGGTCATGGTTTATGGAAATCGAGGACGTTGTGCTTTATTTTTACTGTACATCTGAAAACA  
CCAGGGCCCTATGATGAAAACAACCTTTGATTGATTATCTTAGATAGTTA

>M6-PGSC0003DMG400028429M6LRR-RLK\_3111

CTGAAAACACCAGGGCCCTATGATGAAAACAACCTTTGATTGATTATCTTAGATAGTTAAATTGGATTTA  
CATTGTCAATTTTTCTTGTGAAAGTGGAATGAAATCTATTATCAACATAT

>M6-PGSC0003DMG400028429M6LRR-RLK\_3172



TTGGATTACATTGTCAATTTTTCTTGTGAAAGTGGAATGAAATCTATTATCAACATATCAATCAACAATG  
CATCAAACCCAATCTAGTTGGGGTTGACTATATGAATTTTTGTATCCA

>M6-PGSC0003DMG400028429M6LRR-RLK\_3233

ATCAACAATGCATCAAACCCAATCTAGTTGGGGTTGACTATATGAATTTTTGTATCCATTGCAATTAAGA  
CTCCTGATGTAGTGCATTACTTAAGTAGGCATGCCTCTAGCAATCTATT

>M6-PGSC0003DMG400028429M6LRR-RLK\_3294

GCAATTAAGACTCCTGATGTAGTGCATTACTTAAGTAGGCATGCCTCTAGCAATCTATTGCGACCTTACG  
TGCTATTAAGCTTAATTTTTATGTGACAAAGTTTCTATCCATCTTCTGAA

>M6-PGSC0003DMG400028429M6LRR-RLK\_3355

GACCTTACGTGCTATTAAGCTTAATTTTTATGTGACAAAGTTTCTATCCATCTTCTGAAACTCTAATGCCAT  
TTATGGTATCGACTTACATTATCCATGAATAAAATAAATTGTTATTTG

>M6-PGSC0003DMG400028429M6LRR-RLK\_3416

TCTAATGCCATTTATGGTATCGACTTACATTATCCATGAATAAAATAAATTGTTATTTGGCAGTAAGGTAA  
CTGTCGTGTTGTCATTAATTTTTAGCATGACCAATTCAAGTCAATTTTT

>M6-PGSC0003DMG400028429M6LRR-RLK\_3477

AGTAAGGTAAGTGTGTCGTTGTCATTAATTTTTAGCATGACCAATTCAAGTCAATTTTTAGGTATATGAAC  
ACAAAAATCAAGTTGGAATTATTGGAATGTAAACACATTAGCTTGATGT

>M6-PGSC0003DMG400028429M6LRR-RLK\_3538

GTATATGAACACAAAAATCAAGTTGGAATTATTGGAATGTAAACACATTAGCTTGATGTAGTACTGTGT  
CATCTTTTGCTCTGTTCTCACATAATCTTTGTTATCTACCAGACAATGG

>M6-PGSC0003DMG400028429M6LRR-RLK\_3599

TGACTGTGTCATCTTTTGCTCTGTTCTCACATAATCTTTGTTATCTACCAGACAATGGCCGGGATAAACC  
ATTTTTGGATTGGAGAAAGCGCATGCATATAGCTCTTGGAGCTGCCAGA

>M6-PGSC0003DMG400028429M6LRR-RLK\_366

TAGCACTGTTTACAAGCATTTATTTGTTTATGTTTTCATAGTTTAGAGTGGTAACTTTACTTAAAGATTTGT  
TGAATTTATTGTGGGGTAAGCAGTGGCTGCATTGATGTCTATGAAGAA

>M6-PGSC0003DMG400028429M6LRR-RLK\_3660

GGGATAAACCATTTTTGGATTGGAGAAAGCGCATGCATATAGCTCTTGGAGCTGCCAGAGGTCTTCTGT  
ATTTGCATGAACAGTGAATCCTAAAATAATTCACAGAGATGTTAAGGCGG

>M6-PGSC0003DMG400028429M6LRR-RLK\_3721

TCTTCTGTATTTGCATGAACAGTGTAATCCTAAAATAATTCACAGAGATGTTAAGGCGGCTAATATTCTG  
CTTGATGAAAGTTTTGAAGCTGTTGTTGGTGATTTTGGTCTTGCTAAGCT

>M6-PGSC0003DMG400028429M6LRR-RLK\_3782

AATATTCTGCTTGATGAAAGTTTTGAAGCTGTTGTTGGTGATTTTGGTCTTGCTAAGCTTTTAGACTGTAG  
AGATTCTCATGTTACAACACTGCAGTTCGTGGTACTATAGGTCATATAGCA

>M6-PGSC0003DMG400028429M6LRR-RLK\_3843

TAGACTGTAGAGATTCTCATGTTACAACACTGCAGTTCGTGGTACTATAGGTCATATAGCACCAGAGTATTT  
ATCAACTGGTCAATCATCTGAGAAGACAGATGTCTTTGGATATGGGATAC

>M6-PGSC0003DMG400028429M6LRR-RLK\_3904

AGAGTATTTATCAACTGGTCAATCATCTGAGAAGACAGATGTCTTTGGATATGGGATACTACTTTTGGAA  
CTCATTACAGGACACAAGGCATTAGATGCAGGAATTGGTCAGGGTCAGAA

>M6-PGSC0003DMG400028429M6LRR-RLK\_3965

CTTTTGGAACTCATTACAGGACACAAGGCATTAGATGCAGGAATTGGTCAGGGTCAGAAAGGAACTATT  
CTTGACCGGGTGTGTAGCTTCTAACCTCCTACTGTTTGAAGCTTTATATA

>M6-PGSC0003DMG400028429M6LRR-RLK\_4026

GAACTATTCTTGACCGGGTGTGTAGCTTCTAACCTCCTACTGTTTGAAGCTTTATATAGTTGTGCATATA  
ATTTCTAGACTTTATTTGATTAACCTGTTAATAGTTAATCTTCTTGACAG

>M6-PGSC0003DMG400028429M6LRR-RLK\_4087

TGTGCATATAATTTCTAGACTTTATTTGATTAACCTGTTAATAGTTAATCTTCTTGACAGGATTTTGTGGAG  
TCATAATCAATATCAATATTTGACTTGAAATTTTCACTAAAATTGAC

>M6-PGSC0003DMG400028429M6LRR-RLK\_4148

TTTTGTTTGAGTCATAATCAATATCAATATTTGACTTGAAATTTTCACTAAAATTGACGCAATAACTAGT  
GTCTAACGCAGAAGTTGCTCCACATCTTATGAGAGAAGTACAGTTCCAA

>M6-PGSC0003DMG400028429M6LRR-RLK\_4209

AATAACTAGTGTCTAACGCAGAAGTTGCTCCACATCTTATGAGAGAAGTACAGTTCCAAAATTCTGAATC  
ATTGCTCGAAAATTGTTCTTTTACTGACTGCATAATCTGGTTCATGAT

>M6-PGSC0003DMG400028429M6LRR-RLK\_427

TAAAGATTTGTTGAATTTATTGTGGGGTAAGCAGTGGCTGCATTGATGTCTATGAAGAATATAATGAGA

GATGAATACCATGTGTTAGATGGATGGGATATAAATTCTGTTGATCCTTGT

>M6-PGSC0003DMG400028429M6LRR-RLK\_4270

TTCTGAATCATTGCTCGAAAACCTGTTCTTTTTACTGACTGCATAATCTGGTTCATGATCTGTAGGAATTA

TGGACAACATATTCAAGGTTTTGAATCACTTACTGATCAGTGCAATAA

>M6-PGSC0003DMG400028429M6LRR-RLK\_4331

GTAGGAATTATGGACAACATATTCAAGGTTTTGAATCACTTACTGATCAGTGCAATAAAATTATTGCTG

TGTATAACCTTACTGTTGCATACTTTAAGCCCTTAAATATAAATTATTTG

>M6-PGSC0003DMG400028429M6LRR-RLK\_4392

TTATTGCTGTGTATAACCTTACTGTTGCATACTTTAAGCCCTTAAATATAAATTATTTGGTTGATTTTTTAT

TACATATAATGTTACACTTGCATACTTTAAGCCCTTGATTAACCTATT

>M6-PGSC0003DMG400028429M6LRR-RLK\_4453

TGATTTTTTATTACATATAATGTTACACTTGCATACTTTAAGCCCTTGATTAACCTATTTGGTTGATATTTAT

TACATTATCATGTAAGTCTGAACAACCATGTATTATTCTAGAATAGT

>M6-PGSC0003DMG400028429M6LRR-RLK\_4514

GTTGATATTTATTACATTATCATGTAAGTCTGAACAACCATGTATTATTCTAGAATAGTTGTGTGAAAAAA

GGTACCCGTTCTATGCTTCTCAATTATGATTTTTCTTCTTCTCAGGC

>M6-PGSC0003DMG400028429M6LRR-RLK\_4575

TGTGAAAAAAGGTACCCGTTCTATGCTTCTCAATTATGATTTTTCTTCTTCTCAGGCTGTTTTATGTGGA

GTAAAGATTTTCAGAACATGATAGAGTTCAGAGTTTGTTATGTCTATT

>M6-PGSC0003DMG400028429M6LRR-RLK\_4636

TTTTATGTGGAGTAAAGATTTTCAGAACATGATAGAGTTCAGAGTTTGTTATGTCTATTATTCGGGCCTAT

TCATTCTGACAACCTGTCCAATTTACAGGTCCGGAATTTATTTGAGGAA

>M6-PGSC0003DMG400028429M6LRR-RLK\_4697

TCGGGCCTATTCATTCTGACAACCTGTCCAATTTACAGGTCCGGAATTTATTTGAGGAAAAGAAAGTGGA

AATGCTTGCGGATAGGGATCTAAGAGGATGTTTTAATGCAGAGGAGCTAG

>M6-PGSC0003DMG400028429M6LRR-RLK\_4758

GAAAGTGAAATGCTTGCGGATAGGGATCTAAGAGGATGTTTTAATGCAGAGGAGCTAGAGAAAACAG

TTGAAGTGGCTCTACAGTGTACTCAATCTAACCCCAATAATCGGCCTAAGAT

>M6-PGSC0003DMG400028429M6LRR-RLK\_4819

AAAACAGTTGAAGTGGCTCTACAGTGTACTCAATCTAACCCCAATAATCGGCCTAAGATGTCGGAAGTTT  
TGAGAATCCTGGAAGGCGTTACAGAACAAATGGGGCATGTGGACGAATCA

>M6-PGSC0003DMG400028429M6LRR-RLK\_488

TAATGAGAGATGAATACCATGTGTTAGATGGATGGGATATAAATTCTGTTGATCCTTGACTTGGTACAT  
GGTTGGTTGTTCTTCAGAAGGCTTTGTTATTTCTCTGTGAGTTTTCTCCC

>M6-PGSC0003DMG400028429M6LRR-RLK\_4880

CGGAAGTTTTGAGAATCCTGGAAGGCGTTACAGAACAAATGGGGCATGTGGACGAATCACAAGGTGGA  
AGCAACACATGTCAAACAAGGGCTTTCTAGCTTCTCTAGGAATTTTAGTGATT

>M6-PGSC0003DMG400028429M6LRR-RLK\_4941

AGGTGGAAGCAACACATGTCAAACAAGGGCTTTCTAGCTTCTCTAGGAATTTTAGTGATTTTCATGAAGA  
ATCCTCATTACTTTTGAACCAATTGAGCTTTCTAGGACCCAGATAACAAAA

>M6-PGSC0003DMG400028429M6LRR-RLK\_5002

CATGAAGAATCCTCATTACTTTTGAACCAATTGAGCTTTCTAGGACCCAGATAACAAAAGCAGCCTGCAC  
TGGCATCGTCATAAAAAGCATGCAATCTTGATATATCTAGTGTAGCCATA

>M6-PGSC0003DMG400028429M6LRR-RLK\_5063

AGCCTGCACTGGCATCGTCATAAAAAGCATGCAATCTTGATATATCTAGTGTAGCCATACATACGAGTAT  
ATTGTTGCTTTAAGTCAATGTCCTAGTACTCTGTAAGTTACTGTAATTTG

>M6-PGSC0003DMG400028429M6LRR-RLK\_5124

TACGAGTATATTGTTGCTTTAAGTCAATGTCCTAGTACTCTGTAAGTTACTGTAATTTGTAAATTTTGTTG  
CAAAAACATTCATTATACTAGTTCTTGGTGGTTCACAATCTGTGTTAGA

>M6-PGSC0003DMG400028429M6LRR-RLK\_5178

ATTTGTAAATTTTGTTGCAAAAACATTCATTATACTAGTTCTTGGTGGTTCACAATCTGTGTTAGAACTAG  
CTAGACTAACTTCATTTTGGAACTTCATTCTTTGGAAATGACAACTTC

>M6-PGSC0003DMG400028429M6LRR-RLK\_549

TTGGTACATGGTTGGTTGTTCTTCAGAAGGCTTTGTTATTTCTCTGTGAGTTTTCTCCCTTTCTGTTACATC  
TTGTCCATTTCTTTCCCTTTCTGTGAAAATAATTTATTATTATTCTT

>M6-PGSC0003DMG400028429M6LRR-RLK\_61

TAGCTTTTTGGATCCAAATGGTAACTTTGCTACTCATTTTCTCATTTTTCTTCATTGGGTGGCCACCACTC  
CAGCTTCCATGGGTTTTCTTTCACCTAAAGGTGTCAACTATGAAGGTA

>M6-PGSC0003DMG400028429M6LRR-RLK\_610

TCTGTTACATCTTGTCCATTTCTTTCCCTTTCTGTGAAAATAATTTATTATTATTCTTTGGTTATATATTCTT  
GGCAGTGAAATGGCAAGTATGGGATTATCTGGCACACTTTTCGCCTA

>M6-PGSC0003DMG400028429M6LRR-RLK\_671

GTTATATATTCTTGGCAGTGAAATGGCAAGTATGGGATTATCTGGCACACTTTTCGCCTAGTATTGGGAAT  
TAACTCATCTTCGGACAATGTAAGACTAATTTGACATGAATTTCCCACT

>M6-PGSC0003DMG400028429M6LRR-RLK\_732

ATTGGGAATTTAACTCATCTTCGGACAATGTAAGACTAATTTGACATGAATTTCCCACTTTATTCTTATTTT  
GATGTGATGCTGCTCACATATATCTTGGAGATACTTGAAGTTAAAATC

>M6-PGSC0003DMG400028429M6LRR-RLK\_793

ATTCTTATTTTATGATGTGATGCTGCTCACATATATCTTGGAGATACTTGAAGTTAAAATCACATAGTACTTT  
TAGTTTAATAAATACTAATACTATTAAGAGTGACATTAAGTGATTTAAT

>M6-PGSC0003DMG400028429M6LRR-RLK\_854

ATAGTACTTTTAGTTTAATAAATACTAATACTATTAAGAGTGACATTAAGTGATTTAATTGCAAGATATGT  
TGAAAAATATCTTTTAATATGATCTGTTTAAGTCATTTTTGCATTGGTT

>M6-PGSC0003DMG400028429M6LRR-RLK\_915

CAAGATATGTTGAAAAATATCTTTTAATATGATCTGTTTAAGTCATTTTTGCATTGGTTTTTGTGTAGGTT  
GTTGCAGAATAATCATTTATCTGGTCCAATTCCTACTGAAATTGGACA

>M6-PGSC0003DMG400028429M6LRR-RLK\_976

TGTTGTAGGTTGTTGCAGAATAATCATTTATCTGGTCCAATTCCTACTGAAATTGGACAGCTCACTGAACT  
GCTGACCCTTGATTTGTCTGGTAATCAGTTTGATGGAGGAATTCCTAGG

>M6-PGSC0003DMG400028435M6LRR-RLK\_0

TTAGCATGAGGCTAAGCACCAAAGTTTGTTAATTGAGAATTAACACCTTGAGCAACATCATAAAAAATTTG  
CAAATTTGCTTGCCGTTTGTCAAATAATTTGCAGGCACAATTCCAGCAA

>M6-PGSC0003DMG400028435M6LRR-RLK\_1054

CATCGTTGGGCTTGCTTTCTTTGTACTATAATCGGATTTCTGGTCCGATACCATCTTGCATTGGTAATGCA  
ACCTCTTTGAGAAATGCTTATCTAAATTCAAATAGGCTCACTAACATAC

>M6-PGSC0003DMG400028435M6LRR-RLK\_1116

GGTAATGCAACCTCTTTGAGAAATGCTTATCTAAATTCAAATAGGCTCACTAACATACCATAAGTCTGT

GGAGCCTCAAATATCTTTTGGTGCTTAACTTGTCAAATAATTCTTTGATT

>M6-PGSC0003DMG400028435M6LRR-RLK\_1178

AAGTCTGTGGAGCCTCAAATATCTTTTGGTGCTTAACTTGTCAAATAATTCTTTGATTGGTTCTATACCTC  
CAGAATTAGGGAACCTTGAAAGCCATAACGTCCTTAAATCTGTCCTGGAA

>M6-PGSC0003DMG400028435M6LRR-RLK\_124

TGGTAATTTAGGAAAGTTGCAGCAATTACAATTGGAGAACAATCGCATCGTGGGTTCAATACCGCGCAC  
CATATCGAACTTATCATCACTATGGATGCTTAAATTTGAACACAAATAATTT

>M6-PGSC0003DMG400028435M6LRR-RLK\_1240

CTATACCTCCAGAATTAGGGAACCTTGAAAGCCATAACGTCCTTAAATCTGTCCTGGAATCACTTTTCAGG  
AAGTATCCCTCCACAATTGGAGACTTGCAGAGCCTACTTTATCTTTCT

>M6-PGSC0003DMG400028435M6LRR-RLK\_1302

TTTTCAGGAAGTATCCCTCCACAATTGGAGACTTGCAGAGCCTACTTTATCTTTCTTGTCTTATAATGA  
GTTACAAGGATCTATCCAGAGTCATTTGGGAAAATGATAAGTTTGGAA

>M6-PGSC0003DMG400028435M6LRR-RLK\_1364

TTATAATGAGTTACAAGGATCTATCCAGAGTCATTTGGGAAAATGATAAGTTTGGAAATCGGTTAATCTA  
TCCAATAACATTCTTTTCAGGTACCATTCCAAAATCATTAGAGTTGCTTCG

>M6-PGSC0003DMG400028435M6LRR-RLK\_1426

TTAATCTATCCAATAACATTCTTTTCAGGTACCATTCCAAAATCATTAGAGTTGCTTCGGTATCTGAAGAAT  
TTCAATGTATCATTCAATAGATTAGAAGGTGAAATCCCAAGTAAAGGAC

>M6-PGSC0003DMG400028435M6LRR-RLK\_1488

CTGAAGAATTTCAATGTATCATTCAATAGATTAGAAGGTGAAATCCCAAGTAAAGGACCTTTTCTCATTTT  
CATCTCTCAATCTTTTATGGGAAATGGAGGGTTATGCGGCGGTTTAGTT

>M6-PGSC0003DMG400028435M6LRR-RLK\_1550

TCTCATTTTCATCTCTCAATCTTTTATGGGAAATGGAGGGTTATGCGGCGGTTTAGTTTTCCAACCTTGTA  
TGACTAGGGCTTTTCATCATTCAAGGAGAATCAAAGTCTTCTGATTTT

>M6-PGSC0003DMG400028435M6LRR-RLK\_1612

AACCTTGATGACTAGGGCTTTTCATCATTCAAGGAGAATCAAAGTCTTCTGATTTTACTTGTCTCACTG  
GGAGCTGCTGTAATGGTACTTGGCTCAATCGCTGTGTTTATGTAAAGGA

>M6-PGSC0003DMG400028435M6LRR-RLK\_1674

GTCTCACTGGGAGCTGCTGTAATGGTACTTGGCTCAATCGCTGTGTTTATGTTAAGGAGACCTCGGAATA  
GAAATATTCCAACCTCAAGCTGAATCCTTTGCTGCAACCACACTAGCCAGG

>M6-PGSC0003DMG400028435M6LRR-RLK\_1736

TCGGAATAGAAATATTCCAACCTCAAGCTGAATCCTTTGCTGCAACCACACTAGCCAGGATTCATACATT  
GAAATTGAAAGGGCAACTCAAGGGTTCGACCAATGCAACTTGCTAGGCTC

>M6-PGSC0003DMG400028435M6LRR-RLK\_186

CGCGCACCATATCGAACTTATCATCACTATGGATGCTTAATTTGAACACAAATAATTTATCAGGTACCTTG  
GTCTTGTGTTGCTTGGAAATTAATTGTTGTTTTTATCAACTCTTATATA

>M6-PGSC0003DMG400028435M6LRR-RLK\_1860

GGTTTTGGCTCTGTTTACAAGGGCATGTTTGCAAATGGGATGACTTTGGCAATCAAAGTGTTTAATTTAC  
AGGTTGAAGGTGCGTTAAAGAGTTTTGATGCTGAATGTGAAGTTTTACGC

>M6-PGSC0003DMG400028435M6LRR-RLK\_1922

TAATTTACAGGTTGAAGGTGCGTTAAAGAGTTTTGATGCTGAATGTGAAGTTTTACGCAACCTTCGTCAT  
AGAAATCTTACCAAAGTTATCAGCAGTTGTAATAACTTGGATTTTAAAGC

>M6-PGSC0003DMG400028435M6LRR-RLK\_2046

CCTCTTGAGTATATGCCCAATGGAAGCCTAGAGCTGTGGTTACATTCTGATGATCGCTTCTTGAATATGA  
TCCAAAGATTAGACATAATGATCGATGTTGCATTTGCTTTGGAATATCTC

>M6-PGSC0003DMG400028435M6LRR-RLK\_2108

GAATATGATCCAAAGATTAGACATAATGATCGATGTTGCATTTGCTTTGGAATATCTCCATCATGGTTAT  
GAAACAGTTGTTGTACATAGTGACCTGAAGCCTAGCAACGTCTTGCTAGA

>M6-PGSC0003DMG400028435M6LRR-RLK\_2170

ATGGTTATGAAACAGTTGTTGTACATAGTGACCTGAAGCCTAGCAACGTCTTGCTAGATGAAAAGTTGG  
TTGGACATGTGAGTGACTTTGGCCTGACCAAGTTATTAGGAGAAGGGGAAT

>M6-PGSC0003DMG400028435M6LRR-RLK\_2294

TGCTCATACTAAAACACTTGCCACAATGGGCTACATTGCACCAGGTAACCTTTCTTTAAGTCCTTTTATCAT  
CGCCTATGATGTGTTATTTTACATCAAATAATTAGTTGACTGGTTCTAA

>M6-PGSC0003DMG400028435M6LRR-RLK\_2356

TTTTATCATCGCCTATGATGTGTTATTTTACATCAAATAATTAGTTGACTGGTTCTAATAATGCATCACA  
TTAGAACTGGGTGAACGCCTAGGTGGATGGCTTATATTAATGGGAAGA

>M6-PGSC0003DMG400028435M6LRR-RLK\_248

GGTACCTTGGTCTTGTTGTCTTGAATTAATTGTTGTTTTTATCAACTCTTATATATACTGATGGGCACA  
ATCAAATAAAAGTAATTTAGATTTATTCTTTCGTGTGGCAGGTATTAT

>M6-PGSC0003DMG400028435M6LRR-RLK\_2604

TATTTGGCTCGTCAAGAATCTAATTACTCTGGTAACATTGGATCAGAGTATGGATCAGTAGGATTAGTTT  
CTACAAGATGTGATGCGTACAGCTATGGCATTATGCTCATGGAACTTTT

>M6-PGSC0003DMG400028435M6LRR-RLK\_2666

ATTAGTTTCTACAAGATGTGATGCGTACAGCTATGGCATTATGCTCATGGAACTTTTACAAGAAAAAGG  
CCATATGATGAAATGTTTCAAGAAAATTTGAGCATGAGGAGTTGGGTCTG

>M6-PGSC0003DMG400028435M6LRR-RLK\_2728

GAAAAAGGCCATATGATGAAATGTTTCAAGAAAATTTGAGCATGAGGAGTTGGGTCTGCAATTCACTAA  
CTGCAATGCCAGAGGATATTATTGATGCCACATTAATGGAACCAGAAAAGA

>M6-PGSC0003DMG400028435M6LRR-RLK\_2790

TCACTAACTGCAATGCCAGAGGATATTATTGATGCCACATTAATGGAACCAGAAAAGACTCATTTTCAGG  
AAAAGTTGCATTGTGTGTCTTCTATTTTGGAGTTGGCATTGCATTGCACA

>M6-PGSC0003DMG400028435M6LRR-RLK\_2852

TTTTCAGGAAAAGTTGCATTGTGTGTCTTCTATTTTGGAGTTGGCATTGCATTGCACAACTGAATCTCCCA  
ATGAAAGGTTGAACATGATAGAAGTCCTTGCAAATATCAAGAAGATCAA

>M6-PGSC0003DMG400028435M6LRR-RLK\_2914

AATCTCCAATGAAAGGTTGAACATGATAGAAGTCCTTGCAAATATCAAGAAGATCAAGTTGGAATTTCT  
TAGCAAATGATGTACGTCGCACTGGTAACTATCCCTTTTTTAAAATATTC

>M6-PGSC0003DMG400028435M6LRR-RLK\_2976

GAATTTCTTAGCAAATGATGTACGTCGCACTGGTAACTATCCCTTTTTTAAAATATTCTAATGTCGTCTAG  
ATATATTATTTCTTATTCAGGAATAGAAAAAATTATTGTCTTGTCTTT

>M6-PGSC0003DMG400028435M6LRR-RLK\_3038

GTCGTCTAGATATATTATTTCTTATTCAGGAATAGAAAAAATTATTGTCTTGTCTTTATCGTACATAAATA  
TTGAATTGGATATTCTGGTTTTCCATACAAATATATCCACTTGTATAA

>M6-PGSC0003DMG400028435M6LRR-RLK\_310

GATGGGCACAATCAAATAAAAGTAATTTAGATTTATTCTTTCGTGTGGCAGGTATTATACCCAGAGAGAT



TGGAAATCTTCACAAACTGGAGATACTTTATTTGCAAATTAATAAGTTAA

>M6-PGSC0003DMG400028435M6LRR-RLK\_3100

TACATAAATATTGAATTGGATATTCTGGTTTTCCATACAAATATATCCACTTGTATAAGAAAAACAAGAA  
CTAATTGAAACATAACTTTAATCATGATTTTATAAGTAGAAGAATCCAA

>M6-PGSC0003DMG400028435M6LRR-RLK\_3162

AAACAAGAACTAATTGAAACATAACTTTAATCATGATTTTATAAGTAGAAGAATCCAACATTTTTGCCCAT  
GGAAATTTGAATTGTGATGAATGTTGAAAACACTGAAGTAAACAACACTCAAG

>M6-PGSC0003DMG400028435M6LRR-RLK\_3224

TTTGCCCATGGAAATTTGAATTGTGATGAATGTTGAAAACACTGAAGTAAACAACACTCAAGTCTCCGTTACTG  
TTAGTTTGTTTTTGCAGTGTCAACTCAAGTTTGATTCCAATTGAACATTT

>M6-PGSC0003DMG400028435M6LRR-RLK\_3286

CGTTACTGTTAGTTTGTTTTTGCAGTGTCAACTCAAGTTTGATTCCAATTGAACATTTGTGCAGGTTGTGC  
TGCCGTTTTCTGGCTTCTAGCAAATTTGGGTGACACCAATTGAGATGA

>M6-PGSC0003DMG400028435M6LRR-RLK\_3348

AGTTGTGCTGCCGTTTTCTGGCTTCTAGCAAATTTGGGTGACACCAATTGAGATGAAAAATCAACATT  
TGTTCCAGATTTGAAATTTCTGTTTCTGTTGTGTTTTGTCTTGTGC

>M6-PGSC0003DMG400028435M6LRR-RLK\_3410

TCAACATTTGTTCCAGATTTGAAATTTCTGTTTCTGTTGTGTTTTGTCTTGTGCATATTTGACATTTG  
GTAAAATAAGTTTTAATATATAAGATGTGTACTACAGTTGGAATGGA

>M6-PGSC0003DMG400028435M6LRR-RLK\_372

AGAGAGATTGGAAATCTTCACAAACTGGAGATACTTTATTTGCAAATTAATAAGTTAAGTGGTTCCATAC  
CGGAAGGGCTCTTCAATATCTCTACTCTAACAGAGGTGTCAGTTTTCTTC

>M6-PGSC0003DMG400028435M6LRR-RLK\_434

TTCCATACCGGAAGGGCTCTTCAATATCTCTACTCTAACAGAGGTGTCAGTTTTCTTCAATAACTTTTCGG  
GTAGTCTTCCATCTGCTTCAGGGTACTGGCAAACAAATCTACAGCGTTT

>M6-PGSC0003DMG400028435M6LRR-RLK\_496

ACTTTTCGGGTAGTCTTCCATCTGCTTCAGGGTACTGGCAAACAAATCTACAGCGTTTGAATCTTGGTCA  
AAACTACATTGGTGGAGTTATACCTACTTCAATCTCCAATTCATCAAATC

>M6-PGSC0003DMG400028435M6LRR-RLK\_558

CTTGGTCAAACACTACATTGGTGGAGTTATACCTACTTCAATCTCCAATTCATCAAATCTAGAGATTGTAGA  
TCTTAGTATAAACAAATTCAGTGGCCAAATTCCTAACTCGTTGGGGGAT

>M6-PGSC0003DMG400028435M6LRR-RLK\_62

AAAATTTGCAAATTTGCTTGCCGTTTGTCAAATAATTTGCAGGCACAATTCCAGCAAAGATTGGTAATT  
TAGGAAAGTTGCAGCAATTACAATTGGAGAACAATCGCATCGTGGGTTCA

>M6-PGSC0003DMG400028435M6LRR-RLK\_620

GATTGTAGATCTTAGTATAAACAAATTCAGTGGCCAAATTCCTAACTCGTTGGGGGATTTGAGGAATCTT  
GAATATCTGGACTTGTTTCGTTAATAATTTATCGTCTCCGCACCTAAGTAT

>M6-PGSC0003DMG400028435M6LRR-RLK\_682

GGAATCTTGAATATCTGGACTTGTTTCGTTAATAATTTATCGTCTCCGCACCTAAGTATCTTAACTTCATTG  
GTGAACTGCATATATTTGAAAGAAGTAATATTAGGGGATAATCCTCTGA

>M6-PGSC0003DMG400028435M6LRR-RLK\_744

ACTTCATTGGTGAACCTGCATATATTTGAAAGAAGTAATATTAGGGGATAATCCTCTGAATGGTGTCTTC  
CAGATTCCATTGGCAATCTCTCCACTTCTATCATGGAACCTGAGTTACAT

>M6-PGSC0003DMG400028435M6LRR-RLK\_806

TGTTCTTCCAGATTCCATTGGCAATCTCTCCACTTCTATCATGGAACCTGAGTTACATCATTCTGAAATTAG  
GGGCCAGATACCATTAGGAATTGGGAATTTAAGTAACTTAAACACTTT

>M6-PGSC0003DMG400028435M6LRR-RLK\_868

CTGAAATTAGGGGCCAGATACCATTAGGAATTGGGAATTTAAGTAACTTAAACACTTTGACCCTATACG  
GCAATGACTTGACTGGATCATTACCAACAACATTATGTGATTTACACATTC

>M6-PGSC0003DMG400028435M6LRR-RLK\_930

CTATACGGCAATGACTTGACTGGATCATTACCAACAACATTATGTGATTTACACATTCTTCTAAGGCTAG  
GACTTGGTGGTAATAGGTTGAGTGGATCCTTGCCAGAGTGCCTTTGTAAA

>M6-PGSC0003DMG400028435M6LRR-RLK\_992

AAGGCTAGGACTTGGTGGTAATAGGTTGAGTGGATCCTTGCCAGAGTGCCTTTGTAAAATGTCATCGTT  
GGGCTTGCTTTCTTTGTAATAATCGGATTTCTGGTCCGATACCATCTTG

>M6-PGSC0003DMG400028436M6LRR-RLK\_0

TATATACCTTGATATCACCTTCTTATTTATCCTTTCCTGCCTGAAAACCTAATTTGTTCCCATGGAGAGAT  
CATACTGTTTCTTTCTTTCACTACTACTATTGAAACTCTACTTGTTTCG

>M6-PGSC0003DMG400028436M6LRR-RLK\_1037

TTTAACCTCCCAATTCTATCATTTTTATTTTACTTTATAAAATAAGTTTATCCATATTCAAAAGCCTTCTAG  
CATGAGGCTAATTTCTGAAGTTTGTATTGAGCAACAGGATAAAGGT

>M6-PGSC0003DMG400028436M6LRR-RLK\_1098

AAAGCCTTCTAGCATGAGGCTAATTTCTGAAGTTTGTATTGAGCAACAGGATAAAGGTTTACAAGTTTG  
TTTGCCGCTTGTCAAATAATTTGCAGGCACAATTCCAGCAAAGATTGGT

>M6-PGSC0003DMG400028436M6LRR-RLK\_1159

ACAAGTTTGTGGCCGCTTGTCAAATAATTTGCAGGCACAATTCCAGCAAAGATTGGTAATTTACGAAA  
GTTGCAGCAAATACAAGTGGAGAACAATCAAATTGTGGGTTCAATACCGC

>M6-PGSC0003DMG400028436M6LRR-RLK\_122

GCCACAGACATAAAAACAGATCAATCAGCTCTACTTGCCTTAAAAGCTAGCTTTACTCTAAATCTTCTCA  
TCCCTTGACTCAAATTGGTCTTCTCAATCTTCCGTTTGTGATTGGATT

>M6-PGSC0003DMG400028436M6LRR-RLK\_1220

TTTACGAAAGTTGCAGCAAATACAAGTGGAGAACAATCAAATTGTGGGTTCAATACCGCGCACCATATC  
CAACCTATCATCACTATGGGTGATTAATTTGAACACAACTATTTATCAGG

>M6-PGSC0003DMG400028436M6LRR-RLK\_1281

ACCATATCCAACCTATCATCACTATGGGTGATTAATTTGAACACAACTATTTATCAGGTAGCGTACGTG  
GTCTTGTGGTTATCCGGAGGCAATAAAATAAACTAATCGAGATATATA

>M6-PGSC0003DMG400028436M6LRR-RLK\_1342

GCGTACGTGGTCTTGTGGTTATCCGGAGGCAATAAAATAAACTAATCGAGATATATACTCTTTCAT  
GTGTCAGGTGTTATACCAGAGTGATTGGGAATCTTCACAAATTGGAGAC

>M6-PGSC0003DMG400028436M6LRR-RLK\_1403

CTCTTTCATGTGTCAGGTGTTATACCCAGAGTGATTGGGAATCTTCACAAATTGGAGACACTTTATTTGCA  
ATTTAATCAATTAAGTGGTAATATAACCAGAAGAGCTCTTCAATATCTCT

>M6-PGSC0003DMG400028436M6LRR-RLK\_1464

TTTATTTGCAATTAATCAATTAAGTGGTAATATAACCAGAAGAGCTCTTCAATATCTCTACACTTACAAGG  
GTTTCTCTTCTTTAACAACGTTTCGGGTAGTCTTCCATATGCTTCAA

>M6-PGSC0003DMG400028436M6LRR-RLK\_1525

ACTTACAAGGGTTTCTTCTCTTTAACAACGTTTCGGGTAGTCTTCCATATGCTTCAAACACTACTGGCTAA

CAAATCTAGAGATTTTGAATCTTGGTGTAACAACATTGGTGGAGTTAT

>M6-PGSC0003DMG400028436M6LRR-RLK\_1586

TACTGGCTAACAAATCTAGAGATTTTGAATCTTGGTGTAACAACATTGGTGGAGTTATACCCACCTCAA

TCTCTAATTCCTCATATCTAATGAGATTATATCTTAATGGTAACAAATTC

>M6-PGSC0003DMG400028436M6LRR-RLK\_1647

CCACCTCAATCTCTAATTCCTCATATCTAATGAGATTATATCTTAATGGTAACAAATTCAGTGGTCAGATT

CCTAACTCATTGGGGGGTTTGAGGCATCTTGAACATCTGGACTTGTCCA

>M6-PGSC0003DMG400028436M6LRR-RLK\_1708

TGGTCAGATTCCTAACTCATTGGGGGGTTTGAGGCATCTTGAACATCTGGACTTGTCCAACAATAACTTA

TTCTCTCTGCACCTAAGTATCTTAACTTCATTGGCAAACACTGCAGATCATT

>M6-PGSC0003DMG400028436M6LRR-RLK\_1769

AATAACTTATTCTCTCTGCACCTAAGTATCTTAACTTCATTGGCAAACACTGCAGATCATTGAAAGAAGTTTA

CTTATACCATAATCTTCTCGACGGTGTATTCCAGATTCCATTGGCAAT

>M6-PGSC0003DMG400028436M6LRR-RLK\_183

ATTCTTCTCATCCCTTGACTCAAAATTGGTCTTCTCAATCTTCCGTTTGTGATTGGATTGGAGTCACTTGCG

GCTCTCTTACCATAGGGTGACTTTACTAAATATATCCAACATGGACA

>M6-PGSC0003DMG400028436M6LRR-RLK\_1830

AAGAAGTTTACTTATACCATAATCTTCTCGACGGTGTATTCCAGATTCCATTGGCAATCTCTCCACTACC

ATTATGGAATTTTATTTAGATAGTTGTGAAATAAGGAGTCAGATACCAT

>M6-PGSC0003DMG400028436M6LRR-RLK\_1891

CTCCACTACCATTATGGAATTTTATTTAGATAGTTGTGAAATAAGGAGTCAGATACCATTAGGAATTGGG

AATTTAAGTAACTTAAACACTTTGTCCCTATCCCGCAATGATTTGACTGG

>M6-PGSC0003DMG400028436M6LRR-RLK\_1952

GGAATTGGGAATTTAAGTAACTTAAACACTTTGTCCCTATCCCGCAATGATTTGACTGGATCAGTGCCAA

CAACATTATGTAATTTACATATTCTTCAAAGGGTAGCAATTGATGATAAT

>M6-PGSC0003DMG400028436M6LRR-RLK\_2013

CAGTGCCAACAACATTATGTAATTTACATATTCTTCAAAGGGTAGCAATTGATGATAATAGGTTAAGTGG

ACCGTTGCCCCAGTGCCTTTGCAAATTATCATCCTTGGGCTTGGTTGATT

>M6-PGSC0003DMG400028436M6LRR-RLK\_2074

GTAAAGTGGACCGTTGCCCCAGTGCCTTTGCAAATTATCATCCTTGGGCTTGGTTGATTTTTCTAATAATA  
GGATTCGGGTCCGGTACCGTCTTGCAATTGGTAATGCAACCTCTTTGAG

>M6-PGSC0003DMG400028436M6LRR-RLK\_2135

TCTAATAATAGGATTTCCGGTCCGGTACCGTCTTGCAATTGGTAATGCAACCTCTTTGAGAAATGTTTATCT  
AAATTCAAATAGGATCACTATCATACCCATGAGTCTATGGAGCCTCAA

>M6-PGSC0003DMG400028436M6LRR-RLK\_2196

ATGTTTATCTAAATTCAAATAGGATCACTATCATACCCATGAGTCTATGGAGCCTCAAAGATCTTTTGGAT  
CTTAACCTGTCAAATAATTCCTTGGTTGGTTCTATACCTCCAGAGTTAG

>M6-PGSC0003DMG400028436M6LRR-RLK\_2257

TCTTTTGGATCTTAACCTGTCAAATAATTCCTTGGTTGGTTCTATACCTCCAGAGTTAGGAAAGTTGAAAG  
CCATAACATCCATAGATCTTTCCAGGAATCACCTTTCCAGGAAGTATTCC

>M6-PGSC0003DMG400028436M6LRR-RLK\_2318

AAGTTGAAAGCCATAACATCCATAGATCTTTCCAGGAATCACCTTTCCAGGAAGTATTCCCTCCACAATTG  
GAGACTTGCAGAATCTATTTTATCTTTTCGTTGGCTTATAATGAGTTACAA

>M6-PGSC0003DMG400028436M6LRR-RLK\_2379

CCACAATTGGAGACTTGCAGAATCTATTTTATCTTTTCGTTGGCTTATAATGAGTTACAAGGATCTATTCCG  
GAGTCACTCTAGAATACGATAAGTTTGGAAATCAGCAAATCTATCCAATA

>M6-PGSC0003DMG400028436M6LRR-RLK\_244

AGTCACTTGC GGCTCTCTTACCATAGGGTGACTTTACTAAATATATCCAACATGGACATTCTTGGAAACCA  
TTCCCCAAACTTGGGAAACCTCACCTTCCTCGTTTCTCTTGATTTGAG

>M6-PGSC0003DMG400028436M6LRR-RLK\_2440

ATCTATTCCGGAGTCACTCTAGAATACGATAAGTTTGGAAATCAGCAAATCTATCCAATAACTTTCTTTTCAG  
GTATGATTCCAAAATCATTAGAGTCACTTCGACATCTGAAGGATTCAA

>M6-PGSC0003DMG400028436M6LRR-RLK\_2501

TTTCTTTCCAGGTATGATTCCAAAATCATTAGAGTCACTTCGACATCTGAAGGATTTCAATGTATCATTCAA  
TAGATTAGAAGGTGAAATCCCAAGTAAAGGACCTTTTCTCAATTTCCACC

>M6-PGSC0003DMG400028436M6LRR-RLK\_2562

TATCATTCAATAGATTAGAAGGTGAAATCCCAAGTAAAGGACCTTTTCTCAATTTCCACTCTCAATCTTTT  
ATGGGAAATGAAGGTTATGCGGCGGTTTGCTTTTCCAACCTTG TAGGA

>M6-PGSC0003DMG400028436M6LRR-RLK\_2623

TCAATCTTTTATGGGAAATGAAGGGTTATGCGGCGGTTTCTTTTCCAACCTTGTAGGACTAGGTCTTTT  
CATCATTCAAGGAAAAGCAAACCTGCTTTTGTATTATACTTGTCTTCCTGGG

>M6-PGSC0003DMG400028436M6LRR-RLK\_2684

AGGTCTTTTCATCATTCAAGGAAAAGCAAACCTGCTTTTGTATTATACTTGTCTTCCTGGGAGCTGCAGTAAT  
GGTACTTGGCTCAATCGTTGTGTTTATGTTAAGGAGACGTCGGACTAGA

>M6-PGSC0003DMG400028436M6LRR-RLK\_2745

CTGCAGTAATGGTACTTGGCTCAATCGTTGTGTTTATGTTAAGGAGACGTCGGACTAGAAATGTTCCAAC  
TCAAGCTGAGTCCTTTGCTGCAACCACACTAGCCAGGATTTTCATACATTG

>M6-PGSC0003DMG400028436M6LRR-RLK\_2806

TGTTCCAACCTCAAGCTGAGTCCTTTGCTGCAACCACACTAGCCAGGATTTTCATACATTGAAATTGAAAGT  
GCAACTCAAGGATTCGACCAATGCAACTTGATTGGCTCTGGAGGTTTTAG

>M6-PGSC0003DMG400028436M6LRR-RLK\_2867

ATTGAAAGTGCAACTCAAGGATTCGACCAATGCAACTTGATTGGCTCTGGAGGTTTTAGCGCTGTTTACA  
AGGGTATGTTTGCAAATGGGATGACTTTGGCAATCAAAGTGTTTAATTTA

>M6-PGSC0003DMG400028436M6LRR-RLK\_305

CTTGGAACCATTCCCCAAACTTGGGAAACCTCACCTCCTCGTTTCTCTTGATTTGAGCAACAATAATTT  
ACATGGAGACCTCCCTCAAGATTTTTCTTGTTTACGTAGACTGAAGGTG

>M6-PGSC0003DMG400028436M6LRR-RLK\_3050

AGAAACCTTACCAAAGTTATCAGCAGTTGTACTAACTTGGATTTTAAAGCGTACTTCTCGAGTATATGCC  
CAATGGAAGCCTAGAGATGTGGTTACATTCTGATGATCACTTCTTGAAT

>M6-PGSC0003DMG400028436M6LRR-RLK\_3355

TCATACTAAAACACTTGCCACAATGGGCTACATTGCACCAGGTAACCTTTCTTTTAGTCCTTAAATATCGCA  
TATGATGTGTTATTTACATAATAATTAGTTTACTATTACATCACATTAA

>M6-PGSC0003DMG400028436M6LRR-RLK\_3416

AAATATCGCATATGATGTGTTATTTACATAATAATTAGTTTACTATTACATCACATTAATAACTAGGTGAAG  
GCCTGAGTGGATAACTTAATTAAGAAAATGTAATATATCACAGATTAA

>M6-PGSC0003DMG400028436M6LRR-RLK\_3477

CTAGGTGAAGGCCTGAGTGGATAACTTAATTAAGAAAATGTAATATATCACAGATTAAGTATGAACAA

AAATGGTATAGAAAACATTGAAATATGACTGTCAAACCTCTATATGCATGCA

>M6-PGSC0003DMG400028436M6LRR-RLK\_3538

ATGAACAAAAATGGTATAGAAAACATTGAAATATGACTGTCAAACCTCTATATGCATGCATCTACGAATTT

TTTTTATCAAAAGTTCTCTCAGAGGATATTAATAGATAAGCCAAAGGG

>M6-PGSC0003DMG400028436M6LRR-RLK\_3599

TACGAATTTTTTTTTATCAAAAGTTCTCTCAGAGGATATTAATAGATAAGCCAAAGGGGCATAGAGGG

GGACTATGCCTGACCTCAGCAATACAAATTTACGATATTAGGAGTGAGGAA

>M6-PGSC0003DMG400028436M6LRR-RLK\_366

ACAATAATTTACATGGAGACCTCCCTCAAGATTTTTCTTGTTTACGTAGACTGAAGGTGATGGATTTTGC

GTTCAATAATTTACGCGGAGAGATACCAGTGTGGTTTGGTTTCATTTCAA

>M6-PGSC0003DMG400028436M6LRR-RLK\_3660

ATAGAGGGGGACTATGCCTGACCTCAGCAATACAAATTTACGATATTAGGAGTGAGGAAACGAAAAAG

TAGGGGGGGGGGGGGGGGGTTAAGGGTTCACCATCAATTAAGCATAACAAA

>M6-PGSC0003DMG400028436M6LRR-RLK\_3721

GAAAAAGTAGGGGGGGGGGGGGGGTTAAGGGTTCACCATCAATTAAGCATAACAAAAGATAAA

TTCTAGGATTTTAGAGCAAGCAAAGAAGACTCAGCCAGGATCAAAAAGAAAGT

>M6-PGSC0003DMG400028436M6LRR-RLK\_3782

GATAAATTCTAGGATTTTAGAGCAAGCAAAGAAGACTCAGCCAGGATCAAAAAGAAAGTTGTTCTCTTC

ACTTAGATTCTAATGTTAGGCTTGCCAACTACATCATTCTTCAACGTGGAT

>M6-PGSC0003DMG400028436M6LRR-RLK\_3843

TTCTCTTCACTTAGATTCTAATGTTAGGCTTGCCAACTACATCATTCTTCAACGTGGATATAATCTTAAACG

GAAGATTTATAGGCCTAGTCTCAGTGAAGAAGGTAGTCATTTTGCCT

>M6-PGSC0003DMG400028436M6LRR-RLK\_3904

AATCTTAAACGGAAGATTTATAGGCCTAGTCTCAGTGAAGAAGGTAGTCATTTTGCCTATTTAGCCAAG

TTAGCAAGCATGTGAGCAGGAGTGTTACCTTCTCTTAAGGTATGTGTGAA

>M6-PGSC0003DMG400028436M6LRR-RLK\_3965

TTAGCCAAGTTAGCAAGCATGTGAGCAGGAGTGTTACCTTCTCTTAAGGTATGTGTGAAAGTGAAACGG

CTAAGTGAACCTCATAGATTGGATCTGTCTAATATCATCTTTTATCTGCTAG

>M6-PGSC0003DMG400028436M6LRR-RLK\_4026

TGAAACGGCTAAGTGAACATAGATTGGATCTGTCTAATATCATCTTTTATCTGCTAGAAGTCCATATCG  
TTTCAATTGACTGCCTTACACTTGTTTCATTCCAATTATACTTTTCAGTT

>M6-PGSC0003DMG400028436M6LRR-RLK\_4087

GTCCATATCGTTTCAATTGACTGCCTTACACTTGTTTCATTCCAATTATACTTTTCAGTTTTTAAAGTCCTTAT  
CTGCTCAAGGTAAATTCAACTATTTTCAATATCTAGCAAATATATAT

>M6-PGSC0003DMG400028436M6LRR-RLK\_4148

TAAAGTCCTTATCTGCTCAAGGTAAATTCAACTATTTTCAATATCTAGCAAATATATATATATATATATA  
TATACAGACACAAACACACACATATATATGTATAATATTTTCATTTCT

>M6-PGSC0003DMG400028436M6LRR-RLK\_4209

ATATATATATATATACAGACACAAACACACACATATATATGTATAATATTTTCATTTCTTTATCGGGCTCGT  
CAAGAACTAATTACTCTGGTAATATTGGATCTCAGAGTATGGATCAG

>M6-PGSC0003DMG400028436M6LRR-RLK\_427

GGATTTTGC GTTCAATAATTTTCAGCGGAGAGATACCAGTGTGGTTTGGTTTCATTTCAAAGTTAGAAACC  
CTGAGTGTGAGAAACAATCATCTTCAAGGCAATATCCCTAAGGAGATTGG

>M6-PGSC0003DMG400028436M6LRR-RLK\_4270

ATCGGGCTCGTCAAGAACTAATTACTCTGGTAATATTGGATCTCAGAGTATGGATCAGTTGGATTAGTT  
TCTAGAAGATGTGATGTGTACAGCTATGGCATTATGCTCATGGAACTTT

>M6-PGSC0003DMG400028436M6LRR-RLK\_4331

GGATTAGTTTCTAGAAGATGTGATGTGTACAGCTATGGCATTATGCTCATGGAACTTTTACAAGGAAA  
AGGCCATATGATGAAATGTTTCAAGGAAATTTGAACATGAGTAGTTGGGTC

>M6-PGSC0003DMG400028436M6LRR-RLK\_4392

CAAGGAAAAGGCCATATGATGAAATGTTTCAAGGAAATTTGAACATGAGTAGTTGGGTCTGTAATTCAC  
TACCTGTAGCACCAGATGATATTATCGATGACACCTTATTGCAACCTGAAG

>M6-PGSC0003DMG400028436M6LRR-RLK\_4453

TAATTCACCTGTAGCACCAGATGATATTATCGATGACACCTTATTGCAACCTGAAGAGATTGATTTCA  
ACAAAAAGTTGTGTTGTGTGACCTCTATTTTGGAGTTGGCATTGAATTG

>M6-PGSC0003DMG400028436M6LRR-RLK\_4514

ATTGATTTCAACAAAAAGTTGTGTTGTGTGACCTCTATTTTGGAGTTGGCATTGAATTGCACAGCTGAAT  
CTCCTAATGAGAGGCTCAACATGAAAGATGTCCTGGCAAATATCAAGAAG



>M6-PGSC0003DMG400028436M6LRR-RLK\_4575

CAGCTGAATCTCCTAATGAGAGGCTCAACATGAAAGATGTCCTGGCAAATATCAAGAAGATCAAGCATG  
ATTTTCTATGCAGATGATGTAACAAGGTTTATTCAATGGTAGGTATCCAAC

>M6-PGSC0003DMG400028436M6LRR-RLK\_4636

CAAGCATGATTTTCTATGCAGATGATGTAACAAGGTTTATTCAATGGTAGGTATCCAACTTTTTAAACAT  
TCTAATGTCATATGGAGAAATTATTTCCCATTTTCAGGAATAGAAAGATT

>M6-PGSC0003DMG400028436M6LRR-RLK\_4697

TTTTAAACATTCTAATGTCATATGGAGAAATTATTTCCCATTTTCAGGAATAGAAAGATTACTGTCTTGTCT  
ATACCATGTAGAAATGGGTTTTTTCCATACAAATAATAATAAAAAAT

>M6-PGSC0003DMG400028436M6LRR-RLK\_488

TTAGAAACCCTGAGTGTGAGAAACAATCATCTTCAAGGCAATATCCCTAAGGAGATTGGGAATCTTGAG  
TATCTAAAGGAGTTGATTTTATTTGAAAACCAATTTACTGGCTCTATCCCG

>M6-PGSC0003DMG400028436M6LRR-RLK\_4880

AAATTGGTCACATAATCAAGGAGAACTTCATTAGTGAGTAAAGTAAATCAAGAATTCATGAGGACCAAC  
ATTTGGAAATTATGATGAATGTTGAAAAGGGAAGCAAACAACACTCATGAATC

>M6-PGSC0003DMG400028436M6LRR-RLK\_4941

GGACCAACATTTGGAAATTATGATGAATGTTGAAAAGGGAAGCAAACAACACTCATGAATCCGTTACAATT  
AGTGTATTTTTGTGTGTGCTATGAGTTTTTATCTGCAATGACTGCCAACTC

>M6-PGSC0003DMG400028436M6LRR-RLK\_5002

TTACAATTAGTGTATTTTTGTGTGTGCTATGAGTTTTTATCTGCAATGACTGCCAACTCAAGTTTGATGCC  
ATTTAAATTTTTGTACAGGTAGTGCTGCCTTTTTTGCCTGTCGTTGGCA

>M6-PGSC0003DMG400028436M6LRR-RLK\_5063

GTTTGATGCCATTTAAATTTTTGTACAGGTAGTGCTGCCTTTTTTGCCTGTCGTTGGCAAATTTGGGTTAC  
ACCAATTGAGTTGTCAACAAAGATTTGGTCTGAGATTCGGTCTTCTCTT

>M6-PGSC0003DMG400028436M6LRR-RLK\_5124

TTTGGGTTACACCAATTGAGTTGTCAACAAAGATTTGGTCTGAGATTCGGTCTTCTCTTATTTCTTGTGCC  
TTCCTCTTGTGCATGTTTCAAGTTTGAGTATGTTTATGTAATAAATTTA

>M6-PGSC0003DMG400028436M6LRR-RLK\_5185

TTCTTGTGCCTTCTCTTGTGCATGTTTCAAGTTTGAGTATGTTTATGTAATAAATTTAATATAAAGATGT

GTATTAAGTATCATACTGGTGATCATGAATTATTATTGAGATAGCAG

>M6-PGSC0003DMG400028436M6LRR-RLK\_549

ATCTTGAGTATCTAAAGGAGTTGATTTTATTTGAAAACCAATTTACTGGCTCTATCCCGCTCTCCATTTTCA

ATATGTCGTCGTTGGAAATTTTAGGTCTAACATATAATCAATTAAGT

>M6-PGSC0003DMG400028436M6LRR-RLK\_61

CATGGAGAGATCATACTGTTTCTTTCTTTCACTACTACTATTGAAACTCTACTTGTTTCGAGGCCACAGACA

TAAAACAGATCAATCAGCTCTACTTGCCTTAAAAGCTAGCTTTACTCT

>M6-PGSC0003DMG400028436M6LRR-RLK\_610

CTCCATTTTCAATATGTCGTCGTTGGAAATTTTAGGTCTAACATATAATCAATTAAGTGGGAGTCTTCCTG

TAGATATATGTCTTCGTCTTGCAAAAATAAAGAGCATTTCATCATTTC

>M6-PGSC0003DMG400028436M6LRR-RLK\_671

AGTCTTCCTGTAGATATATGTCTTCGTCTTGCAAAAATAAAGAGCATTTCATCATTTCACCAACTTGAG

TGGTCAAATTCACAGGTTTGTCTAACTGCACAGAATTGCATGATTTT

>M6-PGSC0003DMG400028436M6LRR-RLK\_732

ACCACTTGAGTGGTCAAATTCACAGGTTTGTCTAACTGCACAGAATTGCATGATTTTTCATTGTCATAC

AATAACTTCAGTGGAACTTCACAGAAATTGTAACTTGGTGAGGC

>M6-PGSC0003DMG400028436M6LRR-RLK\_793

ATTGTCATACAATAACTTCAGTGGAACTTCACAGAAATTGTAACTTGGTGAGGCTTGAGCTCTTA

AATCTCGGGGAAACAATTGCACGGTACTCCTTTCGTCCACTTTTACTT

>M6-PGSC0003DMG400028436M6LRR-RLK\_854

GAGCTCTTAAATCTCGGGGAAACAATTGCACGGTACTCCTTTCGTCCACTTTTACTTGTTCAATTTAGA

AAATAATTGTATTTATATTGCTGCTTAAGGATGGCCATCCCATTTGGCA

>M6-PGSC0003DMG400028436M6LRR-RLK\_915

TCAATTTAGAAAATAATTGTATTTATATTGCTGCTTAAGGATGGCCATCCCATTTGGCAAATAACATCTAA

CTTGCTTTATTTTTCATTTTGATACTTCATCTTAACCTTGTATGTTTC

>M6-PGSC0003DMG400028436M6LRR-RLK\_976

ATACATCTAACTTGTCTTTATTTTTCATTTTGATACTTCATCTTAACCTTGTATGTTTTCATTTTAACCCTCCCA

ATTCTATCATTTTATTTTACTTTATAAAATAAGTTTATCCATATT

>M6-PGSC0003DMG400028437M6LRR-RLK\_0

AATTTTCAAATGGTATTCCAAGAGAAATTGGAGACATGCAAATCTGATACATCTTTCTTTGGCACAAA  
CAAGCTACAAGGATCTATTCTGACTCAATTGGTAGCATACCGAGTTTGC

>M6-PGSC0003DMG400028437M6LRR-RLK\_1008

AAACCTTAGCAACATTTGGCTACATTGCACCAGGTAAATCTTATAATTCTTGTTTCAGTATCCTATCTTC  
ATTTTCCTTTTCTCGGTTTAAATGATAATCCGTAAGTGTGATTTACTG

>M6-PGSC0003DMG400028437M6LRR-RLK\_1071

CCTATCTTCATTTTCTTTTCTCGGTTTAAATGATAATCCGTAAGTGTGATTTACTGTAGAGTATGGAAGG  
GAAGGATTGGTGTGCTAAAATGTGATGTTTATAGTTATGGGATCATGC

>M6-PGSC0003DMG400028437M6LRR-RLK\_1134

ATGGAAGGGAAGGATTGGTGTGCTAAAATGTGATGTTTATAGTTATGGGATCATGCTAATGGAAACAT  
TTACGAGGAGAAGGCCTAACTATGAAATATTTGATGGAGATCTTAGTTTAA

>M6-PGSC0003DMG400028437M6LRR-RLK\_1197

AAACATTTACGAGGAGAAGGCCTAACTATGAAATATTTGATGGAGATCTTAGTTTAAAGAAATGGGTAA  
GTGATTCACTCCTAGAGGCAACAATCAAAGTTGTAGATGCAAATTTGCTAA

>M6-PGSC0003DMG400028437M6LRR-RLK\_126

TAGACCTCTCGAATAACAATCTATCTGGATCAATTCCGATGTCCTTAGAGAAGCTTCAGTATCTCAACTAT  
TTCAATGTTTCTTTAACAGCTTGCAGGGTCAAATCCCTTTAGTGGTC

>M6-PGSC0003DMG400028437M6LRR-RLK\_1260

GGGTAAGTGATTCACTCCTAGAGGCAACAATCAAAGTTGTAGATGCAAATTTGCTAAAGCCAGAAGATA  
AGAAATTCATGGACAAGGTAGATTGTGTAGCATCCATCATGAAAGTGGCAC

>M6-PGSC0003DMG400028437M6LRR-RLK\_1323

AAGATAAGAAATTCATGGACAAGGTAGATTGTGTAGCATCCATCATGAAAGTGGCACTATATTGCTCTG  
CTGAATCTCCTGAAGAAAGAATCAACATGAAAGATGTCGTAGGAATGCTAC

>M6-PGSC0003DMG400028437M6LRR-RLK\_1386

GCTCTGCTGAATCTCCTGAAGAAAGAATCAACATGAAAGATGTCGTAGGAATGCTACAAAAGATCAAGA  
TTCAACTTCTTTCATGCTCTACAAGTACATAAAAACATATCAGTCATGCCA

>M6-PGSC0003DMG400028437M6LRR-RLK\_1449

TCAAGATTCAACTTCTTTCATGCTCTACAAGTACATAAAAACATATCAGTCATGCCACTTAAGGGTATAGC  
AAGTGTGGTAACTTCGTATCTGCATACATAGACTGGTTTCTTTTT

>M6-PGSC0003DMG400028437M6LRR-RLK\_1490

CATATCAGTCATGCCACTTAAGGGTATAGCAAGTGTGGTAAACTTCGTATCTGCATACATAGACTGGT  
TTCTTTTTAGCTGCATAAGGTTATTTCTGCAGCACTATGTAAAATCGG

>M6-PGSC0003DMG400028437M6LRR-RLK\_189

TCAACTATTTCAATGTTTCCTTTAACAGCTTGCAGGGTGAAATCCCTTTAGTGGTCCTTTCAAGAACCTTT  
CCAGCCAGTCATTCATGTTCAATAAAGCATTGTGTGGTGCTCCAAGAT

>M6-PGSC0003DMG400028437M6LRR-RLK\_252

AGAACCTTTCCAGCCAGTCATTCATGTTCAATAAAGCATTGTGTGGTGCTCCAAGATTTTCGTGTCCCTCCG  
TGCCCCACTTCTTCAAACCATAGATCAAAGAAGAAGAAGTTACTTCTGA

>M6-PGSC0003DMG400028437M6LRR-RLK\_315

TCCCTCCGTGCCCCACTTCTTCAAACCATAGATCAAAGAAGAAGAAGTTACTTCTGATAGTCTTTCCTCTA  
CTGGGAGCTGCTGTGATAATTGTTTTGTAACATTGGCATTATGTGGA

>M6-PGSC0003DMG400028437M6LRR-RLK\_378

TTCTCTACTGGGAGCTGCTGTGATAATTGTTTTGTAACATTGGCATTATGTGGATGAGGTACAGAAG  
AGAAGGAAATGTTCCAGTTGAAGCTGATTTGTTAGCTACAATGGAAAGAA

>M6-PGSC0003DMG400028437M6LRR-RLK\_441

ACAGAAGAGAAGGAAATGTTCCAGTTGAAGCTGATTTGTTAGCTACAATGGAAAGAATTCATACTATG  
AAATCATACAAGCCACTAATGATTTTAGTGAGAGTAATTTCAATTGGTTTCGG

>M6-PGSC0003DMG400028437M6LRR-RLK\_504

ACTATGAAATCATACAAGCCACTAATGATTTTAGTGAGAGTAATTTCAATTGGTTTCGGGGAGTTTTGGTTC  
TGTTTACAAAGGAATTCTCAGAGATGGGACTACCATTGCAGTTAAAGTGT

>M6-PGSC0003DMG400028437M6LRR-RLK\_567

TTGGTTCTGTTTACAAAGGAATTCTCAGAGATGGGACTACCATTGCAGTTAAAGTGTTTAACCTACAAGC  
TGAAGGTGCATTCAAGAGTTTTGAAATAGAATGTGAAGTTCTTCGCAACC

>M6-PGSC0003DMG400028437M6LRR-RLK\_63

CACAAAACAAGCTACAAGGATCTATTCCTGACTCAATTGGTAGCATACCGAGTTTGCAATTTCTAGACCT  
CTCGAATAACAATCTATCTGGATCAATTCCGATGTCCTTAGAGAAGCTTC

>M6-PGSC0003DMG400028437M6LRR-RLK\_756

AGTACATGCCTAATGGGAGCCTTGAAAAGTGGTTGTATTCGCACAACACTTCTTAGACATCCTGCAAAG

ACTAAGTATAATGATCGATGTGGCACGTGCATTGGAATATCTCCATCATG

>M6-PGSC0003DMG400028437M6LRR-RLK\_819

TGCAAAGACTAAGTATAATGATCGATGTGGCACGTGCATTGGAATATCTCCATCATGGTTGCTCAACACC

TGTGATTCATTGTGATCTGAAGCCTAGCAACGTTTTGCTAGATGAAAACA

>M6-PGSC0003DMG400028437M6LRR-RLK\_945

CTCATGTAAGTGACTTTGGCATTCTAACTACTCTGTGAAGATGACAGTGATTTACACACTAAAACCTTA

GCAACATTTGGCTACATTGCACCAGGTAAATCTCTTATAATTCTTGTTT

>M6-PGSC0003DMG400028438M6LRR-RLK\_0

ATGAAGAGAAAATTAATTTCCTTTTCCCTCTTGTAGTTTCAGTAATATGGCATCATTTTCTGATATTATCA

GCCACTGCAGAAGTCAATCTCAAACTGATGAAGCTGCTCTACTTGCT

>M6-PGSC0003DMG400028438M6LRR-RLK\_1037

TTTAATTTGCAGGTGAAATTCCAGAAGAGATTGGAAATCTTCGTAATCTAGAGATATTGGATGCACAGA

ACTGTAGCCTAAGTGGTCCTTTACCATCTTCTATAAGTAACTTAACTTCAC

>M6-PGSC0003DMG400028438M6LRR-RLK\_1098

TGCACAGAACTGTAGCCTAAGTGGTCCTTTACCATCTTCTATAAGTAACTTAACTTCACTTCAATCACTCA

ATCTTTATGGCAATAATCTCTTTGGCACCTTGCCCCGGTATATATGTTT

>M6-PGSC0003DMG400028438M6LRR-RLK\_1159

CAATCACTCAATCTTTATGGCAATAATCTCTTTGGCACCTTGCCCCGGTATATATGTTTGAACATGCCTGA

TCTCAGTGCATTTCGATCTTGGGAATAATTTATTCAGTGGAAACATTCCA

>M6-PGSC0003DMG400028438M6LRR-RLK\_122

GAAATCCTATGTTACTTCTGATACTTACAATATCTTGACAAGCAACTGGACCTCAACTACTTCCGTTTGCA

ATTGGATTGGAGTCACCTGTGGCTCTCGCCATCAAAGGATCATAACCTT

>M6-PGSC0003DMG400028438M6LRR-RLK\_1220

ACATGCCTGATCTCAGTGCATTTCGATCTTGGGAATAATTTATTCAGTGGAAACATTCCAAAAGAATTTGG

AAACTGCAGTTCACCTTCTGACCTCTTCTAAGAGAAAACAACCTTAACAG

>M6-PGSC0003DMG400028438M6LRR-RLK\_1281

AGAATTTGGAACTGCAGTTCACCTTCTGACCTCTTCTAAGAGAAAACAACCTTAACAGGTATCATCTTGT

CATTTTCTTTTCCATTATTTGGTGTATGTTCCCTATGTTTTTCATATCC

>M6-PGSC0003DMG400028438M6LRR-RLK\_1342

ATCATCTTGTCAATTTCTTTTTCCATTATTTGGTGTATGTTTCCTATGTTTTTCATATCCTAATAAGTCACTCA  
AATGTCATCAGGTGAGTTACCAAGGGAGATTGGTAATCTTTTCAATT

>M6-PGSC0003DMG400028438M6LRR-RLK\_1403

ATAAGTCACTCAAATGTCATCAGGTGAGTTACCAAGGGAGATTGGTAATCTTTTCAATTTGGGAAGATTA  
GATCTACATTACAATTTCTTAACAGGTCCTATTCCATCTACAATATTCAA

>M6-PGSC0003DMG400028438M6LRR-RLK\_1464

GGAAGATTAGATCTACATTACAATTTCTTAACAGGTCCTATTCCATCTACAATATTCAACATGTCAAACAT  
AAGGGGCATTTCAATTTTAGGGAACCTTTACTGGAAGTCTACCATCA

>M6-PGSC0003DMG400028438M6LRR-RLK\_1525

TGTCAAACATAAGGGGCATTTCAATTTTAGGGAACCTTTACTGGAAGTCTACCATCAGATATAGGACT  
TGGTCTTCTAATCTTGAAGAACTTTATCTTGGTTACAATAACCTTACTG

>M6-PGSC0003DMG400028438M6LRR-RLK\_1586

TATAGGACTTGGTCTTCTAATCTTGAAGAACTTTATCTTGGTTACAATAACCTTACTGGAGCCATCCCTA  
ATTCTCTCTCAAATGCTTCCAATATTTCCGGCTTGGAATTGGATATAA

>M6-PGSC0003DMG400028438M6LRR-RLK\_1647

GCCATCCCTAATTCTCTCTCAAATGCTTCCAATATTTCCGGCTTGGAATTGGATATAATGACTTTTCTGGT  
CATTTTCCGAGGTCGTTTGGTAATCTAAGACGTTTAGAGTACCTCAAC

>M6-PGSC0003DMG400028438M6LRR-RLK\_1708

ACTTTTCTGGTCATTTTCCGAGGTCGTTTGGTAATCTAAGACGTTTAGAGTACCTCAACGTGAACGGCAA  
TCATTTACAAGAGATCCTTCATCTCCAGGATTGACTTTCTTTGATTCTT

>M6-PGSC0003DMG400028438M6LRR-RLK\_1769

GAACGGCAATCATTTACAAGAGATCCTTCATCTCCAGGATTGACTTTCTTTGATTCTTGACAAATTGCA  
GACATTTGAGAAAACGTGGATTGGTTATAATCCACTCAATGGAAATCT

>M6-PGSC0003DMG400028438M6LRR-RLK\_183

TCCGTTTGCAATTGGATTGGAGTCACCTGTGGCTCTCGCCATCAAAGGATCATAACCTTGGATATTTCCA  
ATATGGGATTAATAGGTACCATCCCTCCTCACTTGGGAAATCTGTCCTTT

>M6-PGSC0003DMG400028438M6LRR-RLK\_1830

ACAAATTGCAGACATTTGAGAAAACGTGGATTGGTTATAATCCACTCAATGGAAATCTTCCGGCTTCTA  
TTGGAAATCTCTCAAGTTCTCTCGACTACATTTATGCTGTTAATAGTGAA

>M6-PGSC0003DMG400028438M6LRR-RLK\_1891

CGGCTTCTATTGGAAATCTCTCAAGTTCTCTCGACTACATTTATGCTGTTAATAGTGAAATCAGAGGCTAC  
ATTCCCAGTGAAATAGGAAATTTAAGTGGTTTGTCTTTCTTGTTACTTC

>M6-PGSC0003DMG400028438M6LRR-RLK\_1952

CAGAGGCTACATTCCCAGTGAAATAGGAAATTTAAGTGGTTTGTCTTTCTTGTTACTTCAAGGCAATTATT  
TGAGTGGGTTTCATTCCAAGAACAATAGGGAATTTAAAGAATCTTCAAGC

>M6-PGSC0003DMG400028438M6LRR-RLK\_2013

GGCAATTATTTGAGTGGGTTTCATTCCAAGAACAATAGGGAATTTAAAGAATCTTCAAGCTTTGAATTTGT  
ATGACAACAAAATGATAAGTGGACCTATCCCTGAGGAACTCTGCAATTTA

>M6-PGSC0003DMG400028438M6LRR-RLK\_2074

TGAATTTGTATGACAACAAAATGATAAGTGGACCTATCCCTGAGGAACTCTGCAATTTAAAGAAATTAG  
GATTCTTGAGCTTGGGAAATAATGAGCTTTGCTGTTCTATAACCATCATGTT

>M6-PGSC0003DMG400028438M6LRR-RLK\_2135

GAAATTAGGATTCTTGAGCTTGGGAAATAATGAGCTTTGCTGTTCTATAACCATCATGTTTAGGGAACATT  
ACATCTCTTAGATACATTTACCTTGGTTCCAACAAATTGACTTTTAGCAT

>M6-PGSC0003DMG400028438M6LRR-RLK\_2196

GGGAACATTACATCTCTTAGATACATTTACCTTGGTTCCAACAAATTGACTTTTAGCATAACCTCCCAGCCT  
GTGGAACCTCAATGATCTCTTGATCTTGATGTATCCTCAAATTCCTTG

>M6-PGSC0003DMG400028438M6LRR-RLK\_2257

CTCCCAGCCTGTGGAACCTCAATGATCTCTTGATGTATCCTCAAATTCCTTGAAAAGCTCTCTA  
CCTCCAGAAATTGGAATCTGAAAGTCGCAACATTGCTGAATATATCGA

>M6-PGSC0003DMG400028438M6LRR-RLK\_2318

AAGCTCTCTACCTCCAGAAATTGGAAATCTGAAAGTCGCAACATTGCTGAATATATCGAAGAATCAAATC  
TCAGGAAGTATACCGAGCACAATTGGAGGCATGCAAATATGGCTGAACT

>M6-PGSC0003DMG400028438M6LRR-RLK\_2379

AATCAAATCTCAGGAAGTATACCGAGCACAATTGGAGGCATGCAAATATGGCTGAACTTTCTTTTGCA  
GAAAATAGACTAGAAGGGTCAATTCCAGAGTCAATGGGGAACATGGTCGCC

>M6-PGSC0003DMG400028438M6LRR-RLK\_244

ATATTTCCAATATGGGATTAATAGGTACCATCCCTCCTCACTTGGGAAATCTGTCCTTTTTGGTTTCTCTCG

ATATCAGTAGCAACGGTTTCCAAGGAATTCTGCCACGAGAGTTGGCTA

>M6-PGSC0003DMG400028438M6LRR-RLK\_2440

CTTTTGCAGAAAATAGACTAGAAGGGTCAATTCCAGAGTCAATGGGGAACATGGTTCGCCTTGGAATCGC  
TAGACTTGTCTCATAACAAGCTCTCTGGTGGCATTCCCAAATCATTGGTAG

>M6-PGSC0003DMG400028438M6LRR-RLK\_2501

GGAATCGCTAGACTTGTCTCATAACAAGCTCTCTGGTGGCATTCCCAAATCATTGGTAGCTCTTTCACATC  
TCAACTATCTTAATGTATCTAACAACAGATTGAGTGGTCAAATTCCAAT

>M6-PGSC0003DMG400028438M6LRR-RLK\_2562

CTTTCACATCTCAACTATCTTAATGTATCTAACAACAGATTGAGTGGTCAAATTCCAATTGGAGGTCCTTT  
CGTGAACCTTCTTTATGATTCATTCTTTCAAATGAGGCATTATGTGGT

>M6-PGSC0003DMG400028438M6LRR-RLK\_2623

GAGGTCTTTTCGTGAACTTCTTTATGATTCATTCTTTCAAATGAGGCATTATGTGGTGCTGCTAGGTTG  
CAGATACCAGCATGTAGGTCTAATTCTCCTATTAGGAAAAGAAAAAAGA

>M6-PGSC0003DMG400028438M6LRR-RLK\_2684

TGCTAGGTTGCAGATACCAGCATGTAGGTCTAATTCTCCTATTAGGAAAAGAAAAAAGAAGGTGCTTCT  
TATTGTGTTGATCTTGTGGTGGCTTCTTCAGTAATAATGCTCTCAGTCAT

>M6-PGSC0003DMG400028438M6LRR-RLK\_2745

GTGCTTCTTATTGTGTTGATCTTGTGGTGGCTTCTTCAGTAATAATGCTCTCAGTCATGCTCACCATCTTT  
TTGGTGATTAGAAGTCGAAAGAGGAAGACAAACATTGCTACTCATCAG

>M6-PGSC0003DMG400028438M6LRR-RLK\_2806

TCACCATCTTTTTGGTGATTAGAAGTCGAAAGAGGAAGACAAACATTGCTACTCATCAGGCTGATGCCTC  
TCCAGCCACGGTACATGGAAGAGTTTCATACCATGACCTTCAACAAGCAA

>M6-PGSC0003DMG400028438M6LRR-RLK\_2867

TGATGCCTCTCCAGCCACGGTACATGGAAGAGTTTCATACCATGACCTTCAACAAGCAACCAACAGATTC  
GGTACAAGCAACTTGCTCGGTTCTGGAAGTTATGGCTCTGTTTACAAAGC

>M6-PGSC0003DMG400028438M6LRR-RLK\_2928

AACAGATTCGGTACAAGCAACTTGCTCGGTTCTGGAAGTTATGGCTCTGTTTACAAAGCAACATTTGGGA  
GTAATATAGTGGCCGTTAAGGTATTCAACTTGCAAACAGAAGGCGCATTC

>M6-PGSC0003DMG400028438M6LRR-RLK\_2989



CATTTGGGAGTACTATAGTGGCCGTTAAGGTATTCAACTTGCAAACAGAAGGCGCATTCAAGAGTTTTG  
ATACAGAATGTGAAGTCTTACGCAACCTTCGTCATAGAAATCTGACCAAAG

>M6-PGSC0003DMG400028438M6LRR-RLK\_305

GGTTTCTCTCGATATCAGTAGCAACGGTTTCCAAGGAATTCTGCCACGAGAGTTGGCTAATTTGCATAGA  
TTGGAGTTAATAAATGTCACCTTCTAATAAGTTCACTGGAGATATCCCTC

>M6-PGSC0003DMG400028438M6LRR-RLK\_3111

ATCAATAGTTGCTCCAGCATTGATTTCAAAGCCTTTGTATTAGAGTACATGCCTAAGGGAAGCCTGGATG  
ATTGGCTTCATTCTGAAACTTGTTCCCTTAGATATAATGAAGAGAGTAGAC

>M6-PGSC0003DMG400028438M6LRR-RLK\_3172

GCCTGGATGATTGGCTTCATTCTGAAACTTGTTCCCTTAGATATAATGAAGAGAGTAGACATAATGATTGA  
TGTGGGATCAGCATTAGACTATCTTCATCAAGGCTATTTTGTGCCTGTAG

>M6-PGSC0003DMG400028438M6LRR-RLK\_3233

AATGATTGATGTGGGATCAGCATTAGACTATCTTCATCAAGGCTATTTTGTGCCTGTAGTTCACTGTGATC  
TAAAGCCTAGCAATGTCTTGCTCGACGAAGATATGGTTGCACATGTGAG

>M6-PGSC0003DMG400028438M6LRR-RLK\_3294

CACTGTGATCTAAAGCCTAGCAATGTCTTGCTCGACGAAGATATGGTTGCACATGTGAGTGACTTTGGCC  
TGGCTAAGCTATTAGGGGTAGGAGAAAGTATTGTACAAACCAAAACACTT

>M6-PGSC0003DMG400028438M6LRR-RLK\_3355

ACTTTGGCCTGGCTAAGCTATTAGGGGTAGGAGAAAGTATTGTACAAACCAAAACACTTGAACCATG  
GATACATTGCACCAGGTAATAATCATGTCAACAAGCTTCATTTCTCCTTCA

>M6-PGSC0003DMG400028438M6LRR-RLK\_3416

AACCATTGGATACATTGCACCAGGTAATAATCATGTCAACAAGCTTCATTTCTCCTTCAAATTTCAACCAT  
TTTAAATATACCATATTCTCTTGATAAATTGTTTTATTTCAATGTAGAG

>M6-PGSC0003DMG400028438M6LRR-RLK\_3477

TTTCAACCATTTTAAATATACCATATTCTCTTGATAAATTGTTTTATTTCAATGTAGAGTTTGGATTGGAAG  
GACTTGTATCTACAAGGTGCGACATTTACAGCTACGGTGTCATGTTGA

>M6-PGSC0003DMG400028438M6LRR-RLK\_3538

TGGATTGGAAGGACTTGTATCTACAAGGTGCGACATTTACAGCTACGGTGTCATGTTGATGGAAACCTT  
ACGAGAAAGAAACCAACGGATTGAATGTTTGTGAAAATTTAAGCCTGAG

>M6-PGSC0003DMG400028438M6LRR-RLK\_3599

GAAACCTTTACGAGAAAGAAACCAACGGATTGAATGTTTGCTGAAAATTTAAGCCTGAGGGAGTGGATA  
AGACAATCATGGCCACGCAGAATGGACGAGATAATAGACCCCGAGCTTATG

>M6-PGSC0003DMG400028438M6LRR-RLK\_366

TTGCATAGATTGGAGTTAATAAATGTCACCTTCTAATAAGTTCACTGGAGATATCCCTCGTGGTTCTCGCT  
TTTGCCAGAACTCCAGCACTTGCATCTAGCTTTTAACAGTTTCACAGGT

>M6-PGSC0003DMG400028438M6LRR-RLK\_3660

AGTGGATAAGACAATCATGGCCACGCAGAATGGACGAGATAATAGACCCCGAGCTTATGATACCAGTG  
GAGAAGAACAAAACAGGAAAGGTGCAGTGCTTATCATCCATCATGGAATTAG

>M6-PGSC0003DMG400028438M6LRR-RLK\_3721

ACCAGTGGAGAAGAACAAAACAGGAAAGGTGCAGTGCTTATCATCCATCATGGAATTAGCTCTGAGGT  
GCACTGCAGACTTGCCAGAGGAAAGAATGAATATCAAACATGTTCTTGCTCA

>M6-PGSC0003DMG400028438M6LRR-RLK\_3767

ATCATGGAATTAGCTCTGAGGTGCACTGCAGACTTGCCAGAGGAAAGAATGAATATCAAACATGTTCTT  
GCTCAACTGAAGAACATCAGAACTATGTTGGAAAATGTAATAAATCACTAA

>M6-PGSC0003DMG400028438M6LRR-RLK\_427

GGTTCTCGCTTTTGCCAGAACTCCAGCACTTGCATCTAGCTTTTAACAGTTTCACAGGTATTATTCCACCA  
GATAGTTGTAACGCTTCCAACTTGAGAGTTTAGTCTTGGGATTTAATC

>M6-PGSC0003DMG400028438M6LRR-RLK\_488

TATTCCACCAGATAGTTGTAACGCTTCCAACTTGAGAGTTTAGTCTTGGGATTTAATCAGTTACAAGGG  
GAAATTCCAAATGAAATTGGTAATCTTCAGAACTTGACTTGGTTGAGCTT

>M6-PGSC0003DMG400028438M6LRR-RLK\_549

TTACAAGGGGAAATTCCAAATGAAATTGGTAATCTTCAGAACTTGACTTGGTTGAGCTTGGGATCAAATC  
AGCTAACAGGCTCCGTACCACTTAGCCTGTACAACATTTTCATCGTTACAA

>M6-PGSC0003DMG400028438M6LRR-RLK\_61

TGATATTATCAGCCACTGCAGAAGTCAATCTCAAACTGATGAAGCTGCTCTACTTGCTTTGAAATCCTAT  
GTTACTTCTGATACTTACAATATCTTGACAAGCAACTGGACCTCAACTA

>M6-PGSC0003DMG400028438M6LRR-RLK\_610

GATCAAATCAGCTAACAGGCTCCGTACCACTTAGCCTGTACAACATTTTCATCGTTACAACGTTTGGTTTTG

ACAAAAAATAGTTTGTCTGGAAATCTTCCTGTCGATATATGCTTGAACC

>M6-PGSC0003DMG400028438M6LRR-RLK\_671

TTTGGTTTTGACAAAAAATAGTTTGTCTGGAAATCTTCCTGTCGATATATGCTTGAACCTTCCAGAACTTA

TGGTGCTTGCACCTTCTGACAATGAATTTGATGGTCAAATTCCTTTGGG

>M6-PGSC0003DMG400028438M6LRR-RLK\_732

CCAGAACTTATGGTGCTTGCACCTTCTGACAATGAATTTGATGGTCAAATTCCTTTGGGGATAGATAAAT

GTTCAAAGCTTCAGATTTTGTCAATTGTCATTCAATAAGTTCAGTGGATTG

>M6-PGSC0003DMG400028438M6LRR-RLK\_793

TAGATAAATGTTCAAAGCTTCAGATTTTGTCAATTGTCATTCAATAAGTTCAGTGGATTGATACCTAAACAG

ATTGGGAACTTGAATGTGCTGTCTATTTTATATCTTGGTCGTAATGACT

>M6-PGSC0003DMG400028438M6LRR-RLK\_854

ACCTAAACAGATTGGGAACTTGAATGTGCTGTCTATTTTATATCTTGGTCGTAATGACTTGAAAGGTGAG

TTATACATATTTGCTTTTAGGTTCTTCTTTGTTTCATACATGAAACATAT

>M6-PGSC0003DMG400028438M6LRR-RLK\_915

AAAGGTGAGTTATACATATTTGCTTTTAGGTTCTTCTTTGTTTCATACATGAAACATATTTTTTGAGTCATG

TATGCACTCCTTAATTGATATACTGCAGAAAGTAGACTTTCTATTTAT

>M6-PGSC0003DMG400028438M6LRR-RLK\_976

TTTGAGTCATGTATGCACTCCTTAATTGATATACTGCAGAAAGTAGACTTTCTATTTATGATTTAATTTGC

AGGTGAAATTCAGAAGAGATTGGAAATCTTCGTAATCTAGAGATATTG

>M6-PGSC0003DMG400028443-(rev)M6RLKANKrepeat\_0

CTTTTAATAGCCCCATTGATAGCTAAGTCTCATTTTTTTTTGAAGTAGGTTGTCTTTGAACTGTCTGGTT

CAATTATTAATTTTCAAAAAAAGAAGAAGAAAATCTATTCTTTT

>M6-PGSC0003DMG400028443-(rev)M6RLKANKrepeat\_1037

AATGGTTATAAATATGGTACTTTATAACCATTGTTCTTGTCTAGTATCAAGGTTGTTTTAAGTGTAAGCA

GAAAATCTATCAGGTAATAATCTCTGTAATTTCAAGGAGACCTGAGCAT

>M6-PGSC0003DMG400028443-(rev)M6RLKANKrepeat\_1098

AGTGTAAGCAGAAAATCTATCAGGTAATAATCTCTGTAATTTCAAGGAGACCTGAGCATTGCAGCTCCCA

GTTGTTTTACTTCCAACCCCTCTTGCATTGAGGGAAGAGTAAGAAATGA

>M6-PGSC0003DMG400028443-(rev)M6RLKANKrepeat\_1159

CAGCTCCCAGTTGTTTTACTTCCAACCCCTCTTTGCATTGAGGGAAGAGTAAGAAATGATAATAACATTG  
TCATGTATTACCACGCATTATTGACACAATGTTACCATCTAAAACATGA

>M6-PGSC0003DMG400028443-(rev)M6RLKANKrepeat\_122

AAGTTTATTCACCTCTGATCCTAAATTTGGTTGAAATATTAAGTTTCAAGAATACCCTTTTGCCATCTTTGG  
ATTCTTGAAAAGCTTTAGTGTGAAGCATTAAAGTTTTGCTGACATCCTT

>M6-PGSC0003DMG400028443-(rev)M6RLKANKrepeat\_1220

ATAACATTGTCATGTATTACCACGCATTATTGACACAATGTTACCATCTAAAACATGAAGTATCCTGCTT  
TTCCTATTGATCAACATGTTCTGAGCAATCTGATCTTTGCTGAGCAGCC

>M6-PGSC0003DMG400028443-(rev)M6RLKANKrepeat\_1281

TATCCTGCTTTTCCTATTGATCAACATGTTCTGAGCAATCTGATCTTTGCTGAGCAGCCTTTAGGAGATGC  
AATACATTATAAAAATCATCATGTGATCAAGCTACTAGAGGAACATGGT

>M6-PGSC0003DMG400028443-(rev)M6RLKANKrepeat\_1342

TAGGAGATGCAATACATTATAAAAATCATCATGTGATCAAGCTACTAGAGGAACATGGTGCCAAGCCTC  
CTGTAAGTTTTATTTCCATTCTATTTTACTCATCAAGTGATTAATAACT

>M6-PGSC0003DMG400028443-(rev)M6RLKANKrepeat\_1403

CAAGCCTCCTGTAAGTTTTATTTCCATTCTATTTTACTCATCAAGTGATTAATAACTGTAAGAAAGAAA  
ACTTTTGTCTCCGTTGCACAAAAGATTGCTTGGCTTTATTGTTGTCTAA

>M6-PGSC0003DMG400028443-(rev)M6RLKANKrepeat\_1464

AAGAAAGAAAACCTTTTGTCTCCGTTGCACAAAAGATTGCTTGGCTTTATTGTTGTCTAAATTTTGT  
AAAAATAAAATTCTCATCCAGATGGCTCCCATGCATGTCAACAATTCAC

>M6-PGSC0003DMG400028443-(rev)M6RLKANKrepeat\_1525

TTTGTTTTGAAAAATAAAATTCTCATCCAGATGGCTCCCATGCATGTCAACAATTCACGTGAAGTTCCA  
GAATATGAGATTGATGCTAAAGAACTTGATTTACGAATAGCATTGAATT

>M6-PGSC0003DMG400028443-(rev)M6RLKANKrepeat\_1586

GAAGTTCCAGAATATGAGATTGATGCTAAAGAACTTGATTTACGAATAGCATTGAATTGGCCAAGGTA  
ATTTCATATATAAAATGTGAACATTTACATTAACCTTGATTGGTAATTAGCT

>M6-PGSC0003DMG400028443-(rev)M6RLKANKrepeat\_1647

CCAAGGTAATTTATATATAAAATGTGAACATTTACATTAACCTTGATTGGTAATTAGCTATTTTCAATGGG  
CTAGGTATGCTGATTTTCCTTTCAAATACTTCCTTTTAACTACACTA

>M6-PGSC0003DMG400028443-(rev)M6RLKANKrepeat\_1708

TTTCAATGGGCTAGGTATGCTGATTTTCCTTTCAAATACTTCCTTTAACCTACACTATCTTGGGAGGTT  
ATAGTGAAAAGTTAACACAACAAATTGAGTGGGATGCTAGGTTGGTAA

>M6-PGSC0003DMG400028443-(rev)M6RLKANKrepeat\_1769

TTGGGAGGTTATAGTGAAAAGTTAACACAACAAATTGAGTGGGATGCTAGGTTGGTAAGGATAAGTT  
GATCTTCTTTGGTGTCTTCTGTCATAAGAAGTCCTTATATTAGGGTGGTATGT

>M6-PGSC0003DMG400028443-(rev)M6RLKANKrepeat\_183

GCCATCTTTGGATTCTTGAAAAGCTTTAGTGTGAAGCATTAAAGTTTGCTGACATCCTTTTGCAGATTTTA  
TATTCTTGAAAAGCTTTGATCTTTTTTGTGTTTGTGCTTCTGAAGC

>M6-PGSC0003DMG400028443-(rev)M6RLKANKrepeat\_1830

ATAAGTTGATCTTCTTTGGTGTCTTCTGTCATAAGAAGTCCTTATATTAGGGTGGTATGTTTGGAAAAAGC  
TGGGAAATATTCACCTGATCCTTTTCTATTCTCTAGTGTATTGCTTCA

>M6-PGSC0003DMG400028443-(rev)M6RLKANKrepeat\_1891

GGAAAAAGCTGGGAAATATTCACCTGATCCTTTTCTATTCTCTAGTGTATTGCTTCAATCTACAAACTT  
TTGCTTCTGTATCTTTCTGATGATTCTGAACTATTATAGGGAACCTTT

>M6-PGSC0003DMG400028443-(rev)M6RLKANKrepeat\_1952

CTACAAACTTTTGCTTCTGTATCTTTCTGATGATTCTGAACTATTATAGGGAACCTTTCATATTGCCTCAT  
GGCGTGAATACAAGTTGCTGTGAAAAAGTTTGGAGATGATGAGATTG

>M6-PGSC0003DMG400028443-(rev)M6RLKANKrepeat\_2013

TATTGCCTCATGGCGTGAATACAAGTTGCTGTGAAAAAGTTTGGAGATGATGAGATTGCTGATGAGGA  
TAAAGTGTGAGTATAAGATACCAATATTGATTCTGTGGAATCTTCTAATGA

>M6-PGSC0003DMG400028443-(rev)M6RLKANKrepeat\_2074

GATGAGGATAAAGTGTGAGTATAAGATACCAATATTGATTCTGTGGAATCTTCTAATGAAAACAGAAAA  
AGCCATAAGGGCTCTTCACATTGTTTAGCTCTCCTCATATCTCACTTATTT

>M6-PGSC0003DMG400028443-(rev)M6RLKANKrepeat\_2135

ACAGAAAAAGCCATAAGGGCTCTTCACATTGTTTAGCTCTCCTCATATCTCACTTATTTATTATATATTCTT  
AATTTATGGATATTTGCAGGACGGCATTGAGAGACGAGCTTGCCTTC

>M6-PGSC0003DMG400028443-(rev)M6RLKANKrepeat\_2196

TATATATTCTTAATTTATGGATATTTGCAGGACGGCATTGAGAGACGAGCTTGCCTTCTCCAGAAGATT

AGGCATCCAAATGTTGTCCAATTTCTTGGTGCTGTAACACAAAGTAGCCC

>M6-PGSC0003DMG400028443-(rev)M6RLKANKrepeat\_2257

CAGAAGATTAGGCATCCAAATGTTGTCCAATTTCTTGGTGCTGTAACACAAAGTAGCCCGATGATGATA  
GTGACAGAATACTTACCAAAGGTAGTCCCAAATTTACTCTCTTGTTTTTC

>M6-PGSC0003DMG400028443-(rev)M6RLKANKrepeat\_2318

TGATGATAGTGACAGAATACTTACCAAAGGTAGTCCCAAATTTACTCTCTTGTTTTTCTTTATCTAAAAT  
AGTTGTGGTGTGTATGTTATATTTACAACATTTCCGGTAGGCCGTGAA

>M6-PGSC0003DMG400028443-(rev)M6RLKANKrepeat\_2379

TATCTAAAATAGTTGTGGTGTGTATGGTTATATTTACAACATTTCCGGTAGGCCGTGAAGGTTTTAGTTA  
TTCTACACATTTGTCTTAGTTGATTCCTTTCTCTATTTTGTTCTTTTCTA

>M6-PGSC0003DMG400028443-(rev)M6RLKANKrepeat\_244

GCAGATTTTATATTCTTGAAAAGCTTTGATCTTTTTGTTGTTTTGTGCTTCTGAAGCTGTATGTTCTTTG  
TTACTACTTTTTAAGTCAAATTTACGTTTTAGTAGTTTTTTTAGGTAG

>M6-PGSC0003DMG400028443-(rev)M6RLKANKrepeat\_2440

TTTTAGTTATTCTACACATTTGTCTTAGTTGATTCCTTTCTCTATTTTGTTCTTTTCTAGCAAAAGCAACATC  
CTGATACTAAATGTCCTTTTCATGGCTATATTTTCCAGGGCGATCT

>M6-PGSC0003DMG400028443-(rev)M6RLKANKrepeat\_2501

AAAAGCAACATCCTGATACTAAATGTCCTTTTCATGGCTATATTTTCCAGGGCGATCTCCATGCATATTT  
GAAGAATGAAGAACCTCTTAGACCAACAAAAGCTATCAGATTTGCAATA

>M6-PGSC0003DMG400028443-(rev)M6RLKANKrepeat\_2562

ATGCATATTTGAAGAATGAAGAACCTCTTAGACCAACAAAAGCTATCAGATTTGCAATAGACATCGCAA  
GGTTCACAAGCCACTCTACACTATTAGCTAATGTTATAAACTCACTACGTA

>M6-PGSC0003DMG400028443-(rev)M6RLKANKrepeat\_2623

CATCGCAAGGTTACAAGCCACTCTACACTATTAGCTAATGTTATAAACTCACTACGTAATTACAAGACCA  
ACACTTGATAAATGTCTGGAACCTGGGGAACCTTTGTGGAGTAACATTT

>M6-PGSC0003DMG400028443-(rev)M6RLKANKrepeat\_2684

TACAAGACCAACACTTGTATAAATGTCTGGAACCTGGGGAACCTTTGTGGAGTAACATTTAAATCCACACA  
ACTTGCATATCTTTTGGTTTTAAATTCTAAAATTAGCATCTGTGGGAGG

>M6-PGSC0003DMG400028443-(rev)M6RLKANKrepeat\_2745

ATCCACACAACCTTGCATATCTTTTGGTTTTAAATTCTAAAAATTAGCATCTGTGGGAGGCAGAGCAAGTA  
ATCACTCAGCTATTGATTATACTTCTGAGAATATTTATTGCTTAATTCAT

>M6-PGSC0003DMG400028443-(rev)M6RLKANKrepeat\_2806

GAGCAAGTAATCACTCAGCTATTGATTATACTTCTGAGAATATTTATTGCTTAATTCATCTAGTAGTTTGT  
TATGAATCTTTTAGTTAACATCTATTGTGTTTCTTAAAGATCCCATCTG

>M6-PGSC0003DMG400028443-(rev)M6RLKANKrepeat\_2867

AGTAGTTTGTATGAATCTTTTAGTTAACATCTATTGTGTTTCTTAAAGATCCCATCTGGTGTTCATATC  
CACTGGTAATATTAATAGAAAGAAGAAAAGAAAATAGAAGATCATACT

>M6-PGSC0003DMG400028443-(rev)M6RLKANKrepeat\_2928

GTTTGCATATCCACTGGTAATATTAATAGAAAGAAGAAAAGAAAATAGAAGATCATACTTGTTAATGGA  
TATGCCACTTTTCTCAAATGCTAGGTTATCTGCTGACCTAGTATTCTAA

>M6-PGSC0003DMG400028443-(rev)M6RLKANKrepeat\_2989

TTAATGGATATGCCACTTTTCTCAAATGCTAGGTTATCTGCTGACCTAGTATTCTAATGTCCTGCATATC  
ACTTTAAGCTGACCCTAGGAATATGAAGTAGGATGCATTTAGTAAAGA

>M6-PGSC0003DMG400028443-(rev)M6RLKANKrepeat\_305

TATGTTCTTTGTTACTACTTTTTAAGTCAAATTTACGTTTTAGTAGTTTTTTTAGGTAGAGTGGCTGCAGAT  
CTTAAAAGGGGTTCAAGTAAATTAGTTGTTGGAATCTTGATCTTGAAA

>M6-PGSC0003DMG400028443-(rev)M6RLKANKrepeat\_3050

TCCTGCATATCACTTTAAGCTGACCCTAGGAATATGAAGTAGGATGCATTTAGTAAAGAAAAGGAGAA  
AAACATATAGAGATGATGCAACACTAGTTGCTTTTTCCGTCAGTCAATACT

>M6-PGSC0003DMG400028443-(rev)M6RLKANKrepeat\_3111

AAGGAGAAAACATATAGAGATGATGCAACACTAGTTGCTTTTTCCGTCAGTCAATACTGGAAGTTAAT  
AAACATCATTTGATATTACTTTTACTTCCCCTTTGTTTGATCTGCTTCC

>M6-PGSC0003DMG400028443-(rev)M6RLKANKrepeat\_3172

AAGTTAATAACATCATTTGATATTACTTTTACTTCCCCTTTGTTTGATCTGCTTCCAAGCTAAAATTTA  
TGCCCTGTAGTACCCTGTATTATTTCAAATATAATGTGATATCTTTAT

>M6-PGSC0003DMG400028443-(rev)M6RLKANKrepeat\_3233

GCTAAAATTTATGCCCTGTAGTACCCTGTATTATTTCAAATATAATGTGATATCTTTATACCCATTTCAAGT  
CTTCTACTATTTAATATTATCATAAATAATTGGAATCATTCTCTTGA

>M6-PGSC0003DMG400028443-(rev)M6RLKANKrepeat\_3294  
CCATTTCAAGTCTTCCTACTATTTAATATTATCATAAATAATTGGAATCATTCTCTTGAGCTCTGAGATAGT  
CAACACAGCTCAAATAAATTGGATTGGAGCATTAAAGGATCTCTTCAA  
>M6-PGSC0003DMG400028443-(rev)M6RLKANKrepeat\_3355  
TCTGAGATAGTCAACACAGCTCAAATAAATTGGATTGGAGCATTAAAGGATCTCTTCAAAGTTATTTTT  
AATTCTATCAAATTTTCATTTCAAATTTCACTTGAATTTCCACAGCTGC  
>M6-PGSC0003DMG400028443-(rev)M6RLKANKrepeat\_3416  
TTATTTTTTAATTCTATCAAATTTTCATTTCAAATTTCACTTGAATTTCCACAGCTGCTTGGCATGTGAGA  
CATTTGATTATATTTATTTCTTGAATCAGCTTGTGTTTGCTATTTA  
>M6-PGSC0003DMG400028443-(rev)M6RLKANKrepeat\_3477  
GGCATGTGAGACATTTGATTATATTTATTTCTTGAATCAGCTTGTGTTTGCTATTTACTGAAATAATTTA  
TCAAACATACTGTTACATTCATTTGGAGTTGAAGCTTTGTGTGATTC  
>M6-PGSC0003DMG400028443-(rev)M6RLKANKrepeat\_3538  
GAAATAATTTATCAAACATACTGTTACATTCATTTGGAGTTGAAGCTTTGTGTGATTCATGTTATTTCTG  
AATCATAATGTGCATAAGTAGAATTTTAAACACTATTGTATTTTATATG  
>M6-PGSC0003DMG400028443-(rev)M6RLKANKrepeat\_3599  
GTTATTTCTGAATCATAATGTGCATAAGTAGAATTTTAAACACTATTGTATTTTATATGTTTGCAGGGGAC  
TGAACATCTACATGAAATTAGACCTGAAGCGATTATTCATCGTGACCT  
>M6-PGSC0003DMG400028443-(rev)M6RLKANKrepeat\_366  
TGGCTGCAGATCTTAAAAGGGGTTCAAGTAAATTAGTTGTTGGAATCTTGATCTTGAAATGGAACCACT  
AAGATTCTTGTGGTAAGCAATCATCCCTTGCACCAGAAAAGGTGATTGC  
>M6-PGSC0003DMG400028443-(rev)M6RLKANKrepeat\_3660  
TGCAGGGGACTGAACTATCTACATGAAATTAGACCTGAAGCGATTATTCATCGTGACCTAGAGCCTTCGT  
AAGTTCTCTTTTGTAGGTTTCCTTTGATGCCATTTGTGTAAGCAA  
>M6-PGSC0003DMG400028443-(rev)M6RLKANKrepeat\_3721  
AGCCTTCGTAAGTTCTCTCTTTTGTAGGTTTCCTTTGATGCCATTTGTGTAAGCAAATCCCATCCAAGG  
TTTTGTTGACAAGCCTCAATCTTTGAAGTTCTCTCTTTCAAATTTGA  
>M6-PGSC0003DMG400028443-(rev)M6RLKANKrepeat\_3782  
CCCATCCAAGGTTTTGTTGACAAGCCTCAATCTTTGAAGTTCTCTCTTTCAAATTTGAGTTTCTTCATCTT



AATGTTTTAATATTTTCACGTGACATAACAGAAATATTTTGAGGGATG

>M6-PGSC0003DMG400028443-(rev)M6RLKANKrepeat\_3843

TTCTTCATCTTAATGTTTTAATATTTTCACGTGACATAACAGAAATATTTTGAGGGATGATACGGGACACC

TGAAAGTTGCTGATTTTGGAGTCAGCAAGCTATTGAAAGTTACCAACAG

>M6-PGSC0003DMG400028443-(rev)M6RLKANKrepeat\_3904

ACGGGACACCTGAAAGTTGCTGATTTTGGAGTCAGCAAGCTATTGAAAGTTACCAACAGGGTCAAAGAA

GATAAGCCTCTGACATGTGATAACACATCTTGTGAGTACTCCTTTCTTTTA

>M6-PGSC0003DMG400028443-(rev)M6RLKANKrepeat\_3965

TCAAAGAAGATAAGCCTCTGACATGTGATAACACATCTTGTGAGTACTCCTTTCTTTTAGGTATCACAATG

TTTCTTTTCCAATGGAGAATTATGCTGACATTTGACACAGACTCGACAG

>M6-PGSC0003DMG400028443-(rev)M6RLKANKrepeat\_4026

TATCACAATGTTTCTTTTCCAATGGAGAATTATGCTGACATTTGACACAGACTCGACAGTATTTGTGACAC

TGTTGTTGCTGCTTGTGGATGTAAAATTCCTGCCAGTCTAATTTTAA

>M6-PGSC0003DMG400028443-(rev)M6RLKANKrepeat\_4087

TTTGTGACACTGTTGTTGCTGCTTGTGGATGTAAAATTCCTGCCAGTCTAATTTTAAAAAATTGTTCA

GCATTGCATGGTGCCACAATTGCTTCTACTGATCCATTTCTGTTGATTA

>M6-PGSC0003DMG400028443-(rev)M6RLKANKrepeat\_4148

AAATTGTTGAGCATTGCATGGTGCCACAATTGCTTCTACTGATCCATTTCTGTTGATTAATATTTGGAAAT

CTCTTAACCTGTTTCCTTTTGCCTTTTGTGGAAATATATAGGC

>M6-PGSC0003DMG400028443-(rev)M6RLKANKrepeat\_4209

ATTTGGAAATCTCTTAACCTGTTTCCTTTTGCCTTTTGTGGAAATATATAGGCCGATATGTAGCTC

CAGAGGTTTTCAAAAATGAGGAATACGATACCAAAGTTGATGTCTTTT

>M6-PGSC0003DMG400028443-(rev)M6RLKANKrepeat\_427

GAACCAGTAAGATTCTTGTTGGGTAAGCAATCATCCCTTGCACCAGAAAAGGTGATTGCGGCAGTGGAG

ATTGAGAGTGAAGATGGGGAGGAAGGGGATGTTATAGATATTGATCCAAGG

>M6-PGSC0003DMG400028443-(rev)M6RLKANKrepeat\_488

CAGTGGAGATTGAGAGTGAAGATGGGGAGGAAGGGGATGTTATAGATATTGATCCAAGGATCAGGTT

GATGTATTCAGCTAATGAGGGTGATATAGAGGGGATTAAGGAGCTTTTGGATT

>M6-PGSC0003DMG400028443-(rev)M6RLKANKrepeat\_549

CAGGTTGATGTATTCAGCTAATGAGGGTGATATAGAGGGGATTAAGGAGCTTTTGGATTTGGGCACTGA  
TGTGAACTTTTCGAGACGATGATGAGAGGACTGCCCTACATGTTGCTGCTTG

>M6-PGSC0003DMG400028443-(rev)M6RLKANKrepeat\_61

ACTGTCTGGTTCAATTATTAAATTTTCCAAAAAAGAAGAAGAAAAATCTATTCTTTTTCAAGTTTATTC  
ACCTCTGATCCTAAATTTGGTTGAAATATTAAGTTTCAAGAATACCCTT

>M6-PGSC0003DMG400028443-(rev)M6RLKANKrepeat\_610

GGCACTGATGTGAACTTTTCGAGACGATGATGAGAGGACTGCCCTACATGTTGCTGCTTGCCAAGGTTAC  
AGTGATGTTGTGCAGCTGTTGGTTGATAATGGGGCTGAAATTGATTCCGAA

>M6-PGSC0003DMG400028443-(rev)M6RLKANKrepeat\_671

AAGGTTACAGTGATGTTGTGCAGCTGTTGGTTGATAATGGGGCTGAAATTGATTCCGAAGATCGCTGGG  
GAAGCACGGTATATCTCATGAACTAGTTTTATTATCATATAGTTTTTGTG

>M6-PGSC0003DMG400028443-(rev)M6RLKANKrepeat\_732

TCGCTGGGGAAGCACGGTATATCTCATGAACTAGTTTTATTATCATATAGTTTTTGTCTCCCTAATGATT  
GGTAATTTGGTATAAGTTAGATAACGCTTGATTATGATTCTATATTGTT

>M6-PGSC0003DMG400028443-(rev)M6RLKANKrepeat\_793

CCTAATGATTGGTAATTTGGTATAAGTTAGATAACGCTTGATTATGATTCTATATTGTTAGTATCTTCACT  
TTTGGGTAGTTAGTTGGTATTGGAGAAAAAGGTATAGACCCTTGCATTC

>M6-PGSC0003DMG400028443-(rev)M6RLKANKrepeat\_854

TATCTTCACTTTTGGGTAGTTAGTTGGTATTGGAGAAAAAGGTATAGACCCTTGCATTCTGTTTTTATCTA  
TATATGTTAATCTTAATCAAATCCGAACCTTGATTCATTTGGGTTAATGA

>M6-PGSC0003DMG400028454-(rev)M6RLKmalectin\_0

CTCTTTATTCTATCCATTGAAATGTTTTAAACCAGGAATCTCGAGGCGAACCAGTTTTTCAGGCAGTGTCC  
TTCTGAACTAGGGAACTGATTAACCTTGCAAACCCTGTAAGACCTTTCT

>M6-PGSC0003DMG400028454-(rev)M6RLKmalectin\_1098

TCCTTCTCTTCTGTCCGTGACCTTTGGATTCTCTGAGTCACACTATTAACCTGTCCTCTATTGGCGCCTCTT  
TCAGTTAACTGCCTTCCCCAGTCAAAAACAATTGAGAAATCATTTC

>M6-PGSC0003DMG400028454-(rev)M6RLKmalectin\_1159

TGGCGCCTCTTTCAGTTAACTGCCTTCCCCAGTCAAAAACAATTGAGAAATCATTCTTCTCTACCAAG  
AACTCCTGTAGAAATTAAGCCCCTTTTAATTTCTTGTGGAAAGTT

>M6-PGSC0003DMG400028454-(rev)M6RLKmalectin\_122  
TCTCTTCCACTTTGTTATCTTCTCCTAAAGCAACTTGAAGAATAATTGGCATTGGCACCTGAATGACTGA  
TGCATAGACGAGTGGGTGATTAATCTTTTTCTACTTTCAGGATTTTATC

>M6-PGSC0003DMG400028454-(rev)M6RLKmalectin\_1220  
CTCTACCAAGAACTCCTGTAGAAATTAAGCCCCTTTAATTCCTTGTTGGAAAGTTGAAATATTTAC  
ATCTAGTGTGCTCTCTGTGACTGTAAATTTTTAGCATTCCAGTTTTA

>M6-PGSC0003DMG400028454-(rev)M6RLKmalectin\_1281  
AATATTTACATCTAGTGTGCTCTCTGTGACTGTAAATTTTTAGCATTCCAGTTTTAAAAGATAATTGA  
GGCTGTTGAGAAATAATGCGCTCGTTCTTAATTAGTATATGACACCTT

>M6-PGSC0003DMG400028454-(rev)M6RLKmalectin\_1342  
AGATAATTGAGGCTGTTGAGAAATAATGCGCTCGTTCTTAATTAGTATATGACACCTTAATATCAAAG  
GTTTCATGCTGCTCTTTGCTTTTCACTAACTTCTCATCCTTCTTCTTCT

>M6-PGSC0003DMG400028454-(rev)M6RLKmalectin\_1403  
TATCAAAGGTTTCATGCTGCTCTTTGCTTTTCACTAACTTCTCATCCTTCTTCTTCTGTATCTCTCCAGT  
ACATTATTTAGTCTAACATATAGAGTTGGCTCTTATACATTTTTCTT

>M6-PGSC0003DMG400028454-(rev)M6RLKmalectin\_1464  
TATCTCTCCAGTACATTATTTAGTCTAACATATAGAGTTGGCTCTTATACATTTTTCTTCTACAATATACAT  
GTGGCGGTTGTAAGAGTTTGTGCACACAGATTCATCTGCTGTATCTCC

>M6-PGSC0003DMG400028454-(rev)M6RLKmalectin\_1525  
ACAATATACATGTGGCGGTTGTAAGAGTTTGTGCACACAGATTCATCTGCTGTATCTCCTTCTGAGAGTT  
CAAATGGTAATCATGATTTCTTTTTAATTTTCTGCAGAGACGTTACCTTC

>M6-PGSC0003DMG400028454-(rev)M6RLKmalectin\_1586  
CTGAGAGTTCAAATGGTAATCATGATTTCTTTTTAATTTTCTGCAGAGACGTTACCTTCAACAAGTTAGTC  
GGAGAAATCCCAAACAATATTAGTGCTAGAAGTATGCTAAAGTTTGTGT

>M6-PGSC0003DMG400028454-(rev)M6RLKmalectin\_1647  
CAAGTTAGTCGGAGAAATCCCAAACAATATTAGTGCTAGAAGTATGCTAAAGTTTGTGTAAGTTGAATT  
GCAAAAAGTGGATTCTCTCAAATGTGATGTCCTTTTTATTTATTATTAG

>M6-PGSC0003DMG400028454-(rev)M6RLKmalectin\_1708  
GTTGAATTGCAAAAAGTGGATTCTCTCAAATGTGATGTCCTTTTTATTTATTATTAGCAAGTTACATCA

GTCTCTTCTCAATCTTCTTTTGCTCATAACCCGAACATCTTCGAGTATGA

>M6-PGSC0003DMG400028454-(rev)M6RLKmalectin\_1769

AGTTACATCAGTCTTCTCAATCTTCTTTTGCTCATAACCCGAACATCTTCGAGTATGAAGTGTATAACAT

GTGCTTGCACTTCCAGATTTGCTGTTGCCTTACTGCTTTATGTTCTCTG

>M6-PGSC0003DMG400028454-(rev)M6RLKmalectin\_183

GAATGACTGATGCATAGACGAGTGGGTGATTAATCTTTTTCTACTTTCAGGATTTTATCCTCCAACCAATT

GGTGGGGAAGTTTCCAACCTCATTTTCCAAACTCGTAAATTTAACGGAT

>M6-PGSC0003DMG400028454-(rev)M6RLKmalectin\_1830

TGTATAACATGTGCTTGCACTTCCAGATTTGCTGTTGCCTTACTGCTTTATGTTCTCTGCATAGGTTTCTTA

CTGGCAACATGCTCAGTGGAGATATAACCAGACTCAATTTTGAAGACTG

>M6-PGSC0003DMG400028454-(rev)M6RLKmalectin\_1891

TAGGTTTCTTACTGGCAACATGCTCAGTGGAGATATAACCAGACTCAATTTTGAAGACTGGAATAAATGTG

TAAGTGTATATTTGTTAATATTCTAATTTTATAAACAATTTCTGCTGGTG

>M6-PGSC0003DMG400028454-(rev)M6RLKmalectin\_1952

ATAAATGTGTAAGTGTATATTTGTTAATATTCTAATTTTATAAACAATTTCTGCTGGTGTATGATGGACTC

AGTCTTTGCGGAACATGTCATAATTTTATTATAAACAATAATGGTCAT

>M6-PGSC0003DMG400028454-(rev)M6RLKmalectin\_2013

TGATGGACTCAGTCTTTCGGAACATGTCATAATTTTATTATAAACAATAATGGTCATACAGTGGCATG

CCAAAGCAATTTTGATTCATTCACGTTGGCATTATTTTTTTCCATATAT

>M6-PGSC0003DMG400028454-(rev)M6RLKmalectin\_2074

AGTGGCATGCCAAAGCAATTTTGATTCATTCACGTTGGCATTATTTTTTTCCATATATTGTCTTCATGTG

GATCTCACAACCTGCTTAGTTCATAATAGGAAAGATGACATCTAACAGCG

>M6-PGSC0003DMG400028454-(rev)M6RLKmalectin\_2135

TCTTCATGTGGATCTCACAACCTGCTTAGTTCATAATAGGAAAGATGACATCTAACAGCGTCCGTTGCGCG

CAGTGATCTTTCCTACAATAATTTTACATGGCAAGGACCTGACCAATATG

>M6-PGSC0003DMG400028454-(rev)M6RLKmalectin\_2196

CGTTGCGCGCAGTGATCTTTCCTACAATAATTTTACATGGCAAGGACCTGACCAATATGCTTGTGAGCAG

AACATGTAAGAATAATTCATTTTGTAAATTCATGCTTTTACATTGTTT

>M6-PGSC0003DMG400028454-(rev)M6RLKmalectin\_2257

TGTCAGCAGAACATGTAAGAATAATTCCATTTTTGTTAATTCATGCTTTTACATTGTTTATTGGATAAGCA  
TATATGGTTCTGACAATTATTCATTCTACAGGAATCTGTATTTAACTT

>M6-PGSC0003DMG400028454-(rev)M6RLKmalectin\_2318

TGGATAAGCATATATGGTTCTGACAATTATTCATTCTACAGGAATCTGTATTTAACTTGTACAAGAGTTC  
TGCAGCAGTAAGCCCCTTGTAAGATGATTCCCTTATTATCCTGAAACATT

>M6-PGSC0003DMG400028454-(rev)M6RLKmalectin\_2379

ACAAGAGTTCTGCAGCAGTAAGCCCCTTGTAAGATGATTCCCTTATTATCCTGAAACATTAATAATTCTGATT  
TATGATGAAACTGAGAGAAAAAGGAAGTGCAAAGCAGAAGTGGTTGCTT

>M6-PGSC0003DMG400028454-(rev)M6RLKmalectin\_244

CCAACCAATTGGTGGGGAAGTTTCCAACCTTCATTTTCCAACCTCGTAAATTTAACGGATTTGTAAGAGCA  
TACAATCTAGCCGAGCTCCTTTTAGCTCTTATCTTTCTCGGGGAATAGAA

>M6-PGSC0003DMG400028454-(rev)M6RLKmalectin\_2440

AATTCTGATTTATGATGAAACTGAGAGAAAAAGGAAGTGCAAAGCAGAAGTGGTTGCTTTACTATCTGA  
TTCGGATTTGGGTCTAACTGCTTTTGTGCTTTAACTTCTTCAGAATGAGAA

>M6-PGSC0003DMG400028454-(rev)M6RLKmalectin\_2501

CTATCTGATTCGGATTTGGGTCTAACTGCTTTTGTGCTTTAACTTCTTCAGAATGAGAATTCATCCATGTA  
CGAAGGATTTCACTTGTCGTCAGTGTAAGTATGTTCTTTTCTTCTCTGG

>M6-PGSC0003DMG400028454-(rev)M6RLKmalectin\_2562

CATCCATGTACGAAGGATTTCACTTGTCGTCAGTGTAAGTATGTTCTTTTCTTCTCTGGAAAGTTATACAA  
TTTTCATATGGAATATGAATCCCATCAGTAGCAAGAATCTGAAACTTTA

>M6-PGSC0003DMG400028454-(rev)M6RLKmalectin\_2623

AGTTATACAATTTTCATATGGAATATGAATCCCATCAGTAGCAAGAATCTGAAACTTTATCTTTAGCCGCT  
TGGCCATCTTCTCCTTCACTCAAATAGCAAATTGCTCAACTATGCAAGA

>M6-PGSC0003DMG400028454-(rev)M6RLKmalectin\_2684

TTTAGCCGCTTGGCCATCTTCTCCTTCACTCAAATAGCAAATTGCTCAACTATGCAAGAGACTGTAGCAAT  
TTAGTTTCATTTTTGATATTTAACAAAGAGACATTCTAAGGGTGGATTC

>M6-PGSC0003DMG400028454-(rev)M6RLKmalectin\_2989

GTCATAAGCCAAAAGTCAATCCAAACAGGTCCTTAACTCATGTATATACAAGTATTTAGATGATTTGAG  
GACTCACAACCTAATCGTTGGAAATATTTTCTGCTTGATCATTTTCCCAA

>M6-PGSC0003DMG400028454-(rev)M6RLKmalectin\_305

GTAAGAGCATAACAATCTAGCCGAGCTCCTTTTAGCTCTTATCTTTCTCGGGGAATAGAATATCTCACAGT  
ATAATTTTACTATACAGTAGGATAAATGACAACAATTCAGTGGACAGAT

>M6-PGSC0003DMG400028454-(rev)M6RLKmalectin\_3050

TGATTTGAGGACTCACAACTAATCGTTGGAAATATTTTCTGCTTGATCATTTTCCCAACTTATGAAAAAT  
ATTTTGAGCATTGACTTCTATTATTTTCATTGGCAGATGGGTGTTTCATT

>M6-PGSC0003DMG400028454-(rev)M6RLKmalectin\_3111

TATGAAAAATATTTTGGAGCATTGACTTCTATTATTTTCATTGGCAGATGGGTGTTTCATTACATGTTAATAG  
TGGCGGAAATGATTTTACTGTCAAGGAGAGCGATGGAGAAGTTCATTAT

>M6-PGSC0003DMG400028454-(rev)M6RLKmalectin\_3172

ATGTTAATAGTGGCGGAAATGATTTTACTGTCAAGGAGAGCGATGGAGAAGTTCATTATGCAGGAGAT  
GCAAGCGTTGATGGTGGTTCTGCTAGATATTTTCAGCAGTAGCAACAATTATT

>M6-PGSC0003DMG400028454-(rev)M6RLKmalectin\_3233

AGGAGATGCAAGCGTTGATGGTGGTTCTGCTAGATATTTTCAGCAGTAGCAACAATTATTGGGGATTGAG  
TAGCACTGGGGACTTTATGGATGATAATAACGACCAAATGCACGTTTTAT

>M6-PGSC0003DMG400028454-(rev)M6RLKmalectin\_3294

GGATTGAGTAGCACTGGGGACTTTATGGATGATAATAACGACCAAATGCACGTTTTATTGAAAGTACA  
TCATCAAAAAGCCTCTCTGAATTGTACAATAATGCACGGATATCTCCCCTC

>M6-PGSC0003DMG400028454-(rev)M6RLKmalectin\_3355

AAAGTACATCATCAAAAAGCCTCTCTGAATTGTACAATAATGCACGGATATCTCCCCTCTCACTCACTTAC  
TTCCGTTATTGCTTGAGGAACGGGAGTTACAATGTCAGCTTGCACTTTG

>M6-PGSC0003DMG400028454-(rev)M6RLKmalectin\_3416

ACTCACTTACTTCCGTTATTGCTTGAGGAACGGGAGTTACAATGTCAGCTTGCACTTTGCTGAGATAATTT  
TTACAAATGACAGCACCTATAGAAGTCTTGAAGGCGAGTATTTGATAT

>M6-PGSC0003DMG400028454-(rev)M6RLKmalectin\_3477

GAGATAATTTTACAAATGACAGCACCTATAGAAGTCTTGAAGGCGAGTATTTGATATATACATCCAG  
GTTGGTATGTCCATTAGAAAACTTTCTATACGCTTAACTATGTTGGATG

>M6-PGSC0003DMG400028454-(rev)M6RLKmalectin\_3538

ACATCCAGGTTGGTATGTCCATTAGAAAACTTTCTATACGCTTAACTATGTTGGATGTGTGAAAATAT

GAGGAAAAAAGAGAGAACCTGTATTGTATTTGGTTGTAGATGATATAAAA

>M6-PGSC0003DMG400028454-(rev)M6RLKmalectin\_3599

TGAAAATATGAGGAAAAAAGAGAGAACCTGTATTGTATTTGGTTGTAGATGATATAAAAGATGCCTCCA  
CATATAGAAGTTCAGGCAATTACAAATATGGTAAGCTAACCTAAATGAAAT

>M6-PGSC0003DMG400028454-(rev)M6RLKmalectin\_366

TCTCACAGTATAATTTTACTATACAGTAGGATAAATGACAACAATTTTCAGTGGACAGATTCCGGATTCA  
TACAGAACTGGAAACAACCTACCAAACGTACGATCTTTAGAAATACCTT

>M6-PGSC0003DMG400028454-(rev)M6RLKmalectin\_3660

TGCCTCCACATATAGAAGTTCAGGCAATTACAAATATGGTAAGCTAACCTAAATGAAATAAGAGAACTTA  
TTAATTTAGGGAGACTACACATCCAGAATTAGAAAAAATGCTCTCTACTA

>M6-PGSC0003DMG400028454-(rev)M6RLKmalectin\_3721

GAGAACTTATTAATTTAGGGAGACTACACATCCAGAATTAGAAAAAATGCTCTCTACTACTTACCTAGAA  
TATATTTTAACACATCACTGCATTAATTCTCCACAACGCGCCTTCCAAA

>M6-PGSC0003DMG400028454-(rev)M6RLKmalectin\_3782

TACCTAGAATATATTTTAACACATCACTGCATTAATTCTCCACAACGCGCCTTCCAAACTCAAGGTGATA  
CAGCAACTAGTGTGGCAAATCAAAGTGAAAAGTGATATGATACTACT

>M6-PGSC0003DMG400028454-(rev)M6RLKmalectin\_3843

CAAGGTGATACAGCAACTAGTGTGGCAAATCAAAGTGAAAAGTGATATGATACTACTTGGACAAAAT  
AGAGTAGGAGTTATGATTGAATTTGAGGACATTCATGTCGTGAGCTTAACT

>M6-PGSC0003DMG400028454-(rev)M6RLKmalectin\_3904

GACAAAATAGAGTAGGAGTTATGATTGAATTTGAGGACATTCATGTCGTGAGCTTAACTAGATGGCTAC  
AGAGAAGCAAGCACTGTACCAGATTGATTGGATAAATGACCATTCATGGTG

>M6-PGSC0003DMG400028454-(rev)M6RLKmalectin\_3965

ATGGCTACAGAGAAGCAAGCACTGTACCAGATTGATTGGATAAATGACCATTCATGGTGTTTAACTTGG  
TGACGATATAGTAACCATGCGTTGACTAGTACTAGTCTCAACTAAAAGTGT

>M6-PGSC0003DMG400028454-(rev)M6RLKmalectin\_4026

TAACTTGGTGACGATATAGTAACCATGCGTTGACTAGTACTAGTCTCAACTAAAAGTGTCTCTAGAAAG  
CGACATGGTGCTGTCTGGATGGTGACACATCAGCTAGCTAGACAGCTATA

>M6-PGSC0003DMG400028454-(rev)M6RLKmalectin\_4087

TCTAGAAAGCGACATGGTGCTGTCTGGATGGTGACACATCAGCTAGCTAGACAGCTATAGACTGTTTAA  
CTTGACAGGTTAACAGGTATAGAGTGATGATAACAACCCAACGCGGACTGT

>M6-PGSC0003DMG400028454-(rev)M6RLKmalectin\_4148

CTGTTTAACTTGACAGGTTAACAGGTATAGAGTGATGATAACAACCCAACGCGGACTGTGATAACATGG  
CACGTGCTGCCCAAAGATGCTGGAACCTGGAAGAGAGAAGAAAAGAGTGA

>M6-PGSC0003DMG400028454-(rev)M6RLKmalectin\_4209

ATACATGGCACGTGCTGCCCAAAGATGCTGGAACCTGGAAGAGAGAAGAAAAGAGTGATGCTGCTTT  
ATCTGGAAAGAGACGAGCCTTATTATGAAAAAATGAAAACTTTGTGTGGC

>M6-PGSC0003DMG400028454-(rev)M6RLKmalectin\_427

CGGATTTACATACAGAACTGGAAACAACCTACCAAAGTACGATCTTTAGAAATACCTTCCAACTTCAA  
AATAATATTTTGGCAAGAGTTTCTAACTTTTTCTTGACGATATATGAAG

>M6-PGSC0003DMG400028454-(rev)M6RLKmalectin\_4270

CTGCTTTATCTGGAAAGAGACGAGCCTTATTATGAAAAAATGAAAACTTTGTGTGGCAGGCAGCGTT  
AGATTGAAGCTATTAGATCTATAACAACAAAGTAGTCTCTATATAGGAGTT

>M6-PGSC0003DMG400028454-(rev)M6RLKmalectin\_4331

GCAGCGTTAGATTGAAGCTATTAGATCTATAACAACAAAGTAGTCTCTATATAGGAGTTTAGACAACCTAG  
GATACAAAATTTTTCTTTCTTTATACTGAGATTTTTGAATAGGAAGAA

>M6-PGSC0003DMG400028454-(rev)M6RLKmalectin\_4392

GACAACTAGGATACAAAATTTTTCTTTCTTTATACTGAGATTTTTGAATAGGAAGAATTTAGTATACTA  
TTAATCTAGACATATTCTAACATCTCGCTGAATAAGTTCCTGTGACTTT

>M6-PGSC0003DMG400028454-(rev)M6RLKmalectin\_4453

TAGTATACTATTAATCTAGACATATTCTAACATCTCGCTGAATAAGTTCCTGTGACTTTCCACAAGATACC  
TACACAATATTCTTTCTACTTCAGGAGAAATTAGTTTGGAAAGACTTCA

>M6-PGSC0003DMG400028454-(rev)M6RLKmalectin\_4514

ACAAGATACCTACACAATATTCTTTCTACTTCAGGAGAAATTAGTTTGGAAAGACTTCAATATTGTGAAT  
GAGGCTGGTGGAGTTCAAACACCTGTGGTTAGGCATTTTAAACACCAGTGT

>M6-PGSC0003DMG400028454-(rev)M6RLKmalectin\_4575

ATTGTGAATGAGGCTGGTGGAGTTCAAACACCTGTGGTTAGGCATTTTAAACACCAGTGTAACAGATAAT  
TTTTTGGAGATTGATTTTACTGGGCTGGCAAAGGAACTATCAGAATCCCA



>M6-PGSC0003DMG400028454-(rev)M6RLKmalectin\_4636

CAGATAATTTTTGGAGATTCGATTTTACTGGGCTGGCAAAGGAAGTATCAGAATCCCATCTAGAGGGA  
AATACGGTCCACTAATATCTGCAATCTCACTCAAACCAAGTAAGTTTCTTC

>M6-PGSC0003DMG400028454-(rev)M6RLKmalectin\_4697

TAGAGGGAAATACGGTCCACTAATATCTGCAATCTCACTCAAACCAAGTAAGTTTCTTCAATCTTAATCAT  
TATAAGGGGAATATCATAGTATATCTGCTTTCACACTTCTCACTTCGTT

>M6-PGSC0003DMG400028454-(rev)M6RLKmalectin\_4758

TCTTAATCATTATAAGGGGAATATCATAGTATATCTGCTTTCACACTTCTCACTTCGTTTCCTTCAAGTATA  
TTGTGTATTTAAGCATGTCTCAGTGAGAACTAACACAAAAGACATGT

>M6-PGSC0003DMG400028454-(rev)M6RLKmalectin\_4819

CTTCAAGTATATTGTGTATTTAAGCATGTCTCAGTGAGAACTAACACAAAAGACATGTATCATTTTAAA  
CTTTAAAGTCCCAAGAGATATTCTAGAGATTGTACATATCATATGAGAAG

>M6-PGSC0003DMG400028454-(rev)M6RLKmalectin\_488

AAACTTCAAATAATATTTTGGCAAGAGTTTCTAAACTTTTTCTTGACGATATATGAAGGGAGATGCATG  
CCACCGGACTAGAGGGTCCCATTCACAAACATATCTCTTCTGAATAAA

>M6-PGSC0003DMG400028454-(rev)M6RLKmalectin\_4880

CATTTTAACTTTAAAGTCCCAAGAGATATTCTAGAGATTGTACATATCATATGAGAAGGTTTCATACATG  
ATAAATTTAATTGTTTCTAGAAGAAATACTGCAATTGAATGCATGATTAC

>M6-PGSC0003DMG400028454-(rev)M6RLKmalectin\_4941

TCATACATGATAAATTTAATTGTTTCTAGAAGAAATACTGCAATTGAATGCATGATTACATGCATTGTTTG  
CTTAGTTGTGGGGTTGACATTGTTTATCAACTCCGTTGTATAAGATAA

>M6-PGSC0003DMG400028454-(rev)M6RLKmalectin\_5002

GCATTGTTTGCTTAGTTGTGGGGTTGACATTGTTTATCAACTCCGTTGTATAAGATAAAAATTGCTGCTAT  
CTAACATGATCCATGCTAATATTGTTGAAGTATGTGACCATCTCATCTG

>M6-PGSC0003DMG400028454-(rev)M6RLKmalectin\_5185

CACTTTAACAGTTAATTATATTCTCAACAAATATGTGGAAGATTCTGATATTTTTTTTGGCATTTCACCGT  
TCTATTAGAACACCAGTTGGCGTCTGAAATTGCAAAGATAACTGGTT

>M6-PGSC0003DMG400028454-(rev)M6RLKmalectin\_5246

ATTTCCACCGTTCTATTAGAACACCAGTTGGCGTCTGAAATTGCAAAGATAACTGGTTGGCTATCTCTCT

CAACCGTTGATTTGCTTTGGTCTCTTTAGAGTTGCGACATTTATCTAGA

>M6-PGSC0003DMG400028454-(rev)M6RLKmalectin\_5307

CTATCTCTCTCAACCGTTGATTTGCTTTGGTCTCTTTAGAGTTGCGACATTTATCTAGAGATCAAGTAAAC

TATTATCAGCACCAAAAAGCCAATCTGTGGCTTTAACTTAGCCTGCTCCG

>M6-PGSC0003DMG400028454-(rev)M6RLKmalectin\_5368

TCAAGTAAACTATTATCAGCACCAAAAAGCCAATCTGTGGCTTTAACTTAGCCTGCTCCGAATCATTGAAA

GAGTAATTTTTCAATAACTTTCCTAATTTTTTACTGGGCAAACCTAGTTTT

>M6-PGSC0003DMG400028454-(rev)M6RLKmalectin\_5429

TCATTGAAAGAGTAATTTTTCAATAACTTTCCTAATTTTTTACTGGGCAAACCTAGTTTTTTTTGAAACTAAGC

TATTAAGTTCATACATGGCTTGATATTCCTGTGGTTCTGTACCAACT

>M6-PGSC0003DMG400028454-(rev)M6RLKmalectin\_549

AGATGCATGCCACCGGACTAGAGGGTCCCATTCCAACAAACATATCTCTTCTGAATAAATTAACAGATTT

GTGAGTAGAGAACCTTTCACATTATCTTAACTATTTTTTATTAGGTTTT

>M6-PGSC0003DMG400028454-(rev)M6RLKmalectin\_5490

TGAAACTAAGCTATTAAGTTCATACATGGCTTGATATTCCTGTGGTTCTGTACCAACTATAAGTATTAGT

ATGTTACTGATTTATAGTATAAACTTAGATGTTTACCAGGTGATAGAAT

>M6-PGSC0003DMG400028454-(rev)M6RLKmalectin\_5551

AAGTATTAGTATGTTACTGATTTATAGTATAAACTTAGATGTTTACCAGGTGATAGAATATTTGTATTGTG

GTTATTTCAACCAGGCTCTTCTTTTCAGCTTCCAATATATAGTTTTAAG

>M6-PGSC0003DMG400028454-(rev)M6RLKmalectin\_5612

TTGTATTGTGGTATTTCAACCAGGCTCTTCTTTTCAGCTTCCAATATATAGTTTTAAGCTCTAAATACTTT

TCCTATTTCTATTGCTATTTTCTTTTCATCTAAAAAATAAGTAGGAG

>M6-PGSC0003DMG400028454-(rev)M6RLKmalectin\_5673

CTAAACTTTTTCTATTTCTATTGCTATTTTCTTTTCATCTAAAAAATAAGTAGGAGTTAAATCTCTTCTG

GTATGTCCGATGTAGGTTTACATTTTAAAACCTGTTTTCTCTCCTTTT

>M6-PGSC0003DMG400028454-(rev)M6RLKmalectin\_5734

AAATCTCTTCTGGTATGTCCGATGTAGGTTTACATTTTAAAACCTGTTTTCTCTCCTTTTTTGGTTATTGATTC

AAAGGGTCATTCTATATGGCCGAGGAAATCCATTTTCGTAATTTTGG

>M6-PGSC0003DMG400028454-(rev)M6RLKmalectin\_5795

GGTTATTGATTCAAAGGGTCATTCTATATGGCCGAGGAAATCCATTTTCGTAATTTTGGTTGAATTAACA  
GACAGAAATTCTCAGCTTGAAGGAGTGTGGATGAGTGCCACATATATT

>M6-PGSC0003DMG400028454-(rev)M6RLKmalectin\_5856

GAATTAACAGACAGAAATTCTCAGCTTGAAGGAGTGTGGATGAGTGCCACATATATTTCTTTGCTATT  
ATTTTCCCATGAATAATATGCATGTTGATATTCTATGTAATCAACTGGAA

>M6-PGSC0003DMG400028454-(rev)M6RLKmalectin\_5917

TTTGCTATTATTTTCCCATGAATAATATGCATGTTGATATTCTATGTAATCAACTGGAATAATCTTATTTTC  
TATTGCCCTGCTGCTGCATACACATAACAATCTTGTCTTTATTTCTG

>M6-PGSC0003DMG400028454-(rev)M6RLKmalectin\_5978

ATCTTATTTTCTATTGCCCTGCTGCTGCATACACATAACAATCTTGTCTTTATTTCTGTGCAGCTTTTGGAA  
TCTTGTTGAGAGGAAGATAAAAAGAGTGTGACTGTTTATGTTATTGTC

>M6-PGSC0003DMG400028454-(rev)M6RLKmalectin\_6039

CAGCTTTTGGATCTTGTTGAGAGGAAGATAAAAAGAGTGTGACTGTTTATGTTATTGTCGGAGTAGTGG  
TTACATGCATTTCCCTGTTGGTAATGAGCACACTTTGGTGGAAAGGATATC

>M6-PGSC0003DMG400028454-(rev)M6RLKmalectin\_61

GCAGTGTTCTTCTGAACTAGGGAACTGATTAACCTGCAAACCCTGTAAGACCTTTCTTTTCTCTCCAC  
TTTGTTATCTTCTCCTAAAGCAACTGAAGAATAATTGGCATTGGCAC

>M6-PGSC0003DMG400028454-(rev)M6RLKmalectin\_610

AACAGATTTGTGAGTAGAGAACCTTTCAACATTATCTTAACTATTTTTATTAGGTTTTTGTAGAGCATT  
ACTCTTTGCAGTTCTCTCACGGTCAATTTTGTATACAGGAGGATCAGTG

>M6-PGSC0003DMG400028454-(rev)M6RLKmalectin\_6100

AGTAGTGGTTACATGCATTTCCCTGTTGGTAATGAGCACACTTTGGTGGAAAGGATATCTTCAATGCAAA  
AAGAAACAGAGAAAAGGTGATCACTGAACAGGTGTTAGAATGAAGTAATT

>M6-PGSC0003DMG400028454-(rev)M6RLKmalectin\_6161

CAATGCAAAAAGAAACAGAGAAAAGGTGATCACTGAACAGGTGTTAGAATGAAGTAATTTAACTAGC  
AAATTTTATGACTAGGCAGCCAGCTGATCCATGCATTACTGATTTGAAAGAG

>M6-PGSC0003DMG400028454-(rev)M6RLKmalectin\_6222

AACTAGCAAATTTTATGACTAGGCAGCCAGCTGATCCATGCATTACTGATTTGAAAGAGCACATTCTACT  
GAAATGATAATCAAAGAAAACCTCATATCCAGAAGTCGTGACGTGTAAT

>M6-PGSC0003DMG400028454-(rev)M6RLKmalectin\_6283

CATTCTACTGAAATGATAATCAAAGAAAACCTCCATATCCAGAAGTCGTGACGTGTAAATAGATGACTAAC  
CAGTAAAGTCTCTCTATTTCCATGACAGATTTAGAGGGCATGGAGCTGCA

>M6-PGSC0003DMG400028454-(rev)M6RLKmalectin\_6344

ATGACTAACCAGTAAAGTCTCTCTATTTCCATGACAGATTTAGAGGGCATGGAGCTGCAGACCATTCTT  
TTACTTTAAAGCAAATAAAGGCTGCCACTAATAACTTTGATGCTTCTAAC

>M6-PGSC0003DMG400028454-(rev)M6RLKmalectin\_6405

CCATTTCTTTTACTTTAAAGCAAATAAAGGCTGCCACTAATAACTTTGATGCTTCTAACAAGATAGGGGA  
AGGTGGTTTTGGTGCAGTTTTCAAGGTATCACTTTGGTAACAACAGTAAT

>M6-PGSC0003DMG400028454-(rev)M6RLKmalectin\_6466

GATAGGGGAAGGTGGTTTTGGTGCAGTTTTCAAGGTATCACTTTGGTAACAACAGTAATATAGTATCGT  
CTTTATCATTATTGTTTGTGAACCTCTGACCAAATAATTTATGTAGGGTCCGG

>M6-PGSC0003DMG400028454-(rev)M6RLKmalectin\_6527

AGTATCGTCTTTATCATTATTGTTTGTGAACCTCTGACCAAATAATTTATGTAGGGTCCGGTTATCTGATGGT  
ACGTTAGTTGCAGTGAAGCAGCTCTCGCGTCAATCAAGACAGGGGAACC

>M6-PGSC0003DMG400028454-(rev)M6RLKmalectin\_6588

ATCTGATGGTACGTTAGTTGCAGTGAAGCAGCTCTCGCGTCAATCAAGACAGGGGAACCGTGAATTTTT  
AAATGAGATTGGCATGATTTTCATGTTTGAACACCCAAATCTTGTTAAGCT

>M6-PGSC0003DMG400028454-(rev)M6RLKmalectin\_6649

GAATTTTTAAATGAGATTGGCATGATTTTCATGTTTGAACACCCAAATCTTGTTAAGCTGCATGGTTGTTG  
CATTGAAGGGACTGAATTACTGCTCGTATATGAATACTTGAAAACAAT

>M6-PGSC0003DMG400028454-(rev)M6RLKmalectin\_671

TAGAGCATTACTCTTTGCAGTTCTCTCACGGTCAATTTTGTATACAGGAGGATCAGTGACATAGGTGGA  
CCAGCTCAGGCATTTCTTCACTGAGTGATATAATGGGATTCCATAACTT

>M6-PGSC0003DMG400028454-(rev)M6RLKmalectin\_6710

ATGGTTGTTGCATTGAAGGGACTGAATTACTGCTCGTATATGAATACTTGAAAACAATAGCCTCGCTCG  
CGCATTATTTGTAAGTTATTCAATCTCTTTTAAAAAAGTTCCTAAACTA

>M6-PGSC0003DMG400028454-(rev)M6RLKmalectin\_6771

CCTCGCTCGCGCATTATTTGTAAGTTATTCAATCTCTTTTAAAAAAGTTCCTAAACTATTACTAACTCTCT

ATGAAATGTCAATTAATAATTTAGCATGTTGGACAACCTTAGATTCCG

>M6-PGSC0003DMG400028454-(rev)M6RLKmalectin\_6832

ACTAACTCTCTATGAAATGTCAATTAATAATTTAGCATGTTGGACAACCTTAGATTCCGAGAAAAGTCAA  
TTGATACTTGATTGGCCGACAAGGTTCAAGATTTGTGTTGGGATTGCTAA

>M6-PGSC0003DMG400028454-(rev)M6RLKmalectin\_6893

AAAAGTCAATTGATACTTGATTGGCCGACAAGGTTCAAGATTTGTGTTGGGATTGCTAAAGGTTTGGCTT  
TCCTTCATGAGGAATCAAGCCTTAAAATTGTACACAGAGACATTAAGCT

>M6-PGSC0003DMG400028454-(rev)M6RLKmalectin\_6954

GTTTGGCTTTCCTTCATGAGGAATCAAGCCTTAAAATTGTACACAGAGACATTAAGCTACTAATGTACT  
GCTAGATAGAGATCTAAATCCCAAATTTGGACTTCGGACTTGCTAAAC

>M6-PGSC0003DMG400028454-(rev)M6RLKmalectin\_7015

TAATGTACTGCTAGATAGAGATCTAAATCCCAAATTTGGACTTCGGACTTGCTAAACTTACTGAAGAT  
GATAATACCCATATTAGCACTCGAGTTGCTGGAACAATGTAAGTTGCAAC

>M6-PGSC0003DMG400028454-(rev)M6RLKmalectin\_7076

ACTGAAGATGATAATACCCATATTAGCACTCGAGTTGCTGGAACAATGTAAGTTGCAACGTAATAATTCAA  
ACTAGATCTTCTTTTTTTTTGCCGTTATCTTGTGTCAGCAGCGTGGTTAGGT

>M6-PGSC0003DMG400028454-(rev)M6RLKmalectin\_7137

AAAATTCAAAGTATCTTCTTTTTTTTTGCCGTTATCTTGTGTCAGCAGCGTGGTTAGGTAAAATTTGTAGC  
ATAATTGTATGTTAATAACTGCAGAGGATACATGGCACCAGAGTATGCA

>M6-PGSC0003DMG400028454-(rev)M6RLKmalectin\_7198

AATTTGTAGCATAATTGTATGTTAATAACTGCAGAGGATACATGGCACCAGAGTATGCACTATGGGGTT  
ATTTGACTTACAAAGCAGATGTCTACAGCTTTGGAATTGTCCTCCTGGAAA

>M6-PGSC0003DMG400028454-(rev)M6RLKmalectin\_7259

ATGGGGTTATTTGACTTACAAAGCAGATGTCTACAGCTTTGGAATTGTCCTCCTGGAAATTGTTAGCGGC  
AAGCACAACCTATGGCTATGTGCCTCCGACAATTTCAATTTGTCTTTTAGA

>M6-PGSC0003DMG400028454-(rev)M6RLKmalectin\_732

ATAGGTGGACCAGCTCAGGCATTTCTTCACTGAGTGATATAATGGGATTCCATAACTTGTATGTCCAAT  
TATACCGAAATGTGGAAAACATTGCACAGTTACAGTGTGCTATTAAGCAT

>M6-PGSC0003DMG400028454-(rev)M6RLKmalectin\_7320

GTTAGCGGCAAGCACAACTATGGCTATGTGCCTTCCGACAATTTCAATTTGTCTTTTAGATTGGGTATCTTT  
CCTTTTCCTTTTGTTAATGCACTTCAACAAAGCCTGACTAGTCTACAA

>M6-PGSC0003DMG400028454-(rev)M6RLKmalectin\_7381

GGGTATCTTTCCTTTTCCTTTTGTTAATGCACTTCAACAAAGCCTGACTAGTCTACAATTTATAAGATTGA  
GAATCCTTGAACTTTTTTAACCTTGAACCTCCCTCACTCCCTTTGAAG

>M6-PGSC0003DMG400028454-(rev)M6RLKmalectin\_7442

TATAAGATTGAGAATCCTTGAACTTTTTTAACCTTGAACCTCCCTCACTCCCTTTGAAGTTGCTAGCTTATA  
AACTTTATTGCAGGCCTCTCACTTGCTGCAAATGGAAAAATAGAGG

>M6-PGSC0003DMG400028454-(rev)M6RLKmalectin\_7503

GCTAGCTTATAAACTTTATTGCAGGCCTCTCACTTGCTGCAAATGGAAAAATAGAGGAGCTGATTGAT  
GATAAATTGGGTTCTCAGTTTAGCAAAGCAGAAGCAGAAAGGGTAATAAAA

>M6-PGSC0003DMG400028454-(rev)M6RLKmalectin\_7564

CTGATTGATGATAAATTGGGTTCTCAGTTTAGCAAAGCAGAAGCAGAAAGGGTAATAAAAAGTAGCACTA  
TTATGCACTAGTGCGACGCCTTCACTCAGGCCTGTAATGTCTGAGGCTGTA

>M6-PGSC0003DMG400028454-(rev)M6RLKmalectin\_7625

TAGCACTATTATGCACTAGTGCGACGCCTTCACTCAGGCCTGTAATGTCTGAGGCTGTAGGCATGCTTGA  
AGGAAAAATTGATGCCCTGATAGTATCCCAGAAGCAAGTATGTATACTG

>M6-PGSC0003DMG400028454-(rev)M6RLKmalectin\_7686

CATGCTTGAAGGAAAAATTGATGCCCTGATAGTATCCCAGAAGCAAGTATGTATACTGACGATTTGAG  
ATTTCAAGCCTTGAAAGATTTCCAACAAGAGAGGCAAAATCAAAGTGAGTC

>M6-PGSC0003DMG400028454-(rev)M6RLKmalectin\_7747

GATTTGAGATTTCAAGCCTTGAAAGATTTCCAACAAGAGAGGCAAAATCAAAGTGAGTCAAGTAATCAA  
GCTCAGTGTTCAAGCATCCAACTGCCTCTGATCTCTGTGAATACAACCCC

>M6-PGSC0003DMG400028454-(rev)M6RLKmalectin\_7808

GTAATCAAGCTCAGTGTTCAAGCATCCAACTGCCTCTGATCTCTGTGAATACAACCCCGAATCAAGATC  
TGACTGACACTCTATTGTGTGTGTATTCTTATTTAATCTCTTGCCGGTGT

>M6-PGSC0003DMG400028454-(rev)M6RLKmalectin\_7869

ATCAAGATCTGACTGACACTCTATTGTGTGTGTATTCTTATTTAATCTCTTGCCGGTGTGCCTGTATCTTAT  
GGCTCATGAGGGATTGCATTGGTTCAAAGCCACTCATCGAGGTATGAT

>M6-PGSC0003DMG400028454-(rev)M6RLKmalectin\_793  
ATGTCCAATTATACCGAAATGTGGAAAACATTGCACAGTTACAGTGTGCTATTAAGCATTCTAGCTTTCT  
TAAGCTAATAAAATATGGATACAGGGTATTAAGAAACTGCAGCCTTTCT

>M6-PGSC0003DMG400028454-(rev)M6RLKmalectin\_7930  
CTGTATCTTATGGCTCATGAGGGATTGCATTGGTTCAAAGCCACTCATCGAGGTATGATTGTTGCAAGTT  
GTA ACTATTTGTTCAATTTTTGTGAGTAAGATTTCTATAAAATGTACAT

>M6-PGSC0003DMG400028454-(rev)M6RLKmalectin\_7991  
TTGCAAGTTGTA ACTATTTGTTCAATTTTTGTGAGTAAGATTTCTATAAAATGTACATAAATTACTATCCC  
AAGAAAAAGTGTGAGGAGTTATATTTCTCCAGCTCTGCATTTTTACAC

>M6-PGSC0003DMG400028454-(rev)M6RLKmalectin\_8052  
ATTACTATCCCAAGAAAAAGTGTGAGGAGTTATATTTCTCCAGCTCTGCATTTTTACACCTCCTAGCTAGA  
TTTCAAAGTTGTATAAAATTCTGCCCCATTGTGATATACCTGAAATGTA

>M6-PGSC0003DMG400028454-(rev)M6RLKmalectin\_8106  
TACACCTCCTAGCTAGATTTCAAAGTTGTATAAAATTCTGCCCCATTGTGATATACCTGAAATGTAGACTA  
TAAGGTCCTTCTGTAAACAAAAAAGGATTCGTTGTTCTAATTGTGTCAG

>M6-PGSC0003DMG400028454-(rev)M6RLKmalectin\_854  
TAGCTTTCCTTAAGCTAATAAAATATGGATACAGGGTATTAAGAAACTGCAGCCTTTCTGGAGAGCTTCC  
TGTATATATTTGGGCGATGAAGGATCTGCAAACATTGTAAGTTATGGACT

>M6-PGSC0003DMG400028454-(rev)M6RLKmalectin\_915  
AGAGCTTCTGTATATATTTGGGCGATGAAGGATCTGCAAACATTGTAAGTTATGGACTTATTCTTCTGC  
ACCTAATGTTCAA ACTTCTTCAGCTGCATTCAA AATTACATGGTATTA AA

>M6-PGSC0003DMG400028461-(rev)M6G-LecRK\_0  
AAATACAACATCAGCTTCAAATCATCTTTACCCTATCTAGACAAGTAGTTAAGCAGATGGGAATAGATTC  
ATTTCAATGATCGTCAAGTCATTGATATAAATTAGAGGTTTCACAGATGA

>M6-PGSC0003DMG400028461-(rev)M6G-LecRK\_1054  
CCTTCAAGGATGAAATATTTGAGATATGATTATGATGGACATCTTCGAGCCTACACCGAGGGGAAGTGAT  
CAGACAAATGATCTTTTGGCAGATTTCAATTGGGCTTTGCGTTACCCACAG

>M6-PGSC0003DMG400028461-(rev)M6G-LecRK\_1116  
AAGTGATCAGACAAATGATCTTTTGGCAGATTTCAATTGGGCTTTGCGTTACCCACAGCTTGTGGCAGTT

TGGAGCTTTGCTCAAATGGAATTTGTTCTTGTCCAGGTCCATTAATAAAA

>M6-PGSC0003DMG400028461-(rev)M6G-LecRK\_1178

TGGCAGTTTGGAGCTTTGCTCAAATGGAATTTGTTCTTGTCCAGGTCCATTAATAAAAAGTAATGATCGA  
CAAAACAACGGATGTGTGGAAGTTAGTCCGGTGGAAATGTGATGGACAACG

>M6-PGSC0003DMG400028461-(rev)M6G-LecRK\_124

TTTGTATGTATAAGAATCTTTTCCCTTCTAATATGTTTTTTGGTCAATGAACATTTTAGTTTTTTGTCTAA  
ACAGAATCATGGCTTTACCCTCTGTCAAACATTCGTTGACGCTTTTG

>M6-PGSC0003DMG400028461-(rev)M6G-LecRK\_1240

ATGATCGACAAAACAACGGATGTGTGGAAGTTAGTCCGGTGGAAATGTGATGGACAACGCTCCCACAGA  
ATGGACCGTGCTTCGGATGTCTATTACTTAACTATGTCGACACTGATGCAG

>M6-PGSC0003DMG400028461-(rev)M6G-LecRK\_1302

CACAGAATGGACCGTGCTTCGGATGTCTATTACTTAACTATGTCGACACTGATGCAGCAGCTCTGAGA  
GGAACAGATGAGGAAAGTTGCCAAGAGTTGTGCTTGAAGAACTGCTCTTGT

>M6-PGSC0003DMG400028461-(rev)M6G-LecRK\_1364

TCTGAGAGGAACAGATGAGGAAAGTTGCCAAGAGTTGTGCTTGAAGAACTGCTCTTGTAAGTAGTTCT  
ATTCCGGTATTTACTAACTTTTCAAGTGGTGACTGCTATTTACCCTCTCC

>M6-PGSC0003DMG400028461-(rev)M6G-LecRK\_1426

TAGTTCTATTCCGGTATTTACTAACTTTTCAAGTGGTGACTGCTATTTACCCTCTCTGTTCTGTCACTTA  
TAATTGATGGAAAGGGAAGAAGTGTCTATGAATCATCTGCATTCATCA

>M6-PGSC0003DMG400028461-(rev)M6G-LecRK\_1488

CTGTCACTTATAATTGATGGAAAGGGAAGAAGTGTCTATGAATCATCTGCATTCATCAAATTACCAAATG  
ATGCAGAAAAAGGTAAGTCTACAGCTACAAGAAGAACTGGCATAATAGCT

>M6-PGSC0003DMG400028461-(rev)M6G-LecRK\_1550

ACCAAATGATGCAGAAAAAGGTAAGTCTACAGCTACAAGAAGAACTGGCATAATAGCTGGATTAAGT  
GTGGAACAGTTCTGCTGGTAGCATTAACTGTTGGCATCTTGATTGCTTTCAA

>M6-PGSC0003DMG400028461-(rev)M6G-LecRK\_1612

TAACTGGTGGAAACAGTTCTGCTGGTAGCATTAACTGTTGGCATCTTGATTGCTTTCAACAGAAAACACAC  
ATTACAAGAAAATAATGATGATTACTCCGGGGAGATATCTGGTCTTGTA

>M6-PGSC0003DMG400028461-(rev)M6G-LecRK\_1674



AAACACACATTACAAGAAAATAATGATGATTACTCCGGGGAGATATCTGGTCTTGTAAGATTTTCTTATG  
AACAGCTGAAGATGGCAACTTGGAATTTCCAGAAAAAGCTTGGTCAGGGA

>M6-PGSC0003DMG400028461-(rev)M6G-LecRK\_1736

TTCTTATGAACAGCTGAAGATGGCAACTTGGAATTTCCAGAAAAAGCTTGGTCAGGGAGGTTTTGGCTC  
AGTTTATGAAGGAGTTATTCGAGATGGTCAGAAAGTAGCAGTGAAGGTTCT

>M6-PGSC0003DMG400028461-(rev)M6G-LecRK\_1798

TTGGCTCAGTTTATGAAGGAGTTATTCGAGATGGTCAGAAAGTAGCAGTGAAGGTTCTTGATGGTTTTG  
GCCAAGGAAAGAGGGAATTCTTGGCAGAGGTCCAGACCATAGGAAGCATCC

>M6-PGSC0003DMG400028461-(rev)M6G-LecRK\_186

TTTTTGCTAAACAGAATCATGGCTTTACCCTCTGTCAAACATTCGTTGACGCTTTTGATCATTGTGCTCCT  
TGAGTACCTTACTTTGGCTCAATTTCTGATTATCACACGGTGAAATT

>M6-PGSC0003DMG400028461-(rev)M6G-LecRK\_1860

GGTTTTGGCCAAGGAAAGAGGGAATTCTTGGCAGAGGTCCAGACCATAGGAAGCATCCATCATGTTAAT  
CTTGTTAGACTAATTGGAGTTTGTGCTGAGAAAGAGCACACAATATTAGTT

>M6-PGSC0003DMG400028461-(rev)M6G-LecRK\_1922

TGTTAATCTTGTTAGACTAATTGGAGTTTGTGCTGAGAAAGAGCACACAATATTAGTTTATGATTTTCATG  
AGTAATGGATCATTGGATAAATGGATTTTTGGCACAACCTCTACTCAATT

>M6-PGSC0003DMG400028461-(rev)M6G-LecRK\_1984

ATTTTCATGAGTAATGGATCATTGGATAAATGGATTTTTGGCACAACCTCTACTCAATTTACCCTTGATTGG  
AAAATAAGAAGAAAAATCATCCATGATATAGCAAAAGGATTGGCTTATC

>M6-PGSC0003DMG400028461-(rev)M6G-LecRK\_2046

CTTGATTGGAAAATAAGAAGAAAAATCATCCATGATATAGCAAAAGGATTGGCTTATCTTCATGAAGAA  
TGTATGCAAAGAATAGTCCACTTAGATGTTAAGCCACAGAACATTCTGCTG

>M6-PGSC0003DMG400028461-(rev)M6G-LecRK\_2108

TGAAGAATGTATGCAAAGAATAGTCCACTTAGATGTTAAGCCACAGAACATTCTGCTGGACGAGAATCT  
TTGTGCAAAGTATCTGATTTTGGCTTGGCCAAGTTGGTGGATAAAAATCA

>M6-PGSC0003DMG400028461-(rev)M6G-LecRK\_2170

AGAATCTTTGTGCAAAGTATCTGATTTTGGCTTGGCCAAGTTGGTGGATAAAAATCAGAGCCACATAG  
TGACCAGAATTAGGGGAACCCCTGGATACTTGGCTCCTGAATGGTGTAGTG

>M6-PGSC0003DMG400028461-(rev)M6G-LecRK\_2232

CACATAGTGACCAGAATTAGGGGAACCCCTGGATACTTGCTCCTGAATGGTGTAGTGCATTCATTACA  
GAAAAAGCAGATGTCTACAGCTTTGGAATTGTTGCAATGGAGATCCTCTGT

>M6-PGSC0003DMG400028461-(rev)M6G-LecRK\_2294

CATTACAGAAAAAGCAGATGTCTACAGCTTTGGAATTGTTGCAATGGAGATCCTCTGTGGACGCAAGAA  
CGTGGACTATTCACACTCACTCGAACATCCACATTTGCTTAGCTTATTTAT

>M6-PGSC0003DMG400028461-(rev)M6G-LecRK\_2356

GCAAGAACGTGGACTATTCACACTCACTCGAACATCCACATTTGCTTAGCTTATTTATGGAGAAAGCCGA  
AAACAATCAGCTTATCGATATGATGGGAAACTACAGCGATGATCCACAAT

>M6-PGSC0003DMG400028461-(rev)M6G-LecRK\_2418

AAAGCCGAAAACAATCAGCTTATCGATATGATGGGAAACTACAGCGATGATCCACAATGCAATACATCA  
GAAGTCATCCGTATGATGAAGCTTGCTGTCTGGTGCTTACAGAATGATTTT

>M6-PGSC0003DMG400028461-(rev)M6G-LecRK\_248

TTGTGCTCCTTGAGTACCTTACTTTGGCTCAATTCCTGATTATCACACGGTGAAATTACCCACAACATGG  
ATAACAATAAAGTCTCGTCTATCAATGTTACAAAGCCCTTGACATGGC

>M6-PGSC0003DMG400028461-(rev)M6G-LecRK\_2480

TACATCAGAAGTCATCCGTATGATGAAGCTTGCTGTCTGGTGCTTACAGAATGATTTTACTCTGAGGCCT  
TCCATGTCAATGGTGGTTAAAGTAATCGAGGGGACAATGGACATTGAATC

>M6-PGSC0003DMG400028461-(rev)M6G-LecRK\_2542

TGAGGCCTTCCATGTCAATGGTGGTTAAAGTAATCGAGGGGACAATGGACATTGAATCTCACTTAGACT  
ATAGTGTTCCAAATTCACAAACAATTGCAGCAATCAAAGAGTGGCAGACA

>M6-PGSC0003DMG400028461-(rev)M6G-LecRK\_2604

TTAGACTATAGTGTTCCAAATTCACAAACAATTGCAGCAATCAAAGAGTGGCAGACACCACGACTAACT  
TGTTTCCTTCAATTCTTTCAGGACCTAGGTAAGCATTCTAAGCATGATG

>M6-PGSC0003DMG400028461-(rev)M6G-LecRK\_2666

GACTAACTTGTTTCCTTCAATTCTTTCAGGACCTAGGTAAGCATTCTAAGCATGATGAAGAGTCAATAG  
AGAAAAAGAAAATCCCCCTCCTTATCCTATTTCTTGTCTGATCCCATG

>M6-PGSC0003DMG400028461-(rev)M6G-LecRK\_2728

GTCAATAGAGAAAAAGAAAATCCCCCTCCTTATCCTATTTCTTGTCTGATCCCATGATCATCATTGTTG

TATAGCTATTTATTGGTTTCATTTGTGTTGTTTTCTATGACTTAGTAA

>M6-PGSC0003DMG400028461-(rev)M6G-LecRK\_2766

ATTTCTTGTCTGATCCCATGATCATCATTGTTGTATAGCTATTTATTGGTTTCATTTGTGTTGTTTTCTATG  
ACTTAGTAAGATACTACAATTAATTAAGAACCATGGCGTGATTCCA

>M6-PGSC0003DMG400028461-(rev)M6G-LecRK\_310

ACAACATGGATAACAATAAAGTCTCGTCTATCAATGTTACAAAGCCCTTGACATGGCCTTTTTACTCATT  
CAATCAATCATCTGGACCTTTCATGCGAATTCTGATGCTCAAAGAGATA

>M6-PGSC0003DMG400028461-(rev)M6G-LecRK\_372

TTACTCATTCAATCAATCATCTGGACCTTTCATGCGAATTCTGATGCTCAAAGAGATAGAAAAGGACATG  
GGGTATGCTTGTGGTTTTGCTTCAAATGGAGAGGACGATTCCTTTGTGTT

>M6-PGSC0003DMG400028461-(rev)M6G-LecRK\_434

AGGACATGGGGTATGCTTGTGGTTTTGCTTCAAATGGAGAGGACGATTCCTTTGTGTTTTCCATTGGAAT  
TATACGTCTTCGTCAGGACTTCTAGGAGCTCAGCGCTGGACTGACCTTG

>M6-PGSC0003DMG400028461-(rev)M6G-LecRK\_496

ATTGGAATTATACGTCTTCGTCAGGACTTCTAGGAGCTCAGCGCTGGACTGACCTTGAAGTGGTCTGGT  
TTGCAAACAGAAACCATCCAGTTCGTGAAAATGGAACGCTGCAATTGCTG

>M6-PGSC0003DMG400028461-(rev)M6G-LecRK\_558

GGTCTGGTTTGCAAACAGAAACCATCCAGTTCGTGAAAATGGAACGCTGCAATTGCTGCAAGATGGAGA  
TTTAGTGTTAAAAGATGTGGATGGAACCTTGTATGGTCTACAGGCACAGC

>M6-PGSC0003DMG400028461-(rev)M6G-LecRK\_62

ATAGATTCATTTCAATGATCGTCAAGTCATTGATATAAATTAGAGGTTTCACAGATGAACTATTTGTATGT  
ATAAGAATTCTTTCCCTTCTAATATGTTTTTTGGTCAATGAACATTTT

>M6-PGSC0003DMG400028461-(rev)M6G-LecRK\_620

ATGGAGATTTAGTGTTAAAAGATGTGGATGGAACCTTGTATGGTCTACAGGCACAGCGAATAAGTTTG  
TTTCGGGCATTAAGATGATGGAGACTGGGAACCTTGTGCTTCATGACATGT

>M6-PGSC0003DMG400028461-(rev)M6G-LecRK\_682

AAGTTTGTTCGGGCATTAAGATGATGGAGACTGGGAACCTTGTGCTTCATGACATGTATAATCAGACT  
GTATGGCAGTCTTTTGATCATCCAACAGATGCATTGCTTCCAGGCCAGAAA

>M6-PGSC0003DMG400028461-(rev)M6G-LecRK\_744

TCAGACTGTATGGCAGTCTTTTGATCATCCAACAGATGCATTGCTTCCAGGCCAGAAATTAAGGTCTGGT  
CAAAGACTTGCGGCTAGAGTTTATTCGTCCAATTGGAGTGAAGGGAATTA

>M6-PGSC0003DMG400028461-(rev)M6G-LecRK\_806

GGTCTGGTCAAAGACTTGCGGCTAGAGTTTATTCGTCCAATTGGAGTGAAGGGAATTACTATATCTCTGT  
AACCAATCAAGGCTTGTTTGCATTTTACATATCAGACAAGCCACAGATGT

>M6-PGSC0003DMG400028461-(rev)M6G-LecRK\_868

ATCTCTGTAACCAATCAAGGCTTGTTTGCATTTTACATATCAGACAAGCCACAGATGTATTTTAAGTTTTT  
GGTCAGTGGAGAAAGGGATAGCTTTGATGAAAGTTATGTCAAAGCAGTG

>M6-PGSC0003DMG400028461-(rev)M6G-LecRK\_930

TAAGTTTTTGGTCAGTGGAGAAAGGGATAGCTTTGATGAAAGTTATGTCAAAGCAGTGAATGGTACTCT  
TGCCTTGACATATCTTCAACCGAGCCGAATGAGCCAAATGCTGTCTTCTC

>M6-PGSC0003DMG400028461-(rev)M6G-LecRK\_992

GTACTCTTGCCTTGACATATCTTCAACCGAGCCGAATGAGCCAAATGCTGTCTTCTCAAGACCTTCAAG  
GATGAAATATTTGAGATATGATTATGATGGACATCTTCGAGCCTACACCG

>M6-PGSC0003DMG400028473-(rev)M6LRR-RLK\_0

ATGAATATTAGCACTGATCAATCTTCTTCTTGCCTTGAATCCCACATCACTTCAGATCCTTTTCATGTT  
CTTTGACGAACTGGTCTTCTTCTACCTCTGTTTGTGATTGGATTGGA

>M6-PGSC0003DMG400028473-(rev)M6LRR-RLK\_1054

AATCCCTTAACTTATTCAACATTTTCATCACTTGAATGCTATATATGAATGATAACAAGCTTGAAGGAC  
CTTTACCGAGACAGGTTGGAAATTTGACTATGCTTGCCTGGTTTGATCT

>M6-PGSC0003DMG400028473-(rev)M6LRR-RLK\_1116

TTGAAGGACCTTACCGAGACAGGTTGGAAATTTGACTATGCTTGCCTGGTTTGATCTTTCCAATAATTAC  
CTGGCAGGTACGGAAAAAATCTAATTCAAGTCATGTTAGAATTTTTA

>M6-PGSC0003DMG400028473-(rev)M6LRR-RLK\_1178

AATAATTACCTGGCAGGTACGGAAAAAATCTAATTCAAGTCATGTTAGAATTTTTAGTTTTTTGGGAT  
ATGTCTACTGATCATAATCATACTGAATTTTTTCAGGTGTAATTCCACATG

>M6-PGSC0003DMG400028473-(rev)M6LRR-RLK\_124

CTTGAGCTCTCGCCATCAACGAGTGATTGCACTGAATATTTCAAACATGGGTTTTTCGGGTACTATCCCCG  
CCACAACCTGGCAACCTCTTTTTCTGTTTCACTTGATCTAAGCAAAA

>M6-PGSC0003DMG400028473-(rev)M6LRR-RLK\_1240

TTTGGGATATGTCTACTGATCATAATCATACTGAATTTTTAGGTGTAATCCACATGAAGTTGGTAACCT  
TCAAGGGTTGACAGATCTTCCATTGTCTTACAATGAATTTAGTGGGTCG

>M6-PGSC0003DMG400028473-(rev)M6LRR-RLK\_1302

TGGTAACCTTCAAGGGTTGACAGATCTTCCATTGTCTTACAATGAATTTAGTGGGTCGATCCCTATTGGT  
ATCTTTAATATCTCATCTCTTGTAACTATTGGACTCACAGAAAACCCACAT

>M6-PGSC0003DMG400028473-(rev)M6LRR-RLK\_1364

CTATTGGTATCTTTAATATCTCATCTCTTGTAACTATTGGACTCACAGAAAACCCACATTTAGGTAATCTTC  
CGTCCACTATAGGCAATGGGTTACCTAATGTTGAAAATTATTTCTAG

>M6-PGSC0003DMG400028473-(rev)M6LRR-RLK\_1426

GGTAATCTTCCGTCCACTATAGGCAATGGGTTACCTAATGTTGAAAATTATTTCTAGGTGGAAACAACA  
TTAATGGTGTTTTACCTGGATCCATCTCAAATTTGTCTAAGCTCACCTTT

>M6-PGSC0003DMG400028473-(rev)M6LRR-RLK\_1488

AAACAACATTAATGGTGTTTTACCTGGATCCATCTCAAATTTGTCTAAGCTCACCTTTCTCGAACTCTTAG  
TAATGAATTTACTGGTTCAATTCCTGACTCTCTGGGAAATTTAAGACA

>M6-PGSC0003DMG400028473-(rev)M6LRR-RLK\_1550

AACTCTTTAGTAATGAATTTACTGGTTCAATTCCTGACTCTCTGGGAAATTTAAGACAACCTGAACTTCTC  
AACTTGACGGTAACTCCTTTACAAGTGAATTGAGCTTCATTACTCCTT

>M6-PGSC0003DMG400028473-(rev)M6LRR-RLK\_1612

GAACTTCTCAACTTGACGGTAACTCCTTTACAAGTGAATTGAGCTTCATTACTCCTTTGGCCAATTGTAA  
ACACTTGAGAATATTGATATTGTCTTTCAATCCCCTAAATGCAATGCTC

>M6-PGSC0003DMG400028473-(rev)M6LRR-RLK\_1674

CAATTGTAAACACTTGAGAATATTGATATTGTCTTTCAATCCCCTAAATGCAATGCTCCCAAGATCCATTG  
GCAATATCTCTTCTTCAATCATTTATTGCTGTAGGCTGTAACCTCAA

>M6-PGSC0003DMG400028473-(rev)M6LRR-RLK\_1736

GATCCATTGGCAATATCTCTTCTTCAATCATTTATTGCTGTAGGCTGTAACCTCAAAGGCAATGTTCCA  
AGTGAGATCAGAAATATGAGAAATTTATCCACTTTGTCTCTGGGAGGTA

>M6-PGSC0003DMG400028473-(rev)M6LRR-RLK\_1798

AATGTTCCAAGTGAGATCAGAAATATGAGAAATTTATCCACTTTGTCTCTGGGAGGTAATAACCTTACTG

GAATTGCCCCGACGACATTAAGTTCTTTGAAAAACCTGCAACGGCTTTTT

>M6-PGSC0003DMG400028473-(rev)M6LRR-RLK\_186

ACTATCCCGCCACAACCTTGGCAACCTCTCTTTTCTGTTTCACTTGATCTAAGCAAAAACGATTTACAGGG

TGAACTTCCATCAGATTTTTCTCATTTAAGGAGATTGAGAGTCATTAAT

>M6-PGSC0003DMG400028473-(rev)M6LRR-RLK\_1860

CCTTACTGGAATTGCCCCGACGACATTAAGTTCTTTGAAAAACCTGCAACGGCTTTTTTCTTGATGCAAACA

GAATAACTGGTCCTTTCCAATTGTTTTATGTGAGCTGCCCAACTTGGG

>M6-PGSC0003DMG400028473-(rev)M6LRR-RLK\_1922

ATGCAAACAGAATAACTGGTCCTTTCCAATTGTTTTATGTGAGCTGCCCAACTTGGGGATACTAAGCCT

TTCACAAAATAAAATTTTGGGACATATTCCTAGCTGCGTGGGGAATATGA

>M6-PGSC0003DMG400028473-(rev)M6LRR-RLK\_1984

CTAAGCCTTTCACAAAATAAAATTTTGGGACATATTCCTAGCTGCGTGGGGAATATGACATCCCTAAGGG

AGGTTTATCTTGATTCCAATAACTTTACTGCTAGCATACCTTCAAGTCTA

>M6-PGSC0003DMG400028473-(rev)M6LRR-RLK\_2046

CCTAAGGGAGGTTTATCTTGATTCCAATAACTTTACTGCTAGCATACCTTCAAGTCTATGGAACCTCAAAG

ACATTTTGAAGCTGAACTTGTCTTCTAATTCCTTCAATGGATCTCTACC

>M6-PGSC0003DMG400028473-(rev)M6LRR-RLK\_2108

ACCTCAAAGACATTTTGAAGCTGAACTTGTCTTCTAATTCCTTCAATGGATCTCTACCACTAGAAGTTGGA

AACCTCAAGGCTGCACTACTTCTGGATCTTTCTAGGAACCAAATATCAG

>M6-PGSC0003DMG400028473-(rev)M6LRR-RLK\_2170

GAAGTTGGAAACCTCAAGGCTGCACTACTTCTGGATCTTTCTAGGAACCAAATATCAGGCAACATTCCAA

CTACATTGGGAGGTCTACAGAAATTGATTCAACTATCTTTGGCTCATAAC

>M6-PGSC0003DMG400028473-(rev)M6LRR-RLK\_2232

CATTCCAACACTACATTGGGAGGTCTACAGAAATTGATTCAACTATCTTTGGCTCATAACGGAATTGAAGGA

TCTATTCTGAGACATTTGGGGAACCTCCTAAGTTTGGGAAGCATTAGATCT

>M6-PGSC0003DMG400028473-(rev)M6LRR-RLK\_2294

TTGAAGGATCTATTCCTGAGACATTTGGGGAACCTCCTAAGTTTGGGAAGCATTAGATCTTTCATATAACAA

AATGTCTGGTGTGATTCCAAGTCATTAGAGGCACTTAACCAGCTAAACT

>M6-PGSC0003DMG400028473-(rev)M6LRR-RLK\_2356

TATAACAAAATGTCTGGTGTGATTCCAAAGTCATTAGAGGCACTTAACCAGCTAAACTCCTTTAATGTCTC  
ATTCAATAGGTTACACGGGGAAATTCCGAGTGGAGGACCTTTTCTTAAT

>M6-PGSC0003DMG400028473-(rev)M6LRR-RLK\_2418

TAATGTCTCATTCAATAGGTTACACGGGGAAATTCCGAGTGGAGGACCTTTTCTTAATCTACCTTACCAG  
TCTTTCATGTCTGAATAAAGGATTGTGTGGTAACCCTCAAAGCATGTCCC

>M6-PGSC0003DMG400028473-(rev)M6LRR-RLK\_248

TTTACAGGGTGAACCTCCATCAGATTTTTCTCATTTAAGGAGATTGAGAGTCATTAATCTTAGTTACACCA  
ACTTCACCGGGAAATTCCAATAGGAATAGCCACTCTTCCGAGTTTGAT

>M6-PGSC0003DMG400028473-(rev)M6LRR-RLK\_2480

CTTACCAGTCTTTCATGTCTGAATAAAGGATTGTGTGGTAACCCTCAAAGCATGTCCCAGCTTGTCTTCT  
TATTCAAAGAATCAGTCTAAGTCGAAGAAAAGAAATCTGATATGGATTA

>M6-PGSC0003DMG400028473-(rev)M6LRR-RLK\_2542

TGTCCTTCTTATTCAAAGAATCAGTCTAAGTCGAAGAAAAGAAATCTGATATGGATTAAAGTTACCTCTT  
CAGTTATCTCTGTAACAGGGCTTGCTTCAGCAATAGTTTTTCATGTTGATG

>M6-PGSC0003DMG400028473-(rev)M6LRR-RLK\_2604

TACCTCTTCAGTTATCTCTGTAACAGGGCTTGCTTCAGCAATAGTTTTTCATGTTGATGAGACGTGGGGGT  
AAAACGATCAATGCTGAAGTTGAGTGGTCTCCTGAAGTAGCACCACAAAG

>M6-PGSC0003DMG400028473-(rev)M6LRR-RLK\_2666

GTGGGGGTAAAACGATCAATGCTGAAGTTGAGTGGTCTCCTGAAGTAGCACCACAAAGATTTTCTTACT  
ATGAACTTCAAAGAGCAACTCAGAGTTTTAATGAAAATAACTTGCTTGGTA

>M6-PGSC0003DMG400028473-(rev)M6LRR-RLK\_2728

TCTTACTATGAACTTCAAAGAGCAACTCAGAGTTTTAATGAAAATAACTTGCTTGGTAGTGGAAGTTTTG  
GTTTCGGTTTATAAAGGGATGTTGGCTGATGGGATGATTATAGCTGTAAA

>M6-PGSC0003DMG400028473-(rev)M6LRR-RLK\_2790

AAGTTTTGGTTCGGTTTATAAAGGGATGTTGGCTGATGGGATGATTATAGCTGTTAAAGTTTTCAATGTG  
CAGATGGAAGGAACATTTACAGACCTTTGACAGAGAGTGTGAAATCTTGCG

>M6-PGSC0003DMG400028473-(rev)M6LRR-RLK\_2846

AAGTTTTCAATGTGCAGATGGAAGGAACATTTACAGACCTTTGACAGAGAGTGTGAAATCTTGCGGAATC  
TTCGTACAGAAATCTCACAAGATCATTAGCAGCTGCTGTAACCTGGATT

>M6-PGSC0003DMG400028473-(rev)M6LRR-RLK\_310

GTTACACCAACTTCACCGGGGAAATTCCAATAGGAATAGCCACTCTTCCGAGTTTGATACGGTTTTCCAT  
GGGATAACAATAAATACTCAATGGCTCCAATGTGCTCTCTAAATTCAACA

>M6-PGSC0003DMG400028473-(rev)M6LRR-RLK\_372

TTTTCCATGGGATAACAATAAATACTCAATGGCTCCAATGTGCTCTCTAAATTCAACATCTCAACCCTTGA  
ATATTTGGATCTCAGAAATTCTGGTTTGACTGGTGATTCCCTTCTGAT

>M6-PGSC0003DMG400028473-(rev)M6LRR-RLK\_434

AACCCTTGAATATTTGGATCTCAGAAATTCTGGTTTGACTGGTGATTCCCTTCTGATTTATGTCATCGTCT  
TCCTAGATTGCAAAAGCTTGCACTTGGCGACAACATGTTAAGCGGAGA

>M6-PGSC0003DMG400028473-(rev)M6LRR-RLK\_496

GTCATCGTCTTCTAGATTGCAAAAGCTTGCACTTGGCGACAACATGTTAAGCGGAGAGGTACCAAGAA  
ACATATCTGAATGCTCAGAGCTTCAACTCCTAATGTTGTTTCAAATAACT

>M6-PGSC0003DMG400028473-(rev)M6LRR-RLK\_558

CCAAGAAACATATCTGAATGCTCAGAGCTTCAACTCCTAATGTTGTTTCAAATAACTTTGTTGGAACAAT  
TCCAAGAGAAATAGGTAAGTGCAGCTGCTGCAACATTTAGATCTTGCA

>M6-PGSC0003DMG400028473-(rev)M6LRR-RLK\_62

TTTTCATGTTCTTTGACGAACTGGTCTTCTTCTACCTCTGTTGTGATTGGATTGGAATCACTTGTAGCTC  
TCGCCATCAACGAGTGATTGCACTGAATATTTCAAACATGGGTTTTTC

>M6-PGSC0003DMG400028473-(rev)M6LRR-RLK\_620

TGGAACAATTCCAAGAGAAATAGGTAAGTGCAGCTGCTGCAACATTTAGATCTTGCAGATAACACGTT  
AAAAGGTATGGCTTTACCCTTTTTTCTCAGGACATTAGATTTAACTTATT

>M6-PGSC0003DMG400028473-(rev)M6LRR-RLK\_682

ACACGTTAAAAGGTATGGCTTTACCCTTTTTTCTCAGGACATTAGATTTAACTTATTTAAAAGAAAATGT  
ATTTTAGAGAGTTGAAGTGTGGACAATCTTTAAAAAATGTAAGTAT

>M6-PGSC0003DMG400028473-(rev)M6LRR-RLK\_744

AGAAAATGTATTTAGAGAGTTGAAGTGTGGACAATCTTTAAAAAATGTAAGTATTTTTTAATAGT  
AGCATAAGAAGATTTGTTTGTCTCACTAATTGCTCTGCTCACTTCTCCTC

>M6-PGSC0003DMG400028473-(rev)M6LRR-RLK\_806

TTAATAGTAGCATAAGAAGATTTGTTTGTCTCACTAATTGCTCTGCTCACTTCTCCTCTCGATTTGTATACT



TGTTGCCGGTTTGACCAAGCTTCTGGCATACCCATTTGGAAGTTAAAC

>M6-PGSC0003DMG400028473-(rev)M6LRR-RLK\_868

TTTGTATACTTGTTGCCGGTTTGACCAAGCTTCTGGCATACCCATTTGGAAGTTAAACTCTTGTTAAATAT

ATGTTTTTTATGTGATATTTCTGTTTAAACAATATGACAGGCACAATTCC

>M6-PGSC0003DMG400028473-(rev)M6LRR-RLK\_930

GTTAAATATATGTTTTTTATGTGATATTTCTGTTTAAACAATATGACAGGCACAATTCCTGATGAGATCGGC

CATCTTTATAACTTAAAGAACATATTCATGGATAAAAATTATTTAACAG

>M6-PGSC0003DMG400028473-(rev)M6LRR-RLK\_992

GAGATCGGCCATCTTTATAACTTAAAGAACATATTCATGGATAAAAATTATTTAACAGGCTCAATCCCTTT

AACCTTATTCAACATTTTCATCACTTGAAATGCTATATATGAATGATAAC

>M6-PGSC0003DMG400028474-(rev)M6LRR-RLK\_0

AACACATTTTCTCCCATTCCTCAGAAAAAATGAGGATTTAATTAATGGAGAAAAATCCCTCTTTTCACCT

TCTAACAAATTTGTTTCGTTCTTCTTCATGCTCTAGCAACTTGCTTAGCC

>M6-PGSC0003DMG400028474-(rev)M6LRR-RLK\_1037

CTTTAATTTTCAGTTTCGACAAGAGGTTAAGTGTTCAATTTTCTCTCCTAAACAAGCATATGTATGGTTTT

GACCTGGTGTGAGAATTCGTTACATCATAAAGTAGACCTTTGCTTATA

>M6-PGSC0003DMG400028474-(rev)M6LRR-RLK\_1098

TGTATGGTTTTGACCTGGTGTGAGAATTCGTTACATCATAAAGTAGACCTTTGCTTATACCTGTCTGATAA

ATTATTTAATGAGGTATTGCAATTTGTTCAACTTAATTCCTTAGAACTT

>M6-PGSC0003DMG400028474-(rev)M6LRR-RLK\_1159

TGTCTGATAAATTATTTAATGAGGTATTGCAATTTGTTCAACTTAATTCCTTAGAACTTCATTTGATACTTT

TGCATAACAATTTGACAGGCACAATTCCTCAATGAGATTGGTCATCTTC

>M6-PGSC0003DMG400028474-(rev)M6LRR-RLK\_122

GAATTTTAGAACTGATCAAACCTTCTTCTCGCGTTGAAATCCCAAATCACTTCAGACCCTTATCAAATTCT

TTCAACAAACTGGTCTTCTTCTGCCTCTATTTGTAGCTGGATTGGTGT

>M6-PGSC0003DMG400028474-(rev)M6LRR-RLK\_1220

TTTGATACTTTTGCATAACAATTTGACAGGCACAATTCCTCAATGAGATTGGTCATCTTCATAACTTGAAGC

AATTGGGATTGGAACAAAATGCATTAACAGGCTCAATCCCATTAAGCAT

>M6-PGSC0003DMG400028474-(rev)M6LRR-RLK\_1281

AACTTGAAGCAATTGGGATTGGAACAAAATGCATTAACAGGCTCAATCCCATTAAGCATATTCAATATTT  
CATCACTTCAAGTTTTATCAATGTGGGACAACAAGCTTGAAGGAACTCTA

>M6-PGSC0003DMG400028474-(rev)M6LRR-RLK\_1342

TCAATATTTTCATCACTTCAAGTTTTATCAATGTGGGACAACAAGCTTGAAGGAACTCTACCAAGAGAGGT  
TGGAATTTGACTACGGTTAACGTACTTGATCTTGGAATGAATAGCCTGA

>M6-PGSC0003DMG400028474-(rev)M6LRR-RLK\_1403

AAGAGAGGTTGGAATTTGACTACGGTTAACGTACTTGATCTTGGAATGAATAGCCTGACGGGTATGGA  
ATAATATTTGACCACAGGATTTGAGAATGCTAGTTCTTTCAATACTTCTTC

>M6-PGSC0003DMG400028474-(rev)M6LRR-RLK\_1464

GGTATGGAATAATATTTGACCACAGGATTTGAGAATGCTAGTTCTTTCAATACTTCTTCTAATGGTAATCT  
TACTTCATTCTGCAGGCGTACTTCCAGATGAAATCGGTAACCTTCAAGA

>M6-PGSC0003DMG400028474-(rev)M6LRR-RLK\_1525

ATGGTAATCTTACTTCATTCTGCAGGCGTACTTCCAGATGAAATCGGTAACCTTCAAGAGTTGCTGATGC  
TGAAGTTGGATTTCAATAACTTTAGTGGGTCGATCCCTATTGGTATATTT

>M6-PGSC0003DMG400028474-(rev)M6LRR-RLK\_1586

TGCTGATGCTGAAGTTGGATTTCAATAACTTTAGTGGGTCGATCCCTATTGGTATATTTAATATCTCAACT  
CTTGATCTATTACTCACACAAAACCGCATTTTCAGGTAATCTTCCTA

>M6-PGSC0003DMG400028474-(rev)M6LRR-RLK\_1647

TATCTCAACTCTTGATCTATTACTCACACAAAACCGCATTTTCAGGTAATCTTCCTAACACTATAGGCA  
GCGGGTCACCCAATCTTGAACGAATTTTTCTAGGTGCAAAAAACATTGA

>M6-PGSC0003DMG400028474-(rev)M6LRR-RLK\_1708

ACTATAGGCAGCGGGTCACCCAATCTTGAACGAATTTTTCTAGGTGCAAAAAACATTGATGGTCTTTTAC  
CTAGTTCCATCTCAAATTTGTCTAAGCTTACTGTTCTCGAACTTAGTGCG

>M6-PGSC0003DMG400028474-(rev)M6LRR-RLK\_1769

GTCTTTTACCTAGTTCCATCTCAAATTTGTCTAAGCTTACTGTTCTCGAACTTAGTGCGAATGAACTCACA  
GGTTCAATTCCTGACTTTCTAGGAACTTAAGACTTATTGAAATCCTCA

>M6-PGSC0003DMG400028474-(rev)M6LRR-RLK\_183

TATCAAATCTTTCAACAACTGGTCTTCTTCTGCCTCTATTTGTAGCTGGATTGGTGCACTTGTGGCTCT  
CGTCATCAACGAGTACTGTACTCAATATTTTCAGACATGGGCTTTTCG

>M6-PGSC0003DMG400028474-(rev)M6LRR-RLK\_1830

TGAACTCACAGGTTCAATTCCTGACTTTCTAGGAACTTAAGACTTATTGAAATCCTCAACTTGCAAGGTA  
ACTCCTTCACTAGTGACTCTTCAATCTTGAGTTTTATTACTCCTTTGGC

>M6-PGSC0003DMG400028474-(rev)M6LRR-RLK\_1891

TTGCAAGGTAACCTTCACTAGTGACTCTTCAATCTTGAGTTTTATTACTCCTTTGGCCAATTGTAAATAC  
TTAAGAGAAGTATAGTGTCTATCAATCCCCTAAATGCAATACTTCCA

>M6-PGSC0003DMG400028474-(rev)M6LRR-RLK\_1952

ATTGTAAATACTTAAGAGAAGTATAGTGTCTATCAATCCCCTAAATGCAATACTTCCAAAATCCATAGG  
GAATCTTTCGTCTCTTCAAACGTTTGAGGCAATAGGTTGTAATCTCAAAG

>M6-PGSC0003DMG400028474-(rev)M6LRR-RLK\_2013

ATCCATAGGGAATCTTTCGTCTCTTCAAACGTTTGAGGCAATAGGTTGTAATCTCAAAGGCCATATTCCA  
AATGAAATTGGAAATTTGAGAAATTTATCTTATTTGAAGCTGGATAAAAA

>M6-PGSC0003DMG400028474-(rev)M6LRR-RLK\_2074

CATATTCCAAATGAAATTGGAAATTTGAGAAATTTATCTTATTTGAAGCTGGATAAAAAATGACTTCACTG  
GAATTGTCCCGACGACAATAAGTTCTTGGAAAACTTCAACAGTTTTCA

>M6-PGSC0003DMG400028474-(rev)M6LRR-RLK\_2135

ACTTCACTGGAATTGTCCCGACGACAATAAGTTCTTGGAAAACTTCAACAGTTTTCACTTGGTGCAA  
CAGAATTAGTGGTCCTTCCCAATTGTTTTATGTGAGCTACCCAACCTGG

>M6-PGSC0003DMG400028474-(rev)M6LRR-RLK\_2257

ATGCTAAACCTTTCACAAAACCAAATGTGGGGAAGTATTCCTAGTTGCTTAGGGGATGTGACTTCTCTAA  
GGGAGATTTATCTTGATTCCAATAAATTCCTGCTAGCATACTTCAAGT

>M6-PGSC0003DMG400028474-(rev)M6LRR-RLK\_2318

CTTCTTAAGGGAGATTTATCTTGATTCCAATAAATTCCTGCTAGCATACTTCAAGTCTATGGAACCTC  
AAAGACATTTTGAAGCTGAACTTGTCTTCTAATTTCTTCAATGGCTCTC

>M6-PGSC0003DMG400028474-(rev)M6LRR-RLK\_2379

ATGGAACCTCAAAGACATTTTGAAGCTGAACTTGTCTTCTAATTTCTTCAATGGCTCTCTACCATTAGAAG  
TTGGAAACCTCAAGGCTGCAATACTTCTGGATCTTCAAGGAACCAAAT

>M6-PGSC0003DMG400028474-(rev)M6LRR-RLK\_244

CTTGTGGCTCTCGTCATCAACGAGTACTGTACTCAATATTTAGACATGGGCTTTTCGGGTACCATACCG

TCACAAATTGGCAACCTCTCTTTTCTTGTTTCACTTGATCTAAGCTACA

>M6-PGSC0003DMG400028474-(rev)M6LRR-RLK\_2440

CCATTAGAAGTTGGAAACCTCAAGGCTGCAATACTTCTGGATCTTCAAGGAACCAAATCTCAGGCAACA  
TTCCTAGTACATTGGGAGGTTTGCAGAAATTGATTCAGCTATCTTTGGCT

>M6-PGSC0003DMG400028474-(rev)M6LRR-RLK\_2501

CAGGCAACATTCTAGTACATTGGGAGGTTTGCAGAAATTGATTCAGCTATCTTTGGCTCATAACAGAAT  
TGAAGGATCTATTCTGAGACATTTGGGGAACCTCGTAAGTTTGGGAAGAAT

>M6-PGSC0003DMG400028474-(rev)M6LRR-RLK\_2562

TAACAGAATTGAAGGATCTATTCTGAGACATTTGGGGAACCTCGTAAGTTTGGGAAGAATTGGATCTTCA  
AATAACAATATTTCTGGTGTGATTCCAAAGTCATTAGAGACACTCAAGCA

>M6-PGSC0003DMG400028474-(rev)M6LRR-RLK\_2623

GATCTTTCAAATAACAATATTTCTGGTGTGATTCCAAAGTCATTAGAGACACTCAAGCAACTACATTCCTT  
TAATGTCTCATTCAACAGGTTACATGGGGAAATCCGAGTGGTGGACCA

>M6-PGSC0003DMG400028474-(rev)M6LRR-RLK\_2684

TACATTCCTTTAATGTCTCATTCAACAGGTTACATGGGGAAATCCGAGTGGTGGACCATTTCTTAATCTC  
CCTTACCAGTCTTTCTTGTCGAATGAAGGATTGTGTGGTAATCCTCAA

>M6-PGSC0003DMG400028474-(rev)M6LRR-RLK\_2745

TCTTAATCTCCCTTACCAGTCTTTCTTGTCGAATGAAGGATTGTGTGGTAATCCTCAAAGCATGTCCCAG  
CTTGTCGTTCAAATTCAAAGAATCATTCTAATTCAAAGAAAAGAAGAAT

>M6-PGSC0003DMG400028474-(rev)M6LRR-RLK\_2806

CATGTCCCAGCTTGTGTCGTTCAAATTCAAAGAATCATTCTAATTCAAAGAAAAGAAGAATGATATGGATTG  
TAATTGTCTCTTCAGTTATATCTATAATAGGGTTTGCTTCAGCAATAATT

>M6-PGSC0003DMG400028474-(rev)M6LRR-RLK\_2867

TATGGATTGTAATTGTCTCTTCAGTTATATCTATAATAGGGTTTGCTTCAGCAATAATTTTCGTGTTGATG  
CGACATCGGGGTAAAGTAATCAAAGGTGGAGATGAGTGGTACCTGAGG

>M6-PGSC0003DMG400028474-(rev)M6LRR-RLK\_2928

CGTGTTGATGCGACATCGGGGTAAAGTAATCAAAGGTGGAGATGAGTGGTACCTGAGGTAGCACCCAC  
AGAGATTCTCTTACTATGAACTTCAAAGAGCAACTCGGGGGTTTGATGGAAA

>M6-PGSC0003DMG400028474-(rev)M6LRR-RLK\_2989

GCACCACAGAGATTCTTACTATGAACTTCAAAGAGCAACTCGGGGGTTTGATGGAAACAACTTGCTA  
GGTAGTGGAAGTTTTGGTTCTGTTTTAAAGGGACGTTGGCAGATGGGATG

>M6-PGSC0003DMG400028474-(rev)M6LRR-RLK\_305

TACCATACCGTCACAAATTGGCAACCTCTCTTTCTTGTTTCACTTGATCTAAGCTACAACCTATTTCCATGG  
TGAACCTCCACTTGAGTTTTCTCGTTTGCGAAAATTGAGAGCTATTAA

>M6-PGSC0003DMG400028474-(rev)M6LRR-RLK\_3050

ACTTGCTAGGTAGTGGAAGTTTTGGTTCTGTTTTAAAGGGACGTTGGCAGATGGGATGATACTAGCTG  
TCAAAGTTTTAATGTGCAGATGGAAGGTACATTTCAAACCTTTGATAGAG

>M6-PGSC0003DMG400028474-(rev)M6LRR-RLK\_3111

ACTAGCTGTCAAAGTTTTAATGTGCAGATGGAAGGTACATTTCAAACCTTTGATAGAGAGTGTGAAATC  
TTGAGGAATCTTCGTCACAGAAATCTCACAAAGATCATTAGCAGCTGTTG

>M6-PGSC0003DMG400028474-(rev)M6LRR-RLK\_3172

TGTGAAATCTTGAGGAATCTTCGTCACAGAAATCTCACAAAGATCATTAGCAGCTGTTGTAACCTGGATT  
TTAAAGCATTGGTACTTGAGTACATGCCAAATGGGAGCTTAGACAAGTTG

>M6-PGSC0003DMG400028474-(rev)M6LRR-RLK\_3233

ACTTGGATTTTAAAGCATTGGTACTTGAGTACATGCCAAATGGGAGCTTAGACAAGTTGCTATATTCTAG  
AGATTATTCTCTAAGTATAATGCAACGATTGAATATCATGGTCGATGTTG

>M6-PGSC0003DMG400028474-(rev)M6LRR-RLK\_3294

ATATTCTAGAGATTATTCTCTAAGTATAATGCAACGATTGAATATCATGGTCGATGTTGCATCTGCTCTGG  
AATATCTCCATCATGGTACTCTGTACCTGTTATTATTGTTGATCTGAA

>M6-PGSC0003DMG400028474-(rev)M6LRR-RLK\_3416

CTAGCAACGTCTTACTTGACAAAGACATGGTGGGACACCTAACTGACTTTGGCATAGCAAACCTTCTAAC  
AAAAGAGGAATCTATTGCTCACACTACAACCTTTGCCACAATTGGTTACA

>M6-PGSC0003DMG400028474-(rev)M6LRR-RLK\_3477

ACTTCTAACAAAAGAGGAATCTATTGCTCACACTACAACCTTTGCCACAATTGGTTACATTGCTCCAGGT  
GAATCATTTATTTAACTTGTAACAAAGTTTTTGAGTAACAGTTGATCAGA

>M6-PGSC0003DMG400028474-(rev)M6LRR-RLK\_3538

GCTCCAGGTGAATCATTTATTTAACTTGTAACAAAGTTTTTGAGTAACAGTTGATCAGATTTATGCCTTAT  
AAGTTCAGTTGCTGATGTATTTCAATTTTTCTTTCTAGAATATGGATT

>M6-PGSC0003DMG400028474-(rev)M6LRR-RLK\_3599

TATGCCTTATAAGTTCAGTTGCTGATGTATTTCAATTTTTCTTTCTAGAATATGGATTGGAAGGACTTAT  
ATCCAAGAGGTCTGATGTTTATAGTTATGGTATCATGTTGCTGGAACT

>M6-PGSC0003DMG400028474-(rev)M6LRR-RLK\_366

TATTTCCATGGTGAACCTTCACTTGAGTTTTCTGTTGCGAAAATTGAGAGCTATTAATCTTAGTTTCAA  
CAACTTCACCGGAGAAATCCCTAAATCCTCGGTGATTTTCAAGACCTT

>M6-PGSC0003DMG400028474-(rev)M6LRR-RLK\_3660

AAGGACTTATATCCAAGAGGTCTGATGTTTATAGTTATGGTATCATGTTGCTGGAACTTTTACAAAGAA  
GAAACCGAATGATGAAATGTTACGGGCGATTTGGATTTGAAAAGCTGGG

>M6-PGSC0003DMG400028474-(rev)M6LRR-RLK\_3721

TACAAAGAAGAAACCGAATGATGAAATGTTACGGGCGATTTGGATTTGAAAAGCTGGGTACATAGTTC  
ACTTCTGATAAGCTGGATGAAATCATAGATGCCGACTTACTAACACTAGA

>M6-PGSC0003DMG400028474-(rev)M6LRR-RLK\_3782

CATAGTTCACCTTCTGATAAGCTGGATGAAATCATAGATGCCGACTTACTAACACTAGATGAACAAAAGC  
TAAATGAAAAGTTACAGTATGTGTCATCTATCATGGAGTTAGCTATGAAT

>M6-PGSC0003DMG400028474-(rev)M6LRR-RLK\_3843

AACAAAAGCTAAATGAAAAGTTACAGTATGTGTCATCTATCATGGAGTTAGCTATGAATTGCACAGCTAA  
ATCTCCGTTGAAAGGATGAACATGACTGATGTTGTAGCAGCATTGGAAA

>M6-PGSC0003DMG400028474-(rev)M6LRR-RLK\_3904

CACAGCTAAATCTCCGTTGAAAGGATGAACATGACTGATGTTGTAGCAGCATTGGAAAAGATCAAGCA  
GCAGCTTTCTTCATGTTACTGATTGAATGGTTTAATGACATGACATCAGGT

>M6-PGSC0003DMG400028474-(rev)M6LRR-RLK\_3965

ATCAAGCAGCAGCTTTCTTCATGTTACTGATTGAATGGTTTAATGACATGACATCAGGTACTTTTTCCATA  
TCACTTTTGGGAGGCAAAAAGGAAAGTTGTAAAACAGTTCACTAGCATT

>M6-PGSC0003DMG400028474-(rev)M6LRR-RLK\_4026

TTTTTCCATATCACTTTTGGGAGGCAAAAAGGAAAGTTGTAAAACAGTTCACTAGCATTTTAATCAGTAA  
TTGTTCTTCAAATGCTTTTGAAGAGACTGTTTGGCTATCGTAATTGTCC

>M6-PGSC0003DMG400028474-(rev)M6LRR-RLK\_4087

AATCAGTAATTGTTCTTCAAATGCTTTTGAAGAGACTGTTTGGCTATCGTAATTGTCCTTCGTTGAGATG

AGTATTCTGTACAATGTATTGCTAATTAAGGATCAATAAAATACAGTGC

>M6-PGSC0003DMG400028474-(rev)M6LRR-RLK\_4148

CGTTGAGATGAGTATTCTGTACAATGTATTGCTAATTAAGGATCAATAAAATACAGTGCTTCTTAAATTC

AAGTGAAGTGATCCTCATCTGGCCTTAGTAAATATATCCAAAAGAGTCAC

>M6-PGSC0003DMG400028474-(rev)M6LRR-RLK\_4181

AATTAAGGATCAATAAAATACAGTGCTTCTTAAATCAAGTGAAGTGATCCTCATCTGGCCTTAGTAAAT

ATATCCAAAAGAGTCACTTACCCTTGCTTAAATCTTGTATCCAGTGGA

>M6-PGSC0003DMG400028474-(rev)M6LRR-RLK\_427

TTAGTTTCAACAACCTTACCGGAGAAATCCCTAAATTCCTCGGTGATTTTCAAGACCTTCAAATATTGTCT

CTTGAAAACAATAGTTTCAGTGGGTTCACTTCTTCTATCTCAAATA

>M6-PGSC0003DMG400028474-(rev)M6LRR-RLK\_488

AATATTGTCTCTTGAAAACAATAGTTTCAGTGGGTTCACTTCTTCTATCTCAAATATGAAGAATCTTG

GATTCCTGAATCTGAGGTACAACAATTTAGAAGGAAATATCCAGCTGG

>M6-PGSC0003DMG400028474-(rev)M6LRR-RLK\_549

AAGAATCTTGGATTCCTGAATCTGAGGTACAACAATTTAGAAGGAAATATCCAGCTGGAATAGCCGCT

CTTCGGAGTTTGAAATGGTTGAGCTTTGGATTTAATAAACTCAATGGTTCC

>M6-PGSC0003DMG400028474-(rev)M6LRR-RLK\_61

CTTTTACCTTCTAACAATTTTGTTCGTTCTTCTTCATGCTCTAGCAACTTGCTTAGCCATGAATTTTAGAA

CTGATCAAACCTTCTTCTCGCGTTGAAATCCCAAATCACTTCAGACC

>M6-PGSC0003DMG400028474-(rev)M6LRR-RLK\_610

TAGCCGCTCTTCGGAGTTTGAAATGGTTGAGCTTTGGATTTAATAAACTCAATGGTTCCAATGTGCTCTCT

ATGTTCAACATCTCTACACTAGAATATTTGGATCTCAGAAATGCTGGTT

>M6-PGSC0003DMG400028474-(rev)M6LRR-RLK\_671

TGTGCTCTCTATGTTCAACATCTCTACACTAGAATATTTGGATCTCAGAAATGCTGGTTTAACTGGTGATT

TTCCATCTGATTTGTGTGGTCGTCTTCCAAGATTGCAAAAAGCTTGGACT

>M6-PGSC0003DMG400028474-(rev)M6LRR-RLK\_732

ACTGGTGATTTTCCATCTGATTTGTGTGGTCGTCTTCCAAGATTGCAAAAAGCTTGGACTTAATTTCAATAT

GTTAAGTGGAGAGATCCCAAGACGTATATCAGAATGCTCGCAACTCAA

>M6-PGSC0003DMG400028474-(rev)M6LRR-RLK\_793

ATTTCAATATGTTAAGTGGAGAGATCCCAAGACGTATATCAGAATGCTCGCAACTTCAAGTCTTACTGTT  
GATGGAAAATAAATTGATTGGAACAATTCCAGGAGAAGTGGGAAATTAC

>M6-PGSC0003DMG400028474-(rev)M6LRR-RLK\_854

CTTACTGTTGATGGAAAATAAATTGATTGGAACAATTCCAGGAGAAGTGGGAAATTACAAGTCTGCTGCA  
ACAATTAGCTCTCGGAAATAACAAATTAGAAGGTATGTTGCTTCCAATCTT

>M6-PGSC0003DMG400028474-(rev)M6LRR-RLK\_915

CTGCTGCAACAATTAGCTCTCGGAAATAACAAATTAGAAGGTATGTTGCTTCCAATCTTAACAATATCTA  
CATATATAGTAAGAAATCGAAGATATTGTTTTGTGCTGAGCACATGCATT

>M6-PGSC0003DMG400028474-(rev)M6LRR-RLK\_976

CAATATCTACATATATAGTAAGAAATCGAAGATATTGTTTTGTGCTGAGCACATGCATTCCCTTTAATTTT  
CAGTTTCGACAAGAGGTTAAGTGTTCATTTTCTCTCCTAAACAAGCA

>M6-PGSC0003DMG400028478-(rev)M6LRR-RLK\_0

CAATTCTATTGGACTTACTTACCTCCACTTGAAATCCCCTTAATACATCTACTCTTATCAACTCTATATGGC  
ATTTACATCAACTACTTCCAAGTAAAGAAACAATCACAATCCCACA

>M6-PGSC0003DMG400028478-(rev)M6LRR-RLK\_1037

TCAAGAAAGAAAGTTTTAACCATAGCTATTTCTCTGCTTCAGCATTCTAATCTTGGCCATGGGATTAGT  
CATATTGTGTCTATACAAGAGGAGAAAACAATTGGCTAGGAAGAACAAA

>M6-PGSC0003DMG400028478-(rev)M6LRR-RLK\_1098

TGGGATTAGTCATATTGTGTCTATACAAGAGGAGAAAACAATTGGCTAGGAAGAACAATGGTTAATTT  
CAAAGCCAATACAAATACCCTTTAGAATGGACAAATCAGGGCCATTTTCAT

>M6-PGSC0003DMG400028478-(rev)M6LRR-RLK\_1159

GTTAATTTCAAAGCCAATACAAATACCCTTTAGAATGGACAAATCAGGGCCATTTTCATTTGAAACAGAG  
TCAGGGAATTCATGGGTTGCTGACATAAAAGAACCAAGTTCAGCAGCTGT

>M6-PGSC0003DMG400028478-(rev)M6LRR-RLK\_122

CAAAAAATGAAAATCTTGTTCACTCTTCATCTTCTTTCTTTTTCACATTCTCAAAATCAGAATCCCCTT  
GCAAAAACAACACAGATTTAGATTTATCTCTTGTGTTTCAAGGCTTTC

>M6-PGSC0003DMG400028478-(rev)M6LRR-RLK\_1220

GAAACAGAGTCAGGGAATTCATGGGTTGCTGACATAAAAGAACCAAGTTCAGCAGCTGTAGTTATGTTT  
GAGAAGCCATTGATGAACCTAACATTCAAAGACCTCATAGCAGCCACATCT



>M6-PGSC0003DMG400028478-(rev)M6LRR-RLK\_1281

TTATGTTTGAGAAGCCATTGATGAACCTAACATTCAAAGACCTCATAGCAGCCACATCTCACTTTGGAAA  
AGAGTCATTGTTAGCTGAAGGAAGGTGTGGGCCCGTTTACAGAGCCGTAC

>M6-PGSC0003DMG400028478-(rev)M6LRR-RLK\_1342

CTTTGGAAAAGAGTCATTGTTAGCTGAAGGAAGGTGTGGGCCCGTTTACAGAGCCGTACTTCCAGGTGA  
CCTCCACGTGGCAATCAAGGTCTTGGAACATGCTAGGGAAGTACTAGCCCATGA

>M6-PGSC0003DMG400028478-(rev)M6LRR-RLK\_1403

CCAGGTGACCTCCACGTGGCAATCAAGGTCTTGGAACATGCTAGGGAAGTACTAGCCCATGAAGATGCTAAT  
ACCTTGTTTGAACAAGTCTCCAGGCTTAAGCATCCTAATCTGTTGCCTATT

>M6-PGSC0003DMG400028478-(rev)M6LRR-RLK\_1464

ATGCTAATACCTTGTTTGAACAAGTCTCCAGGCTTAAGCATCCTAATCTGTTGCCTATTTCTGGTTACTGC  
ATCGCAGGTACAAATCTTCTTTCACCTTACTGTTTCCTCTGTCCACC

>M6-PGSC0003DMG400028478-(rev)M6LRR-RLK\_1525

TGGTACTGCATCGCAGGTACAAATCTTCTTTCACCTTACTGTTTCCTCTGTCCACCGTCGATCGATGT  
GACACAATTCAAATTTTAAGGGGAGAAAAATATCTAGAGGTGAGCATAT

>M6-PGSC0003DMG400028478-(rev)M6LRR-RLK\_1586

CGATCGATGTGACACAATTCAAATTTTAAGGGGAGAAAAATATCTAGAGGTGAGCATATTGAATGCATT  
CACGTGGGAGGATGGGATGAGAAATAGGACAGACAGTAGTAAATGAGACAG

>M6-PGSC0003DMG400028478-(rev)M6LRR-RLK\_1647

AATGCATTCACGTGGGAGGATGGGATGAGAAATAGGACAGACAGTAGTAAATGAGACAGAAATCTTTG  
CAACCATAGAAACGTAGGCAGTAGTTATGATTACATACAACAAGATGAAGCA

>M6-PGSC0003DMG400028478-(rev)M6LRR-RLK\_1708

ATCTTTGCAACCATAGAAACGTAGGCAGTAGTTATGATTACATACAACAAGATGAAGCAGTAAATAGGA  
ATGCGTGACTTATTTGGATGTTAGTACTATGACTACATCATTCAATTTATA

>M6-PGSC0003DMG400028478-(rev)M6LRR-RLK\_1769

AAATAGGAATGCGTGACTTATTTGGATGTTAGTACTATGACTACATCATTCAATTTATATGTGCTTTTAAAT  
GCTCTTGGTAAATTGTGTCCATTTTTTACCCTACAAAGTCAAACCTTTCA

>M6-PGSC0003DMG400028478-(rev)M6LRR-RLK\_183

CAGAATCCCCTTGCAAAAACAACACAGATTTAGATTTATCTCTTGTTTTCAAGGCTTTCAGTTCTGTTTAT

GGTTTCAACATCTCTTGGTTCAACTCAAAGTGTCTTCTCCAATAACTG

>M6-PGSC0003DMG400028478-(rev)M6LRR-RLK\_1830

TGCTTTTAATGCTCTTGGTAAATTGTGTCCATTTTTACCTACAAAGTCAAAGTTTCAAATCTTATGCCAG  
ATTGGGATTTGAAAATACTGAAACTGCAGTATGGTTTGGTTCGCAGA

>M6-PGSC0003DMG400028478-(rev)M6LRR-RLK\_1891

TCTTATGCCAGATTGGGATTTGAAAATACTGAAACTGCAGTATGGTTTGGTTCGCAGAATTACGATAAC  
CAATGATATTCTATGAATTGAGATATTTCACTACATTTATCTATCGTGAA

>M6-PGSC0003DMG400028478-(rev)M6LRR-RLK\_1952

TACGATAACCAATGATATTCTATGAATTGAGATATTTCACTACATTTATCTATCGTGAAATTAATGGTG  
GAATAAAAGAAATTTGTGATTAATTAATATCTCAAATAAATATGAAA

>M6-PGSC0003DMG400028478-(rev)M6LRR-RLK\_2013

TAAAATGGTGAATAAAAGAAATTTGTGATTAATTAATATCTCAAATAAATATGAAAAAATAATTTT  
TAATTTTATTTTCGAGATTATAATTTGTATCACATATATCACCACGACATT

>M6-PGSC0003DMG400028478-(rev)M6LRR-RLK\_2074

AATAATTTTAAATTTTATTTTCGAGATTATAATTTGTATCACATATATCACCACGACATTTATGATGATGCTC  
TTGGTAAATTGTGTCCATTTTGCACGATAAGGTCAAATCTTTAAAAAT

>M6-PGSC0003DMG400028478-(rev)M6LRR-RLK\_2135

TGATGATGCTCTTGGTAAATTGTGTCCATTTTGCACGATAAGGTCAAATCTTTAAAAATCTTACCCGATTG  
GGAGTTCTACTGTTTCAGCCTTGATTTATGATTTTTGGAAGAATGTTGCA

>M6-PGSC0003DMG400028478-(rev)M6LRR-RLK\_2196

TACCCGATTGGGAGTTCTACTGTTTCAGCCTTGATTTATGATTTTTGGAAGAATGTTGCACAAATATTATCC  
ATAAAGTATTATTTTATGAAACCGTTATTGAATTAATAAAGATAAGAGGA

>M6-PGSC0003DMG400028478-(rev)M6LRR-RLK\_2257

AATATTATCCATAAAGTATTATTTTATGAAACCGTTATTGAATTAATAAAGATAAGAGGATATTTTAAAG  
CATTAAATGGTTCAGAAGAATGTCATTTTCAATTGAAAATGCTTAAAGTTG

>M6-PGSC0003DMG400028478-(rev)M6LRR-RLK\_2318

TTTTAAAGCATTAAATGGTTCAGAAGAATGTCATTTTCAATTGAAAATGCTTAAAGTTGGAAAATTATTTT  
ATGACATGCATTGATTGATCAATTGTAGTATCAAAGTCCTTGTCAAATA

>M6-PGSC0003DMG400028478-(rev)M6LRR-RLK\_2379

AAATTATTTTCATGACATGCATTGATTGATCAATTGTAGTATCAAAGTCCTTGTCAAATAATTTTGGAGGAC  
TTTTCTAGCTAGGAACCAAATTGCTCCATTTGATAAGAACAGAATCCAA

>M6-PGSC0003DMG400028478-(rev)M6LRR-RLK\_244

TTCTGTTTATGGTTTCAACATCTCTTGGTTCAACTCAAAGTCTTCTTCTCCAATAACTGAAATTAACCTTATC  
TTCAAGAAACCTCACTGGCATAGTTTCATGGAAGTACTTAACAAATTT

>M6-PGSC0003DMG400028478-(rev)M6LRR-RLK\_2440

TTTGGAGGACTTTTCTAGCTAGGAACCAAATTGCTCCATTTGATAAGAACAGAATCCAATTATATTTTCTT  
TCAATTAAGTCATATTTAAAGCTAATTTAATACTCCCTTTGATGCAGG

>M6-PGSC0003DMG400028478-(rev)M6LRR-RLK\_2501

ATATTTTCTTTCAATTAAGTCATATTTAAAGCTAATTTAATACTCCCTTTGATGCAGGGAAAGAGAAGCT  
AGTCTTGACGAATTCATGTCCAATGGTGACCTCCACCGATGGCTACAC

>M6-PGSC0003DMG400028478-(rev)M6LRR-RLK\_2562

AAGAGAAGCTAGTCTTGTACGAATTCATGTCCAATGGTGACCTCCACCGATGGCTACACGAGCTTCCAAC  
TGCTACCACCAAAGTGGAAGACTGGACAACCGACACGTGGGAGTTACAAA

>M6-PGSC0003DMG400028478-(rev)M6LRR-RLK\_2623

GCTTCCAAGTCTACCACCAAAGTGGAAGACTGGACAACCGACACGTGGGAGTTACAAAACGGTTCCCA  
AATTACGTCACCCGGGAAAATGGAATGGCACACACGCCACCGTATTGCGGT

>M6-PGSC0003DMG400028478-(rev)M6LRR-RLK\_2684

GGTTCCCAAATTACGTCACCCGGGAAAATGGAATGGCACACACGCCACCGTATTGCGGTTGGCGTAGCA  
CGTGGACTAGCCTACCTCCACCACGCGCAGTCAAACCCGTGGTCCACGGT

>M6-PGSC0003DMG400028478-(rev)M6LRR-RLK\_2745

GCGTAGCACGTGGACTAGCCTACCTCCACCACGCGCAGTCAAACCCGTGGTCCACGGTCATTTGGTGC  
TATCTAATGTCTTACTAGCCGATGACTTTGAGCCTCGGATAGCCGATTTTG

>M6-PGSC0003DMG400028478-(rev)M6LRR-RLK\_2806

TTTGGTGCTATCTAATGTCTTACTAGCCGATGACTTTGAGCCTCGGATAGCCGATTTTGGATTGAGCCAA  
AACCAAGCCGAGGGATCTAGTGAGATGGATGTGTACGATTTTGGAGTCGT

>M6-PGSC0003DMG400028478-(rev)M6LRR-RLK\_2867

TTGAGCCAAAACCAAGCCGAGGGATCTAGTGAGATGGATGTGTACGATTTTGGAGTCGTATTAGTAGA  
GATATTAACAGGGAAAATTGGCTCGGATGAGACGATTAATGGGTGAGGAGG

>M6-PGSC0003DMG400028478-(rev)M6LRR-RLK\_2928

TAGTAGAGATATTAACAGGGAAAATTGGCTCGGATGAGACGATTAATGGGTGAGGAGGCTAGTGAA  
GGATGGACATGGAGCTGACGCGCTTGATTCGAGACTAAGACTCGGTGGTGACT

>M6-PGSC0003DMG400028478-(rev)M6LRR-RLK\_2989

AGTGAAGGATGGACATGGAGCTGACGCGCTTGATTCGAGACTAAGACTCGGTGGTGACTCGGTGAGTG  
AGATGGTGGAGTGCCTCCGAGTTGGTACTTGTGTACGGCGGAGACCCCAA

>M6-PGSC0003DMG400028478-(rev)M6LRR-RLK\_305

ATTAECTTATCTTCAAGAAACCTCACTGGCATAGTTTCATGGAAGTACTTAACAAATTTGTCTCATCTTCA  
TACTATAGATCTATCAAATAATTCCTTAAAGGGTTCTGTTTCATCCTCTG

>M6-PGSC0003DMG400028478-(rev)M6LRR-RLK\_3050

GTGAGTGAGATGGTGGAGTGCCTCCGAGTTGGTACTTGTGTACGGCGGAGACCCCAAATAAACGGCC  
TAGAATGCAACAAGTTTTGGTTTTGCTAAAAGACATACAGCCCCACTACCAA

>M6-PGSC0003DMG400028478-(rev)M6LRR-RLK\_3111

AACGGCCTAGAATGCAACAAGTTTTGGTTTTGCTAAAAGACATACAGCCCCACTACCAACTCGGGAAAA  
CGCAAATTTATAATCTTTAGGTAAACCACTCTCACTCCAGCGCGTGATTT

>M6-PGSC0003DMG400028478-(rev)M6LRR-RLK\_3172

CGGGAAAACGCAAATTTATAATCTTTAGGTAAACCACTCTCACTCCAGCGCGTGATTTACACGACGAG  
GAAGATTGATTGGCAGCATTGCATTATTGTACTCCCATGTGTTTTGGTTGAC

>M6-PGSC0003DMG400028478-(rev)M6LRR-RLK\_3233

ACGACGAGGAAGATTGATTGGCAGCATTGCATTATTGTACTCCCATGTGTTTTGGTTGACCATTGAAAAGT  
CAAAGTACAAGGCATCTATTCCACTTCATCAATGGCATTAGTCACGTG

>M6-PGSC0003DMG400028478-(rev)M6LRR-RLK\_3294

TTGAAAAGTCAAAGTACAAGGCATCTATTCCACTTCATCAATGGCATTAGTCACGTGCAGATCACGTG  
ATGAAGTGTAGTGAGAGGAACATGTTTGCTTGCTTGCTCATTATTCT

>M6-PGSC0003DMG400028478-(rev)M6LRR-RLK\_366

CTCATCTTCATACTATAGATCTATCAAATAATTCCTTAAAGGGTTCTGTTTCATCCTCTGTTTTGGTCCATTT  
CATCTTTGGTTCAAGTCAATTTGTCAAAGAATAAGCTAGGTGGAGCTG

>M6-PGSC0003DMG400028478-(rev)M6LRR-RLK\_427

TTGGTCCATTTTCATCTTTGGTTCAAGTCAATTTGTCAAAGAATAAGCTAGGTGGAGCTGTTGCTGTAGCA

AGATCATCATCATCTATTCAAAGACTTGATCTTTCTTTCAACAGGTTTAC

>M6-PGSC0003DMG400028478-(rev)M6LRR-RLK\_488

GCTGTAGCAAGATCATCATCATCTATTCAAAGACTTGATCTTTCTTTCAACAGGTTTACCAACTTAGGCTC  
TGTTTTTATGGTTTTCTAATCTTACTTCTCTTGACCTTTCACATAAT

>M6-PGSC0003DMG400028478-(rev)M6LRR-RLK\_549

ACTTAGGCTCTGTTTTTATGGTTTTCTAATCTTACTTCTCTTGACCTTTCACATAATGATATCAAGTTTTT  
ACCTTTTTGGTTTACCAACCTAACTAAGCTTGAAAATTTGAGCATT

>M6-PGSC0003DMG400028478-(rev)M6LRR-RLK\_61

CTCTATATGGCATTTACATCAACTACTTCCAAGTAAACAATCACAATTCCCACAAACAAAAAATG  
AAAATCTTGTTCACTCTTCATCTTCTTTCTTTTCACATTCTCAA

>M6-PGSC0003DMG400028478-(rev)M6LRR-RLK\_610

TATCAAGTTTTTACCTTTTTGGTTTACCAACCTAACTAAGCTTGAAAATTTGAGCATTCTAGCTGTAACAT  
TTATGGTAATCCAGAACCCCTTTCACATATCAAGTCACTGAAGCATT

>M6-PGSC0003DMG400028478-(rev)M6LRR-RLK\_671

AGCTGTAACATTTATGGTAATCCAGAACCCCTTTCACATATCAAGTCACTGAAGCATTAGATGTTTCTGT  
CAACCATATGAATGGTAAATTTCTAATGATTTTCTCTCTGTCTGGC

>M6-PGSC0003DMG400028478-(rev)M6LRR-RLK\_732

ATGTTTCTGTCAACCATATGAATGGTAAATTTCTAATGATTTTCTCTCTGTCTGGCCTCAATTTCTTGA  
ATATCTCATTCAATAACTTTACTGGGGAAATACCCAAAGACCAGTTTG

>M6-PGSC0003DMG400028478-(rev)M6LRR-RLK\_793

CAATTTCTGAATATCTCATTCAATAACTTTACTGGGGAAATACCCAAAGACCAGTTTGCTAAATTTGGGA  
ACTCTTCTTTCATTCATGCTGGGCACTTGCAAATCAAGAATCTCTTACC

>M6-PGSC0003DMG400028478-(rev)M6LRR-RLK\_854

AAATTTGGGAACTCTTCTTTCATTCATGCTGGGCACTTGCAAATCAAGAATCTCTTACCAAATCCCAAGAA  
TTCCTCACAGTTACACATTAATAATCATAACTTTACTACCCCAACACAC

>M6-PGSC0003DMG400028478-(rev)M6LRR-RLK\_915

ATCCCAAGAATTCCTCACAGTTACACATTAATAATCATAACTTTACTACCCCAACACACAAAAAATGTTG  
CCTTTGAGACACAAACCTATCAAACCAAACACACACAAGAAAAAGCCCA

>M6-PGSC0003DMG400028478-(rev)M6LRR-RLK\_976

AAAAATGTTGCCTTTGAGACACAAACCTATCAAACCAAACACACACAAGAAAAAGCCCAAATCAAGAAA  
GAAAGTTTTAACCATAGCTATTTCTCTGCTTCAGCATTTCTAATCTTGGC

>M6-PGSC0003DMG400028561-(rev)M6OtherRLKTM\_0

ATGCCATCCAATGATATCCTTGACTGGAATACTCATATCACAAGCTCGTTTATCTTATCCGAATCCAGAGT  
TAACATACCCTTTTCGTTGTGATTGCCTTAATAATGGTGAGTTTTTGGGA

>M6-PGSC0003DMG400028561-(rev)M6OtherRLKTM\_1037

TAGCAGTAGCTGCACTAGCCGGAGTTTCATTATTGGTAGGCATCATTTATGTGGGAATTTATAGAAAGA  
AGGAACAAAAGGTTGCAGCAAACATCCCAGCATCTTCTGGTCAATACCATC

>M6-PGSC0003DMG400028561-(rev)M6OtherRLKTM\_1098

TAGAAAGAAGGAACAAAAGGTTGCAGCAAACATCCCAGCATCTTCTGGTCAATACCATCCACCTAGTCCT  
GGTAATTGTAATTCCTTTTTCTTTTTCTACTTCTTTGCTCTTCCCAAATT

>M6-PGSC0003DMG400028561-(rev)M6OtherRLKTM\_1159

CCTAGTCCTGGTAATTGTAATTCCTTTTTCTTTTTCTACTTCTTTGCTCTTCCCAAATTTTCGAGTTCAAATCT  
CCTTCTGAATGAAGCCTCCAGTTGAAAATGTCTATCATGGATGTAA

>M6-PGSC0003DMG400028561-(rev)M6OtherRLKTM\_122

TGTATTTTCGTATAATGTTAGTGCCAACGACACTTATGATCTCATCGCAACAAGGCTCTATTCAAGTTTGA  
CGAATAAAGAGTTGTTGATAAGGGATAATAGTTATCCGGAAAACAATAT

>M6-PGSC0003DMG400028561-(rev)M6OtherRLKTM\_1220

GAGTTCAAATCTCCTTCTGAATGAAGCCTCCAGTTGAAAATGTCTATCATGGATGTAAATTAAGCATTTT  
CGCGATTTCCAGCAAAAATTCTTTCAACCCTGTCCTTTAGGATAGCCAA

>M6-PGSC0003DMG400028561-(rev)M6OtherRLKTM\_1281

TAAGCATTTTCGCGATTTCCAGCAAAAATTCTTTCAACCCTGTCCTTTAGGATAGCCAATATTCTAATTCAT  
TATCAAATTTCAACTTCATGGAGGTATCTAATGCTAGATTTATTACTC

>M6-PGSC0003DMG400028561-(rev)M6OtherRLKTM\_1342

TTCTAATTCATTATCAAATTTCAACTTCATGGAGGTATCTAATGCTAGATTTATTACTCCCAATGTGCTTGC  
AATATGTTTGATCCGTGTGAAGAACCACTAGAACTTGCTTAGTTTATT

>M6-PGSC0003DMG400028561-(rev)M6OtherRLKTM\_1403

AATGTGCTTGCAATATGTTTGATCCGTGTGAAGAACCACTAGAACTTGCTTAGTTTATTACTCCAAACATG  
TTCCAATAAATGTGGCCTAAGGCACTGACCTTGTTGATGGTGCTTCAGC

>M6-PGSC0003DMG400028561-(rev)M6OtherRLKTM\_1464

TCCAAACATGTTCCAATAAATGTGGCCTAAGGCACTGACCTTGTTGATGGTGCTTCAGCAGGTCTTTCCG  
GCATACATGTGGACAAATCAGTAGAGTTTTTCATATGAAGAACTTGCTAAG

>M6-PGSC0003DMG400028561-(rev)M6OtherRLKTM\_1525

GTCTTTCCGGCATAACATGTGGACAAATCAGTAGAGTTTTTCATATGAAGAACTTGCTAAGTCAACTGATAA  
CTTTAGCATTTCGAATAAGATTGGAGAAGGTGGCTTTGGAACCGTTTATT

>M6-PGSC0003DMG400028561-(rev)M6OtherRLKTM\_1647

GCTGAGCTGAGAGGCAAGGTCTGCAGTTCATGTTTTGTCTCCCATGATGCAAAGTTTTGTTTATCTATT  
GTTAGAAATATATTGCAAATCAGTAAGGAGAACACAATTCAATCATT

>M6-PGSC0003DMG400028561-(rev)M6OtherRLKTM\_1708

TTTATCTATTGTTAGAAATATATTGCAAATCAGTAAGGAGAACACAATTCAATCATTCTTGCACTTGATT  
AAGTTAGATGTCTGAGTAGTCTCAACTAAAATAAACTGAAAAAGCTGTT

>M6-PGSC0003DMG400028561-(rev)M6OtherRLKTM\_1769

GCACTTGATTAAGTTAGATGTCTGAGTAGTCTCAACTAAAATAAACTGAAAAAGCTGTAAAACAGTGTT  
ATTAAGGGTAGCAATGTCTCTGCTAATTCTACATTTAAAACACTACAGAAAG

>M6-PGSC0003DMG400028561-(rev)M6OtherRLKTM\_183

TCAAGTTTGACGAATAAAGAGTTGTTGATAAGGGATAATAGTTATCCGGAAAACAATATACCGCATCAT  
GCAACCTTGAACGTGACTGTGAATTGCTCCTGTGGGAATAAAGATGTGTCA

>M6-PGSC0003DMG400028561-(rev)M6OtherRLKTM\_1830

AACAGTGTTATTAAGGGTAGCAATGTCTCTGCTAATTCTACATTTAAAACACTACAGAAAGCAGCAATAAAG  
CGAATGAATCGGGAAGGAAGAACAGAATTTCTTGCTGAACTTAAAATTTT

>M6-PGSC0003DMG400028561-(rev)M6OtherRLKTM\_1891

GCAATAAAGCGAATGAATCGGGAAGGAAGAACAAGAAATTTCTTGCTGAACTTAAAATTTTGACGCGTGTT  
CATCACCTGAACTTGGTATGATAAATATCTTCTGCACTTGTTTCATTTTG

>M6-PGSC0003DMG400028561-(rev)M6OtherRLKTM\_2013

TATAATTTTTTTTTTTGGTTTGTGTTTGGACAGTATAATAAGTATTGAATGCCAGATATTGCAAGTTTAAGCA  
ATATCTTTTAGAACTTCATTAGCATTCCCGTGCCTGGAATTCACATGTT

>M6-PGSC0003DMG400028561-(rev)M6OtherRLKTM\_2074

AGTTTAAGCAATATCTTTTAGAACTTCATTAGCATTCCCGTGCCTGGAATTCACATGTTTTGCTTATTTAGT

TGATTGCTTTGAAGGAAATGTAAAGAGAGGGAAAAGAAATTGATTTTC

>M6-PGSC0003DMG400028561-(rev)M6OtherRLKTM\_2135

GCTTATTTAGTTGATTGCTTTGAAGGAAATGTAAAGAGAGGGAAAAGAAATTGATTTTCTCACTCATAGC

ATGTCGTTTTACTAATTTTCACCCCTTTTATTTTAATCATTCTACTCCAT

>M6-PGSC0003DMG400028561-(rev)M6OtherRLKTM\_2196

ACTCATAGCATGTCGTTTTACTAATTTTCACCCCTTTTATTTTAATCATTCTACTCCATAAACATTGAGCTCG

TAAAGCTGCAAGTTTAGTTTATAGTATGAGGGTATTGATAGATCCTG

>M6-PGSC0003DMG400028561-(rev)M6OtherRLKTM\_2257

ACATTGAGCTCGTAAAGCTGCAAGTTTAGTTTATAGTATGAGGGTATTGATAGATCCTGTAGGAGTTTAT

TTTCAATTTACAAAGGGAACCGTATTTGAAAATATGTCCATGAAGAGAGC

>M6-PGSC0003DMG400028561-(rev)M6OtherRLKTM\_2318

GGAGTTTATTTTCAATTTACAAAGGGAACCGTATTTGAAAATATGTCCATGAAGAGAGCGCATGCCTAA

GAATGTGAAGGATGTTTGCACCTTAAATTACAAGTATCGAAATGCATGTAT

>M6-PGSC0003DMG400028561-(rev)M6OtherRLKTM\_2379

ATGCCTAAGAATGTGAAGGATGTTTGCACCTTAAATTACAAGTATCGAAATGCATGTATATCATTTTATT

GATCTGGTGCGGAACTCAAATGTGATTGTATTATGCTTAATTTGTTTTCT

>M6-PGSC0003DMG400028561-(rev)M6OtherRLKTM\_2440

CATTTTATTGATCTGGTGCGGAACTCAAATGTGATTGTATTATGCTTAATTTGTTTTCTCATTTGACTATTT

CATCTGATGCTGAGTTGCATGCAGGTGTCCTTGATAGGGTATTGTGTT

>M6-PGSC0003DMG400028561-(rev)M6OtherRLKTM\_2501

TTTACTATTTTATCTGATGCTGAGTTGCATGCAGGTGTCCTTGATAGGGTATTGTGTTGAGAGGTCCCT

CTTCCTTGATATGAATTCATTGAGAATGGTAATCTAAGCCAACATCTTC

>M6-PGSC0003DMG400028561-(rev)M6OtherRLKTM\_2562

GAGGTCCCTCTTCCTTGATATGAATTCATTGAGAATGGTAATCTAAGCCAACATCTTCGTGGTACGAGA

ACTCTACTAGCTATAGCAATATGATGGAATAGTTCATTCTTTATGGTTTT

>M6-PGSC0003DMG400028561-(rev)M6OtherRLKTM\_2623

GGTACGAGAACTCTACTAGCTATAGCAATATGATGGAATAGTTCATTCTTTATGGTTTTCTTCTTATTTGT

ATTTGTGATGTTTATATGCTTACAGATTTATTAATTGTTTGGTAAATCT

>M6-PGSC0003DMG400028561-(rev)M6OtherRLKTM\_2684



TCTTATTTGTATTTGTGATGTTTATATGCTTACAGATTTATTAATTGTTTGGTAAATCTATTTACAGGGAAA  
GACGTATTGACATGGTCAACAAGGGTGCAAATTGCAATGGATTGAGCC

>M6-PGSC0003DMG400028561-(rev)M6OtherRLKTM\_2806

AGGTCTTGAGTATATACACGAGCACACCATCCCCTTTTACATCCATCGTGATGTTAAATCAGCAAATATTC  
TGATAAACGAAAACCTTTCATGCAAAGGTATCTTTAACGTCCTCTATTAA

>M6-PGSC0003DMG400028561-(rev)M6OtherRLKTM\_2867

GCAAATATTCTGATAAACGAAAACCTTTCATGCAAAGGTATCTTTAACGTCCTCTATTAATTCTCTGTGTTT  
CAACAACCTTCTGTAGTCTTCTAACTGGTTAATCACTCACAGATTGGAGA

>M6-PGSC0003DMG400028561-(rev)M6OtherRLKTM\_2928

CTCTGTGTTTCAACAACCTTCTGTAGTCTTCTAACTGGTTAATCACTCACAGATTGGAGATTTTGGCTTATC  
AAAACCTTGTGAAAGTGAAATCCAACCTCTGAATACACGTTTTATGGGT

>M6-PGSC0003DMG400028561-(rev)M6OtherRLKTM\_2989

TTGGCTTATCAAACTTGTGAAAGTGAAATCCAACCTCTGAATACACGTTTTATGGGTACATTTGGATA  
CATGCCACCAGAGTAAGTTTTTTTTTTTCACTGTATAAAGCGCGTCTAAA

>M6-PGSC0003DMG400028561-(rev)M6OtherRLKTM\_305

GGACTATGGATTGTTTATCACGTATCCGATGAGGCCAGGGGAAAATTTGAGTTATATCGCGTTGGTGAC  
TAATACTAGCTCAAGGCTGATAGAAATGTACAATCCAATGGTGAATTTGAG

>M6-PGSC0003DMG400028561-(rev)M6OtherRLKTM\_3050

ATTTGGATACATGCCACCAGAGTAAGTTTTTTTTTTTCACTGTATAAAGCGCGTCTAAAAGTATGTGTAGC  
TTCAGCTGTTCAAACCTTTTTACTTGAATAGAGAATCTGGCAATTAATA

>M6-PGSC0003DMG400028561-(rev)M6OtherRLKTM\_3111

TATGTGTAGCTTCAGCTGTTCAAACCTTTTTACTTGAATAGAGAATCTGGCAATTAATACAAAATAGTAAC  
AAATGCTAAAATGTGCAGGTATGGTCATTCAGGAGTTATCTCTCGTAAA

>M6-PGSC0003DMG400028561-(rev)M6OtherRLKTM\_3172

AAATAGTAACAAATGCTAAAATGTGCAGGTATGGTCATTCAGGAGTTATCTCTCGTAAAGTAGATGTCTA  
CGCTTTTGGTGTTGTCCTTTATGAATTGATTCGTCCAAGGACGCAGTAG

>M6-PGSC0003DMG400028561-(rev)M6OtherRLKTM\_3294

AAGGAAGATGGTGTTGATGAAGCAAGAAGCCTTGTTGCTTTGGTAACTTTTTCTTCAAAGTTCTTCATTG  
AATGTTATTCATTGGCATTGAGATGACCTTGACATAAACTTTACTCCTCT

>M6-PGSC0003DMG400028561-(rev)M6OtherRLKTM\_3355

TCTTCATTGAATGTTATTCATTGGCATTGAGATGACCTTGACATAAACTTTACTCCTCTGCATTTAAAATCT  
GACACTTTTAGTTTGAACCAGACGATGAGCTAATCATGATTGTTCTGT

>M6-PGSC0003DMG400028561-(rev)M6OtherRLKTM\_3416

ATTTAAAATCTGACACTTTTAGTTTGAACCAGACGATGAGCTAATCATGATTGTTCTGTGATAATTGTAGT  
TTGATGAAGCTTATAGTCATCAAATCAAATTGAAGCCATTTCCAGATT

>M6-PGSC0003DMG400028561-(rev)M6OtherRLKTM\_3477

TAATTGTAGTTTGTGATGAAGCTTATAGTCATCAAATCAAATTGAAGCCATTTCCAGATTGATAGACCCTA  
AACTCCGCAATGACTACCCCCCGATTCAAGTCTACAAGGTACAATTATAT

>M6-PGSC0003DMG400028561-(rev)M6OtherRLKTM\_3538

TAGACCCTAACTCCGCAATGACTACCCCCCGATTCAAGTCTACAAGGTACAATTATATCTCTTTAATTAC  
TGCACTAGCTATGTACCCCCTTTTCTTCTCTGCTTCCACTTGAAGCAA

>M6-PGSC0003DMG400028561-(rev)M6OtherRLKTM\_3599

CTTTAATTACTGCACTAGCTATGTACCCCCTTTTCTTCTCTGCTTCCACTTGAAGCAACACATGGTTTGTG  
TATTGCAGATGGCACAGCTTGCTAAAGCTTGACGGAGAAGAATCCTG

>M6-PGSC0003DMG400028561-(rev)M6OtherRLKTM\_3652

AAGCAACACATGGTTTGTCTATTGCAGATGGCACAGCTTGCTAAAGCTTGACGGAGAAGAATCCTGAA  
ATGAGACCGACTATGCAATCAGTAGTGGTTGCTCTTATGGCGCTCTCATGA

>M6-PGSC0003DMG400028561-(rev)M6OtherRLKTM\_366

TTGGTGACTAATACTAGCTCAAGGCTGATAGAAATGTACAATCCAATGGTGAATTTCAAGTGGTGGCAGC  
GGGTTGTTGTACATTCCAGGCAAAGGTTAGTTCAGATTAAAGAAAAGAAGA

>M6-PGSC0003DMG400028561-(rev)M6OtherRLKTM\_427

CTGGCAGCGGGTTGTTGTACATTCCAGGCAAAGGTTAGTTCAGATTAAAGAAAAGAAGAAGAGTATTTG  
GCAGATTAGCTTTTTCTTTTATATAATATTGGACTGAGACGGACTTACATG

>M6-PGSC0003DMG400028561-(rev)M6OtherRLKTM\_488

AGTATTTGGCAGATTAGCTTTTTCTTTTATATAATATTGGACTGAGACGGACTTACATGAAGTGACATGG  
TCTGTGAAGATTCATATAGCATGAATCGCAATGCAAACAGACTCTGCTGA

>M6-PGSC0003DMG400028561-(rev)M6OtherRLKTM\_549

GTGACATGGTCTGTGAAGATTCATATAGCATGAATCGCAATGCAAACAGACTCTGCTGAAGTAAAATTT

AGGCAAAGCATAGAAAATCCTGTATTTAATGATTTGTTTCTTTTGTACAAT

>M6-PGSC0003DMG400028561-(rev)M6OtherRLKTM\_61

AATCCAGAGTTAACATACCCTTTTCGTTGTGATTGCCTTAATAATGGTGAGTTTTTGGGACATGTATTTTCG

TATAATGTTAGTGCCAACGACACTTATGATCTCATCGCAACAAGGCTCT

>M6-PGSC0003DMG400028561-(rev)M6OtherRLKTM\_610

TAAAATTTAGGCAAAGCATAGAAAATCCTGTATTTAATGATTTGTTTCTTTTGTACAATGTTGCTGCTGTT

GGGATGGATATTATATTTGTAAATCCAGTTTTATCTATGTATATACTTG

>M6-PGSC0003DMG400028561-(rev)M6OtherRLKTM\_671

TGCTGCTGTTGGGATGGATATTATATTTGTAAATCCAGTTTTATCTATGTATATACTTGTTTTATGCAGAT

AAACTGGGGAATTATCCACCTATACCAACCAGGTACAATTTTCAGATTT

>M6-PGSC0003DMG400028561-(rev)M6OtherRLKTM\_732

TTATGCAGATAAACTGGGGAATTATCCACCTATACCAACCAGGTACAATTTTCAGATTTGAAGTAGTTAT

ACATTGAGCACCTTATCTTAACACATGCTTGCATATTCTTTAACTTATTT

>M6-PGSC0003DMG400028561-(rev)M6OtherRLKTM\_793

AGTAGTTATACATTGAGCACCTTATCTTAACACATGCTTGCATATTCTTTAACTTATTTGGTCATCCATGTT

TCCCCTGGCTTGCAGAAAAGGTGGACTACCCTTTCCTTCTCTTTATTT

>M6-PGSC0003DMG400028561-(rev)M6OtherRLKTM\_854

TCATCCATGTTTCCCCTGGCTTGCAGAAAAGGTGGACTACCCTTTCCTTCTCTTTATTTTGTGTTGGATCGC

TTCTAATTGCTCCCAAATCAAGTTGTTGATGGAAGTGTGTACAACAT

>M6-PGSC0003DMG400028561-(rev)M6OtherRLKTM\_915

TGTTGGATCGCTTCTAATTGCTCCCAAATCAAGTTGTTGATGGAAGTGTGTACAACATAAGCATATTGA

CTGTTCTGTATGAGTGTCTCATCAGGCTCATCAGGTAAAACAATAGCTGC

>M6-PGSC0003DMG400028575-(rev)M6LRR-RLP\_0

AGTATTTAAAATAGGCAAAAAGAATTGATCTGTTAGCCAAAAAATAAATACAAACGAATCCTGTTGTTT

ATTTGCGAGGATTTTGCTATTTTATACGTTTCAGATCTGCAGAAACTTGG

>M6-PGSC0003DMG400028575-(rev)M6LRR-RLP\_1054

TTTCTGGCCAAATAACTGAATTACAAAATGTGATTTCTCCACTAAAAAGTCTTGAGTTGAGTTCCAACAA

ATTGGAAGGGCCAATACCTGAGTTTTTATTTGAGCTGCGTGATCTTTATG

>M6-PGSC0003DMG400028575-(rev)M6LRR-RLP\_1116

TCCAACAAATTGGAAGGGCCAATACCTGAGTTTTTATTTGAGCTGCGTGATCTTTATGGTCTTTCACTTTC  
ATTCAACAAGTTTAAACGGTACTGTGCAGTTGAAGAAGTTTACAAACCTC

>M6-PGSC0003DMG400028575-(rev)M6LRR-RLP\_1178

TTCACCTTCATTCAACAAGTTTAAACGGTACTGTGCAGTTGAAGAAGTTTACAAACCTCAATAAACTTGTTA  
GTCTTGATCTGTCCCACAACAGTTTATCAGTTGACACAACCTATAAGTGA

>M6-PGSC0003DMG400028575-(rev)M6LRR-RLP\_124

TCTTTTTTCTGTTGACAGTCCAAATGAGAAGTGAAATGTTTTCCAGCTTTTTCTTGATCCTATTACTCTCCA  
TCTGCTGTAAAATGAGTGATGCAGTGGCAGCTAATTCCAGTAAATGTC

>M6-PGSC0003DMG400028575-(rev)M6LRR-RLP\_1240

AACTTGTTAGTCTTGATCTGTCCCACAACAGTTTATCAGTTGACACAACCTATAAGTGAATCGGACCTTGCC  
TTGCTACCCAGCTGAATAGTTTCATGTTAGCATCATGCAATCTGCAGA

>M6-PGSC0003DMG400028575-(rev)M6LRR-RLP\_1364

TTCCTTCTCAAGAACCAATCAAAGTTGTCGATGTTAGATCTCTCAAACAACCAGCTTACTGGTGAAATAC  
CAAACCTGGTTGGTGGAAATCAATGACGGACTTCTCCGTTTTCTGAATCT

>M6-PGSC0003DMG400028575-(rev)M6LRR-RLP\_1426

GTGAAATACCAAACCTGGTTGGTGGAAATCAATGACGGACTTCTCCGTTTTCTGAATCTTTCTTTCAATCAA  
TTTACGCGCCTTCAAGAACCTTATACAATTGGCTTTCTCATGAATTTCC

>M6-PGSC0003DMG400028575-(rev)M6LRR-RLP\_1488

TTCAATCAATTTACGCGCCTTCAAGAACCTTATACAATTGGCTTTCTCATGAATTTCTTGATCTGCATTCA  
AATCTGCTCACTGGGGTTATTCCATTACCACCACGTGCAGCTGCTTAT

>M6-PGSC0003DMG400028575-(rev)M6LRR-RLP\_1550

TCTGCATTCAAATCTGCTCACTGGGGTTATTCCATTACCACCACGTGCAGCTGCTTATATTGACTTCTCAG  
ACAATAACTTTTCTTCTTTTCCACCTGACTTTGGCAAGTATCTAGTAAC

>M6-PGSC0003DMG400028575-(rev)M6LRR-RLP\_1612

ACTTCTCAGACAATAACTTTTCTTCTTTTCCACCTGACTTTGGCAAGTATCTAGTAACTGCTCGGTTCTCT  
CAATTGCAAACAACAAAGTTATCAGTAGTATCCCTTCTTCGATATGCA

>M6-PGSC0003DMG400028575-(rev)M6LRR-RLP\_1674

CGGTTCTCTCAATTGCAAACAACAAAGTTATCAGTAGTATCCCTTCTTCGATATGCAACTCCAGCTATCT  
TGAAGTACTTGAGTTGTCAAACAACAGTTTGAATGGAATAATACCATCA

>M6-PGSC0003DMG400028575-(rev)M6LRR-RLP\_1736

CAGCTATCTTGAAGTACTTGAGTTGTCAAACAACAGTTTGAATGGAATAATACCATCATGTTTAGCAGAA  
AAGAGCAGCACACTCAAAGTACTGAACCTGGGAAAGAACAATCTCATAGG

>M6-PGSC0003DMG400028575-(rev)M6LRR-RLP\_1798

TAGCAGAAAAGAGCAGCACACTCAAAGTACTGAACCTGGGAAAGAACAATCTCATAGGAAATATACCT  
GAAAAGTTTTCTTATAATTGTGAGTTACAGAGCCTTGACCTCAGTCAGAATC

>M6-PGSC0003DMG400028575-(rev)M6LRR-RLP\_186

TTACTCTCCATCTGCTGTAAAATGAGTGATGCAGTGGCAGCTAATTCCAGTAAATGTCTTGAGGATCAGA  
AGATGTTGCTGCTGCAGCTGAGAAATAACCTTACTTATGATTCTGAAATA

>M6-PGSC0003DMG400028575-(rev)M6LRR-RLP\_1860

ATACCTGAAAAGTTTTCTTATAATTGTGAGTTACAGAGCCTTGACCTCAGTCAGAATCACTTAACGGGTG  
TGCTTCCTCGTTCTTTGTCCAACCTGCACAAAGTTAAAGGTATTAATATT

>M6-PGSC0003DMG400028575-(rev)M6LRR-RLP\_1922

AACGGGTGTGCTTCCTCGTTCTTTGTCCAACCTGCACAAAGTTAAAGGTATTAATATTGGAAACAACAAG  
ATCAAGGATACTTTCCCCTGCTGGTTGAAGAACATGTCAGATCTTCGTGT

>M6-PGSC0003DMG400028575-(rev)M6LRR-RLP\_1984

ACAACAAGATCAAGGATACTTTCCCCTGCTGGTTGAAGAACATGTCAGATCTTCGTGTACTTGTATTACG  
CTTCAATGGTTTCCATGGGAACATTGATTGCTCACGAGTGAGTTCCAACCT

>M6-PGSC0003DMG400028575-(rev)M6LRR-RLP\_2108

CGCACTTCAAATCATGGATCTAGCTTCCAACAATTTAGGGGGTATTCTTCCACGAGGTTCACTTCTGGAG  
CTAAGAGCAATGATGGCTGACCCATCTTTAACACATTCACGCTCTGATAT

>M6-PGSC0003DMG400028575-(rev)M6LRR-RLP\_2170

TCTTGGAGCTAAGAGCAATGATGGCTGACCCATCTTTAACACATTCACGCTCTGATATCTTGCACTTTGA  
GTCTTCTATTAGGCCGATATACTATCAGGACAGAGTCACTCTTTCTCTTA

>M6-PGSC0003DMG400028575-(rev)M6LRR-RLP\_2232

CACTTTGAGTCTTCTATTAGGCCGATATACTATCAGGACAGAGTCACTCTTTCTCTTAAAGGACAAGATGT  
TACACAGACAAAGATCTTTCTTCTTCCACCTCCATTGACTTCTCAAGT

>M6-PGSC0003DMG400028575-(rev)M6LRR-RLP\_2294

ACAAGATGTTACACAGACAAAGATCTTTCTTCTTCCACCTCCATTGACTTCTCAAGTAACAATTTGTAG

GGAACATACCAGAGATAGTTGGAGATCTCAGATCACTTTATCTTCTCAA

>M6-PGSC0003DMG400028575-(rev)M6LRR-RLP\_2356

ATTTTGTAGGGAACATACCAGAGATAGTTGGAGATCTCAGATCACTTTATCTTCTCAATATTTACACAAC

AATCTCACGGGTCAAATCCCTCCAGCAATTGGAAATTTGAAGCAATTGG

>M6-PGSC0003DMG400028575-(rev)M6LRR-RLP\_2418

TCACACAACAATCTCACGGGTCAAATCCCTCCAGCAATTGGAAATTTGAAGCAATTGGAATCGCTGGACC

TCTCATTCAACAAGTTAGGTGGCAATATCCCAGAAAAGCTTGCTAGCCTC

>M6-PGSC0003DMG400028575-(rev)M6LRR-RLP\_248

GGATCAGAAGATGTTGCTGCTGCAGCTGAGAAATAACCTTACTTATGATTCTGAAATATCTACCAAGCTA

GTGAAGTGGAAACCAACGGATTGACTGCTGTCAATGGGAGGGTGTCACTTG

>M6-PGSC0003DMG400028575-(rev)M6LRR-RLP\_2480

GCTGGACCTCTCATTCAACAAGTTAGGTGGCAATATCCCAGAAAAGCTTGCTAGCCTCACATTTCTTTCCT

TCTTAAATTTATCAGCTAATGAATTGGTTGGAATGATTCCACGAGGCAA

>M6-PGSC0003DMG400028575-(rev)M6LRR-RLP\_2542

TTCTTTCTTCTTAAATTTATCAGCTAATGAATTGGTTGGAATGATTCCACGAGGCAACCAAATTCAAACA

TTTGGAGAAATTTCTTTTGAAGGAAACAAGGGGCTATGTGGGTTTCCGC

>M6-PGSC0003DMG400028575-(rev)M6LRR-RLP\_2666

CAGAACTTGCAAGAATAATTCAGCAGATGCACCTTCTGAGCCAGAAGTTGAAGTGGACGAATTCATTTTC

AAGGACGGAGATTTATGTAAGTGCTATATTGGGATTTGTTGTTGGTATTGG

>M6-PGSC0003DMG400028575-(rev)M6LRR-RLP\_2728

TCATTTCAAGGACGGAGATTTATGTAAGTGCTATATTGGGATTTGTTGTTGGTATTGGGATCATTTTCCTA

CCACTTCTGTTCTCAAAAAGATGGAACCAGTCGTACAACAGAATAATTG

>M6-PGSC0003DMG400028575-(rev)M6LRR-RLP\_2790

ATTTTCTACCACTTCTGTTCTCAAAAAGATGGAACCAGTCGTACAACAGAATAATTGACAGATTAATTTT

AAGGATATTTACAGCAGCAAGATCAAGAAAGGAGAACTAGTAGCAGTAGT

>M6-PGSC0003DMG400028575-(rev)M6LRR-RLP\_2852

ATTAATTTTAAGGATATTTACAGCAGCAAGATCAAGAAAGGAGAACTAGTAGCAGTAGTGTAGCATCTTC

GAAAAAGGCAGCAGGGAAATCAAGAGGCAGCCATTAATTTACAGGATGTA

>M6-PGSC0003DMG400028575-(rev)M6LRR-RLP\_2914

CATCTTCGAAAAAGGCAGCAGGGAAATCAAGAGGCAGCCATTAATTTACAGGATGTAACACTTCCTTG  
CAGCATGCACACTATTGGTACTTCTAATTGTTTCCACTATGAGTTATCGGT

>M6-PGSC0003DMG400028575-(rev)M6LRR-RLP\_2976

TTCCTTGCAGCATGCACACTATTGGTACTTCTAATTGTTTCCACTATGAGTTATCGGTGTTTGTTTACCTTT  
CATGTTTCATTTTAGTGGCTTCTTATTAGAAAGAAGAACAATGCAA

>M6-PGSC0003DMG400028575-(rev)M6LRR-RLP\_3022

TGAGTTATCGGTGTTTGTTTACCTTTTATGTTTCATTTTAGTGGCTTCTTATTAGAAAGAAGAACAATG  
CAATCTTACATTCTGTTTTAGGTAACGGTCAGCGAATAGCCATAACAAA

>M6-PGSC0003DMG400028575-(rev)M6LRR-RLP\_372

GGTGAAGGCCAAGTTATTGGTCTTGACCTTAGCGCTGAATCATTCTCGGGCAGTATCACTCCGTTAGCTG  
ATCTTAAGTTTCTCTCTAGTGCCGTCTTGATGGGAACAATTTATCTGCA

>M6-PGSC0003DMG400028575-(rev)M6LRR-RLP\_434

GTTAGCTGATCTTAAGTTTCTCTCTAGTGCCGTCTTGATGGGAACAATTTATCTGCACCAATTCAGAGT  
TCTTTGCGGAATTCACCAATTTAACTGTCTTGAGTCTGAGTTCCTGCAA

>M6-PGSC0003DMG400028575-(rev)M6LRR-RLP\_496

TTCCAGAGTTCTTTGCGGAATTCACCAATTTAACTGTCTTGAGTCTGAGTTCCTGCAACTTGATAGGAGA  
GGCACCTCAGAAAATATTCCAGGTACCAACTCTGCAAACAATTGACTTAT

>M6-PGSC0003DMG400028575-(rev)M6LRR-RLP\_558

ATAGGAGAGGCACCTCAGAAAATATTCCAGGTACCAACTCTGCAAACAATTGACTTATCAGGAAATAGG  
ATTCTTGGGGGTTCTTTACCTGAATTTCTTCAAAGGATCTCTACAAAAC

>M6-PGSC0003DMG400028575-(rev)M6LRR-RLP\_62

TGTTGTTTATTTGCGAGGATTTTGCTATTTTATACGTTTCAGATCTGCAGAACTTGGAGTTTCTTTTTTCT  
GTTGACAGTCCAAATGAGAAGTGAAATGTTTTCCAGCTTTTCTTGAT

>M6-PGSC0003DMG400028575-(rev)M6LRR-RLP\_620

AAATAGGATTCTTGGGGGTTCTTTACCTGAATTTCTTCAAAGGATCTCTACAAAACCTGGTTCTTAGTG  
ATACGAAATTTTACGGAAGTTTACCTGAGTCCATAGGGAACCTTAGGAA

>M6-PGSC0003DMG400028575-(rev)M6LRR-RLP\_682

TTCTTAGTGATACGAAATTTTACGGAAGTTTACCTGAGTCCATAGGGAACCTTAGGAAGTTGTCGCGTGT  
TGAACCTAGAGCTTGTAATTTTACAGGTCCAATTCATCTTCTATGGAAA

>M6-PGSC0003DMG400028575-(rev)M6LRR-RLP\_744

TCGCGTGTGAACTTAGAGCTTGTAATTTACAGGTCCAATTCCATCTTCTATGGAAAATCTAACCCAGCT  
TGTTCTTCTGGATTTCAATTTCAATAGCTTCATGGGTTCAATTCATCT

>M6-PGSC0003DMG400028575-(rev)M6LRR-RLP\_806

AACCCAGCTTGTTCTTCTGGATTTCAATTTCAATAGCTTCATGGGTTCAATTCATCTTTAAGCTGTCCAA  
AAATCTCACTCATATATCCTCTGCTAGAAATCGTTTGACAGGAATATC

>M6-PGSC0003DMG400028575-(rev)M6LRR-RLP\_868

AGCTGTCCAAAAATCTCACTCATATATCCTCTGCTAGAAATCGTTTGACAGGAATATCATCAAAGTGGGA  
AGGCTTTGAGAATCTTGAGTATCTTGACTTGAGCAGTAATTCAATTTCTG

>M6-PGSC0003DMG400028575-(rev)M6LRR-RLP\_930

AACTGGGAAGGCTTTGAGAATCTTGAGTATCTTGACTTGAGCAGTAATTCAATTTCTGGGCTCATTCCAG  
AATCATTTTTTTACCTACCCTCACTTTAGTTTTAGTTCTGTCCAACAAC

>M6-PGSC0003DMG400028575-(rev)M6LRR-RLP\_992

CATTCCAGAATCATTTTTTTACCTACCCTCACTTTAGTTTTAGTTCTGTCCAACAACAAGTTTTCTGGCCA  
AATAACTGAATTACAAAATGTGATTTCTCCACTAAAAAGTCTTGAGTT

>M6-PGSC0003DMG400028576-(rev)M6LRR-RLP\_2013

AGAACATGTCAGATCTTCGTGTACTTGTATTACGCTTCAATGGTTTCCATGGGAACATTGATTGCTCAG  
AGTGAGTTCCAACTGGACCGCACTTCAAATCATGGATCTAGCTTCCAACA

>M6-PGSC0003DMG400028576-(rev)M6LRR-RLP\_2318

TTCTTACCTCCATTGACTTCTCAAGTAACAATTTGTAGGGAAACATAACCAGAGATAGTTGGAGATCTCA  
GATCACTTTATCTTCTCAATATTTACACAACAATCTCACGGGTCAAATC

>M6-PGSC0003DMG400028576-(rev)M6LRR-RLP\_3050

TTTTAGTGGCTTCTTATTAGAAAGAAGAACAATGCAATCTTACATTCTGTTTTAGGTAACGGTCAGCG  
AATAGCCATAACAAACCTAATAACAACCTCTCTTTTTTTGAAGAAACAG

>M6-PGSC0003DMG400028576-(rev)M6LRR-RLP\_3111

CGGTCAGCGAATAGCCATAACAAACCTAATAACAACCTCTCTTTTTTTGAAGAAACAGAAGCCAACCTT  
GCCATTTTCTAAGTACAAAATAGTTTATTCAAGTTCTCCCTTATTCTTCG

>M6-PGSC0003DMG400028576-(rev)M6LRR-RLP\_3172

GCCAACTTTGCCATTTTCTAAGTACAAAATAGTTTATTCAAGTTCTCCCTTATTCTTCGAAGTCAGAGTCG



CTCTGCGCAGACAGTAAGACTTCATCAAATTCCTTACTGAAGTCTTTAT

>M6-PGSC0003DMG400028576-(rev)M6LRR-RLP\_3213

GTTCTCCCTTATTCTTCTGAAGTCAGAGTCGCTCTGCGCAGACAGTAAGACTTCATCAAATTCCTTACTGAA

GTCTTTATCGCCATCCTGCTCTTCAGCCACTTCTTGTTGGGAGAACTTA

>M6-PGSC0003DMG400028591M6LRR-RLP\_0

TTCCAAAATTCATTTGGAACCTTTCACAAATCACCCAACCTGGACCTTTCAGACAACAATTTGGATGGCAA

ATTCCAGACGTTTTTCCAACCTTGCAAATGCTTACATCCTTGCTACTGC

>M6-PGSC0003DMG400028591M6LRR-RLP\_1054

CGGACCCATCGTTTCTTCCAAACAAAATTGCCATTTCCAAATATGAGGATCTTTGACCTCTCCAACAATT

CATTTACCGGCTCTTTACCTATGGAGGTTCTAAAAGGTTTCAAAGCTAT

>M6-PGSC0003DMG400028591M6LRR-RLP\_124

CAACAACCTTCACTGGCCGGTTCATCTTTTCTGTGGATTTGACAAACCTTCAAGTTTTAAGGTTGGGAA

ACAATTCCTCAGTGGTACCCTTCCCGAGCTTAAGACTAATTCAATAGA

>M6-PGSC0003DMG400028591M6LRR-RLP\_1922

TTTACAGAACAAGACTGAAAATCTATGAGGTAATGACTAATTAATAGTCGCGTTAATTCATTATTTTC

TTGTATGCATAATCAAACATATATTTTATTAGCAATACTTAAGGTCATG

>M6-PGSC0003DMG400028591M6LRR-RLP\_1984

ATTATTTTCTTGTATGCATAATCAAACATATATTTTATTAGCAATACTTAAGGTCATGAAAACACTACAACAT

AATCCATTGATATTAATGGGAATTGGAACTTTGTTTTTTGTACAAGCT

>M6-PGSC0003DMG400028591M6LRR-RLP\_2046

CTACAACATAATCCATTGATATTAATGGGAATTGGAACTTTGTTTTTTGTACAAGCTCTAGTCCCAAAG

AGTTTCTTAGATATTCAATACTTTAAAACCTTATTTGTTTGTTTTTTTT

>M6-PGSC0003DMG400028591M6LRR-RLP\_2108

TCCCAAAGAGTTTCTTAGATATTCAATACTTTAAAACCTTATTTGTTTGTTTTTTTTTTTCAATAAAAAATC

AAGGAAGTGACACAATATCCTAATGTAACCTATTGTTTATCATTGC

>M6-PGSC0003DMG400028591M6LRR-RLP\_2170

AATAAAAAATCAAGGAAGTGACACAATATCCTAATGTAACCTATTGTTTATCATTGCTATTAGATGAC

AATCAGAAAGTATGAAGCAAGAGAGAGGTCGGAGTATGCCACTAGAGCAT

>M6-PGSC0003DMG400028591M6LRR-RLP\_2232

CAGATGACAATCAGAAAGTATGAAGCAAGAGAGAGGTCCGAGTATGCCACTAGAGCATGGGCTTGGG  
AAAATAGTGATTTTATAATTTTAAAATAATGCAGATTGTTGTTTTTAGTATAC

>M6-PGSC0003DMG400028591M6LRR-RLP\_62

GATGGCAAATCCAGACGTTTTTCCAACCTTGCAAATGCTTACATCCTTGTCCTGCAGAACAACTT  
CACTGGCCGGTCCCATCTTTTCTGTGGATTGACAAACCTTCAAGTT

>M6-PGSC0003DMG400028591M6LRR-RLP\_992

CCCTCTGGTTGGAAACATTGCAAGAGTTAGAGCTTCTCATACTGAAATCTAATAGATTTTACGGACCCA  
TCGTTTCTTTCAAACAAAATTGCCATTTCAAATATGAGGATCTTTGAC

>M6-PGSC0003DMG400028617M6G-LecRK\_0

GTCACAGTAAAAGTTCTACAAACAATATCATCGAACTTGGGAACACACATTGGAATGTCAGCCGAGCG  
TCTTGTATGCAGGAGAGGGATTTAACATGACGGATCCTAATTATAAAGAA

>M6-PGSC0003DMG400028617M6G-LecRK\_1037

TAACCATATATTCAACGTTTAATATCTACTTATTGTTATATCTATTCCAAATTATTTGGCACTTTTCGATTC  
CACTTGCAAATAAATTGCATTTCTTTCACCGTTTTTATTTGAAAA

>M6-PGSC0003DMG400028617M6G-LecRK\_122

TTTCAGCAATGTAAAATGTAATTGTTCAATCAATAATGGCTCAGTTTGCCATGTTGTAACAATGTAAGCTC  
TGCTTTGATCTTTAAAACCTTACATTTTACTCTTAATCAGAAAGTATTA

>M6-PGSC0003DMG400028617M6G-LecRK\_1342

ATAGATTTATTTATAGCCATAGAAGTACTGTTTCTGAAAGTTTGCAACCTCCAGAATAACTTAAGAGAA  
GTACTATTTGCGAAAGTTTCCTTAAGATTGTTGTTTATCTGTATTAATAG

>M6-PGSC0003DMG400028617M6G-LecRK\_1403

TTAAGAGAAGTACTATTTGCGAAAGTTTCCTTAAGATTGTTGTTTATCTGTATTAATAGGATACTAAGAAC  
AATACTTTGCAGAACTTCTTAAGAAACATCCCTTCATTTCTCATTTATT

>M6-PGSC0003DMG400028617M6G-LecRK\_1464

TACTAAGAACAATACTTTGCAGAACTTCTTAAGAAACATCCCTTCATTTCTCATTTATTATTATTATAC  
CCAACACTTTTAATATGAAGAAAGAGTTAATCTAGTTTAATTTGCTC

>M6-PGSC0003DMG400028617M6G-LecRK\_1525

TATTATTATACCAACACTTTTAATATGAAGAAAGAGTTAATCTAGTTTAATTTGCTCCAAAAGTTGGTC  
AAATTGTATCAAACATAAGTAAAAAGTGTTGATCAAATTGGGATGAACA

>M6-PGSC0003DMG400028617M6G-LecRK\_1586

AAAGTTGGTCAAATTGTATCAAACATAAGTAAAAAGTGTGATCAAATTGGGATGAACAGTGTGATTTTT  
CAGTTATCGTGGTTAATTGATGGATCATTTTGCAGGTTTCTTTCTGCCAA

>M6-PGSC0003DMG400028617M6G-LecRK\_1647

GTGATTTTTTCAGTTATCGTGGTTAATTGATGGATCATTTTGCAGGTTTCTTTCTGCCAATAATCTCAATGG  
AACTATACCTGAGAACTTCAGCAATCTTAAGAATATGACAGATTTGTAA

>M6-PGSC0003DMG400028617M6G-LecRK\_1708

ATCTCAATGGAACCTATACCTGAGAACTTCAGCAATCTTAAGAATATGACAGATTTGTAAGCAAGAAAATG  
TTTTAAGGTACATTTGACTTTTGTGCTTCAATCTCTTAATTCTTTCGTCT

>M6-PGSC0003DMG400028617M6G-LecRK\_1769

AAGAAAATGTTTTAAGGTACATTTGACTTTTGTGCTTCAATCTCTTAATTCTTTCGTCTGTTTGCAGTAGG  
ATCGATGGGACTAGCATATCTGGAACCATAACCAGATTTTATTGGCAATT

>M6-PGSC0003DMG400028617M6G-LecRK\_183

ATGTAAGCTCTGCTTTGATCTTTAAACTTCACATTTTACTCTTAATCAGAAAGTATTACAGTTAAACAGA  
TGCCATCTTCTGCATCATGTAATGAGAATTTCTTACGCTTTTTTTGTTG

>M6-PGSC0003DMG400028617M6G-LecRK\_1830

TTGCAGTAGGATCGATGGGACTAGCATATCTGGAACCATAACCAGATTTTATTGGCAATTGGACCGAAAT  
GGATAGATTGTAAGTATGCATCTTGTAGTTGTAATGTTGATGGAATATTC

>M6-PGSC0003DMG400028617M6G-LecRK\_1891

ACCGAAATGGATAGATTGTAAGTATGCATCTTGTAGTTGTAATGTTGATGGAATATTCTTCTCCCGGAA  
GGATTCTAAACTTTAAAAAAGCAAAAAATTGGTATCATAACATTGTATTT

>M6-PGSC0003DMG400028617M6G-LecRK\_1952

CTCCCGGAAGGATTCTAAACTTTAAAAAAGCAAAAAATTGGTATCATAACATTGTATTTAATAGCAAATA  
TCATGAAACTTTTTGCAGAGACATTCAAGGAACGTCAATGGAGGGACCTA

>M6-PGSC0003DMG400028617M6G-LecRK\_2013

TAGCAAATATCATGAAACTTTTTGCAGAGACATTCAAGGAACGTCAATGGAGGGACCTATTCTCCTACA  
ATATCCAGTTGAAAAACATGAAAGAGTTGTAAGTACACACGTCTCTCGT

>M6-PGSC0003DMG400028617M6G-LecRK\_2074

CCTCCTACAATATCCAGTTGAAAAACATGAAAGAGTTGTAAGTACACACGTCTCTCGTACTACCTGCTA

TAGCGGAAGTTCTCATGTGCATTGTTGTTTTCAGGACAATATCTGATTG

>M6-PGSC0003DMG400028617M6G-LecRK\_2135

TACCTGCTATAGCGGAAGTTCTCATGTGCATTGTTGTTTTCAGGACAATATCTGATTTGAGAGGAGAACA

AATGCAATTCCCAAATCTTAAGGGCTTGACGAATATGGAAAGGCTGTGAG

>M6-PGSC0003DMG400028617M6G-LecRK\_2196

AGGAGAACAAATGCAATTCCAAATCTTAAGGGCTTGACGAATATGGAAAGGCTGTGAGTAGTTGGAA

ATTTAGCTATTACATCTCTTCATTTTAATTTTGTATTCTCATGGTTCTTTAG

>M6-PGSC0003DMG400028617M6G-LecRK\_2257

GTTGGAAATTTAGCTATTACATCTCTTCATTTTAATTTTGTATTCTCATGGTTCTTTAGTTTGACTCAGGAC

TTTGAGAAATTGCTCAATTTTGGTCCGATTCCGAGATATGTAGGTGA

>M6-PGSC0003DMG400028617M6G-LecRK\_2318

TGACTCAGGACTTTGAGAAATTGCTCAATTTTGGTCCGATTCCGAGATATGTAGGTGACATGCCTTTGA

AACTTTTGTAAGTTTGTCACTCCTCTTTCGAAAAAAAATTAATTTTGTCT

>M6-PGSC0003DMG400028617M6G-LecRK\_2379

TGCCTTTGAAACTTTTGTAAAGTTTGTCACTCCTCTTTCGAAAAAAAATTAATTTTGTCTGTAATGCAAACC

TGGAATTACCCTATATTGTATAAAAGGAAAATCTTCTACATACCAATG

>M6-PGSC0003DMG400028617M6G-LecRK\_244

GTTAAACAGATGCCATCTTCTGCATCATGTAATGAGAATTTCTTACGCTTTTTTTTGTGATACAGCCAATT

GAAGCGTCTTAATATGACAGGAATTCTGCCTCCAGAATTTGCAAATCTT

>M6-PGSC0003DMG400028617M6G-LecRK\_2440

TAATGCAAACCTGGAATTACCCTATATTGTATAAAAGGAAAATCTTCTACATACCAATGCATTCGTCGTAT

TTGCATGATGGAGCAAAGATTTTCACTAATTGTCTGGATACCACAGTGA

>M6-PGSC0003DMG400028617M6G-LecRK\_2501

TTCGTCGATTTGCATGATGGAGCAAAGATTTTCACTAATTGTCTGGATACCACAGTGATTTGCTTTGATG

TCTGGTTTGATGCTAATCCTACCTGCTTCTGATAAGAGTTATTTACTTG

>M6-PGSC0003DMG400028617M6G-LecRK\_2562

TGCTTTGATGTCTGGTTTGATGCTAATCCTACCTGCTTCTGATAAGAGTTATTTACTTGCAGGGACCTGAG

TAACAATATGTTGAATGATACAATCCCAGATACATTTGAGAAGTTGGAT

>M6-PGSC0003DMG400028617M6G-LecRK\_2623

GGGACCTGAGTAACAATATGTTGAATGATACAATCCCAGATACATTTGAGAAGTTGGATTTTGATAACAT  
GTAGGTACCTTGCAAGTGAAACTTTTACAAGTTGAAGCATAAATCTTGTA

>M6-PGSC0003DMG400028617M6G-LecRK\_2684

TGATAACATGTAGGTACCTTGCAAGTGAAACTTTTACAAGTTGAAGCATAAATCTTGACATGTTTGTTTT  
TTTTCTTTTCTCTCAAAATTTTCATTTCGGTTATAACAAGCAAAAGTTTT

>M6-PGSC0003DMG400028617M6G-LecRK\_2745

TGTTTGTTTTTTTTCTTTTCTCTCAAAATTTTCATTTCGGTTATAACAAGCAAAAGTTTTATCTGCAATGTAG  
GTTGCTTGGTAACAACACATTAAGCGGAGCAATCCCAGCAGGATGTT

>M6-PGSC0003DMG400028617M6G-LecRK\_2806

CTGCAATGTAGGTTGCTTGGTAACAACACATTAAGCGGAGCAATCCCAGCAGGATGTTGAGTATGAGT  
GGTAGAAAGAACATGTTGGTATTTGCTCAATTTGTTCCGTTTTCTCATCT

>M6-PGSC0003DMG400028617M6G-LecRK\_2867

GTATGAGTGGTAGAAAGAACATGTTGGTATTTGCTCAATTTGTTCCGTTTTCTCATCTTAGTAGTAAATT  
TTGGTTATTATTATAGTTAGCCACACTTCAAAGTTAACAGTTATTTTCC

>M6-PGSC0003DMG400028617M6G-LecRK\_2928

GTAGTAAATTTGGTTATTATTATAGTTAGCCACACTTCAAAGTTAACAGTTATTTTCCCATAGCTTTTTGT  
TACTGCAAGGACACATTTACAAGAATTTGATGGCGTCGACAACATA

>M6-PGSC0003DMG400028617M6G-LecRK\_2989

TAGCTTTTTGTTTACTGCAAGGACACATTTACAAGAATTTGATGGCGTCGACAACATAATTTTATGCAGT  
GATTTATCATAACAATTTACCCATACATCTACTCCAGAATGCCAGC

>M6-PGSC0003DMG400028617M6G-LecRK\_305

ACAGCCAATTGAAGCGTCTTAATATGACAGGAATTCTGCCTCCAGAATTTGCAAATCTTACTCATCTGCA  
AGAATTGTGAGTATCAGTTATAGTTTTTTCTCCCCTTCCGATTACAGAA

>M6-PGSC0003DMG400028617M6G-LecRK\_3050

TTTATGCAGTGATTTATCATAACAATTTACCCATACATCTACTCCAGAATGCCAGCACTCTACCGTGT  
GAGCATTATATATTATTGCTTTTTTTATTAGTGAGAGTTTCGGTCCTT

>M6-PGSC0003DMG400028617M6G-LecRK\_3111

TCTACCGTGTGAGCATTATATATTATTGCTTTTTTTATTAGTGAGAGTTTCGGTCCTTAACTGCATAACT  
TACTAACATTCTTTCTTTAATAGAAACATAGCCGCCAGCTATTCAGGT

>M6-PGSC0003DMG400028617M6G-LecRK\_3172

ACTGCATAACTTACTAACATTCTTTCTTTAATAGAAACATAGCCGCCAGCTATTCAGGTATAATGAACACG  
TTCAAAAACACGTAAGTCTTCTAAATGTTGTCTTATGCATCAGGTGCT

>M6-PGSC0003DMG400028617M6G-LecRK\_3233

AATGAACACGTTCAAAAACACGTAAGTCTTCTAAATGTTGTCTTATGCATCAGGTGCTAGTTTGTGGAT  
GCCTTCTATCTATTGTCTGGGCTTAATCTATTGAAATTGTAGGGATGCC

>M6-PGSC0003DMG400028617M6G-LecRK\_3355

GTGTTCCATGAAACCCCTCATTGTCCCACAGAAGCGAAATGTAAGAGTTACATCCTATTAACCTTTTCTT  
TTTTATACCTGAAAATTCATAAATGAAGTAGCAGTTTGTCAAAGGACCT

>M6-PGSC0003DMG400028617M6G-LecRK\_3416

ACCTTTTCTTTTTTATACCTGAAAATTCATAAATGAAGTAGCAGTTTGTCAAAGGACCTCAGGGGTTATGT  
CTGGATCGTTTACCACTGAATCGACTCTTGGAGTGGCAGACTGTGGAGT

>M6-PGSC0003DMG400028617M6G-LecRK\_3477

GGGGTTATGTCTGGATCGTTTACCACTGAATCGACTCTTGGAGTGGCAGACTGTGGAGTTTGAAGTACA  
AAAGCATAGCCTTGGAGTTGAGAGATAATTTACAACCCTTCCTCATGTTA

>M6-PGSC0003DMG400028617M6G-LecRK\_3538

GAAGTACAAAAGCATAGCCTTGGAGTTGAGAGATAATTTACAACCCTTCCTCATGTTATGGTCTTTATG  
TCAATTGCAGATACTTCTCTATTCATAAACTGTGGAGGAGGTAGAACTAC

>M6-PGSC0003DMG400028617M6G-LecRK\_3599

GTCTTTATGTCAATTGCAGATACTTCTCTATTCATAAACTGTGGAGGAGGTAGAACTACATTTGAGGGAA  
ATGATTATGAGGAGGACAAGATCAGTTCGGGTCCATCATATTTTTCTTCG

>M6-PGSC0003DMG400028617M6G-LecRK\_366

TCATCTGCAAGAATTGTGAGTATCAGTTATAGTTTTTTCTCCCCTTCCGATTACAGAACTTTTATTCAAT  
TGTTTTTATAAAATCGTAACAGTAGTAGCAAGTTAACTGTTTGTGGCT

>M6-PGSC0003DMG400028617M6G-LecRK\_3660

TTGAGGGAAATGATTATGAGGAGGACAAGATCAGTTCGGGTCCATCATATTTTTCTTCGTCCTCCGATAA  
ATGGGCATTCAGCAGTTCAGGAGGTACATGGGTGACAAAATAGCTATA

>M6-PGSC0003DMG400028617M6G-LecRK\_3721

CTCCGATAAATGGGCATTCAGCAGTTCAGGAGGTACATGGGTGACAAAATAGCTATATTGCAACAAA

TACATTTTCACTGGATGTGTCCGGTCCTGACTTTTACAACACAGCACGCCT

>M6-PGSC0003DMG400028617M6G-LecRK\_3782

GCAACAAATACATTTTCACTGGATGTGTCCGGTCCTGACTTTTACAACACAGCACGCCTTGCCCCGAATTC

TCTCAAATATTATGGGCTTTGTCTACGAGAAGGTATCTACAGAGTGCGC

>M6-PGSC0003DMG400028617M6G-LecRK\_3965

TTTGATGTAGCAATACAAGTAAGTTTGAGGCCTAACTTCTTTTGTAATAATAAATATGTAATCTAAAATG

TCGATTTATTAGTTCTGATATGATTTGGCCACTTTCTGGTACTTGATG

>M6-PGSC0003DMG400028617M6G-LecRK\_4026

ATCTAAAATGTCGATTTATTAGTTCTGATATGATTTGGCCACTTTCTGGTACTTGATGTAGATATACCGA

ATTCTGATATGATTGGCAACTTTCTGATTTAATATTGAATGTTGGAGAT

>M6-PGSC0003DMG400028617M6G-LecRK\_4087

GATATACCGAATTCTGATATGATTGGCAACTTTCTGATTTAATATTGAATGTTGGAGATAATTTTGATTTTC

TTACACAGGGGAGAGTAGTTTTGAAGGATTTCAACATCATGGAGAAAGC

>M6-PGSC0003DMG400028617M6G-LecRK\_4148

TTTTGATTTCTTACACAGGGGAGAGTAGTTTTGAAGGATTTCAACATCATGGAGAAAGCTAATGGTGTGG

GAAAAGGTCATACCGAGGACTTTGATGATATTACTGTTAGTAGCACTCTG

>M6-PGSC0003DMG400028617M6G-LecRK\_4209

ATGGTGTGGAAAAGGTCATACCGAGGACTTTGATGATATTACTGTTAGTAGCACTCTGGAGATTCACTT

GTATTGGACCGGGAAGGGGACTAACGCCATTCCAGAAAGAGGTGTATATG

>M6-PGSC0003DMG400028617M6G-LecRK\_427

TTTTATTCAATTGTTTTTATAAAATCGTAACAGTAGTAGCAAGTTAACTGTTTGCTTTTATTATACCC

TTCGAGGTGGCCTAGTGGTCTGGGCTTGGGAATTCCATGTCGGAGGTC

>M6-PGSC0003DMG400028617M6G-LecRK\_4331

CCTCTGATTTAGCTATCACAGTGACACCAAGTCCGTTTATCTCTCTCTGCCTATAGACTTTACACTTTTCT

TCCCTCCCACAATCTTATCCCATTTTCTTCTTGCAGACTTTAACACAG

>M6-PGSC0003DMG400028617M6G-LecRK\_4392

TACACTTTTCTTCCCTCCCACAATCTTATCCCATTTTCTTCTTGCAGACTTTAACACAGGCTACGGGTTACC

TGTCGGAGCTGTTATTGGCATTGTACTTGCTTCAATTGTGGTGGTTCT

>M6-PGSC0003DMG400028617M6G-LecRK\_4453

TACGGGTTACCTGTCGGAGCTGTTATTGGCATTGTACTTGCTTCAATTGTGGTGGTTCTGATAGTGTTATT  
TGCTCTGTGGAAGAAGGGCATTTTTGGAGGGAAAAATAATGAAGAAGAA

>M6-PGSC0003DMG400028617M6G-LecRK\_4514

TAGTGTTATTTGCTCTGTGGAAGAAGGGCATTTTTGGAGGGAAAAATAATGAAGAAGAATTAGGTAAAC  
ATACCTCAAAGAATTAATTAATCACTCTCTATATTTGATATGGTGATACTT

>M6-PGSC0003DMG400028617M6G-LecRK\_4575

AGGTAAACATACCTCAAAGAATTAATTAATCACTCTCTATATTTGATATGGTGATACTTTTGTGTGATAA  
TCAGAATTATTTACGAGATTTCTAGCTGCGACATACAAATAATAATCTG

>M6-PGSC0003DMG400028617M6G-LecRK\_4636

GTTGTGATAATCAGAATTATTTACGAGATTTCTAGCTGCGACATACAAATAATAATCTGCCTGTAATTGA  
CCAGCATTGAGATGATTGTTCTGTTGGTGGATCGACATCACGACATATCA

>M6-PGSC0003DMG400028617M6G-LecRK\_4697

TGTAATTGACCAGCATTGAGATGATTGTTCTGTTGGTGGATCGACATCACGACATATCATAGATAGTTAG  
CACACAATAAATGCTCATGACTGCTTAAACTATATATCTTCGTCATACA

>M6-PGSC0003DMG400028617M6G-LecRK\_4758

GATAGTTAGCACACAATAAATGCTCATGACTGCTTAAACTATATATCTTCGTCATACAGATGTTTCATTGT  
TGTTTCATACATACAGATGTTTTAGAAGATCTATATATACTGACGTTTGCA

>M6-PGSC0003DMG400028617M6G-LecRK\_4941

CAAATTAAGCTGCTACAAATAAATTTGATCCTGCCAACAAAATTGGTGAAGGAGGGTTTGGACCAGTT  
TACAAGGTATCAAATCTCTATCTATCTCTACCCATACTGATTTTGTGTAAG

>M6-PGSC0003DMG400028617M6G-LecRK\_5002

GACCAGTTTACAAGGTATCAAATCTCTATCTATCTCTACCCATACTGATTTTGTGTAAGGACAGCTTGTGG  
TTCTGTGGTGATATTTCTACTATGCGTAACGCTTATAGGAAAATAGCT

>M6-PGSC0003DMG400028617M6G-LecRK\_5063

CAGCTTGTTCTGTGGTGATATTTCTACTATGCGTAACGCTTATAGGAAAATAGCTGATATAATCCA  
TATCCTACGTTCTTCCCTCCGTGTGTGATATGATCGTTGTGAATTAATCT

>M6-PGSC0003DMG400028617M6G-LecRK\_5124

TATAATCCATATCCTACGTTCTTCCCTCCGTGTGTGATATGATCGTTGTGAATTAATCTTGCTATCTGTAGG  
GTGTAICTCGCGGATGGTGCAGTGATAGCTGTTAAGCAGCTGTCTTCCA



>M6-PGSC0003DMG400028617M6G-LecRK\_5185

CTATCTGTAGGGTGTACTCGCGGATGGTGCAGTGATAGCTGTTAAGCAGCTGTCTTCCAAGTCAAAGCA  
AGGAAATCGTGAATTTGTCAATGAGATAGGCATGATTCAGGTCTACAACA

>M6-PGSC0003DMG400028617M6G-LecRK\_5307

CAAACCTTGTCAAGCTTTACGGTTGTTGTATAGAAGGGAACCAGTTATTAGTGATATACGAATACATGGA  
AAATAACTGTCTTGCTCGAGCTCTCTTTGGTAATGCTTTGCAATACCATT

>M6-PGSC0003DMG400028617M6G-LecRK\_5368

ATACATGGAAAATAACTGTCTTGCTCGAGCTCTCTTTGGTAATGCTTTGCAATACCATTTTGAAAATTATT  
AATCATGTAATGATAATTTTATGCTTATTAGTCCTCGTATTCTCCTTTC

>M6-PGSC0003DMG400028617M6G-LecRK\_549

AAGTTCAAACCCCTTTGTCAAGCGAAAAGTACAAGGGGTTTGCCTTCTGCTTGCCTAGTGCGGGTTACC  
TCTCCTGTGTGCATAAGAGTGGGGATTTTACCTGTGGCTTAATCAATTTT

>M6-PGSC0003DMG400028617M6G-LecRK\_5551

ATAGCAAAGGGTTAGCTTACCTTCATGAAGAATCAAGGTTGAAAATCGTACACCGAGATATCAAGTGT  
ACCAATGTGCTTCTTGATAAGGATCTTAACGCTAAGATTTCCGATTTTGGGA

>M6-PGSC0003DMG400028617M6G-LecRK\_5612

TCAAGTGTACCAATGTGCTTCTTGATAAGGATCTTAACGCTAAGATTTCCGATTTTGGATTAGCTAAATTA  
GATGAAGAAGAGAACACTCATATTAGCACCCGAATTGCTGGAACAGTGT

>M6-PGSC0003DMG400028617M6G-LecRK\_5673

AGCTAAATTAGATGAAGAAGAGAACACTCATATTAGCACCCGAATTGCTGGAACAGTGTGAGCCTTCTT  
ATCATAACTATCTCTGTACTATCATTGAAATTTGTTTCGTCATGGTCAGTTT

>M6-PGSC0003DMG400028617M6G-LecRK\_5734

GCCTTCTTATCATAACTATCTCTGTACTATCATTGAAATTTGTTTCGTCATGGTCAGTTTGAAGTATCTTACA  
TTTCTTTTTCCGTTTTTGAAGAGGTTATATGGCTCCCGAGTATGCAAC

>M6-PGSC0003DMG400028617M6G-LecRK\_5795

AGTATCTTACATTTCTTTTTCCGTTTTTGAAGAGGTTATATGGCTCCCGAGTATGCAACGAGAGGCTACTT  
GACAGATAAAGCTGATGTTTATAGCTTCGGAGTCGTTGCATTGGAGATT

>M6-PGSC0003DMG400028617M6G-LecRK\_5856

GAGGCTACTTGACAGATAAAGCTGATGTTTATAGCTTCGGAGTCGTTGCATTGGAGATTGTCAGTGGGA

AAAGCAACACAAACTACAGGCCAAAAGAGGAATTTGTTTACCTTCTTGACT

>M6-PGSC0003DMG400028617M6G-LecRK\_6039

AAATGTCTTTGTTACTTTCTTAAACTCTGTACGGAGGGATCTTGCATATTTAGTTTTCTTTCTGTAGCT

AATTCATGTTTGCTATGTATGTGAATGTTTGTTTAGGCTTATGTCC

>M6-PGSC0003DMG400028617M6G-LecRK\_61

GCCGAGCGTCTTGTATGCAGGAGAGGGATTTTAAACATGACGGATCCTAATTATAAAGAAGTTTTAGCA

ATGTAAAATGTAATTGTTCAATAATGGCTCAGTTTGCCATGTTGTAA

>M6-PGSC0003DMG400028617M6G-LecRK\_610

CGGGTTACCTCTCCTGTGTGCATAAGAGTGGGGATTTTACCTGTGGCTTAATCAATTTTTGCATTTCCAGA

GATCTGACTCGTAATTACTTAAGTGGATCGATTCCCTCAAGCTATGGCC

>M6-PGSC0003DMG400028617M6G-LecRK\_6100

TTTCTGTAGCTAATTCATGTTTGCTATGTATGTGAATGTTTGTTTTAGGCTTATGTCCTACAAGAACAGG

GAAATCTGTTAGAACTAGTGGATTCACATCTCGGTTCCAATTACTCCAA

>M6-PGSC0003DMG400028617M6G-LecRK\_6161

CAAGAACAGGGAAATCTGTTAGAACTAGTGGATTCACATCTCGGTTCCAATTACTCCAAAAAAGAGGCA

ATGCAGATGATAAATCTTTCTTTTTGTGCACAAATCTCTCCTACTCTC

>M6-PGSC0003DMG400028617M6G-LecRK\_6283

ACCATCCATGTCTTCTGTGGTGAGTATGCTCGAAGGGAAACTCCCCGTGCAAGCACCAATAATCAAGCT

GACTACATCAACCAACGAAATGAGATTTAAATCGTTTGAAAAAATTTTACA

>M6-PGSC0003DMG400028617M6G-LecRK\_6344

ATCAAGCTGACTACATCAACCAACGAAATGAGATTTAAATCGTTTGAAAAAATTTTACATGACAGCCAAA

CAACATACTCTCAAGAGTCTCAAGGACAAGCACCTTGAATGATTCGTCA

>M6-PGSC0003DMG400028617M6G-LecRK\_6405

ACAGCCAAACAACATACTCTCAAGAGTCTCAAGGACAAGCACCTTGAATGATTCGTGAGGGTCAGGGT

CTCTGCCTGCTAAAGATGAAAAGTTTAGTTCCTCGAGTACACTTCTCCAG

>M6-PGSC0003DMG400028617M6G-LecRK\_6466

GTCAGGGTCTCTGCCTGCTAAAGATGAAAAGTTTAGTTCCTCGAGTACACTTCTCCAGATCTTTATGATA

TAAACATAGATTGATTTTGATTTTGATTTTACACAGGATCAAATATTT

>M6-PGSC0003DMG400028617M6G-LecRK\_671

CATTTCCAGAGATCTGACTCGTAATTAAGTGGATCGATTCCCTCAAGCTATGGCCAGCTTCGCGTC  
ACTATTTTGTAAGTTCTTTTCTTGTTAATCTTTTCATTGAAGAATTTT

>M6-PGSC0003DMG400028617M6G-LecRK\_732

CTTCGCGTCACTATTTTGTAAGTTCTTTTCTTGTTAATCTTTTCATTGAAGAATTTTGGACATTTTGTTCAA  
ACTCAGGTCACTCTTGGGTAACCGTATCAGTGGACCGATTCCGAAGG

>M6-PGSC0003DMG400028617M6G-LecRK\_793

CATTTTGTTCAAACACTCAGGTCACTCTTGGGTAACCGTATCAGTGGACCGATTCCGAAGGAGTTAGGTGAC  
ATTTTCACACTGGAAAACTGTAAGTTGAAGATATTGCATACTTCCTTTA

>M6-PGSC0003DMG400028617M6G-LecRK\_854

TTAGGTGACATTTTCACACTGGAAAACTGTAAGTTGAAGATATTGCATACTTCCTTTAATTTTCTACATA  
TGTCACATTCATGAATTCCATATTTTCAGAGTTTTGGAAAATAATCTAC

>M6-PGSC0003DMG400028617M6G-LecRK\_915

TTTCTACATATGTCACATTCATGAATTCCATATTTTCAGAGTTTTGGAAAATAATCTACTTGAAGGACCTCT  
TCCTCCGAACCTTGGTAGCTTGAACCGCCTCAGAGAAATGTAAGACAT

>M6-PGSC0003DMG400028617M6G-LecRK\_976

GAAGGACCTCTTCCTCCGAACCTTGGTAGCTTGAACCGCCTCAGAGAAATGTAAGACATAGTAACCATAT  
ATTC AACGTTTAATATCTACTTATTGTTATATCTATTCCAAATTATTTGG

>M6-PGSC0003DMG400028627M6LRR-RLP\_0

GTCATTGCCATAAATATTTATATTATGTCACTTATAAACACCCCTACAAATACAACCAAGTTTGTCACTTC  
ATTCATAGTCCAAAATGGCCTTTTTTCTCTCAATACAAATAACACTAC

>M6-PGSC0003DMG400028627M6LRR-RLP\_1054

CGATGGTTTCAACAACCTTAATGATTTTAGGATTATCAAACATGAACCTTCAAGGTCCAATACCAAATTCAC  
TAGGCCTATTACCTATGCTACGAGTCCTTCATCTCGATGGGAACAAGTT

>M6-PGSC0003DMG400028627M6LRR-RLP\_1116

CAAATTCAGTGGCCTATTACCTATGCTACGAGTCCTTCATCTCGATGGGAACAAGTTAAATGGTTTCGAT  
CCCATCGAGTTTTGGTAATTTAAATAACATAAGTGAGCTTAGGCTAAATA

>M6-PGSC0003DMG400028627M6LRR-RLP\_1178

GGTTCGATCCCATCGAGTTTTGGTAATTTAAATAACATAAGTGAGCTTAGGCTAAATAACATGTTGA  
GTGGTCCTATTCCATTTAAAAGAGACATGGTTTGGAGAATGAGAAGGAAA

>M6-PGSC0003DMG400028627M6LRR-RLP\_124

ATCTTTTTCTTCTTCTCTAGGATTGTCATTCACCGTTATAATGTCGGATTCCGGTGCACCTTCAGCTCT  
AGTTGATGCTCCACAACTGGTTTCTCGATGAATAATAATCGTGCACG

>M6-PGSC0003DMG400028627M6LRR-RLP\_1240

CATGTTGAGTGGTCCTATTCCATTTAAAAGAGACATGGTTTGGAGAATGAGAAGGAAAATGAAGCTTTC  
AAATAATGAAGGGCTTTGTTACAATAAAGAAAATGGGCTTGGAGATGATTT

>M6-PGSC0003DMG400028627M6LRR-RLP\_1302

AGCTTCAAATAATGAAGGGCTTTGTTACAATAAAGAAAATGGGCTTGGAGATGATTTAGAGACATTGT  
TGGATTCAGGGATTGGACATTGTGGGGACTCTAAAACAGAGCCAATAAAAA

>M6-PGSC0003DMG400028627M6LRR-RLP\_1364

ACATTGTTGATTGAGGGATTGGACATTGTGGGGACTCTAAAACAGAGCCAATAAAAACAGTACAACAC  
ATTTCAACACTCAACAGAGCAAGTTTTGTAAGATCAAATAGCTACAAATTA

>M6-PGSC0003DMG400028627M6LRR-RLP\_1426

ACAACACATTTCAACACTCAACAGAGCAAGTTTTGTAAGATCAAATAGCTACAAATTATTATCATCTCTTG  
GATGCTTGCTTTGGTCAGCTTTAGTTTTTGTGTAGTTTGTGTTGTG

>M6-PGSC0003DMG400028627M6LRR-RLP\_1481

TTATTATCATCTCTTGGATGCTTGCTTTGGTCAGCTTTAGTTTTTGTGTAGTTTGTGTTGTGAGTGTTT  
AGAGATTTTGGTACAGTTTTTTTTCTCCTTCTGTTTTAAATGTAAC

>M6-PGSC0003DMG400028627M6LRR-RLP\_186

CTTCAGCTCTAGTTGATGCTCCACAACTGGTTTCTCGATGAATAATAATCGTGCACGAACCGATCCTCGT  
GAGCAAGAAGCCGTTTACGACATTATGAGGGCTACGGGGAACGATTGGG

>M6-PGSC0003DMG400028627M6LRR-RLP\_248

GATCCTCGTGAGCAAGAAGCCGTTTACGACATTATGAGGGCTACGGGGAACGATTGGGCCACCGATAT  
CCCTGATGTTTGTCTGGTTCGATGGCATGGTATTGAGTGCATGCCGGATAAT

>M6-PGSC0003DMG400028627M6LRR-RLP\_310

CGATATCCCTGATGTTTGTCTGGTTCGATGGCATGGTATTGAGTGCATGCCGGATAATGACAATGTGTA  
CCATGTTGTGTCACCTTCTTCGGCGCATTGTCTGATGACACAGCATTTC

>M6-PGSC0003DMG400028627M6LRR-RLP\_372

ATGTGTACCATGTTGTGTCACCTTCTTCGGCGCATTGTCTGATGACACAGCATTTCCTACGTGTTACTCA

AGTCATTCGTTCAATTCACCTTCAGTTAGGAACTTCCACACCTTCGGA

>M6-PGSC0003DMG400028627M6LRR-RLP\_434

TGTTACTCAAGTCATTCGTTCAATTCACCTTCAGTTAGGAACTTCCACACCTTCGGACTTTATTCTTCTAT  
CGTTGCTTTAGTAACAATCCTCAGCCCATTCCAGGATTTCTAGCCCAA

>M6-PGSC0003DMG400028627M6LRR-RLP\_496

ATTCTTCTATCGTTGCTTTAGTAACAATCCTCAGCCCATTCCAGGATTTCTAGCCCAATTAGGGCCCACTTT  
GCAAACACTAGTTTTAAGGGAAAATGGGTTACAGGGACCATTCTCTAA

>M6-PGSC0003DMG400028627M6LRR-RLP\_558

GGCCCACTTTGCAAACACTAGTTTTAAGGGAAAATGGGTTACAGGGACCATTCTCTAATGAATTGGGTA  
ACCTAACTCATTTGAGAGTTCTAGATCTTCACAAAACAATCTTAATGGTT

>M6-PGSC0003DMG400028627M6LRR-RLP\_62

TTGTCACTTCATTCATAGTCCAAAATGGCCTTTTTTCTCTCAATACAAATAACACTACTACTATCTTTTTTCT  
TCTTTCCTCTAGGATTGTCATTCACCGTTATAATGTCGGATTCCGGT

>M6-PGSC0003DMG400028627M6LRR-RLP\_620

TTGGGTAACCTAACTCATTTGAGAGTTCTAGATCTTCACAAAACAATCTTAATGGTTCAATACCGATCTC  
TCTGGGCCGGATCATCGGTTTGAAGTCATTAGATTTGAGTGACAACAAA

>M6-PGSC0003DMG400028627M6LRR-RLP\_682

ACCGATCTCTCTGGGCCGGATCATCGGTTTGAAGTCATTAGATTTGAGTGACAACAACTAACCGGTTCA  
ATTCCAAGTTTAACTTCCCTCAGTTAAATATCTTGGACCTTAACCAAAA

>M6-PGSC0003DMG400028627M6LRR-RLP\_744

CCGGTTCAATTCCAAGTTTAACTTCCCTCAGTTAAATATCTTGGACCTTAACCAAAAATCACCTTACGGGT  
TCAATTCCATCCACACTCATGAGCTGTCATTCGCTTATAAAGCTAGACC

>M6-PGSC0003DMG400028627M6LRR-RLP\_806

CTTACGGGTTCAATTCCATCCACACTCATGAGCTGTCATTCGCTTATAAAGCTAGACCTGAGCCGTAATCA  
CCTCTCTGGTTCAATACCTGACTCGATCCACAACCTTAAACAACCTCATC

>M6-PGSC0003DMG400028627M6LRR-RLP\_868

CCGTAATCACCTCTCTGGTTCAATACCTGACTCGATCCACAACCTTAAACAACCTCATCCTTTTGGATTAA  
GCTACAATAGTCTAACAAGCCCATTCCAAACGTTACTCAAGAAATTGAA

>M6-PGSC0003DMG400028627M6LRR-RLP\_930

TGGATTTAAGCTACAATAGTCTAACAAGCCCATTCCAAACGTTACTCAAGAAATTGAATTCTCTACAAACC  
TTAGTCCTCAATGGAAATCCAATGGACTCAGCTACTCTATCGGATAACG

>M6-PGSC0003DMG400028627M6LRR-RLP\_992

CTACAAACCTTAGTCCTCAATGGAAATCCAATGGACTCAGCTACTCTATCGGATAACGTCTTCGATGGTTT  
CAACAACTTAATGATTTTAGGATTATCAAACATGAACCTTCAAGGTCCA

>M6-PGSC0003DMG400028630M6LRR-RLP\_0

ATACAACACATTTAAATCTTCAATTAGTACAAAATACATTAATAGTAAAAGCAGATCACTCTGGTTCT  
GCTCTCCGCCGTCGCCGGCAGTCTTCGTTGAGGTTTGATCGGTTCTCTT

>M6-PGSC0003DMG400028630M6LRR-RLP\_1037

AAAAATGTTTTTTTTTTGGTAAACCGTGAAGAATTACCATTGACAGCCAAAAATTTACACCTATAGAGCA  
CTTTAGGTAGAGGAGCCATCTTCCAGGAAGGGTACCCTTTCCTCTAAAGC

>M6-PGSC0003DMG400028630M6LRR-RLP\_1098

TATAGAGCACTTTAGGTAGAGGAGCCATCTTCCAGGAAGGGTACCCTTTCCTCTAAAGCCTCAAACAAA  
GACAAATCTAGTTACAAAATTTCTGAACCAAATATCTACATTTACTTGCTT

>M6-PGSC0003DMG400028630M6LRR-RLP\_1159

CAAACAAAGACAAATCTAGTTACAAAATTTCTGAACCAAATATCTACATTTACTTGCTTTCCTACTATCCTT  
CAGGTAATCCACTCTTCCACTATCTCTTCTTTATCTGTGTGATTGT

>M6-PGSC0003DMG400028630M6LRR-RLP\_122

CTTTTATTTTCATATAGAAGAACAATAAACCAAATCAAACCTAAATTTGAGCTATTATTTATCACCGGGGT  
TTTTTTTTTTAGGGGAAACTGAAATTCCTCATGAAACCCTAAATTAAGA

>M6-PGSC0003DMG400028630M6LRR-RLP\_1220

CTACTATCCTTCAGGTAATCCACTCTTCCACTATCTCTTCTTTATCTGTGTGATTGTAATCTATGTATTTT  
TTTTTTGAAACTGGTAACTATATATTTTAAATTACACCATAACAGTG

>M6-PGSC0003DMG400028630M6LRR-RLP\_1281

TCTATGTATTTTTTTTTTTGAAACTGGTAACTATATATTTTAAATTACACCATAACAGTGCAAAGACATTAC  
AAAATCCCAACCAAGCTTAGGCTACTGCTTCACAAGGATCCTATCATA

>M6-PGSC0003DMG400028630M6LRR-RLP\_183

TCACCGGGGTTTTTTTTTTAGGGGAAACTGAAATTCCTCATGAAACCCTAAATTAAGAAATGAATGGGT  
TTTTGATTGTATGGTAGAGATGGAATTTGCAACTAGAATAAGAAAATCTC

>M6-PGSC0003DMG400028630M6LRR-RLP\_244

TGAATGGGTTTTTGGATTGTATGGTAGAGATGGAATTTGCAACTAGAATAAGAAAATCTCATGCTTATATT  
ATTCATGTACAAAGAGCTTGTGATTTGATCTGTATGTAATTGTTGTTTGG

>M6-PGSC0003DMG400028630M6LRR-RLP\_2928

AATAGCTCTCAGATGTAATCTATGTATTTAGTATTGTCCCTCTGAATAGTTTCCAATTTCTTGCTCTCCAAG  
TGGATAGATTCTGGCTCCCATATAGCTGTAGCTATTTCTTCTTATA

>M6-PGSC0003DMG400028630M6LRR-RLP\_2989

TGCTCTCCAAGTGGATAGATTCTGGCTCCCATATAGCTGTAGCTATTTCTTCTTATATTGCTTCCAGTGT  
CTTCTTTTATCCATTTTAGGCATTAGCACTTCCGTTTTTTGTATTTT

>M6-PGSC0003DMG400028630M6LRR-RLP\_305

GCTTATATTATTCATGTACAAAGAGCTTGTGATTTGATCTGTATGTAATTGTTGTTTGGTAGAGATGGACT  
TTGCAACTAGAATATAAAATGAATTCTATTTTTATTTTTTACGATCTG

>M6-PGSC0003DMG400028630M6LRR-RLP\_3050

GCTTCCAGTGTCTTCTTTTATCCATTTTAGGCATTAGCACTTCCGTTTTTTGTATTTAATACACGACCAA  
GTCTCCAGTGTCTTCTTCACTTTTGTGTCCAGGTATATTCTGCAAAT

>M6-PGSC0003DMG400028630M6LRR-RLP\_3111

TACACGACCAAGTCTCCAGTGCTTCTTCACTTTTGTGTCCAGGTATATTCTGCAAATAAATGTACTTGA  
GTCTCCAATTTGCTTTCTCCACATAGGCAACACTTGTTCATCTTCTATTG

>M6-PGSC0003DMG400028630M6LRR-RLP\_3172

ATGTACTIONGAGTCTCCAATTTGCTTTCTCCACATAGGCAACACTTGTTCATCTTCTATTGGCATTGTCAGTCT  
GATCATCCTCTCTTTGTTAGCAGTTTTTCTGATTTGCTAGCCATAA

>M6-PGSC0003DMG400028630M6LRR-RLP\_3233

ATTTGCAGTCTGATCATCCTCTCTTTGTTAGCAGTTTTTCTGATTTGCTAGCCATAAAATAAACCTGTGT  
CTAGGCAGCATGAGTGAGTTCCATATCAAGTCTGCTACAGGTAGTTTC

>M6-PGSC0003DMG400028630M6LRR-RLP\_3294

TAAACCTGTGTCTAGGCAGCATGAGTGAGTTCCATATCAAGTCTGCTACAGGTAGTTTCAACTGCCTACC  
CAGTAATTGGTTGTAACACTACAACACTCACATTATATGCTCCATTGGTCAATA

>M6-PGSC0003DMG400028630M6LRR-RLP\_3355

CTGCCTACCCAGTAATTGGTTGTAACACTACAACACTCACATTATATGCTCCATTGGTCAATAGACAGTAGGTTT

CATTAGTATACCACATTCCCATGGTTAGTTTAATGGAGTTGAGCTTCCT

>M6-PGSC0003DMG400028630M6LRR-RLP\_3416

CAGTAGGTTCCATTAGTATAACCACATTCCCATGGTTAGTTTAATGGAGTTGAGCTTCCTCCAATACCAGCT  
GCTATCCTTAGAGGGTGTATGTGTCCAAAAATCTTGCTCGTCTTTCATA

>M6-PGSC0003DMG400028630M6LRR-RLP\_3477

AATACCAGCTGCTATCCTTAGAGGGTGTATGTGTCCAAAAATCTTGCTCGTCTTTCATATATAGTCCATGC  
ACCCATCTTATCCATGGTGTATCTGCCTTGCTAGCAATCTGCCATATCA

>M6-PGSC0003DMG400028630M6LRR-RLP\_3538

TAGTCCATGCACCCATCTTATCCATGGTGTATCTGCCTTGCTAGCAATCTGCCATATCAACTTACCAACTG  
ATGCAATATTCCATAACTTGCATCTCTTGATGTTCACTCCACCATTCTT

>M6-PGSC0003DMG400028630M6LRR-RLP\_3599

TTACCAACTGATGCAATATTCCATAACTTGCATCTCTTGATGTTCACTCCACCATTCTTCTTTGGCACACAA  
ATCTTCTCCCACGATACAAGGACTACCTTCTCTTGTTCTCCTTATTT

>M6-PGSC0003DMG400028630M6LRR-RLP\_3660

TTGGCACACAAATCTTCTCCCACGATACAAGGACTACCTTCTCTTGTTCTCCTTATTTCTCATAGATAAT  
CCCTACATTTTATATCAACCTCTTTCAAAATACTTTGAGGCAAGATGA

>M6-PGSC0003DMG400028630M6LRR-RLP\_3721

TCATAGATAATCCCTACATTTTATATCAACCTCTTTCAAAATACTTTGAGGCAAGATGAAAACATTGCTCC  
AAAAGTTATAGAGCGAGAAGAGTGCAGCATTTATGACCTGCAATCTGCC

>M6-PGSC0003DMG400028630M6LRR-RLP\_3782

ACATTGCTCCAAAAGTTATAGAGCGAGAAGAGTGCAGCATTTATGACCTGCAATCTGCCTGCACATGAC  
AATGTTTTTTGAATATGCACCAGTAATCCTGTTGGTTATCTTGTTGATCAGT

>M6-PGSC0003DMG400028630M6LRR-RLP\_3843

CACATGACAATGTTTTTTGAATATGCACCAGTAATCCTGTTGGTTATCTTGTTGATCAGTTGATGGCAATCT  
ATCTTTGTCCATTTCTTTGATGATAATGGCAAGCCCAAATATCTGATAG

>M6-PGSC0003DMG400028630M6LRR-RLP\_3904

ATGGCAATCTATCTTTGTCCATTTCTTTGATGATAATGGCAAGCCCAAATATCTGATAGGAAGATCACCTA  
GTGTAATCCTGTCAGCTGCAATATTTTTTCCTTCATAACATCATCCAC

>M6-PGSC0003DMG400028630M6LRR-RLP\_3965



AGATCACCTAGTGTAATCCTGTCAGCTGCAATATTTTTTCCTTCATAACATCATCCACCCCAGCTACAAA  
TATATTAGACTTGTCCAGATTTGCCACAAGGCCTGTCACCCTACTGAAA

>M6-PGSC0003DMG400028630M6LRR-RLP\_4392

AGCCGTGAAGGTTTCTGGAAAACCATATCCATGAAGTGCCTCCTCAATAAACTCCCAAGATACCATATCA  
TATGCTTTCCGAGAACAAAAATGTTGTTGTACAGGTTCTGGGGGTTTCAGT

>M6-PGSC0003DMG400028630M6LRR-RLP\_4453

ACCATATCATATGCTTTCCGAGAACAAAAATGTTGTTGTACAGGTTCTGGGGGTTTCAGTAATATATTGAA  
GAAACTTTCCATTTAGGGTCCATTTTCATTCTTTTTTTTTTTTTTTGTTTCTT

>M6-PGSC0003DMG400028630M6LRR-RLP\_4514

TATATTGAAGAACTTTCCATTTAGGGTCCATTTTCATTCTTTTTTTTTTTTTTTGTTTCTTTACTCATTTTCTTTT  
GTAATATTTTGGTGCAATTTGGCTTCGATTCCAAAAGTTTAAACAT

>M6-PGSC0003DMG400028630M6LRR-RLP\_4575

CTCATTTTCTTTTGTAATATTTTGGTGCAATTTGGCTTCGATTCCAAAAGTTTAAACATTTTCTATCATGGC  
CCCTTATGTTTTGGCTTCATAATAAGAGACAATTTTTTTGACTCTTTTC

>M6-PGSC0003DMG400028630M6LRR-RLP\_4636

TCTATCATGGCCCCTTATGTTTTGGCTTCATAATAAGAGACAATTTTTTTGACTCTTTTCGGGATACCATTGT  
ATTTCTTAACTGTTTTGGGAGCTTAATTGAACAAAATAAAAAGACATC

>M6-PGSC0003DMG400028630M6LRR-RLP\_4697

GATACCATTGTATTTCTTAACTGTTTTGGGAGCTTAATTGAACAAAATAAAAAGACATCTACTATCATAAT  
GTTCTCCTCTTTTCTTGCTACTGACAGATCAAGACGCCTCTTTGCACAA

>M6-PGSC0003DMG400028630M6LRR-RLP\_4758

CTATCATAATGTTCTCCTCTTTTCTTGCTACTGACAGATCAAGACGCCTCTTTGCACAAATTCTACTATT  
GCTAGTAAGGTGGAAAAAAATCAAATCAGAAAAAGAAAATCAAGCAT

>M6-PGSC0003DMG400028630M6LRR-RLP\_4819

TCTACTATTGCTAGTAAGGTGGAAAAAAATCAAATCAGAAAAAGAAAATCAAGCATGAATCAAGGC  
ACTTTCTCTTCCCCTTAATTTGTCTGATTCTTTCTGGATTACAAACTTGAA

>M6-PGSC0003DMG400028630M6LRR-RLP\_4880

ATCAAGGCACTTTCTCTTCCCCTTAATTTGTCTGATTCTTTCTGGATTACAAACTTGAAGGCTTATTGAGAT  
TTATCAACTTTTCTCTAACAGATAAAGGAAAAATTTAACCCCTTAATAA

>M6-PGSC0003DMG400028630M6LRR-RLP\_4941

CTTATTGAGATTTATCAACTTTTCTCTAACAGATAAAGGAAAAATTTAACCCCTAATAAGATCATTAAAT  
TCTTCTTCACAGATAGAGTAAGCATTGCGGTTGAGGGGGACATAGAAGA

>M6-PGSC0003DMG400028630M6LRR-RLP\_5002

TCATTTAAATTCTTCTTCACAGATAGAGTAAGCATTGCGGTTGAGGGGGACATAGAAGATAGAATTAGT  
GTCCTACCAAGAAATGTTATTGATTGTATCCTTGAGTTCTTGCCTGTTAAA

>M6-PGSC0003DMG400028630M6LRR-RLP\_5063

GAATTAGTGTCTACCAAGAAATGTTATTGATTGTATCCTTGAGTTCTTGCCTGTTAAAGAAGCTGCAAA  
AACTTGACATTGTCCAAAAGCTGGAGATACATTTGGAGCGAGCTTCCAA

>M6-PGSC0003DMG400028630M6LRR-RLP\_5124

AGCTGCAAAAATTGTACATTGTCCAAAAGCTGGAGATACATTTGGAGCGAGCTTCAAAAATGGTGCT  
GGATTACGAGTTTTGTGATGAGTTAATAGACGAGTCTGAATCCAAATTCAG

>M6-PGSC0003DMG400028630M6LRR-RLP\_5185

ATGGTGCTGGATTACGAGTTTTGTGATGAGTTAATAGACGAGTCTGAATCCAAATTCAGAGAAGTAGTA  
GATGGGATTATGTTGCTGCATATGGGCAAGATTGTGAAGTTTGATCTTGAC

>M6-PGSC0003DMG400028630M6LRR-RLP\_5246

AAGTAGTAGATGGGATTATGTTGCTGCATATGGGCAAGATTGTGAAGTTTGATCTTGACGTTAGAGTAG  
AAGATTTAGCTTCATATACAGCTATTGATAGATGGGTTCTTTATGTCACCA

>M6-PGSC0003DMG400028630M6LRR-RLP\_5307

TAGAGTAGAAGATTTAGCTTCATATACAGCTATTGATAGATGGGTTCTTTATGTCACCAGAAACAGTGTC  
AAGAAGCTACACCTTAGAATTTCTAATATTGGTGATCGTACCTATACACT

>M6-PGSC0003DMG400028630M6LRR-RLP\_5368

AACAGTGTCAAGAAGCTACACCTTAGAATTTCTAATATTGGTGATCGTACCTATACACTGCCTCCTTGAT  
ATTTCACTGTTCAACCCTGACACAGTTGAACTTGCTAGATGTTCTTT

>M6-PGSC0003DMG400028630M6LRR-RLP\_5429

CTCCTTGATATTTCACTGTTCAACCCTGACACAGTTGAACTTGCTAGATGTTCTTTAAACCACCTGGTT  
CTTTTCGTGGCTTTCCCAATCTTGTAACCCTTCGGTTGGCATCAGTAA

>M6-PGSC0003DMG400028630M6LRR-RLP\_549

AGTGTTTTTTGGATTTGAAAATCATTTTCTAAAGAGCAAAATGTTTCTTAAGTTTTGAAGTGTTTTGTTTTA

GTTGAAGCAAGTAATTTCTCCTACAATGAAAGGCTTCACAGAGTGCCT

>M6-PGSC0003DMG400028630M6LRR-RLP\_5490

ACCACCTGGTTCTTTTCGTGGCTTTCCCAATCTTGTAACCCTTCGGTTGGCATCAGTAACCTTTTCAGAGC

ATTGTGTTATCAAGGCCCTCTTCTTGCTAATTTGACCTTGAAGTGTG

>M6-PGSC0003DMG400028630M6LRR-RLP\_5551

TTTTCAGAGCATTGTGTTATCAAGGCCCTCTTCTTGCTAATTTGACCTTGAAGTGTGATGGTATGCA

ATACCTAAACATTGTTTCACCAGTGTGAAGTCCTTGATGTTTGTTAC

>M6-PGSC0003DMG400028630M6LRR-RLP\_5612

ATGGTATGCAATACCTAAACATTGTTTCACCAGTGTGAAGTCCTTGATGTTTGTTACCCTCACTCCTAT

ATCGCACTAAATTGCTTCATGAAGTCAAGAATTTGAGAGATTTAGGAC

>M6-PGSC0003DMG400028630M6LRR-RLP\_5673

TCACTCCTATATCGCACTAAATTGCTTCATGAAGTCAAGAATTTGAGAGATTTAGGACTTGTGTTTTCCA

AAGTGGTTGATAATCCAAATCATGATCATAGATCAACGTTGGTGAAT

>M6-PGSC0003DMG400028630M6LRR-RLP\_5734

GTGTTTTCCAAAGTGGTTGATAATCCAAATCATGATCATAGATCAACGTTGGTGAATTTCTTGGTAGCT

TGCCTGCACTTGAGGTAAGTACTCCTGTTGGATTCACTTTTCATTGACGTAAGA

>M6-PGSC0003DMG400028630M6LRR-RLP\_5795

TTGGTAGCTTGCCTGCACTTGAGGTAAGTACTCCTGTTGGATTCACTTTTCATTGACGTAAGACATGAAGTGT

TTTTCATTTGAATATCTCCTATAGTGATTTCAATCAAGTGAAGTGTAA

>M6-PGSC0003DMG400028630M6LRR-RLP\_5856

TGAAGTGTGTTTTTCATTTGAATATCTCCTATAGTGATTTCAATCAAGTGAAGTGTAAATCATTGTATTTGC

TCCAAAGCTTTTGAGTGCAGACGTAGTTCTATCAAGTGGTCCTCCTTT

>M6-PGSC0003DMG400028630M6LRR-RLP\_5917

ATTGTATTTGCTCCAAAGCTTTTGAGTGCAGACGTAGTTCTATCAAGTGGTCCTCCTTTTATGCTCAACTG

CTTGCAGGAAAGCTGTCCCTCTCTGTTGACTTTGGCAAATTGGGTCATATT

>M6-PGSC0003DMG400028630M6LRR-RLP\_5978

TGCTCAACTGCTTGCAGGAAAGCTGTCCCTCTCTGTTGACTTTGGCAAATTGGGTCATATTTCTTGCATTCTA

CAATTAATCGAGTGTTCGCCAATTTGAATGAAGTGTGAGATTACGGTAA

>M6-PGSC0003DMG400028630M6LRR-RLP\_6039

TTGCGTTCTACAATTAATCGAGTGTCGCCCAATTTGAATGAACTTGAGATTACGGTAAGAAATGTTAAA  
TATATCTGGTGGTTCTTTTTTTGCTCTTCATATATTTGAAGTTGAAGAT

>M6-PGSC0003DMG400028630M6LRR-RLP\_61

CTCTGGTTCTGCTCTCCGCCGTCGCCGGCAGTCTTCGTTGAGGTTTGATCGGTTCTTCTCTTTTATTTCA  
TATAGAAGAACAATAAACCAAATCAAATAAAATTTGAGCTATTATT

>M6-PGSC0003DMG400028630M6LRR-RLP\_610

GTTTTGTTTTAGTTGAAGCAAGTAATTTCTCCTACAATGAAAGGCTTCACAGAGTGCCTGAAAGAGAAGA  
TGTTTTCTTATTTGTAATGAGCCTATTATAAGAGACATTGTCATATTATA

>M6-PGSC0003DMG400028630M6LRR-RLP\_6100

AATGTAAATATATCTGGTGGTTCTTTTTTTGCTCTTCATATATTTGAAGTTGAAGATAATGGTGTGGT  
TATACCATTAGGTCAATGGTACCGATGATAATATTGAAGCATTGTGA

>M6-PGSC0003DMG400028630M6LRR-RLP\_6161

TGGTGTGGCTTATACCATTAGGTCAATGGTACCGATGATAATATTGAAGCATTGTGAAATGTCTGAAG  
ATGGCTGACTGCTTGCAGCTACCACTCAACAAGCTAGAGTATGTGAGTTT

>M6-PGSC0003DMG400028630M6LRR-RLP\_6222

TGTCTGAAGATGGCTGACTGCTTGCAGCTACCACTCAACAAGCTAGAGTATGTGAGTTTCTATGGTTTTG  
CAAGTCCAATCTGTGTAGAGGCTTTTGCTATGCTATTCATTATTCAGGCA

>M6-PGSC0003DMG400028630M6LRR-RLP\_6283

ATGGTTTTGCAAGTCCAATCTGTGTAGAGGCTTTTGCTATGCTATTCATTATTCAGGCACGATCTTTGCTA  
AGGATCTTCATTGAACAACCGCTAGGAACTAAATCCAGTAAAGATTTGA

>M6-PGSC0003DMG400028630M6LRR-RLP\_6344

ATCTTTGCTAAGGATCTTCATTGAACAACCGCTAGGAACTAAATCCAGTAAAGATTTGAGTGGTTTACCC  
AGAGCTTCTCCTAAGGCTGAGCTAGTTATAAGTTAAATCGATACATTATC

>M6-PGSC0003DMG400028630M6LRR-RLP\_6405

GGTTTACCCAGAGCTTCTCCTAAGGCTGAGCTAGTTATAAGTTAAATCGATACATTATCTATTTGTTGTCG  
ATAAGTTTATCTAATATGTCACAAATGTTGAACCAGTTTTCTCCATAT

>M6-PGSC0003DMG400028630M6LRR-RLP\_6466

TTTGTTGTCGATAAGTTTATCTAATATGTCACAAATGTTGAACCAGTTTTCTCCATATTTACTGTTGGGA  
AAGTATGACTGATATCTGAATCTTCATCTTTTGACAGTTGAGCTTATTT

>M6-PGSC0003DMG400028630M6LRR-RLP\_6527

ACTGTTGGGAAAGTATGACTGATATCTGAATCTTCATCTTTTGACAGTTGAGCTTATTTTGGTCTCTATAT  
CTACATGAGGCCAACTAGTAAGATTAATTTGTGAATGTTGTTGTTGGGT

>M6-PGSC0003DMG400028630M6LRR-RLP\_6576

GAGCTTATTTTGGTCTCTATATCTACATGAGGCCAACTAGTAAGATTAATTTGTGAATGTTGTTGTTGGGT  
TTGATATCCTACTAGTTTTTGGAGATAAAAACATAAAATAAAATATACTA

>M6-PGSC0003DMG400028630M6LRR-RLP\_671

AAGAGAAGATGTTTTCTTATTTGTAATGAGCCTATTATAAGAGACATTGTCATATTATATTGATTATGAT  
TTCATTAGTAGAATTCTTCGCGCTGTCTTCCTTATGTTAGTTTTGATTT

>M6-PGSC0003DMG400028630M6LRR-RLP\_732

TGATTATGATTTCATTAGTAGAATTCTTCGCGCTGTCTTCCTTATGTTAGTTTTGATTTATATATTTTTTGT  
CTATCAAGTGTTTTTATGAGTTACCTATATATTACTACATAGTGTGA

>M6-PGSC0003DMG400028630M6LRR-RLP\_793

ATATTTTTTGTCTATCAAGTGTTTTTATGAGTTACCTATATATTACTACATAGTGTGATTTGATGTTATCG  
GTTTGTCCAATTCGTTGAATTTTTTAAATTTCAAGCTTCAAAGCTT

>M6-PGSC0003DMG400028630M6LRR-RLP\_854

TGATGTTATCGGTTTGTCCAATTCGTTGAATTTTTTAAATTTCAAGCTTCAAAGCTTGAATGTCCTTGAC  
CAAATTCATGGCGCCGCACTAGCTCAGGTTGTTTCGGTGGTTCAGGT

>M6-PGSC0003DMG400028630M6LRR-RLP\_915

ATGTCCTTGACCAAAATTCATGGCGCCGCACTAGCTCAGGTTGTTTCGGTGGTTCAGGTTGTGTGTGACA  
ATTTAGTCGAGGTCCTGATGCCGTAGCTCCTTTTCTGCTCTTTTGGAGA

>M6-PGSC0003DMG400028630M6LRR-RLP\_976

TGTGTGACAATTTAGTCGAGGTCCTGATGCCGTAGCTCCTTTTCTGCTCTTTTGGAGAACAAAAATGTTT  
TTTTTTGGTAAACCGTGAAGAATTACCATTGACAGCCAAAAATTTACA

>M6-PGSC0003DMG400028688M6LRR-RLK\_0

CTGTAAAGAACAACCTGGTTTTCTGTTTTTCTTCATTGTCTTGTCAAAAAGTTTCAATCTTTGCAAAAGAAAT  
GAACACCCTTCTTGTGTTAAAGCTTGTATCTTTACTTGTCTATAAAG

>M6-PGSC0003DMG400028688M6LRR-RLK\_1054

TGGAGACATTGAGTCTTAGAGATAATGCCTTTACAGGTCCCGTGCCAAGTTCTTTGATGAATCTTGAGTC

TTTGAAGTTCGTTAATTTGACGAATAATTTCTTTCAAGGACCAATGCCGG

>M6-PGSC0003DMG400028688M6LRR-RLK\_1116

CTTGAGTCTTTGAAGTTCGTTAATTTGACGAATAATTTCTTTCAAGGACCAATGCCGGTGTTC AAAGGTT

TGTTGTTGTTGATTTCGGCAAAGGTACAAATAGCTTTTGCTCGTCACAA

>M6-PGSC0003DMG400028688M6LRR-RLK\_1178

CAAAGGTTCTGTTGTTGTTGATTTCGGCAAAGGTACAAATAGCTTTTGCTCGTCACAACCAGGTGATTGT

GATCCTAGAGTAAATACATTGCTTTCAATTGCAAAGCAATGGATTATCC

>M6-PGSC0003DMG400028688M6LRR-RLK\_124

CTTGGGTTCTTGTTTTGTCAAAAAGTTTTCAATCTTTACAAAAGAAATGAACACCCTTCTTGTTTTAAAGCT

TGTAGCTTTACTTGTTCTATAAAGAACAACACTCGGGTTCTTGTGTTTTTTT

>M6-PGSC0003DMG400028688M6LRR-RLK\_1240

GTGATTGTGATCCTAGAGTAAATACATTGCTTTCAATTGCAAAGCAATGGATTATCCAACAAATTTTGC

GAAGAAGTGAAGGGAAATGATCCCTGTGCTGATTGGTTTGGTCTTACTT

>M6-PGSC0003DMG400028688M6LRR-RLK\_1302

AATTTTGCGAAGAACTGGAAGGGAAATGATCCCTGTGCTGATTGGTTTGGTCTTACTTGCAGTAATGGA

AACATTACTGTCATAAATTTCCAGAAAATGGGGCTTTCAGGAACAATTTCT

>M6-PGSC0003DMG400028688M6LRR-RLK\_1364

TAATGGAAACATTACTGTCATAAATTTCCAGAAAATGGGGCTTTCAGGAACAATTTCTCCTGAATTTGCTT

CACTGAAGTCACTACAAAAAATAGTTCTTGCAGATAATAATCTGACTGG

>M6-PGSC0003DMG400028688M6LRR-RLK\_1426

AATTTGCTTCACTGAAGTCACTACAAAAAATAGTTCTTGCAGATAATAATCTGACTGGTACAATTCCAGA

AGAGCTAACCACATTGACAAGCCTTACAGAGTTAGATGTGTCAAACAATC

>M6-PGSC0003DMG400028688M6LRR-RLK\_1488

ATTCCAGAAGAGCTAACCACATTGACAAGCCTTACAGAGTTAGATGTGTCAAACAATCAAATTTATGGAA

AAGTACCAGCTTTTAGGAAAAATTTGATTTTCAAATTTAGTGGTAACCCT

>M6-PGSC0003DMG400028688M6LRR-RLK\_1550

TTATGGAAAAGTACCAGCTTTTAGGAAAAATTTGATTTTCAAATTTAGTGGTAACCCTGATATTGGAAAG

GATAAGAGTGATGCACCATCCCAAGGCAGTTCTCCAGGTGGTTCAACAGG

>M6-PGSC0003DMG400028688M6LRR-RLK\_1612

TTGGAAAGGATAAGAGTGATGCACCATCCCAAGGCAGTTCTCCAGGTGGTTCAACAGGCTCTGATGATG  
GAAATGCCCAAGCAGCTCGTAAGAAGTCCAATCGCCGGGTGGAATTGTGG

>M6-PGSC0003DMG400028688M6LRR-RLK\_1674

GATGATGGAAATGCCCAAGCAGCTCGTAAGAAGTCCAATCGCCGGGTGGAATTGTGGTGTCTTCTGTA  
ATTGGAAGTGTATTTATGCTTTGTTTGATTGGAGTGGCAGCTTTCTGTCTG

>M6-PGSC0003DMG400028688M6LRR-RLK\_1736

TTCTGTAATTGGAAGTGTATTTATGCTTTGTTTGATTGGAGTGGCAGCTTTCTGTCTGTACAAAAGCAAA  
CAAAAGCGTTTTAGCCGAGTGCAAAGTCCAATACCATGGTGTTCATCC

>M6-PGSC0003DMG400028688M6LRR-RLK\_1798

AAAGCAAACAAAAGCGTTTTAGCCGAGTGCAAAGTCCAATACCATGGTGTTCATCCACGTCATTCTG  
GTTGAGACAATGATAGTGTGAAAATCACAGTTGCAGGATCTAGTGTCAGTG

>M6-PGSC0003DMG400028688M6LRR-RLK\_186

TTTAAAGCTTGAGCTTTACTTGTCTATAAAGAACAACACTCGGGTCTTGTGTTTTTTTCATTGTCTTGTC  
AAAGTTTCAATCTTTACAAAAGAAATGAACACCCTTCTGGTTTTAAAG

>M6-PGSC0003DMG400028688M6LRR-RLK\_1860

CATTCTGGTTCAGACAATGATAGTGTGAAAATCACAGTTGCAGGATCTAGTGTCAGTGTTGGTGCAGTT  
ACTGAAACTCATACTGTTTCTGCTAGTGAAGCTGGTGTGTTCAAATGGTT

>M6-PGSC0003DMG400028688M6LRR-RLK\_1922

TGCAGTTACTGAAACTCATACTGTTTCTGCTAGTGAAGCTGGTGTGTTCAAATGGTTGAAGCAGGAAAT  
ATGGTGATTTCCATCCAAGTACTGAAGAGTGTGACCAACAATTTTAGTGA

>M6-PGSC0003DMG400028688M6LRR-RLK\_1984

CAGGAAATATGGTGATTTCCATCCAAGTACTGAAGAGTGTGACCAACAATTTTAGTGAAGACAACATAC  
TAGGCCGGGGAGGCTTTGGCACTGTCTACAAAGGTGAATTGCATGATGGGA

>M6-PGSC0003DMG400028688M6LRR-RLK\_2046

AACATACTAGGCCGGGGAGGCTTTGGCACTGTCTACAAAGGTGAATTGCATGATGGGACTAAAATTGCA  
GTCAAAGAATGGAAAATGGAATCATCACTGGGAAGGGACTAGCTGAATTC

>M6-PGSC0003DMG400028688M6LRR-RLK\_2108

AATTGCAGTCAAAGAATGGAAAATGGAATCATCACTGGGAAGGGACTAGCTGAATTCAAATCCGAGA  
TTGCTGTATTGACTAAGGTCAGACATAGGCATCTTGTGGACTACTTGGGTA

>M6-PGSC0003DMG400028688M6LRR-RLK\_2170

CCGAGATTGCTGTATTGACTAAGGTCAGACATAGGCATCTTGTTGGACTACTGGGTACTGTCTTGATGG  
AAATGAGAACTTCTAGTCTATGAATACATGCCTCAAGGAACATTAAGCA

>M6-PGSC0003DMG400028688M6LRR-RLK\_2232

CTTGATGGAAATGAGAACTTCTAGTCTATGAATACATGCCTCAAGGAACATTAAGCAGTCATCTCTTCA  
ACTGGGCAGAAGAAGGGCTTAAACCCATGGAATGGACAAAACGATTGACC

>M6-PGSC0003DMG400028688M6LRR-RLK\_2294

TCTCTTCAACTGGGCAGAAGAAGGGCTTAAACCCATGGAATGGACAAAACGATTGACCATTGCATTAGA  
TGTTGCTAGGGGTGTAGAGTACCTCCATAGTTTAGCACACCAGAGTTTCAT

>M6-PGSC0003DMG400028688M6LRR-RLK\_2356

CATTAGATGTTGCTAGGGGTGTAGAGTACCTCCATAGTTTAGCACACCAGAGTTTCATTACAGGGGATCT  
GAAGCCTTCAAATATTCTTCTAGGGGATGATATGAGGGCTAAAGTTGCAG

>M6-PGSC0003DMG400028688M6LRR-RLK\_2418

AGGGATCTGAAGCCTTCAAATATTCTTCTAGGGGATGATATGAGGGCTAAAGTTGCAGATTTTGGCCTT  
GTCAGACTTGCCCCAGAAGGGAAAGGTTCTATAGAGACAAGGATTGCTGGG

>M6-PGSC0003DMG400028688M6LRR-RLK\_248

GTCTTGTCAAAAAGTTTCAATCTTTACAAAAGAAATGAACACCCTTCTTGTTTAAAGCTTGTATCTATAC  
TTGTTCTTGGTATTTCTGCATTTTTTTTTGGGTGTTGAGTCTCAAGATGA

>M6-PGSC0003DMG400028688M6LRR-RLK\_2480

TGGCCTTGTGCAACTTGCCCCAGAAGGGAAAGGTTCTATAGAGACAAGGATTGCTGGGACATTTGGATA  
TCTGGCACCGGAATATGCAGGTATGCTCTTTGCTTACTTATATGTGTATGC

>M6-PGSC0003DMG400028688M6LRR-RLK\_2542

TTGGATATCTGGCACCGGAATATGCAGGTATGCTCTTTGCTTACTTATATGTGTATGCTAAATTGCTGATA  
AAATACTTGTATGCAATTTGTGCCTAGATAAACTTGGTCTTAAGTCCAA

>M6-PGSC0003DMG400028688M6LRR-RLK\_2604

TTGCTGATAAAATACTTGTATGCAATTTGTGCCTAGATAAACTTGGTCTTAAGTCCAATACCTCTAAAGTA  
TGAATTATGTGAACCTTAGGGGTTTGATCTCAGGATGCTTCCAGAGAAT

>M6-PGSC0003DMG400028688M6LRR-RLK\_2666

TCTAAAGTATGAATTATGTGAACCTTAGGGGTTTGATCTCAGGATGCTTCCAGAGAATTAGCATTCAATT



GACTGATAAGAGTCGGATGATAATAACTGTACTCCAAGAACTTAGCCTG

>M6-PGSC0003DMG400028688M6LRR-RLK\_2728

ATTCATTTGACTGATAAGAGTCGGATGATAATAACTGTACTCCAAGAACTTAGCCTGTTTTACATTAATC  
AACTTTTGTCTATAATAGGTTTATAACAGTATATTTAATATTTTGTC

>M6-PGSC0003DMG400028688M6LRR-RLK\_2790

ACATTAATCAACTTTTGTCTATAATAGGTTTATAACAGTATATTTAATATTTTGTCTTTTTCTAAGTCAA  
TTATACTTGTGCTCATGGTTAAGAACCTGCCATTCATACATTGTCAT

>M6-PGSC0003DMG400028688M6LRR-RLK\_2852

TTCTAAGTCAATTATACTTGTGCTCATGGTTAAGAACCTGCCATTCATACATTGTCATATATCAAATATCCT  
TATTGATTCTGTCATCCCCTTTAATGCTATGATTTCTTGGTTTCTAAA

>M6-PGSC0003DMG400028688M6LRR-RLK\_2914

CAAATATCCTTATTGATTCTGTCATCCCCTTTAATGCTATGATTTCTTGGTTTCTAAAAGTGGATACCCATC  
CTACTGGAAACACTTTTTCTGATGCATTTGCTTAATGCCACCAGTGT

>M6-PGSC0003DMG400028688M6LRR-RLK\_2976

GATACCATCCTACTGGAAACACTTTTTCTGATGCATTTGCTTAATGCCACCAGTGTCTACTTTGGCCTA  
ATCGCACACTTTAAACATGTTATTAATCTTATGACAGAAGATCCTCCTT

>M6-PGSC0003DMG400028688M6LRR-RLK\_3038

TTTGGCCTAATCGCACACTTTAAACATGTTATTAATCTTATGACAGAAGATCCTCCTTTTTACTTTTCCGCT  
TGGTGGAAATTGGAATTCAAGGATAGCCAAATTCGTTATTTGCTCACT

>M6-PGSC0003DMG400028688M6LRR-RLK\_310

TATCTATACTTGTCTTGGTATTTCTGCATTTTTTTGGGTGTTGAGTCTCAAGATGATGATGTTTCAGTGA  
TGTTAGCTTTGAAAAAGAACTTAAACCCACCTCAAGAAGTTGGATGGT

>M6-PGSC0003DMG400028688M6LRR-RLK\_3100

CTTTTCCGCTTGGTGGAAATTGGAATTCAAGGATAGCCAAATTCGTTATTTGCTCACTTTCCTGATCGTGA  
TATGTGCATAGGAGTTTTTGAATGTAGATACATCATTATCTAAACTTG

>M6-PGSC0003DMG400028688M6LRR-RLK\_3162

TGATCGTGATATGTGCATAGGAGTTTTTGAATGTAGATACATCATTATCTAAACTTGATTTTTATCTTGT  
TTCGTCTGCCAGTAACAGGGAGAGTGACAACCAAGGTGGACGTGTTTCAAG

>M6-PGSC0003DMG400028688M6LRR-RLK\_3224

TTATCTTGTTTCGTCTGCCAGTAACAGGGAGAGTGACAACCAAGGTGGACGTGTTTCAGTTTCGGTGTGA  
TTTTAATGGAGCTCATCACAGGAAGAAAGGCTCTTGATGAAAGCCAGCCTG

>M6-PGSC0003DMG400028688M6LRR-RLK\_3286

GGTGTGATTTTAATGGAGCTCATCACAGGAAGAAAGGCTCTTGATGAAAGCCAGCCTGAGGAGAGAAT  
GCATCTAGTAACATGGTTCCGAAGAATGCATCTGAATAAGGATACATTTCAGA

>M6-PGSC0003DMG400028688M6LRR-RLK\_3348

GAGAATGCATCTAGTAACATGGTTCCGAAGAATGCATCTGAATAAGGATACATTTCAGAAAGGCAATTGA  
CCCCGCAATTGACCTTAGTGAGGAAACTCGCCAGTGTCAGCACTGTAGC

>M6-PGSC0003DMG400028688M6LRR-RLK\_3410

CAATTGACCCCGCAATTGACCTTAGTGAGGAAACTCGCCAGTGTCAGCACTGTAGCTGAGCTAGCTG  
GACTGTCTGCAAGGGAGCCATATCAAAGGCCTGACATGGGCCATGCTG

>M6-PGSC0003DMG400028688M6LRR-RLK\_3472

CTAGCTGGACTGTCTGCAAGGGAGCCATATCAAAGGCCTGACATGGGCCATGCTGTCAATGTTCTTT  
CTTCTTTGTGGAGCTCTGGAACCATCCGACGAGTGCTCAGAGGACATA

>M6-PGSC0003DMG400028688M6LRR-RLK\_3534

TGTTCTTTCTTCTTTGTGGAGCTCTGGAACCATCCGACGAGTGCTCAGAGGACATATACGGCATTGAT  
CTCGATATGTCATTACCCCAAGCGCTTAAAAAGTGGCAGGCTTATGAAGG

>M6-PGSC0003DMG400028688M6LRR-RLK\_3596

GCATTGATCTCGATATGTCATTACCCCAAGCGCTTAAAAAGTGGCAGGCTTATGAAGGTACAAGTCACAT  
GGATTCATCCTCATCTTCTTACCTTCCAAGCTTGGATAAACTCAAATA

>M6-PGSC0003DMG400028688M6LRR-RLK\_3658

AGTCACATGGATTCATCCTCATCTTCTTACCTTCCAAGCTTGGATAAACTCAAATACTAGCATACTACTCG  
CCCCTACGGATTTGCCGAGTCATTTACATCTTCTGATGGTAGGTGAGAA

>M6-PGSC0003DMG400028688M6LRR-RLK\_372

GTTTCAGTGATGTTAGCTTTGAAAAAGAACTTAAACCCACCTCAAGAAGTTGGATGGTCAGACCCGGAT  
CCATGCAAATGGAACCATGTGGGTTGTTTCGATAAACGGGTCACCCGGATC

>M6-PGSC0003DMG400028688M6LRR-RLK\_3720

ACCTACTCGCCCCTACGGATTTGCCGAGTCATTTACATCTTCTGATGGTAGGTGAGAAGTTGACTCTTT  
GATCTAGGTTTGGTTGTTTCATTCTCTCCGTTTTCTTCTCATCGCGAGT

>M6-PGSC0003DMG400028688M6LRR-RLK\_3782

ACACTCTTTGATCTAGGTTTGGTTGTTCACTCTCCGTTTTCTCCTCATCGCGAGTCACACATCATTTTTT  
TTTTGCTTTTAACTCTGATGCTTTTACCTTAACTCATTGTTAGTTTT

>M6-PGSC0003DMG400028688M6LRR-RLK\_3844

CATCATTTTTTTTTGCTTTTAACTCTGATGCTTTTACCTTAACTCATTGTTAGTTTTGGCACTGTGGTGAAT  
AGGGATTCTTTTAAAGATTTTTGTTTTCTTTGACTCTTATTGTATG

>M6-PGSC0003DMG400028688M6LRR-RLK\_3906

CTGTGGTGAATAGGGATTCTTTTAAAGATTTTTGTTTTCTTTGACTCTTATTGTATGATGAATCTCTCTCT  
CTTTCCATGTGAATACATTGTGGTTTGGTTGGAAATGAAAGGGATGC

>M6-PGSC0003DMG400028688M6LRR-RLK\_3968

ATCTCTCTCTTTTTCCATGTGAATACATTGTGGTTTGGTTGGAAATGAAAGGGATGCCATCAATTACCAG  
TAGATCATAGTACTTTTTGTATTCTTGAATTGTTTTTTTGTAGAAAAAT

>M6-PGSC0003DMG400028688M6LRR-RLK\_4030

AATTACCAGTAGATCATAGTACTTTTGTATTCTTGAATTGTTTTTTTGTAGAAAAATTTGTAGGTGCAAG  
CTGTATTGAAATGTAAAGTGGCATTGAAGTGTGCAAATCATAATGTTAG

>M6-PGSC0003DMG400028688M6LRR-RLK\_4092

AGGTGCAAGCTGTATTGAAATGTAAAGTGGCATTGAAGTGTGCAAATCATAATGTTAGCTTTTTGCTTAT  
GATGCTTTTTCAAGCAAATGTAAAGTTTTTTGTTATGATTACAGATCAA

>M6-PGSC0003DMG400028688M6LRR-RLK\_434

CCCGGATCCATGCAAATGGAACCATGTGGGTTGTTCCGATAAACGGGTCACCCGGATCCAAATTGGGCG  
CCAGAACATTCAAGGTACCCTCCCTCCAGAAATCTCTAAACTTACTGAACT

>M6-PGSC0003DMG400028688M6LRR-RLK\_496

TTGGGCGCCAGAACATTCAAGGTACCCTCCCTCCAGAAATCTCTAAACTTACTGAACTTGAACGTTTAGA  
GCTTCAAGGGAACAATATTTCTGGCCCTTTGCCAAGTTTGAGTGGTTTGA

>M6-PGSC0003DMG400028688M6LRR-RLK\_558

CGTTTAGAGCTTCAAGGGAACAATATTTCTGGCCCTTTGCCAAGTTTGAGTGGTTTGAAGTTTCAATTGAAAG  
TGTTACTGCTTGGTAAAATCAGTTTAGTTCAATTCCTGCTGATTTCTTT

>M6-PGSC0003DMG400028688M6LRR-RLK\_62

CAAAGAAATGAACACCCTTCTTGTGTTAAAGCTTGTATCTTTACTTGTCTATAAAGAACAACCTTGGGTTT

TTGTTTTGTCAAAAAGTTTCAATCTTTACAAAAGAAATGAACACCCCTTC

>M6-PGSC0003DMG400028688M6LRR-RLK\_620

ATTGAAAGTGTTACTGCTTGGTGAAAATCAGTTTAGTTCAATTCCTGCTGATTTCTTTACTGAAATGTCTT  
CATTACTCTCTGTTGATATTGATAAGAACCCTTTTGTGGTTGGGAGAT

>M6-PGSC0003DMG400028688M6LRR-RLK\_682

AAATGTCTTCATTACTCTCTGTTGATATTGATAAGAACCCTTTTGTGGTTGGGAGATCCCTGAAAGTCTT  
AGAAATGCTTCTTCACTTAAAACTTTTCAGCAAATTCAGCAAATGTAA

>M6-PGSC0003DMG400028688M6LRR-RLK\_744

GAAAGTCTTAGAAATGCTTCTTCACTTAAAACTTTTCAGCAAATTCAGCAAATGTAATTGGGAGAATTC  
CTAACTTTTTTAGTCCTGATGAGTTTCCTGGATTGGTAAATTTACATTTG

>M6-PGSC0003DMG400028688M6LRR-RLK\_806

GAGAATTCCTAACTTTTTTAGTCCTGATGAGTTTCCTGGATTGGTAAATTTACATTTGGCTGGCAATAACT  
TGGAAGGTGAATTGCCCTCCAGTTTTTCTGGCATGCTGCTTGAGTCTTT

>M6-PGSC0003DMG400028688M6LRR-RLK\_868

GCAATAACTTGAAGGTGAATTGCCCTCCAGTTTTTCTGGCATGCTGCTTGAGTCTTTATGGTTAAATGG  
ACAGAAGCTTAATGGAGGAATTGATGTTCTAACAACATGACATTCCTGA

>M6-PGSC0003DMG400028688M6LRR-RLK\_930

TTAAATGGACAGAAGCTTAATGGAGGAATTGATGTTCTAACAACATGACATTCCTGAAGGAGGTTTGG  
TTGCATTCGAATAACTTTTCGGGGCCGTTGCCGGACTTTTCAGGATTAAG

>M6-PGSC0003DMG400028688M6LRR-RLK\_992

GGTTTGGTTGCATTCCAATAACTTTTCGGGGCCGTTGCCGGACTTTTCAGGATTAAGGCTTTGGAGACA  
TTGAGTCTTAGAGATAATGCCTTTACAGGTCCCGTGCCAAGTTCTTTGAT

>M6-PGSC0003DMG400028801-(rev)M6LRR-RLK\_0

AACACATCCTAGAACTACTATACATTTTTTCACTACTCTACAAAGAACACCATTCTTTCTTCTTACTTCTGCT  
ACTACATTTCTCTGCTATGAATTTCTAGCAGTTCTTGGTTCTTGC

>M6-PGSC0003DMG400028801-(rev)M6LRR-RLK\_1037

ATAAAACAAGGTCTCTTGATGTTGAGACAATTAAGTCACCGGAAACAGAAGTTCCCGGGGAGAAACAA  
ATTGAGAAACCCGAAAATGGAGGTGTAAATAATGGGAATTCAGTTGCTGTAG

>M6-PGSC0003DMG400028801-(rev)M6LRR-RLK\_1098

GAAACAAATTGAGAAACCCGAAAATGGAGGTGTAAATAATGGGAATTCAGTTGCTGTAGCAGCACCTG  
CTGCTGCAGTATTGAATAGTGGTGAAGAGAATTGGGGAGAAAATGGGGTTAG

>M6-PGSC0003DMG400028801-(rev)M6LRR-RLK\_1159

GCACCTGCTGCTGCAGTATTGAATAGTGGTGAAGAGAATTGGGGAGAAAATGGGGTTAGGAAAAAGCT  
TGTGTTTTTTGGAGATTATTATAAAGCATTGAATTGGAGGATTTGTTGAGA

>M6-PGSC0003DMG400028801-(rev)M6LRR-RLK\_1220

AAAAGCTTGTGTTTTTTGGAGATTATTATAAAGCATTGAATTGGAGGATTTGTTGAGAGCATCTGCTGA  
GGTCTTGGAAATGGGACATTTGGAACAGCTTATAAGGCAGTTTTGGAGA

>M6-PGSC0003DMG400028801-(rev)M6LRR-RLK\_1281

ATCTGCTGAGGTTCTTGAAATGGGACATTTGGAACAGCTTATAAGGCAGTTTTGGAGATTGGTACAAT  
TGTTGCTGTTAAGAGATTGAAAGATGTGGCAATATCTGAAAGGGAGTGCAA

>M6-PGSC0003DMG400028801-(rev)M6LRR-RLK\_1342

GGTACAATTGTTGCTGTTAAGAGATTGAAAGATGTGGCAATATCTGAAAGGGAGTGCAAGGAGAAAAT  
TGAAACAGTTGGAGCAATGAATCATGAGAATTTGGTGCCTCTCAGAGCTTAT

>M6-PGSC0003DMG400028801-(rev)M6LRR-RLK\_1403

AGAAAATTGAAACAGTTGGAGCAATGAATCATGAGAATTTGGTGCCTCTCAGAGCTTATTATTTTCAGCA  
GGGAGGAAAACTTCTTGTCTTTGACTATATGCCAATGGGAAGCTTGTCTG

>M6-PGSC0003DMG400028801-(rev)M6LRR-RLK\_1464

TTTCAGCAGGGAGGAAAACTTCTTGTCTTTGACTATATGCCAATGGGAAGCTTGTCTGCTCTTCTTCATG  
GTAAGTTATAGTTACTCTTTTACTGTCGATTCATCTTGTTCGGACTC

>M6-PGSC0003DMG400028801-(rev)M6LRR-RLK\_1525

CTTCTTCATGGTAAGTTATAGTTACTCTTTTACTGTCGATTCATCTTGTTCGGACTCTCTAAAAATGTTA  
TCGCATCTGTGCCAAATCCTCGAAAAATGCATTACTTTGGAGGATTCA

>M6-PGSC0003DMG400028801-(rev)M6LRR-RLK\_1586

TAAAAATGTTATCGCATCTGTGCCAAATCCTCGAAAAATGCATTACTTTGGAGGATTCAACACGCACTCA  
GCGGTATGGATCCTTTAACAATACTACTACCTTTTTGGAGGATCTCACATG

>M6-PGSC0003DMG400028801-(rev)M6LRR-RLK\_1647

ACGCACTCAGCGGTATGGATCCTTTAACAATACTACTACCTTTTTGGAGGATCTCACATGCACTTAGCAGC  
ATGGGTCTCAAAAATATGCACTACCTTTGGAGGATCCAACACACTCAG

>M6-PGSC0003DMG400028801-(rev)M6LRR-RLK\_1708

CTTAGCAGCATGGGTCCTCAAAATATGCACTACCTTTGGAGGATCCAACACACACTCAGTGGCATGGATT  
CTCAAAAAAAAAAAAAATCACTATTTTTGGAGGGTCGACATGTATTGGTCG

>M6-PGSC0003DMG400028801-(rev)M6LRR-RLK\_1769

GCATGGATTCTCAAAAAAAAAAAAAATCACTATTTTTGGAGGGTCGACATGTATTGGTCGATATTCTTAAT  
GAGTTCAAGATACTATATTTTTGTTCCCTTATTCAGTAGATACTATA

>M6-PGSC0003DMG400028801-(rev)M6LRR-RLK\_183

ACTGTCAAATTTGACAATGGTGTGTTAATCATCTTCATAATTCATGTTTTCATGTTTGTAACAGCTTCGTC  
GGATCTTAGTTCCGACCGTGCTGCACTTTTAGCTTTTCGCTCCGCCGT

>M6-PGSC0003DMG400028801-(rev)M6LRR-RLK\_1830

ATTCTTAATGAGTTCAAGATACTATATTTTTGTTCCCTTATTCAGTAGATACTATATTTTTGTTCCAGAT  
TTTGACATTTTGTTAGAGTAATTAGTTTGACTTGTGCTAACAGTGTA

>M6-PGSC0003DMG400028801-(rev)M6LRR-RLK\_1891

TTGTTCCAGATTTTGACATTTTGTTAGAGTAATTAGTTTGACTTGTGCTAACAGTGTAACATGCAATGTC  
TGTAGTATTTGGCCCCTCAATCCAATGAAAATGTGATCCTAGAATTAAG

>M6-PGSC0003DMG400028801-(rev)M6LRR-RLK\_1952

ATGCAATGTCTGTAGTATTTGGCCCCTCAATCCAATGAAAATGTGATCCTAGAATTAAGCATTAAATTTGTT  
ATCATTACCTTAGTCTTCATTATGTAAAGCATGCTTCTAATATAAGAAA

>M6-PGSC0003DMG400028801-(rev)M6LRR-RLK\_2013

TTAATTTGTTATCATTACCTTAGTCTTCATTATGTAAAGCATGCTTCTAATATAAGAAAGTATGTTAAATCT  
AAAGTTGTTTGTAATTAAGAGCAATAAGTAGTACTCCATTTTCATTTAG

>M6-PGSC0003DMG400028801-(rev)M6LRR-RLK\_2074

ATGTTAAATCTAAAGTTGTTTGTAATTAAGAGCAATAAGTAGTACTCCATTTTCATTTAGTGCTTTTCATTAT  
AGTAAAAGGGTCCTTTGTTCTTTATAGATACCCTGTCCATATACAGGGG

>M6-PGSC0003DMG400028801-(rev)M6LRR-RLK\_2135

CTTTTCATTATAGTAAAAGGGTCCTTTGTTCTTTATAGATACCCTGTCCATATACAGGGGAAAGGTGAACA  
AGCACACATATAATCTTTCACCTGGCCCTACAGTAGTAGGGTCTATCATT

>M6-PGSC0003DMG400028801-(rev)M6LRR-RLK\_2196

AGGTGAACAAGCACACATATAATCTTTCACCTGGCCCTACAGTAGTAGGGTCTATCATTTTATGTTCTTTT

TCTATCTAGAGCATCTGTATAGGACTAGAATTTTGAATCTCCGAAACTA

>M6-PGSC0003DMG400028801-(rev)M6LRR-RLK\_2257

ATGTTCTTTTTCTATCTAGAGCATCTGTATAGGACTAGAATTTTGAATCTCCGAAACTAATTATTCAACTG

GTGATTAGTTTCTGGCATGTGAATCTTGCATGAACATGTACATTTTTTC

>M6-PGSC0003DMG400028801-(rev)M6LRR-RLK\_2318

TATTCAACTGGTGATTAGTTTCTGGCATGTGAATCTTGCATGAACATGTACATTTTTTCGCCTTTGGTATA

CTTGAAACTTGTTAAGTGACTAAGAAGCTGTAATGAGCTGTATGCTGCA

>M6-PGSC0003DMG400028801-(rev)M6LRR-RLK\_2379

CTTTGGTATACTTGAAACTTGTTAAGTGACTAAGAAGCTGTAATGAGCTGTATGCTGCAACTCTACTTTCT

ATTCACTACAATTTTTTTAATTTACTAGGAAGCAAGGGGGCTGGCAGAA

>M6-PGSC0003DMG400028801-(rev)M6LRR-RLK\_244

ACAGCTTCGTCGGATCTTAGTTCCGACCGTGCTGCACTTTTAGCTTTTCGCTCCGCCGTGGGTGGCCGTA

CATTTCTCTGGAACACCACCAGTACCTCCCCATGCAACTGGGCTGGTGTA

>M6-PGSC0003DMG400028801-(rev)M6LRR-RLK\_2440

TCTACTTTCTATTCACTACAATTTTTTTAATTTACTAGGAAGCAAGGGGGCTGGCAGAACACCATTGAATT

GGGAAATCAGGTCCAGTATTGCCCTCGGAATTGCACGTGGCATCAAATA

>M6-PGSC0003DMG400028801-(rev)M6LRR-RLK\_2501

CCATTGAATTGGGAAATCAGGTCCAGTATTGCCCTCGGAATTGCACGTGGCATCAAATACCTTCACTCTC

AAGTCTCTGATGTCTCCCATGGGAATATCAAATCATCCAATGTTCTTCTC

>M6-PGSC0003DMG400028801-(rev)M6LRR-RLK\_2562

TTCACTCTCAAGGTCCTGATGTCTCCCATGGGAATATCAAATCATCCAATGTTCTTCTCACCAAATCATA

GAAGCACGTGTCTCAGATTTTGGCCTGGCTAACTTGGTTGGATCGCCAT

>M6-PGSC0003DMG400028801-(rev)M6LRR-RLK\_2623

CAAATCATACGAAGCACGTGTCTCAGATTTTGGCCTGGCTAACTTGGTTGGATCGCCATCCTCCCCTACTC

GAGTTGTTGGATATCGTGCTCCAGAGGTAAGTATGATCCTCGCAAGGTTTC

>M6-PGSC0003DMG400028801-(rev)M6LRR-RLK\_2684

TCCCCTACTCGAGTTGTTGGATATCGTGCTCCAGAGGTAAGTATGATCCTCGCAAGGTTTCCCAAAGGCTG

ATGTCTATAGCTTTGGAGTATTACTCTTGGAGCTTCTTACTGGAAAAGCA

>M6-PGSC0003DMG400028801-(rev)M6LRR-RLK\_2745

AAAAGGCTGATGTCTATAGCTTTGGAGTATTACTCTTGGAGCTTCTTACTGGAAAAGCACCTAGTCATGC  
CCTCTTAAATGAAGAAGGTGTTGATTTGCCAAGGTGGGTTCAATCTGTCTG

>M6-PGSC0003DMG400028801-(rev)M6LRR-RLK\_2806

TAGTCATGCCCTCTTAAATGAAGAAGGTGTTGATTTGCCAAGGTGGGTTCAATCTGTCGTTTCGTGAAGAA  
TGGCCTTCTGAAGTTTTTGGATATTGAGCTCCTCAGGTACCAGACTGCTGA

>M6-PGSC0003DMG400028801-(rev)M6LRR-RLK\_2867

CGTGAAGAATGGCCTTCTGAAGTTTTTGGATATTGAGCTCCTCAGGTACCAGACTGCTGAAGAAGAGATG  
GTCCAACCTTGCAGCTAGCAATAAATTGTACAGTTCAATATCCTGATAAG

>M6-PGSC0003DMG400028801-(rev)M6LRR-RLK\_2928

AAGAGATGGTCCAACCTTGCAGCTAGCAATAAATTGTACAGTTCAATATCCTGATAAGCGACCTTCAAT  
GGCTGAGATCTCTAAACAGATTGAAGAGCTTCGACACCCAACCTCACATG

>M6-PGSC0003DMG400028801-(rev)M6LRR-RLK\_2989

ACCTTCAATGGCTGAGATCTCTAAACAGATTGAAGAGCTTCGACACCCAACCTCACATGATAAACAAGAA  
CTCTCTGATCTTGCCAATGCAACAGAGTGAAGTGGTTATTATTAGTCCCC

>M6-PGSC0003DMG400028801-(rev)M6LRR-RLK\_305

GTGGCCGTACATTTCTCTGGAACACCACCAGTACCTCCCCATGCAACTGGGCTGGTGTACAATGTGAAAA  
CAACCGTGTACAGTTCTCCGGCTACCGGCGTCAGCTCTCTCCGGTACCC

>M6-PGSC0003DMG400028801-(rev)M6LRR-RLK\_3050

AAACAAGAACTCTCTGATCTTGCCAATGCAACAGAGTGAAGTGGTTATTATTAGTCCCCCTCGAGATGTG  
CAGTAATTAAGCTTAAACTCAGATTCATCACCAATCTTTTTTTAAGCATA

>M6-PGSC0003DMG400028801-(rev)M6LRR-RLK\_3111

CGAGATGTGCAGTAATTAAGCTTAAACTCAGATTCATCACCAATCTTTTTTTAAGCATATTAACCTTGTTG  
TTTGTGGGGGAGGGGTGTCTCATCTTCTTTCTGTTTGAATTAACCTGAT

>M6-PGSC0003DMG400028801-(rev)M6LRR-RLK\_3172

AAACTTGTGTTGTTGTTGGGGGAGGGGTGTCTCATCTTCTTTCTGTTTGAATTAACCTGATCATGGCCCCTTT  
TTCTCTATGTTTCTGTAGTAGTCTAGTGGTTACCCCTTTCATTTTCCTT

>M6-PGSC0003DMG400028801-(rev)M6LRR-RLK\_3233

TGGCCCCTTTTCTCTATGTTTCTGTAGTAGTCTAGTGGTTACCCCTTTCATTTTCCTTTAGATGAGGGGCC  
AAAGCCAATATCTGTACCATTTATTCTTGTGGATGTATAATGCTTTC



>M6-PGSC0003DMG400028801-(rev)M6LRR-RLK\_3294

GATGAGGGGCCAAAGCCAATATCTGTACCATTTATTCTTGTTGGATGTATAATGCTTTCTGTAATTATTAC  
TGCTTCTGCTTTACTTCTGCTTTGTCAGTTGCAACTGTCGATGGCTAT

>M6-PGSC0003DMG400028801-(rev)M6LRR-RLK\_3355

TAATTACTGCTTCTGCTTTACTTCTGCTTTGTCAGTTGCAACTGTCGATGGCTATTCTGTGTGTATAT  
GAGGCATGCATGCATGTGGTTCTTGATATACTGAAGCCAGCAGGGAGA

>M6-PGSC0003DMG400028801-(rev)M6LRR-RLK\_3398

AACTGTCGATGGCTATTCTGTGTGTATATGAGGCATGCATGCATGTGGTTCTTGATATACTGAAGCCAGC  
AGGGAGATTGCATTGAGAGTTTTCATAGATGCTGAGTTGGCCAAATATTG

>M6-PGSC0003DMG400028801-(rev)M6LRR-RLK\_366

ATGTGAAAACAACCGTGTTACAGTTCTCCGGCTACCGGCGTCAGCTCTCTCCGGTACCCTTCCGGTGAAC  
ACAATTTCCAACCTCACTCGTCTTCGTACACTTAGTCTTCGTCTCAATCG

>M6-PGSC0003DMG400028801-(rev)M6LRR-RLK\_427

CCGGTGAACACAATTTCCAACCTCACTCGTCTTCGTACACTTAGTCTTCGTCTCAATCGCCTTTCCGGTCT  
CTCCCTTCTGATCTCTCAAATGTGTTGAGCTCCGTAACATTTATCTC

>M6-PGSC0003DMG400028801-(rev)M6LRR-RLK\_488

TTTCCGGTCTCTCCCTTCTGATCTCTCAAATGTGTTGAGCTCCGTAACATTTATCTCCAGGGTAACTTTT  
TTACCGGAGCTATTTCTTCTTTCTCTGGGCTTCACTCTTTAGTTC

>M6-PGSC0003DMG400028801-(rev)M6LRR-RLK\_549

GGGTAACTTTTTACC GGAGCTATTTCTTCTTTCTCTGGGCTTCACTCTTTAGTTCGGTTAAATCTTGC  
TGAAAACAATTTTCTGGAGAAATCCATCTGGGTTAACAGTTTGAC

>M6-PGSC0003DMG400028801-(rev)M6LRR-RLK\_61

CTTACTTCTGCTACTACATTTCTCTCTGCTATGAATTTCTAGCAGTTCTTGGTTCTTGCGCCATATTCAGCT  
AAAACAAGTAGGCACTGCCATTTAGTTGGCTAGTTCAATTTAGTT

>M6-PGSC0003DMG400028801-(rev)M6LRR-RLK\_610

TTAAATCTTGCTGAAAACAATTTTCTGGAGAAATCCATCTGGGTTAACAGTTTGACCCGATTGAGAA  
CATTTCTACTTGAGAAAACCAGTTTTCTGGGTTAATGCCTGAGCTAAAG

>M6-PGSC0003DMG400028801-(rev)M6LRR-RLK\_671

GATTGAGAACATTTCTACTTGAGAAAACCAGTTTTCTGGGTTAATGCCTGAGCTAAAGTTTTTCCCAA

TCTCGAACAGTTTAATGTGTCTTTCAATAGATTAAATGGGTCTATTCCGA

>M6-PGSC0003DMG400028801-(rev)M6LRR-RLK\_732

TTTCCCAAATCTCGAACAGTTTAATGTGTCTTTCAATAGATTAAATGGGTCTATTCCGAAAAGTTTGGAG  
GTAATGCCAGTGAGTTCTTTTACTGGGAATTCTCTATGTGGAAAGCCTAT

>M6-PGSC0003DMG400028801-(rev)M6LRR-RLK\_793

AGTTTGGAGGTAATGCCAGTGAGTTCTTTTACTGGGAATTCTCTATGTGGAAAGCCTATTAATGTTTGCC  
CAGGAAGTAAGACTCAGCCTGCTATAGCTACTGATGGAATCGAAATTGGG

>M6-PGSC0003DMG400028801-(rev)M6LRR-RLK\_854

ATGTTTGGCCAGGAAGTAAGACTCAGCCTGCTATAGCTACTGATGGAATCGAAATTGGGAATTCAAATA  
ACAAGAAGAAGAAGCTATCTGGTGGAGCTATTTCCGGTATTGTCATTGGGT

>M6-PGSC0003DMG400028801-(rev)M6LRR-RLK\_915

TTCAAATAACAAGAAGAAGAAGCTATCTGGTGGAGCTATTTCCGGTATTGTCATTGGGTCTGTTGCTGG  
ATTTTTATTCTTTTGTGCGATTTTGTGGTTAGGTAGGATGAAAACCGG

>M6-PGSC0003DMG400028801-(rev)M6LRR-RLK\_976

GTTGCTGGATTTTTATTCTTTTGTGCGATTTTGTGGTTAGGTAGGATGAAAACCGGTGATAAAACAA  
GGTCTCTTGATGTTGAGACAATTAAGTCACCGGAAACAGAAGTTCCCGGG

>M6-PGSC0003DMG400028845-(rev)M6LRR-RLK\_0

TGTGTGGCTTTGGATTCTTGTAAGTGAATAGTGGTTTTTTCTTTAGAATGGCAAAGCATCTGACCCTTTTC  
TTCTTTTAGTGTCTTTTCTCACTCAAAAAAGAGTCTTTCTGTGTAATT

>M6-PGSC0003DMG400028845-(rev)M6LRR-RLK\_1037

TTTATGTGGTAAGGGGTGACAAAAACCAATGAGTTTGAAGTTGATCAAAAACCTTAATAAAGCTATATAA  
TTTACTTTTGGACTCCTGATGATCCAAAGAGTTTACAGTCATGGTTTGGT

>M6-PGSC0003DMG400028845-(rev)M6LRR-RLK\_1098

CTATATAATTTACTTTTGGACTCCTGATGATCCAAAGAGTTTACAGTCATGGTTTGGTTAAGTTGCTCGC  
TACTTTGTACCATGCTGGTCAAGTTGCCGTAGCTGCACATTCTTTAAC

>M6-PGSC0003DMG400028845-(rev)M6LRR-RLK\_1159

AGTTGCTCGCTACTTTGTACCATGCTGGTCAAGTTGCCGTAGCTGCACATTCTTTAACAGATTGTCCTAT  
GTAAAATCTGTCTCTTGAGCCGTTCTCTGTCCATATATAACTATTTCTT

>M6-PGSC0003DMG400028845-(rev)M6LRR-RLK\_122

GTGTTGTTGGTGTGGGAGAGATGAGGTTGTTGTTGCTCCTGGCAGTAGTACTGTTGGTGGCCATTTTGG  
CGAATTTTCAAGCTTTGTTAATGGTGATACAGACCCATCTGATGGTTAGC

>M6-PGSC0003DMG400028845-(rev)M6LRR-RLK\_1220

ATTGTCCTATGTAAAATCTGTCTCTTGAGCCGTTCTCTGTCCATATATAACTATTTCTTTATCATTAAAATTT  
CTTACACAATCACATATGTCTTGATTTTAAAATAATCTAGTTGACTT

>M6-PGSC0003DMG400028845-(rev)M6LRR-RLK\_1281

TCATTAATAATTTCTTACACAATCACATATGTCTTGATTTTAAAATAATCTAGTTGACTTCTGTTTGGTTTTTC  
AGCATCTGTTCTGAGAGTCCTGTATACCACCCTAAACTCACCAGGGCA

>M6-PGSC0003DMG400028845-(rev)M6LRR-RLK\_1342

GTTTGGTTTTTCAGCATCTGTTCTGAGAGTCCTGTATACCACCCTAAACTCACCAGGGCAGCTGACAAAAT  
GGAATGCCAATGGCGGTGATCCTTGTGGAGAGTCCTGGACAGGCATTACC

>M6-PGSC0003DMG400028845-(rev)M6LRR-RLK\_1403

TGACAAAATGGAATGCCAATGGCGGTGATCCTTGTGGAGAGTCCTGGACAGGCATTACCTGCTCGGGC  
AATAAAGTTACTGAAATGTGGGGTTCGGTCTTCCTTTTTGTCTTCATCTCCA

>M6-PGSC0003DMG400028845-(rev)M6LRR-RLK\_1464

CTCGGGCAATAAAGTTACTGAAATGTGGGGTTCGGTCTTCCTTTTTGTCTTCATCTCCATGTTGTTTCAAC  
TTTTTGGAATTATTGACTAGGTAAACTGATGATTAGTTTCTTTTCATTT

>M6-PGSC0003DMG400028845-(rev)M6LRR-RLK\_1525

TTGTTTCAACTTTTTGGAATTATTGACTAGGTAAACTGATGATTAGTTTCTTTTCATTTTCTTCAGCAAGA  
TGTCAGGTCTTGGGCTCTCAGGTTCATTGGGGTCTCAGCTAGATAGTC

>M6-PGSC0003DMG400028845-(rev)M6LRR-RLK\_1586

CTTCAGCAAGATGTCAGGTCTTGGGCTCTCAGGTTCATTGGGGTCTCAGCTAGATAGTCTAAAATCTGTG  
ACCAATTTGTAAGATAAATGGCCTTCATTTGTTCTTATTAATTGGATTT

>M6-PGSC0003DMG400028845-(rev)M6LRR-RLK\_1647

AAATCTGTGACCAATTTGTAAGATAAATGGCCTTCATTTGTTCTTATTAATTGGATTTATGTTGAATTCCT  
GAATGTGGTCATCTTTGTGAATGTTGCAGTGACATAAGCAATAACAAT

>M6-PGSC0003DMG400028845-(rev)M6LRR-RLK\_1708

GTTGAATTCCTGAATGTGGTCATCTTTGTGAATGTTGCAGTGACATAAGCAATAACAATATGGGGAGCC  
AGTTACCTTACCAGCTTCCTCAAATGTGCAAAGATTGTATGTTTGTAT

>M6-PGSC0003DMG400028845-(rev)M6LRR-RLK\_1769

GGGGAGCCAGTTACCTTACCAGCTTCTCCAAATGTGCAAAGATTGTATGTTTGTATTTGCATATCTTC  
CTCCTTGCAGGTTCTATTTTCTTCTCTTATCTTTCTTAGAACTTGCCT

>M6-PGSC0003DMG400028845-(rev)M6LRR-RLK\_1830

GCATATCTTCTCCTTGCAGGTTCTATTTTCTTCTTATCTTTCTTAGAACTTGCCTTGCAGAAACCTCGC  
TTCTAGTGGTTTTAGTGGTGGCCTCCCATATTCCATTTACAGATGA

>M6-PGSC0003DMG400028845-(rev)M6LRR-RLK\_1891

CAGAAACCTCGCTTCTAGTGGTTTTAGTGGTGGCCTCCCATATTCCATTTACAGATGACCTCCCTCCAGT  
ACTTGTAAGTGAATGCTTAAATTTAATATTTGCTTAAATACTTGGTCCT

>M6-PGSC0003DMG400028845-(rev)M6LRR-RLK\_1952

TCCCTCCAGTACTTGTAAGTGAATGCTTAAATTTAATATTTGCTTAAATACTTGGTCCTCTTCACTCTTT  
GGGGCTCCTTATGGTTCTTTGCAATGTTTATGCCTGGTTGTAGAAATG

>M6-PGSC0003DMG400028845-(rev)M6LRR-RLK\_2013

TCATTCTCTTTGGGGCTCCTTATGGTTCTTTGCAATGTTTATGCCTGGTTGTAGAAATGTCAGTCATAATC  
AAATTCAAGGATCAGTGGTTGTCTCGTTTGACTCGCTCTCTGCACTCAA

>M6-PGSC0003DMG400028845-(rev)M6LRR-RLK\_2074

AGTCATAATCAAATCAAGGATCAGTGGTTGTCTCGTTTGACTCGCTCTCTGCACTCAACACATTGTAAG  
GCCGATTCATCTCCTTCCATTACACCAGAGTTTTCATATTGCCTAATTAT

>M6-PGSC0003DMG400028845-(rev)M6LRR-RLK\_2135

CATTGTAAGGCCGATTCATCTCCTTCCATTACACCAGAGTTTTCATATTGCCTAATTATGATCTGAATGAG  
AATAGTTTGCTGTTCTCAAATGTTATGATGAAAGTACACTTATTCTATT

>M6-PGSC0003DMG400028845-(rev)M6LRR-RLK\_2196

TCTGAATGAGAATAGTTTGTCTCAAATGTTATGATGAAAGTACACTTATTCTATTATTTAAGTTGTC  
TCGATTTGAGAAAGAGGTTAAACACACTTGTTCATTTCCACACTTACT

>M6-PGSC0003DMG400028845-(rev)M6LRR-RLK\_2257

TTAAGTTGTCTCGATTTGAGAAAGAGGTTAAACACACTTGTTCATTTCCACACTTACTGTGCAGAAGTG  
AGTCATGTCTTTGGTCTGCTGCCAAAGTATTGAATTATGCCAATTGAGCT

>M6-PGSC0003DMG400028845-(rev)M6LRR-RLK\_2318

GCAGAAGTGAGTCATGTCTTTGGTCTGCTGCCAAAGTATTGAATTATGCCAATTGAGCTTAGTTGCTACT

TAGATTGTA CTTATTCTTAAGCAAGTATTA AAAAGCCTCAAAGGTGCGCTT

>M6-PGSC0003DMG400028845-(rev)M6LRR-RLK\_2745

TGATAACGCTGGTACCTTATCATATTTTCTTGTTTAAAACATAATAGTTTGAAATTTATCATTCTCGGTCAC  
AATTTTGATTGATCTTTTAAATGCTTCAGGGATTCTCTTTCAATTCT

>M6-PGSC0003DMG400028845-(rev)M6LRR-RLK\_2806

TTCTCGGTCACAATTTTGATTGATCTTTTAAATGCTTCAGGGATTCTCTTTCAATTCTATGACGGGTAATC  
TTCCTCAAAGCTTCCAGTCACTAACTAGTATGAACAAAATGTAAGAAG

>M6-PGSC0003DMG400028845-(rev)M6LRR-RLK\_2867

GACGGGTAATCTTCCTCAAAGCTTCCAGTCACTAACTAGTATGAACAAAATGTAAGAAGAGTTTTTCATAC  
TTCATCTATCTATTTGCAAACCTCCATCAGATATAGAAGTTTTGTTGTTA

>M6-PGSC0003DMG400028845-(rev)M6LRR-RLK\_2928

TTTTCATACTTCATCTATCTATTTGCAAACCTCCATCAGATATAGAAGTTTTGTTGTTATAATATGCAGGTA  
TTTGCAACAACCAAGTTTAGTGGAACCTATTGATGTCCTGGCCAATCT

>M6-PGSC0003DMG400028845-(rev)M6LRR-RLK\_2989

ATATGCAGGTATTTGCAGAACAACCAAGTTTAGTGGAACCTATTGATGTCCTGGCCAATCTCCCCTTGAA  
ATCTGTGAGTTGTATGCCACATGTGTAGATATTATGTCTTATGTCTACAT

>M6-PGSC0003DMG400028845-(rev)M6LRR-RLK\_305

AGTACAAGTTCCAGTTTTCTGTTCTCAAGGAAAAATTTAGCTGAGAGTGGGCTTGAGTCTTGACAACCTC  
ATGAAATGAACAAACCAACTGAAAAAAGTTGTTTCTTTGAAGCCCCATG

>M6-PGSC0003DMG400028845-(rev)M6LRR-RLK\_3050

CCCTTGAAATCTGTGAGTTGTATGCCACATGTGTAGATATTATGTCTTATGTCTACATCTCACTTCAGTT  
TCAGTTAAATCCATTGGTTGAAAACCATGTTGATTCTTCTATTCTTTAG

>M6-PGSC0003DMG400028845-(rev)M6LRR-RLK\_3111

CACTTCAGTTTCAGTTAAATCCATTGGTTGAAAACCATGTTGATTCTTCTATTCTTTAGGAATGTTGAAAA  
CAACCAATTTACTGGCTGGATTCCAGATCAGCTGAAAGGGATAGTGCAG

>M6-PGSC0003DMG400028845-(rev)M6LRR-RLK\_3172

ATGTTGAAAACAACCAATTTACTGGCTGGATTCCAGATCAGCTGAAAGGGATAGTGCAGTGAGTGTCTT  
AGATTGCAATAATTTTCACTTCTTTGCAAATCTTTGGGGAGTTCTTTC

>M6-PGSC0003DMG400028845-(rev)M6LRR-RLK\_3233

AGTGTCTTAGATTGCAATAATTTTCATTCTTCTTTGCAAATTCTTTGGGGAGTTCTTTCTAATTGTTTTCTG  
CATTTATGAATCTTTCATAACAGATCAAATGGTAATTCATGGATCTCC

>M6-PGSC0003DMG400028845-(rev)M6LRR-RLK\_3294

ATTGTTTTCTGCATTTATGAATCTTTCATAACAGATCAAATGGTAATTCATGGATCTCCGGACCTGCACCC  
CCACCTCCACCTGGCACACCTCCTGCAAACAATCCCAATGGAGATCACA

>M6-PGSC0003DMG400028845-(rev)M6LRR-RLK\_3355

ACCTGCACCCCCACCTCCACCTGGCACACCTCCTGCAAACAATCCCAATGGAGATCACAAATCCAGAGAC  
AACAGCAGCAATTCGGGCAGTAGGAAATCAGGTATAGGGGGTGGAGGTGT

>M6-PGSC0003DMG400028845-(rev)M6LRR-RLK\_3416

TCCAGAGACAACAGCAGCAATTCGGGCAGTAGGAAATCAGGTATAGGGGGTGGAGGTGTTGCAGGAA  
TAGTGATATCTATTCTAGTTGTTGGAGCAATAGTAGCATTCTTTATTATCAAG

>M6-PGSC0003DMG400028845-(rev)M6LRR-RLK\_3477

CAGGAATAGTGATATCTATTCTAGTTGTTGGAGCAATAGTAGCATTCTTTATTATCAAGAAAAGATCAAG  
AAGGTCGTCCACAGACATAGAAAACTTGATAAGCAGCCACTTGCTCCTC

>M6-PGSC0003DMG400028845-(rev)M6LRR-RLK\_3538

AAGATCAAGAAGGTCGTCCACAGACATAGAAAACTTGATAAGCAGCCACTTGCTCCTCTTACTTCACAG  
AAAGTAGAAGGTATTTGGCTTTCATAATTCTTGATATTGTTAGAAATGTC

>M6-PGSC0003DMG400028845-(rev)M6LRR-RLK\_3599

ACTTCACAGAAAGTAGAAGGTATTTGGCTTTCATAATTCTTGATATTGTTAGAAATGTCTTGAATTCTCTC  
TCAACTCTTTGGATATTTCTTAACGAATAATTATAATCAATTGCGGTGT

>M6-PGSC0003DMG400028845-(rev)M6LRR-RLK\_3660

GAATTCTCTCTCAACTCTTTGGATATTTCTTAACGAATAATTATAATCAATTGCGGTGTTACTATTTACTCA  
GTTGCTTGGGAATATGGAAAATGATGTCTAACCTCTATCCTTACCTTG

>M6-PGSC0003DMG400028845-(rev)M6LRR-RLK\_3721

CTATTTACTCAGTTGCTTGGGAATATGGAAAATGATGTCTAACCTCTATCCTTACCTTGCTAATGAGTGGT  
CATAAACCATGCAAGTAGTATCAAATTTTGCAAGGGGTTGCCATTGAT

>M6-PGSC0003DMG400028845-(rev)M6LRR-RLK\_3782

AATGAGTGGTCATAAACCATGCAAGTAGTATCAAATTTTGCAAGGGGTTGCCATTGATACAGAAGGAA  
GCAGCAAAGCTGGAAAATATTTATCTTCGAAGTGGAAAACTGTATGGATT

>M6-PGSC0003DMG400028845-(rev)M6LRR-RLK\_3843

AGAAGGAAGCAGCAAAGCTGGAAAATATTTATCTTCGAAGTGGAAAACTGTATGGATTTGAAAGATCC  
TAAGTTCTGAACAAACAAAAGTTTCATACTTTATTGGTAGTCCCGTAGGTA

>M6-PGSC0003DMG400028845-(rev)M6LRR-RLK\_3904

AAAGATCCTAAGTTCTGAACAAACAAAAGTTTCATACTTTATTGGTAGTCCCGTAGGTATAATCTTTAGA  
AATTCAAACTGATCTTTTGGAGGAGTTCCTAAATTACGTGGTGCTTTTAA

>M6-PGSC0003DMG400028845-(rev)M6LRR-RLK\_3965

ATCTTTAGAAATTCAAACCTGATCTTTTGGAGGAGTTCCTAAATTACGTGGTGCTTTTAAAGCTTATGATTA  
TTTTTTGACAAATTAACATCAGCTACCCTTGATGGTTTAACTTCCTGGG

>M6-PGSC0003DMG400028845-(rev)M6LRR-RLK\_4026

CTTATGATTATTTTTTGACAAATTAACATCAGCTACCCTTGATGGTTTAACTTCCTGGGAGACAAAAACTC  
TTGAGAATATAGTTGACCCGAAGAACTCTTGCTTCAGACAAATATGAAG

>M6-PGSC0003DMG400028845-(rev)M6LRR-RLK\_4087

ACAAAAACTCTTGAGAATATAGTTGACCCGAAGAACTCTTGCTTCAGACAAATATGAAGTTGCTTTCTCC  
TTTTTAATCCATCAAAGCCCAAAAACAAACCGTCTCTTACAATACGAG

>M6-PGSC0003DMG400028845-(rev)M6LRR-RLK\_4148

GCTTTCTCCTTTTTAATCCATCAAAGCCCAAAAACAAACCGTCTCTTACAATACGAGTTCCTTCTCATTT  
GCAACTTCATCAGTAATTTCCAGTTCATGCTTATAACTTTTCATGCCT

>M6-PGSC0003DMG400028845-(rev)M6LRR-RLK\_4209

CCTTCTCATTTGCAACTTCATCAGTAATTTCCAGTTCATGCTTATAACTTTTCATGCCTCATTTTCATTATCGA  
CTTCAATGATGTCATGGAATCCAAATTGGAACCTTGATTTGCTTATG

>M6-PGSC0003DMG400028845-(rev)M6LRR-RLK\_4270

TTTCATTATCGACTTCAATGATGTCATGGAATCCAAATTGGAACCTTGATTTGCTTATGTCTAACTTTTTCA  
TTGTTGTGTTGCTGTTTTTTTTAAAAGGTAACATCACTGTTATGTTTT

>M6-PGSC0003DMG400028845-(rev)M6LRR-RLK\_4331

TAACTTTTTTCATTGTTGTGTTGCTGTTTTTTTTAAAAGGTAACATCACTGTTATGTTTTGTTTGTCCCGGA  
ATTCCTACTCATTGTCTGTTTTTGGTTGCAGAGTTGAAACCTTATCAA

>M6-PGSC0003DMG400028845-(rev)M6LRR-RLK\_4392

TTGTTCCCGGAATTCCTACTCATTGTCTGTTTTTGGTTGCAGAGTTGAAACCTTATCAAACCTTCTCCACA

GTAAGCACGGGCACATTTGAAACTCCCCTGCTGTAAGCTAAGACCTC

>M6-PGSC0003DMG400028845-(rev)M6LRR-RLK\_4453

CTTCTCCACAGTAAGCACGGGCACATTTGAAACTCCCCTGCTGTAAGCTAAGACCTCCACCTATTGATC

GCCTTAAGTCCTTTGATGAGGTTGACATTTACCGAAACCCATTGTTCC

>M6-PGSC0003DMG400028845-(rev)M6LRR-RLK\_4514

CCTATTGATCGCCTTAAGTCCTTTGATGAGGTTGACATTTACCGAAACCCATTGTTCTCCCAAGAAAAT

TAATACAGCTCAAATCAGGGCTACACAGTTTTCAATTGCAGACCTACAG

>M6-PGSC0003DMG400028845-(rev)M6LRR-RLK\_4575

CCAAGAAAATTAATACAGCTCAAATCAGGGCTACACAGTTTTCAATTGCAGACCTACAGATTGCTACTGA

TAGCTTCAATGTTGAAAACCTTATTGACGAGGGATCAATTGGGCGTGTTT

>M6-PGSC0003DMG400028845-(rev)M6LRR-RLK\_4636

TGCTACTGATAGCTTCAATGTTGAAAACCTTATTGACGAGGGATCAATTGGGCGTGTTTATTGCGCTCAG

TTTGATGATGGCAAAGTAATACTTCTCTCTATGACTACCCATTAATAAAAAA

>M6-PGSC0003DMG400028845-(rev)M6LRR-RLK\_4697

TGCGCTCAGTTTGATGATGGCAAAGTAATACTTCTCTCTATGACTACCCATTAATAAAAAACTTTTTTTCTTTC

TTATGACTATATAAGATGATTTAGTGATGCTAACACATGTTTAGGCAA

>M6-PGSC0003DMG400028845-(rev)M6LRR-RLK\_4758

TTTTTTCTTTCTTATGACTATATAAGATGATTTAGTGATGCTAACACATGTTTAGGCAAAAATGTATTATCA

GAGAAACTACATACTTATTGTGTTCCCTTCTGTTATTTGAAATGTTGT

>M6-PGSC0003DMG400028845-(rev)M6LRR-RLK\_4819

ATGTATTATCAGAGAAACTACATACTTATTGTGTTCCCTTCTGTTATTTGAAATGTTGTAGGTTCTTGCTGT

CAAGAAAATCAATTCTTCTGCCCTCCAAAATCATGAAGATTTTCTCTA

>M6-PGSC0003DMG400028845-(rev)M6LRR-RLK\_4880

GTTCTTGCTGTCAAGAAAATCAATTCTTCTGCCCTCCAAAATCATGAAGATTTTCTCTATATAGTTTCTGA

GATATCACAGTTGCACCATCCAAATATAATTGAGCTTGTTGGTTATTGT

>M6-PGSC0003DMG400028845-(rev)M6LRR-RLK\_4941

TAGTTTCTGAGATATCACAGTTGCACCATCCAAATATAATTGAGCTTGTTGGTTATTGTTTCAGAGCATGG

ACAGTACTTGCTAGTTCATGAATTCCATAAAAATGGTTCTCTGCATGATT

>M6-PGSC0003DMG400028845-(rev)M6LRR-RLK\_5002



AGAGCATGGACAGTACTTGCTAGTTCATGAATCCATAAAAATGGTTCTCTGCATGATTTCTGCACCTG  
TCAGATGAAGACAGCAAGCCACTGGCATGGAATAGCCGAGTCAAGATTGC

>M6-PGSC0003DMG400028845-(rev)M6LRR-RLK\_5063

CTGCACCTGTCAGATGAAGACAGCAAGCCACTGGCATGGAATAGCCGAGTCAAGATTGCACTTGGTGCA  
GCACGAGCACTAGAGTGAGTTTTTGAATCTCAGAATTATTTTATCATATT

>M6-PGSC0003DMG400028845-(rev)M6LRR-RLK\_5124

TTGGTGCAGCAGCACTAGAGTGAGTTTTTGAATCTCAGAATTATTTTATCATATTTTATATTCAATT  
GGTTACAGTTATGCGGGACTATTTCTTATTGATTCATTCCAGAAAGGA

>M6-PGSC0003DMG400028845-(rev)M6LRR-RLK\_5368

TCAGACAAATGCTATGCCATGTTTAAGATCGATCACAAGTTTCAAATTTTTTTATCCCTTTCTTAGATTCAA  
TGCCGATTGGAAGTATGTCACATAAATTGGAAGGGGAAGTAAAATTCA

>M6-PGSC0003DMG400028845-(rev)M6LRR-RLK\_5429

CTTAGATTCAATGCCGATTGGAAGTATGTCACATAAATTGGAAGGGGAAGTAAAATTCATGGAGCATGC  
AGCAATGCTATGTTTTCTCTTTATTTATTGATGGCCAATTACTAGTAGTT

>M6-PGSC0003DMG400028845-(rev)M6LRR-RLK\_549

CTCGGACACTGTGGTTATCATAAAAAAGATCTTTGAAAATGATGGATATAATAAGTCTTGCTTGGGCTGC  
ATCAATGGTAGTCTTCACTTTTCGAGTAAGGGAAATACTCATTACTTATGG

>M6-PGSC0003DMG400028845-(rev)M6LRR-RLK\_5490

GAGCATGCAGCAATGCTATGTTTTCTCTTTATTTATTGATGGCCAATTACTAGTAGTTTACATGAATCTT  
CTGCTTATCTATACCGGAGATTCATAGAGTAGATCTTCTGGGTAGAAGA

>M6-PGSC0003DMG400028845-(rev)M6LRR-RLK\_5551

CATGAATCTTCTGCTTATCTATACCGGAGATTCATAGAGTAGATCTTCTGGGTAGAAGAAAAGGGGATTC  
TGTGAAAGTCAATACCAAGCACGTAGTCGTGACTCGTGATGAACTTTACC

>M6-PGSC0003DMG400028845-(rev)M6LRR-RLK\_5612

AGGGGATTCTGTGAAAGTCAATACCAAGCACGTAGTCGTGACTCGTGATGAACTTTACCAGAGGATCCA  
TAGTAATATTGCATTTAGAGGTCATACTTGTGGACTAAAAAGACCACTAT

>M6-PGSC0003DMG400028845-(rev)M6LRR-RLK\_5673

AGGATCCATAGTAATATTGCATTTAGAGGTCATACTTGTGGACTAAAAAGACCACTATAGAGTTTAGTC  
TTTTTTAAACATTGATGACCAGTAAGTTAACATAAAGAAGAGTTCATTTA

>M6-PGSC0003DMG400028845-(rev)M6LRR-RLK\_5734

AGTTTAGTCTTTTTTAAACATTGATGACCAGTAAGTTAACATAAAGAAGAGTTCATTTATTCCTTTTAGTT  
AGAGCCTAGTATCCTAAATATGCCGGTCTTGCCAATATAAAGCTAATCA

>M6-PGSC0003DMG400028845-(rev)M6LRR-RLK\_61

GACCCTTTTCTTCTTTTAGTGTCTTTTTCTCACTCAAAAAAGAGTCTTTCTGTGTAATTTTGTGTTGTTGGT  
GTGGGAGAGATGAGGTTGTTGTTGCTCCTGGCAGTAGTACTGTTGGTG

>M6-PGSC0003DMG400028845-(rev)M6LRR-RLK\_610

TTGGGCTGCATCAATGGTAGTCTTCACTTTTCGAGTAAGGGAAATACTCATTACTTATGGCTGAACAACCC  
CTTAGTCTTGTGCGACTAGATTGAGTCATAGTTATTGTAATTGTTGTATTT

>M6-PGSC0003DMG400028845-(rev)M6LRR-RLK\_6100

TGTAACAAATTTCCAATTTATGTGGTTTTTCATATCTGTTCAATTCCTGTTTTCCATACACAAATTTCTTCACT  
AGCTAATATAAGCATCCTTTCAGGTATCTGCATGAAGTTCATTCAC

>M6-PGSC0003DMG400028845-(rev)M6LRR-RLK\_6161

AATTTCTTCACTAGCTAATATAAGCATCCTTTCAGGTATCTGCATGAAGTTCATTCACCATCATTGGTTC  
ATAAAAACATTAATCGGCAAATATTTTACTTGATCTGGAACCTCAATCC

>M6-PGSC0003DMG400028845-(rev)M6LRR-RLK\_6222

TCATTGGTTCATAAAAACATTAATCGGCAAATATTTTACTTGATCTGGAACCTCAATCCTCATCTATCAGA  
CTCTGGATTAGCAAGCCTTATTAATGATGCAGATCAGGTGGCTTTAAGC

>M6-PGSC0003DMG400028845-(rev)M6LRR-RLK\_6283

ATCTATCAGACTCTGGATTAGCAAGCCTTATTAATGATGCAGATCAGGTGGCTTTAAGCTCCTTACTTTAT  
GCATTGTTGCAAAGTGTTCGGTGGATTTCGATATAGAAGCATGCATGCA

>M6-PGSC0003DMG400028845-(rev)M6LRR-RLK\_6344

CTTACTTTATGCATTGTTGCAAAGTGTTCGGTGGATTTCGATATAGAAGCATGCATGCACATAAGTACAC  
ATGTATTATATAGGCATGTTTTGACATACTATTGGCTGTGTATGTGTCCT

>M6-PGSC0003DMG400028845-(rev)M6LRR-RLK\_6405

TAAGTACACATGTATTATATAGGCATGTTTTGACATACTATTGGCTGTGTATGTGTCCTTTTCAAGGAGAT  
AAGAAATATCAAAAAACCACATGGTTGAAACGTCATTTGTTTCAGGAGA

>M6-PGSC0003DMG400028845-(rev)M6LRR-RLK\_6466

TCAAGGAGATAAGAAATATCAAAAAACCACATGGTTGAAACGTCATTTGTTTCAGGAGAAGCTTTGTTTT

GTGCACAAACCTTTGAAACATGAAATCATTTACAACAGTTTCTGGGGTGC

>M6-PGSC0003DMG400028845-(rev)M6LRR-RLK\_6527

CTTTGTTTTGTGCACAAACCTTTGAAACATGAAATCATTTACAACAGTTTCTGGGGTGCATAAATTGGATT

CCAAGAGAAGTTGTCAAGTAAAAACAGAAAATTTATCCAAATCTAGA

>M6-PGSC0003DMG400028845-(rev)M6LRR-RLK\_6588

AAATTGGATTCCAAGAGAAGTTGTCAAGTAAAAACAGAAAATTTATCCAAATCTAGAGCATGGAATT

ATCCAGTATATTCTATAGAAGTAACACTACCATATAAGTCATTTTAATGAA

>M6-PGSC0003DMG400028845-(rev)M6LRR-RLK\_6649

ATGGAATTATCCAGTATATTCTATAGAAGTAACACTACCATATAAGTCATTTTAATGAACTAGTCTCTCTA

TGGTCCCTGTTGCTTTATCTCTTGCTCTTCTCTACTTACTCAATTGGTA

>M6-PGSC0003DMG400028845-(rev)M6LRR-RLK\_6710

AGTCTCTCTATGGTCCCTGTTGCTTTATCTCTTGCTCTTCTCTACTTACTCAATTGGTAAAATTGTAGCCGT

TTCTTCTTCTTCTTAAAAGATTCACATAACTATCATCTTCTCAAGATG

>M6-PGSC0003DMG400028845-(rev)M6LRR-RLK\_6771

ATTGTAGCCGTTTCTTCTTCTTCTTAAAAGATTCACATAACTATCATCTTCTCAAGATGTTTGAAAGTGATC

ATCTTTGCAGGCACTAAACCATAATACAGGGTCTGGATATGGTGCACC

>M6-PGSC0003DMG400028845-(rev)M6LRR-RLK\_6832

TGAAAGTGATCATCTTTGCAGGCACTAAACCATAATACAGGGTCTGGATATGGTGCACCTGAGGTAGCT

ATGTATGGGCAATGCACCATAAAAAGTGATGTCTACAGCTTTGGAGTTGTT

>M6-PGSC0003DMG400028845-(rev)M6LRR-RLK\_6893

AGGTAGCTATGTATGGGCAATGCACCATAAAAAGTGATGTCTACAGCTTTGGAGTTGTTATGTTGGAAC

TTCTTACCGGACGGACACCTTTTGACAGGTAAAGTTACTTAGGCATCATGA

>M6-PGSC0003DMG400028845-(rev)M6LRR-RLK\_6954

GTTGGAACCTTACCGGACGGACACCTTTTGACAGGTAAAGTTACTTAGGCATCATGATATTGTGTCAA

ATTACTAAGAAACAAACAGGAAGAAATTCAGAAAGTCTTAACTTTCTTGA

>M6-PGSC0003DMG400028845-(rev)M6LRR-RLK\_7015

TTGTGTCAAATTACTAAGAAACAAACAGGAAGAAATTCAGAAAGTCTTAACTTTCTTGATCAATATGTAT

GCTCTTGATGCAGTGAGAGACCAAGATCTGAACAATCTTTAGTTAGATGG

>M6-PGSC0003DMG400028845-(rev)M6LRR-RLK\_7076

AATATGTATGCTCTTGATGCAGTGAGAGACCAAGATCTGAACAATCTTTAGTTAGATGGGCAACACCTCA  
ACTCCATGATATTGATGCCTTAGCTAAGATGGTTGATCCAGCACTCAAAG

>M6-PGSC0003DMG400028845-(rev)M6LRR-RLK\_7137

AACACCTCAACTCCATGATATTGATGCCTTAGCTAAGATGGTTGATCCAGCACTCAAAGGGCTCTATCCT  
GTTAAATCCATTTCCCGCTTTGCTGATGTAATTGCTCTTTGTGTCCAGGT

>M6-PGSC0003DMG400028845-(rev)M6LRR-RLK\_7198

CTCTATCCTGTAAATCCATTTCCCGCTTTGCTGATGTAATTGCTCTTTGTGTCCAGGTAATATTTTGTATA  
GACAGTGTGCCAAATTCATAAATCTGCTGTGTTAATCAAGAACCTAGT

>M6-PGSC0003DMG400028845-(rev)M6LRR-RLK\_7259

TATTTTGTATAGACAGTGTGCCAAATTCATAAATCTGCTGTGTTAATCAAGAACCTAGTTCTGTTAGTTCA  
GTCAACACTATCTCATTGTCCTGTATGCTATTGTTGACAGCCTGAGCCT

>M6-PGSC0003DMG400028845-(rev)M6LRR-RLK\_7320

TGTTAGTTCAGTCAACACTATCTCATTGTCCTGTATGCTATTGTTGACAGCCTGAGCCTGAGTTCCGGCCA  
CCTATGTCAGAAGTGGTTGAAGCCTTAGTTCGGCTAGTTCAACGAGCAA

>M6-PGSC0003DMG400028845-(rev)M6LRR-RLK\_7381

GTTCCGGCCACCTATGTCAGAAGTGGTTGAAGCCTTAGTTCGGCTAGTTCAACGAGCAAATATGAGCAA  
GAGGACATATAGTATTGATCGGGTTCAAGGGGTGAAACAGATGCTCAAGA

>M6-PGSC0003DMG400028845-(rev)M6LRR-RLK\_7442

ATGAGCAAGAGGACATATAGTATTGATCGGGGTTCAGGGGTGAAACAGATGCTCAAGACAACCAACC  
TTAGTTCCGATGTAATGTAGCCTTTTCTACCAGAATGTCTCTCTTTATAGTT

>M6-PGSC0003DMG400028845-(rev)M6LRR-RLK\_7503

ACCAACCTTAGTTCGGATGTAATGTAGCCTTTTCTACCAGAATGTCTCTCTTTATAGTTTGTGTTTATGGG  
ATCTATCAGCTTATCTGTTTCAGCAAGATCTTGTGGTTTCATTGCGTT

>M6-PGSC0003DMG400028845-(rev)M6LRR-RLK\_7564

TTGTTTATGGGATCTATCAGCTTATCTGTTTCAGCAAGATCTTGTGGTTTCATTGCGTTGTACACACTGCT  
AGATACTAAAATCTGTTTCATAGTCATATTCAATTTTCATTTTCCCTG

>M6-PGSC0003DMG400028845-(rev)M6LRR-RLK\_854

GGGAAGATGCACTTAATAGCTAATAGAAAACGTCAACCTTCGCACAATAATTTTCTTTTCATTAATAAATTG  
AACAAAGTCTGGGTAAAAGGTAAATCCTTACAGAACTTGTGGTTTGTGAA

>M6-PGSC0003DMG400028845-(rev)M6LRR-RLK\_915

TAAAAATTGAACAAGTCTGGGTAAAAGGTAAATCCTTACAGAACTTGTGGTTTGTGAATGTGATTGGT  
TTTAGTTACTATTGCCAGCCTTATATAAGCAATTACTGGATAATGTTTTCT

>M6-PGSC0003DMG400028845-(rev)M6LRR-RLK\_976

TGATTGGTTTTAGTTACTATTGCCAGCCTTATATAAGCAATTACTGGATAATGTTTTCTACTTTATGTGGT  
AAGGGGTGACAAAACCAATGAGTTTGAAGTTGATCAAAACTTAATAA

>M6-PGSC0003DMG400029146M6LRR-RLK\_0

GGAAAATGAAGGATCATTTCATATTAGAAAAAGTTGCTCAAGCTTTATTTAGTTCCTCTTTTTCCATGCAA  
CTTATGATATAGAACTTTTCATATCTAGCTAGAGAGAAAAAATGGCCAGC

>M6-PGSC0003DMG400029146M6LRR-RLK\_1054

TTGCGAACAATTTCACTGGTAGAATTCCAAATACTTTATCTACCTTACCTCGACTTCAAGTTCTTCAACTAT  
GGTCTAATAAATTATCTGGTGAGATTCCCAAGGACCTTGGGAAACACA

>M6-PGSC0003DMG400029146M6LRR-RLK\_1116

CTTCAACTATGGTCTAATAAATTATCTGGTGAGATTCCCAAGGACCTTGGGAAACACAACAATCTCACAA  
TTCTAGACCTTTCCACCAATAACCTCACGGGTAAAATACCCGAAACCATA

>M6-PGSC0003DMG400029146M6LRR-RLK\_1178

TCTCACAATTCTAGACCTTTCCACCAATAACCTCACGGGTAAAATACCCGAAACCATATGTTACTCCAACC  
ATCTTTTCAAACCTCATACTCTTTTCAAATTCACCTTCATGGCGAAATCCC

>M6-PGSC0003DMG400029146M6LRR-RLK\_124

GATCAAAATCGATCATGTGTTTGATCGTGTTGCTATTTTACATGCAGCAAGTCAAAGTATCTCTGA  
GCTGGAGCTACTTTTATCGATGAAAACATCGATGAAGGATCCATTAGGAT

>M6-PGSC0003DMG400029146M6LRR-RLK\_1240

ACTCCAACCATCTTTTCAAACCTCATACTCTTTTCAAATTCACCTTCATGGCGAAATCCCTGTAAGCTTGAGAC  
ATTGCAAAAGCTTACAAAGGGTCCGCCTTCAAACAACCCACCTCACCG

>M6-PGSC0003DMG400029146M6LRR-RLK\_1302

AGCTTGAGACATTGCAAAGCTTACAAAGGGTCCGCCTTCAAACAACCCACCTCACCGGTGAATTGTCCT  
CAGAATTCACAAAGCTCCCACTTGTTTACTTCTTGATATCTCAGGCAAC

>M6-PGSC0003DMG400029146M6LRR-RLK\_1364

ATTGTCCTCAGAATTCACAAAGCTCCCACTTGTTTACTTCTTGATATCTCAGGCAACAATCTATTTGGCTC

CATTAGCGAAAGACGATGGGATATGCCATCACTTCAAATGCTAAATTT

>M6-PGSC0003DMG400029146M6LRR-RLK\_1426

TATTTGGCTCCATTAGCGAAAGACGATGGGATATGCCATCACTTCAAATGCTAAATTTGGCTAGGAACAA  
GTTTTTGGTACCTTGCCTGATTCTTTGGTAGCAAGAACTCGAAAAC

>M6-PGSC0003DMG400029146M6LRR-RLK\_1488

AGGAACAAGTTTTTGGTACCTTGCCTGATTCTTTGGTAGCAAGAACTCGAAAACCTGGACTTATCGG  
AAAATGATTTTAACAGTACTATTCCTAAGAATTCGGAGAGTTATCAGAG

>M6-PGSC0003DMG400029146M6LRR-RLK\_1550

CTTATCGGAAAATGATTTTAACAGTACTATTCCTAAGAATTCGGAGAGTTATCAGAGTTAATGGAGCTC  
AAACTAAGAAGCAACAAGCTTTCAGGCGAAATCCCAATGAATTGTCTTC

>M6-PGSC0003DMG400029146M6LRR-RLK\_1612

TGGAGCTCAAATAAGAAGCAACAAGCTTTCAGGCGAAATCCCAATGAATTGTCTTCATGCAAGAAGA  
TTGTGAGTCTTGATCTGAGCCATAATCGATTTTCAGGTCAAATTCCTCAACTA

>M6-PGSC0003DMG400029146M6LRR-RLK\_1674

AAGAAGATTGTGAGTCTTGATCTGAGCCATAATCGATTTTCAGGTCAAATTCCTCAACTAGTCTCTCCGAAA  
TGCAAGTTCTTAGCCTTCTTGATTTGTCAATGAATGAATTATCAGGTGAA

>M6-PGSC0003DMG400029146M6LRR-RLK\_1736

CTCCGAAATGCAAGTCTTAGCCTTCTTGATTTGTCAATGAATGAATTATCAGGTGAAATCCCGCCTAATT  
TGGGGAAAGTTGAATCACTTGTCTTGGTTAACATCTCTCACAACCATTT

>M6-PGSC0003DMG400029146M6LRR-RLK\_1798

CGCCTAATTTGGGGAAAGTTGAATCACTTGTCTTGGTTAACATCTCTCACAACCATTTTCAGTGGATATTTA  
CCATCCACCGGAGCTTTCCTAGCCATAAATTCAAGTGCGGTGGTTGGAA

>M6-PGSC0003DMG400029146M6LRR-RLK\_186

ATCTCTGAGCTGGAGCTACTTTTATCGATGAAAACATCGATGAAGGATCCATTAGGATCTCTTCATGATT  
GGATTCCGCGGTCTCAATCTTTTGCATTGGAATGGTGTGTTGTGAT

>M6-PGSC0003DMG400029146M6LRR-RLK\_1860

GGATATTTACCATCCACCGGAGCTTTCCTAGCCATAAATTCAAGTGCGGTGGTTGGAAACCAACTATGTG  
CCCGTGGGGACGACGACATTACAAGCGGCTTAACGCCTTGTAATCGCTC

>M6-PGSC0003DMG400029146M6LRR-RLK\_1922

ACTATGTGCCCGTGGGGACGACGACATTACAAGCGGCTTAACGCCTTGTAATCGCTCAAGAAAAGCTC  
AATTTGGTGGTTCTTCTTGACATTTCTTCTTGGAATACTAGTTTTGCTAGT

>M6-PGSC0003DMG400029146M6LRR-RLK\_1984

AAAGCTCAATTTGGTGGTTCTTCTTGACATTTCTTCTTGGAATACTAGTTTTGCTAGTATTCTCGGCTTTAG  
TTGTTGTATTTATTCAAAGAAGAAGAGAATTGAAGCTAAAGAAAGTGG

>M6-PGSC0003DMG400029146M6LRR-RLK\_2046

TCGGCTTTAGTTGTTGTATTTATTCAAAGAAGAAGAGAATTGAAGCTAAAGAAAGTGGAGAGTACTACT  
CAAGATGGTAATAATTGGGAAATTCAATTCTTCGATTCAAAAAGCCTCAAAA

>M6-PGSC0003DMG400029146M6LRR-RLK\_2108

TACTACTCAAGATGGTAATAATTGGGAAATTCAATTCTTCGATTCAAAAAGCCTCAAAAATCCATCACCTAG  
ATGACATCTTAGGGATTGGAGTTTCGTACAAAGGGTTTTATTCTGAAAT

>M6-PGSC0003DMG400029146M6LRR-RLK\_2170

TCACCCTAGATGACATCTTAGGGATTGGAGTTTCGTACAAAGGGTTTTATTCTGAAATAAGTAACATGCA  
AGTATTCGTGAAGAAGTTGAATGTGAATATTCCAACAAGTTTTTGGACAA

>M6-PGSC0003DMG400029146M6LRR-RLK\_2232

AACATGCAAGTATTCGTGAAGAAGTTGAATGTGAATATTCCAACAAGTTTTTGGACAAACATCCAAGAA  
CTAGGAAATATTCGACATCCAAATGTTGTGAAGATATTGGCTGCATGCAAAA

>M6-PGSC0003DMG400029146M6LRR-RLK\_2294

CCAAGAACTAGGAAATATTCGACATCCAAATGTTGTGAAGATATTGGCTGCATGCAAATCGGAGAAAGG  
AGGTATTTTGGTTTATGAGTATGTAAAAGGGAAAGATTTGAGTGAAGTGAT

>M6-PGSC0003DMG400029146M6LRR-RLK\_2356

AGAAAGGAGGTATTTTGGTTTATGAGTATGTAAAAGGGAAAGATTTGAGTGAAGTGATTTCGAGTCATG  
AGTTGGGAACGTAGACAAAAAATTGCTATTGGCATATCTAGAGCATTGAAAT

>M6-PGSC0003DMG400029146M6LRR-RLK\_2418

GTCATGAGTTGGGAACGTAGACAAAAAATTGCTATTGGCATATCTAGAGCATTGAAATATTTGCATTGTT  
CTTGTTCAAAAGCATTTCATCGGTGACCTTTCTACCCGGAAAGTTATC

>M6-PGSC0003DMG400029146M6LRR-RLK\_248

TCATGATTGGATTCCGCGGTCTCAATCTTTTTGCCATTGGAATGGTGTGTTTGTGATGACTTGTTGCATG  
TTGCAAAAATTGAGCTATCAGGGAAGAACTTATCTGGTAAATTATCCGA

>M6-PGSC0003DMG400029146M6LRR-RLK\_2480

GCATTGTTCTTGTTACAAAGCATTTTCATCGGTGACCTTTCTACCCGGAAAGTTATCATTGACGGAAAA  
GATGAACCTCGCCTGAGATTGAGTCTTCCCACTACGTCCTACGTTGGTCC

>M6-PGSC0003DMG400029146M6LRR-RLK\_2542

ACGGAAAAGATGAACCTCGCCTGAGATTGAGTCTTCCCACTACGTCCTACGTTGGTCCAGGTAAATTTAC  
CATTTTACCCTTGTCATCTACGGTACTTCTCTTGTTTTGACATTTCTTA

>M6-PGSC0003DMG400029146M6LRR-RLK\_2604

AAATTTACCATTTTACCCTTGTCATCTACGGTACTTCTCTTGTTTTGACATTTCTTAAGAGTTTAAGTAAT  
ATACAACCATAAGCTAAAACATCATATATTCTATCAGTTAACATGCAT

>M6-PGSC0003DMG400029146M6LRR-RLK\_2666

TTTAAGTAATATAACAACCATAAGCTAAAACATCATATATTCTATCAGTTAACATGCATGTCTTATTTGCAA  
GATTATAATTAAGCTTACCTACATACATCTTTCAATTGACTAGATCGTG

>M6-PGSC0003DMG400029146M6LRR-RLK\_2728

TATTTGCAAGATTATAATTAAGCTTACCTACATACATCTTTCAATTGACTAGATCGTGTAATTAATTTATA  
TTGATGATGCATATAACTTAATTAACCTCGTTAGTTTAATAATTAACAA

>M6-PGSC0003DMG400029146M6LRR-RLK\_2790

TTAATTTATATTGATGATGCATATAACTTAATTAACCTCGTTAGTTTAATAATTAACAACCTTTGTTATAACT  
TAAACAAACCACATATAGTTTCTAAAGAGTGTAACGTAGCTATGATGA

>M6-PGSC0003DMG400029146M6LRR-RLK\_2852

TGTTATAACTTAAACAAACCACATATAGTTTCTAAAGAGTGTAACGTAGCTATGATGACTTTAATGAAAA  
TTGATTTTTTTCAGCTTTAGCATTGATGTGATAGGAATGTCATGTTATGTT

>M6-PGSC0003DMG400029146M6LRR-RLK\_2914

AATGAAAATTGATTTTTTTCAGCTTTAGCATTGATGTGATAGGAATGTCATGTTATGTTGAAAATTATTTGA  
TCTAACTAAAAGAAATTTTGATTTTTTCTAATTATTAGAATAGAAATAA

>M6-PGSC0003DMG400029146M6LRR-RLK\_2976

ATTATTTGATCTAACTAAAAGAAATTTTGATTTTTTCTAATTATTAGAATAGAAATAATTCTTAGAATTTAC  
GTAATTGGTCTTTATTTGGTTTCTATTTAACTTTAGTTCTCATAGTC

>M6-PGSC0003DMG400029146M6LRR-RLK\_3038

TAGAATTTACGTAATTGGTCTTTATTTGGTTTCTATTTAACTTTAGTTCTCATAGTCTCTAGGAGTAATGA



TAAGGTCAAGGAATTAAGCAAACAAATGTCATGGAGGCAATCATGAAT

>M6-PGSC0003DMG400029146M6LRR-RLK\_310

TGTTGCATGTTGCAAAAATTGAGCTATCAGGGAAGAACTTATCTGGTAAATTATCCGAGACGATTTTCAA  
CTTTCCACACGTTGAATCGATTGATCTCTCGAATAATCAACTCTATGGAG

>M6-PGSC0003DMG400029146M6LRR-RLK\_3100

GGAGTAATGATAAGGTCAAGGAATTAAGCAAACAAATGTCATGGAGGCAATCATGAATGTTTTTTTCTC  
TTAAAATAAATGTAGAGAAATATAAATCTTATCATTCTTTCTTTACGTAG

>M6-PGSC0003DMG400029146M6LRR-RLK\_3162

TTTTCTCTTAAAATAAATGTAGAGAAATATAAATCTTATCATTCTTTCTTTACGTAGAAAACAATAAATCT  
AGTCTAGTGTAACAAAAGTCATGACCTTTTATGCCATGCAAGTACAAT

>M6-PGSC0003DMG400029146M6LRR-RLK\_3224

CAATAAATCTAGTCTAGTGTAACAAAAGTCATGACCTTTTATGCCATGCAAGTACAATACTGTTACTTAAT  
TACGAGTTACAACCTTTTCTCATAAATTGTAGAATACAATGGAATATCGG

>M6-PGSC0003DMG400029146M6LRR-RLK\_3286

TTACTTAATTACGAGTTACAACCTTTTCTCATAAATTGTAGAATACAATGGAATATCGGAGAAGAGCGATA  
TACATGGATTTGGGCTTGTTTTGATTGAGTTATTGACTGGAAAAAATTGC

>M6-PGSC0003DMG400029146M6LRR-RLK\_3348

GAGCGATATACATGGATTTGGGCTTGTTTTGATTGAGTTATTGACTGGAAAAAATTGCGATGATGCTGA  
ATTTGGGAAGCGTGAGAGTATAGTTGATTGGGCGAGATATTGTTACTCAGA

>M6-PGSC0003DMG400029146M6LRR-RLK\_3410

ATGCTGAATTTGGGAAGCGTGAGAGTATAGTTGATTGGGCGAGATATTGTTACTCAGAATGTCATTTGG  
AGACATGGATTGAACCACTATTGAAGAGTGATGCAGTGAATAATCAGAATA

>M6-PGSC0003DMG400029146M6LRR-RLK\_3472

CATTTGGAGACATGGATTGAACCACTATTGAAGAGTGATGCAGTGAATAATCAGAATAAAATGGTGGA  
ATGATGAATGTGGCTCTTCAATGTACTGCTAGTGAGCCAGCAGCAAGGCCT

>M6-PGSC0003DMG400029146M6LRR-RLK\_3534

GGTGGAATGATGAATGTGGCTCTTCAATGTACTGCTAGTGAGCCAGCAGCAAGGCCTTGCTAGTGA  
TGTTGCAAAGACATTGGACTCTTTGTTAGATCAAATCTTGTGGTTTAGG

>M6-PGSC0003DMG400029146M6LRR-RLK\_3596

CTAGTGATGTTGCAAAGACATTGGACTCTTTTGTAGATCAAATCCTGTGGTTTAGGGTTGAAAAGGTG  
TGGTAGTGTAGATTTTGGGATTTCTAACTTCAAGTCCAAGATTTTGT

>M6-PGSC0003DMG400029146M6LRR-RLK\_372

ATTTTCAACTTTCCACACGTTGAATCGATTGATCTCTCGAATAATCAACTCTATGGAGAAATCCAAGCAA  
TATCTCAACTGTTTGGTGTGAGATTTCTCAATCTTAGTAACAATAAC

>M6-PGSC0003DMG400029146M6LRR-RLK\_434

TCCAAGCAATATCTCAACTGTTTGGTGTGAGATTTCTCAATCTTAGTAACAATAACTTCACAGGTCCAC  
TTCCTCAAGGCTCGAGAATCCCACTTGTGCGAGACATTGGATCTCTCAA

>M6-PGSC0003DMG400029146M6LRR-RLK\_496

CAGGTCCACTTCTCAAGGCTCGAGAATCCCACTTGTGCGAGACATTGGATCTCTCAAACAACATGATTTCC  
GGGAAAATCCCCGAAAATATTGGTTTATTCTCAAGGCTCAAAGTTCTTG

>M6-PGSC0003DMG400029146M6LRR-RLK\_558

ATGATTTGCGGGAAAATCCCCGAAAATATTGGTTTATTCTCAAGGCTCAAAGTTCTTGATTTTGGTGGAA  
ATGTGTTGGTTGGAAGCATTCCAAAGTCTATTGCAAATATTTCTAGTTTG

>M6-PGSC0003DMG400029146M6LRR-RLK\_62

TCCATGCAACTTATGATATAGAACTTTCATATCTAGCTAGAGAGAAAAAATGGCCAGCATAGGATCAA  
ATCGATCATGTGTTTGTATCGTGTTGCTATTTTACATGCAGCAAGTCAA

>M6-PGSC0003DMG400029146M6LRR-RLK\_620

TGGTGGAAATGTGTTGGTTGGAAGCATTCCAAAGTCTATTGCAAATATTTCTAGTTTGGAGTTTTTGACT  
CTTGCTTCAAACCAACTAATCGGAGAAATCCCTCGAGAACTAGGTCTTTT

>M6-PGSC0003DMG400029146M6LRR-RLK\_682

TTTTGACTCTTGCTTCAAACCAACTAATCGGAGAAATCCCTCGAGAACTAGGTCTTTTGAAGAACTGAA  
GCTTATTTATTTGGGATACAACAATTTCTCTGGTGAATACCGGAGGAGA

>M6-PGSC0003DMG400029146M6LRR-RLK\_744

AACTTGAAGCTTATTTATTTGGGATACAACAATTTCTCTGGTGAATACCGGAGGAGATTGGTGAATTGT  
CTTCTTTGTATCATCTCGATCTTGTGTACAACAATCTCACAGGTGAAATC

>M6-PGSC0003DMG400029146M6LRR-RLK\_806

TGAATTGTCTTCTTTGTATCATCTCGATCTTGTGTACAACAATCTCACAGGTGAAATCCCTTCATCTTTAGG  
TAATCTACCAATCTTGAATACCTTTTTCTTTACATAAACAAGCTCAC

>M6-PGSC0003DMG400029146M6LRR-RLK\_868

CATCTTTAGGTAATCTCACCAATCTTGAATACCTTTTTCTTTACATAAACAAGCTCACTGGCCCAATTCCAA  
GATCTCTATTTAATCTCAAGAAAATCATCTCGCTTGATTTAAGTGATA

>M6-PGSC0003DMG400029146M6LRR-RLK\_930

CCAATTCCAAGATCTCTATTTAATCTCAAGAAAATCATCTCGCTTGATTTAAGTGATAATTTCTTGTCTGGT  
GAAATTCCTGAGCTTATTTCCCAATTACAAAATTTGGAAGTTCTACAA

>M6-PGSC0003DMG400029146M6LRR-RLK\_992

CTTGTCTGGTGAAATTCCTGAGCTTATTTCCCAATTACAAAATTTGGAAGTTCTACAATTGTTGCGAACA  
ATTTCACTGGTAGAATTCCAATACTTTATCTACCTTACCTCGACTTCA

>M6-PGSC0003DMG400029168-(rev)M6LRR-RLP\_0

CCTGAAAGTTGCAGTCAAGGGAAATGCAGACTCCAGTAGACGTCCTTCTGGTCGATTGCTGGAGTTTG  
TTTTTAGAACAAATGATTCTGGCCAAAGGTTCTGATATTCTGCATTGTACA

>M6-PGSC0003DMG400029168-(rev)M6LRR-RLP\_122

TTGTGGTCAAACATAGCAGATGCTGTGAGTTTTAGGGTGTGAAAGAAAGGAGAGGAAGAGAACATTT  
ACTGGCAAAAAATATTCTTCATACAAAGCCAACCGGGAACCTTTTTTTTCGAA

>M6-PGSC0003DMG400029168-(rev)M6LRR-RLP\_183

AACATTTACTGGCAAAAAATATTCTTCATACAAAGCCAACCGGGAACCTTTTTTTTCGAACTCGCTCAACAC  
AAAAGAAAAGACGAAAGACGAGAATCCGCCCTTTTACCAAGTGTACCAG

>M6-PGSC0003DMG400029168-(rev)M6LRR-RLP\_2257

ATAATCGAAAGAATGAGACACATGCACCAGTATAAGGTGAAAACATCATAGCACGGTTGCAACCCAAGT  
ATTTAAAGAACCTACTTTATCTGTTGATAATATCATTTGATTAGAGCTCCG

>M6-PGSC0003DMG400029168-(rev)M6LRR-RLP\_2318

ACCCAAGTATTTAAAGAACCTACTTTATCTGTTGATAATATCATTTGATTAGAGCTCCGTGCATCTAAGAC  
TTGATACTTGTGCAACATAAGATGCACTCAGAAGCTTTGTCTGCCTAAA

>M6-PGSC0003DMG400029168-(rev)M6LRR-RLP\_2379

CATCTAAGACTTGATACTTGTGCAACATAAGATGCACTCAGAAGCTTTGTCTGCCTAAATCCAATATGAT  
GCACAACATGCACTTCATTGACTAGAATTGCAATATGTCCTGTTTACCTT

>M6-PGSC0003DMG400029168-(rev)M6LRR-RLP\_2440

CAATATGATGCACAACATGCACTTCATTGACTAGAATTGCAATATGTCCTGTTTACCTTATTGCAACTTTA

ATAGGAGCCTCACCATGAGATACATCAAGCTAGTCGAATATGCTCTTCA

>M6-PGSC0003DMG400029168-(rev)M6LRR-RLP\_2501

TGCAACTTTAATAGGAGCCTCACCATGAGATACATCAAGCTAGTCGAATATGCTCTTCAAATATACATGC  
CAAATATACTGAGGTGTCGTTTGTGATGTTCCCCTCAAATATTTCAAGT

>M6-PGSC0003DMG400029168-(rev)M6LRR-RLP\_2684

AACTGATAAGTATAACTATCCAATTCGATTTTCGCCCTTCTGCAGCTATGTACATAAGTTGCACTTGCTT  
CTCATTATGCAAATCCTCTTAGCTTCATTTGATCCATACTCGTTCTGCT

>M6-PGSC0003DMG400029168-(rev)M6LRR-RLP\_2745

GCACTTGCTTCTCATTATGCAAATCCTCTTAGCTTCATTTGATCCATACTCGTTCTGCTGAAGATTTTTCTC  
ATTGTATTGATATTTTATGCAGAATATTACAGACAAAAGTTTGCATCT

>M6-PGSC0003DMG400029168-(rev)M6LRR-RLP\_2806

AGATTTTTCTCATTGTATTGATATTTTATGCAGAATATTACAGACAAAAGTTTGCATCTGGTTGCTGACAA  
TTATCAAGAATTGGAATCGTTGAACATCACTAGGTTGGATATTTTCTCT

>M6-PGSC0003DMG400029168-(rev)M6LRR-RLP\_2867

TTGCTGACAATTATCAAGAATTGGAATCGTTGAACATCACTAGGTTGGATATTTTCTCTCAGTCTGCACG  
AGATTAGTTAAAGGAAGAGTTGTTTTTAAATGTTCTGGATAACACATAGC

>M6-PGSC0003DMG400029168-(rev)M6LRR-RLP\_2928

GTCTGCACGAGATTAGTTAAAGGAAGAGTTGTTTTTAAATGTTCTGGATAACACATAGCATCTCTTGGAC  
ATAAGGATGCCCTTCTTGGCTTAGGCCTTGTCTGTTGTAGGGGTGATG

>M6-PGSC0003DMG400029168-(rev)M6LRR-RLP\_2989

CTCTTGGACATAAGGATGCCCTTCTTGGCTTAGGCCTTGTCTGTTGTAGGGGTGATGATAATATAAGC  
CCCCCTTCTCTAAGAAGGATACTTATAATCGAGTATCTTGAGAGTATTT

>M6-PGSC0003DMG400029168-(rev)M6LRR-RLP\_3050

AATATAAGCCCCCTTCTCTAAGAAGGATACTTATAATCGAGTATCTTGAGAGTATTTCTAATTGTTTGG  
TCTTTATAACCTTTTTGAGAGGGAACAAATATGATTATGTTTTCTTGAT

>M6-PGSC0003DMG400029168-(rev)M6LRR-RLP\_3111

AATTGTTTGGTCTTTATAACCTTTTTGAGAGGGAACAAATATGATTATGTTTTCTTGATTGTAAGTATTT  
GTTTGTGACTAGGTGCATCAAGATGACGGATTCTGGTTTGCAGCGG

>M6-PGSC0003DMG400029168-(rev)M6LRR-RLP\_3172

TACTGATTTTGTGGATGTGACTAGGTGCATCAAGATGACGGATTCTGGTTTGCAGCGGATATTGCTGAA  
CTGCTCTTCTCTACAGACTTTGAACCTTTATGCCCTTCCACGTAACCGC

>M6-PGSC0003DMG400029168-(rev)M6LRR-RLP\_3233

ATTGCTGAACTGCTCTTCTCTACAGACTTTGAACCTTTATGCCCTTCCACGTAACCGCTTGTTTCATTTTA  
TAATATATCTGTCAAAAGATATGTTCCATTTTCATTGCATATCGTGTGA

>M6-PGSC0003DMG400029168-(rev)M6LRR-RLP\_3294

GTTTCATTTTATAATATATCTGTCAAAAGATATGTTCCATTTTCATTGCATATCGTGTGAATGCACCTTTCCT  
ACCACTCAATGGTATACTACAAAATGCATATGTTGGAGTTTCTACTCA

>M6-PGSC0003DMG400029168-(rev)M6LRR-RLP\_3355

GCACCTTTCCTACCACTCAATGGTATACTACAAAATGCATATGTTGGAGTTTCTACTCAGATAATCTGCTT  
CCTTTCCTTCTTGCAGTTTAAACAGATGAAGCTTATAAGATGATATCTCG

>M6-PGSC0003DMG400029168-(rev)M6LRR-RLP\_3416

TAATCTGCTTCCTTCTTCTTCTGCAGTTTAAACAGATGAAGCTTATAAGATGATATCTCGTCTGCCTCATCTT  
AGATTTCTGGATCTCTGTGGTGCTCAGGTATAGTCTTCAGCATTTTCT

>M6-PGSC0003DMG400029168-(rev)M6LRR-RLP\_3477

TGCCTCATCTTAGATTTCTGGATCTCTGTGGTGCTCAGGTATAGTCTTCAGCATTTTCTTGGACTGCTTTTC  
ATAGGTTATGCTATTGCTTGGTGCAATACCGAAACTGTCTAAGTGACA

>M6-PGSC0003DMG400029168-(rev)M6LRR-RLP\_3538

GACTGCTTTTCATAGGTTATGCTATTGCTTGGTGCAATACCGAAACTGTCTAAGTGACATTGCTATTAACC  
CCAGTTGTCCTTCAGAATCTGACAGATGATGGGCTTTCCTGTATAGCGA

>M6-PGSC0003DMG400029168-(rev)M6LRR-RLP\_3599

GCTATTAACCCAGTTGTCCTTCAGAATCTGACAGATGATGGGCTTTCCTGTATAGCGATGTGCAAAAAC  
CTGGTGTCTCTCAATTTGACATGGTATGTATCCTAAGTATATTTCAATTT

>M6-PGSC0003DMG400029168-(rev)M6LRR-RLP\_366

GTGTCGGCTCTGAAATGATGGAAGATTGAATCATTCTTCTATTACAAGTAGTGATGGCCGGGTAT  
CATTTTTCCGGTAGGCCATGACTAAATTCGAGATTTCTCTGTTTATTCT

>M6-PGSC0003DMG400029168-(rev)M6LRR-RLP\_3660

TGCAAAAACCTGGTGTCTCTCAATTTGACATGGTATGTATCCTAAGTATATTTCAATTTTCATTGGGAGCAA  
AAGGAGATACAATTGTATATTATTGAACCGATATATATTCACATTTACA

>M6-PGSC0003DMG400029168-(rev)M6LRR-RLP\_3721

TTGGGAGCAAAAGGAGATACAATTGTATATTATTGAACCGATATATATTCACATTTACAGGTGTGTACAA  
GTCAGTGATGTTGGGGTCATAGCAATAGCTCAAGGCTGCAGGTCTCTTGA

>M6-PGSC0003DMG400029168-(rev)M6LRR-RLP\_3782

TGTGTACAAGTCAGTGATGTTGGGGTCATAGCAATAGCTCAAGGCTGCAGGTCTCTTGAATTATTAAGG  
TGAGTGTGGACCTAGAATTATCACTAAAATAGGAAGACCAAAATGACCTAT

>M6-PGSC0003DMG400029168-(rev)M6LRR-RLP\_3843

TATTAAGGTGAGTGTGGACCTAGAATTATCACTAAAATAGGAAGACCAAAATGACCTATGCTATATTACT  
TCAGCACCTCCACAAAGTCGACAAATATCTTATCTTGTGAACTAACTAGA

>M6-PGSC0003DMG400029168-(rev)M6LRR-RLP\_3904

TATATTACTTCAGCACCTCCACAAAGTCGACAAATATCTTATCTTGTGAACTAACTAGATAGAGATATCCT  
GTTTTTGAATACTCCAATGTTTGTGTAGTCATTGGGCCTCCGGCTTAAG

>M6-PGSC0003DMG400029168-(rev)M6LRR-RLP\_3962

ATAGAGATATCCTGTTTTTGAATACTCCAATGTTTGTGTAGTCATTGGGCCTCCGGCTTAAGCAATTATAA  
AATATAAAGTATAACCACTTCTATTGACTACAGATTTATTTGCAATTT

>M6-PGSC0003DMG400029168-(rev)M6LRR-RLP\_427

GCCGGGTATCATTTTTCCGGTAGGCCATGACTAAATTCGAGATTTCTCTGTTTATTCTAAAAAATGGAG  
AAGACACGATAATTGCTTCTTCTTTGTTGAGATCCCCCAGGCCTTTTCT

>M6-PGSC0003DMG400029168-(rev)M6LRR-RLP\_488

AAAATGGAGAAGACACGATAATTGCTTCTTCTTTGTTGAGATCCCCCAGGCCTTTTCTTCTTCTTTCAGG  
TCCCTCCCCTCTTATTCATTTTAAATTCCATGCCACCGACTTCTTTTTCT

>M6-PGSC0003DMG400029168-(rev)M6LRR-RLP\_549

TTCTTTCAGGTCCCTCCCCTCTTATTCATTTTAAATTCCATGCCACCGACTTCTTTTTTCATTTTTCACAGTTA  
GTTCTGGTTCGAAAGTTTTTGCATGTCAGCACTTAACTTAAGCTTAT

>M6-PGSC0003DMG400029168-(rev)M6LRR-RLP\_61

GGAGTTTGTTTTTTAGAACAATGATTCTGGCCAAAGTTCTGATATTCTGCATTGTACAGTTTGTGGTCA  
AAACATAGCAGATGCTGTGAGTTTTAGGGTGTGAAAGAAAGGAGAGGAAG

>M6-PGSC0003DMG400029168-(rev)M6LRR-RLP\_610

TTTTCACAGTTAGTTCTGGTCGAAAGTTTTTGCCATGTCAGCACTTAACTTAAGCTTATATGGTGTGGTCT

TCAAGTCTTTTCATTATTTATTTGGAAAATTTGAATGGTTATCAATTGG

>M6-PGSC0003DMG400029168-(rev)M6LRR-RLP\_671

GGTGTGGTCTTCAAGTCTTTTCATTATTTATTTGGAAAATTTGAATGGTTATCAATTGGGATTGAATAAGA

GTGGCAGAGTTGGCAGACCACTATTTTCAATGGAGAATTGAACGAGGAA

>M6-PGSC0003DMG400029415-(rev)M6LRR-RLP\_1159

GTGAAAGAATCATTAGAAGTAATAAAATAAGATATAAATCATAAAAGAGACCACACATTTGGGTGCTAA

ATGTAAAGAACTCTATAATCTTATTTGATCTCTAAGTAGTTGTTTCGTTTCA

>M6-PGSC0003DMG400029415-(rev)M6LRR-RLP\_122

AACCAGGACTGGGTTTCGAGTCCCCCAAGTACAAAGTCTTTTATTAGAAAGATGTGTACACTATGTAAGA

CTTCTTGACACAAATTTGGATTTAGTCAACGGGATACCGGATAACGCGTG

>M6-PGSC0003DMG400029415-(rev)M6LRR-RLP\_1220

GGTGCTAAATGTAAAGAACTCTATAATCTTATTTGATCTCTAAGTAGTTGTTTCGTTTCATTGTCGTTTAGG

GATGAGGCAAATTGCATCAAGAAGGTGGTTGATCACATATTACCAAACG

>M6-PGSC0003DMG400029415-(rev)M6LRR-RLP\_183

TATGTAAGACTTCTTGACACAAATTTGGATTTAGTCAACGGGATACCGGATAACGCGTGGAACCATA

AGGCAATAAAGATACTACAATATAGTCTTTTAAGTTGTAAACATGTAATGA

>M6-PGSC0003DMG400029415-(rev)M6LRR-RLP\_2257

AGTCAAATGGGTCAAATGTGTCAAGGGAAGAATACGCAAACAGCAGAGTATGGCTTATTGAGGAAGT

TCATGACCTTTTTGCTGGAAAGTTGGTAAGAAATATTTTATCAAAAAAATTG

>M6-PGSC0003DMG400029415-(rev)M6LRR-RLP\_2318

AGGAAGTTCATGACCTTTTTGCTGGAAAGTTGGTAAGAAATATTTTATCAAAAAAATTGATAATTTAAGA

AGCTCTTAGTATTTTGTGACTTCGTTATGTTGAGTTTTTTTTGACAAATAG

>M6-PGSC0003DMG400029415-(rev)M6LRR-RLP\_2379

AATTTAAGAAGCTCTTAGTATTTTGTGACTTCGTTATGTTGAGTTTTTTTTGACAAATAGATATATGTTCCCTT

TCCTTACAGAAAACAAAAAGGTTGAAAGCCTACGGATCCCAAATGGT

>M6-PGSC0003DMG400029415-(rev)M6LRR-RLP\_244

AAACCATAAGGCAATAAAGATACTACAATATAGTCTTTTAAGTTGTAAACATGTAATGACTTTTAGTTTTT

GGTCAAGGACCAAGTTATAAGTCTTCTAATAAGGAAGATGATAAGAAGT

>M6-PGSC0003DMG400029415-(rev)M6LRR-RLP\_2440

ATATGTTCTTTCTTACAGAAAACAAAAAGGTTGAAAGCCTACGGATCCCAAATGGTTACCGGTTTGA  
TGATGATCATATCAATTATAACAAGGTATTCAAGAGAATGCAATGCTTAC

>M6-PGSC0003DMG400029415-(rev)M6LRR-RLP\_2501

CCGTTTTGATGATGATCATATCAATTATAACAAGGTATTCAAGAGAATGCAATGCTTACAGGTGTTGATA  
CTTCATCGTAGAACTATTTGCTCGGAAAACACTGTCACCTGTTTGCCTTC

>M6-PGSC0003DMG400029415-(rev)M6LRR-RLP\_2562

GTGTTGATACTTCATCGTAGAACTATTTGCTCGGAAAACACTGTCACCTGTTTGCCTTCTAACCTGCGGTG  
GATTGAATGGCCGAACATCCTTCAAGTTCATTGCCAGAGGGGTTTGA

>M6-PGSC0003DMG400029415-(rev)M6LRR-RLP\_2623

ACCTGCGGTGGATTGAATGGCCGAACATCCTTCAAGTTCATTGCCAGAGGGGTTTGAACCATCACAAC  
CGTTGGGCTTTGTTTACGTGGAAGTTGTCTTGTGAACTTTGGCCAATAC

>M6-PGSC0003DMG400029415-(rev)M6LRR-RLP\_2684

ATCACAACCTCGTTGGGCTTTGTTTACGTGGAAGTTGTCTTGTGAACTTTGGCCAATACCAAAGGTATAG  
TGATTTCTTTCTCTCCAAAACAATAGCTCCAGTTCATCACACGCTATGGT

>M6-PGSC0003DMG400029415-(rev)M6LRR-RLP\_2745

AAGGTATAGTGATTTCTTTCTCTCCAAAACAATAGCTCCAGTTCATCACACGCTATGGTTCAAATGCTATA  
CCAAATTAATGCTTTTGTATAAGCAATTTACATCATGTAACAGAAATAG

>M6-PGSC0003DMG400029415-(rev)M6LRR-RLP\_2806

AAATGCTATACCAAATTAATGCTTTTGTATAAGCAATTTACATCATGTAACAGAAATAGAATAGCATATG  
TCTATTAGGAGTACTACTTGAGCTAACTGGTAATTCGCAGGTACGTTATG

>M6-PGSC0003DMG400029415-(rev)M6LRR-RLP\_2867

TAGCATATGTCTATTAGGAGTACTACTTGAGCTAACTGGTAATTCGCAGGTACGTTATGTTTTAATATTTT  
GTTATTTTTATGAAAACAGAACTGTGCAACTTGAAGTATTTGAATCTA

>M6-PGSC0003DMG400029415-(rev)M6LRR-RLP\_2928

TTAATATTTTTGTTATTTTTATGAAAACAGAACTGTGCAACTTGAAGTATTTGAATCTAAGCGAGAGCCTT  
GGGTTAACGAAGACCCCTAATTTGGTGATATGCCAACTTGGAGACAC

>M6-PGSC0003DMG400029415-(rev)M6LRR-RLP\_305

TTTAGTTTTTGGTCAAGGACCAAGTTATAAGTCTTCTAATAAGGAAGATGATAAGAAGTTTCCATAAAA  
GACTATGAATTGTGAAAAATGTAAAGTCTTGCTCTTATTATGTGTGTT



>M6-PGSC0003DMG400029415-(rev)M6LRR-RLP\_3233

TGTGGAGATATGCTGCGCTTATCAATACTGTATGTAGAATCCCCCTGGATAAGAACTTACCCCATCTC  
TCAGCGGCCTTAGTCATTTGAAACTGAAAGGTTGTGAAGTTCTTGAAAGT

>M6-PGSC0003DMG400029415-(rev)M6LRR-RLP\_3294

CCCCATCTCTCAGCGGCCTTAGTCATTTGAAACTGAAAGGTTGTGAAGTTCTTGAAAGTATTCCAGACTC  
TTTTCTAAATCTTGAAAGACTTCACATTTGAGGTTGCAATAAACTTACAA

>M6-PGSC0003DMG400029415-(rev)M6LRR-RLP\_3355

TCCAGACTCTTTTCTAAATCTTGAAAGACTTCACATTTGAGGTTGCAATAAACTTACAACCTTGCCAAACA  
GCCTCTTTGAATCACAACAATGGATATTTCTTTATATATACCGATGTTC

>M6-PGSC0003DMG400029415-(rev)M6LRR-RLP\_3416

TTGCCAAACAGCCTCTTTGAATCACAACAATGGATATTTCTTTATATATACCGATGTTCTGGATTGGTAGA  
GCTCCCCGTATCTCTTGAGTTCAAAGAAGCTTGGTTTTTTATCCGTA

>M6-PGSC0003DMG400029415-(rev)M6LRR-RLP\_61

GTTTGACTCTTGAAAAATGAAATGTCTACATAAATTGGGACAGAGGGAGTACTTTGTACTTAACCAGGA  
CTGGGTTGAGTCCCCAAGTACAAAGTTCTTTTATTAGAAAGATGTGTAC

>M6-PGSC0003DMG400029442M6LRR-RLK\_0

TTCCAACACTCACTAAAAGCTTACTCTCTAAGCTCTCTTCTTTTCATTTTTTTTCTATCTATTTTCTCTATGCA  
TCATGGACAACATGAACACCAACTCTGCTATAACATTGCTCATTGT

>M6-PGSC0003DMG400029442M6LRR-RLK\_1037

TAGCTTCTTTAGAGTCTTTGCAAATGAGTAGTAACAAGATTTCTGGTTCATTTCTGCTTCTCTTTTCATATT  
GCAAGAAACTCCGCGTTGTAGACTTTAGTTCCAACATGATCAATGGGA

>M6-PGSC0003DMG400029442M6LRR-RLK\_1098

TCTTTTCATATTGCAAGAAACTCCGCGTTGTAGACTTTAGTTCCAACATGATCAATGGGATGATTCCACCA  
GATTTATGCTCTGGAGCTTCATCATTGGAAGAGCTGAGAGCACCTGATAA

>M6-PGSC0003DMG400029442M6LRR-RLK\_1159

ATTCCACCAGATTTATGCTCTGGAGCTTCATCATTGGAAGAGCTGAGAGCACCTGATAACTCACTTTATG  
GTCCAATTCCATCTCAATTGTCTCAATGTTACAGCTCAAGACTATTGAT

>M6-PGSC0003DMG400029442M6LRR-RLK\_122

TGTTTTTTTTCTTGATTCTTGCATCCGTACACACGGTATCTTCTCCATCAAACTGATGCTGAATCACTCT

TGCTATTCAAGAATATGATACAAAAAGACCCTTCTGGTGTTTTATCAG

>M6-PGSC0003DMG400029442M6LRR-RLK\_1220

CACTTTATGGTCCAATTCCATCTCAATTGTCTCAATGTTACAGCTCAAGACTATTGATTTAGCTTGAAC  
ATTTGAACGGTTCGATTCCATCAGAGCTAGGAAAACCTTGAGAAAACCTG

>M6-PGSC0003DMG400029442M6LRR-RLK\_1281

TAGCTTGAAC TATTTGAACGGTTCGATTCCATCAGAGCTAGGAAAACCTTGAGAAAACCTTGAGCAGCTTATT  
GCTTGGTACAATAGTTTGAAGGGAGCATACCAGCAGAGTTGGGAAAATG

>M6-PGSC0003DMG400029442M6LRR-RLK\_1342

CAGCTTATTGCTTGGTACAATAGTTTGAAGGGAGCATACCAGCAGAGTTGGGAAAATGCAGTAACTTG  
AAGAATCTTATACTTAATAACAACACTACTTGAGTGGGAAAATTCCAGTTGAA

>M6-PGSC0003DMG400029442M6LRR-RLK\_1403

GTAAC TGAAGAATCTTATACTTAATAACAACACTACTTGAGTGGGAAAATTCCAGTTGAATTGTTTAATTGT  
GGTAATCTTGAGTGGATTGCTCTCACAAGTAATGGACTTAGTGGTGAGA

>M6-PGSC0003DMG400029442M6LRR-RLK\_1464

GTTTAATTGTGGTAATCTTGAGTGGATTGCTCTCACAAGTAATGGACTTAGTGGTGAGATTCCCTAAAGAA  
TTTGGCCATCTTTCAAGGCTTGCTGTTTTGCAACTAGCAAATAATAGCTT

>M6-PGSC0003DMG400029442M6LRR-RLK\_1525

CCTAAAGAATTTGGCCATCTTTCAAGGCTTGCTGTTTTGCAACTAGCAAATAATAGCTTGAGTGGTCAGA  
TTCCAAGTGAATTAGTCAATTGTAGTAGCTTGGTTTGGTTGGATTTGAGT

>M6-PGSC0003DMG400029442M6LRR-RLK\_1586

GTGGTCAGATTCCAAGTGAATTAGTCAATTGTAGTAGCTTGGTTTGGTTGGATTTGAGTAGCAATAGGTT  
AACCGGGGAGATCCCACCGCGACTTGGTAGGCAGCAAGGGGCTAAAGCAT

>M6-PGSC0003DMG400029442M6LRR-RLK\_1647

CAATAGGTTAACCGGGGAGATCCCACCGCGACTTGGTAGGCAGCAAGGGGCTAAAGCATTGAGTGGGA  
TTCTATCAGGTAACACATTGGTGTGTGTCGAAATGTAGGTAATTCGTGCAG

>M6-PGSC0003DMG400029442M6LRR-RLK\_1708

AGTGGGATTCTATCAGGTAACACATTGGTGTGTGTCGAAATGTAGGTAATTCGTGCAGAGGCGTTGGA  
GGATTGCTTGAGTTCTATGGGATACATCCTGAAAGGCTTTTACAGGTTCCA

>M6-PGSC0003DMG400029442M6LRR-RLK\_1769

GC GTTGGAGGATTGCTTGAGTTCTATGGGATACATCCTGAAAGGCTTTTACAGGTTCCATCATTAAAGAG  
TTGTGATTTCACTAGGCTGTATTCTGGTCCAGTTCTTAGTGCTTTTACTC

>M6-PGSC0003DMG400029442M6LRR-RLK\_183

TGAATCACTCTTGCTATTCAAGAATATGATACAAAAAGACCCTTCTGGTGTTTTATCAGGATGGCAACTT  
AAAAACAATCCATGTTTCATGGAATGGTGTAACCTGCAATAGTCTTGGTAG

>M6-PGSC0003DMG400029442M6LRR-RLK\_1830

ATTAAGAGTTGTGATTTCACTAGGCTGTATTCTGGTCCAGTTCTTAGTGCTTTTACTCGGTATCAGACTA  
TCGAGTACCTTGATCTTTCGTACAATGAGCTTCGTGGGAAAATCCCTGA

>M6-PGSC0003DMG400029442M6LRR-RLK\_1891

TATCAGACTATCGAGTACCTTGATCTTTCGTACAATGAGCTTCGTGGGAAAATCCCTGATGAATTTGGTG  
ATATGATAGCTTTGCAAGTTCTTGTTATATCACATAATCATTGTGCAGGA

>M6-PGSC0003DMG400029442M6LRR-RLK\_1952

AATTTGGTGATATGATAGCTTTGCAAGTTCTTGTTATATCACATAATCATTGTGCAGGAGAGATTCCTTCA  
TCACTTGGAGGGCTAAAGAATTTGGGAGTGTTTGATGCATCACATAACA

>M6-PGSC0003DMG400029442M6LRR-RLK\_2013

GATTCCTTCATCACTTGGAGGGCTAAAGAATTTGGGAGTGTTTGATGCATCACATAACAGATTGCAGGG  
TCAAATCCTGATTCGTTTTCACTTCTTCTTCTTGGTGCAGATTGACTT

>M6-PGSC0003DMG400029442M6LRR-RLK\_2074

TTGCAGGGTCAAATTCCTGATTCGTTTTCACTTCTTCTTCTTGGTGCAGATTGACTTGTCTAATAATGAA  
TTGACAGGACAAATTCACAAAGGGGTCAGCTTAGTACACTTCCTGCA

>M6-PGSC0003DMG400029442M6LRR-RLK\_2135

CTAATAATGAATTGACAGGACAAATTCACAAAGGGGTCAGCTTAGTACACTTCCTGCAAGCCAATATGC  
AAACAATCCAGGACTCTGTGGGGTTCCATTGTCTGAATGCCAGTATAACT

>M6-PGSC0003DMG400029442M6LRR-RLK\_2196

CCAATATGCAAACAATCCAGGACTCTGTGGGGTTCCATTGTCTGAATGCCAGTATAACTCACCTGCCACG  
AATACTGGAGACGGAGGAGGAGGAAAAAGAAGTTCAACTGCATCATTGGC

>M6-PGSC0003DMG400029442M6LRR-RLK\_2257

CCTGCCACGAATACTGGAGACGGAGGAGGAGGAAAAAGAAGTTCAACTGCATCATTGGCTAATAGCAT  
TGTTCTTGGAGTTCTCATTTCATTGCCTCAGTATGCATTTTGATTGTTTGG

>M6-PGSC0003DMG400029442M6LRR-RLK\_2318

ATAGCATTGTTCTTGGAGTTCTCATTTCCATTGCCTCAGTATGCATTTTGATTGTTTGGGCTATTGCTATGC  
GTGCAAGGCGTAGAGAGGCTGAAGGAGTGAAAATGCTTAGTAGTTGA

>M6-PGSC0003DMG400029442M6LRR-RLK\_2379

TATTGCTATGCGTGCAAGGCGTAGAGAGGCTGAAGGAGTGAAAATGCTTAGTAGTTTGAGTACTAACTA  
TGCAGCTTCATCATGGAAGATTGACAAAGAGAAGGAGCCATTAAGCATCAA

>M6-PGSC0003DMG400029442M6LRR-RLK\_244

TGGCAACTTAAAAACAATCCATGTTTCATGGAATGGTGTAAGTTCGCAATAGTCTTGGTAGAGTAACAAATC  
TTGATCTTCAACAATCTGAACTTGTTGGAGAGGTTTCTTTTTCTCCTTTC

>M6-PGSC0003DMG400029442M6LRR-RLK\_2440

ACTAACTATGCAGCTTCATCATGGAAGATTGACAAAGAGAAGGAGCCATTAAGCATCAATGTAGCAACT  
TTCCAAAGACAACCTTAGGAAGCTGAAGTTCTCACAACCTTATTGAGGCCACA

>M6-PGSC0003DMG400029442M6LRR-RLK\_2501

TAGCAACTTTCCAAAGACAACCTTAGGAAGCTGAAGTTCTCACAACCTTATTGAGGCCACAAATGGATTCTC  
AGCTGCAAGCCTCATCGGTTCTGGAGGATTCGGAGAAGTCTTCAAGGCAA

>M6-PGSC0003DMG400029442M6LRR-RLK\_2562

TGGATTCTCAGCTGCAAGCCTCATCGGTTCTGGAGGATTCGGAGAAGTCTTCAAGGCAACATTGAAGGA  
TGGATCAAGTGTTGCAATCAAGAACTCATCAGGTTAAGTTGCCAAGGCGA

>M6-PGSC0003DMG400029442M6LRR-RLK\_2623

TTGAAGGATGGATCAAGTGTTGCAATCAAGAACTCATCAGGTTAAGTTGCCAAGGCGACCGAGAGTTC  
ATGGCTGAAATGGAGACATTTGGAAAGATCAAGCACAAGAACCTTGTACCT

>M6-PGSC0003DMG400029442M6LRR-RLK\_2684

GAGAGTTCATGGCTGAAATGGAGACATTTGGAAAGATCAAGCACAAGAACCTTGTACCTCTCTTAGGAT  
ACTGCAAGGTTGGTGAGGAAAGACTTCTAGTTTACGAGTTCATGGAATATG

>M6-PGSC0003DMG400029442M6LRR-RLK\_2745

CTTAGGATACTGCAAGGTTGGTGAGGAAAGACTTCTAGTTTACGAGTTCATGGAATATGGCAGCCTAGA  
AGAAATGCTTCACGGGAAGACAAGAACGCCTGATAGAAGGATCCTAACATG

>M6-PGSC0003DMG400029442M6LRR-RLK\_2806

AGCCTAGAAGAAATGCTTCACGGGAAGACAAGAACGCCTGATAGAAGGATCCTAACATGGGAGGAAA

GGAAAAAATAGCCAGAGGAGCAGCCAAAGGACTCTGCTTCCTTCACCACAAT

>M6-PGSC0003DMG400029442M6LRR-RLK\_2867

AGGAAAGGAAAAAATAGCCAGAGGAGCAGCCAAAGGACTCTGCTTCCTTCACCACAATTGCATCCCAC  
ACATCATAACCCGCGACATGAAGTCAAGCAACGTGCTATTAGACAATGAAA

>M6-PGSC0003DMG400029442M6LRR-RLK\_2928

CATCCCACACATCATAACCCGCGACATGAAGTCAAGCAACGTGCTATTAGACAATGAAATGGACGCCAG  
GGTGTCTGATTTTGGCATGGCAAGGCTGATAAGCGCACTGGACACACACCT

>M6-PGSC0003DMG400029442M6LRR-RLK\_2989

GACGCCAGGGTGTCTGATTTTGGCATGGCAAGGCTGATAAGCGCACTGGACACACACCTCAGTGTGTCC  
ACACTAGCAGGAACACCAGGATATGTACCACCTGAGTACTATCAAAGTTTT

>M6-PGSC0003DMG400029442M6LRR-RLK\_305

TAACAAATCTTGATCTTCAACAATCTGAACTTGTTGGAGAGGTTTCTTTTTCTCCTTTCAATTCTCTAGATA  
TGTTAACTGTCCTTAATCTTTCATCGAATTCGTTTTATGTAAATGCAT

>M6-PGSC0003DMG400029442M6LRR-RLK\_3050

GTGTGTCCACACTAGCAGGAACACCAGGATATGTACCACCTGAGTACTATCAAAGTTTTAGGTGCACAG  
CAAAGGGAGACGTGTATTCGTTTGGAGTCGTGCTTCTTGAACCTTGACAG

>M6-PGSC0003DMG400029442M6LRR-RLK\_3111

GTGCACAGCAAAGGGAGACGTGTATTCGTTTGGAGTCGTGCTTCTTGAACCTTGACAGGTAAAAGGCC  
AACAGATAAGGAAGATTTTGGTGACACAACTTGGTTGGATGGGTGAAAAT

>M6-PGSC0003DMG400029442M6LRR-RLK\_3172

AAAAGGCCAACAGATAAGGAAGATTTTGGTGACACAACTTGGTTGGATGGGTGAAAATGAAAGTAAG  
AGAAGGGAAATCAATGGAAGTAATTGATCAAGAATTGTTATCAGTGACTAAA

>M6-PGSC0003DMG400029442M6LRR-RLK\_3233

AAGTAAGAGAAGGGAAATCAATGGAAGTAATTGATCAAGAATTGTTATCAGTGACTAAAGGAAATGAT  
GAAGCAGAAGTTTTAGAAGTTAAAGAGATGGTAAGGTACTTAGAGATAACAA

>M6-PGSC0003DMG400029442M6LRR-RLK\_3294

AAATGATGAAGCAGAAGTTTTAGAAGTTAAAGAGATGGTAAGGTACTTAGAGATAACAATGCAATGTG  
TAGAGGATTTTGCATCAAAAAGGCCTAATATGTTACAAGTTGTGGCTATGTT

>M6-PGSC0003DMG400029442M6LRR-RLK\_3355

CAATGTGTAGAGGATTTTGCATCAAAAAGGCCTAATATGTTACAAGTTGTGGCTATGTTGAGAGAACTA  
ATGCCTGGAAGTAGTTCAAGCAACAGTGGCTAAACAGCAAACCAGAAACAA

>M6-PGSC0003DMG400029442M6LRR-RLK\_3519

CTTTCTTGTTTTGTTTGTGCAAGTATTCATCTGCATTTGTATTTAGTCAACAACCTCTCTTATTTTTTTGCAA  
TATTATTCCCATGTTTTAAGAATCTTGTGTATGGATATTGATAACAT

>M6-PGSC0003DMG400029442M6LRR-RLK\_366

TTCTCTAGATATGTTAACTGTCCTTAATCTTTTCATCGAATTCGTTTTATGTAAATGCATCAACCTCTTTAAC  
TCAGTTACCTTATAGTTTGAAACAACCTGAACTTTCATTCACTGGCTT

>M6-PGSC0003DMG400029442M6LRR-RLK\_427

ACCTCTTTAACTCAGTTACCTTATAGTTTGAAACAACCTGAACTTTCATTCACTGGCTTAGCAGGCTATGT  
ACCTGAGAATTTCTTTGCAAATGTCCAAATCTTGAATATGTTAGTCTT

>M6-PGSC0003DMG400029442M6LRR-RLK\_488

CAGGCTATGTACCTGAGAATTTCTTTGCAAATGTCCAAATCTTGAATATGTTAGTCTTTCTTTCAATAAC  
ATAACAGGTTCTTTGCCTCAGAATTTCTTGTTCATACTGATAAGTTAC

>M6-PGSC0003DMG400029442M6LRR-RLK\_549

TTTCAATAACATAACAGGTTCTTTGCCTCAGAATTTCTTGTTCATACTGATAAGTTACAGTATCTTGCAA  
TGGACTATAATAATCTTACAGGATCAATTTCTGATATCATGATTGAGAG

>M6-PGSC0003DMG400029442M6LRR-RLK\_61

TTTTCTCTATGCATCATGGACAACATGAACACCAACTCTGCTATAACATTGCTCATTGTCTTGTTTTTTTTC  
TTGATTCTTGCATCCGTACACACGGTATCTTCCTCCATCAAAACTGAT

>M6-PGSC0003DMG400029442M6LRR-RLK\_610

TATCTTGCAATGGACTATAATAATCTTACAGGATCAATTTCTGATATCATGATTGAGAGTTGTAATTCATT  
GTTACGACTCGATTTGTCAGGGAATCAGATAATGGATTCAATTCCTTCT

>M6-PGSC0003DMG400029442M6LRR-RLK\_671

GTAATTCATTGTTACGACTCGATTTGTCAGGGAATCAGATAATGGATTCAATTCCTTCTGCTTTATCTAAT  
TGTACAACCTTTCAAGAATTGGTTTTGTCTGAGAATTTCTTCTCTGGTT

>M6-PGSC0003DMG400029442M6LRR-RLK\_732

TTTATCTAATTGTACAACCTTTCAAGAATTGGTTTTGTCTGAGAATTTCTTCTCTGGTTCAATTCCAACTTC  
TTTTGGTGAGCTTATAAGTTTGCAAAGATTGGATCTTTCTAAGAATCA

>M6-PGSC0003DMG400029442M6LRR-RLK\_793

ATTCCAACCTCTTTTGGTGAGCTTATAAGTTTGCAAAGATTGGATCTTTCTAAGAATCATTTATCTGGTTG  
GATCCCATCTGAATTAGGAACTCATGTAGTTCACTTGTGGAACTCAAG

>M6-PGSC0003DMG400029442M6LRR-RLK\_854

TATCTGGTTGGATCCCATCTGAATTAGGAACTCATGTAGTTCACTTGTGGAACTCAAGTTTTCTAATAAC  
AATATCACTGGTTCAATCCCGAATTCATTCTCATCATGTTCTTCTCTTC

>M6-PGSC0003DMG400029442M6LRR-RLK\_915

TTCTAATAACAATATCACTGGTTCAATCCCGAATTCATTCTCATCATGTTCTTCTCTTCAAAATCTTGATT  
GTCGAATAATAATCTAACCGGTCCATTCCCTGATTCCATCCTACAGAA

>M6-PGSC0003DMG400029442M6LRR-RLK\_976

AATCTTGATTTGTCGAATAATAATCTAACCGGTCCATTCCCTGATTCCATCCTACAGAATTTAGCTTCTTTA  
GAGTCTTTGCAAATGAGTAGTAACAAGATTTCTGGTTCATTTCTGCT

>M6-PGSC0003DMG400029520-(rev)M6G-LecRK\_0

CCCCACGCCACCCCTCCTTTGAATTTTCTGAATATCCACATAAACACGGTTCCTTAATGTACCAAAAAA  
CCTTAAAATTTGTAATTTTTCTATTGCATATACTTTGTACAAAGTCCTC

>M6-PGSC0003DMG400029520-(rev)M6G-LecRK\_1054

CTCTTCAGTAAGTTTTATTAGTTTTTATCTTCTTAGATCTACTAGCTTTTGTATGTTCTTTTAAAATGAAATG  
AAATGACATTCATTGAGAGGCGTAGCCAGGATTTTATGTTTATGTGT

>M6-PGSC0003DMG400029520-(rev)M6G-LecRK\_1116

AAAATGAAATGAAATGACATTCATTGAGAGGCGTAGCCAGGATTTTATGTTTATGTGTTCTAGGTCATAA  
TTGTGTTTGTACTGAATTCTGGATAGATTATTCGTACTIONTATTAGATGA

>M6-PGSC0003DMG400029520-(rev)M6G-LecRK\_1178

GGTCATAATTGTGTTTGTACTGAATTCTGGATAGATTATTCGTACTIONTATTAGATGAATTTTTAATGCA  
ATAACAAGGTTTGTAGCCAAAGTTACCGGATCTGCAGAACTAGTAGACA

>M6-PGSC0003DMG400029520-(rev)M6G-LecRK\_124

GTTTTGTAATGGACTAATTATTTTTGTGTACCAGCTATGACCAAACCAAAAAAATTCTTGAGAACTTTTT  
GAAACCTTTTTCTCAAGCTCCAACAAGGTAAGCAAAAAATCTTGTGA

>M6-PGSC0003DMG400029520-(rev)M6G-LecRK\_1240

TTAATGCAATAACAAGGTTTGTAGCCAAAGTTACCGGATCTGCAGAACTAGTAGACACCTGTGGCTCT

GCCCTTGCTTCACTATCCAAAGATTAACAAATTGAACTGCAGATGGAT

>M6-PGSC0003DMG400029520-(rev)M6G-LecRK\_1302

TGGCTCTGCCCTTGCTTCACTATCCAAAGATTAACAAATTGAACTGCAGATGGATGCTCTTGTCAGTT

TTTTGAGGAGTGAGATACTGGAAATAGCCTTGGGATATGCATTTTCATT

>M6-PGSC0003DMG400029520-(rev)M6G-LecRK\_1364

TTGTCAGTTTTTTGAGGAGTGAGATACTGGAAATAGCCTTGGGATATGCATTTTCATTTTGCTATTGGGT

CCAGAAATTTTTCTTTCAGTTACGTTGTCAGTAATCTAGTTCAATGATCT

>M6-PGSC0003DMG400029520-(rev)M6G-LecRK\_1426

TATTGGGTCCAGAAATTTTTCTTTCAGTTACGTTGTCAGTAATCTAGTTCAATGATCTCTGTGTCAGTCCG

TGAAACCACTAGGGATCGTCATATTGTTCTGTATTCGTGTGTTTTAGTT

>M6-PGSC0003DMG400029520-(rev)M6G-LecRK\_1488

GTCAGTCCGTGAAACCACTAGGGATCGTCATATTGTTCTGTATTCGTGTGTTTTAGTTGCTAAACAAACTC

TAAGCTCAAATGTTCTTGAACCTCCAGTGATGGACATAACGTTTATTGT

>M6-PGSC0003DMG400029520-(rev)M6G-LecRK\_1550

AACAAACTCTAAGCTCAAATGTTCTTGAACCTCCAGTGATGGACATAACGTTTATTGTTTTCTCGACATCC

AGCAACAAACATGTGGCTGTTCTTCTGTTGTCTTCTTCTTTTTGAT

>M6-PGSC0003DMG400029520-(rev)M6G-LecRK\_1612

TCGACATCCAGCAACAAACATGTGGCTGTTCTTCTGTTGTCTTCTTCTTTTTGATAACTTTGATGTTTG

GACCAGCATGTGTGCACCTCAACTACTTCATGGAATACTTGCATCCTC

>M6-PGSC0003DMG400029520-(rev)M6G-LecRK\_1674

TTGATGTTTGGACCAGCATGTGTGCACCTCAACTACTTCATGGAATACTTGCATCCTCCTATCAATACATG

TATCATGTAAATCTGTTACCAACGGTTAGACAGATGAAAAGAAATTAC

>M6-PGSC0003DMG400029520-(rev)M6G-LecRK\_1736

CAATACATGTATCATGTAAATCTGTTACCAACGGTTAGACAGATGAAAAGAAATTACTTAGTTTGTTTTT

TTGCCTTTGCTAGGATTCGTACCCACCCATTGTGTTTATTCCAGTTTC

>M6-PGSC0003DMG400029520-(rev)M6G-LecRK\_1798

TTTGTTTTTTTGCTTTGCTAGGATTCGTACCCACCCATTGTGTTTATTCCAGTTTTCATCAACCTTAGGCG

GCCGCAGTACGTTATTGAAACTTCTTCTGTTCGAAACAACCTCCCAT

>M6-PGSC0003DMG400029520-(rev)M6G-LecRK\_186



GAACTTTTTGAAACCCTTTTTCTCAAGCTCCAACAAAGGTAAGCAAAAAATCTTGTGAGGGTACCCTTAA  
TCTTGATTTTTTTTTTTGTTGTTCTAATGGTGATTTGGGTTTTCTCTT

>M6-PGSC0003DMG400029520-(rev)M6G-LecRK\_1984

AGTATTTGTAGATATTGAAACTCCTTGTACTTCTCAAGAATTCTGTAACCCTGAAACATCATTGACGACA  
TTTGAGGACCTTAACTTCCTCGTGTAAGTTAACTTATCAGTAGAAGC

>M6-PGSC0003DMG400029520-(rev)M6G-LecRK\_2046

TCGACGACATTTGAGGACCTTAACTTCCTCGTGTAAGTTAACTTATCAGTAGAAGCAATTTGTGATTC  
CGAGCCCGAATATAATATAATTCTTCAAGCAAGCAATTTTTCTCATAGTG

>M6-PGSC0003DMG400029520-(rev)M6G-LecRK\_2108

TGTGATTCCGAGCCCGAATATAATATAATTCTTCAAGCAAGCAATTTTTCTCATAGTGGTCTTAGAAAAAC  
CAGACTCTTACTTTATGAATCTTTTAACTTTCCGAGTTTTGAGCAA

>M6-PGSC0003DMG400029520-(rev)M6G-LecRK\_2170

TAGAAAAACCAGACTCTTACTTTATGAATCTTTTTAACCTTTCCGAGTTTTGAGCAAGAAGAAACATGTT  
TAGTAGTTTTAGAACTAGTACTGACTCTTAAATTTTTGTATTAGAATC

>M6-PGSC0003DMG400029520-(rev)M6G-LecRK\_2232

AAACATGTTTAGTAGTTTTAGAACTAGTACTGACTCTTAAATTTTTGTATTAGAATCTGTTAACAGAGAT  
GCACTCATCTGGAAGCAACGGCATGACATAATTGTTGGCATTGCTAGAG

>M6-PGSC0003DMG400029520-(rev)M6G-LecRK\_2294

AACAGAGATGCACTCATCTGGAAGCAACGGCATGACATAATTGTTGGCATTGCTAGAGGGTTGCTATAT  
CTTCATGAAGGTTACATACTTGCATTATCCACCGTGACATAAAAGCTAGC

>M6-PGSC0003DMG400029520-(rev)M6G-LecRK\_2356

GCTATATCTTCATGAAGGTTACATACTTGCATTATCCACCGTGACATAAAAGCTAGCAACATCCTACTTG  
ATGACAAATGGGTGCCCAAGATTGCTGATTTTGAATGGCTAGACTCTA

>M6-PGSC0003DMG400029520-(rev)M6G-LecRK\_2418

TCCTACTTGATGACAAATGGGTGCCCAAGATTGCTGATTTTGAATGGCTAGACTCTACCCTGAAGATAA  
AACACATGTTAACACCCGTGAAGCTGGTACAAAGTATGATTCTATAGAAC

>M6-PGSC0003DMG400029520-(rev)M6G-LecRK\_248

ACCCTTAATCTTGATTTTTTTTTTTGTTGTTCTAATGGTGATTTTGGGTTTTCTCTTGTGGAATTGACTA  
ATCAAAAAAAGGGAAAAATGAGGAGGACTTAGAGAAAATTGCAGCAC

>M6-PGSC0003DMG400029520-(rev)M6G-LecRK\_2480

GAAGATAAAACACATGTTAACACCCGTGAAGCTGGTACAAAGTATGATTCTATAGAACCTTATAAACTGT  
GTTTAGTGATGACTATGTAGAAATTCGTTATATTGCACAAGTACACTCA

>M6-PGSC0003DMG400029520-(rev)M6G-LecRK\_2542

TAAACTGTGTTTAGTGATGACTATGTAGAAATTCGTTATATTGCACAAGTACACTCACTCGATATTGCTA  
ACAACCTCTCTTGATAATTTAACTTGGGAAGCCAGTGGCTATATGGCGCC

>M6-PGSC0003DMG400029520-(rev)M6G-LecRK\_2604

ATATTGCTAACAACTCTCTTGATAATTTAACTTGGGAAGCCAGTGGCTATATGGCGCCAGAGTACGTTAT  
GCATGGACAACACTATCAGTGAAGGCTGATGTATTCAGTTTCGGAGTTGTAA

>M6-PGSC0003DMG400029520-(rev)M6G-LecRK\_2666

TACGTTATGCATGGACAACACTATCAGTGAAGGCTGATGTATTCAGTTTCGGAGTTGTAATTCTGGAGCTCA  
TAAGTGGCCAGAAGAATTCTACGTTTAAACAGAGATCCTGATTCTCGAAGC

>M6-PGSC0003DMG400029520-(rev)M6G-LecRK\_2728

GGAGCTCATAAGTGGCCAGAAGAATTCTACGTTTAAACAGAGATCCTGATTCTCGAAGCCTTCTTGAATG  
GGTAAGAACTTGATTTCTCTGCACTTTTCAGTCTTGATATTCCTTGAAATT

>M6-PGSC0003DMG400029520-(rev)M6G-LecRK\_2790

TTGAATGGGTAAGAACTTGATTTCTCTGCACTTTTCAGTCTTGATATTCCTTGAAATTTCTGGATTACAAG  
AAGAAGAATAACCTGTCAATGCCTTCATTCTGTTGAGTATAATAGGAG

>M6-PGSC0003DMG400029520-(rev)M6G-LecRK\_2852

GATTACAAGAAGAAGAATAACCTGTCAATGCCTTCATTCTGTTGAGTATAATAGGAGAGTCCTCGGAA  
TCAATTCGAGCTTCTATAAACATGTAACAGAAAAATAATATAGCCATAT

>M6-PGSC0003DMG400029520-(rev)M6G-LecRK\_2914

CTCGGAATCAATTCGAGCTTCTATAAACATGTAACAGAAAAATAATATAGCCATATCGTAGAACTTTT  
TAACTACTTGAAAAGTAAGATCGGACTACTTTTATCTATGTTGAGGGTGC

>M6-PGSC0003DMG400029520-(rev)M6G-LecRK\_2976

GAACTTTTAACTACTTGAAAAGTAAGATCGGACTACTTTTATCTATGTTGAGGGTGCAAAACATAATCA  
AATCGGTAGATGGAGGGAGAAGGACTTTACTTATAAGGTGTAGGTATACT

>M6-PGSC0003DMG400029520-(rev)M6G-LecRK\_3038

CATAATCAAATCGGTAGATGGAGGGAGAAGGACTTTACTTATAAGGTGTAGGTATACTCTTAATGGTGT

GAGACCTTTGGGAGAAAAGTGTGGCTGTGACTGTAAGTGGATAGTATCA

>M6-PGSC0003DMG400029520-(rev)M6G-LecRK\_310

TGAATTGACTAATCAAAAAAGGGAAAAATGAGGAGGACTTAGAGAAAATTGCAGCACAGAAGAACAGAA  
GCAATTCCTTTTGAAGTTCTTGTCTGCTACCAAAGATTTTCACCCAGAT

>M6-PGSC0003DMG400029520-(rev)M6G-LecRK\_3100

ATGGTGTGAGACCTTTGGGAGAAAAGTGTGGCTGTGACTGTAAGTGGATAGTATCACACCATGTAAA  
GGTATTTTTTAGGCCAATTTAGCCTAAAAGTGGGTAGTAGTGCCAATTATT

>M6-PGSC0003DMG400029520-(rev)M6G-LecRK\_3162

ATGTAAAGGTATTTTTTAGGCCAATTTAGCCTAAAAGTGGGTAGTAGTGCCAATTATTTGACGGATAGA  
GTATGGAGATGAAGGCATTGGGTGAGTTTGCTGCTAGTCGTTGGAAATGCA

>M6-PGSC0003DMG400029520-(rev)M6G-LecRK\_372

ACAGAAGCAATTCCTTTTGAAGTTCTTGTCTGCTACCAAAGATTTTCACCCAGATAACAAGCTTGGTG  
AAGGTGGATTTGGGCCTGTATTCAAGGTAAAAAAAAGTAAAATCAA

>M6-PGSC0003DMG400029520-(rev)M6G-LecRK\_434

AGCTTGGTGAAGGTGGATTTGGGCCTGTATTCAAGGTAAAAAAAAGTAAAATCAACAAAATTGAGT  
CTTTTTGTGATTTGGGTGTTAACAAAAGTCAAGCTTTCCTGAAAAGATTG

>M6-PGSC0003DMG400029520-(rev)M6G-LecRK\_496

ATTGAGTCTTTTTGTGATTTGGGTGTTAACAAAAGTCAAGCTTTCCTGAAAAGATTGAGTCGTTTTGTGA  
TTTTGGGTGTTAACTGAAACTCAAAGTTTCTGAAAAAATTGTGTCTTTT

>M6-PGSC0003DMG400029520-(rev)M6G-LecRK\_558

GTTTTGTGATTTGGGTGTTAACTGAAACTCAAAGTTTCTGAAAAAATTGTGTCTTTTTGTGATTCTTGAA  
GAAAATGAATCTTTTTGTGATTTGAGTATGAACAAAACCTCAAGCTTTC

>M6-PGSC0003DMG400029520-(rev)M6G-LecRK\_62

ACCAAAAACCTTAAAATTTGTAATTTTTCTATTGCATATACTTTGTACAAAGTCCTCTTGAGTTTTGTAAT  
GGACTAATTATTTTTGTGTACCAGCTATGACCAAACCAAAAAAATTC

>M6-PGSC0003DMG400029520-(rev)M6G-LecRK\_620

ATTCTTGAAGAAAATGAATCTTTTTGTGATTTGAGTATGAACAAAACCTCAAGCTTTCCTGCAAAAATTGA  
GTCTTTTTGTGATTCTTGAAAAAAAGAAGAAGTCTTTTTGTGGTTTGG

>M6-PGSC0003DMG400029520-(rev)M6G-LecRK\_682

AAAAATTGAGTCTTTTTGTGATTCTTGAAAAAAGAAGAAGTCTTTTTGTGGTTTGGGTATGAACTGAA  
ACTAAAGCTTTCTTGAAAAAATTGAGTCTTTATGTGATTTGGGTATTGAA

>M6-PGSC0003DMG400029520-(rev)M6G-LecRK\_744

GAACTGAAACTAAAGCTTTCTTGAAAAAATTGAGTCTTTATGTGATTTGGGTATTGAACAGAACTCAAC  
ATTTCTTGAAAAAATTGAGTCTTTCTTATTTATAGGGGAAATTGAGTGA

>M6-PGSC0003DMG400029520-(rev)M6G-LecRK\_806

AACTCAACATTTCTTGAAAAAATTGAGTCTTTCTTATTTATAGGGGAAATTGAGTGATGGGAGGCAAAT  
AGCTGTGAAGAAGCTTTCACATAGTTCAAGGCAGGGGATGAAGGAATTCA

>M6-PGSC0003DMG400029520-(rev)M6G-LecRK\_868

AGGCAAATAGCTGTGAAGAAGCTTTCACATAGTTCAAGGCAGGGGATGAAGGAATTCAAGAATGAAGC  
TAAGTTGTTGGCTCGTGTACAACACAGAAATGTGGTGAATTTGTTAGGGTAC

>M6-PGSC0003DMG400029520-(rev)M6G-LecRK\_930

TGAAGCTAAGTTGTTGGCTCGTGTACAACACAGAAATGTGGTGAATTTGTTAGGGTACTGTGTACATGG  
GGTAGAGAAGTTGCTTGTCTATGAGTATGTTGCTAATGAGAGCCTTGACAA

>M6-PGSC0003DMG400029520-(rev)M6G-LecRK\_992

TACATGGGGTAGAGAAGTTGCTTGTCTATGAGTATGTTGCTAATGAGAGCCTTGACAAAATCCTCTTCAG  
TAAGTTTTATTAGTTTTTATCTTCTTAGATCTACTAGCTTTTGTATGTTC

>M6-PGSC0003DMG400029572M6LRR-RLP\_3162

AAATAGCAATGGATGCATCTGTTTGTACTTTATGTCCATGGTTGCCAAATACGTATGTAAATGTTACAG  
TTTAGTTCTGTTTGTATGGTTCTTACATGTTGTTTTGTAACGTATTGTA

>M6-PGSC0003DMG400029572M6LRR-RLP\_3268

TGTAACGTATTGTATTATATTGTATTGTTAGTACAACAATATGAATCCTGTATTATTTACTAGATGAGTCA  
GATCCATGCTTAGCACGAGCTCAACATTTAGGTGATTGAAATCTCTTTT

>M6-PGSC0003DMG400029644-(rev)M6LRR-RLK\_0

AAAAACAGAGCAAAACCAAGAAACAAAAAGAAGGGATTTTTACTTAGTTTTTTGATATGCAATTGC  
AAACCAAGAAGAAATTTTTGGAATTTGAGGCAAAGATGTCTTCTTCTTCT

>M6-PGSC0003DMG400029644-(rev)M6LRR-RLK\_183

TCTTCTTCTGCTGCTGTTACTGATGTTGTTGCACATTTTCTAATTGGGACATTCTTGATGATACCCCATGT  
AAATGGTCTTTCATAAAATGCAACTTTCAAGGTTTTATTACAGAAATC

>M6-PGSC0003DMG400029644-(rev)M6LRR-RLK\_2013

CTCGATAATCTTGTCTCACTGAATGTCTCATACAACAACCTCACTGGTTATCTTCCGGACAATAAGCTCTTT  
CGACAGTTGCCATCATCAGACCTAGATGGAAATGAAGGTCTATGTTCA

>M6-PGSC0003DMG400029644-(rev)M6LRR-RLK\_2928

TCTTATGGCTACATTGCTCCAGGTAAAAAATTTTATTTTCATGTCATCATTTTTCTTACACCTAGCATAT  
TATTCTGAGTATACATTTTGCTTAGTTATAGTATAAGCATTGATTGCG

>M6-PGSC0003DMG400029644-(rev)M6LRR-RLK\_2989

ACCTAGCATATTATTCTGAGTATACATTTTGCTTAGTTATAGTATAAGCATTGATTGCGTATTGCAACCAC  
AACACATAACCCAGTGTAGTCCCACAGAAAAAGAAGTAACGGATGTGAA

>M6-PGSC0003DMG400029644-(rev)M6LRR-RLK\_3050

TTGCAACCACAACAACATAACCCAGTGTAGTCCCACAGAAAAAGAAGTAACGGATGTGAAAGCATAACAA  
AGCATGCTGAACACTAACTTCATCAAATAATATGATAATCGAAGTACAAG

>M6-PGSC0003DMG400029644-(rev)M6LRR-RLK\_3111

CATAACAAAGCATGCTGAACACTAACTTCATCAAATAATATGATAATCGAAGTACAAGAAACAAACAG  
TAGTAACAAAAATCGAAGGACAATGATTGCACATTGCATTTATCTACAAAG

>M6-PGSC0003DMG400029644-(rev)M6LRR-RLK\_3172

ACAAACAGTAGTAACAAAAATCGAAGGACAATGATTGCACATTGCATTTATCTACAAAGAATATTAGTA  
GTTCTTGATGATCATTGATCCAAGGGTACCAATATTGTTCATTTTTCATTA

>M6-PGSC0003DMG400029644-(rev)M6LRR-RLK\_3233

TATTAGTAGTTCTTGATGATCATTGATCCAAGGGTACCAATATTGTTCATTTTTCATTACAGAATATGGCT  
ATATGATGAAGATAACTGCAAAGAGCGATGTCTACAGCTACGGAGTGGT

>M6-PGSC0003DMG400029644-(rev)M6LRR-RLK\_3294

GAATATGGCTATATGATGAAGATAACTGCAAAGAGCGATGTCTACAGCTACGGAGTGGTTGTATTAGAA  
GTCTTGACAGGTAAGCAGCCAATCGATCCAACAATTCCCGAAGGAGTGCAT

>M6-PGSC0003DMG400029644-(rev)M6LRR-RLK\_3355

TATTAGAAGTCTTGACAGGTAAGCAGCCAATCGATCCAACAATTCCCGAAGGAGTGCATCTAGTTGATT  
GGGTAAGACGGAAAAGAGGAGGAATTGAAGTCCTCGATCCAAGTCTACACT

>M6-PGSC0003DMG400029644-(rev)M6LRR-RLK\_3416

AGTTGATTGGGTAAGACGGAAAAGAGGAGGAATTGAAGTCCTCGATCCAAGTCTACACTCGAGACCAG

AATCAGAAATCGAGGAAATGTTACAAGCATTAGGAGTAGCCCTGTTATGTGT

>M6-PGSC0003DMG400029644-(rev)M6LRR-RLK\_3477

AGACCAGAATCAGAAATCGAGGAAATGTTACAAGCATTAGGAGTAGCCCTGTTATGTGTCAACTCCACT  
CCTGATGAAAGGCCTACAATGAAAGATGTAGCAGCAATGCTAAAGGAAATC

>M6-PGSC0003DMG400029644-(rev)M6LRR-RLK\_3538

ACTCCACTCCTGATGAAAGGCCTACAATGAAAGATGTAGCAGCAATGCTAAAGGAAATCAAACATGAAA  
GGGAAGAATACGCCAAAGTCGATGTTTTACTCAAAGGCTCTCCAACAACAA

>M6-PGSC0003DMG400029644-(rev)M6LRR-RLK\_3705

GTTTTAGCAACATCTTCATCAGGACAGAAAGCAAGAAGTATGTATACAATGAGCAATAACACAAGCTTCT  
CTGCTTCATCATTGCTTTATTCATCATCATCATCAAATGCCAAAAGT

>M6-PGSC0003DMG400029712-(rev)M6RLKmalectin\_0

TTTACCTGCACAGAACGTTTCCCATTATCACTCCACTGATTATTGTGTGATAATTAGTGCCCAGAAAACAA  
CAAGGGAAGTACAAGATTTGAGTATGAAATCAATGAGTTTCTAGAAGAA

>M6-PGSC0003DMG400029712-(rev)M6RLKmalectin\_1037

GGGGTGGAACTTGGAAAGTCGGGTTTGAGAGGGAGTGAGCATGCTTTTTCTGGTTGTGCTTTGATGAATC  
ATAGGAGGAACAAATAAGAGTAGACTCAGAAATCTGCTGAGCCTCTTTAGG

>M6-PGSC0003DMG400029712-(rev)M6RLKmalectin\_1098

GATGAATCATAGGAGGAACAAATAAGAGTAGACTCAGAAATCTGCTGAGCCTCTTTAGGTCTACTTTTT  
GCCCATTAACGATAAGTTTTAAAGCGCATCAAATTAATGTAACATTAGTGA

>M6-PGSC0003DMG400029712-(rev)M6RLKmalectin\_1159

TACTTTTTGCCCATTAACGATAAGTTTTAAAGCGCATCAAATTAATGTAACATTAGTGAAAAATAAACACT  
ATTCCATCTCAAATATTCAAGTTGCTCCTGCTCCTGTCAAGTGTAGAG

>M6-PGSC0003DMG400029712-(rev)M6RLKmalectin\_122

TAACAACAAATTGAAGCAAATCTAAGTAGCATTTGGAGCCGAAATGCTGAGATTCCACTGTTTTTTCTTG  
TTTCTTTGCTTCTGCGTGGGTCTTCAGCTTGTCTGCTCTCGACATGGTCA

>M6-PGSC0003DMG400029712-(rev)M6RLKmalectin\_1220

AATAAACACTATTCCATCTCAAATATTCAAGTTGCTCCTGCTCCTGTCAAGTGTAGAGTTTGATAAACTT  
GTCAAGTACCTCTAGGACTACATTTTTTTCAATAAAAAAAGCTTTCAAG

>M6-PGSC0003DMG400029712-(rev)M6RLKmalectin\_1281

TGATAAACTTGTCAAGTACCTCTAGGACTACATTTTTTTCAATAAAAAAAGCTTCAAGTGCATTACGCA  
GTGTAACACTAGTGAAGGTTAAAGTTAGTTTACTGCTGATATTCAAGGT

>M6-PGSC0003DMG400029712-(rev)M6RLKmalectin\_1342

CATTACGCAGTGTAACACTAGTGAAGGTTAAAGTTAGTTTACTGCTGATATTCAAGGTAGAGTCTACTG  
CTGATATTGAGGTGGACTTGCTTCCTCTTTTGTGTACCTGTTCTGCTTT

>M6-PGSC0003DMG400029712-(rev)M6RLKmalectin\_1403

AGTCTACTGCTGATATTGAGGTGGACTTGCTTCCTCTTTTGTGTACCTGTTCTGCTTTTCTGGATATCTAG  
TGCTTTTATTCCATCATATTGAAAATTTAATTCTTGGCTATTACTCA

>M6-PGSC0003DMG400029712-(rev)M6RLKmalectin\_1464

TGGATATCTAGTGCTTTTATTCCATCATATTGAAAATTTAATTCTTGGCTATTACTCATTAGTCTCCTAGT  
TGGCATTTTGTGTTCACTCTACTGTTTACTCACCGCAGATCCATAAGT

>M6-PGSC0003DMG400029712-(rev)M6RLKmalectin\_1525

AGTCTCCTAGTTGGCATTTTGTGTTCACTCTACTGTTTACTCACCGCAGATCCATAAGTAATGCGAATAAG  
CTGTGGAGCTCGACATGATGTTCACTGCCCCTACAAAGACTCTCTGG

>M6-PGSC0003DMG400029712-(rev)M6RLKmalectin\_1586

TGCGAATAAGCTGTGGAGCTCGACATGATGTTCACTGCCCCTACAAAGACTCTCTGGTATAAGGATTT  
TGCATATACAGGAGGGATACCTTTCAATGGAACATCCCCAAGTTTCATTG

>M6-PGSC0003DMG400029712-(rev)M6RLKmalectin\_1647

TAAGGATTTTGCATATACAGGAGGGATACCTTTCAATGGAACATCCCCAAGTTTCATTGCGCCTCAACTC  
ACTACGCTGCGGTATTTCCCTTTATCGGAGGGACCTGAGAATTGTTACAA

>M6-PGSC0003DMG400029712-(rev)M6RLKmalectin\_1708

CCTCAACTCACTACGCTGCGGTATTTCCCTTTATCGGAGGGACCTGAGAATTGTTACAATATCAAGAGAG  
TCCCCATGGCCACTATTCAAGTGGATATTCTTTGGAATGGTTGTAGAA

>M6-PGSC0003DMG400029712-(rev)M6RLKmalectin\_1769

TCAAGAGAGTCCCCCATGGCCACTATTCAAGTGGATATTCTTTGGAATGGTTGTAGAACCAAGCTTTGA  
TAATGAACCACTATTTGATGTTTCTGTTGAAGGCACCTGGTTTATACTT

>M6-PGSC0003DMG400029712-(rev)M6RLKmalectin\_183

TTTTTCTGTTTCTTTGCTTCTGCGTGGGTCTTCAGCTTGTCTGCTCTCGACATGGTCAGCCCTTTTTTCTT  
TTGGTTGTAATGTGAAATGGTTCAACTAATTTTACTGGGTTTCTTTA

>M6-PGSC0003DMG400029712-(rev)M6RLKmalectin\_1830

AAGCTTTGATAATGAACCACTATTTGATGTTTCTGTTGAAGGCACCTTGGTTTATACTTTGCCATCTGGTT  
GGAGCAATCATGACGATGAACAAGTATTTGTTGAAACACTTATTTTTCT

>M6-PGSC0003DMG400029712-(rev)M6RLKmalectin\_1891

CCATCTGGTTGGAGCAATCATGACGATGAACAAGTATTTGTTGAAACACTTATTTTTCTTGATGATGGTA  
CTGCCTCTCTTTGCTTCCAAAGCACAGGTCATGGAGATCCAGCTATACTT

>M6-PGSC0003DMG400029712-(rev)M6RLKmalectin\_1952

ATGATGGTACTGCCTCTCTTTGCTTCCAAAGCACAGGTCATGGAGATCCAGCTATACTTGCAATTGAAAT  
TCTCCAAGTAGATGACAGAGCATAACCATTTTGGTCCTGACTTTGGTAAAG

>M6-PGSC0003DMG400029712-(rev)M6RLKmalectin\_2013

AATTGAAATTCTCCAAGTAGATGACAGAGCATAACCATTTTGGTCCTGACTTTGGTAAAGGGACAATTATC  
AGAAGTGTCAAAGACTCAGCTGTGGTGCTCAGGAATCAATGTTTGATGA

>M6-PGSC0003DMG400029712-(rev)M6RLKmalectin\_2074

ACAATTATCAGAACTGTCAAAGACTCAGCTGTGGTGCTCAGGAATCAATGTTTGATGATGACTACAGT  
GGTGATCATTGGGGTGGTGATCGGTTTTGGAGTTCAATCAAGACATTTGGC

>M6-PGSC0003DMG400029712-(rev)M6RLKmalectin\_2135

ACTACAGTGGTGATCATTGGGGTGGTGATCGGTTTTGGAGTTCAATCAAGACATTTGGCCAGAATTCTG  
ATCGCCGCATTTCTACCAAAAACAGTACAAAGTCAACTTCCAAAGCACCAA

>M6-PGSC0003DMG400029712-(rev)M6RLKmalectin\_2196

GAATTCTGATCGCCGATTTCTACCAAAAACAGTACAAAGTCAACTTCCAAAGCACCAAACATTTTATCCA  
GGATCTATTTATCAAAGTCTCTTCTTAGCACTGACAATGAGCCAGAATT

>M6-PGSC0003DMG400029712-(rev)M6RLKmalectin\_2257

TTTTATCCAGGATCTATTTATCAAAGTCTCTTCTTAGCACTGACAATGAGCCAGAATTAACATACACAGT  
GGATGTGATACCAATAAAAAGTACTCTGTTTGGTTACACTTTGCGGAA

>M6-PGSC0003DMG400029712-(rev)M6RLKmalectin\_2318

CATACACAGTGGATGTCGATACCAATAAAAAGTACTCTGTTTGGTTACACTTTGCGGAAATTGATCCTTC  
AGTTACATCTGAGGGACAGAGGGTCATGGACATTTCAATCAATGGTGACA

>M6-PGSC0003DMG400029712-(rev)M6RLKmalectin\_2379

TGATCCTTCAGTTACATCTGAGGGACAGAGGGTCATGGACATTTCAATCAATGGTGACTGTATTTCCA



GATGTTGACATTGTGAAGATGGCTGGGGGTGTTAACAGTGCTCTTGTGCT

>M6-PGSC0003DMG400029712-(rev)M6RLKmalectin\_244

CCTTTTTTCTTTTGGTTGTAATGTGAAATGGTTCAACTAATTTTACTGGGTTTCTTTAGTAGTGATAACTT

AGTTTTTTGGGATCTACTTGTTTTATTTGCTAGTAGTGAACTTTTTTA

>M6-PGSC0003DMG400029712-(rev)M6RLKmalectin\_2440

GTATTTCCAGATGTTGACATTGTGAAGATGGCTGGGGGTGTTAACAGTGCTCTTGTGCTGAACACAACA

GTTCCAATCAGTGGCAGGACCTTGACAATCACACTGCAGCCAAAAAATGGA

>M6-PGSC0003DMG400029712-(rev)M6RLKmalectin\_2501

ACACAACAGTTCCAATCAGTGGCAGGACCTTGACAATCACACTGCAGCCAAAAAATGGAACATCATGCTA

TAATTAGTGCTATTGAAATTTTTGAGGTTATAATAGCTGAATCTAAAACGT

>M6-PGSC0003DMG400029712-(rev)M6RLKmalectin\_2562

TCATGCTATAATTAGTGCTATTGAAATTTTTGAGGTTATAATAGCTGAATCTAAAACGTTACTTGATGAAG

GTACTIONAAGTTAAAAATTTACACCAACATTTCTTGGATGCTTGTTCAG

>M6-PGSC0003DMG400029712-(rev)M6RLKmalectin\_2623

CTTGATGAAGTACTTAAGTTTAAAAATTTACACCAACATTTCTTGGATGCTTGTTCAGAGTTTAAAGTG

GGAAAGAAAGATAAAAAGTCAAAAGTTTGTACAAGTTTTACGCATGGTATA

>M6-PGSC0003DMG400029712-(rev)M6RLKmalectin\_2684

TTTAAAGTGGGAAAGAAAGATAAAAAGTCAAAAGTTTGTACAAGTTTTACGCATGGTATAGGCGATAGCT

TACTCGCTTTGTTATGCTATAGAAAATGGCCATAAGTAGTAACGTGTTCTT

>M6-PGSC0003DMG400029712-(rev)M6RLKmalectin\_2745

CGATAGCTTACTCGCTTTGTTATGCTATAGAAAATGGCCATAAGTAGTAACGTGTTCTTTTTTTGACTAAT

GAGTCCAGCTTGTGCCATTATCATTCTACTGCTCTGATTATGGAAGATT

>M6-PGSC0003DMG400029712-(rev)M6RLKmalectin\_2806

TTTGACTAATGAGTCCAGCTTGTGCCATTATCATTCTACTGCTCTGATTATGGAAGATTGGAAGTTATCTG

GACGATTATTGATACAATTTTATCCTTCTTATATTCTGCAGTCAGGGGT

>M6-PGSC0003DMG400029712-(rev)M6RLKmalectin\_2867

AAGTTATCTGGACGATTATTGATACAATTTTATCCTTCTTATATTCTGCAGTCAGGGGTTTGCAGTCGCTA

AAGAATGCACTTGGACTTCCCCTTCGGCTTGGATGGAATGGTGATCCAT

>M6-PGSC0003DMG400029712-(rev)M6RLKmalectin\_2928

GCAGTCGCTAAAGAATGCACTTGGACTTCCCCTTCGGCTTGGATGGAATGGTGATCCATGTGTGCCCA  
ACAACATCCCTGGAGTGGAGCAGATTGTCAGTTTGACAAAAGTAGCAATAA

>M6-PGSC0003DMG400029712-(rev)M6RLKmalectin\_2989

GTGCCCAACAACATCCCTGGAGTGGAGCAGATTGTCAGTTTGACAAAAGTAGCAATAAATGGGTCATC  
GACGGGATGTACGTCAATGAGCTTACTCTTAGATATACAAGTTTCTATCTA

>M6-PGSC0003DMG400029712-(rev)M6RLKmalectin\_305

AGTGATAACTTAGTTTTTGGGATCTACTTGTGTTTTATTGCTAGTAGTGAACTTTTTATTAGCTATACTTT  
GCTTATGTAGATTTGTTTTAGATGTAGTAATGGAATGATGTTTCTCA

>M6-PGSC0003DMG400029712-(rev)M6RLKmalectin\_3050

GGGTCATCGACGGGATGTACGTCAATGAGCTTACTCTTAGATATACAAGTTTCTATCTATATGTATGTTT  
GTGTGGTCGGACATATGGTATATCCATGGGCATATTCAAAAATCACTTAC

>M6-PGSC0003DMG400029712-(rev)M6RLKmalectin\_3111

TGTATGTTTGTGTGGTCGGACATATGGTATATCCATGGGCATATTCAAAAATCACTTACATACACCATCTA  
TTTTACTTGTAATCTTCAGTCAAGCTCCCCACCTCAATATAGGTTTTGG

>M6-PGSC0003DMG400029712-(rev)M6RLKmalectin\_3172

ACACCATCTATTTTACTTGTAATCTTCAGTCAAGCTCCCCACCTCAATATAGGTTTTGGTTGACAAGTTTCT  
GGACAACCTGGTCTCCACTGTGTGTGAATTTTCTGATCAATCATGAAT

>M6-PGSC0003DMG400029712-(rev)M6RLKmalectin\_3233

GACAAGTTTCTGGACAACCTGGTCTCCACTGTGTGTGAATTTTCTGATCAATCATGAATCAACCCAAGAT  
AAATATCCTTTCCCCCTCTCAAAGGAAAACGGAAAAAATGGGCATCTT

>M6-PGSC0003DMG400029712-(rev)M6RLKmalectin\_3294

ACCCAAGATAAATATCCTTTCCCCCTCTCAAAGGAAAACGGAAAAAATGGGCATCTTTGCAATCACTT  
TTCTCAATTAGAGAACCTTGCAGCTGTAAAACCTTTTCATCCTATAAATAT

>M6-PGSC0003DMG400029712-(rev)M6RLKmalectin\_3355

CAATCACTTTTCTCAATTAGAGAACCTTGCAGCTGTAAAACCTTTTCATCCTATAAATATATATGCTCACGC  
ACACATACTCAAACACCCGTTTGTATTCTTTCCCTAAGTTCCAC

>M6-PGSC0003DMG400029712-(rev)M6RLKmalectin\_3416

ATGCTCACGCACACATACTCAAACACCCGTTTGTATTCTTTCCCTAAGTTCCACACCTCAATCTAAC  
AGGGCCCGGGTGGTAAGTTGTTCAACAACCTGGCTTTCTCTGCTTTGT

>M6-PGSC0003DMG400029712-(rev)M6RLKmalectin\_3477

CTCAATCTAACAGGGCCCGGGTGGTAAGTTGTTCAACAACCTGGCTTTCTCTGCTTTGTGTATTTCACTAA  
TTAACACAGTTCATTACACATAAGTAGGGAAAACCAAGTTGAGTGTGAA

>M6-PGSC0003DMG400029712-(rev)M6RLKmalectin\_3538

ATTTCACTAATTAACACAGTTCATTACACATAAGTAGGGAAAACCAAGTTGAGTGTGAATGTGAAATGC  
GGAATGAGGTGGAATATTGGGACTTTGAAGAGCAAAGGCCAGGGACTAGGG

>M6-PGSC0003DMG400029712-(rev)M6RLKmalectin\_3599

TGAAATGCGGAATGAGGTGGAATATTGGGACTTTGAAGAGCAAAGGCCAGGGACTAGGGGGAGGCTG  
TGAAAGGGGAAAGTGAGAAAGAATGGTGGCAGTGGTCAGAAAGGGAAGTTGCG

>M6-PGSC0003DMG400029712-(rev)M6RLKmalectin\_366

AGCTATACTTTGCTTATGTAGATTTGTTTTAGATGTAGTAATGGAATGATGTTTCTCATTAAATTGGGATT  
TTGCAATGGACTTGCTTTGATTTTGAATGATATTATGCTGATTTTAGCT

>M6-PGSC0003DMG400029712-(rev)M6RLKmalectin\_3660

AGGCTGTGAAAGGGGAAAGTGAGAAAGAATGGTGGCAGTGGTCAGAAAGGGAAGTTGCGGCAATGA  
GGGAAGGGTTGGTTTTATGAAAGAAGGGAATGAGGAAGAGGACTGGGCTGATTC

>M6-PGSC0003DMG400029712-(rev)M6RLKmalectin\_3721

AATGAGGGAAGGGTTGGGTTTTATGAAAGAAGGGAATGAGGAAGAGGACTGGGCTGATTCGTTGTGGA  
GATCAAGGACACATTTATCTAACTAGACCAGAAAGCCCATGTGGAAGTGGGGA

>M6-PGSC0003DMG400029712-(rev)M6RLKmalectin\_3782

TGTGGAGATCAAGGACACATTTATCTAACTAGACCAGAAAGCCCATGTGGAAGTGGGGAACAGGCAGT  
TAATTAGTTAGGAACTTCTGGTTGCATAATATCGATTGCCAAAGTAACCAAC

>M6-PGSC0003DMG400029712-(rev)M6RLKmalectin\_3843

AGGCAGTTAATTAGTTAGGAACTTCTGGTTGCATAATATCGATTGCCAAAGTAACCAACCCCATCTCTCG  
TCATGGTCAAAATTTGTTATTTGAGTATCAAATAGTTTATGTATTGGGTC

>M6-PGSC0003DMG400029712-(rev)M6RLKmalectin\_3904

CATCTCTCGTCATGGTCAAAATTTGTTATTTGAGTATCAAATAGTTTATGTATTGGGTCTTAAAATTAAC  
TTTAGTTTGTGATATAATGATAGTTGAAAGCTCTTTAGTGTACATTTTT

>M6-PGSC0003DMG400029712-(rev)M6RLKmalectin\_3965

AAAATTAACCTTTAGTTTGTGATATAATGATAGTTGAAAGCTCTTTAGTGTACATTTTTTAATTTCAAAA

AAATGAGATAAATTGTTTGTATTACACCTTCAATGTTAAAATTCTCA

>M6-PGSC0003DMG400029712-(rev)M6RLKmalectin\_4026

ATTCATAAAAAATGAGATAAATTGTTTGTATTACACCTTCAATGTTAAAATTCTCACAAATTCATATAT  
TTCTGATCTCATTCTTTGTCCCCTAGGACAGTATAATTATGTATTT

>M6-PGSC0003DMG400029712-(rev)M6RLKmalectin\_4087

AATTCATATATTTCTGATCTCATTCTTTGTCCCCTAGGACAGTATAATTATGTATTTTGTGTCAGCAAGATG  
CCTTTCCTGATTGGAATCCTCAATTTCAAATCTGCATGTTAGCATG

>M6-PGSC0003DMG400029712-(rev)M6RLKmalectin\_4148

TCAGCAAGATGCCTTTCCTGATTGGAATCCTCAATTTCAAATCTGCATGTTAGCATGCCTACACTTTCA  
TATTGTGTGGTTTTTTACTTGCAAGCTTTGTGTAATGAATCCTTAGAG

>M6-PGSC0003DMG400029712-(rev)M6RLKmalectin\_4209

TACACTTTCATATTGTGTGGTTTTTTACTTGCAAGCTTTGTGTAATGAATCCTTAGAGGAACTACATATCT  
GTCGCAGTAAATCCTGTTATTAGAATAGCAAACATGGTGTCTCCATT

>M6-PGSC0003DMG400029712-(rev)M6RLKmalectin\_427

AATTGGGATTTTGCAATGGACTTGCTTTGATTTTGAATGATATTATGCTGATTTTAGCTAGTTCTGATGTT  
TTATTCCTGAGTTGAATACTGAGAAGTTCTTTTTATTATTTATTTGAGT

>M6-PGSC0003DMG400029712-(rev)M6RLKmalectin\_4270

ACTACATATCTGTCGCAGTAAATCCTGTTATTAGAATAGCAAACATGGTGTCTCCATTTCTTCTGTTCTA  
TAATGCATAACTTCTATAAGCTTGATTGGTTCATAGTGATTTATTTTTT

>M6-PGSC0003DMG400029712-(rev)M6RLKmalectin\_4331

TTCTGTTCTATAATGCATAACTTCTATAAGCTTGATTGGTTCATAGTGATTTATTTTTTTCTGAAAATGTGA  
ATTATTGTTGTTGCTATTTGCTGTATAAACATGTTACCTCTTGTGATG

>M6-PGSC0003DMG400029712-(rev)M6RLKmalectin\_4392

TGAAAATGTGAATTATTGTTGTTGCTATTTGCTGTATAAACATGTTACCTCTTGTGATGTAAGTCTTCTG  
TCTGTTAATGTCCCCTTTTATCTTTACATTCTTCAGTGCTGGTTTTTTG

>M6-PGSC0003DMG400029712-(rev)M6RLKmalectin\_4453

ACTGCTTCTGTCTGTTAATGTCCCCTTTTATCTTTACATTCTTCAGTGCTGGTTTTTTGACCAAATTTTATCA  
TTTTCTAAGGTCTATATTGCTTTTCTTACTGCGGTCTGCAGGAAT

>M6-PGSC0003DMG400029712-(rev)M6RLKmalectin\_4514

CAAATTTTATCATTTTCCTAAGGTCTATATTGCTTTTCTTGACTGCGGTCTGCAGGAATGCTTTGAATTCG  
TTCACATAATCATCTTTAACTATTTTTCTTTTTCCAAATGGTTTACC

>M6-PGSC0003DMG400029712-(rev)M6RLKmalectin\_4575

TTTGAATTCGTTACATAATCATCTTTAACTATTTTTCTTTTTCCAAATGGTTTACCTGTAAGGTCAGTG  
GCTTGGACAACCAAGGTTTAAGAGGCTTCTTACCAAATGAAATTTCTC

>M6-PGSC0003DMG400029712-(rev)M6RLKmalectin\_4636

TAAGGTCAGTGGCTTGGACAACCAAGGTTTAAGAGGCTTCTTACCAAATGAAATTTCTCGATTGCGTCAT  
CTTCAGAGCATGTAAGTTAGCTTGCAAATGCTTTTTGTTTTGGGGAATAC

>M6-PGSC0003DMG400029712-(rev)M6RLKmalectin\_4697

TTGCGTCATCTTCAGAGCATGTAAGTTAGCTTGCAAATGCTTTTTGTTTTGGGGAATACGTGTTGCCTAA  
GGCAAATACACCTTATGAAGAAATACATGACACTTCCCAGAACTGCAACC

>M6-PGSC0003DMG400029712-(rev)M6RLKmalectin\_4758

GTTGCCTAAGGCAAATACACCTTATGAAGAAATACATGACACTTCCCAGAACTGCAACCTTCTCAAATCT  
TCTAAGCATCCCTCTGGTCTTAATGCTCCATTCTTGCATGTAGTAATGGA

>M6-PGSC0003DMG400029712-(rev)M6RLKmalectin\_4819

CTCAAATCTTCTAAGCATCCCTCTGGTCTTAATGCTCCATTCTTGCATGTAGTAATGGAAACTGGAAACAA  
CCATTTCAAATATGATATACTTTGACCATGCTTTCCTTGTGTGCGTTT

>M6-PGSC0003DMG400029712-(rev)M6RLKmalectin\_488

TTCTGATGTTTTATTCTGAGTTGAATACTGAGAAGTTCTTTTTATTATTTATTTGAGTAATGGATTTAGG  
GGCGAAGATTCGTACTACTAAAATTCGTACATATATGATAATCAATGTA

>M6-PGSC0003DMG400029712-(rev)M6RLKmalectin\_4880

CTGGAAACAACCATTTCAAATATGATATACTTTGACCATGCTTTCCTTGTGTGCGTTTTTTTTTTTTTAA  
CAGAAATCTAAGTGGGAACAGCATTTCATGGACCTATCCCCCGGCATT

>M6-PGSC0003DMG400029712-(rev)M6RLKmalectin\_4941

TTTTTTTTTAACAGAAATCTAAGTGGGAACAGCATTTCATGGACCTATCCCCCGGCATTGGGAACGGTAA  
CTAGTCTGGAGACATTGTGAGTAAAGCTTTCAGGAACTTCATGTGCTTTT

>M6-PGSC0003DMG400029712-(rev)M6RLKmalectin\_5002

GAACGGTAACTAGTCTGGAGACATTGTGAGTAAAGCTTTCAGGAACTTCATGTGCTTTTCAAATTAATT  
TAGATTTTTCTGCCGACAATCAATTTTGAAATTAAGCGGTTTCTAAAC

>M6-PGSC0003DMG400029712-(rev)M6RLKmalectin\_5063

AAATTAATTTAGATTTTTCTGCCGACAATCAATTTGAAATTAAGCGGTTTCTAACTATACTTTTTGA  
GGAGTGTGAGTCATACAAGTCTCTATTTTATTAATATCATAGCCCA

>M6-PGSC0003DMG400029712-(rev)M6RLKmalectin\_5124

TACTTTTTGAGGAGTGTGAGTCATACAAGTCTCTATTTTATTAATATCATAGCCCACTTTCTTAAAAA  
TTAGGTAGGAATAAAGAATAAGTAATGGAAGACTCTTGATTAATAATAG

>M6-PGSC0003DMG400029712-(rev)M6RLKmalectin\_5185

CTTCTTAAAAATTAGGTAGGAATAAAGAATAAGTAATGGAAGACTCTTGATTAATAATAGCTTTATGGATT  
GTGAAATACAAGTCATATTGCCCATATGGATATGATGGTAGTATATACAC

>M6-PGSC0003DMG400029712-(rev)M6RLKmalectin\_5246

TTATGGATTGTGAAATACAAGTCATATTGCCCATATGGATATGATGGTAGTATATACACTGTTCTTTGAA  
ATTTGGATACATCTTTATGTTTTGTTGAAATTCATAGACCTAAATAGAG

>M6-PGSC0003DMG400029712-(rev)M6RLKmalectin\_5307

TTCTTTGAAATTTGGATACATCTTTATGTTTTGTTGAAATTCATAGACCTAAATAGAGTAGGACAATTTA  
TAAAGGATAGCGGATAATGCTCATACTGAGAAACATAACAATTCCTTAT

>M6-PGSC0003DMG400029712-(rev)M6RLKmalectin\_5368

GGACAATTTATAAAGGATAGCGGATAATGCTCATACTGAGAAACATAACAATTCCTTATGGGTACAGCT  
CTTATTTTAGCGGGGTGAAAAGAATGTTATATATTTATTGTGTATTAGAAC

>M6-PGSC0003DMG400029712-(rev)M6RLKmalectin\_5429

GTACAGCTCTTATTTTAGCGGGGTGAAAAGAATGTTATATATTTATTGTGTATTAGAACAACACTATTA  
CCTTAGTTCAATTAAGTCTTCTCCAATTTCTCTGGACATCTCTTTTTA

>M6-PGSC0003DMG400029712-(rev)M6RLKmalectin\_5490

ACACTATTACCTTAGTTCAATTAAGTCTTCTCCAATTTCTCTGGACATCTCTTTTTAGTTAGAAATGATA  
CAAGATGATCTCATTCCCTATTTAGCAAAATAGTGAAGGATATTCCA

>M6-PGSC0003DMG400029712-(rev)M6RLKmalectin\_5551

TAGAAATGATACAAGATGATCTCATTCCCTATTTAGCAAAATAGTGAAGGATATTCCACTAGTAAAAAA  
AAAGGTGGATCTCACCTGGTGTGAGTGTCTAACAAGATTTGCATTACAGGG

>M6-PGSC0003DMG400029712-(rev)M6RLKmalectin\_5612

AGTAAAAAAAAGGTGGATCTCACCTGGTGTGAGTGTCTAACAAGATTTGCATTACAGGGATCTCTCATA

CAATTTCTTCAATGGATCGATTCTGAAAGCCTCGGGCAATTGACCTCATT

>M6-PGSC0003DMG400029712-(rev)M6RLKmalectin\_5673

CTCTCATACAATTTCTTCAATGGATCGATTCTGAAAGCCTCGGGCAATTGACCTCATTACGGACGCTGTA  
AGATATTTTAACTTTTGATCAGTTGAAGACAAAAGAATGATAGAACTAT

>M6-PGSC0003DMG400029712-(rev)M6RLKmalectin\_5734

GGACGCTGTAAGATATTTTAACTTTTGATCAGTTGAAGACAAAAGAATGATAGAACTATTTTATTATTG  
TTTTGAGGGTAAAGAGTCTAAAAATACTCCAACCTTTGACTGAAATTGTT

>M6-PGSC0003DMG400029712-(rev)M6RLKmalectin\_61

CAGAAAACAACAAGGGAAGTACAAGATTTGAGTATGAAATCAATGAGTTTCTAGAAGAAAATAACAAC  
AAATTGAAGCAAATCTAAGTAGCATTGGAGCCGAAATGCTGAGATTCCACT

>M6-PGSC0003DMG400029712-(rev)M6RLKmalectin\_610

TGGAATAATCGTATTGAATAGTTGCATTGATAGTTATCTTCACTCTCAAATTTGTTAATTGTTTTCTATTTT  
TGAAGCTCTAGTGATCCTTAAAAGAAGTTAAGGTAGTATGTGGAGTGC

>M6-PGSC0003DMG400029712-(rev)M6RLKmalectin\_6100

ATTTTTCCCTTGTTTTGATAAAGAGAATTAATAACTGTTTTGTTACAGGAATCTCAATGGCAACTCACTCT  
CTGGAAGGATTCTGCTGCATTAGGTGGAAGGCTCTTGCACAGGGCTA

>M6-PGSC0003DMG400029712-(rev)M6RLKmalectin\_6161

CAACTCACTCTCTGGAAGGATTCTGCTGCATTAGGTGGAAGGCTCTTGCACAGGGCTAAATTCAAGTAT  
GTTTTCTATAATCATCATATTATTTGGCCTATGGCTTGTCTTGGTGAAG

>M6-PGSC0003DMG400029712-(rev)M6RLKmalectin\_6222

TTCAAGTATGTTTTCTATAATCATCATATTATTTGGCCTATGGCTTGTCTTGGTGAAGCATCTTTTAATAT  
TCTATCTTTTATAGTTGCTCTTGTTCGATTTTGTGGTGCCAAATA

>M6-PGSC0003DMG400029712-(rev)M6RLKmalectin\_6283

TCTTTTAATATTCTATCTTTTATAGTTGCTCTTGTTCGATTTTGTGGTGCCAAATAATTATACTGCGTAG  
CATGATGATTCTTTATATGCCTTTAGAACATTGCTGTGCTTAGGAAT

>M6-PGSC0003DMG400029712-(rev)M6RLKmalectin\_6344

TATACTGCGTAGCATGATGATTCTTTATATGCCTTTAGAACATTGCTGTGCTTAGGAATTGTCTGACCATC  
TTCCGACTGCCGTTATCATGATTATGCTGTATTGACAAATTCCTTGCC

>M6-PGSC0003DMG400029712-(rev)M6RLKmalectin\_6405

TCTGACCATCTCCGACTGCCGTTATCATGATTATGCTGTATTGACAAATTCCTTGGCCTCGACTAATTTCC  
ACTAGCATGTACCAATTTTATCCAAAATATGATGCCCTCAATCTGGAG

>M6-PGSC0003DMG400029712-(rev)M6RLKmalectin\_6466

GACTAATTTCCACTAGCATGTACCAATTTTATCCAAAATATGATGCCCTCAATCTGGAGTTGTATGTACGC  
TGAGAAATTTTAGAAGTTGCAAATTTCTGGCATGTTGTTTCTGTAGTTT

>M6-PGSC0003DMG400029712-(rev)M6RLKmalectin\_6588

GACGATAAAATGCTTACAGTGGATGGTCCAGTTTCACTGATAATGCAGGTCTTTGTGGTATTCCGGGAT  
TACCAACTTGCGGAACACATCTCACAGTTGGAGCAAAAATTGGGATCGGA

>M6-PGSC0003DMG400029712-(rev)M6RLKmalectin\_6649

TTCCGGGATTACCAACTTGCGGAACACATCTCACAGTTGGAGCAAAAATTGGGATCGGATTAGGGGCGT  
GTGTATTTGTCCTGCTTATTGCTACCTGCATAACATGCTGGTGGAAGAGAC

>M6-PGSC0003DMG400029712-(rev)M6RLKmalectin\_671

TTTTCTATTTTTGAAGCTCTAGTGATCCTTAAAGAAGTTAAGGTAGTATGTGGAGTGCTCGCAGAATGC  
AAGACAAGAAAATGAGTCTATAATTGCAGTTCAATCCCCCAAATCAGCTC

>M6-PGSC0003DMG400029712-(rev)M6RLKmalectin\_6710

AGGGGCGTGTGTATTTGTCCTGCTTATTGCTACCTGCATAACATGCTGGTGGAAGAGACGGCAGAATAT  
CCTCCGTGTGCAAAGAATTGCTGGTAATATTCTCATTTCAAAACATTTTGT

>M6-PGSC0003DMG400029712-(rev)M6RLKmalectin\_6771

CAGAATATCCTCCGTGTGCAAAGAATTGCTGGTAATATTCTCATTTCAAAACATTTTGTGATACTAGATT  
CCTGATTAATTCAACTGCTACCCATGCTTATGGTTACTCTTCTTAAACC

>M6-PGSC0003DMG400029712-(rev)M6RLKmalectin\_6832

ATACTAGATTCCTGATTAATTCAACTGCTACCCATGCTTATGGTTACTCTTCTTAAACCACTATCTTTTTTTT  
TGTCAGCGAGAGATGCTCCATATGCGAAGTCGAGAACTCAATTCAA

>M6-PGSC0003DMG400029712-(rev)M6RLKmalectin\_6893

TATCTTTTTTTTTGTCCAGCGAGAGATGCTCCATATGCGAAGTCGAGAACTCAATTCAATCGAGATGTAC  
AAATGGCAAGAAGCTATAGTCACGAACATACGCGAACAGCTGCTGAGAAT

>M6-PGSC0003DMG400029712-(rev)M6RLKmalectin\_6954

GAGATGTACAAATGGCAAGAAGCTATAGTCACGAACATACGCGAACAGCTGCTGAGAATGGACCTCCCT  
TGCTTACCTGACTGATTACTAACAAAATGGCAGATGCTTTGTGACTGAAA



>M6-PGSC0003DMG400029712-(rev)M6RLKmalectin\_7015

ACCTCCCTTGCTTACCTGACTGATTACTAACAAAACACTGGCAGATGCTTTGTGACTGAAAAAATGTGTATA  
TTGGGTGGGCATAGAAGATTAGTTGAAATGGTGTGTTTGCATAAATGTAGT

>M6-PGSC0003DMG400029712-(rev)M6RLKmalectin\_7076

ATGTGTATATTGGGTGGGCATAGAAGATTAGTTGAAATGGTGTGTTTGCATAAATGTAGTATCTTATATAC  
ACAGAGATCTTGAGGGAATAGAAAGAATGTTGTATATTACTCGCACTCT

>M6-PGSC0003DMG400029712-(rev)M6RLKmalectin\_7137

CTTATATACACAGAGATCTTGAGGGAATAGAAAGAATGTTGTATATTACTCGCACTCTTTTTGTTAGTTT  
TGATTAAACCGGCACCATGTACCATGTAAGTAAATTGATGAATGGA

>M6-PGSC0003DMG400029712-(rev)M6RLKmalectin\_7173

ATGTTGTATATTACTCGCACTCTTTTTGTTAGTTTTGATTAAACCGGCACCATGTACCATGTAAGTAA  
TTGATGAATGGAAAGGTGAACAAGTTTTTCTAGTCCCACATTTTGCTG

>M6-PGSC0003DMG400029712-(rev)M6RLKmalectin\_732

GCAGAATGCAAGACAAGAAAATGAGTCTATAATTGCAGTTCAATCCCCAAATCAGCTCGGATCAGTTG  
TGATTAGCTATATTGAATTGAATCTTCTATGTTTCATTCCACTCTACTTGGA

>M6-PGSC0003DMG400029712-(rev)M6RLKmalectin\_793

ATCAGTTGTGATTAGCTATATTGAATTGAATCTTCTATGTTTCATTCCACTCTACTTGGACCTGTTCAATCCA  
ATACTAGAACTTATGCCTTTTAAAGTCAACTTAAGGAGTCTTTGAATG

>M6-PGSC0003DMG400029712-(rev)M6RLKmalectin\_854

TGTTCAATCCAATACTAGAACTTATGCCTTTTAAAGTCAACTTAAGGAGTCTTTGAATGTCGCGCTTATCC  
CTATGCGCATTACTGTTTTCTAAACAAGTAAACTTTTTGTAATGTTTT

>M6-PGSC0003DMG400029712-(rev)M6RLKmalectin\_915

GCGCTTATCCCTATGCGCATTACTGTTTTCTAAACAAGTAAACTTTTTGTAATGTTTTGTTGTTGCACACT  
TGCAGTTAGTTGTTTTAGGTCATGTTTTACTTTAGCTCTTTTTTGGTT

>M6-PGSC0003DMG400029712-(rev)M6RLKmalectin\_976

TGTTGCACACTTGCAGTTAGTTGTTTTAGGTCATGTTTTACTTTAGCTCTTTTTTGGTTAAGGGGTGGAAC  
TTGGAAGTCGGGTTTGAGAGGGAGTGAGCATGCTTTTTCTGGTTGTGCT

>M6-PGSC0003DMG400029735-(rev)M6L-LecRK\_0

GAATGATATTTCCCATTTTCTCTGCTTCCATAATTCTTTATCCATGTGAATTAGCTCTGCTTCTTTCTTAG

AATGAACCAATATTATCCAAAAATTCTTCTTTCTTACCTGTTGTAA

>M6-PGSC0003DMG400029735-(rev)M6L-LecRK\_1054

AAGAAGGAGAATGAAAAAGGAAAGAGAGGATATGGAAGATTGGAATTGGAATATTGGCCACATAGG  
ATTACTTATCAAGAAATTGATACTGCAACAAAGGGTTTTGCTGATGAAAATGT

>M6-PGSC0003DMG400029735-(rev)M6L-LecRK\_1116

ATAGGATTACTTATCAAGAAATTGATACTGCAACAAAGGGTTTTGCTGATGAAAATGTGATTGGAATTG  
GAGGTAATGGGAAGGTTTATAAAGGGTTTTGGCTGGGGGTTTCAGAGGTTG

>M6-PGSC0003DMG400029735-(rev)M6L-LecRK\_1178

GGAATTGGAGGTAATGGGAAGGTTTATAAAGGGTTTTGGCTGGGGGTTTCAGAGGTTGCAGTAAAGC  
GAATTTCTCACAAAACAGTGAAGGGGCAAGGCAATTCTTGGCTGAGATTTTCG

>M6-PGSC0003DMG400029735-(rev)M6L-LecRK\_124

ATTTTCTTGTAAATCAATCAGTTGCAGAACTGATTTTGTCTTCAATGGCTTTAAACAATCAGATGTGTCAA  
TTTTTGGGAATGTTACAATTGAATCTAGAATTCTTACTCTTCAAATGA

>M6-PGSC0003DMG400029735-(rev)M6L-LecRK\_1240

AAAGCGAATTTCTCACAAAACAGTGAAGGGGCAAGGCAATTCTTGGCTGAGATTTTCGAGTCTTGGTAG  
GCTAAAGCAAAGAAATTTGGTGTCAATTAAGAGGGTGGTGCAAGAAAGATAG

>M6-PGSC0003DMG400029735-(rev)M6L-LecRK\_1302

TTGGTAGGCTAAAGCAAAGAAATTTGGTGTCAATTAAGAGGGTGGTGCAAGAAAGATAGAGGCAGCATG  
ATTGTGGTTTTATGATTATATGGAAAATGGGAGCTTGGATAAAAGGCTGTTTG

>M6-PGSC0003DMG400029735-(rev)M6L-LecRK\_1364

AGCATGATTGTGGTTTATGATTATATGGAAAATGGGAGCTTGGATAAAAGGCTGTTTGAATCTAATGAG  
AGAAACATGCTGAGTTTTGAAGACAGAATTAGGATTTTGAAGACGTGGCA

>M6-PGSC0003DMG400029735-(rev)M6L-LecRK\_1426

TAATGAGAGAAACATGCTGAGTTTTGAAGACAGAATTAGGATTTTGAAGACGTGGCATCAGGGGTTCT  
ATACTTGCATGAGGGATGGGAGTCAAAGTGTTGCATAGGGACATTAAGGC

>M6-PGSC0003DMG400029735-(rev)M6L-LecRK\_1488

GGGTTCTATACTTGCATGAGGGATGGGAGTCAAAGTGTTGCATAGGGACATTAAGGCTAGCAATGTTT  
TACTTGACAGGGACATGAATGCAAGGCTAGGTGATTTTGGTCTAGCTAGAA

>M6-PGSC0003DMG400029735-(rev)M6L-LecRK\_1550

AATGTTTTACTTGACAGGGACATGAATGCAAGGCTAGGTGATTTTGGTCTAGCTAGAATGCATGATCAT  
AGTCAAGTGGCTAGCACGACTCGAGTTGTTGGCACGGTGGGATACTTGGCG

>M6-PGSC0003DMG400029735-(rev)M6L-LecRK\_1612

TGATCATAGTCAAGTGGCTAGCACGACTCGAGTTGTTGGCACGGTGGGATACTTGGCGCCAGAATTTGC  
CAAGACTGGCCGTGCCTCCACACAAACCGATGTTTTTGGATATGGAGTGCT

>M6-PGSC0003DMG400029735-(rev)M6L-LecRK\_1674

AATTTGCCAAGACTGGCCGTGCCTCCACACAAACCGATGTTTTTGGATATGGAGTGCTAATTATGGAGGT  
GATGTGTGGAAGGAGGCCTATAGAGGAGGAAGGCAAGCCACCTTTAGTGG

>M6-PGSC0003DMG400029735-(rev)M6L-LecRK\_1736

ATGGAGGTGATGTGTGGAAGGAGGCCTATAGAGGAGGAAGGCAAGCCACCTTTAGTGGATTGGCTGT  
GGGAATTAATGAGACGAGGTGAATTGATTAACGCCTTTGATAGTCGATTAAGG

>M6-PGSC0003DMG400029735-(rev)M6L-LecRK\_1798

GCTGTGGGAATTAATGAGACGAGGTGAATTGATTAACGCCTTTGATAGTCGATTAAGGACTAATCAAGA  
TTTCAATGAAGAGGAAGCTTTAAGGGTGTGCAATTAGGCATGATATGCGC

>M6-PGSC0003DMG400029735-(rev)M6L-LecRK\_186

ATGTGTCAATTTTTGGGAATGTTACAATTGAATCTAGAATTCTTACTCTTTCAAATGACTCAACTTTTTCAA  
TTGGTAGAGCTCTGTACCCTTCAAAGATTGTCACAAAAGAAGCCAATT

>M6-PGSC0003DMG400029735-(rev)M6L-LecRK\_1860

ATCAAGATTTCAATGAAGAGGAAGCTTTAAGGGTGTGCAATTAGGCATGATATGCGCGAGCCTAGATG  
CCAAAGCTAGGCCAAGCATGAGACAAGTGGTGAATTCCTTTGACAGGAATA

>M6-PGSC0003DMG400029735-(rev)M6L-LecRK\_1922

CTAGATGCCAAAGCTAGGCCAAGCATGAGACAAGTGGTGAATTCCTTTGACAGGAATAGTGATATTGAT  
GAATATGAAACTGAGGATATGGATGCTTACCTTCTAGAGAGTTTGAGATCT

>M6-PGSC0003DMG400029735-(rev)M6L-LecRK\_1984

TATTGATGAATATGAAACTGAGGATATGGATGCTTACCTTCTAGAGAGTTTGAGATCTAATACCATGTTG  
TCCAATTTCTCCTTAAGTTTAAGCCATGGTTCACATCCAACATTTGAAGA

>M6-PGSC0003DMG400029735-(rev)M6L-LecRK\_2046

CCATGTTGTCCAATTTCTCCTTAAGTTTAAGCCATGGTTCACATCCAACATTTGAAGAAATTAGAGAAGGT  
TTTTCTTCTTCATGTCAATTTCTTGGACAAATTCTCTGGTGGATGGTA

>M6-PGSC0003DMG400029735-(rev)M6L-LecRK\_2108

AGAGAAGGTTTTCTTCTCCATGTCAATTTCTGGACAAATTCTCTGGTGGATGGTAGATGAGTTTAAACA  
TTTGGTTGGTTTATGTCCATCACTCTGATTTAACTTATGTTACCTTCCA

>M6-PGSC0003DMG400029735-(rev)M6L-LecRK\_2170

AGTTTAAACATTTGGTTGGTTTATGTCCATCACTCTGATTTAACTTATGTTACCTTCCAGGGCCTTGCTTTGA  
TTGAATTTGCATTTGGCAATGCTGCTTCATGTACAAATTTATATGATG

>M6-PGSC0003DMG400029735-(rev)M6L-LecRK\_2232

CTTGCTTTGATTGAATTTGCATTTGGCAATGCTGCTTCATGTACAAATTTATATGATGGAGTAGGAAAAA  
GGATTTGGTTATGACTTATGAGATATACATGTATTCATTTCTTTATTTGT

>M6-PGSC0003DMG400029735-(rev)M6L-LecRK\_248

ACTTTTTCAATTGGTAGAGCTCTGTACCCTCAAAGATTGTCACAAAAGAAGCCAATTCATCTAAAGTTCT  
TCCCTTTTCAACATCTTTCATTTTTGCAATGGCTCCTTACAGAGACAGG

>M6-PGSC0003DMG400029735-(rev)M6L-LecRK\_310

TAAAGTTCTTCCCTTTTCAACATCTTTCATTTTTGCAATGGCTCCTTACAGAGACAGGCTTCCAGGACATG  
GTATAGTTTTCTTGTTTGTGCCACACACAGGTATTGATGGTACTACTTC

>M6-PGSC0003DMG400029735-(rev)M6L-LecRK\_372

CAGGACATGGTATAGTTTTCTTGTTTGTGCCACACACAGGTATTGATGGTACTACTTCTGCACAGAATTTA  
GGTTTCTTGAATTTTACAAATAATGGGAATCCTGATAATCATGTTTTTG

>M6-PGSC0003DMG400029735-(rev)M6L-LecRK\_434

CAGAATTTAGGTTTCTTGAATTTTACAAATAATGGGAATCCTGATAATCATGTTTTTGGGGTTGAGTTTGA  
TGTTTTCAAGAATCAAGAATTCAATGATATAAATGAAAACCATGTTGGA

>M6-PGSC0003DMG400029735-(rev)M6L-LecRK\_496

TGAGTTTGATGTTTTCAAGAATCAAGAATTCAATGATATAAATGAAAACCATGTTGGAATTGATGTTAAT  
TCTCTTGCATCAGAGTTTGCTCATGAAGCAGGATATTGGCCTGATGAGAA

>M6-PGSC0003DMG400029735-(rev)M6L-LecRK\_558

ATGTTAATTCTTTCATCAGAGTTTGCTCATGAAGCAGGATATTGGCCTGATGAGAAAAATAAGTATAA  
TAGTGATGGTAGCCTAAATGAGGAGTCTTTAGAGACTTTTAAGTTGAATA

>M6-PGSC0003DMG400029735-(rev)M6L-LecRK\_62

TTCTTTCTTAGAATGAACCAATATTATCCAAAAATTCTTCTTTCTTACCTGTTGTTAACCTATTTTCTTGTA

ATCAATCAGTTGCAGAACTGATTTTGTCTTCAATGGCTTTAAACAA

>M6-PGSC0003DMG400029735-(rev)M6L-LecRK\_620

AAGTATAATAGTGATGGTAGCCTAAATGAGGAGTCTTTAGAGACTTTTAAGTTGAATAATGGAAGAAAT  
TATCAAGTTTGGATTGATTATGCTGATTTCAACATTAGTGTA ACTATGGCA

>M6-PGSC0003DMG400029735-(rev)M6L-LecRK\_682

AAGAAATTATCAAGTTTGGATTGATTATGCTGATTTCAACATTAGTGTA ACTATGGCACCAGTTGGTATG  
AAAAGGCCTAAGCAGCCTTTGTTGGATTTTACCTAAATCTTTCCCAGGT

>M6-PGSC0003DMG400029735-(rev)M6L-LecRK\_744

TTGGTATGAAAAGGCCTAAGCAGCCTTTGTTGGATTTTACCTAAATCTTTCCCAGGTTTTTGAGGAAGA  
GATGTATGTTGGGTTTACAGCAGCCACAGGAGA ACTTGCTCAAAGTCACA

>M6-PGSC0003DMG400029735-(rev)M6L-LecRK\_806

GAGGAAGAGATGTATGTTGGGTTTACAGCAGCCACAGGAGA ACTTGCTCAAAGTCACAAGATTTTAGCT  
TGGAGTTTTAGTAACTCGAATTTTTCTATAGGTGATGGTTTGATCACACAA

>M6-PGSC0003DMG400029735-(rev)M6L-LecRK\_868

TTTAGCTTGGAGTTTTAGTAACTCGAATTTTTCTATAGGTGATGGTTTGATCACACAAGGGCTGCCTTCAT  
TTGAGCTTCCTGAGGATCCAGTTTATCGATCGAAGGGATTCATTGCAGG

>M6-PGSC0003DMG400029735-(rev)M6L-LecRK\_930

TGCCTTCATTTGAGCTTCTGAGGATCCAGTTTATCGATCGAAGGGATTCATTGCAGGTATGACAGTGTT  
AGTCTTGTCTTCTGTTGTGGTCATTGCTGTAGCTTCATGGCTTTTGATTA

>M6-PGSC0003DMG400029735-(rev)M6L-LecRK\_992

ACAGTGTTAGTCTTGTCTTCTGTTGTGGTCATTGCTGTAGCTTCATGGCTTTTGATTAAGAGAAGAAGGA  
GAATGAAAAAGGAAAGAGAGGATATGGAAGATTGGGAATTGGAATATTGG

>M6-PGSC0003DMG400029885M6RLKmalectin\_0

AATTAGTAGAGTTTTTAATATCAAGCTCACAAGCAACTACCATCTTCTTCAATTTCACTTCTCCATTTTTTC  
TCTCTCTCTAAA ACTCAAACCCTGTTCTGTCTCTTCTTTTCATCTTCAG

>M6-PGSC0003DMG400029885M6RLKmalectin\_1037

TTCCCTGTAGCATCTGGTCGTAAGTTTGTCCGTCTGTATTTCTATCCCTCGTCTTACAACAAGCTAAATGCT  
ACTAATGCCATCTTCAATGTGGCCTCCGGACAATATACCTTACTTAGA

>M6-PGSC0003DMG400029885M6RLKmalectin\_1098

AGCTAAATGCTACTAATGCCATCTTCAATGTGGCCTCCGGACAATATACCTTACTTAGAAATTTTCAGTGCA  
GCACAAACTGCTGAAGCCCTCAACTATGATTACTTGACCAAGGAATTCT

>M6-PGSC0003DMG400029885M6RLKmalectin\_1159

TTTCAGTGCAGCACAAACTGCTGAAGCCCTCAACTATGATTACTTGACCAAGGAATTCTCAATAAATGTG  
CCATCTGAAACTTTGAACATCACTTTACACCCTCTCCAAATACTTCAAA

>M6-PGSC0003DMG400029885M6RLKmalectin\_122

CACTGCTGCATTCAATTTACTTCTTTTGGTGTGTGCAACTCAGCAATGGCCTGAAGTTTGCTGCTTTTGG  
ATCTCTCTGTCTATTCTCATCTTTAAGGTATTCTTTTTTTGTCTTCT

>M6-PGSC0003DMG400029885M6RLKmalectin\_1220

ATAAATGTGCCATCTGAAACTTTGAACATCACTTTACACCCTCTCCAAATACTTCAAACCTCTTTGCGTTT  
GTCAATGGGATTGAGATTATTTACATCCTGATATCTATAATACAGAA

>M6-PGSC0003DMG400029885M6RLKmalectin\_1281

CCTTTGCGTTTGTCAATGGGATTGAGATTATTTACATCCTGATATCTATAATACAGAAGATGGAATTACC  
TTCATTGTGGGTCAGAAATCTTCTTTTCATCATTGTCAATTCTACTGCCT

>M6-PGSC0003DMG400029885M6RLKmalectin\_1342

TGGAATTACCTTCATTGTGGGTCAGAAATCTTCTTTTCATCATTGTCAATTCTACTGCCTTGAAAATGTTT  
ATCGCCTTAATGTGGGAGGCAATGTAATCTCACCATCAGGTGATACTGG

>M6-PGSC0003DMG400029885M6RLKmalectin\_1403

GAAAATGTTTATCGCCTTAATGTGGGAGGCAATGTAATCTCACCATCAGGTGATACTGGTATGTTTAGGT  
CATGGGGTGATGACTCAAATTATATTTTTGGAGCAGCCACCGGAGTTACC

>M6-PGSC0003DMG400029885M6RLKmalectin\_1464

TGTTTAGGTCATGGGGTGATGACTCAAATTATATTTTTGGAGCAGCCACCGGAGTTACCAATACTGCCGA  
TGATGAGAATGTCACAATAAGCTATGGTAATGGGCAGCCTACCTACGTTG

>M6-PGSC0003DMG400029885M6RLKmalectin\_1525

TACTGCCGATGATGAGAATGTCACAATAAGCTATGGTAATGGGCAGCCTACCTACGTTGCCCGCTTGAT  
GTCTATAAGACAGCTAGGTCAATGGGTCCAACCTTTTCAAATTAACCAGCA

>M6-PGSC0003DMG400029885M6RLKmalectin\_1586

CCGCTTGATGTCTATAAGACAGCTAGGTCAATGGGTCCAACCTTTTCAAATTAACCAGCAATTCAATTTAA  
GTTGGGTTTTCTCAGTTGATTCAGGGTTCTTATCTTGTTAGGCTCCAT

>M6-PGSC0003DMG400029885M6RLKmalectin\_1647

TCAATTTAAGTTGGGTTTTCTCAGTTGATTCAGGGTCTCTTATCTTGTTAGGCTCCATTTCTGTGAAATCA  
CTAAAAATATCACAAAAGTCAACCAGAGGGTGTGGTTCATCTACATGA

>M6-PGSC0003DMG400029885M6RLKmalectin\_1708

CTGTGAAATCACTAAAAATATCACAAAAGTCAACCAGAGGGTGTGGTTCATCTACATGAATAATCAGACT  
GCAGAACCTGCAGCGGATGTCATTGCTTGGGCTGGTGGCAATGGAGTTCC

>M6-PGSC0003DMG400029885M6RLKmalectin\_1769

AATCAGACTGCAGAACCTGCAGCGGATGTCATTGCTTGGGCTGGTGGCAATGGAGTTCCTTTTCACAAG  
GATTATGTGGTCTCTGTTCCCTCGTGGGGCTTCACAGCAGGATCTTTGGCTT

>M6-PGSC0003DMG400029885M6RLKmalectin\_183

CTGCTTTTGGATCTCTCTGTCTATTCCCTCATCTTTAAGGTATTCTTTTTTTGTCTTCCTCTACTTGTTTATGCT  
TTTGTTTAGCTCCCAAGATTTTGTGTATGTACATATTCTTGCTTG

>M6-PGSC0003DMG400029885M6RLKmalectin\_1830

TTCACAAGGATTATGTGGTCTCTGTTCCCTCGTGGGGCTTCACAGCAGGATCTTTGGCTTGCCCTCCATCCA  
AACGTTGCTTCAAATCCAATTGGTATGATGCAATTTTGAATGGAATAG

>M6-PGSC0003DMG400029885M6RLKmalectin\_1891

CCTCCATCCAAACGTTGCTTCAAATCCAATTGGTATGATGCAATTTTGAATGGAATAGAGATTTTCAA  
GTGAGTGACACCAATAATAACCTTGCTGGGCCTAATCCAGTTCCAGTTGC

>M6-PGSC0003DMG400029885M6RLKmalectin\_1952

ATTTTCAAAGTGAGTGACACCAATAATAACCTTGCTGGGCCTAATCCAGTTCCAGTTGCAGAACCCAGATC  
ATATTGACCCTCTGCCGTCCAAAACAAGTGAATCAAAAAATAATAAATCA

>M6-PGSC0003DMG400029885M6RLKmalectin\_2013

AACCAGATCATATTGACCCTCTGCCGTCCAAAACAAGTGAATCAAAAAATAATAAATCAGCTATTGGTGG  
AGGCGTTGGAGGAGGAATTGCTGCTGTAGTTCTTATTGGTTTAGTTGTAT

>M6-PGSC0003DMG400029885M6RLKmalectin\_2074

TATTGGTGGAGGCGTTGGAGGAGGAATTGCTGCTGTAGTTCTTATTGGTTTAGTTGTATGCCTTGTCATG  
CGCCGCCGAAACGTGGGAAGGTCCAAAGTCCAAGTGAATGGACCATCAGG

>M6-PGSC0003DMG400029885M6RLKmalectin\_2135

CTTGTCATGCGCCCGGAAACGTGGGAAGGTCCAAAGTCCAAGTGAATGGACCATCAGGCTGGCTCCCT

CTTTCTTTGTATGGAAATTCACATACTTCTGGTTCCGCTAAGACAAACACT

>M6-PGSC0003DMG400029885M6RLKmalectin\_2196

GGCTCCCTCTTTCTTTGTATGGAAATTCACATACTTCTGGTTCCGCTAAGACAAACACTACTGGCAGTTAT

GCTTCGTCCTCCCATCAAACCTTTGTCGTCACCTTTTCATTTGCTGAGA

>M6-PGSC0003DMG400029885M6RLKmalectin\_2257

TGGCAGTTATGCTTCGTCCTCCCATCAAACCTTTGTCGTCACCTTTTCATTTGCTGAGATCAAGGCAGCCA

CCAATAACTTTGATGAAGCACTGCTTCTTGGGGTTGGTGGTTTTGGAAA

>M6-PGSC0003DMG400029885M6RLKmalectin\_2318

AAGGCAGCCACCAATAACTTTGATGAAGCACTGCTTCTTGGGGTTGGTGGTTTTGGAAAAGTATATCAG

GGAGAAATTGATGGTGGCACAAAAGTTGCTATTAAACGTGGGAATCCTCTC

>M6-PGSC0003DMG400029885M6RLKmalectin\_2379

TATATCAGGGAGAAATTGATGGTGGCACAAAAGTTGCTATTAAACGTGGGAATCCTCTCTCCGAGCAAG

GTGTTTCATGAATTCCAAACTGAAATTGAAATGCTCTCAAACCTTCGCCATC

>M6-PGSC0003DMG400029885M6RLKmalectin\_244

ACTTGTTTATGCTTTTGTAGCTCCCAAGATTTTGTGTATGTACATATTCTTGCTTGTTTTAGCTGGATC

TTGATACTCTGGTTTCTTTATTTGGACTGAGTGCTTTCAGCCTTTCA

>M6-PGSC0003DMG400029885M6RLKmalectin\_2440

CGAGCAAGGTGTTTCATGAATTCCAAACTGAAATTGAAATGCTCTCAAACCTTCGCCATCGCCATCTTGTT

TCTTTGATTGGTTATTGTGAAGAGAACTGTGAAATGATCCTAGTATATGA

>M6-PGSC0003DMG400029885M6RLKmalectin\_2501

CATCTTGTTTCTTTGATTGGTTATTGTGAAGAGAACTGTGAAATGATCCTAGTATATGACTACATGGCTCA

TGGTACCCTTCGTGAGCATCTCTATAAGACCCAGAAGCCTCCTTTACCT

>M6-PGSC0003DMG400029885M6RLKmalectin\_2562

ACATGGCTCATGGTACCCTTCGTGAGCATCTCTATAAGACCCAGAAGCCTCCTTTACCTTGAAGCAGAG

GCTTGAGATTTGCATTGGTGTCTGCTCGTGGGTTGCACTATCTTCATACTG

>M6-PGSC0003DMG400029885M6RLKmalectin\_2623

GAAGCAGAGGCTTGAGATTTGCATTGGTGTCTGCTCGTGGGTTGCACTATCTTCATACTGGTGCCAAGCA

TACTATTATCCACCGTGATGTGAAGACCACTAATATCCTCTTGGATGAAAA

>M6-PGSC0003DMG400029885M6RLKmalectin\_2684



GCCAAGCATACTATTATCCACCGTGATGTGAAGACCACTAATATCCTCTTGATGAAAAGTGGGTGGCA  
AAGGTTTCTGATTTTGGTTTGTCTAAACAGGTCCTACATTGGATCACACC

>M6-PGSC0003DMG400029885M6RLKmalectin\_2745

GGGTGGCAAAGGTTTCTGATTTTGGTTTGTCTAAACAGGTCCTACATTGGATCACACCCATGTCAGTAC  
TGTGGTGAAGGGCAGTTTTGGATATCTGGATCCAGAATACTTCAGAAGGC

>M6-PGSC0003DMG400029885M6RLKmalectin\_2806

TGTCAGTACTGTGGTGAAGGGCAGTTTTGGATATCTGGATCCAGAATACTTCAGAAGGCAGCAACTGAC  
AGACAAATCTGATGTTTACTCATTTGGTGTAGTGCTGTTTGAGATTTTGTG

>M6-PGSC0003DMG400029885M6RLKmalectin\_2867

CAACTGACAGACAAATCTGATGTTTACTCATTTGGTGTAGTGCTGTTTGAGATTTTGTGTGCTCGGCCAG  
CTCTGAACCCAACTCTTCCAAAGGAGCAAGTAAGCTTGGCAGAGTGGGCT

>M6-PGSC0003DMG400029885M6RLKmalectin\_2928

CTCGGCCAGCTCTGAACCCAACTCTTCCAAAGGAGCAAGTAAGCTTGGCAGAGTGGGCTTTCATTGCT  
ACAAGAAGGGGACTTTTGACCAGATAATCGACCCATATCTGAAAGGGAAGC

>M6-PGSC0003DMG400029885M6RLKmalectin\_2989

CCATTGCTACAAGAAGGGGACTTTTGACCAGATAATCGACCCATATCTGAAAGGGAAGCTTGCACCAGA  
GTGCTTGAAGAAATTTACAGAAACAGCAGTGAAGTGTGTGTCTGATGTTGG

>M6-PGSC0003DMG400029885M6RLKmalectin\_305

TTAGCTGGATCTTGATACTCTGGTTTCTTTATTTTGGACTGAGTGCTTTCAGCCTTTCATCATTTAGTTCTG  
AAGTTCCTTTTTATGCTACTTGTGATGCTTCTACTGGGTTTTCTTT

>M6-PGSC0003DMG400029885M6RLKmalectin\_3050

GCACCAGAGTGCTTGAAGAAATTTACAGAAACAGCAGTGAAGTGTGTGTCTGATGTTGGTGTAGACAG  
GCCGTCGATGGGAGATGTGCTGTGGAACCTTGAGTTTGCTCTGCAACTTCAG

>M6-PGSC0003DMG400029885M6RLKmalectin\_3111

TAGACAGGCCGTCGATGGGAGATGTGCTGTGGAACCTTGAGTTTGCTCTGCAACTTCAGGAGAGTGCA  
GAGGAGTGTGGGAAGGGTTTTGGGAAAATGGACATTGAAGAAGGGTTTGATG

>M6-PGSC0003DMG400029885M6RLKmalectin\_3172

GAGTGCAGAGGAGTGTGGGAAGGGTTTTGGGAAAATGGACATTGAAGAAGGGTTTGATGATGTTACAT  
GCAAAGGAAAGAAGGATTTAAATGAATCCCCAGGTTATGATGCAAGCATGAC

>M6-PGSC0003DMG400029885M6RLKmalectin\_3233

GTTACATGCAAAGGAAAGAAGGATTTAAATGAATCCCCAGGTTATGATGCAAGCATGACTGATTCAAGA  
AGCAGCGGAATATCTATGAGCATTGGCGGCCGCAGCCTTGCCAGCGAAGAC

>M6-PGSC0003DMG400029885M6RLKmalectin\_3294

ATTCAAGAAGCAGCGGAATATCTATGAGCATTGGCGGCCGCAGCCTTGCCAGCGAAGACTCAGATGGG  
CTAACACCTAGTGCTGTTTTCTCTCAAATCATGAATCCAAAAGGACGTAAA

>M6-PGSC0003DMG400029885M6RLKmalectin\_3355

AGATGGGCTAACACCTAGTGCTGTTTTCTCTCAAATCATGAATCCAAAAGGACGTAAAATCTCCTCATG  
TCTTGAAAGCAGCAAATACACGCCAAGGCAATGTTCTTTAACAGAGAGCA

>M6-PGSC0003DMG400029885M6RLKmalectin\_3416

CTCCTCATGTCTTGAAAGCAGCAAATACACGCCAAGGCAATGTTCTTTAACAGAGAGCACAAAGTCACTTT  
TTTTTTCTTTCCATTTTTCTTTTCTACCTCGTACTGCCTGCCTTATT

>M6-PGSC0003DMG400029885M6RLKmalectin\_3477

AGTCACTTTTTTTTTCTTTCCATTTTTCTTTTCTACCTCGTACTGCCTGCCTTATTCTTTTACTCACTATT  
ATTTTGTAATTCATATGTTTTGTTTAAGCTCGTTGTATCTACCAA

>M6-PGSC0003DMG400029885M6RLKmalectin\_3538

TTTACTCACTATTTATTTTGTAATTCATATGTTTTGTTTAAGCTCGTTGTATCTACCAATACTCAAAAAGTG  
TGAAATTATCTTCTGTTGTACTATTAAGTATCATAAAGAGGTTGTTC

>M6-PGSC0003DMG400029885M6RLKmalectin\_3597

TACTCAAAAAGTGTGAAATTATCTTCTGTTGTACTATTAAGTATCATAAAGAGGTTGTTCACTATGGCA  
GTCTGATCTCTTGCTAGTAATCAATTGTTCTGTATATTATTATATGTTCC

>M6-PGSC0003DMG400029885M6RLKmalectin\_366

ATTTAGTTCTGAAGTTCCTTTTTATGCTACTTGTTGATGCTTCTACTGGGTTTTCTTTATTTTGGACAGATT  
GCCTTTTATTTAGCTCTTAAACTTTTATCTGTCTACTTTATGTCAT

>M6-PGSC0003DMG400029885M6RLKmalectin\_427

TTTGGACAGATTGCCTTTTATTTAGCTCTTAAACTTTTATCTGTCTACTTTATGTCATCCCCTGCATCTTAT  
ACTGCATCGTGATGCTGGGTTTTTATTTATTTTGGACTTAGTGTTTT

>M6-PGSC0003DMG400029885M6RLKmalectin\_488

CCTGCATCTTATACTGCATCGTGATGCTGGGTTTTTATTTATTTTGGACTTAGTGTTTTTGGTCTTCTAGA

TTCATTTGAAAAAATATTTGAGGTTCCGGATTTCCGGTCAATTTTGA

>M6-PGSC0003DMG400029885M6RLKmalectin\_549

GGTCTTCTAGATTCATTTGAAAAAATATTTGAGGTTCCGGATTTCCGGTCAATTTTGAAGATTGTCTTGTCT

TGTGCGGTCAAATTGAGGGGAGGTCAACAGATGGAACTGATTTTTCT

>M6-PGSC0003DMG400029885M6RLKmalectin\_61

CTCCATTTTTCTCTCTCTCTAAACTCAAACCCTGTTCTGTCTCTTCTTTCATCTTCAGCTCACTGCTGCATT

CAATTTACTTCTTTTGGTGTGTGCAACTCAGCAATGGCCTGAAGTT

>M6-PGSC0003DMG400029885M6RLKmalectin\_610

TTGTCTTGTCTGTGCGGTCAAATTGAGGGGAGGTCAACAGATGGAACTGATTTTTCTTTTTGCAATTC

TGTCTTTTTTTTTCTTTTGTCCAGTGATTTCTGCGGACAACCTATAGGC

>M6-PGSC0003DMG400029885M6RLKmalectin\_671

TTGCAATTCTGTCTTTTTTTTTCTTTTGTCCAGTGATTTCTGCGGACAACCTATAGGCTTGTGCAGCATCA

ATGGCAGACGACAGTAAATTCTGTTTTTCTTGGTTTCGACATTTTTG

>M6-PGSC0003DMG400029885M6RLKmalectin\_732

GTGCAGCATCAATGGCAGACGACAGTAAATTCTGTTTTTCTTGGTTTCGACATTTTTGTTGTTGGCTGTT

GTGGTTAATGTGGCATTGGCTGCCAATTATGTGCCCGGTGATGATATTC

>M6-PGSC0003DMG400029885M6RLKmalectin\_793

GTTGGCTGTTGTGGTTAATGTGGCATTGGCTGCCAATTATGTGCCCGGTGATGATATTCTGTTGAACTGT

GGAGGTCCTAACAACTCTCCAGATGCTGATGGTTCGAAATGGGGCACAGA

>M6-PGSC0003DMG400029885M6RLKmalectin\_854

TTGAACTGTGGAGGTCCTAACAACTCTCCAGATGCTGATGGTTCGAAATGGGGCACAGATATTGGGTCA

AAATATATGTTGAGTAGTAAGTCATCAATCTCTGATGCTGATGATCAAAAG

>M6-PGSC0003DMG400029885M6RLKmalectin\_915

TTGGGTCAAATATATGTTGAGTAGTAAGTCATCAATCTCTGATGCTGATGATCAAAGCCCTCTGTCCC

TCAAGTTCCTTTTATGTCTGCCCGTGTTCAGTCTGAGTTCACCTATA

>M6-PGSC0003DMG400029885M6RLKmalectin\_976

CTCTGTCCCTCAAGTTCCTTTTATGTCTGCCCGTGTTCAGTCTGAGTTCACCTATAGTTTCCCTGTAGC

ATCTGGTCGTAAGTTTGTCCGTCTGTATTTCTATCCCTCGTCTTACAA

>M6-PGSC0003DMG400030035M6LRR-RLK\_0

GGCTAGGGTACCAAATGAAGTTTCCAAGTAAAGTCCTTGAATAAACAAGTGAAGATTATAACAAAGGGC  
TTTGT CATATTATGATGATCTGTCGTTAGCTTTTACTCAGTCATCAAACCT

>M6-PGSC0003DMG400030035M6LRR-RLK\_1037

TTTTGTTCCATGAGTTGGCGGTGATTCCAGAAGGGGTATGATCAAAGACAGATAAATGAGAAGCTTTT  
GGCACCAATTCCTGTTGAAGCTTTAGTATAATGAACATCTTTTGGTGTTTT

>M6-PGSC0003DMG400030035M6LRR-RLK\_1098

AAGCTTTTGGCACCAATTCCTGTTGAAGCTTTAGTATAATGAACATCTTTTGGTGTTTTGTACCTGGAGTG  
TAGCTAATGTGTTCTTGTAAGAGGGAGCTATTTTAAAATTTGATTTTT

>M6-PGSC0003DMG400030035M6LRR-RLK\_1159

ACCTGGAGTGTAGCTAATGTGTTCTTGTAAGAGGGAGCTATTTTAAAATTTGATTTTTATTACTCAATAT  
TTTGAGAGGCTAAGCACAACTTATGATATGTTGGTGATCAAGATAATT

>M6-PGSC0003DMG400030035M6LRR-RLK\_122

TGAATCTTTCAATCTCTCTCAAGTCTCAACCATTTTTCTACGTCATAGTTTTTTTTGAATAGAAGAAGTAG  
GCAACTTGATTGAAAATTCTATCTGAAACTCAAAAAAGAAAAATTCA

>M6-PGSC0003DMG400030035M6LRR-RLK\_1220

TACTCAATATTTTGAGAGGCTAAGCACAACTTATGATATGTTGGTGATCAAGATAATTAACATAGCCT  
CGAGAATGGATGTAAATAAGTTGATGTCTAAATTCAGAATGATGAAGCAT

>M6-PGSC0003DMG400030035M6LRR-RLK\_1281

ACATAGCCTCGAGAATGGATGTAAATAAGTTGATGTCTAAATTCAGAATGATGAAGCATCTGACCGTGG  
GTCTAATGGAAGGGAGAGATTTGGAAAACCCGCCCTCCTCTAGAAAGGGCA

>M6-PGSC0003DMG400030035M6LRR-RLK\_1342

GACCGTGGGTCTAATGGAAGGGAGAGATTTGGAAAACCCGCCCTCCTCTAGAAAGGGCAAACATGGCG  
TTAGATATAGTAACAAAGATATAAATATTATCAGAGATCAAATAAAAGGAGG

>M6-PGSC0003DMG400030035M6LRR-RLK\_1403

CATGGCGTTAGATATAGTAACAAAGATATAAATATTATCAGAGATCAAATAAAAGGAGGCAAATTTAC  
ATACTACCTTCGATGTCAACTTTCTCCAGTTTATTTATTTTTCTCAAATAA

>M6-PGSC0003DMG400030035M6LRR-RLK\_1464

AATTTACATACTACCTTCGATGTCAACTTTCTCCAGTTTATTTATTTTTCTCAAATAAATGTAAACTAGAT  
AATTAGAGCTACATGTATAACATGATCTCTTTGTTTCTTGACCTGATA

>M6-PGSC0003DMG400030035M6LRR-RLK\_1525

GTAAACTAGATAATTAGAGCTACATGTATAACATGATCTCTTTGTTTCTTGACCTGATACATGATTCTATA  
TTTCTATGAATTAAGTGGCAGTCGAATTTTGTGAAACGGGTAATTATAT

>M6-PGSC0003DMG400030035M6LRR-RLK\_1586

TGATTCTATATTTCTATGAATTAAGTGGCAGTCGAATTTTGTGAAACGGGTAATTATATCATAGATAGAAT  
ATATTCATCCCTAGCTAACTTTAGAAACGCATTTTACTGTAGTCATTTT

>M6-PGSC0003DMG400030035M6LRR-RLK\_1647

TAGATAGAATATATTCATCCCTAGCTAACTTTAGAAACGCATTTTACTGTAGTCATTTTCGTAAATGCAAT  
AATTTTCATACACAATTATCTCCATTTATTATCATGAATATAATTTTCA

>M6-PGSC0003DMG400030035M6LRR-RLK\_1708

TAAATGCAATAATTTTCATACACAATTATCTCCATTTATTATCATGAATATAATTTTCAAGTCGGTAAGTA  
GCATAGTGTCTAAGTTGAATTGGCTATTGTAAAAATTATCCATGATACT

>M6-PGSC0003DMG400030035M6LRR-RLK\_1769

TCGGTAAGTAGCATAGTGTCTAAGTTGAATTGGCTATTGTAAAAATTATCCATGATACTGATGTTCTAAT  
CTGTGTTTTTTTATCTACTCACAGGGACTTGAAAGATCTCCATCTATGTGG

>M6-PGSC0003DMG400030035M6LRR-RLK\_183

AGAAGAAGTAGGCAACTTGTATTGAAAATTCTATCTGAAACTCAAAAAAGAAAAATTCACGTTTTTTCACA  
GTAAACCTTTCTTCTCCTTGTTTTTCTATTGGCAAAGAAGACAATACCAT

>M6-PGSC0003DMG400030035M6LRR-RLK\_1830

TGTTCTAATCTGTGTTTTTTTATCTACTCACAGGGACTTGAAAGATCTCCATCTATGTGGTACCCTAGCTCCT  
GATCTCGCGCACTTGTTCACTTGAAGTTTATGTATGTGCACATTTAA

>M6-PGSC0003DMG400030035M6LRR-RLK\_1891

CCCTAGCTCCTGATCTCGCGCACTTGGTTCACCTGAAGTTTATGTATGTGCACATTTAACTAGATGTCTT  
CATTTTCTAGTCGCTGTCATTACAACTCTTAATTCAAGTCTTTTTCT

>M6-PGSC0003DMG400030035M6LRR-RLK\_1952

TAGATGTCTTCATTTTCTAGTCGCTGTCATTACAACTCTTAATTCAAGTCTTTTTCTTTAAGATAATTTCG  
CAACTCACTGGAGACTTCTTTACAGAATTTTACATAACAATTCCTTTA

>M6-PGSC0003DMG400030035M6LRR-RLK\_2013

AAGATAATTCGCAACTCACTGGAGACTTCTTTACAGAATTTTACATAACAATTCCTTTACTGGGTTTCATAC

CTGATGAGATTGCAAAGCTAAAAGAATTGGAGATTCTGGACCTGGGATC

>M6-PGSC0003DMG400030035M6LRR-RLK\_2074

GGGTTACATACCTGATGAGATTGCAAAGCTAAAAGAATTGGAGATTCTGGACCTGGGATCTAATAACTTT

AGCCAGCCGCTGCCTTCCGAGCTTTGCCATAATCCCTCTCTGGAAATAATG

>M6-PGSC0003DMG400030035M6LRR-RLK\_2135

ATAACTTTAGCCAGCCGCTGCCTTCCGAGCTTTGCCATAATCCCTCTCTGGAAATAATGTGAGTTCAAACA

GAGGTGGTGTCAATTTCTAATTTTACCACCTTGTCCCTTACTTACAGA

>M6-PGSC0003DMG400030035M6LRR-RLK\_2196

AGTTCAAACAGAGGTGGTGTCAATTTCTAATTTTACCACCTTGTCCCTTACTTACAGAGTTACACTAATG

CAGCTTATCAGACAACAATGAGCTGTTTAGCAGCATATTTCTGGAACC

>M6-PGSC0003DMG400030035M6LRR-RLK\_2257

TACACTAATGCAGCTTATCAGACAACAATGAGCTGTTTAGCAGCATATTTCTGGAACCGATAGACTTGA

AATGGTCCCAAATGTCCAAGAAAATAACAACCACGCTACGAGAGCCCAAC

>M6-PGSC0003DMG400030035M6LRR-RLK\_2318

TAGACTTGAAATGGTCCCAAATGTCCAAGAAAATAACAACCACGCTACGAGAGCCCAACCTTTGTCACTT

CCCAATGGGAGATTGATATTAAGGTAAACATCTTTCAATCAAATGAAATG

>M6-PGSC0003DMG400030035M6LRR-RLK\_2379

TTGTCACTTCCCAATGGGAGATTGATATTAAGGTAAACATCTTTCAATCAAATGAAATGTATATTTAAGA

GCAATCATGTGTATTTGTAACCTTTAAATGTCCAACATAGTAATAGTAAA

>M6-PGSC0003DMG400030035M6LRR-RLK\_244

TTTTTACAGTAAACCTTTCTTCTCCTTGTCTTTTCTATTGGCAAAGAAGACAATACCATTTTTGCCTAAAGT

GAATAAAGTCAAAAAGAGCTTCCAGTTTTTGTGGCTTGGTTTTGTT

>M6-PGSC0003DMG400030035M6LRR-RLK\_2440

TATTTTAAGAGCAATCATGTGTATTTGTAACCTTTAAATGTCCAACATAGTAATAGTAAAATGACTTAAATC

ATTAGATTCAGTTATTGGAATACATATTCCTGGAATAAGTATGCATCTG

>M6-PGSC0003DMG400030035M6LRR-RLK\_2501

GACTTAAATCATTAGATTCAGTTATTGGAATACATATTCCTGGAATAAGTATGCATCTGTAGCAATTCATT

GCTTGTCTTTTTGACCCCTGATGCTTGCGAAGACGTTTAGAAGTCCC

>M6-PGSC0003DMG400030035M6LRR-RLK\_2562

GCAATTCATTGCTTGTCTTTTGACCCCCCTGATGCTTGCGAAGACGTTTAGAAGTCCCATCAATTTTCCC  
TGTCTTCTAGTTGTCTTTCAGTTTTCTTATGGTTTGCCCTTCACATTGA

>M6-PGSC0003DMG400030035M6LRR-RLK\_2623

CAATTTTCCCTGTCTTCTAGTTGTCTTTCAGTTTTCTTATGGTTTGCCCTTCACATTGAACATCTCTTGTTTC  
CCTTAATGGCCTGATAGGTGATTGTTAAGCACATTTTGATTCATGTT

>M6-PGSC0003DMG400030035M6LRR-RLK\_2684

ATCTCTTGTTTCCCTTAATGGCCTGATAGGTGATTGTTAAGCACATTTTGATTCATGTTTGACAAACAAT  
GTTTCAAGTTAATTTTCTGATATTTCTGAAAAGACACTACTAATCTTTTCT

>M6-PGSC0003DMG400030035M6LRR-RLK\_2745

CACAAACAATGTTTCAAGTTAATTTTCTGATATTTCTGAAAAGACACTACTAATCTTTTCTTTTCATCTTGTGA  
TAATTTTCTCATTTCATCAAGCTTTGCACTAGCTTCTTTTATGGG

>M6-PGSC0003DMG400030035M6LRR-RLK\_2806

TCATCTTGATGATAATTTTCTCATTTCATCAAGCTTTGCACTAGCTTCTTTTATGGGTATATACTTCTATG  
GTAACAACCTTACATAGTTATCATGAAATTTAAATTATTTGTAGGACT

>M6-PGSC0003DMG400030035M6LRR-RLK\_2867

TATACTTCTATGGTAACAACCTTACATAGTTATCATGAAATTTAAATTATTTGTAGGACTACTGAAGCACTT  
GGAAATGTAGCTGGAAGAAAATTACTAAGAGTATCATCTTTTCTGTCC

>M6-PGSC0003DMG400030035M6LRR-RLK\_2928

TGAAGCACTTGGAATGTAGCTGGAAGAAAATTACTAAGAGTATCATCTTTTCTGTCCTGAATAACTTC  
CAGAAGCAATTTCTGCCAGTCTCCGACTTCTAGACCGTCGTGAAGTTGC

>M6-PGSC0003DMG400030035M6LRR-RLK\_305

TTGCCTAAAGTGAATAAAGTCAAAAAGAGCTTCCAGTTTTTGTTTGCTTGGTTTTGTTGTTTTTACGC  
GTTTTTCGAACAAACTCAGTCTCCTATTTGTTTTTCCCTCTTCTTCTA

>M6-PGSC0003DMG400030035M6LRR-RLK\_3111

TCCTACACCGGCAATTACTGCAGAACCTCATATGGCTCATTACCAAGATCCTCTCCTTCTCCATCTTCACT  
TCCCAGTCTGCAGAGAACAGCAGTAGAGTTGAAGATGCCAGACGAAG

>M6-PGSC0003DMG400030035M6LRR-RLK\_3172

CCATCTTCACTTCCCAGTCTGCAGAGAACAGCAGTAGAGTTGAAGATGCCAGACGAAGTAATCATCGA  
GTTTTAATATTGTCTGCAGCTATAGGAGGTTCCGTTCTACTAATAATATTG

>M6-PGSC0003DMG400030035M6LRR-RLK\_3233

ATCATCGAGTTTTAATATTGTCTGCAGCTATAGGAGGTTCCGTTCTACTAATAATATTGATAACTGGCACT  
ATCGTCTTTCGAAGCAACAAAATGGCTGTTGTAAAGCCTTGGGCCACTG

>M6-PGSC0003DMG400030035M6LRR-RLK\_3294

AACTGGCACTATCGTCTTTCGAAGCAACAAAATGGCTGTTGTAAAGCCTTGGGCCACTGGATTGAGTGG  
ACAGTTGCAGAGAGCATTGTTACTGGTAATTTTCTATCTTTCGATGAATG

>M6-PGSC0003DMG400030035M6LRR-RLK\_3355

TTGAGTGGACAGTTGCAGAGAGCATTGTTACTGGTAATTTTCTATCTTTCGATGAATGAATAGTATTTCT  
ATTTTTAGAACCAAAAATAGTTGTCTTAAAAATCAGATCCATAAAAATAGA

>M6-PGSC0003DMG400030035M6LRR-RLK\_3416

TAGTATTTCTATTTTTAGAACCAAAAATAGTTGTCTTAAAAATCAGATCCATAAAAATAGAAGCTTATATGAA  
CATGTGTAGCTGTAAAACCAAAAATTTTTCCTTAAAAGTATTACCCAAAT

>M6-PGSC0003DMG400030035M6LRR-RLK\_3477

CTTATATGAACATGTGTAGCTGTAAAACCAAAAATTTTTCCTTAAAAGTATTACCCAAATGGGAGAAGCTT  
AAATGGACCTTTTCGCTCCCATTATGAGCTTGTTACAAGCTTTCTTTTCT

>M6-PGSC0003DMG400030035M6LRR-RLK\_3538

GAGAAGCTTAAATGGACCTTTTCGCTCCCATTATGAGCTTGTTACAAGCTTTCTTTTCTAATTGTTAATGA  
TCTTTTCCCTTTTCCCTTTTTTCTTCTTGATATCTCGAAACTTTTGTTT

>M6-PGSC0003DMG400030035M6LRR-RLK\_3599

TTGTTAATGATCTTTTCCCTTTTCCCTTTTTTCTTCTTGATATCTCGAAACTTTTGTTTATCAATATGAGCAA  
ATAGTCTTAGATAGAGAGCTGAGTTCTATCATTCTTACTGTGAACAG

>M6-PGSC0003DMG400030035M6LRR-RLK\_366

TTTTTTACGCGTTTTTCGAACAAACTCAGTCTCCTATTTGTTTTCCCTCTTCTTCTACTATTTTATTTACTG  
GGTTTATTCAATTTCTGGGTTTTGGAGCGGTGGACTTTTAATTAAT

>M6-PGSC0003DMG400030035M6LRR-RLK\_3660

CAATATGAGCAAATAGTCTTAGATAGAGAGCTGAGTTCTATCATTCTTACTGTGAACAGGTGTGCCAAA  
GCTTAAGAGATCAGAACTTGAGTCAGCCTGTGAAGATTTTCAGCAATGTGAT

>M6-PGSC0003DMG400030035M6LRR-RLK\_3721

GTGCCAAAGCTTAAGAGATCAGAACTTGAGTCAGCCTGTGAAGATTTTCAGCAATGTGATCGGTTCCCTCA



TCTGTTTGCACATTATATAAGGGCACATTATCCAGTGGAGTTGAGATAGCT

>M6-PGSC0003DMG400030035M6LRR-RLK\_3782

GTTCCCTCATCTGTTTGCACATTATATAAGGGCACATTATCCAGTGGAGTTGAGATAGCTGTGATATCTCG

TACAGTGGCATCTACTAAGGATTGGTCAAAAGATATGGAAGCCCATTATA

>M6-PGSC0003DMG400030035M6LRR-RLK\_3843

GATATCTCGTACAGTGGCATCTACTAAGGATTGGTCAAAAGATATGGAAGCCCATTATAGGAAAAAGGT

GATTTAGATTTTCCAGTTGGAATTTTACATCTCATTTTTTCCAATATGCGA

>M6-PGSC0003DMG400030035M6LRR-RLK\_3904

AAAAAGGTGATTTAGATTTTCCAGTTGGAATTTTACATCTCATTTTTTCCAATATGCGAGTTTCTAAATGC

TTTTCTCCTCCTTTTACCAGATCGATACATTGTCAAAGGTCAATCACAA

>M6-PGSC0003DMG400030035M6LRR-RLK\_3965

TTCTAAATGCTTTTCTCCTCCTTTTACCAGATCGATACATTGTCAAAGGTCAATCACAAAGAACTTTGTCAG

CCTCCTGGGTTTTGTGAAGAAGAGGATCCATTTACCAGAATGATGGTT

>M6-PGSC0003DMG400030035M6LRR-RLK\_4026

ACTTTGTCAGCCTCCTTGGGTTTTGTGAAGAAGAGGATCCATTTACCAGAATGATGGTTTTTGTGATATGC

TCCTAATGGGACCCTCTTGAACATCTTCACAGTAAGTTTCTGATTCTAA

>M6-PGSC0003DMG400030035M6LRR-RLK\_4087

TGAGTATGCTCCTAATGGGACCCTCTTGAACATCTTCACAGTAAGTTTCTGATTCTAATGGTGTATCTGT

TGTGATTTACTCAATATTGTTACCCAACCTCGTCTACATCTGCTTGATTG

>M6-PGSC0003DMG400030035M6LRR-RLK\_4148

GTGTATCTGTTGTGATTTACTCAATATTGTTACCCAACCTCGTCTACATCTGCTTGATTGAACTGCACTAGG

ATATACTTTTATATAGCAGGTAAAAACATACCTGCATTTGGTGTTTACA

>M6-PGSC0003DMG400030035M6LRR-RLK\_4209

CTGCACTAGGATATACTTTTATATAGCAGGTAAAAACATACCTGCATTTGGTGTTTACACAAACCATATTA

ATTTACCATTGTTAAGTGATAAATTGACGTGAGAATGTGTATTAATTA

>M6-PGSC0003DMG400030035M6LRR-RLK\_427

ATTTTATTTACTGGGTTTATTCAATTTCTGGGTTTTGGAGCGGTGGACTTTTAATTAATTGTGAATTTAG

CGATTGTTTTTTCAGTTTTGGGTAAAAGATATACTAGTGGGTTTGTTTAT

>M6-PGSC0003DMG400030035M6LRR-RLK\_4270

AACCATATTAATTTACCATTGTTAAGTGATAAATTGACGTGAGAATGTGTATTAATTAACCTTTGGTTCAAT  
GATACTAGTGGGTGTGAAAACACATCTTATGTATTCATTGGGTGGTGTA

>M6-PGSC0003DMG400030035M6LRR-RLK\_4331

TTGGTTCAATGATACTAGTGGGTGTGAAAACACATCTTATGTATTCATTGGGTGGTGTAACACCAAGTG  
TGAATAAGTTTTTTCTCTACCTCGAGTATGATGTATACGGACGTGTCTTT

>M6-PGSC0003DMG400030035M6LRR-RLK\_4392

CACCAAGTGTGAATAAGTTTTTTCTCTACCTCGAGTATGATGTATACGGACGTGTCTTTGGTCTCGTGTCTG  
ATAATTTGTCTGTAATTTGAGAAGTAACCATTTTCACTTTAGCCTCATA

>M6-PGSC0003DMG400030035M6LRR-RLK\_4453

TCTCGTGTGATAATTTGTCTGTAATTTGAGAAGTAACCATTTTCACTTTAGCCTCATAAGATGTGTTTAC  
ACCTGTACAAGACATCTTTGGTATTCACTTTACATGCTCTTTCAACAAT

>M6-PGSC0003DMG400030035M6LRR-RLK\_4514

ATGTGTTACACCTGTACAAGACATCTTTGGTATTCACTTTACATGCTCTTTCAACAATTTATGTTTAGCTT  
TCCCTGTGGTAAACAATCTTATGTAATCTATTATGACCGAAAAG

>M6-PGSC0003DMG400030035M6LRR-RLK\_4575

ATGTTTAGCTTTCCCTGTGGTAAACAATCTTATGTAATCTATTATGACCGAAAAGATCTCTAATTCTA  
GTGTTTTGTAGTAAGGGAAGCTGAACACTTGGACTGGGGGATGCGAAT

>M6-PGSC0003DMG400030035M6LRR-RLK\_4636

CTCTAATTCTAGTGTGTTTGTAGTAAGGGAAGCTGAACACTTGGACTGGGGGATGCGAATGAGGATAACA  
ATGGGAATGGCATACTGCCTTGAGCACATGCACAATTTGTCGCCATCGTTA

>M6-PGSC0003DMG400030035M6LRR-RLK\_4697

GGATAACAATGGGAATGGCATACTGCCTTGAGCACATGCACAATTTGTCGCCATCGTTACCTCATAAAAA  
CTTGACCTCCTCTGCCGTATACCTCACAGAAGACTCTGCAGCCAAAATAT

>M6-PGSC0003DMG400030035M6LRR-RLK\_4758

TCATAAAAACCTTGACCTCCTCTGCCGTATACCTCACAGAAGACTCTGCAGCCAAAATATCGGATTTTGGG  
TTCTGGAATGAGACAGATGCAGCTGAAATGGTGTGAGTCCAGAAAGTAA

>M6-PGSC0003DMG400030035M6LRR-RLK\_4819

GATTTTGGGTCTGGAATGAGACAGATGCAGCTGAAATGGTGTGAGTCCAGAAAGTAATGTTTACAGC  
TTTGGTGTCACTTCTGTTTGTAGATGATGACTGGTAGGCTCCCTTACTCAGCA

>M6-PGSC0003DMG400030035M6LRR-RLK\_488

TGAATTTTAGCGATTGTTTTTCAGTTTTGGGTAAAAGATATACTAGTGGGTTTGTATGTTTTGTGTGAA  
ATGAATTGGCAATGGAAATTCAGTGAGAATAGCTTGTTGTTGGTTATTG

>M6-PGSC0003DMG400030035M6LRR-RLK\_4880

TTTACAGCTTTGGTGTCAATTCTGTTTGAGATGATGACTGGTAGGCTCCCTTACTCAGCAAACAGTAGCTCT  
CTTGACGACTGGGCATCAGACTATCTTAGGGGAGGAGAATCCCTGAGAG

>M6-PGSC0003DMG400030035M6LRR-RLK\_4941

CAGTAGCTCTCTTGACGACTGGGCATCAGACTATCTTAGGGGAGGAGAATCCCTGAGAGAAATGGTTGA  
TCCAACTTTAAATTCTTTCCAAGTAGAGCAGCTAGAGAGAATAGCTGTTGT

>M6-PGSC0003DMG400030035M6LRR-RLK\_5002

ATGGTTGATCCAACCTTAAATTCTTTCCAAGTAGAGCAGCTAGAGAGAATAGCTGTTGTGATTAATGTT  
GTGTACATCCCGAGCCAAGACGAAGACCGACAATGAGAGAGGTTTCTTCC

>M6-PGSC0003DMG400030035M6LRR-RLK\_5063

TTAAAATGTGTGTACATCCCGAGCCAAGACGAAGACCGACAATGAGAGAGGTTTCTTCCAGATTGAGAG  
AGATAACAGATATTGGACCAGATGGGGCAACCCCAAGACTCTCTCCTCTAT

>M6-PGSC0003DMG400030035M6LRR-RLK\_5124

ATTGAGAGAGATAACAGATATTGGACCAGATGGGGCAACCCCAAGACTCTCTCCTCTATGGTGGGCTGA  
GCTTGAGATTATATCAACTGAGGCTTGTTAATGCATAGGTACCTCAGTTTT

>M6-PGSC0003DMG400030035M6LRR-RLK\_5185

TGGGCTGAGCTTGAGATTATATCAACTGAGGCTTGTTAATGCATAGGTACCTCAGTTTTGCCTTAGATG  
GTAATTAATATATAGGCTGTATATACAAAGATTTTTCTTTTGTGTGGATA

>M6-PGSC0003DMG400030035M6LRR-RLK\_5246

CTTTAGATGGTAATTAATATATAGGCTGTATATACAAAGATTTTTCTTTTGTGTGGATAACAAGAGCATAT  
CGACTGTGGGGGCTAAAGAGAAGTTGTTTGGGTACAAAAATGGAAAATT

>M6-PGSC0003DMG400030035M6LRR-RLK\_5307

AAGAGCATATCGACTGTGGGGGCTAAAGAGAAGTTGTTTGGGTACAAAAATGGAAAATTTAGTAAGTA  
AAAAAATTTCTTTTTTATTTTATATTTTAGTATGTAAGTAATTTCTAAAT

>M6-PGSC0003DMG400030035M6LRR-RLK\_5368

GTAAGTAAAAAAATTTCTTTTTTATTTTATATTTTAGTATGTAAGTAATTTCTAAATCGCCTTAATTTGC

TTTCTTGGCGGCTTGGGATCAATTCTATTGCTTATGAAACTATAAGG

>M6-PGSC0003DMG400030035M6LRR-RLK\_5428

GCCTTAATTTGCTTTCTTGGCGGCTTGGGATCAATTCTATTGCTTATGAAACTATAAGGACCCTAGACAA  
AAGGGATAAAACCTAAGGGGTCGTTTGGCTTTATCGCATTAAACAAAAC

>M6-PGSC0003DMG400030035M6LRR-RLK\_549

TTTGTGTGAAATGAATTGGCAATGGAAATTCAGTGAGAATAGCTTGTTGTTGGTTATTGTGCTGTTCTTG  
TGTTTGGTGCATCAGGAATTGTGTTTCTGTTGGTCTCTCAATGATGAGGG

>M6-PGSC0003DMG400030035M6LRR-RLK\_61

CAAAGGGCTTTGTCATATTATGATGATCTGTCGTTAGCTTTTACTCAGTCATCAAACCTTTGTGAATCTTTC  
AATCTCTCTCTCAAGTCTCAACCATTTTTCTACGTCATAGTTTTTTTTGA

>M6-PGSC0003DMG400030035M6LRR-RLK\_610

CTGTTCTTGTGTTTGGTGCATCAGGAATTGTGTTTCTGTTGGTCTCTCAATGATGAGGGTATTACTCTTCT  
TCTTGTTATTATTTGCTATTTAAGACTTACTTTGTTAGAAATGGCAATA

>M6-PGSC0003DMG400030035M6LRR-RLK\_671

TTACTCTTCTTCTTGTATTATTTGCTATTTAAGACTTACTTTGTTAGAAATGGCAATAAAAAATTTGTTAT  
TTTGCTTAAAGTTTTAGTCTTTATTGCTGCAGGTTTGGCACTGTTAAG

>M6-PGSC0003DMG400030035M6LRR-RLK\_732

AAATTTGTTATTTTGCTTAAAGTTTTAGTCTTTATTGCTGCAGGTTTGGCACTGTTAAGATTCAGGGAGAG  
AGTGGAGAGTGATCCATTTGGGGCTTTGTTGAATTGGAAAGATGGTGAT

>M6-PGSC0003DMG400030035M6LRR-RLK\_793

TCAGGGAGAGAGTGGAGAGTGATCCATTTGGGGCTTTGTTGAATTGGAAAGATGGTGATGGAGTGGAA  
AATCCATGTACTTGGTTAGGAGTTGGGTGCGTTAATGGGAATGTTGTGTCTC

>M6-PGSC0003DMG400030035M6LRR-RLK\_854

AGTGGAAAATCCATGTACTTGGTTAGGAGTTGGGTGCGTTAATGGGAATGTTGTGTCTCTGTAAGTACT  
AAAAATTGCTCTTTTCTTGTATTGTTTCTGCAGAAGTCTTCTTTTTTC

>M6-PGSC0003DMG400030035M6LRR-RLK\_915

TAAGTACTAAAAATTGCTCTTTTCTTGTATTGTTTCTGCAGAAGTCTTCTTTTTCAATTTTGATCTGG  
TTGGCTTATATAGATGATTCTAAATTTGGTCTCTGATTGAATTCTGAA

>M6-PGSC0003DMG400030035M6LRR-RLK\_976

TTTTGATCTGGTTGGCTTATATAGATGATTCTAAATTTGGTCTCTGATTGAATTCTGAAACTTTTGTTCAT  
GAGTTGGCGGTGATTCCAGAAGGGGTATGATCAAAGACAGATAAATG

>M6-PGSC0003DMG400030072M6LRR-RLP\_0

CTAAGTCTCTTTTATCTACTAAACTGCATCACTGGAAATAGTATATAATTACACTACTATCTGTGGAAGT  
TAAACCATATATAATATGACTTATTTGTGAACTGTGAGTTCAATTGGAA

>M6-PGSC0003DMG400030072M6LRR-RLP\_126

GTAAAGTGACCGCTTTTCTCACGCTCAAATATTGAGGAACCTTGGCTAATGCGAGGAGGAAAATCCA  
TATATAAGTTTTAAATAGATTAGATGGGTGGAATATCGAGAAGAGTAATGA

>M6-PGSC0003DMG400030072M6LRR-RLP\_189

AATCCATATATAAGTTTTAAATAGATTAGATGGGTGGAATATCGAGAAGAGTAATGAAACCTTTGTAGG  
AGTTAATGGGCTAGCTTTATCGATACTAGTGGTGTTTAAGTTCGCTGTCAT

>M6-PGSC0003DMG400030072M6LRR-RLP\_2005

GAAAGAATTCCGCAGAGCATCAACCAATGTTGAATTCACATTTGAAGAAATCGATATGGAAGGTGGATA  
TGAACATGAAGAAGTCATGGAAGTGCCATGATTTTGCTAACATATTATTTT

>M6-PGSC0003DMG400030072M6LRR-RLP\_252

TGTAGGAGTTAATGGGCTAGCTTTATCGATACTAGTGGTGTTTAAGTTCGCTGTCATCCTATCTTCCAGT  
GGTGGAGCCACGTTTACTGAAGAGAGGGAGGGGGGGGGGTATAACTGAA

>M6-PGSC0003DMG400030072M6LRR-RLP\_315

TTCCAGTGGTGGAGCCACGTTTACTGAAGAGAGGGAGGGGGGGGGGTATAACTGAATACCATTTTGC  
CAAAGATTATATTGTGTATATAGGGGAAATGTCATTTTATGTGTAGATATA

>M6-PGSC0003DMG400030072M6LRR-RLP\_378

TTTGCCAAAAGATTATATTGTGTATATAGGGGAAATGTCATTTTATGTGTAGATATATACTTGTGAAATCC  
CCCGCACACAAGAGAACATTTTTGTGAATCCCTCAATGAAAATCTTGCC

>M6-PGSC0003DMG400030072M6LRR-RLP\_441

TTGAATCCCCCGCACACAAGAGAACATTTTTGTGAATCCCTCAATGAAAATCTTGCCTTACCCTATTGT  
CTTCAATTTATGTTCTTTCCCGTGCTCAATCATGTATCATTCTGTAATG

>M6-PGSC0003DMG400030072M6LRR-RLP\_504

ACTATTGTCTTCAATTTATGTTCTTTCCCGTGCTCAATCATGTATCATTCTGTAATGACGTTGAACCTAG  
TTATTTTCAATACACTTACTGAAATGTATTGGGATATTGCCTTCATCCC

>M6-PGSC0003DMG400030072M6LRR-RLP\_567

AACCACTAGTTATTTTCAATACACTACTGAAATGTATTGGGATATTGCCTTCATCCCTGATTTTAATTTTCA  
GAGTTGCTGACATGCTTGTTTTGTTAGACCATGAGGAATGCTTGGACA

>M6-PGSC0003DMG400030072M6LRR-RLP\_63

GTGGAAGTTAAACCATATATAATATGACTTATTTGTGAACTGTGAGTTCAATTGGAAAGAAAAGTAAAG  
TGACCGCTTTTTCTCACGCTCAAATATTGAGGAACCTTGGCTAATGCGAG

>M6-PGSC0003DMG400030072M6LRR-RLP\_630

TAATTTTCAGAGTTGCTGACATGCTTGTTTTGTTAGACCATGAGGAATGCTTGGACATCTGGTGTAGATA  
CAATTAGCAATTTGCCTTGTAATGTACTGGATGCTGTTCTTGGATGCTTG

>M6-PGSC0003DMG400030072M6LRR-RLP\_756

AAAGATGCAGTGAGAACCAGTATCTTGTCAAAGACTGGAGGTACAAATGGGTAACACGTCAAGAACT  
TGATTTTAATGATGAGTTTTTCAAGTCTTTCAAACAAGATGAAGAAGCCAAG

>M6-PGSC0003DMG400030113M6LRR-RLK\_0

GAAGTTGACTTCATTCCAGAGGTTGGATTTACAGAGGCGAACATTTTGTCAAGTTTGACGGAAAATAA  
CATGATTGGAAGTGGTGGATCGGGTAAGGTGTACAGAATTTCCGTTGGCAG

>M6-PGSC0003DMG400030117-(rev)M6LRR-RLK\_305

TCACAGCCAAAATAGCTGATTTTGGGTTGGCCAAGATTTTAGAGAAGAAAGGAGAGCTTAACACCATGT  
CTGCTGTTGCGGGTTCCTTTGGTTACATAGCTCCAGGTAAAAGCAAATCC

>M6-PGSC0003DMG400030119-(rev)M6LRR-RLK\_65

ACAGAGGCGAACATTTTGTCAAGTTTGACGGAAAATAACATGATTGGAAGTGGTGGATCGGGTAAGGT  
GTACAGAATTTCCGTTGGCAGACCAAATGAGTATGTTGCTGTGAAGAGGATT

>M6-PGSC0003DMG400030144-(rev)M6L-LecRK\_0

GTATATATAAAATTTATTTTTTAGCAAAGCACTAAACAGAGTGTTTGGTGTATTATTGTATATATTCAGTTG  
AATGTCTAACAATGTGATTAACATATTGTCCAACCTATGGTTGTTTTTGT

>M6-PGSC0003DMG400030144-(rev)M6L-LecRK\_1220

GATATCTCAGTGAATCCAACCCTTATATTGCTGTAAAGAGGGTTCAAGGGAATCACAGCAAGGAATAA  
AAGAGTATGTATCAGAAGTCAGGATCGTCAGCCGGTTAAGACATAAACATT

>M6-PGSC0003DMG400030144-(rev)M6L-LecRK\_1525

TGTGTGGTGCATAGGGATATAAAGTCTAGCAATATTATGTTGGATTCTAATTTCAATGCCAAGCTTGGGG

ATTTTGGGTTAGCTAGGCTAGTTGACCATGATAAGGGATCCCAAACAACA

>M6-PGSC0003DMG400030144-(rev)M6L-LecRK\_61

TATTCAGTTGAATGTCTAACAAATGTGATTAACATATTGTCCAACATATGGTTGTTTTGTGTCTTTATCTTCT  
CTCAAATACTTGCTTCTTATCATAATTATCCCTCTAGTCACTTCACTC

>M6-PGSC0003DMG400030149M6LRR-RLP\_0

TGTTAGGATATACTATTAACCATGCGTTTTGATATAGTATTATTATTGAACAATTGTTTATTCATTTATTCA  
ATTCAATAAAGTGTTACATTAATAGATCAATTTTCATATATGTGTCC

>M6-PGSC0003DMG400030149M6LRR-RLP\_945

GAACTCAGAATCCTATTTTCTAGTAGAAGAAGGAAAAGTAACGTGTATATTTTCTCCAAGAAAGAAAC  
GTGAGTTTTGGGGTTTTCTTGAAGAATAAGGATTTATACTTTCTTCTCCTT

>M6-PGSC0003DMG400030159M6LRR-RLP\_0

ATATGGGCAACATTAAGTTTTTGTGTTAGCTTTTTTTCTAATAGTAAATGTGGCGAATGGTTGTTGGGA  
GGAAGAGAGAAGTGCTCTCTTGGAGCTGCAAGCAAACATAATGAGTTTGA

>M6-PGSC0003DMG400030159M6LRR-RLP\_108

TAATGAGTTTGAATGGTGAATTGGTTGTTGATTGGGCAGGATATAATGCCAATGGTTTTATAAATTGTTG  
TTTTTGAAAAAAGTTAAATGCAGCTTAGCAACAGGTCGAGTGATCGAAC

>M6-PGSC0003DMG400030159M6LRR-RLP\_162

GTTTTATAAATTGTTGTTTTTGGAAAAAAGTTAAATGCAGCTTAGCAACAGGTCGAGTGATCGAACTCGA  
TCTTGCAGCAAGGTTTGGATCAGGGGATGATTGGAGATTTAATGCCTCTC

>M6-PGSC0003DMG400030159M6LRR-RLP\_216

GAGTGATCGAACTCGATCTTGCAGCAAGGTTTGGATCAGGGGATGATTGGAGATTTAATGCCTCTCTCTT  
TCTACCGTTCAAGTCCCTCCAACCTCTTTTTTTGTCTTACAGAAATATTA

>M6-PGSC0003DMG400030159M6LRR-RLP\_54

CGAATGGTTGTTGGGAGGAAGAGAGAAGTGCTCTTGGAGCTGCAAGCAAACATAATGAGTTTGAAT  
GGTGAATTGGTTGTTGATTGGGCAGGATATAATGCCAATGGTTTTATAAATT

>M6-PGSC0003DMG400030169-(rev)M6LRR-RLK\_0

AAGCCCCAAGATAAATAGTATTAAGCAGGGTACATGATCACACGAACTTCCATTAATACAAGGGAACT  
AGGTAGGTAGAGCATCCTACCAGGATGTTTTTTGTGGTCTCTTTAAAGAGG

>M6-PGSC0003DMG400030169-(rev)M6LRR-RLK\_1037

CTAACAGGTCTCCAATAGGAAAAAAGAAAAGGGAAGTATATGAAGTGACTTTGTTTCGCATGGAGTAT  
GGAATATAGAATACGCTGCCTTAAGGGGTTTTAGGTGCAAAGGTGTCCACA

>M6-PGSC0003DMG400030169-(rev)M6LRR-RLK\_1098

GGAGTATGGAATATAGAATACGCTGCCTTAAGGGGTTTTAGGTGCAAAGGTGTCCACACACTTCACAC  
TTCAGAATTGCGAGCTTGTTGCTGTCACAGTAGTATGCACTATAGCTAATA

>M6-PGSC0003DMG400030169-(rev)M6LRR-RLK\_1159

CTTCACACTTCAGAATTGCGAGCTTGTTGCTGTCACAGTAGTATGCACTATAGCTAATAGCAGATTAAGT  
GAACTTTTGCTTAGCATGCGTAATTTATCAGTTGTATATCATCGCTTAAT

>M6-PGSC0003DMG400030169-(rev)M6LRR-RLK\_122

AAGACGGGGAAAAAGTATTTGCAGGTTTAAATGGTTAGTTTCAGTTTTCGGGTACAAAATTTTCCTGTTA  
GTTCAAACCTGTTTTGTAGATTGACATGACCAAGCAAACAATTTTATGC

>M6-PGSC0003DMG400030169-(rev)M6LRR-RLK\_1220

AGATTAAGTGAACTTTTGCTTAGCATGCGTAATTTATCAGTTGTATATCATCGCTTAATGTTGGTAGGACT  
GGAAATTAGTCGTTTTTGCAGTTGGAAGGAGGATTCAAATTGGAAATAG

>M6-PGSC0003DMG400030169-(rev)M6LRR-RLK\_1281

TGGTAGGACTGGAATTAGTCGTTTTTGCAGTTGGAAGGAGGATTCAAATTGGAATAGGTGTTAGGAT  
TTGTATTTTATAGTGTTCTTTTATTGGGTGCAGTTACGCCAGAATATTGA

>M6-PGSC0003DMG400030169-(rev)M6LRR-RLK\_1342

GTTAGGATTTGTATTTTATAGTGTTCTTTTATTGGGTGCAGTTACGCCAGAATATTGACTCTTCAGATAA  
AAGTCATGTTTAAGTTGTTTGACACTTGATACATTTTGTAGATGATGT

>M6-PGSC0003DMG400030169-(rev)M6LRR-RLK\_1403

CTTCAGATAAAAGTCATGTTTAAGTTGTTTGACACTTGATACATTTTGTAGATGATGTTTGACACTTGAT  
ACATTTTGTAGATGAGGTCTGATATCTAAAAATATCTGTACATCACAT

>M6-PGSC0003DMG400030169-(rev)M6LRR-RLK\_1464

GACACTTGATACATTTTGTAGATGAGGTCTGATATCTAAAAATATCTGTACATCACATTTTATTGTTTTG  
ATATCTGAAAGGCTAAACTTCATTCTGCTACTCTTTTGGCAAGCAGTG

>M6-PGSC0003DMG400030169-(rev)M6LRR-RLK\_1525

TATTGTTTTGATATCTGAAAGGCTAAACTTCATTCTGCTACTCTTTTGGCAAGCAGTGCTTTACTTTTGGT  
TGCTAGAGGTTGAAAGTTGTGAACCATAAACTTGTAGATTCAGTTCAT



>M6-PGSC0003DMG400030169-(rev)M6LRR-RLK\_1586

TTACTTTTGGTTGCTAGAGGTTGAAAGTTGTGAACCATAAACTTGTAGATTCAGTTCATATCTATAAACCA  
TTTTATCTTTTTTATCATTGTACTCCATTATAATGCCATTGTTCTTG

>M6-PGSC0003DMG400030169-(rev)M6LRR-RLK\_1647

CTATAAACCATTTTTATCTTTTTTATCATTGTACTCCATTATAATGCCATTGTTCTTGCTGTTCTTGCAGAT  
ATTTACCTCCGGAATAGCCTGCCTCACTAAATTGGAGTGCCTTGAT

>M6-PGSC0003DMG400030169-(rev)M6LRR-RLK\_1708

GTTCTTGCAGATATTTACCTCCGGAATAGCCTGCCTCACTAAATTGGAGTGCCTTGATCTTTCATTCAAT  
AAGATGAAGAATTTACCTGTTGAGATAACTCATCTTAACTCCTTGCTGT

>M6-PGSC0003DMG400030169-(rev)M6LRR-RLK\_1769

TTCATTCAATAAGATGAAGAATTTACCTGTTGAGATAACTCATCTTAACTCCTTGCTGTCCTGAAGGTTG  
CTAATAATAAACTGATTGAAGTACCTCCGGGGTTGTCTTCTCTGCAAAG

>M6-PGSC0003DMG400030169-(rev)M6LRR-RLK\_183

TTCCTGTTAGTTCAAACCTGTTTTGTAGATTGACATGACCAAGCAAAACAATTTTATGCATGATTAGTAAA  
AGTTTTACAAAACAACAGATCTTCTCAAAGAAATTTGGATGTGGTAA

>M6-PGSC0003DMG400030169-(rev)M6LRR-RLK\_1830

CTGAAGGTTGCTAATAATAAACTGATTGAAGTACCTCCGGGGTTGTCTTCTCTGCAAAGATTAGAACGTT  
TGGACTTTTCTAACAATAGATTAACATCCTTGGAGAATCTTGATCTCCTT

>M6-PGSC0003DMG400030169-(rev)M6LRR-RLK\_1891

TAGAACGTTTGGACTTTTCTAACAATAGATTAACATCCTTGGAGAATCTTGATCTCCTTTCAATGTATAAT  
CTGCAGAGTCTCAATCTTCAGGTATGTGCTACTGAAATTACAGTTTCTT

>M6-PGSC0003DMG400030169-(rev)M6LRR-RLK\_1952

AATGTATAATCTGCAGAGTCTCAATCTTCAGGTATGTGCTACTGAAATTACAGTTTCTTCCAGTCTTTTT  
GCTTTTAGGCTTTTTCTCTAGTTTCTTTTCTTCTCTGATAAATGTTTA

>M6-PGSC0003DMG400030169-(rev)M6LRR-RLK\_2013

CAGTCTTTTTGCTTTTAGGCTTTTTCTCTAGTTTCTTTTCTTCTCTGATAAATGTTTATAACATGAGAGGC  
ATCTACTCTTAATGTGGATGAAATTCTTGCATCCCACTGGAAAAAAC

>M6-PGSC0003DMG400030169-(rev)M6LRR-RLK\_2074

ACATGAGAGGCATCTACTCTTAATGTGGATGAAATTCTTGCATCCCACTGGAAAAAACCCGAAATGTAT

TTGTCTCAATTGTCTAGTCAAGAACTTGATATATTATAATTACCTTATC

>M6-PGSC0003DMG400030169-(rev)M6LRR-RLK\_2135

GAAATGTATTTGTCTCAATTGTCTAGTCAAGAACTTGATATATTATAATTACCTTATCCTGACCCATATAT  
CTTCATTGAAATTTGCTGAAGCACATAAGCTTCTTAGGTGTTGTTTCG

>M6-PGSC0003DMG400030169-(rev)M6LRR-RLK\_2196

GACCCATATATCTTCATTGAAATTTGCTGAAGCACATAAGCTTCTTAGGTGTTGTTTCGATTCCCTTCATGG  
GTATGCTGCAATTTGGAGGGGAATTCATAGATTTGTCCAAGGATGACA

>M6-PGSC0003DMG400030169-(rev)M6LRR-RLK\_2257

TCCTTCATGGGTATGCTGCAATTTGGAGGGGAATTCATAGATTTGTCCAAGGATGACACCACCAGTTCA  
TCTTCAGAAATGGACGTGCTTGAAAGTTATGAACAAGAACTTCTGAGAA

>M6-PGSC0003DMG400030169-(rev)M6LRR-RLK\_2318

ACCAGTTCATCTTCAGAAATGGACGTGCTTGAAAGTTATGAACAAGAACTTCTGAGAATACCCAAAAT  
GGTGAGTTCCTCGGAATCTCTTGCTCCCTCCTTATATCTATTGCTATTT

>M6-PGSC0003DMG400030169-(rev)M6LRR-RLK\_2379

CCCAAATGGTGAGTTCCTCGGAATCTCTTGCTCCCTCCTTATATCTATTGCTATTTCTGCACATTCTGA  
TTCCTTTGGATCTTGTTTGTGTCCTTCTAAGAAGTGTTGTTTCGGAAG

>M6-PGSC0003DMG400030169-(rev)M6LRR-RLK\_244

GATTAGTAAAAGTTTTACAAAACAACAGATCTTCTCAAAGAAATTTGGATGTGGTAACACAGCTGGA  
GCATAAAAGAAAATAAAGACTTGTTTTTCTGCTTAGATGCTTCATGAGAT

>M6-PGSC0003DMG400030169-(rev)M6LRR-RLK\_2440

GCACATTCTGATTCCTTTGGATCTTGTTTGTGTCCTTCTAAGAAGTGTTGTTTCGGAAGGGTAGTACCTTT  
GAGAAGTCTGATGTGTGAACTTTTAATTGTGTAGGAGTTTCTACCAAAT

>M6-PGSC0003DMG400030169-(rev)M6LRR-RLK\_2501

TAGTACCTTTGAGAAGTCTGATGTGTGAACTTTAATTGTGTAGGAGTTTCTACCAAATTGTCAGGTCATT  
TATGTGGCTCATCACCCAGTCATCGATGTTTTCGGCCTCGAAAATCCAA

>M6-PGSC0003DMG400030169-(rev)M6LRR-RLK\_2562

TCAGGTCATTTATGTGGCTCATCACCCAGTCATCGATGTTTTCGGCCTCGAAAATCCAAGAAATGGAAGC  
GGCAGTATTATATGCAACAGAGGGCTCGTCAAGAGCGATTAAAAACAGC

>M6-PGSC0003DMG400030169-(rev)M6LRR-RLK\_2623

AATGGAAGCGGCAGTATTATATGCAACAGAGGGCTCGTCAAGAGCGATTAAAAAACAGCAGGAAATGT  
GTTGCCTGCAAACATTCTAAGCTAATTGATGATTCTCTGGTGGAGGCCTCAT

>M6-PGSC0003DMG400030169-(rev)M6LRR-RLK\_2684

GAAATGTGTTGCCTGCAAACATTCTAAGCTAATTGATGATTCTCTGGTGGAGGCCTCATCAAGCATAGTG  
GATGATGATACACATGTTAAAGAACTGATTACTGAAGAAGCTGAGTGCAA

>M6-PGSC0003DMG400030169-(rev)M6LRR-RLK\_2745

AGCATAGTGGATGATGATACACATGTTAAAGAACTGATTACTGAAGAAGCTGAGTGCAAAGGCTCTTTA  
GCTAGTGGTATTGATGAACATATCAGATTAAAGGAGGACAATTATATAGGA

>M6-PGSC0003DMG400030169-(rev)M6LRR-RLK\_2806

GCTCTTTAGCTAGTGGTATTGATGAACATATCAGATTAAAGGAGGACAATTATATAGGAAGATCTTCATA  
TGTTGCTTCTGACTCCATTGAAACATGCATAGATATTCAGAATTGTAAAA

>M6-PGSC0003DMG400030169-(rev)M6LRR-RLK\_2867

ATCTTCATATGTTGCTTCTGACTCCATTGAAACATGCATAGATATTCAGAATTGTAAAACATGTGATGCTT  
CAGTAGGTTCTGTTTCTGATGCTGCTGATGTGGCTGAGGAAAGTTTGTC

>M6-PGSC0003DMG400030169-(rev)M6LRR-RLK\_2928

TGTGATGCTTCAGTAGGTTCTGTTTCTGATGCTGCTGATGTGGCTGAGGAAAGTTTGTCTTCAGAGGTGA  
CTAATAGTCCTCCAAAATCGAAAAGGCACCTGGATGGGGTCATTGATAAT

>M6-PGSC0003DMG400030169-(rev)M6LRR-RLK\_2989

CAGAGGTGACTAATAGTCCTCCAAAATCGAAAAGGCACCTGGATGGGGTCATTGATAATCCAAAACCAT  
GCAAACCCCGCAGACCAACAGATCATTACAGAGGTATCCTGCAAATACAGCA

>M6-PGSC0003DMG400030169-(rev)M6LRR-RLK\_305

CAGCTGGAGCATAAAAGAAAATAAAGACTTGTTTTTCTGCTTAGATGCTTCATGAGATTGAAGTTTGT  
AATTAGGACTAAAAGATATGCACAAAATTTGTAAGTTGTTTATCGTGAG

>M6-PGSC0003DMG400030169-(rev)M6LRR-RLK\_3050

AAAACCATGCAAACCCCGCAGACCAACAGATCATTACAGAGGTATCCTGCAAATACAGCATGATGTCTTTC  
TGTGGTATTGATGATTATTTACCAGATGGCTTTTATGATGCTGGGCGAGA

>M6-PGSC0003DMG400030169-(rev)M6LRR-RLK\_3111

ATGTCTTCTGTGGTATTGATGATTATTTACCAGATGGCTTTTATGATGCTGGGCGAGATCGGCCATTTAT  
GACGCTGAGGAGTTATGAGCAGAATTTGCATCTTGATTCACGGGAAGTC

>M6-PGSC0003DMG400030169-(rev)M6LRR-RLK\_3172

GGCCATTTATGACGCTGAGGAGTTATGAGCAGAATTTGCATCTTGATTCACGGGAAGTCATTATAGTTG  
ATAGGTAACCTCCATGTTTGCATGCCATTAATAGACTAATAGTTATGGACC

>M6-PGSC0003DMG400030169-(rev)M6LRR-RLK\_3233

TATAGTTGATAGGTAACCTCCATGTTTGCATGCCATTAATAGACTAATAGTTATGGACCTCAACTACTAAC  
TTCAGGGAATGCTTTCCTCTACTCATTTTGATTACTTATTTAATCT

>M6-PGSC0003DMG400030169-(rev)M6LRR-RLK\_3294

AACTACTAACCTCAGGGAATGCTTTCCTCTACTCATTTTGATTACTTATTTAATCTGTTTAGGCAAAGA  
GATGAAATGCTGGATGCCATTGCTCTACGTGCTCAAGCTCTAATCTTT

>M6-PGSC0003DMG400030169-(rev)M6LRR-RLK\_3355

TTAGGCAAAGAGATGAAATGCTGGATGCCATTGCTCTACGTGCTCAAGCTCTAATCTTTCATTTTAATCA  
GATAGATGGTCTGTTTAAAGATAGAGAACATGTTGCTGTAGACAACCTTGC

>M6-PGSC0003DMG400030169-(rev)M6LRR-RLK\_3416

TTTTAATCAGATAGATGGTCTGTTTAAAGATAGAGAACATGTTGCTGTAGACAACCTTGCAAATTGCATCA  
CTGCTTGCACTTTTAGTGTCGGATCATTTTGGTGGAAAGTGACAAAAGTAA

>M6-PGSC0003DMG400030169-(rev)M6LRR-RLK\_3477

ATTGCATCACTGCTTGCACTTTTAGTGTCGGATCATTTTGGTGGAAAGTGACAAAAGTAATATTGTACAGA  
AGGCAAGGAAAGATGTATCTGGGTCGAACTATAGCAAGCCTTTTGTCTGC

>M6-PGSC0003DMG400030169-(rev)M6LRR-RLK\_3538

TTGTACAGAAGGCAAGGAAAGATGTATCTGGGTCGAACTATAGCAAGCCTTTTGTCTGCACATGCCCTA  
CTGGAAATGATGACACTACCAGCATGGTCACAAAAGAAAGTCCTAGCATCT

>M6-PGSC0003DMG400030169-(rev)M6LRR-RLK\_3599

ATGCCCTACTGGAAATGATGACACTACCAGCATGGTCACAAAAGAAAGTCCTAGCATCTTAGAAGATAT  
ACTATTCCTTAATCTTTGTGAGAAAGCACTTCACTCAATAAAATCAAGGCA

>M6-PGSC0003DMG400030169-(rev)M6LRR-RLK\_366

AAGTTTGTTAATTAGGACTAAAAGATATGCACAAAATTTTGTAAAGTTGTTTATCGTGAGTTTAGACTTTA  
GCACTCTTCAAAGGGTATCAGTTTCTACTCTAGGACCATACTAAGTTCAA

>M6-PGSC0003DMG400030169-(rev)M6LRR-RLK\_3660

GAAGATATACTATTCCTTAATCTTTGTGAGAAAGCACTTCACTCAATAAAATCAAGGCAAATCTATTGT

TGTTCTATTGGGAGTTTGCAGTTTGGTGTATGTAGGCATAGGGCCTTG

>M6-PGSC0003DMG400030169-(rev)M6LRR-RLK\_3721

ATTCTATTGTTGTTCTATTGGGAGTTTGCAGTTTGGTGTATGTAGGCATAGGGCCTTGCTTATGAAGGT

ATTTTGCATCAGACATGTTTCTAATTAGATATGGTGGTACTGAATTTAG

>M6-PGSC0003DMG400030169-(rev)M6LRR-RLK\_3782

TATGAAGGTATTTTGCATCAGACATGTTTCTAATTAGATATGGTGGTACTGAATTTAGTTTATTATTATG

AACTGATAAATTTGTTTGTCTTCTGCAGTACCTGTGTGACCAAATAGA

>M6-PGSC0003DMG400030169-(rev)M6LRR-RLK\_3843

TATTATTATGAACTGATAAATTTGTTTGTCTTCTGCAGTACCTGTGTGACCAAATAGAACCTCGAATATC

TTGTGAGCTTGTTAGGGGTTATTAGGATTTTTACCCGCATGCGTGGAAT

>M6-PGSC0003DMG400030169-(rev)M6LRR-RLK\_3904

CTCGAATATCTTGTGAGCTTGTTAGGGGTTATTAGGATTTTTACCCGCATGCGTGGAATGTGATCGTGGT

AAAAAGGGGTGAATCATGGGTTTGAATGATAGTTGATGCGTGTGCATCCCC

>M6-PGSC0003DMG400030169-(rev)M6LRR-RLK\_3965

GATCGTGGTAAAAAGGGGTGAATCATGGGTTTGAATGATAGTTGATGCGTGTGCATCCCCCTTGATATCAG

AGAAGAGACAGATCCAGAATACTTTTGCAGGTCAATGATTTTCCAATTCTG

>M6-PGSC0003DMG400030169-(rev)M6LRR-RLK\_4026

GATATCAGAGAAGAGACAGATCCAGAATACTTTTGCAGGTCAATGATTTTCCAATTCTGTGTTACTTTCTT

CATGACTAATTTCTGGTACTACAAGCATTATATCAATACACGTGTATG

>M6-PGSC0003DMG400030169-(rev)M6LRR-RLK\_4087

TTACTTTCTTCATGACTAATTTCTGGTACTACAAGCATTATATCAATACACGTGTATGACGATATTGCATT

TTCAATTTAGCCAGTGTGATTATTGGTTATTTGGGGTGAAATTGCCA

>M6-PGSC0003DMG400030169-(rev)M6LRR-RLK\_4148

GATATTGCATTTTCAATTTAGCCAGTGTGATTATTGGTTATTTGGGGTGAAATTGCCAGCTTCTTGAGTA

GTTCTTAGTTACTAAAAATCTCTAGTTTACCTGAGTTATTTTCGGAATG

>M6-PGSC0003DMG400030169-(rev)M6LRR-RLK\_4209

TTCTTGAGTAGTTCCTTAGTTACTAAAAATCTCTAGTTTACCTGAGTTATTTTCGGAATGAAAATGGCCAGA

TAACTGAGCTTGCTGTTTCTTTCAGGTATATTCCACTGAACGGGGATAA

>M6-PGSC0003DMG400030169-(rev)M6LRR-RLK\_427

TAGACTTTAGCACTCTTCAAAGGGTATCAGTTTCTACTCTAGGACCATACTAAGTTCAACTAGGATATGAT  
ACAATATTAGGATTAGTCGATAGTACATAGCATAACTAGCCCTTGGTTA

>M6-PGSC0003DMG400030169-(rev)M6LRR-RLK\_4270

AATGGCCAGATAACTGAGCTTGCTGTTTCTTTCAGGTATATTCCACTGAACGGGGATAAATGTTCTGTT  
GTGCCAGATGCTAGTCCTGGTCAAGTTAGTTCTTTTCCTTCTCTAACCGG

>M6-PGSC0003DMG400030169-(rev)M6LRR-RLK\_4331

GTTCTGTTGTGCCAGATGCTAGTCCTGGTCAAGTTAGTTCTTTTCCTTCTCTAACCGGTGATGATAAAAT  
TCATAAAGCTCCCTCCTCAACCCTCGTCCCGTGAAATTGGGAATTTGG

>M6-PGSC0003DMG400030169-(rev)M6LRR-RLK\_4392

ATGATAAAATTCATAAAGCTCCCTCCTCAACCCTCGTCCCGTGAAATTGGGAATTTGGGATCCCTTGAG  
ACTTTGGCAAAGGTGTGGTTCCTGATTGCTTTTAACTTCTCCAGTTATTA

>M6-PGSC0003DMG400030169-(rev)M6LRR-RLK\_4453

TCCCTTGAGACTTTGGCAAAGGTGTGGTTCCTGATTGCTTTTAACTTCTCCAGTTATTATTATGCAAATAT  
ACTTAAGTTCTTATTCCAAACTTCAATGACTTGAATTAATATGTTTTA

>M6-PGSC0003DMG400030169-(rev)M6LRR-RLK\_4514

ATGCAAATATACTTAAGTTCTTATTCCAAACTTCAATGACTTGAATTAATATGTTTTATTCTTAGAGTGAC  
TGAACTACATGTATATGTGTTAACCACACAACAATTAGAAAATGATTTT

>M6-PGSC0003DMG400030169-(rev)M6LRR-RLK\_4575

CTTAGAGTGACTGAACTACATGTATATGTGTTAACCACACAACAATTAGAAAATGATTTTTCTGGCTTTATT  
GTACTTTCCATTATTGACTGGAATTTACCAGTCTATCTGGTCTTGTGCT

>M6-PGSC0003DMG400030169-(rev)M6LRR-RLK\_4636

TGGCTTTATTGACTTTCCATTATTGACTGGAATTTACCAGTCTATCTGGTCTTGTGCTTTTGATTTGTTTT  
GGAAATCTGAAATAGATAAGAAGCAAAGCAATCCTTTTTGACTTATTC

>M6-PGSC0003DMG400030169-(rev)M6LRR-RLK\_4697

TGATTTGTTTTGGAAATCTGAAATAGATAAGAAGCAAAGCAATCCTTTTTGACTTATTCTGCTATTCAGCA  
GGAATCCATTATATTGCAGGCTTATGCTTTTCATTTTGCAAATTTTTCA

>M6-PGSC0003DMG400030169-(rev)M6LRR-RLK\_4758

CTATTCAGCAGGAATCCATTATATTGCAGGCTTATGCTTTTCATTTTGCAAATTTTTCATTTATCTTCTGAT  
AAAACCTTGATTAGTGACAAGTATTATACCACTAGATGTGGGAATTTTT

>M6-PGSC0003DMG400030169-(rev)M6LRR-RLK\_4819

TATCTTCTGATAAACTTGATTAGTGACAAGTATTATACCACTAGATGTGGGAATTTTTCTTGGCTAGCAT  
CTTTATTGACGAGGCATAGTTGATTTTTTAAAAAATTTATTCTGCTCAA

>M6-PGSC0003DMG400030169-(rev)M6LRR-RLK\_488

AGGATATGATACAATATTAGGATTAGTCGATAGTACATAGCATAACTAGCCCTTGGTTAAGGGTCGTAA  
AGAGAGTTATTTTTAACTATTTATTTGTGTTTCCTTAATTGAAATTTTT

>M6-PGSC0003DMG400030169-(rev)M6LRR-RLK\_4880

TGGCTAGCATCTTTATTGACGAGGCATAGTTGATTTTTTAAAAAATTTATTCTGCTCAATTAACCTGAATT  
GAGCAGAATGAATATAAAAGAGTCATATGACTGATACCGACTAGTTCAG

>M6-PGSC0003DMG400030169-(rev)M6LRR-RLK\_4941

AACCTGAATTGAGCAGAATGAATATAAAAGAGTCATATGACTGATACCGACTAGTTCAGGATTGAGGTT  
TAGATGATTGAATGAACATTTTTGCCACTGCAGGTGCGAACTATAGAGATG

>M6-PGSC0003DMG400030169-(rev)M6LRR-RLK\_5002

TTGAGGTTTAGATGATTGAATGAACATTTTTGCCACTGCAGGTGCGAACTATAGAGATGTCCAAGTCCAC  
GGCGGATGAGATTAAGAATTTGAGTTTAACTGTATTGGAGAAGTTAGGG

>M6-PGSC0003DMG400030169-(rev)M6LRR-RLK\_5063

CAAGTCCACGGCGGATGAGATTAAGAATTTGAGTTTAACTGTATTGGAGAAGTTAGGGTGTGGGTGT  
CTTAAACAGTTCGTGCATTGTCAAATATTATGGTCATCAAATATCTTCAAG

>M6-PGSC0003DMG400030169-(rev)M6LRR-RLK\_5124

TTGGGTGTCTTAAACAGTTCGTGCATTGTCAAATATTATGGTCATCAAATATCTTCAAGATGGGTTCTTC  
ATCAGATGGCAGTTCAGAAAGTCGTACTIONTGCAGTCTGCCATTTTGATG

>M6-PGSC0003DMG400030169-(rev)M6LRR-RLK\_5185

GGGTTCTTCATCAGATGGCAGTTCAGAAAGTCGTACTIONTGCAGTCTGCCATTTTGATGGAGCATATTAA  
AGGGGGTTCATAAAGGTATATGTTTTCTAGAACTCTTCTCGTACCTGA

>M6-PGSC0003DMG400030169-(rev)M6LRR-RLK\_5246

GCATATTAAGGGGGTTCATAAAGGTATATGTTTTCTAGAACTCTTCTCGTACCTGACTTTCCTCTCCT  
TTATTTCCCTTCCCTTTTGAGGTGGGAAGGGTATAAATAACACCTGATT

>M6-PGSC0003DMG400030169-(rev)M6LRR-RLK\_5307

TTCTCTCCTTTATTTCCCTTCCCTTTTGAGGTGGGAAGGGTATAAATAACACCTGATTGCCTTTTGTATTC

AGCTCATTCTTACTTTCTTATCCTTAACTGGCAGAAACATGTAGATAAG

>M6-PGSC0003DMG400030169-(rev)M6LRR-RLK\_5368

CTTTTGTATTTCAGCTCATTCTTACTTTCTTATCCTTAACTGGCAGAAACATGTAGATAAGCTATCTAATGCTG  
GTGAGAAGCGTCTTCCCGTTGAGCTGTCGGTATTTATTGCCCGAGATG

>M6-PGSC0003DMG400030169-(rev)M6LRR-RLK\_5429

ATCTAATGCTGGTGAGAAGCGTCTTCCCGTTGAGCTGTCGGTATTTATTGCCCGAGATGTAGCAAGTGCA  
TTGACAGAGCTGCATTCTAGGCATATCATAACATCGTGATATAAAAAGTGA

>M6-PGSC0003DMG400030169-(rev)M6LRR-RLK\_549

GGTCGTAAAGAGAGTTATTTTTTAACTATTTATTTGTGTTTCCTTTAATTGAAATTTTTATTTTTGTTTTAT  
GGGATTTCTTATCCTATAGTGCATCTTAGTTAGGTTAAAATCATCTTA

>M6-PGSC0003DMG400030169-(rev)M6LRR-RLK\_5490

GCAAGTGCATTGACAGAGCTGCATTCTAGGCATATCATAACATCGTGATATAAAAAGTGAAAACATCCTG  
ATAGATCTGGATAAGAAGAGAGCTGATGGTACCCCTACAGTAAAGCTATGA

>M6-PGSC0003DMG400030169-(rev)M6LRR-RLK\_5551

ACATCCTGATAGATCTGGATAAGAAGAGAGCTGATGGTACCCCTACAGTAAAGCTATGAGACTTCGATA  
TGGCAATCCCCTTCGTTACATACTTACATACTTGCTGCATTGCCCATGCTG

>M6-PGSC0003DMG400030169-(rev)M6LRR-RLK\_5612

CTTCGATATGGCAATCCCCTTCGTTACATACTTACATACTTGCTGCATTGCCCATGCTGGAATTCCTCCACC  
AGATGTTTGTGTTGGTACACCTCGTTGGATGGCTCCTGAGGTCTTTCA

>M6-PGSC0003DMG400030169-(rev)M6LRR-RLK\_5673

ATTCCTCCACCAGATGTTTGTGTTGGTACACCTCGTTGGATGGCTCCTGAGGTCTTTCAGGCGATGAATA  
AGCGCAATATCTATGGGTTGGTAAGTCACCAATCCTTCTGACCAAAAAAA

>M6-PGSC0003DMG400030169-(rev)M6LRR-RLK\_5734

CGATGAATAAGCGCAATATCTATGGGTTGGTAAGTCACCAATCCTTCTGACCAAAAAAAAAGTCACCAAT  
CCTTGAAGTTAGAATCCTAACCATTGAATTCTCTACTAACAAGTACCAAT

>M6-PGSC0003DMG400030169-(rev)M6LRR-RLK\_5795

GTCACCAATCCTTGAAGTTAGAATCCTAACCATTGAATTCTCTACTAACAAGTACCAATTAATGCCCCAC  
CGGGTGCGTTGATCTGCTAAAACAATGTGGTTCTTTCTGATTTGCCAAT

>M6-PGSC0003DMG400030169-(rev)M6LRR-RLK\_5856



AATGCCCCACCGGGTGC GTT GATCTGCTAAAACAATGTGGTTCTTTCTGATTTGCCAATTTGTCACCCTGG  
GGTAAAATCAATTCAACACAATCAAGAACTTACCACCTTCAAAGACAC

>M6-PGSC0003DMG400030169-(rev)M6LRR-RLK\_5917

GTCACCCTGGGGTAAAATCAATTCAACACAATCAAGAACTTACCACCTTCAAAGACACACATTTTCTACT  
AAAAACTGATATATCACTCATTCTCTATTAAAATTCAGCTTTATCTTG

>M6-PGSC0003DMG400030169-(rev)M6LRR-RLK\_5978

ATTTTCTACTAAAACTGATATATCACTCATTCTCTATTAAAATTCAGCTTTATCTTGTCATTATTAECTTC  
AAATGTTTTAAGCTAGAAAAGAAAGCATGTTTTGTCTGCTCTATTGC

>M6-PGSC0003DMG400030169-(rev)M6LRR-RLK\_6039

ATTATTAECTTCAAATGTTTTAAGCTAGAAAAGAAAGCATGTTTTGTCTGCTCTATTGCTGCACTGCTACA  
GATTAAAGAACAATAATATGTACTCATTGACAAATTCAAATTTTCACCT

>M6-PGSC0003DMG400030169-(rev)M6LRR-RLK\_61

GGGAAACTAGGTAGGTAGAGCATCCTACCAGGATGTTTTTTGTGGTCTCTTTAAAGAGGTAAAGACGGG  
GAAAAAGTATTTGCAGGTTTAAATGGTTAGTTTCAGTTTTCGGGTACAAAA

>M6-PGSC0003DMG400030169-(rev)M6LRR-RLK\_610

TTTTGGTTTATGGGATTTCTTATCCTATAGTGCATCTTAGTTAGGTAAAATCATCTTATTATTTTACCTCA  
TGTAATTTGACAGATGAAGAGGTTATATGGTTTGCCTTTATAATGGAT

>M6-PGSC0003DMG400030169-(rev)M6LRR-RLK\_6100

CACTGCTACAGATTAAGAACAATAATATGTACTCATTGACAAATTCAAATTTTCACCTTTCTTTCTTGGA  
AATTTGTTTGTAAATTTCTCATTTTTGATGCTTGAATCTATTTTCGG

>M6-PGSC0003DMG400030169-(rev)M6LRR-RLK\_6161

CTTTCTTGAAATTTGTTTGTAAATTTCTCATTTTTGATGCTTGAATCTATTTTCGGAGATGAGGATTTT  
TGTTTTTGAGAGACTATTTTTATATGACGGCTAATCTCAGAGGATGTA

>M6-PGSC0003DMG400030169-(rev)M6LRR-RLK\_6222

ATGAGGATTTTTGTTTTGAGAGACTATTTTTATATGACGGCTAATCTCAGAGGATGTATCCTGTGGCAA  
AAGGGGTTGGGGAATATTATCTTACTTCTTTGAAGTTGAAAAGGTCTG

>M6-PGSC0003DMG400030169-(rev)M6LRR-RLK\_6283

CTGTGGCAAAGGGGTTGGGGAATATTATCTTACTTCTTTGAAGTTGAAAAGGTCTGATGAGTTGCTT  
CAAGGTAAAAGGTTTTTCTTGCTTTTACTTTGCAGGTTCCCCTTTTCAA

>M6-PGSC0003DMG400030169-(rev)M6LRR-RLK\_6344

GAGTTGCTTCAAGGTAAAAAGTTTTTCTTGCTTTTACTTTGCAGGTTCCCCTTTTCAATAGGTAGATGAA  
AGCTAATGGACCTAAAATAAGTCCACTATGGCCAAAAAATATCAGGAGG

>M6-PGSC0003DMG400030169-(rev)M6LRR-RLK\_6405

GGTAGATGAAAGCTAATGGACCTAAAATAAGTCCACTATGGCCAAAAAATATCAGGAGGGGCGGGGAG  
CGGTTGGATTATTTACCCCTTAACCCAAATTCAATAGATGGGTAAATTGGCT

>M6-PGSC0003DMG400030169-(rev)M6LRR-RLK\_6466

CGGGGAGCGGTTGGATTATTTACCCCTTAACCCAAATTCAATAGATGGGTAAATTGGCTAGAATGGGAT  
ATTGAACAACAAAAAAGTATTTATAGGTGCTAATTTCTGTATTATCTTTT

>M6-PGSC0003DMG400030169-(rev)M6LRR-RLK\_6527

AATGGGATATTGAACAACAAAAAAGTATTTATAGGTGCTAATTTCTGTATTATCTTTTCTTTTGAAGA  
TGAACAAATGAGTTTAATTGCTTTGAGTTGGTGACTTGAAAGATAAAGT

>M6-PGSC0003DMG400030169-(rev)M6LRR-RLK\_6588

CTTTTGAAGATGAACAAATGAGTTTAATTGCTTTGAGTTGGTGACTTGAAAGATAAAGTGAAGTTTTTGTC  
ATGTCTAAACTGCAATTCTAGCTTAATGTATTCAAAGTTTTCCAAACTA

>M6-PGSC0003DMG400030169-(rev)M6LRR-RLK\_6649

GTTTTTGTGCATGTCTAAACTGCAATTCTAGCTTAATGTATTCAAAGTTTTCCAAACTAGGTTTTTACTTGT  
CTTTCTTTGGATGTAGGGTGCTGATATATGGTCGTTTGGGTGCGTCCT

>M6-PGSC0003DMG400030169-(rev)M6LRR-RLK\_671

ATTTTACCTCATGTAATTTGACAGATGAAGAGGTTATATGGTTTTGCCTTTATAATGGATAAATTTATTATT  
TTGAGGTTGGCATTATGCAGCCACCAGAAGACTTTTCCCTTTATCTCCG

>M6-PGSC0003DMG400030169-(rev)M6LRR-RLK\_6710

TTTTTACTTGTCTTTCTTTGGATGTAGGGTGCTGATATATGGTCGTTTGGGTGCGTCCTTCTGGAATTGTT  
AACACTGCAACTTCCTTACTCAGAGTCATCCGAGTTAGATATCCACCAT

>M6-PGSC0003DMG400030169-(rev)M6LRR-RLK\_6771

TGGAATTGTTAACACTGCAACTTCCTTACTCAGAGTCATCCGAGTTAGATATCCACCATTCTCTTCAGGTA  
TTTCTTGATCTCTAACCTTCGATCTATTAATGCTCTAAATACCATGATG

>M6-PGSC0003DMG400030169-(rev)M6LRR-RLK\_6832

TCTTCAGGTATTTCTTGATCTCTAACCTTCGATCTATTAATGCTCTAAATACCATGATGAGTACCTAGTGTG

CTTGAAATATCATTGTGTGATGAGGACTTCAGAAGTTCCAAAGTCCCC

>M6-PGSC0003DMG400030169-(rev)M6LRR-RLK\_6893

TACCTAGTGTGCTTGAAATATCATTGTGTGATGAGGACTTCAGAAGTTCCAAAGTCCCCTGTTGGACAAT

CTTTATTATGGCTGCCTTTGGCTGCTCAAAGGCTAATGGTTCTAGCATCT

>M6-PGSC0003DMG400030169-(rev)M6LRR-RLK\_6954

TTGGACAATCTTTATTATGGCTGCCTTTGGCTGCTCAAAGGCTAATGGTTCTAGCATCTGGTTGTTGGAT

ATTTGGAGCTCTCATGGTTTTCTCCTTATATTGCTTTCGTTTCATAAG

>M6-PGSC0003DMG400030169-(rev)M6LRR-RLK\_7015

GTTGTTGGATATTTTCGGAGCTCTCATGGTTTTCTCCTTATATTGCTTTCGTTTCATAAGAACTGCCTGCAG

AAGTACACTTGTCCCATGCACATTTTTAAAAAATAAGTTTTTGTTTGA

>M6-PGSC0003DMG400030169-(rev)M6LRR-RLK\_7076

CTGCCTGCAGAAGTACACTTGTCCCATGCACATTTTTAAAAAATAAGTTTTTGTTTGAATTGCATTAAAT

GGTAGAAAACAATATAATTCATGTTTAAACACATGCAGGAAGGTAAACGG

>M6-PGSC0003DMG400030169-(rev)M6LRR-RLK\_7137

TGCATTAATGGTAGAAAACAATATAATTCATGTTTAAACACATGCAGGAAGGTAAACGGCCACAATTA

CCGAAAATTAGAGGCAATGGCTGCATCCAAAGCAGAGCTAGAGGATCTAG

>M6-PGSC0003DMG400030169-(rev)M6LRR-RLK\_7198

ACAATTAACCGAAAAATTAGAGGCAATGGCTGCATCCAAAGCAGAGCTAGAGGATCTAGCGAAGTCTT

GTTCTAGCTCGGACCTTGACAAGAAACAATCTGAATCTCGTATCCTGAAACT

>M6-PGSC0003DMG400030169-(rev)M6LRR-RLK\_7259

AAGTCTTGTTCTAGCTCGGACCTTGACAAGAAACAATCTGAATCTCGTATCCTGAAACTTCTTGTTTCTAT

TTATCGTTGGTGTACTGAGAAGGATCCAAACGACCGTCCCACAGCAGAG

>M6-PGSC0003DMG400030169-(rev)M6LRR-RLK\_732

ATTTATTATTTTGAGGTTGGCATTATGCAGCCACCAGAAGACTTTTCCCTTTATCTCCGTCTTGTTGTTCCCT

TGCAACTACAACGAGTTAAAGATTTTGAGACATTAATAAATCTGGCTGG

>M6-PGSC0003DMG400030169-(rev)M6LRR-RLK\_7320

TTGTTTCTATTTATCGTTGGTGTACTGAGAAGGATCCAAACGACCGTCCCACAGCAGAGAACCTCTACAA

CCTCTTACTTACCTGTGCTAATCCCTCCCTTACAACAAAGTCAAGAAG

>M6-PGSC0003DMG400030169-(rev)M6LRR-RLK\_7381

CCTCTACAACCTCTTACTTACCTGTGCTAATTCCCTCCCTTCACAACAAAGTCAAGAAGATTCTTGATCTTC  
CTCAAATTTTGGTAGCCTTAGGATGTTGTAGATTAGCATTAGATTATT

>M6-PGSC0003DMG400030169-(rev)M6LRR-RLK\_7442

TCTTGATCTTCCTCAAATTTTGGTAGCCTTAGGATGTTGTAGATTAGCATTAGATTATTCAGCAGGAGTTA  
CAGACCCAATACTTGGGTCTGTTGACCCCTCATTGAGCAATGTAACAT

>M6-PGSC0003DMG400030169-(rev)M6LRR-RLK\_7503

GCAGGAGTTACAGACCCAATACTTGGGTCTGTTGACCCCTCATTGAGCAATGTAACATGTTCTTAGTCT  
TATTTGAAATGGAAAACCATACGGACGTATTCGCGTCCATAGGACATTTA

>M6-PGSC0003DMG400030169-(rev)M6LRR-RLK\_7564

TCTTAGTCTTATTTGAAATGGAAAACCATACGGACGTATTCGCGTCCATAGGACATTTATGATGGTCTTG  
TTGTGTGTGTGTGTTGTGTATCAGTTTCTTTAGTCCTTTTCCAGCTTGTA

>M6-PGSC0003DMG400030169-(rev)M6LRR-RLK\_7625

ATGGTCTTGTTGTGTGTGTGTGTTGTGTATCAGTTTCTTTAGTCCTTTTCCAGCTTGTAGTTGTATACATTT  
GTACCCATCTAATGTATTTCATCTTCACTAATTCCAATTGATGTTAATT

>M6-PGSC0003DMG400030169-(rev)M6LRR-RLK\_7662

TTTAGTCCTTTTCCAGCTTGTAGTTGTATACATTTGTACCCATCTAATGTATTTCATCTTCACTAATTCCAATT  
GATGTTAATTATGAATGTATTCTGAGTTTCTAAGACTTGGATTGTGC

>M6-PGSC0003DMG400030169-(rev)M6LRR-RLK\_793

TTGTTGTTCCCTTGCAACTACAACGAGTTAAAGATTTTGAGACATTAATACTGGCTGGTTAATCAATTTG  
CAGCATATTGGTTGCTGCTGTCTCCTGGCAATTATACCCTCTCAAGGTC

>M6-PGSC0003DMG400030169-(rev)M6LRR-RLK\_854

AATCAATTTGCAGCATATTGGTTGCTGCTGTCTCCTGGCAATTATACCCTCTCAAGGTCCACATTTTGTTT  
GAGAATTATCTTTTGGTCCCTGAAGACATCATTCTACTTTTGATTAGCA

>M6-PGSC0003DMG400030169-(rev)M6LRR-RLK\_915

CATTTTGTTTGAGAATTATCTTTTGGTCCCTGAAGACATCATTCTACTTTTGATTAGCAGGTGTTATGAAA  
AGCCTATGCACGAGTACATCACATAATTTTAAAGTTATAGACGTCTTAA

>M6-PGSC0003DMG400030169-(rev)M6LRR-RLK\_976

TGTTATGAAAAGCCTATGCACGAGTACATCACATAATTTTAAAGTTATAGACGTCTTAAATCTAACAGGT  
CTCCAATAGGAAAAAAGAAAAGGGAAGTATATGAAGTGACTTTGTTTCGC

>M6-PGSC0003DMG400030209-(rev)M6G-LecRK\_0

TTTTGATATTTTCTTTCAATTATTAACCAAAAAAACACCAATTCTTCTGGCCAAAAAAGTATTTCAAAA  
ATGAAAATTCAACTTAAAAGAAGGCCAAAGTAGAAATGTAAAGTCAAAG

>M6-PGSC0003DMG400030209-(rev)M6G-LecRK\_1054

GGTTATTGTGGGAATTTCTGGGGTTTGTAGTTATAATGAAACTGATCCAACCTGTGGATGTCCTTCGCAGA  
ATTTTGAGCTTACTGATCCGAATGATAGTCGAAGAGGGTGTAGGAGGATA

>M6-PGSC0003DMG400030209-(rev)M6G-LecRK\_1116

TTCGCAGAATTTTGAGCTTACTGATCCGAATGATAGTCGAAGAGGGTGTAGGAGGATAGTTGAACTTAG  
TAATTGTCCTTCCAATGCAACTATGTTGCAATTGGATAATGCTAAGTTCTT

>M6-PGSC0003DMG400030209-(rev)M6G-LecRK\_1178

AACTTAGTAATTGTCCTTCCAATGCAACTATGTTGCAATTGGATAATGCTAAGTTCTTTACTTATCCTCCG  
GAATTATCTGAGCAGATTTTTTCTGCTGGTATTTACGCATGTAGGTTTA

>M6-PGSC0003DMG400030209-(rev)M6G-LecRK\_124

CTCTTCTTCTTCCACCTTCCCCTGTTTTCTCCACCTCCACAACAATGGCACACAACCTCATAAATCCACACC  
AAATACCTCATTCTTCTTACCCATTTCTCCAAAAATGAGACTACTA

>M6-PGSC0003DMG400030209-(rev)M6G-LecRK\_1240

TATCCTCCGGAATTATCTGAGCAGATTTTTTCTGCTGGTATTTACGCATGTAGGTTTAACTGTCTTGTTAA  
TGGTGCTTGTGTTGCTTCGACTTCTTTAGCAGATGGCACGGGGATGTGT

>M6-PGSC0003DMG400030209-(rev)M6G-LecRK\_1302

TCTTGTTAATGGTGCTTGTGTTGCTTCGACTTCTTTAGCAGATGGCACGGGGATGTGTTATATTAAACAG  
CCAAATTTTGTAGTGGCTATCAGGCGCCGACCCTTCTAGCACTTCATT

>M6-PGSC0003DMG400030209-(rev)M6G-LecRK\_1364

TTAAACAGCCAAATTTTGTAGTGGCTATCAGGCGCCGACCCTTCTAGCACTTCATTTCTTAAGATATGT  
GGGCCTGCAATGCCTAATCCTACTGCAGTTTCAGAACTGTTTCAGGAGA

>M6-PGSC0003DMG400030209-(rev)M6G-LecRK\_1426

AAGATATGTGGGCCTGCAATGCCTAATCCTACTGCAGTTTCAGAACTGTTTCAGGAGAAGAATGGAGGG  
AGGGTTCCTGGCTGGGTTGTGCGAGTTGTGGTTGTGGCTAGTTTCTTGGGT

>M6-PGSC0003DMG400030209-(rev)M6G-LecRK\_1488

TGGAGGGAGGGTTCCTGGCTGGGTTGTGCGAGTTGTGGTTGTGGCTAGTTTCTTGGGTTTGATCCTGTT

GGAGGGTGGTTTGTGGTGTGGTGCTTTAGGAATAGTTCTAAATTTGCATC

>M6-PGSC0003DMG400030209-(rev)M6G-LecRK\_1550

TCCTGTTGGAGGGTGGTTTGTGGTGTGGTGCTTTAGGAATAGTTCTAAATTTGCATCACTGTCATCTCA

ATATGCACTTCTTGAATATGCCTCTGGTGCCCTGTGCAGTTCACATTCA

>M6-PGSC0003DMG400030209-(rev)M6G-LecRK\_1612

TCATCTCAATATGCACTTCTTGAATATGCCTCTGGTGCCCTGTGCAGTTCACATTCAATCAGCTTCAGCG

GGCAACCAAGGGGTTTAAGGAGAAGCTTGGTGCAAGGAGGATTTGGGGTT

>M6-PGSC0003DMG400030209-(rev)M6G-LecRK\_1674

GCTTCAGCGGGCAACCAAGGGGTTTAAGGAGAAGCTTGGTGCAAGGAGGATTTGGGGTTGTTTATCGGG

CAGTTCTGGCTAATAGGTCTGTTGCTGCAGTGAAGCAGCTTGAAGGAATTGA

>M6-PGSC0003DMG400030209-(rev)M6G-LecRK\_1736

ATCGGGCAGTTCTGGCTAATAGGTCTGTTGCTGCAGTGAAGCAGCTTGAAGGAATTGAGCAAGGAGAG

AAGCAGTTCAGAATGGAGGTTGCTACTATTAGTAGCACACACCATTTGAATT

>M6-PGSC0003DMG400030209-(rev)M6G-LecRK\_1798

GGAGAGAAGCAGTTCAGAATGGAGGTTGCTACTATTAGTAGCACACACCATTTGAATTTGGTGAGATTA

ATTGGGTTTTGTTCTGAAGGGCGCCACAGGCTACTGGTTTATGAATTCATG

>M6-PGSC0003DMG400030209-(rev)M6G-LecRK\_186

AATCCACACCAAATACCTCATTCTTCTCACCCATTTCTCCAAAATGAGACTACTATTCATACTTTTCAC

CATTCTTATCATCACCATAGAAGCTGCAGATATTCTTCTAATACTAC

>M6-PGSC0003DMG400030209-(rev)M6G-LecRK\_1860

GAGATTAATTGGGTTTTGTTCTGAAGGGCGCCACAGGCTACTGGTTTATGAATTCATGAAAAATGGTTCT

CTTGATAAGTTCCTCTTTTCAGAAGATCATTTCGTCGGGAAGGCTTTTGAA

>M6-PGSC0003DMG400030209-(rev)M6G-LecRK\_1922

ATGGTTCTCTTGATAAGTTCCTCTTTTCAGAAGATCATTTCGTCGGGAAGGCTTTTGAAGTGGGAGCAACG

GTATAATATTGCTTTGGGGACAGCAAGAGGTATCACATACCTTCACGAGG

>M6-PGSC0003DMG400030209-(rev)M6G-LecRK\_1984

GAGCAACGGTATAATATTGCTTTGGGGACAGCAAGAGGTATCACATACCTTCACGAGGAATGCCGAGAT

TGTATAGTTCACTGTGACATAAAGCCTGAGAACATACTGTTGGATGAGAAC

>M6-PGSC0003DMG400030209-(rev)M6G-LecRK\_2046

CCGAGATTGTATAGTTCCTACTGTGACATAAAGCCTGAGAACATACTGTTGGATGAGAACTACATTGCCAA  
AGTATCAGATTTTGGCCTCGCCAAGCTCATTAACCCAAAGGACCACAGACA

>M6-PGSC0003DMG400030209-(rev)M6G-LecRK\_2108

TTGCCAAAGTATCAGATTTTGGCCTCGCCAAGCTCATTAACCCAAAGGACCACAGACATAGAACCTTGAC  
AAGTCATGTGAGGGGTACTAGAGGATATTTGGCTCCTGAGTGGCTGGCCA

>M6-PGSC0003DMG400030209-(rev)M6G-LecRK\_2170

ACCTTGACAAGTCATGTGAGGGGTACTAGAGGATATTTGGCTCCTGAGTGGCTGGCCAATCTTCCTATA  
ACTTCCAAATCTGATGTGTACAGTTATGGTATGGTATTACTGGAAATAGTG

>M6-PGSC0003DMG400030209-(rev)M6G-LecRK\_2232

TCCTATAACTTCCAAATCTGATGTGTACAGTTATGGTATGGTATTACTGGAAATAGTGAGTGGAAAAAG  
GAACTTCGAAGTCTCTGAAGAGACTAACCAGAAGAAGTGCTCTTTGTGGGC

>M6-PGSC0003DMG400030209-(rev)M6G-LecRK\_2294

GAAAAAGGAACTTCGAAGTCTCTGAAGAGACTAACCAGAAGAAGTGCTCTTTGTGGGCATATGAAGAA  
TTTGAAAGGGGTAATATGGAGGCCATTATGGACAAAAAGCTTTCCAATCAGG

>M6-PGSC0003DMG400030209-(rev)M6G-LecRK\_2356

GAAGAATTTGAAAGGGGTAATATGGAGGCCATTATGGACAAAAAGCTTTCCAATCAGGAGATGGATAT  
GGAACAAGTTATACGAGCAATTCAGGTGAGCTTTTGGTGCATCCAAGAGCAA

>M6-PGSC0003DMG400030209-(rev)M6G-LecRK\_2418

GGATATGGAACAAGTTATACGAGCAATTCAGGTGAGCTTTTGGTGCATCCAAGAGCAACCATCTCAAAG  
GCCAACGATGGGCAAGGTGGTTCAGATGTTAGAAGGCTTTTTTGAGATTGA

>M6-PGSC0003DMG400030209-(rev)M6G-LecRK\_248

TACTTTTACCATTCTTATCATCACCATAGAAGCTGCAGATATTCTTCTAATACTACCCTTTCAGCTTCCA  
ACCCAAACTCCAGATGGTCATCTCCAAACAACACCTTCTCTTTTCT

>M6-PGSC0003DMG400030209-(rev)M6G-LecRK\_2480

CTCAAAGGCCAACGATGGGCAAGGTGGTTCAGATGTTAGAAGGCTTTTTTGAGATTGATCGGCCACCAG  
CACCTAAAGCTACTGAAGGGTCTTTGCTGGAACCAGCTTAACCGCCAGTA

>M6-PGSC0003DMG400030209-(rev)M6G-LecRK\_2542

CCACCAGCACCTAAAGCTACTGAAGGGTCTTTGCTGGAACCAGCTTAACCGCCAGTAGCACAAGCGGT  
CTCTCCACCTTTGCAGTCTCGGCCCCAGCTCCCTCTTCATCATCATCATTC

>M6-PGSC0003DMG400030209-(rev)M6G-LecRK\_2604

AAGCGGTCTCTCCACCTTTGCAGTCTCGGCCCCAGCTCCCTCTTCATCATCATCATTCCAAACTGCAGGAT  
TCCTGTCTTCATCTTCTGCAATGAATGTCGAGAGGCAAATCATCATCAC

>M6-PGSC0003DMG400030209-(rev)M6G-LecRK\_2666

CTGCAGGATTCTGTCTTCATCTTCTGCAATGAATGTCGAGAGGCAAATCATCATCACTTCTACACTCCGA  
AATTAAGTGAGTCTAAACCATACTTTAGATTCCCTACAACAACACTGAT

>M6-PGSC0003DMG400030209-(rev)M6G-LecRK\_2728

ACACTCCGAAATTAAGTGAGTCTAAACCATACTTTAGATTCCCTACAACAACACTGATGGGAGTTTGGAG  
TTTTAGTATCTCAAAGATCATAGTTTGACTTGTGTCTTACAATTCATATT

>M6-PGSC0003DMG400030209-(rev)M6G-LecRK\_2790

GTTTGGAGTTTTAGTATCTCAAAGATCATAGTTTGACTTGTGTCTTACAATTCATATTGTATAATAGATAG  
GTTTGCATATATATATATATATATATATATATATATTGATATGTTTCATA

>M6-PGSC0003DMG400030209-(rev)M6G-LecRK\_2976

TCCTGTCTGTCTGTGGTGCTTGTCCAACCTCTTTTTATACATGAAGCTAGGGGTATGCATCAGTTGGTTC  
GTTTATCGTTTTTCGGGGTCAGGGATGATTTGATTAGGGGGTGGTTGA

>M6-PGSC0003DMG400030209-(rev)M6G-LecRK\_310

TCAGCTCCAACCCAAACTCCAGATGGTCATCTCAAACAACACCTTCTCTCTTTCCTCCTACAGCTCGAC  
CCCACAAACCAGAGTTCCTATTTTGCTGCTATTTCTTACAACAATATA

>M6-PGSC0003DMG400030209-(rev)M6G-LecRK\_372

ACAGCTCGACCCCAACAACCAGAGTTCCTATTTTGCTGCTATTTCTTACAACAATATACCCATATGGAAAG  
CCGGCGCCGATACCGTTAACGGTGGAGCAGTTGATATCTCTGGTGAAC

>M6-PGSC0003DMG400030209-(rev)M6G-LecRK\_434

TATGGAAAGCCGGCGCCGATACCGTTAACGGTGGAGCAGTTGATATCTCTGGTGAACACTACGGTTCCTCT  
CTAACGGTGACCTCAGCTCATAAGTGGATCATCTGGTTCTGTTGTTTGA

>M6-PGSC0003DMG400030209-(rev)M6G-LecRK\_496

TTCCTCTAACGGTGACCTCAGCTCATAAGTGGATCATCTGGTTCTGTTGTTTGGAGTTCAGGAACTGT  
AAATCGTGGTGTTCCTCAGCTTCTTCTGATGATAATGGAAATTTTCGT

>M6-PGSC0003DMG400030209-(rev)M6G-LecRK\_558

AGGAACTGTAAATCGTGGTGTTCCTCAGCTTCTTCTGATGATAATGGAAATTTTCGTCTCAAAAACGGT



ACGGTATCGAACATTTGGTCTACTTTTGATAACCCAAGTACTACTATTGT

>M6-PGSC0003DMG400030209-(rev)M6G-LecRK\_62

ATTTCAAAAATGAAAATTCAACTTAAAAGAAGGCCAAAGTAGAAATGTAAAGTCAAAGTGGACTCTTCT  
TCTTCCACCTTCCCCTGTTTTCTCCACCTCCACAACAATGGCACACAAGT

>M6-PGSC0003DMG400030209-(rev)M6G-LecRK\_620

AAAACGGTACGGTATCGAACATTTGGTCTACTTTTGATAACCCAAGTACTACTATTGTTCTGGACAGAA  
TTTACTAATAATCATGTTTTGAGATCTGGGTTGTATTCTTTTAGGCTTA

>M6-PGSC0003DMG400030209-(rev)M6G-LecRK\_682

GGACAGAATTTCACTAATAATCATGTTTTGAGATCTGGGTTGTATTCTTTTAGGCTTATGAATAATGGAA  
ACTTGTCACCTTTGTGGAACGCTTCTATAGTGTATTATAATTCTGGGTTG

>M6-PGSC0003DMG400030209-(rev)M6G-LecRK\_744

TAATGGAAACTTGTCACTTTTGTGGAACGCTTCTATAGTGTATTATAATTCTGGGTTGAATTCTTCTGCAA  
ATGTTAACTTGTCTTCTCTAGTTTGGGAATGCAGCCTATTGGGATTCT

>M6-PGSC0003DMG400030209-(rev)M6G-LecRK\_806

CTTCTGCAAATGTTAACTTGTCTTCTCTAGTTTGGGAATGCAGCCTATTGGGATTCTTTCACCTTCTGATC  
CTAGTCTTTCGAACCTTTGAATGTTGTTTATAGTAGTGATTATGCTG

>M6-PGSC0003DMG400030209-(rev)M6G-LecRK\_868

CTTCTGATCCTAGTCTTTCGAACCTTTGAATGTTGTTTATAGTAGTGATTATGCTGATGAAGGGAACAT  
TCTAAGGTTTTTCAAGCTGGATGATGATGGAAATCTTAGGATTTATAGT

>M6-PGSC0003DMG400030209-(rev)M6G-LecRK\_930

AGGGAACATTCTAAGGTTTTTCAAGCTGGATGATGATGGAAATCTTAGGATTTATAGTTCTACACAGGGT  
AGTGGGACTCAAATGTGAGATGGGCTGCTTTAACTGATCAGTGTGAGGT

>M6-PGSC0003DMG400030209-(rev)M6G-LecRK\_992

CACAGGGTAGTGGGACTCAAATGTGAGATGGGCTGCTTTAACTGATCAGTGTGAGGTTTTTGGTTATT  
GTGGGAATTTTCGGGGTTTGTAGTTATAATGAAACTGATCCAAGTGTGGAT

>M6-PGSC0003DMG400030225M6G-LecRK\_0

ATGTCTGGTAAAGCTGGTCATAATGCACCTGTATTTGAGAAGTACCCGCAGAAAGCAAAGAAGCTTTATG  
TGTTTCATGTCTTGCAAAGGGTGACAGAAATACCCAGAAAAGTCTGGAGGT

>M6-PGSC0003DMG400030225M6G-LecRK\_1105

GGCAAAGTTTTGACAATCCAGGTGACACAGCTTTACCTGGAATGAAGGTTGGGATTAATCTGAAAATA  
GTTTTTCATCGTTCCCTTTTCGTCATGGAAGAGCACAAATAATCCTTCCAGAG

>M6-PGSC0003DMG400030225M6G-LecRK\_1170

ACTAGTTTTTCATCGTTCCCTTTTCGTCATGGAAGAGCACAAATAATCCTTCCAGAGGTGAGTTAACTGGA  
CATTGATACTGGTGGATTCTGCAAACATTATTATGAATGGTTCCATT

>M6-PGSC0003DMG400030225M6G-LecRK\_130

GGCAAAGATGGAACAATATGTAGTTTGTACTAGTGCTGCATTCTTGCCACTACTTATTCTGACTATTTG  
GCCTCTTCTGGCAATACCTCAAGTGTCTTCTGGTTCTGTTTCTCCGAA

>M6-PGSC0003DMG400030225M6G-LecRK\_1347

GACACATCTTGAATGGTTATAACTATACATACTTATCTGATCCTAATGAAATATTATTCATGTATGAACT  
TACAGATAGCTCGATCATTGCAAGGGTAGTGATGCAACTAAATAGATAA

>M6-PGSC0003DMG400030225M6G-LecRK\_195

TATTTGGCCTCTTCTGGCAATACCTCAAGTGTCTTCTGGTTCTGTTTCTCCGAATGAGCTTCTCTCATTCCG  
CTAAGTCTCAGGTAAAGATTTTAACTTTGATAGAGTGCTACAAGTCTG

>M6-PGSC0003DMG400030225M6G-LecRK\_260

TCATTCGCTAAGTCTCAGGTAAAGATTTTAACTTTGATAGAGTGCTACAAGTCTGTATTATGACGATTCAT  
CATAAATTGAAGCATGGAAGTAGCAATGTGTTCTTGGTGAACATAATCAT

>M6-PGSC0003DMG400030225M6G-LecRK\_455

GAAACAATAACCCAAGACAAGTACACCACAGAGCTTCCCTCCATTGTCTCGTTTAAAGGTTAATCCTAGTTTT  
GTTAGCGCCAGGGAGGCTATGCTACCTGGTATAGTAGAAAGGTGAGCGA

>M6-PGSC0003DMG400030225M6G-LecRK\_520

AGTTTTGTTAGCGCCAGGGAGGCTATGCTACCTGGTATAGTAGAAAGGTGAGCGATCCTAATCTCCTTA  
CTGGTGCTCTTACCTGATGCCTATGACAACCTTCGCTGATCAAAGAGACAAC

>M6-PGSC0003DMG400030225M6G-LecRK\_585

CTTACTGGTGCTCTTACCTGATGCCTATGACAACCTTCGCTGATCAAAGAGACAACACTATGGGCAAACCTGAG  
CCTGCCACTTACAACAATGCTCCGTTGATCGGTGTGTTGGCAAGACTTCA

>M6-PGSC0003DMG400030225M6G-LecRK\_715

AACGGTTACAATCAGCTCCTCCAGGTAAATTTTAGTGAATTAACATCTTTATATGAGCATTCCGAGGATT  
CATCATAAAATGACTAGTGTTAGCCACCTACTACAACCTTGCTTGGGAT

>M6-PGSC0003DMG400030225M6G-LecRK\_780

AGGATTCATCATAAAATGACTAGTGTTAGCCACCTACTACAACTTGCTTGGGATTGAGACGTAGTAGTT  
GTTGTAGTACTAAAATTTTCGTATAACTCATTTAGTCTCAAGTTCTAACC

>M6-PGSC0003DMG400030225M6G-LecRK\_845

TAGTTGTTGTAGTACTAAAATTTTCGTATAACTCATTTAGTCTCAAGTTCTAACCTGTAATAGAGAAAACC  
CACTCAATGACACATCCAGTGCCTAAATTCTACCAGACAAGGAATTCT

>M6-PGSC0003DMG400030225M6G-LecRK\_910

AAAACCCACTCAATGACACATCCAGTGCCTAAATTCTACCAGACAAGGAATTCTTACTCCTCTAAATGG  
TTCTGGCAGAGTAATTTGGTCTCCGATTCCACTAGACATGGGCAAATC

>M6-PGSC0003DMG400030239-(rev)M6LRR-RLP\_0

TTGCAAATTGCTCTAGCATTCAACAGGTAAATTCAATCTCTTAATTCCTAGCAAAAATAGACAACCATCTT  
TAATTTTTCCATTCTTGTCATTTTTTGATTCTTTGTTTTGTTTTCA

>M6-PGSC0003DMG400030239-(rev)M6LRR-RLP\_1054

AGTAAGATCATTGTGACAACACGTAAGGAGAGTGTTGCCTTGATGATGGGTGGTGGGGCAATGAATGT  
GGGGATTCTGTCTAATGAAGTCTCTGGGCTTTATTCAAACGACATTCATTA

>M6-PGSC0003DMG400030239-(rev)M6LRR-RLP\_1116

GAATGTGGGGATTCTGTCTAATGAAGTCTCTGGGCTTTATTCAAACGACATTCATTAGAAAACAGGGAT  
CCTGAGGAACATCTAGAACTTGAAGAGATAGGAAAGAAAATTGCAGAGAA

>M6-PGSC0003DMG400030239-(rev)M6LRR-RLP\_1178

ACAGGGATCCTGAGGAACATCTAGAACTTGAAGAGATAGGAAAGAAAATTGCAGAGAAATGCAAAGG  
GTTGCCTTTAGCTATAAAGACCCTTGCTGGGATGTTACGCTCAAATCAACGA

>M6-PGSC0003DMG400030239-(rev)M6LRR-RLP\_124

TCAGAAATGGATATTGGCTTGGCAGTTGGTGGTGCATTTCTCTCTTCAGTCCTGCAAGTCCTATTCGATA  
GGCTTGCTCCTCAGGGAGAGCTGCTGAATATGTTTCGAAGGGACAAGCAC

>M6-PGSC0003DMG400030239-(rev)M6LRR-RLP\_1426

ATATTTCCAAAAGATTATCAATTTTACAAAGAACAAATCATTCAACTGTGGATCGCTAATGGTCTAGTACA  
GAAGTTGCAAATGATGAAACGGTTGAAGAACTAGGCAACCAGTACATT

>M6-PGSC0003DMG400030239-(rev)M6LRR-RLP\_1488

TCTAGTACAGAAGTTGCAAATGATGAAACGGTTGAAGAACTAGGCAACCAGTACATTCTTGAGTTGAG

ATCAAGATCATTGTTAGACAGGGTCCCTGATTCTCTTAAATGGAAGGGCAT

>M6-PGSC0003DMG400030239-(rev)M6LRR-RLP\_1550

AGTTGAGATCAAGATCATTGTTAGACAGGGTCCCTGATTCTCTTAAATGGAAGGGCATGGCATTCTTAA  
GAGAGGACTTAGACAAATATTTTCAAATGGATGGTGAGAAATTCTTTATGC

>M6-PGSC0003DMG400030239-(rev)M6LRR-RLP\_1612

TTCTTAAGAGAGGACTTAGACAAATATTTTCAAATGGATGGTGAGAAATTCTTTATGCATGACCTTGTC  
ATGATCTTGCCCAAATTGCATCTTCAAACACTGTACCAGGTTGGAAGAC

>M6-PGSC0003DMG400030239-(rev)M6LRR-RLP\_1736

AAGGATCTCATATGTTGGAACGAACCTCGACACTTGTCTGATTCCATGGGTGATGGTAACTTTCTGTC  
TTCAGCAGGAGATGGTGATTTTGGTAAATTGAAAACCCTCTACAAATTGG

>M6-PGSC0003DMG400030239-(rev)M6LRR-RLP\_1798

CTGTCACTTTCAGCAGGAGATGGTGATTTTGGTAAATTGAAAACCCTCTACAAATTGGAGCAATTAAG  
ACATTGCTCCGATAAATATCCAGCTCCATTTGTTTTAGTTAATCTAAGC

>M6-PGSC0003DMG400030239-(rev)M6LRR-RLP\_186

ATTCGATAGGCTTGCTCCTCAGGAGAGCTGCTGAATATGTTTCGAAGGGACAAGCACGATAATCGGAT  
TTTAAAGAAGCTGAGAATGACTTTGCTCGGTCTTCAGGCTGTGCTAAGTGA

>M6-PGSC0003DMG400030239-(rev)M6LRR-RLP\_1860

ATTAAGGACATTGCTCCGATAAATATCCAGCTCCATTTGTTTTAGTTAATCTAAGCAAGAGGGTGCTG  
CATAACATACTCCAAGGCTAACATTTTAAAGGGCATTGTCATTTTCTCG

>M6-PGSC0003DMG400030239-(rev)M6LRR-RLP\_1922

GGGTGCTGCATAACATACTTCCAAGGCTAACATTTTAAAGGGCATTGTCATTTTCTCGTTATGACATCAAG  
GAGTTACCAATTGTCTTATTTATCAAATTAAACTCCTAAGATTTTTGG

>M6-PGSC0003DMG400030239-(rev)M6LRR-RLP\_2108

TTATCGTGTCGTCTTGTGATTATCTTGAGGAGTTACCGCTGCAGATGGGAAATTTGATCAACTTGCGTTA  
CCTTGACATTAGGTGTTGTTCTCGGTTGAAGATGCCTCCACATCCTAGCA

>M6-PGSC0003DMG400030239-(rev)M6LRR-RLP\_2170

TTGCGTTACCTTGACATTAGGTGTTGTTCTCGGTTGAAGATGCCTCCACATCCTAGCAAGTTGAAAAGCC  
TCCAGGTGCTATTAGGAGTTAAATGTCTTCAAAGTGGTTTGAACTCAAG

>M6-PGSC0003DMG400030239-(rev)M6LRR-RLP\_2232

GAAAAGCCTCCAGGTGCTATTAGGAGTTAAATGTCTTCAAAGTGGTTTGAAACTCAAGGATTTGGGTGA  
ACTACACAACCTTGATGGATCTCTATCAATTGTAGAGTTGCAAATGTGGT

>M6-PGSC0003DMG400030239-(rev)M6LRR-RLP\_2294

TGGGTGAACTACACAACCTTGATGGATCTCTATCAATTGTAGAGTTGCAAATGTGGTTGATAGAAGGG  
AAGCTTTGAAGGCAAACATGAGGGAAAAGGAACATATTGAGAGGTTATCAT

>M6-PGSC0003DMG400030239-(rev)M6LRR-RLP\_2356

AGAAGGGAAGCTTTGAAGGCAAACATGAGGGAAAAGGAACATATTGAGAGGTTATCATTGTCGTGGG  
GTACAAGTATTGCTGACAATTCACAACTGAAAGAGACATACTCGATGAACTA

>M6-PGSC0003DMG400030239-(rev)M6LRR-RLP\_2418

GTGGGGTACAAGTATTGCTGACAATTCACAACTGAAAGAGACATACTCGATGAACTACAACCACACAC  
AAACATAAAAGAACTGGAAATCTCTGGATATAGAGGGACAAAATTTCCGAA

>M6-PGSC0003DMG400030239-(rev)M6LRR-RLP\_248

ATCGGATTTTAAAGAAGCTGAGAATGACTTTGCTCGGTCTTCAGGCTGTGCTAAGTGATGCACAGAATA  
AGCAGGCGTCAAATCCATATGTGAGCCAGTGGCTTAATGAGCTACAAGATG

>M6-PGSC0003DMG400030239-(rev)M6LRR-RLP\_2480

CACACACAAACATAAAAGAACTGGAAATCTCTGGATATAGAGGGACAAAATTTCCGAACTGGTTGGCTG  
ATCATTCTTTCTTAAGCTAGTGAAGTTGTCTCTTAGCAACTGCAACTACT

>M6-PGSC0003DMG400030239-(rev)M6LRR-RLP\_2542

TTGGCTGATCATTCTTTCTTAAGCTAGTGAAGTTGTCTCTTAGCAACTGCAACTACTGTGATTCCTAGCC  
AGCACTAGGACAACCTTCTTCTTTGAAATCCCTCACCATTGGGTATATG

>M6-PGSC0003DMG400030239-(rev)M6LRR-RLP\_2666

GAATAACAGAGGTGACCGAAGAATTCTATGGTAGCCATCTTCAATAAAGCCATTTAACTCTCTGGAATG  
GCTTGCATTTAATCAGATGACTAGGTGGAAGGAATGGCACGTACTAGGAA

>M6-PGSC0003DMG400030239-(rev)M6LRR-RLP\_2728

CTGGAATGGCTTGCAATTAATCAGATGACTAGGTGGAAGGAATGGCACGTACTAGGAAGTGGAGAGTT  
CCCTGCACTTCAGAACCTTTTAATTGAAGACTGTCCTGAGTTGATGGGGGAAG

>M6-PGSC0003DMG400030239-(rev)M6LRR-RLP\_2790

AGAGTTCCTGCACTTCAGAACCTTTTAATTGAAGACTGTCCTGAGTTGATGGGGAAAGTTGCCTGGAAAT  
CTTTGTTCTTTAACAGGATTGAGAATTTCAAATTGTCCGAAATTCAATTT

>M6-PGSC0003DMG400030239-(rev)M6LRR-RLP\_2852

CTGGAAATCTTTGTTCTTTAACAGGATTGAGAATTTCAAATTGTCCGAAATTCAATTTGGAGACACCAATT  
GAACTTTCAAGTCTAAAAGGGTTTGAAGTTGTTGGTTCTTTAAAGGTTG

>M6-PGSC0003DMG400030239-(rev)M6LRR-RLP\_2914

ACACCAATTGAACTTTCAAGTCTAAAAGGGTTTGAAGTTGTTGGTTCTTTAAAGGTTGGAGTTCTTTTTGA  
TCATGCTGAGCTATTTGCATCCCAACTTCAAGGAATGATGCAGTTAGAG

>M6-PGSC0003DMG400030239-(rev)M6LRR-RLP\_2976

TCTTTTTGATCATGCTGAGCTATTTGCATCCCAACTTCAAGGAATGATGCAGTTAGAGTTCTTAATTATCA  
GAAGGTGTGACTCTTACCTCCTTGCATATTAGCAGTCTGCCGAAAAC

>M6-PGSC0003DMG400030239-(rev)M6LRR-RLP\_3038

TAATTATCAGAAGGTGTGACTCTTACCTCCTTGCATATTAGCAGTCTGCCGAAAACCTTGAAGGAAAT  
AGTGATATCTGATTGTGATCAATTGAAATTGGAGGCGTCAGCTAGTGAGA

>M6-PGSC0003DMG400030239-(rev)M6LRR-RLP\_310

CAGAATAAGCAGGCGTCAAATCCATATGTGAGCCAGTGGCTTAATGAGCTACAAGATGCTGTGGACAGT  
GCTGAGAACTTAATTGAAGAAGTCAATTATGAAGTTTTGAGACTAAAGGTG

>M6-PGSC0003DMG400030239-(rev)M6LRR-RLP\_3100

AAGGAAATAGTGATATCTGATTGTGATCAATTGAAATTGGAGGCGTCAGCTAGTGAGATGTTTCTCGAG  
AGACTGGACCTAAGTGGATGTAATTCTATAAATGAGATATCACCTGAGCTG

>M6-PGSC0003DMG400030239-(rev)M6LRR-RLP\_3162

TCTCGAGAGACTGGACCTAAGTGGATGTAATTCTATAAATGAGATATCACCTGAGCTGGTCCCCAGAGC  
ACACTATTTGAGTGTAATAGTTGCCACAGCCTTACTAGGCTTTTGATTCC

>M6-PGSC0003DMG400030239-(rev)M6LRR-RLP\_3286

GGGACTGAAGATCTCTATATTTCTGGATGTGAAAATCTTGAAATACTTTTGGTGGCATCCAGGACTCCAA  
CGTTGTTGCGAACTATGAAAATTCATATCTGCGAGAAGCTGAAGTCGCTG

>M6-PGSC0003DMG400030239-(rev)M6LRR-RLP\_3348

GACTCCAACGTTGTTGCGAACTATGAAAATTCATATCTGCGAGAAGCTGAAGTCGCTGCCAGAACATAT  
GCAGGAACTTCTCCATCTCTTAATCATCTCTACCTGTATGATTGTCCAGA

>M6-PGSC0003DMG400030239-(rev)M6LRR-RLP\_3410

AACATATGCAGGAACTTCTCCATCTCTTAATCATCTCTACCTGTATGATTGTCCAGAAATAAAGTCCTTC

CCTGAAGGAGGGTTGCCCTTCAGTCTAGTAGTCCTTGAGATCTGGTATT

>M6-PGSC0003DMG400030239-(rev)M6LRR-RLP\_3534

TAAACTACAGAATGATCGAAAGGAGTGGCATTACAGAGACTCCCTTGTCTCAGAGAACTTCAAATCTAT  
CCCGTTCTACTGACGAAGAGATTCAATGGGAGATGCCTTGCTCAATTCA

>M6-PGSC0003DMG400030239-(rev)M6LRR-RLP\_434

GTCAGTGTCAAATCTAGGAGAAACAAGCAGGCCGCAGGTAAGTCACCTCAGCTTGTCTTGAGTGATG  
ATTTTTTTCTTAACATAAAGGATAAATTGGAAGAAAATATTGAAACACTGG

>M6-PGSC0003DMG400030239-(rev)M6LRR-RLP\_496

AGTGATGATTTTTTTCTTAACATAAAGGATAAATTGGAAGAAAATATTGAAACACTGGAGGAGTTGCAA  
AAACAGATTGGTTGTCTTGACCTGAAATCGTGTCTTGATTCGGGTAAACAA

>M6-PGSC0003DMG400030239-(rev)M6LRR-RLP\_558

GTTGCAAAAACAGATTGGTTGTCTTGACCTGAAATCGTGTCTTGATTCGGGTAAACAAGAACTAGAAG  
ACCTCAACTTCTGTGGTTGATGAATCTGATATCTTTGGTAGGCAGAATGA

>M6-PGSC0003DMG400030239-(rev)M6LRR-RLP\_62

AACCATCTTAATTTTTTCCATTCTGTCCATTTTTTGATTCTTTGTTTTGTTTTTCAGATTCAGAAATGGA  
TATTGGCTTGGCAGTTGGTGGTGCATTTCTCTTTCAGTCCTGCAAG

>M6-PGSC0003DMG400030239-(rev)M6LRR-RLP\_620

CTAGAAGACCTTCAACTTCTGTGGTTGATGAATCTGATATCTTTGGTAGGCAGAATGAAATAGAGGAATT  
GGTGGGCCGTTTATTATCTGTTGATGCAAATGGTAAAAGTTTGACTGTAA

>M6-PGSC0003DMG400030239-(rev)M6LRR-RLP\_806

AGGTGAATGACCATTTTGATTTGAAAGCTTGGTTTTGTGTTTCTGAACAATATGATGCTTTCAGAATAGC  
AAAAGGATTGCTTCAAGAGATTGGCTTACAGGTTGATGATAATATAAATC

>M6-PGSC0003DMG400030239-(rev)M6LRR-RLP\_868

AGAATAGCAAAAGGATTGCTTCAAGAGATTGGCTTACAGGTTGATGATAATATAAATCAGATTCAGATC  
AAATTGAAGGAGAGCTTAAAGGGTAAAAGTTTCTTATTGTTCTAGATGAT

>M6-PGSC0003DMG400030239-(rev)M6LRR-RLP\_930

TCAGATCAAATTGAAGGAGAGCTTAAAGGGTAAAAGTTTCTTATTGTTCTAGATGATGTTTGGAAATGA  
CCACTATAATGAGTGGGATGACTTGAGAAATCTTTTTGTGCAAGGAGATCT

>M6-PGSC0003DMG400030239-(rev)M6LRR-RLP\_992

GGAATGACCACTATAATGAGTGGGATGACTTGAGAAATCTTTTTGTGCAAGGAGATCTCGGAAGTAAGA  
TCATTGTGACAACACGTAAGGAGAGTGTGCCTTGATGATGGGTGGTGGGG

>M6-PGSC0003DMG400030240-(rev)M6LRR-RLP\_1054

CATTGGGAGTTGCCTTGCTCAATTCAAAGACTTATCATAGACAATATGAAAACATTAAGCAGCCAACTTC  
TCAAAAGCCTCACCTCTCTTCAATATCTATTCACCTATACTTTACCTCAA

>M6-PGSC0003DMG400030240-(rev)M6LRR-RLP\_1178

AGTCACTGATCAAAGAAGGGCTTCCCTCGTCTCTTTCTTCACTAACATTAAACAACCATCATGAGCTCCAT  
TCACTGTCAACTGAAGGTCTTCGGGGCCTCACTTCTCTTAGGTGTCTAA

>M6-PGSC0003DMG400030240-(rev)M6LRR-RLP\_124

AGCCCATCTTCAATAAAGCCATTTAACTCTCTTGAATGGCTTGAATTTAATCGGATGAACGGGTGGAAGA  
AATGGCACGTACTAGGAAGTGGAGAATTCCTGCACTTCAGAACCTTTCA

>M6-PGSC0003DMG400030240-(rev)M6LRR-RLP\_1240

GAGCTCCATTCCTGTCAACTGAAGGTCTTCGGGGCCTCACTTCTCTTAGGTGTCTAAAGATTGACTCCT  
GCAGTCAACTCCAATCTCTTCCAGAGTCAGCGCTGCCCTCCTCCCTCTCT

>M6-PGSC0003DMG400030240-(rev)M6LRR-RLP\_1302

TGACTCCTGCAGTCAACTCCAATCTCTTCCAGAGTCAGCGCTGCCCTCCTCCCTCTCTGAGCTGACCATCC  
ATTCTTGTCTAAACTTCAACATCTTCCAGTAAAAGGGATGCCCTCTGC

>M6-PGSC0003DMG400030240-(rev)M6LRR-RLP\_1364

TGACCATCCATTCTTGTCTAAACTTCAACATCTTCCAGTAAAAGGGATGCCCTCTGCCCTCTCTAAGCTA  
TCTATTTAGACTGTCCAATGCTCAATCCACGTCTAGAATTTATGAAGG

>M6-PGSC0003DMG400030240-(rev)M6LRR-RLP\_1426

TCTAAGCTATCTATTTAGACTGTCCAATGCTCAATCCACGTCTAGAATTTATGAAGGGGAATACTGGC  
CAAATATTGCTCATATTTCCACTATACAGATCAATGGGGAATACCTGTGA

>M6-PGSC0003DMG400030240-(rev)M6LRR-RLP\_248

AAGACTGTCCCAAGTTGATGGGGAAATTGCCTGGAAATCTTTGTTCTTTGACAGGATTGACAATTTAGG  
TTGTCCGGAATTTATTTTGGAGACACCTGTCCAACCTTTCAAGTCTAAAAT

>M6-PGSC0003DMG400030240-(rev)M6LRR-RLP\_310

ATTTAGGTTGTCCGGAATTTATTTTGGAGACACCTGTCCAACCTTTCAAGTCTAAAATGGTTTGAAGTTGT  
CGGTTCTTAAAGGTTGGAGTTCTTTTTGATCATGCTGATCTATTTGCA



>M6-PGSC0003DMG400030240-(rev)M6LRR-RLP\_372

TGAAGTTGTCGGTCTTTAAAGGTTGGAGTCTTTTTGATCATGCTGATCTATTTGCATCCCAACTTCAAG  
GAATGATGCAGCTAGAGTCATTAATTATCAAAAGTTGTCACTCTCTTAC

>M6-PGSC0003DMG400030240-(rev)M6LRR-RLP\_434

AACTTCAAGGAATGATGCAGCTAGAGTCATTAATTATCAAAAGTTGTCACTCTCTTACCTCCTTGCATATT  
AGCAGTCTGTGCGAAAACCTTGAAGATAATAGAGATACATGATTGTGAGA

>M6-PGSC0003DMG400030240-(rev)M6LRR-RLP\_496

TTGCATATTAGCAGTCTGTGCGAAAACCTTGAAGATAATAGAGATACATGATTGTGAGAAATTGAAATTG  
GAGCCGTCAGCTAGTGAGATGTTTCTCGAGAGACTGGTACTAACTGAATGT

>M6-PGSC0003DMG400030240-(rev)M6LRR-RLP\_558

GAAATTGGAGCCGTCAGCTAGTGAGATGTTTCTCGAGAGACTGGTACTAACTGAATGTAATTCTATAAA  
TGATATATCACCTGAGCTGGTCCCAAGAGCACACGATGTGAGTGTAATAG

>M6-PGSC0003DMG400030240-(rev)M6LRR-RLP\_62

TGAAAGTCCTCACCATTGGGTATATGGATCGAATAACTGAGGTGACCGAAGAATTCTATGGTAGCCCAT  
CTTCAATAAAGCCATTTAACTCTCTTGAATGGCTTGAATTTAATCGGATGA

>M6-PGSC0003DMG400030240-(rev)M6LRR-RLP\_620

CTATAAATGATATATCACCTGAGCTGGTCCCAAGAGCACACGATGTGAGTGTAATAGGTGCCACAGCC  
TTACTAGGCTTTTGATTTCTACTGGGACTGAAGATCTCCATATTTCTGGAT

>M6-PGSC0003DMG400030240-(rev)M6LRR-RLP\_744

AAATCTTGAAATACTTTTGGTGGCATCCAGGACTCCAACGTTGTTGCGAACTATTAATAATTGCGAGCTGC  
AAGAAGCTGAGGTGCTGCCAGAACATATGCAGGAACTTCTTCCATCTCT

>M6-PGSC0003DMG400030240-(rev)M6LRR-RLP\_806

GCAGCTGCAAGAAGCTGAGGTGCTGCCAGAACATATGCAGGAACTTCTCCATCTCTTAATCATCTCTC  
CCTGGAAAGTTGTCCAGAAATAAAGTCCTTCCCTGAAGGAGGGTTGCCCT

>M6-PGSC0003DMG400030240-(rev)M6LRR-RLP\_868

CATCTCTCCCTGGAAAGTTGTCCAGAAATAAAGTCCTTCCCTGAAGGAGGGTTGCCCTCAGTCTAGAAG  
TCCTTGAGATCTTGTATTGCAATAAACTGGAGAATGATCGAAAGGAGTGG

>M6-PGSC0003DMG400030240-(rev)M6LRR-RLP\_930

TCTAGAAGTCCTTGAGATCTTGTATTGCAATAAACTGGAGAATGATCGAAAGGAGTGGCATTACAGAG

ACTCCCCTGTCTCAGAGAACTTATAATCTTCCATTTGGGTAGTGACGAAGA

>M6-PGSC0003DMG400030240-(rev)M6LRR-RLP\_992

TACAGAGACTCCCCTGTCTCAGAGAACTTATAATCTTCCATTTGGGTAGTGACGAAGAGATTCATTGGGA  
GTTGCCTTGCTCAATTCAAAGACTTATCATAGACAATATGAAAACATTAA

>M6-PGSC0003DMG400030291M6RLKWAX-EGF\_952

CCTCAATGACTAAAGTAGTGAAATGCTTGAAGGAGAATTACAAGCACTGCAAATGCCTCCCAGGCCCT  
CTGAATTGCAGGAACCATGTTTCGTTGGAATTCTATCTAATTAGTTCTTCAA

>M6-PGSC0003DMG400030298M6LRR-RLK\_549

TTTCCCTCACACACACCAAGCTTATTCTATGATTTGAGAAAAGATTGGAATTGTTGTTGGTGGTGTGGTT  
GAAGTCATTGTTTCGTTTTGAGACATGATTGGGTTATGTATTTACGTTGAA

>M6-PGSC0003DMG400030443-(rev)M6LRR-RLK\_0

ATTTGATCCATCCCTAAATTTATATTCTTTCTTCTCTTTATAAACTTTGTGTGAAGTTAATTAATTTGG  
GCGAACGAGAGAGACTACTAATTCAAATCGGCGAGTTTTGAAACCAGAA

>M6-PGSC0003DMG400030443-(rev)M6LRR-RLK\_1037

TCATATGTCTGATTATATTTAACTATATATAATTATAATTACATATGATTTATTAATTTAATTTCTAATACAC  
CAATGTTTTGTTTTGTTTGTAAACAACGCAACTCTAACTTGAGTGC

>M6-PGSC0003DMG400030443-(rev)M6LRR-RLK\_1098

TTTCTAATACACCAATGTTTTGTTTTGTTTGTAAACAACGCAACTCTAACTTGAGTGCCGCAGGAGGAA  
GTTGACTTTCTTATGAAGTTGTTTTAGAGCTGATAGGCTCACAAGAAAA

>M6-PGSC0003DMG400030443-(rev)M6LRR-RLK\_1159

CAGGAGGAAGTTGACTTTCTTATGAAGTTGTTTTAGAGCTGATAGGCTCACAAGAAAACCTTGGATGAG  
TGGACAAGGTATTCTATATATTATCTATATGTGATAAATAAAAATATCTTG

>M6-PGSC0003DMG400030443-(rev)M6LRR-RLK\_122

CACACTACAACATGTTATCCCTGGGATTCTCACTTCTCATCCTTCCAATAATAAACTAATTATTACCAACA  
AAAACCAATTTAATTTTCGTACCAATTTAGCCAAGGTTTGTCTAATA

>M6-PGSC0003DMG400030443-(rev)M6LRR-RLK\_1220

TGGATGAGTGGACAAGGTATTCTATATATTATCTATATGTGATAAATAAAAATATCTTGTGTGATCAGCT  
ATCCGACTATCTATATAAGAAGATCGTTAATTCCACCATTTAATGCAAA

>M6-PGSC0003DMG400030443-(rev)M6LRR-RLK\_1281

TGATCAGCTATCCGACTATCTATATAAGAAGATCGTTAATTCCACCATTTAATGCAAAATGGCTCCCGAA  
ACTAACTCCTCATGGTTTAGTAAATGAAAGGTGGTGTGGATATTCATT

>M6-PGSC0003DMG400030443-(rev)M6LRR-RLK\_1342

GGCTCCCGAAACTAACTCCTCATGGTTTAGTAAATGAAAGGTGGTGTGGATATTCATTTGAAATTCAA  
CTTATTCGAATTAATTATATTATGTGATAGGGATGGTAGACGAGTATCA

>M6-PGSC0003DMG400030443-(rev)M6LRR-RLK\_1403

GAAATTCAACTTATTCGAATTAATTATATTATGTGATAGGGATGGTAGACGAGTATCATTATTGGGGA  
TAAATCAATCCTTTCCAAGTCTTACAGAAAGCTCTTGCGGTAATGGAGG

>M6-PGSC0003DMG400030443-(rev)M6LRR-RLK\_1464

TATTGGGGATAAATCAATCCTTTCCAAGTCTTACAGAAAGCTCTTGCGGTAATGGAGGAGAGAACAAA  
ATGTAATTCTGGACTACATGTTATTATAGCAATCAATTACAGTGGACGACA

>M6-PGSC0003DMG400030443-(rev)M6LRR-RLK\_1525

AGAACAAAATGTAATTCTGGACTACATGTTATTATAGCAATCAATTACAGTGGACGACATGATATATTAC  
AAGCAACTAAAAGCATTGCCAGTAAAGTGAAAAATGGACATTTAACTGTA

>M6-PGSC0003DMG400030443-(rev)M6LRR-RLK\_1586

ATATATTACAAGCAACTAAAAGCATTGCCAGTAAAGTGAAAAATGGACATTTAACTGTAAAAGACATTG  
ATCAGAGCCTATTTGAACAAGAACTGGAAACTTATTGCGCTGAATTTCTG

>M6-PGSC0003DMG400030443-(rev)M6LRR-RLK\_1647

AGACATTGATCAGAGCCTATTTGAACAAGAACTGGAAACTTATTGCGCTGAATTTCTGAACCAGATTTG  
TTAATTAGAACAAGTGGAGAGAAAAGATTTAGCAATTTTCATGTTATGGCA

>M6-PGSC0003DMG400030443-(rev)M6LRR-RLK\_1708

CCAGATTTGTTAATTAGAACAAGTGGAGAGAAAAGATTTAGCAATTTTCATGTTATGGCAATTAGCTTATA  
CTGAATTCTATTTGCGAATAAGTTATTTCTGACATGGAAGAAGCTGAT

>M6-PGSC0003DMG400030443-(rev)M6LRR-RLK\_1769

TAGCTTATACTGAATTCTATTTGCGAATAAGTTATTTCTGACATGGAAGAAGCTGATTTTATGGAGGC  
TTAATGTCGTTTAAAGTCGAGACAGAGACGTTATGGTGGACAAAAAATCT

>M6-PGSC0003DMG400030443-(rev)M6LRR-RLK\_183

TATTACCAACAAAACCAATTTAATTTTCGTACCAATTTAGCCAAGGTTTGTCTAATAATGTTAATGCAG  
CTGGGGATCAATTAGTGACACTGCCTGAGGGCCTCAAACATGTTGCAGT

>M6-PGSC0003DMG400030443-(rev)M6LRR-RLK\_1830

TATGGAGGCTTTAATGTCGTTTAAGTCGAGACAGAGACGTTATGGTGGACAAAAAATCTAGTAATATTTT  
CAACAACCTCCATTACTTAGAATTAACCTAGCTCGACATATGAAGAATT

>M6-PGSC0003DMG400030443-(rev)M6LRR-RLK\_1891

TAATATTTTCAACAACCTCCATTACTTAGAATTAACCTAGCTCGACATATGAAGAATTATTGATTAGATC  
CCTTGAATTTCTCTTGCTATTAGTACTATTAATAATTTTATGGTGGT

>M6-PGSC0003DMG400030443-(rev)M6LRR-RLK\_1952

TGATTAGATCCCTTGAATTTCTCTTGCTATTAGTACTATTAATAATTTTATGGTGGTTCGATTGTATCTAT  
ACCAGCACTATATAAGCATGAAATATCGTCATGTGGTTTGTGCTGAGT

>M6-PGSC0003DMG400030443-(rev)M6LRR-RLK\_2013

ATTGTATCTATACCAGCACTATATAAGCATGAAATATCGTCATGTGGTTTGTGCTGAGTTTTTTTTTCTTTT  
CCCACCGGCCAGTTAAATTTGAATCACGCACTTTGAAGGACTTGTAG

>M6-PGSC0003DMG400030443-(rev)M6LRR-RLK\_2074

TTTTTTCTTTTCCCACCGGCCAGTTAAATTTGAATCACGCACTTTGAAGGACTTGTAGCACTCCCAACAA  
GGTATTCATATATTCATAATTAATAAAAAAAAAAAAAAAAAACAAGGAGTGGG

>M6-PGSC0003DMG400030443-(rev)M6LRR-RLK\_2135

CTCCAACAAGGTATTCATATATTCATAATTAATAAAAAAAAAAAAAAAAAACAAGGAGTGGGGCAACGCCGG  
AAAATGAGACTATAAAAAGTCTTCAAAGTCATATATGCTTCCAAGATGTCA

>M6-PGSC0003DMG400030443-(rev)M6LRR-RLK\_2196

AACGCCGGAAAATGAGACTATAAAAAGTCTTCAAAGTCATATATGCTTCCAAGATGTCAATCACATCACA  
TCATTCATCAATTTGTTGGTTCAAAGTGATGAGTGGATATAAAAATTTTCA

>M6-PGSC0003DMG400030443-(rev)M6LRR-RLK\_2257

CACATCACATCATTATCAATTTGTTGGTTCAAAGTGATGAGTGGATATAAAAATTTTCAATTTTTTACATCA  
CATTTGATTTTTGCTAGACTATAATATAGTAAATTAATTATAAAAATT

>M6-PGSC0003DMG400030443-(rev)M6LRR-RLK\_244

GTTAATGCAGCTGGGGATCAATTAGTGACACTGCCTGAGGGCCTCAAACATGTTGCAGTGATCATGGAT  
GGCCATAGAAGGTGGGCAAAAAACAAAGGCTTGAAGTAAAGCAAGGTCAC

>M6-PGSC0003DMG400030443-(rev)M6LRR-RLK\_2440

TATTAATCGTAACTTGTCTTTTTAGCAAATCCTTAAATTTTTAGATGAGGGAAGTTCACTTTCTTTAGTCA

AATGTCAACTCATTAGTCATTACTIONCATCTCATTATTCAAAGATCCTTG

>M6-PGSC0003DMG400030443-(rev)M6LRR-RLK\_2501

TTCTTTAGTCAAATGTCAACTCATTAGTCATTACTIONCATCTCATTATTCAAAGATCCTTGAAAATAAAAAGA

TTTGACAAACAAATAACAAACTCTTTGGTCTTCTCCTTTCTCTTAAAGG

>M6-PGSC0003DMG400030443-(rev)M6LRR-RLK\_2562

AAATAAAAGATTTGACAAACAAATAACAAACTCTTTGGTCTTCTCCTTTCTCTTAAAGGGAGAGTCGTTTA

CCTATACAAGTCTATATTTGTGGAACACTTAAAGTCATTGGCCATACTT

>M6-PGSC0003DMG400030443-(rev)M6LRR-RLK\_2623

GAGTCGTTTACCTATACAAGTCTATATTTGTGGAACACTTAAAGTCATTGGCCATACTTTGACTCAAGGG

ATGGTATCCTGTTTGATTGGTAAATCTAGAACCTTTTTTTTTTTTTTATTA

>M6-PGSC0003DMG400030443-(rev)M6LRR-RLK\_2745

ATTATTATTATTATTATTATTATTATAGTTGTAGTATTCAAATCAACTTATAAGCATCTTGATTAATTTACACA

AGATATGTTAGCTCCATCAACACAAGTACTGAGTAAGATTTGCTAA

>M6-PGSC0003DMG400030443-(rev)M6LRR-RLK\_2806

ATTAATTTACACAAGATATGTTAGCTCCATCAACACAAGTACTGAGTAAGATTTGCTAAGAAAGTGTCTT

TTCCCTTACATGATCTTCTTTTTTTTATTACAAGTTATATGCACTAATTG

>M6-PGSC0003DMG400030443-(rev)M6LRR-RLK\_2867

AAGTGTCTTTCCCTTACATGATCTTCTTTTTTTTATTACAAGTTATATGCACTAATTGAGTCAAATAACT

ACACAACCATGTCACTTGTAATAAATTCATGTAAATATCACAATATA

>M6-PGSC0003DMG400030443-(rev)M6LRR-RLK\_2928

TCAAATAACTACACAACCATGTCACTTGTAATAAATTCATGTAAATATCACAATATATATATTGATAAC

CCGATAAAAATAATGTCTAACCTGATATAATAGGTAAATTACATTGAA

>M6-PGSC0003DMG400030443-(rev)M6LRR-RLK\_2989

TATTGATAACCCGATAAAAATAATGTCTAACCTGATATAATAGGTAAATTACATTGAAAATGGTTGTAA

AAAATTTGTACTACTACATTGTGTACAACCTTAAAGCCCTTTTTCTCAAAC

>M6-PGSC0003DMG400030443-(rev)M6LRR-RLK\_305

TCATGGATGGCCATAGAAGGTGGGCAAAAACAAAGGCTTGACTGTAAAGCAAGGTCACCGCGCTGGC

GGAGAGAAAATTCAAGTCCTCACCGCCTTTGTAGCCAGTGGGGAGTCAAAG

>M6-PGSC0003DMG400030443-(rev)M6LRR-RLK\_3050

TGGTTGTAAAAATTTGTACACTACCATTGTGTACAACCTTTAAGCCCTTTTTCTCAAACACTTTTGTACCCC  
ACATAAGGAATAATGAACTCATTATAATTAGCAGAATCAAATGTGACT

>M6-PGSC0003DMG400030443-(rev)M6LRR-RLK\_3111

TTTTGTACCCACATAAGGAATAATGAACTCATTATAATTAGCAGAATCAAATGTGACTCAGTATTATCC  
CTTTCTCCACATATCACCTAACCTTCTCAATCCCCAAATGGAGCTTCAA

>M6-PGSC0003DMG400030443-(rev)M6LRR-RLK\_3172

GTATTATCCCTTTCTCCACATATCACCTAACCTTCTCAATCCCCAAATGGAGCTTCAAACACTTTTGTTC  
ATTCAAGCTCTCTTTTTTTTCTGTCATTCCATGCTATTCTCTTCATGT

>M6-PGSC0003DMG400030443-(rev)M6LRR-RLK\_3294

CTATACTTTTCTTTTCCAGAGTGTGCTTCAGCAGGCATACTGGGAATCAAACAGACAACTTGCATTACT  
TGATCTTAAGTCTCAAATAACTGAAGATCCACAAGGACTCATGGATTCT

>M6-PGSC0003DMG400030443-(rev)M6LRR-RLK\_3355

TTGCATTACTTGATCTTAAGTCTCAAATAACTGAAGATCCACAAGGACTCATGGATTCTTGAATGCCAC  
TCTTAATGTCTGCCAATGGCCTGGTGTTACATGTGGCCATAAACATCAAA

>M6-PGSC0003DMG400030443-(rev)M6LRR-RLK\_3416

GAATGCCACTCTTAATGTCTGCCAATGGCCTGGTGTTACATGTGGCCATAAACATCAAAGGGTCATTCT  
TTAGATCTCAAAGAACATAGATTGGCTGGCACTATATCACCTAGCATTGG

>M6-PGSC0003DMG400030443-(rev)M6LRR-RLK\_3477

GTCATTTCTTTAGATCTCAAAGAACATAGATTGGCTGGCACTATATCACCTAGCATTGGCAATCTTTCATT  
TCTTCGAATTCTTGACATCTCAGATAACTCCTTTCACGGTGTAATCCCT

>M6-PGSC0003DMG400030443-(rev)M6LRR-RLK\_3538

ATCTTTCATTTCTTCGAATTCTTGACATCTCAGATAACTCCTTTCACGGTGTAATCCCTCCAGAGCTTGGCC  
AATTGATCAGACTTCAAACCATGAACTTAAGCTTCAACTTCTTGAGAG

>M6-PGSC0003DMG400030443-(rev)M6LRR-RLK\_3599

AGAGCTTGGCCAATTGATCAGACTTCAAACCATGAACTTAAGCTTCAACTTCTTGAGAGGTGAAATCCCG  
TTTACCCTGTCTCGTTGTGTTAACGTTGTTAACCTTATTCTAGACCATAA

>M6-PGSC0003DMG400030443-(rev)M6LRR-RLK\_366

CGCTGGCGGAGAGAAAATTCAAGTCCTCACCCGCCTTTGTAGCCAGTGGGGAGTCAAAGTTCTCACCAT  
TTTTGCATTCTCTACAGAAAATTGGGTTTCGCCTCAAAGTAAGTCATTGTAT

>M6-PGSC0003DMG400030443-(rev)M6LRR-RLK\_3660

GAAATCCCGTTTACCCTGTCTCGTTGTGTTAACGTTGTTAACCTTATTCTAGACCATAATATCCTTGAAGG  
ACACATTCCTACTGAACTTGGTTCATTGACAACGCTGGAAATGTTGTAC

>M6-PGSC0003DMG400030443-(rev)M6LRR-RLK\_3721

TCCTTGAAGGACACATTCCTACTGAACTTGGTTCATTGACAACGCTGGAAATGTTGTACCTCAAGAACAA  
CAATCTCACAGGAAATGTTCCGAATTCTGTTGGAAATCTTACGTCTCTAA

>M6-PGSC0003DMG400030443-(rev)M6LRR-RLK\_3782

CAAGAACAACAATCTCACAGGAAATGTTCCGAATTCTGTTGGAAATCTTACGTCTCTAAGAGAGCTTTAC  
ATTTCTACAATGACTTGGAAAGGTGAATTACCTGAAACAATGGCCAATAT

>M6-PGSC0003DMG400030443-(rev)M6LRR-RLK\_3843

GAGCTTTACATTTCTACAATGACTTGGAAAGGTGAATTACCTGAAACAATGGCCAATATGAGAAGCTTG  
ATTGAGTTAGGTGTTTCAGTGA ACTCTCTGTCCGAGAATTTCCCCCTGCA

>M6-PGSC0003DMG400030443-(rev)M6LRR-RLK\_3904

GAAGCTTGATTGAGTTAGGTGTTTCAGTGA ACTCTCTGTCCGAGAATTTCCCCCTGCACTCTACAATCTT  
TCATCTCTTACACTTTTAAGCTTGTCAATTAACAAGTTCAGAGGCAGAC

>M6-PGSC0003DMG400030443-(rev)M6LRR-RLK\_3965

CTACAATCTTTCATCTCTTACACTTTTAAGCTTGTCAATTAACAAGTTCAGAGGCAGACTTAGACCAGATA  
TTGGCCTTGCCCTCCCAAATCTTCAGAGACTGTATTTGGCCAACAATTA

>M6-PGSC0003DMG400030443-(rev)M6LRR-RLK\_4026

AGACCAGATATTGGCCTTGCCCTCCCAAATCTTCAGAGACTGTATTTGGCCAACAATTA ACTTCACTGGTTC  
AATACCAGCTTCATTGTCCAATTGTTTCAGATCTTCTGCGGCTTGATATT

>M6-PGSC0003DMG400030443-(rev)M6LRR-RLK\_4087

TCACTGGTTCAATACCAGCTTCATTGTCCAATTGTTTCAGATCTTCTGCGGCTTGATATTCTCTAAACAATT  
TCACAGGAAATATACCGTTGAGTTTTGGAAACCTTAAGAATCTCTTAT

>M6-PGSC0003DMG400030443-(rev)M6LRR-RLK\_4148

TCTAAACAATTTACAGGAAATATACCGTTGAGTTTTGGAAACCTTAAGAATCTCTTATGGCTAAATGTTT  
TCAATAACCAGCTTGGAAATTGGTGACCTGATGATCTAAATTTCATAAA

>M6-PGSC0003DMG400030443-(rev)M6LRR-RLK\_4209

CTAAATGTTCTCAATAACCAGCTTGGAAATTGGTGACCTGATGATCTAAATTTCATAAATTCTTTAACCAA

TTGCAAATGCTTGAGTTCCTGGACATTGCAAACAACAAATTTGGAGGT

>M6-PGSC0003DMG400030443-(rev)M6LRR-RLK\_427

CTCACCATTTTTGCATTCTCTACAGAAAATTGGGTTGCCTCAAAGTAAGTCATTGTATTCCTTCCATCCTA  
ATTTACATGACACAGTTTGAATTTGAAAGTAAAATAGTATAATTTTG

>M6-PGSC0003DMG400030443-(rev)M6LRR-RLK\_4270

CTTTAACCAATTGCAAATGCTTGAGTTCCTGGACATTGCAAACAACAAATTTGGAGGTATGTTGCCCTA  
TTCTATAACTAATCTCTCAACAACCTTTGACAAAGCTACTGATTGGATACA

>M6-PGSC0003DMG400030443-(rev)M6LRR-RLK\_4331

GTTGCCCTATTCTATAACTAATCTCTCAACAACCTTTGACAAAGCTACTGATTGGATACAACAGGATAAGT  
GGAACCATACCTAGAGAGATCTCCAACCTTGCAACTTGGATATGCTTAG

>M6-PGSC0003DMG400030443-(rev)M6LRR-RLK\_4392

AGGATAAGTGGAACCATACCTAGAGAGATCTCCAACCTTGCAACTTGGATATGCTTAGCATCCAAGGA  
ACTCTTATCAATGGTAGCATTCTGATTCTATTGGAATGTTATCAAACCTTG

>M6-PGSC0003DMG400030443-(rev)M6LRR-RLK\_4453

TCCAAGGAACTCTTATCAATGGTAGCATTCTGATTCTATTGGAATGTTATCAAACCTTGAAAAATCTGCAC  
ATGGAATCGAATCAGTTGACAGGAAATATCCCCTCTTCTTAGGAAACA

>M6-PGSC0003DMG400030443-(rev)M6LRR-RLK\_4514

AAATCTGCACATGGAATCGAATCAGTTGACAGGAAATATCCCCTCTTCTTAGGAAACATTAGAGGATTG  
CTGTACATTTATTTGCAAGATAATAGCTTGGAGGGAACCATACCTTTAAG

>M6-PGSC0003DMG400030443-(rev)M6LRR-RLK\_4575

AGAGGATTGCTGTACATTTATTTGCAAGATAATAGCTTGGAGGGAACCATACCTTTAAGTTTAGGAAATT  
GTACATCTCTCAAACCTTAGACATCGCTCAGAATAAACTCAGTGGTAGT

>M6-PGSC0003DMG400030443-(rev)M6LRR-RLK\_4636

TAGGAAATTGTACATCTCTCAAACCTTAGACATCGCTCAGAATAAACTCAGTGGTAGTATACCCAAACA  
AGTCATTGCACTCTCCTCCCTTTGGTACTCCTTAATATGTCTTACAACCT

>M6-PGSC0003DMG400030443-(rev)M6LRR-RLK\_4697

ACCCAAACAAGTCATTGCACTCTCCTCCCTTTGGTACTCCTTAATATGTCTTACAACCTTTGAGTGGTTC  
CTTGCCTGTTGAAATAGGTAACCTGACCAATCTTGCTGCACTTGACAT

>M6-PGSC0003DMG400030443-(rev)M6LRR-RLK\_4758



TTGAGTGGTTCCTTGCCTGTTGAAATAGGTAACCTGACCAATCTTGCTGCACTTGACATATCGAACAACA  
AACTGTCTGGTCAAATTCCACACTACTGGAGAGTTGTTTCATCCCTTGAA

>M6-PGSC0003DMG400030443-(rev)M6LRR-RLK\_4819

CGAACAACAACTGTCTGGTCAAATTCCACACTACTGGAGAGTTGTTTCATCCCTTGAAATACTCTACCT  
GCAAGGAAACATCTTTGAAGGAACTATTCCTCCTCTGGATGATTTGAAAA

>M6-PGSC0003DMG400030443-(rev)M6LRR-RLK\_488

CTTCCATCCTAATTTACATGACACAGTTTGAATTCGAAAGTAAATAGTATAATTTTGATTGTGATTCCG  
GGGAATCTCTAACTTTTGAATAGAAATTTACATATTTGAAAAGTAGGTT

>M6-PGSC0003DMG400030443-(rev)M6LRR-RLK\_4880

ACTCTACCTGCAAGGAAACATCTTTGAAGGAACTATTCCTCCTCTGGATGATTTGAAAAACATTCAGTAT  
CTTGATCTTTCACGTAATAACTTGTGAGGCAACATTCCTAGGAGTATCAC

>M6-PGSC0003DMG400030443-(rev)M6LRR-RLK\_4941

ATTCAGTATCTTGATCTTTCACGTAATAACTTGTGAGGCAACATTCCTAGGAGTATCACCAAGCATGTTTC  
ATTACAGAACCTCAATTTGTCGTTTAACCCACTTGACGGAGAGGTGCCA

>M6-PGSC0003DMG400030443-(rev)M6LRR-RLK\_5002

AGCATGTTTCATTACAGAACCTCAATTTGTCGTTTAACCCACTTGACGGAGAGGTGCCATTTCAAGGTGT  
TTTTTCTGATGCAAGTAGAATTCAAGTATGGGAAATATGAATCTTTGTG

>M6-PGSC0003DMG400030443-(rev)M6LRR-RLK\_5063

TCAAGGTGTTTTTCTGATGCAAGTAGAATTCAAGTATGGGAAATATGAATCTTTGTGGGGGAATTGA  
AGAGCTGCATTTGCATCCATGTCTCAAGCATGCAAATAAAAGACCCAGAA

>M6-PGSC0003DMG400030443-(rev)M6LRR-RLK\_5124

GGAATTGAAGAGCTGCATTTGCATCCATGTCTCAAGCATGCAAATAAAAGACCCAGAAAGCACATTGCC  
CTCATTTTGGTGTGCTGGCACTGGGTAAGTGTGCTGCATGTTTAACTTTGTTG

>M6-PGSC0003DMG400030443-(rev)M6LRR-RLK\_5185

ACATTGCCCTCATTTTGGTGTGCTGGCACTGGGTAAGTGTGCTGCATGTTTAACTTTGTTGCTGCTAGTTTCG  
TATTGCTGCGTGAAAAAGGGGAAGCATAGGCCTAGCACAGCATCTTCAT

>M6-PGSC0003DMG400030443-(rev)M6LRR-RLK\_5246

GCTAGTTTCGTATTGCTGCGTGAAAAAGGGGAAGCATAGGCCTAGCACAGCATCTTCATTCAGGAAAGT  
ATACACTCAAGTTTCCTATGAAGATCTCTTAAATGCAACTGGTGGGTTCTC

>M6-PGSC0003DMG400030443-(rev)M6LRR-RLK\_5307

AGGAAAGTATACTCAAGTTTCCTATGAAGATCTCTTAAATGCAACTGGTGGGTTCTCTTCAAATAACT  
TGATAGGATCAGGAAGTTTTGGCTCCGTTTACAGAGGAAATCTTTCTCCA

>M6-PGSC0003DMG400030443-(rev)M6LRR-RLK\_5368

CAAATAACTTGATAGGATCAGGAAGTTTTGGCTCCGTTTACAGAGGAAATCTTTCTCCAGAAGGAACAA  
TTGCAGTAAAGGTACTAAAAGTTGAAAAAAGGGTGCTTCTAAAAGCTTTT

>M6-PGSC0003DMG400030443-(rev)M6LRR-RLK\_5429

AGGAACAATTGCAGTAAAGGTACTAAAAGTTGAAAAAAGGGTGCTTCTAAAAGCTTTTTGGCTGAATG  
TGAAGCCTTGAGGAACATAAGGCACCGAACCTGGTGAAGATCTCAACTGT

>M6-PGSC0003DMG400030443-(rev)M6LRR-RLK\_549

TGTGATTCCGGGGAATCTCTAACTTTTGAATAGAATTTACATATTTGAAAAGTTAAACTACTATA  
AGTCACCATAATTCATAATTCAAGATGTTTACATGAAAAAATCCGGTCA

>M6-PGSC0003DMG400030443-(rev)M6LRR-RLK\_5551

GCTCAAGTGTTGATTTTATGGCAATGATTTCAAAGCTCTCATTTATCCATTTATGGAAAATGGGAGCCT  
AGACGAGTGGTTGCACCCAAAGGAGGGACAGATGCTGCAGAAGAGATTGA

>M6-PGSC0003DMG400030443-(rev)M6LRR-RLK\_5612

TGGGAGCCTAGACGAGTGGTTGCACCCAAAGGAGGGACAGATGCTGCAGAAGAGATTGAGTATCTTAC  
ACATATTAACATCACAATAGATGTGGCTTCAGCATTGCATTATCTTCACAG

>M6-PGSC0003DMG400030443-(rev)M6LRR-RLK\_5673

ATCTTACACATATTAACATCACAATAGATGTGGCTTCAGCATTGCATTATCTTCACAGTCAATGCCATAC  
ATCTATAGTTCACTGTGATCTTAAGCCAAGCAATGTTCTACTGGACAAT

>M6-PGSC0003DMG400030443-(rev)M6LRR-RLK\_5734

AATGCCATACATCTATAGTTCACTGTGATCTTAAGCCAAGCAATGTTCTACTGGACAATGATCTGACTGCT  
CTTGTTAGCGACTTTGGTTTGGCAAAGTTCTGTCTGACTCGGGTCAA

>M6-PGSC0003DMG400030443-(rev)M6LRR-RLK\_5795

TCTGACTGCTCTTGTTAGCGACTTTGGTTTGGCAAAGTTCTGTCTGACTCGGGTCAAATGCCGATGTA  
AATCAGTTCAGCACAACTGGGATTAAGGCACAGTAGGTTATGCTGCTCC

>M6-PGSC0003DMG400030443-(rev)M6LRR-RLK\_5856

GCCGATGTAAATCAGTTCAGCACAACTGGGATTAAGGCACAGTAGGTTATGCTGCTCCAGGTAAATAT

TATAGTGCGGATCTTAGTCTAAATATTGTCTGAACTCTGAAATCCATTTTT

>M6-PGSC0003DMG400030443-(rev)M6LRR-RLK\_5917

GTAAATATTATAGTGCGGATCTTAGTCTAAATATTGTCTGAACTCTGAAATCCATTTTTCTCCATAAGA  
CCATAACATATTAACAATTTAAGCAATTACATACTTCCTTTAGAGACTC

>M6-PGSC0003DMG400030443-(rev)M6LRR-RLK\_5978

CTCCATAAGACCATAACATATTAACAATTTAAGCAATTACATACTTCCTTTAGAGACTCCGGATGCTTCTT  
GTCCTAAGCCCCAGGCATCCGTTACCTTTGCAGATCACTACCTCATGAT

>M6-PGSC0003DMG400030443-(rev)M6LRR-RLK\_6039

GATGCTTCTTGTCTAAGCCCCAGGCATCCGTTACCTTTGCAGATCACTACCTCATGATTTTGCGCTATTG  
ATTCTTATAACCAGAGGCAGAGGAAGCTTTAATTTAATGGATTCAACCA

>M6-PGSC0003DMG400030443-(rev)M6LRR-RLK\_61

AATTAATTTGGGCGAACGAGAGAGTACTAATTCAAATCGGCGAGTTTTGAAACCAGAACGCACACTAC  
AACATGTTATCCCTGGGATTCTCACTTCCTCATCCTTCCAATAATAAACTA

>M6-PGSC0003DMG400030443-(rev)M6LRR-RLK\_610

AACTACTATAAGTCACCATAATTCATAATTCAGATGTTTACATGAAAAAATCCGGTCAAATAAAGATTT  
ATTTGAATTTCTAAATTTGAAATTAGGTGCACCATAAATTGGGGAATGAG

>M6-PGSC0003DMG400030443-(rev)M6LRR-RLK\_6100

TGCGCTATTGATTCTTATAACCAGAGGCAGAGGAAGCTTTAATTTAATGGATTCAACCAAATCTAGTATT  
TTCGACACTGAATATGGATATATAAGTTAAAAAACTACTTAAATTTCAA

>M6-PGSC0003DMG400030443-(rev)M6LRR-RLK\_6161

TCTAGTATTTTCGACACTGAATATGGATATATAAGTTAAAAAACTACTTAAATTTCAATAAATATCATAT  
TTTGAACCATAATTTCAGAAGTACAATGATTTTCAGTTCTAAGAATCTT

>M6-PGSC0003DMG400030443-(rev)M6LRR-RLK\_6222

AATATCATATTTTGAACCCATAATTTCAGAAGTACAATGATTTTCAGTTCTAAGAATCTTAGATGTTGAATC  
CATCAAATTTAAATCCTGGATGCCTCTTCTCTCAGATATAATTCCTGAC

>M6-PGSC0003DMG400030443-(rev)M6LRR-RLK\_6283

ATGTTGAATCCATCAAATTTAAATCCTGGATGCCTCTTCTCTCAGATATAATTCCTGACTAGTCATTGTTTT  
TCTAAGGACCTTAATAAGAGGTTTCAGCTTTCTGGGGCATTTTACATA

>M6-PGSC0003DMG400030443-(rev)M6LRR-RLK\_6344

GTCATTGTTTTCTAAGGACCTTAATAAGAGGTTTCAGCTTTCTGGGGCATTTTACATAACATTCTCTATT  
GGAAAATCGATACAAGTGATCTGTGTTGCTTAGGCATTTTTGACAAATG

>M6-PGSC0003DMG400030443-(rev)M6LRR-RLK\_6405

ATTCTCTATTGGAAAATCGATACAAGTGATCTGTGTTGCTTAGGCATTTTTGACAAATGTTTAGGATCCCT  
AATATTACTATGAAACACCTTCTCTGATACATCAAATTTTTTCAGAATAT

>M6-PGSC0003DMG400030443-(rev)M6LRR-RLK\_6466

TAGGATCCCTAATATTACTATGAAACACCTTCTCTGATACATCAAATTTTTTCAGAATATGGCATGGGTGGT  
CAGGTATCATGTCAAGGAGATGTCTATAGCTTTGGGATTCTTCTATTAG

>M6-PGSC0003DMG400030443-(rev)M6LRR-RLK\_6527

CATGGGTGGTCAGGTATCATGTCAAGGAGATGTCTATAGCTTTGGGATTCTTCTATTAGAGATTTTCACT  
GGACGAAGACCAACCAGTGAACATTTGAGGACAATGAAACTCTTCACAG

>M6-PGSC0003DMG400030443-(rev)M6LRR-RLK\_6588

ATTTTCACTGGACGAAGACCAACCAGTGAACATTTGAGGACAATGAAACTCTTCACAGTTTTGTAAAGC  
AGGCATTGCCCGGTCAAGTGATGGATGTTGTGGATCAATCTGCTTTGTAC

>M6-PGSC0003DMG400030443-(rev)M6LRR-RLK\_6649

TTGTTAAGCAGGCATTGCCCGGTCAAGTGATGGATGTTGTGGATCAATCTGCTTTGTACGAGACAGAAC  
CAGGGGATTTTATGGATATACTCAGCTGCAGAAGTGACTTCTCGGATGAAT

>M6-PGSC0003DMG400030443-(rev)M6LRR-RLK\_671

TAAAGATTTATTTGAATTTCTAAATTTGAAATTAGGTGCACCATAAATTGGGGAATGAGGGAATAACTTT  
TATGACGATCTATCAATCATGTTAAAATAAATCATCAAGAAAATAAATTA

>M6-PGSC0003DMG400030443-(rev)M6LRR-RLK\_6710

GACAGAACCAGGGGATTTTATGGATATACTCAGCTGCAGAAGTGACTTCTCGGATGAATTTGTTGAATG  
CTTAGTTTCTATTCTTACTGCTGGAGTTTCTTGTTTCAGAGGAAACTCCACA

>M6-PGSC0003DMG400030443-(rev)M6LRR-RLK\_6771

GTTGAATGCTTAGTTTCTATTCTTACTGCTGGAGTTTCTTGTTTCAGAGGAAACTCCACAAGCCAGAATAA  
GCATGGGTCAAGTTATTTGGATCTCATTTCTTCAGAAACAAATTGAGC

>M6-PGSC0003DMG400030443-(rev)M6LRR-RLK\_6822

ACTCCACAAGCCAGAATAAGCATGGGTCAAGTTATTTGGATCTCATTTCTTCAGAAACAAATTGAGCA  
GAATTTTAGTTCATTCAGAGAAAGTGATCTCAAGAAAAGGTGAATCATAA

>M6-PGSC0003DMG400030443-(rev)M6LRR-RLK\_793

TAAAGAACAACAATAACATATTCAGTGTAATTTTATAGGTGAGGATCTGAAAATGATATAATATACGCTG  
AACTTACCCCCACCTCGAAAAGATATTAAGTTGTTTTAAAGATCATC

>M6-PGSC0003DMG400030443-(rev)M6LRR-RLK\_976

ATATATATCAGAGAAAGTGACTTTCTTTCTAACAATGAAATTAATTATACAAGAAATGAATCATATGTCT  
GATTATATTTAACTATATATAATTATAATTACATATGATTTATTAATTT

>M6-PGSC0003DMG400030474-(rev)M6LRR-RLK\_0

AAAAAACAGATTCATTACAAAAAAGCTGAAATTCCTTTTACCATTTCTCCACCTCTCACTCTTCACTTTGTA  
CTTGGCACTAAACACTCCTTCTTCTTCTCCATTAACATAGATCCAAAT

>M6-PGSC0003DMG400030474-(rev)M6LRR-RLK\_1054

GATTTTTTGATGTAGTTCTTCTTCACTCAACTGTTTCAAGCTTCAACCTTGAATAAGAATTATCATGAGGATT  
GAAAACTTGTGATTAATGGGTTAGTCTAGTCCCGGTTGACTTGAA

>M6-PGSC0003DMG400030474-(rev)M6LRR-RLK\_1116

CATGAGGATTGAAAACTTGTGATTAATGGGTTAGTCTAGTCCCGGTTGACTTGAAGGAGTGGTTAT  
TTTCTTCCCGTTGCTTATTAGATACTATCATGTCAGAATACTTAAGTGCT

>M6-PGSC0003DMG400030474-(rev)M6LRR-RLK\_1178

TGGTTATTTTCTTCCCGTTGCTTATTAGATACTATCATGTCAGAATACTTAAGTGCTAGCTATTTGTATGT  
ATTTTTTTTTCTCAAACATTTCTTGTTTATTAATAATATAATTACA

>M6-PGSC0003DMG400030474-(rev)M6LRR-RLK\_124

TACTACTTCAGCTCAAGCTAAACGGGTCGGGTCGGGGTTTTATTCTGCGCAAATGTGGTTACTGCAACT  
CGATGAATTCGATTTGATGTTTACTGTTAATTTACCTCAGAAC

>M6-PGSC0003DMG400030474-(rev)M6LRR-RLK\_1240

ATTTGTATGTATTTTTTTTTCTCAAACATTTCTTGTTTATTAATAATATAATTACAAAAGAGGGTGACAT  
AAGGCCTAACACCTTCTCACACGTAACACCAAAAAAAAAAAGAGTTT

>M6-PGSC0003DMG400030474-(rev)M6LRR-RLK\_1302

AGGGTGACATAAGGCCTAACACCTTCTCACACGTAACACCAAAAAAAAAAAGAGTTTCCATCCCGGAA  
GGCTTCTTCTCAATTAGAGTTTTTACCAAACCGAGGGTGGCTCATAATG

>M6-PGSC0003DMG400030474-(rev)M6LRR-RLK\_1364

CCCGGAAGGCTTCTTCTCAATTAGAGTTTTTACCAAACCGAGGGTGGCTCATAATGCCAACCAAGAAATG

GTTTTCTTTTTTTGAACCTAAAGGAGGCAAGGTTAAGTTTATCCATCCTC

>M6-PGSC0003DMG400030474-(rev)M6LRR-RLK\_1426

CCAGAATGGTTTTCTTTTTTTGAACCTAAAGGAGGCAAGGTTAAGTTTATCCATCCTCAGAAGGTTTATTT

GTATGTATTAGCTCTTGCTCTTCTACTTCAAGACTCTTTTTTTCATGAA

>M6-PGSC0003DMG400030474-(rev)M6LRR-RLK\_1488

GGTTTATTTGTATGTATTAGCTCTTGCTCTTCTACTTCAAGACTCTTTTTTTCATGAAATTGAGAATGGAAT

ATTTGTGAACCAAAGTTTTTCTGTAAATGTTTCTTCTTCTACTATA

>M6-PGSC0003DMG400030474-(rev)M6LRR-RLK\_1550

AGAATGGAATATTTGTGAACCAAAGTTTTTCTGTAAATGTTTCTTCTTCTACTATATTCTTTTCTAATCTC

GCTAATTCTTCTGTTTTGAGCTGTTAATATTGTACATGGTTTGGTA

>M6-PGSC0003DMG400030474-(rev)M6LRR-RLK\_1612

TTTCTAATCTCGCTAATTCTTCTGTTTTGAGCTGTTAATATTGTACATGGTTTGGTATCTCTTAGCATCTTT

TTATTTTATTTTGGTGAATCATTCCATCTGTAACATTTTCACC

>M6-PGSC0003DMG400030474-(rev)M6LRR-RLK\_1674

TTAGCATCTTTTTATTTTATTTTGGTGAATCATTCCATCTGTAACATTTTCACCCACTTCGTTGTTAAG

GTTTTCGTTATTTTGGCTTAGAAAGTGATATGGCAAGGTTTCTGGT

>M6-PGSC0003DMG400030474-(rev)M6LRR-RLK\_1736

TCGTTGTTAAGGTTTTCGTTATTTTGGCTTAGAAAGTGATATGGCAAGGTTTCTGGTTTTTGTTCAGC

ATCTCTTTTGCATTTTGTATTTCTTGGCATCAGTATCTATGAGATTG

>M6-PGSC0003DMG400030474-(rev)M6LRR-RLK\_1798

GTTTCCAGCATCTCTTTTGCATTTTGTATTTCTTGGCATCAGTATCTATGAGATTGAATAGCTTTTGAAG

TAATTATAAGTTGTTAGTATGGTGGATAAGATTTTAAACCAAGTCAGC

>M6-PGSC0003DMG400030474-(rev)M6LRR-RLK\_186

CTGCAACTCGATGAATTTCGATTTGATGTTTCATGTTTACTGTTAATTTACCTCAGAACCTCAGTATTACTCC

TAGAACTTCAAGTGCTTTCTCTATTTTATAGGTAATTACACTGCGATT

>M6-PGSC0003DMG400030474-(rev)M6LRR-RLK\_1860

GCTTTTGAAGTAATTATAAGTTGTTAGTATGGTGGATAAGATTTTAAACCAAGTCAGCAGAGCTTTCATC

ATACTATGTAATTTGACTGACTGGTTTTTTCTTTTTTATTCTTCTTTT

>M6-PGSC0003DMG400030474-(rev)M6LRR-RLK\_1922

CTTTCATCATACTATGTAATTTGACTGACTGGTTTTTTTTCTTTTTTATTCTTCTTTTTATGGTTCCATGAGA  
ACATGATTAGTTTTATTAATCTTCTTCTGCAGATGGTGAAAAATTAG

>M6-PGSC0003DMG400030474-(rev)M6LRR-RLK\_1984

GTTCCATGAGAACATGATTAGTTTTATTAATCTTCTTCTGCAGATGGTGAAAAATTAGTTAAATGTAGAA  
CAATTACTATTTGGAATTCATAAGCAATTGTATAAGTCTAGTTCATTGCT

>M6-PGSC0003DMG400030474-(rev)M6LRR-RLK\_2046

ATGTAGAACAATTACTATTTGGAATTCATAAGCAATTGTATAAGTCTAGTTCATTGCTAAGTGCTTTTGGAA  
ACGTATGTGCAAAGAGAAACATTAGTTGGACACATAATAATTGCTAATT

>M6-PGSC0003DMG400030474-(rev)M6LRR-RLK\_2108

GCTTTTGGAAACGTATGTGCAAAGAGAAACATTAGTTGGACACATAATAATTGCTAATTGGAATCCACAA  
AAAGTCATCCAGTTTTAGTTCATGAAAATTTAGTGCTGATTCCAAACATAT

>M6-PGSC0003DMG400030474-(rev)M6LRR-RLK\_2170

TCCACAAAAGTCATCCAGTTTTAGTTCATGAAAATTTAGTGCTGATTCCAAACATATTTCTTGAGGATAT  
TCTTATAACTTTGACTGCATAGATGCTTGCTATGTCATAATGTCTTTTT

>M6-PGSC0003DMG400030474-(rev)M6LRR-RLK\_2232

TGAGGATATTCTTATAACTTTGACTGCATAGATGCTTGCTATGTCATAATGTCTTTTTTAATCCTTCCTCTC  
TCACCTTTGGTGTTTGTGGTTCTCAAATGTTTATCTACTGAATTA

>M6-PGSC0003DMG400030474-(rev)M6LRR-RLK\_2294

CCTTCCTCTCACCTTTGGTGTTTGTGGTTCTCAAATGTTTATCTACTGAATTATTCCAGGACGATCA  
CAATACTGGCAGCATAGTGGCTTTCAATCTGTTGAAGGTTTCCTCATG

>M6-PGSC0003DMG400030474-(rev)M6LRR-RLK\_2356

AGGACGATCACAATACTGGCAGCATAGTGGCTTTCAATCTGTTGAAGGTTTCCTCATGAGAATCTACTAC  
ACCAATCAACTGCTACATTCTTTTTGTTGTAGCAACTCTCCTTTGCT

>M6-PGSC0003DMG400030474-(rev)M6LRR-RLK\_2418

TCTACTACCAATCAACTGCTACATTCTTTTTGTTGTAGCAACTCTCCTTTGCTGTGCCGTGGTGATC  
TAAACTCAGACAAACAAGCCCTTCTGACTTTGCTGCAGCAGTCCCAC

>M6-PGSC0003DMG400030474-(rev)M6LRR-RLK\_248

GTATTACTCCTAGAACTTCAAGTGCTTTCTCTATTTTATAGGTAATTACTGCGATTTCATATTGTTTGT  
GAAATTTATAATTTTGTATTTGTTAGCTTGATTCTTTTGTGTTTTT

>M6-PGSC0003DMG400030474-(rev)M6LRR-RLK\_2480

CGTGGTGATCTAAACTCAGACAAACAAGCCCTTCTTGACTTTGCTGCAGCAGTCCCACATGGCAGGAAG  
ATCAACTGGGATCCTGCCACTCCTATCTGCTCATCTTGGGTAGGTGTTACT

>M6-PGSC0003DMG400030474-(rev)M6LRR-RLK\_2542

CAGGAAGATCAACTGGGATCCTGCCACTCCTATCTGCTCATCTTGGGTAGGTGTTACTTGTAGTAATGAT  
GGAGCCCATGTGGTGAAGTACGACTTCCAGGAGTTGGACTCATTGGTTC

>M6-PGSC0003DMG400030474-(rev)M6LRR-RLK\_2604

GTAATGATGGAGCCCATGTGGTGAAGTACGACTTCCAGGAGTTGGACTCATTGGTTCCTTCCGAAAA  
ATACTTTTGGGAAGATGGATAGCTTAAGGATTATCAGCCTTCGATCCAATC

>M6-PGSC0003DMG400030474-(rev)M6LRR-RLK\_2666

CCGAAAATACTTTTGGGAAGATGGATAGCTTAAGGATTATCAGCCTTCGATCCAATCGTCTCAGTGGA  
AACCTTCCTCCGCTATCACTTCACTTCCTTCTCTCCAATCCCTGTTCTTA

>M6-PGSC0003DMG400030474-(rev)M6LRR-RLK\_2728

CAGTGGAACCTTCCTTCCGCTATCACTTCACTTCCTTCTCTCCAATCCCTGTTCTTACAGCAAATAACTT  
ATCTGGACCTATTCTTCTTCTTTCAAATAAACTGAATGTTTTGGA

>M6-PGSC0003DMG400030474-(rev)M6LRR-RLK\_2790

AAAATAACTTATCTGGACCTATTCTTCTTCTTTCAAATAAACTGAATGTTTTGGACCTATCACATAATT  
TCTTCACTGGAAAGATACCTGAAACAATTCAGAATTTGTCTCAGCTAA

>M6-PGSC0003DMG400030474-(rev)M6LRR-RLK\_2852

TCACATAATTTCTTCACTGGAAAGATACCTGAAACAATTCAGAATTTGTCTCAGCTAACAGGTTTAAGCCT  
CCAGAATAACTTACTTTCTGGACCCATACCCAATATTACTCTTCCAAGG

>M6-PGSC0003DMG400030474-(rev)M6LRR-RLK\_2914

TTTAAGCCTCCAGAATAACTTACTTTCTGGACCCATACCCAATATTACTCTTCCAAGGCTAAAACATATTA  
ATATAAGCCACAACAATCTTAATGGTTCTATTCCATTATCCCTCCAGAA

>M6-PGSC0003DMG400030474-(rev)M6LRR-RLK\_2976

AACATATTAATATAAGCCACAACAATCTTAATGGTTCTATTCCATTATCCCTCCAGAAGTTTCCAAATTCCT  
CCTTTGTGGGGAACACTACTCTTGTGTGGACTACCCTTAAATCCTTGTT

>M6-PGSC0003DMG400030474-(rev)M6LRR-RLK\_3038

CCAAATTCCTCCTTTGTGGGGAACACTACTCTTGTGTGGACTACCCTTAAATCCTTGTTACCTGTTCTACCA



CCATCCCCTCCTTCCCCTTCCCCTTCCCCACCTGCACCCTCCCCAAAC

>M6-PGSC0003DMG400030474-(rev)M6LRR-RLK\_310

ATTGTTTGTGAAATTTATAATTTGTATTTGTTTAGCTTGATTCTTTTGTGTTTTCTGCTAATTTTGGTGG  
CAGATCTGTTTGTCTATTTGTTTCCTATTTGTTTGGCATTGTTAGAT

>M6-PGSC0003DMG400030474-(rev)M6LRR-RLK\_3100

TGTTCTACCACCATCCCCTCCTTCCCCTTCCCCTTCCCCACCTGCACCCTCCCCAAACTCTCAAGAAAAAAG  
TTCAAAAAAGAACTTAAACTAGGAGTTATTCTTGCTATTGCTGCTGG

>M6-PGSC0003DMG400030474-(rev)M6LRR-RLK\_3162

AAGAAAAAAGTTCAAAAAAGAACTTAAACTAGGAGTTATTCTTGCTATTGCTGCTGGAGGGGTTGTGC  
TGGTCTTGCTGCTAGTTGTGATCCTGGTTTTGTGCTGCCTGAAAAGAAAAA

>M6-PGSC0003DMG400030474-(rev)M6LRR-RLK\_3224

GTTGTGCTGGTCTTGCTGCTAGTTGTGATCCTGGTTTTGTGCTGCCTGAAAAGAAAAAGGGGTGATGGC  
AGAGGTGTGCGGAAAGGGAAATCTCCGGTGGAGGAAGGAGTGAAAAACCT

>M6-PGSC0003DMG400030474-(rev)M6LRR-RLK\_3286

TGATGGCAGAGGTGTGCGGAAAGGGAAATCTCCGGTGGAGGAAGGAGTGAAAAACCTAGGGGAAGA  
GTTCCGGTAGTGGGGTGCAAGAACCTGACAAAAATAAGCTTGTTTTCTTTGAAGG

>M6-PGSC0003DMG400030474-(rev)M6LRR-RLK\_3348

AAGAGTTCGGTAGTGGGGTGCAAGAACCTGACAAAAATAAGCTTGTTTTCTTTGAAGGCAGCTCTTACA  
ATTTGATCTCGAGGACCTATTGAGGGCCTCAGCTGAAGTGCTAGGAAAGG

>M6-PGSC0003DMG400030474-(rev)M6LRR-RLK\_3410

TCTTACAATTTGATCTCGAGGACCTATTGAGGGCCTCAGCTGAAGTGCTAGGAAAGGGGAGTTTTGGA  
ACTGCTTATAAGGCTATTTTGGAGGAGTCATCAACAGTGGTGGTTAAAAGA

>M6-PGSC0003DMG400030474-(rev)M6LRR-RLK\_3472

TTTTGGAAGTCTTATAAGGCTATTTTGGAGGAGTCATCAACAGTGGTGGTTAAAAGACTAAAAGAAGT  
CATTGTGGGGAAGAAGGACTTTGAACAGCAGATGGAAATTATTGGTAGAGT

>M6-PGSC0003DMG400030474-(rev)M6LRR-RLK\_3534

AAGAAGTCATTGTGGGGAAGAAGGACTTTGAACAGCAGATGGAAATTATTGGTAGAGTTGGACAGCAT  
CCAAATGTGGTTCCTTTACGTGCTTATTACTCCAAGGATGAGAAGTTAC

>M6-PGSC0003DMG400030474-(rev)M6LRR-RLK\_3596

CAGCATCCAAATGTGGTTCCTTTACGTGCTTATTACTCCAAGGATGAGAAGTTACTGGTGTATGGTT  
ATTTCTCAATGGGCAACTTGTCAATGCTCTTGCATGGTAAGGCATCATAT

>M6-PGSC0003DMG400030474-(rev)M6LRR-RLK\_3658

GTATGGTTATTTCTCAATGGGCAACTTGTCAATGCTCTTGCATGGTAAGGCATCATATGCTCTCATCGTCA  
TTTCCTTTTTCTATTTCTAGCGTTTGGTGGAGTAACTTGATTGCCCCTT

>M6-PGSC0003DMG400030474-(rev)M6LRR-RLK\_372

AATTTTGGTGGCAGATCTGTTTGTCTATTTGTTTCCTATTTGTTTGGCATTGTTAGATTGAGCAGTCAATTT  
TTATCTATTTTGAATATGATTTTGAAGGTTTTCTGATAGTATTTT

>M6-PGSC0003DMG400030474-(rev)M6LRR-RLK\_3720

TCATCGTCATTTCTTTTTCTATTTCTAGCGTTTGGTGGAGTAACTTGATTGCCCCTTTGTTATTGAATGCC  
TAATAGTAAGCTTCTAACACAATACAAAATGCACTCAAGTAATGTCCT

>M6-PGSC0003DMG400030474-(rev)M6LRR-RLK\_3782

ATTGAATGCCTAATAGTAAGCTTCTAACACAATACAAAATGCACTCAAGTAATGTCCTAACGAATCTAA  
ACAATGTGAGTTTGAACTTTTTAATTTGTGAAGTGGTGTGAAAAGAAGCT

>M6-PGSC0003DMG400030474-(rev)M6LRR-RLK\_3844

GAATCTAAACAATGTGAGTTTGAACTTTTTAATTTGTGAAGTGGTGTGAAAAGAAGCTTTCTTTCTTGAG  
CTTATTGCAAAGTTTCGAGAAGAAAAAGTCTTCTTTAGAATATATGCATC

>M6-PGSC0003DMG400030474-(rev)M6LRR-RLK\_3906

TTCTTGAGCTTATTGCAAAGTTTCGAGAAGAAAAAGTCTTCTTTAGAATATATGCATCAGTTTGATCTTTA  
TAGGTCTATTATATGAGTATAAACAGCTCTTATGCTATTCTGTATCTAT

>M6-PGSC0003DMG400030474-(rev)M6LRR-RLK\_3968

TGATCTTTATAGGTCTATTATATGAGTATAAACAGCTCTTATGCTATTCTGTATCTATTGTTTCTTTAGAAC  
TTGCTGGCTTTCTTTACTTATCACTGGTAGTTTATCACTCGCACTAT

>M6-PGSC0003DMG400030474-(rev)M6LRR-RLK\_434

CAGTCAATTTTTATCTATTTTGAATATGATTTTTGAAGTTTTCTGATAGTATTTTTTTTTGTAGCTTTAAA  
TTTGATTTTTAGAAATTAATTAGGAAATCCGTGACGAATTCATGCAG

>M6-PGSC0003DMG400030474-(rev)M6LRR-RLK\_496

GTAGCTTTAAATTTGATTTTTAGAAATTAATTAGGAAATCCGTGACGAATTCATGCAGAAAATTAGACTC  
ATTGGAGGGAGGAGTATTAAGTAGCGGCAGAGCTAGGATTTTCAGTAAAG

>M6-PGSC0003DMG400030474-(rev)M6LRR-RLK\_558

TTAGACTCATTGGAGGGAGGAGTATTAAGTAGCGGCAGAGCTAGGATTTTCAGTAAAGTGATTGAAAA  
TATAAAGAAAGAAATATAATGATAAACTATGTATGATTTTTTTCTATTTCTT

>M6-PGSC0003DMG400030474-(rev)M6LRR-RLK\_62

TCACTTTGTACTTGGCACTAAACACTCCTTCTTCTTCTCCATTAACATAGATCCAAATCTCTTACTACTTCA  
GCTCAAGCTAAACGGGTCGGGTCGGGGTTTTATTCTGCGCAAAATGTG

>M6-PGSC0003DMG400030474-(rev)M6LRR-RLK\_620

TGAAAATATAAAGAAAGAAATATAATGATAAACTATGTATGATTTTTTTCTATTTCTTTTTTTTTGAACTTG  
TATATATGGTATGATTTTCCAGCTTGCACCCCTGGCTCCGGCGGTGGA

>M6-PGSC0003DMG400030474-(rev)M6LRR-RLK\_682

TTTGAAGTTGTATATATGGTATGATTTTCCAGCTTGCACCCCTGGCTCCGGCGGTGGACTATTAAGTAGC  
AAGACCATGTTAGGTTCTGTATGTTGTTAGTCTTCAGTGTTTGCTTCTT

>M6-PGSC0003DMG400030474-(rev)M6LRR-RLK\_744

TAAGTAGCAAGACCATGTTAGGTTCTGTATGTTGTTAGTCTTCAGTGTTTGCTTCTTTGATAATGTGGAA  
GTATAATGAATTGAGAAATTGAAAATGTTGTTAGTCATTATGAACTATC

>M6-PGSC0003DMG400030474-(rev)M6LRR-RLK\_806

AATGTGGAAGTATAATGAATTGAGAAATTGAAAATGTTGTTAGTCATTATGAACTATCATTGGATTATAT  
TTGTGTAAAGGAAGCTTAGGATTCCCTATTACTGGGACCTCATATGAGTT

>M6-PGSC0003DMG400030474-(rev)M6LRR-RLK\_868

GATTATATTTGTGTAAAGGAAGCTTAGGATTCCCTATTACTGGGACCTCATATGAGTTGGGGTTGTTCAA  
TAGTCTTAATTAACCCAACCTCTCTTTGACATTTACTTGAGAGAAGAATTA

>M6-PGSC0003DMG400030474-(rev)M6LRR-RLK\_930

TTGTTCAATAGTCTTAATTAACCCAACCTCTCTTTGACATTTACTTGAGAGAAGAATTATGAATGTGGTAAT  
AGGTAACCCCAACCCCAATAATAATAATAATAAAAATCCCATGATCT

>M6-PGSC0003DMG400030474-(rev)M6LRR-RLK\_992

TGTGGTAATAGGTAACCCCAACCCCAATAATAATAATAATAAAAATCCCATGATCTGGTAGATTTTTT  
GATGTAGTTCTTCTTCATCAACTGTTTCAAGCTTCAACCTTGAATAAGAA

>M6-PGSC0003DMG400030496-(rev)M6LRR-RLP\_0

ACAAAACCTAGAGAGAGAAAATGGCCTATGCTTGTATTTCTCACTTATGCAAACCTCTGCAGCAACTCCT

GCAAGCTAAATCACCTTTGATTTGTGAAAGTTCTATACAACAACATGTTG

>M6-PGSC0003DMG400030496-(rev)M6LRR-RLP\_1098

CATATGATAATTGGAAGAAAATTGAGGAAAATTTGAAGTCATTTTCATGGTTCCGGTTTTAGAACAGTGTCA  
AGCAATTCTTTCTTTGAGCTACGATTACTTGCCCCATACTTGAAGGCGT

>M6-PGSC0003DMG400030496-(rev)M6LRR-RLP\_1159

ACAGTGTCAAGCAATTCTTTCTTTGAGCTACGATTACTTGCCCCATACTTGAAGGCGTGCTTTCTCTATA  
TTGGAGGTTTTCTGAAGATATGGAGTTTCGTGTATCGAAGATGATGAG

>M6-PGSC0003DMG400030496-(rev)M6LRR-RLP\_122

TCTTCTTATCAAAGTCTATGTTCTTCTCAGGTTTTCTTGAGGATACCACAAATGAGGCCAATGATATTGA  
AAATCTCCAGATTTTAGAAAAAAGATCAAAGATGTAGTCTACAAAGCA

>M6-PGSC0003DMG400030496-(rev)M6LRR-RLP\_1220

TTTCTCTATATTGGAGGTTTTCTGAAGATATGGAGTTTCGTGTATCGAAGATGATGAGCTCATGGATAG  
CTGAGCAATTCATAAAGGCAACAAGCGATAAAAGGTTAGAAGTTGTGGCA

>M6-PGSC0003DMG400030496-(rev)M6LRR-RLP\_1342

GGAGTATGTGCAAGAGTTAATGGATAGGAGTCTAATTTTGGGTAAAACACGAAAGCCTAATGGAAGAT  
TCAAACTTGCAAAATTCATGACCTTCTTAGGCAGTTGTGCATAAGAGAAGC

>M6-PGSC0003DMG400030496-(rev)M6LRR-RLP\_1403

GGAAGATTCAAAACCTTGCAAAATTCATGACCTTCTTAGGCAGTTGTGCATAAGAGAAGCTCAAATTCAAA  
ATGTTGTGCATTTCCCTTACAGTGATCATGTTCTCACTTACTCAAATGAC

>M6-PGSC0003DMG400030496-(rev)M6LRR-RLP\_1464

AAATTCAAAATGTTGTGCATTTCCCTTACAGTGATCATGTTCTCACTTACTCAAATGACATAAATGATCGT  
AGACGTGTGATGATTCCTTTCTGATTGAGGATTATTTTTGCGATCATC

>M6-PGSC0003DMG400030496-(rev)M6LRR-RLP\_1586

AGTCAAATGAGTGGTAAGATTACAACCCGCAGCTTGATCTTTATGGGAGCTGGTAAATCTTATCTAGTAC  
CTGAAATAAATCACTGGCCTGATAGTATTTCAAACCTCAAGCTACTTAAG

>M6-PGSC0003DMG400030496-(rev)M6LRR-RLP\_1647

ATCTAGTACCTGAAATAAATCACTGGCCTGATAGTATTTCAAACCTCAAGCTACTTAAGGTGTTGGATGC  
ACGTGAAATTGGCTACGATTTCTCTCATATAATACCTCAAACCTTAACCTTGT

>M6-PGSC0003DMG400030496-(rev)M6LRR-RLP\_1708

GTTGGATGCACGTGAAATTGGCTACGATTTCTCTCATATAATACCTCAACTTAACTTGTACATTTGAGGTA  
TATTGATGCAAGAATTGAGGATCCTTCTTCACTAGCCAAATTGTTCAAT

>M6-PGSC0003DMG400030496-(rev)M6LRR-RLP\_1769

ATTTGAGGTATATTGATGCAAGAATTGAGGATCCTTCTTCACTAGCCAAATTGTTCAATCTACAAACCATA  
ATTGTCTATTCAAGGAGAAATGTGCAGCTCCCCGCAGAGATTTGGACAA

>M6-PGSC0003DMG400030496-(rev)M6LRR-RLP\_183

ATGATATTGAAAATCTCCAGATTTTAGAAAAAAGATCAAAGATGTAGTCTACAAAGCAGAAGATAGAG  
TTGATTCATGCTTAACAAACATGATTCTAGCTGATAATGAAGACGACCGAG

>M6-PGSC0003DMG400030496-(rev)M6LRR-RLP\_1830

ACAAACCATAATTGTCTATTCAAGGAGAAATGTGCAGCTCCCCGCAGAGATTTGGACAATGTCACAGAT  
AAAACATGTGGATATTGAACAAATCTATATGCCTAATCCTCTTAGTATTGA

>M6-PGSC0003DMG400030496-(rev)M6LRR-RLP\_1891

TCACAGATAAAACATGTGGATATTGAACAAATCTATATGCCTAATCCTCTTAGTATTGAAGAGCAACAAC  
CTTTGTTTCTGAATAACTTGCAAACACTTGCTCTCTATTCCCTCGCCTTTT

>M6-PGSC0003DMG400030496-(rev)M6LRR-RLP\_1952

AGCAACAACCTTTGTTTCTGAATAACTTGCAAACACTTGCTCTCTATTCCCTCGCCTTTTTTGGCAGAAATCC  
TAAAGAGAACACCCAATGTAGATAAGCTAAAGATTAGAGCTGCTAATA

>M6-PGSC0003DMG400030496-(rev)M6LRR-RLP\_2013

GGCAGAAATCCTAAAGAGAACACCCAATGTAGATAAGCTAAAGATTAGAGCTGCTAATACACATAATGA  
GTGGTCTGATTTTGTGATTGTCTCATTAACTACAGAGACTGGAAAAGCT

>M6-PGSC0003DMG400030496-(rev)M6LRR-RLP\_2074

CATAATGAGTGGTCTGATTTTGTGATTGTCTCATTAACTACAGAGACTGGAAAAGCTAAGTATAACAA  
CAACAGTAGACAACAGTCCGTGCATTCTGTCTAGTGCTTTTTTGC GCGCCT

>M6-PGSC0003DMG400030496-(rev)M6LRR-RLP\_2135

GTATAACAACAACAGTAGACAACAGTCCGTGCATTCTGTCTAGTGCTTTTTTGC GCGCCTAATCTAAAGCA  
AGTGAGATTAGCTTATACTTCATTGGCTTGGGAAGAAATGGATGTGCTTG

>M6-PGSC0003DMG400030496-(rev)M6LRR-RLP\_2196

TCTAAAGCAAGTGAGATTAGCTTATACTTCATTGGCTTGGGAAGAAATGGATGTGCTTGCTAGTTTACCC  
AATCTTGAGGTGCTCAAAGCAGATAGTGCATTCAATGGAACAGATTGGAC

>M6-PGSC0003DMG400030496-(rev)M6LRR-RLP\_2318

TAAGTGAAGATGTTGTTTTTCATAAACTAAAATATCTACGAATTTGGAGCGCAGATGATCTGGAAAGAT  
GGGAAGCAACTAGTGATAATTTTCCAATGCTTGAGCAACTAGTCCTTCAGC

>M6-PGSC0003DMG400030496-(rev)M6LRR-RLP\_2379

GGAAAGATGGGAAGCAACTAGTGATAATTTTCCAATGCTTGAGCAACTAGTCCTTCAGCTTCTCGAAGA  
ACTAGAGGAGATTCCACAAAGTTTTGGAGAAATAATGACATTAATAATTAGT

>M6-PGSC0003DMG400030496-(rev)M6LRR-RLP\_244

AGATAGAGTTGATTCATGCTTAACAAACATGATTCTAGCTGATAATGAAGACGACCGAGAAAAAGCTTG  
TAAATTCTTCAATGAAGAATTACAACAAGTTGAAACAGAATTTGATTCTCT

>M6-PGSC0003DMG400030496-(rev)M6LRR-RLP\_2440

CTCGAAGAACTAGAGGAGATTCCACAAAGTTTTGGAGAAATAATGACATTAATAATTAGTCCAAGTGGAT  
TATTGCAATCCTGCAGTCGACACTAGTGCAAGGAATATTCTAGAAGATCAA

>M6-PGSC0003DMG400030496-(rev)M6LRR-RLP\_2501

AAGTGGATTATTGCAATCCTGCAGTCGACACTAGTGCAAGGAATATTCTAGAAGATCAACAAGGCTGGG  
GAAATTGTGAGCTTCAAATTCAAATTGTACCTTCGTTAAAATACTTAATTT

>M6-PGSC0003DMG400030496-(rev)M6LRR-RLP\_2551

GAAGATCAACAAGGCTGGGGAAATTGTGAGCTTCAAATTCAAATTGTACCTTCGTTAAAATACTTAATTT  
AATAAATTCATGTGATGTTTTAGTTTTGTGTCATTTCTTGTTTTACCT

>M6-PGSC0003DMG400030496-(rev)M6LRR-RLP\_366

GGAAAGAGGTGATGGTGATCGAGTTCAACAAGCGTGGAAAGCAAATCAACGGAGTTAGCAGCAGCAAC  
AACTTCTTTCTCATCAATCGAGGAAACGACTTATGTTGGGATGAAAAAAGACT

>M6-PGSC0003DMG400030496-(rev)M6LRR-RLP\_427

AGCAACAACCTCTTTCTCATCAATCGAGGAAACGACTTATGTTGGGATGAAAAAAGACTACAAAGCCAT  
ACTGAATTGCCTCAATGCCCAAACAAAAGAGCTAATAGTCATATCACTTGT

>M6-PGSC0003DMG400030496-(rev)M6LRR-RLP\_488

AAAGCCATACTGAATTGCCTCAATGCCCAAACAAAAGAGCTAATAGTCATATCACTTGTGGTATGGGC  
GGTATAGGTAAGACAACCTCTTGCTAGAAAAGTTTTTGATAACTCAACTATT

>M6-PGSC0003DMG400030496-(rev)M6LRR-RLP\_549

GTATGGGCGGTATAGGTAAGACAACCTCTTGCTAGAAAAGTTTTTGATAACTCAACTATTCGTGATCGATT

TGAGAAACATGCATGGGTCACCATATCTGAACACTATAATAAGAGACAAA

>M6-PGSC0003DMG400030496-(rev)M6LRR-RLP\_61

GCAACTCCTGCAAGCTAAATCACCTTTGATTTGTGAAAGTTCTATACAACAACATGTTGAATCTTCTTATC  
AAAGTCTATGTTCTTTCAGGTTTTTCTTGAGGATACCACAAATGAGGC

>M6-PGSC0003DMG400030496-(rev)M6LRR-RLP\_610

TGATCGATTTGAGAAACATGCATGGGTCACCATATCTGAACACTATAATAAGAGACAAATGCTTCTTGAA  
GTTGCTTCTTCAATTAGTGGAGTCAACAATCAAGAAATGAGCAATGATGA

>M6-PGSC0003DMG400030496-(rev)M6LRR-RLP\_671

CTTCTTGAAGTTGCTTCTTCAATTAGTGGAGTCAACAATCAAGAAATGAGCAATGATGAATTGATGGTGA  
TTGTGTATAGAAGTCTCAAGGGTAGGAGATTTCTAATTGTCATAGATGAT

>M6-PGSC0003DMG400030496-(rev)M6LRR-RLP\_732

TGATGGTGATTGTGTATAGAAGTCTCAAGGGTAGGAGATTTCTAATTGTCATAGATGATCTTTGGAGTAC  
TGATGCTTGGGACCAAATGCGAAGAATATTTCAAATGATAACAATAAAA

>M6-PGSC0003DMG400030496-(rev)M6LRR-RLP\_854

CGAATTATACTAACCCTCGTCTCAAACGTGTTGCTGATTATGCAAGCTCCCCTGATTTTCTCCTCATGA  
TGTGTCTTTTCTAAGTTTTAAAGATAGTTGGAACTATTTACCAAAAAG

>M6-PGSC0003DMG400030496-(rev)M6LRR-RLP\_915

CTCCTCATGATGTGTCTTTTCTAAGTTTTAAAGATAGTTGGAACTATTTACCAAAAAGCTATTCAAAAA  
GATTGTTGCTCCTCAACTACGAAAAATAGGGAAGCATATCATAGAAC

>M6-PGSC0003DMG400030496-(rev)M6LRR-RLP\_976

ATTCAAAAAAGATTGTTGCTCCTCAACTACGAAAAATAGGGAAGCATATCATAGAACAATGTCAAGG  
ATTACCTCTCTCGATTATTGTCATTGCTGGACTTCTTGTAAGATAGGCGT

>M6-PGSC0003DMG400030497-(rev)M6LRR-RLP\_0

GAAAAGTAGCAAGTAGTAATTGATTTTATTTATGTGCTTCATTATTCATGCTTTCATCTACTTTTGACTAAC  
AAAACCTAGAGAGAGAAAATGGCCTATGCTTGTATTTCTCACTTATG

>M6-PGSC0003DMG400030497-(rev)M6LRR-RLP\_1116

TTACCTCTCTCGATTATTGTCATTGCTGGACTTCTTGTAAGATAGGCGTGACATATGATAATTGGAAGA  
AAATTGAGGAAAATTTGAAGTCATTTTCATGGTTCGGTTTTAGAACAGTGT

>M6-PGSC0003DMG400030497-(rev)M6LRR-RLP\_1612

TGATGATTCCTTTCTGATTGAGGATTATTTTTGCGATCATCCAAGTCAAATGAGTGGTAAGATTACAACC  
CGCAGCTTGATCTTTATGGGAGCTGGTAAATCTTATCTAGTACCTGAAA

>M6-PGSC0003DMG400030533-(rev)M6RLKWAX-EGF\_0

TAGAGTCACAATTCACAAAGCTTCAGTTAGCTTTCCTCTCATTGCAGTTAGATTCAATATGGCTTTGGCTT  
CTTCTTTTATTTGTTTCCTTCTATCTCTACTTGTGATCTTAGTTCAGGC

>M6-PGSC0003DMG400030533-(rev)M6RLKWAX-EGF\_1054

AAGCTCAAATCCTTTCTCTAGCAATAAAGGAACAGAAAGAAGAGACTTAAACACACAATGTATGGATGT  
GGAGTTAAGGGAGAATTCCTTCTCCATGCTATTTCTTTTTTGCTTTTCCAA

>M6-PGSC0003DMG400030533-(rev)M6RLKWAX-EGF\_1116

TGGATGTGGAGTTAAGGGAGAATTCCTTCTCCATGCTATTTCTTTTTTGCTTTTCCAAAGAAATTGATTC  
TAACTTCTCTCCAGTCTTTGGCGGAGTAGGATCGGTGATGATAACTTC

>M6-PGSC0003DMG400030533-(rev)M6RLKWAX-EGF\_1178

ATTGATTTCTAACTTCTCTCCAGTCTTTGGCGGAGTAGGATCGGTGATGATAACTTCTTTAGTTGTATAC  
ATTATCTGGCGTTACACGAAGAGGAAATTTAGTTCATCCCGCTTCTTCT

>M6-PGSC0003DMG400030533-(rev)M6RLKWAX-EGF\_124

GGCAGAAATGTTTCAACTTGCCAAAGTCCTTTTCATGTGGAAATTTACTGACCTGAGCTTTCCTTTCTC  
TCTTTCCACACAACCCGATTGTGGAATGATGTCCATGTCTGGTTGTGAT

>M6-PGSC0003DMG400030533-(rev)M6RLKWAX-EGF\_1240

GTTGTATACATTATCTGGCGTTACACGAAGAGGAAATTTAGTTCATCCCGCTTCTTCTCGACAAGGAAAT  
TGTCCGATATCCTTAATCATGATGTTGAGGGAGGCAGTATATACTTTGGT

>M6-PGSC0003DMG400030533-(rev)M6RLKWAX-EGF\_1302

AAGGAAATTGTCCGATATCCTTAATCATGATGTTGAGGGAGGCAGTATATACTTTGGTGTTCAGTCTTC  
TCTTATTCAGAACTTGAAGAGGCCACAGATGATTTCAATTCCTCTAGAGT

>M6-PGSC0003DMG400030533-(rev)M6RLKWAX-EGF\_1364

CAGTCTTCTTATTTCAGAACTTGAAGAGGCCACAGATGATTTCAATTCCTCTAGAGTACTTGGAGAAGG  
AGGTTATGGAAGTGTTCCTTACTATGGTGAGAACTTCTTAACCTTGATATGC

>M6-PGSC0003DMG400030533-(rev)M6RLKWAX-EGF\_1426

GGAGAAGGAGGTTATGGAAGTGTTCCTTACTATGGTGAGAACTTCTTAACCTTGATATGCATCAACTGTTTC  
TTCTTGTGGCTAATTCCTTTCCATCGATGAACAGGAAAACCTTAAAGATGG



>M6-PGSC0003DMG400030533-(rev)M6RLKWAX-EGF\_1488  
ACTGTTTCTTCTTGTGGCTAATTCTTTCCATCGATGAACAGGAAACTTAAAGATGGACGGGAGATTGC  
TGTAAGCGCCTCTACGAGCACAACCTGCAAGCGAATGGAGCAGTTTGTGA

>M6-PGSC0003DMG400030533-(rev)M6RLKWAX-EGF\_1550  
GAGATTGCTGTAAAGCGCCTCTACGAGCACAACCTGCAAGCGAATGGAGCAGTTTGTGAATGAAATTGAT  
ATCCTTACTAGACTAAGGCACAACAATCTTGTACCCTCTATGGCTGCACT

>M6-PGSC0003DMG400030533-(rev)M6RLKWAX-EGF\_1612  
AATTGATATCCTTACTAGACTAAGGCACAACAATCTTGTACCCTCTATGGCTGCACTTCAAGACGAAGC  
CGTGAACACTCCTTGTCTATGAATATATTCCTAATGGTACTCTTGCTGA

>M6-PGSC0003DMG400030533-(rev)M6RLKWAX-EGF\_1674  
GACGAAGCCGTGAACTACTCCTTGTCTATGAATATATTCCTAATGGTACTCTTGCTGATCACCTTCATGGT  
GACAGAGCAAAGACGGATCACTTACCTGGCCAGTCCGCATGAACATTG

>M6-PGSC0003DMG400030533-(rev)M6RLKWAX-EGF\_1736  
CTTCATGGTGACAGAGCAAAGACGGATCACTTACCTGGCCAGTCCGCATGAACATTGCCGTAGAAACT  
GCTAGTGCATTGGCTTACCTGCATGCTTCTGACGTAATACACTGCGATGTG

>M6-PGSC0003DMG400030533-(rev)M6RLKWAX-EGF\_1798  
AGAAACTGCTAGTGCATTGGCTTACCTGCATGCTTCTGACGTAATACACTGCGATGTGAAGACTAATAAC  
ATACTCCTTGATCAAACTTTGGTGTTAAAGTTGCGGATTTTGGGATTTT

>M6-PGSC0003DMG400030533-(rev)M6RLKWAX-EGF\_186  
TCCTTTCTCTCTTTCCACACAACCCGATTGTGGAATGATGTCCATGTCTGGTTGTGATGCTAAACCATATC  
CAAGAATCCAAGTCTTGGAGGAGAATGGTACTATGCTTTAAAGAT

>M6-PGSC0003DMG400030533-(rev)M6RLKWAX-EGF\_1860  
CTAATAACATACTCCTTGATCAAACTTTGGTGTTAAAGTTGCGGATTTTGGGATTTCAAGGCTCTTCCCA  
AATGATGTCTCTCATATTTCAACTACACCCCGGGGTACCCAGGCTATA

>M6-PGSC0003DMG400030533-(rev)M6RLKWAX-EGF\_1984  
TCCAAAGTATCACGAATGTTACCAGCTGACCATTAAGTGTATGTCTATAGCTTCGGGGTGGTCCTTGT  
GAGCTCATTTCAATGCCGGCAGTGGATATGAACAGGCATAGCCAAGA

>M6-PGSC0003DMG400030533-(rev)M6RLKWAX-EGF\_2046  
TCCTTGTTGAGCTCATTTCAATGCCGGCAGTGGATATGAACAGGCATAGCCAAGAGATCAATTTGGC

CAACTATGCAATAAACAAGATCATAAAATCTGCAGTTAATGAGTTGATTG

>M6-PGSC0003DMG400030533-(rev)M6RLKWAX-EGF\_2108

AATTTGGCCAACTATGCAATAAACAAGATCATAAAATCTGCAGTTAATGAGTTGATTGATCCATCCCTGG

GGTTCGATTGATACCAAACTTGGGAAATGACTACTTCAGTGGCTGAG

>M6-PGSC0003DMG400030533-(rev)M6RLKWAX-EGF\_2232

CTTTTCTGTGCTTGCAGACAGATAGGGACGTGAGGCCTACTATGCTTGAAGTTTTGGATACTCTAAAGGA

GATTCAGACTAATCTCAATGCCAATGAAGCTAAAATAGCAGTTGTTCTC

>M6-PGSC0003DMG400030533-(rev)M6RLKWAX-EGF\_2294

CTAAAGGAGATTCAGACTAATCTCAATGCCAATGAAGCTAAAATAGCAGTTGTTCTCCTTTTCTGAAT

CAGAAGATATTTTCTTGTGAAGAAAGTTAAATCACTACCTTCTCAAAT

>M6-PGSC0003DMG400030533-(rev)M6RLKWAX-EGF\_2356

TCCTGAATCAGAAGATATTTTCTTGTGAAGAAAGTTAAATCACTACCTTCTCAAATTCTGTGACTGATA

AATGGACTACTTGCTCTGATATAACTTGTACAAAATAGTTAAGATTTCT

>M6-PGSC0003DMG400030533-(rev)M6RLKWAX-EGF\_2418

TGACTGATAAATGGACTACTTGCTCTGATATAACTTGTACAAAATAGTTAAGATTTCTATACTCCGTTTCT

TTGTTACTTTTATGTAAATTTTTGTAAACTGCAAATGTACTACTGTGA

>M6-PGSC0003DMG400030533-(rev)M6RLKWAX-EGF\_248

AACCATATCCAAGAATCCAAGTCTTGGAGGAGAATGGTACTATGCTTTAAAGATGCATAATTCATC

AGTTTGGATTGGGGACACGAAGCTTCAAACAACCTTGACGCAACACAAGT

>M6-PGSC0003DMG400030533-(rev)M6RLKWAX-EGF\_310

AATTCATCAGTTTGGATTGGGGACACGAAGCTTCAAACAACCTTGACGCAACACAAGTGCCAGGCGTTT

AACAAAATTTCTCCCTCCATACTCTCCTTTATTTCTTTCAATATGAAT

>M6-PGSC0003DMG400030533-(rev)M6RLKWAX-EGF\_372

GGCGTTTAACAAAAATTTCTCCCTCCATACTCTCCTTTATTTCTTTCAATATGAATAATCTTATAAACATC

TTCAAATGCATCAGTAGCAGTAATAATGTCCATAACATTACGCAGAA

>M6-PGSC0003DMG400030533-(rev)M6RLKWAX-EGF\_434

TTATAAACATCTTCAAATGCATCAGTAGCAGTAATAATGTCCATAACATTACGCAGAAGAAGAACGATCA

TTTTGTGGGTTATAATACGTACAGTGGCTGTGAAGGCTTTAGAATATACT

>M6-PGSC0003DMG400030533-(rev)M6RLKWAX-EGF\_496

AACGATCATTTTGTGGGTTATAATACGTACAGTGGCTGTGAAGGCTTTAGAATATACTACAAGCTTTCCG  
ATGAATACATAGGAGCAGACAATATTCTACCAACTGTTCACTTGTCAGA

>M6-PGSC0003DMG400030533-(rev)M6RLKWAX-EGF\_558

GCTTTCCGATGAATACATAGGAGCAGACAATATTCTACCAACTGTTCACTTGTCAGATTGCCGATTGAG  
TCAGGTGATGGTGATTTGTTCAACAGGTTAGGTCCTGAAATTCTAGTAGA

>M6-PGSC0003DMG400030533-(rev)M6RLKWAX-EGF\_62

CTTTGGCTTCTTCTTTTATTGTTTCCTTCTATCTCTACTTGTGATCTTAGTTCAGGCAAAGGGCAGAAATG  
TTTCAACTTGCCAAAGTCCTTTTCATGTGGAAATTTTACTGACCTGA

>M6-PGSC0003DMG400030533-(rev)M6RLKWAX-EGF\_620

CGATTCAGTCAGGTGATGGTGATTTGTTCAACAGGTTAGGTCCTGAAATTCTAGTAGAATGGAACTGT  
CTGAGGAATGTAACGAATGTCATTATGGTGGAGGTCAATGCCAGACTGATA

>M6-PGSC0003DMG400030533-(rev)M6RLKWAX-EGF\_744

CAACAAATTTTCTTGTCACAAAGGTAGGCATCTCCAAAATGATCTATACTTTCAAGGCCAAGTTCATGCTT  
CTTAAGTCCCTTTCTTGTTCATGCCGCGTAAATAATATATTTTCGTAGT

>M6-PGSC0003DMG400030533-(rev)M6RLKWAX-EGF\_806

TTCATGCTTCTTAAGTCCCTTTCTTGTTCATGCCGCGTAAATAATATATTTTCGTAGTATTGCCTCCTTCTGT  
AGATGCAAAAACACCTACAGGTAGTACCGATCAAAGAAAAGAAACAA

>M6-PGSC0003DMG400030533-(rev)M6RLKWAX-EGF\_868

CCTCCTTCTGTAGATGCAAAAACACCTACAGGTAGTACCGATCAAAGAAAAGAAACAACCTGGAAGAAAT  
GGAAGAAATATGGTGAGGCAGATTCTGGGAACAGGTAGTAAAATATGTTTA

>M6-PGSC0003DMG400030533-(rev)M6RLKWAX-EGF\_930

AAGAAATGGAAGAAATATGGTGAGGCAGATTCTGGGAACAGGTAGTAAAATATGTTTAATTGCTGCCA  
TGTATTCTTATTACAGAATATTCATGCATATCATTTAAAATTTTCATCATTTT

>M6-PGSC0003DMG400030533-(rev)M6RLKWAX-EGF\_992

CTGCCATGTATTCTTATTACAGAATATTCATGCATATCATTTAAAATTTTCATCATTTTGTATAAGCTCAAAT  
CCTTTCTCTAGCAATAAAGGAACAGAAAGAAGAGACTTAAACACACAA

>M6-PGSC0003DMG400030535-(rev)M6RLKWAX-EGF\_0

ATGAGTTATCCTTTTTCAGAATTCAATAAACCATATTGTGGATTATCAAAGATTGATTGTAACAACACTTT  
TCAATATCCAAAAGTTGAGATTGAAGGTGTGACATACAATGCTTACAAG

>M6-PGSC0003DMG400030535-(rev)M6RLKWAX-EGF\_1178  
CTGACACGTGTACGAGAGCATTTTGGGAGAGTCTGAGCAACATTGAGTAAAATGTAACCTGTTTAATAT  
CTCATCTGCTCTGCAGTGCTTGGTGGAAATTTTTATAATAGCAATCAGCATA

>M6-PGSC0003DMG400030535-(rev)M6RLKWAX-EGF\_124  
GGCTATGGGTTGATGGTATCGATCTTTCGGACTCGATTCTTGAAGGTTATTTGGATACTAAAAGTTGTAA  
ATCCTTTGAAAGGAACTTATCTTTCCTAATACACCTTCTGTTTCATTTG

>M6-PGSC0003DMG400030535-(rev)M6RLKWAX-EGF\_1240  
TTAATATCTCATCTGCTCTGCAGTGCTTGGTGGAAATTTTTATAATAGCAATCAGCATAGTGATCAATATAA  
TCTGCTGTTGCAAGAAGGGTAATAGAAGTTTTACTAATGTTCTTCCAAG

>M6-PGSC0003DMG400030535-(rev)M6RLKWAX-EGF\_1302  
TCAATATAATCTGCTGTTGCAAGAAGGGTAATAGAAGTTTTACTAATGTTCTTCCAAGAAGCATCCCTTC  
AGAGCCCTCAACACAAAGCTACGAATTAGACAGCGGGTCTTTGGGGTTC

>M6-PGSC0003DMG400030535-(rev)M6RLKWAX-EGF\_1364  
ATCCCTTCAGAGCCCTCAACACAAAGCTACGAATTAGACAGCGGGTCTTTGGGGTCCCGTCTTCTCTT  
ATGCTGAACTTCAACAAGCTACCATGAATTTGATTTCATCCAGAGAACTC

>M6-PGSC0003DMG400030535-(rev)M6RLKWAX-EGF\_1426  
CTTCTCTTATGCTGAACTTCAACAAGCTACCATGAATTTGATTTCATCCAGAGAACTCGGAGATGGAGGA  
TACGGAACAGTGTACTATGGTAAGAACTTTTGACAATGCAGATGTCTAG

>M6-PGSC0003DMG400030535-(rev)M6RLKWAX-EGF\_1488  
ATGGAGGATACGGAACAGTGTACTATGGTAAGAACTTTTGACAATGCAGATGTCTAGCCATCACTTTCT  
TCTTTTTCGTTGATTCTAATTCTTGTATGCTACAATACTAGGGAACTTC

>M6-PGSC0003DMG400030535-(rev)M6RLKWAX-EGF\_1550  
CACTTTCTTCTTTTTCGTTGATTCTAATTCTTGTATGCTACAATACTAGGGAACTTCAGGATGGAAGAGA  
GGTAGCAGTAAAACGCCTCTACGACCACAATGCTAGGAGAAAGGAGCAG

>M6-PGSC0003DMG400030535-(rev)M6RLKWAX-EGF\_1612  
TGGAAGAGAGGTAGCAGTAAAACGCCTCTACGACCACAATGCTAGGAGAAAGGAGCAGTTTGTAAGT  
AGATCGAAATTCTAACAAGGTTAAGGCACAAAAATCTTGTCACTCTTTATGG

>M6-PGSC0003DMG400030535-(rev)M6RLKWAX-EGF\_1674  
TAACTGAGATCGAAATTCTAACAAGGTTAAGGCACAAAAATCTTGTCACTCTTTATGGTTGCACATCTAA

ACTCAGCGATCAACTCTTACTTGTTTATGAGTATGTCCCAAATGGAACGA

>M6-PGSC0003DMG400030535-(rev)M6RLKWAX-EGF\_1736

ACATCTAAACTCAGCGATCAACTCTTACTTGTTTATGAGTATGTCCCAAATGGAACGATTGCTGATCACTT

ACACGGTCATAAGGTGAAGGATGGTTCACCTCACGTGGCCTATCCGCATG

>M6-PGSC0003DMG400030535-(rev)M6RLKWAX-EGF\_1798

TGATCACTTACACGGTCATAAGGTGAAGGATGGTTCACCTCACGTGGCCTATCCGCATGAAAATTGCTATT

GAAGCTGCCACTGCTCTAGCATATCTGCATGCTTCTGATATAATCCACCG

>M6-PGSC0003DMG400030535-(rev)M6RLKWAX-EGF\_186

AGTTGTAAATCCTTTGAAAGGAACTTATCTTTTCTAATACACCTTCTGTTTCATTTGGTGTATTCAACAAT

ATCACTTTGTTCAAATGTATGAATGGTAGTACTAATGAGGAGATAGGT

>M6-PGSC0003DMG400030535-(rev)M6RLKWAX-EGF\_1860

TTGCTATTGAAGCTGCCACTGCTCTAGCATATCTGCATGCTTCTGATATAATCCACCGCGATGTGAAGAG

TAACAACATACTACTTGATCAAACTTCTGTGTCAAAGTTGGAGATTTTG

>M6-PGSC0003DMG400030535-(rev)M6RLKWAX-EGF\_1922

GTGAAGAGTAACAACATACTACTTGATCAAACTTCTGTGTCAAAGTTGGAGATTTTGGACTTTCAAGAC

TTCATCCAAGTATTTCTCACATATCAACTGCACCTCAAGGTACCCCT

>M6-PGSC0003DMG400030535-(rev)M6RLKWAX-EGF\_1984

TTCAAGACTTCATCCAAGTATTTCTCACATATCAACTGCACCTCAAGGTACCCCTGGATACGTCGATC

CAAAGTACCACGAATGTTACCAGCTTACTGATAAAAGTGATGTTTATAG

>M6-PGSC0003DMG400030535-(rev)M6RLKWAX-EGF\_2046

ACGTCGATCCAAAGTACCACGAATGTTACCAGCTTACTGATAAAAGTGATGTTTATAGCTTTGGGGTAGT

CCTCGTTGAGCTGTTATCATCCATGCCTGCAGTAGACTTCAGTAGACGTA

>M6-PGSC0003DMG400030535-(rev)M6RLKWAX-EGF\_2108

GGGGTAGTCCTCGTTGAGCTGTTATCATCCATGCCTGCAGTAGACTTCAGTAGACGTAACGAAGAGATC

AACTTGTCTAACTATGCAATAAACAGGATTTTAAGGTGTGCATTTCGATGAG

>M6-PGSC0003DMG400030535-(rev)M6RLKWAX-EGF\_2170

AGAGATCAACTTGTCTAACTATGCAATAAACAGGATTTTAAGGTGTGCATTTCGATGAGTTGATAGACCC

GTCCCTCGGTTTTTCACTGCTGATGCAGAAGTTAGGAGGATGACTACTTCAGT

>M6-PGSC0003DMG400030535-(rev)M6RLKWAX-EGF\_2232

TAGACCCGTCCCTCGGTTTTAGTCTGATGCAGAAGTTAGGAGGATGACTACTTCAGTAGCCGAGATATC  
ATTTTCGATGCTTGCAACATGACAAGGACATGAGACCTACTATGGTTGAAG

>M6-PGSC0003DMG400030535-(rev)M6RLKWAX-EGF\_2294

GAGATATCATTTCGATGCTTGCAACATGACAAGGACATGAGACCTACTATGGTTGAAGTACTAGAAACA  
TTGCAAGAAATTCAGCATGGTGAGTTTAAACATGATAAGAAAATCGATTGT

>M6-PGSC0003DMG400030535-(rev)M6RLKWAX-EGF\_2356

AGAAACATTGCAAGAAATTCAGCATGGTGAGTTTAAACATGATAAGAAAATCGATTGTGACGGAAACAC  
GAAAGAGAGTGTACAAGTCCCTCTTTCTCCTGAATCAGAAGTAGATGTATT

>M6-PGSC0003DMG400030535-(rev)M6RLKWAX-EGF\_2418

GAAACACGAAAGAGAGTGTACAAGTCCCTCTTTCTCCTGAATCAGAAGTAGATGTATTATTGAAGAAAC  
TCAACAAGAAGTTTCCAACCTTACCAATTCAGTAACTCAAGTGTGGATTA

>M6-PGSC0003DMG400030535-(rev)M6RLKWAX-EGF\_2450

TCTCCTGAATCAGAAGTAGATGTATTATTGAAGAACTCAACAAGAAGTTTCCAACCTTACCAATTCAG  
TAACTCAAGTGTGGATTAGTGACTCTAGCACAAGTACCACTAGTACATAA

>M6-PGSC0003DMG400030535-(rev)M6RLKWAX-EGF\_248

ATTCAACAATATCACTTTGTTCAAATGTATGAATGGTAGTACTAATGAGGAGATAGGTGGTTATTTTCGA  
CGTTATGAGAAGTACTTGAATTGTGATGGATTAACTTGTACTATCATAA

>M6-PGSC0003DMG400030535-(rev)M6RLKWAX-EGF\_310

ATTTTCGACGTTATGAGAAGTACTTGAATTGTGATGGATTAACTTGTACTATCATAAACCAAGAACAGA  
TCATAGAAACTATAGTATTCCAGTTGATGAGGATGATCTTCCTGCAAACCT

>M6-PGSC0003DMG400030535-(rev)M6RLKWAX-EGF\_372

AGAACAGATCATAGAAACTATAGTATTCCAGTTGATGAGGATGATCTTCCTGCAAACCTGCTCGATTATTC  
GATTGCCTTTGAAGTATATTCCAACCTCAGTACCAGTTCCATCTGATTTG

>M6-PGSC0003DMG400030535-(rev)M6RLKWAX-EGF\_434

GATTATTCGATTGCCTTTGAAGTATATTCCAACCTCAGTACCAGTTCCATCTGATTTGTTTGAGTTGTTGA  
GTTCTAATTTACATTGGATTGGGAAGTGTCTAAAGATTGTTCTAAGTG

>M6-PGSC0003DMG400030535-(rev)M6RLKWAX-EGF\_496

AGTTGTTGAGTTCTAATTTACATTGGATTGGGAAGTGTCTAAAGATTGTTCTAAGTGTTTTATAGAGA  
AGGACAATGTCAAAGTGACAGCAAAAATAACTTCTCTTGCTCCAAAGGTA

>M6-PGSC0003DMG400030535-(rev)M6RLKWAX-EGF\_558

TATAGAGAAGGACAATGTCAAAGTGACAGCAAAAATAACTTCTCTTGCTCCAAAGGTATTTGTTGCTTTC  
TTTACTATGTTAATGTGGATGAATGTGCATTTATTTCAATCTTATTGTGA

>M6-PGSC0003DMG400030535-(rev)M6RLKWAX-EGF\_62

CAACACTTTTCAATATCCAAAAGTTGAGATTGAAGGTGTGACATACAATGCTTACAAGAAGTGGCTATG  
GGTTGATGGTATCGATCTTTCGGACTCGATTCTTGAAGGTTATTTGGATAC

>M6-PGSC0003DMG400030535-(rev)M6RLKWAX-EGF\_620

TTGCTTTCTTTACTATGTTAATGTGGATGAATGTGCATTTATTTCAATCTTATTGTGACTAATTGAACTGTC  
ATTTGTGTGTTTTGCAGCAGCAAAAAGAATTTGGGATTGATTCTAGG

>M6-PGSC0003DMG400030535-(rev)M6RLKWAX-EGF\_682

TTGAACTGTCATTTGTGTGTTTTGCAGCAGCAAAAAGAATTTGGGATTGATTCTAGGCTCAGGTACTTT  
ACTATAGTCTATAATCAATAACTTTTGGCATAACGTATAAATAAACACTC

>M6-PGSC0003DMG400030535-(rev)M6RLKWAX-EGF\_744

GGTACTTTACTATAGTCTATAATCAATAACTTTTGGCATAACGTATAAATAAACACTCGAAACTTGATCTC  
AACCGACAAGTAAACATTCCAACCTTTGAGTATATATGCACATCTAGACA

>M6-PGSC0003DMG400030536-(rev)M6RLKWAX-EGF\_0

TTTTAACTAACATTCTTGCTTATTCTTGTTGTTTTTTAATCCAAAAGGGCTCATCATGGATATGTTCTCTT  
GTTTTTTCGTCTTCGTTTTGTTTCACTTTTGGTGCTTTGATTCAGCTC

>M6-PGSC0003DMG400030536-(rev)M6RLKWAX-EGF\_1037

TCTCCTTGGTCATATGAAGGAAACTCTTATTGTTGTATCAAGGCTACCCTTATCAATAACAAAGATATAAA  
GAATCTAAAATATTTAACTTTAGTCCATGTTTAATGTTTCGTTGATTGGT

>M6-PGSC0003DMG400030536-(rev)M6RLKWAX-EGF\_1159

TTGTTGTTTTTTGTTTCAGTTTCAGCATTTATCGGTTCTGTTGTTGGACTCTGTGCAATTGCCTGTGTTCTA  
TGGTTTTACATGAGGAGGAGAAATGATTCTTCACAATTTATTTCAAGA

>M6-PGSC0003DMG400030536-(rev)M6RLKWAX-EGF\_1220

CCTGTGTTCTATGGTTTTACATGAGGAGGAGAAATGATTCTTCACAATTTATTTCAAGAAATACATCTGGT  
ATTTCAATGATTCATCACGAGCTCGAGGAACGTTGTGAGTACCTAGGGA

>M6-PGSC0003DMG400030536-(rev)M6RLKWAX-EGF\_1281

TACATCTGGTATTTCAATGATTCATCACGAGCTCGAGGAACGTTGTGAGTACCTAGGGATTCCGGTATTC

TCCTATGAAGAACTTGAAGAAGCCACCAACAAATTCAGCTCTTCTAGAGA

>M6-PGSC0003DMG400030536-(rev)M6RLKWAX-EGF\_1342

CCGGTATTCTCCTATGAAGAACTTGAAGAAGCCACCAACAAATTCAGCTCTTCTAGAGAACTTGGTGATG

GAGGTTATGGAAGTGTGTACTATGGTAAGAAAACCTTTTTTCATAGAAGTT

>M6-PGSC0003DMG400030536-(rev)M6RLKWAX-EGF\_1708

CCACAAAAGTCTTTTTTGTGGTTTGTCTTTTTGAGGGGAAATGTACGTAGTAAGCATCTTTTGATCTAAC

AGCTATTTCTGTATGTTTCGAAAATCAGGAAAGCTTAAAGATGGAAAAGA

>M6-PGSC0003DMG400030536-(rev)M6RLKWAX-EGF\_1769

TTGATCTAACAGCTATTTCTGTATGTTTCGAAAATCAGGAAAGCTTAAAGATGGAAAAGAAGTTGCAGTT

AAGAGCCTTTATGAGAACAATCACAGGCAAATGCAGCAATTTATCAATGAA

>M6-PGSC0003DMG400030536-(rev)M6RLKWAX-EGF\_183

TGAGTTTTCTTTCTACAAATCCACTGAACTTGATTGTGGATTGTCCAAAGTTTATTGTGAAGATACTGAA

AATCCCATGATTGAATTAGAAGGGGTGAAATATCAAGCTCTTGAAAAAT

>M6-PGSC0003DMG400030536-(rev)M6RLKWAX-EGF\_1830

TTGCAGTTAAGAGCCTTTATGAGAACAATCACAGGCAAATGCAGCAATTTATCAATGAAATTGAAATTCT

CACTCGCCTTAGGCATCCAAATCTTGTTACCCTTTATGGATGTGCATCAA

>M6-PGSC0003DMG400030536-(rev)M6RLKWAX-EGF\_1891

TGAAATTCTCACTCGCCTTAGGCATCCAAATCTTGTTACCCTTTATGGATGTGCATCAAGACGTAGCCGTG

AACTCTTCCTTGTTTATGAGTACATTCCTAATGGAACAATTGCTGATCA

>M6-PGSC0003DMG400030536-(rev)M6RLKWAX-EGF\_1952

CGTAGCCGTGAACTCTTCCTTGTTTATGAGTACATTCCTAATGGAACAATTGCTGATCACCTGAACGGAC

ATAGAGCGAAGGATAAGTTACTAACATGGTCTATAAGGCTCAAAAATCGCC

>M6-PGSC0003DMG400030536-(rev)M6RLKWAX-EGF\_2013

TGAACGGACATAGAGCGAAGGATAAGTTACTAACATGGTCTATAAGGCTCAAAAATCGCCATTGAAACTG

CTAGCGCGTTGGCTTACCTTCATGCTTCTGACATCATAACCCGTGATGTCA

>M6-PGSC0003DMG400030536-(rev)M6RLKWAX-EGF\_2074

TGAAACTGCTAGCGCGTTGGCTTACCTTCATGCTTCTGACATCATAACCCGTGATGTCAAACAAATAAC

ATTCTCCTGGACAATAAGTTTTGTGTCAAAGTAGCAGATTTCTGGGTTGTC

>M6-PGSC0003DMG400030536-(rev)M6RLKWAX-EGF\_2135



ACAAATAACATTCTCCTGGACAATAAGTTTTGTGTCAAAGTAGCAGATTTTCGGGTTGTCAAAATCCTTCC  
CTAATGATGTTACTCATATCTCAACCGCACCTCAGGGGACCCCGGGATAT

>M6-PGSC0003DMG400030536-(rev)M6RLKWAX-EGF\_2196

AATCCTTCCCTAATGATGTTACTCATATCTCAACCGCACCTCAGGGGACCCCGGGATATGTTGATCCTCA  
GTATCATGAATGTTACCACCTTACTGATAAGAGTGATGTTTATAGCTTTG

>M6-PGSC0003DMG400030536-(rev)M6RLKWAX-EGF\_2257

TGATCCTCAGTATCATGAATGTTACCACCTTACTGATAAGAGTGATGTTTATAGCTTTGGGGTTGTCCTTG  
TTGAGCTCATATCATCAAAGCGAGCTGTAGATATGAACAGACATATGCA

>M6-PGSC0003DMG400030536-(rev)M6RLKWAX-EGF\_2318

GTTGTCCTTGTTGAGCTCATATCATCAAAGCGAGCTGTAGATATGAACAGACATATGCATGAGATTAATT  
TGGCAAACACTACGCGATGAACAGGATACTAAAATCCGCATTTGATGAGGTG

>M6-PGSC0003DMG400030536-(rev)M6RLKWAX-EGF\_2379

AGATTAATTTGGCAAACACTACGCGATGAACAGGATACTAAAATCCGCATTTGATGAGGTGATTGATCCAT  
CTCTTGATTTCGAGACAGATGCTGAAGTTAGGAGGATGACAACATCAGTGG

>M6-PGSC0003DMG400030536-(rev)M6RLKWAX-EGF\_244

AGATACTGAAAATCCCATGATTGAATTAGAAGGGGTGAAATATCAAGCTCTTGAAAATATGATGTTTTT  
ATCAGACTTAAGGACACTAGTCTTGGAGAACTTTTGAAGAAGAAGCAGTTG

>M6-PGSC0003DMG400030536-(rev)M6RLKWAX-EGF\_2440

TGATCCATCTCTTGATTTCGAGACAGATGCTGAAGTTAGGAGGATGACAACATCAGTGGCAGAACTCGC  
TTTCCAGTGCTTGCAAGTTGTCAAGGACATGAGACCTACAATGGAAGAAGT

>M6-PGSC0003DMG400030536-(rev)M6RLKWAX-EGF\_2501

GAACTCGCTTTCCAGTGCTTGAAGTTGTCAAGGACATGAGACCTACAATGGAAGAAGTACACGAAGCG  
TTGAAGCTTATCAAATACAGTGAATGGAAAAATTATCAGAAAAAGGATATC

>M6-PGSC0003DMG400030536-(rev)M6RLKWAX-EGF\_2562

ACGAAGCGTTGAAGCTTATCAAATACAGTGAATGGAAAAATTATCAGAAAAAGGATATCAATAGCTGCA  
ATACCAAGACAAGAAGTGTAAAAGTTCATCGTCATCCTTCTGAAACGGATG

>M6-PGSC0003DMG400030536-(rev)M6RLKWAX-EGF\_2623

TAGCTGCAATACCAAGACAAGAAGTGTAAAAGTTCATCGTCATCCTTCTGAAACGGATGATGCTGTGTTA  
TTGAAGAAAAACATTCCAGCTTCACCTGATACTGTGATTGATACATGGGC

>M6-PGSC0003DMG400030536-(rev)M6RLKWAX-EGF\_2684  
GCTGTGTTATTGAAGAAAAACATTCCAGCTTCACCTGATACTGTGATTGATACATGGGCTAGTAGTTCCA  
CTACAAGTAGTACTGGAGGGTGATATTTTCATAAACTCATTTTTCCCCTTC

>M6-PGSC0003DMG400030536-(rev)M6RLKWAX-EGF\_2745  
GTAGTTCCACTACAAGTAGTACTGGAGGGTGATATTTTCATAAACTCATTTTTCCCCTTCATGCTAGATACA  
TATCATGATATCATTTTTATAGAGTTTTTTCAGCTTGTTTCAGCCTGTT

>M6-PGSC0003DMG400030536-(rev)M6RLKWAX-EGF\_2806  
GCTAGATACATATCATGATATCATTTTTATAGAGTTTTTTCAGCTTGTTTCAGCCTGTTTCATGAATATAGTA  
GATGAAGCTTTCTTAAAGTGTTAGTTATAGTCACATATGTATATGATT

>M6-PGSC0003DMG400030536-(rev)M6RLKWAX-EGF\_2867  
TGAATATAGTAGATGAAGCTTTCTTAAAGTGTTAGTTATAGTCACATATGTATATGATTCCCCTTTAGACT  
ATGTTCCCTCGGATTCTCCTAAAATGTTGCTGCACGTGTGTCTGATCCTC

>M6-PGSC0003DMG400030536-(rev)M6RLKWAX-EGF\_2979  
TGATCCTCCAAAAATGCACTACTTCTAGAGGATCCGCACACACTTGTGAGCATTGAAAATTCTCTATG  
GATTATCCTGGCTTTAAAAATGTCTTCGCTACTTTTGGTGAATTATAAC

>M6-PGSC0003DMG400030536-(rev)M6RLKWAX-EGF\_305  
GATGTTTTTATCAGACTTAAGGACACTAGTCTTGGAGAACTTTTGAAGAAGAACAGTTGTGAGATTTTTG  
ATAAAAATATCTCGATCGCTATTTCTCCTTCAATAACATATAGATTTGAT

>M6-PGSC0003DMG400030536-(rev)M6RLKWAX-EGF\_366  
AGATTTTTGATAAAAATATCTCGATCGCTATTTCTCCTTCAATAACATATAGATTTGATCCCTTACTCACTT  
TGTTCAAATGCAACAGAAGCTAAAAGAGTACTCATGACGAATTTTTTC

>M6-PGSC0003DMG400030536-(rev)M6RLKWAX-EGF\_427  
CTTACTCACTTTGTTCAAATGCAACAGAAGCTAAAAGAGTACTCATGACGAATTTTTTCAACTCCAAAAGT  
TACAATGTCTGTGATAGTTTCATATTATACTATAACATCTCCATCCATT

>M6-PGSC0003DMG400030536-(rev)M6RLKWAX-EGF\_488  
CTCCAAAAGTTACAATGTCTGTGATAGTTTCATATTATACTATAACATCTCCATCCATTATTATCAAGTATA  
TAATATTCTAGTAACTGTTTCATTTATTCAGTTGCCTTTGACATCAAA

>M6-PGSC0003DMG400030536-(rev)M6RLKWAX-EGF\_549  
TATCAAGTATATAATATTCCTAGTAACTGTTTCATTTATTCAGTTGCCTTTGACATCAAATTCAGAAGCAAA

AACAAATGGAAGTGGCTTATTTCAATTTGTTAACTGATGAAGTTGTAGTA

>M6-PGSC0003DMG400030536-(rev)M6RLKWAX-EGF\_61

TATGTTCTCTTGTTTTTCGTCTTCGTTTTGTTTCACTTTTGGTGCTTTGATTCAGCTCAAGGACAGAACAC

ATCCTACCCAACTGCACTAAAGAATTCCAGTGTGGGAACTTAAGAAA

>M6-PGSC0003DMG400030536-(rev)M6RLKWAX-EGF\_610

CAGAAGCAAAAACAAATGGAAGTGGCTTATTTCAATTTGTTAACTGATGAAGTTGTAGTAGGATGGACTG

TGTCTGATGAGTGTAATCAGTGTTATTATACAGGAGGAAGGTGTCAAACAG

>M6-PGSC0003DMG400030536-(rev)M6RLKWAX-EGF\_671

ATGGACTGTGTCTGATGAGTGTAATCAGTGTTATTATACAGGAGGAAGGTGTCAAACAGATAATACTAC

TAACAACCTTTCTTTGTTCTAATGCCAATACCAACAATGGTAAAGAGAAGCT

>M6-PGSC0003DMG400030536-(rev)M6RLKWAX-EGF\_732

AATACTACTAACAACCTTTCTTTGTTCTAATGCCAATACCAACAATGGTAAAGAGAAGCTTTTTTCATGGTT

CACATTAAAGATATTAGTTCTTTTCTTTTCTTGTTTCATCTTACATTTT

>M6-PGSC0003DMG400030536-(rev)M6RLKWAX-EGF\_793

TTTCATGGTTCACATTAAAGATATTAGTTCTTTTCTTTTCTTGTTTCATCTTACATTTTTCATTTTACTGTGA

TTGCAGCAGGTCATCATAAATATGCGAAACTGATTGTTGCAGGTACC

>M6-PGSC0003DMG400030536-(rev)M6RLKWAX-EGF\_854

TTTTACTGTGATTGCAGCAGGTCATCATAAATATGCGAAACTGATTGTTGCAGGTACCTATCTTTTAAAC

ATTTTGTCTGCAATTTTGTGTTACATTACAAGATTTTAGCATTTAAAA

>M6-PGSC0003DMG400030536-(rev)M6RLKWAX-EGF\_915

TCTTTTAAACATTTTGTCTGCAATTTTGTGTTACATTACAAGATTTTAGCATTTAAAAGTTTATTTCTACAA

TGAGTATGATATAACAAGAAGTAGTGTTTTCCACCGCTTGAGCTTGT

>M6-PGSC0003DMG400030536-(rev)M6RLKWAX-EGF\_976

TTATTTCTACAATGAGTATGATATAACAAGAAGTAGTGTTTTCCACCGCTTGAGCTTGTGATCTCCTTGGT

CATATGAAGGAACTCTTATTGTTGTATCAAGGCTACCCTTATCAATAA

>M6-PGSC0003DMG400030553M6G-LecRK\_0

AAAAAATGTCTCCTCTCTTTGTTTTCTCTTTGTTACTCTTTTTTCTCTCTAAAAAATTTAGCAAAAGCTAA

CAATTTACAAGCCAAAATAGTTCAATAATTGGTAACACAATTGGTG

>M6-PGSC0003DMG400030553M6G-LecRK\_1037

AGTTTTTCAAGTGGATGTATGAGGAAAACAAGTTTGAATTGTGGTGATTTTGGTGAAAAGGATAGGTTT  
TGGATGTATAAGAATATGAGATTACCTACAAATAATGAGAGTTTGGGAGTT

>M6-PGSC0003DMG400030553M6G-LecRK\_1098

ATAGGTTTTGGATGTATAAGAATATGAGATTACCTACAAATAATGAGAGTTTGGGAGTTGGAAATGAAG  
TAGAGTGTGAAAGTGGTTGTTTGGAGGATTGTGATTGTGTTGGTTATGCTT

>M6-PGSC0003DMG400030553M6G-LecRK\_1159

AAATGAAGTAGAGTGTGAAAGTGGTTGTTTGGAGGATTGTGATTGTGTTGGTTATGCTTATGGTAGTGG  
AAATATTGGGTGTTTGTATATGGAAAAGGGAGATGTTGAATTTGCAACAAC

>M6-PGSC0003DMG400030553M6G-LecRK\_122

AACAAATGGATTTCAATTGCCTCAACAATAGTTTCTTCAAGTGGTAATTTTGAATTGGGATTCTTCACACC  
AGGTAACAATTCCAATTATTACATAGGTATATGGTACAAAAAATAAGT

>M6-PGSC0003DMG400030553M6G-LecRK\_1220

GGTAGTGGAAATATTGGGTGTTTGTATGGAAAAGGGAGATGTTGAATTTGCAACAACCTTCTCAAGAT  
AATGTTAATGGAAGCACCATTTATGTTAGGCTTGCAGCTTCTGAGTTTTCA

>M6-PGSC0003DMG400030553M6G-LecRK\_1281

CTCAAGATAATGTTAATGGAAGCACCATTTATGTTAGGCTTGCAGCTTCTGAGTTTTCAAGTAACCAAGG  
TAATGACTTGCAATTTCTCCTATTTTGTGAAATTTTAGATGCATGATGTA

>M6-PGSC0003DMG400030553M6G-LecRK\_1342

TAACCAAGGTAATGACTTGCAATTTCTCCTATTTTGTGAAATTTAGATGCATGATGTACTTTATTTTGT  
TTTTGGTTCTCGTTTGGTGTATGATATCTGTTTTGGGATCTGACTAAG

>M6-PGSC0003DMG400030553M6G-LecRK\_1403

TTATTTTGTTTTTTGGTTCTCGTTTGGTGTATGATATCTGTTTTGGGATCTGACTAAGATGTATTCGCACC  
ACTTTTAGGGATGGGGTGGGGGAAGGGGAAGCTTTTCTACCGAAAAC

>M6-PGSC0003DMG400030553M6G-LecRK\_1464

GTATTCGCACCACTTTTAGGGATGGGGTGGGGGAAGGGGAAGCTTTTCTACCGAAAACGACTTCAATC  
TCAAACTTGAAGTAGAGACTAGAGACATCTAGTTGAGGATAGAGGAGTAC

>M6-PGSC0003DMG400030553M6G-LecRK\_1525

CTTCAATCTCAAACTTGAAGTAGAGACTAGAGACATCTAGTTGAGGATAGAGGAGTACTTACCAGTTA  
CCACTTCACCACAACCTTTGATAATACATATATGATATATACTTCAAATTG

>M6-PGSC0003DMG400030553M6G-LecRK\_1586

ACCAGTTACCACTTCACCACAACCTTTGATAATACATATATGATATATACTTCAAATTGTTACCTCTAACCA  
GTTACCATTCCATCACAACCTTTATACATATATACTTCAAATTGTTAC

>M6-PGSC0003DMG400030553M6G-LecRK\_1647

ACCTCTAACCAGTTACCATTCCATCACAACCTTTATACATATATACTTCAAATTGTTACCTTTGTAGGTAGA  
GTGGATTTACCTAGTTTATAAAGTTTCTTTTGAGTCCAAATTTGAATT

>M6-PGSC0003DMG400030553M6G-LecRK\_1708

TTGTAGGTAGAGTGGATTTACCTAGTTTATAAAGTTTCTTTTGAGTCCAAATTTGAATTTCATTAACTT  
CTTTTTTTTTCTCTATTATCAAGAAAATGAAAACCAAAAACACATATT

>M6-PGSC0003DMG400030553M6G-LecRK\_1769

ATTAATTACTTCTTTTTTTTTCTCTATTATCAAGAAAATGAAAACCAAAAACACATATTTTCTTGGTTAAC  
TATCCAGTAGCTGAAGTTTACTGCCTTGATTAATTTAGGTTTACATCA

>M6-PGSC0003DMG400030553M6G-LecRK\_183

TCTTCACACCAGGTAACAATTCCAATTATTACATAGGTATATGGTACAAAAAATAAGTAAACAAACCAT  
AATTTGGGTTGCAAATAGAGAGACACCAATTTCCATATATGAAATGGATT

>M6-PGSC0003DMG400030553M6G-LecRK\_1830

CTTGGTTAACTATCCAGTAGCTGAAGTTTACTGCCTTGATTAATTTAGGTTTACATCAGGTAAGCCTAAT  
TAAGGTGTTAAATCTTTTTCTATTAATTCATTATTGAATTCGAGACGTC

>M6-PGSC0003DMG400030553M6G-LecRK\_1891

TAAGCCTAATTAAGGTGTTAAATCTTTTTCTATTAATTCATTATTGAATTCGAGACGTCTGGTTAAAGATG  
GAGGCCATCACTCACAATTAGTGACACATTGAAACATACTAACATTTTT

>M6-PGSC0003DMG400030553M6G-LecRK\_1952

GTTAAAGATGGAGGCCATCACTCACAATTAGTGACACATTGAAACATACTAACATTTTTTTTTCTCTTTTG  
TTATTTGTCTATTTATGAACTTGTCATTAATCTTTTCATTTTACTTGGT

>M6-PGSC0003DMG400030553M6G-LecRK\_2013

TTCTCTTTTGTTATTTGTCTATTTATGAACTTGTCATTAATCTTTTCATTTTACTTGGTAATAATGTGTTCTTT  
GTTCTCTTCATAAACAGATCAAAGCAAACCTTCAACAAAGCTGAAA

>M6-PGSC0003DMG400030553M6G-LecRK\_2074

TAATGTGTTCTTTGTTCTCTTCATAAACAGATCAAAGCAAACCTTCAACAAAGCTGAAAATTGCAATTCCT

ATTGGTGTAATTGCTGCACTTCTTATTCTATCATGCTTTACCTACATAT

>M6-PGSC0003DMG400030553M6G-LecRK\_2135

TGCAATTCCTATTGGTGTAATTGCTGCACTTCTTATTCTATCATGCTTTACCTACATATACTTTAGAAAAAG

AAGAAACTCAAAGTCAAAGGTAACAACAAATGTCTCTTTTTTTAAT

>M6-PGSC0003DMG400030553M6G-LecRK\_2196

TTTAGAAAAAGAAGAACTCAAAGTCAAAGGTAACAACAAATGTCTCTTTTTTTAATGACATTTTTCTC

CTTTTTATTAATAAAAATATACAAAATTTAGTCTTATCAAGACTCTAAA

>M6-PGSC0003DMG400030553M6G-LecRK\_2257

CATTTTTCTCTTTTTATTAATAAAAATATACAAAATTTAGTCTTATCAAGACTCTAAACTCATTCATTTTT

TTTATTTTTAAATATAGAGAGTACTACAAAATTTACAGGCAGAATA

>M6-PGSC0003DMG400030553M6G-LecRK\_2318

CATTCATTTTTTTTTATTTTTAAATATAGAGAGTACTACAAAATTTACAGGCAGAATACAGAAGGGGAA

AGACTAGAATTGATAGATATTCAAGATGATGATATTGAGGTTCCATTTTT

>M6-PGSC0003DMG400030553M6G-LecRK\_2379

GAAGGGGAAAGACTAGAATTGATAGATATTCAAGATGATGATATTGAGGTTCCATTTTTAGCTTTGAA

AGTATATTAGTGGCAACAGATGACTTCTCTGAACAAAATAAGCTTGGTCAA

>M6-PGSC0003DMG400030553M6G-LecRK\_244

ACAAACCATAATTTGGGTTGCAAATAGAGAGACACCAATTTCCATATATGAAATGGATTTTGCACAATTC

AAGATTGATAATGGTAATTTAGTACTATAAATGGTACTAGACACATAAT

>M6-PGSC0003DMG400030553M6G-LecRK\_2440

GCTTTGAAAGTATATTAGTGGCAACAGATGACTTCTCTGAACAAAATAAGCTTGGTCAAGGAGGATTTG

GTCCTGTTTACAAGGATTTATGCAATATCATTTTGCATTTATTTTTATA

>M6-PGSC0003DMG400030553M6G-LecRK\_2501

AGGATTTGGTCCTGTTTACAAGGATTTATGCAATATCATTTTGCATTTATTTTTATAAGTGGTGCACGG

TTCAAACCTCGATTTGTACATGTTTGGCAGAACCAATAATTTTGATTC

>M6-PGSC0003DMG400030553M6G-LecRK\_2562

TGGTGCACGGTTCAAACCTCGATTTGTACATGTTTGGCAGAACCAATAATTTTGATTCATACGTTATATT

TGTGTTTAAAAAATCGATTAATAAGTATAAATATTTTATCCACATCCCA

>M6-PGSC0003DMG400030553M6G-LecRK\_2623

ACGTTATATTTGTGTTTAAAAAATCGATTAATAAGTATAAATATTTTATCCACATCCCAATAAGCTCTCTTT  
TCAAGAATCTGAAATCTATACACTCAAATTCTAGTTTGCTGCATGTA

>M6-PGSC0003DMG400030553M6G-LecRK\_2684

AAGCTCTCTTTTCAAGAATCTGAAATCTATACACTCAAATTCTAGTTTGCTGCATGTACTACTTTTCTTAT  
TAGTTGTCATATCCTTTTTATTGCCACTTTCCTTTTTTCAAACACT

>M6-PGSC0003DMG400030553M6G-LecRK\_2745

ACTTTTCTTATTAGTTGTCATATCCTTTTTATTGCCACTTTCCTTTTTTCAAACACTTTTGAAATGCTTTTCT  
CGAGTTTGATTGTCTATCAGAAACAATTTCTCTATTTCCATGAGGT

>M6-PGSC0003DMG400030553M6G-LecRK\_2806

GAAATGCTTTTCTCGAGTTTGATTGTCTATCAGAAACAATTTCTCTATTTCCATGAGGTAGGAGTAAGGTC  
TATGTACCATCTACCCTCTCTATGCTCCACTTATGAAATTACACTACTG

>M6-PGSC0003DMG400030553M6G-LecRK\_2867

GAGTAAGGTCTATGTACCATCTACCCTCTCTATGCTCCACTTATGAAATTACACTACTGAATATGTTAGTA  
GTATTATATTGTTTTGATGTGGTGGACGAACCTGTGACGTGTGCCTAA

>M6-PGSC0003DMG400030553M6G-LecRK\_2928

TATGTTAGTAGTATTATATTGTTTTGATGTGGTGGACGAACCTGTGACGTGTGCCTAACCAACATAATC  
ACTTTTTAAAATAAATAAATAAATTGTATCACAGTATTTATTTTTAAAAA

>M6-PGSC0003DMG400030553M6G-LecRK\_2989

AACATAATCACTTTTTAAAATAAATAAATAAATTGTATCACAGTATTTATTTTTAAAATAAATAATTTTTT  
TGTAGGGAATATTTTCTGGAGGAAGAGAAATTGCATTA AAAAGGTTAT

>M6-PGSC0003DMG400030553M6G-LecRK\_305

GCACAATTCAAGATTGATAATGGTAATTTAGTACTCATAAATGGTACTAGACACATAATTTGGTCCACAA  
ATATCAATTTTACAACAAATTTCAACAATTCACAAGTTGTAGCAACACTA

>M6-PGSC0003DMG400030553M6G-LecRK\_3050

AATAATTTTTTTGTAGGGAATATTTTCTGGAGGAAGAGAAATTGCATTA AAAAGGTTATCAAGTCATTCT  
GGACAAGGTATAAATGAATTCAAGAATGAAGTGATGTTGATTGCAAGGCT

>M6-PGSC0003DMG400030553M6G-LecRK\_3111

AGTCATTCTGGACAAGGTATAAATGAATTCAAGAATGAAGTGATGTTGATTGCAAGGCTTCAACATAGA  
AATCTTGTTAACTTTTTGGGCTATTGCATTCAATCAAGTGAAAAGATTTTA

>M6-PGSC0003DMG400030553M6G-LecRK\_3172

AACATAGAAATCTTGTTAAACTTTTGGGCTATTGCATTCAATCAAGTGAAAAGATTTTACTCTATGAGTAT  
ATGGCAAACAAAAGTCTAGACACCTTCATATTTGGTTAGTATTTTTATT

>M6-PGSC0003DMG400030553M6G-LecRK\_3233

CTATGAGTATATGGCAAACAAAAGTCTAGACACCTTCATATTTGGTTAGTATTTTTATTTTTAACTAATAT  
CTTTATACTGTTCGATGTCTACAAGTTAAATTTATTTGATTGTTTTTCT

>M6-PGSC0003DMG400030553M6G-LecRK\_3294

TAACTAATATCTTTATACTGTTCGATGTCTACAAGTTAAATTTATTTGATTGTTTTTCTTGCATAAGATCGA  
AAACGAAGCGTGGTGTGGATTGGAGAAAAAGATTTGAGATTATAGAG

>M6-PGSC0003DMG400030553M6G-LecRK\_3355

CATAAGATCGAAAACGAAGCGTGGTGTGGATTGGAGAAAAAGATTTGAGATTATAGAGGGAATTGCT  
AAAGGACTTCTTTATCTACACCATGATTCAAGATTAAGGATTATTCATAGAG

>M6-PGSC0003DMG400030553M6G-LecRK\_3416

AATTGCTAAAGGACTTCTTTATCTACACCATGATTCAAGATTAAGGATTATTCATAGAGATCTCAAAACAA  
GTAACATATTATTAGATGAGGAATTGAATCCAAAATATCAGATTTTGG

>M6-PGSC0003DMG400030553M6G-LecRK\_3477

CTCAAAACAAGTAACATATTATTAGATGAGGAATTGAATCCAAAATATCAGATTTTGGATTAGCAAGA  
GTTGTTGAAGGGAAAATTACACAAGCAAATACAAATAAAGTGGTTGGAACC

>M6-PGSC0003DMG400030553M6G-LecRK\_3538

TAGCAAGAGTTGTTGAAGGGAAAATTACACAAGCAAATACAAATAAAGTGGTTGGAACCTAGTAAGTA  
CTCATAACTCCCTATTGTGATGTGACCCTTCTCCAGAATCTGCTAACGTAGG

>M6-PGSC0003DMG400030553M6G-LecRK\_3599

GTAAGTACTCATAACTCCCTATTGTGATGTGACCCTTCTCCAGAATCTGCTAACGTAGGATGTTTTGTGCA  
TCAGACTGTCCTTTTTGAAATAATTTGCCAATTGTGTTGATTTTCTTGT

>M6-PGSC0003DMG400030553M6G-LecRK\_366

GGTCCACAAATATCAATTTTACAACAAATTTCAACAATTCACAAGTTGTAGCAACACTATTTGATGATGGC  
AATCTAGTATTAAGTAATCAGGATATTACCAATTCGACGAATTATCTAT

>M6-PGSC0003DMG400030553M6G-LecRK\_3660

GTTTTGTGCATCAGACTGTCCTTTTTGAAATAATTTGCCAATTGTGTTGATTTTCTTGTTCAATTAATATGTT



TTGTTGATACTATTAATGCAGTGGTTATATGGCTCCGGAGTATGCAAT

>M6-PGSC0003DMG400030553M6G-LecRK\_3721

ATTAATATGTTTTGTTGATACTATTAATGCAGTGGTTATATGGCTCCGGAGTATGCAATAGACGGATTAT

TCTCAATTAAATCAGATGTATTTAGTTTTGGAATAGTTATACTCGAGATC

>M6-PGSC0003DMG400030553M6G-LecRK\_3782

ACGGATTATTCTCAATTAAATCAGATGTATTTAGTTTTGGAATAGTTATACTCGAGATCATCAGTGGAAG

AAGAAATACTGGATTTTTTAATCAAGAAGAAGCGTCAATCTCTTAGGCC

>M6-PGSC0003DMG400030553M6G-LecRK\_3843

CAGTGGAAGAAGAAATACTGGATTTTTTAATCAAGAAGAAGCGTCAATCTCTTAGGCCCTTGAGTGGA

ATCATTACTTAAATTCTTGCTTCTTTTTTTCAACACTGTCACAGAGTTTC

>M6-PGSC0003DMG400030553M6G-LecRK\_3904

GTGAGTGAATCATTACTTAAATTCTTGCTTCTTTTTTTCAACACTGTCACAGAGTTTCAAACCTTCATAGGT

TAAACTCCAGTACATTGTCACGGAATTTACCTATGAAATTTGAATCG

>M6-PGSC0003DMG400030553M6G-LecRK\_3965

ACTTCATAGGTTAAACTCCAGTACATTGTCACGGAATTTACCTATGAAATTTGAATCGGTCTCTATGACA

TTTATTTCTCAATTACATGACTGAAAAGTACTAGTCCGCGCTATGTAT

>M6-PGSC0003DMG400030553M6G-LecRK\_4026

CTCTATGACATTTATTTCTCAATTACATGACTGAAAAGTACTAGTCCGCGCTATGTATTACAAAACCTTTA

TGCTAACATAAATATGTGTACTATATTTTAGGCATGGAGATTGTGGACA

>M6-PGSC0003DMG400030553M6G-LecRK\_4087

CAAACCTTTATGCTAACATAAATATGTGTACTATATTTTAGGCATGGAGATTGTGGACAGAAGATAAGTC

AATGGACTTAGTGGATCAATCACTACATGAATCATGCAACAAAGAGGAAG

>M6-PGSC0003DMG400030553M6G-LecRK\_4148

AGATAAGTCAATGGACTTAGTGGATCAATCACTACATGAATCATGCAACAAAGAGGAAGCAATTAATTA

GATAAATATTGGGCTTTTTATGTGTACAAGAAGATCCAAAAGATAGGCCCAA

>M6-PGSC0003DMG400030553M6G-LecRK\_4209

ATTAATGATAAATATTGGGCTTTTTATGTGTACAAGAAGATCCAAAAGATAGGCCCAATACATCAAATA

TAATAATGATGCTTGGTAGTGAAAATTCCAATATTATTTCACTTCCAAGA

>M6-PGSC0003DMG400030553M6G-LecRK\_427

TGATGATGGCAATCTAGTATTAAGTAATCAGGATATTACCAATTCGACGAATTATCTATGGACAAGTTTT  
GATCATCCCTCTCATACGTTTCATGCCTGGTTCAAATTCGGTTACAACAA

>M6-PGSC0003DMG400030553M6G-LecRK\_4270

CATCAAATATAATAATGATGCTTGGTAGTGAAAATTCCAATATTATTTCACTTCCAAGACCAAATCAACCA  
GCTTTTATGACAAGAAAATGTGGTAATAATAACACATCTTCTTCTTCTA

>M6-PGSC0003DMG400030553M6G-LecRK\_4331

AAATCAACCAGCTTTTATGACAAGAAAATGTGGTAATAATAACACATCTTCTTCTTCTAATGCTAAGTCTG  
ATGGTGTCTCCAACAATCAGCTTACAGTCACCATTGAAATGGGTTCGATA

>M6-PGSC0003DMG400030553M6G-LecRK\_4392

GCTAAGTCTGATGGTGTCTCCAACAATCAGCTTACAGTCACCATTGAAATGGGTTCGATAACGCACTACTA  
GAAATCAGTCAATTTTTATCATGAGCATGTTTATTAAAAAATCCATCGA

>M6-PGSC0003DMG400030553M6G-LecRK\_4453

GCACTACTAGAAATCAGTCAATTTTTATCATGAGCATGTTTATTAAAAAATCCATCGAAAATATTTTTGA  
TAGAACGTCTGTTGAAAATTGACTGATTTAAGAGTGAGATGCCAGCAAT

>M6-PGSC0003DMG400030553M6G-LecRK\_4514

ATATTTTTGATAGAACGTCTGTTGAAAATTGACTGATTTAAGAGTGAGATGCCAGCAATTTTGACATAGC  
AATATTGTAGTTTTATCTTTACTTATTCAATGTATATATTCAACTTAAGT

>M6-PGSC0003DMG400030553M6G-LecRK\_4557

GTGAGATGCCAGCAATTTTGACATAGCAATATTGTAGTTTTATCTTTACTTATTCAATGTATATATTCAACT  
TAAGTATGTACTTTAAAAACATCTTTAGTAATTAATTATGTATTTTT

>M6-PGSC0003DMG400030553M6G-LecRK\_488

ACAAGTTTTGATCATCCCTCTCATACGTTTCATGCCTGGTTCAAATTCGGTTACAACAAACATACAAGATT  
TAAACAGGTACTTACTTCATGGAAAAACGCAAACGATCCATCACCAGGA

>M6-PGSC0003DMG400030553M6G-LecRK\_549

ATACAAGATTTAAACAGGTACTTACTTCATGGAAAAACGCAAACGATCCATCACCAGGACCCTTTACACA  
TGAAGTTTACATGGAAAATAAGTATATTGGACAAGGTGTTAATATGTGGA

>M6-PGSC0003DMG400030553M6G-LecRK\_61

AGCAAAGCTAACAATTTACAAGCCAAAATAGTTCAATAATTGGTAACACAATTGGTGGAACAAATG  
GATTTCAATTGCCTCAACAATAGTTTCTTCAAGTGGTAATTTGAATTGGG

>M6-PGSC0003DMG400030553M6G-LecRK\_610

CTTTACACATGAAGTTTACATGGAAAATAAGTATATTGGACAAGGTGTTAATATGTGGAACCATAGTGTT  
GTTTATTGGAATAGTGGACCTTGGACAGGTAACAATTTTACAGGGGTACC

>M6-PGSC0003DMG400030553M6G-LecRK\_671

CATAGTGTTGTTTATTGGAATAGTGGACCTTGGACAGGTAACAATTTTACAGGGGTACCATATCAACCAA  
ATCCTATGTTTAATTATACATATGTTAATAATGATGATGAAGTTTATTAT

>M6-PGSC0003DMG400030553M6G-LecRK\_732

ATCAACCAAATCCTATGTTTAATTATACATATGTTAATAATGATGATGAAGTTTATTATATGTATAATTTCT  
TTAACCCCTTCATTAATATCAAATTTTATTATGGATGTTAATGGACAAA

>M6-PGSC0003DMG400030553M6G-LecRK\_793

GTATAATTTCTTTAACCCCTTCATTAATATCAAATTTTATTATGGATGTTAATGGACAAACAAAACAAGTAT  
TGTGGATGGATAGTACTAATGATTGGAATGTATTTTACACTGATCCAAA

>M6-PGSC0003DMG400030553M6G-LecRK\_854

AAACAAGTATTGTGGATGGATAGTACTAATGATTGGAATGTATTTTACACTGATCCAAAACAAGTTTGTG  
ATGTTTATTCTTATTGTGGAGGTTTTGGTATTTGTAATGAGGTAAACTCT

>M6-PGSC0003DMG400030553M6G-LecRK\_915

AAGTTTGTGATGTTTATTCTTATTGTGGAGGTTTTGGTATTTGTAATGAGGTAAACTCTACTTCAACATGT  
GATTGTTTGAATGGTTTTAAGCCTAAGTTTGAGAAAGATTGGAAATTGA

>M6-PGSC0003DMG400030553M6G-LecRK\_976

TTCAACATGTGATTGTTTGAATGGTTTTAAGCCTAAGTTTGAGAAAGATTGGAAATTGAGTAGTTTTTCA  
AGTGGATGTATGAGGAAAACAAGTTTGAATTGTGGTGATTTTGGTGAAAA

>M6-PGSC0003DMG400030561M6LRR-RLP\_0

TGAAGTTCTTAAAGCTAAAACCCCTCAAGAAAACAGAACAATAGCACTATACTCAAATTAATAAAAAAATGA  
ACTACCATCCCTTTTTGATTCTGCTACTTCTTGTTTTTGTCAACCAATCTT

>M6-PGSC0003DMG400030561M6LRR-RLP\_1054

TTTATTTGGATTTGTTAGGGAATGGCATCCACTTCTCTAGTCTCCATTTACTTGAAATCTGACTTCACTTT  
CTGTACTTAAGTTGAGATATAACGTGTTAAAAGGGCTGATCCCGGAGG

>M6-PGSC0003DMG400030561M6LRR-RLP\_1116

ACTTCACTTTCTGTACTTAAGTTGAGATATAACGTGTTAAAAGGGCTGATCCCGGAGGGTTTAACGAGCA

TTTTCTGTCAATTGAGTGTGCTTGATTTGTCAGACAATGAAATCAGTGGA

>M6-PGSC0003DMG400030561M6LRR-RLP\_1178

AACGAGCATTTTCTGTCAATTGAGTGTGCTTGATTTGTCAGACAATGAAATCAGTGGACTGCTTCCAAC

TTTATAAGAGATCCATTGAGCTGTCTCGAGAATCATTGAAGGAGCTATA

>M6-PGSC0003DMG400030561M6LRR-RLP\_124

TTGGTTTCACTAAACTCATCATTCCAATACAACCTGTTCTGAAAATGACCAAAAAGCTCTGATTGAATTC

AAGAATGGCCTAATCGATAACTCGAATCGTTTGTATCATGGACAGGAC

>M6-PGSC0003DMG400030561M6LRR-RLP\_1240

TTCCAACCTTTTATAAGAGATCCATTGAGCTGTCTCGAGAATCATTGAAGGAGCTATACATAGGAAATAC

AAAATTCAGTGACTTCTTCTGAAGGATTGACAATGCACAAGAATCTTG

>M6-PGSC0003DMG400030561M6LRR-RLP\_1302

GGAAATACAAAATTCAGTGACTTCTTCTGAAGGATTGACAATGCACAAGAATCTTGAAGTTATTGACA

GTACTAATAGCTTAATATATGGTGAAATTCATATTCAATAAGCAAGCTG

>M6-PGSC0003DMG400030561M6LRR-RLP\_1364

TATTGACAGTACTAATAGCTTAATATATGGTGAAATTCATATTCAATAAGCAAGCTGTCAAATTTGAGG

TTTCTAAGGATAGCAAACAACAAGTTGAATGGGAGCATTCTTCGAGTAT

>M6-PGSC0003DMG400030561M6LRR-RLP\_1426

ATTTGAGGTTTCTAAGGATAGCAAACAACAAGTTGAATGGGAGCATTCTTCGAGTATTGGACAGTTAT

CGAATCTTGAAGAGCTAGATATCTCGGAGAACTTATTCACCGGTATTGTTT

>M6-PGSC0003DMG400030561M6LRR-RLP\_1488

CAGTTATCGAATCTTGAAGAGCTAGATATCTCGGAGAACTTATTCACCGGTATTGTTTCTGAACTCCACTT

TGTAAAATTAAGCAAATTGATGAAATTGCACTTGTCTAAAAACGAAAAC

>M6-PGSC0003DMG400030561M6LRR-RLP\_1550

ACTCCAACCTTTGTAAAATTAAGCAAATTGATGAAATTGCACTTGTCTAAAAACGAAAACCTTGGTTTTTAATG

TGAGTTCCAATTGGTATCCAACCTTTCCAAGTCAAAGAGATTGGGATGGC

>M6-PGSC0003DMG400030561M6LRR-RLP\_1612

TTTTAATGTGAGTTCCAATTGGTATCCAACCTTTCCAAGTCAAAGAGATTGGGATGGCTTCAGTAAAAGT

AGGGCCTGCTTTTCTCAATGGCTACAAAAGCAGTCAATTCTTGATACTC

>M6-PGSC0003DMG400030561M6LRR-RLP\_1674

GTAAAAGTAGGGCCTGCTTTTCCTCAATGGCTACAAAAGCAGTCAATTCTTGATACTCTTATTATGTCTGA  
TGCTAACATTTCTGATATGATCCCGAATTGGTTGAGCAATATAACGTTG

>M6-PGSC0003DMG400030561M6LRR-RLP\_1736

TATGTCTGATGCTAACATTTCTGATATGATCCCGAATTGGTTGAGCAATATAACGTTGTTTCATGACAACCTC  
TGGATCTCTCTGTTAACAAATTAGTCGGTGGTATAAGCGTGTGTGTGA

>M6-PGSC0003DMG400030561M6LRR-RLP\_1798

TGACAACCTCTGGATCTCTCTGTTAACAAATTAGTCGGTGGTATAAGCGTGTGTGTGATGCTCAACTTTT  
GAAATCGATTGATCTTTCAAAGAATCTGTTATCTGGACGAATCCCTTCAT

>M6-PGSC0003DMG400030561M6LRR-RLP\_186

ATTGAATTCAAGAATGGCCTAATCGATAACTCGAATCGTTTGTTCATCATGGACAGGACAAAATTGTTGCA  
AATGGGATGGAGTTTTTTGTGATGAAAAACAGGAAATGTTGTCAAAT

>M6-PGSC0003DMG400030561M6LRR-RLP\_1860

CAACTTTTGAAATCGATTGATCTTTCAAAGAATCTGTTATCTGGACGAATCCCTTCATGTTTGAGTTACTT  
GGAAGAGTTGAGATCATTAAATTTGGCTGATAATAGTCTTGAAGGTGAA

>M6-PGSC0003DMG400030561M6LRR-RLP\_1922

GAGTTACTTGGAAGAGTTGAGATCATTAAATTTGGCTGATAATAGTCTTGAAGGTGAAATCCCAAGTTCT  
TTAGGTGATTTGCCACTTAAGTTTTTGCATTTGCAAAGAACAACCTTACA

>M6-PGSC0003DMG400030561M6LRR-RLP\_1984

CAAGTTCTTTAGGTGATTTGCCACTTAAGTTTTTGCATTTGCAAAGAACAACCTTACAAGGTAAAATCCCT  
TTGTCTTTTCAAATTTGACATGGTTAGAAAGACTAGACTTAGGAGAAA

>M6-PGSC0003DMG400030561M6LRR-RLP\_2046

AAAATCCCTTTGTCTTTTCAAATTTGACATGGTTAGAAAGACTAGACTTAGGAGAAAACAAGTTGAAGA  
TGTTTTTCTACATGGATTGGCGAAAAGCTACAGAGTTTGGAACCTTGA

>M6-PGSC0003DMG400030561M6LRR-RLP\_2108

GTTGAAGATGTTTTTCTACATGGATTGGCGAAAAGCTACAGAGTTTGGAACCTTGTGAGGCTAAATTCTA  
ATCAATTTTACGGTGTATCCATTAGAACTATGTCAAATCTCATCTCTA

>M6-PGSC0003DMG400030561M6LRR-RLP\_2170

AAATTCTAATCAATTTTACGGTGTATCCATTAGAACTATGTCAAATCTCATCTCTATGTTGGCTAAATCT  
TGCTGGTAATAACTTGTATGGAACCTTCCGAGTTGTTTTGGAACTT

>M6-PGSC0003DMG400030561M6LRR-RLP\_2232

GGCTAAATCTTGCTGGTAATAACTTGTATGGAACATTCCGAGTTGTTTTGGAACTTTTCGTGTGGTAA  
TTTTCGTGGACCTGGCGAAGTATTTGGACAAAGAGTTGAAAGTTTTATGA

>M6-PGSC0003DMG400030561M6LRR-RLP\_2294

TGTGGTAATTTTCGTGGACCTGGCGAAGTATTTGGACAAAGAGTTGAAAGTTTTATGAAAGGAATACCA  
CTTGAGTATGTTGGTGAACAAATTTGTTACTTAGAATTTTGGATCTTTCT

>M6-PGSC0003DMG400030561M6LRR-RLP\_2356

AATACCACTTGAGTATGTTGGTGAACAAATTTGTTACTTAGAATTTTGGATCTTTCTGAAAATAAACTTG  
TTGGAGGTATCCCCAAGGAGTTAACAAAATTGGTATACTTGCAATACTT

>M6-PGSC0003DMG400030561M6LRR-RLP\_2418

ATAAACTTGTTGGAGGTATCCCCAAGGAGTTAACAAAATTGGTATACTTGCAATACTTGAATTTGTCTAG  
AAATAGTCTTAATGGGAGCATACCAAAAAAGATAGGTGATTTGAAGCAAT

>M6-PGSC0003DMG400030561M6LRR-RLP\_248

TTGTTGCAAATGGGATGGAGTTTTTTGTGATGAAAAACAGGAAATGTTGTCAAATTTGATTTGCATTAC  
AAGAATTATCTTCTAGATGGTGAATATCCACAAAGGGTGTAGATAATCA

>M6-PGSC0003DMG400030561M6LRR-RLP\_2480

TTGTCTAGAAATAGTCTTAATGGGAGCATACCAAAAAAGATAGGTGATTTGAAGCAATTGGAGTCACTT  
GATTTGTCACATAACAACTTTCTGGTTCAATTCCTCAAAGTTTAGCTTCT

>M6-PGSC0003DMG400030561M6LRR-RLP\_2542

GTCACCTGATTTGTCACATAACAACTTTCTGGTTCAATTCCTCAAAGTTTAGCTTCTTTGAATTATTTGAG  
CTACATGAACTTGTCATATAACAGTTTTTCAGGTCCAATTCCTACTGG

>M6-PGSC0003DMG400030561M6LRR-RLP\_2604

ATTATTTGAGCTACATGAACTTGTCATATAACAGTTTTTCAGGTCCAATTCCTACTGGAAATCAGCTCCAA  
TCTTTGGATGATCAATCATTTTATGTTGGTAATCCTAGACTTTGTGGAA

>M6-PGSC0003DMG400030561M6LRR-RLP\_2666

CAGCTCCAATCTTTGGATGATCAATCATTTTATGTTGGTAATCCTAGACTTTGTGGAATATTGATCAAGAA  
AAGTTGCAATGGCAATGGAACATCTCATGTAATGAACAACTCCTCAA

>M6-PGSC0003DMG400030561M6LRR-RLP\_2728

GATCAAGAAAAGTTGCAATGGCAATGGAACATCTCATGTAATGAACAACTCCTCAAGGTGATGATCA

TGATCAAGATGTTGATGAACATAAGTGGTTTTATGCTGGAATTGCACCTGG

>M6-PGSC0003DMG400030561M6LRR-RLP\_2790

ATGATCATGATCAAGATGTTGATGAACATAAGTGGTTTTATGCTGGAATTGCACCTGGTTTTTGTGTTGG  
CTTCTTGGGTGTCCTCTTCATTTTGTACAAGACAAGGAATCGTGGCGTGG

>M6-PGSC0003DMG400030561M6LRR-RLP\_2852

TGTGTTGGCTTCTTGGGTGTCCTCTTCATTTTGTACAAGACAAGGAATCGTGGCGTGGTGCACGTTTTCC  
AATGCTTGGCTCGACGTCTATGACAAGTCGTGTATGTACTCCTATGAGAG

>M6-PGSC0003DMG400030561M6LRR-RLP\_2914

CGTTTTCCAATGCTTGGCTCGACGTCTATGACAAGTCGTGTATGTACTCCTATGAGAGGTTGTCTGGTTG  
ACAGTTGACACACAAGTTTTGCAGAGATTAGAGTGTGAGAATTGTAATGC

>M6-PGSC0003DMG400030561M6LRR-RLP\_2976

TCTGGTTGACAGTTGACACACAAGTTTTGCAGAGATTAGAGTGTGAGAATTGTAATGCAGAACATTATA  
ATGTAAAGATTGTAACATATATATATTTTTTTTCGAACTTCATTGTACTAAA

>M6-PGSC0003DMG400030561M6LRR-RLP\_3038

CATTATAATGTAAAGATTGTAACATATATATATTTTTTTTCGAACTTCATTGTACTAAAAACATAAATATTTT  
TTCTATAATGGCAAGCTTGTGCATGAATGTACATCTGTCTCTCATCGA

>M6-PGSC0003DMG400030561M6LRR-RLP\_310

TGCATTACAAGAATTATCTTCTAGATGGTGAATATCCACAAAGGGTGTAGATAATCACACTAAAAACTT  
CTTGCAGAGGTGAGTTAAGTCCTTCTTTGGTTAAATTGAAACATTTGAGTT

>M6-PGSC0003DMG400030561M6LRR-RLP\_3100

TAAATATTTTTTCTATAATGGCAAGCTTGTGCATGAATGTACATCTGTCTCTCATCGAGTTGCTGATCATG  
ATCTCTCTAGACTCGAGAAGAGACTCATCATGACCTGAGATTTTGGATC

>M6-PGSC0003DMG400030561M6LRR-RLP\_372

AAAACTTCTTGCAGAGGTGAGTTAAGTCCTTCTTTGGTTAAATTGAAACATTTGAGTTACTTAGACTTGA  
GTCACAACTACTTCTCAAGTATCCAAATCCACCTTTTTTTGGATTGTTA

>M6-PGSC0003DMG400030561M6LRR-RLP\_434

AGACTTGAGTCACA ACTACTTCTCAAGTATCCAAATCCACCTTTTTTTGGATTGTTAATGAACTTGAGAT  
TTCTTAATCTTCTCTGTGCTGGTTTTGGTGGATATATTCCCAAAAATCT

>M6-PGSC0003DMG400030561M6LRR-RLP\_496

ACTTGAGATTTCTTAATCTTTCCTGTGCTGGTTTTGGTGGATATATCCCAAAAATCTTGGAATTTGTCG  
AGATTAGAACATCTTTATCTTGGTGGATGTTATGGCTACGTTATCGGAC

>M6-PGSC0003DMG400030561M6LRR-RLP\_558

AATTTGTCGAGATTAGAACATCTTTATCTTGGTGGATGTTATGGCTACGTTATCGGACCAGGAAATGATC  
TCAGAGTTGATAGTTTGAGTTGGATATCTAAGTTTTCTTCTTTGAAAAGT

>M6-PGSC0003DMG400030561M6LRR-RLP\_62

AAAAATGAACTACCATCCTTTTTGATTCTGCTACTTCTGTTTTTGTCACCAATCTTGAAGTTGGTTTCAC  
TAAACTCATCATTCCAATACTTGTCTGAAAATGACCAAAAAGC

>M6-PGSC0003DMG400030561M6LRR-RLP\_620

AAATGATCTCAGAGTTGATAGTTTGAGTTGGATATCTAAGTTTTCTTCTTTGAAAAGTTTTGATCTTTCTC  
AATTGGTTATTGAAGATACTAAAGATCTTTGGAATTCAATTAACATGTT

>M6-PGSC0003DMG400030561M6LRR-RLP\_682

ATCTTTCTCAATTGGTTATTGAAGATACTAAAGATCTTTGGAATTCAATTAACATGTTGCCCTCATTACTTT  
CATTGAACTTAGAAGGTTGTAACCTCAACATTTTGCCTTCTTTAGAC

>M6-PGSC0003DMG400030561M6LRR-RLP\_744

TCATTACTTTCATTGAACTTAGAAGGTTGTAACCTCAACATTTTGCCTTCTTTAGACAAGTTAATTTACACA  
TCTCTTAGTTCACTCAATATCCATGATAACGCGATTGGAATGGGCTTT

>M6-PGSC0003DMG400030561M6LRR-RLP\_806

TAATTTACATCTCTTAGTTCACTCAATATCCATGATAACGCGATTGGAATGGGCTTTGAGAATTCCTCCA  
TCATCCCTCCATGGTTTTCTAATCTTACAAGGCTTATGAATCTTGATCT

>M6-PGSC0003DMG400030561M6LRR-RLP\_868

ATTCCTCCATCATCCCTCCATGGTTTTCTAATCTTACAAGGCTTATGAATCTTGATCTTGGTCAAATAACT  
TTGATGATCCAATAATGTTCTTGAGAAGCTTAGTTCACTAAGAGTAT

>M6-PGSC0003DMG400030561M6LRR-RLP\_930

CAAATAACTTTGATGATCCAATAATGTTCTTGAGAAGCTTAGTTCACTAAGAGTATTAGATGTTTCTAG  
TAATGGATTTGGCGATTGTTGCTGAGTTCATTGAGTAAGTTGAACAAC

>M6-PGSC0003DMG400030561M6LRR-RLP\_992

TGTTTCTAGTAATGGATTTGGCGATTGTTGCTGAGTTCATTGAGTAAGTTGAACAACCTTGGTTTATTG  
GATTTGTTAGGGAATGGCATCCACTTCTCTAGTCTCCATTTACTTGGAAA



>M6-PGSC0003DMG400030572M6LRR-RLK\_0

CTATTTTCCCAACGTCTCTTTATTTTCTTAGCTGAAATCAACTTTACCTTTTCTCACTCTCAAAAAGTCTCACC  
TTTCACACTCTTTTTTCTCTCTTAAGCTCCATTCTTGGTTATCTGGT

>M6-PGSC0003DMG400030572M6LRR-RLK\_1054

TGCGCAAAGTGACGCAAGTTCACCGTCCTCGGAACCTTTCTTGCCTAATAACGTACCTCCCTTAGATGGT  
GCTGGAGGGGATGGGAATGGTAGAGGTCTGAGTAGAGGTGCTGTAATCGC

>M6-PGSC0003DMG400030572M6LRR-RLK\_1116

TAGATGGTGCTGGAGGGGATGGGAATGGTAGAGGTCTGAGTAGAGGTGCTGTAATCGCGATAATTGTG  
GGGGATGTGGTTGGAATTTGTGTTATTGGGTTGTTATTCTCGTATTGTTATT

>M6-PGSC0003DMG400030572M6LRR-RLK\_1178

ATTGTGGGGGATGTGGTTGGAATTTGTGTTATTGGGTTGTTATTCTCGTATTGTTATTTCGAGAATCTGTG  
GTTGTGGGAGGAAAAAGGATGAATCCAGATTTGGTTTTTCAGAAGGGGGGA

>M6-PGSC0003DMG400030572M6LRR-RLK\_124

AAAAGGTAAGGTCTTTGAGACACCCTTTTGCTCGTTTTTCATTTTTTCAGTTGTCCTGTTCTTGATTTTCATC  
ATATTTGTAGATAAAAATGCAATCTTTTTTGTTTTTTGCATTTTCTT

>M6-PGSC0003DMG400030572M6LRR-RLK\_1240

AATCTGTGGTTGTGGGAGGAAAAAGGATGAATCCAGATTTGGTTTTTCAGAAGGGGGGAGGGGAAAGGA  
AGGAAAGAGTGTATGTTTTAGGAAGGATGAGTCGGAGACGTTATCGGAAAA

>M6-PGSC0003DMG400030572M6LRR-RLK\_1302

AAGGAAGGAAAGAGTGTATGTTTTAGGAAGGATGAGTCGGAGACGTTATCGGAAAATGTTGAACAA  
TATGATCTAGTGGCACTTGATAATCAAGTGGCATTGATCTCGATGAACTTC

>M6-PGSC0003DMG400030572M6LRR-RLK\_1364

GAACAATATGATCTAGTGGCACTTGATAATCAAGTGGCATTGATCTCGATGAACTTCTCAAGGCATCTG  
CTTTTGTCTTTGGTAAAAGTGGTATCGGCATTGTGTACAAAGTTGTGCTT

>M6-PGSC0003DMG400030572M6LRR-RLK\_1426

GGCATCTGCTTTTGTCTTGGTAAAAGTGGTATCGGCATTGTGTACAAAGTTGTGCTTGAAGACGGACTT  
AACTTGGCTGTGAGGAGATTAGGCGAGGGTGGTTCGCAGAGATTTAAGGA

>M6-PGSC0003DMG400030572M6LRR-RLK\_1488

ACGGACTTAAGTTGGCTGTGAGGAGATTAGGCGAGGGTGGTTCGCAGAGATTTAAGGAATTCAGACG

GAGGTCTGAAGCAATTGGAAAAGTCTGAGACATCAAATATCGTGACTCTTCGTG

>M6-PGSC0003DMG400030572M6LRR-RLK\_1550

CAGACGGAGGTCTGAAGCAATTGGAAAAGTCTGAGACATCAAATATCGTGACTCTTCGTGCCTATTATTGG  
TCTGTCGACGAGAAGCTACTGATATATGACTTCATTCCAAATGGAAACCTT

>M6-PGSC0003DMG400030572M6LRR-RLK\_1612

TTATTGGTCTGTCTGACGAGAAGCTACTGATATATGACTTCATTCCAAATGGAAACCTTACCACTGCAATTC  
ACGGTACGCTTCAAACCTCAGGCTGTTGCCTTCTCGTTTATCCTTTTTTTC

>M6-PGSC0003DMG400030572M6LRR-RLK\_1674

CTGCAATTCACGGTACGCTTCAAACCTCAGGCTGTTGCCTTCTCGTTTATCCTTTTTTCTTTGATTCCACAA  
CTGTTTTAACTTTCGTGATTATTAAGTTGTTAACTTGTCTTTTTGCT

>M6-PGSC0003DMG400030572M6LRR-RLK\_1736

ATTTCCACAACCTGTTTTAACTTTCGTGATTATTAAGTTGTTAACTTGTCTTTTTGCTTGTGTAATCAATTCT  
TAGGAAAACCTGGTATGGTGTCAATTCACCGCTTTCGTGGTCCATT

>M6-PGSC0003DMG400030572M6LRR-RLK\_1798

TAATCAATTCTTAGGAAAACCTGGTATGGTGTCAATTCACCGCTTTCGTGGTCCATTTCGACTGAAAATA  
ATGAAGGGTACTGCAAAGGTTTGGTTTATTTACATGAGTACAGTCCCAA

>M6-PGSC0003DMG400030572M6LRR-RLK\_186

TGATTTTCATCATATTTGTAGATAAAAATGCAATCTTTTTTGTTTTTTGCATTTTCTTGATTCTGTGTAGTTG  
TGTTTTTGTACTTCTTTGAATGATGAAGGAATAGCTCTTTGGTCAT

>M6-PGSC0003DMG400030572M6LRR-RLK\_1860

TGAAAATAATGAAGGGTACTGCAAAGGTTTGGTTTATTTACATGAGTACAGTCCCAAGAAATATGTTC  
ATGGTGATCTAAAGCCATCTAATATATTACTTGGACACGACATGGAGCCCA

>M6-PGSC0003DMG400030572M6LRR-RLK\_1922

TATGTTTCATGGTGTCTAAAGCCATCTAATATATTACTTGGACACGACATGGAGCCCAAATCTCCGACT  
TTGGACTTGGACGTCTTGCTAATATAGCCGGAGCATCTCCTACGTTGCAA

>M6-PGSC0003DMG400030572M6LRR-RLK\_1984

CTCCGACTTTGGACTTGGACGTCTTGCTAATATAGCCGGAGCATCTCCTACGTTGCAATCCAACCACATG  
ACCTCTGACAAACCACAACAAAGTAAGCAAGGCAGTGCACCATCAGAGTC

>M6-PGSC0003DMG400030572M6LRR-RLK\_2046

ACCACATGACCTCTGACAAACCACAACAAAGTAAGCAAGGCAGTGCACCATCAGAGTCCGGGACAGTTA  
CATCAACTACAACATCTGGTTCTTGCTACCAAGCTCCCGAGGCATTGAAAG

>M6-PGSC0003DMG400030572M6LRR-RLK\_2108

ACAGTTACATCAACTACAACATCTGGTTCTTGCTACCAAGCTCCCGAGGCATTGAAAGTGGTGAACCAT  
CACAAAATGGGACATTTACTCGTATGGAGTGATCTTGCTTCAAATGATC

>M6-PGSC0003DMG400030572M6LRR-RLK\_2170

GAAACCATCACAAAATGGGACATTTACTCGTATGGAGTGATCTTGCTTCAAATGATCACGGGAAGAAC  
CCCGATTATCCAAGTAGGTTCTACAGAAATGGATCTAGTAAACTGGATTCA

>M6-PGSC0003DMG400030572M6LRR-RLK\_2232

GAAGAACCCCGATTATCCAAGTAGGTTCTACAGAAATGGATCTAGTAAACTGGATTCCTGGTGCATTG  
AAGAGAAGAAGCCACTTTCGGATGTATTGGACTCATATTTAGCACAAAGATG

>M6-PGSC0003DMG400030572M6LRR-RLK\_2294

TGCATTGAAGAGAAGAAGCCACTTTCGGATGTATTGGACTCATATTTAGCACAAAGATGCTGATAAAGAA  
GAGGAAATGATCGCGGTTTTGAAGATTGCAATGGCGTGTGTTACAGCAGC

>M6-PGSC0003DMG400030572M6LRR-RLK\_2356

TAAAGAAGAGGAAATGATCGCGGTTTTGAAGATTGCAATGGCGTGTGTTACAGCAGCCCGGAGAGGA  
GACCTTCAATGAGACACATATCTGATGCATTAGAAAGACTGCAAGCTTCCTC

>M6-PGSC0003DMG400030572M6LRR-RLK\_2418

AGAGGAGACCTTCAATGAGACACATATCTGATGCATTAGAAAGACTGCAAGCTTCCTCTGAATGAACGA  
TCGAAACAGAACCTGAAGGCTTACATTGCAGTAAGGATCACAGCATCTAA

>M6-PGSC0003DMG400030572M6LRR-RLK\_248

CTGTGTAGTTGTGTTTTGTTACTTCTTTGAATGATGAAGGAATAGCTCTTTGGTCATTCAAAAAAGGTAT  
TGGACAAGACCCTGAAGGGTCACTTAAAAATTGGAACCTTTTCTGATGAA

>M6-PGSC0003DMG400030572M6LRR-RLK\_2480

TGAACGATCGAAACAGAACCTGAAGGCTTACATTGCAGTAAGGATCACAGCATCTAACCGATAACTAT  
GGAGCACGATCACTGCTTGGCGCGCGATCATATTGACTAACAGTAGTAATC

>M6-PGSC0003DMG400030572M6LRR-RLK\_2542

TAACTATGGAGCACGATCACTGCTTGGCGCGCGATCATATTGACTAACAGTAGTAATCTCCACTTGTCTG  
TTTGAATATTGGCCTTCTTGCTCTCTAATTGCAAGGTTTTTGTGTGTCT

>M6-PGSC0003DMG400030572M6LRR-RLK\_2604

CTTGTCTGTTTGAATATTGGCCTTCTTGCTCTCTAATTGCAAGGTTTTTGTGTGTCTATTTGTTGTTTCCTT  
CTATTGATGAACATAAGTTATTTGTTCTCTTTATTACTACTACTATT

>M6-PGSC0003DMG400030572M6LRR-RLK\_2666

GTTGTTTCCTTCTATTGATGAACATAAGTTATTTGTTCTCTTTATTACTACTACTATTCATCTTTGTGTGTCA  
CAAATGAGTTCATGTAAATAAAAATGATTGTCAAATAATAAATAAG

>M6-PGSC0003DMG400030572M6LRR-RLK\_2709

ATTACTACTACTATTCATCTTTGTGTGTCACAAATGAGTTCATGTAAATAAAAATGATTGTCAAATAATA  
AATAAGATAGGTGTAAGCAATAACTATATGTCTGTTGTGAGTCTGCAAG

>M6-PGSC0003DMG400030572M6LRR-RLK\_310

AAAAGGTATTGGACAAGACCCTGAAGGGTCACTTAAAAATTGGAACTTTTCTGATGAAACCCCTTGTCTT  
TGGAATGGTGTACATGCAAAGACCTAAAAGTTGTATCTGTTAGTATAACC

>M6-PGSC0003DMG400030572M6LRR-RLK\_372

CTTGTTCTTGGAATGGTGTACATGCAAAGACCTAAAAGTTGTATCTGTTAGTATAACCTAAAAAGAACT  
CACTGGGTTTTCTTTCTTAGTCTTGGATCTCTTACTGAGCTTAGACATG

>M6-PGSC0003DMG400030572M6LRR-RLK\_434

AAGAACTCACTGGGTTTTCTTTCTTAGTCTTGGATCTCTTACTGAGCTTAGACATGTTAATTTGAGAAG  
TAATTTGTTTTCTGGTAGTTTACCTGTTGAGCTTTTTGAGGTTCAAGGT

>M6-PGSC0003DMG400030572M6LRR-RLK\_496

TTTGAGAAGTAATTTGTTTTCTGGTAGTTTACCTGTTGAGCTTTTTGAGGTTCAAGGTTTGCAAAGTTTGG  
TTCTTTATGGGAATTCCTTTTCTGGGGTTATACCTATTGAGGTTGGGAA

>M6-PGSC0003DMG400030572M6LRR-RLK\_558

AAAGTTTGGTTCTTTATGGGAATTCCTTTTCTGGGGTTATACCTATTGAGGTTGGGAAGCTAAATTATCTT  
CAAACCTTTGGATTTATCACATAATTTCTTGAATGGGTCTGTGCCTATAA

>M6-PGSC0003DMG400030572M6LRR-RLK\_62

AAAGTCTCACCTTTCACACTCTTTTTCTCTTAAAGCTCCATTCTTGGTTATCTGGTGTACAAAAGGTAAG  
GTCTTTGAGACACCCTTTTGCTCGTTTTTCATTTTTCAGTTGTCCTG

>M6-PGSC0003DMG400030572M6LRR-RLK\_620

AATTATCTTCAAACCTTTGGATTTATCACATAATTTCTTGAATGGGTCTGTGCCTATAACATTACTTCAGTGC

AAGAGATTGAAGTTTCTTCATTTAAGTCATAATAACTTTACTGGTGTT

>M6-PGSC0003DMG400030572M6LRR-RLK\_682

ACTTCAGTGCAAGAGATTGAAGTTTCTTCATTTAAGTCATAATAACTTTACTGGTGTTGTACCTGAGGGG  
TTTGGGGGTAATTTGTCTGCATTGGAAGAACTTGATCTTGGATTCAACAA

>M6-PGSC0003DMG400030572M6LRR-RLK\_744

CTGAGGGGTTTGGGGGTAATTTGTCTGCATTGGAAGAACTTGATCTTGGATTCAACAAATTTGATGGTA  
AAATCCAAGTGATTTGGGAAATTTGTCTAATTTGAAAGGAACTGTTGATT

>M6-PGSC0003DMG400030572M6LRR-RLK\_806

GATGGTAAAATCCAAGTGATTTGGGAAATTTGTCTAATTTGAAAGGAACTGTTGATTTGTCTCATAATA  
TGTTTAGTGGTTTCGATTCCGGCTAGTCTTGGTAATCTTCCTGAGAAGGTG

>M6-PGSC0003DMG400030572M6LRR-RLK\_868

TCATAATATGTTTAGTGGTTTCGATTCCGGCTAGTCTTGGTAATCTTCCTGAGAAGGTGTATATTGATTTGA  
CTTATAACAATTTGAGTGGTCCAATTCCACAAAATGGTGCTCTGATTAA

>M6-PGSC0003DMG400030572M6LRR-RLK\_930

TTGATTTGACTTATAACAATTTGAGTGGTCCAATTCCACAAAATGGTGCTCTGATTAACAGAGGACCTAC  
TGCTTTTATTGGAAATCCTGGGCTTTGTGGACCTCCGTTGAAAAACCAAGT

>M6-PGSC0003DMG400030572M6LRR-RLK\_992

GGACCTACTGCTTTTATTGGAAATCCTGGGCTTTGTGGACCTCCGTTGAAAAACCAAGTGTCTGCGCAAA  
GTGACGCAAGTTCACCGTCTCGGAACCTTTCTTGCCTAATAACGTACCT

>M6-PGSC0003DMG400030578M6RLKWAX-EGF\_0

ATGTACAAATGGCTGTGAAGGCTTTAACATATACTACAAGCTTTCCGAAGATGTTGATGAAAACATAGG  
AGCAGACAATCTTCCTACCAACTGTTTACTTATCAGATTGCCAATTCATTC

>M6-PGSC0003DMG400030578M6RLKWAX-EGF\_124

CGTGGTGATTTGTTAAACCTGTTAGGTCCCGAAATCTTGTAGAATGGAACTGTCTGATGAATGTGGCG  
AATGCCATTATGGTGGAGGTGCATGCCAGACTGATAAAACCAACAAATTT

>M6-PGSC0003DMG400030578M6RLKWAX-EGF\_1240

TTTTGCATTTTATATAAAGCCTCATAATATCCTTCTTGTGATGAAGATTTTTGTCCTAAGATCTCAGACTTTG  
GTCTTGCCAACTGTGCATGAAAAAGTAGAGTATCGTGTCAATGTTAG

>M6-PGSC0003DMG400030578M6RLKWAX-EGF\_1302

TCAGACTTTGGTCTTGCCAACTGTGCATGAAAAAGTAGAGTATCGTGTCAATGTTAGGTCCACGAGGG  
ACTATCGGTTATATTGCTCCAGAAATTGTTTATAGAACTTGGGAGGTGTC

>M6-PGSC0003DMG400030578M6RLKWAX-EGF\_1426

ACAAGTCTGATGTCTATAGCTATGGAATGATGGTCCTAGAGATGGTTTGAGGAAGAAAAAATGTTGATG  
AAGGAGTTGATCGCACGAGTGAAATCTACTTTCCACATTGGCTTTATCAAC

>M6-PGSC0003DMG400030578M6RLKWAX-EGF\_1488

GTTGATGAAGGAGTTGATCGCACGAGTGAAATCTACTTTCCACATTGGCTTTATCAACGACTTGAAGTAG  
ACGAAGAGCTTCAACTAATCGGGATAATAAATGAAGAGGAGAAAGAATGT

>M6-PGSC0003DMG400030578M6RLKWAX-EGF\_1670

CATGAACAAGATTGTGGAAATGTTTGAAGGGAACCTAGACTCTTTGCAAATGCCTCCCAAGCCTTACCTA  
TATTCTCCGTCAAGAACCGAGTAGATTCATCAGTAGTAGAACTGACCTAG

>M6-PGSC0003DMG400030578M6RLKWAX-EGF\_186

ATGTGGCGAATGCCATTATGGTGGAGGTCGATGCCAGACTGATAAAACCAACAAATTTTCTTGTCACAA  
AGGTAGACATCTCCAAAATAATCTATACTTTATAGGTCAAGTTCATGCTTC

>M6-PGSC0003DMG400030578M6RLKWAX-EGF\_248

GTCACAAAGGTAGACATCTCCAAAATAATCTATACTTTATAGGTCAAGTTCATGCTTCTTAAGTCCCTTTC  
TTGTTTCATGCCGCATAGATAATATATTTTCGTATTATTGCCCCCTTCTG

>M6-PGSC0003DMG400030578M6RLKWAX-EGF\_310

GTCCCTTTCTTGTTTCATGCCGCATAGATAATATATTTTCGTATTATTGCCCCCTTCTGTAGATGCATAAACA  
CCTACAAGTAGTACTGATCAAAGAAAAGAAACAACCTGAAGAAATGGA

>M6-PGSC0003DMG400030578M6RLKWAX-EGF\_372

TGCATAAACACCTACAAGTAGTACTGATCAAAGAAAAGAAACAACCTGAAGAAATGGAAGAAACATGG  
TGGAGCTGATTCTAGTCACAGGTACTAGAATATATTTAATTGCTTCCATGTT

>M6-PGSC0003DMG400030578M6RLKWAX-EGF\_434

ACATGGTGGAGCTGATTCTAGTCACAGGTACTAGAATATATTTAATTGCTTCCATGTTATTCTTATTACAG  
AATTTTCATGCATAACATTTGAATTCTCATCATTTTGTATAAGCTCAAA

>M6-PGSC0003DMG400030578M6RLKWAX-EGF\_496

TTATTACAGAATTTTCATGCATAACATTTGAATTCTCATCATTTTGTATAAGCTCAAAAACCTTTCTCTAGT  
GATAAAGAAACAAAAACAAGAGAATTAATAGTTTTCGGTACACAAAA

>M6-PGSC0003DMG400030578M6RLKWAX-EGF\_558

TTTCTCTAGTGATAAAGAAACAAAAACAAGAGAATTAATAGTTTTTCGGTACACAAAATGTATGGATGT  
GGAATTGAGGGAAAAAAATTTCTCTGATGGGGCATGATTTCAATTTTTCCC

>M6-PGSC0003DMG400030578M6RLKWAX-EGF\_62

ACATAGGAGCAGACAATCTTCCTACCAACTGTTTACTTATCAGATTGCCAATTCATTCAAGTCGTGGTGTAT  
TTGTTAAACCTGTTAGGTCCCGAAATCTTGTAGAATGGAAACTGTCTG

>M6-PGSC0003DMG400030578M6RLKWAX-EGF\_620

TGGATGTGGAATTGAGGGAAAAAAATTTCTCTGATGGGGCATGATTTCAATTTTTCCCCTGGTGCAAGT  
TTATCTATTGTTGGACTGTTGGCTTTACTACTCTTTTGCTTCAGAGAAAA

>M6-PGSC0003DMG400030578M6RLKWAX-EGF\_682

GTGCAAGTTTATCTATTGTTGGACTGTTGGCTTTACTACTCTTTTGCTTCAGAGAAAAAAATTTGTGGTAC  
AAACACCTCAGTTTTGGGAATCTAATGCTGAGGATCACCAAAAAGTTG

>M6-PGSC0003DMG400030578M6RLKWAX-EGF\_806

ATTCTTAAAGAACTATGGATCATATGCTCCAAACAGATACAATTATACAGACATCAAAGAATCACTGGT  
CACTTCAGAAGCAAAGTCAAGGAGGATTTGGTAATGTGTATAGAGA

>M6-PGSC0003DMG400030578M6RLKWAX-EGF\_868

TCACTGGTCACTTCAGAAGCAAAGTCAAGGAGGATTTGGTAATGTGTATAGAGAAAGTTTGAGTA  
ATGGGAGTGAAGTAGCAGTAAAGGTCCTGAATGAACTAAAAGGCAGTGGTG

>M6-PGSC0003DMG400030579M6RLKWAX-EGF\_0

ATGGCTGCTGCCTGTTTTCTGCTATGTTCTTTATGTTTCATCTTTTTATCTTCAACTTAGTTAAAGTTGAG  
AGTAAATTATCTTGTCCAAAAGAGTTCAATTGTGGAAGACTTGGTACC

>M6-PGSC0003DMG400030579M6RLKWAX-EGF\_1037

AGTTTTCACTTGCATCGGAATTGTGAATTTGCTCTTCTGCTTCAGAGAAAAGATTTTGTGGTACAAGTGCC  
TCAGGTTTTGGGAATCTAAAGCTGAGGATCACCGAAATATTGAAGCATT

>M6-PGSC0003DMG400030579M6RLKWAX-EGF\_1098

TACAAGTGCCTCAGGTTTTGGGAATCTAAAGCTGAGGATCACCGAAATATTGAAGCATTCTGAAGAAC  
TCTGGGTCATATGCTCCAAAAGATACAACACTATACAGACATCAAACGAATC

>M6-PGSC0003DMG400030579M6RLKWAX-EGF\_1159

TGAAGAACTCTGGGTCATATGCTCCAAAAGATACAACACTATACAGACATCAAACGAATCACCAGTCACTT

CAAAATCAAAGTGGCCAAGGAGGATTTGGTAATGTATACAGAGGAAGTT

>M6-PGSC0003DMG400030579M6RLKWAX-EGF\_1281

CGTGACGGGAGTCAAGTGGCAGTCAAGGTCCTGAATGAACTAAATGGCAGTGGTGAAGATTTTCATTAA  
TGAGGTAGCAAGTAGTAGCAGGACATCACATGTTAACATTGTGAGACTTGTG

>M6-PGSC0003DMG400030579M6RLKWAX-EGF\_1342

TCATTAATGAGGTAGCAAGTAGTAGCAGGACATCACATGTTAACATTGTGAGACTTGTGGGATTTTGT  
TGAGGGTCACAAAAGAGCTCTTATTTATGAATTCATGCCAAATGGATCTC

>M6-PGSC0003DMG400030579M6RLKWAX-EGF\_1403

ATTTTGTGAGGGTCACAAAAGAGCTCTTATTTATGAATTCATGCCAAATGGATCTCTTGAAAAGTTTA  
TCTATGAGGAAAGATCTGACGGAGTTCGCCAATTAGGCTGGCCAATATT

>M6-PGSC0003DMG400030579M6RLKWAX-EGF\_1464

GAAAAGTTTATCTATGAGGAAAGATCTGACGGAGTTCGCCAATTAGGCTGGCCAATATTAATGAAATC  
TCACTAGGCATCGCTCGAGGATTGGAGTACTTGACCGTGGTTGTAACACT

>M6-PGSC0003DMG400030579M6RLKWAX-EGF\_1525

ATGAAATCTCACTAGGCATCGCTCGAGGATTGGAGTACTTGACCGTGGTTGTAACACTAGAATTTTGCA  
TTTTGATATAAAGCCTCATAATATCCTACTGGATGAGGATTTTGTCCAA

>M6-PGSC0003DMG400030579M6RLKWAX-EGF\_1586

AATTTTGCATTTTATATAAAGCCTCATAATATCCTACTGGATGAGGATTTTGTCCAAAGCTCTCAGACT  
TTGGTCTTGCCAAACTATGCATAAAAAGGAGAGTATCGTGTCAATGTT

>M6-PGSC0003DMG400030579M6RLKWAX-EGF\_183

AACACTTTTCAATATCCAAAAGTTGAGATTGAAGGAGTGACATACAATGCTTACAAGAAGTGGCTATGG  
GTTAATGGTATCGATCTTTCGGACTCGATTCTTGAAAGTTATTTAGCTAAT

>M6-PGSC0003DMG400030579M6RLKWAX-EGF\_1891

GACGAATTGAACTAGACGAAGAGCTTCAACTAATCGGGATAATGAATGAAGGGGAGAACGAATATGCA  
AGAAAGATGGTGATAGCAAGTTTGTGGTGCATACAGACTGATCCGGCAAATC

>M6-PGSC0003DMG400030579M6RLKWAX-EGF\_244

GGCTATGGGTAAATGGTATCGATCTTTCGGACTCGATTCTTGAAAGTTATTTAGCTAATAGAAGTTGCAA  
ATCTTTGAAAGGAACTTATCTTCCCTGATACACCTTCTATTTCAATTTG

>M6-PGSC0003DMG400030579M6RLKWAX-EGF\_305



AAGTTGCAAATCTTTTGAAAGGAACTTATCTTCCCTGATACACCTTCTATTTTCATTTGGTGTATTTCGACAA  
TATCACTTTGTTCAAATGTATGAATGGTAGTACTAATGAGGAGATAGG

>M6-PGSC0003DMG400030579M6RLKWAX-EGF\_488

ACCAAGAACAGATCATAGAACTATAGTATTCCAGTTGATGATGATGATCTTCCTGCAAATTGCTCGATT  
ATTCGATTGCCTTTAAAGTATATTTACCTTCAGTACCAGTTCCTCATGA

>M6-PGSC0003DMG400030579M6RLKWAX-EGF\_549

TGCTCGATTATTCGATTGCCTTTAAAGTATATTTACCTTCAGTACCAGTTCCTCATGATTTGTTTGAGTTG  
TTGAGTTCTAATTTACATTGGATTGGGAAGTTTCTAAAGATTGTTCT

>M6-PGSC0003DMG400030579M6RLKWAX-EGF\_61

TTAAAGTTGAGAGTAAATTATCTTGTCCAAAAGAGTTCAATTGTGGAAGACTTGGTACCATGAGTTATCC  
TTTTTCAGAATTCAACAAACCATATTGTGGATTATCCAAGATTGATTGTA

>M6-PGSC0003DMG400030579M6RLKWAX-EGF\_610

TGTTTGAGTTGTTGAGTTCTAATTTACATTGGATTGGGAAGTTTCTAAAGATTGTTCTAAGTGTATCCAT  
ACAGAAGGGCAATGCCAAAGTGACAGCAAAAATGACTTCTTCTGCTCCA

>M6-PGSC0003DMG400030579M6RLKWAX-EGF\_671

GTGTATCCATACAGAAGGGCAATGCCAAAGTGACAGCAAAAATGACTTCTTCTGCTCCAAAGCCAAAGG  
TAAATGCATAAATGATGCTTTGTCAGTTGCTTGTATTGGTTGGTTCATTCA

>M6-PGSC0003DMG400030579M6RLKWAX-EGF\_732

GCCAAAGGTAAATGCATAAATGATGCTTTGTCAGTTGCTTGTATTGGTTGGTTCATTCAATTCAAGATGTT  
TAATATGTCAATGTGAATTGAAGTAAAAATTGCTTTTACTCTTATTGTG

>M6-PGSC0003DMG400030579M6RLKWAX-EGF\_793

TCAAGATGTTTAATATGTCAATGTGAATTGAAGTAAAAATTGCTTTTACTCTTATTGTGACTATTATAAA  
TCATTCATTTCTTGTCTTGCAGCAGCTAAAAGATATTTGGGACTGATT

>M6-PGSC0003DMG400030579M6RLKWAX-EGF\_854

TATTATTAATCATTCAATTTCTTGTCTTGCAGCAGCTAAAAGATATTTGGGACTGATTCTAGGCATAGGT  
ACATGTCTAACTTTTATCTGTAATTAGACTTGATCAAATAAGAATTAT

>M6-PGSC0003DMG400030579M6RLKWAX-EGF\_915

AGGCATAGGTACATGTCTAACTTTTATCTGTAATTAGACTTGATCAAATAAGAATTATTTTACTATATAT  
GTTTTGCAAATGTTGTAATTGTTGTGTTGCCTCAAACCAGGTTTCATTT

>M6-PGSC0003DMG400030579M6RLKWAX-EGF\_976

TACTATATATGTTTTGCAAATGTTGTAATTGTTGTGTTGCCTCAAACCAGGTTTCATTTGCAGTTTTCACTT  
GCATCGGAATTGTGAATTTGCTCTTCTGCTTCAGAGAAAAGATTTTGT

>M6-PGSC0003DMG400030581M6RLKWAX-EGF\_0

TTTCTGTTTGTATTGTTGAAGTTTAGAGTTAGACCAATGACTTTAGCCTCCTTTTCTGCTATGTTCTCTA  
TGTTTCATCGGCTTATCTTCAACTTAGTTCAATTAGAGAGTAAATCTT

>M6-PGSC0003DMG400030581M6RLKWAX-EGF\_1116

GAGTCAAGTGGCAGTGAAGGTCCTGAATGAACTAAAAGGCAGTGGTGAAGATTTTCATTAATGAGGTAA  
CAAGTATTAGCAGGACATCACATATTAACATTGTGAGGCTTGTGGGATTTTG

>M6-PGSC0003DMG400030581M6RLKWAX-EGF\_1178

AGGTAACAAGTATTAGCAGGACATCACATATTAACATTGTGAGGCTTGTGGGATTTTGTGTTTGAGGGTC  
ACAAAAGAGCTCTTATTTATGAATTCATGCCAAATGGATCTCTTGAAAAGT

>M6-PGSC0003DMG400030581M6RLKWAX-EGF\_1426

GATATAAAGCCTCATAATATCCTACTAGATGAGGATTTTTGTCCAAAGATCTCCGACTTTGGTCTTGCCAA  
ACTATGTATAAAAAAGGAGAGTATCGTGTCAATGTTAGGTCCACGAGGT

>M6-PGSC0003DMG400030581M6RLKWAX-EGF\_1488

TCTTGCCAAACTATGTATAAAAAAGGAGAGTATCGTGTCAATGTTAGGTCCACGAGGTTACTATAGGCTA  
TATTGCTCCAGAAGTTGTTTGCAGAACTTGGGAGGTGTCTCTCACAAGTC

>M6-PGSC0003DMG400030581M6RLKWAX-EGF\_1736

AAGAGCTTCAACTAATCGGGATAATGAATGAAGAGGAGAATGAATGTGCAAGAAAGATGGTGATAGCG  
AGTTTATGTTGTATACAGACTGATCCCGCAAATCGACCATCGATGAGCAAGG

>M6-PGSC0003DMG400030581M6RLKWAX-EGF\_186

TTTGAGTAGACAACAATATTACTTTGTACATTCAAATGCACAAATAACAGTACGCGGATTGATAGTTATT  
TTCAAAGTTATAAGAACTACTCGAGTTGTGATGACATCAGCTTATAGTGT

>M6-PGSC0003DMG400030581M6RLKWAX-EGF\_1860

GGAAATGTTAGAAGGGAAACTAGACTCTTTGCAAATGCCTCCCAAGCCTTATCTATATTCTCCCTCAAGA  
TCAGAGGTAGATTCATCAATAATAGAACTGACATCAACAACAACAACAAC

>M6-PGSC0003DMG400030581M6RLKWAX-EGF\_248

TAGTTATTTTCAAAGTTATAAGAACTACTCGAGTTGTGATGACATCAGCTTATAGTGCATAAACCAAGA

ACAGATCAAAGACATAGTATTCCAGCTAGAGATCTTCCTGCAAATTCATT

>M6-PGSC0003DMG400030581M6RLKWAX-EGF\_310

AACCAAGAACAGATCAAAGACATAGTATTCCAGCTAGAGATCTTCCTGCAAATTCATTATTTTCCTTCAGA

ACCAAATTTACTGATTTGTTTGATCTATTGACTCCTAGTTTCACATTA

>M6-PGSC0003DMG400030581M6RLKWAX-EGF\_434

GGGAATTGTCATTAAATTATTCCAGCTGTCTTCATAGAGAAGGGCGATACCAAAGTGACATCGAAAACA

ACTTCTTTTGCTCCAAAGGTATCGGATAGAAGAAGCTTGTCAGTTGCTTGT

>M6-PGSC0003DMG400030581M6RLKWAX-EGF\_496

GAAAACAACCTTCTTTTGCTCCAAAGGTATCGGATAGAAGAAGCTTGTCAGTTGCTTGTGTATGTCTGGTT

TCATTTTGGAAAAGATTTAGATGTGTGTTGGTTGGTTCATTCCAAGATG

>M6-PGSC0003DMG400030581M6RLKWAX-EGF\_744

GTTATCTGTAATTAGACTTGACAAAATCTCCTATTGCCTTGCAAATGTTGTAATTGTTGTGTTGCCTCAA

AACCAGGCTCTTCCGGTGCATGACTTTCCTTTTTTCCCCACATTTGC

>M6-PGSC0003DMG400030581M6RLKWAX-EGF\_806

TTGCCTCAAACCAGGCTCTTCCGGTGCATGACTTTCCTTTTTTCCCCACATTTGCAGTTTTCTCTTGCA

TCGGAGTCGTGATTTTGCTCTTCTGCTTGAGAAAAAGATTTTCTGGC

>M6-PGSC0003DMG400030581M6RLKWAX-EGF\_930

AAATCTCAGGTTTTGGGAATCTATAGCTGAGGATCACCGAAATATTGAAGCATTCTGAAGAACTCTGG

GTCATATGCTCCAAAAAGATACTATAACAGACATCAAACGAATCACCCAG

>M6-PGSC0003DMG400030625-(rev)M6LRR-RLK\_0

ATTTACTCAAACAAAAGAATATACACCAAACGGATTACCCACCCCAAACCAAATCCTCATTTTTGCTTT

TCTCACTCTCACTGAGTGAAACCGCAAACCAAACAGTTGGTGGACATTA

>M6-PGSC0003DMG400030625-(rev)M6LRR-RLK\_1037

CGGAGCTTAAGAATATCACTCTTGTTAATCTTTTCGGAATAAGCTTTATGGGTCAATACCAGAGTTCATA

GAGGACTTGCCGGAGCTAGAGGTGTTGCAACTTTGGGAAAATAACTTTA

>M6-PGSC0003DMG400030625-(rev)M6LRR-RLK\_1098

AGAGTTCATAGAGGACTTGCCGGAGCTAGAGGTGTTGCAACTTTGGGAAAATAACTTTACTGGAAGGAT

TCCACAGGGGTTAGGCACAAAGAGCAAGCTCAAAAAGTTGATCTCAGTTC

>M6-PGSC0003DMG400030625-(rev)M6LRR-RLK\_1159

GGAAGGATTCCACAGGGGTTAGGCACAAAGAGCAAGCTCAAAAAAGTTGATCTCAGTTCCAATAAATTG  
ACTGGAAATTTACCCCCAACATGTGCTCCGGTAACAATCTGCAGACAATT

>M6-PGSC0003DMG400030625-(rev)M6LRR-RLK\_122

TTAAGGAAGGAAAAATGCGTCTTCTTTTTCTTCTTCTTCTTGTATGCATTTACTGACTTTTCTGCCGGTC  
GGTTACCGGAATACCAGGCATTGCTTGCCCTGAAAAGTCCATTACTG

>M6-PGSC0003DMG400030625-(rev)M6LRR-RLK\_1220

ATAAATTGACTGGAAATTTACCCCCAACATGTGCTCCGGTAACAATCTGCAGACAATTATCACTCTTGG  
GAACTTCTGTTTGGCCCAATTCCTGAATCTTGGGTAGGTGTGAATCAC

>M6-PGSC0003DMG400030625-(rev)M6LRR-RLK\_1281

CACTCTGGGAACTTCTGTTTGGCCCAATTCCTGAATCTTGGGTAGGTGTGAATCACTTAATCGGATTA  
GAATGGGAGAGAATTATCTGAATGGGTCAATTCCAAAGGGGCTCTTAAG

>M6-PGSC0003DMG400030625-(rev)M6LRR-RLK\_1342

AATCGGATTAGAATGGGAGAGAATTATCTGAATGGGTCAATTCCAAAGGGGCTCTTAAGCTTGCCACAT  
CTGTCACAAGTTGAACTTCAGAATAATATTCTCACTGGTACATTTCTGAT

>M6-PGSC0003DMG400030625-(rev)M6LRR-RLK\_1403

TGCCACATCTGTCACAAGTTGAACTTCAGAATAATATTCTCACTGGTACATTTCTGATATTTCTTCCAAAT  
CTAATAGTCTTGGGCAGATTATCCTTTCAAATAATCGCCTAACTGGAC

>M6-PGSC0003DMG400030625-(rev)M6LRR-RLK\_1464

TTCTTCCAAATCTAATAGTCTTGGGCAGATTATCCTTTCAAATAATCGCCTAACTGGACCTTTGCCGCCAA  
GCATTGGAAATTTGCTGTAGCCCAAAAATTGCTTCTTGATGGGAACAA

>M6-PGSC0003DMG400030625-(rev)M6LRR-RLK\_1525

TTGCCGCAAGCATTGGAAATTTGCTGTAGCCCAAAAATTGCTTCTTGATGGGAACAAATTTTCGGGAC  
GAATTCCAGCAGAAATAGGAAAGCTTCAACAGCTATCCAAAATTGATTC

>M6-PGSC0003DMG400030625-(rev)M6LRR-RLK\_1586

TTTCGGGACGAATCCAGCAGAAATAGGAAAGCTTCAACAGCTATCCAAAATTGATTCAGTCACAACAA  
CTTTTCTGGACCCATGGCTCCGGAGATTAGCCAGTGCAAGTTGCTGACTT

>M6-PGSC0003DMG400030625-(rev)M6LRR-RLK\_1647

TCACAACAATTTTCTGGACCCATGGCTCCGGAGATTAGCCAGTGCAAGTTGCTGACTTATGTTGATCTC  
AGCAGGAACCAATTTTCGGGTGAGATTCCTTCTGAGATCACAGGTATGAG

>M6-PGSC0003DMG400030625-(rev)M6LRR-RLK\_1708

GTTGATCTCAGCAGGAACCAACTTTCGGGTGAGATTCTTCTGAGATCACAGGTATGAGGATACTCAACT  
ACTTGAACCTATCGAGAAACCACTTAGTTGGGAGTATTCTTCCCCTATT

>M6-PGSC0003DMG400030625-(rev)M6LRR-RLK\_1769

TACTCAACTACTTGAACCTATCGAGAAACCACTTAGTTGGGAGTATTCTTCCCCTATTTCTAGTATGCAG  
AGTTTAACTTCTGTTGATTTCTCATATAACAACCTTTTCTGGTTTAGTTC

>M6-PGSC0003DMG400030625-(rev)M6LRR-RLK\_183

TTCTGCCGGTTCGGTTACCGGAATACCAGGCATTGCTTGCCCTGAAAACCTGCCATTACTGATGACCCACAG  
TAACTCTTGCCTCATGGAACATCTCCACCAGTCACTGTACGTGGAATGG

>M6-PGSC0003DMG400030625-(rev)M6LRR-RLK\_1830

TAGTATGCAGAGTTTAACTTCTGTTGATTTCTCATATAACAACCTTTTCTGGTTTAGTTCCTGGAACCGGGC  
AATTTAGTTATTTCAATTACACCTCATTCTGGGCAATCCAGATCTTTG

>M6-PGSC0003DMG400030625-(rev)M6LRR-RLK\_1891

GGAACCGGGCAATTTAGTTATTTCAATTACACCTCATTCTGGGCAATCCAGATCTTTGCCGACCCTATTT  
GGGCCCTTGCAAAGAGGGTGTGTTGATGGGGTTAGTCAACCTCACCAA

>M6-PGSC0003DMG400030625-(rev)M6LRR-RLK\_1952

GACCCTATTTGGGCCCTTGCAAAGAGGGTGTGTTGATGGGGTTAGTCAACCTCACCAACGAGGAGCCT  
TATCGCCTTCGATGAAGCTTTTACTTGTTATTGGTTTGCTTGTCTGTTCTA

>M6-PGSC0003DMG400030625-(rev)M6LRR-RLK\_2074

GTGTTTGCTGTTGCTGCAATTATAAAGGCCCGATCTTAAAGAAGGCAAGTGAAGCTCGTGCCTGGAAG  
CTCACTGCTTTTCAGCGCCTAGATTTTACTTGTGATGATATTTTGGACAGC

>M6-PGSC0003DMG400030625-(rev)M6LRR-RLK\_2135

CCTGGAAGCTCACTGCTTTTCAGCGCCTAGATTTTACTTGTGATGATATTTTGGACAGCTTGAAGGAGGA  
TAACATTATTGAAAAGGAGGTGCTGGTATAGTCTACAAGGGGGTAATGC

>M6-PGSC0003DMG400030625-(rev)M6LRR-RLK\_2196

GAAGGAGGATAACATTATTGAAAAGGAGGTGCTGGTATAGTCTACAAGGGGGTAATGCCGAGCGGG  
GAACATGTAGCGGTTAAGAGGTTGCCAGCTATGAGCAGGGGTTCTCTCATGA

>M6-PGSC0003DMG400030625-(rev)M6LRR-RLK\_2257

AGCGGGGAACATGTAGCGGTTAAGAGGTTGCCAGCTATGAGCAGGGGTTCTCTCATGATCATGGGTT

CAATGCAGAGATACAGACTCTTGGGAGGATCCGACACAGGCACATTGTTAGA

>M6-PGSC0003DMG400030625-(rev)M6LRR-RLK\_2318

ATGGGTTCAATGCAGAGATACAGACTCTTGGGAGGATCCGACACAGGCACATTGTTAGATTATTAGGAT  
TTTGCTCGAATCATGAGACAAATCTTTTGGTTTATGAGTACATGCCTAATG

>M6-PGSC0003DMG400030625-(rev)M6LRR-RLK\_2379

ATTAGGATTTTGTCTGAATCATGAGACAAATCTTTTGGTTTATGAGTACATGCCTAATGGAAGTCTTGGG  
GAAATGCTTCATGGAAAGAAAGGCGGTCATCTACTTTGGGATACCAGGTA

>M6-PGSC0003DMG400030625-(rev)M6LRR-RLK\_244

GACCCACAGTTAACTCTTGCCTCATGGAACATCTCCACCAGTCACTGTACGTGGAATGGTGTACGTGCG  
ACACGCATCGTCACGTGACCTCTTGTATCTCTGGGTTTAACTTACC

>M6-PGSC0003DMG400030625-(rev)M6LRR-RLK\_2440

AGTCTTGGGGAAATGCTTCATGGAAAGAAAGGCGGTCATCTACTTTGGGATACCAGGTATAAGATAGCC  
GTGGAGTCTGCAAAGGGTCTTTGCTATCTCCATCACGATTGCTCTCCTTTG

>M6-PGSC0003DMG400030625-(rev)M6LRR-RLK\_2501

AGATAGCCGTGGAGTCTGCAAAGGGTCTTTGCTATCTCCATCACGATTGCTCTCCTTTGATCCTCCACCGT  
GATGTGAAATCAAACAACATTCTGCTAGACTCCAGCTTTGAAGCTCATG

>M6-PGSC0003DMG400030625-(rev)M6LRR-RLK\_2562

CCTCCACCGTGATGTGAAATCAAACAACATTCTGCTAGACTCCAGCTTTGAAGCTCATGTTGCTGATTTTG  
GACTTGCTAAATTCTTGCAAGATTCAGGGACATCAGAATGCATGTCTGC

>M6-PGSC0003DMG400030625-(rev)M6LRR-RLK\_2623

GCTGATTTTGGACTTGCTAAATTCTTGCAAGATTCAGGGACATCAGAATGCATGTCTGCTATTGCTGGTT  
CTTATGGGTACATTGCTCCAGGTATTTTGTAAGCCTTCGTATCTTGAA

>M6-PGSC0003DMG400030625-(rev)M6LRR-RLK\_2684

TTGCTGGTTCTTATGGGTACATTGCTCCAGGTATTTTGTAAGCCTTCGTATCTTGAAATCCTTAGTTTCT  
AACATGTGTTTCATATTTATTTTCTTGTACATCATGCTATGCGAGTT

>M6-PGSC0003DMG400030625-(rev)M6LRR-RLK\_2745

TCTTAGTTTCTAACATGTGTTTCATATTTATTTTCTTGTACATCATGCTATGCGAGTTTAGTGCCGAAGTT  
ACAACTTACTGATGAACTAAAGTTTATCAGCTGAGACTAATTATCAG

>M6-PGSC0003DMG400030625-(rev)M6LRR-RLK\_2806

GTGCCGAAGTTACAACTTACTGATGAACTAAAGTTTATCAGCTGAGACTAATTATCAGTCTGTAAAAA  
TGAAGCTTAGGTGTTCTAACATCATAAATGTGCTATCCTATAGTCTTGT

>M6-PGSC0003DMG400030625-(rev)M6LRR-RLK\_2867

TGTTAAAAATGAAGCTTAGGTGTTCTAACATCATAAATGTGCTATCCTATAGTCTTGTATTTCCACTACT  
AATAATGTTACGATGAAGGACAGCATTAAAGACATTGATAGTGGTGGTCC

>M6-PGSC0003DMG400030625-(rev)M6LRR-RLK\_2928

TTCCACTACTAATAATGTTACGATGAAGGACAGCATTAAAGACATTGATAGTGGTGGTCCTTGACTGGTAG  
TAAACTAGAGGATTGGGCCTTCTTACTTTTGAAAAGGATCTCTAACTACT

>M6-PGSC0003DMG400030625-(rev)M6LRR-RLK\_2989

GACTGGTAGTAACTAGAGGATTGGGCCTTCTTACTTTTGAAAAGGATCTCTAACTACTTCGGTGATGGT  
TAGGTTGGAATTTATAAATGCTTATGTAACCTGGTAAGTAAGGCAACTGT

>M6-PGSC0003DMG400030625-(rev)M6LRR-RLK\_305

TCACGTGCGACACGCATCGTCACGTGACCTCTCTTGATATCTCTGGGTTAATCTTACCGGTACTCTTCCG  
CCGGAAGTTGGGAATCTTCGTTACTTACGAAATCTGTCTGTCTGCTGTTA

>M6-PGSC0003DMG400030625-(rev)M6LRR-RLK\_3050

GGTGATGGTTAGGTTGGAATTTATAAATGCTTATGTAACCTGGTAAGTAAGGCAACTGTGTTGCATGCTC  
CTGAAGCAAAGCAACATTAAATAGTGGTACTGGTACTTGATGAACTATTA

>M6-PGSC0003DMG400030625-(rev)M6LRR-RLK\_3111

TGCATGCTCCTGAAGCAAAGCAACATTAAATAGTGGTACTGGTACTTGATGAACTATTAATAACTGTTGGA  
ACGGGTAAGGGGATGTAAACTCTGGTTTCTTGTTTAGTTATCTAACAAA

>M6-PGSC0003DMG400030625-(rev)M6LRR-RLK\_3172

ACTGTTGGAACGGGTAAGGGGATGTAAACTCTGGTTTCTTGTTTAGTTATCTAACAACTTACTGATTG  
CTAGCAATTATTTGTTCTGCTCTATTGTCTACTTCTCATTAGCATCTTAT

>M6-PGSC0003DMG400030625-(rev)M6LRR-RLK\_3233

TACTGATTGCTAGCAATTATTTGTTCTGCTCTATTGTCTACTTCTCATTAGCATCTTATTTTCAATTTTGCAG  
AATATGCTTACACGCTTAAGGTTGATGAGAAAAGTGATGTATATAGC

>M6-PGSC0003DMG400030625-(rev)M6LRR-RLK\_3294

TCAATTTTGCAGAATATGCTTACACGCTTAAGGTTGATGAGAAAAGTGATGTATATAGCTTAGGTGTGGT  
GCTATTAGAAGTGGTAAGTGGCAAAAAGCCAGTTGGAGAATTTGGTGATG

>M6-PGSC0003DMG400030625-(rev)M6LRR-RLK\_3355

AGGTGTGGTGCTATTAGAAGTGGTAAAGTGGCAAAAAGCCAGTTGGAGAATTTGGTGATGGTGTGACA  
TAGTCCAATGGGTTAGGAAAATGACTGAAGGGAAAAAGGATGGAGTTCTCAA

>M6-PGSC0003DMG400030625-(rev)M6LRR-RLK\_3416

GTTGACATAGTCCAATGGGTTAGGAAAATGACTGAAGGGAAAAAGGATGGAGTTCTCAAGATCCTTGA  
CCCAAGACTCTCAACGGTCCCCTTAATGAGGTGATGCATGTCTTCTATGTC

>M6-PGSC0003DMG400030625-(rev)M6LRR-RLK\_3477

TCCTTGACCCAAGACTCTCAACGGTCCCCTTAATGAGGTGATGCATGTCTTCTATGTCGCATTGTTGTGT  
GTTGAAGAGCAGGCTGTGGAACGCCCCACCATGCGAGAGGTAGTGCAA

>M6-PGSC0003DMG400030625-(rev)M6LRR-RLK\_3538

ATTGTTGTGTGTTGAAGAGCAGGCTGTGGAACGCCCCACCATGCGAGAGGTAGTGCAAATACTAACTGA  
ACTTCCAAGTCACCAGGTGCAAATCAGATGACTCAGCCGTCACTGATCA

>M6-PGSC0003DMG400030625-(rev)M6LRR-RLK\_3599

CTAACTGAACTTCCAAGTCACCAGGTGCAAATCAGATGACTCAGCCGTCACTGATCAGTCACCCCCAC  
CATCAGCCTCTGCATTAGAGTCCCCAACCTCAATTCCCGAGGAAACAAAA

>M6-PGSC0003DMG400030625-(rev)M6LRR-RLK\_366

TACTCTTCCGCCGGAAGTTGGGAATCTTCGTTACTTACGAAATCTGTCTGTCGCTGTTAACCAGTTTACTG  
GACCCATTCTGTTGAAATCTCCTTTATTCCAAATCTTGTTACCTTAA

>M6-PGSC0003DMG400030625-(rev)M6LRR-RLK\_3660

CACCCCCACCATCAGCCTCTGCATTAGAGTCCCCAACCTCAATTCCCGAGGAAACAAAAGACCACCATCA  
ACCAACACCTCAAGCAACTCCACCTGACCTACTCAGTATCTGATTTGCAA

>M6-PGSC0003DMG400030625-(rev)M6LRR-RLK\_3721

CCACCATCAACCAACACCTCAAGCAACTCCACCTGACCTACTCAGTATCTGATTTGCAATGTTCTTGAAT  
AGGAGTGTTTTATTTAGTTTATTCTCTAGTTCTATTATGATGAATTGT

>M6-PGSC0003DMG400030625-(rev)M6LRR-RLK\_3782

TTCTTGAAATAGGAGTGTTTTATTTAGTTTATTCTCTAGTTCTATTATGATGAATTGTGCTAGCTTTGTT  
TTTTTTAAAAAAATTGGGTCTATTTAGGCTCAGGGGTTTATTTAA

>M6-PGSC0003DMG400030625-(rev)M6LRR-RLK\_3843

TAGCTTTGTTCTTTTTTTAAAAAAATTGGGTCTATTTAGGCTCAGGGGTTTATTTAACTCCAAGATGGG



TTAATGCTCAGAAGTTTTCTCTTGTACAGTAAGATTGGTAAGGTTTT

>M6-PGSC0003DMG400030625-(rev)M6LRR-RLK\_3882

GGCTCAGGGGTTTATTTAACTCCAAGATGGGTTAATGCTCAGAAGTTTTCTCTTGTACAGTAAGATT

GGTAAGGTTTTCTCAAGTGTATTAATGGAAAAATTGCCCTTCATTTGCTA

>M6-PGSC0003DMG400030625-(rev)M6LRR-RLK\_427

CAGTTTACTGGACCCATTCCTGTTGAAATCTCCTTTATTCCAAATCTTGGTTACCTTAATCTTTCTAATAAC

ATATTCGGGATGGAATTCCTTCGCAGTTAACCCGTCTGCGTAACCTC

>M6-PGSC0003DMG400030625-(rev)M6LRR-RLK\_488

TTTCTAATAACATATTCGGGATGGAATTCCTTCGCAGTTAACCCGTCTGCGTAACCTCCAAGTCCTTGAC

CTTTACAACAACAATATGACCGGTAACTTCCCCTTGAGGTGTATCAGA

>M6-PGSC0003DMG400030625-(rev)M6LRR-RLK\_549

AGTCCTTGACCTTTACAACAACAATATGACCGGTAACTTCCCCTTGAGGTGTATCAGATGACTAACCTTC

GACATCTACACCTCGGCGGGAACCTTTTTCGGTGGCCGCATTCCTCCGGA

>M6-PGSC0003DMG400030625-(rev)M6LRR-RLK\_61

TTTTTGCTTTTCTCACTCTCACTGAGTGAAACCGCAAACCAACAGTTGGTGGACATTAGATTAAGGAAG

GAAAAATGCGTCTTCTTTTTCTTCTTCTTGTATGCATTTTACTGAC

>M6-PGSC0003DMG400030625-(rev)M6LRR-RLK\_610

ACTAACCTTCGACATCTACACCTCGGCGGGAACCTTTTTCGGTGGCCGCATTCCTCCGGAGTATGGAAGGT

TCCCGTCTCTAGAGTACCTCGCAGTTTCAGGCAATGCACTGGTAGGAGAG

>M6-PGSC0003DMG400030625-(rev)M6LRR-RLK\_671

ATGGAAGGTTCCCGTCTCTAGAGTACCTCGCAGTTTCAGGCAATGCACTGGTAGGAGAGATACCACCGG

AGATTGAAACATCACTACACTTCAGCAGTTGTATGTAGGATACTACAATA

>M6-PGSC0003DMG400030625-(rev)M6LRR-RLK\_732

ACCACCGGAGATTGGAAACATCACTACACTTCAGCAGTTGTATGTAGGATACTACAATACCTTCACCGGT

GGGATTCCGCCGGAATAGGGAACCTTATCGCAGCTCCTCCGGTTAGATGC

>M6-PGSC0003DMG400030625-(rev)M6LRR-RLK\_793

TTCACCGGTGGGATTCCGCCGGAATAGGGAACCTTATCGCAGCTCCTCCGGTTAGATGCTGCTAACTGT

GGACTTTCGGGGGAGATTCCACCGGAGATTGGGAAGCTTCAGAACCTTGAC

>M6-PGSC0003DMG400030625-(rev)M6LRR-RLK\_854

CTAACTGTGGACTTTCGGGGGAGATTCCACCGGAGATTGGGAAGCTTCAGAACCTTGACACCCTCTTCCT  
GCAAGTGAATTCTCTGTCTGGGTCATTA ACTCCGGAGATAGGTTATCTGA

>M6-PGSC0003DMG400030625-(rev)M6LRR-RLK\_915

CCTCTTCTGCAAGTGAATTCTCTGTCTGGGTCATTA ACTCCGGAGATAGGTTATCTGAAGAGCTTGAAA  
TCTTTGGATCTGTCTGAATAACATGTTCTCTGGCGAGATACCGCCAACATT

>M6-PGSC0003DMG400030625-(rev)M6LRR-RLK\_976

AGCTTGAAATCTTTGGATCTGTCTGAATAACATGTTCTCTGGCGAGATACCGCCAACATTTGCGGAGCTTA  
AGAATATCACTCTTGTTAATCTTTTCGGAATAAGCTTTATGGGTCAATA

>M6-PGSC0003DMG400030626-(rev)M6LRR-RLK\_0

TTATGCAATATTATTTTTGAGTCCAAAACCTTATCATTACTCTCTGATTCAAGTTACTGTA ACTCTTGTCT  
TGTTCTTCGCCATTAGAGTCCAATACTACTAGCTTCTTCTTTTTTCTA

>M6-PGSC0003DMG400030626-(rev)M6LRR-RLK\_1037

ACCTGAAATCTATTCAGAATTTTGATGTGGCAAACAACAATCTCTCCGGAAAAATTCCAGAAAGCTTCGG  
AGAACTCAAAACCATAACAACAATAGAGCTCTTTGGAAACCATTTTTTCAG

>M6-PGSC0003DMG400030626-(rev)M6LRR-RLK\_1098

AAGCTTCGGAGAACTCAAAACCATAACAACAATAGAGCTCTTTGGAAACCATTTTTTCAGGCGAATTACCG  
GACATGTTTTCCGGTCTTGTTCTCTTTCCAGGTTTGACGCTTCTGAGAA

>M6-PGSC0003DMG400030626-(rev)M6LRR-RLK\_1159

GAATTACCGGACATGTTTTCCGGTCTTGTTCTCTTTCCAGGTTTGACGCTTCTGAGAACAATCTCACCGG  
GAAAATACCTGAAACCCTTGCCATTTGCCATTGGAATCTCTAAATCTC

>M6-PGSC0003DMG400030626-(rev)M6LRR-RLK\_122

GTGTGAACACTCTTCACGCTTTAGTACTATTTCTTCTCCTTAAACTCTGCCTCCGTTACACTTGTAATCCA  
TGCAAAAATTACCCCCACCTCTTTCTAACTCTTATCTTCCCAACATTC

>M6-PGSC0003DMG400030626-(rev)M6LRR-RLK\_1220

ATCTCACCGGGAAAATACCTGAAACCCTTGCCATTTGCCATTGGAATCTCTAAATCTCAATGATAACCAA  
TTAGAAGGCGAAATTTAGAAAATTTAGCTCTTAACCCAAATCTTAGTC

>M6-PGSC0003DMG400030626-(rev)M6LRR-RLK\_1281

TGATAACCAATTAGAAGGCGAAATTTAGAAAATTTAGCTCTTAACCCAAATCTTAGTCAGTTCAAGCTT  
TTAACAACAGATTTTCAGGTA CTTTACCTCAAAAATTTTGGTTTAAGTTC

>M6-PGSC0003DMG400030626-(rev)M6LRR-RLK\_1342

TTCAAGCTTTTTAACAAACAGATTTTCAGGTACTTTACCTCAAATTTTGGTTTAAGTTCAGATTTAGATGA  
GTTTGATGTCTCCGGCAACAATCTAAAAGGTTCTTTACCTCCCAACCTA

>M6-PGSC0003DMG400030626-(rev)M6LRR-RLK\_1403

ATTTAGATGAGTTTGATGTCTCCGGCAACAATCTAAAAGGTTCTTTACCTCCCAACCTATGTTCTAGAAAG  
AAACTTAGGATTTTGAACCTGTTTGATAATAAGTTCAATGGGCCAATCC

>M6-PGSC0003DMG400030626-(rev)M6LRR-RLK\_1464

TTCTAGAAAGAACTTAGGATTTTGAACCTGTTTGATAATAAGTTCAATGGGCCAATCCCAGAATCCTAT  
GGGCAGTGTTATTTCACTATCATATGTGCGTATCTATAACAATCAATTCTC

>M6-PGSC0003DMG400030626-(rev)M6LRR-RLK\_1525

GAATCCTATGGGCAGTGTTATTTCACTATCATATGTGCGTATCTATAACAATCAATTCTCTGGTGAATTACC  
AACTGGTTTCTGGGGATTTGATGGATACACATTTCTTGAAGTGCGAAAC

>M6-PGSC0003DMG400030626-(rev)M6LRR-RLK\_1586

GTGAATTACCAACTGGTTTCTGGGGATTTGATGGATACACATTTCTTGAAGTGCGAAACAACAACCTTTCA  
AGTTCAATTCCAGCTTCAATCTCCAATGCTCGAGGCCTGACACAAATTC

>M6-PGSC0003DMG400030626-(rev)M6LRR-RLK\_1647

CAACTTTCAAGTTCAATTCCAGCTTCAATCTCCAATGCTCGAGGCCTGACACAAATTCCTATCTCCGGCA  
ACAAGTTCTCCGGGGAATTGCCAACAGAAATATGCAATTTGGAAGAGGT

>M6-PGSC0003DMG400030626-(rev)M6LRR-RLK\_1708

ATCTCCGGCAACAAGTTCTCCGGGGAATTGCCAACAGAAATATGCAATTTGGAAGAGGTTGTGATCATG  
GACATTAGCAAGAATCAATTATCAGGGGAGTTGCCTTCGTGTATCACAAGA

>M6-PGSC0003DMG400030626-(rev)M6LRR-RLK\_1769

TGATCATGGACATTAGCAAGAATCAATTATCAGGGGAGTTGCCTTCGTGTATCACAAGATTGAAAACATT  
ACAGAAGCTTGATCTTTCACAAAATAGGATCAAGGGTCAAATTCCCAAAT

>M6-PGSC0003DMG400030626-(rev)M6LRR-RLK\_183

CTTGTAATCCATGCAAAAATTACCCCCACCTCTTTCTAACTCTTATCTTCCCAACATTCAACCTCCATTACA  
GATGTTTATGATTAATCGATTCTTGCCTTTTTAAGGACTTGGAGGTA

>M6-PGSC0003DMG400030626-(rev)M6LRR-RLK\_1830

GAAAACATTACAGAAGCTTGATCTTTCACAAAATAGGATCAAGGGTCAAATTCCCAAATCAGTTAGTTCT

TGGAATGACCTGACTGAATTGAATTTAGCTAACAATCAATTGACAGGTGA

>M6-PGSC0003DMG400030626-(rev)M6LRR-RLK\_1891

GTTAGTTCTTGGAATGACCTGACTGAATTGAATTTAGCTAACAATCAATTGACAGGTGAAATTCCAGGTG

AGCTTGGGACGTTACCGGTCTTAACCTACTTAGACCTTGCCACAACTTA

>M6-PGSC0003DMG400030626-(rev)M6LRR-RLK\_1952

TTCCAGGTGAGCTTGGGACGTTACCGGTCTTAACCTACTTAGACCTTGCCACAACTTACTTTCTGGCGA

AATTCCATCTGAGCTGAGCAAGCTCAAGCTCAACAAATTCAATGTATCAA

>M6-PGSC0003DMG400030626-(rev)M6LRR-RLK\_2013

TTCTGGCGAAATTCCATCTGAGCTGAGCAAGCTCAAGCTCAACAAATTCAATGTATCAAATAACAGGCTG

GAAGGGAAAGTTCCACTTGGGTTTGATAACGATTTTTTCGTCTCAGGTTT

>M6-PGSC0003DMG400030626-(rev)M6LRR-RLK\_2074

AACAGGCTGGAAGGGAAAGTTCCACTTGGGTTTGATAACGATTTTTTCGTCTCAGGTTTACTGGGCAATC

CGGATCTTTGAAGTCCGGATCTTAAGCCTCTGCCCAATGCCGAAGACCC

>M6-PGSC0003DMG400030626-(rev)M6LRR-RLK\_2135

TGGGCAATCCGGATCTTTGAAGTCCGGATCTTAAGCCTCTGCCCAATGCCGAAGACCCAAAAGTGTA

GCTTGTACTTGGTGTGAATTTATCAGCTTTTGCCTTCATACTTGTCGGGT

>M6-PGSC0003DMG400030626-(rev)M6LRR-RLK\_2196

AAGTGTAAGCTTGTACTTGGTGTGAATTTATCAGCTTTTGCCTTCATACTTGTCTGGGTCACTTGTTTGTG

TCTTACTCAAGGCCAGTAAGCTGCTACCAATCCGTAGTAAGCGTAAAAG

>M6-PGSC0003DMG400030626-(rev)M6LRR-RLK\_2257

CTTGTGTGTCTTACTCAAGGCCAGTAAGCTGCTACCAATCCGTAGTAAGCGTAAAAGTGTGTGGAGA

ATTACTGCATTCCAACGCGTCGGTTTCACAGAGAGAGAAGTGTTAGATGCA

>M6-PGSC0003DMG400030626-(rev)M6LRR-RLK\_2318

TGTGGAGAATTACTGCATTCCAACGCGTCGGTTTCACAGAGAGAGAAGTGTTAGATGCACTGATAGAGG

AAAATCTCATTGGAGCTGGTGGGTCGGGTCGTGTGTACCGGGTCAAATTGA

>M6-PGSC0003DMG400030626-(rev)M6LRR-RLK\_2379

GATAGAGGAAAATCTCATTGGAGCTGGTGGGTCGGGTCGTGTGTACCGGGTCAAATTGAAAAACGGAC

AGATGGTAGCAGTGAAGAACTTTGGGCGGCTAACGGGAAAGAGAATCAGA

>M6-PGSC0003DMG400030626-(rev)M6LRR-RLK\_244

CCTCCATTTACAGATGTTTATGATTAATCGATTCTTGCCTTTTTAAGGACTTGGAGGTAGGGGAGATTCAT  
TCAGTCATCAATGGATTACATGAAGCTTCAATTTCTGATACTCGTTTGT

>M6-PGSC0003DMG400030626-(rev)M6LRR-RLK\_2440

AACGGACAGATGGTAGCAGTGAAGAACTTTGGGCGGCTAAACGGGAAAGAGAATCAGAGGAGGTGT  
TCAGGTCTGAGGTGGAGACATTAGGGAGAGTCCGACATGGAAACATAGTCAAA

>M6-PGSC0003DMG400030626-(rev)M6LRR-RLK\_2501

AGGTGTTCAAGTCTGAGGTGGAGACATTAGGGAGAGTCCGACATGGAAACATAGTCAAATTAATACTATAC  
ACTGGCATTGGTGATGACTTTAGGATATTGGTGTACGAATACATGGAAAATG

>M6-PGSC0003DMG400030626-(rev)M6LRR-RLK\_2562

ACTATACTGGCATTGGTGATGACTTTAGGATATTGGTGTACGAATACATGGAAAATGGAAGCTTAGG  
AGATGTATTACATGGGGAAAAAGGTGGCTTGTATTGGATTGGCAGAGGAG

>M6-PGSC0003DMG400030626-(rev)M6LRR-RLK\_2623

AGCTTAGGAGATGTATTACATGGGGAAAAAGGTGGCTTGTATTGGATTGGCAGAGGAGATTTGCCAT  
AGCAGTTGGAGCAGCTCACGGATTGGCCTATTTGCACCATGATTCTGTGCCA

>M6-PGSC0003DMG400030626-(rev)M6LRR-RLK\_2684

TTGCCATAGCAGTTGGAGCAGCTCACGGATTGGCCTATTTGCACCATGATTCTGTGCCAGCAATAGTGCA  
CAGAGATGTTAAGTCTAATAACATTTTGTGGACGAGGATTCAGGCCCA

>M6-PGSC0003DMG400030626-(rev)M6LRR-RLK\_2745

AATAGTGACAGAGATGTTAAGTCTAATAACATTTTGTGGACGAGGATTCAGGCCCAAAGTGGCTGA  
TTTTGGGCTAGCTAAGGCAATGCAACGGGATGCTGAGGAGAGTGAACAAGC

>M6-PGSC0003DMG400030626-(rev)M6LRR-RLK\_2806

GTGGCTGATTTTGGGCTAGCTAAGGCAATGCAACGGGATGCTGAGGAGAGTGAACAAGCCATGTCCCA  
CATTGCTGGTTCCTAAGGCTACATTGCACCTGGTAAGCTTAAATTCCTTATT

>M6-PGSC0003DMG400030626-(rev)M6LRR-RLK\_2867

TGTCCCACATTGCTGGTTCCTAAGGCTACATTGCACCTGGTAAGCTTAAATTCCTTATTGTTTTTCACCATT  
TATTTTAGGTCCAATGACTGTTAGAAATTTCTAGTCTTGTTAGAAAT

>M6-PGSC0003DMG400030626-(rev)M6LRR-RLK\_2928

TTTTACCATTTATTTAGGTCCAATGACTGTTAGAAATTTCTAGTCTTGTTAGAAATTTATTTGCCAATA  
AAAAATGTTGAAAAAATCTAGTGCTAAGGAGACTATTTTAAAAA

>M6-PGSC0003DMG400030626-(rev)M6LRR-RLK\_2989

ATTTGCCAATAAAAAATGTTGAAAAAATCTAGTGCTAAGGAGACTATTTTAAAAAATAATTTGATCC  
AAGATAGGCATAAATGAAGTGGTATGGACAGCAGGAATTCATATGCTAAC

>M6-PGSC0003DMG400030626-(rev)M6LRR-RLK\_305

GGAGATTCATTCAGTCATCAATGGATTACATGAAGCTTCAATTTCTGATACTCGTTTGTCTCTTCA  
TTGTTCCGGCGAGTTCATCGCCTCGGGATATCGCTATTTACTCCGGG

>M6-PGSC0003DMG400030626-(rev)M6LRR-RLK\_3050

TATTGATCCAAGATAGGCATAAATGAAGTGGTATGGACAGCAGGAATTCATATGCTAACCTCTACTTGT  
TGGGATCGGGGCCTAATTATTGTTGTCGTTCAACTTTTTGTTTACTTGT

>M6-PGSC0003DMG400030626-(rev)M6LRR-RLK\_3111

CTACTTGTGGGATCGGGGCCTAATTATTGTTGTCGTTCAACTTTTTGTTTACTTGTGTGAAAAGATA  
TTAATATCTTGCCTTGGCATAACCAAGGACATCCAAAATAGTTTTGT

>M6-PGSC0003DMG400030626-(rev)M6LRR-RLK\_3172

TGAAAAGATATTTAATATCTTGCCTTGGCATAACCAAGGACATCCAAAATAGTTTTGTGGAAGTTTTGG  
TTAACTTCACATACTATCTTAAAATTTGATTTGATTTGATTTGAAATTC

>M6-PGSC0003DMG400030626-(rev)M6LRR-RLK\_3233

AAGTTTTGGTTAACTTCACATACTATCTTAAAATTTGATTTGATTTGATTTGAAATTCCTTAATATGAAGC  
CAGAGAAGATTTTAGGAGATGATTCAAACATATAAGTAGATTGGAAAC

>M6-PGSC0003DMG400030626-(rev)M6LRR-RLK\_3294

TAATATGAAGCCAGAGAAGATTTTAGGAGATGATTCAAACATATAAGTAGATTGGAAACCTTAATAATA  
TCCATTTAATTGTAGCATCTAGTTTCATTCCTCTAACTGGACGTTGTTTCT

>M6-PGSC0003DMG400030626-(rev)M6LRR-RLK\_3355

TAATAATATCCATTTAATTGTAGCATCTAGTTTCATTCCTCTAACTGGACGTTGTTTCTGAAGTCTGCATAT  
TCTTGTGTTGCTTGCTAATGCTTGATTATATGTTTAAACAAGGGGATTT

>M6-PGSC0003DMG400030626-(rev)M6LRR-RLK\_3416

AGTCTGCATATTCTTGTGTTGCTTGCTAATGCTTGATTATATGTTTAAACAAGGGGATTTGTCAAAGTAAAA  
TCAAAGAATGATTGGGCACCCCATTTTTGAAGTCTGCATGACTATTTAG

>M6-PGSC0003DMG400030626-(rev)M6LRR-RLK\_3477

CAAAGTAAAATCAAAGAATGATTGGGCACCCCATTTTTGAAGTCTGCATGACTATTTAGTTTTAACTACCT

GTAATATTTAATCCTGAGTTTCGTTTGGGATTTGTCAAAGTAAAATCAA

>M6-PGSC0003DMG400030626-(rev)M6LRR-RLK\_3538

TAACTACCTGTAATATTTAATCCTGAGTTTCGTTTGGGATTTGTCAAAGTAAAATCAAAGCATAGTAGG

GCGCTCCTTTTTCTGAAGTCGGCATGACCATTATTCTACACCGGTAGTA

>M6-PGSC0003DMG400030626-(rev)M6LRR-RLK\_3599

CATAGTAGGGCGCTCCTTTTTCTGAAGTCGGCATGACCATTATTCTACACCGGTAGTAATATTTAATTCT

GAGATCACATCAAATTATTGAATGATTTTGTACCCAATGTTTGTTACA

>M6-PGSC0003DMG400030626-(rev)M6LRR-RLK\_366

TTTTCTCTTCATTGTTCCGGCGAGTTCATCGCCTCGGGATATCGCTATTTTACTCCGGGTTAAGTCCGATC

AACTCGAAGACCCGAATGGGTTGCTTGATGATTGGAACGGGTCTGCTCC

>M6-PGSC0003DMG400030626-(rev)M6LRR-RLK\_3660

ATTTAATTCTGAGATCACATCAAATTATTGAATGATTTTGTACCCAATGTTTGTTACACAGTCAAGATTT

GTTTGAAAGAATAAAAAATAGGAGGGTCATGTGTGTCCTGTCACCTAGC

>M6-PGSC0003DMG400030626-(rev)M6LRR-RLK\_3721

GTCAAGATTTGTTTGAAAGAATAAAAAATAGGAGGGTCATGTGTGTCCTGTCACCTAGCATTGTTAACA

TATTCAAGATTTGATCTAAAAGAATAGGATTGAAAGAGACATGTGCCTAA

>M6-PGSC0003DMG400030626-(rev)M6LRR-RLK\_3782

TTGTTAACATATTCAAGATTTGATCTAAAAGAATAGGATTGAAAGAGACATGTGCCTAAGTATTGTTACT

TATTTATCTAATTTGTGCATATCTTAAATTCTATTTACTCCCTTAAGTCC

>M6-PGSC0003DMG400030626-(rev)M6LRR-RLK\_3843

ATTGTTACTTATTTATCTAATTTGTGCATATCTTAAATTCTATTTACTCCCTTAAGTCCCTCTTTGATTGGACA

TACAGTTTCATGTGCCCTTCCTTTGCAAACTGAGAGAATACAGAAA

>M6-PGSC0003DMG400030626-(rev)M6LRR-RLK\_3904

TTTGATTGGACATACAGTTTCATGTGCCCTTCCTTTGCAAACTGAGAGAATACAGAAACCAATATCCTT

GATGGAAATTTTTGTGGCCTTTTGATACTAGAAAACATTCCGGTTGCAA

>M6-PGSC0003DMG400030626-(rev)M6LRR-RLK\_3965

AATATCCTTGATGGAAATTTTTGTGGCCTTTTGATACTAGAAAACATTCCGGTTGCAATGACAAACAGTT

TGTTAAGTTGATCTTGGCTACATAACGATTAGGAAGATGCTAAATATCT

>M6-PGSC0003DMG400030626-(rev)M6LRR-RLK\_4026

ACAAACAGTTTGTAAAGTTGATCTTGGCTACATAACGATTAGGAAGATGCTAAATATCTCATGGGATGGC  
ACATGTGTTATCCAAGTTTTTCAGCTGCACGATTAACTTAACCTCGATT

>M6-PGSC0003DMG400030626-(rev)M6LRR-RLK\_4087

TGGGATGGCACATGTGTTATCCAAGTTTTTCAGCTGCACGATTAACTTAACCTCGATTCTTTGTTTCAA  
TTGCAGAATATGCATACACTCTGAAGATCACTGAGAAGAGTGATGTTA

>M6-PGSC0003DMG400030626-(rev)M6LRR-RLK\_4148

TTTGTTCATTGCAGAATATGCATACACTCTGAAGATCACTGAGAAGAGTGATGTTTATAGCTTTGGTG  
TGGTACTGTTGGAACATAAATACTGGTAAAAGGCCTAATGACTCCTCTTTT

>M6-PGSC0003DMG400030626-(rev)M6LRR-RLK\_4209

GCTTTGGTGTGGTACTGTTGGAACATAAATACTGGTAAAAGGCCTAATGACTCCTCTTTTGGAGAGAACA  
AGGACATTGTCAAGTGGGTGTTAGAGGTTGCAACATCGTCTAAGAAAGATG

>M6-PGSC0003DMG400030626-(rev)M6LRR-RLK\_427

AAGTCCGATCAACTCGAAGACCCGAATGGGTTGCTTGATGATTGGAACGGGTCTGCTCCAAATGCGCCT  
TGCAGCTGGAACGGGATTAAGTGTGATCGGAAAACCGGTCAGGTTGTGTCC

>M6-PGSC0003DMG400030626-(rev)M6LRR-RLK\_4270

AGAGAACAAGGACATTGTCAAGTGGGTGTTAGAGGTTGCAACATCGTCTAAGAAAGATGAAGGAACTG  
GCCATATTGTTACGTGCGCAAGTGGTATTCTTGATTTGAACCAGCTAGTTGA

>M6-PGSC0003DMG400030626-(rev)M6LRR-RLK\_4331

GGAAGTGGCCATATTGTTACGTGCGCAAGTGGTATTCTTGATTTGAACCAGCTAGTTGACCAGAGAATG  
AATCCATCTGCAAGCAATTATGCAGAGATTAATAATGTTTTTCGATGTGGCT

>M6-PGSC0003DMG400030626-(rev)M6LRR-RLK\_4392

AGAGAATGAATCCATCTGCAAGCAATTATGCAGAGATTAATAATGTTTTTCGATGTGGCTTTGCTTTGCAC  
TTCAGCATTGCCTATTAATAGGCCCTCCATGAGAAGAGTTGTTGAGTTGC

>M6-PGSC0003DMG400030626-(rev)M6LRR-RLK\_4453

GCTTTGCACTTCAGCATTGCCTATTAATAGGCCCTCCATGAGAAGAGTTGTTGAGTTGCTGAAGGGTATC  
CCCTCCGCTCGCACTAAAACAACCCATTAGCTTTTTCACAGTTTCAACATG

>M6-PGSC0003DMG400030626-(rev)M6LRR-RLK\_4514

AAGGGTATCCCCTCCGCTCGCACTAAAACAACCCATTAGCTTTTTCACAGTTTCAACATGTCCTTGCTCAAG  
TAACTTGATACTATTGTAACTGTAAAAGAATGTGTGAAATTAGGTGTG



>M6-PGSC0003DMG400030626-(rev)M6LRR-RLK\_4575

CTTGCTCAAGTAACTTGATACTATTGTAAGTGTAAAAGAATGTGTGAAATTAGGTGTGTTTAGGTCTGC  
TTCATAGGTCGATTTAGTTTGCTTGTGCTGTGGTTTAAACAAGCACCTTGTTA

>M6-PGSC0003DMG400030626-(rev)M6LRR-RLK\_4636

TAGGTCTGCTTCATAGGTCGATTTAGTTTGCTTGTGCTGTGGTTTAAACAAGCACCTTGTTAGATACTCCAGTA  
CTACACAGAGTAGCTTAACTAAAAGTTTGCTGACCCTGTAAAACATG

>M6-PGSC0003DMG400030626-(rev)M6LRR-RLK\_4697

TACTCCAGTACTACACAGAGTAGCTTAACTAAAAGTTTGCTGACCCTGTAAAACATGTTGTAACGACT  
AAACCTTAGAGTTTTTGTGCAATATATGAACTTTACTATCATATACAAG

>M6-PGSC0003DMG400030626-(rev)M6LRR-RLK\_488

ATGCGCCTTGCAGCTGGAACGGGATTAAGTGTGATCGGAAAACCGGTCAGGTTGTGTCCATTGATTTTG  
CAAGTTTTGGAATCGCTGGTCGTTTTCTGCTGATTTCTGCCGGATTTCTGA

>M6-PGSC0003DMG400030626-(rev)M6LRR-RLK\_549

TGATTTTGCAAGTTTTGGAATCGCTGGTCGTTTTCTGCTGATTTCTGCCGGATTTCTGACTTTGCAGAAAC  
TCAATCTGGGTGATAACAGTTTTGGTGAGTCCATTTCTCTGACTCATG

>M6-PGSC0003DMG400030626-(rev)M6LRR-RLK\_61

AACTCTGTCTTGTCTTCGCCATTAGAGTCCAATACTACTAGCTTCTTCTTTTTCTAATGTGTGAACACT  
CTTCACGCTTTCAGTACTATTTCTTCTCCTTAACTCTGCCTCCGTTA

>M6-PGSC0003DMG400030626-(rev)M6LRR-RLK\_610

TTGCAGAACTCAATCTGGGTGATAACAGTTTTGGTGAGTCCATTTCTCTGACTCATGGTCACTCTGTTC  
GCATCTACACTTTTTGAATATTTCTTTAAATTTCTTTGTTGGCCGGCTG

>M6-PGSC0003DMG400030626-(rev)M6LRR-RLK\_671

CACTCTGTTCGCATCTACACTTTTTGAATATTTCTTTAAATTTCTTTGTTGGCCGGCTGCCGGAGTTTATTA  
CCAAGTTCGATAACTTGACCATCCTTGATGTTAATTCAAACAATTTCT

>M6-PGSC0003DMG400030626-(rev)M6LRR-RLK\_732

GGAGTTTATTACCAAGTTCGATAACTTGACCATCCTTGATGTTAATTCAAACAATTTCTCCGGTGAAGTTC  
CGGCGAGTTTAGGCCGTTTACCCAAATTACAAGTCTGAATATAGCTAA

>M6-PGSC0003DMG400030626-(rev)M6LRR-RLK\_793

GGTGAAGTTCCGGCGAGTTTAGGCCGTTTACCCAAATTACAAGTCTGAATATAGCTAACAAATCTCCTCA

ATGGTTCAATTCCTGAGTTCTTGACGAATCTTACCGAGTTGACTCGATTG

>M6-PGSC0003DMG400030626-(rev)M6LRR-RLK\_854

ATCTCCTCAATGGTTCAATTCCTGAGTTCTTGACGAATCTTACCGAGTTGACTCGATTGGAAATTGCTGCA

AATCCGTTTAAGCCAGGTCCATTGCCTTCCTCAATCGGCCGACTCGGTA

>M6-PGSC0003DMG400030626-(rev)M6LRR-RLK\_915

AATTGCTGCAAATCCGTTTAAGCCAGGTCCATTGCCTTCCTCAATCGGCCGACTCGGTAAGCTTCGAGTT

TTCTATGCTCGGTATGCGAACCTTATTGGAAATTTCCAGATTCTATCAA

>M6-PGSC0003DMG400030626-(rev)M6LRR-RLK\_976

CTTCGAGTTTTCTATGCTCGGTATGCGAACCTTATTGGAAATTTCCAGATTCTATCAAAGACCTGAAATC

TATTCAGAATTTTGATGTGGCAAACAACAATCTCTCCGGAAAAATTCCA

>M6-PGSC0003DMG400030658M6RLKmalectin\_0

ATGTGGTTTTCGAGCAGGATTTCTAAGTATTCAGTGCTGTGCTGCTGCAAACCTTACAGAGCCACGTACCA

ACTTAAGTTGGATTTTCAGATGGAACCTGGTTCCTGAAAATCAGAGTTGC

>M6-PGSC0003DMG400030658M6RLKmalectin\_1037

CAAATCTATCCCAATTGGGACCCATTTGTAATGGTTATGAGATTTTAAAGACTCTTCCTTGGGTTAAAGA

AACAGCCATGAAAGAAGGTAATTTACTCAAGAATATGCATAGTAGCAGA

>M6-PGSC0003DMG400030658M6RLKmalectin\_1098

GGTTAAAGAAACAGCCATGAAAGAAGGTAATTTACTCAAGAATATGCATAGTAGCAGAATATAAGATG

CCATAGTAGAAAAGCATTACAGAGAAGTGCATTTATTATCTCTCTATATGT

>M6-PGSC0003DMG400030658M6RLKmalectin\_1159

ATAAGATGCCATAGTAGAAAAGCATTACAGAGAAGTGCATTTATTATCTCTCTATATGTTTCAGTTGACA

TAATGGCGAATGTCAAGAAGGAATTATTGCAAAAAACAATGAAATATGG

>M6-PGSC0003DMG400030658M6RLKmalectin\_122

ATCAAGGCCAGTGTACAAGAGTGCACACTATGAACGAGCTCGATCTTTTAGCTTAGACATTGGCCATAA

GTGGTGTACAGCTTGCCAACCAGGAAAGATCATGACTATCTAGTAAGAGG

>M6-PGSC0003DMG400030658M6RLKmalectin\_1220

CAGTTGACATAATGGCGAATGTCAAGAAGGAATTATTGCAAAAAACAATGAAATATGGAAGAGTTGG

TCAGGAGACCCTTGTCTTCCCCTTCATGGCCGGGTCTAACTTGTGATCGAG

>M6-PGSC0003DMG400030658M6RLKmalectin\_1281

GAGTTGGTCAGGAGACCCTTGTCTTCCCCTTCCATGGCCGGGTCTAACTTGTGATCGAGTTAATGGTACT  
TCAGTCATCACTCAGATGTAAGTTATCCCTCTCTATCAAATACTCAAAG

>M6-PGSC0003DMG400030658M6RLKmalectin\_1342

AATGGTACTTCAGTCATCACTCAGATGTAAGTTATCCCTCTCTATCAAATACTCAAAGCAGTTTGGTTTT  
CTGAAAATTATCAAATAATATGTCTACCATTTTTTCAACCTCATTTATC

>M6-PGSC0003DMG400030658M6RLKmalectin\_1403

GTTTGGTTTTCTGAAAATTATCAAATAATATGTCTACCATTTTTTCAACCTCATTTATCCGTAGCATAGTAA  
GCACGTTTGAGATAAGACGGATTACACTTCTGGTCATTTAATCCTTTT

>M6-PGSC0003DMG400030658M6RLKmalectin\_1464

TAGCATAGTAAGCACGTTTGAGATAAGACGGATTACACTTCTGGTCATTTAATCCTTTTTCTCTTATCCCT  
ACCACAGAGATCTCTCCTCAGGTGGCATTAGTGGACCTAGCCCTCCTA

>M6-PGSC0003DMG400030658M6RLKmalectin\_1525

TCTTATCCCTACCACAGAGATCTCTCCTCAGGTGGCATTAGTGGACCTAGCCCTCCTAGCATCCAAAAAC  
TGATGCACCTGAGAAAAGTATGTCCAAGCCTTTGTCATCAACACTAA

>M6-PGSC0003DMG400030658M6RLKmalectin\_1586

ATCCAAAACTGATGCACCTGAGAAAAGTATGTCCAAGCCTTTGTCATCAACACTAATATTTACCTGT  
TCATTTTCTTTTAAAACAAATTTACAATCTGGTGTAGTTTTACTAAACA

>M6-PGSC0003DMG400030658M6RLKmalectin\_1647

TTTACCTGTTCAATTTCTTTTAAAACAAATTTACAATCTGGTGTAGTTTTACTAAACAATCAAGTTATTTG  
CCAAGACAGGAATATCAGCAATAATGGCTCTAGTGGCACAAATTTCACT

>M6-PGSC0003DMG400030658M6RLKmalectin\_1708

CAAGTTATTTGCCAAGACAGGAATATCAGCAATAATGGCTCTAGTGGCACAAATTTCACTCTTTACATCAT  
CCTTCACATACTCTACAAGGTAAATCTCCTAAGTTGGTTTCCACATAAAA

>M6-PGSC0003DMG400030658M6RLKmalectin\_1769

TTACATCATCCTTCACATACTCTACAAGGTAAATCTCCTAAGTTGGTTTCCACATAAAAATAATTGCACAAT  
GTGAAGAAGTTAAATAATATCATAACAGAGGATTAACCTCTGAAAAAAA

>M6-PGSC0003DMG400030658M6RLKmalectin\_183

GGCCATAAGTGGTGTTACAGCTTGCCAACCAGGAAAGATCATGACTATCTAGTAAGAGGTACATTTCTTT  
CTGTCAAACAAGAGAAGACTCTACCACACAGTTCTTTTGGTTGTTTTGATT

>M6-PGSC0003DMG400030658M6RLKmalectin\_1830

ATTGCACAATGTGAAGAAGTTAAATAATATCATACAGAGGATTAACCTCTGAAAAAAAAATACCAAAGCT  
GTACAAAAGTTTTACTAGCAAGCTGCCTTCATGCTTCATATGTTACAATA

>M6-PGSC0003DMG400030658M6RLKmalectin\_1891

CCAAAGCTGTACAAAAGTTTTACTAGCAAGCTGCCTTCATGCTTCATATGTTACAATAAAAAAGTATGA  
TGTGACACTAATATCTTTGTTTCCTTGTCCCTCCAGATACTTAAGCAGAA

>M6-PGSC0003DMG400030658M6RLKmalectin\_1952

AAAGTATGATGTGACACTAATATCTTTGTTTCCTTGTCCCTCCAGATACTTAAGCAGAAACATTCATATCA  
GCAACAAGCTTTCTACAAGCATCAAAGAATCTAATATTACAACAGAGTA

>M6-PGSC0003DMG400030658M6RLKmalectin\_2013

ATTCATATCAGCAACAAGCTTTCTACAAGCATCAAAGAATCTAATATTACAACAGAGTATGAGACCACTG  
CCCTGTCTTCAGAGAAAAAACAATTTCTATGATTTTACGCTGTCCACT

>M6-PGSC0003DMG400030658M6RLKmalectin\_2074

AGACCACTGCCCTGTCTTCAGAGAAAAAACAATTTCTATGATTTTACGCTGTCCACTTTTTCTCCAGGG  
GTGGGGGAAAGCAATGGGATATCAGGAGCTGACAAAGAAAGAGAAATAA

>M6-PGSC0003DMG400030658M6RLKmalectin\_2135

TTCTCCAGGGGTGGGGGAAAGCAATGGGATATCAGGAGCTGACAAAGAAAGAGAAATAAGCCTAATTT  
GTTTTCTTATTTACATTTAGCAAAAGGGATAGCTAATGTAAACAAAACCTC

>M6-PGSC0003DMG400030658M6RLKmalectin\_2196

CTAATTTGTTTTCTTATTTACATTTAGCAAAAGGGATAGCTAATGTAAACAAAACCTCAAGTTCAACACA  
TAAACTTGTGATAGGAGCAGCTGTAGGTACATCTCTCTGCGATCCTT

>M6-PGSC0003DMG400030658M6RLKmalectin\_2257

GTTCAACACATAAACTTGTGATAGGAGCAGCTGTAGGTACATCTCTCTGCGATCCTTGCAATTGTTAT  
CTCTGTGGTCTGCCTCTTCAAAGACGAGTAATGGCAGGGCCAAAATTTT

>M6-PGSC0003DMG400030658M6RLKmalectin\_2318

AATTGTTATCTCTGTGGTCTGCCTCTTCAAAGACGAGTAATGGCAGGGCCAAAATTTCTTATGAGAAAT  
TACTCGATCACAAGGAGTAAGTACACTCTCAGCACACTAGAAATAATCCT

>M6-PGSC0003DMG400030658M6RLKmalectin\_2379

ATGAGAAATTACTCGATCACAAGGAGTAAGTACACTCTCAGCACACTAGAAATAATCCTGCACGCATAAT

GCATGACAATATATCATGATAATTTAAGAATTTTTCTTGTTGCTTGCAA

>M6-PGSC0003DMG400030658M6RLKmalectin\_244

CATTTCTTTCTGTCAAACAAGAGAAGACTCTACCACACAGTTCTTTTGTGTTTTGATTGGTGTACACCA

ATAGCCACAGTAAAGTCATCTGATGAACTTAAGGTTGAGGGAATTTTA

>M6-PGSC0003DMG400030658M6RLKmalectin\_2440

ACGCATAATGCATGACAATATATCATGATAATTTAAGAATTTTTCTTGTTGCTTGCAATAGCTTAAGATT

GGACTCAGCAAGCATAAATCATAAACTTTCATGATTAATAAAGCAGA

>M6-PGSC0003DMG400030658M6RLKmalectin\_2501

GCTTAAGATTGGACTCAGCAAGCATAAATCATAAACTTTCATGATTAATAAAGCAGAACTGTAACATA

TATCATCTGTTGCAAAGAAGCTTTTTTGACAGGAACTCAAGAAATTTGAA

>M6-PGSC0003DMG400030658M6RLKmalectin\_2562

CTGTAACATATCATCTGTTGCAAAGAAGCTTTTTTGACAGGAACTCAAGAAATTTGAAACAGAGTTAAT

ATCCTTAACATTTGGTACTTATACTCAATGAAGCAATATGCTCAAAAAA

>M6-PGSC0003DMG400030658M6RLKmalectin\_2623

AGAGTTAATATCCTTAACATTTGGTACTTATACTCAATGAAGCAATATGCTCAAAAAAATTTCAAATGC

AGATGCAGTATATTCAGTACCAAGCACGGATACTACCATGATGAAATCA

>M6-PGSC0003DMG400030658M6RLKmalectin\_2684

TTCAAATGCAGATGCAGTATATTCAGTACCAAGCACGGATACTACCATGATGAAATCAATATCCTCCAG

GAACTTCAAAGTGAATATATAGAAGCTATTACTCAGAACTACAAAATTT

>M6-PGSC0003DMG400030658M6RLKmalectin\_2745

ATCCTCCAGGAACTTCAAAGTGAATATATAGAAGCTATTACTCAGAACTACAAAATTTGATAGGTGAA

GGAGGCTTTGGATCCGTTTACCGTGGTACCTTACCTGATGGTGTAGAAGT

>M6-PGSC0003DMG400030658M6RLKmalectin\_2806

ATAGGTGAAGGAGGCTTTGGATCCGTTTACCGTGGTACCTTACCTGATGGTGTAGAAGTAGCTGTAAAG

GTCAGGTCAGCCACTTCGACTCAGGGAATTCGAGAATTCATAACGAGGTA

>M6-PGSC0003DMG400030658M6RLKmalectin\_2867

CTGTAAAGGTCAGGTCAGCCACTTCGACTCAGGGAATTCGAGAATTCATAACGAGGTAACAATCTAGA

GTATTTGTAGACCAATTTCTCCCACTTCTTATTTGCATCAAACCAACA

>M6-PGSC0003DMG400030658M6RLKmalectin\_2928

AATCTAGAGTATTTGTAGACCAATTTCTCCCAACTTCCTTATTTGCATCAAACCAACAAAAAGATGTTAC  
CTAAAATGTGAGAAAAGCATCAGCACATGGAGTGAGCAATGAATCTTCT

>M6-PGSC0003DMG400030658M6RLKmalectin\_2989

AAGATGTTACCTAAAATGTGAGAAAAGCATCAGCACATGGAGTGAGCAATGAATCTTCTATTTTCTATTG  
CTATTTACATAGGAAATAAACTAACGATACGCTCCACAAAATTAATACT

>M6-PGSC0003DMG400030658M6RLKmalectin\_305

TGTCACACCAATAGCCACAGTAAAGTCATCTGATGAACCTAAGGTTGAGGGAATTTTTAGAGCTACTAG  
AAGCTATACCAACTTCTGCCTATTGAAAAAGAAGGGAATCCTTACATTTT

>M6-PGSC0003DMG400030658M6RLKmalectin\_3050

TTTCTATTGCTATTTACATAGGAAATAAACTAACGATACGCTCCACAAAATTAATACTTTCTCACAGATC  
CGTGATGTTCTCTTCATAATTACTCCGGCGAGCAGTGTTGCCTCTGAA

>M6-PGSC0003DMG400030658M6RLKmalectin\_3111

CTCACAGATCCGTGATGTTCTCTTCATAATTACTCCGGCGAGCAGTGTTGCCTCTGAAATGCCTTAGCTC  
TTCAGGAGCCATCTTTATAATAATGCATCTTATCCATGCATATATAGTT

>M6-PGSC0003DMG400030658M6RLKmalectin\_3172

GCCTTAGCTCTTCAGGAGCCATCTTTATAATAATGCATCTTATCCATGCATATATAGTTAACACATGCATA  
ACAAATAACACAGCCTGCAAATTAACCACTGCTGTAATTTGTATTACAG

>M6-PGSC0003DMG400030658M6RLKmalectin\_3233

CACATGCATAACAAATAACACAGCCTGCAAATTAACCACTGCTGTAATTTGTATTACAGCTGAACCTTCTG  
TCAGCTATCACGCATGAGAACCTGGTCCCTCTTCTTGGCTACTGCTGCG

>M6-PGSC0003DMG400030658M6RLKmalectin\_3294

GAACCTTCTGTCAGCTATCACGCATGAGAACCTGGTCCCTCTTCTTGGCTACTGCTGCGAGAATGAACAG  
CAGATTCTGGTTTATCCATTTATGTCAAACAGCTCCCTACAGGATCGGTT

>M6-PGSC0003DMG400030658M6RLKmalectin\_3355

AATGAACAGCAGATTCTGGTTTATCCATTTATGTCAAACAGCTCCCTACAGGATCGGTTATATGGTACTG  
CATAATAACAAATTCATGTCTATCACTTTTATCATAAGAACCAGCACT

>M6-PGSC0003DMG400030658M6RLKmalectin\_3416

ATGGTACTGCATACATAACAAATTCATGTCTATCACTTTTATCATAAGAACCAGCACTAATTTCTTGCTT  
GTTCCCTCATCCTATTTAGGAGCAGCAGCAAAAAGGAAGATTCTAGACT

>M6-PGSC0003DMG400030658M6RLKmalectin\_3477

TTTCTTGCTTGTTCCTCATCCTATTTAGGAGCAGCAGCAAAAAGGAAGATTCTAGACTGGCCAACCAGA  
CTTCCATTGCGTTAGGAGCAGCGAGAGGCAAGTAACACAAAACCTCTGCT

>M6-PGSC0003DMG400030658M6RLKmalectin\_3538

CCAACCAGACTTTCCATTGCGTTAGGAGCAGCGAGAGGCAAGTAACACAAAACCTCTGCTATTCATGCAA  
CTCTTCAATGAAATAAGCCATATCAATGGACTTAAGCATGCGTAAATAAAA

>M6-PGSC0003DMG400030658M6RLKmalectin\_3599

TCATGCAACTCTTCAATGAAATAAGCCATATCAATGGACTTAAGCATGCGTAAATAAAAAGAGAACGTG  
TTTACCTGAGAGACAAAGATTGAAGGCATAATATGAATCTAATAGAGTTTA

>M6-PGSC0003DMG400030658M6RLKmalectin\_366

GCTACTAGAAGCTATACCAACTTCTGCCTATTGAAAAAGAAGGGGAATCCTTACATTTCTAAGGTTGAAC  
TAAGACCGATAAATTCAGATTATCTGAAAAGGGAGCCTTCAGAAGTACTC

>M6-PGSC0003DMG400030658M6RLKmalectin\_3660

AGAACGTGTTTACCTGAGAGACAAAGATTGAAGGCATAATATGAATCTAATAGAGTTTAAACAATCAATC  
ATTCCCTATTACTTATTATCAAGGCACATTTGTAAACAGCAAATACCAAAG

>M6-PGSC0003DMG400030658M6RLKmalectin\_3721

AATCAATCATTCCCTATTACTTATTATCAAGGCACATTTGTAAACAGCAAATACCAAAGTTTGCCGTTTTC  
ATTATGATATTTCTTTAATCTTCTTCAGGTTTGCTGCACCTTCACAC

>M6-PGSC0003DMG400030658M6RLKmalectin\_3782

TGCCGTTTTATTATGATATTTCTTTAATCTTCTTCAGGTTTGCTGCACCTTCACACATTCTCGGACCGTT  
GTCTGATCCATAGGGATGTCAAGTCAAGTAACATACTCTTGGATCAG

>M6-PGSC0003DMG400030658M6RLKmalectin\_3843

TCTCGGACCGTTGTCTGATCCATAGGGATGTCAAGTCAAGTAACATACTCTTGGATCAGAGCATGTGTGC  
CAAGGTTGCTGATTTTGGATTTTCAAATATGCATCTCAAGAAGGTGATA

>M6-PGSC0003DMG400030658M6RLKmalectin\_3904

CATGTGTGCCAAGGTTGCTGATTTTGGATTTTCAAATATGCATCTCAAGAAGGTGATAGTGGTACTTCT  
TTAGAAGTAAGGGGGACAGCTGGGTACTTGGATCCAGAGTAAGTATTATC

>M6-PGSC0003DMG400030658M6RLKmalectin\_3965

GGTACTTCTTTAGAAGTAAGGGGGACAGCTGGGTACTTGGATCCAGAGTAAGTATTATCTTCTTAGATT

GTGTCGTCATTATGAAATTAGGACAAGAGATAAGTTTCTAAAGCACAGCC

>M6-PGSC0003DMG400030658M6RLKmalectin\_4026

TTCTAGATTGTGTCGTCATTATGAAATTAGGACAAGAGATAAGTTTCTAAAGCACAGCCTAATGGACAGC

TCTGCTACCTTAATATGGATTACGCGAAGTGATTATTATTTGAATCATCC

>M6-PGSC0003DMG400030658M6RLKmalectin\_4087

ATGGACAGCTCTGCTACCTTAATATGGATTACGCGAAGTGATTATTATTTGAATCATCCGCAGGAGATTC

TATTAGTATATTTATTGACTTTATTTTCGTTATAATTCACCATAGCACAA

>M6-PGSC0003DMG400030658M6RLKmalectin\_4148

AGGAGATTCTATTAGTATATTTATTGACTTTATTTTCGTTATAATTCACCATAGCACAAATGGTTCAAAA

TCTTTGGGGAAATCAAGCTCGTGTCTTTTCATGAATTCTTTCTGCATA

>M6-PGSC0003DMG400030658M6RLKmalectin\_4209

GGTTCAAAAATCTTTGGGGAAATCAAGCTCGTGTCTTTTCATGAATTCTTTCTGCATAGGTACTACTCGA

CCCAACGTCTGTCAGCAAAAAGTGATGTCTTCAGCTTTGGAGTTGTCCT

>M6-PGSC0003DMG400030658M6RLKmalectin\_427

AGGTTGAACTAAGACCGATAAATTCAGATTATCTGAAAAGGGAGCCTTCAGAAGTACTCAAACCTGTAC

ATAGAGTAGATGCTGGAAACAAGGTTGCGGAAATCAGGTATTCTTTTCATCC

>M6-PGSC0003DMG400030658M6RLKmalectin\_4270

TACTACTCGACCCAACGTCTGTCAGCAAAAAGTGATGTCTTCAGCTTTGGAGTTGTCCTACTGGAAATCC

TCACAGGTGAGAGCCTCTCAACATAAACAAGCCAAGAAATGAGTGGAGC

>M6-PGSC0003DMG400030658M6RLKmalectin\_4331

TGGAAATCCTCACAGGTCGAGAGCCTCTCAACATAAACAAGCCAAGAAATGAGTGGAGCTTGGTTGAGT

GGGTATGGCCCAACTTAGCAAGCTATTTCTTTAACTGAAATTATCCAGATA

>M6-PGSC0003DMG400030658M6RLKmalectin\_4392

GGTTGAGTGGGTATGGCCCAACTTAGCAAGCTATTTCTTTAACTGAAATTATCCAGATACAAATTGCTAC

TATTACTGAATCCTCAGAACCACACAGTCTCTCCATAATTTATTTGCA

>M6-PGSC0003DMG400030658M6RLKmalectin\_4453

AATTGCTACTATTACTGAATCCTCAGAACCACACAGTCTCTCCATAATTTATTTGCAGCAAACACTACGT

GCCATGAAAAGACTGAAAGAGCTTCTTTTCTTCTTTTTTTTTTAAACA

>M6-PGSC0003DMG400030658M6RLKmalectin\_4514



AAACTACAGTGCCATGAAAAGACTGAAAGAGCTTCTTTTTCTTCTTTTTTTTTTAAACACAGAAAGAACTT  
CTGTTGTTACTACGACTTACGTGATAATTCACAGCTACTCAGATGATAA

>M6-PGSC0003DMG400030658M6RLKmalectin\_4575

GAAAGAACTTCTGTTGTTACTACGACTTACGTGATAATTCACAGCTACTCAGATGATAAACTGATGTTGA  
GTGCTTAACTATATATACTCTTTTGATTTGCATGTAAACATCTGATCACA

>M6-PGSC0003DMG400030658M6RLKmalectin\_4636

TGATGTTGAGTGCTTAACTATATATACTCTTTTGATTTGCATGTAAACATCTGATCACAAGCAAGTATCCA  
CTTTGAAATACAGGCGAAACCTCTAATAAGAAGCTCAAGAGTTGAAGAA

>M6-PGSC0003DMG400030658M6RLKmalectin\_4697

CAAGTATCCACTTTGAAATACAGGCGAAACCTCTAATAAGAAGCTCAAGAGTTGAAGAAATTGTGGATC  
CCACTATCAAGGGAGGGTATCATGGTGAGGCACTGTGGAGAGTGGTAGAGG

>M6-PGSC0003DMG400030658M6RLKmalectin\_4758

TGTGGATCCCACTATCAAGGGAGGGTATCATGGTGAGGCACTGTGGAGAGTGGTAGAGGTGGCTTTGG  
CATGCACGGAGACATACTCGACTTACAGACCATGCATGGCGGATATTGTAAG

>M6-PGSC0003DMG400030658M6RLKmalectin\_4819

GCTTTGGCATGCACGGAGACATACTCGACTTACAGACCATGCATGGCGGATATTGTAAGAGAGCTCGAG  
GATGCATTGATAATAGAAAACAATGCATCAGAATACTTGAAGTCCCTAGAC

>M6-PGSC0003DMG400030658M6RLKmalectin\_488

ACTTGATACATAGAGTAGATGCTGGAAACAAGGTTGCGGAAATCAGGTATTCTTTCATCCTATCACAGAAT  
TATATTTTGGATTGGCAATACAGTATATTCTTTCATGGTAACAAATCAAG

>M6-PGSC0003DMG400030658M6RLKmalectin\_4880

AGCTCGAGGATGCATTGATAATAGAAAACAATGCATCAGAATACTTGAAGTCCCTAGACAGCTTTGGAG  
GATCAAATCGTTTCTCTATAGAAAGGTCCATTGTCCTTCCACCTATTAAT

>M6-PGSC0003DMG400030658M6RLKmalectin\_4936

GACAGCTTTGGAGGATCAAATCGTTTCTCTATAGAAAGGTCCATTGTCCTTCCACCTATTAATCTCAAAC  
AGAGCCATCCTGTCTCCTCTCAAACCCAGCCCCTCCACAACCAAGGTAA

>M6-PGSC0003DMG400030658M6RLKmalectin\_549

TCACAGAATTATTTTTGGATTGGCAATACAGTATATTCTTTCATGGTAACAAATCAAGTATCATGAAGT  
GATAATGTGAAGACTTGTCAACTCAGGTACCCATATGACCAGTATGATAG

>M6-PGSC0003DMG400030658M6RLKmalectin\_61

CACGTACCAACTTAAGTTGGATTTTCAGATGGAAGTTGGTTCCTGAAAATCAGAGTTGCATATCAAGGCC  
AGTGTACAAGAGTGCACACTATGAACGAGCTCGATCTTTTAGCTTAGACA

>M6-PGSC0003DMG400030658M6RLKmalectin\_610

TCATGAAGTGATAATGTGAAGACTTGTCAACTCAGGTACCCATATGACCAGTATGATAGAATTTGGAGA  
CCAGACTCAAATCTAGAATCACAAGTTACTCGAACGCAGCCATCCATTATT

>M6-PGSC0003DMG400030658M6RLKmalectin\_671

TTTGGAGACCAGACTCAAATCTAGAATCACAAGTTACTCGAACGCAGCCATCCATTATTAAGCAGGTCAT  
TGCAAGAAAACACAGTTTATTACCTCCTGCATTTCGTATTACGAACAGCCC

>M6-PGSC0003DMG400030658M6RLKmalectin\_732

GCAGGTCATTGCAAGAAAACACAGTTTATTACCTCCTGCATTTCGTATTACGAACAGCCCTCACCCATCCA  
GAGAGATTGGACTTCTTGCATGAAGACCTTGACACAGGATATTATACTTA

>M6-PGSC0003DMG400030658M6RLKmalectin\_793

ACCCATCCAGAGAGATTGGACTTCTTGCATGAAGACCTTGACACAGGATATTATACTTACTCTCTCTTCCT  
GTACTTTCTAGAGCCCAATGACTCAGTTCAAGCTGGAGAAAGGGTGTTCT

>M6-PGSC0003DMG400030658M6RLKmalectin\_854

CTCTCTTCTGTACTTTCTAGAGCCCAATGACTCAGTTCAAGCTGGAGAAAGGGTGTTCTGTATATACATT  
AACAAACGAAAAGAGACTCAAGGTTGATATACTGGCTAGTGGTTCCAGAT

>M6-PGSC0003DMG400030658M6RLKmalectin\_915

TATATACATTAACAACGAAAAGAGACTCAAGGTTGATATACTGGCTAGTGGTTCCAGATACCTGGATGT  
AGTTATGAATTTTCAGAGCAAATAGGTTTGTCAACCTGACGATGATCAAGGC

>M6-PGSC0003DMG400030658M6RLKmalectin\_976

CTGGATGTAGTTATGAATTTTCAGAGCAAATAGGTTTGTCAACCTGACGATGATCAAGGCCTCAAATCTAT  
CCCAATTGGGACCCATTTGTAATGGTTATGAGATTTAAAGACTCTTCCT

>M6-PGSC0003DMG400030704M6RLKWAX-EGF\_1798

GGGTACATTTGGTTACATAGATCCAGAATACTTCCGCTCAGGTCAACTTACAGACAAATGTGATGTCTAT  
GCCTTCGGTGTAATTCTTGCAGAGCTTCTAACAAGTCAAAGAGTTGTCAC

>M6-PGSC0003DMG400030704M6RLKWAX-EGF\_930

GCTGGGACTGTTTACAAAGGAATGTTATCAGATGGGAGCATTGTAGCTGTGAAGAAGTCCAATGCAGT

GGATAAAGATCAAATTGAACAGTTTATAAATGAGATACTCATTCTCTCCCAA

>M6-PGSC0003DMG400030705M6RLKWAX-EGF\_0

ATGTGGTCATTTTTTCATTCTTCTGATGGGGCTTCTTTCTAAAGAAACAACACAAGTTTCAGCTATAAGAAT

ATGGTCATCATCAGCAATATTATCTTCACAAAGGCCTGGCTGCCAGAA

>M6-PGSC0003DMG400030705M6RLKWAX-EGF\_130

ATGTAACCATTCTTATCCATTTGGAATAGGAAAAGAGTGTTACTTCAATGAAGAATTTGAAGTGAGCTG

CAATAACAACACTGTTTTTAGTCTTGGTACTGGTCATCCTGTTCAACACA

>M6-PGSC0003DMG400030705M6RLKWAX-EGF\_195

AGCTGCAATAACAACACTGTTTTTAGTCTTGGTACTGGTCATCCTGTTCAACACATATCAATGGACTCCAT

CACTGTTGATATTACTTTTCAGTTCAAAGCACTACAACAAATCATCTGGA

>M6-PGSC0003DMG400030705M6RLKWAX-EGF\_260

CTCCATCACTGTTGATATTACTTTTCAGTTCAAAGCACTACAACAAATCATCTGGAAAGAACATCTACGGT

GATGAAATTCTTCAATCAACCAGGAGCGAGCATTTTCAGTATTTCTAACAA

>M6-PGSC0003DMG400030705M6RLKWAX-EGF\_325

ACGGTGATGAAATTCTTCAATCAACCAGGAGCGAGCATTTTCAGTATTTCTAACAAGAACAAAATAGTAG

CCATTGGGTGTGATATTTATGCTTATGTCAAAGATTTAGACACTGGTAGTG

>M6-PGSC0003DMG400030705M6RLKWAX-EGF\_390

GTAGCCATTGGGTGTGATATTTATGCTTATGTCAAAGATTTAGACACTGGTAGTGGAGGCAGCATTGTA

ACTGGATGCGCTTCTTTCTGTGGCAACTCCACTTATAATGTTTCATCCTCT

>M6-PGSC0003DMG400030705M6RLKWAX-EGF\_455

TGTAAGTGGATGCGCTTCTTTCTGTGGCAACTCCACTTATAATGTTTCATCCTCTTTAGCTTCATCATCTTA

TTGCACTGGGAATAACGGTTGTTGTCAGTCCGAATTTTCAAAAATACC

>M6-PGSC0003DMG400030705M6RLKWAX-EGF\_520

CATCTTATTGCACTGGGAATAACGGTTGTTGTCAGTCCGAATTTTCAAAAATACCAAGAGAATTCAGTGT

GTCCATAACAACAAATGAACACGGCGGAAACATCTCGGACATCTAGAGATT

>M6-PGSC0003DMG400030705M6RLKWAX-EGF\_585

AGTGTGTCCATACAAACAATGAACACGGCGGAAACATCTCGGACATCTAGAGATTGCACCTATTTCTTAG

TTGTGGAAAAGGGCAGCTCTGAGTCCGACTTCACTCAATTACTTGGTAAG

>M6-PGSC0003DMG400030705M6RLKWAX-EGF\_65

AAGAATATGGTCATCATCAGCAATATTATCTTCACAAAGGCCTGGCTGCCAGAAAGATGTGGCAATGT  
AACCATTCTTATCCATTTGGAATAGGAAAAGAGTGTTACTTCAATGAAGA

>M6-PGSC0003DMG400030705M6RLKWAX-EGF\_650

CTTAGTTGTGGAAAAGGGCAGCTCTGAGTCCGACTTCACTCAATTACTTGGTAAGTGCAAAGAATATGA  
TGATTATGAAGAAAGGGTGGTGTCTGGACTGGGTAATTGGCAATGTTAGCTG

>M6-PGSC0003DMG400030705M6RLKWAX-EGF\_715

ATGATGATTATGAAGAAAGGGTGGTGTCTGGACTGGGTAATTGGCAATGTTAGCTGTGACAAAGCCATG  
AGAAGGCCAAAAGATTATGCATGTAGAAATAACAGTATGTGTGTCAATGACA

>M6-PGSC0003DMG400030705M6RLKWAX-EGF\_780

ATGAGAAGGCCAAAAGATTATGCATGTAGAAATAACAGTATGTGTGTCAATGACTACTAGACCTGCA  
GGGGGATACCGATGCAATTGCTCTTCTGGTTATCAAGGCAACCCTTACCTC

>M6-PGSC0003DMG400030705M6RLKWAX-EGF\_842

ACCTGCAGGGGGATACCGATGCAATTGCTCTTCTGGTTATCAAGGCAACCCTTACCTCCCTCATGGATGC  
CAAGGTACTAATTCCCCTTCCATTTCTCTTTTTATTTTTGGGATTTAA

>M6-PGSC0003DMG400030790M6LRR-RLP\_1037

CTTAAAGGGCTGTTATGTTGGAGATCAAGGTCTAGCAGCTGTTGGGGAGTTCTCTAAGCAACTTGAAGA  
TTTGAATTTGAGGTTCTGTGAAGGCCTAACTGATGCAGGCTTGATTAATTT

>M6-PGSC0003DMG400030790M6LRR-RLP\_1098

CTTGAAGATTTGAATTTGAGGTTCTGTGAAGGCCTAACTGATGCAGGCTTGATTAATTTGGTAGATGGTT  
CTGGGAAGACGTTGAAATCTATTAGTTTGGCTGCCTGTGCAAAGTAACT

>M6-PGSC0003DMG400030790M6LRR-RLP\_1159

TAGATGGTTCTGGGAAGACGTTGAAATCTATTAGTTTGGCTGCCTGTGCAAAGTAACTGACACCTCCTT  
GGAAGCTGTGGGATCTCATTGTAGATCTTTGGAGTCCTTGCTACTAGACT

>M6-PGSC0003DMG400030790M6LRR-RLP\_1220

CACCTCCTTGGAAGCTGTGGGATCTCATTGTAGATCTTTGGAGTCCTTGCTACTAGACTCAGAGTGTATC  
CATGATAAAGGTGTACTTGCTGTTGCCAAGGATGCCCTCAGTTGAAGGT

>M6-PGSC0003DMG400030790M6LRR-RLP\_1281

GAGTGTATCCATGATAAAGGTGTACTTGCTGTTGCCAAGGATGCCCTCAGTTGAAGGTTCTGAAGCTA  
CAATGCGTCAATGTTACAGATGGTGTCTCTCCAAGGCGTTGGCACTTGCTGT

>M6-PGSC0003DMG400030790M6LRR-RLP\_1342

TGAAGCTACAATGCGTCAATGTTACAGATGGTGCTCTCCAAGGCGTTGGCACTTGCTGTTTGTGCTGGA  
GTTGTTGGCTCTTTACAGTTTCCAAATATTTACGGACAAGTTAGTTGCTT

>M6-PGSC0003DMG400030790M6LRR-RLP\_1403

GTCGCTGGAGTTGTTGGCTCTTTACAGTTTCCAAATATTTACGGACAAGTTAGTTGCTTATTCTGGTTGTC  
TTCCCTATTTGGATTTATTTGTTTTAACTTACCAGCAGCATGATCGTA

>M6-PGSC0003DMG400030790M6LRR-RLP\_1464

TCTGGTTGTCTCCCTATTTGGATTTATTTGTTTTAACTTACCAGCAGCATGATCGTAACTTCTATATTCA  
TGTAAGCTTTTGTAAATGTACATCTACATTTTAGGCATGAATACAATTC

>M6-PGSC0003DMG400030790M6LRR-RLP\_1525

TTCTATATTCATGTAAGCTTTTGTAAATGTACATCTACATTTTAGGCATGAATACAATTCCTCTTAACCAATA  
GCTTTTCCAGTGTTTCAGATTACGCAATCTAAATACCTAATCTTTAAAT

>M6-PGSC0003DMG400030790M6LRR-RLP\_1586

CTTAACCAATAGCTTTTCCAGTGTTTCAGATTACGCAATCTAAATACCTAATCTTTAAATTTTCAACTCCATC  
TTTGCTAACAAAATAATTCCTGAATATAGAGAACAGATAGTAACTTG

>M6-PGSC0003DMG400030790M6LRR-RLP\_1647

TCAACTCCATCTTTGCTAACAAAATAATTCCTGAATATAGAGAACAGATAGTAACTTGATTCAAATATG  
TGTTGCTGTCTGTCTTTTTATGGCAATAATTGCAAGCAAAAATTTAACA

>M6-PGSC0003DMG400030790M6LRR-RLP\_1708

TCAAATATGTGTTGCTGTCTGTCTTTTTATGGCAATAATTGCAAGCAAAAATTTAACAAGCATGTGCTG  
GGATGATTGGTTTTACAATCTGACCTATATCTTTATGCATATTTTTTC

>M6-PGSC0003DMG400030790M6LRR-RLP\_1769

GCATGTGCTGGGATGATTGGTTTTACAATCTGACCTATATCTTTATGCATATTTTTTTCAGGAGTCTGTAT  
GCTATTGGTAAAGGGTGCAAACGGTTGAAGTCTTACCTTGAATGATT

>M6-PGSC0003DMG400030790M6LRR-RLP\_183

AATCTCGAATGCGAAAGAACAAAAGAAACCCTATAATCTAAGAACAAGGAAGTAAATGATAGAAAGCT  
AGACACAAGAATGGAACGAATAGGCAACAAGGACTATATTAAGTCAAACC

>M6-PGSC0003DMG400030790M6LRR-RLP\_1830

GAGTCTGTATGCTATTGGTAAAGGGTGCAAACGGTTGAAGTCTTACCTTGAATGATTGTACTTTCTTA

AGTGACAAAGGCTTGGAAGCAGTTGCAGTTGGTTGCACTGGGCTCACGTA

>M6-PGSC0003DMG400030790M6LRR-RLP\_1891

ACTTTCTTAAGTGACAAAGGCTTGGAAGCAGTTGCAGTTGGTTGCACTGGGCTCACGTATCTTGAGGTTA

ATGGCTGCCACAATATAGGGACATATGGACTGGAGTCTATTGCAAGATCT

>M6-PGSC0003DMG400030790M6LRR-RLP\_1952

TTGAGGTTAATGGCTGCCACAATATAGGGACATATGGACTGGAGTCTATTGCAAGATCTTGACGTACA

CTTTCTCCTCGTGCTTTATTTGAATTTCTTTCAACCTTTGTGTTGAAT

>M6-PGSC0003DMG400030790M6LRR-RLP\_2013

CACGTACACTTTTCTCCTCGTGCTTTATTTGAATTTCTTTCAACCTTTGTGTTGAATTTAGTTATTGAAG

GCAAAAAGACCTAGTGCTTACTTTTCCCCTTTCTCCTTGTCTCTGA

>M6-PGSC0003DMG400030790M6LRR-RLP\_2074

TAGTTATTGAAGGCAAAAAGACCTAGTGCTTACTTTTCCCCTTTCTCCTTGTCTCTGAATTCAAGATGGA

TTCTTGAAACTGCTTATATTTTAAGGTCGTATGCATGAGTGGTGGTG

>M6-PGSC0003DMG400030790M6LRR-RLP\_2135

TCAAGATGGATTCTTGAAACTGCTTATATTTTAAGGTCGTATGCATGAGTGGTGGTGCATTTGAGGAG

AGTATTTAGCTTGAGAAGCACTTATGTGAGTATCTAGTAAATGTTTAGAA

>M6-PGSC0003DMG400030790M6LRR-RLP\_2196

TTTGAGGAGAGTATTTAGCTTGAGAAGCACTTATGTGAGTATCTAGTAAATGTTTAGAATTACATTTAGA

GGCTTCAAAAAAAAAAAGCATTAAAGAAGCAGCTCAAAATTGGTGCCT

>M6-PGSC0003DMG400030790M6LRR-RLP\_2257

ACATTTAGAGGCTTCAAAAAAAAAAAGCATTAAAGAAGCAGCTCAAAATTGGTGCCTATAGAACTAC

TTTTGCACCTAAGATTTTAGGCGCCATGTTAAAGGAAAATATGCTATTCTA

>M6-PGSC0003DMG400030790M6LRR-RLP\_2318

AGAACTACTTTTGCACCTAAGATTTTAGGCGCCATGTTAAAGGAAAATATGCTATTCTATCAAATAGAAA

TGCTTGCTTGAGTTTAATTTGTATAAATTAACAGAAAAAATGCTTCATA

>M6-PGSC0003DMG400030790M6LRR-RLP\_2379

AAATAGAAATGCTTGCTTGAGTTTAATTTGTATAAATTAACAGAAAAAATGCTTCATAGAACAAGTATA

GCAGATTATGTAGGGAGTGCTTATATTAGATTTTAAACGTGATTTTCTTT

>M6-PGSC0003DMG400030790M6LRR-RLP\_244

GAAAGCTAGACACAAGAATGGAACGAATAGGCAACAAGGACTATATTAAGTCAAAACCTCCTATTAAG  
AATACCAAACAAGCACCTAAACTATAGAGACACCCTCAAGAGGAATGATCC

>M6-PGSC0003DMG400030790M6LRR-RLP\_2440

ACAAGTATAGCAGATTATGTAGGGAGTGCTTATATTAGATTTTTAACGTGATTTTCTTTGAACGCATTCTC  
TAGAAAAGTATTGTACTCCCAAGTTAGACTAAATTGAGTTCTCTGTTAT

>M6-PGSC0003DMG400030790M6LRR-RLP\_2501

ACGCATTCTCTAGAAAAGTATTGTACTCCCAAGTTAGACTAAATTGAGTTCTCTGTTATTCCAAAGCTCAT  
GTGACAATCATGTTATTCTATTTCTGTCAGTATTACCTCATGAAACAAA

>M6-PGSC0003DMG400030790M6LRR-RLP\_2562

CAAAGCTCATGTGACAATCATGTTATTCTATTTCTGTCAGTATTACCTCATGAAACAAAATGCTATACTTTT  
CCAAACTCCAGGGGATGGTTTCATCCATGTTTACAGCCAGATTTTTGA

>M6-PGSC0003DMG400030790M6LRR-RLP\_2623

GCTATACTTTTCCAAACTCCAGGGGATGGTTTCATCCATGTTTACAGCCAGATTTTTGAATCTATTGTGTT  
AGATAATTAATGCGGAATGCATATAAGTTCCACCACTTTCAAAGAGGCT

>M6-PGSC0003DMG400030790M6LRR-RLP\_2684

CTATTGTGTTAGATAATTAATGCGGAATGCATATAAGTTCCACCACTTTCAAAGAGGCTTACAGTAGGAT  
GTAGGCTGATCTAGTATTATAATTTGATAGATAGAAGTGTGAAACTACCT

>M6-PGSC0003DMG400030790M6LRR-RLP\_2745

CAGTAGGATGTAGGCTGATCTAGTATTATAATTTGATAGATAGAAGTGTGAAACTACCTTTGAATATAG  
GATAATATGTTGAATCAGAATGGTAAATTGCAGTTCTCTTATGTTTTATTT

>M6-PGSC0003DMG400030790M6LRR-RLP\_2806

GAATATAGGATAATATGTTGAATCAGAATGGTAAATTGCAGTTCTCTTATGTTTTATTTAATTGCAGATT  
TTAATTTTCATCATATATACTTCCTTTGAAAATGATGTTATTTCTTTTCAT

>M6-PGSC0003DMG400030790M6LRR-RLP\_2867

ATTGCAGATTTTAATTTTCATCATATATACTTCCTTTGAAAATGATGTTATTTCTTTTCATGAAGATGTGGGCA  
GTAAAATTTATGTTTGTGTTTCATAGACGATTGGCAGTAATTTTCATTGT

>M6-PGSC0003DMG400030790M6LRR-RLP\_2928

AGATGTGGGCAGTAAAATTTATGTTTGTGTTTCATAGACGATTGGCAGTAATTTTCATTGTCTTTAATGAAA  
TCCTGTCTTTTTTCATCGTTTAGTGTCTCCAATTTCTTTTCATCTCTTTT

>M6-PGSC0003DMG400030790M6LRR-RLP\_2989

TTAATGAAATCCTGTCTTTTTTCATCGTTTAGTGTCTCCAATTTCTTTCATCTCTTTTTCTTTAAAAATGAA  
GACTGAAAACCTAATCTATTATGAGTTTATGACTAGCAAACCTGTTGA

>M6-PGSC0003DMG400030790M6LRR-RLP\_305

CTATTAAGAATACCAAACAAGCACCTAACTATAGAGACACCCTCAAGAGGAATGATCCTCAAAAAAGC  
AATCCCATCAACATTTTCTAGCACCTAACAAAAAAAAGTTTCACATTTAG

>M6-PGSC0003DMG400030790M6LRR-RLP\_3050

TTAAAAATGAAGACTGAAAACCTAATCTATTATGAGTTTATGACTAGCAAACCTGTTGAATGGTAGTTGA  
TTGGTTTCACTGATAGATTGATTACTGCTATTTATGTTATGCTTGGCTCA

>M6-PGSC0003DMG400030790M6LRR-RLP\_3111

GGTAGTTGATTGGTTTCACTGATAGATTGATTACTGCTATTTATGTTATGCTTGGCTCATCTTATTAATAA  
TACTTATGAAATTCATGAATTATATCCATTGCTTGACCTGATAGTTTGT

>M6-PGSC0003DMG400030790M6LRR-RLP\_3172

TTATTAATAATACTTATGAAATTCATGAATTATATCCATTGCTTGACCTGATAGTTTGTACCCCTCTAAAAT  
TCTGTCCTGGTCTATCTTGAGTTTTTTGTCCTTCTTTTTCTAAGAA

>M6-PGSC0003DMG400030790M6LRR-RLP\_3233

CCCTCTAAAATTCTGTCCTGGTCTATCTTGAGTTTTTTGTCCTTCTTTTTCTAAGAAGTCAAAAGGTCTCT  
AATTTGAGTTTTGGCTTCATAATGTAGGCATCTGTCTGAGTTGGCCTT

>M6-PGSC0003DMG400030790M6LRR-RLP\_3294

CAAAAGGTCCTAATTTGAGTTTTGGCTTCATAATGTAGGCATCTGTCTGAGTTGGCCTTGCTGTATTGTCA  
AAGAATTGGTAATTTGCATTGTCCGAGATTGGCAAAGGATGCAAGTTC

>M6-PGSC0003DMG400030790M6LRR-RLP\_3355

TGTATTGTCAAAGAATTGGTAATTTGCATTGTCCGAGATTGGCAAAGGATGCAAGTTCTTGCAAGCTTT  
ACATTTGGTAGATTGTGCAAGTATTGGGGACGAAGCCATATGTTCTATAG

>M6-PGSC0003DMG400030790M6LRR-RLP\_3416

GCAAGCTTTACATTTGGTAGATTGTGCAAGTATTGGGGACGAAGCCATATGTTCTATAGCCAGAGGATG  
CTGCAACCTCAAAGGCTCCACATCCGTCGATGTTATGAGGTGCTTTAATA

>M6-PGSC0003DMG400030790M6LRR-RLP\_3477

AGAGGATGCTGCAACCTCAAAGGCTCCACATCCGTCGATGTTATGAGGTGCTTTAATAATTTCTCTCCC



TCATTACTIONAGGGATTCTCTCTTGTCTCTAGTGATGTCAAAGTTACAG

>M6-PGSC0003DMG400030790M6LRR-RLP\_3538

TTCTCTCCCTCATTACTTAGGGATTCTCTCTTGTCTCTAGTGATGTCAAAGTTACAGGATATCTTTACAT

GCGGAGGTGTTGCATATTGCTGGAGGCCTATGCATTTTTTTTTATCAGT

>M6-PGSC0003DMG400030790M6LRR-RLP\_3599

TATCTTTACATGCGGAGGTGTTGCATATTGCTGGAGGCCTATGCATTTTTTTTTATCAGTAAAGATTCAAAG

ATATCATTAAATTACCAGCACCGAGATGGTGCTGCACATGTACGCTAGGG

>M6-PGSC0003DMG400030790M6LRR-RLP\_366

AAAAAAGCAATCCCATCAACATTTTCTAGCACCCCTAACAAAAAAAAGTTTCACATTTAGTGGTAATATAA

GGGACTCCCGTATTTGTTAGGTTCAACAAGCGAATTTCTCTGCCTTCTGT

>M6-PGSC0003DMG400030790M6LRR-RLP\_3660

AGATTCAAAGATATCATTAAATTACCAGCACCGAGATGGTGCTGCACATGTACGCTAGGGATCCAGAAAC

AACAGCAGAACTTTTCTAATACATCAGCTGACAAAAGCAAGAGCATTCTC

>M6-PGSC0003DMG400030790M6LRR-RLP\_3721

CCAGAAACAACAGCAGAACTTTTCTAATACATCAGCTGACAAAAGCAAGAGCATTCTCCAGTTCTAGTG

TTTTACTATGTACACAAATCAGATACTCTCTATACCTGAAGGCACTGAAT

>M6-PGSC0003DMG400030790M6LRR-RLP\_3782

GTTCTAGTGTTTTACTATGTACACAAATCAGATACTCTCTATACCTGAAGGCACTGAATTTATCTAAGAGA

CTAACCTCATCTGATATGAATCATTCTCCAAACATAAAACCTCATCCGA

>M6-PGSC0003DMG400030790M6LRR-RLP\_3843

ATCTAAGAGACTAACCTCATCTGATATGAATCATTCTCCAAACATAAAACCTCATCCGACATGAATACGA

GAGTAAAAGACAAATAGTTGTATTTGATTTTGCTAACAGATTCTGCTTTA

>M6-PGSC0003DMG400030790M6LRR-RLP\_3904

TGAATACGAGAGTAAAAGACAAATAGTTGTATTTGATTTTGCTAACAGATTCTGCTTTATTCGTGAAGCA

CCTTAAGTTCCTTTCCCTCCATATTGCCCATCTAGTGACGCTGGTACT

>M6-PGSC0003DMG400030790M6LRR-RLP\_3965

CGTGAAGCACCTTAAGTTCCTTTCCCTCCATATTGCCCATCTAGTGACGCTGGTACTGTAGTTCGTACG

CTTTTCTGTTTCTTATTGATGCCTCTTCCATTCTACTGAGTGGAAGCT

>M6-PGSC0003DMG400030790M6LRR-RLP\_4026

AGTTCGTACGCTTTTCTGTTTCTTATTGATGCCTCTTCCATTCCCTACTGAGTGGAAGCTCCCTGGTAGTTCT  
TGGCATTCTCCACAATCCACATAAGCTTAGAGATGTGCAGGAACATTA

>M6-PGSC0003DMG400030790M6LRR-RLP\_4087

CTGGTAGTTCTTGGCATTCTCCACAATCCACATAAGCTTAGAGATGTGCAGGAACACTACTATAGTTGTG  
AGAGTAATATGCAATGTAGAAAAATGTGACAGCTGTCTTCCATCTCTTTC

>M6-PGSC0003DMG400030790M6LRR-RLP\_4148

ATAGTTGTGAGAGTAATATGCAATGTAGAAAAATGTGACAGCTGTCTTCCATCTCTTTCTTACAAAGTTA  
GCACTTGCTGCACAAGTTTATCTTCTTTTTTTAACTAGCCTCATATGCTG

>M6-PGSC0003DMG400030790M6LRR-RLP\_4209

ACAAAGTTAGCACTTGCTGCACAAGTTTATCTTCTTTTTTTAACTAGCCTCATATGCTGCCACGCGAGTCA  
ATCTTCTTTAACATTTGAAATCTGCTTCCAAGGCCATCTCAGGTTATG

>M6-PGSC0003DMG400030790M6LRR-RLP\_427

GTAATATAAGGGACTCCCGTATTTGTTAGGTTCAACAAGCAATTCCTCTGCCTTCTGTTTGTGAGACTTG  
GGTTATGCTTTTTTCAAGTTTGTGATGCCAAAACAGTATTTTCTAAAGG

>M6-PGSC0003DMG400030790M6LRR-RLP\_4270

ACGCGAGTCAATCTTCTTTAACATTTGAAATCTGCTTCCAAGGCCATCTCAGGTTATGTTCACTTCTCTGC  
CCTTTAAGTCCCTTTAATTGAACACATCACTGTTATGTGCCTTCTCTGT

>M6-PGSC0003DMG400030790M6LRR-RLP\_4331

CACTTCTGCCCTTTAAGTCCCTTTAATTGAACACATCACTGTTATGTGCCTTCTCTGTAGATTATGTTACC  
ATAGCATTCAAGAGACCTGAATACTGAGTAGTCCATGGGAGGCCTAAC

>M6-PGSC0003DMG400030790M6LRR-RLP\_4392

ATTATGTTACCATAGCATTCAAGAGACCTGAATACTGAGTAGTCCATGGGAGGCCTAACAGCACTCCCTG  
TTTCCCCTTTTTTCACTTCTTCTGATCTATTGTTAGTGAAATCTGATTTGT

>M6-PGSC0003DMG400030790M6LRR-RLP\_4453

CACTCCCTGTTTCCCCTTTTTTCACTTCTTCTGATCTATTGTTAGTGAAATCTGATTTGTGCTGTTTCTTTGC  
ACTTTATGCCCAAACTCAATTGTTTTACTTGATAATACTGCTCTTT

>M6-PGSC0003DMG400030790M6LRR-RLP\_4514

TGTTTCTTTGCACTTTATGCCCAAACTCAATTGTTTTACTTGATAATACTGCTTTTTTCTGATTTGAA  
GGTTGGAAATAAGGGAATTATAGCTGTTGGCGAGAACTGTAAATTC

>M6-PGSC0003DMG400030790M6LRR-RLP\_4575

ATCTGATTTGAAGGTTGGAAATAAGGGAATTATAGCTGTTGGCGAGAAGCTGTAAATTTCTTACAGACCTT  
AGCCTCCGATTCTGCGATAGGTACGTGATTTTCTCTTTCTCAACTAGTAT

>M6-PGSC0003DMG400030790M6LRR-RLP\_4636

ACAGACCTTAGCCTCCGATTCTGCGATAGGTACGTGATTTTCTCTTTCTCAACTAGTATTGCCTTCTATTTT  
TTTTTTGTTTCTCAATCATCAAGTCTCGGCTGATAAAATTGTCAGACA

>M6-PGSC0003DMG400030790M6LRR-RLP\_4697

CCTTCTATTTTTTTTTTTGTTTCTCAATCATCAAGTCTCGGCTGATAAAATTGTCAGACAGTCTCTTCCTTGCT  
TGCATTAATTCCTTCTATTGTCCTTTAAATTTATACTTGAATGCTCT

>M6-PGSC0003DMG400030790M6LRR-RLP\_4758

CTCTTCCTTGCTTGCATTAATTCCTTCTATTGTCCTTTAAATTTATACTTGAATGCTCTTTGAGATGAACATT  
TATCTTTGCATCTCTTTTCTTTTTTGATATGGGAATTGTTGTGCTCC

>M6-PGSC0003DMG400030790M6LRR-RLP\_4819

GAGATGAACATTTATCTTTGCATCTCTTTTCTTTTTTGATATGGGAATTGTTGTGCTCCTTGTGGCGCCTCT  
GGTGTGCAAGAGGTCGCTTGTCCATTTGAAGATGAAGATTGCCTAGG

>M6-PGSC0003DMG400030790M6LRR-RLP\_488

GTGAGACTTGGGTTATGCTTTTTTCAAGTTTGTGATGCCAAAACAGTATTTTCTAAAGTTTGTGTGTTAT  
ATTATTTGTTAGGCTCACAAGTGAATTTCTGAGCTTGTACCGGGAAGCT

>M6-PGSC0003DMG400030790M6LRR-RLP\_4880

GTGGCGCCTCTGGTGCTGCAAGAGGTCGCTTGTCCATTTGAAGATGAAGATTGCCTAGGCACAATTTTC  
ATCTGCTTCTTTAAACTTTCTGGCCCATAGTCCGACGGAAAATGTTCTAC

>M6-PGSC0003DMG400030790M6LRR-RLP\_4941

CAATTTTCATCTGCTTCTTTAAACTTTCTGGCCCATAGTCCGACGGAAAATGTTCTACACTGCGAGATCA  
ACAAAAAATTGTGTCTAGATGGTTATTTGCTTTAGTAACTTCTCTTTTA

>M6-PGSC0003DMG400030790M6LRR-RLP\_5002

TGCGAGATCAACAAAAAATTGTGTCTAGATGGTTATTTGCTTTAGTAACTTCTCTTTTATGCGTATTGTTG  
ATTGCTTATATTTGCATAGCATATACTTTGAACTGCTTCTTTATCAAA

>M6-PGSC0003DMG400030790M6LRR-RLP\_5063

CGTATTGTTGATTGCTTATATTTTGCATAGCATATACTTTGAACTGCTTCTTTATCAAAGCTTGCTACTTAA

CTACCGTATTACTGGTAATTTGGCTCTAATAAGTCTTAGCCTCTATTT

>M6-PGSC0003DMG400030790M6LRR-RLP\_5124

TTGCTACTTAACTACCGTATTACTGGTAATTTGGCTCTAATAAGTCTTAGCCTCTATTTGATTACCAGAGT  
AGGGGATGAAGCACTTGTGGCTATTGGTGAAGGTTGCTCTCTGCATCAT

>M6-PGSC0003DMG400030790M6LRR-RLP\_5185

TTACCAGAGTAGGGGATGAAGCACTTGTGGCTATTGGTGAAGGTTGCTCTCTGCATCATTTAAATGTCA  
GTGGCTGCCACCAAATTGGGGATGCTGGAATAATTGCCATAGCAAGAGGAT

>M6-PGSC0003DMG400030790M6LRR-RLP\_5246

AAATGTCAGTGGCTGCCACCAAATTGGGGATGCTGGAATAATTGCCATAGCAAGAGGATGCCCTGAACT  
CAGTTACTTGGATGTGAGTGTACTCCAGGTGTGTCCACTTATACTTGCTCT

>M6-PGSC0003DMG400030790M6LRR-RLP\_5307

CCTGAACTCAGTTACTTGGATGTGAGTGTACTCCAGGTGTGTCCACTTATACTTGCTCTTTTTATAGTGGG  
ATACACATTGTATATGATGCATAGACGGTATGAATATGCTTACCATACC

>M6-PGSC0003DMG400030790M6LRR-RLP\_5368

TTATAGTGGGATACACATTGTATATGATGCATAGACGGTATGAATATGCTTACCATACCAAGGTTATTAG  
ATAATTACATTAAGGTGATTACGTAACAACATTAAGTTATATTAGAACTA

>M6-PGSC0003DMG400030790M6LRR-RLP\_5429

GGTTATTAGATAATTACATTAAGGTGATTACGTAACAACATTAAGTTATATTAGAACTACTTAGTGTAGG  
TAGAGCTTAAAATGGTTGCTTCCTCCTGAATCCACCGGTTAACAAGTGCA

>M6-PGSC0003DMG400030790M6LRR-RLP\_549

TGTGTGTTATATTATTTGTTAGGCTCACAAAGTGAATTTCTGAGCTTGTACCGGGAAGCTACATTCATCTTG  
AAAGTTTAACTTATTGTTTCTTTTGTATACCCGTTGCAGGGAAGAAGG

>M6-PGSC0003DMG400030790M6LRR-RLP\_5490

TAGTGTAGGTAGAGCTTAAAATGGTTGCTTCCTCCTGAATCCACCGGTTAACAAGTGCATTAGGAACCCC  
ATATTATAAAGTCCCATATGCAACACACACACACGTATTGCTCCCATATA

>M6-PGSC0003DMG400030790M6LRR-RLP\_5551

AGGAACCCCATATTATAAAGTCCCATATGCAACACACACACACGTATTGCTCCCATATACAAGATGTTTG  
ACAGACCAAAAAATTGTATTTTTATCTCCATTCCGCACTGAATACTAGC

>M6-PGSC0003DMG400030790M6LRR-RLP\_5612

AGATGTTTGACAGACCAAAAAATTGTATTTTTATCTCCATTCCGCACTGAATACTAGCACATCAATTTTT  
GACAGGATTTGGGAGATATGGCCATGGTGGAGCTAGGTGAAGGATGTCC

>M6-PGSC0003DMG400030790M6LRR-RLP\_5673

ATCAATTTTTGACAGGATTTGGGAGATATGGCCATGGTGGAGCTAGGTGAAGGATGTCCCTTGCTGAGG  
GATATTGTGTTGTCTCACTGTCGTCAAATAACAGATGTAGGTTTAAGTTAT

>M6-PGSC0003DMG400030790M6LRR-RLP\_5734

TGCTGAGGGATATTGTGTTGTCTCACTGTCGTCAAATAACAGATGTAGGTTTAAGTTATATTGCTAATAG  
GTGTACCTTGTTGGAACTAGCCACATGGTCTATTGCCCTGGTATCACCG

>M6-PGSC0003DMG400030790M6LRR-RLP\_5917

GGAAAGTGAGTCCAAGAACCAAAAGGAGAGCAGGATCCATCATCTCCTATCTCTGTGTTGATCTGTAGA  
TCTCTGTACACGTGTTAGTGTTATCTATTCCTTGCAGCTCCAATCGAAAAC

>M6-PGSC0003DMG400030790M6LRR-RLP\_5978

TCTGTAGATCTCTGTACACGTGTTAGTGTTATCTATTCCTTGCAGCTCCAATCGAAAACAGCAAGGGTAA  
AACAGACTATCGTTGTGGATAGCCAGTTTAAGTTGCAAATTACCCCGACA

>M6-PGSC0003DMG400030790M6LRR-RLP\_6039

CAAGGGTAAAACAGACTATCGTTGTGGATAGCCAGTTTAAGTTGCAAATTACCCCGACATAGAAAGAGG  
GGTGTCTGTGAGAGCTTGTGTTGCACTTTTCTTTTATCTGCTATGTTCTTTC

>M6-PGSC0003DMG400030790M6LRR-RLP\_610

ATTCATCTTGAAAGTTTAACTTATTGTTTCTTTTGTATACCCGTTGCAGGGAAGAAGGCGTGGCACTGA  
TCATTCCGTGATTTCACTCTCAAGATCCATTCCCTGGCTGAAACAAATG

>M6-PGSC0003DMG400030790M6LRR-RLP\_6100

GAAAGAGGGGTGTCGTGAGAGCTTGTGTTGCACTTTTCTTTTATCTGCTATGTTCTTTCAGTGTTTTTTTT  
GTCCAAATCTCACAGTAATTTACTAGTAGATCGACTTCATTTTAGAAG

>M6-PGSC0003DMG400030790M6LRR-RLP\_6161

TGTTTTTTTTGTCCAAATCTCACAGTAATTTACTAGTAGATCGACTTCATTTTAGAAGGTGGGGTGTCTT  
GTATCCCTCCCGATATGCTCGTTGATTGTCTTTATTGGGGAAAGATAGC

>M6-PGSC0003DMG400030790M6LRR-RLP\_6222

GGGGTGTCTTGTATCCCTCCCGATATGCTCGTTGATTGTCTTTATTGGGGAAAGATAGCAAATAGCCAGT  
TCTTTTACCATCAGTTAAAGCTTTAGCCAGCATTTTCAAGATTATTCAAAG

>M6-PGSC0003DMG400030790M6LRR-RLP\_6265

ATTGGGGAAAGATAGCAAATAGCCAGTTCTTTTACCATCAGTTAAAGCTTTAGCCAGCATTTCAGAATTA  
TTCAAAGTTAACTGCTTTTTTAAGGCGGAAATAAAATTTGGACAAAACCTC

>M6-PGSC0003DMG400030790M6LRR-RLP\_671

TGGCACTGATCATTCCGTGATTTTCAAGATCCATTCCCTGGCTGAAACAAATGGCTCGGAAGAC  
AATGAAACAGAATCTTACTGTTTGTGATGCTGGGTTGGCTGCTGTTGC

>M6-PGSC0003DMG400030790M6LRR-RLP\_732

TCGGAAGACAATGAAACAGAATCTTACTGTTTGTGATGCTGGGTTGGCTGCTGTTGCTGCTGGCTTCA  
GTAAGCTTGAAAAGCTGAGCTTAATATGGTGCTCCAATGTGACACATGTG

>M6-PGSC0003DMG400030790M6LRR-RLP\_793

CTGGCTTCAGTAAGCTTGAAAAGCTGAGCTTAATATGGTGCTCCAATGTGACACATGTGGGGCTGAGGT  
CTATAGCTGAAAAGTGTATATTTTTGAAGTCTTTGGATTTACAGGTAAATA

>M6-PGSC0003DMG400030790M6LRR-RLP\_854

GCTGAGGTCTATAGCTGAAAAGTGTATATTTTTGAAGTCTTTGGATTTACAGGTAAATATCTAGTCATTTA  
GAACTTTGGTTTCCTCATGGTATTTTTATTGCTCTGTTTCAAGCTGTTT

>M6-PGSC0003DMG400030790M6LRR-RLP\_915

TAGTCATTTAGAACTTTGGTTTCCTCATGGTATTTTTATTGCTCTGTTTCAAGCTGTTTTGGAATTGAACTA  
TATGATGTGCATGTTATCAAAGGTCTGAGAAGCTTTAGTTTCCTGTAC

>M6-PGSC0003DMG400030790M6LRR-RLP\_976

GAATTGAACTATATGATGTGCATGTTATCAAAGGTCTGAGAAGCTTTAGTTTCCTGTACCTCTTAAAGGG  
CTGTTATGTTGGAGATCAAGGTCTAGCAGCTGTTGGGGAGTTCTCTAAGC

>M6-PGSC0003DMG400030856M6LRR-RLP\_0

AGTATATTGAGCAAAAATATTCTCTATTTTCTGCTGTCTCCTAATGAGTTTGATGCAATAATATTCTCATGT  
GGATGTTGCTTGCACCAGTTCTGTATTAACCGAACCCCAAGTTTATG

>M6-PGSC0003DMG400030856M6LRR-RLP\_1054

TAAATCTGGTAAAACCTATTTCAAGATGCATGATCTCATCCATGATTTGGCTACATCTCTGTTTTAGCAA  
GCACATCAAGCAGCAATATCCGCGAAATAAATGTAAAAGGTTACCCACA

>M6-PGSC0003DMG400030856M6LRR-RLP\_1116

TTTCAGCAAGCACATCAAGCAGCAATATCCGCGAAATAAATGTAAAAGGTTACCCACATAAGATGATGT

CCATTGGTTTCACTGAAGTGGTGTCTTCTTACTCTCCCTCTCTGTCGCAA

>M6-PGSC0003DMG400030856M6LRR-RLP\_1178

ATGATGTCCATTGGTTTCACTGAAGTGGTGTCTTCTTACTCTCCCTCTCTGTCGCAAAGTTTGTCTCGTTA

AGAGTGCTTAATCTAAGTAACTTACACTTTGAGGAGTTATCCTCTTCC

>M6-PGSC0003DMG400030856M6LRR-RLP\_124

AGACAAAGAGGAAGATGAGATAGTGAAAATCCTGATAACAATGTTAGTGATGCCCAACACCTTTCAGT

CCTCCCAATACTTGGTATGGGGGGACTAGGAAAAACGACTCTTGCCCAAAT

>M6-PGSC0003DMG400030856M6LRR-RLP\_1302

GAGATCTAGTACATTTAAGATGCCTGGACTTGTCTGAGAATTCTGGAATTCATAGTCTTCCGAAGCAGTT

ATGCAAGCTTCAAATCTGCAGACTCTTGATCTACATAATTGCTACTCTC

>M6-PGSC0003DMG400030856M6LRR-RLP\_1364

AAGCAGTTATGCAAGCTTCAAATCTGCAGACTCTTGATCTACATAATTGCTACTCTCTTTCTTGTGGCC

AAAACAACAAGTAACTTGGTAGTCTCCGAAATCTTTTACTTCATGGT

>M6-PGSC0003DMG400030856M6LRR-RLP\_1550

TTTGCTGTGGGAATTCAGAAGAAAGTTATCAACTTGGTAACTACGAGATGTAAATCTCTATGGCTCAA

TTGAAATCACACATCTTGAGAGAGTGAAGAATGTTATGGATGCAAAGAA

>M6-PGSC0003DMG400030856M6LRR-RLP\_1674

ATTTATCAGCAAAGGGGAATCTGCACTCTTTAATCATGAATTGGAGTAGGAAAGGACCTCATAGATATG

AATCAGAAGAAGTTAGAGTGATTGAAGCCCTCAAACACACCCCAATTTGA

>M6-PGSC0003DMG400030856M6LRR-RLP\_1736

AGATATGAATCAGAAGAAGTTAGAGTGATTGAAGCCCTCAAACACACCCCAATTTGACTTGTTTAAACA

TCAGTGGCTTCAGAGGATTCCGTTTCCCTGAGTGGATGAATCACTCAGTT

>M6-PGSC0003DMG400030856M6LRR-RLP\_1798

TTTAACAATCAGTGGCTTCAGAGGATTCCGTTTCCCTGAGTGGATGAATCACTCAGTTTTGAGAAATGTT

GTCTCCATTACAATTAAGGGTTCACAAACTGCTCATGCTTACCACCCTT

>M6-PGSC0003DMG400030856M6LRR-RLP\_186

TTTCAGTCCCTCCAATACTTGGTATGGGGGGACTAGGAAAAACGACTCTTGCCCAAATGGTCTTCAATGA

CCAGAGAATTAAGTACTGAGCATTTCATTCCAAAATATGGATTTGTGTCTCGG

>M6-PGSC0003DMG400030856M6LRR-RLP\_1860

GAAATGTTGTCTCCATTACAATTAAGGGTTGCACAACTGCTCATGCTTACCACCCTTTGGTGAGCTTCCT  
TGTCTAGAAAGTCTAGAGTTGTTAATGGGGTCTGCGGAGTATGTTGAAG

>M6-PGSC0003DMG400030856M6LRR-RLP\_1922

GAGCTTCCTTGTCTAGAAAGTCTAGAGTTGTTAATGGGGTCTGCGGAGTATGTTGAAGAAGTGGATATT  
GATGTTCAATTCTGGATTCCCTACAAGAAGAAGATTTCCATCTCTGAGAAAA

>M6-PGSC0003DMG400030856M6LRR-RLP\_248

TTCAATGACCAGAGAATTACTGAGCATTTCCATTCCAAAATATGGATTTGTGTCTCGGAAGATTTTGATG  
AGAAGAGGTTACTAAAGGCAATCATAGAATCTATTGAAGGAAGGCCACTA

>M6-PGSC0003DMG400030856M6LRR-RLP\_310

TTTTGATGAGAAGAGGTTACTAAAGGCAATCATAGAATCTATTGAAGGAAGGCCACTACTTGGTGAGAT  
GGACTTGGCTCCACTTCAAAGAAGCTTCAGGAGTTGCTGAATGGAAAAAG

>M6-PGSC0003DMG400030856M6LRR-RLP\_372

GTGAGATGGACTTGGCTCCACTTCAAAGAAGCTTCAGGAGTTGCTGAATGGAAAAAGATACTTGCTTG  
TCTTAGATGATGTTTGAATGAAGATCAACAGAAGTGGGATAATTTAAGAG

>M6-PGSC0003DMG400030856M6LRR-RLP\_434

TTGCTTGTCTTAGATGATGTTTGAATGAAGATCAACAGAAGTGGGATAATTTAAGAGCAGTCCTGAAG  
GTTGGAGCAAGTGGTGCTTTTGTCTAGCCACTACTCGTCTTGAAAAGGTT

>M6-PGSC0003DMG400030856M6LRR-RLP\_496

CCTGAAGTTGGAGCAAGTGGTGCTTTTGTCTAGCCACTACTCGTCTTGAAAAGGTTGGATCAATTATG  
GGAACCTTGCAACCATATGAATTGTCAAATCTGTCTCAAGAAGATTGTTG

>M6-PGSC0003DMG400030856M6LRR-RLP\_558

CAATTATGGGAACTTTGCAACCATATGAATTGTCAAATCTGTCTCAAGAAGATTGTTGGTTGTTGTTCCATA  
CAACGTGCATTTGGACACCAGGAAGAAATAAATCCTAACCTTGTGGCTA

>M6-PGSC0003DMG400030856M6LRR-RLP\_62

ATTCTCATGTGGATGTTGCTTGCAACCAGGTTCTGTATTAACCGAACCCCAAGTTTATGGAAGAGACAAAG  
AGGAAGATGAGATAGTGAATAATCCTGATAAACAATGTTAGTGATGCCCAA

>M6-PGSC0003DMG400030856M6LRR-RLP\_744

TGCGCTCAAGAGAGAAGAAAGAGAATGGGAACATGTGAGAGATAGTGAGATTTGGAATTTACCTCAA  
GAGGAAAGGTCTATTTTGCCTGCCCTAAGGCTTAGTTATCATCATCTTCCAC



>M6-PGSC0003DMG400030856M6LRR-RLP\_806

CCTCAAGAGGAAAGGTCTATTTTGCCTGCCCTAAGGCTTAGTTATCATCATCTTCCACTTGATTTGAGACA  
ATGCTTTGCATATTGTGCAGTATTCCCAAAGGACACCAAATGGAAAAA

>M6-PGSC0003DMG400030856M6LRR-RLP\_868

TTTGAGACAATGCTTTGCATATTGTGCAGTATTCCCAAAGGACACCAAATGGAAAAAGAAAAGGTAAT  
CTCTCTCTGGATGGCACACGGCTTTCTTTTATTGGAAGGAAAATTAGAGCC

>M6-PGSC0003DMG400030856M6LRR-RLP\_930

AGGTAATCTCTCTCTGGATGGCACACGGCTTTCTTTTATTGGAAGGAAAATTAGAGCCAGAGGATGTGG  
GTAATGAAGTATGGAAAGAATTATGCTTGAGCTCTTTTTTCCAAGAGATTG

>M6-PGSC0003DMG400030856M6LRR-RLP\_992

GATGTGGGTAATGAAGTATGGAAAGAATTATGCTTGAGCTCTTTTTTCCAAGAGATTGAAGTTAAATCTG  
GTAAACTTATTTCAAGATGCATGATCTCATCCATGATTTGGCTACATCT

>M6-PGSC0003DMG400030928M6LRR-RLP\_1054

CGAATGCCTATTTGAGATCTTCAGAAAGATTGGAAGGAGGCCGTGAAAGGAGTGCAGCAGCTTGCCTTTC  
TAAGCGTTGGCTTATGCTCTTGAGTAATATGAGGAGCTCTGATATTCGCCA

>M6-PGSC0003DMG400030928M6LRR-RLP\_1116

GCGTTTCTAAGCGTTGGCTTATGCTCTTGAGTAATATGAGGAGCTCTGATATTCGCCATACTAATCATTCA  
GCTGCTAATGGGGCTTCAGATGATACGAAAATGGCATCAGCTGATGAAG

>M6-PGSC0003DMG400030928M6LRR-RLP\_1178

AATCATTAGCTGCTAATGGGGCTTCAGATGATACGAAAATGGCATCAGCTGATGAAGATCTTGAAATG  
GAGTGTGACGGATATCTTACTAGGTGTTTAGAAGGGAAGAAAGCTACAGAC

>M6-PGSC0003DMG400030928M6LRR-RLP\_124

AAATTTGGGGTTTGTGTTCTTGGTGCAAAGTTTGTTTTTTTAAATTTCTTTGGGGGGTTTGTGTTGAA  
GTGAAGCAACAACCATGTCTACTCTTGTTAAATACAGTGGTGAGTTTTT

>M6-PGSC0003DMG400030928M6LRR-RLP\_1240

TGAAATGGAGTGTGACGGATATCTTACTAGGTGTTTAGAAGGGAAGAAAGCTACAGACATTAGGCTCTC  
AGCTATAGCAGTTGGAACCTTAGCCGTGGGGTCTTGGAAGCTCTCAGT

>M6-PGSC0003DMG400030928M6LRR-RLP\_1364

GGGAGCAACTCTGTTCCGGGTATTACTAATGTTGGTCTATCAGCAATCGCCACGGTTGTCCGTCTCTTA

GGGTTCTTTCATTGTGGGATGTTTCAGGATGTCGGAGATGAAGGTCTTATG

>M6-PGSC0003DMG400030928M6LRR-RLP\_1426

GTCTCTTAGGGTCTTTCATTGTGGGATGTTTCAGGATGTCGGAGATGAAGGTCTTATGGAGATTGCAAG  
AGGATGTCATTCATTAGAAAAGCTAGACTTAACTAAATGTCCCTCAATTC

>M6-PGSC0003DMG400030928M6LRR-RLP\_1488

TTGCAAGAGGATGTCATTCATTAGAAAAGCTAGACTTAACTAAATGTCCCTCAATTTCCAACAAAGGTCT  
GGTTGCAATAGCAGAGAATTGCCCAAGTTTGACTTCTTTGACGATCGAAT

>M6-PGSC0003DMG400030928M6LRR-RLP\_1550

AAAGGTCTGGTTGCAATAGCAGAGAATTGCCCAAGTTTGACTTCTTTGACGATCGAATCTTGTA AAAAGTA  
TTGGAAATGAGGGCCTGCAAGCTATTGGAAGATGTTGTACCAAATTAGAG

>M6-PGSC0003DMG400030928M6LRR-RLP\_1612

TAAAAGTATTGGAAATGAGGGCCTGCAAGCTATTGGAAGATGTTGTACCAAATTAGAGTCTCTTACTATT  
AAAGACTGCCCTCTTG TAGGTGATCAGGCAGTTGTTAGCCTTCTGTCGTC

>M6-PGSC0003DMG400030928M6LRR-RLP\_1674

TTACTATTAAAGACTGCCCTCTTG TAGGTGATCAGGCAGTTGTTAGCCTTCTGTCGTCGGGCAATACAAG  
GTTGAAGAAAGTGAAACTTCATTCTCTAACATTACGGATTTCTCCCTCG

>M6-PGSC0003DMG400030928M6LRR-RLP\_1736

AATACAAGGTTGAAGAAAGTGAAACTTCATTCTCTAACATTACGGATTTCTCCCTCGCTGTCATTGGTC  
ACTATGGCAAGGAGATTATCGATCTTAATCTGTGTAAACTTGGTCACGTA

>M6-PGSC0003DMG400030928M6LRR-RLP\_1798

CATTGGTCACTATGGCAAGGAGATTATCGATCTTAATCTGTGTAAACTTGGTCACGTAAGTCCGAGGGG  
GTTTTGGGTTATGGGTGCTGCTCAGGGTTTGCAATCACTGGCTTCTTTGAC

>M6-PGSC0003DMG400030928M6LRR-RLP\_186

TGTGTTGAAGTGAAGCAACAACCATGTCTACTCTTGTTAAATACAGTGGTGAGTTTTCTTGGTTTGTTC  
ATGTATTGGATTATGGGTTTTTGAGTTTTAAGGAATTTGGCATTGGGT

>M6-PGSC0003DMG400030928M6LRR-RLP\_1860

CGAGGGGGTTTTGGGTTATGGGTGCTGCTCAGGGTTTGCAATCACTGGCTTCTTTGACTGTCACCTTCGTG  
CATTGGACTGACGAATCCGAGTCTTGAAGCAGTGGGAAAGGGCTGCACAA

>M6-PGSC0003DMG400030928M6LRR-RLP\_1984

TAAAAGCATGTGCCTTCGCGAGTGTAACGTGTTACTGATAGTGGACTTGTTGCGTTTGCTCAAGCTGCT  
GGATCTCTCGAGTATCTCTTGTGGAAGAGTGCGACAAGATCACCCAAAC

>M6-PGSC0003DMG400030928M6LRR-RLP\_2046

AAGCTGCTGGATCTCTCGAGTATCTCTTGTGGAAGAGTGCGACAAGATCACCCAAACAGGCATACTAA  
ATGCTGTTTCAATCTGCAGCAAGTTGAAGTCGCTTCCCTGGTGAAGTGTT

>M6-PGSC0003DMG400030928M6LRR-RLP\_2108

ATACTAAATGCTGTTTCAATCTGCAGCAAGTTGAAGTCGCTTCCCTGGTGAAGTGTTCCGGGAGTCAGG  
GATTTGCCTCAACAAGCTTCCCTGTTGTCTCCCTGTGATTCTCTCCGATCG

>M6-PGSC0003DMG400030928M6LRR-RLP\_2232

CCATCCGAAGCTGTGCAGGATTAGGTAGCAGAAGCTTAGCTATGGTGGGGAAGCTATGACCCCAGCTTC  
ATCATTTGGATCTCAGAGGGCTTACTAGAATAACAGATGCTGGACTTCTCC

>M6-PGSC0003DMG400030928M6LRR-RLP\_2294

CAGCTTCATCATTTGGATCTCAGAGGGCTTACTAGAATAACAGATGCTGGACTTCTCCACTTTTGGAGA  
GCTCCAAGGCAGGACTAGTCAAGGTTAATCTTACTCACTGCCTGAACGTG

>M6-PGSC0003DMG400030928M6LRR-RLP\_2356

TTTGGAGAGCTCCAAGGCAGGACTAGTCAAGGTTAATCTTACTCACTGCCTGAACGTGACCGATGAAGT  
GGTGCTCTCATTAGCTAGGCTACACGGTGAGACTTTGGAATTGCTGAATCT

>M6-PGSC0003DMG400030928M6LRR-RLP\_2418

ATGAAGTGGTGCTCTCATTAGCTAGGCTACACGGTGAGACTTTGGAATTGCTGAATCTTGATGGATGCA  
GGAGGGTTACCGATGCAAGCTTGGTGGCAATTGCTGATAATTGTCTATTAC

>M6-PGSC0003DMG400030928M6LRR-RLP\_248

TTTGTTCATGTATTGGATTATGGGTTTTGAGTTTTAAGGAATTTGGCATTGTTGGGTGATTTAGTTTTCAT  
AGAATAGATTCATTTTTAGTGCTCCATGAATCTATTAAGGGTTCTTGA

>M6-PGSC0003DMG400030928M6LRR-RLP\_2480

GGATGCAGGAGGGTTACCGATGCAAGCTTGGTGGCAATTGCTGATAATTGTCTATTACTTAACGATCTT  
GATGTTTCAAAGTGTTCAATAACTGATTCGGGTGTAGCTGCTTTATCCCAA

>M6-PGSC0003DMG400030928M6LRR-RLP\_2542

CGATCTTGATGTTTCAAAGTGTTCAATAACTGATTCGGGTGTAGCTGCTTTATCCCAAGGAGTGCAATTG  
AATTTGCAGGTTCTTTCACTCTCAGGTTGCTCCATGGTAACAAACAAGAG

>M6-PGSC0003DMG400030928M6LRR-RLP\_2604

TGCAATTGAATTTGCAGGTTCTTTCACTCTCAGGTTGCTCCATGGTAACAAACAAGAGCTTTTCGTCTCTT  
AGAACATTGGGTGAGAGCTTAATTGGTTTAAATCTCCAGCACTGCAATG

>M6-PGSC0003DMG400030928M6LRR-RLP\_2666

TCGTCTCTTAGAACATTGGGTGAGAGCTTAATTGGTTTAAATCTCCAGCACTGCAATGCCATCGGTAGCA  
GCAGAGTCGAGGCTCTTGTTGAGGACTTGTGGAGGTGTGATATCCTCTCC

>M6-PGSC0003DMG400030928M6LRR-RLP\_2728

CGGTAGCAGCAGAGTCGAGGCTCTTGTTGAGGACTTGTGGAGGTGTGATATCCTCTCCTAAAAGCCAAC  
TGGAGCACAAGGCTATGCATCATCCAAAGGTGTTTGAACACTACGAGTCGTAG

>M6-PGSC0003DMG400030928M6LRR-RLP\_2790

AGCCAACTGGAGCACAAGGCTATGCATCATCCAAAGGTGTTTGAACACTACGAGTCGTAGCTATTTGGTTC  
ATTAATCTTGGTGGGATAGAAGTAAACATGATTGTGGTTTTTTGGCTAACTA

>M6-PGSC0003DMG400030928M6LRR-RLP\_2852

TTGGTTCATTAATCTTGGTGGGATAGAAGTAAACATGATTGTGGTTTTTTGGCTAACTAATGGCCTTGTGA  
TGCTCCAGTGGCTTGTTGTTTTCCAGGAGGCTATGACAAACAACCTTTTT

>M6-PGSC0003DMG400030928M6LRR-RLP\_2914

CCTTGTGATGCTCCAGTGGCTTGTTGTTTTCCAGGAGGCTATGACAAACAACCTTTTTCCATCCATTTTTT  
GCAGGCTTCATCTACTTAAAAGCTTGTTCCACATCGTTCAAACCTCCGGT

>M6-PGSC0003DMG400030928M6LRR-RLP\_2976

CCATTTTTTGCAGGCTTCATCTACTTAAAAGCTTGTTCCACATCGTTCAAACCTCCGGTGTACACACGGAG  
GCTGCCTCTTACACAACCATGGTATCCTGAGAATACAGTTACCTAAGTC

>M6-PGSC0003DMG400030928M6LRR-RLP\_3038

CACACGGAGGCTGCCTCTTACACAACCATGGTATCCTGAGAATACAGTTACCTAAGTCCTGGTGCTAAAG  
TTTTCACTAGTGTTGCTCCTTGTCTCCCCATCCGGGGATGAACTAATAAT

>M6-PGSC0003DMG400030928M6LRR-RLP\_310

TAGTTTTCATAGAATAGATTCATTTTTAGTGCTCCATGAATCTATTAAGGGTCTTGATTGTTGATATGAA  
TATGAAGGGTGTAGGAGTAACTAGAAGAAAAAGATTGTTGGTTGGGAAT

>M6-PGSC0003DMG400030928M6LRR-RLP\_3100

TGCTAAAGTTTTCACTAGTGTTGCTCCTTGTCTCCCCATCCGGGGATGAACTAATAATGCTTCTCTTAAAC

TTATATAGATATCATGCATTAGCCTTGATAGTACTACACTGCAGAATCA

>M6-PGSC0003DMG400030928M6LRR-RLP\_3162

CTCTTAAACTTATATAGATATCATGCATTAGCCTTGATAGTACTACACTGCAGAATCAGACAGTTTTTTCT  
TAGTTCTAGTATGTTAGTTTTCGTATTAAGAAGTCGTCCTCGTTGTTAT

>M6-PGSC0003DMG400030928M6LRR-RLP\_3224

GTTTTTCTTAGTTCTAGTATGTTAGTTTTCGTATTAAGAAGTCGTCCTCGTTGTTATAGTTGTTACTATAA  
GTGTTTTACTTTTCATCTTAGTCGTCTGTAGTTGAATCAAACGATTTTC

>M6-PGSC0003DMG400030928M6LRR-RLP\_3286

GTTACTATAAGTGTTTTACTTTTCATCTTAGTCGTCTGTAGTTGAATCAAACGATTTCTGTAGCATGGTGT  
CTGTTAATCTGGGGCTTGGTCATGGCAACTAGTCCATCTAGGTTGTTTA

>M6-PGSC0003DMG400030928M6LRR-RLP\_3348

GCATGGTGTCTGTTAATCTGGGGCTTGGTCATGGCAACTAGTCCATCTAGGTTGTTTATCTAGTGTCCAA  
GTTCTAGTTTTTGATAGGATTGTAAAAAGTCCTTGATTGTACAGGTTCCCT

>M6-PGSC0003DMG400030928M6LRR-RLP\_3410

GTGTCCAAGTTCTAGTTTTTGATAGGATTGTAAAAAGTCCTTGATTGTACAGGTTCCCTGTCTTTCAGATT  
TGTACATTGCAACTACTTTGTTATGTGTAATAAACTCTGTTTAGTTTGT

>M6-PGSC0003DMG400030928M6LRR-RLP\_372

TGATATGAATATGAAGGGTGTAGGAGTAACTAGAAGAAAAAGATTGTTGGTTGGGAATTTTAGTAGCTC  
CATTTAGTTGGTTGGTTGGTTATCTGAACTTTCACCTTGTAATCCTTGCC

>M6-PGSC0003DMG400030928M6LRR-RLP\_434

GTAGCTCCATTTAGTTGGTTGGTTGGTTATCTGAACTTTCACCTTGTAATCCTTGCCCCATTTCCCCCAAT  
TTGAAAAAAGATTAAAAAGTTGTTGCTTTGGCTTTGAAGATGTTAATC

>M6-PGSC0003DMG400030928M6LRR-RLP\_496

TTCCCCAATTTGAAAAAAGATTAAAAAGTTGTTGCTTTGGCTTTGAAGATGTTAATCTTGCTCCTATTTA  
AACTTTTGTTATGCTTTAGTAAGTTTTTGTGTGTGTGTTGTTTAGATTG

>M6-PGSC0003DMG400030928M6LRR-RLP\_558

TCCTATTTAACTTTTGTTATGCTTTAGTAAGTTTTTGTGTGTGTGTTGTTTAGATTGATGTTAAAGATTGG  
CACTTTTGTATAAAGGTGTGAATAAGAAACATTTTTCTGGTATTTGT

>M6-PGSC0003DMG400030928M6LRR-RLP\_62

GATAGGGTTTCTGTTGAAATCTTGAACCTTTTCATGTGTAATGCAAATCTTGGTTGAAAATAAAATTTGG  
GGTTTGTGTTCTTGGTGCAAAGTTTGTGTTTTTTAAATTCCTTTGGGG

>M6-PGSC0003DMG400030928M6LRR-RLP\_620

TAAAGATTGGCACTTTTTGATAAAAGGTGTGAATAAGAAACATTTTTCTGGTATTTGTAGCTAAGAATTT  
GTTTGTGTTCAACTTTTGATCTGATTTGGTAGATCTTAGTTCTAAGTTT

>M6-PGSC0003DMG400030928M6LRR-RLP\_682

AAGAATTTGTTTGTGTTCAACTTTTGATCTGATTTGGTAGATCTTAGTTCTAAGTTTTTTATGTAATGAGT  
TCTCTGACTTCAAATGAAGTTAAAGATAGGATTTTTGTAAGAAATGGG

>M6-PGSC0003DMG400030928M6LRR-RLP\_744

TGTAATGAGTTCTCTGACTTCAAATGAAGTTAAAGATAGGATTTTTGTAAGAAATGGGCATGAAATTATT  
ATCTTGGGAATTTTAGTATGTTGATTTGGTGGAAAAGATAGTTGATGAAG

>M6-PGSC0003DMG400030928M6LRR-RLP\_806

AAATTATTATCTTGGGAATTTTAGTATGTTGATTTGGTGGAAAAGATAGTTGATGAAGTTCTTGATGTTT  
GATCTTCAGGTGATAATGAGTTCTATAGTGGAGGATCACTTTGTTTCAGCT

>M6-PGSC0003DMG400030928M6LRR-RLP\_868

TGATGTTTGATCTTCAGGTGATAATGAGTTCTATAGTGGAGGATCACTTTGTTTCAGCTGATTTGGGTCTT  
ATGTTGGCTCTTGGACATGCTGATATATACTGTCCTGTTAGTAAGAGGGC

>M6-PGSC0003DMG400030928M6LRR-RLP\_930

TGGGTCTTATGTTGGCTCTTGGACATGCTGATATATACTGTCCTGTTAGTAAGAGGGCACGAATTAGTGG  
CCCGTTTGTCGTTGAAGATAGGACTAAGAATCCATCCATTGAAGTACTTC

>M6-PGSC0003DMG400030928M6LRR-RLP\_992

ATTAGTGGCCCGTTTGTGCTTGAAGATAGGACTAAGAATCCATCCATTGAAGTACTTCCCAACGAATGCC  
TATTTGAGATCTTCAGAAGATTGGAAGGAGGCCGTGAAAGGAGTGCAGCA

>M6-PGSC0003DMG400031028M6LRR-RLK\_0

ATGGAGGTGAGCGTGAAGATGAAATCCCTCACAAAGCACTACTGTTGGCTCTATTGCTTGTGTTTACCGA  
TCGTTTTAGCTCTCACCGAAGAAGGTAACATTTCTTTGAACATCTAGAA

>M6-PGSC0003DMG400031028M6LRR-RLK\_1037

GCTAGAGTTATTGTGAGTTATTTAATCACGTTAAATTGATATCTTCTCATATCTGATATGGTTATGATGAA  
TTAATTCATATGTGGTACAGGAACCTGAAAAACAATCAGTTGTCTGGCC

>M6-PGSC0003DMG400031028M6LRR-RLK\_1098

TTATGATGAATTAATTCATATGTGGTACAGGAACCTGAAAAACAATCAGTTGTCTGGCCCAATCCCATCC  
ACATTA ACTCAAATCCCTAATCTAAAGACGCTGTGAGTTCATGACTTTA

>M6-PGSC0003DMG400031028M6LRR-RLK\_1159

ATCCCATCCACATTA ACTCAAATCCCTAATCTAAAGACGCTGTGAGTTCATGACTTTAGTTTATCTCACTC  
AAAATTTAGTCCAATATACATGATTA ACTAATGGTTATTTGATGGTGA

>M6-PGSC0003DMG400031028M6LRR-RLK\_122

TGTTTTGGTGTCTTAGCTCCTCTGTTTTGCTAGCAGAAGGTAGTGCTTTGTGTGCTATCTAGGAAATAC  
GAAAGTTATTGTTTGAATTTAGTTTTATTTTCAGTTTCTGGAGCAGCA

>M6-PGSC0003DMG400031028M6LRR-RLK\_1220

TTATCTCACTCAAATTTAGTCCAATATACATGATTA ACTAATGGTTATTTGATGGTGAAGTGATCTGGCT  
CGAAACCAGCTCATTGGTGAGATACCAAGGTTGATCTATTGGAATGAAG

>M6-PGSC0003DMG400031028M6LRR-RLK\_1281

TGATCTGGCTCGAAACCAGCTCATTGGTGAGATACCAAGGTTGATCTATTGGAATGAAGTTCTGCAATAC  
CTGTGAGTGCATGTTCTGGTGTCTTGGAGGTTTCTTTTTGTTTGTGA

>M6-PGSC0003DMG400031028M6LRR-RLK\_1342

CTGCAATACCTGTGAGTGCATGTTCTGGTGTCTTGGAGGTTTCTTTTTGTTTGTGAAATTTACAATGT  
TATAATTACCTTCTGTTTTGCAGTGGCTTAAGAGGCAACATGTTGACAG

>M6-PGSC0003DMG400031028M6LRR-RLK\_1403

TTTACAATGTTATAATTACCTTCTGTTTTGCAGTGGCTTAAGAGGCAACATGTTGACAGGAACATTGTCCC  
CTGATATGTGCCAGTTGACTGGTTTGTGGTATTTGTATGTGCTCTGCTA

>M6-PGSC0003DMG400031028M6LRR-RLK\_1464

ACATTGTCCCCTGATATGTGCCAGTTGACTGGTTTGTGGTATTTGTATGTGCTCTGCTACAAGCTGTCTAT  
ACGGAATGCTCTGTTGTCTGTTTGGTGTATGTTTATTCTAACATAAGA

>M6-PGSC0003DMG400031028M6LRR-RLK\_1525

AGCTGTCTATACGGAATGCTCTGTTGTCTGTTTGGTGTATGTTTATTCTAACATAAGAAGTTTCATATTA  
TTTCAGTGATGTGCGGGGCAACAACCTCAGTGGAATAATTCCAGATAAT

>M6-PGSC0003DMG400031028M6LRR-RLK\_1586

TTTCATATTATTTTCAGTGATGTGCGGGGCAACAACCTCAGTGGAATAATTCCAGATAATATTGGGAATTG

TACAAGCTTTGAGATACTGTCAGTGTCTCTCCTCGCTCTTG TAGCATT

>M6-PGSC0003DMG400031028M6LRR-RLK\_1647

TGGGAATTGTACAAGCTTTGAGATACTGTCAGTGTCTCTCCTCGCTCTTG TAGCATTATGCTACGGTTTT

TACTCCTACTGCTGCCCAATTATAACAAAGTATTTTTTCGTTATTTCA

>M6-PGSC0003DMG400031028M6LRR-RLK\_1708

CTACGGTTTTTACTCCTACTGCTGCCCAATTATAACAAAGTATTTTTTCGTTATTTTCAGGGATATCTCATA

CAATCAGATAACTGGAGAAATCCCTACAATATTGGATTTTTACAAGT

>M6-PGSC0003DMG400031028M6LRR-RLK\_1769

GATATCTCATAACAATCAGATAACTGGAGAAATCCCTACAATATTGGATTTTTACAAGTGGCTACCTTGTT

AGTAAATTCAACTTTTAAATGATTTTTAGCTGTTGTCATTTTTACCTTG

>M6-PGSC0003DMG400031028M6LRR-RLK\_183

TAGGAAATACGAAAGTTATTGTTTCGAATTTAGTTTTTATTTTCAGTTTCTGGAGCAGCATTCCATGCTATT

TAACTCTGATAACGAAAAATCCGTGTTATTTAAGATATATTTAGCCTCC

>M6-PGSC0003DMG400031028M6LRR-RLK\_1830

CTACCTTGTTAGTAAATTCAACTTTTAAATGATTTTTAGCTGTTGTCATTTTTACCTTGTCTGTTCTGTTATG

GGGTTCAATTTCTGTGAATTGTAAATGGTGATTGTGGTCCTTTCAACA

>M6-PGSC0003DMG400031028M6LRR-RLK\_1891

TGTTCTGTTATGGGGTTCATTTCTGTGAATTGTAAATGGTGATTGTGGTCCTTTCAACAGGTCTTTGCAAG

GAAATAGGCTAACTGGGAAGATCCCAGAAGTGATTGGTCTAATGCAAGC

>M6-PGSC0003DMG400031028M6LRR-RLK\_1952

TCTTTGCAAGGAAATAGGCTAACTGGGAAGATCCCAGAAGTGATTGGTCTAATGCAAGCTCTTGCTGTT

CTGTGAGTATTCATACTACTACATATTTAATTTTTTTTATCAACTCCATT

>M6-PGSC0003DMG400031028M6LRR-RLK\_2013

TTGCTGTTCTGTGAGTATTCATACTACTACATATTTAATTTTTTTTATCAACTCCATTTCTTACTATTTACT

ACTTGCAAGTTAGAAGGTTTCATGATGTCTGTTTCCTCTGTAGGGAC

>M6-PGSC0003DMG400031028M6LRR-RLK\_2074

TTACTATTTACTACTTGCAAGTTAGAAGGTTTCATGATGTCTGTTTCCTCTGTAGGGACTTGAGTGAAAAT

GAGTTGGTGGGACCAATTCCTCCAATCTTTGGCAATTTATCCTACTG

>M6-PGSC0003DMG400031028M6LRR-RLK\_2135



GAGTGAAAATGAGTTGGTGGGACCAATTCCTCCAATCTTTGGCAATTTATCCTACACTGGGAAGCTGTAA  
GTTTTACCCCTATTTAATGCATATACTTTTCTACGTGTGGCTCGTTTG

>M6-PGSC0003DMG400031028M6LRR-RLK\_2196

AAGCTGTAAGTTTTACCCCTATTTAATGCATATACTTTTCTACGTGTGGCTCGTTTGTCTGATTCACTTG  
TACATTCAACAGGTACCTGCACGGCAACAACTTACGGGGCCAATACC

>M6-PGSC0003DMG400031028M6LRR-RLK\_2257

TGATTCACTTGTACATTCAACAGGTACCTGCACGGCAACAACTTACGGGGCCAATACCACCGGAGCTA  
GGAAATATGTCTAACTTAGTTACTTGTAAAGAGGATTAATTCACAATTTCA

>M6-PGSC0003DMG400031028M6LRR-RLK\_2318

CGGAGCTAGGAAATATGTCTAACTTAGTTACTTGTAAAGAGGATTAATTCACAATTTACAGATACATTATG  
CAGTCACCTTTTTTTTTGCTTCATGCATTGAGCTATCTTATTTACAGGCA

>M6-PGSC0003DMG400031028M6LRR-RLK\_2379

TACATTATGCAGTCACCTTTTTTTTTGCTTCATGCATTGAGCTATCTTATTTACAGGCAATTAATGACAAT  
CAGCTAATGGGGCGAATCCCTCCGAACTTGGCAAACCTGGACCAGTTA

>M6-PGSC0003DMG400031028M6LRR-RLK\_244

CCATGCTATTTAACTCTGATAACGAAAAATCCGTGTTATTTAAGATATATTTAGCCTCCAGTTTATGGCAT  
AACAACCGTAATACTAGTTGATGAAAACCTGAAAATGGTTATGACTGCTT

>M6-PGSC0003DMG400031028M6LRR-RLK\_2440

TAAATGACAATCAGCTAATGGGGCGAATCCCTCCGAACTTGGCAAACCTGGACCAGTTATTTGAATTGTG  
AGCCTTTTATTCTTGTAGTATATAAATCTGGTTCCATTTCTCTTAGAATA

>M6-PGSC0003DMG400031028M6LRR-RLK\_2501

TGAATTGTGAGCCTTTTATTCTTGTAGTATATAAATCTGGTTCCATTTCTCTTAGAATATTGTGTTCTCAGC  
TTTCCTTTACCAGGAATCTTGCAAATAACAAGTTGGAGGGACCAATTC

>M6-PGSC0003DMG400031028M6LRR-RLK\_2562

GTGTTCTCAGCTTTTCTTTACCAGGAATCTTGCAAATAACAAGTTGGAGGGACCAATTCCTGAAAATATC  
AGCTCCTGCTCGGCATTGAATCAACTGTAAGATTGTTGCGTATCCTTTAG

>M6-PGSC0003DMG400031028M6LRR-RLK\_2745

CTTTCTTTAGTAATGTTTCATGGCAACAACCTAACCGGGTCCATTCCTTCAGGGTTTAAGAATCTTGAGAG  
CCTGACGTATCTGTATGTTATATGCTTCTGGTTTGTCTAGTGATCATGA

>M6-PGSC0003DMG400031028M6LRR-RLK\_2806

ATCTTGAGAGCCTGACGTATCTGTATGTTATATGCTTCTGGTTTGTCTAGTGATCATGAAAATGATTTTGA  
ATTTCTTTTCATATGGTACAAACTCATTGGTGACATTTTGTGATATATA

>M6-PGSC0003DMG400031028M6LRR-RLK\_2867

ATGATTTTGAATTTCTTTTCATATGGTACAAACTCATTGGTGACATTTTGTGATATATACCTGGCAGAAAT  
CTTTCAGCAAATAAATTTAAAGGTCACATACCCTATCAACTAGGGCGAA

>M6-PGSC0003DMG400031028M6LRR-RLK\_2928

TGGCAGAAATCTTTCAGCAAATAAATTTAAAGGTCACATACCCTATCAACTAGGGCGAATCATCAACCTT  
GATACATTGTGAGTTCTTGACTGTCAAGGTCAATAAAATTTATTAGTTCA

>M6-PGSC0003DMG400031028M6LRR-RLK\_2989

ATCAACCTTGATACATTGTGAGTTCTTGACTGTCAAGGTCAATAAAATTTATTAGTTCAAGTGATTTCTTG  
TACTAAAATTTGACTCTGTAGGGATCTATCTGGCAATGAATTTTCTGG

>M6-PGSC0003DMG400031028M6LRR-RLK\_305

TTTATGGCATAACAACCGTAATACTAGTTGATGAAAATGAAAATGGTTATGACTGCTTGCGCAGGCCGA  
AGCATTAAATGTCGATCAAGGCATCGTTTAGCAACGTGGCAAACGTGTTGCT

>M6-PGSC0003DMG400031028M6LRR-RLK\_3050

TGATTTCTTGACTAAAATTTGACTCTGTAGGGATCTATCTGGCAATGAATTTTCTGGGTCTATCCCTGG  
TTCTATTGGAGATTTGGAGCATCTCCTCACACTGTAAGATATTAACAT

>M6-PGSC0003DMG400031028M6LRR-RLK\_3111

CTATCCCTGGTTCTATTGGAGATTTGGAGCATCTCCTCACACTGTAAGATATTAACATTTTGTGATGTACAA  
GGAGCTTGATCATATTAAGACTTGAACATAATCACAATATCATTGCAC

>M6-PGSC0003DMG400031028M6LRR-RLK\_3172

TGATGTACAAGGAGCTTGTATCATATTAAGACTTGAACATAATCACAATATCATTGCACATTGTAGGAAT  
CTGAGCAGCAATCATCTTGATGGACAAATTCCTGTAGAATTTGGAAATCT

>M6-PGSC0003DMG400031028M6LRR-RLK\_3233

TGTAGGAATCTGAGCAGCAATCATCTTGATGGACAAATTCCTGTAGAATTTGGAAATCTGAAAAGTATA  
CAGACCATGTGAGTTTCTGCTGAGAGCTTAGGTTACACTGCCTTCAAATG

>M6-PGSC0003DMG400031028M6LRR-RLK\_3294

AAAGTATACAGACCATGTGAGTTTCTGCTGAGAGCTTAGGTTACACTGCCTTCAAATGTGTACTTCTTA

GTATACTGATTTTCTTGTTCTGTGATTGGTTTCTATTCTTTCAGTGATAT

>M6-PGSC0003DMG400031028M6LRR-RLK\_3355

TACTTCTTAGTATACTGATTTTCTTGTTCTGTGATTGGTTTCTATTCTTTCAGTGATATGTCGTGCAACAAG

ATTTCTGGTGGCATCCCAAAGAGCTGGGACAGCTGCAGACCATGATA

>M6-PGSC0003DMG400031028M6LRR-RLK\_3416

CGTGCAACAAGATTTCTGGTGGCATCCCAAAGAGCTGGGACAGCTGCAGACCATGATAACTCTGTAAG

TACATTTAGTTTTGTCAAGTAAATTGATGTAGTGTTAATCAGTTGTCCT

>M6-PGSC0003DMG400031028M6LRR-RLK\_3477

TCTGTAAGTACATTTAGTTTTGTCAAGTAAATTGATGTAGTGTTAATCAGTTGTCCTAAAATCAGTCA

ATTCTAATGAATTTTGATTGGCTTTGTTTCTTTATGAAGTACTTTGAC

>M6-PGSC0003DMG400031028M6LRR-RLK\_3538

AAATCAGTCAATTCTAATGAATTTTGATTGGCTTTGTTTCTTTATGAAGTACTTTGACAGCTAACGATCTT

AGTGGAGCAATCCCTGACCAATTGACCAATTGTTTCAGCCTCACTAGT

>M6-PGSC0003DMG400031028M6LRR-RLK\_3599

CTAACGATCTTAGTGGAGCAATCCCTGACCAATTGACCAATTGTTTCAGCCTCACTAGTTTGTGAGTTCAT

CTATCTTTGTCTTAACATCATAGACATTCTAATTCTTCCTACAGTTACT

>M6-PGSC0003DMG400031028M6LRR-RLK\_366

GCAGGCGAAGCATTAAATGTCGATCAAGGCATCGTTTAGCAACGTGGCAAACGTGTTGCTAGATTGGGAT

GATGTCCATGACGAGGATTTTGCTCATGGCGAGGCGTGCTGTGTGGAAAT

>M6-PGSC0003DMG400031028M6LRR-RLK\_3660

GTGAGTTCATCTATCTTTGTCTTAACATCATAGACATTCTAATTCTTCCTACAGTTACTGATCTTATGCCAT

TTTCCTTTAGGAATATATCCTACAACAATTTAGTGGTGTGTTTCCTC

>M6-PGSC0003DMG400031028M6LRR-RLK\_3721

TCTTATGCCATTTTCCTTTAGGAATATATCCTACAACAATTTAGTGGTGTGTTTCCTCTTTCACGGAATTT

CTCGCGGTTTGACACCTGACAGGTATTTCCATATAGAATGAAGCTTCA

>M6-PGSC0003DMG400031028M6LRR-RLK\_3782

TCACGGAATTTCTCGCGGTTTGACACCTGACAGGTATTTCCATATAGAATGAAGCTTCATCATTATATATG

AACATTAGTACAAGTTAATGACCACCTTACTATGGTCATCAGCTTTTTG

>M6-PGSC0003DMG400031028M6LRR-RLK\_3843

ATTATATATGAACATTAGTACAAGTTAATGACCACCTTACTATGGTCATCAGCTTTTTGGGGAATCCATTT  
CTCTGTGGCAACTGGAAAGGCTCAATATGTGACCCCTATGCACCAAGGT

>M6-PGSC0003DMG400031028M6LRR-RLK\_3904

GAATCCATTTCTCTGTGGCAACTGGAAAGGCTCAATATGTGACCCCTATGCACCAAGGTCTAACGGTATG  
ACTTCATTTTTGTGCATTGGTTAGTGAATCTTTTGGTATGCTAGAGTCAT

>M6-PGSC0003DMG400031028M6LRR-RLK\_3965

AACGGTATGACTTCATTTTTGTGCATTGGTTAGTGAATCTTTTGGTATGCTAGAGTCATGTGCATTAAAAT  
GACTTGTTACTTTTGCAGCCTTGTCTCTAGAACAGCTGTTGTTTGCAC

>M6-PGSC0003DMG400031028M6LRR-RLK\_4026

GCATTAAAATGACTTGTTACTTTTGCAGCCTTGTCTCTAGAACAGCTGTTGTTTGCACAGCATTGGGTGT  
CATAGCACTCTTATCCATGGTTATAGTGGCAGTGTACAAGTCAAACCAA

>M6-PGSC0003DMG400031028M6LRR-RLK\_4087

CATTGGGTGTCATAGCACTCTTATCCATGGTTATAGTGGCAGTGTACAAGTCAAACCAACCACACCAGTT  
TCTGAAGGGGCCTAAGACCAATCAAGGTAAAAATTAGTACATGTCCATTC

>M6-PGSC0003DMG400031028M6LRR-RLK\_4148

ACACCAGTTTCTGAAGGGGCCTAAGACCAATCAAGGTAAAAATTAGTACATGTCCATTCTGTTCTTTTGT  
TTTTCAGTACTTTCAGGTATTTATGTTAGCTTTAATCTTGTTTCCCTCTA

>M6-PGSC0003DMG400031028M6LRR-RLK\_4209

TTCTTTTGTTTTTCAGTACTTTCAGGTATTTATGTTAGCTTTAATCTTGTTTCCCTCTAATTCCTAGGTTCC  
CCCAAACCTTGTTGTTCTTCACATGGATATGGCCATCCATACATATGA

>M6-PGSC0003DMG400031028M6LRR-RLK\_427

ATTGGGATGATGTCCATGACGAGGATTTTTGCTCATGGCGAGGCGTGCTGTGTGGAAATTTCTCCATTTCC  
CGTCGTTGCCCTGTAGGTTTTCCATCCTTGTCTCCTAACTTTTACTGATA

>M6-PGSC0003DMG400031028M6LRR-RLK\_4270

TCCCTAGGTTCCCCAAACTTGTTGTTCTTCACATGGATATGGCCATCCATACATATGATGACATTATGAG  
GATTACTGAGAACTTCAATGAGAAATTCATCATAGGATATGGTGCTTCC

>M6-PGSC0003DMG400031028M6LRR-RLK\_4331

ACATTATGAGGATTACTGAGAACTTCAATGAGAAATTCATCATAGGATATGGTGCTTCCAGCACTGTATA  
TAAATGTGTTTTGAAAGATTCCCGACCGATTGCCGTTAAGCGACTTTACA

>M6-PGSC0003DMG400031028M6LRR-RLK\_4392

CACTGTATATAAATGTGTTTTGAAAGATTCCCGACCGATTGCCGTTAAGCGACTTTACACTACACATCCGC  
ACAGCTTGCGAGAGTTTGAGACTGAACTGGAGACAATTGGAAGCATCAG

>M6-PGSC0003DMG400031028M6LRR-RLK\_4453

ACACATCCGCACAGCTTGCGAGAGTTTGAGACTGAACTGGAGACAATTGGAAGCATCAGGCATAGAAA  
CCTTGTTAGCTTGCATGGTACTCCCTTTCCCTCATGGGAATCTCCTTTGT

>M6-PGSC0003DMG400031028M6LRR-RLK\_4514

ATAGAAACCTTGTTAGCTTGCATGGTACTCCCTTTCCCTCATGGGAATCTCCTTTGTTACGAATACATG  
GAGAATGGTTCACTCTGGGATCTACTTCATGGTTAGTAACCCTCTTTTC

>M6-PGSC0003DMG400031028M6LRR-RLK\_4575

CGAATACATGGAGAATGGTTCACTCTGGGATCTACTTCATGGTTAGTAACCCTCTTTTCCTTGAATCTTT  
TATAAAGCATCTTCGTGTAAGATATTTACTGTTTTCCCTGTCGGAG

>M6-PGSC0003DMG400031028M6LRR-RLK\_4636

TGTAATCTTTTATAAAGCATCTTCGTGTAAGATATTTACTGTTTTCCCTGTCGGAGAATGGTGCTATA  
AGCCAGGATTGATTTGAAAATGGCTAATTATCAACTGAATACATGTCAT

>M6-PGSC0003DMG400031028M6LRR-RLK\_4697

TGGTGCTATAAGCCAGGATTGATTTGAAAATGGCTAATTATCAACTGAATACATGTCATAGGGCCTTCCA  
AAAAGGTGAAGCTTGACTGGGAAACACGTCTGAGGATTGCTGTTGGTGCT

>M6-PGSC0003DMG400031028M6LRR-RLK\_4758

GGCCTTCCAAAAGGTGAAGCTTGACTGGGAAACACGTCTGAGGATTGCTGTTGGTGCTGCTCAGGGTC  
TTGCTTATCTTCACCACGATTGCAACCCAAGAATCATCCACAGAGATGTGA

>M6-PGSC0003DMG400031028M6LRR-RLK\_4819

TCAGGGTCTTGCTTATCTTCACCACGATTGCAACCCAAGAATCATCCACAGAGATGTGAAATCTTCAAAC  
ATTCTAGTTGATGAAAATTCGAAGCTCATCTTTCTGATTTTGGGGTTGC

>M6-PGSC0003DMG400031028M6LRR-RLK\_488

CTCCATTTCCGTCGTTGCCCTGTAGGTTTTCCATCCTGTCTCCTAACTTTTACTGATACACCAGAACAAAG  
CAGTCTGATGACCTGCTAGCTATTGTATAGCTCTTTGTTAATTTAGCT

>M6-PGSC0003DMG400031028M6LRR-RLK\_4880

TCTTCAAACATTCTAGTTGATGAAAATTCGAAGCTCATCTTTCTGATTTTGGGGTTGCAAATGCATCCC

TACTGCAAAAACATGCATCAACTTTGGTGTGGGTACCATAGGTTAC

>M6-PGSC0003DMG400031028M6LRR-RLK\_4941

AATGCATCCCTACTGCAAAAACATGCATCAACTTTGGTGTGGGTACCATAGGTTACATTGACCCTGA  
GTATGCCAGGACTTCCAGGTTAACTGAAAAGTCAGACGTCTACAGCTTTG

>M6-PGSC0003DMG400031028M6LRR-RLK\_5002

TGACCCTGAGTATGCCAGGACTTCCAGGTTAACTGAAAAGTCAGACGTCTACAGCTTTGGCATTGTTCTC  
CTAGAGCTTTTGACAGGAAAGAAACCGGTTGATAATGACTTGAACCTGCA

>M6-PGSC0003DMG400031028M6LRR-RLK\_5063

ATTGTTCTCCTAGAGCTTTTGACAGGAAAGAAACCGGTTGATAATGACTTGAACCTGCATCAGCTGGTAT  
TACTCTCCTCTTATAGTCTACGTACGTTGTTACTTGTA AAAAAGATTTAA

>M6-PGSC0003DMG400031028M6LRR-RLK\_5124

AGCTGGTATTACTCTCCTCTTATAGTCTACGTACGTTGTTACTTGTA AAAAAGATTTAACTCAGACTGGAT  
ATAGAAAAGAACA ACTTATCTCCAATTTTCCTACCTTCTCCTTAGCATT

>M6-PGSC0003DMG400031028M6LRR-RLK\_5307

TTATAGAGTACTTTGATTTGTGTTACAGATAATGTCAAAGGCGGATGATAACACCGTGATGGATGCTGTT  
GATCCTGAGGTATCTGTTACATGTATGGACTTAATGCATGTGAGGAAAAC

>M6-PGSC0003DMG400031028M6LRR-RLK\_5368

GATGCTGTTGATCCTGAGGTATCTGTTACATGTATGGACTTAATGCATGTGAGGAAAAC TTTTCAGCTTG  
CGTTGCTGTGCACAAAAGATTTCCATGTGAGAGGCCAACGATGCATGAG

>M6-PGSC0003DMG400031028M6LRR-RLK\_5429

TTCAGCTTGCGTTGCTGTGCACAAAAGATTTCCATGTGAGAGGCCAACGATGCATGAGGTAGCTAGGG  
TACTTGTTTCCTTGCTTCTCCCCGCCAACCAACCTTGTTTAGACCCAC

>M6-PGSC0003DMG400031028M6LRR-RLK\_549

CCAGAACAAGCAGTCTGATGACCTGCTAGCTATTGTATAGCTCTTTGTTAATTTAGCTAAAACCTTATACG  
TCTTTTATTTCAATTTGCCTTTTCTGCTTGCGAAGGAATCTGTCCAATC

>M6-PGSC0003DMG400031028M6LRR-RLK\_5490

AGCTAGGGTACTTGTTTCCTTGCTTCTCCCCGCCAACCAACCTTGTTTAGACCCACCTCCCAAATCCA  
TTAATTATACAAAGTTTGTGATTGGGAAAGGACTACCGCAAGTTCAGCA

>M6-PGSC0003DMG400031028M6LRR-RLK\_5551

CCCAAATCCATTAATTATACAAAGTTTGTGATTGGGAAAGGACTACCGCAAGTTCAGCAGGGTGATGAT  
TCCTCCGAAGCACAGTGGCTTGTTAGATTTCAAGAAGCTATATCCAAAAAC

>M6-PGSC0003DMG400031028M6LRR-RLK\_5612

GTGATGATTCTCCGAAGCACAGTGGCTTGTTAGATTTCAAGAAGCTATATCCAAAAACTCCCTTTGACT  
TGGGTTTCATAGACACTAAATATCAAATCAGAAGAGAATATGGAACACATA

>M6-PGSC0003DMG400031028M6LRR-RLK\_5673

CCTTTGACTTGGGTTTCATAGACACTAAATATCAAATCAGAAGAGAATATGGAACACATATATATGTTGGC  
CAAAGGTTTTTTGATGTTAGAGATTTCCCTATAAGATGGTTAGGTACAC

>M6-PGSC0003DMG400031028M6LRR-RLK\_5734

TATGTTGGCCAAAGGTTTTTTGATGTTAGAGATTTCCCTATAAGATGGTTAGGTACACGGTAATAGCTT  
AGTGATTTTACATTTGTAGATGGAATGTTTTATGGTGTGGATGATATCC

>M6-PGSC0003DMG400031028M6LRR-RLK\_5783

TTAGGTACACGGTAATAGCTTAGTGTATTTACATTTGTAGATGGAATGTTTTATGGTGTGGATGATATC  
CACAGTAGGTTAGATCTACAACAGTGCAGTTTAACTAAATCTTTGTTGA

>M6-PGSC0003DMG400031028M6LRR-RLK\_61

TTTTACCGATCGTTTTAGCTCTCACCGAAGAAGGTAACATTTCTTTGAACATCTAGAAGCTGTTTTGGTG  
TTTTCTAGCTCCTCTGTTTTGCTAGCAGAAGGTAGTGCTTTGTGTGCTA

>M6-PGSC0003DMG400031028M6LRR-RLK\_610

AACTTATACGTCTTTTATTTCAATTTGCCTTTCTGCTTGCGAAGGAATCTGTCCAATCTTAACTGGGCG  
GGGAAATTTACCAGCCATTGGAGATTTGAAGAATCTAGCGGCATTGTA

>M6-PGSC0003DMG400031028M6LRR-RLK\_671

AACTGGGCGGGGAAATTTACCAGCCATTGGAGATTTGAAGAATCTAGCGGCATTGTATGGTCCATGT  
TCTCTTTTACTGTTCTTGGTCCATTGACTGTTATTTTTCCATGCTGATATT

>M6-PGSC0003DMG400031028M6LRR-RLK\_732

GTCCATGTTCTCTTTTACTGTTCTTGGTCCATTGACTGTTATTTTTCCATGCTGATATTATATTCTAATGTTA  
ATGACAGAGACCTTCAGGGAAATAAATTAACCTGGTCAAGTCCCAGAT

>M6-PGSC0003DMG400031028M6LRR-RLK\_793

ATTCTAATGTTAATGACAGAGACCTTCAGGGAAATAAATTAACCTGGTCAAGTCCCAGATGAAATTGGCA  
ACTGCATTTCACTGATCTATCTGTAACTGTTTTAACCTATTCTTTTAAT

>M6-PGSC0003DMG400031028M6LRR-RLK\_854

AATTGGCAACTGCATTTCACTGATCTATCTGAAACTGTTTTAACCTATTCTTTAATATCTTTTTCTTGCG  
TGTCAGTAAATTTAAAGTGTTCACTAGTTGATTTGCCATTTCTG

>M6-PGSC0003DMG400031028M6LRR-RLK\_915

CTTTTTCTTGCGTGTGTCAGTAAATTTAAAGTGTTCACTAGTTGATTTGCCATTTCTGTCAGTGATTTGTCT  
GATAACTTGCTCTATGGAGATATACCTTTCTCAATTTCTAAGCTCAAG

>M6-PGSC0003DMG400031028M6LRR-RLK\_976

GTGATTTGTCTGATAACTTGCTCTATGGAGATATACCTTTCTCAATTTCTAAGCTCAAGCAGCTAGAGTTA  
TTGTGAGTTATTTAATCACGTTAAATTGATATCTTCTCATATCTGATAT

>M6-PGSC0003DMG400031103-(rev)M6LRR-RLK\_0

CAATTTTATCATCACCATATAGTTGTATTCAATCACATATCACTCACATGTTCTAGTACTCCTCCATTCT  
GTAAAGTTCTAGTTGACTCTCTCCCTTTGTGGTCCTTTTCCATTTTC

>M6-PGSC0003DMG400031103-(rev)M6LRR-RLK\_1037

CGCGTCGTGTCATAGTTTGGAGAAATTAACCTTTGTACCAATAGGTTCCATGGAGAGTTTCTGTCCAA  
TTATGCAATATTACCTCACTTAGACAGCTTTACTTATGTGAGAATTACAT

>M6-PGSC0003DMG400031103-(rev)M6LRR-RLK\_1098

CCTGTCCAATTATGCAATATTACCTCACTTAGACAGCTTTACTTATGTGAGAATTACATTTCTGGTGAAAT  
CCCTCAGGATATCGGAAACTTGTCACCTTCTGAGGAGCTTGTGTTTAT

>M6-PGSC0003DMG400031103-(rev)M6LRR-RLK\_1159

CTGGTGAAATCCCTCAGGATATCGGAAACTTGTCACCTTCTGAGGAGCTTGTGTTTATAGTAACAATCTT  
ACTGGAAGAATACCTGTTTCAATAGGTAAATTGAAAAAAGCTTAGGATCA

>M6-PGSC0003DMG400031103-(rev)M6LRR-RLK\_122

GCCTTATCAATCAATCAACTTTCTTAGCCAATTTTTTCTCTGTTTTCACATCCTTTTTATCCTCTTATTTAA  
GTTTTAGCTAAACCCCATTTCTGATTTTTAGTCTTTTGCATGTCC

>M6-PGSC0003DMG400031103-(rev)M6LRR-RLK\_1220

TAACAATCTTACTGGAAGAATACCTGTTTCAATAGGTAAATTGAAAAAAGCTTAGGATCATCAGGGCCGG  
GCGAAACTATCTGTCTGGCCCTATTCTGCTGAAGTTAGTGAATGTGATAG

>M6-PGSC0003DMG400031103-(rev)M6LRR-RLK\_1281

AGGGCCGGGCGAAACTATCTGTCTGGCCCTATTCTGCTGAAGTTAGTGAATGTGATAGTTTACAAGTG



CTTGGTGTAGCGGAAAATAGGCTAGAAGGGTCTTTTCCAGTAGAGCTACAA

>M6-PGSC0003DMG400031103-(rev)M6LRR-RLK\_1342

TACAAGTGCTTGGTGTAGCGGAAAATAGGCTAGAAGGGTCTTTTCCAGTAGAGCTACAAAGGCTTAAGA

ACCTCATCAACTTAATTCTTTGGGCTAACTCATTCTCTGGTGCAATTCCTC

>M6-PGSC0003DMG400031103-(rev)M6LRR-RLK\_1403

GCTTAAGAACCTCATCAACTTAATTCTTTGGGCTAACTCATTCTCTGGTGCAATTCCTCCTGAGGTTGGGA

ACTTCAGTAAGTTGGAATTACTCGCGTTGCATGAGAATTCATTCAAGTGG

>M6-PGSC0003DMG400031103-(rev)M6LRR-RLK\_1464

GAGGTTGGGAACCTTCAGTAAGTTGGAATTACTCGCGTTGCATGAGAATTCATTCAAGTGGACAAATTCCT

AAAGAGATTGGGAAGTTAACTAATTTGAGAAGGTTGTACATTTACACTAAT

>M6-PGSC0003DMG400031103-(rev)M6LRR-RLK\_1525

AAATTCCTAAAGAGATTGGGAAGTTAACTAATTTGAGAAGGTTGTACATTTACACTAATCAATTGAATGG

AACAATTCATGGCAAATGGGGAATTGTTTGAGTGCAGTTGAGATTGATT

>M6-PGSC0003DMG400031103-(rev)M6LRR-RLK\_1586

ATTGAATGGAACAATTCCATGGCAAATGGGGAATTGTTTGAGTGCAGTTGAGATTGATTTATCCGAAAA

TCAGTTGAGAGGAAGCATTCCGAAAAGTTTGGGGCAACTTTCTAATCTGCG

>M6-PGSC0003DMG400031103-(rev)M6LRR-RLK\_1647

TCCGAAAATCAGTTGAGAGGAAGCATTCCGAAAAGTTTGGGGCAACTTTCTAATCTGCGGTTGCTTCACC

TTTTCGAGAACAGATTACATGGGAAGATTCCAAAGGAGCTTGGAGAGTTG

>M6-PGSC0003DMG400031103-(rev)M6LRR-RLK\_1708

TGCTTCACCTTTTCGAGAACAGATTACATGGGAAGATTCCAAAGGAGCTTGGAGAGTTGAAGCTGCTTA

AGAATTTTGACTTGTCTATAAACAATTTGACAGGTAGAATTCAGCAGTGT

>M6-PGSC0003DMG400031103-(rev)M6LRR-RLK\_1769

GCTGCTTAAGAATTTTGACTTGTCTATAAACAATTTGACAGGTAGAATTCAGCAGTGTTCAGCATCTTG

CATTCTTGAGAAATTTACAATTTTGAACAATCACCTTGAAGGTCCTAT

>M6-PGSC0003DMG400031103-(rev)M6LRR-RLK\_183

TCCTCTTATTTAAGTTTTAGCTAAACCCCATTTCTTGATTTTTAGTCTTTTGCATGTCCTGAGTGGCATTATT

TTTCAAGATTTTCATATTATAGCTAAACCCCATTTCTTGATTTGTAGT

>M6-PGSC0003DMG400031103-(rev)M6LRR-RLK\_1830

CAGCATCTTGCATTCTTGGAGAATTTACAACCTTTTTGACAATCACCTTGAAGGTCCTATTCCGCGATTTAT  
TGGCCTCAAAGCAACCTCACTGTAGTGGACCTGTCCAAGAATAATCTT

>M6-PGSC0003DMG400031103-(rev)M6LRR-RLK\_1891

CGCGATTTATTGGCCTCAAAGCAACCTCACTGTAGTGGACCTGTCCAAGAATAATCTTGAAGGAAGAA  
TACCTTCAAATCTTTGTCAGTTTCAGAAGTTAACATTCTGAGCCTCGGGT

>M6-PGSC0003DMG400031103-(rev)M6LRR-RLK\_1952

AGGAAGAATACCTTCAAATCTTTGTCAGTTTCAGAAGTTAACATTCTGAGCCTCGGGTCTAACAAAGTTG  
TCTGGCAATATCCCTTATGGCCTAAAGACTTGCAAGTCCCTTGAGCAGCT

>M6-PGSC0003DMG400031103-(rev)M6LRR-RLK\_2013

AACAAGTTGTCTGGCAATATCCCTTATGGCCTAAAGACTTGCAAGTCCCTTGAGCAGCTAATGCTAGGAG  
ATAACCTGCTCACTGGGAGTTTTCTTTGATCTTAGCAAGCTGGAGAAC

>M6-PGSC0003DMG400031103-(rev)M6LRR-RLK\_2074

TGCTAGGAGATAACCTGCTCACTGGGAGTTTTCTTTGATCTTAGCAAGCTGGAGAACCTTTCAGCTCTT  
GAGCTTTTTCACAATAGATTTTCTGGATTGCTACCACCAGAGGTGGGCA

>M6-PGSC0003DMG400031103-(rev)M6LRR-RLK\_2135

TTCAGCTCTTGAGCTTTTTCACAATAGATTTTCTGGATTGCTACCACCAGAGGTGGGCAACCTTAGAAGA  
TTAGAGAGGTTGCTCTTGTCAAATAACAACCTTTTTGGGAAAATTCCTCC

>M6-PGSC0003DMG400031103-(rev)M6LRR-RLK\_2196

CTTAGAAGATTAGAGAGGTTGCTCTTGTCAAATAACAACCTTTTTGGGAAAATTCCTCCTGATATTGGAA  
AACTTGTAAGCTTGTTGCTTTTAATGTTTCCTCCAACCGGCTCTCGGGT

>M6-PGSC0003DMG400031103-(rev)M6LRR-RLK\_2257

ATATTGGAAAACCTGTGAAGCTTGTTGCTTTTAATGTTTCCTCCAACCGGCTCTCGGGTGATATTCCTCAT  
GAATTAGGGAATTGTTAAGTCTCAAAGGCTTGATCTTAGCAAGAACT

>M6-PGSC0003DMG400031103-(rev)M6LRR-RLK\_2318

TATTCCTCATGAATTAGGGAATTGTTAAGTCTCAAAGGCTTGATCTTAGCAAGAACTCGTTCACTGGA  
AATCTCCCGGATGAACTTGGTAGGCTAGTCAAGTTGGAAGTCTTAAGCT

>M6-PGSC0003DMG400031103-(rev)M6LRR-RLK\_2379

TTCACTGGAAATCTCCCGGATGAACTTGGTAGGCTAGTCAAGTTGGAAGTCTTAAGCTATCTGATAATA  
AGTTTAATGGACAGATACCTGGTGGCTTAGGTGGACTAGCAAGACTAACA

>M6-PGSC0003DMG400031103-(rev)M6LRR-RLK\_244

AGTGGCATTATTTTTCAAGATTTTCATATTATAGCTAAACCCATTCTTGATTTGTAGTATCTTGTCTTTTG  
CATGTCTTGAGTAGCATACTATCCAAGATTTTCATATTATAGCTAAACC

>M6-PGSC0003DMG400031103-(rev)M6LRR-RLK\_2440

CTGATAATAAGTTTAATGGACAGATACCTGGTGGCTTAGGTGGACTAGCAAGACTAACAGATTTGGAAA  
TGGGAGGCAATTTCTTCTCTGGTAGTATTCTATTGAGCTTGGCTACCTTG

>M6-PGSC0003DMG400031103-(rev)M6LRR-RLK\_2501

TTTGAAATGGGAGGCAATTTCTTCTCTGGTAGTATTCTATTGAGCTTGGCTACCTTGGAACCTCTCAG  
ATTTCTCTGAATCTGAGTCACAATGCTCTCAATGGATCGATTCTTAGTGC

>M6-PGSC0003DMG400031103-(rev)M6LRR-RLK\_2562

ACTCTTCAGATTTCTCTGAATCTGAGTCACAATGCTCTCAATGGATCGATTCTTAGTGCCCTCGGGAACCT  
GCAGATGCTTGAAACATTGTACTTAAATGACAACCAGCTTATTGGTGAG

>M6-PGSC0003DMG400031103-(rev)M6LRR-RLK\_2623

TCGGGAACCTGCAGATGCTTGAAACATTGTACTTAAATGACAACCAGCTTATTGGTGAGATTCCAACCTC  
AATAGGGCAGTTGATGAGTCTGATAGTATGCAATCTTTCTAACAATAACC

>M6-PGSC0003DMG400031103-(rev)M6LRR-RLK\_2684

TCCAACCTCAATAGGGCAGTTGATGAGTCTGATAGTATGCAATCTTTCTAACAATAACCTTGTGGGATCA  
GTACCAAACACGCCTGCCTTTAAGAGGATGGACTCGAGCAACTTTGCTGG

>M6-PGSC0003DMG400031103-(rev)M6LRR-RLK\_2745

GTGGGATCAGTACCAAACACGCCTGCCTTTAAGAGGATGGACTCGAGCAACTTTGCTGGAAATGTTGGG  
TTATGCACGTCCGATTCCATCCACTGTGATCCTCCTCCGGCCCCTTGGATT

>M6-PGSC0003DMG400031103-(rev)M6LRR-RLK\_2806

ATGTTGGGTTATGCACGTCCGATTCCATCCACTGTGATCCTCCTCCGGCCCCTTGGATTGCTCCAAAGTCA  
AACTGGTTGAAACACGGTTCTTCTAGGCAAAAATAATTACTGCTGTTT

>M6-PGSC0003DMG400031103-(rev)M6LRR-RLK\_2867

TCCAAAGTCAAACCTGGTTGAAACACGGTTCTTCTAGGCAAAAATAATTACTGCTGTTTCTGCGACTGTT  
GGGATGATCTCTTTGGTATTGATTTTAGTTATATGTAGGATCATTAGAGG

>M6-PGSC0003DMG400031103-(rev)M6LRR-RLK\_2928

GCGACTGTTGGGATGATCTCTTTGGTATTGATTTTAGTTATATGTAGGATCATTAGAGGCAACAAAGCAG

CTTTTGTGTCCGTGGAAAATCAAGTAAAGCCGGATGACTTGAATGATCAT

>M6-PGSC0003DMG400031103-(rev)M6LRR-RLK\_2989

ACAAAGCAGCTTTTGTGTCCGTGGAAAATCAAGTAAAGCCGGATGACTTGAATGATCATTACTTTCCACG

AAAAGGGTTCACGTATCAGGACCTTGTCGATGCTACTGGAAATTTCTCAG

>M6-PGSC0003DMG400031103-(rev)M6LRR-RLK\_305

CTTGTCTTTTGCATGTCTTGAGTAGCATACTATCCAAGATTTTCATATTATAGCTAAACCCCATTTCTTGATT

TTGTAAACCTTTGGTGATTTGCATGTCTTGAGTGGCATGTTTTTGTG

>M6-PGSC0003DMG400031103-(rev)M6LRR-RLK\_3050

CTTTCCACGAAAAGGGTTCACGTATCAGGACCTTGTCGATGCTACTGGAAATTTCTCAGACAGCGCGATC

ATAGGAAGGGGAGCTTGTGGCACTGTCTACAGAGCTCATATGGCTGATGG

>M6-PGSC0003DMG400031103-(rev)M6LRR-RLK\_3111

AGCGCGATCATAGGAAGGGGAGCTTGTGGCACTGTCTACAGAGCTCATATGGCTGATGGTGAGTTTGT

GCAGTTAAAAAGCTGAAGCCACAAGGAGAAACCGCGAGTGTTGACAGCAGC

>M6-PGSC0003DMG400031103-(rev)M6LRR-RLK\_3172

AGTTTGTGTCAGTTAAAAAGCTGAAGCCACAAGGAGAAACCGCGAGTGTTGACAGCAGCTTCCAAGCT

GAATTATCTACACTTGGTAAGATAAATCACAGAAATATTGTCAAGCTATATG

>M6-PGSC0003DMG400031103-(rev)M6LRR-RLK\_3233

CCAAGCTGAATTATCTACACTTGGTAAGATAAATCACAGAAATATTGTCAAGCTATATGGTTTCTGCTAC

CATCAAGATTGCAATCTTCTCTTGTATGAGTACATGGGAAACGGAAGCCT

>M6-PGSC0003DMG400031103-(rev)M6LRR-RLK\_3294

TTCTGCTACCATCAAGATTGCAATCTTCTCTTGTATGAGTACATGGGAAACGGAAGCCTCGGGGAAGTAC

TTCATGGGAATAAGACAATAATTTACTAAATTGGAATAGCAGGTACAAA

>M6-PGSC0003DMG400031103-(rev)M6LRR-RLK\_3355

GGGAAGTACTTCATGGGAATAAGACAATAATTTACTAAATTGGAATAGCAGGTACAAAATTGCCTTAG

GAGCTGCTGAGGGACTGTGCTATCTGCACCATGACTGTAAGCCACATATCA

>M6-PGSC0003DMG400031103-(rev)M6LRR-RLK\_3416

TGCCTTAGGAGCTGCTGAGGGACTGTGCTATCTGCACCATGACTGTAAGCCACATATCATTACAGGGA

TATAAAATCGAACAAACATTTTGTGGACGAATTGCTTGAAGCACATGTAGG

>M6-PGSC0003DMG400031103-(rev)M6LRR-RLK\_3477

CACAGGGATATAAAATCGAACAAACATTTTGTGGACGAATTGCTTGAAGCACATGTAGGAGACTTTGGC  
TTGGCAAAGCTAATTGACTTCCCTTACTCAAATCCATGTCCGCGGTTGCT

>M6-PGSC0003DMG400031103-(rev)M6LRR-RLK\_3538

ACTTTGGCTTGGCAAAGCTAATTGACTTCCCTTACTCAAATCCATGTCCGCGGTTGCTGGTTCATACGGC  
TACATTGCCCTGGTAAGACCGGTGTTTAGGCAATTAACGATACTCT

>M6-PGSC0003DMG400031103-(rev)M6LRR-RLK\_3599

TTCATACGGCTACATTGCCCTGGTAAGACCGGTGTTTAGGCAATTAACGATACTCTTATTAGGATT  
ACTTACATAATACAGAAACAACTAAGTTCTAGTTTTTCTTTTTTCAGA

>M6-PGSC0003DMG400031103-(rev)M6LRR-RLK\_366

ATTTCTTGATTTTGTAAACCTTTGGTGATTTGCATGTCTTGAGTGGCATGTTTTGTGGTCATTAAGGTT  
AAAACAATTCAAGATTTCAATTTATCCTTTGCTTCTTGAAATTGGGTTG

>M6-PGSC0003DMG400031103-(rev)M6LRR-RLK\_3660

ATTAGGACTTACTTACATAATACAGAAACAACTAAGTTCTAGTTTTTCTTTTTTCAGAATATGCATACAC  
AATGAAAGTGACAGAGAAATGCGACATCTATAGTTATGGCGTTGTTTTG

>M6-PGSC0003DMG400031103-(rev)M6LRR-RLK\_3721

ATGCATACACAATGAAAGTGACAGAGAAATGCGACATCTATAGTTATGGCGTTGTTTTGTTGGAATTGA  
TTACTGGTAGGTCTCCAGTTCAACCCCTCGAACAGGGAGGCGATTTGGTGA

>M6-PGSC0003DMG400031103-(rev)M6LRR-RLK\_3782

GGAATTGACTTACTGGTAGGTCTCCAGTTCAACCCCTCGAACAGGGAGGCGATTTGGTGACTTGGGTAAG  
GAGATCAATTCATGAAGGAGTGGCACTAACTGAGCTTTTTGACAAAAGACT

>M6-PGSC0003DMG400031103-(rev)M6LRR-RLK\_3843

TGGGTAAGGAGATCAATTCATGAAGGAGTGGCACTAACTGAGCTTTTTGACAAAAGACTGGATTTAGT  
GTTGCAAGAACCAGAGAGGAGATGTCTCTAGTTCTCAAGATTGCTATGTTC

>M6-PGSC0003DMG400031103-(rev)M6LRR-RLK\_3904

ATTTTAGTGTTGCAAGAACCAGAGAGGAGATGTCTCTAGTTCTCAAGATTGCTATGTTCTGCACCAATAC  
ATCCCTGCCAATAGGCCTACAATGCGAGAAGTCATCGCCATGCTGATTG

>M6-PGSC0003DMG400031103-(rev)M6LRR-RLK\_3965

CACCAATACATCCCTGCCAATAGGCCTACAATGCGAGAAGTCATCGCCATGCTGATTGAAGCCCGGGA  
ATTTGTGTGCACTTCACCACCATCACCATCCTCCGAACTCCTCTGAGTGA

>M6-PGSC0003DMG400031103-(rev)M6LRR-RLK\_4026

GCCCGGGAATTTGTGTGCACTTCACCACCATCACCATCCTCCGAAACTCCTCTGAGTGAAGCTGATGCTA  
ATAAAGGTGCATAAAAACAACCTCCTCATCTTTCAATCTTTTCACTACAG

>M6-PGSC0003DMG400031103-(rev)M6LRR-RLK\_4087

CTGATGCTAATAAAGGTGCATAAAAACAACCTCCTCATCTTTCAATCTTTTCACTACAGTCAAACATCTCT  
ATAACAGTCATCCTCTATAACAACATTTCAATATAACAAACGGGTTTTTC

>M6-PGSC0003DMG400031103-(rev)M6LRR-RLK\_4148

AAACATCTCTATAACAGTCATCCTCTATAACAACATTTCAATATAACAAACGGGTTTTCTATGGAACCAAT  
TTTCATGTTATGTTACATTACATGTTCTCTATAACAACATTTTCGCTATA

>M6-PGSC0003DMG400031103-(rev)M6LRR-RLK\_427

CATTAAGGTTAAAACAATTCAAGATTTCAATTTATTCCTTTGCTTCTTGAAATTGGGTTGAGTTGTATACTG  
AGAGTTATGGGCCCTGGAATCTCAAACTTGCTTAATGGTATCTGTTTC

>M6-PGSC0003DMG400031103-(rev)M6LRR-RLK\_488

TTGTATACTGAGAGTTATGGGCCCTGGAATCTCAAACTTGCTTAATGGTATCTGTTTCTTGGTCTGCCAT  
TACCTCTGTTACAACCTTTTGGGCATTGCCATACTCATAAGTTTCCTAAT

>M6-PGSC0003DMG400031103-(rev)M6LRR-RLK\_549

GGTCTGCCATTACCTCTGTTACAACCTTTTGGGCATTGCCATACTCATAAGTTTCCTAATTTTCATCCATAAA  
AAAAATATTGACATGACTTTAGTGTAACCTAACAGCATGTCATTCAT

>M6-PGSC0003DMG400031103-(rev)M6LRR-RLK\_61

TCCTTCCATTCTGTAAAGTTCTAGTTGACTCTCTCCCTTTGTGGTCCTTTTCCATTTTCTTGCCTTATCAATC  
AATCAACTTTCTTAGCCAATTTTTTCTCTGTTTTCACATCCTTTTT

>M6-PGSC0003DMG400031103-(rev)M6LRR-RLK\_610

TCATCCATAAAAAAATATTGACATGACTTTAGTGTAACCTAACAGCATGTCATTCATGCTCTTTTATCC  
TTGGAAATGGCAAGTTATAGTAACTCTGCAATCCAACAGCATTGCTTT

>M6-PGSC0003DMG400031103-(rev)M6LRR-RLK\_671

TCTTTTATCCTTGGAATGGCAAGTTATAGTAACTCTGCAATCCAACAGCATTGCTTTTTGTGCTGTTGA  
TTCTTCTTTTCTTACTGGTTTTGCTGAATCTTTAAATGAAGAGGGACT

>M6-PGSC0003DMG400031103-(rev)M6LRR-RLK\_732

GTGCTGTTGATTCTTCTTTTCTTACTGGTTTTGCTGAATCTTTAAATGAAGAGGGACTTATTCTTTTGGAG

TTCAAAGAATCCCTTAATGATCCTGATAACAATCTTGAAAGTTGGAAT

>M6-PGSC0003DMG400031103-(rev)M6LRR-RLK\_793

TTCTTTTGGAGTTCAAAGAATCCCTTAATGATCCTGATAACAATCTTGAAAGTTGGAATTCTTCAAACCTG  
AATCCTTGCAAATGGGATGGTGTTAAGTGTAGCAAAAATGATCAGGTGA

>M6-PGSC0003DMG400031103-(rev)M6LRR-RLK\_854

TTCAAACCTGAATCCTTGCAAATGGGATGGTGTTAAGTGTAGCAAAAATGATCAGGTGATTTCTCTCAAT  
ATCGATAATCGTAACTTGTCTGGTAGTTTTTCTTCAAGAATTTGTGAACT

>M6-PGSC0003DMG400031103-(rev)M6LRR-RLK\_915

TCTCTCAATATCGATAATCGTAACTTGTCTGGTAGTTTTTCTTCAAGAATTTGTGAACTTCCTTACTTGACA  
GTATTGAATGTGTCATCAAATTTCAATTTCTGGTCAAATTCCTGATGAT

>M6-PGSC0003DMG400031103-(rev)M6LRR-RLK\_976

CTTACTTGACAGTATTGAATGTGTCATCAAATTTCAATTTCTGGTCAAATTCCTGATGATTTTCGCGTCGTGT  
CATAGTTTGGAGAAATTAACCTTTGTACCAATAGGTTCCATGGAGAGT

>M6-PGSC0003DMG400031228-(rev)M6LRR-RLK\_0

CAAACCTGCAGGAGTCTTAGGAACTGCAACTTGCAAGGAACAGTTCCTGATCTAAGCACAATACCACAC  
CTTCTTTACTTGTAAGCATACTTCATTGAGAAATTCCTGTGTCCTGTAAA

>M6-PGSC0003DMG400031228-(rev)M6LRR-RLK\_1037

GAGTCGAGCCAAATTTGTGTGCCTATTCCATTTTGTAGCTAGTCAGTACACATTTTGGATATGCATAGA  
AGGTATCCTGGAAAAAATAGTACAGTCAAGGAATAGTGTGTCCATTGTCA

>M6-PGSC0003DMG400031228-(rev)M6LRR-RLK\_1098

ATGCATAGAAGGTATCCTGGAAAAAATAGTACAGTCAAGGAATAGTGTGTCCATTGTCAACAAGGGTTT  
CCTATCTCTATACAGTTAATATATAACAAGGGATAATATGTCTGATGTTTG

>M6-PGSC0003DMG400031228-(rev)M6LRR-RLK\_1159

AAGGGTTTCCTATCTCTATACAGTTAATATATAACAAGGGATAATATGTCTGATGTTTGTGTTTGTTCGAGG  
TAATGTAGCATGTATTCTTTCCTCTTACTAAACCATGCCATGTCTGACT

>M6-PGSC0003DMG400031228-(rev)M6LRR-RLK\_122

ACATTTTGAAGCTTATGTTCTTGTGTTCTAACCTCTTGGAATGTTGATATCTGCTTAATAATTCTTATAT  
GCCATCTGCTTAATAATTCTTATATGCCAGATGTAGTTGAACTCATCT

>M6-PGSC0003DMG400031228-(rev)M6LRR-RLK\_1220

TTGTTTCGAGGTAATGTAGCATGTATTCTTTCCTCTTACTAAACCATGCCATGTCTGACTAGAAAAGGCCCC  
TTAGATGTAAACATATCAGATTGCCAGGCTGATCCAGTTGTTCTACTTT

>M6-PGSC0003DMG400031228-(rev)M6LRR-RLK\_1281

AAAAGGCCCTTAGATGTAAACATATCAGATTGCCAGGCTGATCCAGTTGTTCTACTTTGTGCAGGAACT  
TTCAACGTAATTTTCTCTCAGATATTTCCGGTAATCTTGATCCACCTCCA

>M6-PGSC0003DMG400031228-(rev)M6LRR-RLK\_1342

GCAGGAACTTTCAACGTAATTTTCTCTCAGATATTTCCGGTAATCTTGATCCACCTCCAAATGTCGATATT  
ATGTAAGACCTTATATCCGGTAGTCTTGTACATACATATTTGCGGACTT

>M6-PGSC0003DMG400031228-(rev)M6LRR-RLK\_1403

TGTCGATATTATGTAAGACCTTATATCCGGTAGTCTTGTACATACATATTTGCGGACTTACTTTTCAGTTCTT  
GGCTTTTATATTTAGATGTGGCGAATCAAGCTCCCCTAATTCAATTGC

>M6-PGSC0003DMG400031228-(rev)M6LRR-RLK\_1464

TTTCAGTTCTTGGCTTTTATATTTAGATGTGGCGAATCAAGCTCCCCTAATTCAATTGCTATCTAACTTTCA  
TTATCCTGTTTTGATAAGCTTCAAATTACAAAGTAATTCTGTGGAGT

>M6-PGSC0003DMG400031228-(rev)M6LRR-RLK\_1525

TCTAACTTTCATTATCCTGTTTTGATAAGCTTCAAATTACAAAGTAATTCTGTGGAGTCTTAGTTTCTATT  
TCAGATTTCTGTTATTCAACAGAACTACTATCATGAGGAAGGCAGGAA

>M6-PGSC0003DMG400031228-(rev)M6LRR-RLK\_1586

TAGTTTCTATTTTCAGATTTCTGTTATTCAACAGAACTACTATCATGAGGAAGGCAGGAAAACCTTGCTATA  
GAATATCCCCATGACAACATTTAGGATAGTTGCATAAACTGCCTTCATT

>M6-PGSC0003DMG400031228-(rev)M6LRR-RLK\_1647

CTTGCTATAGAATATCCCCATGACAACATTTAGGATAGTTGCATAAACTGCCTTCATTTGCTGTTTTCTT  
GCTAAACTCTTTCATCAGTGTAGAGATTTACTTCGAGTATCCATTAAT

>M6-PGSC0003DMG400031228-(rev)M6LRR-RLK\_1708

CTGTTTTCTGCTAAACTCTTTCATCAGTGTAGAGATTTACTTCGAGTATCCATTAATGAAGCTAGAGTA  
GTGAACCAACACAGTTTCAACTTCTTTATTTTTTTCATCGTTTCAAAA

>M6-PGSC0003DMG400031228-(rev)M6LRR-RLK\_1769

AGCTAGAGTAGTGAACCAACACAGTTTCAACTTCTTTATTTTTTTCATCGTTTCAAAACTTCATTTTTTGT  
CAGAAGATGGGTAGTTTTCTTGCTAGCAGTGCACCTTATATGGAGCTC



>M6-PGSC0003DMG400031228-(rev)M6LRR-RLK\_183

AATTCTTATATGCCATCTGCTTAATAATTCTTATATGCCAGATGTAGTTGAACTCATCTGCCACTCAATTTG  
TGCTAAATATAGAAAGTTAAATTTACAGCCAGTGGCAATTCATCTGAT

>M6-PGSC0003DMG400031228-(rev)M6LRR-RLK\_1830

TCATTTTTGTCAGAAGATGGGTAGTTTTCTTGCTAGCAGTGCACCTTATATGGAGCTCAAAAACAATGA  
GGTCAAATTCATATATGTGAATTTCTTCCATATGATATGGCAATATGAC

>M6-PGSC0003DMG400031228-(rev)M6LRR-RLK\_244

CACTCAATTTGTGCTAAATATAGAAAGTTAAATTTACAGCCAGTGGCAATTCATCTGATATAAAATTTCTCA  
TGTCACAGAGACCTTAGCAGAAACCAACTCACAGGAAATATACCCTCCA

>M6-PGSC0003DMG400031228-(rev)M6LRR-RLK\_2501

TTATTACAATTCTGGCATAACTTGCCTCTAAACCAGACAACCTAAGTTACATACTGAAGTGGTAACAA  
ACTTTCCAATTTGATGGAGAGATCATGCCTCAGCAATATCTTTCAAGCTG

>M6-PGSC0003DMG400031228-(rev)M6LRR-RLK\_2562

TGGTAACAAACTTTCCAATTTGATGGAGAGATCATGCCTCAGCAATATCTTTCAAGCTGTATATATTTAAT  
TCTAAAAGCAAATTGTTCAACTTCTTTAAATAAATTCCGGCTTCACCTA

>M6-PGSC0003DMG400031228-(rev)M6LRR-RLK\_2623

TATATTTAATTCTAAAAGCAAATTGTTCAACTTCTTTAAATAAATTCCGGCTTCACCTACTAACTTTATTTTT  
TTGAAGAGCAGCTTCACCTACTAACTTTATACATGTTTGTGTGCAGC

>M6-PGSC0003DMG400031228-(rev)M6LRR-RLK\_2684

AACTTTATTTTTTTGAAGAGCAGCTTCACCTACTAACTTTATACATGTTTGTGTGCAGCTGTGTGCGCCAT  
ATTTGCTGATTTTCATGAATAACATAAATAATGAGTTTGAGTTTTGTTTT

>M6-PGSC0003DMG400031228-(rev)M6LRR-RLK\_2745

TGTGCGCCATATTTGCTGATTTTCATGAATAACATAAATAATGAGTTTGAGTTTTGTTTTTAACCCATTTACT  
GGTACTTTAACGTGCAAATATTTTCAATGGCATAAAATCCCTACATAC

>M6-PGSC0003DMG400031228-(rev)M6LRR-RLK\_2806

ACCCATTTACTGGTACTTTAACGTGCAAATATTTTCAATGGCATAAAATCCCTACATACATTTTGCTTTATC  
ACTCCTTTATATTTCTGATTAAGTATCCATTAGGTGCGACACTTTAAC

>M6-PGSC0003DMG400031228-(rev)M6LRR-RLK\_2867

TTTGCTTTATCACTCCTTTATATTTCTGATTAAGTATCCATTAGGTGCGACACTTTAACTGAATAACTTTCA

GGCTTTATGGAAATCCTGTTTGTGGAAATGCAAATGAGCGCCAGATTA

>M6-PGSC0003DMG400031228-(rev)M6LRR-RLK\_2928

AATAACTTTCAGGCTTTATGGAAATCCTGTTTGTGGAAATGCAAATGAGCGCCAGATTACCCAATTTTGT

AAATCAAGAGATGGAGGTGAAGAGTATGGAGGCTTGAACAACTCTATTCC

>M6-PGSC0003DMG400031228-(rev)M6LRR-RLK\_2989

CAATTTTGTAATCAAGAGATGGAGGTGAAGAGTATGGAGGCTTGAACAACTCTATTCCAAGTTGTGCA

GCCCAGCTGCCTTGCACATGGATTTTGAACATGTCCCAGCATTAAATGGAT

>M6-PGSC0003DMG400031228-(rev)M6LRR-RLK\_305

AAATTTCTCATGTACAGAGACCTTAGCAGAAACCAACTCACAGGAAATATACCCTCCAATAAGCTGTCT

GATAATATCACAACCATGTAAGTTTCTGGTTAAGTGTGATACTGCTGAAA

>M6-PGSC0003DMG400031228-(rev)M6LRR-RLK\_3050

GTTGTGCAGCCCAGCTGCCTTGCACATGGATTTTGAACATGTCCCAGCATTAAATGGATGGCTGCTTTTG

TGCAGCACCTTTTGGAGTTGGTTTGCCTTAAAGAAGCCCTAGCATTTCAG

>M6-PGSC0003DMG400031228-(rev)M6LRR-RLK\_3111

CTGCTTTTGTGCAGCACCTTTTGGAGTTGGTTTGCCTTAAAGAAGCCCTAGCATTTCAGACTTTCCTCCAC

ATTATAGTGACTTTGAACAGTGGATAACAAAAAGTGTTAATTTGAATGA

>M6-PGSC0003DMG400031228-(rev)M6LRR-RLK\_3172

TTTCCTCCACATTATAGTGACTTTGAACAGTGGATAACAAAAAGTGTTAATTTGAATGATTATCAACTGCA

CATTGATTCGGTTGCATGGCAAAGCGGTCCTAGGCTTAGATTCTTTTTG

>M6-PGSC0003DMG400031228-(rev)M6LRR-RLK\_3233

ATCAACTGCACATTGATTCGGTTGCATGGCAAAGCGGTCCTAGGCTTAGATTCTTTTTGAAATTCCTCCCT

CCACGTGCAAATGACTCTGGAACCAATGATTTTGGCAAATTAATGACA

>M6-PGSC0003DMG400031228-(rev)M6LRR-RLK\_3294

ATTCTTCCCTCCACGTGCAAATGACTCTGGAACCAATGATTTTGGCAAATTAATGACAGCGAGATAGTA

CGGATCGCAAACAAGTTTGCCTTTTTTAATCTTACTGGAAGTGATATCTT

>M6-PGSC0003DMG400031228-(rev)M6LRR-RLK\_3355

GAGATAGTACGGATCGCAAACAAGTTTGCCTTTTTTAATCTTACTGGAAGTGATATCTTTGGCCCATATG

ACCTGCTCAATTTACTGCCATGGCGTATAATTCTGGTATGTCTCAAAT

>M6-PGSC0003DMG400031228-(rev)M6LRR-RLK\_3416

GCCCATATGACCTGCTCAATTTCACTGCCATGGCGTATAATTCTGGTATGTCTCCAAATCCATTATGTTCTT  
GCATAAGTAGGATATAATAATACATTAACATGTGGACATTTTCAGTTG

>M6-PGSC0003DMG400031228-(rev)M6LRR-RLK\_3477

ATTATGTTCTTGCATAAGTAGGATATAATAATACATTAACATGTGGACATTTTCAGTTGTGGTTCTGTAAT  
GATTCCTGAGGAATTTAAAGTAAAACCAATGTGAACAATAATAGAAAA

>M6-PGSC0003DMG400031228-(rev)M6LRR-RLK\_3538

GTTCTGTAATGATTTCTGAGGAATTTAAAGTAAAACCAATGTGAACAATAATAGAAAAAACAACGTG  
AATCTCGTTTGTGTTTTACAACCTTAGGTCATGCACGGAGAGTGGCAAAAAC

>M6-PGSC0003DMG400031228-(rev)M6LRR-RLK\_3599

ACAACGTGAATCTCGTTTGTGTTTTACAACCTTAGGTCATGCACGGAGAGTGGCAAAAACCTCAATTTTTTTT  
AGTTTAAATCTCTCTAGGGAGGAACAAGAACCCAAGGTTGAGATTAGCA

>M6-PGSC0003DMG400031228-(rev)M6LRR-RLK\_366

AAGCTGTCTGATAATATCACACCATGTAAGTTTCTGGTTAAGTGTGATACTGCTGAAATCTTTCCTGGTT  
TGATTCAGTCATCTTTAATCACACTTCCTTCTTCCCCCCCACCCCA

>M6-PGSC0003DMG400031228-(rev)M6LRR-RLK\_3660

AATTTTTTTTAGTTTAAATCTCTCTAGGGAGGAACAAGAACCCAAGGTTGAGATTAGCATGCAAGCCGA  
GAGAAACACCTTTATTGTAAAACCTGTTTCTTCAGTTCTAATTTTGTGTTT

>M6-PGSC0003DMG400031228-(rev)M6LRR-RLK\_3721

CAAGCCGAGAGAAACACCTTTATTGTAAAACCTGTTTCTTCAGTTCTAATTTTGTGTTTAAATGCCAAATAT  
TGGATACTTTTCAACTAGACTGGAAATCTGGAACCTTGTGCACCCGCA

>M6-PGSC0003DMG400031228-(rev)M6LRR-RLK\_3904

TTTTATCTTTACTGGTCATGCTAAGATAAAAGTTCTCTTTCCTATTGTGCTCCATTTTCGCTTCTGAAAATGT  
CTAGTTATATCGTTTACCCTGTGATATAGAACATGTTTTTCTTCTTGT

>M6-PGSC0003DMG400031228-(rev)M6LRR-RLK\_3965

TCTGAAAATGTCTAGTTATATCGTTTACCCTGTGATATAGAACATGTTTTTCTTCTTGTGCATAGAAGTATG  
CGAGTATGAAAATTCAATGAAATGGTCTAGATATCATGCATGCTTTGAA

>M6-PGSC0003DMG400031228-(rev)M6LRR-RLK\_4026

TAGAAGTATGCGAGTATGAAAATTCAATGAAATGGTCTAGATATCATGCATGCTTTGAAGCTTAGCATCC  
TCATGGACATGGTAACCTGACAGAGATGCTAGTAATCTCTTAGATACTCT

>M6-PGSC0003DMG400031228-(rev)M6LRR-RLK\_4087

TTAGCATCCTCATGGACATGGTAACCTGACAGAGATGCTAGTAATCTCTTAGATACTCTGTAAGGGTCAA  
GAGACTAAATTGACTACCTTAGTACAAAATCTTGATTAAGTAAAATCTTA

>M6-PGSC0003DMG400031228-(rev)M6LRR-RLK\_4148

AAGGGTCAAGAGACTAAATTGACTACCTTAGTACAAAATCTTGATTAAGTAAAATCTTAGGTGAACCATA  
TGGTACTTTTAAAATATGTGAATATCCCCATTTAGAAACTCAAGATGAAT

>M6-PGSC0003DMG400031228-(rev)M6LRR-RLK\_4209

TGAACCATATGGTACTTTTAAAATATGTGAATATCCCCATTTAGAAACTCAAGATGAATTGGCTACTTTTG  
TTTTATTTTTGCTGTAAAGAAGAATTTGTTAATGACGCAGAATCTGTGT

>M6-PGSC0003DMG400031228-(rev)M6LRR-RLK\_427

TTTCCTGGTTTGATTGAGTCATCTTTAATCACACTTCCTTCTCTTCCCCCCCACCCCAACTCTCTATCGATA  
TCTGTGGATAGGTGGTTGAATGGACATTAGTGTCTTAACACGCACTC

>M6-PGSC0003DMG400031228-(rev)M6LRR-RLK\_4270

GCTACTTTTGTTTTATTTTTGCTGTAAAGAAGAATTTGTTAATGACGCAGAATCTGTGTGAAGAAGCCTTA  
TAGAATCTTTGTAAGAAGAACAAGGATTTACTATTTTTTTCTTTCTATT

>M6-PGSC0003DMG400031228-(rev)M6LRR-RLK\_4331

AGAAGCCTTATAGAATCTTTGTAAGAAGAACAAGGATTTACTATTTTTTTCTTTCTATTTGAGATGTCTCA  
CAACACAGTTCTTGTCTGAATATAAATATACCATTGTTACCTTTCTTC

>M6-PGSC0003DMG400031228-(rev)M6LRR-RLK\_4392

AGATGTCTCACAAACACAGTTCTTGTCTGAATATAAATATACCATTGTTACCTTTCTTCAAAAAAATATAT  
GCTATCATATAAGAGAGCCATCAACTTTTTTGAAACTGATAAGAGAGCC

>M6-PGSC0003DMG400031228-(rev)M6LRR-RLK\_4453

AAAAATATATGCTATCATATAAGAGAGCCATCAACTTTTTTGAAACTGATAAGAGAGCCAATAACTTGCT  
CTGTTCTTGTCTTTCTTTGTGCTTTCTCAAGATCAAATAACAAATGTTTT

>M6-PGSC0003DMG400031228-(rev)M6LRR-RLK\_4514

TAACTTGCTCTGTTCTTGTCTTTCTTTGTGCTTTCTCAAGATCAAATAACAAATGTTTTCTTTCTTGCAGTC  
CTTTTTCTCCGTTGGGAGGAGAGGGAAGCAGAAAAACAGAGGCAC

>M6-PGSC0003DMG400031228-(rev)M6LRR-RLK\_4636

TGGTTGGAATTGTCTTAGGGTCCATATTTGCTGCAGCTGTGCTACTTATGGCCATAATATTTGTGTTGCTT

AAAATGCGGCGGAGGTTACACGTTTCAAAGATCAACCATGTGAGTTAA

>M6-PGSC0003DMG400031228-(rev)M6LRR-RLK\_4697

TGTGTTGCTTAAAATGCGGCGGAGGTTACACGTTTCAAAGATCAACCATGTGAGTTAATCTTCAGTTAT  
TTTATGTGACTTTTCCTCAGCTATGGGGAGTTTCTTCTCCATTTCTCTCA

>M6-PGSC0003DMG400031228-(rev)M6LRR-RLK\_4758

TTCAGTTATTTTATGTGACTTTTCCTCAGCTATGGGGAGTTTCTTCTCCATTTCTCTCATTACCCCCACTAG  
GACCTGCTGGTTTAGTAGACAATAGGTTTAACTTTTCTTTGGTAATCT

>M6-PGSC0003DMG400031228-(rev)M6LRR-RLK\_4819

CACCCCCACTAGGACCTGCTGGTTTAGTAGACAATAGGTTTAACTTTTCTTTGGTAATCTGTTGAATCTCCA  
AAATAGAGGACATGAAACCACATTCTTTGAGTGCTTCATGCATATAATG

>M6-PGSC0003DMG400031228-(rev)M6LRR-RLK\_488

TCTCTATCGATATCTGTGGATAGGTGGTTGAATGGACATTAGTGTCTTAACACGCACTCTTTTCTTTTTGA  
TGTTTGAGTAACTCGGTCTTGGTATCAGACCCTCAATAGTGAACCTAACT

>M6-PGSC0003DMG400031228-(rev)M6LRR-RLK\_4880

TGAATCTCCAAAATAGAGGACATGAAACCACATTCTTTGAGTGCTTCATGCATATAATGCAAACCTTGCA  
CCTGATAATTTCCAATTTCCATCTTCTGATAAACAAAAAGATGCCAAAAC

>M6-PGSC0003DMG400031228-(rev)M6LRR-RLK\_4941

AACTTTGCACCTGATAATTTCCAATTTCCATCTTCTGATAAACAAAAAGATGCCAAAACCATAAAATCTGT  
CTTCCTTCTTTAATTTTCTTGTTTAAGTTCTCTATTTAATCAAGAAAT

>M6-PGSC0003DMG400031228-(rev)M6LRR-RLK\_5002

TAAAATCTGTCTTCTTCTTTAATTTTCTTGTTTAAGTTCTCTATTTAATCAAGAAATAACAAGAATTGCC  
AGTGTTAACCATCTTTTCTATGTGGCAAATTATCTTTCTTAGTATGT

>M6-PGSC0003DMG400031228-(rev)M6LRR-RLK\_5063

CAAGAATTGCCAGTGTTAACCATCTTTTCTATGTGGCAAATTATCTTTCTTAGTATGTATATTTGTAATTT  
AGCTATGATACTGCTTGGTGTTTTACTTTTAAGTAGAGAGTATGGTGC

>M6-PGSC0003DMG400031228-(rev)M6LRR-RLK\_5124

ATTTGTAATTTAGCTATGATACTGCTTGGTGTTTTACTTTTAAGTAGAGAGTATGGTGCTTTAATTCCTCA  
CATGGACAGATAACTTTACGGTTTTATGGGAAGTTTGTGCATATTTATG

>M6-PGSC0003DMG400031228-(rev)M6LRR-RLK\_5185

TAATTCCTCACATGGACAGATAACTTTACGGTTTTATGGGAAGTTTGTGCATATTTATGAGTAAACTCTCT  
GGCAATGCCCCATCACCCCTTAAAACAAAAAGTGGAAAAGAAATAAATAG

>M6-PGSC0003DMG400031228-(rev)M6LRR-RLK\_5246

TAAACTCTCTGGCAATGCCCCATCACCCCTTAAAACAAAAAGTGGAAAAGAAATAAATAGGAAGTGTGTG  
CTGGGCAAGGGGCATGTATATCTAAGTAATACTCTTGTGTAGTGCTTCTG

>M6-PGSC0003DMG400031228-(rev)M6LRR-RLK\_5307

AGTGTGTGCTGGGCAAGGGGCATGTATATCTAAGTAATACTCTTGTGTAGTGCTTCTGCTATTTGTACA  
TTAATTAGACGATTATTTCTGTTCTTTTCTTAGCCAGATCAATTGATATT

>M6-PGSC0003DMG400031228-(rev)M6LRR-RLK\_5368

ATTTGTACATTAATTAGACGATTATTTCTGTTCTTTTCTTAGCCAGATCAATTGATATTCTTAAAGTGAACA  
AAGTTAGCTGAAGCCAACCTATTGTATCAAAGGTTCAATTTGCATTAAAG

>M6-PGSC0003DMG400031228-(rev)M6LRR-RLK\_5429

TAAAGTGAACAAAGTTAGCTGAAGCCAACCTATTGTATCAAAGGTTCAATTTGCATTAAAGTCATGCTACCA  
TCACCTAAGCTTTTTCTTTTCAATTTTATGTCAACTTTTCATGCTAA

>M6-PGSC0003DMG400031228-(rev)M6LRR-RLK\_549

TTCTTTTTGATGTTTGAGTAACTCGGTCTTGGTATCAGACCCTCAATAGTGAACCTAACTACTTTGATGATG  
ATTGCAGCATTCTGTCAGGAAATATGCTTAATGGTTCTATCCCTTCGAA

>M6-PGSC0003DMG400031228-(rev)M6LRR-RLK\_5490

ATGCTACCATCACCTAAGCTTTTTCTTTTCAATTTTATGTCAACTTTTCATGCTAAAGTTTTCAATGAAT  
ATCTGATTTTAAATAAATTGAACCATGTGGCGATGATGTATTTCTTG

>M6-PGSC0003DMG400031228-(rev)M6LRR-RLK\_5551

TTTTCAATGAATATCTGATTTTAAATAAATTGAACCATGTGGCGATGATGTATTTCTTGCTTAAACAACT  
TAGCCAGGACCACGTGGAACCTCATAGTGATATTCCTTTCAATTTCTTTTG

>M6-PGSC0003DMG400031228-(rev)M6LRR-RLK\_5612

TAAACAACTTAGCCAGGACCACGTGGAACCTCATAGTGATATTCCTTTCAATTTCTTTGTAGTACCAAAT  
TTCCAATGCGAATAGAAGGTGTTAAGGCATTGGGTTTTAAGGAATTAGA

>M6-PGSC0003DMG400031228-(rev)M6LRR-RLK\_5673

GTACCAAATTTCCAATGCGAATAGAAGGTGTTAAGGCATTGGGTTTTAAGGAATTAGAGGCAGCAACT  
AACAGTTTTAGCAGTGCTACTGAAATTGGCCAAGGAGGCTATGGGAAGGTC

>M6-PGSC0003DMG400031228-(rev)M6LRR-RLK\_5734

CAGCAACTAACAGTTTTAGCAGTGCTACTGAAATTGGCCAAGGAGGCTATGGGAAGGTCTACAAAGGC  
ACTTTAGCAGAGGGAACAATAGTGGCAATTAACGTGCACAGCAAGGCTCAT

>M6-PGSC0003DMG400031228-(rev)M6LRR-RLK\_5795

CAAAGGCACTTTAGCAGAGGGAACAATAGTGGCAATTAACGTGCACAGCAAGGCTCATTGCAGGGTG  
AAAAAGAGTTCTATACTGAGATAGAATTACTTTCACGTGTGCATCATCGAAA

>M6-PGSC0003DMG400031228-(rev)M6LRR-RLK\_5856

CAGGGTGAAAAAGAGTTCTATACTGAGATAGAATTACTTTCACGTGTGCATCATCGAAATCTTGTTTCCT  
TGGTGGGATACTGTAATGAAGGAAGTGAACAAGTAAGATTCTCCAAACTG

>M6-PGSC0003DMG400031228-(rev)M6LRR-RLK\_5917

TTGTTTCCTTGGTGGGATACTGTAATGAAGGAAGTGAACAAGTAAGATTCTCCAAACTGGAAAAATAAT  
ACACACACACAGACTAGTTCATGTTGCTATTCTGCATGCAGAGGGGAGAG

>M6-PGSC0003DMG400031228-(rev)M6LRR-RLK\_6039

GAGTATGTTCCGGTGAATAATTTCTATGATGTATCAGTTCAGCCACTTGTTGAATTCTGATTGCCAGTTC  
TGGTTGAATACCTAGGTCAAATTGAATTTTTTGCATATCCTTGATCAT

>M6-PGSC0003DMG400031228-(rev)M6LRR-RLK\_61

TACCACACCTTCTTTACTTGTAAGCATACTTCATTGAGAAATTCCTGTGCCTGTTAAACCACATTTTGAAG  
CTTATGTTCTTGTGTTCTAACCTCTTGGTAATGTTGATATCTGCTTA

>M6-PGSC0003DMG400031228-(rev)M6LRR-RLK\_610

TTTGATGATGATTGCAGCATTCTGTCAGGAAATATGCTTAATGGTTCTATCCCTTCGAACTTTTCTGTCCTT  
CCAAATCTGCAGAGGCTGTAAGGAGCTTCATTTGCTCAATCCTTGTTT

>M6-PGSC0003DMG400031228-(rev)M6LRR-RLK\_6100

TGCCAGTTCTGGTTGAATACCTAGGTCAAATTGAATTTTTTGCATATCCTTGATCATTTAGGATGCCTC  
ATTGCCGCTGTGCAGAAGCAATTAATCATAATGTCAATTACCTTGACT

>M6-PGSC0003DMG400031228-(rev)M6LRR-RLK\_6161

AGGATGCCTCATTGCCGCTGTGCAGAAGCAATTAATCATAATGTCAATTACCTTGACTACTTAGAGAAA  
TCCATTTGATATCACTCTAGATGCAAATGAAATGACCAGAATCACACAAA

>M6-PGSC0003DMG400031228-(rev)M6LRR-RLK\_6222

TTAGAGAAATCCATTTGATATCACTCTAGATGCAAATGAAATGACCAGAATCACACAAATGATAGTTGAA

TTGCAGTGCAAAGTTCAGACTTACTGATTCATCTGTAAAGTAAAATCAA

>M6-PGSC0003DMG400031228-(rev)M6LRR-RLK\_6283

ATAGTTGAATTGCAGTGCAAAGTTCAGACTTACTGATTCATCTGTAAAGTAAAATCAAGCAAAGCCTT  
CTGAGATATTATTTTCATCATACTTCTTTTTTTGTCACCAATTATTATCA

>M6-PGSC0003DMG400031228-(rev)M6LRR-RLK\_6344

AAAAGCCTTCTGAGATATTATTTTCATCATACTTCTTTTTTTGTCACCAATTATTATCACACGTTAAGTGAT  
TCAATTTGTGAGCATATCCAGTCTACAGTACTTGGATCACTGAATATT

>M6-PGSC0003DMG400031228-(rev)M6LRR-RLK\_6405

CGTTAAGTGATTCAATTTGTGAGCATATCCAGTCTACAGTACTTGGATCACTGAATATTAAGTTCAACCA  
AATTCCCATCTATCAGTAGGCAGTGGCTCATCAGTTACATCCCTCTTATA

>M6-PGSC0003DMG400031228-(rev)M6LRR-RLK\_6466

GTTCAACCAAATTCCCATCTATCAGTAGGCAGTGGCTCATCAGTTACATCCCTCTTATACTTGCGTAGTCT  
CTAGTCTGGTCACATTAGTGAAATGCATGTCTTCTGAAAAAGTAATCAA

>M6-PGSC0003DMG400031228-(rev)M6LRR-RLK\_6527

TGCGTAGTCTCTAGTCTGGTCACATTAGTGAAATGCATGTCTTCTGAAAAAGTAATCAAATCAAAAAGCA  
GATGGAAGGATAAGAACAGATATTATGTTTTGTGGGTTTTTATTCTACTT

>M6-PGSC0003DMG400031228-(rev)M6LRR-RLK\_6588

CAAAAAGCAGATGGAAGGATAAGAACAGATATTATGTTTTGTGGGTTTTTATTCTACTTTTGTAAATAGTT  
GGTTACATGTGCATGCAGATGTTGGTGTATGAGTTCATGCCAAATGGTTC

>M6-PGSC0003DMG400031228-(rev)M6LRR-RLK\_6649

GTAATAGTTGGTTACATGTGCATGCAGATGTTGGTGTATGAGTTCATGCCAAATGGTTCCTTGCATGATC  
TTCTAAAAGGTATGTGATGTATCCTTACTTTGCCTATGTTGTCATTTGAC

>M6-PGSC0003DMG400031228-(rev)M6LRR-RLK\_671

TTTCTGTCCTTCAAATCTGCAGAGGCTGTAAGGAGCTTCATTTGCTCAATCCTTGTTTCTTGATCCTCTGT  
CTGTTTCAAATTTTCATGTGATACTCTAATAAATGCAGTATTGACT

>M6-PGSC0003DMG400031228-(rev)M6LRR-RLK\_6710

TGCATGATCTTCTAAAAGGTATGTGATGTATCCTTACTTTGCCTATGTTGTCATTTGACTTTCTTTTGTTAG  
AATCAAGCACATCTATTCTCCTTATCACTTTTTTTTTCTGGTGTA

>M6-PGSC0003DMG400031228-(rev)M6LRR-RLK\_6771



TCTTTTGTTAGAATCAAGCACATCTATTCTCCTCTTATCACTTTTTTTTTCTGGTGTAGTAGTTCTTTCTG  
AAAAAGAGGGTGAAAGATATGTTCTCTAGTAAAGAATACTTGTATA

>M6-PGSC0003DMG400031228-(rev)M6LRR-RLK\_6832

AGTTCTTTTCTGAAAAGAGGGTGAAAGATATGTTCTCTAGTAAAGAATACTTGTATAGATGAAAGTAT  
TTCTAAATTATCTAATCACTCAGAGATTTTTTTTTCTGAAGTTTTACTT

>M6-PGSC0003DMG400031228-(rev)M6LRR-RLK\_6893

TGAAAGTATTTCTAAATTATCTAATCACTCAGAGATTTTTTTTTCTGAAGTTTTACTTCATTTTGACTCCTG  
AATCCTGACAGTCACTGTTAGTTTTCTACTTTCTTCACTTGTGTGG

>M6-PGSC0003DMG400031228-(rev)M6LRR-RLK\_6954

TTTTGACTCCTGAATCCTGACAGTCACTGTTAGTTTTCTACTTTCTTCACTTGTGTGGTCATCAACAAGCT  
TATCACATGGAACTTTATATTCTTAATTTTAGTCATGTGTCAGTTCCA

>M6-PGSC0003DMG400031228-(rev)M6LRR-RLK\_7015

ATCAACAAGCTTATCACATGGAACTTTATATTCTTAATTTTAGTCATGTGTCAGTTCCAATATGAATATCA  
AACAGGTATCTCCAAAATAAGATTATTAAGATATTATACTTATTTTA

>M6-PGSC0003DMG400031228-(rev)M6LRR-RLK\_7076

ATGAATATCAAACAGGTATCTCCAAAATAAGATTATTAAGATATTATACTTATTTTACAGCTAGATATG  
GGGAACGTCTGAGTCTTGGAACAAGGTTATACATTGCTTTAGGTGCTGC

>M6-PGSC0003DMG400031228-(rev)M6LRR-RLK\_7198

GGGAATCCTCTACCTCCATACTGAAGCTAATCCTCCAATAATCCATCGTGATGTCAAAGCAAATAACAT  
ACTGTTGGACTCTAAGTTCACCGCAAAGTCTCTGATTTTGGAAATCTCAA

>M6-PGSC0003DMG400031228-(rev)M6LRR-RLK\_7259

AAATAACATACTGTTGGACTCTAAGTTCACCGCAAAGTCTCTGATTTTGGAAATCTCAAAGCTTGCACCA  
TTACCTGATGCTGAAACGAGTGGAATGTATCAACTGTTGTGAAAGGAAC

>M6-PGSC0003DMG400031228-(rev)M6LRR-RLK\_732

TGATCCTCTGTCTGTTTCAAATTCATGTCGATACTCTAATAAATGCAGTATTGACACTACCTTTCCTTAA  
TTATTTTTCTTGTAGGTCCTCAACAATAATAGGTTAAGTGGTTTTGT

>M6-PGSC0003DMG400031228-(rev)M6LRR-RLK\_7320

CTTGACCATTACCTGATGCTGAAACGAGTGGAATGTATCAACTGTTGTGAAAGGAACTCCTGTAAGG  
CTTACTCATCTTATATAAACCTGCAATAGAAAATCTAGAAAATCACAATG

>M6-PGSC0003DMG400031228-(rev)M6LRR-RLK\_7381

CTGTAAGGCTTTACTCATCTTATATAAACCTGCAATAGAAAATCTAGAAAATCACAATGAGATAAGACCT  
GCAACTTGAGTAATCTAGGTAGCATGGCTACAGACCAGGAGAACTTCATT

>M6-PGSC0003DMG400031228-(rev)M6LRR-RLK\_793

CTTTCCTTAAATTATTTTTCTTGTAGGTCACTCAACAATAATAGGTTAAGTGGTTTTGTGCCAACCACCATT  
TGGGAGAATAAGACATTTTCCCAGGCGCAAACCTTAGATTGTAAGTG

>M6-PGSC0003DMG400031228-(rev)M6LRR-RLK\_854

CAACCACCATTTGGGAGAATAAGACATTTTCCCAGGCGCAAACCTTAGATTGTAAGTGTCTCATTGTA  
CCTTTTCTCTTATCAGTAATTTGATTTTCTTGTCTGTTGTCTGCTGC

>M6-PGSC0003DMG400031228-(rev)M6LRR-RLK\_915

TCATTTGTACCTTTTCTCTTATCAGTAATTTGATTTTCTTGTCTGTTGTCTGCTGCCCCACAATCTATTG  
GCCAATTAAGTTTTTAACTGTAAGATACAGACAAAACCTTTTTGTA

>M6-PGSC0003DMG400031228-(rev)M6LRR-RLK\_976

CACAATCTATTGGCCAATTAAGTTTTTAACTGTAAGATACAGACAAAACCTTTTTGTAGAGAGTCGAGC  
CAAATTTGTGTGCCTATTCCATTTTGTAGCTAGTCAGTACACATTTTGG

>M6-PGSC0003DMG400031283M6LRR-RLP\_0

AACAATAGTCTTAGTGGGACAGTTAATACAACCTTTTAGTATTGGAAACCAACTCCAATCATTAAACATGG  
ACGGGAATAAGCTAGAGGGGAAGGTCCCACCATCTTTGATCAATTGCAAA

>M6-PGSC0003DMG400031283M6LRR-RLP\_189

TCTGATTTGCGGATTTTAAAGTTTGAGATCAAATAAGTTGCATGGTCCCATAGAAGTTTCAAGGACCGAAA  
CCATTTTTTCTCAACTTCGAATTATGGATCTCTCATCCAACAGATTTAGT

>M6-PGSC0003DMG400031283M6LRR-RLP\_252

ACCGAAACCATTTTTTCTCAACTTCGAATTATGGATCTCTCATCCAACAGATTTAGTGGGAAGTTACCAGC  
AAGTCTTTTTGATAGTTTTCAAGCCATGAAGATAATTAATGAGAACATG

>M6-PGSC0003DMG400031283M6LRR-RLP\_315

TTACCAGCAAGTCTTTTTGATAGTTTTCAAGCCATGAAGATAATTAATGAGAACATGACAACCTCATATT  
GGGAGTTCAATATGATTCTTTGACTATTACAACAAAGGGATTGGATCTT

>M6-PGSC0003DMG400031283M6LRR-RLP\_378

TCATATTTGGGAGTTCAATATGATTCTTTGACTATTACAACAAAGGGATTGGATCTTCAATTTGTTAAAGT

TTTTGAAGCAAACATAGTTATCGATCTCTCTAACAATAGATTTGAAGGC

>M6-PGSC0003DMG400031283M6LRR-RLP\_441

GTTAAAGTTTTTGAAGCAAACATAGTTATCGATCTCTCTAACAATAGATTTGAAGGCTATATTCCACGTAC  
TATTGGAGATCTCATTGGGCTTTGTACATTGAATTTGTCTCATAATAAA

>M6-PGSC0003DMG400031283M6LRR-RLP\_504

CCACGTAATTTGGAGATCTCATTGGGCTTTGTACATTGAATTTGTCTCATAATAAATTGAAAGGTCATAT  
ACCAACATCACTGCACCAATTATCTGTAGTTGAGTCATTGGATCTCTCA

>M6-PGSC0003DMG400031283M6LRR-RLP\_567

GGTCATATAACCAACATCACTGCACCAATTATCTGTAGTTGAGTCATTGGATCTCTCATTTAATAAAAATCAG  
CGGAGAAATTCCACAACAACCTCGCATCCCTCACATTTCTTGCAGTCTTA

>M6-PGSC0003DMG400031283M6LRR-RLP\_63

AACATGGACGGGAATAAGCTAGAGGGGAAGGTCACCATCTTTGATCAATTGCAAATATTTGGGACA  
GCTTGATTTAGGTAATAATGAGTTGAATGACACATTCCCAAATGGTTGGGA

>M6-PGSC0003DMG400031283M6LRR-RLP\_693

TCTCACAAATCATCTTGTGGATGCATCCCCAAAGGAAAACAATTTGATACGTTTGAGAACAGTTCATAACA  
AAGAGAATGATAGACTATGTGGATTTCCACTCTCAAAGAATGTGTGGTG

>M6-PGSC0003DMG400031283M6LRR-RLP\_756

TCATACAAAGAGAATGATAGACTATGTGGATTTCCACTCTCAAAGAATGTGTGGTGATGATGGGGTAC  
CACAAGCGGCAACTCATTTTGGTCTTGATCAAGAAGAAGAAGGAGATTCAT

>M6-PGSC0003DMG400031283M6LRR-RLP\_819

GGGTACCACAAGCGGCAACTCATTTTGGTCTTGATCAAGAAGAAGAAGGAGATTCATCAATTGTCAATT  
GGCAGGCAGTTCTTATGGGCTATGGTTGTGGATTAGTCATCGTATTGTTTG

>M6-PGSC0003DMG400031283M6LRR-RLP\_874

ATCAATTGTCAATTGGCAGGCAGTTCTTATGGGCTATGGTTGTGGATTAGTCATCGTATTGTTTGAATA  
TACATAATGTTTGAACACGATATCCATCATGGTTTTCGAGGTTGTTTGA

>M6-PGSC0003DMG400031320-(rev)M6LRR-RLP\_882

CACAGGGTGACCTGTTCTATTGTCTTCCCTGAATGTGCGATTCCAGGTGGTTTAAGCATCAGAGTGTTG  
ATGAAAAGATATTGTTCAAACCTGCCATGAATTGGTATAATGATAAGTTC

>M6-PGSC0003DMG400031446-(rev)M6LRR-RLP\_753

AGCGAGGTCAAAGAATTACAGAAGAAGAAATAATCGCTTCTAGACAAGTACCAGTAAAGAAGAATTT  
GATTCAGAACTTCAGGTATTCATGCTAAGCTTTACACTAATGTTTTTTAG

>M6-PGSC0003DMG400031451-(rev)M6LRR-RLP\_1064

AAGAATCATTGAAGAACTGGAACACAAAACATCATGCGAAGGAGAAAGAAGCAGCGAGGTCAAAG  
AATTACAGAAGAAGAAATAATCGCTTCTAGACAAGTACCAGTAAAGAAGAAT

>M6-PGSC0003DMG400031451-(rev)M6LRR-RLP\_504

TTGAAGCTTGAAGTTGTGAAAATTTGTCTTTGTACACAGTTATCGATCTTTCAAACAACAAATTTGAAGG  
ACATATACCTAGTGTCTAGGAGATCTTATTGCGATTCGGGTACTTAAT

>M6-PGSC0003DMG400031486-(rev)M6OtherRLKTM\_0

ATTGTAGGTGTAGTTTTAGGTACAGCGCTTGTTCATTATTGTCTTCTCACTTTATAAGCTTTATTTGACA  
AGTAGAAATGAAAGAGAGAGTCGAGTTAGACTTGAAAAGTTTTTGAA

>M6-PGSC0003DMG400031802M6RLKmalectin\_0

TTAATAGTGATATAGTCCTACCATAATACATTATCATATTCTTAACCTTTTTCTCTCTTTCAATTTAGAA  
ACAAAATTTAATAATCATTTTTTAAGAAAAAGAATTAGCTACTCC

>M6-PGSC0003DMG400031802M6RLKmalectin\_1037

ATTACAAGGAGCAGTTTTGGGAACAATGGATCAATTATCAAGTAAGTTTGTTACCTATTTGGACCTAAA  
GTTGTTAGCTTTGACTAAAAAAGATTGCTTTTGATTTGATTAAGTTGGTA

>M6-PGSC0003DMG400031802M6RLKmalectin\_1098

GGACCTAAAGTTGTTAGCTTTGACTAAAAAAGATTGCTTTTGATTTGATTAAGTTGGTATTTTTAAGTTCT  
GATTATAATTCCTGAATTTTGCATGCAATTCAAATACATTTACAGTTT

>M6-PGSC0003DMG400031802M6RLKmalectin\_1159

TTTAAGTTCTGATTATAATTCCTGAATTTTGCATGCAATTCAAATACATTTACAGTTTATGTAGAAGTGA  
ATCCCAATTCAGGTGTTGAAATGATTAGCAATTTATGTATTTCAATCCC

>M6-PGSC0003DMG400031802M6RLKmalectin\_122

AAATGGCAGCAAAGTGAAGCAGGCTGACCTGGTTCATTCCCGCTCTCTCCTCCAAAAACAATGGCA  
TTAATCCAACCTTTGATTCTTTCTCTTACCAACTTCACCTCTCTTTCTCC

>M6-PGSC0003DMG400031802M6RLKmalectin\_1220

GTAGAAGTGAATCCCAATTCAGGTGTTGAAATGATTAGCAATTTATGTATTTCAATCCCTATTGATCATCG  
ACTTGTGCCTGAACTTTAAGATTTTAGAAGTTCTTTCAACTTTCAATAT

>M6-PGSC0003DMG400031802M6RLKmalectin\_1281

TTGATCATCGACTTGTGCCTGAACTTTAAGATTTTAGAAGTTCTTTCAACTTTCAATATAGAATCTGCTGT  
AATTTGGTTTAACTAGTCTGAATAACTCTTTTGATCACAATGTGAATTG

>M6-PGSC0003DMG400031802M6RLKmalectin\_1342

AATCTGCTGTAATTTGGTTTAACTAGTCTGAATAACTCTTTTGATCACAATGTGAATTGAAACCTTGGAGG  
CAAAGTTCTTTCTAGTGCTCATTGTAATAGGTTATGAACTGCAGCAGA

>M6-PGSC0003DMG400031802M6RLKmalectin\_1403

ACCTTGGAGGCAAAGTTCTTTCTAGTGCTCATTGTAATAGGTTATGAACTGCAGCAGAATCTATCTTATT  
CGTGTTTCTCCTAAATTTATTACAAGGAAGATAGAAAAATGGCTAGGCA

>M6-PGSC0003DMG400031802M6RLKmalectin\_1464

CTATCTTATTCGTGTTTCTCCTAAATTTATTACAAGGAAGATAGAAAAATGGCTAGGCATGATTTATGCTC  
TTTGTACTAACCAGATAACAGCCTTTGTGAGCATATCTTTTTGAGCGTG

>M6-PGSC0003DMG400031802M6RLKmalectin\_1525

ATTTATGCTCTTTGTACTAACCAGATAACAGCCTTTGTGAGCATATCTTTTTGAGCGTGTTCTGAAAATT  
GTTCTCAAGCATATCTAAAGCAAGAAAATTACCACCCTTAATATACATA

>M6-PGSC0003DMG400031802M6RLKmalectin\_1586

CCTGAAAATTGTTCTCAAGCATATCTAAAGCAAGAAAATTACCACCCTTAATATACATAGTTGCTAAGCT  
GTCTGAATGCAAATATACTCGACTCTATTTGGTTACCAGTTTTATAGTGG

>M6-PGSC0003DMG400031802M6RLKmalectin\_1647

TGCTAAGCTGTCTGAATGCAAATATACTCGACTCTATTTGGTTACCAGTTTTATAGTGGTTGTTAGATGAA  
TTAGTATCTGATTATATCATCCATGTTTAAACAAACGTGTTTCTTTTGG

>M6-PGSC0003DMG400031802M6RLKmalectin\_1708

GTTAGATGAATTAGTATCTGATTATATCATCCATGTTTAAACAAACGTGTTTCTTTTGGTTATGTTTATCAT  
AACTTCAAGCATTTTAACTGCCAGATATCCTGACGATGAATTTGATC

>M6-PGSC0003DMG400031802M6RLKmalectin\_1769

ATGTTTATCATAACTTCAAGCATTTTAACTGCCAGATATCCTGACGATGAATTTGATCGTTACTGGGAGC  
CCTATGGACAACATTCTCCTGCAGAAAGTTTCAGTCATGTTTCTGTTTC

>M6-PGSC0003DMG400031802M6RLKmalectin\_1830

TACTGGGAGCCCTATGGACAACATTCTCCTGCAGAAAGTTTCAGTCATGTTTCTGTTTCTGGTATCTGGA

ATCACCCCCCGGCAAAGTATTTTCGGACACGGTTAACAGTACCTAAGCCT

>M6-PGSC0003DMG400031802M6RLKmalectin\_1891

GTATCTGGAATCACCCCCCGGCAAAGTATTTTCGGACACGGTTAACAGTACCTAAGCCTGAAGCTATGG  
AGTTATTATGGCCTCCAGCACCTCTCCCAAACGCAACGTATTACATAGCTC

>M6-PGSC0003DMG400031802M6RLKmalectin\_1952

AGCTATGGAGTTATTATGGCCTCCAGCACCTCTCCCAAACGCAACGTATTACATAGCTCTTTACTTTGCTG  
ATGATCAAATTCATTCTCAGGAAGAACTTTCAACATAAGCATAAATGA

>M6-PGSC0003DMG400031802M6RLKmalectin\_2013

TACTTTGCTGATGATCAAATTCATTCTCAGGAAGAACTTTCAACATAAGCATAAATGATATATTGTTTTA  
TCCCAACCTTAATGTTGCTCCGGCTGGCATGGTTGTGTTTGCAAGTCAG

>M6-PGSC0003DMG400031802M6RLKmalectin\_2074

TATTGTTTTATCCCAACCTTAATGTTGCTCCGGCTGGCATGGTTGTGTTTGCAAGTCAGTGGCCTCTGTCT  
GGTATTACAAAGATAACTTTAACTCCGGTGATTGGATCAAGTATTGGTC

>M6-PGSC0003DMG400031802M6RLKmalectin\_2135

GCCTCTGTCTGGTATTACAAAGATAACTTTAACTCCGGTGATTGGATCAAGTATTGGTCCGTTGATTAAT  
GCAGGAGAGGTTTTGAAGTGTTGCCCTTGAGGAAAACTCATACTCG

>M6-PGSC0003DMG400031802M6RLKmalectin\_2196

TTGATTAATGCAGGAGAGGTTTTGAAGTGTTGCCCTTGAGGAAAACTCATACTCGAGACGGTAAT  
CTGCTTTTCTTGCTTCTAATATAGTGCTTGGATTAGCATGAGCAGTCCTCT

>M6-PGSC0003DMG400031802M6RLKmalectin\_2257

ACGGTAATCTGCTTTTCTTGCTTCTAATATAGTGCTTGGATTAGCATGAGCAGTCCTCTAGGATTTCTTTTT  
ACCTCATTTTCTGTTGATTAATTACCTCTGCTACATCAATGTGATATA

>M6-PGSC0003DMG400031802M6RLKmalectin\_2318

GATTTCTTTTACCTCATTTTCTGTTGATTAATTACCTCTGCTACATCAATGTGATATATTTCTTACTGCAGT  
GATAGCTCTGGAAAATTGATGGAGAGCTTCAAGAATCCTCCCCCAG

>M6-PGSC0003DMG400031802M6RLKmalectin\_2379

TCTTACTGCAGTGATAGCTCTGGAAAATTGATGGAGAGCTTCAAGAATCCTCCCCCAGATTGGAATGG  
TGATCCATGTTTACCCCTCAATACCAATGGACTGGAGTTACATGTGCTGG

>M6-PGSC0003DMG400031802M6RLKmalectin\_244

ATTTTCTATTCTTTTCTTCCTTAACTCACCCAAACGACTCATTCAACTCCACTCCACCTAAAATCAACCTTTT  
TTTCCTTCTCAAATCATCACATGACTCTCTGTTTCTTCAATCATCA

>M6-PGSC0003DMG400031802M6RLKmalectin\_2440

TGGAATGGTGATCCATGTTTACCCCTCAATACCAATGGACTGGAGTTACATGTGCTGGAGGATCACGA  
ATTCTGTACTTCTTTGTGAGTTCAGATGTCTCTTACTCCATTAACCTCA

>M6-PGSC0003DMG400031802M6RLKmalectin\_2501

GATCACGAATTCGTGTTACTTCTTTGTGAGTTCAGATGTCTCTTACTCCATTAACCTCAAACCTCTCCCATGC  
CACCTGCCTCATGAATAAGAAAAATGGGAAAAATGAATACCTTACCTT

>M6-PGSC0003DMG400031802M6RLKmalectin\_2562

CTCTCCCATGCCACCTGCCTCATGAATAAGAAAAATGGGAAAAATGAATACCTTACCTTACCCCAACCCA  
AATTACGATTGGCCAACCTGTAACTTGTGTTCTTTCTCCTTTGTCTGC

>M6-PGSC0003DMG400031802M6RLKmalectin\_2623

CCCAACCCAAATTACGATTGGCCAACCTGTAACTTGTGTTCTTTCTCCTTTGTCTGCAGAAACCTAACA  
AGCATGGGTCTTTCTGGATCAATTCACCTAGCATTGCCAGATTGACAG

>M6-PGSC0003DMG400031802M6RLKmalectin\_2684

AAACCTAACAAGCATGGGTCTTTCTGGATCAATTCACCTAGCATTGCCAGATTGACAGCATTGAATGGC  
ATGTAAGTGCATATTAGTTTCTTAGTGCTCATATATTGATGGATGCAAAT

>M6-PGSC0003DMG400031802M6RLKmalectin\_2745

TTGAATGGCATGTAAGTGCATATTAGTTTCTTAGTGCTCATATATTGATGGATGCAAATAGATTTCTTATA  
AGTCTCCTACTTATCACAGATGGCTTGC GGATAATAATTTGACGGGATC

>M6-PGSC0003DMG400031802M6RLKmalectin\_2806

ATTTCTTATAAGTCTCCTACTTATCACAGATGGCTTGC GGATAATAATTTGACGGGATCTATCCCAGATTT  
GAGCTCATTGAGTATCCTGGAGACTCTGTAAGTAAAACCTTTGGTTTCT

>M6-PGSC0003DMG400031802M6RLKmalectin\_2867

TCCCAGATTTGAGCTCATTGAGTATCCTGGAGACTCTGTAAGTAAAACCTTTGGTTTCTTTTGTCTTCTTC  
AAAATTGCTGTTGCAATAATGATCTTTCTAATTATAGCCCAAGCTTTT

>M6-PGSC0003DMG400031802M6RLKmalectin\_2928

TGTTCTTCTTCAAATGCTGTTGCAATAATGATCTTTCTAATTATAGCCCAAGCTTTTGTGAAAAAGTTG  
GGAAAAAAGTTGTGTAATTAAGTGTGTCTATTCTAATAACTCTCG

>M6-PGSC0003DMG400031802M6RLKmalectin\_2989

GAAAAAGTTGGGAAAAAAAAAAGTTGTGTAATTAAGTGTGTCTATTCTAATACTCTCGTCTTTTATTCA  
GACACTTGAAGACAATCAGCTTAGTGGAGAAATCCGCCTTCTCTTGG

>M6-PGSC0003DMG400031802M6RLKmalectin\_305

AATCAACCTTTTTTCTTCTCAAATCATCACATGACTCTCTGTTTCTTCAATCATCATCATTAAACCATGTC  
TTTCTTCTATTTCTCCTTCTTCTCTCCCTTTTTATCTTCCCTTCTG

>M6-PGSC0003DMG400031802M6RLKmalectin\_3050

TTTTATTTAGACTTGAAGACAATCAGCTTAGTGGAGAAATCCGCCTTCTTGGAAACATTATGA  
GCCTTAATGAAATGTAAGTTCGTCTTTCCATAATAAAACAAAATGAGTAG

>M6-PGSC0003DMG400031802M6RLKmalectin\_3111

ACATTATGAGCCTTAATGAAATGTAAGTTCGTCTTTCCATAATAAAACAAAATGAGTAGATACATAATGG  
ATTTTGGCCCCCTAAGTTTGCATAGATTTCAATTAGTAATCTGCAACACT

>M6-PGSC0003DMG400031802M6RLKmalectin\_3172

ACATAATGGATTTTGGCCCCCTAAGTTTGCATAGATTTCAATTAGTAATCTGCAACACTTCTGTTTTACAC  
AATCATAGTTTCCCTATGATGTATTATAAGTACACTTTTTCTCAAGTAT

>M6-PGSC0003DMG400031802M6RLKmalectin\_3233

TGTTTTACACAATCATAGTTTCCCTATGATGTATTATAAGTACACTTTTTCTCAAGTATAGTAGCCCTACGT  
CGCTAGCTAGTATAAGCACAGTTTCTATAACACCTCAACGGATTGTC

>M6-PGSC0003DMG400031802M6RLKmalectin\_3294

TAGCCCTACGTCGCTAGCTAGTATAAGCACAGTTTCTATAACACCTCAACGGATTGCTAGATCTTTTCT  
CTGTCGGAAAGTGGGTGGTGGTGGTACACAGCGTCATTAGGCACATGCT

>M6-PGSC0003DMG400031802M6RLKmalectin\_3355

GATCTTTTCTCTGTTCGAAAGTGGGTGGTGGTGGTACACAGCGTCATTAGGCACATGCTAAGCAAGGGA  
ATTAGGATAGCTGGATCAACAAACAGGTGGATGTGGCTATGCAGCACGGAA

>M6-PGSC0003DMG400031802M6RLKmalectin\_3416

GCAAGGGAATTAGGATAGCTGGATCAACAAACAGGTGGATGTGGCTATGCAGCACGGAAATTAATAAG  
TACCTCAAATAGTGTCTCTTAAGTAGTTTTCTTGGTATAGAGATCATTTT

>M6-PGSC0003DMG400031802M6RLKmalectin\_3477

AACTAAGTACCTCAAATAGTGTCTCTTAAGTAGTTTTCTTGGTATAGAGATCATTTTCAAAAATGGTTG



AAGCAGGTTTTAGGAAAATTTGTGTCAGATACTTAAATTGATGGATGGT

>M6-PGSC0003DMG400031802M6RLKmalectin\_3538

AAAATGGTTGAAGCAGGTTTTAGGAAAATTTGTGTCAGATACTTAAATTGATGGATGGTAGAGCAGCCA  
TTGATCTCTTTAGTGTGAGAATCCAAGTCAATTCGAGGTTTTATCACT

>M6-PGSC0003DMG400031802M6RLKmalectin\_3599

AGCAGCCATTGATCTCTTTAGTGTGAGAATCCAAGTCAATTCGAGGTTTTATCACTTACGAGTCATTA  
CCTTGAGCACAACAAGCAAAAAGGTACTGCTTGGAAATATGTCTAGGCG

>M6-PGSC0003DMG400031802M6RLKmalectin\_366

ATTAACCATGTCTTTCTTCTATTTCTCCTTCTCTCCCTTTTTATCTCCCTTCTGTTTCTCAATCCTTTAG  
AGGTAAACCCCTTTTCCCATTTAATCAACCCCTTTTCAAAAATT

>M6-PGSC0003DMG400031802M6RLKmalectin\_3660

CGAGTCATTACCTTGAGCACAACAAGCAAAAAGGTACTGCTTGGAAATATGTCTAGGCGCCGAGAAAG  
GACTACTATCCAACTCATGGTTAATGAGAGATGTACTTAGTGACCTTTGTA

>M6-PGSC0003DMG400031802M6RLKmalectin\_3721

GAGAAAGGACTACTATCCAACTCATGGTTAATGAGAGATGTACTTAGTGACCTTTGTATTCATCTGCCA  
CCTAGTTCTAATATTTAGACTACTGCAAAAATTTATGAGTACATGAGAAAT

>M6-PGSC0003DMG400031802M6RLKmalectin\_3782

CATCTGCCACCTAGTTCTAATATTTAGACTACTGCAAAAATTTATGAGTACATGAGAAATAGGATCACAGA  
GTTTAACCGATAGTAGTTCTAGTTTCGGGATGCAAGTGGTGAGGCTGTTA

>M6-PGSC0003DMG400031802M6RLKmalectin\_3843

GATCACAGAGTTTAACCGATAGTAGTTCTAGTTTCGGGATGCAAGTGGTGAGGCTGTTAGGTTGAATGA  
TAGTTGTAAACAAAGAAAGCAATGAGCTAGCTTACCACAGCTGTACATAG

>M6-PGSC0003DMG400031802M6RLKmalectin\_3904

TTGAATGATAGTTGTAAACAAAGAAAGCAATGAGCTAGCTTACCACAGCTGTACATAGCTCAAATTATT  
CTTGTTGCTTCAGCAACAGGATCTCTATTGAGCGAAATCACCATTAGAG

>M6-PGSC0003DMG400031802M6RLKmalectin\_3965

CAAATTATTCTTGTTGCTTCAGCAACAGGATCTCTATTGAGCGAAATCACCATTAGAGCCCACGCTATA  
ATACTCATTTAATAGAGCTTCCACTACAAATCACTCATTTGATCAGAGCT

>M6-PGSC0003DMG400031802M6RLKmalectin\_4026

CACGCTATAATACTCATTTAATAGAGCTTCCACTACAAATCACTCATTTGATCAGAGCTCATAGAAGCTAT  
TGTATGAAAAGCTAATGTTCTAAAGTCATTACCTTGACTGCTTTAGACA

>M6-PGSC0003DMG400031802M6RLKmalectin\_4087

TAGAAGCTATTGTATGAAAAGCTAATGTTCTAAAGTCATTACCTTGACTGCTTTAGACATAACTTTGCTCA  
TAGAATTTCAATTCACAGGCACTCGTTCTGTTTTCTTTCTAAGAGACC

>M6-PGSC0003DMG400031802M6RLKmalectin\_4148

ACTTTGCTCATAGAATTTCAATTCACAGGCACTCGTTCTGTTTTCTTTCTAAGAGACCAAATAGAGATA  
TATTAATGATATCAAATGCGATCGAGGAACTTTCTTGATGTTGTATATG

>M6-PGSC0003DMG400031802M6RLKmalectin\_4209

AATAGAGATATATTAATGATATCAAATGCGATCGAGGAACTTTCTTGATGTTGTATATGCTCATATGCTG  
AGGTAAAGTTAAATGACACATTATTATTTTTGTTGCAGCTTCTTGCAGAA

>M6-PGSC0003DMG400031802M6RLKmalectin\_427

TCTCAATCCTTTAGAGGTAAACCCCTTTTCCCCATTTAATCAACCCCTTTTCAAAAATTTGATCTTTTTTTTCA  
AGATTTCAACTTTTCTTGTTTTTTTTTTCAGGTGTTTTGATTGATTG

>M6-PGSC0003DMG400031802M6RLKmalectin\_4270

CATATGCTGAGGTAAAGTTAAATGACACATTATTATTTTTGTTGCAGCTTCTTGCAGAACAATAATTTATC  
TGGCCAGATACCAAGCAATCTTCTCGGAAAACCAACGTTGAATCTCAGG

>M6-PGSC0003DMG400031802M6RLKmalectin\_4331

ATAATTTATCTGGCCAGATACCAAGCAATCTTCTCGGAAAACCAACGTTGAATCTCAGGTAATGAATCAT  
TCATTAGCGATAATCTTTTCGTTGTTTTGCCTTTTGCTTTTTGTTTCGAA

>M6-PGSC0003DMG400031802M6RLKmalectin\_4392

ATGAATCATTATTAGCGATAATCTTTTCGTTGTTTTGCCTTTTGCTTTTTGTTTCGAATATTAATCAAATT  
GCTCTGTTGCTTTAATTGTAGAACCACTCCTGGGAATCCATTGTTGTC

>M6-PGSC0003DMG400031802M6RLKmalectin\_4453

TTAATCAAATTGCTCTGTTGCTTTAATTGTAGAACCACTCCTGGGAATCCATTGTTGTCACAGCCCCCTAT  
ATGAGGAGATTGTCCTTGCTACTTTGGACATTGAGAAGTATAAAATATG

>M6-PGSC0003DMG400031802M6RLKmalectin\_4514

AGCCCCATATGAGGAGATTGTCCTTGCTACTTTGGACATTGAGAAGTATAAAATATGCAGTTTTTCGAC  
ATTAGATTTCAGAACCTCCAGTTCATTTTTCTCAATATTTTTGAATTTTT

>M6-PGSC0003DMG400031802M6RLKmalectin\_4575

GTTTTCGACATTAGATTTTCAGAACCTCCAGTTCATTTTTCTCAATATTTTTGAATTTTTGGTGAAAAGAAAA  
ATCTTCAAAGCTTACTATTTTTGGAAGCTCCGGAATACACTCACCAAGAC

>M6-PGSC0003DMG400031802M6RLKmalectin\_4636

TGAAAAGAAAAATCTTCAAAGCTTACTATTTTTGGAAGCTCCGGAATACACTCACCAAGACTAACTATTCAA  
AATGGTTTGCCAGCACATTGTCTGCCCAAGTAGTTTAGTAAAATGGAATT

>M6-PGSC0003DMG400031802M6RLKmalectin\_4697

ACTATTCAAATGGTTTGCCAGCACATTGTCTGCCCAAGTAGTTTAGTAAAATGGAATTTTTGCTGTAATTT  
TTTTGTGTGTCCATAGCTGTATGTACAGTCATTCAAGGTAAGTCAAAAA

>M6-PGSC0003DMG400031802M6RLKmalectin\_4758

GCTGTAATTTTTTTGTGTGTCCATAGCTGTATGTACAGTCATTCAAGGTAAGTCAAAAAAGTTGTGTTTTTG  
ATTCATATATACAGAAAAGTCAATTGTATACACATGTTTGTAAGTGTGTT

>M6-PGSC0003DMG400031802M6RLKmalectin\_4798

ATTCAAGGTAAGTCAAAAAAGTTGTGTTTTTGATTATATACAGAAAAGTCAATTGTATACACATGTTTG  
TAACTTGTATTATTGAAGTGATGCAAGAGCTTTTGTGTTGATTGTGCG

>M6-PGSC0003DMG400031802M6RLKmalectin\_488

ATCTTTTTTTCAAGATTTCAACTTTTCTGTTTTTTTTTTTTCAGGTGTTTTGATTGATTGTGGTGCTGTAGTTG  
ATTCTGTAGTTAATGAGTAGAATTGGGTGTCGGATTCTGGTTATGTA

>M6-PGSC0003DMG400031802M6RLKmalectin\_549

GTGCTGTAGTTGATTCTGTAGTTAATGAGTAGAATTGGGTGTCGGATTCTGGTTATGTATCAGCAGGAA  
AACCCAAGAATCTTACTGTTGATGTTCTTGATTATACACTCTCTACTGTCC

>M6-PGSC0003DMG400031802M6RLKmalectin\_61

TTCAATTTAGAAACAAAATTTTAATAATCATTTTTTTAAGAAAAAGAATTAGCTACTCCGCAAATGGCAGC  
AAAGTGAAGCAGGCTGACCTGGTTCATCCCGCGTCTCTCCTCCCAAAA

>M6-PGSC0003DMG400031802M6RLKmalectin\_610

AGCAGGAAAACCAAGAATCTTACTGTTGATGTTCTTGATTATACACTCTCTACTGTCCGTACATTTCCAT  
TGAAGAACAATGTTTTCAAGAAGTCTGTTATGAGGTTCTGTTTATCG

>M6-PGSC0003DMG400031802M6RLKmalectin\_671

ACATTTCCATTGAAGAACAATGTTTTCAAGAAGTCTGTTATGAGGTTCTGTTTATCGTGGAGGGAAGT

ACTTGGTCAGGACGACTTATTTCTATGGTGGGGTTAATGGGAATTTGAAT

>M6-PGSC0003DMG400031802M6RLKmalectin\_732

GAGGGAAGTACTTGGTCAGGACGACTTATTTCTATGGTGGGGTTAATGGGAATTTGAATCCTCCTGTTTT  
TGATCAGATTGTTGATGGGACTTTTTGGAGTCCAGTGAATACAACCTGAGG

>M6-PGSC0003DMG400031802M6RLKmalectin\_793

TCCTGTTTTTGTATCAGATTGTTGATGGGACTTTTTGGAGTCCAGTGAATACAACCTGAGGATTATTGGAAG  
GGACTGTCTTCATATTATGAAGGGATTTTTAAGGCTGTTGGGAAGACTAT

>M6-PGSC0003DMG400031802M6RLKmalectin\_854

TATTGGAAGGGACTGTCTTCATATTATGAAGGGATTTTTAAGGCTGTTGGGAAGACTATGAGTGTGTGT  
TTGGCAGCTAATAGTTTAACGGATTCTGACCCTTTTATATCTGCTTTGGAA

>M6-PGSC0003DMG400031802M6RLKmalectin\_915

GTGTGTGTTTGGCAGCTAATAGTTTAACGGATTCTGACCCTTTTATATCTGCTTTGGAACTGTTTTGGTG  
TCGATTTCGTTGTATAATTCTACAGATTTTAATATTTATGGATTGACTT

>M6-PGSC0003DMG400031802M6RLKmalectin\_976

TGTTTTGGTGTCTCGATTTCGTTGTATAATTCTACAGATTTTAATATTTATGGATTGACTTTGATTACAAGGA  
GCAGTTTTGGGAACAATGGATCAATTATCAAGTAAGTTTGTTACCTAT

>M6-PGSC0003DMG400031860-(rev)M6G-LecRK\_0

CTTTGATAGTACAAACAATTTCTGGTTAGACCAAGAAATATAGTGAGCCATTGTGTATATGAAATCATTT  
GTTACTTCCTATTGTCTAAACCAAGGCCCTTCTGATTTTCATACAAGATGAG

>M6-PGSC0003DMG400031860-(rev)M6G-LecRK\_1037

CGGGGTATGTCTTCTTGATCCAAGTAATCCTACCAAAGGTTGTCATCCGGAGACAATGATCAACTTCTG  
TGCAGGTCATCTATCTAGCGGAAATTTACAATAGAGGCTATTCAGGATA

>M6-PGSC0003DMG400031860-(rev)M6G-LecRK\_1098

CAACTTCTGTGCAGGTCATCTATCTAGCGGAAATTTACAATAGAGGCTATTCAGGATAGTGACATGCCT  
TACAATGAGGTTGGGGATTATGAAATTTATCGTGATGTTGACGAGGAGGA

>M6-PGSC0003DMG400031860-(rev)M6G-LecRK\_1159

GACATGCCTTACAATGAGGTTGGGGATTATGAAATTTATCGTGATGTTGACGAGGAGGAATGCAAGAA  
AGTTATCATGGAAGATTGTTATGCCATGGCTGCTTCTAATCAATAGGGAA

>M6-PGSC0003DMG400031860-(rev)M6G-LecRK\_122

TATCTCTTAATCTTCTTGCATTCTCCTCCTAGTCCTTCATCATCAGTCAAATGGCCAAAATAATCCAAATA  
TTAGCATAGGTTCTACTTTCACTGCTGGAGAAAATGTTTCTTTGTTAT

>M6-PGSC0003DMG400031860-(rev)M6G-LecRK\_1281

TCACAAGAGGCGTACTCCTATACTCAACGCCCGTAGAATTTCTATGACCACAGGCAGCGTTTCCTTCATC  
AAGGTGCCTATTAAGTCAGCTAAAGATGACATATCAATAAAAAAGAAATC

>M6-PGSC0003DMG400031860-(rev)M6G-LecRK\_1342

TCCTTCATCAAGGTGCCTATTAAGTCAGCTAAAGATGACATATCAATAAAAAAGAAATCCAACACCAGAG  
CCCATCTCACTGCTGGCCTTATAACTACCAGTTCACCTTACTTTCTATTT

>M6-PGSC0003DMG400031860-(rev)M6G-LecRK\_1403

ACACCAGAGCCCATCTCACTGCTGGCCTTATAACTACCAGTTCACCTTACTTTCTATTTGGAGCCTTGCGG  
TTTTACTATCATCCTGCTCCTCGGAGACTTGTAACGAGAGTGGAATC

>M6-PGSC0003DMG400031860-(rev)M6G-LecRK\_1464

AGCCTTGCGTTTTACTATCATCCTGCTCCTCGGAGACTTGTAACGAGAGTGGAATCCAAATTCATCA  
AGAATAGGTATCAATTTCCGCGAGTTCACATACAAAGAACTGCATGAAAT

>M6-PGSC0003DMG400031860-(rev)M6G-LecRK\_1525

AATTCATCAAGAATAGGTATCAATTTCCGCGAGTTCACATACAAAGAACTGCATGAAATAACTAATGGCT  
TCAGCAAGCAACTTGAAAAGGAGCTTCTGCAAAAGTTTACTATGGTAAT

>M6-PGSC0003DMG400031860-(rev)M6G-LecRK\_1647

CAAGTTAAAGGATGTTCAAGTAGAGATTGCGGTGAAGCTGATGCAAGACGTTGCAGAGCCAAGTGAGA  
AGGTATTTATGACAGAGCTAAAAATCATAGGCAGAACTCATCACAAGAATTT

>M6-PGSC0003DMG400031860-(rev)M6G-LecRK\_1708

AGTGAGAAGGTATTTATGACAGAGCTAAAAATCATAGGCAGAACTCATCACAAGAATTTGGTAAAGCTA  
TTAGGATTTTGCATTGAGGATAATCACTTCATTTTGGTTTATGAGTTGATG

>M6-PGSC0003DMG400031860-(rev)M6G-LecRK\_1769

TAAAGCTATTAGGATTTTGCATTGAGGATAATCACTTCATTTTGGTTTATGAGTTGATGAAGAACGGAGC  
TTTATCAGATTTTTTGTTC AAGGAAGAAATACTGCCTACTTGGAGTCACA

>M6-PGSC0003DMG400031860-(rev)M6G-LecRK\_183

TAATCCAAATATTAGCATAGGTTCTACTTTCACTGCTGGAGAAAATGTTTCTTTGTTATCCTTGTCTGGGG  
ACTTTGCCTTCGGATTTTATCCTGTTTCAGATACTCTTTTCTAGTTGG

>M6-PGSC0003DMG400031860-(rev)M6G-LecRK\_1830

GAACGGAGCTTTATCAGATTTTTTGTCAAGGAAGAAATACTGCCTACTTGGAGTCACAGAACTGAAAT  
GGCACTAGGAATTGCAAGAGGACTGCTTTACTTACATGAAGAATGTGATTC

>M6-PGSC0003DMG400031860-(rev)M6G-LecRK\_1891

ACTGAAATGGCACTAGGAATTGCAAGAGGACTGCTTTACTTACATGAAGAATGTGATTCTCCAATCATCC  
ACTGTGACATAAAGCCTCAAATGTACTTCTTGACAGTAAATATAATGCC

>M6-PGSC0003DMG400031860-(rev)M6G-LecRK\_1952

CAATCATCCACTGTGACATAAAGCCTCAAATGTACTTCTTGACAGTAAATATAATGCCAAGATTCAGA  
TTTTGGGCTATCGAAACTCTGAAGAAGGATCAAACAAGAACAGATACTT

>M6-PGSC0003DMG400031860-(rev)M6G-LecRK\_2013

GATTCAGATTTTGGGCTATCGAAACTCTGAAGAAGGATCAAACAAGAACAGATACTTGCGCAAGAGG  
GACAGTGGGATATTTAGCACCAGAATGGCTAAAGAATGCTCCAATAACACC

>M6-PGSC0003DMG400031860-(rev)M6G-LecRK\_2074

GCAAGAGGGACAGTGGGATATTTAGCACCAGAATGGCTAAAGAATGCTCCAATAACACCCAAAGTTGA  
CATTTTTAGTTTTGGTGTAAATGTTACTGGAGATAACATGTGGTAGAAGGCAT

>M6-PGSC0003DMG400031860-(rev)M6G-LecRK\_2135

AAGTTGACATTTTTAGTTTTGGTGTAAATGTTACTGGAGATAACATGTGGTAGAAGGCATATTGAGCTTAG  
CAGGGTAGAGGAAGAGAGCGAAGACGATGAAGGTGATGATTTATTGCTTG

>M6-PGSC0003DMG400031860-(rev)M6G-LecRK\_2196

TGAGCTTAGCAGGGTAGAGGAAGAGAGCGAAGACGATGAAGGTGATGATTTATTGCTTGTAATTGGG  
TTTCAGGCTGTGTGAGAAGTGGTAGAATTGACAACTTGCAAGGAGTGATCC

>M6-PGSC0003DMG400031860-(rev)M6G-LecRK\_2318

AAGTATTGAATGATATTAAGACTTGAACGATTCGTGAAGGTGGGATTGTGGTGTGTCCATCCTGATC  
CAACTGTTAGACCTTCAATGAAAATAGTGATGCAAATGCTTGAAGGCATAA

>M6-PGSC0003DMG400031860-(rev)M6G-LecRK\_2379

TCCTGATCCAACCTTGTAGACCTTCAATGAAAATAGTGATGCAAATGCTTGAAGGCATAACTGAGGTTGG  
AGTTCCTCCAATGTTCTATAACTAAATGATTGTTTAAATCATCAACAGGGA

>M6-PGSC0003DMG400031860-(rev)M6G-LecRK\_244

TTGTCTGGGGACTTTCCTTCGGATTTATCCTGTTTCAGATACTCTTTTCCTAGTTGGAATTTGGTTCAAC

AAAATCCAGAAAACAACACTTGTATGGTCAGCAAATCGCGACAATCCA

>M6-PGSC0003DMG400031860-(rev)M6G-LecRK\_2440

GAGGTTGGAGTTCCTCCAATGTTCTATAACTAAATGATTGTTAAATCATCAACAGGGAGGAGCATCGG

AACAAGACGAAAACTGGAAGGAAAAAGGCCTCCTTGGCTTTGCAAACCTGG

>M6-PGSC0003DMG400031860-(rev)M6G-LecRK\_2501

AGCATCGGAACAAGACGAAAACTGGAAGGAAAAAGGCCTCCTTGGCTTTGCAAACCTGGAAGTGAATA

ATGAAAATTGTCATAATGTTAATATTTAATACTTGTGCTATTGTAAAATTAT

>M6-PGSC0003DMG400031860-(rev)M6G-LecRK\_2562

GTGAATAATGAAAATTGTCATAATGTTAATATTTAATACTTGTGCTATTGTAAAATTATTCTAAGTCTCAG

AGTTTGATTGTTAAGTTTTTTCTTTTTTTGTATGAAGTCCTGAATTTGA

>M6-PGSC0003DMG400031860-(rev)M6G-LecRK\_2612

TAAAATTATTCTAAGTCTCAGAGTTTGATTGTTAAGTTTTTTCTTTTTTTGTATGAAGTCCTGAATTTGAAT

TGTTACTTTTGCTAGTTTATAATCTGCACTTCAGTTTCTCCCTGGTCA

>M6-PGSC0003DMG400031860-(rev)M6G-LecRK\_305

TTTGGTTCAACAAAATCCAGAAAACAACACTTGTATGGTCAGCAAATCGCGACAATCCAGCTGAAATCA

GATCAACTATTAGTCTAACAAATGGTGGTCAGCTTGTGCTCAACTATGCTA

>M6-PGSC0003DMG400031860-(rev)M6G-LecRK\_366

TGAAATCAGATCAACTATTAGTCTAACAAATGGTGGTCAGCTTGTGCTCAACTATGCTAATGGCACAGTT

CAACAGATTTACAATGAGTCTGCAAGGTTGGGAACCATGCAAGATGATGG

>M6-PGSC0003DMG400031860-(rev)M6G-LecRK\_427

GGCACAGTTCAACAGATTTACAATGAGTCTGCAAGGTTGGGAACCATGCAAGATGATGGAAATCTTGTG

TTGAGAGACTCAAGTTCAAATAAAGTTTGGGAAAGCTTTAAATCTCCCACT

>M6-PGSC0003DMG400031860-(rev)M6G-LecRK\_488

ATCTTGTGTTGAGAGACTCAAGTTCAAATAAAGTTTGGGAAAGCTTTAAATCTCCCACTGATACACTTTT

GCCAGGACAACTTTATTATCAGCAGGAAAGCTCTATTCTAATTCTATTT

>M6-PGSC0003DMG400031860-(rev)M6G-LecRK\_549

TACACTTTTGCCAGGACAACTTTATTATCAGCAGGAAAGCTCTATTCTAATTCTATTTCCGGATGGGAATT

CCAAGTACTCTAAAGGGAAATTCATGCTAGAAATGCAAGCTGATGGAAA

>M6-PGSC0003DMG400031860-(rev)M6G-LecRK\_61

AAATCATTGTTACTTCCTATTGTCTAAACCAAGGCCTTCTGATTTTCATACAAGATGAGAATATCTCTTAAT  
CTTCTTGCATTCCCTCCTCTAGTCCTTCATCATCAGTCAAATGGCCAA

>M6-PGSC0003DMG400031860-(rev)M6G-LecRK\_610

GATGGGAATTCCAAGTACTCTAAAGGGAAATTCATGCTAGAAATGCAAGCTGATGGAAAATTGGTACTA  
TCTGCTTATCATTTTGGAGACACAGGATATTGGCTGAGTAGTCAAGATGAT

>M6-PGSC0003DMG400031860-(rev)M6G-LecRK\_671

TGGTACTATCTGCTTATCATTTTGGAGACACAGGATATTGGCTGAGTAGTCAAGATGATAAAGGAAACC  
GTGAAGTGAAATTAGTTTTCGACCAGAGGAATGCATCTTTGTACCTTGTGA

>M6-PGSC0003DMG400031860-(rev)M6G-LecRK\_793

GATAACAATAACACAATTTTTCTTTCCATCGAATGTGCCAACCCAGTTGAAGACTACTACCACCGTGC  
AACTATAGACAGTTTTGGCAACTCCAGCAGTATGCTTATCATAAGACT

>M6-PGSC0003DMG400031860-(rev)M6G-LecRK\_854

ACCACCGTGCAACTATAGACAGTTTTGGCAACTCCAGCAGTATGCTTATCATAAGACTAATGGTAGCAA  
TTGGATTAGAGTTTTGAAGATCCCTTCAGAGCCATGTATGGTTAATGCTG

>M6-PGSC0003DMG400031860-(rev)M6G-LecRK\_915

TGGTAGCAATTGGATTAGAGTTTTGAAGATCCCTTCAGAGCCATGTATGGTTAATGCTGTTTGTGGGGCT  
TATGGATTCTGCAGCTCAAATGATAATGAAACTGTAAATTGTGACTGTCT

>M6-PGSC0003DMG400031861-(rev)M6G-LecRK\_0

GAAAAGAATTCACACATTCCAGTGACCTCATAATCATAGCCTTCTGCATTATAATATGCAAGTCTTTGAA  
TCATGGCATTGACTAATAGATTTTTACTCTCCATTTGTATCAAATAA

>M6-PGSC0003DMG400031861-(rev)M6G-LecRK\_1037

GAAGCCTTGTATTGTGAATAACATTTGTGGTGTATATGGCTTTTGCCAATCACCAGACAATAAGGAAGTC  
AACTGTAGTTGCTTGCCAGGCTATTCTCCAAGGGATCAGTACACTCCATC

>M6-PGSC0003DMG400031861-(rev)M6G-LecRK\_1098

AAGGAAGTCAACTGTAGTTGCTTGCCAGGCTATTCTCCAAGGGATCAGTACACTCCATCTAAAGGATGTT  
ATCCGAATGAGATGAAAGATTTTTGTGATCTGAATTCTTCCCTTTCCGGAT

>M6-PGSC0003DMG400031861-(rev)M6G-LecRK\_1159

AAGGATGTTATCCGAATGAGATGAAAGATTTTTGTGATCTGAATTCTTCCCTTTCCGGATGTCTACGTTGA  
AAGGATCTCTAATGCTGATTTCCCTAATAGGATGTATGCTGAACTAGAAA



>M6-PGSC0003DMG400031861-(rev)M6G-LecRK\_122

TTATTTGTTGTGAAAACAATTATAATATCTCAAAAAGAATAAAGTTTTTCCGTAAGATTCCAACAATTCA  
TGGTGTAACAATGGTTTCTTGGAAAATCCTGTTATGGTTTGTCTCAATT

>M6-PGSC0003DMG400031861-(rev)M6G-LecRK\_1220

CTACGTTGAAAGGATCTCTAATGCTGATTTCCCTAATAGGATGTATGCTGAACTAGAAAGGGTATATGAT  
ACTACAGAGGAGCTTTGCAGGCAGGAAGTGTGAATGATTGTCTTTGTGA

>M6-PGSC0003DMG400031861-(rev)M6G-LecRK\_1281

GTATATGATACTACAGAGGAGCTTTGCAGGCAGGAAGTGTGAATGATTGTCTTTGTGAGGCAGCTGTG  
TTAATGATTCAACATGTTTCAAGAAGAGGATGCCTATACAGAATGCCAGA

>M6-PGSC0003DMG400031861-(rev)M6G-LecRK\_1342

CAGCTGTGTTTAATGATTCAACATGTTTCAAGAAGAGGATGCCTATACAGAATGCCAGAAGTATTAATCC  
TGATACAAATAACATGGTTGCATTTCTTAAAATTAGCAACTCTTCGATAA

>M6-PGSC0003DMG400031861-(rev)M6G-LecRK\_1403

TATTAATCCTGATACAAATAACATGGTTGCATTTCTTAAAATTAGCAACTCTTCGATAACTCAAACAAAA  
AGCACTCTCTATCAAAGGGTGTGTTTGGTAGCTGGTGTGACAGTATGTTT

>M6-PGSC0003DMG400031861-(rev)M6G-LecRK\_1464

CAAACAAAAAGCACTCTCTATCAAAGGGTGTGTTTGGTAGCTGGTGTGACAGTATGTTTCAGTACTCGCTC  
CGCTTTTTGCAGCAATTGCTATATATTATCACCTTTTGTGAAGAAACAT

>M6-PGSC0003DMG400031861-(rev)M6G-LecRK\_1525

TACTCGCTCCGCTTTTTGCAGCAATTGCTATATATTATCACCTTTTGTGAAGAAACATAGAGATGCCAAA  
ACCCCTCAAAGAAAGGCAATTGAGATGAATTTAAGGGCATTTCGT

>M6-PGSC0003DMG400031861-(rev)M6G-LecRK\_1586

AGATGCCAAAACCCCTCAAAGAAAGGCAATTGAGATGAATTTAAGGGCATTTCGTTCCAGCAGCT  
GCACGAAGCCACCAATGGTTTCAAGAATAAATTAGGCCAAGGGGCTTCTGG

>M6-PGSC0003DMG400031861-(rev)M6G-LecRK\_1708

CTGTTTATAGCGGAATTCTCAAGTTAGAGGATGAAGAAGTTGAAGTTGCTGTGAAGAAATTAGGAAATG  
GAATTGAACAAGGTGATGATATAGAATTTTTGGCAGAAGTAAGGGTGGTAG

>M6-PGSC0003DMG400031861-(rev)M6G-LecRK\_1769

AGGAAATGGAATTGAACAAGGTGATGATATAGAATTTTTGGCAGAAGTAAGGGTGGTAGGCCTAACAC

ATCACAAAATCTGGTTCATTTGTTAGGCTTCTGCAATGAAAAAGCAACAG

>M6-PGSC0003DMG400031861-(rev)M6G-LecRK\_183

CAACAATTCATGGTGTAAACAATGTTTCTTGGAAAATCCTGTTATGGTTTGTCTCAATTTATCTCACATTT  
ATTAGCTCTTTCTGTCAAGAACTACAAATATTGTCCCTCTTGGTTCCA

>M6-PGSC0003DMG400031861-(rev)M6G-LecRK\_1830

CTAACACATCACAAAATCTGGTTCATTTGTTAGGCTTCTGCAATGAAAAAGCAACAGGCTTGTTGTTT  
ATGAATTAATGAAAAATGGGGCTGTGTCAAATTTTATCTTTCGTGATGGA

>M6-PGSC0003DMG400031861-(rev)M6G-LecRK\_1891

TTGTTGTTTATGAATTAATGAAAAATGGGGCTGTGTCAAATTTTATCTTTCGTGATGGACAAATACCAATC  
TGGAAGCTAAGAAGTGACATTGTACTTGACATTGCCAGAGGCCTGTTAT

>M6-PGSC0003DMG400031861-(rev)M6G-LecRK\_1952

AATACCAATCTGGAAGCTAAGAAGTGACATTGTACTTGACATTGCCAGAGGCCTGTTATACTTGCATGAA  
GAGTGTGAGAACCAGATCATTATTGCGACATTAAGCCACATAATATCCT

>M6-PGSC0003DMG400031861-(rev)M6G-LecRK\_2013

TTGCATGAAGAGTGTGAGAACCAGATCATTATTGCGACATTAAGCCACATAATATCCTTCTTGACTAGA  
ACTACTCTGCTAAAATTGCTGATTTTGGTTTTGCAAAGCTTCTTATGAAA

>M6-PGSC0003DMG400031861-(rev)M6G-LecRK\_2074

TTGACTAGAACTACTCTGCTAAAATTGCTGATTTTGGTTTTGCAAAGCTTCTTATGAAAGACCAGACGCTA  
ACAAACACTAATTTTAGAGGAACCATGGGTTATATGGCACCAGAATGGC

>M6-PGSC0003DMG400031861-(rev)M6G-LecRK\_2135

CCAGACGCTAACAAACACTAATTTTAGAGGAACCATGGGTTATATGGCACCAGAATGGCTAAAAAATGT  
GCCCGTGACAACCAAAGTTGACATCTACAGCTTTGGTGTTTTGCTGCTTGA

>M6-PGSC0003DMG400031861-(rev)M6G-LecRK\_2196

AAAAATGTGCCCGTGACAACCAAAGTTGACATCTACAGCTTTGGTGTTTTGCTGCTTGAGATTATTTTCTG  
CCAAAGGCACATGGACTTGAACCCAATCGGCCAAGAAAATGAAGAGCCC

>M6-PGSC0003DMG400031861-(rev)M6G-LecRK\_2257

TTATTTTCTGCCAAAGGCACATGGACTTGAACCCAATCGGCCAAGAAAATGAAGAGCCCCGAGTTGATCT  
TAGTCGATTGGGTTCTTCATTGTATGAGAAACAAGAAGCTGAGAGCTGTTG

>M6-PGSC0003DMG400031861-(rev)M6G-LecRK\_2318

GTTGATCTTAGTCGATTGGGTTCTTCATTGTATGAGAAACAAGAAGCTGAGAGCTGTTGCTAGTCTTGAT  
GAAGAAATTATGTTACATTTTCACAATTTTGAGAGGATGACTATGGTTGG

>M6-PGSC0003DMG400031861-(rev)M6G-LecRK\_2379

AGTCTTGATGAAGAAATTATGTTACATTTTCACAATTTTGAGAGGATGACTATGGTTGGCCTATGGTGCT  
TGTGTCCTGAGCCAAATCTTCGACCATCTGCAGCAAAGCTTGTTTCAGATG

>M6-PGSC0003DMG400031861-(rev)M6G-LecRK\_244

TCTCACATTTATTAGCTCTTTCTGTCAAGAACTACAATATTGTCCCTCTGGTTCCAATATCATAGCTGG  
AACTGAATCTTCACACTGGCTTTCATCCTCTGGAGATTTTGCTTTTGG

>M6-PGSC0003DMG400031861-(rev)M6G-LecRK\_2440

TATGGTGCTTGTGTCCTGAGCCAAATCTTCGACCATCTGCAGCAAAGCTTGTTTCAGATGTTGGAAGGAAC  
TATAGAACTAGGTGTTCCCTCCTATGGTTGATACAACATATGAGTCATTT

>M6-PGSC0003DMG400031861-(rev)M6G-LecRK\_2501

GGAAGGAACATAGAACTAGGTGTTCCCTCCTATGGTTGATACAACATATGAGTCATTTTCTGTATTATCT  
TGTAATTTTTCCAACAATTATCATTCTATTTTATTAGTCATTAGACCTG

>M6-PGSC0003DMG400031861-(rev)M6G-LecRK\_2553

GTCATTTTCTGTATTATCTTGTAATTTTTCCAACAATTATCATTCTATTTTATTAGTCATTAGACCTGGTTAA  
ATTTTCAGTGTTTTTTCTCATAGTTCTCTGGTGCAAAAGTTAGTGTTT

>M6-PGSC0003DMG400031861-(rev)M6G-LecRK\_305

ATCATAGCTGGAACATGAATCTTCACACTGGCTTTCATCCTCTGGAGATTTTGCTTTTGGTTTCTACCTTCTT  
AACAGTACTGGATTATTCCTTGTTGGCATATGGTTTGATAAAATCCCA

>M6-PGSC0003DMG400031861-(rev)M6G-LecRK\_366

TCTACCTTCTTAACAGTACTGGATTATTCCTTGTTGGCATATGGTTTGATAAAATCCCATATAAAACTCTC  
GTTTGGTCAGCCAATCGCGATGATCCAGTTCATGCTGGATCAAAGGTTA

>M6-PGSC0003DMG400031861-(rev)M6G-LecRK\_427

TAAACTCTCGTTTGGTCAGCCAATCGCGATGATCCAGTTCATGCTGGATCAAAGGTTAATCTAACGTTG  
AGTGGACGCCTCGTGTGACAGATACTAATGGGAGAGAGTTTGTGTTTGTGTA

>M6-PGSC0003DMG400031861-(rev)M6G-LecRK\_488

CTAACGTTGAGTGGACGCCTCGTGTGACAGATACTAATGGGAGAGAGTTTGTGTTTGTACAATGGCACA  
GGCACTAGTCATGCTACTATGCAAGATGATGGAAATTTTGCCTGAAAAAT

>M6-PGSC0003DMG400031861-(rev)M6G-LecRK\_549

ATGGCACAGGCACTAGTCATGCTACTATGCAAGATGATGGAAATTTGTCCTGAAAAATTCATTCTCAGG  
TGTCTTGTGGGAAAGCTTTGATTTCCCAACAGATACAATTTTGCCTGGTC

>M6-PGSC0003DMG400031861-(rev)M6G-LecRK\_61

AGTCTTTGAATCATGGCATTGACTAATAGATTTTACTCTCCATTTGTATCAAATAAGTTTATTTGTTGT  
GAAAACAATTATAATATCTCAAAAAGAATAAAGTTTTTCCGTAAGAT

>M6-PGSC0003DMG400031861-(rev)M6G-LecRK\_671

TATCTTGATATGGGGCAGGCGCTGTTTTCCAGTGCCAATGGGACAGTAGATTACTCGACGGGGAAGTAT  
AGACTACTGGTGCAGACTGATGGGAATGTGGTCTTGTCTGCATATAGAACT

>M6-PGSC0003DMG400031861-(rev)M6G-LecRK\_732

GGAAGTATAGACTACTGGTGCAGACTGATGGGAATGTGGTCTTGTCTGCATATAGAACTGCTGATTTTG  
GCTACTGGAATTCTGTAATAAACAATAATAATGTAAGACTGGTTTTCA

>M6-PGSC0003DMG400031861-(rev)M6G-LecRK\_793

TGATTTTGGCTACTGGAATTCTGTAATAAACAATAATAATGTAAGACTGGTTTTCAAAAACACCAGT  
CATACTTTGTTCTTACAAATAGAAGCTCAATCTTATCCAACCTTGACAGCG

>M6-PGSC0003DMG400031861-(rev)M6G-LecRK\_854

AACACCAGTCATACTTTGTTCTTACAAATAGAAGCTCAATCTTATCCAACCTTGACAGCGAACTTGCCTGAT  
TAGTTCAAGATTATTACCACAGAGCTATGATCACTGATAAAGGAGATTT

>M6-PGSC0003DMG400031861-(rev)M6G-LecRK\_915

CTTGCCTGATTAGTTCAAGATTATTACCACAGAGCTATGATCACTGATAAAGGAGATTTCCAACAGCTCT  
TCCACAGAAAAGTAAATGGGAGAGGTTGGAATGTTGCGCTGCAAGTTATC

>M6-PGSC0003DMG400031861-(rev)M6G-LecRK\_976

AACAGCTCTTCCACAGAAAAGTAAATGGGAGAGGTTGGAATGTTGCGCTGCAAGTTATCGAGAAGCCTT  
GTATTGTGAATAACATTTGTGGTGTATATGGCTTTTGCCAATCACCAGACA

>M6-PGSC0003DMG400032130M6LRR-RLP\_0

TGAAGATTTTAAGCTTGAGATCAAATAAGTTTCATGGTCCATTAAATCTTCAGGGAATACAACTTGTTT  
GCGCGGCTTCAAATTCTGGATCTATCATCTAATGGATTTAGTGGTAATT

>M6-PGSC0003DMG400032130M6LRR-RLP\_126

AAAGTCTTTTTGGGAATTTACAAGCCATGAAGAAAATTGATGAGAGTACAAGAACCCAGAAATATGTTT

CTGATCAATATGCTGGTTATTATGCTTATTTGACGACAATTACGACAAAGG

>M6-PGSC0003DMG400032130M6LRR-RLP\_189

ATGTTTCTGATCAATATGCTGGTTATTATGCTTATTTGACGACAATTACGACAAAGGGACAAGATTATGA  
TTCTATTCGAATTTTGGATTCTAACATGATTATCGATCTCTCAAAGAACA

>M6-PGSC0003DMG400032130M6LRR-RLP\_252

ATTATGATTCTATTCTGAATTTTGGATTCTAACATGATTATCGATCTCTCAAAGAACAGATTTGAAGGTCAT  
ATTCCAAACATTATTGGAGATCTCGTTGGACTTCGTACGTTGAACTTAT

>M6-PGSC0003DMG400032130M6LRR-RLP\_315

AAGGTCATATTCCAAACATTATTGGAGATCTCGTTGGACTTCGTACGTTGAACTTATCTCATAATGTCTTG  
GAAGGTCATATACCTGCATCATTCCAAAATTTATCTATGCTCGAATCAT

>M6-PGSC0003DMG400032130M6LRR-RLP\_378

ATGTCTTGGAAGGTCATATACCTGCATCATTCCAAAATTTATCTATGCTCGAATCATTGGATCTCTCATCT  
AATAAAATCAGCGGAGCAATTCCACCACAACCTGCATCCCTCACATTTT

>M6-PGSC0003DMG400032130M6LRR-RLP\_441

TCTCATCTAATAAAATCAGCGGAGCAATTCCACCACAACCTGCATCCCTCACATTTCTTGCAGTCTTAAAT  
CTCTCTACAATCAACTTGTTGGATGCATCCCCAAAGGAAAACAATTTG

>M6-PGSC0003DMG400032130M6LRR-RLP\_567

TTGAGAACAGTTCATACCAAGGGAATGATGGGTACGTGGACTGCCACTCTCAAACATTGTGGTGGTG  
ATGGTAGGGTACCACAAGCGACAATTCCAGCTGAGCTAGATCAAGAAGAAG

>M6-PGSC0003DMG400032130M6LRR-RLP\_63

ACTTGTGGCGCGGCTTCAAATTCTGGATCTATCATCTAATGGATTTAGTGGTAATTTACCCGAAAGTCTT  
TTTGGGAATTTACAAGCCATGAAGAAAATTGATGAGAGTACAAGAACCC

>M6-PGSC0003DMG400032130M6LRR-RLP\_630

GTGGTGATGGTAGGGTACCACAAGCGACAATTCCAGCTGAGCTAGATCAAGAAGAAGAAGAAGA  
AGATTCACCAATGATCTGTTGGCAGGCGTTCTCATGGGTACGGTTGTGGTC

>M6-PGSC0003DMG400032130M6LRR-RLP\_756

TTGGACTGTCTGTAATACATAATGTTGTCAACTCAATATCCAGCATGGTTTTCGAGGATGGTATTGAA  
ATTGGAACACATATTTACTATGAGAATGAAAAAGCACAAGAAAAGATATT

>M6-PGSC0003DMG400032130M6LRR-RLP\_819

TATTGAAATTGGAACACATATTTACTATGAGAATGAAAAGCACAAGAAAAGATATTAGTGTGTAACCT  
CCAGGTATTCAAGTTTATCTCTATCCTTAAAAGAATTACTTTTTATATATC

>M6-PGSC0003DMG400032130M6LRR-RLP\_882

TAACCTCCAGGTATTCAAGTTTATCTCTATCCTTAAAAGAATTACTTTTTATATATCGATGTATTTTTACCT  
ATTTTCATCCTCAAAGCTCTTAGCTTTAATTCTTTACTTTTGAAAATT

>M6-PGSC0003DMG400032130M6LRR-RLP\_945

TTTTTACCTATTTTCATCCTCAAAGCTCTTAGCTTTAATTCTTTACTTTTGAAAATTGCAGGATTCAAGTCTA  
CTAAGTTGCTGGGAATGCAGATAAAAAGCCTTCATCTTTCATAGTTTG

>M6-PGSC0003DMG400032130M6LRR-RLP\_998

AATTGCAGGATTCAAGTCTACTAAGTTGCTGGGAATGCAGATAAAAAGCCTTCATCTTTCATAGTTTGTGA  
TATTTCCGTGAAGTGTGTTTATCTTATGAATAAAGATATGACTTTTCTT

>M6-PGSC0003DMG400032572-(rev)M6LRR-RLP\_0

AAAATGGCTGATGCCTTTGTGTCATTTGCAGTTCAAAATTGGGTGATTTCTCATACAACAAGTTTCCCT  
GCGTAAAAATCTGAGAAAGGAAATTGAGTGGCTGAGAAATGAGTTACTC

>M6-PGSC0003DMG400032572-(rev)M6LRR-RLP\_1116

TTGAGTGGACTACTTTCGCATAGAGGGGGGGTGGACAAATGGCAAGAAGTGAAAGATCAACTTTGGAA  
GAGCATTATTGAAGATAAATTTATTGAAATCTCCTGCATTCTATCATTAAAGC

>M6-PGSC0003DMG400032572-(rev)M6LRR-RLP\_1178

TTGGAAGAGCATTATTGAAGATAAATTTATTGAAATCTCCTGCATTCTATCATTAAAGCTACAACGATTTGT  
CAACTGTGCTCAAGCAGTGTCTTCTATACTTTGGTATTTTTCCAGAAGA

>M6-PGSC0003DMG400032572-(rev)M6LRR-RLP\_124

TACAGTCTTTCCTCAAAGATGCAGAACTAAAGCAATGTGTAGATCATAGAGTTCAACAATGGGTGTTTGA  
AATCAATTCTGTTGCGAATGATGCTGTCGCTATACTCGAGACTTACAGCT

>M6-PGSC0003DMG400032572-(rev)M6LRR-RLP\_1240

ACGATTTGTCAACTGTGCTCAAGCAGTGTCTTCTATACTTTGGTATTTTTCCAGAAGATCAAGTTCTCGAG  
GCTGATAACATAATAAGGTTGTGGATGGCTGAGGGTTTCGTACCAAATG

>M6-PGSC0003DMG400032572-(rev)M6LRR-RLP\_1426

AAGTGGTGCATACGTTTTGGGAAAAGTTACTGAATGTAGGGTTCATGATTTACTCCGTGATCTTGCCAT  
ACAAAAGGCATCCGACACAAACCTCTTTGACATTTATCATCCAAGAAAGC

>M6-PGSC0003DMG400032572-(rev)M6LRR-RLP\_1550

CAAATCCTCTTCATGTATCAGACTTGCCATTCATGGTCAAGGAGAAAGGTATCACTTACTTGATCTTTCTA  
ATTTGAAGTTGAGGTCAATTATGTTCTTCGATCAGGATTTTCGTAATGT

>M6-PGSC0003DMG400032572-(rev)M6LRR-RLP\_1612

ATCTTTCTAATTTGAAGTTGAGGTCAATTATGTTCTTCGATCAGGATTTTCGTAATGTGTTCCAACATATA  
GATGTGTTTCGACATATATATGTGTTGTACTTGGATATTAAGGCTGTG

>M6-PGSC0003DMG400032572-(rev)M6LRR-RLP\_1674

CAACATATAGATGTGTTTCGACATATATATGTGTTGTACTTGGATATTAAGGCTGTGGTGCTATACCTG  
ATGCCATAGGGAGTTTGTACCACCTAAAGTTGTTAAGCTTGAGAGGTATC

>M6-PGSC0003DMG400032572-(rev)M6LRR-RLP\_1736

TATACCTGATGCCATAGGGAGTTTGTACCACCTAAAGTTGTTAAGCTTGAGAGGTATCCGTGGTCTTCCA  
TCTTCCATTGGCAACCTCAAGAATCTACAGACACTTGCTGTCACTGACTT

>M6-PGSC0003DMG400032572-(rev)M6LRR-RLP\_1798

GTCTTCCATCTTCCATTGGCAACCTCAAGAATCTACAGACACTTGCTGTCACTGACTTTGGATAACAATAAT  
TGCCAACTACCCCGCGAAACAGCTGACCTGATAAATTTAAGACATTTAG

>M6-PGSC0003DMG400032572-(rev)M6LRR-RLP\_186

GTGTTTGAAATCAATTCTGTTGCGAATGATGCTGTCGCTATACTCGAGACTTACAGCTTTGAGGCTGATA  
AAGGTGATGACGATGAATTTGCTAGTCGTCTCAAGGCTTGCGCTTGCATA

>M6-PGSC0003DMG400032572-(rev)M6LRR-RLP\_1860

TACAATAATTGCCAACTACCCCGCGAAACAGCTGACCTGATAAATTTAAGACATTTAGTTGTTCCGTATTC  
AAAACCTCTGGCACATATAAGCAAACCTCACTAGTCTTCAAGTTCTTGAA

>M6-PGSC0003DMG400032572-(rev)M6LRR-RLP\_1922

TCCGTATTCAAACCTCTGGCACATATAAGCAAACCTCACTAGTCTTCAAGTTCTTGAAAGAGTTTGTGTTG  
ATCAATGGAAAGATGTTGATCCTGTTGATTTAGTCAATCTTCGAGAATT

>M6-PGSC0003DMG400032572-(rev)M6LRR-RLP\_1984

TTTGTGTTGATCAATGGAAAGATGTTGATCCTGTTGATTTAGTCAATCTTCGAGAATTAAGCATGTTTCAT  
ATTAGCATATCTTACTCCCTAAACAACATTAGCAGCTTGAAAAACCTTA

>M6-PGSC0003DMG400032572-(rev)M6LRR-RLP\_2046

ATGTTTCATATTAGCATATCTTACTCCCTAAACAACATTAGCAGCTTGAAAAACCTTAGCACTCTCACATT

GTCTTGTC AAGATTATGATGGATCATTCCCATCCCTTGAATTTGTTAAT

>M6-PGSC0003DMG400032572-(rev)M6LRR-RLP\_2108

TCTCACATTGTCTTGTC AAGATTATGATGGATCATTCCCATCCCTTGAATTTGTTAATTGTTGTGAAAAGC

TCCAGAAATTGTTCTTATATGGGAGAATAGAGAAACTGCCTAATCTGTT

>M6-PGSC0003DMG400032572-(rev)M6LRR-RLP\_2170

GTGAAAAGCTCCAGAAATTGTTCTTATATGGGAGAATAGAGAAACTGCCTAATCTGTTTCCAAATTCCAT

CACAATGATGGCTCTGAGGGACTCAAGACTGACAGAAGATCCGATGCCTA

>M6-PGSC0003DMG400032572-(rev)M6LRR-RLP\_2232

AATTCCATCACAATGATGGCTCTGAGGGACTCAAGACTGACAGAAGATCCGATGCCTATTTTGGGAATG

TTGCCAAACCTAAGGAATCTCTATTTGGTTAGTGCTTATCTTGAAAAGAA

>M6-PGSC0003DMG400032572-(rev)M6LRR-RLP\_2294

GGGAATGTTGCCAAACCTAAGGAATCTCTATTTGGTTAGTGCTTATCTTGAAAAGAAATAATGTGCAGT

GATAACAGCTTCAGTCAACTAGAGTTCCTTCATCTTTATCATCTTTGGAA

>M6-PGSC0003DMG400032572-(rev)M6LRR-RLP\_2356

TGTGCAGTGATAACAGCTTCAGTCAACTAGAGTTCCTTCATCTTTATCATCTTTGGAACCTAGAAACATGG

CATTTAGGCACAAGTGCAATGCCTCTCATTAAAGGTCTTCATATCTATG

>M6-PGSC0003DMG400032572-(rev)M6LRR-RLP\_2404

ATCTTTGGAACCTAGAAACATGGCATTTAGGCACAAGTGCAATGCCTCTCATTAAAGGTCTTCATATCTA

TGAATGTCCAAACCTGAAGGAGATTCCAGAGAGAATAAAAGACGTGAAGC

>M6-PGSC0003DMG400032572-(rev)M6LRR-RLP\_310

GGAAAGAGAAGAAATTCTACAATGTCGCCGAGGAGATTCAATCACTCAAGCAGCGAATCATAGATATCT

CTCGCAAGCGAGAACTTATGGTATTACAAATATCAATAGTAATGCTGGAG

>M6-PGSC0003DMG400032572-(rev)M6LRR-RLP\_372

GATATCTCTCGCAAGCGAGAACTTATGGTATTACAAATATCAATAGTAATGCTGGAGAAGGGCCAAGT

AATCAGGTTAGAACATTGAGGAGAACTACCTCATATGTGGATGACCAGGAT

>M6-PGSC0003DMG400032572-(rev)M6LRR-RLP\_434

GCCAAGTAATCAGGTTAGAACATTGAGGAGAACTACCTCATATGTGGATGACCAGGATTACATTTTGT

GGACTTCAGGATGTTGTACAAACATTGCTATCTGAACTTCTCAAAGCAGT

>M6-PGSC0003DMG400032572-(rev)M6LRR-RLP\_558



CGTCGAAGCGTCGTCTCCATTTATGGAATGGGCGGATTAGGCAAGACCGCTCTTGCAAGAAACCTCTAC  
AAAAATCCTAATATAGCCTCTAGCTTCTCTACACGCGCTTGGATATGTGTT

>M6-PGSC0003DMG400032572-(rev)M6LRR-RLP\_62

AGTTTCCCTGCGTAAAAATCTGAGAAAGGAAATTGAGTGGCTGAGAAATGAGTTACTCTTCATACAGTC  
TTTCTCAAAGATGCAGAACTAAAGCAATGTGTAGATCATAGAGTTCAACA

>M6-PGSC0003DMG400032572-(rev)M6LRR-RLP\_682

AAGAGTACAACACAATGGATCTTCTTAAGACTATCATAAAATCCATCCAAGGTCGCACCAAGGGAACCTCT  
AGGATTGTTAGAACTATGACAGAAGGAGATCTAGAAGTTCACCTTCGTG

>M6-PGSC0003DMG400032572-(rev)M6LRR-RLP\_744

GGAACCTCTAGGATTGTTAGAACTATGACAGAAGGAGATCTAGAAGTTCACCTTCGTGATCTATTGAAA  
GAACGCAAATACCTTGTGGTGGTTGATGATGTATGGCAGAGAGAAGCATGG

>M6-PGSC0003DMG400032782M6G-LecRK\_0

CTCTCTCTCTCTCTCTCTCTCTTATCTCATATCAGCAAAAAGCCACACAAAACCTGCGTTTGCACCAAAC  
AAATGCAATTTTGTACCTCTTCTGTTTCATCACTCTTCTTGCATACGT

>M6-PGSC0003DMG400032782M6G-LecRK\_1054

TGGAGGAGGTGTCACTTCAGCAATTCTTGATGGAAATGCTTGGAAAATTTATGGTGAGAAGAGAGTGT  
GCTCTGGCAGTTCATTTCCCTGATGATAAATATCCAAATGCGACTCGGTT

>M6-PGSC0003DMG400032782M6G-LecRK\_1116

GAGTGTGCTCTGGCAGTTCATTTCCCTGATGATAAATATCCAAATGCGACTCGGTTGGCTGTTCTTGG  
AGAAGATGGTTCATTACTTTTAGCATTCTTCAAGATGAATCGAAGCTTG

>M6-PGSC0003DMG400032782M6G-LecRK\_1178

GTTCTTGGAGAAGATGGTTCATTACTTTTAGCATTCTTCAAGATGAATCGAAGCTTGACTCGGGGACAA  
GAATCCACAAGATGAATGCAGCAGACCAGACTCTTGTGATCCATATTTT

>M6-PGSC0003DMG400032782M6G-LecRK\_124

TCTTCTGTGTAGACTGTCTTCTCTGTTGTTTCATTCAAATGAATTTTTTTCAGAGCTTTGACTTGAAT  
GATTTCTTATTGCTTCTTCTGCTTGTGGGTCTTGTTCACCTTTCAC

>M6-PGSC0003DMG400032782M6G-LecRK\_1240

GGGACAAGAATCCACAAGATGAATGCAGCAGACCAGACTCTTGTGATCCATATTTTCAATTTGTTATAGT  
GGCAACAAGTGTGAGTCCCATCAGCCCTTCATCTTGCAAACCTGATAC

>M6-PGSC0003DMG400032782M6G-LecRK\_1302

GTTATAGTGGCAACAAGTGTCAAGTGTCCATCAGCCCTTCCATCTTGCAAACCTGATACTGCTTCGTTTTGC  
AATAAAGATGTGGAGCTTGTAGATGCTGGGGATAGTCTTGGTTATTTTG

>M6-PGSC0003DMG400032782M6G-LecRK\_1364

TCGTTTTGCAATAAAGATGTGGAGCTTGTAGATGCTGGGGATAGTCTTGGTTATTTTGCACTTGGTTTTG  
TTTCTCCATCTGCTAAACTGATTTAAATGGTTGCAAAGCTTCTTGCCTT

>M6-PGSC0003DMG400032782M6G-LecRK\_1426

TGGTTTTGTTTCTCCATCTGCTAAACTGATTTAAATGGTTGCAAAGCTTCTTGCCTTGGCAATTGCTCAT  
GTGCTGCTATGTTCTTTGATAGCACTTCAGGGAATTGTTTTATGTTTGA

>M6-PGSC0003DMG400032782M6G-LecRK\_1488

ATTGCTCATGTGCTGCTATGTTCTTTGATAGCACTTCAGGGAATTGTTTTATGTTTGATCAAATAGGAAGT  
TTACAAGGTTTCGGTTAATGGAGCTGGTTTCAAGTCATACATTAAAGTAT

>M6-PGSC0003DMG400032782M6G-LecRK\_1550

ATAGGAAGTTTACAAGGTTTCGGTTAATGGAGCTGGTTTCAAGTCATACATTAAAGTATCAGCTAGCCAG  
GGGAATGGGGATAGCGGTGGTGGAGGTGGAGGTGGGAAGGGACGATTACCT

>M6-PGSC0003DMG400032782M6G-LecRK\_1612

TAGCCAGGGGAATGGGGATAGCGGTGGTGGAGGTGGAGGTGGGAAGGGACGATTACCTATTGTCTTT  
GGTATCGTCATTTCTTCGGCTATTGTCATTCTTGGCCTAATTTATGGAGGTAT

>M6-PGSC0003DMG400032782M6G-LecRK\_1674

TCTTTGGTATCGTCATTTCTTCGGCTATTGTCATTCTTGGCCTAATTTATGGAGGTATTAGATATCAGAGG  
AGAAAGAACAACAAGATGCCTGATTCTGCAAAGGGGAGTTCAGAAGAAG

>M6-PGSC0003DMG400032782M6G-LecRK\_1736

TATCAGAGGAGAAAGAACAACAAGATGCCTGATTCTGCAAAGGGGAGTTCAGAAGAAGACAATTTCTT  
GGAGGGCCTATCAGGGATGCCGATTCTTTAGTTACAAAGAACTTCAGAAT

>M6-PGSC0003DMG400032782M6G-LecRK\_1798

TTTCTTGGAGGGCCTATCAGGGATGCCGATTCTTTAGTTACAAAGAACTTCAGAATGCAACTAATAAC  
TTCTCAATAAACTTGGGCAAGGAGGGTTTGGTTTCAAGTTTACCAAGGGGT

>M6-PGSC0003DMG400032782M6G-LecRK\_186

TGACTTGAATGATTTCTTATTGCTTCTTCTGCTCTTGTGGGTCCTTGTTCACTTTCACGTTTTTTGATTCTTG

GACCATAATTTTCATACCCCATGTGAATGTGATAGACAATGTCATTTA

>M6-PGSC0003DMG400032782M6G-LecRK\_1860

CTAATAACTTCTCAATAAACTTGGGCAAGGAGGGTTTGGTTTCAGTTTACCAAGGGGTCCTTCCAGATG  
GGACTAGACTTGCTGTGAAGAAATTGGAAGGCATTGGCCAGGGAAAGAAAG

>M6-PGSC0003DMG400032782M6G-LecRK\_1922

CCAGATGGGACTAGACTTGCTGTGAAGAAATTGGAAGGCATTGGCCAGGGAAAGAAAGAATTTTCGAGC  
AGAAGTTAGTATTATAGGCAGCATCCATCATCTTCATTTGGTGAGACTGAGA

>M6-PGSC0003DMG400032782M6G-LecRK\_1984

TCGAGCAGAAGTTAGTATTATAGGCAGCATCCATCATCTTCATTTGGTGAGACTGAGAGGTTTTTGTGCT  
GAAGGAACACACAGGCTTCTGGCTTATGAGTACATGGGAAATGGATCTTT

>M6-PGSC0003DMG400032782M6G-LecRK\_2046

TTTGTGCTGAAGGAACACACAGGCTTCTGGCTTATGAGTACATGGGAAATGGATCTTTAGAGAAATGGC  
TTTTCAAGAAGAACAAGGAATTCTTGCTAGACTGGGATACACGATTTAATA

>M6-PGSC0003DMG400032782M6G-LecRK\_2108

AAATGGCTTTTTCAAGAAGAACAAGGAATTCTTGCTAGACTGGGATACACGATTTAATATTGCACTTGGCA  
CAGCAAAGGCCTAGCTTACCTCCACGAGGACTGTGATGTAAAAATTGTG

>M6-PGSC0003DMG400032782M6G-LecRK\_2170

ACTTGGCACAGCAAAGGCCTAGCTTACCTCCACGAGGACTGTGATGTAAAAATTGTGCATTGCGATAT  
CAAACCTGAAAATGTACTTCTTGATGATCATTTCTCGCCAAGGTCTCAGA

>M6-PGSC0003DMG400032782M6G-LecRK\_2232

GCGATATCAAACCTGAAAATGTACTTCTTGATGATCATTTCTCGCCAAGGTCTCAGATTTTGGCCTTGCT  
AAGCTGATGACCAGAGAGCAGAGCCATGTTTTACAACCATGAGGGGTA

>M6-PGSC0003DMG400032782M6G-LecRK\_2294

GGCCTTGCTAAGCTGATGACCAGAGAGCAGAGCCATGTTTTACAACCATGAGGGGTACAAGAGGATA  
TCTCGCACCAGAATGGATCACAAATTATGCCATATCAGAGAAAAGTGACGTT

>M6-PGSC0003DMG400032782M6G-LecRK\_2356

AGGATATCTCGCACCAGAATGGATCACAAATTATGCCATATCAGAGAAAAGTGACGTTTTTAGTTATGG  
AATGGTTTTGCTTGAGATAATTGGAGGTAGGAAGAATTATGATCCTTCACA

>M6-PGSC0003DMG400032782M6G-LecRK\_2418

GTTATGGAATGGTTTTGCTTGAGATAATTGGAGGTAGGAAGAATTATGATCCTTCACAAAGTTCAGAGA  
AATCCCATTTCCCTCATATGCCTTTAGGATGATGGAAGAGGGGAAATTGG

>M6-PGSC0003DMG400032782M6G-LecRK\_248

TTTGATTCTTGGACCATAATTCATACCCCATGTGAATGTGATAGACAATGTCATTTATGAGTTCCTGCC  
TTCTTTCTTATCATAATTCTCATTCAACTTTTCCCCTTTTGAATCTGAG

>M6-PGSC0003DMG400032782M6G-LecRK\_2480

TCAGAGAAATCCCATTTCCCTCATATGCCTTTAGGATGATGGAAGAGGGGAAATTGGAAGACCTTATC  
GATAGGAACTTGAAAGTTGAAGAAGAGGATGAAAGGGTCTCCATAGCAATT

>M6-PGSC0003DMG400032782M6G-LecRK\_2542

CCTTATCGATAGGAACTTGAAAGTTGAAGAAGAGGATGAAAGGGTCTCCATAGCAATTAAAGTTGCTCT  
GTGGTGTATACAGGATGACATGTCTCTCAGGCCATCCATGGCTAAGGTTGT

>M6-PGSC0003DMG400032782M6G-LecRK\_2604

TTGCTCTGGTGTATACAGGATGACATGTCTCTCAGGCCATCCATGGCTAAGGTTGTGCAAATGCTGGA  
AGGGATCTCCCATGTCCCTTACCGCCAACCTGCTTCTCAAATGGGGTCAC

>M6-PGSC0003DMG400032782M6G-LecRK\_2666

ATGCTGGAAGGGATCTCCCATGTCCCTTACCGCCAACCTGCTTCTCAAATGGGGTCACGACTTTTTTCAA  
GTTATTTGAAATCACTAAGTGGCGAGGGTACTTCATCCGGCACCTCTGCA

>M6-PGSC0003DMG400032782M6G-LecRK\_2728

TTTTTCAAGTTATTTGAAATCACTAAGTGGCGAGGGTACTTCATCCGGCACCTCTGCACCATCAGACTGC  
AACAGCGATGCTTATCTTTCCGGCTGTTCCGGCTCTCAGGTCCAAGATAGCA

>M6-PGSC0003DMG400032782M6G-LecRK\_2852

CAAGAAGCATAAACATAGTCGTTTCATGTAAGGGCTGTTGTAGATGATTGACAAACATGTGCAATGGTTT  
CATACTTTTAGTTTTTCTGTATATTTAAATTATCTAGGAAATTTTTTTGC

>M6-PGSC0003DMG400032782M6G-LecRK\_2914

ATGGTTTCATACCTTTTAGTTTTCTGTATATTTAAATTATCTAGGAAATTTTTTTGCCATATTAGCCATGA  
CAAAGGTTGGAGTTGATTGAGAATGTTTTATTTGTATATATATCAATG

>M6-PGSC0003DMG400032782M6G-LecRK\_2976

TTAGCCATGACAAAGGTTGGAGTTGATTGAGAATGTTTTATTTGTATATATATCAATGTTATAAATGAGT  
TGAAAATAAACAAAGAAAATGCATTTGGTAACACTCATCCTGGATTTCAA

>M6-PGSC0003DMG400032782M6G-LecRK\_310

TTCCCTGCCTTCTTTCTTATCATAATTCTCATTCAACTTTTCCCCTTTTGAATCTGAGGTTTTGGTGGATATT  
TTCCAGATTGTTCTTGTTCCAAATTGGGTAATGGAGTCTTGGATTTC

>M6-PGSC0003DMG400032782M6G-LecRK\_372

TGGTGGATATTTTCCAGATTGTTCTTGTTCCAAATTGGGTAATGGAGTCTTGGATTTCCTTTATTTAGTA  
ATGATCTTCCTATTTCTGCCTGAGACTTGTATAGCTAGTGTTTCAGAATA

>M6-PGSC0003DMG400032782M6G-LecRK\_434

TATTTAGTAATGATCTTCCTATTTCTGCCTGAGACTTGTATAGCTAGTGTTTCAGAATAAAGGCAGACTGA  
ATCTGGGGTTTTCAAGGCTCTCAAATGACTTGGATAGACAACGATGGATTA

>M6-PGSC0003DMG400032782M6G-LecRK\_496

CAGACTGAATCTGGGGTTTTCAAGGCTCTCAAATGACTTGGATAGACAACGATGGATTAATTCTTGTTC  
AATAGCTCCAAATTTGCATTTGGATTTAACCTACTAATGATGTTACCTT

>M6-PGSC0003DMG400032782M6G-LecRK\_558

TTGTTTCCAATAGCTCCAAATTTGCATTTGGATTTAACCTACTAATGATGTTACCTTGTTCCTTCTTGTG  
TCATCCATGTAAGTAGCTCTACCATCGTTTGGTCAGCTAACAGAGATT

>M6-PGSC0003DMG400032782M6G-LecRK\_62

TGCACCAAACAAATGCAATTTTGTACCTCTTCTGTTTCATCACTCTTCTTGCATACGTGCTGTCTTCCTGTG  
TAGACTGTCTTCTCTCTGGTTGTTTCATTCAAATGAATTTTTTTCAGA

>M6-PGSC0003DMG400032782M6G-LecRK\_620

CTTCTTGTGTCATCCATGTAAGTAGCTCTACCATCGTTTGGTCAGCTAACAGAGATTCCCCTGTTTCGAAA  
TAATGATAATTTTGTGTTTGGATGATACTGGAAATGCCAATTTGCAAAGT

>M6-PGSC0003DMG400032782M6G-LecRK\_682

TGTTTCGAAATAATGATAATTTTGTGTTTGGATGATACTGGAAATGCCAATTTGCAAAGTGGGAAATCATCA  
ATTTGGTCTACGAATACGGCTGTTAAAGGAGTTTCCGCCATGGAATTGAA

>M6-PGSC0003DMG400032782M6G-LecRK\_744

AATCATCAATTTGGTCTACGAATACGGCTGTTAAAGGAGTTTCCGCCATGGAATTGAAGGATTCGGGGA  
ATCTAATTTTGGTTGGGAAAGATGGTAGCGTTATTTGGGAAAGCTTCACAC

>M6-PGSC0003DMG400032782M6G-LecRK\_806

TCGGGGAATCTAATTTTGGTTGGGAAAGATGGTAGCGTTATTTGGGAAAGCTTCACACATCCTGTTGAT

ACTCTTCTGTCAGGCCAGAATTTCACTCAAGGAATGAAGCTTGTAAGCACT

>M6-PGSC0003DMG400032782M6G-LecRK\_868

TGTTGATACTCTTCTGTCAGGCCAGAATTTCACTCAAGGAATGAAGCTTGTAAGCACTCCTAACAACAAT

AATTTGAGTTATTTCACTTGAATTTAAGTCTGGGGATATGGTTCTTTCTGC

>M6-PGSC0003DMG400032782M6G-LecRK\_930

ACAACAATAATTTGAGTTATTTCACTTGAATTTAAGTCTGGGGATATGGTTCTTTCTGCAAGTTTTCAGCCT

CCACAGCCTTATTGGGCTATGGGGAAAGATGATAGAAGGACTATCAATC

>M6-PGSC0003DMG400032782M6G-LecRK\_992

TTTCAGCCTCCACAGCCTTATTGGGCTATGGGGAAAGATGATAGAAGGACTATCAATCAAGTTGGAGGA

GGTGTCACCTCAGCAATTCTTGATGGAAATGCTTGGAAAATTTATGGTGAG

>M6-PGSC0003DMG400032785-(rev)M6LRR-RLP\_0

TGTATAGTTCCTATATAAACATTCGGTTAGGTAGCTAGCAAATTAGTTTGCCAGAAAAGAAAGTAGAGT

AATAGTGGGGATGGGAAATATTAAGTTTTTGTGTTAGTGTTTTTTCTTAT

>M6-PGSC0003DMG400032785-(rev)M6LRR-RLP\_1037

AATAACTTCAATTCACCATCTTTTCATCACTCAAGATTTTTCCGTATCTCAAGCATCTCAATCTCGCCTCG

AATGAAATAGATGGAAATATCGAAATGAATGGTTTGTACGCGCCTCT

>M6-PGSC0003DMG400032785-(rev)M6LRR-RLP\_1098

ATCTCGCCTCGAATGAAATAGATGGAAATATCGAAATGAATGGTTTGTACGCGCCTCTTCATATCCAAG

TCTTCCCACAAAATATCTCAATTTTATTTCTTCACATATCAAATTATAC

>M6-PGSC0003DMG400032785-(rev)M6LRR-RLP\_1159

ATATCCAAGTCTTCCCACAAAATATCTCAATTTTATTTCTTCACATATCAAATTATACTTTATTTTTTATTA

ACCTGTGTAGATATAATTGATTTGAGCACTTTGGAATATCTAGATCT

>M6-PGSC0003DMG400032785-(rev)M6LRR-RLP\_122

TAATAATGGCGAATGGTTGTTGGGAGGAAGAGAGAAGTGCTCTTGGATCTGCAAGCAAATATAATG

AGTTCTAATGGCGAATTGTTGGTTGATTGGGAAGCTTATTATACGAATGGTT

>M6-PGSC0003DMG400032785-(rev)M6LRR-RLP\_1220

TATTTTTTATTAACCTGTGTAGATATAATTGATTTGAGCACTTTGGAATATCTAGATCTTTCGGATAACAA

TATAGAGAGCTTTGCGACTACCAAAGGTACACGAATCAATGCAGTTGCT

>M6-PGSC0003DMG400032785-(rev)M6LRR-RLP\_1281

CGGATAACAATATAGAGAGCTTTGCGACTACCAAAGGTACACGAATCAATGCAGTTGCTCTAATGTTGA  
ATGTTCTATTTTAACCTTAACACATCCTACAGAACAAAATACATCTTTATG

>M6-PGSC0003DMG400032785-(rev)M6LRR-RLP\_1342

AATGTTGAATGTTCTATTTTAACCTTAACACATCCTACAGAACAAAATACATCTTTATGGATTTGAATAAC  
CATGTGCCGTGGTATGTAAATTTTTGATTGAAAACGTGGGATACAAA

>M6-PGSC0003DMG400032785-(rev)M6LRR-RLP\_1403

TTTGAATAACCATGTGCCGTGGTATGTAAATTTTTGATTGAAAACGTGGGATACAAATTAGATTTTAAT  
AAGATTGAACTATTCATTCTTATTTAAAAATGTATACTATTATTTATTT

>M6-PGSC0003DMG400032785-(rev)M6LRR-RLP\_1464

AGATTTTAATAAGATTGAACTATTCATTCTTATTTAAAAATGTATACTATTATTTATTTATTCACCATTTAAC  
AGGTAACAAAAGAATGAGTTCTCTGCGGAATTTACTATTGGGAAGTT

>M6-PGSC0003DMG400032785-(rev)M6LRR-RLP\_1525

TCACCATTTAACAGGTAACAAAAGAATGAGTTCTCTGCGGAATTTACTATTGGGAAGTTCCTACTCCAAC  
TCTAGCAGAGTCATACAGTCCCTAAAACCATTCTCATCTCTTAAGTCACT

>M6-PGSC0003DMG400032785-(rev)M6LRR-RLP\_1586

TACTCCAACCTCTAGCAGAGTCATACAGTCCCTAAAACCATTCTCATCTCTTAAGTCACTTTCTTATGAAGA  
TAGTGATCTCACTTCTCCAACCATAATTTACGGTACTCAAAATTCATA

>M6-PGSC0003DMG400032785-(rev)M6LRR-RLP\_1647

CTTATGAAGATAGTGATCTCACTTCTCCAACCATAATTTACGGTACTCAAAATTCATATATACCTTAGCTT  
ACTTCTATCGCCACTCTTTTCGTTTGAAATGTGAATATATTTTTCTTT

>M6-PGSC0003DMG400032785-(rev)M6LRR-RLP\_1708

TACCTTAGCTTACTTCTATCGCCACTCTTTTCGTTTGAAATGTGAATATATTTTTCTTTCTTTTTTTGGAC  
TCTATCATATAAGCATTAAAGAAATCTGAGCACGATGGAGTACCTATA

>M6-PGSC0003DMG400032785-(rev)M6LRR-RLP\_1769

TTTTTTTTGGACTCTATCATATAAGCATTAAAGAAATCTGAGCACGATGGAGTACCTATACTTGGAGGGAT  
GTTCTTTAAATGACAACTTTCTCCAAACATTGGACAAATGACTTCTCTC

>M6-PGSC0003DMG400032785-(rev)M6LRR-RLP\_183

TATAATGAGTTCTAATGGCGAATTGTTGGTTGATTGGGAAGCTTATTATACGAATGGTTTTACAGATTGT  
TGTTTTCTGGAAAAGGGTAAAATGCAGCTTAGCAACAGGTCGAGTGATCAA

>M6-PGSC0003DMG400032785-(rev)M6LRR-RLP\_1891

GGTGTT CAGTATAGCTTTTGGTGACAATGATGGCACCTCCCTAATCAAGGTACCCAATTTTTCTCTTTTT  
TCCCTAATGCCCGCATTTTCATGTTGGAGGTCTGATTTTATCATGTTCA

>M6-PGSC0003DMG400032785-(rev)M6LRR-RLP\_244

ACAGATTGTTGTTTCTGGAAAAGGGTAAAATGCAGCTTAGCAACAGGTTCGAGTGATCAAACCTCGATCTC  
GAAACAAATTTTGGTACAGGGGATGGTTGGAGATTTAATGCCTCTCTCTTT

>M6-PGSC0003DMG400032785-(rev)M6LRR-RLP\_2501

ATTGGATCCCAAATTTCCAGTTGGAGTTTTTTGCTATCGAAGGATGTAAAAACCTTCAAAAATTGCCTTCT  
TTCCTTCACTACCAATATGACTTGAGGATTCTTACTATTGAAGGAAATC

>M6-PGSC0003DMG400032785-(rev)M6LRR-RLP\_2562

ATTGCCTTCTTTCCTTCACTACCAATATGACTTGAGGATTCTTACTATTGAAGGAAATCAATTGTCAGGGA  
TCTTTCCAACATGGTTGTTAGAAAATAACACCAGACTTGCAGGGATTTA

>M6-PGSC0003DMG400032785-(rev)M6LRR-RLP\_2684

GTAGAGATAATGCTTTCACGGACCATTCAAGTTGCCATCGAGTGTTACCTCCATCTAGAGGCGATTGA  
TGTATCTAATAACAACTAAATGGATATATTCCAGAAAATATGAGTTTAG

>M6-PGSC0003DMG400032785-(rev)M6LRR-RLP\_2745

GGCGATTGATGTATCTAATAACAACTAAATGGATATATTCCAGAAAATATGAGTTTAGCTTTCCCAAAG  
CTTACTTATTTGAACATGTCACAAAATTATCTTGAAGGTCCTATACCTTC

>M6-PGSC0003DMG400032785-(rev)M6LRR-RLP\_2806

TTCCCAAAGCTTACTTATTTGAACATGTCACAAAATTATCTTGAAGGTCCTATACCTTCTAAGATTAGTGG  
CATTCAATTTAGAATTTCTAGATCTATCTGTCAATAACTTGTCCGGAGAA

>M6-PGSC0003DMG400032785-(rev)M6LRR-RLP\_2867

AGATTAGTGGCATTCAATTTAGAATTTCTAGATCTATCTGTCAATAACTTGTCCGGAGAAGTTCCTGGTGAT  
CTGGCGATTGGTTCTCCAGCATTAGTTTACCTTCGATTGTCTCACAACA

>M6-PGSC0003DMG400032785-(rev)M6LRR-RLP\_2928

TCCTGGTGATCTGGCGATTGGTTCTCCAGCATTAGTTTACCTTCGATTGTCTCACAACAAGTTAAAAGGCC  
AAATTTTTCCAAAGGATGTCAAACCAAGGATGTTATTGTTTTGTACTT

>M6-PGSC0003DMG400032785-(rev)M6LRR-RLP\_2989

TTAAAAGGCCAAATTTTTCCAAAGGATGTCAAACCAAGGATGTTATTGTTTTGTACTTGAATGGAAATA



ACTTTGAGGGACCACTACCTAGCAACATGTTTATCACATCCCTTTTTGTA

>M6-PGSC0003DMG400032785-(rev)M6LRR-RLP\_305

TCGATCTCGAAACAAATTTTGGTACAGGGGATGGTTGGAGATTTAATGCCTCTCTCTTTCTTCCATTCAAG

TCACTACAAGTTCTTTTATTGTCTTACGGAAATATTATAGGGTGGACAA

>M6-PGSC0003DMG400032785-(rev)M6LRR-RLP\_3050

ATGGAAATAACTTTGAGGGACCACTACCTAGCAACATGTTTATCACATCCCTTTTTGTACTAGACGCTAG

CAACAATAATTTCTCTGGAGAGATCCGAGATGTGTTAGGAATAATACAA

>M6-PGSC0003DMG400032785-(rev)M6LRR-RLP\_3111

AGACGCTAGCAACAATAATTTCTCTGGAGAGATCCGAGATGTGTTAGGAATAATACAAGATTGTTACA

GCTTGATTTGTCCAAGAATCATCTCAAAGGTTCAATTCCAGTTGAGATTTG

>M6-PGSC0003DMG400032785-(rev)M6LRR-RLP\_3172

TTGTTACAGCTTGATTTGTCCAAGAATCATCTCAAAGGTTCAATTCCAGTTGAGATTTGCAATTTAAAGCT

CATTCAGGTCTTAGCTATATCTGAAAACAGGCTTTCAGGCCTTATTCT

>M6-PGSC0003DMG400032785-(rev)M6LRR-RLP\_3233

ATTTAAAGCTCATTGAGGTCTTAGCTATATCTGAAAACAGGCTTTCAGGCCTTATTCTTCTTGTGTGAAT

TCTTTACCTGTGCAACACATCCATCTTGAGAAAAATCAATTGGGTGGTG

>M6-PGSC0003DMG400032785-(rev)M6LRR-RLP\_3294

TTGTGTGAATTCTTTACCTGTGCAACACATCCATCTTGAGAAAAATCAATTGGGTGGTGAATTGGGACAT

GTACTTTTCAACTTCTTCTCTGATAACTTTGGATCTTGGGTACAACAA

>M6-PGSC0003DMG400032785-(rev)M6LRR-RLP\_3355

TTGGGACATGTACTTTTCAACTTCTTCTCTGATAACTTTGGATCTTGGGTACAACAATTTTACAGGAAA

TATCCCACACACCGTAGGTTGCTTAATAATCTGAACTACCTTCTCCT

>M6-PGSC0003DMG400032785-(rev)M6LRR-RLP\_3416

TTACAGGAAATATCCCACACACCGTAGGTTGCTTAATAATCTGAACTACCTTCTCCTTAGCAATAACAAA

TTGGAAGGGCAGATTCCAACCTCAGATTTGTATGCTGAATAAGTTATCTA

>M6-PGSC0003DMG400032785-(rev)M6LRR-RLP\_3477

CAATAACAAATTGGAAGGGCAGATTCCAACCTCAGATTTGTATGCTGAATAAGTTATCTATTGTGGATTTA

TCTTTCAATAAGCTTTATGGTCCACTCCTTCTTGTGGTTACTTAAC

>M6-PGSC0003DMG400032785-(rev)M6LRR-RLP\_3538

GTGGATTTATCTTTCAATAAGCTTTATGGTCCACTCCTTCCTTGTTTGGGTTACTTAACACAAGCCAAAAA  
GGATGCAGAGATAAGTAGGACCTACTACCCTATGACTTTTGGGCATTCA

>M6-PGSC0003DMG400032785-(rev)M6LRR-RLP\_3599

AAGCCAAAAAGGATGCAGAGATAAGTAGGACCTACTACCCTATGACTTTTGGGCATTCATGGTTAAATT  
TTGTGGCCTTGATACATTTGAAACAGAACTACCACGATAGTCAAGGACTTG

>M6-PGSC0003DMG400032785-(rev)M6LRR-RLP\_366

TCCATTCAAGTCACTACAAGTTCTTTTATTGTCTTACGGAAATATTATAGGGTGGACAAAAAATGAAGGT  
ATATATGGAGTATGGAGTATATTCATGACTCTTGAAAAATGAACTATAT

>M6-PGSC0003DMG400032785-(rev)M6LRR-RLP\_3660

GTTAAATTTTGTGGCCTTGATACATTTGAAACAGAACTACCACGATAGTCAAGGACTTGTAATTGACACA  
TTTTTAATGGATGTGGAAAACCAGGTCCGATTTTCAACGAAAAGAACTC

>M6-PGSC0003DMG400032785-(rev)M6LRR-RLP\_3721

ATTGACACATTTTTAATGGATGTGGAAAACCAGGTCCGATTTTCAACGAAAAGAACTCATACATTTATA  
AGGGAATCATTTTAAAATATATGTCGGGTATTGATCTCTCAAGTAATAGA

>M6-PGSC0003DMG400032785-(rev)M6LRR-RLP\_3782

ACATTTATAAGGGAATCATTTTAAAATATATGTCGGGTATTGATCTCTCAAGTAATAGATTAAGTGGTGA  
AATTCCCGTTGAGCTAGGGAAGATGAGTACTATACATGCACTGAATCTAT

>M6-PGSC0003DMG400032785-(rev)M6LRR-RLP\_3843

AAGTGGTGAATTTCCCGTTGAGCTAGGGAAGATGAGTACTATACATGCACTGAATCTATCACACAACCA  
TCTCATCGGAAGAATACCAAATAGCTTCTCCAATCTACAGAAAATTGAGAG

>M6-PGSC0003DMG400032785-(rev)M6LRR-RLP\_3904

CACAACCATCTCATCGGAAGAATACCAAATAGCTTCTCCAATCTACAGAAAATTGAGAGTTTAGACCTTT  
CCTTCAACAACCTGAATGGGAGAATTCCTGTTGGTCTAATTGAGCTAAAT

>M6-PGSC0003DMG400032785-(rev)M6LRR-RLP\_3965

TAGACCTTTCCTTCAACAACCTGAATGGGAGAATTCCTGTTGGTCTAATTGAGCTAAATCCTTGGGAAGTA  
TTCAATGTTTCATTCAATAACTTATCCGGTGCAGTGCCTGATTTTAAAG

>M6-PGSC0003DMG400032785-(rev)M6LRR-RLP\_4026

TTTGGAAAGTATTCAATGTTTCATTCAATAACTTATCCGGTGCAGTGCCTGATTTTAAAGCTCAATTTGCAA  
CTTTCGATAAAAGCAGCTACGAGGGAAATCCTTTTCTTTGCGGTGATCC

>M6-PGSC0003DMG400032785-(rev)M6LRR-RLP\_4087

CAATTTGCAACTTTTCGATAAAAGCAGCTACGAGGGAAATCCTTTTCTTTGCGGTGATCCATTAGACAACA  
AGTGTGGCATGAGTCCTAAATTATCAAATACCTCCAAGGTTAATGGAGAT

>M6-PGSC0003DMG400032785-(rev)M6LRR-RLP\_4148

TAGACAACAAGTGTGGCATGAGTCCTAAATTATCAAATACCTCCAAGGTTAATGGAGATGAGGAATCAT  
CAGAATTGGAGGATATGGAGTGTTTTTACATTGGCTTTGTTGTGTCTTATG

>M6-PGSC0003DMG400032785-(rev)M6LRR-RLP\_4209

GGAATCATCAGAATTGGAGGATATGGAGTGTTTTTACATTGGCTTTGTTGTGTCTTATGGAGCGATCTTG  
TTGGGATTAGCTACAGCGCTCTGCTTCAATTGTCATTGGAGAACACCATG

>M6-PGSC0003DMG400032785-(rev)M6LRR-RLP\_427

AATGAAGGTATATATGGAGTATGGAGTATATTCATGACTCTTGAAAAATGAACTATATGGAGTATATA  
AATTACTAACATGTGTTTTTTGGTCTAATTTTGTAAATCCAGGTTTCAGTAA

>M6-PGSC0003DMG400032785-(rev)M6LRR-RLP\_4270

GCGATCTTGTTGGGATTAGCTACAGCGCTCTGCTTCAATTGTCATTGGAGAACACCATGGTTCAGGATGA  
TAGAGTCATTGATGTTTTATTGTTACTATTTTGTGTTAGACAACATTGTT

>M6-PGSC0003DMG400032785-(rev)M6LRR-RLP\_4331

TCAGGATGATAGAGTCATTGATGTTTTATTGTTACTATTTTGTGTTAGACAACATTGTTACACCCCTCAAG  
AGTAGATGGTGCAGGAAAGTTGGTTAATTAGGTAGTTGTTTAAAATTAT

>M6-PGSC0003DMG400032785-(rev)M6LRR-RLP\_4367

ATTTTGTGTTAGACAACATTGTTACACCCCTCAAGAGTAGATGGTGCAGGAAAGTTGGTTAATTAGGTA  
GTTGTTTAAAATTATTGTTGTATGTCTATCACAATTATTATGTTGTTATTC

>M6-PGSC0003DMG400032785-(rev)M6LRR-RLP\_488

AGTATATAAATTACTAACATGTGTTTTTTGGTCTAATTTTGTAAATCCAGGTTTCAGTAAACTAAAGCAGCT  
TCCCAACCTGAAAGTACTCGATTTGCAATTTAATCATATCCATCCTAAA

>M6-PGSC0003DMG400032785-(rev)M6LRR-RLP\_549

TAAAGCAGCTTCCCAACCTGAAAGTACTCGATTTGCAATTTAATCATATCCATCCTAAAGATTTACTATCA  
TCTTTACGTTGGATTTTCATCTCTTGAGGTTCTAAAACCTGGTGCAGATG

>M6-PGSC0003DMG400032785-(rev)M6LRR-RLP\_61

AGTAGAGTAATAGTGGGGATGGGAAATATTAAGTTTTTGTGTTAGTGTTTTTTCTTATAGTAATAATGG

CGAATGGTTGTTGGGAGGAAGAGAGAAGTGCTCTCTTGGATCTGCAAGCA

>M6-PGSC0003DMG400032785-(rev)M6LRR-RLP\_610

TTTACTATCATCTTTACGTTGGATTTCATCTCTTGAGGTTCTAAACTTGGTGCAGATGTTGATACCTCTTT  
CAACGTACCGCCGACATATAATAGCAGTATATTCTATATCCTCCTACT

>M6-PGSC0003DMG400032785-(rev)M6LRR-RLP\_671

GATACCTCTTCAACGTACCGCCGACATATAATAGCAGTATATTCTATATCCTCCTACTCTATAGTCCATA  
ATTGGCCAATAATTTACTTAGAAGTTGTAATTTTTGGATGAAGGCACGA

>M6-PGSC0003DMG400032785-(rev)M6LRR-RLP\_732

ATAGTCCATAATTGGCCAATAATTTACTTAGAAGTTGTAATTTTTGGATGAAGGCACGAGTAAGAAATGT  
GGAGGGCTAACCAATTTAAGAGAACTCTGGTTTGAAGGTTATGCAATCAA

>M6-PGSC0003DMG400032785-(rev)M6LRR-RLP\_793

AAGAAATGTGGAGGGCTAACCAATTTAAGAGAACTCTGGTTTGAAGGTTATGCAATCAATGACATCAAT  
AGCCTTTCTGCATTGGGTAAGCTCCCTTTAACAAAGTAGCAAATAACAAA

>M6-PGSC0003DMG400032785-(rev)M6LRR-RLP\_854

ACATCAATAGCCTTTCTGCATTGGGTAAGCTCCCTTTAACAAAGTAGCAAATAACAAATTTACAAGAG  
AACAAATTAACAACTAACACTAAGTATGGTCTCTTACGTATTTTTTTTTT

>M6-PGSC0003DMG400032785-(rev)M6LRR-RLP\_915

TCACAAGAGAACAATTAACAACTAACACTAAGTATGGTCTCTTACGTATTTTTTTTTTTCATAAATCAAAT  
GCAGGTGCAAATTCTGGACTGAGGAATTTAGAGAAGCTCATTTTGAATG

>M6-PGSC0003DMG400032785-(rev)M6LRR-RLP\_976

TAAATCAAATGCAGGTGCAAATTCTGGACTGAGGAATTTAGAGAAGCTCATTTTGAATGATAATAACTTC  
AATTCCACCATCTTTTCATCACTCAAGATTTTTCCGTATCTCAAGCATCT

>M6-PGSC0003DMG400032828-(rev)M6LRR-RLP\_0

TGCATTACTAGTCATTAACAAAATGGCTTCATTTTCTTTCCATTACCACTACTGCCTTTGTTATCTTGC  
TTCTAAGTCTTACCTCCAATGTGTTCAACAACTCAGCAGCCAAACACA

>M6-PGSC0003DMG400032828-(rev)M6LRR-RLP\_1024

GGGCATAGTGACGATGATCGTCGAAATTGTTTGCCAGAAAAGCCTCTTCAGAGAAGCAAGAAGGAAT  
GTGATGCTGTGGATGAGCATCCCATTGACTGTTTAGCATTTTCATTGTGGCAC

>M6-PGSC0003DMG400032828-(rev)M6LRR-RLP\_1088

GAATGTGATGCTGTGGATGAGCATCCCATTGACTGTTTAGCATTTCATTGTGGCACTTGATACTGTTTTCA  
TGTGTTGGTTCTACTGAAAATGTGACAAATTAGTACTAGCTTGAGTTTT

>M6-PGSC0003DMG400032828-(rev)M6LRR-RLP\_1152

GTTTTCATGTGTTGGTTCTACTGAAAATGTGACAAATTAGTACTAGCTTGAGTTTTCTTGACTTTTTTTTT  
CAAATTTAGTAGCCAATGTGAAAAAGAATAAAGTCAATAGTAATTCT

>M6-PGSC0003DMG400032828-(rev)M6LRR-RLP\_1216

TTTTTTTTCAAATTTAGTAGCCAATGTGAAAAAGAATAAAGTCAATAGTAATTCTGTAAATATGGTGTG  
TGATGAAGTTTTTCTTATGTTGGTTATTTAACTTTGATGCTGCTGCTATT

>M6-PGSC0003DMG400032828-(rev)M6LRR-RLP\_128

TCCTCCGTTAAGGGCATAAAAAACCCGAGGCTGCAAAAAGCCTACATTGCTCTCCAAGCTTGGAACGT  
GTTATCTACTCTGATCCTAACAACTTCACTTCTACTTGGGTTGGCCCTTCA

>M6-PGSC0003DMG400032828-(rev)M6LRR-RLP\_1280

GGTGTGTGATGAAGTTTTTCTTATGTTGGTTATTTAACTTTGATGCTGCTGCTATTATATGTTGTCCCAA  
ACATGATTCTCATTCTTGAAAAATCTTAATCAAGTTGCTACCTACATAG

>M6-PGSC0003DMG400032828-(rev)M6LRR-RLP\_1331

CTATTATATGTTGTCCCAAACATGATTCTCATTCTTGAAAAATCTTAATCAAGTTGCTACCTACATAGTG  
AATTCTTCTGTAATTCCATATTTTTCTTGACTGTATATTTCAATTTAGA

>M6-PGSC0003DMG400032828-(rev)M6LRR-RLP\_192

AACGTGTTATCTACTCTGATCCTAACAACTTCACTTCTACTTGGGTTGGCCCTTCAGTCTGCAACTACACT  
GGCATATATTGCGCGCCATTCCCTAATAACACCAAACCTCCAAGATGTTG

>M6-PGSC0003DMG400032828-(rev)M6LRR-RLP\_256

CTACACTGGCATATATTGCGCGCCATTCCCTAATAACACCAAACCTCCAAGATGTTGCTGGCATTGATCTG  
AACCATGCTGATATAGCCGGTTTCTACCTGAGGAACTCGGTCTTCTCAA

>M6-PGSC0003DMG400032828-(rev)M6LRR-RLP\_320

GATCTGAACCATGCTGATATAGCCGGTTTCTACCTGAGGAACTCGGTCTTCTCAATGACTTAGCGTTGC  
TGCACCTAACAGCAATCGCTTCTGTGGAATCCTCCCACTCTCTTTATCC

>M6-PGSC0003DMG400032828-(rev)M6LRR-RLP\_384

CGTTGCTGCACCTAACAGCAATCGCTTCTGTGGAATCCTCCCACTCTCTTTATCCAACCTCACTCTCTTGC  
ATGAGCTTGATCTCAGTAACAACAGATTGCTAGGACCTTTTCCTAACG

>M6-PGSC0003DMG400032828-(rev)M6LRR-RLP\_448

TCTCTTGCATGAGCTTGATCTCAGTAACAACAGATTCGTAGGACCTTTTCCTAACGTTGTCCTCTCTCTACC  
TTCCTTGAAATATCTTGATCTTCGCTACAATGAGTTTGAAGGGCCATT

>M6-PGSC0003DMG400032828-(rev)M6LRR-RLP\_512

TCTCTACCTTCCTTGAAATATCTTGATCTTCGCTACAATGAGTTTGAAGGGCCATTGCCTCCTCCACTCTTT  
AGCAAAGATCTCGATGCTATTTTAGTTAACAATAACCGTTTAACTAAC

>M6-PGSC0003DMG400032828-(rev)M6LRR-RLP\_576

CACTCTTTAGCAAAGATCTCGATGCTATTTTAGTTAACAATAACCGTTTAACTAACGTGATCCCTTCAAAT  
TTAGGATCAAGCTCTGCTTCTGTTGTGGTTTTTGCTAATAACTACTTTG

>M6-PGSC0003DMG400032828-(rev)M6LRR-RLP\_64

TATCTTGCTTCTAAGTCTTACCTCCAATGTGTTCAACAACCTCAGCAGCCAAACACAGCCATTCCCTCCTCCG  
TTAAGGGCATAAAAAACCCGAGGCTGCAAAAAGCCTACATTGCTCTCCA

>M6-PGSC0003DMG400032828-(rev)M6LRR-RLP\_640

TTCAAATTTAGGATCAAGCTCTGCTTCTGTTGTGGTTTTTGCTAATAACTACTTTGGAGGATGCTTACCAC  
CAAGCATAGCCAACTTTGCAAACACCATAGAAGAGTTGCTCCTTACTAA

>M6-PGSC0003DMG400032828-(rev)M6LRR-RLP\_704

TTACCACCAAGCATAGCCAACTTTGCAAACACCATAGAAGAGTTGCTCCTTACTAATACTAGCTTATCAG  
GGTGTTCCTCCTGAAGTGGGATTTTTGTACAAGCTAAAAGTTCTTGAT

>M6-PGSC0003DMG400032828-(rev)M6LRR-RLP\_768

TATCAGGGTGTTCCTCCTGAAGTGGGATTTTTGTACAAGCTAAAAGTTCTTGATGTGAGCAACAACAA  
GTTAGCAGGGACAATACCTTATACTATTGCTGGTTTAGCTCACTTGGAGC

>M6-PGSC0003DMG400032828-(rev)M6LRR-RLP\_832

CAACAAGTTAGCAGGGACAATACCTTATACTATTGCTGGTTTAGCTCACTTGGAGCTACTAAATTTAGCA  
CATAACATGTTTAGTGGAAGTGTACCAGAGGGAATATGTGTATTACCTAA

>M6-PGSC0003DMG400032828-(rev)M6LRR-RLP\_896

TTAGCACATAACATGTTTAGTGGAAGTGTACCAGAGGGAATATGTGTATTACCTAAGCTCTCAAACCTTCA  
CATTCTTATACTATTTATGTGAGGAGCAAGGTATTTGCAGCAACTTG

>M6-PGSC0003DMG400032828-(rev)M6LRR-RLP\_960

ACTTCACATTCTTATACTATTTATGTGAGGAGCAAGGTATTTGCAGCAACTTGACATCAAAGGGCAT

AGTGTACGATGATCGTCGAAATTGTTTGCCAGAAAAGCCTCTTCAGAGAA

>M6-PGSC0003DMG400033049-(rev)M6LRR-RLK\_0

GAGGAAAACAAGATTGTAATTAAGTGACACTAATTATCATGTCTGAAGTGGAATCTCATGTTCTTCTTCC  
CATTGTATTACTCAATTTCTTCATTCTCATAACAGGTATGTCATATTTGA

>M6-PGSC0003DMG400033049-(rev)M6LRR-RLK\_1037

CTTATCAGAAAATATGTTATTTGGTGAATTGCCTACGTCTATCGCGAACTGTAAACGATTAGTAGAGTTG  
AATTTGTGGGGAAATAGCTTTTCAGGGTCAATCCCTAGAGAGATTGGATC

>M6-PGSC0003DMG400033049-(rev)M6LRR-RLK\_1098

GTAGAGTTGAATTTGTGGGGAAATAGCTTTTCAGGGTCAATCCCTAGAGAGATTGGATCAGTACAGAGT  
CTTAAAGAACTATGCTTGGGAAGTAACAACCTTTTCAAGTGATATTCCAGAC

>M6-PGSC0003DMG400033049-(rev)M6LRR-RLK\_1159

TACAGAGTCTTAAAGAACTATGCTTGGGAAGTAACAACCTTTTCAAGTGATATTCCAGACACTCTATCAGG  
TCTAAACAATTGGTATTTCTGGACCTAAGTAGAAACAACCTTTGGAGGAG

>M6-PGSC0003DMG400033049-(rev)M6LRR-RLK\_122

GCTTTAATTTGATCAAGTTTAGTATTAGAGTCTCATTTTGTACATAATTA AAAAGAATCAATTTTTTAAAC  
AACATTTATTGCAGTAAGACTAATGTTTTTTTTAACTTAGCAAAAATCAT

>M6-PGSC0003DMG400033049-(rev)M6LRR-RLK\_1220

TCTATCAGGTCTAAACAAATTGGTATTTCTGGACCTAAGTAGAAACAACCTTTGGAGGAGAAATACAAGA  
AATTTTCGGGCAATTGACACAGGTAAAATTTCTCGTGCTGCATGGAAACTC

>M6-PGSC0003DMG400033049-(rev)M6LRR-RLK\_1281

ATACAAGAAATTTTCGGGCAATTGACACAGGTAAAATTTCTCGTGCTGCATGGAAACTCATATATTGGAG  
GCATAGTGCATCAGGAATTCCAACTTGGTGAACCTTTTCGCGGTTGGAC

>M6-PGSC0003DMG400033049-(rev)M6LRR-RLK\_1342

ATATTGGAGGCATAGTGCATCAGGAATTCCAACTTGGTGAACCTTTTCGCGGTTGGACTTGAGTGATA  
ACCAATTCTCTGGTCCATTACCAGTTGAAATTTCTCAGATGAACGGTTTGG

>M6-PGSC0003DMG400033049-(rev)M6LRR-RLK\_1403

GAGTGATAACCAATTCTCTGGTCCATTACCAGTTGAAATTTCTCAGATGAACGGTTTGGAGTTTTTGATTC  
TTGCCACAATCAGTTTAGTGGCAATATACCTTTAGAATATGGAGATCT

>M6-PGSC0003DMG400033049-(rev)M6LRR-RLK\_1464

TTTTGATTCTTGCCACAATCAGTTTAGTGGCAATATACCTTTAGAATATGGAGATCTTACTGCACTTCA  
GGCTGTTGATCTTTCCTCTAATAGGATCAATGGTTCAATACCACCAAGT

>M6-PGSC0003DMG400033049-(rev)M6LRR-RLK\_1525

CTGCACTTCAGGCTGTTGATCTTTCCTCTAATAGGATCAATGGTTCAATACCACCAAGTTTCGGGAAGCT  
AAGGTCACTATTGTGGTTGATGCTTGAAGCAATTCGTTGAGAGGTGAAA

>M6-PGSC0003DMG400033049-(rev)M6LRR-RLK\_1586

CGGGAAGCTAAGGTCACTATTGTGGTTGATGCTTGAAGCAATTCGTTGAGAGGTGAAATCCCATCAGA  
GTTGGGGAAGTGCAGCAGCCTGTTATGGTTGAATCTCGCGAATAATCAACT

>M6-PGSC0003DMG400033049-(rev)M6LRR-RLK\_1647

CCATCAGAGTTGGGGAAGTGCAGCAGCCTGTTATGGTTGAATCTCGCGAATAATCAACTTACTGGTCCA  
ATTCCTCCTCAATTAGCAAGTATTGGTGCAGATCCACTGCCTACTTTTTTG

>M6-PGSC0003DMG400033049-(rev)M6LRR-RLK\_1708

CTGGTCCAATTCCTCCTCAATTAGCAAGTATTGGTGCAGATCCACTGCCTACTTTTTTGTGAATAGGGGA  
AAGGAGAAGCTCACTGCTAGCCCAGGGGATTGTTTTGCCATGAGGAGGT

>M6-PGSC0003DMG400033049-(rev)M6LRR-RLK\_1769

GAATAGGGGAAAGGAGAAGCTCACTGCTAGCCCAGGGGATTGTTTTGCCATGAGGAGGTGGATACCAG  
CTGACTACCCTCCATTTAGCTTTATATATCCTCTATTGACAGGGAAGAGTTG

>M6-PGSC0003DMG400033049-(rev)M6LRR-RLK\_183

TTTTTAAACAACATTTATTGCAGTAAGACTAATGTTTTTTTTAACTTAGCAAATCATAGGACCATTCTTG  
ATTGTGTTACTCCAACACCAAGCATTAAATGTTGTTCTGTTTTGTTTT

>M6-PGSC0003DMG400033049-(rev)M6LRR-RLK\_1830

ATACCAGCTGACTACCCTCCATTTAGCTTTATATATCCTCTATTGACAGGGAAGAGTTGTAGAATCCTGG  
GGGATAAGTTGTTTATGGGAGATGGTTTAATGCCAGTCTGTGAACCTGGT

>M6-PGSC0003DMG400033049-(rev)M6LRR-RLK\_1891

GAATCCTGGGGGATAAGTTGTTTATGGGAGATGGTTTAATGCCAGTCTGTGAACCTGGTAGTAATGTCC  
GAAAGAATCAGGTACCGGGCTATATACAACCTTAGTGATAACAAATTGTCTG

>M6-PGSC0003DMG400033049-(rev)M6LRR-RLK\_1952

TAATGTCCGAAAGAATCAGGTACCGGGCTATATACAACCTTAGTGATAACAAATTGTCTGGTGAGATCCCT  
CCTGAGATTGGCAACATGAAGAAAATGAGTATGATGCATTTGGGTGCAAA



>M6-PGSC0003DMG400033049-(rev)M6LRR-RLK\_2013

GAGATCCCTCCTGAGATTGGCAACATGAAGAAAATGAGTATGATGCATTTGGGTGCAAATGAATTTTCT  
GGCAGGCTCCCTTCAGAGATTGAACAAGTGACCTAGTAGTCCTTAATGTT

>M6-PGSC0003DMG400033049-(rev)M6LRR-RLK\_2074

AATTTTCTGGCAGGCTCCCTTCAGAGATTGAACAAGTGACCTAGTAGTCCTTAATGTTTCACAGAATAA  
ATTTTCTGGTCAAATCCCAAAGCAGATTGGCCATCTTAAGTGCTTGCTAA

>M6-PGSC0003DMG400033049-(rev)M6LRR-RLK\_2135

ACAGAATAAATTTTCTGGTCAAATCCCAAAGCAGATTGGCCATCTTAAGTGCTTGCTAAACCTTGACCTT  
TCATTTAACAATTTTCTGGTCCATTCCCAGTTAGCTTTAGTAACTTGCA

>M6-PGSC0003DMG400033049-(rev)M6LRR-RLK\_2196

CTTGACCTTTCATTTAACAATTTTCTGGTCCATTCCCAGTTAGCTTTAGTAACTTGCATGATTTGAGCAAG  
TTCAACATCTCTTACAACCCATACATCTATGGAAGTGTACCAGAAATC

>M6-PGSC0003DMG400033049-(rev)M6LRR-RLK\_2257

ATTTGAGCAAGTTCAACATCTCTTACAACCCATACATCTATGGAAGTGTACCAGAAATCGGGCAACTGCC  
TACATTTGATAAGTCATCATTCTTGTTAATCCGTTGTTGCGTCTTCCAT

>M6-PGSC0003DMG400033049-(rev)M6LRR-RLK\_2318

GCAACTGCCTACATTTGATAAGTCATCATTCTTGTTAATCCGTTGTTGCGTCTTCCATCCTACATGCATA  
ACTCTAACAACAACACAGAACGAAACAAGAATGACAATAACAAAAAGCA

>M6-PGSC0003DMG400033049-(rev)M6LRR-RLK\_2379

TACATGCATAACTCTAACAACAACACAGAACGAAACAAGAATGACAATAACAAAAAGCACAAAAAGGT  
GGGTGCACTTTTGGTAATTGTGGTTCTGGTACTAGCTTTCCTAGTCTGTGGA

>M6-PGSC0003DMG400033049-(rev)M6LRR-RLK\_244

GACCATTCTTGATTGTGTTACTCCAACACCAAGCATTAAATGTTGTTCTGTTTTGTTTTGGGAGAATTGA  
CTTGATTTATTGTAGCATGATTAGTTTATGCAAATATTATATAGGTA

>M6-PGSC0003DMG400033049-(rev)M6LRR-RLK\_2440

AAAAGGTGGGTGCACTTTTGGTAATTGTGGTTCTGGTACTAGCTTTCCTAGTCTGTGGAGTCATGTCCT  
GCTTGTCTGCCTCCTTATCAAAGTGCCAAGGGGTCCCCAGGAATCTTAC

>M6-PGSC0003DMG400033049-(rev)M6LRR-RLK\_2501

CATGTCACTGCTTGTCTGCCTCCTTATCAAAGTGCCAAGGGGTCCCCAGGAATCTTACTGGAGGATACA

GAGGGCAGACATGATTCTCCATCAAGTACTAATGCATCCTCCTCACGGTT

>M6-PGSC0003DMG400033049-(rev)M6LRR-RLK\_2562

GAGGATACAGAGGGCAGACATGATTCTCCATCAAGTACTAATGCATCCTCCTCACGGTTGTGTGCATCCT  
CATCACGGGGTTCTGATGATGTTAAGGTTATCCGTTTGGACAGAACAAGC

>M6-PGSC0003DMG400033049-(rev)M6LRR-RLK\_2623

GTGCATCCTCATCACGGGGTTCTGATGATGTTAAGGTTATCCGTTTGGACAGAACAAGCTTCACACATTC  
TGATATACTGAAGGCCACATGGAACCTTCTCGAATGATAGAATTATCGGGA

>M6-PGSC0003DMG400033049-(rev)M6LRR-RLK\_2684

CACACATTCTGATATACTGAAGGCCACATGGAACCTTCTCGAATGATAGAATTATCGGGAGAGGAGGATT  
TGGGATAGTCTATCGTGGAGTCTTGCTGATGGAAGGGAAGTAGCAGTGAA

>M6-PGSC0003DMG400033049-(rev)M6LRR-RLK\_2745

GGAGGATTTGGGATAGTCTATCGTGGAGTCTTGCTGATGGAAGGGAAGTAGCAGTGAAGAAGCTACA  
GAGGGAGGGAATCGAAGGAGAAAGAGAGTTCAGAGCTGAAATGGAGGGGCTC

>M6-PGSC0003DMG400033049-(rev)M6LRR-RLK\_2806

AGCTACAGAGGGAGGGAATCGAAGGAGAAAGAGAGTTCAGAGCTGAAATGGAGGGGCTCAGTGGGA  
ATGGCTCCGGTTGGCCTCATCCCAACCTTGTAACCTTTATGGGTGGTGCCTTG

>M6-PGSC0003DMG400033049-(rev)M6LRR-RLK\_2867

TGGGAATGGCTCCGGTTGGCCTCATCCCAACCTTGTAACCTTTATGGGTGGTGCCTTGATGGATCAGAG  
AAACTTCTAGTCTATGAGTACATGGAAGGTGGTACCTTAGAGGACTTCAT

>M6-PGSC0003DMG400033049-(rev)M6LRR-RLK\_2928

GGATCAGAGAACTTCTAGTCTATGAGTACATGGAAGGTGGTACCTTAGAGGACTTCATTACAGATAGA  
ACAAGGTTTACATGGAAGAGCAGAATTCAAGCAGCAATCGATGTAGCACGT

>M6-PGSC0003DMG400033049-(rev)M6LRR-RLK\_2989

CAGATAGAACAAGGTTTACATGGAAGAGCAGAATTCAAGCAGCAATCGATGTAGCACGTGCTTTAGTCT  
ACTTGCACCATGATTGCTATCCTTGCATTGTCCACAGAGATGTCAAAGCTA

>M6-PGSC0003DMG400033049-(rev)M6LRR-RLK\_305

GGAGAATTGACTTGTATTTATTGTAGCATGATTAGTTTATGCAAATATTATATAGGTAGGCTTGTGGT  
GGAGACTCAATTGAGACAGACAAGCAGATGCTGCTGAACTTGAAGTCATT

>M6-PGSC0003DMG400033049-(rev)M6LRR-RLK\_3050

TTTAGTCTACTTGCACCATGATTGCTATCCTTGCATTGTCCACAGAGATGTCAAAGCTAGCAACGTGCTTC  
TTGACAAGGACGGAAGAGCAAAAGTCACCGACTTTGGCCTTTCTAGGGT

>M6-PGSC0003DMG400033049-(rev)M6LRR-RLK\_3111

AACGTGCTTCTTGACAAGGACGGAAGAGCAAAAGTCACCGACTTTGGCCTTTCTAGGGTCATGATTCT  
GAACATACTCATGTTAGCACAAATGGTGGCAGGGACTATTGGTTATGTTGCA

>M6-PGSC0003DMG400033049-(rev)M6LRR-RLK\_3172

TGATTTCTGAACATACTCATGTTAGCACAAATGGTGGCAGGGACTATTGGTTATGTTGCACCAGAATATGG  
GCAGATAATGCAGGCCACTACAAAAGGAGATGTCTACAGCTATGGGGTGC

>M6-PGSC0003DMG400033049-(rev)M6LRR-RLK\_3233

AGAATATGGGCAGATAATGCAGGCCACTACAAAAGGAGATGTCTACAGCTATGGGGTGCTAGCAATGG  
AGCTAGCAACTGGGAGACATGCTATAGATGGGGGCGAAGAATGTCTAGTTGA

>M6-PGSC0003DMG400033049-(rev)M6LRR-RLK\_3294

GCAATGGAGCTAGCAACTGGGAGACATGCTATAGATGGGGGCGAAGAATGTCTAGTTGAATGGGCGA  
CAAGGGTCATGGGAGACGGAAGGAAAGGGTTCACCAGAGCCATTATACCAGTT

>M6-PGSC0003DMG400033049-(rev)M6LRR-RLK\_3355

GGGCGACAAGGGTCATGGGAGACGGAAGGAAAGGGTTCACCAGAGCCATTATACCAGTTGCTCTATTG  
GTACCTGGCCTAGTAGAGGGAGCAGAGGAAATGTATGAGATGCTTAGGATTG

>M6-PGSC0003DMG400033049-(rev)M6LRR-RLK\_3416

TCTATTGGTACCTGGCCTAGTAGAGGGAGCAGAGGAAATGTATGAGATGCTTAGGATTGGGATAAGGT  
GCACAGCTGAGACGCCTCATGACCGGCCTAACATGAAGCAGGTATTAGATAT

>M6-PGSC0003DMG400033049-(rev)M6LRR-RLK\_3477

ATAAGGTGCACAGCTGAGACGCCTCATGACCGGCCTAACATGAAGCAGGTATTAGATATGTTGATTAGT  
ATTCCTAGCAGCCAAAAGGGATCCAGCCGTAGCTTTGGATCAAGTCGTAGC

>M6-PGSC0003DMG400033049-(rev)M6LRR-RLK\_3538

TGATTAGTATTCTAGCAGCCAAAAGGGATCCAGCCGTAGCTTTGGATCAAGTCGTAGCACTTCTCCATT  
ATTATGATAGACTTTCTTGGAACCCAAGAGATAAAAACGTCAATAGTTTC

>M6-PGSC0003DMG400033049-(rev)M6LRR-RLK\_3599

TTCTCCATTATTATGATAGACTTTCTTGGAACCCAAGAGATAAAAACGTCAATAGTTTCTTTACAAGATGT  
GTAACATACTAGCAGATTCTTCTGTAAAACAGTTTTTCTTTTTTTCAC

>M6-PGSC0003DMG400033049-(rev)M6LRR-RLK\_366

CTTGTTTGTGGAGACTCAATTGAGACAGACAAGCAGATGCTGCTGAACTTGAAGTCATTTCTTAAGGAA  
CAAAATCCTGTTGACAAAGGATTCAAATATAACCATTGGAATCCTACAGAT

>M6-PGSC0003DMG400033049-(rev)M6LRR-RLK\_3660

TACAAGATGTGTAACATACCTAGCAGATTCTTCTTGTAACAGTTTTTCTTTTTTACATTTGTTATTCTA  
GGAAAATGTAAGTCAATTTTGTGTTTGGATCACAAAATGTTCTCAA

>M6-PGSC0003DMG400033049-(rev)M6LRR-RLK\_3721

TTGTTATTCTAGGAAAATGTAAGTCAATTTTGTGTTTGGATCACAAAATGTTCTCAAGGATATCAATTT  
TTGCTATGAAATTGAAGCACTCAAATATTTGACCCACCTACAAAGTTAC

>M6-PGSC0003DMG400033049-(rev)M6LRR-RLK\_3782

ATATCAATTTTGTCTATGAAATTGAAGCACTCAAATATTTGACCCACCTACAAAGTTACTACTACAGACTAC  
AGCAGGTGGCAAGATTGTTCCCCTTATCAGGTACATTATTTGTCTGGTG

>M6-PGSC0003DMG400033049-(rev)M6LRR-RLK\_3843

TACAGACTACAGCAGGTGGCAAGATTGTTCCCCTTATCAGGTACATTATTTGTCTGGTGCAATTCAAAGT  
CTCTATTTCAAACAAGATTCCTCTACCAGGGACTGTGCAATAGCAACTAC

>M6-PGSC0003DMG400033049-(rev)M6LRR-RLK\_3904

ATTCAAAGTCTCTATTTCAAACAAGATTCCTCTACCAGGGACTGTGCAATAGCAACTACAAATAGGAGTG  
TCCAAATTTCAACTTCTGGACCACATCTGATGGAAAATTTTAGTATACTT

>M6-PGSC0003DMG400033049-(rev)M6LRR-RLK\_3965

ATAGGAGTGCCAAATTTCAACTTCTGGACCACATCTGATGGAAAATTTTAGTATACTTCCACTAAATCAA  
CACACCACCAATTGTCAACGCCACAATACTCATTTTCATATCAGGCTAG

>M6-PGSC0003DMG400033049-(rev)M6LRR-RLK\_4026

ACTAAATCAACACACCACCAATTGTCAACGCCACAATACTCATTTTCATATCAGGCTAGCTTCATCATCCG  
TGGGAATAATGTGGATATGCACTCAAGCATCATACTGATTTCAAGTTAA

>M6-PGSC0003DMG400033049-(rev)M6LRR-RLK\_4087

TCATCATCCGTGGGAATAATGTGGATATGCACTCAAGCATCATACTGATTTCAAGTTAAGGCTCAAATTT  
TTAAGTCACTCTCTGATGTATAAACACTGCTAATAGAAGAGTACAAATTC

>M6-PGSC0003DMG400033049-(rev)M6LRR-RLK\_4148

CTCAAATTTTAAGTCACTCTCTGATGTATAAACACTGCTAATAGAAGAGTACAAATTTCTGTCTACCTGC

TTAACAAAAAGAACTACAGATAACGTTTAGTGAAACTCTTAATGGTGT

>M6-PGSC0003DMG400033049-(rev)M6LRR-RLK\_4209

GTCTACCTGCTTAACAAAAAGAACTACAGATAACGTTTAGTGAAACTCTTAATGGTGTGAGACCTTTTA

AGAAAAACATCGCGAGGTTGGATGAAATCTACCAGTATCCTACCATGTTA

>M6-PGSC0003DMG400033049-(rev)M6LRR-RLK\_4256

TCTTAATGGTGTGAGACCTTTTAAGAAAAACATCGCGAGGTTGGATGAAATCTACCAGTATCCTACCATG

TTAAGAATGTCTTTGGGCTAACGTAACATTAATCTAGAGGTCACCAATG

>M6-PGSC0003DMG400033049-(rev)M6LRR-RLK\_427

TTAAGGAACAAAATCCTGTTGACAAAGGATTCAAATATAACCATTGGAATCCTACAGATTTGTCACCATG

TAGATGGCCTGGAATATCATGCAGTACCTCCATCAATCGTGTCACTGGAA

>M6-PGSC0003DMG400033049-(rev)M6LRR-RLK\_488

GTCACCATGTAGATGGCCTGGAATATCATGCAGTACCTCCATCAATCGTGTCACTGGAATCGATCTCTCG

GAAAGTAATCTGGCTGGGAAATTGTTTAATAAATTCTCAGCCATGACAGA

>M6-PGSC0003DMG400033049-(rev)M6LRR-RLK\_549

GATCTCTCGGAAAGTAATCTGGCTGGGAAATTGTTTAATAAATTCTCAGCCATGACAGAATTGAACTCTC

TTGACCTGTCCAAGAACACATTTTCAGAGTCCATTCCATCAGACTTAGGC

>M6-PGSC0003DMG400033049-(rev)M6LRR-RLK\_61

TCTTCTTCCCATTGTACTCAATTTCTTCATTCTCATAACAGGTATGTCATATTTGATAGCTTTAATTTGA

TCAAGTTTAGTATTAGAGTCTCATTTTGTACATAATTA AAAAGAATC

>M6-PGSC0003DMG400033049-(rev)M6LRR-RLK\_610

TGAACTCTTTGACCTGTCCAAGAACACATTTTCAGAGTCCATTCCATCAGACTTAGGCTGGTGTAGAAA

TCTGAAGTTCTTGAAGTTGTCACACAATATCATTGTTGGTGTGAGCTCAACT

>M6-PGSC0003DMG400033049-(rev)M6LRR-RLK\_671

GTGTAGAAATCTGAAGTTCTTGAAGTTGTCACACAATATCATTGTTGGTGTGAGCTCAACTTGACAGGCATG

AACAAGCTGGAAGTTCTTGATTGACGATGAACAGGATCCACGGGCTAAT

>M6-PGSC0003DMG400033049-(rev)M6LRR-RLK\_732

ACAGGCATGAACAAGCTGGAAGTTCTTGATTTGACGATGAACAGGATCCACGGGCTAATGATCCCTGAG

ATTTGAGACAAGTTAGCTGTTGCAAATATTTCTAACAACAATTTCACTAGT

>M6-PGSC0003DMG400033049-(rev)M6LRR-RLK\_793

TCCCTGAGATTTGAGACAACCTTAGCTGTTGCAAATATTTCTAACACAATTTCACTAGTGGGAGTGGATT  
TGAATTTTCTCACTGCAAGAACTGAAGTATCTTGATCTGAGCTACAATT

>M6-PGSC0003DMG400033049-(rev)M6LRR-RLK\_854

GAGTGGATTTGAATTTTCTCACTGCAAGAACTGAAGTATCTTGATCTGAGCTACAATTATTTGACAGGG  
AATCTGTCGTTCTGGGCTTGATATGCTGAATATGTTTTCAGCATCTCATAA

>M6-PGSC0003DMG400033049-(rev)M6LRR-RLK\_915

TTGACAGGGAATCTGTCGTTCTGGGCTTGATATGCTGAATATGTTTTCAGCATCTCATAACAACCTTAAGTG  
GCTCTCTGCCTTCTGGATTTTCACTCAAACTGCTCTTTGCAAGGTTTG

>M6-PGSC0003DMG400033049-(rev)M6LRR-RLK\_976

ACTTAAGTGGCTCTCTGCCTTCTGGATTTTCACTCAAACTGCTCTTTGCAAGGTTTGGACTTATCAGAA  
AATATGTTATTTGGTGAATTGCCTACGTCTATCGCGAACTGTAAACGAT

>M6-PGSC0003DMG400033131-(rev)M6LRR-RLP\_0

GTCATTTTTTTAATTTCTATTACCATCAATTTAGGGCAACCCTTTGGAGCAATTGATCTCTGTTTGCCACAA  
TCAACAACGGAAGGTGAGATTTTTTTAAAATCTTTTTTCGCTTATAAA

>M6-PGSC0003DMG400033131-(rev)M6LRR-RLP\_1008

GAAAAGGGAAACGTCCTTGTGGCTCGAGGTTGCAAATAACTTAAGTTCTTTGCTTTGGGGGAGCAGAG  
TATGAAGGTAATACAATCAAGTTATGACCATTTAGAAGACCATTTAAAGCC

>M6-PGSC0003DMG400033131-(rev)M6LRR-RLP\_1071

GCAGAGTATGAAGGTAATACAATCAAGTTATGACCATTTAGAAGACCATTTAAAGCCTTGCCTTCTATAC  
ATGGGATTGTTTCCAGAGGACCATAAGATTCCAGTGAACGATCTGCTGAA

>M6-PGSC0003DMG400033131-(rev)M6LRR-RLP\_1197

GATGGATGAAGAGTTTGTATTGAATGCCGAAACAGAGAACATGGAGGAAACATCTCGAGTTTGCTTGA  
GTGATTTGCTTAACAGAAGCCTAGTAATGGTCTCTGGAAAGAGAGTTAATCG

>M6-PGSC0003DMG400033131-(rev)M6LRR-RLP\_126

TAATTAATTCAAATATGTAACCTACTTCAAGTTGGTTTGTAAATTGTAGTACAACAAAAATTCAAATC  
ATTTGAACTTGGTTTGGGTGTTTTCTTCTCTAAATTATGAAATGATAT

>M6-PGSC0003DMG400033131-(rev)M6LRR-RLP\_1260

CTTGAGTGATTTGCTTAACAGAAGCCTAGTAATGGTCTCTGGAAAGAGAGTTAATCGTGATGTAGTGTA  
CTGCTCACTTCACGATGTAGTGCGTGAGTTCTGCTTGAGAAAACCTCACAGA

>M6-PGSC0003DMG400033131-(rev)M6LRR-RLP\_1386

TTATATACAGGTTGCAGTGCCATACAATCCGTATCAACATATGCATTCCACGGAATCACGGTTATGCATTT  
ATATTCATGATGATCTTGTTAAACAATTAGATTATTCTAAATACCAGTT

>M6-PGSC0003DMG400033131-(rev)M6LRR-RLP\_1449

ATGCATTTATATTCATGATGATCTTGTTAAACAATTAGATTATTCTAAATACCAGTTGGATAAGATTCCAA  
TGCTCGATTTC AAGGAAACAAATTCTTTGGAGTTCATTGCTCATCCAAA

>M6-PGSC0003DMG400033131-(rev)M6LRR-RLP\_1512

GATTCCAATGCTCGATTTC AAGGAAACAAATTCTTTGGAGTTCATTGCTCATCCAAA ACTCAATACATGG  
AATAACCAATATTCAAATCCATTAGATTTAGTTGTTAAATTCAGATTTAT

>M6-PGSC0003DMG400033131-(rev)M6LRR-RLP\_1575

TACATGGAATAACCAATATTCAAATCCATTAGATTTAGTTGTTAAATTCAGATTTATTCGGGCATTGTATT  
TGATGGATGTGGAATTGCCAAATTCATGGGCTGCTGTACTGCAATCGCT

>M6-PGSC0003DMG400033131-(rev)M6LRR-RLP\_1638

ATTGTATTTGATGGATGTGGAATTGCCAAATTCATGGGCTGCTGTACTGCAATCGCTAACTCAGTTGAGG  
TACCTAGCACTTTATGTCAAACAATTTCAATTGAAGTGGATATCACACCT

>M6-PGSC0003DMG400033131-(rev)M6LRR-RLP\_1694

TAACTCAGTTGAGGTACCTAGCACTTTATGTCAAACAATTTCAATTGAAGTGGATATCACACCTACACCAT  
CTCCAAACTCTGCAACTCAAACAAGGAAGAGGATATGGCTAAGGGCTT

>M6-PGSC0003DMG400033131-(rev)M6LRR-RLP\_189

TTCAAATCATTGAACTTGGTTTGGGTGTTTTCTCTCTAAATTATGAAATGATATTGTTTTCAATTTCTTT  
ATTAAGGTGAAAGAGCAATTA ACTCAATCCATGGAAGTTGTTGAGA

>M6-PGSC0003DMG400033131-(rev)M6LRR-RLP\_252

CATTTCTTTTATTAAAGGTGAAAGAGCAATTA ACTCAATCCATGGAAGTTGTTGAGACTTGTGCTAAAGG  
AACTCTTTCTTCTGGAGAGCCTTCAAACAACCTGGTATACATCAATCTA

>M6-PGSC0003DMG400033131-(rev)M6LRR-RLP\_315

CTAAAGGAACTCTTTCTTCTGGAGAGCCTTCAAACAACCTGGTATACATCAATCTATGATGATGATGAA  
GTTGTGGGCTTTGAGAAAGAAGCAGAAATTATAATGATGAAATTGATACG

>M6-PGSC0003DMG400033131-(rev)M6LRR-RLP\_378

TGATGAAGTTGTGGGCTTTGAGAAAGAAGCAGAAATTATAATGATGAAATTGATACGAGGAACAAAGG

AGCGGGATCTTATCTCCATCTATGGAATGGCAGGACTTGGTAAAAAACTTT

>M6-PGSC0003DMG400033131-(rev)M6LRR-RLP\_441

AAAGGAGCGGGATCTTATCTCCATCTATGGAATGGCAGGACTTGGTAAAAAACTTTGGCAAGAAAGG

TATACAACAATCCCTATATTGTTAATCACTTTGATGTTAAAGCATGGTGTGC

>M6-PGSC0003DMG400033131-(rev)M6LRR-RLP\_504

AAAGGTATAACAACAATCCCTATATTGTTAATCACTTTGATGTTAAAGCATGGTGTGCTTTGTCGCAAACAT

ATAATAGGACGACGTTATTGATTGAGATTTTCAAACAAGCTACAAATGA

>M6-PGSC0003DMG400033131-(rev)M6LRR-RLP\_567

GCAAACATATAATAGGACGACGTTATTGATTGAGATTTTCAAACAAGCTACAAATGATGAGATAGAAAT

CAAAGAAGACGATGATGTAGCTGACATGTTGCGCAGGGTTCTAATAGGCAA

>M6-PGSC0003DMG400033131-(rev)M6LRR-RLP\_63

TTGCCACAATCAACAACGGAAGGTGAGATTTTTTAAAATCTTTTTTCGCTTATAAAATCATGTAATTAAT

TCAAATATGTAACACTACTTCAAGTTGGTTTGTAAATTGTAGTACAA

>M6-PGSC0003DMG400033131-(rev)M6LRR-RLP\_693

CCTCATCGTATTAGATGATATTTGGGATGTGCGAGGCATGGGAAGATTGGGTTTATGTTCCCTCAAGGT

AAATATGGAAGCAGAGTAATGGTTACAACAAGAATTGAACAAGTGGCTAA

>M6-PGSC0003DMG400033131-(rev)M6LRR-RLP\_756

TCAAGGTAAATATGGAAGCAGAGTAATGGTTACAACAAGAATTGAACAAGTGGCTAAGTATCTTCAGCA

CCATAGTGATCCTTATTCTCTTAGCTTTATAACATCCGAACAGAGTTGGAA

>M6-PGSC0003DMG400033131-(rev)M6LRR-RLP\_819

TCAGCACCATAGTGATCCTTATTCTCTTAGCTTTATAACATCCGAACAGAGTTGGAAATTATTGGAGAAG

AAGGTATTTCAAGGAGAGAGTTGTCCCCTGAATCTACTTGAAGCAGGGTT

>M6-PGSC0003DMG400033131-(rev)M6LRR-RLP\_882

GGAGAAGAAGGTATTTCAAGGAGAGAGTTGTCCCCTGAATCTACTTGAAGCAGGGTTACAAGTTGCCCA

ACATTGCAAGGGATTGCCTCTTGTGGTTGCCTGGTTGCTGGGTTTATTGC

>M6-PGSC0003DMG400033131-(rev)M6LRR-RLP\_945

TGCCAACATTGCAAGGGATTGCCTCTTGTGGTTGCCTGGTTGCTGGGTTTATTGCGAAAATGAAAAG

GGAAACGTCCTTGTGGCTCGAGGTTGCAAATAACTTAAGTTCTCTTGCTTT

>M6-PGSC0003DMG400033132-(rev)M6LRR-RLP\_0



CCAATTGACATGGATGTTGTTGAAACTTCTGGAGAGCCTTCCACCAAACCTAGTATTACATCAATTTATG  
ATGATGATGAAGTTGTCGGCTTTGAGAAAGATGAAGAAATTGACACGAGG

>M6-PGSC0003DMG400033132-(rev)M6LRR-RLP\_1008

TTGCTTGAGAAACTTAAAGAGGAAAAGTTTATGCAGTTAATAGTGCCATACAATCCATATCAACAGTTT  
TATTCCATGGAATCGCGGATAAGTGTTTATCTTCATGATGATCTTGTTAA

>M6-PGSC0003DMG400033132-(rev)M6LRR-RLP\_1071

ACAGTTTTATTCCATGGAATCGCGGATAAGTGTTTATCTTCATGATGATCTTGTTAAACAATTGGATGATT  
TTGAATATATCAGTTAGATAATATTCCAATGCTTGAGTCTAAGGGAAGT

>M6-PGSC0003DMG400033132-(rev)M6LRR-RLP\_1134

GGATGATTTTGAATATATCAGTTAGATAATATTCCAATGCTTGAGTCTAAGGGAAGTAGAAAGTGTTTTG  
GTAAATGTCCTAGGACTTTGGAGTTCATTGCTCATCCAAAATTCAACACA

>M6-PGSC0003DMG400033132-(rev)M6LRR-RLP\_1197

TGTTTTGGTAAATGTCCTAGGACTTTGGAGTTCATTGCTCATCCAAAATTCAACACATGGATTAGATCATC  
AAATCCTTAGTTTTACTTGAAAACTTAGACTTGTTTCAGGTGTTGCAT

>M6-PGSC0003DMG400033132-(rev)M6LRR-RLP\_126

GGATCTATGGAATGGCGGGACTAGGTAAATCAACTTTGGCAAGGAAGGTGTACAACAATCCCTATATTG  
TTAATTACTTTGATGTTAAAATATGGTGTGCTGTGTCTCAAGCATATAGTA

>M6-PGSC0003DMG400033132-(rev)M6LRR-RLP\_1260

AGATCATCAATCCTTTAGTTTTACTTGAAAACTTAGACTTGTTTCAGGTGTTGCATTTTCCGGATGTGAA  
TCTGCCAAGTTGTTGGCGTAGTGCTGTGCAATCGCTAACTCACTTGAGG

>M6-PGSC0003DMG400033132-(rev)M6LRR-RLP\_1323

GATGTGAATCTGCCAAGTTGTTGGCGTAGTGCTGTGCAATCGCTAACTCACTTGAGGTACCTTGAGATTT  
ATGTCGAAGAATTTGATTTTGGAGTGGATATCTCACCTTCTCAATCTTCAA

>M6-PGSC0003DMG400033132-(rev)M6LRR-RLP\_1386

GAGATTTATGTCGAAGAATTTGATTTTGGAGTGGATATCTCACCTTCTCAATCTTCAAACCTTAGTAGTTCCG  
TTCATCTAAGTCTCTGAGGATATTATCGCCTGCAGCTATGTGGAAAATG

>M6-PGSC0003DMG400033132-(rev)M6LRR-RLP\_1449

GTAGTTCGTTTCATCTAAGTCTCTGAGGATATTATCGCCTGCAGCTATGTGGAAAATGATGAAGCTAAGGC  
ATCTGAATATAATCAATTTGTGCTTCTTGTTGGGAAGATAATGATCGAGCA

>M6-PGSC0003DMG400033132-(rev)M6LRR-RLP\_189

ATATTGTTAATTACTTTGATGTTAAAATATGGTGTGCTGTGTCTCAAGCATATAGTAGGACGACTTTGTTG  
GTTGAGATTTTCAAACAAGCAACAAATGATAATAGCGAAATCAAAGAGG

>M6-PGSC0003DMG400033132-(rev)M6LRR-RLP\_252

CTTTGTTGGTTGAGATTTTCAAACAAGCAACAAATGATAATAGCGAAATCAAAGAGGACGTTGACATAG  
CTGACAAGTTGCAGAAAGCTCTAAAAGGTAAGAGATACCTCATCGTATTGG

>M6-PGSC0003DMG400033132-(rev)M6LRR-RLP\_315

ACATAGCTGACAAGTTGCAGAAAGCTCTAAAAGGTAAGAGATACCTCATCGTATTGGATGATATATGGG  
AAGTCGAGGTTTATGTTTCCCTAAGGGTGAATATGGAAGTAGAGTAATGGT

>M6-PGSC0003DMG400033132-(rev)M6LRR-RLP\_378

TATGGGAAGTCGAGGTTTATGTTTCCCTAAGGGTGAATATGGAAGTAGAGTAATGGTAACCATTCTGAAT  
TGAACAAGTGGCTACACATCTTCAACACTGCGGTGAACCTTATTCTCTTAG

>M6-PGSC0003DMG400033132-(rev)M6LRR-RLP\_441

TCGAATTGAACAAGTGGCTACACATCTTCAACACTGCGGTGAACCTTATTCTCTTAGATTTCTAACTCCGG  
AAGAGAGTTGGGAATTATTGGAGAAGAAAATATTTCAAGGAGAGAGTTG

>M6-PGSC0003DMG400033132-(rev)M6LRR-RLP\_504

AACTCCGGAAGAGAGTTGGGAATTATTGGAGAAGAAAATATTTCAAGGAGAGAGTTGTCCCTCGGACC  
TACTAGAAGCAGGTTTACAAGTTGCCAACACTGCAAGGGATTGCCTCTTGT

>M6-PGSC0003DMG400033132-(rev)M6LRR-RLP\_567

GGACCTACTAGAAGCAGGTTTACAAGTTGCCAACACTGCAAGGGATTGCCTCTTGTGATTGTCTGATT  
GCTGGAATTATTAAGAAAATGGAAAGGCATCCGTCCATGTGGATGGAAGT

>M6-PGSC0003DMG400033132-(rev)M6LRR-RLP\_63

ATTTATGATGATGATGAAGTTGTCGGCTTTGAGAAAGATGAAGAAATTGACACGAGGAACAAAGGATC  
TATGGAATGGCGGGACTAGGTAAATCACTTTGGCAAGGAAGGTGTACAACA

>M6-PGSC0003DMG400033132-(rev)M6LRR-RLP\_630

CCTGATTGCTGGAATTATTAAGAAAATGGAAAGGCATCCGTCCATGTGGATGGAAGTTGCAAATGATTT  
AAGTTCTCATGTTTTAGGAGAGCAGAGTACAAAGGTGATGCAGTCAAGTTA

>M6-PGSC0003DMG400033132-(rev)M6LRR-RLP\_693

TGATTTAAGTTCTCATGTTTTAGGAGAGCAGAGTACAAAGGTGATGCAGTCAAGTTATGACCATTTAGA

AGGCCACTTAAAGTCTTGCCTTCTTTACATGGCATTGTTTCCAGAAGACTA

>M6-PGSC0003DMG400033132-(rev)M6LRR-RLP\_756

TTTAGAAGGCCACTTAAAGTCTTGCCTTCTTTACATGGCATTGTTTCCAGAAGACTATAAGATTCCAGTGT  
CCAATTTGATGATGTGGTGGATTGCTGAGGAGTTTGTACTGAATGTTGA

>M6-PGSC0003DMG400033132-(rev)M6LRR-RLP\_819

TCCAGTGTCCAATTTGATGATGTGGTGGATTGCTGAGGAGTTTGTACTGAATGTTGACAACAAGAATAT  
GGAGGATGCATCTAGAGTTTGCTTGAATGGTCTACTTAACAGAAGCCTAGT

>M6-PGSC0003DMG400033132-(rev)M6LRR-RLP\_882

GAATATGGAGGATGCATCTAGAGTTTGCTTGAATGGTCTACTTAACAGAAGCCTAGTAAAGGTCTCTCA  
AGGTAGTTCTAATGGTGGCGTAACTTACTGCATACTTCATGATGTAGTGCG

>M6-PGSC0003DMG400033132-(rev)M6LRR-RLP\_945

CTCTCAAGGTAGTTCTAATGGTGGCGTAACTTACTGCATACTTCATGATGTAGTGCGTGAGTTTTGCTTG  
AGAAACTTAAAGAGGAAAAGTTTATGCAGTTAATAGTGCCATACAATCC

>M6-PGSC0003DMG400033152-(rev)M6LRR-RLP\_130

TCATTTTCTTACTCTGGAGTTCCTTTAATACAATTATTTGAATTAGTTGGATGGGAGAGGTATTGTGTGT  
TCCCTTCAAATCTTAGGCATTTGGACCTTGCCAACTGTTTCTTGACGGA

>M6-PGSC0003DMG400033152-(rev)M6LRR-RLP\_260

TTAAACATTGCAAGACTGAAGAAGCTTGAGAGTCTTCAATTATCTATGGGATTTGCTTCTATGAGATATT  
GTTGGGATGTCACAAATGTGGAGTTTGATGCACTCAAATACTTGGGATTA

>M6-PGSC0003DMG400033152-(rev)M6LRR-RLP\_325

ATATTGTTGGGATGTCACAAATGTGGAGTTTGATGCACTCAAATACTTGGGATTATTCTTTATGCAGATA  
GAAGAATGGAAAGCTTCAGAGGAATCCTTCTGTGCTTGAGAAGCTAGT

>M6-PGSC0003DMG400033152-(rev)M6LRR-RLP\_455

TGGCCCGTTTTCAAGGATATCAAGGAGATCCCCCAAGCTTTGCGGATATTCTAACCTAAGACGTATTG  
AACTGTTTGACTGCACAGACTCTTAGGGTTTTAGCTTTGAATATCAAA

>M6-PGSC0003DMG400033152-(rev)M6LRR-RLP\_518

CGTATTGAACTGTTTGACTGCACAGACTCTTAGGGTTTTAGCTTTGAATATCAAAAGAGCGATTGAAG  
AAAACACAGGATGTGACAGTCTCAAGTTTTTATACAAAAGTAACTAAAT

>M6-PGSC0003DMG400033152-(rev)M6LRR-RLP\_65

TGCCTCAACGTTAAAGTTGTACCTGAGTTCCGTTGTTTCCCATAGCGGAAGTTCATAGTCACCTTCATTT  
TCTTACTCTGGAGTTCCTTTAATACAATTATTTGAATTAGTTGGATGG

>M6-PGSC0003DMG400033153-(rev)M6LRR-RLP\_0

GTGGGCTTTGAGAAACATGCAGAAATTATAATGAATAAATTGATACGAGGAACAAAGGAGCGGGATCT  
TATCACCATCTATGGGATGCCTGGACTAGGTAAAACAACCTTTGGCAAAAAAG

>M6-PGSC0003DMG400033153-(rev)M6LRR-RLP\_1054

GCATTTATATTCGTGATGATCTTGTTAAACAATTAGATCATTCCGACTACCAACTGGATAAGATTCCAATG  
CTAGATTTCAAGGAAACAAATTCTTTGGAGTTCATTGCTCATCCAAAAC

>M6-PGSC0003DMG400033153-(rev)M6LRR-RLP\_1116

ATTCCAATGCTAGATTTCAAGGAAACAAATTCTTTGGAGTTCATTGCTCATCCAAAACCTCAATACATGGA  
ATAACCAATATTCAAATCCTTTAGATTTACTTGTTAAATTAAGATTTGTT

>M6-PGSC0003DMG400033153-(rev)M6LRR-RLP\_1178

TACATGGAATAACCAATATTCAAATCCTTTAGATTTACTTGTTAAATTAAGATTTGTTTCGGGCATTGGATT  
TGATGGATGTGGAATTGCCAGATTCATGGGCCACTGCAATTCAATCGCT

>M6-PGSC0003DMG400033153-(rev)M6LRR-RLP\_124

ACAACAATCCCTCTATTGTTAATTACTTTGATGTTAAAGCATGGTGTACTGTGTCACAAGCATATGATAG  
GCGGACGTTATTGGTTGAGATTTTCAAACAAGCTACAAATAATAAGATCA

>M6-PGSC0003DMG400033153-(rev)M6LRR-RLP\_1240

CATTGGATTTGATGGATGTGGAATTGCCAGATTCATGGGCCACTGCAATTCAATCGCTAACTGAGTTGA  
GATACCTTGCACTTTGTGTCAAACAATTTGAATTGAAGTGGATATCACACC

>M6-PGSC0003DMG400033153-(rev)M6LRR-RLP\_1302

GAGTTGAGATACCTTGCACTTTGTGTCAAACAATTTGAATTGAAGTGGATATCACACCTACACAATCTCC  
AAACTCTGCAGGTCAAGTCAAGTGAGAAGTTACACCTAAGGGCTACTACT

>M6-PGSC0003DMG400033153-(rev)M6LRR-RLP\_1364

CAATCTCCAACTCTGCAGGTCAAGTCAAGTGAGAAGTTACACCTAAGGGCTACTACTTTATCAGAAATG  
ACGAAGCTAAGGCATGTGAAAATAGACTGTTTTTTCATGATATGGGAAGA

>M6-PGSC0003DMG400033153-(rev)M6LRR-RLP\_1426

CAGAAATGACGAAGCTAAGGCATGTGAAAATAGACTGTTTTTTCATGATATGGGAAGACATTAATGACG  
AAGGAGTTTTGAAACAAGTATGCTAGAGAACATGAAGAGTTTTGGAACCT

>M6-PGSC0003DMG400033153-(rev)M6LRR-RLP\_1488

AATGACGAAGGAGGTTTTGAAACAAGTATGCTAGAGAACATGAAGAGTTTTGGAAGTTGCGATATACG  
CTTGGATAATATGAATGCAAGGTTCTGGTGGAGGTTCCGAATCTTGAAGAA

>M6-PGSC0003DMG400033153-(rev)M6LRR-RLP\_1612

GCCTCAGCGTTAAAGATGTACCTGAGTTTCCTTTGTTCCCATAGCGGAAGTTCATAGTCACCTTCATTTT  
CTTTCTCTGGAGTTTTCTATAATGGAATTATTTAATTCAGTTGGATGGG

>M6-PGSC0003DMG400033153-(rev)M6LRR-RLP\_1674

CTTCATTTTCTTTCTCTGGAGTTTTCTATAATGGAATTATTTAATTCAGTTGGATGGGAGAGGTATTTTGT  
GTTGCCTTCAAGTCTTAGGCATTTGGACCTTGCCGGCTGTTTCTTGACG

>M6-PGSC0003DMG400033153-(rev)M6LRR-RLP\_1736

GTATTTTGTGTTGCCTTCAAGTCTTAGGCATTTGGACCTTGCCGGCTGTTTCTTGACGGAAGAAATGGTTT  
TAAACATTGCAAGATTGAAGAAGCTTGAGAGTCTCAAATTGCTTGTGGG

>M6-PGSC0003DMG400033153-(rev)M6LRR-RLP\_1798

AAATGGTTTTAAACATTGCAAGATTGAAGAAGCTTGAGAGTCTCAAATTGCTTGTGGGATTTCTTTTGG  
GAGATCAGAGAGCTGTTGCTGGGATGTCACAAATGTGGAGTTTGCTGCAC

>M6-PGSC0003DMG400033153-(rev)M6LRR-RLP\_186

TATGATAGGCGGACGTTATTGGTTGAGATTTTCAAACAAGCTACAAATAATAAGATCATAATCGAAGAG  
GACGATGATGTAGCTGACATGTTGCGCAAGGTTCTAATAGGCAAGAGATAC

>M6-PGSC0003DMG400033153-(rev)M6LRR-RLP\_1922

ATACTTGGGATTATTCTTTATGCAGATAGAAGAATGGAAAGCTTCAGAGGAATCCTTTCCTGTGCTTGAG  
AAGCTAGTTATAAGTGGATGTTCCAATTTCCAGGAGATCCCCCAAGCTT

>M6-PGSC0003DMG400033153-(rev)M6LRR-RLP\_1984

TGCTTGAGAAGCTAGTTATAAGTGGATGTTCCAATTTCCAGGAGATCCCCCAAGCTTTGCGGATATTCC  
AACACTAACACGTATTGAACTGACTAACTGCATCGACTCTCTAGGGGTTT

>M6-PGSC0003DMG400033153-(rev)M6LRR-RLP\_2046

GATATTTCAACACTAACACGTATTGAACTGACTAACTGCATCGACTCTCTAGGGGTTTCAGCTATGAATA  
TCAAAAGAGAAATTGAAGAAAACACTGGATGTGACAGTCTCCAAGTTGTT

>M6-PGSC0003DMG400033153-(rev)M6LRR-RLP\_2108

TATGAATATCAAAAGAGAAATTGAAGAAAACACTGGATGTGACAGTCTCCAAGTTGTTATAGAAAAGTA

AATAAATGTAATTAAGCACTTCATTGCTGCTCTGTTTCCACTTCCTACT

>M6-PGSC0003DMG400033153-(rev)M6LRR-RLP\_2170

AAAAGTAAATAAATGTAATTAAGCACTTCATTGCTGCTCTGTTTCCACTTCCTACTTCTATATTGTTGCA  
TTATTATCTGTTTTAGACATAATACATAAACATACCATTGAACTTTG

>M6-PGSC0003DMG400033153-(rev)M6LRR-RLP\_372

GGTGAATGTGGAAGCAGAGTAATGGTCACGACACGAATTGAAGAAGTACTAAGCATCACAGTGATCC  
TTATTCTTAGCTTTCTAACGTCCGAAGAGAGTTGGGAATTATTGGAGAAG

>M6-PGSC0003DMG400033153-(rev)M6LRR-RLP\_62

GGATCTTATCACCATCTATGGGATGCCTGGACTAGGTAAAACAACCTTTGGCAAAAAGGTATACAACAA  
TCCCTCTATTGTTAATTACTTTGATGTTAAAGCATGGTGTACTGTGTCACA

>M6-PGSC0003DMG400033153-(rev)M6LRR-RLP\_682

TGAAGGTGATACAATCAAGTTATGACCATTTAGAAGAACAACCTTAAAGCCTTGCCTTCTTTACATGGAATT  
GTTTCCAGAAGACCATAAGATCCCAGTGGACCATCTGCTGAAGTTGTGGA

>M6-PGSC0003DMG400033153-(rev)M6LRR-RLP\_806

TGAAGAGTTTGTATTGAATGCCGAAAAGAGAACATGGAGGAAGCATGTCGAGTTTGCATGAGTGATT  
TGCTTAACAGAAGCCTAATAATGGTCTCCGGGATGAGATTTTATCGTGATGT

>M6-PGSC0003DMG400033153-(rev)M6LRR-RLP\_868

GTGATTTGCTTAACAGAAGCCTAATAATGGTCTCCGGGATGAGATTTTATCGTGATGTACAATACTGCTC  
ACTTCATGATGTAGTGCCTGAGTTCTGCTTGAGAAAACCTCACAGAAGACA

>M6-PGSC0003DMG400033153-(rev)M6LRR-RLP\_930

TACTGCTCACTTCATGATGTAGTGCCTGAGTTCTGCTTGAGAAAACCTCACAGAAGACAAGTATATGCAG  
GCCACAGTGCCATTCAATCCGTATCAACATTTGCATTCCACGGAATCACGG

>M6-PGSC0003DMG400033153-(rev)M6LRR-RLP\_992

TATGCAGGCCACAGTGCCATTCAATCCGTATCAACATTTGCATTCCACGGAATCACGGTTATGCATTTATA  
TTCGTGATGATCTTGTTAAACAATTAGATCATTCCGACTACCAACTGGA

>M6-PGSC0003DMG400033334-(rev)M6LRR-RLP\_1731

ATCAGACTCTTTTCTTTACTTTATTAATAATAGAAGCAAAAATAATAGTAGTTGCCTAAGGTAGCTAATT  
CGTCAAGTATCGATTTTATGTTAACGTTGCCTAATTCGTTTATGTTATG

>M6-PGSC0003DMG400033334-(rev)M6LRR-RLP\_868

CTTATAGAATATATATATATAGTCAATTTTCGTTTATTTATTCATCTTTCTTTATATTCTAGCGCGTATGTCAT  
TTTAGTCATTTATTACTTTAAGGGAAAAGGGCTCGATATACCCCTCA

>M6-PGSC0003DMG400033563-(rev)M6LRR-RLP\_63

TGGATTATAAAATTTTTAAGTTTAATTAAGCATTCAACTTTTTTTCTAATAGATTCTAAAAGAGTTGATG  
CTGATATTGAAGATAGATTCAAGTCTCTACCAATAAACCTTGATAGATGA

>M6-PGSC0003DMG400033632M6LRR-RLP\_124

TCTAAAATCAAGAAAACACTTACTGTAGATCCTTCATTAGATAGGTGTATTTCTTACTTTTATCCAAATAT  
GAGTTCATGGAACATGAGCAGAGATTGTTGCTCATGGGATAGAGTCAT

>M6-PGSC0003DMG400033632M6LRR-RLP\_1736

TCTGGGACTCTCTCAATGGCTTTTGAATCGTAAGTGAAGTCTAGAACCTCAACTTTCATGGAAATGAAC  
TAGAGGGGAAAATCCCTCGATCTTTGGCCAATTGTGAAGCGTTGCAAGTT

>M6-PGSC0003DMG400033632M6LRR-RLP\_186

ATCCAAATATGAGTTCATGGAACATGAGCAGAGATTGTTGCTCATGGGATAGAGTCATATGCGATGAGA  
TTACTGGCCATGTCATTGAACTTGACCTCGGCTGTAGCCGTCTGGTAGGAT

>M6-PGSC0003DMG400033632M6LRR-RLP\_2046

CAAGTCTGTTTCAACATCTGAAAGCCATGAGGACAATTGACCAATCATTGAAGGCACCAAGATCATCTTA  
CATAGAATCATATTACCAAGATTCTATTACAATTGCAACCAAGGGAATGG

>M6-PGSC0003DMG400033632M6LRR-RLP\_2108

TCATCTTACATAGAATCATATTACCAAGATTCTATTACAATTGCAACCAAGGGAATGGATCGTGAAATTG  
TGAGAATCTTGATTTGTACACCGCTCTTGATCTTTCAAATAATAAATTT

>M6-PGSC0003DMG400033632M6LRR-RLP\_2170

TGAAATTGTGAGAATCTTGATTTGTACACCGCTCTTGATCTTTCAAATAATAAATTTAGTGGGAAAATTC  
CAAGTATTATTGGGGATCTCGTTGCACTTCATGTGCTGAGTTTATCTCA

>M6-PGSC0003DMG400033632M6LRR-RLP\_248

GATGAGATACTGGCCATGTCATTGAACTTGACCTCGGCTGTAGCCGTCTGGTAGGATAGATTGATTCCA  
ATAGCAGCCTATTCCGACTCTCTCATCTCCAAAGGCTTGATCTTTCTTGG

>M6-PGSC0003DMG400033632M6LRR-RLP\_310

TGATTCCAATAGCAGCCTATTCCGACTCTCTCATCTCCAAAGGCTTGATCTTTCTTGAATAAATTTCTTAAA  
TTCTCACATCTCTCCTGAATTTGGCAGGTTCTCGAGCTTGACACATCT

>M6-PGSC0003DMG400033632M6LRR-RLP\_372

ACTTCTTAAATTCTCACATCTCTCTGAATTTGGCAGTTCTCGAGCTTGACACATCTTAATCTTACCAACT  
CATTTTTCTCAGGCCAAATTCCTTCTGAAATCTCTCATCTTTCCAAGT

>M6-PGSC0003DMG400033632M6LRR-RLP\_434

CTTACCAACTCATTTTTCTCAGGCCAAATTCCTTCTGAAATCTCTCATCTTTCCAAGTTACAATCTCTTCATC  
TCTCAGACCTAAGAGTTGGACCTACAATTTAAATTGCTCCTTCAG

>M6-PGSC0003DMG400033632M6LRR-RLP\_62

TGTCTGCTTTCTTTTTCTTCATCCATACCTCATCGGTGCCACGAAGATGAAAGTATTTCCCTTCTAAAATTC  
AAGAAAACACTTACTGTAGATCCTTCATTAGATAGGTGTATTTCTTAC

>M6-PGSC0003DMG400033632M6LRR-RLP\_620

TTTTCTTCTCATTTTCAACTCTGGGGCTGGAAGACACAGGATTGTATGGGATAATACCTGAGAGTATTT  
TTCACCTTCCCAACCTGGAATACTTGACTTATCCGGCAATTATCAGCTA

>M6-PGSC0003DMG400033632M6LRR-RLP\_682

GAGTATTTTTACCTTCCCAACCTGGAAATACTTGACTTATCCGGCAATTATCAGCTAAGTGGTTATTTTC  
CAAAGACCAAATGGAACAGCAGTGCATCTCTCGTAGGGTTAGATCTCAG

>M6-PGSC0003DMG400033632M6LRR-RLP\_744

GTTATTTTCAAAGACCAAATGGAACAGCAGTGCATCTCTCGTAGGGTTAGATCTCAGTGGCGTGAATTT  
TTCTTGTAATTTGCCTGAGTCTTTGGATATCTAACATCGGTACATTCTT

>M6-PGSC0003DMG400033632M6LRR-RLP\_806

GTGAATTTTTCTTGTAATTTGCCTGAGTCTTTGGATATCTAACATCGGTACATTCTTTGTCTCTTGAAAT  
TGCAACCTTAGAGGACCTATTCCTGAATCTATTTCGAATCTCACCCGC

>M6-PGSC0003DMG400033632M6LRR-RLP\_868

TCTTGAAATTGCAACCTTAGAGGACCTATTCCTGAATCTATTTCGAATCTCACCCGCATAGAGTCTTTGT  
ACCTTGATGGTAACTCCCTGAATGGAACAATACCATCAGGGATGTTCTC

>M6-PGSC0003DMG400033632M6LRR-RLP\_930

AGTCTTTGTACCTTGATGGTAACTCCCTGAATGGAACAATACCATCAGGGATGTTCTCCCTTCCATCACTA  
AGTTATTTAAGCTTGGGTTTTAACCAATTTTCTGGTCAGCTTGAGGATT

>M6-PGSC0003DMG400033667M6LRR-RLK\_1302

CTCGGAACTTGTTCTAGCTTACGTTTCGATTCAGCTCTACAAGAATCAGTTTTCGGGTGAAATTCATCTGG



GGTTTGGACTTTGGTTGACATGACAAGTTTGGTTGTTGAATGATAACTCA

>M6-PGSC0003DMG400033670M6LRR-RLP\_0

CTTGTATTAAATGTGCTGTGTTTCATATTACTGTGGACCCATAACAATAATTCATGAAAACTTTTTCATATTT  
GTTGTCCTGTATAACAATAATGGTCCCAAATATCATCAATTTTATCTGT

>M6-PGSC0003DMG400033670M6LRR-RLP\_2135

CATTTAATATGCTTATCAAGCTTTCAAATCATTGAATTAACCTTGAAATTTGTATGATATTTTCATTTTACAA  
GATGACAGTTATTAGTACTTTTTTCATTTTACAAGATAACTTGAAATGT

>M6-PGSC0003DMG400033670M6LRR-RLP\_2196

TCATTTTACAAGATGACAGTTATTAGTACTTTTTTCATTTTACAAGATAACTTGAAATGTGGCACTTTTGTG  
AGATTCTTATCTGAACTATCATGTGTTTATCGTCTTATATATAGCCTTA

>M6-PGSC0003DMG400033670M6LRR-RLP\_2257

CACTTTTGTGAGATTCTTATCTGAACTATCATGTGTTTATCGTCTTATATATAGCCTTATGCAAATAGTGAT  
ATCGGTAAGTTTATTGTACACAACATTTGAAGTAATGATTTGTTAATT

>M6-PGSC0003DMG400033670M6LRR-RLP\_4270

TAAAGATGATCCTGAGTTTGACGCGAATTGCTCCTCTTCTACGAAACATTCTGATATTCTTGGGAGAGTG  
GTTAGTCTCTTCAGCTGCATTAATTGATCTCTGTTTAAATAATTTAATT

>M6-PGSC0003DMG400033670M6LRR-RLP\_4331

GGGAGAGTGGTTAGTCTCTTCAGCTGCATTAATTGATCTCTGTTTAAATAATTTAATTACTTAAGCTCTT  
CTCATATATGGTTAGCACTGTTTTGATTGCTTGTATCAACGTGTTG

>M6-PGSC0003DMG400033670M6LRR-RLP\_4392

TTAAGCTCTTCTCATATATGGTTAGCACTGTTTTGATTGCTTGTATCAACGTGTTGTCGATGATAAAG  
AAATTAGTGGGTACTTTTTCTCTCCAGCTTCGTCTGTTTGTAGCACATA

>M6-PGSC0003DMG400033670M6LRR-RLP\_4439

ATCAACGTGTTGTCGATGATAAAGAAATTAGTGGGTACTTTTTCTCTCCAGCTTCGTCTGTTTGTAGCACA  
TATTTGTTTGTGGATCTTCTAATACAGTTCAAACAAAAATTTCTAATA

>M6-PGSC0003DMG400033670M6LRR-RLP\_671

CATCCGCCAAGGGTGAGTTAAAAAATGTGTAGTTTAGACGTTAGAAATGCTTATTTAAGTCTCTTTTTTT  
TATGAAAAAATGTTTCTAGACACTTTTTTTTTTAAATTTAATATATAA

>M6-PGSC0003DMG400033670M6LRR-RLP\_732

CTCTTTTTTTTATGAAAAAATGTTTCTAGACACTTTTTTTTTTAAATTTAATATATAATCACTTTATTTTCA  
ATTTTAGCACTTCAACTCAAACATCTGATGGTGCTTATTTATTAAC

>M6-PGSC0003DMG400033914M6LRR-RLK\_0

TTTAATCTTTCTCATAATACGTTTTATGGAAATTTGCCATCCTTAAACAGAAGCTTCAGTTTTCTAGATCTA  
TCAGGAAACTATTTTGAAGGCAAACCTCCAGATTATGCACAACGTAAC

>M6-PGSC0003DMG400033914M6LRR-RLK\_128

TAGTAGCAATTGCCTCCAAAATGCGACAAGTCAAAGGAATAGGAGCGAATGTGCTTCTTTTTATAGCGG  
GCGTGGCTTGTTGTTGATAATTTTGGAGAGCCAAATGCCACAGAGCCTCT

>M6-PGSC0003DMG400033914M6LRR-RLK\_192

AGCGGGCGTGGCTTGTTGTTGATAATTTTGGAGAGCCAAATGCCACAGAGCCTCTTCCAACCTCCAAAT  
CCAACAGAAAGAGTCACAGAAATAAAATCATATTGGCGGCTGTTCTGGGT

>M6-PGSC0003DMG400033914M6LRR-RLK\_256

CCAAATCCAACAGAAAGAGTCACAGAAATAAAATCATATTGGCGGCTGTTCTGGGTAGCGTTGGATTAC  
TTGCACTTGTCTTTATCTGTATATTTCTGCTGATTTTTTGCACCCGCAAAC

>M6-PGSC0003DMG400033914M6LRR-RLK\_320

ATTACTTGCCTTGTCTTTATCTGTATATTTCTGCTGATTTTTTGCACCCGCAAACGGGGTGCCACGAATC  
AAAGAGCCACTGAGGTTGGCCTGGTCCTGCCAGTTCAAGTCCACCACC

>M6-PGSC0003DMG400033914M6LRR-RLK\_384

ACGAATCAAAGAGCCACTGAGGTTGGCCTGGTCCTGCCAGTTCAAGTCCACCACCTCCTGCACCTGGA  
GCATCATTGAATTTTTCAAGTTTAGGAGATGCATTTACCTACCAGCAGATT

>M6-PGSC0003DMG400033914M6LRR-RLK\_448

CTGGAGCATCATTGAATTTTTCAAGTTTAGGAGATGCATTTACCTACCAGCAGATTCTGCAAGCCACAGG  
TGAGTTCAATGATGCAAATCTTATGAAGCATGGTCATTCAGGTGATCTCT

>M6-PGSC0003DMG400033914M6LRR-RLK\_512

CACAGGTGAGTTCAATGATGCAAATCTTATGAAGCATGGTCATTCAGGTGATCTCTTCCGTGGCACCCCTA  
GAAGGCGGGACACTTATAGTTGTCAAAGAATAGATGTGCAGTCTGCAAG

>M6-PGSC0003DMG400033914M6LRR-RLK\_576

ACCCTAGAAGGCGGGACACTTATAGTTGTCAAAGAATAGATGTGCAGTCTGCAAGGAATGAAGCATA  
CTTGTGAGAATTGGACTTCTCAGCAAGGTTTCTCACTCCAGATTAGTACCT

>M6-PGSC0003DMG400033914M6LRR-RLK\_64

TAGATCTATCAGGAACTATTTTGAAGGCAAACCTCCAGATTATGCACAACGTAACGTGTCAATTAGTAG  
CAATTGCCTCCAAAATGCGACAAGTCAAAGGAATAGGAGCGAATGTGCTT

>M6-PGSC0003DMG400033914M6LRR-RLK\_640

CATACTTGTCAGAATTGGACTTCTTCAGCAAGGTTTCTCACTCCAGATTAGTACCTTTTATGGGGCACTGT  
TTGGAGAATGAGAATGAGAAGTTCGTGGTGTACAAGTATATGCCAAATG

>M6-PGSC0003DMG400033914M6LRR-RLK\_704

GCACTGTTTGGAGAATGAGAATGAGAAGTTCGTGGTGTACAAGTATATGCCAAATGGAGATCTTTCCAG  
TTCTTTGTTTAGAAAAACAATTCAGATGATGATAGTTTGCAGTCATTGGA

>M6-PGSC0003DMG400033914M6LRR-RLK\_768

TCCAGTTCTTTGTTTAGAAAAACAATTCAGATGATGATAGTTTGCAGTCATTGGATTGGATAACACGAC  
TGAAAATTGCTATTGGAGCTGCTGAGGGTTTGTCTTATCTACATCATGAA

>M6-PGSC0003DMG400033914M6LRR-RLK\_830

AACACGACTGAAAATTGCTATTGGAGCTGCTGAGGGTTTGTCTTATCTACATCATGAATGTAACCCGCCT  
CTAGTGACAGGTATCAAGGACTTGTTCATATTACATTTATCTTACTTCCA

>M6-PGSC0003DMG400034634-(rev)M6LRR-RLP\_0

ATGAGTTTAGTAGTGGAAGTTGTGAAAACTTGAAAGGCTCCCACTAAGTTACAGTCTGAGTCTCTTG  
AAATTCTAAATTTTTCTGGATGTCGGAGTTTGATAAAAGTTCCAGAAGTT

>M6-PGSC0003DMG400034634-(rev)M6LRR-RLP\_114

GAAGTTCAGCAAATGTGAATCGCTTATCAGAATTCAGAAGACATACTTTCGTGTATCTACATCATCAT  
TTGAACATGGCAATTCTCTGAGCTATATAGATATGTGTGACTGCATTAC

>M6-PGSC0003DMG400034634-(rev)M6LRR-RLP\_171

TCTACATCATCATTTGAACATGGCAATTCTCTGAGCTATATAGATATGTGTGACTGCATTACATTGAAAT  
TCTCCCTACCAGCATTTGCAGGTTGAAGAATTTGAAGTTTCTTTACCTC

>M6-PGSC0003DMG400034634-(rev)M6LRR-RLP\_228

ATTCACATTGAAATTCTCCCTACCAGCATTTGCAGGTTGAAGAATTTGAAGTTTCTTTACCTCATTGAGTG  
TTCTAAACTAAAAACCTTGCCGGAAAATATTGGTGATCTAGAAAACATT

>M6-PGSC0003DMG400034634-(rev)M6LRR-RLP\_283

TTTACCTCATTGAGTGTCTAAACTAAAAACCTTGCCGGAAAATATTGGTGATCTAGAAAACATTGAGGG

GCTTGATGCAACTGGCACAGCAATCTGGCACACCCCAAATTCCTTCATAA

>M6-PGSC0003DMG400034634-(rev)M6LRR-RLP\_57

TCTGAGTCTCTTGAAATTCTAAATTTTTCTGGATGTCCGGAGTTTGATAAAAGTTCCAGAAGTTCAGCAA

ATGTGAATCGCTTATCAGAATTCAAGAAGACATACTTTCGTGTATCTACA

>M6-PGSC0003DMG400034859M6G-LecRK\_0

ATGGTACAAAGATGTAGGTCCCGGTACCGTTGTATGGGTTGGCAATAGAAGAAATCCAGTTAATTGTGG

TGTATTGCTAGGACTATACACAGAAGGAGACATTTTTCTCCACGATATACT

>M6-PGSC0003DMG400034859M6G-LecRK\_1054

TTTTATACGGATGGCACCTGAAAACTAGGTAAAAATGATTGCTTGCTTTAACTGATTTAATTCCTAGATT

ATATTATTAATATGGTGCAAAACAATGTGTGCAAGAATGACATTTGAAA

>M6-PGSC0003DMG400034859M6G-LecRK\_1116

TCCTAGATTATATTATTAATATGGTGCAAAACAATGTGTGCAAGAATGACATTTGAAAGGTGAAGTAGTT

AATTGTTGTGTAGGTTTGATTATTTACACAGAAACATCAATTAATAGAAT

>M6-PGSC0003DMG400034859M6G-LecRK\_1178

AAGTAGTTAATTGTTGTGTAGGTTTGATTATTTACACAGAAACATCAATTAATAGAATTTCCATATTAATT

CTTGATTAAGTGGTTCATCGCAGATCGATGTTTGAAGCATTAGATTGAA

>M6-PGSC0003DMG400034859M6G-LecRK\_124

ACAACGGTATGGATTCATAAGCCCAACAGTACAGTTCCTTACCAGTACTGAAGCTCCTTGATTCAGGTA

ATCTTGTGTTTGGAGATTCTAGCAACTAACGGCTGGAGAGTACCTATGGC

>M6-PGSC0003DMG400034859M6G-LecRK\_1240

ATATTAATTCCTTGATTAAGTGGTTCATCGCAGATCGATGTTTGAAGCATTAGATTGAATGTTGTCACATAA

CTGCTATATAATCGAGCATAAGATGAAACAACCCTGCATGCATCTAGTT

>M6-PGSC0003DMG400034859M6G-LecRK\_1302

GTCACATAACTGCTATATAATCGAGCATAAGATGAAACAACCCTGCATGCATCTAGTTATTCTCATTGCA

AAATCTTTAACATAATGAGTAAATACCTCTAGAAATTCCTATAAAGTTTA

>M6-PGSC0003DMG400034859M6G-LecRK\_1364

TCATTGCAAATCTTTAACATAATGAGTAAATACCTCTAGAAATTCCTATAAAGTTTATGTCAAATTTGAA

GCCTAATTTTATGAGTAAGAAACAACACTTTTAACTTTCTTATGG

>M6-PGSC0003DMG400034859M6G-LecRK\_1426

AAATTTGAAGCCTAATTTTATGAGTAAGAAACAACACTTTTAACTTTCTTATGGACAGATGCACAT  
GTTTCCGACATCAGATGGAAAAATGAATGGACAGCTTTTGCTTCTTTAAT

>M6-PGSC0003DMG400034859M6G-LecRK\_1488

ATGCACATGTTTCCGACATCAGATGGAAAAATGAATGGACAGCTTTTGCTTCTTTAATCTCAGAGTTGGC  
ACTACTTATTATTTTCTTATAGCTGTTGTGGTTCTATGTCAAAAAATGA

>M6-PGSC0003DMG400034859M6G-LecRK\_1550

GAGTTGGCACTACTTATTATTTTCTTATAGCTGTTGTGGTTCTATGTCAAAAAATGAGGACAGAGGTGC  
TAGGTA AAAAGAATCACCTTGCCTGCTATTATATTATTTTCATAGTTCT

>M6-PGSC0003DMG400034859M6G-LecRK\_1612

AGAGGTGCTAGGTA AAAAGAATCACCTTGCCTGCTATTATATTATTTTCATAGTTCTTTATTACAAACTA  
AGCTTAGTTTCACTAGAACACTATTATTTAGCAAACACAAGACCTAAGT

>M6-PGSC0003DMG400034859M6G-LecRK\_1674

TACAACTAAGCTTAGTTTCACTAGAACACTATTATTTAGCAAACACAAGACCTAAGTAAGAAAGCTAGC  
CTAATACTCATATTAAGGTATGATTCACATCCATTATTTTCTGATTAATT

>M6-PGSC0003DMG400034859M6G-LecRK\_1736

AAGCTAGCCTAATACTCATATTAAGGTATGATTCACATCCATTATTTTCTGATTAATTTGCTTTCTCATAGC  
AGATGAACAAGAAATCAATCAGCCGACAAATTCTCAAGGAGCTTTGCT

>M6-PGSC0003DMG400034859M6G-LecRK\_1798

TTCTCATAGCAGATGAACAAGAAATCAATCAGCCGACAAATTCTCAAGGAGCTTTGCTGCAAGGCACTA  
ATGTCATTGCATATGATTCCAGTGATCTAGCTGCAGCCACTAACAATTTCT

>M6-PGSC0003DMG400034859M6G-LecRK\_186

TTCAGGTAATCTTGTGTTTGGAGATTCTAGCAACTAACGGCTGGAGAGTACCTATGGCAAAGCTTTGACC  
ACCCAGTTGACACATTGTTACCAAAAATGAAGCTTGGTTGGGACAAGAAA

>M6-PGSC0003DMG400034859M6G-LecRK\_1860

GGCACTAATGTCATTGCATATGATTCCAGTGATCTAGCTGCAGCCACTAACAATTTCTCGCTGGCTAAAA  
AGATAGGGCATGGTGGCTTTGACAATGTTTGTAAAGGTTATTATTTCTTTC

>M6-PGSC0003DMG400034859M6G-LecRK\_1922

GGCTAAAAGATAGGGCATGGTGGCTTTGACAATGTTTGTAAAGGTTATTATTTCTTTCGACAAGCATGAA  
AATGAATATTTACAGTAACTCAGACAACGTAATTAATACCTAAATGATAC

>M6-PGSC0003DMG400034859M6G-LecRK\_1984

AGCATGAAAATGAATATTTACAGTAACTCAGACAACGTAATTAATACCTAAATGATACATTTGTAGGGTG  
TACTAGAGAATGGAGTAGAAATAGCAGTGAAGAAGCAGGACGTGACTTCA

>M6-PGSC0003DMG400034859M6G-LecRK\_2046

GTAGGGTGTACTAGAGAATGGAGTAGAAATAGCAGTGAAGAAGCAGGACGTGACTTCATGTCAAGGAT  
TACTGAGTTCGAGAATGAAGTCAAGTTAATAGCAAAGCTACAACATCGTAA

>M6-PGSC0003DMG400034859M6G-LecRK\_2108

AAGGATTTACTGAGTTCGAGAATGAAGTCAAGTTAATAGCAAAGCTACAACATCGTAACCTAACCAAAT  
TGTTGGGATACTGCATTAATGGAACAGAAAAATTTCTAGTCTATGAGTTCA

>M6-PGSC0003DMG400034859M6G-LecRK\_2170

ACCAAATTGTTGGGATACTGCATTAATGGAACAGAAAAATTTCTAGTCTATGAGTTCATGGCGAATAATA  
GCCTAGACAAGGTCATATTTGGTATGACATCTTAAATAATATTTTTCTTT

>M6-PGSC0003DMG400034859M6G-LecRK\_2232

GAATAATAGCCTAGACAAGGTCATATTTGGTATGACATCTTAAATAATATTTTTCTTTTTTTACTATTGTCT  
GTGTTGTTTTGATATTGGAAAATCCACAAAAGACAGAAATTTAGGAGT

>M6-PGSC0003DMG400034859M6G-LecRK\_2294

ACTATTGTCTGTGTTGTTTTGATATTGGAAAATCCACAAAAGACAGAAATTTAGGAGTATCCGAGTGAAA  
TTGAGTAACTGTTTTCTGTACATGTCTAGATCCTGCAAGAAGGGGTACAG

>M6-PGSC0003DMG400034859M6G-LecRK\_2356

GAGTGAAATTGAGTAACTGTTTTCTGTACATGTCTAGATCCTGCAAGAAGGGGTACAGTAACATGGCCA  
ATGCGCTTTAACATTATCAAAGGAATCGCAAAAAGGATTAGTTTACATGCAT

>M6-PGSC0003DMG400034859M6G-LecRK\_2418

ATGGCCAATGCGCTTTAACATTATCAAAGGAATCGCAAAAAGGATTAGTTTACATGCATCATGACTCAAG  
GTTGACAATAATCCACCAGGACTTAAAAGCTAGCAATGTCTTGCTAGACAG

>M6-PGSC0003DMG400034859M6G-LecRK\_248

CTTTGACCACCCAGTTGACACATTGTTACCAAAAATGAAGCTTGGTTGGGACAAGAAAATGATCGA  
TCGATCCATGAGGTCCTGGAGGACAGAAGGTGATCCAGCTCCAGATGATTA

>M6-PGSC0003DMG400034859M6G-LecRK\_2480

ACTCAAGGTTGACAATAATCCACCAGGACTTAAAAGCTAGCAATGTCTTGCTAGACAGAGAGATGACAC

CCAAGATATCTGACTTAGGGTTGTCAAGGGTATTCGAAGATGATGTTGAAG

>M6-PGSC0003DMG400034859M6G-LecRK\_2542

ATGACACCCAAGATATCTGACTTAGGGTTGTCAAGGGTATTCGAAGATGATGTTGAAGAAAAGACTCAG  
CATTTAATTGGAACACGGTTAGTATATTATCATTAAGACTACATGTTTATG

>M6-PGSC0003DMG400034859M6G-LecRK\_2604

GACTCAGCATTTAATTGGAACACGGTTAGTATATTATCATTAAGACTACATGTTTATGTATATTTTAGAGT  
TTTTACAGATGGTTTTATGTTGTGGCTGTAGTGGTTATATGCCTCCTGA

>M6-PGSC0003DMG400034859M6G-LecRK\_2666

TTTTAGAGTTTTTACAGATGGTTTTATGTTGTGGCTGTAGTGGTTATATGCCTCCTGAGTACATGAAAAAT  
GGACATTATTCAACAAAATCATGACGTTTTTGTAGTTTTGGAATCCTGGCA

>M6-PGSC0003DMG400034859M6G-LecRK\_2728

ATGAAAAATGGACATTATTCAACAAAATCATGACGTTTTTGTAGTTTTGGAATCCTGGCATTGGAGATTGTG  
AGTGGCCAAAAGAATTATGATTATCGGCACCCAGTCTATGATATTGGTCT

>M6-PGSC0003DMG400034859M6G-LecRK\_2790

AGATTGTGAGTGGCCAAAAGAATTATGATTATCGGCACCCAGTCTATGATATTGGTCTAGTAGACTATGT  
ACGTAAGTACATCATCGATCCCCTGGTTATCGTCATTACTTCACTTAAAT

>M6-PGSC0003DMG400034859M6G-LecRK\_2852

GACTATGTACGTAAGTACATCATCGATCCCCTGGTTATCGTCATTACTTCACTTAAATTGGTTACATAGAA  
GTTTCACCTTGTGCTAAAACAATTTACATGATTGATGTTTCGATCTATTG

>M6-PGSC0003DMG400034859M6G-LecRK\_2914

TACATAGAAGTTTCACCTTGTGCTAAAACAATTTACATGATTGATGTTTCGATCTATTGTTGGTCAAGCTTG  
GAGAATTTGGAGTAAGGGGAATGCCATAGAACTACTGGATCCAATGATT

>M6-PGSC0003DMG400034859M6G-LecRK\_2976

TCAAGCTTGGAGAATTTGGAGTAAGGGGAATGCCATAGAACTACTGGATCCAATGATTGAAAAACCAG  
GTGATGAGAATGAAGTTTTAGGATGCATCCTTGTGGGGTCTTGTGTTGTCA

>M6-PGSC0003DMG400034859M6G-LecRK\_3038

AACCAGGTGATGAGAATGAAGTTTTAGGATGCATCCTTGTGGGGTCTTGTGTTGTCAACGCCGTGCC  
AAGACAGACCTTCAATGATTCAGGTGGTTTCCTTACTGGAGGAGAATGAAA

>M6-PGSC0003DMG400034859M6G-LecRK\_3073

CTTGTTGGGGTCTTGTGTTGTCAACGCCGTGCCAAGACAGACCTTCAATGATTCAGGTGGTTTCCTTAC  
TGGAGGAGAATGAAATGTCAAGGTAAATTTTGTGCCTCAGGAACCTTAA

>M6-PGSC0003DMG400034859M6G-LecRK\_310

GCATCGATCGATCCATGAGGTCCTGGAGGACAGAAGGTGATCCAGCTCCAGATGATTATTTGTTTCAGGT  
TAGACTCAGGTGACTCAGGTCAGTTACCCCACTAGTTCTTGAGAAAAACC

>M6-PGSC0003DMG400034859M6G-LecRK\_434

AATACATTCAAGATGGGGTCCTTGGGATGGACAGATCTAGAAATTCAGTGGCGGTTATGCCCTCATGGA  
TAACCATGCATTCAAGCCAATATTTTCATTCCGATACAAATGCATTTTTTTTT

>M6-PGSC0003DMG400034859M6G-LecRK\_496

TCATGGATAACCATGCATTCAAGCCAATATTTTCATTCCGATACAAATGCATTTTTTTTTTTCACATTCGAAGCC  
AAGAACGATTAGAGTTTGAACTTTCACTGAATCCAGATGGAAAATACA

>M6-PGSC0003DMG400034859M6G-LecRK\_558

TTCGAAGCCAAGAACGATTAGAGTTTGAACTTTCACTGAATCCAGATGGAAAATACAATTCTTGAGGT  
GGAATAATGCTACCAATTACTAGGAGGAAGTGAATACACTGAATAAGGACA

>M6-PGSC0003DMG400034859M6G-LecRK\_62

ATTGTGGTGTATTGCTAGGACTATACACAGAAGGAGACATTTTTCTCCACGATATACTGGGAACAACGG  
TATGGATTCATAAGCCCAACAGTACAGTTCCCTTACCAGTACTGAAGCTCC

>M6-PGSC0003DMG400034859M6G-LecRK\_620

TTGAGGTGGAATAATGCTACCAATTACTAGGAGGAAGTGAATACACTGAATAAGGACACATGTGACCA  
GTATTGCACTTGTGGGCCTTATGGAGTTTGTAGTGATGGAGATCTCCCCTGC

>M6-PGSC0003DMG400034859M6G-LecRK\_682

TGACCAGTATTGCACTTGTGGGCCTTATGGAGTTTGTAGTGATGGAGATCTCCCCTGCGGGTGTCTGAT  
GGTTTCACAGCTGCATCACCAGATGAATGGGGCATGATGAATTTTACGGA

>M6-PGSC0003DMG400034859M6G-LecRK\_744

GTCCTGATGGTTTCACAGCTGCATCACCAGATGAATGGGGCATGATGAATTTTACGGAGGTATGTAGGA  
GAAACACCTCACTTAACTACACCAATAAAGACGTCTTTGTGGAGAATACTG

>M6-PGSC0003DMG400034859M6G-LecRK\_806

TGTAGGAGAAACACCTCACTTAACTACACCAATAAAGACGTCTTTGTGGAGAATACTGGATTGAAGTTG  
CTTGATAATGCTACTTACTAGGGAATGTTGTACCACCAGGAGTGTGAACAG



>M6-PGSC0003DMG400034859M6G-LecRK\_868

GAAGTTGCTTGATAATGCTACTTACTAGGGAATGTTGTACCACCAGGAGTGTGAACAGAAGTGCTTAAA  
TGAAAGATCGTGTATGACTTATACTATCATCAATATCAATGGAAATGGAAG

>M6-PGSC0003DMG400034859M6G-LecRK\_930

GCTTAAATGAAAGATCGTGTATGACTTATACTATCATCAATATCAATGGAAATGGAAGCAAATGTGTCGT  
TTGGTTGGGAAATTTACTTGATATGAGACATTCACAGATAGTTGGGAACA

>M6-PGSC0003DMG400034859M6G-LecRK\_992

TGTGTCGTTTGGTTGGGAAATTTACTTGATATGAGACATTCACAGATAGTTGGGAACAACATTTTTATAC  
GGATGGCACCTGAAAACTAGGTAAAAATGATTGCTTGCTTTAACTGATT

>M6-PGSC0003DMG400034987M6LRR-RLP\_378

ATATTCCTATGTTCTTCCAATGTTTACTGTATTACTGGGATTCCTATTTACTGAACCATATCAAAGAAGCTA  
CTTTCTTTCTGGCTTTTATACCCAGGTATAAAGGGATAGACAGTCTAA

>M6-PGSC0003DMG400035141M6LRR-RLP\_1024

GAATTCTTGATTTGTCTTTAAATGTATTGTCAGGTACTATTCCTAAGTCTTTGGAAAACTCTACTACCTT  
AAAAGCATTAAATGTTTCATTTAATGATTTAGAAGGTGAAATACCGAGT

>M6-PGSC0003DMG400035141M6LRR-RLP\_1152

GTTTGCAAATCCACTCTGCAGTCATTTCTTCGGAACAAAGGTCTTTGCGGAATACACATATTGGAGATT  
CCTGTTTGTGCTATCAATAATCCTGGAAAACAATCAAAGCTTAAGGAGGT

>M6-PGSC0003DMG400035141M6LRR-RLP\_1216

GAGATTCCTGTTTGTGCTATCAATAATCCTGGAAAACAATCAAAGCTTAAGGAGGTCTACTAAAAATTG  
TACTCCAGTGGTTATTGCATCCTTTTTGATATTCTTGTTGGTTTTAATT

>M6-PGSC0003DMG400035141M6LRR-RLP\_1536

TCTAGATTTGGAAAATGAGAAAGTATGCAAGAGGTTTGATACCGAATGTGAAGTGATGAGAAATGTTA  
GACACAGAAATCTTGTTCCAGTGATTACTACATGTTCTAATGACTATATAAG

>M6-PGSC0003DMG400035141M6LRR-RLP\_1576

ACCGAATGTGAAGTGATGAGAAATGTTAGACACAGAAATCTTGTTCCAGTGATTACTACATGTTCTAATG  
ACTATATAAGAGCCTTTGTTCTGCGATATACACCCAATGGGAGTCTTTGA

>M6-PGSC0003DMG400035141M6LRR-RLP\_320

AATCAGCGACAACATTCAAAGGAGGTCGGTAATCTGTGCCAGCTTGCAATTTTTGTACTTGTTGATAAT

CAATTAACATGTTCCATTCCCGTAACACTGTTTAATATCTCGTCACTACT

>M6-PGSC0003DMG400035141M6LRR-RLP\_384

GATAATCAATTAACATGTTCCATTCCCGTAACACTGTTTAATATCTCGTCACTACTTGTCTATCTCTGGGA  
AATAATATCCTTTCTGGTCCTCTCTTGGTAGATGAAGGGAACATTGTC

>M6-PGSC0003DMG400035141M6LRR-RLP\_448

CTCTGGGAAATAATATCCTTTCTGGTCCTCTCTTGGTAGATGAAGGGAACATTGTCTCAAATATGAACGT  
TTAAGTATATCTCTCAGTCAAATTTCTGGTTGCATTCTTCCAACATAT

>M6-PGSC0003DMG400035141M6LRR-RLP\_512

GAACGTTTTAAGTATATCTCTCAGTCAAATTTCTGGTTGCATTCTTCCAACATATGCCAACTCATAGAGC  
TCAAACTTTTGTCCATATCATTCAACAACATAACTGGAGACATACCTAG

>M6-PGSC0003DMG400035141M6LRR-RLP\_576

ATAGAGCTCAAACTTTTGTCCATATCATTCAACAACATAACTGGAGACATACCTAGAAATATTGATTGTTT  
ATCCAACTCAAGATGTTTCTTGTGGAGATAATCGAATAAAAGGGACT

>M6-PGSC0003DMG400035141M6LRR-RLP\_64

ATCCCTTATGAACTTGGCCACTTGCGAGTGATTGATTTCAAACAATCAGCTCAACGGAAGTATACCAA  
CAAGTCTATTTCAACACCAGAGAGTTCAAGTAATTTCAATTGAACTAGGTG

>M6-PGSC0003DMG400035141M6LRR-RLP\_640

ATTGTTTATCCAACTCAAGATGTTTCTTGTGGAGATAATCGAATAAAAGGGACTATTCCCACTTCATTG  
GGAAATATTTCCACTCTGCAATATCTTTATTGTGAAAACAATCGCATGG

>M6-PGSC0003DMG400035141M6LRR-RLP\_704

TTCATTGGGAAATATTTCCACTCTGCAATATCTTTATTGTGAAAACAATCGCATGGTTGGGCAAATTTCTC  
CAGAATTAGGGAAGCTATCAAATTTGAGGGAATTATTCTTTGACAATAA

>M6-PGSC0003DMG400035141M6LRR-RLP\_768

ATTTCTCCAGAATTAGGGAAGCTATCAAATTTGAGGGAATTATTCTTTGACAATAATTATAATCTTATTGG  
TCAAATTCCTAAGGCTATTTTCAACATATCTTATTTGGAAGTTATTGAT

>M6-PGSC0003DMG400035141M6LRR-RLP\_832

TTATTGGTCAAATTCCTAAGGCTATTTTCAACATATCTTATTTGGAAGTTATTGATTTCAAGTTTCAACAACC  
TCTCGGGTAGAATTCCAACCACTACAGGTCTTCATCTTCCAACATTA

>M6-PGSC0003DMG400035141M6LRR-RLP\_896

CAACAACCTCTCGGGTAGAATTCCAACCACTACAGGTCTTCATCTTCCAAACATTAAGCAACTTATCTTGG  
GAGACAATCAGCTGGAAGGAGAAATTCCATTGTTCATAACAAATGCTTC

>M6-PGSC0003DMG400035333-(rev)M6LRR-RLP\_0

ATGGCTAAATCTACAATATTTTTCTCCTTTTCCTTTTCATTTTCAGTGTTGCTTCACAATGTTACTGCATCAG  
ATGATATTAGGTGTTTGCAAGGACTGAAGGACTCATTTAAGGATCCT

>M6-PGSC0003DMG400035333-(rev)M6LRR-RLP\_130

TGAATTCTTGGAACCTCTCAAATACTCCATGGGGTTTATCTGCAAGTTCATTGGTGTCGGTTGCTGGAA  
CGCCCTCGAGAACCGGGTGCTCAGCCTCTCACTTCCAAACATGAATCTCA

>M6-PGSC0003DMG400035333-(rev)M6LRR-RLP\_195

TGGAACGCCCTCGAGAACCGGGTGCTCAGCCTCTCACTTCCAAACATGAATCTCAGTGGACAGCTCTCA  
GATGCCTTCAAATATTGCTCCTCTTTGACTACTCTTGATCTCTCTGGTAAC

>M6-PGSC0003DMG400035333-(rev)M6LRR-RLP\_260

CTCAGATGCCTTCAAATATTGCTCCTCTTTGACTACTCTTGATCTCTCTGGTAACAGGTTCTCCGGTCCCAT  
TCCTTCGGAGATTTGTAGCTGGACTCCTTTTTTAGTAATCCTCGACTT

>M6-PGSC0003DMG400035333-(rev)M6LRR-RLP\_325

GTCCCATTCCTTCGGAGATTTGTAGCTGGACTCCTTTTTTAGTAATCCTCGACTTGCCAACAACGGTTTC  
TCCGGCTCTATACCTGCTGAACTTGAAACTGCACCTACCTGAACAAGT

>M6-PGSC0003DMG400035333-(rev)M6LRR-RLP\_390

GGTTTCTCCGGCTCTATACCTGCTGAACTTGAAACTGCACCTACCTGAACAAGTTGATGCTCAATAACA  
ACAAACTCTCTGGAAATATTCCACCAGAAATCTCTCGATTAACGAGGCTT

>M6-PGSC0003DMG400035333-(rev)M6LRR-RLP\_455

TAACAACAAACTCTCTGGAAATATTCCACCAGAAATCTCTCGATTAACGAGGCTTAAGGTGCTCTCCGTG  
GCCAACAATAATCTTTCTGGTAAAATACCACCATTTTCAGGATTGTCTGA

>M6-PGSC0003DMG400035333-(rev)M6LRR-RLP\_513

GTGCTCTCCGTGGCCAACAATAATCTTTCTGGTAAAATACCACCATTTTCAGGATTGTCTGATTTTGAATA  
TGGAGGAAATAGACATCTTTGCGGTGGACCATTAGCCAAATGTGGTTGA

>M6-PGSC0003DMG400035333-(rev)M6LRR-RLP\_65

TGCATCAGATGATATTAGGTGTTTGCAAGGACTGAAGGACTCATTTAAGGATCCTAATGGAAATTTGAA  
TTCTTGGAACCTCTCAAATACTCCATGGGGTTTATCTGCAAGTTCATTGG

>M6-PGSC0003DMG400035513-(rev)M6LRR-RLP\_0

ATGAGTTTTAGCCCTCTAGGGTTTTGTCAAAAAATTTCACTGAATCAAATCTCTAAGCACAAAGAGAAG  
TACAGTTTAGTGAAAGTAGGTTCCCTAATTA AAAATGTTGCCAAAAGTAA

>M6-PGSC0003DMG400035513-(rev)M6LRR-RLP\_120

AGAAAATGTTGATCTTCACAAGTTAATACACAAGATTGAATGGCTTCCATTGTCCTCTTGAAATTGGTG  
AATGTCCTGCGCTAAACATTGCCGATAACCAAATTATGGCTCTTCTAAC

>M6-PGSC0003DMG400035513-(rev)M6LRR-RLP\_180

GAAATTGGTGAATGTCCTGCGCTAAACATTGCCGATAACCAAATTATGGCTCTTCTAACTACCATTGGT  
AGCCTTAATGCCTTAACGAAGCTCAATACTCACTCCAACCAAATTATAAA

>M6-PGSC0003DMG400035513-(rev)M6LRR-RLP\_240

TACCATTGGTAGCCTTAATGCCTTAACGAAGCTCAATACTCACTCCAACCAAATTATAAACCTTCTGATT  
CATTTGGTAAGGTAATCAATTTGACCGATCTTGACCTTTACGCGAACAG

>M6-PGSC0003DMG400035513-(rev)M6LRR-RLP\_300

CCTTCTGATTCATTTGGTAAGGTAATCAATTTGACCGATCTTGACCTTTACGCGAACAGGTTGAAATCG  
ATGCCAGCTACTTTTCAGGAACTTAATAAATCTGATTGATCTTGATTCAGG

>M6-PGSC0003DMG400035513-(rev)M6LRR-RLP\_358

AGGTTGAAATCGATGCCAGCTACTTTTCAGGAACTTAATAAATCTGATTGATCTTGATTCAGGTTCAAACG  
AGTTTGCTCATTTTCTGATTTCTTGGGAACTTAACCTCCTTGAAGTGA

>M6-PGSC0003DMG400035513-(rev)M6LRR-RLP\_60

CAAAGAGAAGTACAGTTTAGTGAAAGTAGGTTCCCTAATTA AAAATGTTGCCAAAAGTAAAGAAAATGT  
TGATCTTCACAAGTTAATACACAAGATTGAATGGCTTCCATTGTCCTCT

>M6-PGSC0003DMG400035816M6RLKmalectin\_0

ATGTTTCTCTCTCTTTTATTCACTCTTATTGTGTATTCAAACAATCATCATATCTACTGCAACTAACATTC  
ATGAAAACGTTGCCATATCATGTGGTGCCTCTGGCAATTACCCTGCA

>M6-PGSC0003DMG400035816M6RLKmalectin\_1024

ATGCTAATGTGATCAAATGGAGTGGGGGAATGGAATTTCTGTATTTCAGGGACTATGTTGCCGTTATGG  
AGGGTGATAGAAGGGAAGGGAAGCGTAACCTTACTATAGTTTTGCAGCCAA

>M6-PGSC0003DMG400035816M6RLKmalectin\_1088

TATGGAGGGTGATAGAAGGGAAGGGAAGCGTAACCTTACTATAGTTTTGCAGCCAAAGTTTCCTTCAAT

CAGTAAACATGCTAATGCCATCTTAAATGGGATAGAAGTCTTCAAGATAAG

>M6-PGSC0003DMG400035816M6RLKmalectin\_1216

ACAACAATCTTGGTAGTGTGAGCCCTGTGCATCCTGTTACAAGTTCAACACCAGAAAAATCAGAGGAAT  
CTGTGCTGTTCTATACAAAGAATCAAATTGCAATTGTACTIONGACATTTATGG

>M6-PGSC0003DMG400035816M6RLKmalectin\_1280

GGAATCTGTGCTGTTCTATACAAAGAATCAAATTGCAATTGTACTIONGACATTTATGGTCACTTTGGTCAAT  
GTTGTTGTTTATTACATTAGGTGTATTTAGAGATGAACTCTGGAAAGAC

>M6-PGSC0003DMG400035816M6RLKmalectin\_1344

GTCAATGTTGTTGTTTATTACATTAGGTGTATTTAGAGATGAACTCTGGAAAGACGAACAATAGAATAT  
CTTCAGGAGAGCATCAGTGTCTCAATTCTCATTGGATGAGATGGAAAGA

>M6-PGSC0003DMG400035816M6RLKmalectin\_1472

CAATTTTGATCCTCAGCTTGTGATTGGTAGCGGTGGATATGGCCAGTATATAAAGGGGATATTGATGGT  
GGAAAAACCACTGTAGCAGTTAAGCGATTGAAACGAGGATCTAGCCAGGG

>M6-PGSC0003DMG400035816M6RLKmalectin\_1523

TAAAGGGGATATTGATGGTGGAAAAACCACTGTAGCAGTTAAGCGATTGAAACGAGGATCTAGCCAGG  
GGGAGAAAGAGTTTTGGATGGAAATCAATATGTTATCTACGCACCGCCATGA

>M6-PGSC0003DMG400035816M6RLKmalectin\_192

AATTCAGAGTACCTACCAAGCTGCCTTGTCCGATCCAGTTCCTTATAACTCTGCTCGATCGTCTCGCCA  
TCAGTTTACCTACAAATTTTTCAGTGAAACCTGGACACAAGTTCATACGC

>M6-PGSC0003DMG400035816M6RLKmalectin\_256

CTCGCCATCAGTTTACCTACAAATTTTTCAGTGAAACCTGGACACAAGTTCATACGCCTGCACTTCAAACCA  
GCTTTATACAATGGTTTCTACAAGTCCAAAGCCATTTTTACTGTCAAAA

>M6-PGSC0003DMG400035816M6RLKmalectin\_384

CATACCCTGCTCAGTGACTIONCATACTACCCTTGTGCAAGGTATGAACTATTTCAAAAAGGAATTTTGCAT  
CAATGTACAAGAAAGTGAAACATTAAGCATAACATTCATACCATCTCGA

>M6-PGSC0003DMG400035816M6RLKmalectin\_448

TTTGCATCAATGTACAAGAAAGTGAAACATTAAGCATAACATTCATACCATCTCGAAAATCAAGCTTTTC  
AGAAGACACTTATGCTTTTGTAAATGCAATCGAGATTGTTTCCATGCCCA

>M6-PGSC0003DMG400035816M6RLKmalectin\_512

CTTTTCAGAAGACACTTATGCTTTTGTTAATGCAATCGAGATTGTTTCCATGCCCACTGGTCTGTATTCA  
CACCTGATGGCAATCAGGGAGTCCCTGTTGTTTCGACGAAATTACAGATT

>M6-PGSC0003DMG400035816M6RLKmalectin\_576

TATTTACACCTGATGGCAATCAGGGAGTCCCTGTTGTTTCGACGAAATTACAGATTCTACATTGACAACA  
GCACAGCACTGGAGACAATTCAGCGAATAAATGTTGGCGGAAACTCTATT

>M6-PGSC0003DMG400035816M6RLKmalectin\_64

CTAACATTCATGAAAACGTTGCCATATCATGTGGTGCCTCTGGCAATTACCCTGCACCAGATGGACGATT  
ATGGATTGGAGATTCAACTTTCACTTCCTCATTTCTACACTTAACTGGAA

>M6-PGSC0003DMG400035816M6RLKmalectin\_704

GGAAGATGCAACCATGTTCCGGGAATGGGAAGATGACACTAATTACCTGATTCAAGTAGGAGCCTTTTC  
GATCAACAGAGCCATTGATATCAGATATGCATCCTCAGCAACTCACGTTGC

>M6-PGSC0003DMG400035816M6RLKmalectin\_768

TTTTCGATCAACAGAGCCATTGATATCAGATATGCATCCTCAGCAACTCACGTTGCACCAAAGAAGTTT  
ACCTGACGGCCAGGTCAGTGGGTGCGCACTGCCATTTGAATTTCTGTAAT

>M6-PGSC0003DMG400035816M6RLKmalectin\_896

GAACATTCCACTTGATTTGGGATTCAGATACCTTGTTAGGCTTCACTTTTGTGAAATTGAACCTATGATCA  
CATATGAAGGCCAAAGGAATTTCACTATCGTTATAAACAATCAGAATGC

>M6-PGSC0003DMG400035816M6RLKmalectin\_960

ATGATCACATATGAAGGCCAAAGGAATTTCACTATCGTTATAAACAATCAGAATGCTGAAGATGATGCT  
AATGTGATCAAATGGAGTGGGGGGAATGGAATTTCTGTATTCAGGGACTAT

>M6-PGSC0003DMG400035841M6G-LecRK\_0

GGAATTCTTACTCCTCTAAATGGTTCTGGCAGAGTAATTTGGTCCTCCGATTCCACTAGACATGGGCAAA  
ATCCAGTAGCACAACCTCTTGATTCAGGCAATCTTGTAGTTTCGAGATGCG

>M6-PGSC0003DMG400035841M6G-LecRK\_244

AGAGCACAAATAATCCTTCCAGAGGTGAGTTTAACTGGACATTCGATACTGGTGGATTCTGCAAACATT  
CATTATGAATGGTTCCATTGAACTCTACAGAGCTGGACCATGGAATGGCC

>M6-PGSC0003DMG400035893-(rev)M6LRR-RLP\_768

CACCGAGAAGCTTAAGGTTCTTTATTTTCATAATAATATGACAGGTGATGAAGGGGCTGTTGCGATTGC  
GGAAATTGTGAAGCGTTCTCCTTTATTGGAAGATTTCAAGGTGCTCTTCTAC

>M6-PGSC0003DMG400035934M6LRR-RLP\_0

TTCACAATTTTCAATATTTCTCGAATCAAAGTTGTTTCATTTGCAATCAATAGGTTATCAGGAAATCTTCAC  
AATGATTTATGCAATGGTCTCCAATACTCAAAGGCTTTATCTATCA

>M6-PGSC0003DMG400035934M6LRR-RLP\_1008

TTTTTAAGCTTCCTCACTTCCTTAACCAATTGCAAAAATTTAACATCTCTTTATCTATCTTTCAACCCTCTAA  
ATGGCATGCTTCCGGTCTCCGCAGGGAAGTTCTCCATATCTCTTGTA

>M6-PGSC0003DMG400035934M6LRR-RLP\_1055

TCTTTATCTATCTTTCAACCCTCTAAATGGCATGCTTCCGGTCTCCGCAGGGAAGTTCTCCATATCTCTTGT  
AATTTTTTATGCCACTGCTTGCAAGATCAACGGCCAGATTCCAAATGA

>M6-PGSC0003DMG400035934M6LRR-RLP\_126

AAGCTTGATGGTCATATGCCTACAAGCTTGTCAAATTGTTCACTTCAAATATTGTTTCTATCCGAAAA  
TGATTTTGATGGACCAATACATAGTGAAATTGGAAGATTGAGTAACTTG

>M6-PGSC0003DMG400035934M6LRR-RLP\_189

TCCGAAAATGATTTTGATGGACCAATACATAGTGAAATTGGAAGATTGAGTAACTTGCAGACATTGTATC  
TCGGATATAACCATTTACAGGTATATATGTTTTATCTTATGAATACTAG

>M6-PGSC0003DMG400035934M6LRR-RLP\_252

TTGTATCTCGGATATAACCATTTACAGGTATATATGTTTTATCTTATGAATACTAGTACTGTTGTATCTAA  
TAACCTCATATCTTTTTATTACACATTAAATGCAGGGATAATTCCACA

>M6-PGSC0003DMG400035934M6LRR-RLP\_315

TGTATCTAATAACCTCATATCTTTTTATTACACATTAAATGCAGGGATAATTCCACAAGAAATTGGAAATC  
TTGTTAATTTGGTGGAGTTAGCAATGGAGAAAAACCAGATTACCGGCTC

>M6-PGSC0003DMG400035934M6LRR-RLP\_378

TGGAAATCTTGTTAATTTGGTGGAGTTAGCAATGGAGAAAAACCAGATTACCGGCTCTATCCCGATCTCC  
ATATTCAATATCTCCTCGTTGCGTTTTGTTTCACTATGGAGGAACAATCT

>M6-PGSC0003DMG400035934M6LRR-RLP\_504

ATCCTTACCACGGGAGATTGGCACTTAACCAAGATGCAAGTTTTATATCTTAACGAAAATAGGTTTGTT  
GGTACGTATTCAAAGTGATAACAATCTGTATTGAACTAGCTAGTTAGTAA

>M6-PGSC0003DMG400035934M6LRR-RLP\_567

GTTTGTGGTACGTATTCAAAGTGATAACAATCTGTATTGAACTAGCTAGTTAGTAACTCAAATCTTTCT

TTGTTGACAGGTGAAATACCCAAAGAGATAAGAAATTTGTTGAGTTGG

>M6-PGSC0003DMG400035934M6LRR-RLP\_63

AATCTTCACAATGATTTATGCAATGGTCTCCAATACTCAAAAGGCTTTATCTATCACGAAACAAGCTTGA  
TGGTCATATGCCTACAAGCTTGTCAAATTGTTCACAACTTCAAATATTG

>M6-PGSC0003DMG400035934M6LRR-RLP\_630

ATCTTTCTTTGTTGACAGGTGAAATACCCAAAGAGATAAGAAATTTGTTGAGTTGGAGAACTTGGTCT  
TCACTTTAATAATTTTAGTGGTTCCTTGGATATAGAGATCTTCAACATAT

>M6-PGSC0003DMG400035934M6LRR-RLP\_693

TTGGTCTTCACTTTAATAATTTTAGTGGTTCCTTGGATATAGAGATCTTCAACATATCAGGGATGAGAGCA  
ATTGATCTTTCAGCCAACAATCTATCAGGGACCATCCAACCAAACATAG

>M6-PGSC0003DMG400035934M6LRR-RLP\_756

TGAGAGCAATTGATCTTTCAGCCAACAATCTATCAGGGACCATCCAACCAAACATAGGTTCTATCTCACC  
CAACATTGAAGAGCTTAACCAATCTCGTTGGGACTATTCCTTATTCTATC

>M6-PGSC0003DMG400035934M6LRR-RLP\_819

TCTCACCAACATTGAAGAGCTTAACCAATCTCGTTGGGACTATTCCTTATTCTATCTCCAATTGTTCAAA  
GCTTACTATTCTAGAGCTTTCATACAACAACTCACAGGATTGATTCCC

>M6-PGSC0003DMG400035934M6LRR-RLP\_882

TGTTCAAAGCTTACTATTCTAGAGCTTTCATACAACAACTCACAGGATTGATTCCCAATTCTCTTGGATA  
TTTGACTCATCTACACTTCTAACTTGGCTGAAAACAATTTAACCAGT

>M6-PGSC0003DMG400035934M6LRR-RLP\_945

CTTGGATATTTGACTCATCTACACTTCTAACTTGGCTGAAAACAATTTAACCAGTGATTCATTTTTAAG  
CTTCTCACTTCTTAACCAATTGCAAAAATTTAACATCTCTTTATCTA

>M6-PGSC0003DMG400036044M6RLKWAX-EGF\_0

AAATAGCCCCGAAACCACACTAATGTATGGTCTTCAACCCTGTAGCTACGCGTTCCTTGGCGATCAT  
GAAAAGTTCACATTTAGGGGTACATCAGACTTCATGGACCCAACTTTGT

>M6-PGSC0003DMG400036044M6RLKWAX-EGF\_126

AATAGTGAATGATGTTCTATTGTGATTGACTGGGCAATTGGGACTAAAAATTGCAGTGTGGTTAGGAA  
CTCAACAACTTATTCATGTATGGAACATAGTCTATGTGTTGATTCTGAAAG

>M6-PGSC0003DMG400036044M6RLKWAX-EGF\_1260



ACCAAATTTTAAACAGAAGATATCGATATGTCTTTTCTCAAAATTCGATGACGTATTTGAGTCTTTCTCAA  
AAAACAAAACCCTCTTTTGAGACACAATTCCTCGGTACACACTATGTTT

>M6-PGSC0003DMG400036044M6RLKWAX-EGF\_1323

TTTCTCAAAAACAAAACCCTCTTTTGAGACACAATTCCTCGGTACACACTATGTTTCTCCTTATGACTTGA  
ATGAATAATATAAAGAAAAAATTACCTAAATACACAACCTATTTTATC

>M6-PGSC0003DMG400036044M6RLKWAX-EGF\_1575

ATTGTATCGATCAGAAATCAAGACGCGATGTATTGAAATATTGAGTGATGTATTCGAAATTGGGACGTG  
ATGTATATTGGGTACGTTTTGTAATTTGAAAAAGAGTATGGATATGATGTA

>M6-PGSC0003DMG400036044M6RLKWAX-EGF\_1701

TCTTAATACTATGTGATTTATGTAAAAATCCCTGAGACTTTGTCAAAAACAAATATCCCAAGAAACATTGT  
CAAAAAACAAATATCCCAATATTTTTTTAATTTTTGACATTCTACTAT

>M6-PGSC0003DMG400036044M6RLKWAX-EGF\_1764

AACATTGTCAAAAAACAAATATCCCAATATTTTTTTAATTTTTGACATTCTACTATATTGATCAATTGCAG  
GTTTAGGTCTTGGATTGTTGTCAATACTGGTTAGTGTTACATGGATAT

>M6-PGSC0003DMG400036044M6RLKWAX-EGF\_1810

CATTCTACTATATTGATCAATTGCAGGTTTAGGTCTTGGATTGTTGTCAATACTGGTTAGTGTTACATGGA  
TATATTTTCAAGTTTAAAAAGAAGAAAAATTCTAAAATTACGAGAGAAATT

>M6-PGSC0003DMG400036044M6RLKWAX-EGF\_189

TAGGAACTCAACAACCTTATTCATGTATGGAACATAGTCTATGTGTTGATTCTGAAAGTGGAAGTGGAGG  
TTATCGTTGCATTTGTGAGGAAGGATATGACGGAAATCCTTATCTTAGTCC

>M6-PGSC0003DMG400036044M6RLKWAX-EGF\_252

TGGAGGTTATCGTTGCATTTGTGAGGAAGGATATGACGGAAATCCTTATCTTAGTCCAGGCTGTCAAGG  
TTTGTGTGACCATCTCATCTAAAAGTTTAAGCTGTTAGAAAGAGTCAAGCA

>M6-PGSC0003DMG400036044M6RLKWAX-EGF\_315

TCAAGTTTTGTGTGACCATCTCATCTAAAAGTTTAAGCTGTTAGAAAGAGTCAAGCAGGTGCTTTCAGGA  
TTTTGTCTGCTCTGATACCATATTGAACTGTGTGACCATCTCATCTAAA

>M6-PGSC0003DMG400036044M6RLKWAX-EGF\_441

AGCTGTCAGAGGTACATTAACCTTCTGATGAACTAATTTGAGCGTTCTTGTAACAGATATCGATGAGTGT  
GCAACGAGCCCTTGTGATGGAATTTGCAAAAACACTCCAGGAGGGTTTGA

>M6-PGSC0003DMG400036044M6RLKWAX-EGF\_504

TGAGTGTGCAACGAGCCCTTGTGATGGAATTTGCAAAAACACTCCAGGAGGGTTTGAGTGTTCGTGTCC  
GAAGGGATATTTGACGATGGAAGAAGGGACGTGGTTGCCAGAAGGAGCA

>M6-PGSC0003DMG400036044M6RLKWAX-EGF\_63

CGATCATGAAAAGTTCACATTTAGGGGTACATCAGACTTCATGGACCCAACTTTGTGAACAGAATAGT  
GAATGATGTTCTATTGTGATTGACTGGGCAATTGGGACTAAAATTGCAG

>M6-PGSC0003DMG400036044M6RLKWAX-EGF\_630

CCCCATCTTAAAGTTATCTATTGGTATGTAAACACAATTACAATGGCATGAAGTTTCAATTTATCAAACCA  
TAGACATAAAAAATATAAACATTAGATGATTATAATGTAGTTAGAAATT

>M6-PGSC0003DMG400036044M6RLKWAX-EGF\_693

TCAAACCATAGACATAAAAAATATAAACATTAGATGATTATAATGTAGTTAGAAATTATAGAACCAAGCA  
CAAATGATTTAGGTAGTTTTAGTCTTTAATTATCTTAGTCAATAAGCAT

>M6-PGSC0003DMG400036044M6RLKWAX-EGF\_756

CCAAGCACAAAATGATTTAGGTAGTTTTAGTCTTTAATTATCTTAGTCAATAAGCATATCACTATAATAGG  
GAGATTTTACAATTACCAGTACATGTGGAGAGGAGACTCTCCAAACTTA

>M6-PGSC0003DMG400036044M6RLKWAX-EGF\_819

ATAATAGGGAGATTTTACAATTACCAGTACATGTGGAGAGGAGACTCTCCAACTTATATATTCAACATA  
AACTATCTTTAACATAGGAAAAAACTCAAATATGTCATCAAACCTTTGAGA

>M6-PGSC0003DMG400036109-(rev)M6LRR-RLP\_0

ATGAGTCCATGTACTAGAAGCAAGTCAGCTAGAGATTTGAGAAAGTCTATTATTTCTGAATTACCGATTG  
GTGCACTACATAGAATACTAGAACTTATGCCCATTAATATGCTGCAAGA

>M6-PGSC0003DMG400036109-(rev)M6LRR-RLP\_1054

ACTTCCATATTGCCGTTAAGTTTAATTGTTACATTTTGTATCTTTAATTCTGGTAATGTAGATTGACTATCA  
TGAGACTTTTTCTTCAGGTTGATGAGACATTGAATCAGAGAACGGAGA

>M6-PGSC0003DMG400036109-(rev)M6LRR-RLP\_1116

TTGACTATCATGAGACTTTTTCTTCAGGTTGATGAGACATTGAATCAGAGAACGGAGATGTTATCTTCTT  
ATTATTTATCAACGAAAAAAGAGCATGTGAATGAAGCTTTGAGATTGATT

>M6-PGSC0003DMG400036109-(rev)M6LRR-RLP\_1178

ATCTTCTTATTATTTATCAACGAAAAAAGAGCATGTGAATGAAGCTTTGAGATTGATTCAAACAGTGAGG

TTGCGGAAATTCAAGGGATCAAGAACTGAAATGTGCTTAATAAGAGTCAT

>M6-PGSC0003DMG400036109-(rev)M6LRR-RLP\_124

GCATCTTATCAAATATTGGAGACAGTTATGGTCTACACAACCTTAATCTTGTGTTTCGATCCACTGTTTTTT

CAGTATGTATCTAATACTAAGGATTCTGCTGCAAGTGTAAATTCATAAAA

>M6-PGSC0003DMG400036109-(rev)M6LRR-RLP\_1240

CAGTGAGGTTGCGGAAATTCAAGGGATCAAGAACTGAAATGTGCTTAATAAGAGTCATATTTTCTCATT

TCCAAACCTAGAGAGGATGATCATTGAACAGTGCAGAGAAATTAGGAAATG

>M6-PGSC0003DMG400036109-(rev)M6LRR-RLP\_1302

TCTCATTCTCCAAACCTAGAGAGGATGATCATTGAACAGTGCAGAGAAATTAGGAAATGCAACAACTAT

AAGGAAAAATTGAGGGAACAACCTAAGCTGCATTACTCGAGCATCACCCAAA

>M6-PGSC0003DMG400036109-(rev)M6LRR-RLP\_1364

AAACTATAAGGAAAAATTGAGGGAACAACCTAAGCTGCATTACTCGAGCATCACCCAAAGCAATAGTTGT

CAATTATTTACAACCTGTTTTCCAGTGGCGTATTACGATTTTTTTGTTTA

>M6-PGSC0003DMG400036109-(rev)M6LRR-RLP\_186

CTGTTTTTTTCAGTATGTATCTAATACTAAGGATTCTGCTGCAAGTGTAAATTCATAAAATTCTCTTTAAACAT

ACTGGAGATATTCTGGGATTCCATCTCATCTCCGAGGCAAACACTTTA

>M6-PGSC0003DMG400036109-(rev)M6LRR-RLP\_248

CTTTAAACATACTGGAGATATTCTGGGATTCCATCTCATCTCCGAGGCAAACACTTTAACACAGTCCGAT

GTGAATCAATTCATCATCTTTGTCTCGAATCATGGTATCCAAAAAGCTCA

>M6-PGSC0003DMG400036109-(rev)M6LRR-RLP\_310

AGTCCGATGTGAATCAATTCATCATCTTTGTCTCGAATCATGGTATCCAAAAAGCTCACTCTAATAATGGC

CAACGATGAAAAATATGTGTTGCCTGATCGCATATTTACATGTGCAACG

>M6-PGSC0003DMG400036109-(rev)M6LRR-RLP\_372

AATAATGGCCAACGATGAAAAATATGTGTTGCCTGATCGCATATTTACATGTGCAACGTTGACACATTTG

AAGCTCTCAAGGTGTATCTTTATGCTGCCGGATGGTACCCAATTTCCCAA

>M6-PGSC0003DMG400036109-(rev)M6LRR-RLP\_434

CACATTTGAAGCTCTCAAGGTGTATCTTTATGCTGCCGGATGGTACCCAATTTCCCAATCTTATTAGCCTT

CAGTTAGAACATTCTAAAATTGCCGGTCATCGAGGATTAGAAAACAAC

>M6-PGSC0003DMG400036109-(rev)M6LRR-RLP\_496

ATTAGCCTTCAGTTAGAACATTCTAAAATTGCCGGTCATCGAGGATTAGAAAACAACTTAATTTGCCAG  
TTCTAGAGACTATGGAGTTGAGATTTTGTGTTGATGTTGATTCTGTTTAT

>M6-PGSC0003DMG400036109-(rev)M6LRR-RLP\_558

TTTGCCAGTTCTAGAGACTATGGAGTTGAGATTTTGTGTTGATGTTGATTCTGTTTATTTGGTTTCTCCAA  
AACTTGAGAACTTGTCTATCATTAGCAGCTATAACAATTACATTTCCGGTG

>M6-PGSC0003DMG400036109-(rev)M6LRR-RLP\_62

ACCGATTGGTGCCTACATAGAATACTAGAACTTATGCCCATTAATATGCTGCAAGATCTAGCATCTTA  
TCAAATATTGGAGACAGTTATGGTCTACACAACCTAATCTTGTGTTCTGA

>M6-PGSC0003DMG400036109-(rev)M6LRR-RLP\_620

TTTCTCCAAAACCTTGAGAACTTGTCTATCATTAGCAGCTATAACAATTACATTTCCGGTGTTTTAGTGTGAAC  
CCAATCTTACTATCATTAAAGCACCTCTGCTTGAATGGAACCTCCCTAG

>M6-PGSC0003DMG400036109-(rev)M6LRR-RLP\_682

AGTGTGAACCCAATCTTACTATCATTAAAGCACCTCTGCTTGAATGGAACCTCCCTAGAGGTAAGAAAAT  
AGTGTACTTTGTTTTTCATTCGTAGATGCTCTTACTAACACTCCATAAC

>M6-PGSC0003DMG400036109-(rev)M6LRR-RLP\_744

AAGAAAATAGTGTTACTTTGTTTTTCATTCGTAGATGCTCTTACTAACACTCCATAACTTCATTTATTTGTC  
ATTGGTTTTTTCAGAACTTTGCTCGGCGTATGTGGAAGTCAAGCTTT

>M6-PGSC0003DMG400036109-(rev)M6LRR-RLP\_806

TTTATTTGTCATTGGTTTTTTCAGAACTTTGCTCGGCGTATGTGGAAGTCAAGCTTTGTCAACCACTAAA  
ATTGCAAAGCCTGAAAATTTGTAACCTTAAGATTTCACTTGAAAGTATT

>M6-PGSC0003DMG400036109-(rev)M6LRR-RLP\_868

ACCACTAAAATTGCAAAGCCTGAAAATTTGTAACCTTAAGATTTCACTTGAAAGTATTGCTTGTGTAGTTT  
GCCTGCTTAGGAGTTCTCCCAACCTTTCTGAAATTGAAATAGATGAGGT

>M6-PGSC0003DMG400036109-(rev)M6LRR-RLP\_930

GTGTAGTTTGCCTGCTTAGGAGTTCTCCCAACCTTTCTGAAATTGAAATAGATGAGGTTGTAAAGGTAAT  
ACATATCATGACTAATAAGGACAGTTCTATGTATATTTATTTGAAATCGT

>M6-PGSC0003DMG400036109-(rev)M6LRR-RLP\_992

AAGGTAATACATATCATGACTAATAAGGACAGTTCTATGTATATTTATTTGAAATCGTAAGAACTCCAT  
ATTGCCGTTAAGTTTAATTGTTACATTTTGTATCTTTAATTCTGGTAATG

>M6-PGSC0003DMG400036410-(rev)M6LRR-RLP\_0  
ATGGGAAAAACAATTGAGACTCAAATCACAAGGAAATAATGTTTGAATTCGCCAAAGAGTTAGGCG  
GAAATTGCAGAAGCGAGGCGAAGAGTTGATTAGCGGAGTCGAAAAATGGGG

>M6-PGSC0003DMG400036410-(rev)M6LRR-RLP\_1054  
GATTCTAAGCCCCATGTGGACGTTTTAAATGTCACCATTATATGGAAGGACGGGGAGAGCCCAACATTT  
GTGGATGCTTTGGTATGGAGTTGTCAGCCTAGGAGACTCAACGTTTATTCA

>M6-PGSC0003DMG400036410-(rev)M6LRR-RLP\_1116  
AACATTTGTGGATGCTTTGGTATGGAGTTGTCAGCCTAGGAGACTCAACGTTTATTCAACAAGAGAAAA  
TATTACATTTTTTCATTGATCATTGATGTATATGAAGAATTTGAGTCAGTC

>M6-PGSC0003DMG400036410-(rev)M6LRR-RLP\_1240  
TTCATGAAAGCATGCCTCAACTCAGTCAATTAAGACATAAAGCCTACAAATTTGATCCTAGATACT  
ATAAGGAGGAGAGTTGGCTTCTGTGGAACACAAAAGTGGGGAGCTGGCA

>M6-PGSC0003DMG400036410-(rev)M6LRR-RLP\_1291  
AAATTTGATCCTAGATACTATAAGGAGGAGAGTTGGCTTCTGTGGAACACAAAAGTGGGGAGCTGGC  
AACACGAACTCTGAAAAGTGGGAATGGTGTATTTTTTATTAGATTGGTGA

>M6-PGSC0003DMG400036410-(rev)M6LRR-RLP\_248  
TGCAAGCCTGGTCGAATCTTCCAACTTGGATTTACAGTTGATTATTCTAATTGCAACGATATGAAAAT  
AGTGGATGATACCCTGGGGAGATATAGGGATGGAAAAATCCCTATAGAAA

>M6-PGSC0003DMG400036410-(rev)M6LRR-RLP\_310  
ATGAAAATAGTGGATGATACCCTGGGGAGATATAGGGATGGAAAAATCCCTATAGAAAAGTTTGAATT  
ATTAGATGATTGTTTGATAATGTTTCTAACTCTTTTGAAGTTTTAGATTTT

>M6-PGSC0003DMG400036410-(rev)M6LRR-RLP\_372  
TGAATTATTAGATGATTGTTTGATAATGTTTCTAACTCTTTTGAAGTTTTAGATTTCCCTATGATTGATAA  
GTGGCTTGGCATTGTACTAACAATGGTGAAAAGACCTTACCATATC

>M6-PGSC0003DMG400036410-(rev)M6LRR-RLP\_496  
TACCCCTGTTTATTTTCGCAATCTTGGCGTAAAATCTGTGAGAAAATTGGTTCTGAAATATTGTACTCT  
TTTGCTGTTTCGTTATCTAGCGTTGTTGTGAATTGCAATTCCTTGAGA

>M6-PGSC0003DMG400036410-(rev)M6LRR-RLP\_62  
TTAGGCGGAAATTGCAGAAGCGAGGCGAAGAGTTGATTAGCGGAGTCGAAAAATGGGGTTTTAAGGT

ACGGTTGCACAATAGGACACCTTCAATTGATATATTGTCAGAATGTCTCATTC

>M6-PGSC0003DMG400036410-(rev)M6LRR-RLP\_620

TTTCTCTATCTTATGTAAGATTAGTAGACGAAAACATGCTTCAGACTCTACTTAATAGCTGTCTGTTGATT  
GAATCTTTCACCTTTGAGTGTTGCAAGGGCTTGAAACAATGAATCCTC

>M6-PGSC0003DMG400036410-(rev)M6LRR-RLP\_682

CTGTTGATTGAATCTTTCACCTTTGAGTGTTGCAAGGGCTTGAAACAATGAATCCTCAAAGATTAAGT  
CGGTTTCCCTGAAGTTCTTGAAGATTCGGCATTGTGGGGTAATATGGGAG

>M6-PGSC0003DMG400036410-(rev)M6LRR-RLP\_744

GATTAAGTCGGTTTCCCTGAAGTTCTTGAAGATTCGGCATTGTGGGGTAATATGGGAGATTGATGCTCC  
AAACTTGGTATCACTTAAGTTAACCTGGGAAGACATTCCTCAAATTTAAAAT

>M6-PGSC0003DMG400036410-(rev)M6LRR-RLP\_806

ATGCTCCAAACTTGGTATCACTTAAGTTAACCTGGGAAGACATTCCTCAAATTTAAAATTGTGAGAGAGTC  
AAGACAACCTGAAGTACTCAAGAATCATTCTTGAATGCTTAGACAGTGACA

>M6-PGSC0003DMG400036410-(rev)M6LRR-RLP\_992

TTTGGATTGATTCTTATGAATGCAATAACATCAACATTCAAAATTTGCAACTGGACCATAAAGATTCTAA  
GCCCCATGTGGACGTTTTAAATGTCACCATTATATGGAAGGACGGGGAGA

>M6-PGSC0003DMG400036835-(rev)M6LRR-RLP\_0

GCTCAGGTGGTTATCACTTAGAAATAACAACCTTTGATGGCCAACCTTGAGTTCTTATCCTTTAACAGATGG  
ACGCAACTTGTTGAGCTAGATATTTCAATTAATTCCTAACAGGTTCAAT

>M6-PGSC0003DMG400036882-(rev)M6RLKWAX-EGF\_0

ATTAATGTTGTAATTAGTTATAGGTCCATATATTAATTCTGGACAACGTAGATTAATTAATAAATATAACT  
CGAAGCAAAACAATTTCTCAAGTGGACCACATATATATTTTTGGATT

>M6-PGSC0003DMG400036882-(rev)M6RLKWAX-EGF\_1054

GTTTCATCATGAACCGGAACAAGCTGTAGTTCGAGTGTATTATAATTAGTGCTAACATGTTGTGTATATTTT  
TTTGTTTTATTTTCAGTTGCTGTTATATCAGTGCTTCTCATGCTCTTAG

>M6-PGSC0003DMG400036882-(rev)M6RLKWAX-EGF\_1116

GTATATTTTTTTGTTTTATTTTCAGTTGCTGTTATATCAGTGCTTCTCATGCTCTTAGGTGGATTTTTAGTCC  
ACAGACGTTACCTAATAAAAAGAAGAACAATAAGGTTACTTGTAATA

>M6-PGSC0003DMG400036882-(rev)M6RLKWAX-EGF\_1178

ATTTTTAGTCCACAGACGTTACCTAATAAAAAGAAGAACAATAAGGTTACTTGTAAGAAAGAGAAGA  
AATATTAAGTGCAAATACAAGTGAAAATCAGCTAAAGTTTTCTCTGGCAA

>M6-PGSC0003DMG400036882-(rev)M6RLKWAX-EGF\_124

AAGAAAGGAATTAATACTAATTAGTTGTTCAATTAATTTGTTTATGTACTTTAGAAAACTTTGGTATAAAAT  
TCATTGGCTATTGTTTAGGGATTTGTAGTAGATTTTGTATCCTTGCTTC

>M6-PGSC0003DMG400036882-(rev)M6RLKWAX-EGF\_1240

GAGAAGAAATATTAAGTGCAAATACAAGTGAAAATCAGCTAAAGTTTTCTCTGGCAAAGAAATAAAAA  
AATCAACAAATAATTTTGCCAAAGAAAATCTTTTAGGCACTGGTGGATTTG

>M6-PGSC0003DMG400036882-(rev)M6RLKWAX-EGF\_1302

ATAAAAAAATCAACAAATAATTTTGCCAAAGAAAATCTTTTAGGCACTGGTGGATTTGGTGAAGTATTTA  
AAGGCAATTTAGATGATGGTACTATAGTTGCAGTTAAAAGAGCGAAACCC

>M6-PGSC0003DMG400036882-(rev)M6RLKWAX-EGF\_1364

AGTATTTAAAGGCAATTTAGATGATGGTACTATAGTTGCAGTTAAAAGAGCGAAACCCGGTAACGCTAA  
GGGCACGTTACAAGTCCTTAACGAAGTTCGAATTCTGTGCCAAGTGAACCA

>M6-PGSC0003DMG400036882-(rev)M6RLKWAX-EGF\_1426

ACGCTAAGGGCACGTTACAAGTCCTTAACGAAGTTCGAATTCTGTGCCAAGTGAACCATCGTGGTCTAG  
TGAGACTACTCGGTTGTTGTGTGCGAGCTCGAGTTACCTCTTTAATTTACG

>M6-PGSC0003DMG400036882-(rev)M6RLKWAX-EGF\_1488

GGTCTAGTGAGACTACTCGGTTGTTGTGTGCGAGCTCGAGTTACCTCTTTAATTTACGAGTATGTACCTA  
ATGGTACGCTTTTCGAACACCTCCACGTGTTTCGTCTCCATGAGCGGGCC

>M6-PGSC0003DMG400036882-(rev)M6RLKWAX-EGF\_1550

TGTACCTAATGGTACGCTTTTCGAACACCTCCACGTGTTTCGTCTCCATGAGCGGGCCCCACTTACTTGGT  
TGAGGCGTCTAGTGATCGCTCAACAAACCGCGGACGGACTCGCGTACCT

>M6-PGSC0003DMG400036882-(rev)M6RLKWAX-EGF\_1612

TACTTGGTTGAGGCGTCTAGTGATCGCTCAACAAACCGCGGACGGACTCGCGTACCTACACTCGTCGG  
CTGTTCCGCCGATTTATCATCGCGATGTTAAATCAAGTAATATTTTACTAG

>M6-PGSC0003DMG400036882-(rev)M6RLKWAX-EGF\_1674

TCGTGGGCTGTTCCGCCGATTTATCATCGCGATGTTAAATCAAGTAATATTTTACTAGACGATAAGCTCG  
ATGCTAAGGTTTCAGACTTTGGACTGTGCGAGATTAGTCGAGCTGAGTGAA

>M6-PGSC0003DMG400036882-(rev)M6RLKWAX-EGF\_1736  
TAAGCTCGATGCTAAGGTTTCAGACTTTGGACTGTTCGAGATTAGTCGAGCTGAGTGAAAGTGAGAACAC  
TCATATCAACACATCTGCTCAGGGTACATTGGGGTACCTCGATCCTGAATA

>M6-PGSC0003DMG400036882-(rev)M6RLKWAX-EGF\_1798  
AGAACACTCATATCAACACATCTGCTCAGGGTACATTGGGGTACCTCGATCCTGAATACTATCTGAACCT  
TCAACTGACAGATAGGAGCGACGTTTATAGTTTTGGAGTTGTGCTTCTAG

>M6-PGSC0003DMG400036882-(rev)M6RLKWAX-EGF\_186  
GTATAAAATTCATTGGCTATTGTTTAGGGATTTGTAGTAGATTTTGTATCCTTGCTTCCTGCCCAATCAAA  
TTTACATTACATGGCTGCTGCCTAGTGAGGATTTAAGAATAATAATAAA

>M6-PGSC0003DMG400036882-(rev)M6RLKWAX-EGF\_1860  
CTGAACCTTCAACTGACAGATAGGAGCGACGTTTATAGTTTTGGAGTTGTGCTTCTAGAAGTGTGACGT  
CTAAAAGGCGATCGACTTCAATCGAGATGAGGAAAATGTGAATTTGGTT

>M6-PGSC0003DMG400036882-(rev)M6RLKWAX-EGF\_1922  
GTTGACGTCTAAAAGGCGATCGACTTCAATCGAGATGAGGAAAATGTGAATTTGGTTGTGTACATGAA  
GAGGATCATGGATGGAGAAAAATTGATGGATGTAATTGACCCTTTTATTAA

>M6-PGSC0003DMG400036882-(rev)M6RLKWAX-EGF\_1984  
ACATGAAGAGGATCATGGATGGAGAAAAATTGATGGATGTAATTGACCCTTTTATTAAAGATGGGGCA  
AGTAAAGTGGAAGTTGAGACAATTAAGGCTGTAGGGAACTTAGCATCAGCTT

>M6-PGSC0003DMG400036882-(rev)M6RLKWAX-EGF\_2046  
GGGGCAAGTAAAGTGGAAGTTGAGACAATTAAGGCTGTAGGGAACTTAGCATCAGCTTGTTTAGATGA  
AAGGAGGCAAATAGGCCATCAATGAAAGAAGTATCTGATGAACTTGAGTAT

>M6-PGSC0003DMG400036882-(rev)M6RLKWAX-EGF\_2085  
GGGAACTTAGCATCAGCTTGTTTAGATGAAAGGAGGCCAAAATAGGCCATCAATGAAAGAAGTATCTGAT  
GAACTTGAGTATGTTATTGGTATTGTTAGTGGCCAGGCTTCAAAGAGTTAG

>M6-PGSC0003DMG400036882-(rev)M6RLKWAX-EGF\_372  
ATATAAATATTAATAAATGATAGTAGTATTTAATTAACATAAATACAATATGTATAAATGATAAGCAT  
ATTTAGATAGTTGGATGTGATCAAATTTAATTAATAAATTTGACTTATAAA

>M6-PGSC0003DMG400036882-(rev)M6RLKWAX-EGF\_434  
ATAAGCATATTTAGATAGTTGGATGTGATCAAATTTAATTAATAAATTTGACTTATAAACAGTTTAAGAAAT



TATCAATTATATAGATAAACACGAATTAAAAAAAAAAATTTAAGTCAAT

>M6-PGSC0003DMG400036882-(rev)M6RLKWAX-EGF\_496

TTAAGAAATTATCAATTATATAGATAAACACGAATTAAAAAAAAAAATTTAAGTCAATTTGACTAATTTTT

ATTTCTTAATTCACGCAGAATGTCGACATGGCACAGCTTGCAAAATTCG

>M6-PGSC0003DMG400036882-(rev)M6RLKWAX-EGF\_558

CTAATTTTTATTTCTTAATTCACGCAGAATGTCGACATGGCACAGCTTGCAAAATTCGAAGGAACAAAGC

GCCTCTTATTGCAGGTTCTCTTTTTTATTTTCTTATTTTTATCACTTAT

>M6-PGSC0003DMG400036882-(rev)M6RLKWAX-EGF\_62

AATATAACTCGAAGCAAAACAAATTTCTCAAGTGGACCACATATATATTTTTGGATTTCAAAAGAAAGG

AATTAECTAATTAGTTGTTCAATTAATTTGTTTATGTACTTTAGAAAAAC

>M6-PGSC0003DMG400036882-(rev)M6RLKWAX-EGF\_620

AACAAAGCGCCTCTTATTGCAGGTTCTCTTTTTTATTTTCTTATTTTTATCACTTATCCAATTAATCCCTCA

CTTGACTATCGGTTGTTTCAATTGATCATTGAATATAATAATAAAA

>M6-PGSC0003DMG400036882-(rev)M6RLKWAX-EGF\_682

TTACTCCCTCACTTGACTATCGGTTGTTTCAATTGATCATTGAATATAATAATAAAAATTTTTATTAGAT

ACGTTATATTCAAATTTGAAAAAAAAAACTTGTGTGTCTTCTCAAAT

>M6-PGSC0003DMG400036882-(rev)M6RLKWAX-EGF\_744

TTTATTAGATACGTTATATTCAAATTTGAAAAAAAAAACTTGTGTGTCTTCTCAAATACCTATTAGGTAG

TTTATTTGACAACATAAAATATGTCATCTCCTTAATTATATGCATAAG

>M6-PGSC0003DMG400036882-(rev)M6RLKWAX-EGF\_806

ATTAGGTAGTTTATTTGACAACATAAAATATGTCATCTCCTTAATTATATGCATAAGTTTGAATTGAAAC

ACGCCGAGGTTTTATAGCTTGTGAGGTTAACACATATAATCAAAGA

>M6-PGSC0003DMG400036882-(rev)M6RLKWAX-EGF\_868

AATTGAAACACGCCGAGGTTTTATAGCTTGTGAGGTTAACACATATAATCAAAGAGATAACATATTT

TAAGTATTAATTTACCTAATGGACTATCGAGAACACGAGCAATTT

>M6-PGSC0003DMG400036882-(rev)M6RLKWAX-EGF\_930

ACATATTTAACTGATTAATTTACCTAATGGACTATCGAGAACACGAGCAATTTTTTTTTCAAATTT

GAATTAAGTGTATACTTAGAAATTAGAAACATTTTATCATGTGTTC

>M6-PGSC0003DMG400036882-(rev)M6RLKWAX-EGF\_992

TTCAAATTTGAATTAAGTGTATACTTAGAAATTAGAAACATTTTATCATGTGTTTCAGACGTTTCATCAT  
GAACCGGAACAAGCTGTAGTTTCGAGTGTATTATAATTAGTGCTAACATG

>M6-PGSC0003DMG400036994M6LRR-RLP\_0

AACCTGAGGAGTTCAAATCCAAAGAACTGTTTTGGATAGATCTAAAAAAAATTACTTGCAAAGTTCCAT  
TCCAACTCACTCCTAAACCAGGAGAAGTTGATGTTTCTTAGCCTATCAT

>M6-PGSC0003DMG400036994M6LRR-RLP\_1024

CTGTTGAACCTATCTCATAATAGTTTGAAGGCCATATACCAACATCACTTGGAAGTGTATCAGCGCTTC  
AATCATTGGATCTCTCATTTAACAACTTGGTGGAGAGATACCAAGTGCAA

>M6-PGSC0003DMG400036994M6LRR-RLP\_1152

TCTGACATTTCTGGATTCGTAAGTGTCTCTCACAATCATCTCGTTGGATGCATCCCTAGTGGAACCAGT  
TTGCTATGTTTGAAGTGGTTCATTTGAAGGGAATGATGAATTGCGAGG

>M6-PGSC0003DMG400036994M6LRR-RLP\_1216

AACCAGTTTGCTATGTTTGAAGTGGTTCATTTGAAGGGAATGATGAATTGCGAGGCTTTCCAATTTCAA  
AAGATTGTGGTGAAGTGGTCGTGGTCATGTACCACAATCAACGACTCCA

>M6-PGSC0003DMG400036994M6LRR-RLP\_128

TTCAGTGACAATCTAAATTTTAGCATGTTTTCAAAGTGGACTAGGCACACTTAATCTTTTCATATAA  
TAGTTTCTCATGGGCTGATAAGGATCAAGTCAAGTCTAATTTGCTCAAC

>M6-PGSC0003DMG400036994M6LRR-RLP\_1280

TTTCAAAGATTGTGGTGAAGTGGTCGTGGTCATGTACCACAATCAACGACTCCATCCACACTAGATG  
ATCATGAAGAAGATTCTGGCTTTGAGATAAGTTGGGAAGCGGTTCTGATGG

>M6-PGSC0003DMG400036994M6LRR-RLP\_1344

AGATGATCATGAAGAAGATTCTGGCTTTGAGATAAGTTGGGAAGCGGTTCTGATGGGCTACGGTTGTG  
GACTCATTATTGGAATATCCATAATATATATTATGTCATCAACTCACAAACC

>M6-PGSC0003DMG400036994M6LRR-RLP\_1408

TGTGGACTCATTATTGGAATATCCATAATATATATTATGTCATCAACTCACAAACCGATACAGCTTTTCAG  
GATGATTGCAGAATGGGAACACAAAGTTATAACCATGAGAAAGAAAAAG

>M6-PGSC0003DMG400036994M6LRR-RLP\_1453

ACTCACAAACCGATACAGCTTTTCAGGATGATTGCAGAATGGGAACACAAAGTTATAACCATGAGAAAG  
AAAAAGAAAGTGGCCAGACAAGTCAGGTATTCAACTCTAACTCTACACTAA

>M6-PGSC0003DMG400036994M6LRR-RLP\_192

CATATAATAGTTTCTCATGGGCTGATAAGGATCAAGTCAAGTCTAATTTGCTCAACTTTCTTTATGACTTG  
GATTTGCACTCCAATTTGCTGCAAGGGTCACTACCTATTCCACCAAGTT

>M6-PGSC0003DMG400036994M6LRR-RLP\_256

TGACTTGGATTTGCACTCCAATTTGCTGCAAGGGTCACTACCTATTCCACCAAGTTCTATAGAGAACTTCT  
ACATATCACATAATAAGCTTAGCGGACATATCCCTTCGACTATATGCAA

>M6-PGSC0003DMG400036994M6LRR-RLP\_320

AACTTCTACATATCACATAATAAGCTTAGCGGACATATCCCTTCGACTATATGCAAACCTAGAAATTTCTGAG  
AGTTCTAGATTTGGCAAGTAATAGTTTGAAGGGAGCAATCCCACCTTGT

>M6-PGSC0003DMG400036994M6LRR-RLP\_384

TTCTGAGAGTTCTAGATTTGGCAAGTAATAGTTTGAAGGGAGCAATCCCACCTTGTTTTGGTAACATGAG  
CGCAATTGAGTTTTAGATTTGCGCTACAATAATCTTAGTGGGACAATTC

>M6-PGSC0003DMG400036994M6LRR-RLP\_448

CATGAGCGCAATTGAGGTTTTAGATTTGCGCTACAATAATCTTAGTGGGACAATCAAACAACTTTAGT  
GTTGGAAATCCACTCAGAAGCTTTAATTTGCGTGGAATAAGTTAGAGGG

>M6-PGSC0003DMG400036994M6LRR-RLP\_512

TTTAGTGTTGGAAATCCACTCAGAAGCTTTAATTTGCGTGGAATAAGTTAGAGGGGGAAATCCCACAT  
TCTTTGATCATAGCAAGCGACTGGAAGTTCTTGATTTAGGAAACAATGAGT

>M6-PGSC0003DMG400036994M6LRR-RLP\_64

TTCCATTCAAACCTCACTCCTAAACCAGGAGAAGTTGATGTTTCTTAGCCTATCATCAAACAATTTAGTG  
ACAATCTAAATTTTAGCATGTTTTCAAACCTTGAGTGGACTAGGCACACT

>M6-PGSC0003DMG400036994M6LRR-RLP\_640

ACATTTCCAATGTGGTTGGGAACTCTACCAAACCTTGATGGTTTTGATCTTGAGATCAAATAAATTGCATG  
GACCCATCAGAACATCAAAGACTAAGAGATTGTTTCCTCAACTTCGAATT

>M6-PGSC0003DMG400036994M6LRR-RLP\_704

TGCATGGACCCATCAGAACATCAAAGACTAAGAGATTGTTTCTCAACTTCGAATTATAGACATCTCATC  
CAATGGATTTTATGGGGATTTACCAACACATCTTTTGGAGAATTTTCAAG

>M6-PGSC0003DMG400036994M6LRR-RLP\_768

CTCATCCAATGGATTTTATGGGGATTTACCAACACATCTTTTGGAGAATTTTCAAGCCATGAAGAAAGTT

GATGAAAACATGAAAACCCCAATGTATATTGGAGATTACTATTATAAAGA

>M6-PGSC0003DMG400036994M6LRR-RLP\_832

AAAGTTGATGAAAACATGAAAACCCCAATGTATATTGGAGATTACTATTATAAAGATTCCATAACAATTT

CATCAAAGGAATGAACATAGAATTGGTTAGAATTTTTTCGATGTACACA

>M6-PGSC0003DMG400036994M6LRR-RLP\_896

CAATTCATCAAAGGAATGAACATAGAATTGGTTAGAATTTTTTCGATGTACACAACCATTGATCTTTCA

AGCAATAGATTTGAAGGTAACATTCCAAGTGTATAGGATATCTCACTT

>M6-PGSC0003DMG400036994M6LRR-RLP\_960

TCTTTCAAGCAATAGATTTGAAGGTAACATTCCAAGTGTATAGGATATCTCACTTCACTAGTTCTGTTGA

ACCTATCTCATAATAGTTTGAAGGCCATATACCAACATCACTTGAAG

>M6-PGSC0003DMG400037069-(rev)M6LRR-RLP\_0

ATGAATAATCGTGGTACAGAAGTGATCGTTGATGAAAATGAGATAGACAGAATCTCTGATTTGCCCATG

GATATCCTCGATGAAATATTCAAGGATATGTCATTTCAAGAATTGGTAAAA

>M6-PGSC0003DMG400037069-(rev)M6LRR-RLP\_1054

ATGGATTTAAACCAAGTCTCTGGTGTCTTTCTTGATTCGAAGTTCTCCCAACTTACACTCACTGGAGAT

AGATGTAATGTTTCCTCACTTTCAATAATTTAAAATTGAGTTTAAGTTT

>M6-PGSC0003DMG400037069-(rev)M6LRR-RLP\_1116

ACTGGAGATAGATGTAATGTTTCCTCACTTTCAATAATTTAAAATTGAGTTTAAGTTTTATATACTGAT

TGTAGGTAACCTTACATGTTGTAGTAGGTAATATATCTTATTTTTAATA

>M6-PGSC0003DMG400037069-(rev)M6LRR-RLP\_1178

TACACTGATTGTAGGTAACCTTACATGTTGTAGTAGGTAATATATCTTATTTTTAATATTACAAGTTTAACT

TGGTTACCAGTAGATACTTTTCGGTGAGTTAAGTACTTTACAGTTTTA

>M6-PGSC0003DMG400037069-(rev)M6LRR-RLP\_124

GTGTTTTGTCCAAGAAGTGGTACAATTTTGGACTATGCATCCAATACTAATTCTAGATTGGGAGTTCTTT

GAAGAGAAAAGTGGTACTATAGGATTGGTTGAAAATGGTTTTAGTAATA

>M6-PGSC0003DMG400037069-(rev)M6LRR-RLP\_1240

AAGTTTAACTTGGTTACCAGTAGATACTTTTCGGTGAGTTAAGTACTTTACAGTTTTAGAGTTTAACTAT

ATATGTACCGACAACGTAATGAATTTTATACACTATCAATATCAGGTTA

>M6-PGSC0003DMG400037069-(rev)M6LRR-RLP\_1302

TTAACCTATATATGTACCGACAACGTAATGAATTTTATACACTATCAATATCAGGTTATAAAAATTA  
ATACTACAAGTAATATTTTATGGTTATGGAATTTTAAAAAATACTA

>M6-PGSC0003DMG400037069-(rev)M6LRR-RLP\_1364

AATTA AAAAATATCTACAAGTAATATTTTATGGTTATGGAATTTTAAAAAATACTAACCTTTTTTTTTG  
TCTTTTGCACCATATGAATTTTATAGGTTGTTAATAACTTAAGTGA

>M6-PGSC0003DMG400037069-(rev)M6LRR-RLP\_1426

TTTTTTTTGTCTTTTGCACCATATGAATTTTATAGGTTGTTAATAACTTAAGTGAAGAAAACATAGATG  
AAGTTACACATTATTTGGAAGATCCAAATTGTGTTGACAAACAATTTG

>M6-PGSC0003DMG400037069-(rev)M6LRR-RLP\_1488

AACATAGATGAAGTTACACATTATTTGGAAGATCCAAATTGTGTTGACAAACAATTTGAGAAGCTTGAAT  
TTGTAGAGCTAAGAGAGTTTGGAGGGACACAATTTGAACTCCTTTCTTA

>M6-PGSC0003DMG400037069-(rev)M6LRR-RLP\_1550

GCTTGAATTTGTAGAGCTAAGAGAGTTTGGAGGGACACAATTTGAACTCCTTTCTTAAAGCTCATATTG  
GCATATCCCCTTCACTTTCAAGGATGATTGTTGAACCTTCTGATGAACT

>M6-PGSC0003DMG400037069-(rev)M6LRR-RLP\_1612

TCATATTGGCATATCCCCTTCACTTTCAAGGATGATTGTTGAACCTTCTGATGAACTTGTAGCTGAG  
GTATTGAATTTGTACGAAGAATTGAGGATGTCCTTAAAAGCATCACCAA

>M6-PGSC0003DMG400037069-(rev)M6LRR-RLP\_1653

GAACCTTCTGATGAACTTGTAGCTGAGGTATTGAATTTGTACGAAGAATTGAGGATGTCCTTAAAA  
GCATACCAAGAGCAAAAAGTCATCGTAGCACCTCATGGTGAAGATGTGTAA

>M6-PGSC0003DMG400037069-(rev)M6LRR-RLP\_186

GAGTTCTTTGAAGAGAAAAGTGGTACTATAGGATTGGTTGAAAATGGTTTTAGTAATATGATTGGCAAC  
ATTATCTTGCATCATGTTGGATCCATAGTCAAATTTTTCCTTGATTTGTCA

>M6-PGSC0003DMG400037069-(rev)M6LRR-RLP\_248

TGGCAACATTATCTTGCATCATGTTGGATCCATAGTCAAATTTTTCCTTGATTTGTCAACTATTGATTGTAA  
TGATAGGGACCTTGACCATTGGTTGTTATGTGTAACAAGTAAACGCGT

>M6-PGSC0003DMG400037069-(rev)M6LRR-RLP\_310

TTGATTGTAATGATAGGGACCTTGACCATTGGTTGTTATGTGTAACAAGTAAACGCGTCAAAGAACTTAC  
CCTAAAAATCACAAACGCAAACGCTATACATTGCCTTTTTGTGATTTG

>M6-PGSC0003DMG400037069-(rev)M6LRR-RLP\_372

GAACTTACCCTAAAAAATCACAAACGCAAACGCTATACATTGCCTTTTTGTGTATTTGATTGTCCAACCTCT  
CACATATCTAGATGTCACAAATTCATAGCTAAACCACTTTCTCCCAA

>M6-PGSC0003DMG400037069-(rev)M6LRR-RLP\_434

TCCAACCTCTCACATATCTAGATGTCACAAATTCATAGCTAAACCACTTTCTCCCAAAGCATTATTCCCAA  
TCTACTTGAATTGACCTTGAAGTTCATCAAATTTGCCAGACAAAGC

>M6-PGSC0003DMG400037069-(rev)M6LRR-RLP\_496

TATTCCCAAATCTACTTGAATTGACCTTGAAGTTCATCAAATTTGCCAGACAAAGCAAATTATGTCTTG  
AATACCCCACTACTTTACTCTTTAACGTTCAATTGCTTGCAATGGCGTTC

>M6-PGSC0003DMG400037069-(rev)M6LRR-RLP\_62

GCCCATGGATATCCTCGATGAAATATTCAAGGATATGTCATTTCAAGAATTGGTAAAAACATGTGTTTTG  
TCCAAGAAGTGGGTACAATTTGGACTATGCATCCAATACTAATTCTAGA

>M6-PGSC0003DMG400037069-(rev)M6LRR-RLP\_620

CCTCACCATATCTGCTCCTAGGATCCAGTCTTGACTGTTTCATGATAGTCATGACATTCACGCAAGTTTTTT  
TGATAACTTGTCAAATGCTAGGGAGTTGTTTCATGGTATTAGATGTCTG

>M6-PGSC0003DMG400037069-(rev)M6LRR-RLP\_682

CAAGTTTTTTTGATAACTTGTCAAATGCTAGGGAGTTGTTTCATGGTATTAGATGTCTGTGAAGAATCTAA  
AAGTTATGAGCAAGAGAGGTTCAATTACATGGTCGCGTCTTCTTTATTTGT

>M6-PGSC0003DMG400037069-(rev)M6LRR-RLP\_744

GAATCTAAAAGTTATGAGCAAGAGAGGTTCAATTACATGGTCGCGTCTTCTTTATTTGTGCTCTAACCTGA  
CAAGGCTTGTTTTGAGTAATTCTTGCATTAAGGTGATTATAATATGATCA

>M6-PGSC0003DMG400037069-(rev)M6LRR-RLP\_806

TAACCTGACAAGGCTTGTTTTGAGTAATTCTTGCATTAAGGTGATTATAATATGATCACGACATATTTAAA  
TATTCTTTATTATAATATTCTCAATAAGTGTTACTATGCTTATCATATA

>M6-PGSC0003DMG400037069-(rev)M6LRR-RLP\_868

ATATTTAAATATTCTTTATTATAATATTCTCAATAAGTGTTACTATGCTTATCATATATACTTAACCATTAAT  
GCATTTTGCCTTTTTGTTTTCTTTACTAAGCATTGGGTGCAGAG

>M6-PGSC0003DMG400037069-(rev)M6LRR-RLP\_930

TAACCATTAATGCATTTTGCCTTTTTGTTTTCTTTACTAAGCATTGGGTGCAGAGATCATTCCGAAAA

GGTTTCAATCCAAACCCTACCATTTGGAGCATGTAACATTGTGTGTGAC

>M6-PGSC0003DMG400037069-(rev)M6LRR-RLP\_992

TTCCGAAAAGGTTTCAATCCAAACCCTACCATTTGGAGCATGTAACATTGTGTGTGACATTTATGGATTTA  
AACCAAGTCTCTGGTGTCTTTCTTGATTCGAAGTTCTCCCAACTTAC

>M6-PGSC0003DMG400037551M6LRR-RLP\_0

ATGATGATGGTTACCAAATATTTCTCCACTTCATTTTTCTACTCTTATATCTCTACACAATTACTTTTG  
CTTCTATTGAGGAAGCAACTTCTCTCTAAAATGGAAATCATCTTTG

>M6-PGSC0003DMG400037551M6LRR-RLP\_1024

ATGATACATCATCGCTACAAGATAAAGCAATCGATTCTCAATTTCTCATTGACTGGAAGGCGATTCTTTTG  
GGCTATGGATGTGGACTACGTATTGGATTTCCATTGGATATTTTCATGA

>M6-PGSC0003DMG400037551M6LRR-RLP\_1088

TCTTTTGGGCTATGGATGTGGACTACGTATTGGATTTCCATTGGATATTTTCATGATTTCTACTGGAAATC  
CAAATGGCTTTCAAGATTCATTGAAGAATATGAACACATAATTACTAC

>M6-PGSC0003DMG400037551M6LRR-RLP\_1149

ACTGAAATCCAAAATGGCTTTCAAGATTCATTGAAGAATATGAACACATAATTACTACGCGAAGGAGA  
AAAAACAACGAGGTCAAAGGGACAACAAAAGAAGAAATAATCGCTTCTAA

>M6-PGSC0003DMG400037551M6LRR-RLP\_128

GAAGGATTCATTATTGACTTCATGGACACAAAATTCTAGTGAATGCAGGGATTGGAATGGAGTTAAATG  
TTCTAATGGAAGGGTAAACAGTTTGGATATTACAAATGCAAGTGTTATAGG

>M6-PGSC0003DMG400037551M6LRR-RLP\_192

AAATGTTCTAATGGAAGGGTAAACAGTTTGGATATTACAAATGCAAGTGTTATAGGCACACTCTATGATT  
TTCCATTTTCGACTCTCATTTTTCTTGAATATGTTAATCTTAGTATAAAT

>M6-PGSC0003DMG400037551M6LRR-RLP\_256

ATGATTTTCCATTTTCGACTCTCATTTTTCTTGAATATGTTAATCTTAGTATAAATTGTTTCTCCGGAATCAT  
TCCACTTGAAATTGGTAAACTACTAATCTTGTTTCGTCTTGATTTGT

>M6-PGSC0003DMG400037551M6LRR-RLP\_320

CGGAATCATTCCACTTGAAATTGGTAAACTACTAATCTTGTTTCGTCTTGATTTGTCCAACAATTATATTTTC  
AGGCACAATCCCATCACAATCGACTCTCTAGCCAAGCTTGAAACCTT

>M6-PGSC0003DMG400037551M6LRR-RLP\_384

TATATTTTCAGGCACAATCCCATCACAATCGACTCTCTAGCCAAGCTTGAAACCTTCTACATCTCTAAGAA  
CCAGTTAAATAGTTTCGATTCCAAGAGAAATAGGTTATCTAAGGTCTCTT

>M6-PGSC0003DMG400037551M6LRR-RLP\_576

ACCTATTTGTGTCTTTATGGAAATCGCCTTTCTGGCTCCATTCTGTAGAAATAGGGAAACTCGTCAATCT  
TGTTGAAATTTATCTTGATTCAAATCAGTTAACAGGTCATATTCCTCCA

>M6-PGSC0003DMG400037551M6LRR-RLP\_64

TTACTTTTGCTTCTATTGAGGAAGCAACTTCTCTCCTAAAATGGAAATCATCTTTGCATTATAAGAAGGAT  
TCATTATTGACTTCATGGACACAAAATTCTAGTGAATGCAGGGATTGGA

>M6-PGSC0003DMG400037551M6LRR-RLP\_640

TCAATCTTGTTGAAATTTATCTTGATTCAAATCAGTTAACAGGTCATATTCCTCCAGAAATAGGTAACCTG  
ATCAATGTAAGAGTGTTCTCTGCTTTCTCCAACGGAATTACTGATCCCA

>M6-PGSC0003DMG400037551M6LRR-RLP\_704

TAACTTGATCAATGTAAGAGTGTTCTCTGCTTTCTCCAACGGAATTACTGATCCCATTCTGTAGAAATAG  
CAAAGATGCAAATACTTGAGGCATTGGACCTATCAGTCAACATGCTTGA

>M6-PGSC0003DMG400037551M6LRR-RLP\_768

GAAATAGCAAAGATGCAAATACTTGAGGCATTGGACCTATCAGTCAACATGCTTGAAGGAGAGATACAA  
GAACAACTCGTTTCTCTTTCAAATCTTGTTGGTTGAATCTCTCTACAAT

>M6-PGSC0003DMG400037551M6LRR-RLP\_832

TACAAGAACAACCTCGTTTCTCTTTCAAATCTTGTTGGTTGAATCTCTCTACAATCGTCTCACAGGATGC  
ATACCTCAAGGACATCAATTTTATACCTTTGGGGAAAGTTCGTATGCAT

>M6-PGSC0003DMG400037551M6LRR-RLP\_896

AGGATGCATACCTCAAGGACATCAATTTTATACCTTTGGGGAAAGTTCGTATGCATTCCAAGGTAATATT  
GGATTACAGGGATACCCAGTTACGAGACGTTGTCATAATAAAGGGGTAGA

>M6-PGSC0003DMG400037551M6LRR-RLP\_960

AATATTGGATTACAGGGATACCCAGTTACGAGACGTTGTCATAATAAAGGGGTAGAAGAAGGAAATGA  
TACATCATCGCTACAAGATAAAGCAATCGATTCTCAATTTCTCATTGACTGG

>M6-PGSC0003DMG400037653M6LRR-RLP\_0

ATGTCGACGAACGGAGCCCGTGAAGTTGAAAAACCCTAGATCGTATCAGTAAGTTGCCGGACGCAGTT  
CTCATACAAATTCTCTCTTCTGCCGACGAAAGATGCCGTTCGCATCATGT



>M6-PGSC0003DMG400037653M6LRR-RLP\_1008

TTGTGAAAGAGAAGAGCCTTCAGAATCTAATAAAATTATGAACTTCTGTATACATGAAAATTTTAGTGAG  
AATATTTTTTGGATCGATTAAGTGAATTTTTATCCATATAAATTGATCTT

>M6-PGSC0003DMG400037653M6LRR-RLP\_1071

TAGTGAGAATATTTTTGATCGATTAAGTGAATTTTTATCCATATAAATTGATCTTTCTCTTCGCCTTTTGT  
GGTCTTCCTATCTACTCTTTGAAGTTTGGATATTTTTAGAACTAGA

>M6-PGSC0003DMG400037653M6LRR-RLP\_1134

CGCCTTTTGTGGTCTTCCTATCTACTCTTTGAAGTTTGGATATTTTTAGAACTAGATTTTCTGCATTGCTA  
TTCATTAAAGTGGTTAGATGGTTAGATTAACAATTATAAAGTACATAA

>M6-PGSC0003DMG400037653M6LRR-RLP\_1197

GCATTGCTATTCATTAAAGTGGTTAGATGGTTAGATTAACAATTATAAAGTACATAAATTTGTCATAGCA  
CTATTTTTTTTGTGGATTATTTTTCTTTCCAGCAATTTTTCTCTATC

>M6-PGSC0003DMG400037653M6LRR-RLP\_126

TCAAAAAGGTGGCGTTATCTCTGTAATTCAATTGATAATTTCCATTTTCGATGGTTGTAGCTACTACAACAA  
TGTAGAAAATTTTCGATTTCTAGTGGATCATGTTTTATCTCATTGCACT

>M6-PGSC0003DMG400037653M6LRR-RLP\_1260

CATAGCACTATTTTTTTTGTGGATTATTTTTCTTTCCAGCAATTTTTCTCTATCCTTTACTAATTTCTTTG  
AAATTATTTACCAGGTCGTGTTTCATGTTGCGACTCGAAGGTGTGT

>M6-PGSC0003DMG400037653M6LRR-RLP\_1323

TAATTTCTTTGAAATTATTTACCAGGTCGTGTTTCATGTTGCGACTCGAAGGTGTGTGCTACCAAAATTG  
AGATGCAAGTGTCTAACTTTAGAGATGTACGTGACAAAGAATAATTTGT

>M6-PGSC0003DMG400037653M6LRR-RLP\_1386

CAAAATTGAGATGCAAGTGTCTAACTTTAGAGATGTACGTGACAAAGAATAATTTGTATGGAGTAGCTA  
GCCTTTTGCAGAACTCGCCTCTTTTGGAGACTCAACATACCCTTGAGAG

>M6-PGSC0003DMG400037653M6LRR-RLP\_1449

TAGCTAGCCTTTTGCAGAACTCGCCTCTTTTGGAGACTCAACATACCCTTGAGAGCTAGAGCTGTAAT  
TTCTCTCAATTTATGCTTTGCTTTTAAATCTTTGATTTTTTAAGTTTTAA

>M6-PGSC0003DMG400037653M6LRR-RLP\_1512

CTGTAATTTCTCTCAATTTATGCTTTGCTTTTAAATCTTTGATTTTTTAAGTTTTAAGAACTCCCCAGCCCCA

ACCTCACCAGTTCAAACATTTTCTTAAGGAGGATGGAAATATTAATT

>M6-PGSC0003DMG400037653M6LRR-RLP\_1575

CCCAGCCCCAACCTCACCAGTTCAAACATTTTCTTAAGGAGGATGGAAATATTAATTTAATTAACACTAA  
GAATTTTTTTTTGTCACTGTAGTTGCTTTCTATCTGGTAAATGTACTTAGA

>M6-PGSC0003DMG400037653M6LRR-RLP\_1638

ACACTAAGAATTTTTTTTTGTCACTGTAGTTGCTTTCTATCTGGTAAATGTACTTAGAAAGCAATGGTGACA  
AACTAAGCCTTGCTTGTTTTACTTTTCATCTACTGCTTGAGCATATCTG

>M6-PGSC0003DMG400037653M6LRR-RLP\_1701

TGGTGACAACTAAGCCTTGCTTGTTTTACTTTTCATCTACTGCTTGAGCATATCTGGTAGGGATAAGATA  
TTGTAATCAATTGCTGAGAAGTCAAGGTTTGTGGCTTCTGAAAATT

>M6-PGSC0003DMG400037653M6LRR-RLP\_1764

ATAAGATATTGTAATCAATTGCTGAGAAGTCAAGGTTTGTGGCTTCTGAAAATTATTCTATATTTGAC  
TATTGCAAATGCACTTCCTTTTTGTGTTACATGGTATATTCCCATTCT

>M6-PGSC0003DMG400037653M6LRR-RLP\_1827

TATTTGACTATTGCAAATGCACTTCCTTTTTGTGTTACATGGTATATTCCCATTCTGTTGTGGATCTCCAT  
TTGATTCTTATTATATTATCTACTACAGTTTAATGATTTCCGCTGCCA

>M6-PGSC0003DMG400037653M6LRR-RLP\_189

TACAACAATGTAGAAAATTTTCTAGTGGATCATGTTTTATCTCATTGCACTTGTTCCAAAATCAA  
AAAATTCCAACCTATTTTACCTTATAACTCTGAGTGGAACCTTGATTTG

>M6-PGSC0003DMG400037653M6LRR-RLP\_1890

GATCTCCATTTGATTCTTATTATATTATCTACTACAGTTTAATGATTTCCGCTGCCAAGTTGAGCTACGTTA  
TTTGGACAAAGGACGTCATATAATCTTGCAGAGTTGGATTTCAAACGC

>M6-PGSC0003DMG400037653M6LRR-RLP\_1953

GCTACGTTATTTGGACAAAGGACGTCATATAATCTTGCAGAGTTGGATTTCAAACGCTGTGTTTCCAAT  
CTCAAGAATGTTACGTTTGATGCCTGCATATATGAATGTAGAAAAAAGTG

>M6-PGSC0003DMG400037653M6LRR-RLP\_2016

TCCAATCTCAAGAATGTTACGTTTGATGCCTGCATATATGAATGTAGAAAAAAGTGGTTTGGAGGGGG  
CAATGATAAGCTTTTCGAACTTTTCACTAAGTATTTCTACTAAGAAATGCAACGGC

>M6-PGSC0003DMG400037653M6LRR-RLP\_2079

AGGGGGCAATGATAAGCTTTTCGAACTTTCAGTATTTCTACTAAAGAATGCAACGGCTTTGAAGAAGTTT  
GTCATTGTATCAAAGAGGAGAATCTGCAGGGAATGTTTCAGAGAGCTGTGT

>M6-PGSC0003DMG400037653M6LRR-RLP\_2142

GAAGTTTGTATTGTATCAAAGAGGAGAATCTGCAGGGAATGTTTCAGAGAGCTGTGTGTCCCAATATTT  
ATCAGGATTGGCTAAGAAATTGTTAGACAGCCCAAGATCATCTAAGAAGCT

>M6-PGSC0003DMG400037653M6LRR-RLP\_2205

ATATTTATCAGGATTGGCTAAGAAATTGTTAGACAGCCCAAGATCATCTAAGAAGCTTTTGATTATTTAC  
CAAGAGTCTGCTTTGGATTGACTAGAGTAGAAGTTTTGTTTTGGTATACT

>M6-PGSC0003DMG400037653M6LRR-RLP\_2268

TATTTACCAAGAGTCTGCTTTGGATTGACTAGAGTAGAAGTTTTGTTTTGGTATACTAGAAATGTCACTGT  
ATATTGTAGCTTTTGATTTACTGCAGATGTAAATTATTAACCTGTGGCA

>M6-PGSC0003DMG400037653M6LRR-RLP\_2331

GTCACTGTATATTGTAGCTTTTGATTTACTGCAGATGTAAATTATTAACCTGTGGCATTCTAGTCGTTGCA  
TATATGTGTTTGTAAATTTCTTGCAAACCTGTTGTTTTCTTGTAACCTGT

>M6-PGSC0003DMG400037653M6LRR-RLP\_2394

TCGTTGCATATATGTGTTTGTAAATTTCTTGCAAACCTGTTGTTTTCTTGTAACCTGTGCGAGATCGGCAAAC  
CTACAAGACATGTTTATTTACTCAGACATAAGTTGGTATTTTGTCTTTT

>M6-PGSC0003DMG400037653M6LRR-RLP\_2457

CGGCAAACCTACAAGACATGTTTATTTACTCAGACATAAGTTGGTATTTTGTCTTTTTAACTTCATCAAAC  
TCTGGCTTGAGGAACTCTCCTGCAACATTATTTCAATGTTATCTAGCCA

>M6-PGSC0003DMG400037653M6LRR-RLP\_252

AAAATCAAAAATTCCAACCTATTTTACCTTATAACTCTGAGTGGAACCTTGATTTGAGTATCAGCCGATG  
GATGAATTTTTCTGTGAAAGAAAAGTGAAGATGTTGTATTGTGTTTA

>M6-PGSC0003DMG400037653M6LRR-RLP\_2520

CATCAAACCTCTGGCTTGAGGAACTCTCCTGCAACATTATTTCAATGTTATCTAGCCAGAAGAGATGTCAG  
CTGTAGATGATGTTTACTTCATTTCCCTCTGTTTTCTTATCAGCTTATT

>M6-PGSC0003DMG400037653M6LRR-RLP\_2583

ATGTCAGCTGTAGATGATGTTTACTTCATTTCCCTCTGTTTTCTTATCAGCTTATTCTGTCTTATTTTCTTT  
GATTTGAAGGCAACCTTCACAGGGCACCTAGGAATTATAACGAGGCA

>M6-PGSC0003DMG400037653M6LRR-RLP\_2646

TATTTTCTTTGATTTGAAGGCAACCTTCACAGGGCACCTAGGAATTATAACGAGGCAGGGCTGGTCTGTC  
CTTTTGTGTGTGGTGCGGGTTGAAGCAATTTTTTTGAAAATCATAAGCGG

>M6-PGSC0003DMG400037653M6LRR-RLP\_315

AGCCGATGGATGAATTTTTCTGTGGAAAGAAAAGTGAAGATGTTGTATTGTGTTTATGTGATGACAAT  
TTCACTTTCGAATTGCCTTTATCTATCTGTACTTGTTCCTCATTGATTACA

>M6-PGSC0003DMG400037653M6LRR-RLP\_378

GACAATTTCACTTTTCGAATTGCCTTTATCTATCTGTACTTGTTCCTCATTGATTACATTGGATTGGAGCTGT  
TGTGCGATTGATAAAGAATCGGTTATACAGTGGAAGTCGTTGAAGAGC

>M6-PGSC0003DMG400037653M6LRR-RLP\_441

TGGAGCTGTTGTGCGATTGATAAAGAATCGGTTATACAGTGGAAGTCGTTGAAGAGCCTAAAGTTGAAC  
TATGTTTTTATAGATAATGACGATCTCTCGAAGATTTTGTGAGGTTGTCCT

>M6-PGSC0003DMG400037653M6LRR-RLP\_504

TTGAACTATGTTTTTATAGATAATGACGATCTCTCGAAGATTTTGTGAGGTTGTCCTGCTTTGGAACTCT  
GGAGTTGTCCTTTATTTGAAGGTTTTCGCCGTCTAGAAATCACTTCTTTG

>M6-PGSC0003DMG400037653M6LRR-RLP\_567

GAAACTCTGGAGTTGTCTTTATTTGAAGGTTTTCGCCGTCTAGAAATCACTTCTTTGAATTTAAAGAGACT  
ATCATTAGGAAGCTACTGGTGGTTTTATGGCAGAGCTGATGAACCTTTG

>M6-PGSC0003DMG400037653M6LRR-RLP\_63

GCAGTTCTCATACAAATTCTCTCTCTTCTGCCGACGAAAGATGCCGTCGCATCATGTGTTCTCTCAAAAAG  
GTGGCGTTATCTCTGTAATTCAATTGATAATTTCCATTTGATGGTTGT

>M6-PGSC0003DMG400037653M6LRR-RLP\_630

AAGAGACTATCATTAGGAAGCTACTGGTGGTTTTATGGCAGAGCTGATGAACCTTTGGAAATTATTGCC  
CCGTATCTTCAGCATTGAAATTTGAGGAGACCTTGATTATCTCAAGTGT

>M6-PGSC0003DMG400037653M6LRR-RLP\_693

ATTGCCCGTATCTTCAGCATTGAAATTTGAGGAGACCTTGATTATCTCAAGTGTAAAGCTAGTAAATG  
TCTCCTCTTTGGTACTGCTACACTTACTTTTAACATTACATGTATAACT

>M6-PGSC0003DMG400037653M6LRR-RLP\_756

GTAAATGTCTCCTCTTTGGTACTGCTACACTTACTTTTAACATTACATGTATAACTGAGATCGAGGGGTT

TGCTGACGAAGATGGTTGTAGTGATTATCATCAAGGTTTTAGAAATCTC

>M6-PGSC0003DMG400037653M6LRR-RLP\_819

GAGGGGTTTGCTGACGAAGATGGTTGTAGTGATTATCATCAAGGTTTTAGAAATCTCGTTCTGGACTATC

TTCAAAAATAAGTTATGCAACTGAGCTAACAATTGGACGCTGGTTTGCA

>M6-PGSC0003DMG400037653M6LRR-RLP\_882

GACTATCTTCAAAAATAAGTTATGCAACTGAGCTAACAATTGGACGCTGGTTTGCAGAGGTTTGTTC

ATGTCAAAGACCTTATTCTCTATTTAAGTTCAAGTGAAAATTGCGGAAT

>M6-PGSC0003DMG400037653M6LRR-RLP\_945

TGTTTTCATGTCAAAGACCTTATTCTCTATTTAAGTTCAAGTGAAAATTGCGGAATGTAACTTGTGAAA

GAGAAGAGCCTTCAGAATCTAATAAAATTATGAACTTCTGTATACATGA

>M6-PGSC0003DMG400037968M6LRR-RLP\_0

ATGGCTGACCTATTGCCTGAATGTCTCATTATAAAATACTTTCTTACCTTAGTTTAAACAGAAGCAACTCG

GTTGAGTATTCTCTCGAAAACATGGTTGCAAGCATGTTGACTCTTCCC

>M6-PGSC0003DMG400037968M6LRR-RLP\_128

ATTCACAGTTAAGTATCGCAACAATTTGAAAATAGTGGATAATATCATGGAGAGATATCGGGATGAAAA

AATCCCTATTGAAAAGTTTGAATTATCAGACTTTAGTTATTTGCGTTTAGT

>M6-PGSC0003DMG400037968M6LRR-RLP\_192

GAAAAAATCCCTATTGAAAAGTTTGAATTATCAGACTTTAGTTATTTGCGTTTAGTTTTCCCTTTGTTTGAT

AAATGGCTTGACATTGCACTTCAGAACGGTGTAACATATTGTCTTT

>M6-PGSC0003DMG400037968M6LRR-RLP\_256

TGTTTGATAAATGGCTTGACATTGCACTTCAGAACGGTGTAACATATTGTCTTTGGTGTTCCCTTGCCAT

ACGTCCTACCCCTTGCTATTTTCAAATCTTTGCATCAAATCTTTAA

>M6-PGSC0003DMG400037968M6LRR-RLP\_320

TTGCCATACGTCCTACCCCTTGCTATTTTCAAATCTTTGCATCAAATCTTTAAGAGAATTGGTTCTAAG

TGGTAGTAATTTGAAGCATGTTTCATTATCTAGTGGTGTGGTGAAGTG

>M6-PGSC0003DMG400037968M6LRR-RLP\_384

GTTCTAAGTGGTAGTAATTTGAAGCATGTTTCATTATCTAGTGGTGTGGTGAAGTGCAATTCGTTGAGAA

AGCTTACTCTATCTGATGTAGTTTTAGATGAAAACATGCTTCAGACTCTA

>M6-PGSC0003DMG400037968M6LRR-RLP\_512

TTGTCCGTTTATTGTCAGTTTCATCTTTGATAATTGTTACGGGTTGAAAAAGATTAAGCTACTGAATAATC  
TTCAAAAGATCAAGTCGGTTTTAATTTGGAAAGGTGGAAACCAGCTCGT

>M6-PGSC0003DMG400037968M6LRR-RLP\_576

AATAATCTTCAAAAGATCAAGTCGGTTTTAATTTGGAAAGGTGGAAACCAGCTCGTTAAAATTCAAGTAC  
CAACTCTTGAACACTTGTCTTATGTTACTCAACCGGAAACTTCTCCTAAG

>M6-PGSC0003DMG400037968M6LRR-RLP\_64

CAACTCGGTTGAGTATTCTCTCGAAAACATGGTTGCAAGCATGTTGACTCTTCCCAACTTGAATTAC  
AGTTAAGTATCGCAACAATTTGAAAATAGTGGATAATATCATGGAGAGAT

>M6-PGSC0003DMG400037968M6LRR-RLP\_640

AAGTACCAACTCTTGAACACTTGTCTTATGTTACTCAACCGGAAACTTCTCCTAAGTTGGATATTGTTGAT  
GCTCCAAATTTGATGTCACCTGTGTATGAGGGAAATCTAGTGCCACGA

>M6-PGSC0003DMG400037968M6LRR-RLP\_704

TGTTGATGCTCCAAATTTGATGTCACCTGTGTATGAGGGAAATCTAGTGCCACGATTTTCGTGGATGCT  
AAATTGCCATGGAGTTGTCATCCTAGGAGACTCCTCCTCGAGTCAAATGG

>M6-PGSC0003DMG400037968M6LRR-RLP\_768

GATGCTAAATTGCCATGGAGTTGTCATCCTAGGAGACTCCTCCTCGAGTCAAATGGTACAACGATTGCAT  
ATGTCATGGACCGTTTAATGTACATGAAGAGTTCGAGTCAATTAAGAA

>M6-PGSC0003DMG400037968M6LRR-RLP\_832

TTGCATATGTCATGGACCGTTTAATGTACATGAAGAGTTCGAGTCAATTAAGAAAGTAAAAGTCTATA  
GATTTGATTGGGGAGAAGTGAGATGGCATTGTTGTGGAACCTCAGAAGGGGAA

>M6-PGSC0003DMG400037968M6LRR-RLP\_891

AAAGTCTATAGATTTGATTGGGGAGAAGTGAGATGGCATTGTTGTGGAACCTCAGAAGGGGAAAGGAGGC  
AATAAGGTACTATACCGAGAGGAATAGATTTGTTTTTATTAGATTGGTGA

>M6-PGSC0003DMG400038191-(rev)M6LRR-RLK\_660

AGCTTGAAGGTGCTTCAAAAAGCTTCTTAGCAGAATGCCAAGCATTGAGAAACACAAGGCACCGGAATC  
TTGTCAAGGTCATCAGTGTATGCTCAAGTTCTGATTTCAAGGGAAATGACT

>M6-PGSC0003DMG400038314M6LysM-RLK\_0

ATGAATTGGTTTCTGAATATTCTCTGCATACTGAACTTTCTAATTTTCATGTACCAAAGCTCAACAAGAATA  
CTCAGGTAATTCAGTATTGAATTGCAAAAACGAATACGAAACGAATTAC

>M6-PGSC0003DMG400038314M6LysM-RLK\_1054

AAATATTAGCAGTCAAATGGCGATCACGGATGTATCTAGAGAAGTGAACATGCTGCATAAGATCAATC  
ACTTCAATCTAATAAAGCTTTGTGGCTATTGTGAACATAAAGGATGCTTCT

>M6-PGSC0003DMG400038314M6LysM-RLK\_1116

ATCAATCACTTCAATCTAATAAAGCTTTGTGGCTATTGTGAACATAAAGGATGCTTCTTCTGTCTTTGA  
ATACATGAAAAATGGCTCTCTCAGGGAATGGCTGACCAGAACCAAGTCT

>M6-PGSC0003DMG400038314M6LysM-RLK\_1178

TGTCTTTGAATACATGAAAAATGGCTCTCTCAGGGAATGGCTGACCAGAACCAAGTCTCGAGATACCAT  
AAGCTGGAAAAAAGGATTCAGATTGCGTTGGATGTAGCTAATGGACTTCA

>M6-PGSC0003DMG400038314M6LysM-RLK\_124

GCAATGGAAGAAATCCACTTGTCAAGCATTCTCATATTCAAGGCCAGGGATCCTTACAATTCAGTACC  
TGGAATTGCTGCTCTCATGTCTTCAAACATGTCTGAGATTGCTCGTATCA

>M6-PGSC0003DMG400038314M6LysM-RLK\_1240

ATACCATAAGCTGGAAAAAAGGATTCAGATTGCGTTGGATGTAGCTAATGGACTTCATTATCTTCACAG  
CTTTACCAAACCAGGCTACATCCACAAGAACATCAACAGTAGAAACATTC

>M6-PGSC0003DMG400038314M6LysM-RLK\_1302

CTTCACAGCTTTACCAAACCAGGCTACATCCACAAGAACATCAACAGTAGAAACATTCTCCTCGACAGCA  
ACATACGAGCAAAGATTGCAAACCTTCAGTCTTGCTAAAGAAACAGATACA

>M6-PGSC0003DMG400038314M6LysM-RLK\_1364

CGACAGCAACATACGAGCAAAGATTGCAAACCTTCAGTCTTGCTAAAGAAACAGATACATCAGGCACGAC  
TTGGGAGCTTGTGGGGACAACAGGATACATGGCGCCTGAGTACGTTGAGAG

>M6-PGSC0003DMG400038314M6LysM-RLK\_1426

GCACGACTTGGGAGCTTGTGGGGACAACAGGATACATGGCGCCTGAGTACGTTGAGAGAGGGTCAGT  
GACTTCAAAGATGGACATTTATGCCTTTGGAGTTGTAAGTGTGGAATTAGTCA

>M6-PGSC0003DMG400038314M6LysM-RLK\_1488

TCAGTGAATCAAAGATGGACATTTATGCCTTTGGAGTTGTAAGTGTGGAATTAGTCAACCGAAAAGACA  
CGGTAATTGTAGAGGAAAGTAGAGAAATTCTGCTTTCTGCTGCAGTAGCT

>M6-PGSC0003DMG400038314M6LysM-RLK\_1550

AAAAGACACGGTAATTGTAGAGGAAAGTAGAGAAATTCTGCTTTCTGCTGCAGTAGCTGCAATAATGGA

AGGAGAAAATGCAGAAATCAAACCTGGATGGATTCATCAAAGCAGACATGAG

>M6-PGSC0003DMG400038314M6LysM-RLK\_1612

TAATGGAAGGAGAAAATGCAGAAATCAAACCTGGATGGATTCATCAAAGCAGACATGAGGGGAGATGAT  
GATTTGGAAATAGCATTTCCTGGTAGCCAACCTAAGCTTAAGATGCTTGACTC

>M6-PGSC0003DMG400038314M6LysM-RLK\_1674

GATGATGATTTGGAAATAGCATTTCCTGGTAGCCAACCTAAGCTTAAGATGCTTGACTCGAGAACCAACA  
AATCGTCCAAACATGGAAGAAATAGTATCATGTTTACTGAAGATTCAAGTT

>M6-PGSC0003DMG400038314M6LysM-RLK\_1710

CTAAGCTTAAGATGCTTGACTCGAGAACCAACAAATCGTCCAAACATGGAAGAAATAGTATCATGTTTAC  
TGAAGATTCAAGTTAATGCACATAAGGCAGAACAAACCAGTCAGAATTAA

>M6-PGSC0003DMG400038314M6LysM-RLK\_186

TCAGTACCTGGAATTGCTGCTCTCATGTCTTCAAACATGTCTGAGATTGCTCGTATCAACAATGTCACGA  
GGTTTACAGTGTTTCGCGCCAGAAAAGGAGGTTATAATTCCAGTGGACTGC

>M6-PGSC0003DMG400038314M6LysM-RLK\_248

TGTCACGAGGTTTACAGTGTTTCGCGCCAGAAAAGGAGGTTATAATTCCAGTGGACTGCTCTTGTTTCAGG  
TTTGTATTATCAAGCCAAAACCATGTACTATATATCAGCTCTTATTGAAAC

>M6-PGSC0003DMG400038314M6LysM-RLK\_310

GTTTCAGGTTTGTATTATCAAGCCAAAACCATGTACTATATATCAGCTCTTATTGAAACATACTTTGTGATA  
GCAAATAATACTTACCAAGGATTATCAACCTGTAATGCATTAGTACGTC

>M6-PGSC0003DMG400038314M6LysM-RLK\_372

TTTGTGATAGCAAATAATACTTACCAAGGATTATCAACCTGTAATGCATTAGTACGTCGAAATGAATATG  
ATGAGTTCAGTTTGAGACCTGGTCTTGAGTTGCAAGTTCCTCTCAGGTGT

>M6-PGSC0003DMG400038314M6LysM-RLK\_434

TGAATATGATGAGTTCAGTTTGAGACCTGGTCTTGAGTTGCAAGTTCCTCTCAGGTGTGCCTGTCCAACA  
GCAAAACAAGCTGCAAAAGGCTCAAAGTATTTGATGACTTATTCAATTGA

>M6-PGSC0003DMG400038314M6LysM-RLK\_496

GTCCAACAGCAAAACAAGCTGCAAAAGGCTCAAAGTATTTGATGACTTATTCAATTGACGTTGGCGATG  
ACATCCTTAAAGTTGGCAAAAGATTTAATGTTAATGTAAGGAACATAGTCG

>M6-PGSC0003DMG400038314M6LysM-RLK\_558



GGCGATGACATCCTTAAAGTTGGCAAAGATTTAATGTTAATGTAAGGAACATAGTCGAAGCAAATGGA  
TTCTTGGATGAAAATTCTGTTTTATATCCTTTTACAACCATTCTAATTCCC

>M6-PGSC0003DMG400038314M6LysM-RLK\_62

ACAAGAATACTCAGGTAATTCAGTATTGAATTGCAAAAACGAATACGAAACGAATTACTCTTGCAATGG  
AAGAAATTCCACTTGTCAAGCATTCTCATATTCAAGGCCAGGGATCCTTA

>M6-PGSC0003DMG400038314M6LysM-RLK\_620

AAATGGATTCTTGGATGAAAATTCTGTTTTATATCCTTTTACAACCATTCTAATTCCCCTGCCTTCTGAACC  
GTCAAATTTAGATACCGGAAATGAGAATTACAGAAAACCTATTAGGTC

>M6-PGSC0003DMG400038314M6LysM-RLK\_682

CTTCTGAACCGTCAAATTTAGATACCGGAAATGAGAATTACAGAAAACCTATTAGGTCCTTTTCACCTCC  
ACCTGCAGCTAATGCTTCAAAGGGAAAATCAAAGAGAAATCTTTACATAG

>M6-PGSC0003DMG400038314M6LysM-RLK\_744

TCACCTCCACCTGCAGCTAATGCTTCAAAGGGAAAATCAAAGAGAAATCTTTACATAGGTAGTGGAGTT  
GCAACAGGCTTTGTTCTGTTACTGCTTGTGGTTTCTTGGGTCATCCTTCTT

>M6-PGSC0003DMG400038314M6LysM-RLK\_806

TGGAGTTGCAACAGGCTTTGTTCTGTTACTGCTTGTGGTTTCTTGGGTCATCCTTCTTGCTTTGTTAAGA  
AAAGGGATAGAAAATTTCCGAGGAGGTCTTCAAGTCATGAAGATATCCT

>M6-PGSC0003DMG400038314M6LysM-RLK\_868

TGTTTAAGAAAAGGGATAGAAAATTTCCGAGGAGGTCTTCAAGTCATGAAGATATCCTCGTGGAGATCG  
CGAACATAGATCATGTCCCTAAAGTTTTCAAGTTCAAAGAATTGAAGCATG

>M6-PGSC0003DMG400038314M6LysM-RLK\_930

GAGATCGCGAACATAGATCATGTCCCTAAAGTTTTCAAGTTCAAAGAATTGAAGCATGCTACACGAAACT  
TTGACTCCAAGAACCGGATAAAGGGATCTGTATACTGGGGAGGGTTTAAA

>M6-PGSC0003DMG400038314M6LysM-RLK\_992

ACGAAACTTTGACTCCAAGAACCGGATAAAGGGATCTGTATACTGGGGAGGGTTTAAAGGGGAAATAT  
TAGCAGTCAAATGGCGATCACGGATGTATCTAGAGAAGTGAACATGCTGCA

>M6-PGSC0003DMG400038495-(rev)M6LRR-RLP\_0

ATGTGGGATGAAAACAGTATTGACTGTTGCCAGTGGTCAGGTGTAAGTTGTGATGAGGAAGGTCATGT  
GCTTACTCTGGAGTTGGACGACGAAGCCATTTCTGGCGGAATTGAGAAGTCA

>M6-PGSC0003DMG400038495-(rev)M6LRR-RLP\_1008

ACTCAATTAGCGCTTCTTCTTTTCGCTGCCATCATTGCAGTTCCTTAGTGTTTCAGAACAGTCAATTAAGTGG  
AGAAATCCATGAATTCCTAATGCATCCTCCTCTGTTCTGGAAACACTT

>M6-PGSC0003DMG400038495-(rev)M6LRR-RLP\_1071

TTAAGTGGAGAAATCCATGAATTCCTAATGCATCCTCCTCTGTTCTGGAAACACTTGATTTGAGAAATA  
ACCATCTAAGTGGATCGATCCCCGGTCAATCTTTAACTCAATAGGCTT

>M6-PGSC0003DMG400038495-(rev)M6LRR-RLP\_1134

AGAAATAACCATCTAAGTGGATCGATCCCCGGTCAATCTTTAACTCAATAGGCTTTCACAACTCTTCCT  
TTTCTCCAACCTCCTTCAGTGAACCATTGATATCGAAGCAGTAAAGGGA

>M6-PGSC0003DMG400038495-(rev)M6LRR-RLP\_1197

CTCTTCCTTTTCTCCAACCTCCTTCAGTGAACCATTGATATCGAAGCAGTAAAGGGACTTCCTAGGCTTAC  
CACCTTGACCTTTCAAACAACAAAATTGAAGGGGAAATACCAAGTTGG

>M6-PGSC0003DMG400038495-(rev)M6LRR-RLP\_126

CTCTTCCATCTTCGATATCTTGAGAAGCTCAATCTGGCTTATAATGGCCTATACCCTGTTCCAATACCAAG  
AGAAATTTATAAGCTGGCAAACCTTGATGTACCTGAATTTGTCTCATGCT

>M6-PGSC0003DMG400038495-(rev)M6LRR-RLP\_1260

AGGCTTACCACCCTTGACCTTTCAAACAACAAAATTGAAGGGGAAATACCAAGTTGGGTTTGGACAGTT  
GGAAATCTGAATCTTTCTCACAATCTTTTAGAGTCTCTAGGAAAACCTCAC

>M6-PGSC0003DMG400038495-(rev)M6LRR-RLP\_1323

ACAGTTGGAAATCTGAATCTTTCTCACAATCTTTTAGAGTCTCTAGGAAAACCTCACAATTTGTCTACTAC  
TTCTATTGTCATTGATTTGAGTTCCAATAAGATCAAGGGCGATATACCC

>M6-PGSC0003DMG400038495-(rev)M6LRR-RLP\_1386

TCTACTACTTCTATTGTCATTGATTTGAGTTCCAATAAGATCAAGGGCGATATACCCATTCTACCTACTTCT  
CTTACCTACTTTTCAATTGCCAATAATGAATTTACGGGATCAATACAC

>M6-PGSC0003DMG400038495-(rev)M6LRR-RLP\_1449

CCTACTTCTTACTACTTTTCAATTGCCAATAATGAATTTACGGGATCAATACACTCTTCCATATACAGT  
CTAGATACGCTTCAAATCTTGATATGTCAAATAACAACTAACTGGC

>M6-PGSC0003DMG400038495-(rev)M6LRR-RLP\_1512

ATATACAGTCTAGATACGCTTCAAATCTTGATATGTCAAATAACAACTAACTGGCATTATTCCTGACAT

ATTTCCACTGAATTGGAATTTGAAAACCTTTAAACCTCAGCAGTAATATA

>M6-PGSC0003DMG400038495-(rev)M6LRR-RLP\_1575

CCTGACATATTTCCACTGAATTGGAATTTGAAAACCTTTAAACCTCAGCAGTAATATATTAGAAGGAAAAG

TTCCAAGCTCTCTGGAAAATGCTCATTCTGGAGGTTTTAGACATTGGA

>M6-PGSC0003DMG400038495-(rev)M6LRR-RLP\_1638

GGAAAAGTTCCAAGCTCTCTGGAAAATGCTCATTCTGGAGGTTTTAGACATTGGAAACAACAAGATA

AGAGATACGTTTCCGTGCATGTTGAATAAATTAGCCAATTTGCGTGTCTTA

>M6-PGSC0003DMG400038495-(rev)M6LRR-RLP\_1701

AAGATAAGAGATACGTTTCCGTGCATGTTGAATAAATTAGCCAATTTGCGTGTCTTAGTCATAAGATCAA

ACAAGTTCTACGGGAATCTCCAGTGTCTTAGAGCTGAACAAACCTGGCCA

>M6-PGSC0003DMG400038495-(rev)M6LRR-RLP\_1764

AGATCAAACAAGTTCTACGGGAATCTCCAGTGTCTTAGAGCTGAACAAACCTGGCCAATGATTCATATTA

TAGATATTGCTTCAAACAATTTTACGAGGAGATACCTGAGACATTGGGA

>M6-PGSC0003DMG400038495-(rev)M6LRR-RLP\_1827

CATATTATAGATATTGCTTCAAACAATTTTACGAGGAGATACCTGAGACATTGGGAAATCTCAAATTAC

TAATCCATCTTAACTTCTCACACAACGCTTTGACTGGAAGAATACCAAAT

>M6-PGSC0003DMG400038495-(rev)M6LRR-RLP\_189

ATACCAAGAGAAATTTATAAGCTGGCAAACCTTGATGTACCTGAATTTGTCTCATGCTAGTTTTAACGGGC

AGATTCCTATGGAATTGTCAAGATTGATCAAGTTAGAGATTCTTGACCTT

>M6-PGSC0003DMG400038495-(rev)M6LRR-RLP\_1890

AAATTAATAATCCATCTTAACTTCTCACACAACGCTTTGACTGGAAGAATACCAAATGCCATTGGAAAGC

TGACTCTGCTTGAATCTTTAGATTTGTCAGTTAACCAGTTAAGTGGGAGA

>M6-PGSC0003DMG400038495-(rev)M6LRR-RLP\_1953

GGAAAGCTGACTCTGCTTGAATCTTTAGATTTGTCAGTTAACCAGTTAAGTGGGAGAATTCCAGACGAG

CTTGCGAGTTTACATTCCTTTCTTTCTTGAACCTATCTTTTAATCAACTT

>M6-PGSC0003DMG400038495-(rev)M6LRR-RLP\_2016

GACGAGCTTGCGAGTTTACATTCCTTTCTTTCTTGAACCTATCTTTTAATCAACTTTCTGGTAGGATTCCA

AGTGGCAACCAACTTCAGACATTCTCAGCAGATTCTTTGAAGGGAAC

>M6-PGSC0003DMG400038495-(rev)M6LRR-RLP\_2079

AGGATTCCAAGTGGCAACCAACTTCAGACATTCTCAGCAGATTCTTTGAAGGGAACACAAGGCTGTGC  
GATTTTCCTTTAAAGAAAACGTGCAGTGACACCAAAGAACTGAACGTGAA

>M6-PGSC0003DMG400038495-(rev)M6LRR-RLP\_2142

CTGTGCGATTTTCCTTTAAAGAAAACGTGCAGTGACACCAAAGAACTGAACGTGAAATTGATGGGAAA  
TATATAAGCTTTGCCTTGGGATCTTCTGTGGGTTTTGGCATCATAACCTGG

>M6-PGSC0003DMG400038495-(rev)M6LRR-RLP\_2205

GGGAAATATATAAGCTTTGCCTTGGGATCTTCTGTGGGTTTTGGCATCATAACCTGGCTGATTTTGCTTA  
GCCGAAAATATAATGAGCTCGTCGATAGACTTCTTTTCAGAATTTTGGGT

>M6-PGSC0003DMG400038495-(rev)M6LRR-RLP\_2244

TTTGGCATCATAACCTGGCTGATTTTGCTTAGCCGAAAATATAATGAGCTCGTCGATAGACTTCTTTTCAG  
AATTTTGGGTTCGGAGTGGCAGGAATAAAAACAGAGAAGGTCAAGGTAA

>M6-PGSC0003DMG400038495-(rev)M6LRR-RLP\_252

AACGGGCAGATTCTATGGAATTGTCAAGATTGATCAAGTTAGAGATTCTTGACCTTTCTGGAGGGGAA  
TTAAAGCTTGAGAGGCCAGATCTGAAAACACTGGTAGGGAATCTTGCAAAT

>M6-PGSC0003DMG400038495-(rev)M6LRR-RLP\_315

GGGGAATTAAGCTTGAGAGGCCAGATCTGAAAACACTGGTAGGGAATCTTGCAAATCTTAGAGAACT  
TTACCTTGATAGGGTGAATATTTTCATTGAAGGGGAGTGAGTGGTGCTCGGCG

>M6-PGSC0003DMG400038495-(rev)M6LRR-RLP\_378

GAACTTTACCTTGATAGGGTGAATATTTTCATTGAAGGGGAGTGAGTGGTGCTCGGCGTTATCTTCATCTC  
TGCCTCAATTGAGAGTCTTGTTCGATGAGAGACTGTAAAATTTCCGGCCCT

>M6-PGSC0003DMG400038495-(rev)M6LRR-RLP\_441

TCATCTCTGCCTCAATTGAGAGTCTTGTTCGATGAGAGACTGTAAAATTTCCGGCCCTCTTGATCCTGTCCT  
TTTAAATCTTCGTTTCCTTTTCAGTCATTCGTCTCGATTATAACTACTTG

>M6-PGSC0003DMG400038495-(rev)M6LRR-RLP\_504

CCTGTCCTTTTAAATCTTCGTTTCCTTTTCAGTCATTCGTCTCGATTATAACTACTTGTCCTACTATGGTTCCAG  
ATTTTCTGGCAGATTTTACAAAATTGACAATCCTAAGTGTCAGATGG

>M6-PGSC0003DMG400038495-(rev)M6LRR-RLP\_567

ATGGTTCCAGATTTTCTGGCAGATTTTACAAAATTGACAATCCTAAGTGTCAGATGGTGTTACTTGTTTGG  
TCCATTTCCAGTAAAATCTTTTCAGGTACCAACTCTACAGCAACTTGAT

>M6-PGSC0003DMG400038495-(rev)M6LRR-RLP\_63

CATGTGCTTACTCTGGAGTTGGACGACGAAGCCATTTCTGGCGGAATTGAGAAGTCAAGCAGTCTCTTC  
CATCTTCGATATCTTGAGAAGCTCAATCTGGCTTATAATGGCCTATAACCCT

>M6-PGSC0003DMG400038495-(rev)M6LRR-RLP\_630

TTGTTTGGTCCATTTCCAGTAAAATCTTTCAGGTACCAACTCTACAGCAACTTGATTTATCTGGAAATGA  
AAACCTTACAGGCAATTTACCTGAATTTCCACATAAAAAGTGCATTAAGG

>M6-PGSC0003DMG400038495-(rev)M6LRR-RLP\_693

GGAAATGAAAACCTTACAGGCAATTTACCTGAATTTCCACATAAAAAGTGCATTAAGGGAGGTAGTGCTT  
AGCTACACGGGATTCACCGTTTCGCTTCCAGATTCAATTGCTAACCTTCGG

>M6-PGSC0003DMG400038495-(rev)M6LRR-RLP\_756

GTGCTTAGCTACACGGGATTCACCGTTTCGCTTCCAGATTCAATTGCTAACCTTCGGAACCTTGACCCAGC  
TTGATTTAGGAAGTTGCAACTTCAGTGGAGAAATTCCATCAAAAATGGGA

>M6-PGSC0003DMG400038495-(rev)M6LRR-RLP\_819

ACCCAGCTTGATTTAGGAAGTTGCAACTTCAGTGGAGAAATTCCATCAAAAATGGGAAATCTCACAGAA  
CTAGTTCATCTAGACTTGTCAATTCAACAGTTTTACTGGCTCTATCCCCTC

>M6-PGSC0003DMG400038495-(rev)M6LRR-RLP\_882

ACAGAACTAGTTCATCTAGACTTGTCAATTCAACAGTTTTACTGGCTCTATCCCCTCTTCCATAAGGCAAA  
AAAGCTCAATCGCATTGACCTTTCTAATAACAATGGTCCACTAGCTTCT

>M6-PGSC0003DMG400038495-(rev)M6LRR-RLP\_945

AAGGCAAAAAGCTCAATCGCATTGACCTTTCTAATAACAATGGTCCACTAGCTTCTGCTCAAACCTCAATT  
AGCGCTTCTTCTTTCGCTGCCATCATTGCAGTTCCTTAGTGTTTCAGAAC

>M6-PGSC0003DMG400038918-(rev)M6LysM-RLK\_0

ATGAGTTGTAAAGGAACCAATGAAACAGGAACTACTGCTTCTTTTCTCTATTCTTGCAATGGTGAAAAGT  
CCTCTTGCCATCATTCTGATTTTTAGATCAGATTCTCCTTATAATTCT

>M6-PGSC0003DMG400038918-(rev)M6LysM-RLK\_1024

AGGTAAATTCCTTGCAAAGATCAACCATTTCAATTTAATTAGCCTCACTGGTGTCTGTAAGCATCACCAA  
CTATCCTATCTTGTTTTGAGTTCATGGAAAATGGATCTTTAAATGAAT

>M6-PGSC0003DMG400038918-(rev)M6LysM-RLK\_1088

TCACCAACTATCCTATCTTGTTTTGAGTTCATGGAAAATGGATCTTTAAATGAATGGCTTTTCAAGGATG

ATAACCCCGAGGCTCAGAGCTGGAAGTGCAGAATTCGTATTGCCTTAGA

>M6-PGSC0003DMG400038918-(rev)M6LysM-RLK\_1152

AAGGATGATAACCCCGAGGCTCAGAGCTGGAAGTGCAGAATTCGTATTGCCTTAGATATCGCTGATGGT  
CTAGATTATATTCATAACTTTACAGCTCCAGCTTATGTGCACAATAACATT

>M6-PGSC0003DMG400038918-(rev)M6LysM-RLK\_1216

ATGGTCTAGATTATATTCATAACTTTACAGCTCCAGCTTATGTGCACAATAACATTAGTAGTAACAGTATC  
TACTTAACAGACATCTAAGGGCCAAGATTTCAAATTTTAGCCTGGCGC

>M6-PGSC0003DMG400038918-(rev)M6LysM-RLK\_128

CATCTCAAAACTCCTATCTTCGAACCCTGATGATATTGTCCACATCAACAATATCTCAAGGTCTAAAATAT  
TGGATCAGAATCAAGAAGTTATAATTCCAGTAAATTGTTTCATGTTTCAGG

>M6-PGSC0003DMG400038918-(rev)M6LysM-RLK\_1280

CAGTATCTTACTTAACAGACATCTAAGGGCCAAGATTTCAAATTTTAGCCTGGCGCGGTCAGCAAACAAT  
GAGGGAAAGGAAAGTTCATCTATGAAGTTCGTCAAGGGAAACAATGGCTA

>M6-PGSC0003DMG400038918-(rev)M6LysM-RLK\_1344

AACAATGAGGGAAAGGAAAGTTCATCTATGAAGTTCGTCAAGGGAAACAATGGCTACTTGGCACCAGA  
GTACATTGAAACTGGCCAGGTTACTCCAAGGTAGATATCTATGCATTTGGA

>M6-PGSC0003DMG400038918-(rev)M6LysM-RLK\_1408

CAGAGTACATTGAAACTGGCCAGGTTACTCCAAGGTAGATATCTATGCATTTGGAATCGTTTTGTTGGA  
GATTATTACAGGAAAAGGGGCTGCTTTTGAGCAGGATGGAAAAGAAGTAC

>M6-PGSC0003DMG400038918-(rev)M6LysM-RLK\_1472

GTTGGAGATTATTACAGGAAAAGGGGCTGCTTTTGAGCAGGATGGAAAAGAAGTACTCTTGTCAGAGA  
CAGTGCTTGAAAGTATGGATAAAGAATCTAAAATTCAAGAACTCGAAGATCC

>M6-PGSC0003DMG400038918-(rev)M6LysM-RLK\_1536

GAGACAGTGCTTGAAAGTATGGATAAAGAATCTAAAATTCAAGAACTCGAAGATCCAAGGCTACAAATT  
AAGCACCCGCTTGGTTACATAATTTAACAACACTGATCTCGTTCTTCGATTG

>M6-PGSC0003DMG400038918-(rev)M6LysM-RLK\_1600

AAATTAAGCACCCGCTTGGTTACATAATTTAACAACACTGATCTCGTTCTTCGATTGGTGAAATTATCTGCA  
GCATGCTTGACGATGGAACCTGAAAGAAGACCAAGTGCAACTGAAATAA

>M6-PGSC0003DMG400038918-(rev)M6LysM-RLK\_1641

CTCGTTCTTCGATTGGTGAAATTATCTGCAGCATGCTTGACGATGGAACCTGAAAGAAGACCAAGTGCA  
ACTGAAATAATATCTACCTTAATCAAAATCCAGACAGATATACAAACTAG

>M6-PGSC0003DMG400038918-(rev)M6LysM-RLK\_192

AAAATATTGGATCAGAATCAAGAAGTTATAATTCCAGTAAATTGTTTCATGTTTCAGGTCAATACTATCAGG  
CTGACACCTCTTATGTTATACCAAGCAAATTTGATACCTATTTTCGCATC

>M6-PGSC0003DMG400038918-(rev)M6LysM-RLK\_256

ATCAGGCTGACACCTCTTATGTTATACCAAGCAAATTTGATACCTATTTTCGCATCGCAAACAGCACGTAT  
CAGGGGTTATCTACTTGACAGTGCTCTTATGCATGAAAATGTCTACAATG

>M6-PGSC0003DMG400038918-(rev)M6LysM-RLK\_320

CACGTATCAGGGGTTATCTACTTGACAGTGCTCTTATGCATGAAAATGTCTACAATGCACTGGATCTGTTTC  
CAGGTCTAAATTTGCGGGTACCACTCAGATGTGCCTGTCCTACAAGGGA

>M6-PGSC0003DMG400038918-(rev)M6LysM-RLK\_384

CTGTTTCCAGGTCTAAATTTGCGGGTACCACTCAGATGTGCCTGTCCTACAAGGGATCAGTCAAGAAATG  
GAGTCAAATATCTGGTGACTCATTGGTTACATGGGGGTACAACGTTTCT

>M6-PGSC0003DMG400038918-(rev)M6LysM-RLK\_448

GAAATGGAGTGAAATATCTGGTGACTCATTGGTTACATGGGGGTACAACGTTTCTAGCATTAGCGCGC  
AGTTCAGTGTCAGTAGTCAAAGTACAGCATATGCAAATGTATTATCTGAAA

>M6-PGSC0003DMG400038918-(rev)M6LysM-RLK\_512

CGCGCAGTTCAGTGTCAGTAGTCAAAGTACAGCATATGCAAATGTATTATCTGAAAATTCAGTTCTTTAT  
CCTTTCACAACAATACTGATTCCTCTGCCAAAAGAACCTTCAAGCTCCCA

>M6-PGSC0003DMG400038918-(rev)M6LysM-RLK\_576

CTTTATCCTTTCACAACAATACTGATTCCTCTGCCAAAAGAACCTTCAAGCTCCCAAACAAGGACTATTAA  
GACAGCACACACTGTAATATTTTACCCTTCTAGGCACAAAATATCATAC

>M6-PGSC0003DMG400038918-(rev)M6LysM-RLK\_64

AAAAGTCCTCTTGCCATCATTCTGATTTTTAGATCAGATTCTCCTTATAATTCTGTTTCTTCCATCTCAA  
ACTCCTATCTTCGAACCCTGATGATATTGTCCACATCAACAATATCT

>M6-PGSC0003DMG400038918-(rev)M6LysM-RLK\_640

CTATTAAGACAGCACACACTGTAATATTTTACCCTTCTAGGCACAAAATATCATACCGCAGTCTTTTCATT  
GGGGTAGGATCTGGTGTATCCCTTGCAGTCCTCTGTTTTATCTTGTTCA

>M6-PGSC0003DMG400038918-(rev)M6LysM-RLK\_704

TTTCATTGGGGTAGGATCTGGTGTATCCCTTGCAGTCCTCTGTTTTATCTTGTTTCATTGTCTTAAATATAA  
GAAGGAAAACAAAAGAGGTGAAATACTTGGGAACCGAAGACAAGGGAA

>M6-PGSC0003DMG400038918-(rev)M6LysM-RLK\_768

AAATATAAGAAGGAAAACAAAAGAGGTGAAATACTTGGGAACCGAAGACAAGGGAAAACAAACAAGGA  
ATTTGCCAGAACATGTCCTGGAAAGTATTGTTGGTGAAGGTCAAATGATTAA

>M6-PGSC0003DMG400038918-(rev)M6LysM-RLK\_832

GGAATTTGCCAGAACATGTCCTGGAAAGTATTGTTGGTGAAGGTCAAATGATTAAAGTGTATGAATTCCG  
AAGAACTGGTGGCTGCAACTGAAAACCTCAGCTCGCGAAAAAAAATTGGTA

>M6-PGSC0003DMG400038918-(rev)M6LysM-RLK\_896

ATTCGAAGAACTGGTGGCTGCAACTGAAAACCTCAGCTCGCGAAAAAAAATTGGTAATTGTGTTTATAA  
AGGGGTCCTTCGAGGAAAACCTGATGGCCATCAAGGAGACGCGGACAGACAT

>M6-PGSC0003DMG400038918-(rev)M6LysM-RLK\_960

TATAAAGGGGTCCTTCGAGGAAAACCTGATGGCCATCAAGGAGACGCGGACAGACATTTCAAAGGAGGT  
TAAATTCCTTGCAAAGATCAACCATTTCAATTTAATTAGCCTCACTGGTGTC

>M6-PGSC0003DMG400038990-(rev)M6LRR-RLP\_0

ATGTGGTTGGGAACTCTTCTAAGTTGAGAGTTTTAAGCTTGAGATCGAATAAGTTGCATGGACCGATTA  
GAACTTTAAGAAGTGAAAACATTTTTCTTGAGCTTCGAATGTTGGATATC

>M6-PGSC0003DMG400038990-(rev)M6LRR-RLP\_183

ACAATTGATCAAACGATGAATGCAGCAAGTGAGGAAGGAGATGAATATTACCAAGACACGGTAACTCTT  
GTAACGAAGGGATTGGAGCTTGAAGTTGTGAAAATCCTTTTTTTGTACACC

>M6-PGSC0003DMG400038990-(rev)M6LRR-RLP\_610

ATGGATTACGTGGATTACCTGTTTCAAAGGCTGTGGTAGTTATGATAATGATTCAGAATCAGAGAAAA  
TTGATACCGGATCTGAGCTAGATAAAGAAAGTGACTTTGAATTTCTGAATG

>M6-PGSC0003DMG400039455-(rev)M6LRR-RLP\_0

ATGGATTCTGGCGAAAACATAGAAGAAACAACAACAGCTGTAGACCGAATCAGTCAGTTGTCTGGACGA  
TCTTCTCCTTCACATTCTCTCTTATGCCGACCGAAGCCGCACTTGTGACA

>M6-PGSC0003DMG400039455-(rev)M6LRR-RLP\_1054

ATTAATTGTAAAAAATTGTGGAGAAGGGTAGAGGGGTGGGCTTGTCTCCACTGACTTTCAAACCATG



GGCCTCTGACCCTAGCGGATTTCTTGATTAAGAAGAACTGAGTTAGAGAATT

>M6-PGSC0003DMG400039455-(rev)M6LRR-RLP\_1116

AACCATGGGCCTCTGACCCTAGCGGATTTCTTGATTAAGAAGAACTGAGTTAGAGAATTTTGTGGACCTTT  
ATGCAATCCGTTTGCCAATTTTGTGAAGTCGGGTATTTCTTTTATCATAT

>M6-PGSC0003DMG400039455-(rev)M6LRR-RLP\_1178

GGACCTTTATGCAATCCGTTTGCCAATTTTGTGAAGTCGGGTATTTCTTTTATCATATCGCCAAAGTTATA  
TCTAGACACCAGGATTTTCGTACATTGATGTTGCTTAAAGTGTTTAGAT

>M6-PGSC0003DMG400039455-(rev)M6LRR-RLP\_124

CTCTCTCAAAAAGGTGGCGCTATCTTTGGAAATCACTTGATAGTTTCTCTTTTAGTACATTTGGTAACTAT  
GAGTGGTATGTATCCTATGTTGATTATGTATTAGGTCATTCAGTTTCTC

>M6-PGSC0003DMG400039455-(rev)M6LRR-RLP\_1240

AAAGTTATATCTAGACACCAGGATTTTCGTACATTGATGTTGCTTAAAGTGTTTAGATAGTTTATTTGTCA  
CAACACTATATCTGTTGTGGAGTGCTTCTATCTGTTGTTTTTTGTTGC

>M6-PGSC0003DMG400039455-(rev)M6LRR-RLP\_1302

TATTTGTCACAACACTATATCTGTTGTGGAGTGCTTCTATCTGTTGTTTTTTGTTGCTTCTCCGGTTTTTT  
CATTGGTAATACTGCACCAGGTCCTGTGCATGTTGCAGTTCAAAGGG

>M6-PGSC0003DMG400039455-(rev)M6LRR-RLP\_1364

TCCGGTTTTTTCATTGGTAATACTGCACCAGGTCCTGTGCATGTTGCAGTTCAAAGGGGTGCGAATTCCA  
GAATTGAAATGCAAGTATTTGACGCTGGAGTTGCATAAGAAAGAGTTAAG

>M6-PGSC0003DMG400039455-(rev)M6LRR-RLP\_1426

GAATCCAGAATTGAAATGCAAGTATTTGACGCTGGAGTTGCATAAGAAAGAGTTAAGTGTGTTTGGAG  
CAGCTGGCCTTTTGCAGCATCACCTCATGTTGAGTGTCTCAACATAGACA

>M6-PGSC0003DMG400039455-(rev)M6LRR-RLP\_1488

TTTGGAGCAGCTGGCCTTTTGCAGCATCACCTCATGTTGAGTGTCTCAACATAGACATAAGAGCTATGC  
ATGTAACCTTCTGTTGCTTTGTATCTTCTTTTACATAATTTTATGAAG

>M6-PGSC0003DMG400039455-(rev)M6LRR-RLP\_1550

AGCTATGCATGTAACCTTCTGTTGCTTTGTATCTTCTTTTACATAATTTTATGAAGCTTGCCTTTTACC  
TTTGTACATCATTTTACACAATAGAATAGAGTTAAGTGTGTTGGGAG

>M6-PGSC0003DMG400039455-(rev)M6LRR-RLP\_1612

GCCTTTTACCTTTGTACATCATTTTACACAATAGAATAGAGTTAAGTGTGTTGGGAGCAGCTGGCCTTTT  
GGCCTACCTCTCCCTCTTATAAGGCCACCACGGCCACCTCTCACTGGG

>M6-PGSC0003DMG400039455-(rev)M6LRR-RLP\_1674

TGGCCTTTTGGCCTACCTCTCCCTCTTATAAGGCCACCACGGCCACCTCTCACTGGGGCATTGTCACATC  
TCCTCTACACTTGCACGAACCATCTCAACACAAATATATCCTTAACTGT

>M6-PGSC0003DMG400039455-(rev)M6LRR-RLP\_1736

TTGCACATCTCCTCTACACTTGCACGAACCATCTCAACACAAATATATCCTTAACTGTCATTAAGAGACTT  
TGCTTATGTCACCGTATAGCTTCGTGATTGCTTTCTTGTGAAAAATGTG

>M6-PGSC0003DMG400039455-(rev)M6LRR-RLP\_1798

AAGAGACTTTGCTTATGTCACCGTATAGCTTCGTGATTGCTTTCTTGTGAAAAATGTGTTATCAAGTTTTG  
GCTACCTACATCATGAGTCTCTTTATGAAAAGAATAGCCATTATAATCA

>M6-PGSC0003DMG400039455-(rev)M6LRR-RLP\_186

GGTAACTATGAGTGGTATGTATCCTATGTTGATTATGTATTAGGTCATTCAGTTTCTCCCAAATTAATAAA  
GTTTCAACTCGATAGTAATGAGCCGGATGCATACAAGTCAGACATGGAT

>M6-PGSC0003DMG400039455-(rev)M6LRR-RLP\_1860

CAAGTTTTGGCTACCTACATCATGAGTCTCTTTATGAAAAGAATAGCCATTATAATCATTTCAGGTATCA  
TTAAATTTGTTGGCTCTGAAATTTATTTTACTGGAAATTTCTACTTCA

>M6-PGSC0003DMG400039455-(rev)M6LRR-RLP\_1922

CAGGTATCATAAATTTGTTGGCTCTGAAATTTATTTTACTGGAAATTTCTACTTCAAAGTTTTCTTTTC  
AACTTTTCTGCAATTTCCATTAGGCTGCCATGTATTTGTCCCTGATCG

>M6-PGSC0003DMG400039455-(rev)M6LRR-RLP\_1984

TTTCTTTTCAACTTTTCTGCAATTTCCATTAGGCTGCCATGTATTTGTCCCTGATCGTATTCTGTTTCCAGC  
CTGATGCTACCTTCTGCTGCTTTGGGTTACAAGATTTGGTCAAAGAA

>M6-PGSC0003DMG400039455-(rev)M6LRR-RLP\_2046

CTGTTTCCAGCCTGATGCTACCTTCTGCTGCTTTGGGTTACAAGATTTGGTCAAAGAAAATACTATCAATT  
TGCAGAGATGGATTTCAATCTTTGTGCTTCCCAACCTCAAGAATGTAA

>M6-PGSC0003DMG400039455-(rev)M6LRR-RLP\_248

AATTA AAAAGTTTCAACTCGATAGTAATGAGCCGGATGCATACAAGTCAGACATGGATCGATGGCTTAG  
TTTTGCTATTGAAAAGAAAGTGGAAAATTTGAAAATCCAGTCAGTCTCTGA

>M6-PGSC0003DMG400039455-(rev)M6LRR-RLP\_310

GGCTTAGTTTTGCTATTGAAAAGAAAGTGGAAAATTTGAAAATCCAGTCAGTCTCTGAAGAAGAGGTTT  
ATGCATTGCCGGAATGTTTATACACCTGTTTCGTCTGTTGATAAACACTAGTTT

>M6-PGSC0003DMG400039455-(rev)M6LRR-RLP\_372

GAGGTTTATGCATTGCCGGAATGTTTATACACCTGTTTCGTCTGTTGATAAACACTAGTTTTGGGATTCTGTTC  
TTTTGATGCTAATGTGGTTGTAGCATGGAAGTCTCTAAAGAGCATAAAA

>M6-PGSC0003DMG400039455-(rev)M6LRR-RLP\_434

ATTCTGTTCTTTTGATGCTAATGTGGTTGTAGCATGGAAGTCTCTAAAGAGCATAAAAATTGAAGTGGATG  
GTGTTATCTAATGACCATATATTGAACTTATTGTCGGGATGTCCTATATT

>M6-PGSC0003DMG400039455-(rev)M6LRR-RLP\_496

AGTGGATGGTGTATCTAATGACCATATATTGAACTTATTGTCGGGATGTCCTATATTGGAACTATGGA  
ATTATCTCGTTTTAAGGGTTTTAGTCGTTTGAAATTAGGTCTTCAAAT

>M6-PGSC0003DMG400039455-(rev)M6LRR-RLP\_558

ACTATGGAATTATCTCGTTTTAAGGGTTTTAGTCGTTTGAAATTAGGTCTTCAAATTTGAAGAGACTAA  
ATTTGATAGCATAACAATGATGATGAACTTGATCATTCTTGGAAATTGTT

>M6-PGSC0003DMG400039455-(rev)M6LRR-RLP\_62

GGACGATCTTCTCCTTCACATTCTCTCTTATGCCGACCGAAGCCGCACTTGTGACAAGTGCTCTCTCAA  
AAAGGTGGCGCTATCTTTGGAAATCACTTGATAGTTTCTTTTTAGTAC

>M6-PGSC0003DMG400039455-(rev)M6LRR-RLP\_620

GAGACTAAATTTGATAGCATAACAATGATGATGAACTTGATCATTCTTGGAAATTGTTGCCCCCTATCTTC  
AGCATTGGAGATTTGTGAAAAGTCTTTATGGTTTCAAGTGTAGGCTTG

>M6-PGSC0003DMG400039455-(rev)M6LRR-RLP\_682

CCTATCTTCAGCATTGGAGATTTGTGAAAAGTCTTTATGGTTTCAAGTGTAGGCTGTAGACGTATCCTC  
CTTGGTTAATGCTAAGCTTACGTTTGAGATTACATGTATCAAAGACATC

>M6-PGSC0003DMG400039455-(rev)M6LRR-RLP\_744

CGTATCCTCCTTGGTTAATGCTAAGCTTACGTTTGAGATTACATGTATCAAAGACATCCAATATTTGCTTG  
ATGAAGAAATTGATGATGACGAAGATAGTTGTCGTGGCTATCATCAAGG

>M6-PGSC0003DMG400039455-(rev)M6LRR-RLP\_806

ATTTGCTTGATGAAGAAATTGATGATGACGAAGATAGTTGTCGTGGCTATCATCAAGGTTTTATGATTCT

CGTGTGGGATTATCTTCAAAGCTGAGTAGTGCAAGCAAGATAACAGTTG

>M6-PGSC0003DMG400039455-(rev)M6LRR-RLP\_868

ATGATTCTCGTGTGGGATTATCTTCAAAGCTGAGTAGTGCAAGCAAGATAACAGTTGGAACATGGTTC

ATAGAGGTTTGTTTTAAACTCAAAGTCTTTATTTTCTCTCATTGATTATT

>M6-PGSC0003DMG400039455-(rev)M6LRR-RLP\_930

ATGGTTCATAGAGGTTTGTTTTAAACTCAAAGTCTTTATTTTCTCTCATTGATTATTAGCAGACAGTTGC

AGATAAACATTATACAATGGAGATTTGTATACACAATCCATTAAAGCAA

>M6-PGSC0003DMG400039455-(rev)M6LRR-RLP\_992

GACAGTTGCAGATAAACATTATACAATGGAGATTTGTATACACAATCCATTAAAGCAACTGGATTAATTG

TAAAAAATTGTGGAGAAGGGTAGAGGGTGGGCTTGTCTCCACTGACT

>M6-PGSC0003DMG400039627M6LRR-RLP\_124

TTTGAGAAATCTGAAAATATGATTCTCAACGATAACAATCTCATTGGGGAAATTCCTTCATCTATATGCA

ATTTGACATCACTTGAAATGTTTTATATGCCGAGAAACAACCTGAAGGG

>M6-PGSC0003DMG400039627M6LRR-RLP\_1550

TAAAGAAGAATTTGATTTCAAGAACTTCAGGTATTCATGCTAAGCTTTACACTAATGTTTTTTAGTTTATTCT

AACAATAATATATTAGGTTTTATGCTTTTTTGATATAAACAAAATAC

>M6-PGSC0003DMG400039627M6LRR-RLP\_1612

AGTTTATTCTAACAACTAATATATTAGGTTTTATGCTTTTTTGATATAAACAAAATACTTATTAACGCTTGA

TACGAATTGCTAGTAATCAGTTGGAAACTGTGAGAACAGAGGCTAAAA

>M6-PGSC0003DMG400039627M6LRR-RLP\_1674

TAACGCTTGATACGAATTGCTAGTAATCAGTTGGAAACTGTGAGAACAGAGGCTAAAAATTTATAGTTG

TGTGGCTCACTTTCTTATATTTTCAAGATGCCAAGAATAAGAAGACATTGGCG

>M6-PGSC0003DMG400039627M6LRR-RLP\_1736

ATAGTTGTGTGGCTCACTTTCTTATATTTTCAAGATGCCAAGAATAAGAAGACATTGGCGTAATGGATTTGG

TTCTTCTATGTTGCAACTTATGATGTTGGATTTGATTTTTAGTTTTATA

>M6-PGSC0003DMG400039627M6LRR-RLP\_1798

GGATTTGGTTCTTCTATGTTGCAACTTATGATGTTGGATTTGATTTTTAGTTTTATAAGCTTTCCATAACT

CGGGAAAATGTAATATTATGAGTTTTGATGATATAACAATAAATGTTGT

>M6-PGSC0003DMG400039627M6LRR-RLP\_1860

TTCCATAACTCGGGAAAATGTAATATTATGAGTTTTGATGATATAACAATAAATGTTGTGTGTATTGAATG  
ATGTGTTTGCATTTCTCGGATCAATATAACTCACCTTAAAGAATCTAAGA

>M6-PGSC0003DMG400039627M6LRR-RLP\_1912

TGTTGTGTGTATTGAATGATGTGTTTGCATTTCTCGGATCAATATAACTCACCTTAAAGAATCTAAGAGA  
GCTGAAGAATTAATGGAGGAAGATATTTAACGTGTGTAGAAGAAAGAGAA

>M6-PGSC0003DMG400039627M6LRR-RLP\_62

CTTACTTATCTATATTTGGGTAATAGCTCTCTTAATAGATCTATTCCTGCTTCATTTGGCAATTTGAGAAAT  
CTGAAAATATGATTCTCAACGATAACAATCTCATTGGGGAAATTCCT

>M6-PGSC0003DMG400039680-(rev)M6LRR-RLK\_0

GAATTTGCAGAATTTGCTTCATGGCTTGCCACTCGGGGTTTGAECTACTACTAAAGACTATAACCACGGAC  
ATGTAGGAAGAGGAGGATGATAATAATAATAGTATTCATAATGTTTGTTT

>M6-PGSC0003DMG400039680-(rev)M6LRR-RLK\_116

GTTCTAAAGGGTTGTTAATCACTTAGAGATATAGGCACAAAATTGTGCTTGGCACTGCTAGAGCACTTGC  
ATTTCTACACCATGGTTGTTACCTCCCATTATACATAGAGATGTCAAAG

>M6-PGSC0003DMG400039680-(rev)M6LRR-RLK\_174

TAGAGCACTTGCATTTCTACACCATGGTTGTTACCTCCCATTATACATAGAGATGTCAAAGCTAGCAGT  
GTTTATTTTGGCACAAGACCCGAGAATCATGAACTTGGATCCTAGACTAT

>M6-PGSC0003DMG400039680-(rev)M6LRR-RLK\_230

TCAAAGCTAGCAGTGTTTATTTTGGCACAAGACCCGAGAATCATGAACTTGGATCCTAGACTATCCAATT  
TTGGATTGGCCAAAATCTTTGGCACAAGACCCGAGAATCAGATCAATCGC

>M6-PGSC0003DMG400039680-(rev)M6LRR-RLK\_58

TATACCACGGACATGTAGGAAGAGGAGGATGATAATAATAATAGTATTCATAATGTTTGTCTAAAGGG  
TTGTTAATCACTTAGAGATATAGGCACAAAATTGTGCTTGGCACTGCTAGA

>M6-PGSC0003DMG400040066-(rev)M6RLKmalectin\_0

ATGGGGCTATGGGTGCATTTGGTTCTAGCTTTTATGCTGTCCTGTTTCTTGATTGAGGAGGCAAATGCTG  
CTTTTACTCCTGCTGATAAATATTTGATTGCTTGTGGATCTTCCAAAAAT

>M6-PGSC0003DMG400040066-(rev)M6RLKmalectin\_1054

ATTCAGGTGTTCTGACAGTCAGTGTGGTCCAGACACAGGAGCTGATTGGATCAATGCCCTTATGAATG  
GATTGGAAATCATGAAGATTAGCAATGGAGCTAGAAGCTTGAGTGGGGTTA

>M6-PGSC0003DMG400040066-(rev)M6RLKmalectin\_1116

ATGAATGGATTGGAAATCATGAAGATTAGCAATGGAGCTAGAAGCTTGAGTGGGGTTACATCTGTGGA  
GACTCTATTTGTGAGGCCTCACAAAAAGAACAAAAAAGGTATTATAATTGGT

>M6-PGSC0003DMG400040066-(rev)M6RLKmalectin\_1178

TGTGGAGACTCTATTTGTGAGGCCTCACAAAAAGAACAAAAAAGGTATTATAATTGGTTCTGTTGTAGG  
AGGAGCATCAGCTGCATTAGCAATTATTGGGTTGTGTTATTGCTTCTTGGT

>M6-PGSC0003DMG400040066-(rev)M6RLKmalectin\_124

CCTTTCTTGCCAGATTTTTGTTCTGACACACACCATTCTTCAGTTGTTTTGGAAAGTGAAGAAAATTCT  
ATTTCTGCAACATCTAATTCCACTGCTCCATTTTCAATTTACCAGTCTG

>M6-PGSC0003DMG400040066-(rev)M6RLKmalectin\_1240

TTGTAGGAGGAGCATCAGCTGCATTAGCAATTATTGGGTTGTGTTATTGCTTCTTGGTAGCCCTCAGATC  
AAAGGTCTCCCGCCAGGGGCAGCCATGGCTTCTCTTCCCCTGTATGGAA

>M6-PGSC0003DMG400040066-(rev)M6RLKmalectin\_1302

CTCAGATCAAAGGTCTCCCGCCAGGGGCAGCCATGGCTTCTCTTCCCCTGTATGGAAACTCTTAACTTT  
GACAAAGATGTCCACAGTTTCTCAAAGAGTGGAACGGCAAGCTGTATC

>M6-PGSC0003DMG400040066-(rev)M6RLKmalectin\_1364

TTTAACTTTGACAAAGATGTCCACAGTTTCTCAAAGAGTGGAACGGCAAGCTGTATCTCCTTAGCTTCA  
CCCAATCTTGGTTCGATTCTTCAGTTTCCAAGAAATAATGGATGCTACTAA

>M6-PGSC0003DMG400040066-(rev)M6RLKmalectin\_1426

TAGCTTCACCCAATCTTGGTCGATTCTTCAGTTTCCAAGAAATAATGGATGCTACTAACAAGTTTGATGAA  
AACTTGCTTCTTGGTGTGTTGGTGGTTTTGGTAGAGTCTACAAGGGAACAC

>M6-PGSC0003DMG400040066-(rev)M6RLKmalectin\_1488

TTTGATGAAAACCTTGCTTCTTGGTGTGTTGGTGGTTTTGGTAGAGTCTACAAGGGAACACTAGAAGATGGG  
ACAAGGCTTGCTGTCAAAGAGGCAACCCGAGATCTGAACAAGGTCTAGCT

>M6-PGSC0003DMG400040066-(rev)M6RLKmalectin\_1550

AGATGGGACAAGGCTTGCTGTCAAAGAGGCAACCCGAGATCTGAACAAGGTCTAGCTGAATTTGAA  
CAGAAATTGAAATGTTGTCCAAGCTTCGCCACCGCCATCTTGTGTCTTTGAT

>M6-PGSC0003DMG400040066-(rev)M6RLKmalectin\_1612

TTCGAACAGAAATTGAAATGTTGTCCAAGCTTCGCCACCGCCATCTTGTGTCTTTGATTGGTTATTGTGAT

GAAAGATCAGAAATGATTTTGGTTTATGAATACATGGCAAATGGGCCTC

>M6-PGSC0003DMG400040066-(rev)M6RLKmalectin\_1674

TATTGTGATGAAAGATCAGAAATGATTTTGGTTTATGAATACATGGCAAATGGGCCTCTCCGAAGTCATC

TTTATGGAACGGATCTTCCATCTCTTTCGTGGAAGCAGCGTCTTGAGATT

>M6-PGSC0003DMG400040066-(rev)M6RLKmalectin\_1736

AAGTCATCTTTATGGAACGGATCTTCCATCTCTTTCGTGGAAGCAGCGTCTTGAGATTTGTATAGGTTCT

GCTAGGGGGCTGCATTACCTCCACACTGGTGCATCGCAGAGCATCATTCA

>M6-PGSC0003DMG400040066-(rev)M6RLKmalectin\_1798

TAGGTTCTGCTAGGGGGCTGCATTACCTCCACACTGGTGCATCGCAGAGCATCATTACCCGTGATGTGA

AAACTACAAACATACTCTTGGATGAGAACTTTGTAGCTAAAGTTGCTGATT

>M6-PGSC0003DMG400040066-(rev)M6RLKmalectin\_186

GAAAATTCTATTTCTGCAACATCTAATTCCACTGCTCCATTTTCAATTTACCAGTCTGCTAGAATTTTCCAC

ACTACAACATCTTACGAATTTGATATTCATCAACAAGGGCGACATTGG

>M6-PGSC0003DMG400040066-(rev)M6RLKmalectin\_1860

GATGTGAAAACACTACAAACATACTCTTGGATGAGAACTTTGTAGCTAAAGTTGCTGATTTTGGTCTTTCTA

AAGCTGGACCAGCTATTGATCAGACCCATGTCAGCACTGCTGTTAAAGGT

>M6-PGSC0003DMG400040066-(rev)M6RLKmalectin\_1922

TCTTTCTAAAGCTGGACCAGCTATTGATCAGACCCATGTCAGCACTGCTGTTAAAGGTAGCTTTGGTTAC

CTGGATCCCAGTACTTTAGAAGACAGCAGCTTACTGAGAAATCAGATGT

>M6-PGSC0003DMG400040066-(rev)M6RLKmalectin\_1984

TTGGTTACCTGGATCCCGAGTACTTTAGAAGACAGCAGCTTACTGAGAAATCAGATGTTTATTCATTTGG

TGTTGTCCTAATGGAAGTGCTCTGCACCAGACCTGCATTGAATCCTGTCC

>M6-PGSC0003DMG400040066-(rev)M6RLKmalectin\_2046

TCATTTGGTGTTCCTAATGGAAGTGCTCTGCACCAGACCTGCATTGAATCCTGTCCTACCACGGGATC

AAGTCAATATAGCTGAGTGGGCCATGACTTGGCAAAGAAAGGCATGTTG

>M6-PGSC0003DMG400040066-(rev)M6RLKmalectin\_2108

ACGGGATCAAGTCAATATAGCTGAGTGGGCCATGACTTGGCAAAGAAAGGCATGTTGGATCAGATAA

TGGACCCAAATCTTACAGGGAAGGTGAATTCAGCCTCCCTCAAGAAGTTTGG

>M6-PGSC0003DMG400040066-(rev)M6RLKmalectin\_2170

AGATAATGGACCCAAATCTTACAGGGAAGGTGAATTCAGCCTCCCTCAAGAAGTTTGGGGAGACTGCG  
GAGAAGTGTTTGGCTGACCATGGAGTTGATAGACCTCCATGGGGGATGTTT

>M6-PGSC0003DMG400040066-(rev)M6RLKmalectin\_2232

ACTGCGGAGAAGTGTTTGGCTGACCATGGAGTTGATAGACCTCCATGGGGGATGTTCTATGGAATCTA  
GAATATGCTCTTCAGCTTGAGGAAACCTCATCAGCTCTGGCAGATCCCGAT

>M6-PGSC0003DMG400040066-(rev)M6RLKmalectin\_2294

GAATCTAGAATATGCTCTTCAGCTTGAGGAAACCTCATCAGCTCTGGCAGATCCCGATGATAACAGCATG  
AACCATATACCCAGCATAACCTTTGACACCATTTGACAATAGTGTGAGTAT

>M6-PGSC0003DMG400040066-(rev)M6RLKmalectin\_2356

ACAGCATGAACCATATACCCAGCATAACCTTTGACACCATTTGACAATAGTGTGAGTATGATCGAAGGGA  
TCAACTCTGGAAGTATGATGATGCAGAGGATGCTGCCACTAGTGCTGTTT

>M6-PGSC0003DMG400040066-(rev)M6RLKmalectin\_2388

ACACCATTTGACAATAGTGTGAGTATGATCGAAGGGATCAACTCTGGAAGTATGATGATGCAGAGGAT  
GCTGCCACTAGTGCTGTTTTCTCTCAACTGGTAAATCCGCGGGGAAGGTGA

>M6-PGSC0003DMG400040066-(rev)M6RLKmalectin\_248

AATTTTCCACACTACAACATCTTACGAATTTGATATTCATCAACAAGGGCGACATTGGGTTTCGCTTTATT  
TCTATCCTCTCCCTGGTCATAACTTAACATCTGCCTCAATCACAGTTGT

>M6-PGSC0003DMG400040066-(rev)M6RLKmalectin\_310

GCCTTTATTTCTATCCTCTCCCTGGTCATAACTTAACATCTGCCTCAATCACAGTTGTCACAGAAAATTTTG  
TTCTGTTGAACAATTTCAAGAGATATAAGGGTACTTATCTAT

>M6-PGSC0003DMG400040066-(rev)M6RLKmalectin\_372

GAAAATTTTGTCTGTTGAACAATTTCAAGAGATATAAGGGTACTTATCTATTTAAGGAATACTC  
AATTAATGTCACCTCAGATAGCTTGACTATTGCTTTAATCCCTTCAAAC

>M6-PGSC0003DMG400040066-(rev)M6RLKmalectin\_434

GGAATACTCAATTAATGTCACCTCAGATAGCTTGACTATTGCTTTAATCCCTTCAAACAACCTCCGTCGCGT  
TTATTAATGCGATTGAAGTTGATCAGCTCCTGATGAGTTGATTCCGGA

>M6-PGSC0003DMG400040066-(rev)M6RLKmalectin\_496

CCGTCGCGTTTATTAATGCGATTGAAGTTGATCAGCTCCTGATGAGTTGATTCCGGATCAAGCTGTGAC  
TGCATCTCCACCAGCACCTTTCAATGGCCTTTCTGGGCTAGCCCTTGAAA



>M6-PGSC0003DMG400040066-(rev)M6RLKmalectin\_558

GCTGTGACTGCATCTCCACCAGCACCTTCAATGGCCTTCTGGGCTAGCCCTTGAAACTGTTTATCGGTT  
AAACATGGGAGGTCCTTTGATTACTGCTCAGAATGATACTCTAGGGAGA

>M6-PGSC0003DMG400040066-(rev)M6RLKmalectin\_62

AAATGCTGCTTTTACTCCTGCTGATAAATATTTGATTGCTTGTGGATCTTCCAAAAATGTAACCTTTCTTG  
GCCAGATTTTTGTTCTGACACACACCATTCTTCAGTTGTTTTGGAAAG

>M6-PGSC0003DMG400040066-(rev)M6RLKmalectin\_620

TTATCGGTTAAACATGGGAGGTCCTTTGATTACTGCTCAGAATGATACTCTAGGGAGAACGTGGGAGAA  
TGATGTTAAGTACCTGCATGTTAATAGCTCTGCAGTGAATGTTTCAGTTAT

>M6-PGSC0003DMG400040066-(rev)M6RLKmalectin\_682

GGGAGAATGATGTTAAGTACCTGCATGTTAATAGCTCTGCAGTGAATGTTTCAGTTATCCCTTCAAGCAT  
AAAATATCCAGCCACCATTACTCCTGAAATAGCACCATATTGGGTTTATG

>M6-PGSC0003DMG400040066-(rev)M6RLKmalectin\_744

TCAAGCATAAAATATCCAGCCACCATTACTCCTGAAATAGCACCATATTGGGTTTATGCTACTGCTGAAA  
CCATGGGAGATGCTAATACTGTTCGATGGGAATTTCAATATCACCTGGGAG

>M6-PGSC0003DMG400040066-(rev)M6RLKmalectin\_806

TGCTGAAACCATGGGAGATGCTAATACTGTTCGATGGGAATTTCAATATCACCTGGGAGTTCCCAGTTGA  
TCCAACTTCATGTACCTCATCCGCGTACATTTTTGTGATATTGTGAGCGA

>M6-PGSC0003DMG400040066-(rev)M6RLKmalectin\_868

CAGTTGATCCAACTTCATGTACCTCATCCGCGTACATTTTTGTGATATTGTGAGCGAGTCCTTGAATACT  
CTACTTTTTAATCTGTACATAAATGATGACACTGCTTTACCGGACCTAG

>M6-PGSC0003DMG400040066-(rev)M6RLKmalectin\_930

TTGAATACTCTACTTTTTAATCTGTACATAAATGATGACACTGCTTTACCGGACCTAGATTTGTCTTCAGTT  
GGCAATTTGGATGTGCCGTATTACAGAGATTTTGTCTCCAACTCCACA

>M6-PGSC0003DMG400040066-(rev)M6RLKmalectin\_992

GTCTTCAGTTGGCAATTTGGATGTGCCGTATTACAGAGATTTTGTCTCCAACTCCACAACAAATTCAGGT  
GTTCTGACAGTCAGTGTGGTCCAGACACAGGAGCTGATTGGATCAATGC

>M6-PGSC0003DMG400040306-(rev)M6LRR-RLP\_0

ATGGCTGATTTATTGCCTCAATGTCTTATTCATAAAATACTGTGTCTGCATAGTTTTAAGAGAGCAGCCCA

GTTGAGTATTCTTTCTAAAACATGGCTGCAAGCGTGGTTGACTATTCCC

>M6-PGSC0003DMG400040306-(rev)M6LRR-RLP\_126

AGTTATTCACCTGGTTATCTCGAGCACAATATGAAAAAAGTAATGGATAATATCATGGAGAGATATCGA  
GATGGAAAAATCCCTATTGAAAAGTTAGATTTATCATACTCTGTTTATTCT

>M6-PGSC0003DMG400040306-(rev)M6LRR-RLP\_189

TATCGAGATGGAAAAATCCCTATTGAAAAGTTAGATTTATCATACTCTGTTTATTCTAATGAAGTTTTTCC  
TTTGTTTAATAAGTGGCTTGATATTGCACTTCAGAATGGTGTAAAAGAT

>M6-PGSC0003DMG400040306-(rev)M6LRR-RLP\_252

GTTTTTCCTTTGTTTAATAAGTGGCTTGATATTGCACTTCAGAATGGTGTAAAAGATCTCGTCTTTCGAAT  
TCCTAGCCACCTTACGTCATACCCGTTGCCTATGTTAACAATCTTGGCA

>M6-PGSC0003DMG400040306-(rev)M6LRR-RLP\_315

TTTCGAATTCCTAGCCACCTTACGTCATACCCGTTGCCTATGTTAACAATCTTGGCAACAAAATCTTTAAG  
AGAATTAGTATTAACAGGTTGTGATTTGTACTGTGTTTCATTATCTAGT

>M6-PGSC0003DMG400040306-(rev)M6LRR-RLP\_378

TCTTTAAGAGAATTAGTATTAACAGGTTGTGATTTGTACTGTGTTTCATTATCTAGTGGTGTGGTGAATTG  
CTATTCGTTGAGAAAGCTTTCTCTAACTCATGTAGGTTTAGGTGATAAC

>M6-PGSC0003DMG400040306-(rev)M6LRR-RLP\_504

CAGATTCTACTTAATAGTTGTCCCTTTATTGACAACTTAATTTTAGATTACTGTTCTTGGTTGAAAAAGATT  
GAGATACTGAATAATCTTCCAAAGATTAAGTCGGTTTTTTATTCGGAAA

>M6-PGSC0003DMG400040306-(rev)M6LRR-RLP\_567

AAAAAGATTGAGATACTGAATAATCTTCCAAAGATTAAGTCGGTTTTTTATTCGGAAATCTGGCACAGAGC  
TTGTTAAAATTCAAGCACCAACTCTTGAACACTTATCTTATTTTACTGGT

>M6-PGSC0003DMG400040306-(rev)M6LRR-RLP\_63

GCAGCCCAGTTGAGTATTCTTTCTAAAACATGGCTGCAAGCGTGGTTGACTATTCCCAACTTGAGTTATT  
CACTTGGTTATCTCGAGCACAATATGAAAAAAGTAATGGATAATATCATG

>M6-PGSC0003DMG400040306-(rev)M6LRR-RLP\_630

ACAGAGCTTGTTAAAATTCAAGCACCAACTCTTGAACACTTATCTTATTTTACTGGTGGGGAAGAGTTTG  
CTATGTTGATATTGATGCTCCAAATTTGGTGTGATTGGAGTATAAGGGA

>M6-PGSC0003DMG400040306-(rev)M6LRR-RLP\_693

GAGTTTGCTATGTTTCGATATTGATGCTCCAAATTTGGTGTTCATTGGAGTATAAGGGATTTAAATTCCTG  
CAACTTTTATGGATACTAATTTGCAATGGAGTTGTTATCCTACGAGATTC

>M6-PGSC0003DMG400040306-(rev)M6LRR-RLP\_756

TTTCCTGCAACTTTTATGGATACTAATTTGCAATGGAGTTGTTATCCTACGAGATTCGTCCTTGATTCAAC  
TAGCGAAACAATTGCTAGTTTCATGGACGTTTTAATGCATATGATGAGC

>M6-PGSC0003DMG400040306-(rev)M6LRR-RLP\_819

GATTCAACTAGCGAAACAATTGCTAGTTTCATGGACGTTTTAATGCATATGATGAGCTCGAGTCATTCTA  
CTTCTCATGGAAGCAACAAGCCTTGCATCGTCAATTAAGAAGCTAAA

>M6-PGSC0003DMG400040306-(rev)M6LRR-RLP\_882

CATTCTACTTCTCATGGAAGCAACAAGCCTTGCATCGTCAATTAAGAAGCTAAAGCCGATAAATTTG  
ATTGGGAAAATCAGAGATGGCATTGTGATCCTGTGGAAGTTGGAAGTGAA

>M6-PGSC0003DMG400040306-(rev)M6LRR-RLP\_945

AAATTTGATTGGGAAAATCAGAGATGGCATTGTGATCCTGTGGAAGTTGGAAGTGAAAGGATGGCAAT  
AAGGGACCTTAAGGATAAGTTTTGCTTTTTATTATATTGGTCATGCAATTA

>M6-PGSC0003DMG400040620M6LRR-RLP\_0

TGAGGGAATGAAACAGATTGAGGTATTATATATTAGGGATTGTAAGTCTGTTACCTCCTTACCTTTTAGC  
ATTCTGCCACTACCTTGAAGAGAATAGACATATCTGATTGTCAGAAATT

>M6-PGSC0003DMG400040620M6LRR-RLP\_132

GCCAGTTGGTGAGATGTTTCTCGAGAATTTGTTTGTAAGAGATGCCCAACTTTACGAGGTTTTTGATT  
CCTACTGGACGTCTCATTATTTGGAATTGTGAGAATCTTGAATACTTTC

>M6-PGSC0003DMG400040620M6LRR-RLP\_198

GATTCCTACTGGACGTCTCATTATTTGGAATTGTGAGAATCTTGAATACTTTCCGGTGGCATGTGGGGGG  
ACCCAGATGACGTCCTGATTATTAGGTACTGTTCAAAGCTGAAGTGGCT

>M6-PGSC0003DMG400040620M6LRR-RLP\_330

GCAGGAACTCCTTCCATCTCTTACAAAAGTACTGACTGTGGAATTGTCCAGAAATAGAGTCCTTTCCTGAA  
GGAGGATTGCCCTTCAATTTACGAGTCCTTGAGATTGAAAATTGCAAGAA

>M6-PGSC0003DMG400040620M6LRR-RLP\_396

TGAAGGAGGATTGCCCTTCAATTTACGAGTCCTTGAGATTGAAAATTGCAAGAACTGGTGAACAGACG  
AAAGGAGTGGTGTTTACAGAGACTCCCCTGTCTCAGAGAGTTAGTGATAGA

>M6-PGSC0003DMG400040620M6LRR-RLP\_462

ACGAAAGGAGTGGTGTTTACAGAGACTCCCCTGTCTCAGAGAGTTAGTGATAGAACATGATGGCAGTG  
ACAAAGAGATTGTTGGTGGTGAGAATTGGGAGTTGCCTTCCTCTATTCAAAC

>M6-PGSC0003DMG400040620M6LRR-RLP\_528

TGACAAAGAGATTGTTGGTGGTGAGAATTGGGAGTTGCCTTCCTCTATTCAAACACTTGTTATATCCAAT  
CTGAAAACATTAAGCAGCCAACCTTCTCAAAGTCTCACCTCTCTTCAATA

>M6-PGSC0003DMG400040620M6LRR-RLP\_66

TAGCATTCTGCCACTACCTTGAAGAGAATAGACATATCTGATTGTCAGAAATTGGAATTGGAGCAGCC  
AGTTGGTGAGATGTTTCTCGAGAATTTGTTTGTAAAGAGATGCCCAACTT

>M6-PGSC0003DMG400040620M6LRR-RLP\_660

GGGTAATTTACCTCAAATTCAGTCAATGATGGAGCAAGGGCAGCTCCCTCCTCTCTTTTTGAGCTACATT  
TATATTACCATCATAAGGTCCATTCACTAGGTCTTTGGCACCTCACTTC

>M6-PGSC0003DMG400040620M6LRR-RLP\_726

ACATTTATATTACCATCATAAGGTCCATTCACTAGGTCTTTGGCACCTCACTTCCCTTCAAAGTCTACACAT  
CATTCAATTGCCGTAATCTCCAATCACTTTCAAATCAGCACTGCCCTC

>M6-PGSC0003DMG400040620M6LRR-RLP\_858

GCTGGAGATCTCCGATTGCCCTAATCTGCAATCTTCCAGTAAAAGGGATGCCATCTTCCCTCTCTAAAC  
TATCTATTTCAAAGTGTCCATTGCTCACACCACTAGTAGAATTTGACAA

>M6-PGSC0003DMG400040620M6LRR-RLP\_913

TCTTCCCTCTCTAAACTATCTATTTCAAAGTGTCCATTGCTCACACCACTAGTAGAATTTGACAAGGGGGA  
ATACTGGCCAAATATTGCTCAAATCCCACCATAGAGATCGATGGGGAA

>M6-PGSC0003DMG400040927-(rev)M6LRR-RLP\_0

TTTTTTTAGTACATGAAACTTATATATTTTTTGTATCTTATTTTATTAGGAACTTTATGAACTTGGATGTCTG  
TAATATTATAGTGAGTGGGCTACCTCCAATTGGCTGTCTTCCAATTCA

>M6-PGSC0003DMG400040927-(rev)M6LRR-RLP\_1088

TTACATAATTATGACAGGATTTGAAGAAACAAAAAGAGGTTGTTGTGGAAGTGGATTATTAGAAACAGG  
ACCCTTATGTACAAAAAATCTCAAGTGTGTTACATACTTCACAATATGT

>M6-PGSC0003DMG400040927-(rev)M6LRR-RLP\_1152

ACAGGACCCTTATGTACAAAAAATCTCAAGTGTGTTACATACTTCACAATATGTTTTCTTTGATAGTAT

TCATCCAAGTGAAGCAGCTTATTACCAAATTTCTGAGTATTTTATGAAG

>M6-PGSC0003DMG400040927-(rev)M6LRR-RLP\_1216

ATAGTATTCATCCAAGTGAAGCAGCTTATTACCAAATTTCTGAGTATTTTATGAAGGAGCTTCTCCCAAAA

TTCTCAACCATTGACAACCTTTTAATTTATTACATTCAAATAAAAATTTGT

>M6-PGSC0003DMG400040927-(rev)M6LRR-RLP\_128

CAAAATCTCCACTGCATAGAAGCTTGCATTGAAAAAGAGAATTCAGATTCTCAATCTTATAATAAAAAACT

TGAAGAAATATTGCCACATTTACAAGCACAACCTTAGAGGAAGCAAATAC

>M6-PGSC0003DMG400040927-(rev)M6LRR-RLP\_1280

CCCAAAATTCTCAACCATTGACAACCTTTTAATTTATTACATTCAAATAAAAATTTGTAAAAAAGATTTTAA

AAAAAAGAAGGTGTTATTTGACTTCTGGTTAATTAAGAAGAGAGTTAT

>M6-PGSC0003DMG400040927-(rev)M6LRR-RLP\_1344

TTTTTAAAAAAAAGAAGGTGTTATTTGACTTCTGGTTAATTAAGAAGAGAGTTATTCATGTATTAAT

AGGGTAGGTAAATATCATATGTGGTAACTTTCTAGTTTTTTTTGTATAAAA

>M6-PGSC0003DMG400040927-(rev)M6LRR-RLP\_1408

TAAATTAGGGTAGGTAAATATCATATGTGGTAACTTTCTAGTTTTTTTTGTATAAAAAATTCAGCATATCAA

CTATGATATGTAGTTTCTCATTTTATAATGAAAAAGTAATCTTAACGC

>M6-PGSC0003DMG400040927-(rev)M6LRR-RLP\_1472

ATATCAACTATGATATGTAGTTTCTCATTTTATAATGAAAAAGTAATCTTAACGCAAATATTAGTTTCGT

TTCTGAATTATTAGAGTATCATTTATCTACGTCTTTTAAAGTTTATTTT

>M6-PGSC0003DMG400040927-(rev)M6LRR-RLP\_1536

GTTTCGTTTCTGAATTATTAGAGTATCATTTATCTACGTCTTTTAAAGTTTATTTTCTTTTTCAAGGATTTTA

TGATAGTTTGTACTTAAAAAAGAAAATGTAAATGTGTAACACATG

>M6-PGSC0003DMG400040927-(rev)M6LRR-RLP\_1600

AGGATTTTATGATAGTTTGTACTTAAAAAAGAAAATGTAAATGTGTAACACATGGATAAAATAAGAA

GAGATAAAAAAGAAAAACATAACAACCTAAATTTAACTTGAGAATGACAA

>M6-PGSC0003DMG400040927-(rev)M6LRR-RLP\_1642

ATGTGTAACACATGGATAAAATAAGAAGAGATAAAAAAGAAAAACATAACAACCTAAATTTAACTTGA

GAATGACAATTTTCTCTGATAAAGTATGAACAGGCAAATTAGAAATAGTTT

>M6-PGSC0003DMG400040927-(rev)M6LRR-RLP\_192

AAAACCTGAAGAAATATTGCCACATTTACAAGCACAACCTTAGAGGAAGCAAATACTTTATTCTGATATA  
TACACTCCTTTATCACATCTCATCAATAATCCACATGAATATGGTAAGCT

>M6-PGSC0003DMG400040927-(rev)M6LRR-RLP\_256

GATATATACTCCTTTATCACATCTCATCAATAATCCACATGAATATGGTAAGCTTTCAATTATGTTGTTT  
GAGTTCTTCAAAAATATTACTGAATATGTATCAATTCCTTATAAATT

>M6-PGSC0003DMG400040927-(rev)M6LRR-RLP\_320

TGTTGTTTGAGTTCTTCAAAAATATTACTGAATATGTATCAATTCCTTATAAATTATATTTTCTTTAGAAA  
AAATGGTACAAATATAATATTATTTTTGGAGAGTAAGAGCGACTTCTG

>M6-PGSC0003DMG400040927-(rev)M6LRR-RLP\_384

TTTAGAAAAAATGGTACAAATATAATATTATTTTTGGAGAGTAAGAGCGACTTCTGTGCATTTTTTCATATT  
ATACTTGACTTGATTCTTGTATTAATTAGAAAATCTTTGTGTGAGTACA

>M6-PGSC0003DMG400040927-(rev)M6LRR-RLP\_448

TCATATTATACTTGACTTGATTCTTGTATTAATTAGAAAATCTTTGTGTGAGTACATCATCAATCTATTTTA  
TACTATCTTTGATTTATGTTATCAATCTAGTTAATAATGTTTTTCTTT

>M6-PGSC0003DMG400040927-(rev)M6LRR-RLP\_512

CTATTTTATACTATCTTTGATTTATGTTATCAATCTAGTTAATAATGTTTTTCTTTTTTTTTTAAAAAGAAG  
TATGATACAATGATTATTTTTAAATACATAGTTTTGTCTTAAATACC

>M6-PGSC0003DMG400040927-(rev)M6LRR-RLP\_576

AAAAAGAAGTATGATACAATGATTATTTTTAAATACATAGTTTTGTCTTAAATACCAAACAACAATCCTT  
TTTGACAAATGTGGGAACTATCATATTACAATTTCAACCAAGGCTCATT

>M6-PGSC0003DMG400040927-(rev)M6LRR-RLP\_64

GGATGTCGTAATATTATAGTGAGTGGGCTACCTCCAATTGGCTGTCTTCCAATTCAAATGACAGCAAAAT  
CTCCACTGCATAGAACTTGCATTGAAAAAGAGAATTCAGATTCTCAATCT

>M6-PGSC0003DMG400040927-(rev)M6LRR-RLP\_640

AATCCTTTTTGACAAATGTGGGAACTATCATATTACAATTTCAACCAAGGCTCATTTCATGAAAATAATG  
TTCAGATCAATTTACACATATTTAGTTGTTTCATTGAGTATTTATTGT

>M6-PGSC0003DMG400040927-(rev)M6LRR-RLP\_704

AATAATGTTTCAGATCAATTTACACATATTTAGTTGTTTCATTGAGTATTTATTGTTTTATTAATATATATAT  
TAGGTAATTTTACTCATTAGTAGAGTGGCCACACAAAGTCATGAACC

>M6-PGSC0003DMG400040927-(rev)M6LRR-RLP\_768

TATATATATTAGGTAATTTTACTCATTAGTAGAGTGGCCACACAAAGTCATGAACCGTGGTTAGTTGAAC  
ATTCTTTATCAAATCATACTCATGACTATTACCATTTCAAAATATCCTT

>M6-PGSC0003DMG400040927-(rev)M6LRR-RLP\_832

TTGAACATTCTTTATCAAATCATACTCATGACTATTACCATTTCAAAATATCCTTGAAATATAATTTGGGA  
TAAATAGTTAATATATAGAGTGAAACAAAAATGAAACGAGTAAAATTA

>M6-PGSC0003DMG400040927-(rev)M6LRR-RLP\_896

ATTTGGGATAAATAGTTAATATATAGAGTGAAACAAAAATGAAACGAGTAAAATTAATAAATATTTTTT  
ATCAAATGAATAAATAAAAATGAATGGTAAAGTACTTTACAAGCCTCCC

>M6-PGSC0003DMG400041062M6LRR-RLP\_0

ATGGAAGCTCCAACATGTTTTCTCATTCTTTTATGGTTTTGCTAAGCTTAGCAATATGCTCTGCCAGCCT  
ATTGATGTTACACAATTGAGTCTAAGGAAGTTGATCATCATCACAAC

>M6-PGSC0003DMG400041062M6LRR-RLP\_330

GGTTCCCTATCTATATACCTGGCTTTGATTTCCAGTCTATTCCCATGATTGTGGTTATGTGTGTCTTGCT  
AATAATCCTAGAGGAGAAATCACTGAATTCAAATCTCAGGATTATCA

>M6-PGSC0003DMG400041062M6LRR-RLP\_396

CTTGCTAATAATCCTAGAGGAGAAATCACTGAATTCAAATCTCAGGATTATCACACTTCACCAAACCAT  
ACAGATGCAGGCCAGGGCCTAACATGCACGGAGACAAAGATTTTAACCAT

>M6-PGSC0003DMG400041062M6LRR-RLP\_462

CCATACAGATGCAGGCCAGGGCCTAACATGCACGGAGACAAAGATTTTAACCATGAACTTCTTCTAAACT  
TTGTTTCTACAATGCAGGACAAACACGAGAACAACATGAACGTCTAAAC

>M6-PGSC0003DMG400041062M6LRR-RLP\_528

AACTTTGTTTCTACAATGCAGGACAAACACGAGAACAACATGAACGTCTAAACTATGGAGGACACGGT  
GGAGATGTAGGCCTCCGAGTAGGAGGAGCTAGACGTTTAGGATTTGGTCGT

>M6-PGSC0003DMG400041062M6LRR-RLP\_594

GGTGGAGATGTAGGCCTCCGAGTAGGAGGAGCTAGACGTTTAGGATTTGGTCGTGGTACTGATACCTCT  
GATCAGTATGCTAATGAGGACCCTGGTTGGAGTATTGAGGGCTGTGGTTAT

>M6-PGSC0003DMG400041062M6LRR-RLP\_66

CAGCCTATTGATGTTACACAATTGAGTCTAAGGAAGTTGATCATCATCACAACCACAAAGCTCACACTT

TGAGAAATATCGACGTCCAAGGCTTTGGAGGAGGAGGCAGTGATGGCGGA

>M6-PGSC0003DMG400041062M6LRR-RLP\_660

TCTGATCAGTATGCTAATGAGGACCCTGGTTGGAGTATTGAGGGCTGTGGTTATGTATGTCCAGGCAAC  
AGTCCTAGTGGAGGAATCACTGAATTCCATATCTCAGGATTATCACATTTT

>M6-PGSC0003DMG400041062M6LRR-RLP\_726

AACAGTCCTAGTGGAGGAATCACTGAATTCCATATCTCAGGATTATCACATTTTCACTGAACCTTACAGAT  
GTAGCCCAGATATGTGTGACACAGAAGAATGTGGTGAATTTCTTCTACGC

>M6-PGSC0003DMG400041062M6LRR-RLP\_792

AGATGTAGCCCAGATATGTGTGACACAGAAGAATGTGGTGAATTTCTTCTACGCTTTGTTTCTCCAATGC  
ATAACAAACACGAGAACAAACATGTTTCATCAGTCTGAGCAGCAACACAAA

>M6-PGSC0003DMG400041062M6LRR-RLP\_858

ATGCATAACAAACACGAGAACAAACATGTTTCATCAGTCTGAGCAGCAACACAAACACGAGAACAAACAT  
GTTTCATCAGTCTGAGCAGCAACACAAACATGAGAACCAACATGGTCATCAG

>M6-PGSC0003DMG400041062M6LRR-RLP\_921

AAACATGTTTCATCAGTCTGAGCAGCAACACAAACATGAGAACCAACATGGTCATCAGTCAGAGCAGCAA  
GAGGAAGAAATCACAAACGATATCCCCGACCCACCCACACCCCAATCCTGA

>M6-PGSC0003DMG400041071M6RLKmalectin\_1403

CAATAGAATATCTTCAGGAGAGCATCAGTGTGTCGTCATTCTCATTGGATGAGATGGAAAGATCAACGAA  
CAATTTTGATCCTCAGCTTGTGTCATTGGTAGCGGTGGATATGGCCCAGTATA

>M6-PGSC0003DMG400041071M6RLKmalectin\_1586

CCAGGGGGAGAAAGAGTTTTGGATGGAAATCAATATGTTATCTACGCACCGCCATGAGAACCTTCTCTC  
CCTAATTGGTTACTGCACTGAAGGTCATGAGATGCTATTAGTTTATGATTA

>M6-PGSC0003DMG400041071M6RLKmalectin\_1647

CTTCTCTCCCTAATTGGTTACTGCACTGAAGGTCATGAGATGCTATTAGTTTATGATTATATGCCTCGGGG  
ATCACTTGCTGACAACCTCTACAAAATGGACAGAAATGGCTCATCTCTC

>M6-PGSC0003DMG400041071M6RLKmalectin\_1830

TCTCAAATAGGGTGATACATCGTGATATCAAAGCTCAAATATTCTGCTGGATGAAAATGGGAAAGT  
AAGATTTAGATTTTGGGTTGTCCAAAATGGGGCCTGGAAATGAATCAGCT

>M6-PGSC0003DMG400041071M6RLKmalectin\_1952



TCATGTTAGTACACAAGTCAAAGGCACAATTGGGTACCTCGATCCTGAGTACTTCCAGACTAATAGATTG  
ACATGGAAAGCTGATGTGTATGCTTTTGATGTAGTACTATTTGAATTGCT

>M6-PGSC0003DMG400041071M6RLKmalectin\_2013

AATAGATTGACATGGAAAGCTGATGTGTATGCTTTTGATGTAGTACTATTTGAATTGCTCTCAGGAAGAC  
CTGCAGTCGATATGGGCCTGCCTGAGGAGCAGCATGGACTTGTAGCATGG

>M6-PGSC0003DMG400041071M6RLKmalectin\_2135

CAAGCAATGCATCAGGGAAGGAGAAGTTAATAAGCTTATTGACCTGAATCTGGCAGGGCCTATCTCATC  
AACTTGTTTGAAGGTGTTCTGATAGGAATTGCAGAAAAATGCTTGGATGATAA

>M6-PGSC0003DMG400041071M6RLKmalectin\_2196

ATCTCATCAACTTGTTTGAAGGTGTTCTGATAGGAATTGCAGAAAAATGCTTGGATGATAATCCACGTGAAC  
GGCCTCCAATGTCTAAAGTGGTGAAAAGTCTGGAATTAGCATTAGTATTT

>M6-PGSC0003DMG400041071M6RLKmalectin\_2257

CACGTGAACGGCCTCCAATGTCTAAAGTGGTGAAAAGTCTGGAATTAGCATTAGTATTTTCAGCAGAGTG  
CAGGTGAAGGCATCATTTTCATTTGATGACACATCAACATCTCTGTCAAAGG

>M6-PGSC0003DMG400041071M6RLKmalectin\_2318

GCAGAGTGCAGGTGAAGGCATCATTTTCATTTGATGACACATCAACATCTCTGTCAAAGGCTGAAGCAGA  
AAGGGCATCCATCAAAGAGGGTTGTAATGGCATTGATACAGCAAAAAGGAG

>M6-PGSC0003DMG400041071M6RLKmalectin\_2379

GAAGCAGAAAGGGCATCCATCAAAGAGGGTTGTAATGGCATTGATACAGCAAAAAGGAGTGTCATTTTC  
ACTGAGATGGTGGGATTTTTTTTGGTCTTTTTTCCAAAAACACCACCAAAGCCA

>M6-PGSC0003DMG400041071M6RLKmalectin\_2501

AGCTTTACCAACACCGCCACAAGTACTTTACCACTTCCCCCTCAATGAGATGCTAAAGGCTACAAAAGAT  
TTCAATGAGAGCCTGAAAATAGGTTTTCTAGGATCGGACAATGCATACGT

>M6-PGSC0003DMG400041071M6RLKmalectin\_2562

ACAAAAGATTTCAATGAGAGCCTGAAAATAGGTTTTCTAGGATCGGACAATGCATACGTTGGCTTCATA  
AATGGTCGACGTGTTGCCATCAGACGTTACACACTGCAGAGTCAAGACTT

>M6-PGSC0003DMG400041071M6RLKmalectin\_2684

CATGGTTAGTGAGTTGCAAGCTAAAAGAGAAATGAGTCCCTTGCCTAGCCACATCAACGTGGTGTCACT  
GATTGGGTTTTGCAGAAATGTTACAGAGATGATCCTTGTGTATGATTATGC

>M6-PGSC0003DMG400041071M6RLKmalectin\_2745

GTGTCACTGATTGGGTTTTGCAGAAATGTTACAGAGATGATCCTTGTGTATGATTATGCAGCTGGAGGG  
ACCTACATGATTATCTCCGTGACCCTGATAGGAATCCTCTCTCATGGAAG

>M6-PGSC0003DMG400041071M6RLKmalectin\_2806

CTGGAGGGACCCTACATGATTATCTCCGTGACCCTGATAGGAATCCTCTCTCATGGAAGAAGAGGCTTG  
AGATCTGCATTGGTGCTGCAGAGGGTTTGA ACTATCTTCGGTCCATACTGA

>M6-PGSC0003DMG400041071M6RLKmalectin\_2867

GAGGCTTGAGATCTGCATTGGTGCTGCAGAGGGTTTGA ACTATCTTCGGTCCATACTGAAGATAACAGT  
TCTCCATTGCATTTTCAACTCCTCCTATATTTTTTTGGATGAGAATTTGGT

>M6-PGSC0003DMG400041071M6RLKmalectin\_2928

ATAACAGTTCTCCATTGCATTTTCAACTCCTCCTATATTTTTTTGGATGAGAATTTGGTAGCCAAAGTTTCA  
GAAGTTAGCTGGTCAAAAACAAAAGGGATCAATACAGCGGGGGTAATT

>M6-PGSC0003DMG400041071M6RLKmalectin\_3050

TGAAGGGGGATATTTGGATTACAGACTACTTACGAGATAAAAGTGTGACAGAAAAATCATACGCATACTC  
ATTTGGCTTGGTGTTATTTGAGATGCTATGTGCCAATGAAGCATTGAAACA

>M6-PGSC0003DMG400041071M6RLKmalectin\_3111

GCATACTCATTGGCTTGGTGTTATTTGAGATGCTATGTGCCAATGAAGCATTGAAACATTGGCTGAATC  
AGGGACAGGTCAGTCTAGCCAAATGGATTA AACATGTTTTATGACTGTG

>M6-PGSC0003DMG400041071M6RLKmalectin\_3172

GGCTGAATCAGGGACAGGTCAGTCTAGCCAAATGGATTA AACATGTTTTATGACTGTGACGTCCCATT  
GATTCACCCATGCTTGGTTGGAAGAATATCACCTGACTGCTTTGAGCTGT

>M6-PGSC0003DMG400041071M6RLKmalectin\_3233

GTCCCATTGATTCACCCATGCTTGGTTGGAAGAATATCACCTGACTGCTTTGAGCTGTTTGTAGATACTG  
CAATTA ACTGCCTGCACGATGAGGGCAACAAACGTCCATCAATGAATGA

>M6-PGSC0003DMG400041071M6RLKmalectin\_3291

TTTGTAGATACTGCAATTA ACTGCCTGCACGATGAGGGCAACAAACGTCCATCAATGAATGATATAATCA  
CAAGTCTCAAGGAAGCACTCAAGCTGCAAGAGGCAGCTAATATTACATAG

>M6-PGSC0003DMG400041071M6RLKmalectin\_610

TTGTTGACGAAATTACAGATTCTACATTGACAACAGCACAGCACTGGAGACAATTCAGCGAATAAATGT

TGGCGGAAACTCTATTTTCATCCTTGAAGATGCAACCATGTTCCGGGAAT

>M6-PGSC0003DMG400041071M6RLKmalectin\_671

AATAAATGTTGGCGGAAACTCTATTTTCATCCTTGAAGATGCAACCATGTTCCGGGAATGGGAAGATGA  
CACTAATTACCTGATTCAAGTAGGAGCCTTTTCGATCAACAGAGCCATTGA

>M6-PGSC0003DMG400041071M6RLKmalectin\_854

AGTGGGTGCGCACTGCCATTTGAATTTCTGTAATCTCACATGGAACATTCCAATTGATTTGGGATTCAGA  
TACCTTGTTAGGCTTCACTTTTGTGAAATTGAACCTATGATCACATATGA

>M6-PGSC0003DMG400041336M6LRR-RLP\_0

ATGAAGGAAATTGACGATTCCGACGATGTTATCGATGTATTCGATGTCGGAGAGTTTGATTATTCTTCTA  
ATATTCCTGATGAGTGTTTAGCTTGCATTTTCCATTTCCCTTAGCTCAGGT

>M6-PGSC0003DMG400041336M6LRR-RLP\_1037

TTTGGAGAGATTAGCTCTGTGTGGAAGTGAAACTGTTGGGGATCCAGAACTATCGTGCATAGCTGCGAA  
ATGTATTGCATTAAGAAAACCTTTGTATAAAGAGTTGCCAGTATCCGATCA

>M6-PGSC0003DMG400041336M6LRR-RLP\_1098

GCTGCGAAATGTATTGCATTAAGAAAACCTTTGTATAAAGAGTTGCCAGTATCCGATCAGGGTATGGAA  
GCGCTTGCTAGTGGATGCCCAAATTTGGTAAAAGTAAAGGTTAAGAAATGT

>M6-PGSC0003DMG400041336M6LRR-RLP\_1159

GTATGGAAGCGCTTGCTAGTGGATGCCCAAATTTGGTAAAAGTAAAGGTTAAGAAATGTAGATTGGTG  
ACTTCTGGAAGTGCAGATTGGCTGCGGACAAGTGGGGTTCTGTTGCTGTGA

>M6-PGSC0003DMG400041336M6LRR-RLP\_122

CCGAAAAGTTCTTCCCTCGTCTGCCGCCGTTGGCTCCGTGTTGAAGGCCAGAGTCGTCACCGTCTCTCG  
CTTAATGCACAATCGGAACTTGTGCTGTGGTTCCTGTGATTTTTTCTAG

>M6-PGSC0003DMG400041336M6LRR-RLP\_1220

ATTGGTGAATTCTGGAAGTGCAGATTGGCTGCGGACAAGTGGGGTTCTGTTGCTGTGAACTTGGATAC  
ACCTGAACCTGAAAATCCTGATGCAAGTGCCAGTATGGAGGTGTGCCTGA

>M6-PGSC0003DMG400041336M6LRR-RLP\_1281

TTGGATACACCTGAACCTGAAAATCCTGATGCAAGTGCCAGTATGGAGGTGTGCCTGAATTTGGCAAT  
GAAATTAGACAGGTGGCTGGCCAAGTAAGAGGTGTAAGTATTGCATCAAGC

>M6-PGSC0003DMG400041336M6LRR-RLP\_1342

TTGGCAATGAAATTAGACAGGTGGCTGGCCAAGTAAGAGGTGTAAGTATTGCATCAAGCAGTACTGGG  
AGGTCAAATTCCTTTAAGGCCAGGCTAGGACTTACAACAGGAAGGAATCTGG

>M6-PGSC0003DMG400041336M6LRR-RLP\_1403

TACTGGGAGGTCAAATTCCTTTAAGGCCAGGCTAGGACTTACAACAGGAAGGAATCTGGTGGCTTGAC  
ATTCAGAAGGTGGTCGAGCTTTGGTGGGAGTCCAGTCCAGAAATAATTA

>M6-PGSC0003DMG400041336M6LRR-RLP\_1464

GCTTGCACATTCAGAAGGTGGTCGAGCTTTGGTGGGAGTCCAGTCCAGAAATAATTAGAAAAAAGG  
AGTTGACTGAGATGCTCAAACATTCTGCTATTGAAGTATTTGACTTTTAT

>M6-PGSC0003DMG400041336M6LRR-RLP\_1525

AAAAAAGGAGTTGACTGAGATGCTCAAACATTCTGCTATTGAAGTATTTGACTTTTATTACATTTATATA  
TTCTTGAATTTGCATGCTAGTTAATGCAACTACAGATTCAGCCTTCGTG

>M6-PGSC0003DMG400041336M6LRR-RLP\_1586

CATTTATATATTCTTGAATTTGCATGCTAGTTAATGCAACTACAGATTCAGCCTTCGTGGTTGGACCTTGT  
TCGTGAGTTTCCGTTCTTTTTGTTTTGCTTATGTACAATCCCAGTGAT

>M6-PGSC0003DMG400041336M6LRR-RLP\_1647

TGGACCTTGTTTCGTGAGTTTCCGTTCTTTTTGTTTTGCTTATGTACAATCCCAGTGATGCTATTTTTGGG  
TTGGTATGCTCCTTCAACGTGGAGTCTTATCACTTCTCCTGGGAGAG

>M6-PGSC0003DMG400041336M6LRR-RLP\_1708

TATTTTTGGGCTTGGTATGCTCCTTCAACGTGGAGTCTTATCACTTCTCCTGGGAGAGGACTCAACATGC  
TATCTTCTGAAAAAGAAAGAAAGGAGAAGGTTATAATCCAAGAAGTTGG

>M6-PGSC0003DMG400041336M6LRR-RLP\_1769

CTCAACATGCTATCTTCTGAAAAAGAAAGAAAGGAGAAGGTTATAATCCAAGAAGTTGGTGATTTTGG  
ATGTGTTTACCAGTTTATGTTTTGCTAAGTTTTTCTGTATATATTCTCCGT

>M6-PGSC0003DMG400041336M6LRR-RLP\_183

CGTCTCTCGCTTAATGCACAATCGGAACCTGTCGCTGTGGTTCCTGTGATTTTTTCTAGGTTTGATTCCGT  
AACGAAACTCGCTTTGAAATGTGACCGTAGATCTGCGAGTATTGGGGAC

>M6-PGSC0003DMG400041336M6LRR-RLP\_1830

ATTTTGAATGTGTTTACCAGTTTATGTTTTGCTAAGTTTTTCTGTATATATTCTCCGTACGAAAGATTCAA  
TATCGTTAACACATTCTTCTTGACGCATTAGGGGTTTGAATGGAGAAC

>M6-PGSC0003DMG400041336M6LRR-RLP\_1891

GAAAGATTCAATATCGTTAACACATTCTTCTTGACGCATTAGGGGTTTGAATGGAGAACTGAGAAGAAC  
CGAAGAACTAGAAAGTGTTTCATAAATCATACTATTGCTTTCTCTTATACAC

>M6-PGSC0003DMG400041336M6LRR-RLP\_1952

AGAAGAACCGAAGAACTAGAAAGTGTTTCATAAATCATACTATTGCTTTCTCTTATACACTAGGATATGCA  
CAATAAGCTAGTAGAAAGTCAAATTTTGATTCTAAGTTCTAATCGTCCG

>M6-PGSC0003DMG400041336M6LRR-RLP\_2013

GGATATGCACAATAAGCTAGTAGAAAGTCAAATTTTGATTCTAAGTTCTAATCGTCCGTTACCTTTCTCA  
AACACAAAAAAGTTCAGATTCTGATTTCATACCGCTACCTTTCTCAAACA

>M6-PGSC0003DMG400041336M6LRR-RLP\_2074

ACCTTTCTCAAACACAAAAAAGTTCAGATTCTGATTTCATACCGCTACCTTTCTCAAACAGAAAAAAGTCCA  
GATTTTGATTCACTCCCATGTTATTAATTACTGGATAGCATCATGGAAA

>M6-PGSC0003DMG400041336M6LRR-RLP\_2135

AAAAAGTCCAGATTTTGATTCACTCCCATGTTATTAATTACTGGATAGCATCATGGAAAGTCAAATTGATT  
TTGAGTTCAAAGAAGATGTTTCCAGCTAATTAGGGGAATCCACATTTCT

>M6-PGSC0003DMG400041336M6LRR-RLP\_2196

CAAATTGATTTTGAGTTCAAAGAAGATGTTTCCAGCTAATTAGGGGAATCCACATTTCTTCTTGAGTTCCG  
ATTAGGGGCCCTACCCTCCATTCTCTCAAGTACCTCTCTGCTTGCTTT

>M6-PGSC0003DMG400041336M6LRR-RLP\_2257

CTTGAGTTGATTAGGGGCCCTACCCTCCATTCTCTCAAGTACCTCTCTGCTTGCTTTGGGATCAACTTC  
ACTAACTTCTTTATAAAAATTTATGATACCTTTCTAAAAAAAATACC

>M6-PGSC0003DMG400041336M6LRR-RLP\_2318

GATCAACTTCACTAACTTCTTTATAAAAATTTATGATACCTTTCTAAAAAAAATACCTTTCATAAAGGTT  
CATTAGTCTTACAACCTGTTTGTCCACGGCTTTTACCAATTAACCTT

>M6-PGSC0003DMG400041336M6LRR-RLP\_2379

TCATAAAGGTTCAATTAGTCTTACAACCTGTTTGTCCACGGCTTTTACCAATTAACCTTGTACATTTTAT  
ATTAATCAGATGTGTTTGGGACGTGCCAGATCAGGAATCATTCTTG

>M6-PGSC0003DMG400041336M6LRR-RLP\_244

TTGATTCGGTAACGAACTCGCTTTGAAATGTGACCGTAGATCTGCGAGTATTGGGGACGAGGCGTTGG

TGCTTATATCTTTAAGGTGCCGGAACCTAACTCGTTTGAAGCTCCGGTCAT

>M6-PGSC0003DMG400041336M6LRR-RLP\_2440

TACATTTTTATATTAATCAGATGTGTTTGGGACGTGCCAGATCAGGAATCATTCTTGATTTTTGGTGA

ATGTGGGGGGAAGTTAGCAATAGTGTGATTCACCTGGTAAATGAAGAAC

>M6-PGSC0003DMG400041336M6LRR-RLP\_2501

TTTTTGGTGAATGTGGGGGGAAGTTAGCAATAGTGTGATTCACCTGGTAAATGAAGAACATTTGGTGAA

AAGTCAAAGCTGCACCCCTCATTGAAACAGGAAGTGTTC AAGGCCTTGAT

>M6-PGSC0003DMG400041336M6LRR-RLP\_2562

TTGGTGAAAAGTCAAAGCTGCACCCCTCATTGAAACAGGAAGTGTTC AAGGCCTTGATATGCTACAAT

AAATGTTTAAATGCCATATAAGTCTGATTGTCTGAATCTTTCTATATCATT

>M6-PGSC0003DMG400041336M6LRR-RLP\_2623

GCTACAATAAATGTTTAAATGCCATATAAGTCTGATTGTCTGAATCTTTCTATATCATTCTGTCAATGTGCT

TATCTGATTTGGTTATCAAAAAAGAATAGTGCTTATTTGACTTGTAT

>M6-PGSC0003DMG400041336M6LRR-RLP\_2684

GTCAATGTGCTTATCTGATTTGGTTATCAAAAAAGAATAGTGCTTATTTGACTTGTATGACATTTAGGA

AACATGTTGAGAACTAGAGCGTGGATTTGTTTATGCTGAGAGCTGGAGTA

>M6-PGSC0003DMG400041336M6LRR-RLP\_2745

CATTTAGGAAACATGTTGAGAACTAGAGCGTGGATTTGTTTATGCTGAGAGCTGGAGTATAAATTGACT

CTCTATTAGATCAAGAGATTGTTGAAGTCAAGGTATCGACCTCTAGATGTT

>M6-PGSC0003DMG400041336M6LRR-RLP\_2806

AATTGACTCTCTATTAGATCAAGAGATTGTTGAAGTCAAGGTATCGACCTCTAGATGTTGGGTTAATAAA

TAGTTACACCAAACCTTTCTGGTTCATTGGTGTGAGATGTGGATGTACTC

>M6-PGSC0003DMG400041336M6LRR-RLP\_2867

GTTAATAAATAGTTACACCAAACCTTTCTGGTTCATTGGTGTGAGATGTGGATGTACTCTCCTAGAAGCT

CTGCACTTCGCATAAGACACAACAACAGAGTTGTAAGTTAAATCTCTGGG

>M6-PGSC0003DMG400041336M6LRR-RLP\_2928

CTAGAAGCTCTGCACTTCGCATAAGACACAACAACAGAGTTGTAAGTTAAATCTCTGGGTTTGGGGCCA

CAAATTAGTATTTGTGTGATACCATGTTGACTTAATTGTTTCTGTTCTATT

>M6-PGSC0003DMG400041336M6LRR-RLP\_2989

TGGGGCCACAAATTAGTATTTGTGTGATACCATGTTGACTTAATTGTTTCTGTTCTATTTAAGAACTTTT  
GTTGACTTCTTGAATCAGAATATAATTATGTCAACCTTTGTCTTTCTA

>M6-PGSC0003DMG400041336M6LRR-RLP\_305

GGCGTTGGTGCTTATATCTTTAAGGTGCCGGAACCTAACTCGTTTGAAGCTCCGGTCATGCCGGGAGCTT  
ACTGATACTGGAATGGAATCTTTTGCGAAAAATTGTAAGGGTTTGAAGAA

>M6-PGSC0003DMG400041336M6LRR-RLP\_3050

AGAAACTTTTGTGACTTCTTGAATCAGAATATAATTATGTCAACCTTTGTCTTTCTAGTGTGGAGTCTT  
GAATAGGAATGGAGATCAAGGATGGTTATTGTAGTTATTTTTCGTACCA

>M6-PGSC0003DMG400041336M6LRR-RLP\_3111

GTGGAGTCTTGAATAGGAATGGAGATCAAGGATGGTTATTGTAGTTATTTTTCGTACCAGTTCCTCTTGC  
GTTGTCCTTGAAGGCCAAATTTTAGTCATACTCCCCTTGAGGCCATTGCC

>M6-PGSC0003DMG400041336M6LRR-RLP\_3172

TCCTCTTGC GTTGCCTTGAAGGCCAAATTTTAGTCATACTCCCCTTGAGGCCATTGCCTGCAGTTATTTA  
GCTACATCGAATAAATAAATCAGCTAACTTTATCAGAAAAAGATGACTG

>M6-PGSC0003DMG400041336M6LRR-RLP\_3233

CAGTTATTTAGCTACATCGAATAAATAAATCAGCTAACTTTATCAGAAAAAGATGACTGACCCTCATTTTA  
ATAGGGTAAACACAACCTTTATTTTTGCTCTTCTGCATGACTCTGAGGTC

>M6-PGSC0003DMG400041336M6LRR-RLP\_3294

CCTCATTTTAATAGGGTAAACACAACCTTTATTTTTGCTCTTCTGCATGACTCTGAGGTCTGAACTGCATGC  
CTGATTTATTGGTGTGCATGTCCAGCTTATGTCCTTTAGTTGGTTTTGTA

>M6-PGSC0003DMG400041336M6LRR-RLP\_3355

AACTGCATGCCTGATTTATTGGTGTGCATGTCCAGCTTATGTCCTTTAGTTGGTTTTGTATTAAGCCCTTCA  
GTTTACTTATGCTTTGTGTCACTTTTACTGAATATTTTCTTTGAAAATC

>M6-PGSC0003DMG400041336M6LRR-RLP\_3416

AAGCCCTCAGTTTACTTATGCTTTGTGTCACTTTTACTGAATATTTTCTTTGAAAATCATATGAAGGCAAT  
TGAAAAACCTTTGAAAAGTTGCATTGTCAGTGGTGAGTTGAATATTGT

>M6-PGSC0003DMG400041336M6LRR-RLP\_3477

ATGAAGGCAATTGAAAAACCTTTGAAAAGTTGCATTGTCAGTGGTGAGTTGAATATTGTGTTTGGAGAA  
TTGTATTCTTAGAGAGTAGGTATAACTATCAATACAAAGTTGCTCATTTAA

>M6-PGSC0003DMG400041336M6LRR-RLP\_3538

TTGGAGAATTGTATTCTTAGAGAGTAGGTATAACTATCAATACAAAGTTGCTCATTTAATTAGATGACGC  
CTGATGTTTGTGAACTGTATCTTGTTGTTTTCTTCATGCTTTGGTTAGTA

>M6-PGSC0003DMG400041336M6LRR-RLP\_3599

AGATGACGCCTGATGTTTGTGAACTGTATCTTGTTGTTTTCTTCATGCTTTGGTTAGTAGCAGGTATTGAA  
TTGTTGTCTTAAATTGTACGGTGTAAATTTGGATTCTTTACCATAGACA

>M6-PGSC0003DMG400041336M6LRR-RLP\_366

CGGGAGCTTACTGATACTGGAATGGAATCTTTTGCGAAAAATTGTAAGGGTTTGAAGAAGCTATCTTGT  
GGATCTTGTGCTTTTGGAGCTAAAGGGATGAACGCCGTGTTGAATAACTGC

>M6-PGSC0003DMG400041336M6LRR-RLP\_3660

AGGTATTGAATTGTTGTCTTAAATTGTACGGTGTAAATTTGGATTCTTTACCATAGACAGGCTATAACACT  
AATATTTGTTTCTTTGAGAATGAATCATCGAATTTTGTATCATCTTTT

>M6-PGSC0003DMG400041336M6LRR-RLP\_3721

CTATAACACTAATATTTGTTTCTTTGAGAATGAATCATCGAATTTTGTATCATCTTTTGTGGTGAGTTGG  
TCTAACAAAGCAAATCCTAGTTCATCATTCTATATGGATCCAGTGGACC

>M6-PGSC0003DMG400041336M6LRR-RLP\_3782

TGGTGAGTTGGTCTAACAAAGCAAATCCTAGTTCATCATTCTATATGGATCCAGTGGACCGAACAAAGCATG  
TCCTTTAGTTGATTTATGACTAACACAGTTAGAACTTCAGTTATGCTGCA

>M6-PGSC0003DMG400041336M6LRR-RLP\_3843

ACAAGCATGTCCTTTAGTTGATTTATGACTAACACAGTTAGAACTTCAGTTATGCTGCATGAACTGGTTAT  
TGTATACACAGTCAGGGTTGTGGCAACTACTGTAGAATTATCCTTTAG

>M6-PGSC0003DMG400041336M6LRR-RLP\_3904

AACTGGTTATTGTATACACAGTCAGGGTTGTGGCAACTACTGTAGAATTATCCTTTAGTTACTGAAGCA  
TAACAATTATATGTTTCTTTTTCTGAATGATGGGGTTGTGTAGATTTTG

>M6-PGSC0003DMG400041336M6LRR-RLP\_3965

ACTGAAGCATAACAATTATATGTTTCTTTTTCTGAATGATGGGGTTGTGTAGATTTTGTCTCCACCAA  
TCCCAAACAATTGACACTGGCTATACCTGTGAGTTGCCATGATTGATGT

>M6-PGSC0003DMG400041336M6LRR-RLP\_4026

CTCCACCAAATCCCAAACAATTGACACTGGCTATACCTGTGAGTTGCCATGATTGATGTTTTATGACTTGG



AAAACTCACTCTTATCAGACACTGGGTTTAATTTTTGATTTGGTAGTAA

>M6-PGSC0003DMG400041336M6LRR-RLP\_4087

TATGACTTGGAAAACACTCACTCTTATCAGACACTGGGTTTAATTTTTGATTTGGTAGTAAAAACACATACTG  
CTCATTTCCGGTGTGTTGTTTTGGAAGGATTCTTTTGCTTCTTTTCTGTC

>M6-PGSC0003DMG400041336M6LRR-RLP\_4148

ACACATACTGCTCATTTCCGGTGTGTTGTTTTGGAAGGATTCTTTTGCTTCTTTTCTGTCTTGCTTGATGTAG  
TGATAATATTGTTGTTTTGAGAATTTTCTGTCTTGTACCGGTGATCA

>M6-PGSC0003DMG400041336M6LRR-RLP\_4209

GCTTGATGTAGTGATAATATTGTTGTTTTGAGAATTTTCTGTCTTGTACCGGTGATCAAAAATTTCTTCAG  
TAGTTGTCGATCTTTTTTGTTGTAATTCTTGTCTTTCTGGCTATGCATAC

>M6-PGSC0003DMG400041336M6LRR-RLP\_427

TATCTTGTGGATCTTGTGCTTTTGGAGCTAAAGGGATGAACGCCGTGTTGAATAACTGCTCGGCTCTGGA  
AGAGTTGTCCGTGAAACGGCTGCGTGGTATCACAGATGGGGCTGCAGCTG

>M6-PGSC0003DMG400041336M6LRR-RLP\_4270

ATTTCTTCAGTAGTTGTCGATCTTTTTTGTTGTAATTCTTGTCTTTCTGGCTATGCATACTTCATCTGGTAAG  
TGGTGTTATGGTGATTGGTTTGTAAGCTTTTGCTTGCTTGATAATGAT

>M6-PGSC0003DMG400041336M6LRR-RLP\_4331

CATCTGGTAAGTGGTGTATGGTGATTGGTTTGTAAGCTTTTGCTTGCTTGATAATGATTTTCTTTATGTT  
TAAAGATGTCTCGATTCAAGCTTTGAAACTGACAAAAGCTATGCTTCCG

>M6-PGSC0003DMG400041336M6LRR-RLP\_4392

TCTTTATGTTTAAAGATGTCTCGATTCAAGCTTTGAAACTGACAAAAGCTATGCTTCCGCGACGTCTGCA  
GGTTGTTTTGGCTTCATGTGATGGTACTGATGAGTGTTTGCTTTGTTT

>M6-PGSC0003DMG400041336M6LRR-RLP\_4453

ACGTCTGCAGGTTGTTTTGGCTTCATGTGATGGTACTGATGAGTGTTTGCTTTGTTTGTCAAACCTTTC  
CGTATACTGAAATATTGTCAATCAAATTATGTGCGATTAGTATTGGAT

>M6-PGSC0003DMG400041336M6LRR-RLP\_4514

CAAACCTTCCGTATACTGAAATATTGTCAATCAAATTATGTGCGATTAGTATTGGATCTGTTGACAATA  
TTTTTGCTTGAACCTGCATCCATTGAGTGTATCAATCTAAAATGTAACG

>M6-PGSC0003DMG400041336M6LRR-RLP\_4575

GTTGACAATATTTTTGCCTTGAAGTGCATCCATTGAGTGTATCAATCTAAAATGTAACGCTAGACGCTCAT  
AGAACTTAAAGAGTCTGAACCAAGGGATACAGTTCGTCTTGCTGATCTG

>M6-PGSC0003DMG400041336M6LRR-RLP\_4880

CTTAAGTTGGCATGAATACCACTGTAAGTATAATATCCATATTTTATAACCTTCATATGTACACTATGGG  
TGCCATTACTCCTTTAACAACTATTTCTATTACTATGAACACCA

>M6-PGSC0003DMG400041336M6LRR-RLP\_4941

ACACTATGGGTGCCATTACTCCTTTAACAACTATTTCTATTACTATGAACACCATATTTGAATTGG  
ATTTCCGATCCATTGATTAGTAGCACTTTTCGATCGATTCAACCTTAGA

>M6-PGSC0003DMG400041336M6LRR-RLP\_5002

TTTGAATTGGATTTCCGATCCATTGATTAGTAGCACTTTTCGATCGATTCAACCTTAGAAGAATCCCTGTT  
ACATAAATTTGATAATCATACTCATTTCTCTATGATTTCAAACCGGTA

>M6-PGSC0003DMG400041336M6LRR-RLP\_5063

AATCCCTGTACATAAATTTGATAATCATACTCATTTCTCTATGATTTCAAACCGGTAGATTGTTCTTCTG  
CTGATTTTGTGGCACTGGGTTCCAACATCACCTGGACAAATAGATAA

>M6-PGSC0003DMG400041336M6LRR-RLP\_5124

TTGTTCTTCTGCTGATTTTGTGGCACTGGGTTCCAACATCACCTGGACAAATAGATAAATTTGGTTGCGG  
TGTATTTCTTCAACATTTGGTTCTTCTTAGGCATTTTCAACACAGGTTT

>M6-PGSC0003DMG400041336M6LRR-RLP\_5185

TTGGTTGCGGTGTATTTCTTCAACATTTGGTTCTTCTTAGGCATTTTCAACACAGGTTCTATGCATAGTGA  
GGGATCGAGAATGAAGTAGGAGGTTTGTCTTGTGGTCTAGCTCGACTT

>M6-PGSC0003DMG400041336M6LRR-RLP\_5246

TGCATAGTGAGGGATCGAGAATGAAGTAGGAGGTTTGTCTTGTGGTCTAGCTCGACTTGTAGAATTCC  
TCATTCAATCAGCTCAAGACCTTCAAGTTTCTCCGATCGTCAAATACTCAG

>M6-PGSC0003DMG400041336M6LRR-RLP\_5307

AGAATTCCTCATTCAATCAGCTCAAGACCTTCAAGTTTCTCCGATCGTCAAATACTCAGCACTGTCAATTT  
TCGCCATCGATTCTACCCAGCTCTTACCGGGGAAGATACTAAGGATGC

>M6-PGSC0003DMG400041336M6LRR-RLP\_5368

CTGTCAATTTTCGCCATCGATTCTACCCAGCTCTTACCGGGGAAGATACTAAGGATGCTAAGAGCTGGC  
TCTTACGGCCTCTGAGTGAAAGCAATTTGCAGCTATTTTCGCTTGTGGCA

>M6-PGSC0003DMG400041336M6LRR-RLP\_5429

AGAGCTGGCTCTTACGGCCTCTGAGTGAAAGCAATTTGCAGCTATTTTCGCTTGTGCAATATGGATCTC  
AAGCAAATAACACGATTCTCCTTCTCTAAGTGTTAAATCCTTCAAGTCTC

>M6-PGSC0003DMG400041336M6LRR-RLP\_549

CCCATTGGTCCTGGTGTGTCAGGGGGTTCTCTGAGAGTTATTTGCCTTAAGGAACTCTACAATGGTCAGT  
GTTTTGGACCGTTGATTATTGGATCGAAGAGTTTGCGGACGCTGAAGCTT

>M6-PGSC0003DMG400041336M6LRR-RLP\_5490

ATGGATCTCAAGCAAATAACACGATTCTCCTTCTCTAAGTGTTAAATCCTTCAAGTCTCTGGCTGACATCA  
CCATTAAAGAGCAGCATTTTACAACAAAGGATTTTCTGGAAGCTGAGCT

>M6-PGSC0003DMG400041336M6LRR-RLP\_5551

GCTGACATCACCATTAAAGAGCAGCATTTTACAACAAAGGATTTTCTGGAAGCTGAGCTAGTGTTAATTC  
AGGTATTGAAATTTGAGATTGGCATGTTAAGCATTCCCTTCCGATTCTTC

>M6-PGSC0003DMG400041336M6LRR-RLP\_5612

TGTTAATTCAGGTATTGAAATTTGAGATTGGCATGTTAAGCATTCCCTTCCGATTCTTCGAAGATCTACTT  
TCGAAGTTCAGTGAAGTTGCTAGAGTTGGAAGCAATTAAGCTTGGAAG

>M6-PGSC0003DMG400041336M6LRR-RLP\_5673

AGATCTACTTTTGAAGTTCAGTGAAGTTGCTAGAGTTGGAAGCAATTAAGCTTGGAAGCTTGCATGGA  
TATCATGGACCTGATATATGAAAAGGGGGATATTTTCATCTTTCAATTGTTC

>M6-PGSC0003DMG400041336M6LRR-RLP\_5734

TGCATGGATATCATGGACCTGATATATGAAAAGGGGGATATTTTCATCTTTCAATTGTTCTTCTCATCATCT  
AGCCGCATCGATTGTTGTTGCTGCATATGCAATCACAGTTCCATTGCAA

>M6-PGSC0003DMG400041336M6LRR-RLP\_5795

CTCATCATCTAGCCGCATCGATTGTTGTTGCTGCATATGCAATCACAGTTCCATTGCAAAAAGAGTGAATTC  
CCCATTCTTGTATGGGTAAAGTTTGTCACTTCGTGCAGAGAGGAGGATA

>M6-PGSC0003DMG400041336M6LRR-RLP\_5842

GTTCCATTGCAAAAAGAGTGAATTCCTTCTTGTATGGGTAAAGTTTGTCACTTCGTGCAGAGAGGAGG  
ATATTGTAGACACTGTCAAAAATATTCTAATGCATGTGTTGAAGCTTGA

>M6-PGSC0003DMG400041336M6LRR-RLP\_61

ATTCTTCTAATATTCCTGATGAGTGTTTAGCTTGCATTTTCCATTTCTTAGCTCAGGTGACCGGAAAAGT

TCTTCCCTCGTCTGCCGCCGTTGGCTCCGTGTTGAAGGCCAGAGTCGTC

>M6-PGSC0003DMG400041336M6LRR-RLP\_610

ATGGTCAGTGTTTTGGACCGTTGATTATTGGATCGAAGAGTTTGCGGACGCTGAAGCTTTTCCGTTGTTCC

TGGAGATTGGGATAAGATTCTGGAAGTGATTGCTGAACAAGTCAGTGAAC

>M6-PGSC0003DMG400041336M6LRR-RLP\_671

CCGTTGTTCTGGAGATTGGGATAAGATTCTGGAAGTGATTGCTGAACAAGTCAGTGAAGTTGTTGAAAT

TCATCTTGAGAGGCTTCAGGTCAGTGATACTGGTCTTGCTGCTATATCTAA

>M6-PGSC0003DMG400041336M6LRR-RLP\_732

GTTGAAATTCATCTTGAGAGGCTTCAGGTCAGTGATACTGGTCTTGCTGCTATATCTAAATGTTCCATTCT

TGAAATTCTGCACCTTGTGAAAACGCCTGAATGCACTAATAATGGTCTA

>M6-PGSC0003DMG400041336M6LRR-RLP\_793

GTTCCATTCTTGAAATTCTGCACCTTGTGAAAACGCCTGAATGCACTAATAATGGTCTAAAGACTGTTGCT

GAAAACGTAAAGCTTCTAAGGAAGCTCCACATTGATGGGTGGAAGACTA

>M6-PGSC0003DMG400041336M6LRR-RLP\_854

GACTGTTGCTGAAAACGTAAAGCTTCTAAGGAAGCTCCACATTGATGGGTGGAAGACTAACAGGATAAG

TGATGATGGGTAAATTGCTGTGGCAAACATTGCCCTAATTTACAAGAATT

>M6-PGSC0003DMG400041336M6LRR-RLP\_915

AGGATAAGTGATGATGGGTAAATTGCTGTGGCAAACATTGCCCTAATTTACAAGAATTGGTTTTAATAG

GTGTGAATCCAACATGTGCTAGTTTGGAGAAGTTGGCTACGAATTGCTTG

>M6-PGSC0003DMG400041336M6LRR-RLP\_976

TTTTAATAGGTGTGAATCCAACATGTGCTAGTTTGGAGAAGTTGGCTACGAATTGCTTGAATTTGGAGA

GATTAGCTCTGTGTGGAAGTGAAACTGTTGGGGATCCAGAACTATCGTGCA

>M6-PGSC0003DMG400041974M6RLKantifungi(GNK)\_0

ATGCCTTCCAATGTATGTTCCATACCTCTCTTCATTGCCTTCTTTCTGATTCCATTTGTGAATTCAGTGTCCCT

TTCAAATATCTCGATTTGGACCGGACGTGACTGACATACTCTATGAA

>M6-PGSC0003DMG400041974M6RLKantifungi(GNK)\_1008

CGAAAATTAGGCGAAGGAGGATTTGGAGAAGTTTACAAAGGGTATCTCATCGATCTTGACATAGCGGTT

GCTGTAAAGAAGATCTCGAGAGGGTCTAAGCAGGGGAAGAAGGAATACATA

>M6-PGSC0003DMG400041974M6RLKantifungi(GNK)\_1071

GCGGTTGCTGTAAAGAAGATCTCGAGAGGGTCTAAGCAGGGGAAGAAGGAATACATAACCGAGGTGA  
AGGTTATTAGTCGATTAAGGCATAGAAATCTTGTGCAACTAATCGGTTGGTGT

>M6-PGSC0003DMG400041974M6RLKantifungi(GNK)\_1134

GTGAAGGTTATTAGTCGATTAAGGCATAGAAATCTTGTGCAACTAATCGGTTGGTGTGCATGATCAAGGT  
GAGTTCTTACTTGTTTACGAATTCATGCCAAATGGTAGCTTAGATTTTCAT

>M6-PGSC0003DMG400041974M6RLKantifungi(GNK)\_1197

CAAGGTGAGTTCTTACTTGTTTACGAATTCATGCCAAATGGTAGCTTAGATTTTCATTTGTTTGGTAAAAA  
GAATCCTCTTAGTTGGACTATGAGGTACAAGATTTCACTTGGTTTAGCA

>M6-PGSC0003DMG400041974M6RLKantifungi(GNK)\_126

GCAGTCGCGTCTGTAGGAGAGATCGAGTTTAAACAAAGCGAACTATCTATGTCGCGTTGCTCATGCCATCT  
ATAGAGAGAAAGTTCCACTTTGGGATCCTGATCATGACTCCACAAAGCTA

>M6-PGSC0003DMG400041974M6RLKantifungi(GNK)\_1260

GGTAAAAAGAATCCTCTTAGTTGGACTATGAGGTACAAGATTTCACTTGGTTTAGCATCCGCGTTGCTCT  
ATCTACACGAAGAATGGGAACAGTGTGTGATCCACAGAGACATAAAATCA

>M6-PGSC0003DMG400041974M6RLKantifungi(GNK)\_1323

TTGCTCTATCTACACGAAGAATGGGAACAGTGTGTGATCCACAGAGACATAAAATCAAGCAACATAATG  
CTAGATTCAAGTTTTAATGTCAAGCTTGGTGATTTTGGCCTAGCTAGACTA

>M6-PGSC0003DMG400041974M6RLKantifungi(GNK)\_1386

ATAATGCTAGATTCAAGTTTTAATGTCAAGCTTGGTGATTTTGGCCTAGCTAGACTAATGGACCATGAAT  
TAGGTCCTCAGACTACAGGACTAGCTGGAACCTTTAGGTTATTTGGCTCCG

>M6-PGSC0003DMG400041974M6RLKantifungi(GNK)\_1449

CATGAATTAGGTCCTCAGACTACAGGACTAGCTGGAACCTTTAGGTTATTTGGCTCCGGAATACATAAAAA  
CAGGACGAGCAAGCAAAGAGTCGGATGTATACAGCTTCGGAATAGTTGCA

>M6-PGSC0003DMG400041974M6RLKantifungi(GNK)\_1512

ATAAAAACAGGACGAGCAAGCAAAGAGTCGGATGTATACAGCTTCGGAATAGTTGCATTAGAAATTGC  
AACAGGAAGAAAATCAGTTGATCCAGGGACAGGGAAATGTGATGCAGGATTA

>M6-PGSC0003DMG400041974M6RLKantifungi(GNK)\_1575

ATTGCAACAGGAAGAAAATCAGTTGATCCAGGGACAGGGAAATGTGATGCAGGATTAGTAGAGTATGT  
TTGGGATTTTTATGAAAAAGGAAAACCTTTCTTCTGTTGTTGATGAGAAATTA

>M6-PGSC0003DMG400041974M6RLKantifungi(GNK)\_1638

TATGTTTGGGATTTTTATGAAAAGGAAAACCTCTTCTGTTGTTGATGAGAAATTAACATGGATTTCCG  
AACAGAACAAGTAGAACGATTGATGATTATCGCGTTGTGGTGTGCTCAT

>M6-PGSC0003DMG400041974M6RLKantifungi(GNK)\_1701

GATTTGGAACAAGAACAAGTAGAACGATTGATGATTATCGCGTTGTGGTGTGCTCATCCAGAGAGCAAT  
CTAAGGCCATCGATAAAACAAGCAATTCATGTTCTGAATTTGAGGCCATCG

>M6-PGSC0003DMG400041974M6RLKantifungi(GNK)\_1764

AGCAATCTAAGGCCATCGATAAAACAAGCAATTCATGTTCTGAATTTGAGGCCATCGTTGCCTAATCTTC  
CAATGAAGATGCCTGTTCTGTGTACTATTACCTAGGCCATGTGGTGAA

>M6-PGSC0003DMG400041974M6RLKantifungi(GNK)\_1824

CCTAATCTTCCAATGAAGATGCCTGTTCTGTGTACTATTACCTAGGCCATGTGGTGAACCAACAGTTA  
GCTCCGAGGAGCCTACGATGACTTACACAAGCATCGATGTGGGTCGATAA

>M6-PGSC0003DMG400041974M6RLKantifungi(GNK)\_189

GCCATCTATAGAGAGAAAGTTCCACTTTGGGATCCTGATCATGACTCCACAAAGCTAGCTGATTTCTCCA  
CACGTTTTTCGTTCACTATAGATACTCAAATCGTTCTCATATGGTCAT

>M6-PGSC0003DMG400041974M6RLKantifungi(GNK)\_252

TTCTCCACACGTTTTTCGTTCACTATAGATACTCAAATCGTTCTCATATGGTCATGGTATTGCGTTTTTC  
CTAGCTCCAGTTGGTTTTCGAATTCCACCTAACTCAGATGGTGGTTTT

>M6-PGSC0003DMG400041974M6RLKantifungi(GNK)\_315

GCGTTTTTCCTAGCTCCAGTTGGTTTTCGAATTCCACCTAACTCAGATGGTGGTTTTCTGGACTGTTCAA  
TACAACCACTAGTGATTCAGCTCAAAGCCAAATTGTTTCTGTTGAGTTT

>M6-PGSC0003DMG400041974M6RLKantifungi(GNK)\_378

CTGTTCAATACAACCACTAGTGATTCAGCTCAAAGCCAAATTGTTTCTGTTGAGTTTGACTCATTTTCCAA  
CGTCGAATGGGATCCTCCATTCGAGCACGTTGGTATCAATAACAATTCA

>M6-PGSC0003DMG400041974M6RLKantifungi(GNK)\_441

TTTTCCAACGTCGAATGGGATCCTCCATTCGAGCACGTTGGTATCAATAACAATTCAATTGCTTCATCTGT  
AACAGCTCCTTGAATGTTAGTTTACATAGTGGTATCCTATTGAGACA

>M6-PGSC0003DMG400041974M6RLKantifungi(GNK)\_504

TCATCTGTAACAGCTCCTTGAATGTTAGTTTACATAGTGGTATCCTATTGAGACATGGATTACTTACAA

TGCTACAACAAATAATCTTAGTGTCATTTGGAACACTATGGAACAGGCCCG

>M6-PGSC0003DMG400041974M6RLKantifungi(GNK)\_567

ACTTACAATGCTACAACAAATAATCTTAGTGTCATTTGGAACACTATGGAACAGGCCCGAATTCGAGCATGT

TTACATAATAAACCTCAGAGATGTTCTGCCTCCATGGGTCACAATCGGA

>M6-PGSC0003DMG400041974M6RLKantifungi(GNK)\_63

TCAGTGTCTTTCAAATATCTCGATTTGGACCGGACGTGACTGACATACTCTATGAAGGAGATGCAGTCG

CGTCTGTAGGAGAGATCGAGTTTAAACAAAGCGAACTATCTATGTGCGGTT

>M6-PGSC0003DMG400041974M6RLKantifungi(GNK)\_630

AGCATGTTTTACATAATAAACCTCAGAGATGTTCTGCCTCCATGGGTCACAATCGGATTCTCTGCTGCAA

CAGGACAAAATGTGCGAGAGACATACACTTGAATCGTGGGAATTCAGCTCG

>M6-PGSC0003DMG400041974M6RLKantifungi(GNK)\_693

GCTGCAACAGGACAAAATGTGCGAGAGACATACACTTGAATCGTGGGAATTCAGCTCGAGTCTTGATATA

ACAGAGTTAGGTGGAAATGATCGCGAAAAGATTGGACTGATTGCAGGGCTA

>M6-PGSC0003DMG400041974M6RLKantifungi(GNK)\_756

GATATAACAGAGTTAGGTGGAAATGATCGCGAAAAGATTGGACTGATTGCAGGGCTAACAAACATTAGG

TGGGATTTTGTGTTGTGATCGCGATTTTGGCTTTGGTAGTTTTGAGAAAATGT

>M6-PGSC0003DMG400041974M6RLKantifungi(GNK)\_819

TTAGGTGGGATTTTGTGTTGTGATCGCGATTTTGGCTTTGGTAGTTTTGAGAAAATGTAGACGAAAGGTG

AAGGGAAATCCAGAGACAATAAGCTTAACATCATTCAATGATGATCTTGAA

>M6-PGSC0003DMG400041974M6RLKantifungi(GNK)\_882

AAGGTGAAGGGAAATCCAGAGACAATAAGCTTAACATCATTCAATGATGATCTTGAAAAAGGGGCAGG

GCCAAGAAAGTTTTCGTACAAAGAGTTAGATACTTCAACTAATCATTCTCA

>M6-PGSC0003DMG400041974M6RLKantifungi(GNK)\_945

GCAGGGCCAAGAAAGTTTTCGTACAAAGAGTTAGATACTTCAACTAATCATTCTCAGAGGAACGAAAA

TTAGGCGAAGGAGGATTTGGAGAAGTTTACAAAGGGTATCTCATCGATCTT

>M6-PGSC0003DMG400042176M6LRR-RLP\_0

ATGGATCTTGGTTACAATAATTTAGCGGAGAGATTCCAATGTGGTTCGGTTTCAATTCTGGTTTTATTTT

AAAGTTAGAACTCTGAGTGTGAGAAACAATCTCCTTCAAGGCAGTATC

>M6-PGSC0003DMG400042176M6LRR-RLP\_120

CCCAAGGAGATTGGGAACCTTGAGAATCTTAAGGACTTGATTTTAGAATAAAATCAACTTACTGGCTCTA  
TTCTACTCTCCGTTTCCAACATTTCTCTATGGAACTTTAGGTCTCTCG

>M6-PGSC0003DMG400042176M6LRR-RLP\_180

ACTGGCTCTATTCTACTCTCCGTTTCCAACATTTCTCTATGGAACTTTAGGTCTCTCGGGTAATCAATTA  
ACAGGGAGTCTTCTGTAGATATATGCCGCCGTCTTGGAAGAATAAAG

>M6-PGSC0003DMG400042176M6LRR-RLP\_240

GGTAATCAATTAACAGGGAGTCTTCTGTAGATATATGCCGCCGTCTTGGAAGAATAAAGAGAATATCA  
TTAGTTTCAAACATTTGAGTGGTTACATTCCATCAGGTTTGTCTAACTGC

>M6-PGSC0003DMG400042176M6LRR-RLP\_300

AGAATATCATTAGTTTCAAACATTTGAGTGGTTACATTCCATCAGGTTTGTCTAACTGCACAGAATTGTC  
CGAATTGTCATTGGCGTACAATAACTTCAGTGGAAACATTCCGCCAGAA

>M6-PGSC0003DMG400042176M6LRR-RLP\_358

GCACAGAATTGTCCGAATTGTCATTGGCGTACAATAACTTCAGTGGAAACATTCCGCCAGAAATTGTCAA  
CTTGGAGAGGCTTGAGCTTTTAAGCCTCGGGGGAAACAACCTTGCAAGGTA

>M6-PGSC0003DMG400042176M6LRR-RLP\_60

GGTTTTATTTCAAAGTTAGAACTCTGAGTGTGAGAAACAATCTCCTTCAAGGCAGTATCCCCAAGGAGA  
TTGGGAACCTTGAGAATCTTAAGGACTTGATTTTAGAATAAAATCAACTT

>M6-PGSC0003DMG400042190M6LRR-RLP\_180

ATGATGAACCTTCAGTTTGTCTGGGAATAGAGTCAGCGGCAACATTCCAAAGGAGATCAGTAATCTGAGC  
CAACTTGCAGACTTGACTTGACTGATAATCAATTAACAGGTTCCATTCCC

>M6-PGSC0003DMG400042190M6LRR-RLP\_240

AATCTGAGCCAACCTTGCAGACTTGACTTGACTGATAATCAATTAACAGGTTCCATTCCCGCAGCACTGTT  
TAATATCTCGTCACTACTTTCCATACATCTGCGATACAATACACTTTCT

>M6-PGSC0003DMG400042190M6LRR-RLP\_300

GCAGCACTGTTTAATATCTCGTCACTACTTTCCATACATCTGCGATACAATACACTTTCTGGTCTCTTTTG  
CTTGATCAAGGGAATAATATTGTGTCAAATCTGAAGTTTTTAAGTATA

>M6-PGSC0003DMG400042190M6LRR-RLP\_360

GGTCTCTTTTGCTTGATCAAGGGAATAATATTGTGTCAAATCTGAAGTTTTTAAGTATATCTAACAACCA  
AATTTCTGGTTGCATTCTTCCAACATATGCCAACTCAAAGAGCTCAA



>M6-PGSC0003DMG400042190M6LRR-RLP\_420

TCTAACAAACCAATTTCTGGTTGCATTCTTCCAACATATGCCAACTCAAAGAGCTCAAATGGTTGTCTTT  
ATCTTTCAACAACATAACCGGAGACATTCCCAGAAATATTGATTGTTTA

>M6-PGSC0003DMG400042190M6LRR-RLP\_480

TGGTTGTCTTTATCTTTCAACAACATAACCGGAGACATTCCCAGAAATATTGATTGTTTATCTAAGCTTGA  
GGGGTTCTCTATTGGCGATAATCCAATAAAAGGGACTATTCCCCTTCA

>M6-PGSC0003DMG400042190M6LRR-RLP\_539

ATCTAAGCTTGAGGGGTTCTCTATTGGCGATAATCCAATAAAAGGGACTATTCCCCTTCATTGGGAAAT  
ATTTCCACTCTGCATATTCTTCATATTAGTAACAATCACATAGTGGGGCA

>M6-PGSC0003DMG400042486M6LRR-RLP\_0

ATGGCAAAAAGAGAAGACAGAACATCAGAATTGCATGTGCATATTATTCATCACATCTTATGCCGCACCA  
ACCTCGAAGTGAAAGAGGCGGCAGCAACTTATATGTTGTCCAAGAGATGG

>M6-PGSC0003DMG400042486M6LRR-RLP\_122

CTATTGCTGGACTTCAAGACCTAATTTGATACTCCATCAATTTCAAGGCAACACATATATGCCCTGGAAA  
AGTTTGTCAAGTTGTTGATCAATCCCTACGATTCCATGTTGAACACAA

>M6-PGSC0003DMG400042486M6LRR-RLP\_183

CCCCTGGAAAAGTTTGTCAAGTTGGTTGATCAATCCCTACGATTCCATGTTGAACACAACCTTACATCTAG  
AGAAATTAACCTTACATATAGTGATCGAGATTTGGATTCTAAAGTGGAT

>M6-PGSC0003DMG400042486M6LRR-RLP\_244

TACATCTAGAGAAATTAACCTTACATATAGTGATCGAGATTTGGATTCTAAAGTGGATCATTGGATTGA  
ACTGGGGGTAACTTAACGTCACCGTGCTGGTGATTTACCCTTCCTTTT

>M6-PGSC0003DMG400042486M6LRR-RLP\_305

TTGGATTGAACTGGGGGTAACTTAACGTCACCGTGCTGGTGATTTACCCTTCCTTTTAAAGTAAATCAT  
ACAGCTTACCTAATGTTATTTATGATGCTAAAAAGCTGAAAACATTGTC

>M6-PGSC0003DMG400042486M6LRR-RLP\_366

AGTAAATCATACAGCTTACCTAATGTTATTTATGATGCTAAAAAGCTGAAAACATTGTCGTTAAGTAGGT  
GCAAGTTTGAATTTGATATTAGCACCCTCACATAAGATTTTGTGTCTT

>M6-PGSC0003DMG400042486M6LRR-RLP\_427

TAAGTAGGTGCAAGTTTGAATTTGATATTAGCACCCTCACATAAGATTTTGTGTCTTGAGGATCTTTAT

TTGTATTATGTTTCATATTTCTGATGCTCAATTGCAAAGAGTTATCGATA

>M6-PGSC0003DMG400042486M6LRR-RLP\_488

GGATCTTTATTTGTATTATGTTTCATATTTCTGATGCTCAATTGCAAAGAGTTATCGATAGATGCCCGTTCA

TCAAGACTCTAGATCTAGTCTCTTGCCAGGGAATAAGCAAATTGCATGT

>M6-PGSC0003DMG400042486M6LRR-RLP\_549

TGCCCGTTCATCAAGACTCTAGATCTAGTCTCTTGCCAGGGAATAAGCAAATTGCATGTTTTTGGCCTAG

TTTATCTCAAGAATTTGACAGTAGTATTGTGCAAACCTTAATAGAGTGATA

>M6-PGSC0003DMG400042486M6LRR-RLP\_61

GCCGCACCAACCTCGAAGTGAAAGAGGCGGCAGCAACTTATATGTTGTCCAAGAGATGGTACTATTGCT

GGACTTCAAGACCTAATTTGATACTCCATCAATTTCAAGGCAACACATATA

>M6-PGSC0003DMG400042486M6LRR-RLP\_610

TTGGCCTAGTTTATCTCAAGAATTTGACAGTAGTATTGTGCAAACCTTAATAGAGTGATAGTCCAGGTCCA

AAATCTTCAATTCTTTAGATATGTAGAAGTTCCTGATCATCCTTGCGAAA

>M6-PGSC0003DMG400042486M6LRR-RLP\_671

CCAGGTCCAAAATCTTCAATTCTTTAGATATGTAGAAGTTCCTGATCATCCTTGCGAAATTGCTATTTTGG

ATGGTTACAATACTTTACAAACTCAAGCTCACTGGTGCCAGTATCAC

>M6-PGSC0003DMG400042486M6LRR-RLP\_732

GCTATTTTGGATGGTTACAATACTTTACAAACTCAAGCTCACTGGTGCCAGTATCACAGACCAACAGT

TTCGAGATGTTCCCAAACATTTAGAATTGGATCTAACATTATGCTTTAA

>M6-PGSC0003DMG400042529-(rev)M6LRR-RLP\_0

ATGGGGACTGCTGACATGTTGCCTGTATGCCTCATTCGCAAATACTCTGTTATCTTAGTTATCGAGAAG

CATCCCGGATGAGAATTCTCTCCAAAACATGGCTACTAGCCTGGTTGGAT

>M6-PGSC0003DMG400042529-(rev)M6LRR-RLP\_1024

GGTTTTGTCAGCTGAGGCAATCTCTATCAGATTCGATCTCTTGGTCTCAAGTTACCATTTATTTTCACAAA

TACGAGGAGATCAACATGAATGATTTGCAGCTGCACTGTAGAGATGCTA

>M6-PGSC0003DMG400042529-(rev)M6LRR-RLP\_1088

TCACAAATACGAGGAGATCAACATGAATGATTTGCAGCTGCACTGTAGAGATGCTATCCCCAAAGTGGA

CGTTTTAGATGTAAATTTTTAAGGCCTACTGGAGAGTGCTCGACGTTTGT

>M6-PGSC0003DMG400042529-(rev)M6LRR-RLP\_1152

GTGGACGTTTTAGATGTAAATTTTTTAAGGCCTACTGGAGAGTGCTCGACGTTTGTGGATGCCTTGCTGT  
GGAGTTGTCGTCCAAGGAAACTCAACCTACAATCAACAAGTGACATGTTT

>M6-PGSC0003DMG400042529-(rev)M6LRR-RLP\_1216

TGCTGTGGAGTTGTCGTCCAAGGAAACTCAACCTACAATCAACAAGTGACATGTTTACATGTTTCATGGA  
TCGTTTGATGCATATGAAGAGTTTGAGACGCGCTCTTACTCATGAAATGG

>M6-PGSC0003DMG400042529-(rev)M6LRR-RLP\_128

CTTGGAATTCTCGGGGAAAAGCATAGCAATAGTGGATAATATCATGGAGAGATATAGGGACGGAAATA  
TTCCTATTGACAAGTTTGAATTTGACAACCTCTAAAAGCCTGATCGTATTTT

>M6-PGSC0003DMG400042529-(rev)M6LRR-RLP\_1280

CATGGATCGTTTGATGCATATGAAGAGTTTGAGACGCGCTCTTACTCATGAAATGGGCTGTTTGATGCAT  
ATGAAGAATTGGAGACGCGCTCTTCTCATGAAAGGCATGGTCAATTTAA

>M6-PGSC0003DMG400042529-(rev)M6LRR-RLP\_1344

ATGCATATGAAGAATTGGAGACGCGCTCTTCTCATGAAAGGCATGGTCAATTTAAAGAGGGCAAAGTC  
TACAAATTTGATCAGAGAAATCAGAGTTGGCATCCTGTAGAACACAAAAGA

>M6-PGSC0003DMG400042529-(rev)M6LRR-RLP\_1407

AAAGTCTACAAATTTGATCAGAGAAATCAGAGTTGGCATCCTGTAGAACACAAAAGAGGAGAGCTCTCA  
ATAAGGACCGTTAGCACGTTGGAGAAATATTTCTTTTTATTAGATTGGTGA

>M6-PGSC0003DMG400042529-(rev)M6LRR-RLP\_192

AATATTCCTATTGACAAGTTTGAATTTGACAACCTCTAAAAGCCTGATCGTATTTCTGCTCTGATTGATAA  
ATGGCTTGGCATTGCTCTTCAAATGGTGTAAAGACATCTAGTGTATAGA

>M6-PGSC0003DMG400042529-(rev)M6LRR-RLP\_256

TTGATAAATGGCTTGGCATTGCTCTTCAAATGGTGTAAAGACATCTAGTGTATAGAGATGTTACACATTC  
AAAAATATACCCCTTCTATTTTTAAATTCTTGGGAAGCAAATTTTTTAG

>M6-PGSC0003DMG400042529-(rev)M6LRR-RLP\_320

ACATTCAAAATATACCCCTTCTATTTTTAAATTCTTGGGAAGCAAATTTTTTAGGAGAACTAGTCCTGA  
TGGGTTGTGATCTGATGCATGTTTCATTATCTAATACTAGTCATGTGGT

>M6-PGSC0003DMG400042529-(rev)M6LRR-RLP\_384

GTCCTGATGGGTTGTGATCTGATGCATGTTTCATTATCTAATACTAGTCATGTGGTGTCTGTCATTCTTT  
GAGAAAGCTTCTCTATCTCGTGTACGCTTAGATAAGAACATGCTTCAG

>M6-PGSC0003DMG400042529-(rev)M6LRR-RLP\_448

ATTCTTTGAGAAAGCTTTCTCTATCTCGTGTACGCTTAGATAAGAACATGCTTCAGACTATACTCTCTAGT  
TGTCCTTCATTGTTGATTTAATCATCAGGAATTGTAICTCGGTTGAAAA

>M6-PGSC0003DMG400042529-(rev)M6LRR-RLP\_512

CTCTAGTTGTCCCTTCATTGTTGATTTAATCATCAGGAATTGTAICTCGGTTGAAAAATGTTGAGCTCCGGA  
ATCTTCCTAAGATCAAGTCACTTGCCATTGATATTGACCATCCCATTAA

>M6-PGSC0003DMG400042529-(rev)M6LRR-RLP\_576

CTCCGGAATCTTCCTAAGATCAAGTCACTTGCCATTGATATTGACCATCCCATTAAAATCGAAGCACCAAC  
TCTTGAACACTTGTATTATTCTAGTTTTTGTGTTGAATAAATTGAATATT

>M6-PGSC0003DMG400042529-(rev)M6LRR-RLP\_64

GAGAAGCATCCCGGATGAGAATTCTCTCCAAAACATGGCTACTAGCCTGGTTGGATCTTCCGAACTTGG  
AATTCTCGGGGAAAAGCATAGCAATAGTGGATAATATCATGGAGAGATATA

>M6-PGSC0003DMG400042529-(rev)M6LRR-RLP\_640

CACCAACTCTTGAACACTTGTATTATTCTAGTTTTTGTGTTGAATAAATTGAATATTGATAAATATAAGAAT  
CTGAAATCTTTAGAGATATCATGTACGAAGATATCTGATATATATCTCA

>M6-PGSC0003DMG400042529-(rev)M6LRR-RLP\_704

TAAGAATCTGAAATCTTTAGAGATATCATGTACGAAGATATCTGATATATATCTCAACCGCCTTATCTTCA  
GACCTTACTGCCTCGAGAAATTGGTATTAGCTAACATTTCTTTAGGAAG

>M6-PGSC0003DMG400042529-(rev)M6LRR-RLP\_768

ATCTTCAGACCTTACTGCCTCGAGAAATTGGTATTAGCTAACATTTCTTTAGGAAGGTTTAACGTTTGCAG  
GAGTCGATCCCTAAAGGTCTTAAAGATTCATAATTGCAAGAAAATCGGA

>M6-PGSC0003DMG400042529-(rev)M6LRR-RLP\_832

TTTGCAGGAGTCGATCCCTAAAGGTCTTAAAGATTCATAATTGCAAGAAAATCGGAGCAATTTATGCTCC  
AAATTTGTTTTGCTGGAGTATAAAGGACATGATATTCCTCAGCATAAAT

>M6-PGSC0003DMG400042529-(rev)M6LRR-RLP\_896

TGCTCCAAATTTGGTTTTGCTGGAGTATAAAGGACATGATATTCCTCAGCATAAATTTGCACAAGAATCA  
AGACAATTGAAGCAGTCACAAATGATTCTTTATCCCTTGTTCAATGTAGA

>M6-PGSC0003DMG400042529-(rev)M6LRR-RLP\_960

GAATCAAGACAATTGAAGCAGTCACAAATGATTCTTTATCCCTTGTTCAATGTAGACGCGGCATGGTTTT

GTCAGCTGAGGCAATCTCTATCAGATTCGATCTCTTGGTCTCAAGTTACC

>M6-PGSC0003DMG400042787M6LRR-RLP\_0

ATGACAAATGACGCCTTAGTTACTATTGGAAGGAACCGTCCTAACATGATCCAATTTCAATTTGTGTATTAT  
CAAGCCTCAAACCTCTGATTACTTAACCCTTGAACCACTTGATGCTGAT

>M6-PGSC0003DMG400042787M6LRR-RLP\_122

TGGGGGCCATTGTGCAACACTGCAAGGAATTACGACGACTTTCTCTTTTCTGGCCTCCTTACAGATCGTG  
TGTTTGAGTACATCGGGTTCATGCTAAGTAGTTAGAGATGATTTCTTA

>M6-PGSC0003DMG400042814-(rev)M6G-LecRK\_0

ATGGAGATCAAACACAATTATTTTCTCCTCTTTTCTTTGATGTACCTATGTTTCTCTCTCAAACCCATCTCT  
CCATTGAAGCTGCTGACACCATTCTGCAAATCAATCCCTTTCTGGA

>M6-PGSC0003DMG400042814-(rev)M6G-LecRK\_1054

TGCATCCCAGATGAAAGTACCTGAAAATGCTCAAATATTTCTGCTGGAAGTGCTGAAGAATGCAGAT  
CTACCTGTTTGAATAATTGCAATTGCACTGCTTATACTTATGAAAGTTCAT

>M6-PGSC0003DMG400042814-(rev)M6G-LecRK\_1116

TGCAGATCTACCTGTTTGAATAATTGCAATTGCACTGCTTATACTTATGAAAGTTCATGCTCAATATGGAA  
TGGTGAACCTTTGAATATGCAGCAACTCCACAAAATGATGGCAGGGGC

>M6-PGSC0003DMG400042814-(rev)M6G-LecRK\_1178

AATATGGAATGGTGAACCTTTGAATATGCAGCAACTCCACAAAATGATGGCAGGGGGCGAGTTGATCTA  
TGTCAGGGTAGCTGCATCTGACATCCCAAAATCAAAGAGTAAAAAGGGAAT

>M6-PGSC0003DMG400042814-(rev)M6G-LecRK\_124

AAACAATTATCTCTTCAGATGGAAAATTTAAGCTTGTTTTCTTCAAACCAGGTAATTCTACCAACTAATAC  
ATAGGCATGTGGTATGATAAAGTGGTTGAACAAACTGCTGTTTGGGTTG

>M6-PGSC0003DMG400042814-(rev)M6G-LecRK\_1240

TGATCTATGTCAGGGTAGCTGCATCTGACATCCCAAAATCAAAGAGTAAAAAGGGAATTCCAATTGGTG  
TTTCTGTGGGGTCTGCTGCTGCCGTAATGATCCTTCTGGGAATTCTTTTTG

>M6-PGSC0003DMG400042814-(rev)M6G-LecRK\_1302

ATTGGTGTCTGTGGGGTCTGCTGCTGCCGTAATGATCCTTCTGGGAATTCTTTTTGTTGTATTCCGGAG  
AAGGCGTAGGCATATTGGAAGTGGGAAAATAGTGGAGGGTTCATTGGTT

>M6-PGSC0003DMG400042814-(rev)M6G-LecRK\_1364

ATTCCGGAGAAGGCGTAGGCATATTGGAAGTGGGAAAATAGTGGAGGGTTCATTGGTTGCATTTGATT  
ACAAAGACTTGCAACATGCGACTAAAAATTTCTCAGAGAAGTTGGGTGGTGG

>M6-PGSC0003DMG400042814-(rev)M6G-LecRK\_1426

TTGATTACAAAGACTTGCAACATGCGACTAAAAATTTCTCAGAGAAGTTGGGTGGTGGAGGCTTTGGTT  
CTGTTTTCAAAGGGAAACTATCTGATTCATCTGTTATTGCTGTAAAAGGC

>M6-PGSC0003DMG400042814-(rev)M6G-LecRK\_1488

TTTGGTTCTGTTTTCAAAGGGAAACTATCTGATTCATCTGTTATTGCTGTAAAAGGCTCGATAGCATCAG  
CCAGGGAGAGAAGCAATTCGATCAGAAGTCAGCACAATCGGGACAATC

>M6-PGSC0003DMG400042814-(rev)M6G-LecRK\_1550

TAGCATCAGCCAGGGAGAGAAGCAATTCGATCAGAAGTCAGCACAATCGGGACAATCCAACATGTAA  
TCTTGTACGCCTTCGTGGATTTTGCTCTGAAGGTAACAAGAACTACTGGT

>M6-PGSC0003DMG400042814-(rev)M6G-LecRK\_1612

ATGTTAATCTTGTACGCCTTCGTGGATTTTGCTCTGAAGGTAACAAGAACTACTGGTTTATGATTACATG  
GAAAATGGATCCTTGGATTCACATATTTTTACCGAAAAGCAGTCAGATG

>M6-PGSC0003DMG400042814-(rev)M6G-LecRK\_1674

GATTACATGGAAAATGGATCCTTGGATTCACATATTTTTACCGAAAAGCAGTCAGATGTTATGGATTGGA  
AAACGAGGTACCAGGTGGCACTAGGGACAGCTAGAGGCTTGACTTATCTC

>M6-PGSC0003DMG400042814-(rev)M6G-LecRK\_1736

GGATTGGAAAACGAGGTACCAGGTGGCACTAGGGACAGCTAGAGGCTTGACTTATCTCCATGAGAAGT  
GCAGGGACTGCATCATAATTGTGACATAAAGCCTGAAAACATCCTTCTTGA

>M6-PGSC0003DMG400042814-(rev)M6G-LecRK\_1798

AGAAGTGCAGGGACTGCATCATAATTGTGACATAAAGCCTGAAAACATCCTTCTTGATGCACAATTATG  
CCCCAAAGTAGCAGATTTTGGCCTGGCAAAGCTTGTTGGGCGCGATTTTA

>M6-PGSC0003DMG400042814-(rev)M6G-LecRK\_186

AACTAATACATAGGCATGTGGTATGATAAAGTGGTTGAACAACTGCTGTTTGGGTGCAAACAGGGAA  
AAACCAGTTCTTGATAAGAATTCTGCAGAGTTAAAGATCTTAGATGGTAAT

>M6-PGSC0003DMG400042814-(rev)M6G-LecRK\_1860

CAATTATGCCCCAAAGTAGCAGATTTTGGCCTGGCAAAGCTTGTTGGGCGCGATTTTAGCAGAGTCCTTA  
CTACTATGAGAGGAACAAGAGGTTATCTTGCACCAGAATGGATATCAGGG

>M6-PGSC0003DMG400042814-(rev)M6G-LecRK\_1922

AGTCCTTACTACTATGAGAGGAACAAGAGGTTATCTTGCACCAGAATGGATATCAGGGGTGGCCATTAC  
AGCCAAAGCCGATGTTTATAGCTACGGCATGATGCTTTTGAAATTGTATC

>M6-PGSC0003DMG400042814-(rev)M6G-LecRK\_1984

CCATTACAGCCAAAGCCGATGTTTATAGCTACGGCATGATGCTTTTGAAATTGTATCAGGGAGGCGAA  
ACTCAGAATACTCTCACGATGGGAAAGTGAAATTCTTCTAGTTGGGCTG

>M6-PGSC0003DMG400042814-(rev)M6G-LecRK\_2046

AGGCGAAACTCAGAATACTCTCACGATGGGAAAGTGAAATTCTTCTAGTTGGGCTGCACGTGTAGTA  
GTTGATGAAGGCGATATCCTTAGCCTATTGGACAATAGGCTGGACAGAGCT

>M6-PGSC0003DMG400042814-(rev)M6G-LecRK\_2108

TGTAGTAGTTGATGAAGGCGATATCCTTAGCCTATTGGACAATAGGCTGGACAGAGCTGCTGATGCTGA  
GGAGGTGTCAAAAATATGTAAAGTTGCATATTGGTGCATCCAAGATGATGA

>M6-PGSC0003DMG400042814-(rev)M6G-LecRK\_2170

ATGCTGAGGAGGTGTCAAAAATATGTAAAGTTGCATATTGGTGCATCCAAGATGATGAATTCCAAAGAC  
CCTCAATGGGTCAGGTTGTTGAGATTCTTGAAGGAGTTTTGGATGTGAATT

>M6-PGSC0003DMG400042814-(rev)M6G-LecRK\_2232

CAAAGACCCTCAATGGGTCAGGTTGTTGAGATTCTTGAAGGAGTTTTGGATGTGAATTTGCCTCCTCTCC  
CACGCTCTCTCAAGTTTATGCAGACAATGAGGAGCACATCGTTTTCTTC

>M6-PGSC0003DMG400042814-(rev)M6G-LecRK\_2294

TCCTCTCCCACGCTCTCTTCAAGTTTATGCAGACAATGAGGAGCACATCGTTTTCTTCACCGAGTCATCCT  
CGAGCCAGACTAGTTCACAAGCTCAGAGCAAGACTTCAAGTACAACATC

>M6-PGSC0003DMG400042814-(rev)M6G-LecRK\_2337

CACATCGTTTTCTTCACCGAGTCATCCTCGAGCCAGACTAGTTCACAAGCTCAGAGCAAGACTTCAAGTA  
CAACATCTCAATCTAAAAGCATCACAGAGTCTACGAATTCCAGGTCTTGA

>M6-PGSC0003DMG400042814-(rev)M6G-LecRK\_248

CAGGGAAAAACCAGTTCTTGATAAGAATTCTGCAGAGTTAAAGATCTTAGATGGTAATTTAGTACTGGT  
GGATGAATCTCAAACCTCAATTTGGTCCACAAATATCAGTTCCAGCAACTC

>M6-PGSC0003DMG400042814-(rev)M6G-LecRK\_310

TACTGGTGGATGAATCTCAAACCTCAATTTGGTCCACAAATATCAGTTCCAGCAACTCGAGTTCTGTTGT

AGCAGTCCTCCAAGATGATGGTAATTTGATCTTGACAGATGGGTCTAATT

>M6-PGSC0003DMG400042814-(rev)M6G-LecRK\_372

TCTGTTGTAGCAGTCCTCCAAGATGATGGTAATTTGATCTTGACAGATGGGTCTAATTCAACACCACCAC

TTTGGGAAAGTTTTAATAACCCCACTTGGTTGCCTGGTTCTAAA

>M6-PGSC0003DMG400042814-(rev)M6G-LecRK\_434

ACCACCACTTTGGGAAAGTTTTAATAACCCCACTTGGTTGCCTGGTTCTAACTTTCTTACAACA

AAGTCACCAGAACAAGCAACTTCTTACTTCATGGAAGAGTGCAGATGA

>M6-PGSC0003DMG400042814-(rev)M6G-LecRK\_496

CTTACAACAAAGTCACCAGAACAAGCAACTTCTTACTTCATGGAAGAGTGCAGATGATCCTGCACCTGG

GCTGTATTCACTTGAACCTCGACCCAAATGAGAAGCAGTATATTATAAGGT

>M6-PGSC0003DMG400042814-(rev)M6G-LecRK\_558

GCACCTGGGCTGTATTCACTTGAACCTCGACCCAAATGAGAAGCAGTATATTATAAGGTTCAAAGAAGT

GAGCAATATTGGAATACTGGACCATGGAATAATCGAATTTTCAGGGATGTG

>M6-PGSC0003DMG400042814-(rev)M6G-LecRK\_62

AACCCATCTCTCCATTGAAGCTGCTGACACCATTTCTGCAAATCAATCCCTTTCTGGAGACCAAACAATTA

TCTCTTCAGATGGAAAATTTAAGCTTGGTTTCTTCAAACCAGGTAATTC

>M6-PGSC0003DMG400042814-(rev)M6G-LecRK\_620

AAGAAGTGAGCAATATTGGAATACTGGACCATGGAATAATCGAATTTTCAGGGATGTGCCTGAGATGA

GGACTAACTATATTTACAATTTTAGCTATGAGGACAATCAGAATGAAAGCTA

>M6-PGSC0003DMG400042814-(rev)M6G-LecRK\_682

AGATGAGGACTAACTATATTTACAATTTTAGCTATGAGGACAATCAGAATGAAAGCTATTTTACATATTC

CCTTTATAATGATTCTATTATCTCAAGATTCATTATGGATGGCTCTGGAC

>M6-PGSC0003DMG400042814-(rev)M6G-LecRK\_744

ACATATTCCTTTATAATGATTCTATTATCTCAAGATTCATTATGGATGGCTCTGGACAGATTAAGCAACT

CACATGGTTGGATAATAACAATCAGTGAATCTGTTCTGGTCTCAACCA

>M6-PGSC0003DMG400042814-(rev)M6G-LecRK\_806

TAAGCAACTCACATGGTTGGATAATAACAATCAGTGAATCTGTTCTGGTCTCAACCAAGACAACAATGT

GAAGTTTATGCATTTTGCGGGCCATTTGCTACCTGTCAGGAAACCAATCC

>M6-PGSC0003DMG400042814-(rev)M6G-LecRK\_868



AACAATGTGAAGTTTATGCATTTTGCGGGCCATTTGCTACCTGTCAGGAAACCAATCCCTTCTGTAATTGT  
TTGGATGGTTTCAAGCAAAGTTCAGAGACTGATTGGAATCAAATGATT

>M6-PGSC0003DMG400042814-(rev)M6G-LecRK\_930

TGTAATTGTTTGGATGGTTTCAAGCAAAGTTCAGAGACTGATTGGAATCAAATGATTTTTTCATGTGAGA  
GGCAAACGAAGTCGCAATGTGGCAATGGTAATGGGGAGAAAGATGACTTT

>M6-PGSC0003DMG400042814-(rev)M6G-LecRK\_992

ATGTGAGAGGCCAAACGAAGTCGCAATGTGGCAATGGTAATGGGGAGAAAGATGACTTTTGGATGCATC  
CCCAGATGAAAGTACCTGAAAATGCTCAAAATATTTCTGCTGGAAGTGCTGA

>M6-PGSC0003DMG400042886-(rev)M6G-LecRK\_0

ATGGACTTAGTTAACTCATTA ACTCCTTTGAAATTA ACTCAGTTTTTCATTATTTCCATCTTTTTCTCAATTT  
TTTTTCAAATTGAAGTTGAATCTGAGACACCCAATCAATTTTTTCAA

>M6-PGSC0003DMG400042886-(rev)M6G-LecRK\_1008

CGCGATTTTTGCGGGGCCTCCTATGATCTTGATCACAAGAAGTACAAGGGGTTATCAAGAAATGGTGTT  
GATTTGCCTAACACTGAGTTAATGGACTATCAACATATGGTTTCTTTTCAA

>M6-PGSC0003DMG400042886-(rev)M6G-LecRK\_1071

GGTGTTGATTTGCCTAACACTGAGTTAATGGACTATCAACATATGGTTTCTTTTCAAGAATGTCAAAGTG  
CATGTGAAGGAAATTGTACATGTTGGGGTGTGGTGTACTAACACATCT

>M6-PGSC0003DMG400042886-(rev)M6G-LecRK\_1134

CAAAGTGCATGTGAAGGAAATTGTACATGTTGGGGTGTGGTGTACTAACACATCTGGATTTTGCTAC  
ATACTAAATTACCCCATACAAAGTTTAGTAGGGGTGAGGGATGAGTCCAAG

>M6-PGSC0003DMG400042886-(rev)M6G-LecRK\_1197

TGCTACATACTAAATTACCCCATACAAAGTTTAGTAGGGGTGAGGGATGAGTCCAAGATGGGGTTTTTC  
AAAATGAGGGAGGGTGTAGGAAAAGATAAGATGGGGGTGGGGTTTGGTGTA

>M6-PGSC0003DMG400042886-(rev)M6G-LecRK\_126

AAAGCAAACCCAGATCCCCAAATTTGCAATTTTCAGCCTCTTCTTACTGATTCTACTGGAAATTATCACT  
GAGTTTTCTTCGAGTTGAAGAAAATCAACTCAGTCTTGCTATTATCCAT

>M6-PGSC0003DMG400042886-(rev)M6G-LecRK\_1260

TTTTTCAAATGAGGGAGGGTGTAGGAAAAGATAAGATGGGGGTGGGGTTTGGTG TAGGGGTAGGGT  
TATTATGTGGGGCCATCTTGGTATTAGGTGGGGTCATAGGTTTAGGGTATTAT

>M6-PGSC0003DMG400042886-(rev)M6G-LecRK\_1323

GGGTTATTATGTGGGGCCATCTTGGTATTAGGTGGGGTCATAGGTTTAGGGTATTATAGATATATAAAA  
AGAAAAAGAGAAAGAGGAGTTAGTGGTTATGTTGATGATGATGGAGTAGTG

>M6-PGSC0003DMG400042886-(rev)M6G-LecRK\_1386

ATAAAAAGAAAAAGAGAAAGAGGAGTTAGTGGTTATGTTGATGATGATGGAGTAGTGGTTGGACCATA  
TAAAGATTTGGGAAATGCAAGTTTTAGGTCAATTGAACTAATTGAAAGATGA

>M6-PGSC0003DMG400042886-(rev)M6G-LecRK\_189

TATTCAGTGGTTTTCTTCGAGTTGAAGAAAATCAACTCAGTCTTGCTATTATCCATGTTAAATCTTTCGA  
GTCGATATGGGTTGCTAATTTGACCCGTTTAGCTAAATGGGCTGACCCG

>M6-PGSC0003DMG400042886-(rev)M6G-LecRK\_252

TCTTTCGAGTCGATATGGGTTGCTAATTTGACCCGTTTAGCTAAATGGGCTGACCCGACTGAGCTCTACT  
TCAATGGCAGCCTTGTCTGTCTGATTCACGTTCAAGGGTATTTTGGTCA

>M6-PGSC0003DMG400042886-(rev)M6G-LecRK\_315

CTCTACTTCAATGGCAGCCTTGTCTGTCTGATTCACGTTCAAGGGTATTTTGGTCAACTCACACTGATGG  
AGACCGTGTGGCTTTCAAATACATCGAATTTGCAAGTTCAGAAGGTT

>M6-PGSC0003DMG400042886-(rev)M6G-LecRK\_378

ACTGATGGAGACCGTGTTTGGCTTTCAAATACATCGAATTTGCAAGTTCAGAAGGTTGATAATGGAGTG  
ACGTCACCTTCTGTTTTATGGCAAAGTTTTGATTTCCCTCAAATACCCTT

>M6-PGSC0003DMG400042886-(rev)M6G-LecRK\_441

GGAGTGACGTCACCTTCTGTTTTATGGCAAAGTTTTGATTTCCCTCAAATACCCTTGTGGAAAATCAAAA  
TTTCACTAGTGCCATGACTTTAGTTTCTTCAAATGGGCTTTATTCCATG

>M6-PGSC0003DMG400042886-(rev)M6G-LecRK\_504

AATCAAAATTTCACTAGTGCCATGACTTTAGTTTCTTCAAATGGGCTTTATTCCATGAGATTGGGCTTTGA  
TTTTTTCGGGTTGTATTTTAAAGGTGAATCGGGTTCGGGTCCGGGTCCG

>M6-PGSC0003DMG400042886-(rev)M6G-LecRK\_567

GGCTTTGATTTTTTCGGGTTGTATTTTAAAGGTGAATCGGGTTCGGGTCCGGGTCCGGATCTATTGGAGG  
CATAAGGCATTAGAAGCTAAAGCTGATGTGATGGAGGATCAAGGACATATT

>M6-PGSC0003DMG400042886-(rev)M6G-LecRK\_63

TTCTCAATTTTTTTCAAATTGAAGTTGAATCTGAGACACCCAATCAATTTTTCAAAGGATTTAAAGCAAA

CCCAGATCCCCAAATTTTGAATTTTCAGCCTCTTCTTACTGATTCTACT

>M6-PGSC0003DMG400042886-(rev)M6G-LecRK\_630

TGGAGGCATAAGGCATTAGAAGCTAAAGCTGATGTGATGGAGGATCAAGGACATATTTATGTTGTATTA  
AAGTCAAATGGATTTTTGGGAATGTACCAAATGAGTCAGTCCCAGTTGAT

>M6-PGSC0003DMG400042886-(rev)M6G-LecRK\_693

GTATTAAAGTCAAATGGATTTTTGGGAATGTACCAAATGAGTCAGTCCCAGTTGATGTTGAATCATTTA  
ACAGCTTTCAACAACCCTTATCCGGTGTCCGTCGGGTCCGGGTCCGAACCG

>M6-PGSC0003DMG400042886-(rev)M6G-LecRK\_756

TCATTTAACAGCTTTCAACAACCCTTATCCGGTGTCCGTCGGGTCCGGGTCCGAACCGGATGGTAACTTAA  
AAGGGTATTTTTGGGACGGGTTCGAGTTGGGTATTGGACTATCAAGCGATA

>M6-PGSC0003DMG400042886-(rev)M6G-LecRK\_819

AACTTAAAAGGGTATTTTTGGGACGGGTTCGAGTTGGGTATTGGACTATCAAGCGATAAAGGAGACATG  
TGAATTGCCTAGCCCCTGTGGGGCATAACGGGCTCTGTCATCCAGGCAAGAGT

>M6-PGSC0003DMG400042886-(rev)M6G-LecRK\_882

ACATGTGAATTGCCTAGCCCCTGTGGGGCATAACGGGCTCTGTCATCCAGGCAAGAGTTGTTCTTGCCTG  
GATAACAACACGGATTATAGTATCGGCGGGTGTGTCTCGCTGAACACTCAG

>M6-PGSC0003DMG400042886-(rev)M6G-LecRK\_945

TGCCTGGATAACAACACGGATTATAGTATCGGCGGGTGTGTCTCGCTGAACACTCAGGAGCCCCGCGAT  
TTTTGCGGGGCCTCCTATGATCTTGATCACAAGAAGTACAAGGGGTTATCA

>M6-PGSC0003DMG400043061-(rev)M6LRR-RLP\_0

ATGGGTATTTGGAGCAACCTACTTGTGCTCCTTCTTATTTTCCCTTTTTGTACACCAGATCCAAACGATGA  
GATGTGCTTGACCCATCTCAGTCAATCTTACAAGACCCTTTGAAGAAT

>M6-PGSC0003DMG400043061-(rev)M6LRR-RLP\_126

AACTGGACTAAATCTTCCTTCGCTAAACCTTGTGATGGGTTCACTTCATATCTACAAGGGGCAACTTGTA  
ACAATGGCCGCATCTACAAATTGTCCCTTTGAATCTCTCGCTTAAAGGT

>M6-PGSC0003DMG400043061-(rev)M6LRR-RLP\_189

ACTTGTAACAATGGCCGCATCTACAAATTGTCCCTTTGAATCTCTCGCTTAAAGGTACCATTTCTCCTTAT  
CTCTCTAATTGCACCAATCTCCAAGCTCTTGACCTCTCTTCCAACGCA

>M6-PGSC0003DMG400043061-(rev)M6LRR-RLP\_252

TCTCCTTATCTCTCTAATTGCACCAATCTCCAAGCTCTTGACCTCTCTTCCAACGCAATCTCCGGCCCAATA  
CCTCTGGAACTCCAGTTCCTAGTCAATCTGGCTGTTCTCAACCTCTCA

>M6-PGSC0003DMG400043061-(rev)M6LRR-RLP\_315

GGCCCAATACCTCTGGAACTCCAGTTCCTAGTCAATCTGGCTGTTCTCAACCTCTCAGCTAATCAACTTTC  
AGGCCAATTCTGAACAGCTCGCCATTTGCGCTTACCTCAACGTCATC

>M6-PGSC0003DMG400043061-(rev)M6LRR-RLP\_378

CAACTTTCAGGCCCAATTCCTGAACAGCTCGCCATTTGCGCTTACCTCAACGTCATCGATCTTCATGATAA  
TCAGCTTAATGGGCTTATCCCGCAGCAACTGGGCCTCCTTGTACGGCTA

>M6-PGSC0003DMG400043061-(rev)M6LRR-RLP\_441

CATGATAATCAGCTTAATGGGCTTATCCCGCAGCAACTGGGCCTCCTTGTACGGCTATCAGTTTTTCGACG  
TATCAAACAATAGATTATCGGGTCCCATACCAGCCTCACTGGGTAACCGG

>M6-PGSC0003DMG400043061-(rev)M6LRR-RLP\_504

TTCGACGTATCAAACAATAGATTATCGGGTCCCATACCAGCCTCACTGGGTAACCGGAGCGGAAATTTG  
CCCCGATTCAATGCCAGTTCGTTTGATGGGAATAAGGATCTTTACGGGTAC

>M6-PGSC0003DMG400043061-(rev)M6LRR-RLP\_567

AATTTGCCCGATTCAATGCCAGTTCGTTTGATGGGAATAAGGATCTTTACGGGTACCCATTGCCACCCA  
AAAAGAGTAATGGGTTATCGGTTTTGGCAATTGTAGGGATCGGATTGGGA

>M6-PGSC0003DMG400043061-(rev)M6LRR-RLP\_63

AACGATGAGATGTGCTTGACCCATCTCAGTCAATCTTTACAAGACCCTTTGAAGAATCTTCAAACTGGA  
CTAAATCTTCCTTCGCTAAACCTTGTGATGGGTTCACTTCATATCTACAA

>M6-PGSC0003DMG400043061-(rev)M6LRR-RLP\_630

CCACCCAAAAGAGTAATGGGTTATCGGTTTTGGCAATTGTAGGGATCGGATTGGGAAGTGGGTTCTTG  
AGTTTGGTGCTAAGTTTTACTGCTGTTTGCATATGGTTGAGAGTTACTGAG

>M6-PGSC0003DMG400043061-(rev)M6LRR-RLP\_684

GGAAGTGGGTTCTTGAGTTTGGTGCTAAGTTTTACTGCTGTTTGCATATGGTTGAGAGTTACTGAGCAAA  
AATTGGATGCTGAAGAAGGAAAAATTAGTCATCTTATGCCTGATTATTGA

>M6-PGSC0003DMG400043237-(rev)M6LRR-RLP\_0

TAGAGAGGACAGAATATCAGAATTACCTGTGCATATTATTCATCAAATGTTATGCCGCACTAACCTCGAA  
GTGAAAGAGGCGGCCAGAAGTTGTATCTTGTCCAAGAGATGGTACTATTG

>M6-PGSC0003DMG400043237-(rev)M6LRR-RLP\_124

TCTTCTAGACCTAATCTCATATTCCATCAATTTCAAGGCAAAATATATATGCCCTCGAAAACCTATGTCAA  
GTTGGTTGATCAATCCCTGCAATCCCATGTCTGAACAAAACCTTACATCTT

>M6-PGSC0003DMG400043237-(rev)M6LRR-RLP\_186

CTATGTCAAGTTGGTTGATCAATCCCTGCAATCCCATGTCTGAACAAAACCTTACATCTTGAACAATTTATCC  
TTGTGTATCAAGATCGAGAATTGGATTCTCACTTGGATCATTGGATTGA

>M6-PGSC0003DMG400043237-(rev)M6LRR-RLP\_248

AATTTATCCTTGTGTATCAAGATCGAGAATTGGATTCTCACTTGGATCATTGGATTGAATTGGCAGTTAA  
ACTTAACGTCAGAGTGCTGGAGATTTATGCTTCCTTTTTAAGATCATATA

>M6-PGSC0003DMG400043237-(rev)M6LRR-RLP\_310

GCAGTTAACTTAACGTCAGAGTGCTGGAGATTTATGCTTCCTTTTTAAGATCATATAGCTTACCTGATGT  
TATTTATGATGCTAAAAGCTGAAAACATTGTCGTTACGCAGGTGCAAG

>M6-PGSC0003DMG400043237-(rev)M6LRR-RLP\_372

ACCTGATGTTATTTATGATGCTAAAAGCTGAAAACATTGTCGTTACGCAGGTGCAAGTTTGAATTTGAT  
ATTAGCACCCTAACATAAGATTTAGTTGTCTTGAGGATCTTTATTTGTA

>M6-PGSC0003DMG400043237-(rev)M6LRR-RLP\_434

AATTTGATATTAGCACCCTAACATAAGATTTAGTTGTCTTGAGGATCTTTATTTGTATTATGTTTCATATTT  
CTGATGCCCAATTGCAAAGAATTATCCATAGATCCCCGTTTCATCAGGA

>M6-PGSC0003DMG400043237-(rev)M6LRR-RLP\_496

GTTTCATATTTCTGATGCCCAATTGCAAAGAATTATCCATAGATCCCCGTTTCATCAGGACTCTAACCCCTATT  
TGCGTGCAGAGGAATAAACAATTGCAAGTTTGTGCCCAGTACATCTG

>M6-PGSC0003DMG400043237-(rev)M6LRR-RLP\_558

AACCCTATTTGCGTGCAGAGGAATAAACAATTGCAAGTTTGTGCCCAGTACATCTGGAGAATTTGATT  
GTTGTATGCTGCGAATTTCGATAGTGTGATACTCCAAGCCCCGAATCTTAA

>M6-PGSC0003DMG400043237-(rev)M6LRR-RLP\_62

ACCTCGAAGTGAAAGAGGCGGCCAGAAGTTGTATCTTGTCCAAGAGATGGTACTATTGTTGGTCTTCTA  
GACCTAATCTCATATTCCATCAATTTCAAGGCAAAATATATATGCCCTCG

>M6-PGSC0003DMG400043237-(rev)M6LRR-RLP\_620

ATTTGATTGTTGTATGCTGCGAATTTCGATAGTGTGATACTCCAAGCCCCGAATCTTAAATACTTTGAATAT

GACGAGCATACTGATTGTCCTTGCAAATTGCTGTTTTGGATGGTTACA

>M6-PGSC0003DMG400043237-(rev)M6LRR-RLP\_682

TTTGAATATGACGAGCATACTGATTGTCCTTGCAAATTGCTGTTTTGGATGGTTACAATACTTTACAAAC

ACTCAAGCTCACCGGTGCCAGCATCACAGACCAATAGTTTCGAGATGTA

>M6-PGSC0003DMG400043237-(rev)M6LRR-RLP\_744

TTTACAAACTCAAGCTCACCGGTGCCAGCATCACAGACCAATAGTTTCGAGATGTATCCTACAAGTTC

CCAAACATTTAGAAATTGGATCTAAAATTCTGCTTTAAGCTGAAAAATAT

>M6-PGSC0003DMG400043237-(rev)M6LRR-RLP\_806

ACAAGTTCCCAAACATTTAGAAATTGGATCTAAAATTCTGCTTTAAGCTGAAAAATATAGAGATTCAGAG

TGAAAACTCAAGAAATTCACCTTAGTAGGGTTGAAGAGTCTGGAAAAAG

>M6-PGSC0003DMG400043237-(rev)M6LRR-RLP\_868

ATTCAGAGTGAAAACTCAAGAAATTCACCTTAGTAGGGTTGAAGAGTCTGGAAAAAGTCACGATTCAA

GCTCCAAATTTATTGGAATTTGATTATAATGGTGATAAAATGCCCTTCCCG

>M6-PGSC0003DMG400043237-(rev)M6LRR-RLP\_930

GATTCAAGCTCCAAATTTATTGGAATTTGATTATAATGGTGATAAAATGCCCTTCCCGTCTATGAATCCTT

CTTCCCTGGAAAGATCCCAAATTTCTTCTTGACAAGCACAACTT

>M6-PGSC0003DMG400043334M6LRR-RLP\_0

ATGGGTGAGGTAGCTAGTAAAGGAAGGAAGTCTACCACTATATATCGGTGACTTACCAAATGCCATACT

ATATACAATACTAGAGTTTATGCCCATCCAAGACGCTGCAAGAACTAGCGT

>M6-PGSC0003DMG400043334M6LRR-RLP\_128

AGAAATGGATACCTATATGGTCCACATCTTGTTGATCCCCGTTTTTTTCAGTATGTATCTAATATTGG

TGCTTCTGCTGCAACCGTAATTTATAATATTCTAATGCAACACACTGGA

>M6-PGSC0003DMG400043334M6LRR-RLP\_192

ATATTGGTGCTTCTGCTGCAACCGTAATTTATAATATTCTAATGCAACACACTGGAAATATTATGGGGTTT

CATCTTATCTCGAGTACGTGCAAATTTGCACAGTCAGATGTGGATCAAT

>M6-PGSC0003DMG400043334M6LRR-RLP\_256

GGGGTTTCATCTTATCTCGAGTACGTGCAAATTTGCACAGTCAGATGTGGATCAATTCATCTTTTTGTCT

CGAAGCATGGTATCCAAAAGCTCACTCTTGATATGGCAAATGAAGAAAA

>M6-PGSC0003DMG400043334M6LRR-RLP\_320

TTTGTCTCGAAGCATGGTATCCAAAAGCTCACTCTTGATATGGCAAATGAAGAAAATTACATGTTGCCTC  
ATAGAATATTTACTTGTGCAACATTGACACATTTGAAGCTCTCAAGGTGT

>M6-PGSC0003DMG400043334M6LRR-RLP\_384

TGCCTCATAGAATATTTACTTGTGCAACATTGACACATTTGAAGCTCTCAAGGTGTTTCTTTAGGCTTCCG  
GATGGTACCCAATTTCCAATCTTATTAGCCTTCAGTTGGAACATTCTA

>M6-PGSC0003DMG400043334M6LRR-RLP\_448

GCTTCCGGATGGTACCCAATTTCCAATCTTATTAGCCTTCAGTTGGAACATTCTAAAATTGCTGGTCATC  
GAGGATCAGAAGACATGATTAATCTGCCAATGCTTGAAGCTTTGGAGTT

>M6-PGSC0003DMG400043334M6LRR-RLP\_512

GGTCATCGAGGATCAGAAGACATGATTAATCTGCCAATGCTTGAAGCTTTGGAGTTGAGATTTTGTGTT  
GGTGTGATTCTGTTTATTTGGTTTGTCCAAAACCTTGACAACATGTATCTC

>M6-PGSC0003DMG400043334M6LRR-RLP\_574

TTGTGTTGGTGTGATTCTGTTTATTTGGTTTGTCCAAAACCTTGACAACATGTATCTCATTAGCAGCTATA  
CAATTACATTTAGTGTTTAATGTGAACCCAATCTTTGCAATCATTA

>M6-PGSC0003DMG400043334M6LRR-RLP\_64

ATACTATATACAATACTAGAGTTTATGCCCATCCAAGACGCTGCAAGAAGCTAGCGTCTTATCGAAGAAAT  
GGATACCTATATGGTCCACATCTTGTGTTTGTATCCCCGTTTTTTTCAGTA

>M6-PGSC0003DMG400043603M6LRR-RLP\_0

ATGAAAACCTTGCAAAATTCACGATCTTCTCGCCAACCTGTGCCTAAGTGAAGCTCATACTGAAAATGTTG  
TGCATGTCATGAATGGGAATGATCTCGAAGCCATAGATGATCAACGTCGA

>M6-PGSC0003DMG400043603M6LRR-RLP\_1008

CCTAAACTGGAGGAGATTCCCGAGAGTATTGGAGAAATAATGACACTAAAGTCAATCCGAATAGTTGAT  
TGCAGCTCTGGTGTTAATACAAGTGCAAGGAAAATTCAAGAAGAGCAAGAA

>M6-PGSC0003DMG400043603M6LRR-RLP\_1056

AAGTCAATCCGAATAGTTGATTGCAGCTCTGGTGTTAATACAAGTGCAAGGAAAATTCAAGAAGAGCAA  
GAAAGTTTGGGAAATTATGAGCTTCAACTGGAAATTGTTTTGGTATGTTAA

>M6-PGSC0003DMG400043603M6LRR-RLP\_126

CTTCTGTCTGAAGTTGAAGAGAAGTATGATTATGGTCCACGAAATAGCAGTGGTATTGTCCGTACCTTTA  
TTTCAATGGGTGTAGTAGCATTACAAAAGAGATGTGTTCCATTGTTTCA

>M6-PGSC0003DMG400043603M6LRR-RLP\_189

ACCTTTATTTCAATGGGTGTAGTAGCATTACCAAAGAGATGTGTTCCATTGTTTCAGAATTCAAGTTGCT  
TAAGGTGTTGGACGTATTATCAGTACTCTGGTACGATTTCTCTAGTGTA

>M6-PGSC0003DMG400043603M6LRR-RLP\_315

GAGCTTGACATTTGAGATATGTTTCTGCAAGAATTGAGGAAGCTCCTTCACTAGCCAAATTGAGAAGTC  
TACAGACCATAATTCTTCGAAGATATTTCTCTGGCAGTGTGACACCAACA

>M6-PGSC0003DMG400043603M6LRR-RLP\_378

AGAAGTCTACAGACCATAATTCTTCGAAGATATTTCTCTGGCAGTGTGACACCAACAACGTTGGAGCTGC  
AGCCATTAGATATCTGGAGAATGTGACAGAGATAAGACATATGGATATTGAT

>M6-PGSC0003DMG400043603M6LRR-RLP\_441

GAGCTGCAGCCATTAGATATCTGGAGAATGTGACAGAGATAAGACATATGGATATTGATTGGCCACTATAT  
ATATCAAACCTTGTTGAAGCAGAACAACATTGTTTCTGAATAACTTGCAA

>M6-PGSC0003DMG400043603M6LRR-RLP\_504

CTATATATATCAAACCTTGTTGAAGCAGAACAACATTGTTTCTGAATAACTTGCAAACACTTTATCTCTA  
TAATTCTCCTTTTGTGAGAAATCATAAAAAGAACTCCCAATCTAAAA

>M6-PGSC0003DMG400043603M6LRR-RLP\_567

TATCTCTATAATTCTCCTTTTGTGAGAAATCATAAAAAGAACTCCCAATCTAAAAAAGCTAAAGATTTT  
ATATAGATCTAAGCTTCTGATTCTCTGAGTATTTTACAGCATCTGGAG

>M6-PGSC0003DMG400043603M6LRR-RLP\_63

AATGTTGTGCATGTCATGAATGGGAATGATCTCGAAGCCATAGATGATCAACGTCGAATGATCCTTCTGT  
CTGAAGTTGAAGAGAAGTATGATTATGGTCCACGAAATAGCAGTGGTATT

>M6-PGSC0003DMG400043603M6LRR-RLP\_630

AAGATTTTATATAGATCTAAGCTTCTGATTCTCTGAGTATTTTACAGCATCTGGAGACACTACACATAGA  
AATAGAAGAAAACATTGATCCGATGATTATCTCTAGAGATATTTCTCTT

>M6-PGSC0003DMG400043603M6LRR-RLP\_693

CACATAGAAATAGAAGAAAACATTGATCCGATGATTATCTCTAGAGATATTTCTCTTCTAATCTCAAGA  
AGTTGAAATTAAGAGGTACTCGTATACCATGGGAAGTTGTGAATTTGCTG

>M6-PGSC0003DMG400043603M6LRR-RLP\_756

CTCAAGAAGTTGAAATTAAGAGGTACTCGTATACCATGGGAAGTTGTGAATTTGCTGGCTAATTTACCCA



ATCTTGAGGTGCTCGAGGGGAAATATGCCTTTGCTGGAGCAGATTGGAAA

>M6-PGSC0003DMG400043603M6LRR-RLP\_882

GAAGATGTTGTGTTTCGCAAATTTAAATATCTACGTCTATATAGGTGCAGAGATCTGGAAAGGTGGGAA  
TTAGCAGCTGGTAGTGATAATTTTCCGATGCTTGAGAACTAACACTGTAT

>M6-PGSC0003DMG400043603M6LRR-RLP\_945

TGGGAATTAGCAGCTGGTAGTGATAATTTTCCGATGCTTGAGAACTAACACTGTATGAATTGCCTAAAC  
TGGAGGAGATTCCCAGAGATTGGAGAAATAATGACACTAAAGTCAATC

>M6-PGSC0003DMG400043752-(rev)M6LRR-RLP\_0

GGAAGTTTTGAAGAATGTTCAACAACACTATGCTAGAGAACATGAAGACTTTTCACACTTACCATATATTGT  
TGGATAATAAGAATCCAAGTTCTGGTGGAGGTTTTCAAATCTCGAAGAT

>M6-PGSC0003DMG400043752-(rev)M6LRR-RLP\_126

CTCCACGTAAATGTATACCTAAGTTTCCTCTGTTTTCCATACCGAAAGTTCATACTAGCCTTCATTCTCTT  
TCTCTGTTTTATCTTTCACGGAATCCGGGATTCAGTTGGCCGATGG

>M6-PGSC0003DMG400043752-(rev)M6LRR-RLP\_189

CATTCTCTTCTCTGTTTTATCTTTCACGGAATCCGGGATTCAGTTGGCCGATGGGAGAGCTATTGTGT  
GTTCCCTCAAATCTTAGGCATTTGCACCTTGCTGGCTGTTTCTTAACT

>M6-PGSC0003DMG400043752-(rev)M6LRR-RLP\_252

TATTGTGTGTTCCCTCAAATCTTAGGCATTTGCACCTTGCTGGCTGTTTCTTAACTGAACAAATGATATT  
AAACATTGCAAGATTGGAGAATCTTGAGAGTCTGAAATTAGAGTTGGGA

>M6-PGSC0003DMG400043752-(rev)M6LRR-RLP\_315

ATGATATTAACATTGCAAGATTGGAGAATCTTGAGAGTCTGAAATTAGAGTTGGGAATTCCTTTGGGG  
AGATCAGAGAGCTATTGTTGGGACGTCACAAATGTGGAGTTCCTTCACTC

>M6-PGSC0003DMG400043752-(rev)M6LRR-RLP\_378

TTGGGGAGATCAGAGAGCTATTGTTGGGACGTCACAAATGTGGAGTTCCTTCACTCAAATACTTGACA  
TACTCCGTATGCAGATAGACGAATGGAAAGCTTCAGAGGAATCCTTTCCC

>M6-PGSC0003DMG400043752-(rev)M6LRR-RLP\_441

TTGACATACTCCGTATGCAGATAGACGAATGGAAAGCTTCAGAGGAATCCTTTCCCGTGCTTGAGGTG  
CTATCTATAAAAGCTGGTTCCGATTTCTGGAGATCCCTCCTAGCTTTCAG

>M6-PGSC0003DMG400043752-(rev)M6LRR-RLP\_504

GAGGTGCTATCTATAAAAGCTGGTTCCGATTTCTGGAGATCCCTCCTAGCTTTCAGGACATTCCAGCAC  
TGCGACTTATTGAACTGTTTGACTGCAACGACTATCTTGTTGATTGAGCT

>M6-PGSC0003DMG400043752-(rev)M6LRR-RLP\_562

ACATTCCAGCACTGCGACTTATTGAACTGTTTGACTGCAACGACTATCTTGTTGATTGAGCTTTGCAACTC  
AAAAAAGAAATTGAAGAAAACACAGGAAGTGACAGTCTCCAAGTTGTTA

>M6-PGSC0003DMG400043752-(rev)M6LRR-RLP\_63

ATATTGTTGGATAATAAGAATCCAAGGTTCTGGTGGAGGTTTTCAAATCTCGAAGATCTCAGCCTCCACG  
TTAAATGTATACCTAAGTTTCTCTGTTTTCCATACCGAAAGTTCATACT

>M6-PGSC0003DMG400043836M6RLKmalectin\_0

ATGCCAAGAGGATCACCATCACACCACCACCACCATTGTCTACAATAATGGCTAATATCCTCGTGGCGT  
TTGTTTGCCTCATTTTCATCGGCCCTCGAGTGTAATTCCAGTTTCTGCA

>M6-PGSC0003DMG400043836M6RLKmalectin\_1054

ATGATAAGATGGCAATTTCCGGGCTAGACTTGTCTATCTTTGACACAGCGGTTGTCCACAGCTTTTTACAA  
GGACTTTGTGATAGATGCCTCTTCAGCATCTAATCCTCTTAGTGTAAGG

>M6-PGSC0003DMG400043836M6RLKmalectin\_1116

TTTTACAAGGACTTTGTGATAGATGCCTCTTCAGCATCTAATCCTCTTAGTGTAAGGTTTCACCAGTGAA  
CGATGTCCAAGGATTCAAGAATGCAATCCTGAATGGGCTTGAGGTTTTT

>M6-PGSC0003DMG400043836M6RLKmalectin\_1178

ACCAGTGAACGATGTCCAAGGATTCAAGAATGCAATCCTGAATGGGCTTGAGGTTTTTCGGATGAATAA  
TTCTATGGGTAGTCTTGATGGGCAATATGGTGTGATGGAACGAAGAGTAG

>M6-PGSC0003DMG400043836M6RLKmalectin\_124

CAGATTCTACTGCACCTGCAAAATCTTTCCAGCATTACACCTTCAGATAACTACCTTATTAATTGTGGA  
TCTACTTCTCCTACTACTCTTCCAGGAAATCGCGCATTTCACCAGATG

>M6-PGSC0003DMG400043836M6RLKmalectin\_1240

TGAATAATTCTATGGGTAGTCTTGATGGGCAATATGGTGTGATGGAACGAAGAGTAGTGGCCCAAGCA  
AAACAGTGGCTTATGTTGGTTTTGCTATGATGTTTCGGAGCATTGTAGGAT

>M6-PGSC0003DMG400043836M6RLKmalectin\_1302

CCAAGCAAAACAGTGGCTTATGTTGGTTTTGCTATGATGTTTCGGAGCATTGTAGGATTGGGTGCTATAG  
TTTTCAAGTGGCAAAAGAGGCCTCAAGATTGGCAAAAAGGAACAGTTTC

>M6-PGSC0003DMG400043836M6RLKmalectin\_1364

TGCTATAGTTTTCAAGTGGCAAAGAGGCCTCAAGATTGGCAAAAAGGAACAGTTTCTCCTCTTGTT  
GCTTCCACTTCATGCTGGAGATACAAGCTTTATGGCGGGAAGCAAGGCTTC

>M6-PGSC0003DMG400043836M6RLKmalectin\_1426

CTTGGTTGCTTCCACTTCATGCTGGAGATACAAGCTTTATGGCGGGAAGCAAGGCTTCATTGTCGCGCAA  
GAGCCAATTTTTCTTTCAAACATGGGGCTAGGCCGATATTTTTCATTTG

>M6-PGSC0003DMG400043836M6RLKmalectin\_1488

TCGCGCAAGAGCCAATTTTTCTTTCAAACATGGGGCTAGGCCGATATTTTTCATTTGCTGAGTTGTCAG  
ACGCCACCAACAATTGGGAATCGACTGCCATAATTGGTGTGGTGGCTTT

>M6-PGSC0003DMG400043836M6RLKmalectin\_1550

GTTGTCAGACGCCACCAACAATTGGGAATCGACTGCCATAATTGGTGTGGTGGCTTTGGCAATGTCTAT  
TATGGAGAAATCGATGATGGAACAAAAGTAGCTGTCAAGAGAGGAAATCC

>M6-PGSC0003DMG400043836M6RLKmalectin\_1612

ATGTCTATTATGGAGAAATCGATGATGGAACAAAAGTAGCTGTCAAGAGAGGAAATCCACAATCTGAGC  
AAGGTATCAATGAGTTCCAGACTGAAATTCAGATGTTATCTAAGCTCAGAC

>M6-PGSC0003DMG400043836M6RLKmalectin\_1674

TCTGAGCAAGGTATCAATGAGTTCCAGACTGAAATTCAGATGTTATCTAAGCTCAGACATCGCCATCTGG  
TGTCGTTGATTGGTTATTGTGATGAAAACACAGAGATGATACTGGTTTAT

>M6-PGSC0003DMG400043836M6RLKmalectin\_1736

CCATCTGGTGTCTGTTGATTGGTTATTGTGATGAAAACACAGAGATGATACTGGTTTATGAGTTCATGCAA  
AATGGTCCTTTAGAGATCATCTCTATGGCAAGAACTTTCCACCTTTGAC

>M6-PGSC0003DMG400043836M6RLKmalectin\_1798

TCATGCAAATGGTCCTTTAGAGATCATCTCTATGGCAAGAACTTTCCACCTTTGACATGGAAGCAGAG  
GCTAGAAATCTGCATTGGCTCAGCTCGTGGGCTTCATTACCTCCATACAG

>M6-PGSC0003DMG400043836M6RLKmalectin\_186

AATTGTGGATCTACTTCTCTACTACTCTTCCAGGAAATCGCGCATTTC AACCCAGATGAAACCACAGCTAA  
ATATTTAGCCTATAGCGGACGTGACCTTACATTTCTGCACCTGACAAT

>M6-PGSC0003DMG400043836M6RLKmalectin\_1860

AAGCAGAGGCTAGAAATCTGCATTGGCTCAGCTCGTGGGCTTCATTACCTCCATACAGGTGCATCTACA

GCAATTATCCACAGAGATGTCAAACCACCAACATTCTTCTTGATGAGAAC

>M6-PGSC0003DMG400043836M6RLKmalectin\_1922

ATCTACAGCAATTATCCACAGAGATGTCAAACCACCAACATTCTTCTTGATGAGAACTTGGTCGCTAAA

ATGGCTGACTTTGGGCTGTCAAAGATTGCCTTGCCAACGAGACTCACGT

>M6-PGSC0003DMG400043836M6RLKmalectin\_1984

TCGCTAAAATGGCTGACTTTGGGCTGTCAAAGATTGCCTTGCCAACGAGACTCACGTAAGTACAGCTG

TGAAGGGAAGTTTTGGGTACCTCGATCCTGAGTACTTCCGTAAACAGCAGT

>M6-PGSC0003DMG400043836M6RLKmalectin\_2046

ACAGCTGTGAAGGGAAGTTTTGGGTACCTCGATCCTGAGTACTTCCGTAAACAGCAGTTAACAGACAAG

TCTGATGTGTACTCATTTGGAGTGGTACTTCTAGAGGCCTTGTGCGCTCGT

>M6-PGSC0003DMG400043836M6RLKmalectin\_2108

AGACAAGTCTGATGTGTACTCATTTGGAGTGGTACTTCTAGAGGCCTTGTGCGCTCGTCCTGCCATTAAT

CCATCACTTCCAAGAGAGCAAGTGAATTTAGCAGAATGGGGAATGCAATG

>M6-PGSC0003DMG400043836M6RLKmalectin\_2170

CCATTAATCCATCACTTCCAAGAGAGCAAGTGAATTTAGCAGAATGGGGAATGCAATGGAAGAAAAAA

GGTTTGTGGACAAGATCATTGATCCTACTCTTGTGGGACAAATTAACCCAG

>M6-PGSC0003DMG400043836M6RLKmalectin\_2232

AAAAAAGTTTTGTTGGACAAGATCATTGATCCTACTCTTGTGGGACAAATTAACCCAGAGTCAATGAAG

AAATTTGGTGAAGCAGCAGAAAAGTGTGGCAGAATATGGTGCTGATAGA

>M6-PGSC0003DMG400043836M6RLKmalectin\_2294

AATGAAGAAATTTGGTGAAGCAGCAGAAAAGTGTGGCAGAATATGGTGCTGATAGACCTAGCATGG

GTGATGTGCTGTGGAACCTGGAATATGCTTTGCAGCTACAAGAAGCCTCATT

>M6-PGSC0003DMG400043836M6RLKmalectin\_2356

GCATGGGTGATGTGCTGTGGAACCTGGAATATGCTTTGCAGCTACAAGAAGCCTCATTACAAGGGAAG

GCTGAAGAAGAAAACAAAGCATCTTCTCCCAAGTCTCTCCTGCTATAGTTA

>M6-PGSC0003DMG400043836M6RLKmalectin\_2418

GGGAAGGCTGAAGAAGAAAACAAAGCATCTTCTCCCAAGTCTCTCCTGCTATAGTTACCCCTACTCCTG

CCCCCGTCCCTGCTCCTTCGACTCCTGACAACAGACCAGTTTCTACACCT

>M6-PGSC0003DMG400043836M6RLKmalectin\_248

CACAGCTAAATATTTAGCCTATAGCGGACGTGACCTTCACATTTCTGCACCTGACAATAAAAATGTACCTT  
CACCTATGTACCTTAGCGCGAAAATTTTCGATAGTGAAGCTACTTATAC

>M6-PGSC0003DMG400043836M6RLKmalectin\_2480

TACTCCTGCCCCCGTCCCTGCTCCTTCGACTCCTGACAACAGACCAGTTTCTACACCTGAGCAGACAAGA  
AATCCTGCTGAACTTCAAACAATTGACGATCATTGAGGAACAAAAATGTT

>M6-PGSC0003DMG400043836M6RLKmalectin\_2511

CCTGACAACAGACCAGTTTCTACACCTGAGCAGACAAGAAATCCTGCTGAACTTCAAACAATTGACGATC  
ATTCAGGAACAAAAATGTTTGATCAATTTGGTGCACCTAACGGGCGATGA

>M6-PGSC0003DMG400043836M6RLKmalectin\_310

ATGTACCTTCACCTATGTACCTTAGCGCGAAAATTTTCGATAGTGAAGCTACTTATACATTTTCATGTAACC  
AGTCCAGGCTTGCATTGGATCCGTCTTTATTTTTACCCTTTACAAAACA

>M6-PGSC0003DMG400043836M6RLKmalectin\_372

CATGTAACCAGTCCAGGCTTGCATTGGATCCGTCTTTATTTTTACCCTTTACAAAACAATGAATTTAATCTC  
CAAACAGCCAAATTCTCTGTTTCAGAGGATACATTAGTTCTCCTCCGA

>M6-PGSC0003DMG400043836M6RLKmalectin\_434

ATTTAATCTCCAAACAGCCAAATTCTCTGTTTCAGAGGATACATTAGTTCTCCTCCGAGACTACCAAATGG  
AGAAAAACGAACCAGTTATGAAAGAGTTTCTTGTAATGTCACAACAGA

>M6-PGSC0003DMG400043836M6RLKmalectin\_496

ACCAAATGGAGAAAAACGAACCAGTTATGAAAGAGTTTCTTGTAATGTCACAACAGAGCGTTATGCCA  
TCAAATTTGCACCTTCCAAGGCTCAATTGCATTGCCAACGCCATTGAGT

>M6-PGSC0003DMG400043836M6RLKmalectin\_558

TATGCCATCAAATTTGCACCTTCCAAGGCTCAATTGCATTGCCAACGCCATTGAGTTTGTTACTGCACC  
AGGCAAATTACTCGACTATTCTGTCCCTCTCCTTTTCCCCGTTTCACAG

>M6-PGSC0003DMG400043836M6RLKmalectin\_62

CGTGGCGTTTGTTTGCCTCATTTTCATCGGCCCTCGAGTGTAATTCCAGTTTCTGCACAATCAGATTCTA  
CTGCACCTGCAAAAATCTTTTCCAGCATTACACCTTCAGATAACTACCT

>M6-PGSC0003DMG400043836M6RLKmalectin\_620

TACTGCACCAGGCAAATTACTCGACTATTCTGTCCCTCTCCTTTTCCCCGTTTCACAGAAATTTGATCTTTC  
CACTAGTAATTTCGAAACAACCTATAGGCTTAATGTTGGAGGTGCATA

>M6-PGSC0003DMG400043836M6RLKmalectin\_682

TTGATCTTCCACTAGTAATTTGAAACAACCTATAGGCTTAATGTTGGAGGTGCATACCTTGATGCAAC  
AAATGACACTTTAGGGAGAAGTTGGTTATCCGATGAACCATTCCGTAATA

>M6-PGSC0003DMG400043836M6RLKmalectin\_744

GATGCAACAAATGACACTTTAGGGAGAAGTTGGTTATCCGATGAACCATTCCGTAATAGTGCCACAGGA  
CAGGTGGTTACTGTTGAGCCTTCTGTGATTGAGTATCCAACGGCAGGAGGG

>M6-PGSC0003DMG400043836M6RLKmalectin\_806

CACAGGACAGGTGGTTACTGTTGAGCCTTCTGTGATTGAGTATCCAACGGCAGGAGGGTGCCTTTAATT  
GCTCCTCCTACAGTTTACAGTTCAGCAGTGAAAATGGCTGATTCAGAAAC

>M6-PGSC0003DMG400043836M6RLKmalectin\_868

CTTTAATTGCTCCTCCTACAGTTTACAGTTCAGCAGTGAAAATGGCTGATTCAGAACTACCATTCCCAAT  
TTCAACATATCATGGACGATGGATATTGATACCTCATATACATACCTCA

>M6-PGSC0003DMG400043836M6RLKmalectin\_930

ATTCCCAATTTCAACATATCATGGACGATGGATATTGATACCTCATATACATACCTCATTGCGCTTCACTTC  
TGTGATATCATTAGCAAATCGCTCAATGAACTGTATTTCAACGTGTAC

>M6-PGSC0003DMG400043836M6RLKmalectin\_992

CCTTCACTTCTGTGATATCATTAGCAAATCGCTCAATGAACTGTATTTCAACGTGTACATTAATGATAAGA  
TGGCAATTTCCGGGCTAGACTTGTGATCTTTGACACAGCGGTTGTCCAC

>M6-PGSC0003DMG400044365-(rev)M6LRR-RLP\_0

ATTGAAAACCTCACCTCTGAAAAAGCGAAGATTGAGATAGAATGTGAAGATAATGACAGAATTGATAG  
GATCAGTCAACTACCTGAAGCTCTTATTGTTCAAATTCTATCTCGATTGTCC

>M6-PGSC0003DMG400044365-(rev)M6LRR-RLP\_1008

TGTTGATTGTGAATAGAGCTCCTATTTTATATTCTGCCTCATTCTTCTATTTAGGTAATTTCCAATTTGATG  
TTAAAAGAAGAAGATGTCTCTTTACCGTTGCTGGAATGCAGATGGTTG

>M6-PGSC0003DMG400044365-(rev)M6LRR-RLP\_1071

AATTTGATGTTAAAAGAAGAAGATGTCTCTTTACCGTTGCTGGAATGCAGATGGTTGACAATAAGTTCTT  
GTATTTCAAACCTTTTATTCCCTCTACTAGACAACCTCTTAAGGTCAACT

>M6-PGSC0003DMG400044365-(rev)M6LRR-RLP\_1134

AGTTCTTGATTTCAAACCTTTTATTCCCTCTACTAGACAACCTCTTAAGGTCAACTCGTAAATTGGAAAA

TTTGATGATATTTCTGATACTCCGGTATGTTTTCAATTCACGATATCT

>M6-PGSC0003DMG400044365-(rev)M6LRR-RLP\_1197

TTGGAAAATTTGATGATATTTCTGATACTCCGGTATGTTTTCAATTCACGATATCTTTATATCAAATGCAT

ATTAATCCCCTACAGCCTCAACAACCTTCAATTCATCACTGTAGTTGT

>M6-PGSC0003DMG400044365-(rev)M6LRR-RLP\_126

GATGCGTTAAGAACAACACTATTCTCTCTAAATATTGGCAATACTTCTGGACTTGTATCGACAACATTGTTTA

TGAAGAGGATTATAGTCGTTCAAATAGCTCGACAATGCACAAATTCATT

>M6-PGSC0003DMG400044365-(rev)M6LRR-RLP\_1260

CAAATGCATATTAATCCCCTACAGCCTCAACAACCTTCAATTCATCACTGTAGTTGTTAAGCTTACCACTTA

ACTTGATTTGTCCTTGTCTGTATTTTTAGTACCATCATTTTTTTGAG

>M6-PGSC0003DMG400044365-(rev)M6LRR-RLP\_1323

TACCACTTAACTTGATTTGTCCTTGTCTGTATTTTTAGTACCATCATTTTTTTGAGGACGAAGAGATAGAT

TTGTTGGAAGACAAGTACCTCTCCTTTGAAGAAAACATATTCAAAGTT

>M6-PGSC0003DMG400044365-(rev)M6LRR-RLP\_1374

TTTGAGGACGAAGAGATAGATTTGTTGGAAGACAAGTACCTCTCCTTTGAAGAAAACATATTCAAAGTTT

CCTTACAGAATTTGAAGAATGTCAAGGTTATGCCATTTTGTAGTCGTACG

>M6-PGSC0003DMG400044365-(rev)M6LRR-RLP\_63

GATAGGATCAGTCAACTACCTGAAGCTCTTATTGTTCAAATTCTATCTCGATTGTCCATAACAGATGCGTT

AAGAACAACACTATTCTCTCTAAATATTGGCAATACTTCTGGACTTGTATC

>M6-PGSC0003DMG400044365-(rev)M6LRR-RLP\_630

TTGAAGCTACAAGAATTTGTGGTTTTAATCGTTTGCACATGACTTCTCCAAAATGTAGGCGGCTGCATTT

GATCCATCACGGTCATCCTTGTGGGGATTGGTACTCATTGAAAGTGAT

>M6-PGSC0003DMG400044365-(rev)M6LRR-RLP\_693

CTGCATTTGATCCATCACGGTCATCCTTGTGGGGATTGGTACTCATTGAAAGTGATATATGTTGCTTTG

AAATTGTTGCTCCACATGTTGAACATTTAACGATTTCTGGGGTTTTTAAT

>M6-PGSC0003DMG400044365-(rev)M6LRR-RLP\_819

AAAATTAAGCTCAGAGACTTGTATCTTTGAAACATGCCAATCTTGATCTCGTCTGTGATGAATTTAATGA

AATGGATGAACACATAGTGAAAGATCTTTTGGTAAGCGTTCGTTGTGCT

>M6-PGSC0003DMG400044365-(rev)M6LRR-RLP\_882

TTAATGAAATGGATGAACACATAGTGAAAGATCTTTTGGTAAGCGTTCGTTGTGCTAATGAGCTAATAC  
TTCATCCTGGTTTATCAAGGTCAGTTATTAGTCCCAAATATCTAAAGTC

>M6-PGSC0003DMG400044365-(rev)M6LRR-RLP\_945

CTAATACTCTCATCCTGGTTTATCAAGGTCAGTTATTAGTCCCAAATATCTAAAGTCTTTTTATGTTGATTG  
TGAATAGAGCTCCTATTTTATATTCTGCCTCATTCTTCTATTTAGGTA

>M6-PGSC0003DMG400044406M6LRR-RLP\_0

CTTTAAGCAGCATTCAACAAGGATAAGATTGCAGAATCTAATGGTATAGAAGGTGAGGAATATCTTGTC  
AGGTCCCTTGTTAGTAGGGAGGCCACAGATGTCAGATTTGCTGCTATTGCC

>M6-PGSC0003DMG400044406M6LRR-RLP\_120

GTTAGAGCTGCAAATTATGGAGGTTTGGCAACGCTATCTATTCGGGGAGACAATCCTTGTCATGGTATG  
AGTGATGGTGGTCTCAAGGCTATAGCTTGATGTTGCCCTACTCTGAGAGAT

>M6-PGSC0003DMG400044406M6LRR-RLP\_180

CATGGTATGAGTGATGGTGGTCTCAAGGCTATAGCTTGATGTTGCCCTACTCTGAGAGATCTTTCCTTGT  
CGAATGTGTCATTAGTTGGTGATAAAGGCTTATATGAGATTGCTCATGGG

>M6-PGSC0003DMG400044406M6LRR-RLP\_240

CTTTCCTTGTCGAATGTGTCATTAGTTGGTGATAAAGGCTTATATGAGATTGCTCATGGGTGTCATCTGTT  
AGAGAAGCTTTATCTTTTCTAGTGCCCAAATTACCGACAATTCTTTGT

>M6-PGSC0003DMG400044406M6LRR-RLP\_300

TGTCATCTGTTAGAGAAGCTTTATCTTTTCTAGTGCCCAAATTACCGACAATTCTTTGTTGGACATTGCA  
AAGAATTGTACTIONCACCTGACCTTCTTGACGGTAGATTCTTGTTCAAATA

>M6-PGSC0003DMG400044406M6LRR-RLP\_360

TGGACATTGCAAAGAATTGTACTIONCACCTGACCTTCTTGACGGTAGATTCTTGTTCAAATATTGGGAATAA  
GTCGCCCAAAGTTGTGGGTCAATACTGTCTGAACCTGAAGCTCGTCATAT

>M6-PGSC0003DMG400044406M6LRR-RLP\_420

TTGGGAATAAGTCGCCCAAAGTTGTGGGTCAATACTGTCTGAACCTGAAGCTCGTCATATTGAAAAATT  
GTCCACTCATTGGGGATCGAGGAATTAAGATTTCTTTTATTCAGCTGGTC

>M6-PGSC0003DMG400044406M6LRR-RLP\_473

GTCATATTGAAAAATTGTCCACTCATTGGGGATCGAGGAATTAAGATTTCTTTTATTCAGCTGGTCATAT  
TTAACAGAAGTAGAGCTCCAGGCACTACACATCAGCGACATTTCTCTA



>M6-PGSC0003DMG400044406M6LRR-RLP\_60

TATCTTGTCAAGTCCCTTGTTAGTAGGGAGGCCACAGATGTCAGATTTGCTGCTATTGCCGTTAGAGCTG  
CAAATTATGGAGGTTTGGCAACGCTATCTATTCGGGGAGACAATCCTTGT

>M6-PGSC0003DMG400044512M6LRR-RLP\_0

ATGCCTATTTGTTTTCTAGCGAAGTGACGAATTGCAATCCTTGAGAAAGCTTTCTCTAACCCATGTCAA  
ATTAGATGAAAACATGCTACAACTCTACTTAATTGTTGTCCTTTGATT

>M6-PGSC0003DMG400044512M6LRR-RLP\_122

CAGTTTCATCTTTCATTATTGTTGGGGTTCAAAAAGATTGAGTTGACGTTGAATCTTCAAAAAGATCAAG  
TCAGTTTCCATTAAATCAAGAGAACAAAACGAACTTGTTAAAATCCAAGC

>M6-PGSC0003DMG400044512M6LRR-RLP\_183

AAGATCAAGTCAGTTTCCATTAAATCAAGAGAACAAAACGAACTTGTTAAAATCCAAGCACCAACTCTTG  
AACACCTGACTTATGACGGTATTTATGGGGAAAATTGGATATTGTTGAA

>M6-PGSC0003DMG400044512M6LRR-RLP\_244

CAACTCTTGAACACCTGACTTATGACGGTATTTATGGGGAAAATTGGATATTGTTGAATGTCAGAATCT  
AAAATCTTATAGATATATCATATGTGAGAATATCTGATGAATTTCTGCAGA

>M6-PGSC0003DMG400044512M6LRR-RLP\_305

TCAGAATCTAAAATCTTTAGATATATCATATGTGAGAATATCTGATGAATTTCTGCAGAACCTTAATTCTG  
GATCTCAATCCCTGAAGGACTTGAAGATTCGAAATTGTGAGGATATAGA

>M6-PGSC0003DMG400044512M6LRR-RLP\_366

CTTAATTCTGGATCTCAATCCCTGAAGGACTTGAAGATTCGAAATTGTGAGGATATAGAGGAGATTGATT  
CTTCGAATTTGGAGTCACTTGAGTATATGGGATATAAAAATTCCTAAACTA

>M6-PGSC0003DMG400044512M6LRR-RLP\_424

AGGAGATTGATTCTTCGAATTTGGAGTCACTTGAGTATATGGGATATAAAAATTCCTAAACTAAAATTGC  
AAGAAAATTGAAGCACTTGAATCAATCTTCAGTGCTTTAGCAGTTTAA

>M6-PGSC0003DMG400044512M6LRR-RLP\_61

CCCATGTCAAATTAGATGAAAACATGCTACAACTCTACTTAATTGTTGTCCTTTGATTGTCAGTTTCATCT  
TTCATTATTGTTGGGGTTCAAAAAGATTGAGTTGACGTTGAATCTTC

>M6-PGSC0003DMG400044624-(rev)M6LRR-RLP\_0

ATGAGTGAGGTAGCTAGAAATGCGAGGAAGTCTACCACTATATATCGGTGACTTACCAAATCGCATACT

ACATACAATACTAGAGTTTATGCCAATCCAAGATGCTGCAAGAACTAGCGT

>M6-PGSC0003DMG400044624-(rev)M6LRR-RLP\_1008

ACAACACATTGATATGTGGATTAGGTGGAATGTCATGGGTTTGAACCTTGTGCCGCTGGCCCTCTTGAAT  
TTCTTGTTTATAAAATGTGTATGTGTATATATAAGCTTTACTAATTTTTG

>M6-PGSC0003DMG400044624-(rev)M6LRR-RLP\_1071

CTTGAATTTCTTGTTTATAAAATGTGTATGTGTATATATAAGCTTTACTAATTTTTGAAAGATTGACTACCT  
TGTACAATATGATATTTTCCTCAGGTTGATGAGACAATACGTCACACA

>M6-PGSC0003DMG400044624-(rev)M6LRR-RLP\_1134

TGACTACCTTGTACAATATGATATTTTCCTCAGGTTGATGAGACAATACGTCACACAGATGAACTGCTTG  
ATTACTTGTCCGATGCAGTAAATGAAGTGATTGAAGCACTGAAGATGATT

>M6-PGSC0003DMG400044624-(rev)M6LRR-RLP\_1193

TGAACTGCTTGATTACTTGTCCGATGCAGTAAATGAAGTGATTGAAGCACTGAAGATGATTCGGACAGT  
GAGGTTAAGGAAATCAAAGGAACA ACTACTGAAATGTACTTGATAGAAGT

>M6-PGSC0003DMG400044624-(rev)M6LRR-RLP\_126

GAAGAAATGGATACCTATATGGTCCACACCTTGTGTTTGGTCCCCTATTTTTGAAGTATGTATCTAATATT  
ATATTGGTGCTTCTGCTGCAGCTGTAATTCATAAGATTCTAATGCAACA

>M6-PGSC0003DMG400044624-(rev)M6LRR-RLP\_189

CTAATATTATATTGGTGCTTCTGCTGCAGCTGTAATTCATAAGATTCTAATGCAACACACTGGAAATATTA  
TGGGATTTTCATCTTATCTTGAGTACGTGCAA ACTAGCACAGTCAGATGT

>M6-PGSC0003DMG400044624-(rev)M6LRR-RLP\_252

AAATATTATGGGATTTTCATCTTATCTTGAGTACGTGCAA ACTAGCACAGTCAGATGTGGATCAATGCATC  
ATTTTTGTCTTATAGCCTGGTATCCAGAAGGTC ACTCTCAATATGGCAAA

>M6-PGSC0003DMG400044624-(rev)M6LRR-RLP\_315

ATGCATCATTTTTGTCTTATAGCCTGGTATCCAGAAGGTC ACTCTCAATATGGCAAACGATGAAAATTACT  
TGTTGCCTGATAGAATTTTACTTGTGCAACATTGACACATTTGAAGCT

>M6-PGSC0003DMG400044624-(rev)M6LRR-RLP\_378

AAATTA CTGTTGCCTGATAGAATTTTACTTGTGCAACATTGACACATTTGAAGCTCTCAAGGTGTATCT  
TTAAGCTTCCGGATGGTACCAAATTTCCCAATCTTATTAGCCTTCAGTT

>M6-PGSC0003DMG400044624-(rev)M6LRR-RLP\_441

GTGTATCTTTAAGCTTCCGGATGGTACCAAATTTCCCAATCTTATTAGCCTTCAGTTAGAACATTCTGAAA  
TTGTCAATCATCAAGGATCAGCACTCTATCTTTCAAAGCTTGAGACTTT

>M6-PGSC0003DMG400044624-(rev)M6LRR-RLP\_504

TTCTGAAATTGTCAATCATCAAGGATCAGCACTCTATCTTTCAAAGCTTGAGACTTTAGAGTTGACATTTT  
GTGTTGATGTTGATTCTGTTAATATTGTTTCTCCAAAACCTTGGAACCT

>M6-PGSC0003DMG400044624-(rev)M6LRR-RLP\_567

GACATTTTGTGTTGATGTTGATTCTGTTAATATTGTTTCTCCAAAACCTTGGAACCTTGCTATCCTTAGCAG  
CTATACGGTAACATTTGAGTGTTTTAATGTGAACCCAATACTTGAGAG

>M6-PGSC0003DMG400044624-(rev)M6LRR-RLP\_63

CATACTACATAACAATACTAGAGTTTATGCCAATCCAAGATGCTGCAAGAACTAGCGTCTTATCGAAGAAA  
TGGATACCTATATGGTCCACACCTTGTTTGGTCCCCTATTTTTGAAGT

>M6-PGSC0003DMG400044624-(rev)M6LRR-RLP\_630

CCTTAGCAGCTATACGGTAACATTTGAGTGTTTTAATGTGAACCCAATACTTGAGAGGATTAAGCACCTA  
TGCTTGGATGGCTCATCCCTAAAGGTGAGAAAATGACTGACTTGCTTTCT

>M6-PGSC0003DMG400044624-(rev)M6LRR-RLP\_693

GCACCTATGCTTGGATGGCTCATCCCTAAAGGTGAGAAAATGACTGACTTGCTTTCTTTCTTATTTGAAAT  
ATGAAGTACTAACTATTTACTCTAATAATGTTTTGCTGCCTCTCAGAA

>M6-PGSC0003DMG400044624-(rev)M6LRR-RLP\_756

TTTGAAATATGAAGTACTAACTATTTACTCTAATAATGTTTTGCTGCCTCTCAGAACTTAGGGTTCGGTTC  
CTGTTCCAGATATGCTTGATGTATCACTAACTTGCAAAGCCTGAGAAT

>M6-PGSC0003DMG400044624-(rev)M6LRR-RLP\_819

GTCGGTTCCTGTTCCAGATATGCTTGATGTATCACTAACTTGCAAAGCCTGAGAATTTGTGACTTGAAG  
ATTTCTGTTAAACGTATTTCTTGTCACCTTTGCCTATTAAGGAATTCACC

>M6-PGSC0003DMG400044624-(rev)M6LRR-RLP\_882

CTTGAAGATTTCTGTTAAACGTATTTCTTGTCACCTTTGCCTATTAAGGAATTCACCTAACCTTGCTGAACT  
TGACATAGATGAAGTTGTGAAGGTTAGACATACCTTGACTCTTGTGTT

>M6-PGSC0003DMG400044624-(rev)M6LRR-RLP\_945

TGCTGAACTTGACATAGATGAAGTTGTGAAGGTTAGACATACCTTGACTCTTGTGTTAAGACTACAACAC  
ATTGATATGTGGATTAGGTGGAATGTCATGGGTTTGAACCTTGCGCGCT

>M6-PGSC0003DMG400044936-(rev)M6LRR-RLP\_0

ATGGCCTCCACTACTTTTCGCAATTTGCATAGCTACACCAATAGTAGTAGTACTGCATTATTACCAGATGA  
TATCCTTCACAAAATCCTCTGTTCTCTTAATCTCAGAAACAGAGCAATT

>M6-PGSC0003DMG400044936-(rev)M6LRR-RLP\_1050

AGGTTGGTTCGGTACTTGAGAGCTTTGGGAGAAAATTTGGGTGATAATTTGACCTTTTCTCTAACAACTG  
ATGCAGCAACTGAATCAAAGCTGATGCAGCAACTGAATCAAAGGTATTGA

>M6-PGSC0003DMG400044936-(rev)M6LRR-RLP\_124

CCCAGGTTTGTA AAACTTGGCATGACATTATATCATTGTGTAACATTAACGATAACATTATCAACGACCA  
CGTATTACAAGCACAAGTTTCTAACCGCACATTCTGTGCATACTGCTGCT

>M6-PGSC0003DMG400044936-(rev)M6LRR-RLP\_186

AACGACCACGTATTACAAGCACAAGTTTCTAACCGCACATTCTGTGCATACTGCTGCTCTCGAATTGTCCA  
TCGAATCTGCTATCACAGTCTCTATCCTATAGTTGTCAAGTTTGCTTCC

>M6-PGSC0003DMG400044936-(rev)M6LRR-RLP\_248

AATTGTCCATCGAATCTGCTATCACAGTCTCTATCCTATAGTTGTCAAGTTTGCTTCCGACAACATCAATTT  
CGAGGAATTATATTTGATTGCTACTGTTACCTCATTAGCATTGTCCCC

>M6-PGSC0003DMG400044936-(rev)M6LRR-RLP\_310

ACATCAATTTTCGAGGAATTATATTTGATTGCTACTGTTACCTCATTAGCATTGTCCCCCGCAATTTTCAAT  
CAAGAGTATTGTTAACCGTTTTATGTTTAAAAAACTGCAAATTTGAGG

>M6-PGSC0003DMG400044936-(rev)M6LRR-RLP\_372

ATTTTTCAATCAAGAGTATTGTTAACCGTTTTATGTTTAAAAAACTGCAAATTTGAGGATGAAGCATTTGA  
TGATATTCAAGAGATGAATTTATTGAAGGAGATTTATTTTGTTCGGTT

>M6-PGSC0003DMG400044936-(rev)M6LRR-RLP\_434

AGCATTGATGATATTCAAGAGATGAATTTATTGAAGGAGATTTATTTTGTTCGGTTCAAATCTCTCCCA  
TAAATTTTCGTAAAACCTTATCAACAATTGCCTTCTATTGCTGATTTAAC

>M6-PGSC0003DMG400044936-(rev)M6LRR-RLP\_496

TCTCTCCATAAATTTTCGTAAAACCTTATCAACAATTGCCTTCTATTGCTGATTTAACCTTGATCAATTGCT  
ACAACGAATTTGGAGTATTTCCCATCTTATTGCCTGATTTGAATCAAC

>M6-PGSC0003DMG400044936-(rev)M6LRR-RLP\_558

ATCAATTGCTACAACGAATTTGGAGTATTTCCCATCTTATTGCCTGATTTGAATCAACTTAAAAAGGTTCA

TTTGAGTGGTACTGGAATTGGGCCAATTGAAATAAAAGCTCGAAATTTA

>M6-PGSC0003DMG400044936-(rev)M6LRR-RLP\_62

ACCAGATGATATCCTTCACAAAATCCTCTGTTCTCTTAATCTCAGAAACAGAGCAATTGCTTCCCAGGTTT

GTAAAACTTGGCATGACATTATATCATTGTGTAACATTAACGATAACAT

>M6-PGSC0003DMG400044936-(rev)M6LRR-RLP\_620

AAAGGTTCAATTTGAGTGGTACTGGAATTGGGCCAATTGAAATAAAAGCTCGAAATTTACGAGAGTTTCA

CTTGTTAAGATCCTTAGCAGTGAAACTTGATTTAAGTGCTTGTACTAAGCT

>M6-PGSC0003DMG400044936-(rev)M6LRR-RLP\_682

AGTTTCACTTGTTAAGATCCTTAGCAGTGAAACTTGATTTAAGTGCTTGTACTAAGCTACATGTTCTGAAA

ATTGATTGTGAGTATATTCCTATCGGATTTCTAATGATATTTCTTCAG

>M6-PGSC0003DMG400044936-(rev)M6LRR-RLP\_744

GTTCTGAAAATTGATTGTGAGTATATTCCTATCGGATTTCTAATGATATTTCTTCAGCATTCCCCTGTCTT

AAATCGTTGTTTCTTCGTTCTGTGCAAAGGATTGAAAATTTTCAAACCTT

>M6-PGSC0003DMG400044936-(rev)M6LRR-RLP\_806

CCCCTGTCTTAAATCGTTGTTTCTTCGTTCTGTGCAAAGGATTGAAAATTTTCAAACCTTTCGAGTCCTGAAT

TGGAGAATTTGACGTTAAGTAACATGGTTGATTTGAATGATGCTGTCAT

>M6-PGSC0003DMG400044936-(rev)M6LRR-RLP\_868

GTCCTGAATTGGAGAATTTGACGTTAAGTAACATGGTTGATTTGAATGATGCTGTCATTGTTACTCCCAA

TTTACGTTCTCAAGATAGTAGATATGAAACAAGTCCCAAACCTCGTGTC

>M6-PGSC0003DMG400044936-(rev)M6LRR-RLP\_930

ACTCCCAATTTACGTTCTCAAGATAGTAGATATGAAACAAGTCCCAAACCTCGTGTCATCGTTGGTT

CGAGTCTCATGGAAGTCGAGATTGGATTTAAGTACGTTACCTCGATCAGT

>M6-PGSC0003DMG400044936-(rev)M6LRR-RLP\_992

CGTTGGTTTCGAGTCTCATGGAAGTCGAGATTGGATTTAAGTACGTTACCTCGATCAGTAGGTTGGTTTCG

GTAATTGAGAGCTTTGGGAGAAAATTTGGGTGATAATTTGACCTTTTCTCT

>M6-PGSC0003DMG400044943M6G-LecRK\_0

ATGGCTTCATGCTTTCTTTGTTTACTATCTGTCATCTTTTTATCTCCATAGCCCTGTATGCATGTTCCGCTG

GTGCTACTGACTCCTTGTGTTGCATATCAATTCATCACCAACTTGAAC

>M6-PGSC0003DMG400044943M6G-LecRK\_1054

TGTTTGTCAAGAACACTGAACTAAAGTTGCCTGATAAAGCTACTTACTGGGGAATGTTGTACCCTCAGGA  
CTGTGAACAGAAGTGCTTAAACAAAAGATCGTGTATGGCTTATACTAACA

>M6-PGSC0003DMG400044943M6G-LecRK\_1116

CCTCAGGACTGTGAACAGAAGTGCTTAAACAAAAGATCGTGTATGGCTTATACTAACATCAATATCAACG  
GAAATGGAAGCAAATGCGTTGTTTGGTTGGGAGATTTACTTGATATGAGA

>M6-PGSC0003DMG400044943M6G-LecRK\_1178

TATCAACGGAAATGGAAGCAAATGCGTTGTTTGGTTGGGAGATTTACTTGATATGAGACGTTACCGGAT  
AGCTGGGAACGACATTTTTATAAGGATGGCAAATGGAAAACCCGGTAAAAA

>M6-PGSC0003DMG400044943M6G-LecRK\_124

TAGTTTCATCCAACCATAATTTTCGTAATTGGATTTTTTGGTTATTATTCATCGACTCTACGTGTATGCAAGA  
CGTACCTGGGATTGGGGTACAGGAGTGTAGATCCCAGGGCTATAGTAT

>M6-PGSC0003DMG400044943M6G-LecRK\_1240

CACGGATAGCTGGGAACGACATTTTTATAAGGATGGCAAATGGAAAACCCGGTAAAAATGATTGCTTAC  
TTGTGATATGATTACTTGCTTATGACACGACAATAATTCAATGCCTAAAT

>M6-PGSC0003DMG400044943M6G-LecRK\_1302

TGCTTACTTGTGATATGATTACTTGCTTATGACACGACAATAATTCAATGCCTAAATTATTTTTAGTATA  
GTGCAAAGTTATGTGTGCATGAATGACATTTGAATGGTGAAGTAGTTAA

>M6-PGSC0003DMG400044943M6G-LecRK\_1364

TTTAGTATAGTGCAAAGTTATGTGTGCATGAATGACATTTGAATGGTGAAGTAGTTAATTGTTGGTGCAT  
AAACATCAATAAATAGAATTTCCATATTAGTGCTTGATTAAGTGATTCCT

>M6-PGSC0003DMG400044943M6G-LecRK\_1426

TGGTGCATAAACATCAATAAATAGAATTTCCATATTAGTGCTTGATTAAGTGATTCCTGCAGCTTTGTCTT  
TTTTTAAAAAAAATAAAAATTGTGTCTATAACTTGATTCTTACATGAA

>M6-PGSC0003DMG400044943M6G-LecRK\_1488

CTTTGTCTTTTTTAAAAAAAATAAAAATTGTGTCTATAACTTGATTCTTACATGAACCACTCATCCCTCA  
TCTCTATCAGAGGGAAACAGTTCTATAACTTTTCAAATGCATATGTA

>M6-PGSC0003DMG400044943M6G-LecRK\_1550

TCATCCCTCATCTCTATCAGAGGGAAACAGTTCTATAACTTTTCAAATGCATATGTATCTCCGTTATATA  
GAAACATTAGATGTGTTTCAAGCATTTTACTGAATGTTGTCACATAACT

>M6-PGSC0003DMG400044943M6G-LecRK\_1612

CGTTATATAGAAACATTAGATGTGTTTCAAGCATTTTACTGAATGTTGTCACATAACTGCTACACAATCTA  
GCAAAAGTTGACACTAACCTGCATGCATCTAGTTGTTCTCATAGCAAAA

>M6-PGSC0003DMG400044943M6G-LecRK\_1674

CACAATCTAGCAAAAGTTGACACTAACCTGCATGCATCTAGTTGTTCTCATAGCAAAAATCTTTAACTTTGT  
ATCAACAGAATATTATGAGTAAGAAAACAACTAACACCTTTTACTTTCT

>M6-PGSC0003DMG400044943M6G-LecRK\_1736

TAACTTTGTATCAACAGAATATTATGAGTAAGAAAACAACTAACACCTTTTACTTTCTTATGAACAGATGC  
ACCTGTTTCCCATGGGAAAAGAAAATTGAATGAGGGATCGATAGCAGTG

>M6-PGSC0003DMG400044943M6G-LecRK\_1798

AACAGATGCACCTGTTTCCCATGGGAAAAGAAAATTGAATGAGGGATCGATAGCAGTGATTTCTGTATT  
AGTTCTGGAAGTACTTATCTCGATTTTCATATATTGTGTATACACATCGAGC

>M6-PGSC0003DMG400044943M6G-LecRK\_186

GTATGCAAGACGTACCTGGGATTGGGGTACAGGAGTGTAGATCCCAGGGCTATAGTATGGGTAGGTAA  
TGAATTGAATCCACTTGGATGTTTTACAGCGCTAGCACTAACCAAAGAAGGA

>M6-PGSC0003DMG400044943M6G-LecRK\_1860

CTGTATTAGTTCTGGAAGTACTTATCTCGATTTTCATATATTGTGTATACACATCGAGCAAAGAGTACAGA  
GGTGCTAGGTAATGAATCACCTCTCGCTGCTTATATATTATTTTCATA

>M6-PGSC0003DMG400044943M6G-LecRK\_1922

AGTACAGAGGTGCTAGGTAATGAATCACCTCTCGCTGCTTATATATTATTTTCATAGTTATTTTTTTCA  
GCCAACCTTAGTTTCACTCAAACACCATTCATGAGCAAAACCTCCTTT

>M6-PGSC0003DMG400044943M6G-LecRK\_1984

TTTTTTTCAGCCCAACCTTAGTTTCACTCAAACACCATTCATGAGCAAAACCTCCTTTCAACTCTTGAGACA  
ACAAGAATGAGCAGAGACATTGTTCAAAGCATCTTGTTCTGCCAATA

>M6-PGSC0003DMG400044943M6G-LecRK\_2046

TCTTGAGACAACAAGAATGAGCAGAGACATTGTTCAAAGCATCTTGTTCTGCCAATACCCTTTAGTTTG  
TAATGAAAAACAAAATTTACTTAGAGCACACATGACTCTGTAACCTAGCT

>M6-PGSC0003DMG400044943M6G-LecRK\_2108

TTAGTTTGTAATGAAAAACAAAATTTACTTAGAGCACACATGACTCTGTAACCTAGCTTGTGGTTCGCTTC

CATTATTGTCTGATATATTTGTTTTGAAAATGAATATCTTCATCTGAG

>M6-PGSC0003DMG400044943M6G-LecRK\_2170

GTTTCGCTTCCATTATTGTCTGATATATTTGTTTTGAAAATGAATATCTTCATCTGAGCAGATGTCATTGC

GCCAGAAAATTCTATAGGAGCTTTGCTGCAGGGAACAGATGCTATTGCA

>M6-PGSC0003DMG400044943M6G-LecRK\_2232

TGTCATTGCGCCAGAAAATTCTATAGGAGCTTTGCTGCAGGGAACAGATGCTATTGCATATGATTCCAGT

GATCTAGCTGCAGCCACTGACAATTTCTCGCTGTCTAATAAGATAGGGCA

>M6-PGSC0003DMG400044943M6G-LecRK\_2356

GGCTTTGGCAATGTTTATAAGGTTAGTATTTCTTTTCAACAAGCATGAGCATGCATATTTACAGTAACTCA

GACAACACAATTAATACCCAAATGATACATAAATCTGTAGGGTGTACTA

>M6-PGSC0003DMG400044943M6G-LecRK\_2418

AGTAACTCAGACAACACAATTAATACCCAAATGATACATAAATCTGTAGGGTGTACTAGAGAATGGAGT

AGAAATAGCAGTGAAGAAGCAAGACGTGGCTTTGCGTCAAGGAGTTGAGGA

>M6-PGSC0003DMG400044943M6G-LecRK\_248

AGGTAATGAATTGAATCCACTTGATGTTTTACAGCGCTAGCACTAACCAAAGAAGGATTTTATGTCAA

GATATAGTACTGGGAACAACGGTATGGATTCATAAGCCCAACAGAACAGT

>M6-PGSC0003DMG400044943M6G-LecRK\_2480

ATGGAGTAGAAATAGCAGTGAAGAAGCAAGACGTGGCTTTGCGTCAAGGAGTTGAGGAGTTGAGAA

TGAAGTCAAATTAATTGCAAACCTACAGCATCGTAATCTAACCAAGTTGTTGG

>M6-PGSC0003DMG400044943M6G-LecRK\_2542

GAGAATGAAGTCAAATTAATTGCAAACCTACAGCATCGTAATCTAACCAAGTTGTTGGGATACTGCATTC

ATGGAATAGAAAAATTCGTAGTCTATGAGTTCATGGCGAATAAAAGCCTA

>M6-PGSC0003DMG400044943M6G-LecRK\_2604

CTGCATTCATGGAATAGAAAATTCGTAGTCTATGAGTTCATGGCGAATAAAAGCCTAGACAAGGTCAT

ATTTGGTAGGTGATCATCTTAAATAACAACCTTTGTTTTACTATTATTTGTG

>M6-PGSC0003DMG400044943M6G-LecRK\_2666

AGGTCATATTTGGTAGGTGATCATCTTAAATAACAACCTTTGTTTTACTATTATTTGTGTTATTTTGATATTG

GACAAGCCATAAGAGAGAAATTTTATTAGGCCTATCCGAGTGAAATAG

>M6-PGSC0003DMG400044943M6G-LecRK\_2728



TTTGATATTGGACAAGCCATAAGAGAGAAATTTTATTAGGCCTATCCGAGTGAAATAGGGTAACTGTTTT  
CTCTACATGTCCAGATGCTGCAAGAAGGGCTACAGTAACATGGCCAACGC

>M6-PGSC0003DMG400044943M6G-LecRK\_2790

ACTGTTTTCTCTACATGTCCAGATGCTGCAAGAAGGGCTACAGTAACATGGCCAACGCGCTTAAACATTA  
TCAAAGGAATCGCAAGAGGACTAGTTTACATGCATCATGACTCGAGGTTG

>M6-PGSC0003DMG400044943M6G-LecRK\_2852

AAACATTATCAAAGGAATCGCAAGAGGACTAGTTTACATGCATCATGACTCGAGGTTGACAGTAATCCA  
CCGGGACCTAAAAGCTAGCAATGTCTTGCTAGACAGCGAGATGACACCCAA

>M6-PGSC0003DMG400044943M6G-LecRK\_2914

TAATCCACCGGGACCTAAAAGCTAGCAATGTCTTGCTAGACAGCGAGATGACACCCAAGATATCTGACT  
TTGGGTTGGCAAGGGAATTTGAAGACGATGTTGAAGTGAAGACTCACCGTG

>M6-PGSC0003DMG400044943M6G-LecRK\_2976

TCTGACTTTGGGTTGGCAAGGGAATTTGAAGACGATGTTGAAGTGAAGACTCACCGTGTAGCTGGAACA  
TAGTAAGTAGACTAGCACTCATTATCATTAACTACTACATGTTTATGCATAT

>M6-PGSC0003DMG400044943M6G-LecRK\_3038

TGGAACATAGTAAGTAGACTAGCACTCATTATCATTAACTACTACATGTTTATGCATATTTTACAGATAGTC  
TTATGTTGTGGCTGTAGTGGCTATATGTCTCCTGAATACATGCAAGCTG

>M6-PGSC0003DMG400044943M6G-LecRK\_310

ATGTCAAAGATATAGTACTGGGAACAACGGTATGGATTGATAAGCCCAACAGAACAGTTCCGTCACCAG  
TTCTGAAGCTCCTTGATTCAGGTAATCTTGTGTTTGGAGATTCTAGCAATC

>M6-PGSC0003DMG400044943M6G-LecRK\_3100

CAGATAGTCTTATGTTGTGGCTGTAGTGGCTATATGTCTCCTGAATACATGCAAGCTGGACATTATTCAA  
CAAAATCAGATGTGTTTCAGTTTTGGAATTTTGACATTGGAGATTGTGAGT

>M6-PGSC0003DMG400044943M6G-LecRK\_3162

TTATTCAACAAAATCAGATGTGTTTCAGTTTTGGAATTTTGACATTGGAGATTGTGAGTGGCCAAAGGAAT  
TCGATTTATCGGCACCCAACCTATGATGTTGGTCTAGTAGGCTATGTAAG

>M6-PGSC0003DMG400044943M6G-LecRK\_3224

AAAGGAATTCGATTTATCGGCACCCAACCTATGATGTTGGTCTAGTAGGCTATGTAAGTATATCATCCCC  
TGATTATGGTCACTACTTGTACACCTAAGTTTCACCTTGTGCTAAAACAA

>M6-PGSC0003DMG400044943M6G-LecRK\_3286

TCATCCCCTGATTATGGTCACTACTTGTACACCTAAGTTTCACCTTGTGCTAAAACAATTTACATGCATGA  
TTGATCTTTTGTGGTTCAGGCTTGAAAAATTTGGAATGAAGGGAATGCC

>M6-PGSC0003DMG400044943M6G-LecRK\_3348

CATGCATGATTGATCTTTTGTGGTTCAGGCTTGAAAAATTTGGAATGAAGGGAATGCCATAGAACTACT  
GGATCCACTGATAGATAAACCAGATGATTTGGATGAAGTTTTAGGATGCAT

>M6-PGSC0003DMG400044943M6G-LecRK\_3410

AACTACTGGATCCACTGATAGATAAACCAGATGATTTGGATGAAGTTTTAGGATGCATCCATGTTGGGA  
TCTTGTGTTGTCAACGGCGATCCCAAGACAGACCTTCAATGGTTCAGGTGG

>M6-PGSC0003DMG400044943M6G-LecRK\_3472

GTTGGGATCTTGTGTTGTCAACGGCGATCCCAAGACAGACCTTCAATGGTTCAGGTGGTTTCCTTACTGG  
AGGAGAATGAAATGTTAAAGTTTAATTGTGTGCCCGGGAACCTTACTTC

>M6-PGSC0003DMG400044943M6G-LecRK\_3534

CTTACTGGAGGAGAATGAAATGTTAAAGTTTAATTGTGTGCCCGGGAACCTTACTTCTATAGGGAGAC  
GAGTCAGAGTAGCAGGAGTCGCGAAAGTATGAATGGGCTAAGTATTACTGA

>M6-PGSC0003DMG400044943M6G-LecRK\_372

TCACCAGTTCTGAAGCTCCTTGATTCAGGTAATCTTGTGTTTGGAGATTCTAGCAATCTGACGGCTGGAG  
AGTATCTGTGGCAAAGCTTTGACCACCCTTTCACACATTGTTACCAGGA

>M6-PGSC0003DMG400044943M6G-LecRK\_434

GGCTGGAGAGTATCTGTGGCAAAGCTTTGACCACCCTTTCACACATTGTTACCAGGAATGAAGCTTGG  
CTGGGACAAGAAAACCTGGCATCGACCGATCCATGAGGTCCAGGAGGACAGA

>M6-PGSC0003DMG400044943M6G-LecRK\_558

GATCCAGCTCCAGGTGATTATTTGTTAAGGTTAGACTTAGGTGACTCAGGTCAGTTACCCCAACTAGTTC  
TTGAGAAAAACCAGCAAATACAATCAAGATGGGGTCCTTGGGATGGAGAA

>M6-PGSC0003DMG400044943M6G-LecRK\_62

ATGTTCCGCTGGTGCTACTGACTCCTGTTTGCATATCAATTCATCACCAACTTGAACCCTTTAGTTTCATC  
CAACCATAATTTCTGAATTGGATTTTTTGGTTATTATTCATCGACTCT

>M6-PGSC0003DMG400044943M6G-LecRK\_620

ACTAGTTCTTGAGAAAAACCAGCAAATACAATCAAGATGGGGTCCTTGGGATGGAGAAAAATTCAGTG

GCGGTAATGCCCTCATGGATAGCCATGCATTCAGACCAATATTTTCATTCCGA

>M6-PGSC0003DMG400044943M6G-LecRK\_744

GATGCGATTTTTTTCACATTTCGAAGCCAAAGAGGATTTCGAGTTTGATACTTTCACTGAATCCAGATGGGA  
AACTACAATTCTTGAGATGGGATAATAATGCTACCAATTTCTGGGATGAA

>M6-PGSC0003DMG400044943M6G-LecRK\_806

AGATGGGAAACTACAATTCTTGAGATGGGATAATAATGCTACCAATTTCTGGGATGAAGTGAAGACACT  
CAATATGGCCATATGTGACCAGTATAGCACATGTGGGCCTTATGGAGTTTG

>M6-PGSC0003DMG400044943M6G-LecRK\_868

AGACTCAATATGGCCATATGTGACCAGTATAGCACATGTGGGCCTTATGGAGTTTGTACTGATGGAG  
AATCCCCTGTGAATGTCCTGATGGTTTCACAGCTGTATCACCAGAAGAAT

>M6-PGSC0003DMG400044943M6G-LecRK\_930

GATGGAGAATTCCCCTGTGAATGTCCTGATGGTTTCACAGCTGTATCACCAGAAGAATGGGACAAGATG  
AATTCATGGAAGGATGTAGGAGAAACACCTCACTTAACTATACTGATAAA

>M6-PGSC0003DMG400044943M6G-LecRK\_992

CAAGATGAATTTTCATGGAAGGATGTAGGAGAAACACCTCACTTAACTATACTGATAAAGACGTGTTTGT  
CAAGAACTGAACAAAGTTGCCTGATAAAGCTACTTACTGGGGAATGTT

>M6-PGSC0003DMG400045368M6LRR-RLP\_0

ATGGTGGATTTTGAGGCATTCCAATTGATATTTAATGGCATTTCAGCAGCTGTCGTCCCTTCGTACATTGG  
GGGTGTGGGGACACTTGCCTGGGATTCACTGCCCTATCAGCTTACGCAA

>M6-PGSC0003DMG400045368M6LRR-RLP\_114

ACGCAACTCTCTAATCTAACAGATATAAAAATGTATGGATTTCAGAATCGAGGCTCTTCCTCATAGATTTG  
CCAGCCTTACTTCTCTTGAAAGATTAACACTAGTGGGGTGCAAACGGCTA

>M6-PGSC0003DMG400045368M6LRR-RLP\_171

CCTCATAGATTTGCCAGCCTTACTTCTCTTGAAAGATTAACACTAGTGGGGTGCAAACGGCTATAACATA  
TGGACTTCTCAGATGCCATGCCCAAATTACGATATTTGTGGATAAATGAT

>M6-PGSC0003DMG400045368M6LRR-RLP\_228

CGGCTATAACATATGGACTTCTCAGATGCCATGCCCAAATTACGATATTTGTGGATAAATGATTGTCCAT  
TGTTAGAAGATCTATCGGATGGACTCAGCAACCTTGTTTCTTTGCAAAG

>M6-PGSC0003DMG400045368M6LRR-RLP\_285

AATGATTGTCCATTGTTAGAAGATCTATCGGATGGACTCAGCAACCTTGTTTCTTTGCAAAGTTAGTTTT  
ACAGAAATGCGAGAACTAGAGCATCTCCATCTAGGGATGCCATGCGA

>M6-PGSC0003DMG400045368M6LRR-RLP\_57

CTTCGTACATTGGGGGTGTGGGGACACTTGCACTGGGATTCACTGCCCTATCAGCTTACGCAACTCTCTA  
ATCTAACAGATATAAAAATGTATGGATTGAGAATCGAGGCTCTTCCTCAT

>M6-PGSC0003DMG400045411M6LRR-RLP\_0

ATGAGCAACCAAGACCAATTCTCTGGCAACTCAGAAAGTCTGCTTATTGAAAACCTCACCTCAAGAAAA  
GCAAAGATTGAGATAGAATGTGAAGATATTTATAGGATCAGTCAACTACCT

>M6-PGSC0003DMG400045411M6LRR-RLP\_130

TTGTTCAAATTCTATCTCGATTGTCCATAACATATGAGTTCAGAACAACCTATTCTCTCTAAGCATTGGCAA  
TACTTCTGGACTTGTGTGCGACAACATTATTTATGAAGAAAAGTATGGTC

>M6-PGSC0003DMG400045411M6LRR-RLP\_65

AAAAGCAAAGATTGAGATAGAATGTGAAGATATTTATAGGATCAGTCAACTACCTGACGCTCTTATTGTT  
CAAATTCTATCTCGATTGTCCATAACATATGAGTTCAGAACAACCTATTCT

>M6-PGSC0003DMG400045777-(rev)M6LRR-RLP\_0

TGGGACTTCTTGAGGCACCTAAACCTTTCACATAATTCATTAACAGGCCACCTACCACAATTCATTATTA  
TAGTCTAGAGTCTCTTGATCTAAAATTTAACTTCCTTGAGGAGTCACTA

>M6-PGSC0003DMG400045777-(rev)M6LRR-RLP\_124

CATCGATTTGTAACATGAGTAATCTTAGACTTCTCACAGATGATATTCCAATGGAACCTGGGACAGTTAAA  
TACACTGAAGCATTAGATCTCTCTTGTAATCTGCTCACAGGAAAGATTC

>M6-PGSC0003DMG400045777-(rev)M6LRR-RLP\_186

CAGTTAAATACACTTGAAGCATTAGATCTCTCTTGTAATCTGCTCACAGGAAAGATTCCGCGAGAATTGA  
CAAGGCTAACCTTTCTGGAAATGTTAACCTCTCTCAGAATCTTCTTGTC

>M6-PGSC0003DMG400045777-(rev)M6LRR-RLP\_248

AGAATTGACAAGGCTAACCTTTCTGGAAATGTTAACCTCTCTCAGAATCTTCTTGTCGGGCCACAACCTCA  
ACACATTTGAAAATGACTCATATGGTGGGAAACCTTGATTTATGCAGTC

>M6-PGSC0003DMG400045777-(rev)M6LRR-RLP\_62

TCATTATTATAGTCTAGAGTCTCTTGATCTAAAATTTAACTTCCTTGAGGAGTCACTACCTTCATCGATTG  
TAACATGAGTAATCTTAGACTTCTCACAGATGATATTCCAATGGAACCT

>M6-PGSC0003DMG400045997M6G-LecRK\_0

ATGACTTTTTTAGCTATGCTTCTTGTTGGTCTCTTATTGTTCCCTTCAGCCATTGCTCAATCTTACCAA  
ATGTTAGTTTGGGTTTCATCACTCACTACAAGTGATGTTACTAGCTTT

>M6-PGSC0003DMG400045997M6G-LecRK\_1054

TCACATTCCATGAAATGTTGGATACTAACTGGCCTGACTCTGATTATGAGTCTCACCGCGATGTTTCAGA  
GGATTGGTGCAGACAGAATTGCTTGAATGATTGTTTTGTGATGTTGCCA

>M6-PGSC0003DMG400045997M6G-LecRK\_1116

GTTTCAGAGGATTGGTGCAGACAGAATTGCTTGAATGATTGTTTTGTGATGTTGCCATTTACAGTGACG  
ACAACATCTGTTGGAAGAAAAGGTATCCTCTTCAAATGGGAGAGTAGGT

>M6-PGSC0003DMG400045997M6G-LecRK\_1178

CAGTGACGACAACATCTGTTGGAAGAAAAGGTATCCTCTTCAAATGGGAGAGTAGGTCCAACGATCGG  
AGGGAAGGCTTTGATAAAAATAAGGAAAGACAACCTCCACAGTGGGAACACC

>M6-PGSC0003DMG400045997M6G-LecRK\_124

CATCCCCATCTGATGAATTCGCTTTGGGCTTCCAAAAAATTGGAAATGAATCAAGGTACTTACTAGCCAT  
ATGTTCAACAAAATCACAGACAAAACCATAGTTTGGTCAGCCAATAGGA

>M6-PGSC0003DMG400045997M6G-LecRK\_1240

CGATCGGAGGGAAGGCTTTGATAAAAATAAGGAAAGACAACCTCCACAGTGGGAACACCAAATGTTGAA  
ATAAGAAAAAAGAAAAATCAGTCTACTCTGATCATTTCTGGTTCTGTGTTGT

>M6-PGSC0003DMG400045997M6G-LecRK\_1302

GTTGAAATAAGAAAAAAGAAAAATCAGTCTACTCTGATCATTTCTGGTTCTGTGTTGTTGGCCAGTTCAG  
TTTTCATGAATTTGTTCTTAATTCTTTTGGTCCTATTGTACATTTTTAAG

>M6-PGSC0003DMG400045997M6G-LecRK\_1364

CAGTTCAGTTTTCATGAATTTGTTCTTAATTCTTTTGGTCCTATTGTACATTTTTAAGTTTATAGGGAAAA  
ACGAAAGAGGACTGCACTGTATTAGCTGTTCCGGGAGTGAACCTAAG

>M6-PGSC0003DMG400045997M6G-LecRK\_1426

TAGGGAACAAACGAAAGAGGACTGCACTGTATTAGCTGTTCCGGGAGTGAACCTAAGAAGTTTTAGCT  
ACAAAGAGCTAGAACAAGCTACAAATGGATTCAAGGAAGAATTAGGAACTG

>M6-PGSC0003DMG400045997M6G-LecRK\_1488

TTTAGCTACAAAGAGCTAGAACAAGCTACAAATGGATTCAAGGAAGAATTAGGAACTGGAGCTTTCTCA

ACAGTTTACAAAGCGGTTCTTGATGATGAAAATGGGAAAGTCGTTGCTGTC

>M6-PGSC0003DMG400045997M6G-LecRK\_1550

TTTCTCAACAGTTTACAAAGCGGTTCTTGATGATGAAAATGGGAAAGTCGTTGCTGTCAAAAAACTCCGA  
AACATGGTAACAGAAGGAGAAGGAGAAGAAGTATTTGAAGCTGAAGTGAA

>M6-PGSC0003DMG400045997M6G-LecRK\_1612

AACTCCGAAACATGGTAACAGAAGGAGAAGGAGAAGAAGTATTTGAAGCTGAAGTGAATTCAATCAGC  
AGGACTAATCACAAGAACTTGGTCCAACCTTGGATTCTGCAACGAAGGCC

>M6-PGSC0003DMG400045997M6G-LecRK\_1674

ATCAGCAGGACTAATCACAAGAACTTGGTCCAACCTTGGATTCTGCAACGAAGGCCAACACCGCCTTT  
TGGTATATGAACACATGAAAACCGGCTCAATAGCACACTTGCTATTCAA

>M6-PGSC0003DMG400045997M6G-LecRK\_1736

CCGCCTTTTGGTATATGAACACATGAAAACCGGCTCAATAGCACACTTGCTATTCAAAGATTCTAGGCTT  
AGTTGGTCCAAAAGGGTACAAGTTGCCATCGACACTGCCAAAGGACTTTG

>M6-PGSC0003DMG400045997M6G-LecRK\_1798

CTAGGCTTAGTTGGTCCAAAAGGGTACAAGTTGCCATCGACACTGCCAAAGGACTTTGTTATTTGCATGA  
AGAGTGCAGTACCCAAATTATACATTGTGACATCAAGCCCCAAAATGTGC

>M6-PGSC0003DMG400045997M6G-LecRK\_186

CTAGCCATATGGTTCAACAAAATCACAGACAAAACCATAGTTTGGTCAGCCAATAGGAATAATCTTGCCT  
TAGATGGATCCAAAGTTCAGCTCTCCGCGGATGGAAGACTAGTCCTCACT

>M6-PGSC0003DMG400045997M6G-LecRK\_1860

TTGCATGAAGAGTGCAGTACCCAAATTATACATTGTGACATCAAGCCCCAAAATGTGCTTTTGGATGAAA  
ATTTGACAGCAAAAATAGCAGATTTTGGTATGGCCAAGCTACTGAAAAA

>M6-PGSC0003DMG400045997M6G-LecRK\_1922

GGATGAAAATTTGACAGCAAAAATAGCAGATTTTGGTATGGCCAAGCTACTGAAAAACATCAGACTCA  
AACAACTAGGATACGTGGAACCAAAGGGTACGTAGCCCCAGACTGGTT

>M6-PGSC0003DMG400045997M6G-LecRK\_1984

AGACTCAAACAACCTAGGATACGTGGAACCAAAGGGTACGTAGCCCCAGACTGGTTCAGAAGCATG  
CCTGTAAGTGTGAAGGTTGATGTGTACAGCTTCGGGGTCTTGCTCTTGGAGT

>M6-PGSC0003DMG400045997M6G-LecRK\_2046

AGCATGCCTGTAAGTGTGAAGTTGATGTGTACAGCTTCGGGGTCTTGCTCTGGAGTTGATTTGCTGCA  
GAAAAAACTATGAGCAGGATGTGGCAAACGAGAACGAAATGATACTACTG

>M6-PGSC0003DMG400045997M6G-LecRK\_2108

TTGCTGCAGAAAAAACTATGAGCAGGATGTGGCAAACGAGAACGAAATGATACTACTGGAGTGGGCTT  
ATGATTGCTATAGAAGAAATAAGTTGCATTTACTTGTAGGTGATGATGAAGA

>M6-PGSC0003DMG400045997M6G-LecRK\_2170

GGGCTTATGATTGCTATAGAAGAAATAAGTTGCATTTACTTGTAGGTGATGATGAAGAGGCATTAGAAG  
ATATCAAGAGATTCGAGAAGTTCTTGTGGTTGCAATTTGGTGCATTCAAG

>M6-PGSC0003DMG400045997M6G-LecRK\_2232

TTAGAAGATATCAAGAGATTCGAGAAGTTCTTGTGGTTGCAATTTGGTGCATTCAAGAAAATCTAGCAT  
CAAGGCCTAACATGAAGAAAGTCATGTTAATGCTTGAAGTTCTGTTGAA

>M6-PGSC0003DMG400045997M6G-LecRK\_2277

TGGTGCATTCAAGAAAATCTAGCATCAAGGCCTAACATGAAGAAAGTCATGTTAATGCTTGAAGTTCT  
GTTGAAGTATCAATTCCTCCTGACCCTTTTTCGTTTGTGCGATTCTATTTAG

>M6-PGSC0003DMG400045997M6G-LecRK\_248

TCTTGCCTTAGATGGATCCAAAGTTCAGCTCTCCGCGGATGGAAGACTAGTCCTCACTGATCCAAATGGT  
CAAGAGATGTGGGCTCGTGGCATGGCGAATGCTCAATTGGCCTATGGAGC

>M6-PGSC0003DMG400045997M6G-LecRK\_310

CAATGGTCAAGAGATGTGGGCTCGTGGCATGGCGAATGCTCAATTGGCCTATGGAGCCATGCTTGATA  
ACGGAAACTTTGTGCTAGCAACTAGTAGTTCAGACACTCTATGGCAGAGTT

>M6-PGSC0003DMG400045997M6G-LecRK\_372

CTTGATAACGGAAACTTTGTGCTAGCAACTAGTAGTTCAGACACTCTATGGCAGAGTTTTAATGAGCCCA  
CCGATACGATTTTGCCTGGTCAAGTACTTAACCAAGATCACAGTCTTGTT

>M6-PGSC0003DMG400045997M6G-LecRK\_434

TGAGCCCACCGATACGATTTTGCCTGGTCAAGTACTTAACCAAGATCACAGTCTTGTTTCAAGTTTCTCTG  
ACACAAATGTATCGAGTGGGAGGTTTGTGTTTACTACTTCAAATGATGG

>M6-PGSC0003DMG400045997M6G-LecRK\_496

GTTTCTCTGACACAAATGTATCGAGTGGGAGGTTTGTGTTTACTACTTCAAATGATGGAAATCTAGTGCT  
TTACACAGTCAATTATCCAGCTGAGACAACAAATGCTGCATATTGGTCAT

>M6-PGSC0003DMG400045997M6G-LecRK\_558

CTAGTGCTTTACACAGTCAATTATCCAGCTGAGACAACAAATGCTGCATATTGGTCATCTATGTCAGTTG  
GCAGTGGTTATCAGGTGATCTTCAATCAATCAGGCTTTATTTTTCTTCAA

>M6-PGSC0003DMG400045997M6G-LecRK\_62

ATCTTACCAAATGTTAGTTTGGGTTTCATCACTCACTACAAGTGATGTTACTAGCTTTTGGTCATCCCCAT  
CTGATGAATTCGCTTTGGGCTTCCAAAAAATTGGAAATGAATCAAGGTA

>M6-PGSC0003DMG400045997M6G-LecRK\_620

GTCAGTTGGCAGTGGTTATCAGGTGATCTTCAATCAATCAGGCTTTATTTTTCTTCAAGCAAAGAATGGA  
ACTTTGATAAATTCGATATCTTCTAATGTGGAAAATTCAAGAAGCCAATC

>M6-PGSC0003DMG400045997M6G-LecRK\_682

AGAATGGAACCTTTGATAAATTCGATATCTTCTAATGTGGAAAATTCAAGAAGCCAATCAATGTATCATCG  
AGCGATTCTTGAATATGATGGAGTTTTTAGGCACTATGTCCATCCGAAAT

>M6-PGSC0003DMG400045997M6G-LecRK\_744

TATCATCGAGCGATTCTTGAATATGATGGAGTTTTAGGCACTATGTCCATCCGAAATCTTCTGGTAGGG  
AACCGATGGCATGGTCTAGTTTGTATAACATTCCTGATAACATCTGTTTG

>M6-PGSC0003DMG400045997M6G-LecRK\_806

TGGTAGGGAACCGATGGCATGGTCTAGTTTGTATAACATTCCTGATAACATCTGTTTGTCTATCAGGCAA  
GGTACAGGAGGGGGTGCCTGTGGTTTCAACAGCCTATGCTCAATAGGAAC

>M6-PGSC0003DMG400045997M6G-LecRK\_868

TCAGGCAAGGTACAGGAGGGGGTGCCTGTGGTTTCAACAGCCTATGCTCAATAGGAACTGATCAGAGG  
CCGAGATGTGATTGTCCACTCGGATATATCTTGGATGATCCAAATGACAAAT

>M6-PGSC0003DMG400045997M6G-LecRK\_930

CAGAGGCCGAGATGTGATTGTCCACTCGGATATATCTTGGATGATCCAAATGACAAATTAGGCAGCTGC  
AGACAAAATTTCTCTGAGCAAACTGTAACCATGAATCGCGAGAAGTTGAG

>M6-PGSC0003DMG400045997M6G-LecRK\_992

CAGCTGCAGACAAAATTTCTCTGAGCAAACTGTAACCATGAATCGCGAGAAGTTGAGTCTTTCACATTC  
CATGAAATGTTGGATACTAACTGGCCTGACTCTGATTATGAGTCTCACCG

>M6-PGSC0003DMG400046138-(rev)M6LRR-RLP\_0

ATGACATACACCTCTACCTTAGATCTTATTGATCTTTCTTCAACAATCTTCACGGTGAAATCCCGAATGA



GATTACAGGTCTGTCAGCCTTGGGCACTCTGAATTTATCTTGGAACCAA

>M6-PGSC0003DMG400046138-(rev)M6LRR-RLP\_118

AATTATCAGGAAGAATTCCAGAGGACATAGAGAGCATGCAGCAATTGGAGACACTAGACCTGTCATCTA  
ACCATCTCTCTGGTTCTATCCCATGGAGCATGACTTCAATCACTACACTAA

>M6-PGSC0003DMG400046138-(rev)M6LRR-RLP\_177

CTGTCATCTAACCATCTCTCTGGTTCTATCCCATGGAGCATGACTTCAATCACTACACTAAGCTATCTTAAC  
TTGTCATATAACAACCTTGGTGGCCCTATCCCATCAAAAAACCAATTT

>M6-PGSC0003DMG400046138-(rev)M6LRR-RLP\_236

AAGCTATCTTAACTTGTTCATATAACAACCTTGGTGGCCCTATCCCATCAAAAAACCAATTTGGAACCTTCA  
CTAATCCTTCAAGTTTTGAATGTAATCCAGAACTCTGTGGGAAACCATT

>M6-PGSC0003DMG400046138-(rev)M6LRR-RLP\_295

TTGGAACCTTCACTAATCCTTCAAGTTTTGAATGTAATCCAGAACTCTGTGGGAAACCATTGATTACAGAT  
TGCTCTCCACCAAGAAAAAGAGATCTCAAGAAAATTGAAGAAGAAGATG

>M6-PGSC0003DMG400046138-(rev)M6LRR-RLP\_352

CATTGATTACAGATTGCTCTCCACCAAGAAAAAGAGATCTCAAGAAAATTGAAGAAGAAGATGATGATG  
ATGATGAAAGGCTGTGGTTTTAAATGAGTGCAAGAATAGGTTTTGTCATAA

>M6-PGSC0003DMG400046138-(rev)M6LRR-RLP\_59

AATCCCGAATGAGATTACAGGTCTGTCAGCCTTGGGCACTCTGAATTTATCTTGGAACCAATTATCAGGA  
AGAATTCCAGAGGACATAGAGAGCATGCAGCAATTGGAGACACTAGACCT

>M6-PGSC0003DMG400046324-(rev)M6G-LecRK\_0

ATGGTTGTTAATTATAGTGCCACTCTTTTCATGCTCAGTCTCCTCATTCTTTCTTCACAGCATCTGATTAGT  
TGTC AACCTTCTGAAACCTTTATCACCAATTCCTCCATTTCTGGATC

>M6-PGSC0003DMG400046324-(rev)M6G-LecRK\_1008

ACACCTATCACTTGTGAACATTCCAATATCATATTCTTATAGAGCTCGAGGACATAGCTTATATTCCCCT  
CTACTTGCAATATGGTACCAACAAAACAGATTTGGAAAATTGCAAAGG

>M6-PGSC0003DMG400046324-(rev)M6G-LecRK\_1071

ATTCCCCTCTACTTGCAATATGGTACCAACAAAACAGATTTGGAAAATTGCAAAGGTCTTGCTTAAGTA  
ACTGTTCTTGCAAAGCAGCTCAATTTCAATTTAGTGGTCCAGGTAACACA

>M6-PGSC0003DMG400046324-(rev)M6G-LecRK\_1134

TTAAGTAACTGTTCTTGCAAAGCAGCTCAATTTCAATTTAGTGGTCCAGGTAACACAATGGGTGACTGCG  
CATTGTTGAATGATGTGTTTTCGCTCACAAACAATGATGGAGCATCCAAT

>M6-PGSC0003DMG400046324-(rev)M6G-LecRK\_1197

GACTGCGCATTGTTGAATGATGTGTTTTCGCTCACAAACAATGATGGAGCATCCAATAAGACCACTCTTT  
TCATCAAGGTGCAGAACTCTTCTAACTTACATGCCTCTCCACCACATATC

>M6-PGSC0003DMG400046324-(rev)M6G-LecRK\_126

CGCGCCCCTCCTATGTAGTGAATCCACAGATGGAGCTACACTGACACCGATCCTCTTGAGAGAAGGG  
AACGAGACTCAGTTTGTGGTTTCTTATGTGATTACAATGGCACTGCT

>M6-PGSC0003DMG400046324-(rev)M6G-LecRK\_1260

ACTCTTTTCATCAAGGTGCAGAACTCTTCTAACTTACATGCCTCTCCACCACATATCTCTACAGAGAAGAA  
ATCAAAGCGTGCCCAACAATAGTAGGATCCACCATCGGAGCTTCATTT

>M6-PGSC0003DMG400046324-(rev)M6G-LecRK\_1323

GAGAAGAAATCAAAGCGTGCCCAACAATAGTAGGATCCACCATCGGAGCTTCATTTGGTTTGCTTTTCA  
TTGTTTTAACTGGCTTTGCCTATATTTTCAGAGGGAGAAAAGGACTCGAT

>M6-PGSC0003DMG400046324-(rev)M6G-LecRK\_1386

CTTTTCATTGTTTTAACTGGCTTTGCCTATATTTTCAGAGGGAGAAAAGGACTCGATGAAGACGAGGAG  
GAGTTCCTTGATCAAATACCAGGAATGCCTACTAGATTTTCCTACGAGGAA

>M6-PGSC0003DMG400046324-(rev)M6G-LecRK\_1575

ACAGTGAGTGATGGACCAAATAGCGGTGAAGCGTCTGCAAGGTTTTGGTAATGTGAAGAAATCATTC  
TTAGCTGAGGTAGCAACAATCGGTAGCATTTCATCATGTTAATTTGGTAAAA

>M6-PGSC0003DMG400046324-(rev)M6G-LecRK\_1638

TCATTCTTAGCTGAGGTAGCAACAATCGGTAGCATTTCATCATGTTAATTTGGTAAAACCTGTTGGATTTTG  
TGCTGAGAAATCACACAGACTTCTGGTTTATGAATACATGGCCAATGGA

>M6-PGSC0003DMG400046324-(rev)M6G-LecRK\_1701

GGATTTTGTGCTGAGAAATCACACAGACTTCTGGTTTATGAATACATGGCCAATGGATCTTTAGATAGGT  
GGATTTTTACGGAAAACAGGAACAATCTCTCACATGGGATGTCAGGGAA

>M6-PGSC0003DMG400046324-(rev)M6G-LecRK\_1764

GATAGGTGGATTTTTACGGAAAACAGGAACAATCTCTCACATGGGATGTCAGGGAAAAAATCATTGCA  
GACGTCGCCAAGGGCCTAGCTTACCTACATGAAGATTGTAACAACAAAATT

>M6-PGSC0003DMG400046324-(rev)M6G-LecRK\_1827

ATTGCAGACGTCGCCAAGGGCCTAGCTTACCTACATGAAGATTGTAACAACAAAATTTTTCATTTGGACA  
TTAAACCTCAGAACATTCTTCTTGATCAGAATCTCAATGCAAAAGTATCA

>M6-PGSC0003DMG400046324-(rev)M6G-LecRK\_189

GAAGGGAACGAGACTCAGTTTGTGGTTTCTTATGTGATTACAATGGCACTGCTTGCCTTTTGGCG  
TCCTTATATTACCAAATATCTATGATCCTTATCTATATAACCTGAGATTA

>M6-PGSC0003DMG400046324-(rev)M6G-LecRK\_2079

GGGGTTGTGATCTTGAAATCATCTGTGGCCGGAAGAATTTGGATCGTCATCAAGATGAGGATGATATG  
CATTTGCTTAGTTTGTTCATGAGAAAGTCAGTGGAGAGACAACCTTTGGAA

>M6-PGSC0003DMG400046324-(rev)M6G-LecRK\_2142

GATATGCATTTGCTTAGTTTGTTCATGAGAAAGTCAGTGGAGAGACAACCTTTGGAAATGGTGGACAAG  
AACAGTGAAGACATGCAGCTACATAAAAAAGAGGCTGTGGAAATGATGAAG

>M6-PGSC0003DMG400046324-(rev)M6G-LecRK\_2205

GACAAGAACAGTGAAGACATGCAGCTACATAAAAAAGAGGCTGTGGAAATGATGAAGATTGCAGCCTG  
GTGTTTACAAAGTGATTATACTAAGAGGCCTTCCATGTCGTTGGTAGTTAAG

>M6-PGSC0003DMG400046324-(rev)M6G-LecRK\_2268

GCCTGGTGTTTACAAAGTGATTATACTAAGAGGCCTTCCATGTCGTTGGTAGTTAAGGTGTTTCAGGGTT  
TAGTCGCTGCTGAAACCGACTTGGATTACAGCTTCACATTTCCAACAATG

>M6-PGSC0003DMG400046324-(rev)M6G-LecRK\_2331

CAGGGTTTAGTCGCTGCTGAAACCGACTTGGATTACAGCTTCACATTTCCAACAATGACGAGAAGAGTT  
GCCGGAGCTATTCAAGAAAGGGAAGCTGTGGTTGGTATCAGTTTACCACTT

>M6-PGSC0003DMG400046324-(rev)M6G-LecRK\_252

TTTGGCGTCCTTATATTACCAAATATCTATGATCCTTATCTATATAACCTGAGATTAGTTTGGTCAGCAA  
TCGGAATAATCCGGTTAGAGCTAATGCAACCTTGCAACTTAGGCAAGAT

>M6-PGSC0003DMG400046324-(rev)M6G-LecRK\_315

TCAGCAAATCGGAATAATCCGGTTAGAGCTAATGCAACCTTGCAACTTAGGCAAGATGGAGGCTTGTT  
TTGATAGACTCAGATGGAACCTATGATTTGGAGTACAAGCACAAGGGGAAAG

>M6-PGSC0003DMG400046324-(rev)M6G-LecRK\_378

TTGTTCTTGATAGACTCAGATGGAACCTATGATTTGGAGTACAAGCACAAGGGGAAAGGTTGTTGCGGGA

TTCAACATGACAGTACTGGGAAATCTTGTCTCTTTGACAAATATAACCAC

>M6-PGSC0003DMG400046324-(rev)M6G-LecRK\_441

GCGGGATTCAACATGACAGTACTGGGAAATCTTGTCTCTTTGACAAATATAACCACACCATTGGCAGT  
CTTTTGATCATCCTACAGACTGTTGGCTTCTGGTCAAATGACAAATGAG

>M6-PGSC0003DMG400046324-(rev)M6G-LecRK\_504

TGGCAGTCTTTTGATCATCCTACAGACTGTTGGCTTCTGGTCAAATGACAAATGAGGGACAAAAGCTG  
AGATCCAGTGTATCAGCAACAAATTGGAGTGAAGGTTTGTTCACATTTGAA

>M6-PGSC0003DMG400046324-(rev)M6G-LecRK\_567

AAGCTGAGATCCAGTGTATCAGCAACAAATTGGAGTGAAGGTTTGTTCACATTTGAAGTTCTACGATTTG  
GCTTTTTCAGCATACTGAGTCAAATCCACGTCAACTCTATGTCTCAAAT

>M6-PGSC0003DMG400046324-(rev)M6G-LecRK\_63

CTGATTAGTTGTCAACCTTCTGAAACCTTTATCACCAATTCCTCCATTTCTGGATCAATAACCGCGCCCG  
CTCCTATGTAGTGAATTCCACAGATGGAGCTACACTGACACCGATCCTC

>M6-PGSC0003DMG400046324-(rev)M6G-LecRK\_630

CGATTTGGCTTTTTAGCATACTGAGTCAAATCCACGTCAACTCTATGTCTCAAATTTCTGATTGGGAAAG  
AGCTTTCATGTTTCTCGACTAAGATTCATTGAAGGGATGTTAATTGTA

>M6-PGSC0003DMG400046324-(rev)M6G-LecRK\_693

TGGGAAAGAGCTTTCATGTTTCTCGACTAAGATTCATTGAAGGGATGTTAATTGTAAATTTTGAATTTTC  
AAATGCTAGATTCATGAGGTTTGGGGATGATGGGCATTTAAGGTTGTAT

>M6-PGSC0003DMG400046324-(rev)M6G-LecRK\_756

GAATTTTCAAATGCTAGATTCATGAGGTTTGGGGATGATGGGCATTTAAGGTTGTATCACTGGGAAGGA  
TCTTGGTCAGAGGAGGCTGATCTACTGCCAACCTACATTGGTGAGTGTGGG

>M6-PGSC0003DMG400046324-(rev)M6G-LecRK\_819

GAAGGATCTTGGTCAGAGGAGGCTGATCTACTGCCAACCTACATTGGTGAGTGTGGGTATCCAACCTGTG  
TGTGGCAATTAATCTGTTTGTGGAAATGGGCAGTGTAGTTGTCTCAAACCT

>M6-PGSC0003DMG400046324-(rev)M6G-LecRK\_882

ACTGTGTGTGGCAATTAATCTGTTTGTGGAAATGGGCAGTGTAGTTGTCTCAAACCTGCGGTTGATCAG  
ACTAACTTTCTCCAGCAAATCAATTACAGGCACCCAAACCAGGGGTGTGTC

>M6-PGSC0003DMG400046324-(rev)M6G-LecRK\_945

GATCAGACTAACTTTCTCCAGCAAATCAATTACAGGCACCCAAACCAGGGGTGTGTCCTTATCACACCTA  
TCACTTGTGAACATTCCCAATATCATATTCTTATAGAGCTCGAGGACATA

>M6-PGSC0003DMG400046485M6LRR-RLP\_0

ATGAGCAACCAAAAACAATTCTCTAGCAGTTGTGGTGATAATGGAACTCCGAAAGTCTGCTTATTGAA  
AACTCACCTCTGAAAAAAGCGAAGATTGAGATAGAATGTGAAGATAATGAC

>M6-PGSC0003DMG400046550M6LRR-RLP\_0

ATGCAGGAACTCCTTCCATCTCTTAAGGAACTGGAAGTCTGGATTGTCCAGAAATAGAGTTCTTTCCTG  
AAGGAGGAATGCCATTCAATTTACAACAACCTCGAATTGGGAATTGCAAG

>M6-PGSC0003DMG400046550M6LRR-RLP\_132

AGCCGAAAAGAGTGGAGTTTACATAGACTTCCCTGTCTCAGAAAGTTAGTGATCGAACATGATGGCAGT  
GACGAAGAGATCGAACATTGGGAGTTGCCTTGCTCTATTCAAAGATTTGAG

>M6-PGSC0003DMG400046550M6LRR-RLP\_330

CCTCAAATTCAGTCAATGCTGGAAGAAGGGCTTCCCTCCTCTCTTCTCACCTCACTTCAAGCCT  
AAGCATCTTCTCCTGCCATCAACTCCAGTCTTTCCCTTCCCTCCTCC

>M6-PGSC0003DMG400046550M6LRR-RLP\_396

AGCCTAAGCATCTTCTCCTGCCATCAACTCCAGTCTTTCCCTTCCCTCCTCCCTCTCCGAGCTGAACATC  
GAAGATTGCTTAATCTCCAATCACTTTCCGAATCAGCACTGCCTTCC

>M6-PGSC0003DMG400046550M6LRR-RLP\_528

CTGACCATCGCGCATTGCGCTAATCTCCAATCCCTTCCAGCAAAGGAATGCTCTTCCCTCTCTAAACT  
AGATATTTCCAAGTCCATTCTCAAACTCCTAGAAATTTGACAAG

>M6-PGSC0003DMG400046550M6LRR-RLP\_591

TCTAAACTAGATATTTCCAAGTCCATTCTCAAACTCCTAGAAATTTGACAAGGGGGAATACTGGC  
CAGAAATTGCTCATATCTCCATCATAGCGATCGATGAGGAATACCTTTAA

>M6-PGSC0003DMG400046550M6LRR-RLP\_66

CCTGAAGGAGGAATGCCATTCAATTTACAACAACCTCGAATTGGGAATTGCAAGAACTGGTGAACAGC  
CGAAAAGAGTGGAGTTTACATAGACTTCCCTGTCTCAGAAAGTTAGTGATC

>M6-PGSC0003DMG400047213M6L-LecRK\_0

ATCTTGCTATTTTTAGTAATTTTTGTTATCCCTTCTTATATTCACTTCAATCTCACCAATATCAATC  
CTTCTTATGTTAATCTCTCTATCAATGTCACTGGAGACGCCTATGTA

>M6-PGSC0003DMG400047213M6L-LecRK\_1054

TAGCTATGGATGATGAATTTGAAAAGGTTACCGGTCCTAAGAAGTTCTCGTATAGTGAATTAGCTCGTGC  
AACAAACAACCTTTGCTGAGGTACAGAAGCTTGGAGAAGGGGGATTGTTGGTG

>M6-PGSC0003DMG400047213M6L-LecRK\_1116

GCTCGTGCAACAAACAACCTTTGCTGAGGTACAGAAGCTTGGAGAAGGGGGATTGTTGGTGATGTTTATAAA  
GGTTTCTTGAAGGAATGTAACCTCATATGTTGCTGTTAAGAGAGTGTCAAAA

>M6-PGSC0003DMG400047213M6L-LecRK\_1178

TTATAAAGGTTTCTTGAAGGAATGTAACCTCATATGTTGCTGTTAAGAGAGTGTCAAAAAGGGTCTAAACA  
AGGGATAAAGGAGTATGCATCAGAAGTGAAGATCATCAGTCGATTAAGGCA

>M6-PGSC0003DMG400047213M6L-LecRK\_124

AAGAGGGCATAACAAGTTACGCCTAATGAACGTAACATTACATTAATGGGAAAACAGGACGCGCCACG  
TACATTGAGACACTGCAGTTATGGGACAAAGCTACAGGGGAAATGACAGATT

>M6-PGSC0003DMG400047213M6L-LecRK\_1240

CTAAACAAGGGATAAAGGAGTATGCATCAGAAGTGAAGATCATCAGTCGATTAAGGCATAGAAATTTG  
GTTCAACTTATCGGTTGGTGTACGAGAAAGAGAAGCTGCATCTTGTTTATG

>M6-PGSC0003DMG400047213M6L-LecRK\_1302

AATTTGGTTCAACTTATCGGTTGGTGTACGAGAAAGAGAAGCTGCATCTTGTTTATGAATTGATGCCCA  
ATGAAAGCCTAGATAAACATCTTTCAAAGAAAAGTCATTGTTGGTCTGG

>M6-PGSC0003DMG400047213M6L-LecRK\_1364

GATGCCCAATGAAAGCCTAGATAAACATCTTTCAAAGAAAAGTCATTGTTGGTCTGGGAAATAAGGTG  
GAAATTTGCTCAAGCAATTGCCTCAGCTTTGCTGTATCTACACGAAGAGTG

>M6-PGSC0003DMG400047213M6L-LecRK\_1426

TAAGGTGGAAATTTGCTCAAGCAATTGCCTCAGCTTTGCTGTATCTACACGAAGAGTGGGAACAATGCG  
TAGTCCATAGGGACATAAAAGCAAGTAATGTCATGTTGGATTCAAACCTCA

>M6-PGSC0003DMG400047213M6L-LecRK\_1488

CAATGCGTAGTCCATAGGGACATAAAAGCAAGTAATGTCATGTTGGATTCAAACCTCACTGCTAAATTAG  
GTGATTTTGGGTTGGCTAGGCTTATTGACCATGACAAAGGATCTCAAACA

>M6-PGSC0003DMG400047213M6L-LecRK\_1550

TAAATTAGGTGATTTTGGGTTGGCTAGGCTTATTGACCATGACAAAGGATCTCAAACAACAATGTTAGCA

GGGACGGTGGGGTATATGGCACCGGAATGTATCATGAATGGAAAAGCTAG

>M6-PGSC0003DMG400047213M6L-LecRK\_1612

TGTTAGCAGGGACGGTGGGGTATATGGCACCGGAATGTATCATGAATGGAAAAGCTAGCAAGGAGTCA  
GATGTATACAGCTTTGGAATAGTAGCATTGGAAATAGCAAGTGAAGAAGAT

>M6-PGSC0003DMG400047213M6L-LecRK\_1674

GAGTCAGATGTATACAGCTTTGGAATAGTAGCATTGGAAATAGCAAGTGAAGAAGATCAATAAATATT  
AAAGCACCGAGAAGATGAAGTGAGATTGGTTGAATGGGTGTGGAGCCTCTAT

>M6-PGSC0003DMG400047213M6L-LecRK\_1736

AAATATTAAGCACCGAGAAGATGAAGTGAGATTGGTTGAATGGGTGTGGAGCCTCTATGGAACGGGAG  
AGCTAGTCAAAGCAACTGATCCAAGATTGAATAAAATGTTAATGAGAAAGA

>M6-PGSC0003DMG400047213M6L-LecRK\_1798

CGGGAGAGCTAGTCAAAGCAACTGATCCAAGATTGAATAAAATGTTAATGAGAAAGAAATGGAACGT  
TTAATGGTCATCGGTCTATGGTGTGCTCATCCAGACAACAACTCAGGCCAT

>M6-PGSC0003DMG400047213M6L-LecRK\_186

GCCACGTACATTGAGACACTGCAGTTATGGGACAAAGCTACAGGGGAAATGACAGATTTTACTACACAT  
TTCTCTTTTGTATTGATTCAAATGGTAACGATTGTTTTGCTGATGGACTA

>M6-PGSC0003DMG400047213M6L-LecRK\_1860

GAACGTTAATGGTCATCGGTCTATGGTGTGCTCATCCAGACAACAACTCAGGCCATCAATAAGGCAA  
GCAATCCATGTTCTAAATTCTGAAGCCCAATTACCAAATCTCCATCAAGA

>M6-PGSC0003DMG400047213M6L-LecRK\_1922

AAGGCAAGCAATCCATGTTCTAAATTCTGAAGCCCAATTACCAAATCTCCATCAAGAATGCCAGTTGCA  
ACATTTTCACCCCCTCCATTGAATATGTTTTCGTCTCCATTTTCAAATAC

>M6-PGSC0003DMG400047213M6L-LecRK\_1984

CAGTTGCAACATTTTCACCCCCTCCATTGAATATGTTTTCGTCTCCATTTTCAAATACCTATGAAGTTAATA  
AGCAGGAGCAGACTATGACTTACACTATTTCCCTCAAGTGTCTATACTT

>M6-PGSC0003DMG400047213M6L-LecRK\_2019

TTTTCGTCTCCATTTTCAAATACCTATGAAGTTAATAAGCAGGAGCAGACTATGACTTACACTATTTCCCTC  
AAGTGTCTATACTTCGTGCTGCTTCATCGACAAAATCACTTTTGTA

>M6-PGSC0003DMG400047213M6L-LecRK\_248

TACACATTTCTCTTTTGTATTGATTCAAATGGTAACGATTGTTTTGCTGATGGACTAGCCTTTTTCTTAGC  
TCCTGTTGGTCCAGTATTCCAGTTGGTTCGTCTGGCAGTGGCCTTGG

>M6-PGSC0003DMG400047213M6L-LecRK\_310

TTTTCTTAGCTCCTGTTGGTCCAGTATTCCAGTTGGTTCGTCTGGCAGTGGCCTTGGTCTTGTTGATGCT  
GAGACAGAAAACATGTCATCACATGAGTCATTTGTTGCTGTAGAGTTCG

>M6-PGSC0003DMG400047213M6L-LecRK\_372

GTTGATGCTGAGACAGAAAACATGTCATCACATGAGTCATTTGTTGCTGTAGAGTTCGATACATATGTGA  
ATAACTGGGACCCCTCAGACATACATGTAGGCATCAATATAAATTCTATG

>M6-PGSC0003DMG400047213M6L-LecRK\_434

ATATGTGAATAACTGGGACCCCTCAGACATACATGTAGGCATCAATATAAATTCTATGGAATCTGTTACT  
ACAACAATATGGAAAAATGACATTAACCTGGGAAGAAAAATGATGCTTG

>M6-PGSC0003DMG400047213M6L-LecRK\_496

CTGTTACTACAACAATATGGAAAAATGACATTAACCTGGGAAGAAAAATGATGCTTGGATTAGTTACA  
ATGCTAGTTCCAAGGTTCTTGAAGTTGTTTTACAGGATTTTGGAAAAAAT

>M6-PGSC0003DMG400047213M6L-LecRK\_558

AGTTACAATGCTAGTTCCAAGGTTCTTGAAGTTGTTTTACAGGATTTTGGAAAAAATATAATCGAGACA  
AACTAAGCTACCCGTTGATCTGAGGGATTATTTGCCTGAGAATGTTAGT

>M6-PGSC0003DMG400047213M6L-LecRK\_62

CAATATCAATCCTTCTTATGTTAATCTCTCTATCAATGTCACTGGAGACGCCTATGTAACGAAAGAGGGC  
ATACAAGTTACGCCTAATGAACGTAACATTACATTAATGGGAAAACAGG

>M6-PGSC0003DMG400047213M6L-LecRK\_620

TCGAGACAACTAAGCTACCCGTTGATCTGAGGGATTATTTGCCTGAGAATGTTAGTTTTGGCTTCTCA  
GCATCAACTGGACAATTGTTTCAGAAAAACAATGTCAAGTCTTGGGATTT

>M6-PGSC0003DMG400047213M6L-LecRK\_682

GCTTCTCAGCATCAACTGGACAATTGTTTCAGAAAAACAATGTCAAGTCTTGGGATTTCAATTCAAGTTT  
GAGTTTTGATGCTATCAAAGTTCCACAACAGCCTAGTGCAAGTCCTCCTA

>M6-PGSC0003DMG400047213M6L-LecRK\_744

TCAAGTTTGAGTTTTGATGCTATCAAAGTTCCACAACAGCCTAGTGCAAGTCCTCCTATACAAGCTCAAG  
ATCCAAGAAATCATCCTATTCAAGGTCATAATCCAAATGATCCTCCAATT



>M6-PGSC0003DMG400047213M6L-LecRK\_806

AGCTCAAGATCCAAGAAATCATCCTATTCAAGGTCATAATCCAAATGATCCTCCAATTACTCATGTTCAAG  
AACCAAAGGGTCCTCCTCAAGAAGCACTCAGCACCTCAGGAAAAGGAAG

>M6-PGSC0003DMG400047213M6L-LecRK\_868

ATGTTCAAGAACCAAAGGGTCCTCCTCAAGAAGCACTCAGCACCTCAGGAAAAGGAAGCAAGGGACTA  
GTAGTCGGATCAAGCATAGGTTTACCTATTCTGATTCTTGGTTTGATAACTG

>M6-PGSC0003DMG400047213M6L-LecRK\_930

GGACTAGTAGTCGGATCAAGCATAGGTTTACCTATTCTGATTCTTGGTTTGATAACTGCCAGTTGCTTTTT  
GTGGAGGAAAAGAGGAAAGGAGATAAGAAATTAGACCATGTCTTCATT

>M6-PGSC0003DMG400047213M6L-LecRK\_992

TTGCTTTTTGTGGAGGAAAAGAGGAAAGGAGATAAGAAATTAGACCATGTCTTCATTGATCTAGCTAT  
GGATGATGAATTTGAAAAGGTTACCGGTCCTAAGAAGTTCTCGTATAGTGA

>M6-PGSC0003DMG400047346-(rev)M6LysM-RLK\_0

ATGAATTATTCTCATCTCATCTTTGTTTTACCATCATTCTTGCTTATTCCTCTGTTTCAATTCTTGACAAC  
AGTCTTACTTTGGAACAGGAACAAATGACTGCAACGCCCAAGATACC

>M6-PGSC0003DMG400047346-(rev)M6LysM-RLK\_1008

TCCAGTATAGCTCAATCTGTTAAGGTTTACAAGTTTGAAGAGGTTAAAGCAGCCACAGAAAATTTTCAGTC  
CTACTTGTGTTGATTAAGGGATCTGTTTATCGGGGCACGATAAATGGAGAT

>M6-PGSC0003DMG400047346-(rev)M6LysM-RLK\_1071

TTCAGTCCTACTTGTGTTGATTAAGGGATCTGTTTATCGGGGCACGATAAATGGAGATTTTGCTGCGATAA  
AGAAAATGAGTGGTGATGTATCAAAGGAAATTAATTTGTTGAGCAAATC

>M6-PGSC0003DMG400047346-(rev)M6LysM-RLK\_1134

GCGATAAAGAAAATGAGTGGTGATGTATCAAAGGAAATTAATTTGTTGAGCAAATCAATCATTTTAAT  
CTTATTAGTCTCTCGGGAATTTGTTTTCATGATGGTCACTGGTATCTTGTA

>M6-PGSC0003DMG400047346-(rev)M6LysM-RLK\_1197

TTTAATCTTATTAGTCTCTCGGGAATTTGTTTTCATGATGGTCACTGGTATCTTGTATATGAATATGCTGCC  
AATGGACCATTAAGTGATTGGATATGTCACCATAATGGTGATCACAAG

>M6-PGSC0003DMG400047346-(rev)M6LysM-RLK\_126

TCTGCTTTTGGGTATTTATGCAATGGCGCTAACCGTACTTGCCAATCTTATTTGACCTTCAGATCTCAACC

CCCTTTCAACACCGTGCCCTCAATCTCATCTCTATTGGGTGCTAACCCCT

>M6-PGSC0003DMG400047346-(rev)M6LysM-RLK\_1260

TATGCTGCCAATGGACCATTAAGTGATTGGATATGTCACCATAATGGTGATCACAAGTCACTAAGTTGG  
GCACAGAGAGTACAGATTTCTTTTGATGTGGCTACAGGACTTAACTATCTC

>M6-PGSC0003DMG400047346-(rev)M6LysM-RLK\_1323

AGTTGGGCACAGAGAGTACAGATTTCTTTTGATGTGGCTACAGGACTTAACTATCTCCATAGCTACACAT  
CCCCCTCATGTTTACAAGGATTTAAACAGTGATAATATTCTTCTTGAT

>M6-PGSC0003DMG400047346-(rev)M6LysM-RLK\_1386

TACACATCCCCTCCTCATGTTTACAAGGATTTAAACAGTGATAATATTCTTCTTGATGGTGATTTAAGAGC  
CAAGATTGCAAACCTTTGGTCTAGCAAGGTCAGCAGATGGACAAGAAGGT

>M6-PGSC0003DMG400047346-(rev)M6LysM-RLK\_1449

TTAAGAGCCAAGATTGCAAACCTTTGGTCTAGCAAGGTCAGCAGATGGACAAGAAGGTGAGTTTGCCTT  
GACAAGGCACATAGTTGGGACCCAAGGCTACATGGCACCTGAGTATTTGGAG

>M6-PGSC0003DMG400047346-(rev)M6LysM-RLK\_1512

GCGTTGACAAGGCACATAGTTGGGACCCAAGGCTACATGGCACCTGAGTATTTGGAGAATGGGCTAGT  
CTCTCCAAAGCTGGATGTCTATGCATTGGGAGTTCTGTTGCTGGAGATTCTC

>M6-PGSC0003DMG400047346-(rev)M6LysM-RLK\_1575

CTAGTCTCTCCAAAGCTGGATGTCTATGCATTGGGAGTTCTGTTGCTGGAGATTCTCACTGGGAAAGAA  
GTTTCTGCTTTATATGAAGGCTCAAATACAACTTGTCTGAGGTGTTGATC

>M6-PGSC0003DMG400047346-(rev)M6LysM-RLK\_1638

AAAGAAGTTTCTGCTTTATATGAAGGCTCAAATACAACTTGTCTGAGGTGTTGATCCCGGTGCTTCATG  
ATGAGGATGCAAAGGAGAATTTAAGCAACTTCATCGACCCTTCTCTGCAA

>M6-PGSC0003DMG400047346-(rev)M6LysM-RLK\_1701

CTTCATGATGAGGATGCAAAGGAGAATTTAAGCAACTTCATCGACCCTTCTCTGCAAGGGAAGTACCCT  
GCAGAACTTGCCTTTGCCATGGTCAGATTGATCGATAACTGCATAATGAAA

>M6-PGSC0003DMG400047346-(rev)M6LysM-RLK\_1764

TACCCTGCAGAACTTGCCTTTGCCATGGTCAGATTGATCGATAACTGCATAATGAAAGATCCTTCGCATC  
GCCCTAGTACGGATGAGATTGTGCAATCTGTTTCAAGAATTATGACAGCC

>M6-PGSC0003DMG400047346-(rev)M6LysM-RLK\_1801

TCGATAACTGCATAATGAAAGATCCTTCGCATCGCCCTAGTACGGATGAGATTGTGCAATCTGTTTCAAG  
AATTATGACAGCCACACTCATGGGAAATGTCATTTAGCACTTCAGTGT

>M6-PGSC0003DMG400047346-(rev)M6LysM-RLK\_189

TCTCAACCCCTTTCAACACCGTGCCCTCAATCTCATCTCTATTGGGTGCTAACCCCTTCACAGCTCTCTCAG  
CTCAATTCAGTTTCTCAAATGCTACCTTTAACACCAACCAAATGGTT

>M6-PGSC0003DMG400047346-(rev)M6LysM-RLK\_252

CTCTCTCAGCTCAATTCAGTTTCTCAAATGCTACCTTTAACACCAACCAAATGGTTCTTGTTCTGTCCT  
TGTTCTTGTTGAGGTCAGTTTATCAATCCAATGCATCTTATGTTATC

>M6-PGSC0003DMG400047346-(rev)M6LysM-RLK\_315

CCTGTCACCTTGTTCTTGTTGAGGTCAGTTTTATCAATCCAATGCATCTTATGTTATCAGAAGGGATGATAC  
TTTCTTGAATATTGCAATTAATACCTTACAAGGATTGTCAACTTGTCAT

>M6-PGSC0003DMG400047346-(rev)M6LysM-RLK\_378

GATGATACTTTCTTGAATATTGCAATTAATACCTTACAAGGATTGTCAACTTGTCATGCTATCAACGCGGA  
GAACAGTGAACAAGCTAATAATCTGGTTGTTGGTTCAAGAATTAATGTT

>M6-PGSC0003DMG400047346-(rev)M6LysM-RLK\_441

AACGCGGAGAACAGTGAACAAGCTAATAATCTGGTTGTTGGTTCAAGAATTAATGTTCTCTGCGATGT  
GCTTGTCTACGCAAACCAAACCTTATAATGGTACAAATTATCTCCTTACT

>M6-PGSC0003DMG400047346-(rev)M6LysM-RLK\_504

CGATGTGCTTGCTACGCAAACCAAACCTTATAATGGTACAAATTATCTCCTTACTTATTTGATTGCTTCT  
GGGGAATTTGTTTCTTATTAGTGATAAATTTGGGGTGGATTTTAGG

>M6-PGSC0003DMG400047346-(rev)M6LysM-RLK\_567

ATTGCTTCTGGGGAATTTGTTTCTTATTAGTGATAAATTTGGGGTGGATTTTAGGGCAACTCTTGCTGC  
TAATAGTATACCAGAAGATGCTCCTACTGTCTTTCAAATACTACTCTA

>M6-PGSC0003DMG400047346-(rev)M6LysM-RLK\_63

CTTGACAACAGTCTTACTTTGGAACAGGAACAAATGACTGCAACGCCCAAGATACCTCCACTTCTGCTT  
TTGGGTATTTATGCAATGGCGCTAACCGTACTTGCCAATCTTATTTGACC

>M6-PGSC0003DMG400047346-(rev)M6LysM-RLK\_630

CTTGCTGCTAATAGTATACCAGAAGATGCTCCTACTGTCTTTCAAATACTACTCTATTAGTTCCTTTATCG  
ACCCACCTTTGAGTTCCAAGTTGCTGGACCATCTCCACCACCGCCT

>M6-PGSC0003DMG400047346-(rev)M6LysM-RLK\_882

TTTTTGTTCAGGAAAAGGAAAAGAAAGCTGATCCACAGTTTGTCTGAAAGCTTTGAAGCTGTTG  
AGAAACTGTCAAATAAGAAAATTGAAGAAGAATCAGAGGAGTTTTTGGAA

>M6-PGSC0003DMG400047346-(rev)M6LysM-RLK\_945

GCTGTTGAGAACTGTCAAATAAGAAAATTGAAGAAGAATCAGAGGAGTTTTTGGAAAGTTTATCCAGT  
ATAGCTCAATCTGTAAAGTTTACAAGTTTGAAGAGGTTAAAGCAGCCACA

>M6-PGSC0003DMG401000105M6LRR-RLP\_0

CTTCTTCAACTTCTAAAGAATTTTTATGCGGAACTATACATACAGCTTCTGTATATATAATATTCGTGAG  
TTCAACAACCCTAAAAATGGTGAAGTTGTAGAGAGAGAGAAAAGTGAGC

>M6-PGSC0003DMG401000105M6LRR-RLP\_1037

TTTCAGATATAGGGTTGACCATTTAGCTCAAGGGTGTCCGCGTTTACTGAAGCTTGAGCTGGTCGGATG  
TGAGGGAAGTTATGATGGGATCAAAGCAATTGGGCAGTGCTGTCAGATGC

>M6-PGSC0003DMG401000105M6LRR-RLP\_1098

GGTCGGATGTGAGGGAAGTTATGATGGGATCAAAGCAATTGGGCAGTGCTGTCAGATGCTTGAGGAAT  
TGATACTTTGTGATCATAGGATGGATGGTGGGTGGTTGTCTGCTTTGTCATT

>M6-PGSC0003DMG401000105M6LRR-RLP\_1159

GAGGAATTGATACTTTGTGATCATAGGATGGATGGTGGGTGGTTGTCTGCTTTGTCATTTTGCAGCAACT  
TGAAAACCTTTGAAGCTTCAGTGTTGTAAGTTCTAGATTCAAGTCCTGGC

>M6-PGSC0003DMG401000105M6LRR-RLP\_122

CAGCTTGCGATGTTGGAGAGGTGGTGCGGAAATCGAGGTAAAGATTCCCGTCTTTGTAACCTTAACCC  
GGACCCGATTCCCAACATTGACTGTGCGAGAAATGCCTACGTACCTGAAG

>M6-PGSC0003DMG401000105M6LRR-RLP\_1220

GCAGCAACTTGAAAACCTTTGAAGCTTCAGTGTTGTAAGTTCTAGATTCAAGTCCTGGCCTTGATGAGCA  
CTTGGGTTCTTGTCTACTCTCGAGGAGCTACATTTACATCAGTGTCAAT

>M6-PGSC0003DMG401000105M6LRR-RLP\_1281

TGATGAGCACTTGGGTTCTTGTCTACTCTCGAGGAGCTACATTTACATCAGTGTCAATTACGGGATAAG  
CAAGGTGTGAGAGCATTGTTTCTGGTTTGTGGGACTGTCCGAGAGCTCGT

>M6-PGSC0003DMG401000105M6LRR-RLP\_1342

CGGGATAAGCAAGGTGTGAGAGCATTGTTTCTGGTTTGTGGGACTGTCCGAGAGCTCGTCTTTGGGGAC

TGTTGGGGATTAGACAACACTATATTTGCTGCTGCAAGTGTTCGGTAC

>M6-PGSC0003DMG401000105M6LRR-RLP\_1403

TTGGGGACTGTTGGGGATTAGACAACACTATATTTGCTGCTGCAAGTGTTCGGTACGAACACATATT  
TATTCTATTTATGTATTGTATATGCATTTCTAACTTTAACAGATGGGTCA

>M6-PGSC0003DMG401000105M6LRR-RLP\_1464

ACACATATTTATTCTATTTATGTATTGTATATGCATTTCTAACTTTAACAGATGGGTCACTGATAAATTTG  
AAATTGATGTATGATATTGTTAACGAGTGCATGTAGAAATGGAAAAC

>M6-PGSC0003DMG401000105M6LRR-RLP\_1525

TGATAAATTTGAAATTGATGTATGATATTGTTAACGAGTGCATGTAGAAATGGAAAACCTTGCTGAATGG  
ATAAGGAAATTTTCATCTTTAACAATTGAATGACCAACTTTTTTGGTGAGA

>M6-PGSC0003DMG401000105M6LRR-RLP\_1586

CTGAATGGATAAGGAAATTTTCATCTTTAACAATTGAATGACCAACTTTTTTGGTGAGAATTTATCTGTTT  
GCAAACATAGAAGATAGGTGCATATTTTAAAAGGAATTGTACCCAAGC

>M6-PGSC0003DMG401000105M6LRR-RLP\_1647

TTATCTGTTTGCAAACATAGAAGATAGGTGCATATTTTAAAAGGAATTGTACCCAAGCTTCAGAAGAGA  
CTTCCATAGTCCTTTGCTTATTAATATTCTGTGTTATTAATCTCTCAGAG

>M6-PGSC0003DMG401000105M6LRR-RLP\_1708

CAGAAGAGACTTCCATAGTCCTTTGCTTATTAATATTCTGTGTTATTAATCTCTCAGAGAAAAAGGAGGT  
AACTAACAATGTTGCGATGAGATAAATTACAACAACAAACCCAACGTAAT

>M6-PGSC0003DMG401000105M6LRR-RLP\_183

TTTAACCCGGACCCGATTCCAACATTGACTGTGCGAGAAATGCCTACGTCACCTGAAGAAAACCTAAC  
TCTAAGGTTATGTCGGCGGCGGCGGCGGAAGAAACGGCGGTTCGAGCTT

>M6-PGSC0003DMG401000105M6LRR-RLP\_1891

AGAGGCTGCTTCTGGTAGACCCTTGGTGGGGTCTGAGAGGTAGATAGATTATCATCATTAAATGCACAA  
AGTGTTCCAAAGTCAGTTTGACACCTAAAATTTCTTTCTATAATATCTAAT

>M6-PGSC0003DMG401000105M6LRR-RLP\_1952

ATGCACAAAGTGTTCCAAAGTCAGTTTGACACCTAAAATTTCTTTCTATAATATCTAATATTAATAATTTG  
GGTGCTTTTCTTTAAAGAAAAAACCAACTGCAGTCAAATTCGTCTTTT

>M6-PGSC0003DMG401000105M6LRR-RLP\_2013

TAATAATTTGGGTGCTTTTCTTTAAAGAAAAAACCCTGCAGTCAAATTCGTCTTTTATGGCTAATTTG  
ATGCAGTGCATTTCTTTTTGAACAGAAGATTGCATCTAGCTCGTCCAT

>M6-PGSC0003DMG401000105M6LRR-RLP\_2074

GGCTAATTTGATGCAGTGCATTTCTTTTTGAACAGAAGATTGCATCTAGCTCGTCCATGAACTCTATAAG  
TAGAAAACATAATAATTGTGCTGACACTTCCAAGATTAATGGGAACTTT

>M6-PGSC0003DMG401000105M6LRR-RLP\_2135

ACTCTATAAGTAGAAAACATAATAATTGTGCTGACACTTCCAAGATTAATGGGAACTTTTTCTTTCTAG  
GAGCTTGAGAAATCTCTTTTGAAGGATGCTCGTTGCTCACGACGGAA

>M6-PGSC0003DMG401000105M6LRR-RLP\_2196

TCTTTTCTAGGAGCTTGAGAAATCTCTTTTGAAGGATGCTCGTTGCTCACGACGGAAAGGATTAGATTC  
GGTAGTTCAGTCATGGAAAGAGCTTGAAAGGCTTAAGGTAGTCTCATGTA

>M6-PGSC0003DMG401000105M6LRR-RLP\_2257

ATTAGATTCGGTAGTTCAGTCATGGAAAGAGCTTGAAAGGCTTAAGGTAGTCTCATGTAACAATATAAA  
GGATAGTGAAATAACACCAGAACTAGCAACTTTATTTTCTGTTCTCAAAGA

>M6-PGSC0003DMG401000105M6LRR-RLP\_2318

AATATAAAGGATAGTGAAATAACACCAGAACTAGCAACTTTATTTTCTGTTCTCAAAGAGCTAAAGTGGGA  
GGCCAGATTCTCGATCTTTTCTATCATCAGGTCTTGAAGGGACTAGTATT

>M6-PGSC0003DMG401000105M6LRR-RLP\_2379

TAAAGTGAGGCCAGATTCTCGATCTTTTCTATCATCAGGTCTTGAAGGGACTAGTATTGGCCAGAAAG  
GTGGTAGATCGTTGCGGAGGAAGTAGAGTGTGGACTGGTAAAGATTTCAAT

>M6-PGSC0003DMG401000105M6LRR-RLP\_244

AACCCTAACTCTAAGGTTATGTCGGCGGCGGCGGCGGAAGAAACGGCGGTTCGAGCTTGTCGGATAT  
ATGGAATAACAAGGATACTCAGGCGTTGAAGCAATTGGTGCTTCAAATGCGA

>M6-PGSC0003DMG401000105M6LRR-RLP\_2440

CCAGAAAGGTGGTAGATCGTTGCGGAGGAAGTAGAGTGTGGACTGGTAAAGATTTCAATGTAAATGCA  
GTTACCATGAAGGTGAAAGTCTGTCTCACTCACTCCAGACAGTCCAGAAA

>M6-PGSC0003DMG401000105M6LRR-RLP\_2501

AAATGCAGTTCACCATGAAGGTGAAAGTCTGTCTCACTCACTCCAGACAGTCCAGAAAACATTGGGCA  
GAGTGTTGTTGCCTCTAGTGTTGGCACTGATATTGCATCTGCAATTGAAAG

>M6-PGSC0003DMG401000105M6LRR-RLP\_2623

TTCAACCAGAAAAAGAAGCTTCTGGTACTTCTGAGCCAATTGTTGTGGAAGCGAGCTCCGGTGTGAAAG  
AAAGCAATGTTGCAGAACCCAGTAATAATTTAAGACCTATACGAGTTCCTC

>M6-PGSC0003DMG401000105M6LRR-RLP\_2684

TGTGAAAGAAAGCAATGTTGCAGAACCCAGTAATAATTTAAGACCTATACGAGTTCCTCAGGAAGATGC  
AGTCTCAAAGGATTGAGACTTGAAAAACCTTTGATTTCCAAGAATTTAGT

>M6-PGSC0003DMG401000105M6LRR-RLP\_2745

GAAGATGCAGTCTCAAAGGATTGAGACTTGAAAAACCTTTGATTTCCAAGAATTTAGTTCAGCTGCGG  
AACTAGAGGTATGCATAATCTCTGATATAGTATAGTTGATTTCCATTGCTT

>M6-PGSC0003DMG401000105M6LRR-RLP\_2806

AGCTGCGGAACTAGAGGTATGCATAATCTCTGATATAGTATAGTTGATTTCCATTGCTTAGTATATGTGT  
GTTGTTCAATACATATCATTAAAGCCTTTCTCTGTTTTCTGTAACAATTT

>M6-PGSC0003DMG401000105M6LRR-RLP\_2867

TATATGTGTGTTGTTCAATACATATCATTAAAGCCTTTCTCTGTTTTCTGTAACAATTTGTTCTCAACTGGT  
TGTAATCAAATTGAAAATTACAGTGCTCAACTTTTCTGTTTGGCTAA

>M6-PGSC0003DMG401000105M6LRR-RLP\_2928

TCTCAACTGGTTGTAAATCAAATTGAAAATTACAGTGCTCAACTTTTCTGTTTGGCTAATTCTACAACCTG  
TTATAACCCCAACCCTGCCCAACCACTGCGCGTGCCCTTTCTGTTT

>M6-PGSC0003DMG401000105M6LRR-RLP\_2989

CTACAACCTGTTATAACCCCAACCCTGCCCAACCACTGCGCGTGCCCTTTCTGTTTTGGATAGCTCAA  
AAGTTGCCAATGACCGTGCAATTCGGTGATTGTTACTTGTTTACATGGC

>M6-PGSC0003DMG401000105M6LRR-RLP\_305

CGGATATATGGAATAACAAGGATACTCAGGCGTTGAAGCAATTGGTGCTTCAAATGCGAGCTCAATCGG  
TTTCTAATTCCTACTCCACCGTCTGAGCCCGAATCTGATATTCAATCCC

>M6-PGSC0003DMG401000105M6LRR-RLP\_3050

GATAGCTCAAAGTTGCCAATGACCGTGCAATTCGGTGATTGTTACTTGTTTACATGGCCTTTTCTGTGA  
GGTCAATATCAGTTTATAAATAAATTTTTTTTTGGGGGTGTGCCCTAGTGG

>M6-PGSC0003DMG401000105M6LRR-RLP\_3111

TTTCTGTGAGGTCAATATCAGTTTATAAATAAATTTTTTTTTGGGGGTGTGCCCTAGTGGCTAAGTAAGAG

AGTCCCAACACTTCTATATCCTCCTGGCTGCACTCCAGATAAACGTAAAC

>M6-PGSC0003DMG401000105M6LRR-RLP\_3172

AAGTAAGAGAGTCCCAACACTTCTATATCCTCCTGGCTGCACTCCAGATAAACGTAAACTGTTGACATTG  
AAATCCTTGAGAGGGTTAATAAACACCTCATCTGTGCATGGCCCATACTTT

>M6-PGSC0003DMG401000105M6LRR-RLP\_3233

TTGACATTGAAATCCTTGAGAGGGTTAATAAACACCTCATCTGTGCATGGCCCATACTTTGTTTTAAATCAT  
CTTTTAGCTAATGTCCGAGTTTAATTTGTTATTTTCTTCTGTTACTTTG

>M6-PGSC0003DMG401000105M6LRR-RLP\_3294

TTTAAATCATCTTTTAGCTAATGTCCGAGTTTAATTTGTTATTTTCTTCTGTTACTTTGCATAGCTGATGGC  
ACTGCTGCTTTTCTAATTTGTGTTTTATAGTGTTGCCTTCAGTGATAT

>M6-PGSC0003DMG401000105M6LRR-RLP\_3355

TAGCTGATGGCACTGCTGCTTTTCTAATTTGTGTTTTATAGTGTTGCCTTCAGTGATATTGCTTCAGTGAC  
TAGTAAAACTCCTTTATGGCTTCAATGGGATGTTAACAAAGTTGCTGG

>M6-PGSC0003DMG401000105M6LRR-RLP\_3416

CTTCAGTGACTAGTAAAACTCCTTTATGGCTTCAATGGGATGTTAACAAAGTTGCTGGAAAATGATTCT  
TGAGAGAATTGCAGTAAAATTAATAAAAAAAAAATAGAAAGCAGGGAAGTCAT

>M6-PGSC0003DMG401000105M6LRR-RLP\_3477

AATGATTCTTGAGAGAATTGCAGTAAAATTAATAAAAAAAAAATAGAAAGCAGGGAAGTCATTTTCTAGTAT  
TGTTTGAAAGAAATTGGAGTTTAAATGAGAAGTGGAACAAGACCCTTTTTT

>M6-PGSC0003DMG401000105M6LRR-RLP\_3538

TCTAGTATTGTTTGAAAGAAATTGGAGTTTAAATGAGAAGTGGAACAAGACCCTTTTTTCCCCTTACATT  
GCAGGACTTTGGTGGAATTTTTTCTGGGTGAAGTTTTTAAGTGCATTT

>M6-PGSC0003DMG401000105M6LRR-RLP\_3599

CCTTACATTTGCAGGACTTTGGTGGAATTTTTTCTGGGTGAAGTTTTTAAGTGCATTTCCATCAACTTTA  
TTTTTTTACTAAATGCATCAAAAAGTGTGAATAATTAACCTTTCTGATAC

>M6-PGSC0003DMG401000105M6LRR-RLP\_366

TCAATCGGTTTCTAATTCCACTACTCCACCGTCTGAGCCCGAATCTGATATTCAATCCCTAACCTAGATG  
ACCCGGAGCAGACCCGTTTTAGTTCTGGACCAGATTATACCGCCGTACT

>M6-PGSC0003DMG401000105M6LRR-RLP\_3660



ATCAACTTTATTTTTTTACTAAATGCATCAAAAAGTGTGAATAATTAACCTTTCTGATACTTGGGTTTCCTTT  
CCACACAATCAAATGGTACCTATGTGTCCTTGCTGCGAGTAAACCGTG

>M6-PGSC0003DMG401000105M6LRR-RLP\_3721

GGGTTTCCTTTCCACACAATCAAATGGTACCTATGTGTCCTTGCTGCGAGTAAACCGTGTTTTAGGGGGA  
AAAGGATGTGTGTCTTCTGTTTATTGGTCTTCCCTTCTTGTTGGAAGTGT

>M6-PGSC0003DMG401000105M6LRR-RLP\_3782

TTAGGGGGAAAAGGATGTGTGTCTTCTGTTTATTGGTCTTCCCTTCTTGTTGGAAGTGTGGACTTCGGGC  
ATTGCTTGGTTCATCTGCCACTGCTAAGTTTGTACTCTTCGTCACAGATA

>M6-PGSC0003DMG401000105M6LRR-RLP\_3843

ACTTCGGGCATTGCTTGGTTCATCTGCCACTGCTAAGTTTGTACTCTTCGTCACAGATAACAGTATGGAA  
GCTTGACATGAATACTTTAATATATGTGCTATTTTAAATTGGGACTATAT

>M6-PGSC0003DMG401000105M6LRR-RLP\_3904

AGTATGGAAGCTTGACATGAATACTTTAATATATGTGCTATTTTAAATTGGGACTATATACTACTATGATT  
TTGGCGTTGATATTGTTGTCTGGTCTCTATGTTTTCTCGTCACCAGTA

>M6-PGSC0003DMG401000105M6LRR-RLP\_3965

TACTATGATTTTGGCGTTGATATTGTTGTCTGGTCTCTATGTTTTCTCGTCACCAGTAAGCTTTTGTTACT  
GTTCAATTGGTGAATGCAGTAGTGTGTTTGTACCAATAATTCCCAACTG

>M6-PGSC0003DMG401000105M6LRR-RLP\_4026

CTTTTGTTACTGTTCAATTGGTGAATGCAGTAGTGTGTTTGTACCAATAATTCCCAACTGTATGTACTTTGAT  
TTGGTTGTGTTAGGTCCTTGCCATGGAGAGGTTAAAGTTAGAACTTCA

>M6-PGSC0003DMG401000105M6LRR-RLP\_4087

TGTACTTTGATTTGGTTGTGTTAGGTCCTTGCCATGGAGAGGTTAAAGTTAGAACTTCAAGTGCGTGGGT  
TGAAGTGTGGATGCACTCTGCCAAGAGCGTGCAGCCAGGCTTTTCTTGCT

>M6-PGSC0003DMG401000105M6LRR-RLP\_4209

AAACCACACCTTTGGAGATGCTTCCAAAGAAGTTGCTTGCTAAGAAGTAATTTTGTGCTCGTTTGTGTTTGC  
TATTGTAGCTAGTTGTAATTGTAACCTCATTTTTAAAGTGTGCTAGCTTAT

>M6-PGSC0003DMG401000105M6LRR-RLP\_427

ACCCTAGATGACCCGGAGCAGACCCGTTTTAGTTCTGGACCAGATTATACCGCCGTACTTTCTGATAAGT  
TGCTGTAAAGTGTGCTTTCGAAGCTTCCGGAACAGCAACATACTTCTAAT

>M6-PGSC0003DMG401000105M6LRR-RLP\_4270

TTTGTTTTGCTATTGTAGCTAGTTGTAATTGTAACCTCATTTTTAAAGTGTGAGCTTATTCTCTATTTGACTT  
AGTACCCGTTTGGATTGGCTTATTTTAGGTGCTTTTAAGCCAAAATA

>M6-PGSC0003DMG401000105M6LRR-RLP\_488

CTGATAAGTTGCTGTAAAGTGTGCTTTCGAAGCTCCGGAACAGCAACATACTTCTAATTCATTAGTTTGT  
CAGCGTTGGTGTAAGCTTAGTGGGAAGTTGGTTAGGTCTATTAAGCTGT

>M6-PGSC0003DMG401000105M6LRR-RLP\_549

ATTAGTTTGTGAGCGTTGGTGTAAGCTTAGTGGGAAGTTGGTTAGGTCTATTAAGCTGTTAGATTGGGA  
ATTTTTAGAATCTGGGAGGCTTAGTTATAGATTTCCGGGTTTAATTGACAT

>M6-PGSC0003DMG401000105M6LRR-RLP\_61

ATATTCGTGAGTTCAACAACCCTAAAAATGGTGAAGTTGTAGAGAGAGAGAAAGTGAGCTACAGCTTG  
GCGATGTTGGAGAGGTGGTGCAGAAATCGAGGTAAAGATTCCCGTCTTTGTA

>M6-PGSC0003DMG401000105M6LRR-RLP\_610

GATTGGGAATTTTTAGAATCTGGGAGGCTTAGTTATAGATTTCCGGGTTTAATTGACATTGACCTAGTTC  
GAGCATGTGTGAAATCCCGGAGGAATTCGGGAATTGTGATGAGTCATAGG

>M6-PGSC0003DMG401000105M6LRR-RLP\_671

ACCTAGTTCGAGCATGTGTGAAATCCCGGAGGAATTCGGGAATTGTGATGAGTCATAGGCTCGTTTCGG  
TGCATTTGGATTCGAACTCTATTTATGGAGGGTTTGTGGGAAAGAGGGCT

>M6-PGSC0003DMG401000105M6LRR-RLP\_732

CGTTTCGGTGCATTTGGATTGAACTCTATTTATGGAGGGTTTGTGGGAAAGAGGGCTTTTTGGCACAA  
GAGGTGGTTGATGGAGGGGTTAAGGTTTTAGTTGAGGGTTGTGCTAATTT

>M6-PGSC0003DMG401000105M6LRR-RLP\_793

TTGGCACAAGAGGTGGTTGATGGAGGGGTTAAGGTTTTAGTTGAGGGTTGTGCTAATTTAAGAAGAAT  
ACTATTGATGAATGCGAGTGTAGAGGGGCTGGGTTATTTGGGTGAAAAGTGT

>M6-PGSC0003DMG401000105M6LRR-RLP\_854

GAAGAATACTATTGATGAATGCGAGTGTAGAGGGGCTGGGTTATTTGGGTGAAAAGTGTGAAACTTTA  
CAGGAGTTGGAATTGCATTTCTCTGATGACTTTGCATTGAAGGGGTTATTTG

>M6-PGSC0003DMG401000105M6LRR-RLP\_915

AACTTTACAGGAGTTGGAATTGCATTTCTCTGATGACTTTGCATTGAAGGGGTTATTTGGCTGTAGGAAT

TTGCAGATACTGAAATTGGTTGGTTGTATTGATGGACTATATAATTCCAT

>M6-PGSC0003DMG401000105M6LRR-RLP\_976

TGTAGGAATTTGCAGATACTGAAATTGGTTGGTTGTATTGATGGACTATATAATTCCATGGTTTCAGATA  
TAGGGTTGACCATTTTAGCTCAAGGGTGTCCGCGTTTACTGAAGCTTGAG

>M6-PGSC0003DMG401000299-(rev)M6LRR-RLP\_0

ATGGAGAAGTTATACCTTTTGGTTTTAACCTTCATAACAGTTTGGTTGAGTTCAGTCAAGGGATTACAA  
ACATAGAAAAAGATGAATCTGCACCTTATTGCCTTTAGAGCATATATAACT

>M6-PGSC0003DMG401000299-(rev)M6LRR-RLP\_1037

TGTTGAAATTGCATGTTCAAAGAATTATGTTTCTCCGAATAGTTGTGTTTTAGCAGATATCTAAGTAGGG  
GCAGAGCCAGGAAGGGCAAACTATATATAGCAATGTTGGACCCTTTGGC

>M6-PGSC0003DMG401000299-(rev)M6LRR-RLP\_122

AGACCATGATCATATCTTGTCCAAAACCTGGATGCCATCCAGTAACAAATCCTCTATCTGTTACTGGATC  
GGCGTCTTTTGTAGTGGAGAAAACGAAAATCAAAGAGTGACATCTTAAA

>M6-PGSC0003DMG401000299-(rev)M6LRR-RLP\_1708

GTTGTTGTATATGTATAGCAACTAAATAAGAGTTAAGTGAGTTTAAATCAACAAGAAATTCCTACTTACT  
ACACCAATCGATCGAGGTGTTTTGCTATCTATATTTATCTAGCTTTGACA

>M6-PGSC0003DMG401000299-(rev)M6LRR-RLP\_1769

CTACTTACTACCAATCGATCGAGGTGTTTTGCTATCTATATTTATCTAGCTTTGACAATCTTTTTGCAGG  
TGGAATTCCTGAAAATTTAGGCAATCTTACATATTTGGAGATGCTAAG

>M6-PGSC0003DMG401000299-(rev)M6LRR-RLP\_183

TACTGGATCGGCGTCTTTTGTAGTGGAGAAAACGAAAATCAAAGAGTGACATCTTAAATGTCTCAGGA  
TTCAGACTTTCAGGCACAATTGCTCCTGATTTAGGAACTTGACATTTCTA

>M6-PGSC0003DMG401000299-(rev)M6LRR-RLP\_1830

CTTTTTGCAGGTGGAATTCCTGAAAATTTAGGCAATCTTACATATTTGGAGATGCTAAGCCTAAGAGGTG  
GTTCACTAACAGGTCAAATTCACACACTCTATTCAACATGTCCAGCTTA

>M6-PGSC0003DMG401000299-(rev)M6LRR-RLP\_1891

TAAGAGGTGGTTCACCTAACAGGTCAAATTCACACACTCTATTCAACATGTCCAGCTTAAAGCAACTCGA  
TCTTTTGAACAACAGCTTGTCCGGAAGCCTACCATCCGTGAGCAGTCAAT

>M6-PGSC0003DMG401000299-(rev)M6LRR-RLP\_1952

GCAACTCGATCTTTTGAACAACAGCTTGTCCGGAAGCCTACCATCCGTGAGCAGTCAATGTAATCTTCCT  
CACATAACTGGTGAAATCCCAGCAAACACATTCAGATGCAAACGCCTTCA

>M6-PGSC0003DMG401000299-(rev)M6LRR-RLP\_2013

AATCTTCCTCACATAACTGGTGAAATCCCAGCAAACACATTCAGATGCAAACGCCTTCAATTCATACAATT  
AGCAGACAATATGCTTACAGGCAGCATTCTAAAGATATTCGGAACCTT

>M6-PGSC0003DMG401000299-(rev)M6LRR-RLP\_2074

TCATACAATTAGCAGACAATATGCTTACAGGCAGCATTCTAAAGATATTCGGAACCTTACTTTCCTTCAG  
AATCTATATTTAGAAGACAACAACCTTCACAGGTACGCAACGCCAAATTG

>M6-PGSC0003DMG401000299-(rev)M6LRR-RLP\_2135

TTTCCTTCAGAATCTATATTTAGAAGACAACAACCTTCACAGGTACGCAACGCCAAATTGTTATTGCCCTTG  
TAGTTTCTATTTATAGACATCAAAGTCCTAAATTTACCACATTAGATAT

>M6-PGSC0003DMG401000299-(rev)M6LRR-RLP\_2196

ATTGCCCTTGTAGTTTCTATTTATAGACATCAAAGTCCTAAATTTACCACATTAGATATTTCTACCTCATA  
TTTAACGACACCATGTAGCTTGTCTCAATGCACGTGTAATTACATTC

>M6-PGSC0003DMG401000299-(rev)M6LRR-RLP\_2257

CTACCTCATACTTTAACGACACCATGTAGCTTGTCTCAATGCACGTGTAATTACATTCATGGTATTAGTT  
ATAGTATATATTACATTCCTAATTCATTTGATACTTTGTCAGGGAGATT

>M6-PGSC0003DMG401000299-(rev)M6LRR-RLP\_2318

GGTATTAGTTATAGTATATATTACATTCCTAATTCATTTGATACTTTGTCAGGGAGATTACCAGCTGAGAT  
AGGTACCATAAATCTGAAGGTCCTTAACGTCCATGGAAATCACTTGTCA

>M6-PGSC0003DMG401000299-(rev)M6LRR-RLP\_2379

CAGCTGAGATAGGTACCATAAATCTGAAGGTCCTTAACGTCCATGGAAATCACTTGTGAGGTGTCATTCC  
ATCTGAAGTATTCAACATATCGATGTTGCAGATTCTAGACTTAAGCAGGA

>M6-PGSC0003DMG401000299-(rev)M6LRR-RLP\_244

TCTCAGGATTCAGACTTTCAGGCACAATTGCTCCTGATTTAGGAACTTGACATTTCTAACATCATTAGAC  
ATCAGTAACAACAACCTTCAGTGGCTTGATGCCTAATGAGTTAGGTAATC

>M6-PGSC0003DMG401000299-(rev)M6LRR-RLP\_2440

TGTCATTCCATCTGAAGTATTCAACATATCGATGTTGCAGATTCTAGACTTAAGCAGGAACCGGCTCACA  
GGAACCTTCCCTCAGGCTTGGGCCATCAGTTTCCAAATCTGCAAGAGCT

>M6-PGSC0003DMG401000299-(rev)M6LRR-RLP\_2501

CGGCTCACAGGAACTCTTCCCTCAGGCTTGGGCCATCAGTTTCCAAATCTGCAAGAGCTTTATTTAGGTG  
AGAATGAACTTACAGGATCAATCCCAAGTTCTATCTCAAATGCTTCACAG

>M6-PGSC0003DMG401000299-(rev)M6LRR-RLP\_2562

ATTTAGGTGAGAATGAACTTACAGGATCAATCCCAAGTTCTATCTCAAATGCTTCACAGCTTGCTATTATA  
TCCATGACCTTCAACTCGTTCCTACTGGCTCGATACCCGACCTTGGCAATT

>M6-PGSC0003DMG401000299-(rev)M6LRR-RLP\_2623

TGCTATTATATCCATGACCTTCAACTCGTTCCTACTGGCTCGATACCCGACCTTGGCAATTTAAGACTTTTGA  
AGAGGCTATTTCTAGCAGAGAATAATCTTACAGGGGAACTTCCAAAGG

>M6-PGSC0003DMG401000299-(rev)M6LRR-RLP\_2684

AGACTTTTGAAGAGGCTATTTCTAGCAGAGAATAATCTTACAGGGGAACTTCCAAAGGAGAATTA  
TTTCTGTCCTATTTAACTAATTGTAGACATTTGGAAAAGATAGAAGTGTCT

>M6-PGSC0003DMG401000299-(rev)M6LRR-RLP\_2745

AATTAATAATTTCTGTCCTATTTAACTAATTGTAGACATTTGGAAAAGATAGAAGTGTCTTTAAATCAGTTA  
AATGGTGTCTTCCAACTTCATTAGGGAATCTCTCTGCTAGCCTTCAA

>M6-PGSC0003DMG401000299-(rev)M6LRR-RLP\_2806

AAATCAGTTAAATGGTGTCTTCCAACTTCATTAGGGAATCTCTCTGCTAGCCTTCAAATTTTCTCAGCAT  
TTGGTAGCAAAATCAAGGGGACTATACCTGTCTGGAGTTGGAACTTGAC

>M6-PGSC0003DMG401000299-(rev)M6LRR-RLP\_2867

TTCTCAGCATTGGTAGCAAAATCAAGGGGACTATACCTGTCTGGAGTTGGAACTTGACAAGCTTGACC  
GGTATGTACTTGGATAGCAATGAGTTGACTGGAGTTATCCCGAATACAATT

>M6-PGSC0003DMG401000299-(rev)M6LRR-RLP\_2928

GCTTGACCGGTATGTACTTGGATAGCAATGAGTTGACTGGAGTTATCCCGAATACAATTGGAAAGTTAA  
AAAATCTCGAACGTATATATCTAGAATACAATAGACTGGAAGGGTATATCC

>M6-PGSC0003DMG401000299-(rev)M6LRR-RLP\_2989

AAAGTTAAAAAATCTCGAACGTATATATCTAGAATACAATAGACTGGAAGGGTATATCCCAACTGATATT  
TGCCAGTTAAGTAAGCTGGGGGATATCTACATAAGTCACAACATGATCCG

>M6-PGSC0003DMG401000299-(rev)M6LRR-RLP\_305

ATCATTAGACATCAGTAACAACAACCTTCAGTGGCTTGATGCCTAATGAGTTAGGTAATCTACAACGATTA

CAAGAGATAAACGTAGGATTCAACTATTTAAGAGGAGACATTCCAAGCTG

>M6-PGSC0003DMG401000299-(rev)M6LRR-RLP\_3050

ACTGATATTTGCCAGTTAAGTAAGCTGGGGGATATCTACATAAGTCACAACATGATCCGTGGAGCCATA  
CCATCATGTTTTGGTGAACCTCAAATCACTACAGAGAGTTTTCTTGGATTCT

>M6-PGSC0003DMG401000299-(rev)M6LRR-RLP\_3111

GAGCCATACCATCATGTTTTGGTGAACCTCAAATCACTACAGAGAGTTTTCTTGGATTCTAACAATTTGGC  
ATCTACCATTCCATTGAACTTTTGGAACCTGAGTGACCTTGTAGGTTTGA

>M6-PGSC0003DMG401000299-(rev)M6LRR-RLP\_3172

CAATTTGGCATCTACCATTCCATTGAACTTTTGGAACCTGAGTGACCTTGTAGGTTTGAACCTTATCCACAA  
ACTCTTTCAAAGGCTATTTACCATCAGAGATCTCTAATCTGAAGGTTGC

>M6-PGSC0003DMG401000299-(rev)M6LRR-RLP\_3233

TTATCCACAACTCTTTCAAAGGCTATTTACCATCAGAGATCTCTAATCTGAAGGTTGCAACAGACGTGG  
ACTTATCGTGGAATCAATTTTCAGGAGATATCCCCAGCAGAATAGGCAGT

>M6-PGSC0003DMG401000299-(rev)M6LRR-RLP\_3294

CAGACGTGGACTTATCGTGGAATCAATTTTCAGGAGATATCCCCAGCAGAATAGGCAGTGCCCAATCAA  
TAGTTTACCTTTCTTTGGCACATAATAGATTGCAAGGTCCTATTCCTGAAT

>M6-PGSC0003DMG401000299-(rev)M6LRR-RLP\_3355

CCAATCAATAGTTTACCTTTCTTTGGCACATAATAGATTGCAAGGTCCTATTCCTGAATCTTTGAGTAACT  
TGATAAGTTTAGAGACATTAGATTGTCGTCCAACAATTTGTCCGGAAT

>M6-PGSC0003DMG401000299-(rev)M6LRR-RLP\_3416

TTGAGTAACTTGATAAGTTTAGAGACATTAGATTGTCGTCCAACAATTTGTCCGGAATGATTCCAAAGT  
CTCTCGAGGCATTGAGGTATCTCCGACACTTCAATGTCTCTGTGAATGAA

>M6-PGSC0003DMG401000299-(rev)M6LRR-RLP\_3477

TTCCAAAGTCTCTCGAGGCATTGAGGTATCTCCGACACTTCAATGTCTCTGTGAATGAATTGGAAGGGGA  
AATTCCATCAGGTGGATGTTTTTCAAATTTCAAGTGCTGAATCTTTTAGGC

>M6-PGSC0003DMG401000299-(rev)M6LRR-RLP\_3538

GGAAGGGGAAATTCCATCAGGTGGATGTTTTTCAAATTTCAAGTGCTGAATCTTTTAGGCCAAAATCATGA  
GCTATGTGGAGTAGCTCGGCTGCATGTTCTGCCCTGCCGGACAAAACATTC

>M6-PGSC0003DMG401000299-(rev)M6LRR-RLP\_3599

AATCATGAGCTATGTGGAGTAGCTCGGCTGCATGTTCTGCCCTGCCGGACAAAACATTCCAAGTCAAAA  
AGTGTTTCATCTTTGATTAAATATGTTGTTCCCCCTCTCTTGTCAACAATT

>M6-PGSC0003DMG401000299-(rev)M6LRR-RLP\_366

CAACGATTACAAGAGATAAACGTAGGATTCAACTATTTAAGAGGAGACATTCCAAGCTGGTTTGGAAAC  
TTACCACAGCTCGAGAGCATTTTTATGAACGATAACAAGTTTAGTGGTCCT

>M6-PGSC0003DMG401000299-(rev)M6LRR-RLP\_3660

AGTCAAAAAGTGTTTCATCTTTGATTAAATATGTTGTTCCCCCTCTCTTGTCAACAATTCTCATGGTGACTG  
TTGTACTTATATTGATAAGAAAACGGAACCAATACGTAAAGATGAAAA

>M6-PGSC0003DMG401000299-(rev)M6LRR-RLP\_3721

CATGGTGACTGTTGTACTTATATTGATAAGAAAACGGAACCAATACGTAAAGATGAAAATGGAGGAATC  
ACAGCTTGCTGCAATTCTTTCACCTATTGCATACTTGAGAAATGTTTCATA

>M6-PGSC0003DMG401000299-(rev)M6LRR-RLP\_3771

AGATGAAAATGGAGGAATCACAGCTTGCTGCAATTCTTTCACCTATTGCATACTTGAGAAATGTTTCATA  
TCTTGAACCTGTACGAGCAACAAATTCTTTTTCTGAATCCAATCTACTAG

>M6-PGSC0003DMG401000299-(rev)M6LRR-RLP\_427

TTGGAAACTTACCACAGCTCGAGAGCATTTTTATGAACGATAACAAGTTTAGTGGTCCTATTCCACCGGT  
TTTAGGCAACAACACAAAGCTGAAGAGATTGGTACTGTCATACAATTTGT

>M6-PGSC0003DMG401000299-(rev)M6LRR-RLP\_488

TCCACCGTTTTAGGCAACAACACAAAGCTGAAGAGATTGGTACTGTCATACAATTTGTTACATGGAAAC  
ATACCTCAAGAGATAGGAAACCTTTCATGCTGATAATAGTTGACTCTAA

>M6-PGSC0003DMG401000299-(rev)M6LRR-RLP\_549

CATGGAAACATACCTCAAGAGATAGGAAACCTTTCATGCTGATAATAGTTGACTCTAAGTATAATGTGC  
TGACAGGATCTATACCATCTGAATTATTCAACATCTCATCGTTGCAAAGC

>M6-PGSC0003DMG401000299-(rev)M6LRR-RLP\_61

GATTTACAAACATAGAAAAAGATGAATCTGCACCTTATTGCCTTTAGAGCATATATAACTTCAGACCATGA  
TCATATCTTGTCAAAAACTGGATGCCATCCAGTAACAAATCCTCTATCT

>M6-PGSC0003DMG401000299-(rev)M6LRR-RLP\_610

ATAATGTGCTGACAGGATCTATACCATCTGAATTATTCAACATCTCATCGTTGCAAAGCATCGATCTCACT  
GGTAATAGTCTAACAGGTGGACTAGCACCGGATATCTGCAGTAATCATC

>M6-PGSC0003DMG401000299-(rev)M6LRR-RLP\_671

CGATCTCACTGGTAATAGTCTAACAGGTGGACTAGCACCGGATATCTGCAGTAATCATCGTCTTGTTGAG  
CTTCAAGGAATATTTTTATCCGCGAATCAGCTTCATGGACTGATCCCATC

>M6-PGSC0003DMG401000299-(rev)M6LRR-RLP\_732

CTTGTTGAGCTTCAAGGAATATTTTTATCCGCGAATCAGCTTCATGGACTGATCCCATCGACGTTTCATCT  
TTGCAAGGAACTCCAGGATTTATCCTTGTCTACAATCAATTTAGTGGA

>M6-PGSC0003DMG401000299-(rev)M6LRR-RLP\_793

CGTTTCATCTTTGCAAGGAACTCCAGGATTTATCCTTGTCTACAATCAATTTAGTGGAATAATCCCAGAT  
GAAATTGGATATATAACCAAGCTCAAGACGTTATATCTGGGGATAAACA

>M6-PGSC0003DMG401000299-(rev)M6LRR-RLP\_854

AATCCCAGATGAAATTGGATATATAACCAAGCTCAAGACGTTATATCTGGGGATAAACAATTTTCATAGGT  
ATCATATTATTTTATTCAAGTTATATAGTAGTCAACACTCTTATTATAT

>M6-PGSC0003DMG401000299-(rev)M6LRR-RLP\_915

TTCATAGGTATCATATTATATTTATTCAAGTTATATAGTAGTCAACACTCTTATTATATTGCTAGTGTAGTT  
AGTGATTGGAAGTGAAGTCAAGTTCTATAATTTTTACATAGAAAGATG

>M6-PGSC0003DMG401000299-(rev)M6LRR-RLP\_976

CTAGTGTAGTTAGTGATTGGAAGTGAAGTCAAGTTCTATAATTTTTACATAGAAAGATGACTGTTGAAAT  
TGCATGTTCAAAGAATTATGTTTCTCCGAATAGTTGTGTTTTAGCAGATA

>M6-PGSC0003DMG401000515M6LRR-RLK\_180

AATGAGTGAAGTTGTCAAATGCTAACGTGTGAGGGCTATCAAATCCAGAACCATGCCAACCACCATT  
CTTAAATTCCAACCTATTAGTTGGCGGTTTCAGTCAAATCCAGTATAAGAAG

>M6-PGSC0003DMG401000515M6LRR-RLK\_240

ACCACCATTCTTAAATTCCAACCTATTAGTTGGCGGTTTCAGTCAAATCCAGTATAAGAAGTTTAGTCTCAA  
ATGCACTCTATAAACTTGATGAATCATCATCTTATGCCACCACCCTGG

>M6-PGSC0003DMG401000515M6LRR-RLK\_300

TTTAGTCTCAAATGCACTCTATAAACTTGATGAATCATCATCTTATGCCACCACCCTGGGTCCTCAAGTA  
TGCAAAGCTCATCAACTGGACCACACAAAAGTGACGAATTCCTTTTAAA

>M6-PGSC0003DMG401000515M6LRR-RLK\_360

GTCTCAAGTATGCAAAGCTCATCAACTGGACCACACAAAAGTGACGAATTCCTTTTAAAAGAGTCTGAA



AATAGGAAATAATTGCAAAGACAAATATAGAAATGGAAATTTTGAGAGAT

>M6-PGSC0003DMG401000515M6LRR-RLK\_420

AGAGTCTGAAAATAGGAAATAATTGCAAAGACAAATATAGAAATGGAAATTTTGAGAGATTTTGTATCA  
GTACATTTTTTTGTACAGTAATAGAATTGCTGTAGTTGTGCATTTTTATGAT

>M6-PGSC0003DMG401000515M6LRR-RLK\_480

TTTTGATCAGTACATTTTTTTGTACAGTAATAGAATTGCTGTAGTTGTGCATTTTTATGATTTTATTTTTGCA  
TTTTTGGTGAGTGATGATACAAGAAAGTGTAGGGGTGGCAATTCAGC

>M6-PGSC0003DMG401000674-(rev)M6LysM-RLK\_0

ATGTTGAACTTATCCCTTTTCTTTATACTAATTTACTTATCCTCTGCTCCATTACCAGTTAACTCTCAATGCA  
ACAGAGGTTGCGATTTAGCATTAGCTTCATTCTACGTATGGCGAGGA

>M6-PGSC0003DMG401000674-(rev)M6LysM-RLK\_128

CACTTACATCGCAAATTTATTCAATATCGAAACTAGACAAGAACTCATGGATTACAACACCAGAGACACC  
ATCCCAAATCTAGACAGTGTAATCGCCGGAAGTGAATTAACATACCTTT

>M6-PGSC0003DMG401000674-(rev)M6LysM-RLK\_192

GACACCATCCCAAATCTAGACAGTGTAATCGCCGGAAGTGAATTAACATACCTTTTCGCTGTGATTGCT  
TGGAGGACGGCGATTTTTTAGGTCATGATTTTCAATATGAGGCTAATTCA

>M6-PGSC0003DMG401000674-(rev)M6LysM-RLK\_256

ATTGCTTGGAGGACGGCGATTTTTTAGGTCATGATTTTCAATATGAGGCTAATTCAGGGGATACGTATAG  
TATAATTGTGTCGAATTACTCTAATTTGACGAGTGTTGATTTGTTGAGGA

>M6-PGSC0003DMG401000674-(rev)M6LysM-RLK\_320

GTATAGTATAATTGTGTCGAATTACTCTAATTTGACGAGTGTTGATTTGTTGAGGAGGTTTAATAGTAGA  
TACCCGGAGAATAATATTCCGACTGGTGTGAATTTGAGTGTTGTAGTGAA

>M6-PGSC0003DMG401000674-(rev)M6LysM-RLK\_384

AGTAGATACCCGGAGAATAATATTCCGACTGGTGTGAATTTGAGTGTTGTAGTGAATTGTTCTTGTGGA  
GATAGAGATGTTTCTGAAGATTTTGGGGTTTTTGTGACGTATCCTTTGAGA

>M6-PGSC0003DMG401000674-(rev)M6LysM-RLK\_448

GTGGAGATAGAGATGTTTCTGAAGATTTTGGGGTTTTTGTGACGTATCCTTTGAGATCGGAGGAGAACT  
TGACGTATGTGGCGGCGACGACGAATGTGAGTGCTGAGTTAATACGAAGGT

>M6-PGSC0003DMG401000674-(rev)M6LysM-RLK\_512

GAAGTTGACGTATGTGGCGGCGACGACGAATGTGAGTGCTGAGTTAATACGAAGGTATAATCCAGATA  
TGGATGCTAAATTCAGTGCCGGAGAAGGGATCATCTATATTCCGGGAAGAGG

>M6-PGSC0003DMG401000674-(rev)M6LysM-RLK\_576

GATATGGATGCTAAATTCAGTGCCGGAGAAGGGATCATCTATATTCCGGGAAGAGGTTGGTGTTTCATGC  
TCTTTTGCTTTATTTCTCTCGGATAATACATAAGCTTGTTTTTAACTTTG

>M6-PGSC0003DMG401000674-(rev)M6LysM-RLK\_64

CTCAATGCAACAGAGGTTGCGATTTAGCATTAGCTTCATTCTACGTATGGCGAGGAACAGATCTCACTTA  
CATCGCAAATTTATTCAATATCGAACTAGACAAGAAGCTCATGGATTACA

>M6-PGSC0003DMG401000674-(rev)M6LysM-RLK\_640

CATGCTCTTTTGCTTTATTTCTCTCGGATAATACATAAGCTTGTTTTTAACTTTGCTTAGCTAGTGTTTATA  
TTCTTATTACTTTGAAGGTGCGTAATTAACATCTAAATTGGTATGA

>M6-PGSC0003DMG401000674-(rev)M6LysM-RLK\_704

GTGTTTATATTCTTATTACTTTGAAGGTGCGTAATTAACATCTAAATTGGTATGAAATTGAATAAGTAAC  
TAAACTAATTCTACATGATATAATATGCATCATAACAGGAAGCTTATCATT

>M6-PGSC0003DMG401000674-(rev)M6LysM-RLK\_768

AAGTAACTAACTAATTCTACATGATATAATATGCATCATAACAGGAAGCTTATCATTTTATTAGATATAGAT  
TATTCGCATTGCTGAGGGCGCCTTTGGTCAAATATAGGTGCTAAACAAG

>M6-PGSC0003DMG401001040M6LRR-RLP\_0

AAAAAAAAAAAAAATACCAAATAAGGTCCATCCACGTATAGGTAGTAGGATTTGCCACGTGCCAATACAC  
GATTTGGGGATCATCTGACGAGCACGTGCTTCCATCATTGCAACTGAAAGG

>M6-PGSC0003DMG401001040M6LRR-RLP\_1037

CACCAACGCATACTCAAGTCCGAACGTATGGAGCATGGATAACATGGCATAGGATCGCAACAATAGGTA  
AATTAAGAGTAGCGATGGGTCTAGCTCTGGTATCATGTAAAGAAAATGAAC

>M6-PGSC0003DMG401001040M6LRR-RLP\_1098

AATAGGTAAATTAAGAGTAGCGATGGGTCTAGCTCTGGTATCATGTAAAGAAAATGAACTTTAGGTCTA  
ACTCAACCCTATAATTTTGTTTCATTAGTAGACAAAACCCATTTCTGAAT

>M6-PGSC0003DMG401001040M6LRR-RLP\_1159

TAGGTCTAACTCAACCCTATAATTTTGTTTCATTAGTAGACAAAACCCATTTCTGAATCATCATGGGACT  
CTAATGGAGCTCTTAATGGTAAATACTAGCAAGTACAAGTTGGACCACT

>M6-PGSC0003DMG401001040M6LRR-RLP\_122

TATTCACCTTTTTACACACACCAGTGAAAACAAAGAGTCGGGATTGTCGTGTTTCAGTACTTCTCCGATGAT  
CAAATTCGCCCGTAACGGAGGTTATCGGTTATCGGTCGCCGTGGTTCCA

>M6-PGSC0003DMG401001040M6LRR-RLP\_1708

AGGAGTGAGGGCTTGAACCTTCAGGAAAGCTTTAAAAGATGTAAAACCTGGATAGAACATGAAAGCAT  
AATTGAACTAAAATAAACTACATTGAATTGGATTGACAAAAAAGGATAATAA

>M6-PGSC0003DMG401001040M6LRR-RLP\_1769

AAAGCATAATTGAACTAAAATAAACTACATTGAATTGGATTGACAAAAAAGGATAATAAGAGTTGTGGA  
TGTGTTGTGTTGGATGCCTCGTTACCTACTGTAAAAGTGTTCGATCATTTTA

>M6-PGSC0003DMG401001040M6LRR-RLP\_183

TCCGATGATCAAATTCGCCCGTAACGGAGGTTATCGGTTATCGGTCGCCGTGGTTCCACATTTATTGTC  
TACTTTTGCTACCAAAGCTTCAGTTTCCGAGTTCTCATTCTTAAATGG

>M6-PGSC0003DMG401001040M6LRR-RLP\_1830

GTTGTGGATGTGTTGTGTTGGATGCCTCGTTACCTACTGTAAAAGTGTTCGATCATTTTATATATATATTGT  
AGATTTAGAAATGGAAATTAAGCTACCCTGACTATCTTTTTTATTTTCT

>M6-PGSC0003DMG401001040M6LRR-RLP\_1891

TATATATTGTAGATTTAGAAATGGAAATTAAGCTACCCTGACTATCTTTTTTATTTTCTTCTAGACTTGCCC  
CTTAAGTTTTGTATAAGTGGATCATGTCCACATATTATGGGGATGGTT

>M6-PGSC0003DMG401001040M6LRR-RLP\_1952

TAGACTTGCCCCTTAAGTTTTGTATAAGTGGATCATGTCCACATATTATGGGGATGGTTGATACTTATCGT  
ATAAGTAACTGGTTTGTTCCTTGTCCCTCACTCCTTGGGAAGTTAGTTT

>M6-PGSC0003DMG401001040M6LRR-RLP\_2013

TACTTATCGTATAAGTAACTGGTTTGTTCCTTGTCCCTCACTCCTTGGGAAGTTAGTTTCTAACTAGATCCT  
TTGCCTATAAGTAAAGTTAGTTTCTAACTAAATCCTTTGCCTATAAGTT

>M6-PGSC0003DMG401001040M6LRR-RLP\_2074

AACTAGATCCTTTGCCTATAAGTAAAGTTAGTTTCTAACTAAATCCTTTGCCTATAAGTTTCTTTGGACTTGG  
TCAAACACAATAACTATTTCCATGGTAACTTGGACCTTGATTGATTCT

>M6-PGSC0003DMG401001040M6LRR-RLP\_2135

TTTGGACTTGGTCAAACACAATAACTATTTCCATGGTAACTTGGACCTTGATTGATTCTACGACGTAGCTA

CCTGGGCTTAGTTAGCTAAAGGTATGATCACAGTCATGCTAATCTAATT

>M6-PGSC0003DMG401001040M6LRR-RLP\_2196

GACGTAGCTACCTGGGCTTAGTTAGCTAAAGGTATGATCACAGTCATGCTAATCTAATTGATTCAGACCC  
GGTTTAAGCTTAACTTGTCGTTGTGAAGACTCAAATAATTATCTAGTTG

>M6-PGSC0003DMG401001040M6LRR-RLP\_2257

TTCAGACCCGGTTTAAGCTTAACTTGTCGTTGTGAAGACTCAAATAATTATCTAGTTGATAGGCTTGCG  
TAAGGTGTAGAGGTGTTGTTTTCAACTCAGTTGAACTGGCCTTTGTCTCA

>M6-PGSC0003DMG401001040M6LRR-RLP\_2318

AGGCTTGCCTAAGGTGTAGAGGTGTTGTTTTCAACTCAGTTGAACTGGCCTTTGTCTCATTGTTGGGCT  
GACTTGCCCCTCGGCTCAGCTACACTGGCCTTTGTCTGAACTGAAGTTTT

>M6-PGSC0003DMG401001040M6LRR-RLP\_2379

GTTTGGGCTGACTTGCCCCTCGGCTCAGCTACACTGGCCTTTGTCTGAACTGAAGTTTTGGATCGAATAA  
ACTACCCCTAATCTCTGTGAACAATGACCAAGTGGGTTTAATTTAATGT

>M6-PGSC0003DMG401001040M6LRR-RLP\_244

TTTATTGTCTACTTTTGCTACCAAAGCTTCAGTTTCCGAGTTCTCATTCCCTTAAATGGCCACAATCGTCTC  
TAGTGAGCTCCTTTTCGCTTCTCTTTAGTGTATCGCAACCTCTTTTCG

>M6-PGSC0003DMG401001040M6LRR-RLP\_2440

ATCGAATAAACTACCCCTAATCTCTGTGAACAATGACCAAGTGGGTTTAATTTAATGTGATATTATCGC  
ATATAAATCATGTTGTTTCTTCTTCTGTTTGGGGTCTTGGGGAAGAGG

>M6-PGSC0003DMG401001040M6LRR-RLP\_2501

ATATTATCGCATATAAATCATGTTGTTTCTTCTTCTGTTTGGGGTCTTGGGGAAGAGGGTCAATTTAGT  
TGAAGGGCATGATTCATTCGTGAGGCTTCTAATGCATTAGGCTGATAAT

>M6-PGSC0003DMG401001040M6LRR-RLP\_2562

CAATTTAGTTGAAGGGCATGATTCATTCGTGAGGCTTCTAATGCATTAGGCTGATAATGAATATGTCTC  
ATTTCTAGGATTTGGATGGTTTACTAAGTTTTAAATACTTTGATTGTCTC

>M6-PGSC0003DMG401001040M6LRR-RLP\_2623

ATATGTCTCATTCTAGGATTTGGATGGTTTACTAAGTTTTAAATACTTTGATTGTCTCGCTTAGTAATTCA  
TTGATGGTGTACAGATCCTAGTCTTCTTTAGTTTGATTCCACACGT

>M6-PGSC0003DMG401001040M6LRR-RLP\_2684

TTAGTAATTCATTGATGGTGTACAGATCCTAGTCTTCTTTAGTTTGATTCCACACGTTAACTAACGAGA  
ATCTTATGCTTCAACTTGCATTTGTGTTTGCCATTTACTGCTAAGTTC

>M6-PGSC0003DMG401001040M6LRR-RLP\_2745

ACTAACGAGAATCTTATGCTTCAACTTGCATTTGTGTTTGCCATTTACTGCTAAGTTCCATCTACTAACTG  
CTTTTTTCATTGCCAGGGAGTAGGTGGCACACAATTAACAGCTTCAA

>M6-PGSC0003DMG401001040M6LRR-RLP\_2806

TCTACTAACTGCTTTTTTCATTGCCAGGGAGTAGGTGGCACACAATTAACAGCTTCAAACGGCATACTG  
CTTTGGAAGTGCATAACCCCGAAGGCGGAGAAGATAAGATCAGCAATCTA

>M6-PGSC0003DMG401001040M6LRR-RLP\_2867

GGCATACTGCTTTGGAAGTGCATAACCCCGAAGGCGGAGAAGATAAGATCAGCAATCTACATGATTCCA  
TTCTTCTTACATTCTTTCATATCTTCTACCAGAGAAGTTGTGGGCACAT

>M6-PGSC0003DMG401001040M6LRR-RLP\_2928

TGATTCCATTCTTCTTACATTCTTTCATATCTTCTACCAGAGAAGTTGTGGGCACATGTATACTTTCAAC  
AAGGTGGAAGAATCTCTGGACTTGTGTTGAAAACATTGACTTTGATGA

>M6-PGSC0003DMG401001040M6LRR-RLP\_2989

ATACTTTCAACAAGGTGGAAGAATCTCTGGACTTGTGTTGAAAACATTGACTTTGATGACTCATTCTCTA  
CTCAAGTACGGTTTTTGGTTATCCGATGAAGGTCACTACTTTCATGCAC

>M6-PGSC0003DMG401001040M6LRR-RLP\_305

ACAATCGTCTCTAGTGAGCTCCTTTTCGCTTCTTTTTAGTGTATCGCAACCTCTTTCGGTTTCCGTTTTGT  
GGTTATGGCTTCTGATGTTGTTGATGTATCAAACGTAGTTAATATTTA

>M6-PGSC0003DMG401001040M6LRR-RLP\_3050

CATTTCTCTACTCAAGTACGGTTTTTGGTTATCCGATGAAGGTCACTACTTTCATGCACTTTGTTACAGA  
TTTCTTCAACTTCGAGAAGAATCAGACATAAAAAAGTTTCGCCTTTCCT

>M6-PGSC0003DMG401001040M6LRR-RLP\_3111

TGTTACAGATTTCTTCAACTTCGAGAAGAATCAGACATAAAAAAGTTTCGCCTTTCCTGCCGTGTTTGCT  
TCAGTGCCTCTCATGTTTGTTCATGGCTTTCATTTGTTATTAGGCATAA

>M6-PGSC0003DMG401001040M6LRR-RLP\_3172

CGTGTTCGTTTCAGTGCCTCTCATGTTTGTTCATGGCTTTCATTTGTTATTAGGCATAATGTTCAAGATCTT  
GATCTCTGTCTTTTTGTAGAAGAACCCTTTTATGTTGCCTCAATGTGTT

>M6-PGSC0003DMG401001040M6LRR-RLP\_3233

TTCAAGATCTTGATCTCTGTCTTTTTGTAGAAGAACCTTTTATGTTGCCTCAATGTGTTTTTCAGTAGCAAG  
ACACTTACTTCTCTAAAACCTTGAAATGAATTGTGTTCTTGAACCTACCTA

>M6-PGSC0003DMG401001040M6LRR-RLP\_3294

CAGTAGCAAGACACTTACTTCTCTAAAACCTTGAAATGAATTGTGTTCTTGAACCTACCTACTAGTACTTGT  
TTCCTTTCCTTAAGACCTTGCACCTATGTCTTGTACATTTTCGGGATGA

>M6-PGSC0003DMG401001040M6LRR-RLP\_3355

AGTACTTGTTTTCTTTCTTAAGACCTTGCACCTATGTCTTGTACATTTTCGGGATGATAGCTCAACCCA  
GAGGCTGTTATCTAGCTGCCCTATGCTTCGGGAGTTGGCTATATTAGAT

>M6-PGSC0003DMG401001040M6LRR-RLP\_3416

GCTCAACCCAGAGGCTGTTATCTAGCTGCCCTATGCTTCGGGAGTTGGCTATATTAGATTGTGAATGGAT  
GAACTTGAAGCTAGTTGCAATTTCAATCTCTTCATTAAGAGTTTGATAA

>M6-PGSC0003DMG401001040M6LRR-RLP\_3477

TGAATGGATGAACTTGAAGCTAGTTGCAATTTCAATCTCTTCATTAAGAGTTTGATAATCGACGATTTG  
CCTTCTTTGGCTCCACTGATGATCTAAATGGCTGCAAAATCAAGATTGA

>M6-PGSC0003DMG401001040M6LRR-RLP\_3538

GACGATTTGCCTTTCTTTGGCTCCACTGATGATCTAAATGGCTGCAAAATCAAGATTGATGCAGCAAGTC  
TTACTTTCCTTAAGTACAGTGGTTATCTCTCAAATGAGATATGTTTGTAT

>M6-PGSC0003DMG401001040M6LRR-RLP\_3599

CAGCAAGTCTTACTTTCTTAAGTACAGTGGTTATCTCTCAAATGAGATATGTTTGTATAATCTATCTTCCT  
CAGTCAATGCATCAATTCACATCCCCATTCTGTATGAGAAGAGAAATC

>M6-PGSC0003DMG401001040M6LRR-RLP\_366

TTCCGTTTTGTGGTTATGGCTTCTGATGTTGTTGATGTATCAAACGTAGTTAATATTTATCTTTTGGCATT  
GTCACCTTATTCGATTTTTTGGGGTGAAAAGTCTCTTTAGCTATTATT

>M6-PGSC0003DMG401001040M6LRR-RLP\_3660

TCTATCTTCCTCAGTCAATGCATCAATTCACATCCCCATTCTGTATGAGAAGAGAAATCAAATTGCTTTTC  
GTGCTGTTAAGCTCTTTAGAGGGCTACACAAGATTAGTGCTGCGAGAAT

>M6-PGSC0003DMG401001040M6LRR-RLP\_3721

ATTGCTTTTCGTGCTGTTAAGCTCTTTAGAGGGCTACACAAGATTAGTGCTGCGAGAATATCTAGCAGGG

CTATTGAGGTAATTACTAACCAGACGGAAATTAGCTACAGAACATCACAG

>M6-PGSC0003DMG401001040M6LRR-RLP\_3782

CTAGCAGGGCTATTGAGGTAATTACTAACCAGACGGAAATTAGCTACAGAACATCACAGTCTAGAATGT

TGAATGTCTAAATATGCAGTACTGATGTTTTTCGTTTTTCCTTTTCTGT

>M6-PGSC0003DMG401001040M6LRR-RLP\_3843

TAGAATGTTGAATGTCTAAATATGCAGTACTGATGTTTTTCGTTTTTCCTTTTCTGTGATCCCACCTTGT

TGCTTGGCAAAGTCTCTTTCATCGCTGATATAGAGAAAGACCGACTT

>M6-PGSC0003DMG401001040M6LRR-RLP\_3904

TCCCACCTTGTTGCTTGGCAAAGTCTCTTTCATCGCTGATATAGAGAAAGACCGACTTCCAATATTTTAT

AACTTGACGCATTTGGAGCTGAGTATGGAACCTGAAAATCATTCCATTG

>M6-PGSC0003DMG401001040M6LRR-RLP\_3965

AATATTTTATAACTTGACGCATTTGGAGCTGAGTATGGAACCTGAAAATCATTCCATTGGACCATTGAAG

GAACTGCTCCAATGTCTTCAAAGTTGCAATCGCTTCATTTTTCTGAGGT

>M6-PGSC0003DMG401001040M6LRR-RLP\_4026

CCATTGAAGGAACTGCTCCAATGTCTTCAAAGTTGCAATCGCTTCATTTTTCTGAGGTAGATACCTTTGG

CATTGTGGACTTGTTTATAATTTTTTTTCAATTCACATGAGTTCTTTTC

>M6-PGSC0003DMG401001040M6LRR-RLP\_4087

ATACCTTTGGCATTGTGGACTTGTTTATAATTTTTTTTCAATTCACATGAGTTCTTTTCTATTTTTCATACCA

TTCAGGGACTTGACCCCTGCATGCACCTTTGTGAAGATGACTGGAAC

>M6-PGSC0003DMG401001040M6LRR-RLP\_4148

TTTTTCATACCATTACAGGGACTTGACCCCTGCATGCACCTTTGTGAAGATGACTGGAACCTTGAGATCTGT

ACCACCCTGTTTCTTGTCTAGTCTCAAGACAGTGAAATACAGCAATTTTC

>M6-PGSC0003DMG401001040M6LRR-RLP\_4209

GAGATCTGTACCACCCTGTTTCTTGTCTAGTCTCAAGACAGTGAAATACAGCAATTTTCATGGTAATGAT

ACAGAGATTTCTTTTTTAAGAAATTTGCTGGAAATTGCATTAGTTTTGGA

>M6-PGSC0003DMG401001040M6LRR-RLP\_427

TTTTGGCATTGTCACTTTATTCGATTTTTTGGGGTGAAAAGTCTCTTAGCTATTATTATCCCTAGTTTTTC

ATTCGACACTTTTTTATTTGGTTCTTTGTGTACATCTAGCTATCA

>M6-PGSC0003DMG401001040M6LRR-RLP\_4270

GGTAATGATACAGAGATTTCTTTTTTAAGAAATTTGCTGGAAATTGCATTAGTTTTGGAGAAGCTGAACA  
TAGTTTGTTCGAAGAAACCTTTTGGGGACCTAAAGAAGCAAAGGAAGTT

>M6-PGSC0003DMG401001040M6LRR-RLP\_4331

AGCTGAACATAGTTTGTTCGAAGAAACCTTTTGGGGACCTAAAGAAGCAAAGGAAGTTGAAGATCAAC  
TGCGGAGTGGGCACGGAGGATCAGTGTCTTGTGCTATCAAGTTTATGTAAA

>M6-PGSC0003DMG401001040M6LRR-RLP\_4392

AGATCAACTGCGGAGTGGGCACGGAGGATCAGTGTCTTGTGCTATCAAGTTTATGTAAACCTAAAAGAG  
CTTTTACATGTGAGTTCCTTTTCCATCAAGAAGCTTGTTAGTTTTCTTGT

>M6-PGSC0003DMG401001040M6LRR-RLP\_4453

TAAAAGAGCTTTTACATGTGAGTTCCTTTTCCATCAAGAAGCTTGTTAGTTTTCTTGTCATTTTCTTTCT  
ATGCAGAACTGTGGCATTGTTTTTCTTCTTGCTTTGGTTCATAA

>M6-PGSC0003DMG401001040M6LRR-RLP\_4514

TTTTTCTTCTATGCAGAACTGTGGCATTGTTTTTCTTCTTGCTTTGGTTCATAATTCGATTTACTAGC  
TAAATATCTGAATCAGACTTCTCAGTGCAGTAATGAGTTTAAAAGCC

>M6-PGSC0003DMG401001040M6LRR-RLP\_4575

CGATTTACTAGCTAAATATCTGAATCAGACTTCTCAGTGCAGTAATGAGTTTAAAAGCCCAGATTCTACC  
CCTTGAGATATGAACTTGAGTTTTACTAAGAAAGCATGATGAGTTTCTCG

>M6-PGSC0003DMG401001040M6LRR-RLP\_4636

GATTCTACCCCTTGAGATATGAACTTGAGTTTTACTAAGAAAGCATGATGAGTTTCTCGTCATTTTCAGAA  
GGTCCGTCTTCGGTGGATTATACATGAGTTACTTTCAAGTTGCTAGGAG

>M6-PGSC0003DMG401001040M6LRR-RLP\_4697

ATTTTCAGAAGGTCCGTCTTCGGTGGATTATACATGAGTTACTTTCAAGTTGCTAGGAGCTAGTTATAAG  
TTGGGAATACAAAAGAGGAAGGGTTATGAATGTTTCAGAATAACATAGA

>M6-PGSC0003DMG401001040M6LRR-RLP\_4758

AGTTATAAGTTGGGAATACAAAAGAGGAAGGGTTATGAATGTTTCAGAATAACATAGAAGTACATCTA  
TCCAGAAATGAATTTTAGCTTAGTAGCTACTGCTTGAAAATCACATTTTGC

>M6-PGSC0003DMG401001040M6LRR-RLP\_4819

TACATCTATCCAGAAATGAATTTTAGCTTAGTAGCTACTGCTTGAAAATCACATTTTGCACATATGCTGTC  
CAGGTCAAATAAGATCTCTTGTCTATTTCTATTTTGTGTATCTATGG



>M6-PGSC0003DMG401001040M6LRR-RLP\_488

CCCTAGTTTTATTTCGACACTTTTTATTTGGTTCTCTTTGTGTACATCTAGCTATCAGTAGTATTATCACT  
GTTCTCGTAGTTTTTTGTTATTATCTATTGTTTCTAGTGCTAAGGTT

>M6-PGSC0003DMG401001040M6LRR-RLP\_4880

ATATGCTGTCCAGGTCAAATAAGATCTCTTGTCTATTTCTATTTTTGTGTATCTATGGTCCACCGAATGA  
AAAATATGTCTCTTTATGGTATAAAAAGATTTGCCTGTGCGTGACACCAA

>M6-PGSC0003DMG401001040M6LRR-RLP\_4941

CACCGAATGAAAAATATGTCTCTTTATGGTATAAAAAGATTTGCCTGTGCGTGACACCAAAGCTCACCGT  
GTTAATAAAGCTAATGTTTGACTGGACAATTATATTCAGACCCGATTGTT

>M6-PGSC0003DMG401001040M6LRR-RLP\_5002

GCTCACCGTGTTAATAAAGCTAATGTTTGACTGGACAATTATATTCAGACCCGATTGTTCCATCTTTCAGC  
AACTTAAGTGAACCTTCTGCACATGAGACTAATGTATCAAATTAGATAAC

>M6-PGSC0003DMG401001040M6LRR-RLP\_5063

ATCTTTCAGCAACTTAAGTGAACCTTCTGCACATGAGACTAATGTATCAAATTAGATAACCATTAATAAATAG  
ATGGTGGGTAATCTCTTATTGAATATCCGGTTTGTCTAGTTAGGAGTTA

>M6-PGSC0003DMG401001040M6LRR-RLP\_5124

TTAAAAATAGATGGTGGGTAATCTCTTATTGAATATCCGGTTTGTCTAGTTAGGAGTTAGGATTCACATT  
CACAGAGTTTCTTATTTTAAAAGGCAGTGTTGCGAAGAAATTCTTGAACCT

>M6-PGSC0003DMG401001040M6LRR-RLP\_5185

ATTCACATTCACAGAGTTTCTTATTTTAAAAGGCAGTGTTGCGAAGAAATTCTTGAACCTAGAACCTCTTTG  
GACTTTTACGACTGGAAACATCAAAGAATTCTTCTTTTCTCAAGGAGTT

>M6-PGSC0003DMG401001040M6LRR-RLP\_5246

AACCTCTTTGGACTTTTACGACTGGAAACATCAAAGAATTCTTCTTTTCTCAAGGAGTTGAGGCCAGAGT  
AAGTGCAATATGCATCGTTAATTATTATAAATTACTGTTACATATTAATCA

>M6-PGSC0003DMG401001040M6LRR-RLP\_5307

GGCCAGAGTAAGTGCAATATGCATCGTTAATTATTATAAATTACTGTTACATATTAATCAAATAGTCTCAT  
TCTTTTATAATGATGATAATATTTTGTGTATCTGTGGTCACCAGATGAA

>M6-PGSC0003DMG401001040M6LRR-RLP\_5368

ATAGTCTCATTCTTTTATAATGATGATAATATTTTGTGTATCTGTGGTCACCAGATGAAAAATATGTCTCTTT

ATATAGTAGAAAAAGATTTGCATGTGCTTGCACCAAAGCTCACCATG

>M6-PGSC0003DMG401001040M6LRR-RLP\_5429

TATGTCTCTTTATATAGTAGAAAAAGATTTGCATGTGCTTGCACCAAAGCTCACCATGTTAATAGAGTT  
GAGGTTTGACTGGAAAATTATATCCAGACCCGTTTGTTCATCTTTCGGC

>M6-PGSC0003DMG401001040M6LRR-RLP\_549

AGTATTACTACTGTTCTCGTAGTTTTTTGTTATTATCTATTGTTTCTAGTGCTAAGGTTATTGCATTATTTTG  
CTGTAGCTACTATTTAATGTTTTGCATATTATCTGTCATGTCTTCTT

>M6-PGSC0003DMG401001040M6LRR-RLP\_5490

AATAGAGTTGAGGTTTGACTGGAAAATTATATCCAGACCCGTTTGTTCATCTTTCGGCAACTTAACTGA  
TATTCTGCACATGAGACTGTGAAATTAGATTACCATTATAGATTGATTAA

>M6-PGSC0003DMG401001040M6LRR-RLP\_5551

CTTAACTGATATTCTGCACATGAGACTGTGAAATTAGATTACCATTATAGATTGATTAATGGGAATCGCA  
TTATGAAATCTGGTTTCTCTAGTTAGGATGTACATTCACCGAATTTCTTA

>M6-PGSC0003DMG401001040M6LRR-RLP\_5612

GGAATCGCATTATGAAATCTGGTTTCTCTAGTTAGGATGTACATTCACCGAATTTCTTATTCTAAATAGCA  
CAGTGCAGCGAGGAAATTGTTGAACTAGAACCTCTTGGACCCTTACGA

>M6-PGSC0003DMG401001040M6LRR-RLP\_5673

CTAAATAGCACAGTGCAGCGAGGAAATTGTTGAACTAGAACCTCTTGGACCCTTACGAGTGGAAACAT  
CACAAGGATTTGAAAGCACGAGTAACTGCAATATGCAAATCTACTTTTGGGA

>M6-PGSC0003DMG401001040M6LRR-RLP\_5734

GGAAACATCACAAGGATTTGAAAGCACGAGTAACTGCAATATGCAAATCTACTTTTGGAGCCTGTGCAA  
ATTTGTTTTTTCCAGTCTTTCAGCTAGCCAAGAAGCCGCCAATTTAACTAA

>M6-PGSC0003DMG401001040M6LRR-RLP\_5795

CTGTCGAAATTTGTTTTTTCCAGTCTTTCAGCTAGCCAAGAAGCCGCCAATTTAACTAAAGTTATATATGT  
CATTATACTTGGACTTTGAAGAATTTTCATGTTGCACTTACACTTCTTGA

>M6-PGSC0003DMG401001040M6LRR-RLP\_5856

TTATATATGTCATTATACTTGGACTTTGAAGAATTTTCATGTTGCACTTACACTTCTTGGATGCAGCAAGTAA  
CTTCACCTAAATCGATATCAAACCTCATGTCTTGCCTGCAAGATTAGTG

>M6-PGSC0003DMG401001040M6LRR-RLP\_5917

CAGCAAGTAACTTCACCTAAATCGATATCAAACCTCATGTCTTGCACTGCAAGATTAGTGTGATTTTCTTTT  
TCATCTTTTCATGTGTCAAAAATATTCTGCTCGCTTAAAAATGAAATCAG

>M6-PGSC0003DMG401001040M6LRR-RLP\_5978

ATTTTCTTTTTCATCTTTTCATGTGTCAAAAATATTCTGCTCGCTTAAAAATGAAATCAGTTGACAATTTTAG  
ACACTTGGTAGTGCTGCAGTATTGCATTTTACAAGCCAGTGTCTGTTA

>M6-PGSC0003DMG401001040M6LRR-RLP\_6039

GACAATTTTAGACACTTGGTAGTGCTGCAGTATTGCATTTTACAAGCCAGTGTCTGTAAAGAGCATTTA  
AGATGGTGTGTAGATCTGATACTAACATTTTAAAGCTTATTAGCTTCTTA

>M6-PGSC0003DMG401001040M6LRR-RLP\_61

CAATACACGATTTGGGGATCATCTGACGAGCACGTGCTCCATCATTGCAACTGAAAGGACTATTCACTT  
TTTACACACACCAGTGAAAACAAAGAGTCGGGATTGTCGTGTTTCAGTACT

>M6-PGSC0003DMG401001040M6LRR-RLP\_610

TGCATTATTTTGCTGTAGCTACTATTTAATGTTTTGCATATTATCTGTCATGTCTTCTTTACTTTGGTTATTT  
CCTTTCCAAATGGCTTTGTTATGCGCTACTTGAGTCGAGGGTTTTTC

>M6-PGSC0003DMG401001040M6LRR-RLP\_6100

GAGCATTTAAGATGGTGTGTAGATCTGATACTAACATTTTAAAGCTTATTAGCTTCTTATTGTATGTGTAT  
GTGATGCAGTTTCCAACAAGCAGATATTTTGCAAGCATTAGCTGTGGAT

>M6-PGSC0003DMG401001040M6LRR-RLP\_6161

GTATGTGTATGTGATGCAGTTTCCAACAAGCAGATATTTTGCAAGCATTAGCTGTGGATCCAGCGCTACA  
ATTTTTGGTTCCTTTTACAAGTGCAACACCATGCTTTAGTACACTTCTTG

>M6-PGSC0003DMG401001040M6LRR-RLP\_6222

AGCGCTACAATTTTTGGTTCCTTTTACAAGTGCAACACCATGCTTTAGTACACTTCTTGGATCAGTTATTTT  
TGGTAATGAATTCTGCAGATTTGTGTAAATCAGTTGGAACCTCTTTTT

>M6-PGSC0003DMG401001040M6LRR-RLP\_6283

TCAGTTATTTTTGGTAATGAATTCTGCAGATTTGTGTAAATCAGTTGGAACCTCTTTTTGCATTTAGGTCA  
CAAGTCTTTCTGAAGTAGTGGAATCTGACTGTAGTGGAACAGGTAAACA

>M6-PGSC0003DMG401001040M6LRR-RLP\_6344

ATTTAGGTCACAAGTCTTTCTGAAGTAGTGGAATCTGACTGTAGTGGAACAGGTAAACAGTTAACTTAG  
CAATGGACCCTTTACCCCTTTTTTGTCAATTTATTTTGTGGGGGATAGGCAT

>M6-PGSC0003DMG401001040M6LRR-RLP\_6405

TAACTTAGCAATGGACCCTTTACCCCTTTTTGTCAATTTATTTGTGGGGATAGGCATAGGTAGATGATT  
TTGTGATTGTTTTAATTCAAAGGAATCAAGCATTGTAATCTACTAT

>M6-PGSC0003DMG401001040M6LRR-RLP\_6466

GTAGATGATTTTGTGATTGTTTTAATTCAAAGGAATCAAGCATTGTAATCTACTATCTGTGATATAGC  
TGACTCAGTCATATGAAACAACAAGGATAGGGAAAATATTTATAACAA

>M6-PGSC0003DMG401001040M6LRR-RLP\_6527

GTGATATAGCTGACTCAGTCATATGAAACAACAAGGATAGGGAAAATATTTATAACAAGTTTGGGTTTT  
TTGGGAAAGAAAGTTACACATGCATTGATCAAGTTCCAATGTCTTGTTAT

>M6-PGSC0003DMG401001040M6LRR-RLP\_6588

TTGGGTTTTTGGGAAAGAAAGTTACACATGCATTGATCAAGTTCCAATGTCTTGTTATTTTGTGTGTTTT  
ACATGTCTGAAGTTTTATGCATTATGTCTTGTTTTACAATTGGAGAAATT

>M6-PGSC0003DMG401001040M6LRR-RLP\_6649

TGTGTGTTTTACATGTCTGAAGTTTTATGCATTATGTCTTGTTTTACAATTGGAGAAATTGAGTTTTATCTTT  
TTTTTCATACCCTGCTGATATGTAGCAGTCAGAAAAATTAGAAGTAGA

>M6-PGSC0003DMG401001040M6LRR-RLP\_671

CTTTGGTTATTTCTTTCAAATGGCTTTGTTATGCGCTACTTGAGTCGAGGGTTTTTCAGAAACAATGCG  
CGGGTCTTTCAGAAATACACTTGCTATGTTGTTGTTGTTGGTATACATC

>M6-PGSC0003DMG401001040M6LRR-RLP\_6710

GTTTTATCTTTTTTTTCATACCCTGCTGATATGTAGCAGTCAGAAAAATTAGAAGTAGAACTATCAGAGG  
GTTTAACTCTCTTGATAACCATCTTCAACTTAGTTTCGTAAGTGGAGT

>M6-PGSC0003DMG401001040M6LRR-RLP\_6771

TATCAGAGGGTTAACTCTCTTGATAACCATCTTCAACTTAGTTTCGTAAGTGGAGTTTGGAGAATGT  
AGAATGTATGCAAATTTTATGCTTATTTTTACAGAGTAAAGAGACTGTTT

>M6-PGSC0003DMG401001040M6LRR-RLP\_6832

GGAGAATGTAGAATGTATGCAAATTTTATGCTTATTTTTACAGAGTAAAGAGACTGTTTTCGATAGATTT  
TCTTTGTATCAAGGGAGGAAAAGCATAAAGAAATGGAAAAAGAATAATTG

>M6-PGSC0003DMG401001040M6LRR-RLP\_6893

GATAGATTTTCTTTGTATCAAGGGAGGAAAAGCATAAAGAAATGGAAAAAGAATAATTGCTCCAAAAAG

CATTTCTTTTCCATCTTGACTTATAAATGTTGTTGTGGAGGGTTGTTATTA

>M6-PGSC0003DMG401001040M6LRR-RLP\_6954

CCAAAAAGCATTCTTTTCCATCTTGACTTATAAATGTTGTTGTGGAGGGTTGTTATTATACCCCTTTGGAT

AAAAATGTCTTTTTATTCCAATAAAAAGCCACTTATAAGACTTGGTTCT

>M6-PGSC0003DMG401001040M6LRR-RLP\_7015

CCCTTTGGATAAAAATGTCTTTTTATTCCAATAAAAAGCCACTTATAAGACTTGGTTCTGTCCCATAGAG

AAAAACCAGACAAGGGGCAGAGAACAAGTGCAAAAAATTCTCAGATTTA

>M6-PGSC0003DMG401001040M6LRR-RLP\_7076

CCCATAGAGAAAAACCAGACAAGGGGCAGAGAACAAGTGCAAAAAATTCTCAGATTTACACATTTATT

AAATGACACAGCATTAAAATAATCTAACAAGAATATGCCAATTCAGAGAA

>M6-PGSC0003DMG401001040M6LRR-RLP\_732

AAACAATGCGCGGGTCTTTCAGAAATACACTTGCTATGTTGTTGTTGGTATACATCTAATCTTTTGTT

GGCTAAGATGACTACTGATTCAAAAAAAGTTCCTAGGGCACCGGGCTT

>M6-PGSC0003DMG401001040M6LRR-RLP\_793

ATCTTTTGTGGCTAAGATGACTACTGATTCAAAAAAAGTTCCTAGGGCACCGGGCTTAGTTAGTTGTG

TTGTGTAGTCGAATTACATATTAATGATTCCCAAATTTGCAATGATCCA

>M6-PGSC0003DMG401001040M6LRR-RLP\_854

TTAGTTGTGTTGTGTAGTCGAATTACATATTAATGATTCCCAAATTTGCAATGATCCACATGGGAAAGA

CTACCCGTTGACTAGAAATGGACATTTGGCCTAACTCCGAAATCTAGCTT

>M6-PGSC0003DMG401001040M6LRR-RLP\_915

TGGGAAAGACTACCCGTTGACTAGAAATGGACATTTGGCCTAACTCCGAAATCTAGCTTATAATGCGAG

GATTGTTCAAGAAAAAATAATCATTCCCTCGATCAATGTGGATTGACTCT

>M6-PGSC0003DMG401001040M6LRR-RLP\_976

AATGCGAGGATTGTTCAAGAAAAAATAATCATTCCCTCGATCAATGTGGATTGACTCTAACACCAACGC

ATACTCAAGTCCGAACGTATGGAGCATGGATAACATGGCATAGGATCGCA

>M6-PGSC0003DMG401001828-(rev)M6LRR-RLP\_0

ATGAAGTACCAACAAGTCTTATTGCTTTCTGCTTCTATTCATTTGTTATATTTTTTTTCCAGCAATCTCAG

CTCACATATGCTGGGCAACATCTCTGTGCCTGCTATGACGCTTTTTAT

>M6-PGSC0003DMG401001828-(rev)M6LRR-RLP\_512

CCTCTCCTCGAATGATTTCCAAGTTGGCCGAACAACCTCTAGAAGTTTGCTTCAGAACTTAACTAATTTGG  
AGGTACTGTTGCTTGACAGCGTGGATGCACCATTTGAGTTACCTAAGAA

>M6-PGSC0003DMG401001979-(rev)M6LRR-RLP\_0

GGACAATGTCAGAGATTAGATACCTGGATATTAGATTGCCACTATATATATCAAATCCTCTTGAAGCAGA  
ACAGCCTTTGTTTCTCAATAACTTGCACACACTTTTTCTCTATTACTCTC

>M6-PGSC0003DMG401001979-(rev)M6LRR-RLP\_1008

TTCTATGTCCATGCAGGACAAAGCTCAAGCGTCTCTTCAGATAGACAAACAATACTTGACAAAACCTTC  
TCTCACGCACTATCCTTTTATTGCCGAAAAGATAAGAAGAAGCTTCCAATC

>M6-PGSC0003DMG401001979-(rev)M6LRR-RLP\_1071

AACTTTCTCTCACGCACTATCCTTTTATTGCCGAAAAGATAAGAAGAAGCTTCCAATCTAAAAGAGCTAAA  
GATTTTACATAAATCTAAGCATCCTGACTGGCCTGATATTCTCAATTCTC

>M6-PGSC0003DMG401001979-(rev)M6LRR-RLP\_1134

AGCTAAAGATTTTACATAAATCTAAGCATCCTGACTGGCCTGATATTCTCAATTCTCTCCGTCTTTTAGAG  
AAACTGGAGACACTATACCTAGGAGCAGAACAAACCATCAATGACCAGA

>M6-PGSC0003DMG401001979-(rev)M6LRR-RLP\_1197

TTTTAGAGAAACTGGAGACACTATACCTAGGAGCAGAACAAACCATCAATGACCAGATCATGATTTTCTA  
GGGGGATATTTTCTCCTAGTCTCAAGGAATTGAAATTAACACGTACTT

>M6-PGSC0003DMG401001979-(rev)M6LRR-RLP\_126

TTGCGGAAATCATAAGAAGAACCCCAATCTAAAAAAGCTAAAGATTTTCAGATAGATCTGAGCATCCTG  
ACTGGCCTCCTATTATGAATTCTCTCAGTCTTCTAGAGGGGCTGGAGACAC

>M6-PGSC0003DMG401001979-(rev)M6LRR-RLP\_1260

TTTTCTAGGGGGATATTTTCTCCTAGTCTCAAGGAATTGAAATTAACACGTACTTTTATACCATGGGAA  
GCTATGAATTTACTGGCTAATTTACCCAATCTTGAGGCGTTTATGGGGG

>M6-PGSC0003DMG401001979-(rev)M6LRR-RLP\_1323

CATGGGAAGCTATGAATTTACTGGCTAATTTACCCAATCTTGAGGCGTTTATGGGGGTTGATGCATTCGA  
TGGAACAAACTGGACACTAAATGAAGATATTGTATTTCCCAAATTAAT

>M6-PGSC0003DMG401001979-(rev)M6LRR-RLP\_1449

GAATTTTGTTCCGATGTCTGGCAAGGTGGGAAGCAGGTAGTAATAATTTTCCGATGCTTGAGCAACTAT  
TACTGGATGGATTGTATGAACTGGAGCAGATTCCCGAGAGCATTGGAGATA

>M6-PGSC0003DMG401001979-(rev)M6LRR-RLP\_1512

AACTATTACTGGATGGATTGTATGAACTGGAGCAGATTCCCAGAGCATTGGAGATATAATAACACTAG  
AATTGATCAAATAGACCGTTGTGGCTCTGGTGTGGAGACTAGTGCAAAGA

>M6-PGSC0003DMG401001979-(rev)M6LRR-RLP\_1575

CACTAGAATTGATCAAATAGACCGTTGTGGCTCTGGTGTGGAGACTAGTGCAAAGAAAATTCAACAAG  
AGCAACAAAGCCAGGGAAATTATGAGCTTCAAGTTCAAATTATTAGGTATG

>M6-PGSC0003DMG401001979-(rev)M6LRR-RLP\_1638

AACAAGAGCAACAAAGCCAGGGAAATTATGAGCTTCAAGTTCAAATTATTAGGTATGTTAAAAGTTCCA  
TCATTGATATTAATCCAATTCTTATTAATATGTTTGTGTGGTCTTTTTTGT

>M6-PGSC0003DMG401001979-(rev)M6LRR-RLP\_1699

AAGTTCCATCATTGATATTAATCCAATTCTTATTAATATGTTTGTGTGGTCTTTTTTGTGTTTTGTTTTACCT  
GCTAAAAGGCTTGTAACCTGGAACATGATAAATATGAAAGAACA

>M6-PGSC0003DMG401001979-(rev)M6LRR-RLP\_189

ATCCTGACTGGCCTCCTATTATGAATTCTCTCAGTCTTCTAGAGGGGCTGGAGACACTACATATAGCAAC  
AGAACAAACCATTACTGGCCGGATGATTTTCTCCGGATGTAATCTCCCGC

>M6-PGSC0003DMG401001979-(rev)M6LRR-RLP\_252

TAGCAACAGAACAACCACTACTGGCCGGATGATTTTCTCCGGATGTAATCTCCCGCCTAATCTCAAGCA  
ACTGAAGTTATCAGGTACTTCTATACCATGGGAAGATATGAATTTGCTGG

>M6-PGSC0003DMG401001979-(rev)M6LRR-RLP\_315

TCAAGCAACTGAAGTTATCAGGTACTTCTATACCATGGGAAGATATGAATTTGCTGGCTAATTTACCCAA  
TCTTGAGGTGCTCAAAGGGTCTCATGCATTCACTGGAACAGTTTGGAAAC

>M6-PGSC0003DMG401001979-(rev)M6LRR-RLP\_378

TACCCAATCTTGAGGTGCTCAAAGGGTCTCATGCATTCACTGGAACAGTTTGGAAACTAAATGAAGATG  
TTGTGTTTAGCAAATTAATATCTACGACTGTATGCCTGTGGAGATCTGC

>M6-PGSC0003DMG401001979-(rev)M6LRR-RLP\_441

AAGATGTTGTGTTTAGCAAATTAATATCTACGACTGTATGCCTGTGGAGATCTGCAAAGGTGGGAAG  
CTGGTAGTGATAATTTCCCGATGCTTGAGCAACTACTACTGCGTGATTTGG

>M6-PGSC0003DMG401001979-(rev)M6LRR-RLP\_567

TGGAGAAGATTCCGGAGAGTATTGGGGAAATAATGACACTAAAATTGATCCAAATAGATGATTGAAGCT

CTTTGTAGAGACTAGTGCGACACAAATTCAAGAAGAGCAAGAAAGCGTAG

>M6-PGSC0003DMG401001979-(rev)M6LRR-RLP\_63

AAGCAGAACAGCCTTTGTTTCTCAATAACTTGCACACACTTTTTCTCTATTACTCTCCTTTTGTTGCGGAAA

TCATAAGAAGAACCCCAATCTAAAAAGCTAAAGATTCAGATAGAT

>M6-PGSC0003DMG401001979-(rev)M6LRR-RLP\_630

GAAGCTCTTTGTAGAGACTAGTGCGACACAAATTCAAGAAGAGCAAGAAAGCGTAGGAAATTATGAG

CTTCAAGTTTGAATTAATAGGTATGTTTAAATTCCATCTTTGATTATTAGCC

>M6-PGSC0003DMG401001979-(rev)M6LRR-RLP\_693

ATGAGCTTCAAGTTTGAATTAATAGGTATGTTTAAATTCCATCTTTGATTATTAGCCAATTCTCAATTAAC

ATGTTCTTGTGGTCTTTCTATTTTCTTTCATTTTTGTTGTCACCTGCTA

>M6-PGSC0003DMG401001979-(rev)M6LRR-RLP\_756

CAATTAACATGTTCTTGTGGTCTTTCTATTTTCTTTCATTTTTGTTGTCACCTGCTAAAAAGGCTGTGTAGA

TTAGTGTAACCTTGTGAATACACCAATTTAGCTGCAATAGCCTTAG

>M6-PGSC0003DMG401001979-(rev)M6LRR-RLP\_819

CTGTGTAGATTAGTGTAACCTTGTGAATACACCAATTTAGCTGCAATAGCCTTAGCTTGGCAGGGAAA

GCATCGCGAAGAATTGTATTGGAGAGTATAATTAATACTATACCAAGAGACT

>M6-PGSC0003DMG401001979-(rev)M6LRR-RLP\_882

AGGGAAAGCATCGCGAAGAATTGTATTGGAGAGTATAATTAATACTATACCAAGAGACTCTCTCGGAAGA

GAATATAAGTATAAATATTATGATTTTTTTTTCTTTCCAAGTTGCGATGGCCA

>M6-PGSC0003DMG401001979-(rev)M6LRR-RLP\_945

GAAGAGAATATAAGTATAAATATTATGATTTTTTTTTCTTTCCAAGTTGCGATGGCCATAATTCTTCTATGTC

CATGCAGGACAAAGCTCAAGCGTCTCTTCAGATAGACAAACAATACT

>M6-PGSC0003DMG401002428M6LRR-RLP\_1344

GAAGCTGAGCTTACATTGGGATAAGGAGGAGCAGATATGAAGAGGCCAGTCGCTCCTCTTCTAAGAA

ACAAAGGTCACAAGTACAAGTGCCACTCTTGCCGCTCTTTCCACAAGCCCG

>M6-PGSC0003DMG401002428M6LRR-RLP\_1392

AGTCGCTCCTCTTCTAAGAAACAAAGGTCACAAGTACAAGTGCCACTCTTGCCGCTCTTTCCACAAGCC

CGGGATTATAGATTAATATAGGTATATACCTCATGAAATTGTGTTCTCT

>M6-PGSC0003DMG401002542M6OtherRLKTM\_1037



ATCTAAAATTGAACTTACAAAAGGACAAAACCTTTCTCGCAGATGTTGAGGTGTTACAAATGACCATATT  
TTGATGTGTGTAAGAGAGCACTAATCATTTAGTCTTGTTCAAAGAGAGGG

>M6-PGSC0003DMG401002542M6OtherRLKTM\_1098

GACCATATTTTGTGATGTGTGTAAGAGAGCACTAATCATTTAGTCTTGTTCAAAGAGAGGGAGTTGAAGGA  
TAAGGGGTACATGCTCTTTCTCCATTTTCAATGAGGTTGTGTGCCCTTTT

>M6-PGSC0003DMG401002542M6OtherRLKTM\_1159

TTGAAGGATAAGGGGTACATGCTCTTTCTCCATTTTCAATGAGGTTGTGTGCCCTTTTTTTAGATTACCA  
GGGAGATACATTGATTTCTTGCCTTACGGGAAATTTTGTGCGGTGCAC

>M6-PGSC0003DMG401002542M6OtherRLKTM\_122

TCATTATAAACATCATCATTTACATAATATGGTTTGTCTGCTTGTTCATGCTCAGATAATTTGTTTGGT  
GGTCAACATCATCACTGGCAACAAAATGCTCCTCCCTCAGCAGAAAAC

>M6-PGSC0003DMG401002542M6OtherRLKTM\_1220

TAGATTACCAGGGAGATACATTGATTTCTTGCCTTACGGGAAATTTTGTGCGGTGCACTTCTTGTGCC  
CTTTTACCCTAACCATGTTTTCTAAAGGAGAAAGAGAAGAATGGAAAAAA

>M6-PGSC0003DMG401002542M6OtherRLKTM\_1281

CTTGTGCCCCTTTTACCCTAACCATGTTTTCTAAAGGAGAAAGAGAAGAATGGAAAAAAGTTGTTTTTTA  
ATGTTCTTCAAATTGACATGTGAGTCGAAGAAGAAATTGGCATATTCACA

>M6-PGSC0003DMG401002542M6OtherRLKTM\_1342

TGTTTTTAAATGTTCTTCAAATTGACATGTGAGTCGAAGAAGAAATTGGCATATTCACACTAACAGTCCA  
GTCCCAAGCTACAACAACAAGTCTAACTTTGTGATACCAATTCCTTTG

>M6-PGSC0003DMG401002542M6OtherRLKTM\_1403

AACAGTCCAGTCCCAAGCTACAACAACAAGTCTAACTTTGTGATACCAATTCCTTTGAGTTTTAGCCTT  
ATGTTAAATCTATTTGTTATTTTTAGAATGAGACTTGTGAAGTATATA

>M6-PGSC0003DMG401002542M6OtherRLKTM\_1464

TTTTAGCCTTATGTTAAATCTATTTGTTATTTTTAGAATGAGACTTGTGAAGTATATATCCAAGTTAGTC  
TGTTTCTTTCTTTCCCAAATCCTTGTTCCTCTATTATGTTTTGGAC

>M6-PGSC0003DMG401002542M6OtherRLKTM\_1525

CCAAGTTAGTCTGTTTCTTTCTTTCCCAAATCCTTGTTCCTCTATTATGTTTTGGACACAGTTCCTGGAG  
AGGTATCTCTCATTGTAGAACTTAGTTGTCATTTGATCTTTTTAGGTA

>M6-PGSC0003DMG401002542M6OtherRLKTM\_1586

AGTTCCTGGAGAGGTATCTCTCATTGTAGAACTTAGTTGTCATTTGATCTTTTTAGGTATCCCTAGAAAAT  
TCGGAGAGAAACTGCGATTTTCTTGTTCTTTCAAGTGTTAGTTCTAAG

>M6-PGSC0003DMG401002542M6OtherRLKTM\_1647

CCTAGAAAATTCGGAGAGAAACTGCGATTTTCTTGTTCTTTCAAGTGTTAGTTCTAAGTAACTAGTAATC  
TTGATGCATTATTATACCCTTGGTTGTCAATCTTGCCATGGCTGTCACC

>M6-PGSC0003DMG401002542M6OtherRLKTM\_1708

ACTAGTAATCTTGATGCATTATTATACCCTTGGTTGTCAATCTTGCCATGGCTGTCACCCAAGAGTTGAAT  
GTTTTCTTTATCACGAATGGTTGAATATGTTATTTTTACCTTTTAAATA

>M6-PGSC0003DMG401002542M6OtherRLKTM\_1769

AGAGTTGAATGTTTTCTTTATCACGAATGGTTGAATATGTTATTTTTACCTTTTAAATATCCGATATTGAT  
ACTTCTTTTACCTGTTATTATAATAACAAATAAAAAGGAGATATAACTG

>M6-PGSC0003DMG401002542M6OtherRLKTM\_1830

CCGATATTGATACTTCTTTTACCTGTTATTATAATAACAAATAAAAAGGAGATATAACTGCAGGCAAGGAG  
CATCCCCACTAAGCTGGGAACTAGGATGAGAGTTACTTTATGCTCTGC

>M6-PGSC0003DMG401002542M6OtherRLKTM\_1891

GGCAAGGAGCATCCCCACTAAGCTGGGAACTAGGATGAGAGTTACTTTATGCTCTGCGAGAGGATT  
GGCATATCTGCACGAAGAATGTATGTTTCATGAGTTGCAGAATTCTACTAATT

>M6-PGSC0003DMG401002542M6OtherRLKTM\_1952

GAGGATTGGCATATCTGCACGAAGAATGTATGTTTCATGAGTTGCAGAATTCTACTAATTAATATCACCTT  
TCTTGTTATAGTCGGCAGAATTCATGATTTTGCATTTGAATATGTTGAAA

>M6-PGSC0003DMG401002542M6OtherRLKTM\_2013

TATCACCTTTCTTGTTATAGTCGGCAGAATTCATGATTTTGCATTTGAATATGTTGAAATTTGTCTGTCTTG  
GCAGGTCATCCCAAGATCATAACATCGCGATATCAAGGCGTCCAATATT

>M6-PGSC0003DMG401002542M6OtherRLKTM\_2074

TGTCTGTCTTGGCAGGTCATCCCAAGATCATAACATCGCGATATCAAGGCGTCCAATATTCTTCTTGATGAC  
AATTTTGATGCAAAGGTGAAATGGACAATTCTGTATCTCTGTGTGTATA

>M6-PGSC0003DMG401002542M6OtherRLKTM\_2135

TCTTGATGACAATTTTGTATGCAAAGGTGAAATGGACAATTCTGTATCTCTGTGTGTATAGTGTGTGCATC

AATCTGCAGTTGTTTTTTAGCATTCTGGTAAAGCATGCCCTTTTCATT

>M6-PGSC0003DMG401002542M6OtherRLKTM\_2196

GTGTGCATCAATCTGCAGTTGTTTTTTAGCATTCTGGTAAAGCATGCCCTTTTCATTTCCACCATCATC  
TACTTTAGAAAGCAAGAGCTTTATTCATGTGGAGAATGACCGGGCTAC

>M6-PGSC0003DMG401002542M6OtherRLKTM\_2257

CCACCATCATCTACTTTAGAAAGCAAGAGCTTTATTCATGTGGAGAATGACCGGGCTACTTATAAGAGAC  
ACCCCTACAATAATAGAAGATACAATTTTGAGGTTTAGTGACGATTATTC

>M6-PGSC0003DMG401002542M6OtherRLKTM\_2318

ATAAGAGACACCCCTACAATAATAGAAGATACAATTTTGAGGTTTAGTGACGATTATTCCTTTTCTAACT  
GCATGAATGCACAAGGCAACTGTGCCCTTAAATCCTTAATGCAATTTTAT

>M6-PGSC0003DMG401002542M6OtherRLKTM\_2379

TTTCTAACTGCATGAATGCACAAGGCAACTGTGCCCTTAAATCCTTAATGCAATTTTATCCTGCCAGGGG  
GCAATCAAGGCTGAGCTTTTTCTCTCCTTCGTTTACCTTGGAACCTTCGAT

>M6-PGSC0003DMG401002542M6OtherRLKTM\_244

GGTGAGGAATCCAATAAATCCCTCCCCTCCACCATCCATTACATCAGTTTCACAAGAATCTGCAGCAGAT  
GGATGTACTCCTCCACTGCCACCTTCCACTGGCAGTAACTTCAGTACTGA

>M6-PGSC0003DMG401002542M6OtherRLKTM\_2440

TGCCAGGGGGCAATCAAGGCTGAGCTTTTTCTCTCCTTCGTTTACCTTGGAACCTTCGATTGACAACAGTG  
AAATAAGTCAAAAACCTGCCAAAGTTACCAAGTTAAAAAAAACAGTCAAA

>M6-PGSC0003DMG401002542M6OtherRLKTM\_2501

ACAACAGTGAAATAAGTCAAAAACCTGCCAAAGTTACCAAGTTAAAAAAAACAGTCAATAACTGCCAC  
CAAGCTCTGTTATTACAGTAAGATGATATTATTAATGGTAGACTGATGGAC

>M6-PGSC0003DMG401002542M6OtherRLKTM\_2562

ACTGCCACCAAGCTCTGTTATTACAGTAAGATGATATTATTAATGGTAGACTGATGGACATCATATGTGA  
GTTGACAGCTTCATAAATCTGGCATATGGTTCTTTTTTTTTTTGAGAA

>M6-PGSC0003DMG401002542M6OtherRLKTM\_2745

GAAACCTCAACGTTTTAATTGGGTGCATTATTAAGTAAGAATTACAGCATTTGACACAAAAAGTTGGTG  
GGACCTGATATGAAGTGGAAAGTATCTGACTATCTTCTATGGATTTGTTT

>M6-PGSC0003DMG401002542M6OtherRLKTM\_2806

AAGTTGGTGGGACCTGATATGAAGTGGAAAGTATCTGACTATCTTCTATGGATTTGTTTTCTCAATCTAA  
AGTAAGAAACAGAAACAAGCGTGCTTGTCTTTTTTCCTTCAAATATTTT

>M6-PGSC0003DMG401002542M6OtherRLKTM\_2867

TCAATCTAAAGTAAGAAACAGAAACAAGCGTGCTTGTCTTTTTTCCTTCAAATATTTTCTTTGGACTTAT  
ATTCGCTGAATTTATTTTTAGTAAGTTGTAATGATTTTCAAAAACCCAG

>M6-PGSC0003DMG401002542M6OtherRLKTM\_2928

TTGGACTTATATTCGCTGAATTTATTTTTAGTAAGTTGTAATGATTTTCAAAAACCCAGGCCATCAAATAT  
GATCTGAATTTCCGTACTGCTGTGGTTTAGTGCTGACTGAATGAACACC

>M6-PGSC0003DMG401002542M6OtherRLKTM\_2989

CATCAAATATGATCTGAATTTCCGTACTGCTGTGGTTTAGTGCTGACTGAATGAACACCTTTTTTTTTTTCT  
TTTACATATAAGTTGATTGCTAGATGCATTTGTTATATGTGATCCAGG

>M6-PGSC0003DMG401002542M6OtherRLKTM\_305

GCAGCAGATGGATGTACTCCTCCACTGCCACCTCCACTGGCAGTAACTTCAGTACTGACAAACCTTTTC  
AACAAACAAATCCTGATTCCAACCTGAGTTTCCCGAGAACTACATTCACC

>M6-PGSC0003DMG401002542M6OtherRLKTM\_3050

TTTTTTTTCTTTTACATATAAGTTGATTGCTAGATGCATTTGTTATATGTGATCCAGGTTGCTGATTTTGG  
GCTTGCGAGGTTGAATTATGACTCTGATACTCACGTCTCCACACGAGT

>M6-PGSC0003DMG401002542M6OtherRLKTM\_3111

GCTGATTTTGGGCTTGCAGGTTGAATTATGACTCTGATACTCACGTCTCCACACGAGTAATGGGAACTT  
TTGGTAATACTCTTTTTATCATCTATTAAGACGTTTCTGTTTCCATCC

>M6-PGSC0003DMG401002542M6OtherRLKTM\_3172

TGGGAACTTTTGGGTAATACTCTTTTTATCATCTATTAAGACGTTTCTGTTTCCATCCTCATGCAGTATTA  
TTCTGCAGTTGCTATAGCACATTGAATCAAGATTTAATCCCTATAACAT

>M6-PGSC0003DMG401002542M6OtherRLKTM\_3233

ATGCAGTATTATTCTGCAGTTGCTATAGCACATTGAATCAAGATTTAATCCCTATAACATTTACGGTTTATG  
TTTATCTTTGAGCTCTCCATATCTTTTCTTTCACTAACTTCTTACCTTT

>M6-PGSC0003DMG401002542M6OtherRLKTM\_3294

ACGGTTTATGTTTATCTTTGAGCTCTCCATATCTTTTCTTTCACTAACTTCTTACCTTTTGCAGGTAAGC  
TCCTGAGTATGCTCTTACTGGGAAGCTGACTGAAAAATCTGATGTCT

>M6-PGSC0003DMG401002542M6OtherRLKTM\_3355

CAGGTACTTAGCTCCTGAGTATGCTCTTACTGGGAAGCTGACTGAAAAATCTGATGTCTTCTCTTTTGGAGTCATGCTTTTGGAGATTATAACTGGTAGACGACCAATTGATAAAGCTCA

>M6-PGSC0003DMG401002542M6OtherRLKTM\_3416

TCTTTTGGAGTCATGCTTTTGGAGATTATAACTGGTAGACGACCAATTGATAAAGCTCAACACTACCTTGACGATAACATTGTTGATTGGGTAAGTTTTTCTGTAAGTGGTGCAATAAT

>M6-PGSC0003DMG401002542M6OtherRLKTM\_3477

ACTACCTTGACGATAACATTGTTGATTGGGTAAGTTTTTCTGTAAGTGGTGCAATAATCTGGGACAACAGATGTGGTTCAGATTTTCATGTGCAAGTGCCTAGCATTATTATCATT

>M6-PGSC0003DMG401002542M6OtherRLKTM\_3538

GGGACAACACTAGATGTGGTTCAGATTTTCATGTGCAAGTGCCTAGCATTATTATCATTTCCTCAATACTCATGAATAAGGACAGGAAGTTAATACTACTGTGGTTTCCAAGTTGTGAGTTTA

>M6-PGSC0003DMG401002542M6OtherRLKTM\_3599

CAATACTCATGAATAAGGACAGGAAGTTAATACTACTGTGGTTTCCAAGTTGTGAGTTTATGCATTCTTCTTCTATTATTTGTATGTAATTGCTAAGCTTCTGAGATGATCTAGAGCATC

>M6-PGSC0003DMG401002542M6OtherRLKTM\_366

AACCTTTTCAACAAACAAATCCTGATTCCAACCTTGAGTTTCCCGAGAACTACATTCACCTATCAAGAATTAACATTGCTACCGATAATTTCTCTGTCGCCAACCTCCTTGGTCAAGGTG

>M6-PGSC0003DMG401002542M6OtherRLKTM\_3660

CATTCTTTCTTCTATTATTTGTATGTAATTGCTAAGCTTCTGAGATGATCTAGAGCATCCATCTTCTTCTACTTCCCACTCCCCGCAAATAACCTATCCCCGAAAAAACTAACACTT

>M6-PGSC0003DMG401002542M6OtherRLKTM\_3721

TCTTCTTCTACTTCCCACTCCCCGCAAATAACCTATCCCCGAAAAAACTAACACTTCTCTCATGAAATTAGGCGAGGCCTTTGCTTACCCAGGCTCTGGATAATGGCAACTTTGAGA

>M6-PGSC0003DMG401002542M6OtherRLKTM\_3782

CTCATGAAATTAGGCGAGGCCTTTGCTTACCCAGGCTCTGGATAATGGCAACTTTGAGACTCTGGCTGATCCAAGATTGGACAAGAATTATGACTTGACTGAAATGACCAGAATGGTCAC

>M6-PGSC0003DMG401002542M6OtherRLKTM\_3843

CTGGCTGATCCAAGATTGGACAAGAATTATGACTTGACTGAAATGACCAGAATGGTCACTTGTGCTGCT

GTGTGTGTGCGCCATCTAGCACGTCGCAGGCCTCGTATGAGTCAGGTACCT

>M6-PGSC0003DMG401002542M6OtherRLKTM\_3904

GTGCTGCTGTGTGTGTGCGCCATCTAGCACGTCGCAGGCCTCGTATGAGTCAGGTACCTTCTACTTGTGA  
AAGCTCTATTTTATTCATACACTGTAGCTGCATGATTACCTTTAGATTTG

>M6-PGSC0003DMG401002542M6OtherRLKTM\_3965

TACTTGTGAAAGCTCTATTTTATTCATACACTGTAGCTGCATGATTACCTTTAGATTTGCATGTGGAAAGG  
AACTGTCTGAACTTAGAAAGTAAGGTTAAATTCCTCTTGTGACAAAAGG

>M6-PGSC0003DMG401002542M6OtherRLKTM\_4026

TGTGGAAAGGAACTGTCTGAACTTAGAAAGTAAGGTTAAATTCCTCTTGTGACAAAAGGTTGTAATGAT  
TTATATTAGAGTCTTTTTGCTTCTTTTCTTCCCGAAATAGTTATTAGTTGT

>M6-PGSC0003DMG401002542M6OtherRLKTM\_4087

GTAATGATTTATATTAGAGTCTTTTTGCTTCTTTTCTTCCCGAAATAGTTATTAGTTGTACCCCTCTGACAC  
CTAAACTGGTGTCTGATACCTGTCGCCTAAAGAAAATTTTTTGTCTTA

>M6-PGSC0003DMG401002542M6OtherRLKTM\_4148

CCCTCTGACACCTAAACTGGTGTCTGATACCTGTCGCCTAAAGAAAATTTTTTGTCTTAAATGTTTAC  
TCACCAGTTCCTACTTCTACTACGTGTTCCAGGTGCCAATATTTGTTT

>M6-PGSC0003DMG401002542M6OtherRLKTM\_4209

AAATGTTTACTCACCAGTTCCTACTTCTACTACGTGTTCCAGGTGCCAATATTTGTTTCTTGCACAATTA  
GCATCTCAAATGTAGATTACTTATTACAAGGAGTTTATAGCGCATAT

>M6-PGSC0003DMG401002542M6OtherRLKTM\_427

TCAAGAATTAGCATTGCTACCGATAATTTCTCTGTGCGCAACCTCCTTGGTCAAGGTGGTTTTGGATATG  
TATACAAGGGAGTATTCCGTGATGGGAAGGAGGTTGCAATTAAGCAACT

>M6-PGSC0003DMG401002542M6OtherRLKTM\_4270

TTGCACAATTAGCATCTCAAATGTAGATTACTTATTACAAGGAGTTTATAGCGCATATTTGTAGTTTTAC  
CTTCTTTTTTTTCCCTAGTCTAGGTCCTTTAGGAATATTCCTCAAATTCC

>M6-PGSC0003DMG401002542M6OtherRLKTM\_4331

GTAGTTTTACCTTCTTTTTTTTCCCTAGTCTAGGTCCTTTAGGAATATTCCTCAAATTCCTCAAACCTTGTCT  
TTATAAATTCTCGGGACAACACTGTGTCACATTGTGTTCTTTATGGG

>M6-PGSC0003DMG401002542M6OtherRLKTM\_4392

AAACCTTGTTCTTTATAAATTCTCGGGACAACACTGTGTCACATTGTGTTCTTTATGGGTACTAACAATTA  
CAGCAAGTCTACAAGAGATTTCTGAGAATGTCTCCTTGAGTTTCAGAT

>M6-PGSC0003DMG401002542M6OtherRLKTM\_4453

CTAACCAATTACAGCAAGTCTACAAGAGATTTCTGAGAATGTCTCCTTGAGTTTCAGATGTTAAAATAAG  
AAAGCAATGTATCATTCTCGTGAAACTACTTGGAAGAAAGCAAATAC

>M6-PGSC0003DMG401002542M6OtherRLKTM\_4514

TAAAATAAGAAAGCAATGTATCATTCTCGTGAAACTACTTGGAAGAAAGCAAATACCCCTTTTAGT  
AGCATACTCACCTTTAACTGTCCTTCCAAATGGAATAGAACAACCTTGTT

>M6-PGSC0003DMG401002542M6OtherRLKTM\_4575

CCTTTTAGTAGCATACTCACCTTTAACTGTCCTTCCAAATGGAATAGAACAACCTTGTTGAGTGCTGCTTC  
ATCTTGCGTTAGCTCAGCAGAAGCTGGACTATACAATTGAAAATTTGAA

>M6-PGSC0003DMG401002542M6OtherRLKTM\_4636

GTGCTGCTTCATCTTGCGTTAGCTCAGCAGAAGCTGGACTATACAATTGAAAATTTGAAATAACTGGAT  
CTATAATCACCTTTCTCAACCCCAAGATGGTTACACTATATTTGAGGATT

>M6-PGSC0003DMG401002542M6OtherRLKTM\_4697

AACTTGATCTATAATCACCTTTCTCAACCCCAAGATGGTTACACTATATTTGAGGATTTAGGAAGCATCT  
GAAATATACCAATTCTTCTGTTACTTTGTTTTTTGAGATCTCAAGTTG

>M6-PGSC0003DMG401002542M6OtherRLKTM\_4758

GGAAGCATCTGAAATATACCAATTCTTCTGTTACTTTGTTTTTTGAGATCTCAAGTTGGAACTTAGTCT  
CCCTCTCTAATCTCTCTTTTCTTCTGAATGGCTTTAGCCTTTTAAA

>M6-PGSC0003DMG401002542M6OtherRLKTM\_4819

AACTTAGTCTCCCTCTCTAATCTCTCTTTTCTTCTGAATGGCTTTAGCCTTTTAAATTCATGCTTACCA  
CTTTTTATTTTTTTCCCAGAATTCTATTACTGTCAAAGAAGACTTG

>M6-PGSC0003DMG401002542M6OtherRLKTM\_488

TTTGGATATGTATACAAGGGAGTATTCCGTGATGGGAAGGAGTTGCAATTAAGCAACTAAAAGCTGG  
AAGTGGGCAGGGGAGCGTGAATTTCAAGCAGAGGTGGAGATTATTAGTCAC

>M6-PGSC0003DMG401002542M6OtherRLKTM\_4880

TCATGCTTACCACTTTTTATTTTTTTCCCAGAATTCTATTACTGTCAAAGAAGACTTGTCTTGGCTTAATA  
ATCAGTGTGGAACTTTTCTTATGCAGATTGTCAGAGCTTTAGAAGGA

>M6-PGSC0003DMG401002542M6OtherRLKTM\_4941

TTGGCTTAATAATCAGTGTTGGAACCTTTTCTTATGCAGATTGTCAGAGCTTTAGAAGGAAATTTGCCGTT  
GGATGAGTTAAATGATGGACTTAGACCTGGACATAGTGGTATACATGAAT

>M6-PGSC0003DMG401002542M6OtherRLKTM\_5002

TTTGCCGTTGGATGAGTTAAATGATGGACTTAGACCTGGACATAGTGGTATACATGAATCTTATGGGAG  
CTCGGATTTTCGATGCTGTTTCAGTACAAAGAAGACCTTAAGAAATTTAGAAA

>M6-PGSC0003DMG401002542M6OtherRLKTM\_5063

TATGGGAGCTCGGATTTTCGATGCTGTTTCAGTACAAAGAAGACCTTAAGAAATTTAGAAAGATGGCACTG  
GAAAGCCAGACACATAATTCTAGTGAATGCAGCGGGCCTACCAGCGAATTT

>M6-PGSC0003DMG401002542M6OtherRLKTM\_5124

TGGCACTGGAAAGCCAGACACATAATTCTAGTGAATGCAGCGGGCCTACCAGCGAATTTGGCCCCCATC  
CTTCCGTTCAAGTAGTGAAGGCCTAAGAACAACCTCAAGGTACACGCTCTA

>M6-PGSC0003DMG401002542M6OtherRLKTM\_5185

CCCCCATCTTCCGGTTCAAGTAGTGAAGGCCTAAGAACAACCTCAAGGTACACGCTCTAGTATTGAAGGT  
CATCGAGAAATTAGAATAGACTAGAAGGCAGTTAGGAAGCAGAAAAGAGT

>M6-PGSC0003DMG401002542M6OtherRLKTM\_5246

ATTGAAGGTCATCGAGAAATTAGAATAGACTAGAAGGCAGTTAGGAAGCAGAAAAGAGTGATTTTTTC  
AAATGAAAGGGAGCAATGTAATGAACTCTTCTCAGAAATTGTTGGATTTGGT

>M6-PGSC0003DMG401002542M6OtherRLKTM\_5307

TTTTTCAAATGAAAGGGAGCAATGTAATGAACTCTTCTCAGAAATTGTTGGATTTGGTAGTGTGTTTAG  
AGAATTGTTAAATTTGGCATACTTTTCATATGCCACTCATCTTTGTAATT

>M6-PGSC0003DMG401002542M6OtherRLKTM\_5368

TGTGTTTAGAGAATTGTTAAATTTGGCATACTTTTCATATGCCACTCATCTTTGTAATTATCAATTGATCTA  
GGTGCTGTTGCAGATTTTGTAGTGTCCCATATCTAGTTCCTCAAAG

>M6-PGSC0003DMG401002542M6OtherRLKTM\_5429

CAATTGATCTAGGTGCTGTTGCAGATTTTGTAGTGTCCCATATCTAGTTCCTCAAAGTTACATGTAAAG  
AAAGGATTATCAAAAACATTGTATGAAAGCCATGAAGTTGGCTGTATT

>M6-PGSC0003DMG401002542M6OtherRLKTM\_549

AAGCTGGAAGTGGGCAGGGGAGCGTGAATTTCAAGCAGAGGTGGAGATTATTAGTCACGTTTCATCAC



AAGCATCTGTTTCATTGGTTGGACACTGCATTTACAGGGGTGCAACGGTTGT

>M6-PGSC0003DMG401002542M6OtherRLKTM\_5490

ACATGTAAAGAAAGGATTATCAAAAACATTGTATGAAAGCCATGAAGTTGGCTGTATTTTTTTATCCTT  
GAAACTGGTTAATACTTACCCACACCACGTGGACAGGTCATGTTTAATAT

>M6-PGSC0003DMG401002542M6OtherRLKTM\_610

TCATCACAAGCATCTTGTTCATTGGTTGGACACTGCATTTACAGGGGTGCAACGGTTGTTAGTTTATGAA  
TTTGTCCCAAACAAAACCTTGGAGTCCACTTGCATGGTAAGTTCTCAGA

>M6-PGSC0003DMG401002542M6OtherRLKTM\_671

GTTTATGAATTTGTCCCAAACAAAACCTTGGAGTCCACTTGCATGGTAAGTTCTCAGAATATCTAGATA  
GTTTGTCTTCTGCAATTTAGCATAGACTGCTGTCAATTGCCATACTTGCT

>M6-PGSC0003DMG401002542M6OtherRLKTM\_732

ATCTAGATAGTTTGTCTTCTGCAATTTAGCATAGACTGCTGTCAATTGCCATACTTGCTTTTATTAGAGGT  
TCTTTGTAATCATTTAATGGTGCAGAAGTTGTCCTCACCATATGATCTA

>M6-PGSC0003DMG401002542M6OtherRLKTM\_793

TATTAGAGGTTCTTTGTAATCATTTAATGGTGCAGAAGTTGTCCTCACCATATGATCTAAATTTAAGCTTA  
ATTAGAAGCATCAATTATTAAGGGTGGTTCAAAGAGAGGGATTTAAAGG

>M6-PGSC0003DMG401002542M6OtherRLKTM\_854

TTTAAGCTTAATTAGAAGCATCAATTATTAAGGGTGGTTCAAAGAGAGGGATTTAAAGGGTAAGGGGCT  
TGGGTGTTTCATATTCCTGATTTTCTTGTCTTATTCGCGTATTCAAAGAAT

>M6-PGSC0003DMG401002542M6OtherRLKTM\_915

AAGGGGCTTGGGTGTTTCATATTCCTGATTTTCTTGTCTTATTCGCGTATTCAAAGAATTTCTTGCTTTTAT  
TTAGTATTTTAACTTTTTTCTGAAGCAGAAGAGTTGTGTACTGTCA

>M6-PGSC0003DMG401002542M6OtherRLKTM\_976

CTTGCTTTTATTTAGTATTTTAACTTTTTTCTGAAGCAGAAGAGTTGTGTACTGTCACGATCTAAAATT  
GAACTTACAAAAGGACAAAACCTTCTCGCAGATGTTTCAGGTGTTACAA

>M6-PGSC0003DMG401002869-(rev)M6LRR-RLP\_0

TACACTCTCTTCGTCTCAATTCATTTGGTCGTCTAAGACTCGTATCTCACGATTTTAAATTGCTTCTTCAA  
ACTTGACTCAATTAAGAGAGCTTGATCTTAATTTGTAACATCTCTT

>M6-PGSC0003DMG401002869-(rev)M6LRR-RLP\_1008

CTCTTCAGACTGTACATACTATTGATTTACGGTCCAATTTTCTTCAAGGTTCACTACCTATTCCACCAAATT  
CCACAAAATACTTCTTCATATCTGATAATAATCTCACTGGAGAAATTT

>M6-PGSC0003DMG401002869-(rev)M6LRR-RLP\_1071

CACCAAATTCCACAAAATACTTCTTCATATCTGATAATAATCTCACTGGAGAAATTTCTTCATCTATTTGCA  
ATTTGACATCATTGGTAATGCTAGATTTGACAAGAAACAATTTGGGGG

>M6-PGSC0003DMG401002869-(rev)M6LRR-RLP\_1134

CTATTTGCAATTTGACATCATTGGTAATGCTAGATTTGACAAGAAACAATTTGGGGGGAGGAATTCCGC  
AATGTTTGGGTAATATTAGTGGCCTCGAGGTTCTGGATATGAGTAACAACA

>M6-PGSC0003DMG401002869-(rev)M6LRR-RLP\_1197

TTCCGCAATGTTTGGGTAATATTAGTGGCCTCGAGGTTCTGGATATGAGTAACAACAACTTTCTGGGAC  
TCTTCCAACAATTTTCAACAATGGAAGTTCCTGAGAAGCCTCGACTTGC

>M6-PGSC0003DMG401002869-(rev)M6LRR-RLP\_126

TTCCTTTGAATTTTCTTCTCATTTAACAACCTGAGTATGCAATCTACAACATTGTATGGGATAATACCTG  
AGAGTATATTTCACTTACCCAACCTGGAAACACTTGATTTAAGTTACA

>M6-PGSC0003DMG401002869-(rev)M6LRR-RLP\_1575

TGTTTCAACATCTGAAAGCTATGAGGAAATCTGATCCATCAATGGAAAGAGTACTATCTCCAGAAGACAC  
ATATTATGAAGATTCTATTACAGTTGCAACCAAGGGATTTGATCGTGAAA

>M6-PGSC0003DMG401002869-(rev)M6LRR-RLP\_1638

AAGACACATATTATGAAGATTCTATTACAGTTGCAACCAAGGGATTTGATCGTGAAATTGTGAGAATCTT  
GCATTTGTACACCGTTATCGATTTTTCAAGTAATAAATTTGGAGGGCAA

>M6-PGSC0003DMG401002869-(rev)M6LRR-RLP\_1701

GAATCTTGCAATTTGTACACCGTTATCGATTTTTCAAGTAATAAATTTGGAGGGCAAATTCGAGTATCAT  
GGGGGATCTCATTGCAGTTCACATATTGAATTTATCACATAATGGATTGC

>M6-PGSC0003DMG401002869-(rev)M6LRR-RLP\_189

TAATACCTGAGAGTATATTTCACTTACCCAACCTGGAAACACTTGATTTAAGTTACAGCTATCCACTAAGT  
GGTTATTTTCCAGAAACCAAATGGAACAGTAGTGCATCTCTCATAGAGT

>M6-PGSC0003DMG401002869-(rev)M6LRR-RLP\_1890

TTTCGGGAGAGATACCACAACAACTGGTTTCTTACGTCTCTTTTATTCTTAAATCTCTCCCACAATCATC  
TCCAAGGATGCATCCCTCAGGGACCTCAATTTCACACTTTTGAGAACA

>M6-PGSC0003DMG401002869-(rev)M6LRR-RLP\_2016

ATGAAGGAAATGATGGTTTACGTGGATTCCTGTTTCAAAAAATTGTGGTGATACTCGGGCATTAGATAC  
AAATGATACTGTATCTGCACTAGACGATGAAGAAAGCAATTCTGAATTC

>M6-PGSC0003DMG401002869-(rev)M6LRR-RLP\_252

CACTAAGTGGTTATTTTCCAGAAACCAAATGGAACAGTAGTGCATCTCTCATAGAGTTAGATCTTAGTGG  
CGTGAATTTTTCTGATAATTTGCCTGAGTCTCTTGGATATCTAACATCGG

>M6-PGSC0003DMG401002869-(rev)M6LRR-RLP\_315

TTAGTGGCGTGAATTTTTCTGATAATTTGCCTGAGTCTCTTGGATATCTAACATCGGTACATTCTATTTCTC  
TTAGAAATTGTAATCTTAGAAGGCCTATTCCTGAATATCTTTTGAATC

>M6-PGSC0003DMG401002869-(rev)M6LRR-RLP\_378

CTATTTCTCTTAGAAATTGTAATCTTAGAAGGCCTATTCCTGAATATCTTTTGAATCTCACACAAATAGAG  
GATTTGGACCTTTGGACTAACTTCTTGAATGGAACAATACCGTCATGGA

>M6-PGSC0003DMG401002869-(rev)M6LRR-RLP\_441

AAATAGAGGATTTGGACCTTTGGACTAACTTCTTGAATGGAACAATACCGTCATGGATGTTCTCCCGGCT  
TCCATCACTAAGTCGTTTAATCTTGAGTAATAACCACTTATCTGGTCAGC

>M6-PGSC0003DMG401002869-(rev)M6LRR-RLP\_504

CCCGGCTTCCATCACTAAGTCGTTTAATCTTGAGTAATAACCACTTATCTGGTCAGCTTGAGGATCATTTCC  
AAGTCCAATTCAGTAAAGATTAATTTAAGTGATAATCAGCTTCAAG

>M6-PGSC0003DMG401002869-(rev)M6LRR-RLP\_567

ATCATTTCAAGTCCAATTCAGTAAAGATTAATTTAAGTGATAATCAGCTTCAAGGCAATCTTCCCAAC  
TCAATTCAAAACCTTGTGAACCTAAAATCTTTTATCTTGACTTCAATA

>M6-PGSC0003DMG401002869-(rev)M6LRR-RLP\_630

TTCCCAACTCAATTCAAACCTTGTGAACCTAAAATCTTTTATCTTGACTTCAATAATTTAATGGAAATG  
TGAATATTAGCTTATTTTCAAACCTCAAACAACCTTTTGGTTCTTAGTC

>M6-PGSC0003DMG401002869-(rev)M6LRR-RLP\_693

ATGGAAATGTGAATATTAGCTTATTTTCAAACCTCAAACAACCTTTTGGTTCTTAGTCTTTCATATAATAATA  
TATCATTGATCAATGAGAACAAAGTCAAATCTACTTTGCCCGAATCTC

>M6-PGSC0003DMG401002869-(rev)M6LRR-RLP\_756

ATAATAATATATCATTGATCAATGAGAACAAAGTCAAATCTACTTTGCCCGAATCTCTTGAAAAGTTAGG

ATTGGCCAAATGTGATGTGAAAGAAGTGGAGTTTCTAAGATAAGCAAAGA

>M6-PGSC0003DMG401002869-(rev)M6LRR-RLP\_819

AGTTAGGATTGGCCAAATGTGATGTGAAAGAAGTGGAGTTTCTAAGATAAGCAAAGAATCTTGGGAAG  
TTGGATCTTTCAAATAATAAAATTCAAGGAAGAATCCTGATTGGGCATGGT

>M6-PGSC0003DMG401002869-(rev)M6LRR-RLP\_882

GGAAGTTGGATCTTTCAAATAATAAAATTCAAGGAAGAATCCTGATTGGGCATGGTCTAACTGGATGT  
TTTCATTGACAAATCTTAATATATCCCACAATATGCTGACGAGTAACGATT

>M6-PGSC0003DMG401002869-(rev)M6LRR-RLP\_945

GGATGTTTTATTGACAAATCTTAATATATCCCACAATATGCTGACGAGTAACGATTTGATTCTCTTCAG  
ACTGTACATACTATTGATTTACGGTCCAATTTTCTTCAAGGTTCACTAC

>M6-PGSC0003DMG401002888M6LRR-RLP\_0

GGTTGTTCAAGTAAAGCATTCTGATGCTTAAACATACTAGACATTATAGCATCAATGGACACCTTCCT  
GTACATTTATTCAAGCAGCTCGAAACATCTTGATCTTTTATGATTGCATG

>M6-PGSC0003DMG401002888M6LRR-RLP\_1037

TCTTCCAATTCATCGTCTTCAGACGCTAAACCTTGCTTACAATAACTTATCTGGTCTCATTCTGATTCCA  
TTGGCAACATCACACAAATCAGAGAGTTGGATTTTGGTTCCAATCATT

>M6-PGSC0003DMG401002888M6LRR-RLP\_1098

TCCTGATTCCATTGGCAACATCACACAAATCAGAGAGTTGGATTTTGGTTCCAATCATTCTACTGGCCATA  
TTCCTTCAACAATCTCAAACTGAAACATCTCACACGTCTAGATCTTTC

>M6-PGSC0003DMG401002888M6LRR-RLP\_1159

ACTGGCCATATTCCTTCAACAATCTCAAACTGAAACATCTCACACGTCTAGATCTTTCGTTTAACTCACT  
GGAGGTAAAATCCCGATGTTTTTCTTAACCTCCAAGAGCTAGTTAC

>M6-PGSC0003DMG401002888M6LRR-RLP\_1220

TTAACTCACTTGGAGGTAATAATCCCGATGTTTTTCTTAACCTCCAAGAGCTAGTTACATTGTATCTTCT  
TACAACAGCTTCATTGGTCCATTTCCCTCTTCGATTTTAACTTGACA

>M6-PGSC0003DMG401002888M6LRR-RLP\_1342

TCTTGAAAACCTTAGACTTGTGAGTAATCCTTGTCTGGTCCATTGCCAAGCAATGTCAGCATGCTTCTAA  
AGCTAGTTGACCTGGATTTTCTCACAACCTTGCTAAATGGAACAATACC

>M6-PGSC0003DMG401002888M6LRR-RLP\_1403

ATGCTTCTAAAGCTAGTTGACCTGGATTTTTCTCACAACCTGCTAAATGGAACAATACCATCTTGGGTGTT  
TAGCCTCCCTTCTTTATATATGTTGGAGCTCCATCATAATCTATTCAAT

>M6-PGSC0003DMG401002888M6LRR-RLP\_1464

CTTGGGTGTTTAGCCTCCCTTCTTTATATATGTTGGAGCTCCATCATAATCTATTCAATGGACTATCTGAT  
GAGCTCAAAGTGAATCGAGCAGTAGGGCGTTTTGATTTGAGTTATAATC

>M6-PGSC0003DMG401002888M6LRR-RLP\_1525

ACTATCTGATGAGCTCAAAGTGAATCGAGCAGTAGGGCGTTTTGATTTGAGTTATAATCAACTCAGTATT  
CCTGTTCTTCTATCACTTCAAATCTCACTAACCTTGTAACCTTGACCT

>M6-PGSC0003DMG401002888M6LRR-RLP\_1586

CTCAGTATTCTGTTCTTCTATCACTTCAAATCTCACTAACCTTGTAACCTTGACCTTTCATCAAACAAC  
ATCACCATTGATGGGGGAACACAAATCACTTTTCCTAGACTAGAAATT

>M6-PGSC0003DMG401002888M6LRR-RLP\_1647

CATCAAACAACATCACCATTGATGGGGGAACACAAATCACTTTTCCTAGACTAGAAATTTTGCTGTTATC  
ATCTTGGAAGTGAAGGATTTTCCACAGTTTCTAAGAAATTTAAAGACAC

>M6-PGSC0003DMG401002888M6LRR-RLP\_1708

GCTGTTATCATCTTGGAAGTGAAGGATTTTCCACAGTTTCTAAGAAATTTAAAGACACTTCGGGTCATA  
AATCTTTCTAACAATAAGATTCGTGGTCAAATCCCTAACTGGTTTAGCGG

>M6-PGSC0003DMG401002888M6LRR-RLP\_1769

CGGGTCATAAATCTTTCTAACAATAAGATTCGTGGTCAAATCCCTAACTGGTTTAGCGGGTTGAGGTGG  
GACTCGTTGTTTACCTAAACCTTTCATATAATCACTCAATGGTCACATA

>M6-PGSC0003DMG401002888M6LRR-RLP\_183

TGCATTCGTCCAACCTTGGTTTCACTTGATTAAGTGTCCCCTCTTGTCATCTCATCCATGGACCACTAA  
TTGGTTCAATAACTTCAAATTCACACTCTATTATCAACTTAAAGCA

>M6-PGSC0003DMG401002888M6LRR-RLP\_1830

TGAGGTGGGACTCGTTGTTTACCTAAACCTTTCATATAATCACTCAATGGTCACATAGATCTATCTCAT  
TTCTATAGTCTAGTTTCTTTGATCTTAAATTTAACTTCCTTCAGGGTC

>M6-PGSC0003DMG401002888M6LRR-RLP\_1891

TCTATCTCATTTCTATAGTCTAGTTTCTTTGATCTTAAATTTAACTTCCTTCAGGGTCCACTACCTTCATCC  
ATTTGTAACATGAGCATCATTAGCCTTCTGGATTTATCACACAATA

>M6-PGSC0003DMG401002888M6LRR-RLP\_1952

CTACCTTCATCCATTTGTAACATGAGCATCATTAGCCTTCTGGATTTATCACACAACACTACTTCAGTAACTCG  
ATTCCAAGTTGCTTGGGTAACATGACTCAGCTAACGGTGTGGACTTA

>M6-PGSC0003DMG401002888M6LRR-RLP\_2074

AAGGAACAATTTCACTGGTAGTCTTCCACCGTTATGTAGTCAACACACTTCATCGACTACCAGTATCCTGA  
ATGGTGATGGTAATCAATTGACGACCATTATCTTGAATGGTAATCATT

>M6-PGSC0003DMG401002888M6LRR-RLP\_2135

AGTATCCTGAATGGTGATGGTAATCAATTGACGACCATTATCTTGAATGGTAATCATTGGAAGGACATG  
TCCCTGTGTCATTACTCAACTGTGTTGGTTTAGAAATTCTTGATATCGGG

>M6-PGSC0003DMG401002888M6LRR-RLP\_2196

AAGGACATGTCCCTGTGTCATTACTCAACTGTGTTGGTTTAGAAATTCTTGATATCGGGAACAACGCTGT  
AAATGACTCATTTCAGCTTGGCTAGGAACTCTTCAAGAGCTGCAAGTCC

>M6-PGSC0003DMG401002888M6LRR-RLP\_2257

CAACGCTGTAAATGACTCATTTCAGCTTGGCTAGGAACTCTTCAAGAGCTGCAAGTCCTTATATTAAG  
TCGAACAAGTTCCATGGACCTATAAGTACTAGGTTGAGGTTTGGGTTTCC

>M6-PGSC0003DMG401002888M6LRR-RLP\_2318

ATATTAAAGTCGAACAAGTTCCATGGACCTATAAGTACTAGGTTGAGGTTTGGGTTTCCCAGGTTGCGG  
ATTTTAGATCTCTCTCATAATGAGTTCAGTGGCTCACTGCCTGCAGAAGTT

>M6-PGSC0003DMG401002888M6LRR-RLP\_2379

GGTTGCGGATTTTAGATCTCTCTCATAATGAGTTCAGTGGCTCACTGCCTGCAGAAGTTTTTCAAACCTC  
AAAGGAATGATCAAATAGCTGACAGTGACAAAGGTAAGATTGAATATA

>M6-PGSC0003DMG401002888M6LRR-RLP\_244

TGGACCACTAATTGGTTCAATAACTTCAAATTCACACTCTATTATCAACTTAAAGCAGCACAACACATC  
TTGACCTATTATGATAGTATAGATTCCATGAAAAAATTGCACTAAAAAT

>M6-PGSC0003DMG401002888M6LRR-RLP\_2440

TCAAACCTCAAAGGAATGATCAAATAGCTGACAGTGACAAAGGTAAGATTGAATATATGAAAACATC  
AGACTCATTTTTTGTATGTACGATGATTCAGTGAGGTTGGTGATCAAAGG

>M6-PGSC0003DMG401002888M6LRR-RLP\_2501

AAAACATCAGACTCATTTTTTGTATGTACGATGATTCAGTGAGGTTGGTGATCAAAGGAAACGATATAG

AGCTAGAAAGAATCACTACAATTATGACAGTCATAGATCTCTCAAGCAAT

>M6-PGSC0003DMG401002888M6LRR-RLP\_2562

ACGATATAGAGCTAGAAAGAATCACTACAATTATGACAGTCATAGATCTCTCAAGCAATCATTTTGAAGG  
TGTGATTCCGAAAACACTAAAGGATCTCAGCTCACTTTGGCTACTCAATT

>M6-PGSC0003DMG401002888M6LRR-RLP\_2623

TTTTGAAGGTGTGATTCCGAAAACACTAAAGGATCTCAGCTCACTTTGGCTACTCAATTTATCTCATAACA  
ATCTCAGAGGAGATATTCCTATGGAAGTACTAGGAGGATTGAATATGCTTGA

>M6-PGSC0003DMG401002888M6LRR-RLP\_2684

TCTCATAACAATCTCAGAGGAGATATTCCTATGGAAGTACTAGGAGGATTGAATATGCTTGAAGCGTTAGAT  
CTCTCTTGGAAATCGACTCACTGGAAAGATTCCGCAACAATTGACAAGGCTA

>M6-PGSC0003DMG401002888M6LRR-RLP\_2867

CAGTTCAACACATTTGAAAATGACTCATATGGTGGCAACCTTGATTTATGTGGTCTTCCTTTATCAAAGCA  
ATGTGGAACGGGTGATCCATTGCATATTCCTCAACCATTAGAGGAAGAA

>M6-PGSC0003DMG401002888M6LRR-RLP\_305

ACAACACATCTTGACCTATTATGATAGTATAGATTCCATGAAAAAATTGCACTAAAAATTTATTGCATTCA  
TAGAAGTCGACACATCATGTCATTTGACTTAGTCAATCAATAGTTTCTC

>M6-PGSC0003DMG401002888M6LRR-RLP\_3103

GCCAAAATGGTTTGTGGAATTTTTCCAAGGCATTATCCCCACAGAAAAAGAAGGCCAAAGAAGAGAGC  
TCAAAGAAGATGGACTTAATTAATTTTTGTTTGGTGTGTATATGTTTG

>M6-PGSC0003DMG401002888M6LRR-RLP\_366

ATTGCATTCATAGAAGTCGACACATCATGTCATTTGACTTAGTCAATCAATAGTTTCTCTTTTTGAACATTC  
TTGTGGGAAAACAAGAAAAATATGGCTGATAAGTTGGAAGTCAACAAA

>M6-PGSC0003DMG401002888M6LRR-RLP\_427

TTTGAACATTCTTGTGGGAAAACAAGAAAAATATGGCTGATAAGTTGGAAGTCAACAAAAGAGATATTG  
ATGGGACAATAATAGCAGAGAGTTCAATTAGCTGTAAACAACACTCAAACAAA

>M6-PGSC0003DMG401002888M6LRR-RLP\_61

CACCTTCCTGTACATTTATTCAAGCAGCTCGAAACATCTTGATCTTTTATGATTGCATGGATTCACATCTTG  
ACCTTTTATGATTGTATAGATTCCACGAAAAAATTGCACAAAAAAATT

>M6-PGSC0003DMG401002888M6LRR-RLP\_610

ATCTATGTCTCCGCCCTAATCAGAGAGTGGAGAAAGTAAGCCATTTAACTATATATATATGTGGATTAT  
GATTGATTTTGTGAAGAACATTTTGTATCTGCTAAAAATAACAATGGGA

>M6-PGSC0003DMG401002888M6LRR-RLP\_671

GTGGATTATGATTGATTTTGTGAAGAACATTTTGTATCTGCTAAAAATAACAATGGGACGTCTCGTTTTT  
TTTTATTCACCTTCTCTGTTTTGTCTTCCTAAGTCAAACCTTTTCTTCAT

>M6-PGSC0003DMG401002888M6LRR-RLP\_732

TCTCGTTTTCTTTTATTCACCTTCTCTGTTTTGTCTTCCTAAGTCAAACCTTTTCTTCATCCTTTGTGCAGCATC  
TTTGTCTCCAGTGAAGCTTATCATTGCTTCAGTTCAAGCAACA

>M6-PGSC0003DMG401002888M6LRR-RLP\_793

TTTGTGCAGCATCTTTGTTCTCCAGTGAAGCTTATCATTGCTTCAGTTCAAGCAACACTTTGAAATGTC  
CAACAAGTACTCTAGACATTATAGTACTTCTCTCCAAAAGCATCGTCT

>M6-PGSC0003DMG401002888M6LRR-RLP\_854

TTGAAATGTCCAACAAGTACTCTAGACATTATAGTACTTCTCTCCAAAAGCATCGTCTTGGAAATGAGAG  
TACGGATTGCTGCACTTGGGGCTGGATCACTTGTGACATGTTAACTGGTT

>M6-PGSC0003DMG401002888M6LRR-RLP\_915

GAATGAGAGTACGGATTGCTGCACTTGGGGCTGGATCACTTGTGACATGTTAACTGGTTATGTTATTGG  
CCTAGACCTTAGTAATGCAAATATTAGCGGAACTATTCATCCCAACAGCAG

>M6-PGSC0003DMG401002888M6LRR-RLP\_976

GTTATTGGCCTAGACCTTAGTAATGCAAATATTAGCGGAACTATTCATCCCAACAGCAGCCTCTTCCAACT  
TCATCGTCTTCAGACGCTAAACCTTGCTTACAATAACTTATCTGGTCTC

>M6-PGSC0003DMG401002909-(rev)M6LRR-RLP\_1178

ATGTAGCGAAATCAATACCATTTTAATATTATTATATCAACTTATCAAATTAAGCGCAATTATTTCAATAC  
CATTGTATAATCTTCTTAATGTTTTGAGTAAGATTTGATTATTTAACT

>M6-PGSC0003DMG401002909-(rev)M6LRR-RLP\_1240

TTTCAATACCATTGTATAATCTTCTTAATGTTTTGAGTAAGATTTGATTATTTAACTTAATATTATATTTTT  
TCATTGAAAATTTTTGTTGTTGTATATCCTACCTTCTTGAACTTT

>M6-PGSC0003DMG401002909-(rev)M6LRR-RLP\_1302

ATTATATTTTTTCATTGAAAATTTTTGTTGTTGTATATCCTACCTTCTTGAACTTTACTTGTAGGATTACA  
TTAATCAGTATGTTATAGGTATTCAATTTATGTATGACAACTGAAAC



>M6-PGSC0003DMG401002909-(rev)M6LRR-RLP\_1364

GTAGGATTACATTAATCAGTATGTTATAGGTATTCAATTTATGTATGACAACACTGAAACTAGTATATATATA  
TATGTGGATAATGCTGATTGATTTGTAAAAAGAGAACAAACATCCTGTT

>M6-PGSC0003DMG401002909-(rev)M6LRR-RLP\_1426

ATATATATATATGTGGATAATGCTGATTGATTTGTAAAAAGAGAACAAACATCCTGTTATTTGCTGAAAA  
CAAACAAACAAAAAATGGGACGTTTCTTTTTCTTTTATTCATTTTTGTGT

>M6-PGSC0003DMG401002909-(rev)M6LRR-RLP\_1488

GCTGAAAACAAACAAACAAAAAATGGGACGTTTCTTTTTCTTTTATTCATTTTTGTGTTTTGTGTTGCTAAT  
AAGTGAATGCTTTTCTTCATCCTTTGATCATCATCTTTGCTCTCCAC

>M6-PGSC0003DMG401002909-(rev)M6LRR-RLP\_1550

TGTTGCTAATAAGTGAATGCTTTTCTTCATCCTTTGATCATCATCTTTGCTCTCCCACTGAAGCTTCCGCTT  
TGGCTCAGTTCAAACAATCCTTTCAAATTATGTCCAAAGAGTACTTTA

>M6-PGSC0003DMG401002909-(rev)M6LRR-RLP\_1612

GCTTCCGCTTTGGCTCAGTTCAAACAATCCTTTCAAATTATGTCCAAAGAGTACTTTATTTATTACAACACTAC  
TCCGAATGCTTTACTTCTTTCCCAAAAACAAGTTCTTGGAATGAGAGT

>M6-PGSC0003DMG401002909-(rev)M6LRR-RLP\_1798

CTTAGTTGTAATCTGCTTCATGGAAGTATTCATCCCAATAGCAGCCTCTTCCAACCTTCATCATCTCCAAAC  
GCTAAACCTTGCTTACAATAACTTTTATCCTTCTTCGATCCACATAAC

>M6-PGSC0003DMG401002909-(rev)M6LRR-RLP\_1860

TCTCCAAACGCTAAACCTTGCTTACAATAACTTTTATCCTTCTTCGATCCACATAACATTGGCCGATTAAG  
GAATTTGAGGCATCTCGACCTTTCTGACTCGTCCTTTAGTGGGAAAGT

>M6-PGSC0003DMG401002909-(rev)M6LRR-RLP\_1922

GCCGATTAAGGAATTTGAGGCATCTCGACCTTTCTGACTCGTCCTTTAGTGGGAAAGTCCCAACAGAAAT  
CTCATACTTTCCAATTTGGTTTCACTTGATCTTTCTTCTTTTTATGGTT

>M6-PGSC0003DMG401002909-(rev)M6LRR-RLP\_1984

ACAGAAATCTCATACCTTTCCAATTTGGTTTCACTTGATCTTTCTTCTTTTTATGGTTATGGATTACAACCTT  
GATGAGAGAACATTTGAAACAATGCTTCACAACCTTTACTGATCTGGAG

>M6-PGSC0003DMG401002909-(rev)M6LRR-RLP\_2035

TATGGTTATGGATTACAACCTTGATGAGAGAACATTTGAAACAATGCTTCACAACCTTTACTGATCTGGAGT

TACTAGCTCTCCCTCTTGGCGACATCTCATCACCGATACCTGTAAGTATT

>M6-PGSC0003DMG401002909-(rev)M6LRR-RLP\_434

TAAAAAGTCTTATGGAACACTACAAAATATGTGTAACAAGTTGTTAGAAGTGACTTTGAGTCTTCCTGGA  
AATTGACTTAACACTTGGGACAACCTTTTTTTGTAACCACAAATTATTACC

>M6-PGSC0003DMG401002909-(rev)M6LRR-RLP\_496

TTCCTGGAAATTGACTTAACACTTGGGACAACCTTTTTTTGTAACCACAAATTATTACCTCATTTTATTTGTC  
TGGATGCGTTTCTTTTCTTTGTTAATTTATACCTCATAGTCTCATGC

>M6-PGSC0003DMG401002909-(rev)M6LRR-RLP\_558

TTTATTTGTCTGGATGCGTTTCTTTTCTTTGTTAATTTATACCTCATAGTCTCATGCATAGACAAGTCAAC  
GACGTTACTTTATCAAATAGTGTTTAGTTAACTGTTTACTTTATTTAA

>M6-PGSC0003DMG401002909-(rev)M6LRR-RLP\_620

ACAAGTCAACGACGTTACTTTATCAAATAGTGTTTAGTTAACTGTTTACTTTATTTAATATGGAGGTCCTT  
GTAATAATTAATAAATAAATAAGTGTTTAGATAATTATAACATTCTTTC

>M6-PGSC0003DMG401002909-(rev)M6LRR-RLP\_682

GAGGTCCTTGTAATAATTAATAAATAAATAAGTGTTTAGATAATTATAACATTCTTTCTTATATGACTACT  
TATTTTATTGACTTATTTATATATTGAAGATCTACATGAACCCATATTA

>M6-PGSC0003DMG401002909-(rev)M6LRR-RLP\_868

CCAAACGGTAAAACCTTTTGCATTATACAAAATAAATTGTTGGGTGTCAAAAAAAGATCAAATTTGTTT  
TTTGGTGTATTCTTTGAATTACAAGCACTGCAACAAACACTACAACAAAA

>M6-PGSC0003DMG401002917-(rev)M6LRR-RLP\_0

GATAGATGTCTAGTTTTAGTTAGCAAAGAAGTGAGATGGAAGAAAAATCAAGACACGTAGGATTCAT  
GATCTGGTCCATGAGTTATGCTTGAGAGAAGCACAAAGCCAAAACCTTTTTG

>M6-PGSC0003DMG401002917-(rev)M6LRR-RLP\_1116

CTGAAATGTTGGAAAGCCACAAATGATCATTTCCCTGCTCTTGAGCATCTAGTGATCAGACATTGCTTTC  
ATTTGGAGGAGATCCCTATTGAGTTTGCTGATATTTACTCGCTACAACATA

>M6-PGSC0003DMG401002917-(rev)M6LRR-RLP\_1178

TTGCTTTCATTTGGAGGAGATCCCTATTGAGTTTGCTGATATTTACTCGCTACAACATAATCGAGTTACAGA  
ACTGTACTGCGAACTCTTGGCTTCTACTGTGCTTATTCAAGAAGAGCA

>M6-PGSC0003DMG401002917-(rev)M6LRR-RLP\_124

TTAGAAATGATAAAACAGAATCCGTTCTCATGTGGGATGTCGATGGATTAGCATAACAGAAATGTTCGAC  
AAACTGGTGTGAGTTTCAGGATGAGCATTGGTTTAGGTCCTTACACATA

>M6-PGSC0003DMG401002917-(rev)M6LRR-RLP\_1240

AGTTACAGAACTGTACTGCGAACTCTTGGCTTCTACTGTGCTTATTCAAGAAGAGCAAGAATCCCTAGG  
AAGCAAAGCTGTGGACGTTTCGTTCTTACAATGATCCAGGTTAGTACAATA

>M6-PGSC0003DMG401002917-(rev)M6LRR-RLP\_1302

TCCCTAGGAAGCAAAGCTGTGGACGTTTCGTTCTTACAATGATCCAGGTTAGTACAATAATTCCTTCGAA  
ACTTAAACAATTTTGAAGTTATATATTAAGAGTTGATGGTCAAAAATG

>M6-PGSC0003DMG401002917-(rev)M6LRR-RLP\_1364

CCTTCGAACTTAAACAATTTTGAAGTTATATATTAAGAGTTGATGGTCAAAAATGCACCTAAAGTAT  
CCCCATTTTCGAGTTTCATATATGAACTATTAGATATGTGAGTTTCCTA

>M6-PGSC0003DMG401002917-(rev)M6LRR-RLP\_1488

AACTATCACCAACTATTTATCAAACACACAACCTTAAGTATCCGTTGTTCTCTTTTCCTATATGAAACATCC  
CCATCATTAGGTTAGGAAACGGGAACAACCTGATAGTTTAGATAGGAAA

>M6-PGSC0003DMG401002917-(rev)M6LRR-RLP\_1550

TGAAACATCCCCATCATTAGGTTAGGAAACGGGAACAACCTGATAGTTTAGATAGGAAACTCACACACCT  
GATAGTTCAGATATGAAATTCGAAAAACCAGATATTTAAGGTGTGTTTTTG

>M6-PGSC0003DMG401002917-(rev)M6LRR-RLP\_1612

CACACCTGATAGTTCAGATATGAAATTCGAAAAACCAGATATTTAAGGTGTGTTTTTGACCCTCCGTCTA  
TACTAAACACGAACCAAATGACTCAACTTTGTGTATATATCAAATGT

>M6-PGSC0003DMG401002917-(rev)M6LRR-RLP\_1674

TTCCGTCTATACTAAACACGAACCAAATGACTCAACTTTGTGTATATATCAAATGTATAGTTGACCATT  
TATGTTCTTTTTGCTACAGCTGAATGTGAACTAAATGGAAGTGATTCTG

>M6-PGSC0003DMG401002917-(rev)M6LRR-RLP\_1736

TTGACCATTTATGTTCTTTTTGCTACAGCTGAATGTGAACTAAATGGAAGTGATTCTGATTCAGACTGATG  
TTAGCTAAGGATTGAAGACTTTCAGACTTTTGATTTGTTGATCATTTC

>M6-PGSC0003DMG401002917-(rev)M6LRR-RLP\_1798

AGACTGATGTTAGCTAAGGATTGAAGACTTTCAGACTTTTGATTTGTTGATCATTGCTTATCTTATTCCA  
TAATTGGAGTTTATCTGAATGAACATTGGGGCAATTGCAGACCAACATT

>M6-PGSC0003DMG401002917-(rev)M6LRR-RLP\_186

TGTCGACAAACTGGTGTGAGTTTCAGGATGAGCATTGGTTTAGGTCCTTACACATAAACTTTGCTGGT  
TGATTAGGACGCCTACTGATGATGATAATAGTCCCTTGCGAAGAATTCGA

>M6-PGSC0003DMG401002917-(rev)M6LRR-RLP\_1922

GTTGCTAAGGCATTATCAGTGAGATATGAGATCGAGGAGAAGTAGTCGAGATATACACAAGTTGATCTG  
AACATCACAAGCTGATCGCCATTTCAATTTGTTTTCTTACTCTACATTTT

>M6-PGSC0003DMG401002917-(rev)M6LRR-RLP\_1984

TGATCTGAACATCACAAGCTGATCGCCATTTCAATTTGTTTTCTTACTCTACATTTTTTATTAGTCCCAA  
AAGAATGTCTATTTCTTTTTGGGCAACTTCTATTTAACTTTCCA

>M6-PGSC0003DMG401002917-(rev)M6LRR-RLP\_248

TTGCTGGTTGATTAGGACGCCTACTGATGATGATAATAGTCCCTTGCGAAGAATTCGATCAATTTCTG  
TTTGCTGCACCTTCTCTCAGTAATAATTCAAATTTAGAGCTTGGTCATTT

>M6-PGSC0003DMG401002917-(rev)M6LRR-RLP\_310

TTTTCTGTTTGCTGCACCTTCTCTCAGTAATAATTCAAATTTAGAGCTTGGTCATTTGAATGTAATCAGA  
GTCTTGGACTTGAGTTCAATGTACTTCTCAAGCTTTCCCCTGCAGATAC

>M6-PGSC0003DMG401002917-(rev)M6LRR-RLP\_372

GTAATCAGAGTCTTGGACTTGAGTTCAATGTACTTCTCAAGCTTTCCCCTGCAGATACTTAGTCTTTTT  
GTTGAGGTACCTATCCTTTTCGACTCGTAACACTTTTGACATACCTGGA

>M6-PGSC0003DMG401002917-(rev)M6LRR-RLP\_434

TCTCTTTTTGTTGAGGTACCTATCCTTTTCGACTCGTAACACTTTTGACATACCTGGAGGACTTCGCAAAT  
ACTGAATCTACAAACATTCATCATTTCGAGGGCCAGTTAGCTCATTAT

>M6-PGSC0003DMG401002917-(rev)M6LRR-RLP\_496

TTCGCAAATTAAGTGAATCTACAAACATTCATCATTTCGAGGGCCAGTTAGCTCATTATAGAGTTCCCGGA  
ACTAATTTGGGAAACAACACAATTAAGGCACCTGAAACTCAGGAACTTTT

>M6-PGSC0003DMG401002917-(rev)M6LRR-RLP\_558

TTCCCGGAACTAATTTGGGAAACAACACAATTAAGGCACCTGAAACTCAGGAACTTTTATTTGCCAGATC  
CTCCAAGTTCATCCATTGATGGAGAGACGAACTTGTGTTGGCCAAACATA

>M6-PGSC0003DMG401002917-(rev)M6LRR-RLP\_62

GATTCATGATCTGGTCCATGAGTTATGCTTGAGAGAAGCACAAAGCCAAAACCTTTTTGTTTATTAGAAAT

GATAAAACAGAATCCGTTCCCTCATGTGGGATGTTCGATGGATTAGCATACA

>M6-PGSC0003DMG401002917-(rev)M6LRR-RLP\_682

CTGTTTCGGGCTTGATTCCTTATTGTTGCACTAAGAAGATCCTTTCAAGGTTTCAAACATTAAGAAATTA  
TGTATTCGGGGGACGTCTATGACTATAGAGTGCACGAAGAAGACATGG

>M6-PGSC0003DMG401002917-(rev)M6LRR-RLP\_744

AAGAAATTATGTATTCGGGGGACGTCTATGACTATAGAGTGCACGAAGAAGACATGGACCTCCGTCAT  
CTTGTTGATCTGCATCAGCTAGAAACATTGAGTGTTAAAGTTGATCGTTAT

>M6-PGSC0003DMG401002917-(rev)M6LRR-RLP\_806

CCGTCATCTTGTTGATCTGCATCAGCTAGAAACATTGAGTGTTAAAGTTGATCGTTATCAGGTAAGTCAC  
TGGAGTTCAAGATTCCATAAAACACCTGTTTACGTACCAAGTGCAATACA

>M6-PGSC0003DMG401002917-(rev)M6LRR-RLP\_868

TAAGTCACTGGAGTTCAAGATTCCATAAAACACCTGTTTACGTACCAAGTGCAATACATTTTCCAATAAA  
GTTGAAGAAGTTAAACTGGTCGGAACCTCGTCTATCATGGGAGGAGTTGA

>M6-PGSC0003DMG401002917-(rev)M6LRR-RLP\_930

CCAATAAAGTTGAAGAAGTTAAACTGGTCGGAACCTCGTCTATCATGGGAGGAGTTGAACATCATAGG  
GCAATGGCCTAACCTTGAGGTGTTGAAGCTGAAACCAAATGCTTGTCGTGGC

>M6-PGSC0003DMG401002917-(rev)M6LRR-RLP\_992

CATAGGGCAATGGCCTAACCTTGAGGTGTTGAAGCTGAAACCAAATGCTTGTCGTGGCCTAGAATGGCG  
TCCAATTGAAGGAAGATTTCCACAGTTGAAGTTTTTGCTAATTGAAGGTAC

>M6-PGSC0003DMG401002925-(rev)M6LRR-RLK\_0

TGGACTTGTAGACTTGAATCAAACCTGTCGCAAATTTTTATCATAAGCTTGGTGAGGGGTCAAACATG  
TCTATTGAAGGTTATGGGATGAGCAATGCTGGTGGTTCTGGTGCAATGGC

>M6-PGSC0003DMG401002925-(rev)M6LRR-RLK\_1159

CTTTATGGAATAAATTTTATTAGAACTGAAGTGAAGAGCATGGTGGTTGATGGGTTCAAGTCCTGTATGT  
CCTTTTGATGCCACCTCACTGATTGTGATTGATTTTCTATTGTATACCT

>M6-PGSC0003DMG401002925-(rev)M6LRR-RLK\_122

TGGATAACAGCAGTGTTGGATCAAATGATTCACACACTCATATTCTAAACCAGCAGGGTAATCACATCCA  
CAATAACGATTCTGTTGCTGCTAGCGTAGTCAGGGGGAGAGTTACTAGGT

>M6-PGSC0003DMG401002925-(rev)M6LRR-RLK\_1220

CCTGTATGTCCTTTTGATGCCACCTCACTGATTGTGATTGATTTTCTATTGTATACCTAGTGTTTCTCCA  
GTTAACTTCTTAATTTAGTTCTGTACCTGTTAATGAAGGATAAAGAGT

>M6-PGSC0003DMG401002925-(rev)M6LRR-RLK\_1281

TGTTTCTTCCAGTTAACTTCTTAATTTAGTTCTGTACCTGTTAATGAAGGATAAAGAGTTGATTGACTTTA  
CTTTCTCTTTCAATTCCTTTCCCTCTTTTCCTTTTCCTTCTTGTCCAT

>M6-PGSC0003DMG401002925-(rev)M6LRR-RLK\_1586

AGTTGGATTGGATACCATTTTCAGAAAGAGTAAAATTGCATATATCTGAAAATGGGTCTAAGACATTAAC  
TACCACACTGGGTTCACTTTTCAGGATGTGTCTGAGAGATATGAACCACAA

>M6-PGSC0003DMG401002925-(rev)M6LRR-RLK\_1647

GACATTAACCTACCACACTGGGTTCACTTTTCAGGATGTGTCTGAGAGATATGAACCACAATTCTATTCTTAT  
TGAATATGTAGATGAAAGTTCTATGGGAAGTATATTATCTCTTTCTCTC

>M6-PGSC0003DMG401002925-(rev)M6LRR-RLK\_1708

CTATTCTTATTGAATATGTAGATGAAAGTTCTATGGGAAGTATATTATCTCTTTCTCTCCTTTGTGAGTTTC  
GACCTTCCAGCATCATCTTTAACATCACCTCTTTCTTCAAAGCAGTGA

>M6-PGSC0003DMG401002925-(rev)M6LRR-RLK\_1769

TTGTGAGTTTCGACCTTCCAGCATCATCTTTAACATCACCTCTTTCTTCAAAGCAGTGAGGCTATTTTGGGA  
AATAATGTATTGGTAAGAAAGAGAATGGGGAGGTGCGATTCAACCAGAGA

>M6-PGSC0003DMG401002925-(rev)M6LRR-RLK\_183

TCACATCCACAATAACGATTCTGTTGCTGCTAGCGTAGTCAGGGGGAGAGTTACTAGGTTGAGCGATGA  
TGCCCTTGCTCAAGCCTTGGTTGATCCTCAATCCCCACTATTGGGCTTGC

>M6-PGSC0003DMG401002925-(rev)M6LRR-RLK\_1830

CTATTTTGAAATAATGTATTGGTAAGAAAGAGAATGGGGAGGTGCGATTCAACCAGAGATCTCTCTCTT  
TATAGGATGACATACATCCACAAGAGTCGCATTGTTTGTGCTGCTGGAGA

>M6-PGSC0003DMG401002925-(rev)M6LRR-RLK\_1891

TCTCTTTTATAGGATGACATACATCCACAAGAGTCGCATTGTTTGTGCTGCTGGAGAACTTAAAAAG  
AGCAAGGGAATGACATGTCTACCAGAAACATTTCTTGTTTAGAGTGGAAG

>M6-PGSC0003DMG401002925-(rev)M6LRR-RLK\_1952

CTTAAAAAGAGCAAGGGAATGACATGTCTACCAGAAACATTTCTTGTTTAGAGTGGAAGTTGGTTGCCG  
AATGAAAGTTTTTAAGTTGTTAGTAGTTGAACAGCATTCTGTTTGCTTGG

>M6-PGSC0003DMG401002925-(rev)M6LRR-RLK\_2013

GGTTGCCGAATGAAAGTTTTTAAGTTGTTAGTAGTTGAACAGCATTCTGTTTGCTTGGCTCGTGCTAAC  
TTTCTCAAAGCACTGAAATGAATCAGTTAAAGAAGGATTGTTTAGGACAT

>M6-PGSC0003DMG401002925-(rev)M6LRR-RLK\_2074

CGTGCTAACTTTCTCAAAGCACTGAAATGAATCAGTTAAAGAAGGATTGTTTAGGACATGTTATTTGGAC  
ATACACTGGTGTCTCTGGAATCTGCAGGGCTCTTGTTAACTTTCTCAAAG

>M6-PGSC0003DMG401002925-(rev)M6LRR-RLK\_2135

TATTTGGACATACACTGGTGTCTCTGGAATCTGCAGGGCTCTTGTTAACTTTCTCAAAGCACTGAAATGA  
ATCAGTTAAAGGAGGACTGTTTAGGACAATTTAATTGGACATACACTAGT

>M6-PGSC0003DMG401002925-(rev)M6LRR-RLK\_2196

CTGAAATGAATCAGTTAAAGGAGGACTGTTTAGGACAATTTAATTGGACATACACTAGTGTCTCTGGAA  
TCTGCAGGTAGATTTTAAGTTGTGCAGGTGGAAGTCATTGCTCTGTTGGAG

>M6-PGSC0003DMG401002925-(rev)M6LRR-RLK\_2257

CTCTGGAATCTGCAGGTAGATTTTAAGTTGTGCAGGTGGAAGTCATTGCTCTGTTGGAGGATGGCAAAA  
CAAACATCGATTTTTTTTTATGACAAAGGAAACCCGCAGCTGCTATCCATT

>M6-PGSC0003DMG401002925-(rev)M6LRR-RLK\_244

AGCGATGATGCCCTTGCTCAAGCCTTGGTTGATCCTCAATCCCCACTATTGGGCTTGCAATTTATCATGA  
GTGGACAATTGACTTGAGGAGGCTTACCATTGGACAAGCATTGCTCAA

>M6-PGSC0003DMG401002925-(rev)M6LRR-RLK\_2562

CCACCCCAAAGGGTAACTGACATATCTATTCTGATGTTTCTGGAAGGAATTCTAGGAGGGCCTTACAGA  
AACTAGACTCTACAACGATAATATGATTCTCCGCTGAGTTACTACATAGAC

>M6-PGSC0003DMG401002925-(rev)M6LRR-RLK\_2623

CTTACAGAACTAGACTCTACAACGATAATATGATTCTCCGCTGAGTTACTACATAGACTTTTTTTCATCAT  
TAGACAATCTCTACGGAAAGGTAAAAGTGGAATATTTGGCTCAATCTTC

>M6-PGSC0003DMG401002925-(rev)M6LRR-RLK\_2684

TTTTCATCATTAGACAATCTCTACGGAAAGGTAAAAGTGGAATATTTGGCTCAATCTTCAATGAATCTAA  
ATCATTTATTGGAACCTTCACTATTCTTTAGGAAGAGGCCTCTTAAAAG

>M6-PGSC0003DMG401002925-(rev)M6LRR-RLK\_2745

TGAATCTAAATCATTTATTGGAACCTTCACTATTCTTTAGGAAGAGGCCTCTTAAAAGCATAAAAAGCG

ACAAGGTGATGTTTCTATAATCTACAATGATTATGTGGATTCTGCATTGA

>M6-PGSC0003DMG401002925-(rev)M6LRR-RLK\_2806

TAAAAAGCGACAAGGTGATGTTTCTATAATCTACAATGATTATGTGGATTCTGCATTGAGTTGCTACATG  
GACTTGTTCCGCCATAAGACTATTTCAATCTCTATGGAAAGGTAGAAGT

>M6-PGSC0003DMG401002925-(rev)M6LRR-RLK\_2867

TGCTACATGGACTTGTTCCGCCATAAGACTATTTCAATCTCTATGGAAAGGTAGAAGTGAATACATGG  
CTTAATCTTCTCATATTAAGCAAAAACGATCCATGGAGTAAAAAGCT

>M6-PGSC0003DMG401002925-(rev)M6LRR-RLK\_2928

AATACATGGCTTAATCTTCTCATATTAAGCAAAAACGATCCATGGAGTAAAAAGCTTGGAGTGAAG  
CATAAAGTTATGGAAAAGTATAATGAAGTACCATCCACAAAGAAATTTAG

>M6-PGSC0003DMG401002925-(rev)M6LRR-RLK\_2989

GAGTGAAGCATAACAAGTTATGGAAAAGTATAATGAAGTACCATCCACAAAGAAATTTAGTAATCTTCTC  
ATGAACTTGAAACATTTGTTGAAACCTCCAATTATTGAGAGTACTGTTATT

>M6-PGSC0003DMG401002925-(rev)M6LRR-RLK\_3050

ATCTTCTCATGAACTTGAAACATTTGTTGAAACCTCCAATTATTGAGAGTACTGTTATTAGAAGCGAGAA  
ACACAAAAGCGACAAAGTCCATGGAGTTTGAAGCAAATATCGAGAAGTG

>M6-PGSC0003DMG401002925-(rev)M6LRR-RLK\_3111

AAGCGAGAAACACAAAAGCGACAAAGTCCATGGAGTTTGAAGCAAATATCGAGAAGTGAAGCACAAAT  
GGCTATGAGAAGTAAGTAATGCCGAACATAAAAGGATTTAGTACAATAAAGA

>M6-PGSC0003DMG401002925-(rev)M6LRR-RLK\_3172

GCACAATGGCTATGAGAAGTAAGTAATGCCGAACATAAAAGGATTTAGTACAATAAAGATGCAAATAA  
AATAAATGGTTTTTGCATCTAGTTTACTTAATATTGATATTGATCTTGCTCT

>M6-PGSC0003DMG401002925-(rev)M6LRR-RLK\_3233

CAAATAAAATAAATGGTTTTTGCATCTAGTTTACTTAATATTGATATTGATCTTGCTCTTCAAAGTCGAGA  
TTCAAAAAGTAGATCCTTTCTTGTTAGGATCATTTGCACGTCATTGT

>M6-PGSC0003DMG401002925-(rev)M6LRR-RLK\_3294

AAAGTCGAGATTCAAAAAGTAGATCCTTTCTTGTTAGGATCATTTGCACGTCATTGTTAAAGCAGTG  
CATGGGTTCAAGAAGTAATCCCATTCTTCAAATTGCTTTAAGTGATGGCT

>M6-PGSC0003DMG401002925-(rev)M6LRR-RLK\_3355



AAAGCAGTGCATGGGTTCAAGAAGTAATCCCATTCTTCAAATTGCTTTAAGTGATGGCTTTGAATAATAA  
TGTGGGAGAGATGTGACACATGATGAAATCAATGCCAGTAAGAAGAATG

>M6-PGSC0003DMG401002925-(rev)M6LRR-RLK\_3416

GAATAATAATGTGGGAGAGATGTGACACATGATGAAATCAATGCCAGTAAGAAGAATGATAAGAATG  
CCTTATTTGGTATTAAGTCTTACAACAGGTGTTGCTAGACCTGATTTGACAA

>M6-PGSC0003DMG401002925-(rev)M6LRR-RLK\_3477

AAGAATGCCTTATTTGGTATTAAGTCTTACAACAGGTGTTGCTAGACCTGATTTGACAAATGCCTTGTAT  
AAGTTGAAGTAGATCGTTTAGAAACAAAAGGAGCATGAAAACCTCATAAT

>M6-PGSC0003DMG401002925-(rev)M6LRR-RLK\_3538

GCCTTGATAAGTTGAAGTAGATCGTTTAGAAACAAAAGGAGCATGAAAACCTCATAATGATCAATCAA  
TTAGTATAACTTGTTAAATTACGGAGATCTTACGTCAGGCCGATTATGACT

>M6-PGSC0003DMG401002925-(rev)M6LRR-RLK\_3599

TCAATCAATTAGTATAACTTGTTAAATTACGGAGATCTTACGTCAGGCCGATTATGACTCAGTATTTCTGA  
CATCTAACTTTTAGTGCCTCACACACTATGTTGTATCGGTCCTTTGCAT

>M6-PGSC0003DMG401002925-(rev)M6LRR-RLK\_366

ATCTTTTGGGAAACTCTATAAGGGAAGTTATAATGGTGAAGATGTTGCCATCAAGCTTCTAGAGAGGCC  
AGAGCATGATCTTGAGAAGGCTCACTTTATGGAGCTGCAATTTTCATCATGA

>M6-PGSC0003DMG401002925-(rev)M6LRR-RLK\_3660

GTATTTCTGACATCTAACTTTTAGTGCCTCACACACTATGTTGTATCGGTCCTTTGCATTACATACATGTTG  
AAATGGGTGTGTCATGGTTGCGCGTACTCTTCAAGATACACAAATAAT

>M6-PGSC0003DMG401002925-(rev)M6LRR-RLK\_3721

CATACATGTTGAAATGGGTGTGTCATGGTTGCGCGTACTCTTCAAGATACACAAATAATTTACAAAATGA  
TACTTACATCTGATAAAATTCATACTCACAAACGAGTCAAGAAGATTTAG

>M6-PGSC0003DMG401002925-(rev)M6LRR-RLK\_3782

ACAAAATGATACTTACATCTGATAAAATTCATACTCACAAACGAGTCAAGAAGATTTAGGATTTAAAGTT  
AATCGGTTCCCAATGATATCAAGTTTAAAAAGTAAATTATTATATGTGCC

>M6-PGSC0003DMG401002925-(rev)M6LRR-RLK\_3843

TTTAAAGTTAATCGGTTCCCAATGATATCAAGTTTAAAAAGTAAATTATTATATGTGCCCAAGGGGAATC  
GAGCCTTCAATGAGGAGGGCAATAAAGCTCAAGCAAGTTCCCATTTATGC

>M6-PGSC0003DMG401002925-(rev)M6LRR-RLK\_3904

AGGGGAATCGAGCCTTCAATGAGGAGGGCAATAAAGCTCAAGCAAGTTCCCATTTATGCCACTGGACCA  
AGAGCTTACTTTGTTAGTAGATCCCAACAAATACTTTATATATTTAATTGA

>M6-PGSC0003DMG401002925-(rev)M6LRR-RLK\_3965

CTGGACCAAGAGCTTACTTTGTTAGTAGATCCCAACAAATACTTTATATATTTAATTGACTGGATTCCACA  
AAACCTACACATGATACTTTAGGTCCGCCCTGTTCAATAGCAACAACA

>M6-PGSC0003DMG401002925-(rev)M6LRR-RLK\_427

GAGAGGCCAGAGCATGATCTTGAGAAGGCTCACTTTATGGAGCTGCAATTCATCATGAGGTCAAAATG  
TTGGCAAATTTGAAGCATCCAAATGTAGTACGATTTATTGGTGCATGCCGT

>M6-PGSC0003DMG401002925-(rev)M6LRR-RLK\_4819

GGTCTAACCCTACTCTGTAGAACTTACCCATCCATACTCCATATAATATGGATTCATGTTATTTTAGTTG  
TGAAGAATAAGTATATTTGAAACATTTTGGATTTCTCCACTAAAATT

>M6-PGSC0003DMG401002925-(rev)M6LRR-RLK\_488

TCAAAATGTTGGCAAATTTGAAGCATCCAAATGTAGTACGATTTATTGGTGCATGCCGTAAAGCCATGGT  
GTGGTGTATTGTGACTGAATATGCAAGAGGGGGTTCAGTGCCTCAGTTCC

>M6-PGSC0003DMG401002925-(rev)M6LRR-RLK\_4880

TATTTTAGTTGTGGAAGAATAAGTATATTTGAAACATTTTGGATTTCTCCACTAAAATTCATCACCTCTAA  
AGAATGATAGAAAAACGAAAGCATCAAATCTATTTAGGTGCCACGGGT

>M6-PGSC0003DMG401002925-(rev)M6LRR-RLK\_4941

TCACCTCTAAAGAATGATAGAAAAACGAAAGCATCAAATCTATTTAGGTGCCACGGGTGTCCACATGG  
GCTTGATTTGCCAAGTTTGTTAATATGTACTATGAAACGCCAAATTAATTT

>M6-PGSC0003DMG401002925-(rev)M6LRR-RLK\_5002

CCACATGGGCTTGATTTGCCAAGTTTGTTAATATGTACTATGAAACGCCAAATTAATTTTAGAAGTATGC  
ATTAGGTATGTAAAAATATATTTTACTATTTGTTTTATGTATTACGGTGC

>M6-PGSC0003DMG401002925-(rev)M6LRR-RLK\_5063

GAAGTATGCATTAGGTATGTAAAAATATATTTTACTATTTGTTTTATGTATTACGGTGCATGCATAGGCTG  
ACTGTTGTATTGATTCATGCATTAGCGCCTGATTGTTAACTGTTGAAA

>M6-PGSC0003DMG401002925-(rev)M6LRR-RLK\_5124

GCATAGGCTGACTGTTGTATTGATTCATGCATTAGCGCCTGATTGTTAACTGTTGAAAATTTATTGACAT

CTATTGGAAGATCTCCTTGGTTGGCACAATTTGACCTGGAGGCTGCAAA

>M6-PGSC0003DMG401002925-(rev)M6LRR-RLK\_5185

TTATTGACATCTATTGGAAGATCTCCTTGGTTGGCACAATTTGACCTGGAGGCTGCAAAAATTATGACAA

CTAAGAAAATTACTTCATTTTGCTCAGTTTATTGTTCTACTGATACATGG

>M6-PGSC0003DMG401002925-(rev)M6LRR-RLK\_549

AGCCATGGTGTGGTGTATTGTGACTGAATATGCAAGAGGGGGTTTCAGTGCCTCAGTTCCTCACGAGGC

GGCAAAACCGAGCTGTGCCATTGAAGTTAGCAGTTGTGCAGGCCTTGGATGT

>M6-PGSC0003DMG401002925-(rev)M6LRR-RLK\_5551

AAGAGTTGGTAATATTTAGTGACTCTTTTGAGAAAAAATTTCAAATCACGATTTCCCTTATGATTCTGCT

CTTAAAAGTTCAGTTATTTGTGTCTCAGGCATATATGGCAGTTAGAATT

>M6-PGSC0003DMG401002925-(rev)M6LRR-RLK\_5612

TGATTCTGCTCTTAAAAGTTCAGTTATTTGTGTCTCAGGCATATATGGCAGTTAGAATTTAAACCTTGAAT

TAGATCATCAATTCAGTTGGTTTAGAGAATATGGTATAGAGTTAAATA

>M6-PGSC0003DMG401002925-(rev)M6LRR-RLK\_5673

AACCTTGAATTAGATCATCAATTCAGGTTGGTTTAGAGAATATGGTATAGAGTTAAATAAATCCCTTTCA

ATCTGGTGGAGATTGATTGCTATATCCAGTTGAGGGTAGATTACTGATGA

>M6-PGSC0003DMG401002925-(rev)M6LRR-RLK\_5734

TCCCTTTCAATCTGGTGGAGATTGATTGCTATATCCAGTTGAGGGTAGATTACTGATGATAGAACTGGCA

TTTTTTATTTCTTTTGTCTGGACAGAAGTATCGCCATCAGTTTCCGTT

>M6-PGSC0003DMG401002925-(rev)M6LRR-RLK\_5795

GAACTGGCATTTTTTTTATTTCTTTTGTCTGGACAGAAGTATCGCCATCAGTTTCCGTTTGGGTTTGTACCT

TACACAATGTTAGAGAGGAAAGCATATTCCTTGTAAAGCTAAGTGAGTT

>M6-PGSC0003DMG401002925-(rev)M6LRR-RLK\_5856

GGTTTGTACCTTACACAATGTTAGAGAGGAAAGCATATTCCTTGTAAAGCTAAGTGAGTTGGAGATTAAG

CTTTTGTTTTCTTGAGATAATGTGACAACCTGGAGAAGTTTTGATTTCTAAT

>M6-PGSC0003DMG401002925-(rev)M6LRR-RLK\_5917

AGATTAAGCTTTTGTTTTCTTGAGATAATGTGACAACCTGGAGAAGTTTTGATTTCTAATAGGACATTTCTT

TCAGACTTGATAAAAAATAAGTGTTTCATGTCTGCCTGAAATATCTTCAA

>M6-PGSC0003DMG401002925-(rev)M6LRR-RLK\_5978

GACATTTCTTTCAGACTTGATAAAAAATAAGTGTCATGTCTGCCTGAAATATCTTCAAATGGTTGGGA  
TCAGAAAGGATTTAGGAGGTTGACCCGGTGAGTGGTGGTAATTTTATAGT

>M6-PGSC0003DMG401002925-(rev)M6LRR-RLK\_6039

TGGTTGGGATCAGAAAGGATTTAGGAGGTTGACCCGGTGAGTGGTGGTAATTTTATAGTCTTCTCTGTG  
TGATAATAGGCTAGTATGATGAATGGCCTTCCTTGGGGAAATAGACAAAAT

>M6-PGSC0003DMG401002925-(rev)M6LRR-RLK\_61

TCAAACATGTCTATTGAAGGTTATGGGATGAGCAATGCTGGTGGTTCTGGTGCAATGGCGGTGGATAAC  
AGCAGTGTGGATCAAATGATTCACACTCATATTCTAAACCAGCAGGGT

>M6-PGSC0003DMG401002925-(rev)M6LRR-RLK\_6100

TCTCTGTGTGATAATAGGCTAGTATGATGAATGGCCTTCCTTGGGGAAATAGACAAAATAATATGTTTGC  
TTTTGTTAATTTGATGTGATAATGAAAGATCTTGCCAAAAGAGGTGTGGA

>M6-PGSC0003DMG401002925-(rev)M6LRR-RLK\_6161

TATGTTTGCTTTTGTTAATTTGATGTGATAATGAAAGATCTTGCCAAAAGAGGTGTGGATCGGATCTCAA  
TATCTGGTAAACTCGAATACGTGCAGCCAGTCTGACTCTTTGTATAATT

>M6-PGSC0003DMG401002925-(rev)M6LRR-RLK\_6222

GGATCTCAATATCTGGTAAACTCGAATACGTGCAGCCAGTCTGACTCTTTGTATAATTCTAGTATACTCA  
AATTTTTATTCTGATTAAGTGAAGTTACTTTTCAAGTTTACT

>M6-PGSC0003DMG401002925-(rev)M6LRR-RLK\_6283

AGTATACTCAAATTTTTATTCTGATTAAGTGAAGTTACTTTTCAAGTTTACTCTTGAGAAATTA  
GTTATTCACATTCTGCAGATCCTATCCCGTTTAACTTTGTGAATTATTG

>M6-PGSC0003DMG401002925-(rev)M6LRR-RLK\_6344

TGAGAAATTAGTTATTCACATTCTGCAGATCCTATCCCGTTTAACTTTGTGAATTATTGGCAAGTGTGTCT  
GGTTTCTTCTTTTTCAGAAAAAAGAAAAATGGATGTTCAAAGTTGTTA

>M6-PGSC0003DMG401002925-(rev)M6LRR-RLK\_6405

AAGTGTGTCTGGTTTCTTCTTTTTCAGAAAAAAGAAAAATGGATGTTCAAAGTTGTTAGCAATAGCATC  
TGTGTTTCGTTGTGGATCGCTAAGCGTTTACTTTGTTTTGTAGGGAGAT

>M6-PGSC0003DMG401002925-(rev)M6LRR-RLK\_6466

AATAGCATCTGTGTTTCGTTGTGGATCGCTAAGCGTTTACTTTGTTTTGTAGGGAGATGATCCAGCACC  
GGCCATACACCCAGAAAGTTGATGTTTATAGTTTTGGCATTGTTCTGTGG

>M6-PGSC0003DMG401002925-(rev)M6LRR-RLK\_6527

TCCAGCACCGGCCATACACCCAGAAAGTTGATGTTTATAGTTTTGGCATTGTTCTGTGGGAGCTCATAAC  
AGGGTTGCTTCCTTACCAGAGCATGACTGCTGTGCAGGCTGCTTTTGCTG

>M6-PGSC0003DMG401002925-(rev)M6LRR-RLK\_6588

GCTCATAACAGGGTTGCTTCCTTACCAGAGCATGACTGCTGTGCAGGCTGCTTTTGCTGTTGTCAACAAA  
GGCGTCCGTCCAACAATCCCCATTGATTGCTTGCCTGTCTTATCTGATAT

>M6-PGSC0003DMG401002925-(rev)M6LRR-RLK\_6649

GTCAACAAAGGCGTCCGTCCAACAATCCCCATTGATTGCTTGCCTGTCTTATCTGATATCATGACCTGCTG  
CTGGGATTCTGACCCTGATAATCGGCCAACTTTCTCTCAGGTGGTCAAG

>M6-PGSC0003DMG401002925-(rev)M6LRR-RLK\_671

CTAGGGGGATGGAGTATGTGCATGGCCGGAATCTGATTCACCGAGATCTGAAATCCGACAATCTGCTGA  
TTGCTGCTGACAAGTCAATCAAGATTGCAGACTTTGGTATTGCTCGAATTG

>M6-PGSC0003DMG401002925-(rev)M6LRR-RLK\_6771

GCTTGAGGCGGCTGAGACAGAAATCATGACTAATATCAGAAGGGCACGTTTCAGGTGCTCCCCTCATCC  
TACGGCTACAGGGTAAGAGGAAACTGGAGGCAACTGATTTTGAGTCTGCCA

>M6-PGSC0003DMG401002925-(rev)M6LRR-RLK\_6832

CCTCATCCTACGGCTACAGGGTAAGAGGAAACTGGAGGCAACTGATTTTGAGTCTGCCATGTGTATCTA  
TGAGGCACAATTTCTTTGCAAATAGAAAAAGGGCTATAGTTATGAGAAAAA

>M6-PGSC0003DMG401002925-(rev)M6LRR-RLK\_6893

TGTATCTATGAGGCACAATTTCTTTGCAAATAGAAAAAGGGCTATAGTTATGAGAAAAAACTAAACATTT  
CTCTGCTGTATTTGTTTCTTTCTTTAATCCGTGTATTTAAGTGGTGAC

>M6-PGSC0003DMG401002925-(rev)M6LRR-RLK\_6954

TAAACATTTCTCTGCTGTATTTGTTTCTTTCTTTAATCCGTGTATTTAAGTGGTGACTAGTTGGTAATAC  
AGGATATCTGATGTGCATGTCAGATTATGGCTGTATTTACTGAATTTG

>M6-PGSC0003DMG401002925-(rev)M6LRR-RLK\_732

TCTGCTGATTGCTGCTGACAAGTCAATCAAGATTGCAGACTTTGGTATTGCTCGAATTGAGGTGCTGACT  
GAAGGAATGACACCAGAACTGGAACCTACCGCTGGATGGCTCCGTAAGC

>M6-PGSC0003DMG401002925-(rev)M6LRR-RLK\_854

CTAGACTCTTTAGCAGCCTTGTCAAATCTGGTGTCTTGATCCAGTTTGATTTTATTGCCAAACCCTATAAT

AGAGCTCTTAAGCTTTTTATCCTATTCTTGTGGGCTATTTTTCTCTGT

>M6-PGSC0003DMG401004423M6LRR-RLP\_0

CCTCAAATGTCAGAAACGAAGAGCTTTCTTCAACTAATCCTCGAATCCTTGACAAAGAGGAAAAGTGGAG  
GTCCAAAGCAGAGACATAATAGTCAAGACGCTACAAGAAGAACTGGCAGGA

>M6-PGSC0003DMG401004423M6LRR-RLP\_1037

AATCAAGGAGTTGTCAGCCAAAATCGGGAAGCTAATACACTTGAGATATCTTGATCTCTCGAACACTAA  
GATCATAGCCTTGCCCAACTCCATTTGCGAGCTCTATAATTTGCAAACATT

>M6-PGSC0003DMG401004423M6LRR-RLP\_1159

GAGTTGATCGTTGCTATCCACTTCCATATGAGATGGGAAATATGATAAGTTTGAGACACATATATTGCCA  
TTCTCGGTGTCAGAGTCAGATGCCACTTAACATGGGACAATTGACTTGTC

>M6-PGSC0003DMG401004423M6LRR-RLP\_122

AAAGTATTTGCTTGTCTGGATGATTTGTGGCGTGTGACTCTACATTGTGGGTAGAGTTTGTGACACC  
TTAGGAGGAATAAATACATCCCGAGGAACTTCATTCTTGTGACTACTCG

>M6-PGSC0003DMG401004423M6LRR-RLP\_1220

ATATTGCCATTCTCGGTGTCAGAGTCAGATGCCACTTAACATGGGACAATTGACTTGTCTTCAAACCCTA  
CAATATTTCAATGTGGGTTTAGAGAAAGGTTGTTGAATAGAAGAATTAGG

>M6-PGSC0003DMG401004423M6LRR-RLP\_1281

CAAACCCTACAATATTTCAATGTGGGTTTAGAGAAAGGTTGTTGAATAGAAGAATTAGGTCTTTTGAAG  
AACCTTAGAGGTGAATTGAGGATCAATCATCTCCAATTGGTCCGTAGCAGA

>M6-PGSC0003DMG401004423M6LRR-RLP\_1342

TTTTGAAGAACCTTAGAGGTGAATTGAGGATCAATCATCTCCAATTGGTCCGTAGCAGAGAAGAAGCTC  
GAACAACATATTTACAAGAGAAATCGAATATTTATAAGCTGTCATATGTGT

>M6-PGSC0003DMG401004423M6LRR-RLP\_1403

AGAAGCTCGAACACATATTTACAAGAGAAATCGAATATTTATAAGCTGTCATATGTGTGGTTCCGTGAT  
GAACCAGAAGGCTGTGAAACCATTGATGAGCATGTGTTGGATGGTCTTCA

>M6-PGSC0003DMG401004423M6LRR-RLP\_1464

TTCCGTGATGAACCAGAAGGCTGTGAAACCATTGATGAGCATGTGTTGGATGGTCTTCAACCGCATCCT  
AACTTGACAACCTTACTGGTGGAGGACTATTTGGGCACTAGATTTCTTCA

>M6-PGSC0003DMG401004423M6LRR-RLP\_1525

CGCATCCTAACTTGACAACCTTACTGGTGGAGGACTATTTGGGCACTAGATTCCTTCATGGTTCAGTGA  
AGAGTCGCTACCAAATTTGGTCAAGTTGACATTAAGTGGTTGCAAAGGT

>M6-PGSC0003DMG401004423M6LRR-RLP\_1647

AAAGAAATTCCATCGCTTGGCCAACTGAAGTTCCTTCGGCATCTTAAGCTGATAGGACTCCCTGAATTGG  
AATTCATCGGACCTACATTTTATGGTGTGAGGTTAATGATAATGGATCA

>M6-PGSC0003DMG401004423M6LRR-RLP\_1708

CTGAATTGGAATTCATCGGACCTACATTTTATGGTGTGAGGTTAATGATAATGGATCATGCAGCAAAT  
CCAAGTGTCCCGTCACTGAAAGTACTTCTATTGGAGAATATGCATAGCC

>M6-PGSC0003DMG401004423M6LRR-RLP\_1769

CAGCAAATCCAAGTGTCCCGTCACTGAAAGTACTTCTATTGGAGAATATGCATAGCCTTACTGAGTGG  
AAGGGAGTGAAATTGATACCAACAACAAGTGGGGTAAGAATGTTTCCTGG

>M6-PGSC0003DMG401004423M6LRR-RLP\_1830

ACTGAGTGAAGGGAGTGAAATTGATACCAACAACAAGTGGGGTAAGAATGTTTCCTGGGCTTGAGAA  
GTTGAGGATTAGTAACTGTCCAGTGTTAAAAAGTACTCCAAATCAATTTGAA

>M6-PGSC0003DMG401004423M6LRR-RLP\_1891

TTGAGAAGTTGAGGATTAGTAACTGTCCAGTGTTAAAAAGTACTCCAAATCAATTTGAAATCCTACGTGA  
ATTAGAGATTGTAGAAGTTGACAGTGAAATGCCATTGTTGAACTTGTGCA

>M6-PGSC0003DMG401004423M6LRR-RLP\_1952

CCTACGTGAATTAGAGATTGTAGAAGTTGACAGTGAAATGCCATTGTTGAACTTGTGCAGCAACTTGGC  
ATCTCTTGTAATGCTTAGTGTGTATGATGTGAAAGAGCTCACTTGTTTTCC

>M6-PGSC0003DMG401004423M6LRR-RLP\_2013

AACTTGGCATCTCTTGTAATGCTTAGTGTGTATGATGTGAAAGAGCTCACTTGTTTTCCAGATGAGATGC  
TACGTAACAACGTTTCTCTTCAACACCTATCAGTCGCAGACTGCAGAGAG

>M6-PGSC0003DMG401004423M6LRR-RLP\_2074

ATGAGATGCTACGTAACAACGTTTCTCTTCAACACCTATCAGTCGCAGACTGCAGAGAGTTTCATGAATT  
GCCACAGAGCTTGATAATCTCCATTTTCTTAAGAGCTTAAGGATTAACC

>M6-PGSC0003DMG401004423M6LRR-RLP\_2135

TCATGAATTGCCACAGAGCTTGATAATCTCCATTTTCTTAAGAGCTTAAGGATTAACCTCTGCACCAATT  
TCAGTTCCTTCTGTTCCCACTGGAGAGAATTATTTGACTTCCCTCCA

>M6-PGSC0003DMG401004423M6LRR-RLP\_2257

GTCTTCAGTTAATCTCTTGTGATGGATTGACCAGTTTACCAAGGGGGATGCTAGAGCATTGTCGGTCTTT  
GGAATCTTTGAAGGTCTTCAACTGTAACAACCTTAGTTTCCTTCCCTTTAC

>M6-PGSC0003DMG401004423M6LRR-RLP\_2318

TCGGTCTTTGGAATCTTTGAAGGTCTTCAACTGTAACAACCTTAGTTTCCTTCCCTTTACATGTCAGGGAAA  
AACCTTCACTTTCATATTTGAATATATCAAATGTCCCAAATTGATTAG

>M6-PGSC0003DMG401004423M6LRR-RLP\_2379

GTCAGGGAAAAACCTTCACTTTCATATTTGAATATATCAAATGTCCCAAATTGATTAGTGTACCCGCAG  
GTGGCCTTCGTCTCACTGGGTTACAGAATTTGGAAATAGGTCCTTTCTTA

>M6-PGSC0003DMG401004423M6LRR-RLP\_2440

TACCCGCAGGTGGCCTTCGTCTCACTGGGTTACAGAATTTGGAAATAGGTCCTTTCTTAGAAATGGTGGAA  
TTTTGAGGCATTCCAATTGATAATTGATGGCATTCACTCTTTCATACAT

>M6-PGSC0003DMG401004423M6LRR-RLP\_2501

AATGGTGGATTTTGAGGCATTCCAATTGATAATTGATGGCATTCACTCTTTCATACATTGGAGGTGTGG  
GGACTTGCCTGGGATTCTTCCCTATCAGCTTATGCAACTCTCTGA

>M6-PGSC0003DMG401004423M6LRR-RLP\_2562

GAGGTGTGGGGACTTGCCTGGGATTCTTCCCTATCAGCTTATGCAACTCTCTGACCTTATAGAGA  
TCAAATATATGGATTTGGAATCGAGGCTTTCCTCATAGATTTGGCAAC

>M6-PGSC0003DMG401004423M6LRR-RLP\_2623

TTATAGAGATCAAATATATGGATTTGGAATCGAGGCTTTCCTCATAGATTTGGCAACCTTATTTCTCTT  
GAAAGATTAATGCTAATGGGGTGCAAACGGCTACAACATCTGGACTTCT

>M6-PGSC0003DMG401004423M6LRR-RLP\_2684

TATTTCTTTGAAAGATTAATGCTAATGGGGTGCAAACGGCTACAACATCTGGACTTCTCAGATGCCATG  
CCCAAATTACGTTATCTGTGCATAAATGATTGTCCATTGTTAGAAGCTAT

>M6-PGSC0003DMG401004423M6LRR-RLP\_2745

GATGCCATGCCCAAATTACGTTATCTGTGCATAAATGATTGTCCATTGTTAGAAGCTATATCGGATGGGC  
TCGGTAACATTGTTTCTTTGCAAGAGTTATTTTTACAGAAATGCAAGAAA

>M6-PGSC0003DMG401004423M6LRR-RLP\_2806

CGGATGGGCTCGGTAACATTGTTTCTTTGCAAGAGTTATTTTTACAGAAATGCAAGAACTAGAGCATCT



GCCATCTAGAGATGCCATGCGACGCCTCACCAAATTACGGAACTTGAAAA

>M6-PGSC0003DMG401004423M6LRR-RLP\_2867

AGAGCATCTGCCATCTAGAGATGCCATGCGACGCCTCACCAAATTACGGAACTTGAAAATTAAGGCTG  
CCCAAAGTTAGAAGAAAGTTGCACAAATTGGAGCGGCTCAAACCTCCAATG

>M6-PGSC0003DMG401004423M6LRR-RLP\_2928

AAAGGCTGCCCAAAGTTAGAAGAAAGTTGCACAAATTGGAGCGGCTCAAACCTCCAATGGTCCAACATT  
TCCCATATCCCAAATGAAGTAGGTGGAAGCATAATTCAGGACTTGCCT

>M6-PGSC0003DMG401004423M6LRR-RLP\_305

AGATCATTGTTGGTCCATTTTCAAACAAAGAGCGTTTGTGATGGGGAAATTCCAGAGGAAATAGTGTG  
CATGGAGAACATGATTGTGGAAATGTGTCAAGGTCTACCGTTGGCTGCAAG

>M6-PGSC0003DMG401004423M6LRR-RLP\_3050

GTTTCTGTTTCTCTTTTAGTTTCTGAGTCGCATTTTTAATTATTTTTTTCCACGAGTTACTCTCCTCCACTCTC  
CTTTATAGTTTTCAAACATTTTTTTGTTCCACTTGAAACAAATTT

>M6-PGSC0003DMG401004423M6LRR-RLP\_3111

CTCCTCCACTCTCCTTTATAGTTTTCAAACATTTTTTTGTTCCACTTGAAACAAATTTATGAATATCTATTA  
TTACCTTTAAGATATGGTTAATCATGAATATTTATGTGTGCTTTTT

>M6-PGSC0003DMG401004423M6LRR-RLP\_3172

GAATATCTATTATTACCTTTAAGATATGGTTAATCATGAATATTTATGTGTGCTTTTTCTCATTGGTTATT  
AGTTTAAAGGTCATGCTAGAACGTTGCTGTGGCATTTCAGTCAAAT

>M6-PGSC0003DMG401004423M6LRR-RLP\_3233

CATTGGTTATTAGTTTAAAGGTCATGCTAGAACGTTGCTGTGGCATTTCAGTCAAATCCATCTGCAGC  
AATTACATTAGGTAACTTGCAATTAGACTGTTGTAACAAGTTTTTCTTT

>M6-PGSC0003DMG401004423M6LRR-RLP\_3294

ATCTGCAGCAATTACATTAGGTAACTTGCAATTAGACTGTTGTAACAAGTTTTTCTTTGCACTCCTTTTTT  
TCTCATGACACAATTTTACTGTTTAAACAGGATTGGTTATGTACGACAA

>M6-PGSC0003DMG401004423M6LRR-RLP\_3355

ACTCCTTTTTTCTCATGACACAATTTTACTGTTTAAACAGGATTGGTTATGTACGACAAAGGAACCACCAC  
ATTTGTTTTGTTGAAGAATAGAATCTTCAGCCGTAGACAGTTTCATGAG

>M6-PGSC0003DMG401004423M6LRR-RLP\_3416

GAACCACCACATTTGTTTTGTTGAAGAATAGAATCTTCAGCCGTAGACAGTTTCATGAGCATTGGAAAA  
GACTATATAATCTCTCAACAGTAAGTTGAAGCTATTCATAAGATGAAGCT

>M6-PGSC0003DMG401004423M6LRR-RLP\_3477

TTTGGAAAAGACTATATAATCTCTCAACAGTAAGTTGAAGCTATTCATAAGATGAAGCTAGAAGGTTATT  
GTGATACAGAGACACAATATATGTCAATTTCTAACTACACCTTACTTCTA

>M6-PGSC0003DMG401004423M6LRR-RLP\_3538

AAGGTTATTGTGATACAGAGACACAATATATGTCAATTTCTAACTACACCTTACTTCTATGCCAGCCAAG  
ACTTAAAAGCTATGTGGAAGTATAAGGTATGCCCAAGAACAATTCATCA

>M6-PGSC0003DMG401004423M6LRR-RLP\_3599

CCAGCCAAGACTTAAAAGCTATGTGGAAGTATAAGGTATGCCCAAGAACAATTCATCAATTTTACTTTT  
CAGCTCCTTTTTCTCGTTAAAATACTGAAACGTTTAAACAGGTATTATCTT

>M6-PGSC0003DMG401004423M6LRR-RLP\_3660

TTTACTTTTCAGCTCCTTTTTCTCGTTAAAATACTGAAACGTTTAAACAGGTATTATCTTTTCAGCAATATAGT  
CCTTCTCTAAATCCTCAAATATTATTATACACTTCATTATATGGTATG

>M6-PGSC0003DMG401004423M6LRR-RLP\_3721

AGCAATATAGTCCTTCTCTAAATCCTCAAATATTATTATACACTTCATTATATGGTATGATTCTGGTAAAG  
GAAATTGTTCTTTCTCTTTGAGGAAAGTGAAGAATTTGATTGGCATAAC

>M6-PGSC0003DMG401004423M6LRR-RLP\_3782

TCTGGTAAAGGAAATTGTTCTTTCTCTTTGAGGAAAGTGAAGAATTTGATTGGCATAACATTGGCTTGTC  
ATGATTGGTATACACAGGATTCTTAGATGCAAGACAGATTCATTTTGAA

>M6-PGSC0003DMG401004423M6LRR-RLP\_3843

TGGCTTGTCATGATTGGTATACACAGGATTCTTAGATGCAAGACAGATTCATTTGAATTCCATTGATA  
GTAGACGCTTCTCAAATTATGTTTCAGTCTTCAACATTATTTTAATTTTC

>M6-PGSC0003DMG401004423M6LRR-RLP\_3904

CCATTGATAGTAGACGCTTCTCAAATTATGTTTCAGTCTTCAACATTATTTTAATTTTCAGGGGACAGATT  
GGAAGTTTGTGGACATTGGTGCTGCATTAGAGACTCTGGTTGCACAAAG

>M6-PGSC0003DMG401004423M6LRR-RLP\_3965

GGGACAGATTGGAAGTTTGTGGACATTGGTGCTGCATTAGAGACTCTGGTTGCACAAAGCTAGAAAATT  
TAAGGTAAGTCAGTTTTTGTTCATAAAAGATTGCAAATGGTGCTTTAGATC

>M6-PGSC0003DMG401004423M6LRR-RLP\_4026

AGAAAATTTAAGGTAAGTCAGTTTTTGTTCATAAAAGATTGCAAATGGTGCTTTAGATCAATTATAACGA  
GTTGCTTCTCCATTTTCGCAAGGATCAGACGAAATGTGTGCCAAAACCTGAC

>M6-PGSC0003DMG401004423M6LRR-RLP\_4087

TTATAACGAGTTGCTTCTCCATTTTCGCAAGGATCAGACGAAATGTGTGCCAAAACCTGACTTTTTACCATT  
CTTATGTTTAAGATTATTGGTTGAAACAACGACATGCATGGACCTTGTT

>M6-PGSC0003DMG401004423M6LRR-RLP\_4148

TTTACCATTTCTTATGTTTAAGATTATTGGTTGAAACAACGACATGCATGGACCTTGTTGAGATGGTAGA  
GTGGACCAGACTTCTCTTAGAGGTGTTCAAGTGTCTTGATTGGCAAGTGA

>M6-PGSC0003DMG401004423M6LRR-RLP\_4209

GATGGTAGAGTGGACCAGACTTCTCTTAGAGGTGTTCAAGTGTCTTGATTGGCAAGTCAAATTGCATT  
GGCGGAAACTGGAGTGGAGATATTATTTACTTGTATGACTAAGATTTGATA

>M6-PGSC0003DMG401004423M6LRR-RLP\_427

TGTTGGGAGGCATCTTACGCAACAAGGAAAAACATGAATGGCAAGCAATTCTTGATGGAAACCCCTTG  
TTACAGGTGAAGATGATAACGAAGAAAATAGCGTTAAGAAAATCCTAAAAC

>M6-PGSC0003DMG401004423M6LRR-RLP\_4270

TTGCATTTGGCGGAAACTGGAGTGGAGATATTATTTACTTGTATGACTAAGATTTGATAGCAGAGGCCT  
TAATTTCTTGCGCACAGAGTACATGCCTTTTTTCGTACAAATAGAGTTTCCT

>M6-PGSC0003DMG401004423M6LRR-RLP\_4331

AGAGGCCTTTAATTTCTTGCGCACAGAGTACATGCCTTTTTTCGTACAAATAGAGTTCCTTTGTTCCAGCA  
AACATTTTGAACCTAATACTTATCTGCTGCATCCTTGCCTAGTTGATAG

>M6-PGSC0003DMG401004423M6LRR-RLP\_4392

GTTTCCAGCAAACATTTTGAACCTAATACTTATCTGCTGCATCCTTGCCTAGTTGATAGCTTCTTTAATGTA  
GCTCTGCTTTTCTCTTCAAATTTATCTATAGGAATTGCACCATTTCA

>M6-PGSC0003DMG401004423M6LRR-RLP\_4453

TCTTTAATGTAGCTCTGCTTTTCTCTTCAAATTTATCTATAGGAATTGCACCATTTCAATCCACCTTTTCA  
TTGGTTTTATAAAATGGATAAGTATTGTTGGACATTCCAGAATAGTA

>M6-PGSC0003DMG401004423M6LRR-RLP\_4575

GTGTATAAGTAAAGATGGACGAAGGCTACTCCAGCGTTAGACCATCATTGAATTCCTTCTACGGACACG

TCTAAATAACTTTAAAATAACCAACACAAATACACCACATGTACCTAAGTT

>M6-PGSC0003DMG401004423M6LRR-RLP\_4636

CGGACACGTCTAAATAACTTTAAAATAACCAACACAAATACACCACATGTACCTAAGTTAACACATAAAG

TGGGAACCTCACACTCCTTTTTCTTCTCACACCTCATCTCTAAAACCTACA

>M6-PGSC0003DMG401004423M6LRR-RLP\_488

CCCCCTTGTTACAGGTGAAGATGATAACGAAGAAAATAGCGTTAAGAAAATCCTAAAACCTCAGCAATGA

TTATCTACCATCTCCACATCTGAAAAATGCTTTGCTTACTTTGCAATGTT

>M6-PGSC0003DMG401004423M6LRR-RLP\_61

AAACTGAGGTCCAAAGCAGAGACATAATAGTCAAGACGCTACAAGAAGAACTGGCAGGAAGAAAGTAT

TTGCTTGTCTGGATGATTTGTGGCGTGTGACTCTACATTGTGGGTAGAGT

>M6-PGSC0003DMG401004423M6LRR-RLP\_610

CAAAGATTTTGAGTTTGAAAAGGACCAACTAATCCAACCTCTGGATGGCCGAAGACTTTCTTCATCCATG

TCAAGAGACCACCGTAATGGAAGACATTGGGAACAAGTTCTTTCAACTCT

>M6-PGSC0003DMG401004423M6LRR-RLP\_671

TCATCCATGTCAAGAGACCACCGTAATGGAAGACATTGGGAACAAGTTCTTTCAACTCTTGTTGCGAAAT

TCCTTGCTGCAAGATGTTAAGTTAGATGAGCACAATAATATAACACACTA

>M6-PGSC0003DMG401004423M6LRR-RLP\_732

TTGCGAAATTCCTTGCTGCAAGATGTTAAGTTAGATGAGCACAATAATATAACACACTATAAGAAGCACG

ATCTTGTCATGATTTGGCTGGAGATATCTTAAAATCTAAACTATATGAT

>M6-PGSC0003DMG401004423M6LRR-RLP\_793

AGAAGCACGATCTTGTGCATGATTTGGCTGGAGATATCTTAAAATCTAAACTATATGATCCGAAGGGCG

ATGGTCCAGAAGATCTTTCTCAAGTGCGATACTTTGGATGGGACTCACCAA

>M6-PGSC0003DMG401004423M6LRR-RLP\_854

GAAGGGCGATGGTCCAGAAGATCTTTCTCAAGTGCGATACTTTGGATGGGACTCACCAAGTGATCAAAT

AGTTAATATAAATGAGCCAGTACATTTGTGCACACTGTTTTGGAGAATCAA

>M6-PGSC0003DMG401004423M6LRR-RLP\_915

GATCAAATAGTTAATATAAATGAGCCAGTACATTTGTGCACACTGTTTTGGAGAATCAATATATCGGAAG

ATATTCTGTTGAGATTTAAGTTCTTGAGAGTTTTAAATTTGTCCAGTTCA

>M6-PGSC0003DMG401004423M6LRR-RLP\_976

TATCGGAAGATATTCTGTTGAGATTTAAGTTCTTGAGAGTTTTAAATTTGTCCAGTTCATGAATCAAGGA  
GTTGTCAGCCAAAATCGGGAAGCTAATACACTTGAGATATCTTGATCTCT

>M6-PGSC0003DMG401004726M6LRR-RLP\_1054

TTGATTTAAGCAATAATCAGCTGCAAGGTCATCTTCCCAAGTCGATTCAAACCTTGGAACCTAACAGG  
CCTTGTTCTTTCTTTCAATAATTTAATGGTAGTGTGGATGTCAGCTTCT

>M6-PGSC0003DMG401004726M6LRR-RLP\_1116

CTAACAGGCCTTGTTCTTTCTTTCAATAATTTAATGGTAGTGTGGATGTCAGCTTCTTTGCTGACCTCAA  
GCAACTTTATTATCTTGATCTTTTCATATAATTGTATCTCATTGACCAAT

>M6-PGSC0003DMG401004726M6LRR-RLP\_1178

TGACCTCAAGCAACTTTATTATCTTGATCTTTTCATATAATTGTATCTCATTGACCAATGAGAACAAACATA  
ATGTTACTTTGCCAGGATCTTATGAGCTTACGATTGGCTGCATGTGA

>M6-PGSC0003DMG401004726M6LRR-RLP\_124

TTATCGTAGATCCCTCATTAGTTACGAGTAGTTCCTACTCTTATACGAGTTCATGGAATATGAGCAGAGA  
TTGTTGCTCATGGGATGGAGTCGTATGCAATGAGATGACTGGCCATGTCA

>M6-PGSC0003DMG401004726M6LRR-RLP\_1240

ACAAACATAATGTTACTTTGCCAGGATCTTATGAGCTTACGATTGGCTGCATGTGAAGTGAAAGAATT  
GGAGTTTCTAAGATCCGCAAAGCTTCTTTGGCATTGGATCTTTCAAATA

>M6-PGSC0003DMG401004726M6LRR-RLP\_1364

GATTGAAGGAAGAATCCCAGATTGGGCATGGTCTAACTGGATTATTTTCATTGAAGAGTCTTAATATATCC  
CACAACATGCTGGCAAGTGTTGATTCAATTCCTCTTCAATCTGCAAATGC

>M6-PGSC0003DMG401004726M6LRR-RLP\_1426

ATATATCCCACAACATGCTGGCAAGTGTTGATTCAATTCCTCTTCAATCTGCAAATGCCATTGATTTGCGG  
TCCAATTTCTTCAAGGTTCACTACCTATTCCACCAATTTCCACAAGAT

>M6-PGSC0003DMG401004726M6LRR-RLP\_1488

GATTTGCGGTCCAATTTCTTCAAGGTTCACTACCTATTCCACCAATTTCCACAAGATTCTTCTTCATATCC  
CATAATAATCTCAGTGGGGAGATCCCTTCGTCTATTTGCAATTTGACG

>M6-PGSC0003DMG401004726M6LRR-RLP\_1736

TTTTAGAATTGGAAGTGCCCTCAAAGCTTCAACTTTCATGGCAATAAGCTGGAGGGGAAAATCCCACA  
ATCCTTGATCAACTGCAAACACTCGAAGTTCCTTGATTTAGGAGACAATCA

>M6-PGSC0003DMG401004726M6LRR-RLP\_1922

CAATATATTGCATGGACCCATTAGAACTCTAACAACTGAAAACATGTTTCCTCAGCTTCAAATATTAGATC  
TCTCCTCCAATGCTTTCACAAAAACATACCACCGGGTTTGTTCACA

>M6-PGSC0003DMG401004726M6LRR-RLP\_1984

TATTAGATCTCTCCTCCAATGCTTTCACAAAAACATACCACCGGGTTTGTTCACATTTGAAAGCCATG  
AGGACAATTCATCAAATGATGAACACACCAAGTGATGAAGGAAGTCGAT

>M6-PGSC0003DMG401004726M6LRR-RLP\_2294

ATCACTTGGAAGATTATGTTTCAGTTGAATCATTGGACCTGTCAAGTAACCATCTTGTAGGAGAGATACCA  
GCACAATTTGCTTCTTACATCTTGAAGTCTTAAATCTCTCTACAA

>M6-PGSC0003DMG401004726M6LRR-RLP\_248

ACTTGATCTCAGTTGCAACAGTCTTGTAGGAAAGGTTGATTCCAATAGCAGCCTCTTCCAACCTCTCTCATC  
TTCAAAGGCTCGACCTTCTTCTAATAACTTCTCTAATTCTAACATCTC

>M6-PGSC0003DMG401004726M6LRR-RLP\_2480

CAATGATGGATTACGTGGATTCCCTTTACAAAAGGTTGTGGCAATGATCGTGTATCAGGGACAAATTAT  
GCCATATCTGGACAGCTAGACGATGAAGAGAGCAATTCTGAATTTCTGCG

>M6-PGSC0003DMG401004726M6LRR-RLP\_2700

GCAAGAATCATTGAAGAGCTGGAGCACAAAATTATGATGGGAAGGAGAAAGACGCAGCGAAAGCAAA  
GGCTCTTCTGCATTTCCATTTGTTTTCTTCTGTTTTTGGTCTAACATTGTGA

>M6-PGSC0003DMG401004726M6LRR-RLP\_310

TCTCTCATCTTCAAAGGCTCGACCTTCTTCTAATAACTTCTCTAATTCTAACATCTCGCCTGAATTTGGCA  
GGTTCTCGAGCTTGACATATCTTGATCTTCTGACTCCTATTTCTCAG

>M6-PGSC0003DMG401004726M6LRR-RLP\_372

GAATTTGGCAGGTTCTCGAGCTTGACATATCTTGATCTTCTGACTCCTATTTCTCAGGTCAAATCCTTCT  
GAAATCTCTCACCTTTCCAAGTTACAATCTCTTTATTTCTCAGGAGAA

>M6-PGSC0003DMG401004726M6LRR-RLP\_434

AAATCCTTCTGAAATCTCTCACCTTTCCAAGTTACAATCTCTTTATTTCTCAGGAGAAATGCTTAAATTTGG  
ACCTCACGATTTTGAATGCTCCTCAGAATTTGACTCAATTAAGAGA

>M6-PGSC0003DMG401004726M6LRR-RLP\_558

CATCTTACTTCCATAAACATCTCTTCCACTATTCTCTGAATTTTTCTTCTCATTTAACAACTCTGAGGCTGG

GAAATACAGGATTGCACGGGTTAATACCCGAGAGTATTTTTACCTT

>M6-PGSC0003DMG401004726M6LRR-RLP\_62

ATCCATACCTCATTGTGCCGTAAAGATCAAAGCTACGCTCTTCTAGAATTCAAGAGAACACTTATCGTA  
GATCCCTCATTAGTTACGAGTAGTTCCTACTCTTATACGAGTTCATGGAA

>M6-PGSC0003DMG401004726M6LRR-RLP\_620

TCTGAGGCTGGGAAATACAGGATTGCACGGGTTAATACCCGAGAGTATTTTTACCTTCCCAATCTGGAA  
ACACTTGTCTTACAAAATAATGATCAGCTAAGTGGTTATTTTCCAAAGAC

>M6-PGSC0003DMG401004726M6LRR-RLP\_682

ATCTGGAAACACTTGTCTTACAAAATAATGATCAGCTAAGTGGTTATTTTCCAAAGACGAAATGGAACAG  
CAGTGCATCTCTCGTAGAGTTAGATCTCAGTGGCGTGAATTTTTCTTGTA

>M6-PGSC0003DMG401004726M6LRR-RLP\_744

TGGAACAGCAGTGCATCTCTCGTAGAGTTAGATCTCAGTGGCGTGAATTTTTCTTGTAATTTGCCTGAGT  
CTATCGGTTATCTAACTTCACTGCATTCTTTGTCTCTTAAAAATTGCAAC

>M6-PGSC0003DMG401004726M6LRR-RLP\_806

GCCTGAGTCTATCGGTTATCTAACTTCACTGCATTCTTTGTCTCTTAAAAATTGCAACCTTCGAGGGCCTA  
TTCCTGAATCTCTTTCGAATCTCACACACATATTGGATTTGGACCTTTC

>M6-PGSC0003DMG401004726M6LRR-RLP\_930

AACTCCCTAAATGGAACAATACCATCAGGGATGTTCTCTTCCGTCACTAAGTCGTTTAGTCTTGAGTAA  
TAACCACCTTTATGGTCAGTTTGAGGATTTCAATTCCAATTCAGTAATC

>M6-PGSC0003DMG401004726M6LRR-RLP\_992

CTTGAGTAATAACCACCTTTATGGTCAGTTTGAGGATTTCAATTCCAATTCAGTAATCTGGATTGATTTAA  
GCAATAATCAGCTGCAAGGTCATCTTCCCAAGTCGATTCAAACCTTGT

>M6-PGSC0003DMG401004946M6G-LecRK\_0

ATGGGATTTTTTTGCCCGGCTAGTTTCACGAATAATTGGTATATTGGAATATGGTATAAGCACGATGTAC  
CTGATAAGTCTGTAGTATGGGTTGCCAATAGAGAAAATCCATTCAACAAC

>M6-PGSC0003DMG401004946M6G-LecRK\_1116

ATAAGGGTTGCTACCTCAGAGTTAGGTAACATTTGTGAATTTGATCAAAGTTGGAGTATTAGCTGAATG  
ATTTAACTTCCCAATTCTCAGATTTAGTTGTATTCTACTTAGATATCTGT

>M6-PGSC0003DMG401004946M6G-LecRK\_1178

CTGAATGATTTAAACTTCCCAATTCTCAGATTTAGTTGTATTCTACTTAGATATCTGTTAAAAGTTCACACA  
GTATATGTTCACTCTTCCATGTCTATTTAGTTTATTTACCCCTCCAT

>M6-PGSC0003DMG401004946M6G-LecRK\_124

CAGGTGTTATGTTGAAAATCATCGATACAGGACAACCTTGCTCTTCTCACTGCTGCTAATAAAATCGTGTG  
GTCTACTAATTCATCGAGGCCTTTGGCTGTGAAGAATACAGTTGCACAGT

>M6-PGSC0003DMG401004946M6G-LecRK\_1240

AGTTCACACAGTATATGTTCACTCTTCCATGTCTATTTAGTTTATTTACCCCTCCATGTTTTGTTCAAGCT  
CGAAGAAAACAAAACACTACTCGTGTTGAGTCTGTTACTGTTGATTGGAG

>M6-PGSC0003DMG401004946M6G-LecRK\_1302

TGTTCAAGGCTCGAAGAAAACAAAACACTACTCGTGTTGAGTCTGTTACTGTTGATTGGAGTACTGTGACTG  
GCCTGACCATAGGGCTGTATATTTGGAAAAAGAAGAAGAAGAGGAAGATG

>M6-PGSC0003DMG401004946M6G-LecRK\_1426

TGAAAGATGACCTAGACCTCCCACTGTTTACCTTATCAACTCTAAAGCATCCTCTAATTTCTCAATC  
GAGAACAAGATTGGAGAAGGTGGATTTGGATCTGTTTACAAGGTAACAT

>M6-PGSC0003DMG401004946M6G-LecRK\_1488

TTCTCAATCGAGAACAAGATTGGAGAAGGTGGATTTGGATCTGTTTACAAGGTAACATCTTAAGTTTATG  
AATCATTCTTTCAGTAAATAATATCTACTATTATTGACAGTAAACAGATG

>M6-PGSC0003DMG401004946M6G-LecRK\_1550

AGTTTATGAATCATTCTTTCAGTAAATAATATCTACTATTATTGACAGTAAACAGATGACACTTACTGAAT  
AACTAAGCCAGATATATGTTGATATTATAGGGAATCCTGGAAGGTGGAC

>M6-PGSC0003DMG401004946M6G-LecRK\_1612

TTACTGAATAACTAAGCCAGATATATGTTGATATTATAGGGAATCCTGGAAGGTGGACACGAAGTAGCT  
ATAAAGAGGCTATCCAAGTCTTCTCGCAAGGAGTTAACGAGTTCAAGAAT

>M6-PGSC0003DMG401004946M6G-LecRK\_1674

AGTAGCTATAAAGAGGCTATCCAAGTCTTCTCGCAAGGAGTTAACGAGTTCAAGAATGAAGTTATTTG  
CATTGCCAAACTTCAGCATCGAAATCTTGTGAAGCTTATAGGTTGCTGCAT

>M6-PGSC0003DMG401004946M6G-LecRK\_1798

GGAGGAGAAAAAATGTTGGTCTATGAATACATGTGCAACAGAAGTCTAGATCTCTTCATATTTGGTCTG  
GTTACTCTCTTAACTCGAATAACCTCTATTAGTACAAATAGTAAAGTTG



>M6-PGSC0003DMG401004946M6G-LecRK\_186

ATCGTGTGGTCTACTAATTCATCGAGGCCTTTGGCTGTGAAGAATACAGTTGCACAGTTGTTGAACTCGG  
GGAATCTTGTGCATAAGAGATGCAAATGATACCAAGCCTGAGAAGTTCCTG

>M6-PGSC0003DMG401004946M6G-LecRK\_1860

TGGTCTGGTTACTCTCTCTTAACTCGAATAACCTCTATTAGTACAAATAGTAAAGTTGATAGTTAATCAC  
ATTATCAGTGTTCTAACAGAGGACCTGTTAACAGATGAAAAGAGGAGCT

>M6-PGSC0003DMG401004946M6G-LecRK\_1922

TTAATCACATTATCAGTGTTCTAACAGAGGACCTGTTAACAGATGAAAAGAGGAGCTTGTTACTCAACT  
GGCCTAAGCGCTTCGACATCATCAATGGAATTGGTAGAGGACTTCTGTAT

>M6-PGSC0003DMG401004946M6G-LecRK\_1984

ACTCAACTGGCCTAAGCGCTTCGACATCATCAATGGAATTGGTAGAGGACTTCTGTATCTCCATCAAGAT  
TCTCGGCTAAGAATTATCCACAGAGACCTCAAAGCTAGTAACATTTTGCT

>M6-PGSC0003DMG401004946M6G-LecRK\_2170

TGGTGCTAATACACACCATGTGGTTGGGACACAGTAAGAAATTTAATACTACTCACTTCTTAGCATTAT  
ATTATGTATAATATCCTTTATTTTACATTACTTTCTGTTTGCAGTGGTTA

>M6-PGSC0003DMG401004946M6G-LecRK\_2232

GCATTTATATTATGTATAATATCCTTTATTTTACATTACTTTCTGTTTGCAGTGGTTACATGTCCCCAGAGT  
ATGTAGTCCATGGTGTTTTTTTCAGTAAAATCAGATGTATTTAGCTTTG

>M6-PGSC0003DMG401004946M6G-LecRK\_2294

TCCCCAGAGTATGTAGTCCATGGTGTTTTTTTCAGTAAAATCAGATGTATTTAGCTTTGGCGTATTAGTGCT  
AGAGATAATCAGTGGTTCGAAGAAACAGAGGATTTGCCCGTGAAAGTCAC

>M6-PGSC0003DMG401004946M6G-LecRK\_2356

ATTAGTGCTAGAGATAATCAGTGGTTCGAAGAAACAGAGGATTTGCCCGTGAAAGTCACAGTATCAACCT  
ACTCGGACATGTAAGTCTTGTTTGTAAATTAAGACGAGTTTAAATTTTGTG

>M6-PGSC0003DMG401004946M6G-LecRK\_2418

TCAACCTACTCGGACATGTAAGTCTTGTTTGTAAATTAAGACGAGTTTAAATTTTGTGCACTATATGGTAG  
CTACAGATATTTCTCTCTAATAATTAATTGATAACACCTCGTACAAATG

>M6-PGSC0003DMG401004946M6G-LecRK\_248

GAACTCGGGGAATCTTGTGCATAAGAGATGCAAATGATACCAAGCCTGAGAAGTTCCTGTGGCAGAGTTT

TGATTATCCTACTGATACACTCTTACCAGGCATGAAGATGGGTAAGAACTT

>M6-PGSC0003DMG401004946M6G-LecRK\_2480

ATATGGTAGCTACAGATATTTCTCTCTAATAATTAATTGATAACACCTCGTACAAATGATAGTTAAACTGC

ATTGAACTTAAATCCATCAGGCACATCAACCGCTGCATGTTTCTTGATT

>M6-PGSC0003DMG401004946M6G-LecRK\_2542

TTAAACTGCATTGAACTTAAATCCATCAGGCACATCAACCGCTGCATGTTTCTTGATTATGTAAGTATTG

GTTATTGATAGGTATGGAACTTTATAAAGAAGGTAGACCATTAGAGCT

>M6-PGSC0003DMG401004946M6G-LecRK\_2604

ACTGATTGTGTTATTGATAGGTATGGAACTTTATAAAGAAGGTAGACCATTAGAGCTAATTGATGGCC

ATCTAATGGATTTCGCGTTATATTTCTGAATTGCTACGCTTAATCCATGTTCG

>M6-PGSC0003DMG401004946M6G-LecRK\_2666

GATGGCCATCTAATGGATTTCGCGTTATATTTCTGAATTGCTACGCTTAATCCATGTTCGCTCTGTTATGTGT

ACAACAATGTCCAGAAGACAGGCCAGATATGCCTACAGTGATCTTGATG

>M6-PGSC0003DMG401004946M6G-LecRK\_2728

GTTATGTGTACAACAATGTCCAGAAGACAGGCCAGATATGCCTACAGTGATCTTGATGTTGACTAATGAT

GCTATTTTGCCTCAAGCTAAGGAACCTGGTTTCTTACAGAAAGCAAAGT

>M6-PGSC0003DMG401004946M6G-LecRK\_2790

CTAATGATGCTATTTTGCCTCAAGCTAAGGAACCTGGTTTCTTACAGAAAGCAAAGTCGCGTCTGAATG

TTCTACAAGCATGTGTTCAACAAACGAAATTACCGTCACACAGTTAGAAC

>M6-PGSC0003DMG401004946M6G-LecRK\_2914

GTAAATTACATTACATGTTCAATCAGATCGTTCAATGTCAACAAGCTTGAATTACAGTGTTTTGTGCTGTA

AAGCCATAATTTCTATGGTATCTGTTATTAGTAAATATGGGTGTGTTG

>M6-PGSC0003DMG401004946M6G-LecRK\_2976

TGTGCTGTAAAGCCATAATTTCTATGGTATCTGTTATTAGTAAATATGGGTGTGTTGTAGTTTTTATTAA

TTCTAATGTATTTTAAAGTATTCGTACAAAGTACCTATTCAACAGTACA

>M6-PGSC0003DMG401004946M6G-LecRK\_3038

TTTTATTAATTCTAATGTATTTTAAAGTATTCGTACAAAGTACCTATTCAACAGTACATCAAATAATCGA

AAGATCCATATAAAATGAATCAACACAATGAGAGTTCACAATAACAACA

>M6-PGSC0003DMG401004946M6G-LecRK\_310

AGAGTTTTGATTATCCTACTGATACACTCTTACCAGGCATGAAGATGGGTAAGAAGCTTTGTAAGTGGACA  
AGAATTTTACCTGTCCTCATGGAAGAACGAATATGATCCAGCTCCAGGGG

>M6-PGSC0003DMG401004946M6G-LecRK\_3100

AATAATCGAAAGATCCATATAAAATGAATCAACACAATGAGAGTTCACAATAACAACAGATGCCATTGTT  
GATGGCTTTTAGAAGCTCCAGTCCCATAGTACTCCATTAAGTACAGAGTA

>M6-PGSC0003DMG401004946M6G-LecRK\_3162

CCATTGTTGATGGCTTTTAGAAGCTCCAGTCCCATAGTACTCCATTAAGTACAGAGTATCAGTTTTGTTGT  
TCCCATTCTCCGAGTTTAGGATATTCATTAAGTGTGGGGTTCCAGTTAT

>M6-PGSC0003DMG401004946M6G-LecRK\_3224

TTTTGTTGTTCCATTCTCCGAGTTTAGGATATTCATTAAGTGTGGGGTTCCAGTTATACGATCAAACATC  
AGGCAGTCGCTACGCTAACAAATTTGAATGATAGCAGAATGGTTGATTAA

>M6-PGSC0003DMG401004946M6G-LecRK\_3286

TCAAACATCAGGCAGTCGCTACGCTAACAAATTTGAATGATAGCAGAATGGTTGATTAAAGTCATGAAATT  
GCCAAGACTACAGTGAATGGAAGAATTGCAATTCTAATTTCTATTTTCT

>M6-PGSC0003DMG401004946M6G-LecRK\_372

ACTGGACAAGAATTTTACCTGTCCTCATGGAAGAACGAATATGATCCAGCTCCAGGGGAATATACGTAT  
CATTGTGATCCGACTGGATATCCTCAGGATGTCATGAGGAAAGGTAAAGTT

>M6-PGSC0003DMG401004946M6G-LecRK\_496

TGTTCACTACTGGACCATGGAATGGACTCCGCTGGAGTGGTGTACCAGGACTGACAAAAATACTATTT  
ATACATTTAACTGGATCTTGATGAAAAGAGAGCATTTTACAGCTTCGCGC

>M6-PGSC0003DMG401004946M6G-LecRK\_558

ACTATTTATACATTTAACTGGATCTTGATGAAAAGAGAGCATTTTACAGCTTCGCGCTTTTAGGTTCTGT  
TATGACCAAATTAACCATGAACAGTAATGGTGTGCTTCAGCGTTCAATG

>M6-PGSC0003DMG401004946M6G-LecRK\_62

CGATGTACCTGATAAGTCTGTAGTATGGGTTGCCAATAGAGAAAATCCATTCAACAACACATCAGGTGTT  
ATGTTGAAAATCATCGATACAGGACAACCTTGCTCTTCTCACTGCTGCTAA

>M6-PGSC0003DMG401004946M6G-LecRK\_620

AGGTTCTGTTATGACCAAATTAACCATGAACAGTAATGGTGTGCTTCAGCGTTCAATGTGGGCTGAGAA  
TAGACAGGAATGGCATGTTTACATTTCTTACCGGAAGATACTTGTGACAA

>M6-PGSC0003DMG401004946M6G-LecRK\_682

CTGAGAATAGACAGGAATGGCATGTTTACATTTCTTACCAGGAAGATACTTGTGACAATTATGGAACAT  
GTGGTTCATATGGTAGTTGCAACAACATACTCACTCCTGTGTGTAATTGCT

>M6-PGSC0003DMG401004946M6G-LecRK\_744

GGAACATGTGGTTCATATGGTAGTTGCAACAACATACTCACTCCTGTGTGTAATTGCTTAGACAAGTTTG  
TGCCTAAAGATCCAAGAAATTGGGCAATGACAAATTGGTCCAGCGGGTGT

>M6-PGSC0003DMG401004946M6G-LecRK\_806

CAAGTTTGTGCCTAAAGATCCAAGAAATTGGGCAATGACAAATTGGTCCAGCGGGTGTATTAGAAGGA  
AACCGCTTAATTGCCAGAATGGAGATGGATTTCTCAAGTACTCTGGTATAAA

>M6-PGSC0003DMG401004946M6G-LecRK\_868

GAAGGAAACCGCTTAATTGCCAGAATGGAGATGGATTTCTCAAGTACTCTGGTATAAAGCTACCAGATA  
CACAGTATTCATGGTTTGATAGGAGTATGACTCCACGAGTGCAAGCAAG

>M6-PGSC0003DMG401004946M6G-LecRK\_930

CCAGATACACAGTATTCATGGTTTGATAGGAGTATGACTCCACGAGTGCAAGCAAGCTTGCTTGAGG  
AATTGCTCGTGTATGGCTTACTCAAATCTTGATATACACAATGGTGGGAGT

>M6-PGSC0003DMG401004946M6G-LecRK\_992

CTTGAGGAATTGCTCGTGTATGGCTTACTCAAATCTTGATATACACAATGGTGGGAGTGGCTGTTTGCTT  
TGGTGTGGCGACTTAATTGACATTCTAGAATTACCTGGAGGACAGGACAT

>M6-PGSC0003DMG401005047M6G-LecRK\_0

TTCACGTAAATTCAATAGCTTTTATTTAGATCATCGTTTTCTTTCGGGTGAAGCTATAATAAGTATGTAGG  
CAGGTTTGATAGAACTTAGTAGCTTTGATCTATACTCTGTATTTTTGCT

>M6-PGSC0003DMG401005047M6G-LecRK\_1037

TATTAAGGTTGTATAAAAATAATATCACAATTACGGTGTAAATGGCTAGCCCCAAAATCAAACCTTCAAT  
CACACGGAATAATAATCTCACATTCATCTCGGGATTGTTATCTATTA

>M6-PGSC0003DMG401005047M6G-LecRK\_1098

ACTTTCAATCACACGGAATAATAATCTCACATTCATCTCGGGATTGTTATCTATTATTCCAACATCAA  
ACGACTATAGTAATTAAGTTATGTAATGTGCACTAATGTTTTTGG

>M6-PGSC0003DMG401005047M6G-LecRK\_1159

CAAACATCAAACGACTATAGTAATTAAGTTATGTAATGTGCACTAATGTTTTTGGATTCATGACAAA

AGAAACTTGATCTTCCATTCATTTGTATTTTTTCGAGCAATTAACACCTA

>M6-PGSC0003DMG401005047M6G-LecRK\_122

AAAATACTCTAATCATGTATAAATTATTTATCAAGAACTCAGCAAGCTAATTTTTCTAGAGTTTATAATTT

ATAAACTTAAAATTTTAGCTCAGACTCTTATTATAAATATTCGTAAAC

>M6-PGSC0003DMG401005047M6G-LecRK\_1220

TCATGACAAAAGAACTTGATCTTCCATTCATTTGTATTTTTTCGAGCAATTAACACCTAGTTCAAGTTACT

CAATCGTGATAAAAAATAATTTTGTGACTTTACTGTTAAAAAAAATAC

>M6-PGSC0003DMG401005047M6G-LecRK\_1281

TCAAGTTACTCAATCGTGATAAAAAATAATTTTGTGACTTTACTGTTAAAAAAAATACAACCTTTGATGG

AAGACTCATTTTTATGTGTTAATTTTCAGCAAAAAGTGGAAATGTTGGA

>M6-PGSC0003DMG401005047M6G-LecRK\_1342

CCTTTGATGGAAGACTCATTTTTATGTGTTAATTTTCAGCAAAAAGTGGAAATGTTGGATCTGAAGATGG

TTCTGGCAAAACAAAAGAATTGCTATGGCTACTGGAATTACAGCTGGTG

>M6-PGSC0003DMG401005047M6G-LecRK\_1403

TGAAGATGGTTCTGGCAAAACAAAAGAATTGCTATGGCTACTGGAATTACAGCTGGTGTTGTTCTTGT

CTAATTGGAGTTGTAAGCATTTGCTTTTTATCAAAGAGAAAAAATTATT

>M6-PGSC0003DMG401005047M6G-LecRK\_1464

GTTCTTGTCTAATTGGAGTTGTAAGCATTTGCTTTTTATCAAAGAGAAAAAATTATTGGAAGATCCAAT

AAGAAAGAAAACAGAACAAAGAGGTATGTTATAATATAAGCCTATAATT

>M6-PGSC0003DMG401005047M6G-LecRK\_1525

AAGATCCAATAAGAAAGAAAACAGAACAAAGAGGTATGTTATAATATAAGCCTATAATTTTCGATTTAG

TATGGTATTCGATATTTACTTTAAGGCATAATACATAAAGAATGCACATCT

>M6-PGSC0003DMG401005047M6G-LecRK\_1586

GATTTAGTATGGTATTCGATATTTACTTTAAGGCATAATACATAAAGAATGCACATCTATAGACACCTC

GACTCGTCTTCACTGTGTCTCATGGACACCTAATACGTTATTGTGACACA

>M6-PGSC0003DMG401005047M6G-LecRK\_183

GTTTATAATTTATAAACTTAAAATTTTAGCTCAGACTCTTATTATAAATATTCGTAACTTCAAATCTTAAA

TCCGGCTCATTATAAGTTAATGCTTACCTAAAAAAAAGAAGGTGAGAA

>M6-PGSC0003DMG401005047M6G-LecRK\_1891

TTACACTATTTTTGAACCAGGCTCTATTGAAAGAAGTCAAGATCTTCTAGTGAACACAGCCATTATTCCAA  
GTAAGAGAGAAATTTCTGGCGAAACTGTCGCGGACGAGTTTGAATTGCC

>M6-PGSC0003DMG401005047M6G-LecRK\_1952

ATTATTCCAAGTAAGAGAGAAATTTCTGGCGAAACTGTCGCGGACGAGTTTGAATTGCCATTATTTGATC  
TCAGTACCTTAGCTGTGGCTACTGAAGATTTTTCTGATGCAAACAAGCTA

>M6-PGSC0003DMG401005047M6G-LecRK\_2013

TATTTGATCTCAGTACCTTAGCTGTGGCTACTGAAGATTTTTCTGATGCAAACAAGCTAGGCCAGGGCGG  
TTTTGGTTGCGTTTACAAGGTAAAGATCATCTAGACGTTAAAAAAGCAAA

>M6-PGSC0003DMG401005047M6G-LecRK\_2074

CCAGGGCGGTTTTGGTTGCGTTTACAAGGTAAAGATCATCTAGACGTTAAAAAAGCAAAAGCTTATGTT  
GCTCGGATTGGTCAAAAATATCATCATATCCATGTCAGATCCTCCAAAAAC

>M6-PGSC0003DMG401005047M6G-LecRK\_2135

CTTATGTTGCTCGGATTGGTCAAAAATATCATCATATCCATGTCAGATCCTCCAAAAACACATTACTTTGG  
AAGATGTAACACGTGCAGTGACATTTTTCGAGGATCATAGCAATACATC

>M6-PGSC0003DMG401005047M6G-LecRK\_2196

ATTACTTTGGAAGATGTAACACGTGCAGTGACATTTTTCGAGGATCATAGCAATACATCAATTAAGTAGT  
ACTTTTTTGCATTTACAAGTTAAAGCTGATCATATATCAGTAAAAAGAAC

>M6-PGSC0003DMG401005047M6G-LecRK\_2257

TTAAGTAGTACTTTTTTGCATTTACAAGTTAAAGCTGATCATATATCAGTAAAAAGAACATATGCTGCTCA  
GACAGGACAAAAATGTCGTTGCATGCACTCGTGTGTCAGATCCTCCAAAAA

>M6-PGSC0003DMG401005047M6G-LecRK\_2318

ATGCTGCTCAGACAGGACAAAAATGTCGTTGCATGCACTCGTGTGTCAGATCCTCCAAAAATGCATCACTTT  
GTAGGATTGATCTAACACGGGTGCAGTGACATTTTTCGAGGATCTGAGCA

>M6-PGSC0003DMG401005047M6G-LecRK\_2379

CATCACTTTGTAGGATTGATCTAACACGGGTGCAGTGACATTTTTCGAGGATCTGAGCAATAAAAACTAA  
TCCTTTTTTTTTGCATTTACAATGTAAAGCTCAACTAGATGTGAAAAAAAC

>M6-PGSC0003DMG401005047M6G-LecRK\_244

CAAATCTAAATCCGGCTCATTATAAGTTAATGCTTACCTAAAAAAAAGAAGGTGAGAAAAGGGGTTTA  
AAATTAACATGGTCATAAAGTGAACAAAGCGTGTGTTACATTTTTTTAT

>M6-PGSC0003DMG401005047M6G-LecRK\_2440

AAAACTAATCCTTTTTTTTGCATTACAATGTAAAGCTCAACTAGATGTGAAAAAACTTTTGTGTTTCG  
GATTCTACAAAATGTCATTGCACCCTTGTCTGATCTGACACTGGTGTT

>M6-PGSC0003DMG401005047M6G-LecRK\_2501

TTGTTGTTTCGGATTCTACAAAATGTCATTGCACCCTTGTCTGATCTGACACTGGTGTTACAACATTTTCA  
AGGATATGAGCAACATATGAAAACTAGCCCTTTTTGCCTTTACAAGGT

>M6-PGSC0003DMG401005047M6G-LecRK\_2562

AACATTTTCAAGGATATGAGCAACATATGAAAACTAGCCCTTTTTGCCTTTACAAGGTAGACGTGAAAA  
CAACCTATGTTGTTTCGTATCCTCCAAAATATCATTGCACCCTTGTTCGGA

>M6-PGSC0003DMG401005047M6G-LecRK\_2623

ACGTGAAAACAACCTATGTTGTTTCGTATCCTCCAAAATATCATTGCACCCTTGTTCGGATCTCCAAGAAA  
ATGCTTCATTTTTGGAGGATCTGACACGAGTGCAGTGACATTTTTCAAGA

>M6-PGSC0003DMG401005047M6G-LecRK\_2684

TCCAAGAAAATGCTTCATTTTTGGAGGATCTGACACGAGTGCAGTGACATTTTTCAAGATTCGAACAACA  
TTGGGAAAGACGGACTCTGTTTTATTGGAAAATGTGAAGACATTCAACAA

>M6-PGSC0003DMG401005047M6G-LecRK\_2745

CGAACAACATTGGGAAAGACGGACTCTGTTTTATTGGAAAATGTGAAGACATTCAACAAAAGAACATCT  
TTTTTTTTTTATTATCAGGGAATAATAGATGAAGGTCAAGAAATAGCAGTG

>M6-PGSC0003DMG401005047M6G-LecRK\_2806

GAACATCTTTTTTTTTTTATTATCAGGGAATAATAGATGAAGGTCAAGAAATAGCAGTGAAAAGGCTGTC  
AAAGAATTCAGGCCAAGGAGTAGAGGAATTCAAGAATGAGCTAAGATTGA

>M6-PGSC0003DMG401005047M6G-LecRK\_2867

AAGGCTGTCAAAGAATTCAGGCCAAGGAGTAGAGGAATTCAAGAATGAGCTAAGATTGATTGCAAGAC  
TTCAACACAGAAACCTCGTTCGCCTTCTTGATGTTGCGTTGAGATGGAAGA

>M6-PGSC0003DMG401005047M6G-LecRK\_2928

GCAAGACTTCAACACAGAAACCTCGTTCGCCTTCTTGATGTTGCGTTGAGATGGAAGAGAAAATGTTG  
ATATACGAATACATGGAAAATAAAAGCTTGGATTCAATGTTATTAGTAAG

>M6-PGSC0003DMG401005047M6G-LecRK\_2989

AAATGTTGATATACGAATACATGGAAAATAAAAGCTTGGATTCAATGTTATTAGTAAGTCGTTTTCCGT

TCAATATATTCTTATGATCAGTAACTATGTTTATGTGTGCTATTGGACTT

>M6-PGSC0003DMG401005047M6G-LecRK\_305

GGGGTTTAAAATTTAAAACATGGTCATAAAGTGAACAAAGCGTGTGTTACATTTTTTTATTTTGTATTTTGT  
ATTGCTAACGCGAATTGTTGCGTGACATAATGAAAAATACATTAATTTT

>M6-PGSC0003DMG401005047M6G-LecRK\_3050

GTTTTCCGTTCAATATATTCTTATGATCAGTAACTATGTTTATGTGTGCTATTGGACTTCAAATTAACAAA  
TATACGCGTCTCAGATAAGCAGAAAAGCTCATTGCTAGATTGGCAAAG

>M6-PGSC0003DMG401005047M6G-LecRK\_3111

AAATTAACAAATATACGCGTCTCAGATAAGCAGAAAAGCTCATTGCTAGATTGGCAAAGACGATTACAGC  
ATTATCTGTGGGATTGCTCGGGGGCTTCTGTATCTTCATCAAGATTCAAGA

>M6-PGSC0003DMG401005047M6G-LecRK\_3172

GATTCAGCATTATCTGTGGGATTGCTCGGGGGCTTCTGTATCTTCATCAAGATTCAAGATTTCCGATTAT  
CCACCGAGACCTCAAAGCAAGCAACATTCTCCTTGACAAGGAAATGATCC

>M6-PGSC0003DMG401005047M6G-LecRK\_3233

TCGGATTATCCACCGAGACCTCAAAGCAAGCAACATTCTCCTTGACAAGGAAATGATCCCGAAAATATCA  
GATTTTGGCATGGCACGGATTTTGGAGGCGATGAGACCGAAGGAAATAC

>M6-PGSC0003DMG401005047M6G-LecRK\_3294

AAAATATCAGATTTTGGCATGGCACGGATTTTGGAGGCGATGAGACCGAAGGAAATACAAAGAGAGT  
TGTTGGAACCTAGTAAGTAGAATCACATTATTCCTTATAAATCATTCAATAA

>M6-PGSC0003DMG401005047M6G-LecRK\_3355

AGAGAGTTGTTGGAACCTAGTAAGTAGAATCACATTATTCCTTATAAATCATTCAAAAAAACACTTTGA  
AAAGTGTGGTAAATCGACTTTTTTCTCTCTTAATGTAGCGGTTACATG

>M6-PGSC0003DMG401005047M6G-LecRK\_3416

ACACTTTGAAAAGTGTGGTAAATCGACTTTTTTCTCTCTTAATGTAGCGGTTACATGTCTCCTGAATAC  
GCGATGGATGGTCTATTCTCTGTTAAATCAGACGTTTTCAGCTTCGGAG

>M6-PGSC0003DMG401005047M6G-LecRK\_3477

TCCTGAATACGCGATGGATGGTCTATTCTCTGTTAAATCAGACGTTTTCAGCTTCGGAGTTTTAGTGTTG  
GAAATAGTAACAGGGAAGAAGAACAGAGGATTTTATTTTCAGAACAATGA

>M6-PGSC0003DMG401005047M6G-LecRK\_3538



TTAGTGTTGGAAATAGTAACAGGGAAGAAGAACAGAGGATTTTATTTTCAGAACAATGAAAGAACCTT  
CTTGGCCATGTAAGTACACCAAATTATCACAACTTAGCCATCATTTCTAA

>M6-PGSC0003DMG401005047M6G-LecRK\_3599

GAAACCTTCTTGGCCATGTAAGTACACCAAATTATCACAACTTAGCCATCATTTCTAACAAAGTCAGAA  
CAGAGAATTTTGAGTTTATGCGTTCTGAATTCTTAAAAAATATAGCTAA

>M6-PGSC0003DMG401005047M6G-LecRK\_366

TGTATTTTGTATTGCTAACGCGAATTGTTGCGTGACATAATGAAAAATACATTAATTTTTTGCTGCTTTTA  
TTGTTATATTTTCATGAGGATATCGTATCTTTTTTAATTTTAAAATTT

>M6-PGSC0003DMG401005047M6G-LecRK\_3660

AAGTCAGAACAGAGAATTTTGAGTTTATGCGTTCTGAATTCTTAAAAAATATAGCTAATTAGTAGGTTCC  
TTGATAAATTATTTATGCATATTAAGTAGATTTTCATAACATAAATACAAG

>M6-PGSC0003DMG401005047M6G-LecRK\_3721

AGTAGTTCTTGATAAATTATTTATGCATATTAAGTAGATTTTCATAACATAAATACAAGGTTTTTACTAAA  
GTTGCTACTGAGTTCTGTGCGAACCTGTAACCTTCTCTCTAGTTCCGCC

>M6-PGSC0003DMG401005047M6G-LecRK\_3782

TTTTACTAAAGTTGCTACTGAGTTCTGTGCGAACCTGTAACCTTCTCTCTAGTTCCGCCCTAACTATGTAAT  
CACTCTGCAGGCGTGGAACTATGGAGAGAAGGAGGAGCCTCAGAACT

>M6-PGSC0003DMG401005047M6G-LecRK\_3843

AACTATGTAATCACTCTGCAGGCGTGGAACTATGGAGAGAAGGAGGAGCCTCAGAACTACTCGATTCA  
TCAGTTGGTGAATCATTTTCTCCGTGTGAAGTAATCAGATGCATACAGGTC

>M6-PGSC0003DMG401005047M6G-LecRK\_3904

TCGATTCATCAGTTGGTGAATCATTTTCTCCGTGTGAAGTAATCAGATGCATACAGGTCGGGTTATTGTG  
TGTTTCAGGAACAAGCAGAAGATAGACCGAACATGGCAACCGTTGTATTGA

>M6-PGSC0003DMG401005047M6G-LecRK\_3965

GTTATTGTGTGTTTCAGGAACAAGCAGAAGATAGACCGAACATGGCAACCGTTGTATTGATGTTAGGAAG  
TGAAACCGCAACAATGCCTCAGCCTAACACCCTGGTTTTTGCCTCGGAAG

>M6-PGSC0003DMG401005047M6G-LecRK\_4026

TTAGGAAGTGAAACCGCAACAATGCCTCAGCCTAACACCCTGGTTTTTGCCTCGGAAGAAGACCTGTT  
GATGAACACTCGGAACTATTTACGAAGAACTTTCACTGTGAATCAAGTA

>M6-PGSC0003DMG401005047M6G-LecRK\_4087

GACCTGTTGATGAACACTCGGAACTATTTACGAAGAACTTTCCTACTGTGAATCAAGTAACGATTACCAT  
GCTTGATCCCCGGTAGAGTTAAACGTTTCAGACAGATCATAGGCTAGCCCCG

>M6-PGSC0003DMG401005047M6G-LecRK\_4148

GATTACCATGCTTGATCCCCGGTAGAGTTAAACGTTTCAGACAGATCATAGGCTAGCCCCGCTTCAACGTGA  
CAGAATAGAAATCAAGGCAAATTCCGCTGATGGGAGTGTGAACATAGAGA

>M6-PGSC0003DMG401005047M6G-LecRK\_4209

TCAACGTGACAGAATAGAAATCAAGGCAAATTCCGCTGATGGGAGTGTGAACATAGAGATTCCACGAC  
GAATGAATGCAATACATGGAGGATGGGTCCCTGCTGGCAAAAATGTATAGAT

>M6-PGSC0003DMG401005047M6G-LecRK\_427

GCTGCTTTTATTGTTATATTTTCATGAGGATATCGTATCTTTTTTAATTTTAAAATTTTGGACAATAAATGT  
AAAACTAAAATTAGTGGACAATTGGTCCTAAAAAGTTAGGTGTAAG

>M6-PGSC0003DMG401005047M6G-LecRK\_4270

CCACGACGAATGAATGCAATACATGGAGGATGGGTCCCTGCTGGCAAAAATGTATAGATAGTACATTAG  
TGTTTTTTCTCCACCCGACCATATCAGGAGGATCAATAGTGTTTTAACTTA

>M6-PGSC0003DMG401005047M6G-LecRK\_4331

TACATTAGTGTTTTTTCTCCACCCGACCATATCAGGAGGATCAATAGTGTTTTAACTTACCCTCGTATAGT  
ACATTAGTACTACGAGTGGTTAACAATTTTCTCTTTGTACACTTACCTT

>M6-PGSC0003DMG401005047M6G-LecRK\_4380

TTTTAACTTACCCTCGTATAGTACATTAGTACTACGAGTGGTTAACAATTTTCTCTTTGTACACTTACCTTG  
ATTCTTTTACAAAAATAATGTTGTTTTTGGGTAGTTAATTATAGAA

>M6-PGSC0003DMG401005047M6G-LecRK\_488

GACAATAAATGTAAAACTAAAATTAGTGGACAATTGGTCCTAAAAAGTTAGGTGTAAGTTCACACAAA  
AGATTCTTTTGAATGGATGAGAAGAAATCATTTTTTGGACCCACTTTA

>M6-PGSC0003DMG401005047M6G-LecRK\_61

AGTATGTAGGCAGGTTTGATAGAACTTAGTAGCTTTGATCTATACTCTGTATTTTTGCTTAAAAATACTCT  
AATCATGTATAAATTATTTATCAAGAACTCAGCAAGCTAATTTTTCTA

>M6-PGSC0003DMG401005047M6G-LecRK\_732

GAGTTCTACTTTTAAATTTTTCATGAGGTTTACTTTTCATATTGTAATATAAAAAATAAATACTTTTTGACAA

GGACAAAGTCTTTGGGTCATTTGAATGGTGTACAAGTTACATTTAAAT

>M6-PGSC0003DMG401005047M6G-LecRK\_793

CTTTTTGACAAGGACAAAGTCTTTGGGTCATTTGAATGGTGTACAAGTTACATTTAAATTATAATATTAAA  
AAATAAATAATATTATTTAATATATATGTATTTGACTTTACATTGGATA

>M6-PGSC0003DMG401005047M6G-LecRK\_854

TAATATTAATAAATAAATAATATTATTTAATATATATGTATTTGACTTTACATTGGATAAATTAGTATTAAC  
TATTATATTTTCTATTTTAACCTTAGATTTAATCTAAAGGACCTTGGA

>M6-PGSC0003DMG401005047M6G-LecRK\_915

TTAGTATTAAC TATTATATTTTCTATTTTAACCTTAGATTTAATCTAAAGGACCTTGGAAGAAGAGTCTCA  
AGAAAGGCCATTTTGGTCAATTTTTGTATTTTATCTAGAGATTATTATC

>M6-PGSC0003DMG401005047M6G-LecRK\_976

AAGAGTCTCAAGAAAGGCCATTTTGGTCAATTTTTGTATTTTATCTAGAGATTATTATCCGTATTAAGGT  
TGTATAAAAATAATATCACAATTACGGTGTAAATGGCTAGCCCCAAAATC

>M6-PGSC0003DMG401005729M6RLKWAX-EGF\_1037

TGAAATTTTCTATAGTAAAATAATCACAGAAAAGTCTTATAAAACATGAGCAGCCATTTCTTTTTTCGTTT  
ATAACA ACTCTCAAGTTTGT CATCTTTTGT TAGTCAA AACTGGATTAAC

>M6-PGSC0003DMG401005729M6RLKWAX-EGF\_1098

TTTTTCGTTTATAACA ACTCTCAAGTTTGT CATCTTTTGT TAGTCAA AACTGGATTAAC TTTGACACTTGAA  
CAACTCAATTGAATCATATATTTTGCCAAACTCTTCTAATACATAGGT

>M6-PGSC0003DMG401005729M6RLKWAX-EGF\_1159

TGACACTTGAACA ACTCAATTGAATCATATATTTTGCCAAACTCTTCTAATACATAGGTTCTCCAACCAAC  
ATAGTCTATCATTGATGAGTTCTCACAAATGCATGCTCAA AACTTCCCT

>M6-PGSC0003DMG401005729M6RLKWAX-EGF\_122

GTATCTAGAGAAGCAACTCGGACAAGATACGTAATTATTGAAACTATCGATGCGCTATGTAATTAGCATC  
TATAGTAGTATGTTTTATAAAAGTTTCTCAATTTATCAATATTA AATTAT

>M6-PGSC0003DMG401005729M6RLKWAX-EGF\_1220

TCCAACCAACATAGTCTATCATTGATGAGTTCTCACAAATGCATGCTCAA AACTTCCCTCTTCTCTGCTCC  
ATTCCATCATCACCTTCTATGCTTCTTGATCACGTCCTCGCCATCCT

>M6-PGSC0003DMG401005729M6RLKWAX-EGF\_1281

TCCTCTGCTCCATTCCATCATCACCTTCCTATGCTTCTTGATCACGTCTCGCCATCCTATGGCCAAGAGGA  
TAAACAGTATTCCATTTGTAATAGCTCCTACACCTGTGGGAATATTCA

>M6-PGSC0003DMG401005729M6RLKWAX-EGF\_1403

ATATCAGCTTCCCTTTCTGGGGTGGCGATCGACCTCAAGAATGTGGTCTTCCACAATTCAAGCTTACATG  
TGAAGCCAATCAGGATCCCCTTATACATATCGATGGTCATAATTTTCGCG

>M6-PGSC0003DMG401005729M6RLKWAX-EGF\_1464

GCTTACATGTGAAGCCAATCAGGATCCCCTTATACATATCGATGGTCATAATTTTCGCGTACTTGACATCA  
ATGGAGACAATCAAACCATGAGAATTGCACGAAATGATCTTGAGGAAGA

>M6-PGSC0003DMG401005729M6RLKWAX-EGF\_1525

CTTGACATCAATGGAGACAATCAAACCATGAGAATTGCACGAAATGATCTTGAGGAAGACATTTGTCCT  
GATAGATTCGGTAACACAAGCTTTAATGATCCCCTATTACACTATGGTCCT

>M6-PGSC0003DMG401005729M6RLKWAX-EGF\_1586

TTTGTCTGATAGATTCGGTAACACAAGCTTTAATGATCCCCTATTACACTATGGTCCTGACTTTGGGATT  
CTCATCCTGTTCTATGCTTGTCTTTTCGATATACCTTCTGAATGGAAAA

>M6-PGSC0003DMG401005729M6RLKWAX-EGF\_1708

TTCACCTTTAGCTGCAATAACACCGGAGAGTCCAGTCATGGTTTCTATCCAGATCAGTCATTTATATCATT  
TTGGGGACCGCAGTATGGGAGTTGTGAGCGTAATGTCATAGTTCCTGTG

>M6-PGSC0003DMG401005729M6RLKWAX-EGF\_183

ATTAGCATCTATAGTAGTATGTTTTATAAAAGTTTCTCAATTTATCAATATTAATTATCTTAAGCTCAATC  
CATAAAAATATGGATAGATTGGGCGGATCCTTTTTTTTTTAGGCTTAGT

>M6-PGSC0003DMG401005729M6RLKWAX-EGF\_1830

GTTAACGGCATTAAAGCGGTTCCAAGACCAAGGAAGTACGAAAATATTGGAGCTATTGAAGCAAGGGT  
TTGATGTGGTTTACAACAAAAGCCTAGTATGCATGGCTTGTGAGAGATCAGG

>M6-PGSC0003DMG401005729M6RLKWAX-EGF\_1891

CAAGGGTTTGTATGTGGTTTACAACAAAAGCCTAGTATGCATGGCTTGTGAGAGATCAGGGGGGTTATGT  
TGGTCAGAAACAGATTTTGCAGAGCCAACCTGCCTTTGTCGGGACCGGACT

>M6-PGSC0003DMG401005729M6RLKWAX-EGF\_1952

GGTTATGTTGGTCAGAAACAGATTTTGCAGAGCCAACCTGCCTTTGTCGGGACCGGACTTATTCCTATTA  
CTGCGGTTTTGTACAGGAACAAGGTGTGTTCCATCTCTAACTTATCTTTT

>M6-PGSC0003DMG401005729M6RLKWAX-EGF\_2013

TTCCTATTACTGCGGTTTTGTACAGGAACAAGGTGTGTTCCATCTCTAACTTATCTTTTTTGCCAAAAATTA  
GTCGAACCTAACTGGTAGGTCAGAGTCTTCAACTGTCAAATAAGACTG

>M6-PGSC0003DMG401005729M6RLKWAX-EGF\_2074

GCCAAAAATTAGTCGAACCTAACTGGTAGGTCAGAGTCTTCAACTGTCAAATAAGACTGCCAGAGAAGA  
GAAAAAACCTATAGGCTGCCATGTTTTGGTGAAACTCCAATTATTTTCA

>M6-PGSC0003DMG401005729M6RLKWAX-EGF\_2135

AGAGAAGAGAAAAAACCTATAGGCTGCCATGTTTTGGTGAAACTCCAATTATTTTCACACCTTCCTAT  
TTTATTCCATCCCTTGTAACATTTGTTGGGGCATTCTTTATCATGTTTAT

>M6-PGSC0003DMG401005729M6RLKWAX-EGF\_2196

CCTTCCTATTTTATTCCATCCCTTGTAACATTTGTTGGGGCATTCTTTATCATGTTTATGAAGCCCAGATAA  
TAAATATACTTACAGTTTGCCTAGCACAAGCCCTTTTTGATGATGCC

>M6-PGSC0003DMG401005729M6RLKWAX-EGF\_2257

AGCCCAGATAATAAAATATACTTACAGTTTGCCTAGCACAAGCCCTTTTTGATGATGCCTATTCTAAGAAT  
TTAGTAGTACTAGGCAGCAGCAAGTTTGTATGTGCTTCACCCAGCAAGA

>M6-PGSC0003DMG401005729M6RLKWAX-EGF\_2318

TTCTAAGAATTTAGTAGTACTAGGCAGCAGCAAGTTTGTATGTGCTTCACCCAGCAAGATAGGTATATCA  
AAATTTGTGATCAATGGAGATAACAATGCATTTTTTGAAAGATTAGTTCA

>M6-PGSC0003DMG401005729M6RLKWAX-EGF\_2379

GGTATATCAAAATTTGTGATCAATGGAGATAACAATGCATTTTTTGAAAGATTAGTTCATTAGTTTAGCA  
ACAGTTTAGCAATGGATTCTATTTTCAAGGAATGAGAATTTCTAAGGGA

>M6-PGSC0003DMG401005729M6RLKWAX-EGF\_244

TAAGCTCAATCCATAAAAATATGGATAGATTGGGCGGATCCTTTTTTTTTTAGGCTTAGTTTGACAACCCTA  
AGCTAACCCATTTTAACCTATCCAATTTAGGCACACTGGCTCATTGA

>M6-PGSC0003DMG401005729M6RLKWAX-EGF\_2440

AGTTTAGCAACAGTTTAGCAATGGATTCTATTTTCAAGGAATGAGAATTTCTAAGGGATTGGTTTTCAA  
GAATTAGCTGAGATATATGATAGAATGGACATAAAAACACTTATGATATG

>M6-PGSC0003DMG401005729M6RLKWAX-EGF\_2501

GGTTTTCAAGAATTAGCTGAGATATATGATAGAATGGACATAAAAACACTTATGATATGTGATAGAATTT

CCAGAAACCAATGATCCGAAGTGATCATCTCAAGATTCTTGAAAACCATA

>M6-PGSC0003DMG401005729M6RLKWAX-EGF\_2562

ATAGAATTTCCAGAAACCAATGATCCGAAGTGATCATCTCAAGATTCTTGAAAACCATAAATCTGTGAAA

GGGAGAAATACAATACTTCTGTACTGAAGACGAGAATTTTGCATTTGCAA

>M6-PGSC0003DMG401005729M6RLKWAX-EGF\_2623

TCTGTGAAAGGGAGAAATACAATACTTCTGTACTGAAGACGAGAATTTTGCATTTGCAAGTCTCAGTCA

GGGTATTCTTTGCTAGTCCCTATGGCGCATGTGGATGCTATGACAAAATAA

>M6-PGSC0003DMG401005729M6RLKWAX-EGF\_2684

CTCAGTCAGGGTATTCTTTGCTAGTCCCTATGGCGCATGTGGATGCTATGACAAAATAAAACAGCTTTTT

CCCCTCTGTTTCCATGATTTTACTTCTACCAACCTAAGATTTGAATACT

>M6-PGSC0003DMG401005729M6RLKWAX-EGF\_2745

CAGCTTTTTCCCACTCTGTTTCCATGATTTTACTTCTACCAACCTAAGATTTGAATACTTCCCGAATTTCTTT

ACCTTTCTAGTTCTTCTGTCTAATACGTGATTGAAATCTCTATTTT

>M6-PGSC0003DMG401005729M6RLKWAX-EGF\_2806

CCGAATTTCTTTACCTTTCTAGTTCTTCTTGTCTAATACGTGATTGAAATCTCTATTTCTTTTGCCGCATCTA

GAATCTTTTGACTCTTTACCCAGTAGGTGTTGAAGGTGGACTTTAG

>M6-PGSC0003DMG401005729M6RLKWAX-EGF\_2867

TTGCCGCATCTAGAATCTTTTGACTCTTTACCCAGTAGGTGTTGAAGGTGGACTTTAGATGTTAATAAG

ACTTACAAATTATTTTTACCTAGTCGCCTGACTTCAGTATTCAGGCTTT

>M6-PGSC0003DMG401005729M6RLKWAX-EGF\_2928

GTTAATAAGACTTACAAATTATTTTTACCTAGTCGCCTGACTTCAGTATTCAGGCTTTTCAAATGTTGTT

TTAACAGCAGTTATTTTCTTGTTCCTTCTCTTATCTGGTTTTTTTTG

>M6-PGSC0003DMG401005729M6RLKWAX-EGF\_2989

AAAATGTTGTTTTAACAGCAGTTATTTTCTTGTTCCTTCTCTTATCTGGTTTTTTTTGTTTTCTCCATTTGTA

AACTGCGCCAGCAATGCCACAGATTATTGTTTTGTGATTATTCATA

>M6-PGSC0003DMG401005729M6RLKWAX-EGF\_305

GACAACCCTAAGCTAACCCATTTTAACTATCCAATTTTCAAGGCACACTGGCTCATTTGACACCCCCTAGGG

TATCCCATTTTTGTTTTAGGACAGATCCATGAAAATTAGGGAAGAAATTA

>M6-PGSC0003DMG401005729M6RLKWAX-EGF\_3050

TTCTCCATTTGTAAACTGCGCCAGCAATGCCACAGATTATTGTTTTGTGATTATTCATACTGAGTTTCTAG  
TGCACTATAACTATGCAGTAGAATTATGCAAGAACCCTGTTTATGCAA

>M6-PGSC0003DMG401005729M6RLKWAX-EGF\_3111

GAGTTTCTAGTGCCTATAACTATGCAGTAGAATTATGCAAGAACCCTGTTTATGCAAAAATGAATTACC  
AGAACTTCTGCAAAAGGGAATGAGGCTAATATGTCAAGATTGCCTGAATA

>M6-PGSC0003DMG401005729M6RLKWAX-EGF\_3172

TGAATTACCAGAACTTCTGCAAAAGGGAATGAGGCTAATATGTCAAGATTGCCTGAATAACAGAGGGCA  
CTATATGTTGTGCTTGAATAACAAATACAACCCTAACAGAACAACGTTTT

>M6-PGSC0003DMG401005729M6RLKWAX-EGF\_3233

AGAGGGCACTATATGTTGTGCTTGAATAACAAATACAACCCTAACAGAACAACGTTTTCATAGTAAATT  
CAGAAACTTTAAGTCCAAATCCACGTTTGACTGTGTTTCATAACAGACTA

>M6-PGSC0003DMG401005729M6RLKWAX-EGF\_3294

TAGTAAATTCAGAAACTTTAAGTCCAAATCCACGTTTGACTGTGTTTCATAACAGACTAGAAAATAACCA  
CATAATTCCTTTATAAATTAGAAACAGTAAGAAGTTGTATTTATGTCTTT

>M6-PGSC0003DMG401005729M6RLKWAX-EGF\_3355

AAATAACCACATAATTCCTTTATAAATTAGAAACAGTAAGAAGTTGTATTTATGTCTTTATGATACTACTG  
GAGATATTTTGTGCGTGGTTCTGTATCATCTCATCACATGTTTTTGTCTG

>M6-PGSC0003DMG401005729M6RLKWAX-EGF\_3416

GATACTACTGGAGATATTTTGTGCGTGGTTCTGTATCATCTCATCACATGTTTTTGTCTGCATTACAGGTTCT  
AAAAGAGATATCAGAGTGAAGGTTGCCGTAGGTAACCTTTCTTTGACC

>M6-PGSC0003DMG401005729M6RLKWAX-EGF\_3477

TTACAGGTTCTAAAAGAGATATCAGAGTGAAGGTTGCCGTAGGTAACCTTTCTTTGACCATGTTTCATCTT  
ATGATATCCTTCTCTTTAACAATGATCAAGAACTTCTAGTCACATATTT

>M6-PGSC0003DMG401005729M6RLKWAX-EGF\_3538

GTTTCATCTTATGATATCCTTCTCTTTAACAATGATCAAGAACTTCTAGTCACATATTTCTCTCTTTTCAGGT  
GTAAGTGCAGCTGCATTCACTGCCATTGTGGCATGTGTAATTTTCTTT

>M6-PGSC0003DMG401005729M6RLKWAX-EGF\_3599

CTCTTTTCAGGTGTAAGTGCAGCTGCATTCACTGCCATTGTGGCATGTGTAATTTTCTTTCTCTATTATCGTC  
GACAGAAGAAAAGTCATGCTGGTTCGTCTTTGATAACCAGAAGTATCC

>M6-PGSC0003DMG401005729M6RLKWAX-EGF\_366

CCCCCTAGGGTATCCCATTTTGTGTTTAGGACAGATCCATGAAAATTAGGGAAGAAATTAGAAAAGATGA  
CAACATTTGCGTTGGAACCTTACGCTTATGTGATGCAGTGCGAACTATAAC

>M6-PGSC0003DMG401005729M6RLKWAX-EGF\_3660

CTATTATCGTCGACAGAAGAAAAGTCATGCTGGTTCGTCTTTGATAACCAGAAGTATCCTTTCTATCCCT  
CCTCAAAAATGGATCCTGAAAAATCTTCTCACTATTTGGGAGTTCATGT

>M6-PGSC0003DMG401005729M6RLKWAX-EGF\_3721

TCCTATCCCTCCTCAAAAATGGATCCTGAAAAATCTTCTCACTATTTGGGAGTTCATGTCTTCGATTACAA  
TGAAGTGAAGAAGCCACAAACAGTTTTGATTCCAGCAAAGAGCTAGGA

>M6-PGSC0003DMG401005729M6RLKWAX-EGF\_3782

TCGATTACAATGAACTGGAAGAAGCCACAAACAGTTTTGATTCCAGCAAAGAGCTAGGAGAAGGTGGA  
TTTGGCACAGTATATAAAGGTAAGAGAAATTATCCTGAAGTGGGCTTTCTCT

>M6-PGSC0003DMG401005729M6RLKWAX-EGF\_3843

AGGTGGATTTGGCACAGTATATAAAGGTAAGAGAAATTATCCTGAAGTGGGCTTTCTCTCACTGCCAAC  
CTGCTACTAAACCTAAACATTTGATTTGATTCATTAACCATATGATTGAAC

>M6-PGSC0003DMG401005729M6RLKWAX-EGF\_3904

CTGCCAACCTGCTACTAAACCTAAACATTTGATTTGATTCATTAACCATATGATTGAACATGACATGTTAT  
AGGTAAACTTCGAGATGGGCGTGTTGTTGCTGTAAAGCGTTTATATGAG

>M6-PGSC0003DMG401005729M6RLKWAX-EGF\_3965

GACATGTTATAGGTAAACTTCGAGATGGGCGTGTTGTTGCTGTAAAGCGTTTATATGAGAACAACACTACA  
AGAGGGTTGAGCAATTCCGAAATGAAATTGAAATCCTCACTCGTTTGCGCC

>M6-PGSC0003DMG401005729M6RLKWAX-EGF\_4026

CAACTACAAGAGGGTTGAGCAATTCCGAAATGAAATTGAAATCCTCACTCGTTTGCGCCATCGAAATCTA  
GTTACCCTTTACGGATGCACATCTCGCCATGGTCGTGAGCTTCTTCTTGT

>M6-PGSC0003DMG401005729M6RLKWAX-EGF\_4087

CGAAATCTAGTTACCCTTTACGGATGCACATCTCGCCATGGTCGTGAGCTTCTTCTTGTGTATGAATATAT  
TTCCAATGGCACTGTTGCTGATCATCTTCATGGAGAATTCTCAAAGCCT

>M6-PGSC0003DMG401005729M6RLKWAX-EGF\_4148

ATGAATATATTTCCAATGGCACTGTTGCTGATCATCTTCATGGAGAATTCTCAAAGCCTGGATCACTTTCA



TGGAATACACGAATGAGCATTTCCATAGAAACGGCAAGCGCGCTAGCCT

>M6-PGSC0003DMG401005729M6RLKWAX-EGF\_4209

ATCACTTTCATGGAATACACGAATGAGCATTTCCATAGAAACGGCAAGCGCGCTAGCCTTCTCCATAAT

TCAGAGGTCATTCACCGAGATGTAAAACTAACAATATCCTCCTAGACAG

>M6-PGSC0003DMG401005729M6RLKWAX-EGF\_427

AAAGATGACAACATTTGCGTTGGAACCTTACGCTTATGTGATGCAGTGCGAACTATAACTCAAATCGCA

GTTTCTCTCTTAAGCACGACCCAAAAGAACTTTTTATTTATATATATAAAT

>M6-PGSC0003DMG401005729M6RLKWAX-EGF\_4270

CTCCATAATTCAGAGGTCATTCACCGAGATGTAAAACTAACAATATCCTCCTAGACAGTAATTTCTGCG

TCAAAGTAGCTGATTTTGGGTTGTCTCGGCTTTTCCCTACTGATGTTACA

>M6-PGSC0003DMG401005729M6RLKWAX-EGF\_4331

ATTTCTGCGTCAAAGTAGCTGATTTTGGGTTGTCTCGGCTTTTCCCTACTGATGTTACACATGTCTCAACA

GCTCCACAGGGTACCCCTGGATATGTTGATCCCCAGTATCACGAATGCT

>M6-PGSC0003DMG401005729M6RLKWAX-EGF\_4392

TGTCTCAACAGCTCCACAGGGTACCCCTGGATATGTTGATCCCCAGTATCACGAATGCTATCAACTCACC

AGTAAAAGTGATGTTTATAGTTTCGGGGTGGTATTAATCGAGCTTATATC

>M6-PGSC0003DMG401005729M6RLKWAX-EGF\_4453

CAACTCACCAGTAAAAGTGATGTTTATAGTTTCGGGGTGGTATTAATCGAGCTTATATCCTCTCTGCCAG

CTGTTGATATCTGTAGGCATCGACAGGAAATAAATCTATCAAATATGGCA

>M6-PGSC0003DMG401005729M6RLKWAX-EGF\_4514

CTCTGCCAGCTGTTGATATCTGTAGGCATCGACAGGAAATAAATCTATCAAATATGGCAATTAACAAGAT

TCAGAGCAACACGTTACATGAGCTGGTTGATTCAAATCTTGGTTTTGACT

>M6-PGSC0003DMG401005729M6RLKWAX-EGF\_4575

TAACAAGATTCAGAGCAACACGTTACATGAGCTGGTTGATTCAAATCTTGGTTTTGACTCCAATAACTTG

GTAAAGTTGATGATCACTGCCGTGGCAGAGTTGGCTTTCCAGTGTCTTCA

>M6-PGSC0003DMG401005729M6RLKWAX-EGF\_4636

AATAACTTGGTAAAGTTGATGATCACTGCCGTGGCAGAGTTGGCTTTCCAGTGTCTTCAAGAACGACAGG

GATTTGAGACCATCCATGCCAGAGGTCTTGGAGGCTCTACTGGGAATTCAG

>M6-PGSC0003DMG401005729M6RLKWAX-EGF\_4697

ACGACAGGGATTTGAGACCATCCATGCCAGAGGTCTTGGAGGCTCTACTGGGAATTCAGAGTATGGATA  
AAACAGCAACAGAAATAGGGAAGCCAAGTCCCGGTGATGATGCTGGATTGT

>M6-PGSC0003DMG401005729M6RLKWAX-EGF\_4758

TATGGATAAAACAGCAACAGAAATAGGGAAGCCAAGTCCCGGTGATGATGCTGGATTGTTGAGCAATC  
ACGCATTATCTCTCTCACCCGATTCAGTTATTTCAAATGGACTAGCAGTAG

>M6-PGSC0003DMG401005729M6RLKWAX-EGF\_4819

AGCAATCACGCATTATCTCTCTCACCCGATTCAGTTATTTCAAATGGACTAGCAGTAGCAGTTCAACAA  
CACATGCTTCCAGTATTGGCTAAGTTTATGCCCTTAGTTTGTCTAGTTTG

>M6-PGSC0003DMG401005729M6RLKWAX-EGF\_488

AAATCGCAGTTTCTCTCTTAAGCACGACCCAAAAGAACTTTTTATTTATATATATAAATAAATAATATATA  
CTCCATAAAAAGAAGCCTTGTTTGTAGACCAAATTCAGGTTTCTGAGTG

>M6-PGSC0003DMG401005729M6RLKWAX-EGF\_4880

GTTCAACAACACATGCTTCCAGTATTGGCTAAGTTTATGCCCTTAGTTTGTCTAGTTTGTGGTTTTCTTGAT  
AGTGATTCTTCAGCCACCTGCTCTATTGGTCGCGGAAGGTGAATTTTA

>M6-PGSC0003DMG401005729M6RLKWAX-EGF\_4941

GTTTTCTTGATAGTGATTCTTCAGCCACCTGCTCTATTGGTCGCGGAAGGTGAATTTTAGTGCTTTTCCT  
TGAGTACTTTGGACCTTTTTCTATCTTAAAGAGGTTGTACATATCTCGT

>M6-PGSC0003DMG401005729M6RLKWAX-EGF\_5002

GTCTTTCTTTGAGTACTTTGGACCTTTTTCTATCTTAAAGAGGTTGTACATATCTCGTATGCAGCAATTTA  
AATTTAACGATACTAATTCAATTCATTTCTTAAATTCTTTAGTTAAAT

>M6-PGSC0003DMG401005729M6RLKWAX-EGF\_5050

ACATATCTCGTATGCAGCAATTTAAATTTAACGATACTAATTCAATTCATTTCTTAAATTCTTTAGTTAAAT  
TGTGTAGATACTTGTTCAATTGATCATCTTTGTCATAACAGATTTTGA

>M6-PGSC0003DMG401005729M6RLKWAX-EGF\_549

ATAATATACTCCATAAAAAGAAGCCTTGTTTGTAGACCAAATTCAGGTTTCTGAGTGTCATGGTCTAA  
AATAGCCTCTACCCCTTTTTATTATTTATCTCCTGTAATATTCTGACTAT

>M6-PGSC0003DMG401005729M6RLKWAX-EGF\_61

GAGGGAGGGAGAGAGGCGAGATACATTCGCTAGATACAATGTATCTAGAGGAAATTACACGGTATCTA  
GAGAAGCAACTCGGACAAGATACGTAATTATTGAAACTATCGATGCGCTATG

>M6-PGSC0003DMG401005729M6RLKWAX-EGF\_610

ATGGTCTAAAATAGCCTCTACCCCTTTTTATTATTTATCTCCTGTAATATTCTGACTATCAGCTTCACAAAA  
TGCCAATGAATATTTAAAAACCTTAATAATATACACATTGTCAACAGG

>M6-PGSC0003DMG401005729M6RLKWAX-EGF\_671

GCTTCACAAAATGCCAATGAATATTTAAAAACCTTAATAATATACACATTGTCAACAGGTGCAGTCAGGT  
TACGAATATGATGTGATTTTTGGAATTTTATATTCCAGACAAAGAAAGAA

>M6-PGSC0003DMG401005729M6RLKWAX-EGF\_732

CAGTCAGGTTACGAATATGATGTGATTTTTGGAATTTTATATTCCAGACAAAGAAAGAATTCTCAAACAC  
ACATGTCCTTTTCTTGTTTCAGGAGTTTCCGCCTCTTTTCCTTTCTTTCT

>M6-PGSC0003DMG401005729M6RLKWAX-EGF\_793

CTCAAACACACATGTCCTTTTCTTGTTTCAGGAGTTTCCGCCTCTTTTCCTTTCTTTCTTTGTTTTCTTTCATC  
TAGACCTGTAATTTTTAGTCCGCGGAAAGTTTCAGCCTGTAAGGTT

>M6-PGSC0003DMG401005729M6RLKWAX-EGF\_854

GTTTTCTTTCATCTAGACCTGTAATTTTTAGTCCGCGGAAAGTTTCAGCCTGTAAGGTTAATGAATGGAA  
GTTACCAATAAGATTGGTGTAAAATATTTATCCCTTTTTTATTCATTTGA

>M6-PGSC0003DMG401005729M6RLKWAX-EGF\_915

TGAATGGAAGTTACCAATAAGATTGGTGTAAAATATTTATCCCTTTTTTATTCATTTGAAATTTCTCCTTCT  
AGTTGTGAACAATGAAACTTATTTTCGTCCCACTCGTCTAAGTTGAAA

>M6-PGSC0003DMG401005729M6RLKWAX-EGF\_976

TTTCTCCTTCTAGTTGTGAACAATGAAACTTATTTTCGTCCCACTCGTCTAAGTTGAAAAGTGAAATTTTCT  
ATAGTAAAATAATCACAGAAAAGTCTTATAAAACATGAGCAGCCATTT

>M6-PGSC0003DMG401005927-(rev)M6LRR-RLP\_0

ACCATTTTTCAGTTCATAGTTCTTGCTTAAACACATTATTTTATCCTATTATCTTCCTTATTCTCTTCAATGCT  
GCATCTACCACAAATCAAACATCTAATTATATTGACCATCCTTTTCG

>M6-PGSC0003DMG401005927-(rev)M6LRR-RLP\_1008

ATTTGGAAAATTTTGTCTATGAGCACAATTACTTTTCAGAAGAGAGTCCAGCTTGTCTAAACTTGAATGC  
ATTTGCTGATCAACAGAATTGTCTTAGAGGAAGGCCAATGCAGAGATCTG

>M6-PGSC0003DMG401005927-(rev)M6LRR-RLP\_1071

TGAATGCATTTGCTGATCAACAGAATTGTCTTAGAGGAAGGCCAATGCAGAGATCTGCATTAGATTGCC

AAAGATTTTTGTCAAATGAAGTTGATTGTACCACTTTCAAATGTGCATTAC

>M6-PGSC0003DMG401005927-(rev)M6LRR-RLP\_1134

ATTGCCAAAGATTTTTGTCAAATGAAGTTGATTGTACCACTTTCAAATGTGCATTACCTCCACCGTCTCCA  
CCACCTACCACCCCTCCACAAAACAACACTGTTGTATTTGTTTTCTCCAC

>M6-PGSC0003DMG401005927-(rev)M6LRR-RLP\_126

TCGCAATTGAAACAAGTAACAGTAGAAAGTTGTTGTCTACAAAGGTGATGTTTTGCCATCAATCCATC  
ACTTTCTATTGAGAATTTTAGGTTAAGAATGCTTACATCGCGTTACAAG

>M6-PGSC0003DMG401005927-(rev)M6LRR-RLP\_189

ATCCATCACTTTCTATTGAGAATTTTAGGTTAAGAATGCTTACATCGCGTTACAAGCTTGGAAGAAGT  
AATTCTCTCTGATCCTCATAATATAACACAGAATTGGGTAGGATCTAATG

>M6-PGSC0003DMG401005927-(rev)M6LRR-RLP\_252

AAGAAGTAATTCTCTCTGATCCTCATAATATAACACAGAATTGGGTAGGATCTAATGTGTGTAATTACAC  
TGGAGTTTTTTGTTACCTTCACTTGATCAGCCCTCTGAACTTACAGTTT

>M6-PGSC0003DMG401005927-(rev)M6LRR-RLP\_315

ATTACACTGGAGTTTTTTGTTACCTTCACTTGATCAGCCCTCTGAACTTACAGTTTCTGGTATCGATATCA  
ATCATGCCAATATAGCTGGTAACTTCCACATGAATTAGGTTTACTAT

>M6-PGSC0003DMG401005927-(rev)M6LRR-RLP\_378

TCGATATCAATCATGCCAATATAGCTGGTAACTTCCACATGAATTAGGTTTACTATTTGACATTGCATTG  
ATTCATATAAATTCTAATAGGTTTTGTGGTACAATACCTGAGACTTTCT

>M6-PGSC0003DMG401005927-(rev)M6LRR-RLP\_441

TTGCATTGATTCATATAAATTCTAATAGGTTTTGTGGTACAATACCTGAGACTTTCTTGAATTTGAAGCTT  
CTTTTTGAGTTAGATCTTAGTAATAATCGATTCGTTGGAAAGTTCCCTG

>M6-PGSC0003DMG401005927-(rev)M6LRR-RLP\_504

TGAAGCTTCTTTTTGAGTTAGATCTTAGTAATAATCGATTCGTTGGAAAGTTCCCTGATGTGGTTGTTCAA  
ATGCCTAACTTGAAGTTTCTGATTTGAGGTTCAATGAGTTTGAAGGTG

>M6-PGSC0003DMG401005927-(rev)M6LRR-RLP\_567

TTGTTCAAATGCCTAACTTGAAGTTTCTTGAATTTGAGGTTCAATGAGTTTGAAGGTGCATTGCCAAAGCA  
ACTTTTTGAAAGGGATTTAGATGCTCTGTTCAATTAACAACAACAGATTTT

>M6-PGSC0003DMG401005927-(rev)M6LRR-RLP\_63

TCTTCAATGCTGCATCTACCACAAATCAAACATCTAATTATATTGACCATCCTTTTCGGTGGGATCGCAATT  
GAAACAAGTAACAGTAGAAAAGTTGTTGCTCCTACAAAGGTGATGTTTTTG

>M6-PGSC0003DMG401005927-(rev)M6LRR-RLP\_630

CAAAGCAACTTTTTGAAAGGGATTTAGATGCTCTGTTTCATTAACAACAACAGATTTTCTTTTGAGTTGCCT  
GATAACTTTGGGAATTCGCCTGTTTCTGTTATGGTTTTGGCTAACAACA

>M6-PGSC0003DMG401005927-(rev)M6LRR-RLP\_693

AGTTGCCTGATAACTTTGGGAATTCGCCTGTTTCTGTTATGGTTTTGGCTAACAACAACACTTTGTGGGATGT  
GTACCTGTTAGTATAGGCCAAAATGGTTAGATTGAACGAGTTGCTTCTCT

>M6-PGSC0003DMG401005927-(rev)M6LRR-RLP\_756

TGGGATGTGTACCTGTTAGTATAGGCCAAAATGGTTAGATTGAACGAGTTGCTTCTCTTAAATAACAAGTT  
CCATTCATGTTTTCTAATGAGATTGGGATGCTGAAGAATGTGACTGTGT

>M6-PGSC0003DMG401005927-(rev)M6LRR-RLP\_819

ACAAGTCCATTCATGTTTTCTAATGAGATTGGGATGCTGAAGAATGTGACTGTGTTTGATATAAGTTA  
TAATGAAATGATGGGTACTTTACCTGATAGTATTGGAGGGATGATGAGCT

>M6-PGSC0003DMG401005927-(rev)M6LRR-RLP\_882

TAAGTTATAATGAAATGATGGGTACTTTACCTGATAGTATTGGAGGGATGATGAGCTTGGAGCAGTTGA  
ATTTGGGTCATAATATGTTTTCTGGAATGATTTCTAGCAACATATGTACAC

>M6-PGSC0003DMG401005927-(rev)M6LRR-RLP\_945

AGTTGAATTTGGGTCATAATATGTTTTCTGGAATGATTTCTAGCAACATATGTACACTTCCAAATTTGGAA  
AATTTTGTCTATGAGCACAATTACTTTTCAGAAGAGAGTCCAGCTTGTC

>M6-PGSC0003DMG401006401M6LRR-RLK\_0

AACCAACTTTCTGGCCCCATTCTGCAGAAATAGGAAAACCTACCAGCCTTATAGAAGTGGATCTTGATA  
CAAACCAGTTAACAGGTCATATTCCTCCGGATATAGGCAACTTGATCAAC

>M6-PGSC0003DMG401006401M6LRR-RLK\_1054

GGCTTCTTGACTTGATCTTTCATCGAATCATTTGATTGGGAAGATTCCAAACGAATTTGGAAAATTAAC  
CTCTCTGGTTAAGCTTTCTGTGAAAAACAACAATATTTCTGGCAATATAC

>M6-PGSC0003DMG401006401M6LRR-RLK\_1116

AAATTAACCTCTCTGGTTAAGCTTTCTGTGAAAAACAACAATATTTCTGGCAATATACCTGAGGAGCTTG  
GGTCACTGACAAAGTTAGAGTCGCTTGATTTATCAGACAACAGATTGAAT

>M6-PGSC0003DMG401006401M6LRR-RLK\_1178

GGAGCTTGGGTCACTGACAAAGTTAGAGTCGCTTGATTTATCAGACAACAGATTGAATGGATCAATCCC  
AACGTGGATAGGAGATTTTGTGCTGTTGTTTCAGTTGAATCTGAGCAACAA

>M6-PGSC0003DMG401006401M6LRR-RLK\_124

AGCTGTTCAAGTCTTTCTCCAATGAACTGTCTGGTCCCATTCTGCAGAAATAGGGAAGATGAAGTCACT  
TGAGGAGTTAATGTTATACAGAAACAATCTTTCTGGTTTCGATTCCAAAAG

>M6-PGSC0003DMG401006401M6LRR-RLK\_1240

CAATCCCAACGTGGATAGGAGATTTTGTGCTGTTGTTTCAGTTGAATCTGAGCAACAACAAGTTTGGACA  
AAAGATTCCAAAGGAGATAGGGAGGATAACTCATCTTACTGTACTTGATT

>M6-PGSC0003DMG401006401M6LRR-RLK\_1302

TTTGGACAAAAGATTCCAAAGGAGATAGGGAGGATAACTCATCTTACTGTACTTGATTTGAGCCATAATC  
TTCTTGATGGAGAAATACCTGCTGAGCTAGCCAGTTTGCTGGACTTGTC

>M6-PGSC0003DMG401006401M6LRR-RLK\_1364

CCATAATCTTCTTGATGGAGAAATACCTGCTGAGCTAGCCAGTTTGCTGGACTTGTCAAACTGAATCTTT  
CCCACAATGGTCTATCTGGGCGCATTCTTAAAGAACTTGATAGTTTGAC

>M6-PGSC0003DMG401006401M6LRR-RLK\_1426

TGAATCTTCCACAATGGTCTATCTGGGCGCATTCTTAAAGAACTTGATAGTTTGACTGGTTTGCTGGAT  
GTTGTATTGTCATAACAATGATTTGGAAGGTCCAATCCCTAATAATAAAG

>M6-PGSC0003DMG401006401M6LRR-RLK\_1488

TTGCTGGATGTTGTATTGTCATAACAATGATTTGGAAGGTCCAATCCCTAATAATAAAGCATTTATGAATG  
CTTCGTTAGAAGGTAATAAAGATCTTTGCGGCAATGTAACAGGATTCCAG

>M6-PGSC0003DMG401006401M6LRR-RLK\_1550

TATGAATGCTTCGTTAGAAGGTAATAAAGATCTTTGCGGCAATGTAACAGGATTCCAGCCCTGCCAAAA  
GCCATCTTCTATGGTGAAAAAGCACTCAATAGCAAAGGGAAGTAACTCAT

>M6-PGSC0003DMG401006401M6LRR-RLK\_1612

GCCAAAAGCCATCTTCTATGGTGAAAAAGCACTCAATAGCAAAGGGAAGTAACTCATCCTCATCACTGT  
ACTTCTGTTATGGGAGCACTAGTACTGCTCTGTGTTTTTCATTGGTGTTT

>M6-PGSC0003DMG401006401M6LRR-RLK\_1674

ATCACTGTACTTCTGTTATGGGAGCACTAGTACTGCTCTGTGTTTTTCATTGGTGTTCTCTTTATGTGTAAT

AAAAGAATGAGAGTTAAAGACGTTGAAAGAAGGGATGGTGATGGTTGG

>M6-PGSC0003DMG401006401M6LRR-RLK\_1736

TATGTGTAATAAAAGAATGAGAGTTAAAGACGTTGAAAGAAGGGATGGTGATGGTTGGCTTTCGATAT  
CCATGTTAGATGGAAAGGCATTGTACCGGGATATCTTAAACGCCACAGAGGA

>M6-PGSC0003DMG401006401M6LRR-RLK\_1798

CGATATCCATGTTAGATGGAAAGGCATTGTACCGGGATATCTTAAACGCCACAGAGGAGTTTGATGCAA  
AATTTTGCATTGGGCAAGGAGGACATGGAAGTGTTACAAGGTAAACCTTC

>M6-PGSC0003DMG401006401M6LRR-RLK\_1860

GATGCAAAATTTTGCATTGGGCAAGGAGGACATGGAAGTGTTACAAGGTAAACCTTCCATTATTTGGT  
GATATAGCTGTGAAGAGACTTCATTCTTCATTTCAGAATACACATCCCAA

>M6-PGSC0003DMG401006401M6LRR-RLK\_2046

TATTGTTCAAAGCACAACACTCGCTCTTGGTTTACGAGTATGTAGAGAGGGGGAGTTTGTCTAGTATTC  
TGAGCAATGAAGTTGAGTCTAAGAAATTGGATTGGCTTAAAAGGATGAAT

>M6-PGSC0003DMG401006401M6LRR-RLK\_2108

TAGTATTCTGAGCAATGAAGTTGAGTCTAAGAAATTGGATTGGCTTAAAAGGATGAATATCATTAAAGG  
TGTTGCTTTTGCCTTATCTTACATGCACCAGGATTGCTCACCACCAATTGT

>M6-PGSC0003DMG401006401M6LRR-RLK\_2232

CGAGACATATCAAGCAGTAATGTTTTGGTTGATTCTGAGTATGAAGCTCGTGTTTCAGATTTTGGCATAG  
CGAAGCTTCTCAAACCAAACCTCATCCAATTGGACTGCACTTGCAGGAACA

>M6-PGSC0003DMG401006401M6LRR-RLK\_2294

TGGCATAGCGAAGCTTCTCAAACCAAACCTCATCCAATTGGACTGCACTTGCAGGAACATATGGCTATGTT  
GCACCTGGTAAGGTCTAAATTTAATTTTCGATTTTATTCAGACTTCGTGAA

>M6-PGSC0003DMG401006401M6LRR-RLK\_2356

GCTATGTTGCACCTGGTAAGGTCTAAATTTAATTTTCGATTTTATTCAGACTTCGTGAATTATAGCCAAACA  
CTCTATACTATTTTATCTCACTTACACATATAAATTGTTATACCATT

>M6-PGSC0003DMG401006401M6LRR-RLK\_2418

AGCCAAACACTCTATACTATTTTATCTCACTTACACATATAAATTGTTATACCATTTTGGAAATTGTATT  
GTTTCAGAGCTTGCCTATAACAATGAAGGTTACGGAAATGTGTGATGTC

>M6-PGSC0003DMG401006401M6LRR-RLK\_2480

AAATTGTATTGTTTCAGAGCTTGCCTATAACAATGAAGGTTACGGAAATGTGTGATGTCTACAGCTTTGGA  
GTATTAGCATTGGAGATAATCAAAGGAAAGCATCTAGGGGAATATATTAC

>M6-PGSC0003DMG401006401M6LRR-RLK\_2542

GCTTTGGAGTATTAGCATTGGAGATAATCAAAGGAAAGCATCTAGGGGAATATATTACTGTGCTAGCAA  
ATTCATCGACTATAGATCATGTGCAGCTTAGTGATTTGCTAGATGAACGCC

>M6-PGSC0003DMG401006401M6LRR-RLK\_2604

CTAGCAAATTCATCGACTATAGATCATGTGCAGCTTAGTGATTTGCTAGATGAACGCCTTCCATATCCTG  
AAGATGAAGCAAAGGATGTTTTGGTTTTAATCATCAAGTTAGCAAGCTCT

>M6-PGSC0003DMG401006401M6LRR-RLK\_2666

ATATCCTGAAGATGAAGCAAAGGATGTTTTGGTTTTAATCATCAAGTTAGCAAGCTCTTGTGGTTGAA  
ATTCCAAAATCAAGGCCAACAAATGCACTTCATCTGTCATAGGTTATCATC

>M6-PGSC0003DMG401006401M6LRR-RLK\_2706

ATCAAGTTAGCAAGCTCTGTTTGGTTGAAATTCCAAAATCAAGGCCAACAAATGCACTTCATCTGTCATA  
GGTTATCATCAATGGATGCACGTCCACCTACTCATGTAAAGTGACCTTTG

>M6-PGSC0003DMG401006401M6LRR-RLK\_310

CTGCAGAAATAGGGAAACTTGTCAATCTTGTGAAGTTGATCTTGATACAAACCAGTTAACAGGTCATAT  
TCCTCCGGAAATAGGCAACTTGATTAATGCAAAATTGTTCTATGCTTTTT

>M6-PGSC0003DMG401006401M6LRR-RLK\_372

GGTCATATTCCTCCGGAAATAGGCAACTTGATTAATGCAAAATTGTTCTATGCTTTTTCCAATGAATTGTC  
TGGTCCCATTCTGCAGAAATAGGGAAGATGAGGTCACCTGTGGATTCA

>M6-PGSC0003DMG401006401M6LRR-RLK\_434

TGAATTGTCTGGTCCCATTCTGCAGAAATAGGGAAGATGAGGTCACCTGTGGATTCACTGTTCCAGAG  
AAACAATCTTTCTGGTCCCATTCTAGTGAGTTGGGGAATCTGAATAACCT

>M6-PGSC0003DMG401006401M6LRR-RLK\_558

GATCTGGTTTTATCCGAAAATCAACTTACTGGTTCAGTTCCTACTACATTTGGCAATTTGAGAACTTGCA  
GACTGTCATCTCCATACCAACAACTATCAGGTTCCATTCCAAAAGAA

>M6-PGSC0003DMG401006401M6LRR-RLK\_62

TCTTGATACAAACCAGTTAACAGGTCATATTCCTCCGGATATAGGCAACTTGATCAACGCAAAGCTGTTC  
AGTGCTTTCTCCAATGAACTGTCTGGTCCCATTCTGCAGAAATAGGGAA



>M6-PGSC0003DMG401006401M6LRR-RLK\_620

AAACTTGCGAGACTGCATCTCCATACCAACAACTATCAGGTTCCATTCCAAAAGAACTTGCATATTTG  
GATAACTTGCAGAGTGCTGACAATGACCAAAAATCAGTTATCAGGCCATTT

>M6-PGSC0003DMG401006401M6LRR-RLK\_682

CATATTTGGATAACTTGCAGAGTGCTGACAATGACCAAAAATCAGTTATCAGGCCATTTACCGGACCAGCT  
TTGTCAAAAATGGGAAACTTGAGTTCTTCACTGTGGCTAGCAACAAGCTGA

>M6-PGSC0003DMG401006401M6LRR-RLK\_744

GACCAGCTTTGTCAAAAATGGGAAACTTGAGTTCTTCACTGTGGCTAGCAACAAGCTGACAGGGCCAATA  
CCAAGAAGCTTGAGCAACTGCTCGAGTTTCAAATGGGTTCGCTTTAATAAC

>M6-PGSC0003DMG401006401M6LRR-RLK\_806

GCCAATACCAAGAAGCTTGAGCAACTGCTCGAGTTTCAAATGGGTTCGCTTTAATAACAACAGTTTCATC  
GGAAACTTATCTGAAGCTTTTGAATCTATCCAGAGCTTCTGTTTCATTGA

>M6-PGSC0003DMG401006401M6LRR-RLK\_868

GTTTCATCGGAAACTTATCTGAAGCTTTTGAATCTATCCAGAGCTTCTGTTTCATTGACTTGAACGACAAAT  
GATTTTCATGGTGATCTCGGCAGCAACTGGGGAAAATGCGAAAAATTGA

>M6-PGSC0003DMG401006401M6LRR-RLK\_930

AACGACAATGATTTTCATGGTGATCTCGGCAGCAACTGGGGAAAATGCGAAAAATTGATTAATCTGCAG  
GTAGCCAGAAATAACATTAGTGGTAGCATACCACCAGAAATTGGAAACATC

>M6-PGSC0003DMG401006401M6LRR-RLK\_992

TCTGCAGGTAGCCAGAAATAACATTAGTGGTAGCATACCACCAGAAATTGGAAACATCAAAGGGCTTCT  
TGGACTTGATCTTTCATCGAATCATTTGATTGGGAAGATTCCAAACGAATT

>M6-PGSC0003DMG401006653M6LRR-RLP\_0

TCATTATATTTTAGGAGAGTCGGAGCAACATAACTCATCAGCATAACAAAACAGGAAAAAGCAAAGCCG  
TAAACAAATTGATCAGTTTGGTTTATGATTGAAATCACTTGATATTAGAAA

>M6-PGSC0003DMG401006653M6LRR-RLP\_124

ATATTTTTGAAAATTAATGTAGAAGAGTACTCAAACTACAGAATTGGCTAATAATTTTGTGGTTCTGCA  
TCTTTCTAATGATAAAACATCCTTAAAATGTTCTCTAACTCAGTTTCAAC

>M6-PGSC0003DMG401006653M6LRR-RLP\_1240

GTGGAACACTACAAAATATGAGTAACAAGTTGTTAGAAGTGAGTACTACTCATCTTGTAATTCAATTGTT

CATCGGTCCCGATTCATCATAATCTTTTTTTTTCTCTAGTCTGTGGAA

>M6-PGSC0003DMG401006653M6LRR-RLP\_1302

CAATTGTCATCGGTCCCGATTCATCATAATCTTTTTTTTTCTCTAGTCTGTGGAAATTGGCTTAAAGTC  
TTACAAGTTATCGTCCGCTAGTTACAATACTGTATCACTTTTTTCTT

>M6-PGSC0003DMG401006653M6LRR-RLP\_1364

GCTTAAAGTCTTACAAGTTATCGTCCGCTAGTTACAATACTGTATCACTTTTTTCTTAGGTGGAATGGAA  
TATTGATGGATTTTCCCTTATTTACTTAATGTGAAAATTATTGTGTACC

>M6-PGSC0003DMG401006653M6LRR-RLP\_1488

AAGTTTGAAAATAGCATAAGAGACAATACTCACTCACTCGGATTGACTTTTCTGATTGTATAGATTTTC  
ATGGAAAAATTGCACCAAAATTTATTTAATCCTCAATTGACTTGGTCATG

>M6-PGSC0003DMG401006653M6LRR-RLP\_1550

TAGATTTTCATGGAAAAATTGCACCAAAATTTATTTAATCCTCAATTGACTTGGTCATGCAACAGTTTCTCT  
TTGAAAAGTATTGAGGAAAACAGAAGAGATGTTGATGGAAAGTTGGACA

>M6-PGSC0003DMG401006653M6LRR-RLP\_1612

AGTTTCTCTTTGAAAAGTATTGAGGAAAACAGAAGAGATGTTGATGGAAAGTTGGACAAGGTTGACATA  
AAACAGGAGTTCAAATAACTATAAATTATGTATGGATTTTGTA AAAACAGA

>M6-PGSC0003DMG401006653M6LRR-RLP\_1674

TGACATAAAACAGGAGTTCAAATAACTATAAATTATGTATGGATTTTGTA AAAACAGAACATTCTGTAAT  
TTGCTGTAAGCAAAAAGTAATTCCCGTGACCAGTTCAGTTCAAGGTTGGT

>M6-PGSC0003DMG401006653M6LRR-RLP\_186

GTTCTGCATCTTTCTAATGATAAAACATCCTTAAAATGTTCTCTAACTCAGTTTCAACTCCGTGATTTTGA  
TTTTGGTAGATTTTACATATAATTATACTTCATGACGAGTGTTATGT

>M6-PGSC0003DMG401006653M6LRR-RLP\_1922

GCAGTCAAATTGAAAAAGTGTTCAAATAGGGAAAATATGTAAAAGTGTTATTTCCATCTCTTGCTAT  
TTGAACTGTATCATATAGATGGAATTTCCCTCATTA ACTTAATGTGAAAA

>M6-PGSC0003DMG401006653M6LRR-RLP\_1984

CTTGCTATTTGAACTGTATCATATAGATGGAATTTCCCTCATTA ACTTAATGTGAAAAGTCTTGAAAAACA  
GCACAAGAGACAATACTCGGAAATTTCTCTGCAGGTGGAAGGATCTTC

>M6-PGSC0003DMG401006653M6LRR-RLP\_2046

TGAAAAACAGCACAAGAGACAATAATCGGAAATTTCTCTGCAGGTGGAAGGATCTTCACCAAGTTATT  
CAAAACATACTAATTAAGCAGGAAATGAAGGACTTAAATCATGTCTTTAAT

>M6-PGSC0003DMG401006653M6LRR-RLP\_2108

AGTTATTCAAAACATACTAATTAAGCAGGAAATGAAGGACTTAAATCATGTCTTTAATTATTGTTTCATTTT  
TTCCACTTGACTTAGTCAAGCAATAGTTTCTACCATTTGAAATTTCTAA

>M6-PGSC0003DMG401006653M6LRR-RLP\_2356

ATATATTACTTTGTAAAGTCTTCTCCGTCCTCTAACAAAGTCTTGTGGAACACTACAAAATATGAGTAACAA  
GTTGTTAGAAGTGAGTAGTACTCGTCTTGTGATTCAATTGTTTCATCAGT

>M6-PGSC0003DMG401006653M6LRR-RLP\_2418

GAGTAACAAGTTGTTAGAAGTGAGTAGTACTCGTCTTGTGATTCAATTGTTTCATCAGTCCCGATTTCATCA  
TAATCTTTTATTTTCTCTAGTCTTTGTGGAAATTGGCTCAAAGACTTA

>M6-PGSC0003DMG401006653M6LRR-RLP\_248

GTGATTTTGATTTGGTAGATTTTACATATATTTATACTTCATGACGAGTGTTATGTCTCACGTGATCCA  
ACAACTAATTCATACTGCTTGATTATGAATGAGGGATTTTTTTTGT

>M6-PGSC0003DMG401006653M6LRR-RLP\_2480

ATTCATCATAATCTTTTATTTTCTCTAGTCTTTGTGGAAATTGGCTCAAAGACTTACAAGTCACCGTCTG  
CTAGTTACAATACTGTATCACTTTTTTCTTAGGTGGAATGGAATATA

>M6-PGSC0003DMG401006653M6LRR-RLP\_2542

TCACCGTCTGCTAGTTACAATACTGTATCACTTTTTTCTTAGGTGGAATGGAATATAGATGGATTTTCCC  
TTATTAECTTAATGTGAAAATTATTGTGTACCTAACAAGTTTGAAAATA

>M6-PGSC0003DMG401006653M6LRR-RLP\_2604

GATTTTCCCTTATTAECTTAATGTGAAAATTATTGTGTACCTAACAAGTTTGAAAATAGCAGAAGAGACA  
ACTAATCACTAACTCGGAATATTGACCTTTTACGATTGTATAAATTCCAT

>M6-PGSC0003DMG401006653M6LRR-RLP\_310

CGTGATCCAACAATACTAATACTGCTTGATTATGAATGAGGGATTTTTTTTGTGTTTGGGCGAAATGCT  
CTCTGGAATTGACTCACTGAAAAGATTCCAAGGGAAGTACAAGACTAA

>M6-PGSC0003DMG401006653M6LRR-RLP\_372

CGAAATGCTCTCTGGAATTGACTCACTGAAAAGATTCCAAGGGAAGTACAAGACTAAAATTCCTGGCA  
GTCTAAAACTCTCTCTGAATGTTCTTATCAGACCGATTGCATGTTCTCTCG

>M6-PGSC0003DMG401006653M6LRR-RLP\_558

ATTTACGTGGAAATCAGAGGTCATAGTTGTGGATTAATTGTTGTAAGTGCATGTGGCACCTCATGTTTA  
AAGATGGTATGCTAAACATGTGATCCTTCAGTACAATTAGTCTCTCAGTT

>M6-PGSC0003DMG401006653M6LRR-RLP\_62

AAAGCCGTAAACAAATTGATCAGTTTGGTTTATGATTGAAATCACTTGATATTAGAAAGTTTATATTTTTG  
AAAATTAATGTAGAAGAGTACTCAAACTACAGAATTGGCTAATAATTT

>M6-PGSC0003DMG401006653M6LRR-RLP\_620

CATGTTTAAAGATGGTATGCTAAACATGTGATCCTTCAGTACAATTAGTCTCTCAGTTTTCTTTGCTTGTG  
CATCATTTTTTTTATTTGATCACTACACCTTTATCTTGAGTCGAGGGTCT

>M6-PGSC0003DMG401006653M6LRR-RLP\_682

TTGCTTGTGCATCATTTTTTTTATTTGATCACTACACCTTTATCTTGAGTCGAGGGTCTACGGAAACAACCT  
ATCTACTACTTTGGTTATTTTCCATCTCTTCATATTTGAACTGTATCAT

>M6-PGSC0003DMG401006653M6LRR-RLP\_744

AAACAACCTATCTACTACTTTGGTTATTTTCCATCTCTTCATATTTGAACTGTATCATATAGATGGAATTC  
CCTCATTAACCTAATGTGAAAAGCCTTTGGGAAAACAGCACAAGAGAC

>M6-PGSC0003DMG401006653M6LRR-RLP\_806

ATGGAATTTCCCTCATTAACCTAATGTGAAAAGCCTTTGGGAAAACAGCACAAGAGACAACCTAATCGGA  
AATTTCTCTGCAGGTGGAAGGATCTTCACCAAGTTATTCAGAACATACTAA

>M6-PGSC0003DMG401006653M6LRR-RLP\_868

AATCGGAAATTTCTCTGCAGGTGGAAGGATCTTCACCAAGTTATTCAGAACATACTAATTAAGCAGGAA  
AACACACATCAAACAAAATTTTGTATAAAATTCACAAGGAGGAAATGAAG

>M6-PGSC0003DMG401006653M6LRR-RLP\_930

GCAGGAAAACACACATCAAACAAAATTTTGTATAAAATTCACAAGGAGGAAATGAAGGACTTAAATCA  
TGCTTTAATTATTGTTCATTTTTTTCTCACTTGACTTAGTCAAGCAATA

>M6-PGSC0003DMG401008483M6RLKWAX-EGF\_0

ATATTTGTAAAGGTTTTTATATATATTATCAGGATGATTTAATTAACATCTGTTCTACTAAGTGCAGGTAT  
GGGAGTTGGGTTTATGTCCCTAGTGCTTGAACAACCTGGCTCTATTTT

>M6-PGSC0003DMG401008483M6RLKWAX-EGF\_1024

AGAGTTGCCTTAGTTTGCACGGAGAAGATAGACCTACTATGAAAGAAGTGGCAATGGAACCTGAAAGTT

TGAGAAAGTTCACAAAAAATAACCCTTGGGCTAATGGACATGAAGACGAAG

>M6-PGSC0003DMG401008483M6RLKWAX-EGF\_1088

AAGTTTGAGAAAGTTCACAAAAAATAACCCTTGGGCTAATGGACATGAAGACGAAGAGAATGAAGATG

AAGTAAGAGATCTTTATACAATTGATCCAATCGACTCTAATACAGACAACGA

>M6-PGSC0003DMG401008483M6RLKWAX-EGF\_1152

GATGAAGTAAGAGATCTTTATACAATTGATCCAATCGACTCTAATACAGACAACGACTTTTCTGGACAAT

ATAGTTCGTATAGTCCTTCATTAATATTTTCATACAAATATCCCGCGGTGA

>M6-PGSC0003DMG401008483M6RLKWAX-EGF\_128

GAAACGAAAATAATGAAACTCAGGGAGAAGTTCTTCCAACAAAATGGCGGATTCTCTTAAAACAACG

AATCTCCTCTAACGAGGGTGGTGTGGAAGCAACCAAAATTTTTACAGCTGA

>M6-PGSC0003DMG401008483M6RLKWAX-EGF\_192

CAACGAATCTCCTCTAACGAGGGTGGTGTGGAAGCAACCAAAATTTTTACAGCTGAAGAGTTGAAGAAG

GCTACAAACAACACTACGCCAACGATAGGATTCTTGGTCGTGGTGGAAATGGT

>M6-PGSC0003DMG401008483M6RLKWAX-EGF\_256

AGAAGGCTACAAACAACACTACGCCAACGATAGGATTCTTGGTCGTGGTGGAAATGGTATTGTCTACAAAG

GTATACTACCCGATAATCACATAGTTGCAATTAAGAAATCTAAGTTTGTGG

>M6-PGSC0003DMG401008483M6RLKWAX-EGF\_320

CAAAGGTATACTACCCGATAATCACATAGTTGCAATTAAGAAATCTAAGTTTGTGGATGAGAATCAAATT

GAACAGTTCATCAATGAGGTACTTATTCTTACTCAAGTTAACCATAGAAA

>M6-PGSC0003DMG401008483M6RLKWAX-EGF\_384

CAAATTGAACAGTTCATCAATGAGGTACTTATTCTTACTCAAGTTAACCATAGAAAATGTAGTGAACTGT

TTGGGTGTTGTTTGAAGCTGAAGTCCCTTACTGGTTTACGAATACGTT

>M6-PGSC0003DMG401008483M6RLKWAX-EGF\_448

AACTGTTTGGGTGTTGTTTGAAGCTGAAGTCCCTTACTGGTTTACGAATACGTTTCTAATGGAECTCTT

TACGAGCATATCCACAACAAAATGGAGCGCCTTGGTTATCTTTGGAAA

>M6-PGSC0003DMG401008483M6RLKWAX-EGF\_576

AGAATTGCTGCAGAGACAGCAAGTTCCTTACTTACCTTCATTCATCCGCGTCAATGCCAATAATTCATA

GAGATGTCAAGTCTGCCAATTTATTGTTGGATGATGTTTACACAGCCAAA

>M6-PGSC0003DMG401008483M6RLKWAX-EGF\_64

CAGGTATGGGAGTTGGGTTTATGTCCCTAGTGCTTGGAACTTGGCTCTATTTAGCTTCAAGAAACG  
AAAATAATGAACTCAGGGAGAAGTTCTCCAACAAAATGGCGGATTCC

>M6-PGSC0003DMG401008483M6RLKWAX-EGF\_640

TTCATAGAGATGTCAAGTCTGCCAATTTATTGTTGGATGATGTTTACACAGCCAAAGTGGCAGATTTTGG  
AGCTTCAAGATTAGTCCCTCTTGATCAAACACATGTTGCTACGATGGTTC

>M6-PGSC0003DMG401008483M6RLKWAX-EGF\_704

TTTTGGAGCTTCAAGATTAGTCCCTCTTGATCAAACACATGTTGCTACGATGGTTCAAGGAACGTTAGGG  
TACTTGGATCCCGAATATTTCCACTCAGGTCAATTGACAGAGAAAAGTGA

>M6-PGSC0003DMG401008483M6RLKWAX-EGF\_768

TTAGGGTACTTGGATCCCGAATATTTCCACTCAGGTCAATTGACAGAGAAAAGTGACGTTTATAGTTTTG  
GAGTAGTTCTTGCTGAACTTTTGACAGGGTTGAAACCTATTTTGAAGGAC

>M6-PGSC0003DMG401008483M6RLKWAX-EGF\_832

GTTTTGGAGTAGTTCTTGCTGAACTTTTGACAGGGTTGAAACCTATTTTGAAGGACGAAAATGAGAAGG  
ACAAATGTTTGGTAGACTATTTGCTCTTGCCATGAACACAAATAACTTAT

>M6-PGSC0003DMG401008483M6RLKWAX-EGF\_896

GAAGGACAAATGTTTGGTAGACTATTTGCTCTTGCCATGAACACAAATAACTTATTTAGATTCTTGATC  
GTAGAGTGGTACGAGAAGGAAGTCTTGAGCAACTTCAGAAGACTGCTGA

>M6-PGSC0003DMG401008483M6RLKWAX-EGF\_960

CTTGATCGTAGAGTGGTACGAGAAGGAAGTCTTGAGCAACTTCAGAAGACTGCTGAGCTTGTTAAGAGT  
TGCCTTAGTTTGCACGGAGAAGATAGACCTACTATGAAAGAAGTGGCAATG

>M6-PGSC0003DMG401009323-(rev)M6G-LecRK\_1037

GGGAGCACTGCAGTTGTGTTGGCTTCACCACCACCAGCAATGGAACAGGCTGCATAATTTGGAATGGTG  
ATGGGGAGTTTCAAGTTGATGAGAGTGGTAATACAGTGAAAAAATATGTTC

>M6-PGSC0003DMG401009323-(rev)M6G-LecRK\_1098

GAATGGTGTATGGGAGTTTCAAGTTGATGAGAGTGGTAATACAGTGAAAAAATATGTTCTGGTTTCATC  
AAAATCATCTAATGGTAAATCCTTATAGCAGGAATGCACCTTGCTTATGAA

>M6-PGSC0003DMG401009323-(rev)M6G-LecRK\_1159

GTTTCATCAAATCATCTAATGGTAAATCCTTATAGCAGGAATGCACCTTGCTTATGAACTAATATATTTT  
GAATAGATCAAGAGTCACCTGTATAACTCAGCAACCTATGTGTGCAG

>M6-PGSC0003DMG401009323-(rev)M6G-LecRK\_122

ATGAACTCAATCACACTCAGGTTCTTGATTCTGAAGATGGAATATTCAAGTTAGGATTTTTTCTATCTCA  
CAAACAAATAACTTTTATCTTGGTATATGGTATGCAGGTGATCCAAAAG

>M6-PGSC0003DMG401009323-(rev)M6G-LecRK\_1220

AATATATTTTGAATAGATCAAGAGTCACCTGTATAACACTCAGCAACCTATGTGTGCAGGAAAACAAAA  
GAATTGGATATGGATAGTAATTGTTGTAGCTATTGTTGTCCCTATGCTGAT

>M6-PGSC0003DMG401009323-(rev)M6G-LecRK\_1281

AAACAAAAGAATTGGATATGGATAGTAATTGTTGTAGCTATTGTTGTCCCTATGCTGATATCTGGTTTCA  
TCTGCTACATTATAGTGAGAAGGCGCAAACACTACAAGGTAAATCTCTGAAA

>M6-PGSC0003DMG401009323-(rev)M6G-LecRK\_1342

CTGGTTTCATCTGCTACATTATAGTGAGAAGGCGCAAACACTACAAGGTAAATCTCTGAAAAAGTGAAAATT  
GATTAAGTAGTAAGCTTTTTTATTAATTATGTTAAGCATGTTTAAATATC

>M6-PGSC0003DMG401009323-(rev)M6G-LecRK\_1403

GTGAAAATTGATTAAGTAGTAAGCTTTTTTATTAATTATGTTAAGCATGTTTAAATATCTACAAACTTTTTCT  
TGCACAGCTGAGAAAAGAAGGGAGGAAGAGTATATACGTGAGTTGACA

>M6-PGSC0003DMG401009323-(rev)M6G-LecRK\_1464

CAAACTTTTCTTGACAGCTGAGAAAAGAAGGGAGGAAGAGTATATACGTGAGTTGACAGCATCCGATA  
GCTTCAACGACACCAATATGAAAGAAAAGGATGGAAGGGAAGTCCAAGATT

>M6-PGSC0003DMG401009323-(rev)M6G-LecRK\_1525

ATCCGATAGCTTCAACGACACCAATATGAAAGAAAAGGATGGAAGGGAAGTCCAAGATTTGAAGATAT  
TTAGCTTTGGATTTGTATTGGCAGCCACAAACAATTTCTCAAGTGAAAACAA

>M6-PGSC0003DMG401009323-(rev)M6G-LecRK\_1586

AAGATATTTAGCTTTGGATTTGTATTGGCAGCCACAAACAATTTCTCAAGTGAAAACAAGCTTGGAGAG  
GGTGGTTTTGGACCTGTTTATAAGGTATAATTACATTATATGCCTTCGAAA

>M6-PGSC0003DMG401009323-(rev)M6G-LecRK\_1647

TTGGAGAGGGTGGTTTTGGACCTGTTTATAAGGTATAATTACATTATATGCCTTCGAAAACTTCAGTGC  
CATCATTGCATTAAGTGAATTACCTTTAAAATTTTATGACAGGGAAAATT

>M6-PGSC0003DMG401009323-(rev)M6G-LecRK\_1708

CTTCAGTGCCATCATTGCATTAAGTGAATTACCTTTAAAATTTTATGACAGGGAAAATTTCCAGATGGGA

GAGAGGTGGCAGTCAAGAGACTTTCACGAACATCAGGTCAAGGGCTTGTA

>M6-PGSC0003DMG401009323-(rev)M6G-LecRK\_183

TTCTATCTCACAAACAAATAACTTTTATCTTGGTATATGGTATGCAGGTGATCCAAAAGATAAGAACTA

TGGATAGCCAATCCAAATACGCCTTTATTGAACAATTCAGGATTGCTCAC

>M6-PGSC0003DMG401009323-(rev)M6G-LecRK\_1830

GTTCAAGAATGAGCTTATACTCATTGCAAAGTTCAGCACACAAATCTAGTTCGAGTTCTAGGATGCTGT

ATTCACGAAGATGAGAAAATTTTGATATATGAGTATATGCCTAACAAGAG

>M6-PGSC0003DMG401009323-(rev)M6G-LecRK\_1891

GGATGCTGTATTCACGAAGATGAGAAAATTTTGATATATGAGTATATGCCTAACAAGAGCTTGGACTTCT

TCCTATTCGGTTCGTTACCATTTCAAACAAAGAATTAATAGCTCAAATA

>M6-PGSC0003DMG401009323-(rev)M6G-LecRK\_1952

TGGACTTCTTCCTATTCGGTTCGTTACCATTTCAAACAAAGAATTAATAGCTCAAATAAGTTCTGAAAAT

TTTGACCTGAAATGCTTTCTGTCTTTGACAGATCCTGAAAGAAAGAAGC

>M6-PGSC0003DMG401009323-(rev)M6G-LecRK\_2013

TTCTGAAAATTTTGACCTGAAATGCTTTCTGTCTTTGACAGATCCTGAAAGAAAGAAGCTACTGGATTGG

CAGAAACGTTATGAAATTATCGAAGGATTTGCTCAAGGATTGCTCTATCT

>M6-PGSC0003DMG401009323-(rev)M6G-LecRK\_2074

CTGGATTGGCAGAAACGTTATGAAATTATCGAAGGATTTGCTCAAGGATTGCTCTATCTTCACAAATACT

CAAGAATGAGAGTGATACATAGAGATCTTAAAGCCAGTAATGTGCTATTG

>M6-PGSC0003DMG401009323-(rev)M6G-LecRK\_2135

ACAAATACTCAAGAATGAGAGTGATACATAGAGATCTTAAAGCCAGTAATGTGCTATTGGATGAGAACA

TGAATCCTAAGATAGCTGATTTTGGTATGGCAAGAATTTTCAAACAGAACG

>M6-PGSC0003DMG401009323-(rev)M6G-LecRK\_2196

TGAGAACATGAATCCTAAGATAGCTGATTTTGGTATGGCAAGAATTTTCAAACAGAACGAGACGGAGGC

AGTGACTGCCAGGGTTGTTGGAACATAGTGAGTAGAACTTATTTTCATGATA

>M6-PGSC0003DMG401009323-(rev)M6G-LecRK\_2257

ACGGAGGCAGTGACTGCCAGGGTTGTTGGAACATAGTGAGTAGAACTTATTTTCATGATATAAGTTTTAT

TCATTTAGACATTTTCATATTGACTAAACGGGTAATGTTTCCTGTCCTCTA

>M6-PGSC0003DMG401009323-(rev)M6G-LecRK\_2318



AGTTTTATTCATTTAGACATTTTCATATTGACTAAACGGGTAATGTTTCCTGTCCTCTATACAGTGGTTACA  
TGGCTCCCGAGTTCGCAATGGAAGGAGCATTCTCAATCAAGTCTGATG

>M6-PGSC0003DMG401009323-(rev)M6G-LecRK\_2379

CAGTGGTTACATGGCTCCCGAGTTCGCAATGGAAGGAGCATTCTCAATCAAGTCTGATGTCTTCAGTTTT  
GGAATCTTAATGCTGGAAATTGTGAGTGGTAGGAGAACTACTAGCTTACA

>M6-PGSC0003DMG401009323-(rev)M6G-LecRK\_244

AAGAACTATGGATAGCCAATCCAAATACGCCTTTATTGAACAATTCAGGATTGCTCACTATAGATACTA  
CAGGAACATTGAAAATCACTAGTGGAGGGAAAACAGTTGTGAATATTACC

>M6-PGSC0003DMG401009323-(rev)M6G-LecRK\_2440

TTCAGTTTTGGAATCTTAATGCTGGAAATTGTGAGTGGTAGGAGAACTACTAGCTTACAACAATTCGATC  
GTCCACTCAATTTTATAGGTTATGTAAGTTTTCTTGACACCCCTTTTTTC

>M6-PGSC0003DMG401009323-(rev)M6G-LecRK\_2501

AATTCGATCGTCCACTCAATTTTATAGGTTATGTAAGTTTTCTTGACACCCCTTTTTCTTTTAAGTACTA  
TAATACATAAAGTTTGAGAATACTGATCATTTTGGTTTAGGCATGGGA

>M6-PGSC0003DMG401009323-(rev)M6G-LecRK\_2562

TTTAAGTACTATAATACATAAAGTTTGAGAATACTGATCATTTTGGTTTAGGCATGGGAACTATGGAAAG  
AAAAGTGTGCACTGGAATTGAAGGATCCAGCTCTTGGAGATTTATGTGAC

>M6-PGSC0003DMG401009323-(rev)M6G-LecRK\_2623

TATGGAAAGAAAAGTGTGCACTGGAATTGAAGGATCCAGCTCTTGGAGATTTATGTGACACTAACTGT  
TGTTACGAGTTATTCATGTTGGACTATTATGTGTACAAGAAGGAGCAACTG

>M6-PGSC0003DMG401009323-(rev)M6G-LecRK\_2684

TAAACTGTTGTTACGAGTTATTCATGTTGGACTATTATGTGTACAAGAAGGAGCAACTGATAGGCCAACA  
ATGTCTGATGTTATCTCATTGCTTGGTAATGAAAGTATGCCACTGCCTAC

>M6-PGSC0003DMG401009323-(rev)M6G-LecRK\_2745

AGGCCAACAATGTCTGATGTTATCTCATTGCTTGGTAATGAAAGTATGCCACTGCCTACGCCAAAACAAC  
CAGCATTTTTACAGGAAGAAATGAAGCAGAATCAAATTCATCGGGTATC

>M6-PGSC0003DMG401009323-(rev)M6G-LecRK\_2806

CAAAACAACCAGCATTTTTACAGGAAGAAATGAAGCAGAATCAAATTCATCGGGTATCAAAGCAGAAC  
AATGTTGCGTTAATGATTGTTCCATCACTGTCATTGAAGCAAGGTAGCTTA

>M6-PGSC0003DMG401009323-(rev)M6G-LecRK\_2867

AGCAGAACAATGTTTCGGTTAATGATTGTTCCATCACTGTCATTGAAGCAAGGTAGCTTAGAGACATTATC  
TTGCTGTATTCTGTTGTGCAACACTCAGTAGCTATACATGAAAAGCATGT

>M6-PGSC0003DMG401009323-(rev)M6G-LecRK\_2928

GACATTATCTTGCTGTATTCTGTTGTGCAACACTCAGTAGCTATACATGAAAAGCATGTTTCCTTATGGTA  
TAGATTAGTCAATTTGACTGTAACTTGTATAGCTGTCTTTAGCTG

>M6-PGSC0003DMG401009323-(rev)M6G-LecRK\_2989

CCTTATGGTATAGATTAGTCAATTTGACTGTAACTTGTATAGCTGTCTTTAGCTGACTTTGTAACAA  
TATATTAAATCTCTCTCCTACAAAGACTAGAATTATCATTAACCTTTCT

>M6-PGSC0003DMG401009323-(rev)M6G-LecRK\_305

TAGATACTACAGGAACATTGAAAATCACTAGTGGAGGGAAAACAGTTGTGAATATTACCCCTCCTTTATT  
GACAGGAAGTTTAATAGCTAGGCTTCAAGATTCTGGAAATCTTGTGCTTC

>M6-PGSC0003DMG401009323-(rev)M6G-LecRK\_3050

TTTGTAACAATATATTAAATCTCTCTCCTACAAAGACTAGAATTATCATTAACCTTTCTGTTTTTTTTGCATT  
TTCTCACTTAAATGTAGTAACATTTATTAGTATAACAACCTTAAGAT

>M6-PGSC0003DMG401009323-(rev)M6G-LecRK\_3111

TTTTTTTGCATTTTCTCACTTAAATGTAGTAACATTTATTAGTATAACAACCTTAAGATTGTTAGATTCTCT  
TATTTATTAGCTCCTTTATATTTTTAAAATTAGGAGACTCATCAATG

>M6-PGSC0003DMG401009323-(rev)M6G-LecRK\_3172

TTAGATTCTCTTTATTTATTAGCTCCTTTATATTTTTAAAATTAGGAGACTCATCAATGATGATATTTTTTTG  
TGGTCCACATAAATGGATAACTTATCTGAGGATCATAATTCATAAGG

>M6-PGSC0003DMG401009323-(rev)M6G-LecRK\_3233

GATATTTTTTTGTGGTCCACATAAATGGATAACTTATCTGAGGATCATAATTCATAAGGATGACTGTAAA  
CTAATCTAGTCCAAACAACCTACTCGACTAGTTAAGGACATTCTTAATCT

>M6-PGSC0003DMG401009323-(rev)M6G-LecRK\_3294

GACTGTAAACTAATCTAGTCCAAACAACCTACTCGACTAGTTAAGGACATTCTTAATCTTGATTCAACAAT  
GCATCAATGAAGTTCACAGTGTATTTCAACAAGTAGATATGATATCTTT

>M6-PGSC0003DMG401009323-(rev)M6G-LecRK\_3538

AAAGATTGTCTCTTTCAACAAATTTCTTACAAGTAAGGTAATATTTCTACTTAGAAAAATCTTCAAATTT

CTGGTTGGAAAATGTTTAATATAATTGTCTATTCTCTAATGCATTATT

>M6-PGSC0003DMG401009323-(rev)M6G-LecRK\_3599

CTTCAAATTTCTGGTTGGAAAATGTTTAATATAATTGTCTATTCTCTAATGCATTATTGGCTTTGAACAGT

AAACAACCTAAAAGGAATAATCTATTATTATCTGCAGCAACATTTCT

>M6-PGSC0003DMG401009323-(rev)M6G-LecRK\_366

TCCTTTATTGACAGGAAGTTTAATAGCTAGGCTTCAAGATTCTGGAAATCTTGTGCTTCAGGAAGAACT

CAGAACAGGACTTTATGGCAAAGCTTCGATCATCCTACCGATACTCTTTT

>M6-PGSC0003DMG401009323-(rev)M6G-LecRK\_3660

CTTTGAACAGTAAACAACCTAAAAGGAATAATCTATTATTATCTGCAGCAACATTTCTTTCTTTCTGGCT

GCCAAAATGAAATCTTTAGCAAATTACATTTTCTCCTCATTGACTT

>M6-PGSC0003DMG401009323-(rev)M6G-LecRK\_3721

CTTTCTGGCTGCCAAAATGAAATCTTTAGCAAATTACATTTTCTCCTCATTGACTTTATTCTGTAGCCA

AACATGTATCATTATCTTTCCATCTGTAGCTGCAATAACCTCAATGAA

>M6-PGSC0003DMG401009323-(rev)M6G-LecRK\_3782

TTCTGTAGCCAAACATGTATCATTATCTTTCCATCTGTAGCTGCAATAACCTCAATGAAGCCTGGTGATGT

ACTTAATCATTACAGGTAAGTTCAGAAAGGTGGAAGATTCAAGTTG

>M6-PGSC0003DMG401009323-(rev)M6G-LecRK\_3843

CTGGTGATGTAATCATTACAGGTAAGTTCAGAAAGGTGGAAGATTCAAGTTGGGATTTTTCTC

TATCCCACAAACAAATAAACTTATCTTGGAAATATGGTATGCAGGTGATC

>M6-PGSC0003DMG401009323-(rev)M6G-LecRK\_3904

ATTTTTCTCTATCCCACAAACAAATAAACTTATCTTGGAAATATGGTATGCAGGTGATCCAGTAGAGAAA

AAATTATGGATAGCCAATCCAAACACACCTATATTGAACAGCTCAGGATT

>M6-PGSC0003DMG401009323-(rev)M6G-LecRK\_3965

GTAGAGAAAAAATTATGGATAGCCAATCCAAACACACCTATATTGAACAGCTCAGGATTGCTCACATTA

GATTCTCAGGATTATTGATAATCACCAGTGGAGGTAAGACAGTTGTGAAT

>M6-PGSC0003DMG401009323-(rev)M6G-LecRK\_4026

TCACATTAGATTCTTCAGGATTATTGATAATCACCAGTGGAGGTAAGACAGTTGTGAATATTACCACTTC

TTTATTGACAGGAAGTTTAATAGCTAGGCTTCAAGATTCTGGAAATTTGG

>M6-PGSC0003DMG401009323-(rev)M6G-LecRK\_4087

TACCACTTCTTTATTGACAGGAAGTTTAATAGCTAGGCTTCAAGATTCTGGAAATTTGGTGGTTCAGGAT  
GAGACTCGGAACCGGACTTTATGGCAAAGCTTTGATCATCCTACTAGTTG

>M6-PGSC0003DMG401009323-(rev)M6G-LecRK\_4148

GTTTCAGGATGAGACTCGGAACCGGACTTTATGGCAAAGCTTTGATCATCCTACTAGTTGTCTTTTGCCTG  
GTATGAAGCTTGGTTATAACCTTACCACACGGCAGAATTGGACTCTAACT

>M6-PGSC0003DMG401009323-(rev)M6G-LecRK\_4209

TTTTGCCTGGTATGAAGCTTGGTTATAACCTTACCACACGGCAGAATTGGACTCTAACTTCTTGGTTGGTT  
ATTAGTACAATTCCGGCCTCAGGGGCTTTTACTTTAAGTTTGGAGGCAA

>M6-PGSC0003DMG401009323-(rev)M6G-LecRK\_427

GAAGAACTCAGAACAGGACTTTATGGCAAAGCTTCGATCATCCTACCGATACTCTTTTTCCAGGTATGA  
AGTTTGGTTATAACCTTACAACAAAGCAGAATTGGACTTTAACTTCTTGG

>M6-PGSC0003DMG401009323-(rev)M6G-LecRK\_4270

TTGGTTGGTTATTAGTACAATTCCGGCCTCAGGGGCTTTTACTTTAAGTTTGGAGGCAATTCAAGATGCA  
TTTCAGTTGGTTGTTAGACGAAGGGGTGAGGTTTACTGGACTAGTGGGGC

>M6-PGSC0003DMG401009323-(rev)M6G-LecRK\_4331

CAAGATGCATTTAGTTGGTTGTTAGACGAAGGGGTGAGGTTTACTGGACTAGTGGGGCTTGGAACTAT  
CAAGGTTTTCCATTCTTACCTTCATTCCGTGATTCTGCTACTACTTATCAG

>M6-PGSC0003DMG401009323-(rev)M6G-LecRK\_4392

GGAECTATCAAGTTTTCCATTCTTACCTTCATTCCGTGATTCTGCTACTACTTATCAGTACAATCTCAACT  
TGGTATCCGGTACTGATGGGATGTTCTTCCAATTTGAGGCTACAAAGG

>M6-PGSC0003DMG401009323-(rev)M6G-LecRK\_4453

CAATCTCAACTTGGTATCCGGTACTGATGGGATGTTCTTCCAATTTGAGGCTACAAAGGGAAGTTTCCCA  
AGTCTTGAGTTGTTTTCAGATGGAGCTATTGCTGCTGGAGACGGAAGTAT

>M6-PGSC0003DMG401009323-(rev)M6G-LecRK\_4514

AGTTTCCAAGTCTTGAGTTGTTTTCAGATGGAGCTATTGCTGCTGGAGACGGAAGTATATACACCCGTT  
TTAATAAGTTCTGTTATGGTTATGGAGGTGATGATGGTTGTGTCTCTAGT

>M6-PGSC0003DMG401009323-(rev)M6G-LecRK\_4575

ACACCCGTTTTAATAAGTTCTGTTATGGTTATGGAGGTGATGATGGTTGTGTCTCTAGTCAGTTGCCTGA  
GTGTCGAAAGTACAGTGATAAGTTTGGAGCAAAGATAGGAGACTTTATAG

>M6-PGSC0003DMG401009323-(rev)M6G-LecRK\_4636

GTTGCCTGAGTGTCTGAAAGTACAGTGATAAGTTTGGAGCAAAGATAGGAGACTTTATAGATTTATCTGG  
TACTACTACTAGTTATTATGACAATGCAAGCATTAGTCTTGGTGATTGTAT

>M6-PGSC0003DMG401009323-(rev)M6G-LecRK\_4697

TTATCTGGTACTACTACTAGTTATTATGACAATGCAAGCATTAGTCTTGGTGATTGTATGCAGAAGTGCT  
GGGAGCACTGCAGTTGTGTTGGATTACCAGTCTTAACAGCAATGGGACA

>M6-PGSC0003DMG401009323-(rev)M6G-LecRK\_4819

CTGCCGAATTTGGAATGGAAAGAGGGATTTTCGAGTCGATGAGAGTGGTAATGCAGTTCAAAGATATG  
TTCTGATTTACCCAAAATCATCTAAAGGTTAGTATTTATGTCATAAATGCAC

>M6-PGSC0003DMG401009323-(rev)M6G-LecRK\_488

CAGGTATGAAGTTTGGTTATAACCTTACAACAAAGCAGAATTGGACTTTAACTTCTTGGTTGAGTAGTTT  
TATTCCGGCTTCTGGGGCTTTTACTTTAAGTTTGGAGTCCATTCAAGATG

>M6-PGSC0003DMG401009323-(rev)M6G-LecRK\_4880

AGATATGTTCTGATTTACCCAAAATCATCTAAAGGTTAGTATTTATGTCATAAATGCACATTGTTTATGAA  
CTAAATTTTTGGTCGAACGAACACATTTTGTGCAAACATCCAAAAACA

>M6-PGSC0003DMG401009323-(rev)M6G-LecRK\_4941

TGTTTATGAACTAAATTTTTGGTCGAACGAACACATTTTGTGCAAACATCCAAAAACAGAATACAGTAT  
ATCCTAAGTAAAAAGCTACAACGACCACAGCTAAACAAATTTAAAAACA

>M6-PGSC0003DMG401009323-(rev)M6G-LecRK\_4991

CCAAAAACAGAATACAGTATATCCTAAGTAAAAAGCTACAACGACCACAGCTAAACAAATTTAAAAAC  
AGCCCCTACTCTTCTCCCTTCTATACAGTTTTTCTGATTGTAAAGTTCTT

>M6-PGSC0003DMG401009323-(rev)M6G-LecRK\_549

GAGTAGTTTTATTCCGGCTTCTGGGGCTTTTACTTTAAGTTTGGAGTCCATTCAAGATGCATTTAGCTGG  
TTATACGTCTGAAGAGGAGAGGTTTATTGGACAAGTGGCGCTTGGAAACAA

>M6-PGSC0003DMG401009323-(rev)M6G-LecRK\_61

AGCCATACATGTATCATTAACTTCCATCTGTGGCTGCAATAACCTCTATGAAGCCTGGTGATGAACTCA  
ATCACACTCAGTTCTTGATTCTGAAGATGGAATATTCAAGTTAGGATTT

>M6-PGSC0003DMG401009323-(rev)M6G-LecRK\_610

TTTCAGCTGGTTATACGTCTGAAGAGGAGAGGTTTATTGGACAAGTGGCGCTTGGAAACAATGAAATTTTT

CCATTCTTAACTGCATTGTATGATTCTTCTAACAGATATCAGTATAATCTC

>M6-PGSC0003DMG401009323-(rev)M6G-LecRK\_671

AAATTTTTCCATTCTTAACTGCATTGTATGATTCTTCTAACAGATATCAGTATAATCTCAACTGGGTGTCTG

AAAAAGATGGTGTGTTCTTCCAATTTGATGCTCCAGATGGAAGTTTCC

>M6-PGSC0003DMG401009323-(rev)M6G-LecRK\_732

CTTGGTGTCTGAAAAGATGGTGTGTTCTTCCAATTTGATGCTCCAGATGGAAGTTTCCCAAGTCTTGTG

TTGATTTTTAATGGGGCTATTCTTGGTGGTGGTGAAGACAGTCGTGTATA

>M6-PGSC0003DMG401009323-(rev)M6G-LecRK\_793

AGTCTTGTGTTGATTTTTAATGGGGCTATTCTTGGTGGTGGTGAAGACAGTCGTGTATACGCCCTTTATA

ATGAGTTCTGTTATGGTTACGAAAGTCACGATGGTTGTGTCTCTAATCAG

>M6-PGSC0003DMG401009323-(rev)M6G-LecRK\_854

CCCTTTATAATGAGTTCTGTTATGGTTACGAAAGTCACGATGGTTGTGTCTCTAATCAGTTACCTGAGTGC

CGAAAGGATGGGGATAAATTTGAGCAAAGAGTGGAGACTTTATCGATA

>M6-PGSC0003DMG401009323-(rev)M6G-LecRK\_915

ACCTGAGTGCCGAAAGGATGGGGATAAATTTGAGCAAAGAGTGGAGACTTTATCGATAGATCTAATTC

TAACAGTTATGATAATGCAAGCACTAGTCTTGGTGTGATTGTATGAAGAGGTG

>M6-PGSC0003DMG401009323-(rev)M6G-LecRK\_976

TCTAATTCTAACAGTTATGATAATGCAAGCACTAGTCTTGGTGTGATTGTATGAAGAGGTGCTGGGAGCACT

GCAGTTGTGTTGGCTTACCACCACCAGCAATGGAACAGGCTGCATAATT

>M6-PGSC0003DMG401009415-(rev)M6L-LecRK\_1037

AGCCATTTGTCAAAGTTCAAACAATTTTTATGTCAAATTTGGGAAGCTTCCTTCTTGTCTAACAGT

CCTAACATCCCTTTCATTGCAACGATTAAGACAAGTTTTGGATG

>M6-PGSC0003DMG401009415-(rev)M6L-LecRK\_1098

TCCTAACAGTCCTAACATCCCTTTCATTGCAACGATTAAGACAAGTTTTGGATGTTAGTTGAATGA

TGGTAAATTAATCCAATGAAAAGGACATTAATTCTGTATTTTAGTATA

>M6-PGSC0003DMG401009415-(rev)M6L-LecRK\_1159

AGTTGAATGATGGTAAATTAATCCAATGAAAAGGACATTAATTCTGTATTTTAGTATAACATTCATCTCA

AACACCTAATCTTTGTGTCACCTACTCTTGTGTCATCTGACCCTACAAAGA

>M6-PGSC0003DMG401009415-(rev)M6L-LecRK\_1220

TTCATCTTCAAACACCTAATCTTTGTGTCACCTACTCTTGTCATCTGACCCTACAAAGAGATAAGGTTTGT  
AAAATACAAAAAAAGTTGACCATTTGGGTATTCTGCAACTTCTGTGTC

>M6-PGSC0003DMG401009415-(rev)M6L-LecRK\_1281

TAAGGTTTGTAATAACAAAAAAGTTGACCATTTGGGTATTCTGCAACTTCTGTGTCTAGCTGTTTTTA  
CTGATTAATAAACAAACATATGCATCTTACAAAATTACATGTTATGGTA

>M6-PGSC0003DMG401009415-(rev)M6L-LecRK\_1342

GCTGTTTTTACTGATTAATAAACAAACATATGCATCTTACAAAATTACATGTTATGGTAACAGGATGGTG  
TCACAAGAATGGAAAGTTACTGCTTGTATATGAATACATGCCTAATGGCA

>M6-PGSC0003DMG401009415-(rev)M6L-LecRK\_1403

AGGATGGTGTCAACAAGAATGGAAAGTTACTGCTTGTATATGAATACATGCCTAATGGCAGTCTAGATAT  
GCACCTCTTTCGCGGCCAGATAAAGAGCCGCTGAGCTGGCTCGTCCGCTA

>M6-PGSC0003DMG401009415-(rev)M6L-LecRK\_1464

CTAGATATGCACCTCTTTCGCGGCCAGATAAAGAGCCGCTGAGCTGGCTCGTCCGCTACAAGATTGTG  
CAAGGTGTTGCCTCAGCATTGCACTATCTGCACAATGAGTATGAGCAGAGG

>M6-PGSC0003DMG401009415-(rev)M6L-LecRK\_1525

AGATTGTGCAAGGTGTTGCCTCAGCATTGCACTATCTGCACAATGAGTATGAGCAGAGGGTGGTCCATC  
GCGACTTGAAGGCAAGTAACATCATGCTTGACTCAAAGTTCAATGCGCGCC

>M6-PGSC0003DMG401009415-(rev)M6L-LecRK\_1586

GGTCCATCGCGACTTGAAGGCAAGTAACATCATGCTTGACTCAAAGTTCAATGCGCGCCTTGGGGACTT  
TGGCCTTGACGGGCACTTGACAACGAAAGGACCTCGTATGCTGAGGCAGA

>M6-PGSC0003DMG401009415-(rev)M6L-LecRK\_1647

GGGGACTTTGGCCTTGACGGGCACTTGACAACGAAAGGACCTCGTATGCTGAGGCAGAAGGAGTGCT  
TGGTACAATGGGATACATTGCACCAGAGTGTTCACACAGGGAAAGCCACA

>M6-PGSC0003DMG401009415-(rev)M6L-LecRK\_1708

GAGTGCTTGGTACAATGGGATACATTGCACCAGAGTGTTCACACAGGGAAAGCCACACAGCAATCTG  
ATGTGTACGCGTTTGGGGCAGTGTGTTGGAAGTTGTATGTGGCCAGAGAC

>M6-PGSC0003DMG401009415-(rev)M6L-LecRK\_1769

GCAATCTGATGTGTACGCGTTTGGGGCAGTGTGTTGGAAGTTGTATGTGGCCAGAGACCTGGAACCAA  
GATTAATGGCTTTCAATTCTTTGTTGATTGGGTTTGGTACTTGCACCGCGA

>M6-PGSC0003DMG401009415-(rev)M6L-LecRK\_183

TGTAATATTATTATGTTGTTTCAGACTCTCCAAAATGTTGTTGCACATGTATTGAATTCTTAAAAAATAAT  
ACTACTTTTGAAGGATCCGATCGGTATCCATCCACATATTTAGAGAGAG

>M6-PGSC0003DMG401009415-(rev)M6L-LecRK\_1830

GGAACCAAGATTAATGGCTTTCATTCTTTGTTGATTGGGTTTGGTACTTGCACCGCGATGGCCGTATCT  
TGGAAGCTGTTGATCCAAGGCTTGGAGGTGACTATGTTGCTGATGAAGCA

>M6-PGSC0003DMG401009415-(rev)M6L-LecRK\_1891

GCCGTATCTTGGAAGCTGTTGATCCAAGGCTTGGAGGTGACTATGTTGCTGATGAAGCAAAGAATCTTC  
TACTACTTGGTTTGGCTTGTGCACATCCTATAGCTACTGACAGGCCTAAAA

>M6-PGSC0003DMG401009415-(rev)M6L-LecRK\_1952

GAATCTTCTACTACTTGGTTTGGCTTGTGCACATCCTATAGCTACTGACAGGCCTAAAACACAGGCAATA  
GTTTCAGATTATATCAGGGTCAGCACCAGCACCAGAAGTTCCACCATTCAA

>M6-PGSC0003DMG401009415-(rev)M6L-LecRK\_2013

CAGGCAATAGTTCAGATTATATCAGGGTCAGCACCAGCACCAGAAGTTCCACCATTCAAGCCAGCATTT  
GTGTGGCCATCAATGATGCCAATTGACATAGACTCAAGTGTATGGACACA

>M6-PGSC0003DMG401009415-(rev)M6L-LecRK\_2135

ATCCATTACTACTTCTCAATTCAATTCAGGATGGAGTCTTGACTATCAAAGCAGGGAGACCCCAACATAT  
GCAGACCACTCTTTGGTGTAGTTACTTTGATGGTAAACAACACTATTACCAA

>M6-PGSC0003DMG401009415-(rev)M6L-LecRK\_2196

CCAACATATGCAGACCACTCTTTGGTGTAGTTACTTTGATGGTAAACAACACTATTACCAAAAAGGAAAATTG  
ATTTTTTTGGCCTTCTATTTTTTAAAAATATTCCTGTAATTATGTTTTTC

>M6-PGSC0003DMG401009415-(rev)M6L-LecRK\_2379

TTCAATTTGTTATTGGGGCATGATGAAAAGATCAGGCAGCCTATGTACATTCATATAACTCAGTACTGTT  
ACATTATGTCATATTTACTGTTTTCTGTCTTTGTCAACCAAAATTATGT

>M6-PGSC0003DMG401009415-(rev)M6L-LecRK\_244

AAAAAATAATACTACTTTTGAAGGATCCGATCGGTATCCATCCACATATTTAGAGAGAGCGAAGCAACA  
CTAATTCAATAGACTCATTAAACCGGTGAGCACATGCCCTTATCTTTTTAT

>M6-PGSC0003DMG401009415-(rev)M6L-LecRK\_2440

AGTACTGTTACATTATGTCATATTTACTGTTTTCTGTCTTTGTCAACCAAAATTATGTAAAAGAAACTCAT



GTTGAGCCAAATTGGAGGAGACAGAAAATGAATAGTGGCGAAGTATCT

>M6-PGSC0003DMG401009415-(rev)M6L-LecRK\_2501

AAGAAACTCATGTTGAGCCAAATTGGAGGAGACAGAAAATGAATAGTGGCGAAGTATCTTTTTGCCTC

AATTGTACTACTACATACAACCTTAAAGAATTCCAAGATCTCAAATTGTAAT

>M6-PGSC0003DMG401009415-(rev)M6L-LecRK\_2562

TTTGCCTCAATTGTACTACTACATACAACCTTAAAGAATTCCAAGATCTCAAATTGTAATGAAAGATAAGAC

CTGATCAATTCTTATAAAAGCAATAGATAACAGAAGAACACAATACAAA

>M6-PGSC0003DMG401009415-(rev)M6L-LecRK\_2623

AAGATAAGACCTGATCAATTCTTATAAAAGCAATAGATAACAGAAGAACACAATACAAAGATAGATCAT

AGAAGCTTTGTTGATATGCATAAATGCTCTGCCATTGTAGTATTAGATCGT

>M6-PGSC0003DMG401009415-(rev)M6L-LecRK\_2684

TAGATCATAGAAGCTTTGTTGATATGCATAAATGCTCTGCCATTGTAGTATTAGATCGTTGACAATATATA

GTAGATGAAATCCCACTAAGATTTATATTCTTTCTTACTTTCAAGATCA

>M6-PGSC0003DMG401009415-(rev)M6L-LecRK\_2745

ACAATATATAGTAGATGAAATCCCACTAAGATTTATATTCTTTCTTACTTTCAAGATCATTCTGTAAATTA

ATATAATGGAGGACCTGAGATGCTTGCCAAAGTTTTACAAGTTAGTGC

>M6-PGSC0003DMG401009415-(rev)M6L-LecRK\_2806

TCTGTAAATTAATATAATGGAGGACCTGAGATGCTTGCCAAAGTTTTACAAGTTAGTGCGCATAAGATCA

AGAGTTTCCCCCGCTGCAACTTTGTTGATAAACGGAGCTTTCTATAATC

>M6-PGSC0003DMG401009415-(rev)M6L-LecRK\_2867

ATAAGATCAAGAGTTTCCCCCGCTGCAACTTTGTTGATAAACGGAGCTTTCTATAATCAGTGAAAGTGA

AAGGAACATAGATACGGGGGTGTTTCAGCATCCACCAGCTCAGGTGGTGGT

>M6-PGSC0003DMG401009415-(rev)M6L-LecRK\_2928

TGAAAGTGAAAGGAACATAGATACGGGGGTGTTTCAGCATCCACCAGCTCAGGTGGTGGTCCACTGCT

GTGTCCCTTGGTCCCAAGAGGAATGATGCAATAGACACCCGTAGTTTTGCTT

>M6-PGSC0003DMG401009415-(rev)M6L-LecRK\_305

AAGCAACACTAATTCAATAGACTCATTAAACCGGTGAGCACATGCCCTTATCTTTTTATGCTTTTCTTTTC

TAGTAGCTAGTAAGTGATCAATGTCTTATATGCTTATTCAATTAATTT

>M6-PGSC0003DMG401009415-(rev)M6L-LecRK\_3050

TTGCATATCACTCTATGCTTGACTGTGTGTAATCTTCCATTGCTCCATACCTTCACATAGCAAAAGCAAGT  
ATCATTGTCTAGTTCTTTTTTCTCAATCTTAGAAGGGGTAACGGAGTAG

>M6-PGSC0003DMG401009415-(rev)M6L-LecRK\_3111

AAAAGCAAGTATCATTGTCTAGTTCTTTTTTCTCAATCTTAGAAGGGGTAACGGAGTAGGAATTATCTAA  
CTTCCTGCTAAACAAACCCCGCCAGAGGCTAGCATAAGATTGTTGGAACA

>M6-PGSC0003DMG401009415-(rev)M6L-LecRK\_3172

ATTATCTAACTTCCTGCTAAACAAACCCCGCCAGAGGCTAGCATAAGATTGTTGGAACAATTCAAATCTT  
GAAAATGAACTAGGTAGAGTAGCAGCATAGTTACCGTGCCTATGTCTCCA

>M6-PGSC0003DMG401009415-(rev)M6L-LecRK\_3233

TCAAATCTTGAAAATGAACTAGGTAGAGTAGCAGCATAGTTACCGTGCCTATGTCTCCAAGATTCACAAG  
GAGGGTGTGGCCAAGGATCAACTGCTACAAATTCACCAGACTTCTTCA

>M6-PGSC0003DMG401009415-(rev)M6L-LecRK\_3294

ATTCACAAGGAGGGTGTGGCCAAGGATCAACTGCTACAAATTCACCAGACTTCTTCATGACCTCAAGA  
CCGCCAACGCTTTCATCATCCTGTAGAAATAGTAAGGAATCCTGAGTCTGT

>M6-PGSC0003DMG401009415-(rev)M6L-LecRK\_3355

ACCTCAAGACCGCCAACGCTTTCATCATCCTGTAGAAATAGTAAGGAATCCTGAGTCTGTGTGTATCTGAA  
CCCCAGAGGAACCTACAGCTTCTGGGGTGAAGTGGTACTTGTTAATCCTA

>M6-PGSC0003DMG401009415-(rev)M6L-LecRK\_3477

CTGACAAGGCCAATCCTCAAAGGAAACATTTGGCAGTCCCAACCTTCACTCATCTTTCGCAGAATGTCC  
GTCATTAGTCCATTAATTGCTGTAGCATACTTCTTGATTGTCTCTCTGTT

>M6-PGSC0003DMG401009415-(rev)M6L-LecRK\_3526

CTCATCTTTCGCAGAATGTCCGTCATTAGTCCATTAATTGCTGTAGCATACTTCTTGATTGTCTCTCTGTT  
ACAGTAGGAATCAAAGTCTTTAAGCATTCTAGTAAAGCAGTCTTTT

>M6-PGSC0003DMG401009415-(rev)M6L-LecRK\_366

TTTTCTTTTTCTAGTAGCTAGTAAGTGATCAATGTCTTATATGCTTATTCAATTAATTTATGTAATTTAAC  
AAGGGACTAGTCTTTCTATTCTTACATTTAGTATGCTAGGAATTTTGA

>M6-PGSC0003DMG401009415-(rev)M6L-LecRK\_427

GTAATTTTAAACAAGGGACTAGTCTTTCTATTCTTACATTTAGTATGCTAGGAATTTTGACATGGGACTAGT  
TTTTCTAGTCTGACATTTAGCGTGCTAGGAATGTACTAGGTTGGATCAT

>M6-PGSC0003DMG401009415-(rev)M6L-LecRK\_488

TGGGACTAGTTTTCTAGTCTGACATTTAGCGTGCTAGGAATGTACTAGGTTGGATCATCTTCTGACAAG  
CAAATTTCCCCTTTGGAAGAATCAAAGTCTTCTTGAACATTTAATAACTT

>M6-PGSC0003DMG401009415-(rev)M6L-LecRK\_549

TCTGACAAGCAAATTTCCCCTTTGGAAGAATCAAAGTCTTCTTGAACATTTAATAACTTGGTCCTTCTTTTT  
GTCTTCAATCTCCTTTTCTTTCTTAGAATTCTCAAGTCATCCCAAGG

>M6-PGSC0003DMG401009415-(rev)M6L-LecRK\_610

TCCTTCTTTTTGTCTTCAATCTCCTTTTCTTTCTTAGAATTCTCAAGTCATCCCAAGGGTTGTCAAAGTTT  
CTTTTACCCTGACTAACTAGATTTGCGTAGCATAGGGCCCAACAAAG

>M6-PGSC0003DMG401009415-(rev)M6L-LecRK\_671

TTGTCAAAGTTTCTTTTACCCTGACTAACTAGATTTGCGTAGCATAGGGCCCAACAAAGTGAAAAACGCT  
ATATATCAAGACCATTTTTTAATACTTGAAGTCGAGACCTCTAGTTAAGG

>M6-PGSC0003DMG401009415-(rev)M6L-LecRK\_732

AAAAACGCTATATATCAAGACCATTTTTTAATACTTGAAGTCGAGACCTCTAGTTAAGGAATCACACTCCC  
CGTTAGGCGATAGTAAATGTTTTAATAGTTGATTCATACCATTTGGTAA

>M6-PGSC0003DMG401009415-(rev)M6L-LecRK\_793

TCACACTCCCCGTTAGGCGATAGTAAATGTTTTAATAGTTGATTCATACCATTTGGTAAGTAAGAGTTTAA  
GCCAAAATATCAAGGATGTAAGAAAACTAATGTAATGCCTTAAAGTT

>M6-PGSC0003DMG401009415-(rev)M6L-LecRK\_854

AAGAGTTTAAGCCAAAAATATCAAGGATGTAAGAAAACTAATGTAATGCCTTAAAGTTTTGACCAAGA  
ACCAACTTGCTACTATGGTCCCTCCAATTTAGAAAAACAAGGCACTATCTT

>M6-PGSC0003DMG401009415-(rev)M6L-LecRK\_915

GACCAAGAACCAACTTGCTACTATGGTCCCTCCAATTTAGAAAAACAAGGCACTATCTTGAAGCCCTTCA  
TTTTGATTTGCTTAAAAGAAGATGATCATCCTTTGCTGACCATGGAATAA

>M6-PGSC0003DMG401009415-(rev)M6L-LecRK\_976

AGCCCTTCATTTTGATTTGCTTAAAAGAAGATGATCATCCTTTGCTGACCATGGAATAAGCAGCCATTTGT  
CAAAGTTCAAACAATTTTTTATGTCAAATTTGGGAAGCTTCTTCT

>M6-PGSC0003DMG401010943M6LRR-RLP\_0

ATGGCCGATCCTGTATTTGCTGCTACTGTTAAAGTTTTGCTTGACAAATTGATTTCTCTCACTATCAAGGA

GATCAGCAGCTCAAGGGATTTCAATGAAGATCTCGAAATGTTGACACAT

>M6-PGSC0003DMG401010943M6LRR-RLP\_1037

AGAAGAATTAGCGAGCATGGGCAACAAGATTGTTAAAATGTGTCATGGTCTACCATTGGCTGCAAGTGT  
GTTGGGAGGCCTATTACACAACAAGGAAAAACATGAATGGCAAGCAATTCT

>M6-PGSC0003DMG401010943M6LRR-RLP\_1159

ATGGCAGCCCCCTTGTTCAGGTGAAGATGATAATGGAGAAAATAGCATAAAGAAAATCCTAAACTCA  
GCTATGATTATCTACCATCTCCACATCTAAAAAATGCTTTGCTTACTTTG

>M6-PGSC0003DMG401010943M6LRR-RLP\_1220

AAAACTCAGCTATGATTATCTACCATCTCCACATCTAAAAAATGCTTTGCTTACTTTGCAATGTTGCCAA  
AAGATCTTATGTTTGAAAAGGCCCAACTAATCCAACCTCTGGATGGCAGA

>M6-PGSC0003DMG401010943M6LRR-RLP\_1281

ATGTTGCCAAAAGATCTTATGTTTGAAAAGGCCCAACTAATCCAACCTCTGGATGGCAGAAGGCTTTCTTC  
ATCCATGTCAAGAGACCACCGTGATGGAAGACATCGGGAACAACCTTCTTT

>M6-PGSC0003DMG401010943M6LRR-RLP\_1342

GCTTTCTTCATCCATGTCAAGAGACCACCGTGATGGAAGACATCGGGAACAACCTTCTTTCAACTCTTGTT  
GAGAAATTCCTTGCTACAAGATGTTGTGTTAGATGAGCATAACAATATAA

>M6-PGSC0003DMG401010943M6LRR-RLP\_1403

ACTCTTGTTGAGAAATTCCTTGCTACAAGATGTTGTGTTAGATGAGCATAACAATATAAAATACTGTAAG  
ATGCACGATCTTGTCATGATTTGGCTGGAGATATCTTCAAATCTAAAAT

>M6-PGSC0003DMG401010943M6LRR-RLP\_1464

TACTGTAAGATGCACGATCTTGTCATGATTTGGCTGGAGATATCTTCAAATCTAAAATATTTGATTCTGA  
AGGGCAATGATGGAGAAAACTTTCTCAAGTGCGATACTTTGGATGGGAC

>M6-PGSC0003DMG401010943M6LRR-RLP\_1525

TTGATTCGAAGGGCAATGATGGAGAAAACTTTCTCAAGTGCGATACTTTGGATGGGACTCACCAAGTG  
ATCAAATAGATAAGATAAATGAGCCAGGACGATTGTGCACGCTGTTCTGGA

>M6-PGSC0003DMG401010943M6LRR-RLP\_1586

ACCAAGTGATCAAATAGATAAGATAAATGAGCCAGGACGATTGTGCACGCTGTTCTGGAGAAACAATTA  
TATTTCCGAAGATATGCTGTTGAGCTTTAAGTTCTTGAGAGTTTTAAATTT

>M6-PGSC0003DMG401010943M6LRR-RLP\_1647

AACAATTATATTTTCGGAAGATATGCTGTTGAGCTTTAAGTTCTTGAGAGTTTTAAATTTGTCTAGATCAGG  
AATCAAGGAGTTGTCTAGCTTCAATCGGGAAGCTAATATACTTGAGATAT

>M6-PGSC0003DMG401010943M6LRR-RLP\_1769

AGATATCTCGAGCACTGAGATCACAGCCTTGCCCCACTCCATTTGCAAGCTCTATAATTTGCAAACATTTA  
GAGCCAATTGCTGCTATTTCACTCAAGGAGTTTCCATATGAGATGGGAAA

>M6-PGSC0003DMG401010943M6LRR-RLP\_183

TCTGTGCAACAATGGCTCAGGAGACTTGAAAGAGTTGCTGAAAATGCTGAAAATGTGTTTGATCGATTC  
AGATATGAATCTCTCAAAACAAAAGTGATAAACATCCGAAACAGCCCAATG

>M6-PGSC0003DMG401010943M6LRR-RLP\_1830

CAAACATTTAGAGCCAATTGCTGCTATTTCACTCAAGGAGTTTCCATATGAGATGGGAAATATGATAAGTT  
TGAGACACATATATTTTTATTCTTCGTCTCAGATGCCACTTAACTTGGGA

>M6-PGSC0003DMG401010943M6LRR-RLP\_1952

ATTGACTTGTCTTCAGACCCTACAGTATTTCAATGTGGGTTTGGAGAAAGGCCATCGAATAGAAGAATTA  
GGTTGTTTGAATAACCTTAGAGGTGAATTGAGTATCAATGAACTGGAATT

>M6-PGSC0003DMG401010943M6LRR-RLP\_2013

GAAGAATTAGGTTGTTTGAATAACCTTAGAGGTGAATTGAGTATCAATGAACTGGAATTGGTCCGTAGT  
AGAGAAGATGCTCTAACAGCATATTTACAAGAGAAATCAAATATTTACAAG

>M6-PGSC0003DMG401010943M6LRR-RLP\_2074

TCCGTAGTAGAGAAGATGCTCTAACAGCATATTTACAAGAGAAATCAAATATTTACAAGCTGACATATTT  
ATGGTCCCATCAGGAATCAGAAGGATGTGAGATTAATGCTGAGCATGTGT

>M6-PGSC0003DMG401010943M6LRR-RLP\_2135

GACATATTTATGGTCCCATCAGGAATCAGAAGGATGTGAGATTAATGCTGAGCATGTGTTGGATGGTCT  
TCAACCACATCCTTACTTGAAAACATTTGAAGTGGTGAGATATTTGGGTAC

>M6-PGSC0003DMG401010943M6LRR-RLP\_2196

GATGGTCTTCAACCACATCCTTACTTGAAAACATTTGAAGTGGTGAGATATTTGGGTACTAGATTTCTTC  
ATGGTTCAATGAAGAGTCGCTACCAAATTTGGTCAAGTTGAAATTAAGT

>M6-PGSC0003DMG401010943M6LRR-RLP\_2257

GATTTCTTCATGGTTCAATGAAGAGTCGCTACCAAATTTGGTCAAGTTGAAATTAAGTAATTGCAGCAG  
TTGCAAAGAAATTCATCTCTTGCCAACTGAAATTCCTTCAGCATCTTG

>M6-PGSC0003DMG401010943M6LRR-RLP\_2318

TTGCAGCAGTTGCAAAGAAATTCCATCTCTTGGCCAACTGAAATTCCTTCAGCATCTTGAAGTGGTAGGG  
TTCCATAAGCTGGAATGCATCGGAACTACATTTTATGGTATTGAGGTAA

>M6-PGSC0003DMG401010943M6LRR-RLP\_2379

CTGGTAGGGTCCATAAGCTGGAATGCATCGGAACTACATTTTATGGTATTGAGGTAAACAATATGGGA  
TCAAGCAGCAATAATGCCATTATCCAAGTGTTCCTGTCATTAAGAAGAACTA

>M6-PGSC0003DMG401010943M6LRR-RLP\_244

ATCGATTAGATATGAATCTCTCAAACAAAAGTGATAAACATCCGAAACAGCCCAATGAAAAAGGTCA  
GTGGTTTCTTTTCTCATACTGCTTTTAAGAGCAAATGTCTCGAAAAATCA

>M6-PGSC0003DMG401010943M6LRR-RLP\_2440

ATATGGGATCAAGCAGCAATAATGCCATTATCCAAGTGTTCCTGTCATTAAGAAGAACTAGTATTGGAGAA  
TATGCGTAGCCTTATTGAGTGAAGGGAGTGAATTGATACCAACAACAA

>M6-PGSC0003DMG401010943M6LRR-RLP\_2501

ATTGGAGAATATGCGTAGCCTTATTGAGTGAAGGGAGTGAATTGATACCAACAACAAGTGGGGTAA  
AAATGTTTCCTGTGCTTGAGAAGTTGAGGATTAGATACTGTCCATTGTTAAA

>M6-PGSC0003DMG401010943M6LRR-RLP\_2562

GGGGTAAAAATGTTTCCTGTGCTTGAGAAGTTGAGGATTAGATACTGTCCATTGTTAAAAAGTACTCCG  
AAGCAATTGGAAATCCTACGCGAATTGAGCATTGAAAGAGTTGACAGTGAA

>M6-PGSC0003DMG401010943M6LRR-RLP\_2623

GTACTIONGAAAGCAATTGGAAATCCTACGCGAATTGAGCATTGAAAGAGTTGACAGTGAAATGCCATTAT  
TGAATTTGTGCAGCAACTTGACATCTCTCGTAAAGTTTAGTGTCTCTTTTG

>M6-PGSC0003DMG401010943M6LRR-RLP\_2684

GCCATTATTGAATTTGTGCAGCAACTTGACATCTCTCGTAAAGTTTAGTGTCTCTTTTGTGAAAGAGCTCA  
CTTGTTTTCCAGATGAGATGATACGCAGCAACGTTTCTCTTCAACACTT

>M6-PGSC0003DMG401010943M6LRR-RLP\_2745

AAAGAGCTCACTTGTTTTCCAGATGAGATGATACGCAGCAACGTTTCTCTTCAACACTTATCGGTCTATAA  
CTGCAGAGAGTTTCGTGAATTGCCACAGAGCTTGTACAATTTGCATTCT

>M6-PGSC0003DMG401010943M6LRR-RLP\_2867

TAAGAGCTTAATGATTGAGTACTGCACCAATTTAGTTCCTTTCTGTTCTTAGTGGAGAGAATTATTGA

CTTCCCTACAAAATCTTCAGTTATGGAGTTGTGGTGGATTGGCCAGTTT

>M6-PGSC0003DMG401010943M6LRR-RLP\_2928

AATTATTTGACTTCCCTACAAAATCTTCAGTTATGGAGTTGTGGTGGATTGGCCAGTTTACCAAGTGGAA

TGCTAGAGAAATGCCGGTCTCTACAGAATTTGAGGGTCAACTATTGTAAC

>M6-PGSC0003DMG401010943M6LRR-RLP\_2989

CAAGTGGAATGCTAGAGAAATGCCGGTCTCTACAGAATTTGAGGGTCAACTATTGTAACAACCTTAGTTTC

CTTCCCTTTACATGTGGGGGATATGCCTTCACTTTCTATTTGTCTATAG

>M6-PGSC0003DMG401010943M6LRR-RLP\_305

AAAGGTCAGTGGTTTCTTTTCTCATACTGCTTTAAGAGCAAATGTCTCGAAAAATCAACAGTATTAATA

AAGAGTTGACTGCTATTAACAAGGTAGCTAAAGACCTTGGTCTCCACTC

>M6-PGSC0003DMG401010943M6LRR-RLP\_3050

CTTAGTTTCCCTTCCCTTTACATGTGGGGGATATGCCTTCACTTTCTATTTGTCTATAGCACACTGTCCCAA

ATTGGATAGTGTACCCACAGGGGGCCTTACCATCTCACCAGGTTAAG

>M6-PGSC0003DMG401010943M6LRR-RLP\_3111

CACTGTCCCAAATTGGATAGTGTACCCACAGGGGGCCTTACCATCTCACCAGGTTAAGGGAATTGGAA

ATTGGTCCTGTCTCAGATATGGTGGATTTTGAGGCATTCCAACCTGACTTTT

>M6-PGSC0003DMG401010943M6LRR-RLP\_3172

AATTGGAAATTGGTCCTGTCTCAGATATGGTGGATTTTGAGGCATTCCAACCTGACTTTTAATGGCATTCA

GCAGCTGTTGTCCCTTCGTA CTCTGCTTGTGTTCCGACATTTGCACTGGG

>M6-PGSC0003DMG401010943M6LRR-RLP\_3294

TCTCTGCCCTATCAGCTTATGCAACTCTCTGCCCTAACACATATCCATATATGTGATTTCCGGAATCGAGGC

TCTTCTCATAGACTTGACAACCTTACTTCTCTTGAAATATTACATTTA

>M6-PGSC0003DMG401010943M6LRR-RLP\_3355

GAATCGAGGCTCTTCTCATAGACTTGACAACCTTACTTCTCTTGAAATATTACATTTAGTGAGGTGCAAA

TGGCTGCAACATGTGGACTTCTCAGATGCCATGCCCAAATTACGGTATC

>M6-PGSC0003DMG401010943M6LRR-RLP\_3416

GAGGTGCAAATGGCTGCAACATGTGGACTTCTCAGATGCCATGCCCAAATTACGGTATCTAAGAATCTG

CGATTGTCCATTGTTAGAAGCTCTGTCAGATGCTTTTTGCAACCTTGTTTC

>M6-PGSC0003DMG401010943M6LRR-RLP\_3477

AGAATCTGCGATTGTCCATTGTTAGAAGCTCTGTCAGATGCTTTTTGCAACCTTGTTTCTTTGGAAGAATT  
AAGATTAGAGAACTGCGAAAACTAGAGCACCTGCCATCCAGAGAGGCA

>M6-PGSC0003DMG401010943M6LRR-RLP\_3538

TGGAAGAATTAAGATTAGAGAACTGCGAAAACTAGAGCACCTGCCATCCAGAGAGGCAATGCGACGC  
CTCACTAAATTATGGTACCTAAAAATTAAGGCTGCCCAAAGTTAGAAGAAA

>M6-PGSC0003DMG401010943M6LRR-RLP\_3721

AAGTAGGTGGAAGCATAATTCAGGACTTGCCATAAGTCACATTTTTAAATTTTTATTTTCTACGAATTCTAGA  
AAAGAAGTTCTGTATGAATATATCTCAAATTATTCAAACGTTTCGTTTG

>M6-PGSC0003DMG401010943M6LRR-RLP\_3782

GAATTCTAGAAAAGAAGTTCTGTATGAATATATCTCAAATTATTCAAACGTTTCGTTTGTTTTGCACGTTT  
ATCTTTCAATAAAGAGTTTTATCACTTAATCCTCGAATGTAGTACTCTT

>M6-PGSC0003DMG401010943M6LRR-RLP\_3843

TTGCACGTTTATCTTTCAATAAAGAGTTTTATCACTTAATCCTCGAATGTAGTACTCTTCATTACATAGTAT  
AATGGAAGTTATTGAGTAGTATGGTTCTTGAATAAGATAACTGTTTCAT

>M6-PGSC0003DMG401010943M6LRR-RLP\_3904

TTACATAGTATAATGGAAGTTATTGAGTAGTATGGTTCTTGAATAAGATAACTGTTTCATTCTCTTCAAGTA  
TAGACAAGTATTTTACTGGCATAACATTAGCTTGCCTATCTGGTATAT

>M6-PGSC0003DMG401010943M6LRR-RLP\_3965

TCTTCAAGTATAGACAAGTATTTTACTGGCATAACATTAGCTTGCCTATCTGGTATATTACAGTTTCTTTT  
TGCGTAAGAGGAGGTGAAATGTAGAGAGGAAAAAGCTGACTAAAATTT

>M6-PGSC0003DMG401010943M6LRR-RLP\_4026

CAGTTTCTTTTTGCGTAAGAGGAGGTGAAATGTAGAGAGGAAAAAGCTGACTAAAATTTGACTTCTATT  
GAATTTGCATCAGTGGTGCTTTTGGAGACTCTGATTGTATGTCGTTTGAGA

>M6-PGSC0003DMG401010943M6LRR-RLP\_4087

CTTCTATTGAATTTGCATCAGTGGTGCTTTTGGAGACTCTGATTGTATGTCGTTTGAGATTTTAAGGTAAG  
TTAGTTTTTGTCCATAAAAAGTTTGCAAATTGTGGATTTTAGATTGATA

>M6-PGSC0003DMG401010943M6LRR-RLP\_4148

TTAAGGTAAGTTAGTTTTTGTCCATAAAAAGTTTGCAAATTGTGGATTTTAGATTGATACTTTGTTTTTCTC  
TATGAATGGTTTTCTTTCCCCCTGAAATGCCGCTTTTAAATCTTCTCT



>M6-PGSC0003DMG401010943M6LRR-RLP\_4209

TTGTTTTCTCTATGAATGGTTTTCTTTCCCCTGAAATGCCGCTTTTAAATCTCCTACTTACCATTATCT  
CGTATACTGTTCTTAGTTAATTGAAAAGTCTCAAGGAACAATACCAA

>M6-PGSC0003DMG401010943M6LRR-RLP\_427

TCATAGTTCCTTCTCGGAAAATACTACCGATTTCGAGAAACAGATTCCATAGTAGTTGCTTCAGATGTTGTT  
GGTAGAGATTTGGATGTTGCTGAGATAAAGGAGAAAATTTGAAGATGA

>M6-PGSC0003DMG401010943M6LRR-RLP\_4270

TTACCATTATCTCGTATACTGTTCTTAGTTAATTGAAAAGTCTCAAGGAACAATACCAAGTCTCATATATA  
GTAGAGGTCTATATAACTTTCTTAATAGTCACACTTCTCGTTACTTTCA

>M6-PGSC0003DMG401010943M6LRR-RLP\_4331

CTCATATATAGTAGAGGTCTATATAACTTTCTTAATAGTCACACTTCTCGTTACTTTCAATTCACAGTTTAT  
TTTCTCTGTTGATTAACAATCGCAATTGAAGGACTTGAACAAGAAG

>M6-PGSC0003DMG401010943M6LRR-RLP\_4392

TCACAGTTTATTTCTCTGTTGATTAACAATCGCAATTGAAGGACTTGAACAAGAAGGAAATTTCAA  
GGACTGCTATGTCTTGAACCTTACAGCAAAGAGTTCCCCCATTGACTCT

>M6-PGSC0003DMG401010943M6LRR-RLP\_4453

AATTTCAAAGGACTGCTATGTCTTGAACCTTACAGCAAAGAGTTCCCCCATTGACTCTTAACGTTCCAAA  
AGACAAGTAGGCTTTTCTCAATATTAATTATAAGCAATTTATGTTATTA

>M6-PGSC0003DMG401010943M6LRR-RLP\_4514

ACGTTCCAAAAGACAAGACTAGGCTTTTCTCAATATTAATTATAAGCAATTTATGTTATTATATGCAAGTTTT  
AGAGTTCAATAGCTTAAATTGATTATTTGCTGGTATTTCTTGTTTGGCA

>M6-PGSC0003DMG401010943M6LRR-RLP\_4575

TGCAAGTTTTAGAGTTCAATAGCTTAAATTGATTATTTGCTGGTATTTCTTGTTTGGCATGTGGTTGAATT  
ATGGATACAGTCTTTCCTGTTTGTGGATATCAATAAATCTTCAAGATTT

>M6-PGSC0003DMG401010943M6LRR-RLP\_4636

TGGTTGAATTATGGATACAGTCTTTCCTGTTTGTGGATATCAATAAATCTTCAAGATTTGTTTCCTCAAAT  
TCTCACCGATGGAGTGGTGCCTTTTATTATTATTGGGATATATTGCACA

>M6-PGSC0003DMG401010943M6LRR-RLP\_4697

TTCTCAAATTCTCACCGATGGAGTGGTGCCTTTTATTATTATTGGGATATATTGCACAGAGACTTGATGG

ATACAATAAGTGATTGCCTCACATCTCAGTTAGATTGAGGGAAGAAAAG

>M6-PGSC0003DMG401010943M6LRR-RLP\_4738

ATTGGGATATATTGCACAGAGACTTGATGGATAACAATAAGTGATTGCCTCACATCTCAGTTAGATTGAG  
GGAAGAAAAGAGTAGGAGTATCATAGATGTCACCAAAGACGAATGTACAAA

>M6-PGSC0003DMG401010943M6LRR-RLP\_488

AGATGTTGTTGGTAGAGATTTGGATGTTGCTGAGATAAAGGAGAAAATTTGAAGATGAGAGAAGAGG  
ATGTTGTTATGTGCACCATTCCCATAGTGGGTATGGGGGGTTTAGGGAAAAC

>M6-PGSC0003DMG401010943M6LRR-RLP\_61

CTATCAAGGAGATCAGCAGCTCAAGGGATTTCAATGAAGATCTCGAAATGTTGACACATAATGTATCCTT  
AATCCAAGCTTTCCTTCATGATGTTGAAACACCACAAGTTGAGAAACAAC

>M6-PGSC0003DMG401010943M6LRR-RLP\_610

CTGTGGCTAAGAGGATTTACAATGATGAACACATCAAGCAAATCTTTGAAAGGAGAATTTGGTTGTGTC  
TACCTGAAATGTCTGAAACAAAGAGCTTTCCTTGAACAAATCCTTGAATCAT

>M6-PGSC0003DMG401010943M6LRR-RLP\_671

GTTGTGTCTACCTGAAATGTCTGAAACAAAGAGCTTTCCTTGAACAAATCCTTGAATCATTGACAGAGAGG  
AAAGTTGAGGTTCAAAGGAGAGATATAATAGTCAAGAAGCTACAAGATAA

>M6-PGSC0003DMG401010943M6LRR-RLP\_732

ACAGAGAGGAAAGTTGAGGTTCAAAGGAGAGATATAATAGTCAAGAAGCTACAAGATAAATTGGGAG  
GAAAAAACTATTTGCTAGTCCTGGATGATTTGTGGTGTGTTGACTCTACATCG

>M6-PGSC0003DMG401010943M6LRR-RLP\_854

GCATGAGTTCGTGGACACGTTGAGAGGAATAAATACAGCCAAAGGAAACTGCATTCTTGTGACAACTCG  
TATGAAGAGAGTGGCATCCACAGTAGCAGCAGATCTTCATATGTTGGGAAA

>M6-PGSC0003DMG401010943M6LRR-RLP\_915

ACAACCTCGTATGAAGAGAGTGGCATCCACAGTAGCAGCAGATCTTCATATGTTGGGAAAGTTAACAGAA  
GATCATTGTTGGTCTATTTTCGAACAAAAAGCATTGTTGATGGCAGGGTT

>M6-PGSC0003DMG401010943M6LRR-RLP\_976

TAACAGAAGATCATTGTTGGTCTATTTTCGAACAAAAAGCATTGTTGATGGCAGGGTTCCAGAAGAATT  
AGCGAGCATGGGCAACAAGATTGTTAAAATGTGTCATGGTCTACCATTGG

>M6-PGSC0003DMG401013731M6LRR-RLK\_0

GCTTTGCTGTCTGGTGATGCTAATCCTGCCTGCTTCTGATAAGAGTTATTTACTTGCAGGGACCTGAGCA  
ACAACATGTTGAATGGTCCAATCCCAGATACATTTAGGCAGTTGGACTTT

>M6-PGSC0003DMG401013731M6LRR-RLK\_1116

CCATCATATTTTTTTTCATCCTCTGATAGATGGGCATTCAGTAGTTCGGGAGTGTACGTGGGTCTTGCAA  
ATGTTAGTTATATTGCAACAAATAGATTTTTACTGAACATATCTGGTGCC

>M6-PGSC0003DMG401013731M6LRR-RLK\_1178

TCTTGCAAATGTTAGTTATATTGCAACAAATAGATTTTTACTGAACATATCTGGTGCCGACTTTTACAACA  
CAGCACGCCTTGCCCTAATTCTCTCAAATATTATGGGCTTGCCTACT

>M6-PGSC0003DMG401013731M6LRR-RLK\_124

ACATGTAGGTACCTTGAAGTGAAACCTTTACAAGTTGAAGCATAAATCTTGTAATTTTTTTTTTTTTTTCCTC  
AAAGTTTTCTTTCAGTAACAAGAAGCAAAAGTTTTATCTGTGATGTAG

>M6-PGSC0003DMG401013731M6LRR-RLK\_1364

CAGCCTTGGAAGGCGGATATTTGATGTAGCAATACAAGTAAGTTTGAGGCCTAACTTCTTTTGTAATAA  
TAAAAATGTAATGTTGATATACTGAGTTCTGATATGGTTGGCAACTTTCT

>M6-PGSC0003DMG401013731M6LRR-RLK\_1426

GTAATAATAAAAATGTAATGTTGATATACTGAGTTCTGATATGGTTGGCAACTTTCTGATTTAAGATTG  
AAGGTACCAATTTGTTGGAGATAATGTGGTATATTTTGATTTCTTACACA

>M6-PGSC0003DMG401013731M6LRR-RLK\_1488

TAAGATTGAAGGTACCAATTTGTTGGAGATAATGTGGTATATTTTGATTTCTTACACAGGGGAGAGTAGT  
TTTGAAGGATTTCAATATCATGGAGGAAGCTAACGGTGTGGAGAAGTCA

>M6-PGSC0003DMG401013731M6LRR-RLK\_1550

AGAGTAGTTTTGAAGGATTTCAATATCATGGAGGAAGCTAACGGTGTGGAGAAGTCATTATCAAGGAC  
TTTGATGATATTACTGTTAGTAGCACTCTGGAGATTCACCTGTATTGGACC

>M6-PGSC0003DMG401013731M6LRR-RLK\_1736

ACACCAAGTCCGTATATCTCTGCCTATAGACTTTACACTTATCTCCACAATCTTATCTTAAGAAAATCCC  
ATTTTCTTCTTGCAGACTTCAAAAAAGGTCGCAGGTTACCTGTCAGAG

>M6-PGSC0003DMG401013731M6LRR-RLK\_1798

AGAAAATCCCATTTTTCTTCTTGCAGACTTCAAAAAAGGTCGCAGGTTACCTGTCAGAGCTGTTATTGGCA  
TTGTACTCGCTTCAATTGTGGTGGTTCTGATAGTTTTATTTCTCTATGG

>M6-PGSC0003DMG401013731M6LRR-RLK\_1860

TATTGGCATTGTACTCGCTTCAATTGTGGTGGTTCTGATAGTTTTATTTCTCTATGGAAGAAAGGCATT  
TTGGAGGGAAAATTAATCAAGAAGAATTAGGTAACACATACCTCAAAGA

>M6-PGSC0003DMG401013731M6LRR-RLK\_1922

AAGGCATTTTTGGAGGGAAAATTAATCAAGAAGAATTAGGTAACACATACCTCAAAGAATTTATTCACCT  
TCTACATTAGATATGGCGATATTTCTGTTGTGATAATCAGAATTATGTAC

>M6-PGSC0003DMG401013731M6LRR-RLK\_1984

ATTCACCTCTACATTAGATATGGCGATATTTCTGTTGTGATAATCAGAATTATGTACGAGATTTCTAGCT  
GCGACATACAAATAATTATCATAGATGATTGTTCTGTTGGCAGATAGAC

>M6-PGSC0003DMG401013731M6LRR-RLK\_2046

TTTCTAGCTGCGACATACAAATAATTATCATAGATGATTGTTCTGTTGGCAGATAGACATCATGACATATC  
ATAGATAGTCAGCACACAACAAAATGTTTCATGACATATCATACAGATGT

>M6-PGSC0003DMG401013731M6LRR-RLK\_2108

TGACATATCATAGATAGTCAGCACACAACAAAATGTTTCATGACATATCATACAGATGTTTATTCTTTTAAA  
AATTGTTGTTTCATCATACAGATGTTTTAGAAGATCTATATATACTGACG

>M6-PGSC0003DMG401013731M6LRR-RLK\_2170

TCTTTTAAAAATTGTTGTTTCATCATACAGATGTTTTAGAAGATCTATATATACTGACGTTGATATTATTCTC  
GTTTACAGAACTCAGAGCCCTTGATTTACAAACAGGTCATTTTAGACT

>M6-PGSC0003DMG401013731M6LRR-RLK\_2294

CAAATTAAGCTGCTACAAATAACTTTGATTCTGCCAACAAAATTGGTGAAGGAGGGTTTGGACCAGTTT  
ACAAGGTATTAATTCTCTACCTATATCTATCCGTAAGTACTGAGTTTGCGTAAG

>M6-PGSC0003DMG401013731M6LRR-RLK\_2356

ACCAGTTTACAAGGTATTAATTCTCTACCTATATCTATCCGTAAGTACTGAGTTTGCGTAAGGACAGCTTGCGGT  
TCTGTGGTGATGTTTCCCTACTGGTTATCCTTCTGTCTGTAATATGATCG

>M6-PGSC0003DMG401013731M6LRR-RLK\_2418

GCTTGCGGTTCTGTGGTGATGTTTCCCTACTGGTTATCCTTCTGTCTGTAATATGATCGTTGTAAATTAATC  
CTGCTGTCTGTAGGGTGTCTCTCCGATGGGGCAGTCATAGCTGTTAAG

>M6-PGSC0003DMG401013731M6LRR-RLK\_248

CTTGGTAACAACGCATTAAGCGGAGCAATCCCAGCTGGGTGTTGAGTAGTGATAAGAACATGTTGGTA

TTTGCTCAATTTGTTCCGTTTTCTCATCTAAGTAGTAACTTTGGTTATT

>M6-PGSC0003DMG401013731M6LRR-RLK\_2480

AAATTAATCCTGCTGTCTGTAGGGTGTCTCTCCGATGGGGCAGTCATAGCTGTTAAGCAGCTCTCTTCC

AAGTCAAAGCAAGGAAATCGGGAATTTGTTAATGAGATAGGCATGATTTTC

>M6-PGSC0003DMG401013731M6LRR-RLK\_2604

CTACAACACCCAAACCTTGTCAAGCTCCACGGTTGTTGCATAGAAGGGAGCCAGTTACTGGTGATATAC

GAATACATGGAAAATAACTGTCTTGACGAGCTCTCTTTGGTAATGCTTTG

>M6-PGSC0003DMG401013731M6LRR-RLK\_2666

GATATACGAATACATGGAAAATAACTGTCTTGACGAGCTCTCTTTGGTAATGCTTTGCAACAACATTTT

GAAAATCATTAAATCATGCAGTGATAATTTTATGCTTAATACTCCTCTAAT

>M6-PGSC0003DMG401013731M6LRR-RLK\_2728

AACATTTTGAAAATCATTAAATCATGCAGTGATAATTTTATGCTTAATACTCCTCTAATTCTCCTTTCTTAGG

CCGTGACGACCAGAGGTTGAACCTTGACTGGGCAACCAGAAAAAGGAT

>M6-PGSC0003DMG401013731M6LRR-RLK\_2852

TCAGGAATAGCAAAGGGTTAGCTTACCTTCATGAAGAATCAAGGTTGAAAATCGTCCACAGAGATATA

AAGTGTACCAATGTGCTTCTTGATAAGGATCTGAACGCTAAGATTTTCAGAT

>M6-PGSC0003DMG401013731M6LRR-RLK\_2914

AGATATAAAGTGTACCAATGTGCTTCTTGATAAGGATCTGAACGCTAAGATTTTCAGATTTTGGATTGGCT

AAATTAGATGAAGAAGAGAGCACTCATATTAGCACCCGAATTGCTGGAAC

>M6-PGSC0003DMG401013731M6LRR-RLK\_2976

GATTGGCTAAATTAGATGAAGAAGAGAGCACTCATATTAGCACCCGAATTGCTGGAACAGTGTGAGCCT

TCTTATCATCACTGACTCTGTACTATCATGTGATGAGAGAGTAGCAGTTCT

>M6-PGSC0003DMG401013731M6LRR-RLK\_3038

TGAGCCTTCTTATCATCACTGACTCTGTACTATCATGTGATGAGAGAGTAGCAGTTCTACCCATTTGAATT

TGTTGCTCATACTAATACATGGTCAGTTTGAAGTATCTTACATTTCTTT

>M6-PGSC0003DMG401013731M6LRR-RLK\_310

GTTGGTATTTGCTCAATTTGTTCCGTTTTCTCATCTAAGTAGTAACTTTGGTTATTATCATGCCGGCACA

CTTCAAAGTTAACAGTTTTTTCCCAAACATTTTGATTGCTGAAAGG

>M6-PGSC0003DMG401013731M6LRR-RLK\_3100

ATTTGAATTTGTTTCGTCATACATTAACATGGTCAGTTTGAAGTATCTTACATTTCTTTTTCTCTTTTGAAG  
AGGTTATATGGCTCCGGAGTATGCAACGAGAGGCTACTTGACAGATAA

>M6-PGSC0003DMG401013731M6LRR-RLK\_3224

GATGTTTATAGCTTCGGAGTAGTTGCTTTGGAGATTGTCAGTGGGAAAAGCAACACAAAATACAGGCCA  
AAAGAGGAATTTGTTTACCTTCTTGA CTGGGTAAACTATCTTTTTACTCAA

>M6-PGSC0003DMG401013731M6LRR-RLK\_3286

CAGGCCAAAAGAGGAATTTGTTTACCTTCTTGA CTGGGTAAACTATCTTTTTACTCAACTGTCAATATTCC  
CAAATACTAATATCTTTAAAAACTGCTGCAACATCATGTATTATAAGTC

>M6-PGSC0003DMG401013731M6LRR-RLK\_3348

CAATATTCCCAAATACTAATATCTTTAAAACTGCTGCAACATCATGTATTATAAGTCTTGCATGTACATG  
TTTAATTTAATTGCCACTCTGAATTATAAGCCAGAAAAAGCTTCTCTT

>M6-PGSC0003DMG401013731M6LRR-RLK\_3410

ATGTACATGTTTAATTTAATTGCCACTCTGAATTATAAGCCAGAAAAAGCTTCTCTTGTTAGTGTTTTGT  
GCAAATATATACCCCATCAGTTTCAATTTGTTTGTCTTACTTTAGTTTA

>M6-PGSC0003DMG401013731M6LRR-RLK\_3658

AAAACCAGACAAACAAAGTGAAACGAAGGGAGTATTTGCTATGATACCTCCAAAGAAAATATCAGAATC  
AGAGTTGTTTCATTAGTTCTGCTCACATTCTTATGGATGTCTTTTCTCCAA

>M6-PGSC0003DMG401013731M6LRR-RLK\_372

TGCCGGCACACTTCAAAGTTAACAGTTTTTTCCCAAACATTTTGATTGCTGAAAGGACGCATTTGCAA  
GAATTTGGTGTCTTCTAAGTGTATGGCAACTATAATTTTTTTTGCAGTGA

>M6-PGSC0003DMG401013731M6LRR-RLK\_3720

CAGAATCAGAGTTGTTTCATTAGTTCTGCTCACATTCTTATGGATGTCTTTTCTCCAATTCATCTTGCTTT  
GTATGTCAATGTTTGTTTTAGGCTTACGTCCTACAAGAACAGGGAAAT

>M6-PGSC0003DMG401013731M6LRR-RLK\_434

ATTTGCAAGAATTTGGTGTCTTCTAAGTGTATGGCAACTATAATTTTTTTTGCAGTGATATATCATACAAC  
AATTTACCCATACATCTACTCAAGGATGCCAGCCCTCTACCATGTGAG

>M6-PGSC0003DMG401013731M6LRR-RLK\_496

TCATACAACAATTTACCCATACATCTACTCAAGGATGCCAGCCCTCTACCATGTGAGCATTGTACTTCTT  
TGTTTGGGAACCTACATCCGTGTATTATTTCTATTTTTATTAATTAGAA

>M6-PGSC0003DMG401013731M6LRR-RLK\_558

GTA C T T C T T T G T T T G G G A A C C T A C A T C C G T G T A T T A T T T C T A T T T T T A T T A A T T A G A A T T T C G G T C A T T T A A  
C T G C A T A G C T T A C A A A C C T T C T T T C T T C A A A C A G A A A C T T A G C C G C C A

>M6-PGSC0003DMG401013731M6LRR-RLK\_62

C C T G A G C A A C A A C A T G T T G A A T G G T C C A A T C C C A G A T A C A T T T A G G C A G T T G G A C T T T G A T A A C A T G T A G  
G T A C C T T G A A G T G A A A C C T T T A C A A G T T G A A G C A T A A A T C T T G T A A T T T T

>M6-PGSC0003DMG401013731M6LRR-RLK\_620

G G T C A T T T A A C T G C A T A G C T T A C A A A C C T T C T T T C T T C A A A C A G A A A C T T A G C C G C C A G C T A T T C A G A T A C  
A A T G A A C A C G T T C A A C A A C A C G T A A G T C C T A A A T G T T G T C T T A T G C A T C

>M6-PGSC0003DMG401013731M6LRR-RLK\_682

T T C A G A T A C A A T G A A C A C G T T C A A C A A C A C G T A A G T C C T A A A T G T T G T C T T A T G C A T C A G G T G C T A G T T T  
G T T T G A T G C T T T C T G T C T A C T G T C T A T A A T T A T G T G G C T T A A T C T A T T C G

>M6-PGSC0003DMG401013731M6LRR-RLK\_744

G C T A G T T T G T T T G A T G C T T T C T G T C T A C T G T C T A T A A T T A T G T G G C T T A A T C T A T T C G A A A T T G C A G G A A T  
T C C T G G T G T T C T A T G A A A C C C C T C A T T T G T C C C A C A G A A G C G A A A T G T A

>M6-PGSC0003DMG401013731M6LRR-RLK\_806

T G C A G G A A T T C C T G G T G T T C T A T G A A A C C C C T C A T T T G T C C C A C A G A A G C G A A A T G T A A G A G T T A C A G C C  
T A T A A A A G G A C C T C A G G G G T T A T G T C T G G A T C A T T T A C C A C T G A A C C A A C

>M6-PGSC0003DMG401013731M6LRR-RLK\_930

G G A G T G G C T G C C T G T G G A C T T T T T A A G T A C T A A A G C A T A A C T T T G G A G T T G A G A G A T A A T T T C A C A A C T C  
T T A C T C A T G T T A C G T T C T T T A T G T C A A T T G C A G A T C A T T C G C T A T T C A T A

>M6-PGSC0003DMG401013731M6LRR-RLK\_992

C A C A A C T C T T A C T C A T G T T A C G T T C T T T A T G T C A A T T G C A G A T C A T T C G C T A T T C A T A A A C T G T G G A G G A G  
G T A G A A T T A C A T T T G A G G G A A T G A T T A T G A G G C G G A C T T G A C C T A T A G

>M6-PGSC0003DMG401013876-(rev)M6G-LecRK\_0

G A A A A A C T T G A G A C T T T A A G A A A G G G G A T G A G A G G A G T A C A C A T T T T C G T C A C A A G G C G C A T A A T T T C C  
A T A G C A G C T G A C G A C A A C C T T T T A A C C C T T T G T C A C G T A A T T C C T A C T C A

>M6-PGSC0003DMG401013876-(rev)M6G-LecRK\_1037

T T A C T T C T T G G A T G G A T A C G A A T G A T A C C G C T T C A G G A C A C T T C T C T T T G C A A T T A G A C C C T A A T C A A A A T

GGTGACTTAGTCATACTACGTAACCTCGTGGAAATGTGGATCTGGGTGC

>M6-PGSC0003DMG401013876-(rev)M6G-LecRK\_1098

TAATCAAATGGTGACTTAGTCATACTACGTAACCTCGTGGAAATGTGGATCTGGGTGCCTTTGAATCTC  
GTGGTATCCAACCTCAGTTATAATCCAACCTGAACATAGTGCATTTATTAC

>M6-PGSC0003DMG401013876-(rev)M6G-LecRK\_1159

TTGAATCTCGTGGTATCCAACCTCAGTTATAATCCAACCTGAACATAGTGCATTTATTACATACAATGTCTT  
TGGTGAATCTGTCATTTCTCGAATTGTCCTAGATCATAGCGGGTTCATG

>M6-PGSC0003DMG401013876-(rev)M6G-LecRK\_122

CAAATCTTTCATTGGGCTGTCTAATTCTTGTGCCTCTTCGTAGTTTAACTTAGGCCCAACATCTTAGCCA  
GCCTCAGATAATTGGTCCATAAGCATTATATGGGCTATCCATGTTTACA

>M6-PGSC0003DMG401013876-(rev)M6G-LecRK\_1220

ACAATGTCTTTGGTGAATCTGTCATTTCTCGAATTGTCCTAGATCATAGCGGGTTCATGAGGGAACTCTTC  
TGGTCTAATGAACGTCAGAATTGGATGGTTGTGTGGTCTGTACCTGTTG

>M6-PGSC0003DMG401013876-(rev)M6G-LecRK\_1281

GGAACCTTCTGGTCTAATGAACGTCAGAATTGGATGGTTGTGTGGTCTGTACCTGTTGATATGTGTGAT  
GCAACGAGTTTATGTGGTGCTTTTGGAAATTTGTGATATGAATACCAGTCC

>M6-PGSC0003DMG401013876-(rev)M6G-LecRK\_1342

ATGTGTGATGCAACGAGTTTATGTGGTGCTTTTGGAAATTTGTGATATGAATACCAGTCCAATCTGTGGAT  
GTTTACAAGTTATGAACCCAAGTTTCGATTAGGTTGGGAAACTAATGAT

>M6-PGSC0003DMG401013876-(rev)M6G-LecRK\_1403

TCTGTGGATGTTTACAAGTTATGAACCCAAGTTTCGATTAGGTTGGGAAACTAATGATTATTCTGGTGG  
GTGTGTGAGAATAACTCCGCTGCAGTGTGGCAGCAATAACTATGGTTTTG

>M6-PGSC0003DMG401013876-(rev)M6G-LecRK\_1464

TTCTGGTGGGTGTGTGAGAATAACTCCGCTGCAGTGTGGCAGCAATAACTATGGTTTTGTTTCGTATGCA  
AAATGTTGAACTTCTGCATCATCTGAATCAGTGCAGTGGGGAATGATCA

>M6-PGSC0003DMG401013876-(rev)M6G-LecRK\_1525

CGTATGCAAAATGTTGAACTTCTGCATCATCTGAATCAGTGCAGTGGGGAATGATCAGATCTGTGAA  
TATATATGTTTCATCCAATTGCTCATGCAATGCTTATACTTACAGCAATAGT

>M6-PGSC0003DMG401013876-(rev)M6G-LecRK\_1586



TCTGTGAATATATATGTTTCATCCAATTGCTCATGCAATGCTTATACTTACAGCAATAGTGGAGTGTGCTTA  
TTATGGAATGATGATCTTATCAATCTGAGAAGATTATCTCATAATTCAC

>M6-PGSC0003DMG401013876-(rev)M6G-LecRK\_1647

AGTGTGCTTATTATGGAATGATGATCTTATCAATCTGAGAAGATTATCTCATAATTCACGTCAAGCAGTG  
TTAAGCATAAAAATGTTTGAGCGTTCAAACAAAGGTTAGGTGCTTCTAAA

>M6-PGSC0003DMG401013876-(rev)M6G-LecRK\_1708

CAAGCAGTGTTAAGCATAAAAATGTTTGAGCGTTCAAACAAAGGTTAGGTGCTTCTAAACTGCATCTTGT  
TCTAATTGTGCTTACTTGAAACTGACATTATGTTTCGTTTTCTCCTCTCCC

>M6-PGSC0003DMG401013876-(rev)M6G-LecRK\_1769

GCATCTTGTTCTAATTGTGCTTACTTGAAACTGACATTATGTTTCGTTTTCTCCTCTCCCCATCTATCTTATTG  
CTCAGGCAATAAAAAGTCATCGTTTGTAGTGCTAGTAGCATCCATCA

>M6-PGSC0003DMG401013876-(rev)M6G-LecRK\_183

ATCTTAGCCAGCCTCAGATAATTGGTCCATAAGCATTATATGGGCTATCCATGTTCACTTTATTAGTA  
CTTATTTTTTAGTGGAATGATTGCACTACTGCAGTTTGTATGTCATTTTC

>M6-PGSC0003DMG401013876-(rev)M6G-LecRK\_1830

TCTATCTTATTGCTCAGGCAATAAAAAGTCATCGTTTGTAGTGCTAGTAGCATCCATCACTTCAGCAATTT  
TTGTCTGTGGTACATGCTGTTACTTTCTATGGAGACGAAAGCTCAAGAA

>M6-PGSC0003DMG401013876-(rev)M6G-LecRK\_1891

TCAGCAATTTTTGTCTGTGGTACATGCTGTTACTTTCTATGGAGACGAAAGCTCAAGAAAAAAGGTA  
CTTTATACTTCCAATAGCTATGCCAGCGCTTTATGAATGTTAATGTGGCC

>M6-PGSC0003DMG401013876-(rev)M6G-LecRK\_1952

AAGGTACTTCTTTATACTTCCAATAGCTATGCCAGCGCTTTATGAATGTTAATGTGGCCTACATTGGTTGA  
GGCCATGAGGGTATAGGATCTTGTCTCCTTATATTGTCTTGGCTATCCT

>M6-PGSC0003DMG401013876-(rev)M6G-LecRK\_2013

CATTGGTTGAGGCCATGAGGGTATAGGATCTTGTCTCCTTATATTGTCTTGGCTATCCTCACCTCATGAAC  
TAGCTTCAATCGAGATTGACATTTTCTTAACAATGAACATATGTGGGA

>M6-PGSC0003DMG401013876-(rev)M6G-LecRK\_2074

CCTCATGAACTAGCTTTCAATCGAGATTGACATTTTCTTAACAATGAACATATGTGGGATGCCAATAAAC  
GAACCTAGTCCTTCTTGATTCATTATTAACACTGTGCAGTCTTCGTGTGAT

>M6-PGSC0003DMG401013876-(rev)M6G-LecRK\_2135

CCAATAAACGAACCTAGTCCTTCTTGATTCATTATTAACCTGTGCAGTCTTCGTGTGATATTCTAGTTCTTA  
CTAGTAGTAGCAGGTTATCTGACTTAACTGTGTTCTCGCTGTCACACT

>M6-PGSC0003DMG401013876-(rev)M6G-LecRK\_2196

TCTAGTTCTTACTAGTAGTAGCAGGTTATCTGACTTAACTGTGTTCTCGCTGTCACACTCACTACAATCAT  
GGATTAGATTATAAGTTAAAATTACCAATGTACAGCTTCATCTATAGAC

>M6-PGSC0003DMG401013876-(rev)M6G-LecRK\_2257

CTACAATCATGGATTAGATTATAAGTTAAAATTACCAATGTACAGCTTCATCTATAGACTTCATGTTTCTA  
TTGCCTTTTCAGGGATTTTGAGAAAGATGAAGTTCAGGGAAATGTTACT

>M6-PGSC0003DMG401013876-(rev)M6G-LecRK\_2318

CATGTTTCTATTGCCTTTTCAGGGATTTTGAGAAAGATGAAGTTCAGGGAAATGTTACTTTCTGACTCAG  
CAACTAACATGTCAAAACCTGGAACCTCCATTGGAAAGGGACAAGAAAAG

>M6-PGSC0003DMG401013876-(rev)M6G-LecRK\_2379

CTGACTCAGCAACTAACATGTCAAAACCTGGAACCTCCATTGGAAAGGGACAAGAAAAGAACGGTGAC  
ATTGAACTGAAGTTCCTTGAACCTACATGACTTGAAAGCCGCGACAGACAATT

>M6-PGSC0003DMG401013876-(rev)M6G-LecRK\_244

TTTATTAGTACTTATTTTTTAGTGGAATGATTGCACTACTGCAGTTTGATGTCATTTTCATCAATTGGATAT  
TTTCCTTACGTAGAATTTTCAAATATTTTACTAAGGTGTTTGATTAG

>M6-PGSC0003DMG401013876-(rev)M6G-LecRK\_2440

CGGTGACATTGAACTGAAGTTCCTTGAACCTACATGACTTGAAAGCCGCGACAGACAATTTTTCCCCTGAC  
AATAAGCTTGGAGAAGGAGGTTTTGGTCCTGTTTTTAAGGTATTTTTACT

>M6-PGSC0003DMG401013876-(rev)M6G-LecRK\_2501

TCCCCTGACAATAAGCTTGGAGAAGGAGTTTTGGTCCTGTTTTTAAGGTATTTTTACTACAACCTGAAT  
ACCTGCAAGTCTGCAACACAAATATGCGCTCACACCTAAAGAAAATGGAA

>M6-PGSC0003DMG401013876-(rev)M6G-LecRK\_2562

AACCTGAATACCTGCAAGTCTGCAACACAAATATGCGCTCACACCTAAAGAAAATGGAAAGAAATCCCT  
CCGGAAATAGCCATAGTACATATCCTGATTTTAGGTAATATCTTTGCTAGC

>M6-PGSC0003DMG401013876-(rev)M6G-LecRK\_2623

AAATCCCTCCGGAAATAGCCATAGTACATATCCTGATTTTAGGTAATATCTTTGCTAGCTGTACTTATGTT

TTGGAGGTGTGACAAATGTTTTTTTGTCAATTTCTAGGGTCAATTGCCAG

>M6-PGSC0003DMG401013876-(rev)M6G-LecRK\_2684

TACTTATGTTTTGGAGGTGTGACAAATGTTTTTTTGTCAATTTCTAGGGTCAATTGCCAGATGGGCAGAAA

ATAGCTGTGAAAAGGCTGTCAACTCAATCAAGGCAAGGCATTAGTGAATT

>M6-PGSC0003DMG401013876-(rev)M6G-LecRK\_2745

GGGCAGAAAATAGCTGTGAAAAGGCTGTCAACTCAATCAAGGCAAGGCATTAGTGAATTCAAAAGTGA

GGCCCTTCTCATTGCAAAAAGTCCAACATAGAAACCTTGTTAGGTTCCCTTGGC

>M6-PGSC0003DMG401013876-(rev)M6G-LecRK\_2806

AAACTGAGGCCCTTCTCATTGCAAAAAGTCCAACATAGAAACCTTGTTAGGTTCCCTTGGCTGCTGTGTAGA

AGAAGAGGAGAAAATGTTGGTATATGAATATATGCCAAATAAAAGTCTAG

>M6-PGSC0003DMG401013876-(rev)M6G-LecRK\_2867

CTGTGTAGAAGAAGAGGAGAAAATGTTGGTATATGAATATATGCCAAATAAAAGTCTAGACTATTTTCAT

ATTCGGTATGATAATTTACTACTATCTGTTTTTGTGTTAACCCCTTTCCTCC

>M6-PGSC0003DMG401013876-(rev)M6G-LecRK\_2928

TATTTTCATATTCGGTATGATAATTTACTACTATCTGTTTTTGTGTTAACCCCTTTCCTCCTGTCAAATGTGTG

CTTACTGGATAAATTTGATATGTACAACCTTAGACAAGAGCAGGAGGTC

>M6-PGSC0003DMG401013876-(rev)M6G-LecRK\_2989

TCAAATGTGTGCTTACTGGATAAATTTGATATGTACAACCTTAGACAAGAGCAGGAGGTCGTTGCTTGATT

GGAAAAAGAGGCATGAGATCATTATTGGTATAGCTAGAGGGATACTCTAT

>M6-PGSC0003DMG401013876-(rev)M6G-LecRK\_305

CAATTGGATATTTTCTTACGTAGAATTTTCAAATATTTTACTAAGGTGTTTATTAGTTGCGTAACTTT

GGTTTGGTAGAATTCTCATAGACTAATTTTATTTTTTCTGTTTCTCTGA

>M6-PGSC0003DMG401013876-(rev)M6G-LecRK\_3050

TGCTTGATTGGAAAAAGAGGCATGAGATCATTATTGGTATAGCTAGAGGGATACTCTATCTGCATCAGG

ACTCAAGATTGAGAGTAATCCACCGTGATCTGAAAGCCAGCAACATTCTTT

>M6-PGSC0003DMG401013876-(rev)M6G-LecRK\_3111

GCATCAGGACTCAAGATTGAGAGTAATCCACCGTGATCTGAAAGCCAGCAACATTCTTTTAGATGAAGA

CATGAACCCCAAGATATCAGATTTTGGTACAGCAAGAATATTTAGCGGAAA

>M6-PGSC0003DMG401013876-(rev)M6G-LecRK\_3172

GATGAAGACATGAACCCCAAGATATCAGATTTTGGTACAGCAAGAATATTTAGCGGAAACCAAGATGAA  
GCAAATACTCTTCGAATAGTTGGCACATAGTAAGCAAGCAAATACTGAAAG

>M6-PGSC0003DMG401013876-(rev)M6G-LecRK\_3233

AAGATGAAGCAAATACTCTTCGAATAGTTGGCACATAGTAAGCAAGCAAATACTGAAAGGTCTTTTCCC  
ATACTACTTACCAATATTTTGCCTACTCATTATAGCTCCTTTTCTATGCAG

>M6-PGSC0003DMG401013876-(rev)M6G-LecRK\_3294

CTTTTCCCATACTACTTACCAATATTTTGCCTACTCATTATAGCTCCTTTTCTATGCAGTGGCTATATGTCAC  
CTGAATATGCTCTTGCTGGTCTCTTCTCAGTAAAATCTGATGTCTTT

>M6-PGSC0003DMG401013876-(rev)M6G-LecRK\_3355

GCTATATGTCACCTGAATATGCTCTTGCTGGTCTCTTCTCAGTAAAATCTGATGTCTTTAGCTTTGGTGTC  
ATATTATTGGAGATCATTAGTGGAAAAAGAACAGAATCTCTTATAATA

>M6-PGSC0003DMG401013876-(rev)M6G-LecRK\_3416

CTTTGGTGTCAATTATTGGAGATCATTAGTGGAAAAAGAACAGAATCTCTTATAATAGTGATTCCCCT  
CCAAATTTGATACGACAGGTAAGTTGTAAAATGCAAATGTTTGAATCTTT

>M6-PGSC0003DMG401013876-(rev)M6G-LecRK\_3477

GATTCCCCTCCAAATTTGATACGACAGGTAAGTTGTAAAATGCAAATGTTTGAATCTTTCTTTGATTAAGA  
ATCAAATTTATCCATTTCAATGAACTAATGATTCAGGCCTGGGAGCTTT

>M6-PGSC0003DMG401013876-(rev)M6G-LecRK\_3538

TTGATTAAGAATCAAATTTATCCATTTCAATGAACTAATGATTCAGGCCTGGGAGCTTTGGAATGATGGC  
AAGGCCTTCGAGCTGATAGATCCAACCATAGTTGATTCTTGCCCCAGTGA

>M6-PGSC0003DMG401013876-(rev)M6G-LecRK\_3599

AATGATGGCAAGGCCTTCGAGCTGATAGATCCAACCATAGTTGATTCTTGCCCCAGTGAGGAAGCACTA  
CGCTGTATTCAAGTAGGACTTTTGTGTTTGAAGTGAATGCAGGGGACAGA

>M6-PGSC0003DMG401013876-(rev)M6G-LecRK\_366

GCGTAACTTTGGTTTGGTAGAATTCTCATAGACTAATTTTATTTTTTCTGTTTCTCTGAGATGATAGCATTG  
ATATACTTATGGATACTTGAATGTTTGTGTTGTTAATTCGTCTATTC

>M6-PGSC0003DMG401013876-(rev)M6G-LecRK\_3660

AAGCACTACGCTGTATTCAAGTAGGACTTTTGTGTTTGAAGTGAATGCAGGGGACAGACCAACCATGT  
CATCAGTTCTATTCATGCTAAGTAATGAAGCAACGATTCCCTCCCCAAAGC

>M6-PGSC0003DMG401013876-(rev)M6G-LecRK\_3721

AACCATGTCATCAGTTCTATTCATGCTAAGTAATGAAGCAACGATTCCTCCCAAAGCAGCCATTGATT  
ACCCCTAACTCTGACTCGGGTACAACAGAAACAACACCATCTTCGATCAA

>M6-PGSC0003DMG401013876-(rev)M6G-LecRK\_3782

CCATTGATTACCCCTAACTCTGACTCGGGTACAACAGAAACAACACCATCTTCGATCAATGAGGTGACTA  
TACTGTACTTGATGGTCGTTAGTCAGCTGATGAGTGATGAATCATCAGT

>M6-PGSC0003DMG401013876-(rev)M6G-LecRK\_3843

AGGTGACTATTACTGTACTTGATGGTCGTTAGTCAGCTGATGAGTGATGAATCATCAGTCATCAGCCAAT  
CCGTTGAGTGTGGGAGGGTTATTGACCCGTCCATTTACTAGCTCAACGA

>M6-PGSC0003DMG401013876-(rev)M6G-LecRK\_3904

TCAGCCAATCCGTTGAGTGTGGGAGGGTTATTGACCCGTCCATTTACTAGCTCAACGAATTGGGTTGAT  
ATACTGTCCAAATTGATTCAGGAGAGACTGTCAAATAATTTTCAGAAGA

>M6-PGSC0003DMG401013876-(rev)M6G-LecRK\_3965

TGGGTTGATATACTGTCCAAATTGATTCAGGAGAGACTGTCAAATAATTTTCAGAAGACATTTTTTTATT  
TGATATGTTATATATATAGTTACCATAAAGAAACCAATAATTTTAGGTA

>M6-PGSC0003DMG401013876-(rev)M6G-LecRK\_4026

TTTTTTTATTTGATATGTTATATATATAGTTACCATAAAGAAACCAATAATTTTAGGTACTAAAAATTCATA  
AAAGAACAAATAAAATAATTAACCTTACTAAGAATTGAACAAATTGA

>M6-PGSC0003DMG401013876-(rev)M6G-LecRK\_4087

AAAAATTCATAAAAGAACAAATAAAATAATTAACCTTACTAAGAATTGAACAAATTGAGTTACAACCTCA  
CATTGCAGTCCTGTTTCAGTCAAATTTAATCCACTCAAATTCTAATCAAC

>M6-PGSC0003DMG401013876-(rev)M6G-LecRK\_427

TGATAGCATTGATATACTTATGGATACTTGAATGTTTGTGTTAATTCGTCTATTCCCTCGACTTGTC  
AACTTTTTAAAACAGGTATTTGGGAATGAAGATATTGTTGGTTGAT

>M6-PGSC0003DMG401013876-(rev)M6G-LecRK\_488

TCGACTTGTCAAAACCTTTTTAAAACAGGTATTTGGGAATGAAGATATTGTTGGTTGATTTAGTTCTCTTG  
CTTCTTGTTTTCATTTAGTTAGGTGCAATAATACGCGTTCAGACAACCT

>M6-PGSC0003DMG401013876-(rev)M6G-LecRK\_549

AGTTCTCTTGCTTTCTGTTTTCATTTAGTTAGGTGCAATAATACGCGTTCAGACAACCTTATGCCTGGAC

AAATCCTTTCCTTTTCTGCAGCAGATACTTTAGTGTCCAAACAAGGGAA

>M6-PGSC0003DMG401013876-(rev)M6G-LecRK\_61

TAATTTCCATAGCAGCTGACGACAACCCTTTTAACCTTTGTCACGTAATTCCTACTCAAGCAAATCTTTCA  
TTGGGCTGTCTAATTCTTGTGCCTCTTCGTAGTTTAACTTAGGCCCA

>M6-PGSC0003DMG401013876-(rev)M6G-LecRK\_610

TTGCCTGGACAAATCCTTTCCTTTTCTGCAGCAGATACTTTAGTGTCCAAACAAGGGAAGTTTGAAGCTCG  
GTTTCTTCTGTCCAGGTAATTGTGAAAAGCTTTTTATTGGTATATGGTAT

>M6-PGSC0003DMG401013876-(rev)M6G-LecRK\_671

TTGAACTCGGTTTCTTCTGTCCAGGTAATTGTGAAAAGCTTTTTATTGGTATATGGTATACAAACATAAAG  
CCCAAGACCGTCGTTTGGATAGCAAATAGGGACAACCCTATCCGCCCTC

>M6-PGSC0003DMG401013876-(rev)M6G-LecRK\_732

AAACATAAAGCCCAAGACCGTCGTTTGGATAGCAAATAGGGACAACCCTATCCGCCCTCCGTTCAATAAT  
TCTCATCTAGAGCTGTCTGATGGAAATCTAGGAATCTTTAATGCACGTAA

>M6-PGSC0003DMG401013876-(rev)M6G-LecRK\_793

TTCAATAATTCTCATCTAGAGCTGTCTGATGGAAATCTAGGAATCTTTAATGCACGTAAACAGAGAGTTT  
GGGACTCTAATTTATCCACAGCAGATGTCAATAGGGCAGTACTTCTTGAT

>M6-PGSC0003DMG401013876-(rev)M6G-LecRK\_854

AGAGAGTTTGGGACTCTAATTTATCCACAGCAGATGTCAATAGGGCAGTACTTCTTGATTCTGGAAATTT  
CATTTTGACAAATGGCATTGAAATACAGTGGCAGAGCTTTGATTATCCTA

>M6-PGSC0003DMG401013876-(rev)M6G-LecRK\_915

TGGAAATTTCAATTTGACAAATGGCATTGAAATACAGTGGCAGAGCTTTGATTATCCTACCGATACATGG  
CTGCCTGGTGCAGGATTGGATTTGATAAGTCCAAGAACACACTCCAGAA

>M6-PGSC0003DMG401013876-(rev)M6G-LecRK\_976

GATACATGGCTGCCTGGTGCAGGATTGGATTTGATAAGTCCAAGAACACACTCCAGAACTTACTTCTT  
GGATGGATACGAATGATACCGCTTCAGGACACTTCTCTTTGCAATTAGAC

>M6-PGSC0003DMG401014048M6LRR-RLP\_0

TCCACTATAAGACAATGTCCATTCTTCAAAAAATTTCCATAGGCTCGCATTCTTTGACTGCACTTCTCCCT  
AGTAACTCTACGTAATAGTCTACAAACAGCATGACTATTACTTCTGGA

>M6-PGSC0003DMG401014048M6LRR-RLP\_126

TGCCAGTTCCCAAAGTCATCCTTAAGTTGAGTTGTTGCTTGTGTAGGCTTCGATATTTTATGACAGAGAA  
GAAATATTTGGTGTATCGTCTCCAAGTTTTATCCATGTAGCTTTGCTC

>M6-PGSC0003DMG401014048M6LRR-RLP\_1575

ATTAGAATGGTAGAGAGCTATTCAGATATAATTGTTTTGAGACACTTTCAAAGTGGTATTCTAACGGAGA  
AGCAACCATACTAGTGACATGTTCAACTTCAACCCACATGATTAAAGCAG

>M6-PGSC0003DMG401014048M6LRR-RLP\_1638

ACGGAGAAGCAACCATACTAGTGACATGTTCAACTTCAACCCACATGATTAAAGCAGTTTTTCCACTAAT  
AAGGACATGTGAAATCGAATAGTAAGTTTAGATATTATTGAAAATATCGT

>M6-PGSC0003DMG401014048M6LRR-RLP\_1701

CACTAATAAGGACATGTGAAATCGAATAGTAAGTTTAGATATTATTGAAAATATCGTTTTTCATTGTTCGA  
AAGTTGTTTAAACATACGATTGGCTTTTGTGATCTAAATTTTTATTTTC

>M6-PGSC0003DMG401014048M6LRR-RLP\_1764

TGTTGAAAGTTGTTTAAACATACGATTGGCTTTTGTGATCTAAATTTTTATTTTCTGCTTATCCTCTTCTA  
TATGTTGTTTACACATCTTCTGATTGAGTTAATAATACATGCTTTG

>M6-PGSC0003DMG401014048M6LRR-RLP\_1827

TCCTCTTCTATATGTTGTTTTACACATCTTCTGATTGAGTTAATAATACATGCTTTGCTTCCATAGAAGATG  
AGAAATTGCAAATTCCTTTATGAATGTTTGCTAAGTTTCTGTCACCT

>M6-PGSC0003DMG401014048M6LRR-RLP\_189

ACAGAGAAGAAATATTTGGTGTATCGTCTCCAAGTTTTATCCATGTAGCTTTGCTCCTCTGTTGAAGATA  
AATTTATCCTTGTAGGAGGTCTGTCTGAATTTTTGGTATTTTTCTTC

>M6-PGSC0003DMG401014048M6LRR-RLP\_1890

TAGAAGATGAGAAATTGCAAATTCCTTTATGAATGTTTGCTAAGTTTCTGTCACCTAATTCAGATTCCAC  
TGGATTAATTTTTGACCCAAGATTATGCATATGTTTGGTCTACCGTTGA

>M6-PGSC0003DMG401014048M6LRR-RLP\_1953

GATTCCACTGGATTAATTTTTGACCCAAGATTATGCATATGTTTGGTCTACCGTTGAAAAGGAAAAACCT  
CGAATGATACCGGTATTTTTTAAAGAATACAAAGTTGCGATAAAGACTGA

>M6-PGSC0003DMG401014048M6LRR-RLP\_2016

AAAACCTCGAATGATACCGGTATTTTTTAAAGAATACAAAGTTGCGATAAAGACTGAAATTTTGATGGCA  
TTAATTTGATATGGATCACCGTTGAGAAGTTTTTCTGAGGTATTATGTC

>M6-PGSC0003DMG401014048M6LRR-RLP\_2050

TACAAAGTTGCGATAAAGACTGAAATTTTGATGGCATTAAATTCGATATGGATCACCGTTGAGAACTTTT  
TCTGAGGTATTATGTCCCATTTTCCCTGTTTAGAATTGTTTTCTGTAAC

>M6-PGSC0003DMG401014048M6LRR-RLP\_252

TGAAGATAAATTTATTCCTTGTAGGAGGTCTGTCTGAATTTTTGGTATTTTTCTTCTCATCTTCCTGATAA  
TCAACATTCATAGGATCCTGCTGTAATAGTTGTTGAGCCTTCAACATA

>M6-PGSC0003DMG401014048M6LRR-RLP\_315

TCCTGATAATCAACATTCATAGGATCCTGCTGTAATAGTTGTTGAGCCTTCAACATAGCTTCCCTATCCTC  
TTGACATTCAGAAACAATATTCCTGAAGTCCCGATTATTAAGCTCCTTT

>M6-PGSC0003DMG401014048M6LRR-RLP\_378

CTATCCTCTTGACATTCAGAAACAATATTCCTGAAGTCCCGATTATTAAGCTCCTTTAATCCATATTTTCATG  
ATCTTTAGCTTTCTAACTACTTTTAGCATCTTACAACCTTCTACCTAA

>M6-PGSC0003DMG401014048M6LRR-RLP\_441

TATTTTCATGATCTTTAGCTTTCTAACTACTTTTAGCATCTTACAACCTTCTACCTAAGTGTCCCATGCTTCTC  
TCACTTTCCCTTAAATCTGGGCTGAGTCACTCATACTACAAAT

>M6-PGSC0003DMG401014048M6LRR-RLP\_504

CATGCTTCTCTCACTTTCCCTTAAATCTGGGCTGAGTCACTCATACTACAAATGAAATGACTTCCT  
GTTCTATGAGTCTGCATTAGTTAGTGTCACTTTAATTGGGCAATGATCA

>M6-PGSC0003DMG401014048M6LRR-RLP\_567

GACTTCCTGTTCTATGAGTCTGCATTAGTTAGTGTCACTTTAATTGGGCAATGATCATTTATTCTTTAAGG  
AAGGTACTTTACTACACTGGAACGCAGTGTGCTTAGCCATACTGTTA

>M6-PGSC0003DMG401014048M6LRR-RLP\_63

TTCTTCCCTAGTAACTCTACGTAATAGTCTACAAACAGCATGACTATTACTTCTGGATCAGTCTGCCAGTT  
CCCAAAGTCATCCTTAAGTTGAGTTGTTGCTTGTGTTAGGCTTCGATAT

>M6-PGSC0003DMG401014048M6LRR-RLP\_630

CTTTAAGGAAGGTACTTTACTACACTGGAACGCAGTGTGCTTAGCCATACTGTTAATAAAGACCCTAT  
CAATTTTTTTTTAAAAATCCTCTGATTATCACTTTTATCATTCCAAGTTTA

>M6-PGSC0003DMG401014048M6LRR-RLP\_693

ACCCTATCAATTTTTTTTTAAAAATCCTCTGATTATCACTTTTATCATTCCAAGTTTATCTTTGACCCTGGTAA



GACATTTCTATGAAACCACATGTTGCAATACAATTCTGAAAAATCTT

>M6-PGSC0003DMG401014048M6LRR-RLP\_756

ACCCTGGTAAGACATTTCTATGAAACCACATGTTGCAATACAATTCTGAAAAATCTTCTATTTCTGACCAC

ACCACAGGGTAGCCCCAATCCTGTCTTCAGTTGTTAGTACTGAGTTGA

>M6-PGSC0003DMG401014605M6LRR-RLP\_0

TATATTTCTAAAACCTGGTTGATCACTTTGCAGAAGAAAATGAAAATCGATAGATTTCTACAATTCATTGC

TGCATTTTCACTGTTTCATAGGACTTGAAACAAGTTGGGGTAAAACATTA

>M6-PGSC0003DMG401014605M6LRR-RLP\_1054

TTAGTTCGAATAACTTATCAGGTTTAGTCCCATCATTCTCATCAAACCTGGAAACATTGAACCTTTCGAAA

AACAAGTTTGTGGATCAATATCTTTCTTGCGAAAATAGCCAACCCTT

>M6-PGSC0003DMG401014605M6LRR-RLP\_1116

CTTTCGAAAAACAAGTTTGTGGATCAATATCTTTCTTGCGAAAATAGCCAACCCTTGTCCGTACCAT

TGTCCTCTCGCATAACAAGCTTTCAGGAGAACTCCCACTAATTGTTTC

>M6-PGSC0003DMG401014605M6LRR-RLP\_1178

CCGTACCATTGTCCTCTCGCATAACAAGCTTTCAGGAGAACTCCCACTAATTGTTTCATGAAATTCGAAG

AACTAGCCGTTCTTAATTTAGCTAACAACAAGCTATACGGTAAAATTCC

>M6-PGSC0003DMG401014605M6LRR-RLP\_124

TTGAGAAGGAAAGAGAAGCTCTTGTCAGTTTAAGCAAGGTGTGATAGATGAGTACGATATCCTCTCAT

CGTGGGGGAGAGAAGAAGAGAAACAAGAATGTTGTCGTTGGAAAGGTGTAA

>M6-PGSC0003DMG401014605M6LRR-RLP\_1240

AATTCGAAGAACTAGCCGTTCTTAATTTAGCTAACAACAAGCTATACGGTAAAATTCCTAGCTCTATTGG

ATATTTGATGGATATTCAATCTCTACAGTTGCGTAACAACAACCTTTACTG

>M6-PGSC0003DMG401014605M6LRR-RLP\_1302

TCTATTGGATATTTGATGGATATTCAATCTCTACAGTTGCGTAACAACAACCTTTACTGGTCATCTTCCAAC

CTCTTTGAAAACTGTTTTATGTTGACAATCTTGGATGTTGGTGGAAAT

>M6-PGSC0003DMG401014605M6LRR-RLP\_1364

TCTTCCAACCTCTTTGAAAACTGTTTTATGTTGACAATCTTGGATGTTGGTGGAAATAATTTAATTGGAG

AAATTCGTCATGGATTGGCTCAGATTTAACATTTTTGATTGTCTTGAG

>M6-PGSC0003DMG401014605M6LRR-RLP\_1426

TAATTGGAGAAATCCGTCATGGATTGGCTCAGATTTAACATTTTTGATTGTCTTGAGTTGAGAGCCAA  
TAAATTCGATGGAAATATTCCTTCGAATTTGTGTCATCTGAATAAAATCC

>M6-PGSC0003DMG401014605M6LRR-RLP\_1488

AGAGCCAATAAATTCGATGGAAATATTCCTTCGAATTTGTGTCATCTGAATAAAATCCGATTTTTGGATCT  
TTCTCATAACATCTTATCAGGAGAAATCCCGCATTGTCTCAACAATATC

>M6-PGSC0003DMG401014605M6LRR-RLP\_1550

TTTGGATCTTCTCATAACATCTTATCAGGAGAAATCCCGCATTGTCTCAACAATATCACATCATTGCTTCA  
GAGTAATAGTTCAACCTCAAGCATTCTTTTTGATTTGGGAGAACAAAA

>M6-PGSC0003DMG401014605M6LRR-RLP\_1612

CATTGCTTCAGAGTAATAGTTCAACCTCAAGCATTCTTTTTGATTTGGGAGAACAAAACGGAGATGGTTT  
TTATTCTTTCGTTGAAGAATACATGGGAGATGCATTAGTTCAATGGAAAA

>M6-PGSC0003DMG401014605M6LRR-RLP\_186

CTCTCATCGTGGGGGAGAGAAGAAGAGAAACAAGAATGTTGTCGTTGGAAAGGTGTAAAATGTAGCAA  
CAAAACAGGTCATGTCGTGATGGTTGATATTCATATATACCACAACCTTTT

>M6-PGSC0003DMG401014605M6LRR-RLP\_2046

CAAAGTTTTAATCCTTCGTCATATGCAGGCAACAATGAACTTTGTAGTCCACCACTCGAAAAATGCCCTG  
TTCATGATGATCATAACAAGCAGAACCAACAATGTTGATGAAGACGATGAT

>M6-PGSC0003DMG401014605M6LRR-RLP\_2108

ATGCCCTGTTTCATGATGATCATAACAAGCAGAACCAACAATGTTGATGAAGACGATGATATGTTATTGTCG  
TTTGGGTTTTATGTATCTGTGTGTAGTGGATTCATTGTTGGATTTTGGGG

>M6-PGSC0003DMG401014605M6LRR-RLP\_2170

TATTGTCGTTTGGGTTTTATGTATCTGTGTGTAGTGGATTCATTGTTGGATTTTGGGGAGTGATATTTACT  
TTAGTCTTCAATAAATCATGTAGAGATGCTTGCTTTCATCTGTTCATCA

>M6-PGSC0003DMG401014605M6LRR-RLP\_2232

ATATTTACTTTAGTCTTCAATAAATCATGTAGAGATGCTTGCTTTCATCTGTTTCATCAACGTCGCGAATTG  
GATCTTTGTCACAACAATTATGTGTCTACGCAGATTGAAGATGCTCTGG

>M6-PGSC0003DMG401014605M6LRR-RLP\_2294

CGCGAATTGGATCTTTGTCACAACAATTATGTGTCTACGCAGATTGAAGATGCTCTGGAGCTAGTTAATT  
AGCAAACAACAAGCTACATAATGTCATAAGTAAGTTTACAAGTCTAGATT

>M6-PGSC0003DMG401014605M6LRR-RLP\_2356

AGTTAATTAGCAAACAACAAGCTACATAATGTCATAAGTAAGTTTACAAGTCTAGATTCTTTCATAAAAG  
AATTACATGTTTGTAGTCACCAATGGTGTATATAGTATGTGATGTTTCT

>M6-PGSC0003DMG401014605M6LRR-RLP\_2414

CTTTCATAAAAGAATTACATGTTTGTAGTCACCAATGGTGTATATAGTATGTGATGTTTCTCATCTATAG  
TAATAAAATGTTACTATTAATGAAAATGTTTTGGGAGCAAATACATCTT

>M6-PGSC0003DMG401014605M6LRR-RLP\_248

TAGCAACAAAACAGGTCATGTCGTGATGGTTGATATTCACTATATACCACAACCTTTTCTAGATGTGGAT  
CAACACTTGAAAGGTAATATTACTCCTTCATTGCTTGAATTGCAGCATT

>M6-PGSC0003DMG401014605M6LRR-RLP\_372

TACTTGGACCTTAGTAACAATGATTTTGGTACAAGTCAAATACCGGATTTTATTGGTTCATTTCCAAGACT  
AGAATACCTTAATCTTCAAGGTGCTAACTTATCAGGTGAAATTCCTTAC

>M6-PGSC0003DMG401014605M6LRR-RLP\_434

TCCAAGACTAGAATACCTTAATCTTCAAGGTGCTAACTTATCAGGTGAAATTCCTTACTCATTTAGTAACC  
TTACACATTTGAAGATTCTCGATTTATCTTCGAATCAAATTACAGGATT

>M6-PGSC0003DMG401014605M6LRR-RLP\_496

TTAGTAACCTTACACATTTGAAGATTCTCGATTTATCTTCGAATCAAATTACAGGATTGTTTCCAAACTACT  
TAACAATGTTTTAGCTTTAAGAGAGTTGTATTTGAGCAATAACAAAT

>M6-PGSC0003DMG401014605M6LRR-RLP\_558

CCAAACTACTTAACAATGTTTTAGCTTTAAGAGAGTTGTATTTGAGCAATAACAAATTCAAAGGGAGGT  
TACCTCAAAGTATTGAACAACCTTTCAAACCTCGAGATATTGAGAATCAAT

>M6-PGSC0003DMG401014605M6LRR-RLP\_62

ATTCATTGCTGCATTTTCACTGTTTCATAGGACTTGAAACAAGTTGGGGTAAAACATTATGCATTGAGAAG  
GAAAGAGAAGCTCTTGTCCAGTTTAAGCAAGGTGTGATAGATGAGTACGA

>M6-PGSC0003DMG401014605M6LRR-RLP\_620

AGGGAGGTTACCTCAAAGTATTGAACAACCTTTCAAACCTCGAGATATTGAGAATCAATTCAAATTCCTTC  
GAAGGTCCAATCACAGAACCACATCTTTCAAATCTTTCCAACCTTAAAAGT

>M6-PGSC0003DMG401014605M6LRR-RLP\_682

ATTCCTTTCGAAGGTCCAATCACAGAACCACATCTTTCAAATCTTTCCAACCTTAAAAGTGTTGGACTTGTCG

TATAACTCATTCTCTCTTCAGTTGAGGCCTGATTGGATTCCCTCCTTTTCG

>M6-PGSC0003DMG401014605M6LRR-RLP\_744

GACTTGTCGTATAACTCATTCTCTCTTCAGTTGAGGCCTGATTGGATTCCCTCCTTTTCGAGTTACAAGTTAT  
AGGACTCTCGCATTGTGAAATGGGGAATCGTTTCCCTCAATGGCTACGA

>M6-PGSC0003DMG401014605M6LRR-RLP\_806

ACAAGTTATAGGACTCTCGCATTGTGAAATGGGGAATCGTTTCCCTCAATGGCTACGAACTCAGAAGAC  
GTATTCATATCTTGATATCTCTTTTGTGGTATATCAGATATAGCTCCTAA

>M6-PGSC0003DMG401014605M6LRR-RLP\_868

AGAAGACGTATTCATATCTTGATATCTCTTTTGTGGTATATCAGATATAGCTCCTAACTGGTTTTGGGAT  
CTTTCTCTGAAATGATGTACTTCAACATTTCTAATAACAAAATAAGTG

>M6-PGSC0003DMG401014605M6LRR-RLP\_930

TTTTGGGATCTTTCTCCTGAAATGATGTACTTCAACATTTCTAATAACAAAATAAGTGGACAAGTTCCTGA  
TTTGCTTCCAAGTTTCTACCATCGAAGGAACTAATTATCCGATAATG

>M6-PGSC0003DMG401014605M6LRR-RLP\_992

AGTTCCTGATTTGTCTTCCAAGTTTCTACCATCGAAGGAACTAATTATCCGATAATGGATTTTAGTTCGA  
ATAACTTATCAGGTTTAGTCCCATCATTCTCATCAAACCTTGAAACATT

>M6-PGSC0003DMG401015009M6LRR-RLP\_0

ATTGGGCTGCTGAAAAGAGGTAAACAGAATGCCCAAATTGGTCTCCAAATGGGTTAGATTTGTAGTTA  
ATAAAAGGGCCATAGGGTTACAGACTTAACCAACTTAAGTTGAGAAGTTAG

>M6-PGSC0003DMG401015009M6LRR-RLP\_1071

ATAAACTTTGTAAGTGTCTCAGTAACAAAAGGTCAAACGACATGATATTTGCTAATCTTATCTTAGACTGTG  
GAGACTTCCATTGACTTGGTTTTGGACCATAACAATATATATGATCCATA

>M6-PGSC0003DMG401015009M6LRR-RLP\_1134

AGACTGTGGAGACTTCCATTGACTTGGTTTTGGACCATAACAATATATATGATCCATATGTTTTGTCTTTA  
TAAAGTTGGTCAATGTGAGATGATGTTGCAATAAAAGTTTGTGGGAATG

>M6-PGSC0003DMG401015009M6LRR-RLP\_1197

TGTCTTTATAAAGTTGGTCAATGTGAGATGATGTTGCAATAAAAGTTTGTGGGAATGTTAATATCTTCTC  
AAATCAATTAGTCAAACACAACTGATACTCTTTATAAATAAATACAAG

>M6-PGSC0003DMG401015009M6LRR-RLP\_1260

ATCTTCTCAAATCAATTAGTCAAACACAAACTGATACTCTTTATAAATAAATACAAGTGGGGATGGATTTCTTACCTTTTAAACAAAAACAGAACTTGAATGAGATAATCAAAAAGCATT

>M6-PGSC0003DMG401015009M6LRR-RLP\_1323

TGGATTTCTTACCTTTTAAACAAAAACAGAACTTGAATGAGATAATCAAAAAGCATTTAGGCTTGAAAAAGTTAAGGGTAAGACTTCATATACTTGTGAGATTACTTCATAATACATTT

>M6-PGSC0003DMG401015009M6LRR-RLP\_1386

TGGAAAAAGTTAAGGGTAAGACTTCATATACTTGTGAGATTACTTCATAATACATTTGAAAAACAAAGGTATCAATCTGTTTCCAAGTGCATAGTAATATCATGAAGAAGAACATTGTCT

>M6-PGSC0003DMG401015009M6LRR-RLP\_1449

CAAAGGTATCAATCTGTTTCCAAGTGCATAGTAATATCATGAAGAAGAACATTGTCTTCTTGATTCTTCTCTTTCTAATCAACTTTCTGTATCATTTGCTTCCTCAAATGAGACTGACC

>M6-PGSC0003DMG401015009M6LRR-RLP\_1512

TTCTTCTTTTCTAATCAACTTTCTGTATCATTTGCTTCCTCAAATGAGACTGACCTACAAGCTCTATTAGCTTTCCGAAATCTTGTTACAAGTCCCACTCATTTTTTGGCCAATAATT

>M6-PGSC0003DMG401015009M6LRR-RLP\_1575

CTCTATTAGCTTTCCGAAATCTTGTTACAAGTCCCACTCATTTTTTGGCCAATAATTGGACCAAAAATACCTATTTTTGCTCTTGTTTTGGTGTCACTTGCACTCCAAAAAGCCAAAGGG

>M6-PGSC0003DMG401015009M6LRR-RLP\_2016

TGGGTATGATCCCTCCTCAGTTGAAATGCCACAAAATGATGAACCTTCATTTTGTCTAGGAATAGAGTCAGCGGCAACATTCCAAAGGAGATCGGTAATCTGAGCCAACCTGCAGACT

>M6-PGSC0003DMG401015009M6LRR-RLP\_2079

ATAGAGTCAGCGGCAACATTCCAAAGGAGATCGGTAATCTGAGCCAACCTGCAGACTTGCCTTGTTGGATAATCAATTAACAGGTTCCATTCCCAGTACACTGTTTAATATCTCGTCGC

>M6-PGSC0003DMG401015009M6LRR-RLP\_2142

TGTTGGATAATCAATTAACAGGTTCCATTCCCAGTACACTGTTTAATATCTCGTCGCTACTTGGCGTATCTGTGCATTCAATAGCCTTTCTGGTCCTCACTTGCTAGATGAAGGGAATA

>M6-PGSC0003DMG401015009M6LRR-RLP\_2205

GCGTATCTCTGTCATTCAATAGCCTTTCTGGTCCTCACTTGCTAGATGAAGGGAATATTGTGCTGAATCTGTACTTTTTAAGTATATATGACAACCAAATTTCTGGTTGCATTCCATCCA

>M6-PGSC0003DMG401015009M6LRR-RLP\_2268

TGAATCTGTACTTTTTAAGTATATATGACAACCAAATTTCTGGTTGCATTCCATCCAGCATATGCCAACTC  
ACAGAGCTCAAAGTTTTGTCCGTATCTTTCAACAATATAACTGGAGACA

>M6-PGSC0003DMG401015009M6LRR-RLP\_2331

GCCAACTCACAGAGCTCAAAGTTTTGTCCGTATCTTTCAACAATATAACTGGAGACATACCCAGAAATAT  
TGGTTGTTTATCCAAGCTCGAGACGTTCTTGATTGGCGACAATCCAATAA

>M6-PGSC0003DMG401015527M6RLKmalectin\_0

GCTTCATTATCTTTCAATTCTATTCTTGAGTTCATTATTCTCAAGCCTCAGCAGCATGGCTAGTAGTCATTT  
TCTCCTACTTGTTTTACTTCTTTCTGTTTTCTGTTTTCTGCTGATGG

>M6-PGSC0003DMG401015527M6RLKmalectin\_1037

TATTCTACATAGCTATAACATCAATGTTATCTTGTTGCTTCTCTTTGTGTTAGTTAGAGTACTTCTATTTAGT  
GTTAGTCAGTGGTGAAGTTAGAAATTTGACTTGCTTTATTTGTCTAA

>M6-PGSC0003DMG401015527M6RLKmalectin\_1098

TTCTATTTAGTGTTAGTCAGTGGTGAAGTTAGAAATTTGACTTGCTTTATTTGTCTAACTCAAGGAGGAA  
AGATCGTTCAAGTCCATATAAGAAAGTCCCCCTTGCATCACTGATGTAG

>M6-PGSC0003DMG401015527M6RLKmalectin\_1159

CAAGGAGGAAAGATCGTTCAAGTCCATATAAGAAAGTCCCCCTTGCATCACTGATGTAGGATTGTATTC  
ATTACGGTGTGGATCTATCTCGGGGGATCAAATCGGGGGTCCTGATTTTGA

>M6-PGSC0003DMG401015527M6RLKmalectin\_122

AGCTTTCTTCATTTTCTATATTTAATCATTTTCGTGTTAGAAACCTTTTTGTCTCGATTAATTTGAATTCATG  
TCAAAAACTACTTGTATACTAATCCAAATTCGTGTTTGATCATATA

>M6-PGSC0003DMG401015527M6RLKmalectin\_1220

TTGTATTCATTACGGTGTGGATCTATCTCGGGGGATCAAATCGGGGGTCCTGATTTTGATACCTTGTTAA  
ATAGATCTTGAACCTAACTTAACCCAAGTGGACACTAGATCGTCCTAACT

>M6-PGSC0003DMG401015527M6RLKmalectin\_1281

CCTTGTTAAATAGATCTTGAACCTAACTTAACCCAAGTGGACACTAGATCGTCCTAACTCAACTTCAAAG  
TTAGCTCAAAGGGAGGCCGATGTGAGATTCTTTTCATTCATCAGTTGG

>M6-PGSC0003DMG401015527M6RLKmalectin\_1342

ACTTCAAAGTTAGCTCAAAGGGAGGCCGATGTGAGATTCTTTTCATTCATCAGTTGGACTCCCTTCTG

ATCATGTAGATCCACACCAAATGCTAATAGAGACAAAATATATCTATATT

>M6-PGSC0003DMG401015527M6RLKmalectin\_1403

TCCCTTCTGATCATGTAGATCCACACCAAATGCTAATAGAGACAAAATATATCTATATTTTTGGTTCTTTG

TTTTATGATCATATCATCATTCTGTTTTCCGGATTAGATACAATAACTT

>M6-PGSC0003DMG401015527M6RLKmalectin\_1464

TGGTTCTTTGTTTTATGATCATATCATCATTCTGTTTTCCGGATTAGATACAATAACTTGATATATTTTGAA

TTTCTAGTACTGAAAATATTCACTTTTTTTTAAGAAAAGTAAAATATTG

>M6-PGSC0003DMG401015527M6RLKmalectin\_1525

TATATTTTGAATTTCTAGTACTGAAAATATTCACTTTTTTTTAAGAAAAGTAAAATATTGGATTAACCGGA

CATAAATAAAGGGGCATGAATAGTGAAGATTCATATATTCGATATATAT

>M6-PGSC0003DMG401015527M6RLKmalectin\_1586

TTAAACGGACATAAATAAAGGGGCATGAATAGTGAAGATTCATATATTCGATATATATATATATATATA

TGGACTTAGTTGCTACTTAACTTTTGAAGCTATACAACATTGGGGTTGTT

>M6-PGSC0003DMG401015527M6RLKmalectin\_1647

ATATATATATGGACTTAGTTGCTACTTAACTTTTGAAGCTATACAACATTGGGGTTGTTGTTTTACTTCA

TTAAACAAATTTCTTTTGAGACCCATAAAGGTAAAATCTGTCTATGTT

>M6-PGSC0003DMG401015527M6RLKmalectin\_183

TTTGAATTCATGTCAAAAACTACTTGTATACTAATCCAAATTCGTGTTTGATCATATATATAGGCCATT

ACTAGAAACAAAGTTATTTCCATCGTAAATCAGTGGAAAACCTACTTGC

>M6-PGSC0003DMG401015527M6RLKmalectin\_1830

CTTTTGATCAAATGGACAGGAACACAGATGATCCCTATGACAGAATATGGACTCCTGGTTCTGGAAATT

TAATAGAAACACTCACTAGTGATGCCACAACACTATTGACACTAGTCATGGA

>M6-PGSC0003DMG401015527M6RLKmalectin\_1891

CTGGAAATTTAATAGAAACACTCACTAGTGATGCCACAACACTATTGACACTAGTCATGGAGATCAACCTCC

ACAACAAGTTTTACAAAATGCAATTTCCACAAACAATTCATTAAATATCA

>M6-PGSC0003DMG401015527M6RLKmalectin\_1952

TCAACCTCCACAACAAGTTTTACAAAATGCAATTTCCACAAACAATTCATTAAATATCATATCATGGAACA

TGAATTTTCTTCTATTGATAATGTTATCTACATGAACATGTACTTCTC

>M6-PGSC0003DMG401015527M6RLKmalectin\_2013

TCATGGAACATGAATTTTCTCCTATTGATAATGTTATCTACATGAACATGTACTTCTCTGAAGTAACTCA  
ACTTGATGTCAACCAAACAAGATCATTTAGAATTTTCAAGACAATGAG

>M6-PGSC0003DMG401015527M6RLKmalectin\_2074

AAGTAACTCAACTTGATGTCAACCAAACAAGATCATTTAGAATTTTCAAGACAATGAGTCTATCTCTGAC  
CCAATTTTGCCACCTTATGAGGATTTTATTCTAATGTATGTTAGCAATC

>M6-PGSC0003DMG401015527M6RLKmalectin\_2135

TATCTCTGACCCAATTTTGCCACCTTATGAGGATTTTATTCTAATGTATGTTAGCAATCTCACTGTTTCACC  
ATCCTCTATTTTTTCTGTTGTGAGAACCACAAATTCAACACTTCCTCC

>M6-PGSC0003DMG401015527M6RLKmalectin\_2196

ACTGTTTCACCATCCTCTATTTTTTCTGTTGTGAGAACCACAAATTCAACACTTCCTCCTTATCAATGCCT  
TGAAATATTCACTATTGGTAATGCATTGACTGATGGAACAAACACC

>M6-PGSC0003DMG401015527M6RLKmalectin\_2257

TTATCAATGCCTTGAAATATTCACTATTGGTAATGCATTGACTGATGGAACAAACACCCAAGATGGTAT  
GTACACCTTCTTATATTTAATTTGTTGTAGCAGATAACTTATCTTATGTT

>M6-PGSC0003DMG401015527M6RLKmalectin\_2318

AGATGGTATGTACACCTTCTTATATTTAATTTGTTGTAGCAGATAACTTATCTTATGTTACTTATAGTTATT  
TGATTGTGTAATTTCTTTAACACACTTTCAACGTATAGAAATTAATCT

>M6-PGSC0003DMG401015527M6RLKmalectin\_2379

TTATAGTTATTTGATTGTGTAATTTCTTTAACACACTTTCAACGTATAGAAATTAATCTCGATTTATGAGTT  
TGACTTTTATACTTTTAATAGTATAAAAGAATATATACACTTACCTAA

>M6-PGSC0003DMG401015527M6RLKmalectin\_244

TAGGCCATTACTAGAAACAAAGTTATTTCCATCGTAAATCAGTGGAAAACCTACTTGCCTAGCTAATCC  
GAATTCACACTAGCTAGGTCTACTAAGGGGGTAAATGTAGCTATACTGA

>M6-PGSC0003DMG401015527M6RLKmalectin\_2440

ATTTATGAGTTTGACTTTTATACTTTTAATAGTATAAAAGAATATATACACTTACCTAAAAGATTACCATAT  
ATAATTGTCCATAGACCGTAATAACTATTGATAACTTGAATACAATAT

>M6-PGSC0003DMG401015527M6RLKmalectin\_2501

GATTACCATATATAATTGTCCATAGACCGTAATAACTATTGATAACTTGAATACAATATGCATTTATTTAT  
ATTATCAGTATATATAAGTTAAATACTTTATTTATTGATATTTCTAATA



>M6-PGSC0003DMG401015527M6RLKmalectin\_2562

ATTTATTTATATTATCAGTATATATAAGTTAAATACTTTATTTATTGATATTTCTAATATTATTGAATTATAT  
ATGGGATATTATACTTATTAAGTACTATGTTTTCATTTTTTAAATA

>M6-PGSC0003DMG401015527M6RLKmalectin\_2623

ATTGAATTATATATGGGATATTATACTTATTAAGTACTATGTTTTCATTTTTTAAATATATAGTGGAGACT  
TTAATATCATTGCAAAGGAATTTGAAGTATTACAAGGTTGGATTGGT

>M6-PGSC0003DMG401015527M6RLKmalectin\_2684

TAGTGGAGACTTTAATATCATTGCAAAGGAATTTGAAGTATTACAAGGTTGGATTGGTGATCCTTGCT  
TCCATCACCTTTTACATATGATTGGATCAATTGTAGCAGCAGTGATCCAC

>M6-PGSC0003DMG401015527M6RLKmalectin\_2745

TCCTTGCTTCCATCACCTTTTACATATGATTGGATCAATTGTAGCAGCAGTGATCCACCTCGCATTACAG  
CACTGTAAGTAAAATTTAATTCATTTTAATATGTGTTTTACTTTTTAA

>M6-PGSC0003DMG401015527M6RLKmalectin\_2806

CGCATTACAGCACTGTAAGTAAAATTTAATTCATTTTAATATGTGTTTTACTTTTTAAGGACAGTCTGAT  
GCACAAAGCATTCCGCGTAAGGTCTGCAAAAAGACCTCACCCAAGGGGT

>M6-PGSC0003DMG401015527M6RLKmalectin\_2867

ACAGTCTGATGCACAAAGCATTCCGCGTAAGGTCTGCAAAAAGACCTCACCCAAGGGGTATAACACAAA  
CAGTTTATACTAATGCAAGCATTAAATGATTGTTTTATGGTTCGAACATGT

>M6-PGSC0003DMG401015527M6RLKmalectin\_2928

AACACAAACAGTTTATACTAATGCAAGCATTAAATGATTGTTTTATGGTTCGAACATGTGATCTATAGGTC  
ACACAAAGATAATTTTATTGTTGTTTCAGGGCGCGTACCCCTTTATATA

>M6-PGSC0003DMG401015527M6RLKmalectin\_2989

TCTATAGGTCACACAAAGATAATTTTATTGTTGTTTCAGGGCGCGTACCCCTTTATATAATTGTAATTTTT  
TTGTTGAAATAAAATTAATTTACAGGTAAGTAAATCAATCTAT

>M6-PGSC0003DMG401015527M6RLKmalectin\_305

AGCTAATCCGAATTCACACTAGCTAGGTCTACTAAGGGGGTAAATGTAGCTATACTGAATTGAAAAGT  
TTCAATTCTCATAATTTAACTTGAGATCTCTGGTTAACCATAGAGGAAT

>M6-PGSC0003DMG401015527M6RLKmalectin\_3050

TGTAATTTTTTTTGTGAAATAAAATTAATTTACAGGTAAGTAAATCAATCTATCAGGATCACTCC

AGATTTTAGTTCATGGATGCCCTTGAGACAATGTAATGTTTCTTGTT

>M6-PGSC0003DMG401015527M6RLKmalectin\_3111

GGATCACTTCCAGATTTTAGTTCATGGATGCCCTTGAGACAATGTAATGTTTCTTGTTTTTTTTAATTTT

TTTATTAATTTAAATACATTTCTTCTAAATAGGGATATTTAATTTT

>M6-PGSC0003DMG401015527M6RLKmalectin\_3172

TTTTAATTTTTTTTATTAATTTAAATACATTTCTTCTAAATAGGGATATTTAATTTAATTAATTTCTAACT

CTTTGTTTTTTTGTGCTTCTTGGATTGCAGTGATTTGAGTAACAAC

>M6-PGSC0003DMG401015527M6RLKmalectin\_3233

TTAATTTCTAACTCTTTGTTTTTTTGTGCTTCTTGGATTGCAGTGATTTGAGTAACAACAATTTGGATGGAC

CGATTCCTGATTTTTTTGGCACATTACCCAATCTTAAAGAACTGTTAG

>M6-PGSC0003DMG401015527M6RLKmalectin\_3294

TTTGGATGGACCGATTCTGATTTTTTTGGCACATTACCCAATCTTAAAGAACTGTTAGTATAAAAACATT

ATATTCTGATTGATTTAATTAGTTTGTGGTCAATCTTTTCGAAAGCT

>M6-PGSC0003DMG401015527M6RLKmalectin\_3344

AACTGTTAGTATAAAAACATTATATTCTGATTGATTTAATTAGTTTGTGGTCAATCTTTTCGAAAGCTA

AAAGTATTTTGAAGAAAAAATTGGTTTATTTTAGAAAATAAAGTTGTTT

>M6-PGSC0003DMG401015527M6RLKmalectin\_488

CTTTTTATTTGTAGTGTTTGTGAGCCTAGATTGTGGATCATCAGAAGCATACACTGATCATGAAACTTCAA

TAGATTGGTTAGGAGATGCTGATTACGTAGCCAATGGAGAATCTTATGT

>M6-PGSC0003DMG401015527M6RLKmalectin\_549

GAAACTTCAATAGATTGGTTAGGAGATGCTGATTACGTAGCCAATGGAGAATCTTATGTTGTACAATCCA

ACAACCTCAATATCACACGTAATGGACTCTAAGAGTGTTTCAACAACCAGG

>M6-PGSC0003DMG401015527M6RLKmalectin\_61

AGTAGTCATTTTCTCTACTTGTTTTACTTCTTTCTGTTTTCTGTTTCTGCTGATGGTAAGCTTTCTTCAT

TTTCTATATTTAATCATTTCGTGTTAGAAACCTTTTTTGTCTCGATT

>M6-PGSC0003DMG401015527M6RLKmalectin\_610

TACAATCCAACAACCTCAATATCACACGTAATGGACTCTAAGAGTGTTTCAACAACCAGGACTAAGAATTG

TTTCTAATCGATGAAATCGAAAAGGGTGGAAAAGTTCTAATTCGAGCTA

>M6-PGSC0003DMG401015527M6RLKmalectin\_671

TAAGAATTGTTTCCTAATCGATGAAATCGAAAAGGGTGGAAAAGTTCTAATTCGAGCTAGTTTTACTAT  
GGAAATTACGATGGGAAATCAAATCCACCATCATTTGCACTTCAATTTGA

>M6-PGSC0003DMG401015527M6RLKmalectin\_732

TTTTACTATGGAAATTACGATGGGAAATCAAATCCACCATCATTTGCACTTCAATTTGATGGAAATCATTG  
GGCCAGTGTTACAACCTATGAGTGATCAACTTGTATATTATGAGACATTT

>M6-PGSC0003DMG401015527M6RLKmalectin\_793

GAAATCATTGGGCCAGTGTTACAACCTATGAGTGATCAACTTGTATATTATGAGACATTTTATGTCGTAA  
AGGCGATTACCTTACTGTGTGTCTTGCTCAGACAGAGGATAATCAATTCC

>M6-PGSC0003DMG401015527M6RLKmalectin\_854

TGTCGTAAAGGCGATTACCTTACTGTGTGTCTTGCTCAGACAGAGGATAATCAATTCCTTTTATTTCTG  
CACTTGAAGTTCGTGGCTTGGATTCTACTATGTATAGTCATGTTGATGA

>M6-PGSC0003DMG401015527M6RLKmalectin\_915

TTTATTTCTGCACTTGAAGTTCGTGGCTTGGATTCTACTATGTATAGTCATGTTGATGATAATCATGCTTT  
GTTCTTGAGAAGAAGAGTTGCTTTTGGTTCCAACAAAACCTATCAGGTAA

>M6-PGSC0003DMG401015527M6RLKmalectin\_976

ATCATGCTTTGTTCTTGAGAAGAAGAGTTGCTTTTGGTTCCAACAAAACCTATCAGGTAAAATATTCTACAT  
AGCTATACATCAATGTTATCTTGTGCTTCTCTTTGTGTTAGTTAGAGT

>M6-PGSC0003DMG401015877M6LRR-RLP\_186

AATGAGAAAATCAAATCTTTTGAGGAAGATATTAGAGTTGTTGTTAGTGAGGCAGAGGATGTTGTTGAA  
ATGAAGATTTCTGAAATCATCAAAGAAGAAAGCTGGACATTTGGAATTTTA

>M6-PGSC0003DMG401015877M6LRR-RLP\_2666

TAACAGCGACAGTATCCATAACAGCGACAGTAAGTTTAATTCTCTCTGAAAAGTTCTTCGATTCTTCACAT  
TATTTAAAACCTCGTTTTTATTAATCATACTTCTTTGAAATTAAGATG

>M6-PGSC0003DMG401015877M6LRR-RLP\_2852

TATCTTCCGAATTCAGAACCTTGACTTCATATTTTTGTTTTATATTCTGATGGTTTTTTAATTCATGTTT  
TAGGAATAAGCATGTTTAATACATGTATCGGCCAATTGTGTTTTTTT

>M6-PGSC0003DMG401015894-(rev)M6LRR-RLP\_0

ACATCTGCACTCACCTCACAACCTCGACACGATCTCTAGAAATTCAGTAATTTCTATATGCACATTATA  
GGATGTACAAATCTAATCCTGTAAAGTTTTGAACAATAGATGTATGACC

>M6-PGSC0003DMG401015894-(rev)M6LRR-RLP\_1054

CTAAAAAAAAATAAGGCAGTTAACCTGCTACAAGAATTTACATATATTGACCGTGTAATACTTTTTTACCC  
CAGTGTATAAGAGATAAATCCTATTATTTCTATAACATTGGCAAACACA

>M6-PGSC0003DMG401015894-(rev)M6LRR-RLP\_1116

TTTTTACCCCAGTGTATAAGAGATAAATCCTATTATTTCTATAACATTGGCAAACACATTTTTCAAATGA  
TTAGTCAAATACAAATTGTAATCTCCACAAATACTTTTTCGAAAAACAC

>M6-PGSC0003DMG401015894-(rev)M6LRR-RLP\_1178

TCAAATGATTAGTCAAATACAAATTGTAATCTCCACAAATACTTTTTCGAAAAACACTTGAGATAAAAA  
AATTTTTAAAAATAAACAGACTTTAGAAGATTGACCAAACGTGCTATAAG

>M6-PGSC0003DMG401015894-(rev)M6LRR-RLP\_124

AACATGTTATAAATCAAATGTCAATACTGTAGTTGTTGTGGTGGAGAAGTTGGGCCTTGCCAACCATGT  
CTTTCTGGATCATATTTCTCTCCATCACCCCAAAGGGCATAGGCTTCTTC

>M6-PGSC0003DMG401015894-(rev)M6LRR-RLP\_1240

GATAAAAAAATTTTTAAAAATAAACAGACTTTAGAAGATTGACCAAACGTGCTATAAGTCACCGATGTG  
GGAGTCAATATTAACACTATAACATTTTGCTTGTGTACCTAACAAAAATAAAA

>M6-PGSC0003DMG401015894-(rev)M6LRR-RLP\_1302

CGATGTGGGAGTCAATATTAACACTATAACATTTTGCTTGTGTACCTAACAAAAATAAAAAGGGCAAGTTGT  
TGAAACTTTTTAGTGCTTACCTACTTTTCTCCTTCATTTGAGTATGACAT

>M6-PGSC0003DMG401015894-(rev)M6LRR-RLP\_1364

CAAGTTGTTGAAACTTTTTAGTGCTTACCTACTTTTCTCCTTCATTTGAGTATGACATTATAAGAGCCGTA  
GGGACAAGGGGAAGGTTGGATAGTTATAGCAACTTATTTTGACACACAC

>M6-PGSC0003DMG401015894-(rev)M6LRR-RLP\_1426

AGAGCCGTAGGGACAAGGGGAAGGTTGGATAGTTATAGCAACTTATTTTGACACACACACTATATTCAA  
TTTCAACAATCATATATAAAGACAATTACCAAATACTCTATAGAACAAGTA

>M6-PGSC0003DMG401015894-(rev)M6LRR-RLP\_1488

TATTCAATTTCAACAATCATATATAAAGACAATTACCAAATACTCTATAGAACAAGTAATATTCTTTACAA  
AAAAAAAAAATGGAAGATTATTAAGTAAGTACAATTATCGTACCTGCT

>M6-PGSC0003DMG401015894-(rev)M6LRR-RLP\_1550

TCTTTACAAAAAATAAATGGAAGATTATTAAGTAAGTACAATTATCGTACCTGCTGTAGAAAAGTG

GACTTTTTGTGGAGTATCATCATGGAATACCATGGAATGCTTCCAGCAAGA

>M6-PGSC0003DMG401015894-(rev)M6LRR-RLP\_1612

AAAAGTGGACTTTTTGTGGAGTATCATCATGGAATACCATGGAATGCTTCCAGCAAGAATTCCCATTACT  
ATGGCTGCCCAAGCTTGCACCACTCCTACATCAATAATTTAATTTTAGTA

>M6-PGSC0003DMG401015894-(rev)M6LRR-RLP\_1674

CCATTACTATGGCTGCCCAAGCTTGCACCACTCCTACATCAATAATTTAATTTTAGTATTACTCATTTTTCGA  
TGACACAACCTGTTAGGTCCTTCCTCATTACGAGTCAGTTAAAATCAC

>M6-PGSC0003DMG401015894-(rev)M6LRR-RLP\_1736

TCATTTTCGATGACACAACCTGTTAGGTCCTTCCTCATTACGAGTCAGTTAAAATCACAAGACATGTAGAA  
CTCTCACCGCCACTCATTTAAAAAGGAATGCTTTATATTTTGTTTACTT

>M6-PGSC0003DMG401015894-(rev)M6LRR-RLP\_1798

CATGTAGAACTCTCACCGCCACTCATTTAAAAAGGAATGCTTTATATTTTGTTTACTTTTGTCTTACTTGTG  
ACAAGTTTTTTTCTATAATATCTTAAATTACGTGTTCAATCAAATAGT

>M6-PGSC0003DMG401015894-(rev)M6LRR-RLP\_186

AACCATGTCTTTCTGGATCATATTTCTCTCCATCACCCCAAAGGGCATAGGCTTCTTCACCATGAACCGCG  
TCATCTCCAATCTTTAGCTGCTCATCCGACATCCTTAGTGGAATGACCA

>M6-PGSC0003DMG401015894-(rev)M6LRR-RLP\_1860

CTTACTTGTGACAAGTTTTTTTCTATAATATCTTAAATTACGTGTTCAATCAAATAGTTGTGACATAAAATT  
GGACTTCTCCATACAAAAAACAACCAATAAGAGAGCACAATATTGTT

>M6-PGSC0003DMG401015894-(rev)M6LRR-RLP\_1922

ACATAAAATTGGACTTCTCCATACAAAAAACAACCAATAAGAGAGCACAATATTGTTTATTTTTCTTGAA  
ATATTTTTCAAGTAACCTCACATTGTTGACAGAATTTGACTCCTAAGTT

>M6-PGSC0003DMG401015894-(rev)M6LRR-RLP\_1984

TTTCTTGAAATATTTTTCAAGTAACCTCACATTGTTGACAGAATTTGACTCCTAAGTTTTCTAATCTAGAT  
GTTTTACACATATTCAACCACAATAAATCTTTACTTAATGGTCAACAA

>M6-PGSC0003DMG401015894-(rev)M6LRR-RLP\_2046

TAATCTAGATGTTTTACACATATTCAACCACAATAAATCTTTACTTAATGGTCAACAAAAGAGGGATCAAT  
AATATTTTTGAACTTTAGATAATAGGAGCAATAAATAAGAGAACCAATT

>M6-PGSC0003DMG401015894-(rev)M6LRR-RLP\_2108

GGGATCAATAATATTTTTGAACTTTAGATAATAGGAGCAATAAATAAGAGAACCAATTGCAAGTTTATTT  
CTTGTGGGAATTAAGGTATACAACAAAGTAAAACATAAATCATAATATTA

>M6-PGSC0003DMG401015894-(rev)M6LRR-RLP\_2170

GTTTATTTCTTGTGGGAATTAAGGTATACAACAAAGTAAAACATAAATCATAATATTAGTATAATTTAACA  
TATTCTATCTAGTTAGTTTCTGTTTTTCATTAGGTTACCAATTAATATTT

>M6-PGSC0003DMG401015894-(rev)M6LRR-RLP\_2232

AATTTAACATATTCTATCTAGTTAGTTTCTGTTTTTCATTAGGTTACCAATTAATATTTATAATCGAAATATA  
CTTGTAAGTATCATAGTGTAACACTATTTTTCAACTGTCAGTATATAAAA

>M6-PGSC0003DMG401015894-(rev)M6LRR-RLP\_2294

TCGAAATATACTTGTAAGTATCATAGTGTAACACTATTTTTCAACTGTCAGTATATAAACTTAAACTACCTG  
CTCCAGGAGTTACACAAGCTAGGCCGGTCATCATTCTTGAATCGCTCC

>M6-PGSC0003DMG401015894-(rev)M6LRR-RLP\_2356

AACTACCTGCTCCAGGAGTTACACAAGCTAGGCCGGTCATCATTCTTGAATCGCTCCGATAACGGATGG  
CTTGCCAAAGTAAAAACATCTAGAGTTGTCCAAACAAGAAGACTTGTAG

>M6-PGSC0003DMG401015894-(rev)M6LRR-RLP\_2418

ACGGATGGCTTGCCAAAGTAAAAACATCTAGAGTTGTCCAAACAAGAAGACTTGTAGCTGCTGAAATA  
TTAGTGTTTAAACAGCCAAAGGAGCAGCTACATTTGCAGCATTAGGTGCT

>M6-PGSC0003DMG401015894-(rev)M6LRR-RLP\_248

TGAACCGGTCATCTCCAATCTTTAGCTGCTCATCCGACATCCTTAGTGGAATGACCAGCCTTATTGCAAG  
TAGGATTAACGTCGTTGCAACTATGTTCCAACCAATGATGAAGAGAGCT

>M6-PGSC0003DMG401015894-(rev)M6LRR-RLP\_2480

TGAAATATTAGTGTTTAAACAGCCAAAGGAGCAGCTACATTTGCAGCATTAGGTGCTCCTCCATTGAAA  
CCTGACCAACCCATCCAAAGTAACCCTGCTCCTGCAAGCATCAACAACAC

>M6-PGSC0003DMG401015894-(rev)M6LRR-RLP\_2542

CATTGAAACCTGACCAACCCATCCAAAGTAACCCTGCTCCTGCAAGCATCAACAACACGTTGTTTGGTGG  
AAACCTTCCCTATCACTCTTCAATCTTGGCCCAACCTGCCATCAACATA

>M6-PGSC0003DMG401015894-(rev)M6LRR-RLP\_2604

TTTGGTGAAACCTTCCCTATCACTCTTCAATCTTGGCCCAACCTGCCATCAACATATCCAATCAACTCA  
ATTAATATATACCAAAAAATCGAGTTGAACAGAATCCACTACTTTCAGT

>M6-PGSC0003DMG401015894-(rev)M6LRR-RLP\_2666

ATCAACTCAATTAATATATACCAAAAAATCGAGTTGAACAGAATCCACTACTTTCAGTTCGAATCATGTAA  
TATCCAATCGTGCTATGTGATCTAAAGGCTACTAAATCACTAAAAGTTG

>M6-PGSC0003DMG401015894-(rev)M6LRR-RLP\_2728

ATCATGTAATATCCAATCGTGCTATGTGATCTAAAGGCTACTAAATCACTAAAAGTTGAAACGACATCAA  
AATTTTGATCACCTAATTGTAATGAGTTTAGCTGTATAACCTAAAGTTG

>M6-PGSC0003DMG401015894-(rev)M6LRR-RLP\_2790

GACATCAAAATTTTGATCACCTAATTGTAATGAGTTTAGCTGTATAACCTAAAGTTGAACACGTCAATTT  
TAAATCCTAAATTCACCTCTAAATCATACTGACTCCAAATAAACTAATT

>M6-PGSC0003DMG401015894-(rev)M6LRR-RLP\_2852

CGTCAATTTTAAATCCTAAATTCACCTCTAAATCATACTGACTCCAAATAAACTAATTTGACTTTAAATTGC  
TCGGATCCAACACATAGCTGTGCGAAATTTTGAAGAGTCTGAACAACA

>M6-PGSC0003DMG401015894-(rev)M6LRR-RLP\_2914

TTTAAATTGCTCGGATCCAACACATAGCTGTGCGAAATTTTGAAGAGTCTGAACAACATAACTTTAAATTT  
TGGATTAACTTATCATAACAGAGTAAAACAGAGTTGAATGAATGAATG

>M6-PGSC0003DMG401015894-(rev)M6LRR-RLP\_2976

TTTAAATTTTGGATTAACTTATCATAACAGAGTAAAACAGAGTTGAATGAATGAATGAACGAAAAGGG  
GAGAATTAGTTGGCTGTAATACCCAATAAGCAGCGGTGAATCCAGAAATTC

>M6-PGSC0003DMG401015894-(rev)M6LRR-RLP\_3038

AAAAGGGGAGAATTAGTTGGCTGTAATACCCAATAAGCAGCGGTGAATCCAGAAATTCAGCAGAAAG  
ATGAATAACATAGCCACCAGAATAATCAATGACACCCCAATGATAAAGAAAT

>M6-PGSC0003DMG401015894-(rev)M6LRR-RLP\_310

TATTGCAAGTAGGATTAACGTCGTTGCAACTATGTTCCAACCAATGATGAAGAGAGCTGCAACTATTTGC  
TTAAGGAAAAGAATTCCACCACCTCCACCATAAAATGCACCCTTTGTGTT

>M6-PGSC0003DMG401015894-(rev)M6LRR-RLP\_3100

AGAAAGATGAATAACATAGCCACCAGAATAATCAATGACACCCCAATGATAAAGAAATCCACCTCCCA  
AAGGCTAAAAGCTCCAACAGTATAACAAAAAATAAGCCAAAGAGGAACAAA

>M6-PGSC0003DMG401015894-(rev)M6LRR-RLP\_3162

CTCCCCAAAGGCTAAAAGCTCCAACAGTATAACAAAAAATAAGCCAAAGAGGAACAAAAGCCATCCAAG

CTTTGATATTCATACGAGCAAGAACAGAACCAGCCAACAAAATCATGGTAA

>M6-PGSC0003DMG401015894-(rev)M6LRR-RLP\_3224

ATCCAAGCTTTGATATTCATACGAGCAAGAACAGAACCAGCCAACAAAATCATGGTAATAGCAGCAAAA

GTGAAATGAAAATAGACATGTGCAGCCATAGGATAAAAAGGTTTCATGCATA

>M6-PGSC0003DMG401015894-(rev)M6LRR-RLP\_3286

AGCAAAAGTGAAATGAAAATAGACATGTGCAGCCATAGGATAAAAAGGTTTCATGCATAGGAGATTCTA

TAGTCATTCCATCGCTATAATAATGCGTTGTCTCTGGCATTCTTGCTCGTCC

>M6-PGSC0003DMG401015894-(rev)M6LRR-RLP\_3348

ATTCTATAGTCATTCCATCGCTATAATAATGCGTTGTCTCTGGCATTCTTGCTCGTCCTGTTAAGTATTTTT

GGCCTAAAGCAGGGGCCCTTTTGCCAAAAGGGCAAAGCTTATCGC

>M6-PGSC0003DMG401015894-(rev)M6LRR-RLP\_3410

AAGTATTTTTGGCCTAAAGCAGGGGCCCTTTTGCCAAAAGGGCAAAGCTTATCGCCAAAGGCGATA

CGATAGCCTACTAATACCCAACATATGAGTACAGCTGCGAAAGCGTAAAGA

>M6-PGSC0003DMG401015894-(rev)M6LRR-RLP\_3472

GGCGATACGATAGCCTACTAATACCCAACATATGAGTACAGCTGCGAAAGCGTAAAGAGCCATGAAAG

CAGAGTAACTGCCATTTTTTCTTGACAATGCTGGCGTAAAGGATGACAAG

>M6-PGSC0003DMG401015894-(rev)M6LRR-RLP\_3534

TGAAAGCAGAGTAACTGCCATTTTTTCTTGACAATGCTGGCGTAAAGGATGACAAGGCCTGGCATAAC

TCTGCAGACCAACGAGGGTCGCTGCAGTCATTTGCCAGGCGTTGTCGCCTT

>M6-PGSC0003DMG401015894-(rev)M6LRR-RLP\_3596

GGCATACTCTGCAGACCAACGAGGGTCGCTGCAGTCATTTGCCAGGCGTTGTCGCCTTTGTTTAGCCATG

GTGGAAGTCTGGTAAGTCTGCTTGATATGCTCCTGCTGGTATGGACATG

>M6-PGSC0003DMG401015894-(rev)M6LRR-RLP\_3658

TAGCCATGGTGGAAGTCTGGTAAGTCTGCTTGATATGCTCCTGCTGGTATGGACATGGCTAATTATTTT

TCAGAGCTTCTTGAAATTTTATTTGATGAGATATATTATATGCTCTGTTT

>M6-PGSC0003DMG401015894-(rev)M6LRR-RLP\_372

CTATTTGCTTAAGGAAAAGAATTCCACCACCTCCACCATAAAATGCACCCTTTGTGTTGGTGACTGGAAG

AACAATATTACAGAGAGATGGTTCTGCCAGAAGACCAGTTAATAAACCCC

>M6-PGSC0003DMG401015894-(rev)M6LRR-RLP\_434



ACTGGAAGAACAATATTACAGAGAGATGGTTCTGCCAGAAGACCAGTTAATAAACCCCTAGAAAGTCCT  
GCCACAGCATGTGTGTGAAACACAGCCAGTGTATCATCCACCTGTTATTAT

>M6-PGSC0003DMG401015894-(rev)M6LRR-RLP\_496

AAGTCCTGCCACAGCATGTGTGTGAAACACAGCCAGTGTATCATCCACCTGTTATTATAACAACAAGCAAG  
TCAGTTACAATCTAAGTCTAAAATGGGGGTTGGGGCCGTTCCGGATTGGAT

>M6-PGSC0003DMG401015894-(rev)M6LRR-RLP\_558

CAAGCAAGTCAGTTACAATCTAAGTCTAAAATGGGGGTTGGGGCCGTTCCGGATTGGATATGAAAATTCA  
ATTTTTAGATTGGATGATTTTTTAAGTTCGGGTTTGGATTAATCGGTTTGA

>M6-PGSC0003DMG401015894-(rev)M6LRR-RLP\_62

CACATTATAGGATGTACAAATCTAATCCTGTAAAGTTTTGAACAATAGATGTATGACCTTATAACATGTTA  
TAAATCAAATGTCAATACTGTAGTTGTTTGTGGTGGAGAAGTTGGGCCT

>M6-PGSC0003DMG401015894-(rev)M6LRR-RLP\_620

AAATTC AATTTTTAGATTGGATGATTTTTTAAGTTCGGGTTTGGATTAATCGGTTTGAGACACACAATAGC  
AATTAACAACCTCGGTTACCTAATAGATTGTTACTTAAAATGTACTAT

>M6-PGSC0003DMG401015894-(rev)M6LRR-RLP\_682

CACAATAGCAATTAACAACCTCGGTTACCTAATAGATTGTTACTTAAAATGTACTATAACTTTTTGCAGT  
TAACAAAGATTGAGGTCATCCTGTCACACATGATGTGTA ACTTCATATT

>M6-PGSC0003DMG401015894-(rev)M6LRR-RLP\_744

TTTTGCAGTTAACAAGATTGAGGTCATCCTGTCACACATGATGTGTA ACTTCATATTGGACTTAGTACTA  
TAATGGGTAGTGCATAGAGTACTAATCAATTGAACTTTGAAAATTCG

>M6-PGSC0003DMG401015894-(rev)M6LRR-RLP\_806

TTAGTACTATAATGGGTAGTGCATAGAGTACTAATCAATTGAACTTTGAAAATTCGACATACTAGCTA  
GCATTGGGCACACATGTTTCGGATATCCAATTTAAAATCCATATAATTTA

>M6-PGSC0003DMG401015894-(rev)M6LRR-RLP\_868

ACTAGCTAGCATTGGGCACACATGTTTCGGATATCCAATTTAAAATCCATATAATTTAAAATGAAATAA  
TCCAAAATCCAAACCAATATCCAAAAGTTTGGATTTCCGGTTGACCC

>M6-PGSC0003DMG401015894-(rev)M6LRR-RLP\_930

TGAAATAATCCAAAATCCAAACCAATATCCAAAAGTTTGGATTTCCGGTTGACCCAACTATGCTCA  
CCCTTAGCTAAAATATAACTAGAGATAACCATCCATAATAAGTTGAATTA

>M6-PGSC0003DMG401015894-(rev)M6LRR-RLP\_992

TATGCTCACCCCTTAGCTAAAATATAACTAGAGATAACCATCCATAATAAGTTGAATTAACAACCTAAAAA  
AATAAGGCAGTTAACCTGCTACAAGAATTTACATATATTGACCGTGTA

>M6-PGSC0003DMG401015976M6LRR-RLP\_1701

GGAAGCAGCATTCAAGAGTTTCGATATAGAATGTGAAGTTTTGCGTAGCCTTTGCCATAGAAATCTTGTG  
AAAGTCATCACTAGTTGTTCCAACCTTGATTTTTAGGCTTTAGTGCTCGA

>M6-PGSC0003DMG401015976M6LRR-RLP\_1827

GCCTAATGGAAGTCTTGACAAGTATTTGTATTGCGACAACCTACTTCCTAAACATCAGGCAGAGACTAAGC  
ATTATGATAGATGTTGCATGTGCTTTGGAATATCTTCATCATGGATGCTC

>M6-PGSC0003DMG401015976M6LRR-RLP\_1890

ACTAAGCATTATGATAGATGTTGCATGTGCTTTGGAATATCTTCATCATGGATGCTCCTCTCCGGTGATTC  
ACTGTGACCTGAAGCCTAGTAACGTCTTGTTGGATGAGGATATGGTTTC

>M6-PGSC0003DMG401015976M6LRR-RLP\_1953

GGTGATTCACTGTGACCTGAAGCCTAGTAACGTCTTGTTGGATGAGGATATGGTTTCCCACCTAAGTGAC  
TTTGGTATTTCAACACTGCTTGGTGAAGATGAGAGCGATTTATACACTAA

>M6-PGSC0003DMG401015976M6LRR-RLP\_2079

AGCAACATTTGGTTATATTGCACCGGGTACGTCTCTTTGTTTTTGCTAATTTGAACATTGATTTTTCGTCTT  
TTTTTTTTCAATCAAGAAAGTATATTGCATATTTAAATTAATTCTCTG

>M6-PGSC0003DMG401015976M6LRR-RLP\_2142

TTTCGTCTTTTTTTTTTCAATCAAGAAAGTATATTGCATATTTAAATTAATTCTCTGACTGTAGAGTATGGA  
CTGGATGGACTGGTGTCAATAAAATGTGATGTCTATAGTTACGGGATC

>M6-PGSC0003DMG401015976M6LRR-RLP\_2205

GAGTATGGACTGGATGGACTGGTGTCAATAAAATGTGATGTCTATAGTTACGGGATCATGTTGCTGGAA  
ACGTTTACTAGGAGAAAGCCTACTGAGTTTGAGGGAAATCTTAGCTTGAAG

>M6-PGSC0003DMG401015976M6LRR-RLP\_2268

CTGGAAACGTTTACTAGGAGAAAGCCTACTGAGTTTGAGGGAAATCTTAGCTTGAAGCAATGGGTGAGT  
TATCACTCCCTGAGGCAGTAATGGACGTTGTAGATGCCAATTTGGTAACA

>M6-PGSC0003DMG401015976M6LRR-RLP\_2304

GAGGGAAATCTTAGCTTGAAGCAATGGGTGAGTTATCACTCCCTGAGGCAGTAATGGACGTTGTAGAT

GCCAATTTGGTAACAGTACCAATGGATAATTGCTTACAGAAGGAGCTAGAT

>M6-PGSC0003DMG401015976M6LRR-RLP\_252

AGCAACTCTACCACCAAACACAGGTTCTACCTTATCCAACATTGAAGAGCTTTATATGGGTCACTTAACCA  
ATCTTGTTGGGACTATTCCTCATTCTATCTCCAATTGTTCAAAGCTTAG

>M6-PGSC0003DMG401015976M6LRR-RLP\_504

CTTAACCAATTGCAGAAGATTAACAGTTCTTTCTCTATCTTTCAACCCTCTAAATGGCATGCTGCCGGTCT  
CCGTAGGGAACTTCTCCAATCTCTTGTAACCTTTTATGCCGCTGCTTG

>M6-PGSC0003DMG401016557M6LRR-RLP\_0

CTACATTGTTTGAATGGCCGCTAATACTCTTGCTGATTCCGATCAAATATTTTCCAAGTTACCAGAAGAC  
ATCATCGAGAAAATCCTCTCTTGTAACCTTTGAAACAGAGACCAACAG

>M6-PGSC0003DMG401016557M6LRR-RLP\_1071

GTGAAAATATCACGTTGTCCTTGAAACTGACACAAGGATGACTTACATCTTTAGTAT  
TTTTCAATTCGATTTCTTTTCATGTTTGACAAGTAATTTTGTGTTGAATA

>M6-PGSC0003DMG401016557M6LRR-RLP\_1134

TTAGTATTTTTCAATTCGATTTCTTTTCATGTTTGACAAGTAATTTTGTGTTGAATATTATTTTTATTGCT  
ATGAAGGGAGTAACATTTTCAGCCTGGAACTTTGAACCACTTTGTAT

>M6-PGSC0003DMG401016557M6LRR-RLP\_1197

TTCATTGTCTATGAAGGGAGTAACATTTTCAGCCTGGAACTTTGAACCACTTTGTATCAAGCGCATAAAT  
TTGGTAATACAATCTTCATTTAAACCAAGATATGAATCTTTTCTTGCTGA

>M6-PGSC0003DMG401016557M6LRR-RLP\_126

TTGTTTCCAAAAAATGGCAGCAAATAGTAAAATCATTCAATGAAGATCTCAATTTAGTCCACACATATTCT  
GCAAAGATAGCATGTGGATACTGTGGCTCTTTTCAATTGGACCGTCACG

>M6-PGSC0003DMG401016557M6LRR-RLP\_1260

CATAAATTTGGTAATACAATCTTCATTTAAACCAAGATATGAATCTTTTCTTGCTGAATTTTTTGGTACTT  
CCATCCGCGGACCTTGGTGGTGACAGTAAATTCAGATGCGCGAAAACA

>M6-PGSC0003DMG401016557M6LRR-RLP\_1323

TGGTACTTCCATCCGCGGACCTTGGTGGTGACAGTAAATTCAGATGCGCGAAAACATGACTTTATACAG  
GTATTCTACAATATTATAATGACTTCATTTTTACCTTAATAATTTCCCA

>M6-PGSC0003DMG401016557M6LRR-RLP\_1386

TATACAGGTATTCTACAATATTATAATGACTTCATTTTTACCTTAATAATTTCCCATCTTTACTTATGTTAT  
GAATTTGTAGGTCCTAATGAATGAGTTGGAATGCTGGAACAGAGACG

>M6-PGSC0003DMG401016557M6LRR-RLP\_1449

CTTATGTTATGAATTTGTAGGTCCTAATGAATGAGTTGGAATGCTGGAACAGAGACGACACCAAACGTT  
ACAAACGTAGTGAGTACATGTTTTGGTACATTGTATTGAAACGCTTTACAG

>M6-PGSC0003DMG401016557M6LRR-RLP\_1512

AACGTTACAAACGTAGTGAGTACATGTTTTGGTACATTGTATTGAAACGCTTTACAGTCCTCGGATCTAC  
TGCATTTTCAAGACAAGAAAGGGAAGCCCAGTGTGATAAGTCCACGCTAT

>M6-PGSC0003DMG401016557M6LRR-RLP\_1575

GATCTACTGCATTTTCAAGACAAGAAAGGGAAGCCCAGTGTGATAAGTCCACGCTATGTGCTGGGTCAG  
GGGAAGGGTCAAACCAGAAGGGGCTATCAGTAGACTTACCCAACATTTCTA

>M6-PGSC0003DMG401016557M6LRR-RLP\_189

CATATTCTGCAAAGATAGCATGTGGATACTGTGGCTCTTTTCAATTGGACCGTCACGCGTCTGTTTATGC  
TCGGACACTGATCTCTACCATGTGATCCATTTATTAACCTTGCTGCAG

>M6-PGSC0003DMG401016557M6LRR-RLP\_252

GTTTATGCTCGGACACTGATCTCTACCATGTGATCCATTTATTAACCTTGCTGCAGATAACATCAGTTTC  
AAAGAGGTTTATTTGTTTCATACCACCTAAATTTAGGTACTGTGCGTCTC

>M6-PGSC0003DMG401016557M6LRR-RLP\_315

TCAGTTTCAAAGAGGTTTATTTGTTTCATACCACCTAAATTTAGGTACTGTGCGTCTCTCGGAATTTAGAT  
TCCAAATTTTAACCATTCTCCATATAAAAGGAAATTGCAACATGAATA

>M6-PGSC0003DMG401016557M6LRR-RLP\_378

TTTTAGATTCCAAATTTTAACCATTCTCCATATAAAAGGAAATTGCAACATGAATATTATTCGAAAATTT  
AATGTAATGCCTTCATTGAAAGAGTTGTATTTTCATTCTGTTTGCATTT

>M6-PGSC0003DMG401016557M6LRR-RLP\_441

GAAAATTTAATGTAATGCCTTCATTGAAAGAGTTGTATTTTCATTCTGTTTGCATTTTTTCTCACACCTTCT  
CCAATTTTATACCCAAGTGCCTCTCCTTGTCTGTTAACTTTGATAA

>M6-PGSC0003DMG401016557M6LRR-RLP\_504

ACACCTTCTCCAATTTTATACCCAAGTGCCTCTCCTTGTCTGTTAACTTTGATAAATTGTGACAACCTTA  
ATGAATTAGCAGTCCCCATCTCAATTATCTCGAAAAGCTTCATGTCA

>M6-PGSC0003DMG401016557M6LRR-RLP\_567

ACAACCTTAATGAATTAGCAGTCCCCATCTCAATTATCTCGAAAAGCTTCATGTCAATACTCGCAAAAAA  
ATTACAAAAATTGAAGTAAAAGCTCAAAATCTCCTCGAGTTTCACTTGT

>M6-PGSC0003DMG401016557M6LRR-RLP\_63

CAGAAGACATCATCGAGAAAATCCTCTCTTGTGTAACTTTGAAACAGAGACCAACAGTTTCTCTTGTTC  
AAAAAATGGCAGCAAATAGTAAAATCATTCAATGAAGATCTCAATTTAG

>M6-PGSC0003DMG401016557M6LRR-RLP\_630

GCAAAAAAATTACAAAAATTGAAGTAAAAGCTCAAAATCTCCTCGAGTTTCACTTGTGTTGTCCAGCCTT  
TACCAAACCTTGATCTGTGCGCTTCTACTAACTACAACCTCCTCCATATAG

>M6-PGSC0003DMG401016557M6LRR-RLP\_693

CAGCCTTACCAAACCTTGATCTGTGCGCTTCTACTAACTACAACCTCCTCCATATAGATTCTACAAATGTT  
CCGACTCATTTCTCATGACATTTGCTCAACATTCCCATCTCTAAAAT

>M6-PGSC0003DMG401016557M6LRR-RLP\_756

CAAATGTTCCCGACTCATTTCTCATGACATTTGCTCAACATTCCCATCTCTAAAATCCTTATGTCTTATATT  
ATGTAGAGGATTGAAAAAATCAAATTTGTGAGTCCTCTATTGGAGA

>M6-PGSC0003DMG401016557M6LRR-RLP\_819

GTCTTATATTATGTAGAGGATTGAAAAAATCAAATTTGTGAGTCCTCTATTGGAGAGTTTGACATTGAA  
TAACATCATTGACTTGGACGAAGCATTATAGCTACTCCTAATTTACAAT

>M6-PGSC0003DMG401016557M6LRR-RLP\_882

CATTGAATAACATCATTGACTTGGACGAAGCATTATAGCTACTCCTAATTTACAATTGTTCAACGTAATA  
TATAGCTTTAAATTCAAACCCCGTGTCCCATAGTGGGATCAAGGCAA

>M6-PGSC0003DMG401016933M6LRR-RLP\_0

CAGAAATGGAATTCTTAGCTATTTTTGTTGAAAAACTCACTGATTGCTTAATCCAGCCAGTTGCGCGAGG  
GATTGGATATTTCTATTACTACAAGAGAAACATCACATCTCTGGATGAAG

>M6-PGSC0003DMG401016933M6LRR-RLP\_1054

GCAATTATTACAGTTGCAGGAGCACTAAAGCTTAAACTAAGCCTTCATGGGAGGATGCCCTCAAACAA  
TTATGCAATGCAGAAACAAGAAATATCCCTGTAGTTCACACAAAGGTGTAT

>M6-PGSC0003DMG401016933M6LRR-RLP\_1116

CAAACAATTATGCAATGCAGAAACAAGAAATATCCCTGTAGTTCACACAAAGGTGTATAGACCTCTGAG

GCTAAGCTATGATCACTTGGAAAGTGAAGAAGCCAGGTATATCTTTTTGCT

>M6-PGSC0003DMG401016933M6LRR-RLP\_1178

CTCTGAGGCTAAGCTATGATCACTTGGAAAGTGAAGAAGCCAGGTATATCTTTTTGCTTTGTTCTTTGTTCT  
GAGGAAGATAGTGATATTTGACTGAAGAATTACTTAGATATGGAATGG

>M6-PGSC0003DMG401016933M6LRR-RLP\_124

TCAGAAGCTGGAGAATCTCAGGAGTGGCGTGCAGGAAAGAGTGGAGGCTGCCAGGAGAACTTACAA  
GTCATTTACAAACTGTTGAGGATTGGTTAACTAGTGTTGATACTACTACTGC

>M6-PGSC0003DMG401016933M6LRR-RLP\_1240

TCTTTGTTGAGGAAGATAGTGATATTTGACTGAAGAATTACTTAGATATGGAATGGGGCTTGGCATCT  
TTTTGGAAATTAATAATATAGAAGGAGCAAGAAATAGAGTATGCCATCTG

>M6-PGSC0003DMG401016933M6LRR-RLP\_1302

TGGCATCTTTTTGGAAATTAATAATATAGAAGGAGCAAGAAATAGAGTATGCCATCTGTTAGAAACACT  
GAAAGATCGTTTCTTGTATCCCAAGGTTCAAACATAAATTATGTCAAAT

>M6-PGSC0003DMG401016933M6LRR-RLP\_1426

GATGTGGTTCGTGACGTGGCTATATATATTGCTTCTGAGGGAAAGCATATATTTATTGTAAGTCATGATG  
TGAAGTCAAGAGTTCCTCAAGAAAAGACTCTTACGAGCAATATAGTCAC

>M6-PGSC0003DMG401016933M6LRR-RLP\_1488

TCATGATGTGAAGTCAAGAGTTCCTCAAGAAAAGACTCTTACGAGCAATATAGTCACATGTCCATTGTT  
GCAAATAAATTTGATGAGCATCCTAGTCCAATAATTTGCCCAAATTTGAA

>M6-PGSC0003DMG401016933M6LRR-RLP\_1550

CCATTGTTGCAAATAAATTTGATGAGCATCCTAGTCCAATAATTTGCCCAAATTTGAAGCTTCTAATGTTG  
AAACTCTATTGTAAAGAGCCAATCAAATTACAAGACAATTTTTTTGATG

>M6-PGSC0003DMG401016933M6LRR-RLP\_1612

CTAATGTTGAAACTCTATTGTAAAGAGCCAATCAAATTACAAGACAATTTTTTTGATGGGATGAGTAAAC  
TCAATGTCTTAAGCCTGAGTGGATATGAGTACTCCATTTGGCCTTTTCCA

>M6-PGSC0003DMG401016933M6LRR-RLP\_1674

GAGTAACTCAATGTCTTAAGCCTGAGTGGATATGAGTACTCCATTTGGCCTTTTCCAGCATCCATTCAG  
AGGTTGTTGAATCTGAGGACGTTGTGTCTGAGTAATTTAAGGTTGGATGA

>M6-PGSC0003DMG401016933M6LRR-RLP\_1736

CCATTCAGAGGTTGTTGAATCTGAGGACGTTGTGTCTGAGTAATTTAAGGTTGGATGACATATCCATTCT  
CGGTGAACTTGTCACTTTAGAAATTCTCAGCATAAGAGATTCTCAGTTAG

>M6-PGSC0003DMG401016933M6LRR-RLP\_186

TACAAGTCATTTACAAACTGTTGAGGATTGGTAACTAGTGTTGATACTACTACTGCAGATGTGGCAGT  
TGTAATTCGACGAGGTAGAAATGAGGTTGAAAGTGGTTGCTTCTATGGTT

>M6-PGSC0003DMG401016933M6LRR-RLP\_1860

GCTGCCCGTGGAGATAGGAAAATTGAAGAATCTAATCATGTTAGAGTTGCGGAATGAGGAAAAAGCAC  
TGAAAATGATTTACCAGGGTCTTATCAAGATTAGTTGATTGGAAGAAT

>M6-PGSC0003DMG401016933M6LRR-RLP\_1922

AAGCACTGGAAATGATTTACCAGGGTCTTATCAAGATTAGTTGATTGGAAGAACTACATTTGGTGG  
GAGTAGAACATTGTAGTTACTCCAATTGAGGGAGCTGGAATCGTTATCGA

>M6-PGSC0003DMG401016933M6LRR-RLP\_1984

TTGGTGGGAGTAGAACATTGTAGTTACTCCAATTGAGGGAGCTGGAATCGTTATCGAGATTGACTTCA  
CTGACATTAAGTGAATGTTCCGGAGATGTGATCTACAGTAACTGGGCCTT

>M6-PGSC0003DMG401016933M6LRR-RLP\_2046

GACTTCACTGACATTAAGTGAATGTTCCGGAGATGTGATCTACAGTAACTGGGCCTTACCTCCAAGTTG  
ACACGTTTTGCTCTTACAGTGGGTAAAGCTTACAGAGCTACTTCAATCAT

>M6-PGSC0003DMG401016933M6LRR-RLP\_2108

CCAAGTTGACACGGTTTTGCTCTTACAGTGGGTAAAGCTTACAGAGCTACTTCAATCATGGATGATTACGA  
CAAGAATATTAGTTTAGAGGTCACCGAGACTGCCCCATTAGGTGATTGGA

>M6-PGSC0003DMG401016933M6LRR-RLP\_2232

CCACCTGTTGAGCAAGAGCGAACTTGTACATTCAACCGGAGAGGGAACCAAGAACGTGTTGGCCGAGT  
TGCAGCTGGATGAATTTCAGAATGTGAAATATCTCTGCCTGAAATATTTTGA

>M6-PGSC0003DMG401016933M6LRR-RLP\_2294

CCGAGTTGCAGCTGGATGAATTTCAGAATGTGAAATATCTCTGCCTGAAATATTTTGAATTCATTGGCACA  
TATCCAATGTCAGAATAATGTTTCATTTCCCAAACCTCGAAAGACTGGAGG

>M6-PGSC0003DMG401016933M6LRR-RLP\_2356

TTGGCACATATCCAATGTCAGAATAATGTTTCATTTCCCAAACCTCGAAAGACTGGAGGTAAGAAAGTGTC  
ATTGTCTAAAGTATGTTTTTTTTGTGTCCTTGGATGGAGGAAGTTCAACA

>M6-PGSC0003DMG401016933M6LRR-RLP\_2418

AAAGTGTCAATTGTCTAAAGTATGTTTTTTTTGTGTCCTTGGATGGAGGAAGTTCAACAGTAGCTTTCCTTG  
ATGATGAGGAAGCCGAGATCTCTCTGAGAACACATGAAATAATCAAGTT

>M6-PGSC0003DMG401016933M6LRR-RLP\_2480

CTTTCCTTGATGATGAGGAAGCCGAGATCTCTCTGAGAACACATGAAATAATCAAGTTCCCAATTTATA  
TGATTTGAACCTTCTATCTCTCGAATGCCTCACTCACTTTTGCAATGACA

>M6-PGSC0003DMG401016933M6LRR-RLP\_2542

AATTTATATGATTTGAACCTTCTATCTCTCGAATGCCTCACTCACTTTTGCAATGACACTATTGATGGCATT  
GAGTTCCTCGGTTACGGAAAATGAACTTCATGAACTTACCTGAGTTC

>M6-PGSC0003DMG401016933M6LRR-RLP\_2604

TGATGGCATTGAGTTCCTCGGTTACGGAAAATGAACTTCATGAACTTACCTGAGTTCAAAAATTTCTGG  
CCTACAACCAACAACCTTCATCACTGACTCAAATCCTCTTTTTGATGAAAA

>M6-PGSC0003DMG401016933M6LRR-RLP\_310

TCCAAACTTGATGTCACGTTACTCGTTGAGCAGGAGAGCTAAGAAAATTACACTGAAGATGATTGAACT  
TAGAAATGAAGGCAACAAGTATGATGTTTTCAGCTATCATGTACGACATTT

>M6-PGSC0003DMG401016933M6LRR-RLP\_372

TTGAACTTAGAAATGAAGGCAACAAGTATGATGTTTTCAGCTATCATGTACGACATTTTGAAGCTGAATT  
TATTGTTAGTAACAGTGGTGAGGAGTTTTACTCCAGAAAATTGAAAGAGT

>M6-PGSC0003DMG401016933M6LRR-RLP\_434

GCTGAATTTATTGTTAGTAACAGTGGTGAGGAGTTTTACTCCAGAAAATTGAAAGAGTATGAGGTCATC  
TTAGCTTTGAGAGATGACGGTGTCACTATGATTGGGATATGTGGTATGGGT

>M6-PGSC0003DMG401016933M6LRR-RLP\_496

GGTCATCTTAGCTTTGAGAGATGACGGTGTCACTATGATTGGGATATGTGGTATGGGTGGTGTGGTAA  
GACAACGCTGGCTGAGAAAATCAGACAAAGGGCAAACTAGAAAATTTGTT

>M6-PGSC0003DMG401016933M6LRR-RLP\_558

TTGGTAAGACAACGCTGGCTGAGAAAATCAGACAAAGGGCAAACTAGAAAATTTGTTTGATGATGTTG  
TCATGGTAACTGTCAGTCAGCAACCAGACTTTAAAAGAATTCAGGGTGAGA

>M6-PGSC0003DMG401016933M6LRR-RLP\_62

GCGCGAGGGATTGGATATTTCTATTACTACAAGAGAAACATCACATCTCTGGATGAAGAATCTCAGAAG



CTGGAGAATCTCAGGAGTGGCGTGCAGGAAAGAGTGGAGGCTGCCAGGAGA

>M6-PGSC0003DMG401016933M6LRR-RLP\_620

GATGTTGTCATGGTAACTGTCAGTCAGCAACCAGACTTTAAAAGAATTCAGGGTGAGATTGCAGAAGGA  
GTCGGGCTGACATTAGAAGGGGATAATTTTTGGAGTCGTGGAGATCGGCTT

>M6-PGSC0003DMG401016933M6LRR-RLP\_682

AGAAGGAGTCGGGCTGACATTAGAAGGGGATAATTTTTGGAGTCGTGGAGATCGGCTTCGTTTAAGGT  
TAAAGGGACAGGACAGCATCCTTATAATCTTTGATGATGTTTGGGAGGTTCT

>M6-PGSC0003DMG401016933M6LRR-RLP\_744

TAAGGTTAAAGGGACAGGACAGCATCCTTATAATCTTTGATGATGTTTGGGAGGTTCTTCATGATCTAGA  
GAAACTTGGAATTCCTAGTGGTAGCAACCACAAACATCGGTGCAAAGTGA

>M6-PGSC0003DMG401016933M6LRR-RLP\_868

CACAACGCGTTTCCGACATGTTTGTGAAGCAATGGGAGCTCAGAAGATCATGGAAGTTGGAACCTTATC  
TGAGGAGGAAGCATGGATCCTTTTCAGGCAGAAAGTAGGTGACTCAGTCAA

>M6-PGSC0003DMG401016933M6LRR-RLP\_930

CCTTATCTGAGGAGGAAGCATGGATCCTTTTCAGGCAGAAAGTAGGTGACTCAGTCAACGATCCTTCCCT  
ACTTGACATAGCAAAAGATGTCGCGTCGCAAAGAGTGCAAGGGGTTGCC

>M6-PGSC0003DMG401016933M6LRR-RLP\_992

CCTTCCCTACTTGACATAGCAAAAGATGTCGCGTCGCAAAGAGTGCAAGGGGTTGCCGCTTGCAATTA  
TTACAGTTGCAGGAGCACTAAAGCTTAAACTAAGCCTTCATGGGAGGATG

>M6-PGSC0003DMG401017656M6RLKmalectin\_0

CGTTAACACATTTTCAAAGACTATCAAATCACATCTTCCCCTTACTCAACTCTGTCAACAAAGCAACAG  
AAAAGAAAGTAGAAAAGGACTTGTTGTCTCTTCTTTTTTACTACTCA

>M6-PGSC0003DMG401017656M6RLKmalectin\_1037

TCTCAATAAGTTGCTGAGGAAATGTTATCGTATCAACTGTGGTTATAATTGGTCCCTGAGGTCAGAACAA  
ACACTCACTTGTCGATTATGTTATGTATGACTTTATCGATTGTTTAGTCC

>M6-PGSC0003DMG401017656M6RLKmalectin\_1098

TCAGAACAACACTCACTTGTCGATTATGTTATGTATGACTTTATCGATTGTTTAGTCCCTTAGTTTCTGTTT  
AGATTTGATGTTTTTCGTGCTATGTAAAAGGTACCCGATTGATCAGTA

>M6-PGSC0003DMG401017656M6RLKmalectin\_1159

AGTTTCTGTTTAGATTTGATGTTTTTCGTGCTATGTAAAAGGTACCCGATTGATCAGTATGATAGAATTTG  
GGATGCTGATGAGGATTTTCAGCCATTTTCATGTGTCATCTGGTTTTGAT

>M6-PGSC0003DMG401017656M6RLKmalectin\_122

TCCTCTCTTTTTTCTCCCCAGCAAATTCCTCCTCTGCTTCAATGGAGCTGCATTGGTGTTACTATTCTTG  
GTTCTTCTATCTTCTATCTTCATCAAAGTTGCTTTTTGTGATCCTGA

>M6-PGSC0003DMG401017656M6RLKmalectin\_1220

ATAGAATTTGGGATGCTGATGAGGATTTTCAGCCATTTTCATGTGTCATCTGGTTTTGATATTCAAGCCAA  
TTTCAATATGTCAGTTCTGAAGGAGAGCCCTCCTGTAGCTGTTCTTCAAA

>M6-PGSC0003DMG401017656M6RLKmalectin\_1281

TCAAGCCAATTTCAATATGTCAGTTCTGAAGGAGAGCCCTCCTGTAGCTGTTCTTCAAACCGGAAGAGTT  
TTGGCACGGTGGAGTGATATGACATATAAATTTCTATTGATCACCAAGG

>M6-PGSC0003DMG401017656M6RLKmalectin\_1342

GGAAGAGTTTTGGCACGGTGGAGTGATATGACATATAAATTTCTATTGATCACCAAGGAGATTACCAC  
ATTGTTCTCTACTTTGCTGGGATTCTGCCCGTCTCCCCTTCATTTCGATGTA

>M6-PGSC0003DMG401017656M6RLKmalectin\_1403

ATTACCACATTGTTCTCTACTTTGCTGGGATTCTGCCCGTCTCCCCTTCATTTCGATGTATTGATAAATGGG  
CATGTTGTTTCGATCAAACACTACACAGTTAATCGATGGGAAGTCAGTAGTC

>M6-PGSC0003DMG401017656M6RLKmalectin\_1464

GATAAATGGGCATGTTGTTTCGATCAAACACTACACAGTTAATCGATGGGAAGTCAGTAGTCTTTTCTTTACA  
ATGAAAGGAATCGAGAGCTTGAACATCACATTGAAGACTGTTCACTACTA

>M6-PGSC0003DMG401017656M6RLKmalectin\_1525

TTCTTTACAATGAAAGGAATCGAGAGCTTGAACATCACATTGAAGACTGTTCACTACTATCCATATATCA  
ATGCTCTTGAGGTTTATGAGATCCTAGACATTCCCTTAGAACTTCTTCA

>M6-PGSC0003DMG401017656M6RLKmalectin\_1586

CATATATCAATGCTCTTGAGGTTTATGAGATCCTAGACATTCCCTTAGAACTTCTTCAACAACAGGTTCT  
AATACAGTTTTATTGTTTTTTCGACCTTTGAAGGAGTCTGTTAGAACCA

>M6-PGSC0003DMG401017656M6RLKmalectin\_1647

AACAGGTTCTAATACAGTTTTATTGTTTTTTCGACCTTTGAAGGAGTCTGTTAGAACCAATCACACCAACT  
TTTGACATTTTTTATGCTTGCAGTTTCAGCCCTACAGGTTATTCATCAG

>M6-PGSC0003DMG401017656M6RLKmalectin\_1708

CACACCAACTTTTGACATTTTTTATGCTTGCAGTTTCAGCCCTACAGGTTATTCATCAGTCAACTGGTCTA  
GATCTTGATTGGGAAGATGATCCATGCTCTCCTAAATCATGGGAACACA

>M6-PGSC0003DMG401017656M6RLKmalectin\_1769

AACTGGTCTAGATCTTGATTGGGAAGATGATCCATGCTCTCCTAAATCATGGGAACACATAGAATGTGA  
AGCAAATCTCGTAACTTCATTGTATGTTAAAGCTTACACTAGAACTACATT

>M6-PGSC0003DMG401017656M6RLKmalectin\_183

TACTATTCTTGGTTCCTTCTATCTTCTATCTTCATCAAAGTTGCTTTTTGTGATCCTGAAGGTACACTTCAG  
AGGCAGATACAAGATTTAACTTACGAGTTCAACCTTTTAAACATTCT

>M6-PGSC0003DMG401017656M6RLKmalectin\_1830

GAATGTGAAGCAAATCTCGTAACTTCATTGTATGTTAAAGCTTACACTAGAACTACATTTTCCTTTCTTTTA  
CTTTCTTTGGTCTTATTTTTGTTAAGAGCAGTACATAATAAAGTTAA

>M6-PGSC0003DMG401017656M6RLKmalectin\_1891

CCTTTCTTTTACTTTCTTGGTCTTATTTTTGTTAAGAGCAGTACATAATAAAGTTAAGACTTTATATAGG  
GATCTTTTTGATGTAACTTGAGGTCAATCAGCCCAACATTTGGTGAC

>M6-PGSC0003DMG401017656M6RLKmalectin\_1952

CTTTATATAGGGATCTTTTTGATGTAACTTGAGGTCAATCAGCCCAACATTTGGTGACCTACTGGATCTC  
AAATCACTGTAAGAGTCATTAGTCTTAACAACCTTATCACTTAATAGCCA

>M6-PGSC0003DMG401017656M6RLKmalectin\_2013

ACTGGATCTCAAATCACTGTAAGAGTCATTAGTCTTAACAACCTTATCACTTAATAGCCATTGTTTGGCTAT  
CTTGACTTACTTATTTGAGGTTCTACTTGTTGCAGGGATTTGCATAATA

>M6-PGSC0003DMG401017656M6RLKmalectin\_2074

GTTTGGCTATCTTGACTTACTTATTTGAGGTTCTACTTGTTGCAGGGATTTGCATAATACTTCACTTGCTG  
GAGAGATACAAAACATCGGCAGCCTGCAACATCTTAAGAAGCTGTAATA

>M6-PGSC0003DMG401017656M6RLKmalectin\_2135

TCACTTGCTGGAGAGATACAAAACATCGGCAGCCTGCAACATCTTAAGAAGCTGTAATACTTGATCTCGA  
GAAATTACCATGTTAAGTTAATGTACTTGAGAGAGCATTATCTAAAATAA

>M6-PGSC0003DMG401017656M6RLKmalectin\_2196

TGATCTCGAGAAATTACCATGTTAAGTTAATGTACTTGAGAGAGCATTATCTAAAATAAGTTGTGCGCTC

TCAACTTTGCAGGAACTTAAGTTTTAATCAACTTACAGCTTTTGGTTCAG

>M6-PGSC0003DMG401017656M6RLKmalectin\_2257

TGTGCGCTCTCAACTTTGCAGGAACTTAAGTTTTAATCAACTTACAGCTTTTGGTTCAGAGTTAGAAGACT

TGATAAACCTTCAAATTTTGTAAGTCTCACTGCTTGCATTGATAGTG

>M6-PGSC0003DMG401017656M6RLKmalectin\_2318

TTAGAAGACTTGATAAACCTTCAAATTTTGTAAGTCTCACTGCTTGCATTGATAGTGACTTCCTTCATT

CTTCCTTGCTAGTCTGTTCAACAGTCTTTACAATCAGTGTTTTCTGTT

>M6-PGSC0003DMG401017656M6RLKmalectin\_2379

TTCCTTCATTCTTCCTTGCTAGTCTGTTCAACAGTCTTTACAATCAGTGTTTTCTGTTGAAGGGACTTGCA

TAACAATAGTTTTCAAGGAACAGTACCAGATAGCGTTGGAGAACTGAA

>M6-PGSC0003DMG401017656M6RLKmalectin\_244

GTACACTTCAGAGGCAGATACAAGATTTAACTTACGAGTTCAACCTTTTAAACATTCTTATATTGTA

CTAAAATTATGACTACAAAATGTA

>M6-PGSC0003DMG401017656M6RLKmalectin\_2440

AGGGACTTGCATAACAATAGTTTTCAAGGAACAGTACCAGATAGCGTTGGAGAACTGAAGGACCTCCAC

TTTCTGTGAGTGAGGAAAATATACTGGCATT

>M6-PGSC0003DMG401017656M6RLKmalectin\_2501

ACCTCCACTTTCTGTGAGTGAGGAAAATATACTGGCATT

ATTATTCTAATTACCTCTCTGCAACATTCAGGAACCTAGAAAACAATA

>M6-PGSC0003DMG401017656M6RLKmalectin\_2562

CACCTGATAAATTATTCTAATTTACCTCTCTGCAACATTCAGGAACCTAGAAAACAATAAGCTGCAAGGC

CCCCTGCCACAATCTTTGAACAGAGAGAGCTTACAAGTCCTGTATGAAAT

>M6-PGSC0003DMG401017656M6RLKmalectin\_2623

CTGCAAGGCCCTGCCACAATCTTTGAACAGAGAGAGCTTACAAGTCCTGTATGAAATCAGAAAGTCTT

TTTGT

>M6-PGSC0003DMG401017656M6RLKmalectin\_2684

GAAAGTCTTTTGT

GGAATCTGTGTCTTCCTTCACTATGTCTTTATGCAATGAATTCTC

>M6-PGSC0003DMG401017656M6RLKmalectin\_2745

TGCAGATCATCAGGGAATCTGTGTCTTTCCTTCACTATGTCTTTATGCAATGAATTCTCAAGAAATCCTAC  
AATTGAGACACCACAAGTCACTGTCTTTGCACCTACAAAACACAAACGC

>M6-PGSC0003DMG401017656M6RLKmalectin\_2806

GAAATCCTACAATTGAGACACCACAAGTCACTGTCTTTGCACCTACAAAACACAAACGCCATAATCGATT  
CATAGTTATACTTGGTGCAGTTGGAGGAGCTGTGTTTGTCTATTTCGTTG

>M6-PGSC0003DMG401017656M6RLKmalectin\_2867

TAATCGATTCATAGTTATACTTGGTGCAGTTGGAGGAGCTGTGTTTGTCTATTTCGTTGTCTTTATAGCAG  
TATTATTGTACATGAGGCGAAGAAAAAGTGGAGATACATATGCATCAAG

>M6-PGSC0003DMG401017656M6RLKmalectin\_2928

TTTATAGCAGTATTATTGTACATGAGGCGAAGAAAAAGTGGAGATACATATGCATCAAGTATGGAAAAA  
AGTCAAACCTTTTCTTTAACATTTCTCAGAATATTGATCAATCTGCTTCTA

>M6-PGSC0003DMG401017656M6RLKmalectin\_2989

TGGAAAAAGTCAAACCTTTTCTTTAACATTTCTCAGAATATTGATCAATCTGCTTCTAACATGCACTTTT  
TTCTAATTCTAGGAACTGCAGCAGAAATGAAAACTGGAATGCTGCAA

>M6-PGSC0003DMG401017656M6RLKmalectin\_305

TATTGACTTCTAAAATTATGACTACAAAATGACTATATTTGTTAAAATCTTAGTGGTCTCTTGATTTTAC  
TTCTTCAATCTCTTCTTTTCTCCCTTGTGTAAAGTTGAAGTTATATTT

>M6-PGSC0003DMG401017656M6RLKmalectin\_366

CTTGATTTTACTTCTCAATCTCTTCTTTTCTCCCTTGTGTAAAGTTGAAGTTATATTTGCATGTATGTGTGT  
GTTTCAGCACATGTGAACTCATAAACTTTAAATCCTGGATCTTCTCT

>M6-PGSC0003DMG401017656M6RLKmalectin\_427

ATGTATGTGTGTGTTTCAGCACATGTGAACTCATAAACTTTAAATCCTGGATCTTCTCTATCAGTATGTAT  
TACATTGAAAGAAAATGGAAGTTTTAAGATGAAATGTTGCTTATGTTG

>M6-PGSC0003DMG401017656M6RLKmalectin\_488

CAGTATGTATTACATTGAAAGAAAATGGAAGTTTTAAGATGAAATGTTGCTTATGTTGTGAAATGTGC  
AGGATTCTTGAGCTTGTCTTGTGGTGGAAATACTACCTATGTTGATTCCTC

>M6-PGSC0003DMG401017656M6RLKmalectin\_549

AAATGTGCAGGATTCTTGAGCTTGTCTTGTGGTGGAAATACTACCTATGTTGATTCCTCCAACATTACATG  
GACACCAGATGGTTCCTATATCTCAGCTGGTAACATGACCACTGTTGAT

>M6-PGSC0003DMG401017656M6RLKmalectin\_61

AAAGCAACAGAAAAGAAAGTAGAAAAGGACTTGTTGTCTCTTCTCTTTTTACTACTCACTTCCTCTCTTT  
TTTTCTCCCCAGCAAATTCTTCTCTGCTTCAATGGAGCTGCATTGGT

>M6-PGSC0003DMG401017656M6RLKmalectin\_610

ACATTACATGGACACCAGATGGTTCCTATATCTCAGCTGGTAACATGACCACTGTTGATTTTCTAGAGGG  
TTCCTCTTCATCTACTCTCCCAGTTAGGTTCTTTCCTGATTCGCCACGTA

>M6-PGSC0003DMG401017656M6RLKmalectin\_671

TCTAGAGGGTTCCTCTTCATCTACTCTCCCAGTTAGGTTCTTTCCTGATTCGCCACGTAGAAAATGTTACA  
AGATTCCAGTGAAGAATGTGTCATCCCTGGTCCTTGTCAGGACACAGTT

>M6-PGSC0003DMG401017656M6RLKmalectin\_732

AAATGTTACAAGATTCCAGTGAAGAATGTGTCATCCCTGGTCCTTGTCAGGACACAGTTTGTGTATAAGA  
ATTATGATTGACATAATAAGCCACCTGCATTCTCTGTTTCTCTTGGGAGG

>M6-PGSC0003DMG401017656M6RLKmalectin\_793

TGTATAAGAATTATGATTGACATAATAAGCCACCTGCATTCTCTGTTTCTCTTGGGAGGGCTATTACAACA  
AATGTCAATCTTACTCATATCGATCCGTGGATCGAAGAGTTCATATGGC

>M6-PGSC0003DMG401017656M6RLKmalectin\_854

TATTACAACAAATGTCAATCTTACTCATATCGATCCGTGGATCGAAGAGTTCATATGGCCAGTTGATAAA  
GACATTCTGTCTTTATGTTTTCACTCTCTTCAAGATGGTGGATTTCCAGT

>M6-PGSC0003DMG401017656M6RLKmalectin\_915

GTTGATAAAGACATTCTGTCTTTATGTTTTCACTCTCTTCAAGATGGTGGATTTCCAGTCATTTTCATCCCTT  
GAACTTAGGCCACTTCCACAAGAAGCTTACAGCAATGCCTTGGGAGAT

>M6-PGSC0003DMG401017656M6RLKmalectin\_976

TTTCATCCCTTGAACCTTAGGCCACTTCCACAAGAAGCTTACAGCAATGCCTTGGGAGATTTTCTCAATAAG  
TTGCTGAGGAAATGTTATCGTATCAACTGTGGTTATAATTGGTCCCTGA

>M6-PGSC0003DMG401017953-(rev)M6LRR-RLK\_0

TCTCCGGGAAATTTTCATTTATCATAAGAGTTGTTGAGCCAGTATTGTGGTGATGGGAAAAGAAATGGG  
AGTTGAAAAGCTTCTGGTTTTTTTTTTGGTACTAATCTCAATCAGATATTC

>M6-PGSC0003DMG401017953-(rev)M6LRR-RLK\_1037

TGACAGGATCATTACCTAATTGCCTTCTGTCTAGTTCTAGGAACCGGATTGTGCATTTTTCCAATAACTGC

TTAGCAACCGGAGATGGTACTCAACATCCATTTTCATTTTGCCGGAATG

>M6-PGSC0003DMG401017953-(rev)M6LRR-RLK\_1098

CAATAACTGCTTAGCAACCGGAGATGGTACTCAACATCCATTTTCATTTTGCCGGAATGAGGCTTTGGCT  
GTTGGTGTCTTACCTCAGCATCAAAGACAAAAACATGCTTCTAAAGTGAT

>M6-PGSC0003DMG401017953-(rev)M6LRR-RLK\_1159

GCTTTGGCTGTTGGTGTCTTACCTCAGCATCAAAGACAAAAACATGCTTCTAAAGTGATTCTTGCCTTGAC  
CATATGTGGTAGCATCACCGGTGGAGTCATACTCGTATGCCTGACCATC

>M6-PGSC0003DMG401017953-(rev)M6LRR-RLK\_122

AGCAATTACAATCATCTCAAGTGCAAACACTTTTGAGAATTCAACATCTTTTGAAGTATCCAACAGCTTTG  
AGTAGTTGGAATAATGAGACAGATTTCTGTAAGATTGAGCCAAGTTCAA

>M6-PGSC0003DMG401017953-(rev)M6LRR-RLK\_1220

TTGCCTTGACCATATGTGGTAGCATCACCGGTGGAGTCATACTCGTATGCCTGACCATCTTGATTGTCAA  
ATCTTTTCTTGCAAAGAAGGCTTCTGCCCAAATACCCCAACCAGATTTA

>M6-PGSC0003DMG401017953-(rev)M6LRR-RLK\_1281

GATTGTCAAATCTTTTCTTGCAAAGAAGGCTTCTGCCCAAATACCCCAACCAGATTTATTCAGAAGAT  
GCACCATCTTCATATACCTCCAAGTTATTCACAGATCCAAGTAAGGTTCC

>M6-PGSC0003DMG401017953-(rev)M6LRR-RLK\_1342

TCAGAAGATGCACCATCTTCATATACCTCCAAGTTATTCACAGATCCAAGTAAGGTTCTCTCAATAACCA  
AATTACTGTTTAAAATAGAAGCTTAGGGCAAATGTATCTGCTCTCTGCG

>M6-PGSC0003DMG401017953-(rev)M6LRR-RLK\_1403

TCAATAACCAAATTAAGTGTAAAATAGAAGCTTAGGGCAAATGTATCTGCTCTCTGCGCCCTAGATGCC  
TGAAGGCGAGGGCTTTCCTTCAATCCCAAGTGCCAAGTATACTAACTTG

>M6-PGSC0003DMG401017953-(rev)M6LRR-RLK\_1464

CTAGATGCCTGAAGGCGAGGGCTTTCCTTCAATCCCAAGTGCCAAGTATACTAACTTGATACCTTTGTA  
TTTCTTGATAAGGATACATACTCAAGCAATGAAGTTAGGAGCACTTAG

>M6-PGSC0003DMG401017953-(rev)M6LRR-RLK\_1525

ACCTTTGTATTTCTTGATAAGGATACATACTCAAGCAATGAAGTTAGGAGCACTTAGTCTTCCATCTTA  
TAGAATATTCTCTCTAGAAGAACTTGAGGCGGCAACGAACAACCTTTGAT

>M6-PGSC0003DMG401017953-(rev)M6LRR-RLK\_1586

TTCCATCTTATAGAATATTCTCTCTAGAAAGAACTTGAGGCGGCAACGAACAACCTTTGATACAACAACCTTT  
ATGGGTGAAATTCCTAATGGCCAGGTATGGTATATGAACTCTATTATTC

>M6-PGSC0003DMG401017953-(rev)M6LRR-RLK\_1647

AACAACCTTTTATGGGTGAAATTCCTAATGGCCAGGTATGGTATATGAACTCTATTATTCTTTCTGCTATA  
GCATTGAGGTCTTTGGGTGTTATACTTATGGCCATATTAGTAATGTAGC

>M6-PGSC0003DMG401017953-(rev)M6LRR-RLK\_183

AACAGCTTTGAGTAGTTGGAATAATGAGACAGATTTCTGTAAGATTGAGCCAAGTTCAACTGTTACTGTT  
GTGTGCTACGACGAAAACATAACTCAGTTGCATATAATAGGGAGAAAAGG

>M6-PGSC0003DMG401017953-(rev)M6LRR-RLK\_244

GTTACTGTTGTGTGCTACGACGAAAACATAACTCAGTTGCATATAATAGGGAGAAAAGGGACTTCCCCA  
TTACCTAGAAAGTTCTCTATTCGTTCAATTTCTCAACGCGCTTGCCAAGCTT

>M6-PGSC0003DMG401017953-(rev)M6LRR-RLK\_2684

GTATGTATCAGTATGGGTGTTATATTAGAGAAGTGGTGTGGACTTGTAGTAGTAATGCCATCTGTTTGT  
CTCTATCATTTTGGCACAAAAGGATGAGTTTGACTCTTGAAGAGTAAACC

>M6-PGSC0003DMG401017953-(rev)M6LRR-RLK\_2745

CTGTTTGTCTCTATCATTTTGGCACAAAAGGATGAGTTTGACTCTTGAAGAGTAAACCTATTAATATTAC  
CAGCTGTTCTCGAGGACTAAGGCTCACAAACGTTTTCTGTTTTGGATTC

>M6-PGSC0003DMG401017953-(rev)M6LRR-RLK\_2806

TTAATATTACCAGCTGTTCTCGAGGACTAAGGCTCACAAACGTTTTCTGTTTTGGATTCAGATGTACAGA  
GGGCAGATGAGAGATGGTTCCTACATTACGATTAGATGCCAGATAATGAA

>M6-PGSC0003DMG401017953-(rev)M6LRR-RLK\_2867

ATGTACAGAGGGCAGATGAGAGATGGTTCCTACATTACGATTAGATGCCAGATAATGAAAAGAAGCAA  
CACTAGGCAAAATTTTATGCATCACATAGAGTTGATATCCAAGCTCAGACAT

>M6-PGSC0003DMG401017953-(rev)M6LRR-RLK\_2928

GAAGCAACACTAGGCAAAATTTTATGCATCACATAGAGTTGATATCCAAGCTCAGACATCAGCATTGGT  
CAGTGCTCTTGGACACTGCTTTAGTTTTACTCAGATGATTCAAGTGTC

>M6-PGSC0003DMG401017953-(rev)M6LRR-RLK\_2989

GCATTTGGTCAGTGCTCTTGGACACTGCTTTAGTTTTACTCAGATGATTCAAGTGTCAGCAGAATTTTC  
TCGTCTTTGAGTACGTACCTAATGGGACCCTAAGGAGATGGATTTCTGG



>M6-PGSC0003DMG401017953-(rev)M6LRR-RLK\_305

CTTCCCCATTACCTAGAAAGTTCTCTATTTCGTTCAATTTCTCAACGCGCTTGCCAAGCTTCCTAGCTTGAAAG  
TCCTTAGATTAGTTTCTCTTGGTTTATGGGGGCCGTTGCCTGACAAAC

>M6-PGSC0003DMG401017953-(rev)M6LRR-RLK\_3050

AGAATTTTTCTCGTCTTTGAGTACGTACCTAATGGGACCCTAAGGAGATGGATTTCTGGTAATTACTTGA  
CAAGCAGATATCTACCCCTTCCCTATTGTTGGATATAAATGTGCTTTAGT

>M6-PGSC0003DMG401017953-(rev)M6LRR-RLK\_3111

ATTACTTGACAAGCAGATATCTACCCCTTCCCTATTGTTGGATATAAATGTGCTTTAGTAATTTGATGCTC  
TCTGTTGCTTAATTGCAGATAAACATGCTAGACGTAAACTAACCTGGAC

>M6-PGSC0003DMG401017953-(rev)M6LRR-RLK\_3172

TTTGATGCTCTCTGTTGCTTAATTGCAGATAAACATGCTAGACGTAAACTAACCTGGACACAACGTATAG  
CAGCTGCTACAGGGGTAGCAAAGGGACTACAGTTCTTGCATAATGGAATT

>M6-PGSC0003DMG401017953-(rev)M6LRR-RLK\_3233

AACGTATAGCAGCTGCTACAGGGGTAGCAAAGGGACTACAGTTCTTGCATAATGGAATTATCCCTGGCC  
TCTTTTCGAATAATTTGAAGATAACCGATATTTTGCTGGATCAGAACCTTG

>M6-PGSC0003DMG401017953-(rev)M6LRR-RLK\_3293

TCCCTGGCCTCTTTTCGAATAATTTGAAGATAACCGATATTTTGCTGGATCAGAACCTTGTCGCCAAAATT  
AGCAGCTACAATCTGCCTGTTCTGTTCGGAGAATATCGGCAAGGTGTGAC

>M6-PGSC0003DMG401017953-(rev)M6LRR-RLK\_366

TAGCTTGAAAGTCCTTAGATTAGTTTCTCTTGGTTTATGGGGGCCGTTGCCTGACAACTTTCAAGACTTT  
CAGCTCTCGAGATACTTGACTTGAGTTCAAATTACTTTACAGTGGCAT

>M6-PGSC0003DMG401017953-(rev)M6LRR-RLK\_427

TCAAGACTTTCAGCTCTCGAGATACTTGACTTGAGTTCAAATTACTTTACAGTGGCATACTGAAGCAG  
TTTCATCCTTAACGGACCTCCAACTTTAGTGTTAGATGGAAATAGGTTG

>M6-PGSC0003DMG401017953-(rev)M6LRR-RLK\_488

CTGAAGCAGTTTCATCCTTAACGGACCTCCAACTTTAGTGTTAGATGGAAATAGGTTGACTGGCGGAAT  
TCCAGATGGCCTTGTTCACTTTAGTTTTGGCAGTTTTGAGTTTGAAGA

>M6-PGSC0003DMG401017953-(rev)M6LRR-RLK\_549

TGGCGGAATTCCAGATGGCCTTGGTTCACTTTAGTTTTGGCAGTTTTGAGTTTGAAGATCAATTCATTA

GATGGACCTTTGCCAGATACACTGCGTGATTTGAATAATCTTCGTGTACT

>M6-PGSC0003DMG401017953-(rev)M6LRR-RLK\_61

GAAATGGGAGTTGAAAAGCTTCTGGTTTTTTTTTTGGTACTAATCTCAATCAGATATTCAGAGCAATTAC  
AATCATCTCAAGTGCAAACACTTTTGAGAATTCAACATCTTTTGA ACTAT

>M6-PGSC0003DMG401017953-(rev)M6LRR-RLK\_610

AATTCATTAGATGGACCTTTGCCAGATACACTGCGTGATTTGAATAATCTTCGTGTACTTTCACTTTCGAA  
GAATAATTTTAGTGGTGATGTCCCTGATCTTAGCAGTTTACAAAATCTT

>M6-PGSC0003DMG401017953-(rev)M6LRR-RLK\_671

CACTTTGAAGAATAATTTTAGTGGTGATGTCCCTGATCTTAGCAGTTTACAAAATCTTCAAGTTTTAGAG  
TTAGAGGACA ACTCTTTTGGTCCAAAGTTTCCTCAA ACTGGAAGTAAAA

>M6-PGSC0003DMG401017953-(rev)M6LRR-RLK\_732

AGTTTTAGAGTTAGAGGACA ACTCTTTTGGTCCAAAGTTTCCTCAA ACTGGAAGTAAAATTGAAAGCATT  
GCTCTAAGGAATAACAAATTCACTGCAAACATACCAGAGAAAGTTCAGTC

>M6-PGSC0003DMG401017953-(rev)M6LRR-RLK\_793

GAAAGCATTGCTCTAAGGAATAACAAATTCACTGCAAACATACCAGAGAAAGTTCAGTCCTATTATCAGC  
TTGAACATTTTGATATTTCTTCCAACA ACTTTATGGGGCCATTTCTCCG

>M6-PGSC0003DMG401017953-(rev)M6LRR-RLK\_854

ATTATCAGCTTGAACATTTTGATATTTCTTCCAACA ACTTTATGGGGCCATTTCTCCGTCGTTGCTATCTT  
TGTCATCCATCACATATCTGAATGTTGCAGGAAACAAGTTAACAGGAA

>M6-PGSC0003DMG401017953-(rev)M6LRR-RLK\_915

GTTGCTATCTTTGTCATCCATCACATATCTGAATGTTGCAGGAAACAAGTTAACAGGAATGCTCTTTGAA  
GATAATCCATGTAACACAGCATTAGATTTTGTGATCTGTCTGCTAATCT

>M6-PGSC0003DMG401017953-(rev)M6LRR-RLK\_976

CTCTTTGAAGATAATCCATGTAACACAGCATTAGATTTTGTGATCTGTCTGCTAATCTGTTGACAGGATC  
ATTACCTAATTGCCTTCTGTCTAGTTCTAGGAACCGGATTGTGCATTTT

>M6-PGSC0003DMG401018044M6LRR-RLP\_124

TAAAGGACCTCAACTCACTTTGGCTACTAAATTTATCCCATAACAATCTCATAGGTCATATTCCAATGAAA  
TTGGGGCAATTGAATACACTTGAAGCTTTAGATCTCTCCTGGAATCGGC

>M6-PGSC0003DMG401018044M6LRR-RLP\_248

TGGAAAGATTCCGCAGGAATTGGCAAGAATGAACTTTCTGGCCTTCTTAAACGTCTCTCAAATCATCTC  
ATCGGACCAATTCCTCAGGGTCTACAGTTCAACACATTTGAAAATGACTC

>M6-PGSC0003DMG401018044M6LRR-RLP\_310

ATCATCTCATCGGACCAATTCCTCAGGGTCTACAGTTCAACACATTTGAAAATGACTCGTATGGCGGCAA  
TCTTGATTTATGTGGTCCTCCTTTATCAAAGAAATGTGAAACAAGTGGTT

>M6-PGSC0003DMG401018044M6LRR-RLP\_62

CACAATTATGACAACCATAGATCTCTCAAGCAACCATTTTGAAGGTGTCATTCCGAAAACACTAAAGGAC  
CTCAACTCACTTTGGCTACTAAATTTATCCATAACAATCTCATAGGTCA

>M6-PGSC0003DMG401018044M6LRR-RLP\_620

TCACAAGAAAAGAAGGCTAAAGAAGAGAGCTCAGAGACGAAGGACTTGATGGAAGATTGAGAGGGCT  
AAATTGACTTTGTTTAAATTTGTGGACTAATAAGTGAATTGTTCTGTTTTGT

>M6-PGSC0003DMG401018576M6LRR-RLP\_0

CTCTTAGCATTCAACAGGTAAAATAAAGTTGTTAGTAATTGAAGTTTGAACATTTATCTTCTTAAAATCAT  
TTTGTGTTTCCTTGTTTTGCTTGCAGATTTTCAGAAATGGAGATTGGGTT

>M6-PGSC0003DMG401018576M6LRR-RLP\_1054

CATGTAAAGAGCGTGTTGCCTTGATGATGGGAAATGAGCAAATTAGCATGGACAATTTGTCTACTGAAG  
CCTCTTGGTCTTTATTCAAAGACATGCATTTGAAAACATGGATCCTATGG

>M6-PGSC0003DMG401018576M6LRR-RLP\_1302

ATAAGTGAATATGGGAGCTGCGAGACAAGGACATATTACCAGCGTTGATGTTGAGCTACAATGATCTT  
CCCGCACATTTAAAGCGAAGTTTTCTTTTGTGCAATATTTCTTAAAGAT

>M6-PGSC0003DMG401018576M6LRR-RLP\_1364

TGATCTTCCCGCACATTTAAAGCGAAGTTTTCTTTTGTGCAATATTTCTTAAAGATTATCCATTTAGGAA  
AGAACAAGTCATTCATCTGTGGATTGCCAATGGTCTCGTACCACTGGA

>M6-PGSC0003DMG401018576M6LRR-RLP\_1426

CATTTAGGAAAGAACAAGTCATTCATCTGTGGATTGCCAATGGTCTCGTACCACTGGAAGATGAAATAA  
TTGAAGATACAGGCAACCAATACTTTCTCGAGTTGAGGTCAAGATCATTAT

>M6-PGSC0003DMG401018576M6LRR-RLP\_1488

GAAATAATTGAAGATACAGGCAACCAATACTTTCTCGAGTTGAGGTCAAGATCATTATTCGAAAGGGTC  
CCAAATCTTTCTGAAGGCAACAAAGAGAATTTATTCTTAATGCATGACCTT

>M6-PGSC0003DMG401018576M6LRR-RLP\_1550

AAGGGTCCCAAATCTTTCTGAAGGCAACAAAGAGAATTTATTCTTAATGCATGACCTTGTCAACGATTTA  
GCCCAAATTGCATCTTCAAACCTTTGTATCAGGTTGGAAGAGAGCCAAGG

>M6-PGSC0003DMG401018576M6LRR-RLP\_1674

CATATGTTGGAAAAAAGTCGGCACTTATCTTATTCCATGGGAAAAGATGGTGACTTTGAGAAATTGACA  
CCCCTCGACAAATTGGAGCAGCTGAGGACATTGCTTCCGATATGTATTGGT

>M6-PGSC0003DMG401018576M6LRR-RLP\_1736

ATTGACACCCCTCGACAAATTGGAGCAGCTGAGGACATTGCTTCCGATATGTATTGGTGTCAATTATTAT  
TATCTAAGCAAGAGGGTGCAGCTTAACATATTGCCAAGACTAACATCCTT

>M6-PGSC0003DMG401018576M6LRR-RLP\_1798

ATTATTATTATCTAAGCAAGAGGGTGCAGCTTAACATATTGCCAAGACTAACATCCTTAAGGGGATTATC  
GTTGTTAGGCTATAAGATTCAGGAGTTGCCAGATGATTTGTTTGTCAAAT

>M6-PGSC0003DMG401018576M6LRR-RLP\_186

TGATCTTCTCAACATGTTTCGGAAGCATAAGGATCATGTTTCAGCTTTACACAAGCTGGACGACATTTTG  
CTTGGTCTTCAGATTGTGCTAAGTGATGCAGAGAATAAGCAAGCATCAA

>M6-PGSC0003DMG401018576M6LRR-RLP\_1922

GCTCCTCAGATTTTTGGACCTTTCTGAGACATGGATTACAAAGTTGCCAGATTCCATTTGTGCATTGTATA  
ACTTAGAGACACTTCTCCTGTCATCTTGTGATTATCTTGAGGAGCTACC

>M6-PGSC0003DMG401018576M6LRR-RLP\_2108

GCCGCTACATCTGAGCAAGTTGAAAAGCCTCCAATTGTTAGTGGGAGCCAAGTTTCTTCTAGGTGGTTCCG  
AGAATGGATGATTTGGGTGAAGCACAGAATTTGTATGGATCTCTATCAGT

>M6-PGSC0003DMG401018576M6LRR-RLP\_2170

GTGGTTCGAGAATGGATGATTTGGGTGAAGCACAGAATTTGTATGGATCTCTATCAGTTGTAGAGTTGG  
AAAATGTGGTTGATAGAAGGGAAGCTGTGAAGGCAAAGATGAGGGAGAAGA

>M6-PGSC0003DMG401018576M6LRR-RLP\_2356

GAGACATACTTGATGAGCTACGCCACATAAAAACATAAAAAGTAGTCGAAATCATCGGATATAGAGGGA  
CAGCATTTCCGAATTGGCTAGCTGATCCTTTGTTTCTTAAGCTAGAGCAGT

>M6-PGSC0003DMG401018576M6LRR-RLP\_2418

AGAGGGACAGCATTTCCGAATTGGCTAGCTGATCCTTTGTTTCTTAAGCTAGAGCAGTTGTCTATTGCTA

ACTGCAAGAACTGTTATTCCTTGCCAGCACTAGGAAAACCTCCCATTTTTG

>M6-PGSC0003DMG401018576M6LRR-RLP\_2480

TATTGCTAACTGCAAGAACTGTTATTCCTTGCCAGCACTAGGAAAACCTCCCATTTTTGAAATTCCTTTCCA

TTAGAGGGATGCATGGAATAACAGAGGTGACGGGAGAATTCTATGGCAG

>M6-PGSC0003DMG401018576M6LRR-RLP\_2542

TCCTTTCCATTAGAGGGATGCATGGAATAACAGAGGTGACGGGAGAATTCTATGGCAGTTGGTCCTCCA

AAAAGCCTTTTAACTGTCTTGAGAAGCTTGAATTTAAAGATATGCCGGAGT

>M6-PGSC0003DMG401018576M6LRR-RLP\_2914

GCATACTGCCACTACCTTGAAGAGAATAAGGATATCTGGTTGCCAGAAATTGAAATTGGATCTGCCAG

TTGGTGAGATGAGTATGTTTCTGGAGGATTTGACACTGGGAAAATCTGATT

>M6-PGSC0003DMG401018576M6LRR-RLP\_2976

CTGCCAGTTGGTGAGATGAGTATGTTTCTGGAGGATTTGACACTGGGAAAATCTGATTGTATAGATGAT

ATATCACCTGAGTTGCTCCCAAGAGCACGCAATTTGAATGTATCGGATTGC

>M6-PGSC0003DMG401018576M6LRR-RLP\_3038

AGATGATATATCACCTGAGTTGCTCCCAAGAGCACGCAATTTGAATGTATCGGATTGCCACAACCTTACT

AGGTTTTTGATTCTACTGCCACTGAAAGTCTCTATATTTATAATTGTGA

>M6-PGSC0003DMG401018576M6LRR-RLP\_3100

ACCTTACTAGGTTTTTGATTCTACTGCCACTGAAAGTCTCTATATTTATAATTGTGAGAATGTTGAAATA

CCTTCGGTGGCATGTGGGGGGACCCAGATGACGAAGTTGAGTATTCAGG

>M6-PGSC0003DMG401018576M6LRR-RLP\_3286

ATCTGCGTAATTGTCCAGAAATAGAGTCCTTTCTGAAGGAGGATTGCCCTTCAATTTACGAGTCCTTTG

GATCAAATATTGCAAGAACTGGTGAATGGACGAAAGGAGTGGCGTTTAC

>M6-PGSC0003DMG401018576M6LRR-RLP\_3348

GTCCTTTGGATCAAATATTGCAAGAACTGGTGAATGGACGAAAGGAGTGGCGTTTACAGAGACTCCCC

TGTCTCACAGAGTTATGGATCTGTCATGATGGCAGTGACGAAGAGATTGTT

>M6-PGSC0003DMG401018576M6LRR-RLP\_3410

ACTCCCCTGTCTCACAGAGTTATGGATCTGTCATGATGGCAGTGACGAAGAGATTGTTGGTGGTGAGAA

TTGGGAGTTGCCTTCTCTATTCAAAGACTTGAATATTCAATCTGAAAAC

>M6-PGSC0003DMG401018576M6LRR-RLP\_3472

GTGAGAATTGGGAGTTGCCTTCCTCTATTCAAAGACTTGGAAATATTCAATCTGAAAACATTAAGCAGCCA  
ACATCTCAAAGCCTCACCTCTCTTCAATATCTAGAAATTGCGGGTAATT

>M6-PGSC0003DMG401018576M6LRR-RLP\_3534

AGCAGCCAACATCTCAAAGCCTCACCTCTCTTCAATATCTAGAAATTGCGGGTAATTTACCTCAAATTCA  
GTCAATGCTGGAACAAGGCCAGTTTTCGCACCTCACTTCACTTCAAAGT

>M6-PGSC0003DMG401018576M6LRR-RLP\_3596

TCAAATTCAGTCAATGCTGGAACAAGGCCAGTTTTCGCACCTCACTTCACTTCAAAGTCTAGGAATCATG  
AATTTCCCTAATCTCCAATCACTTCTGAATCAGCACTGCCCTCCGCCCT

>M6-PGSC0003DMG401018576M6LRR-RLP\_372

AGAAGTCAATTATGAAGCTTTGAGGCTTAAGGTGGAAGGCCAGCATCAAATCTTGCAGACACAAGCAA  
CAAACAAGTGACCTCAACCTGTGCTTGACTGATGAATTTTTCTTAACATA

>M6-PGSC0003DMG401018576M6LRR-RLP\_434

CAAGCAACAAACAAGTGACCTCAACCTGTGCTTGACTGATGAATTTTTCTTAACATAAAGGAGAAGTTG  
GAAGAAACCATTGAAACATTGGAGGTGTTGGAAAAGCAAATTGGCCGCCT

>M6-PGSC0003DMG401018576M6LRR-RLP\_558

TTAAAGGATCATTTTGGTTCGACTAAACAAGAACTAGAACACCTTCAACTTCTTTGGTTGATGATTCTGA  
TATCTTTGGAAGGAAGAATGATATAGAGGATTTGATTGACCGTTTATTA

>M6-PGSC0003DMG401018576M6LRR-RLP\_62

TAAAATCATTTTGTGTTTCCTTGTTTTGCTTGACAGATTCAGAAATGGAGATTGGGTTAACAGTTGGTGGT  
GCATTTCTCTCTCAGCTTTAAATGTTCTCTTTGATAGGCTTGCTCCTC

>M6-PGSC0003DMG401018576M6LRR-RLP\_620

TGATTCTGATATCTTTGGAAGGAAGAATGATATAGAGGATTTGATTGACCGTTTATTATCTGAAGATGCA  
AGTGGAAGAAAAGCTTACTGTAGTTCCTATTGTTGGAATGGGCGGCCTGGG

>M6-PGSC0003DMG401018576M6LRR-RLP\_806

TTGGTTTTGTGTTTCTGAGGCATATGATGCTTTCAGAATAACAAAAGGGTACTTCAAGAAATTGGCTCA  
ACTGACTTGAACGTTGGTGACAATCTTAACCAGCTACAAGTCAAATTGAA

>M6-PGSC0003DMG401018576M6LRR-RLP\_868

TTGGCTCAACTGACTTGAACGTTGGTGACAATCTTAACCAGCTACAAGTCAAATTGAAGGAAAGATTAA  
AGGGAAAGAAGTTTCTTCTTGTCTGGATGATGTGTGGAATGACAACACTACA

>M6-PGSC0003DMG401018576M6LRR-RLP\_992

GTGGGATGACTTGAGAAATGTTTTGTACAAGGAGATATAGGAAGTAAGATCATTGTGACGACATGTAA  
AGAGCGTGTTCCTTGATGATGGGAAATGAGCAAATTAGCATGGACAATTT

>M6-PGSC0003DMG401019148M6LRR-RLP\_0

GAGAGAAATTTGACTTTGGTAAAGAAGGAAGAAGACGACTGAGTGTAGAAGCAAACCCAACAATGGC  
AGATCCAGTAATTGGTGCTACAGTTCAAGTTGTGCTTGAGAACTGCTTTCT

>M6-PGSC0003DMG401019148M6LRR-RLP\_1037

TTGTTGGTCCATTTTCAAACAAAGAGCATTGTTGATGGGGAGGTTCCAGAAGAAATGGTGAGCATGGA  
AAGCAGTATTGTTGAAATATGTCAAGGTTTACCGTTGGCTGCAAGTGTGTT

>M6-PGSC0003DMG401019148M6LRR-RLP\_1098

AGCATGGAAAGCAGTATTGTTGAAATATGTCAAGGTTTACCGTTGGCTGCAAGTGTGTTGGGAGGCCTT  
TTACACAACAAGGAAAGACATGAATGGCAGGCAATCCTTTATGGCAACCCC

>M6-PGSC0003DMG401019148M6LRR-RLP\_1159

GAGGCCTTTTACACAACAAGGAAAGACATGAATGGCAGGCAATCCTTTATGGCAACCCCCTTATTGCAG  
GTGAAAATGATAATGGGGAAAATAGCTTAAGGAAAATCCTAAAACCTTAGCT

>M6-PGSC0003DMG401019148M6LRR-RLP\_122

CACTATTGAGAAAGTCAGTAGCTCAAGGGACTGCAACAAACATCTCAGAATGCTCACACAAAATGTATC  
CATCATTCAAGCTTTTATTAATGATGCTGAAAGACGACAAGTTGACGATCA

>M6-PGSC0003DMG401019148M6LRR-RLP\_1220

TATTGCAGGTGAAAATGATAATGGGGAAAATAGCTTAAGGAAAATCCTAAAACCTTAGCTATGATTATTT  
ACCATTTCCACATCTGAAAAAATGCTTTGCCTACTTTGCAATGTTTCCAAA

>M6-PGSC0003DMG401019148M6LRR-RLP\_1403

ATGTCAAGAGACCCCTGTGATGGAAGACGTTGGGAACAAGTATTTTCAACTTTTGTGCAATATTCCTTG  
CTGCAAGATGTTGAGCTAGATGAGCACAACAATATAAGATACTGTAAGAT

>M6-PGSC0003DMG401019148M6LRR-RLP\_1464

TATTCCTTGCTGCAAGATGTTGAGCTAGATGAGCACAACAATATAAGATACTGTAAGATGCATGATCCTG  
TGCATGATTTGGCTGGAGATATTTTAAAATCTAAACTATTTGATCAAAAAG

>M6-PGSC0003DMG401019148M6LRR-RLP\_1525

ATGATCCTGTGCATGATTTGGCTGGAGATATTTTAAAATCTAAACTATTTGATCAAAAAGAGTATTGGAGG

AGAAAATCTTTCTCGAGGCCGATACTTTGGATGGGACTCACCAAGTGATC

>M6-PGSC0003DMG401019148M6LRR-RLP\_1586

TATTGGAGGAGAAAATCTTTCTCGAGGCCGATACTTTGGATGGGACTCACCAAGTGATCAAATTGATAT  
GATAAATGAGCCAGGACGTATATGCACATTGTTCTCGAGAAACAATATATC

>M6-PGSC0003DMG401019148M6LRR-RLP\_1647

ATTGATATGATAAATGAGCCAGGACGTATATGCACATTGTTCTCGAGAAACAATATATCCAAAGATGTTCC  
TATTGAGCTTTTCAGTTCTTGAGAGTTCTAAATTTTTCCAGGTCAGGCATC

>M6-PGSC0003DMG401019148M6LRR-RLP\_1708

AAGATGTTCTATTGAGCTTTTCAGTTCTTGAGAGTTCTAAATTTTTCCAGGTCAGGCATCAAGGAGTTGAC  
AGCCTCAATTGGCAAATAATACTTGAGATATCTTGATCTCTCCAATA

>M6-PGSC0003DMG401019148M6LRR-RLP\_183

AATGTATCCATCATTCAAGCTTTCATTAATGATGCTGAAAGACGACAAGTTGACGATCACGCTGTAGAAA  
AATGGCTGAAAATGCTTGAAAGAGTTGCTGAAAATGTGTTTCGACGAATTC

>M6-PGSC0003DMG401019148M6LRR-RLP\_1830

AATATCAAAGCCTTGCCTAACTCCATTTGCAAGCTCTACAATTTGCAAACATTTAGAGTAAGTAACTGCTT  
TTTACTCGAGGAGCTTCCACATGAAATGGCGAATATGATAAGTTTGAGA

>M6-PGSC0003DMG401019148M6LRR-RLP\_1891

GTAAGTCTTTTTACTCGAGGAGCTTCCACATGAAATGGCGAATATGATAAGTTTGAGACACATATATTA  
CAGCAATGATTTTCAGATCAGACTCTAGAAAATGGTGTGTTTCGGCAATCAGA

>M6-PGSC0003DMG401019148M6LRR-RLP\_1952

CATATATTACAGCAATGATTTTCAGATCAGACTCTAGAAAATGGTGTGTTTCGGCAATCAGAACTTTTCAGATG  
CCACTTTAGATGGGACAATTGACTTGTCTTCAAACACTACAGTTTTTCAA

>M6-PGSC0003DMG401019148M6LRR-RLP\_2013

TTTCAGATGCCACTTTAGATGGGACAATTGACTTGTCTTCAAACACTACAGTTTTTCAAGGTAGGTTTCAG  
AGAAAGGTCGTCAAATAGAAGAATTAGGTTGTTTGAAGAACCTTAGAGGT

>M6-PGSC0003DMG401019148M6LRR-RLP\_2074

TAGGTTTCAGAGAAAGGTCGTCAAATAGAAGAATTAGGTTGTTTGAAGAACCTTAGAGGTGAATTGATG  
ATCAGAGATCTTCAATTGGTCTGTAATAGAGAAGAAGCTGTAAAAGCATGTC

>M6-PGSC0003DMG401019148M6LRR-RLP\_2135



ATTGATGATCAGAGATCTTCAATTGGTCTGTAATAGAGAAGAAGCTGTAAAAGCATGTCTACGGTAGAA  
ACCAAATGTCTCCAAGTTGGCATATTTATGGTCCCATGATGAATCAGAAGA

>M6-PGSC0003DMG401019148M6LRR-RLP\_2196

CGGTAGAAACCAAATGTCTCCAAGTTGGCATATTTATGGTCCCATGATGAATCAGAAGACTGTGAGGTC  
AATGATGAGTATGTTTTGGATGGTCTTCAACCGCATACTAACTTGAAAAAT

>M6-PGSC0003DMG401019148M6LRR-RLP\_2257

GTGAGGTCAATGATGAGTATGTTTTGGATGGTCTTCAACCGCATACTAACTTGAAAAATTTAGTGGTAGT  
GAACTATTTGGGGACTAGATTTCTTCATGGTTCAGTGAAGAATTGTTAC

>M6-PGSC0003DMG401019148M6LRR-RLP\_2318

AGTGGTAGTGAACACTATTTGGGGACTAGATTTCTTCATGGTTCAGTGAAGAATTGTTACCAAATTTGGTC  
AAGTTGAAATTAAGTGGTTGCAGAAAGTGCAAGGAAATTCCATCGCTTGG

>M6-PGSC0003DMG401019148M6LRR-RLP\_244

CTGTAGAAAAATGGCTGAAAATGCTTGAAAGAGTTGCTGAAAATGTGTTTCGACGAATTCACATATGAAT  
CTCTCAAAGCACAAGTGATGCAGATCCGAAATAGCCCTATGAGAAAGGTCA

>M6-PGSC0003DMG401019148M6LRR-RLP\_2440

AACTTAACTACTTCGGCATCTTGAGCTGATAGGATTCCATGAGTTGGAATGTATTGGACCTACATTTTAT  
GGTGTGGAAGTTGACAATAATGGATCAAGCAACAATAACACCAATATCC

>M6-PGSC0003DMG401019148M6LRR-RLP\_2501

TACATTTTATGGTGTGGAAGTTGACAATAATGGATCAAGCAACAATAACACCAATATCCAAGTGTCCCG  
TTACTCAAAGAACTAGTATTGTGGAATATGCCTAGACTTACTGAGTGGAA

>M6-PGSC0003DMG401019148M6LRR-RLP\_2562

GTGTTCCCGTTACTCAAAGAACTAGTATTGTGGAATATGCCTAGACTTACTGAGTGGAACGAAGTGCAG  
TTGTTATCAACAGGAAATGATGGTAGCGACAGATTTGGAGTAAGAATGTTT

>M6-PGSC0003DMG401019148M6LRR-RLP\_2684

TGGGCTGGAGAAGTTGAGGATTATTAAGTCCACTGTAAAAAGTATACCGAATCAATTTGAAATGCT  
GCGTGAATTAAGCATCGATGGAAATCAAATAATTGAATTTAGAATTGAGGT

>M6-PGSC0003DMG401019148M6LRR-RLP\_2745

GAAATGCTGCGTGAATTAAGCATCGATGGAAATCAAATAATTGAATTTAGAATTGAGGTTCTTCTCTTGA  
AACATTAATGCTAGTGAGCTGCAAATGACTACACCATCTGGACTTTTAGA

>M6-PGSC0003DMG401019148M6LRR-RLP\_2867

CCATGCCCAAATTACAGTATCTGAAGATCAAGGACTGTCGATTGCTAGGATTAAGCTATGTTGGATGGG  
CTCATGAACCTTGTTTCTTTAATTTGCAACAGTTATTTTCATCAAAGTGTG

>M6-PGSC0003DMG401019148M6LRR-RLP\_2928

TGGATGGGCTCATGAACCTTGTTTCTTTAATTTGCAACAGTTATTTTCATCAAAGTGTGGAAAAGTAGAG  
CATCTTCCATCCAGATATTCCATGCGATGCCTCACCAAATTGCGGTACCT

>M6-PGSC0003DMG401019148M6LRR-RLP\_305

ATATGAATCTCTCAAAGCACAAGTGATGCAGATCCGAAATAGCCCTATGAGAAAGGTCAGTGATTTTCAT  
TTCTCATAACAGCTTTTAAGAGTAAAATGTCTCGAAAAATCAAAAATATCAA

>M6-PGSC0003DMG401019148M6LRR-RLP\_3050

GAATTAAGGTTGTGCTCAGTTAGAATAAAGTTCTATCAATAATAGGAGTGGCCGAAACTCCCAGTGGT  
CCAACATTTCTCATATTTAGTAATTAACGTTGGGTTTCATGAAAATTCATG

>M6-PGSC0003DMG401019148M6LRR-RLP\_3111

CCAGTGGTCCAACATTTCTCATATTTAGTAATTAACGTTGGGTTTCATGAAAATTCATGACTTGTGTAAGT  
CTCAATTTCTCCTTTTAGTTTTCCAAGCTTTTCATTCTCCCCTTTTAGT

>M6-PGSC0003DMG401019148M6LRR-RLP\_3172

TTGTGTAAGTCTCAATTTCTCCTTTTAGTTTTCCAAGCTTTTCATTCTCCCCTTTTAGTTTTCCAATCTTTTCA  
TTCCCCAAACGAATACATCTTACTATAGTACTGAAGAAGTTGAGGA

>M6-PGSC0003DMG401019148M6LRR-RLP\_3233

TCCAATCTTTTCATTCCCCAAACGAATACATCTTACTATAGTACTGAAGAAGTTGAGGATTAGTAGCTGTC  
CACTGTTAAGAAGTACTCCAAATCAATTTGAAATCCTGCATGAGGTAGC

>M6-PGSC0003DMG401019148M6LRR-RLP\_3294

AGTAGCTGTCCACTGTTAAGAAGTACTCCAAATCAATTTGAAATCCTGCATGAGGTAGCAATTGAAAGA  
GTTAACAGTGAAATGCCGTTGTTGAACTTGTGCAGCAACTTGACATCTCTC

>M6-PGSC0003DMG401019148M6LRR-RLP\_3355

TTGAAAGAGTTAACAGTGAAATGCCGTTGTTGAACTTGTGCAGCAACTTGACATCTCTCGTAGATCTTAT  
TGTGGATGATGTGAAAGAGCTCACTTGTTCAGATGAGATGCTACATA

>M6-PGSC0003DMG401019148M6LRR-RLP\_3477

AATGTTCCCTTGAACATCTACTGGTCTTAAATTGCAGAGAGTTTCGCGAATTGCCACAAAGTTTATACAA

TCTCCGTTCTCTTAAGAGCTTAAGGATTGAGCGCTGCAACAATTTCAAT

>M6-PGSC0003DMG401019148M6LRR-RLP\_3538

GTTTATAACAATCTCCGTTCTCTTAAGAGCTTAAGGATTGAGCGCTGCAACAATTTCAATTCCTTTCCTGTTCCAGCGGAGAGAATCATTTTACTTCATTCCAAAGTCTTGAGTTGTCCA

>M6-PGSC0003DMG401019148M6LRR-RLP\_3599

CTTTCCTGTTCCCAGCGGAGAGAATCATTTTACTTCATTCCAAAGTCTTGAGTTGTCCAATTGTGATGGCTTAACCAGTTTACCAAGTGAAATGCTAGAGCATTGTGCGGTCCTTGGGAATC

>M6-PGSC0003DMG401019148M6LRR-RLP\_366

GATTTTCATTTCTCATACAGCTTTTAAGAGTAAAATGTCTCGAAAAATCAAAAATATCAATGAAGAGTTGAGGGTTATCAATCAGTTAGCCAAAGACCTCGGTCTCCAATCACTAATTGTT

>M6-PGSC0003DMG401019148M6LRR-RLP\_3660

TGTGATGGCTTAACCAGTTTACCAAGTGAAATGCTAGAGCATTGTGCGGTCCTTGGGAATCTTGAAGGTCAACAAATGTAACAACCTTAGTTTCCTTCCCTTTACATGTGTGGGAAATGCCT

>M6-PGSC0003DMG401019148M6LRR-RLP\_3721

TGAAGGTCAACAAATGTAACAACCTTAGTTTCCTTCCCTTTACATGTGTGGGAAATGCCTTCACTTTTCATATTTGAATATATCAAATTGTCTCAAATTGGATAGTGTACCTGCAGGGGGCC

>M6-PGSC0003DMG401019148M6LRR-RLP\_3782

ACTTTCATATTTGAATATATCAAATTGTCTCAAATTGGATAGTGTACCTGCAGGGGGCCTTACCCGCCTCACTGGGTTACAGGAATTGTGCATTGGACCTTTCTCAGAGACGGTGGATTT

>M6-PGSC0003DMG401019148M6LRR-RLP\_3843

CACCGCCTCACTGGGTTACAGGAATTGTGCATTGGACCTTTCTCAGAGACGGTGGATTTTGAGGCATTCCAATTGATATTTAATGGCATTACAGCAGCTATCATCCCTTCTAAATTAGAG

>M6-PGSC0003DMG401019148M6LRR-RLP\_3965

GTATGGGAATAGGCAATGGGATTCTCTGCCCTATCAGCTTCTGCAACTTTCCGCCTTAACAGAGATGGGAATAAATGATTTTGGAAATCAAACCTTCTCCTGATAGATTTGGAAATCTTAC

>M6-PGSC0003DMG401019148M6LRR-RLP\_4005

CTGCAACTTTCCGCCTTAACAGAGATGGGAATAAATGATTTTGGAAATCAAACCTTCTCCTGATAGATTTGGAAATCTTACTTATCTTGAAACATTAGAGCTAGTGAGGTGCAGACGACTA

>M6-PGSC0003DMG401019148M6LRR-RLP\_427

AAGAGTTGAGGGTTATCAATCAGTTAGCCAAAGACCTCGGTCTCCAATCACTAATTGTTTCGTCTCAGCA  
AATACTACCGTTCCGAGAAACAGATTCCTTAGTAGTTGCTTCGGATGTCTG

>M6-PGSC0003DMG401019148M6LRR-RLP\_488

GTCTCAGCAAATACTACCGTTCCGAGAAACAGATTCCTTAGTAGTTGCTTCGGATGTCTGTTGGTAGAGAC  
AACGATGTTGCTGAAATAAAGGAGAAGATGTTGAACATGAGAGACGAAGT

>M6-PGSC0003DMG401019148M6LRR-RLP\_549

GGTAGAGACAACGATGTTGCTGAAATAAAGGAGAAGATGTTGAACATGAGAGACGAAGTTGTTCTGTG  
CACCATTCCCGTAGTGGGGATGGGAGGTTTAGGGAAAACACTACTGTAGCTAAG

>M6-PGSC0003DMG401019148M6LRR-RLP\_61

CAATGGCAGATCCAGTAATTGGTGCTACAGTTCAAGTTGTGCTTGAGAACTGCTTCTCTCACTATTGA  
GAAAGTCAGTAGCTCAAGGGACTGCAACAAACATCTCAGAATGCTCACAC

>M6-PGSC0003DMG401019148M6LRR-RLP\_610

TTCTGTGCACCATTCCCGTAGTGGGGATGGGAGGTTTAGGGAAAACACTACTGTAGCTAAGAGAATTTTCA  
ATGATGAAGAGATCGAAAAACACTTTGAGAAGAGAGTGTGGTTGTGTCTAC

>M6-PGSC0003DMG401019148M6LRR-RLP\_671

AATTTTCAATGATGAAGAGATCGAAAAACACTTTGAGAAGAGAGTGTGGTTGTGTCTACCTGAAATGTC  
AGAGACTAAGAGCTTCTTGAACAGATCCTCCAATCATTGACAGAGAGGAA

>M6-PGSC0003DMG401019148M6LRR-RLP\_793

TTGAGGTCCAGACCAGGGATATAATAGTCAAGAACTCCGAGATGAACTAGGTGGAAAAAGGTATTTG  
CTTGTCTTAGATGATTTGTGGTGTGTTACCTTCCGGTATGGGATGAGTTCTG

>M6-PGSC0003DMG401019148M6LRR-RLP\_854

GTATTTGCTTGTCTTAGATGATTTGTGGTGTGTTACCTTCCGGTATGGGATGAGTTCGTGGACAGCTTG  
AGAGTAGTAAACACTTCTAGAGGAAATTGCATTCTCGTAACTACTCGCAT

>M6-PGSC0003DMG401019148M6LRR-RLP\_915

GACAGCTTGAGAGTAGTAAACACTTCTAGAGGAAATTGCATTCTCGTAACTACTCGCATGAAACAAGTG  
GCATCCACTGTAGCGGTAGATGTTTCATGTGCTGGGAAAGTTAGCAGAAGAT

>M6-PGSC0003DMG401019148M6LRR-RLP\_976

AACAAGTGGCATCCACTGTAGCGGTAGATGTTTCATGTGCTGGGAAAGTTAGCAGAAGATCATTGTTGGT  
CCATTTTCAAACAAGAGCATTGTTGATGGGGAGGTTCCAGAAGAAATGG

>M6-PGSC0003DMG401019239M6G-LecRK\_0

CAAATAGCCGTACCACTAACTGATTAATAAAAAATAGTTACATTGGGATAAAAACGCTTCCTAACAAAGG  
CGACTTCATAAGACTGAAACCCGAGACTTTTAATTAAGAATGAAGGAGTC

>M6-PGSC0003DMG401019239M6G-LecRK\_1037

ATGTTGTCTATCGATCAGGACCGTGGAATGGTCTTCATTTTAGTGGAACAAGAAACCCAAGAGGCAGTC  
ATTTATACAAATATGAGATATTCTCAAGTAAGACACAGGTTTATTTTGGAT

>M6-PGSC0003DMG401019239M6G-LecRK\_1098

AGGCAGTCATTTATACAAATATGAGATATTCTCAAGTAAGACACAGGTTTATTTTGGATATAAGCTCATA  
TCTTCAGTTATCACAAGGTTGATACTAAATCAGAATGGTGCCCTAACCT

>M6-PGSC0003DMG401019239M6G-LecRK\_1159

AAGCTCATATCTTCAGTTATCACAAGGTTGATACTAAATCAGAATGGTGCCCTAACCTTTGGACTTGGG  
GTGATCATGTATCTGATTGGATCCCTCAACTCTCAATACCCGCAGATAAC

>M6-PGSC0003DMG401019239M6G-LecRK\_122

ATCACCACAACGTGTCAGTGATTTGATGTTGTTGTAAGCAAATAAGATAGAGCATGGCCCCAACATCCA  
TGTGTGGCTGTAATTAATTCAACTATTCATTATAAACAAATAATCTCAA

>M6-PGSC0003DMG401019239M6G-LecRK\_1220

GGACTTGGGGTGATCATGTATCTGATTGGATCCCTCAACTCTCAATACCCGCAGATAACTGTGATGCTTA  
CAAACGTGTGGCGCATAACGGGACTTGCAACAGTCAAGATTTTACTGTAT

>M6-PGSC0003DMG401019239M6G-LecRK\_1281

TGATGCTTACAAACTGTGTGGCGCATAACGGGACTTGCAACAGTCAAGATTTTACTGTATGTAGATGCTTA  
GACAGATTTGTGCCCAACAATAGTGAAGCTTGGAAGAAGAGAAACTGGTC

>M6-PGSC0003DMG401019239M6G-LecRK\_1342

AGATGCTTAGACAGATTTGTGCCCAACAATAGTGAAGCTTGGAAGAAGAGAAACTGGTCAGGTGGCTG  
TGTTGGAACAGAACTAAATTGCCTTCAAGGACATAGATTTTTGAAGTAT

>M6-PGSC0003DMG401019239M6G-LecRK\_1403

GTGGCTGTGTTGGAACAGAACTAAATTGCCTTCAAGGACATAGATTTTTGAAGTATTCGCATATCAA  
ATTGCCAGACACACGGAATTCCTGGTCCGATGTGACTATGACACTTGAAG

>M6-PGSC0003DMG401019239M6G-LecRK\_1464

GCATATCAAATTGCCAGACACACGGAATTCCTGGTCCGATGTGACTATGACACTTGAAGAATGCAAGAA

TACCTGCTCTAAAAATTGCTCTTGTATGGCTTACGCAAATCCTGACATACG

>M6-PGSC0003DMG401019239M6G-LecRK\_1525

TGCAAGAATACCTGCTCTAAAAATTGCTCTTGTATGGCTTACGCAAATCCTGACATACGCAATGGAGGAA  
GTGGATGCTTGTGTGGTTTCGAGGATCTGCTTGACATTAAGGTGGTTTCC

>M6-PGSC0003DMG401019239M6G-LecRK\_1586

ATGGAGGAAGTGGATGCTTGTGTGGTTTCGAGGATCTGCTTGACATTAAGGTGGTTTCCGATGAAGGTC  
AAGATATCTACATAAGAATGGCTGCTTCTGAACCAGGTAGGTTTTGTTGTC

>M6-PGSC0003DMG401019239M6G-LecRK\_1647

TGAAGGTCAAGATATCTACATAAGAATGGCTGCTTCTGAACCAGGTAGGTTTTGTTGTCACCTAAAGATT  
TTTGATGGATTACCTGAAAATAGTAAAAGAATGTATGGTTGCAGTCACTT

>M6-PGSC0003DMG401019239M6G-LecRK\_1708

TTAAAGATTTTTGATGGATTACCTGAAAATAGTAAAAGAATGTATGGTTGCAGTCACTTCTTTGAAACA  
ATTGATAGGTATTTAGTTTTCTGTAGAACAAGAAGTTGAGATGCATGTGG

>M6-PGSC0003DMG401019239M6G-LecRK\_1769

TTGAAACAATTGATAGGTATTTAGTTTTCTGTAGAACAAGAAGTTGAGATGCATGTGGCTTGAATCAA  
AGAAAAATCTTCTCAAATTAAGAGATTTATAGTAACATTCAAAAATTA

>M6-PGSC0003DMG401019239M6G-LecRK\_183

CAACATCCATGTGTGGCTGTAATTAAATTCAACTATTCATTATAAACAATAATCTCAAACCAAAGAATA  
CGATGAGTATTAATCAAACCAGCCAAGCTACGGTGTGTTCAAATAGGAC

>M6-PGSC0003DMG401019239M6G-LecRK\_1830

TGAATCAAAGAAAAATCTTCTCAAATTAAGAGATTTATAGTAACATTCAAAAATTAATAATGACTTG  
CATTATATTGAATTCTAGAACCCTTACAACCTCAATATCAACAAATTCAAA

>M6-PGSC0003DMG401019239M6G-LecRK\_1891

AATGACTTGCATTATATTGAATTCTAGAACCCTTACAACCTCAATATCAACAAATTCAAATGATGTGCAGT  
ACTCAAAGCTTACAGAATCCTTTTTAATTCAATATAAAAATTATCTCC

>M6-PGSC0003DMG401019239M6G-LecRK\_1952

GATGTGCAGTACTCAAAGCTTACAGAATCCTTTTTAATTCAATATAAAAATTATCTCCCCGTGGATTGG  
ACAGAAAGTGAAATTGATTATTTTTGCGGAATGGATACTTGCAGATAGT

>M6-PGSC0003DMG401019239M6G-LecRK\_2013

CGTGGATTGGACAGAAAGTGAAATTGATTATTTTTGCGGAATGGATACTTGCAGATAGTCTGGAGAAAT  
CAGATGGAAAGAAAAGAAAAGTACTTTTTCTGGATTCTGCCATTATCAGTTG

>M6-PGSC0003DMG401019239M6G-LecRK\_2074

GGAGAAATCAGATGGAAAGAAAAGAAAAGTACTTTTTCTGGATTCTGCCATTATCAGTTGGTCTGATTCT  
GGTAATTCTTAGCATGTTGATCTTCCATAGAAGAAGGAAGAAGGCTGTACA

>M6-PGSC0003DMG401019239M6G-LecRK\_2135

CTGATTCTGGTAATTCTTAGCATGTTGATCTTCCATAGAAGAAGGAAGAAGGCTGTACAGCTCAAAGG  
AAAGGTAAAATAGGATAAATCTCATTTTTGTCTTGACATCTTAGCAAATCA

>M6-PGSC0003DMG401019239M6G-LecRK\_2196

TCAAAGGAAAGGTAAAATAGGATAAATCTCATTTTTGTCTTGACATCTTAGCAAATCAAGGAACATAAT  
TCAAAGAAAAGTGAAGAATTTAATATTTGGTCTGGATCACAGCTTAAAC

>M6-PGSC0003DMG401019239M6G-LecRK\_2257

GAACATAATTCAAAGAAAAGTGAAGAATTTAATATTTGGTCTGGATCACAGCTTAAACAAAATTCACTT  
CGTTTGCGGGCAGGTAGGTCGGGACGCAATGGCAACTACAAGATGGATCA

>M6-PGSC0003DMG401019239M6G-LecRK\_2318

AATTCACTTCGTTTGCGGGCAGGTAGGTCGGGACGCAATGGCAACTACAAGATGGATCATAGTGGTAAT  
TGTGAGGAAGAATTTGAGATACCAATGTTTGACTTATCTACCATAATGAAG

>M6-PGSC0003DMG401019239M6G-LecRK\_2379

GTGGTAATTGTGAGGAAGAATTTGAGATACCAATGTTTGACTTATCTACCATAATGAAGGCTACCAATAA  
CTTTTCAATAGACAGAAAGATTGGAGAGGGGGGCTTTGGACCGGTTTACA

>M6-PGSC0003DMG401019239M6G-LecRK\_244

CAAAGAATACGATGAGTATTAATCAAACCAGCCAAGCTACGGTGTGTTCAAATAGGACTCAGGTCAAG  
TGTCATCAATATGCTGCATGAACTGGTCATAAGAGTCGGAAGGCAGACTTG

>M6-PGSC0003DMG401019239M6G-LecRK\_2440

TACCAATAACTTTTCAATAGACAGAAAGATTGGAGAGGGGGGCTTTGGACCGGTTTACAAGGTATAACT  
GGTGCACAGGCAAAAACCTCCTGATCCTATAGAGTAAAGTTTCATCTTTAG

>M6-PGSC0003DMG401019239M6G-LecRK\_2501

GTATAACTGGTGCACAGGCAAAAACCTCCTGATCCTATAGAGTAAAGTTTCATCTTTAGATTCAGTACAG  
AAGTTGTATGATGAAATGCATAATGAAATAAAGCTTTGGCTTGTGAAACC

>M6-PGSC0003DMG401019239M6G-LecRK\_2562

TCAGTACAGAAGTTGTATGATGAAATGCATAATGAAATAAAGCTTTGGCTTGTGAAACCAAAGGAGACA  
TATACAATAGCTAAGGAAGAACAAGGATATGGTGGAACACAACACTGATTGTC

>M6-PGSC0003DMG401019239M6G-LecRK\_2623

AGGAGACATATAACAATAGCTAAGGAAGAACAAGGATATGGTGGAACACAACACTGATTGTCTCTTTCTAAT  
TGGAACACAATTGACTCTGTGTACTTCCTACATCAAGTAAGGTAATGAAAA

>M6-PGSC0003DMG401019239M6G-LecRK\_2684

TTTCTAATTGGAACACAATTGACTCTGTGTACTTCCTACATCAAGTAAGGTAATGAAAATATTAACATGCA  
GAAATTGTGATGTTTAGGGCATACTTGAAGAACGGGAAATAGCTGTCAA

>M6-PGSC0003DMG401019239M6G-LecRK\_2745

TAAACATGCAGAAATTGTGATGTTTAGGGCATACTTGAAGAACGGGAAATAGCTGTCAAACGGCTGTCC  
AGAACTTCCAAACAAGGAGAAGGTGAGTTCAAGAATGAAGTTTTATATGTT

>M6-PGSC0003DMG401019239M6G-LecRK\_2806

GGCTGTCCAGAACTTCCAAACAAGGAGAAGGTGAGTTCAAGAATGAAGTTTTATATGTTGCAAGACTTC  
AACACAGGAATCTGGTGAAGATTCTTGGTTGCTGCAGTGACGGGGAAGAAA

>M6-PGSC0003DMG401019239M6G-LecRK\_2867

AAGACTTCAACACAGGAATCTGGTGAAGATTCTTGGTTGCTGCAGTGACGGGGAAGAAAAGATGTTGA  
TCTATGAGTACTTGCCGAACGGGAGTCTTGATTCATTTATATTTGGTACTAT

>M6-PGSC0003DMG401019239M6G-LecRK\_2928

ATGTTGATCTATGAGTACTTGCCGAACGGGAGTCTTGATTCATTTATATTTGGTACTATTCTCCATCCAAT  
ATTGTGCAAATTAATAAATAATTGTGTTTCAGTGATGATGCCTATAGT

>M6-PGSC0003DMG401019239M6G-LecRK\_2989

TCCATCCAATATTGTGCAAATTAATAAATAATTGTGTTTCAGTGATGATGCCTATAGTAGTACTTCATTA  
ATCTTTTTTATTTTGAAGTAAAAGTAACTAGTAGTACTTTGGTAATTTT

>M6-PGSC0003DMG401019239M6G-LecRK\_305

AGGTCAAGTGTCATCAATATGCTGCATGAACTGGTCATAAGAGTCGGAAGGCAGACTTGCTAAGCACTT  
CGACATAGAGGAAAGACAACACAACGTCTATTGGATCGCGAAGCATGAAGG

>M6-PGSC0003DMG401019239M6G-LecRK\_3050

TACTTCATTAATCTTTTTTATTTTGAAGTAAAAGTAACTAGTAGTACTTTGGTAATTTTGTCCAATTATGA



AAGCACCATAAAGCAGGAAAAATATTGATAGACCAAATCTGTTGTGGG

>M6-PGSC0003DMG401019239M6G-LecRK\_3111

TCCAATTATGAAAGCACCATAAAGCAGGAAAAATATTGATAGACCAAATCTGTTGTGGGAGTATTTAAT  
ACTACTTTCTCCTATAACCAATTAGTCAGTTAATGACCCAACAAAAAAAT

>M6-PGSC0003DMG401019239M6G-LecRK\_3172

TATTTAATACTACTTTCTCCTATAACCAATTAGTCAGTTAATGACCCAACAAAAAAATTTGGCAGATGAC  
ACACAAAGCAAGGCATTAGACTGGCCTAAGCGATTTACATTATCAATG

>M6-PGSC0003DMG401019239M6G-LecRK\_3233

GGCAGATGACACACAAAGCAAGGCATTAGACTGGCCTAAGCGATTTACATTATCAATGGTATAGCTCG  
GGGACTTATGTATCTGCATCAAGATTCTCAATTGAGAATAATTTACAGAGA

>M6-PGSC0003DMG401019239M6G-LecRK\_3294

ATAGCTCGGGGACTTATGTATCTGCATCAAGATTCTCAATTGAGAATAATTTACAGAGACCTGAAAGCTA  
ACAACATTCTGCTAGACAAGGACATGAATCCAAAGATATCAGACTTCGGC

>M6-PGSC0003DMG401019239M6G-LecRK\_3416

GGCAAAAATATGTGAAGAGGATGACATTGGAGCCATGACAAACCGAGTAGTTGGAACATAGTAAGAAC  
CTTCCACTGGATAGTATTATTTGATAAGATTTACTGGATAATAATTTGAAC

>M6-PGSC0003DMG401019239M6G-LecRK\_3477

TAAGAACCTTCCACTGGATAGTATTATTTGATAAGATTTACTGGATAATAATTTGAACCTAAGAAGAAT  
CTTCAGTTAGTTAAGGCATGTTTTCCAGCATTACTAATTATAGTGTTGTG

>M6-PGSC0003DMG401019239M6G-LecRK\_3538

AAGAAGAATCTTCAGTTAGTTAAGGCATGTTTTCCAGCATTACTAATTATAGTGTTGTGCACATTTAATG  
CAGTGGGTACCTCTCACCGGAATATGCATTGCACGGAAAATACTCAGTA

>M6-PGSC0003DMG401019239M6G-LecRK\_3599

CATTTTAATGCAGTGGGTACCTCTCACCGGAATATGCATTGCACGGAAAATACTCAGTAAAATCAGATGT  
ATTTAGCTTTGGTATTTTAGTATTGGAAATTGTCAGTGGGAAAAGCAACA

>M6-PGSC0003DMG401019239M6G-LecRK\_366

AAGCACTTCGACATAGAGGAAAGACAACAACGTCTATTGGATCGCGAAGCATGAAGGAATTACTAA  
GGGAGAGTTTTCACTTATTCTTGCTCATGATTTGTATTTTGTTCACGCAG

>M6-PGSC0003DMG401019239M6G-LecRK\_3660

ATCAGATGTATTTAGCTTTGGTATTTTAGTATTGGAAATTGTCAGTGGGAAAAGCAACAGAAAATTCTCT  
CATCCAGATCATAACCTTAATCTACTCGGGCATGTAAGATTTTACTTGTT

>M6-PGSC0003DMG401019239M6G-LecRK\_4148

TTATTCCTTGGTGTATGTTATATACTAGTAACAAATATCTTGTAACGACCCCTGCTAATAAGCTTGCAA  
TATCTACAGGCATGGAACTTTATAACAAGGTAGGTCAATAGAACTAC

>M6-PGSC0003DMG401019239M6G-LecRK\_4209

AAGCTTGCAATATCTACAGGCATGGAACTTTATAACAAGGTAGGTCAATAGAACTACTCGATGAATG  
CCTAGGTGATTCTTGCAACATCTGAAGTGGTACGATCAATTAGTGTGGT

>M6-PGSC0003DMG401019239M6G-LecRK\_427

TTACTAAGGGAGAGTTTTCACTTATTCTTGCTCATGTATTTGTATTTTGTTCACGCAGCATTGGCGCTAC  
AGATACCATAAGTACAACCCACTTTCTGAAAGATGGTGTATGCCAATATT

>M6-PGSC0003DMG401019239M6G-LecRK\_4270

GATGAATGCCTAGGTGATTCTTGCAACATCTGAAGTGGTACGATCAATTAGTGTGGTTTATTATGTGT  
CCAACAATGTCCTGAAGATCGTCCAAGTATGTCTCCGCAGTTCTGATGT

>M6-PGSC0003DMG401019239M6G-LecRK\_4331

ATTATGTGTCCAACAATGTCCTGAAGATCGTCCAAGTATGTCTCCGCAGTTCTGATGTAAACAATGAA  
GGTGTGTTGCCGTTGGCTAAACAACCAGGTTTTTACATAGAAGGAAATGC

>M6-PGSC0003DMG401019239M6G-LecRK\_4392

AACAATGAAGGTGTGTTGCCGTTGGCTAAACAACCAGGTTTTTACATAGAAGGAAATGCACCGGGTGGT  
GATTTCACTCCTAGCCAACCTGCACAGATTACAGTGAGTGACACCCCATC

>M6-PGSC0003DMG401019239M6G-LecRK\_4453

CGGGTGGTGATTTCACTCCTAGCCAACCTGCACAGATTACAGTGAGTGACACCCCATCACAATACTAGC  
TGCTCGATAGAAGATATTGGTTCCTTGTGCAACAAGCTTGCAGTTGC

>M6-PGSC0003DMG401019239M6G-LecRK\_4514

AATACTAGCTGCTCGATAGAAGATATTGGTTCCTTGTGCAACAAGCTTGCAGTTGCAATGATCTTTTC  
TTAATTCTCTATAGTAATGTGGTGAAAAGAATTTGTGCATGATTGTGCA

>M6-PGSC0003DMG401019239M6G-LecRK\_4575

TGATCTTTTCTTAATTCTCTATAGTAATGTGGTGAAAAGAATTTGTGCATGATTGTGCATTTTTAGGTCTA  
TCAACTATGTCAAACATATGTAGGAAGCTTGCTGACTGGCTGTTACTTT

>M6-PGSC0003DMG401019239M6G-LecRK\_488

TTGGCGCTACAGATACCATAAGTACAACCCACTTTCTGAAAGATGGTGATGCCAATATTACTTCACCTGA  
TGGAACCTTTGAAATGGGGTTTTTCAGTTCAGGTAGTTCAAAAATTGCT

>M6-PGSC0003DMG401019239M6G-LecRK\_549

TTCACCTGATGGAACCTTTGAAATGGGGTTTTTCAGTTCAGGTAGTTCAAAAATTGCTACGTGGGTATG  
TGGTACAAAAGCTTATCTGTTAGGACAGTGGTGTGGGTTGCCAACAGAGA

>M6-PGSC0003DMG401019239M6G-LecRK\_61

TAACAAAGGCGACTTCATAAGACTGAAACCCGAGACTTTTAATTAAGAATGAAGGAGTCATATCACCAC  
AACTGTGTCAGTGATTTGATGTTGTTGTAAGCAAATAAGATAGAGCATGGC

>M6-PGSC0003DMG401019239M6G-LecRK\_610

GTGGGTATGTGGTACAAAAGCTTATCTGTTAGGACAGTGGTGTGGGTTGCCAACAGAGAAGCTCCCTTG  
ACCAGTGGATCAGGTATCCTTAAGGTTATTGAGCCAGGACATCTCGTCCTT

>M6-PGSC0003DMG401019239M6G-LecRK\_671

CTCCCTTGACCAGTGGATCAGGTATCCTTAAGGTTATTGAGCCAGGACATCTCGTCCTTCTCAATGACACT  
AACAAATGTTGTATGGTCCACCAATACCTCTACATCTGTGCAGAATCCCA

>M6-PGSC0003DMG401019239M6G-LecRK\_732

CAATGACACTAACAAATGTTGTATGGTCCACCAATACCTCTACATCTGTGCAGAATCCCATTGCACAGTTG  
CTGGATTCTGGGAATCTTGTGTGAAACAAGCTGGTGATGATAATTTCT

>M6-PGSC0003DMG401019239M6G-LecRK\_793

GCACAGTTGCTGGATTCTGGGAATCTTGTGTGAAACAAGCTGGTGATGATAATTTCTTTGGCAGAGTT  
TTGATCACCCAACTGATACACTATTACCGGGCATGAAGCTTGTTGGAAC

>M6-PGSC0003DMG401019239M6G-LecRK\_854

GGCAGAGTTTTGATCACCCAACTGATACACTATTACCGGGCATGAAGCTTGTTGGAACTTTTAACTGA  
CAGAGAGGTGTACTTGTTCATCGTGGAAAGACCCAAGAGGATCCAGCTCCAG

>M6-PGSC0003DMG401019239M6G-LecRK\_915

TTTAACTGACAGAGAGGTGTACTTGTTCATCGTGGAAAGACCCAAGAGGATCCAGCTCCAGGTGATTATAC  
ATATCACTGTGATCCTTCTGGATATCCACAGAACATCCTGAAGAAGGGGTC

>M6-PGSC0003DMG401019239M6G-LecRK\_976

GATTATACATATCACTGTGATCCTTCTGGATATCCACAGAACATCCTGAAGAAGGGGTCAAATGTTGTCT

ATCGATCAGGACCGTGAATGGTCTTCATTTTAGTGGAACAAGAAACCCA

>M6-PGSC0003DMG401019242M6G-LecRK\_0

ATGTTACTAACTTCAGCAGCATTAGACACAATCACTACAGATAAATCCATTAGAGATGGTGACACAATTG  
TTTCAGCTGGAGGAATTTATGAGCTTGGATTTTTCAGCCCTGGAAATTCT

>M6-PGSC0003DMG401019242M6G-LecRK\_1037

CACATATAATTATTTTTGCCTTCACAGGTATCCTCAAGATTCTGCAGCAGACTGGTCTAGTGGTTGCGTA  
AGGAGAACTTCTTTAAATTGTAACCATGATGGTTTTCTTAAATTTACGG

>M6-PGSC0003DMG401019242M6G-LecRK\_1098

TGGTTGCGTAAGGAGAACTTCTTTAAATTGTAACCATGATGGTTTTCTTAAATTTACGGGTATCAAGATG  
CCGGATTCTAGAACTCCTGGTATAATGAGAGAATGAACCTGAAGAATG

>M6-PGSC0003DMG401019242M6G-LecRK\_1159

ATCAAGATGCCGGATTCTAGAACTCCTGGTATAATGAGAGAATGAACCTGAAGAATGCGAGAAAATG  
TGCTTAGCTAATTGCAATTGTACAGCCTACTCAGATCTTGATGTTAGAAAT

>M6-PGSC0003DMG401019242M6G-LecRK\_122

GAATCGTTACGTTGGCATATGGTACAAGAAGATATCACCTAGAACTGTTGTGTGGGTTGCAAACAGAAA  
CATTCCACTTAATGACACTTCAGGAGTGTTAACACTTAATCCCAATGGAAT

>M6-PGSC0003DMG401019242M6G-LecRK\_1220

AGAAAATGTGCTTAGCTAATTGCAATTGTACAGCCTACTCAGATCTTGATGTTAGAAATGGCGGAAGTG  
GATGCTTACTATGGTTTGGAGAACTCATAGATATACGAGAGTTCAGCCAAA

>M6-PGSC0003DMG401019242M6G-LecRK\_1281

CGGAAGTGGATGCTTACTATGGTTTGGAGAACTCATAGATATACGAGAGTTCAGCCAAAATGAGCAAAA  
TCTGTATGTGAGAGTAGCTGCTTCAGAATTAGGTAATCATCCTACTCTGCA

>M6-PGSC0003DMG401019242M6G-LecRK\_1342

GAGCAAAATCTGTATGTGAGAGTAGCTGCTTCAGAATTAGGTAATCATCCTACTCTGCATAAATGCACAA  
CTCTTTAGAATTGAAGGAACTCTACACCTAATATACTTACATGATGGACA

>M6-PGSC0003DMG401019242M6G-LecRK\_1403

AATGCACAACCTTTAGAATTGAAGGAACTCTACACCTAATATACTTACATGATGGACATTAAGTTGAT  
TAGGTGCTTTAGTAGTTGGTAATATGGCGATTTCATTTTCTGTGGTACTG

>M6-PGSC0003DMG401019242M6G-LecRK\_1464

AAAGTTGATTAGGTGCTTTAGTAGTTGGTAATATGGCGATTTCAATTTCTGTGGTACTGGAACGGAAGTA  
GCTTGCTGCAAAGAGCATTGAATAATTTTCATATCTTACTCTACGACTAT

>M6-PGSC0003DMG401019242M6G-LecRK\_1525

ACGGAAGTAGCTTGCTGCAAAGAGCATTGAATAATTTTCATATCTTACTCTACGACTATATGGATACTAG  
GACATAACCGGTTAGTAGGATTGCCAAGGGATGAGACTTCATTCCCTTTA

>M6-PGSC0003DMG401019242M6G-LecRK\_1586

GGATACTAGGACATAACCGGTTAGTAGGATTGCCAAGGGATGAGACTTCATTCCCTTTAAAGGCTTAAA  
AATATGCTAGACCTCATGACAGATCAAGGCTGTTGACAGCAGGTGGTAATC

>M6-PGSC0003DMG401019242M6G-LecRK\_1647

GGCTTAAAAATATGCTAGACCTCATGACAGATCAAGGCTGTTGACAGCAGGTGGTAATCATATGCATTC  
TGCCTTAGTAGTGCCGCTTGTAAATCAGTGACACTGTACTTTAATGTGTCA

>M6-PGSC0003DMG401019242M6G-LecRK\_1708

ATGCATTCTGTCCTTAGTAGTGCCGCTTGTAAATCAGTGACACTGTACTTTAATGTGTCATCTTTCAAAGAA  
GATTCCGATTTAAACAATGCAGCTTCAAATCAATTAACATTGACTACT

>M6-PGSC0003DMG401019242M6G-LecRK\_1769

TTTCAAAGAAGATTTCCGATTTAAACAATGCAGCTTCAAATCAATTAACATTGACTACTTTTTTCAGTAATC  
TTGTTGATTGAATGCCCTGGTCAACAAGTTACAAAGTCTGCAGGGCTTC

>M6-PGSC0003DMG401019242M6G-LecRK\_183

AACAGAAACATTCCACTTAATGACACTTCAGGAGTGTTAACTTAATCCCAATGGAATTCTTGACTTGT  
TGATAAATCCAATGTCTCAATTTGGTCATCAAACCTCATCAAGATCCTTA

>M6-PGSC0003DMG401019242M6G-LecRK\_1830

TTCAGTAATCTTGTTGATTGAATGCCCTGGTCAACAAGTTACAAAGTCTGCAGGGCTTCATAACAAAATA  
AGAAGTAATACAATCAATGCAATTAACTACTGATATGCCTAACTCTTATG

>M6-PGSC0003DMG401019242M6G-LecRK\_1891

AACAAAATAAGAAGTAATACAATCAATGCAATTAACTACTGATATGCCTAACTCTTATGTAAATTGAATA  
CTGATTATGAACTAATATAGAACATGTTTCAGACAGGACGCGGAGGAGAAA

>M6-PGSC0003DMG401019242M6G-LecRK\_1952

AATTGAATACTGATTATGAACTAATATAGAACATGTTTCAGACAGGACGCGGAGGAGAAAGAGGTCAGT  
CATGATTGGTGTCAATTCAGCAGTGGTAGCAACACTTATCCTCAGCATTTTA

>M6-PGSC0003DMG401019242M6G-LecRK\_2013

GGTCAGTCATGATTGGTGTCAATTCAGCAGTGGTAGCAACACTTATCCTCAGCATTITAGCTTGGTTTTAC  
TTCCAAAGAAGGAAAAGAAGAAGAAGAATAGGTAATATAGCTGAGGTAC

>M6-PGSC0003DMG401019242M6G-LecRK\_2074

TTGGTTTTACTTCCAAAGAAGGAAAAGAAGAAGAAGAATAGGTAATATAGCTGAGGTAATCTTGTCTAT  
CTGGCTGACATTGTTGCCTTTACCAAATTCTCATTGATATCATGTTTGTG

>M6-PGSC0003DMG401019242M6G-LecRK\_2135

TTGTCTATCTGGCTGACATTGTTGCCTTTACCAAATTCTCATTGATATCATGTTTGTGGCAGGCGAATGT  
ATATTGACAGGTTCAAAGTTGAAAATGAGGATATGGAGCTTCCATTGT

>M6-PGSC0003DMG401019242M6G-LecRK\_2196

AGGCGAATGTATATTGACAGGTTCAAAGTTGAAAATGAGGATATGGAGCTTCCATTGTTTGATTAGTT  
ACTGTTACTAGTGCCACTGGGAACCTTCTTCTGCTAATGTGATTGGGGA

>M6-PGSC0003DMG401019242M6G-LecRK\_2257

GATTAGTTACTGTTACTAGTGCCACTGGGAACCTTCTTCTGCTAATGTGATTGGGGAAGGCGGCTTTG  
GACCAGTTTACAAGGTAAATCAACTTTGATCTTCAACTTCTAGTTAGAAG

>M6-PGSC0003DMG401019242M6G-LecRK\_2318

GCGGCTTTGGACCAGTTTACAAGGTAAATCAACTTTGATCTTCAACTTCTAGTTAGAAGTGCATCTTTAA  
TCCTTGATAGAAAATTGCAGGGTATCCTACCAAATGGACAAGCAATAGC

>M6-PGSC0003DMG401019242M6G-LecRK\_2379

TCATCTTTAATCCTTGATAGAAAATTGCAGGGTATCCTACCAAATGGACAAGCAATAGCAGTAAAGAGG  
CTATCGGAGTATTCTGGACAAGGCATTCAAGAGTTAAAAAATGAAATCGTT

>M6-PGSC0003DMG401019242M6G-LecRK\_244

TTGTACTTGTTGATAAATCCAATGTCTCAATTTGGTCATCAAACCTCATCAAGATCCTTAAAGAATCCAAAA  
GCACAGCTCCTGGATTCCGCGAACCTTGTGTCAGTGATGGAAATGATA

>M6-PGSC0003DMG401019242M6G-LecRK\_2440

TAAAGAGGCTATCGGAGTATTCTGGACAAGGCATTCAAGAGTTAAAAAATGAAATCGTTCTCATTCCAA  
GTTGCAACATAGGAATCTTGTCAAGCTATTGGGTTGCTGCCTTGAAGGAG

>M6-PGSC0003DMG401019242M6G-LecRK\_2562

GAACGGATGCTAATCTATGAGTTCATGCCCAACGCTAGCTTGGACTATTTCAATTTTTGGTCTGCTTTTTCG

TGACTTATTGGCTATACTAGTACTTGACAAGTCTTCAATATCTCTGATC

>M6-PGSC0003DMG401019242M6G-LecRK\_2623

TGCTTTTTCGTGACTTATTGGCTATACTAGTACTTGACAAGTCTTCAATATCTCTGATCACTCAATGATTAG

TTCTACATTGTGCAGATCCAAGCAGAAAAGCTTCACTTGGATGGAAGA

>M6-PGSC0003DMG401019242M6G-LecRK\_2684

TCAATGATTAGTTCTACATTGTGCAGATCCAAGCAGAAAAGCTTCACTTGGATGGAAGAATCGTTTTGAA

ATTGCTATGGGAATATCTCGTGGTCTTCTTTACCTTACCAGGATTCAAG

>M6-PGSC0003DMG401019242M6G-LecRK\_2745

CGTTTTGAAATTGCTATGGGAATATCTCGTGGTCTTCTTTACCTTACCAGGATTCAAGATTAAGAATTAT

TCACCGAGATCTCAAGACCAGCAACATTTTATTAGATAGTGACATGAAT

>M6-PGSC0003DMG401019242M6G-LecRK\_2806

TAAGAATTATTCACCGAGATCTCAAGACCAGCAACATTTTATTAGATAGTGACATGAATGCCAAAATTC

TGACTTCGGCCTTGCCAAAATTTTTGGTGGAGACCAAGAGGAAGGAAAAA

>M6-PGSC0003DMG401019242M6G-LecRK\_2867

CAAAATTTCTGACTTCGGCCTTGCCAAAATTTTTGGTGGAGACCAAGAGGAAGGAAAAACTAAGAGAGT

AATAGGGACATAGTAAGTTTCTACACATCTATAAATCATAGAACCTTTATT

>M6-PGSC0003DMG401019242M6G-LecRK\_2928

AAGAGAGTAATAGGGACATAGTAAGTTTCTACACATCTATAAATCATAGAACCTTTATTACATTTAATCA

GTACATCATGAGCATAAATATATTGAGTTGATGCAGTGGATATATGTCCC

>M6-PGSC0003DMG401019242M6G-LecRK\_2989

ATTTAATCAGTACATCATGAGCATAAATATATTGAGTTGATGCAGTGGATATATGTCCCCGGAGTATGCT

GTTGATGGGAAATATTCAGTCAAATCAGATGTATTCAAGTATCGGCGTAAT

>M6-PGSC0003DMG401019242M6G-LecRK\_305

GAATCCAAAAGCACAGCTCCTGGATTCCGCGAACCTTGTTGTGTCAGTGATGGAAATGATAGAGGCCTGGA

AAATAATTCGCGTGGCGGAGTTTTGATTATCCAGGAAATACTTTGTTACC

>M6-PGSC0003DMG401019242M6G-LecRK\_3050

GAGTATGCTGTTGATGGGAAATATTCAGTCAAATCAGATGTATTCAAGTATCGGCGTAATCATTCTTGAAA

TAGTTAGTGGCAGAAAGAACAGAAAATTCGTCATATGGAGCATCATCAC

>M6-PGSC0003DMG401019242M6G-LecRK\_3111

TTCTTGAAATAGTTAGTGGCAGAAAGAACAGAAAATTCGTCATATGGAGCATCATCACAATCTCTTGGG  
ACATGTAAGCACATATATATGGAACAAAACCTTCGTTCCCTTTATTCACTC

>M6-PGSC0003DMG401019242M6G-LecRK\_3172

TCTCTTGGGACATGTAAGCACATATATATGGAACAAAACCTTCGTTCCCTTTATTCACTCTTAGCTTTCTATT  
GTGATTAATTACAACGTATAAATGTGTTGTTCTGTTTGTAATTTAGG

>M6-PGSC0003DMG401019242M6G-LecRK\_3233

AGCTTTCTATTGTGATTAATTACAACGTATAAATGTGTTGTTCTGTTTGTAATTTAGGCATGGTACTTTG  
GAGTGAAGGCAACGCGTTGGAACGTATAGACGAATGTATCAAAGAATC

>M6-PGSC0003DMG401019242M6G-LecRK\_3294

TGGTTACTTTGGAGTGAAGGCAACGCGTTGGAACGTATAGACGAATGTATCAAAGAATCATTTTCAGAA  
TCTCAAGTGTGAGATGCATCCAGGTTGGTTTGTATGCGTCCAAAAACTC

>M6-PGSC0003DMG401019242M6G-LecRK\_3416

CGAGGATAGGCCTACAATGGCATCAGTAGTTTTCTGGTTAGGCAATGAAGGTCTAGCTCTTCCTCAACCA  
AAGCAACCTGGTTTTTTCATCGAGAGGAATTCTATGGAATCAACAGAGTC

>M6-PGSC0003DMG401019242M6G-LecRK\_3477

CCTCAACCAAAGCAACCTGGTTTTTTCATCGAGAGGAATTCTATGGAATCAACAGAGTCATCAGCTGATG  
AAGTATATGTAAGTAGCAGCGTGTGCATAACAGTTCTAGAGCCAAGATAA

>M6-PGSC0003DMG401019242M6G-LecRK\_366

GGCCTGGAAAATAATTTGCGTGGCGGAGTTTTGATTATCCAGGAAATACTTTGTTACCTGGTATGAGG  
ATAGGAAAAGATTTGGTCACGGGAATGGATTGGCATCTAACGTCATGGAAG

>M6-PGSC0003DMG401019242M6G-LecRK\_427

GTATGAGGATAGGAAAAGATTTGGTCACGGGAATGGATTGGCATCTAACGTCATGGAAGAGCACGGAT  
GATCCAACCCCTGGTGAATATGTAGATCGTGTTGATTCACATGGATACCCTC

>M6-PGSC0003DMG401019242M6G-LecRK\_488

CACGGATGATCCAACCCCTGGTGAATATGTAGATCGTGTTGATTCACATGGATACCCTCAATTGTTCTTG  
ATGAGAAATTCATCTGTAGTGTGTTAGCTCAGGGCCATGGACTGGTGCTTC

>M6-PGSC0003DMG401019242M6G-LecRK\_549

TTGTTCTTGATGAGAAATTCATCTGTAGTGTGTTAGCTCAGGGCCATGGACTGGTGCTTCATTTTCTAGTAG  
TCCTAGTAATAAACCAACATTGTATTATACGTTTCGAGTTTGTATCACT



>M6-PGSC0003DMG401019242M6G-LecRK\_61

ACACAATTGTTTCAGCTGGAGGAATTTATGAGCTTGATTTTTTCAGCCCTGGAAATTCTAAGAATCGTTA  
CGTTGGCATATGGTACAAGAAGATATCACCTAGAAGTGTGTGTGGGTTG

>M6-PGSC0003DMG401019242M6G-LecRK\_610

TTTCTAGTAGTCCTAGTAATAAACCAACATTGTATTATACGTTTCGAGTTTGTATCACTCAGAAGGAAATT  
TACTTCAAATACGAGCTTAAGAATGACTCTATGCCACCAGGGTGGTGC

>M6-PGSC0003DMG401019242M6G-LecRK\_671

GAAGGAAATTTACTTCAAATACGAGCTTAAGAATGACTCTATGCCACCAGGGTGGTGTCTCAATCCGGA  
TGGGGTGATAACAACCTAATATGGATTGAGCATACTCAGAGCTGGTTTCT

>M6-PGSC0003DMG401019242M6G-LecRK\_732

AATCCGGATGGGGTGATAACAACCTAATATGGATTGAGCATACTCAGAGCTGGTTTCTCTACTTGACA  
GCACAACCTTGATAATTGTGATCGTTTTGCTTTATGCGGACCTTATTCAAGT

>M6-PGSC0003DMG401019242M6G-LecRK\_793

ACTTGACAGCACAACTTGATAATTGTGATCGTTTTGCTTTATGCGGACCTTATTCAAGTTGCAACATCAAT  
AACTCCCCTCCATGTGACTGTTTGAAAGGTTTTGAGCCTAGGTTTGTAT

>M6-PGSC0003DMG401019242M6G-LecRK\_854

CAACATCAATAACTCCCCTCCATGTGACTGTTTGAAAGGTTTTGAGCCTAGGTTTGTATTTGTAAACTAT  
GTGATCATCTCGCGTTAAGCTATCAGAGAGAGTGCACTTTTGAATTTTG

>M6-PGSC0003DMG401019242M6G-LecRK\_915

GTTAAACTATGTGATCATCTCGCGTTAAGCTATCAGAGAGAGTGCACTTTTGAATTTTGATTACTAAGTTA  
TGTTTTCACACACCCTCATGTGTGTGCTTGATTCTTTTTCTTGGACCA

>M6-PGSC0003DMG401019242M6G-LecRK\_976

TACTAAGTTATGTTTTCACACACCCTCATGTGTGTGCTTGATTCTTTTTCTTGGACCAAACACATATAATT  
ATTTTTGCCTTCACAGGTATCCTCAAGATTCTGCAGCAGACTGGTCT

>M6-PGSC0003DMG401019681-(rev)M6LRR-RLP\_1054

GCTGACTAAGCTAACGATTACAAAATTTACAAGAAATGATGATAATTCTATGTTGAAATAACGTTTACTA  
GCTACTTTTCGGTTTTGTCTTTGAAAATAAACTACTTTTCATGAAGTTTCG

>M6-PGSC0003DMG401019681-(rev)M6LRR-RLP\_1116

GTTTACTAGCTACTTTTCGGTTTTGTCTTTGAAAATAAACTACTTTTCATGAAGTTTCGAATTCAACAGCTAA

TGTATTTTTCTTATAGGAAACGTTTCGTCTTTGTGGATATCCATTACGA

>M6-PGSC0003DMG401019681-(rev)M6LRR-RLP\_1178

CAACAGCTAATGTATTTTTCTTATAGGAAACGTTTCGTCTTTGTGGATATCCATTACGAACTATTTGCCCGA

GTGAAACAGTGGATAGTAATCCAACAGTGATGAGTACTCCTAATTCACA

>M6-PGSC0003DMG401019681-(rev)M6LRR-RLP\_124

TTAGCCTTCAAATCCCGAGCTGATACGTCAATTTTCTTACTTCATGGTCTAGAAATGCCCCCTGTTCTTC

ATGGATAGGTGTAAATGTCATCCAATTACTCGTAGAGTCGTAAAAATT

>M6-PGSC0003DMG401019681-(rev)M6LRR-RLP\_1240

TTTGCCCGAGTGAAACAGTGGATAGTAATCCAACAGTGATGAGTACTCCTAATTCACAATCAACTTTCT

TAATCAAAGAAAGAAGAATTTGAGTGAAAACATGTTTCTCTTGATAGTCA

>M6-PGSC0003DMG401019681-(rev)M6LRR-RLP\_1302

AACTTTCTTAATCAAAGAAAGAAGAATTTGAGTGAAAACATGTTTCTCTTGATAGTCACACTTGATGCAA

TTGGCGTTATGATGACGGTTTTGGTAATAACATGGTGTGTTATTACAGA

>M6-PGSC0003DMG401019681-(rev)M6LRR-RLP\_1364

TGATGCAATTGGCGTTATGATGACGGTTTTGGTAATAACATGGTGTGTTATTACAGAAAGAAGAATCA

AGAGAGCGAAAATTACAAGTTGAGGAAGATGAATAGGAAGTATAATCAGGA

>M6-PGSC0003DMG401019681-(rev)M6LRR-RLP\_1426

AGAATCAAGAGAGCGAAAATTACAAGTTGAGGAAGATGAATAGGAAGTATAATCAGGACACGAGTAGT

TCAAGTCTGTATCATTCAATTTGAATATGGTATCAAGAAAACAAGTGATCAAT

>M6-PGSC0003DMG401019681-(rev)M6LRR-RLP\_1488

AGTAGTTCAAGTCTGTATCATTCAATTTGAATATGGTATCAAGAAAACAAGTGATCAATTTGCAACAATGG

TTTGTTTTGAAGGATGTAAAGGTTTCAATAAAGTTGATGATTTGTTGAAG

>M6-PGSC0003DMG401019681-(rev)M6LRR-RLP\_1550

AACAATGGTTTGTGTTTGAAGGATGTAAAGGTTTCAATAAAGTTGATGATTTGTTGAAGGCCTCAGCTGAA

ATGTTGGGAAAAGGGAGTGTTGGAACAAGTTATAAAGTGGCTATTTTGGGA

>M6-PGSC0003DMG401019681-(rev)M6LRR-RLP\_1612

CAGCTGAAATGTTGGGAAAAGGGAGTGTTGGAACAAGTTATAAAGTGGCTATTTTGGATAATGGAGAT

GTTGTTGTGGTTAAAAGAGTAATTGAAAAGTTGAAGAAAATGAAAGATGTTG

>M6-PGSC0003DMG401019681-(rev)M6LRR-RLP\_1674

GGAGATGTTGTTGTGGTTAAAAGAGTAATTGAAAAGTTGAAGAAAATGAAAGATGTTGATGGATTTTTG  
AGATTAATTGGTAATTTGAGACATACAAATGTTGTGCCACTTAGAGCTTAT

>M6-PGSC0003DMG401019681-(rev)M6LRR-RLP\_1736

ATTTTTGAGATTAATTGGTAATTTGAGACATACAAATGTTGTGCCACTTAGAGCTTATTATTCATCAAAAG  
AGGAATTGCTTCTTGTCTATGATTTTCTCCCAATGGAAGTCTACACAA

>M6-PGSC0003DMG401019681-(rev)M6LRR-RLP\_1798

CATCAAAAGAGGAATTGCTTCTTGTCTATGATTTTCTCCCAATGGAAGTCTACACAATCTCTTACATGGT  
AATTTTTCAATCCTTCTTCTCAATTCCAAAGTCCAAAACGGAAATTT

>M6-PGSC0003DMG401019681-(rev)M6LRR-RLP\_186

CTGTTCTTCATGGATAGGTGTAAAATGTCATCCAATTACTCGTAGAGTCGTAAAAATTGTACTCAATCACT  
TAAACCTCACCGGATCAATTCATCCATTGATTCATCTTACACAAATTCG

>M6-PGSC0003DMG401019681-(rev)M6LRR-RLP\_1860

TTACATGGTAATTTTTCAATCCTTCTTCTCAATTCCAAAGTCCAAAACGGAAATTTATTGTCTGTTTGGT  
CAAACCTTCAAACCTGTTTATTTAAAAAAGTGTTTTTTGTTAGAAAA

>M6-PGSC0003DMG401019681-(rev)M6LRR-RLP\_1922

TCTGTTTGGTCAAACCTTCAAACCTGTTTATTTAAAAAAGTGTTTTTTGTTAGAAAAAGTATTTTGTGCT  
TGAAATACACTTTTGCAATATTAGAGCAACAATTTGTGGCTTGATCAT

>M6-PGSC0003DMG401019681-(rev)M6LRR-RLP\_1984

TTTTGTGCTTTGAAATACACTTTTGCAATATTAGAGCAACAATTTGTGGCTTGATCATGTCCACGGTAACC  
TGAAGTTGAGTCACTGAGTATGTTGTTATTGTTGTAATTTCTGCTTGAT

>M6-PGSC0003DMG401019681-(rev)M6LRR-RLP\_2046

ACGGTAACCTGAAGTTGAGTCACTGAGTATGTTGTTATTGTTGTAATTTCTGCTTGATCAAGGTTTCAA  
AAGTGCTTCTAGGGCAAACCTGCTTACTTCTGTTACTACTCAAAGCAC

>M6-PGSC0003DMG401019681-(rev)M6LRR-RLP\_2108

GTTTCAAAAAGTGCTTCTAGGGCAAACCTGCTTACTTCTGTTACTACTCAAAGCACTTATATTTTCTTA  
AACTTTTGTGAAACACCTCAACTCTCTAAATTAAGCACTTTTTTAAA

>M6-PGSC0003DMG401019681-(rev)M6LRR-RLP\_2170

ATTTTTCTAAAACCTTTGTGAAACACCTCAACTCTCTAAATTAAGCACTTTTTTAAACAATAAACACTTTG  
AGCTTCCAAAAAATAATCAAACCTGATTATTAATTAGGAATAAAATG

>M6-PGSC0003DMG401019681-(rev)M6LRR-RLP\_2232

AAACACTTTGAGCTTCCCAAAAAAATAATCAAAGTATTATTAATTAGGAATAAAATGGAAGGGTTATTG  
AGAGTTCATATTGTTGATACCCATTTATTTGAGATTGAAATATAATTGAC

>M6-PGSC0003DMG401019681-(rev)M6LRR-RLP\_2294

GGTTATTGAGAGTTCATATTGTTGATACCCATTTATTTGAGATTGAAATATAATTGACTTACATGCATTAT  
TATAAGTAAGTAACGTTATACTATCAGTGTAATTTAACATGTTATAATA

>M6-PGSC0003DMG401019681-(rev)M6LRR-RLP\_2356

ATGCATTATTATAAGTAAGTAACGTTATACTATCAGTGTAATTTAACATGTTATAATAAGTTGTTTATCAG  
ATAATAAGTTACACTTATCATAATCAATTACTTGTAGTTATCTTTTAGG

>M6-PGSC0003DMG401019681-(rev)M6LRR-RLP\_2418

GTTTATCAGATAATAAGTTACACTTATCATAATCAATTACTTGTAGTTATCTTTTAGGTGATCTAATAGTAT  
AAAAATTCCACAGGCAATCGTGGACCGGGAAGAACACCATTGGATTGG

>M6-PGSC0003DMG401019681-(rev)M6LRR-RLP\_248

TCAATCACTTAAACCTCACCGGATCAATTCATCCATTGATTTCATCTTACACAAATTCGTCATTTAAGTTTAC  
ATCACAATTCTCTCAGTTTCGATTCCGAAATTCGATTTTTGGCCTAATC

>M6-PGSC0003DMG401019681-(rev)M6LRR-RLP\_2480

CTAATAGTATAAAAATTCCACAGGCAATCGTGGACCGGGAAGAACACCATTGGATTGGGCAACAAGACT  
AAAATATGCATTAGGAGCAGCAAAAGGACTTAGGTTTTTACATAGCTACAA

>M6-PGSC0003DMG401019681-(rev)M6LRR-RLP\_2542

CAAGACTAAAATATGCATTAGGAGCAGCAAAAGGACTTAGGTTTTTACATAGCTACAACAAAACCAAGA  
TTTGCCATGGGAATTTACAGCATCAAACATACTAATTGATCACAATGGCA

>M6-PGSC0003DMG401019681-(rev)M6LRR-RLP\_2604

ACCAAGATTTGCCATGGGAATTTACAGCATCAAACATACTAATTGATCACAATGGCAATGCTTGTATCT  
CTGATATATGTCTTCACTTTCTTTACAAATGCCAATTTTCATCAAACAAT

>M6-PGSC0003DMG401019681-(rev)M6LRR-RLP\_2666

TTGTATCTCTGATATATGTCTTCACTTTCTTTACAAATGCCAATTTTCATCAAACAATGGATACAAAGCACC  
GGAATTATCGACACAAAACAATGTAAACACAAACCAAAATCCAAGAAG

>M6-PGSC0003DMG401019681-(rev)M6LRR-RLP\_2728

ACAAAGCACCGGAATTATCGACACAAAACAATGTAAACACAAACCAAAATCCAAGAAGTTTTTCTCAA

AGAGTGATGTTTATAGCTTTGGAGTGGTTTTACTAGAGATTTTGACTGGGA

>M6-PGSC0003DMG401019681-(rev)M6LRR-RLP\_2790

TCTCAAAGAGTGATGTTTATAGCTTTGGAGTGGTTTTACTAGAGATTTTGACTGGGAAAATTGCAACAA  
GTGAAGGGGAAACAAGTTTGGCAAATGGATACAAAGTGTGTGAACAAA

>M6-PGSC0003DMG401019681-(rev)M6LRR-RLP\_2852

TGCAACAAGTGAAGGGGAAACAAGTTTGGCAAATGGATACAAAGTGTGTGAACAAAGAATGGACTT  
GGGATGTGTTTGATTTGAACTTGCAAGGTATAAAGAAAGGGAAGATGAAAT

>M6-PGSC0003DMG401019681-(rev)M6LRR-RLP\_2914

GGACTTGGGATGTGTTTGATTTGAACTTGCAAGGTATAAAGAAAGGGAAGATGAAATGGTTGCACTTT  
TAAAAGTGGCTATGGCTTGTGGTTTCATCTCCAAAAGATAGGCCAAAGA

>M6-PGSC0003DMG401019681-(rev)M6LRR-RLP\_2976

GCACTTTTAAAAGTGGCTATGGCTTGTGGTTTCATCTCCAAAAGATAGGCCAAAGATGATTGTAGTGG  
AGGAAATGATCGAAGACATTGCGAAAAAAGATAACAGATAAAGGGACAAG

>M6-PGSC0003DMG401019681-(rev)M6LRR-RLP\_3038

TGTAGTGGAGGAAATGATCGAAGACATTGCGAAAAAAGATAACAGATAAAGGGACAAGTCCATTATCC  
ATCAAATTTGAAATGTTACATTTACTAGTCCTTAGGAATTTCTCGATCATC

>M6-PGSC0003DMG401019681-(rev)M6LRR-RLP\_310

TTAAGTTTACATCACAATTCTCTCAGTTCCGAAATTCGATTTTTGGCCTAATCTCAAACATGTTTAC  
CTCTCTCACAACAAGTTTCCGGTGAATTTCCACCAGGAATTTACCAT

>M6-PGSC0003DMG401019681-(rev)M6LRR-RLP\_3100

TTATCCATCAAATTTGAAATGTTACATTTACTAGTCCTTAGGAATTTCTCGATCATCGAAAGAGGAGAAT  
AGAGTTCTTTACTACTAAATACTAATTAGTTATGATGATTTTTTTTTCGT

>M6-PGSC0003DMG401019681-(rev)M6LRR-RLP\_3162

GAGGAGAATAGAGTTCTTTACTACTAAATACTAATTAGTTATGATGATTTTTTTTTCGTTTTCAATTTTTACC  
TAGAAATAATTTGGTACAATTACTATATCATTCTTTACTTCTTTAATT

>M6-PGSC0003DMG401019681-(rev)M6LRR-RLP\_372

ACATGTTTACCTCTCTCACAACAAGTTTCCGGTGAATTTCCACCAGGAATTTACCATTTGAAGCGACTCA  
GGCGACTTGATTTGTCGTTAATGAGTTCTCCGGTGAGATTCCGGTGAA

>M6-PGSC0003DMG401019681-(rev)M6LRR-RLP\_434

AGCGACTCAGGCGACTTGATTTGTCGTTAATGAGTTCTCCGGTGAGATTCCGGTGAAGGAGTTGAATC  
AATTGCCGCATTTGATCACTCTGCGTCTCGAGTTAATTCTCTTAGCGGAT

>M6-PGSC0003DMG401019681-(rev)M6LRR-RLP\_496

TTGAATCAATTGCCGCATTTGATCACTCTGCGTCTCGAGTTAATTCTCTTAGCGGATCACTTGGTGCTGA  
TGAAAAAAGAGCTGTTGCTTCAGTTAAGGAATTCAATGTTTCTGGGAAT

>M6-PGSC0003DMG401019681-(rev)M6LRR-RLP\_558

TGGTGCTGATGAAAAAGAGCTGTTGCTTCAGTTAAGGAATTCAATGTTTCTGGGAATAACTTTTCCGGC  
AAAATCCCAAATTGGTTATCAAAATTTCCAGTGGCAGCTTTTGCAGGTAA

>M6-PGSC0003DMG401019681-(rev)M6LRR-RLP\_62

TCTCTCTTTCATCTCCGTCTTCTTCCACCGTATCTCATTGCGACGATTTCTCAGCTCTTTTAGCCTTCAA  
ATCCCGAGCTGATACGTCAATTTTCTTACTTCATGGTCTAGAAATG

>M6-PGSC0003DMG401019681-(rev)M6LRR-RLP\_620

TTTCCGGCAAATCCCAAATTGGTTATCAAAATTTCCAGTGGCAGCTTTTGCAGGTAAAGTGCGGGAAAT  
GAGTGGATTGGATCAAATTTGAACGGATCAAACGGATAAAGTTCATAAA

>M6-PGSC0003DMG401019681-(rev)M6LRR-RLP\_682

CGGGAAATGAGTGGATTGGATCAAATTTGAACGGATCAAACGGATAAAGTTCATAAATGGCCATTTTT  
TAGTTCGTGTAATTGAGAATTAACCATGGTCATAGAATATTGTCGTGGAGT

>M6-PGSC0003DMG401019681-(rev)M6LRR-RLP\_744

CATTTTTTAGTTCGTGTAATTGAGAATTAACCATGGTCATAGAATATTGTCGTGGAGTTTCACTTGTGAAA  
TTTGAAACGTTACCACAATGACTATTTTCTCAATTACAAGATTGAAAAA

>M6-PGSC0003DMG401019681-(rev)M6LRR-RLP\_806

CTTGTGAAATTTGAAACGTTACCACAATGACTATTTTCTCAATTACAAGATTGAAAAATGGCTAGGTCGA  
AACAGGTCAAATTAATAAACAGGTCTTGATTAACTGTTCAAATTTGTT

>M6-PGSC0003DMG401019681-(rev)M6LRR-RLP\_868

TAGGTCGAAACAGGTCAAATTAATAAACAGGTCTTGATTAACTGTTCAAATTTGTTCCGGTCAAACG  
AGTGAAATATCAGGGAATTTGCACAATTGGCCTTAAAAGGTCACTATTTA

>M6-PGSC0003DMG401019681-(rev)M6LRR-RLP\_930

TCAAACGAGTGAAATATCAGGGAATTTGCACAATTGGCCTTAAAAGGTCACTATTTAGATTTTATCCCC  
CCCTATGCTAGTGAGCTAAAATTTGCATTCAACTTCTTCTGAATGCGAAT

>M6-PGSC0003DMG401019681-(rev)M6LRR-RLP\_992

TTATCCCCCCTATGCTAGTGAGCTAAAATTTGCATTCAACTTCTTCTGAATGCGAATTTTAGCTGACTAA  
GCTAACGATTACAAAATTTACAAGAAATGATGATAATTCTATGTTGAAA

>M6-PGSC0003DMG401020789-(rev)M6LRR-RLP\_1008

GAAGTTGGGGAATGGAAGATTTGGGTGAAGTACATAACTTGTACAGATCTCTATCAGTTGTAGAGTTGC  
AAAATGTGGTTGATAGTAGGGAAGCTGTGAAGGCAAAGATGAGGGAGAAGA

>M6-PGSC0003DMG401020789-(rev)M6LRR-RLP\_1134

TTGACAAGTTATCTTTGGAGTGGAGTGAAAGTAGCAGTGCCGACAATTCACAACTGAAAGAGACATTC  
TTGATGAGCTACGCCACATAAAAACATAAAAAGAACTCCAAATCATCGGAT

>M6-PGSC0003DMG401020789-(rev)M6LRR-RLP\_1197

ACATTCTTGATGAGCTACGCCACATAAAAACATAAAAAGAACTCCAAATCATCGGATATAGAGGGACAA  
AATTTCAAATTGGCTAGCTGATCCTTTGTTTCTTAAGCTAGTACAGGTGT

>M6-PGSC0003DMG401020789-(rev)M6LRR-RLP\_126

GTATTTTGAGAAGTGAAATATGGGAGCTGCCACACGATGACATATTACCAGCGTTGATGTTGAGCTACA  
ATGATCTTCCTGCACATTTAAAGCGATGTTTTTCTATTGTGCAATATTC

>M6-PGSC0003DMG401020789-(rev)M6LRR-RLP\_1260

GGACAAAATTTCAAATTGGCTAGCTGATCCTTTGTTTCTTAAGCTAGTACAGGTGTCTCTTAGAACTGC  
AAGAACTGTTATTCTTGCCAGCACTAGGAGAACTCCCTTTTTTGAAAA

>M6-PGSC0003DMG401020789-(rev)M6LRR-RLP\_1323

GAAACTGCAAGAAGTGTATTCCCTTGCCAGCACTAGGAGAACTCCCTTTTTTGAAAATCCTTTCCATTAAA  
GGGATGCATGGAATAACAGAGGTGACGGAAGAATTCTATGGCAGTTTGT

>M6-PGSC0003DMG401020789-(rev)M6LRR-RLP\_1449

AAAAGCCTTTTAACTGTCTTGAGGAACTTAGATTTCAAGATATGCCAGAGTGGAAGCAATGGCACGTAC  
TAGGAAGTGGAGAGTTCCCTATACTTGAGGAGCTTTTAATTATAAATTGCC

>M6-PGSC0003DMG401020789-(rev)M6LRR-RLP\_1512

ACGTACTAGGAAGTGGAGAGTTCCCTATACTTGAGGAGCTTTTAATTATAAATTGCCCTGAACTCAGTTT  
GGAGACAGTACCCATCCAACCTTTCAAGTTTAAAAAGTTTTGAAGTAAATG

>M6-PGSC0003DMG401020789-(rev)M6LRR-RLP\_1575

TCAGTTTGGAGACAGTACCCATCCAACCTTTCAAGTTTAAAAAGTTTTGAAGTAAATGGTTCTCCCACGGT

TGGAGTTGTTTTGAGGGAATTAAGCAGATTGAGAATTTACACATTGGTG

>M6-PGSC0003DMG401020789-(rev)M6LRR-RLP\_1638

CCACGGTTGGAGTTGTTTTGAGGGAATTAAGCAGATTGAGAATTTACACATTGGTGATTGTAACCTCTCT  
TGCCTTCTTTCTTTTAGCATACTGCCACTACCTTGAAGAGAATAATGA

>M6-PGSC0003DMG401020789-(rev)M6LRR-RLP\_1701

ACTCTCTTGCCTTCTTTCTTTTAGCATACTGCCACTACCTTGAAGAGAATAATGATATCTCGTTGCCAGA  
AATTGAAATTGGATCCGCCAGTTGGTGAGATGAGTATGTTTCTCGAGT

>M6-PGSC0003DMG401020789-(rev)M6LRR-RLP\_1764

GTTGCCAGAAATTGAAATTGGATCCGCCAGTTGGTGAGATGAGTATGTTTCTCGAGTATTTGAGTCTGG  
AAAAATGTGATTGTATAGATGTTATATCACCTGAGTTACTCCCAAGAGCAC

>M6-PGSC0003DMG401020789-(rev)M6LRR-RLP\_1827

GTCTGGAAAAATGTGATTGTATAGATGTTATATCACCTGAGTTACTCCCAAGAGCACGCAAATTGTGGGT  
AGAGGATTGCCACAACCTTACTAGGTTTTGATTCTACTGCCACTGAAA

>M6-PGSC0003DMG401020789-(rev)M6LRR-RLP\_189

GCTACAATGATCTTCTGCACATTTAAAGCGATGTTTTCTATTGTGCAATATTTCTAAAGATTATCCAT  
TTAGGAAAGAGCAAGTTATTCATCTGTGGATTGCCAATGGTCTCGTAC

>M6-PGSC0003DMG401020789-(rev)M6LRR-RLP\_1890

TGTGGGTAGAGGATTGCCACAACCTTACTAGGTTTTGATTCTACTGCCACTGAAAGGCTCGATATTTTC  
GAATTGTGAGAATCTTGAATACTTTTCGGTGGCATGTGGGGGGATCCAGA

>M6-PGSC0003DMG401020789-(rev)M6LRR-RLP\_1953

ATATTTTGAATTGTGAGAATCTTGAATACTTTTCGGTGGCATGTGGGGGGATCCAGATGACGTCACTGA  
ATATTTATTCGTGTAAGAAGCTGAAGTGGCTGCCAGAACGTATGCAGGAAC

>M6-PGSC0003DMG401020789-(rev)M6LRR-RLP\_2079

CATCTCTTAAGGAACTGCGACTGATTGAATGTCCAGAAATAGAGTCCTTTCTGAAGGAGGATTGCCCTT  
CAATTTACAAGCCCTCAGATCAATTATTGCAAGAACTGGTGAATGGCC

>M6-PGSC0003DMG401020789-(rev)M6LRR-RLP\_2205

AGTGGTGTTTACAGAGACTCCCCTGTCTCACAGAGTTAAGCATCTCACATGACGGCAGTGACGAAGAGA  
TTGTTGGTGGTGAGAATTGGGAGTTGCCTTCTCTATTCAAAGACTTGGCA

>M6-PGSC0003DMG401020789-(rev)M6LRR-RLP\_2268



AAGAGATTGTTGGTGGTGAGAATTGGGAGTTGCCTTCCTCTATTCAAAGACTTGGCATATACAATCTGAA  
AACATTAAGCAGCCAACATCTCAAAGCCTCACCTCTCTCAATATTTAT

>M6-PGSC0003DMG401020789-(rev)M6LRR-RLP\_252

ATTATCCATTTAGGAAAGAGCAAGTTATTCATCTGTGGATTGCCAATGGTCTCGTACCAAAGGAAGATG  
AAATAATTCAAGATTCAGGAAACCAATACTTTCTCGAGTTGAGTTCAAGAT

>M6-PGSC0003DMG401020789-(rev)M6LRR-RLP\_315

AAGATGAAATAATTCAAGATTCAGGAAACCAATACTTTCTCGAGTTGAGTTCAAGATCATTATTCGAAAG  
GGTCCCAAATCCTTCTAAAAGGAACATAGAGGAATCATTCTTAATGCATG

>M6-PGSC0003DMG401020789-(rev)M6LRR-RLP\_378

TCGAAAGGGTCCCAAATCCTTCTAAAAGGAACATAGAGGAATCATTCTTAATGCATGACCTTGTCATGA  
TTTAGCCCAAATTACATCTTCAAACCTTTGTATCAGGTTGGAAGAGAGCA

>M6-PGSC0003DMG401020789-(rev)M6LRR-RLP\_441

TCAATGATTTAGCCCAAATTACATCTTCAAACCTTTGTATCAGGTTGGAAGAGAGCAAAGGATCTCATAT  
GTTGGAAAAAAGTCTACACTTATCATATTCAATGGGATATGGTGGTGAGT

>M6-PGSC0003DMG401020789-(rev)M6LRR-RLP\_567

AATTGACACCCCTCTACAAATTGGAGCAGCTGAGGACATTGCTCCGACATGTATTAGTAGTTTTGCCAT  
TTTTCACTGTCTAAGCAAGAGGGTGTTCATAACATACTGCCAAGACTAA

>M6-PGSC0003DMG401020789-(rev)M6LRR-RLP\_630

TTGCCATTTTTCACTGTCTAAGCAAGAGGGTGTTCATAACATACTGCCAAGACTAAGATCCTTGAGGGT  
ACTGTCATTGTCTCATTACAAGATTAAGGAGTTGCCAAATGACTTGTTTA

>M6-PGSC0003DMG401020789-(rev)M6LRR-RLP\_693

TGAGGGTACTGTCATTGTCTCATTACAAGATTAAGGAGTTGCCAAATGACTTGTTTATCAAATTAAGCT  
CCTCAGATTTTTGGACCTTTCTGAGACATGGATTAGAAAGTTGCCAGATT

>M6-PGSC0003DMG401020789-(rev)M6LRR-RLP\_819

GTGCATTGTATAACTTAGAGACACTTCTCTTGTCATCTTGTAATTATCTTAAGGAGCTACCGCTGCAGATG  
GAGAAGTTGATTAACCTTGCATCTTGACATAAGCAACACTCGTGTCT

>M6-PGSC0003DMG401020789-(rev)M6LRR-RLP\_945

TGCCGTTACATCTGAGCAAGTTGAAAAGCCTCCAAGTGTTAGTGGGAGCCAAATTTCTTCTAGGAAGTT  
GGGGAATGGAAGATTTGGGTGAAGTACATAACTTGTACAGATCTCTATCAG

>M6-PGSC0003DMG401021043M6LRR-RLP\_1159

TTTTGCGCTTCAAGAGAGAAGAAAGACAGTGGGAACATGTGAGAGATAGTGAGATTTGGAAATTGCCT  
CAAGAAGAAAGCTCTATTCTGCCTGCCCTGAGACTTAGTTACCATCATCTTC

>M6-PGSC0003DMG401021043M6LRR-RLP\_122

TAAAAACAGCTTTATATCATCAAATTCATGTGTGTTTTGGGATTTTGTCTAATCTAAATGTTCTTCTCAA  
GTCTAAGTAGATAAGTGGATCCAGATTTGGATTTATTAATTGGGTTCA

>M6-PGSC0003DMG401021043M6LRR-RLP\_1281

TTTGATTTGAGACAATGCTTTGCATATTGTGCAGTATCCCAAAGGATACCGAAATGGAAAAGCAAATC  
TAATCTCTCTCTGGATGGCACACGGTTTTCTTTTATCAAAGGAAACTTG

>M6-PGSC0003DMG401021043M6LRR-RLP\_1342

AGCAAATCTAATCTCTCTCTGGATGGCACACGGTTTTCTTTTATCAAAGGAAACTTGGAGCTAGAGGA  
TGTAGGAAATGAAGTATGGAATGAATTATACTTGAGGTCTTTCTTCCAAG

>M6-PGSC0003DMG401021043M6LRR-RLP\_1464

ATTGAAGTTAAATCTGGTAAACTTATTTCAAGATGCATGATCTCATCCATGATCTGGCTACATCTCTGTT  
TTCGGCAAGCGCATCAAGCAGCAATATCCGTGAAATAAATGTAAAATAT

>M6-PGSC0003DMG401021043M6LRR-RLP\_1525

CATCTCTGTTTTCGGCAAGCGCATCAAGCAGCAATATCCGTGAAATAAATGTAAAATATTTCCACATAT  
GATGTCGATTGGTTTCGCAAAAGTGGTGTCTTCTTACTCTCCTTCTCACT

>M6-PGSC0003DMG401021043M6LRR-RLP\_1708

CTTCCGTTGGAGATCTGGTACATTTAAGATACTTGAACCTCTCTATCAATGACATGCGCAGTCTACCAA  
GCAGTTATGCAAGCTTCAAATCTGCAGACTCTTGATCTACATGGTTGTC

>M6-PGSC0003DMG401021043M6LRR-RLP\_1769

TCTACCAAAGCAGTTATGCAAGCTTCAAATCTGCAGACTCTTGATCTACATGGTTGTCGTTCACTTGGTT  
GTTTGCCAAAACAAACAAGTAAACTTGGTAGTCTCCGAAATCTTTTACT

>M6-PGSC0003DMG401021043M6LRR-RLP\_183

GTTCTTCTCAAGTCTAAGTAGATAAGTGGATCCAGATTTGGATTTATTAATTGGGTTCAAATCTATTATC  
TAAATCTGTTTAGTGAAGTTTTTAACATATATATAACCTCAGATAAA

>M6-PGSC0003DMG401021043M6LRR-RLP\_1830

TCACTTGGTTGTTTGCCAAAACAAACAAGTAAACTTGGTAGTCTCCGAAATCTTTTACTTGATGGCTGTCA

ATTGGCTTGTATGTCACCAAGGATAGGATCATTGACATGCCTTAAGACT

>M6-PGSC0003DMG401021043M6LRR-RLP\_1891

ATGGCTGTCAATTGGCTTGTATGTCACCAAGGATAGGATCATTGACATGCCTTAAGACTCTAGATTACTT

TGCAGTGGGAGGGAAGAAAAGTTGTCAACTTGGTGAATTACGAAACCTGA

>M6-PGSC0003DMG401021043M6LRR-RLP\_1952

AGATTACTTTGCAGTGGGAGGGAAGAAAAGTTGTCAACTTGGTGAATTACGAAACCTGAATCTCTCTGG

CTCAATTGAAATCACTCATCTTGAGAGAGTGAAGAATGATATAGATGCAAA

>M6-PGSC0003DMG401021043M6LRR-RLP\_2013

CTCTCTGGCTCAATTGAAATCACTCATCTTGAGAGAGTGAAGAATGATATAGATGCAAAAGAAGCCAAT

TTATCTGCAAAAGAAAATCTGCATTCTTTAAGCATGAAATGGGATAACGAT

>M6-PGSC0003DMG401021043M6LRR-RLP\_2074

AAGCCAATTTATCTGCAAAAGAAAATCTGCATTCTTTAAGCATGAAATGGGATAACGATGAACGTGCAC

ATAGATATGAATCAGAAGAAGCTGAAGTGCTTGAAGCCCTGAAACCACT

>M6-PGSC0003DMG401021043M6LRR-RLP\_2196

AATCTGACTTGTTTAAACAATCAGTGGCTTCAGAGGAATCCGTTTCCCAGACTGGATGAATCACTCTATTTT

GAAAATGTTGTCTCTATTGTAATCTTCCGTTGCAAAAAGTCTCATGC

>M6-PGSC0003DMG401021043M6LRR-RLP\_2257

ACTCTATTTTGAAAATGTTGTCTCTATTGTAATCTTCCGTTGCAAAAAGTCTCATGCTTACCACCCTTTG

GAGAGCTGCCTAGTCTAAAAGTCTAGAGTTAGAGAGTGGGTCTTCAG

>M6-PGSC0003DMG401021043M6LRR-RLP\_2318

ACCACCCTTTGGAGAGCTGCCTAGTCTAAAAGTCTAGAGTTAGAGAGTGGGTCTTCAGAAGTGAAGTA

TGTTGATTCTGGATTCCCACAAGAAGAAGGTTTCCATCCCTGAGAAAAGT

>M6-PGSC0003DMG401021043M6LRR-RLP\_244

ATCTATTATCTAAATCTGTTTAGTGAAGTTTTTAACATATATATATAACCTCAGATAAATCCATAGCTTACT

CATAGGATTAGGATAGCCCCCAAGTCTAAATGACAGGATAAAGCCAG

>M6-PGSC0003DMG401021043M6LRR-RLP\_2440

GTATAGAGAGATTCGTAATCTGAAAGGATTGCTGAAAAGGAAGGAGAAGAGCAATTCCTTGTGCTT

GAAGAGATGTCGATTGAGTGGTGCCCTATGTTTGTTATTCCGACCCTTTCTT

>M6-PGSC0003DMG401021043M6LRR-RLP\_2562

GTGAAGAAATTGGTAGCTTATGGGGACAAGTCAGATGCAATAGGTTTCAGTTCCATATCTAATCTCAGG  
GCTCTTACTCCCTCCAGATTAGACATAACGAAGAAGCTACTTCACTCCCA

>M6-PGSC0003DMG401021043M6LRR-RLP\_2623

ATCTCAGGGCTCTTACTTCCCTCCAGATTAGACATAACGAAGAAGCTACTTCACTCCCAGAAGAGATGTT  
CAAAAGCCTTGCAAATCTCAAATACTTGAAAATCTCTTCCTTTAAGAATC

>M6-PGSC0003DMG401021043M6LRR-RLP\_2684

AGAGATGTTCAAAAGCCTTGCAAATCTCAAATACTTGAAAATCTCTTCCTTTAAGAATCTCAAAGAGCTG  
CCTACCAGCCTGGCTAGTCTCAATGCTTTGAAGCATCTGGAAATTGGATA

>M6-PGSC0003DMG401021043M6LRR-RLP\_2806

GTTATGCACTAGAGAGTCTCCCCGAGGAAGGGGTGAAAGGTTTAACTTCACTTACGGAATTATTTCTTGA  
TGATTGTGAGATGCTACAATGTTTACCGGAGGGATTGCAGCATCTAACCT

>M6-PGSC0003DMG401021043M6LRR-RLP\_2867

ATTTCTTGATGATTGTGAGATGCTACAATGTTTACCGGAGGGATTGCAGCATCTAACCTCCCTCACAAT  
TTATCAGTTAGGGATTGTCCAACACTGGCCAAGCGATGTGAGAAGGGAAT

>M6-PGSC0003DMG401021043M6LRR-RLP\_2989

GACAAGACTGGTACAAAATTGCTAACATTCCTGATGTGTTTATCCGTTAAGTCTTATTCCTAATTGGATGT  
AATTTTCTGATTTTCTTTTGAAACAAATCAACTATTTGTAACATACTT

>M6-PGSC0003DMG401021043M6LRR-RLP\_3045

TTCCTAATTGGATGTAATTTTCTGATTTTCTTTTGAAACAAATCAACTATTTGTAACATACTTGATTTTTC  
TTGGGTCTGTAACAATAAATATTTGAATTTTTTTCATATTAAGATTGAG

>M6-PGSC0003DMG401021043M6LRR-RLP\_305

CATAGCTTACTCATAGGATTAGGATAGGCCCCCAAGTCTAAATGACAGGATAAAGCCAGAGTTGTTTTA  
GATCTTATAATGTGAATTCAAAAACGTGCATTTTTTTAATTTGAAATATGT

>M6-PGSC0003DMG401021043M6LRR-RLP\_366

TTGTTTTAGATCTTATAATGTGAATTCAAAAACGTGCATTTTTTTAATTTGAAATATGTCTGCTGCTTCTCA  
AGCTTATCATTGTCTCGTTATTGTGCAAAATCTTCTTCGTTTTTTTG

>M6-PGSC0003DMG401021043M6LRR-RLP\_427

GCTGCTTCTCAAGCTTATCATTGTCTCGTTATTGTGCAAAATCTTCTTCGTTTTTTGCTGACTCCTACCG  
AGCTTGGACCAGGTTTTGTTTTAAATGAACCACAAGTTTATGGAAGGG

>M6-PGSC0003DMG401021043M6LRR-RLP\_488

GACTCCTACCGAGCTTGGACCAGGTTTTGTTTTAAATGAACCACAAGTTTATGGAAGGGACAAAGAAAA  
GGATGAGATTGTGAAAATCCTGATAACAATGTTAGCGATGCCCAAATACT

>M6-PGSC0003DMG401021043M6LRR-RLP\_549

AAAGAAAAGGATGAGATTGTGAAAATCCTGATAACAATGTTAGCGATGCCCAAATACTTTCAGTCCTC  
CCAATACTTGGTATGGGGGACTAGGAAAGACAACACTTGCCCAAATGGTC

>M6-PGSC0003DMG401021043M6LRR-RLP\_61

AAGGACTATAGAGAGACAAGTTGCTACACGCCAAACAGGTGCTCATCTTTAAATATTTTTCTAAAAACA  
GCTTTATATCATCAAATTCATGTGTGTTTTGGGATTTTGTCTAATCTAA

>M6-PGSC0003DMG401021043M6LRR-RLP\_671

CAATGATCAGAGAGTAATTGAGCATTTCGGTCCCAAATATGGATTTGTGTCTCAGAAGATTTAATGAG  
AAGAGGTTGATAAAGGAAATTGTAGAATCTATTGAAGAAAAGTCACTTGG

>M6-PGSC0003DMG401021043M6LRR-RLP\_732

TTTAATGAGAAGAGGTTGATAAAGGAAATTGTAGAATCTATTGAAGAAAAGTCACTTGGTGACATGGAC  
TTGGCTCCACTTCAAAGAAGCTTCAGGACTTGCTGAATGGAAAAAATAT

>M6-PGSC0003DMG401021043M6LRR-RLP\_854

GCTCATCTTAGATGATGTTTGGAAATGAAGATCAAGATAAGTGGGCTAGGTTAAGACAAGTCTTGAAGGT  
TGGAGCAAGTGGTGCTTTTGTCTAACCCTACTCGTCCTAAAAGGTTGG

>M6-PGSC0003DMG401021043M6LRR-RLP\_915

TTGAAGGTTGGAGCAAGTGGTGCTTTTGTCTAACCCTACTCGTCCTAAAAGGTTGGATCAATTATGG  
GAACATTGCAACCATATGAATTGTCAAATTTGTCTCAAGAAGATTGTTGG

>M6-PGSC0003DMG401021043M6LRR-RLP\_976

CAATTATGGGAACATTGCAACCATATGAATTGTCAAATTTGTCTCAAGAAGATTGTTGGTTGTTGTTT  
GCAACGTGCATTTGGGTACCAAGAAGAAATAAATCTTAATCTTGTGGCTA

>M6-PGSC0003DMG401021049M6LRR-RLP\_0

ATGTTTACAATAGATCCTAAAGTTTCTGATTATTGTATCGGCATAAGAGGCCAATGGATTCAGTCATATC  
AAAAACTCTTTCATGGACAAGAGCACAGATTGTTGCTCTTGGGATGGAG

>M6-PGSC0003DMG401021049M6LRR-RLP\_1037

CAATCACTCAGCTTGTTCATCAAACCACTTAAACGGGACTATACCATCCTGGATATTCTCCCTCCCTCACT

ATTTGATTTAGACTTGAGTGATAACCATTTTCAGTGGAAAGATTCAGGAG

>M6-PGSC0003DMG401021049M6LRR-RLP\_1098

TCCCTTCACTATTTGATTTAGACTTGAGTGATAACCATTTTCAGTGGAAAGATTCAGGAGTTCAAATCCCAA  
ACATTGTTTTCCATTTCTGTAAAACAAAATCAGCTGGAAGGTCCTATTC

>M6-PGSC0003DMG401021049M6LRR-RLP\_1159

CAAATCCCAAACATTGTTTTCCATTTCTGTAAAACAAAATCAGCTGGAAGGTCCTATTCCAAAGTCATTCC  
TAAACCAGCAGGGACTATATTATCTTATCCTTTCTCAAATAATCTCAG

>M6-PGSC0003DMG401021049M6LRR-RLP\_122

CATTGTGATGAGATGACAGGACAAGTGATTGAGCTCAACCTCACTTGCAGCAAACCTCAAGGCAAGTTT  
CATTTCAATAGTAGCCTCTTTCAACTCTCCAATCTCAAAGGCTTGATTTG

>M6-PGSC0003DMG401021049M6LRR-RLP\_1220

AAGTCATTCTAAACCAGCAGGGACTATATTATCTTATCCTTTCTCAAATAATCTCAGTGGACATATTGA  
TTCAGCCATCTGCGATCTGAATTTGGGTGTGCTAAATTTGGGAAGTTGT

>M6-PGSC0003DMG401021049M6LRR-RLP\_1281

GACATATTGATTCAGCCATCTGCGATCTGAATTTGGGTGTGCTAAATTTGGGAAGTTGTAATTTGGACGG  
AACAAATACCACAATGTTTGGGTGAGATGAGTGAACCTTTGGGTTTTGGATT

>M6-PGSC0003DMG401021049M6LRR-RLP\_1342

TTTGGACGGAACAATACCACAATGTTTGGGTGAGATGAGTGAACCTTTGGGTTTTGGATTTAAGCAACAA  
CAGTCTTAGTGGGACAATTAATACTTTTAGTTATGGGAACCAACTCAG

>M6-PGSC0003DMG401021049M6LRR-RLP\_1403

AGCAACAACAGTCTTAGTGGGACAATTAATACTTTTAGTTATGGGAACCAACTCAGAGTCATTAAAA  
TGGATGGGAATAAGCTAGAGGGGAAAGTCCCACGATCTTTGATCAATTGC

>M6-PGSC0003DMG401021049M6LRR-RLP\_1464

TCATTAATGGATGGGAATAAGCTAGAGGGGAAAGTCCCACGATCTTTGATCAATTGCAAATATTTGC  
AACTCTTTGATTTAGGTAATAATGAGTTGAATGACACATTTCCAAAATGGT

>M6-PGSC0003DMG401021049M6LRR-RLP\_1525

ATATTTGCAACTCTTTGATTTAGGTAATAATGAGTTGAATGACACATTTCCAAAATGGTTGGGAGCCCTA  
CCTGATTTGCAGATTTTAACTTGAGATCAAATAAGCTGCATGGCCCTAT

>M6-PGSC0003DMG401021049M6LRR-RLP\_1586

GGAGCCCTACCTGATTTGCAGATTTTAACTTGAGATCAAATAAGCTGCATGGCCCTATAAATGATTCAA  
GGACTGAGAACTTGTTTGCTAAAATTCTAGTAATAGATCTCTCATCCAAT

>M6-PGSC0003DMG401021049M6LRR-RLP\_1708

ATTCAGTGGAGATTTACCTGTGAGCCTTTTTGAGAATTTTCAAGCCATGAAAATGATTGGTGAGAATAGT  
GGAACCCAGAGTATGTAGCAGAAACATATTCTACTTTATACACAAATTC

>M6-PGSC0003DMG401021049M6LRR-RLP\_183

GCAAGTTTCATTTCAATAGTAGCCTCTTTCAACTCTCCAATCTCAAAGGCTTGATTTGTCTTATAATGATT  
TTTCTGGGTCGCTCATTTACCTAAATTTGGTGAGTTTTCTAGTTTGA

>M6-PGSC0003DMG401021049M6LRR-RLP\_1891

TATCGATCTCTCAATGAATAGATTTGAAGGTTCTATCCCAAGTATTATTGGAGATCTAATTGGACTTCGTA  
CGTTGAACTTGCTCATAATAACTTGAAAGGTCATATACCAGCATCAAT

>M6-PGSC0003DMG401021049M6LRR-RLP\_1952

GGACTTCGTACGTTGAACTTGCTCATAATAACTTGAAAGGTCATATACCAGCATCAATGCAACATTTATT  
TGTACTTGAATCATTGGATCTCTCATCCAACAAAATCGGCGGAGAAATT

>M6-PGSC0003DMG401021049M6LRR-RLP\_2074

ACAACAACCTGCATCCCTCACATCACTTGAAGTCCTAAATCTCTCTCACAATCATCTTGTTGGATGCATTCC  
GAAAGGAAAACAATTTGATACGTTTGAGAATAGTTCATACCAAGGGAA

>M6-PGSC0003DMG401021049M6LRR-RLP\_2257

AACAACCTCATTGGGCTAGATCAAGAAGAAGAAGATGGAGATTCATCAATGATAAGTTGGCAGG  
CGTTCTCATGGGTTACGGTTGTGGACTTGTTATTGGACTGTCCGTAATATA

>M6-PGSC0003DMG401021049M6LRR-RLP\_2318

TGGCAGGCGGTTCTCATGGGTTACGGTTGTGGACTTGTTATTGGACTGTCCGTAATATACATAATGTTGT  
CAATTCGATATCCAGTGTGGTTTTCGAGGATGGATGTAGAATTGGAACAC

>M6-PGSC0003DMG401021049M6LRR-RLP\_244

TTATAATGATTTTTCTGGGTCGCTCATTTACCTAAATTTGGTGAGTTTTCTAGTTTGACGCATCTTGATT  
GCTTCTTACAAGTTTTACAGGTCTAATCCCAGCAGAAATCTCTCACCT

>M6-PGSC0003DMG401021049M6LRR-RLP\_2440

AATTCTTACGAGAATGAAGAAATACAAAAAGGATATGTAACCTCCAGGTATTAACCTTGATCTTTTTCT  
TCAAAGATTAATTGTTATATAGCAATGAATTTCTATTTCTTCATCCT

>M6-PGSC0003DMG401021049M6LRR-RLP\_2494

ACTTGATCTTTTCTTCAAAGATTAATTGTTATATAGCAATGAATTTCTATTTCTTCATCCTTTAAGAT  
CTTGAGTTTTAGTCTTCTTTTTTAAAAATTGCAGGATTCAAGCCTAA

>M6-PGSC0003DMG401021049M6LRR-RLP\_305

CATCTTGATTGCTTCTTACAAGTTTTACAGGTCTAATCCCAGCAGAAATCTCTCACCTTTCTAAATTACGG  
ATTCTTCGTATCCGGAGTGATTATGGGGTTAGATTCCGGACCTAACAAT

>M6-PGSC0003DMG401021049M6LRR-RLP\_366

CTAAATTACGGATTCTTCGTATCCGGAGTGATTATGGGGTTAGATTCCGGACCTAACAATTTGAATTGTT  
CCTGAAAACTTAACCCAATTAAGAGAGCTCGACCTTAACCTTTGTGAACA

>M6-PGSC0003DMG401021049M6LRR-RLP\_488

TCTTCCACCTTCTCTAAATTTCTTCTTATTTAACAACTCTATGGCTTCATACACACAGTTACGTGGG  
ATATTGCCCAAATAGTTTTCCACCTTCCAACCTAGAATCTCTGGAT

>M6-PGSC0003DMG401021049M6LRR-RLP\_549

AGTTACGTGGGATATTGCCCAAATAGTTTTCCACCTTCCAACCTAGAATCTCTGGATTAAACAAACAAT  
CCCCAGCTCACAGTTAGATTTCCACGACCAAATGGAATACCAGTGCAT

>M6-PGSC0003DMG401021049M6LRR-RLP\_61

AGTCATATCAAAAACTCTTTCATGGACAAGAGCACAGATTGTTGCTCTTGGGATGGAGTTCATTGTGAT  
GAGATGACAGGACAAGTGATTGAGCTCAACCTCACTTGCAGCAAACCTCA

>M6-PGSC0003DMG401021049M6LRR-RLP\_610

AACAAACAATCCCCAGCTCACAGTTAGATTTCCACGACCAAATGGAATACCAGTGCATCACTCATGGAG  
TTATATCTCAGTGGTGTGAATTTCACTGGTAAGATACCTGAATCATTAG

>M6-PGSC0003DMG401021049M6LRR-RLP\_671

CTCATGGAGTTATATCTCAGTGGTGTGAATTTCACTGGTAAGATACCTGAATCATTAGCCATCTAACTC  
ATTGCTTGACTTAGTGATGAGTTCTTCCAATCTCTCGGGGCCATTCTT

>M6-PGSC0003DMG401021049M6LRR-RLP\_732

ATCTAACTTCATTGCTTGACTTAGTGATGAGTTCTTCCAATCTCTCGGGGCCATTCTTAATCCTTTATGGA  
ATCTCACCAACATAGAGGTTTTGGACCTTCATAATAATCATCTTGAAG

>M6-PGSC0003DMG401021049M6LRR-RLP\_793

TCCTTTATGGAATCTCACCAACATAGAGGTTTTGGACCTTCATAATAATCATCTTGAAGGACCAATTTCTC



CGTTCTTGAGATTTGGAAAGCTCAGGGAGTTCTCACTTAGAAATAACAA

>M6-PGSC0003DMG401021049M6LRR-RLP\_915

TTGATCTCCAACCTTGAGTACTTACCCTTTAACAGAAGCTGGACACAACCTGAAACGTTAGACTTTTCGTCC  
AATTACCTAACTGGTCCAATTCCATCGGGTGTTAGTGGACTGCAAACC

>M6-PGSC0003DMG401021049M6LRR-RLP\_976

CTTTTCGTCCAATTACCTAACTGGTCCAATTCCATCGGGTGTTAGTGGACTGCAAACCTACAATCACTCA  
GCTTGTCACTAAACCACTTAAACGGGACTATAACCATCCTGGATATTCTC

>M6-PGSC0003DMG401021514M6LRR-RLK\_1674

GTTGCTTTTGCTTTATCTTACATGCACCAGGATTGCTCACCACCAATTGTTTCATCGAGACATATCAAGCAG  
TAATGTTTTGGTTGATTCTGAGTATGAAGCTCGTGTTCAGATTTTGGC

>M6-PGSC0003DMG401022197M6LRR-RLP\_0

TGATAATATAAGATTGTTTCATAAACAAAAAAAAAATGAATATGAACTTGTCACTTCTGTAGTTATTTTTC  
TTTGCTTTGCTTCTCCTCACTATCAGTAAGATGCAATCCAAAAGACAA

>M6-PGSC0003DMG401022197M6LRR-RLP\_1024

TGGAGGTCGGGGATTTGGATAGCCGAATATTGTGGGAGACGCATGAAGCTGGCCTCCCCTATATATTCC  
TAATCATATTTGGGAATCACGTATTTTCAGTGTGTATTTGTATTTGTTGCT

>M6-PGSC0003DMG401022197M6LRR-RLP\_128

TTTTACAGATAAAGGAAGATTTGGGCAATCCTTACCATTTAGCTTCATGGGATCCAAACACAGATTGCTG  
TACTGGTACGTCGTAAATGTGACCGGAAAACCAACCGGATAAATGCTC

>M6-PGSC0003DMG401022197M6LRR-RLP\_192

TTGCTGTTACTGGTACGTCGTAAATGTGACCGGAAAACCAACCGGATAAATGCTCTCACTGTCTTCCAA  
GCCAATATCTCCGGTCAAATTCGGCAGCCGTCGGAGACCTTCCGTATCT

>M6-PGSC0003DMG401022197M6LRR-RLP\_256

TTCCAAGCCAATATCTCCGGTCAAATTCGGCAGCCGTCGGAGACCTTCCGTATCTCGAGACATTGCAAT  
TCCATCATATACCAATCTCACCGGAACAATTCAACCTGCAATTGCTAAG

>M6-PGSC0003DMG401022197M6LRR-RLP\_320

TGCAATTCATCATATACCAATCTCACCGGAACAATTCAACCTGCAATTGCTAAGCTCACAAATCTCAAA  
ATGTTAAGGCTCAGCTTCACTAATCTTACAGGTCCAATCCCTGAATTCC

>M6-PGSC0003DMG401022197M6LRR-RLP\_384

TCTCAAATGTTAAGGCTCAGCTTCACTAATCTTACAGGTCCAATCCCTGAATTCCTTAGTCAGCTGAAGA  
ATTTGACATTGCTCGAGTTGAATTACAATCAATTAACCGGAACAATCCC

>M6-PGSC0003DMG401022197M6LRR-RLP\_448

CTGAAGAATTTGACATTGCTCGAGTTGAATTACAATCAATTAACCGGAACAATCCCTTCTTCACTCTCTCA  
GCTTCCGAATTTGTTAGCGATTTACTTAGATCGTAACAACTCACCGGA

>M6-PGSC0003DMG401022197M6LRR-RLP\_512

TCTCTCAGCTCCGAATTTGTTAGCGATTTACTTAGATCGTAACAACTCACCGGAACAATACCGGAATC  
GTTTGGGAAATTTAAAGGACCAACATAACCAGATCTGTACCTTTCACATA

>M6-PGSC0003DMG401022197M6LRR-RLP\_576

GGAATCGTTTGGGAAATTTAAAGGACCAACATAACCAGATCTGTACCTTTCACATAACAGCTTGACCGGC  
AAAGTGCCGACATCTTTAGGTGATTTGAATTTTCCAGGCTTGATTTCTC

>M6-PGSC0003DMG401022197M6LRR-RLP\_64

ATTTTTCTTTGCTTTGCTTCTCCTTCACTATCAGTAAGATGCAATCCAAAAGACAAAAAAGTCCTTTTACAG  
ATAAAGGAAGATTTGGGCAATCCTTACCATTTAGCTTCATGGGATCCA

>M6-PGSC0003DMG401022197M6LRR-RLP\_640

ACCGGCAAAGTGCCGACATCTTTAGGTGATTTGAATTTTCCAGGCTTGATTTCTCGAGGAATAAGCTTG  
AAGGAGATGTTTCGTTTTTGTGGGAAGAATAAGACGAGTCAGATAATT

>M6-PGSC0003DMG401022197M6LRR-RLP\_704

AGCTTGAAGGAGATGTTTCGTTTTTGTGGGAAGAATAAGACGAGTCAGATAATTGATTTATCGAGGA  
ATTCATTGGAGTTTGATATTTCGAAATCGGAGTTTGCTGAGAGCTTGATAT

>M6-PGSC0003DMG401022197M6LRR-RLP\_768

GAGGAATTCATTGGAGTTTGATATTTCGAAATCGGAGTTTGCTGAGAGCTTGATATCATTGGATTTGAAT  
CATAATCGAATTTTCAGTAGCTTACCACAAGGATTGAAAGATGTACCGTT

>M6-PGSC0003DMG401022197M6LRR-RLP\_832

TTGAATCATAATCGAATTTTCAGTAGCTTACCACAAGGATTGAAAGATGTACCGTTACAGTTTTTCAATGT  
GAGTTATAATAGACTTTGTGGACAGATTCCACAAGGTGGAACGTTGCAG

>M6-PGSC0003DMG401022197M6LRR-RLP\_896

TCAATGTGAGTTATAATAGACTTTGTGGACAGATTCCACAAGGTGGAACGTTGCAGAGCTTTGATGTTTA  
CTCTTATTTGCATAACAAATGCCTCTGTGGCTCTCCCTTGCCGGACTGTA

>M6-PGSC0003DMG401022197M6LRR-RLP\_960

TGTTTACTCTTATTTGCATAACAAATGCCTCTGTGGCTCTCCCTTGCCGGACTGTAAGTAGATATGGAGGT  
CGGGGATTTGGATAGCCGAATATTGTGGGAGACGCATGAAGCTGGCCTC

>M6-PGSC0003DMG401023552-(rev)M6LRR-RLK\_0

ATGTTGAAATATCTACAAGTGGGTTACAATCCATTGAATGGCGTTCTGCCCAATTCTATTGGGAATCTTTC  
ATCTACTATTCAAACCTTTGAAATAGGAAACACACACATCAATGGCCTC

>M6-PGSC0003DMG401023552-(rev)M6LRR-RLK\_63

AATCTTTCATCTACTATTCAAACCTTTGAAATAGGAAACACACACATCAATGGCCTCATCCCCACAAGTAT  
AGGCAACATGACCGGTCTTACATCCTTAAGCCTTGGCGGAAACAACCTTG

>M6-PGSC0003DMG401023640M6LRR-RLP\_0

CTATATAATGCAGTAACATTGGCAACTACACAAATCAAGTGCATAGCAACATCATGGAGAAGCACATTTT  
CTTATTGATTCTTCTTTTTTAATTCAGTTTTCTATATCAACTGCTTTCT

>M6-PGSC0003DMG401023640M6LRR-RLP\_1260

GTCTTCATCTTCCAAACCTCTTAGAACTTCATTTGTCTGGCAATGAGCTTGAAGGGGAAATTCCTCCGCAT  
ATCACAAATGCTTCCAAGCTTGAAAGGTTGGGGCTAGCAACCAACTTCT

>M6-PGSC0003DMG401023640M6LRR-RLP\_567

GGAACAATAGCCTCACAGGTATAATCCCTCCTTCTGTTGGAAATGCCACAAAGTTGATGAACTTTAGCTT  
GTCTTATAATAGAATAAACGGCAACATTCCTAAGGAGATCGGTAATCTGA

>M6-PGSC0003DMG401023866-(rev)M6LRR-RLP\_124

AAAAAACTATATCTGACTTTGAATAGAAAAGTTTATGACTTTTTCTCTCTCATAAGTTAATGTCACATC  
AGACATTATCACAAATCCAAAAGAGTCCAATATATTTTTCTCTCTCTC

>M6-PGSC0003DMG401023866-(rev)M6LRR-RLP\_1798

AGAAAATGATCTCCCACTTCAAGTTCGTTGTGATGTTGATGTTGTTAATCAAGCTTTAACTCTACTTCAAC  
AGTGATGAGATTACAAGTATTAACAACCTTGATTTTTGTACATTTTG

>M6-PGSC0003DMG401023866-(rev)M6LRR-RLP\_1860

TACTTCAACAGTGATGAGATTACAAGTATTAACAACCTTGATTTTTGTACATTTTGATGTTTATATTAG  
AACTTTGCAAATTTAATTTAATTTTTGGATAGTTAATGTTTATGTTAA

>M6-PGSC0003DMG401023866-(rev)M6LRR-RLP\_1922

TTATATTAGAACTTTGCAAATTTAATTTAATTTTTGGATAGTTAATGTTTATGTTAAAATCTTGCAAAGTG

TAATTTACTTTTGGGAATAGTTTAAAGTTTTGTTGGGACATTGTAAATT

>M6-PGSC0003DMG401023866-(rev)M6LRR-RLP\_1984

TTGCAAAGTGTAATTTACTTTTGGGAATAGTTTAAAGTTTTGTTGGGACATTGTAAATTCAACATGTTGAAG

TAAAATTTTCATTTTGGTAAATGTAAGAAAATTTTACTTCTTGAAGTTT

>M6-PGSC0003DMG401023866-(rev)M6LRR-RLP\_2046

ATGTTGAAGTAAAATTTTCATTTTGGTAAATGTAAGAAAATTTTACTTCTTGAAGTTTATATTTGAAAATT

TTCATTTTATTTTTATTGTAAATCTTAACTACAAAAAATGAAGAAACA

>M6-PGSC0003DMG401023866-(rev)M6LRR-RLP\_2108

TTGAAAATTTTCATTTTATTTTTATTGTAAATCTTAACTACAAAAAATGAAGAAACATTCATCAAAAAA

TTTTAAAGTTAGGACAACTTTTGATCGTACATTCTTAACTTTTAAAAA

>M6-PGSC0003DMG401023866-(rev)M6LRR-RLP\_2170

TCAAAAAATTTTAAAGTTAGGACAACTTTTGATCGTACATTCTTAACTTTTAAAAATAAAATTACATTC

ACATGGAGTACTTCACAATTCTATCAGTAGTGTAAGAAAGAATATGA

>M6-PGSC0003DMG401023866-(rev)M6LRR-RLP\_2232

ATTACATTCACATGGAGTACTTCACAATTCTATCAGTAGTGTAAGAAAGAATATGATAAAGTGGTGAA

AATAAAGAATAGATTATGACAAAGTATTGAAAAAGGGTTAAAGTACTGT

>M6-PGSC0003DMG401023866-(rev)M6LRR-RLP\_2294

GTGGTGAAAATAAAGAATAGATTATGACAAAGTATTGAAAAAGGGTTAAAGTACTGTTGAGTGTTGAC

TATCAGTAAAGGAGAAAAATAGTTGTACTTTATTGCATTTTAATAACTTT

>M6-PGSC0003DMG401023866-(rev)M6LRR-RLP\_248

TTCTCCACTCTCCATTCTCCATTATTTACCCCTTAATCTTTCAATGAAGAAGAAAGACTCAAAAATGATTAA

GTTTTTGCCATTGCAGGTAAAAGTATTTTTTTTTCCATGATTTTAATT

>M6-PGSC0003DMG401023866-(rev)M6LRR-RLP\_310

AAATGATTAAGTTTTTGCCATTGCAGGTAAAAGTATTTTTTTTTCCATGATTTTAATTATAGTTTCAAAAAA

TTGATAACATAAAAAAATGTGGGAAAAGATTAATTTTTCAGTTTC

>M6-PGSC0003DMG401023866-(rev)M6LRR-RLP\_372

TTTCAAAAAATTGATAACATAAAAAAATGTGGGAAAAGATTAATTTTTCAGTTTCTACCGCCAATTT

TTTTGCCAAATTTTAAAATATTATCTAATGAACTCCATATAAGTAGAGAT

>M6-PGSC0003DMG401023866-(rev)M6LRR-RLP\_434

GCCAATTTTTTGCCAAATTTTAAAATATTATCTAATGAACTCCATATAAGTAGAGATACTTCATCTTTAAT  
TTTTCAATTCTTCCTTTTACAGTTTTTCCAATCAGTGATCTTAAAATG

>M6-PGSC0003DMG401023866-(rev)M6LRR-RLP\_496

CATCTTTAATTTTTCAATTCTTCCTTTTACAGTTTTTCCAATCAGTGATCTTAAAATGAGTGTTGAATTTTCA  
GAAGACCCAATTACCACAAAAAGGCGATTGAATCTGAACAACCGTCG

>M6-PGSC0003DMG401023866-(rev)M6LRR-RLP\_62

TGGAAAGACCCTACAATGTTCCGAAAATACCCTTATTAATAAATCTAAATTGTTAAATAAAAAAAAAAAC  
TATATCTGACTTTGAATAGAAAAGTTTATGACTTTTTCTCTCTCATAAG

>M6-PGSC0003DMG401023870-(rev)M6LRR-RLP\_1054

GATTTCAACTGGAAAACCTTATGTGGCTTGCAAGAATCATTGTAGAGCTGGAGCACAAAATAATGATGGG  
AAGGAGAAAGAAGCAGCGAAGGCAAAGGAATTACAGAAAAAGAAATAATCA

>M6-PGSC0003DMG401023870-(rev)M6LRR-RLP\_1116

TGATGGGAAGGAGAAAGAAGCAGCGAAGGCAAAGGAATTACAGAAAAAGAAATAATCAGTTATGATG  
TCACAGTGGCGAGATTGATAATGAACTATTTTATTCGGAATGGCAAGTAACTG

>M6-PGSC0003DMG401023870-(rev)M6LRR-RLP\_1178

TGATGTCACAGTGGCGAGATTGATAATGAACTATTTTATTCGGAATGGCAAGTAACTGGTGGCAATAAG  
CAACTGATAATATCGTTCAGGACTGTTTTATCTTTTAAATACGTATGTGGG

>M6-PGSC0003DMG401023870-(rev)M6LRR-RLP\_1240

CAATAAGCAACTGATAATATCGTTCAGGACTGTTTTATCTTTTAAATACGTATGTGGGATGAGTTGATCG  
TTTCTTACCTATTCTTGTTGTTGTTTCTGCACTTGTGGTGTGATGGTTTT

>M6-PGSC0003DMG401023870-(rev)M6LRR-RLP\_1302

GTTGATCGTTTCTTACCTATTCTTGTTGTTGTTTCTGCACTTGTGGTGTGATGGTTTTCTTTGAGAGTAAT  
GGCTTCGTAATCTGTATTACCTATTGAGTACACTGTACTGAACTTCTG

>M6-PGSC0003DMG401023870-(rev)M6LRR-RLP\_1364

TGAGAGTAATGGCTTCGTAATCTGTATTACCTATTGAGTACACTGTACTGAACTTCTGGAATGTGTTTCTT  
AAGTTGCATTTCTTGTAAGTTACATTTGCAGAATGGGATTTGCTGCT

>M6-PGSC0003DMG401023870-(rev)M6LRR-RLP\_1426

GTGTTTCTTAAGTTGCATTTCTTGTAAGTTACATTTGCAGAATGGGATTTGCTGCTTACGCCATATGCC  
AGACGTCCGCTAGCTGAGGTTTGTACTAGACGTACATAAATCACATACG

>M6-PGSC0003DMG401023870-(rev)M6LRR-RLP\_1488

CCATATGCCAGACGTCCGCTAGCTGAGGTTTGTACTAGACGTACATAAATCACATACGACGTCAGGTAA  
AAGTGCACATTTTGAGAAAAAAAATCAAGATACCCATTCTTAAAAATGAC

>M6-PGSC0003DMG401023870-(rev)M6LRR-RLP\_1550

CAGGTAAAAGTGCACATTTTGAGAAAAAAAATCAAGATACCCATTCTTAAAAATGACATTACTATT  
TGAGGGGTATAGGAATAGTTTAGGGGAAAAATTCACCCTTTTTCACCTAA

>M6-PGSC0003DMG401023870-(rev)M6LRR-RLP\_1612

TTACTATTTGAGGGGTATAGGAATAGTTTAGGGGAAAAATTCACCCTTTTTCACCTAAGCTCCGCCCTG  
GTTTCAGTGATTTGGTATTTTCAGGGGAATAACTCATAGTTTAATGGTTT

>M6-PGSC0003DMG401023870-(rev)M6LRR-RLP\_1674

CGCCCCTGGTTTCAGTGATTTGGTATTTTCAGGGGAATAACTCATAGTTTAATGGTTTTATTGTTACAAAA  
ACAGTTACAAAGAGTATGTTTAATAAATAGCTCGTATTGTTATGAAGAG

>M6-PGSC0003DMG401023870-(rev)M6LRR-RLP\_1736

GTTACAAAAACAGTTACAAAGAGTATGTTTAATAAATAGCTCGTATTGTTATGAAGAGTTAATTTAGAAA  
TGACCATCGGTGATATTATCCTCAAAATTTTGTGATGAAGGTAAATAAGA

>M6-PGSC0003DMG401023870-(rev)M6LRR-RLP\_1798

TTTAGAAATGACCATCGGTGATATTATCCTCAAAATTTTGTGATGAAGGTAAATAAGAAAGTAACACAAC  
ATACAATTCTATTTAATAACAAAACAAAACAGATGATTCTCTATCCTT

>M6-PGSC0003DMG401023870-(rev)M6LRR-RLP\_1860

AACACAACATACAATTCTATTTAATAACAAAACAAAACAGATGATTCTCTATCCTTTTAAAGTTTGT  
CCTATTTAGGGAATTTATTTTCTGTATGATAGATGTGTAACACATGCA

>M6-PGSC0003DMG401023870-(rev)M6LRR-RLP\_1922

AGTTTGTTCCTATTTAGGGAATTTATTTTCTGTATGATAGATGTGTAACACATGCATAAGAATTTGAAA  
AAGACAAAAAGAAAACAACCCAAATTACATATGAACAGACAGAAATGGT

>M6-PGSC0003DMG401023870-(rev)M6LRR-RLP\_1984

AATTTGAAAAAGACAAAAAGAAAACAACCCAAATTACATATGAACAGACAGAAATGGTTAAAGTGTGA  
ATGAGAGAAAGAGCAGCCAACAACATTTGGAGAAAACACTTTTCTGTTTGGT

>M6-PGSC0003DMG401023870-(rev)M6LRR-RLP\_2170

ATGATTCCAAGCAAAATATTCTCTCTACTTCAGGTTTTCACTATTTTATATCTCCATATAGTTACTTTTGCTT

CCATCGAAGAAGCAACTGCCCTCTTGAAATGGAAAACAAGTTTCAAG

>M6-PGSC0003DMG401023870-(rev)M6LRR-RLP\_2232

TACTTTTGCTTCCATCGAAGAAGCAACTGCCCTCTTGAAATGGAAAACAAGTTTCAAGAACCAGGATAAT

TTCTTATTGGCTTCGTGGAAGCCAAAGTCTAATGCATGCAGGGACTGGTA

>M6-PGSC0003DMG401023870-(rev)M6LRR-RLP\_248

TATATTCCCGATGTGGTTGGGAAGCTTCCAAAGCTGCAAGTTTTAAGCTTGAGATCCAATGAATTGCAT

GGGTCCATTAGAAGCTCCAACGATTGAAAACATATTTCTAATCTTCAAAT

>M6-PGSC0003DMG401023870-(rev)M6LRR-RLP\_2542

TCGAGTAATCAGATTTTCAGGCACAGTACCACCACAAATCAGCTCACTAGCCAAGCTTCAGATCCTCCATA

TCATTGACAACCATTTAAATAGTTTTATTCTGAAGAATAGGTCCTCTAA

>M6-PGSC0003DMG401023870-(rev)M6LRR-RLP\_2604

CCTCCATATCATTGACAACCATTTAAATAGTTTTATTCTGAAGAATAGGTCCTCTAAAGTCTCTTACTGA

GCTAGATTTGAGTTCTAACGCACTTAGTGTTCTATTCCAAGTTCATTG

>M6-PGSC0003DMG401023870-(rev)M6LRR-RLP\_496

AAGACTCGGTAGCTGTCGTATCCAAGGGATTTGCGTGAAATAGTGAGAATCTTGTATTTGTACACCGTTA

TCGATCTTTCAAGTAATAAATTTGGAGGGCAGATTCCAAGTATCATGGGG

>M6-PGSC0003DMG401024548M6LRR-RLP\_0

TGAACATTGCTATGCATGGTAGAGCTTGACACGGAGCTTGGACTCTATAGGCAGGAGTTTGTAGTTTAT

ACACCAAGAGATGCTTTAAGTTAACCAGGATAGCAAAAAGATAATCAAGCGT

>M6-PGSC0003DMG401024548M6LRR-RLP\_1037

GACTTTGATAAGTGGGATACCATTAATACTCATGTTGAGCAAATACAATGGAAAAATGATCCTCCCTGAA

AAGAAAACAACCTAATATGAGCTCTTGTAAGGGAACAGAGAAGAAGAGA

>M6-PGSC0003DMG401024548M6LRR-RLP\_1098

CTCCCTGAAAAGAAAACAACCTAATATGAGCTCTTGTAAGGGAACAGAGAAGAAGAGAGCAATATAC

CTGAAAATGTAATTGTAGGAAGTGAATAGGCAACATTAATACTATATAGTT

>M6-PGSC0003DMG401024548M6LRR-RLP\_1159

AATATACCTGAAAATGTAATTGTAGGAAGTGAATAGGCAACATTAATACTATATAGTTATCTGTTTTTAT

TCTTGATTGGGACCTAAGGAGGGTAGATTAACCTTTAAATGTAGCAAGA

>M6-PGSC0003DMG401024548M6LRR-RLP\_122

TTATAGAGGAGACTTTCCCATGCAAATCTTTATGTTGTTTCTTTTCTGATTTACGAGGAGGTAAAGTGAA  
CAAATGCAGATTGTGGGAAGTAGAGGCGGGATAGTAATTAATACTACTCCC

>M6-PGSC0003DMG401024548M6LRR-RLP\_1220

CTGTTTTTATTCTTGATTGGGACCTAAGGAGGGTAGATTAACTTTAAATGTAGCAAGATAACAAAAAA  
TGTTTGTGAAGGGGAAGAAAGCTCTTGGTGATTTCTGATTACTTGATTA

>M6-PGSC0003DMG401024548M6LRR-RLP\_1281

ACAAAAAATGTTTGTGAAGGGGAAGAAAGCTCTTGGTGATTTCTGATTACTTGATTAGCCACTCCTAA  
ATCTTGCACCATAAATTTTGAATATAAAGCATAGAAAATAGCTGTTATA

>M6-PGSC0003DMG401024548M6LRR-RLP\_1342

CACTCCTAAATCTTGCACCATAAATTTTGAATATAAAGCATAGAAAATAGCTGTTATAGCCGAGGGAGA  
ACCACACCCTAAAAGCTAACTATTAGGTTGGGAGAACCCAAGGCTATAAA

>M6-PGSC0003DMG401024548M6LRR-RLP\_1403

CGAGGGAGAACCACACCCTAAAAGCTAACTATTAGGTTGGGAGAACCCAAGGCTATAAATACCCAACAT  
CAGCACTTTGTAGTACCGATGTAGGACTTTGCAATGGAACATAATAATAAC

>M6-PGSC0003DMG401024548M6LRR-RLP\_1464

CCCAACATCAGCACTTTGTAGTACCGATGTAGGACTTTGCAATGGAACATAATAATAACTCTTCTACTTGT  
CCTGTTACTTTTCTTGTGAATAATTCTTTGTAGGATTTCTAAGGACTT

>M6-PGSC0003DMG401024548M6LRR-RLP\_1525

TTCTACTTGTCTGTTACTTTTCTTGTGAATAATTCTTTGTAGGATTTCTAAGGACTTTTATCAGAGAATT  
TTTCTTGTTCATTACTCATAATGATATCATTAGTTTTTACTGTATTA

>M6-PGSC0003DMG401024548M6LRR-RLP\_1586

ATCAGAGAATTTTTCTTGTTCACTACTCATAATGATATCATTAGTTTTTACTGTATTAATGGTGAACATATT  
TCTTAAGTTTATAATCTAATGCTAAGAGCAAAAACTTGTATCTCTAA

>M6-PGSC0003DMG401024548M6LRR-RLP\_1647

GTGAACATATTTCTTAAGTTTATAATCTAATGCTAAGAGCAAAAACTTGTATCTCTAATTATATGTATTC  
AGATTTTAGCTGATAACATTATTGAGCGCCTTCCCATGAATCTGGGATT

>M6-PGSC0003DMG401024548M6LRR-RLP\_1708

ATATGTATTCAGATTTTAGCTGATAACATTATTGAGCGCCTTCCCATGAATCTGGGATTGCTCCAGTCTTT  
GAAAGTGGCAACATTTGATGGGAATCGAATCACAAATTTGCCTGATGAA



>M6-PGSC0003DMG401024548M6LRR-RLP\_1769

TCCAGTCTTTGAAAGTGGCAACATTTGATGGGAATCGAATCACAAATTTGCCTGATGAATGTAAGTCTAT  
ATATGTTAGATCACTCAAGTTAAGTGGATTCCTTTTTCTTATATGAGCC

>M6-PGSC0003DMG401024548M6LRR-RLP\_183

TTAAAGTGAACAAATGCAGATTGTGGGAAGTAGAGGCGGGATAGTAATTAATACTACTCCCTCCTCCCGA  
TTTGAACAAATCATTGTCAGAGGAGTTACTTTTTGCTTGTTGTTTGT

>M6-PGSC0003DMG401024548M6LRR-RLP\_1830

TAAGTCTATATATGTTAGATCACTCAAGTTAAGTGGATTCCTTTTTCTTATATGAGCCAGGCTCTCTGTT  
TAACTACAAAACTTCATGTATTCAGTGGGGCAGTTGGTGAAACTTGA

>M6-PGSC0003DMG401024548M6LRR-RLP\_1891

GCTCTCTGTTCTAACTACAAAACTTCATGTATTCAGTGGGGCAGTTGGTGAAACTTGAGCGTCTGTCTG  
TCTCAGCAAACCTGTTGACCAGCTTGCCTGACACAATCGGGAGCTTGCGG

>M6-PGSC0003DMG401024548M6LRR-RLP\_1952

GTCTGTCTGTCTCAGCAAACCTGTTGACCAGCTTGCCTGACACAATCGGGAGCTTGCGGAGTGTGAGTG  
ATTGATTAACCTCTATATGTTACTTGCTTTCTCTGTTCTATTTAATGTGCC

>M6-PGSC0003DMG401024548M6LRR-RLP\_2013

TGTGAGTGATTGATTAACCTCTATATGTTACTTGCTTTCTCTGTTCTATTTAATGTGCCTATAAAGATTTTA  
CTCCTACATAGTTTTATTGTTGTTAAATATTTTTACCGTAAAGGTG

>M6-PGSC0003DMG401024548M6LRR-RLP\_2074

TAAAGATTTTACTCCTACATAGTTTTATTGTTGTTAAATATTTTTACCGTAAAGGTGTTTAGCTAACAAA  
AGAATTATTTTAGTTTTGATCTTGCCAATGCCTTTGATTGGAGAATTA

>M6-PGSC0003DMG401024548M6LRR-RLP\_2135

TAGCTAACAAAAGAATTATTTTAGTTTTGATCTTGCCAATGCCTTTGATTGGAGAATTATTCTGTAATAGG  
AAAGAAACCCCAATCAATTTATCAAGTTGTGCTATTAAGCCACCTAATT

>M6-PGSC0003DMG401024548M6LRR-RLP\_2196

CTGTAATAGGAAAGAAACCCCAATCAATTTATCAAGTTGTGCTATTAAGCCACCTAATTGTGACATTAAT  
TTAGTTGTCACACCTCTTGCTTCATGTTTTAATTTGTTTCCTGTATCTTT

>M6-PGSC0003DMG401024548M6LRR-RLP\_2257

GACATTAATTTAGTTGTCACACCTCTTGCTTCATGTTTTAATTTGTTTCCTGTATCTTTTTGTCATCACTGT

TAAACAGATAAAATACTGTATAGACTTGCATTATAAGTTATTATTCA

>M6-PGSC0003DMG401024548M6LRR-RLP\_2318

TGTCATCACTGTTAAACAGATAAAATACTGTATAGACTTGCATTATAAGTTATTATTCAAATTCTAGTTGT

TGTGTTTTGGGGTTCTGAATCAAGTTCAATGGTTCTGTTGATTGTGGA

>M6-PGSC0003DMG401024548M6LRR-RLP\_2379

TTCTAGTTGTTGTGTTTTGGGGTTCTGAATCAAGTTCAATGGTTCTGTTGATTGTGGAAGTTTACAC

TTGCACATGCTATTATAAAAAGATTATCAGCTACTTGTGAGTTCTAGTA

>M6-PGSC0003DMG401024548M6LRR-RLP\_244

CTTCCCGATTTGAAACAAATCATTGTCAGAGGAGTTACTTTTTGCTTGTTTGTGTTTGTGATGGATGATA

CTTACTATGATGAAATGCTAAAACAGTTAAATAAGGCAACATATTTAGT

>M6-PGSC0003DMG401024548M6LRR-RLP\_2440

TGTTTTACACTTGACATGCTATTATAAAAAGATTATCAGCTACTTGTGAGTTCTAGTATTCACGGTGATG

CTGTTGAAGGAAGCTAGTACTCTTAGACAGGCATCTTAGCAGTTCCTTT

>M6-PGSC0003DMG401024548M6LRR-RLP\_2501

CACGGTGATGCTGTTGAAGGAAGCTAGTACTCTTAGACAGGCATCTTAGCAGTTCCTTTTCACTGATAAG

TTTTGAGCAGACGAATTGATAATATCTATTGGCAATGCAGTTGGTTTTGT

>M6-PGSC0003DMG401024548M6LRR-RLP\_2562

ACTGATAAGTTTTGAGCAGACGAATTGATAATATCTATTGGCAATGCAGTTGGTTTTGTTGAATGTTTCA

AACAACAAGTTAAAGGTTCTTCTGAATCAATTGGAAGTTGCTACTCATT

>M6-PGSC0003DMG401024548M6LRR-RLP\_2623

AATGTTTCAAACAACAAGTTAAAGGTTCTTCTGAATCAATTGGAAGTTGCTACTCATTGGAAGAACTGC

AAGCAAATGGTACCTTCATTCTTAGCTCATGATTCTTGTGATTCTTTCTG

>M6-PGSC0003DMG401024548M6LRR-RLP\_2684

AAGAACTGCAAGCAAATGGTACCTTCATTCTTAGCTCATGATTCTTGTGATTCTTTCTGTTTCTCCTTTTCC

TTTGGTCTCCTGGGTGTCATAGCTTTGTATGCGTATCAAATTAACAT

>M6-PGSC0003DMG401024548M6LRR-RLP\_2745

TCTCCTTTTCTTTGGTCTCCTGGGTGTCATAGCTTTGTATGCGTATCAAATTAACATTAGCAACTCTTAC

CTGTGAGATGACTAGTCTTTGTGGAATACATTTTTGAGTTGATATACA

>M6-PGSC0003DMG401024548M6LRR-RLP\_2806

GCAACTCTTACCTGTGAGATGACTAGTCTTTGTGGAATACATTTTTGAGTTGATATACAGTATCATTTTTCT  
TACTTTTCTCTGATCCACTGTTGGTACTTTTACTGACTTCAATGCCTTT

>M6-PGSC0003DMG401024548M6LRR-RLP\_2867

ATCATTTTTCTACTTTTCTCTGATCCACTGTTGGTACTTTTACTGACTTCAATGCCTTTATTGAAGTGATGA  
GCTTTGTTTCTCCTAAGGCTCATGATTGGAAGTTTCTGTTACAGATAA

>M6-PGSC0003DMG401024548M6LRR-RLP\_2928

TGAAGTGATGAGCTTTGTTTCTCCTAAGGCTCATGATTGGAAGTTTCTGTTACAGATAACTCCATTGAAG  
AGCTTCCTGGTTCAGTTTGCAATCTCATTGCTAAAATCACTCTGTTT

>M6-PGSC0003DMG401024548M6LRR-RLP\_2989

CCATTGAAGAGCTTCCTGGTTCAGTTTGCAATCTCATTGCTAAAATCACTCTGTTTGAACAATAATAAT  
CTCAATCAGGTAATTTCCAACTTCCCTCGCTGTCTCTTTCTGTCTGTC

>M6-PGSC0003DMG401024548M6LRR-RLP\_305

ATGGATGATACTTACTATGATGAAATGCTAAAACAGTTAAATAAGGCAACATATTTAGTCCATTGAAAAG  
GCCACATATTTGTGATTTCCCTGACTACCCTTTTTTTGAACAGACATTTCC

>M6-PGSC0003DMG401024548M6LRR-RLP\_3172

TGCTCAGCATTAGTAGATCTAAAGTTGTACGGTCTGTCTCACATAATGTAACAAAAAGCAATATTTACTTT  
GTTAAACTGATCTTTTCTTCCAACACTCTCACTCACGCCCCGCACACA

>M6-PGSC0003DMG401024548M6LRR-RLP\_366

ATTGAAAAGGCCACATATTTGTGATTTCCCTGACTACCCTTTTTTTGAACAGACATTTCCCTGATGAAGTTTT  
GACCTGGAAAGATCTGTACGTACCCTCGACTTAACACACAATAAAATG

>M6-PGSC0003DMG401024548M6LRR-RLP\_427

ATGAAGTTTTTGACCTGGAAAGATCTGTACGTACCCTCGACTTAACACACAATAAAATGGGTATTGTTCT  
CCAGCTTCTGAGCTCCTAATTTGTCTTCTTATCACTTCAGAGTATAAAG

>M6-PGSC0003DMG401024548M6LRR-RLP\_488

TATTGTTCTCCAGCTTCTTGAGCTCCTAATTTGTCTTCTTATCACTTCAGAGTATAAAGACAAATTCTATTA  
GAAGATTATTTTTGTATACTTATCTTATTTTCTTAAAAAAGGTTGTTT

>M6-PGSC0003DMG401024548M6LRR-RLP\_549

AAATTCTATTAGAAGATTATTTTTGTATACTTATCTTATTTTCTTAAAAAAGGTTGTTTTCTGGAAGCTAA  
TTCTCACTCTTCTGCTGTGACAGTTGAAATTCCTATGGAGATCAACAA

>M6-PGSC0003DMG401024548M6LRR-RLP\_61

TAGTTTATACACCAAGAGATGCTTTAAGTTAACCAGGATAGCAAAGATAATCAAGCGTCTTTATAGAG  
GAGACTTTCCCATGCAAATCTTTATGTTGTTTCTTTTCTGATTTACGAGGA

>M6-PGSC0003DMG401024548M6LRR-RLP\_610

CTGGAAGCTAATTCTCACTCTTCTGCTGTGACAGTTGAAATTCCTATGGAGATCAACAAATTAACCAACT  
ACAACGTCTTGTAAGTATTGCATCCTACACTTCCTCTTCTTTTTTCTGA

>M6-PGSC0003DMG401024548M6LRR-RLP\_671

TAACCAACTTACAACGTCTTGTAAGTATTGCATCCTACACTTCCTCTTCTTTTTTCTGATGTCTGTTAATGT  
ATTAGGGCCTCATTAAATTAGAAAAATCTATTATATTTGGAAAGAAAA

>M6-PGSC0003DMG401024548M6LRR-RLP\_732

TCTGTTAATGTATTAGGGCCTCATTAAATTAGAAAAATCTATTATATTTGGAAAGAAAACTATACTGTTAT  
TGGCGTCAGATCACATTATAAATGCTAGCTGTGAGAAGGTATCAAACCT

>M6-PGSC0003DMG401024548M6LRR-RLP\_793

ATACTGTTATTGGCGTCAGATCACATTATAAATGCTAGCTGTGAGAAGGTATCAAACCTCATATACTCGC  
AGCCAAAATGCATATAAAGCTAATGAAAATGATTTAGGGAGCAGAAATGG

>M6-PGSC0003DMG401024548M6LRR-RLP\_854

TATACTCGCAGCCAAAATGCATATAAAGCTAATGAAAATGATTTAGGGAGCAGAAATGGGGCAGACAG  
TTATAGTGTTATTTGTTGTTGTTTATAGGAAAAATTTACTAGGGTAGAAAA

>M6-PGSC0003DMG401024548M6LRR-RLP\_915

CAGACAGTTATAGTGTTATTTGTTGTTGTTTATAGGAAAAATTTACTAGGGTAGAAAAAGTTTCTACAG  
AAGGCAATGTCAATAGAAATAGAAGAAAAACAATTCTTCATTCTGTCATA

>M6-PGSC0003DMG401024548M6LRR-RLP\_976

TTTCTACAGAAGGCAATGTCAATAGAAATAGAAGAAAAACAATTCTTCATTCTGTCATAAAGACTTTGAT  
AAGTGGGATACCATTAATACTCATGTTGAGCAAATACAATGGAAAAATGA

>M6-PGSC0003DMG401024846-(rev)M6LRR-RLP\_1037

TTTCTGTAGTTTTGTGGAAAATAATTAGTTAGTTTCAGAGATAGCAACCTCTATACTCTGTATGATGGTTG  
TGCCTAATGTATCGTATTATTTTATATTGATGATTTTCCTTTAAATTG

>M6-PGSC0003DMG401024846-(rev)M6LRR-RLP\_390

GGCTTGGCGCATTCTATTGGGAAACAGTTCAATACATTTCCAGATGATTCATATTGTGGAAATCTTGAT

TTATGTGGATTTCCACTATCAAAGAAATGTGGAAACAATAATAGGCCAGA

>M6-PGSC0003DMG401024846-(rev)M6LRR-RLP\_715

AGACGTCAAGGACGTGGTCTAAGAATGAATTAGCAATATAACCAGGTATGCATCAAACCTTTTTGTTTTGT  
ATCAGGAACAACACTATTTCTGTAGCTGTTTCATTGTATAACTATATGTCA

>M6-PGSC0003DMG401024846-(rev)M6LRR-RLP\_780

TTTGTATCAGGAACAACACTATTTCTGTAGCTGTTTCATTGTATAACTATATGTCAATTGTTTATTTTTCT  
AAATATTCAAAACTCAGAAAAGTCATTAAGTCCTTTAATTCTCAATT

>M6-PGSC0003DMG401024846-(rev)M6LRR-RLP\_845

TTTTCTAAATATTCAAAAACTCAGAAAAGTCATTAAGTCCTTTAATTCTCAATTTGTCTCTGCAGAAAGG  
TTGCTGGAGAATTGGACACATTTATTAGCAAGTTAGTGTTGATGTTCTG

>M6-PGSC0003DMG401025507-(rev)M6LRR-RLP\_0

TATGATGATGGTTTCTAGCAAAATATTCTCTTCACTTCAGTTTTTCACTCTTTTCTACCTCTTTACAGTTGCA  
TTTGCTTCCACTGAGGAAGCAATTGCCCTCTTGAAATGGAAAGCAAC

>M6-PGSC0003DMG401025507-(rev)M6LRR-RLP\_130

CAGAATAATTCCTTATTGGCTTCATGGACGCCAAGTTCTAATGCATGCGAGGACTGGTATGGAGTTGTAT  
GCTTTAATGGTAGGGTAAACACGTTAGCTATTACAAATCCAGTGTCATT

>M6-PGSC0003DMG401025507-(rev)M6LRR-RLP\_260

ATGCTTTTCCGTTTTCATCTGTCCCTTTTCTTGAGCATCTTAATCTTAGCAAGAACAATTTCTCTGGCACCA  
TTCCACCTGAGATTGGTAATCTCACTAATCTGTCTATCTTGACTTGA

>M6-PGSC0003DMG401026447-(rev)M6LRR-RLP\_0

AAAATTTATGCATGTATTTCATTTTACCTTGAAAATTATCTCACTGTGTCTAATATGACACCGACTGCATA  
ATCAGATAATCTCCAATGCAGTGGTCATATGTGCGCTGAATATGCAAT

>M6-PGSC0003DMG401026447-(rev)M6LRR-RLP\_1008

CAATTTTGAATTTGACAAAAGATTTTCTTGCTCGAGTCTTTTCTTTGAATCATGTCCATATTTGAGATGC  
CCAATTGCAAAGAGTTATCAACAGATGCCCATCTATCAGGACTCTAAG

>M6-PGSC0003DMG401026447-(rev)M6LRR-RLP\_1071

TTCAGATGCCCAATTGCAAAGAGTTATCAACAGATGCCCATCTATCAGGACTCTAAGGTTACAGTGTTGT  
GAGGGTATAAGCAAATGTCATATTTTTGGCTTAGTACATCTCAAGTATTT

>M6-PGSC0003DMG401026447-(rev)M6LRR-RLP\_126

ATTTTTTTTTCAATAGTCTAAGCACCAAAAAAAAAAAAAAAAAACCACCAACGCTATAAAAATTGACTGAACA  
TTTCGAGCTGTAAGCAGAAAAGTTGTTGATTTATCTTTTCCTGCTCGCA

>M6-PGSC0003DMG401026447-(rev)M6LRR-RLP\_1260

AGAACCTACTGAACAGGGCAATCTTCATCCTTGCGAAATTGCTATTTTGGATGGTTACAGTACTTTACAA  
ACACTGGAGCTCACTGGTGCCACCATCACAGACCAACAGTTTCGAGATGT

>M6-PGSC0003DMG401026447-(rev)M6LRR-RLP\_1323

TTTACAAACTGGAGCTCACTGGTGCCACCATCACAGACCAACAGTTTCGAGATGTATCCTATAAGTTC  
CCAAATATTTAGAAATTGAATCTAAGATTATGCTATAACCTGAAAAATAT

>M6-PGSC0003DMG401026447-(rev)M6LRR-RLP\_1386

TAAGTCCCAAATATTTAGAAATTGAATCTAAGATTATGCTATAACCTGAAAAATATAGAGATTCAGAGT  
GAAAACTCAAGAAATTCACCTTATTTGAGTTGAAGAGTCTGGAAAACT

>M6-PGSC0003DMG401026447-(rev)M6LRR-RLP\_1449

TCAGAGTGAAAACTCAAGAAATTCACCTTATTTGAGTTGAAGAGTCTGGAAAACTCACGATTCAAGCT  
CCAAATTTATTGGAATTTGATTTTCATGGTAGTAAAATGCCCGTCACATA

>M6-PGSC0003DMG401026447-(rev)M6LRR-RLP\_1512

TCAAGTCCCAAATTTATTGGAATTTGATTTTCATGGTAGTAAAATGCCCGTCACATATATGGATACTTCTT  
CCCTAGAAAGTGCCCGACTGATATTAATAATATTTGTCGCCAGGTAGT

>M6-PGSC0003DMG401026447-(rev)M6LRR-RLP\_1575

TACTTCTTCCCTAGAAAGTGCCCGACTGATATTAATAATATTTGTCGCCAGGTAGTTTACATTATTTTTGT  
GCTTAATTTATGCATTAATTTGTTGAATTTGGTTTAACTATGGGATTG

>M6-PGSC0003DMG401026447-(rev)M6LRR-RLP\_1638

TATTTTTGTGCTTAATTTATGCATTAATTTGTTGAATTTGGTTTAACTATGGGATTGACTAAATCCTTGCA  
ACCAAAGCATCCTTATTTATGAAAATCTAAGAGAAATTGTTATTCCA

>M6-PGSC0003DMG401026447-(rev)M6LRR-RLP\_1701

TTCTTGCAGACCAAAGCATCCTTATTTATGAAAATCTAAGAGAAATTGTTATTCCACCAAGTCACAAAGT  
CGAGATATTCATTGCATCCATGCTGAGTGTGAATCGATCATTGGAATA

>M6-PGSC0003DMG401026447-(rev)M6LRR-RLP\_1764

CACAAAGTCGAGATATTCATTGCATCCATGCTGAGTGTGAATCGATCATTGGAATAATAATGTTCCGGAA  
GTCCCTATATCATATCCATACTTCATGTACAGATAGCAAAGCACTACAG

>M6-PGSC0003DMG401026447-(rev)M6LRR-RLP\_1827

TTCGGAAGTCCCTATATCATATCCATACTTCCATGTACAGATAGCAAAGCACTACAGGTAAAACGTCCCT  
TGTGCTTGTATAATTTGAGAAGAAAATTTGTTGTTAAATGTTGATTGCTC

>M6-PGSC0003DMG401026447-(rev)M6LRR-RLP\_189

CTGAACATTTTCGAGCTGTAAGCAGAAAAGTTGTTTGATTTATCTTTTCCTGCTCGCATATAAAATAATTAT  
CTCTGGAATGGCAACTGTGGAGTGAGGGGAAGACAGTCACGTTTTTAGA

>M6-PGSC0003DMG401026447-(rev)M6LRR-RLP\_1890

CGTCCCTTGTGCTTGTATAATTTGAGAAGAAAATTTGTTGTTAAATGTTGATTGCTCGTCTCATAAGCATT  
ATTATTGTATAATATATCTTATGTTTCTGCTTAAATGCAGGCGATGTCT

>M6-PGSC0003DMG401026447-(rev)M6LRR-RLP\_2016

AAAGGGTGTACACAAAAGCAAAATTGTGGTAAAGAATGTCCATTCAATACCAAGTGGCATCGTAACTTA  
AAAGATGTTATCAGTTGTACTGGGACACCTGAGGAGGGAATGGCCGCCTCC

>M6-PGSC0003DMG401026447-(rev)M6LRR-RLP\_2142

TATCTCTGGTTGAAATCTACATCTGTAATTGACCAAGTGAATAATTTTCATGTTAAAATGGAAATAACAAG  
CTTAGACCAAAGAGTCTTGGCGAATTCAGCATATAGAGTTAATTAGTGTG

>M6-PGSC0003DMG401026447-(rev)M6LRR-RLP\_2205

TAACAAGCTTAGACCAAAGAGTCTTGGCGAATTCAGCATATAGAGTTAATTAGTGTGTATGATTTATTAC  
ATAATTTAGCATTTTTTGGCTGTGTAAGACCTCCAACCTTTGATTACACAT

>M6-PGSC0003DMG401026447-(rev)M6LRR-RLP\_2268

TTATTACATAATTTAGCATTTTTTGGCTGTGTAAGACCTCCAACCTTTGATTACACATTTATACTTGCAATGA  
AATAGATTTTGCAGTCTATCTTTAGTATCGATGGTTATGAATGTGT

>M6-PGSC0003DMG401026447-(rev)M6LRR-RLP\_2331

TTGCAATGAAATAGATTTTGCAGTCTATCTTTAGTATCGATGGTTATGAATGTGTAGATGAATTGGAA  
AATATAATATTCTGGGCTGCAAAGATAGAGGTATTCGGAGTTGTATAAGC

>M6-PGSC0003DMG401026447-(rev)M6LRR-RLP\_2394

ATTGAAAATATAATATTCTGGGCTGCAAAGATAGAGGTATTCGGAGTTGTATAAGCTTGTAGACAGAT  
AGACGCACGCCTTCCTTGTATGTAGAAATCAGGAAATTGAACATAACTTGA

>M6-PGSC0003DMG401026447-(rev)M6LRR-RLP\_2457

ACAGATAGACGCACGCCTTCCTTGTATGTAGAAATCAGGAAATTGAACATAACTTGAAAAATGGAAAGT

AACACTCTGTTATGAACTCATGCAAATAACCTTAATAATGAAGCAGATGGA

>M6-PGSC0003DMG401026447-(rev)M6LRR-RLP\_252

ATAATTATCTCTGGAATGGCAACTGTGGAGTGAGGGGAAGACAGTCACGTTTTTAGATCCAAAGTTGAG

TAACATATGATCAAAGAGTAAGTTATAAGAGGTATAAATATTGGTCTCTTG

>M6-PGSC0003DMG401026447-(rev)M6LRR-RLP\_2520

GAAAGTAACACTCTGTTATGAACTCATGCAAATAACCTTAATAATGAAGCAGATGGATTGTGATCTGTAA

ACAACAATAACTCATCTGAAGAGGACGGCTCCACACTAGCATGTCGTTT

>M6-PGSC0003DMG401026447-(rev)M6LRR-RLP\_315

GTTGAGTAACATATGATCAAAGAGTAAGTTATAAGAGGTATAAATATTGGTCTCTTGTGTGTTGAGGATT

TTATTTAATGATAGAATGATTTTTGAAAATAAAAATAATAAGTTGAGTG

>M6-PGSC0003DMG401026447-(rev)M6LRR-RLP\_378

GAGGATTTTATTTAATGATAGAATGATTTTTGAAAATAAAAATAATAAGTTGAGTGATTTTGATATAAA

AGAAAGTTCAATGACTTTTCTGCATAATTTCTAATAGTTCAGTGATCTTT

>M6-PGSC0003DMG401026447-(rev)M6LRR-RLP\_441

ATATAAAAGAAAGTTCAATGACTTTTCTGCATAATTTCTAATAGTTCAGTGATCTTTAAGCTATTAACCC

TGATGGAGTATGAAAGTGAAACCCTTAAAAGAGGATATACAACGGCACC

>M6-PGSC0003DMG401026447-(rev)M6LRR-RLP\_504

ATTAACCCTGATGGAGTATGAAAGTGAAACCCTTAAAAGAGGATATACAACGGCACCAAGAAATCAAAA

CGAAGGAAGCAATATGGCAAAAAGAGAAGACAGAATATCAGAATTGCCTGT

>M6-PGSC0003DMG401026447-(rev)M6LRR-RLP\_567

TCAAAACGAAGGAAGCAATATGGCAAAAAGAGAAGACAGAATATCAGAATTGCCTGTGCATATTATCA

TCAAATCTTATGCCGCACTGACCTCGGCGTCAAGAGGCGGCGAGAAGTTG

>M6-PGSC0003DMG401026447-(rev)M6LRR-RLP\_63

GACTGCATAATCAGATAATCTCCAATGCAGTGGTCATATGTCGCCTGAATATGCAATACAAGAATTTTTT

TTTCAATAGTCTAAGCACCAAAAAAAAAAAAAAAAAACCACCAACGCTATAAA

>M6-PGSC0003DMG401026447-(rev)M6LRR-RLP\_693

GTCCAAGACATGGTACTATTGCTGGACTTCAAGACCTAATTTGATATTCTATCAATTTGATATGACCCTTG

AAAATATGTCAAGTTGGTTGATCAATCTCTGCGATTCCATGTGCAACA

>M6-PGSC0003DMG401026447-(rev)M6LRR-RLP\_756



GACCCTTGAAAACCTATGTCAAGTTGGTTGATCAATCTCTGCGATTCCATGTGGAACAAAACCTTACATCTTG  
AACAAATTCATCCTTAGATATCGTGATCCAGAAGTGGATTCTCACGTGGA

>M6-PGSC0003DMG401026447-(rev)M6LRR-RLP\_819

ACATCTTGAACAATTCATCCTTAGATATCGTGATCCAGAAGTGGATTCTCACGTGGATACTTGGATTGAA  
TTGGCGGTTAAACTCAACGTCACAGAGCTGGGAATTCACCGTTTGGGTTT

>M6-PGSC0003DMG401026447-(rev)M6LRR-RLP\_945

ATATAACTTACCTGATGTTATTTATGATGCTAAAAGCTGACAACATTGCAGTTAAGCAGGTGCAATTTT  
GAATTTGACAAAAGATTTTCTTGGCTCGAGTCTCTTTCTTTGAATCATGT

>M6-PGSC0003DMG401026747-(rev)M6LRR-RLP\_124

TTGGAAATCTTGTTAATTTGTTGGAGTTAGGCGTGGAGAAAAACCAGATTACCAGCTCTATCCCGATCTC  
CATATTCAATATCTCATCGTTGCAATTTGTTTCACTATGGAGGAACAATC

>M6-PGSC0003DMG401026747-(rev)M6LRR-RLP\_434

GTTGAGTTGGAGGAACCTGGTCTTGCCTTGAATAGTTTTAGTGGTTCACTTCCAATGGAGATCTTCAACA  
TATCACGACTGACAATAATTTCTCTTTCAGCCAATAATCTATCAGCAACT

>M6-PGSC0003DMG401026747-(rev)M6LRR-RLP\_62

TATCTAATTACATTAGATCTTTTTTTATTACACATTAATGCAGGGATAATTCCACAAGAAATTGGAAATC  
TTGTTAATTTGTTGGAGTTAGGCGTGGAGAAAAACCAGATTACCAGCTC

>M6-PGSC0003DMG401026747-(rev)M6LRR-RLP\_620

CTTGTTGGGACTATTCCTCATTCTATCTCCAATTGTTCCAACTTACTAGACTAGAGCTTTCAGATAACAA  
ACTCACAGGATTGATTCCCAATTCTCTTGGATATTTGACTCATCTACAA

>M6-PGSC0003DMG401027271M6LRR-RLK\_0

GTTTTCTTCATTTCTTGATATGGCTTCTTCTTAGATAGTACTCACTACTACTGTCTACTACATTTTATTTCTT  
AAATTTAAGGGCTTCTAGCTTTTTGGTTATTTTCCATTTTCAAGAT

>M6-PGSC0003DMG401027271M6LRR-RLK\_122

CTCAAATGGAATACTCCCTCACATTTCTTGAGCATTTCAAGACTCAATCTTTTTCACTCTAAACACCCTTTT  
GTCTTCTACACCCACCCCAATCTCCAATTCTGCAGAAAGTTTCA

>M6-PGSC0003DMG401027271M6LRR-RLK\_1586

CGGCAGATATCTGCAATACGTCCAGATTGCAATATTTGCTGTTGGGGGAGAACTCGATTGAGGGGAGA  
TACCTCATGAGATAGGGAATTGTGTAAAGTTGCTTGGAGTTGGAAATGGGGA

>M6-PGSC0003DMG401027271M6LRR-RLK\_183

AACACCCTTTTGTCTTCTACACCCACCCCAACAATCTCCAATTCTGCAGAAAGTTTCATGTGATGGATTCT  
TGATGGGAAAAGGAGGAAGAAGTTGAAGAAAAGGTGTTTTCTTTGTAA

>M6-PGSC0003DMG401027271M6LRR-RLK\_244

TGATGGATTCTTGATGGGAAAAGGAGGAAGAAGTTGAAGAAAAGGTGTTTTCTTTGTAAACAACCTCAT  
AACCATTTCAAAGATTCGATCTTTTTCACTGTAAACCCCTTTTTTCACCCC

>M6-PGSC0003DMG401027271M6LRR-RLK\_305

AACCTCATAACCATTTCAAAGATTCGATCTTTTTCACTGTAAACCCCTTTTTTCACCCCCTTAATCTCATCAA  
TGGATTCTTGATTGTTCTATCTGGTTGTTTTGGAGGGAAAAGGAGGA

>M6-PGSC0003DMG401027271M6LRR-RLK\_3111

ATAAATCTGTAATTGACTTGTTTTTTTTTCTAAACAGAGTATGCATATACAATGCAAGTAACAGCTCCT  
GGAAATGTTTACAGCTATGGGGTTGTTTTGCTCGAGATCCTAACCACCC

>M6-PGSC0003DMG401027271M6LRR-RLK\_3172

AACAGCTCCTGGAAATGTTTACAGCTATGGGGTTGTTTTGCTCGAGATCCTAACCACCCGACTACCTGTT  
GATGAAGCTTTTGGTGAAGGAATAGATTTGGTTAAGTGGGTACATGGTGC

>M6-PGSC0003DMG401027271M6LRR-RLK\_3233

CTACCTGTTGATGAAGCTTTTGGTGAAGGAATAGATTTGGTTAAGTGGGTACATGGTGCACCTACAAGG  
GGGGAAACACCGGAGCAGATACTCGATGCAAAGCTCAGCACCATTTCATTT

>M6-PGSC0003DMG401027271M6LRR-RLK\_3294

CTACAAGGGGGGAAACACCGGAGCAGATACTCGATGCAAAGCTCAGCACCATTTCATTTTCTTGGAGAA  
AGGAAATGTTAGCAGCACTAAAGTTGCGTTGCTGTGCACTGACATGACAC

>M6-PGSC0003DMG401027271M6LRR-RLK\_3355

TTGGAGAAAGGAAATGTTAGCAGCACTAAAGGTTGCGTTGCTGTGCACTGACATGACACCAGCAAAAC  
GACCAAAGATGAAGAAGGTGGTAGAAATGCTGCAAGAAATCACGGAAAGCTA

>M6-PGSC0003DMG401027271M6LRR-RLK\_3416

GCAAAACGACCAAAGATGAAGAAGGTGGTAGAAATGCTGCAAGAAATCACGGAAAGCTAAACAAAGTT  
CGTATCATCAAATCTAAGTATGTGTTGATCTCTGTCTCTTCATATGTGAATG

>M6-PGSC0003DMG401027271M6LRR-RLK\_3477

CAAAGTTCGTATCATCAAATCTAAGTATGTGTTGATCTCTGTCTCTTCATATGTGAATGCTCCTGTAAAAA

TACAAGTGTACGACATTCTAAGTCGAGAGGACAAAATGGTCGAACTCTT

>M6-PGSC0003DMG401027271M6LRR-RLK\_3538

CCTGTAAAATACAAGTGTACGACATTCTAAGTCGAGAGGACAAAATGGTCGAACTCTTAAGGGTATGA  
TGTGTCTTACTTCAATCATATGATCACCAGTTCTTTTTCTCCAAAACATGA

>M6-PGSC0003DMG401027271M6LRR-RLK\_3599

GGGTATGATGTGTCTTACTTCAATCATATGATCACCAGTTCTTTTTCTCCAAAACATGAAGATGGAGATG  
ATGTAGATTAATTTCTCACAAGGAGAATATGTTTACAAATAGCATTATCT

>M6-PGSC0003DMG401027271M6LRR-RLK\_3660

ATGGAGATGATGTAGATTAATTTCTCACAAGGAGAATATGTTTACAAATAGCATTATCTTTCATTTTCCAG  
TTCCCCTTTCTGGTACATTGCTTCCAAATCAAGTATAGATTAATCATA

>M6-PGSC0003DMG401027271M6LRR-RLK\_3691

GAGAATATGTTTACAAATAGCATTATCTTTCATTTTCCAGTTCCCCTTTCTGGTACATTGCTTCCAAATCAA  
GTATAGATTAATCATAGTGAAAGATTAAGGGAATGCTACTATTCAAC

>M6-PGSC0003DMG401027271M6LRR-RLK\_61

ATTTTATTTCTAAATTTAAGGGCTTCTAGCTTTTTGGTTATTTTCCATTTTCAAGATTCCTCAAATGGAA  
TACTCCCTCACATTTCTTGAGCATTTCAAGACTCAATCTTTTTCACTC

>M6-PGSC0003DMG401027811M6LRR-RLP\_0

TATGCCTCTTTACATTTCTATATATGTTGATTAATAAAGTCCGTTGTAATAAAGGTTTTCCATGAAGCAG  
GAATATTCATCTTTGCCTGCTTGACCAAAAATGAATTCAAATAATTTCA

>M6-PGSC0003DMG401027811M6LRR-RLP\_1037

GAATCTATCTACTTTGGTTGGTCACAGTAATTTGGCTAGAAACAAGTTGAATGGACCAATTCCTGAATCA  
TTTAAAGATCTGACGCGACTAACGCACATGTGAGTAGTTTCATAACTTCG

>M6-PGSC0003DMG401027811M6LRR-RLP\_1098

CCTGAATCATTTAAAGATCTGACGCGACTAACGCACATGTGAGTAGTTTCATAACTTCGACTGCAAACCTT  
TTCATTATATTCTCCATCCTTCACTGTGTCCATTAGAAATTTACTCATCT

>M6-PGSC0003DMG401027811M6LRR-RLP\_1159

TGCAAACCTTTTCATTATATTCTCCATCCTTCACTGTGTCCATTAGAAATTTACTCATCTATTTTTGAAGTCTT  
TCATTACTATGCATATGATGAAGCCAATTAAGGAATTCTTTTTCTTT

>M6-PGSC0003DMG401027811M6LRR-RLP\_122

ATAATTATAGCAACATCTGCACAATTCACCACTAAAATGTAAAGCAACTTAAGAGACATTTTAAGTTAG  
TACTTTTCATGCCAAATATGTGCTAATCATCCTTGTTTTATGTTTCATTAT

>M6-PGSC0003DMG401027811M6LRR-RLP\_1220

TTTTGAAGTCTTTCATTACTATGCATATGATGAAGCCAATTAAGGAATTCTTTTTCTTTAATTACCTCTGAT  
GCTTATAATGTTTTATCTGACAGTTCTCTCTGTGATAATTCATTAAC

>M6-PGSC0003DMG401027811M6LRR-RLP\_1281

TTACCTCTGATGCTTATAATGTTTTATCTGACAGTTCTCTCTGTGATAATTCATTAACGGAACCATTCCAC  
TTCCCTTGGTGAGATGAAGTCTTTACAAAAAATGTAAGTCATCGGCT

>M6-PGSC0003DMG401027811M6LRR-RLP\_1342

AACCATTCCACTTTCCCTTGGTGAGATGAAGTCTTTACAAAAAATGTAAGTCATCGGCTTACCTAATTATG  
TCCTTATGTTGGTGTTTGTACCTATTTGGGTATGTAAGCTTTAAGAACC

>M6-PGSC0003DMG401027811M6LRR-RLP\_1403

CCTAATTATGTCCTTATGTTGGTGTTTGTACCTATTTGGGTATGTAAGCTTTAAGAACCATTAGATTATTG  
GCGTTCCAATAACGAAAATTGTGAGTGAAGAATATTTTATAATCTAATG

>M6-PGSC0003DMG401027811M6LRR-RLP\_1464

TAGATTATTGGCGTTCCAATAACGAAAATTGTGAGTGAAGAATATTTTATAATCTAATGGTGACAATTCT  
ATTAGCCCCAATTTGATGTTAACACCAAGCTTAGATGGGTTTTCCCTCG

>M6-PGSC0003DMG401027811M6LRR-RLP\_1525

GACAATTCTATTAGCCCCAATTTGATGTTAACACCAAGCTTAGATGGGTTTTCCCTCGTTAAGTATATC  
CAGATTATATACATGTCTGGTGACCTACATGATTAAAATTAGCAATAGT

>M6-PGSC0003DMG401027811M6LRR-RLP\_1586

TAAGTATATCCAGATTATATACATGTCTGGTGACCTACATGATTAAAATTAGCAATAGTTACGTATAAAA  
GTTTGTTTTAAAGCAAAAGGTTGAGGTAATAATGTTGTTGTGATGGTGAA

>M6-PGSC0003DMG401027811M6LRR-RLP\_1647

CGTATAAAAGTTTGTTTTAAAGCAAAAGGTTGAGGTAATAATGTTGTTGTGATGGTGAATATTGGAAAA  
AAAGAGATTTGTAGTGATGGCGGATATCGTGGAATGAAGACCTAAGAACT

>M6-PGSC0003DMG401027811M6LRR-RLP\_1708

TTGGAAAAAAGAGATTTGTAGTGATGGCGGATATCGTGGAATGAAGACCTAAGAACTATTTGGAAT  
AGTAGTTTTACGCGTACTCTATAGACTAGTACTTAGGAAACTAAGGGGGCTT

>M6-PGSC0003DMG401027811M6LRR-RLP\_1769

TTGGAATAGTAGTTTTACGCGTACTCTATAGACTAGTACTTAGGAAACTAAGGGGGCTTCAATCACGACA  
ATGAGCACCTTTAACTCTGCATTCTTACATGTCAACTGATGCAGAGTTAA

>M6-PGSC0003DMG401027811M6LRR-RLP\_183

TTAAGTTAGTACTTTTCATGCCAAATATGTGCTAATCATCCTTGTTTTATGTTTCATTATTACTGTTTGAAGT  
TGTGGTCTCAAGGGAGTTGAAATTTGTAGTATTTGTTTTAACTATGC

>M6-PGSC0003DMG401027811M6LRR-RLP\_1830

ATCACGACAATGAGCACCTTTAACTCTGCATTCTTACATGTCAACTGATGCAGAGTTAACATGGATCCGG  
CATTTTAAAATTGGATTTTGAACCAATGAAGATGGCTCAACTAGAAAATT

>M6-PGSC0003DMG401027811M6LRR-RLP\_1891

TGGATCCGGCATTTTAAAATTGGATTTTGAACCAATGAAGATGGCTCAACTAGAAAATTCCTCAGAATT  
CTATCTTGGGATTGTATTAATCATTACAATCTAACCTTGGTTGATATTAC

>M6-PGSC0003DMG401027811M6LRR-RLP\_1952

CTCAGAATTCTATCTTGGGATTGTATTAATCATTACAATCTAACCTTGGTTGATATTACAGATCTTTGTGC  
AAAACTTCTTCAATGAAACAATTCCTCCAAATTTGAAGTCTCTCAAAT

>M6-PGSC0003DMG401027811M6LRR-RLP\_2013

ATCTTTGTGCAAAAATCTTCAATGAAACAATTCCTCCAAATTTGAAGTCTCTCAAATCTTTAGAATATTT  
GTAAGTCTAAAGCTGCATCTTATATTGTCCTTTATATTGTGAAATAAA

>M6-PGSC0003DMG401027811M6LRR-RLP\_2074

TTAGAATATTTGTAAGTCTAAAGCTGCATCTTATATTGTCCTTTATATTGTGAAATAAATTACTAACTA  
GTCATCTTAGTTCATAATATATTTATTTCTTCTTGTCTTTTCAGAGA

>M6-PGSC0003DMG401027811M6LRR-RLP\_2135

ATTACTAACTAGTCATCTTAGTTCATAATATATTTATTTCTTCTTGTCTTTTCAGAGATTTGAGCTATAATT  
TATTATCAGGGAACATATCTGAGCTGGGAGGAATTGGGACCCTCACC

>M6-PGSC0003DMG401027811M6LRR-RLP\_2196

TGAGCTATAATTTATTATCAGGGAACATATCTGAGCTGGGAGGAATTGGGACCCTCACCGAATTGTAAA  
CGCCTTGATAAGATCCATACTTGTACTTCCCAATTGGTTTGGCTTAACTT

>M6-PGSC0003DMG401027811M6LRR-RLP\_2257

ATTGTAAACGCCTTGATAAGATCCATACTTGTACTTCCCAATTGGTTTGGCTTAACTTTAATCCCCATCTA

TTTTCTTCACAATTAGGAACCTGGCGGATAATCAACTCTCGGGTGAA

>M6-PGSC0003DMG401027811M6LRR-RLP\_2318

ATCCCCATCTATTTCTTCACAATTAGGAACCTGGCGGATAATCAACTCTCGGGTGAACCTCCCGGACAG

TCTCACGAGTTTTGTGAATCTTGAGGAGTTGTAAGTATATTTTTGTTAGT

>M6-PGSC0003DMG401027811M6LRR-RLP\_2379

CCCGGACAGTCTCACGAGTTTTGTGAATCTTGAGGAGTTGTAAGTATATTTTTGTTAGTTACTTTTGGGT

GCATGTACCTAACGAAACAGGGATACTTATTATTACGTTGTAAATGATTT

>M6-PGSC0003DMG401027811M6LRR-RLP\_244

CTGTTTGAAGTTGTGGTCTCAAGGGAGTTGAAATTTGTAGTATTTGTTTTAACTATGCAACTTCTAGTTT

CTGATTGATGTCTTTGCAACATAATGAACTGCAGAGATTTCTCCGATAG

>M6-PGSC0003DMG401027811M6LRR-RLP\_2440

CTTTTGGGTGCATGTACCTAACGAAACAGGGATACTTATTATTACGTTGTAAATGATTTTCAGGCAGTTGC

AGAACAATGAATTTGTTGGTGCCTTGCCATTGAGTTTCCATAGTTTGGTG

>M6-PGSC0003DMG401027811M6LRR-RLP\_2501

GGCAGTTGCAGAACAATGAATTTGTTGGTGCCTTGCCATTGAGTTTCCATAGTTTGGTGAACCTGAAAAC

TTTGTAAGTATCAACTCTTATCTTTCCACTACTAAGAAAATCATTATT

>M6-PGSC0003DMG401027811M6LRR-RLP\_2562

CCTGAAAACCTTTGTAAGTATCAACTCTTATCTTTCCACTACTAAGAAAATCATTATTTTTCCATTGAAAA

ATGTTTCGGTGGCTACTCCACAGATATTTTGATTGAAACAATGAGAAA

>M6-PGSC0003DMG401027811M6LRR-RLP\_2684

AATAACTAGTGTTCATATGGAAAAATTAGGAAGTTTTACACTAATTGTAATGAGAATTTGTTTCCCA

TCTTGAGCTGGTTAGGTTGAAATGGGGTGGGAAATCATGTTTTGTAACA

>M6-PGSC0003DMG401027811M6LRR-RLP\_2745

TTGTTTCCCATCTTGAGCTGGTTAGGTTGAAATGGGGTGGGAAATCATGTTTTGTAACACAAATTTCTTA

TAAAGCCTCTGTTTTTAGTAGTGTTCATCTCATTAGCATAGAATTGGA

>M6-PGSC0003DMG401027811M6LRR-RLP\_2806

AATTTCTATTAAGCCTCTGTTTTTAGTAGTGTTCATCTCATTAGCATAGAATTGGAACATGAAGAGAG

AGAGAGATTAAGTTTTAAATCAATTGTTTATCTTCTTTCTTGTAGCGA

>M6-PGSC0003DMG401027811M6LRR-RLP\_2867

ATGAAGAGAGAGAGAGATTAAGTTTTAAATCAATTGTTTATCTTCTTTCCTTGTAGCGATGTGCGAGGGA  
ACAACCTCAATGGAACAATCCCAGATATTTTTGGAGGGTGGGAAAAGCTG

>M6-PGSC0003DMG401027811M6LRR-RLP\_2928

TGCGAGGGAACAACCTCAATGGAACAATCCCAGATATTTTTGGAGGGTGGGAAAAGCTGCTTATCATGT  
AAAACCTCACTAACTAACTGTACACTTTTATACTATCTATGCATGTTTTTAG

>M6-PGSC0003DMG401027811M6LRR-RLP\_2989

TATCATGTAAAACCTCACTAACTAACTGTACACTTTTATACTATCTATGCATGTTTTTAGCAAGACTACTGAT  
TTATTTTTCTGCACATGTTGAGAAGGAATCTGATGGGGAATACTTTT

>M6-PGSC0003DMG401027811M6LRR-RLP\_305

CTTCTAGTTTCTGATTGATGTCTTTGCAACATAATGAACTGCAGAGATTTCTCCGATAGACGAATAGAAG  
GTGGGATCCCTCAGAACATTGGAAACCTTAAATATTTGACTACTCTGTAA

>M6-PGSC0003DMG401027811M6LRR-RLP\_3050

AGACTACTGATTTATTTTTCTGCACATGTTGAGAAGGAATCTGATGGGGAATACTTTTTCTGCATCATT  
CCTCCCACTTTCTCAGAGCTGAAGAATCTACAACAACCTGAAAATCCTG

>M6-PGSC0003DMG401027811M6LRR-RLP\_3111

TGCATCATCCCTCCCACTTTCTCAGAGCTGAAGAATCTACAACAACCTGAAAATCCTGTAGCTTTTCCGA  
TATACGCATCCTTGAAAGGAGTTCTCCCAAACCTTTGAATTATTAAGGAT

>M6-PGSC0003DMG401027811M6LRR-RLP\_3172

GCTTTTCCGATATACGCATCCTTGAAAGGAGTTCTCCCAAACCTTTGAATTATTAAGGATTATGTAATATCT  
ACTTTCAGGTATATCAGTGACTCAGTTGGAGAACAGTACTCATTCCAG

>M6-PGSC0003DMG401027811M6LRR-RLP\_3233

TGTAATATCTACTTTCAGGTATATCAGTGACTCAGTTGGAGAACAGTACTCATTTCAGATTTATCCACAA  
TAGAATCTTTGACAACCTTTGTGAGTCCCGTGGCACCCAAAACCTTTCATG

>M6-PGSC0003DMG401027811M6LRR-RLP\_3294

TTATCCACAATAGAATCTTTGACAACCTTTGTGAGTCCCGTGGCACCCAAAACCTTTCATGCTTATTGGAATA  
ATAGTTTTTCTTTTGCTTTTCTCCTAAAATAGAATTCTATTTTCCAAT

>M6-PGSC0003DMG401027811M6LRR-RLP\_3355

TATTGGAATAATAGTTTTTCTTTTGCTTTTCTCCTAAAATAGAATTCTATTTTCCAATTTTCTGTTTATCTA  
GGACATTGAGGAATTGCTCACTAAAACCGGAATCCCTGATTGGATA

>M6-PGSC0003DMG401027811M6LRR-RLP\_3416

TCTGTTTATCTAGGACATTGAGGAATTGCTCACTAAAAACCGGAATCCCTGATTGGATATGGAAAATACC  
TCAACTAGAGTATCTGTAAGAAAGCTTCTACATGCAGTAAATATCTCCAT

>M6-PGSC0003DMG401027811M6LRR-RLP\_3477

GAAAATACCTCAACTAGAGTATCTGTAAGAAAGCTTCTACATGCAGTAAATATCTCCATATTCGTTTACTT  
CACAGAGAAAAGGGCGTGCTTTTTGATAGGGGAAAGTCGATGCTTCAAA

>M6-PGSC0003DMG401027811M6LRR-RLP\_3538

TCGTTTACTTCACAGAGAAAAGGGCGTGCTTTTTGATAGGGGAAAGTCGATGCTTCAAATGTTCTCCTCT  
TTGACTGCTTTTTTCAAATGAAACTATTATATTATGAGGTTAATGAGAAA

>M6-PGSC0003DMG401027811M6LRR-RLP\_3599

TTCTCCTCTTTGACTGCTTTTTTCAAATGAAACTATTATATTATGAGGTTAATGAGAAAATAAGTCGTTTGT  
TGATAAAAGAGTTCCGTCAGGCTAAGCTCTTAAAGTGTGCTATCTTTG

>M6-PGSC0003DMG401027811M6LRR-RLP\_366

GAATAGAAGGTGGGATCCCTCAGAACATTGGAAACCTTAAATATTTGACTACTCTGTAAGGATACCTAA  
ACAATATATTCTTTTTGTATTGTGCTTTTCGAAGGGGATCCTTGGGGTAGC

>M6-PGSC0003DMG401027811M6LRR-RLP\_3660

AAGTCGTTTGTTGATAAAAGAGTTCCGTCAGGCTAAGCTCTTAAAGTGTGCTATCTTTGTCTTGCTCTCTT  
CAGTTTAAACATCATAACAGTAAAGTGCCTGGAACAAAGTGGAAAAACTAC

>M6-PGSC0003DMG401027811M6LRR-RLP\_3721

TTGCTCTCTTCAGTTTAAACATCATAACAGTAAAGTGCCTGGAACAAAGTGGAAAAACTACTTGATTGCGTG  
TAAACCTGTCACTAAATAGGCGATTACATGTTTCCTTAACAAATATATAA

>M6-PGSC0003DMG401027811M6LRR-RLP\_3782

GATTGCGTGTAACCTGTCCTAAATAGGCGATTACATGTTTCCTTAACAAATATATAAAGTAATACTACT  
TTCTTTTCTCCTGATGCAGGGACTTGAGTTTCAATAATTTGTCTGGTGT

>M6-PGSC0003DMG401027811M6LRR-RLP\_3843

TAATACTACTTTCTTTTCTCCTGATGCAGGGACTTGAGTTTCAATAATTTGTCTGGTGTAAATTCCAGAAAC  
TGGTCCCAAATCACTGAAATTTATGTAAGTGATCTTGCTTCTCTAACTA

>M6-PGSC0003DMG401027811M6LRR-RLP\_3904

TTCCAGAAACTGGTCCCAAATCACTGAAATTTATGTAAGTGATCTTGCTTCTCTAACTAATCATTAAATAT



AAGTGATCTTATTTTTGTAATGAATTGTGGTTATAAAAATTCATCACTGC

>M6-PGSC0003DMG401027811M6LRR-RLP\_3965

CATTAAATATAAGTGATCTTATTTTTGTAATGAATTGTGGTTATAAAAATTCATCACTGCAAGAAAAGCTTT

TATACCTCTTTCCTTTTGGCTATATCTTCTTCTATGCATTTCTTGTCG

>M6-PGSC0003DMG401027811M6LRR-RLP\_4026

GAAAAGCTTTTATACCTCTTTCCTTTTGGCTATATCTTCTTCTATGCATTTCTTGTCGAAGCTAGTAATAG

TTTATACATCTCAAACTCAAGTTTTTTTTTCGATAACAGCTGATATG

>M6-PGSC0003DMG401027811M6LRR-RLP\_4087

GCTAGTAATAGTTTATACATCTCAAACTCAAGTTTTTTTTTCGATAACAGCTGATATGGATTCTGTACT

ATATGTTGTTTCTTGACATTGACTATTGCATTGTTTTGTTGTAGTTT

>M6-PGSC0003DMG401027811M6LRR-RLP\_4392

TGCTGTTGTTGTTGTATAACAGCTGAGGCGGATCTATAGATGGAAAGCTTTTGAAGTTAACATTGGTTTT

CATACTAATTGCAACGTAACCTTACGGTACTTGTGTATTAGATTGTGTGAT

>M6-PGSC0003DMG401027811M6LRR-RLP\_4453

ATTGGTTTTCATACTAATTGCAACGTAACCTTACGGTACTTGTGTATTAGATTGTGTGATTCTGGTGTTGTT

TGAATATCAGAAATTGTGTGATAGCTCGCATTGATGAATACTTGAGCT

>M6-PGSC0003DMG401027811M6LRR-RLP\_4514

TGGTGTGTTTGAATATCAGAAATTGTGTGATAGCTCGCATTGATGAATACTTGAGCTCTGTGATGTCCG

AAAAATTGATCTTTTATCACATTTTTTCTTTTCTGTCTTGTTTTAAGTG

>M6-PGSC0003DMG401027811M6LRR-RLP\_4575

GTGATGTCGAAAAATTGATCTTTTATCACATTTTTTCTTTTCTGTCTTGTTTTAAGTGTCATAATCCAATG

CATTGTTTCCAGATTTCTAAGAAAAAATAAACTCACTGGGACAATTCC

>M6-PGSC0003DMG401027811M6LRR-RLP\_4636

ATAATCCAATGCATTGTTTCCAGATTTCTAAGAAAAAATAAACTCACTGGGACAATTCCAGCTTGGGTCA

AGGATTATCCATACGTGTAAGTACCTTTTGCATTAATATCTTACTTTTTT

>M6-PGSC0003DMG401027811M6LRR-RLP\_4819

AATGGAAAACACTTCATGTTTTGCAGAGTGACTTTTATTCTTAGTACTGTCCAAACCACAACACGTGACG

CTGAAAGATCACTGGAATCATAGCTGTAGTCAATGGAACAACGAAGATCC

>M6-PGSC0003DMG401027811M6LRR-RLP\_4880

CACGTGACGCTGAAAGATCACTGGAATCATAGCTGTAGTCAATGGAACAACGAAGATCCAAATGATTC  
TTCTTATAATAACATATCTAAACTTTTCCTACTCAAGGCCTCTCAACCTGT

>M6-PGSC0003DMG401027811M6LRR-RLP\_4941

ATGATTTCTTCTTATAATAACATATCTAAACTTTTCCTACTCAAGGCCTCTCAACCTGTAAATTGGGATGCA  
AAACATGTTTCTTAGTCATAGACACAATCTTCACTTTTCAAACAATTT

>M6-PGSC0003DMG401027811M6LRR-RLP\_5002

ATTGGGATGCAAAACATGTTTCTTAGTCATAGACACAATCTTCACTTTTCAAACAATTTGCAATCGCCAAC  
TCATTTGTTTCATGTCTCGCACATTAGTTGATGGAACGGGTTGTTGTTGC

>M6-PGSC0003DMG401027811M6LRR-RLP\_5063

AATCGCCAACTCATTTGTTTCATGTCTCGCACATTAGTTGATGGAACGGGTTGTTGTTGCCTCATATGGTTT  
TAGACAGTCCTCATCTCATGAGCTAGCTTTTGCGGATGAGTTCATCATT

>M6-PGSC0003DMG401027811M6LRR-RLP\_5124

CATATGGTTTTAGACAGTCCTCATCTCATGAGCTAGCTTTTGCGGATGAGTTCATCATTAGGCCCATTTTT  
GTTTTGGTCATTATCTCTTTCCATTAACTACCATATATTCTTAGGCCA

>M6-PGSC0003DMG401027811M6LRR-RLP\_5185

GCCCATTTTTGTTTTGGTCATTATCTCTTTCCATTAACTACCATATATTCTTAGGCCAATTATTTCTTTTTC  
CGTATTCTGTTTTACTCTTCTATCCATTACTTGGATATAATTTTT

>M6-PGSC0003DMG401027811M6LRR-RLP\_5246

TATTTCTTTTTCCGTATTCTGTTTTACTCTTCTATCCATTACTTGGATATAATTTTTGTTGGGGAACAATG  
AAAAATCACACTAATAGTAGTTGATTTAACATGATTTTTGCCTCGG

>M6-PGSC0003DMG401027811M6LRR-RLP\_5307

TGGGGAACAATGAAAAATCACACTAATAGTAGTTGATTTAACATGATTTTTGCCTCGGCTTTCTCTTTTC  
ATTAATGTCTACAACATATTATGCCACTCACTCGTCCAAGTTGAAGTGC

>M6-PGSC0003DMG401027811M6LRR-RLP\_5368

TTCTCTTTTCATTAATGTCTACAACATATTATGCCACTCACTCGTCCAAGTTGAAGTGCAGGGATCTTTCTG  
AAAACCATTTCAACTTAAGACAAATAAACAAGACAAATCCTAACTTGT

>M6-PGSC0003DMG401027811M6LRR-RLP\_5429

GGATCTTTCTGAAAACCATTTCAACTTAAGACAAATAAACAAGACAAATCCTAACTTGTAAGTGTGATTTT  
CACATATCTAGAAAAATCTTATTTATGTGCTTCTGAGTAGCTTTTCTA

>M6-PGSC0003DMG401027811M6LRR-RLP\_5474

AAATCCTAACTTGTAAGTGTGATTTTCACATATCTAGAAAAATCTTATTTATGTGCTTCTGAGTAGCTTTT  
CTATTCCCGAATCCAATTATATTTCCCTTACCAGGAATCTGTTCCGG

>M6-PGSC0003DMG401027811M6LRR-RLP\_61

CATGAAGCAGGAATATTCATCTTGCCTGCTTGACCAAAAATGAATTCAAATAATTTCACTATAATTATAG  
CAACATCTGCACAATTTACCACTAAAATGTAAAGCAACTTAAGAGACA

>M6-PGSC0003DMG401027811M6LRR-RLP\_610

TTTAGTGCATCGGACTACCTTTTTTTAAATACTATGACCGGTAGGCATTTATATTTTAAGGCAGGAGTG  
GAAAAAATGGAATGCATGCCCAAGAGATATGCATAAGTCGGAAAGCATT

>M6-PGSC0003DMG401027811M6LRR-RLP\_671

GCAGGAGTGGAAAAAATGGAATGCATGCCCAAGAGATATGCATAAGTCGGAAAGCATTACAAAAAAA  
TAGTGCAATGTTCTTAAAGATGCTAATCACCTAGTGTTGCATATCAAAAACG

>M6-PGSC0003DMG401027811M6LRR-RLP\_732

AAAAAATAGTGCAATGTTCTTAAAGATGCTAATCACCTAGTGTTGCATATCAAAAACGACACTAGATTT  
AAACACATCATTACTTGAATAATAGCAGGGGAGCTCACAGCTAAAATCTT

>M6-PGSC0003DMG401027811M6LRR-RLP\_793

ACTAGATTTAAACACATCATTACTTGAATAATAGCAGGGGAGCTCACAGCTAAAATCTTAACGTCTTAAG  
CACTCATATTTAGAAAGTGATCTTATCTCTTGGGGCTTGCATTCCACCTT

>M6-PGSC0003DMG401027811M6LRR-RLP\_854

CGTCTTAAGCACTCATATTTAGAAAGTGATCTTATCTCTTGGGGCTTGCATTCCACCTTTTCCAGGTATAC  
TAGTATAAATTACTAAATAAGAGGTTATCAAACCTAAAAAAAATCTCA

>M6-PGSC0003DMG401027811M6LRR-RLP\_915

CCAGGTATACTAGTATAAATTACTAAATAAGAGGTTATCAAACCTAAAAAAAATCTCAATATTATAAAG  
TCTAAACTAAACTACTTCATAACCAAGATTCGATAATGTGCTATCCTTT

>M6-PGSC0003DMG401027811M6LRR-RLP\_976

ATTATAAAGTCTAAACTAAACTACTTCATAACCAAGATTCGATAATGTGCTATCCTTTATGAATCTATCT  
ACTTTGGTTGGTCACAGTAATTTGGCTAGAAACAAGTTGAATGGACCAA

>M6-PGSC0003DMG401028427M6LRR-RLP\_1054

CCTAGGATGATAGTCCACCACCTAAACATGAACATGGACCAAGCAGGGTTGTTTTGGTGTGGCTATTG

GGCTTTCATCCATTGTGTTTTGATTATTTTATTGGTTTTATTGTCCAAAT

>M6-PGSC0003DMG401028427M6LRR-RLP\_1116

GCTATTGGGCTTTCATCCATTGTGTTTTGATTATTTTATTGGTTTTATTGTCCAAATGTTGTAAATGATCA  
TGA CTGTAAATTGTGACAAATTCTTGGTCCAGTTAGAAATTTGAGTTT

>M6-PGSC0003DMG401028427M6LRR-RLP\_1178

TAAATGATCATGACTGTAAATTGTGACAAATTCTTGGTCCAGTTAGAAATTTGAGTTTTGAAAACATGAA  
TCGATTACTCTTTTGAAACTATGCATATGTTTCATGATTTAGTATTTCTTG

>M6-PGSC0003DMG401028427M6LRR-RLP\_124

GAAAAGACCCTTGTTCTCCCCTTACAATTCCACCATTTGTGACTCTTCAACTCCCTTTCACCATCTCATCT  
CCCTCAAACATCATAAACTGTTCAAATGATGTTACATTATCCCAAACAT

>M6-PGSC0003DMG401028427M6LRR-RLP\_1240

AACATGAATCGATTACTCTTTTGAAACTATGCATATGTTTCATGATTTAGTATTTCTTGAAACTGATTCACA  
AACAAATGTATGAACTTTGTACGTCTTATTATTAATCTAGCTCAAATTG

>M6-PGSC0003DMG401028427M6LRR-RLP\_1302

TGATTCACAAACAAATGTATGAACTTTGTACGTCTTATTATTAATCTAGCTCAAATTGGACTCAAATATTT  
AAATGAACAAGCTTGCGTATACGTTTGAACCTTATGTTTATATAATTATA

>M6-PGSC0003DMG401028427M6LRR-RLP\_1364

CAAATATTTAAATGAACAAGCTTGCGTATACGTTTGAACCTTATGTTTATATAATTATATATTCTGCGAGAG  
TATTTTATATACTCTATAGTCTAGTCAATCTTATAAGATCTGTTTCTGG

>M6-PGSC0003DMG401028427M6LRR-RLP\_1550

GATGTAATCATGGGTTCTTTGTTAGCATGAGTAATAAATAATGAAAAGATCAAATATGTCAGTTTTACTA  
TGTTTCATGGTTGGTTTTTTTTATTCCAATCTTAGTACAAAGGGAACATGCC

>M6-PGSC0003DMG401028427M6LRR-RLP\_1612

TTTTACTATGTTTCATGGTTGGTTTTTTTTATTCCAATCTTAGTACAAAGGGAACATGCCTCTCCTGATTCTTT  
TCAGATTATTTTAAATTTGACAAAACATAATGTCTCTTTAACTTCACA

>M6-PGSC0003DMG401028427M6LRR-RLP\_1674

CTGATTCTTTTCAGATTATTTTAAATTTGACAAAACATAATGTCTCTTTAACTTCACAAAGGGAAGAAA  
AGTTTAAAGACGACTTGGGACTCATATTTGAACTGAGAAGAAGGATAAAA

>M6-PGSC0003DMG401028427M6LRR-RLP\_1736

GCCAAGAAAAGTTTAAGACGACTTGGGACTCATATTTGAACTGAGAAGAAGGATAAAAATGCTCCAATCT  
TTTTTATTTTCATTCATGTTACATAGAAATTTGTTTTCATCAAGATCTGACC

>M6-PGSC0003DMG401028427M6LRR-RLP\_1798

CCAATCTTTTTTATTTTCATTCATGTTACATAGAAATTTGTTTTCATCAAGATCTGACCATGTCCTTTTAGTAC  
AAAATTTGATTATACATGTTGATAAAAGGATTCGTTTACTTTGCTTG

>M6-PGSC0003DMG401028427M6LRR-RLP\_186

CATCTCATCTCCCTCAAACATCAAATGTTCAAATGATGTTACATTATCCCAAACATCTCTCAAACATCTC  
TCCACTCTCCAAGACTTACAATTCATCAACTGCCCTGTTTCTCCTATT

>M6-PGSC0003DMG401028427M6LRR-RLP\_1860

CCTTTTAGTACAAAATTTGATTATACATGTTGATAAAAGGATTCGTTTACTTTGCTTGTTTTTTTCATTTTCC  
TTTTACAAATGAACATTCAGAAAGGGTGACTGTAATAATTGGTGAAG

>M6-PGSC0003DMG401028427M6LRR-RLP\_1922

TTTCATTTTCCTTTTACAAATGAACATTCAGAAAGGGTGACTGTAATAATTGGTGAAGAAACAAACAAAA  
ATCAAATGGAGATTTTCAGGTTCAAGTACCTTGATATGAATGTCATTTTGT

>M6-PGSC0003DMG401028427M6LRR-RLP\_1984

AAACAAAATCAAATGGAGATTTTCAGGTTCAAGTACCTTGATATGAATGTCATTTTGTCTGGGAGCGTTT  
ATCCTAATATGACATTTTCTGACGTGAATCCAAATTTAATCAAGCTCCAT

>M6-PGSC0003DMG401028427M6LRR-RLP\_2046

GAGCGTTTATCCTAATATGACATTTTCTGACGTGAATCCAAATTTAATCAAGCTCCATCATGACGCTCCAA  
TATGAATACGGAACAGCAGATTTTTTTTTTTTTAAAAAAAATAAATAATC

>M6-PGSC0003DMG401028427M6LRR-RLP\_2108

ACGCTCCAATATGAATACGGAACAGCAGATTTTTTTTTTTTTAAAAAAAATAAATAATCCTTTTCTCATCCA  
AAACCACATTCTACTTGCAAATAGCACGTGTGATAAGTGACGATGAGAC

>M6-PGSC0003DMG401028427M6LRR-RLP\_2170

TCTCATCCAAAACCACATTCTACTTGCAAATAGCACGTGTGATAAGTGACGATGAGACACAAAATGTGT  
ACATGGCTTTTGTGGTCAGCCTGCATACACGTCTACTATTTTTTGTGGTG

>M6-PGSC0003DMG401028427M6LRR-RLP\_2232

AAATGTGTACATGGCTTTTGTGGTCAGCCTGCATACACGTCTACTATTTTTTGTGGTGTTGAATGAATGT  
GTTTCACTAAAATAAAGAGTCTACGGTATATGTAATCTTCATTAAGAAT

>M6-PGSC0003DMG401028427M6LRR-RLP\_2294

ATGAATGTGTTTCACTAAAAATAAAGAGTCTACGGTATATGTAATCTTCATTAAGAATCGAAAAATTAGT  
TTTTCGAAGAAAATATGGGTGCAACAGCAACTGCAGTTTTCTCTTCAAAT

>M6-PGSC0003DMG401028427M6LRR-RLP\_2356

AAATTAGTTTTTCGAAGAAAATATGGGTGCAACAGCAACTGCAGTTTTCTCTTCAAATTCTATATCTCAAT  
TGCCCTCCTTCTCTGCTTTATGTAAACCCAACCTTGGGGATCCGAATACC

>M6-PGSC0003DMG401028427M6LRR-RLP\_2418

TATCTCAATTGCCCTCCTTCTCTGCTTTATGTAAACCCAACCTTGGGGATCCGAATACCAAAGGTACTTTT  
TTTTAATTATTAATAATCTTCCATGAAATGAGTTGATTAAGTTGTGTTT

>M6-PGSC0003DMG401028427M6LRR-RLP\_2474

CCAAAAGGTACTTTTTTTTTAATTATTAATAATCTTCCATGAAATGAGTTGATTAAGTTGTGTTCTTATGAAT  
TCTTGAAATTAATAATTGGGAAGTACTTGGAAAATCTTGGGTTTTTTTT

>M6-PGSC0003DMG401028427M6LRR-RLP\_248

CAAAACTCTCTCCACTCTCCAAGACTTACAATTCATCAACTGCCCTGTTTCTCCTATTCATTTCCCTTCTGAA  
CTTCTCTCAATCTCCAATCCTTCACTTGCATCAACTCCCTCAAGAA

>M6-PGSC0003DMG401028427M6LRR-RLP\_310

TCCCTTCTGAACTTTCCTCCAATCTCCAATCCTTCACTTGCATCAACTCCCTCAAGAATCTCACTAGCCTTT  
GGCTAATTCAATTGCGCAATGTGACAAGTTTAATGGTGTACATGTTT

>M6-PGSC0003DMG401028427M6LRR-RLP\_372

ACTAGCCTTTGGCTAATTCAATTGCGCAATGTGACAAGTTTAATGGTGTACATGTTTCTGCTAG  
TGGCCCTTCTATAATCTTGAACAGTATCAAGAACTTGCAGAGTGTACA

>M6-PGSC0003DMG401028427M6LRR-RLP\_434

TTCTGCTAGTGGCCCTTCTATAATCTTGAACAGTATCAAGAACTTGCAGAGTGTACAATATCTCATGGA  
AATCTCAAAGGGGTTCTTCTACAAAATGGCATATGAATCTTACTTATGT

>M6-PGSC0003DMG401028427M6LRR-RLP\_496

CTCATGGAAATCTCAAAGGGGTTCTTCTACAAAATGGCATATGAATCTTACTTATGTTGATTTATCTGGG  
AATCAACTAAAAGGGAAAATACCAAGTTCTTTAACTGAACTTGAAAATC

>M6-PGSC0003DMG401028427M6LRR-RLP\_558

TTATCTGGGAATCAACTAAAAGGGAAAATACCAAGTTCTTTAACTGAACTTGAAAATCTTTTGCATTTGA

ATCTTTCTTCAAATTTACTCAATGGGACTATACCAAATTCATTTGGTAAC

>M6-PGSC0003DMG401028427M6LRR-RLP\_62

TCAATCCACTAATCTTGACCCAAACCAACTCAAAGCTCTCAGATCACTAAATGTACCAACAGGAAAAGAC  
CCTTGTTCTCCCCTTCACAATTCACCATTTGTGACTCTTCAACTCCCTT

>M6-PGSC0003DMG401028427M6LRR-RLP\_620

GCATTTGAATCTTTCTTCAAATTTACTCAATGGGACTATACCAAATTCATTTGGTAACTTACTTTCTTTAAA  
AAATGTGTCATTAGCTTCAAATGCTCTGTCTGGAAGTATTCCGAAATC

>M6-PGSC0003DMG401028427M6LRR-RLP\_682

TTTCTTTAAAAAATGTGTCATTAGCTTCAAATGCTCTGTCTGGAAGTATTCCGAAATCTATTGCTGCAATT  
CCTGAATTAGTCCATCTTGATCTTGGATCAAACCAATTGAATGGAECTA

>M6-PGSC0003DMG401028427M6LRR-RLP\_744

GCTGCAATTCCTGAATTAGTCCATCTTGATCTTGGATCAAACCAATTGAATGGAECTATTCCAAAGTTCAT  
ATCAGATATGAAAGGATTGCAATACCTGAATCTTGAAAGAAACAATTTTC

>M6-PGSC0003DMG401028427M6LRR-RLP\_806

AAAGTTCATATCAGATATGAAAGGATTGCAATACCTGAATCTTGAAAGAAACAATTTTCGAAGGTGTTTTG  
CCATTCAATGCTTCTTTTCATCAAGAACTAGTTGTGTTCAAAGTGGGAGA

>M6-PGSC0003DMG401028427M6LRR-RLP\_868

GTGTTTTGCCATTCAATGCTTCTTTTCATCAAGAACTAGTTGTGTTCAAAGTGGGAGAAAATTCAAATCTT  
TGCTACAATCATTCCACATTGTCTTCAAACCTGAACTTGGCATTGCC

>M6-PGSC0003DMG401028427M6LRR-RLP\_930

TCAAATCTTTGCTACAATCATTCCACATTGTCTTCAAACCTGAACTTGGCATTGCCCTTGTGATAAACA  
TGGATTGCCACTGTCTCCGCCGCTCCTAAGGAAGATTTTCAGTGATGAT

>M6-PGSC0003DMG401028427M6LRR-RLP\_992

TGATAAACATGGATTGCCACTGTCTCCGCCGCTCCTAAGGAAGATTTTCAGTGATGATACTGCCTAGGAT  
GATAGTCCACCACCTAAACATGAACATGGACCAAGCAGGGTTGTTTTTGG

>M6-PGSC0003DMG401028902-(rev)M6G-LecRK\_0

TTTTGGCCATTTTGTGTCAATCCTCTAAATAGAAATCCCCAGTCAGCAAAGATGCAATCTTGGAGTTTGG  
CACCACAGGAAATCTTGTGATGGATGGAGACACCACAGTGTGGGCA

>M6-PGSC0003DMG401028902-(rev)M6G-LecRK\_1054

GGTACTCAGGAGCTTGAATTTGGTGGATTTGAGGATCCTGTTTCGACCTTATTTGTGAAGGTTGAGG  
CCAATGCCTCGGTATCTGAAAAACCTGGGAATTCATCAGATGAGTCGAAGA

>M6-PGSC0003DMG401028902-(rev)M6G-LecRK\_1116

GTTGAGGCCAATGCCTCGGTATCTGAAAAACCTGGGAATTCATCAGATGAGTCGAAGAGTAGGCACGA  
TAAGGTTTTGGTACTTCCTATAGTCTGAGTATGACTGTTCTCATTTTGCTT

>M6-PGSC0003DMG401028902-(rev)M6G-LecRK\_1178

GCACGATAAGGTTTTGGTACTTCCTATAGTCTGAGTATGACTGTTCTCATTTTGCTTCTCTGTTGTTTATT  
GTATATCAATATCCATAGGAGAAGATCTATGAGAAGGGCACTTGAGGG

>M6-PGSC0003DMG401028902-(rev)M6G-LecRK\_124

ACACCTCGGAAGCAGGCGTTGAGTTGGCTGTCATGTCTGAAAATGGCAACTTCATTCTCTACAGCACCAA  
TCTAAGTACCATTGCATGGCAAAGCTTTTCACATCCATCTGATACTCTCT

>M6-PGSC0003DMG401028902-(rev)M6G-LecRK\_1240

GTTGTTTATTGTATATCAATATCCATAGGAGAAGATCTATGAGAAGGGCACTTGAGGGATCTTTGCTGTT  
GTCTGGAGCTCCAATTAGCTTCAGCTACCGCGACCTGCAATGTTGGACTA

>M6-PGSC0003DMG401028902-(rev)M6G-LecRK\_1302

TTGCTGTTGTCTGGAGCTCCAATTAGCTTCAGCTACCGCGACCTGCAATGTTGGACTAACAAATTTTCCGA  
GTTACTTGGAACAGGTAAAGATATAGAATTTTATTACTTCTATGATAC

>M6-PGSC0003DMG401028902-(rev)M6G-LecRK\_1364

TTTTCCGAGTTACTTGGAACAGGTAAAGATATAGAATTTTATTACTTCTATGATACTAACCTCTCAACT  
ATAGAAATAACAAGCACAGAAAACCTGTTCTCTTTCAGATAAGGTAAGAA

>M6-PGSC0003DMG401028902-(rev)M6G-LecRK\_1426

CTCTCAACTATAGAAATAACAAGCACAGAAAACCTGTTCTCTTTCAGATAAGGTAAGAATATGATCAGTAA  
CATTGCTGCTTTGACAGGTGGATTTGGAAGTGTGTATAAAGGAAGTTTAA

>M6-PGSC0003DMG401028902-(rev)M6G-LecRK\_1488

ATCAGTAACATTGCTGCTTTGACAGGTGGATTTGGAAGTGTGTATAAAGGAAGTTTAAAGGATGCAACA  
TTGATTGCAGTAAAGAACTTGATAAAGTTTCACCTCATGGGGAGAAGGAA

>M6-PGSC0003DMG401028902-(rev)M6G-LecRK\_1550

TGCAACATTGATTGCAGTAAAGAACTTGATAAAGTTTCACCTCATGGGGAGAAGGAATTTATAACAGA  
GGTCAAACCATTTGGCTCTATGCATCATCTGAACTTGGTTCGTCTATGCGG



>M6-PGSC0003DMG401028902-(rev)M6G-LecRK\_1612

TAACAGAGGTCAAACCATTGGCTCTATGCATCATCTGAACTTGGTTCGTCTATGCGGTTACTGTTCTGA  
GGGAACCCAACGGTAAGTTTTAACTTTTTTTCATTGTAATTTGTGATGTA

>M6-PGSC0003DMG401028902-(rev)M6G-LecRK\_1674

TGTTCTGAGGGAACCCAACGGTAAGTTTTAACTTTTTTTCATTGTAATTTGTGATGTATAGATTGGGAAG  
TACGTAGAATTGTAGCATTACAGTCAAGCACTAGCACAACTTTCCTAA

>M6-PGSC0003DMG401028902-(rev)M6G-LecRK\_1736

TTGGGAAGTACGTAGAATTGTAGCATTACAGTCAAGCACTAGCACAACTTTCCTAAATTTTCACTCTTT  
GGCAGGCTACTAGTGTATGAGTACATGAAAAATAGCTCATTAGACAAGT

>M6-PGSC0003DMG401028902-(rev)M6G-LecRK\_1798

TCACTCTTTGGCAGGCTACTAGTGTATGAGTACATGAAAAATAGCTCATTAGACAAGTGGATATTTTCATT  
CATTTAGTACAAGAAATAGACTACTGGATTGGGCGTCACGTTTTTCGCATA

>M6-PGSC0003DMG401028902-(rev)M6G-LecRK\_186

AGCACCAATCTAAGTACCATTGCATGGCAAAGCTTTTACATCCATCTGATACTCTCTTGCCTGGTCAATC  
CTTAACAGTGTCACTAGAATTAACATCATCAAATTACCTTCTCATGGT

>M6-PGSC0003DMG401028902-(rev)M6G-LecRK\_1860

ATTTTCATTCATTTAGTACAAGAAATAGACTACTGGATTGGGCGTCACGTTTTTCGCATAGCAGTTGGCACT  
GCACAAGGGATAGCCTATTTTCATGAGCAATGTAGGAACAGAATTATACA

>M6-PGSC0003DMG401028902-(rev)M6G-LecRK\_1922

TTGGCACTGCACAAGGGATAGCCTATTTTCATGAGCAATGTAGGAACAGAATTATACATTGTGATATCAA  
GCCAGAAAACATACTTCTGGATGAGAATTTCTGCCCTAAAGTATCTGATT

>M6-PGSC0003DMG401028902-(rev)M6G-LecRK\_1984

GATATCAAGCCAGAAAACATACTTCTGGATGAGAATTTCTGCCCTAAAGTATCTGATTTTGGACTAGCTA  
AGTTAATGGGAAGAGAGCACTCTCATGTTGTCACAATGATCCGAGGAACG

>M6-PGSC0003DMG401028902-(rev)M6G-LecRK\_2046

ACTAGCTAAGTTAATGGGAAGAGAGCACTCTCATGTTGTCACAATGATCCGAGGAACGAGAGGTTATTT  
AGCTCCCGAGTGGGTCAGCAATCGACCTATCACTGTAAAAGCTGATGTTTA

>M6-PGSC0003DMG401028902-(rev)M6G-LecRK\_2108

GTTATTTAGCTCCCGAGTGGGTCAGCAATCGACCTATCACTGTAAAAGCTGATGTTTACAGCTATGGCAT

GCTTCTTCTAGAGATCATTGGTGGTCGGAGAAATCTTGATATGACTTGTG

>M6-PGSC0003DMG401028902-(rev)M6G-LecRK\_2170

TATGGCATGCTTCTTCTAGAGATCATTGGTGGTCGGAGAAATCTTGATATGACTTGTGATGCAGATGACT

TCTTTTATCCTGGATGGGCTTACAAGGTACACACGCAATCCTCTAATTGT

>M6-PGSC0003DMG401028902-(rev)M6G-LecRK\_2232

AGATGACTTCTTTTATCCTGGATGGGCTTACAAGGTACACACGCAATCCTCTAATTGTATTCATAGTGTTT

CCTCCTTTCTGGTACATGTTCTTCTCACTATCTTTCTCCTTTTTTTTCAG

>M6-PGSC0003DMG401028902-(rev)M6G-LecRK\_2294

ATAGTGTTCCCTCCTTTCTGGTACATGTTCTTCTCACTATCTTTCTCCTTTTTTTTCAGGAGATGACTAGTGG

AACACCCGTAAAAGTTGTAGATAGGCGACTTAGAGGAGCAGTAGAGGA

>M6-PGSC0003DMG401028902-(rev)M6G-LecRK\_2356

TGACTAGTGGAACACCCGTAAAAGTTGTAGATAGGCGACTTAGAGGAGCAGTAGAGGAAAAAGAGGT

AACGAGAGCACTGATGGTCGCCTTCTGGTGTATTCAGGATGAAGTGTCAAACA

>M6-PGSC0003DMG401028902-(rev)M6G-LecRK\_2418

GAGGTAACGAGAGCACTGATGGTCGCCTTCTGGTGTATTCAGGATGAAGTGTCAAACAGGCCTTCCATG

GGAGAAGTGGTGAAGATGTTGGAAGGATCAGTTGACATGAATATGCCACCA

>M6-PGSC0003DMG401028902-(rev)M6G-LecRK\_248

TGGTCAATCCTTAACAGTGTCACTAGAATTAACATCATCAAATTACCTTCTCATGGTGGTTACTACACTT

TAAAAATGTTGCAGCAGCCTACTTCACTAAGTCTTGCATTGACCTATAA

>M6-PGSC0003DMG401028902-(rev)M6G-LecRK\_2480

TTCCATGGGAGAAGTGGTGAAGATGTTGGAAGGATCAGTTGACATGAATATGCCACCAATGCCACAGA

CAGTTTTGGAGTTAATAGAGGAAGGCTTAGATCAAGTATAACAAGGCAATGAA

>M6-PGSC0003DMG401028902-(rev)M6G-LecRK\_2542

CACAGACAGTTTTGGAGTTAATAGAGGAAGGCTTAGATCAAGTATAACAAGGCAATGAAGAGGGAACTC

AATCAGTACAGTTCTTTCTCCATTGCTACTCATCCATCATCTAATGCTACAT

>M6-PGSC0003DMG401028902-(rev)M6G-LecRK\_2604

GAACTCAATCAGTACAGTTCTTTCTCCATTGCTACTCATCCATCATCTAATGCTACATGCAGTCACTCCAGT

ATGTCACCTAGATAGTTGAAGGTGAAATCGAACACAGTTTTTCCTAGG

>M6-PGSC0003DMG401028902-(rev)M6G-LecRK\_2666

TCACTCCAGTATGTCACCTAGATAGTTGAAGGTGAAATCGAACACAGTTTTTCCTAGGATTAAGTAATCG  
TATCATCATTGATTATTCATTCCCCGTCTCCCAAAGAAGTCCCGGAAAA

>M6-PGSC0003DMG401028902-(rev)M6G-LecRK\_2728

AGTAATCGTATCATCATTGATTATTCATTCCCCGTCTCCCAAAGAAGTCCCGGAAAAAGAATAAGAAGG  
GAACACAACCACTTTTGTATCATGTGTTGCTACAACACCATAACGTTGC

>M6-PGSC0003DMG401028902-(rev)M6G-LecRK\_2790

TAAGAAGGGAACACAACCACTTTTGTATCATGTGTTGCTACAACACCATAACGTTGCAAGAACTCACTG  
TCTTGTTTTATTGTTAATTTCACTCAATTCCTCTGGTCTCTAAGATATC

>M6-PGSC0003DMG401028902-(rev)M6G-LecRK\_2844

TTGCAAGAACTCACTGTCTTGTTTTATTGTTAATTTCACTCAATTCCTCTGGTCTCTAAGATATCTCCACC  
ATTCCTCTGTATAATTCGTCACTATCTTTTTTCGTTTTCTTTATA

>M6-PGSC0003DMG401028902-(rev)M6G-LecRK\_310

ACTACACTTTAAAAATGTTGCAGCAGCCTACTTCACTAAGTCTTGCATTGACCTATAATGTCCCAACTAC  
TACGATTCATCGCCTGAATTTTACAGCAATTTTTCTTATTGGTCAGGAC

>M6-PGSC0003DMG401028902-(rev)M6G-LecRK\_372

CCCAACTACTACGATTCATCGCCTGAATTTTACAGCAATTTTTCTTATTGGTCAGGACCTGAAATATCAAA  
TGTGACTGGAGATGTTACTGCAGTATTGGATAAAGCAGGAAGCTTTGGT

>M6-PGSC0003DMG401028902-(rev)M6G-LecRK\_434

AATATCAAATGTGACTGGAGATGTTACTGCAGTATTGGATAAAGCAGGAAGCTTTGGTATAGTTTATGG  
CTCATCTTCAGATGGAGCAGTTTATGTATATAAAAATGATGGAGATTATGG

>M6-PGSC0003DMG401028902-(rev)M6G-LecRK\_496

TTTATGGCTCATCTTCAGATGGAGCAGTTTATGTATATAAAAATGATGGAGATTATGGAGGACTATCATC  
GGCTGTAAATCAAACGAATCCAATGTTCCATCTATTCTTCGTCGATTAA

>M6-PGSC0003DMG401028902-(rev)M6G-LecRK\_558

CTATCATCGGCTGTAAATCAAACGAATCCAATGTTCCATCTATTCTTCGTCGATTAACCCTTGAGGTTAA  
TGAAATTTACGTTTGTATCGATGGGATAATGATGTGAATGGATCAAGG

>M6-PGSC0003DMG401028902-(rev)M6G-LecRK\_62

GGAGTTTGGCACCACAGGAAATCTTGTGTTGATGGATGGAGACACCACAGTGTGGGCATCAAACACCTC  
GGAAGCAGGCGTTGAGTTGGCTGTCATGTCTGAAAATGGCAACTTCATTCT

>M6-PGSC0003DMG401028902-(rev)M6G-LecRK\_620

TGAGGTTAATGGAAATTTACGTTTGTATCGATGGGATAATGATGTGAATGGATCAAGGCAATGGGTTC  
AGAGTGGGCAGCTGTGTCTAATCCATGTGATATTTCTGGAGTTTGTGGCAA

>M6-PGSC0003DMG401028902-(rev)M6G-LecRK\_682

GGGTTCCAGAGTGGGCAGCTGTGTCTAATCCATGTGATATTTCTGGAGTTTGTGGCAATGGGATATGTA  
ATTTAGACAGAAGCAAACAAATGCTTCTTGCACATGTTTGCCAGGGACTT

>M6-PGSC0003DMG401028902-(rev)M6G-LecRK\_744

ATATGTAATTTAGACAGAAGCAAACAAATGCTTCTTGCACATGTTTGCCAGGGACTTCTACGGAGGGA  
GATGATGTTTCATGTTTCGGGAAATCCTTCAGTGACAGGGAAATGTGGACCT

>M6-PGSC0003DMG401028902-(rev)M6G-LecRK\_806

GGAGGGAGATGATGTTTCATGTTTCGGGAAATCCTTCAGTGACAGGGAAATGTGGACCTCAGCATGAAA  
ATATGATGTCCCAGTTCAAGATTTCTACGGTTCAGAAAACGAATTATTATTT

>M6-PGSC0003DMG401028902-(rev)M6G-LecRK\_868

ATGAAAATATGATGTCCCAGTTCAAGATTTCTACGGTTCAGAAAACGAATTATTATTTCTCAGAATCATCT  
GTTATAGGAAATTATAGCGATAAAGGGTCACTGTCCAAATGTGGTGATG

>M6-PGSC0003DMG401028902-(rev)M6G-LecRK\_930

GAATCATCTGTTATAGGAAATTATAGCGATAAAGGGTCACTGTCCAAATGTGGTGATGCTTGCTTATCAA  
ACTGTGGTTGTGTTGCATCTGTTTATGGACTTAGTGAGGAAAAGGCTTAT

>M6-PGSC0003DMG401028902-(rev)M6G-LecRK\_992

CTTATCAAACGTGGTTGTGTTGCATCTGTTTATGGACTTAGTGAGGAAAAGGCTTATTGTTGGTTACTC  
AGGAGCTTGGAATTTGGTGGATTTGAGGATCCTGTTTCGACCTTATTTGT

>M6-PGSC0003DMG401029358-(rev)M6LRR-RLK\_0

CATTTCTTGGTTTTGTATTGATATACTAGTTAGCAGGATTTGTATCTGTTGTGCTTCAGAGAGTGATGTT  
TATTGCTTGAAATCAATAAAAGAATCATTACATGACCCTTTCAATTCTT

>M6-PGSC0003DMG401029358-(rev)M6LRR-RLK\_1054

AGCTGGAGAAGTTTGTATGAGAATGAGCTTCACGGAGCTTGAAAACGCGACTTCTGGTTTTAGTGAAG  
ACTATCTAGTAGGAAATGGAATGTTGGCAAAGTGTACAAGGCAATTCTTC

>M6-PGSC0003DMG401029358-(rev)M6LRR-RLK\_1116

AGTGAAGACTATCTAGTAGGAAATGGAATGTTGGCAAAGTGTACAAGGCAATTCTTCAAATGGCTG

GATACTTGCCATCAAGAAGCTCAATGACTGGGAGAATTTGGAGGACGAGTTT

>M6-PGSC0003DMG401029358-(rev)M6LRR-RLK\_1178

TGGCTGGATACTTGCCATCAAGAAGCTCAATGACTGGGAGAATTTGGAGGACGAGTTTGTCTCGGAGAT

TACAACTCTTGGTGGTCTGAGGCATAGGAATCTATTGCCTCTAATAGGTTT

>M6-PGSC0003DMG401029358-(rev)M6LRR-RLK\_124

CTCTTGGAATTTCAACCAAACTCCATCTGTCTTTTTGAGGGAATTGACTGCTGGCAATCTGATGAGAAT

AAGGTAATGAGCATCACACTTTCAAACCTTTGGATTAATAGGTGAGTTTCC

>M6-PGSC0003DMG401029358-(rev)M6LRR-RLK\_1240

CGGAGATTACAACTCTTGGTGGTCTGAGGCATAGGAATCTATTGCCTCTAATAGGTTTCTGCGCCGAAAA

GCAAGAAAGGCTTCTTGTTTACAAATACATGACTAATGGAAGTCTTGATG

>M6-PGSC0003DMG401029358-(rev)M6LRR-RLK\_1302

GCCGAAAAGCAAGAAAGGCTTCTTGTTTACAAATACATGACTAATGGAAGTCTTGATGAATGGCTGCAC

TCGAATGAAGTTAAGGCCAATATTTGGATTTCCCTCGGAGAGCTAAAATT

>M6-PGSC0003DMG401029358-(rev)M6LRR-RLK\_1364

GCTGCACTCGAATGAAGTTAAGGCCAATATTTGGATTTCCCTCGGAGAGCTAAAATTGCACTTGGGATA

GCGAAAGGCCTGGCTTGGCTTCATCATGGTTACGAATTGCACGTTACACA

>M6-PGSC0003DMG401029358-(rev)M6LRR-RLK\_1426

TTGGGATAGCGAAAGGCCTGGCTTGGCTTCATCATGGTTACGAATTGCACGTTACACATGGAAGCATAA

GCACGCGATGTATCTTGCTAGATCAAATCTTGAACCAAAAATATCCAACCT

>M6-PGSC0003DMG401029358-(rev)M6LRR-RLK\_1486

GAAGCATAAGCACGCGATGTATCTTGCTAGATCAAATCTTGAACCAAAAATATCCAACCTTTTGGGAAGC

AAAATTTTGGAGTAAGAATGATTCTGCATTAAGTTGGAGTCTTTTCCCAG

>M6-PGSC0003DMG401029358-(rev)M6LRR-RLK\_186

ATGAGAATAAGGTAATGAGCATCACACTTTCAAACCTTTGGATTAATAGGTGAGTTTCTCGTGGCATTTCG

AAATTGTACAAGCTTGACAGGTCTAAATCTTTCTGGTAATCATTGTATG

>M6-PGSC0003DMG401029358-(rev)M6LRR-RLK\_248

GGCATTGAAATTGTACAAGCTTGACAGGTCTAAATCTTTCTGGTAATCATTGTATGGAACCATCCCTTC

TGATATAGCAGTGATTCTCCATTTGTTACAATACTTGATCTCTCAAAT

>M6-PGSC0003DMG401029358-(rev)M6LRR-RLK\_310

CATCCCTTCTGATATAGCAGTGATTCTTCCATTTGTTACAATACTTGATCTCTCAAATAACACCTTTTCGGG  
CAATATAACACCTGGTATAGGTAATTGTCAATTCATAAATGTTCTAAA

>M6-PGSC0003DMG401029358-(rev)M6LRR-RLK\_372

CCTTTTCGGGCAATATAACACCTGGTATAGGTAATTGTCAATTCATAAATGTTCTAAAGTTGGACTATAAT  
GATTTAGAAGGTGAAATTCCAAGTAGAATAGGCTATTTGCCTCGCCTTA

>M6-PGSC0003DMG401029358-(rev)M6LRR-RLK\_434

GACTATAATGATTTAGAAGGTGAAATTCCAAGTAGAATAGGCTATTTGCCTCGCCTTAAGACGTTTCAGCA  
TAGCTAACAATTACTTGACTGGGCCAGTGCCATTGTTTTTTAGCAAGAAT

>M6-PGSC0003DMG401029358-(rev)M6LRR-RLK\_496

GTTTCAGCATAGCTAACAATTACTTGACTGGGCCAGTGCCATTGTTTTTTAGCAAGAATATCACGGCTGAG  
AGTTTTGCAAACAATCCAGAGCTTTGTGGGAAGCCCTTGAAAGGATGTGA

>M6-PGSC0003DMG401029358-(rev)M6LRR-RLK\_558

CGGCTGAGAGTTTTGCAAACAATCCAGAGCTTTGTGGGAAGCCCTTGAAAGGATGTGAGGATTCTTGGA  
TATGGAAACATGTAGATCGTGCTTCGTTTCATCAAAGCGTTTGTGATTGGTT

>M6-PGSC0003DMG401029358-(rev)M6LRR-RLK\_62

AGTGATGTTTATTGCTTGAAATCAATAAAAGAATCATTACATGACCCTTTCAATTCTTTAAACTCTTGAA  
TTTCAACCAAAACTCCATCTGTCTTTTTGAGGGAATTGACTGCTGGCAA

>M6-PGSC0003DMG401029358-(rev)M6LRR-RLK\_620

TCTTGATATGGAAACATGTAGATCGTGCTTCGTTTCATCAAAGCGTTTGTGATTGGTTGGTACTTTTTGT  
TTACAATGGTTTTAGTCCTTTGCTTATTTAAATTTCTACCAAGGCTATC

>M6-PGSC0003DMG401029358-(rev)M6LRR-RLK\_682

ACTTTTGTTTACAATGGTTTTAGTCCTTTGCTTATTTAAATTTCTACCAAGGCTATCAACAAGATAGTCTC  
ATTAACATATGGAAGCTAAGGAAAAAGAAACATTTAACTTCAGGAAG

>M6-PGSC0003DMG401029358-(rev)M6LRR-RLK\_744

AGATAGTCTCATTAAACATATGGAAGCTAAGGAAAAAGAAACATTTAACTTCAGGAAGTGAAGAGGAA  
TTAAGCAGCCAACATAAGGTAAAGATCTTGCTAAATTTGCTGCACTGCTTAT

>M6-PGSC0003DMG401029358-(rev)M6LRR-RLK\_806

GAGGAATTAAGCAGCCAACATAAGGTAAAGATCTTGCTAAATTTGCTGCACTGCTTATAGTCTGCAAAG  
TTACCTTATCTTCTGTAGTTCCAATTTTGTGATTAGTCCTTGCTAGTCCAT

>M6-PGSC0003DMG401029358-(rev)M6LRR-RLK\_868

TGCAAAGTTACCTTATCTTCTGTAGTTCCAATTTTGTGATTAGTCCTTGCTAGTCCATTATGTTATAAATTC  
TTTATTCGATCGATGATCAAACATGATAGCAATAAGGTTCTCAAGTTT

>M6-PGSC0003DMG401029358-(rev)M6LRR-RLK\_930

TTATAAATTCTTTATTCGATCGATGATCAAACATGATAGCAATAAGGTTCTCAAGTTTCTTTCCTGTTTTGA  
CTTCTGTGTATATTCAAATGATTTAACTTGCTGTTTTATTTACAGATA

>M6-PGSC0003DMG401029358-(rev)M6LRR-RLK\_992

CCTGTTTTGACTTCTGTGTATATTCAAATGATTTAACTTGCTGTTTTATTTACAGATATTAAGCTGGAGA  
AGTTTGTTATGAGAATGAGCTTCACGGAGCTTGAAAACGCGACTTCTGG

>M6-PGSC0003DMG401029444M6G-LecRK\_0

TGGAATAAAATGAAAAAGCACTTAGGTTAATGTCAATTTGTGCAACAATACATTTTTCAATTCCTAGGT  
GCATTATTAGTTGACAATCATGTTGATGATGAGGTGCTAGCTTATTGTC

>M6-PGSC0003DMG401029444M6G-LecRK\_1037

GGCCTTCTCCAAGATTCTGGGAACTTTGTACTCGTAGATTATCGAAACAATATGAGCACAATATGGCAGA  
GTTTTGAACATCCTTCTGATTCAACTATTCCTAGAATGAGAATAAGTGAA

>M6-PGSC0003DMG401029444M6G-LecRK\_1098

TATGGCAGAGTTTTGAACATCCTTCTGATTCAACTATTCCTAGAATGAGAATAAGTGAAAATACAAGGAC  
AGGGGAGGTGGTAGAAGCAAGATCTTGGAGAAGTCCTTCGGATCCTAATA

>M6-PGSC0003DMG401029444M6G-LecRK\_1159

TACAAGGACAGGGGAGGTGGTAGAAGCAAGATCTTGGAGAAGTCCTTCGGATCCTAATATCGGAGACT  
TTTCTTTAAGAATGAACTCTGGAGTCATTCCTCAGGTGTATATATGGAAAGG

>M6-PGSC0003DMG401029444M6G-LecRK\_122

GGTCCCCACTCAATTCTCACACTAACGTGGCTTTTGGATTTTCACTCATTCTTTTCTTTTCGAAATAGTTTAA  
ATATATCAATCATTATATTTCTGGTCTAACGTTGAGTTAAGCTTAGAT

>M6-PGSC0003DMG401029444M6G-LecRK\_1220

GGAGACTTTTCTTTAAGAATGAACTCTGGAGTCATTCCTCAGGTGTATATATGGAAAGGAAACCGTCCCT  
ATTGGCGAACTGGTCAATGGAATGGACAGATCTTTATAGGAGTGCAGAAT

>M6-PGSC0003DMG401029444M6G-LecRK\_1281

ACCGTCCCTATTGGCGAACTGGTCAATGGAATGGACAGATCTTTATAGGAGTGCAGAATATGTATGCTG

TGGTATCTGATGGATTTAATGTAGTGAATGATCGTGAAGGTTACTGTATATT

>M6-PGSC0003DMG401029444M6G-LecRK\_1342

GTATGCTGTGGTATCTGATGGATTTAATGTAGTGAATGATCGTGAAGGTTACTGTATATTTTACTGGACCT  
ATTCGTGATAATTTTTCAAGGATATTAGTCTTGGATTGGAGAGGGAACCT

>M6-PGSC0003DMG401029444M6G-LecRK\_1403

ACTGGACCTATTCGTGATAATTTTTCAAGGATATTAGTCTTGGATTGGAGAGGGAACCTGGTTCAATCAT  
ATTGGAATGTGACTGAGACAACTGGAAGATAATATGGTCAGCTCCCAGT

>M6-PGSC0003DMG401029444M6G-LecRK\_1464

TTCAATCATATTGGAATGTGACTGAGACAACTGGAAGATAATATGGTCAGCTCCCAGTAACGATTGTG  
AAGTTTATGGAACGTGTGGTCCATTTGGGAGCTGCAATCATTTGGAGTCGC

>M6-PGSC0003DMG401029444M6G-LecRK\_1525

CGATTGTGAAGTTTATGGAACGTGTGGTCCATTTGGGAGCTGCAATCATTTGGAGTCGCCGGTCTGTTCT  
TGTCTGAAAGGTTTCGAGCCAAAGCATAGGGAAGAATGGGAAAAGGGGAA

>M6-PGSC0003DMG401029444M6G-LecRK\_1647

GGACTAGTGGTTGTGTTAGGAGGAGTGCTTTGCAATGTGAAGTTAAGAATAACACCGCGAATTCAGTA  
AAGAAGACGGATTTCTAAAGATGGAGTTGATGAAATTGCCTGATTTTGCTG

>M6-PGSC0003DMG401029444M6G-LecRK\_1708

TTCAAGTAAAGAAGACGGATTTCTAAAGATGGAGTTGATGAAATTGCCTGATTTTGCTGAAAGGTCATC  
TACTACAGAAGACTTATGTAGAAGCCAATGCTTGGGGAATTGTTCTCCTGCAT

>M6-PGSC0003DMG401029444M6G-LecRK\_1769

AGGTCATCTACTACAGAAGACTTATGTAGAAGCCAATGCTTGGGGAATTGTTCTCCTGCATGGGGTATGCA  
TTTGATTCAGGTATCGGCTGTATGTCGTGGAGTGAATGATTGACATTCAG

>M6-PGSC0003DMG401029444M6G-LecRK\_183

AAATAGTTTAAATATATCAATCATTATATTTCTGGTCTAACGTTGAGTTAAGCTTAGATGTCATATCTTTAC  
ATCAATACCCATTTTATTTTATTTTCTTCTTTTTTTCAATGAGCAT

>M6-PGSC0003DMG401029444M6G-LecRK\_1830

GGTATGCATTTGATTCAGGTATCGGCTGTATGTCGTGGAGTGAATGATTGACATTCAGCAGTTCCAAA  
GCTCGGGGAAAGATCTCTTATTCATGTGGCACATTCAGAGCTTGTAAGT

>M6-PGSC0003DMG401029444M6G-LecRK\_1891



GTTCCAAAGCTCGGGGAAAGATCTCTTTATTCATGTGGCACATTCAGAGCTTGGTAAGTATTCTGGTGCT  
GAATAAAAGACTCATTGTCAGTCATTTGAGATAGACATAATGCATAAACG

>M6-PGSC0003DMG401029444M6G-LecRK\_2135

GACTTAATTGAATTCCATGTATTCTGTAAAGAACTGATTTTTGTTACCTTTAGTGTTTTCTGCAGATCATG  
GTAAAGACATAAAGAAAATCGTAATTCCAGTAATCGTTGGCTCTCTTA

>M6-PGSC0003DMG401029444M6G-LecRK\_2196

TGCAGATCATGGTAAAGACATAAAGAAAATCGTAATTCCAGTAATCGTTGGCTCTCTTACACTCTGTGTT  
TGTCTGTTCTTTGCTATATAATGGTGATCAGACGTAGAGGTAAACGTGC

>M6-PGSC0003DMG401029444M6G-LecRK\_2257

CTCTGTGTTTGTCTGTTCTTTGCTATATAATGGTGATCAGACGTAGAGGTAAACGTGCTATTAAGTTTT  
GTATTATACATTTAGAAGCACTTTGTTGCTATAGTTAACTTGTATTCC

>M6-PGSC0003DMG401029444M6G-LecRK\_2318

TTAAGTTTTTGTATTATACATTTAGAAGCACTTTGTTGCTATAGTTAACTTGTATTCTGCTGATATTAGG  
AGTGAAAATAGAGGAGGTAGCTTTACTTGGTAACAAAAGTTCAGTTAA

>M6-PGSC0003DMG401029444M6G-LecRK\_2379

CTGATATTAGGAGTGAAAATAGAGGAGGTAGCTTTACTTGGTAACAAAAGTTCAGTTAATATGGAAGAA  
TTACCAGTCTTCAGCCTCGATACGATTGCAAATGCAACATCCCAATTCAAT

>M6-PGSC0003DMG401029444M6G-LecRK\_244

CATATCTTTACATCAATACCCATTTTATTTTATTTCTTCTTTTTTCAATGAGCATTTAATAATTTAAGG  
AAAAGAAATGTGTTATTTCAACCAAGTTAAAACCTGTCAATTCACAA

>M6-PGSC0003DMG401029444M6G-LecRK\_2501

GGATAATAAGCTTGGTCAGGGCGGTTTTGGTCCAGTTTACAAGGTACGAGTTTCATCTCTCTCGATCACT  
TCCCATATTTCAAGTTACTGATATTGGTGATTCTTGTAGGGGAAATTGG

>M6-PGSC0003DMG401029444M6G-LecRK\_2562

TCGATCACTTCCCATATTTCAAGTTACTGATATTGGTGATTCTTGTAGGGGAAATTGGAAGATGGGAAA  
GAAATAGCTGTCAAGAGGCTTTCAAAGCCTCGAAACAAGGGCTAGAGGA

>M6-PGSC0003DMG401029444M6G-LecRK\_2684

TCATGAATGAAGTGTTGGTGATCTCGAAAGTCCAACATAGAAACCTTGTTAGACTCTGTGGATGTTGTG  
TGATAAAGAGGAGAAGATGTTGATTTATGAATATATGCCAAAGAAAAGCT

>M6-PGSC0003DMG401029444M6G-LecRK\_2745

ATGTTGTGTTGATAAAGAGGAGAAGATGTTGATTTATGAATATATGCCAAAGAAAAGCTTAGATGTGTT  
TCTCTTTGGTTAGTCCTTGTTACTTCTCATCTGCATTACTCCACGTCTATG

>M6-PGSC0003DMG401029444M6G-LecRK\_2806

GATGTGTTTCTCTTTGGTTAGTCCTTGTTACTTCTCATCTGCATTACTCCACGTCTATGTTGCTCGGACTCT  
TCAATAATGTTGATGGATGCTTGCTAGATCCTCCAAAAGTACTGCATT

>M6-PGSC0003DMG401029444M6G-LecRK\_2928

TGGAGGATCTGACATGATTACATCAGCATTCTGAGCAACATTACTCCACATTTCTTCTGATCCTTTTGTTT  
AAATTCTGCATTCATATTTGACAAACATCTAGATGAAGGACATCGAGAC

>M6-PGSC0003DMG401029444M6G-LecRK\_2989

CCTTTTGTTTAAATTCTGCATTCATATTTGACAAACATCTAGATGAAGGACATCGAGACATTTTGATTGG  
ACAAAACTTTCCATAATAATCGAAGGAGTTGGTTCGAGGACTCCTTTATC

>M6-PGSC0003DMG401029444M6G-LecRK\_305

AATAATTTAAGGAAAAGAAATGTGTTATTTCAACCAAGTTAAAACCTGTCAATTCACAATGTTATTTTCAG  
GAACATACTACACAATGATAGTGATGGGAGAAAAGACTTATATTGTCAGC

>M6-PGSC0003DMG401029444M6G-LecRK\_3050

TTTGGATTGGACAAAACTTTCCATAATAATCGAAGGAGTTGGTCGAGGACTCCTTTATCTACACAGAGAT  
TCAAGATTGAAGATAATTCATAGAGATCTAAAGCCAAGTAACATCTTGCT

>M6-PGSC0003DMG401029444M6G-LecRK\_3111

CACAGAGATTCAAGATTGAAGATAATTCATAGAGATCTAAAGCCAAGTAACATCTTGCTCGATAATAACT  
TCAATCCAAAGATTTTCAGATTTTGGCATGGCTAGGATTTTTCGGATCTGAT

>M6-PGSC0003DMG401029444M6G-LecRK\_3172

ATAATAACTTCAATCCAAAGATTTTCAGATTTTGGCATGGCTAGGATTTTTCGGATCTGATCAAGATCAAGC  
AGACACAATGAGAGTAGTTGGTACTTAGTAAGTGATCATTTATCTATATA

>M6-PGSC0003DMG401029444M6G-LecRK\_3233

AGATCAAGCAGACACAATGAGAGTAGTTGGTACTTAGTAAGTGATCATTTATCTATATACAATACCATAA  
CTTTGCATAATTTTCCACCATATTTACCAACTAACTACTCGAATCGTAC

>M6-PGSC0003DMG401029444M6G-LecRK\_3294

ATACCATAACTTTGCATAATTTTCCACCATATTTACCAACTAACTACTCGAATCGTACTGACATTTTACA

GTGGATACATGGCCCCGAATATGCAATGGAAGGAAGATTCTCAGAGA

>M6-PGSC0003DMG401029444M6G-LecRK\_3355

ACATTTTTACAGTGGATACATGGCCCCGAATATGCAATGGAAGGAAGATTCTCAGAGAAATCCGATGT  
TTTCAGCTTTGGAGTTCTAGTCTTAGAGATCATAAGTGGTCGAAAAAGTTC

>M6-PGSC0003DMG401029444M6G-LecRK\_3416

TCCGATGTTTTACAGCTTTGGAGTTCTAGTCTTAGAGATCATAAGTGGTCGAAAAAGTTCAAGTTCTTGGGA  
CTGAAACATCCTCTTTGAGCCTTTGGGATATGTAAGACTCCTCTTGTAG

>M6-PGSC0003DMG401029444M6G-LecRK\_3477

GTTCTTGGACTGAAACATCCTCTTTGAGCCTTTGGGATATGTAAGACTCCTCTTGTAGTTGCTATAGTGA  
AATGTTTGTATAAAGAATGAATAATATAACATAACATGAAAAATCAGT

>M6-PGSC0003DMG401029444M6G-LecRK\_3538

GCTATAGTGAAATGTTTGTATAAAGAATGAATAATATAACATAACATGAAAAATCAGTTCCAAAAAAG  
AACTGGCTGTTATATAATGAAATGATATTATAAAGGACGACTGTTATAAA

>M6-PGSC0003DMG401029444M6G-LecRK\_3599

CAAAAAGAAGCTTGGCTGTTATATAATGAAATGATATTATAAAGGACGACTGTTATAAAGAGATGCGAC  
TGA CTATAGGTGCCTTATATTTAGTTTGATGATCAACTTTTCATTGTTTTC

>M6-PGSC0003DMG401029444M6G-LecRK\_366

TTATTTACAGGAACATACTACACAATGATAGTGATGGGAGAAAAGACTTATATTGTCAGCGCGTATAGAA  
GTTAAACTCTACATTTTTATTATTGTTTTAAGTGTCAATATTTCCATT

>M6-PGSC0003DMG401029444M6G-LecRK\_3660

GATGCGACTGACTATAGGTGCCTTATATTTAGTTTGATGATCAACTTTTCATTGTTTTCAGGCATGGAAGT  
TATGGAAAGAACAAGATTTATCAACTTTTATCGATCCGTTTATATTGAA

>M6-PGSC0003DMG401029444M6G-LecRK\_3721

GCATGGAAGTTATGGAAAGAACAAGATTTATCAACTTTTATCGATCCGTTTATATTGAATACGAGCTCGG  
AAATGGAGATCAGAAAATGCATACAGATTGGTTTACTATGTGTTCAAGAA

>M6-PGSC0003DMG401029444M6G-LecRK\_3782

CGAGCTCGGAAATGGAGATCAGAAAATGCATACAGATTGGTTTACTATGTGTTCAAGAATTTGCTGAAG  
ACAGTCCAAGTATTTTCTGTTCTTGTATGCTTACTAGTGAAACAAGTA

>M6-PGSC0003DMG401029444M6G-LecRK\_3843

TGCTGAAGACAGTCCAAGTATTCATCTGTTCTTGTTATGCTTACTAGTGAAACAAGTAGTCTTCCAGCAC  
CATCACAACCTGCTTTTACTGAAAGAAGACACTTCAGAATGTGCAATGA

>M6-PGSC0003DMG401029444M6G-LecRK\_3904

CTTCCAGCACCATCACAACCTGCTTTTACTGAAAGAAGACACTTCAGAATGTGCAATGAAAATAGAGAAA  
CTAAGTTTACTTTGAACAAAATGAGTATCACAAACCTTACTGGTAGATAA

>M6-PGSC0003DMG401029444M6G-LecRK\_3965

ATAGAGAACTAAGTTTACTTTGAACAAAATGAGTATCACAAACCTTACTGGTAGATAACATGAGCATAT  
AAAAGTACTTTTTTAAGATTTGCACAATTGTTATAGTATGATCCATTTTG

>M6-PGSC0003DMG401029444M6G-LecRK\_4026

TGAGCATATAAAAGTACTTTTTTAAGATTTGCACAATTGTTATAGTATGATCCATTTTGTCTCAATTTGTAT  
GATACCTTTTGTTCAAAATGTTTGACAATACTGGATCCGTGTAAAGC

>M6-PGSC0003DMG401029444M6G-LecRK\_427

GTATAGAAGTTAACTCTACATTTTTTCATTATTCGTTTTTAAGTGCAATATTTCCATTGGCCTAAAAGTCT  
CTGATTGAGAATGGTATGTGGTTTGTGATATTTCTACAGAGTCAACAA

>M6-PGSC0003DMG401029444M6G-LecRK\_488

CCTAAAAGTCTCTGATTGAGAATGGTATGTGGTTTGTGATATTTCTACAGAGTCAACAAATTTAAAATCC  
TATTTGGCTGCTTGTGCTATTAGACTTTGACAACATATTGTGCTTTTGT

>M6-PGSC0003DMG401029444M6G-LecRK\_549

TAAAATCCTATTTGGCTGCTTGTGCTATTAGACTTTGACAACATATTGTGCTTTTGTTCATATAGTGTGG  
TAATAAGAAAAGTCTTAGAAAACCAAAAAGATGAGCAACAGCAGCAGCA

>M6-PGSC0003DMG401029444M6G-LecRK\_61

TTCACTAGGTGCATTATTAGTTGACAATCATGTTGATGATGAGGTGCTAGCTTATTGTCAAGGTCCCCAC  
TCAATTCTCACACTAACGTGGCTTTTGGATTTTCACTCATTTTACTTTTT

>M6-PGSC0003DMG401029444M6G-LecRK\_610

TATAGTGTGGTAATAAGAAAAGTCTTAGAAAACCAAAAAGATGAGCAACAGCAGCAGCAGAAGAAGAA  
ATTTGCAATATTTTGTTCATATAATTCTTGTTATTCTTCGTTTTATCGATAC

>M6-PGSC0003DMG401029444M6G-LecRK\_671

AGAAGAAATTTGCAATATTTTGTTCATATAATTCTTGTTATTCTTCGTTTTATCGATACAGGATTATGCAGT  
GAAGTGGATAACATTACCAGCATTCAATCTCTGAGAGATCCTGGAATT

>M6-PGSC0003DMG401029444M6G-LecRK\_732

GATTATGCAGTGAAGTGGATAACATTACCAGCATTCAATCTCTGAGAGATCCTGGAATTTTATCGTCTCC  
AGGAGGCTTATTCAAGTTAGGATTTTTTCAGTCCTCAAAACAGTACTAATA

>M6-PGSC0003DMG401029444M6G-LecRK\_793

ATCGTCTCCAGGAGGCTTATTCAAGTTAGGATTTTTTCAGTCCTCAAAACAGTACTAATAGGTATGTTGGT  
ATTTGGTACAATTTTTCTGTAACAACTGTCATTTGGGTGGCTAATAGGGA

>M6-PGSC0003DMG401029444M6G-LecRK\_854

TATGTTGGTATTTGGTACAATTTTTCTGTAACAACTGTCATTTGGGTGGCTAATAGGGACAAACCTTAA  
GAGATTCTTCTGGTGTGTAAAGATATCTCGTGATGGAAATGTCGTTATA

>M6-PGSC0003DMG401029444M6G-LecRK\_915

AACCTTTAAGAGATTCTTCTGGTGTGTAAAGATATCTCGTGATGGAAATGTCGTTATAACGAATGGAGA  
GGAGGAGATTCTTTGGTCATCAAATGTTTCTACTTCTCAGGTAAACTCAA

>M6-PGSC0003DMG401029444M6G-LecRK\_976

GAATGGAGAGGAGGAGATTCTTTGGTCATCAAATGTTTCTACTTCTCAGGTAAACTCAATTGGCCTTCTC  
CAAGATTCTGGGAACTTTGTACTCGTAGATTATCGAAACAATATGAGCAC

>M6-PGSC0003DMG401030236-(rev)M6LRR-RLP\_1159

TGTTACGCTCAAAATCAACGATTGAAGAGTGGAAACGCATTTTGAGAAGTGAAATATGGGAGCTGCCA  
GGCAATGGAATGTTACCAGCATTAAATGTTGAGCTACAATGAGCTTCCCCCAC

>M6-PGSC0003DMG401030236-(rev)M6LRR-RLP\_1586

TTCAAAACACTGTACCAGGTTGGAAGACATCGAAGGATCTCATATGTTGGAACGAACTCGACACTTGTC  
GTATTCCATGGGTGATGGTAACTTTCTGTCACTTTCAGCAGGAGATGGTGA

>M6-PGSC0003DMG401030236-(rev)M6LRR-RLP\_2501

AGGACAACCTCCTTCTTTGAAATCCCTCACCATTGGGTATATGGATCGAATAACAGAGGTGACCGAAGA  
ATTCTATGGTAGCCCATCTTCAATAAAGCCATTTAACTCTCTGGAATGGCT

>M6-PGSC0003DMG401030236-(rev)M6LRR-RLP\_3355

AGTCCTCCCTGAAGGAGGGTTGCCCTCAGTCTAGTAGTCCTTGAGATCTGGTATTGCAATAAACTACA  
GAATGATCGAAAGGAGTGGCATTACAGAGACTCCCTGTCTCAGAGAAC

>M6-PGSC0003DMG401030236-(rev)M6LRR-RLP\_3477

CAAATCTATCCCGTTCTACTGACGAAGAGATTCAATGGGAGATGCCTTGCTCAATTCAAAACTTGACG

TATCCAACCTGAAAACATTAAGCAGCCAACTTCTCAAAGCCTCACCTCT

>M6-PGSC0003DMG401030236-(rev)M6LRR-RLP\_3599

TGAGTACCTAGAGGCTAGGAATTTACCTCAAATTCAGTCACTGATCGAAGAAGGGCTTCCCTCGTCTCTT

TCTTCACTAACATTAAGAGACCATCATGAGCTCCATTCAGTGTGAGCTGA

>M6-PGSC0003DMG401030236-(rev)M6LRR-RLP\_3660

TCGTCTCTTTCTTCACTAACATTAAGAGACCATCATGAGCTCCATTCAGTGTGAGCTGAAGGTCTTCGGGG

CCTCACTTCTCTTAGGCATCTACAGATTAGCTTCTGCTTTCAACTCCAA

>M6-PGSC0003DMG401030236-(rev)M6LRR-RLP\_3721

GTCTTCGGGGCCTCACTTCTCTTAGGCATCTACAGATTAGCTTCTGCTTTCAACTCCAATCTCTTCCGGAA

TCAGCGCTGCCCTCCTCCCTCTCTGAGCTGACCATCAAATATTGTCCTA

>M6-PGSC0003DMG401030236-(rev)M6LRR-RLP\_3782

TCTTCCGGAATCAGCGCTGCCCTCCTCCCTCTCTGAGCTGACCATCAAATATTGTCCTAAGCTCCAACATC

TTCCAGTAAAAGAGATGCCCTCTGCCCTCTCTAAACTATCTATTTTCTAGA

>M6-PGSC0003DMG401030236-(rev)M6LRR-RLP\_3843

CTCCAACATCTTCCAGTAAAAGAGATGCCCTCTGCCCTCTCTAAACTATCTATTTTCTAGACTGTCCATTGCTC

AATCCACGTCTAGAATTTATGAAGGGGGAATACTGGCCAAATATTGCT

>M6-PGSC0003DMG401030236-(rev)M6LRR-RLP\_3965

TATTTCCACTATACGGATCAATGAGGAATACCTGTGATGATCAAACAAACAGTACTCTGACAGATGTAA

GAACTCTTTTTTTTTCTCAGTAGCTTTTTATTGTTTACTTCTCTTTG

>M6-PGSC0003DMG401030236-(rev)M6LRR-RLP\_3998

GTGATGATCAAACAAACAGTACTCTGACAGATGTAAGAACTCTTTTTTTTTCTCAGTAGCTTTTTATTGT

TCATTACTTCTTTGCTTGTGTTGATTTTTTCTTTGTTATATTG

>M6-PGSC0003DMG401030531-(rev)M6RLKWAX-EGF\_1116

TAGTATAAACTGCATAATCTGATTTGGAGAGGATTATATTCTATTCTGTTCTTTTACTACCTGTTTTCGTTT

AGTATAGTTTGGCAATAGTGAGATTATAGGTGAGTTTTCACTTATTCT

>M6-PGSC0003DMG401030531-(rev)M6RLKWAX-EGF\_1178

GTTTTCGTTTAGTATAGTTTGGCAATAGTGAGATTATAGGTGAGTTTTCACTTATTCTACTCCCTTAATTC

ATGGTCATAGAGTGCTAACTTGTCTGAGATTGACCTATGAATTTTTCTC

>M6-PGSC0003DMG401030531-(rev)M6RLKWAX-EGF\_124

GGTATGATGTTGTTGTATACGTTACATATTATTCCTTCTTACTCATCACGTACCCTTTTTATATCTTAGATA  
TAAATCCATGTTTATGTGGTTTTGGTTATTTACGCCACTTTACTAAAC

>M6-PGSC0003DMG401030531-(rev)M6RLKWAX-EGF\_1240

CCTTAATTCATGGTCATAGAGTGCTAACTTGTCTGAGATTGACCTATGAATTTTTCTCGTATGGTTATTTTC  
GGTGCTGTTCTAAATGTGGCATTAAAGAAAACCAATGTCTAAACGACA

>M6-PGSC0003DMG401030531-(rev)M6RLKWAX-EGF\_1302

GGTTATTTTCGGTGCTGTTCTAAATGTGGCATTAAAGAAAACCAATGTCTAAACGACAATCCTTGGACAT  
TTCTAAAGATTGTATAGCACATCCAGAAGCAGTTGCCTACTGGTCCAAAA

>M6-PGSC0003DMG401030531-(rev)M6RLKWAX-EGF\_1364

TTGGACATTTCTAAAGATTGTATAGCACATCCAGAAGCAGTTGCCTACTGGTCCAAAACCAATAATTATA  
AGTGCATGTCCCTGTATGTCCATTTCCATCCACTGAAACATTTTATAAGT

>M6-PGSC0003DMG401030531-(rev)M6RLKWAX-EGF\_1426

TAATTATAAGTGCATGTCCCTGTATGTCCATTTCCATCCACTGAAACATTTTATAAGTTCTATTTCTTTCTT  
GTCAGATGCAGATCATTATTTTTCGATACTACCTCCTCCACGATTTGT

>M6-PGSC0003DMG401030531-(rev)M6RLKWAX-EGF\_1488

TTTCTTTCTTGTGATGCAGATCATTATTTTTCGATACTACCTCCTCCACGATTTGTCTGACATTACTTCAT  
TTTCAGGGAAAAATAATTTGGGGTTGATTCTTGGCTCAGGTAAATCA

>M6-PGSC0003DMG401030531-(rev)M6RLKWAX-EGF\_1550

CATTACTTCATTTTCAGGGAAAAATAATTTGGGGTTGATTCTTGGCTCAGGTAAATCAGTACTGTATTATT  
ATTATCCCTGAATTTGACATTTCAACATAGATCCACATCTTGTTAACTT

>M6-PGSC0003DMG401030531-(rev)M6RLKWAX-EGF\_1612

TGTATTATTATTATCCCTGAATTTGACATTTCAACATAGATCCACATCTTGTTAACTTCATTTTTGTCTTTTT  
CAGTTTTAGGTGGAGCTGTGTTAATAATCCTTGTGGTCACTTTTCATC

>M6-PGSC0003DMG401030531-(rev)M6RLKWAX-EGF\_1674

TTTGTCTTTTTCAGTTTTAGGTGGAGCTGTGTTAATAATCCTTGTGGTCACTTTTCATCGTTTGTTGTTACAA  
GAAAGAACACAAAAGTTGTTTGTACTTCACCTCGAGAAAAAATCTTG

>M6-PGSC0003DMG401030531-(rev)M6RLKWAX-EGF\_1736

GTTGTTACAAGAAAGAACACAAAAGTTGTTTGTACTTCACCTCGAGAAAAAATCTTGTGATCGTTCCTT  
AACACATGATTTTGACGGAAGTAGTAATTACCATGGAGTCTCGGTCTTCT

>M6-PGSC0003DMG401030531-(rev)M6RLKWAX-EGF\_1798  
CGTTCCTAACACATGATTTTGACGGAAGTAGTAATTACCATGGAGTCTCGGTCTTCTCCTATGTTGAACT  
TGAAGAAGCTACAAGTAACTTCGATTCTCCAATGAACTAGGAGATGGA

>M6-PGSC0003DMG401030531-(rev)M6RLKWAX-EGF\_186  
ATCTTAGATATAAATCCATGTTTATGTGGTTTTGGTTATTTACGCCACTTTACTAAACCTCCAGCAGTCACT  
AAATTACCAAAGTATCTCCTATGAGAGCCAATCATTTTGGTTAGTGA

>M6-PGSC0003DMG401030531-(rev)M6RLKWAX-EGF\_1860  
TGTTGAACTTGAAGAAGCTACAAGTAACTTCGATTCTCCAATGAACTAGGAGATGGAGGTTTTGGTGC  
TGTTTACTATGGTAAGTATCTTGAAGCAAATCAGATGTTCAAATGACACGA

>M6-PGSC0003DMG401030531-(rev)M6RLKWAX-EGF\_1922  
TTGGTGCTGTTTACTATGGTAAGTATCTTGAAGCAAATCAGATGTTCAAATGACACGACTAGATAGCTAA  
ATTTGTACTACCTTTCTTACTAGGTAAGCTTAAGGATGGGAGAGAAGTTG

>M6-PGSC0003DMG401030531-(rev)M6RLKWAX-EGF\_1984  
ATAGCTAAATTTGTACTACCTTTCTTACTAGGTAAGCTTAAGGATGGGAGAGAAGTTGCAGTGAAGCGA  
CTTTACGAGCACAATTGCAAGAGAATGGAACAGTTTAAAAATGAAATTGAA

>M6-PGSC0003DMG401030531-(rev)M6RLKWAX-EGF\_2046  
GAAGCGACTTTACGAGCACAATTGCAAGAGAATGGAACAGTTTAAAAATGAAATTGAAATTCTCTCTCG  
CCTAAGGCATCGAAATCTTGTTACCCTTTATGGTTGCACATCGAAGCACAG

>M6-PGSC0003DMG401030531-(rev)M6RLKWAX-EGF\_2108  
TCTCTCGCCTAAGGCATCGAAATCTTGTTACCCTTTATGGTTGCACATCGAAGCACAGCCGTGAACTCCTC  
CTTGTTTATGAATACATTCCCAATGGAACAGTGGCAGATCACCTTAATG

>M6-PGSC0003DMG401030531-(rev)M6RLKWAX-EGF\_2170  
GAACTCCTCCTTGTTTATGAATACATTCCCAATGGAACAGTGGCAGATCACCTTAATGGGGATAGAGCAA  
AGGACGGATTCTCCCATGGCCTATCCGCATGAATATTGCTGTAGAACT

>M6-PGSC0003DMG401030531-(rev)M6RLKWAX-EGF\_2232  
TAGAGCAAAGGACGGATTCTCCCATGGCCTATCCGCATGAATATTGCTGTAGAACTGCTTGTGCATTG  
GCTTACCTCCATGCTTCTGACATAATACATCGCGATGTGAAGACTAGCAA

>M6-PGSC0003DMG401030531-(rev)M6RLKWAX-EGF\_2294  
GTGCATTGGCTTACCTCCATGCTTCTGACATAATACATCGCGATGTGAAGACTAGCAACATACTCCTCGA



CAGCAATTGTTGTGTCAAAGTTGCAGATTTTGGGCTTTCGAGACTTTTTTC

>M6-PGSC0003DMG401030531-(rev)M6RLKWAX-EGF\_2356

CTCCTCGACAGCAATTGTTGTGTCAAAGTTGCAGATTTTGGGCTTTCGAGACTTTTTCCGAATGATGCTAC

TCATGTCTCAACTGCTCCTCAAGGGACTGCTGGATATGTTGATCCAGAG

>M6-PGSC0003DMG401030531-(rev)M6RLKWAX-EGF\_2418

TGATGCTACTCATGTCTCAACTGCTCCTCAAGGGACTGCTGGATATGTTGATCCAGAGTATCATGAATGT

TACCAGCTCACTGATAAAAGTGATGTTTATAGTTTTGGTGTGTCCTTGT

>M6-PGSC0003DMG401030531-(rev)M6RLKWAX-EGF\_248

AGCAGTCACTAAATTACCAAAAGTATCTCCTATGAGAGCCAATCATTTTGGTTAGTGAATGCTGGCATAG

TGAGTTATTCGTGCATAGCTCTTCTGAGGTTTTTTGCTTTTGATCGATCT

>M6-PGSC0003DMG401030531-(rev)M6RLKWAX-EGF\_2480

ATGAATGTTACCAGCTCACTGATAAAAGTGATGTTTATAGTTTTGGTGTGTCCTTGTGAACCTTATCTCA

TCAATGCCTGCTGTTGATATTACTAGGCGTCGACATGAGATCAATTTGG

>M6-PGSC0003DMG401030531-(rev)M6RLKWAX-EGF\_2542

CTTATCTCATCAATGCCTGCTGTTGATATTACTAGGCGTCGACATGAGATCAATTTGGCCAACCTTAGCGAT

AAACAGGATTCAGAGATGCGCATTTGATGAGCTGATTGATCCATCTCTG

>M6-PGSC0003DMG401030531-(rev)M6RLKWAX-EGF\_2604

CTTAGCGATAAACAGGATTCAGAGATGCGCATTTGATGAGCTGATTGATCCATCTCTGGGATTTAAATCA

GATGCACAGATTATGAGAATGACTACTTCAGTAGCAGAGCTAGCATTTC

>M6-PGSC0003DMG401030531-(rev)M6RLKWAX-EGF\_2666

TTAAATCAGATGCACAGATTATGAGAATGACTACTTCAGTAGCAGAGCTAGCATTTC

TGAAACGGACTTGAGACCAAAAATGGATGAAGTACTAGAGACACTCAAAC

>M6-PGSC0003DMG401030531-(rev)M6RLKWAX-EGF\_2728

TTGCAGCTTGAAACGGACTTGAGACCAAAAATGGATGAAGTACTAGAGACACTCAAACATATTCAAGGC

ACCTATACGGATCAAATCAAAGATGAGAAGACGAATGACTCAATTGTTCGAT

>M6-PGSC0003DMG401030531-(rev)M6RLKWAX-EGF\_2790

TCAAGGCACCTATACGGATCAAATCAAAGATGAGAAGACGAATGACTCAATTGTTCGATAACACAGAATG

TAATGGTGAAAAAGTCCCTACTTCTCCTACATCAGATAAAATAGTTTTATT

>M6-PGSC0003DMG401030531-(rev)M6RLKWAX-EGF\_2852

CAGAATGTAATGGTGAAAAAGTCCCTACTTCTCCTACATCAGATAAAAATAGTTTTATTAAAGAAAATGCA  
TTTGCCACCTTCACCTATTTCTGTAAGTCTGAGAGGTGGGTTAGTAGCTGTG

>M6-PGSC0003DMG401030531-(rev)M6RLKWAX-EGF\_2914

AAAATGCATTTGCCACCTTCACCTATTTCTGTAAGTCTGAGAGGTGGGTTAGTAGCTGTGGCAGTAGTAATG  
TTAGCGGGTGAAATTCTTACACTCTTTGCTTTCATTTCAACATAAAATGTT

>M6-PGSC0003DMG401030531-(rev)M6RLKWAX-EGF\_2976

TAGTAATGTTAGCGGGTGAAATTCTTACACTCTTTGCTTTCATTTCAACATAAAATGTTACAAATATGTACT  
CAATTGATAATCTGTAAAGGAATAAGTTGCTGGGACGTTCTTTTTATCT

>M6-PGSC0003DMG401030531-(rev)M6RLKWAX-EGF\_3038

ATATGTAATCAATTGATAATCTGTAAAGGAATAAGTTGCTGGGACGTTCTTTTTATCTTTATTAGTTTTTA  
CTCTTGTTCTTTGTTCCGCGTTTTCTGAACACAGTGGAGTGTAAGTATT

>M6-PGSC0003DMG401030531-(rev)M6RLKWAX-EGF\_310

TGGCATAGTGAGTTATTCGTGCATAGCTCTTCTGAGTTTTTTGCTTTTGATCGATCTTCCTTCATGTTTGG  
CTCAACTATATTATAGTAAATCTTTAATTGTTTCAATAACTCTATTCC

>M6-PGSC0003DMG401030531-(rev)M6RLKWAX-EGF\_3100

TAGTTTTACTCTTGTTCTTTGTTCCGCGTTTTCTGAACACAGTGGAGTGTAAGTATTGAATATGGACATG  
CTTTCTGCACTAACGAGCATGCATATTTTCACTATCCTGGATTTGAGG

>M6-PGSC0003DMG401030531-(rev)M6RLKWAX-EGF\_372

TCATGTTTGGCTCAACTATATTATAGTAAATCTTTAATTGTTTCAATAACTCTATTCCATAAAGTGCTCCA  
AAAAACCAATTGCTTGTGCTTCAAATGATGTGAATCATCCCTATCCT

>M6-PGSC0003DMG401030531-(rev)M6RLKWAX-EGF\_434

AAGTGCTCCAAAAACCAATTGCTTGTGCTTCAAATGATGTGAATCATCCCTATCCTGTTTTAGACAGC  
GGGAAAAACCAAGTCGATTGTAGTGCAATGCCTTGAGAGTCATATGTTGT

>M6-PGSC0003DMG401030531-(rev)M6RLKWAX-EGF\_496

TAGACAGCGGGAAAAACCAAGTCGATTGTAGTGCAATGCCTTGAGAGTCATATGTTGTTGCACCAGTTA  
AAATAGGAAAAAGAAAAGCAATAAGAAATGCCAATAGATAGACTATTTAAG

>M6-PGSC0003DMG401030531-(rev)M6RLKWAX-EGF\_558

CCAGTAAAATAGGAAAAAGAAAAGCAATAAGAAATGCCAATAGATAGACTATTTAAGGTTGTCAGAA  
AATGAATTAATACTACAATGATCTTGAATAAGTTAGTGGCTGTGAAAGGAC

>M6-PGSC0003DMG401030531-(rev)M6RLKWAX-EGF\_620

TCAGAAAATGAATTAATACTACAATGATCTTGAATAAGTTAGTGGCTGTGAAAGGACAGCAACCATTC  
TGGCTCTGAAAATGGTGAACCTGTTTGTATCGCTCTGTTAGGTTTTGCCA

>M6-PGSC0003DMG401030531-(rev)M6RLKWAX-EGF\_682

ACCATTCTGGCTCTGAAAATGGTGAACCTGTTTGTATCGCTCTGTTAGGTTTTGCCAGAATCATTGCTGG  
ATGGTAACTGCTACTTACCAAGCTGCTAATTTAAGATTCTAGGCATAAG

>M6-PGSC0003DMG401030531-(rev)M6RLKWAX-EGF\_744

CATTGCTGGATGGTAACTGCTACTTACCAAGCTGCTAATTTAAGATTCTAGGCATAAGATACTGATTATTT  
TCAGAGTTATAAAAGCTAACAACGATCAACGAGGCTTTCATGTGCATCA

>M6-PGSC0003DMG401030531-(rev)M6RLKWAX-EGF\_806

TGATTATTTTCAGAGTTATAAAAGCTAACAACGATCAACGAGGCTTTCATGTGCATCATAAACATCAAAA  
ACTCTTCTCTTATCTATTACACCTGCTGTCCCATGACTTGACACAGAATT

>M6-PGSC0003DMG401030532-(rev)M6RLKWAX-EGF\_0

TCTAGGTAGAGTTACTGTATAATGAAAAACCTTCAGCTAGTTTTCTCTTCTTGAAATATGGATTTT  
GCTTCTTCTTTATTTTGCTTCTTCTATCTGTTTTTCTGATGTTAGTTC

>M6-PGSC0003DMG401030532-(rev)M6RLKWAX-EGF\_2418

AAGATAAGTTTATGCTGAAACAAGTTAAATCACTACCTTCTTCAAATTCTGTTACTGATAAATGGGTTACT  
TGCTCTGATATAACTACTACAAAGTAGTTAAGAGTTCTATACTCCCTTT

>M6-PGSC0003DMG401030532-(rev)M6RLKWAX-EGF\_2480

TGGGTTACTTGCTCTGATATAACTACTACAAAGTAGTTAAGAGTTCTATACTCCCTTTCTTTGTTATTGAT  
GTGAATTTTGAGAGATTACGAATGTACAACCTGTGAGAAGTTTCTTGAGC

>M6-PGSC0003DMG401030532-(rev)M6RLKWAX-EGF\_2535

TTTCTTTGTTATTGATGTGAATTTTGAGAGATTACGAATGTACAACCTGTGAGAAGTTTCTTGAGCTATGTA  
CCTAGAGTGAAAGTGATTCAATATTTGATTTTATTATATAAGAGCTGTC

>M6-PGSC0003DMG401030532-(rev)M6RLKWAX-EGF\_558

GCATATACTACAAGCTTCGCTTAGGAGATGATGAAGACGTTTCGAGCAGGCAATCTTCTGCCAACTGTTT  
ACTTATCAGATTGCCTATCCGCTTGCTATCAGATGATGGTGGTTTTGTCA

>M6-PGSC0003DMG401030532-(rev)M6RLKWAX-EGF\_62

ATGGATTTTGCTTCTTCTTTATTTTGCTTCTTCTATCTGTTTTTCTGATGTTAGTTCAGGCAATGGGAAGA

AATGATTCAACTTGTCCAAAGTCCTTTTCATGTGGAAATCTTACTGAC

>M6-PGSC0003DMG401030595-(rev)M6RLKANKrepeat\_0

CGCAAATATACAAGAAACGTCGAAGAATAATACAAGAACTAAGCTAACTTCGTTAAAACCCAAAACCCC

TTTCTTGGACTGAATCGCCCATCCATGGCGACAAGAAACGTTTATCTTTAT

>M6-PGSC0003DMG401030595-(rev)M6RLKANKrepeat\_1037

CCTTAACAGATGCAAAGTTGTACGGGCACCGTGACATATGCAGGATCCTTGAGGTCTGTGGTGGCAAGG

ATTCCAACAGTGATCATCCTTTGGTAAGTGTTTCATCGCTAACAGTGATCAT

>M6-PGSC0003DMG401030595-(rev)M6RLKANKrepeat\_1098

TGGCAAGGATTCCAACAGTGATCATCCTTTGGTAAGTGTTTCATCGCTAACAGTGATCATCCTTTGAAATTT

GATGTTATGAATTACTTATATGGAACAGATCTTATTAATTTTCATTTAC

>M6-PGSC0003DMG401030595-(rev)M6RLKANKrepeat\_1159

TTTGAAATTTGATGTTATGAATTACTTATATGGAACAGATCTTATTAATTTTCATTTACTTAGTGTGAGCAT

CAAGTTCTTACCATTCAATAAGAATAGTATATATCATATCATGTCATT

>M6-PGSC0003DMG401030595-(rev)M6RLKANKrepeat\_122

TAATTTTCATCAGGCAGTTTTGAAGTTCCAATTGTTGAGATATGGAGATCAGTACAATATTGATGCGGCA

TAAAGATTCTTCATCTGGGCATTTTGACATGCAGATGATAGGCACTTTCT

>M6-PGSC0003DMG401030595-(rev)M6RLKANKrepeat\_1220

AGTGTGAGCATCAAGTTCTTACCATTCAATAAGAATAGTATATATCATATCATGTCATTCAGGTGCTTAA

GATATTGACAATAGCTTCATTAACAAATAAAACTCCATCTTATGAATTC

>M6-PGSC0003DMG401030595-(rev)M6RLKANKrepeat\_1281

GGTGCTTAAGATATTGACAATAGCTTCATTAACAAATAAAACTCCATCTTATGAATTCTGCACCTGAAA

ACACACTTGAGACATACATGGTAGACTTAACTTTGGTAGAGTGTAGCTCT

>M6-PGSC0003DMG401030595-(rev)M6RLKANKrepeat\_1342

CACCTGAAAACACACTTGAGACATACATGGTAGACTTAACTTTGGTAGAGTGTAGCTCTAGCTTAAATGT

TGTTTACACAGACTGCTTGACAAAGTGAAGTCTGGTTGAACTTCTATCTT

>M6-PGSC0003DMG401030595-(rev)M6RLKANKrepeat\_1403

CTTAAATGTTGTTTACACAGACTGCTTGACAAAGTGAAGTCTGGTTGAACTTCTATCTTTGACATTGCAGT

TTTAGTCACCTTTGTTGACAATTTACGGAAAAATATGAAGTCTTCCTTT

>M6-PGSC0003DMG401030595-(rev)M6RLKANKrepeat\_1464

ACATTGCAGTTTTAGTCACCTTTGTTGACAATTTACGGAAAAATATGAAGTCTTCCTTTATAAAGCTATGT  
CAAAATTGCACTTTCTATCTTACAAAATAAGCATAATACTCATTTTTGG

>M6-PGSC0003DMG401030595-(rev)M6RLKANKrepeat\_1525

AAAGCTATGTCAAAATTGCACTTTCTATCTTACAAAATAAGCATAATACTCATTTTTGGTCCTATGTCATT  
GCTTTGGGATATAGCTAGCTTTACCTGTTGCTTGTGAACAAAGCACC

>M6-PGSC0003DMG401030595-(rev)M6RLKANKrepeat\_1586

CTATGTCATTGCTTTGGGATATAGCTAGCTTTACCTGTTGCTTGTGAACAAAGCACCAATCAATTACCT  
CACATAAACTTCTCAAGCCTTCATCCCTCCGAGAGCCATACAATTCTT

>M6-PGSC0003DMG401030595-(rev)M6RLKANKrepeat\_1647

TCAATTACCTCACATAAACTTCTCAAGCCTTCATCCCTCCGAGAGCCATACAATTCTTTCTGCATTACCTT  
GTAAGATCACTCCATTCTGGCAATGTGAATTTGGGGGATGATATGGAG

>M6-PGSC0003DMG401030595-(rev)M6RLKANKrepeat\_1708

TGCATTACCTTGTAAGATCACTCCATTCTGGCAATGTGAATTTGGGGGATGATATGGAGAAGGGCTAAG  
GTAGCAGAATTTAAGAATGTAAGTACTGAGCCCTGTCAGTTTCACTGTTGAAGG

>M6-PGSC0003DMG401030595-(rev)M6RLKANKrepeat\_1769

GGGCTAAGGTAGCAGAATTTAAGAATGTAAGTACTGAGCCCTGTCAGTTTCACTGTTGAAGGACTAACTGCT  
TATTTTCCAGAGAGTAGATGAATAGAGGACCCCAACATTGGGGGATATA

>M6-PGSC0003DMG401030595-(rev)M6RLKANKrepeat\_183

GATGCGGCATAAAGATTCTTCATCTGGGCATTTTGACATGCAGATGATAGGCACTTTCTTGAGTTTCGCA  
TCAAGGGGTGACAGAGTTGGTCTCAATCAGATGCTGAGGCAGGGAATTC

>M6-PGSC0003DMG401030595-(rev)M6RLKANKrepeat\_1830

TAACTGCTTATTTTCCAGAGAGTAGATGAATAGAGGACCCCAACATTGGGGGATATACTTGAACCTAC  
TTCCAAATACAAGGACACAAGCACATGTTAAGTCAAAAACCATAAGTTTT

>M6-PGSC0003DMG401030595-(rev)M6RLKANKrepeat\_1891

TGAACTTACTTCCAAATACAAGGACACAAGCACATGTTAAGTCAAAAACCATAAGTTTTCACTCATAAAA  
GTTCCAAGCCTATTAGTGCAGAATTTACTCATGACTGTGGTTTCCGTTTA

>M6-PGSC0003DMG401030595-(rev)M6RLKANKrepeat\_1952

CTCATAAAAGTTCCAAGCCTATTAGTGCAGAATTTACTCATGACTGTGGTTTCCGTTTACTCCTTTCTTGT  
TTTGCTAATCAATCTGAGTAAGAAAATGTCCGTTGATATGACAAGTTG

>M6-PGSC0003DMG401030595-(rev)M6RLKANKrepeat\_2013

CCTTTCTTGTTTTTGCTAATCAATCTGAGTAAGAAAATGTCCGTTGATATGACAAGTTGAATTTTATGACA  
TGCAGACTGTTTCGGCGTGAAGAGGATTCAATTGAAGTGAATATTGACAT

>M6-PGSC0003DMG401030595-(rev)M6RLKANKrepeat\_2074

TTTTATGACATGCAGACTGTTTCGGCGTGAAGAGGATTCAATTGAAGTGAATATTGACATATCTGAACTGA  
ACTTGCAGCATTCTTCAATAATTGAGCAGGTATTAATATGGAAATCCAAA

>M6-PGSC0003DMG401030595-(rev)M6RLKANKrepeat\_2135

CTGAACTGAACTTGCAGCATTCTTCAATAATTGAGCAGGTATTAATATGGAAATCCAAAGGTTGGGATGT  
CATGGTGCTGAGTATATTCTAGGGCTTCTAGGGCTGTTTCTTTCTTTTA

>M6-PGSC0003DMG401030595-(rev)M6RLKANKrepeat\_2196

TTGGGATGTCATGGTGCTGAGTATATTCTAGGGCTTCTAGGGCTGTTTCTTTCTTTTACTTAGCATTAA  
CTTTCTAGGAACTCAGTCCTTTGTTATTTTTACAGGGCTTATTTGGGGA

>M6-PGSC0003DMG401030595-(rev)M6RLKANKrepeat\_2257

TAGCATTTAACTTTCTAGGAACTCAGTCCTTTGTTATTTTTACAGGGCTTATTTGGGGAGTCTGAAAAGGT  
CAAATGGCGTGGAACATGGGTGGTAAAACCGTAATCAAAGGCATTCA

>M6-PGSC0003DMG401030595-(rev)M6RLKANKrepeat\_2318

CTGAAAAGGTCAAATGGCGTGGAACATGGGTGGTAAAACCGTAATCAAAGGCATTCAATTTATATGT  
CATTTTTATTACTATAATTATTTAACAAGGCTTTCTGGATTAATTCTTTCT

>M6-PGSC0003DMG401030595-(rev)M6RLKANKrepeat\_2379

TTATATGTCATTTTTATTACTATAATTATTTAACAAGGCTTTCTGGATTAATTCTTTCTTTTACTTTTTCCAA  
CATACTTGATGCAGGGTTTTTTCTGCTAAGGTTAATACTTTACTGAG

>M6-PGSC0003DMG401030595-(rev)M6RLKANKrepeat\_244

AGTTTCGCATCAAGGGGTGACAGAGTTGGTCTCAATCAGATGCTGAGGCAGGGAATTCACCCAATGTA  
CAGGACTATGACAAAAGAACTGCTCTACATCTTGCTGCTAGCGAAGGACAC

>M6-PGSC0003DMG401030595-(rev)M6RLKANKrepeat\_2440

TACTTTTTCCAACATACTTGATGCAGGGTTTTTTCTGCTAAGGTTAATACTTTACTGAGGGAACCTCGACA  
TCCAAATATTTACAGTTTCTTGATCAATTGTGCATGGTGATGAAATG

>M6-PGSC0003DMG401030595-(rev)M6RLKANKrepeat\_2501

AACTTCGACATCCAAATATTTTACAGTTTCTTGATCAATTGTGCATGGTGATGAAATGATCTTGATCACA

GAGTATTTGCCGAAAGTATGTTGTTTCTCCCTCACTAATATTGGCAGA

>M6-PGSC0003DMG401030595-(rev)M6RLKANKrepeat\_2562

CTTGATCACAGAGTATTTGCCGAAAGTATGTTGTTTCTCCCTCACTAATATTGGCAGAAACAGTTCAGAT

TTTTTTGTAGGACGGCACTCAATAATCATTTTGTGAGACATGATACAG

>M6-PGSC0003DMG401030595-(rev)M6RLKANKrepeat\_2623

CAGTTCAGATTTTTTTGTAGGACGGCACTCAATAATCATTTTGTGAGACATGATACAGAAATAAATGCA

TTTTGTAGCCTTCACTATGCTGTACTATTAATAGATATTTTTTGCCAAAG

>M6-PGSC0003DMG401030595-(rev)M6RLKANKrepeat\_2684

ATAAATGCATTTTGTAGCCTTCACTATGCTGTACTATTAATAGATATTTTTTGCCAAAGTACTATCACCTAA

TATTCCTGGGTGTTGATCTTCAAAAATTTCTCCAAAGATCTTTCAGT

>M6-PGSC0003DMG401030595-(rev)M6RLKANKrepeat\_2745

CTATCACCTAATATTCCTGGGTGTTGATCTTCAAAAATTTCTCCAAAGATCTTTCAGTGATTGCTAAAAT

GGTTAAGGATAGTCCCTGAATATGATATACTTCTTATTATGTTTTCCCA

>M6-PGSC0003DMG401030595-(rev)M6RLKANKrepeat\_2806

TTGCTAAAATGGTTAAGGATAGTCCCTGAATATGATATACTTCTTATTATGTTTTCCCATATATTTTCAGGG

AAACTTGCAAGATATTTTGAGAAAGCGTCTTGACCCCCCAACTGCATTG

>M6-PGSC0003DMG401030595-(rev)M6RLKANKrepeat\_2867

TATTTTCAGGGAAACTTGCAAGATATTTTGAGAAAGCGTCTTGACCCCCCAACTGCATTGCGCTATGCACT

TGACATAGCTAGGTACAACATTCCACTTATTTCTGTTTAGGTTGATTTT

>M6-PGSC0003DMG401030595-(rev)M6RLKANKrepeat\_2928

CTATGCACTTGACATAGCTAGGTACAACATTCCACTTATTTCTGTTTAGGTTGATTTTCAATTTATTATGTG

AAGAACAATCACATTAGTGCTCACTTTGAACACAGGGGAATGAATTA

>M6-PGSC0003DMG401030595-(rev)M6RLKANKrepeat\_2989

TTTATTATGTGAAGAACAATCACATTAGTGCTCACTTTGAACACAGGGGAATGAATTACCTCCATCGGC

ACAAGCCCTTGCTATTGTTCAATAACTTGCATCTGAAGTATGTCTAT

>M6-PGSC0003DMG401030595-(rev)M6RLKANKrepeat\_305

CCAATGTACAGGACTATGACAAAAGAACTGCTCTACATCTTGCTGCTAGCGAAGGACACGCCTCTATTGT

TGAACTTCTTTGGCTTACAAGGCTGATGTTAATCTCAGAGATAGGTGGC

>M6-PGSC0003DMG401030595-(rev)M6RLKANKrepeat\_3050

TCCATCGGCACAAGCCCTTGCCTATTGTTCAACAATAACTTGCATCTGAAGTATGTCTATTCGTTTATCTTTA  
TTAATAACATCTCACTGCAATTTTTTTATGTATATATTATCTTCTATA

>M6-PGSC0003DMG401030595-(rev)M6RLKANKrepeat\_3111

GTTTATCTTTATTAATAACATCTCACTGCAATTTTTTTATGTATATATTATCTTCTATACTTGGGAATTGTAG  
TTGAGTCTGCTTACCAAAAATAGGATCAGGGAAAATAACTGACTTCT

>M6-PGSC0003DMG401030595-(rev)M6RLKANKrepeat\_3172

TGGGAATTGTAGTTGAGTCTGCTTACCAAAAATAGGATCAGGGAAAATAACTGACTTCTAGTTTAAGTCT  
TTCTTTTTACTGAGTTATTATGATTATTCTAGTATCTGTATCTTGGTGTT

>M6-PGSC0003DMG401030595-(rev)M6RLKANKrepeat\_3233

TTTAAGTCTTTCTTTTTACTGAGTTATTATGATTATTCTAGTATCTGTATCTTGGTGTTAATCACTAATAG  
ATAGTTGTTAGATAAAACCGAGTGCTTCTTTTCTTTCAGTTTGTCTGT

>M6-PGSC0003DMG401030595-(rev)M6RLKANKrepeat\_3294

ATCACTAATAGATAGTTGTTAGATAAAACCGAGTGCTTCTTTTCTTTCAGTTTGTCTGTCTATGATTTTCTG  
CAATGGATTCTAGAGAGTTCTTTTGTGTTAACAGTATTGTCAAGCTG

>M6-PGSC0003DMG401030595-(rev)M6RLKANKrepeat\_3355

ATGATTTTCTGCAATGGATTCTAGAGAGTTCTTTTGTGTTAACAGTATTGTCAAGCTGCAGGTCGTTTAC  
ATCTTTGTGTTATGTGCCTTGCCAATCTGACTTGAGATTTCTATCCTTT

>M6-PGSC0003DMG401030595-(rev)M6RLKANKrepeat\_3416

GGTCGTTTACATCTTTGTGTTATGTGCCTTGCCAATCTGACTTGAGATTTCTATCCTTTTAAATGTTCAACT  
GTCTTATTACTTCATAACTCAGAGCATTGGGTATGTTACGTTTTAT

>M6-PGSC0003DMG401030595-(rev)M6RLKANKrepeat\_3477

AATGTTCAACTGTCTTATTACTTCATAACTCAGAGCATTGGGTATGTTACGTTTTATTGCCAGAATATTC  
ATTATCAAAGACATGAAAATGCCTTTTATCTTAACTGATTCCAATTAT

>M6-PGSC0003DMG401030595-(rev)M6RLKANKrepeat\_3538

CCAGAATATTCATTATCAAAGACATGAAAATGCCTTTTATCTTAACTGATTCCAATTATCAATAGGACTCT  
TGAGTCAACATGCAATTGGATGTCTAGGTTTCAACTAACATATTGGTCA

>M6-PGSC0003DMG401030595-(rev)M6RLKANKrepeat\_3599

ATAGGACTCTTGAGTCAACATGCAATTGGATGTCTAGGTTTCAACTAACATATTGGTCATTTGAATGAAT  
GGTGCAAGTATGCATTTGTTCAATATTTTTTTAGTATGTTGATGTAGTGA



>M6-PGSC0003DMG401030595-(rev)M6RLKANKrepeat\_366  
CTCTATTGTTGAACTTCTTTTGGCTTACAAGGCTGATGTTAATCTCAGAGATAGGTGGCGCCGGACTGTA  
AGCCCCTTTTCATATACTATTACCCTTCTCTGCTCGTCTTTCTTCATACT

>M6-PGSC0003DMG401030595-(rev)M6RLKANKrepeat\_3660  
TGAATGAATGGTGCAAGTATGCATTTGTTCAATATTTTTTTAGTATGTTGATGTAGTGATGTCAAAGTGT  
GGTGGCGTATAAATGCATTTTAACCCACTTTTCCATGCTATTTCTATCT

>M6-PGSC0003DMG401030595-(rev)M6RLKANKrepeat\_3721  
TCAAAGTGTGGTGGCGTATAAATGCATTTTAACCCACTTTTCCATGCTATTTCTATCTGTGTGACTTCTGA  
CATGCCAGCAAAGTAATATACGATGAAATGGACACTAATTTGTTTAGT

>M6-PGSC0003DMG401030595-(rev)M6RLKANKrepeat\_3782  
GTGACTTCTGACATGCCAGCAAAGTAATATACGATGAAATGGACACTAATTTGTTTAGTTTATGAAGCAA  
ATTCTAAAATAATGAAGTTAAGCTATATAGCATATGTCCTCCCGAACAAAT

>M6-PGSC0003DMG401030595-(rev)M6RLKANKrepeat\_3843  
ATGAAGCAAATTCTAAAATAATGAAGTTAAGCTATATAGCATATGTCCTCCCGAACAAATTAGCTGTCATC  
TTCAGTGAAGTCTTTTCTTAATTTGGTCCAGGAACTTGTTACTAGATGAA

>M6-PGSC0003DMG401030595-(rev)M6RLKANKrepeat\_3904  
GCTGTCATCTTCACTGAAGTCTTTTCTTAATTTGGTCCAGGAACTTGTTACTAGATGAATGTGGGCACTTA  
AAGATTGGTGAATATTGGGTTCAAATATTGGATAATCAAATATATGCAA

>M6-PGSC0003DMG401030595-(rev)M6RLKANKrepeat\_3965  
TGGGCACTTAAAGATTGGTGAATATTGGGTTCAAATATTGGATAATCAAATATATGCAAGTCAGGACTG  
TTGTATGAAGACTTTTTGGTTCTTGCTTATTTGTTTGTTCATTTATTTGG

>M6-PGSC0003DMG401030595-(rev)M6RLKANKrepeat\_4026  
CAGGACTGTTGTATGAAGACTTTTTGGTTCTTGCTTATTTGTTTGTTCATTTATTTGGGTCACATACTGCA  
GCTTATAATCAATCTCTTTCTTTTACAGGTCAATCAAACAACGGATGT

>M6-PGSC0003DMG401030595-(rev)M6RLKANKrepeat\_4087  
CACATACTGCAGCTTATAATCAATCTCTTTCTTTTACAGGTCAATCAAACAACGGATGTAAGTAAATCAGC  
CATCTGTGTCATGACATTAGCAAAGATATTTATTCATTTGGCCTCATCT

>M6-PGSC0003DMG401030595-(rev)M6RLKANKrepeat\_4148  
CTTAATCAGCCATCTGTGTCATGACATTAGCAAAGATATTTATTCATTTGGCCTCATCTTTTACCAGGTAG

ATTCAAGGAGTTCTCTTATCATATATGTAATCAGCATATTGCAATAATC

>M6-PGSC0003DMG401030595-(rev)M6RLKANKrepeat\_4209

TACCAGGTAGATTCAAGGAGTTCTCTTATCATATATGTAATCAGCATATTGCAATAATCCTCCCCTTTTCTT  
ACTGCTTTTTGTTGGAGATTCAAGGAGTTCTCCAACAATTGAGCATAA

>M6-PGSC0003DMG401030595-(rev)M6RLKANKrepeat\_427

CGGACTGTAAGCCCCTTTTCATATACTATTACCCTTCTCTGCTCGTCTTTCATACTGCATACAACCCCA  
TTCATTTATGTTACACATGGTTGTTACATATTGTTTTATAATGTATT

>M6-PGSC0003DMG401030595-(rev)M6RLKANKrepeat\_4270

CCCCTTTTCTTACTGCTTTTTGTTGGAGATTCAAGGAGTTCTCCAACAATTGAGCATAAACTGATCCA  
TTTGGATTA  
ACTTGAGTTTGGACCTTCTTAAACTAATAACAAAAT

>M6-PGSC0003DMG401030595-(rev)M6RLKANKrepeat\_4331

TGATCCA  
ACTTTTGGATTA  
ACTTGAGTTTGGACCTTCTTAAACTAATAACAAAATTCACATAAAATG  
TTGATAGATTGATAAATTAATAAATGATCTGTGATTTTAGCTTACCT

>M6-PGSC0003DMG401030595-(rev)M6RLKANKrepeat\_4392

ACATAAAATGTTGATAGATTGATAAATTAATAAATGATCTGTGATTTTAGCTTACCTTTGGAATTCCAC  
TCAGTTTGCTATTAGCACTAATGCTGCTACTTAATTCAGGCGATCTTTC

>M6-PGSC0003DMG401030595-(rev)M6RLKANKrepeat\_4453

GGAATTCCACTCAGTTTGCTATTAGCACTAATGCTGCTACTTAATTCAGGCGATCTTTCATGATCTTTTACT  
AGTTTGATGAGCATCCTATAGAGTGCTAACTTGAAAAGCTACAAGAAA

>M6-PGSC0003DMG401030595-(rev)M6RLKANKrepeat\_4514

GATCTTTTACTAGTTTGATGAGCATCCTATAGAGTGCTAACTTGAAAAGCTACAAGAAAATTGAATATTA  
TCCTATTAAGAACTGGATGATCGTGATCTTTTTTTTTGTGTCATGAAAAGG

>M6-PGSC0003DMG401030595-(rev)M6RLKANKrepeat\_4575

TGAATATTATCCTATTAAGAACTGGATGATCGTGATCTTTTTTTTTGTGTCATGAAAAGGGTAACTAGACTT  
CAACTTTAATTACATATTCTGAAGAAGGACTAGCTGGATGCACCCAATA

>M6-PGSC0003DMG401030595-(rev)M6RLKANKrepeat\_4636

AACTAGACTTCAACTTTAATTACATATTCTGAAGAAGGACTAGCTGGATGCACCCAATACCTAGGAATAG  
ACAAAGTTGAATTTATTTTTTTGGTCGGGTAATCAAGAGGATGAGTTCAG

>M6-PGSC0003DMG401030595-(rev)M6RLKANKrepeat\_4697

TAGGAATAGACAAAGTTGAATTTATTTTTTTGGTCGGGTAATCAAGAGGATGAGTTCAGATCCTCTCAAT  
TCCAAACTTTGGCATTAACTTTCTTTAGTTGAGTGCCAAAGTTGTTTCTC

>M6-PGSC0003DMG401030595-(rev)M6RLKANKrepeat\_4758

CCTCTCAATTCCAAACTTTGGCATTAACTTTCTTTAGTTGAGTGCCAAAGTTGTTTCTCGTTAGATGGAAG  
TTCTTTCCCCACAGTGAATGCTCAAACCAATAGAAAAATAGTGACAAAA

>M6-PGSC0003DMG401030595-(rev)M6RLKANKrepeat\_4819

TAGATGGAAGTTCTTTCCCCACAGTGAATGCTCAAACCAATAGAAAAATAGTGACAAAATGAGCATGAT  
CTAAAGTTGTTTGAGGCATAAACTCAACATGATGTAGTCCACGTAGTAGTC

>M6-PGSC0003DMG401030595-(rev)M6RLKANKrepeat\_4880

AGCATGATCTAAAGTTGTTTGAGGCATAAACTCAACATGATGTAGTCCACGTAGTAGTCAGTTGTACTGG  
TAGAACTTTTTCTTTGGTTCAATTGCCAGTGAAAAGTTGTTGTGTTATTAG

>M6-PGSC0003DMG401030595-(rev)M6RLKANKrepeat\_4941

TTGTAAGTTGTTGAGGCATAAACTCAACATGATGTAGTCCACGTAGTAGTCAGTTGTACTGG  
TTCTGTTTACTTATTCTTACTTGACTATTATCACATGAGTTTCCATTAA

>M6-PGSC0003DMG401030595-(rev)M6RLKANKrepeat\_5002

TAAGTCATCTTTCTGTTTACTTATTCTTACTTGACTATTATCACATGAGTTTCCATTAAGATTCAGTACTAA  
CACTGGAAATGCTGCAGATGCTGGAAGGAAGACAAATAACTGACAGGA

>M6-PGSC0003DMG401030595-(rev)M6RLKANKrepeat\_5063

TTCAGTACTAACACTGGAAATGCTGCAGATGCTGGAAGGAAGACAAATAACTGACAGGAGTTTTGAGAC  
CATGCATATCAAGTCTGTAGATTTGGAGAAAAAGCTTTATACAGGTCGATA

>M6-PGSC0003DMG401030595-(rev)M6RLKANKrepeat\_5124

TTTGAGACCATGCATATCAAGTCTGTAGATTTGGAGAAAAAGCTTTATACAGGTCGATACCCGAGTAGA  
ATTCTTCAGTAAGTCAATCACTCAATCTTGAAGCTTTAATTTAACTTCTCC

>M6-PGSC0003DMG401030595-(rev)M6RLKANKrepeat\_5185

CGAGTAGAATTCTTCAGTAAGTCAATCACTCAATCTTGAAGCTTTAATTTAACTTCTCCAATACATGTCCC  
AACTCAGTATATTCTTCACTAAACCAGCTTCTAAGTAATTCATACATAG

>M6-PGSC0003DMG401030595-(rev)M6RLKANKrepeat\_5246

TACATGTCCCAACTCAGTATATTCTTCACTAAACCAGCTTCTAAGTAATTCATACATAGACATCATGATCC  
ATGTTGATAAGAGGTTTAGTGATACGAGACTATCTGGTTAGAGCAACTC

>M6-PGSC0003DMG401030595-(rev)M6RLKANKrepeat\_5307

ATCATGATCCATGTTGATAAGAGGTTTGTAGTACGAGACTATCTGGTTAGAGCAACTCAGTATATGTTT  
AAATGATTATAATATCAGAAATACAGGCTACTAAGAACTCGAACATACAT

>M6-PGSC0003DMG401030595-(rev)M6RLKANKrepeat\_5368

TATATGTTTAAATGATTATAATATCAGAAATACAGGCTACTAAGAACTCGAACATACATTGTAGCTCAAA  
TTATTTATTTAGATCCCAATCAACAACTCAAAGGACCAAATCCCGTAC

>M6-PGSC0003DMG401030595-(rev)M6RLKANKrepeat\_5429

TAGCTCAAATTATTTATTTAGATCCCAATCAACAACTCAAAGGACCAAATCCCGTACCCGTAAGCTTCA  
ATTGTTGGCTCTGCCTATGTTGATAACATATTGTTATTTTGTTCAGGTT

>M6-PGSC0003DMG401030595-(rev)M6RLKANKrepeat\_5490

GTAAGCTTCAATTGTTGGCTCTGCCTATGTTGATAACATATTGTTATTTTGTTCAGGTTAATTGAGGACTG  
CACGAGTACAGTTCCTTCTACAAGGCCATCATTTGCTACAGTAATAGAA

>M6-PGSC0003DMG401030595-(rev)M6RLKANKrepeat\_5551

TTGAGGACTGCACGAGTACAGTTCCTTCTACAAGGCCATCATTTGCTACAGTAATAGAAATCCTAGAAGA  
AGTCTCTTTACTATCAAGAAAACAGGTTGCCCGCCGTGTAATAAAAGCA

>M6-PGSC0003DMG401030595-(rev)M6RLKANKrepeat\_5612

CCTAGAAGAAGTCTCTTTACTATCAAGAAAACAGGTTGCCCGCCGTGTAATAAAAGCAAAGCCCCAA  
GTAAATGAATTTAATTTGCTAGTGATGGATATGCTTTGATACACCATAAAT

>M6-PGSC0003DMG401030595-(rev)M6RLKANKrepeat\_5673

AGCCCCAAGTAAATGAATTTAATTTGCTAGTGATGGATATGCTTTGATACACCATAAATTTGAAAAAGTC  
AGTGAAGAACTCATTCTGGTTCATGAATATGAGTTTGATATAATTCCCAA

>M6-PGSC0003DMG401030595-(rev)M6RLKANKrepeat\_5733

TGAAAAAGTCAGTGAAGAACTCATTCTGGTTCATGAATATGAGTTTGATATAATTCCCAAGTTGACTTTC  
TTGTATTTGACTTTGTGTTACTATAATGTATATAGGAAATTTTACTTGCT

>M6-PGSC0003DMG401030595-(rev)M6RLKANKrepeat\_61

AAAACCCCTTTCTTGGACTGAATCGCCATCCATGGCGACAAGAAACGTTTATCTTTATGTTAATTTTCAT  
CAGGCAGTTTTGAAGTTCCAATTGTTGAGATATGGAGATCAGTACAATA

>M6-PGSC0003DMG401030595-(rev)M6RLKANKrepeat\_732

ACAATGCGATTACACCAAATCAGTTGTTACATAAAATGGGAAATTTTGTGTTGCATAAGGATGGATTTA

ACGATACTATGCAATAAATTTTTAGTAAAAATCAAACACTGACAGTGCAA

>M6-PGSC0003DMG401030595-(rev)M6RLKANKrepeat\_793

ATGGATTTAACGATACTATGCAATAAATTTTTAGTAAAAATCAAACACTGACAGTGCAATATCATGATGG  
TAGTTACCATTTTTATCAATTATTAATTGATGCTTATTTTATAGATTAAC

>M6-PGSC0003DMG401030595-(rev)M6RLKANKrepeat\_854

TCATGATGGTAGTTACCATTTTTATCAATTATTAATTGATGCTTATTTTATAGATTAACCTGTAATTACCTT  
AGAAGTGACCTGATTGTATACATATGTTTTAACTTAACTCTCTGT

>M6-PGSC0003DMG401030595-(rev)M6RLKANKrepeat\_915

GTAATTACCTTAGAAGTGACCTGATTGTATACATATGTTTTAACTTAACTCTCTGTTTTTAATGCATTCC  
TATGATGAGGAATTAACCATCATTATTTTCCTTCAATTGGTTGTAA

>M6-PGSC0003DMG401030595-(rev)M6RLKANKrepeat\_976

TAATGCATTCCATGATGAGGAATTAACCATCATTATTTTCCTTCAATTGGTTGTAAAGCCCTTAACAGA  
TGCAAAGTTGTACGGGCACCGTGACATATGCAGGATCCTTGAGGTCTGT

>M6-PGSC0003DMG402000299-(rev)M6LRR-RLP\_0

CTTGGGTGCAAAGAAGGATACTATTAATGCCTCTCATCTTCTTACAACCAAATGTGACATTCCATAATTG  
AGAATACATCAAATCCACATATGGAGAAGTTATACCTTTGGTTTTAA

>M6-PGSC0003DMG402000299-(rev)M6LRR-RLP\_1281

CCCCCTTAGTGAAAATAGGGTCGGTGTAAATTCCTTGATGACGGAGATTCAGTCAAACCATCAGTT  
TTCTGTTTCTCACAAAGTTTATCTTCCCAACATATATGTATAGCAACTTCA

>M6-PGSC0003DMG402000299-(rev)M6LRR-RLP\_3904

CCTATTGCATACTTGAGAAATGTTTCATATCTTGAACCTGTACGAGCAACAAATCTTTTTCTGAATCCAA  
TCTACTAGGAAAGGGAAGTTACGGTTCAGTTTATCGAGGGGAACTCAAC

>M6-PGSC0003DMG402000299-(rev)M6LRR-RLP\_3965

CTGAATCCAATCTACTAGGAAAGGGAAGTTACGGTTCAGTTTATCGAGGGGAACTCAACGATGGAACA  
GATGTAGCTGTAAAAGTTTTAACTCACTGACAGAAGAAGCAACCAAGAGTT

>M6-PGSC0003DMG402000299-(rev)M6LRR-RLP\_4026

TGGAACAGATGTAGCTGTAAAAGTTTTAACTCACTGACAGAAGAAGCAACCAAGAGTTTCTATGCTGA  
ATGTAAGATATTGAGCAACATCCGTCACCGGAACCTTACAAAAATCCTCAG

>M6-PGSC0003DMG402000299-(rev)M6LRR-RLP\_4087

TATGCTGAATGTAAGATATTGAGCAACATCCGTCACCGGAACCTTACAAAAATCCTCAGTTGTTGTAGTA  
CCACAGACTTCAAAGCTCTTGTATTAGACTACATGCCAAATGGTAATCTT

>M6-PGSC0003DMG402000299-(rev)M6LRR-RLP\_4148

GTTGTAGTACCACAGACTTCAAAGCTCTTGTATTAGACTACATGCCAAATGGTAATCTTGAGAGGTGGTT  
ACATTCCAAGATTATTGTTAAGTATGCTCCAGAGACTGAACATAGCAA

>M6-PGSC0003DMG402000299-(rev)M6LRR-RLP\_4209

GAGGTGGTTACATTCCAAGATTATTGTTAAGTATGCTCCAGAGACTGAACATAGCAATAGATATTGCT  
TCAGCTTTGGAATATCTTCATTGTGGTCTAACAACCTCTATTGTACTG

>M6-PGSC0003DMG402000299-(rev)M6LRR-RLP\_4270

GATATTGCTTCAGCTTTGGAATATCTTCATTGTGGTCTAACAACCTCTATTGTACTGTGACCTGAAGCC  
TACCAATATCTTATTAGATGAAGATATGACTGCACATCTTTGCGATTTT

>M6-PGSC0003DMG402000299-(rev)M6LRR-RLP\_4331

ACCTGAAGCCTACCAATATCTTATTAGATGAAGATATGACTGCACATCTTTGCGATTTTCGGGATCGCAA  
AATTTTTGAGCAAGACATGCATATGGCTCAAACCAAGACACTAGCCACCA

>M6-PGSC0003DMG402000299-(rev)M6LRR-RLP\_4392

GATCGCAAAAATTTTTGAGCAAGACATGCATATGGCTCAAACCAAGACACTAGCCACCATTGGTTATATG  
GCACCAGGTGAAACTAAATCCAATCCTTCTTATTCTGCTTTCTTTAGTA

>M6-PGSC0003DMG402000299-(rev)M6LRR-RLP\_4453

GGTTATATGGCACCAGGTGAAACTAAATCCAATCCTTCTTATTCTGCTTTCTTTAGTAGTAAATCATTTTT  
TTGGTACTTTGAAACATACTAACTATCAAAAATCATTATAAGCTACA

>M6-PGSC0003DMG402000299-(rev)M6LRR-RLP\_4514

AAATCATTTTTTTGGTACTTTGAAACATACTAACTATCAAAAATCATTATAAGCTACATTGCTTGAATCT  
GTCAGGAGCAAGAACTCCATTTATTGATCACATATCCCATATTACCA

>M6-PGSC0003DMG402000299-(rev)M6LRR-RLP\_4575

GCTTGAATCTGTCAGGAGCAAGAACTCCATTTATTGATCACATATCCCATATTACCAAATCCTTTTCAT  
GTCTATGACCTTTATTCGCCAGAAAATCTACATGTTTATCCACTTTCTT

>M6-PGSC0003DMG402000299-(rev)M6LRR-RLP\_4636

TCCTTTTCATGTCTATGACCTTTATTCGCCAGAAAATCTACATGTTTATCCACTTTCTTCATCTCTTAA  
AGTTTTTCCGAAAACAGCATCTCCGGTTTGGATCTTCACACTACCAT

>M6-PGSC0003DMG402000299-(rev)M6LRR-RLP\_4697

TTCATCTCTTAAAGTTTTTCCGAAAACAGCATCTCCGGTTTGGATCTTCACACTACCATTAGTATATAGCTT  
AATTTTTCTTGCACAAGGAGGACCAAGCAATTAGTTTGACTTGTTTGG

>M6-PGSC0003DMG402000299-(rev)M6LRR-RLP\_4758

GTATATAGCTTAATTTTTCTTGCACAAGGAGGACCAAGCAATTAGTTTGACTTGTTTGGATATAGAGGTT  
TTGCATAGGGAAATACTTCAACAATTTCCATAGTGTAATTTATAATGTGT

>M6-PGSC0003DMG402000299-(rev)M6LRR-RLP\_4819

ATAGAGGTTTTGCATAGGGAAATACTTCAACAATTTCCATAGTGTAATTTATAATGTGTTTAGATATACAT  
TTCTTTCTAGTACTCCCTCTTATAATTTGTTTGTCTTATTTTCCTTT

>M6-PGSC0003DMG402000299-(rev)M6LRR-RLP\_5063

CAAATTGAAACAGAGGGAGTGTAATATTAAGTAGATCTTATGCTATATATTTGCTTAAATTGTAATGTCA  
TTGCAGAGTATGGAAGTCACTGGGATAGTTTCAACAAGTGGAGATATCTAC

>M6-PGSC0003DMG402000299-(rev)M6LRR-RLP\_5124

GTAATGTCATTGCAGAGTATGGAAGTCACTGGGATAGTTTCAACAAGTGGAGATATCTACAGCTATGGCA  
TTATATTGTTGGAAATGTTTACAGGAAAAAAACCAACTGATGATATGTTCA

>M6-PGSC0003DMG402000299-(rev)M6LRR-RLP\_5185

CTATGGCATTATATTGTTGGAAATGTTTACAGGAAAAAAACCAACTGATGATATGTTTACAGGGAAACAAT  
GAACTTGAATGTTTCGTGGGCGAAAGCTTACGTAGAAAATCTTTAATGGA

>M6-PGSC0003DMG402000299-(rev)M6LRR-RLP\_5246

GAAACAATGAACTTGAATGTTTCGTGGGCGAAAGCTTACGTAGAAAATCTTTAATGGAAGTTCTGGAT  
TCTGATTTGATTAGAGATGTTGAACAGTTCTCTGAAGTAGTACAACAGTTT

>M6-PGSC0003DMG402000299-(rev)M6LRR-RLP\_5307

TTCTGGATTCTGATTTGATTAGAGATGTTGAACAGTTCTCTGAAGTAGTACAACAGTTTGTGTCATCTATC  
TTTTGTTTGGGATTGGAATGTCTGAAAGATTGTCCTGAAGACAGAATGA

>M6-PGSC0003DMG402000299-(rev)M6LRR-RLP\_5368

GTCATCTATCTTTTGTGGGATTGGAATGTCTGAAAGATTGTCCTGAAGACAGAATGAGCATTAGTAAT  
ATTGTGGATTGCCTTAGAAAAGCTAAAATTGAATATTTAGCAATTAGAGG

>M6-PGSC0003DMG402000299-(rev)M6LRR-RLP\_5429

ATTAGTAATATTGTGGATTGCCTTAGAAAAGCTAAAATTGAATATTTAGCAATTAGAGGAAAGGCAGAA

AAGGTGGTGTAATTTTCTGATTGTGAAGACTGTTGTAATATTTTATTTT

>M6-PGSC0003DMG402000299-(rev)M6LRR-RLP\_5490

AGGCAGAAAAGGTGGTGTAATTTTCTGATTGTGAAGACTGTTGTAATATTTTATTTTGTGTTTGTATTA  
GTGGTTTACAATCTTTGGGAGTTCTTGTCAAATCTGTTTCTGAAAATACT

>M6-PGSC0003DMG402000299-(rev)M6LRR-RLP\_5673

AGGTTTGTGATTTGATTCCTTTTGGACCACATAAGAATTCGTTGTCCAATTGAATATTCCTTTTCTCGG  
AAGTTTGTGATTTGATTCATTGGACCATGTAAGAATTCGTCATC

>M6-PGSC0003DMG402000299-(rev)M6LRR-RLP\_61

TCCATAATTGAGAATACATCAAAATCCACATATGGAGAAGTTATACCTTTTGGTTTTAACCTTCATAACAG  
TTTGGTTGAGTTCAGTCAAGGGATTTACAAACATAGAAAAAGATGAATC

>M6-PGSC0003DMG402000515M6RLKantifungi(GNK)\_0

TATTTCTTATTTTGTGATTTTTTATTTGTAAAAATTTACGAAAGAAACACAAATTTAAATTAACCTTATAAA  
AGAATACAAAATTAATTGACTTTTGTGCACCTGTTTTGACTTTATCTT

>M6-PGSC0003DMG402000515M6RLKantifungi(GNK)\_122

GCATTTTTGTAATGAAAATGCTGTTATTTTCAGGGTTAGCAAAGGGTGATAGTAGCTATCGTTCTTGG  
AGTGACAGCTTTCACCATGCTTGCTCTCTCAGCTGCGTACACAGCTCGTA

>M6-PGSC0003DMG402000515M6RLKantifungi(GNK)\_183

CGTTCTTGGAGTGACAGCTTTCACCATGCTTGCTCTCTCAGCTGCGTACACAGCTCGTAAAAGATCATT  
AGGCGAAAACGAGGTATTGAACAAAATAAAATAGTTTCGTAACGGTACTG

>M6-PGSC0003DMG402000515M6RLKantifungi(GNK)\_366

ATTTTTTGGTTGCATTGTTTCAGCACGCATTAATCTTGGCAAATATCGAATTCATACAACAAGTCGAGC  
TTGAATTTTAAATATGAAAATCTTGAGAAGGCAACAACTACTTTGATC

>M6-PGSC0003DMG402000515M6RLKantifungi(GNK)\_427

CAAGTCGAGCTTGAATTTTAAATATGAAAATCTTGAGAAGGCAACAACTACTTTGATCCTTCAACAAAA  
GTAGGTCAAGGAGGAAATGGTTCTGTATACAAAGGGACTCTGCCTAATGG

>M6-PGSC0003DMG402000515M6RLKantifungi(GNK)\_488

TCAACAAAAGTAGGTCAAGGAGGAAATGGTTCTGTATACAAAGGGACTCTGCCTAATGGAGATGTTATT  
GCAGTTAAGAGACTTTTTTTCAATACAAGACAATGGGTTGATGACTTCTTC

>M6-PGSC0003DMG402000515M6RLKantifungi(GNK)\_549



ATGTTATTGCAGTTAAGAGACTTTTTTTCAATACAAGACAATGGGTTGATGACTTCTTCAATGAGGTTAAT  
CTCATCCATGGAATTGAACACAAAAATCTTGTCAAGTTGTTGGGTTGCA

>M6-PGSC0003DMG402000515M6RLKantifungi(GNK)\_61

AAACTTATAAAAGAATACAAAATTAATTGACTTTTGTGCACCTGTTTTGACTTTATCTTCTGCATTTTTGTA  
ATGAAAATGCTGTTATTTTCAGGGGTTAGCAAAGGGGTGATAGTAGCT

>M6-PGSC0003DMG402000515M6RLKantifungi(GNK)\_610

TGAGGTTAATCTCATCCATGGAATTGAACACAAAAATCTTGTCAAGTTGTTGGGTTGCAGCATTGAAGGC  
CCCGAGAGCCTGCTCGTATACGAGTTTGTGACCAATAAGAGTCTAGATCA

>M6-PGSC0003DMG402000515M6RLKantifungi(GNK)\_671

ATTGAAGGCCCGAGAGCCTGCTCGTATACGAGTTTGTGACCAATAAGAGTCTAGATCAATACCTCTTTG  
GTAATTATCTTTCTTTCTTGTCCATACATAGAAAGGGAAAGTTAAGGAA

>M6-PGSC0003DMG402000515M6RLKantifungi(GNK)\_732

ACCTCTTTGGTAATTATCTTTCTTTCTTGTCCATACATAGAAAGGGAAAGTTAAGGAATCCAACCTGTCAA  
AGACGTCTTTTGGGTAAAACCCAATGTGACAAAAACGTGAGGCACCAAA

>M6-PGSC0003DMG402000515M6RLKantifungi(GNK)\_793

CAACTGTCAAAGACGTCTTTTGGGTAAAACCCAATGTGACAAAAACGTGAGGCACCAAAGTTTGGGGCA  
GAGTGGAAAATAAATTGACAGTTGAACCTGGATTTTACACAGCATTGTTC

>M6-PGSC0003DMG402000515M6RLKantifungi(GNK)\_854

TTGGGGCAGAGTGGAAAATAAATTGACAGTTGAACCTGGATTTTACACAGCATTGTTCTACCTATATA  
TTTCTAAGTTATATTGACAGTTGCAAACCTCTAATTGAGTTGTTGAATTT

>M6-PGSC0003DMG402000515M6RLKantifungi(GNK)\_915

ACCTATATATTTCTAAGTTATATTGACAGTTGCAAACCTCTAATTGAGTTGTTGAATTTTTGTTGTAGATAA  
GGACAAGGTAAAGATTCTAAGTTGGGAAGAACGTTTCCGTATTATAGT

>M6-PGSC0003DMG402000674-(rev)M6LysM-RLK\_0

TTTTATTGTTTTACCAAAGTATTAATAAATCTGAACAATAATCATTATTACTAATTTTCAATCC  
AACTTTATCTATAACCCACTCAGTCAACGCTTCCTCCAAAACCCAGCT

>M6-PGSC0003DMG402000674-(rev)M6LysM-RLK\_1159

AAATTATATGAAAATTAATACTTAAATAACTTGTTTCTTATCCAACCTACCAAATGACCCCTGAGGTTATAG  
TCCTAGTACTTCTTTTTTGGTTAATGTTTTAGTCTCTTGGGAAAAGGGG

>M6-PGSC0003DMG402000674-(rev)M6LysM-RLK\_122

AATTTCCAGAAAAATACGTTCTTGCATCAATTCCTTCATACCCATTCATAAATTTCCAGAAAAATACAT  
TCTTGTATCAATTCATAATACCCATTCAGGAAATCCAGAAAAATAC

>M6-PGSC0003DMG402000674-(rev)M6LysM-RLK\_1220

GAGGTTATAGTCCTAGTACTTCTTTTTGGTTAATGTTTTAGTCTCTTGGGAAAAGGGGGAAAATGCTCT  
CTTTTTAATGATAAGGGAACCCCAGCCACTTGTATGCAATAGCTCACA

>M6-PGSC0003DMG402000674-(rev)M6LysM-RLK\_1342

CCACATAGGAGAGCAAACCACTCTAGGCAAGTCCTTTGTGACAAGCTCGGCCTAGAAGGCCAACCCCTG  
CTGTCACAGGCAAGGAGGCAAATGCATTTTTAAGGAAGGAAGTAGGCACTT

>M6-PGSC0003DMG402000674-(rev)M6LysM-RLK\_1403

AACCCCTGCTGTACAGGCAAGGAGGCAAATGCATTTTTAAGGAAGGAAGTAGGCACTTTGTCAAAAAA  
AAGAAGTTAGGAAGGAAGTAGGAATTAATTTAGGAAGCAACATGTTTTGTT

>M6-PGSC0003DMG402000674-(rev)M6LysM-RLK\_1464

TCAAAAAAAGAAGTTAGGAAGGAAGTAGGAATTAATTTAGGAAGCAACATGTTTTGTTAAGGGTGA  
CATTGGATTGAAGTTTATTGTTTACTATAAACTGGAGTTTGTAGTTTGAATG

>M6-PGSC0003DMG402000674-(rev)M6LysM-RLK\_1525

AGGGTGACATTGGATTGAAGTTTATTGTTTACTATAAACTGGAGTTTGTAGTTTGAATGTATAGAGTCAA  
TGAGGATTGAATCATCAAGGATGGGTTTTGATGTGTCTAAATGCGCAACG

>M6-PGSC0003DMG402000674-(rev)M6LysM-RLK\_1586

TAGAGTCAATGAGGATTGAATCATCAAGGATGGGTTTTGATGTGTCTAAATGCGCAACGGGAACTTGAA  
GCAGTGATACAGCACTAAGCATGGAACATTAATGCAAATTTGTTGATGAT

>M6-PGSC0003DMG402000674-(rev)M6LysM-RLK\_1647

AACTTGAAGCAGTGATACAGCACTAAGCATGGAACATTAATGCAAATTTGTTGATGATACCTGTTTTCT  
TTCTTCTTTTTGGCGTGATGCACCGTGTAGCGCTGGACCAATTGAACT

>M6-PGSC0003DMG402000674-(rev)M6LysM-RLK\_1708

CTGTTTTCTTCTTCTTTTTGGCGTGATGCACCGTGTAGCGCTGGACCAATTGAACTTTAGCATTGTCAT  
CTGTCTTTGTTCTAAAATTGTTCTTACATTGGACTAAAGGGGTTTCGAA

>M6-PGSC0003DMG402000674-(rev)M6LysM-RLK\_1769

AGCATTGTCATCTGTCTTTGTTCTAAAATTGTTCTTACATTGGACTAAAGGGGTTTCGAAGTACATGATTAA

CTTTAGTAGTGCTGAACTGCTCATATCGGGAAAATGTGACAATTTTCAA

>M6-PGSC0003DMG402000674-(rev)M6LysM-RLK\_183

GAAAAATACATTCTTGTATCAATTTACATAATACCCATTTTCAGGAAATCCAGAAAAATACGTTCTTGAATCA  
ATTTCCACATACCCATTTTCAGAAATTTTCATTCTTTCTTCATGAAACA

>M6-PGSC0003DMG402000674-(rev)M6LysM-RLK\_1830

ACATGATTAACCTTTAGTAGTGCTGAACTGCTCATATCGGGAAAATGTGACAATTTTCAAGCTTAATAATC  
TTGTGTGAAATTCCTATGATTTACATAATGTTTTTGATTAGCGGAATTCT

>M6-PGSC0003DMG402000674-(rev)M6LysM-RLK\_1891

TTAATAATCTTGTGTGAAATTCCTATGATTTACATAATGTTTTTGATTAGCGGAATTCTAGCTATACCAACT  
GAGTTTATCGCTGGGCTCTGTAATGGCAACGCAAGGGGCAAGCAGTAT

>M6-PGSC0003DMG402000674-(rev)M6LysM-RLK\_1952

CTATACCAACTGAGTTTATCGCTGGGCTCTGTAATGGCAACGCAAGGGGCAAGCAGTATTCACAAAAG  
AAGAAGCACAACCTGAGTGACTGTTCTCTGTGGCTTGGCTTCTTTGATCATT

>M6-PGSC0003DMG402000674-(rev)M6LysM-RLK\_2013

ACAAAAGAAGAAGCACAACCTGAGTGACTGTTCTCTGTGGCTTGGCTTCTTTGATCATTTCTTCAAACCTG  
CCGACCTGCCTCAATTCCGGTCTTGAAAAACATTTTTATATATACCACA

>M6-PGSC0003DMG402000674-(rev)M6LysM-RLK\_2074

TTCAAACCTGCCGACCTGCCTCAATTCCGGTCTTGAAAAACATTTTTATATATACCACATGGAATGCAAAT  
GTGAAGATTAAGAGATACATTTACCCTCAAAGAGAATTAGATGAAATAA

>M6-PGSC0003DMG402000674-(rev)M6LysM-RLK\_2135

GAATGCAAATGTGAAGATTAAGAGATACATTTACCCTCAAAGAGAATTAGATGAAATAAATGTAAAATA  
ATCTTATCAAAAAGAATGATCTGTAATTTTGTTAGTGATGGTAAAATATC

>M6-PGSC0003DMG402000674-(rev)M6LysM-RLK\_2196

GTAAAATAATCTTATCAAAAAGAATGATCTGTAATTTTGTTAGTGATGGTAAAATATCTAGAGGTATAC  
CCTTTTGGAAGCACAAACAAGCCCTTTCAAGTATTTTCAATATCACTCT

>M6-PGSC0003DMG402000674-(rev)M6LysM-RLK\_2257

GAGGTATACCTTTTGGAAGCACAACAAGCCCTTTCAAGTATTTTCAATATCACTCTGTTTTCTGAAGA  
TCAAACAGTAAGTACTGAACAAGAAGAATCACTTAAAGATCAAAGTTAT

>M6-PGSC0003DMG402000674-(rev)M6LysM-RLK\_2318

TTTCTGAAGATCAAACAGTAAGTACTGAACAAGAAGAATCACTTAAAGATCAAAGTTATGCTTTTGAGG  
ATCTTTGCCGTCCATAATGGCTCTCAACAGCTTCAGAATAAAAGCTATCTT

>M6-PGSC0003DMG402000674-(rev)M6LysM-RLK\_2379

TTTTGAGGATCTTTGCCGTCCATAATGGCTCTCAACAGCTTCAGAATAAAAGCTATCTTCTTATAGGTAAA  
AAAAGGAAAAAGATATAAGGGCTTGAGAGATTCTATTTATTCTTGGTTC

>M6-PGSC0003DMG402000674-(rev)M6LysM-RLK\_244

TCTTGAATCAATTTCCACATACCCATTTTCAGAAATTTTCATTCTTTCTTCATGAAACAATGTTTGAATCCA  
GGCCAAGAAGTGTTTTGAGCTTAGGGGTTTTTGTATACTAGTTTACT

>M6-PGSC0003DMG402000674-(rev)M6LysM-RLK\_2440

TATAGGTAAAAAAGGAAAAAGATATAAGGGCTTGAGAGATTCTATTTATTCTTGGTTCTTATTTTGGTA  
CTTGGGAGGAGCAGGAGTGTAGTGCGGGCATGTTGCTTGTAGTCTTTCC

>M6-PGSC0003DMG402000674-(rev)M6LysM-RLK\_2501

ATTTTGGTACTTGGGAGGAGCAGGAGTGTAGTGCGGGCATGTTGCTTGTAGTCTTTCCTTGAGCAAAC  
TCAAATGATATACAACAAATGCCAGGATATTGTTGTGTTTTAAATAGAAT

>M6-PGSC0003DMG402000674-(rev)M6LysM-RLK\_2562

GAGCAAACCTCAAATGATATACAACAAATGCCAGGATATTGTTGTGTTTTAAATAGAATGCTTTTATCGA  
ACTAAAACCTGACTCAAATCTGTGTCTTGTACAAATGCATTTTTGCC

>M6-PGSC0003DMG402000674-(rev)M6LysM-RLK\_2623

TTTTATCGAACTAAAACCTGACTCAAATCTGTGTCTTGTACAAATGCATTTTTGCCAAGACACTGATA  
TGCTCGTGTATCTTTCTGTTTCTCATCATCTTAGTGTGAGCCAGCAGGC

>M6-PGSC0003DMG402000674-(rev)M6LysM-RLK\_2684

GACACTGATATGCTCGTGTATCTTTCTGTTTCTCATCATCTTAGTGTGAGCCAGCAGGCTCCTTCTTTCAAT  
CTATTTTCTAATAGAACAGTTTGCAATAACTCTGTACTGTTATTTGTG

>M6-PGSC0003DMG402000674-(rev)M6LysM-RLK\_2745

CTTCTTTCAATCTATTTTCTAATAGAACAGTTTGCAATAACTCTGTACTGTTATTTGTGCTGGGAAGATGT  
CATAGCTTGATGGTTAGCAAATGTCCTAAAAGAGCTTGCTTCTGACTTT

>M6-PGSC0003DMG402000674-(rev)M6LysM-RLK\_2806

GGGAAGATGTCATAGCTTGATGGTTAGCAAATGTCCTAAAAGAGCTTGCTTCTGACTTTGATATTCTCTA  
CACCATATTTATTTGATCTTCCCTCTTTAATCCATTCCAATTCCTTGAT

>M6-PGSC0003DMG402000674-(rev)M6LysM-RLK\_2867

TATTCTCTACACCATATTTTATTTGATCTTCCCTCTTTAATCCATTCCAATTCCTTGATCTGTTTCATATAAT  
GCTAAATTTCTCAGTACCAGAAGTTCAAATTTAAAAGAGACTGATACA

>M6-PGSC0003DMG402000674-(rev)M6LysM-RLK\_2928

GTTTCATATAATGCTAAATTTCTCAGTACCAGAAGTTCAAATTTAAAAGAGACTGATACACTTCAAATTACT  
TTTAGCTTTGGTACAACATCTTTTTGACAAATCCTTTTAATCACGTGCT

>M6-PGSC0003DMG402000674-(rev)M6LysM-RLK\_2989

TCAAATTACTTTTAGCTTTGGTACAACATCTTTTTGACAAATCCTTTTAATCACGTGCTTTACTTATTAATG  
AATTAATATCTTTTACCGCTGACCAGCTTCCATATATGATGCCTTTGA

>M6-PGSC0003DMG402000674-(rev)M6LysM-RLK\_305

GTTTGAATCCAGGCCAAGAAGTGTTTTGAGCTTAGGGGTTTTTGTATACTAGTTTACTTATCCTCTGTTC  
CATTACCAGTTAACTCCCAATGTAATAGAGGCTGCGATTTAGCTTTAGC

>M6-PGSC0003DMG402000674-(rev)M6LysM-RLK\_3050

ACTTATTAATGAATTAATATCTTTTACCGCTGACCAGCTTCCATATATGATGCCTTTGATGTTTTCTTTTTC  
AATATCTTCATAGTCTAAGTTTGCCAACTAAAATTGGAGAGCGGTAA

>M6-PGSC0003DMG402000674-(rev)M6LysM-RLK\_3111

TTTTCTTTTTCAATATCTTCATAGTCTAAGTTTGCCAACTAAAATTGGAGAGCGGTAACACATTTAGTAC  
AAATACTTTGTCTGTTTTAGTGATTGTGCCTACTACGGTTCTTTCTTCT

>M6-PGSC0003DMG402000674-(rev)M6LysM-RLK\_3172

CATTTAGTACAAATACTTTGTCTGTTTTAGTGATTGTGCCTACTACGGTTCTTTCTTCTCGTGTTCTTAATG  
TATAACAGTGTTTGAACCATCATTTCTTTTATTATGCAGATAGAAAT

>M6-PGSC0003DMG402000674-(rev)M6LysM-RLK\_3233

TGTTCTTAATGTATAAACAGTGTTTGAACCATCATTTCTTTTATTATGCAGATAGAAATGGGAACCTTCCG  
CCGCTGCCAACAAAGGTAACCTAATAATTTGATGTAAATCTGACTGT

>M6-PGSC0003DMG402000674-(rev)M6LysM-RLK\_3294

GAACTTCCGCCGCTGCCAACAAAGGTAACCTAATAATTTGATGTAAATCTGACTGTTGTTCTCTATTG  
ATCTTCCATTAAGTACACATTGCTGACATTTATCATTGTATTGTTTC

>M6-PGSC0003DMG402000674-(rev)M6LysM-RLK\_3355

TTCTCTATTGATCTTCATTAAGTACACATTGCTGACATTTATCATTGTATTGTTTCTCCCTGTAATTTGC

AGCACAGATGGTTTGGATCTTTCCTCGTCTTCAGTGTTGGCTTATTT

>M6-PGSC0003DMG402000674-(rev)M6LysM-RLK\_3416

CCTGTAATTTGCAGCACAGATGGTTTGGATCTTTCCTCGTCTTCAGTGTTGGCTTATTTGTTATCCGTTTTTC

AGACCATTCATGATGATAAAGGAAGTCCTTTATGCTACCTACACTTAC

>M6-PGSC0003DMG402000674-(rev)M6LysM-RLK\_3477

TATCCGTTTTTCAGACCATTCATGATGATAAAGGAAGTCCTTTATGCTACCTACACTTACTATCGTTGCATA

CTTCTTAATAATTAGTTTTGTCTGGTGGCGCTAAAGCTGGGATATCTAT

>M6-PGSC0003DMG402000674-(rev)M6LysM-RLK\_3538

TCGTTGCATACTTCTTAATAATTAGTTTTGTCTGGTGGCGCTAAAGCTGGGATATCTATAGGAGCAATAG

GAGTAGTCTTGCTGTTGGTTGGTTTGGTTTATGTAGGATGTTATAGGAAC

>M6-PGSC0003DMG402000674-(rev)M6LysM-RLK\_3599

GAGCAATAGGAGTAGTCTTGCTGTTGGTTGGTTTGGTTTATGTAGGATGTTATAGGAACAAAACACAAA

AGGTTTCGCTGCTCAGATCTGAAGACCACCTCCATCAGTATGGTCATGGTA

>M6-PGSC0003DMG402000674-(rev)M6LysM-RLK\_366

TCCTCTGTTCCATTACCAGTTAACTCCCAATGTAATAGAGGCTGCGATTTAGCTTTAGCTTCATTCTATGTC

TGGCGAGGTTCAAATCTCACTTTAATCTCAGAGATGTTCTCCACCAGT

>M6-PGSC0003DMG402000674-(rev)M6LysM-RLK\_3660

AACACAAAAGGTTTCGCTGCTCAGATCTGAAGACCACCTCCATCAGTATGGTCATGGTAGGTGTTGATCC

CTGTTCTTTAGTTCTTATAAGTTATAACATTCATTTATTTGATGTACAAC

>M6-PGSC0003DMG402000674-(rev)M6LysM-RLK\_3721

TGTTGATCCCTGTTCTTTAGTTCTTATAAGTTATAACATTCATTTATTTGATGTACAACATTTCTTAAGGTG

CTTATACTTGGATCACTTTAAGGCTGAAAATGCAATTTAAAATAGCTA

>M6-PGSC0003DMG402000674-(rev)M6LysM-RLK\_3782

TTCTTAAGGTGCTTATACTTGGATCACTTTAAGGCTGAAAATGCAATTTAAAATAGCTAGTTTCTTTGTTG

GAATTGAATATTTCTTTAGTTATGTTGCCAACTTTTAGCAAGAATCGG

>M6-PGSC0003DMG402000674-(rev)M6LysM-RLK\_3843

TTCTTTGTTGGAATTGAATATTTCTTTAGTTATGTTGCCAACTTTTAGCAAGAATCGGAGTAGTAGAAAA

CAATGTTTGTAGTTAACTTATTTGTTAACCTTTTGTCTTGATTAGGCC

>M6-PGSC0003DMG402000674-(rev)M6LysM-RLK\_3904

TAGTAGAAAACAATGTTTGTAGTTAACTTATTTGTTAACCTTTTGTCTTGATTAGGCCCAGAAGGCAGTA  
CGACAGTTAAAGCTGCTGATTCCGGTCGCCTGGCTGATGGCAATTCTCC

>M6-PGSC0003DMG402000674-(rev)M6LysM-RLK\_3965

GAAGGCAGTACGACAGTTAAAGCTGCTGATTCCGGTCGCCTGGCTGATGGCAATTCTCCAGTGCTTTCA  
GGCATAACTGTGGATAAATCTGTTGAGTTCACCTTATGAAGAGCTTGCTACT

>M6-PGSC0003DMG402000674-(rev)M6LysM-RLK\_4026

TGCTTTCAGGCATAACTGTGGATAAATCTGTTGAGTTCACCTTATGAAGAGCTTGCTACTGCAACTAATGA  
CTTCAGCATCGCTAACAAAATCGGACAAGGTGGTTTTTGGTGCGGTTTATT

>M6-PGSC0003DMG402000674-(rev)M6LysM-RLK\_4087

AACTAATGACTTCAGCATCGCTAACAAAATCGGACAAGGTGGTTTTTGGTGCGGTTTATTATGCTGAGCTC  
AGAGGCGAGGTTTGAACCTTAAATCTTACTTCTGCGTATAACCTGT

>M6-PGSC0003DMG402000674-(rev)M6LysM-RLK\_4148

GCTGAGCTCAGAGGCGAGGTTTGAACCTTAAATCTTACTTCTGCGTATAACCTGTTGTATTATGAA  
AGAAGTCATTCTTTTTAGTTCAGATCTCATGAAGTAAGTGGGTAAACAGT

>M6-PGSC0003DMG402000674-(rev)M6LysM-RLK\_4209

TATTATGAAAGAAGTCATTCTTTTTAGTTCAGATCTCATGAAGTAAGTGGGTAAACAGTAGTCCAGAGAA  
AGGAGGAATAAGTAATAACAAAGAGCAGGGAAGACACATGCAGAAGTCAA

>M6-PGSC0003DMG402000674-(rev)M6LysM-RLK\_427

CATTCTATGTCTGGCGAGGTTCAAATCTCACTTTAATCTCAGAGATGTTCTCCACCAGTATACCAGATATC  
GTTTCTTACAACAACAGGGACAACATCCCTAATCAAGATAGTGTAATCG

>M6-PGSC0003DMG402000674-(rev)M6LysM-RLK\_4270

TCCAGAGAAAGGAGGAATAAGTAATAACAAAGAGCAGGGAAGACACATGCAGAAGTCAAATAAATGA  
ATAGCTTAGTCATCTGGTGATGTTCCAGACTTCCAGTGATGCATTGACATACA

>M6-PGSC0003DMG402000674-(rev)M6LysM-RLK\_4331

AAATGAATAGCTTAGTCATCTGGTGATGTTCCAGACTTCCAGTGATGCATTGACATACATTATATCCTGTA  
TATTTTGCACATATTAATCATAACCAACTGAATCATGATTTCACTTC

>M6-PGSC0003DMG402000674-(rev)M6LysM-RLK\_4392

ATATCCTGTATATTTTGCACATATTAATCATAACCAACTGAATCATGATTTCACTTCTCCACTGGGTGG  
GATGTTCCGTGATTTTTCTGTGGTCGTAATTATTTTAAAGTTTTAACC

>M6-PGSC0003DMG402000674-(rev)M6LysM-RLK\_4453

CACTGGGTGGGATGTTCCGTGATTTTTCTGTGGTCGTACTTATTTTTAAAGTTTTAAACCATAACCAACTTA  
AAGAATTATTCAAGTGTCTTCATACCCAGTACTTTTTGTGCTGTAAACT

>M6-PGSC0003DMG402000674-(rev)M6LysM-RLK\_4514

AACCAACTTAAAGAATTATTCAAGTGTCTTCATACCCAGTACTTTTTGTGCTGTAAACTATTTTCAGAAAGC  
AGCTATCAAGAAAATGGACATGGAAGCTACAAGGGAGTTTCTAGCTGAA

>M6-PGSC0003DMG402000674-(rev)M6LysM-RLK\_4575

TTCAGAAAGCAGCTATCAAGAAAATGGACATGGAAGCTACAAGGGAGTTTCTAGCTGAATTGAAGGTCT  
TGACAAATGTTTCATCACCTGAACCTGGTAAAACTCTGCCACTAGATGCAT

>M6-PGSC0003DMG402000674-(rev)M6LysM-RLK\_4636

GAAGGTCTTGACAAATGTTTCATCACCTGAACCTGGTAAAACTCTGCCACTAGATGCATATCTCTTTTGA  
CACTATTTTGGTTTTCTCATTTGAGAATACATACATGATACATATATACA

>M6-PGSC0003DMG402000674-(rev)M6LysM-RLK\_4697

CTCTTTTGACACTATTTTGGTTTTCTCATTTGAGAATACATACATGATACATATATACAGGGTGGACCCAC  
ATGTAGCATTCTGGGTGCTCGAGCACCTATTGATCCACCCTGATCTACA

>M6-PGSC0003DMG402000674-(rev)M6LysM-RLK\_4758

GTGGACCCACATGTAGCATTCTGGGTGCTCGAGCACCTATTGATCCACCCTGATCTACATATTCTTATACT  
GCACTTTCTTAAAATTGGGATATAAGAGCTGAAGGCACCCATCAGTCAA

>M6-PGSC0003DMG402000674-(rev)M6LysM-RLK\_4819

TTCTTATACTGCACTTTCTTAAAATTGGGATATAAGAGCTGAAGGCACCCATCAGTCAAACCTGGGGTG  
GGTGCTTTGGTTGAGAGCCAGATTTAAGGGGCATGGTCATCTACGTTTAC

>M6-PGSC0003DMG402000674-(rev)M6LysM-RLK\_488

ACCAGATATCGTTTCTTACAACAACAGGGACAACATCCCTAATCAAGATAGTGAATCGCCGGGACAAG  
GATTAACATACCTTTCCGTTGTGATTGCTTGAACGACGGGGAGGTATTGGG

>M6-PGSC0003DMG402000674-(rev)M6LysM-RLK\_4880

CTTGGGGTGGGTGCTTTGGTTGAGAGCCAGATTTAAGGGGCATGGTCATCTACGTTCACTGTTTCGATTC  
CCTGATAAAATAATTTTAAAGAACTCCTGTTTTCTTTTTCTTACTCGACTTG

>M6-PGSC0003DMG402000674-(rev)M6LysM-RLK\_4941

TTCGATTCCCTGATAAAATAATTTTAAAGAACTCCTGTTTTCTTTTTCTTACTCGACTTGTCTTCTTTTTCTC



CCATAAAACACTCTCTTATTTATACTTTCCTTGTTCTTCTTCTCTCT  
>M6-PGSC0003DMG402000674-(rev)M6LysM-RLK\_5002  
CTTCTTTTTCTCCATAAAACACTCTCTTATTTATACTTTCCTTGTTCTTCTTCTCTCTTTTTTTTTACAACCT  
CTTCTTTTCATTTTTCATTTGGTTAATCACTTTTTTTAATGTTTC  
>M6-PGSC0003DMG402000674-(rev)M6LysM-RLK\_5063  
TTTTTTACAACCTCTTCTTTTCATTTTTCATTTGGTTAATCACTTTTTTTAATGTTTCTTTTGGTTGATTTTT  
TAACTATCAGTGTTCAAATAATGTTGCTCTTATATTTTATGATTG  
>M6-PGSC0003DMG402000674-(rev)M6LysM-RLK\_5124  
TTGGTTGATTTTTTAACTATCAGTGTTCAAATAATGTTGCTCTTATATTTTATGATTGCTAGCAATTTTAT  
ATTAAAGGAATGTCAACACCCACGACCTTAAAATCCTAAATCCACCAC  
>M6-PGSC0003DMG402000674-(rev)M6LysM-RLK\_5155  
ATAATGTTGCTCTTATATTTTATGATTGCTAGCAATTTTATATTAAGGAATGTCAACACCCACGACCTTA  
AAATCCTAAATCCACCACTGCATATATACACACACATAGAGAGAGAGGG  
>M6-PGSC0003DMG402000674-(rev)M6LysM-RLK\_549  
GGGACAAGGATTAACATACCTTCCGTTGTGATTGCTTGAACGACGGGGAGGTATTGGGCCATGCTTTC  
CCGTACAGGGTTAAACTGGTGATACTTATGATCTTGTGGCGAGGAACTAC  
>M6-PGSC0003DMG402000674-(rev)M6LysM-RLK\_61  
ATTTTCAATCCAACCTTATCTATAACCCACTCAGTCAACGCTTCTCCAAAACCCAGCTCAAATTTCCAGAA  
AAAATACGTTCTTGCATCAATTTCTTCATACCCATTTTCATAAATTTTC  
>M6-PGSC0003DMG402000674-(rev)M6LysM-RLK\_610  
ATGCTTTCCCGTACAGGGTTAAACTGGTGATACTTATGATCTTGTGGCGAGGAACTACTCTGATTTGAC  
GACTGCACAGTGGATGATGAAGTTTAATAGTTATCCTGAGAATAATATCC  
>M6-PGSC0003DMG402000674-(rev)M6LysM-RLK\_671  
TGATTTGACGACTGCACAGTGGATGATGAAGTTTAATAGTTATCCTGAGAATAATATCCCGGATACTGTG  
AATTTAAGTGTTGTAGTGAATTGTTCTTGTGGGAATAGTGATGTTTCGAA  
>M6-PGSC0003DMG402000674-(rev)M6LysM-RLK\_732  
GATACTGTGAATTTAAGTGTTGTAGTGAATTGTTCTTGTGGGAATAGTGATGTTTCGAAGGATTTTGGGT  
TGTTTGTGACGTACCCTGTGCGGGCGGAGGATAACTTGACGTCAGTGGCT  
>M6-PGSC0003DMG402000674-(rev)M6LysM-RLK\_793

ATTTTGGGTTGTTTGTGACGTACCCTGTGCGGGCGGAGGATAACTTGACGTCAGTGGCTTCAGCATCCA  
ATGTGAGTGAAGATATAATCCGAAGGTATAATCCTGCAGCGGAGTCCATAT

>M6-PGSC0003DMG402000674-(rev)M6LysM-RLK\_854

AGCATCCAATGTGAGTGAAGATATAATCCGAAGGTATAATCCTGCAGCGGAGTCCATATTAGATATAGG  
GGAAGGAATCATCTATATACCGGGAAGAGGTTGGTGTTCGTGTCTTTATGT

>M6-PGSC0003DMG402000674-(rev)M6LysM-RLK\_915

GATATAGGGGAAGGAATCATCTATATACCGGGAAGAGGTTGGTGTTCGTGTCTTTATGTGTTTGTTTTAT  
TTCCTGTTAGAAGTTTTATGTCTTGCTTTAGACCTTTATGGGATTTTTTG

>M6-PGSC0003DMG402002888M6LRR-RLP\_1860

ACTAGGAGGATTGAATATGCTTGAAGCGTTAGATCTCTCTTGAATCGACTCACTGGAAAGATTCCGCA  
ACAATTGACAAGGCTAACCTTTCTGGCATTCTTAAACCTCTCTCAAATCA

>M6-PGSC0003DMG402002925-(rev)M6LRR-RLK\_0

GTTCACTTCTCTTTAGTTTTACTTCGATTTTTCTCCGGAGCTCCGGTGGTCGGAAAGTTGATCGGCGTCCG  
GAAAACAAGTAGAATTATAAATTTATAATCACAAATCGAGGTAAATTTGC

>M6-PGSC0003DMG402002925-(rev)M6LRR-RLK\_1037

TAATCAAATATAGAAATAATAAGAAAAGTGGAGAAAACAAAAGTCCAAATTTCAACTTTCACCACTACATTTT  
TTCTTCCAATTATAGGGGGTTCAATTTCAAGAAGAACAAAAGGTCACCG

>M6-PGSC0003DMG402002925-(rev)M6LRR-RLK\_1098

ACTACATTTTTTCTTCCAATTATAGGGGGTTCAATTTCAAGAAGAACAAAAGGTCACCGTTCTTATCTTTG  
TGCTAGAGATAAGAATGGTGACCTTTTGTTTACTTGAAATTGACCCCT

>M6-PGSC0003DMG402002925-(rev)M6LRR-RLK\_122

TTTTCTCCGTAATTTGCCCCGTTGATCATTCTTTTTCTGTGTTTTAATAAAAAGTTTAGTTTTTTTTCTGTGA  
TTTTGGAGTTAAAGTTTGAAGCTTTTTTTCTTAGGGAAGTAGTTTGA

>M6-PGSC0003DMG402002925-(rev)M6LRR-RLK\_1403

TATATAAAAAGAAGAGTTGAAAGTAGCTGACCCTGTCAGTCTACTTAGAAAATTGATTTTTGATGAACC  
TAACCTTTTACATTTTTCATGTTTTGCAGTGTCTCTGGAGGTGTGGTTTG

>M6-PGSC0003DMG402002925-(rev)M6LRR-RLK\_1464

TGATGAACCTAACCTTTTACATTTTTCATGTTTTGCAGTGTCTCTGGAGGTGTGGTTTGATTCTAGAAATC  
CTCGTGCAAAAATAATAAGTCGGATTGAACTTTTCTGCTGTAGCTGCT

>M6-PGSC0003DMG402002925-(rev)M6LRR-RLK\_1525

TCTAGAAATCCTCGTGCAAAAATAATAAGTCGGATTGAACTTTTCTGCTGTAGCTGCTTTGTCAGAAAA  
AATGATGGAGGCTCCAAAATCTGTTGGACTTACAGGCTTGAATCAAAACC

>M6-PGSC0003DMG402002925-(rev)M6LRR-RLK\_1586

GTCAGAAAAAATGATGGAGGCTCCAAAATCTGTTGGACTTACAGGCTTGAATCAAACCTGTCGCAGAG  
CTTTTACCATAAGCTTGGCGAGGGGTCAAACATGTCTACAGAGAGTTATGG

>M6-PGSC0003DMG402002925-(rev)M6LRR-RLK\_1647

TCGCAGAGCTTTTACCATAAGCTTGGCGAGGGGTCAAACATGTCTACAGAGAGTTATGGGATGAGCAAT  
GCTGGAGGTTCTGTTGCAATGTCGGTGGATAACAGCAGTAGTGGATCAAAT

>M6-PGSC0003DMG402002925-(rev)M6LRR-RLK\_1708

TGAGCAATGCTGGAGGTTCTGTTGCAATGTCGGTGGATAACAGCAGTAGTGGATCAAATGATTCTCACA  
CTCATATTTTAAACCACCAGGACAACCACATCCACAATAACTATTCTGTTG

>M6-PGSC0003DMG402002925-(rev)M6LRR-RLK\_1769

TTCTCACACTCATATTTTAAACCACCAGGACAACCACATCCACAATAACTATTCTGTTGCTGCTAGCGTAT  
TTAGGGGGAGAGTTTCTAGGTTGAGCGATGATGCCCTCGCTCAAGCCTT

>M6-PGSC0003DMG402002925-(rev)M6LRR-RLK\_183

TTTTTTCTGTGATTTTGGAGTTAAAGTTTGAAGCTTTTTTTCTTAGGGAAGTAGTTTGAGTTGGAGATGAA  
AAATGGTGAACTTTTGGTTTACTTGAATTGAACCCCCACCCACCCCA

>M6-PGSC0003DMG402002925-(rev)M6LRR-RLK\_1830

GCTAGCGTATTTAGGGGGAGAGTTTCTAGGTTGAGCGATGATGCCCTCGCTCAAGCCTTGGTTGATCCT  
CAGTTCCCACCATTGGGCTTGAATTTATGATGAGTGGACAATTGACTTG

>M6-PGSC0003DMG402002925-(rev)M6LRR-RLK\_1891

TTGATCCTCAGTTCCCACCATTGGGCTTGAATTTATGATGAGTGGACAATTGACTTGAGGAGGCTTAC  
CATTGGACAAGCTTTTGTCAAGGATCTTTCGGGAAACTGTATAAGGGAA

>M6-PGSC0003DMG402002925-(rev)M6LRR-RLK\_1952

GAGGCTTACCATTGGACAAGCTTTTGTCAAGGATCTTTCGGGAAACTGTATAAGGGAACTTATAATGG  
TGAAGATGTTGCCATCAAGCTTCTGGAGAGGCCAGAAAATGATCTTGATAG

>M6-PGSC0003DMG402002925-(rev)M6LRR-RLK\_2013

TATAATGGTGAAGATGTTGCCATCAAGCTTCTGGAGAGGCCAGAAAATGATCTTGATAGGGCTCATCTT

ATGGAGCAACAATTCAGCAGGAGGTCATGATGTTGGCAAATTTGAAGCAT

>M6-PGSC0003DMG402002925-(rev)M6LRR-RLK\_2074

CTCATCTTATGGAGCAACAATTCAGCAGGAGGTCATGATGTTGGCAAATTTGAAGCATCAAATATAGT  
ACGATTTATTGGTGCATGCCGTAAACCCATGGTGTGGTGTATTGTGACTG

>M6-PGSC0003DMG402002925-(rev)M6LRR-RLK\_2135

AAATATAGTACGATTTATTGGTGCATGCCGTAAACCCATGGTGTGGTGTATTGTGACTGAATATGCAAG  
AGGGGGATCAGTGCCTCAGTTCCTCACAAGGCGGCAAACCGAGCTGTGCC

>M6-PGSC0003DMG402002925-(rev)M6LRR-RLK\_2257

TGAAGTTAGCAGTTAAGCAGGCTCTGCATGTGGCAAGGGGGATGGAGTATGTGCATGGCCTGAATCTG  
ATTCACCGGGATCTGAAATCCGACAATCTACTGATTGCTGCTGACAAGTCAA

>M6-PGSC0003DMG402002925-(rev)M6LRR-RLK\_2318

GAATCTGATTCACCGGGATCTGAAATCCGACAATCTACTGATTGCTGCTGACAAGTCAATCAAATTGCA  
GATTTTGGTGTGCTCGAATTGAGGTGCTGACTGAAGGAATGACACCAGA

>M6-PGSC0003DMG402002925-(rev)M6LRR-RLK\_244

TGGAGATGAAAATGGTGAACTTTTGGTTACTTGGAAATTGAACCCCCACCCACCCACAATTGGAAG  
AAAATTGTAGGTGTAAAAGTTGAATTTGGAGTTTTTTGTGATTTTGGAGTT

>M6-PGSC0003DMG402002925-(rev)M6LRR-RLK\_2440

CTGGCACTTACCGCTGGATGGCTCCGTAAGCATCTAGACTCTTAGCAGTCTTGTTAAATCTGGTGTCTT  
GGTCCAGTTTGGGCTTATTGCCAAACCCTATAATAGAGCTCTCTGTCT

>M6-PGSC0003DMG402002925-(rev)M6LRR-RLK\_2501

TGGTGTCTTGGTCCAGTTTGGGCTTATTGCCAAACCCTATAATAGAGCTCTCTGTCTTCACTTTCTG  
AATTTATTTCTTTTTGAAAACCTTTGCTATGTGTTACTTGAGCCG

>M6-PGSC0003DMG402002925-(rev)M6LRR-RLK\_2745

TTCCCTTTATGGAATAAACATTTTTAGAACTAAAGTGAAAAGCATGGAGGTTGATGGGTTCAAGCCCTGT  
ATGTCCTTTTATGATGGCACCTCACTGATAGTGATTATATTTTCTATTGTAT

>M6-PGSC0003DMG402002925-(rev)M6LRR-RLK\_2806

AAGCCCTGTATGTCCTTTTATGATGGCACCTCACTGATAGTGATTATATTTTCTATTGTATATGTGCTGTTACT  
AAGAGGGAGAAATTATTTGTTCCAGTTAGCTTTTTAACATAGTTATGT

>M6-PGSC0003DMG402002925-(rev)M6LRR-RLK\_2867

GTGCTGTTACTAAGAGGGAGAAATTATTTGTTCCAGTTAGCTTTTTAACATAGTTATGTGCCTGTTAATGA  
AGGTTTACGAGTTGATCGATTTTATTTCTCTTTCAATTTCTTCCCTC

>M6-PGSC0003DMG402002925-(rev)M6LRR-RLK\_2928

CTGTTAATGAAGGTTTACGAGTTGATCGATTTTATTTCTCTTTCAATTTCTTCCCTCCTTTTCATCTTCT  
TCTTGTCTGTGATTTGTAAGTTGATTCAAGTTAGTCACATCCAAGGG

>M6-PGSC0003DMG402002925-(rev)M6LRR-RLK\_305

ATTGGAAGAAAATTGTAGGTGTAAGTTGAATTTGGAGTTTTTTGTGATTTTGGAGTTGGTTTGAATGT  
GTATCTTTCTGGTTTTTATGTTTAAAGTTTGGAGTTTTTTTGCTTAGGGA

>M6-PGSC0003DMG402002925-(rev)M6LRR-RLK\_3111

GTGCTTTCTTCCCATATGCCTAAGCCTTAAACCTTGGTGGGTATCTATTTATGTCTGTTTATTGATCCAAAT  
AAATGGTAAAGTGCCTTAGTTGATAACTCCCAGCACCAGCCACGTCAT

>M6-PGSC0003DMG402002925-(rev)M6LRR-RLK\_3172

TTGATCCAAATAAATGGTAAAGTGCCTTAGTTGATAACTCCCAGCACCAGCCACGTCATATTCCATGAAC  
TTATCAGCCCAAAGTGATTATTAACAGGAAAAGAACTAATCTTCAAAAAA

>M6-PGSC0003DMG402002925-(rev)M6LRR-RLK\_3233

TCCATGAACTTATCAGCCCAAAGTGATTATTAACAGGAAAAGAACTAATCTTCAAAAAAATCAGTTCTTTT  
TCTGTTAATAATCACTTTGGGCTGATAAGGTTTCATGGAATATGACATGG

>M6-PGSC0003DMG402002925-(rev)M6LRR-RLK\_3294

CAGTTCTTTTTCTGTTAATAATCACTTTGGGCTGATAAGGTTTCATGGAATATGACATGGCTGGTGCTGGG  
AGTTATCAACTAAGGCACTTTACCATTTATTTGGATGCACTCCCCGATGA

>M6-PGSC0003DMG402002925-(rev)M6LRR-RLK\_3355

GGTGCTGGGAGTTATCAACTAAGGCACTTTACCATTTATTTGGATGCACTCCCCGATGAAGATGATAAGT  
TCTACATTGTGGTGGAAATTTTGGTCTTTTAGCAGGCATCTTAGAGAAGC

>M6-PGSC0003DMG402002925-(rev)M6LRR-RLK\_3416

ATGATAAGTTCTACATTGTGGTGGAAATTTTGGTCTTTTAGCAGGCATCTTAGAGAAGCATGGGAGACA  
TTAGTTCAAATCCTAGAAGAGGCACAAAAACACTAGGTGATTTACCTGAT

>M6-PGSC0003DMG402002925-(rev)M6LRR-RLK\_3477

GGGAGACATTAGTTCAAATCCTAGAAGAGGCACAAAAACACTAGGTGATTTACCTGATACTTATGTTA  
GTGGGGTATTGCAAGTACCTCATAAAATCATCGTCGGCATGCACTAGTGAT

>M6-PGSC0003DMG402002925-(rev)M6LRR-RLK\_3538

TTATGTTAGTGGGGTATTGCAAGTACCTCATAAAATCATCGTCGGCATGCACTAGTGATCTTCGAGGATT  
TCTCGATTATCAAAAAGAAAAATCTAAATAAGTTCTATTCTTAGACATAA

>M6-PGSC0003DMG402002925-(rev)M6LRR-RLK\_3599

TCGAGGATTTCTCGATTATCAAAAAGAAAAATCTAAATAAGTTCTATTCTTAGACATAATTAAGTTTCAAC  
ACTTTTATGCCTCCCACTTTTTTATGCAGTTGTTATAATTGTTATATA

>M6-PGSC0003DMG402002925-(rev)M6LRR-RLK\_366

TTTGAATGTGTATCTTTCTGGTTTTTATGTTTTAAAGTTTGGAGTTTTTTTGCTTAGGGAAGTAGTTTGAGC  
TGGAGATGAAAACATGTTTTGTTAATTTAGAATTGAAACAGAAAAATT

>M6-PGSC0003DMG402002925-(rev)M6LRR-RLK\_3660

AAGTTTCAACACTTTTATGCCTCCCACTTTTTTATGCAGTTGTTATAATTGTTATATATAAGCGACTAATT  
AATGGATTCAAAAACAAAACTGGTTACACCATAACTCAAGTATGGCT

>M6-PGSC0003DMG402002925-(rev)M6LRR-RLK\_3721

AGCGACTAATTAATGGATTCAAAAACAAAACTGGTTACACCATAACTCAAGTATGGCTCTTTTAGTTTC  
TTTGCTAGCTCTGAGTTGGAAAGAAGTTCGTTCTTCTTTGGCTGTTTCCG

>M6-PGSC0003DMG402002925-(rev)M6LRR-RLK\_3782

TTTAGTTTCTTTGCTAGCTCTGAGTTGGAAAGAAGTTCGTTCTTCTTTGGCTGTTTCCGAAAGGAATTCCA  
GGAGAGGCCTTACAAAACTAGACTCTACAACGATAATGTGATTCTCCA

>M6-PGSC0003DMG402002925-(rev)M6LRR-RLK\_3843

AGGAATTCCAGGAGAGGCCTTACAAAACTAGACTCTACAACGATAATGTGATTCTCCACTTACTACATA  
GACTTTTTCCAACATAAGACCATCTCAATCTCTACGGAAAGGTAGAAGTG

>M6-PGSC0003DMG402002925-(rev)M6LRR-RLK\_3904

TACTACATAGACTTTTTCCAACATAAGACCATCTCAATCTCTACGGAAAGGTAGAAGTGGAATATTTGGC  
TCAATCTCCATGAATCTAAATCATTGTTGGAACCTTCGGTCATTCTTT

>M6-PGSC0003DMG402002925-(rev)M6LRR-RLK\_3965

ATATTTGGCTCAATCTTCCATGAATCTAAATCATTGTTGGAACCTTCGGTCATTCTTTACGGAGAGACCT  
CTTTTTAAAAGCATAAAAAGAGACTAGGTGATGTTTCTAGAATCTACAA

>M6-PGSC0003DMG402002925-(rev)M6LRR-RLK\_4026

GGAGAGACCTTTTTTAAAAGCATAAAAAGAGACTAGGTGATGTTTCTAGAATCTACAACGATTATGTG

GATTCTCCATTGAGTTGCTACATAGACTTGTTCCATCCATAAGATTATCTC

>M6-PGSC0003DMG402002925-(rev)M6LRR-RLK\_4087

ATTATGTGGATTCTCCATTGAGTTGCTACATAGACTTGTTCCATCCATAAGATTATCTCAATCTCTATGGA  
AACGTAGAAGTGGAATACGTGGCTCAATCTTCTCATGACCCTAAATCAT

>M6-PGSC0003DMG402002925-(rev)M6LRR-RLK\_4148

TCTCTATGGAAACGTAGAAGTGGAATACGTGGCTCAATCTTCTCATGACCCTAAATCATTAGTTGTAACC  
TCTGAGCATTCTTTCTGGAGAGAAGTCTTATTAAGCAAAGGTGATTC

>M6-PGSC0003DMG402002925-(rev)M6LRR-RLK\_4209

GTTGTAACCTCTGAGCATTCTTTCTGGAGAGAAGTCTTATTAAGCAAAGGTGATTCATGGAGTTTGA  
AGTGAAAAGCTAGGAGTGAAGCATACAAGTTACGGGAAAGTAAAAAGAAG

>M6-PGSC0003DMG402002925-(rev)M6LRR-RLK\_427

TAGTTTGAGCTGGAGATGAAAACATGTTTTGTTAATTTAGAATTGAAACAGAAAATTCGTCTTGTTTG  
TTCCATTTTTGATAAGTTTAGATTATTTTTTTCTGTGATGTTTGAAG

>M6-PGSC0003DMG402002925-(rev)M6LRR-RLK\_4270

GGAGTTTGAAGTGAAAAGCTAGGAGTGAAGCATACAAGTTACGGGAAAGTAAAAAGAAGTACCAATCA  
CATACAAATTTAGTCATCTTCTCATGAACCTGAATCATTGTTAACCTCCAA

>M6-PGSC0003DMG402002925-(rev)M6LRR-RLK\_4331

CCAATCACATACAAATTTAGTCATCTTCTCATGAACCTGAATCATTGTTAACCTCCAATTAAGTGAAGTA  
GTGTTTTTAGAATCGAGAAATGCAAAGATGACAAGGTCCGTGATTTTG

>M6-PGSC0003DMG402002925-(rev)M6LRR-RLK\_4392

ACTGAGAGTAGTGTTTTTAGAATCGAGAAATGCAAAGATGACAAGGTCCGTGATTTTGAAGCAAAAAG  
AGAGAAGTGAAGCGCACTAGCTATAAGAAGTAAGTAATGCTAGACATAGAA

>M6-PGSC0003DMG402002925-(rev)M6LRR-RLK\_4453

GCAAAAAGAGAGAAGTGAAGCGCACTAGCTATAAGAAGTAAGTAATGCTAGACATAGAAGGATTTACT  
ACAATAAAGATGCAATTAGAATAACTGATCTTTTCATCCAATTTACGGTAAT

>M6-PGSC0003DMG402002925-(rev)M6LRR-RLK\_4514

ATTTACTACAATAAAGATGCAATTAGAATAACTGATCTTTTCATCCAATTTACGGTAATATTGATATTAGT  
CTAGCTCCTCTAAGTCGAGATTCAAAAAGTAGACCCTTTCTCATTAGG

>M6-PGSC0003DMG402002925-(rev)M6LRR-RLK\_4575

TGATATTAGTCTAGCTCCTCTAAGTCGAGATTCAAAAAGTAGACCCTTTCTCATTAGGATCGTTTTACAT  
GTCATTGTTAAAGTCCACACTTCTCTGAAATGCATGGCTTCAAGCGGT

>M6-PGSC0003DMG402002925-(rev)M6LRR-RLK\_4636

CGTTTTACATGTCATTGTTAAAGTCCACACTTCTCTGAAATGCATGGCTTCAAGCGGTAATCCCTTACTC  
AAATTGCTTAAAGTAATGGCTTTGAATAACACTGCAGGAGAGATGTGAT

>M6-PGSC0003DMG402002925-(rev)M6LRR-RLK\_4697

TCCCTTACTCAAATTGCTTAAAGTAATGGCTTTGAATAACACTGCAGGAGAGATGTGATACATGAAGAAA  
TCAATATCCGGTTAAAAGAATGATAAGAATGCCTTATTTGGTATTTAGTC

>M6-PGSC0003DMG402002925-(rev)M6LRR-RLK\_4758

ATGAAGAAATCAATATCCGGTTAAAAGAATGATAAGAATGCCTTATTTGGTATTTAGTCTTACAACACGT  
GTTGCTAGACCTGATTTAACGAATGCCTTATATAAGTTGAAGTAGATCTT

>M6-PGSC0003DMG402002925-(rev)M6LRR-RLK\_4819

ACAACACGTGTTGCTAGACCTGATTTAACGAATGCCTTATATAAGTTGAAGTAGATCTTTTAGAAACAAA  
AGGAGCATTAAAACCCCTTAGTGATCAATCAACATGAACAACCTGTTAAG

>M6-PGSC0003DMG402002925-(rev)M6LRR-RLK\_488

TCTTGTTTGTTCATTTTTGATAAGTTTAGATTATTTTTTTTCTGTGATGTTTGAAGTTTTTTCTCTTAGG  
GAAGTTTCAGCTGGAGATTAGAATGATGACATTTTTGTTCTATCATA

>M6-PGSC0003DMG402002925-(rev)M6LRR-RLK\_4880

AGAAACAAAAGGAGCATTAAAACCCCTTAGTGATCAATCAACATGAACAACCTGTTAAGTCAGGGAGAG  
CCTACGTTAGGCCGTTATGACTTAGTATTCCCGACGTCTTACTTTTTGTG

>M6-PGSC0003DMG402002925-(rev)M6LRR-RLK\_4941

AGGGAGAGCCTACGTTAGGCCGTTATGACTTAGTATTCCCGACGTCTTACTTTTTGTGCCTCACATACT  
ATGTTACACCAGTCCTTTGCATTACACACCCGTTGAAATGGGTGGGTCGT

>M6-PGSC0003DMG402002925-(rev)M6LRR-RLK\_5124

ATAATGATACTTGCGTACAACACTGATAAAATTCATACTCACAAATGAGTCCATACTTAGAAGCGGATCTAG  
GATATGGAGTTTATGGGCTCCCAACGATCTCAAATTAATAAATAAATAAATAA

>M6-PGSC0003DMG402002925-(rev)M6LRR-RLK\_5185

CGGATCTAGGATATGGAGTTTATGGGCTCCCAACGATCTCAAATTAATAAATAAATAAATTATTATAAGTGGT  
CAAAGGGAATCAGACCCTCAACGAGGAGGGCAACAAAGCATAAGCAAGTT



>M6-PGSC0003DMG402002925-(rev)M6LRR-RLK\_5246

ATAAGTGGTCAAAGGGAATCAGACCCTCAACGAGGAGGGCAACAAAGCATAAGCAAGTTCATTATGC  
CGCTGGGGAAAAAGCTTACTTTGTTGGTAGATCCCAACAAATAGTTTTTATA

>M6-PGSC0003DMG402002925-(rev)M6LRR-RLK\_5307

ATTATGCCGCTGGGGAAAAAGCTTACTTTGTTGGTAGATCCCAACAAATAGTTTTTATATATTTAATAGAT  
TTTTCAATATAAATACAAAAGTTAGTGGATTCCCCAAAGCCTACACCC

>M6-PGSC0003DMG402002925-(rev)M6LRR-RLK\_549

TTTTCTTTAGGGAAGTTTCAGCTGGAGATTAGAATGATGACATTTTTGTTCTATCATAATTGGAAGAAA  
GAGGTAGATGTAGGGGTGAAAGTTGAATTTGGAGTTGTCATCTCTTTCA

>M6-PGSC0003DMG402002925-(rev)M6LRR-RLK\_61

ATCGGCGTCGGAAAACAAGTAGAATTATAAATTTATAATCACAATCGAGGTAAATTTGCTTTTTTCTCCG  
TAATTTTGCCCGTTGATCATTCTTTTTCTGTGTTTTAATAAAAGTTTA

>M6-PGSC0003DMG402002925-(rev)M6LRR-RLK\_6222

ATGCTCCATATAATATGGATCACATGTTACCTTTAGTTGCTGAAGAAGTATATTTGAACCATTTCAAAT  
TTGGATTCTCTACTAGAACTCATTACCTCTAAGAATGATAGGAAAAAC

>M6-PGSC0003DMG402002925-(rev)M6LRR-RLK\_6283

TTTCAAATTTTGGATTCTCTACTAGAACTCATTACCTCTAAGAATGATAGGAAAAACGAAGCATGGGT  
GTCCACATGGGCTTGATTTGCCAAGTTTGTTGCGTATGTATTATGAAACGC

>M6-PGSC0003DMG402002925-(rev)M6LRR-RLK\_6344

AGCATGGGTGTCCACATGGGCTTGATTTGCCAAGTTTGTTGCGTATGTATTATGAAACGCCAAATTAATTT  
TAGAAGTAATGCATAATTAGTATGTAAGAATATATTTTACAATTTGTTTT

>M6-PGSC0003DMG402002925-(rev)M6LRR-RLK\_6405

AATTAATTTTAGAAGTAATGCATAATTAGTATGTAAGAATATATTTTACAATTTGTTTTATGTATTACGGT  
GCATGTATAGGCTGACAATTGTATCAATTCATGCATTTGCGCCTGATTG

>M6-PGSC0003DMG402002925-(rev)M6LRR-RLK\_6466

GTATTACGGTGCATGTATAGGCTGACAATTGTATCAATTCATGCATTTGCGCCTGATTGTTTAACTGTTGA  
AAATTTTTGTTTTATTTTGATATCTATCAGAAGATCTCCTTGGTTGGCA

>M6-PGSC0003DMG402002925-(rev)M6LRR-RLK\_6527

TAACTGTTGAAAATTTTTGTTTTATTTTGATATCTATCAGAAGATCTCCTTGGTTGGCACAATCTGACATA

GAAGGTGCAAATAATGACAACGAAGATAATTACTTCAATTTGCTTAGT

>M6-PGSC0003DMG402002925-(rev)M6LRR-RLK\_6588

ATCTGACATAGAAGGTGCAAATAATGACAACGAAGATAATTACTTCAATTTGCTTAGTTTATTGTTCCA  
CTGATACATGGGGTTTTCTGTATTTAGAGTCTTATTTAAGAATGGGTAT

>M6-PGSC0003DMG402002925-(rev)M6LRR-RLK\_6649

ATTGTTCCACTGATACATGGGGTTTTCTGTATTTAGAGTCTTATTTAAGAATGGGTATATTTAGTGAATC  
TTTCAAGAAATTTTTCTTATCATGATTTTCCTGGAGTCTTTAGGATTCT

>M6-PGSC0003DMG402002925-(rev)M6LRR-RLK\_6710

TTAGTGAATCTTTCAAGAAATTTTTCTTATCATGATTTTCCTGGAGTCTTTAGGATTCTGCTCTTGGAAGTT  
CAGTTATTTGTTTCTCAGGCATATATGGCAGTTAGAATTTAAACCTTG

>M6-PGSC0003DMG402002925-(rev)M6LRR-RLK\_6771

TCTTGGAAGTTCAGTTATTTGTTTCTCAGGCATATATGGCAGTTAGAATTTAAACCTTGAATTAGATCATC  
ATTTCAAGGATGAGAGAGAGAATGGTATAGATTAGTTGCTTTATCCAGTT

>M6-PGSC0003DMG402002925-(rev)M6LRR-RLK\_6832

TTAGATCATCATTTCAAGGATGAGAGAGAGAATGGTATAGATTAGTTGCTTTATCCAGTTTATGAGTGTAG  
ATTACTGATGATAGAACTGGCATTCTTGATTTCTTTTGCCTGGACAGA

>M6-PGSC0003DMG402002925-(rev)M6LRR-RLK\_6893

TGAGTGTAGATTACTGATGATAGAACTGGCATTCTTGATTTCTTTTGCCTGGACAGAAGTATCACCATT  
AGTTTCTGTTTAGTTTTGATCCTTACATAATGTTGGAGATGAAAGTATA

>M6-PGSC0003DMG402002925-(rev)M6LRR-RLK\_6954

TATCACCATTAGTTTCTGTTTAGTTTTGATCCTTACATAATGTTGGAGATGAAAGTATATTCTTTATAAGCT  
AAGCGAGTTGGAGATTAAGCTTTTGATTTCTTGAGATAATGTGACAAA

>M6-PGSC0003DMG402002925-(rev)M6LRR-RLK\_7015

CTTTATAAGCTAAGCGAGTTGGAGATTAAGCTTTTGATTTCTTGAGATAATGTGACAACTGAGAAGTTT  
CCATTTCTATTAGGACATTTCTTTCTGACTTGAATCAAAGTAAGTTTTTC

>M6-PGSC0003DMG402002925-(rev)M6LRR-RLK\_7076

GAGAAGTTTCCATTTCTATTAGGACATTTCTTTCTGACTTGAATCAAAGTAAGTTTTTCATGTCTGCCTGA  
AATATTGTTGAAATGCTTGCATCAGAATAGGAGGTTGACCTTGTGAGT

>M6-PGSC0003DMG402002925-(rev)M6LRR-RLK\_7137

GTCTGCCTGAAATATTGTTGAAATGCTTGCATCAGAATAGGAGGTTGACCTTGTGAGTGGTGATAATTT  
TGGTGACCTAGTGCAGTCGTGAAACACCACATCCCTGTGATGGTGGATGA

>M6-PGSC0003DMG402002925-(rev)M6LRR-RLK\_7198

TGATAATTTTGGTGACCTAGTGCAGTCGTGAAACACCACATCCCTGTGATGGTGGATGATGTAGCAGTG  
CAATATAGTTCTTCTCTGTGTGATAATAGGCTAGTATGCATGTTAGACTTT

>M6-PGSC0003DMG402002925-(rev)M6LRR-RLK\_7259

TAGCAGTGCAATATAGTTCTTCTGTGTGATAATAGGCTAGTATGCATGTTAGACTTTTCTTGGCGAAA  
TAGACAGAAGAATCTGCTTGCATTTGTTTCATTTGATGTGATAATGAATGA

>M6-PGSC0003DMG402002925-(rev)M6LRR-RLK\_732

GGTATATGCTTAAAGTTTGGATTCTTTTGGCTTATGGTGATGTTTTGTTTTGCTTGGAAATTAACCA  
TATTTGGAAGAAAAATGTAGAGGGTGAAGTTGAATTTGGAGTTTTTTTT

>M6-PGSC0003DMG402002925-(rev)M6LRR-RLK\_7320

TTGGCGAAATAGACAGAAGAATCTGCTTGCATTTGTTTCATTTGATGTGATAATGAATGATCTTGCCAAAA  
AAAAAATGATATTGAATGATCTTTGCCAAGACAGTTGGGGATCGGATCTC

>M6-PGSC0003DMG402002925-(rev)M6LRR-RLK\_7381

TTGCCAAAAAAAATGATATTGAATGATCTTTGCCAAGACAGTTGGGGATCGGATCTCAATATCTGGT  
AAAACCTCGTATACGTGCAGCCAGTCTCAGACATTTGATTCTGATTAAGTGA

>M6-PGSC0003DMG402002925-(rev)M6LRR-RLK\_7442

TATCTGGTAAAACTCGTATACGTGCAGCCAGTCTCAGACATTTGATTCTGATTAAGTGAAGTT  
ACTTTTCAAGTTCACTCTTGAGAAATTAGTTATTCACATTCTGCAGATAC

>M6-PGSC0003DMG402002925-(rev)M6LRR-RLK\_7503

AATGAAGTTACTTTTCAAGTTCACTCTTGAGAAATTAGTTATTCACATTCTGCAGATACTATCCTGTTAAC  
ATTGTGATTTTTTTGGCTAGTGTGTCTGGTTTCTTCTTTTTCAGAAA

>M6-PGSC0003DMG402002925-(rev)M6LRR-RLK\_7564

TCCTGTTAACATTGTGATTTTTTTGGCTAGTGTGTCTGGTTTCTTCTTTTTCAGAAAAGAAAAACGAT  
GTTCAAAGTTGTTAGCATCTGTGTTTCGTTGTGGACCGCTAAGTATTTG

>M6-PGSC0003DMG402002925-(rev)M6LRR-RLK\_7625

GAAAAACGATGTTCAAAGTTGTTAGCATCTGTGTTTCGTTGTGGACCGCTAAGTATTTGACTTTGTTTTGT  
AGGGAGATGATCCAGCACCGGTCATACACCCAGAAAGTTGATGTTTATA

>M6-PGSC0003DMG402002925-(rev)M6LRR-RLK\_7686

TTTGTTTTGTAGGGAGATGATCCAGCACCGTCATACACCCAGAAAGTTGATGTTTATAGTTTTGGCATT  
GTTCTGTGGGAGCTCATAACTGGGTTGCTTCCTTTCCAGAACATGACTGC

>M6-PGSC0003DMG402002925-(rev)M6LRR-RLK\_7808

TGCAGGCTGCTTTTGCTGTTGTCAACAAAGGCGTCCGTCCAACAATCCCCATTGATTGTTTGCCTGTCTTA  
TCTGATATCATGACCTTCTGCTGGGATTCTGACCCCGACAATAGGCCAA

>M6-PGSC0003DMG402002925-(rev)M6LRR-RLK\_7869

GCCTGTCTTATCTGATATCATGACCTTCTGCTGGGATTCTGACCCCGACAATAGGCCAACTTTCTCTCAGG  
TGGTCCAGATGCTTGAGGCAGCTGAGACAGAAATCATGACTAATATCAG

>M6-PGSC0003DMG402002925-(rev)M6LRR-RLK\_793

TAAAAACCCATATTTGGAAGAAAATGTAGAGGGTGAAAGTTGAATTTGGAGTTTTTTTTCTTTTTTGT  
CTTATTAGTTCTATTTTTGACAAGATTTTTTTTTCTGTGATGTTGGTG

>M6-PGSC0003DMG402002925-(rev)M6LRR-RLK\_7930

TTCTCTCAGGTGGTCCAGATGCTTGAGGCAGCTGAGACAGAAATCATGACTAATATCAGAAAGGCACGT  
TTCAGGTGCTGCATTCATCCTACGGCTACAGGTTGATTCGGGAAAGAGGAA

>M6-PGSC0003DMG402002925-(rev)M6LRR-RLK\_7991

AGGCACGTTTCAGGTGCTGCATTCATCCTACGGCTACAGGTTGATTCGGGAAAGAGGAACTGGAGGC  
AAAAAATGTTGAATGGCAAACTGATTTGAGTCTGCCATGTGTATCTATC

>M6-PGSC0003DMG402002925-(rev)M6LRR-RLK\_8052

TGGAGGCAAAAAAATGTTGAATGGCAAACTGATTTGAGTCTGCCATGTGTATCTATCAGGCACAATTT  
CTTTTCAGATAGAAAAAGGGTTATAGTTATGAGAAAAAACTAAACATTTT

>M6-PGSC0003DMG402002925-(rev)M6LRR-RLK\_8113

GCACAATTTCTTTTCAGATAGAAAAAGGGTTATAGTTATGAGAAAAAACTAAACATTTCTCTGTTGTATTT  
TGTTTCTTTTCTTTAACTGTGGATTTAAGACAACGACTAGTTGTTAAT

>M6-PGSC0003DMG402002925-(rev)M6LRR-RLK\_8174

TGTTGTATTTTGTCTTTTCTTTAACTGTGGATTTAAGACAACGACTAGTTGTTAATACAGGTTATCTGA  
TGTGCATCTATGCATTTTCAGATTTTGTCTCTGTGTTTGTGAATTTGT

>M6-PGSC0003DMG402002925-(rev)M6LRR-RLK\_976

AAACATAACAAGGAAGATAAACTTTCAACCGACTCCAAAATTACAGAAAAAAGAGAAGCTAATCAAA

TATAGAAATAATAAGAAAAGCTGAGAAAACAAAACCTCCAATTTCAACTTTCA

>M6-PGSC0003DMG402004423M6LRR-RLP\_1098

AACCCCCTTGTTGCAGGTGAAGATGATAACGGAGAAAATAGCATAAGGAAAATACTAAAACCTCAGCTAT  
GATTATCTACCATCTCCACATCTGAAAAAATGCTTTGCTTACTTTGCAATG

>M6-PGSC0003DMG402004423M6LRR-RLP\_122

TGTGAAACTATGGCTCAAGATGCTTGAGAGAGCTGCTGAAAATGCTGAAAATATGTTTGACGAATTCAG  
ATATGAATCTATCAAAAGACAAGTGAAGATCCAAAAGAACCCAATGAAAAA

>M6-PGSC0003DMG402004423M6LRR-RLP\_1220

TCCAAAAGATTTTGAGTTTGAAAAGGACCAAATAATCCAACCTCTGGATGGCAGAAGGCTTTCTTCATCCA  
TGTCAAGAGACCACCGTAATGGAAGACATTGGGAATAGGTTCTTTCAACT

>M6-PGSC0003DMG402004423M6LRR-RLP\_1281

CTTCATCCATGTCAAGAGACCACCGTAATGGAAGACATTGGGAATAGGTTCTTTCAACTCTTGTTGCGAA  
ATTCTTGCTGCAAGATGTTAAGTTAGATAAGCACAACAATATAACACAC

>M6-PGSC0003DMG402004423M6LRR-RLP\_1342

TGTTGCGAAATTCCTTGCTGCAAGATGTTAAGTTAGATAAGCACAACAATATAACACACTGTAAGATGCA  
CGATCTTGTCATGATTTGGCTGGGGATATCTTAAAATCTAAACTATTTG

>M6-PGSC0003DMG402004423M6LRR-RLP\_1403

TAAGATGCACGATCTTGTGCATGATTTGGCTGGGGATATCTTAAAATCTAAACTATTTGATCCAAAGGAC  
AATGGTGGAGAAAATCTTTCTCAAGTGCATACTTTGGATGGGACTCACC

>M6-PGSC0003DMG402004423M6LRR-RLP\_1464

CCAAAGGACAATGGTGGAGAAAATCTTTCTCAAGTGCATACTTTGGATGGGACTCACCAAGTGATCAA  
ATAGATAAGATAACTGAGCCAGGACGTTTGTGCACTCTGTTTTGGAGAAGC

>M6-PGSC0003DMG402004423M6LRR-RLP\_1525

GTGATCAAATAGATAAGATAACTGAGCCAGGACGTTTGTGCACTCTGTTTTGGAGAAGCATTATATATC  
GGAAGATATGTTGTTGAGCTTCAAGTTCTTGAGAGTTTTAAATTTGTCCA

>M6-PGSC0003DMG402004423M6LRR-RLP\_1586

TTATATATCGGAAGATATGTTGTTGAGCTTCAAGTTCTTGAGAGTTTTAAATTTGTCCAGTTCAGGAATCA  
AAGAGCTGTCAGCCAAAATTGGGAAGTGTATACACTTGAGATATCTTGA

>M6-PGSC0003DMG402004423M6LRR-RLP\_1708

TCTCGAACACTGAGATCAGAGCCTTGCCCACTCCATTTGCGAGCTCTATAATTTGCAAACATTTAGAGT  
CAATGGTTGCTATTTACTCCATGAACTTCCATATGAGATGGGGAATATGA

>M6-PGSC0003DMG402004423M6LRR-RLP\_1769

ATTTAGAGTCAATGGTTGCTATTTACTCCATGAACTTCCATATGAGATGGGGAATATGATAAGTTTGAGA  
CACATATATTGCTATTCTTGGTATCAGATGCCGCTTAACATGGGACAATT

>M6-PGSC0003DMG402004423M6LRR-RLP\_183

GAATTCAGATATGAATCTATCAAAAGACAAGTGAAGATCCAAAAGAACCCAATGAAAAAGGTCAGTGAT  
TTCATTTCTCATACTTTTAAGAGCAAAATGTAACGAAAAATCAACAAC

>M6-PGSC0003DMG402004423M6LRR-RLP\_1830

AGTTTGAGACACATATATTGCTATTCTTGGTATCAGATGCCGCTTAACATGGGACAATTGACTTGTCTTCA  
GACCCTACAATATTTAATGTGGGTTTGGAGAAAGGTCGTCGAATAGAA

>M6-PGSC0003DMG402004423M6LRR-RLP\_1891

CTTGCTTCAGACCCTACAATATTTAATGTGGGTTTGGAGAAAGGTCGTCGAATAGAAGAATTAGGTTG  
TTGAAGAAGCTTAGAGGTAAATTGAGGATCAATGATCTCCATTTGGTCC

>M6-PGSC0003DMG402004423M6LRR-RLP\_1952

ATTAGGTTGTTTGAAGAAGCTTAGAGGTAAATTGAGGATCAATGATCTCCATTTGGTCCGTAGTAGAGA  
AGAAGCTCGAACACATATTTACAAGAGAAATCAAATATTTACAAGCTGTC

>M6-PGSC0003DMG402004423M6LRR-RLP\_2013

AGTAGAGAAGAAGCTCGAACACATATTTACAAGAGAAATCAAATATTTACAAGCTGTCATATGGGTGG  
TTACGTGATGAACCAAAGGTTGTGAAACCATTGATGAGCATGTGTTGGAT

>M6-PGSC0003DMG402004423M6LRR-RLP\_2074

ATGGGTGGTTACGTGATGAACCAAAGGTTGTGAAACCATTGATGAGCATGTGTTGGATGGTCTTCAAC  
CGCATCCTAACTTGAAAATCTTACTGGTGAAGTACTATTTGGGTACTAGAT

>M6-PGSC0003DMG402004423M6LRR-RLP\_2135

TCTTCAACCGCATCCTAACTTGAAAATCTTACTGGTGAAGTACTATTTGGGTACTAGATTCCTTCATGGT  
TCAGTGAAGAGTCCCTACCAAATTTGGTCAAGTTAAAATTAAGTGAATG

>M6-PGSC0003DMG402004423M6LRR-RLP\_2196

CCTTCATGGTTCAGTGAAGAGTCCCTACCAAATTTGGTCAAGTTAAAATTAAGTGAATGCAATAGGTGCA  
AAGAAATTCGTCGCTTGGCCAACTGAAGTTCCTTCGGCATCTTGAGCTG

>M6-PGSC0003DMG402004423M6LRR-RLP\_2257

ATAGGTGCAAAGAAATTCCGTCGCTTGGCCAACTGAAGTTCCTTCGGCATCTTGAGCTGATAGGATTCCC  
TGAATTGGAATTCATCGGGCCTACATTTTATGGTGTTGAGGTTAATGATA

>M6-PGSC0003DMG402004423M6LRR-RLP\_2379

GGATCATGCAGCAAATCCAAGTGTCCCGTCATTGAAAGAACTTCTATTGGAGAATATGCATAGCCTTA  
TTGAGTGGAAGGGAGTGGAATTGATACCAACAACAAGTGGGGTAAAAATG

>M6-PGSC0003DMG402004423M6LRR-RLP\_244

TCAGTGATTTTCAATTTCTCATACTTTTAAGAGCAAATGTAACGAAAAATCAACAACATCAATGAAGA  
GTTGAGGGCTATCAATAAGTTAGCAAACACCTCGGTCTCCAATCACTCA

>M6-PGSC0003DMG402004423M6LRR-RLP\_2440

ATAGCCTTATTGAGTGGAAGGGAGTGGAATTGATACCAACAACAAGTGGGGTAAAAATGTTTCTGTGC  
TTGAGAAGTTGAGGATTAGTAACTGTCCAGTGTTAAAAAGTACTCCGAATC

>M6-PGSC0003DMG402004423M6LRR-RLP\_2623

TGTGCAGCAACTTGACATCTCTTGTAATGCTTAGTGTGTATGATGTGAAAGAGCTCACTTGTTTTCCAGAT  
GAGATGCTACGCAACAACGTTTCTCTTCAACACCTATTGGTTGAAGAAT

>M6-PGSC0003DMG402004423M6LRR-RLP\_2684

TTTTCCAGATGAGATGCTACGCAACAACGTTTCTCTTCAACACCTATTGGTTGAAGAATGCGGAGAGTTT  
CATGAATTGCCAAAGAGCTTGTACAATCTCCATTCTCTTAAGAGATTATG

>M6-PGSC0003DMG402004423M6LRR-RLP\_2745

GGAGAGTTTCATGAATTGCCAAAGAGCTTGTACAATCTCCATTCTCTTAAGAGATTATGTATTAGAAGCT  
GCCCAATTTAGTTCTTTCTGTCTTAGTGAAGAGAATTATTTGACT

>M6-PGSC0003DMG402004423M6LRR-RLP\_2806

TTAGAAGCTGCCCAATTTAGTTCTTTCTGTCTTAGTGAAGAGAATTATTTGACTTCCCTCCAAAGT  
CTTGAGTTACAGAATTGTGATGGATTGACCAATTTACCAAGTGGAATGC

>M6-PGSC0003DMG402004423M6LRR-RLP\_2867

CCTCCAAAGTCTTGAGTTACAGAATTGTGATGGATTGACCAATTTACCAAGTGGAATGCTAGAGCATTGT  
CGGTCTCTTGAATCCTTGAGTGTCTACAAATGTAACAACCTGGTTTCCTT

>M6-PGSC0003DMG402004423M6LRR-RLP\_2989

CTTTACATGTGGGGGAAATGCATTTCGCTTTCATATTTGAGTTTATCACACTGTCCCAAGTTGATTTGTGTA

CCCACAAGCGGCCTTCACCGTCTCACTGGGTTACGTCATTTGGAAATTG

>M6-PGSC0003DMG402004423M6LRR-RLP\_305

CAATGAAGAGTTGAGGGCTATCAATAAGTTAGCAAACACCTCGGTCTCCAATCACTCATGGTTCCTCCT  
CGGCATATACTACCAATTCGAGAAACAGATTCTGTAGTAGTTGCTTCGGA

>M6-PGSC0003DMG402004423M6LRR-RLP\_3050

GATTTGTGTACCCACAAGCGGCCTTCACCGTCTCACTGGGTTACGTCATTTGGAAATTGGTCCTTTCTCAG  
ATATGGTGGATTTTGAGGCATTCCAATTGATATTTAATGGCATTTCAGCA

>M6-PGSC0003DMG402004423M6LRR-RLP\_3477

TTACAGAAATGCGAGAACTAGAGCATCTCCATCTAGGGATGCCATGCGACGCCTCACCAAATTAGGA  
TATCTGATGATCCATGATTGGCCATTGTTAGAAGCTCTGTCTGGATGGGCTT

>M6-PGSC0003DMG402004423M6LRR-RLP\_3538

AATTAGGATATCTGATGATCCATGATTGGCCATTGTTAGAAGCTCTGTCTGGATGGGCTTGGTGACCTTGT  
TTCTTTGCAAGAGTTAGTTTTACTGAATTGCGAGAATCTAAAGCATCTGC

>M6-PGSC0003DMG402004423M6LRR-RLP\_3599

TGACCTTGTTTCTTTGCAAGAGTTAGTTTTACTGAATTGCGAGAATCTAAAGCATCTGCCATCCAGAGAT  
GCCATGCGACGCCTCACCAAATTACGGAACCTGGAAATTAAGGCTGCCC

>M6-PGSC0003DMG402004423M6LRR-RLP\_366

GTTCTCCTCGGCATATACTACCAATTCGAGAAACAGATTCTGTAGTAGTTGCTTCGGAGGTTGTTGGTA  
GAGACAACGATGTTGCAGAAATAAAGAGGAAGATGTTGAACATCAGAGAG

>M6-PGSC0003DMG402004423M6LRR-RLP\_3721

AGTTAGAAGAAAGTTGCACAAATCGGAGTGGCCAAACTCCCAATGGTCCAACATTTCCCATATTCCAAT  
AATTAAGTAGGTGAAAGCAGAATTCAAGACTTGGCGTAAGTCTCTGTTT

>M6-PGSC0003DMG402004423M6LRR-RLP\_3782

TATTCCAATAATTAAAGTAGGTGAAAGCAGAATTCAAGACTTGGCGTAAGTCTCTGTTTCTTTTCAGTTT  
CTGAGTCACACTTCTAATTATTATTTTCCAAGAGGTACTCTCCTCCATT

>M6-PGSC0003DMG402004423M6LRR-RLP\_3843

CTTTCAGTTTCTGAGTCACACTTCTAATTATTATTTTCCAAGAGGTACTCTCCTCCATTCCCATTTTATAGTT  
TTCCAGACAAATTTATGAATATCTATCTTACTTTTAAGATATGGTTT

>M6-PGSC0003DMG402004423M6LRR-RLP\_3904



CATTTTATAGTTTTCCAGACAAATTTATGAATATCTATCTTACTTTTAAGATATGGTTAATCATGAATATT  
TATGTGTGTTTTTCTCATTGGTTATTAGTTTCTAGGTCATGCTAGAA

>M6-PGSC0003DMG402004423M6LRR-RLP\_3965

TCATGAATATTTATGTGTGTTTTTCTCATTGGTTATTAGTTTCTAGGTCATGCTAGAAGGTTTCTGAGGC  
ATTTCAAGTCAAATCCATGGCGCCAATTACATTAGGTAAACTTTTCATT

>M6-PGSC0003DMG402004423M6LRR-RLP\_4026

TTTCTGAGGCATTTCAAGTCAAATCCATGGCGCCAATTACATTAGGTAAACTTTTCATTTAGAATGTTGTA  
ACAAGTTTTTCTTTCACCTCTTTTTTCTCATGACATAATTTTACTGT

>M6-PGSC0003DMG402004423M6LRR-RLP\_4087

GAATGTTGTAACAAGTTTTTCTTTCACCTCTTTTTTCTCATGACATAATTTTACTGTTAACATGGTTGG  
TTATGTACGACAGATGAACCACTTTCACCTCCATTGTTTTGTTGAAGA

>M6-PGSC0003DMG402004423M6LRR-RLP\_4148

AACATGGTTGGTTATGTACGACAGATGAACCACTTTCACCTCCATTGTTTTGTTGAAGAATAAAATCTTC  
AGTATTTGGTAAAGACTACATAATCTCTCAACATTTTACTCTTCATAACG

>M6-PGSC0003DMG402004423M6LRR-RLP\_4209

AAAATCTTCAGTATTTGGTAAAGACTACATAATCTCTCAACATTTTACTCTTCATAACGGGGATAGCAACA  
ACTATTAAGTAATAATAATTGAGTTCACAGTCGCTCATTGCCCCAAGTG

>M6-PGSC0003DMG402004423M6LRR-RLP\_427

TTGTTGGTAGAGACAACGATGTTGCAGAAATAAAGAGGAAGATGTTGAACATCAGAGAGGATGTTGTT  
CTGTGCACCATTCCCATAGCTGGTATGGGGGGTTTAGGGAAAACAACCTATGG

>M6-PGSC0003DMG402004423M6LRR-RLP\_4270

GATAGCAACAACCTATTAAGTAATAATAATTGAGTTCACAGTCGCTCATTGCCCCAAGTGAAACTATTCTTT  
TATGTACAGGTATGTTTTGACTCAGGTACTTTGGTCAAGGTAGTAAAGG

>M6-PGSC0003DMG402004423M6LRR-RLP\_4331

ACTATTCTTTTATGTACAGGTATGTTTTGACTCAGGTACTTTGGTCAAGGTAGTAAAGGGTATCCGTGGA  
TCGAGCCATCAAATTGATCTGTTTCATGAGCTATTCATAAGATGAAGCTAG

>M6-PGSC0003DMG402004423M6LRR-RLP\_4392

ATCCGTGGATCGAGCCATCAAATTGATCTGTTTCATGAGCTATTCATAAGATGAAGCTAGAAGGTTATTGT  
GATACAAAGACAAAATGTATGTCCACTACTAACTGCACCTTAAAGACTTA

>M6-PGSC0003DMG402004423M6LRR-RLP\_4453

GGTTATTGTGATACAAAGACAAAATGTATGTCCACTACTAACTGCACCTTAAAGACTTAAAAGCTATGCG  
GGGAGGTATGAGTTATGCCCAAGAACAATTTTCATCAATTTTACTTTTCAG

>M6-PGSC0003DMG402004423M6LRR-RLP\_4514

AGCTATGCGGGGAGGTATGAGTTATGCCCAAGAACAATTTTCATCAATTTTACTTTTCAGCTCCTTTTTCTC  
ATTAATAACTGAAATATTTAACAGGTATTATCGTTCAACAATATAGTG

>M6-PGSC0003DMG402004423M6LRR-RLP\_4575

CCTTTTTCTCATTAAAATACTGAAATATTTAACAGGTATTATCGTTCAACAATATAGTGTTTCTCTTAATCC  
TCAAATCTTATTATACACTTTATTATATGGTATGATAAAAGTCATAAA

>M6-PGSC0003DMG402004423M6LRR-RLP\_4636

TCTCTTAATCCTCAAATCTTATTATACACTTTATTATATGGTATGATAAAAGTCATAAAGTGGTAAGATTCT  
GGTAAAGGAAATTGTTCTTTCTCTTTGAAGAAAGTGAAGTATTTGAAT

>M6-PGSC0003DMG402004423M6LRR-RLP\_4697

GGTAAGATTCTGGTAAAGGAAATTGTTCTTTCTCTTTGAAGAAAGTGAAGTATTTGAATATTGGCATAAC  
ATTGGCTTGTCATGATTGGTATACACAGAATTCTTAGATGCATGACAGAT

>M6-PGSC0003DMG402004423M6LRR-RLP\_4758

TGGCATAACATTGGCTTGTCATGATTGGTATACACAGAATTCTTAGATGCATGACAGATTTCAATTTGGA  
TTCCGTTGATAGTAGATGCTTCACCAAATTATGTTACAGTCTTCAACAT

>M6-PGSC0003DMG402004423M6LRR-RLP\_4819

CATTTTGGATTCCGTTGATAGTAGATGCTTCACCAAATTATGTTACAGTCTTCAACATTATTATATTTTGA  
GGGGACATACTAGAACGTAGTGGACATTGGTGCCGCGTTGGAGACTCT

>M6-PGSC0003DMG402004423M6LRR-RLP\_488

TGTTGTTCTGTGCACCATTCATAGCTGGTATGGGGGGTTTAGGGAAAACAACACTATGGCTAAGAGAAT  
TTTCAACGATGAACAGATCGAGAAACACTTTGAAAAGAGAGTTTGGTTGTG

>M6-PGSC0003DMG402004423M6LRR-RLP\_4880

TTATATTTTGGAGGGACATACTAGAACGTAGTGGACATTGGTGCCGCGTTGGAGACTCTGGTTGCACAA  
AGCTAGAAAATTTAAGGTAAGTCAGTTTTTGTTCATAAAAGATTGCAAATG

>M6-PGSC0003DMG402004423M6LRR-RLP\_5002

GCTTTAGATCAATTATAACGAGTTGCTTCTCCATTTGCAAGGATCAGAGAAAATGTGTGTCAAAACTGA

CTATTAACCGTTTCCTATGTTTAAGATTCTTGGTTGAAACAACGACATGC

>M6-PGSC0003DMG402004423M6LRR-RLP\_5063

CAAAACTGACTATTAACCGTTTCCTATGTTTAAGATTCTTGGTTGAAACAACGACATGCATGGACCTTGTC  
GAGATGGCAGAATGTAGCAGACTTCTCTTAGATGTGTGTTCAAGTGTC

>M6-PGSC0003DMG402004423M6LRR-RLP\_5124

GGACCTTGTCGAGATGGCAGAATGTAGCAGACTTCTCTTAGATGTGTGTTCAAGTGTCATGATTGACTA  
GTGAAATTGTAATTTGGCGGAAACTGAAAGTGGAGATATTATTTACTTGTA

>M6-PGSC0003DMG402004423M6LRR-RLP\_5185

ATTGACTAGTGAAATTGTAATTTGGCGGAAACTGAAAGTGGAGATATTATTTACTTGTATGACTAAGATT  
TGACAGCACAGGCCTTTAGTTTCTTGACACACAGAGTACATGCCGTTTTTCG

>M6-PGSC0003DMG402004423M6LRR-RLP\_5226

AGATATTATTTACTTGTATGACTAAGATTTGACAGCACAGGCCTTTAGTTTCTTGACACACAGAGTACATGC  
CGTTTTCGTACACTACAAATAGAGTCCATCAAACATTTTGAACCTTAATA

>M6-PGSC0003DMG402004423M6LRR-RLP\_549

AAGAGAATTTTCAACGATGAACAGATCGAGAAACACTTTGAAAAGAGAGTTTGGTTGTGTCTGCCTGAA  
ATGTCAGAAACGAAGAGCTTTCTTCAACTAATCCTCGAATCCCTGACAAAG

>M6-PGSC0003DMG402004423M6LRR-RLP\_671

GAAAGTTGAGGTCCAAAGCAGAGACATAATAGTCAAGACGCTACAAGATGAACTGGCAGGAAGAAAGT  
ACTTACTTGTCTGGATGATTTATGGCGTGTGACTCTACATTGTGGGTAGA

>M6-PGSC0003DMG402004423M6LRR-RLP\_732

AGAAAGTACTTACTTGTCTGGATGATTTATGGCGTGTGACTCTACATTGTGGGTAGAGTTTGTGACACA  
CCTTACGAGGAATAAATACATCCCGAGGAACTTCATTCTTGTGACTACT

>M6-PGSC0003DMG402004423M6LRR-RLP\_793

TTGTCGACACCTTACGAGGAATAAATACATCCCGAGGAACTTCATTCTTGTGACTACTCGTATGGAACA  
GGTGGCATCCACAGTAGCAGCAGTAGCTCCTCATAGGTTGGAAAAATTAG

>M6-PGSC0003DMG402004423M6LRR-RLP\_854

TATGGAACAGGTGGCATCCACAGTAGCAGCAGTAGCTCCTCATAGGTTGGAAAAATTAGCAGAAGCTCA  
TTGTTGGTCCATTTTCAAACAAAGAGCGTTTGTGATGGGGAAATTCCAGA

>M6-PGSC0003DMG402004902-(rev)M6LRR-RLK\_0

TCCTATTA ACTATTCCGATCCGCCATTAATCTAATTCTTCAGTCAGCTTTACTGACCATATATTTATAGATC  
ATCCATTGGTATCATTGATCATGTACAAGAAGATTTGCAGATCGTCCA

>M6-PGSC0003DMG402004902-(rev)M6LRR-RLK\_1037

AAAGGAATTACTTGCTCGGGCAATAGAGTAACTGAAATGTAATTATGTTCTCTTCACCATCCTCCTATAGT  
TTTTCGATATACACTTTATTTTTGGTAACTTCTCGTTAGTTAATTGATT

>M6-PGSC0003DMG402004902-(rev)M6LRR-RLK\_1098

CTCCTATAGTTTTTCGATATACACTTTATTTTTGGTAACTTCTCGTTAGTTAATTGATTTGGCAATTGCTGA  
TTTTCAGTTTTCGTTTCATTTTCCTTCAGCCAGATATCCGGTTTAGGA

>M6-PGSC0003DMG402004902-(rev)M6LRR-RLK\_1159

GCAATTGCTGATTTTCAGTTTTCGTTTCATTTTCCTTCAGCCAGATATCCGGTTTAGGACTATCCGGATCA  
ATGGGATACCAACTAATGAGTTTAAACATCAGTAACCAACTTGTAAGATG

>M6-PGSC0003DMG402004902-(rev)M6LRR-RLK\_122

TCTTTCTCCTATTAATTTGTCAAGAGGATTACTCTTTTTTTCTAATAAAGCCTTGATTTTTTTTTTGAGTTC  
AGAGACATAGACGAATTTAGAATTTAAATTTGATGGATCAACCTTTT

>M6-PGSC0003DMG402004902-(rev)M6LRR-RLK\_1220

ATCCGGATCAATGGGATACCAACTAATGAGTTTAAACATCAGTAACCAACTTGTAAGATGATCAATGGCT  
CAATTACTATTTCTTAATTCGTTCTGTTATTTGTATTTACATTGTAAGA

>M6-PGSC0003DMG402004902-(rev)M6LRR-RLK\_1281

CAATGGCTTCAATTACTATTTCTTAATTCGTTCTGTTATTTGTATTTACATTGTAAGATGTTGTAATTTGC  
AGTGACATAAGCAACAATAATCTCGGAAACCAGATACCTTACCAGCTT

>M6-PGSC0003DMG402004902-(rev)M6LRR-RLK\_1342

TTGTAATTTGCAGTGACATAAGCAACAATAATCTCGGAAACCAGATACCTTACCAGCTTCTCCAAATGT  
AAAGAGACTGTATGTGTTTTATGCCTAATTTCTTCTTTCTTTGCTCAAT

>M6-PGSC0003DMG402004902-(rev)M6LRR-RLK\_1403

TCCAAATGTAAAGAGACTGTATGTGTTTTATGCCTAATTTCTTCTTTCTTTGCTCAATTCCAGGCTCTAGT  
GTTTTTACAAAGTCACTTACAAAATCTTTCTGCCATTTGCCTCGTAT

>M6-PGSC0003DMG402004902-(rev)M6LRR-RLK\_1464

CAGGCTCTAGTGTTTTTTACAAAGTCACTTACAAAATCTTTCTGCCATTTGCCTCGTATTGCAGTAACCTTG  
CTGGTAATGGTTTTACCGGTGTCCTACCTTATTCAGTTTCACAAATAA

>M6-PGSC0003DMG402004902-(rev)M6LRR-RLK\_1525

CAGTAACCTTGCTGGTAATGGTTTTACCGGTGTCCTACCTTATTCAGTTTCACAAATAACTTCCCTTCAATA  
CTTGTAAGTGAATTTTTAAAAATTAATTTACATGTATAGTATTATTA

>M6-PGSC0003DMG402004902-(rev)M6LRR-RLK\_1586

TCCCTTCAATACTTGTAAGTGAATTTTTAAAAATTAATTTACATGTATAGTATTATTACACTCGTTGTTCT  
GATTTTCTCTCCGTTGTATGTGCCTGACTGTAGAAATGTCAGTCATAA

>M6-PGSC0003DMG402004902-(rev)M6LRR-RLK\_1647

CTCGTTGTTCTGATTTTCTCTCCGTTGTATGTGCCTGACTGTAGAAATGTCAGTCATAATCAAATCAAGG  
AGAACTAAATGACATGTTTGGATCACTTTCTTCTCTCAACACATTGTAA

>M6-PGSC0003DMG402004902-(rev)M6LRR-RLK\_1708

AAATCAAGGAGAATAATGACATGTTTGGATCACTTTCTTCTCTCAACACATTGTAAGGCCTTGTCTCG  
ATTTCTTCCTTTTCTTATACAGATTGATATTACCCTGTGATGATTGAGA

>M6-PGSC0003DMG402004902-(rev)M6LRR-RLK\_1769

CCTTGCTCGATTTCTTCCTTTTCTTATACAGATTGATATTACCCTGTGATGATTGAGATTTTCAATGTATC  
TTGTGCTATTCTCGATAGATAAATACAGTATCTCTTCTGTTTATCATG

>M6-PGSC0003DMG402004902-(rev)M6LRR-RLK\_183

TTTTTTGAGTTCAGAGACATAGACGAATTTAGAATTTAAATTTGATGGATCAACCTTTTAAGTTATGACTA  
TTGAATCCATCTGATCACATAATGAGTTCGAAATTTAATGTTACAGTAC

>M6-PGSC0003DMG402004902-(rev)M6LRR-RLK\_1830

TTCAATGTATCTTGTGCTATTCTCGATAGATAAATACAGTATCTCTTCTGTTTATCATGTGAACTATTGTCA  
CGGAGTGAAAGTATCTTTTCTTCTTCTTGGTTGATTATATTATGTTAT

>M6-PGSC0003DMG402004902-(rev)M6LRR-RLK\_1891

AACTATTGTCACGGAGTGAAAGTATCTTTTCTTCTTCTTGGTTGATTATATTATGTTATATCCCGGGTTTCT  
TACTTTGATTGTTTACATTTATGCTTCAGAGATATCTCTTTCAATTCA

>M6-PGSC0003DMG402004902-(rev)M6LRR-RLK\_1952

CCCGGGTTTCTTACTTTGATTGTTTACATTTATGCTTCAGAGATATCTCTTTCAATTCAATGACCGGTAAAC  
TTCCTCAAAGCTTTAAGTCACTGACTAGCATGAAGAAAATGTAAGACA

>M6-PGSC0003DMG402004902-(rev)M6LRR-RLK\_2013

GACCGGTAAACTTCTCAAAGCTTTAAGTCACTGACTAGCATGAAGAAAATGTAAGACACGTATCTTCTG

ATTCATTATTGTAAGTATTGGTTCGAGTGTTCATTGAACTTTCTAGTATTG

>M6-PGSC0003DMG402004902-(rev)M6LRR-RLK\_2074

TATCTTCTGATTCATTATTGTAAGTATTGGTTCGAGTGTTCATTGAACTTTCTAGTATTGTTGTGTAGTGCA  
GCTACCTGCAGAACAAACCAGTTCCTGAAACATTGATGTCCTCGCCAA

>M6-PGSC0003DMG402004902-(rev)M6LRR-RLK\_2135

GTGTAGTGCAGCTACCTGCAGAACAAACCAGTTCCTGAAACATTGATGTCCTCGCCAATCTTCTCTTG  
ACGATCTGTGAGTTATGCAACATCTTTGTGTGTGAATGTTATCGATCT

>M6-PGSC0003DMG402004902-(rev)M6LRR-RLK\_2196

TTCCTCTTGACGATCTGTGAGTTATGCAACATCTTTGTGTGTGAATGTTATCGATCTCTGAATGTTCCA  
TTTCAAGACTTTCTCAGTACTATATTGTTGATTCCTTTGTGCTTTAGG

>M6-PGSC0003DMG402004902-(rev)M6LRR-RLK\_2257

GAATGTTCCATTTCAAGACTTTCTCAGTACTATATTGTTGATTCCTTTGTGCTTTAGGAATATTGAAAACA  
ATCAGTTTACTGGTGGGATTCCAGAGAAGTTTAAAGGGATAATGCAGT

>M6-PGSC0003DMG402004902-(rev)M6LRR-RLK\_2318

TATTGAAAACAATCAGTTTACTGGTGGGATTCCAGAGAAGTTTAAAGGGATAATGCAGTGAGTGTTTCA  
GTCTGCAAATTATTTTTCATCCTTGAATATTTGTAGAAAATAACTTTCTAA

>M6-PGSC0003DMG402004902-(rev)M6LRR-RLK\_2379

GTGTTTCAGTCTGCAAATTATTTTTCATCCTTGAATATTTGTAGAAAATAACTTTCTAACTGAATTCACGAT  
TTGTGATACAATTGTAGAAAATCTAACAGTAACACAGGGAGCTCAGGG

>M6-PGSC0003DMG402004902-(rev)M6LRR-RLK\_244

GTTATGACTATTGAATCCATCTGATCACATAATGAGTTCGAAATTTAATGTTACAGTACTATTTGATAAAA  
TTCCGTATTAATAATTGGGTTCAATTGAACGCGAAGAAGGTGGGGGCA

>M6-PGSC0003DMG402004902-(rev)M6LRR-RLK\_2440

GAATTCACGATTTGTGATACAATTGTAGAAAATCTAACAGTAACACAGGGAGCTCAGGGCCTGCAGCCC  
CTGCGAACAAAGTCCACTCAAAGTCACAAATCAGGAGGCAATGGCAATTCTT

>M6-PGSC0003DMG402004902-(rev)M6LRR-RLK\_2501

TGCAGCCCCTGCGAACAAAGTCCACTCAAAGTCACAAATCAGGAGGCAATGGCAATTCTTCCAGCGGTGG  
AGGTAAAAGTGATAGTGGTGAGAAATCTGGTATCGGTGGTGGAGGCGTTGC

>M6-PGSC0003DMG402004902-(rev)M6LRR-RLK\_2562

AGCGGTGGAGGTAAAAGTGATAGTGGTGAGAAATCTGGTATCGGTGGTGGAGGCGTTGCAGGCATAG  
TTATATCAGTTTCAGTGATTGGAGCAGTTGCAGTAATCTGTATTATCAAGAAA

>M6-PGSC0003DMG402004902-(rev)M6LRR-RLK\_2623

GCATAGTTATATCAGTTTCAGTGATTGGAGCAGTTGCAGTAATCTGTATTATCAAGAAAAGACGCAGGA  
AGTCGTCAACAGACATAGAAAACTTGACGTTCCAGCCATTTGTTCTGAGT

>M6-PGSC0003DMG402004902-(rev)M6LRR-RLK\_2684

ACGCAGGAAGTCGTCAACAGACATAGAAAACTTGACGTTCCAGCCATTTGTTCTGAGTCACATGAAGT  
ACAAGGTATATAATTTTATGACTTCTTTTTTGGGTCAGTTGAGAAACATAG

>M6-PGSC0003DMG402004902-(rev)M6LRR-RLK\_2745

CATGAAGTACAAGGTATATAATTTTATGACTTCTTTTTTGGGTCAGTTGAGAAACATAGCTGGTCAGTAT  
ACTTACCTCAATATCTCAACATATATACTCTTATGGTGGATAGGATCC

>M6-PGSC0003DMG402004902-(rev)M6LRR-RLK\_2806

GGTCAGTATACTTACCTCAATATCTCAACATATATACTCTTATGGTGGATAGGATCCTTTCTTGACATG  
TTATCTAATTTGAATATAGAACTGAATTTATTGTGGTACACAAAGGGGA

>M6-PGSC0003DMG402004902-(rev)M6LRR-RLK\_305

TTTGATAAAATTCCGTATTAATAATTGGGTTCAATTGAACGCGAAGAAGGTGGGGGCAGGATGAGCTT  
GGTGGTAAAGGTGGCCCTACTCTTCTTCATTTTGCATGGCTGCAGCTTCAT

>M6-PGSC0003DMG402004902-(rev)M6LRR-RLK\_3111

ACACACTTTTAACTCTGGATGCAACTTGCAAGTTCCAGCAAAGGTACTGAATCACCTCAGGTGAATTTTG  
GAAAATCAGTTTTCTTTTGAACCTCGTCGTCATCATTTCATGTTCAAGT

>M6-PGSC0003DMG402004902-(rev)M6LRR-RLK\_3172

TGAATTTTGGAAAATCAGTTTTCTTTTGAACCTCGTCGTCATCATTTCATGTTCAAGTGAGCATGTCTAT  
AATGATGAATTATCTTCCCTTTTGCAGCTTCATTTGTAACCTGGTATT

>M6-PGSC0003DMG402004902-(rev)M6LRR-RLK\_3233

GCATGTCTATAATGATGAATTATCTTCCCTTTTGCAGCTTCATTTGTAACCTGGTATTTTCATACATCTTAA  
GCCTTACCTCAATTGTTTTAAGTTCTGTAGCGTCATTCCATCAGAGTT

>M6-PGSC0003DMG402004902-(rev)M6LRR-RLK\_3294

ATACATCTTAAGCCTTACCTCAATTGTTTTAAGTTCTGTAGCGTCATTCCATCAGAGTTTCAGCTAACATT  
TCCCTTTTCTGGTACTAGTATTATTGATTTTAAATCATGTGTTAGTT

>M6-PGSC0003DMG402004902-(rev)M6LRR-RLK\_3355

AGCTAACATTTTCCCTTTTCTGGTACTAGTATTATTGATTTTTAATCATGTGTTAGTTTTGGAACCTATAT  
TTTTCTATTCATCACCTATTTTGGCTGCAGATACGAAACTCAGTCAAG

>M6-PGSC0003DMG402004902-(rev)M6LRR-RLK\_3416

GGAACCTATATTTTTCTATTCATCACCTATTTTGGCTGCAGATACGAAACTCAGTCAAGCTCCGTCCACAG  
TAAACATGGAAGCTACTGAAACTCCCACTGTAGTATCTCTAAGACCTCC

>M6-PGSC0003DMG402004902-(rev)M6LRR-RLK\_3477

CCGTCCACAGTAAACATGGAAGCTACTGAAACTCCCACTGTAGTATCTCTAAGACCTCCACCTATTAATA  
CTCATAAATCCATTGGTGGAGATGACATTTTCAGAAAACTCATTGTTCCA

>M6-PGSC0003DMG402004902-(rev)M6LRR-RLK\_3538

CTATTAATACTCATAAATCCATTGGTGGAGATGACATTTTCAGAAAACTCATTGTTCCACAGAAGAAAAC  
TCGTACAGCTGAAAGAAAAGTTGTGCAATTTTCAATTGAAGACGTACAGA

>M6-PGSC0003DMG402004902-(rev)M6LRR-RLK\_3599

GAAGAAAACCTGTACAGCTGAAAGAAAAGTTGTGCAATTTTCAATTGAAGACGTACAGATAGCTACTGA  
CAGCTTCAGTGTAGAAAACCTTATTGGTGACGGATCTATTGGAAGTGTATA

>M6-PGSC0003DMG402004902-(rev)M6LRR-RLK\_366

ATGAGCTTGGTGGTAAAGGTGGCCCTACTCTTCTTCATTTTGCATGGCTGCAGCTTCATCAATGCAGACA  
CAGATCCATCCGAAGGTTAGCTTAATTCTACGTGCTACGTAGCTGAATCA

>M6-PGSC0003DMG402004902-(rev)M6LRR-RLK\_3660

GCTACTGACAGCTTCAGTGTAGAAAACCTTATTGGTGACGGATCTATTGGAAGTGTATATCGAGCTCACT  
TTGACAATGGCAAAGTAATATCTATTAGTTCTGTTTGTGTTTTAACTGT

>M6-PGSC0003DMG402004902-(rev)M6LRR-RLK\_3721

GAGCTCACTTTGACAATGGCAAAGTAATATCTATTAGTTCTGTTTGTGTTTTAACTGTTTCTTGTTGCAG  
CTAACATTACCTATGCTGATGTAAGTGATTCTGATCGTTTAAGTTCCTC

>M6-PGSC0003DMG402004902-(rev)M6LRR-RLK\_3782

CTTGTTGCAGCTAACATTACCTATGCTGATGTAAGTGATTCTGATCGTTTAAGTTCCTCTTCCATAGGTTT  
TTGCTGTCAAGAACTTTATTCATCTGAGCTCCGGAATCCTGAAGATTT

>M6-PGSC0003DMG402004902-(rev)M6LRR-RLK\_3843

CCATAGGTTCTTGCTGTCAAGAACTTTATTCATCTGAGCTCCGGAATCCTGAAGATTTTCTAAAGATGAT



TCCTGAAATATCCCAGCTGGATCATCCAAATGTAACAGACCTAATTGGT

>M6-PGSC0003DMG402004902-(rev)M6LRR-RLK\_3904

TAAAGATGATTCTGAAATATCCCAGCTGGATCATCCAAATGTAACAGACCTAATTGGTTATTGCTCAGA  
AGATGAGCAGCACCTGCTAGTTTATGAATTCCACAGAAATGGTTCTCTGC

>M6-PGSC0003DMG402004902-(rev)M6LRR-RLK\_3965

TTGCTCAGAAGATGAGCAGCACCTGCTAGTTTATGAATTCCACAGAAATGGTTCTCTGCATGATTTCTCG  
CATCGAATGGATGAAGACAACTCGCGACTAACATGGGATAGCAGAGTTCA

>M6-PGSC0003DMG402004902-(rev)M6LRR-RLK\_4026

GATTTCTGTCATCGAATGGATGAAGACAACTCGCGACTAACATGGGATAGCAGAGTTCAGATTGCACTT  
GGCACAGCTAGAGCACTAGAGTGAGTTTCATAATTTACAAAATTACTTTCA

>M6-PGSC0003DMG402004902-(rev)M6LRR-RLK\_4087

TTGCACTTGGCACAGCTAGAGCACTAGAGTGAGTTTCATAATTTACAAAATTACTTTTCATTATGCATCACA  
TAAGATTAATGCAGCTTGGAGAAAACTTTTGTGTGATTGGTTTCAGATA

>M6-PGSC0003DMG402004902-(rev)M6LRR-RLK\_4148

ATGCATCACATAAGATTAATGCAGCTTGGAGAAAACTTTTGTGTGATTGGTTTCAGATATTTTTTTTATGG  
TAAACTACCTATCTATCATAAATCTTCTAGTTTTCTTAAAACATTGAT

>M6-PGSC0003DMG402004902-(rev)M6LRR-RLK\_4209

TTTTTATGGTAAACTACCTATCTATCATAAATCTTCTAGTTTTCTTAAAACATTGATGACTAGTAAGCAT  
GTAAAAGTGTTTCAATAATTTTTCGAATAGAAAAGCAATTATATTATT

>M6-PGSC0003DMG402004902-(rev)M6LRR-RLK\_427

ATGCAGACACAGATCCATCCGAAGGTTAGCTTAATTCTACGTGCTACGTAGCTGAATCATAAAGAAATTA  
ATATATTCACGGCACTCATGATTAATTTGGAAGTTACTAACAAAGTTTCT

>M6-PGSC0003DMG402004902-(rev)M6LRR-RLK\_4270

CTAGTAAGCATGTAAAAGTGTTTCAATAATTTTTCGAATAGAAAAGCAATTATATTATTTAAGTTGTAG  
AACACCGCGTATGTTGGCTTTCCACTAGATCTAATTAGAATAAGTTTTCT

>M6-PGSC0003DMG402004902-(rev)M6LRR-RLK\_4331

AAGTTGTAGAACACCGCGTATGTTGGCTTTCCACTAGATCTAATTAGAATAAGTTTTCTATTTTGGTCGCG  
ACCTCTCCAATTCTTATGAGTAGGTTTATTCTAGTAGCTAAATCTAAGC

>M6-PGSC0003DMG402004902-(rev)M6LRR-RLK\_4392

TTTGGTCGCGACCTCTCCAATTCTTATGAGTAGGTTTATTCTAGTAGCTAAATCTAAGCTTCCTTTAATTTG  
CAGGTATCTACATGAAGCTTGTCTCCATCTTTAGTTCATAAAAATAT

>M6-PGSC0003DMG402004902-(rev)M6LRR-RLK\_4453

CCTTTAATTTGCAGGTATCTACATGAAGCTTGTCTCCATCTTTAGTTCATAAAAATATAAAATCTGAAAA  
TATTTTACTTGATGCTGATCTCAATCCTCATCTATCAGACAGTGGGTTA

>M6-PGSC0003DMG402004902-(rev)M6LRR-RLK\_4514

AATCTGAAAATATTTTACTTGATGCTGATCTCAATCCTCATCTATCAGACAGTGGGTAGCAAACCTTATG  
GCTGATGCAGATCAGGTAACACTTTATAAATTTGTTTTTGCCTTACTC

>M6-PGSC0003DMG402004902-(rev)M6LRR-RLK\_4575

AAACCTTATGGCTGATGCAGATCAGGTAACACTTTATAAATTTGTTTTTGCCTTACTCTAGATTATAATTT  
CCTAAAATCCACATCAGTATCTTCTAAATGGCTTCAATTTGGACCCT

>M6-PGSC0003DMG402004902-(rev)M6LRR-RLK\_4636

GATTATAATTTCTAAAATCCACATCAGTATCTTCTAAATGGCTTCAATTTGGACCCTTATTTTTTCTCC  
CTACAGGGATTGAACCATAATATAGAGTCTGGATATGGCGCACCGGAG

>M6-PGSC0003DMG402004902-(rev)M6LRR-RLK\_4697

ATTTTTTCTCCCTACAGGGATTGAACCATAATATAGAGTCTGGATATGGCGCACCGGAGGCTGCTATATC  
TGGGAAGTGTACTACCAAGAGTGATGTATACAGCTTTGGAGTTGTTATGT

>M6-PGSC0003DMG402004902-(rev)M6LRR-RLK\_4758

TGCTATATCTGGGAAGTGTACTACCAAGAGTGATGTATACAGCTTTGGAGTTGTTATGTTGGAACCTTGT  
ACTGGTCGAAAACCTTTTCGATAGGTAATGTTAATTTAATGATTTTGAAC

>M6-PGSC0003DMG402004902-(rev)M6LRR-RLK\_4819

GAACTTTGTACTGGTCGAAAACCTTTTCGATAGGTAATGTTAATTTAATGATTTTGAACCCAAAATCTGTT  
TAAGACAAATAATAATATACGTGTGTTCTTCTCTTCTCCACTCAGCTCA

>M6-PGSC0003DMG402004902-(rev)M6LRR-RLK\_488

AAGAAATTAATATATTCACGGCACTCATGATTAATTTGGAAGTTACTAACAAGTTTCTCTGTAAATAAG  
AAAGAATTTTCGTAGTTAACTTATGATAAGGCGTGGAACACTTGGTGTACT

>M6-PGSC0003DMG402004902-(rev)M6LRR-RLK\_4880

AAAATCTGTTTAAGACAAATAATAATATACGTGTGTTCTTCTCTTCTCCACTCAGCTCAAGACCAAGATCT  
GAACAGTCTTTAGTTAGATGGGCAACCCACAGCTTCATGATATTGATG

>M6-PGSC0003DMG402004902-(rev)M6LRR-RLK\_4941

ACCAAGATCTGAACAGTCTTTAGTTAGATGGGCAACCCACAGCTTCATGATATTGATGCCCTGGAAAA  
GATGGTTGATCCAGCTCTATCTGGACTATATTCTGTCAAATCTCTTTCCCG

>M6-PGSC0003DMG402004902-(rev)M6LRR-RLK\_5063

TTGCTGATGTTATTGCTCTCTGTGTTCAAGTAATACTCTCGTTGTTCAATTCATGTGACTAGACACAAAG  
TTAAGATAGAAATGCAAACAATTGAAACGTGTGGTCTTAAACATGACA

>M6-PGSC0003DMG402004902-(rev)M6LRR-RLK\_5124

AGACACAAAGTTAAGATAGAAATGCAAACAATTGAAACGTGTGGTCTTAAACATGACATAACATCTCA  
TTAGAGTAATCTGAGAAGTAGTTCATTCATTTTGTACTGAAAGCTGCTACA

>M6-PGSC0003DMG402004902-(rev)M6LRR-RLK\_5185

ACATCTCATTAGAGTAATCTGAGAAGTAGTTCATTCATTTTGTACTGAAAGCTGCTACATGCCATGTGTTCC  
AATTTTCAATAGAGTACTACCCTAAATCGCGCTCACTATCACAATGGTT

>M6-PGSC0003DMG402004902-(rev)M6LRR-RLK\_5246

CCATGTGTTCAATTTTCAATAGAGTACTACCCTAAATCGCGCTCACTATCACAATGGTTTGTGTATGTTGT  
GTCAGCTTGAGCCTGAGTTCCGGCCACCTATGTCTGAAGTGGTTCAAGC

>M6-PGSC0003DMG402004902-(rev)M6LRR-RLK\_5368

TAGTCCGGCTAGTGCAACGAGCAAATATGAGCAAGAGGTTACACAATAATGATCAGGACTGAAGAGAT  
ATGATCAAGACCTGCTAATTGTTACACCAAATGGTTCTCTTAAACTGTTTGC

>M6-PGSC0003DMG402004902-(rev)M6LRR-RLK\_5429

AAGAGATATGATCAAGACCTGCTAATTGTTACACCAAATGGTTCTCTTAAACTGTTTGTGCAATGGAGA  
TCATCTGATGCTGATCAGCCCAGCAATATCTTCTTCGGTGCAGTTGTATT

>M6-PGSC0003DMG402004902-(rev)M6LRR-RLK\_549

GTAAATAAGAAAGAATTTTCGTAGTTAACTTATGATAAGGCGTGGAACACTTGGTGTACTACTTTTCTTTT  
CCAGTATTCGATATCCGCTTTGTTGTCTCCAATTAATTCGGACTCATTAC

>M6-PGSC0003DMG402004902-(rev)M6LRR-RLK\_61

ATTTATAGATCATCCATTGGTATCATTGATCATGTACAAGAAGATTTGCAGATCGTCCATTTCTTTCTCCTA  
TTAATTTGTCAAGAGGATTACTCTTTTTTTTCTAATAAAGCCTTGATT

>M6-PGSC0003DMG402004902-(rev)M6LRR-RLK\_610

TTTTCTTTTCCAGTATTCGATATCCGCTTTGTTGTCTCCAATTAATTCGGACTCATTACAGGGGAAGCACTT

CCTACATGTAATTTTTCATTCTCAAAGCTCAAACCCGAGACTTTTTAT

>M6-PGSC0003DMG402004902-(rev)M6LRR-RLK\_671

GGGAAGCACTTCCTACATGTAATTTTTCATTCTCAAAGCTCAAACCCGAGACTTTTTATAGCTAAGCTAGG  
TTGCTAATTTTCACTAAAAAGCACGACGATAAGCCAAAGAGTTCACAAC

>M6-PGSC0003DMG402004902-(rev)M6LRR-RLK\_732

CTAAGCTAGGTTGCTAATTTTCACTAAAAAGCACGACGATAAGCCAAAGAGTTCACAACATGCAAAAAA  
AAAGAAAAAATTGTTATAAATTTAGTAACAAAACAGTGGAGTTTGATTTAT

>M6-PGSC0003DMG402004902-(rev)M6LRR-RLK\_793

GCAAAAAAAAAGAAAAAATTGTTATAAATTTAGTAACAAAACAGTGGAGTTTGATTTATTTATTTTTGG  
AGCTGTTCTTAGTCTCTGTGTGTGTATTTATATGTTCTCAATAATTCGT

>M6-PGSC0003DMG402004902-(rev)M6LRR-RLK\_854

ATTTTTGGAGCTGTTCTTAGTCTCTGTGTGTGTATTTATATGTTCTCAATAATTCGTTGGTGTCTGTGCAA  
CTTTGATTATCAGGTTCTGCCCTGAAAGTGATGTATAGCTCCCTAAAT

>M6-PGSC0003DMG402004902-(rev)M6LRR-RLK\_915

GTGTCGTGCAACTTTGATTATCAGGTTCTGCCCTGAAAGTGATGTATAGCTCCCTAAATTCACCGGGGCA  
GCTTACAAAATGGAGCTCATCAGAAGGTGGTGATCCTTGTGGAGAATCCT

>M6-PGSC0003DMG402004902-(rev)M6LRR-RLK\_976

ACCGGGGCAGCTTACAAAATGGAGCTCATCAGAAGGTGGTGATCCTTGTGGAGAATCCTGGAAAGGAA  
TACTTGCTCGGGCAATAGAGTAACTGAAATGTAATTATGTTCTCTTCACCA

>M6-PGSC0003DMG402004946M6G-LecRK\_0

ATTTAAGGCCTTCAGAAGCTAGCTAGATTTACACTGAAAAGGTCAGGTTACCTCCAGATATCTAAACCTG  
CATAGGATAGGTAGCATGTGATAGAGCAGTTCTTAATGGAAAGTTTTGTG

>M6-PGSC0003DMG402004946M6G-LecRK\_124

TATTGCAGATATTGTTATGTTGTTTTGTATGCTCAATTACTAGTGCAAAGATATTATCACTACAAGTAC  
TTTCTAACAGATGGAAAGACCATTACTTCATCTGATGGAAGTTTTGAGA

>M6-PGSC0003DMG402004946M6G-LecRK\_1302

CTTTGGTGTGGCGACTTAATTGACATTCTAGAATTACCTGGAGGACAGGACATTTACATAAGGGTTGCTA  
CCTCAGAGTTAGGTAACATTTGTGAATTTGATCAAAGTTGGAGTATTAGC

>M6-PGSC0003DMG402004946M6G-LecRK\_186

ACAACCTGACTTTCTAACAGATGGAAAGACCATTACTTCATCTGATGGAAGTTTTGAGATGGGATTTTTTT  
GCCCGGCTAGTTTCACGAATAATTGGTATATTGGAATATGGTATAAGCAC

>M6-PGSC0003DMG402004946M6G-LecRK\_62

TAAACCTGCATAGGATAGGTAGCATGTGATAGAGCAGTTCTTAATGGAAAGTTTTGTGCTTATATTGCAG  
ATATTGTTATGTTGTTTTGTATGCTCAATTACTAGTGCAAAGATATTAT

>M6-PGSC0003DMG402005047M6G-LecRK\_0

CAATGGCTATCTCATGAAAAGAACCATAGCAATTGTGACAATCTGCATTGGTGCAATACTCATCGCGCTC  
TCGTTTGCTTGTGTTTTGGTAATAAGGAAAAGGAGAAGAGGTAAAGGTAC

>M6-PGSC0003DMG402005047M6G-LecRK\_1302

TGTGGGTCTTGACATAGCTATTGGTTCATTTTCAGTGGTTATATGTCACCAGAATATGCAATGGAAGGGCA  
TTTTTCAGTGAAATCTGATGTTTTTCAGTTTTGGTGTCTGTTGTTGGAGA

>M6-PGSC0003DMG402005047M6G-LecRK\_1364

GAAGGGCATTTTTTTCAGTGAAATCTGATGTTTTTCAGTTTTGGTGTCTGTTGTTGGAGATCATTACTGGCA  
GGAAGAACAACACTACACATTATCAGGATCATTCAATTAATTTAGTTGGAAAT

>M6-PGSC0003DMG402005047M6G-LecRK\_1426

TACTGGCAGGAAGAACAACACTACACATTATCAGGATCATTCAATTAATTTAGTTGGAAATGTAAGATATCTC  
TTCATCAAGAACTCACCTTTAGTTAAGAAGATGTATATATCTTGTTTTGC

>M6-PGSC0003DMG402005047M6G-LecRK\_1488

GATATCTCTTCATCAAGAACTCACCTTTAGTTAAGAAGATGTATATATCTTGTTTTGCTTTAGCCCTTATAC  
CATTGCTCTAGAGAAGGATATGTGGAAATGTTTCATCTCTTCTTTTTTT

>M6-PGSC0003DMG402005047M6G-LecRK\_1550

GCCCTTATACCATTGCTCTAGAGAAGGATATGTGGAAATGTTTCATCTCTTCTTTTTTTTTCTTATACGATGG  
AGTCGGGGCTAGCTTGTGCATACTTTGACTATTACACTGTACTTGCTAC

>M6-PGSC0003DMG402005047M6G-LecRK\_1612

ATACGATGGAGTCGGGGCTAGCTTGTGCATACTTTGACTATTACACTGTACTTGCTACCCTCCACCAGCA  
TAGGGATGGAAACAATGGCGGAGCTACATGCATTGGAAGGGTATTCAAAT

>M6-PGSC0003DMG402005047M6G-LecRK\_1674

CACCAGCATAGGGATGGAAACAATGGCGGAGCTACATGCATTGGAAGGGTATTCAAATTGAATCCCCTT  
CTTTAGGAAGCTATGATAGAAACTATTGGGTGTGTCTAAACAAAGTCCCAC

>M6-PGSC0003DMG402005047M6G-LecRK\_1736

TCCCCTTCTTTAGGAAGCTATGATAGAACTATTGGGTGTGTCTAAACAAAGTCCCACATGAAAAGTAAA  
AAAAAACTACTTTAAGATGTCGGATAATCTTAATGTTATGAAGTCTTCT

>M6-PGSC0003DMG402005047M6G-LecRK\_1798

AAAGTAAAAAAAAAACTACTTTAAGATGTCGGATAATCTTAATGTTATGAAGTCTTCTGAAAAAACTAT  
GCGGGTTTGGTCCAAGGGGACAATATCATGCCATGTTTCAGAGTATCTTAT

>M6-PGSC0003DMG402005047M6G-LecRK\_186

ACAATAGTACTAAGTTACTTCATGTACAGATAAGGAGGACCAATTCACCAGTTTGAACACTTTGACAAGG  
AATTTAGCATCCTATGAGAACTCTTCAAGAGGTAATGAGATGGATGGAAG

>M6-PGSC0003DMG402005047M6G-LecRK\_1860

AAAACATGCGGGTTTGGTCCAAGGGGACAATATCATGCCATGTTTCAGAGTATCTTATTGGATTATTTTA  
GCCTAACAACTGATATCAGAGCCAGTGGTTTGGCAGGACAATTATTGAGA

>M6-PGSC0003DMG402005047M6G-LecRK\_1922

TTATTTTAGCCTAACAACTGATATCAGAGCCAGTGGTTTGGCAGGACAATTATTGAGATGGTAGAGTGA  
TGGAGTGGGGTCCGACTTGGTGCCTTTGACCATCTATGGGCCGATTTACTA

>M6-PGSC0003DMG402005047M6G-LecRK\_1984

AGAGTGATGGAGTGGGGTCCGACTTGGTGCCTTTGACCATCTATGGGCCGATTTACTATCTTTACCTGTA  
GCCTTAGAGATGCTTACACAAAAAGAAGGTAGTGGCCGTTTGTGACCATA

>M6-PGSC0003DMG402005047M6G-LecRK\_2046

TACCTGTAGCCTTAGAGATGCTTACACAAAAAGAAGGTAGTGGCCGTTTGTGACCATAAATACTCTATTC  
ATATGGTGGCACGCAGTGAAATCTCCAGATAAGCCTATAAAGTGATAGGT

>M6-PGSC0003DMG402005047M6G-LecRK\_2108

CTCTATTCATATGGTGGCACGCAGTGAAATCTCCAGATAAGCCTATAAAGTGATAGGTCATGTGGAACCTC  
AGTTTAAGGAGAAGACTGTTGAGTGTACGTAAACAAAGTTTCACATGAAA

>M6-PGSC0003DMG402005047M6G-LecRK\_2170

TGGAACCTCAGTTTAAGGAGAAGACTGTTGAGTGTACGTAAACAAAGTTTCACATGAAAAAATAGAAAAA  
AGATAACTTATAAGGTATTGGATACTCTTAATATTGTGAGGCCTTTTGAGA

>M6-PGSC0003DMG402005047M6G-LecRK\_2232

AGAAAAAAGATAACTTATAAGGTATTGGATACTCTTAATATTGTGAGGCCTTTTGAGAAAACCGTTGGG

ATTTTGTCCGCAAACGACAATGTCACATCATGTTAAAAGTATCTTTGAGT

>M6-PGSC0003DMG402005047M6G-LecRK\_2294

CGTTGGGATTTTGTCCGCAAACGACAATGTCACATCATGTTAAAAGTATCTTTGAGTTATTTTAGCCCAG  
TAGAAACACATTCTTTCATCGAACATATATGAAATTTTGGACCCCTTA

>M6-PGSC0003DMG402005047M6G-LecRK\_2356

TTAGCCCAGTAGAAACACATTCTTTCATCGAACATATATGAAATTTTGGACCCCTTAACCCCAGACACGA  
CATTTTTGTATTTACTTGAATTCCTAATCGAAAATCCTGGCTCCGCCA

>M6-PGSC0003DMG402005047M6G-LecRK\_2418

CAGACACGACATTTTGTATTTACTTGAATTCCTAATCGAAAATCCTGGCTCCGCCACTAACCAGAAATG  
TTGACTTTGCTCTCCCTTGTTCAGGTTTGGGATTCATGGAATGATGAC

>M6-PGSC0003DMG402005047M6G-LecRK\_248

TGACAAGGAATTTAGCATCCTATGAGAACTTCAAGAGGTAATGAGATGGATGGAAGTGAACACGTTG  
ATGTGTTAATCTTTGATCTAAGCACTATCATTCTTCCACTGATGATTTCT

>M6-PGSC0003DMG402005047M6G-LecRK\_2480

CCAGAAATGTTGACTTTGCTCTCCCTTGTTCAGGTTTGGGATTCATGGAATGATGACAGAGCTTTAGAT  
GTTGTTGATCCCTCATTAGGGGATTGGTATGAAAGTAGTGAAGTTTTGAG

>M6-PGSC0003DMG402005047M6G-LecRK\_2542

CTTTAGATGTTGTTGATCCCTCATTAGGGGATTGGTATGAAAGTAGTGAAGTTTTGAGATGCATCCAAAT  
TGGACTATTATGTGTACAATCATATGCAAATGAAAGACCAATGATGTCTC

>M6-PGSC0003DMG402005047M6G-LecRK\_2604

ATCCAAATTGGACTATTATGTGTACAATCATATGCAAATGAAAGACCAATGATGTCTCAAGTTGTATTCA  
TGCTTTGCAATGAAACAAATTTGTCTAATCCTGGACAACCTGGTTTTTG

>M6-PGSC0003DMG402005047M6G-LecRK\_2666

TGTATTCATGCTTTGCAATGAAACAAATTTGTCTAATCCTGGACAACCTGGTTTTGTGTTTCAGATCAAGAA  
ATTCTTCTTCACTTCTTATTCATCATCAGCTAGTATTGGAAATTCTGT

>M6-PGSC0003DMG402005047M6G-LecRK\_2728

GATCAAGAAATCTTCTTCACTTCTTATTCATCATCAGCTAGTATTGGAAATCTGTAAATGACATTTCTA  
TTACTGCACAACATGCTCGCTAAGTGTGTGTCGGATCCTTCAAAGTA

>M6-PGSC0003DMG402005047M6G-LecRK\_2790

GACATTTCTATTACTGCACAACATGCTCGCTAAGTGTGTGTCGGATCCTTCAAAGTAGTACCATATATTT  
TTGTGGATCTGACATTGGTGCATCAATATTTTTGAAGAGCACTGAGCCA

>M6-PGSC0003DMG402005047M6G-LecRK\_2852

CATATATTTTTGTGGATCTGACATTGGTGCATCAATATTTTTGAAGAGCACTGAGCCATATGGTCATTAG  
GTAATTTATACTTGATCTATTTATTGATTTAGTTTAAGATTTTTTACATT

>M6-PGSC0003DMG402005047M6G-LecRK\_2896

AGAGCACTGAGCCATATGGTCATTAGGTAATTTATACTTGATCTATTTATTGATTTAGTTTAAGATTTTT  
ACATTTATCAATACTGTATTTAACGTGTTATAACAGGTAGCGTATCTT

>M6-PGSC0003DMG402005047M6G-LecRK\_310

CACGTTGATGTGTTAATCTTTGATCTAAGCACTATCATTTCTTCCACTGATGATTTCTCTGATGCTAACAA  
CTCGGAGAAGGAGGCTTTGGTAGCGTTTACAAGGTACCTCCCGATATT

>M6-PGSC0003DMG402005047M6G-LecRK\_372

TGCTAACAAACTCGGAGAAGGAGGCTTTGGTAGCGTTTACAAGGTACCTCCCGATATTTTACAACCTTCT  
ACTCATTTGTTGAGCCAATTTACTTGACAACAAGCTTACATTTTGATTT

>M6-PGSC0003DMG402005047M6G-LecRK\_434

AACTTCTTACTCATTTGTTGAGCCAATTTACTTGACAACAAGCTTACATTTTGATTTTCAAGGACAGCTAA  
ACAACGGCCAAGAGATAGCGGTCAAAGACTTTCGAAAAATTCAGGGCA

>M6-PGSC0003DMG402005047M6G-LecRK\_496

GACAGCTAACAAACGGCCAAGAGATAGCGGTCAAAGACTTTCGAAAAATTCAGGGCAAGGAGTGGA  
GGAATTCAGAATGAAGTAACGTTAATCGCGAGAGTACAACACAGGAATCTTG

>M6-PGSC0003DMG402005047M6G-LecRK\_558

GTGGAGGAATTCAAGAATGAAGTAACGTTAATCGCGAGAGTACAACACAGGAATCTTGTGAGGCTTTTA  
GGATGTTGCATAGAAAGAGGAGAGAAAATGTTGATCTATGAATACTTGCCA

>M6-PGSC0003DMG402005047M6G-LecRK\_620

GCTTTTAGGATGTTGCATAGAAAGAGGAGAGAAAATGTTGATCTATGAATACTTGCCAAACAAAGGCTT  
AGACTGTTTCATCTTTGGTACATATATACATGTCCAGATTGTGTAAAAAAT

>M6-PGSC0003DMG402005047M6G-LecRK\_682

AAGGCTTAGACTGTTTCATCTTTGGTACATATATACATGTCCAGATTGTGTAAAAAATATAAATAGGCAT  
GTTACTGATCCTTTCGAATCGTGTATTGCAGATAAAACTAAAGGGTTGCA



>M6-PGSC0003DMG402005047M6G-LecRK\_744

ATAGGCATGTTACTGATCCTTTTGAATCGTGTATTGCAGATAAACTAAAGGGTTGCAGTTAGATTGGA  
GAAAACGATTTGAAATCATCGTTGGAATAGCACGAGGATTGTCATACCTAC

>M6-PGSC0003DMG402005047M6G-LecRK\_806

GATTGGAGAAAACGATTTGAAATCATCGTTGGAATAGCACGAGGATTGTCATACCTACACCACGAGTCA  
CGAGTACGAATCATAACAGGGATCTAAAAGCTAGCAATGTTTTACTAGAT

>M6-PGSC0003DMG402005047M6G-LecRK\_868

CGAGTCACGAGTACGAATCATAACAGGGATCTAAAAGCTAGCAATGTTTTACTAGATGCCTCAATGCA  
CCCGAAAATATCAGATTTGGAAGTCTAGGATATTTGGTGGTGACCAAGT

>M6-PGSC0003DMG402005047M6G-LecRK\_930

CAATGCACCCGAAAATATCAGATTTGGAAGTCTAGGATATTTGGTGGTGACCAAGTTGAAGCTAACA  
CGAATCGAGTCGTTGGAACATAGTAAGCATCACTTTTATGTATGAACATAT

>M6-PGSC0003DMG402005482-(rev)M6LRR-RLK\_0

AAATGCCAAGTGAATAAATAGAGTACAAAGGATAAAAAGAAAAAAGAAAGGATTTTTTACACCAAAA  
AGCATAGAATAAACCAGCAAGCTACCTCATTCTTGAATACATTGTCTGTAAC

>M6-PGSC0003DMG402005482-(rev)M6LRR-RLK\_1037

AACTTGATGCATATGGTAGCAATTTCACTGGCAAAGTGCAATTGACTTTGGGGGGTTATCAGATCTTTG  
GTGGCTGATTCTTGCATCAAATTCATTGGAACAGGAGAAGTTGATGACT

>M6-PGSC0003DMG402005482-(rev)M6LRR-RLK\_1098

AGATCTTTGGTGGCTGATTCTTGCATCAAATTCATTGGAACAGGAGAAGTTGATGACTTGAGTTTTTTC  
AATTCTTTGAGTAGATGCAGAAACCTGAAAGTTCTGGATTTGAGTGATTG

>M6-PGSC0003DMG402005482-(rev)M6LRR-RLK\_1159

AGTTTTTTCAATTCTTTGAGTAGATGCAGAAACCTGAAAGTTCTGGATTTGAGTGATTGCAAATTTGGAG  
GTGAGCTACCTGATTCTATTGCAAATTTATCGACAACCTCTTCTGTCACTA

>M6-PGSC0003DMG402005482-(rev)M6LRR-RLK\_122

GTATGGTTTTTTCTCTAGACTTCAAGTTTCCAATGCTATTATGTTCTTTTGTCTTCTATCTAATTACCCTCT  
TTCATTCATGTTCAATATCTCACATGCCTTGAAGTTACAGAATGGTA

>M6-PGSC0003DMG402005482-(rev)M6LRR-RLK\_1220

AATTTGGAGGTGAGCTACCTGATTCTATTGCAAATTTATCGACAACCTCTTCTGTCACTAAGATTGGGAGG

TAATCAACTATTTGGTTGTATTCATTCAGGAATAGGGAATCTTGTTAACT

>M6-PGSC0003DMG402005482-(rev)M6LRR-RLK\_1281

ATTGGGAGGTAATCAACTATTTGGTTGTATTCATTCAGGAATAGGGAATCTTGTTAACTTGAAGTGAATTG

CAACTGCAAAGAATGATTTTTTCATGTAGCATTCTGAAGTCGTTGGCAA

>M6-PGSC0003DMG402005482-(rev)M6LRR-RLK\_1342

ACTGAATTGCAACTGCAAAGAATGATTTTTTCATGTAGCATTCTGAAGTCGTTGGCAATCTTCGTAGGC

TTCAGTTAGTGGATTTGTCCGAAAACAAGTTTTTCAGGAAGTATTCCATCT

>M6-PGSC0003DMG402005482-(rev)M6LRR-RLK\_1403

TTCGTAGGCTTCAGTTAGTGGATTTGTCCGAAAACAAGTTTTTCAGGAAGTATTCCATCTTCTATGTCTAAC

ATGACTCGATTATATTCATTCATTTGGAAAAGAATGAGTTAACTGGTA

>M6-PGSC0003DMG402005482-(rev)M6LRR-RLK\_1464

TATGTCTAACATGACTCGATTATATTCATTCATTTGGAAAAGAATGAGTTAACTGGTAATATCCCTTA

GTTTTGGCGATTTCCGGTACTTGCAAGATTTAGACCTTTCTCAGAATCA

>M6-PGSC0003DMG402005482-(rev)M6LRR-RLK\_1525

ATCCCTTAGTTTTGGCGATTTCCGGTACTTGCAAGATTTAGACCTTTCTCAGAATCATCTTAGTGGTAC

CATACCAGATGGATTTATGAGTTTGTCTTCCTTAACAAATTCTCTTAAT

>M6-PGSC0003DMG402005482-(rev)M6LRR-RLK\_1586

TTAGTGGTACCATACCAGATGGATTTATGAGTTTGTCTTCCTTAACAAATTCTCTTAATCTTGCTGACAAT

CAATTGTCGGTCCGCTATCAGTTGAAATTGGAGCTCTCAATAATCTTG

>M6-PGSC0003DMG402005482-(rev)M6LRR-RLK\_1647

TGCTGACAATCAATTGTCCGGTCCGCTATCAGTTGAAATTGGAGCTCTCAATAATCTTGGAAGATTGGAT

ATTTCTAATAACATGTTGTCTGGGAAAATTCCTAGTAGTATAGGGAGGTG

>M6-PGSC0003DMG402005482-(rev)M6LRR-RLK\_1708

AGATTGGATATTTCTAATAACATGTTGTCTGGGAAAATTCCTAGTAGTATAGGGAGGTGTGTAGGTTTG

GAAAGCCTTGTTTTAGCTGGCAACTTATTTGAAGGTATAATTCCTTCATCC

>M6-PGSC0003DMG402005482-(rev)M6LRR-RLK\_1769

TAGTTTTGGAAAGCCTTGTTTTAGCTGGCAACTTATTTGAAGGTATAATTCCTTCATCCATTATTTCTTTG

AAAGGTCTTGAAGAATTGGATCTTTCGCGCAACAATTTATCTGGGCAGA

>M6-PGSC0003DMG402005482-(rev)M6LRR-RLK\_183

AATTACCCTCCTTTCATTCATGTTCAATATCTCACATGCCTTGAAGTTACAGAATGGTAATGAAACTGATA  
TCCAAGCCTTACTTGCCATCAAAGAAAAGGTAAGTCAAGATCCTCATGG

>M6-PGSC0003DMG402005482-(rev)M6LRR-RLK\_1830

TATTTCTTTGAAAGGTCTTGAAGAATTGGATCTTTTCGCGCAACAATTTATCTGGGCAGATTCCAACATCCC  
TTCAACTCATTTCTTAAAAAAGTGAAGTGTCTTTCAACCAGTTTGA

>M6-PGSC0003DMG402005482-(rev)M6LRR-RLK\_1891

CCAACATCCCTTCAACTCATTTCTTAAAAAAGTGAAGTGTCTTTCAACCAGTTTGAAGGTCAGTTGCC  
AACTGAAGGTGTTTTAGGAACGCAACTGCAATCTCCATATCAGGGAAT

>M6-PGSC0003DMG402005482-(rev)M6LRR-RLK\_1952

GTCAGTTGCCAACTGAAGGTGTTTTAGGAACGCAACTGCAATCTCCATATCAGGGAATAGGAACTTT  
GTGGGGGTATACCGGAACTGGAGTTGCCAATATGTCCGAACGCTGACCCTG

>M6-PGSC0003DMG402005482-(rev)M6LRR-RLK\_2013

GAACTTTGTGGGGGTATACCGGAACTGGAGTTGCCAATATGTCCGAACGCTGACCCTGATGGTTGTGA  
TAAGTCCAGAAGCATTAAAGCTAATGATCCCTCTTCTTTCTGGACTTGTTGC

>M6-PGSC0003DMG402005482-(rev)M6LRR-RLK\_2074

GGTTGTGATAAGTCCAGAAGCATTAAAGCTAATGATCCCTCTTCTTTCTGGACTTGTTGCACTGGTTTTCAT  
CATGTCTTTAGTCATAATCATTCGGTTAAGAAAGGCAACGGGAGAGCCT

>M6-PGSC0003DMG402005482-(rev)M6LRR-RLK\_2135

TGGTTTTCATCATGTCTTTAGTCATAATCATTCGGTTAAGAAAGGCAACGGGAGAGCCTTCTTTAACATCT  
TCGCCGTTACTTATGAGAGCCTATATAGAGCGACAAATGGATTCTCTT

>M6-PGSC0003DMG402005482-(rev)M6LRR-RLK\_2196

TTAACATCTTCGCCGGTACTTATGAGAGCCTATATAGAGCGACAAATGGATTCTCTTCTGCCAATTTGA  
TTGGAAATGGTAGCTTTAGTTCTGTTTACAAAGGGGTACTTGATCCAGG

>M6-PGSC0003DMG402005482-(rev)M6LRR-RLK\_2257

GCCAATTTGATTGGAAATGGTAGCTTTAGTTCTGTTTACAAAGGGGTACTTGATCCAGGTCAATGTATGG  
TTGCGGTGAAGGTGATAAACATTGACCAACAAGGGGATACTTCTACGAGC

>M6-PGSC0003DMG402005482-(rev)M6LRR-RLK\_2318

AATGTATGGTTGCGGTGAAGGTGATAAACATTGACCAACAAGGGGATACTTCTACGAGCTTCATGGCTG  
AGTGTGAGGCCTTGAGAAACATAAGGCATCAAAATCTTGTTAAGATCTAAT

>M6-PGSC0003DMG402005482-(rev)M6LRR-RLK\_2379

CATGGCTGAGTGTGAGGCCTTGAGAAACATAAGGCATCAAATCTTGTTAAGATCTAATGCCTGTTCAA  
CTAGTGATTTTGAGGGTAATCCATTTATAGCTTTAGTTTACGAATACATGC

>M6-PGSC0003DMG402005482-(rev)M6LRR-RLK\_244

GAAACTGATATCCAAGCCTTACTTGCCATCAAAGAAAAGGTAAGTCAAGATCCTCATGGTATTTTTACTTC  
ATGGAATAATTCAGTGCATTTCTGCAGCTGGGAAGGTGTCACCTGTGGC

>M6-PGSC0003DMG402005482-(rev)M6LRR-RLK\_2440

CTGTTCAACTAGTGATTTTGAGGGTAATCCATTTATAGCTTTAGTTTACGAATACATGCCTAATGGGAGCT  
TAGAAAGTTGGTTGCATCCTATTCCGGGAGCTGATGCCTCAACTAATGA

>M6-PGSC0003DMG402005482-(rev)M6LRR-RLK\_2501

AATGGGAGCTTAGAAAGTTGGTTGCATCCTATTCCGGGAGCTGATGCCTCAACTAATGAGGTGAGGATA  
CTAGGTCTAGTTGAAAGACTAAGAATTTCTATTGTTGTGGCTTGTGCACTG

>M6-PGSC0003DMG402005482-(rev)M6LRR-RLK\_2562

TGAGGATACTAGGTCTAGTTGAAAGACTAAGAATTTCTATTGTTGTGGCTTGTGCACTGGAATATCTTCA  
TAACCATTGCCATAATCCAATTGTGTTGTGTGATCTGAAGCCGGACAACA

>M6-PGSC0003DMG402005482-(rev)M6LRR-RLK\_2623

ATATCTTCATAACCATTGCCATAATCCAATTGTGTTGTGTGATCTGAAGCCGGACAACATTCTTCTCGACA  
ATGACATGACTGCTCATGTAGCTGATTTTGGATTAACAATGTTTTTCTC

>M6-PGSC0003DMG402005482-(rev)M6LRR-RLK\_2684

CTTCTCGACAATGACATGACTGCTCATGTAGCTGATTTTGGATTAACAATGTTTTTCTCAGAAACCATGAG  
CAAATATAGTTCAATTGGATATGCTGCACCAGGTAACGTAGTTGATAGT

>M6-PGSC0003DMG402005482-(rev)M6LRR-RLK\_305

TTTTACTTCATGGAATAATTCAGTGCATTTCTGCAGCTGGGAAGGTGTCACCTGTGGCCATCTTCATCAA  
AGAGTCACTAACTGCACTTAACATCACTTGTCTTAGTAGGTACTTTGT

>M6-PGSC0003DMG402005482-(rev)M6LRR-RLK\_3355

TTTACATGTTTAAAGTTGATTACATGTTTTCTTCTCTGTGGGCAGAGTACAGCATAGGAGGTAAGGCTT  
CCGAATTTGGTGACGTTTACAGCTATGGGATCCTTCTACTAGAGATGTT

>M6-PGSC0003DMG402005482-(rev)M6LRR-RLK\_3416

GGTAAGGCTCCGAATTTGGTGACGTTTACAGCTATGGGATCCTTCTACTAGAGATGTTTACTGGAAAGA

GACCTACTGACAGCAGGTTGCGAAAATGGACGGAGTCTTCACAGTTTTGCT

>M6-PGSC0003DMG402005482-(rev)M6LRR-RLK\_3477

CTGGAAAGAGACCTACTGACAGCAGGTTGCGAAAATGGACGGAGTCTTCACAGTTTTGCTAAGACGGCTT

TGCTTGATGAAATAGTAGACCCCATGCTTCTACCTAGCAACAGCAGAGAAA

>M6-PGSC0003DMG402005482-(rev)M6LRR-RLK\_3538

GACGGCTTTGCTTGATGAAATAGTAGACCCCATGCTTCTACCTAGCAACAGCAGAGAAAGACAAGAGGC

TGAGGAAGAAGGAGTACTTATCAATCAAGATGATACTAGTATAAAACAAGC

>M6-PGSC0003DMG402005482-(rev)M6LRR-RLK\_3599

CAAGAGGCTGAGGAAGAAGGAGTACTTATCAATCAAGATGATACTAGTATAAAACAAGCGCAGGAATG

CTTGATCTCGATAATACAGATTGGAGTTGCATGTTTCAGCTGAATCCCCGAGA

>M6-PGSC0003DMG402005482-(rev)M6LRR-RLK\_366

TCTTCATCAAAGAGTCACTAACTGCACTTAACATCACTTGTCTTAGTAGGTACTTTGTCACCTTTCATAG

GAAATCTTACTTTTCTTACTAGTCTCAAACCTTGAGCTCAACAATTTCCA

>M6-PGSC0003DMG402005482-(rev)M6LRR-RLK\_3660

AGGAATGCTTGATCTCGATAATACAGATTGGAGTTGCATGTTTCAGCTGAATCCCCGAGAGAAAGGATGG

ATATCGGGGATGTTGTCAAGGAACTTCAACTAATTAGAGACATTCTCCTTG

>M6-PGSC0003DMG402005482-(rev)M6LRR-RLK\_3782

TCTCATGCAATTCACAGCTCAACCAGTGGGTAAATTCGCTCTACTAGCTTTGTTTTCAATCGTGATATTGA

GTTCTCTGCTAGATATTGAGAACTTGTTTCTAAACACGTGTTGCACG

>M6-PGSC0003DMG402005482-(rev)M6LRR-RLK\_3843

GTGATATTGAGTTCCTCTGCTAGATATTGAGAACTTGTTTCTAAACACGTGTTGCACGTGTGTCCTGTGT

AAATTCTGTAGATCCATTAGAACGATGGAAGTTCTACGTAGACATGAA

>M6-PGSC0003DMG402005482-(rev)M6LRR-RLK\_3904

TGTCCTGTGTAATTCTTGTAGATCCATTAGAACGATGGAAGTTCTACGTAGACATGAATGTGTTTCCCA

TGTAATTTTCTTCTTGTGTTAATCGTTGTCTTTCTTTCTTGGTTTCA

>M6-PGSC0003DMG402005482-(rev)M6LRR-RLK\_3965

TGTTTCCCATGTAAATTTTCTTCTTGTGTTAATCGTTGTCTTTCTTTCTTGGTTTCAGGAGCTTGAGGTTT

GAAGGGTCTCCAGTCGTTCTGTTACTAGTAATTGGCAAAATTTTCA

>M6-PGSC0003DMG402005482-(rev)M6LRR-RLK\_4026

AGCTTGAGGTTTGAAGGGTCTCCAGTCGTTCTGTTACTAGTAATTGGCAAATTCACATCATTTTCGTTT  
GCCTTGATGTTTTTGTCTTATATAACAAATTACTTTAGCAGATTGAA

>M6-PGSC0003DMG402005482-(rev)M6LRR-RLK\_4087

CATTTTCGTTTGCCTTGATGTTTTTGTCTTATATAACAAATTACTTTAGCAGATTGAAGATGTTAATCATC  
AATTCAATTATTGGTTCAGTTTGCCTAATGCTGGTTAGTTCAGTTGAG

>M6-PGSC0003DMG402005482-(rev)M6LRR-RLK\_4148

TGTTAATCATCAATTCAATTATTGGTTCAGTTTGCCTAATGCTGGTTAGTTCAGTTGAGCTTAAGCAAATG  
GAATTGGAATTGTCTATGTATATGATGTTATGACTTGGCCAAACACATA

>M6-PGSC0003DMG402005482-(rev)M6LRR-RLK\_427

CCTTTCATAGGAAATCTTACTTTTCTTACTAGTCTCAAACCTTGAGCTCAACAATTTCCATGGAAAAATCCC  
ACCACAGGTTGGTGGTTTGTAAAGGCTTAAGCATCTTAGTTTGACTAAT

>M6-PGSC0003DMG402005482-(rev)M6LRR-RLK\_488

GAAAAATCCCACCACAGGTTGGTGGTTTGTAAAGGCTTAAGCATCTTAGTTTGACTAATAACTCATTTTCT  
GGAGAGATACCGATAAATCTTCTCGTTGTTTGAATCTTGTATACTTG

>M6-PGSC0003DMG402005482-(rev)M6LRR-RLK\_549

CTCATTTTCTGGAGAGATACCGATAAATCTTCTCGTTGTTTGAATCTTGTATACTTGGTGTGGTTGGA  
ATCAGTTGTCTGGAAAGATTCCATTTGAACTTGGTTCATTGCAAAAAGCT

>M6-PGSC0003DMG402005482-(rev)M6LRR-RLK\_61

ACCAAAAAGCATAGAATAAACCAGCAAGCTACCTCATTCTTGAATACATTGTCTGTAACAAGTATGGTTT  
TTTCTCTAGACTTCAAGTTTCCAATGCTATTATGTTCTTTTGTCTTCTAT

>M6-PGSC0003DMG402005482-(rev)M6LRR-RLK\_610

GTTGGTTGGAATCAGTTGTCTGGAAAGATTCCATTTGAACTTGGTTCATTGCAAAAAGCTTGAGAGATTGC  
AAGTTCATAACAACAACCTCAATGGACCAATCCCGGAAACCTTAGGTAAT

>M6-PGSC0003DMG402005482-(rev)M6LRR-RLK\_671

AGAGATTGCAAGTTCATAACAACAACCTCAATGGACCAATCCCGGAAACCTTAGGTAATCTTCCGCAAT  
CAAATCACTTTCCTTATCGTTTAAACAATTTGGAAGGAACTATTCCAAGTT

>M6-PGSC0003DMG402005482-(rev)M6LRR-RLK\_732

TTCCGCAATCAAATCACTTTCCTTATCGTTTAAACAATTTGGAAGGAACTATTCCAAGTTCTCTTAGTCAATT  
GAAGACATTGAATGTTCTTGGTTTGGGTATAAATAAGTTATCTGGTAT

>M6-PGSC0003DMG402005482-(rev)M6LRR-RLK\_793

CTTAGTCAATTGAAGACATTGAATGTTCTTGGTTTGGGTATAAATAAGTTATCTGGTATTGTACCTGCTGA  
AATTTTTAATCTTTCATCTCTTGAGATATTCACAGTTTGTATAATCAG

>M6-PGSC0003DMG402005482-(rev)M6LRR-RLK\_854

TACCTGCTGAAATTTTTAATCTTTCATCTCTTGAGATATTCACAGTTTGTATAATCAGTTGTATGGAACCT  
TGCCATCAGACTTTGGTTAAGTCTTCTTAAGTTGAAAGTTCTTAAGA

>M6-PGSC0003DMG402005482-(rev)M6LRR-RLK\_915

GTATGGAACCTTTGCCATCAGACTTTGGTTAAGTCTTCTTAAGTTGAAAGTTCTTAAGATTGGTCATAACT  
GGTTTACTGGACCCCTTCCAAAGTCATTATCTAATGCTTCAAATCTAGT

>M6-PGSC0003DMG402005482-(rev)M6LRR-RLK\_976

GGTCATAACTGGTTTACTGGACCCCTTCCAAAGTCATTATCTAATGCTTCAAATCTAGTTGAACTTGATGC  
ATATGGTAGCAATTTCACTGGCAAAGTGCAATTGACTTTGGGGGGTTA

>M6-PGSC0003DMG402005729M6RLKWAX-EGF\_244

TCCATTTGTAATAGCTCCTACACCTGTGGGAATATTCAAAATATCAGCTTCCCTTTCTGGGGTGGCGATCG  
ACCTCAAGAATGTGGTCTTCCACAATTCAAGCTTACATGTGAAGCCAAT

>M6-PGSC0003DMG402005729M6RLKWAX-EGF\_549

CTATGCTTGTCTTTTCGATATACCTTCTGAATGGAAAAATTCACCTTTAGCTGCAATAACACCGGAGAGT  
CCAGTCATGGTTTCTATCCAGATCAGTCATTTATATCATTTTTGGGGACC

>M6-PGSC0003DMG402005927-(rev)M6LRR-RLP\_310

CTACCGTGTGAAAATCAGAGAATACCATCAAGTCAAGATATGTCATCTCCTTCACCTTGAAAGTCGTTAT  
GTAAGGTTACTCTTCTTGGTATCATATTTCTCACTCAATGGAACCTTAAA

>M6-PGSC0003DMG402005927-(rev)M6LRR-RLP\_371

AGTCGTTATGTAAGGTTACTCTTCTTGGTATCATATTTCTCACTCAATGGAACCTTAAATCATTCTGGGA  
ATACAGGACATCCGCAGAAGGAGCTGTGAATTGAGATGCAAGATGAAGG

>M6-PGSC0003DMG402006653M6LRR-RLP\_832

GCAACCTTGATTTATGTGGTCTCCTTTATCAAACAATGTGGAACGAGTGATTCATCACATGTTCTCAA  
CCAGAAGATGAAGGCGAGTCATATTTTTAAGTGGATTACGTGGGAAT

>M6-PGSC0003DMG402007101M6G-LecRK\_0

CAAGAAGCAAATGCACCATATCAAACAAGCTAAAACAATAAACTAAACATGTCTCCTAATTCATGGCCTA

CTACACTTCTTGCCTCTCTATTTCTTTTCTCCCAAATATTTTCTTGCATT

>M6-PGSC0003DMG402007101M6G-LecRK\_124

AAGTTCCACTTGAAAACACCTTCAAATTCGTCAATGAAGGTGAATTAGGACCTTATGTTGTAGAATATCA  
AGCAGATTATCGCGTTCTTAGTATTTTCAATAATCCATTCCAGCTCTGTT

>M6-PGSC0003DMG402007101M6G-LecRK\_186

GAATATCAAGCAGATTATCGCGTTCTTAGTATTTTCAATAATCCATTCCAGCTCTGTTTCTATAACACA  
CCTAACGCATGGACTCTAGCTTTGCGAATGGGCACTGTCCGTTCTGAA

>M6-PGSC0003DMG402007101M6G-LecRK\_248

TAACACAACCTCCTAACGCATGGACTCTAGCTTTGCGAATGGGCACTGTCCGTTCTGAATCACTCATGCGG  
TGGGTGTGGGAAGCAAATAGAGGAAACCCCGTTAAAGAAAACGCGACCCT

>M6-PGSC0003DMG402007101M6G-LecRK\_310

TCATGCGGTGGGTGTGGGAAGCAAATAGAGGAAACCCCGTTAAAGAAAACGCGACCCTCACGTTTGG  
ACTAACGGAAATCTCGTATTGGCTGACGCTGACGGTCAATTGCTTGGCAGA

>M6-PGSC0003DMG402007101M6G-LecRK\_372

TTTGGAACTAACGGAAATCTCGTATTGGCTGACGCTGACGGTCAATTGCTTGGCAGACCAACACGGCC  
AATAAGGGGGTGACAGGGTTCAAGTTGTTACCTAGTGGTAACATGGTGCTA

>M6-PGSC0003DMG402007101M6G-LecRK\_434

CACGGCCAATAAGGGGGTGACAGGGTTCAAGTTGTTACCTAGTGGTAACATGGTGCTACATGACTCTAA  
GGGTAAATTCGTTTGGCAGAGTTTCAACTATCCCACTGACACATTACTAGT

>M6-PGSC0003DMG402007101M6G-LecRK\_496

ACTCTAAGGGTAAATTCGTTTGGCAGAGTTTCAACTATCCCACTGACACATTACTAGTGGGCCAAACTCT  
CCGATTGTCTGGCCGAATAAGCTCGTGAGCCGGGCCTCAGTGAAAAAGA

>M6-PGSC0003DMG402007101M6G-LecRK\_62

ATGGCCTACTACACTTCTTGCCTCTCTATTTCTTTTCTCCCAAATATTTTCTTGCATTGCCCAAGTTCCACTT  
GAAAACACCTTCAAATTCGTCAATGAAGGTGAATTAGGACCTTATGT

>M6-PGSC0003DMG402007101M6G-LecRK\_620

GAACGGGCCTTATAGCTTGGTGGTGCAGCCAAAATTGTTTGCTATCTACAATAGGACTAAGTTAAGCGT  
GGAAGTAGCTTGGTTCGATTTTGAAAACAGTACGTTGGAATCAGTAAAATT

>M6-PGSC0003DMG402007101M6G-LecRK\_682



TAAGCGTGGAAGCTTAGCTTGGTTTCGATTTTGAAAACAGTACGTTGGAATCAGTAAAATTGAATAGTGGGA  
ATCAAAGATTGAAATTGGATTATAGATTGGCAAATCAACAAAGAGAAGTT

>M6-PGSC0003DMG402007101M6G-LecRK\_806

TGTGATGGCATTACTAAATACAACACAACATTAACATATCTTAGACTTGAAATTGATGGAAATTTAAAG  
GCCTACACTTTTGTAAAGATGAAGAAGCTGATGAATTCCGTTGGAAGGT

>M6-PGSC0003DMG402007101M6G-LecRK\_868

ATTTAAAGGCCTACACTTTTGTAAAGATGAAGAAGCTGATGAATTCCGTTGGAAGGTAACCTACCAAAT  
GCTATAAGAAAATGTTTTTTTTTTAAATAATAATATTA AAAACTAACTT

>M6-PGSC0003DMG402007101M6G-LecRK\_930

TACCAAATGCTATAAGAAAATGTTTTTTTTTTAAATAATAATATTA AAAACTAACTTTATAAGATAAGGA  
TTTCATTTCCAGTAAAATAAGTGGAGAAAACGAGTGGGTCCACAGCTAT

>M6-PGSC0003DMG402008032-(rev)M6LRR-RLK\_0

AAAAAAGTTCTCTTTCAATGCATTGCCTTCATTA AAATCCCATTACTCATTCTGGGTAGTCTCATTTTTTT  
TTTTCTCTGATTTGTTGCCATGAAAATGCCGTCTTATGGAAAG

>M6-PGSC0003DMG402008032-(rev)M6LRR-RLK\_1037

TGGGGTGGTTTGATTGCAGTAACACTTTATAGGTCATTACCATAAAAGAACCATTTTTTCCTTTTTTCGGT  
TGTGGATTAACGCAGTAACCTTTATAAGGTTCTTCACCATAAAGGTAG

>M6-PGSC0003DMG402008032-(rev)M6LRR-RLK\_1098

TTTTTCGGTTGTGGATTAACGCAGTAACCTTTATAAGGTTCTTCACCATAAAGGTAGGTTTGGAAATTGT  
GAAAGAGCATGTGGTTTGTAGTTGTTTCAAATGATGATTTGTAGTGTGC

>M6-PGSC0003DMG402008032-(rev)M6LRR-RLK\_1159

TTGGAATTGTGAAAGAGCATGTGGTTTGTAGTTGTTTCAAATGATGATTTGTAGTGTGCTACTTTGTTTT  
GGGGGAAAATGTTTGATTAGCTATGATGATTTTGTAAAGAACAAAACCG

>M6-PGSC0003DMG402008032-(rev)M6LRR-RLK\_1220

CTTTGTTTTTGGGGGAAAATGTTTGATTAGCTATGATGATTTTGTAAAGAACAAAACCGAACGCGGAAAT  
GTTAACCTGTTGCGAGTTGCAGGGAAACTTTTGGTTCGAACTCCAGCTGAA

>M6-PGSC0003DMG402008032-(rev)M6LRR-RLK\_1281

CGCGGAAATGTTAACCTGTTGCGAGTTGCAGGGAAACTTTTGGTTCGAACTCCAGCTGAAGTGAAAAGTT  
CTCAGCATCCAAGATCATCTACTCCAACCTATCTTCGTAGGGGGTTCCCTC

>M6-PGSC0003DMG402008032-(rev)M6LRR-RLK\_1342

GAAAAGTTCTCAGCATCCAAGATCATCTACTCCAATTATCTTCGTAGGGGGTTCCTCAGGATCTGAAT  
GCTGAGGGCGTTGAATTCAGGTTGAATGTTCTGTTAGAAGTGCCCCGAG

>M6-PGSC0003DMG402008032-(rev)M6LRR-RLK\_1403

GATCTGAATGCTGAGGGCGTTGAATTCAGGTTGAATGTTCTGTTAGAAGTGCCCCGAGTAGTGGTTTT  
ACAAGCCCCGTCCTAAGCCCCAAAAAGTTTTAGTACACAGGACCTTTTTTCAT

>M6-PGSC0003DMG402008032-(rev)M6LRR-RLK\_1464

GTGGTTTTACAAGCCCCGTCCTAAGCCCCAAAAAGTTTTAGTACACAGGACCTTTTTTCATCATCCCTTGCAT  
CAGGCCTCATCATCACCTTCAGAGGCTTACTCTTCCAACCTTTCACCCA

>M6-PGSC0003DMG402008032-(rev)M6LRR-RLK\_1525

TCCCTTGCATCAGGCCTCATCATCACCTTCAGAGGCTTACTCTTCCAACCTTTCACCCACAAGGGTTATAA  
ATAGCGCGGATCATTCTCCACTGAGTAGCCCAATTTTACCAAGTTCAGC

>M6-PGSC0003DMG402008032-(rev)M6LRR-RLK\_1586

AGGGTTATAAATAGCGCGGATCATTCTCCACTGAGTAGCCCAATTTTACCAAGTTCAGCTAACAGAATCA  
GGAACAGCAGAAGTGGTGCTGTGCATTACATCATAAATCTCTTCCGGAA

>M6-PGSC0003DMG402008032-(rev)M6LRR-RLK\_1647

ACAGAATCAGGAACAGCAGAAGTGGTGCTGTGCATTACATCATAAATCTCTTCCGGAAAGTTCTCTAG  
GTTGGAATGAAGCTAACAAACAATGTGCATCCACTACCCCTTCCACCAG

>M6-PGSC0003DMG402008032-(rev)M6LRR-RLK\_1708

TTCTCTAGGTTGGAATGAAGCTAACAAACAATGTGCATCCACTACCCCTTCCACCAGGAGTTCCACGA  
CAACCAGAATCATGTATCATGCACAGCAATATGGATAAACCATGTGTATC

>M6-PGSC0003DMG402008032-(rev)M6LRR-RLK\_1769

GTTCCACGACAACCAGAATCATGTATCATGCACAGCAATATGGATAAACCATGTGTATCACCAGCAAAG  
GGTCAATGGCTAAAGGGGATGCTTTTAGGTCGTGGTACATTTGGAAGTGTA

>M6-PGSC0003DMG402008032-(rev)M6LRR-RLK\_183

CTTCTTCTCCGGCCGATTCACCGAATACCCGGCGGATTTACGGCGGCGGAAGGAAGCTTACTAGGCAGA  
GGAAGTTGAGACATGTTAGTGATGAGGATCTTGTTTTGCGGAGACCTAATA

>M6-PGSC0003DMG402008032-(rev)M6LRR-RLK\_1830

CAGCAAAGGGTCAATGGCTAAAGGGGATGCTTTTAGGTCGTGGTACATTTGGAAGTGATATGAAGCTA

CTAACTGGTAAGGGATAGAGCTTGCTTAGTAAGTAATTCGGTAGGAATGTA

>M6-PGSC0003DMG402008032-(rev)M6LRR-RLK\_1891

TGAAGCTACTAACTGGTAAGGGATAGAGCTTGCTTAGTAAGTAATTCGGTAGGAATGTAACATTTGCTT  
CTTTTGTTTTCTTCCTTTTACAGTGAAACCGGTGCTTTATGTGCAATGAA

>M6-PGSC0003DMG402008032-(rev)M6LRR-RLK\_1952

ATTTGCTTCTTTTGTTTTCTTCCTTTTACAGTGAAACCGGTGCTTTATGTGCAATGAAAGAAGTTGATCTT  
ACTCCTGATGATCCTAAATCTGCTGAATGTATAAAGCAGTTAGAACAG

>M6-PGSC0003DMG402008032-(rev)M6LRR-RLK\_2013

AAGTTGATCTTACTCCTGATGATCCTAAATCTGCTGAATGTATAAAGCAGTTAGAACAGGTGACGTCCTC  
ATGTCTTCTTAGGCTACATAATCAAATTTGTATATAAACTGCAATTGTA

>M6-PGSC0003DMG402008032-(rev)M6LRR-RLK\_2074

GACGTCCTCATGTCTTCTTAGGCTACATAATCAAATTTGTATATAAACTGCAATTGTATGAGATACATGG  
TGAGAGAAAACATATTTTAAAGGCCAAATCTTTGTTAAGTGAAGTGAAC

>M6-PGSC0003DMG402008032-(rev)M6LRR-RLK\_2135

AGATACATGGTGAGAGAAAACATATTTTAAAGGCCAAATCTTTGTTAAGTGAAGTGAACCTTTAAAACAA  
GTACTTACTAAGCATGTTATATAATATGTCCTGGTTGTCTAACTTGCATTA

>M6-PGSC0003DMG402008032-(rev)M6LRR-RLK\_2196

TAAAACAAGTACTTACTAAGCATGTTATATAATATGTCCTGGTTGTCTAACTTGCATTAGCAAATTAGTCA  
ACTTAAGTTATGTCCAACCTTTGAGCTAACTATCATGTGCCTGAAGATG

>M6-PGSC0003DMG402008032-(rev)M6LRR-RLK\_2257

AAATTAGTCAACTTAAGGTTATGTCCAACCTTTGAGCTAACTATCATGTGCCTGAAGATGCAAAAATCAAT  
ATCGTATCCATGGAGCTAATTTTATTGATCATATTCTTTGACTTCATAAG

>M6-PGSC0003DMG402008032-(rev)M6LRR-RLK\_2318

AAAATCAATATCGTATCCATGGAGCTAATTTTATTGATCATATTCTTTGACTTCATAAGCCTCCTTCATGTT  
TTGCATCATTGAGAAAATATTTTCGGAATGTTGGTAACTGACTTGGGA

>M6-PGSC0003DMG402008032-(rev)M6LRR-RLK\_2379

TCCTTCATGTTTTGCATCATTGAGAAAATATTTTCGGAATGTTGGTAACTGACTTGGGAAAAAAGTTTGA  
GGGTTTCATAATGTGGAGTTTTTTATTCTACTTGCTTATACATAGTTTGT

>M6-PGSC0003DMG402008032-(rev)M6LRR-RLK\_244

TAGGCAGAGGAAGTTGAGACATGTTAGTGATGAGGATCTTGGTTTGCGGAGACCTAATATTCAGGCACT  
GATTATTGATGAACGTTCAAAGTCTTGGCCGGTTCCTGATTCTTACGC

>M6-PGSC0003DMG402008032-(rev)M6LRR-RLK\_2440

AAAGTTTGAGGGTTTCATAATGTGGAGTTTTTATTCTACTTGCTTATACATAGTTTGTGATGGATTGCAA  
AGACTATGACATGTTTTCACTTGTTTATGCTATTCTAAATCGATTTCAG

>M6-PGSC0003DMG402008032-(rev)M6LRR-RLK\_2501

TGGATTGCAAAGACTATGACATGTTTTCACTTGTTTATGCTATTCTAAATCGATTTCAGTTTCTTCTTACT  
TCTGTTGTAGGAAATAAGAGTTCTCCAGCAGTTAAAGCACCAAAATAT

>M6-PGSC0003DMG402008032-(rev)M6LRR-RLK\_2562

TCTTCTTACTTCTGTTGTAGGAAATAAGAGTTCTCCAGCAGTTAAAGCACCAAAATATTGTTCAATATTA  
TGGCAGTGAATTAGTAAGAACATTTATCTTTCTTGGCCATGTTTCAGGT

>M6-PGSC0003DMG402008032-(rev)M6LRR-RLK\_2623

TTCAATATTATGGCAGTGAATTAGTAAGAACATTTATCTTTCTTGGCCATGTTTCAGGTATTTCTTTAGAAT  
ATTGAAAGATAAATGTTGTTGTTGTTGTTTCAGATGGATGACCGCTTTT

>M6-PGSC0003DMG402008032-(rev)M6LRR-RLK\_2684

TTCTTTAGAATATTGAAAGATAAATGTTGTTGTTGTTGTTTCAGATGGATGACCGCTTTTGCATATATTTGG  
AATATGTGCACCCCGTTCAATTAATAAGTATGTTTCGGGAACATTGCGG

>M6-PGSC0003DMG402008032-(rev)M6LRR-RLK\_2745

ATATATTTGGAATATGTGCACCCCGTTCAATTAATAAGTATGTTTCGGGAACATTGCGGAGCTATGACAG  
AGTCAATAGTTCGAAACTTTACTAGGCATATTGTATCAGGGTTGGCTTAC

>M6-PGSC0003DMG402008032-(rev)M6LRR-RLK\_2806

CTATGACAGAGTCAATAGTTTCGAAACTTTACTAGGCATATTGTATCAGGGTTGGCTTACTTGCATAGCAC  
TAAGACAATACACAGGTAGATACTGGGTTACATCGATGTGGTATATGTCA

>M6-PGSC0003DMG402008032-(rev)M6LRR-RLK\_2867

GCATAGCACTAAGACAATACACAGGTAGATACTGGGTTACATCGATGTGGTATATGTCACCTTGATTTAAA  
GATTCATTAACGGAACACTAAAGCGTCTGTGTTGCAATTCCTTGTATAA

>M6-PGSC0003DMG402008032-(rev)M6LRR-RLK\_2928

TGATTTAAAGATTCATTAACGGAACACTAAAGCGTCTGTGTTGCAATTCCTTGTATAAGCAAGGAAGAA  
ACTATTTTCTTTTACCATTTTTTTTTAAAAAAAAACTTTTCGTTGACAGTG

>M6-PGSC0003DMG402008032-(rev)M6LRR-RLK\_2989

AAGGAAGAAACTATTTTCTTTTACCATTTTTTTTTAAAAAAACTTTTCGTTGACAGTGATGCTCAGTCTA  
ATGTTGGTTTTCAATGATTTTTTCTGAGTAGGGACATTAAGGGAGCAAA

>M6-PGSC0003DMG402008032-(rev)M6LRR-RLK\_305

CAGGCACTGATTATTGATGAACGTTCAAAGTCTTGCCGGGTTCTCCTGATTCTTACGCTGATTTCCGGGTC  
GGTTCTAGGTCGTCTCACCACCACCTCCGTCCTGTTCTAACTCCTCT

>M6-PGSC0003DMG402008032-(rev)M6LRR-RLK\_3050

GCTCAGTCTAATGGTTGGTTTTCAATGATTTTTTCTGAGTAGGGACATTAAGGGAGCAAATTTGCTTGTAG  
ATGCATTTGGTGTGTCAAGCTTGCAGATTTTGGGTTAGCAAACATGTA

>M6-PGSC0003DMG402008032-(rev)M6LRR-RLK\_3111

TGCTTGTAGATGCATTTGGTGTGTCAAGCTTGCAGATTTTGGGTTAGCAAACATGTAAGCTTTCAGAA  
CTCTAATGCCAAACTGAAAATGCTACTTTCTATGTTTCGTTCTAATTTAGT

>M6-PGSC0003DMG402008032-(rev)M6LRR-RLK\_3172

CTTTCAGAACTCTAATGCCAAACTGAAAATGCTACTTTCTATGTTTCGTTCTAATTTAGTATTTTTCTTGTA  
ACCCTGATCTGTGGTGAAAATGAATGAGCTTGATCTTTCATCGATTAT

>M6-PGSC0003DMG402008032-(rev)M6LRR-RLK\_3233

TTTTCTTGTAACCCTGATCTGTGGTGAAAATGAATGAGCTTGATCTTTCATCGATTATTTTTCATGCATG  
TCTTACCACTGTAATTTATAACGTTTCTTTTTTCCCAGCTTTCAAGCT

>M6-PGSC0003DMG402008032-(rev)M6LRR-RLK\_3294

TTCATGCATGTCTTACCACTGTAATTTATAACGTTTCTTTTTTCCCAGCTTTCAAGCTGTGCAACTGATCT  
TTCTCTGAAAGGGAGCCCTCACTGGATGGCTCCAGAGGTGGGCATTGT

>M6-PGSC0003DMG402008032-(rev)M6LRR-RLK\_3355

GCAACTGATCTTTCTCTGAAAGGGAGCCCTCACTGGATGGCTCCAGAGGTGGGCATTGTTAAGCTATTTCC  
GCGGCTACTGCCTCTGCCTGGCTTCAGTTTTCTTTCCCTTTATTAATTG

>M6-PGSC0003DMG402008032-(rev)M6LRR-RLK\_3416

AGCTATTTGCGGGCTACTGCCTCTGCCTGGCTTCAGTTTTCTTTCCCTTTATTAATTGGCTTGTACTTATG  
TCTGGACTTAACTTTATATGCAGGTAATGCAGGCTGTGTTGCGCAAAG

>M6-PGSC0003DMG402008032-(rev)M6LRR-RLK\_3477

TTGTACTTATGTCTGGACTTAACTTTATATGCAGGTAATGCAGGCTGTGTTGCGCAAAGATGCCAATCCA

GAGCTTGCCTTAGCTGTTGATATATGGAGCCTGGGTTGACTGTTATTGA

>M6-PGSC0003DMG402008032-(rev)M6LRR-RLK\_3538

GCCAATCCAGAGCTTGCCTTAGCTGTTGATATATGGAGCCTGGGTTGACTGTTATTGAGATGTTTACTG

GACAGCCCCCTTGGGGAGAACTTAGTTGGGTAAGTGTTTAAAGCATCTCA

>M6-PGSC0003DMG402008032-(rev)M6LRR-RLK\_3599

TGTTTACTGGACAGCCCCCTTGGGGAGAACTTAGTTGGGTAAGTGTTTAAAGCATCTCATTGAGAACA

ATGTAATCGCATTACAAGCTTAAATATATTTGTGAGCTTTTAGGTTGTCA

>M6-PGSC0003DMG402008032-(rev)M6LRR-RLK\_366

ATTTCTGGGTCGGGTTCTAGGTCGTCTACCACCACCTCCGTCCTGTTCTAACTCCTCTGCTGTGCCACTG

CCGTTGCCGCTCCCTGAGCTCAATTCTCTGCCTAACAGAACTCGGTTG

>M6-PGSC0003DMG402008032-(rev)M6LRR-RLK\_3660

TTGAGAACAATGTAATCGCATTACAAGCTTAAATATATTTGTGAGCTTTTAGGTTGTCAATATAGCATCAT

AGCTTGTTAATATATGAGCAAGGCTGACTGATTGGCTTAATCTCAATAA

>M6-PGSC0003DMG402008032-(rev)M6LRR-RLK\_3721

ATAGCATCATAGCTTGTTAATATATGAGCAAGGCTGACTGATTGGCTTAATCTCAATAAAGCCAGAGCTA

TGTTCTTACTTTTCAGGCTTTTCGTGAATTGGTTTCTGTAAGTGTCTTAAT

>M6-PGSC0003DMG402008032-(rev)M6LRR-RLK\_3782

CCAGAGCTATGTTCTTACTTTTCAGGCTTTTCGTGAATTGGTTTCTGTAAGTGTCTTAATGTTTCATGCTTTG

GCTTTATTAGGTGCAAGCAATGTTTCGGTGTCTTGAACAAATCACCACCT

>M6-PGSC0003DMG402008032-(rev)M6LRR-RLK\_3843

TCATGCTTTGGCTTTATTAGGTGCAAGCAATGTTTCGGTGTCTTGAACAAATCACCACCTATAACCAGAAAA

ATTATCACCAGAAGGAAAAGATTTCTTCAGTGCTGCTTTTCGGAGGAAAC

>M6-PGSC0003DMG402008032-(rev)M6LRR-RLK\_3904

ACCAGAAAAATTATCACCAGAAGGAAAAGATTTCTTCAGTGCTGCTTTTCGGAGGAAACCTGCAGATAG

GCCATCAGCTGTGATGCTACTTGAACATGCTTTTTTACGTAGTACTAGTTT

>M6-PGSC0003DMG402008032-(rev)M6LRR-RLK\_3965

GCAGATAGGCCATCAGCTGTGATGCTACTTGAACATGCTTTTTTACGTAGTACTAGTTTCTTGAGCATA

GTATCAATGTTGCTGGTTGCTCAGAGGATTCTCCGGGGAAGAAATTCCAT

>M6-PGSC0003DMG402008032-(rev)M6LRR-RLK\_4026

TTGAGCATAGTATCAATGTTGCTGGTTGCTCAGAGGATTCTCCGGGGAAGAAATCCATGTGAGTGGTA  
CATGCTGCTAGCCTGCTACTGATGTGACATTAAGGGTTAACGTCACTGTAT

>M6-PGSC0003DMG402008032-(rev)M6LRR-RLK\_4087

GAGTGGTACATGCTGCTAGCCTGCTACTGATGTGACATTAAGGGTTAACGTCACTGTATTATTTGTGAGA  
TTCTCTAAAAAAAAAAAAATCCAAATGATTTTAAACTCTGAATTCATTACAT

>M6-PGSC0003DMG402008032-(rev)M6LRR-RLK\_4148

TTTGTGAGATTCTCTAAAAAAAAAAAAATCCAAATGATTTTAAACTCTGAATTCATTACATTTTCAGGATACCC  
TGAGTCCTAAGAACCCAATCAACCATAAAAAGGAACAAAAACCACTGTT

>M6-PGSC0003DMG402008032-(rev)M6LRR-RLK\_4209

CAGGATACCCTGAGTCCTAAGAACCCAATCAACCATAAAAAGGAACAAAAACCACTGTTACCAGGAACA  
TCTGGCAGGCATGCAAAATCACCATGTAGCAGGTAAATAACTGTCTTGTGT

>M6-PGSC0003DMG402008032-(rev)M6LRR-RLK\_427

TGTGCCACTGCCGTTGCCGCTCCCTGAGCTCAATTCTCTGCCTAACAGAACTCGGTTGACTCTAATTTGC  
CGGGTAGAGTTGACAGGGAGCTTTTAAAGTCCTCCTCTTGCCAGGTTAGT

>M6-PGSC0003DMG402008032-(rev)M6LRR-RLK\_4270

CAGGAACATCTGGCAGGCATGCAAAATCACCATGTAGCAGGTAAATAACTGTCTTGTGTTTGTGCATGTTA  
TATACCATACACTTTATTCTGTGAGATTATTTTTTTTCGCGTATTAGTATT

>M6-PGSC0003DMG402008032-(rev)M6LRR-RLK\_4331

GTCATGTTATATACCATACACTTTATTCTGTGAGATTATTTTTTTTCGCGTATTAGTATTTACAATTGCAGCT  
AGATACTATATCTTGTGTTGTGCCATTGACTGTCACGTCCATCTTATG

>M6-PGSC0003DMG402008032-(rev)M6LRR-RLK\_4392

CAATTGCAGCTAGATACTATATCTTGTGTTGTGCCATTGACTGTCACGTCCATCTTATGCAAGTTAAACTG  
TGTCTCTTCCAGTGAAACTTGCCGGCAAACCTCAACCTGAAACCTGTGAA

>M6-PGSC0003DMG402008032-(rev)M6LRR-RLK\_4453

AGTTAAACTGTGTCTCTTCCAGTGAAACTTGCCGGCAAACCTCAACCTGAAACCTGTGAATATGGAGCAGC  
TTCTCACCATTCTCCACATTCTGCACTTGAAGTCTTCCCTGTATTTCTT

>M6-PGSC0003DMG402008032-(rev)M6LRR-RLK\_4514

TGGAGCAGCTTCTCACCATTCTCCACATTCTGCACTTGAAGTCTTCCCTGTATTTCTTCAATGGAGCTGA  
ACTCGAGTTCACGTGCAGCCAGCCAATCAAGCGTCCCTAGTATCTTTTCG

>M6-PGSC0003DMG402008032-(rev)M6LRR-RLK\_4575

ATGGAGCTGAACTCGAGTTCACGTGCAGCCAGCCAATCAAGCGTCCCTAGTATCTTTCGCCTGGGACCT  
GAAAACAGAAGTCCTTATAGAATCATAGGAAAGGAAATTTCAAACCTCTGT

>M6-PGSC0003DMG402008032-(rev)M6LRR-RLK\_4636

TGGGACCTGAAAACAGAAGTCCTTATAGAATCATAGGAAAGGAAATTTCAAACCTCTGTATAAGATCAT  
AAATGAATGGAGAGGGGGAAAACCTCATGTACAGATCAGGAGAATTAGATAC

>M6-PGSC0003DMG402008032-(rev)M6LRR-RLK\_4697

AAGATCATAAATGAATGGAGAGGGGGAAAACCTCATGTACAGATCAGGAGAATTAGATACAGAGAACTT  
CAGTTGGATGATTAGTCATAATGTTGCCATATGTGGGAGAGATCTCAATTCC

>M6-PGSC0003DMG402008032-(rev)M6LRR-RLK\_4758

AGAACTTCAGTTGGATGATTAGTCATAATGTTGCCATATGTGGGAGAGATCTCAATTCCTGATGCATTC  
ACATCTTCTGTGTAGTATTGATGTTTGTATTTGAAGGCAAACATATCTTT

>M6-PGSC0003DMG402008032-(rev)M6LRR-RLK\_4819

TATGCATTCACATCTTCTGTGTAGTATTGATGTTTGTATTTGAAGGCAAACATATCTTTGTAACAGATTCA  
TGAAGAACTGAAGATGATTCTGGAGTTAATAGTGTATTTTAGATTGAAA

>M6-PGSC0003DMG402008032-(rev)M6LRR-RLK\_488

TCTAATTTGCCGGGTAGAGTTGACAGGGAGCTTTTAAGTCCTCCTCTTGCCAGGTTAGTCTTGAAAATTG  
AACCCATTGTTTCAGAATTTATACTTAATTTCAAATTTTAGTCTTACTTTT

>M6-PGSC0003DMG402008032-(rev)M6LRR-RLK\_4880

AACAGATTCATGAAGAACTGAAGATGATTCTGGAGTTAATAGTGTATTTTAGATTGAAAGCAAGATTTA  
GTGTTACAATTAATGATTTATGCTAAATTCATATGAGTATCTTTTTCC

>M6-PGSC0003DMG402008032-(rev)M6LRR-RLK\_793

AAACAAATTGACATGTTGGGTATGTTTATCAAACCTTTGAGTTTTTTCTTACATGTATGTTTTGTGCTTTAA  
GTAAAAAAAATGCTACCTTTCTGAGTGAAGTATTGTTTTGCCGATTCA

>M6-PGSC0003DMG402008032-(rev)M6LRR-RLK\_854

TTGTGCTTTAAGTAAAAAAAATGCTACCTTTCTGAGTGAAGTATTGTTTTGCCGATTCATACTGGTTTGGG  
ATTGAGGGGTAGTTATTTTCGGTTTGTATGATGAAAGCTTTTCACCATAG

>M6-PGSC0003DMG402008032-(rev)M6LRR-RLK\_915

CTGTTTTGGGATTGAGGGGTAGTTATTTTCGGTTTGTATGATGAAAGCTTTTCACCATAGGTAACCTCTGTA



TGTAAAGGGATTTAGTAGTAGTAGGTTGGTTCTAATTTGAAGTAGTT

>M6-PGSC0003DMG402008032-(rev)M6LRR-RLK\_976

AACTCTGTATGTAAAGGGATTTAGTAGTAGTAGGTTGGTTCTAATTTGAAGTAGTTTTTGGGGTGGT  
TTGATTGCAGTAACACTTTATAGGTCATTACCATAAAAGAACCATTTTTT

>M6-PGSC0003DMG402008483M6RLKWAX-EGF\_0

ATGGTAACCACAAAAATCATAGCTTAATTTGGTCGTTTAATCCATGTGGATATTCGTTTCTGGTGAAG  
CTAGTCGATTTGAGTTCCAGGGTATAGAGGATCTCAGTGATGTTAATTTT

>M6-PGSC0003DMG402008483M6RLKWAX-EGF\_126

AAGATTAAGAATAATGTCCCTATTGTGCTAGATTGGGCCATTGGAAATCTTTCTTGTGTTGAAGCACAAA  
AAAGTAACGATTATGCCTGCCTCGATAATAGCCAGTGTATTGATTCTGAT

>M6-PGSC0003DMG402008483M6RLKWAX-EGF\_1827

AAAGTTCACCAAAAATAACCCCTGGGCTAATGGAAACGGACATGAAGAGAACGGAGATGAATTATCAG  
ATCTTTATAACAATTCCAATCGACTCTAATACAGACATCGACAATTTCTCTGG

>M6-PGSC0003DMG402008483M6RLKWAX-EGF\_189

GCACAAAAAAGTAACGATTATGCCTGCCTCGATAATAGCCAGTGTATTGATTCTGATACTGGCATTGGTG  
GCTATCGGTGTGGCTGTAAATCGGGATATATAGGCAATCCATACATTGGC

>M6-PGSC0003DMG402008483M6RLKWAX-EGF\_1890

ATCAGATCTTTATAACAATTCCAATCGACTCTAATACAGACATCGACAATTTCTCTGGACAATATAGTTCGA  
ATTCCAATACAAATAGCAGCAATTTTTCTGGACAATATAGTTCAGGTAG

>M6-PGSC0003DMG402008483M6RLKWAX-EGF\_252

ATTGGTGGCTATCGGTGTGGCTGTAAATCGGGATATATAGGCAATCCATACATTGGCTCTGGCTGCCAA  
GGTAATTTGGTCTCTCTGCTTTCTCACATGTTTGGACTTTCTCTTGTATTAT

>M6-PGSC0003DMG402008483M6RLKWAX-EGF\_315

TGCCAAGGTAATTTGGTCTCTCTGCTTTCTCACATGTTTGGACTTTCTCTTGTTTATAAGAAGTTTGTCTCT  
TTTTTCCCTCTGTTTCAATTTGTTTATTATACGTTCTCTTTTAGTCT

>M6-PGSC0003DMG402008483M6RLKWAX-EGF\_378

TTTGTCTCTTTTTTCCCTCTGTTTCAATTTGTTTATTATACGTTCTCTTTTAGTCTGTTTAAAAATAATGTCA  
ATTCATCTTTAATCCAACCTTTGATAGTAAGTATCTAAAAGAAAC

>M6-PGSC0003DMG402008483M6RLKWAX-EGF\_441

AAATAATGTCAATTTTCATCTTTAATTCCAACCTTTGATAGTAAGTATCTAAAAGAAACAAATAAAAAGGATT  
AATTTTCTCTGTTTTGCATGCCAGATATCGATGAATGTGCGGATCCAAT

>M6-PGSC0003DMG402008483M6RLKWAX-EGF\_504

AAAGGATTAATTTTCTCTGTTTTGCATGCCAGATATCGATGAATGTGCGGATCCAATTACCAATTCATGTG  
AAAAGATTTGCACAAACATACCTGGGAGTTACAATTGTTCTTGTCCAGA

>M6-PGSC0003DMG402008483M6RLKWAX-EGF\_567

TTCATGTGAAAAGATTTGCACAAACATACCTGGGAGTTACAATTGTTCTTGTCCAGAAGGATACACCGGT  
GATGGCAAAAAGAATGGTTCGTGGTTGTATTGCACCAAACCTCAAACCTCAGA

>M6-PGSC0003DMG402008483M6RLKWAX-EGF\_63

GGTGAAGCTAGTCGATTTGAGTTCCAGGGTATAGAGGATCTCAGTGATGTTAATTTTGCAAAGAAGATT  
AAGAATAATGTCCCTATTGTGCTAGATTGGGCCATTGGAAATCTTTCTTGT

>M6-PGSC0003DMG402008483M6RLKWAX-EGF\_630

CACCGGTGATGGCAAAAAGAATGGTTCGTGGTTGTATTGCACCAAACCTCAAACCTCAGAGTTCCCATGGAT  
CAAGTTTTCTGTTGGTAAGTTTCTAAGATATTTCAACTTGTCTCTACTTTC

>M6-PGSC0003DMG402008483M6RLKWAX-EGF\_693

ATGGATCAAGTTTTCTGTTGGTAAGTTTCTAAGATATTTCAACTTGTCTCTACTTTCCCTTCTTATATTTT  
TAATCCAATAAATTCGTTTCGATAAACACAGGTATGGGAGTTGGTTT

>M6-PGSC0003DMG402009306M6LRR-RLP\_0

GTGCTTGAAAAGATGACAATTCACAGGTGCCCTGTGTTTGTATTCCGACCCTCCCTTCATTGAAACTTTA  
TTTGACAGATCCCTCAAGTTTGAGGTCCACATCTAATCTTAGTGCTCTT

>M6-PGSC0003DMG402009306M6LRR-RLP\_128

CAACATAGGCCATGACGATGAAGCTACTTCACTCCCAGAAGAGATGTTCAAAGCCTAGCAAATCTCAA  
ATACTTGAGAATCTCTTTCTTTTTCAGAATCTCAAAGAGCTGCCTACCAGCCT

>M6-PGSC0003DMG402009306M6LRR-RLP\_192

CTCAAATACTTGAGAATCTCTTTCTTTTTCAGAATCTCAAAGAGCTGCCTACCAGCCTGGCTTGTCTCAATGC  
TTTGGAGAGTCTGCAAATTGAATATTGTAACGCACTAGAGAGTCTCCCA

>M6-PGSC0003DMG402009306M6LRR-RLP\_256

TCAATGCTTTGGAGAGTCTGCAAATTGAATATTGTAACGCACTAGAGAGTCTCCAGAGGAAGGGGTGG  
AAGTTTAACTTCACTCTCGGAATTATCTGTTTATAACTGTGAGATGCTAA

>M6-PGSC0003DMG402009306M6LRR-RLP\_505

ATCTGCATATTCATAACTATGAGTATTTATAATTGTTTCTTTGTTTGTGAATCTTTTTGGTTCCTGCCATTG  
GATGTAATTGTTTGTAGGGTTGTTTGTGAGTCTCTCTCATTG

>M6-PGSC0003DMG402009306M6LRR-RLP\_64

AACTTTATTTGACAGATCCCTCAAGTTTGAGGTCCACATCTAATCTTAGTGCTCTTACTTCCCTCAACATAG  
GCCATGACGATGAAGCTACTTCACTCCCAGAAGAGATGTTCAAAGCC

>M6-PGSC0003DMG402009323-(rev)M6G-LecRK\_0

ATTAAGCTTGGTTATAACCTCACCACAATGCAGAATTGGACTTTAACTTCTTGGTTGAGTTTTAGTGTTC  
TGCCTCAGGGGCTTTTACTTTAAGTTTGGAGGTTTTTGAAAATGCATTT

>M6-PGSC0003DMG402009323-(rev)M6G-LecRK\_1054

AAGTACAAGATTTGAAGATATTTAGCTTTGGATTCATATTGGAAGCCACAAACAACCTTCTCTAGTGAAAA  
GATGCTCGGAGAGGGTGGTTTTGGCCTGTTTATAAGGTATATTTGCACT

>M6-PGSC0003DMG402009323-(rev)M6G-LecRK\_1116

AGTGAAAAGATGCTCGGAGAGGGTGGTTTTGGCCTGTTTATAAGGTATATTTGCACTATGTTATATGT  
AGCTCAGAGATTTGCTTACTGCTCTCACTACATAACGAATCAACTGTAAAA

>M6-PGSC0003DMG402009323-(rev)M6G-LecRK\_1178

TATATGTAGCTCAGAGATTTGCTTACTGCTCTCACTACATAACGAATCAACTGTAAAAATGGATGTCAGG  
GAAAATTTCCAGATGGTTCGAGAGGTGGCAGTCAAGAGACTTTCAAGAACC

>M6-PGSC0003DMG402009323-(rev)M6G-LecRK\_124

TGGTTATTCGTTGAAGGGGTAAGGTTTATTGGACTAGTGGGGCTTGAACAATCAAGGTTTTCCATTCTT  
ACCTTTATTCCATGATTCTGCTACTATTTATCAGTACAATCTCAATTTGG

>M6-PGSC0003DMG402009323-(rev)M6G-LecRK\_1240

ATGTCAGGGAAAATTTCCAGATGGTCGAGAGGTGGCAGTCAAGAGACTTTCAAGAACCTCGGGACAAG  
GGCTTGTGGAGTTCAAGAATGAACTCATACTAATTGCCAAAGTTCAGCATACT

>M6-PGSC0003DMG402009323-(rev)M6G-LecRK\_1302

GACAAGGGCTTGTGGAGTTCAAGAATGAACTCATACTAATTGCCAAAGTTCAGCATACTAATCTAGTTC  
GAGTTCTAGGATGTTGTATTACGGAGATGAGATAATGTTGATATATGAGT

>M6-PGSC0003DMG402009323-(rev)M6G-LecRK\_1364

CTAGTTCGAGTTCTAGGATGTTGTATTACGGAGATGAGATAATGTTGATATATGAGTACATGCCTAACA

AGAGCTTGAAGCTTCTTCCTCTTTGGTCTGTTACCATTCCACAAAAAAAAG

>M6-PGSC0003DMG402009323-(rev)M6G-LecRK\_1426

GCCTAACAAGAGCTTGAAGCTTCTTCCTCTTTGGTCTGTTACCATTCCACAAAAAAAAGACAGTAATTTTTC

CGGTATTTAAAAAAAATTGATGTAAAATGCTTTCTCTTAAACAGATC

>M6-PGSC0003DMG402009323-(rev)M6G-LecRK\_1488

TAATTTTTCCGGTATTTAAAAAAAATTGATGTAAAATGCTTTCTCTTAAACAGATCCTGCAAGAAAGG

AGCTACTGGATTGGCAGAAGCGATTTGCAATTATCGAAGGAATTGCTCAA

>M6-PGSC0003DMG402009323-(rev)M6G-LecRK\_1550

AAGAAAGGAGCTACTGGATTGGCAGAAGCGATTTGCAATTATCGAAGGAATTGCTCAAGGATTGCTCTA

TCTTCACAAATACTCAAGAATGAGAGTGATACATAGAGATCTAAAAGCCAG

>M6-PGSC0003DMG402009323-(rev)M6G-LecRK\_1612

TGCTCTATCTTCACAAATACTCAAGAATGAGAGTGATACATAGAGATCTAAAAGCCAGTAATGTGCTTTT

GGATGAAAACATGAATCCTAAGATAGCTGATTTTGGTCTGGCAAGAATTT

>M6-PGSC0003DMG402009323-(rev)M6G-LecRK\_1674

GTGCTTTTGGATGAAAACATGAATCCTAAGATAGCTGATTTTGGTCTGGCAAGAATTTTCAAACAGAACG

AGATGGAGGTAGTGACTGGCAGGGTTGTTGGAACATAGTGAGTTGAGCCT

>M6-PGSC0003DMG402009323-(rev)M6G-LecRK\_1736

ACAGAACGAGATGGAGGTAGTGACTGGCAGGGTTGTTGGAACATAGTGAGTTGAGCCTAGTCATTTCTT

CGATATAAATCTATGGAACATGTGTACTTATTCATACTTACTGAGTAAAAA

>M6-PGSC0003DMG402009323-(rev)M6G-LecRK\_1798

ATTTCTTCGATATAAATCTATGGAACATGTGTACTTATTCATACTTACTGAGTAAAAAATGTTTTCTATCCT

CTGCACAGTGGTTACATGGCTCCCGAGTTCGCCATGGAAGGTACTTTC

>M6-PGSC0003DMG402009323-(rev)M6G-LecRK\_186

CCATTCTTACCTTTATTCATGATTCTGCTACTATTTATCAGTACAATCTCAATTTGGTATCCGATAAAGAT

GGGATGTTCTCCAATTTGATGCAACAGAGGGAAGCTTTCCAAGTCTT

>M6-PGSC0003DMG402009323-(rev)M6G-LecRK\_1922

TCAAGTCTGATGTCTTCAGCTTTGGAGTCTTAATACTGGAAATTGTGAGTGGTAGGAGAAATACTAGCTT

ACAACAAATTGATCGTCCACTTAACTTAATAGGTTATGTAAGTTTTCTTT

>M6-PGSC0003DMG402009323-(rev)M6G-LecRK\_1984

ACTAGCTTACAACAAATTGATCGTCCACTTAACTTAATAGGTTATGTAAGTTTTCTTTAAACCTTTCTTTCT  
TTAATGTACTAAAGTTCACAAAGTTCAACAATACTGATCATTTTTGGTT

>M6-PGSC0003DMG402009323-(rev)M6G-LecRK\_2046

CTTTCTTTCTTTAATGTACTAAAGTTCACAAAGTTCAACAATACTGATCATTTTTGGTTCAGGCATGGGAAC  
TATGGAAAGAAGGGTGTGGACTAGAACTGAAGGATCCATCTCTTGAAGA

>M6-PGSC0003DMG402009323-(rev)M6G-LecRK\_2108

CATGGGAACTATGGAAAGAAGGGTGTGGACTAGAACTGAAGGATCCATCTCTTGAAGATCTTTGTGACA  
CTGAACAATTTTTACGAGTTATTCATGTCTGGACTATTATGTGTACAAGAAG

>M6-PGSC0003DMG402009323-(rev)M6G-LecRK\_2170

TGTGACACTGAACAATTTTTACGAGTTATTCATGTCTGGACTATTATGTGTACAAGAAGGTGCAGCAGATA  
GGCCAACAATGTCTGATGTTATCTCAATGCTTGGTAATGGAAGTATGTCA

>M6-PGSC0003DMG402009323-(rev)M6G-LecRK\_2232

AGCAGATAGGCCAACAAATGTCTGATGTTATCTCAATGCTTGGTAATGGAAGTATGTCACTGCCAATTGCA  
AAACAACCTGCATTTTTACGAGTTATTCATGTCTGGACTATTATGTGTACAAGAAG

>M6-PGSC0003DMG402009323-(rev)M6G-LecRK\_2294

CAATTGCAAAACAACCTGCATTTTTACGAGTTATTCATGTCTGGACTATTATGTGTACAAGAAGGTGCAGCAGATA  
AGAAGAATGTTGCGTTAATGATTGTTCCATCACTGCCGTTGAAGCAAGAT

>M6-PGSC0003DMG402009323-(rev)M6G-LecRK\_248

CGATAAAGATGGGATGTTCTCCAATTTGATGCAACAGAGGGGAAGCTTTCCAAGTCTTGCATTGAATTCA  
GATGGGGATATTCTTGGTGGATACCGGTTTACATACACCCTTTTTAAAGA

>M6-PGSC0003DMG402009323-(rev)M6G-LecRK\_310

TGAATTCAGATGGGGATATTCTTGGTGGATACCGGTTTACATACACCCTTTTTAAAGACTTCTGTTATGGT  
TATGAAAGTGAGGACGGTGTGTCTCTACCCAGTTGCCTGAGTGTGCGAA

>M6-PGSC0003DMG402009323-(rev)M6G-LecRK\_372

TGTTATGGTTATGAAAGTGAGGACGGTGTGTCTCTACCCAGTTGCCTGAGTGTGCGAAAGGATGGGGAT  
AAATTTGAGCAAAAGAGTGGAGACTTTATACATTCATCTAGTATTACTACT

>M6-PGSC0003DMG402009323-(rev)M6G-LecRK\_434

TGGGGATAAATTTGAGCAAAAGAGTGGAGACTTTATACATTCATCTAGTATTACTACTGAGTTTTATGAC  
AATGCAAGCATTAGTATTGTTGATTGTATGCAGAAGTGCTGGGAGCACTG

>M6-PGSC0003DMG402009323-(rev)M6G-LecRK\_496

TTTATGACAATGCAAGCATTAGTATTGTTGATTGTATGCAGAAGTGCTGGGAGCACTGCAGTTGTTTTGG  
CTTCACCACCGCCAGTGGCAATGGGACAGGCTGCCGTATTTGGAATGGAA

>M6-PGSC0003DMG402009323-(rev)M6G-LecRK\_558

TGTTTTGGCTTCACCACCGCCAGTGGCAATGGGACAGGCTGCCGTATTTGGAATGGAAATGGTGATTTT  
CGTGTCTATGAGAGTGGTAATGCATTGCTAAGATATGTTCTAGTTTCACCA

>M6-PGSC0003DMG402009323-(rev)M6G-LecRK\_62

TAGTGTTCCTGCCTCAGGGGCTTTTACTTTAAGTTTGGAGTTTTTAAAAATGCATTTTCAGTTGGTTATTC  
GTTGAAGGGGTAAGTTTATTGGACTAGTGGGGCTTGAACAATCAAGG

>M6-PGSC0003DMG402009323-(rev)M6G-LecRK\_620

TGATTTTCGTGTCTATGAGAGTGGTAATGCATTGCTAAGATATGTTCTAGTTTCACCAAATCATCTAAAG  
GTAAGTCTTTATATCAGGAATACTCATTTTTATGTACTCAATTGTCAAC

>M6-PGSC0003DMG402009323-(rev)M6G-LecRK\_682

CATCTAAAGGTAAGTCTTTATATCAGGAATACTCATTTTTATGTACTCAATTGTCAACTGTATAACTCTCA  
GCATGCTATGGGTGCAGGAAAACTTGGATATGGATAGTAATTAGTGTA

>M6-PGSC0003DMG402009323-(rev)M6G-LecRK\_744

TAACTCTCAGCATGCTATGGGTGCAGGAAAACTTGGATATGGATAGTAATTAGTGTAGCTTTTTTTATC  
TCGTTGCTATTATCTGGTTTCATCTGCTACATTATAATGAGAAGACGCAA

>M6-PGSC0003DMG402009323-(rev)M6G-LecRK\_806

TTTTTATCTCGTTGCTATTATCTGGTTTCATCTGCTACATTATAATGAGAAGACGCAAACACTACAAGGTA  
TCACCAAACCTGAGGATTTAGAAGCTAGTAGGTTGTTTAGTCATTTATTT

>M6-PGSC0003DMG402009323-(rev)M6G-LecRK\_868

CAAGGTAATCACCAAACCTGAGGATTTAGAAGCTAGTAGGTTGTTTAGTCATTTATTTAAGCATGAATG  
TATATCTACATACTCTTCTTACATAGATGAGAAAAGAAATGAGGAAGCAT

>M6-PGSC0003DMG402009323-(rev)M6G-LecRK\_930

CATGAATGTATATCTACATACTCTTCTTACATAGATGAGAAAAGAAATGAGGAAGCATATATACGCGAGT  
TGACAGCAGTAGACAGCTTCAACAACGCAAATATTAAGAAGAAGATGGA

>M6-PGSC0003DMG402009323-(rev)M6G-LecRK\_992

ACGCGAGTTGACAGCAGTAGACAGCTTCAACAACGCAAATATTAAGAAGAAGATGGAAGGGAAGTAC

AAGATTTGAAGATATTTAGCTTTGGATTCATATTGGAAGCCACAAACAACCTT

>M6-PGSC0003DMG402009338M6LRR-RLP\_0

GCAACTTTAATTTTTTGGATCATGTTGCTAACTACTTGTACGCTTTTCAGGAATCTGTAACTTAGGAACC  
TGCAGTTTTAAATCTTCAGGATAACCTTATACAAGGTGGACTTGATC

>M6-PGSC0003DMG402009338M6LRR-RLP\_1054

CAAGAAACCAGTTTCATGGGATTATTCCAGTGTCTTTATGCCAGATGCAAAAGCTTCATTTTTGGACATG  
TCTGCAAATTCCTCTCTGGGGATTTACCTTCTTGCCTCGGCAACATAAC

>M6-PGSC0003DMG402009338M6LRR-RLP\_1116

TGGACATGTCTGCAAATTCCTCTCTGGGGATTTACCTTCTTGCCTCGGCAACATAACCGCATGGATGAA  
AGAATCTCAAGTTCTACTCCCAGCCTTCATGTGGTTGTCTCCTTCATATA

>M6-PGSC0003DMG402009338M6LRR-RLP\_1178

TGGATGAAAGAATCTCAAGTTCTACTCCCAGCCTTCATGTGGTTGTCTCCTTCATATACTAACTACAGGGT  
CAAAGTTCCTTTTAAACAACCAAGGGGAATGCACTCTCTTATGAAGGCAT

>M6-PGSC0003DMG402009338M6LRR-RLP\_124

CCTTGGTGGAAATGACTTCCTTGGTTTCTTTAGATCTTTCTTTCAATCATTTTTGAGGGGACTATTTCTTCTTA  
CATATTCAGCAACCTGACTTTGCTTGAGACCCTTCGTCTTTCAGATTA

>M6-PGSC0003DMG402009338M6LRR-RLP\_1240

CTACAGGGTCAAAGTTCCTTTTAAACAACCAAGGGGAATGCACTCTCTTATGAAGGCATTCCTCTTTCTCAA  
ATGACTACACTTGTTCTATCTATGAACCATTTACCAACGAAATTCCAT

>M6-PGSC0003DMG402009338M6LRR-RLP\_1302

CTTTCTCAAATGACTACACTTGTTCTATCTATGAACCATTTACCAACGAAATTCCATCACAACCTAGGAGA  
ACTCGCAGCTCTCCATTCATTAACCTCTCGCACAACGTCCTGTCTGGC

>M6-PGSC0003DMG402009338M6LRR-RLP\_1364

ACTAGGAGAACTCGCAGCTCTCATTTCATTAACCTCTCGCACAACGTCCTGTCTGGCCATATTCCAGAAT  
CTTTCATGAACTTAAAGCAACTGGAGAGTTTGGATCTTTCTTCTAACCA

>M6-PGSC0003DMG402009338M6LRR-RLP\_1426

TTCCAGAATCTTTCATGAACTTAAAGCAACTGGAGAGTTTGGATCTTTCTTCTAACCATCTAATTGGAAAA  
ATCCCACATCAGATGACTCAACTTGATTCCTTTCAACTTTAAATTTGG

>M6-PGSC0003DMG402009338M6LRR-RLP\_1488

ATTGGAAAAATCCCACATCAGATGACTCAACTTGATTCACTTTCAACTTTAAATTTGGCTTTCAACCATCT  
GTCAGGAAGAATCCCGTTTGAAAACAAATTTGTCACCTTTGAAGCATCT

>M6-PGSC0003DMG402009338M6LRR-RLP\_1550

CAACCATCTGTCAGGAAGAATCCCGTTTGAAAACAAATTTGTCACCTTTGAAGCATCTAGTTATAGAGGT  
AACAAGGAACTCTGTGGACCACCTCTGGAAAATGATTGTGTGTTCTCGAG

>M6-PGSC0003DMG402009338M6LRR-RLP\_1612

ATAGAGGTAACAAGGAACTCTGTGGACCACCTCTGGAAAATGATTGTGTGTTCTCGAGCCCGCCTCAGC  
AGCGTGAAGAAGAAGAAGAAGACGAGAAACAAGGAATTGGTGAGAGTGACT

>M6-PGSC0003DMG402009338M6LRR-RLP\_1674

CCTCAGCAGCGTGAAGAAGAAGAAGAAGACGAGAAACAAGGAATTGGTGAGAGTGACTTCTTTTTCTT  
CTCATGCATAGCTGTTGCTTATGTTTTGGGATTTTGGAGTGTCATTGCTCCT

>M6-PGSC0003DMG402009338M6LRR-RLP\_1736

TTTCTTCTCATGCATAGCTGTTGCTTATGTTTTGGGATTTTGGAGTGTCATTGCTCCTCTTCTTCTTAGTAG  
GAACTGGCGCACGACATATTATGCTAAGGTTGATAGCTGCATTGAACT

>M6-PGSC0003DMG402009338M6LRR-RLP\_1798

TTCTTAGTAGGAACTGGCGCACGACATATTATGCTAAGGTTGATAGCTGCATTGAACTGTGCAAGGAGA  
AACTTCATCTGTCCTAATTTTCCATGAAAACCTTTTATGCTACTTTTGATAT

>M6-PGSC0003DMG402009338M6LRR-RLP\_186

TTTCTTCTTACATATTCAGCAACCTGACTTTGCTTGAGACCCTTCGTCTTTCAGATTACAGGTTTGATGGAC  
TTCTCTTGTGGCATCATTGCTAACCTCTCCAATCTTGAAGCCATTG

>M6-PGSC0003DMG402009338M6LRR-RLP\_248

TTTGATGGACTTCTTGTGGTGGCATCATTGCTAACCTCTCCAATCTTGAAGCCATTGATCTTACAAATAAT  
GAGTTTGAAGTTGACTGAAACTCCATCTTGGGTTCCATCTTTTCAA

>M6-PGSC0003DMG402009338M6LRR-RLP\_310

TACAAATAATGAGTTTGAAGTTGACTGAAACTCCATCTTGGGTTCCATCTTTTCAACTTTTGTCCCTTG  
ACCTACGATATACTAGACTAAACCAGAACTATGGCCATGTAATTCCAAC

>M6-PGSC0003DMG402009338M6LRR-RLP\_372

TGTCCCTTGACCTACGATATACTAGACTAAACCAGAACTATGGCCATGTAATTCCAACGTTTCATCTCCAAA  
CAACACAAGTTGAAGTCCCTGTCTTTGTCCTATAATGCCCTTCAAGGAA



>M6-PGSC0003DMG402009338M6LRR-RLP\_434

ATCTCCAAACAACACAAGTTGAAGTCCCTGTCTTTGTCTATAATGCCCTTCAAGGAAGCGTTCGGTCCTG  
GTTGTTGTATAATAATACTTCTTATGTTATCTTTGAGAAGCAACCAT

>M6-PGSC0003DMG402009338M6LRR-RLP\_496

TCCGTCCTGGTTGTTGTATAATAATACTTCTTATGTTATCTTTGAGAAGCAACCATTGTATGGTGGAA  
TTCCTGCGTCTTCTCAGATTCAAGCATCAAGTCTTCTGATGCTTGATGT

>M6-PGSC0003DMG402009338M6LRR-RLP\_558

ATGGTGGAAATTCCTGCGTCTTCTCAGATTCAAGCATCAAGTCTTCTGATGCTTGATGTATCAGATAATTGC  
TTAGGCAGTACACTTCACACTAACGTGCTCGAATCACTTCCAGACTTAT

>M6-PGSC0003DMG402009338M6LRR-RLP\_62

CTTAGGAACCTGCAGGTTTTAAATCTTCAGGATAACCTTATAACAAGGTGGACTTGATCCATGCCTTGGTG  
GAATGACTTCCTTGGTTTCTTTAGATCTTTCTTTCAATCATTTTGAGGGG

>M6-PGSC0003DMG402009338M6LRR-RLP\_620

GATAATTGCTTAGGCAGTACACTTCACACTAACGTGCTCGAATCACTTCCAGACTTATTCTATCTTAACCT  
GTCAAATAACGCTCTCGAAGGCACCCTTCCTTCATCTTTTGACAATCTG

>M6-PGSC0003DMG402009338M6LRR-RLP\_682

TCTTAACCTGTCAAATAACGCTCTCGAAGGCACCCTTCCTTCATCTTTTGACAATCTGCTAAAGTTAGAGG  
TTCTGGACCTTTCTCACAACCTCCTACAGGGAAAACCTCCTCCAGCTTT

>M6-PGSC0003DMG402009338M6LRR-RLP\_744

AGTTAGAGGTTCTGGACCTTTCTCACAACCTCCTACAGGGAAAACCTCCTCCAGCTTTAAGACAGAATCA  
CACTTCATTGGCACATTTAGTTCTTTCAAACAACAACCTTTCACGGGGAGG

>M6-PGSC0003DMG402009338M6LRR-RLP\_806

CAGAATCACACTTCATTGGCACATTTAGTTCTTTCAAACAACAACCTTTCACGGGGAGGTTATGCCTCGATT  
TTCAAATATGCCAAATCTTGCACTTGCATCTTCAAATGATGGATTT

>M6-PGSC0003DMG402009338M6LRR-RLP\_868

GCCTCGATTTTCAAATATGCCAAATCTTGCACTTGCATCTTCAAATGATGGATTTATTGGAGTCCTCC  
CTGCTGCTATGTTAACCTCCTGTTCTGAAGGTCATGGACATTAGTGG

>M6-PGSC0003DMG402009338M6LRR-RLP\_930

GAGTCCTCCCTGCTGCTATGTTAACCTCCTGTTCTGAAGGTCATGGACATTAGTGGGAATAATTTATCA

GGGAATGTTCCAGATTATTTTCCTCTTTCCACATCTAGCCATACTTATC

>M6-PGSC0003DMG402009338M6LRR-RLP\_992

AATTTATCAGGGAATGTTCCAGATTATTTTCCTCTTTCCACATCTAGCCATACTTATCTTGCAAGAAACC

AGTTTCATGGGATTATTCCAGTGTCTTTATGCCAGATGCAAAAGCTTCA

>M6-PGSC0003DMG402010943M6LRR-RLP\_0

GAGGTGCAAACGGCTACAACATCTGGACTTCTCAGATGCCATGCCCAAATTACGGTTGGTGGACATCCG

CGATTGTCCATTGTTAGAATCTCTGTCTGGATGGGCTTGCAACCTTGTTTC

>M6-PGSC0003DMG402010943M6LRR-RLP\_1054

CTGTGTAGGGCCCAATTCGAGGTAAAGCACTCCCCACCAAGGATTTTTCAATACCCAAGGCTCAAACCCG

AGACATCTGGTTAAGGGAGGAACAGCCCATCAAGCACCTCATATTTTAAG

>M6-PGSC0003DMG402010943M6LRR-RLP\_1116

CAAACCCGAGACATCTGGTTAAGGGAGGAACAGCCCATCAAGCACCTCATATTTTAAGTTATCTGCTAAA

GAATGCATCAAATGATAAATATATCCTCTTTTGATACTTCAACTGCTTAT

>M6-PGSC0003DMG402010943M6LRR-RLP\_1178

CTGCTAAAGAATGCATCAAATGATAAATATATCCTCTTTTGATACTTCAACTGCTTATGCAAATTATGTAG

TGTTCAACTAAACGTAGTTTCCCCGTTTCTTTGATGCAGCTGTTGTCCC

>M6-PGSC0003DMG402010943M6LRR-RLP\_124

GAAGAGTTAGATTTATGTAAGTGCAGAAAAGTACTAGAGCATCTGCCATCCCGAAATGCCATGCGACACCTC

ACGAAATTACAGAGCCTGAACATTAAGGCTGCCCAAAGTTAGAAGAAAGT

>M6-PGSC0003DMG402010943M6LRR-RLP\_1302

TGATCTGGTGGTGTTCGGACGTTTGCACTGGGATTCTCTGCCCTACCAAATCACAGAACCTGGAAATTA

AAGGCTGCCCCAAAGTTAGAAGAAAGTTGCACCAATCGGATTACCCCAA

>M6-PGSC0003DMG402010943M6LRR-RLP\_1360

ACCTGGAAATTAAAGGCTGCCCAAAGTTAGAAGAAAGTTGCACCAATCGGATTACCCCAAAGTCCCAG

TACTGGTCCAACCAACATTTCCCATATTCACAAAATCGAAGTAGGTGGAAG

>M6-PGSC0003DMG402010943M6LRR-RLP\_248

ACAATCGGAGTGGCCCAAAGTCCCAGTGGTCCAACATTTCCCATATTCCTAAAGTTAAAGTTGGTTCGAAG

CATAATTCAAGACTTGCCTAAGTCTTTGTTTCTTTCCGTGTCCGAGTC

>M6-PGSC0003DMG402010943M6LRR-RLP\_310

GGTCGAAGCATAATTCAAGACTTGCCTAAGTCTTTGTTTCTCTTTCCGTGTCCGAGTCACATTTTAAATTA  
CTATTTTCTATGAGTTCTTGAAAAGATGTTCTGTATGTAATTTAATACT

>M6-PGSC0003DMG402010943M6LRR-RLP\_372

TTTTAATTACTATTTTCTATGAGTTCTTGAAAAGATGTTCTGTATGTAATTTAATACTACAATTTATCCTGC  
AATTGTTTTGACATAAAAAATGCAATATTATTAGACAATTGCATCTTA

>M6-PGSC0003DMG402010943M6LRR-RLP\_434

TTTATCCTGCAATTGTTTTGACATAAAAAATGCAATATTATTAGACAATTGCATCTTATCTATGCTTTCAGC  
ATTCTGCTAGTTCACTTGAAACAAATTGTTCTTCTTAATTCTTCAA

>M6-PGSC0003DMG402010943M6LRR-RLP\_496

TGCTTTCAGCATTCTGCTAGTTCACTTGAAACAAATTGTTCTTCTTAATTCTTCAAGTACAATATCTCTA  
TATTACTTCTAAGATATGGTTTATTCATGAGATTTTATGTTTTTTTTT

>M6-PGSC0003DMG402010943M6LRR-RLP\_558

AATATCTCTATATTACTTCTAAGATATGGTTTATTCATGAGATTTTATGTTTTTTTTTCTTATAGGTTGCTA  
GTTCTTAGGTCATGCTTGAACCTTAGTTGAACATCACTGTGGTAAATC

>M6-PGSC0003DMG402010943M6LRR-RLP\_62

ACATCCGCGATTGTCCATTGTTAGAATCTCTGTCGGATGGGCTTGCAACCTGTTTCTTGGAAAGAGTT  
AGATTTATGTAAGTGCAGAAAACTAGAGCATCTGCCATCCCGAAATGCCA

>M6-PGSC0003DMG402010943M6LRR-RLP\_620

ATAGGTTGCTAGTTCTTAGGTCATGCTTGAACCTTAGTTGAACATCACTGTGGTAAATCAAGTCAAATCC  
ACAAGTGGCAGGCAATTACCTTAGGTAAATTTTCATTTAGACCTGTCAGA

>M6-PGSC0003DMG402010943M6LRR-RLP\_682

CAAATCCACAAGTGGCAGGCAATTACCTTAGGTAAATTTTCATTTAGACCTGTCAGAGGAATGCACTTT  
TTTTTCACTACTTTTTCTCATGACGCAATTCGTACTATTTAAACAGGGT

>M6-PGSC0003DMG402010943M6LRR-RLP\_744

TGCACTTTTTTTTCACTACTTTTTCTCATGACGCAATTCGTACTATTTAAACAGGGTTGGTTATGTTCCAC  
CACCACATTTGTTTTGTTGAAGAACAAAATCTTCAGCGGTAGACAATA

>M6-PGSC0003DMG402010943M6LRR-RLP\_806

TATGTTCCACCACCACATTTGTTTTGTTGAAGAACAAAATCTTCAGCGGTAGACAATACGGGACACTTTC  
ATGAATAATTAGTTACGATAACATATCTGTCAACATTTTACTCTTCATAA

>M6-PGSC0003DMG402010943M6LRR-RLP\_868

ACACTTTCATGAATAATTAGTTACGATAACATATCTGTCAACATTTTACTCTTCATAATGGGGGATACCAA  
CAATTATTAAGTGAAACTATTTGTGTGTTTTTAAAACATGTGCAACAAA

>M6-PGSC0003DMG402010943M6LRR-RLP\_930

GGATACCAACAATTATTAAGTGAAACTATTTGTGTGTTTTTAAAACATGTGCAACAAAAAGTTTTAAAGT  
GATGTCTCTATACTTTTATCAAGCATAGGAAGTAGACTATTCCAAATT

>M6-PGSC0003DMG402011117M6LRR-RLP\_0

ATGGACACCTTGAAAGGAATCAATACATCCAGAGGAAACTGCATTCTCGTGACTACTCGTATGAAGCAG  
GTGGCATCCATAGTAGCCACAGATCTTCATATGTTGGGAAATCTAACAGAT

>M6-PGSC0003DMG402011117M6LRR-RLP\_1037

ATCAGCAATTCATGGTCAGTTTCAGATGCCACTTAATATGGGGCAATTGACCAGTCTTCAGACGCTACAG  
TTTTTTACATAGGTTTAGAGAAAGGTCGTCTGAATTGAAGAATTAGGTCTG

>M6-PGSC0003DMG402011117M6LRR-RLP\_1098

ACGCTACAGTTTTTTTACATAGGTTTAGAGAAAGGTCGTCTGAATTGAAGAATTAGGTCTTTGGAAAACC  
TTAGAGGTACATTGACGATCGACAGTCTCCAATTAGTCAGAAATAAAGAA

>M6-PGSC0003DMG402011117M6LRR-RLP\_122

TCATTGTTTGTCCATTTTCAAACAAAGAGCATTGTTGATGGGGAAGTTCCGCAGGAAATACTGAGCATG  
GAGAAAAAGATAGTTGAACTGTGTCAAGGTCTACCGTTGGCTGCAAGTGT

>M6-PGSC0003DMG402011117M6LRR-RLP\_1220

GGCTCGAACAGCATGTTTACAGGAGAAACCCAATATCTACAAGCTGGCATATTTATGGTCCCATGATGA  
ATCAGAAGGCCATGAGATCAATGATGAGCATGTGTTGGATGGTCTTCAACC

>M6-PGSC0003DMG402011117M6LRR-RLP\_1281

CATGATGAATCAGAAGGCCATGAGATCAATGATGAGCATGTGTTGGATGGTCTTCAACCGCATCCTAAC  
TTGAAAGCCTTATCAGTAGCAGACTATTTAGGGACTAAATTTCCCTTCATGG

>M6-PGSC0003DMG402011117M6LRR-RLP\_1342

ATCCTAACTTGAAAGCCTTATCAGTAGCAGACTATTTAGGGACTAAATTTCCCTTCATGGTTCAGTGAAGA  
GTTGCTACCAAATTTGGTCAAGTTGAAACTAAGTGGTTGCACAAGGTGCA

>M6-PGSC0003DMG402011117M6LRR-RLP\_1403

CAGTGAAGAGTTGCTACCAAATTTGGTCAAGTTGAAACTAAGTGGTTGCACAAGGTGCAAGGAAATTC

ATCCCTTGCCAACTGAAATTCCTTCGGCATCTTGAGCTGGTAGGATTCGA

>M6-PGSC0003DMG402011117M6LRR-RLP\_1525

AGTTGGAATGCATTGGACCTGCTTATATGGTGTTGAGATTAGCAATATTGGATCAAGCAACATTATCCA

AGTGTTCCCGTCATTGAAAGAACTAGTATTGAAGGCTATGCGTAGTCTTA

>M6-PGSC0003DMG402011117M6LRR-RLP\_1586

CATTATCCAAGTGTTCCCGTCATTGAAAGAACTAGTATTGAAGGCTATGCGTAGTCTTATTGAGTGGAAG

GGAGATGAAGTTGGAGTTAGAATGTTTCCTAGGCTTGAGAAGTTGACGAT

>M6-PGSC0003DMG402011117M6LRR-RLP\_1647

GAGTGGAAGGGAGATGAAGTTGGAGTTAGAATGTTTCCTAGGCTTGAGAAGTTGACGATTTCAAGGTG

TCGGCTGTAAAAAGTACTCCAAGTCAATTTGAAATCCTGCGTGAATTATCA

>M6-PGSC0003DMG402011117M6LRR-RLP\_1708

CAAGGTGTCGGCTGTAAAAAGTACTCCAAGTCAATTTGAAATCCTGCGTGAATTATCAATTGATAGTGT

TAACAGTGAAAAACCATTTGTTGAACTTGTGCAGCAACTTGACATCTCTCG

>M6-PGSC0003DMG402011117M6LRR-RLP\_1769

TGATAGTGTTAACAGTGAAAAACCATTTGTTGAACTTGTGCAGCAACTTGACATCTCTCGTAGAGCTTAGT

GTCTATTTTGTGGAGGAGCTCACTTGTCTTCCCGATGAGATGCTCCACAA

>M6-PGSC0003DMG402011117M6LRR-RLP\_183

CTGAGCATGGAGAAAAAGATAGTTGAACTGTGTCAAGGTCTACCGTTGGCTGCAAGTGTTTTGGGATGC

CTCTTCTGCAGAAAGGAAAAACATGAATGGCAGGCAATTCTTGTTCAGGT

>M6-PGSC0003DMG402011117M6LRR-RLP\_1830

GAGCTTAGTGTCTATTTTGTGGAGGAGCTCACTTGTCTTCCCGATGAGATGCTCCACAACAACGTTTCTCT

TCAATACTTATTGGTCTCAGGCTGCAGAGAGTTTCGTGAATTGCCACAA

>M6-PGSC0003DMG402011117M6LRR-RLP\_1891

ACGTTTCTCTTCAATACTTATTGGTCTCAGGCTGCAGAGAGTTTCGTGAATTGCCACAAAGCTTGTACAAT

CTCCATTCTTTAAAGAGCTTAAGGATTGACAACCTGCCCAATTTTCAGTT

>M6-PGSC0003DMG402011117M6LRR-RLP\_1952

CTTGACAATCTCCATTCTTTAAAGAGCTTAAGGATTGACAACCTGCCCAATTTTCAGTTCTTTTCTGTCC

CAGTGGAGAGAATTATTTGACTTCCCTCAAAGTCTTCAGTTATGGAA

>M6-PGSC0003DMG402011117M6LRR-RLP\_2013

TTTCCTGTTCCCAGTGGAGAGAATTATTTGACTTCCCTCCAAAGTCTTCAGTTATGGAATTGTGATGAATT  
GACCAGTTTACCAAGTGAATGCTAGAGCATTGTCTGTCTCTAGAATCT

>M6-PGSC0003DMG402011117M6LRR-RLP\_2074

GTGATGAATTGACCAGTTTACCAAGTGAATGCTAGAGCATTGTCTGTCTCTAGAATCTTTGATGGTCAA  
GCACTGTAACAACCTTAGTTTCCTTGCCTTTACATGTGTGGGAAATGCCTT

>M6-PGSC0003DMG402011117M6LRR-RLP\_2135

GATGGTCAAGCACTGTAACAACCTTAGTTTCCTTGCCTTTACATGTGTGGGAAATGCCTTCACTTTCATATT  
TGGGTTTATTAGAATGTACCAAATTGATTAGTGTAGCCGCAGGAGGACT

>M6-PGSC0003DMG402011117M6LRR-RLP\_2196

CTTTCATATTTGGGTTTATTAGAATGTACCAAATTGATTAGTGTAGCCGCAGGAGGACTTCACCGTCTCA  
CCGGGTTACGGAAATTGCATATTGGTCCTTCTCAGAGATGGTGGATTTT

>M6-PGSC0003DMG402011117M6LRR-RLP\_2318

GGCATTCCAATTGATTTTTAATGGCATTGGCAGCTGTTGTCCCTTCGTACATTGGGGGTGTCGGGACAC  
TTGCACTGGGATTCTCTGCCCTATCAGCTGATGCAACTCTCTGCCCTAAT

>M6-PGSC0003DMG402011117M6LRR-RLP\_2379

TCGGGACACTTGCACTGGGATTCTCTGCCCTATCAGCTGATGCAACTCTCTGCCCTAATAGAGATCCATA  
TATCTGATTCGGAATCGAGGCTCTCCTCATAGATTTGACAACCTTACT

>M6-PGSC0003DMG402011117M6LRR-RLP\_244

TGGGATGCCTCTTCTGCAGAAAGGAAAAACATGAATGGCAGGCAATTCTTGTTGCAGGTGAAGATGATA  
ATGGGGAAAATAGCTTAAAGAAAATCCTAAAACCTCAGCTATGATTATCTAC

>M6-PGSC0003DMG402011117M6LRR-RLP\_2440

AGATCCATATATCTGATTCGGAATCGAGGCTCTCCTCATAGATTTGACAACCTTACTTCTTGAACA  
TTAACGCTAAAGAGGTGCAAACGGCTGCGATATGTGGACTTCTCAGATG

>M6-PGSC0003DMG402011117M6LRR-RLP\_2501

TCTTGAAACATTAACGCTAAAGAGGTGCAAACGGCTGCGATATGTGGACTTCTCAGATGCCATGCCCAA  
ATTACAATATATGAGGATACAAGATTGTCCATTGTTAGAAGCTTTGTCAGA

>M6-PGSC0003DMG402011117M6LRR-RLP\_2562

ATGCCCAAATTACAATATATGAGGATACAAGATTGTCCATTGTTAGAAGCTTTGTCAGATGGGCTCGACA  
ACCTTGTTTCTTTGGAAACGTTAAGTTTATCTAACTGCAAAAAACTAGAG

>M6-PGSC0003DMG402011117M6LRR-RLP\_2623

GGCTCGACAACCTTGTTCCTTGGAAACGTTAAGTTTATCTAACTGCAAAAACTAGAGCATCTCCATCC  
AGAGATATCATGCGACGCCTCACCAAATTATTGAACCTGCAAATTTATG

>M6-PGSC0003DMG402011117M6LRR-RLP\_2684

TCTTCCATCCAGAGATATCATGCGACGCCTCACCAAATTATTGAACCTGCAAATTTATGCCTGCCCAAAGT  
TAGAAGAAAGTTGTAGCAATCTGAGTGGCCCAAACCTCCCAGTGGTCCAA

>M6-PGSC0003DMG402011117M6LRR-RLP\_2806

TTTCCCATATTCCAAATATTGAATTAGGCAGGAGGATAATTCAGGATAGACGTAAGTGTCTGTTTCTCTTT  
CACTTTCTGAGTAGATTTTTTAAATGTTGTTTTCCGCGAGTTCCAGAAA

>M6-PGSC0003DMG402011117M6LRR-RLP\_2867

GTTTCTCTTTCACTTTCTGAGTAGATTTTTTAAATGTTGTTTTCCGCGAGTTCCAGAAAAAAGCTTTGTAT  
GTAATTTAATATTTTTTCTGCAATTATTTTGACATTAATAAATGCAA

>M6-PGSC0003DMG402011117M6LRR-RLP\_2928

AAGCTTTGTATGTAATTTAATATTTTTTCTGCAATTATTTTGACATTAATAAATGCAAAAATTATCAATCA  
ATTGCATCTGTGCCTATGCTTTCTGCATTCTGCTTGTCCACTTTAATG

>M6-PGSC0003DMG402011117M6LRR-RLP\_2989

ATTATCAATCAATTGCATCTGTGCCTATGCTTTCTGCATTCTGCTTGTCCACTTTAATGGAAGTCTTCTCT  
TCTAATTCTTCAAGTATGGTATATCGTGATATGATTTAATCATGAAAC

>M6-PGSC0003DMG402011117M6LRR-RLP\_305

AGATGATAATGGGGAAAATAGCTTAAAGAAAATCCTAAAACCTCAGCTATGATTATCTACCATCTCCACAT  
CTGAAAAAGTGTTTTGCTTACTTTGCCATGTTTCCAAAAGATTATAAGTT

>M6-PGSC0003DMG402011117M6LRR-RLP\_3050

ACTGTTCTTCTTAATTCTTCAAGTATGGTATATCGTGATATGATTTAATCATGAAACTTATGTTTTATTT  
TCCCTCTAGGTTACTAGTTCCAAGGTCATACTAGAACGTCAATGTGGT

>M6-PGSC0003DMG402011117M6LRR-RLP\_3111

ATGTTTTATTTTCCCTCTAGGTTACTAGTTCCAAGGTCATACTAGAACGTCAATGTGGTAAATCAAGCCAA  
ATCCCATGAGCGGCAGGCAACTACGTTAGGTAAATTTTCATTAGAATTT

>M6-PGSC0003DMG402011117M6LRR-RLP\_3233

AGGCACTTTGTAATCTACCTGTTTTATCTTTGTTTTGTTGGGAACCAATTTTCGGAGGTTTATGCTGAT

GAATACAACATTACCTTCCTTAAAAGAAAGTTTAATCATGAAAATTTAT

>M6-PGSC0003DMG402011117M6LRR-RLP\_3294

TTATGCTGATGAATACAACATTACCTTCCTTAAAAGAAAGTTTAATCATGAAAATTTATGATTCTTCTCAT  
AGGTTACTAGGTACAAGGTCATGGTAAATCGTCTTTGTGGTATATCAAG

>M6-PGSC0003DMG402011117M6LRR-RLP\_3355

TTCTTCTCATAGGTTACTAGGTACAAGGTCATGGTAAATCGTCTTTGTGGTATATCAAGACAAAATCCAT  
GGGCAGAATCATGTAAAGTATTTTGAACCACCACTTTTATTTTGTATAT

>M6-PGSC0003DMG402011117M6LRR-RLP\_3416

AAAATCCATGGGCAGAATCATGTAAAGTATTTTGAACCACCACTTTTATTTTGTATATATGAAGAACAA  
AATCTTCAGCTCTAGACTCATTATGGAACACTTTTATGAGTATTTGGATA

>M6-PGSC0003DMG402011117M6LRR-RLP\_3477

GAAGAACAAAATCTTCAGCTCTAGACTCATTATGGAACACTTTTATGAGTATTTGGATACTGAACAACCT  
TTTCGGGCAACTGAAGTCTACATATGAAGCATAAAAAAATTCAAAGTGTA

>M6-PGSC0003DMG402011117M6LRR-RLP\_3538

GAACAACCTTTTCGGGCAACTGAAGTCTACATATGAAGCATAAAAAAATTCAAAGTGTATAGAGTGCTC  
AATGAGAAGCTACACAGGTCTATCCTCTGTCTTTGCATGGCCGTGTGTGCA

>M6-PGSC0003DMG402011117M6LRR-RLP\_3599

GAGTGCTCAATGAGAAGCTACACAGGTCTATCCTCTGTCTTTGCATGGCCGTGTGTGCATCCTAATTGCA  
TCAATCAACTATCCATGAAATCGTGTACCTGTTTGAATGTAAGCTGTTTG

>M6-PGSC0003DMG402011117M6LRR-RLP\_3660

CTAATTGCATCAATCAACTATCCATGAAATCGTGTACCTGTTTGAATGTAAGCTGTTTGAAGAGACTAC  
ATTAGTTTCAGTTAATTTGGTGTTCCTTCCATATAATTCTTCTTTCCTT

>M6-PGSC0003DMG402011117M6LRR-RLP\_3721

AGAGACTACATTAGTTTCAGTTAATTTGGTGTTCCTTCCATATAATTCTTCTTTCCTTTTCCCTTTTGCCAC  
AACTTCAGTCCATATAATCCAGTGTTCCTTGCATTGATGATAGGGGTGA

>M6-PGSC0003DMG402011117M6LRR-RLP\_3782

TCCTTTTGCCACAACCTTCAGTCCATATAATCCAGTGTTCCTTGCATTGATGATAGGGGTGACAAATTTAATCC  
TTGAGAAGGACACAAATGATTTGACCAGTTTGAGGCGTATCCATCCATT

>M6-PGSC0003DMG402011117M6LRR-RLP\_3843



AATTTAATCCTTGAGAAGGACACAAATGATTTGACCAGTTTGAGGCGTATCCATCCATTAGGCTGAAGGT  
TTCTCTACTTTGCTTATTGAACCAAGATTTCCATGTAAGGTATGCCTATG

>M6-PGSC0003DMG402011117M6LRR-RLP\_3904

GCTGAAGGTTTCTCTACTTTGCTTATTGAACCAAGATTTCCATGTAAGGTATGCCTATGACACCGAAATA  
ACAACTTTTCCACAGCATAAGTTTCTATGTTTGTATCATAATATCCCGTA

>M6-PGSC0003DMG402011117M6LRR-RLP\_3965

ACCGAAATAACAACTTTTCCACAGCATAAGTTTCTATGTTTGTATCATAATATCCCGTAAGTTATGAAGTA  
AATGTAACACCTCGGATTTCTGTCGCCATGAATATTCAGTATGTAGCATA

>M6-PGSC0003DMG402011117M6LRR-RLP\_4026

TTATGAAGTAAATGTAACACCTCGGATTTCTGTCGCCATGAATATTCAGTATGTAGCATAGAAAACCAGAT  
TGAAATTTAAGTTCCAGGTTCCACGGAATGGTTCACGAGTTGTGAACCA

>M6-PGSC0003DMG402011117M6LRR-RLP\_4087

AAACCAGATTGAAATTTAAGTTCCAGGTTCCACGGAATGGTTCACGAGTTGTGAACCAGGCTTGTGGA  
ACCACTAGCTCGTGGAATCCATCCTAGTCCTCTAGGTTTGTACACCTCGA

>M6-PGSC0003DMG402011117M6LRR-RLP\_4148

CTTGTGGAACCACTAGCTCGTGGAATCCATCCTAGTCCTCTAGGTTTGTACACCTCGAGCTTAGACCTTG  
GGCGGAACCGGCACTCGGTATCATTATAGGCCCGAGGGCGTACCCATAA

>M6-PGSC0003DMG402011117M6LRR-RLP\_4209

TTAGACCTTGGGCGGAACCGGCACTCGGTATCATTATAGGCCCGAGGGCGTACCCATAACATGACATTA  
GATATGAGCATAACATCTAGACATGAGTGGAACATTAGTATAAACACATTT

>M6-PGSC0003DMG402011117M6LRR-RLP\_4270

TGACATTAGATATGAGCATAACATCTAGACATGAGTGGAACATTAGTATAAACACATTTGAAAAGACAA  
GTCTTGTAAGAAACACTTGGCATAAATGTAAGTCATAGTACTAAAATCA

>M6-PGSC0003DMG402011117M6LRR-RLP\_4331

AAAGACAAGTCTTGTAAGAAACACTTGGCATAAATGTAAGTCATAGTACTAAAATCACTGACAAAGG  
ACACAAAGGTCCAAAATGAAGCATAACTAAGTCTATATATCTATGACCT

>M6-PGSC0003DMG402011117M6LRR-RLP\_4392

GACAAAGGACACAAAGGTCCAAAATGAAGCATAACTAAGTCTATATATCTATGACCTCTAGATATAAC  
TGAGTAATGTCAAATGGGAGGTGCCATTGAATTCTGTTCATGAGTTTCA

>M6-PGSC0003DMG402011117M6LRR-RLP\_4453

AGATATAACTGAGTAATGTCAAATGGGAGGTGCCATTGAATTCTGTTCATGAGTTTCAGCTCAAATAAA  
TTCTCACTGATTGTTTTATGGATTAGATAGGAGGTTGCTGTTGTACAA

>M6-PGSC0003DMG402011117M6LRR-RLP\_4514

TCAAATAAATTCTCACTGATTGTTTTATGGATTAGATAGGAGGTTGCTGTTGTACAAAGACAAATTGC  
ATGAGCCACCTCACTCTCGTACTAGCCAAGTTTTAACTGGGTTGAAGT

>M6-PGSC0003DMG402011117M6LRR-RLP\_4575

ACAAATTGCATGAGCCACCTCACTCTCGTACTAGCCAAGTTTTAACTGGGTTGAAGTATGCTCAAGAA  
CTATTGTAGCAGTATCCGCTGCGAAGGACCTAGGACTTGAATGGATTGAC

>M6-PGSC0003DMG402011117M6LRR-RLP\_4636

GCTCAAGAACTATTGTAGCAGTATCCGCTGCGAAGGACCTAGGACTTGAATGGATTGACCAGTTGGAGG  
GACATCTGTCCATTAGGTTGAAGGATTCTTTTTCTGCTTATTGAACCAAC

>M6-PGSC0003DMG402011117M6LRR-RLP\_4667

GAAGGACCTAGGACTTGAATGGATTGACCAGTTGGAGGGACATCTGTCCATTAGGTTGAAGGATTCTCT  
TTTTCTGCTTATTGAACCAACATTTCCATGTAAGCTTCTTCTAAAATTGTTA

>M6-PGSC0003DMG402011117M6LRR-RLP\_488

CCCTGTGATGGAAGACGTAGGGAACAAGTTTTTCAACTCTTGTTGCAATATTCCTTGCTGCAAGATGTT  
GAGCTAGATGAGTACAACAATATTACACACTGTAAGATGCATGATCTTGT

>M6-PGSC0003DMG402011117M6LRR-RLP\_549

CAAGATGTTGAGCTAGATGAGTACAACAATATTACACACTGTAAGATGCATGATCTTGTGCATGATTGG  
CTGGAGATAAATTAATAAACTAACTAATTGATAAAAAAAGTGTAGGAAGT

>M6-PGSC0003DMG402011117M6LRR-RLP\_61

TGAAGCAGGTGGCATCCATAGTAGCCACAGATCTTCATATGTTGGGAAATCTAACAGATGATCATTGTTT  
GTCCATTTTCAAACAAGAGCATTGTTGATGGGGAAGTTCCGCAGGAAA

>M6-PGSC0003DMG402011117M6LRR-RLP\_610

ATGATTTGGCTGGAGATAAATTAATAAACTAACTAATTGATAAAAAAAGTGTAGGAAGTGAAATTTTTTC  
TCAAGTTCGATACTTTGGATGGGACTCACAAAGTGATCAAATGGATGCGA

>M6-PGSC0003DMG402011117M6LRR-RLP\_671

AATTTTTTCTCAAGTTCGATACTTTGGATGGGACTCACAAAGTGATCAAATGGATGCGATAAATGAGGCA

GGACGTTTGTGCACATTGTTCTGGAAAAGCAATATATCTGATGATATGCT

>M6-PGSC0003DMG402011117M6LRR-RLP\_793

TGAGCTTTCAGTTCTTGAGAGTTTTAAATTTGTCCGGATCAGGCATTGAGGAGTTGTCAGCCAAAATCAG

TAAGCTAATATACTTGAGATATCTTGATCTCTCCAACACTGAGATCGAAG

>M6-PGSC0003DMG402011117M6LRR-RLP\_854

CAAAATCAGTAAGCTAATATACTTGAGATATCTTGATCTCTCCAACACTGAGATCGAAGACCTTCCCAACT

CCATTTGCAAGCTCTACAATTTGCAAGCATTTAGAGTCAGTGGCTGTTT

>M6-PGSC0003DMG402011117M6LRR-RLP\_915

CTTCCCAACTCCATTTGCAAGCTCTACAATTTGCAAGCATTTAGAGTCAGTGGCTGTTCTTCACTCAGGAA

GCTTCCAGAAGAAATGGCAAATATGATAAGTTTGAGACACATATATTTT

>M6-PGSC0003DMG402011117M6LRR-RLP\_976

CACTCAGGAAGCTTCCAGAAGAAATGGCAAATATGATAAGTTTGAGACACATATATTTTGAATCAGCAA

TTCATGGTCAGTTTCAGATGCCACTTAATATGGGGCAATTGACCAGTCTTC

>M6-PGSC0003DMG402011794M6RLKWAX-EGF\_0

AGCAGAGTAGCCTCTAAACTGAACGTGTCTTATAGAGTCCCACAAAATTTTATTGTCTACAAACTCATA

TTGATTTGCGGTTGTGACTGGTTTCTTTAACGTACATTTCAACTCGAATT

>M6-PGSC0003DMG402011794M6RLKWAX-EGF\_1054

GATCATTAGAACAACCTCAAGTTGCAGCTGAACTTGTCTAGAGATGCCTTCAATTGAATGGTGAGGAAA

GACCTACGATGAAAGAAGTTGCAATTGAACTTGAACGTCTAAGGAAATTCA

>M6-PGSC0003DMG402011794M6RLKWAX-EGF\_1116

GAGGAAAGACCTACGATGAAAGAAGTTGCAATTGAACTTGAACGTCTAAGGAAATTCAACAAAAATCCT

TGGACACATGATCAACAATGACACGACGTGTCTGCTTGCTTAGTGGATGAA

>M6-PGSC0003DMG402011794M6RLKWAX-EGF\_1178

AAATCCTTGGACACATGATCAACAATGACACGACGTGTCTGCTTGCTTAGTGGATGAAAATGAACCGTT

GGATCTTTACAGCATTTCATGATGAGTCATACACAAATGCCAATGAAATTTT

>M6-PGSC0003DMG402011794M6RLKWAX-EGF\_124

ATGCAGGCTTCGGATTTGGCTTCTTGTCATTAATAATTGGTTTCGAGTTGGGTATACCTTATCTTCAAGAA

GAGGAAGCTCATCAGGCTTAGGGAGAAATTTCTTCCAACAAAATGGTGGCG

>M6-PGSC0003DMG402011794M6RLKWAX-EGF\_1240

AACCGTTGGATCTTTACAGCATTGATGATGAGTCATACACAAATGCCAATGAAATTTCCGGAACAATTCAA  
CTTGGATAGTTCTAATCTGATGATATTCCCAGGAAATAGTCCACGATGAT

>M6-PGSC0003DMG402011794M6RLKWAX-EGF\_1302

CAATTCAACTTGGATAGTTCTAATCTGATGATATTCCCAGGAAATAGTCCACGATGATCACGAGAATTGC  
ATCAATTATATCATAAAGAATTGACACCAAATATTTGCTTTATTGTTCT

>M6-PGSC0003DMG402011794M6RLKWAX-EGF\_1364

AGAATTGCATCAATTATATCATAAAGAATTGACACCAAATATTTGCTTTATTGTTCTTTTTATATTGATT  
TCCTCCCTTATGTGAAAGCTTGGGATTGTTGATTTTGAATTTTGC

>M6-PGSC0003DMG402011794M6RLKWAX-EGF\_186

TTCAAGAAGAGGAAGCTCATCAGGCTTAGGGAGAAATTTCCAACAAATGGTGGCGTACTAATGAAA  
CAACAAATCTCGTCAAATGAAGGTGGTGTAGAATCTGCCAAGATTTTCACG

>M6-PGSC0003DMG402011794M6RLKWAX-EGF\_248

AATGAAACAACAAATCTCGTCAAATGAAGGTGGTGTAGAATCTGCCAAGATTTTCACGGCGCAGGAGCT  
AGAGAAAGCTACCAACAAGTATGCAGACGATAGAATCCTTGGACGAGGTGG

>M6-PGSC0003DMG402011794M6RLKWAX-EGF\_310

AGGAGCTAGAGAAAGCTACCAACAAGTATGCAGACGATAGAATCCTTGGACGAGGTGGTTAAGGTACG  
GTTTACAAAGGATTTTACCTGATAAATGCATTGTTGCAATCAAAAAGTCGA

>M6-PGSC0003DMG402011794M6RLKWAX-EGF\_372

GGTACGGTTTACAAAGGATTTTACCTGATAAATGCATTGTTGCAATCAAAAAGTCGAGAATGATGGAT  
GACAGTCAAATAGAACAATTCATTAATGAGGTGATTATTCTTACTCAAGTT

>M6-PGSC0003DMG402011794M6RLKWAX-EGF\_434

GATGGATGACAGTCAAATAGAACAATTCATTAATGAGGTGATTATTCTTACTCAAGTTAATCATCGACAT  
GTGGTGAAACTTATAGGGTGTGTTTGAAGCAGAAGTTCCTTACTAGT

>M6-PGSC0003DMG402011794M6RLKWAX-EGF\_496

ATCGACATGTGGTGAAACTTATAGGGTGTGTTTGAAGCAGAAGTTCCTTACTAGTATACGAATACGT  
CTCTCATGGAACACTGTTCCAGCATATTTACAAGATAGATGGTGTACTTA

>M6-PGSC0003DMG402011794M6RLKWAX-EGF\_558

GAATACGTCTCTCATGGAACACTGTTCCAGCATATTTACAAGATAGATGGTGTACTTAGTAACTGGTTAT  
CGTGGGAGAATCGTTTAAAGGATTGGTGCAGAAGCTGCTGGCGCGCTTGCA

>M6-PGSC0003DMG402011794M6RLKWAX-EGF\_62

ACTCATACTTGATTTGCGGTTGTGACTGGTTTCTTTAACGTACATTTCAACTCGAATTA AAAATGCAGGCT  
TCGGATTTGGCTTCTTGTCAATAAATTGGTTCGAGTTGGGTATACCT

>M6-PGSC0003DMG402011794M6RLKWAX-EGF\_620

CTGGTTATCGTGGGAGAATCGTTTAAGGATTGGTGCAGAAGCTGCTGGCGCGCTTGCATACCTTTATTCT  
GCTGCATCAAAGCCTATTATACACAGGGACGTCAAGTCTGCTAACATACT

>M6-PGSC0003DMG402011794M6RLKWAX-EGF\_682

TTTATTCTGCTGCATCAAAGCCTATTATACACAGGGACGTCAAGTCTGCTAACATACTGTTAGATGAATAT  
TACACCGCGAAAATATCAGATTTTGGTTCATCGAGGCTAGTTCCATTAG

>M6-PGSC0003DMG402011794M6RLKWAX-EGF\_744

GATGAATATTACACCGCGAAAATATCAGATTTTGGTTCATCGAGGCTAGTTCCATTAGATCAAACACAAG  
TCACA ACTCTAGTCTAAGGTACGTTAGGATATCTAGATCCTGAATATTC

>M6-PGSC0003DMG402011794M6RLKWAX-EGF\_806

AACACAAGTCACA ACTCTAGTCTAAGGTACGTTAGGATATCTAGATCCTGAATATTTCCACACAAGTCAA  
TTAACTGAGAAGAGCGACTTCTACAGCTTTGGAGTTGTCCTGGCAGAACT

>M6-PGSC0003DMG402011794M6RLKWAX-EGF\_868

CAAGTCAATTA ACTGAGAAGAGCGACTTCTACAGCTTTGGAGTTGTCCTGGCAGAACTTCTAACCGGGA  
AAAAACCACTTTGCATGGAAAGAACACAAGAAGAACGAAATTTGGCAACTT

>M6-PGSC0003DMG402011794M6RLKWAX-EGF\_930

ACCGGGAAAAAACCACTTTGCATGGAAAGAACACAAGAAGAACGAAATTTGGCAACTTTATTTCTCATC  
GCTATGAAGGAGAATCGTCTGTTTAAAATTCTAGAGCCGAGATTATTGAGA

>M6-PGSC0003DMG402011794M6RLKWAX-EGF\_992

TCTCATCGCTATGAAGGAGAATCGTCTGTTTAAAATTCTAGAGCCGAGATTATTGAGAGAGGGATCATT  
AGAACA ACTTCAAGTTGCAGCTGAACTTGTCTAGAGATGCCTTCAATTGAA

>M6-PGSC0003DMG402012062M6LRR-RLP\_1358

GACGCGAATTGCTCCTCTTGTAAGAAATATTCTAATATTCTTGGGATAGTCGTCAGTTTCTTTAGCTGCAA  
ACCAAGGAATTTAGATTAAATAAATATAGGTAATATTCTAATATTTGTG

>M6-PGSC0003DMG402012981-(rev)M6RLKWAX-EGF\_0

GAGCTACGTGACTTACTTTTACTGTTTTTGGAGATGCCATCATGATTCTTATCCAATATCCTTTACTTCTGT

AGCCATATGGATTTGATGTTGGTCAATCAGAAAGGGGAACAGTCCTTA

>M6-PGSC0003DMG402012981-(rev)M6RLKWAX-EGF\_1037

ATCTAAATGATGAAGAATTGAATATCAGTATAAGAATAAATGTGAGATTTTAGAGAACCTCTAGTTGCA

GAGAAACTCTACTTGCCTTAAAAGAGAAACTATTTAGTTATTGTAATGAAA

>M6-PGSC0003DMG402012981-(rev)M6RLKWAX-EGF\_1098

TAGTTGCAGAGAACTCTACTTGCCTTAAAAGAGAACTATTTAGTTATTGTAATGAAATGTGCCCGAAT

AGAGCATGGATATAGAGGATTCATATTAATGTATTGGAATTGAGGCATAA

>M6-PGSC0003DMG402012981-(rev)M6RLKWAX-EGF\_1159

TGCCCGAATAGAGCATGGATATAGAGGATTCATATTAATGTATTGGAATTGAGGCATAATTGATTGAAA

GTATAATTGTGGTCACATTAATGAGATCATCCTGTACTTGATAGTCAGTGC

>M6-PGSC0003DMG402012981-(rev)M6RLKWAX-EGF\_122

GGATTAGATCTCGGTGTTCAAGGGATGCGAGTAGGAGGGCAGGTGAGACAATTACCTTAATTGTACTTT

CATCACATTCAGGATATTTCTCAATTGAACTGCATAACCTTCTAATGGAGT

>M6-PGSC0003DMG402012981-(rev)M6RLKWAX-EGF\_1220

GATTGAAAGTATAATTGTGGTCACATTAATGAGATCATCCTGTACTTGATAGTCAGTGCACAAAACATTT

AAGTATATGTAGGCTTTTCATCAGAATGTCCTTTAGGTTCTAGCTTTTCC

>M6-PGSC0003DMG402012981-(rev)M6RLKWAX-EGF\_1281

AAAACATTTAAGTATATGTAGGCTTTTCATCAGAATGTCCTTTAGGTTCTAGCTTTTCCCTGAGCTTAGAA

TAATGAACTACAATAATTAAGTCATAATTCAGGGTGTGCATGCCGATGA

>M6-PGSC0003DMG402012981-(rev)M6RLKWAX-EGF\_1342

GAGCTTAGAATAATGAACTACAATAATTAAGTCATAATTCAGGGTGTGCATGCCGATGACTGATGAAATT

TAACTCAGCATAGTTGCATCAATAATGATGGATTAATTACTTTACACGGA

>M6-PGSC0003DMG402012981-(rev)M6RLKWAX-EGF\_1403

GATGAAATTTAACTCAGCATAGTTGCATCAATAATGATGGATTAATTACTTTACACGGAGGCGATAACAT

TTGAAAATGAAAATGTTATGTATTTGCAGCGCCTGCTCATCGTTCCTCCT

>M6-PGSC0003DMG402012981-(rev)M6RLKWAX-EGF\_1464

CGATAACATTTGAAAATGAAAATGTTATGTATTTGCAGCGCCTGCTCATCGTTCCTCCTGAGCTAGCTTAT

GGGAAAAAAGGCGTGCAGGAAATTCCTCCAAATGCAACAATTGAGGTAT

>M6-PGSC0003DMG402012981-(rev)M6RLKWAX-EGF\_1525

GCTAGCTTATGGGAAAAAAGGCGTGCAGGAAATTCCTCAAATGCAACAATTGAGGTATCATTTTGTCTG  
TTGCATTCATGTGCTTATACCGAAATTCGAAGAAAGACTAATCTTGTTTAT

>M6-PGSC0003DMG402012981-(rev)M6RLKWAX-EGF\_1586

TTTTGTCTGTTGCATTCATGTGCTTATACCGAAATTCGAAGAAAGACTAATCTTGTTTATCAAATAGTTTCT  
GAAGGCCATTTGGATTCAACTGTTTTGCACCTATTGTGGTCTATTAAC

>M6-PGSC0003DMG402012981-(rev)M6RLKWAX-EGF\_1647

AATAGTTTCTGAAGGCCATTTGGATTCAACTGTTTTGCACCTATTGTGGTCTATTAACCTTTAAGTTGGT  
CTGTGGAATTCAAAATGCTGTCTTTACCTTTTCGCTATGAAAGATCATC

>M6-PGSC0003DMG402012981-(rev)M6RLKWAX-EGF\_1708

TTAAGTTGGTCTGTGGAATTCAAAATGCTGTCTTTACCTTTTCGCTATGAAAGATCATCATCACTCTTT  
TAGAATAACTTATCAGAATCATCAAATATGTGGCTAGCAGAAAACCTT

>M6-PGSC0003DMG402012981-(rev)M6RLKWAX-EGF\_1769

CATCACTCTTTTAGAATAACTTATCAGAATCATCAAATATGTGGCTAGCAGAAAACCTTTCTAATGGGAG  
CCTTCACAGTGAACCAGAGATTTGTGTTGATAGAAATATCGTGTTGGCAT

>M6-PGSC0003DMG402012981-(rev)M6RLKWAX-EGF\_183

TGTACTTTCATCACATTCAGGATATTTCTCAATTGAACTGCATAACCTTCTAATGGAGTTTCTGAGGAGA  
GGAATATGCTAAAGCTTGTTTTTTATATATTTTATTTTTCTAATTTG

>M6-PGSC0003DMG402012981-(rev)M6RLKWAX-EGF\_1830

TAATGGGAGCCTTCACAGTGAACCAGAGATTTGTGTTGATAGAAATATCGTGTTGGCATCTAACAGATG  
CAGAACATTCTTATCAACAGAAAAGTGTATTCTGCACGTATGGAATTTTAT

>M6-PGSC0003DMG402012981-(rev)M6RLKWAX-EGF\_1891

AACAGATGCAGAACATTCTTATCAACAGAAAAGTGTATTCTGCACGTATGGAATTTTATCTTTCTTGGGA  
AAAGTATGTGGGTGTGCAAAATACATCAGCCTCATAAAAGTGTAACCTC

>M6-PGSC0003DMG402012981-(rev)M6RLKWAX-EGF\_1952

TTCTTGGGAAAAGTATGTGGGTGTGCAAAATACATCAGCCTCATAAAAGTGTAACCTCCGAAAACAAA  
GATGACATAATCTTTAAAATATTCTTTTTTATGTGGTCACTTGTTAGCTTT

>M6-PGSC0003DMG402012981-(rev)M6RLKWAX-EGF\_2013

AAAACAAAGATGACATAATCTTTAAAATATTCTTTTTTATGTGGTCACTTGTTAGCTTTGTTCTTTGTA  
AAGAACGACCCCGAAGAAATGTTATATGAAAATTCTTTTAAGTCCTTT

>M6-PGSC0003DMG402012981-(rev)M6RLKWAX-EGF\_2074  
TCTTTGTAAAAAGAACGACCCCGAAGAAATGTTATATGAAAATTCTTTTAAGTCCTTTTCCAAACTGAGT  
GACATGTGCTTGAGCTAAACCTTTTAGAGAAATGAAAAACATAAAATCT  
>M6-PGSC0003DMG402012981-(rev)M6RLKWAX-EGF\_2135  
CAAAGTGGTGATATTGCAGTAGCCTGATAAACTAGCAACTTTGTAGTTTGAACGAAAACTCAAAGT  
GACATGTGCTTGAGCTAAACCTTTTAGAGAAATGAAAAACATAAAATCTGCTACCTCCTA  
CACATTCTCCCCCTTGAATAATGTGTGTCATCATGTTTTATAATATGGC  
>M6-PGSC0003DMG402012981-(rev)M6RLKWAX-EGF\_2196  
TACCTCCTACACATTCTCCCCCTTGAATAATGTGTGTCATCATGTTTTATAATATGGCTACAAAGTGGTG  
ATATTGCAGTAGCCTGATAAACTAGCAACTTTGTAGTTTGAACGAAAA  
>M6-PGSC0003DMG402012981-(rev)M6RLKWAX-EGF\_2257  
CAAAGTGGTGATATTGCAGTAGCCTGATAAACTAGCAACTTTGTAGTTTGAACGAAAACTCAAAGT  
AGAACAATGTAGAGAACTTCGATTAATAATTTGTGTCAAGACTGTAACGT  
>M6-PGSC0003DMG402012981-(rev)M6RLKWAX-EGF\_2318  
TCAAAGTGGTGATATTGCAGTAGCCTGATAAACTAGCAACTTTGTAGTTTGAACGAAAACTCAAAGT  
TCAAAGTGGTGATATTGCAGTAGCCTGATAAACTAGCAACTTTGTAGTTTGAACGAAAACTCAAAGT  
CCCACAATTAATAGCTGCACCTTGGATCACAACATCATTTCCTAACATCT  
>M6-PGSC0003DMG402012981-(rev)M6RLKWAX-EGF\_2379  
TACATAACCCCCACAATTAATAGCTGCACCTTGGATCACAACATCATTTCCTAACATCTAATAGGATCAGT  
TTTCTGCCCCAGTTCCGCGCAAGCTAGCCCAAACACCACCTCTACCCAA  
>M6-PGSC0003DMG402012981-(rev)M6RLKWAX-EGF\_244  
CCTGAGGAGAGGAATATGCTAAAGCTTGTTTTTTATATATTTTATTTTTCTAATTTGAAGAGTCAACTT  
CATGCCCCCGTGAACCTCCTGCTCTAATTGTGTGATCAATATTCAACT  
>M6-PGSC0003DMG402012981-(rev)M6RLKWAX-EGF\_2440  
TAGGATCAGTTTTCTGCCCCAGTTCCGCGCAAGCTAGCCCAAACACCACCTCTACCCAAAAGAACGGAAA  
TATCAGTTTTCCGCCACGCCTTTTTGCAAGTTTCATCTCTCATAGTTTAC  
>M6-PGSC0003DMG402012981-(rev)M6RLKWAX-EGF\_2501  
GAACGGAAATATCAGTTTTCCGCCACGCCTTTTTGCAAGTTTCATCTCTCATAGTTTACTTATTCTCGAAAT  
GGATGGTATTGTCTCTAACATTATTATGTGGTCATTGTATCTTTATTA  
>M6-PGSC0003DMG402012981-(rev)M6RLKWAX-EGF\_2562  
ATTCTCGAAATGGATGGTATTGTCTCTAACATTATTATGTGGTCATTGTATCTTTACTTCTTTACCTA



CTGAATTTTAAATCTACAGATGGATATTGAACTGCTGTCTATTAACA

>M6-PGSC0003DMG402012981-(rev)M6RLKWAX-EGF\_2623

TCTTTCACCTACTGAATTTTAAATCTACAGATGGATATTGAACTGCTGTCTATTAACAAAGCCCATTCGG

GTGAGCAGCCAACTTTTAGAATATTCAAAAATTAATGGACTTGTTTCT

>M6-PGSC0003DMG402012981-(rev)M6RLKWAX-EGF\_2684

GCCCATTCGGGTGAGCAGCCAACTTTTAGAATATTCAAAAATTAATGGACTTGTTTCTTTGATTTAGCTT

CATTGTCCTCAGCATCTTATGTATTTACTGTAAATTCCTTTTTTTTTCTT

>M6-PGSC0003DMG402012981-(rev)M6RLKWAX-EGF\_2745

GATTTAGCTTCATTGTCCTCAGCATCTTATGTATTTACTGTAAATTCCTTTTTTTTTCTTTTCGGTGCAGAACTC

CTGTCAAAATTGTTGAAGGATAACCCACAGTGTTACCCACTTCATGT

>M6-PGSC0003DMG402012981-(rev)M6RLKWAX-EGF\_2806

GGTGCAGAACTCCTGTCAAAATTGTTGAAGGATAACCCACAGTGTTACCCACTTCATGTTATATTGATTC

ATCACCTGCAAAAGCACTCAGCCTATTGTATGAATTTTGAGAATACTAAG

>M6-PGSC0003DMG402012981-(rev)M6RLKWAX-EGF\_2867

TATTGATTCATCACCTGCAAAAGCACTCAGCCTATTGTATGAATTTTGAGAATACTAAGAGATCTGCTTCT

GATTTGGTATTTTACCAGGAAAATGTCCCTAAATATGTTAATATTGTAT

>M6-PGSC0003DMG402012981-(rev)M6RLKWAX-EGF\_2928

ATCTGCTTCTGATTTGGTATTTTACCAGGAAAATGTCCCTAAATATGTTAATATTGTATAGTTCAAACCTCA

TTGTCATGTTATGAGATTCAAATTGCTTTGAGCATATAAAAGTGCTGTG

>M6-PGSC0003DMG402012981-(rev)M6RLKWAX-EGF\_2989

TTCAAACCTCATTGTCATGTTATGAGATTCAAATTGCTTTGAGCATATAAAAGTGCTGTGAGGACTTGTTCC

GATAATAACCCCAAAGAAATGCCAGTGAGAAAATTCAGATATAGATAACT

>M6-PGSC0003DMG402012981-(rev)M6RLKWAX-EGF\_305

GAGTCAACTTCATGCCCCCGTGAACCTCCTGCTCTAATTGTGTGATCAATATTCAACTGCTAAAGTTTTTC

TAAGCTTTTCAGTGTTAGCTTCTCAAATGAGAAAATGGGAACAATTT

>M6-PGSC0003DMG402012981-(rev)M6RLKWAX-EGF\_3050

GACTTGTTGATAATAACCCCAAAGAAATGCCAGTGAGAAAATTCAGATATAGATAACTGAATTAACCA

GGGGTGAAGCAACTAGTTCAGAGATATAAATAGTACAAAAGACATTAAG

>M6-PGSC0003DMG402012981-(rev)M6RLKWAX-EGF\_3111

ATTAACCAGGGTGAAGCAACTAGTCCAGAGATATAAATAGTACAAAAGACATTAAGATTTAGTTTA  
GGACAAATTCAGCTCTGTAAGAGTCATTTAGGTGTCAAATTTACCGTCTT

>M6-PGSC0003DMG402012981-(rev)M6RLKWAX-EGF\_3172

TTAGTTTAGGACAAATTCAGCTCTGTAAGAGTCATTTAGGTGTCAAATTTACCGTCTTGGACAAAATTCT  
TAGCTTCTCATTGGCTAGATTATGACATTTATAGTGTCTACCAAGATGG

>M6-PGSC0003DMG402012981-(rev)M6RLKWAX-EGF\_3233

ACAAAATTCTTAGCTTCTCATTGGCTAGATTATGACATTTATAGTGTCTACCAAGATGGCTTATACTTCTC  
ATTATGGCTTGCGGTCCTCTCTCTTTATAGATTTTAGTACTGAATTTT

>M6-PGSC0003DMG402012981-(rev)M6RLKWAX-EGF\_3294

TATACTTCTCATTATGGCTTGCGGTCCTCTCTCTTTATAGATTTTAGTACTGAATTTTATATTGGCACAGT  
CGTTTACATACTTCTTGCAGACTGCATTATTATATAGTGATGAAGTAA

>M6-PGSC0003DMG402012981-(rev)M6RLKWAX-EGF\_3355

ATTGGCACAGTCGTTTACATACTTCTTGCAGACTGCATTATTATATAGTGATGAAGTAATAGAGGACTGC  
TGCACATGTATATTTATTGACAACTTGCAAAGTAATTATGTGGAAGTAA

>M6-PGSC0003DMG402012981-(rev)M6RLKWAX-EGF\_3416

GAGGACTGCTGCACATGTATATTTATTGACAACTTGCAAAGTAATTATGTGGAAGTAAATCATCCTTAG  
AATTCGATTCTCTGTCATTATCCTCCTTTAGGCAAGTTCTTACCTTAATA

>M6-PGSC0003DMG402012981-(rev)M6RLKWAX-EGF\_3477

CATCCTTAGAATTCGATTCTCTGTCATTATCCTCCTTTAGGCAAGTTCTTACCTTAATAAGCAAAGATTATA  
TACCTCTTTCCAGAAAGTGGTAATTGAATTGCAGGTATAATAAAAATA

>M6-PGSC0003DMG402012981-(rev)M6RLKWAX-EGF\_366

TAAAGTTTTCTAAGCTTTTCAGTGTTAGCTTCTCAAATGAGAAAATGGGAACAATTTGAAATGAAAAT  
CCAACACTATTGCTGAAGTCAGATCAAAGAAGAAGAAATAAAAATAGGAT

>M6-PGSC0003DMG402012981-(rev)M6RLKWAX-EGF\_3721

AGATAAGAATCCCTTTGCTCAATGATTGCCAAATCTTTTGGCTTTTACTAGATTCTTTTGAATACTTCCTTT  
TCATTTTTTCATTCACCCACTTTATTCTCTTTCTTTGCCTATATTCAC

>M6-PGSC0003DMG402012981-(rev)M6RLKWAX-EGF\_3782

ATACTTCCTTTTCATTTTTTCATTCACCCACTTTATTCTCTTTCTTTGCCTATATTCACCCCCTTATGAAATCC  
TTTCTACCATAATATTTTCAACCTCTTCTTTGCTCTCACAAAATGA

>M6-PGSC0003DMG402012981-(rev)M6RLKWAX-EGF\_3843  
CCTTATGAAATCCTTTCTACCATAATATTTTCAACCTCTTCTTTGCTCTCACAAAATGACCATGACTATTCTT  
TACAGGAGGAAAACCTAACCTGTATGTCTTACTGTTACTCCACTTATT

>M6-PGSC0003DMG402012981-(rev)M6RLKWAX-EGF\_3904  
ATGACTATTCTTTACAGGAGGAAAACCTAACCTGTATGTCTTACTGTTACTCCACTTATTTTGTACTCTTGT  
TCCAAAAGACATGTCCAACTGTGGTTCTCTAGAGGTTCCATATCCC

>M6-PGSC0003DMG402012981-(rev)M6RLKWAX-EGF\_3965  
GTTACTCTTGTTCCTAAAAGACATGTCCAACTGTGGTTCTCTAGAGGTTCCATATCCCTTGAGCACGAAT  
CCCAACTGTGGCAACCCTGACTATTCTATCCGTTGTGATCCTCACTCTC

>M6-PGSC0003DMG402012981-(rev)M6RLKWAX-EGF\_4026  
GAGCACGAATCCCAACTGTGGCAACCCTGACTATTCTATCCGTTGTGATCCTCACTCTCACAAGCTCTATC  
TTGATACCCTTAATGGAAGCTCTTATGTCATCCTCAGAATTATGGCCTC

>M6-PGSC0003DMG402012981-(rev)M6RLKWAX-EGF\_4087  
AAGCTCTATCTTGATACCCTTAATGGAAGCTCTTATGTCATCCTCAGAATTATGGCCTCGTTCAGCGTAT  
GGTGGTGCAATCATCACCTGGATGCCTGGTACCTGTGTTACACAAGAC

>M6-PGSC0003DMG402012981-(rev)M6RLKWAX-EGF\_4148  
TCCAGCGTATGGTGGTGAATCATCACCTGGATGCCTGGTACCTGTGTTACACAAGACATGTCAGTGA  
GTGAGGGACTGTGGTTGAACCAGACTCTTCCATTTAACGTTACTTCTTCTA

>M6-PGSC0003DMG402012981-(rev)M6RLKWAX-EGF\_4209  
GTCAGTGAGTGAGGGACTGTGGTTGAACCAGACTCTTCCATTTAACGTTACTTCTTCTAACACTATCTTCT  
TATTTAATTGTTCTCCTCGTCTTCTAGTATCCCCTTTAAATTGCACACC

>M6-PGSC0003DMG402012981-(rev)M6RLKWAX-EGF\_4270  
ACTATCTTCTTATTTAATTGTTCTCCTCGTCTTCTAGTATCCCCTTTAAATTGCACACCTTCTAGCTTGTGCC  
ATAAATATCTGCTTAGCTCTGGACATGTAGATGCTAAAAGGGAACCTT

>M6-PGSC0003DMG402012981-(rev)M6RLKWAX-EGF\_4331  
CTAGCTTGTGCCATAAATATCTGCTTAGCTCTGGACATGTAGATGCTAAAAGGGAACCTCAGTGTGCAAG  
TGGTGTATCCATGTTGCACATTTATTGCTGGCGGTATGCCCTCAGCAT

>M6-PGSC0003DMG402012981-(rev)M6RLKWAX-EGF\_4392  
GTGTGCAAGTGGTGTATCCATGTTGCACATTTATTGCTGGCGGTATGCCCTCAGCATACAAGATACGC

CTGCATATCTCGGGTTGCCAAGCATTTAGAAGCATTCTACACTTGGATGC

>M6-PGSC0003DMG402012981-(rev)M6RLKWAX-EGF\_4453

AAGATACGCCTGCATATCTCGGGTTGCCAAGCATTTAGAAGCATTCTACACTTGGATGCTATGAAGCCAG

CTAATGAATGGGAGGAGGGACTGGAAATCAATGGTCTCCTCCACCCGAG

>M6-PGSC0003DMG402012981-(rev)M6RLKWAX-EGF\_4514

TGAAGCCAGCTAATGAATGGGAGGAGGGACTGGAAATCAATGGTCTCCTCCACCCGAGCCACACTGTA

AATCACAATCTGATTGCTCTGGAGCTTCTACATGTTACCTTCTGGTAAAA

>M6-PGSC0003DMG402012981-(rev)M6RLKWAX-EGF\_4575

ACACTGTAAATCACAATCTGATTGCTCTGGAGCTTCTACATGTTACCTTCTGGTAAAAACGGTGTCTTTC

GCTGTTTTTGCAATCGTGACTATTATTGGAACAGAAGTCAAGGAAATTG

>M6-PGSC0003DMG402012981-(rev)M6RLKWAX-EGF\_4636

GGTGTCTTTCGCTGTTTTTGCAATCGTGACTATTATTGGAACAGAAGTCAAGGAAATTGCATGAAGAAG

AAACACTCTGGTTTTGTATTAATATATCTATTGGGATTGCCTTGTTTTTG

>M6-PGSC0003DMG402012981-(rev)M6RLKWAX-EGF\_4697

TGAAGAAGAAACACTCTGGTTTTGTATTAATATATCTATTGGGATTGCCTTGTTTTTGGCTTTTGCTGTT

GTGGTGATTGCAGTGGCTTTGAAAAGATCAGGAAGAGTCTCAGCCAGGG

>M6-PGSC0003DMG402012981-(rev)M6RLKWAX-EGF\_4758

TTTTGCTGTTGTGGTGATTGCAGTGGCTTTGAAAAGATCAGGAAGAGTCTCAGCCAGGGCTAGGCTTGC

TAAGGCAAGAGAAGACATTCTAAAATCAAACAATGGTGGAAAACCGGCCAG

>M6-PGSC0003DMG402012981-(rev)M6RLKWAX-EGF\_4819

AGGCTTGCTAAGGCAAGAGAAGACATTCTAAAATCAAACAATGGTGGAAAACCGGCCAGGATGTTTTGT

CTTAAGGAGATGAAGAAAGCTACAAATGGATTCTCAAAGACAGAATCTTG

>M6-PGSC0003DMG402012981-(rev)M6RLKWAX-EGF\_4880

TGTTTTGTCTTAAGGAGATGAAGAAAGCTACAAATGGATTCTCAAAGACAGAATCTTGGGCCATGGTG

GTTTCGGAGAAGTTTATAAAGGCGAGCTTCAGGATGGAACGATTGTAGCAG

>M6-PGSC0003DMG402012981-(rev)M6RLKWAX-EGF\_4941

CCATGGTGGTTTTCGGAGAAGTTTATAAAGGCGAGCTTCAGGATGGAACGATTGTAGCAGTAAAGTTAG

CCAAAGTGGGAAATGTCAAGAGCACTCAACAAGTACTCAATGAAGTTGGGAT

>M6-PGSC0003DMG402012981-(rev)M6RLKWAX-EGF\_5002

AAGTTAGCCAAAGTGGGAAATGTCAAGAGCACTCAACAAGTACTCAATGAAGTTGGGATCCTTTCTCAA  
GTAAATCACAGAAACCTGGTCAAGCTTTTAGGGTGCTGCATAGAAGCTGAA

>M6-PGSC0003DMG402012981-(rev)M6RLKWAX-EGF\_5063

TTTCTCAAGTAAATCACAGAAACCTGGTCAAGCTTTTAGGGTGCTGCATAGAAGCTGAACAGCCTTTGAT  
GATTTACGAATACATTTCCAACGGAACCCTCCAAGATCATCTTCATGGTA

>M6-PGSC0003DMG402012981-(rev)M6RLKWAX-EGF\_5124

GCCTTTGATGATTTACGAATACATTTCCAACGGAACCCTCCAAGATCATCTTCATGGTAAGTACTCCACCT  
TTCTTGACTGGAAAACAAGGTTGAAAATTGCTTCACAACTGCAGAAGC

>M6-PGSC0003DMG402012981-(rev)M6RLKWAX-EGF\_5185

TACTCCACCTTTCTTGACTGGAAAACAAGGTTGAAAATTGCTTCACAACTGCAGAAGCATTGGCTTATC  
TTCACTCAGCTGCTTACCCTCCCATCTACCATAGAGATGTCAAATCTACA

>M6-PGSC0003DMG402012981-(rev)M6RLKWAX-EGF\_5246

TGGCTTATCTTCACTCAGCTGCTTACCCTCCCATCTACCATAGAGATGTCAAATCTACAAACATACTCCTG  
GATAACGAATTCAATGCCAAAGTTTCCGACTTTGGGATATCAAGATTGG

>M6-PGSC0003DMG402012981-(rev)M6RLKWAX-EGF\_5307

CATACTCCTGGATAACGAATTCAATGCCAAAGTTTCCGACTTTGGGATATCAAGATTGGCTTGTCCAGGG  
TTGAGTCATGTGTCCACTTGTGCTCAGGGTACATTAGGTTACTTAGACCC

>M6-PGSC0003DMG402012981-(rev)M6RLKWAX-EGF\_5368

TGTCCAGGGTTGAGTCATGTGTCCACTTGTGCTCAGGGTACATTAGGTTACTTAGACCCTGAATATTTTC  
GCAACTACCAGCTAACCGATAAAAGTGATGTTTACAGCTTTGGGGTTGTG

>M6-PGSC0003DMG402012981-(rev)M6RLKWAX-EGF\_5429

AATATTTTCGCAACTACCAGCTAACCGATAAAAGTGATGTTTACAGCTTTGGGGTTGTGTTACTAGAATT  
TCTTACTTCTCAGAAGGCAGTTGACTTCTCACGAGACGAAAATAGTGCA

>M6-PGSC0003DMG402012981-(rev)M6RLKWAX-EGF\_5490

ACTAGAATTTCTTACTTCTCAGAAGGCAGTTGACTTCTCACGAGACGAAAATAGTGCAACTTGGTCTCTT  
ATGTCAATCAGCAAGAAAACCACGGTTCAGTTATGGATGTAGTGGACAG

>M6-PGSC0003DMG402012981-(rev)M6RLKWAX-EGF\_5551

TTGGTCTCTTATGTCAATCAGCAAGAAAACCACGGTTCAGTTATGGATGTAGTGGACAGGCGCTTGCTTG  
GCGAGGAGCCTTTGACTAATGTA ACTACTGGTATGGACTCGTTCCTTGCCG

>M6-PGSC0003DMG402012981-(rev)M6RLKWAX-EGF\_5612  
GCTTGCTTGGCGAGGAGCCTTTGACTAATGTA ACTACTGGTATGGACTCGTTCTTGGCGCTTGCACCTTC  
GTGTTTAAGAGAAACGAAGACAGAGAGACCCTGCATGAAAGATGTAGTTC

>M6-PGSC0003DMG402012981-(rev)M6RLKWAX-EGF\_5673  
TGCACTTTCGTGTTTAAGAGAAACGAAGACAGAGAGACCCTGCATGAAAGATGTAGTTCAGCAACTTCA  
CTGCATAAGTGAAATAGTTGATCAAGAAGAGCCTATTGAGGTTAGTTAGAA

>M6-PGSC0003DMG402012981-(rev)M6RLKWAX-EGF\_5734  
CAACTTCACTGCATAAGTGAAATAGTTGATCAAGAAGAGCCTATTGAGGTTAGTTAGAAGTATCATAGT  
CCTAGAAGAAAAAAAATGTCACTGGTCTTGATCTTTTAAAATTCATATTA

>M6-PGSC0003DMG402012981-(rev)M6RLKWAX-EGF\_5795  
ATCATAGTCCTAGAAGAAAAAAAATGTCACTGGTCTTGATCTTTTAAAATTCATATTAGTGTAAGAAG  
AATTTTATAAAAGGCATGGATCTTTTTGTTGTACTTTGAGGTTGGGATCA

>M6-PGSC0003DMG402012981-(rev)M6RLKWAX-EGF\_5856  
GTAAAGAAGAATTTTATAAAAGGCATGGATCTTTTTGTTGTACTTTGAGGTTGGGATCAGATGCTTCTTT  
TTCTTACACTGGAAAAGTTAAAGAAGGGACCGTTAGTAAAGTTGTTGTCA

>M6-PGSC0003DMG402012981-(rev)M6RLKWAX-EGF\_61  
TTACTTCCTGTAGCCATATGGATTTGATGTTGGTCAATCAGAAAGGGGAACAGTCCTTAAAGGATTAGAT  
CTCGGTGTTCAAGGGATGCGAGTAGGAGGGCAGGTGAGACAATTACCTTA

>M6-PGSC0003DMG402012981-(rev)M6RLKWAX-EGF\_976  
ATAAGACTTAGTTGTTATTATTACACTCACATTAGGTTTGACTTTTCCACAAGTCCTCCTTATCTAAATGAT  
GAAGAATTGAATATCAGTATAAGAATAAATGTGAGATTTTAGAGAACC

>M6-PGSC0003DMG402013876-(rev)M6G-LecRK\_0  
TTAGTCCTCTATCAGACTTCCCCAAAGTTTCATTGCCATCACCTAGGAACTTTCTTTATTCTTCTCTTTTCG  
TTTTTATGTAGTAGTGAGAAATGAAGATAATATTGGTTCTCTTGCTT

>M6-PGSC0003DMG402013876-(rev)M6G-LecRK\_1037  
GTTTAAATCAGATTGGGATATTAGAACTATTGAGGTGGGTGTGTGAGAAAAATTCCAATGCAGTGTGG  
CAGCAATAACAAAAAATTTGTCCGTATGCCAAATGTTAACTTCCTGTGTC

>M6-PGSC0003DMG402013876-(rev)M6G-LecRK\_1098  
CAGTGTGGCAGCAATAACAAAAAATTTGTCCGTATGCCAAATGTTAACTTCCTGTGTGCATCTCAATCAA

TGAAAGGAGTAAATGATCAGATCTGTGAATATATATGTTTCATCCAATTGC

>M6-PGSC0003DMG402013876-(rev)M6G-LecRK\_1159

CTCAATCAATGAAAGGAGTAAATGATCAGATCTGTGAATATATATGTTTCATCCAATTGCTCATGCAATGC

TTATGCTTACAGCAATAGTGGAGAGTGCTTATTATGGTATAGCGATTTGA

>M6-PGSC0003DMG402013876-(rev)M6G-LecRK\_122

TTACTTTCATTTAGTTAGCTGCAATAGTACACGTTTCAGATACCTTGTTGCCTGGCCAGTCCTTTTCTTTTC

TGCAGAAGATACTTTAGTATCCAAACAAGGGAAGTTTGAAGTTCGGTTT

>M6-PGSC0003DMG402013876-(rev)M6G-LecRK\_1220

ATGCAATGCTTATGCTTACAGCAATAGTGGAGAGTGCTTATTATGGTATAGCGATTTGATTGATCTGTCA

ATATTACCTAATAATTCAAGTCAAGTAGAGTTCAACATTAAGCTTTTTGA

>M6-PGSC0003DMG402013876-(rev)M6G-LecRK\_1281

GATCTGTCAATATTACCTAATAATTCAAGTCAAGTAGAGTTCAACATTAAGCTTTTTGAGCGCTCGAACA

AAGTTAGGTGCTTCCAAGCTGCATCTTATTTCTAATGTGCTCCTTTTCA

>M6-PGSC0003DMG402013876-(rev)M6G-LecRK\_1342

GCTCGAACAAGGTTAGGTGCTTCCAAGCTGCATCTTATTTCTAATGTGCTCCTTTTCAACCAAAAATATG

TTATTTTCTCCTTTCTTGATCTTCTTAATGTTTAGGAAAGAAGAAAC

>M6-PGSC0003DMG402013876-(rev)M6G-LecRK\_1403

CAAAAATATGTTATTTTCTCCTTTCTTGATCTTCTTAATGTTTAGGAAAGAAGAACTACTACTGGTAG

CGCTAGTAGTGTCCATCACTTCTGCAAGTTTTGTCTGTGGTACATGCTG

>M6-PGSC0003DMG402013876-(rev)M6G-LecRK\_1464

CTACTGGTAGCGCTAGTAGTGTCCATCACTTCTGCAAGTTTTGTCTGTGGTACATGCTGTTACTTTCTATG

GAGAATAAACTCAAGGAAAAGGTACATTCTAATTCTTGCTAGTAGCA

>M6-PGSC0003DMG402013876-(rev)M6G-LecRK\_1525

ACTTTCTATGGAGAATAAACTCAAGGAAAAGGTACATTCTAATTCTTGCTAGTAGCAGTTGAGTAACT

TAAGTTTCACTTCTATTTGGCATGACTGAAAGAGGTCAATCAAAAATGTAA

>M6-PGSC0003DMG402013876-(rev)M6G-LecRK\_1586

TGAGTAACTTAAGTTTCACTTCTATTTGGCATGACTGAAAGAGGTCAATCAAAAATGTAACCTTTGATTTAA

TTAGTCATGGAAAGGAAATTATTTCTCTGAATCATGCTTAGATAAAAAG

>M6-PGSC0003DMG402013876-(rev)M6G-LecRK\_1647

TTTGATTTAATTAGTCATGGAAAGGAAATTATATTCTCTGAATCATGCTTAGATAAAAAGTTAAAATTGCC  
ATGTCCAGCTTCTTCTAAACTCATCAATAAACTTCCTGTTTATATTGAT

>M6-PGSC0003DMG402013876-(rev)M6G-LecRK\_1708

AAAATTGCCCATGTCCAGCTTCTTCTAAACTCATCAATAAACTTCCTGTTTATATTGATTTACATCAGGGAT  
TTTGGGAAGGAAAAAGTTCAGGGAAATGTTACTTTCTAAATCAGCAAC

>M6-PGSC0003DMG402013876-(rev)M6G-LecRK\_1769

ACATCAGGGATTTTGGGAAGGAAAAAGTTCAGGGAAATGTTACTTTCTAAATCAGCAACTAACTTATCA  
AAACCTGGAACCTCCAGTAAAATGGGACAAGAAAAGAAACGTTCCATCGAG

>M6-PGSC0003DMG402013876-(rev)M6G-LecRK\_1830

ACTTATCAAAACCTGGAACCTCCAGTAAAATGGGACAAGAAAAGAAACGTTCCATCGAGCTGAAGTTCT  
TTGAATTACGTGAGTTGAAAGCTGTGACAGACAATTTTTACCTGACAATA

>M6-PGSC0003DMG402013876-(rev)M6G-LecRK\_1891

GAAGTTCTTTGAATTACGTGAGTTGAAAGCTGTGACAGACAATTTTTACCTGACAATAAGCTTGGAGAA  
GGAGGTTTTGGGCCTGTTTTTAAGGTATTGTTACTACATAAGAAAATATA

>M6-PGSC0003DMG402013876-(rev)M6G-LecRK\_1952

CTTGAGAAGGAGGTTTTGGGCCTGTTTTTAAGGTATTGTTACTACATAAGAAAATATATTGACAACCTG  
AATAACTGCAACACTAAATTCTACTCAGGCCCAAAGAAAATGGGAAAAAG

>M6-PGSC0003DMG402013876-(rev)M6G-LecRK\_2013

GACAACCTGAATAACTGCAACACTAAATTCTACTCAGGCCCAAAGAAAATGGGAAAAAGTCCCTCTTGA  
GGTGAACAGGTAGCGTAATGGTTTTAACTAAAATCTTTTCCATACTTGTGT

>M6-PGSC0003DMG402013876-(rev)M6G-LecRK\_2074

CCTCTTGAGGTGAACAGGTAGCGTAATGGTTTTAACTAAAATCTTTTCCATACTTGTGTTTTAATGGTGTG  
ATTAATTGCATTGCAATTTCTAGGGTCAATTGCCAGATGGGCAGAAAAT

>M6-PGSC0003DMG402013876-(rev)M6G-LecRK\_2135

TAATGGTGTGATTAATTGCATTGCAATTTCTAGGGTCAATTGCCAGATGGGCAGAAAATAGCTGTGAAA  
AGGCTATCAACTCAATCACAGCAAGGAATTAGTGAATTCAAACTGAGGTC

>M6-PGSC0003DMG402013876-(rev)M6G-LecRK\_2196

CTGTGAAAAGGCTATCAACTCAATCACAGCAAGGAATTAGTGAATTCAAACTGAGGTCCTTCTCATTGC  
TAAACTTCAACACAGAAATCTTGTTAGGTTTCTTGGCTGCTGTGAAGAAG



>M6-PGSC0003DMG402013876-(rev)M6G-LecRK\_2257

TCTCATTGCTAAACTTCAACACAGAAATCTTGTTAGGTTTCTTGGCTGCTGTGAAGAAGACGAGGAGAAA  
ATGTTGATCTATGAATATATGCCAAACAAAAGTCTAGACTATTTTCATATT

>M6-PGSC0003DMG402013876-(rev)M6G-LecRK\_2318

GAGGAGAAAATGTTGATCTATGAATATATGCCAAACAAAAGTCTAGACTATTTTCATATTTGGTATGATAA  
TTACTACTATCTGTTTTTGTGTTAACCTTTCCTCCTAAGTAGTGCTTA

>M6-PGSC0003DMG402013876-(rev)M6G-LecRK\_2379

GTATGATAATTTACTACTATCTGTTTTTGTGTTAACCTTTCCTCCTAAGTAGTGCTTACTGGATAAATTTG  
ATATGAGCAACTTAGACGAGAGCAGGAAGTCATTGCTTGATTGGAGAA

>M6-PGSC0003DMG402013876-(rev)M6G-LecRK\_244

TCTGTCCAGGTAATTGTGAAAAGCTTTTTATTGGTATATGGTATACAAACATAAAGCCCAAACTGTGGT  
TTGGATAGCAAATAGGGACAATCCTATTCGTCCTCCGTTCAATAATTCTC

>M6-PGSC0003DMG402013876-(rev)M6G-LecRK\_2440

GGATAAATTTGATATGAGCAACTTAGACGAGAGCAGGAAGTCATTGCTTGATTGGAGAAGGCGGTATG  
AAATCATTATTGGAATCGCTAGAGGGATACTCTATCTTCATCAGGACTCAAG

>M6-PGSC0003DMG402013876-(rev)M6G-LecRK\_2501

CGGTATGAAATCATTATTGGAATCGCTAGAGGGATACTCTATCTTCATCAGGACTCAAGATTAAGAATAA  
TACACCGTGATCTGAAAGCCAGCAACATTCTTTTAGATGAAGCTATGAAC

>M6-PGSC0003DMG402013876-(rev)M6G-LecRK\_2562

TAAGAATAATACACCGTGATCTGAAAGCCAGCAACATTCTTTTAGATGAAGCTATGAACCCCAAGATATC  
AGATTTTGGTACTGCTCGAATATTTAGTGGAACCAGAATGAAGCTAAGA

>M6-PGSC0003DMG402013876-(rev)M6G-LecRK\_2623

CAAGATATCAGATTTTGGTACTGCTCGAATATTTAGTGGAACCAGAATGAAGCTAAGACTTTCGAGTT  
GTTGGAACATAGTAAGCAAGAAAATACCAAAGGGATTTCTCTGTGCGCAT

>M6-PGSC0003DMG402013876-(rev)M6G-LecRK\_2684

CTTCGAGTTGTTGGAACATAGTAAGCAAGAAAATACCAAAGGGATTTCTCTGTGCGCATCCTTACCATTT  
TTCAATACTTGGCTCATTATTGCCCTTTTCCTTGCAGTGCCTATATGTC

>M6-PGSC0003DMG402013876-(rev)M6G-LecRK\_2745

TTACCATTTTTCAATACTTGGCTCATTATTGCCCTTTTCCTTGCAGTGCCTATATGTCACCTGAATATGCT

CGAGCTGGTCTCTTCTCAGTAAAATCTGATGTCTTTAGCTTTGGTGTT

>M6-PGSC0003DMG402013876-(rev)M6G-LecRK\_2806

CTGAATATGCTCGAGCTGGTCTCTTCTCAGTAAAATCTGATGTCTTTAGCTTTGGTGTTATATTATTGGAG  
ATCATAAGTGGCAAAGGAACATGGTCTCTTATAATAGTGATTCCCCTC

>M6-PGSC0003DMG402013876-(rev)M6G-LecRK\_2867

ATTATTGGAGATCATAAGTGGCAAAGGAACATGGTCTCTTATAATAGTGATTCCCCTCCAAATTTGATA  
CGACGGGTGAGTTTTAAGATAACAACATTTGAAACTATCTTTTGATTTAAT

>M6-PGSC0003DMG402013876-(rev)M6G-LecRK\_2928

AATTTGATACGACGGGTGAGTTTTAAGATAACAACATTTGAAACTATCTTTTGATTTAATAATCATACTTAT  
TTTCTAAATGAACTGCTGCTTCAGGCCTGGGAGTTGTGGAATGATGGTA

>M6-PGSC0003DMG402013876-(rev)M6G-LecRK\_305

AACTGTGGTTTGGATAGCAAATAGGGACAATCCTATTCGTCCTCCGTTCAATAATTCTCATCTAGAGCTG  
TCTGATGGAAATCTACAACCTTTGGATGCACGTAAACAAAGAGTTTGGAG

>M6-PGSC0003DMG402013876-(rev)M6G-LecRK\_366

CTAGAGCTGTCTGATGGAAATCTACAACCTTTGGATGCACGTAAACAAAGAGTTTGGAGTTCTAGTTTAT  
CCACACCTTCAGCATATGCCAATAAAGCAGTACTTCTTGACTCTGGAAAT

>M6-PGSC0003DMG402013876-(rev)M6G-LecRK\_427

CTAGTTTATCCACACCTTCAGCATATGCCAATAAAGCAGTACTTCTTGACTCTGGAAATCTTGTTTTGACA  
AATGGCATTGACAGACAGTGGCAGAGCTTTAATTATCCTACAGATACGT

>M6-PGSC0003DMG402013876-(rev)M6G-LecRK\_488

TGTTTTGACAAATGGCATTGACAGACAGTGGCAGAGCTTTAATTATCCTACAGATACGTGGCTGCCTGGT  
GTGATGATTGGATTTAATAAGTCCAAGAACACACTCCAGAACTTACTTC

>M6-PGSC0003DMG402013876-(rev)M6G-LecRK\_549

CTGCCTGGTGTGATGATTGGATTTAATAAGTCCAAGAACACACTCCAGAACTTACTTCTTGAGGGATC  
TGAATGATCCAGCTTCAGGAAGCTACTCTTTGCAATTAGGCCAGAATCAA

>M6-PGSC0003DMG402013876-(rev)M6G-LecRK\_61

TCTTCTCTTCGTTTTTATGTAGTAGTGAGAAATGAAGATAATATTGGTTCTCTTGCTTCTTACTTTCATT  
AGTTAGCTGCAATAGTACACGTTTCAGATACCTTGTTGCCTGGCCAGT

>M6-PGSC0003DMG402013876-(rev)M6G-LecRK\_610

GGAGGGATCTGAATGATCCAGCTTCAGGAAGCTACTCTTTGCAATTAGGCCAGAATCAAAATGGTGAGT  
TAGTTGTTCAACATAATTTCCAGGAAGAATGGAGGTCTGGGCCTTGGAATG

>M6-PGSC0003DMG402013876-(rev)M6G-LecRK\_671

TGGTGAGTTAGTTGTTCAACATAATTTCCAGGAAGAATGGAGGTCTGGGCCTTGGAATGAAGGAGGGT  
TTGCTATTCTAGGACAACAAAATTATTATAAGGATTTATTCGACTTCAGTTA

>M6-PGSC0003DMG402013876-(rev)M6G-LecRK\_732

GGAGGGTTTGCTATTCTAGGACAACAAAATTATTATAAGGATTTATTCGACTTCAGTTATGATCCAGCTG  
AATATAGTAAATATATTACTTACAATGTCTTTGATGAATCTGACATTTCT

>M6-PGSC0003DMG402013876-(rev)M6G-LecRK\_793

ATCCAGCTGAATATAGTAAATATATTACTTACAATGTCTTTGATGAATCTGACATTTCTCGAATTGTCTTA  
GAATTTAATGGGTCGATGAAGCAATGGTTCTGGTCTAAAGATCATCAGA

>M6-PGSC0003DMG402013876-(rev)M6G-LecRK\_854

AATTGTCTTAGAATTTAATGGGTCGATGAAGCAATGGTTCTGGTCTAAAGATCATCAGAGTTGGCAGTTA  
GTGTGGTCTCGATCTACTGATAATTGTGACCAAATAAATTTCTGTGGTGC

>M6-PGSC0003DMG402013876-(rev)M6G-LecRK\_915

TGGCAGTTAGTGTGGTCTCGATCTACTGATAATTGTGACCAAATAAATTTCTGTGGTGCTTTTGGAATTT  
GTGACATGAATGCCAGTCCACTCTGTGAATGTTTAAAAGGTTATGACCCG

>M6-PGSC0003DMG402013876-(rev)M6G-LecRK\_976

TTGGAATTTGTGACATGAATGCCAGTCCACTCTGTGAATGTTTAAAAGGTTATGACCCGAAGTTTAAATC  
AGATTGGGATATTAGAACTATTCAGGTGGGTGTGTGAGAAAAATTCCAA

>M6-PGSC0003DMG402014514-(rev)M6G-LecRK\_1037

GCTAATTGTTTCGGTCGATTCATCAGATGACTTGTACCATGTTCTGCGTCAAAGTTTTAGACAGCAGAAT  
GTAGAAAATGGTTCTCCTGTTTCCCAAAGCAAGTGACACCATTCCGCCC

>M6-PGSC0003DMG402014514-(rev)M6G-LecRK\_1098

CAGCAGAATGTAGAAAATGGTTCTCCTGTTTCCCAAAGCAAGTGACACCATTCCGCCACTTCACTACT  
TTGACAACAATGCTCATTCCAATCCCTTAATTCAGAAGCTGGCAGTCAT

>M6-PGSC0003DMG402014514-(rev)M6G-LecRK\_1159

TTCACTACTTTGACAACAATGCTCATTCCAATCCCTTAATTCAGAAGCTGGCAGTCATTTTTACCAAAA  
GACCACATAGTGGATTTAGCTGTTTCGGGTGGCAATTTACATATGAAG

>M6-PGSC0003DMG402014514-(rev)M6G-LecRK\_1220

TTCACCAAAAGACCACATAGTGGATTTAGCTGTTTCGGGTGGCAATTTACATATGAAGAGCTGTGGTTA  
GCAACTAGTGGATTCTCTACATCCAACCTTCTAGGTGAAGGTGGATTTGG

>M6-PGSC0003DMG402014514-(rev)M6G-LecRK\_1281

CTGTGGTTAGCAACTAGTGGATTCTCTACATCCAACCTTCTAGGTGAAGGTGGATTTGGGTATGTACACA  
AAGGAGTCCTCCCTACTGGAAGAGAAATTGCAGTTAAACAGTTGAAGGTT

>M6-PGSC0003DMG402014514-(rev)M6G-LecRK\_1342

ATGTACACAAAGGAGTCCTCCCTACTGGAAGAGAAATTGCAGTTAAACAGTTGAAGGTTGGTAGCCATC  
AAGGGGAGCGTGAATTTCAAGCAGAAGTAGAGACTATTAGCCGAGTGCATC

>M6-PGSC0003DMG402014514-(rev)M6G-LecRK\_1403

TAGCCATCAAGGGGAGCGTGAATTTCAAGCAGAAGTAGAGACTATTAGCCGAGTGCATCATAAACATCT  
TGTGTCTTTGGTTGGATACTGCATGAATGGAACAAAGAGATTGCTTGTTTA

>M6-PGSC0003DMG402014514-(rev)M6G-LecRK\_1464

AAACATCTTGTGTCTTTGGTTGGATACTGCATGAATGGAACAAAGAGATTGCTTGTTTACGAATTTGTTT  
CCAACAGGACCTTAGAGTATCATTACATGGTATGTTCTTTCTCTTTTTC

>M6-PGSC0003DMG402014514-(rev)M6G-LecRK\_1525

AATTTGTTTCCAACAGGACCTTAGAGTATCATTACATGGTATGTTCTTTCTTTTTCTTAATTCTTTGGT  
CGAATCCTGTATCAATAAGATTTGTGACCAGCTTAAGTCATTTTTTG

>M6-PGSC0003DMG402014514-(rev)M6G-LecRK\_1586

TAATTTCTTTGGTTCGAATCCTGTATCAATAAGATTTGTGACCAGCTTAAGTCATTTTTTGAATTATGCTAAT  
ATTTGTACAGCAGAGAGTTGATAATTAAGGTTAAAATAAATCTACCTTA

>M6-PGSC0003DMG402014514-(rev)M6G-LecRK\_1647

TTATGCTAATATTTGTACAGCAGAGAGTTGATAATTAAGGTTAAAATAAATCTACCTTAACGGGGGCTTC  
CTTAATGCAGCTTAGTTTCACTGTATTGATTTTGAAAAGCATGTAAAATA

>M6-PGSC0003DMG402014514-(rev)M6G-LecRK\_1708

GGGGGCTTCCTTAATGCAGCTTAGTTTCACTGTATTGATTTTGAAAAGCATGTAAAATACACCTCACGAG  
TTATGAGTTCCATGTTAAATGGACAATCTTTAAGGGGGTACTTAACCAAG

>M6-PGSC0003DMG402014514-(rev)M6G-LecRK\_1769

CCTCACGAGTTATGAGTTCCATGTTAAATGGACAATCTTTAAGGGGGTACTTAACCAAGCCTTTTAAGTA

AGATTCCTCGTGGTATATGCCTATACCACAAAAAGGTGGCCTAGAATTC

>M6-PGSC0003DMG402014514-(rev)M6G-LecRK\_1830

TTTTAAGTAAGATTCCTCGTGGTATATGCCTATACCACAAAAAGGTGGCCTAGAATTCATCAAACCATG

GTTTTTAACATGAGAAGGTAAAAGAAGAGCTTGCAAATACATGCTACTTC

>M6-PGSC0003DMG402014514-(rev)M6G-LecRK\_1891

CAAACCATGGTTTTTAACATGAGAAGGTAAAAGAAGAGCTTGCAAATACATGCTACTTCTGTAACCCAA

GCCCTTAATCTTGCATGGTAAAGCACTGCTATTTCTATGCTTTTGGAAAG

>M6-PGSC0003DMG402014514-(rev)M6G-LecRK\_1952

TAACCCAAGCCCTTTAATCTTGCATGGTAAAGCACTGCTATTTCTATGCTTTTGGAAAGACCAACATTTAA

TATCTTCTGACTTCTGCTGTCCCAGGCACTTCATTTGCAATTTTCCACA

>M6-PGSC0003DMG402014514-(rev)M6G-LecRK\_2013

CAACATTTAATATCTTCTGACTTCTGCTGTCCCAGGCACTTCATTTGCAATTTTCCACATACTTTTCTATACC

CTTATGGTGTATTGGTTAACACACTTCATGTGAGGTACATTTGATG

>M6-PGSC0003DMG402014514-(rev)M6G-LecRK\_2074

CTTTTCTATACCCTTATGGTGTATTGGTTAACACACTTCATGTGAGGTACATTTGATGGAGGATCTTTCA

TAAGTACCACATTTTAGATGTGTGATTTGTTTCATCATCTGTTTTAAGG

>M6-PGSC0003DMG402014514-(rev)M6G-LecRK\_2135

GGATCTTTCATAAGTACCACATTTTAGATGTGTGATTTGTTTCATCATCTGTTTTAAGGTTTGTATAAAGA

ATGTTCCCTATCCACCCTGATGCATGTTTTCTTTTGAACTTTTGTTTTAC

>M6-PGSC0003DMG402014514-(rev)M6G-LecRK\_2196

TGTATAAAGAATGTTCCCTATCCACCCTGATGCATGTTTTCTTTTGAACTTTTGTTTTACAGAAATGCTCTTG

TATCAGTTTATACTTCTCTGATCACTTCTAAATATCCGATTGAATAGA

>M6-PGSC0003DMG402014514-(rev)M6G-LecRK\_2257

AAATGCTCTTGTATCAGTTTATACTTCTCTGATCACTTCTAAATATCCGATTGAATAGAGTTTCCATAAGTT

CCTCTGATATAAAGGTCTTTCTACCAAGATGCTATTTAGAACAGATTG

>M6-PGSC0003DMG402014514-(rev)M6G-LecRK\_2318

TTCCATAAGTTCTCTGATATAAAGGTCTTTCTACCAAGATGCTATTTAGAACAGATTGTATGATATGCAG

GGGAGGCACAATCCACGATGAAATGGGCATCTAGAATGAAAATTGCTAT

>M6-PGSC0003DMG402014514-(rev)M6G-LecRK\_2379

TGATATGCAGGGGAGGCACAATCCACGATGAAATGGGCATCTAGAATGAAAATTGCTATAGGGTCAGC  
CAAAGGATTGGCTTATCTGCATGAAGACTGTGAGTGCGCTTCATCTCTGTCT

>M6-PGSC0003DMG402014514-(rev)M6G-LecRK\_2440

GGTCAGCCAAAGGATTGGCTTATCTGCATGAAGACTGTGAGTGCGCTTCATCTCTGTCTTGGCTTCTAT  
GTTTGTCTTAATTTGCATGTTTCGTCCATTAGTTGACTAGAGGTGTCCAA

>M6-PGSC0003DMG402014514-(rev)M6G-LecRK\_2501

GCTTCCTATGTTTGTCTTAATTTGCATGTTTCGTCCATTAGTTGACTAGAGGTGTCCAAAGGGGTAAATTG  
AATATTAAGTGGCCTGGATGCTTTTTAACAAACGTTGAACATGTTTCCAA

>M6-PGSC0003DMG402014514-(rev)M6G-LecRK\_2562

GGGTAAATTGAATATTAAGTGGCCTGGATGCTTTTTAACAAACGTTGAACATGTTTCCAAAGGGAECTCT  
GTTAGTGTGTTTGTAGATTGTGACAAGTTGGGTAACATAATGGTTTTTCAT

>M6-PGSC0003DMG402014514-(rev)M6G-LecRK\_2623

GGAECTTGTAGTGTGTTTGTAGATTGTGACAAGTTGGGTAACATAATGGTTTTTCATCACATATCTATC  
TTCACTTTTTCTCCTGAAAAGGATGTAAATCTAATTTTTCTCCCTCCCAA

>M6-PGSC0003DMG402014514-(rev)M6G-LecRK\_2684

CATATCTATCTTCACTTTTTCTCCTGAAAAGGATGTAAATCTAATTTTTCTCCCTCCCAATAGATACCATTGA  
TCCTCACTTCTATAATACCATTTCTGAATCTCCTCGAGATTTGAGAGC

>M6-PGSC0003DMG402014514-(rev)M6G-LecRK\_2745

GATACCATTGATCCTCACTTCTATAATACCATTTCTGAATCTCCTCGAGATTTGAGAGCTGAATACCTCGG  
TTCTAGGGTCTGCTAATGGATAGCAGAAGGCCATAATAATTCCTAAATT

>M6-PGSC0003DMG402014514-(rev)M6G-LecRK\_2806

AATACCTCGTTCTAGGGTCTGCTAATGGATAGCAGAAGGCCATAATAATTCCTAAATTGTGAAAGATAT  
AACATGAATATGCATCAGGCCAACTGTACTTTCCCATATAATTTTATAT

>M6-PGSC0003DMG402014514-(rev)M6G-LecRK\_2867

GAAAGATATAACATGAATATGCATCAGGCCAACTGTACTTTCCCATATAATTTTATATGCCATGTACTTT  
CCTGTCAAATATGAAATCAAATAGTTTTAGTATATTTTCTTCCACTACT

>M6-PGSC0003DMG402014514-(rev)M6G-LecRK\_2928

CATGTACTTTCTGTCAAATATGAAATCAAATAGTTTTAGTATATTTTCTTCCACTACTACCAATTTAATAT  
AGATGTCAACGTATCTTTGCGCTCTGTAGGACAATTTAATTGTGGTTG

>M6-PGSC0003DMG402014514-(rev)M6G-LecRK\_2989

CAATTTAATATAGATGTCAACGTATCTTTGCGCTCTGTAGGACAATTTAATTGTGGTTGCTTGAATTAGCT  
TGAATAGAATAAATATCACTTCTTTTGATGTAGCAACAACAGGTAATCG

>M6-PGSC0003DMG402014514-(rev)M6G-LecRK\_3050

TGAATTAGCTTGAATAGAATAAATATCACTTCTTTTGATGTAGCAACAACAGGTAATCGTTCTCTGAAGA  
TACTAACTTGTGGCTGCAGGTAACCCCACTATCATTTCATCGTGATATCAA

>M6-PGSC0003DMG402014514-(rev)M6G-LecRK\_3111

CTCTGAAGATACTAACTTGTGGCTGCAGGTAACCCCACTATCATTTCATCGTGATATCAAGGCAGCTAATA  
TTCTTCTTGATTCTAACTTTGAAGCTAAGGTAACCTTTGTGTTTCGCTTTT

>M6-PGSC0003DMG402014514-(rev)M6G-LecRK\_3172

CAGCTAATATTCTTCTTGATTCTAACTTTGAAGCTAAGGTAACCTTTGTGTTTCGCTTTTTGGTATTGCCACT  
ATATTTTCTGTTCTATTTTTGAGAACTGTTTTTTATTTTTTTTTGA

>M6-PGSC0003DMG402014514-(rev)M6G-LecRK\_3233

GTATTGCCACTATATTTTCTGTTCTATTTTTGAGAACTGTTTTTTATTTTTTTTTGAGAACTATTTTCTGTT  
CTATCTTACTATCAAAGAAAGGTCGGGCTGTTTTCTATTATCGAC

>M6-PGSC0003DMG402014514-(rev)M6G-LecRK\_3294

ACTATTTTCTGTTCTATCTTACTATCAAAGAAAGGTCGGGCTGTTTTCTATTATCGACAACCTGGCTTCTG  
AGTACACCTAGAATCCGCTGTTGATGTAAGTACTAGTTTTTTGTTTTAACA

>M6-PGSC0003DMG402014514-(rev)M6G-LecRK\_3355

CTGGCTTCTGAGTACACCTAGAATCCGCTGTTGATGTAAGTACTAGTTTTTTGTTTTAACAATAAAATCCATA  
TGAAGAGATTAATTTGAACCCAAATGAGCATCTACTCAGGTGCAAATGT

>M6-PGSC0003DMG402014514-(rev)M6G-LecRK\_3416

AAAATCCATATGAAGAGATTAATTTGAACCCAAATGAGCATCTACTCAGGTGCAAATGTAACTGCATTA  
TTGATTCTGATTTTTGTTTCTTTAATTTTCATGTGACAACCTAAGAACATA

>M6-PGSC0003DMG402014514-(rev)M6G-LecRK\_3477

ACTGCATTATTGATTCTGATTTTTGTTTCTTTAATTTTCATGTGACAACCTAAGAACATATTTCTCGAAAGT  
TATTTAACATGAATGGGAACCTTTGATTTGTATCCAGGTTGCAGACTTT

>M6-PGSC0003DMG402014514-(rev)M6G-LecRK\_3538

TCCTCGAAAGTTATTTAACATGAATGGGAACCTTTGATTTGTATCCAGGTTGCAGACTTTGGACTTGCCAA

GTTCTTATCTGATTCAAACCATCATGTCAGTCATATCTCCACTAGAGTGG

>M6-PGSC0003DMG402014514-(rev)M6G-LecRK\_3599

ACTTGCCAAGTTCTTATCTGATTCAAACCATCATGTCAGTCATATCTCCACTAGAGTGGTGGGAACTTTTG

GGTGAGTTTTATTGAACCTGTCTCTGCTACCATGAATTAGATATCAGAA

>M6-PGSC0003DMG402014514-(rev)M6G-LecRK\_366

CCCTTGTTCTTGTACAACAAGATCAAAGATGATTTAATTAATAATTTATCATTATTTTGTTTTATGA

TTTAGTAGGGATTATTAATCCTTTTTACTGATTAAGTGGTGACTTTAT

>M6-PGSC0003DMG402014514-(rev)M6G-LecRK\_3660

GGAACTTTTGGGTGAGTTTTATTGAACCTGTCTCTGCTACCATGAATTAGATATCAGAAGGAAAAAATT

GACTAGATCAAGCAAATACTATATACAGGTCACCATACTGAGTGGACC

>M6-PGSC0003DMG402014514-(rev)M6G-LecRK\_3721

AAAAAATTGACTAGATCAAGCAAATACTATATACAGGTCACCATACTGAGTGGACCAGTCTCTTCTA

CTTTTATCAAGTAAAAAGTGGTGCTCCCTCGTTCTAGCGTTAATAATAT

>M6-PGSC0003DMG402014514-(rev)M6G-LecRK\_3782

TCTCTTCTACTTTTTATCAAGTAAAAAGTGGTGCTCCCTCGTTCTAGCGTTAATAATATTCATTTTTTTGGG

CTAACCTCATACGTAGCATAGGCTATGCCCTTCCCATGTAACTTTGT

>M6-PGSC0003DMG402014514-(rev)M6G-LecRK\_3843

ATTTTTTTGGGCTAACCTCATACGTAGCATAGGCTATGCCCTTCCCATGTAACTTTGTTTCATCCAACCTG

CAAACCTGATATCTATATCAGATACCTATAGAAAATCGAGCTAGAATGG

>M6-PGSC0003DMG402014514-(rev)M6G-LecRK\_3904

CATCCAACCTGCAAACCTGATATCTATATCAGATACCTATAGAAAATCGAGCTAGAATGGGACTCTCAAAT

CTGGGGATTTTAAAGACATTGATGACTTGCATGACCTCGATTTTAGGTCA

>M6-PGSC0003DMG402014514-(rev)M6G-LecRK\_3965

CTCTCAAATCTGGGGATTTTAAAGACATTGATGACTTGCATGACCTCGATTTTAGGTCAACCTGCTCATAA

TGCAGTGATTCCTCTCAGAGTTATAACCGAAGTTTTCTGCTAGTCGGA

>M6-PGSC0003DMG402014514-(rev)M6G-LecRK\_4026

CTGCTCATAATGCAGTGATTCCTCTCAGAGTTATAACCGAAGTTTTCTGCTAGTCGGAGGATGAGAAGA

GCGCATGGGATGTTACTGCTGTTTTCCCGTGTCTGATAGTGTGGGTTTC

>M6-PGSC0003DMG402014514-(rev)M6G-LecRK\_4087



ATGAGAAGAGCGCATGGGATGTTACTGCTGTTTTCCCGTGTCTGATAGTGTGGGTTTCTTAGTCCTTGA  
TTTTCCCTTACCAACTGATTGGGGAAAGAGGGGGTTTGGGGGGTTAAG

>M6-PGSC0003DMG402014514-(rev)M6G-LecRK\_4148

AGTCCTTGATTTTCCCTTACCAACTGATTGGGGAAAGAGGGGGTTTGGGGGGTTAAGGAGAGGGGC  
TTGGATTTTGAAACTGTAGAACTTAAGCTACTTCATGATTAGTAATGATTT

>M6-PGSC0003DMG402014514-(rev)M6G-LecRK\_4209

GAGGGGCTTGATTTTGGAACTGTAGAACTTAAGCTACTTCATGATTAGTAATGATTTCTGGATTACAC  
AGCTTCAGGTAGATGGACAACGTAAAACTAACAGGGTAAAACCTACATT

>M6-PGSC0003DMG402014514-(rev)M6G-LecRK\_427

TTGTTTTATGATTTAGTAGGGATTATTAATCCTTTTTACTGATTAAGTGGTGACTTTATCTCTAAATTCAAC  
TATTGAAAATTAGTGATCCAAATTGCTATTTTTCTCATAAATTA

>M6-PGSC0003DMG402014514-(rev)M6G-LecRK\_4270

GGATTACACAGCTTCAGGTAGATGGACAACGTAAAACTAACAGGGTAAAACCTACATTTCTGATCAC  
AATTTCTTCATGTATTTGATAAACTGACGTCTTGACGGTATCTGGCCCCA

>M6-PGSC0003DMG402014514-(rev)M6G-LecRK\_4331

CTGATCACAATTTCTTCATGTATTTGATAAACTGACGTCTTGACGGTATCTGGCCCCAGAGTATGCACA  
GAGTGGAAAGACCTCAGATAAGTCCGACATCTTTCTTTTGGAGTCATGC

>M6-PGSC0003DMG402014514-(rev)M6G-LecRK\_4392

GTATGCACAGAGTGGAAAGACCTCAGATAAGTCCGACATCTTTCTTTTGGAGTCATGCTCCTGGAGTTA  
ATTACAGGGCGTCCACCTATAATCTCAACTGAATCCTCCGCATGCAGCAG

>M6-PGSC0003DMG402014514-(rev)M6G-LecRK\_4453

CTGGAGTTAATTACAGGGCGTCCACCTATAATCTCAACTGAATCCTCCGCATGCAGCAGTTTGGTCATAT  
GGGTATATTAAGTGTCCACTTTCTTGACCGCTATTCAGCATTCTTAAGT

>M6-PGSC0003DMG402014514-(rev)M6G-LecRK\_4514

TGGTCATATGGGTATTAAGTGTCCACTTTCTTGACCGCTATTCAGCATTCTTAAGTGCCTAAAACCTAA  
TGTTCAACTAGATGCATGAGTAAAACGTTTGTGTGCAACCTTTATAACT

>M6-PGSC0003DMG402014514-(rev)M6G-LecRK\_4575

CTAAAACCTAATGTTCAACTAGATGCATGAGTAAAACGTTTGTGTGCAACCTTTATAACTGGTTAAATAGC  
ATAATGCTTAAATTTACTTTCTGTCCAACCTACACTAATCAAATCCTCAAT

>M6-PGSC0003DMG402014514-(rev)M6G-LecRK\_4636

TTAAATAGCATAATGCTTAAATTTACTTTCTGTCCAACACTACTAATCAAATCCTCAATATGGAATAACAT  
TCATCTTACTATAATCTTATCCTTAATTAGCTATGTATGCACTGTATTT

>M6-PGSC0003DMG402014514-(rev)M6G-LecRK\_4697

GGAATAACATTCATCTTACTATAATCTTATCCTTAATTAGCTATGTATGCACTGTATTTAATCTGAGGCAG  
AACATGCAAGCACAGCTTATGCAATTCTCTGAGGTGGCCTTTCTATTTA

>M6-PGSC0003DMG402014514-(rev)M6G-LecRK\_4758

TCTGAGGCAGAACATGCAAGCACAGCTTATGCAATTCTCTGAGGTGGCCTTTCTATTTATAAGAGATCTT  
GATCCTCCGGAAGGTTTATCATTTGTGGTTTTAGAAGTACTGGGTGGTTT

>M6-PGSC0003DMG402014514-(rev)M6G-LecRK\_4819

AGAGATCTTGATCCTCCGGAAGGTTTATCATTTGTGGTTTTAGAAGTACTGGGTGGTTTTATCCTTTATTG  
CTTTCTTTTTTTCGAGTGATAAATGGTTGAGAAATTTTATCACGGCAG

>M6-PGSC0003DMG402014514-(rev)M6G-LecRK\_488

CTAAATCAACTATTGAAAATTAGTGATCCAAATTGCTATTTTTTCCTCATACAATTTAATAGTAACTTCTT  
TAAAAATTTACTAGTAATGAAAATAGTGACTTATGTTTCTAAATTCAT

>M6-PGSC0003DMG402014514-(rev)M6G-LecRK\_5063

TAATCAATCACTTAAAAAAGAAACATGGAAAAGCATTGGCTTAAATCAGAATTTGGCAGACCACCGT  
CCTTGTACAAAAGAAATGTGCAAATCAAAGGATCTGGTGTCTTGAAAAG

>M6-PGSC0003DMG402014514-(rev)M6G-LecRK\_5124

ACCACCGTCCTTGTACAAAAGAAATGTGCAAATCAAAGGATCTGGTGTCTTGAAAAGTTCATCTCTGT  
CAAGCCAAAGGCATAAAAATTCACGTCCATCTTACAAATTTTTAAAAGAA

>M6-PGSC0003DMG402014514-(rev)M6G-LecRK\_5185

CATCTCTGTCAAGCCAAAGGCATAAAAATTCACGTCCATCTTACAAATTTTTAAAAGAAATTTGTCATCCT  
TGTACCAAATGATTTGGCTTTTGGACACCCGTTTTGATGATGGAACATA

>M6-PGSC0003DMG402014514-(rev)M6G-LecRK\_5246

TTGTCATCCTTGTACCAAATGATTTGGCTTTTGGACACCCGTTTTGATGATGGAACATATCTCAAGTTTTTC  
TGTTGCATCTTTTACAACACTATTAGTTTGACCAAAGTTTCAGTCTTAAAG

>M6-PGSC0003DMG402014514-(rev)M6G-LecRK\_5307

TCAAGTTTTCTGTTGCATCTTTTACAACACTATTAGTTTGACCAAAGTTTCAGTCTTAAAGCATGGAGTTCAC

CATGAATTTGATATCATAATCTATCAAATTTTCCCAAATAAGGCTCCC

>M6-PGSC0003DMG402014514-(rev)M6G-LecRK\_5368

TGGAGTTCACCATGAATTTGATATCATAATCTATCAAATTTTCCCAAATAAGGCTCCCTTTTTAGGAAAT  
CTTGGAGATACGGGTTCTGGAATCATTTTGTTGATCTCAAAGATTATT

>M6-PGSC0003DMG402014514-(rev)M6G-LecRK\_5429

TTTAGGAAATCTTGGAGATACGGGTTCTGGAATCATTTTGTTGATCTCAAAGATTATTACTGTTGGTTCT  
ACTTAAGTCCCACAATTGATCAGAATTAATTAACATAAGTTAATTTCGAA

>M6-PGSC0003DMG402014514-(rev)M6G-LecRK\_549

AGTAACTTCTTTAAAAATTTACTAGTAATGAAAATAGTGACTTATGTTTCTAAATTCATTGTGACAGACAA  
TTATCATTTCTTAAATTTTATACTTCTTATGTTTCATTTTATATGATTGT

>M6-PGSC0003DMG402014514-(rev)M6G-LecRK\_5490

TGTTGGTTCTACTTAAGTCCCACAATTGATCAGAATTAATTAACATAAGTTAATTCGAAATTGAGATCAG  
AAAGACGGATTCAGAGTTAGCAGCTTCTTGCATGCAGCCTACTCACAGA

>M6-PGSC0003DMG402014514-(rev)M6G-LecRK\_5551

TGAGATCAGAAAGACGGATTCAGAGTTAGCAGCTTCTTGCATGCAGCCTACTCACAGACAGAATTAGT  
TATGTCACTTTAGTTAATCAGAATTAACCTTACACCTCTCCGGGGCATT

>M6-PGSC0003DMG402014514-(rev)M6G-LecRK\_5612

GAATTAGTTATGTCACCTTAGTTAATCAGAATTAACCTTACACCTCTCCGGGGCATTTCATAACCT  
CGTCATCAAATACAATATTTTGTATTAGGAATCATTACCGTAGTTTCT

>M6-PGSC0003DMG402014514-(rev)M6G-LecRK\_5673

TTTCATAACCTCGTCATCAAATACAATATTTTGTATTAGGAATCATTACCGTAGTTTCTGGTTTTTCATATTC  
TTGGTTTTTGATTAAGTACTTTTTGAGAGTCGTTTATTAAGTGGATGT

>M6-PGSC0003DMG402014514-(rev)M6G-LecRK\_5734

TTTTCATATTCTTGGTTTTTGATTAAGTACTTTTTGAGAGTCGTTTATTAAGTGGATGTACACAAATTTCTT  
GATCAACATATTGGTTTCTGTAGCAAATAACAAATATTTTGGGAA

>M6-PGSC0003DMG402014514-(rev)M6G-LecRK\_5795

ACAAATTTCTTGATCAACATATTGGTTTCTGTAGCAAATAACAAATATTTTGGGAACTAGAAGCATCT  
CTAGGCCGATGCTTAAATGCATTTTCAAAGATATGGATATCATTGTTGT

>M6-PGSC0003DMG402014514-(rev)M6G-LecRK\_5856

AGAAGCATCTCTAGGCCGATGCTTAAATGCATTTTCAAAGATATGGATATCATTGTTGTCAACCCTCTTCT  
TATAGTATAACCACTTGTACATAGCATAAGAAGACTCTTCTGATACACA

>M6-PGSC0003DMG402014514-(rev)M6G-LecRK\_5917

ACCCTCTTCTTATAGTATAACCACTTGTACATAGCATAAGAAGACTCTTCTGATACACAGGCAAGGCCTT  
GCTTAGAAGTGCATTGGATGATGGAAAATTGGACGCCCTAGTAGATCCA

>M6-PGSC0003DMG402014514-(rev)M6G-LecRK\_5978

CAAGGCCTTTGCTTAGAAGTGCATTGGATGATGGAAAATTGGACGCCCTAGTAGATCCATGTTTGGGAC  
AAAATTATAACAGTGAAGAGATGGCTAACATGATTGCTTGTGCTGCTGCTT

>M6-PGSC0003DMG402014514-(rev)M6G-LecRK\_6039

TTTGGGACAAAATTATAACAGTGAAGAGATGGCTAACATGATTGCTTGTGCTGCTGCTTGTGTGCGTCAT  
TCATCACGGAGAAGACCGCGGATGAGTCAAGTAATAACATCTTCTCTTAG

>M6-PGSC0003DMG402014514-(rev)M6G-LecRK\_610

TGACAGACAATTATCATTCTTAAATTTTATACTTCTTATGTTCATTTTATATGATTGTGTTTGAATGTGTA  
TGGACTACGGAGTTTTAAGAAGAAAAAGGGACTTTTTGAGACATAATC

>M6-PGSC0003DMG402014514-(rev)M6G-LecRK\_6100

GTGCGTCATTCATCACGGAGAAGACCGCGGATGAGTCAAGTAATAACATCTTCTCTTAGTTCTTTTTCTGT  
TAGTGCTGGCGGATTTCTTTAAAGGGGTTTATAAACCAAAACCTTGCTT

>M6-PGSC0003DMG402014514-(rev)M6G-LecRK\_6161

CTTTTTCTGTTAGTGCTGGCGGATTTCTTTAAAGGGGTTTATAAACCAAAACCTTGCTTCTTATTTCTTCT  
TCTTATTGTTTACAGGTAGTTCGTGCTTTAGAAGGCGATGCCTTTATCCT

>M6-PGSC0003DMG402014514-(rev)M6G-LecRK\_6222

TATTTCTTCTTCTTATTGTTTACAGGTAGTTCGTGCTTTAGAAGGCGATGCCTTTATCCTGGACCTTGATGA  
GGAAAATAGACCAGGACAGAGTACCATTTGTGACTTTGATTCTGATGGA

>M6-PGSC0003DMG402014514-(rev)M6G-LecRK\_6283

ACCTTGATGAGGAAAATAGACCAGGACAGAGTACCATTTGTGACTTTGATTCTGATGGAAGCAACTATT  
TTGAGAAGTTCAAGAAAATCCAGCGGAGCACTCTGAAATCAAAGAAGAAT

>M6-PGSC0003DMG402014514-(rev)M6G-LecRK\_6344

CAACTATTTTGAGAAGTTCAAGAAAATCCAGCGGAGCACTCTGAAATCAAAGAAGAATGGTAATACCA  
CCGTGCACCGGGGGCTGTCATGGAAGTACACCAACTGAAGATGGAGTGAGA

>M6-PGSC0003DMG402014514-(rev)M6G-LecRK\_6405

TAATACCACCGTGCACCGGGGCTGTCATGGAAGTACACCAACTGAAGATGGAGTGAGATGAACGAAG  
CTCTTCTCCCCTTTTTATCTTTCTTTTCACTGATGTAGATGTAAATCGAGGG

>M6-PGSC0003DMG402014514-(rev)M6G-LecRK\_6466

AACGAAGCTCTTCTCCCCTTTTTATCTTTCTTTTCACTGATGTAGATGTAAATCGAGGGTGAAATATATGA  
TCACAACCATCAAAGTTGTCTCACTTAGTGAGAGGATTGATAGTTTGTA

>M6-PGSC0003DMG402014514-(rev)M6G-LecRK\_6527

AAATATATGATCACAACCATCAAAGTTGTCTCACTTAGTGAGAGGATTGATAGTTTGTAGTTACTTGAAA  
GTGCAAAAAGAGAAGAAAAAGGAATTGGCATGAGATATTCAGTATATCAC

>M6-PGSC0003DMG402014514-(rev)M6G-LecRK\_6588

TACTTGAAAGTGCAAAAAGAGAAGAAAAAGGAATTGGCATGAGATATTCAGTATATCACCAAGTAAAA  
ATCTGTGTATAAAGATGCATGTTTCAGATGTACATATAGATTTCTTCCCCTCT

>M6-PGSC0003DMG402014514-(rev)M6G-LecRK\_671

TTGAATGTGTATGGACTACGGAGTTTTAAGAAGAAAAAGGGACTTTTTGAGACATAATCGAGTATATGT  
CACATACCAAAGTATCTATAGGATCTTATGCTTTTAAACATGCCATGCCA

>M6-PGSC0003DMG402014514-(rev)M6G-LecRK\_732

GTATATGTCACATACCAAAGTATCTATAGGATCTTATGCTTTTAAACATGCCATGCCATTCTGGAAATGT  
GACAGTTTGGACATTAATCTCTTAAATGTGAAACTTTCTCCGTCTGACC

>M6-PGSC0003DMG402014514-(rev)M6G-LecRK\_793

CTGGAAATGTGACAGTTTGGACATTAATCTCTTAAATGTGAAACTTTCTCCGTCTGACCAGATATAATGCT  
TAAATCTTGTATAAGAGGCTCCTTGTTTCAGAGCTTGTTTTATTGATT

>M6-PGSC0003DMG402014514-(rev)M6G-LecRK\_854

ATATAATGCTTAAATCTTGTATAAGAGGCTCCTTGTTTCAGAGCTTGTTTTATTGATTGCAATTTGCATTT  
AGAATGGGGTCCAAATTGTTGATATTATGAAATTTAGCAGTTTAAATCT

>M6-PGSC0003DMG402014514-(rev)M6G-LecRK\_915

AATTTGCATTTAGAATGGGGTCCAAATTGTTGATATTATGAAATTTAGCAGTTTAAATCTATCAACATAAGT  
TCAAAAAGCTGTTTACTAACCAGTATGAGTTCAACTTGGTATATTCAT

>M6-PGSC0003DMG402014514-(rev)M6G-LecRK\_976

CAACATAAGTTCAAAAAGCTGTTTACTAACCAGTATGAGTTCAACTTGGTATATTCATTTGCTAATTGTT

TCGGTCGATTCATCAGATGACTTGTACCATGTTCTGCGTCAAAGTTTTA

>M6-PGSC0003DMG402015682-(rev)M6LRR-RLP\_1536

ACCATGATGAAGCCAGTTGCTCCTCTTCTAAGAAACAAAGCTCTTATTTCTAATATTCATTGGAGCTGTCT  
TTGAGAATCTGCAGCAACAACCAGTCTCTTCAGAACTTTGCAGCTCTC

>M6-PGSC0003DMG402015682-(rev)M6LRR-RLP\_1578

CTTATTTCTAATATTCATTGGAGCTGTCTTTGAGAATCTGCAGCAACAACCAGTCTCTTCAGAACTTTGC  
AGCTCTCTCCTCCAAGCCCAGAATTTTGGCTTAAATATAGGTATTATAC

>M6-PGSC0003DMG402015827-(rev)M6RLKWAX-EGF\_0

TTCCTCTATATACAAATTATCCCTTTGTCTTTTCTTCTGTTTTAGACATCATATGAATCTTCAAAGCCTATT  
CATGGTAAAGAAATCTGTTTCTGTTCTTGTCGTCGCGATTCTTTTCT

>M6-PGSC0003DMG402015827-(rev)M6RLKWAX-EGF\_1037

GGAAGAAACAGAATCGGAGTAAAGATTGGCATAGGTGATTGTCCTTTGAATATGTTCCACCCTGATTTG  
TCTTATTATCCTCTTTTCTCAAGACTGAAATTCCAATACACATTTCTT

>M6-PGSC0003DMG402015827-(rev)M6RLKWAX-EGF\_1098

CTGATTTGTCTTATTATCCTCTTTTCTCAAGACTGAAATTCCAATACACATTTCTTCTTGCAGGTTTTG  
GTACGGCTGCATTTACCGCTTTGATGGCAGGTGTAATTTTCTTATCC

>M6-PGSC0003DMG402015827-(rev)M6RLKWAX-EGF\_1159

TGCAGGTTTTGGTACGGCTGCATTTACCGCTTTGATGGCAGGTGTAATTTTCTTATCCATCGTCGTAGAC  
AGAACAGAAAAAGTTATGCTGGTTCATCATTGATCACCAGAAGCATTCT

>M6-PGSC0003DMG402015827-(rev)M6RLKWAX-EGF\_122

ACCTTAACAGATGACACTCTTTCTATATACCTCAATTCTAGTGCTTGCATTACACAGAATTGTGGTGATGG  
AGTGAACATATCATACCCCTTTTGGATTCTGAGAAACAGCCATCCTAC

>M6-PGSC0003DMG402015827-(rev)M6RLKWAX-EGF\_1220

CGTCGTAGACAGAACAGAAAAAGTTATGCTGGTTCATCATTGATCACCAGAAGCATTCTTTCCTATCCTT  
CCTCCATGAAGGATCCTGAAAAGTCAAATATAGCTATGGGAGTTCACCTC

>M6-PGSC0003DMG402015827-(rev)M6RLKWAX-EGF\_1281

CCTATCCTTCTCCATGAAGGATCCTGAAAAGTCAAATATAGCTATGGGAGTTCACCTCTTTGACTACACT  
GAACTGGAAGAAGCCACTAACAATTTTGATTCCAAGAAAGAGCTTGGAG

>M6-PGSC0003DMG402015827-(rev)M6RLKWAX-EGF\_1342

TGACTACTGAACTGGAAGAAGCCACTAACAATTTGATTCCAAGAAAGAGCTTGGAGATGGTGGATA  
TGGCACAGTATATAAAGGTAAGTAACTAATCTAAAATTGAAATTCTTACT

>M6-PGSC0003DMG402015827-(rev)M6RLKWAX-EGF\_1403

GGTGGATATGGCACAGTATATAAAGGTAAGTAACTAATCTAAAATTGAAATTCTTACTGAAAATGTGTC  
ACTCAACTTACTCAACTGATTGATTATTAAACATTTGGTTGAATATGAT

>M6-PGSC0003DMG402015827-(rev)M6RLKWAX-EGF\_1464

AAATGTGTCACTCAACTTACTCAACTGATTGATTATTAAACATTTGGTTGAATATGATATGCTTATAGGT  
AAACTTCGAGATGGACGTGTCGTTGCTGTAAACGTTTGTATGAAAACA

>M6-PGSC0003DMG402015827-(rev)M6RLKWAX-EGF\_1525

GCTTATAGGTAACTTCGAGATGGACGTGTCGTTGCTGTAAACGTTTGTATGAAAACAACTGCAAGAG  
AGTAGAGCAATTCATGAATGAAATTGATATCCTAACACGGTTGCATCATCC

>M6-PGSC0003DMG402015827-(rev)M6RLKWAX-EGF\_1586

TGCAAGAGAGTAGAGCAATTCATGAATGAAATTGATATCCTAACACGGTTGCATCATCCGAACCTTGTC  
CTCTTTACGGATGCACATCTCGCCATTCCCGTGAGCTTCTACTTGTAT

>M6-PGSC0003DMG402015827-(rev)M6RLKWAX-EGF\_1647

ACCTTGTCCTTTACGGATGCACATCTCGCCATTCCCGTGAGCTTCTACTTGTATGAATACATTCCAA  
ATGGCACAGTTGCTGATCATCTACACGGTGGAGATTCACGGCGTGGAT

>M6-PGSC0003DMG402015827-(rev)M6RLKWAX-EGF\_1708

ATACATTCCAAATGGCACAGTTGCTGATCATCTACACGGTGGAGATTCACGGCGTGGATTGCCTTCATGG  
AATACACGAATGAAAATTGCCATAGAAACAGCAAACGCACTTGCCTATCT

>M6-PGSC0003DMG402015827-(rev)M6RLKWAX-EGF\_1769

CCTTCATGGAATACACGAATGAAAATTGCCATAGAAACAGCAAACGCACTTGCCTATCTCCATGCTTCAG  
ATGTCATCCACCGTGATGTAAAACTAATAATATCCTTCTAGACAACAAT

>M6-PGSC0003DMG402015827-(rev)M6RLKWAX-EGF\_183

GTGGTGATGGAGTGAACATATCATACCCCTTTGGATTCTGAGAAACAGCCATCCTACTGTGGCTTACC  
AGATTATAATGTCACTTGCAACAAACATAAACCATTTGTTTCATATTTCTG

>M6-PGSC0003DMG402015827-(rev)M6RLKWAX-EGF\_1830

ATGCTTCAGATGTCATCCACCGTGATGTAAAACTAATAATATCCTTCTAGACAACAATTTCTGTGTTAAA  
GTAGCAGATTTTGGCTTGTCTCGGCTTTTCCCAACGCATCTTACTCATG

>M6-PGSC0003DMG402015827-(rev)M6RLKWAX-EGF\_1891  
CTGTGTAAAGTAGCAGATTTTGGCTTGTCTCGGCTTTTCCCAACGCATCTTACTCATGTCTCAACAGCTC  
CACAGGGCACTCCTGGATATGTTGATCCTGAGTACCACGAGTGCTATCA

>M6-PGSC0003DMG402015827-(rev)M6RLKWAX-EGF\_1952  
TCAACAGCTCCACAGGGCACTCCTGGATATGTTGATCCTGAGTACCACGAGTGCTATCAGCTCACTGACA  
AAAGTGATGTTTATAGTTTCGGAGTGGTATTAGTTGAGCTTATATCATCA

>M6-PGSC0003DMG402015827-(rev)M6RLKWAX-EGF\_2013  
TCACTGACAAAAGTGATGTTTATAGTTTCGGAGTGGTATTAGTTGAGCTTATATCATCACTGCCTGCTGTT  
GATATCTGTAGGCATCGACATGAAATTAATTTGTCAAATATGGCCATCA

>M6-PGSC0003DMG402015827-(rev)M6RLKWAX-EGF\_2074  
GCCTGCTGTTGATATCTGTAGGCATCGACATGAAATTAATTTGTCAAATATGGCCATCAACAAGATTCAG  
AGCAATGCATTACATGAGTTGGTGGATCCGAATATCGGGTTTGACTGA

>M6-PGSC0003DMG402015827-(rev)M6RLKWAX-EGF\_2135  
AAGATTCAGAGCAATGCATTACATGAGTTGGTGGATCCGAATATCGGGTTTGACTGATGATAAAATA  
AGGTCAATGATAACTGCAATGGCAGAGTTGGCATTCCAATGTCTACAGAAT

>M6-PGSC0003DMG402015827-(rev)M6RLKWAX-EGF\_2196  
ATAAAATAAGGTCAATGATAACTGCAATGGCAGAGTTGGCATTCCAATGTCTACAGAATGATGGGGATA  
TGAGGCCATCTATGCAGGAAGTTGTGGAGGCTCTGCTGAGAATTCAGAGAA

>M6-PGSC0003DMG402015827-(rev)M6RLKWAX-EGF\_2257  
TGGGGATATGAGGCCATCTATGCAGGAAGTTGTGGAGGCTCTGCTGAGAATTCAGAGAAAGAATAAAA  
CTGGGAAAACAGACAAGGGTCATCCTGATGACGATGATGCAGGCTTGTGCGAA

>M6-PGSC0003DMG402015827-(rev)M6RLKWAX-EGF\_2318  
AATAAACTGGGAAAACAGACAAGGGTCATCCTGATGACGATGATGCAGGCTTGTGCGAAGAATAACAC  
ATCATTAAATTCACCTAATTCGGTACTGCAAATGGAGTAGCAGTTCAACA

>M6-PGSC0003DMG402015827-(rev)M6RLKWAX-EGF\_2379  
ATAACACATCATTAAATTCACCTAATTCGGTACTGCAAATGGAGTAGCAGTTCAACAACACCCAATGG  
CAGTACCTAGCATTGTTCTCTAAGGTGGTGCCTCAAACGCCTTCCAT

>M6-PGSC0003DMG402015827-(rev)M6RLKWAX-EGF\_244  
TGGCTTACCAGATTATAATGTCACTTGCAACAAACATAAACCATTTGTTTCATATTTCTGAAGAGGAGTTTA



TCATTAAGGAAGTATATTACACAACTACTCGATTCTGCTAGCGAAAGC

>M6-PGSC0003DMG402015827-(rev)M6RLKWAX-EGF\_2440

ACCCAATGGCAGTACCTAGCATTGGTTCTCTAAGGTGGTGCCTCAAACGCCTTCCATGTTGGTTTCCA

AAACCTGAATTACATACTTTGATTAGCTTGGTTTTCTCTGTTAAAGAG

>M6-PGSC0003DMG402015827-(rev)M6RLKWAX-EGF\_2501

TGGTTTCCAAAACCTGAATTACATACTTTGATTAGCTTGGTTTTCTCTGTTAAAGAGGATGTACATATG

TCAGTGCAGCACGTTTAATGATTTCGATTTGAACTTCTCAAGTCTTCTTT

>M6-PGSC0003DMG402015827-(rev)M6RLKWAX-EGF\_2562

TGTACATATGTCAGTGCAGCACGTTTAATGATTTCGATTTGAACTTCTCAAGTCTTCTTTTATCTTTTCGATC

TTCTCAAGTGATCTGCTGATTGTAGCAGTACGTGTTTCATTTAGTGCG

>M6-PGSC0003DMG402015827-(rev)M6RLKWAX-EGF\_2623

TCTTTTCGATCTTCTCAAGTGATCTGCTGATTGTAGCAGTACGTGTTTCATTTAGTGCGTAGCAATGGAAG

AATAGGATTAGTTTCAAGAGAACATTATCCGTATAGTGATGATGACAA

>M6-PGSC0003DMG402015827-(rev)M6RLKWAX-EGF\_2681

GTAGCAATGGAAGAATAGGATTAGTTTCAAGAGAACATTATCCGTATAGTGATGATGACAACTGACTG

ATTTTCAATGTAACATAGAAGTTCAGTGCTCTTAAGCAAGAAAGATTGTAC

>M6-PGSC0003DMG402015827-(rev)M6RLKWAX-EGF\_305

GAGGAGTTTATCATTAAAGGAAGTATATTACACAACTACTCGATTCTGCTAGCGAAAGCAGACGTGTTT

GATGAAGAAAACAAATGTCCAGTACCAAGACATAATTTTAGCACAAGGGGT

>M6-PGSC0003DMG402015827-(rev)M6RLKWAX-EGF\_366

ACGTGTTTGATGAAGAAAACAAATGTCCAGTACCAAGACATAATTTTAGCACAAGGGGTACTTCATTTTC

TTTGGGGCCTAACTGCAGATCTTTTTTCTTCTATGACTGCACTCAAC

>M6-PGSC0003DMG402015827-(rev)M6RLKWAX-EGF\_427

TTCATTTTCTTTGGGGCCTAACTGCAGATCTTTTTTCTTCTATGACTGCACTCAACCTTATGAAAGGG

AGACATATGATGTCAATTGTGCCCGTAATGCCACTCACCATTCTTTTGC

>M6-PGSC0003DMG402015827-(rev)M6RLKWAX-EGF\_488

TATGAAAGGGAGACATATGATGTCAATTGTGCCCGTAATGCCACTCACCATTCTTTTGC GGTTTTTCATAC

TGAGCTTCTGGAGCACTATACTATTTCAGTCGAATCGTGTCAGGATCCT

>M6-PGSC0003DMG402015827-(rev)M6RLKWAX-EGF\_549

TTTTTCATACTGAGCTTCTGGAGCACTATAACTATTCAGTCGAATCGTGTTCAGGATCCTGTTTATGCCCTT  
GTTGAGACTGATTCCATAGATAGATTGCTAAAAATGAATTACACACAAG

>M6-PGSC0003DMG402015827-(rev)M6RLKWAX-EGF\_61

TCAAAGCCTATTCATGGTAAAGAAATCTGTTTCTGTTCTTGTCTGTCGCGATTCTTTTCTTCACCTTAACAGA  
TGACACTCTTTCTATATACCTCAATTCTAGTGCTTGC GTTACACAGAA

>M6-PGSC0003DMG402015827-(rev)M6RLKWAX-EGF\_610

TTATGCCCTTGTTGAGACTGATTCCATAGATAGATTGCTAAAAATGAATTACACACAAGTATTACAAAAG  
GGATTCTTTCTGCAGTGGGATGGGAGTAATTGTAGAGATTGTCTCGGAATAG

>M6-PGSC0003DMG402015827-(rev)M6RLKWAX-EGF\_671

TTACAAAAGGGATTCTTTCTGCAGTGGGATGGGAGTAATTGTAGAGATTGTCTCGGAATAGTGGAGGGCG  
TTGTGGTGCTCAAAGTAATGAATTTTTGTGCATTTGCAAAGACCAAACCCAA

>M6-PGSC0003DMG402015827-(rev)M6RLKWAX-EGF\_732

GAGGGCGTTGTGGTGCTCAAAGTAATGAATTTTTGTGCATTTGCAAAGACCAAACCCAAACCAAGAACAT  
GCTTTCATGGTAAATTTAGAAACTGTTATAAGTTTTAAATCCATGTTTGACA

>M6-PGSC0003DMG402015827-(rev)M6RLKWAX-EGF\_793

AAGAACATGCTTTCATGGTAAATTTAGAAACTGTTATAAGTTTTAAATCCATGTTTGACATTGAGTAGAGA  
ATATCTCCTTAATTCCTTGATAAAAAAGGTAAACCATTCTGTTATTTATT

>M6-PGSC0003DMG402015827-(rev)M6RLKWAX-EGF\_854

GAGTAGAGAATATCTCCTTAATTCCTTGATAAAAAAGGTAAACCATTCTGTTATTTATTGATCATGTTAAG  
GGAATAACGTTTCCGATTGAGGTGATACTGATAGCAGCTAATTAGTTAT

>M6-PGSC0003DMG402015827-(rev)M6RLKWAX-EGF\_915

TCATGTTAAGGGAATAACGTTTCCGATTGAGGTGATACTGATAGCAGCTAATTAGTTATGCTTTACTGTG  
ATACATTACAATTGTTCCGGTATCAGTTGATCACCTGT CATGTTTTCATTT

>M6-PGSC0003DMG402015827-(rev)M6RLKWAX-EGF\_976

TTTACTGTGATACATTACAATTGTTCCGGTATCAGTTGATCACCTGT CATGTTTTCATTT CAGGAAGAAACA  
GAATCGGAGTAAAGATTGGCATAGGTGATTGTCCTTTGAATATGTTCCA

>M6-PGSC0003DMG402015894-(rev)M6LRR-RLP\_0

TATTATAATCTGTCCATCATGCTAACAAATTGGTCTATTTTTCTGTAAATTCTTAAGATGACTATAGATTAG  
TGATCTCTATTCGTTTCAGTAGATTAGTCTATAGCGGTCATTTCTTAG

>M6-PGSC0003DMG402015894-(rev)M6LRR-RLP\_1178

GAAGGGGAGTGAGTGGTGCTCGGCGTTATCTTCATCTCTGCCTCAATTGAGAGTCTTGTGCGATGAGAGA  
CTGTAAAATTTCCGGCCCTCTTGATCCTGTCCTTTTAAATCTTCGTTTCCT

>M6-PGSC0003DMG402015894-(rev)M6LRR-RLP\_124

TAAACCACAAGATCCACCCTATGGAGCCTCCCTCAGAAAACACTCCGATTTTCATCTGGGGAAGGAAAAC  
CAACTTAAGCTATAAACTATACTTTAGGTTGACTTGCACAATATAAACGA

>M6-PGSC0003DMG402015894-(rev)M6LRR-RLP\_1240

TGAGAGACTGTAAAATTTCCGGCCCTCTTGATCCTGTCCTTTTAAATCTTCGTTTCCTTTCAGTCATTGTC  
TCGATTATAACTACTTGTCCACTATGGTTCCAGATTTTCTGGCAGATT

>M6-PGSC0003DMG402015894-(rev)M6LRR-RLP\_186

GGAAAACCAACTTAAGCTATAAACTATACTTTAGGTTGACTTGCACAATATAAACGATTCAAGTCAACA  
GAAAACATCCACACGCAAAGAATCAACTTTAATTTTTTAATTTTCTT

>M6-PGSC0003DMG402015894-(rev)M6LRR-RLP\_248

AGTCAACAGAAAACATCCACACGCAAAGAATCAACTTTAATTTTTTAATTTTCTTAAGTGAATTATT  
GACTTGGTCACTGATCATGGCACTCCTTAAATTCCTACATATATTAGTG

>M6-PGSC0003DMG402015894-(rev)M6LRR-RLP\_310

GAAATTATTGACTTGGTCACTGATCATGGCACTCCTTAAATTCCTACATATATTAGTGCATCAACTCTTATT  
CCACATGATCCACTCAAGTCAACAGAAAACACTGCAGAAAGAAACCAAAT

>M6-PGSC0003DMG402015894-(rev)M6LRR-RLP\_3100

GCAGGAATAAAAACAGAGAAGGTCAAGGTAAGTTGAGGTTTGTGTAGAACTAAAAGCTTTTAAGTTC  
AATGTTTTACATTTTGTCTATAAGCGTGTGGTAATAAGTGTTCGGATATG

>M6-PGSC0003DMG402015894-(rev)M6LRR-RLP\_3162

TAAGTTCAATGTTTTACATTTTGTCTATAAGCGTGTGGTAATAAGTGTTCGGATATGTATTTTATTTGG  
TTTTCTAAGACAACTGTTTAGAAAGAACAGTGAATATATAAACTTGT

>M6-PGSC0003DMG402015894-(rev)M6LRR-RLP\_3224

TTATTTTGGTTTTCTAAGACAACTGTTTAGAAAGAACAGTGAATATATAAACTTGTGAATATTTTCTG  
TTCAATAAATTAAGTGGCAAAGCAACCTGGATTGAAAGCACAGGGTATA

>M6-PGSC0003DMG402015894-(rev)M6LRR-RLP\_3286

ATTTTTCTGTTCAATAAATTAAGTGGCAAAGCAACCTGGATTGAAAGCACAGGGTATACATGAATTAGTA

GCTCCTCTAATCAAATCACTGAGAATTTTTGTTATTTTACGACTATTCA

>M6-PGSC0003DMG402015894-(rev)M6LRR-RLP\_3348

AATTAGTAGCTCCTCTAATCAAATCACTGAGAATTTTTGTTATTTTACGACTATTCAGGTATGCGGTATC

AGGTTGATACTGCAGATTTTTAGGTTTCCACAACAGATTAGCCTATCTT

>M6-PGSC0003DMG402015894-(rev)M6LRR-RLP\_3410

TGCGGTATCAGGTTGATACTGCAGATTTTTAGGTTTCCACAACAGATTAGCCTATCTTGTATCATATTTT

GGGTCAGGTCATTCTAGATGTGATGATTGAAAATTTGGGAGACAAAAG

>M6-PGSC0003DMG402015894-(rev)M6LRR-RLP\_3446

CCACAACAGATTAGCCTATCTTGTATCATATTTTGGGTCAGGTCATTCTAGATGTGATGATTGAAAATTT

GGGAGACAAAAGGAATGATACTAGGCTAAGGGAATATGAATAATATAA

>M6-PGSC0003DMG402015894-(rev)M6LRR-RLP\_372

AACTCTTATTCCACATGATCCACTCAAGTCAACAGAAAAGTGCAGAAAGAAACCAAATTGTTGTAGAATA

ATTAAGACACCTCAATCACCCAAGACCTGGTTGACCACAATGACATTTT

>M6-PGSC0003DMG402015894-(rev)M6LRR-RLP\_434

GTAGAATAATTAAGACACCTCAATCACCCAAGACCTGGTTGACCACAATGACATTTTTGGACCAAACCTA

TTAACGAAGGGTATTGTGTTCAATTCACATAATTTAAAGACCCTTTTCT

>M6-PGSC0003DMG402015894-(rev)M6LRR-RLP\_496

CCAACTATTAACGAAGGGTATTGTGTTCAATTCACATAATTTAAAGACCCTTTTCTGTATACTTAAGTA

CTATTTAAAGGCAACTTATTTTGCAGTTTCATTAGTATAATCACTATGA

>M6-PGSC0003DMG402015894-(rev)M6LRR-RLP\_558

ACTTAAGTACTATTTAAAGGCAACTTATTTTGCAGTTTCATTAGTATAATCACTATGAAAATATTACTCCTC

CTTCAGGTTTCTTTCATCACTATCCTTGTGGTGTCTTCTAACTTTACT

>M6-PGSC0003DMG402015894-(rev)M6LRR-RLP\_62

TATAGATTAGTGATCTCTATTCGTTTCAGTAGATTAGTCTATAGCGGTCATTTCTTAGAGAGTAAACCACA

AGATCCACCCTATGGAGCCTCCCTCAGAAAACACTCCGATTTTCATCTGG

>M6-PGSC0003DMG402015894-(rev)M6LRR-RLP\_620

ATTACTCCTCCTCAGGTTTCTTTCATCACTATCCTTGTGGTGTCTTCTAACTTTACTTCTGGCCAATGTTTG

GAGGATCAAAAAGCCTTGTGATTAATTCAAGAACAACCTCACGTT

>M6-PGSC0003DMG402015894-(rev)M6LRR-RLP\_682

GCCAATGTTTGGAGGATCAAAAAGCCTTGTTGATTAATTCAAGAACAACCTCACGTTGACTCTTCTGT  
GTCCACCAAAGTATGTCATGTGGGATGAAAACAGTATTGACTGTTGCCAGT

>M6-PGSC0003DMG402015976M6LRR-RLK\_0

ATTGCAACAACAGAAAGAATTCATACTATGAACTACTCCAAGCAACTGATTGCTTAGCGACGGTAATC  
TAATTGGTTCTGGAAGTTTTGGCTCTGTTACAAAGGTGTTCTCAGGAGT

>M6-PGSC0003DMG402015976M6LRR-RLK\_660

GTAGAGTATGGACTGGATGGACTGGTGTCAATAAAATGTGATGTCTATAGTTACGGGATTATGTTGCTG  
GAAACATTTACTAGGAGAAAGCCTAGTGAGTTAAGGGAGATCTTAGCTTG

>M6-PGSC0003DMG402016933M6LRR-RLP\_512

ATTCTAAGGTATGTCTTGTGCCTCTAGTTGTATAACTAATTACTGCTCTCTTCCCCTTAACTAGTAAATA  
GTAATAGTTATTTCTGTTTGTCACTTAAAGCAACTTTTTTTTATTTTA

>M6-PGSC0003DMG402016933M6LRR-RLP\_576

AGTAAATAGTAATAGTTATTTCTGTTTGTCACTTAAAGCAACTTTTTTTTATTTTACTTGCTGTTACTATGA  
TGTAAGATGAGAATATGGTTCAATTTTGGATTTGTACTTTAAGCTATA

>M6-PGSC0003DMG402016933M6LRR-RLP\_640

TACTATGATGTAAGATGAGAATATGGTTCAATTTTGGATTTGTACTTTAAGCTATATTGATTTTTTCATCCC  
TTATATAAAACACAAGGCCTCAACATTCGCAGGTTTCTTGTCCCAGACT

>M6-PGSC0003DMG402016933M6LRR-RLP\_704

TCATCCCTTATATAAAACACAAGGCCTCAACATTCGCAGGTTTCTTGTCCCAGACTTGAAAAGCTACAAC  
CATTTGTGCTCATAGTATAACTGCTCTATGCTCTCACCAACTTCCAATT

>M6-PGSC0003DMG402016933M6LRR-RLP\_896

GTGGCCAGAGGTGTTTTGAATCTCAAATACTAGATATAGGATATTGTGAGTTGATGGAAGAAGTGATC  
ACAAAAGAGGAACAAGGAGAAGAAATTATGACAAATGAGCCCTTATTTCCC

>M6-PGSC0003DMG402016933M6LRR-RLP\_960

TGATCACAAAAGAGGAACAAGGAGAAGAAATTATGACAAATGAGCCCTTATTTCCCCTGTTGGAAGAGT  
TGAGGCTTCAAAGTCTGCCAAAGCTTGGGCATTTCTTCTTGCTATGCGTG

>M6-PGSC0003DMG402016979M6LRR-RLP\_5246

TGTATAAAGATAAACCTAAGATTGAGGCGAGTTGCTCATCTTCTCAGAAACAATGATGAACTAACAGCC  
ATGATGATAGTGAACACCAAGATGAAGCTAGACTATCCGTTTTAAATGAG

>M6-PGSC0003DMG402016979M6LRR-RLP\_5307

TAACAGCCATGATGATAGTGAACACCAAGATGAAGCTAGACTATCCGTTTTAAAATGAGAATGATCATA  
CACCAGAAGCAACTTTTTTTTTCTTCAAATTTTATAAGAATAATTTTTGT

>M6-PGSC0003DMG402016979M6LRR-RLP\_5368

TGATCATAACCCAGAAGCAACTTTTTTTTTCTTCAAATTTTATAAGAATAATTTTTGTACAGAGCCACATT  
TTGTTGTTTGTGGATGGTGAATGGAGGTTTATTTTTCATGCTCAAT

>M6-PGSC0003DMG402016979M6LRR-RLP\_549

ACACATATTTGCTTTTTATGAAAAAGGAAATGGGATAATTTCCAGTCAAATTAGGATGCTTTTGTGAAAC  
CTAGACATATTCTACTATAGAACAAGAATCTATACCTCCAATATGAGTTA

>M6-PGSC0003DMG402016981M6LRR-RLP\_1830

CTCTGTTCTCTAGCTTCATATACTGACGCACAAGTCATTTAAGTTGTTTCAAATCCACACTACCTAGTTTG  
TTTATCTCATGTTAATAAGTTATGAATAACCACTTAATATATTTAATC

>M6-PGSC0003DMG402016981M6LRR-RLP\_1891

TACCTAGTTTGTATCTCATGTTAATAAGTTATGAATAACCACTTAATATATTTAATCCTATATCACTCTTT  
GGATTAACCTGAAAGTTATACAATATTTAATTTGTTTCATACTAATTT

>M6-PGSC0003DMG402016981M6LRR-RLP\_1952

ATATCACTCTTTGGATTAACCTGAAAGTTATACAATATTTAATTTGTTTCATACTAATTTAATCAATAATTTT  
TTAAAAGCTAATATCACCCATTTATTTACCCCAAGTAATTTTTTATTA

>M6-PGSC0003DMG402016981M6LRR-RLP\_2013

TCAATAATTTTTTAAAAGCTAATATCACCCATTTATTTACCCCAAGTAATTTTTTATTAGTAAAAATTCAGA  
AATGAAAAAATAAAATTTAGGAGGGCCAAAACCTTAATTACCTTACTAA

>M6-PGSC0003DMG402016981M6LRR-RLP\_2074

AAAAATTCAGAAATGAAAAAATAAAATTTAGGAGGGCCAAAACCTTAATTACCTTACTAATTCACCTTGATC  
ATTATTAATTTTATTTTCATTTATAAGATTACAGTTATTGACACTATTTT

>M6-PGSC0003DMG402016981M6LRR-RLP\_2135

CACTTGATCATTATTAATTTTATTTTCATTTATAAGATTACAGTTATTGACACTATTTTACAGTTACCATTTTGT  
TTTTATGAGAGCATGGAAAACCTTTTAACTTTTGTCTAATAAACTTC

>M6-PGSC0003DMG402016981M6LRR-RLP\_2196

TTACCATTTTTGTTTTATGAGAGCATGGAAAACCTTTTAACTTTTGTCTAATAAACTTCTCCAAAAGGCAA

AAATGTATCAGTAAAAAATAAAATTAGCTACGCAAAGCATTCTCTTAA

>M6-PGSC0003DMG402016981M6LRR-RLP\_2257

CAAAAGGC AAAAATGTATCAGTAAAAAATAAAATTAGCTACGCAAAGCATTCTCTTAACTAATATTGTA  
CCTTAAATTTTATTTGATGGTGCTGGCTCTTCAAGTACAATGACAAAAAT

>M6-PGSC0003DMG402016981M6LRR-RLP\_2318

AATATTGTACCTTAAATTTTATTTGATGGTGCTGGCTCTTCAAGTACAATGACAAAAATTAGGGGTAGAG  
TAAGAAAACAATGATATTGATATGTGGATTGTACATGATAAGTTGATTCA

>M6-PGSC0003DMG402016981M6LRR-RLP\_4203

TTGTATAAAAATGAATCTGAGCTTTGCATTGGGATAATGAAGAGCAGATATGAAGAAGAGGGCCACTTGC  
TCCTCTCCTAAGAAACTCTTGCAGCTCTTTCCACAAGCCCGGGATTATAG

>M6-PGSC0003DMG402019148M6LRR-RLP\_63

AAAGAGCTCACTTGTTTTCCAGATGAGATGCTACATAACAATGTTCCCTTGAACATCTACTGGTCTTAAA  
TTGCAGAGAGTTTTCGCGAATTGCCACAAAGTTTATACAATCTCCGTTCT

>M6-PGSC0003DMG402019242M6G-LecRK\_1575

TCTGGTTAGGCAATGAAGGCCTGGTTCTTCTCAACCAAGAAGCCTGTTTTTTTTATCGAGAGGAATACA  
ACAGAATCAGCAGAGTTATCTGATGAAGGATATCTAAGTAACAACGTATC

>M6-PGSC0003DMG402019242M6G-LecRK\_1638

GAATACAACAGAATCAGCAGAGTTATCTGATGAAGGATATCTAAGTAACAACGTATCGATAACAGTCCT  
AGAGCCAAGATAGACATAAAATCCAACAATTAGA ACTTTTGAAATGTATCC

>M6-PGSC0003DMG402019242M6G-LecRK\_1701

AGTCCTAGAGCCAAGATAGACATAAAATCCAACAATTAGA ACTTTTGAAATGTATCCACTTTGTCCTGTTT  
TTGTCAACAGTATTAGTGTATTTATGGACTATATCATGAAGTGCATTGA

>M6-PGSC0003DMG402019242M6G-LecRK\_1764

TCCTGTTTTTGTCAACAGTATTAGTGTATTTATGGACTATATCATGAAGTGCATTGAGGAAGATAGTCTA  
GTATTTCTGTTTTTCATTGACATGTGTATTCTTCGATACTATAATAAACG

>M6-PGSC0003DMG402019242M6G-LecRK\_1827

TAGTCTAGTATTTCTGTTTTTCATTGACATGTGTATTCTTCGATACTATAATAAACGTAACGAATTGGCCTA  
TTCTGAGTAACTTGTGAAAATTCTGTCTCCACTTCTGGCCATCAAAAT

>M6-PGSC0003DMG402019252-(rev)M6RLKmalectin\_0

AAAACAGAGTCTGGCACAGATAGATAAATATTACATTTAATGTATCACTTACAGAAGCTTCATAGCTCTT  
TCTGAGATACTGAGGGTATCAAATCAAACCACAATGTCCATTGAAACAC

>M6-PGSC0003DMG402019252-(rev)M6RLKmalectin\_122

CTGGTGTAAGTGTGGGGGTGCGGGGTGGGGGTTCTTTTGTGGGGTCCTCCATTTCTCCCCTTTGCTATAT  
CTTCTGTAAAATGACAGCCTAATCAACAGCCTGTAAAGAGCTGTTTTGGA

>M6-PGSC0003DMG402019252-(rev)M6RLKmalectin\_183

TTGCTATATCTTCTGTAAAATGACAGCCTAATCAACAGCCTGTAAAGAGCTGTTTTGGAACTTTGCTCTA  
AAAAGCTCTACTTGATTGTGTTTTCATGGTGGCATGGAGGTATTCCCCT

>M6-PGSC0003DMG402019252-(rev)M6RLKmalectin\_244

CTTTGCTCTAAAAGCTCTACTTGATTGTGTTTTCATGGTGGCATGGAGGTATTCCCCTTCTGGGTTTTCT  
TTATTTCTTCTTTTTTCTGAATACCCATTTTTAATCTTTTAAGTTTTTT

>M6-PGSC0003DMG402019252-(rev)M6RLKmalectin\_2989

AGAGGATGCTGCCACTAGTGCTGTTTTCTCTCAACTGGTAAATCCGCGGGGAAGGTGAAAAGGAACAGT  
CTCTGGTGTATGTGACATCCATAATTTTTATTTGTGGCTTCAACAAAAT

>M6-PGSC0003DMG402019252-(rev)M6RLKmalectin\_305

TGGGTTTTCTTATTTCTTCTTTTTTCTGAATACCCATTTTTAATCTTTTAAGTTTTTTAGCTCTAGGAATG  
AGGTAAGAGTAGTGAAAAAGATTCATTTTTTCTGTTTTATTCATTG

>M6-PGSC0003DMG402019252-(rev)M6RLKmalectin\_3050

GGAACAGTCTCTGGTGTATGTGACATCCATAATTTTTATTTGTGGCTTCAACAAAATATTAATGTGATT  
TAAAATCTTTTCATTCATAGTATTTGGGTCATTTTTCTAATAAATGC

>M6-PGSC0003DMG402019252-(rev)M6RLKmalectin\_3111

TAATGTGATTTAAAATCTTTTCATTCATAGTATTTGGGTCATTTTTCTAATAAATGCTCGGGTATGTACT  
GTAAATGATTGGTGGAGCTGGGCATCCATTGAAATTTGTCTTTGTAAT

>M6-PGSC0003DMG402019252-(rev)M6RLKmalectin\_3172

GGGTATGTAAGTAAATGATTGGTGGAGCTGGGCATCCATTGAAATTTGTCTTTGTAATACTAAGAGTTG  
TAACCTTGATGAACTATTACATAGGTGATAGAGTTGCCTCTTTTACTCA

>M6-PGSC0003DMG402019252-(rev)M6RLKmalectin\_3233

TAAGAGTTGTAACCTTGTATGAACTATTACATAGGTGATAGAGTTGCCTCTTTTACTCATAGATGTCATGA  
CTATAAATTGTCAAAGCTTCGTAATCAGTGATGTAGAGAGAAACAATAT



>M6-PGSC0003DMG402019252-(rev)M6RLKmalectin\_3294

GATGTCATGACTATAAATTGTCAAAGCTTCGTAATCAGTGATGTAGAGAGAAACAATATTAATCAATTGT  
TGCAGCACTTCTGCTGAATTATCTTCTGATGGTGGCTGAGTTTGCATGC

>M6-PGSC0003DMG402019252-(rev)M6RLKmalectin\_3355

ATCAATTGTTGCAGCACTTCTGCTGAATTATCTTCTGATGGTGGCTGAGTTTGCATGCTGTTACTGCTGA  
TTAACGATGCTCTCTTAAACTGATCGTTGTTGTGAGATAACCTCCATGT

>M6-PGSC0003DMG402019252-(rev)M6RLKmalectin\_3416

TTACTGCTGATTAACGATGCTCTCTTAAACTGATCGTTGTTGTGAGATAACCTCCATGTTCCGGAATCTGCT  
TCGACTATTATAGATGGAGCTGCTATCTAAGTGGTTTCAAACAGTTTCAG

>M6-PGSC0003DMG402019252-(rev)M6RLKmalectin\_3473

GTTCCGGAATCTGCTTCGACTATTATAGATGGAGCTGCTATCTAAGTGGTTTCAAACAGTTTCAGTTGAACC  
CAGATTTTCTGTTTTGCATACACTAATCCTCTATAAAAGTTGTGTCCGCGG

>M6-PGSC0003DMG402019252-(rev)M6RLKmalectin\_366

GCTCTAGGAATGAGGTAAGAGTAGTGAAAAAGATTCATTTTTCTTGTTTTATTTCATTGCTTCTCTGCTAC  
TCTTACATTGCTTCAGATTGATCTATTAATGGTTTGTAAAGATTAGTCTT

>M6-PGSC0003DMG402019252-(rev)M6RLKmalectin\_427

TCTCTGCTACTCTTACATTGCTTCAGATTGATCTATTAATGGTTTGTAAAGATTAGTCTTTAGGTTTGCTTGG  
GGAATTTGGAGTTTGTGTGCCACCAGGTGTTTGTAAAATGGGGCT

>M6-PGSC0003DMG402019252-(rev)M6RLKmalectin\_488

GGTTTGCTTGGGGAATTTGGAGTTTGTGTGCCACCAGGTGTTTGTAAAATGGGGCTATGGGTGCAT  
TTGGTTCTAGCTTTTATGCTGTCCTGTTTCTTGATTCAGGAGGCAAATGCT

>M6-PGSC0003DMG402019252-(rev)M6RLKmalectin\_61

ATAGCTCTTTCTGAGATACTGAGGGTATCAAAATCAAACCACAATGTCCATTGAAACACAGCTGGTGTA  
CTGTGGGGGTGCGGGGTGGGGGTTCTTTTGTGGGGTCCCTCCATTCTCCC

>M6-PGSC0003DMG402020263M6LRR-RLK\_0

CTTTAGTGGCGTAGGGGTAAAGACGACCGGTGCCACAGTGCTTTTCTGAGACTCTGTGAAAAGAAA  
GTCACCATTAAAGCCAGAACTTGAATCGGTCCCCTGTTTTTCTCCTTGA

>M6-PGSC0003DMG402020263M6LRR-RLK\_126

CTGCATGCAACACTAAATTCTCTCTTTTTGTCAACTACCCTCAATTTGCTCTCTGTTTTTTATTTCAAT

ATTGTTCTTCTCCCAAGAAAAAAGAACATTCCTTTAATTTGCAATT

>M6-PGSC0003DMG402020263M6LRR-RLK\_189

TATTTTCAATATTGTTCTTCTCCCAAGAAAAAAGAACATTCCTTTAATTTGCAATTACAGGTCAATTTATT  
CGCATTTTAAATGGGGTTTTATCAAGATTGTAGCAGCATTAACTGTTT

>M6-PGSC0003DMG402020263M6LRR-RLK\_2016

ATTTTGATCAGTCAGCATTACTTGGTGAAGGGTCAGTTGGAAAAGTATGGCTTCAAACAATACTTATGG  
TTCTCATTGATAATATATATCTTGATGTTTTCCATTCAATGGTCACGCTG

>M6-PGSC0003DMG402020263M6LRR-RLK\_2079

CTTATGGTTCTCATTGATAATATATATCTTGATGTTTTCCATTCAATGGTCACGCTGAATTTTGGCTCAAAC  
TGATATACTTGCTGTAAACTTGAATAAATGAAGCAGGACGTAGATTT

>M6-PGSC0003DMG402020263M6LRR-RLK\_2142

GGCTCAAACGATATACTTGCTGTAAACTTGAATAAATGAAGCAGGACGTAGATTTTGTGCGTAGAC  
CATGTCCAACAATGATAATGCAATGAATGCACTAGTTCACCAAAGTACAAA

>M6-PGSC0003DMG402020263M6LRR-RLK\_2205

GTAGACCATGTCCAACAATGATAATGCAATGAATGCACTAGTTCACCAAAGTACAAAATGGATTTGGGT  
GTTGTTTTTTTTTAAAAAAAGTGCTTGCCTATCATATTCTCATTCTACAC

>M6-PGSC0003DMG402020263M6LRR-RLK\_2268

TTGGGTGTTGTTTTTTTTTAAAAAAAGTGCTTGCCTATCATATTCTCATTCTACACGTGTATCTGTGACTT  
CTTTTGATGATAAAAAGTGGTGTCCACCAATAATGCTTTTGTGCATTTG

>M6-PGSC0003DMG402020263M6LRR-RLK\_2331

CTGTGACTTCTTTTGATGATAAAAAGTGGTGTCCACCAATAATGCTTTTGTGCATTTGATTTTCATATCTAAT  
GAACACATGACAGTTCAACTAAATATATCGAATGCCCTTAAAGGCAAAA

>M6-PGSC0003DMG402020263M6LRR-RLK\_2394

TATCTAATGAACACATGACAGTTCAACTAAATATATCGAATGCCCTTAAAGGCAAAAATTAGATAGTCTCA  
CACGTTTGAGTGCCTATGCAGTGAGTTGATATCTCTGCTATTTTGATTGA

>M6-PGSC0003DMG402020263M6LRR-RLK\_2457

AGTCTCACACGTTTGAGTGCCTATGCAGTGAGTTGATATCTCTGCTATTTTGATTGACATAAACAGGTGTT  
AGCCTTATTATGTCTTGCTTGAATAAGACAGTTACTTTAGTTATCAGCA

>M6-PGSC0003DMG402020263M6LRR-RLK\_252

CAATTTATTCGCATTTTTAATGGGGTTTTATCAAGATTGTAGCAGCATTAACTGTTTGGTAGCTCAATCTT  
GACTTGTCTGCACATTTAGACTTCAATGCTTTTCATTTTCACTGAACTA

>M6-PGSC0003DMG402020263M6LRR-RLK\_2520

CAGGTGTTAGCCTTATTATGTCTTGCTTGAATAAGACAGTTACTTTAGTTATCAGCAATTCCTCAATATA  
TATCTCCATTTAGATTTACAAGGGAAGATTAGAGAATGGAGCTTACAT

>M6-PGSC0003DMG402020263M6LRR-RLK\_315

TCAATCTTGACTTGTCTGCACATTTAGACTTCAATGCTTTTCATTTTCACTGAACTAGAAAGGGTCCACCC  
ATGTAATTTTCTTATTCATGATTAGCCAAGAACGTAAAATGGGTTGCTT

>M6-PGSC0003DMG402020263M6LRR-RLK\_378

GTCCACCCATGTAATTTTCTTATTCATGATTAGCCAAGAACGTAAAATGGGTTGCTTCAAGATTGTTGGA  
AACTGGCTCCATTTTGAAGTCACTGTAAATGGGTTTCTTCAAGATTTT

>M6-PGSC0003DMG402020263M6LRR-RLK\_63

AAAAGTGCACCATTAAGCCAGAACTTGAATCGGTCCCCTGTTTTTCTCCTTGACTTGCTCTGCATGC  
AACACTAAATTCTCTCTCTTTTGTCAACTACCCTCAATTTTGTCTCTCTG

>M6-PGSC0003DMG402021049M6LRR-RLP\_1071

TTTAACAGAATCTGGACGCAACTTGAAGAGCTAGATTGTTCAAGTCAATTCTGTAACAGGTCCCATTCTT  
CTAATGTAAGTGGTATGCAAAACCTTCAAGTTCTTATTGTCATCAAAC

>M6-PGSC0003DMG402021049M6LRR-RLP\_1134

ATTCCTTCAATGTAAGTGGTATGCAAAACCTTCAAGTTCTTATTGTCATCAAACCACTTGAATGGGAC  
TATACCTTCTGGATATTCTCTCTCCCTTCACTATTTATTTTGCCTTG

>M6-PGSC0003DMG402021049M6LRR-RLP\_1197

AATGGGACTATACCTTCTGGATATTCTCTCTCCCTTCACTATTTATTTTGCCTTGAATGATAACCATTTT  
AGTGGAACATTCAAGGAGTTCAAGTCTAAAACATTGTTTTCTGTTTCT

>M6-PGSC0003DMG402021049M6LRR-RLP\_1260

AACCATTTCAAGTGGAAACATTCAAGGAGTTCAAGTCTAAAACATTGTTTTCTGTTTCTCTAAAACAAAATCA  
GCTGCAAGGTCCTATTCCAAAGTCGCTCCTAAACCAGCGTGAACCTATAT

>M6-PGSC0003DMG402021049M6LRR-RLP\_1323

CAAAATCAGCTGCAAGGTCCTATTCCAAAGTCGCTCCTAAACCAGCGTGAACCTATATTTTCTTCTCCTTTC  
GCACAATAATCTCAGTGGACAGATTGCTTCAACCATCTGCAATATGACA

>M6-PGSC0003DMG402021049M6LRR-RLP\_1386

CTCCTTTTCGCACAATAATCTCAGTGGACAGATTGCTTCAACCATCTGCAATATGACAACACTGAATGTGCT  
AGATTTGGGCAGCAATAATTTGGAGGGAACAATCCCACTATGTTTGGGT

>M6-PGSC0003DMG402021049M6LRR-RLP\_1449

AATGTGCTAGATTTGGGCAGCAATAATTTGGAGGGAACAATCCCACTATGTTTGGGTGAGATGAGTGAC  
CTTCGGGTTTTGGATTTAAGCAACAATAGTCTTAGCGGGACAATTAATACT

>M6-PGSC0003DMG402021049M6LRR-RLP\_1575

AGTATAGGAAACGAACTTGGAGTCATTAATTTGACGGGAATAAGCTAGAGGGGAAAGTCCCGCAATC  
TTTGATCAATATCACGAGTTTGGAAAGTTCTTGATTTAGGTAACAATGAGTTT

>M6-PGSC0003DMG402021049M6LRR-RLP\_1638

CAATCTTTGATCAATATCACGAGTTTGGAAAGTTCTTGATTTAGGTAACAATGAGTTTAGTGACACATTTCC  
TAAATGGTTGGGAGCCCTACTTGTTCAGATTTTGAACCTTGAGATCA

>M6-PGSC0003DMG402021049M6LRR-RLP\_1701

ACATTTCTAAATGGTTGGGAGCCCTACTTGTTCAGATTTTGAACCTTGAGATCAAATAAGTTCTTTGG  
CCCTATAAAAGTTTCTAGGACTGACAACCTATTTGCTCAAATTCGAGTC

>M6-PGSC0003DMG402021049M6LRR-RLP\_1764

TTCTTTGGCCCTATAAAAGTTTCTAGGACTGACAACCTATTTGCTCAAATTCGAGTCATAGATCTCTCATCT  
AACGGATTTAGTGGACATTTACCCGTGAGCCTTTTCATGAAATTTGAA

>M6-PGSC0003DMG402021049M6LRR-RLP\_1827

CTCTCATCTAACGGATTTAGTGGACATTTACCCGTGAGCCTTTTCATGAAATTTGAATCCATGAAAATAAC  
TAGTGAAAACAGTGGAAACCCGAGAGTATGTAGGAGATACAGATTTCAAT

>M6-PGSC0003DMG402021049M6LRR-RLP\_1890

AAAATAACTAGTGAAAACAGTGGAAACCCGAGAGTATGTAGGAGATACAGATTTCAATTATTACACAATT  
TCCTTGATAGTGACAACAAAGGGACTGGAGCTTGAACCTCCTCGAGTTTTG

>M6-PGSC0003DMG402021049M6LRR-RLP\_1953

ACAATTTCTTGATAGTGACAACAAAGGGACTGGAGCTTGAACCTCCTCGAGTTTTGACTACAGAGATTA  
TTATCAATCTCTCAAGGAATAAATTTGAAGGTCATATCCCAAGCATTATT

>M6-PGSC0003DMG402021049M6LRR-RLP\_2016

GAGATTATTATCAATCTCTCAAGGAATAAATTTGAAGGTCATATCCCAAGCATTATTGGAGATCTCATTG

GGCTTCGGACTTTGAACTTATCTCATAATCGCTTGGAAGGTGATATACCA

>M6-PGSC0003DMG402021049M6LRR-RLP\_2079

CTCATTGGGCTTCGGACTTTGAACTTATCTCATAATCGCTTGGAAGGTGATATACCAGCATCACTGCACC

AATTATCTGTACTTGAATCATTGGATCTCTCATCCAACAAAATCAGCGGA

>M6-PGSC0003DMG402021049M6LRR-RLP\_2142

CTGCACCAATTATCTGTACTTGAATCATTGGATCTCTCATCCAACAAAATCAGCGGAGAAATTCCACAAC

AGCTTGTATCCCTCACATCACTTGAAGTCTTAAATCTCTCTCACAAATCAT

>M6-PGSC0003DMG402021049M6LRR-RLP\_2268

GGATGCATCCCCAAAGGAAGACAATTTGATACATTTGAGAATACTTCATACCAAGGGAATGATGAGTTA

CGTGGATTGCCACTCTCAAAGATTGTGGAAGTGATGATGGGGTACCACAA

>M6-PGSC0003DMG402021049M6LRR-RLP\_2305

AGAATACTTCATACCAAGGGAATGATGAGTTACGTGGATTGCCACTCTCAAAGATTGTGGAAGTGATG

ATGGGGTACCACAAGGGCTAGGCCAAGGAGAAGAAGGAGATTCATCAATGA

>M6-PGSC0003DMG402023866-(rev)M6LRR-RLP\_192

TTACCGACGAGTCTATTTCAACATTTGAAAGCCATGAGGACAATTGATCCGTCAATGGTAGCACCAAGAT

ATGGATATTACCAAGATACGGTAGCTGTCGTATCCAAGGGATTGGAGCTT

>M6-PGSC0003DMG402023866-(rev)M6LRR-RLP\_640

TAGGTAATGATGGATTACGTGGATTTCCACTATCAAAGGCTGTGGTAGTGATGATAATGATTCGGAGA

CAATGATACCACATCTGGACTAGATGATGAAGAAAGCGACTCTGAATTTT

>M6-PGSC0003DMG402023866-(rev)M6LRR-RLP\_704

GGAGACAAATGATACCACATCTGGACTAGATGATGAAGAAAGCGACTCTGAATTTCTGAATGATTTTTG

GAAAGCTGCTCTTATGGGGTATGGAAGTGGACTATGTATTGGGTTATCGAT

>M6-PGSC0003DMG402025507-(rev)M6LRR-RLP\_1642

GAAATGGAACACAAAATTAACATGCAAAGGAGAAAGAAGCAGCGAGGTCAAAGGAATTACAGAAGAA

GAAATAATCTCTTAGACAAGTTTCCAATAAAGAAAAGGATCTGATTTTCAGA

>M6-PGSC0003DMG402025507-(rev)M6LRR-RLP\_256

TAGTTTCTTAGATCTGAGTATTA ACTCTCTTAATGGTTCTATTCTGCTTCATTGGGGAATTTAAGAAATG

TGCAAAGAATGTTTCTTGATGAAAACAATCTCACTGAAGAAATTCCTTT

>M6-PGSC0003DMG402026153M6G-LecRK\_1054

TTCGGAGTAGTCCTACTCGAGATCATAAGTGGGAGGAGAAACATGGAATTTTTTCGAAGATGTAAACCTC  
ATTGGTCATGTAAGTACCAAAATTTCCCCCATTAAATAAACATCTCATTCT

>M6-PGSC0003DMG402026153M6G-LecRK\_1488

TTCCAACAATGGGTTGACAATAACTCAACAAGTAGGCCGATGAAATCAATATACATATAAGTTAAATGCA  
TAACGCACACAAGCCAATAATGTGCCGGTATATCTTTTCTTCAATTTTCAG

>M6-PGSC0003DMG402026153M6G-LecRK\_1548

GTTAAATGCATAACGCACACAAGCCAATAATGTGCCGGTATATCTTTTCTTCAATTTTCAGTTTGAATTTCT  
GTTAAATTATTTTGGCACGCAAATAACCGATTGTGTTGTAGTCTCGGA

>M6-PGSC0003DMG402026153M6G-LecRK\_434

GGCTATTGTGTTGAGAGAAATGAAAAGATTTTGTATATGAATATATGCCCAACAAAAGCTTGGATACG  
TTTCTATTCGGTTAGTATACTTCCCTCCCTACCATGAAGCTCGTTGCAGTA

>M6-PGSC0003DMG402026432M6LRR-RLP\_0

TACAAAGACGAAAACCTTTGAACTAAACAAAAGTATATTGTACAATTAATCTATTCAATTAATACAATTCAA  
AAGTTAGAAACAAATGGTATTATCATGATTTTGGAGGAATATATAAATGG

>M6-PGSC0003DMG402026432M6LRR-RLP\_1008

TCCATTATTAAGATTATGACATCAAGCTTAACATCATCATATATAATTATGTGGAGAGGTGAACTTTTG  
AGTTTTTAAGGAAGAAAGAATCTTACTTTTTATCATTCAAGCCTTTAAC

>M6-PGSC0003DMG402026432M6LRR-RLP\_1071

AACTTTTGAGTTTTTAAGGAAGAAAGAATCTTACTTTTTATCATTCAAGCCTTTAACAAATTAAGATGAG  
ACCAAAGGTAAAGAATCATTAATAAAAAATGTCCAATTAACAAAATTTAA

>M6-PGSC0003DMG402026432M6LRR-RLP\_1134

AAGATGAGACCAAAGGTAAAGAATCATTAATAAAAAATGTCCAATTAACAAAATTTAATGAAGAATAATT  
GTACAAAATTAATTAAGAATTTATAGCATTAGTTAAGTTACCAAGAAAAA

>M6-PGSC0003DMG402026432M6LRR-RLP\_1197

ATAATTGTACAAAATTAATTAAGAATTTATAGCATTAGTTAAGTTACCAAGAAAAAACCATAGCATGTG  
CATGGCATATTATATATATAGCTATTCATTCTTCCATATATTAGTCATCA

>M6-PGSC0003DMG402026432M6LRR-RLP\_126

TGCCATACAGTCATACACCACTTTACAGTACTTTGTCATAAAATATTAAGATAATTTAATCTATAGAAAAA  
TGGGACCCCTGGAAGATTTAAAAACTGCATAAATAAATTACATTTAATT

>M6-PGSC0003DMG402026432M6LRR-RLP\_189

TAGAAAAATGGGACCCCTGGAAGATTTAAAACTGCATAAATAAATTACATTTAATTTTTTCCACAGTA  
AAGATAGAGCACAATATCAATATTTGGTTGGCATTCTGATAATATTTAAT

>M6-PGSC0003DMG402026432M6LRR-RLP\_252

CACAGTAAAGATAGAGCACAATATCAATATTTGGTTGGCATTCTGATAATATTTAATTTCTATTCCCTTTTT  
TCCCTCCAAAAATACTATAAGAAAATGAAGTTGGAGTAGAAGATATGG

>M6-PGSC0003DMG402026432M6LRR-RLP\_315

TCCCTTTTTTCCCTCCAAAAATACTATAAGAAAATGAAGTTGGAGTAGAAGATATGGTTTGTATTCCCTT  
GCGTTTCTTTGAGTTCCAAATACTATGACTACTACTGGCATTTCATTT

>M6-PGSC0003DMG402026432M6LRR-RLP\_378

ATTCCTTGCGTTTCTTTGAGTTCCAAATACTATGACTACTACTGGCATTTCATTTTACATTTATAGGTTT  
TGAATTTTATAAAAAGCATTTACTGGTCGGATCGGGTTTCGGATATTT

>M6-PGSC0003DMG402026432M6LRR-RLP\_441

TATAGGTTCTGAATTTTATAAAAAGCATTTACTGGTCGGATCGGGTTTCGGATATTTTTTTTACACATAAC  
AAACAAATTTCTTATCATAAATACAAAGTTCAATTTGGAACAAAATTAC

>M6-PGSC0003DMG402026432M6LRR-RLP\_504

CACATAACAAACAAATTTCTTATCATAAATACAAAGTTCAATTTGGAACAAAATTACTGATTTTACCTGCC  
ACACTATAGAGAGGTTCTGTGAACTCAATAGATTTTATTCATATTATT

>M6-PGSC0003DMG402026432M6LRR-RLP\_567

TACCTGCCACACTATAGAGAGGTTCTGTGAACTCAATAGATTTTATTCATATTATTTATATGTACTAAGA  
AAATCATTAAAGTAATTATTATAATTTGATTATGAACTCAATTATTATTG

>M6-PGSC0003DMG402026432M6LRR-RLP\_63

CAATTCAAAAGTTAGAAACAAATGGTATTATCATGATTTTGAGGAATATATAAATGGTATATATGCCATA  
CAGTCATACACCACTTTACAGTACTTTGTCATAAAATATTAAGATAATTT

>M6-PGSC0003DMG402026432M6LRR-RLP\_630

TACTAAGAAAATCATTAAAGTAATTATTATAATTTGATTATGAACTCAATTATTATTGTTTCATAAATTTAAT  
TTTTTTTAATAAGAATTTATAAATTTTAAGTTCTGAATTCGCCTCTA

>M6-PGSC0003DMG402026432M6LRR-RLP\_693

AATTTTAATTTTTTTTTTAATAAGAATTTATAAATTTTAAGTTCTGAATTCGCCTCTATATAAGTATTGATAG

GTATAGGATTAGGACCAATGGTGCAATAAGAGTGATCCAATTAGTTTT

>M6-PGSC0003DMG402026432M6LRR-RLP\_756

TATTGATAGGTATAGGATTAGGACCAATGGTGCAATAAGAGTGATCCAATTAGTTTTATTAGTTGTTTAA  
TAGTTGCAATAGACTAGTAGTTAGTTTTATTACGACAAAGTTTCCTAGTT

>M6-PGSC0003DMG402026432M6LRR-RLP\_819

TGTTTAATAGTTGCAATAGACTAGTAGTTAGTTTTATTACGACAAAGTTTCCTAGTTTTACTTTTAATACA  
AAGTATTTTTCTTTTAAAAAATTATCGTTATAATTTATGTGATACTAT

>M6-PGSC0003DMG402026432M6LRR-RLP\_882

TTTAATACAAAGTATTTTTCTTTTAAAAAATTATCGTTATAATTTATGTGATACTATTTGATTAGATAAAAA  
GAAAAAAAAGTTTAATCCAACCTGTGAATTGAGAACAAATCGATGTT

>M6-PGSC0003DMG402026432M6LRR-RLP\_945

AGATAAAAAGAAAAAAAAGTTTAATCCAACCTGTGAATTGAGAACAAATCGATGTTTTCAATTCCATTA  
TTAAAAGATTATGACATCAAGCTTAACATCATATATAATTATGTGGA

>M6-PGSC0003DMG402026747-(rev)M6LRR-RLK\_0

GACTTATCATCAAACAACACGGTTGGTTCTTTACCTCCGAAATTGGAAATCTAAAAGCTGTGATACAGA  
TGGATTTGTCGATGAATCAATTCTCAAATGGAATTCCAAGAGAAATTGGA

>M6-PGSC0003DMG402026747-(rev)M6LRR-RLK\_1010

ACGTCTTGCTAGATGAGGATATGGTTGCCCACTTAAGCGACTTTGGTATTTCAAACCTGCTTGGTGAAGA  
TGAGAGTGATATACAGTAAAACCTTAGCAACATTTGGTTATATTGCAC

>M6-PGSC0003DMG402026747-(rev)M6LRR-RLK\_128

AAATCTGGTGCATCTTTCTTTGAGACAAAACAAGTTGCAAGGATCTATACCTGACTCAATGAGCAACATG  
GTAGGTTTGAATTCCTAGACCTTTCTCATACTAATATATCATGAATCAT

>M6-PGSC0003DMG402026747-(rev)M6LRR-RLK\_192

AACATGGTAGGTTTGGAAATTCCTAGACCTTTCTCATACTAATATATCATGAATCATTCTATGTCTTTGGA  
GAAACGTCAAACCTGAAGTATTTCAATGTTTCTGATAACAAATTGCAT

>M6-PGSC0003DMG402026747-(rev)M6LRR-RLK\_256

CTTTGGAGAAACGTCAAACCTGAAGTATTTCAATGTTTCTGATAACAAATTGCATGGCGAAATACCCTC  
GGGAGGTCCTTTCAAGAACCTCTCGAGTCTGTTTTTCATCAACAATGAAG

>M6-PGSC0003DMG402026747-(rev)M6LRR-RLK\_320



ACCCTCGGGAGGTCCTTTCAAGAACCTCTCGAGTCTGTTTTTCATCAACAATGAAGCATTGTGTGGTTCTT  
CAAGATTTAGCGTCCCTCCATGCCCCACTTCATCAAACCATAGGTCAAA

>M6-PGSC0003DMG402026747-(rev)M6LRR-RLK\_384

GGTTCTTCAAGATTTAGCGTCCCTCCATGCCCCACTTCATCAAACCATAGGTCAAATAGGAAAAACAATC  
TTGTTCTATCTCTTATGCTGGGAATTGCACTTGTATTTGTTCTATTACC

>M6-PGSC0003DMG402026747-(rev)M6LRR-RLK\_448

ACAATCTTGTCTATCTCTTATGCTGGGAATTGCACTTGTATTTGTTCTATTACCCTTGTTTGTATGGA  
TAAGGTATAGAAGAGGTAAAAGATCTCCTCAGCAAACCTGATTCATTGT

>M6-PGSC0003DMG402026747-(rev)M6LRR-RLK\_512

TGTATGGATAAGGTATAGAAGAGGTAAAAGATCTCCTCAGCAAACCTGATTCATTGTCTATGGCAACAAC  
GGAAAGAATTCATACTATGAACTGCTCCAAGCAACTGATTCGCTTAGCGA

>M6-PGSC0003DMG402026747-(rev)M6LRR-RLK\_64

TACAGATGGATTTGTGCGATGAATCAATTCTCAAATGGAATCCAAGAGAAATTGGAGGATTGCAAATC  
TGGTGCATCTTTCTTTGAGACAAAACAAGTTGCAAGGATCTATACCTGACT

>M6-PGSC0003DMG402026747-(rev)M6LRR-RLK\_704

AGTTAAAGTGTTCAATCTGCAACTGGAAGCAGCATTCAAGAGTTTTGATACAGAATGTGAAGTTTTACTC  
AGCCTTCGCCACAGGAATCTCGTGAAAGTCATCACTAGTTGCTCCAACCT

>M6-PGSC0003DMG402026747-(rev)M6LRR-RLK\_768

TACTCAGCCTTCGCCACAGGAATCTCGTGAAAGTCATCACTAGTTGCTCCAACCTTGATTTAAGGCTTT  
AGTGCTCAAGTATATGCCTAATGGAAGTCTTGACAAGTATTTGTATTCG

>M6-PGSC0003DMG402026747-(rev)M6LRR-RLK\_896

CTTCCTAGACATCAGGCAGAGACTAAGCATTATGTCTAGATGTGGCATGTGCGTTGGAATATTTCCATCA  
TGGATGCTCCTCTCTGTGATTCAATTGTGATATAAAGCCTAGTAACGTCT

>M6-PGSC0003DMG402027402-(rev)M6LRR-RLP\_0

TTGAATCCAGACTGGCAGACTCCATAATTTTTGCTACTCTTTTTCTGTGGCTGTGAGCTGCATACTGT  
AGATAAACATAGTTATACCAATTACAAGCAAAGAGAGGGAGAGAAA

>M6-PGSC0003DMG402027402-(rev)M6LRR-RLP\_1054

AGCTACAAGTCAAATTGAAGGAAAGATTAAGGGAAAGAAGTTTCTTCTTGTCTGGATGATGTGTGGA  
ATGACAACTACAACGAGTGGGATGACTTGAGAAATGTTTTGTACAAGGAG

>M6-PGSC0003DMG402027402-(rev)M6LRR-RLP\_1364

GTGCAAAGGACTGCCCTTAGCTCTGAAGACACTAGCTGGCATGTTACGCTCCAAATCAGAGGTTCAAGA  
GTGGAAACGTATTCTGATAAGTGAAATATGGGAGCTGCGAGACAAGGACAT

>M6-PGSC0003DMG402027402-(rev)M6LRR-RLP\_2418

GCAAAGATGAGGGAGAAGAATCATGTTGACAAGTTATCACTGGAGTGGAGTGAAAGTAGTAGTGCCGA  
CAATTCACAACTGAAAGAGACATACTTGATGAGCTACGCCACATAAAAAC

>M6-PGSC0003DMG402027402-(rev)M6LRR-RLP\_2728

CGGGAGAATTCTATGGCAGTTGGTCCCTCCAAAAGCCTTTTAACTGTCTTGAGAAGCTTGAATTTAAAGA  
TATGCCGGAGTGGAAGCAATGGCACGTAAGTAGGTAGTGAGAGTTCCTTA

>M6-PGSC0003DMG402027402-(rev)M6LRR-RLP\_2976

CTGTTTAGATCCCAACTTGAGGGAATGAAGCAGATTGTTGAATTAGATATACGTGATTGTAAGTCTCTTA  
CCTTCTTTCTTTTAGCATACTGCCACTACCTTGAAGAGAATAAGGATA

>M6-PGSC0003DMG402027402-(rev)M6LRR-RLP\_3348

ACGAAGTTGAGTATTCAGGGCTGTAAGAAGCTGAAGTGGCTGCCAGAACGTATGCAGGAACTCCTTCCA  
TCTCTTAAGAACTGTATCTGCGTAATTGTCCAGAAATAGAGTCCTTTCCT

>M6-PGSC0003DMG402027402-(rev)M6LRR-RLP\_372

TCAGCTTTACACAAGCTGGACGACATTTTGCTTGGTCTTCAGATTGTGCTAAGTGATGCAGAGAATAAG  
CAAGCATCAAATCGACAAGTGAGCCAGTGGTTCAATAAGCTTCAGAATGC

>M6-PGSC0003DMG402027402-(rev)M6LRR-RLP\_434

AGAATAAGCAAGCATCAAATCGACAAGTGAGCCAGTGGTTCAATAAGCTTCAGAATGCTGTGGATGGC  
GCTGAAAACCTTGATAGAAGAAGTCAATTATGAAGCTTTGAGGCTTAAGGTGG

>M6-PGSC0003DMG402027402-(rev)M6LRR-RLP\_62

TGCATACTGTAGATAAAACATAGTTATACCAATTACAAGCAAAAGAGAGGGAGAGAAATCATTCTTGAT  
TACATATCACTCTTAGCTCTTAGCATTCAACAGGTAAAATAAAGTTGTTAG

>M6-PGSC0003DMG402027402-(rev)M6LRR-RLP\_620

TGAATTTTCTTAACATAAAGGAGAAGTTGGAAGAAACCATTGAAACATTGGAGGTGTTGGAAAAGCA  
AATTGGCCGCTTGTCTTAAAGGATCATTTTGGTTCGACTAAACAAGAAAC

>M6-PGSC0003DMG402027811M6RLKmalectin\_0

TTGAATTTAGGGTTGCAAAGCAGGACCAAGTTGATTTACATTGTAAGAATGGAGCTCAGTTAGGTAAGT

ATTAATTTAACAACCTTTACGCATGAAGTGATTCAGTATACGTCTTATGTT

>M6-PGSC0003DMG402027811M6RLKmalectin\_1178

CCCCTATGTTGTGACTGATATTTTCATGGTAACAATTTATGAATCAGATCAATCACATCTGTCCCATGGAGT  
GCTTGTTGGAATTTTCAGGATCTGCATTACTTTTTCTAATATTGTTTCATT

>M6-PGSC0003DMG402027811M6RLKmalectin\_124

TCCTTATGACTAACTTCACACATAATTATTTCAATAGTTAAATGTGTTAGTATCATGACTCGTGATAAGAT  
TGCTGTTTTTCTAGTTTGTGCTTTCCACACTAAAGTTGCTCGCATTCTG

>M6-PGSC0003DMG402027811M6RLKmalectin\_1240

CCATGGAGTGCTTGTTGGAATTTTCAGGATCTGCATTACTTTTTCTAATATTGTTTCATTGTTTTTCTGGAT  
GTACCAAGACAAATTACGTCGGGAAGGTAACACTACTTTAATTATGGA

>M6-PGSC0003DMG402027811M6RLKmalectin\_1302

TTTCCTGGATGTACCAAGACAAATTACGTCGGGAAGGTAACACTACTTTAATTATGGATTTTATTTTGTT  
TCCATTGGGATTTGAAGCGAAGCAATCTTTGAGGCGATCTCCAAAATCT

>M6-PGSC0003DMG402027811M6RLKmalectin\_1364

ATTTTGTTTTCCATTGGGATTTGAAGCGAAGCAATCTTTGAGGCGATCTCCAAAATCTGAAAATGTTATC  
TCTCCTCTTACTCGCCCTTACCATCCTGGAAAGGAGACCCAAGATCCA

>M6-PGSC0003DMG402027811M6RLKmalectin\_1426

ATGTTATCTCTCCTCTTACTCGCCCTTACCATCCTGGAAAGGAGACCCAAGATCCATTTCTTATCATGGC  
ATCAGTATCAGATCTATCCCAATTTTTAGTTTGCCCGATGTTAGGCC

>M6-PGSC0003DMG402027811M6RLKmalectin\_1488

TTATCATGGCATCAGTATCAGATCTATCCCAATTTTTAGTTTGCCCGATGTTAGGCCCCCATATTATGTTTT  
CCACCCTCCCGTTGGTAAGCTTGGGCATAGGTTGGAGGGGTGTTAAGT

>M6-PGSC0003DMG402027811M6RLKmalectin\_1550

ATTATGTTTTCCACCCTCCCGTTGGTAAGCTTGGGCATAGGTTGGAGGGGTGTTAAGTTGTCCCACATTG  
GTCGTTAGCTTCTGGGGTTGAGTTAAGCCCAAGATACATTTTTATCTAGT

>M6-PGSC0003DMG402027811M6RLKmalectin\_1612

CCACATTGGTCGTTAGCTTCTGGGGTTGAGTTAAGCCCAAGATACATTTTTATCTAGTTATCGGTTTTAAT  
TACCACCATATGAATCATAAGACACTTTATTTGTAGTAAGCTTCTTTAC

>M6-PGSC0003DMG402027811M6RLKmalectin\_1674

GGTTTTAATTACCACCATATGAATCATAAGACACTTTATTTGTAGTAAGCTTCTTTACTTTCTTTCTGTTTT  
CACTCAACTGATATTTATTTACTAATAATGTGCTGATATAGAGTTAG

>M6-PGSC0003DMG402027811M6RLKmalectin\_1736

TTTCTGTTTTCCACTCAACTGATATTTATTTACTAATAATGTGCTGATATAGAGTTAGAACTTATTGAATTC  
TACCCTGGAGGGCTTTACAACATCAGAAAATTAAGCTGCCACAAAT

>M6-PGSC0003DMG402027811M6RLKmalectin\_1798

TATTGAATTCTACCCTGGAGGGCTTTACAACATCAGAAAATTAAGCTGCCACAAATAATTTTCATGAT  
GGCCGCCGGCTTGGTGAGGGAGGTTTTGGGACCGTCTACGAGGTTAGCTA

>M6-PGSC0003DMG402027811M6RLKmalectin\_186

TGATAAGATTGCTGTTTTTCTAGTTTGTGTTTTCCACTAAAGTTGCTCGCATTCTGAGATCTCAAATGC  
ACCATGTACTAAAATTTGTGTATCCATTTGTAGATGACCATTTGTATAT

>M6-PGSC0003DMG402027811M6RLKmalectin\_1860

TTCATGATGGCCGCCGGCTTGGTGAGGGAGGTTTTGGGACCGTCTACGAGGTTAGCTAGAATCTTTAAC  
TCATTGCAGGTTATGATTTTTTGTGTTCTTTGTGATATGTCTTTGACAGTT

>M6-PGSC0003DMG402027811M6RLKmalectin\_1922

CTTTAACTCATTGCAGGTTATGATTTTTTGTGTTCTTTGTGATATGTCTTTGACAGTTTTAGTCCGCCTTTG  
TATTCTTCATTTCTTTCCGAAAAGATATTCTCTCATGACAAAAGTTG

>M6-PGSC0003DMG402027811M6RLKmalectin\_1984

TCCGCCTTTGTATTCTTCATTTCTTTCCGAAAAGATATTCTCTCATGACAAAAGTTGCAGTACTAATATTG  
TGTAGCTGCACTATGCACAACCTTTCTCCGTTTGCTAGTTGGATGACC

>M6-PGSC0003DMG402027811M6RLKmalectin\_2356

AAATTGAAACGGAAGGAGTAATTATTTGTTTCTCTGATTCACAATTCATCATCTAAACACTTCACCAA  
CATCCAGGGCACTCTTTGGATGGGACTGCCATTGCAGTTAAAAAGCTT

>M6-PGSC0003DMG402027811M6RLKmalectin\_2418

CTTACCAACATCCAGGGCACTCTTTGGATGGGACTGCCATTGCAGTTAAAAAGCTTTGACAACAAAA  
GAAGGAATGAACGAGTTTGTGGAAAAGAGTCGTACAATTGCTGGCATGAA

>M6-PGSC0003DMG402027811M6RLKmalectin\_248

CTCAAATGCACCATGTACTAAAATTTGTGTATCCATTTGTAGATGACCATTTGTATATAAACTGCGGTGGT  
GAGTCTGTATCAGTTAACGGAAATGTCTATGAAGCTGATGTACATGAAA

>M6-PGSC0003DMG402027811M6RLKmalectin\_2480

CAACAAAAGAAGGAATGAACGAGTTTGTGGAAAAGAGTCGTACAATTGCTGGCATGAAACATCCAAAT  
CTTGTAACACTAATGGGATGCTGTGCAGGAAAGAACCAACTTCTGCTTGTCT

>M6-PGSC0003DMG402027811M6RLKmalectin\_2542

CCAAATCTTGTAACACTAATGGGATGCTGTGCAGGAAAGAACCAACTTCTGCTTGTCTATGAGTACATTG  
GAACTAAATCTCTTGAAGATGCATTATTCGGTAACGTCTTCCATTTATGA

>M6-PGSC0003DMG402027811M6RLKmalectin\_2604

GTACATTGGAACACTAAATCTCTTGAAGATGCATTATTCGGTAACGTCTTCCATTTATGAAAAATTTCTTCAT  
TAAGCCTCTGTAGTTGTAGTAAAGAATTCAGTTGTACAAATTAACGTC

>M6-PGSC0003DMG402027811M6RLKmalectin\_2666

TTTCTTCATTAAGCCTCTGTAGTTGTAGTAAAGAATTCAGTTGTACAAATTAACGTCGAGCTTTGGTTAC  
TTACAGGTTTACAGGAACTTAGAGCAAGCCTAGATTGGCCAACAAGATA

>M6-PGSC0003DMG402027811M6RLKmalectin\_2728

TTTGGTTACTTACAGGTTTACAGGAACTTAGAGCAAGCCTAGATTGGCCAACAAGATATAGAATTTGTCT  
TGGGCTAGCAGAAGGTTTACGCTTTTCTTACGAGGGGTCCAAACTTGAAA

>M6-PGSC0003DMG402027811M6RLKmalectin\_2790

ATTTGTCTTGGGCTAGCAGAAGGTTTACGCTTTTCTTACGAGGGGTCCAAACTTGAAATTATACACGGGA  
ATATTAGACCAGCGAACATTCTTCTTGATGATGATCTGAATCCGAAGATA

>M6-PGSC0003DMG402027811M6RLKmalectin\_2852

ACACGGGAATATTAGACCAGCGAACATTCTTCTTGATGATGATCTGAATCCGAAGATATACGATTTTGGAA  
TTTGCAAAGCTTTATCACAAGCAAAAGTCAGAAGGAACAATGTAAGGAAA

>M6-PGSC0003DMG402027811M6RLKmalectin\_2914

ATTTTGGATTTGCAAAGCTTTATCACAAGCAAAAGTCAGAAGGAACAATGTAAGGAAACACACTAACAA  
ATTATATTTCAAAAAGCGTTAATAGCCAAAAACACATCTAAAATATCCTGG

>M6-PGSC0003DMG402027811M6RLKmalectin\_2976

CTAACAAATTATATTTCAAAAAGCGTTAATAGCCAAAAACACATCTAAAATATCCTGGTTTTCTTAGTTTC  
ATACCTGAACTACCAAGTGTGCGAGTTTCTTACCTGAACTATCACCAAC

>M6-PGSC0003DMG402027811M6RLKmalectin\_310

TGCGGTGGTGAGTCTGTATCAGTTAACGGAAATGTCTATGAAGCTGATGTACATGAAAATGGTGGATCA

ACTTTCTTCATGAGTAATAATTCAAATTGGGGCTATAGTAGTATGGGAACC

>M6-PGSC0003DMG402027811M6RLKmalectin\_3100

TACCAAAACACACCTCAACTATTACCTTAAATATCACCATCATCATTACAGGTAGGAAAATGGAACAATTG

ATAGTTGTTGTGTGTTTTGATAAGTAGCTGGTGATCGTTCAGGTAGGAAA

>M6-PGSC0003DMG402027811M6RLKmalectin\_3162

AACAATTGATAGTTGTTGTGTGTTTTGATAAGTAGCTGGTGATCGTTCAGGTAGGAAACTCGAAAAACCT

GGATACTTTAGGTATTATTTTGACCTTTCCTCTTTTCAGATACAAATT

>M6-PGSC0003DMG402027811M6RLKmalectin\_3224

AAAAACCTGGATACTTTAGGTATTATTTTGACCTTTCCTCTTTTCAGATACAAATTAGTAATACTTTAG

GTGTGTTAAACTTTGTATACATTGGCTATTACAATTGCACTTCTCAGT

>M6-PGSC0003DMG402027811M6RLKmalectin\_3286

ATACTTTAGGTGTGTTAAACTTTGTATACATTGGCTATTACAATTGCACTTCTCAGTAATGGAAGCCTTT

TGCAGGTCATACACCGCGCCTGAAGTTAAAGATCGCGCCTTAGAAGCCA

>M6-PGSC0003DMG402027811M6RLKmalectin\_3348

GAAGCCTTTTGCAGGTCATACACCGCGCCTGAAGTTAAAGATCGCGCCTTAGAAGCCAGCGCGGATGTG

TATAGCTTTGGAGTTGTCATGCTTATACTTGTGAGCGGAATGAAAATCAAG

>M6-PGSC0003DMG402027811M6RLKmalectin\_3410

GGATGTGTATAGCTTTGGAGTTGTCATGCTTATACTTGTGAGCGGAATGAAAATCAAGACCCCGAGGGC

AGGTGGTGACTGAATACCTCGTTGATGAGGTGAGTGAGACTCGATTAAC

>M6-PGSC0003DMG402027811M6RLKmalectin\_3472

CGAGGGCAGGTGGTGACTGAATACCTCGTTGATGAGGTGAGTGAGACTCGATTAAGTCAATAGTA

ATGTACATTAATTTAGGAAACAAAGTTATTGGTTTGTTCGACTACTATAGG

>M6-PGSC0003DMG402027811M6RLKmalectin\_3534

ATAGTAATGTACATTAATTTAGGAAACAAAGTTATTGGTTTGTTCGACTACTATAGGCACAAATAAGGA

ATCGGAGGGGAACTCTAATGGATTTAGTCGATCAAACCTCTGAATTACGAC

>M6-PGSC0003DMG402027811M6RLKmalectin\_3596

AATAAGGAATCGGAGGGGAACTCTAATGGATTTAGTCGATCAAACCTCTGAATTACGACTGGGAAGAAG

CAGAGATGATTCTAAGATTAGCAATCCAATGTATAGATTCACCGCCATTCAG

>M6-PGSC0003DMG402027811M6RLKmalectin\_3658

AAGAAGCAGAGATGATTCTAAGATTAGCAATCCAATGTATAGATTCACCGCCATTCAGACCAACGATGT  
CTACAATCGTGAAGATTTTAAGGAAAGAACGTTCAATCGAGACCATTTTGA

>M6-PGSC0003DMG402027811M6RLKmalectin\_372

TGGATCAACTTTCTTCATGAGTAATAATTCAAATTGGGGCTATAGTAGTATGGGAACCTTCTTATGGGCA  
ATACGTAACAGGTACACTATAAATGATGTATGCGAAGTTCATACTGGTGA

>M6-PGSC0003DMG402027811M6RLKmalectin\_3720

ACGATGTCTACAATCGTGAAGATTTTAAGGAAAGAACGTTCAATCGAGACCATTTTGATCAAGCCCAAG  
GGTGATTAACACTACAACGTCTTGCGGAAAAAGGTTACAAAATCATGTCCTAG

>M6-PGSC0003DMG402027811M6RLKmalectin\_3782

GCCCAAGGGTGATTAACACTACAACGTCTTGCGGAAAAAGGTTACAAAATCATGTCCTAGCTGATTGTTCTG  
CTGAAAAATACCACTCAGATATTGAGAAGTGAAGGACTATCATATTTGCT

>M6-PGSC0003DMG402027811M6RLKmalectin\_3844

TTGTTCTGCTGAAAAATACCACTCAGATATTGAGAAGTGAAGGACTATCATATTTGCTTTAACAATGTGC  
TTGAGTAGGGGCGGAGCTAGAAGGCAACTTACGAGTTCAGCTGAATCAAG

>M6-PGSC0003DMG402027811M6RLKmalectin\_3906

CAATGTGCTTGAGTAGGGGCGGAGCTAGAAGGCAACTTACGAGTTCAGCTGAATCAAGTAGTACGTCC  
GTACTAAATCTTGCATTAATGTATTTGTGTTGCAATGTTTTCTAAATATGTG

>M6-PGSC0003DMG402027811M6RLKmalectin\_3968

ACGTCCGTAATAATCTTGCATTAATGTATTTGTGTTGCAATGTTTTCTAAATATGTGCAAATCTTAAATTA  
AGAGTTCAGTTATGAGCACTTGAAGTCGTTATTGTAAGATTCAGAACC

>M6-PGSC0003DMG402027811M6RLKmalectin\_4030

TCTTAAATTAAGAGTTCAGTTATGAGCACTTGAAGTCGTTATTGTAAGATTCAGAACCTATTAATTCAAA  
TGCTACTAGTGTTAATGTTTTCTTTTATGAAAACATCTGTATTTGGTA

>M6-PGSC0003DMG402027811M6RLKmalectin\_434

TATGGGCAATACGTAACAGGTACACTATAAATGATGTATGCGAAGTTCATACTGGTGATGCCGAATTGT  
ATGGAACAGCACGTTTATCCTCAATCTCTTGAATATTATGGATTTTGT

>M6-PGSC0003DMG402027811M6RLKmalectin\_496

GAATTGTATGGAACAGCACGTTTATCCTCAATCTCTTGAATATTATGGATTTTGTGGTACCCGGTAC  
GTACAAAGTGA CTCTTCACTTTGCTGAAATATCTAGTAGAAAATATAGA

>M6-PGSC0003DMG402027811M6RLKmalectin\_558

ACCCGGTACGTACAAAGTGACTCTTCACTTTGCTGAAATATCTAGTAGAAAATATAGACTCTCGCATGGC  
AAAACAAGGCGAGTCTTTGATGTAGAAATCCAGGTAAGGTACCAAACCA

>M6-PGSC0003DMG402027811M6RLKmalectin\_62

GGTAAGTATTAATTTAACAACTTTACGCATGAAGTGATTTTCAGTATACGTCTTATGTTATGTTTCCTTATGA  
CTAACTTCACACATAATTATTTCAATAGTTAAATGTGTTAGTATCATGA

>M6-PGSC0003DMG402027811M6RLKmalectin\_620

CGCATGGCAAACAAGGCGAGTCTTTGATGTAGAAATCCAGGTAAGGTACCAAACCCACCTTGTTCGATC  
CGTACGCAAACATATAGAAGATCTTTACAGAATAGTTATGCAGGGAACAAA

>M6-PGSC0003DMG402027811M6RLKmalectin\_682

GTCGATCCGTACGCAAACATATAGAAGATCTTTACAGAATAGTTATGCAGGGAACAAAGGTGCTGACAA  
GCTTCAACATAGAAGCAGAAGCAGAACGACAAGCTGTGAATGAGCCTATAA

>M6-PGSC0003DMG402027811M6RLKmalectin\_744

CTGACAAGCTTCAACATAGAAGCAGAAGCAGAACGACAAGCTGTGAATGAGCCTATAACAAGGGAATA  
TTCCGCTGAAGTGCATAACAATCTCCTCGAGATTCACCTATACTGGTCTGGA

>M6-PGSC0003DMG402027811M6RLKmalectin\_806

GGAATATTCCGCTGAAGTGCATAACAATCTCCTCGAGATTCACCTATACTGGTCTGGAAAAGGGTCAATC  
TTATACCCATCAGATAACTATGGGCCCTTATATCTGCGATTACAGTAAC

>M6-PGSC0003DMG402027811M6RLKmalectin\_868

GGTCAATCTTATACCCATCAGATAACTATGGGCCCTTATATCTGCGATTACAGTAACTCTAGGTATTCAT  
TCTGTGTCCAACCTGTTACTGTTTTACGAAGGGGAGCCTTGGAGCAAC

>M6-PGSC0003DMG402028427M6LRR-RLP\_0

CTGGAAATTTAAACTGAGGTATTGATTTTTGATGCAGCTTGTTCAATTTGGCAGAGATTGCATATGGGGT  
TTCTTGAGTACAAATCGTAGGGATTTTCATTGTTCAACACTCTCCACCA

>M6-PGSC0003DMG402028427M6LRR-RLP\_1008

CTAATTGCATTTATGATCACTTTCTCAAGTTGCTTACCTTCTCCTCTCCATCCCCAACAGTTTGCTTGCTTC  
AATGGTTGAAATAGGGGTTACTATTCTCCAATCTGCTAGTTGTTTT

>M6-PGSC0003DMG402028427M6LRR-RLP\_1065

ACAGTTTGCTTGCTTCAATGGTTGAAATAGGGGTTACTATTCTCCAATCTGCTAGTTGTTTTCTTACATA



TATCTGATGTGGTCTTTTAGCCTGGTGTGGGAAGATCCTCACTCGCCAT

>M6-PGSC0003DMG402028427M6LRR-RLP\_126

CTGATGGGATCAGGCGACGGAAGTCTTCAAAGATGCTACACCAAGGAAAACATCCAAAGGAAGTGAG  
CTCAATATACAGCCATCCCTCGACAGTAAATCGCCAAATTCATTAACCAGG

>M6-PGSC0003DMG402028427M6LRR-RLP\_189

GTGAGCTCAATATACAGCCATCCCTCGACAGTAAATCGCCAAATTCATTAACCAGGAAGAGATCATTTT  
TCTTTTCAAGAGAATAACAATCTTCAATTTCAAAGGTGATTCTACAAGTT

>M6-PGSC0003DMG402028427M6LRR-RLP\_252

TCATTTCTCTTTTCAAGAGAATAACAATCTTCAATTTCAAAGGTGATTCTACAAGTTCCAAGAAAAGAAGT  
ACCAAGTCTGAAGAGAAGCCCGCTATTGATTCCGGTCTTGAAATCCTTC

>M6-PGSC0003DMG402028427M6LRR-RLP\_315

AAAGAAGTACCAAGTCTGAAGAGAAGCCCGCTATTGATTCCGGTCTTGAAATCCTTCGTCATTCAAAGA  
CAGAACCAAAGGTAGTGATTTCTTTCAGTTTTACCCAAGCCTGTTTCCAG

>M6-PGSC0003DMG402028427M6LRR-RLP\_378

CAAAGACAGAACCAAAGGTAGTGATTTCTTTCAGTTTTACCCAAGCCTGTTTCCAGTCTTTTCCAAAAT  
TCTATCCCAGTGCAAATGATGATACATACTCAGTTAGCAGCTAATATCT

>M6-PGSC0003DMG402028427M6LRR-RLP\_441

CCCAAATTCTATCCCAGTGCAAATGATGATACATACTCAGTTAGCAGCTAATATCTCTTTTTCTTTTGAA  
GGTACTAAGGATGACAAGGGTTTGACTCATCAAAAAGAACCGGAAACAG

>M6-PGSC0003DMG402028427M6LRR-RLP\_504

CTTTTGAAGGTACTAAGGATGACAAGGGTTTGACTCATCAAAAAGAACCGGAAACAGACTATCCACCAA  
CAGCAGATCCAAGATCAACACGCCTACGGTCAAGCTTTGTGAAAAGATCGC

>M6-PGSC0003DMG402028427M6LRR-RLP\_567

CACCAACAGCAGATCCAAGATCAACACGCCTACGGTCAAGCTTTGTGAAAAGATCGCCTCTACAATCCCC  
ATTTAACTCCAAAGAAAAGTTGAGCTCAAGGCGGAGACATCACTGGAGA

>M6-PGSC0003DMG402028427M6LRR-RLP\_63

ATGGGGTTTCTTGAGTACAAATCGTAGGGATTTTCATTGTTCAACACTCTCCACCATAAGAGCTGATGG  
GATCAGGCGACGGAAGTCTTCAAAGATGCTACACCAAGGAAAACATCCA

>M6-PGSC0003DMG402028427M6LRR-RLP\_630

AATCCCCATTTAACTCCAAAGAAAAAGTTGAGCTCAAGGCGGAGACATCACTGGAGAATCATGTTGAAA  
GTGAAGCAGTCAA AATTGAAGAAATGAACTTCCTCAGCTTAAAGAACTAG

>M6-PGSC0003DMG402028427M6LRR-RLP\_693

TTGAAAGTGAAGCAGTCAA AATTGAAGAAATGAACTTCCTCAGCTTAAAGAACTAGCAA AATCTAGAG  
GACTTAAGGGTTATTCGAAACTGAAGAAAAGTGA ACTAGTGGAATTGCTCA

>M6-PGSC0003DMG402028427M6LRR-RLP\_756

CTAGAGGACTTAAGGGTTATTCGAAACTGAAGAAAAGTGA ACTAGTGGAATTGCTCATCAGTTGTTGAG  
ACAATGCAAAGATGATCAAGTTGTCCATCCAATGCTTTACATACTTGACGG

>M6-PGSC0003DMG402028427M6LRR-RLP\_819

GTTGAGACAATGCAAAGATGATCAAGTTGTCCATCCAATGCTTTACATACTTGACGGTAACTGCAGGAC  
TAGTCTTTTTTCGTATCTGCTTTCTTTTATGGAGAAACAAGATGAAAGG

>M6-PGSC0003DMG402028427M6LRR-RLP\_882

GCAGGACTAGTCTTTTTTCGTATCTGCTTTCTTTTATGGAGAAACAAGATGAAAGGGCAGAGTACTGTG  
TGAGTTTTAACACATTCATTTGTTTGTGGTTTGTAAACATATGTTGTCTT

>M6-PGSC0003DMG402028427M6LRR-RLP\_945

TACTGTGTGAGTTTTAACACATTCATTTGTTTGTGGTTTGTAAACATATGTTGTCTTTAAAGTCTAATTGCA  
TTTATGATCACTTTCTCAAGTTGCTTACCTTCTCCTCTCCATCCCCCA

>M6-PGSC0003DMG402029358-(rev)M6LRR-RLK\_0

TACAAGAAAGTTGAGTTCCTTTCCTTACTAGTTTGACTGACCCCATTTGTTGCTAAAATAAATTCAAGATT  
TTGAAAGAAGTCTGTCAAGTATCAAAAAATGGAGAAAAAAAATTTCAA

>M6-PGSC0003DMG402029358-(rev)M6LRR-RLK\_62

TTCAAGATTTTGAAAGAAGTCTGTCAAGTATCAAAAAATGGAGAAAAAAAATTTCAAACATTTCTTGGT  
TTTGTATTGATATTACTAGTTAGCAGGATTTGTATCTGTTGTGCTTCAGA

>M6-PGSC0003DMG402029906-(rev)M6G-LecRK\_0

AGTTTTTGATATGTGAAAATGACATACTTCACAAAATATCTTCTTGTCTTGTCTTCTCATCTTCCCCTG  
CATATTTTAGCACAACTATACCATTAGGCAGCTCTCTCATAGCAAAT

>M6-PGSC0003DMG402029906-(rev)M6G-LecRK\_1037

TGTTCATAGTTGTGATGAATTTGGACAGGGAAATCCTGAAGAATTATATGATTTTGATGTGGTGACAGAT  
GTTGATTGGCCGTATCAGATTTGAGAGGATTTATCCTTCTGCTGAAGA

>M6-PGSC0003DMG402029906-(rev)M6G-LecRK\_1098

GTGACAGATGTTGATTGGCCGTTATCAGATTTTCGAGAGGATTTATCCTTCTGCTGAAGAAGAATGCAAG  
AAGGCTTGTGTTAGAAGATTGTTTCTGTGCTGTTACTATTTATAGAAGCAAT

>M6-PGSC0003DMG402029906-(rev)M6G-LecRK\_1159

AATGCAAGAAGGCTTGTGTTAGAAGATTGTTTCTGTGCTGTTACTATTTATAGAAGCAATAGTTGTTGGAA  
GAAGAAACTTCCATTGTCAAATGGGAGAGTAGATACCTCTTTGAATGTAA

>M6-PGSC0003DMG402029906-(rev)M6G-LecRK\_122

TGAAACAACACCATGGCTTTCTCAATCTGGAGATTTTGCATTTGGATTCAAGAAAATTCAAAGTCAAAT  
CAGTTCCTTGCTTTGCATATACTATGCCAAGATTAAAGATGCCACCATAGT

>M6-PGSC0003DMG402029906-(rev)M6G-LecRK\_1220

TTGTTGGAAGAAGAAACTTCCATTGTCAAATGGGAGAGTAGATACCTCTTTGAATGTAAAAGTTTTCTT  
AAAATAAGGAAAGTTTGAACATAAGAGCTTCTTAAATTAGATATAATGTA

>M6-PGSC0003DMG402029906-(rev)M6G-LecRK\_1281

GTTTTCTTAAAATAAGGAAAGTTTGAACATAAGAGCTTCTTAAATTAGATATAATGTATGTCTGCTATA  
GGTTCATGGTTGAATTCGTCGATCCAACCTTGCAATTTTACACAATTCAAT

>M6-PGSC0003DMG402029906-(rev)M6G-LecRK\_1342

TCTGCTATAGGTTTCATGGTTGAATTCGTCGATCCAACCTTGCAATTTTACACAATTCAATAGTTTGGATTTG  
TAATAATTAATGGACCATATTGTATAACAACTTTGATTAGCAAATAAT

>M6-PGSC0003DMG402029906-(rev)M6G-LecRK\_1403

TTTGGATTTGTAATAATTAATGGACCATATTGTATAACAACTTTGATTAGCAAATAATGAAATATTTTCAT  
ACATTTCAAGAAACATATTGCACTGAGATACAGATACAAGTTATTGATG

>M6-PGSC0003DMG402029906-(rev)M6G-LecRK\_1464

AATATTTCATACATTTCAAGAAACATATTGCACTGAGATACAGATACAAGTTATTGATGTACTCTTTAGGT  
CCAAGCAAATGAATAATTGAAAAAAAAAACATGGTTGATCTAAATAGA

>M6-PGSC0003DMG402029906-(rev)M6G-LecRK\_1525

CTCTTTAGGTCCAAGCAAATGAATAATTGAAAAAAAAAACATGGTTGATCTAAATAGAATCGACAAAC  
GAAAAAGGGTCAGGAGGAATTGATACTTCAACAGAACCTTCAAGCATTAAC

>M6-PGSC0003DMG402029906-(rev)M6G-LecRK\_183

AGTCAAATCAGTTCCTTGCTTTGCATATACTATGCCAAGATTAAAGATGCCACCATAGTTTGGTATGCAA

ATGGTGGTAACCTCGTGCCACGAGGCTCTATCGCGGAGTTAAATCCTCAA

>M6-PGSC0003DMG402029906-(rev)M6G-LecRK\_244

GGTATGCAAATGGTGGTAACCTCGTGCCACGAGGCTCTATCGCGGAGTTAAATCCTCAAAGGGACTAA  
TTCTCCGCGATCCTAAAGGGAAAATGATCATTGGAGCACTGGTCGGATTG

>M6-PGSC0003DMG402029906-(rev)M6G-LecRK\_305

GGGACTAATTCTCCGCGATCCTAAAGGGAAAATGATCATTGGAGCACTGGTCGGATTGGTTCTAATGT  
TGCTTATGCTGTCATGAATGATACTGGAACTTTGTTCTTGTGGGGTTGA

>M6-PGSC0003DMG402029906-(rev)M6G-LecRK\_366

TCTAATGTTGCTTATGCTGTCATGAATGATACTGGAACTTTGTTCTTGTGGGGTTGATTCTTCAGTTTT  
ATGGGAAAGTTTTCAATATCCGACTGATACCCTTATGCCTACTCAAATA

>M6-PGSC0003DMG402029906-(rev)M6G-LecRK\_3893

TAACATTTTGGTAAGATTGAGCAATGGCTGAAAGGGGAAACAATAAGAGACCAACAAGAAGCATAGCT  
AAAAAAGTCATGTAAGAAAGAGGCAAAGTTATAAATGGATATTATGTACACC

>M6-PGSC0003DMG402029906-(rev)M6G-LecRK\_427

CTTCAGTTTTATGGGAAAGTTTTCAATATCCGACTGATACCCTTATGCCTACTCAAATACTAGAGATTAAC  
AACAAGCTTGTGCTCGAAAATCGGAGTCTTTCTTTGTTCTGCTGGTAGAT

>M6-PGSC0003DMG402029906-(rev)M6G-LecRK\_488

AGAGATTAACAACAAGCTTGTGCTCGAAAATCGGAGTCTTTCTTTGTTCTGCTGGTAGATTTTATCTTCGTA  
TGTTGAGTGATGGGAATTTGGTTCTTGTACTCAATCCAAGCCAACGAA

>M6-PGSC0003DMG402029906-(rev)M6G-LecRK\_549

TATCTTCGTATGTTGAGTGATGGGAATTTGGTTCTTGTACTCAATCCAAGCCAACGAATTCGATTATGA  
TGCTGAGTATTACAACAGTCATACTTCTGATTCAGGAGATGAAGCCAAT

>M6-PGSC0003DMG402029906-(rev)M6G-LecRK\_61

TCTTTCCCTGCATATTTTAGCACAAACTATAACCATTAGGCAGCTCTCTCATAGCAAATGATGAAACAACA  
CCATGGCTTTCTCAATCTGGAGATTTTGCATTTGGATTCAAGAAAATTC

>M6-PGSC0003DMG402029906-(rev)M6G-LecRK\_610

TCGATTATGATGCTGAGTATTACAACAGTCATACTTCTGATTCAGGAGATGAAGCCAATTCTGGTTATGG  
ATTGGTATTCGATGAGTTTGGTTTCAATTTTAAAAAGGAACAATC

>M6-PGSC0003DMG402029906-(rev)M6G-LecRK\_671

TGGTTATGGATTGGTATTCGATGAGTTTGGTTCAGTTTACATTTTAAAAAGGAACAATCAAAGACTTGTG  
TTGACACCTCCCAATGTTCTTCAATTTAGAAAATATCACAGGCTAAG

>M6-PGSC0003DMG402029906-(rev)M6G-LecRK\_732

AGACTTGTGTTGACACCTCCCAATGTTCTTCAATTTAGAAAATATCACAGGCTAAGTCTTGATTTTGA  
TGGTGTTTAACTCATTATTATCATCCTAAGAGTACGGGGGATCAGAAG

>M6-PGSC0003DMG402029906-(rev)M6G-LecRK\_793

TTGATTTTGATGGTGTTTAACTCATTATTATCATCCTAAGAGTACGGGGGATCAGAAGTGGAGTACTCT  
TTGGTCTTGCCTGATAACATATGTCTAGCAATTCTTGAAGATGTTGGAA

>M6-PGSC0003DMG402029906-(rev)M6G-LecRK\_854

GAGTACTCTTTGGTCTTGCCTGATAACATATGTCTAGCAATTCTTGAAGATGTTGGAAGTGGAGTTTGT  
GGATTCAACAATGTATGCAATCTAGGTGAAAATCAAAGACCATATTGTGA

>M6-PGSC0003DMG402029906-(rev)M6G-LecRK\_915

GGAGTTTGTGGATTCAACAATGTATGCAATCTAGGTGAAAATCAAAGACCATATTGTGAGTGTCCAAAA  
GGGTATTCGTTGATCGATCCAAATAATAAGTATGGAAGCTGCAAACCAAAA

>M6-PGSC0003DMG402029906-(rev)M6G-LecRK\_976

GTCCAAAAGGGTATTCGTTGATCGATCCAAATAATAAGTATGGAAGCTGCAAACCAAAATTTGTTCATAG  
TTGTGATGAATTTGGACAGGGAAATCCTGAAGAATTATATGATTTTGATG

>M6-PGSC0003DMG402030236-(rev)M6LRR-RLP\_0

TAAGAAGTGAAATATGGGAGCTGCCACGTCATTCAAATGGAATCTTACCAGCATTGATGTTGAGCTACA  
ATGATCTTCATCCACATTTGAAGCAATGTTTTGCTTTTTGTGCAATATATC

>M6-PGSC0003DMG402030236-(rev)M6LRR-RLP\_1159

AGACTTGTCTCTTAGCAACAGCAAAGACTGTGATTCCTTGCCAGCGCTAGGACAGCTTCCTTGTAAAA  
TTCCTTACCATTAGAGGGATGCATCAAGTAACAGAGGTGACTGAAGAGTT

>M6-PGSC0003DMG402030236-(rev)M6LRR-RLP\_1220

TGTTTAAAATTCCTTACCATTAGAGGGATGCATCAAGTAACAGAGGTGACTGAAGAGTTCTATGGTAGTT  
CATCCTCCACAAAGCCATTTAATTCTCTTGAGCAGCTTGAATTCGCAGAG

>M6-PGSC0003DMG402030236-(rev)M6LRR-RLP\_1281

ATGGTAGTTCATCCTCCACAAAGCCATTTAATTCTCTTGAGCAGCTTGAATTCGCAGAGATGCTGGAGTG  
GAAGCAGTGGGGTGTACTGGGGAAGGGAGAGTTCCCTGTACTTGAGGAGC

>M6-PGSC0003DMG402030236-(rev)M6LRR-RLP\_1342

GCTGGAGTGGAAGCAGTGGGGTGTACTGGGGAAGGGAGAGTTCCCTGTACTTGAGGAGCTTTTCGATAG  
ATGTTGCCCAAAGTTGATTGGGAAGTTGCCTGAAAGTCTTTCTTCTCTGAG

>M6-PGSC0003DMG402030236-(rev)M6LRR-RLP\_1464

GATTGAGGATATCAAATGCCCTGAACTCAGTTTGGAGACACCTATCCAACCTTCAAATTTAAAAGAGTT  
TGAAGTTGCTAATTCTCCTAAGGTTGGAGTTGTTTTTGATGATGTTCAAT

>M6-PGSC0003DMG402030236-(rev)M6LRR-RLP\_1525

AAAAGAGTTTGAAGTTGCTAATTCTCCTAAGGTTGGAGTTGTTTTTGATGATGTTCAATTGTTTACGTCTC  
AACTTGAGGGAATGAAACAGATTGTTAAATTAGATATTACTGATTGTAA

>M6-PGSC0003DMG402030236-(rev)M6LRR-RLP\_1647

CTCTTACCTCCTTACCTATTAGCATTCTGCCGAGTACCTGAAGAGAATAACAATCTCTGGTTGTAGGGAA  
CTGAAATTGGAGGCGCCGATCAATGCTATTTGTCTGAAGGAATTGTCTC

>M6-PGSC0003DMG402030236-(rev)M6LRR-RLP\_1708

TTGTAGGGAACTGAAATTGGAGGCGCCGATCAATGCTATTTGTCTGAAGGAATTGTCTCTAGTAGGATG  
TGATTCACCTGAGTTTCTCCCAAGAGCACACTCTTTGAGTGTAAGAAGTTG

>M6-PGSC0003DMG402030236-(rev)M6LRR-RLP\_1769

GTAGGATGTGATTCACCTGAGTTTCTCCCAAGAGCACACTCTTTGAGTGTAAGAAGTTGCAACAACCTTA  
CTAGGCTTTTGATTCTACTGCCACTGAAACAGTCAGTATTAGAGATTGC

>M6-PGSC0003DMG402030236-(rev)M6LRR-RLP\_183

AGCAGTTGCATTCAGCTAACCAATACTTTCTCGAGTTGAGATCGAGATCATTGTTTGAAAAGGTTTCGACA  
GTCTTCTGAATGGAATCCGGGGGAATTCTTAATGCATGACCTTGTCATG

>M6-PGSC0003DMG402030236-(rev)M6LRR-RLP\_1830

ACAACCTTACTAGGCTTTTGATTCTACTGCCACTGAAACAGTCAGTATTAGAGATTGCGATAATCTTGA  
AATACTTTCAATGGCATGTGTGACTCAGATGACATCATTGCATATTTACA

>M6-PGSC0003DMG402030236-(rev)M6LRR-RLP\_1891

TAATCTTGAAATACTTTCAATGGCATGTGTGACTCAGATGACATCATTGCATATTTACAACCTGCGAGAAG  
CTGAAGTCGCTGCCAGAACATATGCAACAACCTCTTCCATCTCTTAAGGA

>M6-PGSC0003DMG402030236-(rev)M6LRR-RLP\_1952

TGCGAGAAGCTGAAGTCGCTGCCAGAACATATGCAACAACCTCTTCCATCTCTTAAGGAACTGAAACTG

AATAAATGTACAAAAATAGAGTCCTTTCCTGAAGGAGGATTGCCCTTCAAT

>M6-PGSC0003DMG402030236-(rev)M6LRR-RLP\_2013

TGAAACTGAATAAATGTACAAAAATAGAGTCCTTTCCTGAAGGAGGATTGCCCTTCAATTTACAACAAC

TTGGATCTCCTGTTGTAAGAAATTGGTGAATGGCCGAAAAGAGTGGCATT

>M6-PGSC0003DMG402030236-(rev)M6LRR-RLP\_2074

ACAACAACCTTGGATCTCCTGTTGTAAGAAATTGGTGAATGGCCGAAAAGAGTGGCATTACAGAGACT

CCCCTGTCTCAGAGATTTGACTATCCACCATGATGGTAGCGACGAAGTGGT

>M6-PGSC0003DMG402030236-(rev)M6LRR-RLP\_2135

CAGAGACTCCCCTGTCTCAGAGATTTGACTATCCACCATGATGGTAGCGACGAAGTGGTTCTTGCTGATG

AAAAATGGGAGTTGCCTTGCTCTATTCGAAGGCTTAGCATATGGAATCTG

>M6-PGSC0003DMG402030236-(rev)M6LRR-RLP\_2196

TTGCTGATGAAAAATGGGAGTTGCCTTGCTCTATTCGAAGGCTTAGCATATGGAATCTGAAAACATTAA

GCAGCCAACCTTCTCAAAGCCTCACCTCTCTTGAGTACCTATTTGCTAATA

>M6-PGSC0003DMG402030236-(rev)M6LRR-RLP\_2318

TTACCTCAAATGCAGTCATTGCTGGAAGAAGGGCTTCCTTCTCTTTCTGAGCTAAAATTATTTAGCAA

TCATGATCTTCATTCACTACCGACCGAAGGTCTTCAGCGTCTCACGTGG

>M6-PGSC0003DMG402030236-(rev)M6LRR-RLP\_2379

TATTTAGCAATCATGATCTTCATTCACTACCGACCGAAGGTCTTCAGCGTCTCACGTGGCTTCAACATCTA

GAGATTCGGGATTGCCATAGTCTCCAATCTCTTCCCGAATCAGGGATGC

>M6-PGSC0003DMG402030236-(rev)M6LRR-RLP\_2440

TCAACATCTAGAGATTCGGGATTGCCATAGTCTCCAATCTCTTCCCGAATCAGGGATGCCCTCTTCCCTCT

CTAAGTTGACCATCCAACATTGCTCTAATCTCCAATCTCTTCCCGAATC

>M6-PGSC0003DMG402030236-(rev)M6LRR-RLP\_2501

TCTTCCCTCTCTAAGTTGACCATCCAACATTGCTCTAATCTCCAATCTCTTCCCGAATCGGGGTTGCCCTCC

TCCCTCTCTGAGCTGCGCATTGGAATTGCTCTAATGTCCAATCTCTT

>M6-PGSC0003DMG402030236-(rev)M6LRR-RLP\_2562

GGTTGCCCTCTCCCTCTCTGAGCTGCGCATTGGAATTGCTCTAATGTCCAATCTCTTCCCAAATCGGGG

ATGCCCCCTTCTATGTCTAATCTATATATTTCCAAATGCCATTGCTCA

>M6-PGSC0003DMG402030236-(rev)M6LRR-RLP\_305

TTGGCCCAAATTGCATCTTCAAATCTGTGTAACAGGTTGGAAGAGAACCAAGGATCTCATATGTTGGAA  
CAAACCTCGACACCTGTCATATTCAATGGGTGATGGTGATTTTGGTAAACTG

>M6-PGSC0003DMG402030236-(rev)M6LRR-RLP\_366

TGTTGGAACAAACTCGACACCTGTCATATTCAATGGGTGATGGTGATTTTGGTAAACTGAAAACCCTCAA  
CAAATCGGAGCAATTGAGGACATTGCTTCCCATCAATATCCAGCTGCGTT

>M6-PGSC0003DMG402030236-(rev)M6LRR-RLP\_427

AACCCTCAACAAATCGGAGCAATTGAGGACATTGCTTCCCATCAATATCCAGCTGCGTTGGTGCCATCTT  
AGCAAGAGGGTGCTGCATGACATATTGCCAAGACTAACATCTTTGAGGGC

>M6-PGSC0003DMG402030236-(rev)M6LRR-RLP\_610

CCTAAGGTTTTTGGACTTTTCTTGGACAAATATAAAAAAGTTGCCAGATTCAATTTGTGTACTGTACAAC  
TAGACACACTTCTCTTGTCTATTGTAGTTATCTTAAGGAGCTACCTCT

>M6-PGSC0003DMG402030236-(rev)M6LRR-RLP\_671

CTGTACAACCTTAGACACACTTCTCTTGTCTATTGTAGTTATCTTAAGGAGCTACCTCTGCATATGGAAAA  
ATTGATCAACTTGCCTCACCTTGCATTAGCGAAGCTTATTTGACGACA

>M6-PGSC0003DMG402030236-(rev)M6LRR-RLP\_732

ATATGGAAAAATTGATCAACTTGCCTCACCTTGCATTAGCGAAGCTTATTTGACGACACCCCTACATCT  
AAGCAAGTTGAAAAGTCTCGATGTGCTAGTGGGAGCCAAGTTTCTTCTAA

>M6-PGSC0003DMG402030236-(rev)M6LRR-RLP\_793

CCTACATCTAAGCAAGTTGAAAAGTCTCGATGTGCTAGTGGGAGCCAAGTTTCTTCTAAGTGGTCTAGT  
GGTTCAAGAATGGAAGATTTGGGTAAACTGCATAACTTGTATGGATCTCT

>M6-PGSC0003DMG402030236-(rev)M6LRR-RLP\_854

GGTCGTAGTGGTTCAAGAATGGAAGATTTGGGTAAACTGCATAACTTGTATGGATCTCTATCAATTCTAG  
GGTTGCAACATGTGGTAGATAGAAGGGGATCTCTGAAGGCAAACATGAGG

>M6-PGSC0003DMG402030236-(rev)M6LRR-RLP\_915

CAATTCTAGGGTTGCAACATGTGGTAGATAGAAGGGGATCTCTGAAGGCAAACATGAGGGAAAAGAAA  
CATGTTGAAAGGTTATCTTTGGAGTGGAGCGGAAGTAATGCTGACAATTCAC

>M6-PGSC0003DMG402030531-(rev)M6RLKWAX-EGF\_0

CCTCACTTGAGTCCTGTTTCTTTTCCAAAGTCTTTGTAACAAAATTCCAAGTTCACATATAGAAAAATA  
AACCAAATAACAAGGTTAAATTCCAATTTTCTTGTGTGTGAGACCATA



>M6-PGSC0003DMG402030531-(rev)M6RLKWAX-EGF\_1054  
GGTAAAGTTGTCTCGGGTTTTGAGCAGTGGAATCAGCCACTGAAGCTTGCATCAGGGTAGGCTGTCTAC  
ATGACACCCCTTGGGGTGTGCCATTCCCCGGCCAGGCTCCCTTTTTTTTG

>M6-PGSC0003DMG402030531-(rev)M6RLKWAX-EGF\_1116  
TGTCTACATGACACCCCTTGGGGTGTGCCATTCCCCGGCCAGGCTCCCTTTTTTTTGTGGTACACTTTCA  
AAGGATTAGATTTTGATTACTGTATCTTATGTTTTATAGTTTTAGGTGG

>M6-PGSC0003DMG402030531-(rev)M6RLKWAX-EGF\_1178  
ACACTTCAAAGGATTAGATTTTGATTACTGTATCTTATGTTTTATAGTTTTAGGTGGAGTTGGTTTGATC  
CTACTATCTCCATTGTCGCCTTTTCTATCTGGTGTGCAAGAGAGGGA

>M6-PGSC0003DMG402030531-(rev)M6RLKWAX-EGF\_124  
GAACACAATATGGCTTCTACTTTCTGTTTTCTGTTGTTAATGATCTTTAGCCTACATCAAGTACTAGGT  
AACTCCAAATCCAAGTGCACCGATGAATTCGAGTGTGGAGGCCTTGGA

>M6-PGSC0003DMG402030531-(rev)M6RLKWAX-EGF\_1240  
GGTTTGATCCTACTATCTCCATTGTCGCCTTTTCTATCTGGTGTGCAAGAGAGGGGAAGAATGGTTCGA  
CACAATTCATCAGGATCTTGAGGTAGAGAGCAAATATTTTGGATTTTCAG

>M6-PGSC0003DMG402030531-(rev)M6RLKWAX-EGF\_1302  
TGGTTCGACACAATTCATCAGGATCTTGAGGTAGAGAGCAAATATTTTGGATTTTCAGGTTCCAGTTTTTC  
ACCTATGCTGAACTTAAGGAAGCCACCAACAATTTTGGATCCCTTGAATGA

>M6-PGSC0003DMG402030531-(rev)M6RLKWAX-EGF\_1364  
CAGTTTTACCTATGCTGAACTTAAGGAAGCCACCAACAATTTTGGATCCCTTGAATGAACTAGGAGATGG  
AGTTTTCGGAACTGTATATTATGGTAAGTTTTTCTTTGAACCTAAGAATT

>M6-PGSC0003DMG402030531-(rev)M6RLKWAX-EGF\_1426  
GGAGATGGAGGTTTCGGAAGTGTATATTATGGTAAGTTTTTCTTTGAACCTAAGAATTATGTTAAAAAGA  
CGGCAATTTCCAAAAGGTGAAAAGTAGCTAGTGTTTCATGATCAGTGGCGA

>M6-PGSC0003DMG402030531-(rev)M6RLKWAX-EGF\_1860  
GTATTATGCCTTTAATATATATGTATATAAGATCCTTCTCAAAAAAATAAATGTATAAAATGTAACTTTT  
GACCTTTATAGTTGGTATAATTTTCGGTATACACTGTATAATTTTGACG

>M6-PGSC0003DMG402030531-(rev)M6RLKWAX-EGF\_1922  
GTAACTTTTGACCTTTATAGTTGGTATAATTTTCGGTATACACTGTATAATTTTGACGAAGGGTGTTC AAC

TGATCACTTTTCACCATGTGTCGGAAAACCTCAGTATCTCATTGTTATTT

>M6-PGSC0003DMG402030531-(rev)M6RLKWAX-EGF\_1984

GTGTTCAACTGATCACTTTTCACCATGTGTCGGAAAACCTCAGTATCTCATTGTTATTTACATTATGAATTA  
GGAAAACCTATATGATGGAAGAGAAGTTGCAGTAAAATGCCTCTATGAG

>M6-PGSC0003DMG402030531-(rev)M6RLKWAX-EGF\_2046

TTATGAATTAGGAAAACCTATATGATGGAAGAGAAGTTGCAGTAAAATGCCTCTATGAGCACAACCTGCAA  
GAGAATGCAGCAGTTCACAACCGAAATCGAGATTCTTACTCGTTTGAGGCA

>M6-PGSC0003DMG402030531-(rev)M6RLKWAX-EGF\_2108

ACTGCAAGAGAATGCAGCAGTTCACAACCGAAATCGAGATTCTTACTCGTTTGAGGCACCAAAAATCTTGT  
GTCCCTTTATGGCTGCACATCAAGACGCAGCCGTGAACTTCTCCTTGTTT

>M6-PGSC0003DMG402030531-(rev)M6RLKWAX-EGF\_2170

AATCTTGTGTCCCTTTATGGCTGCACATCAAGACGCAGCCGTGAACTTCTCCTTGTTTATGAATACATTCC  
ACATGGAACAGTTGCTGATCATCTCCAAGGTGAAAGAGCAGCAGAGGGA

>M6-PGSC0003DMG402030531-(rev)M6RLKWAX-EGF\_2232

ATACATTCCACATGGAACAGTTGCTGATCATCTCCAAGGTGAAAGAGCAGCAGAGGGATCTCTCACGTG  
GCCCATCCGTATGAACATTGCAGTTGAAACAGCCAGTGCATTGGCTTACCT

>M6-PGSC0003DMG402030531-(rev)M6RLKWAX-EGF\_2294

TCACGTGGCCCATCCGTATGAACATTGCAGTTGAAACAGCCAGTGCATTGGCTTACCTCCATGCTTCTGA  
TGTGATACATCGCGATGTCAAGACTAACAACATCCTTCTCGACAACAACCT

>M6-PGSC0003DMG402030531-(rev)M6RLKWAX-EGF\_2356

GCTTCTGATGTGATACATCGCGATGTCAAGACTAACAACATCCTTCTCGACAACAACCTTTCGTGTCAAAG  
TAGCAGATTTTGGACTCTCGAGACTTTTCCCAACAACGTTTCTCACATA

>M6-PGSC0003DMG402030531-(rev)M6RLKWAX-EGF\_2418

TGTCAAAGTAGCAGATTTTGGACTCTCGAGACTTTTCCCAACAACGTTTCTCACATATCAACAGCTCCTC  
AAGGAACGCTTGGGTACGTTGATCCTGAGTATCACGAATGTTATCAGCT

>M6-PGSC0003DMG402030531-(rev)M6RLKWAX-EGF\_248

TGAAGTTTCCTTTCACAAATTCCTGCAACCCTGAGTGTGGATTATGCAGGTTTGATTGTCATACTAAACCA  
TATCCTAAGATTGTAATTGGTGGACAAAAATATGATGCTTTAGTGAAGA

>M6-PGSC0003DMG402030531-(rev)M6RLKWAX-EGF\_2480

CAGCTCCTCAAGGAACGCTTGGGTACGTTGATCCTGAGTATCACGAATGTTATCAGCTTACTGACAAAAG  
TGACGTTTACAGTTTCGGGGTTGTCCTTATCGAGCTTGTATCATCAATGC

>M6-PGSC0003DMG402030531-(rev)M6RLKWAX-EGF\_2542

GACAAAAGTGACGTTTACAGTTTCGGGGTTGTCCTTATCGAGCTTGTATCATCAATGCCAGCTGTTGACT  
TAAATAGGCACAAGAACGAGATCAATTTGGCTAACTGGCGATAAACAGG

>M6-PGSC0003DMG402030531-(rev)M6RLKWAX-EGF\_2604

TGTTGACTTAAATAGGCACAAGAACGAGATCAATTTGGCTAACTGGCGATAAACAGGATACAAAGATG  
TGCATTTGATGAACTGATTGATCCATCACTCGGGCTAACTCAGATACGCT

>M6-PGSC0003DMG402030531-(rev)M6RLKWAX-EGF\_2666

AAAGATGTGCATTTGATGAACTGATTGATCCATCACTCGGGCTAACTCAGATACGCTTGCTAAGAAAAT  
GACTATCTCTGTCGCGGAGCTAGCTTTTCGATGCTTGCAACTTGATAAGG

>M6-PGSC0003DMG402030531-(rev)M6RLKWAX-EGF\_2728

AAGAAAATGACTATCTCTGTCGCGGAGCTAGCTTTTCGATGCTTGCAACTTGATAAGGATATCAGGCCAA  
CAATGGATGAAGTATTGGACATTTTAAGAAAGATTCAAGGTGGAGAGTTT

>M6-PGSC0003DMG402030531-(rev)M6RLKWAX-EGF\_2790

CAGGCCAACAAATGGATGAAGTATTGGACATTTTAAGAAAGATTCAAGGTGGAGAGTTTCATCAAATGA  
GAAGACATTTGACACTAGTGCTAGTTTTAATTTATCAAAGTCTAAGAGTGT

>M6-PGSC0003DMG402030531-(rev)M6RLKWAX-EGF\_2852

AAAATGAGAAGACATTTGACACTAGTGCTAGTTTTAATTTATCAAAGTCTAAGAGTGTTAATATCCCTCC  
ATTTTCCCCTGAATCAGATCAAGTTGCACTGTTAAAGAAAGTTAAGTTCC

>M6-PGSC0003DMG402030531-(rev)M6RLKWAX-EGF\_2914

ATCCCTCCATTTCCCCTGAATCAGATCAAGTTGCACTGTTAAAGAAAGTTAAGTTCCTAAGTTCATCAGA  
TACTAATAGTGAGGTATGGATTAGTGGCTCTACCACAACAAGCACTAGT

>M6-PGSC0003DMG402030531-(rev)M6RLKWAX-EGF\_2976

TTCATCAGATACTAATAGTGAGGTATGGATTAGTGGCTCTACCACAACAAGCACTAGTGAGTGAGTGAC  
TATCTATGTTGCTCGGACACTCAAAAAATGTTGCCGCACTCATGTCAGATC

>M6-PGSC0003DMG402030531-(rev)M6RLKWAX-EGF\_310

ACTAAACCATATCCTAAGATTGTAATTGGTGGACAAAAATATGATGCTTTAGTGAAGAAGGGTGATTTTT  
TCCTTATTTTCAGATCCTAACTTCAAGAGTACTTAGATAGCAGAAGTTGC

>M6-PGSC0003DMG402030531-(rev)M6RLKWAX-EGF\_3100

AAAAATGCGTAGCTTTTAGAGGATCTGGCACACACCTGACGATATTTTTGAAGAATTCGAGCACCATAG  
GTGAATATCTTAGCTAATGTAGTTTTAGACTTCAGAATCTACTAACTCTTA

>M6-PGSC0003DMG402030531-(rev)M6RLKWAX-EGF\_3162

ACCATAGGTGAATATCTTAGCTAATGTAGTTTTAGACTTCAGAATCTACTAACTCTTAGCTAAAGCATTG  
AGCTTATATGAATGTACATATAATAAATTATGTTCTTGATGTTATGCTT

>M6-PGSC0003DMG402030531-(rev)M6RLKWAX-EGF\_372

TGATTTTTTCTTATTTTCAGATCCTAACTTCAAGAGTACTTAGATAGCAGAAGTTGCAAGTCTTTTTACA  
GAACTTCTCATTTCCAAATCCCCTTTGATTTCTTTCCAAATTGTTCC

>M6-PGSC0003DMG402030531-(rev)M6RLKWAX-EGF\_434

CTTTTTACAGAACTTCTCATTTCCAAATCCCCTTTGATTTCTTTCCAAATTGTTCCCAACTTAACCTTGTA  
CAGATGCAAACATAGTCATGACAACACCATCCAGAAGACAAATGATT

>M6-PGSC0003DMG402030531-(rev)M6RLKWAX-EGF\_496

TTAACCTTGACAGATGCAAACATAGTCATGACAACACCATCCAGAAGACAAATGATTCCTTTTTCAAAG  
ATTTTGATAGATATACTGAGTGTGAAGGTTTTAATGTTTACTATCACCAT

>M6-PGSC0003DMG402030531-(rev)M6RLKWAX-EGF\_558

TTTCAAAGATTTTGATAGATATACTGAGTGTGAAGGTTTTAATGTTTACTATCACCATCCCATGAAAGCAA  
TATTGGGAAATACTAGTGCTAAGATAAGTGGCAAACCTCCAAAGCACTG

>M6-PGSC0003DMG402030531-(rev)M6RLKWAX-EGF\_62

AGAAAAATAAACCAATAACAAGGTAAATTCCAATTTCTTGCTGTGTGAGACCATATAGAGAACACAA  
TATGGCTTCTACTTTCTGTTTTCTGTTGTTAATGATCTTTAGCCTAC

>M6-PGSC0003DMG402030531-(rev)M6RLKWAX-EGF\_620

TGAAAGCAATATTGGGAAATACTAGTGCTAAGATAAGTGGCAAACCTCCAAAGCACTGTTCACTTGTAC  
AGTTGCCAATTCCATTGCCTACACCATCAAACCATATGCAGGTGGTTTGT

>M6-PGSC0003DMG402030531-(rev)M6RLKWAX-EGF\_682

CTTGACAGTTGCCAATTCCATTGCCTACACCATCAAACCATATGCAGGTGGTTTGTGTTGAACTGTTGAC  
TTCTAGTGCACTTCTAACTGGGAGTTGTCCAAAGATTGTCATCTGTGT

>M6-PGSC0003DMG402030531-(rev)M6RLKWAX-EGF\_806

ACAAAGGAGGGAAATGCCAGATGATCGATGGACACGAGTTTCATTGTTCCATTAAAGGTATATATAGTA

TTGTTAAGAAATAAATCTTGTTCTGCTTGTTTTCTATTGAGGTTTATCTAA

>M6-PGSC0003DMG402030531-(rev)M6RLKWAX-EGF\_868

TATAGTATTGTTAAGAAATAAATCTTGTTCTGCTTGTTTTCTATTGAGGTTTATCTAAAAAGATTTATCTTT

TTTCCTTTACTGCAGGACAAAATGGACAAAGTAATTCGAAAATGATTA

>M6-PGSC0003DMG402030531-(rev)M6RLKWAX-EGF\_930

ATTTATCTTTTTCTTTACTGCAGGACAAAATGGACAAAGTAATTCGAAAATGATTATTATGGCCTCAGG

TGATTATCTAGACAATGACCACATTTTTATAGTAGTAGGGGCTTCGGAG

>M6-PGSC0003DMG402030531-(rev)M6RLKWAX-EGF\_992

GGCCTCAGGTGATTATCTAGACAATGACCACATTTTTATAGTAGTAGGGGCTTCGGAGCAACGGTAAAG

TTGTCTCGGGTTTTGAGCAGTGGAATCAGCCACTGAAGCTTGCATCAGGGT

>M6-PGSC0003DMG402030532-(rev)M6RLKWAX-EGF\_0

TAGTATTTCTTTTTGACAAGTTTTACCAGTAAGATGGAGACTATTAATAGCGAAAGTGTTTAGAAGTTAT

GGTACTTCATCTTATTAGATACAAGTCTGGTGAGCTAGAGTTGCAATTCA

>M6-PGSC0003DMG402030532-(rev)M6RLKWAX-EGF\_1054

TTAACCTCATCTTTCTTTCTATTCCAGAATTTCCATACATGTTTCTTGAATTTCTTTTTTATTGTGGTAAAT

GCTCAAACATATCCATAATGACAAAGTGGAGTTGAGAGATTGCTAT

>M6-PGSC0003DMG402030532-(rev)M6RLKWAX-EGF\_1116

TTGTGGTAAATGCTCAAACATATCCATAATGACAAAGTGGAGTTGAGAGATTGCTATGTTTTGCTGTTT

TTTTTTTTTTTTTTTTGATAACCTTCGATTTTTTATTTATTTCCAGTTTT

>M6-PGSC0003DMG402030532-(rev)M6RLKWAX-EGF\_1178

TGCTGTTTTTTTTTTTTTTTTTTTTGATAACCTTCGATTTTTTATTTATTTCCAGTTTTTGGTGGAGTATTGGT

GATGATAACTTGTTTAGCTGTCTACTTTATCTGGTGTTACAAGAAGA

>M6-PGSC0003DMG402030532-(rev)M6RLKWAX-EGF\_124

ACTTCAGCTAGCTTTGCTCTTCTTGCAAGTAGGATTCACAATATGTCTTTGGCTTCTTCGTCTGTTTGCTTTA

TTCTATCTCTTCTTGATGTTAGTTTCAGGCAAAGGGGAGAAATGATT

>M6-PGSC0003DMG402030532-(rev)M6RLKWAX-EGF\_1240

GGAGTATTGGTGATGATAACTTGTTTAGCTGTCTACTTTATCTGGTGTTACAAGAAGAGGAAATATAATC

CACCCCACTTCTCTCAACAAGGAAATTGTCATATATATTTAAAAATGAT

>M6-PGSC0003DMG402030532-(rev)M6RLKWAX-EGF\_1302

ATATAATCCACCCCACTTCCTCTCAACAAGGAAATTGTCATATATATTTAAAAATGATGTTGAGGGAGGC  
AGTATATACTTTGGCATCCCAGTCTTTTCTTATTCAGAACTTGAAGAAGC

>M6-PGSC0003DMG402030532-(rev)M6RLKWAX-EGF\_1426

AATGATTTCAAATCCTCTCGAGTCCTTGGAGATGGAGGTTTCGGAAGTGTACTATGGTGAGAGACTTC  
CTAATCTAACTGAGCTATGCTTCAGTTCTTTCTTCATGTGCCTAATACTT

>M6-PGSC0003DMG402030532-(rev)M6RLKWAX-EGF\_1488

GAGACTTCCTAATCTAACTGAGCTATGCTTCAGTTCTTTCTTCATGTGCCTAATACTTGTTCATTAATGACT  
AGGACAACCTTAAGGATGGACGAGAGGTTGCTGTGAAGCGCCTTTACGA

>M6-PGSC0003DMG402030532-(rev)M6RLKWAX-EGF\_1612

AACTCCAAACGAATGCAGCAGTTTGTAATGAAATTGAGATCCTTACTAGGCTAAGGCACACCAATCTTG  
TCACCCTTTATGGCTGCACTTCAAGGCGAAGCCGTGAACTAATCCTTGTC

>M6-PGSC0003DMG402030532-(rev)M6RLKWAX-EGF\_1674

CAATCTTGTCACCCCTTATGGCTGCACTTCAAGGCGAAGCCGTGAACTAATCCTTGTCTATGAATACATTC  
CTAATGGAACCTTTGCTGATCACCTCCATGGTGACAGAGCGAAGAACAG

>M6-PGSC0003DMG402030532-(rev)M6RLKWAX-EGF\_1798

CTCACCTGGCCAGTCCGCTTGAACATTGCCATAGAACTGCTGGTGCATTGGCTTACCTTCATGCTTCTGA  
CATAATACTGTGATGTCAAGACTAATAACATACTCCTTGATCAGAGT

>M6-PGSC0003DMG402030532-(rev)M6RLKWAX-EGF\_186

GTTTGCTTTATTCTATCTCTTCTTCTGATGTTAGTTCAGGCAAAGGGGAGAAATGATTCAACTTGTCCAAA  
GTCCTTTCCATGTGGCAATCTTACTGACCTGATCTTCCCTTTCACTCTT

>M6-PGSC0003DMG402030532-(rev)M6RLKWAX-EGF\_1860

TGCTTCTGACATAATACTGTGATGTCAAGACTAATAACATACTCCTTGATCAGAGTTTCAGTGTCAAA  
GTTGCAGATTTGGGATATCACGTCTCTTCCCAAATGATGTCTCTCATAT

>M6-PGSC0003DMG402030532-(rev)M6RLKWAX-EGF\_1922

GTGTCAAAGTTGCAGATTTGGGATATCACGTCTCTTCCCAAATGATGTCTCTCATATCTCAACTGCACCC  
CGGGGGACCCCTGGCTATATCGATCCAAAGTATCACGAATGTTACCAGC

>M6-PGSC0003DMG402030532-(rev)M6RLKWAX-EGF\_2046

CATAAAAAGTGATGTTTATAGCTTCGGGGTGGTCCTTGTTGAACTCATTCATCAATGCCAGCTGTGGAT  
ATGATGAGGCATAGTCAAGAGATTAATTTAGCTAGCTTTGCTATAAACAA

>M6-PGSC0003DMG402030532-(rev)M6RLKWAX-EGF\_2108  
CTGTGGATATGATGAGGCATAGTCAAGAGATTAATTTAGCTAGCTTTGCTATAAACAAGATTGTGAAAT  
GTGCATTCAACGAGTTGATCGATCCATCCCTGGGATTTCGATTCAGATACCA

>M6-PGSC0003DMG402030532-(rev)M6RLKWAX-EGF\_2170  
GTGAAATGTGCATTCAACGAGTTGATCGATCCATCCCTGGGATTTCGATTCAGATACCAAGATTTGGGAA  
ATGACTAGATCAGTTGCAGAGTTGGCATTCTATGCTTACAGACAGATAGG

>M6-PGSC0003DMG402030532-(rev)M6RLKWAX-EGF\_2232  
TTGGGAAATGACTAGATCAGTTGCAGAGTTGGCATTCTATGCTTACAGACAGATAGGGAAATGAGGCC  
TACTATGACTGAAGTTTTGGATACTCTAAAAGAGATTCAGACTAGTGAATT

>M6-PGSC0003DMG402030532-(rev)M6RLKWAX-EGF\_2294  
TGAGGCCTACTATGACTGAAGTTTTGGATACTCTAAAAGAGATTCAGACTAGTGAATTTGACAATGAGA  
AGAGAGCTAAGTTATTGCTGAATCAAGTTAAATCACAACTTCACCAAATT

>M6-PGSC0003DMG402030532-(rev)M6RLKWAX-EGF\_2356  
AATGAGAAGAGAGCTAAGTTATTGCTGAATCAAGTTAAATCACAACTTCACCAAATTCTGTGACTGATA  
AATGGACTACTTGCTCTAGTACTATAGCTAATACAAAGTAGTAGCAGTGG

>M6-PGSC0003DMG402030532-(rev)M6RLKWAX-EGF\_2418  
GACTGATAAATGGACTACTTGCTCTAGTACTATAGCTAATACAAAGTAGTAGCAGTGGTGTGCTACTGT  
GAGAAGTGTCTTGCTATGTTGTTGCTCCGACTTTTCGAAAATATCCTCTG

>M6-PGSC0003DMG402030532-(rev)M6RLKWAX-EGF\_248  
TTGTCCAAAGTCCTTTCCATGTGGCAATCTTACTGACCTGATCTTCCCTTTCACTCTTTCCACACAACCCGA  
CTGCGGAATAGTTCCCATCTCTGGTTGTGATGCTAAACCATTTCCAAG

>M6-PGSC0003DMG402030532-(rev)M6RLKWAX-EGF\_2480  
GCTACTGTGAGAAGTGTCTTGCTATGTTGTTGCTCCGACTTTTCGAAAATATCCTCTGGTGTGTCAGATAC  
TCCAAAAGTAGTGAATTTTATCCAACACGGGTGCGACAAAATTTTTGGA

>M6-PGSC0003DMG402030532-(rev)M6RLKWAX-EGF\_2542  
GTCAGATACTCCAAAAGTAGTGAATTTTATCCAACACGGGTGCGACAAAATTTTTGGAGAGTTGAGCAA  
CATAGGTAATAGGTTTCTTGAACCTATGTATCTTAGTATATCTAACTTTAAT

>M6-PGSC0003DMG402030532-(rev)M6RLKWAX-EGF\_2574  
AACACGGGTGCGACAAAATTTTTGGAGAGTTGAGCAACATAGGTAATAGGTTTCTTGAACCTATGTATCTT

AGTATATCTAACTTTAATTCTAGCTTGTTATACACATGTGTGTTATAAAC

>M6-PGSC0003DMG402030532-(rev)M6RLKWAX-EGF\_310

CACAACCCGACTGCGGAATAGTTCCCATCTCTGGTTGTGATGCTAAACCATTTC AAGAATCCAAC TCTGCT  
TCCTGGAGGAGAATGGTACTATGCTAAGGGAAATGAGCATAGTTATACTA

>M6-PGSC0003DMG402030532-(rev)M6RLKWAX-EGF\_372

CAACTGCTTCTGGAGGAGAATGGTACTATGCTAAGGGAAATGAGCATAGTTATACTATTTTACTTGTGG  
ACTTGAAGCTTCAAACCACGTTGACGCAACACAAGTGCCAGGCTTTTAAT

>M6-PGSC0003DMG402030532-(rev)M6RLKWAX-EGF\_434

ACTTGTGGACTTGAAGCTTCAAACCACGTTGACGCAACACAAGTGCCAGGCTTTTAATGAAAATATCTCC  
CTTTCAGGCTCTCCTTCTATTTCTTACACTGCAGTTAACCTTCAGAACTT

>M6-PGSC0003DMG402030532-(rev)M6RLKWAX-EGF\_496

ATATCTCCCTTTCAGGCTCTCCTTCTATTTCTTACACTGCAGTTAACCTTCAGAACTTCTACAAATGCAACA  
GGACTAGTAGTAACAACCCATACACTAATCAGAAGATGAAAGATCATT

>M6-PGSC0003DMG402030532-(rev)M6RLKWAX-EGF\_558

AAATGCAACAGGACTAGTAGTAACAACCCATACACTAATCAGAAGATGAAAGATCATTTTGTGGTTATT  
GCTCATATGATGGCTGTGATGGATTCACCATATACTACAAGTTCGATGGA

>M6-PGSC0003DMG402030532-(rev)M6RLKWAX-EGF\_62

GAAGTTATGGTACTTCATCTTATTAGATACAAGTCTGGTGAGCTAGAGTTGCAATTCATTAACCTTCAGC  
TAGCTTTGCTCTTCTTGCAGTAGGATTCACAATATGTCTTTGGCTTCTTC

>M6-PGSC0003DMG402030532-(rev)M6RLKWAX-EGF\_620

TGGTTATTGCTCATATGATGGCTGTGATGGATTCACCATATACTACAAGTTCGATGGAGTTGATGATAAA  
GACATTCTAGCAGGCAATCATACTGCCAACTGTTCACTTATCAGATTGCC

>M6-PGSC0003DMG402030532-(rev)M6RLKWAX-EGF\_682

ATGATAAAGACATTCTAGCAGGCAATCATACTGCCAACTGTTCACTTATCAGATTGCCATATTTCAAACA  
GAACCTGGTAATAATTTGGTCAACTTCTTGCATCCTGAAATTCTAGTAG

>M6-PGSC0003DMG402030532-(rev)M6RLKWAX-EGF\_744

TTCAAACAGAACCTGGTAATAATTTGGTCAACTTCTTGCATCCTGAAATTCTAGTAGAATGGAAATTGT  
CTGATGACTGTAACGAATGTCACTATGATGGAGGTCGATGCCAGACTGAT

>M6-PGSC0003DMG402030532-(rev)M6RLKWAX-EGF\_806



GAAATTGTCTGATGACTGTAACGAATGTCACTATGATGGAGGTCGATGCCAGACTGATAAGAAGAACAA  
TTTTCTTTGTTACAAAGGTAGACATCTCAAATAATCTACATGTTTAAGGT

>M6-PGSC0003DMG402030532-(rev)M6RLKWAX-EGF\_868

AGAACAATTTTCTTTGTTACAAAGGTAGACATCTCAAATAATCTACATGTTTAAGGTCAAATGCATATTT  
CTTAGGGTCCTTTCTTGTTTCATATCACATCTCATAATTTTCCCTCTTC

>M6-PGSC0003DMG402030532-(rev)M6RLKWAX-EGF\_930

TGCATATTTCTTAGGGTCCTTTCTTGTTTCATATCACATCTCATAATTTTCCCTCTTCTTTTAGATGCAAAAG  
CAAATAGAAGCAAGTTGGGACTGACTCTTGAGCAGGTAGTTAAATA

>M6-PGSC0003DMG402030532-(rev)M6RLKWAX-EGF\_992

AGATGCAAAAGCAAATAGAAGCAAGTTGGGACTGACTCTTGAGCAGGTAGTTAAATATCCATTAACCT  
CATCTTTCTTTCTATTCCAGAATTTCCATACATGTTCTTGAATTTTCTTT

>M6-PGSC0003DMG403000927M6LRR-RLP\_0

TAAAGGAGGGGTTTTTGTATACATGTATTTCCAATCAAGTAGAATATTCATTTATTAGTTTCTGCATG  
ATTAGAAATAGAAAGGTCCAATTCATGACTAAATAGATAATATAACTGA

>M6-PGSC0003DMG403000927M6LRR-RLP\_1105

CCCTTTGATATCTTATTAATCAAGCACTAGCAACCCTGTAGCGTAAGATGCTCGTGATGGAGGTAACAAG  
CAGAGGCAGATCTACATTATAATTGCCAGTAAAATACACTAATAAAGTAA

>M6-PGSC0003DMG403000927M6LRR-RLP\_1164

GAGGTAACAAGCAGAGGCAGATCTACATTATAATTGCCAGTAAAATACACTAATAAAGTAAAAGTTGTT  
TACATTGCCAGTGATACAAGTTAAATTCTTATTTGAAATTCCACTCAGAC

>M6-PGSC0003DMG403000927M6LRR-RLP\_65

TGCATGATTAGAAATAGAAAGGTCCAATTCATGACTAAATAGATAATATAACTGATTTATAAATTTGTGT  
ATTTGCAGGTTTCTTTTCCAACCTGGAATATCTATATATCTATGATGCT

>M6-PGSC0003DMG403000927M6LRR-RLP\_650

TGTCTTGTCGCCGTAGCTGTATAACTAATTAECTTTGTGCTTTCTATTGCATACTTAATAGTAATAACCAT  
ATTCAAATATTAATCTATGTTTGTGAGAATAAACAACCTTCCTTTTACC

>M6-PGSC0003DMG403000927M6LRR-RLP\_715

TAACCATATTCAAATATTAATCTATGTTTGTGAGAATAAACAACCTTCCTTTTACCTGCCCCCAAATATTTTC  
AATTAGAAAATAAGCATCAGCATAGTCTTTTATCTTTTAAGTACAT

>M6-PGSC0003DMG403000927M6LRR-RLP\_780

TATTTTCAATTAGAAAATAAAGCATCAGCATAGTCTTTTATCTTTAAGTACATGTTGTACATACTAAGC  
TAGTCATCTCTCTCTCTGATCCCAGGAACAAAGCACTGGTGATGGCAA

>M6-PGSC0003DMG403000927M6LRR-RLP\_845

CTAAGCTAGTCATCTCTCTCTGATCCCAGGAACAAAGCACTGGTGATGGCAACGAAGTCGGACCTA  
GTTATGACAAGCTAGTGATGTCTATGAATCCAAAGCTAGCTAGGAAGGTAA

>M6-PGSC0003DMG403000927M6LRR-RLP\_910

CCTAGTTATGACAAGCTAGTGATGTCTATGAATCCAAAGCTAGCTAGGAAGGTAAAAAGTATTTGATGA  
AACAGTCCGAGTTAGCTCGAACATAGCCTGATACCTATAGTGCTGTTTATT

>M6-PGSC0003DMG403003025M6LRR-RLP\_0

TGCAACAAAATAATAAAGTTTGCTACTTCATCCCTTCAACGTTTGCAGGTTTCTTGTCCAAGCCTGGAATA  
TCTATATATCGAGAAGGCTAACAGTATAAGTGCTCTATACTCTCATCAA

>M6-PGSC0003DMG403003025M6LRR-RLP\_528

ACACAACAGAGGTTCAATTCTAAGGTTTGTCTAGTGCCGTTAGCTGTATAACTAATTAAGTCTAGTGCTCT  
CTTTCCGTCTTAAGTAAATAGTAATATTCAGATACTTATTTATGTTTGT

>M6-PGSC0003DMG403003025M6LRR-RLP\_66

GAATATCTATATATCGAGAAGGCTAACAGTATAAGTGCTCTATACTCTCATCAACATCCAAGTCCCACTT  
TAGCAACCTTGAAGCATTGGAAGTATGGCATTATGGAAAATTGAGAAAC

>M6-PGSC0003DMG403010943M6LRR-RLP\_1612

TTTTGTTGAAGAACAGAATCTGCAGCCGTAGACTCTTACATGAGCATTGGTAAAGACTACTGACTACAT  
AATCTCTCAACATTTACTCTTCATAACATGGATATATACCAACAAGTATT

>M6-PGSC0003DMG403010943M6LRR-RLP\_2046

CTGTTTCACTGAACTATTCATAAGATGAAGTTAGGAGGTTGCTGTGCTACCAAAAGTACTTTTACCGTCTC  
CTATGTTTCAGATTCTTGAATGAAACAATGGCATGAAACTTGTGCGAGAT

>M6-PGSC0003DMG403010943M6LRR-RLP\_868

GAAACATTAATGCTACTGAGGTGCAAACGGCTACAGAACCTGGACTTCTCATATGTCATGCCCAAATTAC  
AACATCTGTATGTTTATGAATGTCCATTGTTAGAAGCTCTGTGCGGATGGG

>M6-PGSC0003DMG403014059-(rev)M6RLKWAX-EGF\_0

TTTTTCAACAGGTACAGGTTTATTAAGTGGACTGTTGATTCTACTTTTCTACTTCAGAGAAAAGATTA

TGCGGTACAAGTGCATCAGGTTTTCGGAATCTAATGCTGAGGATAACCA

>M6-PGSC0003DMG403014059-(rev)M6RLKWAX-EGF\_1088

TAGATTCATCAGTAGTAGAACTGGCCTAGCCTTTATGTGTTTCATATCTCAGCTAATATCACTGTAGTCACA

TTTTGTTATGGAATTGTAGCAAAAAGTGGTACTGTTACAGTTCGGTTTT

>M6-PGSC0003DMG403014059-(rev)M6RLKWAX-EGF\_1139

CTAATATCACTGTAGTCACATTTTGTATGGAATTGTAGCAAAAAGTGGTACTGTTACAGTTCGGTTTTTT

GATGTGTTTAGACGTCCTTGAATGTAAGAAGCTGTAAATTCATGCTTTT

>M6-PGSC0003DMG403014059-(rev)M6RLKWAX-EGF\_128

AAGCATTCTTAAAGAACTATAGTTCATACGCTCCAAACAGATACAATTATACAGACATCAAAGAATCAC

CGGTCACTTAAGAAGCAAACTAGGCCAAGGAGGATTTGGTAATGTATACA

>M6-PGSC0003DMG403014059-(rev)M6RLKWAX-EGF\_256

TTGTGTAACGGGAGTCAAGTGGCAGTGAAGTCTGAATAAACTAAAAGGCAGTGGTGAAGATTTTCAT

TAATGAGGTAGCAAGTATTAGCAGAACATCGCATGTTAACATCGTGAGCCTT

>M6-PGSC0003DMG403014059-(rev)M6RLKWAX-EGF\_384

TTGTTTTGAGGGTCACAAAAGAGCTCTCGTATATGAGTTCATGCCAAATGGATCTCTTGAAAAATTTATC

TATGAGGAAAGATCCGAAAGTGTAGTCGATTGGGTTGGCCAATACTGTA

>M6-PGSC0003DMG403014059-(rev)M6RLKWAX-EGF\_576

TGATATAAAGCCTCATAATATCCTGCTTGATGAAGATTTTTGTCCGAAAATCTCTGACTTTGGTCTTGCCA

AACTGTGCATGAAACAGGAGAGTATCGTGTCAATGTTAGGTCCACGAGG

>M6-PGSC0003DMG403014059-(rev)M6RLKWAX-EGF\_64

AAGATTATGCGGTACAAGTGCATCAGGTTTTCGGAATCTAATGCTGAGGATAACCAAAAAGTTGAAGCA

TTCTTAAAGAACTATAGTTCATACGCTCCAAACAGATACAATTATACAGAC

>M6-PGSC0003DMG403014059-(rev)M6RLKWAX-EGF\_832

CGCACTAGTGAAATCTACTTTCCACATTGGATCTATCAACGAATTGAACTAGACAATGAGCTTCAACTAA

TTGGGATAATGAATGAAGAGGAGAAAGAATGTGCAAGAAAGATGGTGATG

>M6-PGSC0003DMG403015682-(rev)M6LRR-RLP\_3416

CAAGCCCAGAATTTTGGCTTAAATATAGGTATTATACCTCATGATTTGTTTTTCCCTTAGTTGGTAGTGAA

ATTCTGTTCAACTCTTTTTTATGTAATTCTCTCCTATTAGCTACAAAG

>M6-PGSC0003DMG403015682-(rev)M6LRR-RLP\_3477

TGGTAGTGAAATTCTGTTCAACTCTCTTTTTATGTAATTCTCTCCTATTAGCTACAAAGTCTTCTTCCAATT  
CTGTTAATAACTTTTTTCATCTCTTTTCCTTTTTTTCTTCTTTATTCTT

>M6-PGSC0003DMG403015682-(rev)M6LRR-RLP\_3538

TTCTTCCAATTCTGTTAATAACTTTTTTCATCTCTTTTCCTTTTTTTCTTCTTTATTCTTTCCCGTACTGACAGG  
AGCTCATCAATGGTGATGTATGTCTCAACAGTGAGTTTTGTTGATT

>M6-PGSC0003DMG403015682-(rev)M6LRR-RLP\_3599

CCGTACTGACAGGAGCTCATCAATGGTGATGTATGTCTCAACAGTGAGTTTTGTTGATTGATTCTCCATCT  
TGTGTTAAGCCATGATTAACCATGTGAGTTAAAGGATGTGAGCAAGTTT

>M6-PGSC0003DMG403015682-(rev)M6LRR-RLP\_3660

TTCTCCATCTTGTGTTAAGCCATGATTAACCATGTGAGTTAAAGGATGTGAGCAAGTTTTTTTTCGATACT  
CAAATCAGATCCTGGAATCATTCAACCTTCATAAATTCTTCCCTTAAAA

>M6-PGSC0003DMG403015682-(rev)M6LRR-RLP\_3721

TTTCGATACTCAAATCAGATCCTGGAATCATTCAACCTTCATAAATTCTTCCCTTAAAATGTGCTCACAAG  
TGAATAGAATAATCCTGCATTTTATCCTGGTATTTTTATCACTTATCCC

>M6-PGSC0003DMG403015682-(rev)M6LRR-RLP\_4087

GTATTGGAAACAAATTTCTCTTAAGTTCTATATTATACTCAATTTTGTTTTCGACTTGTTCAATTTGTGGTT  
CTTTTTACGATTCAATTGGCTCTAAAGTGATTTTCTGAAATCAAGTAT

>M6-PGSC0003DMG403015682-(rev)M6LRR-RLP\_4148

CATTTGTGGTTCTTTTTACGATTCAATTGGCTCTAAAGTGATTTTCTGAAATCAAGTATTTTTGTTTCTTT  
AATTAGTTCACGCACCTTTTTCAGTGAGAATGAAGGACTAGGATTTAT

>M6-PGSC0003DMG403015682-(rev)M6LRR-RLP\_4209

TTTGTTTCTTTAATTAGTTCACGCACCTTTTTCAGTGAGAATGAAGGACTAGGATTTATCCTTAGAATCAA  
TTATCATATTCATTTTGTAGTATCACTTCAGATGAATACTCAATTGCTA

>M6-PGSC0003DMG403015682-(rev)M6LRR-RLP\_4270

TTAGAATCAATTATCATATTCATTTTGTAGTATCACTTCAGATGAATACTCAATTGCTATTTCCATTGTTCA  
AATTGGGTGATCCGCAATCGGAGTCTTTGATAAGGATGTATATCTAAA

>M6-PGSC0003DMG403015682-(rev)M6LRR-RLP\_4331

TCCATTGTTCAAATTGGGTGATCCGCAATCGGAGTCTTTGATAAGGATGTATATCTAAACCTCTTTGGTTT  
GCTGTGTGATGTTTGTGAGCATCAATCCCCAACATTTGGAAAAAATGGAA

>M6-PGSC0003DMG403015682-(rev)M6LRR-RLP\_4392

TCTTTGGTTTGCTGTGTGATGTTTGAGCATCAATCCCCAACATTTGGAAAAAATGGAATAGTTCTCAACT  
AATCTGTAGATGCTTATATATCATATTACTTCCTCAAGTAAGGGAAACA

>M6-PGSC0003DMG403015682-(rev)M6LRR-RLP\_4453

GTTCTCAACTAATCTGTAGATGCTTATATATCATATTACTTCCTCAAGTAAGGGAAACATTCTCTTAGTTCT  
TCATTTAATTATGTGCTGTATTAATTACAGAACTAGTTTTTCCTCCAT

>M6-PGSC0003DMG403015682-(rev)M6LRR-RLP\_4575

AGTAAATTTTAGTGGGGTTTTTCAGGCCTGTGCAGCTGCTGAGGAGTTTATGCGGCAGTTGCCACAGTTA  
ACTAAGCAGGAGCAAGAGACTAACTCTGAAGATGTTGATGAAGTGAGCAC

>M6-PGSC0003DMG403015682-(rev)M6LRR-RLP\_4636

CACAGTTAACTAAGCAGGAGCAAGAGACTAACTCTGAAGATGTTGATGAAGTGAGCACTCTGAATTTCT  
ATTTCTAGAACATAACTTGAATTTTAATTTATAGAACTAACTTGAATGCC

>M6-PGSC0003DMG403015682-(rev)M6LRR-RLP\_4697

TGAATTTCAATTTCTAGAACATAACTTGAATTTTAATTTATAGAACTAACTTGAATGCCACAGATGCTTAC  
TATTGTGATGGCTATCCAAGTAGAAAGAACTACTCTTGTATGCTCTTC

>M6-PGSC0003DMG403015682-(rev)M6LRR-RLP\_4758

AGATGCTTACTATTGTGATGGCTATCCAAGTAGAAAGAACTACTCTTGTATGCTCTTCATCAGAACTG  
AAGTTCACCATTTTACTTGGAAAATATATTTTCAATTTTGGAAAAACCAGAA

>M6-PGSC0003DMG403015682-(rev)M6LRR-RLP\_4819

CAGAACTGAAGTTCACCATTTTACTTGGAAAATATATTTTCAATTTTGGAAAAACCAGAAGTTTCTTAAACA  
TTACATAACTTTAAAAGCTTTAGGTGGGACACTCAGTTTGGCACTTAAT

>M6-PGSC0003DMG403015682-(rev)M6LRR-RLP\_5246

AGAAAATAATGATGAACCAACAGAGCATCTCGTTATGACGGGTACGAGCAGATACGGAAATTGTGAAC  
ACCATTACTCCGTGACCAATGAAGCCAGTTAAAATGTCAAATACTCAATAAC

>M6-PGSC0003DMG403015682-(rev)M6LRR-RLP\_5307

TGTGAACACCATTACTCCGTGACCAATGAAGCCAGTTAAAATGTCAAATACTCAATAACATTAGAAACAA  
AGGACATATTTCTTAAATATAGGTAATATACCTCATGATTTTCTTTTTCC

>M6-PGSC0003DMG403015877M6LRR-RLP\_130

GGATTTTCAAGTTGATACTCGGAGATTGATCCAATTATGGATCGCAGAAGGTTTCATAAGGACGTCTTCC

GGAAGTCGTGAAAGCTTGGAGGAAGTGGCTGAACATTATTTGGAGGATCT

>M6-PGSC0003DMG403015877M6LRR-RLP\_390

TTTACCAGCACAAAAGCCTAATTTTCATCGCTTCAGTATTCAAAGTATATTAAGATGCTTATAAGCTC

TTACCCCTGTAGCCAGATCTATCTACTGCTTTTCTAACTTGGGTCTAC

>M6-PGSC0003DMG403015877M6LRR-RLP\_455

AAGCTTTACCCCTGTAGCCAGATCTATCTACTGCTTTTCTAACTTGGGTCTACCTGATGAACCCATTAA

TCTTCTCTATACTGTCCATCTACCGTAAAGATCCTATAATGCATGGA

>M6-PGSC0003DMG403015877M6LRR-RLP\_520

CATTAATCTTCTCTATACTGTCCATCTACCGTAAAGATCCTATAATGCATGGATTTTTCTCTTGTTCAA

CCATCTCAGGGTATTGGACATCTCCCTACCTGTTTCAGCACATTTCC

>M6-PGSC0003DMG403015877M6LRR-RLP\_585

GTTTCAACCATCTCAGGGTATTGGACATCTCCCTACCTGTTTCAGCACATTTCCACTTGTGATTACAAAG

TTATTTCAATTTGAGATATCTCCAAGTTCGATGTTTTGGAAATATTCCTG

>M6-PGSC0003DMG403015877M6LRR-RLP\_65

TTGAGTTACCATCACTTGCCTAATCGACTCAAACCATGCTTCCTTTCCCTGGGTGATTTCCAGAGGATTT

TCAAGTTGATACTCGGAGATTGATCCAATTATGGATCGCAGAAGGTTTC

>M6-PGSC0003DMG403015877M6LRR-RLP\_650

ACAAAGTTATTTCAATTTGAGATATCTCCAAGTTCGATGTTTTGGAAATATTCCTGAATCAATCTCAGAGCT

TCTGAATTTGCAAACCTAATTTGTGATGCTTATCCATTTGATATAACT

>M6-PGSC0003DMG403018696M6LRR-RLP\_0

ATGCAGGAACTCCTTCCATTTCTTAAGAACTATATCTGTTTGATTGTCCAGAAATAGAGTCCTTTCTGA

AGGAGGATTGCCCTTCAATTTCCAACCTCCTTTGTATCCGAAATTGCAAG

>M6-PGSC0003DMG403018696M6LRR-RLP\_120

AAACTGGTGAATGGCCGAAAGGAGTGGTGTTCACAGAGACTCCCCTGTCTCACAGAGTTATCCATGGTA

CATGATGGCAGTGACGAAGAGATTGTTGGTGCTGAGAGTTGGGAGTTGCCT

>M6-PGSC0003DMG403018696M6LRR-RLP\_180

TCCATGGTACATGATGGCAGTGACGAAGAGATTGTTGGTGCTGAGAGTTGGGAGTTGCCTTCTCTATT

CAAAGCCTTAGCATAGAGAATCTGAAAACATTAAGCAGCCAACCTTCTCAA

>M6-PGSC0003DMG403018696M6LRR-RLP\_300

AGCCTCACCTCTCTTCAATATCTATGTATTAGGGTAATTTACCTCAAATTCAGTCCATGCTGGAACAAGG  
CCAGTTTTCTCCTTTTACACCTCACTTCGCTTCAAAGTCTAAAAATC

>M6-PGSC0003DMG403018696M6LRR-RLP\_360

CTGGAACAAGGCCAGTTTTCTCCTTTTACACCTCACTTCGCTTCAAAGTCTAAAAATCAGGAATTTCCC  
TAATCTGCAATCACTTCCCGAATCAGCACTGCCCTCCTCCCTCTCTCAG

>M6-PGSC0003DMG403018696M6LRR-RLP\_480

CTGGAAATCTCCCATTTGCCCTAATCTCCAATCCCTTCCACTAAAAGGGATGCCCTCTTCCCTCTCTAAACTA  
TCTATTTGCAACTGCCCATTTGCTCAAACCACTACTAGAATTTGACAAG

>M6-PGSC0003DMG403018696M6LRR-RLP\_539

CCTCTCTAAACTATCTATTTGCAACTGCCCATTTGCTCAAACCACTACTAGAATTTGACAAGGGGGAATACT  
GGCCAGAAATTGCTCAAATCCCACCATAGTGATCGATTGGGAATCCCT

>M6-PGSC0003DMG403026153M6G-LecRK\_0

ATACCATAAAAAATGTTACTGACTCAAGTAGTTGCTGGAAAAGTTTATGTTATACAAATGAGTAATTTTG  
TCTTGTTGTTGTTTGCAGTGTTGGTGATTATATGTGGATGTGATGCAAGG

>M6-PGSC0003DMG403026153M6G-LecRK\_1054

TTCAGAATGATCCTCCAGAAGATAATGGAGACGGGGAATATTCAGCTGGATGTTTCGAGACTATCAGATA  
ACTCATGCAAAGAAGACACATTTGTGCATCTGAGCTCAATGAAATTTGGAA

>M6-PGSC0003DMG403026153M6G-LecRK\_1116

TCAGATAACTCATGCAAAGAAGACACATTTGTGCATCTGAGCTCAATGAAATTTGGAAATTCAAATTGGA  
CAGATAAAAAGATTAATACCAGTGAGAAATGCATGAGTCATTGTTTAAGC

>M6-PGSC0003DMG403026153M6G-LecRK\_1178

AAATTGGACAGATAAAAAGATTAATACCAGTGAGAAATGCATGAGTCATTGTTTAAGCAACTGCTCATG  
CAAAGCATATACATATTATAACAATTCTGGATGCTGGTTTTGGGGGTCGAA

>M6-PGSC0003DMG403026153M6G-LecRK\_124

CGATCGATGAAAGGAGTGAGTTAGTAGACAACGGGGAACACTGGTATCTGATGGAGAAAACCTTCGAA  
ATGGGATTCTTTTCTGAAGGGTTAAACAGGTATGTAGGTATATGGTATTACA

>M6-PGSC0003DMG403026153M6G-LecRK\_1240

GCTCATGCAAAGCATATACATATTATAACAATTCTGGATGCTGGTTTTGGGGGTCGAATCTCAATAATCT  
CCAGGAGAACTACCCTGGTGGCTTCAACCTCTCTGTCCGCGTGCCCCCTA

>M6-PGSC0003DMG403026153M6G-LecRK\_186

TTCGAAATGGGATTCTTTTCTGAAGGGTTAAACAGGTATGTAGGTATATGGTATTACAAGTTAAGTCCTC  
GAACTGTTGTATGGGTTGCTAATTGGAACAATTCGATTGAGCTTCAACA

>M6-PGSC0003DMG403026153M6G-LecRK\_248

AAGTCCTCGAACTGTTGTATGGGTTGCTAATTGGAACAATTCGATTGAGCTTCAACAAAAAATAAGGA  
GAGTGTTTCCATTGTCGTTCTTGATGGTAACCTCAAATTTTGAATTCAAG

>M6-PGSC0003DMG403026153M6G-LecRK\_310

ATAAGGAGAGTGTTTCCATTGTCGTTCTTGATGGTAACCTCAAATTTTGAATTCAAGTAATGGCGAAAC  
TTATTTCTCCTCAGGATTAGATGGTAACTCTAGCATTAGAGCAGAGTTGC

>M6-PGSC0003DMG403026153M6G-LecRK\_372

GGCGAAACTTATTTCTCCTCAGGATTAGATGGTAACTCTAGCATTAGAGCAGAGTTGCTGGATACAGGG  
AATTTGGTTTTAGTTGATGAATTAGGAGCTAAAATGTGGCAGAGTTTTTCGG

>M6-PGSC0003DMG403026153M6G-LecRK\_434

TACAGGGAATTTGGTTTTAGTTGATGAATTAGGAGCTAAAATGTGGCAGAGTTTTCGGAATCCAACGAA  
TACTTTCTTCTCCTGGCATGAATATGGAGAGTCTGGAATTAACCTTCATGGGA

>M6-PGSC0003DMG403026153M6G-LecRK\_496

CAACGAATACTTTCTTCTCCTGGCATGAATATGGAGAGTCTGGAATTAACCTTCATGGGAAGGATCTGGAA  
ATTGGAAGTACAAATTCAAAGTAGATCAAGGAGACAACAAAAAATATGTGA

>M6-PGSC0003DMG403026153M6G-LecRK\_558

TCTGGAAATTGGAAGTACAAATTCAAAGTAGATCAAGGAGACAACAAAAAATATGTGATAGTTGAGAA  
CGGAGTGGTACTCACTGGCAAGGGTCTGTAGGAGGGTTTGCCAAATCAACT

>M6-PGSC0003DMG403026153M6G-LecRK\_62

TAATTTTGTCTTGTTGTTGTTTGCAGTGTTGGTGATTATATGTGGATGTGATGCAAGGAGCACGATCGAT  
GAAAGGAGTGAGTTAGTAGACAACGGGAAACACTGGTATCTGATGGAGA

>M6-PGSC0003DMG403026153M6G-LecRK\_620

TGAGAACGGAGTGGTACTCACTGGCAAGGGTCTGTAGGAGGGTTTGCCAAATCAACTGCTTATGAATT  
CTTCAGATTCAATGATATGCCTTTTTTTGTAACCTTCTTTTTATCCAATAA

>M6-PGSC0003DMG403026153M6G-LecRK\_682

ATGAATTCTTCAGATTCAATGATATGCCTTTTTTTGTAACCTTCTTTTTATCCAATAATTCAGTTGAAGCGA



GAAGAACATTATTCAATAATTCAGTGGAATTGACAAGAACATTATTCA

>M6-PGSC0003DMG403026153M6G-LecRK\_744

GTTGAAGCGAGAAGAACATTATTCAATAATTCAGTGGAATTGACAAGAACATTATTCAATAATAATCGTA  
ATTTTACTCCGATTGATTTTTCAAGGTTAGTCAATCATAGTAACAAAGAT

>M6-PGSC0003DMG403026153M6G-LecRK\_806

TAATCGTAATTTTACTCCGATTGATTTTTCAAGGTTAGTCAATCATAGTAACAAAGATTCTATTTTCAAAG  
GTACTAGACTCCTGATGATCTCCTCTGGAGAAATACAATTCTACTTTTG

>M6-PGSC0003DMG403026153M6G-LecRK\_868

TTTTCAAAGGTACTAGACTCCTGATGATCTCCTCTGGAGAAATACAATTCTACTTTTGGGATTACCAGAGT  
GGATGGTCCTTGGTCTGGTCTGCCCAAGAGATAAATGCGACCAGTTTA

>M6-PGSC0003DMG403026153M6G-LecRK\_930

TACCAGAGTGGATGGTCCTTGGTCTGGTCTGCCCAAGAGATAAATGCGACCAGTTTAGAAAATGTGGG  
AAATTTGCGATTTGTAACAGCAATGAAAGTTCAGAATGCAGATGTTTGCCT

>M6-PGSC0003DMG403026153M6G-LecRK\_992

ATGTGGGAAATTTGCGATTTGTAACAGCAATGAAAGTTCAGAATGCAGATGTTTGCCTCGTTTTCAGAAT  
GATCCTCCAGAAGATAATGGAGACGGGGAATATTCAGCTGGATGTTTCGAG

>M6-PGSC0003DMG403030532-(rev)M6RLKWAX-EGF\_0

GATCTTAGTTCAGGCAAAGGGAAAAAATGATTCAACTTGTCCAAAGCTCTTTTCATGTGGGAATCTTACT  
GACTTGAGCTTTCTTTCTCTTTCTCACGATCTGATTGCGGACTAAT

>M6-PGSC0003DMG403030532-(rev)M6RLKWAX-EGF\_1037

AAGGAGAAGAAATTTAGTCCATCCCGCTTCTCACAACGAAGAAATTCCTCGGACATTTTCAAACATGATG  
TTGAGGGAGGCAGTATATACTTTGGTGTCCCAGTCTTCTTATTTCAGAA

>M6-PGSC0003DMG403030532-(rev)M6RLKWAX-EGF\_1098

AACATGATGTTGAGGGAGGCAGTATATACTTTGGTGTCCCAGTCTTCTTATTTCAGAACTTGAAGAAGC  
CACAAATGATTTAGTTCTTCTAGAGTCCTTGGCGATGGAGGTTTTGGAA

>M6-PGSC0003DMG403030532-(rev)M6RLKWAX-EGF\_1159

TGAAGAAGCCACAAATGATTTAGTTCTTCTAGAGTCCTTGGCGATGGAGGTTTTGGAACCGTTTACTAT  
GGTGAGAGACTTCTAATCCAATGCGCTATGCTTCAACTGTTTCTTCAT

>M6-PGSC0003DMG403030532-(rev)M6RLKWAX-EGF\_122

CCATGTTTGGTTGTGATACTAAACCATATCCAAGAATCCAGCTGCTTCCTGGAGGAGATTGGTACAATCC  
TATGGAAAAACCGGATAATTTTACAGTTTGGCTCTTGGACCCGAAGCTTC

>M6-PGSC0003DMG403030532-(rev)M6RLKWAX-EGF\_1220

GTTTACTATGGTGAGAGACTTCCTAATCCAAGTGCCTATGCTTCAACTGTTTCTTCATGTACCTAACTCTT  
GTTTCATCAATGACCAGGAAAGCTTAAGGATGGAAGAGAGGTTGCTGTG

>M6-PGSC0003DMG403030532-(rev)M6RLKWAX-EGF\_1281

ACCTAACTCTTGTTTCATCAATGACCAGGAAAGCTTAAGGATGGAAGAGAGGTTGCTGTGAAGCGTCTTT  
ATGAGCACAAGTGCAGACGAATGCAGCAGTTTGTAAATGAAATTGAGATCC

>M6-PGSC0003DMG403030532-(rev)M6RLKWAX-EGF\_1342

GCGTCTTTATGAGCACAAGTGCAGACGAATGCAGCAGTTTGTAAATGAAATTGAGATCCTTACTAGGCT  
AAGGCACAACAATCTTGTTACCCTCTATGGTTGCACTTCAAGGCGAAGCCG

>M6-PGSC0003DMG403030532-(rev)M6RLKWAX-EGF\_1464

AGTACTCCTTGTCTATGAATATATTCCTAATGGAAGTCTTGCTGATCACCTCCATGGTAATAAAGCGAAG  
GATGGATCACTCACGTGGCTGATTCGCATGAACATTGCCATAGAAACTG

>M6-PGSC0003DMG403030532-(rev)M6RLKWAX-EGF\_1525

TAAAGCGAAGGATGGATCACTCACGTGGCTGATTCGCATGAACATTGCCATAGAAACTGCTGGTGCATT  
GGCTTATCTACATGCTTCTGATGTAATACACTGCGATGTCAAGACTAACA

>M6-PGSC0003DMG403030532-(rev)M6RLKWAX-EGF\_1586

GGTGCATTGGCTTATCTACATGCTTCTGATGTAATACACTGCGATGTCAAGACTAACAACATACTCCTTG  
ATCATAACTTTAGTGTTAAAGTTGCAGATTTTGGGATTTCAAGGCTCTTC

>M6-PGSC0003DMG403030532-(rev)M6RLKWAX-EGF\_1647

TACTCCTTGATCATAACTTTAGTGTTAAAGTTGCAGATTTTGGGATTTCAAGGCTCTTCCCAAATGATGTC  
TCTCATATTTCAACTGCACCCCGGGGAACCCCTGGCTATATTGATCCAA

>M6-PGSC0003DMG403030532-(rev)M6RLKWAX-EGF\_1708

AAATGATGTCTCTCATATTTCAACTGCACCCCGGGGAACCCCTGGCTATATTGATCCAAAGTATCACGAA  
TGTTACCAGCTGACTAGTAAAAGTGATGTTTATAGCTTCGGGGTGGTCCT

>M6-PGSC0003DMG403030532-(rev)M6RLKWAX-EGF\_1830

TTGAGCTCATTTTCATCAATGCCAGCTGTGGATATGAATAGACATAGCCAAGAGATTAATTTGTCTAACTT  
TGCAATAACAAGATCGTAAAATGTGCATTTACGAGTTGATTGATCCAT

>M6-PGSC0003DMG403030532-(rev)M6RLKWAX-EGF\_1891  
GTCTAACTTTGCAATAAACAAGATCGTAAATGTGCATTTACGAGTTGATTGATCCATCCCTGGGGTTC  
GATTCAGATACCAAGATTTGGGAAATGACTACTTCAGTAGCAGAGCTGGC

>M6-PGSC0003DMG403030532-(rev)M6RLKWAX-EGF\_2013  
TTCTGTGCTTGCAGACAGATAGGGACATGAGGCCTACTATGGTTGAAGTTTTGGATACTCTAAACGAGA  
TTCAGACTAGTGAATTTGGCAATGAGAAGAGAACTGAGTCTAATCTCAATG

>M6-PGSC0003DMG403030532-(rev)M6RLKWAX-EGF\_2074  
AAACGAGATTCAGACTAGTGAATTTGGCAATGAGAAGAGAACTGAGTCTAATCTCAATGCCAATGAAGC  
TAAAATAGTAGCAGCTTCTCCTTTCCCTGAATCAGAAGATATGTCATCATT

>M6-PGSC0003DMG403030532-(rev)M6RLKWAX-EGF\_2135  
AATGAAGCTAAAATAGTAGCAGCTTCTCCTTTCCCTGAATCAGAAGATATGTCATCATTGAAACAAGTTA  
AATCACTGCCTTCTCCAAATTCTGTGACCGATAAATGGATTACTTGCTCT

>M6-PGSC0003DMG403030532-(rev)M6RLKWAX-EGF\_2195  
AAACAAGTTAAATCACTGCCTTCTCCAAATTCTGTGACCGATAAATGGATTACTTGCTCTGATATAACTAG  
AACAAAGTAGTTAAAATTTCTACACCCCATTTCTTTGTTATTGATGTAC

>M6-PGSC0003DMG403030532-(rev)M6RLKWAX-EGF\_244  
ACCATGTTGAGGCAACACAAGTGCCAGACTTTTAGCAAAAGTTTCTCCCTTCAAGACTCTCCTTCTATTTCT  
TTTCACTACCCCTACGCTTCACGACTTCTTCAAATGTAACAGCACCAGT

>M6-PGSC0003DMG403030532-(rev)M6RLKWAX-EGF\_305  
CTTCTATTTCTTTCACTACCCCTACGCTTCACGACTTCTTCAAATGTAACAGCACCAGTCGTAATGCCCCAA  
ACACTACCCAGAAGAAGAATGATCATTTTGTGGTTATAAAAATATACA

>M6-PGSC0003DMG403030532-(rev)M6RLKWAX-EGF\_366  
TAATGCCCCAAACTACCCAGAAGAAGAATGATCATTTTGTGGTTATAAAAATATACAATGGTTGTAAA  
GACTTTAGCATATACTACAAGCTTTCTGGAGACGATGATGAAGACATTTCG

>M6-PGSC0003DMG403030532-(rev)M6RLKWAX-EGF\_427  
GGTTGTAAAGACTTTAGCATATACTACAAGCTTTCTGGAGACGATGATGAAGACATTTCGAGCAGGCAAT  
CTTCTGCGAATTGTTCACTTATCAGATTGCCAATTGACACATTAGCATAT

>M6-PGSC0003DMG403030532-(rev)M6RLKWAX-EGF\_488  
CAGGCAATCTTCTGCGAATTGTTCACTTATCAGATTGCCAATTGACACATTAGCATATGATAGAGATGT

GTTCAAATGTTAAGTCACGTTTTCTGGTACAATGGGAACTGTCTTACG

>M6-PGSC0003DMG403030532-(rev)M6RLKWAX-EGF\_61

AATCTTACTGACTTGAGCTTTCCTTCTCTTTCCTCACGATCTGATTGCGGACTAATGACCATGTTTGGT  
TGTGATACTAAACCATATCCAAGAATCCAGCTGCTTCTGGAGGAGAT

>M6-PGSC0003DMG403030532-(rev)M6RLKWAX-EGF\_610

TGTTACCAATGTCACCAAGGTGGAGGTCATTGCCAGACTGATAAAACCAACAAATTTCAATGTACAGAT  
GCTCAAGGTCTAGTGCATATTTCTTACCCTTCTTATTTTCATCTCACATA

>M6-PGSC0003DMG403030532-(rev)M6RLKWAX-EGF\_671

GTACAGATGCTCAAGGTCTAGTGCATATTTCTTACCCTTCTTATTTTCATCTCACATATCGTTAATATTCA  
TAGTATTTTCGCTCTTATTTTAGATGCAAAAACAACAAAAGCAGGTT

>M6-PGSC0003DMG403030532-(rev)M6RLKWAX-EGF\_732

GTTAATATTCATAGTATTTTCGCTCTTATTTTAGATGCAAAAACAACAAAAGCAGGTTGGGAGTGACTC  
TGGGAGCAGGTGATTTAATATCCATTAAGTGCAGAGTTCTTTCCTATTTT

>M6-PGSC0003DMG403030532-(rev)M6RLKWAX-EGF\_793

GAGTGACTCTGGGAGCAGGTGATTTAATATCCATTAAGTGCAGAGTTCTTTCCTATTTTCAGAATTTACAT  
GCATATCATTTAACTTTATCAGATAATGACAGAATGATAGGAAAAGACA

>M6-PGSC0003DMG403030532-(rev)M6RLKWAX-EGF\_854

AATTTACATGCATATCATTTAACTTTATCAGATAATGACAGAATGATAGGAAAAGACAAGTACCTTAGG  
TTATGTAAATGTATGGATACTGGAGTTGAGGGACACTGACTTCTCTT

>M6-PGSC0003DMG403030532-(rev)M6RLKWAX-EGF\_915

TACCTTAGGTTATGTAAATGTATGGATACTGGAGTTGAGGGACACTGACTTCTCTTTCAGTTTTTGGT  
GGAGTAGGATTGGTGATGATAACTTTAGTTGTCTCCTTTATCTGGTGTT

>M6-PGSC0003DMG403030532-(rev)M6RLKWAX-EGF\_976

AGTTTTTGGTGGAGTAGGATTGGTGATGATAACTTTAGTTGTCTCCTTTATCTGGTGTTACAAGGAGAAG  
AAATTTAGTCCATCCCGCTTCTCACAACGAAGAAATTCTCGGACATTTT

>M6-PGSC0003DMG404010943M6LRR-RLP\_1024

CCAGGTTAAGGGTATTGGAAATTGGTCCTTCCAGAGATGGTGGATTTTGAAGCATTCCAATTGATTTT  
TAATGGCATTGAGCAGCTGTTGTCCCTTCGTAATCTGGCGGTGACTGGAC

>M6-PGSC0003DMG404010943M6LRR-RLP\_1088

GATTTTAAATGGCATTGAGCAGCTGTTGTCCCTTCGTAATCTGGCGGTGACTGGACTGGGCACTGGAAT  
TCTGTGCCGTATCAGTTTATGCAACTCCCTCCCTAATACATATCCATAT

>M6-PGSC0003DMG404010943M6LRR-RLP\_1152

TGGAATTCTGTGCCGTATCAGTTTATGCAACTCCCTCCCTAATACATATCCATATATGTGATTCGGAAT  
CGAGGCTCTTCCTCATAGACTTGACAACCTTATTTCTCTTGAAACATTA

>M6-PGSC0003DMG404010943M6LRR-RLP\_1216

TCGGAATCGAGGCTCTTCCTCATAGACTTGACAACCTTATTTCTCTTGAAACATTACATCTAGTGAGGTGC  
AAACGGCTACAACATCTGGACTTCTCAGATGCCATGCCCAAATTACGGT

>M6-PGSC0003DMG404010943M6LRR-RLP\_128

GGACTATTTAGGGACTAAATTTCTTCATGGTTCCGTGAAAATTTGCTACCAAATTTGGTCAAGTTGAAA  
TTAAGTGGTTGCAAAGATGCAAAGAAATTCATCACTTGGTCAACTGAA

>M6-PGSC0003DMG404010943M6LRR-RLP\_192

TTGAAATTAAGTGGTTGCAAAGATGCAAAGAAATTCATCACTTGGTCAACTGAAATTTGCTTCGGCATC  
TTGAGCTGTTAGGATTCCACGAGGTGGAAAGCATCGGGCCTAGATTTTAT

>M6-PGSC0003DMG404010943M6LRR-RLP\_256

GGCATCTTGAGCTGTTAGGATTCCACGAGGTGGAAAGCATCGGGCCTAGATTTTATGGTATTGATGGTA  
ACAATAAGGGATGAAGCAGCAATATCCAAGTGTCCCGTCACTGAAAGAAC

>M6-PGSC0003DMG404010943M6LRR-RLP\_320

TGGTAACAATAAGGGATGAAGCAGCAATATCCAAGTGTCCCGTCACTGAAAGAACTAATATTGGAGGA  
TATGTCTAGTCTTATTGAGTGGAGGGGAGATGAAATTTGGGGTAAGATTGTT

>M6-PGSC0003DMG404010943M6LRR-RLP\_384

GAGGATATGTCTAGTCTTATTGAGTGGAGGGGAGATGAAATTTGGGGTAAGATTGTTTCCTGAGCTTGAG  
AAGTTGAGCATTAGTAACTGTCCATTGTTAAAAAGTACTCCAAGTCAATTT

>M6-PGSC0003DMG404010943M6LRR-RLP\_448

TTGAGAAGTTGAGCATTAGTAACTGTCCATTGTTAAAAAGTACTCCAAGTCAATTTGAAATCCTCCATAA  
ATTAAGTATTGAAGGAGTTGACAGTCAAATGCCATTGTTGAACTTGTGCA

>M6-PGSC0003DMG404010943M6LRR-RLP\_576

ACATCTCTCGTAAAGCTTAGTATCATTGGTGTGAAAGAGCTCACTTGTTTTCCAGATGAGATGCTACGCA  
ACAACGTTTCTCTTCAAACCTAACAGTCTCAGGCTGCAGAGAGTTTCGT

>M6-PGSC0003DMG404010943M6LRR-RLP\_64

CCAATGATGAGTATGTCTTGGATGGTCTTCAACCTCATCTAACTTGAAAACCTTAGCAGTAGTGGACTA  
TTTAGGGACTAAATTCCTTCATGGTTCCGTGAAAATTTGCTACCAAATT

>M6-PGSC0003DMG404010943M6LRR-RLP\_640

TACGCAACAACGTTTCTCTTCAAACCTAACAGTCTCAGGCTGCAGAGAGTTTCGTAACCTGCCACAAAG  
CTTGTAACAATCTCCATTCTCTCAAGAGCTTACAAATACACTTCTGCCCCA

>M6-PGSC0003DMG404010943M6LRR-RLP\_768

TCTTTTCTGTTCTAGTGGAGAGAATTATTTGACTTCTCTCAAACCTTGAGTTATGGGATTGTGATGG  
ATTGGCCAGTTTACCAAGTGAATGCTAGAGCATTGTCGGTCTCTGGGA

>M6-PGSC0003DMG404010943M6LRR-RLP\_832

GTGATGGATTGGCCAGTTTACCAAGTGAATGCTAGAGCATTGTCGGTCTCTGGGATTTTTGATGGTCA  
GCTGCTGTAACAACCTTAATTCCTTGCCCTTACATGTGTGGGAAATGCCTT

>M6-PGSC0003DMG404010943M6LRR-RLP\_896

GGTCAGCTGCTGTAACAACCTTAATTCCTTGCCCTTACATGTGTGGGAAATGCCTTCACTTTTTTATTGG  
GTTTATCAGATTGTCCCAAATTCATTAGTATACCCGCAGGGGGCCTTCA

>M6-PGSC0003DMG404010943M6LRR-RLP\_960

TATTTGGGTTTATCAGATTGTCCCAAATTCATTAGTATACCCGCAGGGGGCCTTACCAGTCTCACCAGTT  
AAGGGTATTGGAAATTGGTCCTTCCAGAGATGGTGGATTTTGAAGCA

>MCD360-1\_0

ATGGTCATGAGTCTGTTTTCTTTTATTCAATTTCTATGTTTTGTGTTTTAATAAGTGGATGCTTTTCTTCAT  
CCTTTGATCATCATCTTTGCTCTCCCACTGAAGCTTCCTCTTTGCTT

>MCD360-1\_1098

TTAATGGAGTTGGATATTTTATCCACAGGCATCTCTGGTGAGGTGCCTGATTCAATTGGCACCTTCAGTT  
CCTTGAATATCTTGAACCTTGCAAGGATGCCAATTCTCTGGTTCCATTCTT

>MCD360-1\_1159

CCTTCAGTTCCTTGAATATCTTGAACCTTGCAAGGATGCCAATTCTCTGGTTCCATTCTGATTCCATTAGCA  
ACCTAACACAAATTAGGGAGTTGATTTTATATCATAATCATTCTACTG

>MCD360-1\_1220

TTCCATTAGCAACCTAACACAAATTAGGGAGTTGATTTTATATCATAATCATTCTACTGGCCATATTCCTTC

CACAATCTCTAAATTGAAGCACCTCACACGTTTGGATCTTTCAATTAA

>MCD360-1\_1281

CATATTCCTTCCACAATCTCTAAATTGAAGCACCTCACACGTTTGGATCTTTCAATTA  
ACTACTTTTCAGGT  
GAAATTCCTGATGTTTTCTCAAACCTCCAAGAGCTACGTACTTTACAT

>MCD360-1\_1342

ACTTTTCAGGTGAAATTCCTGATGTTTTCTCAAACCTCCAAGAGCTACGTACTTTACATCTTTCTTATAACA  
GCTTCATCGGTTTCGTTCCCGCTTCAATTTTAAGTTTGACACATCTTG

>MCD360-1\_1769

AAATAACATCACCATTGATGAGGGAATGAATATCACCTTTCTTAGCCTATCATCTTTATTCTTATCATCTTG  
TCAACTGAAGGATTTCCACACTTCTTGAGAAATATAAAGACACTTCG

>MCD360-1\_1830

TTATCATCTTGTCAACTGAAGGATTTCCACACTTCTTGAGAAATATAAAGACACTTCGGTACTTGGATAT  
TTCTAACAAATAAGATTTGTGGTCAAATCCCTAACTGGTTTAGCGGCATG

>MCD360-1\_2013

TTTCGTTACGATAACCTACAGTATCTTGATCTGAAATTTAACTACCTTCAGGGTCCACTAGCTTTATTCATT  
TGTAACATGAGGAACTTATCTTATTAGATTTATCACACA  
ACTACTTC

>MCD360-1\_2074

CTTTATTCATTTGTAACATGAGGAACTTATCTTATTAGATTTATCACACA  
ACTACTTCAGTGACTCAGTTC  
CACATTGCTTGGGAAGCATGCCTAATCTAAGGGTGTGGACTTAAGAA

>MCD360-1\_2135

TGACTCAGTTCCACATTGCTTGGGAAGCATGCCTAATCTAAGGGTGTGGACTTAAGAAGGAACAATTC  
ACAGGGAGTCTTCCCCATTATGTGCACAGAGCACTTCATTGAGTACCAT

>MCD360-1\_244

TATTAACGGACATGTTATCGGGTTAGACCTTAGCTGCAGTCAGCTTCGTGGAAGTATTCATCCCAATAG  
CAGCCTCTCCA  
ACTTCATCATCTCCAAACAGTAAACCTTGCTTACAATA

>MCD360-1\_2440

GTCATACTAAGTTTTGCTTTCCCAAGTTGCGAATTTTTGATCTTTCTCGTAATGATTT  
CAGTGGCTCACTTC  
CTGCAAAAGTTTTTCGAACTTCAAGGCAATGATAAAATTAGATGGCG

>MCD360-1\_2501

TGGCTCACTTCTGCAAAAGTTTTTCGAACTTCAAGGCAATGATAAAATTAGATGGCGAAGACACAGG  
AAATATCAAGTACATGGAATCGATGTGCGAATTTGCCATTTGTCAGATCGTA

>MCD360-1\_2562

GACACAGGAAATATCAAGTACATGGAATCGATGTGCGAATTTGCCATTTGTCAGATCGTATGAGGATTCA  
GTGAGTTTGGTAATCAAAGGGCAGGATATTGAGCTACAAAGAATCAGCACA

>MCD360-1\_2745

GATCTCAGCTCACTTTGGCTACTCAATTTATCCCATAACAATCTCCTAGGTCATATACCAATGGAATTGGG  
GCAATTGAATACGCTTGAAGCTTTAGATCTCTCCTGGAATTGGCTCACT

>MCD360-1\_2867

AAAGATTCCGCAGGAATTGACAAGAATGAACTTTCTTGCCGTCTTAAACCTCTCTCAAATCATCTCGTC  
GGACCAATTCTCAAGGTCCACAATTCAACACATTTGAAAATGACTCGTA

>MCD360-1\_2989

GTGGCAACCTTGATTTATGTGGTCCTCCTTTATCAAAGCAATGTGAAACTAGTGATTCATCGCATGTTCCCT  
CAACAATTGGAGTCCGAAGAAGAAGGCGAGTCATATTTTTTTAGTGGAT

>MCD360-1\_305

TCCCAATAGCAGCCTCTTCCAACCTTCATCATCTCCAAACAGTAAACCTTGCTTACAATAACTTTTCAACTTC  
TTCAATCTCACATAACATTGGCCGATGGAGAAATTTGAGGCATCTCAA

>MCD360-1\_366

TTTTCAACTTCTTCAATCTCACATAACATTGGCCGATGGAGAAATTTGAGGCATCTCAACCTTTCTAATTCT  
TTCTTTAGTGGGAAAATCCCAACAGAAATCTCATTCTTTCCAATTTG

>MCD360-1\_488

TTCACTTGATCTTTCTTCTTATGGATTACAACCTTGATGAGAGAACATTTGAAACAATGCTTCACAACCT  
TACAAATCTGGAGGTACTAGCTCTTTCTTGGCAACATCTCATCACC

>MCD360-1\_61

GCTTTTCTTCATCCTTTGATCATCATCTTTGCTCTCCCACTGAAGCTTCCTCTTTGCTTCAGTTAAGCAATC  
CTTTCAAATATCTGATTACTCTACTCTTAAGTGTGATACTTCTTTCC

>MCD360-1\_610

TACCTGTAAGTATTCATCCCAATAGCAGCCTCTCCAGCTTCATCATCTCCACACACTAAACCTTGTTAACA  
ATTTCTTTTATCCTTCTTCAATCCCAATGGCATTGGCCGATTGAGGA



>MCD360-1\_671

CCTTGTTAAACAATTTCTTTTATCCTTCTTCAATCCCAAATGGCATTGGCCGATTGAGGAATTTGAGGCATC  
TAAAACTCTATGGCTTTCAAGGGAAAATCCCAACAGAAATCTCATACT

>MCD360-1\_732

TTGAGGCATCTAAAACTCTATGGCTTTCAAGGGAAAATCCCAACAGAAATCTCATACTTTCCAATTTGG  
TTTCACTTGATCTTTCTTATAGTTATGAAAGATTACAACTTGATGAGAGA

>MCD360-1\_793

CCAATTTGGTTTCACTTGATCTTTCTTATAGTTATGAAAGATTACAACTTGATGAGAGAACATTTGAAGCA  
ATGTTTCAGAACTTGACAAATCTGGAGCTACTTTCTCTCTATGGTGTCA

>MCD360-1\_915

ATCTCATCTCAGATACCTGTGAATATTTCTTCTTCTTAAGGTACCTGGATCTTGGTTATACTAATCTGCGA  
GGTGTTCACAGAGAACTTTTTCTTCTGCCAACTTGGAATACTC

>MCD360-1\_976

CTAATCTGCGAGGTGTTCTCACAGAGAACTTTTTCTTCTGCCAACTTGGAATACTCAAATTGAGTGG  
GAATGATCTTGTCAAAGGAGTTTTTCCAAGATCCACTGGAGCAACTC

>NbLRK1\_0

ATGAAGTCAATTCCTACATATAGCAACATTCTTGTATGGTTCATACTATTATTCTGTTCTTGCAGTAGTAAT  
AAGTCAATATTTGCTATAACTGAGTTTGACTTTGGAACACTAACTCTG

>NbLRK1\_1054

TCAAGAAAGTGAAAAATTCTGAATTTTTGGCATCTGATGTTATCAAATGCCTAAGGAGTTTAGCTATAA  
AGAGCTTAAATTGGCTACAAAAGCCTTTGATTCGACGAGGATTATAGGCC

>NbLRK1\_1116

AGCTATAAAGAGCTTAAATTGGCTACAAAAGCCTTTGATTCGACGAGGATTATAGGCCACGGTGCATTT  
GGGACAGTTTACAAGGGCATTATCGGACAATGGTGGCATTGTGGCAGTG

>NbLRK1\_1178

TGCATTTGGGACAGTTTACAAGGGCATTATCGGACAATGGTGGCATTGTGGCAGTGAAGAGATGTAG  
TCATAATGGACAGGGGAAAGCGGAGTTCTTATCTGAATTATCTATAATTGG

>NbLRK1\_124

ATTTGAAGCTTCTTGGAGATGCACATTTGGGTGACAACAACAGTGTTCAGTTAACACGTGATCTTGCCGT

GCCAAATCCGGTGCCGGAAAAGCTTTATATTCAAAGCCAGTAAGATTCC

>NbLRK1\_1240

GATGTAGTCATAATGGACAGGGGAAAGCGGAGTTCTTATCTGAATTATCTATAATTGGAACACTTAGGC  
ACAGAAATCTTGTTAGACTTCAAGGATGGTGCCATGAGAAAGGTGAAATTT

>NbLRK1\_1302

CTTAGGCACAGAAATCTTGTTAGACTTCAAGGATGGTGCCATGAGAAAGGTGAAATTTTGTAGTCTAT  
GATCTTATGCCTAATGGGAGTCTTGATAAGGCATTATTTGAATCAAGAATG

>NbLRK1\_1364

AGTCTATGATCTTATGCCTAATGGGAGTCTTGATAAGGCATTATTTGAATCAAGAATGATTCTACCTGG  
CTACATAGGAGGAAAATTTTGCTAGGTGTTGCTTCAGCCTTGGCATATTT

>NbLRK1\_1426

TACCTTGGCTACATAGGAGGAAAATTTTGCTAGGTGTTGCTTCAGCCTTGGCATATTTACATCAAGAATG  
TGAAAACCAGGTGATTCACAGGGATATAAAGAGTAGTAACATTATGTTGG

>NbLRK1\_1488

CAAGAATGTGAAAACCAGGTGATTCACAGGGATATAAAGAGTAGTAACATTATGTTGGATGAAGGGTT  
CAATGCAAGATTAGGTGATTTTGGATTAGCAAGACAAGTTGAACATGACAAG

>NbLRK1\_1550

AGGGTTCAATGCAAGATTAGGTGATTTTGGATTAGCAAGACAAGTTGAACATGACAAGTCCCCCGATGC  
AACGGTTGCAGCCGGGACAATGGGCTACTTGGCTCCTGAATACTTGTTAAC

>NbLRK1\_1612

CCGATGCAACGGTTGCAGCCGGGACAATGGGCTACTTGGCTCCTGAATACTTGTTAACCGGAAGAGCAA  
CCGAAAAAACTGATGTTTTTAGCTATGGAGCAGTGGTTCTTGAAGTGGCAA

>NbLRK1\_1674

AGAGCAACCGAAAAAACTGATGTTTTTAGCTATGGAGCAGTGGTTCTTGAAGTGGCAAGTGGGAAGGAG  
GCCAATTGAGAGGGAAACAACAAGAGTTGAGAAAGTTGGAGTGAATAGCAAC

>NbLRK1\_1736

AAGGAGGCCAATTGAGAGGGAAACAACAAGAGTTGAGAAAGTTGGAGTGAATAGCAACTTAGTTGAAT  
GGGTTTGGGGATTGCATAGAGAAGGGAATTTGCTAATGGCAGCTGATTCAAG

>NbLRK1\_1798

TTGAATGGGTTTGGGGATTGCATAGAGAAGGGAATTTGCTAATGGCAGCTGATTCAAGACTTTATGGTG  
AGTTTGATGAAGGAGAAATGAGAAGGGTACTAATGGTTGGATTAGCTTGTT

>NbLRK1\_186

CTTGCCGTGCCAAATCCGGTGCCGAAAAGCTTTATATTCAAAGCCAGTAAGATTCCGGCAGCCGGGT  
CTTGATTTCCAGCGAGTTTCTCTACATTCTTTTCATTTTCAGTACTAAT

>NbLRK1\_1860

TATGGTGAGTTTGATGAAGGAGAAATGAGAAGGGTACTAATGGTTGGATTAGCTTGTTCAACCTGAC  
CCTATGGTTAGACCAACAATGAGAAGTGTGGTCCAAATGCTAGTAGGTGAA

>NbLRK1\_1922

ACCTGACCCTATGGTTAGACCAACAATGAGAAGTGTGGTCCAAATGCTAGTAGGTGAAGCTGAAGTACC  
TATTGTCCCAAGAACTAAGCCTTCTATGAGTTTCAGCACATCACATCTTCT

>NbLRK1\_1984

AAGTACCTATTGTCCCAAGAACTAAGCCTTCTATGAGTTTCAGCACATCACATCTTCTAATGACTTTGCAA  
GATAGTGTCTGATTTGAATGGTATGATCACACTTCCACTTCATCAT

>NbLRK1\_2034

CATCTTCTAATGACTTTGCAAGATAGTGTCTGATTTGAATGGTATGATCACACTTCCACTTCATCATCT  
GAAAACAGTTTCACTGGTGTGCCCATGGGATGATGGACTTGGTCTAA

>NbLRK1\_248

GCCGGTCTTGATTTCCAGCGAGTTTCTCTACATTCTTTTCATTTTCAGTACTAATTTGAACCCATCGTC  
TATTGGTGGCGGTCTTGCTTTTGTACTCACTCCTAATGATGAGTCAGT

>NbLRK1\_310

ACCCATCGTCTATTGGTGGCGGTCTTGCTTTTGTACTCACTCCTAATGATGAGTCAGTAGGTGATGCTGG  
TGGGTATATGGGAATCTTGATTCTAAAGGCACACAAAGTGGTACAATTT

>NbLRK1\_372

GATGCTGGTGGGTATATGGGAATCTTGATTCTAAAGGCACACAAAGTGGTACAATTTTAGTTGAATTT  
GACACCCTTATGGATGTTGAGTTTAAAGATATTAATGGAAATCATGTTGGT

>NbLRK1\_434

TGAATTTGACACCCTTATGGATGTTGAGTTTAAAGATATTAATGGAAATCATGTTGGTTTGGATCTGAAT  
TCAATGGTTTCAACTCAAGTTGGTATTAGATTCTATTGGTGTGATCT

>NbLRK1\_496

ATCTGAATTC AATGGTTTCAACTCAAGTTGGTGATTAGATTCTATTGGTGTTGATCTCAAGAGTGGTGA  
TATAGTCAATTCTTGGATTGAATATTCTGGTTCTACTGGACAGTTGAATG

>NbLRK1\_558

AGTGGTGATATAGTCAATTCTTGGATTGAATATTCTGGTTCTACTGGACAGTTGAATGTGTTTGTATCAT  
ACTCTAATTTAAAGCCAAAGGAACCATTTTTATCTGTTGTTCTGAATATT

>NbLRK1\_62

CAGTAGTAATAAGTCAATATTTGCTATAACTGAGTTTGACTTTGGAACACTAACTCTGAGTAATTTGAAG  
CTTCTTGGAGATGCACATTTGGGTGACAACAACAGTGTTTCAGTTAACACG

>NbLRK1\_620

TGTATCATACTCTAATTTAAAGCCAAAGGAACCATTTTTATCTGTTGTTCTGAATATTGCTGAGTATGTAA  
ATGATTCATGTTTGTGGGTTTTCTGGTTCAACTCAAGGGAGTACTGA

>NbLRK1\_682

AGTATGTAAATGATTCATGTTTGTGGGTTTTCTGGTTCAACTCAAGGGAGTACTGAGATTCATAGCAT  
TGAGTGGTGGAGTTTTAGTTCATCATTTGATGCAAGTCCTAAGTCGGCGG

>NbLRK1\_744

CATAGCATTGAGTGGTGGAGTTTTAGTTCATCATTTGATGCAAGTCCTAAGTCGGCGGCAGCGGCTGCG  
CCACCGCCACCAACGGCTAGTTTGATGAACCCAACGGCGGATTCCGTCATG

>NbLRK1\_806

GGCTGCGCCACCGCCACCAACGGCTAGTTTGATGAACCCAACGGCGGATTCCGTCATGTCGCGGCCGCC  
TTCTATGGCTCCTCAGAGTCTAATAGTAGTGCAAGTATAATGCAAGATAA

>NbLRK1\_868

GGCCGCTTCTATGGCTCCTCAGAGTCTAATAGTAGTGCAAGTATAATGCAAGATAAGAGCAGTGGGA  
AATGTCATAGCAATTTTTGTAAACAAGGTCTGGAGCTGTTGTTGGGGTGG

>NbLRK1\_930

AGTGGGAAATGTCATAGCAATTTTTGTAAACAAGGTCTGGAGCTGTTGTTGGGGTGGTAACTGCTAGT  
GCATTTTTTCTTGCAATTTGCTACATTAGTACTTATTTGGTTATACACCAA

>NbLRK1\_992

TGCTAGTGCATTTTTTCTTGCAATTTGCTACATTAGTACTTATTTGGTTATACACCAAAAAGTTCAAGAAAG

TGAAAAATTCTGAATTTTTGGCATCTGATGTTATCAAAATGCCTAAGGA

>NbRLK\_0

ATGATTGCAGAACAAAGACTACATATTACTGTCCTCCTCACTTATTTCTCTTCTGTTTCGTCTCAGCTTGCT

ATATCCCAAATTTCTGGAACGTAAACGCCAGTCTTTTGAATTCCACT

>NbRLK\_1037

TTGTGATTCTCCACAGTATCATGGTCTTGTAGAGCTCAAGAATACAGCATATTTTGCATTTTCAGTTCAGTC

ATGAACCAAGTTCGAGTATATTTTGGCCAGAGGGGAAAAAGTTGGAAGA

>NbRLK\_1098

CAGTTCAGTCATGAACCAAGTTCGAGTATATTTTGGCCAGAGGGGAAAAAGTTGGAAGACTGCAAAAT

GGCCTGTCTCAGTAACTGTTCTTGCAAAGTTGCAGCTTTTCAAATGATTTG

>NbRLK\_1159

GCAAAATGGCCTGTCTCAGTAACTGTTCTTGCAAAGTTGCAGCTTTTCAAATGATTTGGGTACAGATCC

AAGAGGGAGTTGTTTGTACTGAATGAAGTCTTCTCTCTCGCAGACAATG

>NbRLK\_122

CGGACTTTCCACTTTCTGGACAAACAGGCCGACACTTTTAGTTAATTCCACCACCGACTTCTCTCGTTTGG

CACCCATACTCCTGCAAAGAAATGCCAGTCCACGATTCCTCTGTGGCTT

>NbRLK\_1220

TACAGATCCAAGAGGGAGTTGTTTGTACTGAATGAAGTCTTCTCTCTCGCAGACAATGAGGACGGAAT

GGACAAGAGAGTATTTCTTAAGGTGCAGAATTCCTCAAAGGCACAGAATCA

>NbRLK\_1281

GACGGAATGGACAAGAGAGTATTTCTTAAGGTGCAGAATTCCTCAAAGGCACAGAATCAGTCTGCAACC

ATTTTTGGAGGACGGAAATCAAGACCTTATAAAGTGATAATAGGATCTTCT

>NbRLK\_1342

CTGCAACCATTTTTGGAGGACGGAAATCAAGACCTTATAAAGTGATAATAGGATCTTCTCTTTCAGCATT

GTTTCGGTATCATTTTGAGTATCACTACTTGCTTTGTTATTTTCAAAAAGA

>NbRLK\_1403

TTCAGCATTGTTTCGGTATCATTTTGAGTATCACTACTTGCTTTGTTATTTTCAAAAAGAGGACGCATAAGT

CCCACAAGGCTGGGGATTTTCTGGATCTAGAACCAATCTTACCTGGAAT

>NbRLK\_1464

ACGCATAAGTCCCACAAGGCTGGGGATTTTCTGGATCTAGAACCAATCTTACCTGGAATGCTAACTCGAT  
TCTGTTACAATGAGTTGAAAATAATCACAAAAGATTTTCAGCACAAAAGCTT

>NbRLK\_1525

TAACTCGATTCTGTTACAATGAGTTGAAAATAATCACAAAAGATTTTCAGCACAAAAGCTTGGGGAAGGAG  
GATTTGGCTCTGTATATGAAGGAACACTGAGTAATGGAACCAAAAATAGTTG

>NbRLK\_1586

GGAAGGAGGATTTGGCTCTGTATATGAAGGAACACTGAGTAATGGAACCAAAAATAGTTGTGAAGCATC  
TGGATGGTGTAGGTCAAGTAAAGGATACATTCTTAACTGAAGTAAACACAGT

>NbRLK\_1647

AAGCATCTGGATGGTGTAGGTCAAGTAAAGGATACATTCTTAACTGAAGTAAACACAGTTGGTGGCATT  
CACCATGTCAATTTGGTAAAACACTATTGGATTTTGCGCCGAAAAAAGCTAC

>NbRLK\_1708

GTGGCATTACCATGTCAATTTGGTAAAACACTATTGGATTTTGCGCCGAAAAAAGCTACAGGCTTCTAAT  
CTACGAGTACATGGTAAATGGATCATTGGATAGGTGGATTTACCATGAAA

>NbRLK\_1769

GCTTCTAATCTACGAGTACATGGTAAATGGATCATTGGATAGGTGGATTTACCATGAAAATGGGCTTAC  
ATGGCTTACAAGGCAAGGGATAATATCGGATATTGCTAAAGGGTTAGCTTA

>NbRLK\_183

TCTCGTTTGGCACCCATACTCCTGCAAAGAAATGCCAGTCCACGATTCCTCTGTGGCTTCTACTGCAATTA  
CAATGCTACAAAATGCATTTTTGGTGCCTCTTGTCCAGAACAGATCC

>NbRLK\_1830

GGGCTTACATGGCTTACAAGGCAAGGGATAATATCGGATATTGCTAAAGGGTTAGCTTATTTACATGAG  
GATTGCAGCCAGAAGATAATTCATTTGGACATCAACCCACAAAATATCCTT

>NbRLK\_1891

TACATGAGGATTGCAGCCAGAAGATAATTCATTTGGACATCAACCCACAAAATATCCTTCTGGATCAACA  
TCTCAATGTTAAGATATCTGATTTTGGGTTGTCAAACTAATCGAGAAAG

>NbRLK\_1952

GGATCAACATCTCAATGTTAAGATATCTGATTTTGGGTTGTCAAACTAATCGAGAAAGACAAAAGCAA  
AGTGGTAACTAGAATGAGAGGAACACCAGGCTATCTTGCTCCTGAATGGTT

>NbRLK\_2013

AAAAGCAAAGTGGTAACTAGAAATGAGAGGAACACCAGGCTATCTTGCTCCTGAATGGTTGAGCTCGATA  
ATCACTGAGAAAAGTTGATGTGTATGCGTTTGGAAATTGTGCTCTTGGAAATT

>NbRLK\_2135

CTGTGGGCGAAAGAATTTGGATTGGTCCCAGGCTGATGAAGAAGATGTCCATTTGCTTAGAGTTTTTAG  
GAGAAAAGCGGAAGAAGAGCAGCTCATGGATATGGTTGACAAAAACAATGA

>NbRLK\_2196

GTTTTTAGGAGAAAAGCGGAAGAAGAGCAGCTCATGGATATGGTTGACAAAAACAATGAGGGTATGCA  
GCTCCATAAAGAAGAAGTTATGGAAATGATGAGCATTGCTGCGTGGTGTCTT

>NbRLK\_2257

GTATGCAGCTCCATAAAGAAGAAGTTATGGAAATGATGAGCATTGCTGCGTGGTGTCTTCAGGGAGATT  
ACACCAAGAGGCCTTCAATGACATGGGTGGTTAAGGCACTGGAAGGTTTGG

>NbRLK\_2318

GGGAGATTACACCAAGAGGCCTTCAATGACATGGGTGGTTAAGGCACTGGAAGGTTTGGTATCTATCG  
AATCCAACCTGGATTACAATTTCAAAACGTACCTCTGGTTGGGGCAGACAA

>NbRLK\_2379

TCTATCGAATCCAACCTGGATTACAATTTCAAAACGTACCTCTGGTTGGGGCAGACAACCAACAGATGG  
AAGCCACTATCAGTACGAAATTGGCTTCAGTTTTATCTGGACCAAGGTAA

>NbRLK\_244

ACTGCAATTACAATGCTACAAAATGCATTTTTGGTGTCTCTTGTTCAGAACAGATCCGACATGCAGAA  
TGATGTGATAAATTTCCCTCAGTTAGTTTGGTCAGCTAACAGGAACCATC

>NbRLK\_305

CATGCAGAATGATGTGATAAATTTCCCTCAGTTAGTTTGGTCAGCTAACAGGAACCATCCAGTGAAAACC  
AATGCAACCTTGCAACTAAGACAAGATGGCAACTTGATCTTGGCAGACTC

>NbRLK\_366

GTGAAAACCAATGCAACCTTGCAACTAAGACAAGATGGCAACTTGATCTTGGCAGACTCTGATGGCACT  
CTCGTTTGGTCCACTAGTACTACTGGCAAATCCATTTAGGCTTAACTTG

>NbRLK\_427

ATGGCACTCTCGTTTGGTCCACTAGTACTACTGGCAAATCCATTTAGGCTTAACTTGACAGAAAGAGG

GAATCTCGCGCTCTTTGATAAGAGAAAACGCGTAATTTGGCAGTCTTTTG

>NbRLK\_488

AGAAAGAGGGAATCTCGCGCTCTTTGATAAGAGAAAACGCGTAATTTGGCAGTCTTTTGATCATCCAAC  
GGATTCTTTGTTTCCGGGGCAGAGTTTGGTTCGCGGGCAGAAGCTCATAGC

>NbRLK\_549

CATCCAACGGATTCTTTGTTTCCGGGGCAGAGTTTGGTTCGCGGGCAGAAGCTCATAGCAAGTGTTTCA  
GCATCCAATTGGAGTGAAGGTTTGCTTTCTTACTGTTCTCAATGGAAGC

>NbRLK\_61

CTCAGCTTGCTATATCCCAAATTTCTGGAACGTAAACGCCAGTCTTTTGAATTCCACTGCCGGACTTTCC  
ACTTTCTGGACAAACAGGCCGACACTTTTAGTTAATTCCACCACCGACT

>NbRLK\_610

GTGTTTCAGCATCCAATTGGAGTGAAGGTTTGCTTTCTTACTGTTCTCAATGGAAGCTGGGCCACTTA  
CATAGATTCTGACCCACCTCAGTTTTACTACACTTCAACTTATTCCTATA

>NbRLK\_671

GGCCACTTACATAGATTCTGACCCACCTCAGTTTTACTACACTTCAACTTATTCCTATAGTCCTTACTTCAG  
TTTTGACGGTCAAACCTTTGCTGCCTTACAATACCCTACTACATCGAA

>NbRLK\_732

CCTTACTTCAGTTTTGACGGTCAAACCTTTGCTGCCTTACAATACCCTACTACATCGAAAGCTCAATTCAT  
GAAGCTTGGGCCTGATGGACATTTAAGGGTATACCAATGGGACGAACCT

>NbRLK\_793

CTCAATTCATGAAGCTTGGGCCTGATGGACATTTAAGGGTATACCAATGGGACGAACCTGATTGGAAAG  
AGGCATCTGACATTTTGATGTCAGATGTAAGAACTATGGGTACCCAATGG

>NbRLK\_854

TTGGAAAGAGGCATCTGACATTTTGATGTCAGATGTAAGAACTATGGGTACCCAATGGTGTGTGGTAG  
ATATAGCATTTCACCAATAACGGGCAATGTACTTGTCCGCCAGAGGAAAA

>NbRLK\_915

TGTGGTAGATATAGCATTTCACCAATAACGGGCAATGTACTTGTCCGCCAGAGGAAAATTTATTCAGG  
CCATTTTCTGAGAGGAAACCAGATCTTGGATGCACAGAGCTGACATCTATT

>NbRLK\_976



TATTCAGGCCATTTTCTGAGAGGAAACCAGATCTTGGATGCACAGAGCTGACATCTATTTCTTGTGATTC  
TCCACAGTATCATGGTCTTGTAGAGCTCAAGAATACAGCATATTTTGCAT

>NsSOBIR1\_0

ATGGCCTTCACTGCTTCACAAATCCACTTCTTTTTCTTCTCCCTTTTCGCCTTTTACTGATTGCTGTTCAAG  
CAAGACTGAATCTTTATCCACGAGATCATGCTGCACTTTTGCTTGTC

>NsSOBIR1\_1054

GATGTGGAGAAGTTTATAGAGCTGAGTTACCAGGAAGTAATGGGAAGATTATAGCTATAAAGAAGATT  
ATACAACCCCAATGGATGCTGCAGAACTCACCGAGGAAGATACCAAGGCTT

>NsSOBIR1\_1116

AAGATTATAACAACCCCAATGGATGCTGCAGAACTCACCGAGGAAGATACCAAGGCTTTGAACAAGAAA  
ATGCGACAGGTAAAATCAGAAATTCAAATTCTTGGTCAAATCAGACACAGG

>NsSOBIR1\_1178

CAAGAAAATGCGACAGGTAAAATCAGAAATTCAAATTCTTGGTCAAATCAGACACAGGAATCTGCTTCC  
CTTACTGGCACATATGCCTAGGCCAGACTGCCATTACTTGGTATATGAATA

>NsSOBIR1\_124

AAGACCTGGGCATCCAAGGTCAACGCATTGCTCTACGCTGCAACTCTGCAACAATATCCTGTGAAAGGC  
GAAAGGCAAACAGAACACAATTGTTGAGAGTCACCCGTATTGACTTCAGAT

>NsSOBIR1\_1240

TGCTTCCCTTACTGGCACATATGCCTAGGCCAGACTGCCATTACTTGGTATATGAATATATGAAAAATGG  
GAGCTTACAAGATATCCTCCAGCAAGTCACAGAAGGGACAAGGGAATTAG

>NsSOBIR1\_1302

AAAAATGGGAGCTTACAAGATATCCTCCAGCAAGTCACAGAAGGGACAAGGGAATTAGATTGGTTGGG  
ACGACACCGAATTGCAGTAGGGATAGCTGCTGGACTTGAGTATCTCCATATA

>NsSOBIR1\_1364

GTTGGGACGACACCGAATTGCAGTAGGGATAGCTGCTGGACTTGAGTATCTCCATATAAACCACAGTCA  
ATGCATAATTCACAGAGATCTAAAGCCAGCAAATGTCCTTCTTGACGATGA

>NsSOBIR1\_1426

ACAGTCAATGCATAATTCACAGAGATCTAAAGCCAGCAAATGTCCTTCTTGACGATGATATGGAAGCTC  
GAATTGCTGATTTTGGACTTGCAAAAGCACTTCCAGATGCCCATACACATA

>NsSOBIR1\_1488

GAAGCTCGAATTGCTGATTTTGGACTTGCAAAAGCACTTCCAGATGCCCATACACATATTACGACTTCAA  
ATGTTGCAGGAACTGTGGGATATATAGCACCAGAATACCATCAGACACTG

>NsSOBIR1\_1550

GACTTCAAATGTTGCAGGAACTGTGGGATATATAGCACCAGAATACCATCAGACACTGAAGTTTACAGA  
TAAGTGTGATATATACAGCTTTGGTGTGGTGTGGCAGTGCTGGTTATAGG

>NsSOBIR1\_1612

TTACAGATAAGTGTGATATATACAGCTTTGGTGTGGTGTGGCAGTGCTGGTTATAGGAAAGCTTCCATC  
AGATGAATTTTTCCAGCACACGCCTGAGATGAGTTTAGTGAAGTGGCTGA

>NsSOBIR1\_1674

CTTCCATCAGATGAATTTTTCCAGCACACGCCTGAGATGAGTTTAGTGAAGTGGCTGAAAAATGTAATGA  
CTTCTGAGGATCCAAAAAGGGCAATTGATCCAAAGCTGATAGGAACTGGA

>NsSOBIR1\_1736

TGTAATGACTTCTGAGGATCCAAAAAGGGCAATTGATCCAAAGCTGATAGGAACTGGATTTGAGGAGC  
AAATGCTTTTGGTTCTCAAGATAGCTTGCTTTTGTACTCTGGAAAATCCAAA

>NsSOBIR1\_1791

GGATTTGAGGAGCAAATGCTTTTGGTTCTCAAGATAGCTTGCTTTTGTACTCTGGAAAATCCAAAGGAGA  
GGCCTAACAGTAAGGATGTTAGGTGTATGTTAACTCAGATCAAGCATTAA

>NsSOBIR1\_186

GAAAGGCGAAAGGCAAACAGAACACAATTGTTGAGAGTCACCCGTATTGACTTCAGATCCAATGGATTG  
ACTGGAACCTTTATCTCCTGCCATTGGAAAACCTTTCTGAGCTCAAAGAACTC

>NsSOBIR1\_248

TGGATTGACTGGAACCTTTATCTCCTGCCATTGGAAAACCTTTCTGAGCTCAAAGAACTCTCTCTTCCAAACA  
ACCAACTCTTTGACCAAATCCCAGTTCAGATTCTTGAATGCCGTAACT

>NsSOBIR1\_310

TTCCAAACAACCAACTCTTTGACCAAATCCCAGTTCAGATTCTTGAATGCCGTAACTGGAGGTCCTTGA  
CCTTGAAACAATCTGTTTTCTGGGAAAGTTCATCTGAATTATCATCTC

>NsSOBIR1\_372

GTCTTGACCTTGAAACAATCTGTTTTCTGGGAAAGTTCATCTGAATTATCATCTCTACTCCGCCTTCG

AATTCTTGATCTTTCTTCAAATGAGTTGTCTGGGAATCTTAACTTCTTG

>NsSOBIR1\_434

CCGCCTTCGAATTCTTGATCTTTCTTCAAATGAGTTGTCTGGGAATCTTAACTTCTTGAAGTATTTTCCCAA  
CTTAGAAAACTCTCTTTAGCTGATAACATGTTCACTGGAAAAATACC

>NsSOBIR1\_496

ATTTTCCCAACTTAGAAAACTCTCTTTAGCTGATAACATGTTCACTGGAAAAATACCCCTTCTTTGAAA  
TCTTTCAGAAATCTCCGTTTCCTTAATATTTTCAGGAAACAGTTTTCTTG

>NsSOBIR1\_558

TCTTTGAAATCTTTCAGAAATCTCCGTTTCCTTAATATTTTCAGGAAACAGTTTTCTTGAAGGTCCTGTGCCT  
GCTATGAGTCAAGTTGAGCACTTGTGAGCAGATTTGGATCGGAACACC

>NsSOBIR1\_62

TGCTGTTCAAGCAAGACTGAATCTTATCCACGAGATCATGCTGCACTTTTGCTTGTCCAAAAAGACCTG  
GGCATCCAAGGTCAACGCATTGCTCTACGCTGCAACTCTGCAACAATATC

>NsSOBIR1\_620

TCCTGTGCCTGCTATGAGTCAAGTTGAGCACTTGTGAGCAGATTTGGATCGGAACACCTTCGTTCCAAAA  
CGTTACATTCTTGCTGAAAATTCGACAAGCTCAAATCAGATATCAGCACT

>NsSOBIR1\_682

TTCCAAAACGTTACATTCTTGCTGAAAATTCGACAAGCTCAAATCAGATATCAGCACTGGCACCTAATTCC  
AATTCAGGAAATGCCCCAGCTCCAGCACCGAGTCATAGTGTGCTCCAA

>NsSOBIR1\_744

CCTAATTCCAATTCAGGAAATGCCCCAGCTCCAGCACCGAGTCATAGTGTGCTCCAATCCATAAAAAGTA  
ATAACAGGAAGAAAAGGAAAGTCAGAGCGTGGTTTCTTGTTTCTTTGCT

>NsSOBIR1\_806

TAAAAGTAATAACAGGAAGAAAAGGAAAGTCAGAGCGTGGTTTCTTGTTTCTTTGCTGGTTCTTTGCGC  
AGGAGCTATATCTGCGGTACTCTTATCAGTTCTCTTTAAGCTGGTAATGTT

>NsSOBIR1\_868

CTTTCGCAGGAGCTATATCTGCGGTACTCTTATCAGTTCTCTTTAAGCTGGTAATGTTTTTCGTCCGAAAG  
GGAAAGACTGATGGAACCTTAACAATATACAGTCCACTGATTAAGAAAG

>NsSOBIR1\_930

GTCCGAAAGGGAAAGACTGATGGAACCTTAAACAATATACAGTCCACTGATTAAGAAAGCCGAGGATTTG  
GCCTTCTTAGAGAAAGAAGATGGAGTAGCATCACTTGAAATGATTGGAAAA

>NsSOBIR1\_992

GGATTTGGCCTTCTTAGAGAAAGAAGATGGAGTAGCATCACTTGAAATGATTGGAAAAGGTGGATGTG  
GAGAAGTTTATAGAGCTGAGTTACCAGGAAGTAATGGGAAGATTATAGCTAT

>PGSC0003DMG400000179-(rev)G-LecRK\_1159

TTCGGGTGGCTGTCACCTCGAGAGTAATGAAGTTTGTGGTGAGAATGATAGTTTGAAGAGGTTGGAA  
TGGTTAAATATGATGGAGCAAGGGTAGTTTCAGTTTCTGGAAGTAGAAATGA

>PGSC0003DMG400000179-(rev)G-LecRK\_122

TCTATGGCATTGAGGTCAGTTCAGAAACAGCAAAATCAAGAATGCAAAATGTAAACATGACCCATGTA  
GCTGAACTCACTAAAGAGTCTTTTTCAGCTGAAAGAAAGTTGGGATCTTTA

>PGSC0003DMG400000179-(rev)G-LecRK\_1220

GTTGGAATGGTTAAATATGATGGAGCAAGGGTAGTTTCAGTTTCTGGAAGTAGAAATGAATGTGAGAG  
AGAGTGTGTTAGGTAATTGTTCTTGTATTGGTTTGTATCACAATGAGAAGACT

>PGSC0003DMG400000179-(rev)G-LecRK\_1281

GTGAGAGAGAGTGTGTTAGGTAATTGTTCTTGTATTGGTTTGTATCACAATGAGAAGACTAATTTGTGCAA  
GAGTTTATATGGGTCATTGCTCAATCTTAGGAATCTTACTTCCGATGGCA

>PGSC0003DMG400000179-(rev)G-LecRK\_2745

TAGTAGCAAAATGCTCATCATGGTATTTTGTAAATGTATCATGAATATAGAAAATCTTGTTTACTTTGCT  
TAAAAATTGTCACCTTTTTTTTTTTTTTGTAAATCCAAAGAACAAAAGCA

>PGSC0003DMG400000179-(rev)G-LecRK\_2806

TTACTTTGCTTAAAATTGTCACCTTTTTTTTTTTTTTGTAAATCCAAAGAACAAAAGCAAAACAAAACATAC  
ATTTCACTTTTGAAGGAATGTATGTTTGGATCAGAGGGTCGGGGCAGA

>PGSC0003DMG400000179-(rev)G-LecRK\_3050

GACTTGCATAGGGTTATAGGAGAGGGCTTCTAACCTTAGAATGAGACGGTAGTTGAAAATATCAAAAG  
TTATAATAACGGAATTATTTAATGGATATATTTTTATTGGTAGATATTTTG

>PGSC0003DMG400000179-(rev)G-LecRK\_3111

ATCAAAAGTTATAATAACGGAATTATTTAATGGATATATTTTTATTGGTAGATATTTTGTATAGTGAACCT  
AAAATGAGATATAAGATATAGGTGTATAATATAAAGCATTAAAACATGT

>PGSC0003DMG400000179-(rev)G-LecRK\_3172

TAGTGAACCTAAAATGAGATATAAGATATAGGTGTATAATATAAAGCATTAAAACATGTGTTTGGATTAT  
ACCAACCAAACATTATGCAAAATTTTATACTGAGATTATTTTTGTTACTA

>PGSC0003DMG400000179-(rev)G-LecRK\_3233

TTGGATTATACCAACCAAACATTATGCAAAATTTTATACTGAGATTATTTTTGTTACTATGGTAAACCAAA  
TGACTATAATAAGAATATACCCTCTAACCTAATTTAATGGGAGAGTTAA

>PGSC0003DMG400000179-(rev)G-LecRK\_3599

TTTTCCAAAATTAATTTTTTCAAAGAGGTGAAAGATTGAGGGGGTTAAAGAAAATGGTCAAAGGAGA  
GCAGAGGTAGACAACCTCTGCACTCTACCAAAGAAGTTTGTACCTTGGAA

>PGSC0003DMG400000179-(rev)G-LecRK\_4087

TTTATATTATGTTATATGGGCATTGAGTATTCATATAGCCGACCCCAACTTGCTTGAATAGCGGGATAG  
TTGTTGTTATTGTTGTGGTTGTTTGTAAAATGTAATACAACGAAGATATG

>PGSC0003DMG400000179-(rev)G-LecRK\_4148

GCGGGATAGTTGTTGTTATTGTTGTGGTTGTTTGTAAAATGTAATACAACGAAGATATGTTGGATTTTGT  
CACTCTTTGATGAGACTTATGACTATAGATCACAATAGTTTATTATGAA

>PGSC0003DMG400000179-(rev)G-LecRK\_5063

TTGTTCTGTTTTTCAAGCTTAGATTCTTCTTCTTCATTGTTTCAGTATGAACCTTAATGGATGGGAAGGCA  
TGTTGTTTCATTGGAATTAATGCAGCAATAAGGTATACTACTACTCTAC

>PGSC0003DMG400000179-(rev)G-LecRK\_5124

ATGGGAAGGCATGTTGTTTCATTGGAATTAATGCAGCAATAAGGTATACTACTACTCTACTAGTTATAGTA  
GGACATTGTCAGTGCACAAAAGTTAAACTCTAACGAATAGTGTAAGTCT

>PGSC0003DMG400000179-(rev)G-LecRK\_5429

AGAAAATGCAAAAAGCTGTTTCTAAGTTGGCATATCTTCTTGGTGTACAAATGCTGCTTAATAGCGTTCA  
GCCAGTTATATCAGGTACCAAATATGTGTGTTTCTTACTCAAACAATTC

>PGSC0003DMG400000179-(rev)G-LecRK\_5490

TAGCGTTCAGCCAGTTATATCAGGTACCAAATATGTGTGTTTCTTACTCAAACAATTCTCCACACACACA  
TCAGTTGATGTGCCAATCAAATAGTAACTATTTGGTACAAATCTATGTT

>PGSC0003DMG400000179-(rev)G-LecRK\_5551

CACACACACATCAGTTGATGTGCCAATCAAATAGTAACTATTTGGTACAAATCTATGTTGCTTGGACTCTT

CAAAAAATGTCAATGGGTGTGTGTCGGATTCTCGATTAGTAGAGTATTG

>PGSC0003DMG400000179-(rev)G-LecRK\_5673

GAAGAACCCGCACAATCAAAAGTGAAGAGTCCGCGCAACTTTAGGTACAAACTCAAAGAATAAATTAGA  
ATGTTTCTAATATTGAAGGTGTTGCTGTTGGAGGAGGATGGCAAGCACTAG

>PGSC0003DMG400000179-(rev)G-LecRK\_5734

AAATTAGAATGTTTCTAATATTGAAGGTGTTGCTGTTGGAGGAGGATGGCAAGCACTAGTGGCATAACAT  
TAATTTGGCTTGCTACTATGTCATTGGCCTCCCACTTGGGTTCTCTTGGG

>PGSC0003DMG400000179-(rev)G-LecRK\_5795

GCATACATTAATTTGGCTTGCTACTATGTCATTGGCCTCCCACTTGGGTTCTCTTGGGCTATAAAACAAG  
TTTGGGAGTTCAGGTAACAACATAAATCTTCTTGATTAATTTAGCTCC

>PGSC0003DMG400000179-(rev)G-LecRK\_5856

ATAAAACAAGTTTGGGAGTTCAGGTAACAACATAAATCTTCTTGATTAATTTAGCTCCGGTTTGACCAT  
AGATTAGTAGTTTAAAAACAAGGTATACTAAATTGTTCTTTTACTTGAT

>PGSC0003DMG400000179-(rev)G-LecRK\_61

AGCAAATTCATCACCATGATTCCACAGAAAGCAATTTTCATTTTACTTTTCATCACAATTTCTATGGCATT  
TGAGGTCAGTTCAGAAACAGCAAATCAAGAATGCAAATGTAAACAT

>PGSC0003DMG400000179-(rev)G-LecRK\_6222

CGTTTATGTATAATTTTGAACATTGTTTGTTCATGAAATTTGGTCAGTTTTCTAAAAATATTCAATTGAGCT  
AGTTTTTGGATGAAATTCACGCCTACTCACAAAACAAGTAAATGCA

>PGSC0003DMG400000179-(rev)G-LecRK\_6283

TCAATTGAGCTAGTTTTTGGATGAAATTCACGCCTACTCACAAAACAAGTAAATGCATATCCAAACAT  
AACTTCATATCCAAAACTATTGTTCAACACAACCTTCAAAAACTCACTT

>PGSC0003DMG400000179-(rev)G-LecRK\_6344

TCCAAACATAACTTCATATCCAAAACTATTGTTCAACACAACCTTCAAAAACTCACTTTTTCAAGTTTCAA  
CTAAATCTATGGTCAAACTCAAACGTTAGCTTAGTTTTAAG

>PGSC0003DMG400000179-(rev)G-LecRK\_6405

TCAAGTTTCAACTAAATCTATGGTCAAACTCAAACGTTAGCTTAGTTTTAAGTTTAAATTTAG  
CTGGAACTTTGATATAACGATAAAGTTATTTTGAATAAACTATTGATA

>PGSC0003DMG400000179-(rev)G-LecRK\_6466

TAAATTTTAGCTGGAACTTTGATATAACGATAAAGTTATTTGAAATAAACTATTGATATTTGTATCCGGA  
TAAATTGTCTACATTACACTAATTGTCTCTTCATTTTTTTTTTCTCTTT

>PGSC0003DMG400000179-(rev)G-LecRK\_6527

TGTATCCGGATAAATTGTCTACATTACACTAATTGTCTCTTCATTTTTTTTTTCTCTTTTCTGTAGGGAATAT  
GGATGGGCATGATTTTTGGAACTTTTTGC AAACAATAATTCTTTGT

>PGSC0003DMG400000179-(rev)G-LecRK\_6561

GTCTCTTCATTTTTTTTTTCTCTTTTCTGTAGGGAATATGGATGGGCATGATTTTTGGAACTTTTTGC AAA  
CAATAATTCTTTGTGTTATCGTATATAAAACCAATTGGAACGAAGAGG

>PGSC0003DMG400000295LRR-RLKs\_2379

CAATGCCTCAAGATCAACACCACATCTGGTCTTGAATGGCCTAGGAGGCTGCAAATCGCGATAGGAGC  
TGCCCGTGGTATTTGCTACATGCACCATGACTGCTCACCACCTATTATTCA

>PGSC0003DMG400000295LRR-RLKs\_2440

ATAGGAGCTGCCCGTGGTATTTGCTACATGCACCATGACTGCTCACCACCTATTATTCATCGCGATGTGA  
AGTCAAGCAACATCCTATTGGATTCCCAATTCAATGCAAAAATTGCAGAT

>PGSC0003DMG400000295LRR-RLKs\_2562

TGGCCTTGCCAGGATGTTGCTCAAGCCTGGAGATAACACAGTGACAGCAGTAGCTGGCTCTTTCGGATA  
CATTGCACCAGGTATAAGGCCATCAACTTATCTATAACATCATTATAAGTT

>PGSC0003DMG400000295LRR-RLKs\_2745

TCAAGGGGTCGTTTTGTTACGTAAGTACTAGCTATGCATGAGTTGTAACACGGGTTGTCTATGTAGAGATTGT  
TATGCAAGTAGTTATTCTTAGTACACTAATTCTCGCGTAACTCATATAAA

>PGSC0003DMG400000295LRR-RLKs\_2806

AGAGATTGTTATGCAAGTAGTTATTCTTAGTACACTAATTCTCGCGTAACTCATATAAATGCTAATATATT  
CATGATGGTATTTTCAGAGTATGCACGAAAACTAGAGTGACAGAGAAAA

>PGSC0003DMG400000295LRR-RLKs\_305

ATCTTAAAAATCTCACCTTTCTTGATTGAACCATAATTTTCATCCCTGGAACTTCCCTGATATCTACAATT  
GTTCAAATCTTGAATTCTTAGACCTTTCTTATAACTACATGGCTGGTA

>PGSC0003DMG400000295LRR-RLKs\_366

TATCTACAATTGTTCAAATCTTGAATTCTTAGACCTTTCTTATAACTACATGGCTGGTAATCTCCCTGATGA  
GATTAACCGTCTTTTCGAGTAATCTAAAATACCTAACTTAACTTCCAA

>PGSC0003DMG400000295LRR-RLKs\_4209

TTCAATCATCTCGGAGAAGAAAGTAAGAAGAGGGTTCTCTTTAGCAAGAAGAGGGGTGATTGTAAACG  
TACAAACTTTGACTAGGCACTTTTGGTTGTGTCACTCTGACCATGATCATGA

>PGSC0003DMG400000295LRR-RLKs\_4270

GTAAACGTACAAACTTTGACTAGGCACTTTTGGTTGTGTCACTCTGACCATGATCATGATTCTCGAGATC  
TGTGTATTGGGAATGCGAGGCAGCCAAAAGTGCAGCTCCAACACCTGAA

>PGSC0003DMG400000295LRR-RLKs\_4697

GGATGAGAAAGACGTTCTCCACTTAATTAAGCCTAGCCAACTTAGTGATGTTGAGCCAGGAGCTAGGAA  
TTTGAGTTTATGGGTTCCGGATAAATTATTTACACATATTAAGTGGGGTTT

>PGSC0003DMG400000295LRR-RLKs\_488

ACTTCAATGGTGATATCCCTAAAGGAATTGGTGGATTGAGTCAGCTCAAAGTACTTGACCTGAGGGGGA  
ATTTGTTTAATGGATCTTTTCTGAAGAGATTGGTGAATTGTTGAATCTTG

>PGSC0003DMG400000295LRR-RLKs\_549

GAGGGGGAATTTGTTTAATGGATCTTTTCTGAAGAGATTGGTGAATTGTTGAATCTTGAAGCACTTATG  
TTGAGCTCGAATGGTTTTGCTCCACAGGCTATACCATCACGATTCACCAA

>PGSC0003DMG400000295LRR-RLKs\_610

GCACTTATGTTGAGCTCGAATGGTTTTGCTCCACAGGCTATACCATCACGATTCACCAAGTTGAAAAATT  
TGAAAATTTTTGGATGACAGAAGCACATTTGATTGGAAATATCCCGGAA

>PGSC0003DMG400000295LRR-RLKs\_6161

AAATCGGTGAAAATGCAATGAAACAATGATCAACTTTGCTTGTATAAAGTTGTATGCATTAAATCCTCAA  
CAATGCCAACCTATGTTAGGCCATGAGGAGTAGTTCATCATTGAAATACA

>PGSC0003DMG400000295LRR-RLKs\_6405

ACTGCTTTTGAAGGATCCTACAAGCACCTGGCCAGTGGCGAAATTTTTGAAGAGTCTGAGCAACATAGA  
TGGTATAATCATCAACGTTGCATGCATAAAGTTGTATGCATTAAATCATCA

>PGSC0003DMG400000295LRR-RLKs\_732

TATTGGTAACATGACAAGTCTTGAATTTTTGGATTTGTCGAACAATGGATTGAGTGGTAGTATCCCTGAT  
GGTTTGTTCAGCTCAAGAAGTCTGAGTATTGTGTATTTATTTACTAACAA

>PGSC0003DMG400000295LRR-RLKs\_7381

CAGTAACAAATAATGAGCAGACAGAAGAAGATGGAACTGAAAAATTTACACACATTATAAGTGTTAATG



AATGGAAGTAGCAATGTAAAATTCAAAAAGGTGGTCAAGATACAAAACAG

>PGSC0003DMG400000295LRR-RLKs\_7625

CATTTTTGCTTTTTGTGATTTATAACGATGCTCAAGGTAATCACCTTAAGAACATCAAAGAATCATAATT  
TAGGACTAAAAATAATAATTAACAATTTGAAAAGTACTTAATCAA

>PGSC0003DMG400000295LRR-RLKs\_7686

AATCATAATTTAGGACTAAAAATAATAATTAACAATTTGAAAAGTACTTAATCAATTATCCAAACA  
TTACGAAAGTGAAATCAATCTCCATGATCACAGCTTTATTCAAAAAGAG

>PGSC0003DMG400000295LRR-RLKs\_7991

AAGATCACAGCTTTATTGAAAAAGAGAAATTCTTGACACCCAAATGAGCAAAAATCAGTTTATACACAC  
AAAAATACTCGCCAGTCGGATGGTTATCAACTTAGGTAATAACCATCTT

>PGSC0003DMG400000295LRR-RLKs\_8174

CTAAAATAAAGAGACCACCTCCAACCGAGGTGGAGCTAGAATTTGATGTTTATTGGTTCTGAACTTGTTG  
AGAAAAAACTATTAGGTTCCGAACCTGTATCTAATATGTAGCTCCAC

>PGSC0003DMG400000295LRR-RLKs\_8296

CTGCCTCCAAAATCACAACCTTTACTAAAAAGAGACAAATTCTTGAACACCCAAATAAGCAAAAGACAGT  
TTATGCACATTCTTAAACACCCAAATTAGCAAAAACAGTTTATCCACAT

>PGSC0003DMG400000295LRR-RLKs\_8479

AAAAAAAACAGTTTATGCACATTCTTGAACACCCAAATAAGCCAAAACAGTTTATCCCACTCTTAAA  
CACCCAAATAAGTAAAAACAGCTTTTCTTAAACACCCAAATAAGGCACT

>PGSC0003DMG400000295LRR-RLKs\_854

TGTCAGGGGAAATACCACAGTCAGTTTCATCAATGAATTTAGATGTTGTTGATTTGTGTAACAACAGTTT  
GACAGGAAAAATACCAGAAGATTTGCGAAAGTTGACGAAACTGAGTGGAT

>PGSC0003DMG400000295LRR-RLKs\_8845

AGCTAGATTTTAACACCAAGGTCCTGAGTTCAATCCCAGCCAGCCACAATTCCTTCTAATTTTTTTAGTA  
ACTAATAACTAGTTTTTACAAAAAAAACGAAATTCTAAAGCAATGG

>PGSC0003DMG400000295LRR-RLKs\_8967

CACCCGTTTTCTTGAATCCTGGATTCGCCTCTGTGGACTGAATACTGATACTTATTGTTGGTGTGAGATG  
CCAAGATTTAGTTGAGGTGCGCGCAAGTTGATCCGGATATCAAAACAAA

>PGSC0003DMG400000295LRR-RLKs\_9028

GTGTGAGATGCCAAGATTTAGTTGAGGTGCGCGCAAGTTGATCCGGATATCAAAACAAAGAACACCCAA  
ATAAGCAAAAAAAAAAACAGTCTATACACATTCTTGAACACCCAAATAAGCA

>PGSC0003DMG400000295LRR-RLKs\_915

CAACAGTTTGACAGGAAAAATACCAGAAGATTTGCGAAAGTTGACGAACTGAGTGGATTGGCTTTGTT  
TTTCAATCAATTATCAGGGGAAATACCTTTGAGTATAGGCAAATTATCATC

>PGSC0003DMG400000295LRR-RLKs\_9150

AATCAGTTTCTTCACACACACAAAACACAAATACTCACCCAGTAGGAAGGTTATCAACATAGCTAATAAG  
CATCTTGAGCTTACTCCACCTTCAGAAGCAAGTCCAGCATGCATCTCTA

>PGSC0003DMG400000295LRR-RLKs\_9211

GCTAATAAGCATCTTGAGCTTACTCCACCTTCAGAAGCAAGTCCAGCATGCATCTCTACAGTCATAGCA  
TCAGCTACCTGCTTAAGTTTCCCATTGGAGTTGCACACTTCTCCTCAA

>PGSC0003DMG400000295LRR-RLKs\_9272

GTCATAGCATCAGCTACCTGCTTAAGTTTCCCATTGGAGTTGCACACTTCTCCTCAAATCCTTCAATAA  
AGCTTCAACTTTTCCCCTCCCAAGATTCTTCATCCTGCGCTTCATT

>PGSC0003DMG400000295LRR-RLKs\_9333

CCTTCAATAAAGCTTCAACTTTTCCCCTCCCAAGATTCTTCATCCTGCGCTTCATTAACAAAAGTCCCA  
CCCCACATACTACAGCAGCAGTACACACAAGTATACACCTACAACCA

>PGSC0003DMG400000295LRR-RLKs\_9394

CAAAAGTCCACCCACATACTACAGCAGCAGTACACACAAGTATACACCTACAACCAATTTCCCATAT  
TTTCTTGAAAAAAATCAAAGTTTGTGTATATTTGAGTGAATATACT

>PGSC0003DMG400000295LRR-RLKs\_9455

TTTCCCATATTTCTTGAAAAAAATCAAAGTTTGTGTATATTTGAGTGAATATACTGTAAAGATTGAA  
ACTTTTTTGGTTGATTTTAAATGGGGTTTGTAAAGATTCAGAATTTGA

>PGSC0003DMG400000295LRR-RLKs\_9509

ATACTGTAAAGATTGAAAGTTTGTGTTGATTTTAAATGGGGTTTGTAAAGATTCAGAATTTGATGTGT  
GGAGTGACAGAGAAAGAAGAAAAATGGGAGTTGCAGAGGATATTTTATT

>PGSC0003DMG400000295LRR-RLKs\_976

GCTTTGTTTTCAATCAATTATCAGGGGAAATACCTTTGAGTATAGGCAAATTATCATCATTGGTATCTGT  
TAAGTTGTTTGGGAACAAGTTATCAGGTGAAATCCACCTGATTTTGGT

>PGSC0003DMG400000386LRR-RLPs\_1240

CACCACCCCGCCATCTCCACCTCCACCACCAAGTTTATTCATCACCACCACCGCCACCATCTCCCCCTCCAC  
CATCACCTCCACCTCCTCCCCACCCGTTTATTCGCCACCACCATCTC

>PGSC0003DMG400000386LRR-RLPs\_1364

TCCTCCATCACCATTGCCTTATTGTATACGCTCACCTCCACCACCAAATTCCCCACCTCCTAATTCTCCACCT  
CCACCGCTTGCTCACTCGCCTCCACCCCTTCACCTTACTATTACAA

>PGSC0003DMG400000386LRR-RLPs\_1488

CCAGCACCTCCGCCCCCAAATTCGCCGCCTCCACCACCAAATTCGCCTCCTCCTCCACCAGTATGCATATA  
CTCATCACCTCCGCCACCAAATTCACCTCCTCCACCACCAACATACGTA

>PGSC0003DMG400000386LRR-RLPs\_1550

ATGCATATACTCATCACCTCCGCCACCAAATTCACCTCCTCCACCACCAACATACGTATATTCTTCACCTCC  
TCCACCTCCTCCCCATTGCCTTGTATAGAACCCCTCCACCACCTCC

>PGSC0003DMG400000386LRR-RLPs\_1674

TGCATTGAACCACCCCCACCTCCCTCCCCTTCACCATCACCTCCTCCACCACCAGTTTATCATTACAATTCT  
CCGCCCCCACCATCTCCATCTCCTCCACCACCAGTTTATTATTACAAT

>PGSC0003DMG400000386LRR-RLPs\_1779

GTTTATTATTACAATTCTCCACCCCCACCATCACCACCACCTACTCCAGTATATGAAGGGCCATTGCCACC  
AATAATAGGAGTTCAATATGCTTCACCACCTCCACCACCCTTTTATTAA

>PGSC0003DMG400000386LRR-RLPs\_992

ATTTGTTCTGTTTTGCCACCTCCTCCGCCACTTTCACCGCCCTTGCTGCCCTCCGCCACCTGTTTATTC  
GCCTCCGCCACCAGTTTATACTCCTCCTTCTCCTTCCCCACCACCTCC

>PGSC0003DMG400000578L-LecRK\_124

AAGTGAAATGAAGTTATCTGTAGACCACATCCTTATGTACAACCTTGACAATTGATAATTTGCTACTCAG  
AAAATTCAAATTCCAAAAAATTTATCACTAGCCAAGAATTAGCTCATCA

>PGSC0003DMG400000578L-LecRK\_1860

CAGACAGCTGATGTGTTGGAATTCGGAGTAGTCGTGCTAGAGATCATTGCGGGTCGGAGCAGAAAGTC  
CAACCCGGGAGAACGGGATTTGTTGGATCTTGCATGGGCAATGCATGAGGTA

>PGSC0003DMG400000578L-LecRK\_1922

AAAGTCCAACCCGGGAGAACGGGATTTGTTGGATCTTGCATGGGCAATGCATGAGGTACAACAGAAGG

AAACTCTAGTGGATCGTAGAATGGGCGCGGTAGTGAACCTGGAGCAGGCGAT

>PGSC0003DMG400000578L-LecRK\_1984

AGAAGGAAACTCTAGTGGATCGTAGAATGGGCGCGGTAGTGAACCTGGAGCAGGCGATTCTGGGCTTTG  
GATATCGGGTTGCTCTGCACGTTGAACGAGAACAAGGAAGGCCTACGATGG

>PGSC0003DMG400000578L-LecRK\_2046

GCTTTGGATATCGGGTTGCTCTGCACGTTGAACGAGAACAAGGAAGGCCTACGATGGAAGAAGTTGT  
GGAGTTCCTAAATATGGAGAAACCGATACCGGAGTTGCCATCGGGTCGACCC

>PGSC0003DMG400000578L-LecRK\_2170

GTTTGTCCCGTACAGCAGCACCCACAGGCTTATGCAGTGGGTATACTTGTACAGCATTCAAATGAAGTTA  
CGTGTTGCTTGACTAATTGGTTCTTCGGCGTTCCACGTAAGCACCAATTA

>PGSC0003DMG400000578L-LecRK\_2232

TGAAGTTACGTGTTGCTTGACTAATTGGTTCTTCGGCGTTCCACGTAAGCACCAATTATTCTTATCTATTA  
TACTACAAAATAATGACAGGGAAGCACATGTATATGCTATGTGACGTTA

>PGSC0003DMG400000578L-LecRK\_2294

TATCTATTATACTACAAAATAATGACAGGGAAGCACATGTATATGCTATGTGACGTTATTTTCATGACAT  
AGACAACTATTGTCTGGTCTATGGTCGGAGTTAATATCACAAGAACTCC

>PGSC0003DMG400000578L-LecRK\_2356

CATGACATAGACAACTATTGTCTGGTCTATGGTCGGAGTTTAATATCACAAGAACTCCTAAAAAGATTTG  
AAATTATTGTAAATTATGTACTGCAATTCAAATGTTCAATATATAAAATT

>PGSC0003DMG400000578L-LecRK\_806

TTTGGGTAGCATAGTATCAACTGCAGCGATTAATGCTTCGGATGCCGGAGTTCAATTGAATGACGGATC  
AATTCACAGAGTTTGGATATCTTATGATGGGCGAAAGGGTTTTATTGAAAT

>PGSC0003DMG400000578L-LecRK\_868

ACGGATCAATTCACAGAGTTTGGATATCTTATGATGGGCGAAAGGGTTTTATTGAAATTCGTCTTGCACC  
TGATGGCAGAGGATATCCTTCTAAACCAGTTTACTCTGGTTTACTTGATC

>PGSC0003DMG400000728-(rev)LRR-RLKs\_0

CTTCTCTTACCTATCAAAGAACTGAAAGAAAAGAGTTGGTAGAGAGAAAACAGTATAGGG  
ATTAGCATTTAGAACTCTTCTTTGCTTTATCAAGAACAAGAATCAAAGCA

>PGSC0003DMG400000728-(rev)LRR-RLKs\_1037

TTGGTTGATCTTAACCTCAGCTTCAATAGTCTAAGTGGAGTGGTCCCTGAATTAGGAGGATTACGGAACT  
TGAAGAGTATGGTAGTTGGGAATAATAGGCTGTCTGGATCGTTGCCTAAT

>PGSC0003DMG400000728-(rev)LRR-RLKs\_1098

TACGGAACTTGAAGAGTATGGTAGTTGGGAATAATAGGCTGTCTGGATCGTTGCCTAATGCTTTGTGGT  
CGATGCCTGGGTTGCAATTCCTAGATGTCTCTGCGAATAACCTCACTGGTA

>PGSC0003DMG400000728-(rev)LRR-RLKs\_1159

TTTGTGGTTCGATGCCTGGGTTGCAATTCCTAGATGTCTCTGCGAATAACCTCACTGGTATTCTGCCAAAT  
GTTAGCTCCGTTGTCAATGCCACTGGTGCAGTGTTAATCTTTCTCATAA

>PGSC0003DMG400000728-(rev)LRR-RLKs\_122

AGCTTAGTTGATTCACTCAAAAAAGGTAATCCCTTTAATTTTCTGACACAGAATGTATATCCCTTTTTTAT  
TTCAAGAATCACTATGATATAGAAGGGGTATAACAAATTAGAGATGCC

>PGSC0003DMG400000728-(rev)LRR-RLKs\_1220

CTGCCAAATGTTAGCTCCGTTGTCAATGCCACTGGTGCAGTGTTAATCTTTCTCATAATACGTTTTATGG  
AAATTTGCCGTCTTTAAACAGAAGCTTCAGTTTTCTAGATCTATCAGGA

>PGSC0003DMG400000728-(rev)LRR-RLKs\_1281

CGTTTTATGGAAATTTGCCGTCTTTAAACAGAAGCTTCAGTTTTCTAGATCTATCAGGAACTATTTTGAA  
GGCAAATCCCAAATTATGCACAACGCAACGCGTCAATTAGTAGCAATT

>PGSC0003DMG400000728-(rev)LRR-RLKs\_1342

CTATTTTGAAGGCAAATCCCAAATTATGCACAACGCAACGCGTCAATTAGTAGCAATTGCCTCCAAAT  
GTGACAAGTCAAAGGAATAGGAGCGAATGTGCTTCTTTTTATAGCGGACG

>PGSC0003DMG400000728-(rev)LRR-RLKs\_183

CCCTTTTTTATTTCAAGAATCACTATGATATAGAAGGGGTATAACAAATTAGAGATGCCCATTTATATATA  
TTTGAGAAATGATGAGAATTTTCGAAGTTAAATGAAGGTTGAGCAAGAA

>PGSC0003DMG400000728-(rev)LRR-RLKs\_2135

TATCTACATCATGAATGTAACCCGCTCTAGTGACAGGTATCAAGGACTTGTCATATTACATTTATCTTA  
CTTCCATGTGCCACCACTTTTATGGTTAATCTGAGAGAACTTGAATAGC

>PGSC0003DMG400000728-(rev)LRR-RLKs\_2196

ATTTATCTTACTTCATGTGCCACCACTTTTATGGTTAATCTGAGAGAACTTGAATAGCAATGCTGGACTT  
ATGTGATTTACTATTAGATTTCCATGTTTCGCATGTGCACTTATATTTCA

>PGSC0003DMG400000728-(rev)LRR-RLKs\_2257

TGCTGGACTTATGTGATTTACTATTAGATTTCCATGTTTCGCATGTGCACTTATATTTCACTATCATGATTAC  
AAGTTTTTCATTTAAACATGTTTATCATATATCTTGGAAGAGTTGCAGG

>PGSC0003DMG400000728-(rev)LRR-RLKs\_2318

ATCATGATTACAAGTTTTTCATTTAAACATGTTTATCATATATCTTGGAAGAGTTGCAGGCTACCAGCTACT  
CTTTCTATGTATATTCATTGGTTATACATAATTGGTGACTCTTGGGCTA

>PGSC0003DMG400000728-(rev)LRR-RLKs\_2379

ACCAGCTACTCTTTCTATGTATATTCATTGGTTATACATAATTGGTGACTCTTGGGCTAGACTCAAGGTAA  
TAAAGGATATGACTTGATGACTTGGAGAGCGCCCTTTTTGGTTTGTACA

>PGSC0003DMG400000728-(rev)LRR-RLKs\_244

TTTATATATATTTGAGAAATGATGAGAATTTTCGAAGTTAAATGAAGGTTGAGCAAGAATGGCGAACCA  
ACAGGGCAGAGTGGTTTTGTTTTGTTTTGTGTTTTCTTGCTGTTGACTC

>PGSC0003DMG400000728-(rev)LRR-RLKs\_2440

CTCAAGGTAATAAAGGATATGACTTGATGACTTGGAGAGCGCCCTTTTTGGTTTGTACACGTTGGAGAT  
ACTAGGAAAAATGCTCTGAATGAAAGCTATCAAATATCAGTGTATTTCTGTG

>PGSC0003DMG400000728-(rev)LRR-RLKs\_2501

TTGGAGATACTAGGAAAAATGCTCTGAATGAAAGCTATCAAATATCAGTGTATTTCTGTGCTCTGAATTA  
GGCGGGACAAGATTCCCATAGAAGGCTCTCAAATTTTCAGCCAAAAATTC

>PGSC0003DMG400000728-(rev)LRR-RLKs\_2562

TCTGAATTAGGCGGGACAAGATTCCCATAGAAGGCTCTCAAATTTTCAGCCAAAAATTCAGTGCAGCGC  
AGACTCTGCACGTTAAAGGTGCTTGCAACTTTATGGATTGTGCCCATGT

>PGSC0003DMG400000728-(rev)LRR-RLKs\_2623

TGCAGCGCAGACTCTGCACGTTAAAGGTGCTTGCAACTTTATGGATTGTGCCCATGTCTGGTCTGACTG  
AAACTCATCTAAAGCCTATTTATAAATGATAAATATTAGATGTCTGCTTC

>PGSC0003DMG400000728-(rev)LRR-RLKs\_2684

GGTCGACTGAAACTCATCTAAAGCCTATTTATAAATGATAAATATTAGATGTCTGCTTCGCTCTTAGCTTC  
TCGAGATTTATAAAAGGAGGCAATTTATGGTTGATGGTTTTCTGATTTG

>PGSC0003DMG400000728-(rev)LRR-RLKs\_2745

TCTTAGCTTCTCGAGATTTATAAAAGGAGGCAATTTATGGTTGATGGTTTTCTGATTTGCTATCAGTTGGA

GATCTGTAATGTTTATTGCCTCGTGAGACTATTATTATACAGAGTTCAT

>PGSC0003DMG400000728-(rev)LRR-RLKs\_2928

TCACTTACTATTTTTATGAGCTACACCTGCATGTAATAAAATTAAGAGCTTAGTAAACCTAAAACCTGTCC

TTTTAGGGCTTAGCAATGTAAAGTCAAGAGCCATGCACTTCTAAAATTG

>PGSC0003DMG400000728-(rev)LRR-RLKs\_305

GCGAACCAACAGGGCAGAGTGGTTTTGTTTTGTTTTGTGTTTTCTTGCTGTTTGACTCTACATTCAGCA

GAGGGTTAGTTCTTCAGCTGAGAAATTTGCTTTGCTTCAACTGAGATCT

>PGSC0003DMG400000728-(rev)LRR-RLKs\_3050

GTAAGCTCAGCTTCTATAGTTCCATGCATGGCTGCGATATCTCTAATCTAGGCAGTTTATATTGTGTTAGA

TTCGGTATGAGGGATGTGGCCTTAGAAGATCTTGATGACATTATATTTT

>PGSC0003DMG400000728-(rev)LRR-RLKs\_3111

TTGTGTTAGATTCCGGTATGAGGGATGTGGCCTTAGAAGATCTTGATGACATTATATTTCTATTGTGCAGA

GATATTGTGAATGCAGAAATAGAAATTTTCTCAAACCTAAGAACAGTAATG

>PGSC0003DMG400000728-(rev)LRR-RLKs\_3172

TTGTGCAGAGATATTGTGAATGCAGAAATAGAAATTTTCTCAAACCTAAGAACAGTAATGTTTTTTAAAA

ATTGTTTTCTTTTCTTATTATTGAACCTTCTCCATACATCAATCCTTCTT

>PGSC0003DMG400000728-(rev)LRR-RLKs\_3233

TTTTTAAAAATTGTTTTCTTTTCTTATTATTGAACCTTCTCCATACATCAATCCTTCTTTTTTTTGATAACCGTG

GTGCCCCGGGCTAGCTTGTGCACACCTCGACACAATCCCATCAATCT

>PGSC0003DMG400000728-(rev)LRR-RLKs\_3294

TTTGATAACCGTGGTGCCCGGGCTAGCTTGTGCACACCTCGACACAATCCCATCAATCTTAATCAACTAA

AGGTAGTCCTCATATGATACTCCTTATTGTACCTTTTATCTCCATGGAAC

>PGSC0003DMG400000728-(rev)LRR-RLKs\_3355

ATCAACTAAAGGTAGTCCTCATATGATACTCCTTATTGTACCTTTTATCTCCATGGAACCTAAGCCTGTCA

GTGAACTATCTTATTTCTCTAAAACCTTTTCATCTGCATGTTTTGGGTTC

>PGSC0003DMG400000728-(rev)LRR-RLKs\_3416

AAGCCTGTCAGTGAACCTATCTTATTTCTCTAAAACCTTTTCATCTGCATGTTTTGGGTTCACCATTATTCTT

TCACCGGGCAACCCTTAGGGATTTGGGTAGTGGCAAGAGCACAACCTC

>PGSC0003DMG400000728-(rev)LRR-RLKs\_3599

TAAGTGGAGAAAGGTAGAAAGGCTGGGACCCATTATCCACCGAGTTTTGGATCGTGCGCCAATAGAGCT  
GGGAGGATTTCTCAGTTACAAACAAAAGATCCTTTCATGGGGAATCCAATAG

>PGSC0003DMG400000728-(rev)LRR-RLKs\_366

CATTTTCAGCAGAGGGTTAGTTCTTCAGCTGAGAAATTTGCTTTGCTTCAACTGAGATCTTCTTTAGGGTTA  
AGAGCCAAAGAATGGCCTATAAAGGGTAACCCTTGTTTCAACTGGGCTG

>PGSC0003DMG400000728-(rev)LRR-RLKs\_3660

TAGAGCTGGGAGGATTTCTCAGTTACAAACAAAAGATCCTTTCATGGGGAATCCAATAGACTTTCTTGAA  
CCGAATATCCATTTTCAAGGAGTTTCCAAAGGAGATGCTTCTCTAAATG

>PGSC0003DMG400000728-(rev)LRR-RLKs\_3782

CGTATAGTTTTTCTGCTGCAGTTCACCGTGAAATTCTCAATGGTTTAATTGCATGAATTAGTTTCTTGAT  
TCAATCTTACCTCCACCCCCACCCCCAAAAAAGAACTTTATTTCTGTC

>PGSC0003DMG400000728-(rev)LRR-RLKs\_3843

TTTCTTGATTCAATCTTACCTCCACCCCCACCCCCAAAAAAGAACTTTATTTCTGTCAGAAATTTTTTAG  
TGCATCATGTAGTGACATCTTCTTTTTCTTTGCCTACTATTCTCGCA

>PGSC0003DMG400000728-(rev)LRR-RLKs\_3904

AAATTTTTTAGTGATCATGTAGTGACATCTTCTTTTTCTTTGCCTACTATTCTCGCAGAGATGTTCAAGC  
AAGCAGCATACTTCTTGATGATAAGTTTGAAGTACGGCTAGGGAGTCT

>PGSC0003DMG400000728-(rev)LRR-RLKs\_4026

ATGAGGCCTGTGCACAAGAAGGAGAGGCCATCAAACCGAATTTCCAGGCTGCTCAGATTTCCACAGT  
AAGTAGTTGTTGTTGGTAAATTCTATGTTCTAACCATCCTTTTCTTTTTGA

>PGSC0003DMG400000728-(rev)LRR-RLKs\_4087

TCCACAGTAAGTAGTTGTTGTTGGTAAATTCTATGTTCTAACCATCCTTTTCTTTTTGAAGGCTAACTACTA  
TTACTACTAGGTTGTTATGTAATGGTCAATTTTTGTCTCCCATGATGG

>PGSC0003DMG400000728-(rev)LRR-RLKs\_4148

GCTAACTACTATTACTACTAGGTTGTTATGTAATGGTCAATTTTTGTCTCCCATGATGGATCTTAAAATCA  
GGCAGTTTTATTGTTAATATATCTGTCTCTCCAATTTGATGTTATAGAA

>PGSC0003DMG400000728-(rev)LRR-RLKs\_4209

CTTAAAATCAGGCAGTTTTATTGTTAATATATCTGTCTCTCCAATTTGATGTTATAGAACTACTTTGGCTT  
GGTTTCTAAATTGGATTTGAGTTCCACAGTTTTGCTGCCAGCTCAAGT



>PGSC0003DMG400000728-(rev)LRR-RLKs\_427

TTTAGGGTTAAGAGCCAAAGAATGGCCTATAAAGGGTAACCCTTGTTTCAACTGGGCTGGGATTCGTTG  
CAAGAATGGTCGAGTTACTGAGATCAACATATCTGGTTTTAAACGTACTION

>PGSC0003DMG400000728-(rev)LRR-RLKs\_4331

TTCTGGTGTATATTTATTAGCTCTGATATAAATGAGAATCCTAACGTTTCATGCAGCAACCTTACTCTTAAC  
CTTGTTATCTGTTCTTATACAAAAGGGCTTTAGCTTTGTTTCTAAATTA

>PGSC0003DMG400000728-(rev)LRR-RLKs\_4392

TACTCTTAACCTTGTTATCTGTTCTTATACAAAAGGGCTTTAGCTTTGTTTCTAAATTATGACAACTTGTA  
TATAGGCCCTGACTAGTTTAGTCCTGATGATAGTTATCATGCAGCTGC

>PGSC0003DMG400000728-(rev)LRR-RLKs\_4453

ACAACTTGTAATATAGGCCCTGACTAGTTTAGTCCTGATGATAGTTATCATGCAGCTGCATATTATCTTAT  
TTCTTCTCAGTATTCAAGTTACAAGGAACACCGTAAAGAACAGTCAGTC

>PGSC0003DMG400000728-(rev)LRR-RLKs\_4514

ATTATCTTATTTCTTCTCAGTATTCAAGTTACAAGGAACACCGTAAAGAACAGTCAGTCTAGTCTGAAAG  
ACCATCACCCACTTGTTAATTACTTGTTCCATCCCTCAGTAAATTATTCC

>PGSC0003DMG400000728-(rev)LRR-RLKs\_4575

GTCTGAAAGACCATCACCCACTTGTTAATTACTTGTTCCATCCCTCAGTAAATTATCCTTTTCTACGTTAT  
ATGAATCTTCTTGCCCTTGATTTACCTATGTCTAGCGGGTGTACATGG

>PGSC0003DMG400000728-(rev)LRR-RLKs\_4636

TTCTACGTTATATGAATCTTCTTGCCCTTGATTTACCTATGTCTAGCGGGTGTACATGGGGTGTGTAGTTT  
AAGTAGAAATTAGCAAAAAATTGTATGTACCCTTACTGTATACTTAAAA

>PGSC0003DMG400000728-(rev)LRR-RLKs\_4697

GTTGTAGTTTAAGTAGAAATTAGCAAAAAATTGTATGTACCCTTACTGTATACTTAAAACCTCATGTATGG  
GATATGCATGCGTAGCTGAATCCATGTAACATAGTCCTTTGATGTACATG

>PGSC0003DMG400000728-(rev)LRR-RLKs\_488

ATTCGTTGCAAGAATGGTCGAGTTACTGAGATCAACATATCTGGTTTTAAACGTACTIONCGAGCTGGGGGT  
CAAACCCCTCAATTCTCAGTTGATGCTCTCCAAAATTTGACTCTTTTGGAA

>PGSC0003DMG400000728-(rev)LRR-RLKs\_4941

AACTATTACCTATTCTCGTTATGCCTACACATTGAATGCAGGAAATTATTAAATTTTGTATTGTGGGGTAA

ATACTAAATACTTCTGGAACGACCTAGATATAATGGCATGTGAAAAATT

>PGSC0003DMG400000728-(rev)LRR-RLKs\_5124

CATGGCTTCTGTAAAACCTTCCAGGTTCTCTTATTTTAGAAATTGAACTTACGACCACTGATCATGATTAT

ATTCAATCATAATCCAGAAAGCTTTAGAAGTTTTTGTGTTTATAGTGAA

>PGSC0003DMG400000728-(rev)LRR-RLKs\_5185

ATCATGATTATATTCAATCATAATCCAGAAAGCTTTAGAAGTTTTTGTGTTTATAGTGAAAACCTTTCCATAT

GTATTTCTGTCTTATGAATGGTTATCACTGTTTGTCCAGCTTTTCGT

>PGSC0003DMG400000728-(rev)LRR-RLKs\_5246

CTTTCCATATGTATTTCTGTCTTATGAATGGTTATCACTGTTTGTCCAGCTTTTCGTCTGAAGCTTGTTGC

ATGATCTCAAAGTTTTGTTATATTCTTTCAACCAGTACTGTTTTATA

>PGSC0003DMG400000728-(rev)LRR-RLKs\_5307

AAGCTTGTTGCATGATCTCAAAGTTTTGTTATATTCTTTCAACCAGTACTGTTTTATAGTTTATACTGCTT

GTTGACATAGTTCTCCCTTTCTTATTTGCAGGACGTCGGAACAAGGTG

>PGSC0003DMG400000728-(rev)LRR-RLKs\_5368

TTATACTGCTTGTTGACATAGTTCTCCCTTTCTTATTTGCAGGACGTCGGAACAAGGTGCATCAGGTATGT

GCAACTTTATTTAGTTCTACTTTCTTAAATAGAGTTTACTTGGATATT

>PGSC0003DMG400000728-(rev)LRR-RLKs\_5429

TCAGGTATGTGCAACTTTATTTAGTTCTACTTTCTTAAATAGAGTTTACTTGGATATTCTTAATATTTATT

AAATTGGTGCAAGTAACTATTTAAAATTTTGCGTACATTTCCGGT

>PGSC0003DMG400000728-(rev)LRR-RLKs\_549

CTGGGGGTCAAACCCCTCAATTCTCAGTTGATGCTCTCAAATTTGACTCTTTTGGAACTTTTAAATGCT

TCCAATTTGTACTTCTGGTTCTATTCCTGAATGGTTTGGTCTTAGGC

>PGSC0003DMG400000728-(rev)LRR-RLKs\_5490

TAATATTTATTAATTGGTGCAAGTAACTATTTAAAATTTTGCGTACATTTCCGGTATTGTTTGGTGGT

GGGTAAAATCTCCTTAAATTGATCTAGGCAACAAATCAAACCTGTAGA

>PGSC0003DMG400000728-(rev)LRR-RLKs\_5551

TGTTTGGTGGTGGTAAAATCTCCTTAAATTGATCTAGGCAACAAATCAAACCTGTAGATTCTCATTAGA

AGTAAGAATAAGTGAACTATTAGGTGGAAATTTACGATATAAAGCTGAT

>PGSC0003DMG400000728-(rev)LRR-RLKs\_5612

CTCATTAGAAGTAAGAATAAGTGAACTATTAGGTGGAAATTTACGATATAAAGCTGATTCCAAAGAGC  
GTAAAGGGCTGGAGATTTTGATGGCGATGTTTTGCTTTACTTTTTGTGGGA

>PGSC0003DMG400000728-(rev)LRR-RLKs\_5673

CAAAGAGCGTAAAGGGCTGGAGATTTTGATGGCGATGTTTTGCTTTACTTTTTGTGGGAGTATGCTTTGT  
TGCTTGAACATCACTAGGGAATACTTCAAAGTCTACTTATCTCGTCCTA

>PGSC0003DMG400000728-(rev)LRR-RLKs\_5734

ATGCTTTGTTGCTTGAACATCACTAGGGAATACTTCAAAGTCTACTTATCTCGTCCTAATATTCTTTCTTA  
CCCGAATGGACAGGTACACCTAGTGCCACTTGTGCGTATGATGTCTAC

>PGSC0003DMG400000728-(rev)LRR-RLKs\_61

GTATAGGGATTAGCATTTAGAACTCTTCTTTGCTTTATCAAGAACAAAGAATCAAAGCAAAAGCTTAGTT  
GATTCACTCAAAAAGGTAATCCCTTTAATTTTCTGACACAGAATGTATA

>PGSC0003DMG400000728-(rev)LRR-RLKs\_610

TTTTAATGCTTCCAATTTGTACTTCCTGGTTCTATTCTGAATGGTTTGGTCTTAGGCTTGTGTCTCTTCG  
GGTACTTGATCTCAGGTCATGTTCCCTCATTGGTCCTATTCTTCCTTC

>PGSC0003DMG400000728-(rev)LRR-RLKs\_6466

CTTTGTTAATAATGCAGTAGGATCTGCATTAAGGTTGCATTTTTGTTGGGGACACCTTGTACATTCTCCG  
TTTCCGGAATGCTTGAGTTTGCAAGCCATTATCTTGCCTGGTCTTGAA

>PGSC0003DMG400000728-(rev)LRR-RLKs\_6527

ACATTCTCCGTTTCCGGAATGCTTGAGTTTGCAAGCCATTATCTTGCCTGGTCTTGAAAATGGAGATGC  
ATAGTTTACCTGGGGACAGCAAACATCAAATTGTTTATTGGGGTTTTGGG

>PGSC0003DMG400000728-(rev)LRR-RLKs\_671

GTGTCTCTTCGGGTACTTGATCTCAGGTCATGTTCCCTCATTGGTCCTATTCTTCCCTTCCCTTGGCAATTA  
ACTAGTTTAGTTACTCTCAATTTGTCCAACAATGGTCTCACTGGACAA

>PGSC0003DMG400000728-(rev)LRR-RLKs\_6756

AATTCCAATTCTTTTCTTATAATTCTTCTTTTACTAGTCTCTCCATGGAATGTAAATTATACACAATCTTT  
CATTTTCCAATTGGAGGAGAGGAAAAAAGAAAAAAAAGAGTATCCC

>PGSC0003DMG400000728-(rev)LRR-RLKs\_732

TTGGCAATTTAACTAGTTTAGTTACTCTCAATTTGTCCAACAATGGTCTCACTGGACAAGTGCCTCGAAGT  
TTCGGTCAATTGTCACGCCTATCAAGTCTTGATCTTTCGCATAATAAGC

>PGSC0003DMG400000728-(rev)LRR-RLKs\_793

GCCTCGAAGTTTCGGTCAATTGTCACGCCTATCAAGTCTTGATCTTTCGCATAATAAGCTTCTTGGGGTAA  
TTCCTGATACATTTGTTTCTCTTAAGAACCTTACCTTGCTTGATATGTC

>PGSC0003DMG400000728-(rev)LRR-RLKs\_854

CTTGGGGTAATTCCTGATACATTTGTTTCTCTTAAGAACCTTACCTTGCTTGATATGTCTTCAAATTTCTTC  
AATGGGGCTATTCCTCAGATATTGGGACTTTGCTTCAGTTGAAATCC

>PGSC0003DMG400000728-(rev)LRR-RLKs\_915

CAAATTTCTTCAATGGGGCTATTCCTCAGATATTGGGACTTTGCTTCAGTTGAAATCCTTGAATCTGTCT  
GACAACAGCTTTTCTACTTCGATACCCACCCAACTCGGTAACCTTTCTA

>PGSC0003DMG400000728-(rev)LRR-RLKs\_976

GAATCTGTCTGACAACAGCTTTTCTACTTCGATACCCACCCAACTCGGTAACCTTTCTAATTTGGTTGATCT  
TAACCTCAGCTTCAATAGTCTAAGTGGAGTGGTCCCTGAATTAGGAGG

>PGSC0003DMG400000810RLKmalectin\_0

AAAAAATATTTGCAATAGATACTCGACTCGAAACAACCTATGCTTTCTCTCTCCAAGTCCCAAAAAGTCAA  
GAAAATCAAAGCATCAATCTTGGCTTAACTTCCTCTTCCTCACAGCAATA

>PGSC0003DMG400000810RLKmalectin\_1037

CGGTCATGGCAATCGGATGCCGATTTCCGGTCTAAGGTTGCGGGGAAAACCACCGGAGCAACTGTAA  
AGCTATTTCTGCTATTA AAAATGTGATAAATGTAGATAGAGCACCAAATTAT

>PGSC0003DMG400000810RLKmalectin\_1098

CTGTTAAAGCTATTTCTGCTATTA AAAATGTGATAAATGTAGATAGAGCACCAAATTATTTTCCTTTGAAA  
TTGTACCAATCTGCAGTTACTGTAATTGGTGAAGGGGGTGAATTTTGG

>PGSC0003DMG400000810RLKmalectin\_1159

TCCTTTGAAATTGTACCAATCTGCAGTTACTGTAATTGGTGAAGGGGGTGAATTTTGGGAATATCAGTTA  
CCGGTAGACGCGAAATTGGATTACTTGTGTTGGTTTCATTTTGCTGAAAT

>PGSC0003DMG400000810RLKmalectin\_1220

TATCAGTTACCGGTAGACGCGAAATTGGATTACTTGTGTTGGTTTCATTTTGCTGAAATTGATGTTAGTG  
TGAATAAGGCAGGTAAAAGGGTGTGTTGAGATTGTAGTGAATGGTGAGAAT

>PGSC0003DMG400000810RLKmalectin\_1281

ATGTTAGTGTGAATAAGGCAGGTAAAAGGGTGTGTTGAGATTGTAGTGAATGGTGAGAATGTGAGTAGA

GTGGATATTTACAAGGAAGTTGGGAGTTTTGCAGCTTATGATTTCAAATATG

>PGSC0003DMG400000810RLKmalectin\_1342

GAGTAGAGTGGATATTTACAAGGAAGTTGGGAGTTTTGCAGCTTATGATTTCAAATATGTTGTTAAGAA

TTGAGTAGTGCTGAGTTGAGTGTGAGGTTTGTGCCTATTGTGGGTGCTCC

>PGSC0003DMG400000810RLKmalectin\_1403

GTTAAGAATTTGAGTAGTGCTGAGTTGAGTGTGAGGTTTGTGCCTATTGTGGGTGCTCCTGTGATTTGTG

GGCTGGAGAATTATGCTATTATTCCAGCTGATCTCAAGACTCTTCCCGCA

>PGSC0003DMG400000810RLKmalectin\_1464

TGATTTGTGGGCTGGAGAATTATGCTATTATTCCAGCTGATCTCAAGACTCTTCCCGCACAAAGGTATAGC

GAGATTTCAATTTATTTAAGAAGTTCGTTGAACTTGCCTGATTTGGTAAT

>PGSC0003DMG400000810RLKmalectin\_1525

AGGTATAGCGAGATTTCAATTTATTTAAGAAGTTCGTTGAACTTGCCTGATTTGGTAATTGACTCAGCTGT

TTATACCTGTGTTTGTAGTTGTTGCTATGAAAGCATTGAAGGAATCGCT

>PGSC0003DMG400000810RLKmalectin\_1586

ACTCAGCTGTTTATACCTGTGTTTGTAGTTGTTGCTATGAAAGCATTGAAGGAATCGCTTAAAGTCCGG

ATAGAATGGGATGGAATGGTGACCCCTGTGCTCCTACTACTTGGGATGCT

>PGSC0003DMG400000810RLKmalectin\_1647

AAGTCCGGATAGAATGGGATGGAATGGTGACCCCTGTGCTCCTACTACTTGGGATGCTTGGGAAGGTG

TTACTTGTGCTTCCACTACGAATGGATCGCTTGTGATCTCCCAAATGTATG

>PGSC0003DMG400000810RLKmalectin\_1708

GGAAGGTGTTACTTGTGCTTCCACTACGAATGGATCGCTTGTGATCTCCCAAATGTATGTGATTTCTTTTC

TGTCTTGTGATGTGGATAACAATTAGGTTAAATGTTGAGTGGAGAACAT

>PGSC0003DMG400000810RLKmalectin\_1769

ATTTCTTTTCTGTCTTGTGATGTGGATAACAATTAGGTTAAATGTTGAGTGGAGAACATGTGAGCTATTA

GCTAGTGTCTAGCCTGCTTTTGATGTTTGGATATCTTGATTGAGGTCATT

>PGSC0003DMG400000810RLKmalectin\_1830

GAGCTATTAGCTAGTGTCTAGCCTGCTTTTGATGTTTGGATATCTTGATTGAGGTCATTACTTTACTCTTA

GTTTGGTCCATTTGTAATTTGATAAGGGGTGTGTACTAACATGTGGTG

>PGSC0003DMG400000810RLKmalectin\_1891

TTTACTCTTAGTTTGGTCCATTTTCGTAATTTGATAAGGGGTGTGTACTAACATGTGGTGATAAGCACGTC  
ATAAGTGCATAATAACAATGTATAAAGTGGCTGTTTGTGTTAAGAACAT

>PGSC0003DMG400000810RLKmalectin\_1952

AAGCACGTCATAAGTGCATAATAACAATGTATAAAGTGGCTGTTTGTGTTAAGAACATTGGGACGAGC  
TAGAAAATAATGTAGAAGATTGAGAAACGAATCATATCTTACTTCTAGTT

>PGSC0003DMG400000810RLKmalectin\_2013

GGACGAGCTAGAAAATAATGTAGAAGATTGAGAAACGAATCATATCTTACTTCTAGTTGCAATACCGA  
ATTCCAGAGCATGATTAGAAGTGTAAAGGAGTTGTTGGAGCAGCTATTGCC

>PGSC0003DMG400000810RLKmalectin\_2379

CATTTGGGTTGGGGTGTCAATTCATCTTACTGAAGCCATGTAAAGAAGTGTGCGTGAATTAATGCACATT  
TCAGATCTATTAGTACACGAGCTCTTAGAAGCCACTGTAGTAACTGGACC

>PGSC0003DMG400000810RLKmalectin\_2440

ATGCACATTTAGATCTATTAGTACACGAGCTCTTAGAAGCCACTGTAGTAACTGGACCATTAAAGACTA  
AAGTGTGAAATTTCCATTGCTCCAGCCTCTTAAGACAGCATTCTCTTT

>PGSC0003DMG400000810RLKmalectin\_2745

TTCAGAGATCTTGGAAGCCAAGGCTTAAAGGGATATATCAGTGACCAAATTGGGCTCTTGTCTAATTTG  
GTAAGCTTGTAAGTACCTCTTAACAATTTTCTCTTAGATACTGGAATTTT

>PGSC0003DMG400000810RLKmalectin\_2806

CTAATTTGGTAAGCTTGTAAAGTACCTCTTAACAATTTTCTCTTAGATACTGGAATTTTACACGTTAATCCT  
CCTGCATAATATCTGAATCTACTCACTTGGTAGTCCTTCAAATGATT

>PGSC0003DMG400000810RLKmalectin\_3233

CATTTCTTTTTTACTTGAAATTGTCTTCTGTTTTGCGTCTTAGAACTATGAGTTTTATCAAGTCCACATAC  
ATAAATTGTTGAGCGTTATTGGAGTCCTGAATATTGATCCTGCCAGAT

>PGSC0003DMG400000810RLKmalectin\_3294

AGTCCACATACATAAATTGTTGAGCGTTATTGGAGTCCTGAATATTGATCCTGCCAGATTTTTCCGATCCA  
CTCAGTTGCTACTAGCATAACAACCTTACCTCTAGTAAATTCCTTTTATT

>PGSC0003DMG400000810RLKmalectin\_3355

TTCCGATCCACTCAGTTGCTACTAGCATAACAACCTTACCTCTAGTAAATTCCTTTTATTCTAGGGCCTTTT  
TTTTAAAGATATTATGTCTTATTGAAGTGCTTTTTGCTCAAATTTTCC

>PGSC0003DMG400000810RLKmalectin\_3477

AAACTCTCCTTAATTATTGATATTCTTGTTAATTAATAGGCGTAGAACCAAGTGCATAACTACTCTGTAGT  
TTAGGGCGGCACTTTACCATCTTTCTCTCTTTTTATGGGCTAACCCCTT

>PGSC0003DMG400000810RLKmalectin\_3538

ACTCTGTAGTTTAGGGCGGCACTTTACCATCTTTCTCTCTTTTTATGGGCTAACCCCTTTGTCAAAGTGGT  
TTGCCGTCATGTTATTGGAACTTGAAGCTTGAATTCATCATTGAA

>PGSC0003DMG400000810RLKmalectin\_366

AAGCAACTTCAAATTCTTCTATTACATTCTTCATTTTTTCAGTTTTTCAGTTTTTCATCAACTGTTATTGACTAA  
CTAGCTGTTTTGCTCTGTTTTTACAGATTATTCTTTGCATATTGATT

>PGSC0003DMG400000810RLKmalectin\_3721

TCTTCACCCTGCAGATTGTGTAAGCTCCATTCTTGTTCTCAATAATCTTTTCATGGATTTGTCGTTGCATA  
ATTCACTCTTTGTGAGGTACCAGTTGCTTATTCATGATTGTTGTAGA

>PGSC0003DMG400000810RLKmalectin\_427

GTTATTGACTAACTAGCTGTTTTGCTCTGTTTTTACAGATTATTCTTTGCATATTGATTGTGGGAGTCTCTC  
AAATTCAACTGATATCTTCAATACTGCATGGGTTTCCGACCGGTATTT

>PGSC0003DMG400000810RLKmalectin\_4453

ATTGTGCACACATAGTGCATCAACCACTAAGCATATATGCCAATGCTGTAACCTTTGGCACACTAACACT  
TGTTAAGTCGAACCCATGATGCCTTACTCACAGTAGAGCAGTACTACATG

>PGSC0003DMG400000810RLKmalectin\_4514

ACTAACACTTGTTAAGTCGAACCCATGATGCCTTACTCACAGTAGAGCAGTACTACATGGCTACAACACTAC  
TAGCAAATCACATATCCGGTGATGAATCACAACATAATCAAATAATTGTA

>PGSC0003DMG400000810RLKmalectin\_488

GGGAGTCTCTCAAATTCAACTGATATCTTCAATACTGCATGGGTTTCCGACCGGTATTTTACCGGCGGAG  
CAATTTCCGTTGTATCGGAACCTCTTCACTATCAGCACTCACAGGAGAAA

>PGSC0003DMG400000810RLKmalectin\_5063

ATTCAGCGGTGTTAAATACATCCTAACAATTCATATCCAAACTTGAACCTTGGTCAAATTCAAAGTCAATC  
TTCCGATTTAACATTGGTCAAACATTATCAAACAATGGATCCAACCCA

>PGSC0003DMG400000810RLKmalectin\_5124

AAAGTCAATCTTCCGATTTAACATTGGTCAAACATTATCAAACAATGGATCCAACCCAACTTGAGAGT

TCTCAATTCAGTGTTTTGGACCAAATCCATGCATTTCTATGGTTGAAC

>PGSC0003DMG400000810RLKmalectin\_5246

TAGTTCTGTGAAGGTAGAACTTGATGTACTATGACTATATTAATCCAATCAATCCTATTAATAAATCACC

TCATACAGTGCTAGTTTTACAATTCAAACTCATACCCATCAATAATCAT

>PGSC0003DMG400000810RLKmalectin\_5307

AAAAATCACCTCATACAGTGCTAGTTTTACAATTCAAACTCATACCCATCAATAATCATATAAATGACATC

TCTAATTAATAGAAATATGAAGATATCCATTCCTTCAATTTTTTAGCT

>PGSC0003DMG400000810RLKmalectin\_5368

AAATGACATCTCTAATTAATAGAAATATGAAGATATCCATTCCTTCAATTTTTTAGCTAAAGCTTGGTTT

TCTCCTCTTCTTCTCCCGTCTCCCTCTTCCAATTACTTTTTTCTCTGA

>PGSC0003DMG400000810RLKmalectin\_5429

AGCTTGGTTTTCTCCTCTTCTTCTCCCGTCTCCCTCTTCCAATTACTTTTTTCTCTGACGTTTGATAGCTTCT

ATAAAGCTACATTGCTTTGTGTTAATTCATCAATTGTACAACCTCA

>PGSC0003DMG400000810RLKmalectin\_549

CCGGCGGAGCAATTTCCGTTGTATCGGAACCTTCACTATCAGCACTCACAGGAGAAAACCTTCGTTA

TTTCCCATTTCATCTGGAAAGAAGAACTGTTATGTGATCCCCAATTTGT

>PGSC0003DMG400000810RLKmalectin\_5490

TTTGATAGCTTCTATAAAGCTACATTGCTTTGTGTTAATTCATCAATTGTACAACCTCAACCTACTTATAGC

CCTTTCTTTGTTTTAGGCTAAATGACAAAAATATTCTTTATTTTGGGT

>PGSC0003DMG400000810RLKmalectin\_5551

CTACTTATAGCCCTTTCTTTGTTTTAGGCTAAATGACAAAAATATTCTTTATTTTGGGTTATTATATTCTCCC

CTACTTAAATAACATTTGAGGGACACCAACTTTGGTGGTCATTTGGA

>PGSC0003DMG400000810RLKmalectin\_5917

CAGATTCCTGAATCCCCTTTGCAAACCAGGTATGTGCTCGTCCTCACATATAGGTTATTGGTAGGATAG

GATGGCTAATGTTTCGTCATATTTTGTATGTTCTGAATGAAATAACTTGG

>PGSC0003DMG400000810RLKmalectin\_5978

GTAGGATAGGATGGCTAATGTTTCGTCATATTTTGTATGTTCTGAATGAAATAACTTGGTTTTTGGAAAC

TATTAATTTAAATGATAGTGTATTCCATGTATTCATAAGTCATCATTAT

>PGSC0003DMG400000810RLKmalectin\_6039



TTTGAAACTATTAATTTAAATGATAGTGTATTCCATGTATTCATAAGTCATCATTATCTCTGAGGATTC  
ATACAGTCGACTGCAACTTGTCTAGGACTGAAGCTTAGTAATAGTAGTT

>PGSC0003DMG400000810RLKmalectin\_61

AAAAGTCAAGAAAATCAAAGCATCAATCTTGGCTTAACTTCCTCTTCCTCACAGCAATACCAGTCTTCTTC  
ATCTCCTTCATACATACTCTCTCCTACACTACCCGCCAATCTCGCACCC

>PGSC0003DMG400000810RLKmalectin\_610

CCTTCGTTATTTCCCATTTTCATCTGGAAAGAAGAACTGTTATGTGATCCCCAATTTGTCTTCCGGCAGGT  
ACCAGCTCCGGACGTTTACGGTGTATGATAATTACGACGGAAAGTCGCA

>PGSC0003DMG400000810RLKmalectin\_6100

CTGAGGATTCATACAGTCGACTGCAACTTGTCTAGGACTGAAGCTTAGTAATAGTAGTTGTTGTTACCTG  
ACTTTTAAGAATCCGGACTGCAAAAATCAAAGCTAAGCTGAGGGGTTCT

>PGSC0003DMG400000810RLKmalectin\_6161

TGTTACCTGACTTTTAAGAATCCGGACTGCAAAAATCAAAGCTAAGCTGAGGGGTTCTCTTATTAGCAA  
ATGAAATATGCCTCAAGGTGTGTGAATGCTTATAGACTTAATTTTTCTGA

>PGSC0003DMG400000810RLKmalectin\_6222

TATTAGCAAATGAAATATGCCTCAAGGTGTGTGAATGCTTATAGACTTAATTTTTCTGAATAGAATTTAAT  
ATTTAATAACCTATAAATATTATTAATAAATAAGTAAGTAAAGAAAACT

>PGSC0003DMG400000810RLKmalectin\_6283

AGAATTTAATATTTAATAACCTATAAATATTATTAATAAATAAGTAAGTAAAGAAAACTAGAGAAAGCA  
GAAAAATATTACTTAGAAAGATGGAAGACTTCTTGTTTGAAACTTCAAAGG

>PGSC0003DMG400000810RLKmalectin\_6344

AGAAAGCAGAAAAATATTACTTAGAAAGATGGAAGACTTCTTGTTTGAAACTTCAAAGGATTGAGAGGA  
GGTTTAGAGATGGCCGGTATGGCCATTTTTCGTAATTAGGGCTTTCGGTGC

>PGSC0003DMG400000810RLKmalectin\_6405

TGAGAGGAGGTTTAGAGATGGCCGGTATGGCCATTTTTCGTAATTAGGGCTTTCGGTGCATGTTTTGCCT  
TTAATATAATGAATGAGAAATCACGGGCTTAAGATGACTAAATGAAGTC

>PGSC0003DMG400000810RLKmalectin\_6466

GTTTTGCCTTTAATATAATGAATGAGAAATCACGGGCTTAAGATGACTAAATGAAGTCATTTAATAGCA  
GATGGTGCCTTCTAGGGTGGGTGGAAGAAGCTTGTGTCACCTGCTTTTGA

>PGSC0003DMG400000810RLKmalectin\_6527

TTAATAGCAGATGGTGCCTTCTAGGGTGGGTGGAAGAAGCTTGTGTACCTGCTTTTGATTCAACTCCTT  
TGTCTCTAAACTCGTAGAAAATGTAAAACACGAAAAAAGTAACAGGTT

>PGSC0003DMG400000810RLKmalectin\_6588

CAACTCCTTTGTCCTCTAAACTCGTAGAAAATGTAAAACACGAAAAAAGTAACAGGTTACTGTTATCTTT  
GAGGTCTTCTTGAAAAGGTCTACAATATAGTAAAATAATTGTCATGGTG

>PGSC0003DMG400000810RLKmalectin\_6649

TGTTATCTTTGAGGTCTTCTTGAAAAGGTCTACAATATAGTAAAATAATTGTCATGGTGGTGTCCCCAGT  
GCTTTCTGTTCTGTTAATAAAAGAAATGTAGTAGATATTGGTGAATTTTG

>PGSC0003DMG400000810RLKmalectin\_671

TCCGGCAGGTACCAGCTCCGGACGTTTACGGTGTATGATAATTACGACGGAAAGTCGCACTCGCCGTCG  
TTTGATGTTTCCGTTGAGGGTAATGTTGTCTTCAATGGAGGTCACCTTGG

>PGSC0003DMG400000810RLKmalectin\_6710

GTCCCCAGTGCTTTCTGTTCTGTTAATAAAAGAAATGTAGTAGATATTGGTGAATTTGTAGAGGTTTAC  
ATTTTGTTACTTCCTTCATGTACTAGTCTTTTCACTGATTTCTAACTGAA

>PGSC0003DMG400000810RLKmalectin\_6771

GAGGTTTACATTTTGTTACTTCCTTCATGTACTAGTCTTTTCACTGATTTCTAACTGAAAGCTTTTTTTGCTT  
CCACAGCCTCTTTGGTAATAAAGGGTTGTGCGGCGGACCTACTTTGC

>PGSC0003DMG400000810RLKmalectin\_6832

CTTTTTTTGCTTCCACAGCCTCTTTGGTAATAAAGGGTTGTGCGGCGGACCTACTTTGCCTGATTGTCCGT  
TATTCTGGAGTAAAATGGTCTCTCTACTGCTGGTAAAGTTGCAATTGG

>PGSC0003DMG400000810RLKmalectin\_6893

GATTGTCCGTTATTCTGGAGTAAAATGGTCTCTCTACTGCTGGTAAAGTTGCAATTGGATTATCATGTG  
TAGTGTTTATTGCGTGGTATTGTTGGTGGCGTACATTTGCTACAAGAGA

>PGSC0003DMG400000810RLKmalectin\_6954

TATCATGTGTAGTGTATTTGCGTGGTATTGTTGGTGGCGTACATTTGCTACAAGAGAAGGCAGAATGA  
TTATGACTTTGGTCTGCCACACGAGATGACGTGTAAGTGGTTTCTGGGAG

>PGSC0003DMG400000810RLKmalectin\_7015

GCAGAATGATTATGACTTTGGTCTGCCACACGAGATGACGTGTAAGTGGTTTCTGGGAGATTACAACAT

GTTATCTTTCCATAACATTCTTTTTTTGAGATCAAAGATAACATTATTCTC

>PGSC0003DMG400000810RLKmalectin\_7076

TACAACATGTTATCTTTCCATAACATTCTTTTTTTGAGATCAAAGATAACATTATTCTCTCCATCATGTCT

ATAAAAAATTGTGTTTCCACAACATGTTTAAACAAGATTTTCAAACAAAA

>PGSC0003DMG400000810RLKmalectin\_7137

CCATCATGTCTATAAAAAATTGTGTTTCCACAACATGTTTAAACAAGATTTTCAAACAAAAACCGGTGTTG

GCTAACATTTGCAAACAGTTTTATATTCCTTCATCTGTGCAACTCATACA

>PGSC0003DMG400000810RLKmalectin\_7198

CCGGTGTGGCTAACATTTGCAAACAGTTTTATATTCCTTCATCTGTGCAACTCATACA ACTGAATTCTAC

TTTCTTGTGGAATATCTTAGATATGATTTTTCTTCATTGCTATATCATA

>PGSC0003DMG400000810RLKmalectin\_7259

TGAATTCTACTTTCTTGTGGAATATCTTAGATATGATTTTTCTTCATTGCTATATCATAGTCATAGATTGTC

CATAATACTCGTCTTATATGTCCATATATTGTTCCCCTGTTATGGC

>PGSC0003DMG400000810RLKmalectin\_732

CGCCGTCGTTTGATGTTCCGTTGAGGGTAATGTTGTCTTTCAATGGAGGTCACCTTGGCATGAAACTAT

CTCACGCGACGGCGCGTATTCCGATCTGTTTTTTACAGTTTCTGATAATG

>PGSC0003DMG400000810RLKmalectin\_7320

CATAGATTGTCCATAATACTCGTCTTATATGTCCATATATTGTTCCCCTGTTATGGCACCATTTGTCCCC

CATATTCAATTCTTTATCTGCCTAACTGATTTTGGAAAGATTCAAACC

>PGSC0003DMG400000810RLKmalectin\_7381

CATTTGTCCCCCATATTCAATTCTTTATCTGCCTAACTGATTTTGGAAAGATTCAAACCAGACCAGTAGGC

TAACTATACCGTGGTAATATTTGTTCTGGTTTATGACCGATAATAGAGC

>PGSC0003DMG400000810RLKmalectin\_7442

ACCAGTAGGCTAACTATAACCGTGGTAATATTTGTTCTGGTTTATGACCGATAATAGAGCTTTAAGTTGGT

TTTGTGATGTATGAAATATGAACTTATGCGAATCATCATATTCTTAGAGA

>PGSC0003DMG400000810RLKmalectin\_7503

TAAGTTGGTTTTGTGATGTATGAAATATGAACTTATGCGAATCATCATATTCTTAGAGAAGTGCACATTA

TCAACTTTGTACCTGTTGCTAAAATCTTGGTATAGCAAGTTCACAATCAT

>PGSC0003DMG400000810RLKmalectin\_7564

TGCACATTATCAACTTTGTACCTGTTGCTAAAATCTTGGTATAGCAAGTTCACAATCATCTATATTTTTGTC  
TGGTGCCTGTTCTGAAATTAGCTGGATGTTTGATTACTTTCTTAACA

>PGSC0003DMG400000810RLKmalectin\_7625

ATATTTTTGTCTGGTGCCTGTTCTGAAATTAGCTGGATGTTTGATTACTTTCTTAACACAAAATTATCTGT  
TTCTATTGGGTATGCTGGATGATAGGTACCTTACTTCGGATTCTCCAA

>PGSC0003DMG400000810RLKmalectin\_7686

AAATTATCTGTTTCTATTGGGTATGCTGGATGATAGGTACCTTACTTCGGATTCTCCAAAATTGTTGTTGC  
ACTATATCGGATCCTCAAAAATGCTCTATTTTGGAGGATCTGACATGC

>PGSC0003DMG400000810RLKmalectin\_7808

CCGTTGAAATTTTGAAGAGTCTGAGCATCATAGTTTTCTATTTGTAGCTTGAATTTTCAGTTGCATTGTT  
GTTTATTCTGATTGTGAACTAATCTCTACACTCCGAAATTTGTCTTTA

>PGSC0003DMG400000810RLKmalectin\_7869

TTGATTGTTGTTTATTCTGATTGTGAACTAATCTCTACACTCCGAAATTTGTCTTTACAGCATTAGCTGC  
AAAGAGGAATAGGTACCAACGACAAAATCGCTGATGACTCTAGAAAT

>PGSC0003DMG400000810RLKmalectin\_793

TGAAACTATCTCACGCGACGGCGCGTATTCCGATCTGTTTTTTACAGTTTCTGATAATGAAGCTAATGTTT  
GTTTTTACAGTATTGCCACTGACTCACCGTTATTGCTTCTCTTGAAAT

>PGSC0003DMG400000810RLKmalectin\_7930

GCATTAGCTGCAAAGAGGAATAGGTACCAACGACAAAATCGCTGATGACTCTAGAAATGGAGAGCCA  
ACATGCCAAAGGATTTATACCAACATAACAATGCAACATGACATAATTTTGAT

>PGSC0003DMG400000810RLKmalectin\_7991

AGAGCCAACATGCCAAAGGATTTATACCAACATAACAATGCAACATGACATAATTTTGATGAAGTTCAACT  
TGCCAAATAGAGACAGATAGAAGTGGTGAGGTAACAAATTATGTCCCTA

>PGSC0003DMG400000810RLKmalectin\_8052

AGTTCAACTTGCCAAATAGAGACAGATAGAAGTGGTGAGGTAACAAATTATGTCCCTAAAGGGGTATG  
TAGAATTTAGATTTGTTTTGTAGAGTTCAATGTATGCCAATTTGTTTCATG

>PGSC0003DMG400000810RLKmalectin\_8113

GGGGTATGTAGAATTTAGATTTGTTTTGTAGAGTTCAATGTATGCCAATTTGTTTCATGAAAATCCACCA  
AACAGATTAGGCAAATGCCTCCATTGTATCATACCCAATTTTGGGCATTT

>PGSC0003DMG400000810RLKmalectin\_8174

AATCCACCAAACAGATTAGGCAAATGCCTCCATTGTATCATACCCAATTTTGGGCATTTGACAAACACAT  
GCTATATATGATTTGTGACTCATAAACTTGTAAATGCACATAGATATAGTC

>PGSC0003DMG400000810RLKmalectin\_8235

CAAACACATGCTATATATGATTTGTGACTCATAAACTTGTAAATGCACATAGATATAGTCAACTTTTGTGTTG  
TTTGATTCCATAATTCACATTATTGTGTACTCATAATGACATTACAATC

>PGSC0003DMG400000810RLKmalectin\_8286

ATATAGTCAACTTTTGTGTTTGTGATTCCATAATTCACATTATTGTGTACTCATAATGACATTACAATCTCT  
CGTTTATCGGTCATCGATTAATTACCATTTCCCCTGAATCAGTTCTTC

>PGSC0003DMG400000810RLKmalectin\_854

GCTAATGTTTGTGTTTTACAGTATTGCCACTGACTCACCGGTTATTGCTTCTCTTGAAATTACCCAAATTGAT  
CCAGCTTCTTATCTAGTCAATGACACTTCAATTTTGGTGAATTATGGT

>PGSC0003DMG400000810RLKmalectin\_915

CCCAAATTGATCCAGCTTCTTATCTAGTCAATGACACTTCAATTTTGGTGAATTATGGTAGATTTTCTAGC  
GGGTCCGATCAATGGGGACCCGTTTTAGCAACGATACTGATCGGTTCCG

>PGSC0003DMG400000810RLKmalectin\_976

ATTTTCTAGCGGGTCGGATCAATGGGGACCCGTTTTAGCAACGATACTGATCGGTTCCGGCCGGTCATG  
GCAATCGGATGCCGATTTCCGGTCTAAGGTTGCGGGGAAAACCACCGGAGC

>PGSC0003DMG400000819-(rev)LRR-RLPs\_1054

AAAGCTTTAAGTGGCAATTTTTTACTATGACATATAATCAAAGAAATTGATAGTATATTTGGAATGATAG  
CTAATTAGCCATAGAAGTTTGTGAAACCAAATTCATAATGAATATCAG

>PGSC0003DMG400000819-(rev)LRR-RLPs\_1178

TTCTTGGCTTGTGTTTTGTTTAGCAGTTTTGACAGACCAACATAGACAGAATATGTTTTAAACACAATGATA  
ATACAGGACAGGACAGAGCTTATACTAAATATACTCCGTTTCGTTTCAAT

>PGSC0003DMG400000819-(rev)LRR-RLPs\_124

AACAAAAAAGTACACATTTTTTTTTATATTTATGAAATGAAAGCATTTTAAGATACCCCTCTTGGAGTTT  
CTTCAATGTTATAAGTTCTAGTTTGGCTTTAAACACTTTTCTTGCATAG

>PGSC0003DMG400000819-(rev)LRR-RLPs\_1550

GGTTTTTGGTATGTTACTGACTTAAACATTGGACCTATACATGATAATTCTCTAAGTTGTGCACCAAATGT

GGAATTCAGCTCCAATCTGTTACATTAAAGCACCTAAAATCTCTCACA

>PGSC0003DMG400000819-(rev)LRR-RLPs\_1612

ACCAAATGTGGAATTCAGCTCCAATCTGTTACATTAAAGCACCTAAAATCTCTCACATTTTTCAATTGTTT  
CGTGTCGCCTCGCCATCATCCAACCTCAATCCCAACAGAGAGGTGGGA

>PGSC0003DMG400000819-(rev)LRR-RLPs\_186

TTGGAGTTTCTTCAATGTTATAAGTTCTAGTTTGGCTTTAAACACTTTTCTTGCATAGTTGACAAAGTTTAT  
TACTTTCAAGATTTTGTCAACCCAACCTCACTTTCAAGCATTTTTTTGG

>PGSC0003DMG400000819-(rev)LRR-RLPs\_248

CAAAGTTTATTACTTTCAAGATTTTGTCAACCCAACCTCACTTTCAAGCATTTTTTTGGGTTTTAAAGAGTGA  
TGGGGGTCTTCAAGAACTTGTATGTGATAAAGTTGTTATCTTTGAT

>PGSC0003DMG400000819-(rev)LRR-RLPs\_2666

AGATGTTTTGTAGTTGAACTATTCATGGTTATTCTACTATTGTTGAAATGAAAGGAATTTGACAATAGTG  
ATTTACCTTTTTTTTTTTGATATTTGTTGTTGTTTACTTGAAATGT

>PGSC0003DMG400000819-(rev)LRR-RLPs\_310

TAAAGAGTGATGGGGTCTTCAAGAACTTGTATGTGATAAAGTTGTTATCTTTGATCACTTTGTGTAC  
TCATTTCAAGAAATTTAGCTTCAAAGAGTGATGGGGTCTTCAAGAA

>PGSC0003DMG400000819-(rev)LRR-RLPs\_372

TTGTGTACTCATTTTCAAGAAATTTAGCTTCAAAGAGTGATGGGGTCTTCAAGAACTTGTGTGTG  
ACAAAGTTGTTTTCTTTAACACTTTGTGAACTCATTGTGTGATAAAGTT

>PGSC0003DMG400000819-(rev)LRR-RLPs\_434

TTTGTGTGACAAAGTTGTTTTCTTTAACACTTTGTGAACTCATTGTGTGATAAAGTTGTTATCTTTGAACA  
CTTTGTGTACTCATTTTCAAGAAAATTTAGCTAAGATAGGGGTCTTCA

>PGSC0003DMG400000819-(rev)LRR-RLPs\_496

TCTTTGAACACTTTGTGTACTCATTTTCAAGAAAATTTAGCTAAGATAGGGGTCTTCAAGAATTCTAACTA  
GTTTGTCTATGTGACAAAGTTCTAACTTTCAAGAATTTGTCAACTCAT

>PGSC0003DMG400000819-(rev)LRR-RLPs\_558

TTCTAACTAGTTTGTCTATGTGACAAAGTTCTAACTTTCAAGAATTTGTCAACTCATTTTCAAGAACTTT  
TTTGTCTACAAAAGTGATGAAGGGTTTCAAGAATTCAAGATTGTGTG

>PGSC0003DMG400000819-(rev)LRR-RLPs\_62

TGTTCCCTCCATTTCCCTGTTTGATTGGATACTTTTACCATTTTCCACCACTGCCCAATAAAACAAAAAAG  
TACACATTTTTTTTTATATTTATGAAATGAAAGCATTTTAAGATACCC

>PGSC0003DMG400000819-(rev)LRR-RLPs\_620

AAGAAACTTTTTGTCTACAAAAGTGATGAAGGGTTTCAAGAATTCAAGATTGTGTGTGTTAGTTATCT  
TCTTCTCCTCCATTTGGTGTTGGTGCAATGGTGATACTGAAAACATG

>PGSC0003DMG400000819-(rev)LRR-RLPs\_682

AGTTATCTTCTTCTCCTCCATTTGGTGTTGGTGCAATGGTGATACTGAAAACATGGGAGCTCAAATG  
GAGAAAAATGAGATAAATTCTCTTACTCAACCATTCAAGGCTTTGTTGG

>PGSC0003DMG400000819-(rev)LRR-RLPs\_806

TGGTGGAATGGTTCAGATCTTATCCAGATCCTTGTGGTTGGACTCCAATACAGGTAACACAAAAAAAT  
TACATAATTTTTTCACTTTTTAGTTACTTTTCTGCCTTAAGGATTCTGT

>PGSC0003DMG400000819-(rev)LRR-RLPs\_868

AAAAAATTACATAATTTTTTCACTTTTTAGTTACTTTTCTGCCTTAAGGATTCTGTTAAGTAAAAAGGTA  
AAAAAAAAAAAAAAAAAAAAAAAAACTATCTTTTTGTGCATATGGTTCTAA

>PGSC0003DMG400000819-(rev)LRR-RLPs\_930

TAAAAAGGTAAAAAAAAAAAAAAAAAAAAAAAAACTATCTTTTTGTGCATATGGTTCTAATTGCCTTTTATT  
ATTTTGTGGTATACATGACAAGATATGACTTCTCATTGTATATAGATTG

>PGSC0003DMG400000819-(rev)LRR-RLPs\_992

CCTTTTATTATTTTGTGGTATACATGACAAGATATGACTTCTCATTGTATATAGATTGTTTTAAAGCTTTAA  
GTGGCAATTTTTACTATGACATATAATCAAAGAAATTGATAGTATAT

>PGSC0003DMG400000888LRR-RLPs\_1952

TGTATAAAGTTGAACAAGAGCTTGATGCCTTGTTACAAATGAGGGAAAATAATAATGAACAGATATGAG  
CACCATGATGAAGCCAGTTTCTCCTCTCGAAGAAACAAATATCTTATTTT

>PGSC0003DMG400000888LRR-RLPs\_2013

GATATGAGCACCATGATGAAGCCAGTTTCTCCTCTCGAAGAAACAAATATCTTATTTAATATAGGTGG  
GAGCTGTCTTTGAGAATCTGCAGCAACAAGTAGAGGCACCAGTTTATTCA

>PGSC0003DMG400000888LRR-RLPs\_2074

TATAGGTGGGAGCTGTCTTTGAGAATCTGCAGCAACAAGTAGAGGCACCAGTTTATTCAGAACTTTCC  
AGGTATTTCCCGCAAGCCAAAATTTGGCATAAAAATAGGTATATACCTC

>PGSC0003DMG400000888LRR-RLPs\_2135

AACTTTCCAGGTATTTCCCGCAAGCCAAAATTTTGGCATAAAAATAGGTATATACCTCATGATTTGTTTT  
TCCTTACTAGTTGGTAGTGAAATATAGTTTACGTATGTATTTATGTCAG

>PGSC0003DMG400000888LRR-RLPs\_2196

GATTTGTTTTTCCTTACTAGTTGGTAGTGAAATATAGTTTACGTATGTATTTATGTCAGTTAATCTAAGAA  
ACTCCCTAAATGAAAGAATTGAATTATGAAAGATGTTTGAAGTTCTAAG

>PGSC0003DMG400000888LRR-RLPs\_2257

AATCTAAGAAACTCCCTAAATGAAAGAATTGAATTATGAAAGATGTTTGAAGTTCTAAGGAGTCCAGAG  
AAAAGGCAAAGGGTTGTTACTTATTCCCTAAGGTATCCACTGATCCAT

>PGSC0003DMG400000888LRR-RLPs\_2318

GTCCAGAGAAAAGGCAAAGGGTTGTTACTTATTCCCTAAGGTATCCACTGATCCATGGGTTTTAAAT  
TTATTAATAATATCATTTTGTATGCAAGGAAATCTCTGTTTTAAATACAAAT

>PGSC0003DMG400000888LRR-RLPs\_2379

GTTTTAAATTTATTAATAATATCATTTTGTATGCAAGGAAATCTCTGTTTTAAATACAAATATCTCTCAGTT  
ATGGCAGGGAGTTTGGGAGCACAATGTGAGACAGTGGAGGAAGCTGGAG

>PGSC0003DMG400000888LRR-RLPs\_244

GACTTCGGTTTAATAATAAGGAGGACGGAAAGCATATGATATTTTCGTATGTATTGAAAAAACCAGTGC  
ATTTGTATGTATGTCTAGTCGAAAAGCTTTTCCTGCTGGGATATAACGAAA

>PGSC0003DMG400000888LRR-RLPs\_2440

CTCTCAGGTTATGGCAGGGAGTTTGGGAGCACAATGTGAGACAGTGGAGGAAGCTGGAGTACACGGT  
GAGGTTAGTAAATCACCTCACATCTTATGATTTGCATCATATCGTGGTGCTCC

>PGSC0003DMG400000888LRR-RLPs\_2501

CACGGTGAGGTTAGTAAATCACCTCACATCTTATGATTTGCATCATATCGTGGTGCTCCATCTGTGCAAG  
CCATTATTCTGCTTTTCTTAGTACCACGTTTCAGATTTTGTATGCTAAGGT

>PGSC0003DMG400000888LRR-RLPs\_2562

CTGTGCAAGCCATTATTCTGCTTTTCTTAGTACCACGTTTCAGATTTTGTATGCTAAGGTTGTACTIONCAGTTT  
TTAACTATACCTGTTCCCTTGATCATGTCTTTCTGCAGATGTATACCC

>PGSC0003DMG400000888LRR-RLPs\_2623

TACTTCAGTTTTTAACTATACCTGTTCCCTTGATCATGTCTTTCTGCAGATGTATACCCTACCAATATAAAT



ATTCACCGTGTCATCGTTGGTAGATGAGGATGCCTTATAAGTTCTTC

>PGSC0003DMG400000888LRR-RLPs\_2684

CCAATATAAATATTTACCGTGTCATCGTTGGTAGATGAGGATGCCTTATAAGTTCTTCTAACAATCCACA  
GAGAAAAGGCAAAGTGTTGTTTCAAAGGTAGCCACTGATCCATGACTT

>PGSC0003DMG400000888LRR-RLPs\_2745

ACAATCCACAGAGAAAAGGCAAAGTGTTGTTTCAAAGGTAGCCACTGATCCATGACTTCAAACTAATT  
ACTAGTTCAATTTGATGCCCTCTTGTATGGAAGGGAGTTTGGGAAAAAG

>PGSC0003DMG400000888LRR-RLPs\_2806

AAACTAATTACTAGTTCAATTTGATGCCCTCTTGTATGGAAGGGAGTTTGGGAAAAAGATAAACTCATT  
GAAGGTCCAGCACAGTGTGAAACAATGGAGGAAGCTGGAGTACGAGGTTA

>PGSC0003DMG400000888LRR-RLPs\_2867

AAACTCATTGAAGGTCCAGCACAGTGTGAAACAATGGAGGAAGCTGGAGTACGAGGTAAATTTGAGGT  
TCGTTTCCCTCGTGATCTCTTTCACCTCTTAGTTTTGTTTTAAATTTTCTAT

>PGSC0003DMG400000888LRR-RLPs\_2928

TTGAGGTTTCGTTTCCCTCGTGATCTCTTTCACCTCTTAGTTTTGTTTTAAATTTTCTATTACATCAGATAAAA  
TATGTTGCCATTATCGAAAACATCAGAATACTAGCTGTGATAGAGTT

>PGSC0003DMG400000888LRR-RLPs\_2989

CATCAGATAAAATATGTTGCCATTATCGAAAACATCAGAATACTAGCTGTGATAGAGTTGGCTTATGACC  
TTCCATCTCTCTCTCTCTCTCTTTTTCGTAAATATTGAATGCTAGATT

>PGSC0003DMG400000888LRR-RLPs\_305

ACCAGTGCATTTGTATGTATGTCTAGTCGAAAAGCTTTTCTGCTGGGATATAACGAAAAGCTTTGCAAA  
CGACAATAGCATGGGCTATAATTAACAGAAGCTGTAATTATGGTTTTTCAG

>PGSC0003DMG400000888LRR-RLPs\_3050

CTTATGACCTTCCATCTCTCTCTCTCTCTCTTTTTCGTAAATATTGAATGCTAGATTAGTAAGCCAAGAC  
TGAATGCACCAATTCATGATTAGATGTTGTAATCGTTGTTGATTTAGG

>PGSC0003DMG400000888LRR-RLPs\_3111

TAAGCCAAGACTGAATGCACCAATTCATGATTAGATGTTGTAATCGTTGTTGATTTAGGAATATGCGACC  
TTTTTATCTTACTGTCTTCTGTCTCGCTTGTGGCTTTGATCTTCACAAA

>PGSC0003DMG400000888LRR-RLPs\_3172

TATGCGACCTTTTTATCTTACTGTCTTCTGTCTCGCTTGTTGGCTTTGATCTTCACAAAAGTAATAACAAGT  
AGCATCTATGTTTTGATTACTTATTTCAAGTGGTTTTAACAAGTTTCA

>PGSC0003DMG400000888LRR-RLPs\_3233

TAATAACAAGTAGCATCTATGTTTTGATTACTTATTTCAAGTGGTTTTAACAAGTTTCACTCTTTTGGTTTT  
GCAGTGCCTGTGAAGGCACATTGTTTTCTGCGCTCGTAACAGAACAAC

>PGSC0003DMG400000888LRR-RLPs\_3294

CTTTTGGTTTTGCAGTGCCTGTGAAGGCACATTGTTTTCTGCGCTCGTAACAGAACAACCAGACCCTTTCG  
CTGAGAAAGAGATTCACGGAACGACAAAAGTTATCCGTTCTCTTCAAAT

>PGSC0003DMG400000888LRR-RLPs\_3355

GACCCTTTCCTGAGAAAGAGATTCACGGAACGACAAAAGTTATCCGTTCTCTTCAAATCTTTATATATC  
AATTTACTGGTCTTATTAGTAAAGGTGACACAACCCCTCTCTTGGATCAG

>PGSC0003DMG400000888LRR-RLPs\_3416

TTATATATCAATTTACTGGTCTTATTAGTAAAGGTGACACAACCCCTCTCTTGGATCAGAATACCACGTTT  
CATTTTGAAATAAAATTATGTCTTCACATTGCTGATGAGTAGCCTGTCC

>PGSC0003DMG400000888LRR-RLPs\_3477

TACCACGTTTCATTTTGAAATAAAATTATGTCTTCACATTGCTGATGAGTAGCCTGTCCAAAATCATATAG  
CAGATGAATGTGCGCGGGAAGCAAGAAAGCTATGCTAAAAAGGGTCAAT

>PGSC0003DMG400000888LRR-RLPs\_3538

AATCATATAGCAGATGAATGTGCGCGGGAAGCAAGAAAGCTATGCTAAAAAGGGTCAATGAAAGAAAC  
ATTGGAACTACTATATCTACTACTCTGCATATATATAGTTTCATAATCAATT

>PGSC0003DMG400000888LRR-RLPs\_3599

AAGAAACATTGGAACTACTATATCTACTACTCTGCATATATATAGTTTCATAATCAATTATTGGTAATGGT  
AAGGAAGATTCAGAAAAGCTGTGCAATTGTAGACACTAATATTTGTTT

>PGSC0003DMG400000888LRR-RLPs\_3660

TGGTAATGGTAAGGAAGATTCAGAAAAGCTGTGCAATTGTAGACACTAATATTTGTTTTAATTAATTTG  
TCAACTCTTCTCTATTGCCCTTTTCAAAGTTAGCTGTTATCTGGTGACA

>PGSC0003DMG400000888LRR-RLPs\_3721

ATTAATTTGTCAACTCTTCTCTATTGCCCTTTTCAAAGTTAGCTGTTATCTGGTGACACAAAATTGTTTA  
GATTATTTTTATTGATTCAGTCTGTTGAAGACTGAGCAATACTTTGCT

>PGSC0003DMG400000888LRR-RLPs\_3782

AAAATTGTTTAGATTATTTTTATTGATTCAGTCTGTTGAAGACTGAGCAATACTTTGCTGGATTAAAGACT  
TTTAGCTGTCCATTGTGTACATATTACGATGAAGTTTTCGTGTAGGGGA

>PGSC0003DMG400000888LRR-RLPs\_3843

ATTAAAGACTTTTAGCTGTCCATTGTGTACATATTACGATGAAGTTTTCGTGTAGGGGACTGGTCTTTGA  
AGGAATTCCTAATACCACAATATTTCTAATCAACTGGAGTAGACATTAA

>PGSC0003DMG400000888LRR-RLPs\_3904

GGTCTTTGAAGGAATTCCTAATACCACAATATTTCTAATCAACTGGAGTAGACATTAAAGAAGCTTCACA  
GAAATTCCTATTACTTCTATAGTTCTATTAATATTCAATGAAAATGTAC

>PGSC0003DMG400000888LRR-RLPs\_3965

AGCTTCACAGAAATTCCTATTACTTCTATAGTTCTATTAATATTCAATGAAAATGTACCACATATAATTTG  
ACTAGATCCAACAATAATAATTTATTTAACTGGAGTAAACCGAATGCT

>PGSC0003DMG400000888LRR-RLPs\_4758

CATCCAAATTTAGATGCTTCTACGAAACCTAGACTTATTCTACAATACAACAGGAATCTATACCTTCAAAA  
TGAGTTAATTTAGTTAGAGAGAATACACAATAATCTTCAAAATGTGCAA

>PGSC0003DMG400000888LRR-RLPs\_488

AGCTTTTCGACTCGACTCTAAACCTGAGAAATTTGAGACTATTGTGTATAAGCTTTGGCATTGTATTAAT  
TTATTGAGTGATAACATACGCAGGGAGTGTATTTATACACATACAAGAG

>PGSC0003DMG400000888LRR-RLPs\_549

TTGTATTAATTTATTGAGTGATAACATACGCAGGGAGTGTATTTATACACATACAAGAGTTAGACTTAAC  
CTAAGACTAGTTCTTCTAATACAATAGGGAGACTAACTAGTTGGATTCAC

>PGSC0003DMG400000888LRR-RLPs\_610

AGACTTAACCTAAGACTAGTTCTTCTAATACAATAGGGAGACTAACTAGTTGGATTCACTACTCTTACCTT  
GTCTCTGAAGAATATGGTGGTCCTTTGCTAGAGTCTTTGTATGAATGTC

>PGSC0003DMG400000888LRR-RLPs\_6161

TAAAAGAAAAAATTGTTGGTACTGTCTCAATTACTACTTCATTTTATCATAACATGATTTTTTTTTTTTCA  
ATTTGACTCTTTAGAACTTGTCAAAAATTGTAATACTAGAAATTAGAA

>PGSC0003DMG400000888LRR-RLPs\_6222

TTTTTTTTTCAATTTGACTCTTTAGAACTTGTCAAAAATTGTAATACTAGAAATTAGAAATATAGAATTAAT

TGCATAAAGTATTTCTCTTTAGCAACATTTTTCTTAAGAAAGTCCTAA

>PGSC0003DMG400000888LRR-RLPs\_6283

ATAGAATTAATTGCATAAAGTATTTCTCTTTAGCAACATTTTTCTTAAGAAAGTCCTAACTAATATTTTACC  
TCTTTTTTTTTTTTTTTTTTTAGTGTTGCTAGCTTTTCAAGCGAAATA

>PGSC0003DMG400000888LRR-RLPs\_6344

AATATTTTACCTCTTTTTTTTTTTTTTTTTTTAGTGTTGCTAGCTTTTCAAGCGAAATAATAAATAATGCAAA  
ATATGATGAAATTTGGCATTGCAAGGAGTTATAAAGTAGTCATGAGA

>PGSC0003DMG400000888LRR-RLPs\_6405

AAATAATGCAAAATATGATGAAATTTGGCATTGCAAGGAGTTATAAAGTAGTCATGAGATTTTAAACAA  
ACATTTGAAGTTGTGCTTTGTAGACTAATGGATCTTTTATCAGGGGACCAA

>PGSC0003DMG400000888LRR-RLPs\_6771

TGGAACAAAGGTACAATTACTGAATACAGTTTTATTTATGCTTCTTTTTGTCAAATACATCTTGACCATTCT  
AATTGAAAACTTGACATAAAAATAAAGTAAAACAATTTCTAATTTCA

>PGSC0003DMG400000888LRR-RLPs\_6832

TTGACCATTCTAATTGAAAACTTGACATAAAAATAAAGTAAAACAATTTCTAATTTACACAAAAATATTG  
TGTTGACTCTCATAATCTGAATGTCCTTACTCATTTTTTCGTGTAAGGGA

>PGSC0003DMG400000888LRR-RLPs\_6893

CAAAATATTGTGTTGACTCTCATAATCTGAATGTCCTTACTCATTTTTTCGTGTAAGGGAGTAAAATTATAC  
GATTGCCCACTAGCCTAATTCGCATTCTTTCTATGTTCTGAATTGCAGC

>PGSC0003DMG400000888LRR-RLPs\_976

GATAATCATAATGAAATTATAGCCAATTGTCAAGTTAAGGGGTTTAGATATTCTACCTTTTATTTATGGT  
AGTAACTCTTTTATTTAGTTTCTTTCTGTGTTTTGAATAGGAGCTTTTG

>PGSC0003DMG400000915-G-LecRK\_1342

TCTTACCTTTACAGGAATCTCCTACTCATGGCGCTGGGTTTCATTATGTGGAGAAGATCTAGACCCCAA  
AGAATGGGAAAGATAGAGTCGAAAAAAGCCAACCCAGTTCTCCTTCTT

>PGSC0003DMG400000915-G-LecRK\_1403

TAGACCCCAAAGAATGGGAAAGATAGAGTCGAAAAAAGCCAACCCAGTTCTCCTTCTTCAGAGGATCT  
GGATGCCTTCTCCATCCAGGATTACCTGTACGGTTTGAGTACAAACAGCT

>PGSC0003DMG400000915-G-LecRK\_1830

GTTGAAATAGCTATTGGTTCTGCCCGCGGACTTGCATACTTGCACAGTGGCTGTGAACAAAAGATTGTTCACTGTGATGTGAAGCCAGAGAACATTCTTGCACGATAATTTTCAGGTG

>PGSC0003DMG400000915-G-LecRK\_2379

AGTGTTGTTAGCATGTTAGAGGGAGAGATACCACCGACTGCGCCAAGAATGGAATCTCTAAACTTTTTACGCTTCTATGGGCGACGGTTTTTCAGAGGCATCAAACATGGAAGAACTGGA

>PGSC0003DMG400000915-G-LecRK\_2440

ACTTTTTACGCTTCTATGGGCGACGGTTTTTCAGAGGCATCAAACATGGAAGAACTGGAGGCCAGATAGATGCCATGTTATATCCGCAGGCAAATACTTCTCATAACAACCTCTCGGAGCG

>PGSC0003DMG400000996-(rev)LRR-RLKs\_0

GGCTGTTGTCTCTTTTTGCCTTAAACTTGAAGTCTTCTAAAATTTCTACTCCACATATTGCTGCAGGCA TGAAGTCTTTAATGTTTTCTTTGTGTTATGTTTTCTTGCTTATTAT

>PGSC0003DMG400000996-(rev)LRR-RLKs\_124

TCTTTCTGTAGATGCATCTTCCAGGCTTGCTGGAAATGAAACGGATCGGTTAGCCCTCCTCAGCATCAAA GCACAGATAACATATGATCCTTCTGGTGTACGAATTCTTGGAATGATTC

>PGSC0003DMG400000996-(rev)LRR-RLKs\_1550

CAACTAGACCTGTCTGGAAACCAGTTAAGTGGATCACTTCCCCTTGAAGTAGGAAGTTTAGTCAATCTCG GGTATCTTGATATATCCGAGAACAAGTTATCTGGAAAACCTCCGAGCACT

>PGSC0003DMG400000996-(rev)LRR-RLKs\_1612

CAATCTCGGGTATCTTGATATATCCGAGAACAAGTTATCTGGAAAACCTCCGAGCACTTAAGCAGTTGC ATCAAGTTGGAAAACCTCTATGTTTCAGGAAAACATGTTTGAAGGTGTGAT

>PGSC0003DMG400000996-(rev)LRR-RLKs\_186

GCATCAAAGCACAGATAACATATGATCCTTCTGGTGTACGAATTCTTGGAATGATTCCTCCATCATTGT AGTTGGCAAGGCGTTACATGTAGTGCTCGACATCAAAGGGTGAATGC

>PGSC0003DMG400000996-(rev)LRR-RLKs\_1860

ATTTTGAGGGTGAAGTACCTCGAGAAGGAGTTTTTCAGTAATGCAAGTGCAGCAATAGTCAACGGAAAC AGAAATCTTTGTGGAGTTCTTCCGCGCTAAAACCTACCACAATGCAACTTTC

>PGSC0003DMG400000996-(rev)LRR-RLKs\_1922

GGAAACAGAAATCTTTGTGGAGGTTCTTCCGCGCTAAAACCTACCACAATGCAACTTTCCAACATCAAAGA AGGGAAGATTAATGTCATCAACCTTGAAGATAGCTATATCTATTGCTAGT

>PGSC0003DMG400000996-(rev)LRR-RLKs\_1984

ATCAAAGAAGGGAAGATTAATGTCATCAACCTGAAGATAGCTATATCTATTGCTAGTGCATTATTTGGA  
GTAGCACTTGTTCTGGTGCTCCTAATTTTGTGTTTCTTAAAGAGGAAACG

>PGSC0003DMG400000996-(rev)LRR-RLKs\_2232

GAATTCTTGGTCCAGATGAAAAAACTGTCGCGATCAAAGCACTCGATTTGCAGCATAAAGGAGCTTTGA  
AAAGCTTCATTGCAGAATGTGAAGTCTAAAGAACCTCAGGCATAGAAATC

>PGSC0003DMG400000996-(rev)LRR-RLKs\_2356

CAAGTTAGTAACTGCATGCTCAGGTACTGACTTTCAAGGCAATGATTTTAAGGCCCTCATTTACGAGTTC  
ATGGTTAATGGTAGCCTAGATGATTGGCTACATTCATTTTCTAATGATGG

>PGSC0003DMG400000996-(rev)LRR-RLKs\_2604

ATATCCTTCTAGACAAGGACATGACTGCCCGTGTGGCGATTTTGGTTTATCAAGATTCCTCCAAGAAAC  
ATCTCAAAGAGAACTAGCACTATTGGTATCAAAGGATCAGTTGGCTATG

>PGSC0003DMG400000996-(rev)LRR-RLKs\_372

GAGAACTAATTCTTCAAATAACACCTTTAACAGTCAGATACCACGCGAAATCGGAAGGCTATTCAGGTT  
GAAGAATTTAGTGCTTAAGGACAACCTCATTTACTGGTGATATTCCAGTGG

>PGSC0003DMG400000996-(rev)LRR-RLKs\_62

GCTGCAGGCATGAAGTCTTTAATGTTTTCTTTGTGTTATGTTTTCTTGCTTATTATGTGTTCTTTCTGTA  
GATGCATCTTCCAGGCTTGCTGGAAATGAAACGGATCGGTTAGCCCTC

>PGSC0003DMG400000996-(rev)LRR-RLKs\_620

ACAGGTGAACTACCATATTCTTTGGGTAATCTTTCATCCCTTATTGCCTTAGCAGCAATAGAGAATAGATT  
AGAAGGAAGTATTCCGTATTCGTTAGGCCAATTGACTAACTTGAGTTAT

>PGSC0003DMG400001016-(rev)LRR-RLPs\_0

ATGTTCTAGTAATTTATGCAATTATGAAAAAAGCCAATTGCTCTTTCCTCTTGACACTCTTGTTGCTTCAC  
TATGTCATGGCTACTTCAGCCATGAACCAACAAACTTTTCTACCGAT

>PGSC0003DMG400001016-(rev)LRR-RLPs\_1037

TCCACAAGATATTGGGATTCTTGATAATTTGGAGGTTTTGGGGCTAGAGAGAAACCATCTAACTGGGAG  
CATCCCAATCTCCATATTCAATATCTCCTCGTTGCAAACGATGTCATTGGA

>PGSC0003DMG400001016-(rev)LRR-RLPs\_1098

ACTGGGAGCATCCCAATCTCCATATTCAATATCTCCTCGTTGCAAACGATGTCATTGGAAATGAACAATC

TCATGGGATCCTTACCGAGGGAGATAGGCAACTTGAACAAATTGCGGATT

>PGSC0003DMG400001016-(rev)LRR-RLPs\_1159

TGAACAATCTCATGGGATCCTTACCGAGGGAGATAGGCAACTTGAACAAATTGCGGATTCTATATCTTG

GTTACAATATGCTAACAGGTATGTAAGTAGTCATTGGGTTATTGAAAACAT

>PGSC0003DMG400001016-(rev)LRR-RLPs\_122

ATCTGCTCTCCTTTCCTTAAAATCTCAAATCATTTTGGACCCTTTTCACTTGTTGGATGAAAGTTGGTCTCC

AACTACTTCTGTTTGCCATTGGGTTCGGAGTCACTTGTGGTTCTCGCCA

>PGSC0003DMG400001016-(rev)LRR-RLPs\_1220

ATATCTTGTTACAATATGCTAACAGGTATGTAAGTAGTCATTGGGTTATTGAAAACATAAATTCAAGCA

ACTTGAACATTAGTCACGGAAGTGGTCAAACAATAACGTAAAAGAATTG

>PGSC0003DMG400001016-(rev)LRR-RLPs\_1281

ATCAAGCAACTTGAACATTAGTCACGGAAGTGGTCAAACAATAACGTAAAAGAATTGGCAGGGACAA

TACCACAGGAAATCGGGATTCTTGATAATTTGGTGAATTAGGACTAGATA

>PGSC0003DMG400001016-(rev)LRR-RLPs\_1342

AGGGACAATACCACAGGAAATCGGGATTCTTGATAATTTGGTGAATTAGGACTAGATAGCAACCAGAT

TACGGGTCATATCCCAATCTCCATATTCAATATCTCCTCGCTGGAGACGTT

>PGSC0003DMG400001016-(rev)LRR-RLPs\_1403

AACCAGATTACGGGTCATATCCCAATCTCCATATTCAATATCTCCTCGCTGGAGACGTTGTATTTGGAAA

GGAACCACCTCATTGGATCCTTGCCAGGGGAGGTTGGCAACTTGACCAA

>PGSC0003DMG400001016-(rev)LRR-RLPs\_1769

AAGGCAGATGGAACTAAAGTATCATTACTAGTTGTACCTTACTATTTAACAATCATACATTTGCAGGT

AAAATACCAGACGTAAGCAATCTCGTTGAATTGGTTGAAATTTACTTGG

>PGSC0003DMG400001016-(rev)LRR-RLPs\_183

AGTTGGTCTCCAATACTTCTGTTTGCCATTGGGTTCGGAGTCACTTGTGGTTCTCGCCACCAGAGAGTGA

GATCACTCAATATTTCCAATATGGCATTAAATCGGAAAAATTCCTTCTCAT

>PGSC0003DMG400001016-(rev)LRR-RLPs\_1830

ATTTGCAGGTAAAATACCAGACGTAAGCAATCTCGTTGAATTGGTTGAAATTTACTTGGGTCTCAACAAG

TTTACCGGTGCACTTCCAACGGAATCTTCAACATGTCAGGGATGAGAGT

>PGSC0003DMG400001016-(rev)LRR-RLPs\_1891

CTCAACAAGTTTACCGGTGCACTTCCAACGGAActCTTCAACATGTCAGGGATGAGAGTGATCGAACTT  
GTGCGAAATAATCTGACAGGAAGCGTCCTCCCATTGAGCATAGGTTCTATG

>PGSC0003DMG400001016-(rev)LRR-RLPs\_1952

TCGAACTTGTGCGAAATAATCTGACAGGAAGCGTCCTCCCATTGAGCATAGGTTCTATGTTACCCAACAT  
TGAAGGTCTTTATCTATCTAGTTTAAATCTTTTTGGAActATACTCATT

>PGSC0003DMG400001016-(rev)LRR-RLPs\_2013

ACCCAACATTGAAGGTCTTTATCTATCTAGTTTAAATCTTTTTGGAActATACTCATTCTCTTCAATTG  
TTCCAAACTCATTATCTTGACCTTTCTTATAACAACTAACC GGTTT

>PGSC0003DMG400001016-(rev)LRR-RLPs\_2074

CTCTTCAATTGTTCCAAACTCATTATCTTGACCTTTCTTATAACAACTAACC GGTTTGATCCCAAActCT  
TTCGGATATATGACTCATCTAAAGTACCTAGGCTTGGGGGGGAACAAT

>PGSC0003DMG400001016-(rev)LRR-RLPs\_2135

TCCCAAActCTTTCCGGATATATGACTCATCTAAAGTACCTAGGCTTGGGGGGGAACAATTTAATGAGTGA  
CACTAGGTCGAGCTTCTTTCTTCTTATCAAATTGTAGAGAATTACAAT

>PGSC0003DMG400001016-(rev)LRR-RLPs\_2196

AATGAGTGACACTAGGTCGAGCTTCTTTCTTCTTATCAAATTGTAGAGAATTACAATTTCTTGATGTAT  
CGTTGAACCCGTTGAATGTTGTGCTTCCAGTTTCAGTTGGAAATGTCTC

>PGSC0003DMG400001016-(rev)LRR-RLPs\_2257

CTTGATGTATCGTTGAACCCGTTGAATGTTGTGCTTCCAGTTTCAGTTGGAAATGTCTCTCTTGTAAGTT  
AATGGTTGTTGAATGTGGACTTAAAGGGGAAATCCGAAAGGAATTGGG

>PGSC0003DMG400001016-(rev)LRR-RLPs\_2318

TTGTAAAGTTAATGGTTGTTGAATGTGGACTTAAAGGGGAAATCCGAAAGGAATTGGGAACTTAAGTA  
GCTTAATAGACCTCGATCTCTCTGGAAATGGTTTGGTTGGATCAATTCCCA

>PGSC0003DMG400001016-(rev)LRR-RLPs\_2379

CTTAAGTAGCTTAATAGACCTCGATCTCTCTGGAAATGGTTTGGTTGGATCAATTCCCACAACAATTAGC  
AACTTGAGACTCCTTCAGAGTCTTAAGTTGAGTGGCAATAAACTTTCTGG

>PGSC0003DMG400001016-(rev)LRR-RLPs\_244

AGAGAGTGAGATCACTCAATATTTCCAATATGGCATTAAATCGGAAAAATTCCTTCTCATATCGGGAACTCT  
CACATTTCTGTTTCCCTCGACTTGAGTCACAACAActTGTATGGCAATT



>PGSC0003DMG400001016-(rev)LRR-RLPs\_2440

ACAATTAGCAACTTGAGACTCCTTCAGAGTCTTAAGTTGAGTGGCAATAAACTTTCTGGATTTATCGGAG  
ACAATCTATGTAAATTGCAGAACCTGGGGTATATACATTTGGATCAAAAT

>PGSC0003DMG400001016-(rev)LRR-RLPs\_2562

ACTTTCAGGATCTCTTCCTAATTGTTTCGGGAACTTAACTTCCCTTCGGGAGATATTTTTAGGTACCAACA  
AGTTGCATTCAAACATTCCAGCTAATTTAGGAAACCTCAAAAATCTCCT

>PGSC0003DMG400001016-(rev)LRR-RLPs\_2623

GGTACCAACAAGTTGCATTCAAACATTCCAGCTAATTTAGGAAACCTCAAAAATCTCCTAACCTTGATTT  
ATCCTCGAACAACTTGACTGGCTCTTTACCTCGAGAAATCGGAAGTCTA

>PGSC0003DMG400001016-(rev)LRR-RLPs\_2684

ACCTTGATTTATCCTCGAACAACTTGACTGGCTCTTTACCTCGAGAAATCGGAAGTCTAAAGGCCATGAT  
ACAGATGGATCTTTCGATGAATAAACTCTCGAATGGCATACTGAAGAAA

>PGSC0003DMG400001016-(rev)LRR-RLPs\_2745

GGCCATGATACAGATGGATCTTTCGATGAATAAACTCTCGAATGGCATACTGAAGAAATTGGTAGCTT  
GCAAAATCTGATACACCTTTCATTGAGAGACAACAAATTGCAAGGTTCAAT

>PGSC0003DMG400001016-(rev)LRR-RLPs\_2806

GGTAGCTTGCAAAATCTGATACACCTTTCATTGAGAGACAACAAATTGCAAGGTTCAATTCCTAGCTCAA  
TGAGCAGCATGTCAGCTTTGGAATATCTAGACCTTCTCATAACAATGTC

>PGSC0003DMG400001016-(rev)LRR-RLPs\_2867

CTAGCTCAATGAGCAGCATGTCAGCTTTGGAATATCTAGACCTTCTCATAACAATGTCTCGGGATTAATT  
CCCAAGTCTTTGGAGAAGCTTCTAAATCTCAAGTATTTCAACGTTTCAT

>PGSC0003DMG400001016-(rev)LRR-RLPs\_2928

GGGATTAATCCCAAGTCTTTGGAGAAGCTTCTAAATCTCAAGTATTTCAACGTTTCATTCAACAATTTGG  
TTGGTGAAATCCCCTCGAGCGGTCCTTTCAAGAACCTATCCAGTCAGTC

>PGSC0003DMG400001016-(rev)LRR-RLPs\_305

CGGGAATCTCACATTTCTGTTTCCCTCGACTTGAGTCACAACAACCTTGATGGCAATTTGCCTCAAGAAA  
TAGCACATCTACGTCGATTAAGGTTTCTTAATTTGGGTGTTAATATGCT

>PGSC0003DMG400001016-(rev)LRR-RLPs\_3050

TCATATCCAATGAAGCATTGTGTGGTTCTTCAAGATTTCTGTGTCCCCCATGCCATAGTGGAACCTCAAA

GCATAGATCCAAGAGAAAAAAGTACTTGTTTTGATTCTACCGTTGGAA

>PGSC0003DMG400001016-(rev)LRR-RLPs\_3111

AACTTCAAAGCATAGATCCAAGAGAAAAAAGTACTTGTTTTGATTCTACCGTTGGAATTGCACTTGTA  
TTAGTGTCCATCGCCTTTGCGTTTGTATGGATAAAGTATATAAGAGGAAA

>PGSC0003DMG400001016-(rev)LRR-RLPs\_3172

GCACTTGTATTAGTGTCCATCGCCTTTGCGTTTGTATGGATAAAGTATATAAGAGGAAAATCAACTGATC  
CTCAACTAGGAGTTGATCCGTCCTCTTTTGTCTCAACAAGAGGAAGAATT

>PGSC0003DMG400001016-(rev)LRR-RLPs\_3233

CAACTGATCCTCAACTAGGAGTTGATCCGTCCTCTTTTGTCTCAACAAGAGGAAGAATTTCATACTATGA  
ATTGCTCCAAGCAACTGATCACTCAACGAGAGCAATTTGATTGGTTCAG

>PGSC0003DMG400001016-(rev)LRR-RLPs\_3294

ATACTATGAATTGCTCCAAGCAACTGATCACTCAACGAGAGCAATTTGATTGGTTCAGGGAGTTTCGGC  
TCTGTTTACAAAGGCATCCTAAGAGATGGGACTTTCATTGCAGCTAAAGT

>PGSC0003DMG400001016-(rev)LRR-RLPs\_3355

AGTTTCGGCTCTGTTTACAAAGGCATCCTAAGAGATGGGACTTTCATTGCAGCTAAAGTGTTCATCTAC  
AATTGCAAGCGGCATTTAGGAGTTTCGATACAGAATGTGAAGTTTTGCGC

>PGSC0003DMG400001016-(rev)LRR-RLPs\_3416

TCAATCTACAATTGCAAGCGGCATTTAGGAGTTTCGATACAGAATGTGAAGTTTTGCGCAATCTTCGCCA  
TAGGGATCTCACAAAGTCATCACTAGTTGTTCCAACCTTGATTTTAAGG

>PGSC0003DMG400001016-(rev)LRR-RLPs\_3538

TTGGTACTCGAATACATGTCCAATGGGAGCCTCGATAAGTGGTTGTATTCACACAACACTACTTCTTAGACA  
TCAAGCATAGGCTGAGTATAATGATTGATGTAGCATGTGCATTAGAATAT

>PGSC0003DMG400001016-(rev)LRR-RLPs\_3599

TCTTAGACATCAAGCATAGGCTGAGTATAATGATTGATGTAGCATGTGCATTAGAATATCTCCACCATGG  
CTGCTCATTGCCCGTGATACACTGTGATTTGAAGCCTAGTAACATCTTGT

>PGSC0003DMG400001016-(rev)LRR-RLPs\_366

CCTCAAGAAATAGCACATCTACGTCGATTAAGGTTTCTTAATTTGGGTGTTAATATGCTTAGCGGGGAGG  
TTCCTTCATGGTTTGGGAACTTACACAACTTCAAGTTCTGAATCTTAGG

>PGSC0003DMG400001016-(rev)LRR-RLPs\_3660

CCACCATGGCTGCTCATTGCCCGTGATACACTGTGATTTGAAGCCTAGTAACATCTTGTTGGACGAGGAC  
ATGCTTGCACACCTAAGTGACTTTGGCATTTCAAAAATGATTTCTGAAGA

>PGSC0003DMG400001016-(rev)LRR-RLPs\_3782

AGAGTGCTTTATACTAAAACCTTAGCAACATTGGGTTATATCGCACCAGGTAAGTTATCTTAATTAATT  
GTTTTTTTTTTTTGAATATTTTCTTTTCTTTTCTGCCAAGAAATGTT

>PGSC0003DMG400001016-(rev)LRR-RLPs\_3843

TTAATTAATTGTTTTTTTTTTTTGAATATTTTCTTTTCTTTTCTGCCAAGAAATGTTGAATATAAAATTCT  
CATTGTAGAGTATGGATTGGAAGGAATGGTGTCAACCAAATGCGATG

>PGSC0003DMG400001016-(rev)LRR-RLPs\_3904

ATATAAAATTCTCATTGTAGAGTATGGATTGGAAGGAATGGTGTCAACCAAATGCGATGTTTATAGTTAT  
GGGATAATGTTGATGGAAACATTTACAAGGACAAAGCCTAGTAATGAGAT

>PGSC0003DMG400001016-(rev)LRR-RLPs\_3965

TATAGTTATGGGATAATGTTGATGGAAACATTTACAAGGACAAAGCCTAGTAATGAGATGTTTATGATGGA  
GATCTTAGCTTAAAGCAATGGGTGAGCAATCACTCCCACATGCAGTAATG

>PGSC0003DMG400001016-(rev)LRR-RLPs\_4087

AGTTATCGATCCCAACTTAATAACACCACAAGATAATCACTCAGTGAAAAAATTGATTGTGTGGTATCC  
ATCATGAAAATAGCAATAAATTGTTGTGTTGAATCTCCTAAAGGAAGGAT

>PGSC0003DMG400001016-(rev)LRR-RLPs\_4148

GTGGTATCCATCATGAAAATAGCAATAAATTGTTGTGTTGAATCTCCTAAAGGAAGGATTGACATGAAA  
GATGTTGCCGCGAGGTTAAAAACCATCAAGATTCAACTTCTTGAATGTTGA

>PGSC0003DMG400001016-(rev)LRR-RLPs\_4209

ACATGAAAGATGTTGCCGCGAGGTTAAAAACCATCAAGATTCAACTTCTTGAATGTTGAACAAGTTCTCA  
GGTTTAAACAATGTTTGCTAGAACATTGATCCTTTAAATATGCTATAGAT

>PGSC0003DMG400001016-(rev)LRR-RLPs\_427

GCGGGGAGGTTCTTCATGGTTTGGGAACCTTACACAACTTCAAGTTCTGAATCTTAGGAATAATAGTTT  
CAATGGTTTCATCCCCTCTCTATTATCTAATATTTCCGGGCTTCAAACCTT

>PGSC0003DMG400001016-(rev)LRR-RLPs\_4270

AAGTTCTCAGGTTTAAACAATGTTTGCTAGAACATTGATCCTTTAAATATGCTATAGATTTACATCTTTTCA  
TCACCAACATAGAGAACAATGTTATGTATACCTCTCCATCTTGAAT

>PGSC0003DMG400001016-(rev)LRR-RLPs\_4331

ACATCTTTTCATCACCAACATAGAGAACAAATGTTATGTATACCTCTTCCATCTTGAATTTTTGAAGTGGT  
TTAGTCTAATCCCCATTACTTTATTTTATATTTCTTTTTATCGTTG

>PGSC0003DMG400001016-(rev)LRR-RLPs\_4392

TTGAAGTGGTTTTAGTCTAATCCCCATTACTTTATTTTATATTTCTTTTTATCGTTGATAGAACTCAATAC  
ATAACTTCTAATGGCTTTCATTAATAATATGTTTCATATGTCACTACA

>PGSC0003DMG400001016-(rev)LRR-RLPs\_4636

GAGTCTCAAAATAGAATGACACCAAGTAAATTGAGATAGATGGAAACATTGTTCTGTGACAAGACAAAAA  
AACTCGTTAGGTATGGGCAAATAACAATAATTATACAACCATCAACCTTCA

>PGSC0003DMG400001016-(rev)LRR-RLPs\_4697

GACAAAAAACTCGTTAGGTATGGGCAAATAACAATAATTATACAACCATCAACCTTCATCTATATACCT  
ACTATATCCCAATACTGGCCATATAACATGTATGCAAGACAAAATTAAC

>PGSC0003DMG400001016-(rev)LRR-RLPs\_4758

TATATACCTACTATATCCCAATACTGGCCATATAACATGTATGCAAGACAAAATTAACGCCACTACTTTG  
GTTCTCTGTTACGTATATATACGAAGAAATAAAAACTCATTTCAGAAAG

>PGSC0003DMG400001016-(rev)LRR-RLPs\_4819

CACTACTTTGGTTCTCTGTTACGTATATATACGAAGAAATAAAAACTCATTTCAGAAAGATCACTATTATA  
TTATAACAATGGAGTCCATAATTAGATGGAGAAAACCGAGTCTGAAACC

>PGSC0003DMG400001016-(rev)LRR-RLPs\_488

TAATAGTTTCAATGGTTTCATCCCCTCTCTATTATCTAATATTTCCGGGCTTCAAACCTTTAAATTTGAGATT  
CAATTCTTTAGGTGGTCAGATACCAGAAAAGATTGGCAAACCTTCAAAA

>PGSC0003DMG400001016-(rev)LRR-RLPs\_4880

CACTATTATATTATAACAATGGAGTCCATAATTAGATGGAGAAAACCGAGTCTGAAACCAATTGAAACTA  
AGGATAAAGCCATTGACGCATCTGAAGATCGAAGAGCCATTGAGTCTGTC

>PGSC0003DMG400001016-(rev)LRR-RLPs\_4941

TTGAAACTAAGGATAAAGCCATTGACGCATCTGAAGATCGAAGAGCCATTGAGTCTGTCATCGAGGCTA  
TTTCATGACCCCAACTTCAACGTGCACGTTCTAGCTATTTTGGGCATCAAA

>PGSC0003DMG400001016-(rev)LRR-RLPs\_5002

CGAGGCTATTTTCATGACCCCAACTTCAACGTGCACGTTCTAGCTATTTTGGGCATCAAAAACAAGAGCCAG

CACTGAGCAAGCTCCCAGAGAGCATGTGGCTAATACTTTGCTTAAACATC

>PGSC0003DMG400001016-(rev)LRR-RLPs\_5063

AAGAGCCAGCACTGAGCAAGCTCCCAGAGAGCATGTGGCTAATACTTTGCTTAAACATCCTGTTTCTCCA  
GCCTGCCGTTACCAGTATAACACTTTGTTTGTCTTACTTTCCATTTTAGT

>PGSC0003DMG400001016-(rev)LRR-RLPs\_5368

CAACTTTAAACAGAAAGAACAATACTTTTCTGATTAATAACACCAAGATGAATAGATGTAAAAGACAATGA  
ATTGATAACCTGCTGCTATCAAATAAAAACATACATTACACTTGATGGTA

>PGSC0003DMG400001016-(rev)LRR-RLPs\_5429

AGACAATGAATTGATAACCTGCTGCTATCAAATAAAAACATACATTACACTTGATGGTAGCCAATAAAAA  
TTGAAACTACAAGTACTTAAGAACAAGTCTAGTGTACTTCTCCTCAGTAA

>PGSC0003DMG400001016-(rev)LRR-RLPs\_549

AATTTGAGATTCAATTCTTTAGGTGGTCAGATACCAGAAAAGATTGGCAAACCTTCAAACCTTAAAGGAAT  
TAAATATAGAAGCTAATCGACTTACAGGATCTATACCATTCTCGATCTTC

>PGSC0003DMG400001016-(rev)LRR-RLPs\_5490

CAATAAAAATTGAAACTACAAGTACTTAAGAACAAGTCTAGTGTACTTCTCCTCAGTAAGTTCAATACAT  
AAATATTGTAAACTAATAAAAAGGGAGAATTGTCAAAAAGCATAAAAACGCT

>PGSC0003DMG400001016-(rev)LRR-RLPs\_5551

TCAATACATAAATATTGTAAACTAATAAAAAGGGAGAATTGTCAAAAAGCATAAAAACGCTCGTATTCAA  
GATCTTGTCTTACTTTTCATAGCCCTCATGGTTAATCACTGCAGGTTATTG

>PGSC0003DMG400001016-(rev)LRR-RLPs\_5612

TATTCAAAGATCTTGTTTTACTTTTCATAGCCCTCATGGTTAATCACTGCAGGTTATTGATGAGGGAAAAG  
GCGGAGAAATGAAATGGGTGCGGACAAAGGTGGACTTAGATCAGCACAT

>PGSC0003DMG400001016-(rev)LRR-RLPs\_5673

GAGGGAAAAGGCGGAGAAATGAAATGGGTGCGGACAAAGGTGGACTTAGATCAGCACATTGTGGTG  
CACAAATTAATGAACAGAACCTGCAGGAATCACCATACAAATTTGTGGAGAAC

>PGSC0003DMG400001016-(rev)LRR-RLPs\_5734

TGGTGCCACAAATTAATGAACAGAACCTGCAGGAATCACCATACAAATTTGTGGAGAACTTCTCTTATTT  
CCCTTCTTGGAGTGACACACCAAACCTGCTGATCCAGATAAAGTTCCA

>PGSC0003DMG400001016-(rev)LRR-RLPs\_5795

CTCTTATTTCCCTTCTCTTGGAGTGACACACCAAAGTCTGATCCAGATAAAGTTCCACCTATTCATGGA  
AGTAAAAAGAGGCTTATTGATTCTTCAAAGCATTCCAATAAGGGATTGC

>PGSC0003DMG400001016-(rev)LRR-RLPs\_5856

TATTCATGGAAGTAAAAAGAGGCTTATTGATTCTTCAAAGCATTCCAATAAGGGATTGCGGCGACATGTT  
ACAAAAATTTGGTCTTTTATGATATTGTTTGGGTACACAAAAGTGGATGT

>PGSC0003DMG400001016-(rev)LRR-RLPs\_5917

CGACATGTTACAAAAATTTGGTCTTTTATGATATTGTTTGGGTACACAAAAGTGGATGTGTTGATGTTTAT  
GGCTACAACCTATGTTCTTGAAGGACACAGCTACACCGATTAAGAGTAGA

>PGSC0003DMG400001016-(rev)LRR-RLPs\_5978

TGATGTTTATGGCTACAACCTATGTTCTTGAAGGACACAGCTACACCGATTAAGAGTAGACCTGGTTATGA  
GTCTAATCCTAGGTGATTTGTTTACCGGACAATAAGTCTTGACGATATGA

>PGSC0003DMG400001016-(rev)LRR-RLPs\_6039

TGGTTATGAGTCTAATCCTAGGTGATTTGTTTACCGGACAATAAGTCTTGACGATATGAAATTGGTGAAA  
AATGCATAAAATATGTTAAGCCATACAAATTAATTCTATATTGTAGCAA

>PGSC0003DMG400001016-(rev)LRR-RLPs\_61

TGTTGCTTCACTATGTCATGGCTACTTCAGCCATGAACCCAACAACTTTTCTACCGATCAATCTGCTCTCC  
TTTCCTTAAAATCTCAAATCATTTTGGACCCTTTTCACTTGTGGATG

>PGSC0003DMG400001016-(rev)LRR-RLPs\_610

TAAAGGAATTAATATAGAAGCTAATCGACTTACAGGATCTATACCATTCTCGATCTTCAACATTTCTGG  
AATAAAGGTCATTGCATTGACAGATAACACTTTATCAGGAAATCTTCCTC

>PGSC0003DMG400001016-(rev)LRR-RLPs\_6100

TTGGTGAAAAATGCATAAAATATGTTAAGCCATACAAATTAATTCTATATTGTAGCAACATCCTTCTCTT  
CAATTTTGAAATGTAGATGTTTATAGCGTGTTGTTTGTGATGTTGTTGTCG

>PGSC0003DMG400001016-(rev)LRR-RLPs\_6161

TCCTTCTTTCAATTTTGAAATGTAGATGTTTATAGCGTGTTGTTTGTGATGTTGTTGTCGGACTTTGTCATTT  
CTTGACAGACAGTAACGGATGTCGCTTTGGGAGTAACACAAGATGGT

>PGSC0003DMG400001016-(rev)LRR-RLPs\_6222

CTTTGTCATTTCTTGACAGACAGTAACGGATGTCGCTTTGGGAGTAACACAAGATGGTTTGTCTATCTA  
TCTTAATAGAAGATATGGTAAGTTTCTGTTTCATGTATTTGGACTTATTA

>PGSC0003DMG400001016-(rev)LRR-RLPs\_6649

TTTGAGGTTGTGTTAGGTCCATATCTTTACACTTAGTTGATCGAAAATCTTACGGAAGAAATCTTTAATGC  
AAAATTTTGCAGGTGAGGTAAGAAAGACAGGAGCAACAGAGAAAAAAT

>PGSC0003DMG400001016-(rev)LRR-RLPs\_671

CATTTCTGGAATAAAGGTCATTGCATTGACAGATAACACTTTATCAGGAAATCTCCTCCTGATATGTGTG  
ATCGACAATCAATGTTGGAAGAGCTTTATCTAAGTTTCAACGAGCTACG

>PGSC0003DMG400001016-(rev)LRR-RLPs\_6710

TCTTTAATGCAAATTTTGCAGGTGAGGTAAGAAAGACAGGAGCAACAGAGAAAAAATAATCTTCCGA  
TGAACATTAGACTTAGATCAACTATACTTATGAACCTAAGACCGGCAGTCG

>PGSC0003DMG400001016-(rev)LRR-RLPs\_6771

TCTTCCGATGAACATTAGACTTAGATCAACTATACTTATGAACCTAAGACCGGCAGTCGGAATTCAGGTG  
ATGGAATCCATTCAAATTTAATCAGCACTTAAGTTTTCTTAGATTATAT

>PGSC0003DMG400001016-(rev)LRR-RLPs\_6832

ATTCAGGTGATGGAATCCATTCAAATTTAATCAGCACTTAAGTTTTCTTAGATTATATACTTAAAGTTATT  
AACATTTTTTTGGGGCTTTCTTTCATGTTTAATTAATTAGCAAATAGG

>PGSC0003DMG400001016-(rev)LRR-RLPs\_6893

TTAAAGTTATTAACATTTTTTTGGGGCTTTCTTTCATGTTTAATTAATTAGCAAATAGGCTTTTGCTGATAT  
GATGGAGAATGACACTGAGGCAAATGGGGGAATTGGATTGGTTTTGT

>PGSC0003DMG400001016-(rev)LRR-RLPs\_6954

TTTGCTGATATGATGGAGAATGACACTGAGGCAAATGGGGGAATTGGATTGGTTTTGTTCTTTTCCCCT  
TAAAAGTTGCATTACGAGATGATCCATTAGATTATATCAGAGAAGCTAAG

>PGSC0003DMG400001016-(rev)LRR-RLPs\_7015

TTTTCCCCTTAAAAGTTGCATTACGAGATGATCCATTAGATTATATCAGAGAAGCTAAGGCAACTATTGG  
TCGAAAGAAGAATTCACCTGAAACTTTCTACACATTTTCTATTTTCAGAAT

>PGSC0003DMG400001016-(rev)LRR-RLPs\_7076

AACTATTGGTCGAAAGAAGAATTCACCTGAAACTTTCTACACATTTTCTATTTTCAGAATTAGCACTCAAGA  
TTTTTGGGATTAAGGTAACATAATTTTCATTCTCAGTTCTTAATCCTACA

>PGSC0003DMG400001016-(rev)LRR-RLPs\_7137

GCACTCAAGATTTTTGGGATTAAGGTAACATAATTTTCATTCTCAGTTCTTAATCCTACACATGAGATATCT

TCATTGTAAGATGTGACTCTTTTTTCAGACATCAAGTTCGATATCGCAC

>PGSC0003DMG400001016-(rev)LRR-RLPs\_7198

TGAGATATCTTCATTGTAAGATGTGACTCTTTTTTCAGACATCAAGTTCGATATCGCACAGAACTATCACC

AATACAACAATGTGCTTTTCTTGTCTGCCTGGTCCTCAAGAAGAAATTT

>PGSC0003DMG400001016-(rev)LRR-RLPs\_7259

AACTATCACCATAACAACAATGTGCTTTTCTTGTCTGCCTGGTCCTCAAGAAGAAATTTGCTTCTGTGGGC

ATCCTTTGGCTTACATTGCACCCAGTTCTTATGGCTCATGTAGGTGTTT

>PGSC0003DMG400001016-(rev)LRR-RLPs\_732

GATATGTGTGATCGACAATCAATGTTGGAAGAGCTTTATCTAAGTTTCAACGAGCTACGTGGTCATATGC

CTCTAAGCTTGCCAACTGTTTGAAACTTCAACTATTGTCTTTATCAGTG

>PGSC0003DMG400001016-(rev)LRR-RLPs\_7320

TTCTGTGGGCATCCTTTGGCTTACATTGCACCCAGTTCTTATGGCTCATGTAGGTGTTTTACTCTTACTAAT

TTCAAGTTTTTGCTTCCATTCTCAGCTAGATTTTGGGGTGTGAATTAG

>PGSC0003DMG400001016-(rev)LRR-RLPs\_793

GTCATATGCCTCTAAGCTTGCCAACTGTTTGAAACTTCAACTATTGTCTTTATCAGTGAACAAGTTTGAT

GGACCTATACATAGTGAAATTGGACATTTAAGTGACCTACGTATTTTGT

>PGSC0003DMG400001016-(rev)LRR-RLPs\_854

CAAGTTTGATGGACCTATACATAGTGAAATTGGACATTTAAGTGACCTACGTATTTTGTATCTCGGACAG

AACCAATTTGAAGGTTTGTGTTGAGTGCTAGATTTTCTTCTAACTAACT

>PGSC0003DMG400001016-(rev)LRR-RLPs\_915

CTCGGACAGAACCAATTTGAAGGTTTGTGTTGAGTGCTAGATTTTCTTCTAACTAACTATTTCCGAAAAG

AAACCATCACACATAAATTTATATGTATGTTATTGTTTTGACAGGGACA

>PGSC0003DMG400001016-(rev)LRR-RLPs\_976

TTCCGAAAAGAAACCATCACACATAAATTTATATGTATGTTATTGTTTTGACAGGGACAATTCCACAAGA

TATTGGGATTCTTGATAATTTGGAGGTTTTGGGGCTAGAGAGAAACCATC

>PGSC0003DMG400001059G-LecRK\_1037

AAACTGTTCTTGTGCTGCTTTTGCCTCTATCACAGCTACTGGTACTGGTTGTGATATTTGGAGTAACGTA

TCGATTTTGAATCACTTGAATCAGATGTTTTCACTCTTGATGATGAAA

>PGSC0003DMG400001059G-LecRK\_1098



GAGTAACGTATCGATTTTGAATTCACCTGAATCAGATGTTTTCACTCTTGATGATGAAAGAGGTATATTC  
ATATTTACCTCATTGTCTTTTTTATGTTGTTGTCGTGTGACCAGGAGGTC

>PGSC0003DMG400001059G-LecRK\_1281

AGGAAGTGCATTGTTTCTATGTCTAGCAAGTAAAGTTAGTAAAGCGGACTCTAACGATGAATTGTGCAA  
TGTGTATTCATAGATTTGGTGCCAATAAGAAATCGGAACAGCACAGATGTA

>PGSC0003DMG400001059G-LecRK\_1403

AAGCACAGTCTCACTTCCTCCAGATTTAGCACCAGAACCATCTCCTAATTCAACGTCAGGATCGTCTAAA  
GGAAGTTGTATGTATTGTGTCTAAATCTTGCTCTTCAACTATTGTATATG

>PGSC0003DMG400001059G-LecRK\_1464

TCGTCTAAAGGAACTTGTATGTATTGTGTCTAAATCTTGCTCTTCAACTATTGTATATGATTGAAGGTGAA  
AACCTTTTTTTGATTGTTTCTCCATATTATCCATTTAAGAAAGAACTA

>PGSC0003DMG400001059G-LecRK\_183

CAATAAAACACAATATATTGGCATATTCTACAATTTACCCTCTAACATGACCTTATCCCCGGTGATGATC  
GACCCGTTTGGGTTGCAAATCGCGATATTCCGATACAATATGCATCAGG

>PGSC0003DMG400001059G-LecRK\_1891

CACTCGTTATGTTGTTTTGTTGTTGATGCAGCAACAAAATGGTGGATATGGCTTATAGCTATAATCGGTT  
TGACACTATTCGTAGGACTTAGCTCCCTATGCTACTTTCTACACGGAAAA

>PGSC0003DMG400001059G-LecRK\_1952

TAATCGGTTTGACACTATTCGTAGGACTTAGCTCCCTATGCTACTTTCTACACGGAAAAGGTGAGCACTC  
GAAGAATTTAGCTAGAAGCTTGACACCAGTAAAACCTCAACTATGTTGCTCG

>PGSC0003DMG400001059G-LecRK\_2013

TGAGCACTCGAAGAATTTAGCTAGAAGCTTGACACCAGTAAAACCTCAACTATGTTGCTCGGACTCTGCTAA  
AATGCTGCCACAGTACCCCTGTCGGATCCTCAAAAAAAAAAACTCACTAC

>PGSC0003DMG400001059G-LecRK\_2074

CTCTGCTAAAATGCTGCCACAGTACCCCTGTCGGATCCTCAAAAAAAAAAACTCACTACTTTTGAAGGAT  
CTGACACACACCAAACAGCATTTTTTAAAAGTCCGAGCAATATAGAAATG

>PGSC0003DMG400001059G-LecRK\_2135

TTGAAGGATCTGACACACACCAAACAGCATTTTTTAAAAGTCCGAGCAATATAGAAATGCTCTATACTAT  
GGGTTCTGATCCCACAACCTCCTCTTTCACTATCAGGGAAAGCAAAGCA

>PGSC0003DMG400001059G-LecRK\_244

GGTGATGATCGACCCGTTTGGGTTGCAAATCGCGATATCCGATACAATATGCATCAGGTAACACTCTCA  
CATTGGATGATGATGGAAAGTTGAAAATTTTTATGGAGGGGACAGTTTT

>PGSC0003DMG400001059G-LecRK\_2440

TTTTATATGAATATGATTCACGTAAGCATAAATACTTAAACGAGTCATTATTTTTTCAGGGAGAAATGGCT  
GATGGGCAAGAAGTAGCTATAAAAAGACTTTTCGACTAGTTCAGGACAAGG

>PGSC0003DMG400001059G-LecRK\_2501

GAAATGGCTGATGGGCAAGAAGTAGCTATAAAAAGACTTTTCGACTAGTTCAGGACAAGGCCTATTGGA  
GTTCAAGAATGAAATTCTATTGATTGCAAACTTCAACATACTAACCTTGTT

>PGSC0003DMG400001059G-LecRK\_2989

ATCTGAAGCAAACACTAAAAGAATTGTTGGAACACAGTAAGTTAATAAGCAATGTTTTCATATACAAGTT  
TTTATACAATATTACTTGAAGTTCTGAATACATTTTTTCGGATACTACTTC

>PGSC0003DMG400001059G-LecRK\_305

ACACTCTCACATTGGATGATGATGGAAAGTTGAAAATTTTTATGGAGGGGACAGTTTTGTTATGTTAAG  
TTCTTATAATGTAACAACAAGAAATGCAAGTGCTACACTATTTGACAATG

>PGSC0003DMG400001059G-LecRK\_3355

GATGAGAGAGCTTTGGAGCTAATAGATGCAACACTAATTGAATCATGCTCGCGCGATGAAGTAATGAG  
ATGCATTCATGTAGGACTTCTTTGTGTGCAAGATTATGCAAAGATAGGCCT

>PGSC0003DMG400001059G-LecRK\_3416

TAATGAGATGCATTCATGTAGGACTTCTTTGTGTGCAAGATTATGCAAAGATAGGCCTTCAATGTCAAA  
TGTTGTTTCAATGCTTATGAATGATACGAAACAACCACCACCACCAG

>PGSC0003DMG400001059G-LecRK\_366

TATGTTAAGTTCTTATAATGTAACAACAAGAAATGCAAGTGCTACACTATTTGACAATGGCAATTTTGTG  
TTGGTGGAATTGAATACTAATGGTTCAGAGAATAAACATTGTGGCAAAG

>PGSC0003DMG400001059G-LecRK\_3721

TACATACTTATAGGACTAATTTTCGAGTCCTCTTTCTTTGATACTATTACATTATGATGCATTTTGTGAGTAG  
AATATTTGAGACGGATCCAGAATTTAAGTCAAAGATGGTAAACGAGAT

>PGSC0003DMG400001059G-LecRK\_3843

GGCAAGGCGAAGTTATGGCAATGGAGACTTCACCATTACCTTCCCCCTCCCGCCTGATAGCAACGTCACC

AGTTACATTTAAAATGTTAGAGAATACACTTGACACTCATCGATTATATA

>PGSC0003DMG400001059G-LecRK\_3904

AACGTCACCAGTTACATTTAAAATGTTAGAGAATACACTTGACACTCATCGATTATATAAGTCGAAAGAG

AATATCAGAGGAGTTTCTGAACTATCAATATTCGTATATTAGAAAAAAGA

>PGSC0003DMG400001059G-LecRK\_3965

TCGAAAGAGAATATCAGAGGAGTTTCTGAACTATCAATATTCGTATATTAGAAAAAAGAGGTAAGTAACTGAA

TGTACATATATTTTCTCATTCTGAGCTTTACATGTTCCACAAATGGGCTGT

>PGSC0003DMG400001059G-LecRK\_4758

ACGTTAGCCCCTCGATCCAAGAGATACTTTACTATTTCTATGTTACCTTCACAAACAGCAACATGGAGAG

CTGATGAACCATTGATCTTGGGAAGCGTGACATCCCCGCCATAACGGACA

>PGSC0003DMG400001059G-LecRK\_4819

CATGGAGAGCTGATGAACCATTGATCTTGGGAAGCGTGACATCCCCGCCATAACGGACAATCTCCTTGA

GCAAACCTCAAGTTGTTTTGTTCAACAGCAACGCAGGCGAAATGTCCCACAT

>PGSC0003DMG400001059G-LecRK\_5002

TGATAGCCTCCCACAATGGCACATTGCCTTCTGAATCTGTGTATACACAAGAAACAAAATCAAATTCTTAT

ATCTGGCTGTGTCTGGTGGACATGATAGGAAAAGGAGACAACTGATAGAG

>PGSC0003DMG400001059G-LecRK\_5063

AAATTCTTATATCTGGCTGTGTCTGGTGGACATGATAGGAAAAGGAGACAACTGATAGAGTGTGAAACTC

GCAAAAAAACGATAGTTGAGGTGTGTTTTGACTATAAACTCTCTAATCT

>PGSC0003DMG400001059G-LecRK\_549

ACAGATATGGTCACTGACTTCTTGGATAAGCAAAGATGTACCTGCCTCGGGGTCATTTACGATTGGTATA

GACACGAATGACATTGACCAATTGATAATATGGTGGATGGGAAGTGTGTT

>PGSC0003DMG400001059G-LecRK\_915

GATTGGGTGCTCGATCAGAAACGATTCATGGTTCAAGAGGAGGCCAAATAGTGTCTCTGGTAATAGATT

TAGGTTTGCAAACAACAACATGAGTTTATTTGATTGCAAGAAACAGTGTGA

>PGSC0003DMG400001059G-LecRK\_976

AATAGATTTAGGTTTGCAAACAACAACATGAGTTTATTTGATTGCAAGAAACAGTGTGAGAAAACTGTT

CTTGTGCTGCTTTTGCCTCTATCACAGCTACTGGTACTGGTTGTGATATT

>PGSC0003DMG400001072-(rev)LRR-RLPs\_0

TATCTCTTCTTCTCCACAAAACCTTCATCTCTCTCATCTCACATTTTGCTTAAAGATTCCATTTTAAAACCAA  
AATAAAAAAATTCCCAAACCCCATTTCTCAAATCCATTTTCTTCA

>PGSC0003DMG400001072-(rev)LRR-RLPs\_124

TCTTCACTTTTTTCATCTCACATTTGGTTAAAGATTCAATCTTTGAACAGAAAAACGCATAAAAAACAAG  
CAGTCTTGATTATCAGATGACTCATGTGAGATGAAGGAGAAAACTCAA

>PGSC0003DMG400001072-(rev)LRR-RLPs\_186

AAAAACAAGCAGTCTTGATTATCAGATGACTCATGTGAGATGAAGGAGAAAACTCAAACACCCATTTGC  
TCTCTGTTTTTCTTGTGCTCTGTTTTTGTGTTTCAGTTTTTACTGAACAC

>PGSC0003DMG400001072-(rev)LRR-RLPs\_1860

CCTCCTAATTCTCCACCTCCACCGCTTGCTCACTCGCCTCCACCCCTTCACCTTACTATTACAATTCACCAC  
CACCTCCGCCCCAAATTCGCCTCCTCCTCCACCAGTATACATATAC

>PGSC0003DMG400001072-(rev)LRR-RLPs\_1922

CAATTCACCACCACCTCCGCCCCAAATTCGCCTCCTCCTCCACCAGTATACATATACTCATCACCTCCGCC  
ACCAAATTCACCTCCTCCTCCACCGCCAACATACGTATATTCTTCACC

>PGSC0003DMG400001072-(rev)LRR-RLPs\_2418

ATAGTTCCTACAATTATTATTTCTCAACTCTTCAAGCCATCAACAAAATCGAGCTAATATGTGATCACGA  
ACCTTAAATGGTACGACAGAAAGAAAGATAGAGGAGGTAAAGAGGAGAA

>PGSC0003DMG400001072-(rev)LRR-RLPs\_2480

TGATCACGAACCTTAAATGGTACGACAGAAAGAAAGATAGAGGAGGTAAAGAGGAGAAAGATTCAATC  
TCCAATGATTTTATTTTGAATTGTTATCAAATAGATTGAAGTTGTGGAGAG

>PGSC0003DMG400001072-(rev)LRR-RLPs\_2666

GAATTAGAAACCAGTTTACAGTGCTTGCTGCAACTGGTTTTATTTAATGATCATACTTTGATTTCTTTGTA  
ATTTTTCTTTTTTTTTTTGGATCTTCCAACTATAGTATAAGATGAGC

>PGSC0003DMG400001072-(rev)LRR-RLPs\_2715

ATCATACTTTGATTTCTTTGTAATTTTTCTTTTTTTTTTTGGATCTTCCAACTATAGTATAAGATGAGCTT  
TTATTTTCTTTTAAAACCTGTATTGATTCTCATAATTCAGATGAT

>PGSC0003DMG400001072-(rev)LRR-RLPs\_62

TTAAAACCAAAAATAAAAAAATCCCAAACCCCATTTCTCAAATCCATTTTCTTCATAGATCTTCACTTT  
TTTCATCTCACATTTGGTTAAAGATTCAATCTTTGAACAGAAAAACGC

>PGSC0003DMG400001072-(rev)LRR-RLPs\_992

CAGTTTCCATGGGTGTCTTCCGGCGAGTATTGGGAATATGAGTAATCTTAATGAAGCGATTTTAATGAAT  
AATGGGTTGCGTTCTTGTGGCCGGCGGAGATTGGGGTGTGAAAAATTT

>PGSC0003DMG400001185LRR-RLKs\_1054

CAATGAACGACCAAGTTGTAGCAGTCAAGAAAACAAAACAAGCCTCGGAGGAAATGACAATACTTCAA  
AAACTACATCACGCAAATCTAGTGAAACTAATGGGCGTTTCATCAGACGATC

>PGSC0003DMG400001185LRR-RLKs\_1116

CTTCAAAAACACTACATCACGCAAATCTAGTGAAACTAATGGGCGTTTCATCAGACGATCGTGGGAATTCCT  
TTGTAGTTTATGAATATGCTGAAAATGGCTCACTGGATCAATGGTTGTTT

>PGSC0003DMG400001185LRR-RLKs\_1860

AAAGATGGAGCGTAAATATAGTTCAAGAACTTTTGTGAGTTCGTCTCAAATTTGTAACATATTCTGGATT  
ATAAAGCCACAGGAACAATAATCAAGCTGATCTCCAGAATATATTGCAA

>PGSC0003DMG400001185LRR-RLKs\_1922

TCTGGATTATAAAGCCACAGGAACAATAATCAAGCTGATCTCCAGAATATATTGCAAATTCGAGTTATCT  
TGTCCAGCTTTTCCCTGTATTTCTTTGCTGCTAAGTTAGTTGCTAGAGT

>PGSC0003DMG400001185LRR-RLKs\_1984

AGTTATCTTGCCAGCTTTTCCCTGTATTTCTTTGCTGCTAAGTTAGTTGCTAGAGTATATTCTTGATTG  
GATGTTTTTCTCAACTTTGAAATAAGTGGAGTGCAATTTGACCTGTAT

>PGSC0003DMG400001185LRR-RLKs\_2095

GACCTGTATTTCTTTGCTCCTCTCAAAGAAAAACAGAAAAAATTAAGTTTCTGAAAAGACACTGCAAAC  
TCGTTCTTATTTATATTTATATATTTAAGATCCAGACGAGTACATGTTTA

>PGSC0003DMG400001252-(rev)LRR-RLPs\_0

ATCAATTTAGAAAATTTTAGAGAGAGAAACAAAACAACACCCTCAGGATGGGCAGCTTCATGTACATT  
GTCATCCTGCTTCTTGCCATAATCTCAACCGTTCATTCCTGCTCGCCATCA

>PGSC0003DMG400001269-(rev)RLKWAX-EGF\_0

ATGACTTACACTTCTTTTATATGCTTTCTTCTGATCAGTTACTTAGTTTCAGGCAAATTGCAGAAATGATTCA  
ACTTGCCAAAGTCCTTTTCATGTGGAAATCTTACTGACCTGAGCTTT

>PGSC0003DMG400001269-(rev)RLKWAX-EGF\_1037

AGTTGAGTGGACATTCTTTCTACTTGTGATGTTTTCTTTCTTTCTTTTCTGAAAACCTTGATAACTGAC

TGCATTTTTGTAGATATCTACTATTTGCATAGTCCCTAAAGAAAAC

>PGSC0003DMG400001269-(rev)RLKWAX-EGF\_1098

TGATAACTGACTGCATTTTTGTAGATATCTACTATTTGCATAGTCCCTAAAGAAAACATACTTCCCTGA

TAGTGCATAAGACATTCAGAATTAGTTATATTTATATTCTCTGATGGAG

>PGSC0003DMG400001269-(rev)RLKWAX-EGF\_1159

ACTTCCCTGATAGTGCATAAGACATTCAGAATTAGTTATATTTATATTCTCTGATGGAGCATGGCTTCATT

TTGCTTTCAACAGGTGCAGTTCTGTTTACAGTTGGACTGTTGGTTTTAC

>PGSC0003DMG400001269-(rev)RLKWAX-EGF\_122

TTTCTCTTTCCACACAACCTGACTGTGGAATAGTGCCCATCTCTGGTTGTGATGCTAAACCATATCCGA

GAATCCAACCTGCTTCTGGAGGAGATTCGTAATGCTTTAGGAAATCC

>PGSC0003DMG400001269-(rev)RLKWAX-EGF\_1220

TGGCTTCATTTGCTTTCAACAGGTGCAGTTCTGTTTACAGTTGGACTGTTGGTTTTACTCTTTTACTTCAG

AGAGAAGATTTGTGGTACAAATACATCAGTTTTGGGAGTCTAATGC

>PGSC0003DMG400001269-(rev)RLKWAX-EGF\_1281

TTTTACTTCAGAGAGAAGATTTGTGGTACAAATACATCAGTTTTGGGAGTCTAATGCTGAGGATCACC

AAAATATTGAAGCATTTTTAAAGAACTATGGATCGTGTATCCAAAGAGA

>PGSC0003DMG400001269-(rev)RLKWAX-EGF\_1342

AGGATCACCAAATATTGAAGCATTTTTAAAGAACTATGGATCGTGTATCCAAAGAGATACAACTATTT

AGAAGTCAAAGAATCACCAGTGGCTTCAAAAATAAACTTGGTCAAGGAG

>PGSC0003DMG400001269-(rev)RLKWAX-EGF\_1403

CAACTATTTAGAAGTCAAAGAATCACCAGTGGCTTCAAAAATAAACTTGGTCAAGGAGGATATGGTTC

TGTATAAAAGGATGTCTGCATAACGGAAGTCATGTGGCTGTGAAGGTCCT

>PGSC0003DMG400001269-(rev)RLKWAX-EGF\_1586

ACATGTTAACGTCGTGAGCCTTGTGGGATTTGTTTTGAGGGATGTAAAAGGGCTCTCGTATATGAATTT

ATGCCAAATAGATCTCTTAAAAATTTATTTATGAGGAAAGATCCGACAG

>PGSC0003DMG400001269-(rev)RLKWAX-EGF\_1647

TATGAATTTATGCCAAATAGATCTCTTAAAAATTTATTTATGAGGAAAGATCCGACAGTGTTCACCAAC

TGGCTTGGCCAATACTGTACAAAATTGCACTAGGCATAGCTCGAGGATTG

>PGSC0003DMG400001269-(rev)RLKWAX-EGF\_183

CCATATCCGAGAATCCAACCTGCTTCCTGGAGGAGATTCGTACTATGCTTTAGGAAATCCATTTAATTATAC  
AGTTTTTCTCGGGGACCCCAAGCTTCATGCCAAGTTGAGGCAACACAAG

>PGSC0003DMG400001269-(rev)RLKWAX-EGF\_2074

AAATCTGCTTTCCACATTGGCTCTATCAACGAATTGAACTAGACGAAGAGCTTCAACTAATTGGGATAAT  
GAATGAAGAGGAGAAAGAATGTGCAAGAAAGATGGTGATGGTGAGTTTAT

>PGSC0003DMG400001269-(rev)RLKWAX-EGF\_2318

GGTAGATTCATCAGTAGTAGAACTGGCCTAGCCTTTATGTGTTCATATCTCAGCTAATATCACTGCAGTC  
ACATTTTGTTATGGAATTGTAGCATAATCTGGTACTGTTACAGGTTTCGGT

>PGSC0003DMG400001269-(rev)RLKWAX-EGF\_2379

ACTGCAGTCACATTTTGTTATGGAATTGTAGCATAATCTGGTACTGTTACAGGTTTCGGTTTCTGATGTGTT  
TAGATGTCCTTGAATGTAAGAAGATGTAAGTTGATGTTTTTCTTAATGA

>PGSC0003DMG400001269-(rev)RLKWAX-EGF\_2440

CTGATGTGTTTAGATGTCCTTGAATGTAAGAAGATGTAAGTTGATGTTTTTCTTAATGATTTAATGCTAAA  
AGAAGAGTGATTTGCCTAGAGGAATGTCAGGATAATAAGCAGACCTAAT

>PGSC0003DMG400001269-(rev)RLKWAX-EGF\_2501

TAATGCTAAAAGAAGAGTGATTTGCCTAGAGGAATGTCAGGATAATAAGCAGACCTAATTAGTGCTTTT  
CATTTTACCTGTTACGCATATGTCTGACTATAAGATAATTTCCAGACAATT

>PGSC0003DMG400001269-(rev)RLKWAX-EGF\_2562

GTGCTTTTACCTTACCTGTTACGCATATGTCTGACTATAAGATAATTTCCAGACAATTAGATAATGGGAT  
TGCCTTATTGGTTAGCCCAATTGTGGTCTGGAGCCTAATTCAATCCCAA

>PGSC0003DMG400001269-(rev)RLKWAX-EGF\_2623

ATAATGGGATTGCCTTATTGGTTAGCCCAATTGTGGTCTGGAGCCTAATTCAATCCCAAAGTTAGCGCA  
TGTGATGAGATCTTTCCAAGACCAAATAAGGCGACTACAACAAGATACTC

>PGSC0003DMG400001269-(rev)RLKWAX-EGF\_2684

GTTAGCGCATGTGATGAGATCTTTCCAAGACCAAATAAGGCGACTACAACAAGATACTCACTTTGTTCAA  
ATGCAACAGAAGCTAGAAGAGTACTCATGAAGCTAGATATTTTTTGCGBA

>PGSC0003DMG400001269-(rev)RLKWAX-EGF\_305

CCAAGCATTTAACAAAAGTTCTCCCTTCCAACTCTTCTTCTATTTCTTTCATACTTCTCCTATTGAATTTT  
GTCAACTTCTTCAAATGCAACATCACTAGTAATAGCACCCCAAACGT

>PGSC0003DMG400001269-(rev)RLKWAX-EGF\_3416

GAGGCCTTTTAGCCCAGCCTAAGAAAGCCAAGTGGCCCTTAAGACTTGACGCCCGTGGGCCAAATGTAG  
TTTTGTTATTTCTACATGACTTCAAGTCTTTCCTCACAGCCCCTTAATATA

>PGSC0003DMG400001269-(rev)RLKWAX-EGF\_3477

AAATGTAGTTTTGTTATTTCTACATGACTTCAAGTCTTTCCTCACAGCCCCTTAATATACGTTTTAACAACT  
TTCCACATCCACTATGCTTTTAAAAATGCGCAAGTACTTGTGAACAA

>PGSC0003DMG400001269-(rev)RLKWAX-EGF\_3538

TTTTAACAACTTTTCCACATCCACTATGCTTTTAAAAATGCGCAAGTACTTGTGAACAACTGAATTCATAA  
TTTTTCTCTTGTTGATATAGGAGGAGACTTTTGCTTGATCAGTGGGAG

>PGSC0003DMG400001269-(rev)RLKWAX-EGF\_3599

GAATTCATAATTTTTCTCTTGTTGATATAGGAGGAGACTTTTGCTTGATCAGTGGGAGGATTTAATATG  
ACTTTCACCTCTGTTATATGCTTTATTCTGATCAGTTACTTAGTTCAGGC

>PGSC0003DMG400001269-(rev)RLKWAX-EGF\_366

CTATTGAATTTTGTCAACTTCTTCAAATGCAACATCACTAGTAATAGCACCCCAAACGTTACCCACACAAA  
TGACCATTTTGCTGGTTATAAAAGGTACAATGGCTGTACAGGCTTCAGC

>PGSC0003DMG400001269-(rev)RLKWAX-EGF\_3660

TTTAATATGACTTTCACCTCTGTTATATGCTTTATTCTGATCAGTTACTTAGTTCAGGCAAAGGGCAGAAA  
TGATTCAACTTATCCAAATTCCTTTTCATGTGGAAATCTTACTGACCTG

>PGSC0003DMG400001269-(rev)RLKWAX-EGF\_3721

AGGGCAGAAATGATTCAACTTATCCAAATTCCTTTTCATGTGGAAATCTTACTGACCTGAGCTTTCTTTTC  
TCTTTTCCACACAACCTGACTGTGGAATAATGTTCTTATCTGGTTGTG

>PGSC0003DMG400001269-(rev)RLKWAX-EGF\_3843

GCTAAACCATTTCCGAGAATCCAAGTCTTCTGGAGGAGATTCTTACTATGCTTTAGTAAATCCATCTAA  
TTATACATTTGGGCTCGGGGACCCCAAGCTTCATGTCAAGTTGAGGCAA

>PGSC0003DMG400001269-(rev)RLKWAX-EGF\_3904

ATCCATCTAATTATACATTTGGGCTCGGGGACCCCAAGCTTCATGTCAAGTTGAGGCAACACAATTGTCA  
GGCTTTTAACAAAAATTTATCCTTGCCAGACTCTCCTTCTATTTTCATGTT

>PGSC0003DMG400001269-(rev)RLKWAX-EGF\_3965

CAATTGTCAGGCTTTTAACAAAAATTTATCCTTGCCAGACTCTCCTTCTATTTTCATGTTTTGAAATCATCAA



AGTGAATTTTCTCAACTTCTTCAAATGCAACAGCAACAGCACTAGTAG

>PGSC0003DMG400001269-(rev)RLKWAX-EGF\_4026

GAAATCATCAAAGTGAATTTTCTCAACTTCTTCAAATGCAACAGCAACAGCACTAGTAGTAGCACCCCAA  
ACATTACCCATAAGATGAAAGATCATTTTGCTGGTTATAGAATGTACAAT

>PGSC0003DMG400001269-(rev)RLKWAX-EGF\_4087

GCACCCCAAACATTACCCATAAGATGAAAGATCATTTTGCTGGTTATAGAATGTACAATGGCTGTAAAG  
GCTTTAGCATATACTACAAGATTCAGCTATATGTTGAAGAAGACATTCTAG

>PGSC0003DMG400001269-(rev)RLKWAX-EGF\_4148

CTGTAAAGGCTTTAGCATATACTACAAGATTCAGCTATATGTTGAAGAAGACATTCTAGCTCGCAATCTT  
CCTGCCAACAGTTCACCTCATTAGTTTGCCAGTTGACTTGATATCAGATCA

>PGSC0003DMG400001269-(rev)RLKWAX-EGF\_4209

CGCAATCTCCTGCCAACAGTTCACCTCATTAGTTTGCCAGTTGACTTGATATCAGATCATGGTGGTTTGT  
CAATATGTTAAGGGCCGGTTTTTTCGTAGAATGGAAGATCTCTGAGGAC

>PGSC0003DMG400001269-(rev)RLKWAX-EGF\_427

CCCACACAAATGACCATTTTGCTGGTTATAAAAGGTACAATGGCTGTACAGGCTTCAGCATATACTACAA  
GCTTCGCCTAGGTGATCATGAAGATGCTCATGCTGGCAATCTCCAGCCA

>PGSC0003DMG400001269-(rev)RLKWAX-EGF\_4270

GTGGTTTGTTC AATATGTTAAGGGCCGGTTTTTTCGTAGAATGGAAGATCTCTGAGGACTGTTACCAATG  
TCACTATGGGGGAGGTCAATGCCAGACTGATATAAACAACAAATTTCACT

>PGSC0003DMG400001269-(rev)RLKWAX-EGF\_4331

TTACCAATGTCACTATGGGGGAGGTCAATGCCAGACTGATATAAACAACAAATTTCACTGTACATATCCA  
AATAATCCACATGAACAAGTTCAGTCACACAGTGCATCTTTCGTAGTGT

>PGSC0003DMG400001269-(rev)RLKWAX-EGF\_4453

TTTCTTGTATTCATATCACATATCTATAATATTTTCCCTCTTTTTTCTTTAGATGCAAAAAGTCTAGAAGA  
AAGTTCGGACTGACTCTGGGAGTAGGTAGTTAAATTTCCATTAAGTGC

>PGSC0003DMG400001269-(rev)RLKWAX-EGF\_4514

CTGCTAGAAGAAAGTTCGGACTGACTCTGGGAGTAGGTAGTTAAATTTCCATTAAGTGCAGTGCCTTTC  
GATCTTTTTCTATTACAGAATTTCCATGCATATCATTTGAGTTTCTTCTT

>PGSC0003DMG400001269-(rev)RLKWAX-EGF\_4575

TGTCCTTTCGATCTTTTTCTATTACAGAATTTCCATGCATATCATTTGAGTTTCTTCTTCATTGTGGTAAAAT  
CTCAAACATTTCTTAATGATAAAGGATGATAAGAGAGGTAAGTAC

>PGSC0003DMG400001269-(rev)RLKWAX-EGF\_4636

TTGTGGTAAAATCTCAAACATTTCTTAATGATAAAGGATGATAAGAGAGGTAAGTACTTTAGCTTACA  
CAAATGATTGGATAGTGGAGTTGAGAGGACACTTTCTTTTTCTTGTGA

>PGSC0003DMG400001269-(rev)RLKWAX-EGF\_488

ATACTACAAGCTTCGCCTAGGTGATCATGAAGATGCTCATGCTGGCAATCTCCAGCCAAGTTCACCT  
AACAGATTGCCAATTGGCTCGATATCAGATGAAGGTGGTTTGTTCATAT

>PGSC0003DMG400001269-(rev)RLKWAX-EGF\_4880

CCGCCCCACTTCTCTCAACAAGGAAATTGTCATGTACATTTAAAATGATGTTGAGAGAGGCAGTATAT  
ACTTTGGCATCCCAGTCTTCTTATTCAGAACTGAAGAAGCCACAAAT

>PGSC0003DMG400001269-(rev)RLKWAX-EGF\_5002

TTTCAATTCCTCTCAAATCCTTGGAGATGGTGGTTTCGGAAGTGTACTATGGTGAGAGACTTCCTAATC  
CAACTGAGCTATGCTTCAATTCCTTTCATATGCCTAATACTTGTTC

>PGSC0003DMG400001269-(rev)RLKWAX-EGF\_5063

CTTCTAATCCAAGTATGCTTCAATTCCTTTCATATGCCTAATACTTGTTCATTAATGACAAGGA  
AACTTAAGGATGGACGAGAGGTTGCTGTGAAGCGCCTTTACGAGCAC

>PGSC0003DMG400001269-(rev)RLKWAX-EGF\_5185

CTGCAAACGAATGCAGCAGTTTGTAATGAAATTGATATCCTTACCAGGCTAAGGCACAACAATCTTGTC  
ACTCTCTATGGCCGCACTTCAAGGCGTAGCCGTGAACCACTCCTTGTCTA

>PGSC0003DMG400001269-(rev)RLKWAX-EGF\_5246

AATCTTGTCCTCTCTATGGCCGCACTTCAAGGCGTAGCCGTGAACCACTCCTTGTCTATGAATTCATTCC  
TAATGGAAGTCTTGCCGATCACCTCCATGGTGACAGAGTGAAGGACGGA

>PGSC0003DMG400001269-(rev)RLKWAX-EGF\_5368

ACTCACCTGGCTAGTCCGCATGAACATTGCCATAGAACTGCTGGTGCATTGGCTTACCTGCATGCGTCT  
GACGTAATACACTGCGATGTGAAGACTAATAACATACTCCTTGATCACAA

>PGSC0003DMG400001269-(rev)RLKWAX-EGF\_549

TGTTCACTTAACAGATTGCCAATTGGCTCGATATCAGATGAAGGTGGTTTGTTCATATGTTAAGCGCCG  
GTTTTCTAGTACAATGGAACTGTCTGCGGACTGTTACAAATGTCACTAT

>PGSC0003DMG400001269-(rev)RLKWAX-EGF\_5490

TTAATGTAAAGTTGCAGATTTTGGGATATCACGGCTTTTCCCAAATGTTGTCACTCATATTTCAACTGCA  
CCCCGGGGTACCCCTGGCTATATTGATCCAAAGTATTATGAATGTTACC

>PGSC0003DMG400001269-(rev)RLKWAX-EGF\_5551

TTCAACTGCACCCCGGGGTACCCCTGGCTATATTGATCCAAAGTATTATGAATGTTACCATTGACTAGTA  
AAAGTGATGTTTATAGCTTCGGGGTGGTCCTTGTGAGCACATTTTCATC

>PGSC0003DMG400001269-(rev)RLKWAX-EGF\_5856

ATAGGGACATGAGGCCTACTATGGTTGAAGTTTTGGATATTCTAAACGAGATTCAGATTAGTGAATTTG  
ACAATGAGAAGAGAGCTGACTCTAATCTCAATGGAAATGAAGCTAAAATTG

>PGSC0003DMG400001269-(rev)RLKWAX-EGF\_5917

TGAATTTGACAATGAGAAGAGAGCTGACTCTAATCTCAATGGAAATGAAGCTAAAATTGTTACAGCACC  
CAGTTTCACTGAATCAGAAGATATGTTTAAGCTGAAGCAAGTTAAATCACT

>PGSC0003DMG400001269-(rev)RLKWAX-EGF\_5957

GGAAATGAAGCTAAAATTGTTACAGCACCCAGTTTCACTGAATCAGAAGATATGTTTAAGCTGAAGCAA  
GTTAAATCACTACCTTCTTCAAATTTTGTACTGATAAATGGGTTTCTTAG

>PGSC0003DMG400001269-(rev)RLKWAX-EGF\_671

CGGAGGTCAATGCCAGACCGATATAACCAACAAATTTTCATTGTTTCATATCCAAATAATCCACATGATCAT  
CAAAAAAATGATCTAAATGCTCAAGGTCTAGTGCATATTTAATAAATTTTC

>PGSC0003DMG400001269-(rev)RLKWAX-EGF\_732

CATGATCATCAAAAAAATGATCTAAATGCTCAAGGTCTAGTGCATATTTAATAAATTTCTTTCTCATTTTC  
GTATCAAATATTGATAATATTTTCATAGAATTTTCTCTTTTTTAGATG

>PGSC0003DMG400001269-(rev)RLKWAX-EGF\_793

TCTCATTTTCGTATCAAATATTGATAATATTTTCATAGAATTTTCTCTTTTTTAGATGCAAAAAATGACTAG  
AAGCAAGTTGGGACCGACTCTGGGAGCAGGTAGTTAAATATCCATTAA

>PGSC0003DMG400001269-(rev)RLKWAX-EGF\_854

AAAATGACTAGAAGCAAGTTGGGACCGACTCTGGGAGCAGGTAGTTAAATATCCATTAAGTGCAGGGTT  
CTTTCTTATTTTCAGCATAATCATGCATATCATTTAAATTTTCTTCTTCATT

>PGSC0003DMG400001269-(rev)RLKWAX-EGF\_915

GCAGGGTTCTTTCTTATTTTCAGCATAATCATGCATATCATTTAAATTTTCTTCTTCATTGTGGTAAAAATTC

AAAAAATTGAGGAGACACGTACTTCAGATTACAGAACGTATGGATAGT

>PGSC0003DMG400001271-(rev)RLKWAX-EGF\_0

GAATAAGATAACGACTAGTTATGGAACCTGAGCCTATAAGATAGTCTGTTTAGCTAGAGTTGCAATTCAC

AAATCTTCAGCTCTCTTTCCTCTTCTTGCGAGTAGATATTCAATATGGCTT

>PGSC0003DMG400001271-(rev)RLKWAX-EGF\_1054

TACTTTAGATTACACAACGTACCGATAGTGGAGTTGAGAGGACATTCTTTCTCCGGGCGAAGTTTAATTT

ATATTCTATGTTGGTGCATGACTTCGCTTTGCTTTCCACAGGTGCAGTTT

>PGSC0003DMG400001271-(rev)RLKWAX-EGF\_1178

TACAGTTGGACTGTTGGTTTTACTCTTCTGCTTCAGAGAGAAGATTTTGTGGTACAAATACATCAGGTTTT

GGGAATCTAATGCTGAGGATCACCAAATATTGAAGCATTTTTAAAGAA

>PGSC0003DMG400001271-(rev)RLKWAX-EGF\_1240

TCAGGTTTTGGGAATCTAATGCTGAGGATCACCAAATATTGAAGCATTTTTAAAGAAGTATGGATCGTG

TTCTCAAAGAGATACAACACTATTTAGAAGTCAAAGAATCACTAGTAGCT

>PGSC0003DMG400001271-(rev)RLKWAX-EGF\_1302

GGATCGTGTTCTCAAAGAGATACAACACTATTTAGAAGTCAAAGAATCACTAGTAGCTTCAAAAATAAAC

TTGGTCAAGGAGGATATGGTTCTGTATACAAAGGATGTCTGCATAATGGA

>PGSC0003DMG400001271-(rev)RLKWAX-EGF\_1550

ATGTAAAAGGGCTCTCGTATATGAATTTATGCCAAATGGATCTCTTGAAAAATTTATATACGAGGAAACA

TCCGACAGTGTTCCGCAATTGGGTTGGCAAATACTGTACAAAATAGCACT

>PGSC0003DMG400001271-(rev)RLKWAX-EGF\_1736

AAAGCCTACAATATCCTGCTTGATGACAATTTTTGTCCTAAGATCTCTGATTTTGGTCTTGCCAACTGT

GCATGAAACAGGAGAGTATCGTGTCGATGTTAGGTCCACGAGGGACTAT

>PGSC0003DMG400001271-(rev)RLKWAX-EGF\_1798

CCAACTGTGCATGAAACAGGAGAGTATCGTGTCGATGTTAGGTCCACGAGGGACTATAGGCTATATTG

CTCCAGAAATTGTTTGCAGAAATTTGGGAGGTGTGTCGCACAAGTCTGGTG

>PGSC0003DMG400001271-(rev)RLKWAX-EGF\_186

ATGATTCAGTTTGTCAAAGTCCTTTTCATGTGGAAATCTTACTGACCTGAGCTTTCCTTCACTCTTCTAA

CACAACCTGACTGTGGAATAATGTCCATTTCTGGTTGTAATGTTAAAC

>PGSC0003DMG400001271-(rev)RLKWAX-EGF\_1860

TATATTGCTCCAGAAATTGTTTGCAGAAATTTGGGAGGTGTGTCGCACAAGTCTGGTGTCTATAGCTATG  
GAATGATGGTCCTAGAGATGCTGGGAGTAAGAACAAATTTTGATTTTGA

>PGSC0003DMG400001271-(rev)RLKWAX-EGF\_1922

TAGCTATGGAATGATGGTCCTAGAGATGCTGGGAGTAAGAACAAATTTTGATTTTGGAGTTGATGGTTG  
GAGGAAGAAAAAATGTTGATGTTGGAGTTGATCGCACTAGTGAAATCTACT

>PGSC0003DMG400001271-(rev)RLKWAX-EGF\_1984

ATGGTTGGAGGAAGAAAAAATGTTGATGTTGGAGTTGATCGCACTAGTGAAATCTACTTTCCACATTGG  
CTCTATCAGCGAATTGAACTAGACGAAGAGCTTCAACTAATTGGAATAATG

>PGSC0003DMG400001271-(rev)RLKWAX-EGF\_2046

ACATTGGCTCTATCAGCGAATTGAACTAGACGAAGAGCTTCAACTAATTGGAATAATGAATGAAGAGGA  
TAATGAATGTGCGAGAAAGATGGTGATAGCAAGTTTATGGTGCATACAGAC

>PGSC0003DMG400001271-(rev)RLKWAX-EGF\_2232

GCAAATGCCTCCCAAGCCTTACCTATATTCTCCACAAGAACTGAGGTAGATTTATCAGTACTAGAGCTG  
GCCAGTCTTAATTGTTTCATATCAGTGTAGTAGATCAAACATTAAGTCGA

>PGSC0003DMG400001271-(rev)RLKWAX-EGF\_2294

TAGAGCTGGCCAGTCTTAATTGTTTCATATCAGTGTAGTAGATCAAACATTAAGTCGATTACCAGGAGAA  
GTTTCGTTCAATCAATGTAGTTGTAATAATCTGTCTAGATCTTCAAAGAA

>PGSC0003DMG400001271-(rev)RLKWAX-EGF\_2356

CAGGAGAAGTTTCGTTCAATCAATGTAGTTGTAATAATCTGTCTAGATCTTCAAAGAAACAGTTATATTT  
AACGAAGATTTAGATTTGTGTTGCAATTATCTTTATTCATCAGGGATGTA

>PGSC0003DMG400001271-(rev)RLKWAX-EGF\_2418

TTATATTTAACGAAGATTTAGATTTGTGTTGCAATTATCTTTATTCATCAGGGATGTAAAATTGTTACATG  
TTATATTGAAAGGATCTAATGACTTTACATAGTCAAAATTCAAAGTTTC

>PGSC0003DMG400001271-(rev)RLKWAX-EGF\_248

ACTCTTCTAACACAACCTGACTGTGGAATAATGTCCATTTCTGGTTGTAATGTAAACAATATCCAAGAAT  
CCAATTGCTTCTGGAGGAGATTGGTATGATGCTATGGACGAGCCGTTT

>PGSC0003DMG400001271-(rev)RLKWAX-EGF\_372

ATACAGTTTGGCTCGTGGACCCGAAGCTTCAACTATATTGAGGAAAAACAAGTGCCAGGCTTTTAAACA  
AAAATATCTCCCTTCCAGATTCTCCTTCTATTTATTTCAAATTTCTCCAAA

>PGSC0003DMG400001271-(rev)RLKWAX-EGF\_434

TTTAACAAAAATATCTCCCTTCCAGATTCTCCTTCTATTTATTTCAAATTCTCCAAATATATACGAGGGAT  
TTTTACAGATGCAACAGCACTAGTAGTACCCCGAAGAACAAGCATTTT

>PGSC0003DMG400001271-(rev)RLKWAX-EGF\_496

TACGAGGGATTTTTACAGATGCAACAGCACTAGTAGTACCCCGAAGAACAAGCATTTTTCTGGTTATAAA  
ATGTACAATGGTTGTAAAGGCTTTAACATATACTACAAGCTTCCCGGAGA

>PGSC0003DMG400001271-(rev)RLKWAX-EGF\_558

GTTATAAAATGTACAATGGTTGTAAAGGCTTTAACATATACTACAAGCTTCCCGGAGATGATGATGAAGT  
CCTTCCAGCAGGCAATCTTACTACAACTGTTCACTTCTCCAATTGCCAA

>PGSC0003DMG400001271-(rev)RLKWAX-EGF\_682

CCCAACATTAGATGGAACTTTTATACTCCCGGATTTCTAGTAGAATGGAACTCTCTGAGGACTGTAAC  
CAATGTCTCTATGGCGGAGGTCAATGCCAGACGGATAAAACCAACAAATT

>PGSC0003DMG400001271-(rev)RLKWAX-EGF\_744

ACTGTAACCAATGTCTCTATGGCGGAGGTCAATGCCAGACGGATAAAACCAACAAATTTTCATTGTACATA  
TCCAAATAATCCACATGAACAAGGTCTAGTGTATATTCCATGAAGTCCTA

>PGSC0003DMG400001271-(rev)RLKWAX-EGF\_806

TGTACATATCCAAATAATCCACATGAACAAGGTCTAGTGTATATTCCATGAAGTCCTATATCTTTTTTCGTA  
TCAAATATTGTTAATATTTTCATAGTATTTTTCTCTTTTTTTAGATGCA

>PGSC0003DMG400001271-(rev)RLKWAX-EGF\_868

TTTTTCGTATCAAATATTGTTAATATTTTCATAGTATTTTTCTCTTTTTTTAGATGCAAAAATGACTAGAAG  
CAAGTGGGGACTGACTCTGGGAGCAGGTAGTTAAATATCCATCAACTG

>PGSC0003DMG400001271-(rev)RLKWAX-EGF\_930

TGACTAGAAGCAAGTGGGGACTGACTCTGGGAGCAGGTAGTTAAATATCCATCAACTGCAGGGTTCTTT  
CTTCTTTAGATTTTCTACTTCACTGTGTTAAAATCTCAAAAATTGGAGAGA

>PGSC0003DMG400001271-(rev)RLKWAX-EGF\_992

GTTCTTTCTTCTTTAGATTTTCTACTTCACTGTGTTAAAATCTCAAAAATTGGAGAGACCAGTACTTTAGAT  
TACACAACGTACCGATAGTGGAGTTGAGAGGACATTCTTTCTCCGGGC

>PGSC0003DMG400001301-(rev)LRR-RLKs\_248

TTTCTTTGTTCTTCCGTGCCTTGATGCTACTGTAGTTGAAGATGATCTCAAGTGTTAGAAGGATTTAAG

AAGTCTTTGGAAGATCCAGATGGGAATCTGAATTCATGGAACCTTTAAAA

>PGSC0003DMG400001301-(rev)LRR-RLKs\_310

GGATTTAAGAAGTCTTTGGAAGATCCAGATGGGAATCTGAATTCATGGAACCTTTAAAAATACTACTGTC

GGAGCTATCTGTAAGTTTACGGGTGTTAATTGCTGGAATGACAACGAAAAT

>PGSC0003DMG400001301-(rev)LRR-RLKs\_372

TACTGTCGGAGCTATCTGTAAGTTTACGGGTGTTAATTGCTGGAATGACAACGAAAATCGCATCATCAGT

CTCTCTCTTTTGAATATAAACCTCGGAGGGAAGGTTACAGAGCCTGTACA

>PGSC0003DMG400001301-(rev)LRR-RLKs\_434

TCATCAGTCTCTCTCTTTTGAATATAAACCTCGGAGGGAAGGTTACAGAGCCTGTACAGTATTGTGCCAG

CTTGACAACCCTTGATCTCTCTGGTAATCGCTTTTCTGGTCCAATTCCTT

>PGSC0003DMG400001301-(rev)LRR-RLKs\_558

AATTTGTACATGGCTACCTTTTTTGGTAACCCTAGACTTGTCCGGTAACGATTATTCCGGCCCTATCCCTG

CTGATCTTGCTAAATGCATCTTTTTGAATAAATTATCGCTCAGTGATAA

>PGSC0003DMG400001301-(rev)LRR-RLKs\_620

CTATCCCTGCTGATCTTGCTAAATGCATCTTTTTGAATAAATTATCGCTCAGTGATAACAAGCTTACTGGA

AATATTCCCCTGAATTTTCTAGTTTTGGTAGGCTTAAAAGTTTTTCTG

>PGSC0003DMG400001368-(rev)RLKmalectin\_1054

AGCCGGAAGTTAAAGAAATAAACGATAGAAGTTTTTCCATTTCTATCGGAAACCAAACAGCAGAGCGAG

AGGCTGATGTAATACAATGGAGTGAAGGCTGGAGAATCCCTGTGTACAAAG

>PGSC0003DMG400001368-(rev)RLKmalectin\_2666

GTCACAAAATGGAATTGAACAGTTATCCGACTAGCCCGTCTTCCCCTTGATTATGAATGGTCATGGTCA

TACCAATATATCTACAGATGAAGGATTCGAGGCATTTTCAGGTTACATG

>PGSC0003DMG400001368-(rev)RLKmalectin\_62

TATAATTATTCCTTGGAACAATAATATCTCCTTACACAAACGCCATGGCAACCATTACTCTACTTTTCTT

TCTCTTATTACAACCTATAACGGCCACTATTTCTACCACGCCGCCACC

>PGSC0003DMG400001368-(rev)RLKmalectin\_682

CAACTGATCTTTACATCCATGGAGACGTAAAATTGGCTGGGAATACTAATCCATATAACATCAATAACAG

CACTGCTCTTGAACTTTGTACAGGCTGAACGTGGGAGGATATTTTGTG

>PGSC0003DMG400001368-(rev)RLKmalectin\_868

GCTATCAAACCTCCTCATTTTGATGATGCCAGCATCACTTACACTCCTAAAACCCCGGCTTATACTGCGCCA  
ACCATAGTTTACACAACCTCTAGGACTATGGCCAATTACAGCCCGGGAC

>PGSC0003DMG400001368-(rev)RLKmalectin\_930

ACTGCGCCAACCATAGTTTACACAACCTCTAGGACTATGGCCAATTACAGCCCGGGACTGGATTGGGAA  
TTTCTCTAAACTCTGGCTTCTATTATCTTTTCAGGCTCCATTTTTGTGAG

>PGSC0003DMG400001368-(rev)RLKmalectin\_992

TTGGGAATTTCTCTAAACTCTGGCTTCTATTATCTTTTCAGGCTCCATTTTTGTGAGATTCAGCCGGAAG  
TTAAAGAAATAAACGATAGAAGTTTTTCCATTTCTATCGGAAACCAAAC

>PGSC0003DMG400001369-(rev)RLKmalectin\_0

GTCAGTTTTTAATACAGAAAAATCGAAATAACAGAATGACTTGATCATTGAAGAAGTAGATATCTGTACA  
CCAAATAACAGAGAAATTTTATAACAACGCCATGTTATTCATTGCTCTGA

>PGSC0003DMG400001369-(rev)RLKmalectin\_1116

ACAATATGATTTACGTAACCTCTAGGACCATGGCCAATAACAGCCAGAGCCTGGATTGGATATTCCTCT  
AGATTCTGGTTTCTATTATCTTTTCAGGCTCCATTTTTGTCAGAATCAGC

>PGSC0003DMG400001369-(rev)RLKmalectin\_1178

TTCCCTCTAGATTCTGGTTTCTATTATCTTTTCAGGCTCCATTTTTGTCAGAATCAGCCGGAAGTTAAGGA  
AGTTTGCAGAATTGGACAAAGAATCATCCAAATTCCAAAGAAAATAACC

>PGSC0003DMG400001369-(rev)RLKmalectin\_124

CTCTCTCTATTACATCTAATGACAGTCACTATGACTCTCACGCCACAGTACGATTACAATGCCACAGACC  
ATCTTTTGCTGAATTGTGTCGCAGTATTGAAAGACCCAAAGTTAGCAGT

>PGSC0003DMG400001369-(rev)RLKmalectin\_1240

AGTTAAGGAAGTTTGCAGAATTGGACAAAGAATCATCCAAATTCCAAAGAAAATAACCCAAAACCTTTC  
CTTTCAAGCAAACCGACTATTGCTCCAGTGGAACATAACAGATTATTATGA

>PGSC0003DMG400001369-(rev)RLKmalectin\_1302

ACCTTTCCTTTCAAGCAAACCGACTATTGCTCCAGTGGAACATAACAGATTATTATGAAAATGAAAGGCA  
GCATTCATGGCCTACAAGAAAAAGATATACACCCCAATTAACAACCTTTT

>PGSC0003DMG400001369-(rev)RLKmalectin\_1364

GAAAGGCAGCATTTCATGGCCTACAAGAAAAAGATATACACCCCAATTAACAACCTTTTCTCTGCCATTT  
CTATTTCTCTGTGTATTTTCTGGGTACATATATGGTCCCCTTCTTTAGT



>PGSC0003DMG400001369-(rev)RLKmalectin\_1488

TAATCCTAATAGTAATTTCACTTACATTCTTCGATGAAGTCAACTCTTGCCTCACTGAGTTTTACTCCATTT  
ATTTGGTGCACTTATAATAAGTTACTTTTTGTACAAAAACAAAATTATG

>PGSC0003DMG400001369-(rev)RLKmalectin\_1550

TACTCCATTTATTTGGTGCACTTATAATAAGTTACTTTTTGTACAAAAACAAAATTATGTCGGTTTTTAATAC  
AGAAAATTAGAAATGACTTGATCTTCGAACAGCTACTGTATATATCTG

>PGSC0003DMG400001369-(rev)RLKmalectin\_1612

TTTTTAATACAGAAAATTAGAAATGACTTGATCTTCGAACAGCTACTGTATATATCTGCACAACAAATATC  
AGTATAGCACGTACATAGTTTTTCAAGACAGCGCCATGGCAACCATTAC

>PGSC0003DMG400001369-(rev)RLKmalectin\_1674

ACAAATATCAGTATAGCACGTACATAGTTTTTCAAGACAGCGCCATGGCAACCATTACTTTACTTTTCTTT  
CTCTTCTTACAACCTATAACGGCCACTATTTCTACCACGCCGCTACCGT

>PGSC0003DMG400001369-(rev)RLKmalectin\_186

CCACAGACCATCTTTTGCTGAATTGTGTCGCAGTATTGAAAGACCCAAAGTTAGCAGTCCCCGTTGAAGA  
TTTCGATGGCCGTCAATGGTATACAGATGCCCACTACCCAAATTTCCAAC

>PGSC0003DMG400001369-(rev)RLKmalectin\_1860

GTCGATGGGATACTGATACTCACTTCCCAAATTTCTTACCTCCGACTTTTCAAACATATCCACAACCTGCC  
ACAGCTTCTGAACAAGATCCTTCGGTCAATAGAGTTCCTTATACGACTG

>PGSC0003DMG400001369-(rev)RLKmalectin\_1922

ACAACTGCCACAGCTTCTGAACAAGATCCTTCGGTCAATAGAGTTCCTTATACGACTGGTGCTCGTATCA  
TGAAATCTCGATTCACTTACACTTTCCGTGTTTCCCCTGGCGCCAAATTC

>PGSC0003DMG400001369-(rev)RLKmalectin\_2418

GCACAGAGGATACAGGGATGTATCGTGTATGGGATTCAGATGATGCATTTGTTGTTGGATATGGCTATC  
AAACTCCTCATTTTGATGTCAACATCACTTACACTTCTGAAACCCCGCCTT

>PGSC0003DMG400001369-(rev)RLKmalectin\_248

GTTGAAGATTTTCGATGGCCGTCAATGGTATACAGATGCCCACTACCCAAATTTCCAACCTTCCAACTTTTC  
AAGAATATCCACAACAGCCACAGCTTTTGAACAAGACCCTTCGGTCAAT

>PGSC0003DMG400001369-(rev)RLKmalectin\_2480

GGCTATCAAACCTCCTCATTTTGATGTCAACATCACTTACACTTCTGAAACCCCGCCTTATTCTGCGCCGAG

GATAGTTTACACAACCTCTAGGACTATGTCCAATCACAGCCAGAGCCTG

>PGSC0003DMG400001369-(rev)RLKmalectin\_2542

TGCGCCGAGGATAGTTTACACAACCTCTAGGACTATGTCCAATCACAGCCAGAGCCTGGATTGGGAATT

CCCTCTAAACTCTGGTTTCTATTATCTTTTCAGGCTCCATTTTTGTGAGAT

>PGSC0003DMG400001369-(rev)RLKmalectin\_2604

GGGAATTCCCTCTAAACTCTGGTTTCTATTATCTTTTCAGGCTCCATTTTTGTGAGATTCAGCCGGAAGTT

CTGGAAGTGAACGACAGGGTTTTGACATATACATTGGAAACCAAATGG

>PGSC0003DMG400001369-(rev)RLKmalectin\_2790

TGGTGAATGTGACTAACCCAGACGACCGACGAAACAAACAAAGTATTACGCTTCAATTGAGTCCTAACA

TGGAAACAAAAGCTGTGTATGCTGATGCTACCTTAGGATCAGCATATTCAA

>PGSC0003DMG400001369-(rev)RLKmalectin\_2852

CCTAACATGGAAACAAAAGCTGTGTATGCTGATGCTACCTTAGGATCAGCATATTCAAATGCTATCTTAA

ATGGCTTAGAAATTTTCAAATTGGGTGATGCAATTGGGAGTCTGGCCGCG

>PGSC0003DMG400001369-(rev)RLKmalectin\_2914

TATCTTAAATGGCTTAGAAATTTTCAAATTGGGTGATGCAATTGGGAGTCTGGCCGCGTCAAATCATGAA

TTGCCGTCAGAAGCTCCGATCGCTTCATTAGCTTTTCCTAACAACAAGAA

>PGSC0003DMG400001369-(rev)RLKmalectin\_2976

ATCATGAATTGCCGTCAGAAGCTCCGATCGCTTCATTAGCTTTTCCTAACAACAAGAAGAAAAGAATATC

ATGGCATATCATTGTTGCTATCATCACAGGTGTGACTAGCGGTATTGCTT

>PGSC0003DMG400001369-(rev)RLKmalectin\_310

CAACTTTTCAAGAATATCCACAACAGCCACAGCTTTTGAACAAGACCCTTCGGTCAATAGAGTTCCTTATA

TGACTGGCACCCGTATTATGCTATCTCAATTCACTACACTTTCCGTGTT

>PGSC0003DMG400001369-(rev)RLKmalectin\_3410

CATCTAGTGTCTTAATTGGTTATTGTGATGATAAGAATGAGATGATCTTGGTTTATGATTACATGGCTA

ATGGTACCCTCCGTGATCACTTGTACAATACTGACAATGCTCCTCTTCCA

>PGSC0003DMG400001369-(rev)RLKmalectin\_3472

CATGGCTAATGGTACCCTCCGTGATCACTTGTACAATACTGACAATGCTCCTCTTCCATGGAAGAAACGC

CTTGACATTTGCATTGGTGCAGCTAAAGGATTATGTTACCTTCATTCAGG

>PGSC0003DMG400001369-(rev)RLKmalectin\_3596

TAATCAATAAATTGATAAACATGTCATGATCTAACTTGCACTATATTTGTTTGGTTAAAAAAGTATTGGG  
TCAGAATAGGTCAAATAACGATCAATGTCAAGTTAAACAGCATGACTCA

>PGSC0003DMG400001369-(rev)RLKmalectin\_3658

AGTATTGGGTCAGAATAGGTCAAATAACGATCAATGTCAAGTTAAACAGCATGACTCAACCTCCCAATTT  
GGTTTTGTATGTTCTATTTGCATTTTGACATGTTTTGATTCAATAGATT

>PGSC0003DMG400001369-(rev)RLKmalectin\_3906

TCATTCATCGAGATGTCAAGTCAACTAACATCCTATTGGACGATAAATGGGTCGCCAAGGTGTCCGATTT  
TGGATTGTCCAAAGTAGGTTCAGTAGGTGGGACAGATATTACCCATGTTA

>PGSC0003DMG400001369-(rev)RLKmalectin\_4092

TAAAATCAGATGTTTATTCTTTTGGGGTGGTTCTATTTGAAGTGTTATGCGCTAGACCGGCAATAAATCC  
AAACTTGCCAAGTGGGCAAGTGAATTTGGCTGAGTGGGCTAGTAGGAGTT

>PGSC0003DMG400001369-(rev)RLKmalectin\_4154

ATAAATCCAAACTTGCCAAGTGGGCAAGTGAATTTGGCTGAGTGGGCTAGTAGGAGTTGTA AAAAGAG  
AGAACTTGAAGAAATTATTGATCCTAACTTGAAAGGACAAATAGCCCCAGAA

>PGSC0003DMG400001369-(rev)RLKmalectin\_434

CTGGAGCCAAATTCCTCCGTCTCTATTTTTACCCGCCGATTACTCTGGCTTCGATAAATCAGAATCTTTTT  
TTTCAGTCACTGCTAATCATTTTACCCTCTTGAGTAACTTCAGCGCTT

>PGSC0003DMG400001369-(rev)RLKmalectin\_4464

TCTCAGATTTAAGTGAAGTTGAAAGAAAATTGACAAGCAATGGTATATCCATGTCCGGTCAGTAGGAGTG  
CCAAAGTGAACAATGTTGCCCTTTCTCTGAGATTATCACTCCATTGGGTC

>PGSC0003DMG400001369-(rev)RLKmalectin\_4588

AAATTGTTATGATCATAGTTCGATACACTGAAATTACATGTATTTAATTTGTTTTTCAGCTTCTTTTTGCA  
ATTTAATGGGTACATACATGGCCCCTATTTCATAACCCCATTGTTTGA

>PGSC0003DMG400001369-(rev)RLKmalectin\_4645

CAGCTTCTTTTTGCAATTTAATGGGTACATACATGGCCCCTATTTCATAACCCCATTGTTTGACGACGTCA  
ACTCTTTTATGGAATGTCTTATAAAAAATATTTCTTAAATCACTTGTA

>PGSC0003DMG400001369-(rev)RLKmalectin\_496

GAATCTTTTTTTTCAGTCACTGCTAATCATTTTACCCTCTTGAGTAACTTCAGCGCTTTCTATACAGTCGCT  
GCAAGTACCAATTCTAGTAAAGCTGTTTCGAAAAGAATTTGTCATTAAT

>PGSC0003DMG400001369-(rev)RLKmalectin\_558

TACAGTCGCTGCAAGTACCAATTCTAGTAAAGCTGTTTCGAAAAGAATTTGTCATTAATGTTAATGAATTT  
CAGATACTCAATATAACCTTTTCTCCCTCGCCAAACTCTTATGCTTTTGT

>PGSC0003DMG400001369-(rev)RLKmalectin\_62

TCTGTACACCAAATAACAGAGAAATTTTCATAACAACGCCATGTTATTCATTGCTCTGATTTCTCTCTCCTA  
TTACATCTAATGACAGTCACTATGACTCTCACGCCACAGTACGATTAC

>PGSC0003DMG400001369-(rev)RLKmalectin\_620

ATGAATTTTCAGATACTCAATATAACCTTTTCTCCCTCGCCAAACTCTTATGCTTTTGTAAATGGGATTGAG  
ATAGTTTCCATGCCACCAATCTTTACATCGGTGGAGATAATCGCATCA

>PGSC0003DMG400001369-(rev)RLKmalectin\_682

GGGATTGAGATAGTTTCCATGCCACCAATCTTTACATCGGTGGAGATAATCGCATCAAATTGGTGGGC  
CAGAATGATCCTTATTCCATCTATAACGACACTGCTCTTGAAACTTTGTAC

>PGSC0003DMG400001369-(rev)RLKmalectin\_744

GGTGGGCCAGAATGATCCTTATTCCATCTATAACGACACTGCTCTTGAAACTTTGTACAGGCTGAACGTC  
GGAGGACATTCAATTGCTAGCACGGAGGATACAGGGATGTATCGTGTATA

>PGSC0003DMG400001369-(rev)RLKmalectin\_806

TGAACGTCGGAGGACATTCAATTGCTAGCACGGAGGATACAGGGATGTATCGTGTATATGAGGAATTT  
GTTGTTGTATATGGCTTTCAAACCTCTAAATTTGATGTCAACATCACTTACA

>PGSC0003DMG400001369-(rev)RLKmalectin\_868

GAATTTGTTGTTGTATATGGCTTTCAAACCTCTAAATTTGATGTCAACATCACTTACACTACTGAAACCCC  
GCCTTAAGGAAGTTTGCAGAATTGGTTTGCAGAATTTGTTGTTGTATAT

>PGSC0003DMG400001732RLKmalectin\_0

TTTAAAATTCTTGATATTATGCTCAACTTTTTAGCTAAGTGTCTTTTTGATGTTCCCATCTCCATAGTAGT  
TCTTGTTTTTTTTGTTTTTTTAGCAAAGAACAAGATTTGGAGTAATG

>PGSC0003DMG400001732RLKmalectin\_1037

CAGCCTAATAATATGATAAAGATCTGGCATTGATTGAGATTTGACTCAACTTGCTATAAATGAGAGAAAC  
ATTTCTGATCCCTTTATGCAGATTGTTACAAGTAAAACACTAGAAATAA

>PGSC0003DMG400001732RLKmalectin\_1098

GAGAGAAACATTTCTGATCCCTTTATGCAGATTGTTACAAGTAAAACACTAGAAATAAGCATAAGCCTG

GAACCACTTACATCAAGTGGCCATTCAATTATTTCAAGTTAAATTCTCAA

>PGSC0003DMG400001732RLKmalectin\_1159

ATAAGCCTGGAACCACTTACATCAAGTGGCCATTCAATTATTTCAAGTTAAATTCTCAATGCAGCTGTCA  
GCCTGTCCTTGTCAATTTCCATTGCACAAATTAATAATTCTGCCAGATGCC

>PGSC0003DMG400001732RLKmalectin\_122

TACTGGAGTTTTCATCTTCTTTGTTTGGTTTGCTGTTTTTCTTCTCATTAAATGGCAGCCAAGCACAGCCAG  
GTAATAACCCTTTTTTTTTTGCTTATTTGTTTGTGGGGTTCTAGATTT

>PGSC0003DMG400001732RLKmalectin\_1220

CAGCTGTCAGCCTGTCCTTGTCAATTTCCATTGCACAAATTAATAATTCTGCCAGATGCCATAGGTAATTTT  
GACTTGTGAGAGCTGATAGAAAGAGTTATTAATAATTGCATGAATAAACCA

>PGSC0003DMG400001732RLKmalectin\_1281

AGGTAATTTTGACTTGTGAGAGCTGATAGAAAGAGTTATTAATAATTGCATGAATAAACACATTAGTCATA  
AAGCTTTTGTGGCAATCATAAGAAGTGTTGATAATCTCAAGCAGAGAAC

>PGSC0003DMG400001732RLKmalectin\_1342

TTAGTCATAAAGCTTTTGTGGCAATCATAAGAAGTGTTGATAATCTCAAGCAGAGAACTGATGATGTAC  
TCAGAATTTTCTGTGAGTTAGTGATTTGAGGGTGTAATAAAACAATAGC

>PGSC0003DMG400001732RLKmalectin\_1403

ATGATGTAATCAGAATTTTCTGTGAGTTAGTGATTTGAGGGTGTAATAAAACAATAGCATCTAACAGAA  
AAGTGTTATGCAATCGCTTAAGTTTCTGCGAAGCTAGAGAGATTAATAGG

>PGSC0003DMG400001732RLKmalectin\_183

GCACAGCCAGGTAATAACCCTTTTTTTTTTGCTTATTTGTTTGTGGGGTTCTAGATTTAGTTGTTCTCGTT  
CATGGGTTTCTGTTGTTATGTGTTGTACTACTTTTTTTTAAAGAAAAT

>PGSC0003DMG400001732RLKmalectin\_1891

TCTCATTCTTTAATGAAGCTTTACCAATGGGTGTGAAAGTTGGTGGATATTTCAATCTTTATGCACTGCTG  
ATAAAATTTTAACTGTCAAACAGGTTTTGTAAGTTTAGATTGTGGAGG

>PGSC0003DMG400001732RLKmalectin\_244

TTGTTCTCGTTCATGGGTTTCTGTTGTTATGTGTTGTACTACTTTTTTTTAAAGAAAATTTGTGTGATTTCC  
TTGAAATAGCTTGTCTTGATGTTTCATAGTGATTTCTCTGTGCAAGAT

>PGSC0003DMG400001732RLKmalectin\_2440

GA CTGAATTTGAGAATGATTTTTTCATGAGCGTCTCTGCTAGGATTAATTTTGGCGCAGCGAGTGATGAT  
CCTGTCAGGTATGTTTCAGTTCTTCTGTTACTGTGGCAGCTTCCAAATCT

>PGSC0003DMG400001732RLKmalectin\_2684

TTCCGAAATTTTAATCTTCCCTTAATGTCCTTATTCTCCTAGGTACCCTGATGACCCATTCGATAGAATATG  
GGCGTCTGACACCATAAAAAAAGCCAATTACCTTGTTGATGTGGCTGC

>PGSC0003DMG400001732RLKmalectin\_305

GTGTGATTTCTTGAATAGCTTGTCTTGATGTTTCATAGTGTATTTCTCTGTGCAAGATTTGATTTTTAAG  
AGTATCTTTAATCTTAGTGAAGGGTGTGGCAGAATGGTAAAGTTTCTT

>PGSC0003DMG400001732RLKmalectin\_3050

GCTTGCTGTTAATATCCAAGAGAATGCCCATGGGAAATATCGTTTATATGAGCCCGGCTACTTCAACTTG  
TCCTTGCCCTTTGTGTTATCTTTTCGTTTCGGAAAGACATCCGATTCCAC

>PGSC0003DMG400001732RLKmalectin\_3111

TTCAACTTGCCTTGCCCTTTGTGTTATCTTTTCGTTTCGGAAAGACATCCGATTCCACCATGGGGCCTCTC  
TTGAATGCTATGGAAGTAAACAGATATGTTAAGAGAACTGATGGCTCT

>PGSC0003DMG400001732RLKmalectin\_3172

TGGGGCCTCTCTTGAATGCTATGGAAGTAAACAGATATGTTAAGAGAACTGATGGCTCTTTAGACGGTA  
AAACCATGCCTTTTTCTTTAACATTATTATAATGTGGTTCGTTGAAATGAT

>PGSC0003DMG400001732RLKmalectin\_3233

AGACGGTAAACCATGCCTTTTTCTTTAACATTATTATAATGTGGTTCGTTGAAATGATTATCTGCAGTTT  
ATTTCAATAGAAAGATTTTTTCTGTTGTAATGAGCATCTTTGTTTCGTTA

>PGSC0003DMG400001732RLKmalectin\_3294

TCTGCAGTTTATTTCAATAGAAAGATTTTTTCTGTTGTAATGAGCATCTTTGTTTCGTTAGTTTCAAATAGT  
AAAGGCATGTCCCTTACTCTTTGCATGTGTTTCAGGACCAGTTATTTT

>PGSC0003DMG400001732RLKmalectin\_3355

TTCAAATAGTAAAGGCATGTCCCTTACTCTTTGCATGTGTTTCAGGACCAGTTATTTCTAGTTTAGTCTC  
GCACTACTCTTCTGCCAATTTGACAAACGAAGGTGGTGACCCATGCTTA

>PGSC0003DMG400001732RLKmalectin\_366

GATTTTTAAGAGTATCTTTAATCTTAGTGAAGGGTGTGGCAGAATGGTAAAGTTTCTTTCACACTTAATC  
AGAGATGAAGTTGTCTTTGTTAGGGAGCGCTAAGACCCCAATAGTGAGC

>PGSC0003DMG400001732RLKmalectin\_3660

TGGGCTATAATTCACAACCTGTCACCTTTGGCAGTAAATTGTCTGGGAAAAATTTGACTGGAAATATTCCG  
TCGGAGTTGACAAAATTGAGCGGCTTAGTTGAGCTGTAAGTCATAATATC

>PGSC0003DMG400001732RLKmalectin\_3721

AATATTCCGTCGGAGTTGACAAAATTGAGCGGCTTAGTTGAGCTGTAAGTCATAATATCGTTCTGTTAAA  
TGTTCCATGCATATGCTGCGGTTCCCTTCTTCTATTCTGCTGCTGTATA

>PGSC0003DMG400001732RLKmalectin\_3782

TCTGTTAAATGTTCCATGCATATGCTGCGGTTCCCTTCTTCTATTCTGCTGCTGTATAATCAATATGCACC  
CATGTTCCCTAATGCAGCTGGCTGGATGGGAATTCAGTACTGACTGGTTCAA

>PGSC0003DMG400001732RLKmalectin\_4148

ATTTACTCAAGCATGTTAGGCTGTAGATGCTATTCAACTATGAGTTCATGCATATGGATGAGAAGCTTAA  
CTCTCATATTAAGCTTCTGCTCATCAGAATAAGAATCTAGCATAACCCTG

>PGSC0003DMG400001732RLKmalectin\_427

ACACTTAATCAGAGATGAAGTTGTCTTTGTTAGGGAGCGCTAAGACCCCAATAGTGAGCTTTCTATTGCG  
CGAATTCGGAGTAGTTAGGGAGTTGGTTCTTGACGCTGGACTCTTGAGGC

>PGSC0003DMG400001732RLKmalectin\_4575

AGTGCTAGAGAACTAAATTCTTAAATGTTGGATTGAGGCGGGTCTAAGGAGCGTGATATGGATAGTG  
AGGATTCATACTGACCCCACTAGCTTGTGGTTAAGGTGTACTTGTGTTGTTGT

>PGSC0003DMG400001732RLKmalectin\_4636

GATAGTGAGGATTCATACTGACCCCACTAGCTTGTGGTTAAGGTGTACTTGTGTTGTTGATGCCTAAA  
CCTTTTCATTTAGCTACCAAGGTATATCTATAGGGAGCTCATGGTAGAG

>PGSC0003DMG400001732RLKmalectin\_4819

CATATGTAAATCCTCCGCGCTTGGTTGTGGTTCTTATTTAGTACTTAATGGTTCTTACTGCGCATTCAA  
AGTGTCTTCAGTTTCTACTAAGCTTGACTCATTACTTTACATTTTATA

>PGSC0003DMG400001732RLKmalectin\_488

TCTATTGCGCGAATTCGGAGTAGTTAGGGAGTTGGTTCTTGACGCTGGACTCTTGAGGCTAAAAAAGA  
AGAAGGAAAGAAGTACGTGCATGACATATGTGTTTGTGTGGTGGGAGTGGA

>PGSC0003DMG400001732RLKmalectin\_4880

TGCGCATTCAAAGTGTCTTCAGTTTCTACTAAGCTTGACTCATTACTTTACATTTTATATGTCGAAATTACA

AATCTTAAGTTTCTCTGATAATCTTGCTGCATTTCTAAATTGTTTGTC

>PGSC0003DMG400001732RLKmalectin\_4941

TCGAAATTACAAATCTTAAGTTTCTCTGATAATCTTGCTGCATTTCTAAATTGTTTGTCTTGTCTGTTTCCTT  
ACTAAATCTGCTAAAATATTCCGTATTCTCCTCAGTTATACTGGAAA

>PGSC0003DMG400001732RLKmalectin\_5002

GTCTGTTTCCTTACTAAATCTGCTAAAATATTCCGTATTCTCCTCAGTTATACTGGAACTTTAATCTTCAC  
GAAGGGGAAACCAGTCGCAGCCGTAAGAAAATCATTATTGGATCATCA

>PGSC0003DMG400001732RLKmalectin\_5185

AAAAGCTCTCCTAAGCAAGGTCTGGTGCAACTTAATTTTGTCAATTTTCATTATAAATAAATTTTTTTGGT  
GGGACACACATTATCTTTCTGCTTCTGTTTTAGGCCACCTCGAAATGA

>PGSC0003DMG400001732RLKmalectin\_5246

ATTTTTTTGGTGGGACACACATTATCTTTCTGCTTCTGTTTTAGGCCACCTCGAAATGAATTTACCTCCTCA  
AAGGTTTGTCTCTTCCTTGGGAGATGCTGCAACAGAAGCAGCACACTA

>PGSC0003DMG400001732RLKmalectin\_549

AAAAAAGAAGAAGGAAAGAAGTACGTGCATGACATATGTGTTTGTGTGGTGGGAGTGGATGAGGTTGT  
GTCTACTGCTTTTGATGGTGCTCTTTGAACAAAATTCCTATTTGATTGGTA

>PGSC0003DMG400001732RLKmalectin\_5551

TATTATATTCTAGAAGCTTGTGCATGATGCATAAGCATGGTCTTAAATGTCGGGACTGATGCTGTGGCTAA  
AAACCGATTATTTATTAGTATAACTTTGTGAGGAAGATCAAGATATAAGA

>PGSC0003DMG400001732RLKmalectin\_5612

TGTGGCTAAAACCGATTATTTATTAGTATAACTTTGTGAGGAAGATCAAGATATAAGAGGCTTCACCAT  
TACACTTCAATGTTTTTAGATTATCGAGGAATCCATTGTTTTACTTTTGG

>PGSC0003DMG400001732RLKmalectin\_5673

CTTCACCATTACACTTCAATGTTTTTAGATTATCGAGGAATCCATTGTTTTACTTTTGGAACTCGGGGATA  
ATGGGCCACCCTCTACCTCAATTAACCTAAATACCAAACCTGGTGCA

>PGSC0003DMG400001732RLKmalectin\_5734

CTCGGGGATAATGGGCCACCCTCTACCTCAATTAACCTAAATACCAAACCTGGTGCAACAACCAGGTT  
TTGAAGTCATGACATGCACCTACCACACTCCTGCTCTGTACTACCTCTGA

>PGSC0003DMG400001732RLKmalectin\_5795



AACCAGGTTTTGAAGTCATGACATGCACCTACCACACTCCTGCTCTGTACTACCTCTGATGTCGAATCAAA  
GCCCCGGAGGCTGCCTTGACACTCACATTATTTTTGCTTTTCAAGTCTG

>PGSC0003DMG400001732RLKmalectin\_5856

TCGAATCAAAGCCCCGGAGGCTGCCTTGACACTCACATTATTTTTGCTTTTCAAGTCTGCATAGCATCTCA  
GTATTGAAAATGAAAGCTGCGTAATATAAAGGATTAATTTCTTCATTAA

>PGSC0003DMG400001732RLKmalectin\_5917

TAGCATCTCAGTATTGAAAATGAAAGCTGCGTAATATAAAGGATTAATTTCTTCATTAATAAAAAAAGAT  
TTATTTAACGCTAGAGGACACTTTCTCAGTGGTACTTTTTCACACTCAT

>PGSC0003DMG400001732RLKmalectin\_5978

AAAAAAGATTTATTTAACGCTAGAGGACACTTTCTCAGTGGTACTTTTTCACACTCATCAAATGTATATT  
CCATAGAAGGTCACGGGCTATAAACCTCTAGACCAGCAATGGACTAGA

>PGSC0003DMG400001732RLKmalectin\_6039

AATGTATATTCCATAGAAGGTCACGGGCTATAAACCTCTAGACCAGCAATGGACTAGAACTTAATTATG  
TTGTTACACAGTGCTGCAACTTTTCCCTCTACATTGTGCAATTTTTGATC

>PGSC0003DMG400001732RLKmalectin\_61

TCCATAGTAGTTCTTGTTTTTTTTGTTTTTTAGCAAAGAACAAGATTTGGAGTAATGGGTACTGGAGTT  
TTCATCTTCTTTGTTGGTTTGCTGTTTTCTTCTCATTAAATGGCAGCC

>PGSC0003DMG400001732RLKmalectin\_610

AGGTTGTGTCTACTGCTTTTGATGGTGCTCTTGAACAAAATTCCTATTTGATTGGTAGTTAATTTTACTT  
GAAATGGAAAATGGAGAAAACAAATATAGAAGAATAGGTGAAATTTAA

>PGSC0003DMG400001732RLKmalectin\_6100

TTAATTATGTTGTTACACAGTGCTGCAACTTTTCCCTCTACATTGTGCAATTTTTGATCTGATGAAAATTAG  
TACAACCATATCCAGTTTATATGTGTCAAATTACAATTTTTGGCGCA

>PGSC0003DMG400001732RLKmalectin\_6161

ATGAAAATTAGTACAACCATATCCAGTTTATATGTGTCAAATTACAATTTTTGGCGCAGGTCGCTCTGCT  
TTCAAGAATTCATCACAGAAACCTTGACAGTTTCTAGGATTTTGTGTCAG

>PGSC0003DMG400001732RLKmalectin\_6222

TCGCTCTGCTTTCAAGAATTCATCACAGAAACCTTGACAGTTTCTAGGATTTTGTGAGGAAGATGGAAA  
GAGTATCCTTGTGTACGAATTCATGCATAATGGAACCTTAAGAACC

>PGSC0003DMG400001732RLKmalectin\_6283

AGATGGAAAGAGTATCCTTGTGTACGAATTCATGCATAATGGAACCTTAAAGAACACCTCTATGGTAA  
GTTTCATCTCGTACATTGATTACAGAAAGTTCTAATCTGAATCATGCTCAAT

>PGSC0003DMG400001732RLKmalectin\_6344

TATGGTAAGTTCATCTCGTACATTGATTACAGAAAGTTCTAATCTGAATCATGCTCAATGTGTAAAATCAT  
TGGCAGGTCCTCAATTACCTGATCGAAGTATTAAGTGGATCAGGCGCCT

>PGSC0003DMG400001732RLKmalectin\_6405

GTAAAATCATTGGCAGGTCCTCAATTACCTGATCGAAGTATTAAGTGGATCAGGCGCCTTGAGATTGCTG  
AAGATTCTGCAAAAGGTTTGTAAGAAAGGAAGAAGTTTTTTGGATTAGAC

>PGSC0003DMG400001732RLKmalectin\_6466

AGATTGCTGAAGATTCTGCAAAAGGTTTGTAAGAAAGGAAGAAGTTTTTTGGATTAGACAAGAAGGATC  
TTTCTATATTTACTGTGTTACTATTTTGATTGTTTCAGGAATTGAATATCT

>PGSC0003DMG400001732RLKmalectin\_6527

GAAGGATCTTTCTATATTTACTGTGTTACTATTTTGATTGTTTCAGGAATTGAATATCTTCACACGGGATG  
TGTCCCATCCATCATCCACAGAGATGTGAAAAGTCAATATTCTGCTT

>PGSC0003DMG400001732RLKmalectin\_6588

ACACGGGATGTGTCCCATCCATCATCCACAGAGATGTGAAAAGTCAATATTCTGCTTGACAAGAATAC  
GAGAGCAAAGGTTTCAGATTTTGGTCTCTCCAACTTGCAGTAGATGGAG

>PGSC0003DMG400001732RLKmalectin\_6649

CAAGAATACGAGAGCAAAGGTTTCAGATTTTGGTCTCTCCAACTTGCAGTAGATGGAGCTTCTCATGTG  
TCAAGCATAGTACGTGGAAGTGTAGGATATCTGGATCCCGAGTATGCATT

>PGSC0003DMG400001732RLKmalectin\_671

TAATTTTACTTGAAATGGAAAATGGAGAAAACAAATATAGAAGAATAGGTGAAATTAATGTTTTGTTT  
GTCTCATTCTATGTGTTACATACTTTATGGGATGTATCTATAGTTGAATG

>PGSC0003DMG400001732RLKmalectin\_6710

TTCATGTGTCAAGCATAGTACGTGGAAGTGTAGGATATCTGGATCCCGAGTATGCATTCTTCTCTGGAA  
CTTTGAGTTTTTTATTTACTGTACAAGGCCAAGCGTTGACTGCATTTTTA

>PGSC0003DMG400001732RLKmalectin\_6771

TCTCTGGAACCTTTGAGTTTTTTATTTACTGTACAAGGCCAAGCGTTGACTGCATTTTTATTCCACAACCTTGT

TGCTATGTGACTCTTAATTTGTTGGAAGGATCATATATTTTCTTTGT

>PGSC0003DMG400001732RLKmalectin\_6832

CCACAACCTTGTTGCTATGTGACTCTTAATTTGTTGGAAGGATCATATATTTTCTTTGTCTCTTGAACCCCT  
ATTAGCAAGAACAACAAAGTTTTTCTATGAATCTTAATGATGCAAATC

>PGSC0003DMG400001732RLKmalectin\_6893

CTTGAACCCCTATTAGCAAGAACAACAAAGTTTTTCTATGAATCTTAATGATGCAAATCAAGCTAGTATTC  
CTAACTTGAATTATATACCTGAGTTTCAAAGCCATGGGAAAAAAGCAAA

>PGSC0003DMG400001732RLKmalectin\_6954

GCTAGTATTCCTAACTTGAATTATATACCTGAGTTTCAAAGCCATGGGAAAAAAGCAAATCCTGGCTACA  
TGAATAGTTTTCCCATAGCACAAGCTAATCTTTTAGCAGTTTTGCTTCAC

>PGSC0003DMG400001732RLKmalectin\_7015

CTGGCTACATGAATAGTTTTCCCATAGCACAAGCTAATCTTTTAGCAGTTTTGCTTCACCAATTA AAAAGA  
TTCTGCATAAATGACTCGTCCACAAGCTGCGACATTTCAATTTGGAAAGTG

>PGSC0003DMG400001732RLKmalectin\_7076

ATTA AAAAGATTCTGCATAAATGACTCGTCCACAAGCTGCGACATTTCAATTTGGAAAGTGTCTCGGTAGCA  
ATATGATTTATTTATTTGATTCTCAATGCTAGATCATATCCATGGTGGTG

>PGSC0003DMG400001732RLKmalectin\_7137

TCGGTAGCAATATGATTTATTTATTTGATTCTCAATGCTAGATCATATCCATGGTGGTGTAAGATATTCAC  
TTGACTGATCTTCAGTGAACTGGAGAGCTCTGTGTATTTAATTTGTTT

>PGSC0003DMG400001732RLKmalectin\_7198

AGATATTCACCTGACTGATCTTCAGTGAACTGGAGAGCTCTGTGTATTTAATTTGTTTTATTGGCCTTGA  
CATCACCTAATCCTCCTCTTTGAGTTCTTCCATGCAACAACGACA ACTA

>PGSC0003DMG400001732RLKmalectin\_7259

TTGGCCTTGACATCACCTAATCCTCCTCTTTGAGTTCTTCCATGCAACAACGACA ACTACGCACCATTGCC  
CAGCTAATTGATTTAGCTATGTCAGTCCTCTATAACAATTCTGCTCGGT

>PGSC0003DMG400001732RLKmalectin\_732

TTTTGTTTGTCTCATTCTATGTGTTACATACTTTATGGGATGTATCTATAGTTGAATGCATATTCATGGGA  
TGTATGTATTGTGGTTTCATTCTTGAAAATCTGATGGACCATGTTACC

>PGSC0003DMG400001732RLKmalectin\_7320

CACCATTGCCAGCTAATTGATTTAGCTATGTCAGTCCTCTATAACAATTCTGCTCGGTTGTTCCCGTCTCA  
TTCTACTAGAAAGAATTAATAAATTTACGAAAAATGGAGATTCTAGG

>PGSC0003DMG400001732RLKmalectin\_7381

TTCCCGTCTCATTCTACTAGAAAGAATTAATAAATTTACGAAAAATGGAGATTCTAGGGCTTCTCTAAC  
CAGACTTTACTTCAATTATGTTATGTTCTCTTCGTCAATATATATGAAAC

>PGSC0003DMG400001732RLKmalectin\_7747

ATAATTAACAACAAGGACTTGTGCATAATCTCCTTTACATGAGTGTGACAGTTGATACATCACCTT  
CTCTTTTAAACTCTAGTGCCCTTCTCTATAATCTCATTGGATTTGTTA

>PGSC0003DMG400001732RLKmalectin\_7808

CATCACCTTCTCTTTTAAACTCTAGTGCCCTTCTCTATAATCTCATTGGATTTGTTAAACTAGCTGTTA  
TGTTCTTTCTGCAAGAACTATGTTGAACGCTCAGAAATTTACCTGAA

>PGSC0003DMG400001732RLKmalectin\_7869

ACTAGCTGTTATGTTCTTTCTGCAAGAACTATGTTGAACGCTCAGAAATTTACCTGAAGTTCGGTGTCTA  
ATGCTCCTAAGTTGTCTTTTCTAATAAGTTATACGTTCTTCAGGACTT

>PGSC0003DMG400001732RLKmalectin\_793

TATTCATGGGATGTATGTATTGTGGTTTCATTCTTGAAAATCTGATGGACCATGTTACCATTTTATATCTTT  
GACTCGGTATCATACTTGTGGAAAGGGAAGTCTGATTTAGAACAGACT

>PGSC0003DMG400001732RLKmalectin\_7930

TCGGTGTCTAATGCTCCTAAGTTGTCTTTTCTAATAAGTTATACGTTCTTCAGGACTTTTGGATTGACTCT  
TTAATTTAATGTCTATACAGATATTACATTTCCAGCAGTTGACGGA

>PGSC0003DMG400001732RLKmalectin\_7991

GGATTGACTCTTTTAATTTAATGTCTATACAGATATTACATTTCCAGCAGTTGACGGACAAAAGTGACG  
TTTACAGTTTTGGTGTCAATTCTCTTGGAGTTAATATCTGGCCAAGAAGCA

>PGSC0003DMG400001732RLKmalectin\_8052

AAAGTGACGTTTACAGTTTTGGTGTCAATTCTCTTGGAGTTAATATCTGGCCAAGAAGCAATATCTAATGA  
AAATTTTGGTCTCAATTGCCGTAATATAGTCCAGTGGGTAAGATTATTTT

>PGSC0003DMG400001732RLKmalectin\_8113

ATCTAATGAAAATTTTGGTCTCAATTGCCGTAATATAGTCCAGTGGGTAAGATTATTTTTTATCATATGC  
ACTATCTTTGATAATAATTTGCTACCGAATTTCCACCTTACTACTTTCT

>PGSC0003DMG400001732RLKmalectin\_8174

TATCATATGCACTATCTTTGATAATAATTTGCTACCGAATTTCCACCTTACTACTTTCTCCATTTAAAAGAA  
GTTGATATCTTCTTGCTTCTGATATAGTCCTATATTATTATACTCATT

>PGSC0003DMG400001732RLKmalectin\_8235

ATTTAAAAGAAGTTGATATCTTCTTGCTTCTGATATAGTCCTATATTATTATACTCATTAGGTGTCCCAACG  
ACCCAACCTTATACATTCATAATGTCTTTAGCTTCTTCTAACAATTTA

>PGSC0003DMG400001732RLKmalectin\_8296

GTGTCCCAACGACCCAACCTTATACATTCATAATGTCTTTAGCTTCTTCTAACAATTTAGTGGGGAACATCT  
GAAAAAATTATATTGACTCCTGCATAATCCCATTGTGGGGAAGGATTTT

>PGSC0003DMG400001732RLKmalectin\_8357

GGGAACATCTGAAAAAATTATATTGACTCCTGCATAATCCCATTGTGGGGAAGGATTTTATCTATTGAAC  
CATGCTATAAAGTTCGGTGCCGTCTTAGACATTTGCTGGACGGATTTTAA

>PGSC0003DMG400001732RLKmalectin\_8418

CTATTGAACCATGCTATAAAGTTCGGTGCCGTCTTAGACATTTGCTGGACGGATTTTAAAACCTTCTACTT  
CTAATCATCCAGGCGAAACTACACATTGAAAGTGGGGACATTCAGGGCA

>PGSC0003DMG400001732RLKmalectin\_8479

CTTTCTACTTCTAATCATCCAGGCGAAACTACACATTGAAAGTGGGGACATTCAGGGCATTATTGACCCC  
GCTTTACACAATGACTATGACATCCAATCAATTTGGAAGATAGCTGAGAA

>PGSC0003DMG400001732RLKmalectin\_854

TTTATATCTTTGACTCGGTATCATACTTGTGGAAAGGGAACTCTGATTTAGAACAGACTCCGAGCAGAAA  
AAGTTTCGACCTTTTGGAGGATAAATTTTAGACTATGTGCAATAGCTTAA

>PGSC0003DMG400001732RLKmalectin\_8540

ATTGACCCCGCTTTACACAATGACTATGACATCCAATCAATTTGGAAGATAGCTGAGAAAGCTTTGATGT  
GTGTCCAACCTCATGGAAACATGAGACCATCGATATCAGAAGTTATCAAA

>PGSC0003DMG400001732RLKmalectin\_8601

CTTTGATGTGTGTCCAACCTCATGGAAACATGAGACCATCGATATCAGAAGTTATCAAAGAAATCCAGG  
ATGCAATTGCAATCGAAAGAGGCGCAGAAGCAGTAAAGGAAGGTAGTTTCAAG

>PGSC0003DMG400001732RLKmalectin\_8662

AATCCAGGATGCAATTGCAATCGAAAGAGGCGCAGAAGCAGTAAAGGAAGGTAGTTTCAAGATGACATAT

CCAGGCATTCGATGCATTCCTCCCTACACGCGGGTTCAATGGACCTAGGTGC

>PGSC0003DMG400001732RLKmalectin\_8723

GACATATCCAGGCATTCGATGCATTCCTCCCTACACGCGGGTTCAATGGACCTAGGTGCAAGTGACCATT  
ACTTGTCCATTGATGAATCTATCACAAGACCAGCAGCTCGATAAGGTTTT

>PGSC0003DMG400001732RLKmalectin\_8784

GTGACCATTACTTGTCCATTGATGAATCTATCACAAGACCAGCAGCTCGATAAGGTTTTTGTTCATATGAC  
TGTAGAATTTTGTTCATATAATAGACCATTAAGTTGTGTTATTTCCAAT

>PGSC0003DMG400001732RLKmalectin\_8845

TTCATATGACTGTAGAATTTTGTTCATATAATAGACCATTAAGTTGTGTTATTTCCAATTCATTTTGCCATC  
ATTTTACATATTTCTCAAGGTCTAGGATTACACAATTGTTGTTATTGA

>PGSC0003DMG400001732RLKmalectin\_8906

ATTTTGCCATCATTTTACATATTTCTCAAGGTCTAGGATTACACAATTGTTGTTATTGACACCTTTTGTGG  
AACATAACCTTCTTTTGTGCTGTGCTGTGTAAAGGCAAGTTTTTTAGC

>PGSC0003DMG400001732RLKmalectin\_8967

CCTTTTGTGGAACATAACCTTCTTTTGTGCTGTGCTGTGTAAAGGCAAGTTTTTTAGCACATTTTATGTTT  
CACATTTTGGCTTGAACCAAGAGAAAAAAGTGTAAGCAATTCTTTA

>PGSC0003DMG400001732RLKmalectin\_9026

ACATTTTATGTTTACATTTTGGCTTGAACCAAGAGAAAAAAGTGTAAGCAATTCTTACTTCTATTGC  
CCTTTTGATAGAAATTTAACCATATGAGTGGCTACAGACTTTGCTGAGG

>PGSC0003DMG400001732RLKmalectin\_915

GAGCAGAAAAAGTTTCGACCTTTTGGAGGATAAATTTTAGACTATGTCGAATAGCTTAATCCAATCCTTG  
AAGGCTGGCTTGCCTCAATTGGTGTCCAACGGACAATGGAGTCATGCCTA

>PGSC0003DMG400001732RLKmalectin\_976

CAATCCTTGAAGGCTGGCTTGCCTCAATTGGTGTCCAACGGACAATGGAGTCATGCCTATGCAGCCTAA  
TAATATGATAAAGATCTGGCATTGATTGAGATTTGACTCAACTTGCTATAA

>PGSC0003DMG400001773-(rev)L-LecRK\_0

ATGGAGATTTACTCATTACTAGTTGTATTGCTCTGTTTCTTGGCTGCTTAGCTGCTGCCACTGAGTTTGA  
TTCTGGGACTTTAACTCTTAGTAGTTTGAAGCTTTTAGGTGATGCCCAT

>PGSC0003DMG400001773-(rev)L-LecRK\_1247

CCACCGGCTAGTTTGATGACCCCCACGGCGGATGTA ACTACATCCGCCACATCGCCCCCTCCGGAGCAAC  
AACAGATTGCTCCGGCGGACGCTAATGGTACTGCTAATGCAGTACAGAGA

>PGSC0003DMG400001773-(rev)L-LecRK\_1312

GCAACAACAGATTGCTCCGGCGGACGCTAATGGTACTGCTAATGCAGTACAGAGAAACAGCAGCAAAT  
GTCATAATAGTTTTTGTAAAGCAGGGTGCTGGTGCTGTTGTTGGGGTTGTTAC

>PGSC0003DMG400001773-(rev)L-LecRK\_132

ACTATAAAGTTGACTCGTGACCTTGCTGTTCCAAATTCGGTGCCGGAAAAGTTTTGTATTCTAAACCAG  
TAAAGTCCGGCAGCCGGGTCTTGATTTTCCGGCAAGTTTCTCTACGTTT

>PGSC0003DMG400001773-(rev)L-LecRK\_1507

GACTTCAGAGACTATGTTGCCTTCTAATATTATCAAAATGCCAAAGGAATTTAGCTATAAGGAGCTTAAA  
ATCGCGACGAAAGGGTTTGATTGACTAGGATTATAGGGCATGGTGCATT

>PGSC0003DMG400001773-(rev)L-LecRK\_198

CCAGTAAAGTTCCGGCAGCCGGGTCTTGATTTTCCGGCAAGTTTCTCTACGTTTTTCTCGTTTTCTGTTAG  
TAATTTGAATCCTTCATCGATTGGAGGTGGATTGGCTTTTGTATCACA

>PGSC0003DMG400001773-(rev)L-LecRK\_2157

TGGTCTTGAAGTGGCAAGTGGGAGGAGGCCAATTGAGAAAGAAACAACAAGTGGTGTGGATTAAC  
AGCAATTTGGTTGAATGGGTGTGGGGATTACACAAAGATGGGAGTCTACTAT

>PGSC0003DMG400001773-(rev)L-LecRK\_2222

AACAGCAATTTGGTTGAATGGGTGTGGGGATTACACAAAGATGGGAGTCTACTATCCGCAGCTGATTCA  
AAACTGAATCTCGAATTTGATGAAAAAGAAATGACAAGAGTGTTGTTAGTT

>PGSC0003DMG400001773-(rev)L-LecRK\_264

GTTAGTAATTTGAATCCTTCATCGATTGGAGGTGGATTGGCTTTTGTATCACACCGGATGATGAGTCGG  
TTGGTGATTCCGGTGGGTATTTGGGGATTTTGGATGCAGAAGGAGGGCAA

>PGSC0003DMG400001773-(rev)L-LecRK\_330

TCGGTTGGTGATTCCGGTGGGTATTTGGGGATTTTGGATGCAGAAGGAGGGCAAAATGGGAATTTTGG  
AGTTGAATTTGATACACTTATGGATGTTGAATTTAAAGATATTAATGGAAAT

>PGSC0003DMG400001773-(rev)L-LecRK\_396

GGAGTTGAATTTGATACACTTATGGATGTTGAATTTAAAGATATTAATGGAAATCATGTGGGGTTAGATT  
TAAATTCAATGATTTCAACTCAGGTTGGTGATCTTGATTCTATTGGTGTT

>PGSC0003DMG400001773-(rev)L-LecRK\_462

GATTTAAATTCAATGATTTCAACTCAGGTTGGTGATCTTGATTCTATTGGTGTGATCTTAAAAGTGGTGA  
TTTGGTTAATTCTTGGATTGATTATTTTGGTTCTACAAAAAATTGAAT

>PGSC0003DMG400001773-(rev)L-LecRK\_528

GGTGATTTGGTTAATTCTTGGATTGATTATTTTGGTTCTACAAAAAATTGAATCTTTATGTTTCATATTCT  
AATCTTAAGCCAAAAGAACCATTTTTATCTGTTACAATTGATATTTCT

>PGSC0003DMG400001773-(rev)L-LecRK\_594

TATTCTAATCTTAAGCCAAAAGAACCATTTTTATCTGTTACAATTGATATTTCTGAATATGTAAATGATTC  
ATGTTTGTGGGGTTTTCTGGTTCAACACAAGGGAGTACAGAGATTCAT

>PGSC0003DMG400001773-(rev)L-LecRK\_66

TTTGATTCTGGGACTTTAACTCTTAGTAGTTTGAAGCTTTTAGGTGATGCCCATTTGGGGAATAATACTAT  
AAAGTTGACTCGTGACCTTGCTGTTCCAAATTCCGGTGCCGAAAAGTT

>PGSC0003DMG400001773-(rev)L-LecRK\_660

GATTCATGTTTGTGGGGTTTTCTGGTTCAACACAAGGGAGTACAGAGATTCATAGTATTGAATATTGGA  
GTTTCACTTCATCATTTGATACAAATCCTAAATCTCCCCCTGAAGCGGTG

>PGSC0003DMG400001773-(rev)L-LecRK\_724

ATTGGAGTTTCACTTCATCATTTGATACAAATCCTAAATCTCCCCCTGAAGCGGTGGCGGAGCAGCCTCC  
GCCCCGCCAACTGCTAGTTTGATGAACCCACGGCGGATGTA ACTACAT

>PGSC0003DMG400001829-(rev)LRR-RLPs\_0

ATGGAGTACAAAAATTGGTAATGGTTCTTTCTATACTTTTTGTCCAACAATCTCAGCTTACGTATTCTGG  
GAAACATCTCTGTCCCCGCGATGAAGCTTTTTATTTGCTTCAATTTAAG

>PGSC0003DMG400001829-(rev)LRR-RLPs\_1054

TTCCAGAATCCATTGGCAACTTCACTGCAATCAAAGAGTTGTCACTTTCAGATAACA ACTTCACTGGTAAT  
GTTCCCTCAACTATCGGAAAGTTGAACAACTTAACTACTTATATCTTA

>PGSC0003DMG400001829-(rev)LRR-RLPs\_1116

ACTGGTAATGTTCCCTCAACTATCGGAAAGTTGAACAACTTAACTACTTATATCTTAATTCCAATAATTT  
TGAAGGCTCGATTCCAGACATCTTTGCCAACTTTTCAGAGCTATCTTTT

>PGSC0003DMG400001829-(rev)LRR-RLPs\_1178

CAATAATTTTGAAGGCTCGATTCCAGACATCTTTGCCAACTTTTCAGAGCTATCTTTTTTAGATTTTCACGG



TAACAATTTCACTGGCCCATTCCCCTGTTCAATTGCAACCTTGACTCA

>PGSC0003DMG400001829-(rev)LRR-RLPs\_124

AACTCACATTTCTTGATACAAGATCTTTTTACTTTTCATAATGTCTGTGACGGCGAGACCCAAGCCAAGACT

TTTTCTGGAATGTTACAGGAGATTGTTGCGAATGGGATGGTGTTACTT

>PGSC0003DMG400001829-(rev)LRR-RLPs\_1240

ATTTTCACGGTAACAATTTCACTGGCCCATTCCCCTGTTCAATTGCAACCTTGACTCACCTGCAAAGGTTA

GAGTTGCAAATCAATTCATAACTGGTCCACTTCCCTCTAATATAACCG

>PGSC0003DMG400001829-(rev)LRR-RLPs\_1302

CAAAGGTTAGAGTTGCAAATCAATTCATAACTGGTCCACTTCCCTCTAATATAACCGGACTTCAAATCT

AGACATACTTGATTTGTCGTTCAATTATTTCACTGGCACAACACCCTCT

>PGSC0003DMG400001829-(rev)LRR-RLPs\_1364

TCAAATCTAGACATACTTGATTTGTCGTTCAATTATTTCACTGGCACAACACCCTCTTGGTTATTCCATCT

TCCGTCCTTGACTTCTTTATCTGTTCAAGCCAATCAATTAAGTGGATT

>PGSC0003DMG400001829-(rev)LRR-RLPs\_1426

TATTCCATCTTCCGTCCTTGACTTCTTTATCTGTTCAAGCCAATCAATTAAGTGGATTGCCAAATGAGCTCA

AGAGAACTTCCCTCAAATACTCTAGAATTGATCTTTCGCACAACAAGC

>PGSC0003DMG400001829-(rev)LRR-RLPs\_1488

AATGAGCTCAAGAGAACTTCCCTCAAATACTCTAGAATTGATCTTTCGCACAACAAGCTGCATGGCGAAA

TCCCTGATTGGATGTTATCCATGAGCATGAGAAGTCTGGATCTCTCTCAT

>PGSC0003DMG400001829-(rev)LRR-RLPs\_1550

TGGCGAAATCCCTGATTGGATGTTATCCATGAGCATGAGAAGTCTGGATCTCTCTCATAACTTTCTCACA

GGCTTTGAAAAACAAGTGTGGCGCGCAGAGAACTTGTCTACCTTAATTT

>PGSC0003DMG400001829-(rev)LRR-RLPs\_1674

AACAATTTTCTTCAAGGGCCTTTGCATCAATCCATTTGTGACTTGATTAACCTTGGAATCCTCATTTTGGCT

CAAACAATCTCAGTGGTTCAATCCCAGGATGTTTAGGTAAGTCCAGT

>PGSC0003DMG400001829-(rev)LRR-RLPs\_1736

CATTTTGGCTCAAACAATCTCAGTGGTTCAATCCCAGGATGTTTAGGTAAGTCCAGTAGGTTTCAATTTTA

TTTTAGACTTGCGAATGAACAATTTTCATGGAGAGATACCAACATTCTT

>PGSC0003DMG400001829-(rev)LRR-RLPs\_1798

TCATTTTTATTTAGACTTGCGAATGAACAATTTTCATGGAGAGATACCAACATTCTTACATAGAGGGTTA  
GAGTATCTTGTTTATATAGCAACCAATTGAGGGGACAAGTCCCCCGAT

>PGSC0003DMG400001829-(rev)LRR-RLPs\_1860

AGAGGGTTAGAGTATCTTGTTTATATAGCAACCAATTGAGGGGACAAGTCCCCCGATCCTTAGTTAACT  
GTACAAGATTGGAAGCTCTTGATTTGGGGAACAACATGATAAATGACACG

>PGSC0003DMG400001829-(rev)LRR-RLPs\_1922

AGTTAACTGTACAAGATTGGAAGCTCTTGATTTGGGGAACAACATGATAAATGACACGTTCCCCATTTAT  
CTGCAGAACTACAAAACCTACAAGTTTTGATTCTGAAATCAAATCTCTT

>PGSC0003DMG400001829-(rev)LRR-RLPs\_1984

CCATTTATCTGCAGAACTACAAAACCTACAAGTTTTGATTCTGAAATCAAATCTCTTTCACGGTCCAATT  
GGTGACTTGGAGTCCGAATTTCCATTTCTAAGTTACGGATCTTTGACC

>PGSC0003DMG400001829-(rev)LRR-RLPs\_2046

GGTCCAATTGGTGACTTGGAGTCCGAATTTCCATTTCTAAGTTACGGATCTTTGACCTTTCCTTTAATGG  
GTTACAGGAACTTTGCCATCTAATCTTTTCAAAGTTTTAAAGGTATG

>PGSC0003DMG400001829-(rev)LRR-RLPs\_2108

CTTTAATGGGTTACAGGAACTTTGCCATCTAATCTTTTCAAAGTTTTAAAGGTATGATGGATGAAGAA  
AAAACAGCAAGTACAAGCACTCGCACGGATTACCTTTACAATATTAGTTT

>PGSC0003DMG400001829-(rev)LRR-RLPs\_2170

ATGAAGAAAAACAGCAAGTACAAGCACTCGCACGGATTACCTTTACAATATTAGTTTGGTGATAAAAG  
GCAATGAGTATGATATGAGAATCACGTCAATTATGACGAGTGTTGATTTAT

>PGSC0003DMG400001829-(rev)LRR-RLPs\_2232

ATAAAAGGCAATGAGTATGATATGAGAATCACGTCAATTATGACGAGTGTTGATTTATCAAGCAACAGG  
TTTGAAGGAGATATTCAAATTCATTGGAAATCTGAGCTCACTTGTGTTA

>PGSC0003DMG400001829-(rev)LRR-RLPs\_2294

CAACAGGTTTGAAGGAGATATTCAAATTCATTGGAAATCTGAGCTCACTTGTGTTACTCAACCTGTCC  
CACAACAGCTTCCGTTGTCGTATTCTGCAGAATTTGCAAAGTTGCAGGC

>PGSC0003DMG400001829-(rev)LRR-RLPs\_2356

ACCTGTCCCACAACAGCTTCCGTTGTCGTATTCTGCAGAATTTGCAAAGTTGCAGGCGCTCGAAGCATT  
AGATCTCTCATGGAACAGACTCATTGGAGAAATTCCAGGTCAATTGTCGA

>PGSC0003DMG400001829-(rev)LRR-RLPs\_248

TGGATTACGGGTCATGTCATAGGCCTCGATGTTTCTTCGAGCTGTCTCATGGGAACCATCAATGCTAAC  
AGTAGCCTCACAAAACCTGGTCATCTCCAAGACTCAACCTTGCCTTCAA

>PGSC0003DMG400001829-(rev)LRR-RLPs\_2480

GACATTTCTTGAGGTCTTAAACCTTTCATACAATCATCTGGCTGGGCGCATTCTATTGGGAAACAGTTCA  
ATACATTTCCAGATGATTCATATTGTGGAAATCTTGATTTATGTGGATT

>PGSC0003DMG400001829-(rev)LRR-RLPs\_2604

CTATCAAAGAAATGTGGAAACAATAATATGCGAGATGAGTCAACACTTGAACAAGATGATGATGATTCA  
TTTTTATGAGCGGGTTCACATGGGAAGCTGTTGTAATAGGTTATGGTTGT

>PGSC0003DMG400001829-(rev)LRR-RLPs\_2666

TGATTCATTTTTTATGAGCGGGTTCACATGGGAAGCTGTTGTAATAGGTTATGGTTGTGGTATGATATT  
GGATTGTTGATGGGAGGCCTTATGTTCTACTGGAAAAACCAAATGGTT

>PGSC0003DMG400001829-(rev)LRR-RLPs\_2728

TGATATTTGGATTGTTGATGGGAGGCCTTATGTTCTACTGGAAAAACCAAATGGTTTTCGAACTTTGC  
TGAAGATATTGCTCAACAAATTGCTGCTAAGAAGCGAACAAGGCAAAGA

>PGSC0003DMG400001829-(rev)LRR-RLPs\_2763

CTACTGGAAAAACCAAATGGTTTTCGAACTTTGCTGAAGATATTGCTCAACAAATTGCTGCTAAGAAGC  
GAACAAGGCAAAGAAGAGACGTCAAAGACGTGGTCTAAGAATGAATTAG

>PGSC0003DMG400001829-(rev)LRR-RLPs\_310

ATGCTAACAGTAGCCTCACAAAACCTGGTCATCTCCAAGACTCAACCTTGCCTTCAACTACTTGGATGA  
CTTCCACTTGGAATAGTATTAGTGAATCACTAGTTTGACGCATCTCA

>PGSC0003DMG400001829-(rev)LRR-RLPs\_372

TTGGATGACTTTCCACTTGGAATAGTATTAGTGAATCACTAGTTTGACGCATCTCAATCTTTCAGATTC  
TGGATATATGAAAGGGAAGATGATCCCACAAGGATTATCCAACCTGTCT

>PGSC0003DMG400001829-(rev)LRR-RLPs\_434

TTCAGATTCTGGATATATGAAAGGGAAGATGATCCCACAAGGATTATCCAACCTGTCTAAGTTGATTTCA  
CTTGACTTCTCCAGGAATTACATCCAAGTTGGCCGAACAACCTTCACTAG

>PGSC0003DMG400001829-(rev)LRR-RLPs\_496

TGATTTCACTTGACTTCTCCAGGAATTACATCCAAGTTGGCCGAACAACCTTCACTAGTTTGGTGCACAAC

TTAGCCAACCTAGAGGTACTGTTGTTTCACAAAGTGGACGCACCATTG

>PGSC0003DMG400001829-(rev)LRR-RLPs\_558

GTGCACAACCTAGCCAACCTAGAGGTACTGTTGTTTCACAAAGTGGACGCACCATTGAGTTACCTAAGA

GTTTTCTTCTTCCCTTAGGAAATTAAGTCTTGAGGGCACCAACATGTTT

>PGSC0003DMG400001829-(rev)LRR-RLPs\_62

GTATTCTGGGAAACATCTCTGTCCCCGCGATGAAGCTTTTTATTTGCTTCAATTTAAGCAAGAACTCACAT

TTCTTGATACAAGATCTTTTTACTTTCATAATGTCTGTGACGGCGAGAC

>PGSC0003DMG400001829-(rev)LRR-RLPs\_620

ACCTAAGAGTTTTCTTCTTCCCTTAGGAAATTAAGTCTTGAGGGCACCAACATGTTTGGGAAAATAACT

GATTCTCAGCTTTTTCATCTACCAAACCTGCAAGTACTGAGATTGGGATG

>PGSC0003DMG400001829-(rev)LRR-RLPs\_682

AAATAACTGATTCTCAGCTTTTTCATCTACCAAACCTGCAAGTACTGAGATTGGGATGGAATCCTTCATTA

ACCGGCACTTTGCCAAATTTAATTGGAGTTTCAGTAAAAGTATTTTAG

>PGSC0003DMG400001829-(rev)LRR-RLPs\_744

CCTTCATTAACCGGCACTTTGCCAAATTTAATTGGAGTTTCAGTAAAAGTATTTAGAGTTGGACTTTTC

CAACTGGCATTGTTGGGAAGGTACCTGATTCTATTGGAAACCTCCAT

>PGSC0003DMG400001829-(rev)LRR-RLPs\_806

GGACTTTTCCAATACTGGCATTGTTGGGAAGGTACCTGATTCTATTGGAAACCTCCATTCTCTTTGCTATT

TAGATCTCTTACAACCATTATCCGGCTCGATTCCAGAATCCATTGG

>PGSC0003DMG400001829-(rev)LRR-RLPs\_868

TTTGCTATTTAGATCTCTTACAACCATTATCCGGCTCGATTCCAGAATCCATTGGCAACCTCACTGCAA

TCACAGAGTTGACACTTTCACGTAACAGCTTCACTGGTAATGTTCTCT

>PGSC0003DMG400001829-(rev)LRR-RLPs\_930

CTCACTGCAATCACAGAGTTGACACTTTCACGTAACAGCTTCACTGGTAATGTTCTCTCAACTATTGCAAA

ATTAACAAACTCGTTTATTTAGAACTCTATTCCAATTATTTTCAAGGC

>PGSC0003DMG400001829-(rev)LRR-RLPs\_992

TATTGCAAATTAACAAACTCGTTTATTTAGAACTCTATTCCAATTATTTTCAAGGCTTGATTCCAGAATC

CATTGGCAACTTCACTGCAATCAAAGAGTTGTCACCTTCAGATAACAA

>PGSC0003DMG400001831-(rev)LRR-RLPs\_0

ATGGAGTACCAACAATTGCTAATAGCTTTCTGCTTCTATTCACTTTTTATAATTTTTTCCCAACAATCTCAG  
CTTACATATGCTGGGAAACATCTCTGTGCTCGCGATGAAGCTTTTTAT

>PGSC0003DMG400001831-(rev)LRR-RLPs\_1054

CAATTCCAGAATCCTTTGGCAACCTCACTGCAATCAGAGAGTTGCGACTTTCAGATAACAGCTTCACCGG  
AAATATCCCTCAACTATCCAAAAGCTAAACAACTTAGCTTCATATCTC

>PGSC0003DMG400001831-(rev)LRR-RLPs\_1116

TTCACCGGAAATATCCCTCAACTATCCAAAAGCTAAACAACTTAGCTTCATATCTCTCTCTTCCAATAAT  
TTTGAAGGCTCGATTCCAGACATCTTTGCCAACTTTTCAGAGCTAGAT

>PGSC0003DMG400001831-(rev)LRR-RLPs\_1178

TTCCAATAATTTTGAAGGCTCGATTCCAGACATCTTTGCCAACTTTTCAGAGCTAGATACTTTATATTTTGA  
AAGTAACAATTTTACTGGCCCATTCCTCCGATTCAATTGCAACCTTGAC

>PGSC0003DMG400001831-(rev)LRR-RLPs\_124

TTCAATTTAAGCAAGAACTCAGAGTTGATTCAAATTATGAGTACTGTGACAACAAGGCCCGAACCAAGA  
ATTTGTCCTGGAATGTTACAGGAGATTGTTGTGAATGGGATGGTGTTACTT

>PGSC0003DMG400001831-(rev)LRR-RLPs\_1240

TATATTTTGAAAGTAACAATTTTACTGGCCCATTCCTCCGATTCAATTGCAACCTTGACTCACCTTGAAAGT  
TTAGACTTGCAAAACAATTCCTAACTGGTCCAATTCCTCTAATATAA

>PGSC0003DMG400001831-(rev)LRR-RLPs\_1302

CTTGAAAGTTTACTGTTGCAAAACAATTCCTAACTGGTCCAATTCCTCTAATATAAGCGGCTTTCAAGA  
GCTACAAATACTTGATTGTCGTTCAATTATTTCACTGGCACAACACCC

>PGSC0003DMG400001831-(rev)LRR-RLPs\_1364

CTTCAAGAGCTACAAATACTTGATTGTCGTTCAATTATTTCACTGGCACAACACCCCTTGTTATTCCA  
TCTTCCATCCTTGCTTTCTTTATATGTTCAAGACAATCAATTAACCGG

>PGSC0003DMG400001831-(rev)LRR-RLPs\_1426

GGTTATCCATCTTCCATCCTTGCTTTCTTTATATGTTCAAGACAATCAATTAACCGGAAATTGCCAAAT  
GAGCTCAAGAGTAATTATCTAGAATACTTTAACATTGATCTTTCATACA

>PGSC0003DMG400001831-(rev)LRR-RLPs\_1488

TTGCCAAATGAGCTCAAGAGTAATTATCTAGAATACTTTAACATTGATCTTTCATACAACAATCTGCATGG  
AGATATCCCTTATGGGATGTTATCCAAGAGCATGGGTAGTCTGGATCTC

>PGSC0003DMG400001831-(rev)LRR-RLPs\_1550

TCTGCATGGAGATATCCCTTATGGGATGTTATCCAAGAGCATGGGTAGTCTGGATCTCTCTCATAACTTC  
CTCACAGGCTTTGAAAAAAAAGTATGGCACTCAGACTCCTTACAATACCT

>PGSC0003DMG400001831-(rev)LRR-RLPs\_1612

ATAACTTCCTCACAGGCTTTGAAAAAAAAGTATGGCACTCAGACTCCTTACAATACCTTAATTTGGAGAA  
CAATTTTCTTCAAGGGACTTTGCATCAATCCTTTTGTGACATGATTAACC

>PGSC0003DMG400001831-(rev)LRR-RLPs\_1674

TTGGAGAACAATTTTCTTCAAGGGACTTTGCATCAATCCTTTTGTGACATGATTAACCTTGATTCTCATT  
TTGGCTCAGAACAATTTCAAGTGGTTCAATCCAGACTGTTTGGGTAAC

>PGSC0003DMG400001831-(rev)LRR-RLPs\_1736

ATTCTCATTTTGGCTCAGAACAATTTCAAGTGGTTCAATCCAGACTGTTTGGGTAACCTCAATAGCTCCA  
TTTCTATTTTAGACTTGCGAATGAACAGTTTTTCATGGAGAGATAACCAAG

>PGSC0003DMG400001831-(rev)LRR-RLPs\_1798

ATAGCTCCATTTCTATTTTAGACTTGCGAATGAACAGTTTTTCATGGAGAGATAACCAAGATTCTTACCTACA  
GGGTTACAGTATCTTGGTTTATATGGCAATCAATTGAGGGGACAAGTCC

>PGSC0003DMG400001831-(rev)LRR-RLPs\_1984

CGTTCATATATGGCTGGAGAACTTCCGAACCTACAAGTTTTGATTCTGAAATCAAATCTCTTTACGGT  
TCAATTGGTGATTTGGAGTCAGAATTTCCATTTCTGAGTTACGAATCT

>PGSC0003DMG400001831-(rev)LRR-RLPs\_2046

TTTACGGTTCAATTGGTGATTTGGAGTCAGAATTTCCATTTCTGAGTTACGAATCTTTGACCTTTCTTC  
AATGGGTTACAGGAACTTTGTCATCTAATTTTTTCAAAGTTTCAGA

>PGSC0003DMG400001831-(rev)LRR-RLPs\_2108

CCTTTCTTCAATGGGTTACAGGAACTTTGTCATCTAATTTTTTCAAAGTTTCAGAGGTATGATGTATG  
TGGATGAAGAAAATACAGGAATTACTCGAGCTACTAATAGGACTCACAG

>PGSC0003DMG400001831-(rev)LRR-RLPs\_2170

TGATGTATGTGGATGAAGAAAATACAGGAATTACTCGAGCTACTAATAGGACTCACAGAGATTACCTTT  
ACCATGTTAGTTTGGTGATAAAAGGTAATGAGTTTGATATGAAAATCACGT

>PGSC0003DMG400001831-(rev)LRR-RLPs\_2232

TACCTTTACCATGTTAGTTTGGTGATAAAAGGTAATGAGTTTGATATGAAAATCACGTCAATTATGACGA

GTGTTGATTTATCAAACAACAGGTTTGAAGGAGATATTCCAAATTCCATT

>PGSC0003DMG400001831-(rev)LRR-RLPs\_2356

GTCTGAGCTCACTTGTGTTACTCAACCTGTCTCACACAGCTTCTGTGGAGTTATTCTGCAGAAATTGCA  
AAGTTGCATGAGCTCGAAGCATTAGACCTTTCATGGAACAGATTTCATTG

>PGSC0003DMG400001831-(rev)LRR-RLPs\_2418

GAAATTGCAAAGTTGCATGAGCTCGAAGCATTAGACCTTTCATGGAACAGATTTCATTGGGGAAATTCCA  
GGTCAATTGTGCGAGTTTGACATTTCTTGCGGTCTTAAACCTCTCCTACAAT

>PGSC0003DMG400001831-(rev)LRR-RLPs\_248

TGGATTTACGGGTCATGTCATAGGCCTCGATCTTTCTTCGAGCTGTCTTTGGGGAACCATCCATGCTAAC  
AGCAGCCTAAAAAACTTGGTCATCTCCAACGACTCAATCTTGCCTTCAA

>PGSC0003DMG400001831-(rev)LRR-RLPs\_2480

AATTCCAGGTCAATTGTGCGAGTTTGACATTTCTTGCGGTCTTAAACCTCTCCTACAATCATCTGGCTGGGC  
ACATTCCTACTGGGAAACAGTTCAATACATTTCCAAATGATTCGTATTG

>PGSC0003DMG400001831-(rev)LRR-RLPs\_2542

TGGCTGGGCACATTCCTACTGGGAAACAGTTCAATACATTTCCAAATGATTCGTATTGTGGAAATCCTGA  
TTTATGTGGATTTCCACTGTCAAAGAATGTGGAAACAATAATGAATCAC

>PGSC0003DMG400001831-(rev)LRR-RLPs\_2706

GAGCGGGTTCACATGGGAAGCAGTGGTAATAGGTTATGGTTGTGGTATGATAATTGGATTGTTGATAG  
GAGGCCTCATGTTTCTACTGGAAAAACCAAATGGTATGTGAACTTTGCTGA

>PGSC0003DMG400001831-(rev)LRR-RLPs\_310

ATGCTAACAGCAGCCTAAAAAACTTGGTCATCTCCAACGACTCAATCTTGCCTTCAACAAGTTGGGCGA  
GTTTCCACTTGAAATAACATTAGTGAACCTCAGTAGTTTGACGCATCTCA

>PGSC0003DMG400001831-(rev)LRR-RLPs\_372

TTGGGCGAGTTTCCACTTGGAAATAACATTAGTGAACCTCAGTAGTTTGACGCATCTCAATCTTTCGCATTC  
TGAACTTTGATGCACATCCACAAGTATTATCAAACCTGTCCAAATTG

>PGSC0003DMG400001831-(rev)LRR-RLPs\_434

TTCGCATTCTGGAACTTTGATGCACATCCACAAGTATTATCAAACCTGTCCAAATTGGTTTCACTTGACC  
TCTCCTGGCATTGGCTGTACTATTCCATTTGGTCAAACAACCTTCAAC

>PGSC0003DMG400001831-(rev)LRR-RLPs\_496

CACTTGACCTCTCCTGGCATTGGCTGTACTATTCCCATTGGTCAAACAACCTTCACAAGTTTGCTTCAA  
GACTTAACCAATTTGGAGGTACTGTTTCTTGACAACGTATACGCACCAT

>PGSC0003DMG400001831-(rev)LRR-RLPs\_558

TTGCTTCAAGACTTAACCAATTTGGAGGTACTGTTTCTTGACAACGTATACGCACCATTGAGTTACCTAA  
GAACCTTCTTCTCCCTTAGGTACTTAAGTTTTCAAGGCACCGGCATT

>PGSC0003DMG400001831-(rev)LRR-RLPs\_62

ACAATCTCAGCTTACATATGCTGGGAAACATCTCTGTGCTCGCGATGAAGCTTTTTATTGCTTCAATTTA  
AGCAAGAACTCAGAGTTGATTCAAATTATGAGTACTGTGACAACAAGGC

>PGSC0003DMG400001831-(rev)LRR-RLPs\_620

GTTACCTAAGAACCTTCTTCTCCCTTAGGTACTTAAGTTTTCAAGGCACCGGCATTTTTGGGAACCTAA  
GTGAGTCTCAGATTTTTCATCTACCAAAGTCAAGTGCTGCTATTGGG

>PGSC0003DMG400001831-(rev)LRR-RLPs\_682

GGAACCTAAGTGAGTCTCAGATTTTTCATCTACCAAAGTCAAGTGCTGCTATTGGGAGAGAATCCGTC  
ATTAACAGGCACCTTGCCGAATTTCAATTGGAGTTTCAGTGGAAGTATTT

>PGSC0003DMG400001831-(rev)LRR-RLPs\_744

AATCCGTCATTAACAGGCACCTTGCCGAATTTCAATTGGAGTTTCAGTGGAAGTATTTAGAGTTGGACT  
TCTCCAATACTGATATATTTGGGAAGCTACCTGATTCAATTGGTAATCTC

>PGSC0003DMG400001831-(rev)LRR-RLPs\_806

GTTGGACTTCTCCAATACTGATATATTTGGGAAGCTACCTGATTCAATTGGTAATCTCCATTCTCTTTTACA  
TTTGAACATCTGGTATTGCCATTTATCCGGCTCTATTCCGGAATCCCT

>PGSC0003DMG400001831-(rev)LRR-RLPs\_868

CTCTTTTACATTTGAACATCTGGTATTGCCATTTATCCGGCTCTATTCCGGAATCCCTGGCAACCTCACTA  
CAATCACAGAGTTGAGACTTCCAGGTAACAGCTTCACTGGTAATGTTC

>PGSC0003DMG400001831-(rev)LRR-RLPs\_930

AACCTCACTACAATCACAGAGTTGAGACTTCCAGGTAACAGCTTCACTGGTAATGTTCTCTCAACTATCTC  
TAAATTAAGCAAAGTGTTCATTTAGATCTCTCTCACAACCATTTTCGA

>PGSC0003DMG400001831-(rev)LRR-RLPs\_992

AACTATCTCTAAATTAAGCAAAGTGTTCATTTAGATCTCTCTCACAACCATTTTCGAGGCTCAATTCCAG  
AATCCTTTGGCAACCTCACTGCAATCAGAGAGTTGCGACTTTCAGATAA



>PGSC0003DMG400001832-(rev)LRR-RLPs\_0

GTACATATAAAAGAGAAAAAGTTACAACAAAGATGTAATCAACAACACTAGCGCAGGAAAATGAGAAATT  
TCAAAAATATATACTCTAGAAAAATTCCTTCAAATAATCACAGTAACTAAA

>PGSC0003DMG400001832-(rev)LRR-RLPs\_122

TACTATATTTCTCACAGCTATAGAGAAGCCAACAAATAGTTGACTTCTTTGCTAAACAGGCCTCTTCAAGT  
GGAAGTGGTACCTTCTATTATTTTTTTCATCAATTCCTAAAGAGGGGA

>PGSC0003DMG400001832-(rev)LRR-RLPs\_1220

TTTTTAATTAATAATTTACTTTAATGAAATTTTTTATTCTAAGCAAAAATAAAAAATCAATAAAAAAGTATC  
CATTTGTACTGCCAATTATATTATGCTTAAAAATATCCAATATCACCGT

>PGSC0003DMG400001832-(rev)LRR-RLPs\_1281

AAAAAGTATCCATTTGTACTGCCAATTATATTATGCTTAAAAATATCCAATATCACCGTCAATATACTATA  
CTTAATTATTTTTTTAAAAACTGGAATAATGTTCTATAAATACGTGTT

>PGSC0003DMG400001832-(rev)LRR-RLPs\_1342

ATATACTATACTTAATTATTTTTTTAAAAACTGGAATAATGTTCTATAAATACGTGTTAAAAGTAGTGTA  
GAAAATAATAATAAAACTCATGGAATTTAAAGGTTCTTAAAATAATTAA

>PGSC0003DMG400001832-(rev)LRR-RLPs\_1403

AAGTAGTGTAGAAAATAATAATAAAACTCATGGAATTTAAAGGTTCTTAAAATAATTAATGCTAACTATT  
ATATTTGGGGGGAAAGGTAAAATAAAAGGATCACTATTATATTTTTTAGTG

>PGSC0003DMG400001832-(rev)LRR-RLPs\_1464

CTAACTATTATATTTGGGGGGAAAGGTAAAATAAAAGGATCACTATTATATTTTTAGTGGATCGAGTCAA  
GTAGGTGGGTCATCTTTTTACAATTTTAGTTAGAAATAAAAATTTTCATGT

>PGSC0003DMG400001832-(rev)LRR-RLPs\_1769

GTTAATTGACTTTCTGAGAAAACAATCAATAGTTGAGTGACCATCTGAGATATTACCTACTCGTTAAAGC  
CACAATTTACCAACTTTACCCAAAATATTAAAATAATATTAGTGGCAGT

>PGSC0003DMG400001832-(rev)LRR-RLPs\_183

CTCTTCAAGTGGAAAGTGGTACCTTCTATTATTTTTTTCATCAATTTCTAAAGAGGGGAATAGACTATTTT  
TACTAGATAAGGGACAACCTTCTAGCATAAGGAGAAGATACAACAAATG

>PGSC0003DMG400001832-(rev)LRR-RLPs\_1830

CGTTAAAGCCACAATTTACCAACTTTACCCAAAATATTAAAATAATATTAGTGGCAGTAAAGTTTTGAA

AAAAATATTAATAATTGTAGTAGTGGTAGTAAAGTTTTTGAAAAAATATT

>PGSC0003DMG400001832-(rev)LRR-RLPs\_1891

AGTTTTGAAAAAATATTAATAATTGTAGTAGTGGTAGTAAAGTTTTTGAAAAAATATTAATAATTGTAGA

GTGGTAGTAAAGTTTTTGAAATTGTATTAGTGGTAGTAAATTTTTTGAAA

>PGSC0003DMG400001832-(rev)LRR-RLPs\_1952

AATTGTAGAGTGGTAGTAAAGTTTTTGAAATTGTATTAGTGGTAGTAAATTTTTTGAAAAAATATTAATA

ATAATATTAGTGGAAAGTAAAGTTTTTGAAAAAATATTAATAACTTGTAG

>PGSC0003DMG400001832-(rev)LRR-RLPs\_2013

AATATTAATAATAATATTAGTGGAAAGTAAAGTTTTTGAAAAAATATTAATAACTTGTAGTTGTGGTAGTA

AAATTTTTGAAAAAATATAATAATTGTATTAGTGGTAGTAAAGTTGTTT

>PGSC0003DMG400001832-(rev)LRR-RLPs\_2074

GTGGTAGTAAATTTTTGAAAAAATATAATAATTGTATTAGTGGTAGTAAAGTTGTTTGACTAAATAAA

GGAGGAAATTGTGTTAATTGAGTTGGGTGAACAACAATAATGCATTATCG

>PGSC0003DMG400001832-(rev)LRR-RLPs\_2135

CTAAATAAAGGAGGAAATTGTGTTAATTGAGTTGGGTGAACAACAATAATGCATTATCGATCACACTGT

ATGTATAAAAAGTATTCTAAGAATGTGCATGTGTAACACGTTTGACCTCT

>PGSC0003DMG400001832-(rev)LRR-RLPs\_2196

CACACTGTATGTATAAAAAGTATTCTAAGAATGTGCATGTGTAACACGTTTGACCTCTACTGCTATATAA

AGATGGAGTACAAGTTCGTAGCTAGTTAGATATAGAGAATGGAGTACCA

>PGSC0003DMG400001832-(rev)LRR-RLPs\_2257

TGCTATATAAAGATGGAGTACAAGTTCGTAGCTAGTTAGATATAGAGAATGGAGTACCAACAATTGCTA

ATAGCTTTCTGTTTGTATGCACATTTTATACTTTTTGTCCATCAATCTCAG

>PGSC0003DMG400001832-(rev)LRR-RLPs\_2318

AATTGCTAATAGCTTTCTGTTTGTATGCACATTTTATACTTTTTGTCCATCAATCTCAGCTTACATATGCTG

GGAAACATCTTTGTGCCCGTGATGAAGCTTTTTATTTGCTTGAATTTA

>PGSC0003DMG400001832-(rev)LRR-RLPs\_2379

TACATATGCTGGGAAACATCTTTGTGCCCGTGATGAAGCTTTTTATTTGCTTGAATTTAAGCAAGGCCTCA

TCGTTGGTCAAATGATTATTACAATGGTTGTGACAGCAAAGCCCAAGC

>PGSC0003DMG400001832-(rev)LRR-RLPs\_244

AGACTATTTCTACTAGATAAGGGACAACCTTCCTAGCATAAGGAGAAGATACAACAAATGTAATTTTTTTT  
GTTAGTTGAACCATTGTTTTTGGCTTATAGTATGAAAGTCTATGTCACTT

>PGSC0003DMG400001832-(rev)LRR-RLPs\_2440

CAAGGCCTCATCGTTGGTCGAAATGATTATTACAATGGTTGTGACAGCAAAGCCCAAGCCAAGACTTTG  
TCCTGGAATGTTACAGGAGATTGTTGTGAATGGGATGGTGTACTTGCAAT

>PGSC0003DMG400001832-(rev)LRR-RLPs\_2562

ATTTACGGGTCATGTCATAGGCCTCGATCTTTCTTGCAACTTTCTTAGTGGAACCATCTATGCTAATAATA  
GCCTCACAAAACCTGTTTCATCTCCAAAGACTCAACCTTACCTTCAACTA

>PGSC0003DMG400001832-(rev)LRR-RLPs\_2623

GCTAATAATAGCCTCACAAAACCTGTTTCATCTCCAAAGACTCAACCTTACCTTCAACTACTTGAATGACTT  
TCCACTTGGAATAGTATTAGTGAACCTCAGTAGTTTGACGCATCTTTTG

>PGSC0003DMG400001832-(rev)LRR-RLPs\_2684

TGAATGACTTTCCACTTGGAATAGTATTAGTGAACCTCAGTAGTTTGACGCATCTTTTGGCAATCTCACTA  
GAATTAGAGTGTTGAAACTTTCATTTAACAACCTTAAATGGTAATGTTCT

>PGSC0003DMG400001832-(rev)LRR-RLPs\_2745

AATCTCACTAGAATTAGAGTGTTGAAACTTTCATTTAACAACCTTAAATGGTAATGTTCTCTCAACTATCTC  
AAAATTAACAAAACCTCGATCATTTAGATCTCTCTTACAACGATTTTCAA

>PGSC0003DMG400001832-(rev)LRR-RLPs\_2806

CAACTATCTCAAATTAACAAAACCTCGATCATTTAGATCTCTCTTACAACGATTTTCAAGGCTCGATTCCA  
GAATCTTTTGGCAATCTCACTAGAAATTAGAAGTTTGGATCTTTCAATGA

>PGSC0003DMG400001832-(rev)LRR-RLPs\_2867

CTCGATTCCAGAATCTTTTGGCAATCTCACTAGAAATTAGAAGTTTGGATCTTTCAATGAACATCTTCACCG  
GAAATGTTCCCTCAACTATCGGAAAGCTCAACAAAACCTTCACTCCTTATC

>PGSC0003DMG400001832-(rev)LRR-RLPs\_2928

ATCTTCACCGGAAATGTTCCCTCAACTATCGGAAAGCTCAACAAAACCTTCACTCCTTATCTCTTTCTTCCAAT  
AATTTTGAAGGCTTGATTCCAACATATTTTCCAACCTTCTCAGAGCTA

>PGSC0003DMG400001832-(rev)LRR-RLPs\_2989

TTTCTTCCAATAATTTTGAAGGCTTGATTCCAACATATTTTCCAACCTTCTCAGAGCTATCTTTTTTAGCTT  
TGACACTAACAATTTCACTGGTCCACTCCCCTATTCAATTGCAACGT

>PGSC0003DMG400001832-(rev)LRR-RLPs\_305

ATTTTTTTTGTAGTTGAACCATTGTTTTTGTCTATAGTATGAAAGTCTATGTCACCTTAGCCTTTCTGTA  
GATATTGCTGCTCAGAAGCAAAGAAGGCAAAACAAGAGACGTCAAAGA

>PGSC0003DMG400001832-(rev)LRR-RLPs\_3050

TTTTTTAGCTTTTGACACTAACAAATTTCACTGGTCCACTCCCCTATTCAATTGCAACGTTGACTCGTCTTGA  
AATATTATACTTGCAAAACAATTTACTAACTGGTCCACTTCCCTCTAA

>PGSC0003DMG400001832-(rev)LRR-RLPs\_3172

TAAGTGGACTTCAAGAGCTACAACAACCTGATTTGTCTTCAATTACTTCACTGGCGCAACACCCCCTTGG  
TTATTCCACCTTCCATCCTTACTTTCTTTATATGTTCAAGACAATCAAT

>PGSC0003DMG400001832-(rev)LRR-RLPs\_3233

ACCCCCTTGTTATTCCACCTTCCATCCTTACTTTCTTTATATGTTCAAGACAATCAATTAACCGGGAAATT  
GCCAAATAAGCTCAAGAGTAATTATCTAGAATACTTTAACATTTCGTCT

>PGSC0003DMG400001832-(rev)LRR-RLPs\_3294

ACCGGGAAATTGCCAAATAAGCTCAAGAGTAATTATCTAGAATACTTTAACATTTCGTCTTTCATACAACA  
AGCTGCAAGGTGAAATTCCCGATTGGATGTTTTCTACAAGCATAGTTAGA

>PGSC0003DMG400001832-(rev)LRR-RLPs\_3355

CATACAACAAGCTGCAAGGTGAAATTCCCGATTGGATGTTTTCTACAAGCATAGTTAGACTGGATCTCTC  
TCATAACTTCTCACAGGCTTTAAAAACAAGTATGGCACTCAGACTCCT

>PGSC0003DMG400001832-(rev)LRR-RLPs\_3477

CAATACCTTAATTTGGAGAACAATTTCTTCAAGGGACTTTGCATCAATCCTTTTGTGACATGCATAACCT  
TGACTTCCTCATTTTGGCTCAGAACAATTTCAAGTTCAATCCAGAC

>PGSC0003DMG400001832-(rev)LRR-RLPs\_3599

TTTGGGTAACCTCAATAGCTTCATTTCTATTTTAGACTTGCGAATGAACAGTTTTTCATGGAGAGATACCAA  
GAATCTTACCTACAACGTTACAGTATCTTGGTTTATATGGCAATCAATT

>PGSC0003DMG400001832-(rev)LRR-RLPs\_366

GCCTTCTGTAGATATTGCTGCTCAGAAGCAAAGAAGGCAAAACAAGAGACGTCAAAGAAAAATAAGCT  
TTAGACATAGCTACCTCTGCACTCTGTTTTTGGATGGATGGATGGATGTCT

>PGSC0003DMG400001832-(rev)LRR-RLPs\_3782

CAACAAGATAAATGACACGTTCCCATATGGCTGGAGAACTTCCAAACCTCCAAGTTTTGATTCTAAAA

TCAAATCTCTTTCACGGTTCAATTGGTGATTTGGAGTCCGAATTTCCATT

>PGSC0003DMG400001832-(rev)LRR-RLPs\_3965

TTTCAAAAGTTTCAGAGGTATGATGGATGTGGATGAAGAAAAACAGGAATTA  
CTCGAGAAAGAACAA  
GCAATGACACAGATTACCTTTACCACATTAGTTTGGTGATAAAAGGTAATGA

>PGSC0003DMG400001832-(rev)LRR-RLPs\_4026

AGAACAAGCAATGACACAGATTACCTTTACCACATTAGTTTGGTGATAAAAGGTAATGAGTTT  
GATATGA  
GAATCACGTCAATTATGACGAGTGTTGATTTATCAAGCAACAGGTTTGAA

>PGSC0003DMG400001832-(rev)LRR-RLPs\_4148

AGATATTCCAAAATCCATTGGAAATCTGAGCTCACTTGTGTTACTCAACCTGTCTCACAACA  
ACTTCCGTG  
GTCATATTCCTGCAGAAATTGCAAAGGTGCAGGCACTCGAAGCATTAGA

>PGSC0003DMG400001832-(rev)LRR-RLPs\_4209

AACTTCCGTGGTCATATTCCTGCAGAAATTGCAAAGGTGCAGGCACTCGAAGCATTAGATCT  
CTCATGGA  
ACAGACTCATTGGAGAAATTCCAGGTCCATTGTTCGAGTTCGACATTTCTT

>PGSC0003DMG400001832-(rev)LRR-RLPs\_427

AATAAGCTTTAGACATAGCTACCTCTGCACTCTGTTTTTGGATGGATGGATGTCTAAACAAA  
AATA  
GGCTTTAGACATAAAAACACCATTTTTTCATGAAAAGGCCCTCAAAGTTTG

>PGSC0003DMG400001832-(rev)LRR-RLPs\_4331

GGTCTTAAACCTTTCCTACAATCATCTGGCCGGGCACATTCTATTGGGAAACAGTTCAATA  
CATTTC  
CAAA  
ATGACTCGTATTGTGGAAATCTGATTTATGTGGATTTCCACTGTCAAA

>PGSC0003DMG400001832-(rev)LRR-RLPs\_4392

ACATTTCCAAATGACTCGTATTGTGGAAATCCTGATTTATGTGGATTTCCACTGTCAA  
AAGAATGTGGAA  
ACAATAATGAATCACCCTTGAACACGATGATGATGATGATTCATTTTTT

>PGSC0003DMG400001832-(rev)LRR-RLPs\_4453

AATGTGGAAACAATAATGAATCACCCTTGAACACGATGATGATGATGATTCATTTTTT  
ATGAGCGGATT  
CACATGGGAAGCAGTGGTAATAGGTTATGGTTGTGGTATGATATTTGGAT

>PGSC0003DMG400001832-(rev)LRR-RLPs\_4575

TTGATAGGAGGCCTCATGTTCTACTGGAAAAACCAAATGGTATGTGAACTTTGCTGAAG  
ATATACAA  
ATTGATGCTAACAAGCAAACAAGGCAAAAGAAGAGACGTCAAAGACGCTGT

>PGSC0003DMG400001832-(rev)LRR-RLPs\_4636

ATATACAAATTGATGCTAACAAGCAAACAAGGCAAAAGAAGAGACGTCAAAGACGCTGTTTAAGAATG  
AATTAGCAATATACCAGGTATGTATCAAACCTTTTGTGTTTGAATCAGGAAC

>PGSC0003DMG400001832-(rev)LRR-RLPs\_4697

AAGAATGAATTAGCAATATACCAGGTATGTATCAAACCTTTTGTGTTTGAATCAGGAACAGCACTATAGA  
GGTTGTTGGATAACTATTTTTCCTAAATATTCAAAACTCAATGTCTCTG

>PGSC0003DMG400001832-(rev)LRR-RLPs\_4758

CACTATAGAGGTTGTTGGATAACTATTTTTCCTAAATATTCAAAACTCAATGTCTCTGCAGAGGTTACTG  
GAGAATTGGACAATTTAATTAGCAAGTTAGTGTGATGTTCTGTCAAAT

>PGSC0003DMG400001832-(rev)LRR-RLPs\_4819

GAGGTTACTGGAGAATTGGACAATTTAATTAGCAAGTTAGTGTGATGTTCTGTCAAATATCAAAGGAT  
GCATTTGTTTCTTCACTTTATGCCCATGGTTGCCAAATACATAATAAGTTA

>PGSC0003DMG400001832-(rev)LRR-RLPs\_488

ACAAAAATAGGCTTTAGACATAAAAACACCATTTTTCATGAAAAGGCCCTCAAAGTTTGAATTCAAAAAT  
GAGGATTTGATGTTGAATTCATGAAGAACTAAATGGGTAATGGAGGATTG

>PGSC0003DMG400001832-(rev)LRR-RLPs\_4880

CAAAGGATGCATTTGTTTCTTCACTTTATGCCCATGGTTGCCAAATACATAATAAGTTACAGTTGATTCT  
ATAGTTTTGTGGCAAATAATAAATTAGCTTTAGACATAGCAACCTCTAC

>PGSC0003DMG400001832-(rev)LRR-RLPs\_549

TTCAAAAATGAGGATTTGATGTTGAATTCATGAAGAACTAAATGGGTAATGGAGGATTGGGGTTGAAAT  
CACTTACCCAAACGTTATTTCTTAAAATCGCCTACTCCAAGCTTCCAAGGT

>PGSC0003DMG400001832-(rev)LRR-RLPs\_61

AGAAATTTCAAAAATATATACTCTAGAAAAATTCCTTCAAATAATCACAGTAACTAAAAATACTATATTT  
CTCACAGCTATAGAGAAGCCAACAAATAGTTGACTTCTTTGCTAAACAG

>PGSC0003DMG400001832-(rev)LRR-RLPs\_610

GTTGAAATCACTTACCCAAACGTTATTTCTTAAAATCGCCTACTCCAAGCTTCCAAGGTCCAAAAATGGAA  
AAATGGGGAAGAAACCCAAATTGGGAAATTTCAATTAATACTGCCAAGCCA

>PGSC0003DMG400001832-(rev)LRR-RLPs\_671

AAAAATGGAAAAATGGGGAAGAAACCCAAATTGGGAAATTTCAATTAATACTGCCAAGCCATTTGGTCTTC  
GCAATCGCGGAGACCAGACGGAATAACCCTTCACGAACGCAGCCACTCTGA

>PGSC0003DMG400001832-(rev)LRR-RLPs\_732

TGGTCTTCGCAATCGCGGAGACCAGACGGAATAACCCTTCACGAACGCAGCCACTCTGACCCTCCACGA  
TCGCGGCCAAGCTCCACCAACGCGAAGGAGGCACCAGAAGACAGCAAACAG

>PGSC0003DMG400001832-(rev)LRR-RLPs\_793

CTCCACGATCGCGGCCAAGCTCCACCAACGCGAAGGAGGCACCAGAAGACAGCAAACAGCAAATACCA  
AGGCATAAAAACATTACCCAATGGACCCTTGGAATCCCGAGCACACAAACT

>PGSC0003DMG400001832-(rev)LRR-RLPs\_854

AATACCAAGGCATAAAAACATTACCCAATGGACCCTTGGAATCCCGAGCACACAAACTACTACCCA  
AAACTCGACGTTTTCGGACTCAATGGAATCATCGAAATATGGATTTCGAGGT

>PGSC0003DMG400001832-(rev)LRR-RLPs\_915

TACCCAATAAACTCGACGTTTTCGGACTCAATGGAATCATCGAAATATGGATTTCGAGGTCTCCGTGACCC  
GGCACCCATTAAGGAATTAATATCTCAGGTGATCACTCAACTAATTCTT

>PGSC0003DMG400001870-(rev)LRR-RLPs\_1008

TCAATTAACAGCTTCACTGGAAATGTTCCCTCAACTATCGGAAAGATGAACAATCTTAACA  
ACTTATTCTCTTTTCCAATAATTTGAAGGCTCGATTCCAGACATCTTCGCCAACTTT

>PGSC0003DMG400001870-(rev)LRR-RLPs\_1071

TTATTTCTCTTTTCCAATAATTTGAAGGCTCGATTCCAGACATCTTCGCCAACTTTTCAGAGCTATACTTT  
TTAGCTTTTGACACTAACAATTTCACTGGCTCATTCCCCTATTCGGTT

>PGSC0003DMG400001870-(rev)LRR-RLPs\_1134

CTATACTTTTGTAGCTTTGACACTAACAATTTCACTGGCTCATTCCCCTATTCGGTTGCAACCTTGACTTAC  
CTTCGAATCTTAGAGTTGCAAAACAATTTACTAACTGGTCCACTTCCC

>PGSC0003DMG400001870-(rev)LRR-RLPs\_1197

TTGACTTACCTTCGAATCTTAGAGTTGCAAAACAATTTACTAACTGGTCCACTTCCCCTAATATAAGCGG  
ACTTCAAGAGCTACA  
ACTACTTGATTTGTCATTTAATTATTTCACTGGT

>PGSC0003DMG400001870-(rev)LRR-RLPs\_1260

ATAAGCGGACTTCAAGAGCTACA  
ACTACTTGATTTGTCATTTAATTATTTCACTGGT  
GCAACACCCCCTTG  
GTTATCTGTTCAACACAATCAATTA  
ACTGGGAAATTACCAAATGAGCTC

>PGSC0003DMG400001870-(rev)LRR-RLPs\_1323

CCCCCTTGTTATCTGTTCAACACAATCAATTA  
ACTGGGAAATTACCAAATGAGCTCAAGAGCAATTACA

AAGAATTCTTAGGTAACCTCAAATGATGCCTCCACCACCTCAAATAAATTA

>PGSC0003DMG400001870-(rev)LRR-RLPs\_1386

AATTACAAAGAATTCTTAGGTAACCTCAAATGATGCCTCCACCACCTCAAATAAATTATTGCCAAAACAAG  
TATGGCGTTCAATGAATTTGGTGTCACTTAATTTGGAGAACAATTTTTTTT

>PGSC0003DMG400001870-(rev)LRR-RLPs\_1449

AAACAAGTATGGCGTTCAATGAATTTGGTGTCACTTAATTTGGAGAACAATTTTTTTCAAGGGCCTTGC  
ATCATTCTATTTGTGACTTTATTAACCTAAAAGTTCTCATTTTTGGCTCGG

>PGSC0003DMG400001870-(rev)LRR-RLPs\_1512

CCTTTGCATCATTCTATTTGTGACTTTATTAACCTAAAAGTTCTCATTTTTGGCTCGGAACAATTCAGTGGT  
TCAATCCCAGACTGTTTGGGTAACCTCCAATAGGTTTATTTCTATTTTA

>PGSC0003DMG400001870-(rev)LRR-RLPs\_1575

TTCAGTGGTTCAATCCCAGACTGTTTGGGTAACCTCCAATAGGTTTATTTCTATTTTAGACTTGCGAATGAA  
CAATTTTCATGGAGAGATACCAAGATTCTTACCTACAAGGTTACAATAT

>PGSC0003DMG400001870-(rev)LRR-RLPs\_1638

CGAATGAACAATTTTCATGGAGAGATACCAAGATTCTTACCTACAAGGTTACAATATCTTGGTGTGTATG  
GCAATCAATTGGGTGGGAGGGGGGATCCCACGATCCTTGGTTAACTGTA

>PGSC0003DMG400001870-(rev)LRR-RLPs\_1701

GTGTATGGCAATCAATTGGGTGGGAGGGGGGATCCCACGATCCTTGGTTAACTGTACAACTTGGTA  
GCTCTTGATTTGGGGAACAACAAGATAAATGACATGTTCCCCATTTTGGTA

>PGSC0003DMG400001870-(rev)LRR-RLPs\_1764

TGGTAGCTCTTGATTTGGGGAACAACAAGATAAATGACATGTTCCCCATTTTGGATTGTTGATGGAG  
GCCTCATGTTCTACTGGAAAAACCAAATGGTTTTCGAACTTTGCTGAAG

>PGSC0003DMG400001870-(rev)LRR-RLPs\_1813

ATTTTGGATTGTTGATGGAGGCCTCATGTTCTACTGGAAAAACCAAATGGTTTTCGAACTTTGCTGAA  
GATATTGCTCAACAAATTGCTGCTAAGAAGCGAACAAGGCAAAAAGAAGAG

>PGSC0003DMG400001870-(rev)LRR-RLPs\_252

TGACTAACCTAAATACAGGAGATAACACTTTCCACTTGGAAATAGTATTAGTGAACCTCAGTAGTTTGACG  
CATCTCAATCTTTCGGATTCTGGAATATTTAATGAAAGGGAGATGCAGAT

>PGSC0003DMG400001870-(rev)LRR-RLPs\_315



TTTGACGCATCTCAATCTTTCGGATTCTGGAATATTTAATGAAAGGGAGATGCAGATCCCATCAGGATTA  
TGCAAGAGTTGTCTAAGCTGATTTCACTTGACCTCTCCTGGAATTACATC

>PGSC0003DMG400001870-(rev)LRR-RLPs\_378

AGGATTATGCAAGAGTTGTCTAAGCTGATTTCACTTGACCTCTCCTGGAATTACATCCAATTTGGCCGAA  
CAACCTTACAAGTTTGCCGCACAACCTTAACCAACTTAGAGATTTTGTG

>PGSC0003DMG400001870-(rev)LRR-RLPs\_441

GGCCGAACAACCTTACAAGTTTGCCGCACAACCTTAACCAACTTAGAGATTTTGTGTTAGACTTCGTGA  
ACATACCATTCAAGTTACCTAAGAATTTCTCTTCTCCCTAAGGTACTTA

>PGSC0003DMG400001870-(rev)LRR-RLPs\_504

TTCGTGAACATACCATTCAAGTTACCTAAGAATTTCTCTTCTCCCTAAGGTACTTAAGTCTTCAAGGCAC  
AAATATGTTTGGGAACATGAGTGATTCTCAAATTTTTCATCTACCAAAC

>PGSC0003DMG400001870-(rev)LRR-RLPs\_567

CAAGGCACAAATATGTTTGGGAACATGAGTGATTCTCAAATTTTTCATCTACCAAACCTTGCAAGTGCTGA  
GATTGGGATCAAATCCTTTATTAACAGGCACTTTGCCGAATTTTAATTGG

>PGSC0003DMG400001870-(rev)LRR-RLPs\_630

GTGCTGAGATTGGGATCAAATCCTTTATTAACAGGCACTTTGCCGAATTTTAATTGGAGTTTCGGTGGAA  
GTATTTTAGAGTTGGACTTCTCCCGTACTGGTATTTTTGGGAAGATACCT

>PGSC0003DMG400001870-(rev)LRR-RLPs\_693

GGTGGAAGTATTTTAGAGTTGGACTTCTCCCGTACTGGTATTTTTGGGAAGATACCTGATTCAGTTGGTA  
ATCTCCATTCTCATTGGCATTGGACCTCTTGAATTGCCATTTATCTGGC

>PGSC0003DMG400001870-(rev)LRR-RLPs\_756

GTTGGTAATCTCCATTCTCATTGGCATTGGACCTCTTGAATTGCCATTTATCTGGCTCGATTCCAGAATC  
CATTGGCAACCTCACTGCAATCAGAGAGTTGATACTTTCAAGTAACAAC

>PGSC0003DMG400001870-(rev)LRR-RLPs\_819

CCAGAATCCATTGGCAACCTCACTGCAATCAGAGAGTTGATACTTTCAAGTAACAACCTCACTGGTAATG  
TTCCCTCAACTATCTCAAATTAACAACCTCGTTAATTTAGATCTCTCT

>PGSC0003DMG400001870-(rev)LRR-RLPs\_882

GGTAATGTTCCCTCAACTATCTCAAATTAACAACCTCGTTAATTTAGATCTCTTTCAACCATTTTCGA  
GGCTCGATTTCCGAATCCATTGGCAACCTCACTGCAATTAGAGAGTTG

>PGSC0003DMG400001870-(rev)LRR-RLPs\_945

CATTTTCGAGGCTCGATTTCCGAATCCATTGGCAACCTCACTGCAATTAGAGAGTTGACGCTTCAATTA  
ACAGCTTCACTGGAAATGTTCCCTCAACTATCGGAAAGATGAACAATCTT

>PGSC0003DMG400002012-(rev)LRR-RLKs\_0

TGGAAGTAGTTAGTCAAAATTGTGTCTAAATGAAAGGTTTTTGGTGGTTTACTGTTTCTTCATTTTTATAA  
GGAAAGTTGGTTTACTAAAATAACAACCCCTATTGACTTGCTTATGGT

>PGSC0003DMG400002012-(rev)LRR-RLKs\_1952

ATTATCATACACATTGTTCCCAATTCTCCCTAGGTTGGAGATATTCATACTTAGACTCAACTCTAAGGC  
AATTATTGCTGTACTTGCATTTTAATTAGTGGAATGTTCCAGTGTCTTT

>PGSC0003DMG400002012-(rev)LRR-RLKs\_2013

ACTCTAAGGCAATTATTGCTGTACTTGCATTTTAATTAGTGGAATGTTCCAGTGTCTTTTTGATTGTTTTT  
TTTGCTGCATTATTAATTTTCATCTCTCCTCGAGCCGAGGGTCTATTGG

>PGSC0003DMG400002012-(rev)LRR-RLKs\_2257

GCTGCATAAAGATATTTTTTCATGTGGTTGGAGTTCTGGTGTATTTTAAGTCTTTCGTTGTTCTTTTAATTAT  
TATATTTAGTTGTTCTTACCACAGGCCTAATCCAAGCTACTTCCTTTC

>PGSC0003DMG400002012-(rev)LRR-RLKs\_366

TTCTTGAAATGATTGTGCAATCTTTAGTCTTTCTACTTGGTGGGTTTGTCTACTTTCTTGGCCCATTCTGA  
ATTATTAGCTTGTCAAACGCTGTCTTTTTTCTTTTTTAGTTCAGTAT

>PGSC0003DMG400002012-(rev)LRR-RLKs\_427

GCCCATTCTGAATTATTAGCTTGTCAAACGCTGTCTTTTTTCTTTTTTAGTTCAGTATTATATGTAACCTCT  
CTGTTAGTGTACACGGGTTTTTCATTGGGAGGAAATGCAATCTACCA

>PGSC0003DMG400002012-(rev)LRR-RLKs\_488

TATGTAACCTCTCTGTTAGTGTACACGGGTTTTTCATTGGGAGGAAATGCAATCTACCATTTGTTTAGTGC  
TGCTATTTTTAGTTGAGTTAGCTAAAGGAAGCTTAGATTTGGATGCTCT

>PGSC0003DMG400002012-(rev)LRR-RLKs\_5063

CCTGGGAACCTCAGAAGTGCTGGATTTAACCGAATGGGCGAGATTATTGGCCTTCAAGACCGTTCAATT  
GAGTGTTCGATCCATTCTTATTGGGAAAGCAAAGCAACAACGAAGACATG

>PGSC0003DMG400002012-(rev)LRR-RLKs\_5124

GTTCAATTGAGTGTTCGATCCATTCTTATTGGGAAAGCAAAGCAACAACGAAGACATGCATACGATTCT

TGATAGCATGCTTCAGGTTGCACTAAGGTGCATTTTGCCAGCTGATGAAA

>PGSC0003DMG400002012-(rev)LRR-RLKs\_5246

CCTGATATGAAATTTGTTTTGAGCAACTTTGCTCGATAGCGCAATAACACAAGTTGAGGGGAGGGGTA

AATTTGAATACTATGTAGTTGTAGATTTGTATCTTAAAAGTTGATATGTCA

>PGSC0003DMG400002017-(rev)G-LecRK\_0

ATGAATGCGATTTGCGTAGCAACAGATACTATATCAATGAACCAACAAGTTGTAGATGGTGAAACATTA

GTTTCAGCAGGAGGTATCTTTGAGCTTGGGTTCTTCAGTCCTAATGGATCC

>PGSC0003DMG400002017-(rev)G-LecRK\_1054

TTGGCATATGCTTATGTGGATGGAATAGGCTGCATGATTTGGGGAAAAGAACTTATTGACCTCCAAGAG

TTTGCCCGTGGTGGAGAGCAACTATAACATTCGCCTCGCACATTCCCAACTT

>PGSC0003DMG400002017-(rev)G-LecRK\_1116

CCAAGAGTTTGCCCGTGGTGGAGAGCAACTATAACATTCGCCTCGCACATTCCCAACTTGGTAGATACAG

ATACACTAATTCTATGTTGCTCGGACACTCCAAAAATGTTGTTGCACCCGT

>PGSC0003DMG400002017-(rev)G-LecRK\_124

GGCGATATGTCGGGATATGGTACAAGGGATTACCAGTTGAAAAAGTTGCATGGGTTGCAAACCGCGAA

AGAGCATAATTGGATCATATGGAGTTCTTATGATTAATGCAAGTGATGGAA

>PGSC0003DMG400002017-(rev)G-LecRK\_1240

GATCCTCCAAAAACACACTATTATTGGAGGATCCTACATGCACACAACAATACTTTTGAAGAGACTGAG

CAACATAGCACCAATTTTCTCTATAAACATCCCATTTTATTACTACTCGA

>PGSC0003DMG400002017-(rev)G-LecRK\_1302

AGACTGAGCAACATAGCACCAATTTTCTCTATAAACATCCCATTTTATTACTACTCGAACGAACTTCACT

TCATTTTGGATTTGTTTTAGTAGTTTGCCTATGTTATTTGTCTCTAATC

>PGSC0003DMG400002017-(rev)G-LecRK\_1488

ATTCTCAGAGACAGAGCTAGGATTTTGGATTTTATGGATTTTGGATTCTAGAAAAACAAATTACTGGGTC

TTGAATAAATTATTTATACTTATTAATGGATTCTTAAACACAAAAAATA

>PGSC0003DMG400002017-(rev)G-LecRK\_1550

ACTGGGTCTTGAATAAATTATTTATACTTATTAATGGATTCTTAAACACAAAAAATATATGGTCTAGCCC

AAAGCTACTGGATTCTACAGACTCTGTAGACAGGCTTGTAGCTCCGCCT

>PGSC0003DMG400002017-(rev)G-LecRK\_186

CGCGAAAGAGCATTAAATTGGATCATATGGAGTTCTTATGATTAATGCAAGTGATGGAAATTTAGTCCTTG  
TGGATGATAAAAATATGTCTGTCTGGTCTACAGAAATTAATCTGGTATCG

>PGSC0003DMG400002017-(rev)G-LecRK\_1860

GGGAGCCCATATTGCAATTATTGTCTCAGCGACATTCGGCCTGATTCTTATTGTTTGCCTATATATGTAT  
TGAAGATCAGGAAAAAAGGTAAAAAAGGTAACAGTCAATTTT

>PGSC0003DMG400002017-(rev)G-LecRK\_1922

TATATGTATTGAAGATCAGGAAAAAAGGTAAAAAAGGTAACAGTCAATTTTACAGTTGTTAGA  
GGCACAACCTTTTCGCTATCTTTGGAAAGACTTTAATTTTACTAGATTTT

>PGSC0003DMG400002017-(rev)G-LecRK\_1984

TGTTAGAGGCACAACCTTTTCGCTATCTTTGGAAAGACTTTAATTTTACTAGATTTTATCAGGCATTGGG  
AGTTTAGTCCCTTTTCGCATAGCTTCAAACACTCTTCAGCAACAAATT

>PGSC0003DMG400002017-(rev)G-LecRK\_2046

GGCATTGGGAGTTTAGTCCCTTTTCGCATAGCTTCAAACACTCTTCAGCAACAAATTTGCTTCATAACAG  
TTTTACTCAAGGTAGAAGTACAGAATTACCAGTTTTCAGCTTCAAGTGC

>PGSC0003DMG400002017-(rev)G-LecRK\_2108

TCATAACAGTTTACTCAAGGTAGAAGTACAGAATTACCAGTTTTCAGCTTCAAGTGCATAGAAGCTGCT  
ACTAAGAACCTTTTGCTATCGAAATAAACTTGGAGAGGGGGGATTTGGACC

>PGSC0003DMG400002017-(rev)G-LecRK\_2170

AAGCTGCTACTAAGAACCTTTTGCTATCGAAATAAACTTGGAGAGGGGGGATTTGGACCTGTATAACAAG  
TATATATATATATACACTCGTGTGTGCTTTAATCATCGAAAAAGTAGAGC

>PGSC0003DMG400002017-(rev)G-LecRK\_2232

TACAAGGTATATATATATATATCACTCGTGTGTGCTTTAATCATCGAAAAAGTAGAGCAAATTTACATG  
GTTTATACTCATTGCTTATTAGTTGAAGTCATGTGTGATTTCATATATAG

>PGSC0003DMG400002017-(rev)G-LecRK\_2294

TTCACATGGTTTATACTCATTGCTTATTAGTTGAAGTCATGTGTGATTTCATATATAGGGGGTATTAGCAA  
ATGGACAAGAGGTTGCTATTAACGACTTTCGAGGAGCTCAGGACAAGG

>PGSC0003DMG400002017-(rev)G-LecRK\_2356

TATTAGCAAATGGACAAGAGGTTGCTATTAACGACTTTCGAGGAGCTCAGGACAAGGCATTGAAGAG  
TTCAAGAATGAGGTTACTGATTCTGGACTTCAACACAGAACTTAGTCA

>PGSC0003DMG400002017-(rev)G-LecRK\_2418

GAAGAGTTCAAGAATGAGGTTACTGATTTCTGGACTTCAACACAGAACTTAGTCAAAGTATGATGGGA  
TTTTGCGTTCACGGGGAGGAAAAGTTGCTGATCTATGAATACATGTCCAAC

>PGSC0003DMG400002017-(rev)G-LecRK\_248

AGTCCTTGTGGATGATAAAAATATGTCTGTCTGGTCTACAGAAATTAATCTGGTATCGAACAATAACACA  
ATTGCTGTACTGACTGATCAGGGGAATCTTGTCTCCGCGATAAGAACGA

>PGSC0003DMG400002017-(rev)G-LecRK\_2480

GATGGGATTTTTCGTTACGGGGAGGAAAAGTTGCTGATCTATGAATACATGTCCAACAGAAGCTTAGA  
CGTTTTTCATATTCGGTGAGCTAATTAACAAGAGTACTTAAACAGTACTTTT

>PGSC0003DMG400002017-(rev)G-LecRK\_2542

GCTTAGACGTTTTTCATATTCGGTGAGCTAATTAACAAGAGTACTTAAACAGTACTTTTCTTGATGAATTAT  
GATTAAATTACTCTTTGTGCTTGGCAGGAGGATCAAGATCTAATGATAA

>PGSC0003DMG400002017-(rev)G-LecRK\_2604

ATGAATTATGATTAAATTACTCTTTGTGCTTGGCAGGAGGATCAAGATCTAATGATAAGGCGGCATTGA  
GTTGGAATCAACGATATAGTATCGTTGAAGGGATAGCTAGAGGTCTTCTTT

>PGSC0003DMG400002017-(rev)G-LecRK\_2666

GCATTGAGTTGGAATCAACGATATAGTATCGTTGAAGGGATAGCTAGAGGTCTTCTTTATCTGCATCGTG  
ATTCACGACTAAAAATCATTACAGAGATCTTAAGACAAGCAATATTCTG

>PGSC0003DMG400002017-(rev)G-LecRK\_2728

GCATCGTGATTCACGACTAAAAATCATTACAGAGATCTTAAGACAAGCAATATTCTGTTAGACGAAGAT  
ATGAATCCCAAAATCTCAGATTTTGAATGGCTAGGATTTTTCGGAGGGAA

>PGSC0003DMG400002017-(rev)G-LecRK\_2852

ACTATAGCAAATACCAACAGGATTGCCGGTACCTAGTAAGTATTAATTGTTTCATATATAGCAGTGAAATT  
CATCATAACTAAATTGTATATTTGTGTATCAATGCAGTGGTTACATGTCC

>PGSC0003DMG400002017-(rev)G-LecRK\_2914

GTGAAATTCATCATAACTAAATTGTATATTTGTGTATCAATGCAGTGGTTACATGTCCCCTGAATATGCAA  
TACAAGGATTTTTTTCCGAGAAGTCGGATGTCTTCAGTTTTGGTGTTCAT

>PGSC0003DMG400002017-(rev)G-LecRK\_2976

AATATGCAATACAAGGATTTTTTTCCGAGAAGTCGGATGTCTTCAGTTTTGGTGTTCATATTGTTAGAGATT

ATCAGCAGTAAAAGAAACAACAGCTATTGTCACTCTGAAGACTCTCTCA

>PGSC0003DMG400002017-(rev)G-LecRK\_3038

TTAGAGATTATCAGCAGTAAAAGAAACAACAGCTATTGTCACTCTGAAGACTCTCTCAACCTCCCGGACC

AGGTGAAAAAAGAGAAAAACTGAAAGAATTTCTCATTTTCTCATATACAG

>PGSC0003DMG400002017-(rev)G-LecRK\_310

ATAACACAATTGCTGTACTGACTGATCAGGGGAATCTTGTCTCCGCGATAAGAACGAGTTGAATGAAT

CTGTACTGTTATGGGAGAGCTTCAATCATCCATCCGATACTCTCTTGCCTC

>PGSC0003DMG400002017-(rev)G-LecRK\_3100

CCCGGACCAGGTGAAAAAAGAGAAAAACTGAAAGAATTTCTCATTTTCTCATATACAGTCAAACCTCTTT

ATAATAACGTAATTTCTTGTCTAGCTGCTATAGCAAAAATGTAGTATAAA

>PGSC0003DMG400002017-(rev)G-LecRK\_3162

ACCTCTTTATAATAACGTAATTTCTTGTCTAGCTGCTATAGCAAAAATGTAGTATAAAGAACATATAAATA

TAACATAATATGGAAGTTGAGAAAACTAGGCCGAGGATGATTGTTAT

>PGSC0003DMG400002017-(rev)G-LecRK\_3224

ATATAAATATAACATAATATGGAAGTTGAGAAAACTAGGCCGAGGATGATTGTTATCGAGAGGTCTG

AATGGACTTGAATATTCTTCTATCCTATACTACTACTATTTTCACATGACA

>PGSC0003DMG400002017-(rev)G-LecRK\_3286

AGGTCTGAATGGACTTGAATATTCTTCTATCCTATACTACTACTATTTTCACATGACAAAATAATATCAA

TGGATTTTATAGGCATGGCAACTGTGGAATGAAGGCAAGATACTCGAGT

>PGSC0003DMG400002017-(rev)G-LecRK\_3348

TAATATCAATGGATTTTATAGGCATGGCAACTGTGGAATGAAGGCAAGATACTCGAGTTTCCGGATCCA

AAGGTGTTTGGTTCACCTGAAACACCAACACAAGTTGTTAGATGCATCATT

>PGSC0003DMG400002017-(rev)G-LecRK\_3410

GGATCCAAAGGTGTTTGGTTCACCTGAAACACCAACACAAGTTGTTAGATGCATCATTGTGGGATTGCTT

TGTGTGCAAGAACATGCAAGTTACAGGCCAAATACAGCTACAATTGTTTC

>PGSC0003DMG400002017-(rev)G-LecRK\_3472

GATTGCTTTGTGTGCAAGAACATGCAAGTTACAGGCCAAATACAGCTACAATTGTTTCCATGCTCTGCAG

TGACACACTTCTTCTCCGCCTAAGCGGCCGCATATAGCAGCAGAGGCT

>PGSC0003DMG400002017-(rev)G-LecRK\_3534

CTCTGCAGTGACACACTTCTCCTCCGCCTAAGCGGCCGCATATAGCAGCAGAGGCTCTGATGATCCAA  
GCATTTACCTTGCTCCAGAAATTCCATTTCTATTTCAAATGTTGAAGGA

>PGSC0003DMG400002017-(rev)G-LecRK\_372

AATGAATCTGTACTGTTATGGGAGAGCTTCAATCATCCATCCGATACTCTCTTGCCTCGTATGAAGATTG  
GGCTGAATACTAGAACAGGGGAGCAAATAGTCGTCACGTCGTGGAAAGAT

>PGSC0003DMG400002017-(rev)G-LecRK\_434

GAAGATTGGGCTGAATACTAGAACAGGGGAGCAAATAGTCGTCACGTCGTGGAAAGATGAGAAAAATC  
CATCACTGGGAAGTTTTAGCACTGCTGTGGTGGATCCTCATGAACTTTTACA

>PGSC0003DMG400002017-(rev)G-LecRK\_496

AAAATCCATCACTGGGAAGTTTTAGCACTGCTGTGGTGGATCCTCATGAACTTTTACAAGTACTTATTTTG  
AATGGCTCATCGAAGCATTTTCAGATCGGGGCAGTGAACCGGAGAAGTT

>PGSC0003DMG400002017-(rev)G-LecRK\_62

AACATTAGTTTCAGCAGGAGGTATCTTTGAGCTTGGGTTCTTCAGTCCTAATGGATCCCAAGGGCGATAT  
GTCGGGATATGGTACAAGGGATTACCAGTTGAAAAAGTTGCATGGGTTGC

>PGSC0003DMG400002017-(rev)G-LecRK\_620

AGGAGTGCCTAGCATGACTAAAGACTTCCATAATGGCTTTCACTACTTATGGATAATAATGGGGAGGA  
ACTTTATTTTACTTATGCTATACTCAATTACTCTGCTCCAACATTGATATA

>PGSC0003DMG400002017-(rev)G-LecRK\_682

GGGAGGAACTTTATTTTACTTATGCTATACTCAATTACTCTGCTCCAACATTGATATACATTGATTCCTAC  
GGAGCGATAATTCAAATGGATTGGGATGCAGAAGAGAATAAATGGTTAA

>PGSC0003DMG400002017-(rev)G-LecRK\_744

GATTCCTACGGAGCGATAATTCAAATGGATTGGGATGCAGAAGAGAATAAATGGTTAAAGGTGCAGGT  
AGTACCTAATGGTCAATGTGACTTGTATAACACATGTGGTCCTTTTGGAAAGT

>PGSC0003DMG400002017-(rev)G-LecRK\_806

GCAGGTAGTACCTAATGGTCAATGTGACTTGTATAACACATGTGGTCCTTTTGGAAAGTTGCAAGGATAAT  
GATTCACCAATATGCAAATGTTTGACGGGCTATGAACCAAAGTCTATCGG

>PGSC0003DMG400002017-(rev)G-LecRK\_930

TGGAACGAGGGGAATTGAACTAGTGGTTGTGTCCGGAGAGCACAATTCCAGTGTGAGGAGACGATCAC  
TAGTACGAATTCTGATGATGAGAGAAAGAGAGGGGAAAAGAATTCTGATCAC

>PGSC0003DMG400002017-(rev)G-LecRK\_992

GATCACTAGTACGAATTCTGATGATGAGAGAAAGAGAGGGGAAAAGAATTCTGATCACTTGTTTGGCAT  
ATGCTTATGTGGATGGAATAGGCTGCATGATTTGGGGAAAAGAACTTATTG

>PGSC0003DMG400002038RLKWAX-EGF\_1116

GTATTGTATAATGGGTCACATTTAGTTTAGTTATTACTCTGTTTTTATTTAAGTTGTTCCGGATTCTTATTTTT  
TTGTGCCACATATATGTCGAGAAGATGTGGGCGTGGGATTCATATCG

>PGSC0003DMG400002038RLKWAX-EGF\_1178

TTCTTATTTTTTTGTGCCACATATATGTCGAGAAGATGTGGGCGTGGGATTCATATCGGATTTGGTCAAT  
CAAATTTGGATACTTTTATCAATATTAACGGAGAAATGCGGGATATATCT

>PGSC0003DMG400002038RLKWAX-EGF\_1240

TGGTCAATCAAATTTGGATACTTTTATCAATATTAACGGAGAAATGCGGGATATATCTAATGATTTTTGT  
GATAAAAATAAAAGCTAAGGTGAAATTGAATAAATTTGAATTGACTTGTA

>PGSC0003DMG400002038RLKWAX-EGF\_1426

TTTTTCTTTGGAATAACTAAGTTTTCTACCTAATGTCTCATAAACATATAACTTTATTTTTAGATACTTGAAT  
TATTTTGGAGAGAATATCAAAACACTCCTAAACTTGGCGCAAGTTAT

>PGSC0003DMG400002038RLKWAX-EGF\_1674

ACTAATAATTTGCATAAAGTTTAGAGGTGTTTTGATACTTCTCTCATTATTTTTAGCTGAATCTTCGTACC  
TGTATTTGAATCCATATCCCAGAATCTTATACTTTAGATCAGGAAGGT

>PGSC0003DMG400002038RLKWAX-EGF\_2356

CCATTGCTAGTTTATGAGTATGTCCCGAATGGAAGTGAAGTGATCACTTGATTTGCAACGCAAACCTTCT  
AACATGGGATTGCCGACTCAGTATTGCTCATGCAACTGCAGAGGGACTT

>PGSC0003DMG400002038RLKWAX-EGF\_2418

CAAACCTTAACATGGGATTGCCGACTCAGTATTGCTCATGCAACTGCAGAGGGACTTGCTTACTTGCAT  
TTCTCTGCAGTTCCTCTATTTACCATCGGGATGTCAAGTCTAGCAACAT

>PGSC0003DMG400002038RLKWAX-EGF\_2976

CACTATTGCTACTGCCAAAGCAATAGAATGACATGTTTTAAATGGTAAATGCAGTTCCTTCTTATTGTGTA  
ATTTTATAAGTTGTGAGTTAAAAGCCAGAAAGTAAGGGAAATAAAGACCC

>PGSC0003DMG400002038RLKWAX-EGF\_3038

ATTGTGTAATTTTATAAGTTGTGAGTTAAAAGCCAGAAAGTAAGGGAAATAAAGACCCTTTATTAGTATT



ATTAATTTGATTGGATCTTCTTCTTTTCAAAGCTTGTTGTAGATACAAC

>PGSC0003DMG400002038RLKWAX-EGF\_3162

AGTGAGTTTATACATACATTGATAATCTTCAAAGCTTGGCCAAACAACCTATCTCTCTAAAATAAGCACTT

TTGGCTTCCCAAAAATGTTGCCGCACCAATATTAGAGACAAAATGCATA

>PGSC0003DMG400002038RLKWAX-EGF\_3286

TTGAAGGATCCGACACACAACAGGGCGGTATTTTTGAAGATTATGAGTGCTAGTTATTAAACTGAGTT

AGACACAAAGTTTGTGTCCGATCCACCCAATTCTTGTTTCATTTGATATCG

>PGSC0003DMG400002038RLKWAX-EGF\_3348

CTGAGTTAGACACAAAGTTTGTGTCCGATCCACCCAATTCTTGTTTCATTTGATATCGGGACTCGTGGCG

GAGGGAGAATACCAGCTACGGGTTCAACTGAATTTAGCTTTGGTTCAACA

>PGSC0003DMG400002038RLKWAX-EGF\_3410

TCGTGGCGGAGGGAGAATACCAGCTACGGGTTCAACTGAATTTAGCTTTGGTTCAACATTTACTTGTCT

TCAAGATTCAATTGACCATGTACATATTATTAACTTGGAACCAATAACTT

>PGSC0003DMG400002038RLKWAX-EGF\_3509

TTAACTTGGAACCAATAACTTTAAAACTTAGAATCCAAAACCTCACAAGCTTTAAATTATGGCTCTGCCTC

TTAATTGGATTCCCACGTCCAGAACTTAGAAATTTCAAATTTGGATCC

>PGSC0003DMG400002038RLKWAX-EGF\_372

AGGACATTTCTACCGTAGGTGTTCAATTGAATTCTTCTTCTTCAACATTACGAGCAGCAACACAATC

ATGTACTTAACTGTACTCAGACTTTGCTTTCGACTCTGCTTAATTGCT

>PGSC0003DMG400002038RLKWAX-EGF\_434

AACACAATCATGTACTTAACTGTACTCAGACTTTGCTTTCGACTCTGCTTAATTGCTCCTCAGAGAGTTT

GTGTCATACTTACGTGAATGGAAGTTCTGGAAATGGAGATGGTGTGGC

>PGSC0003DMG400002038RLKWAX-EGF\_496

AGAGAGTTTGTGTCATACTTACGTGAATGGAAGTTCTGGAAATGGAGATGGTGTGGCGCGTGTAGGA

ACGCGCCGATTTGTTGTACGTTTGGGGCAGGTGGATCGTCGACGGCGTATAT

>PGSC0003DMG400002038RLKWAX-EGF\_806

GGTGTTAACAGATGTTTTTGTCAATCCGGGTTTCATTGGGACCCAATTGCCGCGTTATGTGCCCAAGGTA

AGTTATAAAGAGAGTACTTTTTAGATCTCCTAAAATTAACGCGTTACGG

>PGSC0003DMG400002038RLKWAX-EGF\_868

CCAAGGTAAGTTATAAAGAGAGTACTTTTTAGATCTCCTAAAAATTAACGCGTTACGGGTAAAAATAAA  
GATCTTGATTAATAAATGACACAAAATAGTAAAAAGATTAATTATAAAAAAGG

>PGSC0003DMG400002038RLKWAX-EGF\_930

AAATAAAGATCTTGATTAATAAATGACACAAAATAGTAAAAAGATTAATTATAAAAAAGGCTAGAAAATCA  
CTTCTCCGATTTGATTTGGATGTGTCTTTGTTTTAACTATTTCTGAATTC

>PGSC0003DMG400002038RLKWAX-EGF\_992

AAAATCACTTCTCCGATTTGATTTGGATGTGTCTTTGTTTTAACTATTTCTGAATTCGATACGCAGATGT  
GACATGCCAAGATCGTGACGGTTGTGGTAGCGACCACACTGCACTCATA

>PGSC0003DMG400002045-(rev)RLKantifungi(GNK)\_0

ATGTCTAGTTTGAATATCCCAATATACCTTGTGCTTTTCTTGATCAGCCAAAGTATTAGCACAAACATTAGC  
TCTTGATGACTATTACTGCCAGACACAACACTACTTATAACAATATA

>PGSC0003DMG400002045-(rev)RLKantifungi(GNK)\_1054

ACATGAGGAGTAATATTTTGACCAATACAGTACTGACTTTAATTTGTTGTAGATTTGTGTCACCATTAGTT  
TACGATAAGTTTTTACCTTTACCCCCTCCCCACCACCCGCCACACACA

>PGSC0003DMG400002045-(rev)RLKantifungi(GNK)\_1116

CCATTAGTTTACGATAAGTTTTTACCTTTACCCCCTCCCCACCACCCGCCACACACACACAAATATGTAA  
GCATGCTATCTTTTCTTTTAATTTAATTGGATAAATGACGAAATGAAAA

>PGSC0003DMG400002045-(rev)RLKantifungi(GNK)\_1178

AATATGTAAGCATGCTATCTTTTCTTTTAATTTAATTGGATAAATGACGAAATGAAAAGTATTTTGAGTGT  
GTTCTTATCTTAACTCTTAAATTAATTAATATAATATTTATATTTGG

>PGSC0003DMG400002045-(rev)RLKantifungi(GNK)\_1240

TTTGAGTGTGTTCTTATCTTAACTCTTAAATTAATTAATATAATATTTATATTTGGTATAAGTCGACATT  
GTGCTATTATGGGTTTGTGTCCCATTGATATTGACCCAAAAAAAAGA

>PGSC0003DMG400002045-(rev)RLKantifungi(GNK)\_1302

AGTCGACATTGTGCTATTATGGGTTTGTGTCCCATTGATATTGACCCAAAAAAAAGATTTACCTAAAGA  
AGGTATACGTAACATTCTATTAATTAATATAATAATATTCTTCATCTATA

>PGSC0003DMG400002045-(rev)RLKantifungi(GNK)\_1364

CCTAAAGAAGGTATACGTAACATTCTATTAATTAATATAATAATATTCTTCATCTATATTTCAACCATATGT  
CTCTTTTATATCAACAAATGAAATTCAGATGAATCCGTATTTATTATC

>PGSC0003DMG400002045-(rev)RLKantifungi(GNK)\_1426

AACCATATGTCTCTTTTATATCAACAAATGAAATTCAGATGAATCCGTATTTATTATCTGACGCCCGATAA  
TAATATGATGGTTGGAAATATCACATCCAAAATTAATAGAAAGCATTAA

>PGSC0003DMG400002045-(rev)RLKantifungi(GNK)\_1488

GCCCGATAATAATATGATGGTTGGAAATATCACATCCAAAATTAATAGAAAGCATTAAATAGAATGAATT  
CAAATTCCTGAATTGCGTAGTCGAAAACCCTTCGTCAAATATCGAAAATT

>PGSC0003DMG400002045-(rev)RLKantifungi(GNK)\_1550

AATGAATTCAAATTCCTGAATTGCGTAGTCGAAAACCCTTCGTCAAATATCGAAAATTATTTTTCATATGT  
ATATACTAAATTTTAAACATCATTAAACGAATTTTCTTACTTCGCCAGGG

>PGSC0003DMG400002045-(rev)RLKantifungi(GNK)\_1612

TTCATATGTATATACTAAATTTTAAACATCATTAAACGAATTTTCTTACTTCGCCAGGGCATGACGGAAATC  
CAGAAAAGAAGTACTAATTATTTGTGTAGTGGTTGCCATTGTAATTCT

>PGSC0003DMG400002045-(rev)RLKantifungi(GNK)\_1674

ACGGAAATCCAGAAAAGAAGTACTAATTATTTGTGTAGTGGTTGCCATTGTAATTCTTTTGTCTACTA  
TCAACTGGAGTCTTTCATTTGCTACTAAGGAGAAGAAGGATGAAAAGAA

>PGSC0003DMG400002045-(rev)RLKantifungi(GNK)\_1922

CTTAGTGAGATTTTAACTGCTGAATCATTGCAATATGACTTTAGTACAATTGAAGCTGCCACTAACTTCTT  
TTCTATGGAAAACAAAATTGGCGTTGGTGGATTTGGTGATGTGTATAAG

>PGSC0003DMG400002045-(rev)RLKantifungi(GNK)\_1984

TAACTTCTTTTCTATGGAAAACAAAATTGGCGTTGGTGGATTTGGTGATGTGTATAAGGTAACATGTTCA  
TATTAGACCATATAATATTTTTTTAGATATAAGTTATATATACTGACAAT

>PGSC0003DMG400002045-(rev)RLKantifungi(GNK)\_2046

CATGTTCATATTAGACCATATAATATTTTTTTAGATATAAGTTATATATACTGACAATGTAAAAATTTTTTA  
CACGATCATCAGGGGGAACCTTGATAATGGACAAGAGATAGCTGTAAAG

>PGSC0003DMG400002045-(rev)RLKantifungi(GNK)\_2108

AAATTTTTTACACGATCATCAGGGGGAACCTTGATAATGGACAAGAGATAGCTGTAAAGAGGCTATCAAG  
AAGGTCAAGTCAAGGTGTTGAAGAATTTAAGAATGAAGTTGACTTGTCGC

>PGSC0003DMG400002045-(rev)RLKantifungi(GNK)\_2170

TATCAAGAAGGTCAAGTCAAGGTGTTGAAGAATTTAAGAATGAAGTTGACTTGTCGCTAAGCTTCAAC

ATAGAAATTTAGTAAGACTCTTAGGTTTTTGCTTGGGAAGGAGAAGAAAAA

>PGSC0003DMG400002045-(rev)RLKantifungi(GNK)\_2294

CATCTACGAGTTCGTGTCCAACAAAAGCCTCGACTATTTCTTATTTGGTACGCTTGTTTATACGTCTCACTT  
TTCTTTTAAATTAGATTGTTATATAGAGCATTCTCTAATTTCAATGT

>PGSC0003DMG400002045-(rev)RLKantifungi(GNK)\_2356

CGTCTCACTTTTCTTTTAAATTAGATTGTTATATAGAGCATTCTCTAATTTCAATGTCTCGCGTGATATGA  
TTAAGATACGAAGAAACAAGCAACGTTGGATTGGTCAGTACGTGACAA

>PGSC0003DMG400002045-(rev)RLKantifungi(GNK)\_2418

CGTGATATGATTAAGATACGAAGAAACAAGCAACGTTGGATTGGTCAGTACGTGACAAGATTATTAAG  
GAATAGTACGAGGATTAGTTTATCTCCATGAAGATTCTCGTCCTCGAATCA

>PGSC0003DMG400002045-(rev)RLKantifungi(GNK)\_248

CATGTGTCGAGGTGATATGTTAAGTGTAATTGTCAAGATTTTGTAAACAAGAGCTGTTAAAGATATAATC  
TTGTTATGCCCGGTAGCAAACGGCTGTATTATGGTGGGATGATTGCAT

>PGSC0003DMG400002045-(rev)RLKantifungi(GNK)\_2480

ATTAAGGAATAGTACGAGGATTAGTTTATCTCCATGAAGATTCTCGTCCTCGAATCATAACATCGTGATC  
TCAAAGCAAGTAATATTTTGTAGACAAAGATATGAACCCTAAAATTTCA

>PGSC0003DMG400002045-(rev)RLKantifungi(GNK)\_2604

TTGGCATGGCTAGAATATTTGGAGTTGACCAAATTGAAGGAAGCACTAACATAATTGTTGGAACATAGT  
AAGTGTGGTTTTTCTAAATAAAAACTTTTTTTTTGTGAATCGATTTCGTTA

>PGSC0003DMG400002045-(rev)RLKantifungi(GNK)\_2666

ACATAGTAAGTGTGGTTTTTCTAAATAAAAACTTTTTTTTTGTGAATCGATTTCGTTATAGTATAGAAAAA  
TGTTAATTATTGTGATTTATTGTTCTTTTGTAGCGGCTATATGTCCCC

>PGSC0003DMG400002045-(rev)RLKantifungi(GNK)\_2728

ATAGAAAATGTTAATTATTGTGATTTATTGTTCTTTTGTAGCGGCTATATGTCCCCGGAGTATGCAATG  
CATGGTCAATTCTCAGTGAAATCAGATGTTTTTAGTTTTGGTGTGCTTC

>PGSC0003DMG400002045-(rev)RLKantifungi(GNK)\_2852

GGAGATAATAAGTGGAAAAAAGAAATAATAAAGAAGATAAATTTGATGACCTTCTTATCCATGTAAG  
TGCAAGTTAATTTAATTAACAATATACAATATAGTTATCCTAATTAATTAG

>PGSC0003DMG400002045-(rev)RLKantifungi(GNK)\_2914

ATGTAAGTGCAAGTTAATTTAATTAACAATATACAATATAGTTATCCTAATTAATTAGCATGATTATAATT  
AATTATGTTGATATTTATAGGCATGGAGGTTGTGGAAAGATGGTAGAGC

>PGSC0003DMG400002045-(rev)RLKantifungi(GNK)\_2976

ATTATAATTAATTATGTTGATATTTATAGGCATGGAGGTTGTGGAAAGATGGTAGAGCAATGGAAATTG  
TTGATCCAACCTCTTATTGGTGACTCAAATTCATGTGCGAAAATCATGAGAT

>PGSC0003DMG400002045-(rev)RLKantifungi(GNK)\_310

ATATAATCTTGTTATGCCCCGGTAGCAAACGGCTGTATTATGGTGGGATGATTGCATGCTACGTTACTC  
GAATCAATCAATATTCCCCGATCCAACTATGGATCCACAATTAACAATC

>PGSC0003DMG400002045-(rev)RLKantifungi(GNK)\_3100

ACATATTGGATTGTTATGTGTTCAAATTGATTTGGATGGAAGACCTACAACCTTTGATATCTCATATTC  
TCGATACTAATTCTGCTATTCTACCAGAGCCAAATCAACCAGCGTCTTT

>PGSC0003DMG400002045-(rev)RLKantifungi(GNK)\_3162

CTCATATTCTCGATACTAATTCTGCTATTCTACCAGAGCCAAATCAACCAGCGTCTTTTAAGGATTATTCTA  
GATTAAGAAATATCGATCAACTCACAAGTAATTCCATTCTGTCATCTA

>PGSC0003DMG400002045-(rev)RLKantifungi(GNK)\_3200

CCAAATCAACCAGCGTCTTTTAAGGATTATTCTAGATTAAGAAATATCGATCAACTCACAAGTAATTCCAT  
TCTGTCATCTAGTTTTGAGGAATTAATTACGGAAATCTACCCAAGATAG

>PGSC0003DMG400002045-(rev)RLKantifungi(GNK)\_372

CGTTACTCGAATCAATCAATATTCCCCGATCCAACTATGGATCCACAATTAACAATCCATCTACACCTTT  
TGTTATATATAACTATTCCAATTACCAATAATGAACATGAACAAAGA

>PGSC0003DMG400002045-(rev)RLKantifungi(GNK)\_434

TACACCTTTTGTTATATATAACTATTCCAATTACCAATAATGAACATGAACAAAGAAGGTTCAAACAG  
ATTCTAGGGAGAATTATGAATAACGTAACGGCACAGGCTGCCAGTGATGA

>PGSC0003DMG400002045-(rev)RLKantifungi(GNK)\_496

TCAAACAGATTCTAGGGAGAATTATGAATAACGTAACGGCACAGGCTGCCAGTGATGATCGATCGGTA  
GACAAGAAAATTGCAATTAGGGAAGCTAAGTTCAGTGCTAACACAACAATTT

>PGSC0003DMG400002045-(rev)RLKantifungi(GNK)\_558

TCGGTAGACAAGAAAATTGCAATTAGGGAAGCTAAGTTCAGTGCTAACACAACAATTTATGCCTTAGCT  
CAATGCATTCTCATATGTCTTCTAAAGATTGCCTAAATTGCTTTGAAAAT

>PGSC0003DMG400002045-(rev)RLKantifungi(GNK)\_62

AACATTAGCTCTTGATGACTATTACTGCCAGACACACTACTTATAACAATATAACAAACACCTCTT  
ACAATTCCAACCTCAATTTGCTACTATCAAATCTTTCTTCTGCCTCTAG

>PGSC0003DMG400002045-(rev)RLKantifungi(GNK)\_620

CTTAGCTCAATGCATTCCTCATATGTCTTCTAAAGATTGCCTAAATTGCTTTGAAAATGCCATCGAAGTTT  
TAAACAGGTGTTGTGATGGTTATAGAGGTGCTAGAGTTCAATTTCTAG

>PGSC0003DMG400002045-(rev)RLKantifungi(GNK)\_682

TCGAAGTTTTTAAACAGGTGTTGTGATGGTTATAGAGGTGCTAGAGTTCAATTTCTAGTTGTTTTATGAG  
GCATGAAGTGTACCACTTCTACAATAATGCTAAGCCACCTGCTTTGTCCC

>PGSC0003DMG400002118LRR-RLPs\_2480

CAGTGAGCAATCTATAATGTATTCAATGCTGGTCCCATGGATATCATTGTATATGGTTCAGTACAGAGA  
TTGTTTTTTTTCCAGCAAAGCAATCTAGAAGACAAATGTTCTCTGTATCAG

>PGSC0003DMG400002118LRR-RLPs\_2542

TACAGAGATTGTTTTTTTTCCAGCAAAGCAATCTAGAAGACAAATGTTCTCTGTATCAGTAATCTTTTCTAT  
TCACTTTCTTCTCTTCATATTCATGGAGCCTTGAATTAGTAAGTGGAGT

>PGSC0003DMG400002118LRR-RLPs\_2604

CTTTTCTATTCACTTTCTTCTCTTCATATTCATGGAGCCTTGAATTAGTAAGTGGAGTCATTGGTAAGGCC  
ACAGCAAGGGTAGATGTTCCAAGCTGCACGGTGGCTGATCAAATTGCAG

>PGSC0003DMG400002118LRR-RLPs\_2666

GGTAAGGCCACAGCAAGGGTAGATGTTCCAAGCTGCACGGTGGCTGATCAAATTGCAGCTCAATGAGA  
TTTCTCAAAGGCTTTTCGGCAGAACCAACACTTGTGGAAACACCTGCATGCTC

>PGSC0003DMG400002118LRR-RLPs\_3224

CCATTTATGAGTCTTATCCTCTATTACCTTTCCAGCTGATGAACGGCCCTTCTCTGTCTCATCTCTTGTATCT  
GAAAGAGCCAAGAGCAGGGAGTAGACTGTAGTAGTGAAAGTATAGA

>PGSC0003DMG400002118LRR-RLPs\_3286

CTCTTGATCTGAAAGAGCCAAGAGCAGGGAGTAGACTGTAGTAGTGAAAGTATAGATGGATACTAC  
AGCACACCCCTTAATTTTTAGCTGATGCCAACTTTATCATTATTCTTTTGGGA

>PGSC0003DMG400002118LRR-RLPs\_3348

TACTACAGCACACCCCTTAATTTTTAGCTGATGCCAACTTTATCATTATTCTTTTGGATAACAGTCTTGAGG

AGCCTGTTGTGTTATCCTGTTTACTTTTCATATGCTGCTGCTGCCTCT

>PGSC0003DMG400002426LRR-RLPs\_1798

AGTATTCATATTTCAAAGATATATATACATACTCTGTTCCCTCTAGCTTCATATACTCTAACTAATATTTG

TACCTTAAATTTTGTTCGTGGTGCTAACTCTTCAAGAACTTCAAGTG

>PGSC0003DMG400002426LRR-RLPs\_1860

CTAATATTTGTACCTTAAATTTTGTTCGTGGTGCTAACTCTTCAAGAACTTCAAGTGTAATAATAAATAT

AATATAAACATACATGACAAAAATAGCATTGGGGGTAGACCGGTAGA

>PGSC0003DMG400002426LRR-RLPs\_1922

AATAAATATAATATAAACATACATGACAAAAATAGCATTGGGGGTAGACCGGTAGAGTAAGAAAGT

AATGATATTGATAAGTGAATTGGACAAGAGGTGGCTATATGTGAAGTTGTGA

>PGSC0003DMG400002426LRR-RLPs\_2418

TTTGATTCTTGTGTTTAAATGAAAATAAGTTATTAATTCCATAAACTCAAATAATAGTTTCTGAGCATGT

AATTTCCATAGAAAGTAGTAAAATAAATACGTTGAGTTATAATATAAAC

>PGSC0003DMG400002426LRR-RLPs\_4712

CACTTGCTCCTCTTCTAAGAAACAAAGGCAACTCTTCCACAAGCTCGGGATTATAGATTAAATATAGG

TATATACCTCATGAAATTGTGTTCTCTGTTTATATATAAATTATTTCTTC

>PGSC0003DMG400002426LRR-RLPs\_4774

AATATAGGTATATACCTCATGAAATTGTGTTCTCTGTTTATATATAAATTATTTCTTCTCATTCTTTCTTCTA

TTGGGAATAGGTGATGTACGTATCAGTAATCAGCAGCGAGTTTGGGG

>PGSC0003DMG400002426LRR-RLPs\_4836

TCTTTCTTCTATTGGGAATAGGTGATGTACGTATCAGTAATCAGCAGCGAGTTTGGGGACACTGCCTATG

AAGGGACATGTACGTACAATTTTGGGTGGCAAAAATTCATTCTTTTTATA

>PGSC0003DMG400002426LRR-RLPs\_4898

TGCCTATGAAGGGACATGTACGTACAATTTTGGGTGGCAAAAATTCATTCTTTTTATATTTCAATTCGAAA

TATAATCACATTTTCCATTTCTGACAAATAGATAAATTGCAGAAGCTT

>PGSC0003DMG400002426LRR-RLPs\_5022

ATCCAATGGAGCTCAAATAATTTCTCCCAACCATCAAGTTCTACTGAAGTTGCATAGTCTCCGTTGATAT

CTACTGTAAAATGTTACATTCTTATTCTATTTAATAAGTGCAAGAAAC

>PGSC0003DMG400002426LRR-RLPs\_5084

CGTTGATATCTACTGTAAAATGTTACATTCTTATTCTATTTTAATAAGTGCAAGAAACACATTTGATTAATC  
ATCTCTAAAATTAATGTAATCTAATTAGCAAAGAACACTGCTATATAA

>PGSC0003DMG400002426LRR-RLPs\_5146

TTGATTAATCATCTCTAAAATTAATGTAATCTAATTAGCAAAGAACACTGCTATATAATTGAACCCCTCCC  
TATCCTCATTCTTGTTC AATGTATTGCCAATGTCGAGCACGAAACGAT

>PGSC0003DMG400002426LRR-RLPs\_5270

CACATCCGATTTCAAAGACGTTCCAACGTTGTGTTCCATAGTCCATTGGCACAACCTCAATATTTGGTG  
TTATGTTATGCTTTGCCGAAAATCCAACATTTCTTGAGTCTTCATCCC

>PGSC0003DMG400002478-(rev)LRR-RLPs\_0

CTTCCACTTGATTTGAGACAATGCTTTGAGTATTGTGCGGTATTCCCAAAGGACACCGAAATGGAAAAAC  
AAAACCTTATCTCTCTTTGGATGGCGCATGGTTTTCTTTTATCGAAAGGA

>PGSC0003DMG400002478-(rev)LRR-RLPs\_1054

AAAGTCTAGAGTTACAGTTGGGACCTGCGGAGTATGTTGAAGAAGTGGATATTGATATTCATTCTGGAT  
TCCCCACAAGAATAAGGTTTCCATCCCTGAGAAAACCTTGCATAAAATATT

>PGSC0003DMG400002478-(rev)LRR-RLPs\_1116

TCTGGATTCCCCACAAGAATAAGGTTTCCATCCCTGAGAAAACCTTGCATAAAATATTTTCGTAATCTAAA  
AGGATTGCTGAAAAGGGGAGGAGAAGAGCAATTCCTGTGCTTAAAGAG

>PGSC0003DMG400002478-(rev)LRR-RLPs\_1178

TAATCTAAAAGGATTGCTGAAAAGGGGAGGAGAAGAGCAATTCCTGTGCTTAAAGAGATGGAGATTT  
GCTATTGCCCTATTCCGACCCTTCTTCTGATCTTAGGACTCTTACTTCCCT

>PGSC0003DMG400002478-(rev)LRR-RLPs\_124

TGGAGCTAGAGGATGTGGGTAATGAAGTATGGAGAGAATTATACTCGAGGTCTTTTTTCCAAGAGATTG  
AAGTTAAAGATGGTCAAACCTATTTCAAGATGCATGATCTCATCCATGATT

>PGSC0003DMG400002478-(rev)LRR-RLPs\_1302

ATTAGGGATAACGAAGAAGCTACTTCACTCCCAGAAGAGATGTTCAAAAACCTTCTTAGGACTCTTACTA  
CCCGCAATATTAGGGAAAGCGAAGAAGCTACTTCACTCCCAGAAGAGATG

>PGSC0003DMG400002478-(rev)LRR-RLPs\_1364

TCTTACTACCCGCAATATTAGGGAAAGCGAAGAAGCTACTTCACTCCCAGAAGAGATGTTCAAAAACCTT  
GCAAATCTCAAAGACTTGAAAATCTCTAACTTCAAGAATCTCAGAGAGCT



>PGSC0003DMG400002478-(rev)LRR-RLPs\_1426

AAACCTTGCAAATCTCAAAGACTTGAAAATCTCTAACTTCAAGAATCTCAGAGAGCTGCCTACCAGCCT  
GGCTAGTCTCAATGCTTTGAAGAGTCTGAAAATTCATATGTGTGACGCAC

>PGSC0003DMG400002478-(rev)LRR-RLPs\_1488

ACCAGCCTGGCTAGTCTCAATGCTTTGAAGAGTCTGAAAATTCATATGTGTGACGCACTAGAGAGTCTCC  
CAGAGGAAGGGGTGAAAGGTTTAACTTCACTCACTGAGTTGTATGTCTGT

>PGSC0003DMG400002478-(rev)LRR-RLPs\_1550

GAGTCTCCAGAGGAAGGGGTGAAAGGTTTAACTTCACTCACTGAGTTGTATGTCTGTTACTGTAAGAT  
GCTAAAACGTTTACCTGAGGGATTGCAACACCTAACAACCCTCACAAATTT

>PGSC0003DMG400002478-(rev)LRR-RLPs\_1612

GTAAGATGCTAAAACGTTTACCTGAGGGATTGCAACACCTAACAACCCTCACAAATTTAGGAATTTGGG  
GATGTCCAGAAGTGGAAAAGCGGTGCGAGAAGGGAATTGGAGAAGACTGGC

>PGSC0003DMG400002478-(rev)LRR-RLPs\_1736

AATTGCACACATTCCGTATCTGAAAATATATTCCTAAGTATTATTTGTAATTGTTTCTTTGTTTGTGAGTCT  
TTTTGGTTCCTGCCAGTGGATGTCATTTTTCTAGGGTTGTCTGTTTG

>PGSC0003DMG400002478-(rev)LRR-RLPs\_1798

TTGTGAGTCTTTTTGGTTCCTGCCAGTGGATGTCATTTTTCTAGGGTTGTCTGTTTGTGAGTCTCTCTCT  
TGGATGTAATTTCTTTTGAAACAAATCAACAATCTATTTGTATTAT

>PGSC0003DMG400002478-(rev)LRR-RLPs\_1852

TTTGTGAGTCTCTCTCTTTGGATGTAATTTCTTTTGAAACAAATCAACAATCTATTTGTATTATACGCTT  
TCAGAATCTATTACTTCTTATTTGTAATGGTGAGTATCTCTGTTTCCT

>PGSC0003DMG400002478-(rev)LRR-RLPs\_186

GAGATTGAAGTTAAAGATGGTCAAACCTATTTCAAGATGCATGATCTCATCCATGATTTGGCTACATCTC  
TGTTTTAGCAAACACATCAAGCAGAAATATCCGCGAAATAAATATGATG

>PGSC0003DMG400002478-(rev)LRR-RLPs\_248

TACATCTCTGTTTTAGCAAACACATCAAGCAGAAATATCCGCGAAATAAATATGATGATGTCCATTGGT  
TTCGCTAAATCGGTGTCTTCTTACTCTCCTTCTCTTTCGAAAAGTTTGT

>PGSC0003DMG400002478-(rev)LRR-RLPs\_310

CCATTGGTTTCGCTAAATCGGTGTCTTCTTACTCTCCTTCTCTTTCGAAAAGTTTGTCTCGTTGAGGGTGC

TTAATCTGAGTCGCATAGGAAATGAACAGTTACCATCTTCCATTGGAG

>PGSC0003DMG400002478-(rev)LRR-RLPs\_372

TTGAGGGTGCTTAATCTGAGTCGCATAGGAAATGAACAGTTACCATCTTCCATTGGAGATCTAGTACATT

TAAGATACTTGAACCTCTCTCGCAATAACATGTGTAGTCTTCCAAAGCAG

>PGSC0003DMG400002478-(rev)LRR-RLPs\_434

AGTACATTTAAGATACTTGAACCTCTCTCGCAATAACATGTGTAGTCTTCCAAAGCAGTTATGCAAGCTTC

AAAATATGCAAACTCTTGATTTACAATATTGCACCAGACTTTTGTTGTTT

>PGSC0003DMG400002478-(rev)LRR-RLPs\_62

GGAAAAACAAAACCTTATCTCTCTTTGGATGGCGCATGGTTTTCTTTTATCGAAAGGAAACATGGAGCTA

GAGGATGTGGGTAATGAAGTATGGAGAGAATTATACTCGAGGTCTTTTTT

>PGSC0003DMG400002478-(rev)LRR-RLPs\_682

GCGAGAGGAAAGGTTATCAACTTGGTGAACCTAAGAAACCTAAATCTCTATGGCTCAATTAATCTGGC

ATCTTGAGAGAGTGAAGAATGATAAGGATGCAAAGAAGCCAATTTATCTG

>PGSC0003DMG400002478-(rev)LRR-RLPs\_744

ATCTGGCATCTTGAGAGAGTGAAGAATGATAAGGATGCAAAGAAGCCAATTTATCTGCAAAGGGAA

TCTGCATTCTTTAATCATGAGTTGGGACAGCGGACCACATAGATATGAATCA

>PGSC0003DMG400002478-(rev)LRR-RLPs\_806

AGGGAATCTGCATTCTTTAATCATGAGTTGGGACAGCGGACCACATAGATATGAATCAGAAGAAGTTAA

AGTGCTTGAAGCCCTCAAACCACACCCCAATCTGAAATATTTAGAAATCAA

>PGSC0003DMG400002478-(rev)LRR-RLPs\_868

AAGTTAAAGTGCTTGAAGCCCTCAAACCACACCCCAATCTGAAATATTTAGAAATCAATAGCTTCAGAGG

ATTCCGTCTCCAGACTGGATGAATCACTCAGTTTTGAAAAATATTGTCT

>PGSC0003DMG400002478-(rev)LRR-RLPs\_930

TTCAGAGGATTCCGTCTCCAGACTGGATGAATCACTCAGTTTTGAAAAATATTGTCTCTATTGTAATTTA

CGACTGCAGAACTGCTCGTGCTTACCACCCCTTGGTGATCTGCCTTGT

>PGSC0003DMG400002526LysMRLKs\_0

TTTTCCCTTTTTGGTTGATTTTGCAGTCTCACAGAGTAATTGTTATTAGTAGTAATAAGTTTCACTAAAAG

ACCTTGTTTTAGCCATTACAGGACAATAAACCCCAACCCCAACCC

>PGSC0003DMG400002526LysMRLKs\_122

CAAAATGTTCTGTTCTTGGTTCTCTGCTATTCCCATCTCCCTTTCTTCTCTTGAGATTCAACTCTTTGCAAA  
TTTTTTTCATGTTTTCTTTAAGTTTCCATGACCCGTTTCACTAAAT

>PGSC0003DMG400002526LysMRLKs\_1464

AACAATGTTTCGAAAACATCTAAAAATCTCTACACTTTTTGCACTAAATAGTGAAAAGTTGATTGAAGTGG  
ATGTAATGGGAATTAGCTTGGCACCCCTTGGGGGATGGCCAAAATCAAGTG

>PGSC0003DMG400002526LysMRLKs\_183

ACTCTTTGCAAATTTTTTCATGTTTTCTTTAAGTTTCCATGACCCGTTTCACTAAATCTATCAAAGATTCA  
ATCTTTAATAACAATGGATCATATAACAATCAACATTTCTTGCAATAAT

>PGSC0003DMG400002526LysMRLKs\_1891

ATTATCTTCATTTACTCATAGTCAATAGCTTTTCTAATAAGCCTCTTTTGGTTAAAAGTACTTTACTTTAAC  
GACTTTATGTCCGTCCAGCTCCTGGCGAGCCTTATCCTGTAGAAAATC

>PGSC0003DMG400002526LysMRLKs\_1952

TTTACTTTAACGACTTTATGTCCGTCCAGCTCCTGGCGAGCCTTATCCTGTAGAAAATCACACTGTTCTCG  
CTGCTGCTCCATCACCTTCTGTTGCTGATATTTCAAGTATTCTCAATTC

>PGSC0003DMG400002526LysMRLKs\_2013

ACTGTTCTGCTGCTGCTCCATCACCTTCTGTTGCTGATATTTCAAGTATTCTCAATTCTTAATAGCTTACA  
TGCATTCTACTTTCTGTTGGTGAGATATGTGTTTTCTTTATTAAT

>PGSC0003DMG400002526LysMRLKs\_2135

CACCCTAGGAAGACCAATAAATTTAACTTCTACTCATGGCTTGTCAAGTTTTTGTGTCCTCCTTTCTGTTAG  
TAGTTCCTTGCGAGGGCAGTGTCTCCATAAATTTCTCTCAGTGGAACG

>PGSC0003DMG400002526LysMRLKs\_2867

TCCTCAATTCATCTATGCAGTAACCTTGTAATTCATTTAATAGTTCTCCTTTCAATGTTGTTGCTACTGCTC  
CTTTCCCCGTGAGTTTCATACCTGATTTGATATGCTTTACTTTAGCCA

>PGSC0003DMG400002526LysMRLKs\_4087

GCCCTTGAACCTTGAGTTTCACGAGAATGGATGTCTAAACAGTAAACATGATGTAGTTATAGCCGTCCTAT  
GTTGCTTAGACTCTCCAAAATGTTGCCGCACCCGTGTTGAATCCTCAAAA

>PGSC0003DMG400002526LysMRLKs\_4392

GTGCTCATAATGGGGGAAAATGTAGTTTCACTATCATGCAGGATTTCTCAATATAATAATTGACTATTCTT  
TTTTTTTTTTTTAAAAAAAACAAAACAAAAACTGACTATTTTGGGCTT

>PGSC0003DMG400002526LysMRLKs\_4453

GACTATTCTTTTTTTTTTTTTTAAAAAAAACAAAACAAAACACTGACTATTTTGGGCTTCCTTGACAGTTATA  
GGTACTGATGTCTTTGACATGGAAAAACCTCTTGTTTTCGCCTATGAA

>PGSC0003DMG400002526LysMRLKs\_5002

CGTTTATGAATATGCCAGAAGGGTTCTCTTAAGAGCCACTTGAATGATCCTCAGAACAAAGGTACACAT  
CTTGAAGATAATCATTAAAGCTCAGAATTTTTGTGTAGTGTATATATACAT

>PGSC0003DMG400002526LysMRLKs\_5307

ATCGAGATATAAAGACAAGTAACATCCTGCTTGATGATTCTTTTAGAGCAAAGGTTGTAGCTATTTTGGT  
GCTGAATTTTTCTCCTTTGTGGCTGCCATTTTTCAAACCCAAATTCTCAT

>PGSC0003DMG400002526LysMRLKs\_5368

TATTTTGGTGCTGAATTTTTCTCCTTTGTGGCTGCCATTTTTCAAACCCAAATTCTCATTGCCTATGTTTGC  
AACAGATTTTCAAGATTTTGGTTTGTCAAACTTATGGGGATAACTAATG

>PGSC0003DMG400002526LysMRLKs\_5490

GCAGAAGCCTCTGCAACACGAGTTGTTGGAACCTATGGCTATGTAGCTCCAGAGTAAGCAACTTAACCA  
ACAATAAGCAAGAACACAAACTGAAACATCTCTCTGATTTTGTGGTTTCC

>PGSC0003DMG400002526LysMRLKs\_5551

CTTAACCAACAATAAGCAAGAACACAAACTGAAACATCTCTCTGATTTTGTGGTTTCCCTTGTTCTTGCA  
GGTACTTGAGGGATGGCCTGGCAACTAAAAGACTGATGTGTATGCATT

>PGSC0003DMG400002526LysMRLKs\_61

TCACTAAAAGACCTTGTTTTAGCCATTACAGGACAACCTAAACCCCCACCCCCAAACCCACAAAATGTTCC  
TGTTCTTGTTCTCTGCTATTCCCATCTCCCTTTCTTCTCTTGAGATT

>PGSC0003DMG400002526LysMRLKs\_6100

GTACCTACAGTGTGTGCTGTGGCTATGTATAGGTATACTTATGCATAACATATATATATATATATATATA  
TATATTTACTTATATGCACACTATGAATCAATTCTTAGCAGTGCTTA

>PGSC0003DMG400002526LysMRLKs\_6161

TATATATATATATATTTACTTATATGCACACTATGAATCAATTCTTAGCAGTGCTTAATGCTACATAATT  
GCAGATGCTGGCAGCTCTGAGGAACTCACCAGACTCCACTAGTATGAC

>PGSC0003DMG400002526LysMRLKs\_6771

GTCCATATGCTAGGTGTTGCCTTGCATCCTCATATATAATGTACATAGTACTCTTGATTTTTGAAGCCAA

TCTTCTCCATTTTACCAGTCCAGTCACTTTTTTCTACATTCTTTATAA

>PGSC0003DMG400002526LysMRLKs\_6832

TTGAAGCCAATCTTCTCCATTTTACCAGTCCAGTCACTTTTTTCTACATTCTTTATAATGTTATCTTTTTTA

TGCACCGAGTAATCTCCATATAGCGAATTTTTTCTCTTTTTTTCTT

>PGSC0003DMG400002602-(rev)RLKmalectin\_0

ATGATGAAAGACTTGATTTTTATCTTTCTAATTCTCTTGCACCTGAAGCTAACGCCCAAATTGATGAATC

AGGTATATATAATTTTGTCTTTCAACACATTTTTATTTTTTTGTTTCATTC

>PGSC0003DMG400002602-(rev)RLKmalectin\_1037

ATTACATCTACCTGCACTTTGCGGAGATTGAAGCCAACCATGTGAATAGACAATTTCGACATATATTTAGA

TGGAGAATTGTTTCAGACAGCATATGCTCCTTCTATTTGTCCTCAAACA

>PGSC0003DMG400002602-(rev)RLKmalectin\_1098

ATATTTAGATGGAGAATTGTTTCAGACAGCATATGCTCCTTCTATTTGTCCTCAAACACAATTTATTCAG

GAGTGCCTATTACGCCAAGAAATACGCACCAAATTACCCTCAATAAAAC

>PGSC0003DMG400002602-(rev)RLKmalectin\_1159

ATTTATTCAGGAGTGCCTATTACGCCAAGAAATACGCACCAAATTACCCTCAATAAAACGGGAAATTCGA

TCCGTCAACCCACCATCAATGCCATAGAGATTTATAAAGTGGTCAAACAA

>PGSC0003DMG400002602-(rev)RLKmalectin\_122

TGTATGATTCTTAATTGAATGATATACTTCTAATATTCTCTCAGGATTCGTAAGCATAGACTGTGGAATTC

CTCAAGGTACCGACTACACCGATATAGCTACTGGACTACAATATGTATC

>PGSC0003DMG400002602-(rev)RLKmalectin\_1220

GAAATTCGATCCGTCAACCCACCATCAATGCCATAGAGATTTATAAAGTGGTCAAACAAATCATAACCAC

TCAAACGAATGACCTAGATGGTAATTAAGTTTCTCTTCATTTATTTTTTT

>PGSC0003DMG400002602-(rev)RLKmalectin\_1281

CATAACCACTCAAACGAATGACCTAGATGGTAATTAAGTTTCTCTTCATTTATTTTTTTGTGATTATATATA

TCACCTGAATTGGTCGAATCTTTTTTTGATCCACTGTTTTCTAAAATC

>PGSC0003DMG400002602-(rev)RLKmalectin\_1342

GATTATATATATCACCTGAATTGGTCGAATCTTTTTTTGATCCACTGTTTTCTAAAATCATTTTATTTTGAA

AAGTAGAAATAGTTTGTCTTTCACCACAGAAATTTAAAAAACACTTTC

>PGSC0003DMG400002602-(rev)RLKmalectin\_1403

TTTATTTTGAAAAGTAGAAATAGTTTGTCTTTCACCCACAGAAATTTAAAAAACACTTTCGAGCAACAATTA  
GTGTTTGATCAAACCTTTTAAAAAGTGTTTTTAACTTCTGAAAAACAGT

>PGSC0003DMG400002602-(rev)RLKmalectin\_1464

GCAACAATTAGTGTTTGATCAAACCTTTTAAAAAGTGTTTTTAACTTCTGAAAAACAGTTTCTGTTGCTCT  
CTAAAATGACTTATTTTCTCCCAAAGCTTGACCAAACACTCACTTTTT

>PGSC0003DMG400002602-(rev)RLKmalectin\_1525

CTGTTGCTCTCTAAAATGACTTATTTTCTCCCAAAGCTTGACCAAACACTCACTTTTTAAAAATTACTACT  
ATTTTTGACTCCCAAACCTTGGTCAAACAAGCTATAATTTGGACTAT

>PGSC0003DMG400002602-(rev)RLKmalectin\_1586

AAATTACTACTATTTTTGACTCCCAAACCTTGGTCAAACAAGCTATAATTTGGACTATGCCCAAAGTTTG  
GATGATTTGAAAGGGTTATATATCGATGGATCACTAACATTTATTTTTG

>PGSC0003DMG400002602-(rev)RLKmalectin\_1647

CCAAAGTTTGGATGATTTGAAAGGGTTATATATCGATGGATCACTAACATTTATTTTTGCTATTAGTCGA  
GGCTATTATGAATGTCAAATCGACGTATGAGGTTAAGAAGAACTGGCAAG

>PGSC0003DMG400002602-(rev)RLKmalectin\_1708

ATTAGTCGAGGCTATTATGAATGTCAAATCGACGTATGAGGTTAAGAAGAACTGGCAAGGAGATCCATG  
CGGCCCTAAAGCTGATATTTGGAATGGTGCTCACTTGCAATTTTGATGGGCA

>PGSC0003DMG400002602-(rev)RLKmalectin\_1769

GATCCATGCGGCCCTAAAGCTGATATTTGGAATGGTGCTCACTTGCAATTTTGATGGGCAGCTCCCCACAA  
TTATATCCTTGATTTTCTTATACTCTCAAATTTCTTCATTATAAACAT

>PGSC0003DMG400002602-(rev)RLKmalectin\_183

TGTGGAATTCCTCAAGGTACCGACTACACCGATATAGCTACTGGACTACAATATGTATCCGATTCAGGCT  
TCATCGATACGGGTAGTAATGCTTTTATCTCGAGTGAGTTCCAGGCCGAT

>PGSC0003DMG400002602-(rev)RLKmalectin\_1830

TCCCCACAATTATATCCTTGATTTTCTTATACTCTCAAATTTCTTCATTATAAACATGTTTCTTCTAATTT  
GTTTTGGAGAATGAACTAACTTATAGTTAATTTGTTGAGTAGAAA

>PGSC0003DMG400002602-(rev)RLKmalectin\_1891

TTCTTCTAATTTGTTTTGGAGAATGAACTAACTTATAGTTAATTTGTTGAGTAGAACTTATCTTCAAGT  
GAATTACAAGGGACATTATCGCCTTTTATTACAAGTCTCACAATCTA

>PGSC0003DMG400002602-(rev)RLKmalectin\_1952

TATCTTCAAGTGAATTACAAGGGACATTATCGCCTTTTATTACAAGTCTCACAAATCTAGAAACGTTGTAA  
GTATATAAATACTCACTATAAGCTTTATCACTTGTACCAAACACTAGAAAA

>PGSC0003DMG400002602-(rev)RLKmalectin\_2013

AACGTTGTAAGTATATAAATACTCACTATAAGCTTTATCACTTGTACCAAACACTAGAAAATGAAGAGCCTTT  
TCAGAGAAATGAGTACAAATATAATGTTTTTTTTTAAAAAAAAAATAAAAA

>PGSC0003DMG400002602-(rev)RLKmalectin\_2074

AAGAGCCTTTTCAGAGAAATGAGTACAAATATAATGTTTTTTTTTAAAAAAAAAATAAAAAAAATTGTACA  
TGTTGTACCTTGTGTTTCACAAATTTAGTGAGTTAATAACTTTGATGGT

>PGSC0003DMG400002602-(rev)RLKmalectin\_244

ATTCAGGCTTCATCGATACGGGTAGTAATGCTTTTATCTCGAGTGAGTTCCAGGCCGATGGCCTGGAACA  
ACAGTTGTACACCCTCACAAGTTTTCTGAAGGAAAACGAAATTGCTACA

>PGSC0003DMG400002602-(rev)RLKmalectin\_2440

CATTCTCTGTTTCCTTCTTTCTCCGGAGCGTTCTTCTTTTCTTTTCTTTTCTTTTAAATTTCTCAATTTCAA  
AGAGCAAAAGCAGGACATCTTGCAATCCTCTTATAATGTATAGCA

>PGSC0003DMG400002602-(rev)RLKmalectin\_2501

TTCTCAATTTCAAAGAGCAAAGCAGGACATCTTGCAATCCTCTTATAATGTATAGCAATTTAAAAAAG  
TTTTGCCGTCTTAGAAATTTCCATTGAAATCGTAACCTAAGAGATTGTTG

>PGSC0003DMG400002602-(rev)RLKmalectin\_2562

TTAAAAAAGTTTTGCCGTCTTAGAAATTTCCATTGAAATCGTAACCTAAGAGATTGTTGTAATTTTATTG  
TTTTGAAGTTGGGAAAACAATAATTTGATCCTTAGGGATAACAGAGGG

>PGSC0003DMG400002602-(rev)RLKmalectin\_2623

ATTTTTATTGTTTTGAAGTTGGGAAAACAATAATTTGATCCTTAGGGATAACAGAGGGGTTATGGAAAC  
TACAAAAAATAAAAAACAGAGAGGTTGATATATTATTGATATGTGAAGA

>PGSC0003DMG400002602-(rev)RLKmalectin\_2684

TATGGAAACTACAAAAAATAAAAAACAGAGAGGTTGATATATTATTGATATGTGAAGAAAAGGTTGAA  
GAAGAAGAACGCTTAGGAGAAAGAAGGAGACAAGAGAGAATGATTTAGGGA

>PGSC0003DMG400002602-(rev)RLKmalectin\_305

CCTGGAACAACAGTTGTACACCCTCACAAGTTTTCTGAAGGAAAACGAAATTGCTACACCATAAGAATT

CCACAAGGAAAAGGAAAAAAGTACTTGATCAGGGCTAGATTTTTGTACGG

>PGSC0003DMG400002602-(rev)RLKmalectin\_3050

AGTGACCATCAAAGTTATTA ACTCCA AATTTAGTAGACCCAAATCATA CGTTTTTGGGTGGAACAAATTT

TGAATCCTTCAATTTGTGAAACAAAAGAAGTCTCGATAATAAAATAAAT

>PGSC0003DMG400002602-(rev)RLKmalectin\_3111

AACAAATTTTGAATCCTTCAATTTGTGAAACAAAAGAAGTCTCGATAATAAAATAAATAAAATTTTCGG

TTATTAGTATTTTTATGAGATTCTTTTGTCTGTTGAAGGAACTTGTC

>PGSC0003DMG400002602-(rev)RLKmalectin\_3172

AATTTTCGGTATTAGTATTTTTATGAGATTCTTTTGTCTGTTGAAGGAACTTGTC

CAAACAATCAGCTGACGGGAGAGGTGCCTGCCAATCTCTCACGACTAGCCTTCTTACAAGAGC

>PGSC0003DMG400002602-(rev)RLKmalectin\_3233

CAATCAGCTGACGGGAGAGGTGCCTGCCAATCTCTCACGACTAGCCTTCTTACAAGAGCTGTAATTTACT

CATTTAGTCTCAATTTATGCTGCACAGTTGCAATTAATATGATTTTTATG

>PGSC0003DMG400002602-(rev)RLKmalectin\_3416

GCCAATCTCGCACAACTACCCTTCTTAAAAAAGCTGTAATTTACTCACTCATGACCTCTAAGTTTACAATT

ACTACCTCTGTATCAATTTATGCGGCAAAATTCCAAATATGATTTTTAAA

>PGSC0003DMG400002602-(rev)RLKmalectin\_3477

GTTTACAATTACTACCTCTGTATCAATTTATGCGGCAAAATTCCAAATATGATTTTTAAAATATTTTAAGTTG

TTAATTATTTTCATCTATAGTAATTTTATGTTCAATTCATCTATCAAAG

>PGSC0003DMG400002602-(rev)RLKmalectin\_3538

ATTTTAAGTTGTTAATTATTTTCATCTATAGTAATTTTATGTTCAATTCATCTATCAAAGTTTAGAATTTTGA

ATTGTGTCACATGAATTAGAACATAAGGGGTATTTATTTAATTAGAAC

>PGSC0003DMG400002602-(rev)RLKmalectin\_366

ATAAGAATTCCACAAGGAAAAGGAAAAAAGTACTTGATCAGGGCTAGATTTTTGTACGGAAACTATGAT

GGAAAGAATCAACTACTGATCAATTTTATGATCTTCATCTTGGAGTTGACTTT

>PGSC0003DMG400002602-(rev)RLKmalectin\_3782

TCAGAATCCATGAATTAATTTATGAGTATACAAAAACATCTAAGATTGATTTAGAAAATTATCTCCCCTA

TGATCGATATTAATTTCTCATATAATTGGTCACATGTTAAATTGTGTCA

>PGSC0003DMG400002602-(rev)RLKmalectin\_3843



ATCTCCCCTATGATCGATATTAATTTCTCATATAATTGGTCACATGTAAATTGTGTCATCAACTCATCTAA  
AATTAAAGTCTGATGGTATATTGAATTGTTATCAAGTCGTTAGATATT

>PGSC0003DMG400002602-(rev)RLKmalectin\_3904

AACTCATCTAAAATTAAGTCTGATGGTATATTGAATTGTTATCAAGTCGTTAGATATTGAAGACACACT  
CATATTTATTTTTTTGTGATACAGGTATGACGAATTTTCGTCCTCCAAAAG

>PGSC0003DMG400002602-(rev)RLKmalectin\_3965

AGACACACTCATATTTATTTTTTTGTGATACAGGTATGACGAATTTTCGTCCTCCAAAAGGTAGTAATAATC  
TTAGTCCTGGTGCCTAGCAGCAATTGTTGCATCCGTGGTGGTCTTGGG

>PGSC0003DMG400002602-(rev)RLKmalectin\_427

ACTATGATGGAAAGAATCAACTACTGATCAATTTTGATCTTCATCTTGGAGTTGACTTTTGGGACACGAT  
TCATATAGTCAACGCCTCAACTTCGATATATAGAGAGATCATAACACATTC

>PGSC0003DMG400002602-(rev)RLKmalectin\_4270

TGAAAAACCGACAGTTCACATACTCGCAGGTTTTGCACATGACAAATAACTTCCAGAGAGTCCTTGGAAA  
AGGAGGTTTTGGGACAGTTTATCTTGGCTCTGTGATAACCGTGACGTGG

>PGSC0003DMG400002602-(rev)RLKmalectin\_4331

CCTTGGAAAAGGAGGTTTTGGGACAGTTTATCTTGGCTCTGTGATAACCGTGACGTGGCTGTTAAGAT  
GCTGTCCCATCTTCAGTTCAAGGGTTCAAGGAATTCCGGGCTGAGGTAAA

>PGSC0003DMG400002602-(rev)RLKmalectin\_4392

GTTAAGATGCTGTCCCATCTTCAGTTCAAGGGTTCAAGGAATTCCGGGCTGAGGTAAACTGAAGAAGT  
ATGTTTTAGTACATAAGACATTATATGAATTTGACTATACATAAATTTGAC

>PGSC0003DMG400002602-(rev)RLKmalectin\_4453

GAAGAAGTATGTTTTAGTACATAAGACATTATATGAATTTGACTATACATAAATTTGACTTGACAGGCTA  
GTCTACTGATGAGCATAACATAAGAACTTGATTTCTATAGTTGGGTAT

>PGSC0003DMG400002602-(rev)RLKmalectin\_4575

TGTTGAAGGCACCCACATTGGTATTATACGAATACATGGCCAATCGAAGCTTAGACATGCAACTATCA  
GGTACCTGATTTATAGTCAAATAAATGTTCTTTAGATCACACATTTTACA

>PGSC0003DMG400002602-(rev)RLKmalectin\_4636

CAACTATCAGGTACCTGATTTATAGTCAAATAAATGTTCTTTAGATCACACATTTTACAAGTCTTTAATCG  
TTGCGTGCAGATAGAAATCCAAATGCTTTAACATGGGAGGAAAGACTTC

>PGSC0003DMG400002602-(rev)RLKmalectin\_488

GGACACGATTCATATAGTCAACGCCTCAACTTCGATATATAGAGAGATCATACACATTCTCTCATCGGAT  
TTTGTACACGTTTGTCTAGTAAATACAGGTCGAGGAACACCATTTATATC

>PGSC0003DMG400002602-(rev)RLKmalectin\_5002

GGACTTTACCAACTGGAGAGGGGAAGTCATGTTACCACCATAATCGCGGGTAGTCCAGGCTATCTTGACC  
CTGAGTAAGTGCTCTCTCATTTTATTATTAGTCTGTCTCAAAAAGAAAACG

>PGSC0003DMG400002602-(rev)RLKmalectin\_5063

TCTTGACCCTGAGTAAGTGCTCTCTCATTTTATTATTAGTCTGTCTCAAAAAGAAAACGACTATGTATATC  
TAATTTTTACTCTCGAATTGACCTGCAGTTACTACAGGACAAATAAGCT

>PGSC0003DMG400002602-(rev)RLKmalectin\_5124

TATGTATATCTAATTTTTACTCTCGAATTGACCTGCAGTTACTACAGGACAAATAAGCTAACGGAGAAAA  
GTGATGTATACAGTTTTGGTGTGGTTCTTTTGGAAATAATAACAGGACGG

>PGSC0003DMG400002602-(rev)RLKmalectin\_5246

TTTACTAGGAAAACATGACAAGATTTATGTAATAACGTGGGTCAATGGTATGATTAATGATAACGGAGA  
TGTTTTCAAAAATAATCGATCCAAGATTAGGAGGAGAAGTTGATGTGAATTC

>PGSC0003DMG400002602-(rev)RLKmalectin\_5307

AACGGAGATGTTTCAAAAATAATCGATCCAAGATTAGGAGGAGAAGTTGATGTGAATTCAGCAAAGAG  
AATTGTGGCATTGGCAATGGCTTGTGTTTCTCTTGAACCAACAAATAGACCA

>PGSC0003DMG400002602-(rev)RLKmalectin\_5379

GTGGCATTGGCAATGGCTTGTGTTTCTCTTGAACCAACAAATAGACCAGCTATATCTGTGCTTGTGACGA  
TAATAAAGCAATGTTTAAGGCAGATGATTGATAATTATGACTCGAATTGA

>PGSC0003DMG400002602-(rev)RLKmalectin\_549

TCATCGGATTTTGTACACGTTTGTCTAGTAAATACAGGTCGAGGAACACCATTTATATCCGCACTTGAATT  
GAGACTCTTGAACCAACCATGTATGTAAGTGAATCCGGGTCACTACAA

>PGSC0003DMG400002602-(rev)RLKmalectin\_61

TTGATGAATCAGGTATATATAATTTTCGCTTTCAACACATTTTTATTTTTTGTTCATTCCTTGTATGATTCTT  
AATTGAATGATATACTTCTAATATTCTCTCAGGATTCGTAAGCATAG

>PGSC0003DMG400002602-(rev)RLKmalectin\_610

CACTTGAATTGAGACTCTTGAACCAACCATGTATGTAAGTGAATCCGGGTCACTACAAACTGTCACGCG

GCTTGATCTTGGCTCAACATCCACTCAATTTGCACGGTAATCATTGAAA

>PGSC0003DMG400002602-(rev)RLKmalectin\_671

TGTCACGCGGCTTGATCTTGGCTCAACATCCACTCAATTTGCACGGTAATCATTGAAAATTGTATTAAAT

TCAGAATAGTTGATGTTTTACAAAAAAACATGAAACGTTTGTATATA

>PGSC0003DMG400002602-(rev)RLKmalectin\_732

TGTATTAAATTCAGAATAGTTGATGTTTTACAAAAAAACATGAAACGTTTGTATATAGAGATTGACT

GTACTIONTATTCGTGGTGATTTAGGTACAAAGATGACATGTATGATCGTTT

>PGSC0003DMG400002602-(rev)RLKmalectin\_793

GATTTGACTGTACTCTATTCGTGGTGATTTAGGTACAAAGATGACATGTATGATCGTTTATGGTTGCCAT

ATAACGAGGTGGCAAACACGGTACAATTGAGTACATCTTTAACCATTGAT

>PGSC0003DMG400002602-(rev)RLKmalectin\_854

GGTTGCCATATAACGAGGTGGCAAACACGGTACAATTGAGTACATCTTTAACCATTGATGGCGGTCCGG

TGAATAACAACTTTTTTTCGACCACCGCCAAAGGTGCTGAGCACGGCAATAG

>PGSC0003DMG400002602-(rev)RLKmalectin\_915

CGGTCCGGTGAATAACAACCTTTTTTCGACCACCGCCAAAGGTGCTGAGCACGGCAATAGCAGCCGATAA

CGACACTAGTGGAATATCATATTCGTGGGAACCTGCAAATTCAACAGATGA

>PGSC0003DMG400002602-(rev)RLKmalectin\_976

GCCGATAACGACACTAGTGGAATATCATATTCGTGGGAACCTGCAAATTCAACAGATGAGAATTACATC

TACCTGCACTTTGCGGAGATTGAAGCCAACCATGTGAATAGACAATTCGAC

>PGSC0003DMG400002618-(rev)LRR-RLPs\_0

TAGTAAAGTAAAATAATGGGGAAAGGAGCAATTTTGAAATTGAAAAAAAACAAAAACAAAGAGTGGT

GCTCTTATTCCGGAAAAGCAAGGTGGGAAATCTTAACAGGACTCGTCTCTTT

>PGSC0003DMG400002618-(rev)LRR-RLPs\_1159

AGTGGTATGCATCAAGGGGATATCATGTACATTACTTTCCCAATGTCTGAGATTCTAAGCTATCAA

GTCGGGGGAAAGGCAGAGCAAGATATTGAAATGCTTGTGAATCATCTAG

>PGSC0003DMG400002618-(rev)LRR-RLPs\_122

CCTTATCAGAATCAGAAGAAGAAAGAAGATACTTTTTATTCGTCTCTCAGGTATGGTGTTCCTCTTA

CAATCAATCTATAATGCTTATGTTTGTGTTGAGAGGCCGATCCGCCC

>PGSC0003DMG400002618-(rev)LRR-RLPs\_1464

ACAGTTATGGTGTCATTTTGGAAAAGTTTCAGAAACAAGATCATGCTTTAATGAGAAGGATTAAGGGTT  
GTATTGTTGATTCTGCCCTGTCGCAGCTCCCGATCCACAGGTATTGCTGA

>PGSC0003DMG400002618-(rev)LRR-RLPs\_1647

GAGTAGTCTTATTTCTGAAAGTTAATGCAGAGCACTTGTTTAGAGCTATACATTTCTATTGAAAACCAACC  
TTTTCATGCTTTTATTGGACAACCTATTACAAGTGTCATATATAGTCAGG

>PGSC0003DMG400002618-(rev)LRR-RLPs\_1708

AAAACCAACCTTTTCATGCTTTTATTGGACAACCTATTACAAGTGTCATATATAGTCAGGTTTTAGCCATTC  
AGAATTGCACAGTTGTTTGGATTCTAAACAGGACCTGCTGTTCTCGTAT

>PGSC0003DMG400002618-(rev)LRR-RLPs\_183

TTCCTCTTACAATCAATCTATAATGCTTATGTTTGTGTTGTTGAGAGGCCGATCCGCCACCCCTCATGATG  
GATGGGTCAAACCTGTTTTTTCCATAAAAACAAACCAGACGCTCAACG

>PGSC0003DMG400002618-(rev)LRR-RLPs\_2196

ACTTGACTAACTTGAAGATTTGTACCTAATCCATAACATGCTCTCCGGAAGAATTCCAGTGGAATAGG  
AAAGCTTCAAAGGCTGTGTGAACTACCTATAGCTATGGAAACCAGTTGTC

>PGSC0003DMG400002618-(rev)LRR-RLPs\_2257

GGAAATAGGAAAGCTTCAAAGGCTGTGTGAACTACCTATAGCTATGGAAACCAGTTGTCAGTAACTACC  
CCCAGAGAATTGACAAATTGCTTAGTACGCATTGATTTCTTGGCTAATCAA

>PGSC0003DMG400002618-(rev)LRR-RLPs\_2318

TAACTACCCCAGAGAATTGACAAATTGCTTAGTACGCATTGATTTCTTGGCTAATCAATTTTCAGGCTCT  
ATTTCTGATGCCATTGGTAGGCTTAAGAATCTTGTATCTTCAGCTAAC

>PGSC0003DMG400002618-(rev)LRR-RLPs\_244

CCTCATGATGGATGGGTCAAACCTGTTTTTTCCATAAAAACAAACCAGACGCTCAACGTCTATCTTTTCC  
GTTTTCCCTTTTTGAGTTTTGACCAATTGTTAATTAGATGAAAATCAAC

>PGSC0003DMG400002618-(rev)LRR-RLPs\_2501

GGCCTTTGCTGATAACAACTTTTCAGGATAATTGCCACCAACTTTAAGATTTCTATCAGAGCTGGACCTG  
ACTACTCTTTACAACAATTGTTTTGAAGGTCCAATTCTGAATATCTTTC

>PGSC0003DMG400002618-(rev)LRR-RLPs\_305

TATCTTTTCCGTTTTCCCTTTTTGAGTTTTGACCAATTGTTAATTAGATGAAAATCAACAATAGGGTAAGA  
AAAGGGGGTTTGATTGAATTATGCTGGAATATTCTGTCTTGTTAGCATG

>PGSC0003DMG400002618-(rev)LRR-RLPs\_3416

CAACCGTGCATGCTTTTATTGGATAAGTATTACAAGTGCATATATAGTCTGGGCTTAGCCATTTAGGA  
ATTGCTCAGTTGCTTGTACTCTTATCAGGACCTGCCGTTCTCTTATTTTCG

>PGSC0003DMG400002618-(rev)LRR-RLPs\_366

TAGGGTAAGAAAAGGGGGTTTGATTGAATTATGCTGGAATATTCTGTCTTGTTAGCATGTGTATTTGTGA  
ACAAGGTTACCGCACGCGTTTATTTGACCTTTTCCGTATTATATTGGGT

>PGSC0003DMG400002618-(rev)LRR-RLPs\_427

TATTTGTGAACAAGGTTACCGCACGCGTTTATTTGACCTTTTCCGTATTATATTGGGTCTTGTCTTCTAAT  
TAATTAATCTCGTGCGTTTTTTGTGACAGCACAAAATTTGACAGCTATA

>PGSC0003DMG400002618-(rev)LRR-RLPs\_4659

TTTCTTTTCCATTCTTATTTAATTTAGTTGTATCTGTGGTCTCCCAGCAACAGAATTGTTGCATTGTACCCA  
AAATATACTTTACTTTACTACATATATATAAAAAAGTTGGGCTTAATT

>PGSC0003DMG400002618-(rev)LRR-RLPs\_488

TGTCTTCTAATTAATTAATCTCGTGCGTTTTTTGTGACAGCACAAAATTTGACAGCTATATAGTCTTGCTTG  
TGGGGCTGTCATTATAGTTCATCTATATTGGCAGCCCAATTTCTGAGGT

>PGSC0003DMG400002618-(rev)LRR-RLPs\_549

GTCTTGCTTGTGGGGCTGTCATTATAGTTCATCTATATTGGCAGCCCAATTTCTGAGGTGTGTCTTCTTTTC  
TCTTCACCGGCAAAACAAATATATCATCATGGCTTACTTGTCTGGAATC

>PGSC0003DMG400002618-(rev)LRR-RLPs\_61

GAGTGGTGTCTTATTCCGGAAAAGCAAGGTGGGAAATCTTAACAGGACTCGTCTCTTTTTCCCTTATCAG  
AATCAGAAGAAGAAAGAAGATACTTTTTATTCGTCTCTCAGGTATGG

>PGSC0003DMG400002618-(rev)LRR-RLPs\_732

GAAAAATTCTGGCCATCTAAGTCATTACACAACAACAACAATTCCCAAGAAAAGGAAAAGATAACA  
TCTTGGGTCTCTCACATATATCTTTCTAAGCTACCCCATTTCTCCTCCTAC

>PGSC0003DMG400002618-(rev)LRR-RLPs\_793

AGATAACATCTTGGGTCTCTCACATATATCTTTCTAAGCTACCCCATTTCTCCTCCTACCTCACCACAATAC  
CTGTTCCCCTGCCTATTCTAAATAACACCAATTTTACTTCTCTTTCAA

>PGSC0003DMG400002618-(rev)LRR-RLPs\_854

CACCACAATACCTGTTCCCCTGCCTATTCTAAATAACACCAATTTTACTTCTCTTTCAACCCTTCTTTTCTCT

ACTTCTTCTCTGTTGCTCAACTCTTATCAATCAGCAGCATTGCCCAA

>PGSC0003DMG400002689LRR-RLKs\_1612

ATTCAAGATTGTCTTTTTGGGGTTGGTAAGGATTATTCCTTGGACTTTTCAAAAATATCGATGGAT  
GTGTGTCAGATTCTCCAAAAGTCTCTAGAAATAGTGCATTTTTGGAGAAT

>PGSC0003DMG400002689LRR-RLKs\_1674

CGATGGATGTGTGTCAGATTCTCCAAAAGTCTCTAGAAATAGTGCATTTTTGGAGAATCTTACACGGGTG  
TGACGTGTTTTGTAATTCAAGATTGTCTTTTTGGGGTTGGTAAGGGTTA

>PGSC0003DMG400002689LRR-RLKs\_186

CGCCGCACTCCTCCTTTTCAGTCCCAAAGTACATCCACGGCACTCTCCTTCACAATTGGACACTTCCGG  
TGAACTCCACCACCGCCTGCACAGCTCAATGGCTTGGTGAAAATGCAT

>PGSC0003DMG400002689LRR-RLKs\_1860

GTGTATCTTTGGAGGATCTAACGCGGGTATGGCAACATTTTTGGAGAGTCCGAGCAAGTTGTAGGTAAG  
ATACTAATATTGATGGGATTTTTTTTTCTTGATTCTAATAGGAAACAGAGG

>PGSC0003DMG400002689LRR-RLKs\_2232

GAGGCTATCTCAAAAATCTGATGTTTATAGCTTTGGTGTACTGTTATTGGAAGTGCTCACTGGTAAAGCT  
CCCTCAGAGTACCCTTCACCGACTAGGCCTCACGATGAGGAGGAAGAATT

>PGSC0003DMG400002689LRR-RLKs\_2294

GTAAAGCTCCCTCAGAGTACCCTTCACCGACTAGGCCTCACGATGAGGAGGAAGAATTGCCAGTGGATT  
TGCCTAAATGGGTTTCGATCAGTAGTAAGGGACGAGTGGACTGCTGAAGTGT

>PGSC0003DMG400002689LRR-RLKs\_248

CACTTCCGGTGAACCTCCACCACCGCCTGCACAGCTCAATGGCTTGGTGAAAATGCATAAACAACCGTGT  
CTCCGCCGTAATTCTCCCGTCGTTCAATCTCCGGGGACCCATTACTGCTC

>PGSC0003DMG400002689LRR-RLKs\_310

AACCGTGTCTCCGCCGTAATTCTCCCGTCGTTCAATCTCCGGGGACCCATTACTGCTCTCTCTTTACCC  
TACTCCGCCTTCTCGACCTCCGTAACAATCGCCTTAACGGAACCCTC

>PGSC0003DMG400002870-(rev)LRR-RLKs\_0

TTTTTTTTATAATATTAATAATCTCATTTCATTGTGGGTAGTTCTTTCTTGAATTCTTGAATTAGTAA  
AAGCAAGAAAAATGAAGGCTATTTGGGTTATTTGTACTTATTCAACT

>PGSC0003DMG400002870-(rev)LRR-RLKs\_1220

CTTAGATGTTAATATGAGTGCCTGTTTTACAGACTTCTACAGAGCAATAATATATCAGGATCAATTCCT  
ATGGAGCTTGGAATGCTTAAAAAACTCAAGACAATTGATCTTTCTGATA

>PGSC0003DMG400002870-(rev)LRR-RLKs\_1464

TGTTCTTGATTTTTGATGATTATAGGAGATTAACAACAACAGTCTAACTGGAGCTATTCCTTTGGACTTG  
GCCAATATGACTCAGCTCTCACTTATGTAATTTTCTAATACCATTTTCA

>PGSC0003DMG400002870-(rev)LRR-RLKs\_1525

TTTGGACTTGGCCAATATGACTCAGCTCTCACTTATGTAATTTTCTAATACCATTTTCATGTTATGTTATGT  
TATATGTTCTTTATAACAACATTTTGCTATAGCAGCTAAAAAATATCC

>PGSC0003DMG400002870-(rev)LRR-RLKs\_1586

TTATGTTATGTTATATGTTCTTTATAACAACATTTTGCTATAGCAGCTAAAAAATATCCAGACAAATGACG  
TACGTAGTTATAGAGAGGTTTACTGTATTTTCACTTTGGACATATAT

>PGSC0003DMG400002870-(rev)LRR-RLKs\_1647

ACAAATGACGTACGTAGTTATAGAGAGGTTTACTGTATTTTCACTTTGGACATATATGTATTATGGAG  
TTGTGTGTTTTGCATGTTTAGGGACTTGTCTTTCAACAATCTCAGTGGTC

>PGSC0003DMG400002870-(rev)LRR-RLKs\_1708

ATTATGGAGTTGTGTGTTTTGCATGTTTAGGGACTTGTCTTTCAACAATCTCAGTGGTCCTGTACCAAGG  
CTTCTAGCCAAAACATTCAAGTAAGGTTCTTGAAGAATTCTCTGTGTATC

>PGSC0003DMG400002870-(rev)LRR-RLKs\_1769

GTACCAAGGCTTCTAGCCAAAACATTCAAGTAAGGTTCTTGAAGAATTCTCTGTGTATCACTTTTTCTTA  
ATATCAGTAAATGAAACCAGTTTTTTGTATTTATTTGTCTTTTTTTTA

>PGSC0003DMG400002870-(rev)LRR-RLKs\_1830

TTTTTCCTTAATATCAGTAAATGAAACCAGTTTTTTGTATTTATTTGTCTTTTTTTTAAACCTTATTGACAC  
AGTATTTTGGGAAATCCAATGATATGTGCAACTGGAAAAGAGTCAGA

>PGSC0003DMG400002870-(rev)LRR-RLKs\_1952

GCAATGGAACAACACCAATGCCCTCTCCTTCTCTTCAAGCAATCCACAGAGTAAGAATAACCTTATTTT  
AACTGCCAAATGATAGTTTTTTTGTTTTTTTTATGACCGTATTGTCTGA

>PGSC0003DMG400002870-(rev)LRR-RLKs\_2379

GGTGCTTTTACTAGTCATACAGATTTATGAAGTAAATTTGCTTCACTGGTTAATTTTCTCTGCTGATAGA  
TTCAATATTTATAGTTCATTCCCAGCTAAAAATATTCTGTGTTATCTCA

>PGSC0003DMG400002870-(rev)LRR-RLKs\_2501

TGTTTCAGCCTTCTGGAAAACCGAAAACCTCACAAAGGCTGCGTTAGCCTTTGGAACAAGTCTAGGATGCAT  
CTTCTACTAATCGTTGGGTTTGGATTCTTTCTGTGGTGGAGACAAAAGCA

>PGSC0003DMG400002870-(rev)LRR-RLKs\_2562

GGATGCATCTTCTACTAATCGTTGGGTTTGGATTCTTTCTGTGGTGGAGACAAAAGCACAATAAGCAAA  
TTTTCTTTGACAGTAATGGTGAGTATTGCTTGATCAGAACATTTTGAAGT

>PGSC0003DMG400002870-(rev)LRR-RLKs\_2623

ATAAGCAAATTTTCTTTGACAGTAATGGTGAGTATTGCTTGATCAGAACATTTTGAAGTTACGGTCTAGC  
TCATCGATCCTCTCTTATAAACGTTACTGTCATAAATTGCAGAACATCAT

>PGSC0003DMG400002870-(rev)LRR-RLKs\_2684

CGGTCTAGCTCATCGATCCTCTCTTATAAACGTTACTGTCATAAATTGCAGAACATCATATTGAAGAAGT  
GTGTTTAGGCAACTTAAGGAGGTTTCAATTCAAGGAACTTCAGTCTGCCA

>PGSC0003DMG400002870-(rev)LRR-RLKs\_3050

ATGGAAGTGTAGCTTCGCGTCTCAAAGGTAAACATATCTAAAAACCTGTCTCCTTTGGCCTATAATTACA  
TTATCCTTCTTATTTGCTCAGCTCATAACGTATCATTCTTGCAGCCAAA

>PGSC0003DMG400002870-(rev)LRR-RLKs\_3416

TCCACAGGACAGTCCTCTGATAAGACGGACGTCTTTGGTTTTGGTATTCTCTTGCTAGAGTTAATCACTG  
GACAAAGAGCTCTGGAATTTGGTAAAGCAGCAAACCAAAAAGGTGCCATG

>PGSC0003DMG400002870-(rev)LRR-RLKs\_3477

TAATCACTGGACAAAGAGCTCTGGAATTTGGTAAAGCAGCAAACCAAAAAGGTGCCATGCTTGATTGGG  
TAAGTACAACAAATCCCTATAATTATAGTTACATTTCTTTTTTCAGCATG

>PGSC0003DMG400002870-(rev)LRR-RLKs\_3721

TTGTTGTTGTATATCTGTAAGGTGTGCATTAACACTATCTAAAATATGAACTCTATAAGGTATTAAGAGAT  
GCAATGAACGAAGTACGAACCATCTTTAAATCCTGGATCCGTCCTTCTG

>PGSC0003DMG400002870-(rev)LRR-RLKs\_3782

ATTAAGAGATGCAATGAACGAAGTACGAACCATCTTTAAATCCTGGATCCGTCCTTCTGTGTTTTTTTACC  
TGCAGGTAAGAAAGATTCAACAAGAGAAGAAGCTAGACATGTTGGTGGGA

>PGSC0003DMG400002870-(rev)LRR-RLKs\_3843

TTTTTTTACCTGCAGGTAAGAAAGATTCAACAAGAGAAGAAGCTAGACATGTTGGTGGACAAAGACATG



AAAAACGAGTACGATACGATAGAGTTAGAGGAAATGGTTCAAGTAGCATT

>PGSC0003DMG400002870-(rev)LRR-RLKs\_4270

GACATCACATACATAAAAAAAAAACATGTGTCATATTGAGCTTTGTTTATAAGTTTATACAGAAGCTGCA

AATAGAATATCATACATTCTGATTGTAAAGGATAATATAATAACTTTGTA

>PGSC0003DMG400002870-(rev)LRR-RLKs\_4331

GAAGCTGCAAATAGAATATCATACATTCTGATTGTAAAGGATAATATAATAACTTTGTAAGGCTGAGAGT

TGTTTTTCCTTTTTTGGTTCTTGTGTTGAGTGGAAATGTTTATGGGA

>PGSC0003DMG400002870-(rev)LRR-RLKs\_4373

AATATAATAACTTTGTAAGGCTGAGAGTTGTTTTCTTTTTTGGTTCTTGTGTTGTTGAGTGGAAATGTTT

ATGGGATGTTATAATTTGCTTATGTGTATATATAATTAGAAATAGAAC

>PGSC0003DMG400002870-(rev)LRR-RLKs\_61

TGAATTAGTAAAAGCAAGAAAATGAAGGCTATTTTGGGTTATTTGTACTTATTCAACTTCTTGGCTTATT

ATGCTCATGCTATGCTTACTCCAGCTGGTGTCAATTATGAAGGTTAGTT

>PGSC0003DMG400002870-(rev)LRR-RLKs\_610

TTGAAATTAAGCTCAAGATTTTTTTTTCTTTGGCAGTGCAAGCTTTAATGGAGATAAAGAAGAATTT

AGATGATCCTCATAATGTTTTAACTGGGATGGAGATGCTGTTGATCCTT

>PGSC0003DMG400002870-(rev)LRR-RLKs\_671

GAAGAATTTAGATGATCCTCATAATGTTTTAACTGGGATGGAGATGCTGTTGATCCTTGTAGCTGGAAT

ATGGTGACTTGTTTCATATGATAAATTTGCTACTAGCCTGTAAGTAAAACA

>PGSC0003DMG400002870-(rev)LRR-RLKs\_732

AGCTGGAATATGGTGACTTGTTTCATATGATAAATTTGCTACTAGCCTGTAAGTAAAACAATTTTCACTTAT

TCTAAAATAGTACACCTAACAAGATTTCTTAATATAGTTGAATTATTG

>PGSC0003DMG400002870-(rev)LRR-RLKs\_793

TTTCACTTATTCTAAAATAGTACACCTAACAAGATTTCTTAATATAGTTGAATTATTGATTATGCAGGGA

AAGTCCCAGCCAAAATTTGTCTGGCAAATATCACCATATATCCACAAC

>PGSC0003DMG400002870-(rev)LRR-RLKs\_854

TATGCAGGGAAAGTCCCAGCCAAAATTTGTCTGGCAAATATCACCATATATCCACAACCTTGACACACCT

TGAACTTATGTGAGTACTTACTTAACCAAAGTAAATAAAAAACGTAATAC

>PGSC0003DMG400002885LRR-RLPs\_0

ATGTGGCCTCTCTTTTTCATTTATTTCACTTTTCTGTTGTGTATTTCTAAGTCTAAGTTTTTCTTCATCCTTTGA  
TCATCATCTTTGCTCTCCCAGTGAAGCTTCTGCTTTGCTTCAGTTT

>PGSC0003DMG400002885LRR-RLPs\_1098

GGTCCGTTTCTTCTCCACTTTTAAGCTTGACACAACCTTGAAACCTTAGACTTGTCGAGTAATCCCTATCT  
GGACCACTGCCTAGAAATGCAAGCATGCTTCAAAGCTAGCCGAGCTG

>PGSC0003DMG400002885LRR-RLPs\_1159

ATTCCCTATCTGGACCACTGCCTAGAAATGCAAGCATGCTTCAAAGCTAGCCGAGCTGGATTTGTCTTA  
CAACTCACTGAATGGTACCATAACCATCTTGGGTGTTAGCCTACCTTTGC

>PGSC0003DMG400002885LRR-RLPs\_1281

TCTTCAGTGTGCTCCATCATAACCGGTTAAGTGGTTCTTTTCTCAATCACCTGTGAATCTCACAAACCTT  
TCTACCCTTGACCTTTCATCAAATAACATCACCTTGATGCAGGAATA

>PGSC0003DMG400002885LRR-RLPs\_1342

TCACAAACCTTTCTACCCTTGACCTTTCATCAAATAACATCACCTTGATGCAGGAATACAAATCACTTTA  
CCTAGCCTAGTAGTTTTACAGTTATCATCTTGTGAACCTTAGGGATTTTC

>PGSC0003DMG400002885LRR-RLPs\_1403

AATCACTTTACCTAGCCTAGTAGTTTTACAGTTATCATCTTGTGAACCTTAGGGATTTCCACACTTCTTGAG  
AAATGTAAAGACACTTATGGTCTTGGATATTTCTAACAATAAGATTCG

>PGSC0003DMG400002885LRR-RLPs\_1830

TCTTGATCTTAAATTTAACTTCCTTGAGGGGGCACTACCTTCATCCATTTGTAACATGAGCAGTCTTAGCC  
TTCTGGATTTGTCACACAACCTACTTCAGTGAACCTCGGCTCCGCATTGCTT

>PGSC0003DMG400002885LRR-RLPs\_1891

AGTCTTAGCCTTCTGGATTTGTCACACAACCTACTTCAGTGAACCTCGGCTCCGCATTGCTTGGGCAGCATGG  
TTGGGCTATCTGTGCTAGACTTGAGAAGAAATAGTTTCACTGGGAGTCTT

>PGSC0003DMG400002885LRR-RLPs\_2013

ACCGTTTTGTGCGCAGAGCAATTCATTGAGAACCATTGTCTTGAATGGTAATCATTTTGAAGGAACTGTC  
CCGATGTCATTGCTCAAGTGTGATGGTCTAGAAGTCCTTGATGTGGGGAA

>PGSC0003DMG400002885LRR-RLPs\_2135

ATGTTATAAATGACACGTTTCCAGCTTGGCTCGGAACTCTTCAAGAGCTGCAGGTAATTATATTGAAGTC  
TAACAAGTTCCATGGACCTATAAGTACTAGGCTGAAGTTTGGTTTCCCCG

>PGSC0003DMG400002885LRR-RLPs\_2196

ATTGAAGTCTAACAAGTTCCATGGACCTATAAGTACTAGGCTGAAGTTTGGTTTCCCCGTGTTACGGATT  
TTTGATCTCTCTCATAATGAGTTTGGTGGTTCCTGCCTGCAGAAGTTTT

>PGSC0003DMG400002885LRR-RLPs\_2318

AAAACCTCAAAGGAATGATCAAAACAGATGAGAGAGACAAAGGAGAGATCGAATATATGCAACCACAG  
TCTTACATCGGATTTAGTAACGTAATGTATGAGGTTTCAGTGAGGTTGGTGA

>PGSC0003DMG400002885LRR-RLPs\_2562

CAATTTATCTCATAACAATCTCAAAGGAGATGTACCAATGGAACCTGGAGAAATTGAATATGCTTGAAGC  
GTTAGATCTCTCTTGGGAATCGGCTCACTGGAAAGATTCCACAGCAATTGAC

>PGSC0003DMG400002885LRR-RLPs\_2745

AGGTTACAATTCAACACATTTGAAAATGATTCATATGGTGGCAACCTTGATTTATGTGGTCCTCCTTTAT  
CAAAGAAATGTGGAACAAGTGATCCATCACATGTTCTCAACCATTGGA

>PGSC0003DMG400002885LRR-RLPs\_2928

AGGCTACAGTTTTGGACTCGTTGTTGGAACCTGTCCTGTGGAGTCTCATGTTTAAATATCGTAAGCCAAAA  
TGGTTTGTGGAATTTTTTACGGCATCTTTCCCAAGAAAATGAGAAGGCC

>PGSC0003DMG400002885LRR-RLPs\_305

CCTCATCCAACCTTCATCATCTTCAGACACTAAACCTTGCTAAGAACTACTTTTATCCTTCTACGATTCCAAA  
TGACGTTAGCCGTTGAGGAATTTGAAGCATCTCAACCTTTCTGATGC

>PGSC0003DMG400002885LRR-RLPs\_3050

AGAAGAGAGCTCAGAGACGACGGACATAATGAAAGATTGAAAGCAGTTCCTTTAACTGTTTGTATATAT  
GCAGTATAATTGTATGTGTTGTTTTAGCATTAGCTATTGAAAAGTGTCAA

>PGSC0003DMG400002885LRR-RLPs\_3108

TTTGTATATATGCAGTATAATTGTATGTGTTGTTTTAGCATTAGCTATTGAAAAGTGTCAATGTCCATTTT  
TTGGTCATTTTTACTTCATTATCAAGGGATTGGGCTGAAAATTTGCA

>PGSC0003DMG400002885LRR-RLPs\_488

TTCTGTTCTTCTTATGTGAACGGATTACAATTTGATCAGAGAGCATTTAAAGCAGTGCTTCAGAACTTGA  
CAAATCTAGAGGTACTTTCTCTCTTTGGTGTCAACGTCTCATCTCCGAT

>PGSC0003DMG400002885LRR-RLPs\_610

CTGTAAATTTGTCTTCTCCTTAAGGTACGTCGATCTTAAGGTAACAAATTTGGAAGGTGTTCTCACGGA

GAGCGTTTTCTTCTGCCAAAATTGGAAACGCTCTATTTGAGTAATAACT

>PGSC0003DMG400002885LRR-RLPs\_671

TCTCACGGAGAGCGTTTTCTTCTGCCAAAATTGGAAACGCTCTATTTGAGTAATAACTATCTTCTCAAAG

GAGTTTTACCAAAGATCCATCCAAGCAGCACATTGTTGGAGTTGGATAT

>PGSC0003DMG400002885LRR-RLPs\_732

CTTCTCAAAGGAGTTTTACCAAAGATCCATCCAAGCAGCACATTGTTGGAGTTGGATATTCATACACAG

GAATCTCCGGTGAGCTGCCTGATTCAATTGGCACCTTGAGTTCCTTGACT

>PGSC0003DMG400002885LRR-RLPs\_976

CTAAATTGAAGCACCTCGCAGTTTTAGCTCTTTCATCTAACTCCTTCGGAGGTGAAATCCCAATTTTTTCT

CTAACCTCCAAGAACTACGTTATTTAAGTCTTCTAATTGCAGCTTCA

>PGSC0003DMG400002886LRR-RLPs\_0

ATGTTTCAGAACTTCACAAATCTGGAGATACTTTCTCTCTTATGTCAACATCTTATCTCCGATACCTGTG

AATATTTCTTCTCCTTAAGGTATGTGGATCTTGCACATACTAATCTG

>PGSC0003DMG400002886LRR-RLPs\_1013

TGAATACTTAGGATTTACGAGTAATTCCTATCTGGCCCACTGCCTAATAATGTGAGCATGCTTCAAAG

CTAACCAAACCTGAATTTGTCCTACAACCTCAATGAATGGTACCATACCATC

>PGSC0003DMG400002886LRR-RLPs\_1076

TCAAAGCTAACCAAACCTGAATTTGTCCTACAACCTCAATGAATGGTACCATACCATCTTCTGTGTTTAGCC

TCCCTTTGCTAGGTCAGTTGTGGCTCGATAACAATAGATTTAGTGGATT

>PGSC0003DMG400002886LRR-RLPs\_1139

GTTTAGCCTCCCTTTGCTAGGTCAGTTGTGGCTCGATAACAATAGATTTAGTGGATTACCCGATGAGCTC

AAAACAAACCAACATTAGCACGCCTGGATTTAAGCCATAATCAACTCAG

>PGSC0003DMG400002886LRR-RLPs\_1202

TGAGCTCAAACAAACCAACATTAGCACGCCTGGATTTAAGCCATAATCAACTCAGTGGTTCTTTTCTTC

AATCACTTTCGAATCTCACAAACCTTTCTATCCTTGACCTTTCATCGAA

>PGSC0003DMG400002886LRR-RLPs\_124

GTGTTCTCACAGAGAGCTTTTTCTTATGCCAACTTGGAAAGACTCCAATTGAGAGGGAATGATCTTGT

CAAAGGAGTTTTTCAAAGATCCACCGGAGCAACACTCTGTTAATGGAGT

>PGSC0003DMG400002886LRR-RLPs\_1265

TTTTCTTCAATCACTTTTGAATCTCACAAACCTTTCTATCCTTGACCTTTCATCGAATAACATCACCGTCGA  
TGAGGGAATACAAATCACTTTTCCTAGCCTACAAGATTTGTGGTTATC

>PGSC0003DMG400002886LRR-RLPs\_1328

CACCGTCGATGAGGGAATACAAATCACTTTTCCTAGCCTACAAGATTTGTGGTTATCATCTTGTGAACTG  
AAGGATTTTCCAGTCAACTAAAGGATTTTCCACACTTCTTGAGAAATGTA

>PGSC0003DMG400002886LRR-RLPs\_1580

CAATTTTCGTTACTATAACCTACAGTATCTTGATCTGAAATTTAACTTCCTTCAGGGGTCACTACCTTTATCT  
ATTGGTAACATGAGAAACTTATCTTATTAGATTTATCACACAACACTAC

>PGSC0003DMG400002886LRR-RLPs\_1643

CCTTTATCTATTGGTAACATGAGAAACTTATCTTATTAGATTTATCACACAACACTACTTCAGTGACTCAGTT  
CCACATTGCTTGGGAAGCATGGCTTCACTAGCGGTGCTGGACTTAAGA

>PGSC0003DMG400002886LRR-RLPs\_1706

GACTCAGTTCCACATTGCTTGGGAAGCATGGCTTCACTAGCGGTGCTGGACTTAAGAAAGAACAATTTTC  
ACAGGGAGTCTTCCCCATTATGTGGACACAACACTTCATTGAGTACCATT

>PGSC0003DMG400002886LRR-RLPs\_1895

CTTGATGTGGGGAACAATGCTATAAATGACACGTGTCCAGCTTGGCTCGGAAGTCTTCAAGCTCTGCAA  
GTCCTTATATTAGAGTTGAACAAGTCCATGGACCTATAAGTACGTGTCAG

>PGSC0003DMG400002886LRR-RLPs\_1958

CTGCAAGTCCTTATATTAGAGTTGAACAAGTCCATGGACCTATAAGTACGTGTCAGACTAAGTTTTGCT  
TTCCAATTTGCGAATTTTTGATCTTCTCGTAATGATTTCAAGTGGCTCA

>PGSC0003DMG400002886LRR-RLPs\_2084

GCAAAAGTTTTTGGAACTTCAAGGCAATGATCAAATTAGATGACGAAGACACAAGAGAGATCAGGTA  
CATGGAATCTATGTTGAATTTGTCATTTGTCAGATCGTATGAGGATTCAGTG

>PGSC0003DMG400002886LRR-RLPs\_2147

AGGTACATGGAATCTATGTTGAATTTGTCATTTGTCAGATCGTATGAGGATTCAGTGAGTTTGGTAATCA  
AAGGGAAAGATATTGAGCTACAAAGAATCAGCACAATTACGACAACCATA

>PGSC0003DMG400002886LRR-RLPs\_2195

GATTCAGTGAGTTTGGTAATCAAAGGGAAAGATATTGAGCTACAAAGAATCAGCACAATTACGACAACC  
ATAGATCTCTCAAGCAACCATTTTGAAGGTGTCATTCTGAAAACGTTATAG

>PGSC0003DMG400002886LRR-RLPs\_248

TATTTTCATCCACAAGCATCTCTGGTGAGCTGCCTGATTCAATTAGCGCCTTCAGTTCCTTGAATATATTGT  
ACCTCGAAGGATGTCAATTCTCTGGTTCATTCCCGATTCCATAGGCAA

>PGSC0003DMG400002886LRR-RLPs\_310

ATATATTGTACCTCGAAGGATGTCAATTCTCTGGTTCATTCCCGATTCCATAGGCAACCTAACCAGAATT  
ACGGAGTTGGCTTTGTCTTATAATCATTGGGATAATACATATATTTGA

>PGSC0003DMG400002886LRR-RLPs\_62

GATACCTGTGAATATTTCTTCTCCTTAAGGTATGTGGATCTTGACATACTAATCTGCGAGGTGTTCTCA  
CAGAGAGCTTTTTCTTATGCCAACTTGGAAGACTCCAATTGAGAGG

>PGSC0003DMG400002886LRR-RLPs\_887

GTCCAACCTCTTTTCAGGTGAAATTCCTGATGTTTTCTAACCTCCAAGAGTTACGTACGTTACTACTTTC  
TTATAACAACCTCATTGGTTTGTTCCTCGCTTCACTTTTAAGTTTGAC

>PGSC0003DMG400002886LRR-RLPs\_950

ACTACTTTCTTATAACAACCTCATTGGTTTGTTCCTCGCTTCACTTTTAAGTTTGACACATCTTGAATACTTA  
GGATTTACGAGTAATCCCTATCTGGCCCACTGCCTAATAATGTGAG

>PGSC0003DMG400002887LRR-RLPs\_0

TTTGGTTTCACTTGATCTTTCTGATAGTTATGAATTACAACCTGATGAGAGAACATTTGAAACAATGCTTC  
ACAACCTTACAATCTGGAGTTACTAGCTCTCCCTCTTGGTGACATCTC

>PGSC0003DMG400002887LRR-RLPs\_1053

TAGAGTGGCTGATGAGATCAAACAAACCCGACATTAGTGACTTTGTATTTAAGTCATAATCAATTCAAT  
GGTCCTTTTCTCGATCACTTGTGAATCTCACAAGCCTGGCCTTGCTTGA

>PGSC0003DMG400002887LRR-RLPs\_1115

AATTCAATGGTCCTTTTCTCGATCACTTGTGAATCTCACAAGCCTGGCCTTGCTTGACTTTTCATCAAATA  
ACATCACCGGCGATGTGGGAATAAATACACCTTTCTAGACTATCAG

>PGSC0003DMG400002887LRR-RLPs\_1239

GTTATTATCATCTTGTGAACTGAAGATTTTCCACACTTCTTGAGAAATCTAAAGACACTTCAGTTCTTGG  
ATATTTCTAACAACAAGATCCGTGGTCAAATCCCTAACTGGTTTAGCGG

>PGSC0003DMG400002887LRR-RLPs\_1301

AGTTCTTGGATATTTCTAACAACAAGATCCGTGGTCAAATCCCTAACTGGTTTAGCGGCATGAAGTGGGA

CTCTTTGGAACAACCTAACCTTTACGTAATTTTTTGACAGGCCATCTAG

>PGSC0003DMG400002887LRR-RLPs\_1363

AAGTGGGACTCTTTGGAACAACCTTTACGTAATTTTTTGACAGGCCATCTAGGAGAATTCATT

ATTATAGTCTTGAGTCTCTTGATCTTAAATTTAACTTCCTTCAGGGTCCA

>PGSC0003DMG400002887LRR-RLPs\_1425

ATTTTCATTATTATAGTCTTGAGTCTCTTGATCTTAAATTTAACTTCCTTCAGGGTCCACTACCTTCATCCAT

ATGTAACCTAAGAAGCCTTAGAATTCTGGATTTATCACGCAACAACCT

>PGSC0003DMG400002887LRR-RLPs\_161

TCCAGCTTCATCATCTCCACACACTAACCTTGATAATAATTAATTGAATCCTTCTTCTTCGATCCCACATA

ACATTGGCCGATTGAGGAATTTGAGGCATCTCAACCTTTCTGATGCTT

>PGSC0003DMG400002887LRR-RLPs\_1611

CAATTTTCAGTGGGAGTCTTCCACTGTTATGTACTCAAAGCACTTCATTGATGACCATTGTCTTGAATGGTA

ATCAATTCGAAGGATCTGTCCCTGCGTCATTACACAACCTGTGTTGGTTT

>PGSC0003DMG400002887LRR-RLPs\_1673

TGAATGGTAATCAATTCGAAGGATCTGTCCCTGCGTCATTACACAACCTGTGTTGGTTTAAAAGTTCTTGA

TTTGGGGAACAACGCTATAAATGACACATTTCCAGCTTGGCTTGGAACCTC

>PGSC0003DMG400002887LRR-RLPs\_1797

AGAGCTGCAAGTCCTTATATTAAGTGAACAAGTTCCATGGACCTATAAGTGCTAGGAAGAAGTTTTG

CTTTCCAGGTTGCGGATTTTTGATCTCTCTCATAATGCATTCAATGGTTC

>PGSC0003DMG400002887LRR-RLPs\_1921

CCTGCAGATATTTTTAGAACTTCAAGGCAATGATAAAAAATGGCACAGACAAAGGTAACATTACATAT

ATGGAAACATCAGTTTTCAGGTCATTGGTTGATTCATCGATCAAAGACTGG

>PGSC0003DMG400002887LRR-RLPs\_1983

TACATATATGGAAACATCAGTTTTCAGGTCATTGGTTGATTCATCGATCAAAGACTGGACTATGTATAAG

CTAGAATTGGCCATTGATGAAGTGTACAAGGATTCAGTGAGGTTGATGAT

>PGSC0003DMG400002887LRR-RLPs\_2045

TGTATAAGCTAGAATTGGCCATTGATGAAGTGTACAAGGATTCAGTGAGGTTGATGATCAAAGGAAACA

ATATTGAGCTAGAAAGAATCAGCACAATTGTTACAGCCATAGATCTCTCAA

>PGSC0003DMG400002887LRR-RLPs\_2231

TATCCCACAATAATCTCAAAGGTGATATTCCAATGGAATTGGGGCAATTGAATTCACCTTGAAGCCTTAGA  
TCTCTCTTGAATCGGCTCACTGGAAAGATTCCACAGGAATTGACAAGAA

>PGSC0003DMG400002887LRR-RLPs\_2293

GCCTTAGATCTCTCTTGAATCGGCTCACTGGAAAGATTCCACAGGAATTGACAAGAATGAACTTTCTGG  
CGTTCTTAAACCTCTCTCAAACCAGCTCGTTGGACGCATTCTCAAGGT

>PGSC0003DMG400002887LRR-RLPs\_2789

GAATTTTTTGACGGCATCATGCCCCACAAAGGAGAAGGCCAAAGAAGAGAAGGCTGAGACGGCAGAC  
ATAATGGAAGATTGAAAGATTGAACTTTCTGTTTCTGTTTTTCTGTTTGT

>PGSC0003DMG400002887LRR-RLPs\_54

ATTTGAAACAATGCTTCACAACCTTTACAAATCTGGAGTTACTAGCTCTCCCTCTTGGTGACATCTCATCAC  
CGATACCTGTAAGTATTCATCCAATAGCAGCCTCTTCCAGCTTCATCA

>PGSC0003DMG400002887LRR-RLPs\_619

GGGAAAATCCCAACAGAAATCTCATACCTTTCCAATTTGGTTTCACTTCATCTTTCTGGTTATGGATTACA  
ACTTGATGAGAGAACATTTGAAGCAATGTTTCAGAACTTGACAAATCTG

>PGSC0003DMG400002887LRR-RLPs\_681

TGGATTACAACCTTGATGAGAGAACATTTGAAGCAATGTTTCAGAACTTGACAAATCTGGAGGTACTTTCT  
CTCTCTGAAGTCAACATCTCATCTCCGATACCTGTGAATATTTCTTCTTC

>PGSC0003DMG400002887LRR-RLPs\_743

TACTTTCTCTCTCTGAAGTCAACATCTCATCTCCGATACCTGTGAATATTTCTTCTTCTTAAAGGTACCTGG  
ATCTTAGTCATACTAATCTGCGAGGCATAATCCCCATGGTTTCTCTA

>PGSC0003DMG400002887LRR-RLPs\_867

CCAAGAGCTAGTTGAATTGGATCTTTCTAATAACAACCTCACCGGTCCATTTCCCTCTTCAATTTTAAACTT  
GACAAGTCTTCAATACTTAGATTTGTCTCACAACCTCACTGAATGGCAC

>PGSC0003DMG400002887LRR-RLPs\_929

TTTTAAACTTGACAAGTCTTCAATACTTAGATTTGTCTCACAACCTCACTGAATGGCACAATACACTCTTGG  
GTGTTTAGCCTCCCTTCTTACTTGATTTGAAGCTCCATCATAACCAAT

>PGSC0003DMG400002887LRR-RLPs\_991

CACTCTGGGTGTTTAGCCTCCCTTCTTACTTGATTTGAAGCTCCATCATAACCAATTCAGTAGAGTGGC  
TGATGAGATCAAACAAACCCGACATTAGTGACTTTGTATTTAAGTCAT



>PGSC0003DMG400002902LRR-RLKs\_0

AGAAAAGAAACAGAGACGCATTTGCAGATTGTTTCTTTAAGGGGAAGGTGGACATGTCTAGTAAACAT  
GGCCGCCGTTCCCCTAATCCTTCATCTCCTTCCTCAAGCATCGTCTCCGAAA

>PGSC0003DMG400002902LRR-RLKs\_1647

GTTAAGGTAGGTAAAGAGAAAAATGGATAGTTAAAGTATGAAACTCGTGAAAAAAGGATAGTTTAGGT  
GTGTTTTTGACCATTATGGTAAAAATCTATTCCGAAGAAAACCTTGGTCACTA

>PGSC0003DMG400002902LRR-RLKs\_1708

TTTAGGTGTGTTTTTGACCATTATGGTAAAAATCTATTCCGAAGAAAACCTTGGTCACTATTATAGTGAAAT  
GTTATTATAGACAATGATTGTTATAGAGAGGTATGACTGTATATCAAAT

>PGSC0003DMG400002902LRR-RLKs\_1769

ATAGTGAAATGTTATTATAGACAATGATTGTTATAGAGAGGTATGACTGTATATCAAATCATTAAAGGTCT  
TCACTTCTTCTTGACATTTGTATGAGTAGATTTTATCTGATAATGTGATC

>PGSC0003DMG400002902LRR-RLKs\_1830

TTAAGGTCTTCACTTCTTCTTGACATTTGTATGAGTAGATTTTATCTGATAATGTGATCCGATCTATACTTA  
CCTGTCCCTTCCAAGACATCCGGTCACAATTGGGACGATACAAAGAAG

>PGSC0003DMG400002902LRR-RLKs\_1891

ATCTATACTTACCTGTCCCTTCCAAGACATCCGGTCACAATTGGGACGATACAAAGAAGATTAGCATGAT  
CCCACAAGTTTTAGGATTCACAGTTTACAGAAGGATTGCTTATGACTGTT

>PGSC0003DMG400002902LRR-RLKs\_1952

TAGCATGATCCCACAAGTTTTAGGATTCACAGTTTACAGAAGGATTGCTTATGACTGTTAGTACATTCAT  
ATACATTTTGTCTTCTATGTCAACTATCCTAATTTTGAAATTCGTGCA

>PGSC0003DMG400002902LRR-RLKs\_2013

TACATTCATATACATTTTGTCTTCTATGTCAACTATCCTAATTTTGAAATTCGTGCATACTTTCAGGTGA  
TCGAGGGATATCACACGGTGAGCTAAACTGGCCTACTCGTCTAAGGAT

>PGSC0003DMG400002902LRR-RLKs\_2562

TGTAGGAGCTGCTTGTACTATAAGCGATCCGGATAAGAGGATTGATATGAAGGAAGCATTAAAGGAGGA  
TAGAAGAGATAAGTTTAATATGATGAACATAAACCTTCCAAAAGGTAATAGG

>PGSC0003DMG400002902LRR-RLKs\_2623

AGGAGGATAGAAGAGATAAGTTTAATATGATGAACATAAACCTTCCAAAAGGTAATAGGTTAGTAGATT

CGTGTGAAGCTTTAGTTTCGTTACCTGCCAGAGCGATCCTTAGCCTCCTTT

>PGSC0003DMG400002902LRR-RLKs\_2684

AGTAGATTCGTGTGAAGCTTTAGTTTCGTTACCTGCCAGAGCGATCCTTAGCCTCCTTTGATTCCGTTTTA

TCTCAGTTAAACTCCACAACGTCTCTCGACTCGTTCAAATGAATGTTGA

>PGSC0003DMG400002902LRR-RLKs\_2745

TTCCGTTTTATCTCAGTTAAACTCCACAACGTCTCTCGACTCGTTCAAATGAATGTTGATGCAGGAAACAA

ATGTCATTTTCTTCAAATACTGGAGCTGAGGTTCAATTTGCCAAACAAAA

>PGSC0003DMG400002902LRR-RLKs\_2806

CAGGAAACAAATGTCATTTTCTTCAAATACTGGAGCTGAGGTTCAATTTGCCAAACAAAACAGAGTTTACT

GTATATAAAACACCAAATGAGACTTCTAAATTACCAAAAACATAAAGTT

>PGSC0003DMG400002902LRR-RLKs\_2867

GAGTTTACTGTATATAAAACACCAAATGAGACTTCTAAATTACCAAAAACATAAAGTTGATTACTAATT

CTACATGTTTTGTTTTATTGTATAGAATTTGTTTCTTTTTTTGTGTGTGT

>PGSC0003DMG400002902LRR-RLKs\_2928

TTACTAATTCTACATGTTTTGTTTTATTGTATAGAATTTGTTTCTTTTTTTGTGTGTGTGAGTTAAAGAGGG

ACATGGATCCTCAAGGCAATGATCAATTTAGACATAGATTTTGAAGAC

>PGSC0003DMG400002902LRR-RLKs\_2989

GTTAAAGAGGGACATGGATCCTCAAGGCAATGATCAATTTAGACATAGATTTTGAAGACAACCTTCCGG

CTTGATCTCCTCCTTTCTGCTTATGTTAGCTCACGTTGTCACACAATCTAA

>PGSC0003DMG400002902LRR-RLKs\_3050

CCTTCCGGCTTGATCTCCTCCTTTCTGCTTATGTTAGCTCACGTTGTCACACAATCTAATCTAACGCGCTCC

CATCAAGAGATCGTTTGATGATTTAGCAAACAAGATGATCTAGCTTTG

>PGSC0003DMG400002902LRR-RLKs\_3111

TAACGCGCTCCCATCAAGAGATCGTTTGATGATTTAGCAAACAAGATGATCTAGCTTTGATTTGTCAAAA

AACCTATGTTGTTGCGACTCTCCAGAAGGGTTTTTCGTGCACTTGTTAGAT

>PGSC0003DMG400002902LRR-RLKs\_3164

GCTTTGATTTGTCAAAAACCTATGTTGTTGCGACTCTCCAGAAGGGTTTTTCGTGCACTTGTTAGATCCTC

CCAAAATGCACTACTTTTGAAGATTTGACATGCATCCTATGACATTTG

>PGSC0003DMG400002902LRR-RLKs\_610

CCAAGTGAAGTACTTGATGGAACCTTCGTCTTGAAAGTAATGCATTTTCAGGACGCGTTCCATCTTTCTCA  
CAAGTGAGTTTAACATCTATTGATCTTTTGAATAACAAATTACAAGGCG

>PGSC0003DMG400002902LRR-RLKs\_671

ATCTTTCTCACAAGTGAGTTTAACATCTATTGATCTTTTGAATAACAAATTACAAGGCGAAATCCCTCAGG  
GGATGTCAAAATTTGGTGCTGATCCTTTTAAAGGAAATGCAGACTTATG

>PGSC0003DMG400002902LRR-RLKs\_976

TGCACGTTGGTAGCTCGATTAGGAAGAGCATGAGCATTATAGCAAAGGAGGTGATTCTGGTCGTGGA  
TCAACACGAAGGGGAGGGTCACAAGGTGGTAAGGCTATGGGAGATCTCGTGT

>PGSC0003DMG400002906-(rev)LRR-RLPs\_1054

GTTAACAGGACATGTCATATAGGGTTTCTGAGTCTTACCAGCATATACATGTTCTGGTGATATTGTGA  
ATGACTCTTGCTACTGATGTCTTTTTTCTTCATGCTTCATCCTGTTTCT

>PGSC0003DMG400002906-(rev)LRR-RLPs\_1116

TATTGTGAATGACTCTTGCTACTGATGTCTTTTTTCTTCATGCTTCATCCTGTTTCTTTTCTCCACAATTC  
CCATATTATAAACTAGGAAGAGCTCTGTAAAAAGGTCTCATATTTG

>PGSC0003DMG400002906-(rev)LRR-RLPs\_1302

CTGTAAAAGAACAAAAATAGGACCAAGTCCTGTTAGCTGAATCAGATTTTCAGAAACACATGTTGAGGTC  
TTTCAACACCAGCATTGGATGGGCCTTCAAGACCCCATCTTCTCATT

>PGSC0003DMG400002906-(rev)LRR-RLPs\_1426

ATCAACGGGGATTTTAAATTTCCATAATCTCCACATTATGAAAGCCATTTTAAATGGTACACCCTTACTCC  
ACATCCATTTATAAATTTTGTCTTCTCCGCCTTATGTCTGATATAATG

>PGSC0003DMG400002906-(rev)LRR-RLPs\_1550

GCAGATTTAACTGAGAACTTCCCCTTGTCTCTAGCATCCAACAAGGTTTATCCATTGCTGTTTCTTCTTT  
GGAGGATGAATATTCTGCAGAATATGGTTCACCAATTCCTGTGGGAGT

>PGSC0003DMG400002906-(rev)LRR-RLPs\_1736

TCATCACATTGAAATTTCTTCCAGTAATAGTGTACAAATCCCCTAGGCCCGTCCAGTTATCATGCCAGAC  
TGATACTGATCCTTTCTCCATTTTCCATAAAATTTGGTTTTCAATGAGA

>PGSC0003DMG400002906-(rev)LRR-RLPs\_1798

ATGCCAGACTGATACTGATCCTTTCTCCATTTTCCATAAAATTTGGTTTTCAATGAGATCTCTAGCTTTAAG  
CATTTTTTCCATAAAATTTGGCTCGGAACTCTTCAAGAGCTACAGGT

>PGSC0003DMG400002906-(rev)LRR-RLPs\_186

TTTTCCAGTTGTGTTCAAAATTTCTTCCTCTTGCTTTCTTTCTTCTCTCCCTCTTTGGTCTCTGATT  
CCCATCATTCTGCAAGTGATTTTGCATGGAGTGCAAGGGTAGTTC

>PGSC0003DMG400002906-(rev)LRR-RLPs\_1922

ATATTAAAGTCGAACAAGTTCCATGGACCTATAAGTATGTGTTAGACTAAGTTTTGCTTTCCAAGTTGT  
GAATTTTTGATCTTTCTCGTAATGATTTCAAGTGGCTCACTTCTGCAAAC

>PGSC0003DMG400002906-(rev)LRR-RLPs\_1984

CAAGTTGTGAATTTTTGATCTTTCTCGTAATGATTTCAAGTGGCTCACTTCTGCAAACGTTTTTGAAACT  
TCAAGGCAATGATCAAATTAGATGGTGAAGACACAGGAAATATCAAGTA

>PGSC0003DMG400002906-(rev)LRR-RLPs\_2046

TTGGAAACTTCAAGGCAATGATCAAATTAGATGGTGAAGACACAGGAAATATCAAGTACATGGAATCTG  
TGTTGAATTCGTCATTTGTCACATCGTATGAGGATTCAGTGAGTTTGTTAA

>PGSC0003DMG400002906-(rev)LRR-RLPs\_2108

GAATCTGTGTTGAATTCGTCATTTGTCACATCGTATGAGGATTCAGTGAGTTTGTAATCAAAGGGCGG  
GATATTGAGCTACAAAGAATCAGCACAATAACGACAACCATAGATCTCTCA

>PGSC0003DMG400002906-(rev)LRR-RLPs\_2170

AGGGCGGGATATTGAGCTACAAAGAATCAGCACAATAACGACAACCATAGATCTCTCAAGCAACCATTT  
TGAAGGTGTCATTCCGAAAACACTGAAGGATCTCATATCACTTTGGCTACT

>PGSC0003DMG400002906-(rev)LRR-RLPs\_2232

ACCATTTTGAAGGTGTCATTCCGAAAACACTGAAGGATCTCATATCACTTTGGCTACTCAATTTATCTCAT  
AACAACTAAGAGGTGATATTCCAATAAAACTAGGACAATTGAGTATGC

>PGSC0003DMG400002906-(rev)LRR-RLPs\_2294

TTATCTCATAACAATCTAAGAGGTGATATTCCAATAAAACTAGGACAATTGAGTATGCTTGAAGCTTTAG  
ATCTCTTTGGAATCGGCTCACTGGAAAGATTCCACAAGAATTGACAAGA

>PGSC0003DMG400002906-(rev)LRR-RLPs\_248

TGGTCTCTGATTCCCATCATTCTGCAAGTATTTTGCATGGAGTGCAAGGGTAGTTCAATTCCTCCATCT  
CCAGGTTAAAAGCTCCATCTTGACTCCAGATCCTCCCTTTTGCTGAGAT

>PGSC0003DMG400002906-(rev)LRR-RLPs\_2728

TTTGTGGAATTTTTGATGGACTCATGCCTCACGAAAGAACAAGGCCGAAGAAGAGAGCTCAGAGACGA

CGAACTTAATGGAAGATTGAGAGGGGCCAAGTTGTCTTTGTTTGATTGAACT

>PGSC0003DMG400002906-(rev)LRR-RLPs\_2790

AGACGACGAACTTAATGGAAGATTGAGAGGGGCCAAGTTGTCTTTGTTTGATTGAACTTTTTTGGTTGTG  
TGTTTTAATTTTCTGTTTGTGTGTGTATATGTTTGATAGAAACATAAT

>PGSC0003DMG400002906-(rev)LRR-RLPs\_372

TTGTTGACTGGAATAGCAATAGCATTTCCTGTTTTGTTGCCTTCTAACTTCTATGTAATTTTGTGTTTG  
TGAAAAATATATGTTGTAGCCTTCCTGTCCCTATCCCCTTAAGG

>PGSC0003DMG400002906-(rev)LRR-RLPs\_496

TACTCTTAAATATGGGCATAGTAATTTTTCATTATTTATGAGTCTCCTCGCAAGTGTCTCCCTGTTAAAATT  
TGTGAATGTGCAGCTCCCTCGGTCAATAGCAAAGTTTGCCACATGATC

>PGSC0003DMG400002906-(rev)LRR-RLPs\_620

AGCTTGTTTCCTTCCTTAGAATATGTTGGAAAATAACTTGTTTATCTTGTAGACATGATTGAATCTCTGT  
CACCATTTCTGCAATTATCCATGGACATTCCTTCCTTTCTAATACC

>PGSC0003DMG400002906-(rev)LRR-RLPs\_744

ACAAAAGCATTGAGTCAGTCTGTATGATTATTTGATTATGTTGTAACCTCTTGCAATGCTTGGATTCCCTCC  
AGAATAGCTTTAGCTTCGCGACTCTATTAGTAGTATTTTCTATACTTG

>PGSC0003DMG400002906-(rev)LRR-RLPs\_930

GATTTCTCTAGAAGTTCCATCTGTATTGATTTTACCCACCCATTTGGTGGGAATTCCCATAAGACCCTTT  
TCACTTTCAATTTAGTTTGTAGCTTGTCCATTCTATGAGCATATCAG

>PGSC0003DMG400002906-(rev)LRR-RLPs\_992

AAGACCCTTTTCACTTTCAATTTAGTTTGTAGCTTGTCCATTCTATGAGCATATCAGGCCAGTTAACAGG  
ACATGTCATATAGGGTTTCCTGAGTCTTACCAGCATATACATGTTCCCTG

>PGSC0003DMG400002908-(rev)LRR-RLPs\_357

GTCATGTGGAGCCTCATGTTTAAATATCGTAATCCAAAATGGTTTGTGGAATTTTTTGATAGACTCATGCC  
TCACAAAAGAAGAAGGCCAAAGAAGAGAGCTCAGAGACGACGGATTTAA

>PGSC0003DMG400002910-(rev)LRR-RLPs\_1054

GCCATATTCCTCCACAATCTCTAAATTGAAGCACCTCACACGTTTATATCTTTCCGACAACCTCTTTTCAG  
GTGAAATTCCTGATGGTTTCTTAACCTCAAAGAGCTACGTTATTTAT

>PGSC0003DMG400002910-(rev)LRR-RLPs\_1178

TTCTCACAACCTCCTTTTCAGGTGAAATTCCTGATGTTTTCTCTAACCTCAAAGAGCTATATTATTTAGATCT  
TTCTGAAAACAGCTTCACTGGTCCATTTCCCGATTCAATTTTAAGTTT

>PGSC0003DMG400002910-(rev)LRR-RLPs\_124

TTTCTGGTTATGGATTAGAACTTGATGAGAGAACATTTGAAACAATGCTTCACAACCTTTACAAATCTGGA  
GTTACTCTCTCTTGGCGACATCACATCACCGATACCTGTAAGTATTCATC

>PGSC0003DMG400002910-(rev)LRR-RLPs\_1240

ATTTAGATCTTTCTGAAAACAGCTTCACTGGTCCATTTCCCGATTCAATTTTAAGTTTGACACAACCTTCATA  
CCTTAGACTTGTGCGAGTAATCCCTATCTGGCCCACTGCCTAGCAACC

>PGSC0003DMG400002910-(rev)LRR-RLPs\_1364

CATGCTTCAAAGCTAACTTTTGTGGATTTGTCATACAACCTCACTGAATGGTACCATACCATCTTGGGTGT  
TCAGCCTACCTTTGCTACATTCAGTGTGCTCCAACATAACCGATTGAG

>PGSC0003DMG400002910-(rev)LRR-RLPs\_1612

CATCAAATAACATCACCATTTGATGAGGGAATGAATCTACAGTATCTTGATCTGAAATTTAACTCCCTTCTG  
GGTCCACTACCTTTATCCATTTGTAACATGAGCTCGCTTATCTTATTAG

>PGSC0003DMG400002910-(rev)LRR-RLPs\_1922

CAAGTGTGGTGGTCTAGAAGTACTTGATGTGGGGAACAATGCTATAAATGACACGTTTCCATCTTGGCTT  
GAAATTCTTCAAGAGCTGCAGGTCCTTATATTAAGTCGAACAAATTCCA

>PGSC0003DMG400002910-(rev)LRR-RLPs\_1984

CTTGGCTTCAAATTTCTTCAAGAGCTGCAGGTCCTTATATTAAGTCGAACAAATTCCATGGACCTATAAG  
TATATGTCAAATAAGTTTTGCTTTTCCAAGTTGCGAATTTTTGATCTTT

>PGSC0003DMG400002910-(rev)LRR-RLPs\_2108

TAATGATTTCAAGTGGCTCACTTCTGCAAATGTTTTTGGAACTTCAAGGCAATGATCAAATCAGATGGC  
GAAGACACAAGAGAGATAAAGTACATGAATTCTGTGTTGTATTGCGCCATT

>PGSC0003DMG400002910-(rev)LRR-RLPs\_2170

CAGATGGCGAAGACACAAGAGAGATAAAGTACATGAATTCTGTGTTGTATTGCGCCATTTGTCACATCGT  
ATGAGGATTCAGTGAGTTTGGTAATCAAAGGGCACGATACTGAGCTAGAAA

>PGSC0003DMG400002910-(rev)LRR-RLPs\_2356

CACTAAAGGATCTCAGATCACTTTGGCTACTCAATTTATCTCATAACAATCTCAGAGGTCATATACCAATG  
GAATTGGGGCAATTGAGTATGCTTGAAGCTTTAGATTTCTCCTGGAATC

>PGSC0003DMG400002910-(rev)LRR-RLPs\_2418

ATACCAATGGAATTGGGGCAATTGAGTATGCTTGAAGCTTTAGATTTCTCCTGGAATCGGCTCACTGGAA  
AGATTCCACAGGAATTGACAAGATTGAACTTTCTGGCCTTCTTAAACGTC

>PGSC0003DMG400002910-(rev)LRR-RLPs\_248

TAGCAGCCTCTTCCAGCTTCATCATCTCCACACACTAAACCTTGCTGGCAATTACTTTTATCCTTCTTCAAT  
CCCACATAACATTGGCTGATTGAGGAATTTGAGGCATCTAAAACCTCTC

>PGSC0003DMG400002910-(rev)LRR-RLPs\_2480

CACTGGAAAGATTCCACAGGAATTGACAAGATTGAACTTTCTGGCCTTCTTAAACGTCTCTCAAATCAT  
CTCGTTGGACCAATTCCTCAAGTTCTACAATTCAACACATTTGAAAATGA

>PGSC0003DMG400002910-(rev)LRR-RLPs\_310

CTTCTTCAATCCCACATAACATTGGCTGATTGAGGAATTTGAGGCATCTAAAACCTCTCACTTTCAAGGG  
AAAATCCCAACAGAAATCCCATACCTTTCTAATTTGGTTTCACTTGATC

>PGSC0003DMG400002910-(rev)LRR-RLPs\_372

TTTCAAGGGAAAATCCCAACAGAAATCCCATACCTTTCTAATTTGGTTTCACTTGATCTTTCTGGTTATGG  
ATTAGAACTTGATGAGAGAACATTTGAAACAATGCTTCACAACTTCACA

>PGSC0003DMG400002910-(rev)LRR-RLPs\_434

TGGTTATGGATTAGAACTTGATGAGAGAACATTTGAAACAATGCTTCACAACTTCACAAATCTGGAGTTA  
CTTTCTCTCTTATGTCAACATCTCATCACCGATACCTGTAAGTATTCA

>PGSC0003DMG400002910-(rev)LRR-RLPs\_620

TCCTTCTTCGATCCCATATGGCATTGGCCGATTGAGGAATTTGAGGAATCTGATACTCGCTGACTTTGAT  
GGGAAAATCCCAACAGAAATTTCCATACCTTTCCAATTTGGTTTCACTTCA

>PGSC0003DMG400002910-(rev)LRR-RLPs\_682

ACTTTGATGGGAAAATCCCAACAGAAATTTCCATACCTTTCCAATTTGGTTTCACTTCATCTTTCTTCTTCT  
ATGGTAATGAATTACAACCTTGATGAGAGAACATTTGAAGCAATGTTTC

>PGSC0003DMG400002910-(rev)LRR-RLPs\_806

CTTCACAAATCTGGAGATACTTTCTCTCTATCAAGTCAACATCTCATCTCCGAATATTTCTTCTCCTTAAC  
GGAGTTGGATATATCATAACAGGCATCTCTGGTTCCATTCTGATTC

>PGSC0003DMG400002910-(rev)LRR-RLPs\_868

CTTCTTAACGGAGTTGGATATATCATAACAGGCATCTCTGGTTCCATTCTGATTCAATTGGCACCTTA

AAATCCTTGAATATCTTGATCCTCTATAGATGTCAATTCTCTGGTTCCA

>PGSC0003DMG400002910-(rev)LRR-RLPs\_930

GGCACCTTAAAATCCTTGAATATCTTGATCCTCTATAGATGTCAATTCTCTGGTTCCATTCTGATTCCATA

GGAAACCTAACACAAATTACGAAGTTGATTTTATCTCATAATCATTTC

>PGSC0003DMG400002910-(rev)LRR-RLPs\_992

TGATTCCATAGGAAACCTAACACAAATTACGAAGTTGATTTTATCTCATAATCATTTCACTGGCCATATTC

CTTCCACAATCTCTAAATTGAAGCACCTCACACGTTTATATCTTTTCGGA

>PGSC0003DMG400002914-(rev)LRR-RLPs\_183

GGTTCAAATCTGATCTTTTTTGCTTTACAGTTCGGGATTTCTTCTGAAGAACAGACATGCCTACTCTTGT

TAATTACAGTGGTGAGTTTCAAAAACTTCATTTCTTGTTTTTATAAGT

>PGSC0003DMG400002914-(rev)LRR-RLPs\_2013

TGCTTCAATGTTGTCAAAGTGAACTACATGGTCTAAACATCACAGATTTCTCGCTTGCTGTCATTGGTC

ACTATGGCAAGCTGATTACCAATCTTAATCTTTGTTCACTTCGTAATGT

>PGSC0003DMG400002914-(rev)LRR-RLPs\_2135

GTCAGAAGGGATTTTGGGTCATGGGTAATGCTCAAGGCCTCCAGTCTCTGGTTTTCTTTGACAATCACCTT

ATGCCAGGGAGCCACTGATGTCGGTCTTGAAGCTGTTGGAAAGGGATGCC

>PGSC0003DMG400002914-(rev)LRR-RLPs\_2196

AATCACCTTATGCCAGGGAGCCACTGATGTCGGTCTTGAAGCTGTTGGAAAGGGATGCCCAAATCTCAA

ACATATGTGCATTCGCAAGTGTGCTTTGTTTCTGACGGTGGGCTTGTTGC

>PGSC0003DMG400002914-(rev)LRR-RLPs\_244

CTACTCTTGTTAATTACAGTGGTGAGTTTCAAAAACTTCATTTCTTGTTTTTATAAGTTATGGGGTTGTTT

ATATTTCAATGAATTTTGAAGTTCAGTTACAATTTTTTGATTTTTCAT

>PGSC0003DMG400002914-(rev)LRR-RLPs\_305

TGGGGTTGTTTCATATTTCAATGAATTTTGAAGTTCAGTTACAATTTTTTGATTTTTCATCATGAATTACTGA

GATGGAGATGGATTTGTTATGTTTAGATTCATATAAAGTTGTTTATCA

>PGSC0003DMG400002914-(rev)LRR-RLPs\_3355

AAAATTTTCACTCATGTTGCTCCTCGAAAGAATCAGGCCGTTTGAATCATTACAGCTACAACATCGACAGA

CAATATCTATCGATAGTCTTTTAGTGTTTCATTGTAAGTATTCTACTGTG

>PGSC0003DMG400002914-(rev)LRR-RLPs\_3416



ATCGACAGACAATATCTATCGATAGTCTTTTAGTGTTTCATTGTAAGTATTCTACTGTGTGCTTTTAGACT  
TTAGTTGCTTTGAGCAAATTTCTGTTGTTGTTGTGCCTGTTATTCTAG

>PGSC0003DMG400002914-(rev)LRR-RLPs\_3477

TCTTTTAGACTTTAGTTGCTTTGAGCAAATTTCTGTTGTTGTTGTGCCTGTTATTCTAGGGGCTTGGCCATT  
ACAACCTTACCTAGGTTGTTTTTTTAACCAGTCCCTTGTTTTTGAT

>PGSC0003DMG400002914-(rev)LRR-RLPs\_3538

GCTTGGCCATTACAACCTTACCTAGGTTGTTTTTTTAACCAGTCCCTTGTTTTTGATAGGATTATCAATT  
TCCTATTTTTTACCAGGTTCCACATATTCAGATTTGTACTCTTGCAAC

>PGSC0003DMG400002914-(rev)LRR-RLPs\_3578

CAGTCCCTTGTTTTTGATAGGATTATCAATTTCTATTTTTTACCAGGTTCCACATATTCAGATTTGTACT  
CTTGCAACTATGTTTTACATATATAATGAAGTACTAGTTTGTTTTGAA

>PGSC0003DMG400002914-(rev)LRR-RLPs\_366

TGAATTACTGAGATGGAGATGGATTTGTTATGTTTAGATTCATATAAAGTTGTTTATCATGAATAAAGTTT  
ATAACTTTGTATAGGTAGATTATTGTTGAGATGAATATGAGCAATAATT

>PGSC0003DMG400002914-(rev)LRR-RLPs\_427

AATAAAGTTTATAACTTTGTATAGGTAGATTATTGTTGAGATGAATATGAGCAATAATTTATTGAGATGA  
AGATGAATTCTTTAAGGTTTAGATCCATGAATATAGTCTATAACTATGT

>PGSC0003DMG400002914-(rev)LRR-RLPs\_549

AGGTGCATGATTGTTGATAACTTGAGATGAATATGGTTTATTAATTTACTGAAATGAAGATGATCTTTTA  
GGTTTTAGATCCAATCATGTTTTATTTAAAAAAGGAAGTTGGTTTATGA

>PGSC0003DMG400002914-(rev)LRR-RLPs\_610

GATCTTTTAGGTTTTAGATCCAATCATGTTTTATTTAAAAAAGGAAGTTGGTTTATGAGATAATAACTAA  
AAGTTGAGTGACTATCTAAGAAATTAACCTCATATAACTTTGTATAGGTG

>PGSC0003DMG400002914-(rev)LRR-RLPs\_671

TAATAACTAAAAGTTGAGTGACTATCTAAGAAATTAACCTCATATAACTTTGTATAGGTGCATGATTGTTG  
AGGTGAATATGAGCATTAAATTTACTGAAATGGATAAAAAAGGGAAAAAAG

>PGSC0003DMG400002914-(rev)LRR-RLPs\_976

AATAGGTAGATCTAAAGCTTCAATTCACATGTGATAGTTGTTTCTCTGTTATACTTGAAGTTGAAGTGAA  
AATTCATAAGAAATGGGCATATGGATGAATACTTGTAATAATTCTTTCATT

>PGSC0003DMG400002937LRR-RLPs\_0

GAGTGATTTGTAAGAAGAGAACATCCATCCTTTTTTTGGCTGAATACGAAAAAGAAAGATGGGACATTT  
CTTTTTCTTTTATTCATTTCTGTGTGTTGTGTTGCTAATAAGTGAATGTTT

>PGSC0003DMG400002937LRR-RLPs\_1054

TTGGATCTTTCATCTAACTCCCTTTCAGGTGAAATTCCCAACGTTTTCTCTAACCTCCAAGAGCTACGTTAT  
TTACATCTTTATGATAACAGGTTTCATCGGTTCAATTCCTTCTACAATT

>PGSC0003DMG400002937LRR-RLPs\_1116

GCTACGTTATTTACATCTTTATGATAACAGGTTTCATCGGTTCAATTCCTTCTACAATTTTAAATTTGACACA  
TCTTGAAAGCTTAGCCCTGTCGACAAATTCCTATCTGGCCCACTTCC

>PGSC0003DMG400002937LRR-RLPs\_1178

ATTTGACACATCTTGAAAGCTTAGCCCTGTCGACAAATTCCTATCTGGCCCACTTCCAGCTAATAAAGCG  
AGCATTCTTCAAAGCTAACCCAACCTGGATTTGTCTGACAACTCACTGA

>PGSC0003DMG400002937LRR-RLPs\_1240

AATAAAGCGAGCATTCTTCAAAGCTAACCCAACCTGGATTTGTCTGACAACTCACTGAATGGTACCATAC  
CGTCTTGGGTGTTTAACTCCCTTAGCATCTTCATTGTGGCTCCATAAT

>PGSC0003DMG400002937LRR-RLPs\_1364

AATTTAGTGGACTACCCGATGAAATCAAACAAACCCAACATTAGAATACCTGTATTTAAGCAATAATCA  
ACTCAGTGGTTCTTTACACCAATCACTTGCGAATCTCACAAACCTTTCTA

>PGSC0003DMG400002937LRR-RLPs\_1426

AATAATCAACTCAGTGGTTCTTTACACCAATCACTTGCGAATCTCACAAACCTTTCTACCCTTGACCTTCA  
ACAAATAACATCACCGGTGATGCAGGAACAAATATCACTTTTCCTCGC

>PGSC0003DMG400002937LRR-RLPs\_1488

TGACCTTTCAACAAATAACATCACCGGTGATGCAGGAACAAATATCACTTTTCCTCGCCTACAAGTTTTGC  
AGTTATCATGTTGTGAACTGAAGGATTTTCCATATTTCTTGAGAAATGT

>PGSC0003DMG400002937LRR-RLPs\_1550

AAGTTTTGCAGTTATCATGTTGTGAACTGAAGGATTTTCCATATTTCTTGAGAAATGTAAAGACACTTGA  
GGTCTTGGATATGTCTAAGAATAAGATTCGTGGTCAAATCCCTAACTGGT

>PGSC0003DMG400002937LRR-RLPs\_1612

ACACTTGAGGTCTTGGATATGTCTAAGAATAAGATTCGTGGTCAAATCCCTAACTGGTTTAGCAGCATGA

GGTGGGACTCGTTGGAGTTCCTAAATCTTTCACATAATTCGTTAACAGGC

>PGSC0003DMG400002937LRR-RLPs\_1674

CAGCATGAGGTGGGACTCGTTGGAGTTCCTAAATCTTTCACATAATTCGTTAACAGGCCACCTACCACAA  
TTTCATTACCATAGTCTAGAGTATCTTGATCTTAAATTTAACTCCCTTCA

>PGSC0003DMG400002937LRR-RLPs\_1736

TACCACAATTTCAATTACCATAGTCTAGAGTATCTTGATCTTAAATTTAACTCCCTTCAGGGTCCACTACCT  
CATCCATTTGTAACATGAGCAGCCTTAACATTCTAGATTTATCACGCA

>PGSC0003DMG400002937LRR-RLPs\_1798

CCACTACCTTCATCCATTTGTAACATGAGCAGCCTTAACATTCTAGATTTATCACGCAACAACCTTCAGTAA  
CTCGATTCCAAGTTGCTTGGGAAACATGGCTAGTCTAACAGTGCTGGAC

>PGSC0003DMG400002937LRR-RLPs\_186

ACACTTTGAGATTATATCCTACCCTAATTCCTATGTCCTATTCATTTCCCAAGAACAAGTCTTGGAAATG  
AGAGTAGGGACTGCTGCATTTGGAATGGAGTCACTTGTGATATGTTAAC

>PGSC0003DMG400002937LRR-RLPs\_1860

CTTCAGTAACTCGATTCCAAGTTGCTTGGGAAACATGGCTAGTCTAACAGTGCTGGACTTAAGAAGGAA  
CAATTTACAGGGAGTCTTCCCTCATTATGTGCGCAGAGCACTTTATTGAG

>PGSC0003DMG400002937LRR-RLPs\_1922

GAAGGAACAATTTACAGGGAGTCTTCCCTCATTATGTGCGCAGAGCACTTTATTGAGAACCATTGTCTT  
GAATGGTAATCGTTTTGAAGGAAGTCCCGATGTCGTTGCTCAAGTGTG

>PGSC0003DMG400002937LRR-RLPs\_1984

ATTGTCTTGAATGGTAATCGTTTTGAAGGAAGTGTCCCGATGTCGTTGCTCAAGTGTGATGGTCTACAAG  
TCCTTGACGTGGGGAACAATGCTATAAATGACACATTTCCAGCTTGGCTC

>PGSC0003DMG400002937LRR-RLPs\_2108

CTCTTCAAGAGCTGCAGGTCCTTATATTAAGTCGAACAAGTTCATGGACCTATAAGTACTAGGAAGAA  
GTTTTACTTTCCAGGTTGCGGATATTTGATCTCTCTCAAATGAGTTCA

>PGSC0003DMG400002937LRR-RLPs\_2170

AGGAAGAAGTTTTACTTTCCAGGTTGCGGATATTTGATCTCTCTCAAATGAGTTCAGTGGCTCACTGC  
CTGCAGAAGTTTTTCGAACTTCAAAGCGATGATCAAATTAGATGACAGA

>PGSC0003DMG400002937LRR-RLPs\_2232

CTCACTGCCTGCAGAAGTTTTTCGAAACTTCAAAGCGATGATCAAATTAGATGACAGAGAGGAAGGCGA  
GATCAAATATATGAGTCAATATTTGAATGGACATTCAATATATGAGGATTC

>PGSC0003DMG400002937LRR-RLPs\_2294

AAGGCGAGATCAAATATATGAGTCAATATTTGAATGGACATTCAATATATGAGGATTCAGTGAGGTTGG  
TGATCAAAGGCCAGTATATGGATCTAGAAAGAATCAGCACAAATTATGACAG

>PGSC0003DMG400002937LRR-RLPs\_2480

TTTGGCTACTCAATTTATCCCATAACAATCTCAAAGGTGATATCCCAATGGAATTGGGGCAATTGAATAT  
GCTTGATGCCTTAGATCTCTCCTGGAATCGGCTCACTGGAAAGATTCCGC

>PGSC0003DMG400002937LRR-RLPs\_2542

TTGAATATGCTTGATGCCTTAGATCTCTCCTGGAATCGGCTCACTGGAAAGATTCCGCAGGAATTGACAG  
AATGAACTTTCTGGCATTCTTAAACCTCTCTCAAATCATCTTGTCGGAC

>PGSC0003DMG400002937LRR-RLPs\_2604

ATTGACAGAATGAACTTTCTGGCATTCTTAAACCTCTCTCAAATCATCTTGTCGGACCAATTCCTCAAGG  
TCCACAATTCAACACATTTGGAAATGACTCGTATGGTGGAAACCTTGAT

>PGSC0003DMG400002937LRR-RLPs\_372

CCTCTTCCAACCTTCATCATCTCCACACACTAAACCTTGCTTACAATAACTTCAATTATTCTTCAATCCCACAT  
AACATCGGCCAATTGACGAATTTGAGGCATCTCAACCTCTCTGAGTC

>PGSC0003DMG400002937LRR-RLPs\_434

CAATCCCACATAACATCGGCCAATTGACGAATTTGAGGCATCTCAACCTCTCTGAGTCTGGCTTTGATGG  
GCAAATCCCAACAGAAATATCATACCTTTTGAATTTGGTTTCACTTGATC

>PGSC0003DMG400002937LRR-RLPs\_496

TTTGATGGGCAAATCCCAACAGAAATATCATACCTTTTGAATTTGGTTTCACTTGATCTTTCTGGGTATGA  
ATTACAACCTTGATGAGAGAACATTTGAAACAATGCTTCACAACCTCACA

>PGSC0003DMG400002937LRR-RLPs\_558

TGGGTATGAATTACAACCTTGATGAGAGAACATTTGAAACAATGCTTCACAACCTCACAATCTGGAGCTA  
CTTTCTCTCTCTCAGGTCAACATCACATCTCCGATACCTATGAATATGTC

>PGSC0003DMG400002937LRR-RLPs\_62

GACATTTCTTTTTCTTTTATTCATTTCTGTGTGTTGTGTTGCTAATAAGTGAATGTTTTTGTTCCTTTGA  
GCATCATCTTTGCTCTCCCACTGAAGCTTCTGCTTTGCTTCAGTTTA

>PGSC0003DMG400002937LRR-RLPs\_682

TCCTTAAGGTACGTGGATCTTGGATTACTAATCTGCGAGGTGTTGTCCCAGAGAGTCTTTTCCTTCTGCC  
AAACTTGAAAACCTCAAATTGGGTGTGAATCTTCTTCTCAAAGGAGTT

>PGSC0003DMG400002937LRR-RLPs\_744

CCTTCTGCCAACTTGAAAACCTCAAATTGGGTGTGAATCTTCTTCTCAAAGGAGTTTTACCAAAGATC  
CCCCTGAGCAACACTCTGTTGGAGTTAGATATTTCACTCACAGGCATCTC

>PGSC0003DMG400002937LRR-RLPs\_806

CAAAGATCCCCCTGAGCAACACTCTGTTGGAGTTAGATATTTCACTCACAGGCATCTCTGGTTCCATTCCT  
GATTCAATTGGCACCTTAAGTTCCTTGAATATCTTGAACCTCGAACTAT

>PGSC0003DMG400002937LRR-RLPs\_868

TCCATTCTGATTCAATTGGCACCTTAAGTTCCTTGAATATCTTGAACCTCGAACTATGTCAATTATCTGGT  
TCAATTCTGATTCCATAGGCAACCTAACACAAATTACGGAGTTGATT

>PGSC0003DMG400002937LRR-RLPs\_930

ATTATCTGGTTCAATTCCTGATTCCATAGGCAACCTAACACAAATTACGGAGTTGATTTTATCTACTAATC  
ATTTCACTGGCCATATTCCTTCCACAATCTCTAAATTGAAGCACCTCAC

>PGSC0003DMG400002937LRR-RLPs\_992

CTACTAATCATTTCACTGGCCATATTCCTTCCACAATCTCTAAATTGAAGCACCTCACACGTTTGGATCTTT  
CATCTAACTCCCTTTCAGGTGAAATTCCCAACGTTTTCTCTAACCTCC

>PGSC0003DMG400002954LRR-RLPs\_0

ATGACTCAAGGTATTAACCTTCTCCCTTTTTCCCTTTTAACTCTTTTCTAATAGATAGTAAAGGGTTGCTGCC  
GTTGAAGATAGAATCAGTGTCTACCAAGTAACGTTATAGATCATATC

>PGSC0003DMG400002954LRR-RLPs\_1024

ACTTCAATAAATTGGGTCAGACTTCTTACACTCTGGAGTTGATTAAGTTTCCCAATTTTCGTGACCTT  
GAGATTTGGGTAAGAAATAGCAAATATATGTGGTCATACATTCTATATA

>PGSC0003DMG400002954LRR-RLPs\_1088

TGACCTTGAGATTTGGGTAAGAAATAGCAAATATATGTGGTCATACATTCTATATATCAATGGTCTTGTT  
CGTTTTTGCATTTACGTACTIONAAGAAGCTAAAATGACCTTGTATAACCAT

>PGSC0003DMG400002954LRR-RLPs\_1152

CTTGTTTCGTTTTTGCATTTACGTACTIONAAGAAGCTAAAATGACCTTGTATAACCATCAGGACAAAACCTACC

GATGACATAGTTGAAGGAGTTATGAAATATCTAGACACACCATCATGTT

>PGSC0003DMG400002954LRR-RLPs\_1216

AACTACCGATGACATAGTTGAAGGAGTTATGAAATATCTAGACACACCATCATGTTTGGACAAAACCTC

AACAAGCTTGAAGATGTTTCAATCCATTCTTTAACTATTCTAAAGTTGT

>PGSC0003DMG400002954LRR-RLPs\_128

CTTGATGGTTCATGAGGCTGCAAGAACTAGTATTTTGTCCAAAGATTGGAGATATAGTTGGGCCAAGCT

TCCCAATTTGGTGCTTGATAAGCAATTCTCCATGAAATTAGCTAAAAAATC

>PGSC0003DMG400002954LRR-RLPs\_1280

ACCCTCAACAAGCTTGAAGATGTTTCAATCCATTCTTTAACTATTCTAAAGTTGTAATATATTTTCGTAAAA

TTATTGTTTGCTCATGCTTCATCTTTGTCAAGGATGAGCATCTATCCG

>PGSC0003DMG400002954LRR-RLPs\_1344

TCGTAAAATTATTGTTTGTCTCATGCTTCATCTTTGTCAAGGATGAGCATCTATCCGGATAAAGCTTCTAAT

TCCAAAGAAGAATTGAATGTTGCCACAGAGTTGATGCGTTTCCCAGAG

>PGSC0003DMG400002954LRR-RLPs\_1394

TATCCGGATAAAGCTTCTAATTCCAAAGAAGAATTGAATGTTGCCACAGAGTTGATGCGTTTCCCAGAG

TATCTCCTAAGGCAGAGCTAATCTATCATCCAAATGAAGAGTTGGATTAA

>PGSC0003DMG400002954LRR-RLPs\_192

AAGCTTCCCAATTTGGTGCTTGATAAGCAATTCTCCATGAAATTAGCTAAAAAATCTCACAATGTCTTCAA

AGAAACAATAGATATGATTCTTACAACATATTGGAGATATTGTGAAG

>PGSC0003DMG400002954LRR-RLPs\_256

TCTTCAAAGAAACAATAGATATGATTCTTACAACATATTGGAGATATTGTGAAGTTTTATCTTGATGTT

TCAGGAGTACATTTGTCTACATATGCAGATATTGATAGATGGATGCTTT

>PGSC0003DMG400002954LRR-RLPs\_320

TGATGTTTCAGGAGTACATTTGTCTACATATGCAGATATTGATAGATGGATGCTTTATGTCACCAGAAAT

GGTGTCAAGAAGCTAAAGCTTAACATGACAAAAGATGGTACTTACAAACT

>PGSC0003DMG400002954LRR-RLPs\_384

AGAAATGGTGTCAAGAAGCTAAAGCTTAACATGACAAAAGATGGTACTTACAAACTACCTTCTTATATAT

TTAATTGTCCAACACTGACTCATTGAAACTCTTCAACTGCAACTTCAA

>PGSC0003DMG400002954LRR-RLPs\_448

ATATATTTAATTGTCCAACACTGACTCATTTGAAACTCTTCAACTGCAACTTCAAATTACCAAATTCTTTTC  
TTGGCTTACAGACTCTTACCGTCCTTCGGTTGGAAAAATAACCTTTG

>PGSC0003DMG400002954LRR-RLPs\_512

TTCTTTTCTTGGCTTACAGACTCTTACCGTCCTTCGGTTGGAAAAATAACCTTTGTGCCTGCAATAGAGT  
TTTATACTATCAATGTGCCCTTCTTGTCAAATAACCATAGATTTATG

>PGSC0003DMG400002954LRR-RLPs\_576

ATAGAGTTTTATACTATCAATGTGCCCTTCTTGTCAAATAACCATAGATTTATGTGATGGTACTCAATA  
CCTCAACATTGTGTTCTCATCTGAGTTGAAATCCTTGGTTGTTTCATGAG

>PGSC0003DMG400002954LRR-RLPs\_64

TTGCTGCCGTTGAAGATAGAATCAGTGTTCTACCAAGTAACGTTATAGATCATATCCTCGAGCTCTTGAT  
GGTTCATGAGGCTGCAAGAACTAGTATTTTGTCCAAAGATTGGAGATATA

>PGSC0003DMG400002954LRR-RLPs\_640

CTCAATACCTCAACATTGTGTTCTCATCTGAGTTGAAATCCTTGGTTGTTTCATGAGAGTCACTATAATCTT  
GACCTAAGTAACAACCTTCTTTAAGAAGTGCAAAAATTGACAGATTTAT

>PGSC0003DMG400002954LRR-RLPs\_704

TAATCTTGACCTAAGTAACAACCTTCTTTAAGAAGTGCAAAAATTGACAGATTTATACCTTGTGATTGATA  
ATCCAATACCTGCGGATAATAGATTAACCTTTGGAAAAGCTTCTTTTTAG

>PGSC0003DMG400002954LRR-RLPs\_768

ATTGATAATCCAATACCTGCGGATAATAGATTAACCTTTGGAAAAGCTTCTTTTTAGCTCGCCTACACTTGA  
GACACTTTGTTTGGGTAAATTTGAACTTGAGGTAAGAATCTAACGTGCT

>PGSC0003DMG400002954LRR-RLPs\_832

CACTTGAGACACTTTGTTTGGGTAAATTTGAACTTGAGGTAAGAATCTAACGTGCTGTTTTACTTAGATAT  
CTTCTTTGAGTGTGATCCTTCTTATTGTATAATGTTCCGTTAAAGCTTT

>PGSC0003DMG400002954LRR-RLPs\_896

TAGATATCTTCTTTGAGTGTGATCCTTCTTATTGTATAATGTTCCGTTAAAGCTTTTACTGCAGGTGTAG  
TCCCAAAGAGGCTTCTTGTATACTCAACTGCTTGTGGCATCTTGATTT

>PGSC0003DMG400002954LRR-RLPs\_960

GGTGTAGTCCCAAAGAGGCTTCTTGTATACTCAACTGCTTGTGGCATCTTGATTTAGATGTAACTTCA  
ATAAATTGGGTCAGACTTCTTACACTCTGGAGTTGATTAAGTTTCCCC

>PGSC0003DMG400002960LRR-RLPs\_1098

AAATAGCAGAAAAATGTCAAGGACTCCCTTAATAATTTTCAGTGATTGCAGGGCATCTCTCTAAAACGGC  
CAAGACATTA AAAAGTTGGGAGTATGTTGCCAAAACCTTAAATGAAATCA

>PGSC0003DMG400002960LRR-RLPs\_1159

TAAAACGGCCAAGACATTA AAAAGTTGGGAGTATGTTGCCAAAACCTTAAATGAAATCATTGCTAGCCA  
TCCAAATAAATGCTTAGGAGTGCTCGGTTTGAGTTACCATCACTTGCCTAA

>PGSC0003DMG400002960LRR-RLPs\_122

TCTTGATCAACCAATATTTTCAGAACTCTTTCATGATCACAGTACTGAAATGTTTCGATTCTCTTCGTGCTAC  
AGCTGAATATTTTCAAGATGTTCTTGAAAACACTAGCAATGAGAAAAT

>PGSC0003DMG400002960LRR-RLPs\_1281

GACTCAAACCATGCTTTCTTCTATGGGTAATTTCCCAGAGGATTTTCAAGTTGATACTTGGAGATTGATC  
CAATTATGGATCGCAGAAGGTTTCATAAGGGCACCTGCTGGAAGTCGTA

>PGSC0003DMG400002960LRR-RLPs\_1342

GAGATTGATCCAATTATGGATCGCAGAAGGTTTCATAAGGGCACCTGCTGGAAGTCGTAAAAGCTTGGA  
GGAAGTGGCAAATGTTATTTGGAGGATCTTATCAGCAGGAACTTGATAAT

>PGSC0003DMG400002960LRR-RLPs\_1403

AGCTTGAGGAAGTGGCAAATGTTATTTGGAGGATCTTATCAGCAGGAACTTGATAATGGCTTGAAAA  
AGGAGATTTAATGGTGAGGTTAAAGTATGCGGAATACATGATCTGCTGCGT

>PGSC0003DMG400002960LRR-RLPs\_1464

CTTGAAAAGGAGATTTAATGGTGAGGTTAAAGTATGCGGAATACATGATCTGCTGCGTGAGTTCTGTT  
TCATAGAAGCTGAAATGACTAAGTTTATGCATGTTGTGAGAACTCCATTTT

>PGSC0003DMG400002960LRR-RLPs\_1525

GTTCTGTTTCATAGAAGCTGAAATGACTAAGTTTATGCATGTTGTGAGAACTCCATTTTCACCAACACAA  
AAGCCTAATGTTTCGTCGTTTCAGTATTCAAAGGCATTTTTAGATGAGTA

>PGSC0003DMG400002960LRR-RLPs\_1586

CCAACACAAAAGCCTAATGTTTCGTCGTTTCAGTATTCAAAGGCATTTTTAGATGAGTATGCTTATAAGC  
TATTACCTCCTGTTGCCAGATCTATGTACTACTTTTCTCTATTGAATCTA

>PGSC0003DMG400002960LRR-RLPs\_1647

CTTATAAGCTATTACCTCCTGTTGCCAGATCTATGTACTACTTTTCTCTATTGAATCTACCTTTTGAACCCC



GTATTAAGCTTCTCGGGATATTGCCCATCTACCGTCATGATCCTATAA

>PGSC0003DMG400002960LRR-RLPs\_1708

TTTTGAACCCCGTATTAAGCTTCTCGGGATATTGCCCATCTACCGTCATGATCCTATAATACATGGATTTT

CTCTCGTTTCAACCTTCTCAGGGTATTGGCCATCTTCAATACAAATGT

>PGSC0003DMG400002960LRR-RLPs\_1769

CATGGATTTTTCTCTCGTTTCAACCTTCTCAGGGTATTGGCCATCTTCAATACAAATGTCAGGTTGAGTC

ATTTCCAGTTGTGATTACAAAGTTATTTCAATTTGAGATATCTCCAAATT

>PGSC0003DMG400002960LRR-RLPs\_183

CTTCGTGCTACAGCTGAATATTTTCAAGATGTTCTTGAAAACACTAGCAATGAGAAAATCAAATCTTTGG

AGGAAGATATTAGAGTTGTTGTTAGTGAGGCAGAGGATGTTGTTGAAATG

>PGSC0003DMG400002960LRR-RLPs\_1830

GGTTCGAGTCATTTCCAGTTGTGATTACAAAGTTATTTCAATTTGAGATATCTCCAAATTCGATGTTTTGGC

AATATTCCTGAATCAATCTCAGAGCTTCAGAATTTGCAAACCTCTAATTT

>PGSC0003DMG400002960LRR-RLPs\_1891

ATGTTTTGGCAATATTCCTGAATCAATCTCAGAGCTTCAGAATTTGCAAACCTCTAATTTGTGATGGTCATT

CTTTAGATATAACTTTACCTGAGAAGATATGGATGATGAAGAATTTGAG

>PGSC0003DMG400002960LRR-RLPs\_1952

GATGGTCATTCTTTAGATATAACTTTACCTGAGAAGATATGGATGATGAAGAATTTGAGGTATATACGTT

TAGGGGGAGCCAGTTATTTACCAAGTCCTAGAATAGATAACAAGATGCCA

>PGSC0003DMG400002960LRR-RLPs\_2013

ATATACGTTTAGGGGGAGCCAGTTATTTACCAAGTCCTAGAATAGATAACAAGATGCCAAATCTAGAGG

AATTATTCAGTATTTGTTACTCTAGTTGTACAAATGAAGTCTTTTCTAGCA

>PGSC0003DMG400002960LRR-RLPs\_2074

TCTAGAGGAATTATTCAGTATTTGTTACTCTAGTTGTACAAATGAAGTCTTTTCTAGCATTCCCAATCTAA

AGAGATTGACCATTCGTCTACCTTTGAGTGTCGGAGACAATATTCCTC

>PGSC0003DMG400002960LRR-RLPs\_2135

CCCAATCTAAAGAGATTGACCATTCGTCTACCTTTGAGTGTCGGAGACAATATTCCTCCTCAGCTCATCGA

TATGTCCAGCTTGAGAAAACCTCGAGTCAATCAAGTTTAACTGGTTACTT

>PGSC0003DMG400002960LRR-RLPs\_2196

AGCTCATCGATATGTCCAGCTTGAGAAACTCGAGTCAATCAAGTTTAACTGGTTACTTCCTTTCAAAA  
CCCCATCAACATATTTGCTTTTACAACATCACTTAGGACGTTGTCTTTAA

>PGSC0003DMG400002960LRR-RLPs\_2257

TTTCAAAAACCCCATCAACATATTTGCTTTTACAACATCACTTAGGACGTTGTCTTTAACTGATTGTGCTAA  
TTTTATTTGGAAAGACATATCATCAACTTTTATCATGTTACCAAATCT

>PGSC0003DMG400002960LRR-RLPs\_2318

GATTGTGCTAATTTTATTTGGAAAGACATATCATCAACTTTTATCATGTTACCAAATCTGAAGAGCTCAA  
ACTTAAAAGTTGTCGAGCCGAAGATGATGTATGGAGATTGAGTGATAAA

>PGSC0003DMG400002960LRR-RLPs\_2379

AAGAGCTCAAACCTTAAAAGTTGTCGAGCCGAAGATGATGTATGGAGATTGAGTGATAAAGACATTTTCA  
AAAGCTTGAAGTTGTTGTTACTGAAATACCCAAATCTTAAGTGTGGGAAG

>PGSC0003DMG400002960LRR-RLPs\_2440

CATTTTCAAAGCTTGAAGTTGTTGTTACTGAAATACCCAAATCTTAAGTGTGGGAAGCTAGCAGTGAT  
AACTTCCCAAATCTAAAACGTCTCGTTCTCATGAATTGCAACAACCTGCA

>PGSC0003DMG400002960LRR-RLPs\_2501

AGCAGTGATAACTTCCCAAATCTAAAACGTCTCGTTCTCATGAATTGCAACAACCTGCAAGAAATTCCAA  
CAGATTTTGGGGAAATTTGTACTTTACAATCGATTGAGTTACATAATTGC

>PGSC0003DMG400002960LRR-RLPs\_2562

AAATCCAACAGATTTTGGGGAAATTTGTACTTTACAATCGATTGAGTTACATAATTGCAGCACTTCTGCT  
GATGAGTCTGCCATAAATATTGTACAAGAACAAGAGGAAATGGGAAATA

>PGSC0003DMG400002960LRR-RLPs\_2623

CACTTCTGCTGATGAGTCTGCCATAAATATTGTACAAGAACAAGAGGAAATGGGAAATAATATCCTTAA  
GGTCTACATCAGCCACGGTAAGTTTTAAATGATAAATAAACCAAGAATAAG

>PGSC0003DMG400002960LRR-RLPs\_2684

ATCCTTAAGGTCTACATCAGCCACGGTAAGTTTTAAATGATAAATAAACCAAGAATAAGATTCCTTATTA  
GTTTAGGATTTGTTATCCTCTTGACCAACAAGTTTATAAATGTCAGGTAC

>PGSC0003DMG400002960LRR-RLPs\_2745

TCCTTATTAGTTTAGGATTTGTTATCCTCTTGACCAACAAGTTTATAAATGTCAGGTACAATGGTGAACCT  
TCTGGTGGACAATGTATTGCACCTATTAAGTGAAAATGTGTTGTTAATA

>PGSC0003DMG400002960LRR-RLPs\_2806

TGGTGAAC TTTCTGGTGGACAATGTATTGCACCTATTAAGTGAAAATGTGTTGTTAATAAAAAGCCGGAG  
ATGTCGAATTCAGTAATTTATTGAAAGAAGTGCGATGTCTCAAACAGTTTCG

>PGSC0003DMG400002960LRR-RLPs\_2867

AGCCGGAGATGTCGAATTCAGTAATTTATTGAAAGAAGTGCGATGTCTCAAACAGTTCGTTGACGTTGC  
ATGGAATAACACAGCGAAAGCAAGCAATGGGATGAATTGGTGAGAGATAT

>PGSC0003DMG400002960LRR-RLPs\_2928

GACGTTGCATGGAATAACACAGCGAAAGCAAGCAATGGGATGAATTGGTGAGAGATATTCAACTAAC  
ATTATTTAAAGCGGAAGATGCAATTGATGAATTTGTGATTCAATCGAAGCTG

>PGSC0003DMG400002960LRR-RLPs\_2989

AACTAACATTATTTAAAGCGGAAGATGCAATTGATGAATTTGTGATTCAATCGAAGCTGAATCGAGAAA  
AGAATAAAATTGGAAGAGTTTTTGATAAAGTGAGTCATATCAGTAATGTTA

>PGSC0003DMG400002960LRR-RLPs\_3050

TCGAGAAAAGAATAAAATTGGAAGAGTTTTTGATAAAGTGAGTCATATCAGTAATGTTAGGGCTCTGGT  
AGCTGAGATCAAAGAGATTCATTATAAGGCGACAAATTTTCGACAAAACAA

>PGSC0003DMG400002960LRR-RLPs\_3111

GCTCTGGTAGCTGAGATCAAAGAGATTCATTATAAGGCGACAAATTTTCGACAAAACAATTAACAAGCTT  
TTCAGTTTGTGTGTAATGTTGTAATTTTAAAGTAAAAAATCGATGAT

>PGSC0003DMG400002960LRR-RLPs\_3172

AACAAGCTTTTCAGTTTGTGTGTAATGTTGTAATTTTAAAGTAAAAAATCGATGATGGATGAAGAAA  
AATAATTTAGTTATGGACATCTCAATTAGGAGTGACAAGTCAAATCGAA

>PGSC0003DMG400002960LRR-RLPs\_366

CTACCAGTTGTTGAAAAAATGGATACCACAAAGAAACAAGTGATGGAGATTCTTTGTCATGATGCTGAT  
CAAATTCCTGAATTAACCGGGGATTCCTTGATTGGCGCTTCTTCTATGAGT

>PGSC0003DMG400002960LRR-RLPs\_488

TCCAATGCTGTCAGATCAGTTGGAAGATGATATTGTGCAGGGACTTGATGGTGACTTGGAGATAATAGA  
TAAGAGATTGAGAGGACCAACGTCGGATCTAGACATTGTCACCATATCAGG

>PGSC0003DMG400002960LRR-RLPs\_610

TGGGTGGCATTGGCAAAAACAACACTCGCTAAAAAACTTATGATCATCTCCAATCAGGTATCACTTTGA

CATTTTTGTTGGGTTACAATATCTCAAGAATTTCAATATAGAAATGTATT

>PGSC0003DMG400002960LRR-RLPs\_671

TCACTTTGACATTTTTGTTGGGTTACAATATCTCAAGAATTTCAATATAGAAATGTATTGTTAGAAGCTTT

ACATTGCATTTCAAAGCAAAGAGTTATTGAGAACACAAAAGATTATGAT

>PGSC0003DMG400002961LRR-RLPs\_1062

GAGTTACATGATTGCAACACTATTTCTGAGGAATCTGCCAGAAATATCGAACAGGAACAAGAGGAAATG

GGAAATAATATCCTTAAGGTCTACATCCATAACAACAACAGTAAGTTATAA

>PGSC0003DMG400002961LRR-RLPs\_378

AATTTGCAAACCTCTAATATATGATTGTTATTCTTCACATATGGCTTTACCCGGGAAGATATGGACGATGA

AGAACTTGAGGTATATACATTTAGGGAAAGCTAGTTATACACCAAATCCT

>PGSC0003DMG400002961LRR-RLPs\_441

ACGATGAAGAACTTGAGGTATATACATTTAGGGAAAGCTAGTTATACACCAAATCCTAGAATAGATAAC

AATCTTGTGACGGGGATGCCAAATCTAGAGGAATTTTTCAATATTTGTTAC

>PGSC0003DMG400002961LRR-RLPs\_504

GATAACAATCTTGTGACGGGGATGCCAAATCTAGAGGAATTTTTCAATATTTGTTACTCTAGTTGTACAA

ATGAAGTCTTTTCTAGAATCCCAATCTAAAGAGATTGAGCATTGTGCA

>PGSC0003DMG400002961LRR-RLPs\_567

TGTACAAATGAAGTCTTTTCTAGAATCCCAATCTAAAGAGATTGAGCATTGTGCATCTTCTATAGTCAG

AGAAAATATTCTCTATCGTCTCTTGGATATGTCCAGCTTGAGAAAACCT

>PGSC0003DMG400002961LRR-RLPs\_63

CGCTTCAGTATTCAAAGGCATTTTCAGATGTGTATGCTTATAAAGCATTACCCCCTGTAGCCAGATCTAT

GTAAGTCTTTTCATACTTGGATCTACCTTTGAACCCCATATTAAGCGT

>PGSC0003DMG400002961LRR-RLPs\_630

ATAGTCAGAGAAAATATTCTCTATCGTCTCTTGGATATGTCCAGCTTGAGAAAACCTGAGGCATTCAAGC

TTTACTGGAGATATATTTTGGAAAAGCCCATCAAAGATTTGTTTTTCCA

>PGSC0003DMG400002961LRR-RLPs\_693

TTCAAGCTTTACTGGAGATATATTTTGGAAAAGCCCATCAAAGATTTGTTTTTCCAACATCACTTAGGAA

GTTGATTTAGCTTGTGTAGTCATTTTATTTGGGAAGAGATATCATCA

>PGSC0003DMG400002961LRR-RLPs\_756

CTTAGGAAGTTGATTTAGCTTGCTGTAGTCATTTTATTTGGGAAGAGATATCATCAACTTTTATCATGTT  
GCCAAATCTTGAAGAGCTCAAACCTTAAATATTGTCGAGCCGAAGATGAT

>PGSC0003DMG400002961LRR-RLPs\_819

ATCATGTTGCCAAATCTTGAAGAGCTCAAACCTTAAATATTGTCGAGCCGAAGATGATGTATGGAGATTG  
ACTAGCAAAGACATATTCAAAGCTTGAAGTTGTTACTGAGCGAGCTAAAT

>PGSC0003DMG400002961LRR-RLPs\_882

AGATTGACTAGCAAAGACATATTCAAAGCTTGAAGTTGTTACTGAGCGAGCTAAATCTTAAGCATTGG  
GAAGCTAGCAGTGTTAACTTCCCATGTTTAAAACGTCTTGTTCTGAAGAAT

>PGSC0003DMG400002961LRR-RLPs\_945

CATTGGGAAGCTAGCAGTGTTAACTTCCCATGTTTAAAACGTCTTGTTCTGAAGAATTGCCAGGACCTGC  
AAGAAATCCAACAGATTTGGGGAAATTGGTACTTTGGAATCAATTGAG

>PGSC0003DMG400002980-(rev)LRR-RLPs\_0

ATGGAGGTAGTTGGTGGGGCATTCTCTCTTCAGCTTTGAATGTTCTCTTTGATAGGCTTGTCTCTCATGG  
TGATCTGCTCAACATGTTTCGGAAGCATAAGGATCATGTTTCAGCTCTTA

>PGSC0003DMG400002980-(rev)LRR-RLPs\_1178

GAGAGACATTTAAGTAGTGAAATATGGGAGCTTCCAAGTTGTTGGAATGGTATATTACCAGCGCTGAT  
GTTTGAGCTACAATGATCTTCTGCACATTTGAAGCAATGTTTTGCTTATT

>PGSC0003DMG400002980-(rev)LRR-RLPs\_1240

CGCTGATGTTTGAGCTACAATGATCTTCTGCACATTTGAAGCAATGTTTTGCTTATTGTGCAATATATCC  
CAAAGATTATCAATTTTGGAAAGACCAAATTATTCACCTGTGGATTGCT

>PGSC0003DMG400002980-(rev)LRR-RLPs\_1302

AATATATCCCAAAGATTATCAATTTTGGAAAGACCAAATTATTCACCTGTGGATTGCTAATGGTCTTGAC  
AGCAGTTGCAATCAGGTAACCAATACTTTCTTGAGTTGAGATCAAGATC

>PGSC0003DMG400002980-(rev)LRR-RLPs\_1550

ACATCTTGGACAATGTCGGCACATGTCCTATTCAATAGGAAAAGATGGTGACTTTGAGAAATTGAAAT  
CACTCTTTAAATCAGAGCAGCTGAGGACATTACTTCCAATGGATCTCCAGC

>PGSC0003DMG400002980-(rev)LRR-RLPs\_1612

TTGAAATCACTCTTTAAATCAGAGCAGCTGAGGACATTACTTCCAATGGATCTCCAGCGCCCTGATTATG  
GCCGAAGTAAGCTTAGCAAGAGGGTGCTGCATAACATACTGCCAAGACTA

>PGSC0003DMG400002980-(rev)LRR-RLPs\_1674

TGATTATGGCCGAAGTAAGCTTAGCAAGAGGGTGCTGCATAACATACTGCCAAGACTAACATCCTTAAG  
GGCATTATCATTGTCATGCTATCAGATTGTTGAGTTGCCGGATGCCTTGTT

>PGSC0003DMG400002980-(rev)LRR-RLPs\_186

TCAAATCGACATGTGAGCCAATGGTTTAATAAGCTTCAGAGTGCTGTGGACGGTGCTGAAAACCTTGATA  
GAACATGTCAACTATGAAGCTTTGAGGCTTAAGGTAGAAGGCCAGGATCAA

>PGSC0003DMG400002980-(rev)LRR-RLPs\_1860

CATTTGTACATTGTATAACTTGGAGACACTTCTCCTGTCATTTTGTGTTGATCTTGAGGAGCTACCGCTGC  
AGATGGAGAAGTTGATTAACCTGCGTCATCTTGACATACTCGATACTTG

>PGSC0003DMG400002980-(rev)LRR-RLPs\_1922

TACCGCTGCAGATGGAGAAGTTGATTAACCTGCGTCATCTTGACATACTCGATACTTGTCGCTTGAAGAT  
GCCGCTACATCTGAGCAAGATGAAAAGTCTCCATGGGCTAGTGGGAGCCA

>PGSC0003DMG400002980-(rev)LRR-RLPs\_2046

TCTTGTAGGTGGTCCTGGTGGTTTGAGAATGGAAGATTTGGGTGAAGTACATAACTTATATGAATCTCTA  
TCAGTTGTAGAGTTGCAAAATGTGGTTGATAGAAGGGAAGCTGTGAAGGC

>PGSC0003DMG400002980-(rev)LRR-RLPs\_2108

AATCTCTATCAGTTGTAGAGTTGCAAAATGTGGTTGATAGAAGGGAAGCTGTGAAGGCAAAGATGTGG  
GAGAAGAATCATGTTGGGCAGTTATCTTTGGAGTGGAGTGAAAGTAGTAGTG

>PGSC0003DMG400002980-(rev)LRR-RLPs\_2170

ATGTGGGAGAAGAATCATGTTGGGCAGTTATCTTTGGAGTGGAGTGAAAGTAGTAGTGCCAACAATTC  
ACAAACTGAAAGAGACATAGTTGATGAGCTACGCCACATAAAAACATAAAA

>PGSC0003DMG400002980-(rev)LRR-RLPs\_2232

CAATTCACAACTGAAAGAGACATAGTTGATGAGCTACGCCACATAAAAACATAAAAAGAAGTCGAAAT  
CAGTGGATATAGAGGGCTAACATTTCCAAATTGGCTAGCTGATCTTTTGTT

>PGSC0003DMG400002980-(rev)LRR-RLPs\_2294

TCGAAATCAGTGGATATAGAGGGCTAACATTTCCAAATTGGCTAGCTGATCTTTTGTTTCTTAAGCTGGT  
GAAATTGTCTCTTAGCTACTGCAAGGTCTGTTATTCTTGCCAGCATTAG

>PGSC0003DMG400002980-(rev)LRR-RLPs\_2356

AAGCTGGTGAAATTGTCTCTTAGCTACTGCAAGGTCTGTTATTCTTGCCAGCATTAGGACAACTCCCTTG

TTTGAAAATCCTTTCCATTAAAGGGATGCATGGAATAACAGAGGTGACG

>PGSC0003DMG400002980-(rev)LRR-RLPs\_248

CTTGATAGAACATGTCAACTATGAAGCTTTGAGGCTTAAGGTAGAAGGCCAGGATCAAAATCTTGCAGA

AACAAGCAACAAACAAGTAAGTGATCTCAACCTGTGCTTGAGTGATGATTT

>PGSC0003DMG400002980-(rev)LRR-RLPs\_2480

AATTCTATGGCAGTTTGTCTCCAAAAAGCCTTTTAACTGTCTTGAGGAAATTAGTTTTGAAGATATGCCG

GAGTGGAAGCAATGGCACGTACCAGGAAATGGAGAGTTCCCTATACTTG

>PGSC0003DMG400002980-(rev)LRR-RLPs\_2542

GATATGCCGGAGTGGAAGCAATGGCACGTACCAGGAAATGGAGAGTTCCCTATACTTGAGAAGCTTTCC

ATTATAAATTGCCCTGAACTCAGTTTGGAGACACCCATCCAACCTTTCAAGT

>PGSC0003DMG400002980-(rev)LRR-RLPs\_2604

GCTTTCCATTATAAATTGCCCTGAACTCAGTTTGGAGACACCCATCCAACCTTTCAAGTTTAAAATGGTTTG

AAGTTAGTGGTTGTCCAAAGGTTGGAGTTGTTTTTGATGATGCTCAACT

>PGSC0003DMG400002980-(rev)LRR-RLPs\_2666

AATGGTTTGAAGTTAGTGGTTGTCCAAAGGTTGGAGTTGTTTTTGATGATGCTCAACTACTTAGATCACA

ACTTGAGGGAATGAAGCAGATTGAGGTATTATATATTGGTGATTGTAAGT

>PGSC0003DMG400002980-(rev)LRR-RLPs\_2728

AGATCACAACCTTGAGGGAATGAAGCAGATTGAGGTATTATATATTGGTGATTGTAAGTCTTACCTTCT

TTCCTTTTAGCATACTGCCACTACCTTGAAGAATATATGGATATCTGGT

>PGSC0003DMG400002980-(rev)LRR-RLPs\_2790

TACCTTCTTTCTTTTAGCATACTGCCACTACCTTGAAGAATATATGGATATCTGGTTGCCGGAATTGA

AATTGGAGCAGCCAGTTGGTGAGATGAGTATGTTTCTGGAGAATTTGAG

>PGSC0003DMG400002980-(rev)LRR-RLPs\_2852

GGAAATTGAAATTGGAGCAGCCAGTTGGTGAGATGAGTATGTTTCTGGAGAATTTGAGACTGGATGGA

TGTAATTGTATAGATGATATATCACCCGAGTTGATCCCAAGCGCACATACAT

>PGSC0003DMG400002980-(rev)LRR-RLPs\_2914

GATGGATGTAATTGTATAGATGATATATCACCCGAGTTGATCCCAAGCGCACATACATTGAATGTATCTA

ATTGCGACAACCTTACTAGGTTTTTGATTCCTACTGCCACTGAAAGTCTC

>PGSC0003DMG400002980-(rev)LRR-RLPs\_2976

TGTATCTAATTGCGACAACCTTACTAGGTTTTTATTCTACTGCCACTGAAAGTCTCTTCATTCGGAATT  
GTGAGAATGTTGAAAACTTTCGGTGGCATGTGGTGGGACCCAGATGAC

>PGSC0003DMG400002980-(rev)LRR-RLPs\_3038

TTCGGAATTGTGAGAATGTTGAAAACTTTCGGTGGCATGTGGTGGGACCCAGATGACGTATTTGTATA  
TTGACGACTGTTCAAAGCTGAAGTGGCTGCCAGAACGTATGCAGGAACTCC

>PGSC0003DMG400002980-(rev)LRR-RLPs\_310

TTGCAGAAACAAGCAACAACAAGTAAGTGATCTCAACCTGTGCTTGAGTGATGATTTTTTTCTTAACAT  
AAAGGAGAAGTTGGAAGAAACCATTGAAACATTGGAGGTGTTGGAAAAGC

>PGSC0003DMG400002980-(rev)LRR-RLPs\_3162

ATCTCTTAAGGAACTGCAACTGATTAATTGTCCAGAAATAGAGTCCTTTCCTCAAGGAGGATTGCCCTTC  
AATTTACAACAATTGCGATCAACAATTGCACGAACTGGTGAATGGCCG

>PGSC0003DMG400002980-(rev)LRR-RLPs\_3224

TGCCCTTCAATTTACAACAACCTGCGATCAACAATTGCACGAACTGGTGAATGGCCGAAAGGAGTGGC  
ATTTACAGAGACTCCCCTGTCTCACACAGTTAATCATCTCTCATGATGGCA

>PGSC0003DMG400002980-(rev)LRR-RLPs\_3286

GAGTGGCATTACAGAGACTCCCCTGTCTCACACAGTTAATCATCTCTCATGATGGCAGTGACGAAGAG  
ATTGTTGGTGGTGAGAATTGGGAGTTGCCTTCTCTATTCAAACACTTATC

>PGSC0003DMG400002980-(rev)LRR-RLPs\_3348

CGAAGAGATTGTTGGTGGTGAGAATTGGGAGTTGCCTTCTCTATTCAAACACTTATCATAAACAATCTG  
AAAACATTAAGCAGCCAAGTTCTCAAAGCCTCACCTCTCTTCAATATCT

>PGSC0003DMG400002980-(rev)LRR-RLPs\_3410

ACAATCTGAAAACATTAAGCAGCCAAGTTCTCAAAGCCTCACCTCTCTTCAATATCTATGTATTAAGGGT  
AATTTACCTCAAATTCAGTCAATGCTGGAACAAGGCCAGTTTTCTCGC

>PGSC0003DMG400002980-(rev)LRR-RLPs\_3472

ATTAAGGGTAATTTACCTCAAATTCAGTCAATGCTGGAACAAGGCCAGTTTTCTCGCTTCAAAGTCTAC  
ACATCGAGGATATCCCTAATCTCCAATCACTTCCGAATCAGCACTGCC

>PGSC0003DMG400002980-(rev)LRR-RLPs\_3658

CCCTCCTCCCTCTCTCAGCTGGAGATCTCCCATTGCCCTAATCTGCAATCTCTTCCAGTAAAAGGGATGCC  
ATCTTCACTCTCTACACTATCAATTTCAAATGCCATTACTCACACCA



>PGSC0003DMG400002980-(rev)LRR-RLPs\_3720

AGGGATGCCATCTTCACTCTCTACACTATCAATTTCCAAATGCCATTACTCACACCACTACTAGAATTTG  
TCAAGGGGAAATACTGGCCAGAAATTGCTCATTTCACCACAATAGAGAT

>PGSC0003DMG400002980-(rev)LRR-RLPs\_496

CTTCTTTGGTTGATGATTCTGATATCTTTGGAAGGCAGAATGATATAGAGGATTTGATTAACCGTTTATT  
GGCTGAAGATGCAAGTGGAAAAAAGCTGACTGTGGTTCCTATTGTTGGAA

>PGSC0003DMG400002980-(rev)LRR-RLPs\_682

TTGGTTTGAAAGCTTGGTTTTGTGTTTCTGAGGCATATGATGCTTTCAGAATAACAAAAGGTTTACTTCAA  
GAAATTGACTCATTGACTTGAAGGCTGATGACAATCTTAATCAGCTAC

>PGSC0003DMG400002980-(rev)LRR-RLPs\_744

TTACTTCAAGAAATTGACTCATTGACTTGAAGGCTGATGACAATCTTAATCAGCTACAAGTCAAATTGA  
AGGAAAGCTTAAAGGGAAAGAGGTTTCTAATTGTTTTAGATGATGTGTGG

>PGSC0003DMG400002980-(rev)LRR-RLPs\_806

CAAATTGAAGGAAAGCTTAAAGGGAAAGAGGTTTCTAATTGTTTTAGATGATGTGTGGAATGACAAC  
CAGCGAGTGGGATGACTTGAGAAATGTTTTGTACAAGGAGATATAGGAAG

>PGSC0003DMG400002980-(rev)LRR-RLPs\_868

ACAACACTACAGCGAGTGGGATGACTTGAGAAATGTTTTGTACAAGGAGATATAGGAAGTAAGATCATTG  
TGACGACACGTAAAGAGAGTGTTCCTTGATGATGGGTAGTGGGGCAATCA

>PGSC0003DMG400002980-(rev)LRR-RLPs\_930

ATCATTGTGACGACACGTAAAGAGAGTGTTCCTTGATGATGGGTAGTGGGGCAATCACCGTGGGGACT  
CTGTCTGATGAAATCTCTTGGGATCTATTCAAACGACATTCACTAGAAAAC

>PGSC0003DMG400002980-(rev)LRR-RLPs\_992

GGGGACTCTGTCTGATGAAATCTCTTGGGATCTATTCAAACGACATTCACTAGAAAACAGGGATCCTAA  
AGAACATCCAGAACTTGAAGAGATTGGAAAACAAATTGCAGACAAGTGCAA

>PGSC0003DMG400003002LRR-RLKs\_1488

ATGTGCATACTCAAATTTGGAGTGTACTTGAAGATGATGCCAAAATTTGAGCGTCTGTTGATGTTTT  
ATCAATTATGACTTTCATTTAAGAACGTAAGTTGCATGAAGGTCTGATTC

>PGSC0003DMG400003002LRR-RLKs\_1550

GATGTTTTATCAATTATGACTTTCATTTAAGAACGTAAGTTGCATGAAGGTCTGATTCTTTTTCATCAGCT

AAGCATGTGAACATTCTTATTCATAATAGGTGCATAAAGGTTAGATATC

>PGSC0003DMG400003002LRR-RLKs\_1612

TCATCAGCTAAGCATGTGAACATTCTTATTCATAATAGGTGCATAAAGGTTAGATATCAATATGTTCTATT  
ACCATATGAAATTGTGAGACGTGCTCATCTAAAGACTTAAAACTGTTA

>PGSC0003DMG400003002LRR-RLKs\_1674

TGTTCTATTACCATATGAAATTGTGAGACGTGCTCATCTAAAGACTTAAAACTGTAAAAAGCGCGAAC  
TTTTGCTTACTTAACGATGTTGGATCAATGAGTAGTATTAAGGCTTTTAG

>PGSC0003DMG400003002LRR-RLKs\_1736

GCGCGAACTTTTGCTTACTTAACGATGTTGGATCAATGAGTAGTATTAAGGCTTTTAGGCATGTGAAAGA  
CTTTATTTAAGGTACTTATTGTCCCCTCATGATTTAAACATGTCAAAT

>PGSC0003DMG400003002LRR-RLKs\_1798

GTGAAAGACTTTATTTAAGGTACTTATTGTCCCCTCATGATTTAAACATGTCAAATCTCTTTTAGAACCT  
CAGTTAGAAACCTCTGTTTGCCTTATTATCTTCAACACTGGTGTATGA

>PGSC0003DMG400003002LRR-RLKs\_186

ATCATTCTTGATGGTTATGATTTTTCGTCTGGAACGTTTGATGTTACCACGATTTGTAATGTGGAGCCTAT  
CGCGCACACCCTTTTCTTCTGAGTCTGAAAAATGGCCTACTTCAGGGG

>PGSC0003DMG400003002LRR-RLKs\_1860

TTTAGAACCTCAGTTAGAAACCTCTGTTTGCCTTATTATCTTCAACACTGGTGTATGAATTTGCTTTTCAG  
GAATCCAGACAGGCCAAAGATTCCATTGGAGTAGCAGACTTTCTATAGC

>PGSC0003DMG400003002LRR-RLKs\_1922

GCTTTTCAGGAATCCAGACAGGCCAAAGATTCCATTGGAGTAGCAGACTTTCTATAGCAGCAGGTATCG  
CCGATGCTTTAGCTTTTCATGCATCAGGAGCTTCAACATGACAGAATTGCAC

>PGSC0003DMG400003002LRR-RLKs\_1984

GGTATCGCCGATGCTTTAGCTTTTCATGCATCAGGAGCTTCAACATGACAGAATTGCACATGGAACTTGA  
AATCATCAAACATTTTCTTGACCAACAACATGGAGCCAATGATCGGCGAA

>PGSC0003DMG400003002LRR-RLKs\_2046

AAACTTGAAATCATCAAACATTTTCTTGACCAACAACATGGAGCCAATGATCGGCGAATATGGCCTTATG  
AGCATTGCAGAAATCAGTACTACTACAGCAAGCAATCCCATTATGTCTT

>PGSC0003DMG400003002LRR-RLKs\_2108

GCCTTATGAGCATTGCAGAAATCAGTACTACTACAGCAAGCAATTCCCATTATGTCTTCCCTATAACTGAT  
GAAAATGTAGGAGCAATCTTTAAAGAAGATGTTTATGCATTTGGTGTCA

>PGSC0003DMG400003002LRR-RLKs\_2170

ATAACTGATGAAAATGTAGGAGCAATCTTTAAAGAAGATGTTTATGCATTTGGTGTCACTTCTTTGGAGT  
TGCTAACAGGGAAAGTGCAAACAATGGAATAGAACTTGCAAGTTGGGTT

>PGSC0003DMG400003002LRR-RLKs\_2232

TTTGGAGTTGCTAACAGGGAAAGTGCAAACAATGGAATAGAACTTGCAAGTTGGGTTGTTTCTGTGCT  
AAGAGAAGAATGGACAGTTGAAGTGTGGACAGAAGTTGATAACAAGAAGG

>PGSC0003DMG400003002LRR-RLKs\_2294

CTGTGCTAAGAGAAGAATGGACAGTTGAAGTGTGGACAGAAGTTGATAACAAGAAGGTGCTAGTGAA  
GAAAGGATGGTTAATTTGTTACAAGTTGCTGTAAATGTGTGAACCATTCTC

>PGSC0003DMG400003002LRR-RLKs\_2356

AGTGAAGAAAGGATGGTTAATTTGTTACAAGTTGCTGTAAATGTGTGAACCATTCTCATGAAGCTAGG  
CCTAGTATAAACCAAGTTGCTCTCATGGTTACCACTATACGAGACGAGGAT

>PGSC0003DMG400003002LRR-RLKs\_2401

GTGAACCATTCTCATGAAGCTAGGCCTAGTATAAACCAAGTTGCTCTCATGGTTACCACTATACGAGACG  
AGGATGACAGATCCGTCGATGTTTCTGCAAGTACTAGTACTATCATCTGA

>PGSC0003DMG400003002LRR-RLKs\_248

GGAGCCTATCGCGCACACCCTTTTCTCCTGAGTCTGAAAAATGGCCTACTTCAGGGGAAAAACTTTGAC  
AGTATAGATAAATGTAAGCATCTAAGACATCTTGTCTTGGTGGAAACCG

>PGSC0003DMG400003175LRR-RLKs\_1054

TTATGGGACAATGAAAGAGAGATTGTTACTTGTTCATGGTTGAAAATTGGTTTAAAATAGCCTTGCGCATT  
GAAAATAAGCATAGGTTGAAAATAACCCCTAATGAGTTCTAAAAAATGGA

>PGSC0003DMG400003175LRR-RLKs\_1116

TGCGCATTGAAAATAAGCATAGGTTGAAAATAACCCCTAATGAGTTCTAAAAAATGGATTGAAAATAGT  
CCTGGTGGGTTAAAATAGCCTTGACAAGTTAAAATGGGTTGACAATAGT

>PGSC0003DMG400003175LRR-RLKs\_124

GTCCTACTGGTTTTGGTGTATGTCTTAGTTGTATCTAGTTTGTATGTCCATTTGAATATTGGATTGGTC  
TATTTTACAAAACAAGGATTGGCATTGTTAGGACTACGATCTAAAGTG

>PGSC0003DMG400003175LRR-RLKs\_1302

TAAAGATGGTGCAGCTAAATAATGTTGAAAATGTCTCTCAATTTTTATTAGGCATAAGAGGGGTTTAATA  
GACAACTTGAAAACATAACTTGCAGAAAATCTGCATAACAAAAAGTAGTA

>PGSC0003DMG400003175LRR-RLKs\_1488

CATCTTGCATGTTGTATCTTCTTGTGTGTTGTGTATGACTCCTTTTTTAATCTTAACAATTTAAACATTTTTT  
TTCTCTATGATTGACTCACAGTGTGCTGTCAGAAAACAATTTTTTTG

>PGSC0003DMG400003175LRR-RLKs\_1550

AAACATTTTTTTCTCTATGATTGACTCACAGTGTGCTGTCAGAAAACAATTTTTTTGGTGCCATTCCAAA  
AGAATTTGGATGACTTCGAAGGTTGGAAGTGCTTGACTTGACAGATAAT

>PGSC0003DMG400003175LRR-RLKs\_1612

CATTCCAAAAGAATTTGGATGACTTCGAAGGTTGGAAGTGCTTGACTTGACAGATAATAATTTGAGTGG  
GAGAATTCCAGCAGAAATAGGAGACCTGCATGCGCTAAGAAGCTTGTGAGT

>PGSC0003DMG400003175LRR-RLKs\_1736

AATTTAATTTGTGTGCATGTGAAGATGTGTGCTGCCTATATTAGTTTATATATGTGAGTATTCATGAGGA  
AGAACCATTA AAAAGATTCTTTTGAACCGTGTCTTATACCTTTTCACAGG

>PGSC0003DMG400003175LRR-RLKs\_186

TGGATTGGTCTATTTTACAAAACAAGGATTGGCATTGTTAGGACTACGATCTAAAGTGGATTGTGATCCA  
TATGGAATTCTTGCAAACCTGGAATCTTGATCATTGTGACCCATGTATGTG

>PGSC0003DMG400003175LRR-RLKs\_1860

TTCGTAACAACAACCTGGAAGGAAAAATTCATTTGAAATTGGGAAGCTTCGTTTGCTCTCCAAATTGCA  
ATTTGACGAAGCACTCACCCCTGCTGCTGGGGGAACATGCTGTTTAAATA

>PGSC0003DMG400003175LRR-RLKs\_1922

AAATTGCAATTTGACGAAGCACTCACCCCTGCTGCTGGGGGAACATGCTGTTTAAATAGAAAATTTGCAC  
ACTGGTAAGGTTGTTTTGGTTTTATTGGACCTTTTATATCTGTGTTCTGG

>PGSC0003DMG400003175LRR-RLKs\_2046

TGTTACATTTATGTAACCAAATATCAACATGCAAAGATGTTTGAAATGTATGAAATTTGTATTTAAGCCAT  
TTCAGGCTGCCATTATTTTCAGAAATGGTCATAACTCCTGTCATAAGGT

>PGSC0003DMG400003175LRR-RLKs\_2170

TTGGTGGGAGTGAGGGGGTGGGTGAACACAAGTTGATAAAGTTGAGTATTAATGACAACAAGGAATAT

TGTGGTTTATGTGAATTCAAATAAAGCCTGGGAGATAGGTGATTTTCATAGAT

>PGSC0003DMG400003175LRR-RLKs\_2232

GAATATTGTGGTTTATGTGAATTCAAATAAAGCCTGGGAGATAGGTGATTTTCATAGATGTGGCGATGCA  
ATGACTTGTGCTGCTAATGCTTGAAATTTACTGTCTAGTTTGACATCTAAT

>PGSC0003DMG400003175LRR-RLKs\_2294

CGATGCAATGACTTGTGCTGCTAATGCTTGAAATTTACTGTCTAGTTTGACATCTAATACTAATACTTGAC  
CATACTCAACTCAAACGAAAAAGCTTTGTAACTACAAGGAGGTGATT

>PGSC0003DMG400003175LRR-RLKs\_2480

GGATTGATCCTGGAATCAAGAGAGCATCAAGTTATCATATTGGTTCTAATTTATTTAATTTTTTATCAAG  
ATACTCTTCTCAGATAGCTTTAACTCTTACATAGAATACTGACTATCAA

>PGSC0003DMG400003175LRR-RLKs\_2542

TTTATCAAGATACTCTTCTCAGATAGCTTTAACTCTTACATAGAATACTGACTATCAAACATAATAGCATG  
GTTACTTTCAATAGCACTTACCTTCTTAATCAGATATTTTCATTTGCCT

>PGSC0003DMG400003175LRR-RLKs\_2604

AATAGCATGGTTACTTTCAATAGCACTTACCTTCTTAATCAGATATTTTCATTTGCCTGCTTCTCTCTGGTA  
ATTTGATGTCTGTTTCTGGCAGCATTGTCATGGCAGTTTGATACCAT

>PGSC0003DMG400003175LRR-RLKs\_2666

CTCTCTGGTAATTTGATGTCTGTTTCTGGCAGCATTGTCATGGCAGTTTGATACCATTAAAGACCGTAGA  
CTCCTTTATCAGACCACTTAAAGGGACACTTGTGCGTTATTTCACTCTG

>PGSC0003DMG400003175LRR-RLKs\_2976

GTTGAAAGTGCACAAAAGATTGTTTTCACTCTTCTTTTTTAGCAGGTTTCATCTAGGCCTCACATCATCCAT  
ACTATTTAGAACCAGGCGAATATCGCACGCCACAAGTTAGTAGAACAAT

>PGSC0003DMG400003175LRR-RLKs\_3038

ATCATCCATACTATTTAGAACCAGGCGAATATCGCACGCCACAAGTTAGTAGAACAATCTAGCAACCTTG  
CTGCTGTTTCTGCCAATGCTGGGAAACATTTGGGTCCTATTGTTTCAGTG

>PGSC0003DMG400003175LRR-RLKs\_3100

CAACCTTGCTGCTGTTTCTGCCAATGCTGGGAAACATTTGGGTCCTATTGTTTCAGTGCCAAGCACCAGA  
AGTAGTGGGTCATTTTCATGCTGTGAAAAATACCTAAGGAACACCTCCTAC

>PGSC0003DMG400003175LRR-RLKs\_3162

GCACCAGAAGTAGTGGGTCATTTTCATGCTGTGAAAAATACCTAAGGAACACCTCCTACACCCTTACCTGC  
CTCGCAACGACAGCCTGAGTCTCAATCCAAACCAAATCCAATGGGACAGT

>PGSC0003DMG400003175LRR-RLKs\_3286

TAGTGTGTTAAATAGCCAACTAATAGACAAGCTCCACCTGCCAAAAATCTGGTGATACATGGAAGTAT  
TTAGTTGGAGGTTTTGGGTTTTTTCTGCTCATTGTTGTTGTAGCCGTGTT

>PGSC0003DMG400003175LRR-RLKs\_3348

GGAAGTATTTAGTTGGAGGTTTTGGGTTTTTTCTGCTCATTGTTGTTGTAGCCGTGTTCTTAGTTTACAGA  
AGCAGAGCTGCAAAACCAATAGGCCCTTGAAGACTGGGTTGAGTGGAC

>PGSC0003DMG400003175LRR-RLKs\_3472

GCAAAAAGCATTGTGCATCGGTACTTCAATTGAAATTTGTGACAAGAATTACTGTTAATATTCTGTCCACA  
TTCTGATATTCAATGACAAAATCACTGTTGGTTGATAATAGTCCTAAAT

>PGSC0003DMG400003175LRR-RLKs\_372

TCTGTTAATGAGTATTCAATTCCATAAACTTACTTTATAATTGTAATGTTTTGTTCTTTTTTAGTTAAGA  
ACAAATCTGTTAGATTTATTTAATGACAACAGATGTGCAAAAGATGA

>PGSC0003DMG400003175LRR-RLKs\_3720

TCATGATGCATATATAATCTACAAGGGAACCTTTCTAGTGGAGTAGAGATTGTTGTTGCCTCGACTACT  
CTAACTTCTCTCGAAGATTGGTCTGAGAGTTCAGAAATAGCCTTTAGGAA

>PGSC0003DMG400003175LRR-RLKs\_3782

CGACTACTCTAACTTCTCTCGAAGATTGGTCTGAGAGTTCAGAAATAGCCTTTAGGAAGAAGGTTTGTTG  
TTCCATTTACATCAAAAATAAAATATTATCTCTCCATATATCTCACAGT

>PGSC0003DMG400003175LRR-RLKs\_3968

TTTGTGATTGTGTTATTGAACAGATTGATACACTTTCAAGAGTGAACCACAAAAATTTTGTTAATCTTATT  
GGATACTGTAAGGAGGATGAACCTTTCACTAGGATGATGGTCTTTGACT

>PGSC0003DMG400003175LRR-RLKs\_4030

AATCTTATTGGATACTGTAAGGAGGATGAACCTTTCACTAGGATGATGGTCTTTGACTATGCTCCAAATG  
GAACTTTTCTGTGCATCTACACGGTAAGATTCTTTGTTGTCCACAATTC

>PGSC0003DMG400003175LRR-RLKs\_4092

TCCAAATGGAACCTTTCTGTGCATCTACACGGTAAGATTCTTTGTTGTCCACAATTCAGCTTTAATTACTC  
ACAATGATGGCTGGAGTTAGTTCAGAATAACACTTCTTATTATTTTAT

>PGSC0003DMG400003175LRR-RLKs\_4154

TTAATTACTCACAATGATGGCTGGAGTTAGTTCAGAATAACACTTCTTATTATTTTATTTTAAAAAAAAGA  
TGTTTAGAATGACTTAAAATATAAGTTTAATTGTGTCAATTGAAGAAAC

>PGSC0003DMG400003175LRR-RLKs\_4402

ACGATTATGCTGCTAAGGTCTGCTCCATCTTCTTCAATATGTATATACAATTTATCTACCATATTGAACTAA  
AAACCATTTTTCATTTGTATTTTATATTGAAGTAGAATTTTTTATATT

>PGSC0003DMG400003175LRR-RLKs\_4588

TTTAGAAAATTCTGAGCTGTCAGCTCTTGCTGATCTTGAAACAAATATCTATAGTTTTGGGATTCTGTTAC  
TAGAAATAATTTCTGGAAAGTCACCTTATTCAGAAGAACAAGGATCTCT

>PGSC0003DMG400003175LRR-RLKs\_4898

GAGCTCCTTGGTTGATCCAACACTCAAGTCCTTCAAAAATAATGAGCTTATGGCTATCTATGTGGTAATT  
GAAGAATGCCTTCAAGAAAATATAAGGAAGAGACCAACGATAACTGAAGT

>PGSC0003DMG400003175LRR-RLKs\_558

AGGGATCTTCATGGGAATTCTTTGGAAGGCACATTGGCACCAGAGCTTGGGAATCTCACTCACTTAAGA  
TCAATGTAAGTTCTTACCTACGACAAAATGTTTTTGTCTTTTTTAGTTTTCAT

>PGSC0003DMG400003175LRR-RLKs\_62

TTATCACGTTACGAATGTAGCTCACTCAATTCTGAAGGTAATTATATTCTATGTTTGGACTGTCCTACTG  
GTTTTGGTGTATGTCTTAGTTGTATCTAGTTTGTATGTCCATTTGA

>PGSC0003DMG400003175LRR-RLKs\_620

CTTAAGATCAATGTAAGTTCTTACCTACGACAAAATGTTTTTGTCTTTTTTAGTTTCATAGGTGCAAATTTGT  
GGGGAATGAAAGAGAGATTGTTGCTTGTCATGGTTGAAAATTGATTAA

>PGSC0003DMG400003175LRR-RLKs\_682

GCAAATTTGTGGGGAATGAAAGAGAGATTGTTGCTTGTCATGGTTGAAAATTGATTAACCTTAGTATT  
GGTTGAAAATAGCCTGGCAGCTTAAAATACCTCCTTCTTTTGATTTCTTT

>PGSC0003DMG400003175LRR-RLKs\_744

TAGTATTGGTTGAAAATAGCCTGGCAGCTTAAAATACCTCCTTCTTTGATTTCTTTTTAACATGCAATT  
TTTTATAAAAAAATTGATTTTCTTCTTCTTTTGGTTTTGTGCTT

>PGSC0003DMG400003175LRR-RLKs\_806

ACATGCAATTTTTTATAAAAAAATTGATTTTCTTCTTCTTTTGGTTTTGTGCTTAAAAAACTCCCTA

AATAATCTTGTCTTGTGGAAAGCTCTTTTCAAAGAGCTTGCCTCTGG

>PGSC0003DMG400003175LRR-RLKs\_868

AAACTCCCTAAATAATCTTGTCTTGTGGAAAGCTCTTTTCAAAGAGCTTGCCTCTGGACAATGATAGGA  
TTTCAAAGGAGTGTCTAAGGATCGTTCTTCCGTTACAATATTCCATAA

>PGSC0003DMG400003195-(rev)LRR-RLPs\_1798

AAGCTCAAATCTTTATCCTTTTCAATAACCTCTTTATGGGCCTTTTCCATCCTCGGTTACAAACCTAACA  
GAGCTAGAGAGTTTAGACCTCTCAAATTGTTCTATAACTGGTGCTATT

>PGSC0003DMG400003195-(rev)LRR-RLPs\_1860

AAACCTAACAGAGCTAGAGAGTTTAGACCTCTCAAATTGTTCTATAACTGGTGCTATTCTTCTAGCGTCA  
GCACCGGATTCCCTAACCTCATCTTGCTCTCCTACCATATAACTCCCT

>PGSC0003DMG400003195-(rev)LRR-RLPs\_3100

ATGATAATAGAAGATCAAACGGGAATTCCTTTAATGTATATTGGAGAAGTTTCGATACCATGATTCTTGA  
CATTGTCTATAAAAGGACAGCAGATTGAACTTGTGAGGATTCTTTCTATC

>PGSC0003DMG400003210-(rev)LRR-RLKs\_0

TCGCAGTATGGATCTAAAACGTGCTGTATTATATTAATAAAAAAAAAAACTGACAGAGACTGACTCCCTCA  
TTAAGAATTATTGAACAACCAGCCAAAGCAAAGCATTAAATATTCTCCTA

>PGSC0003DMG400003210-(rev)LRR-RLKs\_1037

GAGGTTTTTAGGGACCTTTCAAATCTTGAATTTCTCTATTTGGATGAGAACAACCTTTGAAGGGGGAATTC  
CTGAGACCTTATGGGATGGGAGCTTACAAGAGTTAGCTCTTTCCTTGAAT

>PGSC0003DMG400003210-(rev)LRR-RLKs\_1098

GGGGAATTCCTGAGACCTTATGGGATGGGAGCTTACAAGAGTTAGCTCTTTCCTTGAATAAATTTAATG  
GTAGTATATCCGAAAAGATTGGTGGTTCTCTTCAGATAAATTACATTGATT

>PGSC0003DMG400003210-(rev)LRR-RLKs\_1281

AGCTTTTTCTGTATGATAACATGCTTAGTGGTTCATTACCAGCAGAACTTGGGAACTGCACTTCTCTTGT  
GCGATAAGTCTCGCCACTAATTCATCGGTGGGGAAATTCCTCAAGAGC

>PGSC0003DMG400003210-(rev)LRR-RLKs\_1342

TTCTCTTGTGCGATAAGTCTCGCCACTAATTCATCGGTGGGGAAATTCCTCAAGAGCTCTGCAACCTC  
ACTCCCTAATAAAATTTCAAGTGTACGGAAATCAAATTCAGGGCCAAAT

>PGSC0003DMG400003210-(rev)LRR-RLKs\_1586



AATAATCTTACAGGGGAGGTACCACCTAATATTGGAAAAACAATTTTCCTGGGTTATTTAAGGTTGATT  
TAGGTTATAATAACTTCAGTGGACCAATTCCTTCTGAACTATGTAATGGC

>PGSC0003DMG400003210-(rev)LRR-RLKs\_1647

AGGTTGATTTAGGTTATAATAACTTCAGTGGACCAATTCCTTCTGAACTATGTAATGGCAACAGGCTTGG  
AGTCCTGGTTCTTGAAAACAACAGTTTTAATGGAAGCTTCCCAACATATA

>PGSC0003DMG400003210-(rev)LRR-RLKs\_1708

CAGGCTTGGAGTCTGGTTCTTGAAAACAACAGTTTTAATGGAAGCTTCCCAACATATATAGCAAATGT  
GAATCCCTCTATAGGGTAAAAGTCCCAACAACAATCTGCAGGGGAGTAT

>PGSC0003DMG400003210-(rev)LRR-RLKs\_1769

GCAAATGTGAATCCCTCTATAGGGTAAAAGTCCCAACAACAATCTGCAGGGGAGTATTCCTGACTAC  
ATTGAAAAGAATGAGAACATCTCTTACTTGAATGTTGCGGGGAAATATGCTT

>PGSC0003DMG400003210-(rev)LRR-RLKs\_1830

CTGACTACATTGAAAAGAATGAGAACATCTCTTACTTGAATGTTGCGGGGAAATATGCTTGCGGGAAGGA  
TTCCAGCAGCATTTGGTTATTGGACCAATCTTTCAACGATTGATCTTTTCAG

>PGSC0003DMG400003210-(rev)LRR-RLKs\_1891

GGGAAGGATTCCAGCAGCATTTGGTTATTGGACCAATCTTTCAACGATTGATCTTTTCAGAGAATATGTTT  
TCTGGTTCATACCTGCCCAAATTGGGAAGCTGCAAATCTTGTAAGACT

>PGSC0003DMG400003210-(rev)LRR-RLKs\_1952

AATATGTTTTCTGGTTCCATACCTGCCCAAATTGGGAAGCTGCAAATCTTGTAAGACTGAACATTTCTTC  
AAACAGACTGACAGGAAAAATTCCTCTTCAGTTAAGTTACTCTGCGAAA

>PGSC0003DMG400003210-(rev)LRR-RLKs\_2013

ACATTTCTCAAACAGACTGACAGGAAAAATTCCTCTTCAGTTAAGTTACTCTGCGAAACTGGAAGAGTT  
GGATCTCAGCAACAACAATCTTTGCGGAAGAATTCCGAAAGAAATTGCAT

>PGSC0003DMG400003210-(rev)LRR-RLKs\_2196

CTTTCTCCTCCTCACAAAAGCTTGTAAGTTGCAGCTCGGGGACAACCTTGCTTGAAGGCTCAATTCATG  
CAGTCTGAGTAACTTAGGGAACCTAATGTTGCACTGAATCTGAGCATGA

>PGSC0003DMG400003210-(rev)LRR-RLKs\_2257

AATCCATGCAGTCTGAGTAACTTAGGGAACCTAATGTTGCACTGAATCTGAGCATGAATAAGTTTAGT  
GGTCAAATTCCTAAGTGTCTGAGCAATCTAGACAATTTAGAAATCCTTGA

>PGSC0003DMG400003210-(rev)LRR-RLKs\_2318

AAGTTTAGTGGTCAAATTCCTAAGTGTCTGAGCAATCTAGACAATTTAGAAATCCTTGATATATCAAGCA  
ACAACTTGTCTGGAGCAATACCATCAGAAATGGACAAGATGAGGTCCCTT

>PGSC0003DMG400003210-(rev)LRR-RLKs\_2379

TATCAAGCAACAACCTTGTCTGGAGCAATACCATCAGAAATGGACAAGATGAGGTCCCTTTCGTTTCTCAA  
CATATCATTTAATAACTTTTCAGGGAAGGTACCCATTTTCATGGGGAAAAC

>PGSC0003DMG400003210-(rev)LRR-RLKs\_244

AGCAGCTCAGTGTTTTAAGAGGTGAGAGATGTTCTTGTCTGGTTAATTGCCTTTTCTTCTTTGCCAATTT  
ATTTGCAGTCTTTTCGACCTCATCGCCTCAAGATTCTGTTTCATCTACT

>PGSC0003DMG400003210-(rev)LRR-RLKs\_2440

GTTTCTCAACATATCATTTAATAACTTTTCAGGGAAGGTACCCATTTTCATGGGGAAAACCTATTAAGTTCAC  
ATCCAGGAACTTCCCAGGGAAATCCAGGACTCTGCTTATCAGACACTGA

>PGSC0003DMG400003210-(rev)LRR-RLKs\_2562

GTAGCAGCTGCAAGCATGTGAAAAAATCACAAAGAACTGGAAGACCTTGGCTGGTGTAAATTAGTGGA  
TGTGTGTTTTCCGTGGCAGTCATAGCTGCGGCAATATACTTGCTAGTGACTC

>PGSC0003DMG400003210-(rev)LRR-RLKs\_2623

TAGTGGATGTGTGTTTTCCGTGGCAGTCATAGCTGCGGCAATATACTTGCTAGTGACTCGGATTCAGCAC  
CCTTCCCTGCTGAATAAGCATCGGCTCGTCAAGTATCATGCAAAAATTGA

>PGSC0003DMG400003210-(rev)LRR-RLKs\_2989

ATATGGCTTCATTCTAACAGAGTTTATCCCTGGAGGAACTCTTCATGATGTCCTTCACCAGAGAAAACCA  
CCTGTAGTCCTGGACTGGGAGCCCCGCCATCGTATTGCTCTTGGTGTTC

>PGSC0003DMG400003210-(rev)LRR-RLKs\_305

TTTGCCAATTTATTTGCAGTCTTTTCGACCTCATCGCCTCAAGATTCTGTTTCATCTACTTGGGTTTCACAGC  
AGTCTTCCAGAGCTCTCTCAACAATTGCTCCCTTGGAAATCAGTCTGTC

>PGSC0003DMG400003210-(rev)LRR-RLKs\_366

GGTTTCACAGCAGTCTTCCAGAGCTCTCTCAACAATTGCTCCCTTGGAAATCAGTCTGTCTCACACTGCCGA  
TGAAAGGTGTTACCTGCTATTCAGACATAACTTCTCATGTCAAATCAT

>PGSC0003DMG400003210-(rev)LRR-RLKs\_3721

GGATGTAGTAAGGTCTCTTGTGCGAGTTAAATCATAGATGTAAGTGAAGAAATGAAACTTTGAATAGT

GAAAGCCATAATCAACTTTTCCATATTCCAACGTCTTTTTTTTTCTTTGCT

>PGSC0003DMG400003210-(rev)LRR-RLKs\_3782

TGAATAGTGAAAGCCATAATCAACTTTTCCATATTCCAACGTCTTTTTTTTTCTTTGCTTACATAAAAATTG  
AACCATTCTCGATTTGTGTGTGCATCCTTGCATTCAAGGGCTAAAT

>PGSC0003DMG400003210-(rev)LRR-RLKs\_3843

CATAAAAATTGAACCATTCTCGATTTGTGTGTGCATCCTTGCATTCAAGGGCTAAATCCAACATAACC  
TGATCGTGGGTGTTTCTGTTAACTTTGTGACATCCACTGCAACATTAT

>PGSC0003DMG400003210-(rev)LRR-RLKs\_3904

CAACATAACCTGATCGTGGGTGTTTCTGTTAACTTTGTGACATCCACTGCAACATTATAGATTAAGAAA  
ATGCATGACGTTTCAAATCAAATTTTGGTAAAAGCGTTTTTCGCATTCTA

>PGSC0003DMG400003210-(rev)LRR-RLKs\_3965

ATTAAGAAAATGCATGACGTTTCAAATCAAATTTTGGTAAAAGCGTTTTTCGCATTCTAGCCATAGCTCTT  
TTCATAATGGATCACTGTCCTTAATCAACTTTTGTGTTACTTTCTCC

>PGSC0003DMG400003210-(rev)LRR-RLKs\_427

ACACTGCCGATGGAAAGGTGTTACCTGCTATTCAGACATAACTTCTCATGTCAAATCATTGATTCTAACA  
GACTTATTGCTACCTGGAACCTTGGACAAGGCCTTTCCTAATCTCTGCCG

>PGSC0003DMG400003210-(rev)LRR-RLKs\_610

GCTTGCTAACTGCAGCCAACTTGACACGATTCTACTCAATGAAAACAGATTTTCAGGATCCATCCCACCA  
GAGATTTTCAAATCAAGCAAATCATAAACTTGATTTGGGTTTAAACCA

>PGSC0003DMG400003210-(rev)LRR-RLKs\_732

TCACTGGCACTATTCCCTCTGAGGTAAGCCTTTCTACAAACCTTCAACATCTCGGGCTGTGGAACAATTC  
CTTAGTGGAATATTCCAAAAGAGCTATTTGATTTGCCAACTTGACAC

>PGSC0003DMG400003210-(rev)LRR-RLKs\_793

GAACAATTTCTTAGTGGAATATTCCAAAAGAGCTATTTGATTTGCCAACTTGACACATCTCCACCTCT  
ACACAAACGAGCTGACAGGACCTTACCCGACTTCCCATTCTCGTGCTC

>PGSC0003DMG400003210-(rev)LRR-RLKs\_854

CTCCACCTCTACACAAACGAGCTGACAGGACCTTACCCGACTTCCCATTCTCGTGCTCCCTTTCCGAGTT  
CTTTATTTATGAGAACCGTTTCTCAGGTTCTTTGCCAATTACCCTAGGC

>PGSC0003DMG400003210-(rev)LRR-RLKs\_976

TTGTCACAACCTTACTTCATTCTCTGCATCATCTGCTCATCTTGGAGGAGTTATTTACCAGAGGTTTTTAG  
GGACCTTTCAAATCTTGAATTTCTCTATTTGGATGAGAACAACCTTTGA

>PGSC0003DMG400003211-(rev)LRR-RLKs\_183

GTAAAGGAGTGTAGTTAAGTAATTTGTCCTAAAATAATCTCCTATATTCATTGTTCCCTCGGTTTCACACG  
TATCTTGAAAAACAGGCTGACCTCAACTTAAACCTAAATAATAGTCT

>PGSC0003DMG400003211-(rev)LRR-RLKs\_2196

AGCAACAACAGTCTTTCAGGAAGAATTCCTAAAGAAATTGCATCATCTTCAGTATTGACAAATCTTCTACT  
CCAGGACAACAACCTTTCTGGTGCTCTTCCAAGCACTTTCTCCTCCTCA

>PGSC0003DMG400003211-(rev)LRR-RLKs\_305

GGTCCAGCCCAAAAATTAGTTTTTGAAGTAGCTCCTCATTGGATGCAGCTTCTTTAAAAGAGTTCAGAA  
ATGTTCTTGTTGATCTTGTTCACTGTTTTATCTTCTTTGCCAGCATTGT

>PGSC0003DMG400003211-(rev)LRR-RLKs\_3721

GCTCTGGAATGTAGAAGAACAATGGAAGGCCCTGAAACTAGTGGATTTGGCGCTTCAATGTGCTCAACT  
CGAGGCAAGCACCAGGCCTGCAATGAGGGATGTAGTAAGGTCTCTTGTCGA

>PGSC0003DMG400003211-(rev)LRR-RLKs\_4941

AAAGACATACCTCAGTTACGAAAAGTCAACACCCGAGCACAATACGATGCGCACCTAAATCATCCAAG  
TAGGAGAAGCCCAACTTAAATGTCCAGATTCCTTTTTTCGTATTTTTTATG

>PGSC0003DMG400003211-(rev)LRR-RLKs\_6039

CAGAATTAGATACCTAATGGAGCTTGCATGTCTGCTTAATTAACACTAAACAATGTAACTATTGCATATC  
CTCGCCACTTGAATATTTTCATGCAACATATTTTTGTCATTTGGATGTA

>PGSC0003DMG400003211-(rev)LRR-RLKs\_6100

ATTGCATATCCTCGCCACTTGAATATTTTCATGCAACATATTTTTGTCATTTGGATGTATATATGTTGAATG  
AAATTAAGGAACCTAAAAGTCAGTTCACCAGACAATCTATAATCAGTT

>PGSC0003DMG400003211-(rev)LRR-RLKs\_6527

TTTTACATACTTTTCTGCTTCAATTTAATCAAAGCAGAATGCTGATAGCCTGATATGCATTCAACTAC  
AGATGTATGGATCCTTTTTTTTTTTTGGATGACAAGGGAAACCCGCAGGT

>PGSC0003DMG400003280-(rev)LRR-RLKs\_0

GGAAATTCTGTCTCTCTCTGGAGAGCGGCTCATTGTTTCTCCACAAAAAATGGCCGCTGTCCTCTTCCAGC  
TCCACCACCTTATTTCTTATTTGTTTTTTTCTATCTCATCCAACCTCC

>PGSC0003DMG400003280-(rev)LRR-RLKs\_1037

TATTTGGGATGCCTGATTTGATGAAGGCAGCAGCTGAAGTCCTTGGTAATGGAGGATTGGGGTCAGCTT  
ACAAGGCGGTATTGGGGAATGGAGTGTCCGTCGTGGTGAAGAGGTTGAGGG

>PGSC0003DMG400003280-(rev)LRR-RLKs\_1098

GTCAGCTTACAAGGCGGTATTGGGGAATGGAGTGTCCGTCGTGGTGAAGAGGTTGAGGGAAACCAATA  
AATTTAACAAGGAAAGTTTTGATGCAGAGATCAGACGACTCGCTAGGATAAG

>PGSC0003DMG400003280-(rev)LRR-RLKs\_1159

ACCAATAAATTTAACAAGGAAAGTTTTGATGCAGAGATCAGACGACTCGCTAGGATAAGGCACAGGAA  
CATATTGCAACCATTAGCATACCATTACAGGAAAGAGGAGAAGTTGGTGGTG

>PGSC0003DMG400003280-(rev)LRR-RLKs\_122

GTGTTTCCATTGGAGATGATCAAGTCCTTCTTGAATTTAAAGAATTGTTATTAATAACCTCACTTCTTGATT  
CTTCTTGAAAAAAGGAACAAATCCTTGTGATAATAATAACAAATGGT

>PGSC0003DMG400003280-(rev)LRR-RLKs\_1220

ACAGGAACATATTGCAACCATTAGCATACCATTACAGGAAAGAGGAGAAGTTGGTGGTGTCTGAATACA  
TTCCCAAAGGCAGCCTGTTATACCTATTACATGGTATCGATATTTCTTCTT

>PGSC0003DMG400003280-(rev)LRR-RLKs\_1281

TGAATACATTCCCAAAGGCAGCCTGTTATACCTATTACATGGTATCGATATTTCTTCTTGCCTCTCATGTC  
TCATCTTCAATGGTAAAAGAGTCCATGAAAACAGCCTATATATTATTG

>PGSC0003DMG400003280-(rev)LRR-RLKs\_1342

CCTCTCATGTCTCATCTTCAATGGTAAAAGAGTCCATGAAAACAGCCTATATATTATTGTGTACAACCTTAA  
TGCTAGCTTCTATTTTCATGTGCATAAGTAGAGACTATCTCATTATGGGA

>PGSC0003DMG400003280-(rev)LRR-RLKs\_1403

TACAACTTAATGCTAGCTTCTATTTTCATGTGCATAAGTAGAGACTATCTCATTATGGGATATCATTTACGT  
TTATCAAATGGTCTGTTAATCATTCCCTTGAAATGACTCTTTTAAAGTT

>PGSC0003DMG400003280-(rev)LRR-RLKs\_1464

TCATTTACGTTTATCAAATGGTCTGTTAATCATTCCCTTGAAATGACTCTTTTAAAGTTTTGGGATTACATA  
ATTCATAAAAATGATCTTAGATAGCCCGAAACATTTCCATTCTTGTA

>PGSC0003DMG400003280-(rev)LRR-RLKs\_1525

GGGATTACATAATTCATAAAAATGATCTTAGATAGCCCGAAACATTTCCATTCTTGTAATTGAGGTAATA

TTCACATTATGTATTTAGCATGCCAATTTGGGATCTGCTTCTATCAATAT

>PGSC0003DMG400003280-(rev)LRR-RLKs\_1586

GAGGTAATATTCACATTATGTATTTAGCATGCCAATTTGGGATCTGCTTCTATCAATATTATAAACTCTTTT

TATCCAAAATTTTCAGGTGATCGGGGGATAGCACATGCTCAGCTAAAT

>PGSC0003DMG400003280-(rev)LRR-RLKs\_1647

TAAACTCTTTTTATCCAAAATTTTCAGGTGATCGGGGGATAGCACATGCTCAGCTAAATTGGACTATTG

CGTTAAAATCATCCTGGGAGTTGCCAGTGGAATGAAATTTCTTCATTGAG

>PGSC0003DMG400003280-(rev)LRR-RLKs\_1708

GACTATTCGCGTTAAAATCATCCTGGGAGTTGCCAGTGGAATGAAATTTCTTCATTGAGAGTTTGCATCA

TATGATGTACCTCATGGGAACCTTAAGTCTAGCAACATTCTTCTTTCTGC

>PGSC0003DMG400003280-(rev)LRR-RLKs\_1769

TTTGATCATATGATGTACCTCATGGGAACCTTAAGTCTAGCAACATTCTTCTTTCTGCAAATAATGAACC

ACTTCTCACAGATTATGCGTTTTATCCACTACTCAACGATTACAAGCT

>PGSC0003DMG400003280-(rev)LRR-RLKs\_183

ACTTCTTGATTCTTCTTGGAAAAAAGGAACAAATCCTTGTGATAATAATAACAAATGGTTTGGTGTACAA

TGTGATAATAAAAATGTTATTCAAGCCCTACTTCTTGGTGGGGTTGGCCT

>PGSC0003DMG400003280-(rev)LRR-RLKs\_1830

ATAATGAACCACTTCTCACAGATTATGCGTTTTATCCACTACTCAACGATTACAAGCTGTCCAATCTCTTT

TTGCTTATAAATCCCCAGAAGCCATACTAAACCAACAAGTCACTCCAA

>PGSC0003DMG400003280-(rev)LRR-RLKs\_1891

CCAATCTCTTTTTGCTTATAAATCCCCAGAAGCCATACTAAACCAACAAGTCACTCCAAAAAGTGATGTAT

ATTGTCTTGGAAATCATAATACTTGAATCCTAACTGGGAAATTCCCATC

>PGSC0003DMG400003280-(rev)LRR-RLKs\_1952

AGTGATGTATATTGTCTTGGAAATCATAATACTTGAATCCTAACTGGGAAATTCCCATCACAATATCTCAG

CAACCAAAGTGTTGGAAGTACGTTGCACAATGGGCGTGGTCAGCAATT

>PGSC0003DMG400003280-(rev)LRR-RLKs\_2013

AATATCTCAGCAACCAAAGTGTTGGAAGTACGTTGCACAATGGGCGTGGTCAGCAATTGAAGAGAAT

AGAGTATCAGAATTGATTGCTCCAGAGATAGAAACAGAAAAGGATTCCCTTG

>PGSC0003DMG400003280-(rev)LRR-RLKs\_2074

AGAGAATAGAGTATCAGAATTGATTGCTCCAGAGATAGAAACAGAAAAGGATTCCCTTGAAATGATGG  
AGAAGTTCCTTCATATAGGAGCTGCATGCACTGAGAGTGATCATGATAATAG

>PGSC0003DMG400003280-(rev)LRR-RLKs\_2135

ATGATGGAGAAGTTCCTTCATATAGGAGCTGCATGCACTGAGAGTGATCATGATAATAGAATCGACATG  
AAGGAAGCCATAAGGAGGATAGAAGAGATAACAAATTTAATGTAGTAATTG

>PGSC0003DMG400003280-(rev)LRR-RLKs\_2196

TCGACATGAAGGAAGCCATAAGGAGGATAGAAGAGATAACAAATTTAATGTAGTAATTGGTTAGATGA  
TCAGGAGGTTTCAATTTATTTTAGGGAGGAGGGAAAAAAGGTACATAAACC

>PGSC0003DMG400003280-(rev)LRR-RLKs\_2257

TAGATGATCAGGAGGTTTCAATTTATTTTAGGGAGGAGGGAAAAAAGGTACATAAACCTGTTTGAGTT  
CTCCAATAATGATCCACGCACGAGCTCTTCCCAGTAGAATGTGGGCATTT

>PGSC0003DMG400003280-(rev)LRR-RLKs\_2318

TTTGAGTTCTCCAATAATGATCCACGCACGAGCTCTTCCCAGTAGAATGTGGGCATTTTACGTTCCCTGA  
GATGAATGCTGTTTTCAATTTGATTTGACTTGCCTGTATCGAACTGGTGT

>PGSC0003DMG400003280-(rev)LRR-RLKs\_2379

CGTTCCTGAGATGAATGCTGTTTTCAATTTGATTTGACTTGCCTGTATCGAACTGGTGTGACATGGGCGT  
GGATACTTTGTGAGGATTCTTCAACATGCACTTAATGTTAGTAGGAAACT

>PGSC0003DMG400003280-(rev)LRR-RLKs\_244

GGTGTACAATGTGATAATAAAAATGTTATTCAAGCCCTACTTCTTGGTGGGGTTGGCCTTTCAGGGAATC  
TTGATGTTGATGTACTAATTAGCCTTCAAGGCCTTAGAGTTGTTAATCTT

>PGSC0003DMG400003280-(rev)LRR-RLKs\_2440

CATGGGCGTGGATACTTTGTGAGGATTCTTCAACATGCACTTAATGTTAGTAGGAACTTAAAGTACCCA  
TACGAAGAATTACACAACTTGTATATTGGATACATTAACATTATGCATT

>PGSC0003DMG400003280-(rev)LRR-RLKs\_2495

AACTTAAAGTACCCATACGAAGAATTACACAACTTGTATATTGGATACATTAACATTATGCATTTTCAAT  
TTTTTCTCTATAGTTCATTTTTTTTTCAGATAACCAATGCAGATACTCG

>PGSC0003DMG400003280-(rev)LRR-RLKs\_305

CAGGGAATCTTGATGTTGATGTACTAATTAGCCTTCAAGGCCTTAGAGTTGTTAATCTTGCAAACAACCTC  
TTTCTCAGGAACAATCCTGATTTTTTTTAGGCTTGGTGCTCTCAAGTCTT

>PGSC0003DMG400003280-(rev)LRR-RLKs\_366

AAACAACCTCTTCTCAGGAACAATTCCTGATTTTTTTAGGCTTGGTGCTCTCAAGTCTTTATTCATTAATGG  
AAACCAGTTTTCCGGAGACATCCCTGGAGATTTCTTCTCCAAAATGGG

>PGSC0003DMG400003280-(rev)LRR-RLKs\_427

TTCATTAATGGAAACCAGTTTTCCGGAGACATCCCTGGAGATTTCTTCTCCAAAATGGGATCTCTCAGGA  
AAATATGGTTTTTCGCGGAACAAGTTTTTCAGGGAAAATCCCTGATTCTTTA

>PGSC0003DMG400003280-(rev)LRR-RLKs\_488

CTCTCAGGAAAATATGGTTTTTCGCGGAACAAGTTTTTCAGGGAAAATCCCTGATTCTTTAGCAGGTTTAAA  
ATATCTTTTAGAACTCCATTTGGAGAATAATGAATTCACAGGACCTATTC

>PGSC0003DMG400003280-(rev)LRR-RLKs\_549

AGGTTTAAAATATCTTTTAGAACTCCATTTGGAGAATAATGAATTCACAGGACCTATTCCAATTTTGTAC  
AGGCTAATCTAGCAACTATAAACTTCTCAAACAATAAATTACAAGGTTT

>PGSC0003DMG400003280-(rev)LRR-RLKs\_61

CTCTCCAGCTCCACCACCTTATTTTCTATTTGTTTTTCTATCTCATCCAACCTCTTGTGTTTCCATTGG  
AGATGATCAAGTCCTTCTTGAATTTAAAGAATTGTTATTAATACC

>PGSC0003DMG400003280-(rev)LRR-RLKs\_610

ATTTTGTACAGGCTAATCTAGCAACTATAAACTTCTCAAACAATAAATTACAAGGTTAATTCCGCAAAG  
TTTGTCTAAGTTTGGTTTGAACCCCTTTCAAGGAAATCCTGATTTGTGT

>PGSC0003DMG400003280-(rev)LRR-RLKs\_671

TTCCGCAAAGTTTGTCTAAGTTTGGTTTGAACCCCTTTCAAGGAAATCCTGATTTGTGTGGAAATCAAAT  
AGGGAGGGAGTGTAAGGCTGTAGCCTCTGGTGAAAAGTCTGAAGGTTCTG

>PGSC0003DMG400003280-(rev)LRR-RLKs\_732

AAATCAAATAGGGAGGGAGTGTAAGGCTGTAGCCTCTGGTGAAAAGTCTGAAGGTTCTGGAAGTACAA  
AATGGATAATTATAGGCTTAGTGGTTGTTTTGCTATTGGTGGCTATATTATT

>PGSC0003DMG400003280-(rev)LRR-RLKs\_793

AGTACAAAATGGATAATTATAGGCTTAGTGGTTGTTTTGCTATTGGTGGCTATATTATTTAAGTCAAAGC  
GTAAGGATGATCAATTTGAAAAGCTTGAAAAGAGAGCCTTGATGAGGCT

>PGSC0003DMG400003280-(rev)LRR-RLKs\_854

AGTCAAAGCGTAAGGATGATCAATTTGAAAAGCTTGAAAAGAGAGCCTTGATGAGGCTGTGAAGGTG



CACCTTAACAAGAGAAGCATGAGCACGCGCACCTCTATGCGTTCATCAAGGA

>PGSC0003DMG400003280-(rev)LRR-RLKs\_915

GAAGGTGCACCTTAACAAGAGAAGCATGAGCACGCGCACCTCTATGCGTTCATCAAGGAAAGGACGCT

CAAGAAGTGGCAGCGATATGGGTGATCTAGTTGTGGTAAATGATGAAAAGGG

>PGSC0003DMG400003280-(rev)LRR-RLKs\_976

GGACGCTCAAGAAGTGGCAGCGATATGGGTGATCTAGTTGTGGTAAATGATGAAAAGGGTATATTTGG

GATGCCTGATTTGATGAAGGCAGCAGCTGAAGTCCTTGGTAATGGAGGATTG

>PGSC0003DMG400003313G-LecRK\_0

TTCAAAATTACATATTTCAAACCTTCTGTATGAATTAGGATTCATACTATAACATGAATATAAAATTTTCA

ATTCTTGTTTTACCTTTACTTGTGTTTCATCTTATTGTTCAACAATC

>PGSC0003DMG400003313G-LecRK\_1488

GTTCAAGCTAGTTGGCCTGATTTTGTTCCTTAAAGTGCCTAAAGCACAAACGTGCCAGGCAGGAGCAG

TATGAAGGAAACCTTCAATGTGACGATAAAAAGGTGATGTTGGATAGAGCT

>PGSC0003DMG400003313G-LecRK\_186

TTCACTGCTGGTTTCTACTCTGTTGGTGATAATGCATATATCTTTGCTATATGGTTTACTAAGTCATTGGCT

GATGGAACCAACACAATTGTTTGGATGGCTAATCGAAATCAACCGATA

>PGSC0003DMG400003313G-LecRK\_248

GTCATTGGCTGATGGAACCAACACAATTGTTTGGATGGCTAATCGAAATCAACCGATAAACGGACAAAA

ATCACATCTGTCGCTGTTAAATCAGGCAACCTTGTACTGATTGACGCGAA

>PGSC0003DMG400003313G-LecRK\_2766

TTTTGAATTCCAAAATGTAAATCCTTATAGAATGACATAGTTTCTTAACAATATTGTGCATTATAGCTACT

GTTATGGTCTTGTGCATCAGTGCTAGATGGAAAGTGTGCAAGAGTACAT

>PGSC0003DMG400003313G-LecRK\_682

GGGATGCAGGTTAGTAGAGACAGATTCAGAATTTAAATTTGATTCGTTAAATCCTTAGTTTGTGTCACT

CAACTCACATATATTTTTGCATGAAAAATACTAGTTTTAGTTGAACTCAT

>PGSC0003DMG400003313G-LecRK\_744

TTGTCACTCAACTCACATATATTTTTGCATGAAAAATACTAGTTTTAGTTGAACTCATTATATGTTTCATTT

GAGTGTATTGGTTAGTAAAGATGGATTCAGGATTTAAATTTAGTTGGT

>PGSC0003DMG400003313G-LecRK\_806

TGTTTCATTTGAGTGTATTGGTTAGTAAAGATGGATTGAGGATTTAAATTTAGTTGGTTCAATCTTTAGTA  
CAACTCATTTTTTTTCGGTTTAACTGAACTCACTGCTGATCATGTCTGC

>PGSC0003DMG400003313G-LecRK\_868

TCTTTAGTACAACACTCATTTTTTTTCGGTTTAACTGAACTCACTGCTGATCATGTCTGCAGGTCGATCCACTT  
ACAATGACAGCAAAACAGCAGTTCTTGATCGTTTTGGGAATTTTACAT

>PGSC0003DMG400003343RLKWAX-EGF\_0

GTTGGTTTGCTCTCATTACTTTATTTCTTCCCAATCCCCTTTCATTCACTTTATCAATTTACCAATTTTCTTT  
CTTCTTCTTCTTCTCCTCCTCCCCTGTTACATGTCCCCAAAAC

>PGSC0003DMG400003343RLKWAX-EGF\_1220

ATTTGGTTATGAGTTGGGTGGTTTAACTAAATGAAATTGAAGTTTATGAGTGGGAATTTTGACCAAATTT  
GGTGAGAGGAGAACATCATAATTAGATTTTTTTTTTAAAAACATGGGTCC

>PGSC0003DMG400003343RLKWAX-EGF\_1281

ACCAAATTTGGTGAGAGGAGAACATCATAATTAGATTTTTTTTTTAAAAACATGGGTCCAAGTACAAATA  
TATTATTAAGATGGCATGCTGAGGCGGCCTAAAAGAAAAGTAACATAT

>PGSC0003DMG400003343RLKWAX-EGF\_1342

GTACAAATATATTATTAAGATGGCATGCTGAGGCGGCCTAAAAGAAAAGTAACATATAATTGATGAA  
AAACTGTTAGATTGAATTGAATGATCAAACCTTCTTCGATAAAGTGAAAGT

>PGSC0003DMG400003343RLKWAX-EGF\_1403

TTGATGAAAACTGTTAGATTGAATTGAATGATCAAACCTTCTTCGATAAAGTGAAAGTATTGATAGTCA  
ATCAATCAGAAATATAAAACAAATTATTCCTATACAAGTTCAATTTTCTC

>PGSC0003DMG400003343RLKWAX-EGF\_1464

TGATAGTCAATCAATCAGAAATATAAAACAAATTATTCCTATACAAGTTCAATTTTCTCCAACCTATAGGGT  
CATGGAGTGCATGTTAAGGAACTAGAAAGTCAATAGTGTATACTATTAA

>PGSC0003DMG400003343RLKWAX-EGF\_1525

ACTATAGGGTCATGGAGTGCATGTTAAGGAACTAGAAAGTCAATAGTGTATACTATTAATAAAATATAA  
TAGAAGAAGAATTTATTTTTTTTCTCATGTTTCATACTAAGAAAAGGTAAAA

>PGSC0003DMG400003343RLKWAX-EGF\_1586

AAATATAATAGAAGAAGAATTTATTTTTTTTCTCATGTTTCATACTAAGAAAAGGTAAAATCAAGAAAAA  
AAGCAAATTATAATTGTTTATTAGAGCAACTTGTGATTGTCGTTTTTCAT

>PGSC0003DMG400003343RLKWAX-EGF\_1769

AACAACCTCGTACTATCTAGGTAGGACCCAAGAATAGTGATGGTTGTTGCCTTTAATGTCACCTTATCAAT  
GCCAAAATTAAGGCAAATCTAAAATGGTTACATCTCGTATAAGTTTTAG

>PGSC0003DMG400003343RLKWAX-EGF\_183

ATAGTTCTTGGATCAAACCTGTACCCATTCATGTGGAAACAGATTCCTTCCATTTCTTTTGGGTTTTCCCAT  
GGCTGCCCAATTCAGCTCAACTGTACCTCAAATGAAGAAATTTTCATG

>PGSC0003DMG400003343RLKWAX-EGF\_1830

CTTATCAATGCCAAAATTAAGGCAAATCTAAAATGGTTACATCTCGTATAAGTTTTAGTTGAAGTTCAC  
GTAAAATAACTAAATGTTTGTGCATATCTAAAGCTATTCGAGGTGGGTA

>PGSC0003DMG400003343RLKWAX-EGF\_1891

GAAGTTCACGTAAAAATAACTAAATGTTTGTGCATATCTAAAGCTATTCGAGGTGGGTAGTCTTGTAAT  
GTTACACACTACGAGTATCACTTAAATGGTGCTTCTGAAATCGAGTGTT

>PGSC0003DMG400003343RLKWAX-EGF\_1952

CTTGTAATGTTACACACTACGAGTATCACTTAAATGGTGCTTCTGAAATCGAGTGTTTGTTCATCAGA  
CATCTAAATCACAATTAATAGGTTTACGAAGACTTAATACCTTTTGTCC

>PGSC0003DMG400003343RLKWAX-EGF\_2013

TTCAATCAGACATCTAAATCACAATTAATAGGTTTACGAAGACTTAATACCTTTTGTCCATACCCATACCC  
TATATGTGAACGAGTTATAATTGTATATTAACCTTGAGATTGTTGCAAAA

>PGSC0003DMG400003343RLKWAX-EGF\_2074

ACCCATACCCTATATGTGAACGAGTTATAATTGTATATTAACCTTGAGATTGTTGCAAAAACCTCACAAACTT  
CAAATTTTGAATACTTTGATTGGTTGGTATAATGTCCATTCATGTTATT

>PGSC0003DMG400003343RLKWAX-EGF\_2196

ATTAAGATATCCTGCCAAAATTTGTTTCATCATTTGGTCAAGGAAGAGGCCTTTTTTCTTTGTTTTCTTC  
ATTTTCTATCAAACCCCATTTGGTTTTGAGTGAACAATGGAAACAAAG

>PGSC0003DMG400003343RLKWAX-EGF\_2257

TTGTTTTCTTCATTTTCTATCAAACCCCATTTGGTTTTGAGTGAACAATGGAAACAAAGTCACTATCATATT  
ACGTGAAGATAGTAACTCAACAATATCAATGGACCCTCGTGAAAAGTA

>PGSC0003DMG400003343RLKWAX-EGF\_2318

ACTATCATATTACGTGAAGATAGTAACTCAACAATATCAATGGACCCTCGTGAAAAGTAATATACGAATT

CGTGACTACTTTTTTTTTTTGTTCCCATCCAATGTTTCAGTATCTGTATTGG

>PGSC0003DMG400003343RLKWAX-EGF\_2440

TCTGAACTAGTTCAAATTCACATCACCTATTA AAAAAGAAACGGTCCCTATTAGGATTTTTTCCATACCCAA

GGCATGAACGCGATAACTCAGGTCCCATCACAACACTTGAGTAGTATGT

>PGSC0003DMG400003343RLKWAX-EGF\_2501

CCATACCCAAGGCATGAACGCGATAACTCAGGTCCCATCACAACACTTGAGTAGTATGTGTCCCATTACT

AATTCCATTTCTTTTTTATGTGAATGCAGATGAAACATCATGCAACCCT

>PGSC0003DMG400003343RLKWAX-EGF\_2684

TCTACGTTGATTTAAGTTATATACGCTGACAGTGCAGAGTCTCAACATCTAGTACTAGTTGATATGAAATT

GTTTTCTTATTCTTTCTTAATTCAATTTCTCTATAACAACACATTAATC

>PGSC0003DMG400003343RLKWAX-EGF\_2745

ATATGAAATTGTTTTCTTATTCTTTCTTAATTCAATTTCTCTATAACAACACATTAATCTAAAGTGATGAAA

ACTATATTTATTCTCCAGGTATTGTAGCAGGTGCTTCGTTAATGGTT

>PGSC0003DMG400003343RLKWAX-EGF\_2806

AAGTGATGAAAACACTATATTTATTTCTCCAGGTATTGTAGCAGGTGCTTCGTTAATGGTTAGTATAGGCCT

AATATGCTGCTTTATTTCGACGAAGATTGAATTTCCAAAACAGAAGAAGAA

>PGSC0003DMG400003343RLKWAX-EGF\_2867

TATAGGCCTAATATGCTGCTTTATTTCGACGAAGATTGAATTTCCAAAACAGAAGAAGAAGAAACCGCGA

GTTATGTGAGACTACAGGGATCAGCATCCCTGTTTATCAGTACAAAGAAAT

>PGSC0003DMG400003343RLKWAX-EGF\_3233

CATGCCTAATGGAACTTTGTCAACATATACAAAGAGAAAAAGGGAACGGGCTTCCATGGCCTGTTCCG

TCTTACAATTGGTGCAGAACTGCACAAGCTATAGCTTATTTGCATAATGC

>PGSC0003DMG400003343RLKWAX-EGF\_3294

CCTGTTCTGCTTACAATTGGTGCAGAACTGCACAAGCTATAGCTTATTTGCATAATGCAACGCACCCTCC

AATATATCACAGAGATGTTAAGTCAAGTAACATACTCTTGGATTACAAT

>PGSC0003DMG400003343RLKWAX-EGF\_3416

CAAGTCAAAGTAGCAGATTTTGGACTCTCAAGACTCGGTATGGTTGAATCGTCTCACATTTCTACTGCA

CCACAAGGAACTCCGGGATATCTTGATCCTCAGTATCATCAGA AACTTTCA

>PGSC0003DMG400003343RLKWAX-EGF\_549

CCGAATAGTGAGAACAATTTTATCAATTTGAAGAATTTGTGCGAAAACAGGGTGTGGCTCTCTGTTTTCTG  
CAATTTCTGTGGAGTCGACTGTGAATAGCTCGTCGGTTTCATTAGATGTT

>PGSC0003DMG400003343RLKWAX-EGF\_61

ACCAATTTTCTTTCTTCTTCTTTCTCCTCCTCCCCTGTTACATGTCCCCAAAACATGAATTTTCCTCTC  
CATTTCAGAACAATTCTCTGTTTGTATTTTCAATTTTTCATCAA

>PGSC0003DMG400003343RLKWAX-EGF\_610

TGTTTTCTGCAATTTCTGTGGAGTCGACTGTGAATAGCTCGTCGGTTTCATTAGATGTTCAGGTGGTTCA  
ATTGGGGTGGTGGATTCATGGACATTGTCGGTGTCTTCTAATGCGAATT

>PGSC0003DMG400003343RLKWAX-EGF\_854

ATTTAATTACTTAATTAGGTGTCAAACACATTAATAATCTATCTAATTATGAGTAACAATGAGATTTGAAC  
TTGACATATCATGTTAAAATATGTGACAATTTTCATATAAAAATTTAAAAT

>PGSC0003DMG400003343RLKWAX-EGF\_915

AGATTTGAACTTGACATATCATGTTAAAATATGTGACAATTTTCATATAAAAATTTAAAATTTTATCCGTGGA  
GGATCGTATTACCAAAAAAATTACATTCAAAAATCCTAAATCCGCCTTC

>PGSC0003DMG400003343RLKWAX-EGF\_976

TATCCGTGGAGGATCGTATTACCAAAAAAATTACATTCAAAAATCCTAAATCCGCCTTCATTGTAGGTAA  
TTTTGCTTTAATTAGTTAACTATTTATTCAACAACTTTTTAAATAAAAAC

>PGSC0003DMG400003380LRR-RLPs\_0

GAGGAAGTGAAGAAATAAACTATAATACTGTGTGTTCTTCTTTCCAGTCCACAACAGTTTAATTCTTGT  
GTCACAAGGATGTATTTCAACAAAGAATTATCTAATCTGAAAGATCGACT

>PGSC0003DMG400003380LRR-RLPs\_1037

TCAAGATATGGATTCTGTTATTATTGATGCTGGACTTCTTATTTACTCATTATATGATATCAAGAGGGAGA  
AGGAAGACACAGTATTGGATGATATGAACCGAGCACTTGGTTTTGATCT

>PGSC0003DMG400003380LRR-RLPs\_1098

AAGAGGGAGAAGGAAGACACAGTATTGGATGATATGAACCGAGCACTTGGTTTTGATCTTCCAAGAAA  
CATTGAGCCTATCAAGGCGATGGTCTACCTCATCATGCAAAAAGGCATTTCAA

>PGSC0003DMG400003380LRR-RLPs\_1159

CAAGAAACATTGAGCCTATCAAGGCGATGGTCTACCTCATCATGCAAAAAGGCATTTCAATGTAACCTGCC  
AAGGATTCATGGACTAGGCTATGTGATTTTCTATTGAAAAACCTGAAGG

>PGSC0003DMG400003380LRR-RLPs\_122

TTAGCACGGTGCAAGATCAAATTACTCGGATGTTACAAGGGATCGAATAAATTTCTTTCTATGGGACTT  
AAAATTCCTCGATTGTTTTCTCCATTTGAAAAGGTTGCCTTTTGCAAGTG

>PGSC0003DMG400003380LRR-RLPs\_1464

GTAGTTGATGCTTGATAAAACAAAGGCATTCCTCATTGGTGCCTCGAGCGTTGGCTCCAGGATATCATAG  
AGGAGATTACTTGTATCAAAGCAAAGATTCAGGAAAATAACACTGTTGAC

>PGSC0003DMG400003380LRR-RLPs\_1525

ATATCATAGAGGAGATTACTTGTATCAAAGCAAAGATTCAGGAAAATAACACTGTTGACGATACAATGA  
AGACTGTCATTGCTCGTACATCATCACAACACTGGCAAGGACTCCGAGGATGA

>PGSC0003DMG400003380LRR-RLPs\_1586

TACAATGAAGACTGTCATTGCTCGTACATCATCACAACACTGGCAAGGACTCCGAGGATGAATGAAGAAAT  
TGTTGGGTTTGAGGATGTCATAGAAAATTTAAGAAAAAACTACTGAATGG

>PGSC0003DMG400003380LRR-RLPs\_183

ATGGGACTTAAAATTCCTCGATTGTTTTCTCCATTTGAAAAGGTTGCCTTTTGCAAGTGAATGCGGTATGC  
TAAAAGTCTCACAGAAAATCATAGAAATTTGGAAGTTTCAGTGTAACC

>PGSC0003DMG400003380LRR-RLPs\_1830

GTGTCTCAAGTATATTCGTATAAGGACTTGTTATTGTCCTTGATACGTGATGCTATTGGTGAGGATTCTG  
ATCAGCATAGAGAACTTCATGACAATGAATTAGCTGATAAGCTTCGCAA

>PGSC0003DMG400003380LRR-RLPs\_2196

CTCCTAAGAGATGTTGGGCTAAGAATAGCAAAAATGTGTGGACAACCTCCCTCTTTCAATTGTTTTGGTGG  
CTGGTATTCTGTCAGAGATGAAAAAGGAAGTAGAATGTTGGGAGCAAGTG

>PGSC0003DMG400003380LRR-RLPs\_244

TGCGGTATGCTAAAAGTCTCACAGAAAATCATAGAAATTTGGAAGTTTCAGTGTAACCCTATGATTGTC  
CAGATCTATTTCCGTACAAGACTCTGTATGTTTACGATTCATTTGGCTAC

>PGSC0003DMG400003380LRR-RLPs\_2623

TACTACTCGACTTCTGCAAGGAAAGAGCAGCTGAGGAGAATTTTCTACTATGGATAAAACGGTAATATG  
ATAAGTAATGGTACTTTCAATCAATCAAGTATTTCAAGTTATATTTGAAAA

>PGSC0003DMG400003380LRR-RLPs\_2684

GTAATATGATAAGTAATGGTACTTTCAATCAATCAAGTATTTCAAGTTATATTTGAAAATTAATGATATGA

TTTTGCTAATTGATATATTCACAGAGATCAGATTACCAAAGCTGTTTAC

>PGSC0003DMG400003380LRR-RLPs\_2745

AATGATATGATTTTGCTAATTGATATATTCACAGAGATCAGATTACCAAAGCTGTTTACTCTCACAAGCA  
GCATGCTCACTTGGCGTTCCTGAAATGGATAATCTTTTAGAATGGAGTA

>PGSC0003DMG400003380LRR-RLPs\_2867

TCTGGCTCACTTGTTGGCTCTGTACTTTTTAAGAATTATGACCAATACTTTGCCGATCGTCCCTTTTTCTCT  
CATGCTTTTGAAATTTACACATTTTACCACATTTCAAGTTTCTAAAA

>PGSC0003DMG400003380LRR-RLPs\_2928

CCTTTTTCTCTCATGCTTTTGAAATTTACACATTTTACCACATTTCAAGTTTCTAAAAGTACTGGATTGG  
AACACCAGGTTGTTATTGATTTTATTCCGACTGAGCTCCCTTACTTGA

>PGSC0003DMG400003380LRR-RLPs\_305

ATGATTGTCCAGATCTATTTCCGTACAAGACTCTGTATGTTTACGATTCATTTGGCTACTGGAAGGATGTA  
ATTTGGAAGACTAAGCAAGAATTCAGAGCTGAATACTCTTTTCCAATA

>PGSC0003DMG400003380LRR-RLPs\_3050

TATTTCTCTGCGCTCATTGATCAGAATTC AATTCCTTCAAGCATATCCAATCTTTGGAACCTTGAAACTCT  
ATATTAAGCGTAGATCAGCTGCCAGATATAACAGGGTATTACTACCT

>PGSC0003DMG400003380LRR-RLPs\_3111

TTGAAACTCTTATATTAAGCGTAGATCAGCTGCCAGATATAACAGGGTATTACTACCTAGTACAGTTTG  
GGATATGGTTAAATTGAGATATCTGTATATTCCTTACTTCAGCCCTGAAA

>PGSC0003DMG400003380LRR-RLPs\_3172

TACAGTTTGGGATATGGTTAAATTGAGATATCTGTATATTCCTTACTTCAGCCCTGAAATAAAAAGCATT  
CTCGAGAACTCTCCAAAATTGATGATTTGGAAACCCTTTCCAATTCAT

>PGSC0003DMG400003380LRR-RLPs\_3294

TTCACTCGTGTTGAGGATGCAGAATTGATGCTGAGAAAAACACCTAATCTTCGAAACCTGACATGTAAA  
ATCGAGTGCTTGAAATACCCCATCAGTACCATGCATTGAATTTTCCAATA

>PGSC0003DMG400003380LRR-RLPs\_3416

GCTTGAAATACTAAAGCTTTATGGATCAAAAATCGTCAAACCATCCCTTTTACATCTCTGCACCAAATC  
TCAAATACCTGATACTCTGTGGCTTTTACCTGGATTCTCAGTACTTATC

>PGSC0003DMG400003380LRR-RLPs\_3477

GCACCAAATCTCAAATACCTGATACTCTGTGGCTTTTACCTGGATTCTCAGTACTTATCAGAAACTGCTGA  
TCATCTGAAGAACCTTGAGGTACTCAGACTGTCCTTCGTTATATTTGGT

>PGSC0003DMG400003380LRR-RLPs\_3538

AAACTGCTGATCATCTGAAGAACCTTGAGGTACTCAGACTGTCCTTCGTTATATTTGGTGGTCATATGAA  
ATGGAAAGTGAGCAATGGCAAGTTCCTCAACTCAAAATCTTGAAACTAG

>PGSC0003DMG400003380LRR-RLPs\_3599

TCATATGAAATGGAAAGTGAGCAATGGCAAGTTCCTCAACTCAAAATCTTGAAACTAGAATATTTGCC  
ATGATGAAATGGATTGTAGCTGATGATGCCTTTCCTAACCTTGAACAATT

>PGSC0003DMG400003380LRR-RLPs\_366

GAAGGATGTAATTTGGAAGACTAAGCAAGAATTCAGAGCTGAATACTCTTTTCCAAATACATCACTTGCA  
GCCAACAAGGTGGATGATGATGTAGCCCCAAATTTGTGATGGAAGTCATC

>PGSC0003DMG400003380LRR-RLPs\_3660

TATTTGCCCATGATGAAATGGATTGTAGCTGATGATGCCTTTCCTAACCTTGAACAATTGGTTTTGCGTCG  
ATGTCATGATCTTATGGAGATCCCTTCTTGTTTCATGAACATCCTTTCT

>PGSC0003DMG400003380LRR-RLPs\_3721

TTTTGCGTCGATGTCATGATCTTATGGAGATCCCTTCTTGTTTCATGAACATCCTTTCTCTGCAGTACATCG  
AGGTAGAAAAGTCAATGAGTCGGTTGTCAAGTCAGCCATGAATATAC

>PGSC0003DMG400003380LRR-RLPs\_3965

GAACTGTTTTCTCTGTTATCTTTACCTGGTGGCCTCGTTTTACATTTGGGTTTTCTCTTGGTTTTCTTGCA  
GAAAGAGACATACCCAAGGCATTTAAACAATTACTTTTACTTCCAGGT

>PGSC0003DMG400003380LRR-RLPs\_4026

GTTTTCTTGCAGAAAGAGACATACCCAAGGCATTTAAACAATTACTTTTACTTCCAGGTACTACTTATTAT  
TTTTTCTTTCTTTCTTTTTTTGAGTACACCGAATAGATAGATTCATCT

>PGSC0003DMG400003380LRR-RLPs\_4087

TACTTATTATTTTTCTTTCTTTCTTTTTTTGAGTACACCGAATAGATAGATTCATCTTTTTTCTCCTGTCGA  
TATAAAAGGGATAGAATCAATTTCAACTGATATGAAAGAGAAGAAA

>PGSC0003DMG400003380LRR-RLPs\_4209

TACTGTGACCAGAGAATGTGGATGCTGATGAAGTTCAATTAGTTGTGGAGAACTGAGAAAGCGTGCC  
ATGCTCTAACAAAATGCTGAACTCTGGTGAACCTCAACCGTGATGGATTCCA



>PGSC0003DMG400003380LRR-RLPs\_4392

GTAATACCATTTTCATGACACACACACAAACATTAAGTGTAGTAAAGTTTTGATGGATCAGCTGATATGTT  
AGTTCAACCCATTGTAATCCCGTTCAAATTCAACTCAAAAAATGCCATT

>PGSC0003DMG400003380LRR-RLPs\_4453

TGATATGTTAGTTCAACCCATTGTAATCCCGTTCAAATTCAACTCAAAAAATGCCATTGAGTTATTCTTT  
AACAGGGTATCCAGAGTTTGTAGCTGGAGCAATTTGGAATATCGCATGT

>PGSC0003DMG400003380LRR-RLPs\_4514

GTTATTCTTTAACAGGGTATCCAGAGTTTGTAGCTGGAGCAATTTGGAATATCGCATGTAATTTCTTTATG  
AGTTATTTCTTTAATAAAGATTCTGTAAAACGTCCAACGGCTGTTGCA

>PGSC0003DMG400003380LRR-RLPs\_4575

TTTCTTTATGAGTTATTTCTTTAATAAAGATTCTGTAAAACGTCCAACGGCTGTTGCATTCATTGTAACT  
AAATACATCTCACAATGTAAGTGAACAAATTTTTCATTCAAGTCC

>PGSC0003DMG400003380LRR-RLPs\_4606

TTCTGTAAAACGTCCAACGGCTGTTGCATTCATTGTAACTAAATACATCTCACAATGTAAGTGAACA  
AATTTTTCATTCAAGTCCTTAAGGTTTGTAGTGAAGTCATTAGATTTTAC

>PGSC0003DMG400003380LRR-RLPs\_488

TGTTTTTGTGGAGAACCTCAATGTTCTAGTGAAGATCAATGATCCAATTTCTGGCTTTTTGTTCCAGAAC  
ACAAGGAACAAATAGAACAAGTGTAAAGGAGTTGAAGTTATTGAGATT

>PGSC0003DMG400003380LRR-RLPs\_61

AATTCTTGTCACAAGGATGTATTTCAACAAAGAATTATCTAATCTGAAAGATCGACTCCTTAGCACGG  
TGCAAGATCAAATTAAGTGGATGTTACAAGGGATCGAATAAATTTCTTT

>PGSC0003DMG400003380LRR-RLPs\_610

TTGTCTGCTTTGTTTCAAACAAATGTATAGAGCCTCAATACCGACATACTACTTTTTATATTCATGCTTTAA  
TTGAGGCTAGCCACATTGCAATGGTTGTCTGGTTGCATTTGCCAGTCG

>PGSC0003DMG400003380LRR-RLPs\_671

TCATGCTTTAATTGAGGCTAGCCACATTGCAATGGTTGTCTGGTTGCATTTGCCAGTCGTCTATGGAAAT  
CAAGACGTGGCTCCAAGTGAAGTCAGTCGTTTGTCTCTCTGATTTTCATGGA

>PGSC0003DMG400003380LRR-RLPs\_732

TATGGAAATCAAGACGTGGCTCCAAGTGAAGTCAGTCGTTTGTCTCTCTGATTTTCATGGAATTGAAGATTA

AGTCCATT CAGCCAGTCATCAGCCGCAACAATATTTATATTGATGTCCTG

>PGSC0003DMG400003380LRR-RLPs\_793

TGAAGATTAAGTCCATT CAGCCAGTCATCAGCCGCAACAATATTTATATTGATGTCCTGCAAGCTTTGAA  
GTCAACCATAACCACAAGCACAAAAGAAGCATGCAGCTGAGAGTAGCACTG

>PGSC0003DMG400003380LRR-RLPs\_854

AGCTTTGAAGTCAACCATAACCACAAGCACAAAAGAAGCATGCAGCTGAGAGTAGCACTGTGGAGATTCC  
AACACACAGTCTGACGGTTGGTTTGAGTGATCAAATGGCTAACCTTCAGGA

>PGSC0003DMG400003380LRR-RLPs\_976

TGCTCTGCCTTCTAAGAGATAATCTCATT CATCTGCCAATACTAGATCTGGAATTT CATCTTCAAGATATG  
GATTCTGTTATTATTGATGCTGGACTTCTTATTTACTCATTATATGATA

>PGSC0003DMG400003406-(rev)RLKmalectin\_1302

TCTGTTGGTAGCTTAGATGGAGAATATGGTGTGATGGACAAAACAAAGTGGTCCAAGCAAACAGT  
GGCTTATGTTGGATTGCGGATGATGTTTGGAGCGTTTGTGGGGTTGGGTGCA

>PGSC0003DMG400003406-(rev)RLKmalectin\_1922

TATCTGTATTGGTGCTGCTCGCGGGCTTCATTACCTCCACACTGGTGCATCTACTGGGATCATA CATAGA  
GATGTCAAACCACCAACATTTTGCTTGATGAGAATTTTGTGCGCAAAGAT

>PGSC0003DMG400003406-(rev)RLKmalectin\_1984

TACATAGAGATGTCAAACCACCAACATTTTGCTTGATGAGAATTTTGTGCGCAAAGATGGCTGATTTTGG  
GCTATCTAAAGATGGACCGACAACAGAACAGACTCATGTGAGCACGGCTG

>PGSC0003DMG400003406-(rev)RLKmalectin\_2418

GTTTTATGGAATTTGGAGTACGCGTTGCAGATGCAAGAAGCCTCGTTACAAGGAAAGACAGATGATATC  
GATAACAAAGCAATTGTTGCACCAATTTCTCCTTCTACAATTGCCCATGCT

>PGSC0003DMG400003429-(rev)LRR-RLKs\_0

AAGCAACACGTCCACACTTCAAACCACAAAAAATAAAAAATAAAATGTCTTCTAGTCATTTTCTTTTCAT  
TCCTTTTCTTTCTTTCTAATTTCCGGGATCTTTTCGGACCTTAACGC

>PGSC0003DMG400003429-(rev)LRR-RLKs\_1037

TTAGTTTGGAGGATTTATTGATGGCGTCTGCGGAGGTTTTGGGGAAAGGGGCAACTGGA ACTACTTATA  
AAGCATATTTGGATAGAGATGTTGAAGTTGTTGTGAAGAGGTTGAGAAATG

>PGSC0003DMG400003429-(rev)LRR-RLKs\_1098

TACTTATAAAGCATATTTGGATAGAGATGTTGAAGTTGTTGTGAAGAGGTTGAGAAATGTTTGTGTTTTA  
GAGGAGGAGTTTAGGGGAAAAGTGGAGCAATTGGGAGGAATTAGTCATGG

>PGSC0003DMG400003429-(rev)LRR-RLKs\_1159

TGTGTTTTAGAGGAGGAGTTTAGGGGAAAAGTGGAGCAATTGGGAGGAATTAGTCATGGGAATTTGGT  
GCCTCTTAGAGCATATTATTATGGAAGGGATGAAAAGCTTGTTGTTTATGAT

>PGSC0003DMG400003429-(rev)LRR-RLKs\_122

ATAGAGCCGCTCTACTCCACCTGAGTGCGCCATCAAAGGCCGCACTCTTAGGTGGAACACAACCAATT  
CAACCCCATGTTTCATGGGAAGGTGTGCAATGTGATACTACAATCAACCGTG

>PGSC0003DMG400003429-(rev)LRR-RLKs\_1220

ATTTGGTGCCTCTTAGAGCATATTATTATGGAAGGGATGAAAAGCTTGTTGTTTATGATTCTATGCCTAC  
AAGTTTGTATGCTGTTTTGCATGGTAAGTATCTTATATCTAATAAACTTT

>PGSC0003DMG400003429-(rev)LRR-RLKs\_1281

TATGCCTACAAGTTTGTATGCTGTTTTGCATGGTAAGTATCTTATATCTAATAAACTTTAGCTTATTGTTGT  
TTAATAATAATATTTGCTACTTGCTTCTTTTAGGTAGTCTCTGGTTT

>PGSC0003DMG400003429-(rev)LRR-RLKs\_1342

CTTATTGTTGTTTAATAATAATATTTGCTACTTGCTTCTTTTAGGTAGTCTCTGGTTTTGGTTAGGGAGTA  
AATCAAGTTAATTAATAATTCTTAGCTTAGATTATATTAGCTTCTAGTT

>PGSC0003DMG400003429-(rev)LRR-RLKs\_1403

GTTAGGGAGTAAATCAAGTTAATTAATAATTCTTAGCTTAGATTATATTAGCTTCTAGTTAATTGTTTTTTA  
GCTTTAGCTATGAAAACCTGAAATTATGTGGAAGAGATGGTATGAAAACA

>PGSC0003DMG400003429-(rev)LRR-RLKs\_1708

TAAAGATAACTTTTGATGTTGTGTATATTGATGTTACATCACAATAATGAAGGACCCATGTAATATTAT  
TAGAGAGAACAAGAACTTTCTGTGTAGAGGGAAAGCCTCCTTAATTAGT

>PGSC0003DMG400003429-(rev)LRR-RLKs\_1769

GTAATATTATTAGAGAGAACAAGAACTTTCTGTGTAGAGGGAAAGCCTCCTTAATTAGTATTTAGTTGAA  
TAGGCCTTCTATCAACTCACATTCTATTAATGTTACGGAAACGAACTAT

>PGSC0003DMG400003429-(rev)LRR-RLKs\_2074

ATGGCAACATCAAGTCATCTAACATCCTCCTCACACTACTACGATGCATATCTATCCGAATTTGGCATA  
ACACAGTTGATTTCTTCAACATCAAACCTCCAAAATGACTGGATACTACG

>PGSC0003DMG400003429-(rev)LRR-RLKs\_2135

ATTTGGCATAACACAGTTGATTTCTTCAACATCAAACCTCCAAAATGACTGGATACTACGCGCCTGAGGTG  
ACAGATATTCGTAATGTTTCCCAGAAAGCCGATGTCTATAGCTTTGGCAC

>PGSC0003DMG400003429-(rev)LRR-RLKs\_2501

CAAAGAAATTGTTATGTGAGTTTTGTTAATGTTTGATCTTCCCCCTCATTCTTGTCCAAATGAAGGGGCG  
AATTCATACCTTCAAATTGGGCACGTGAATATGTGATCTCTCTATAAA

>PGSC0003DMG400003429-(rev)LRR-RLKs\_2556

TCCAAATGAAGGGGCGAATTCATACCTTCAAATTGGGCACGTGAATATGTGATCTCTCTATAAACTAG  
ATATTTTATGTATATATATTTTGAATTAATATAATATTATTTATTGCCTC

>PGSC0003DMG400003429-(rev)LRR-RLKs\_366

TGACATAGGATCATGTACAGAGCTACGTATACTTAATTTGGAAAACAACGATTTCTCTGGTTCAATTCCA  
ACGACTTTTTTCAATCTGAACAATCTTATACGCGTGAGTTTTTCAGGGAA

>PGSC0003DMG400003429-(rev)LRR-RLKs\_427

TCAATTCCAACGACTTTTTTCAATCTGAACAATCTTATACGCGTGAGTTTTTCAGGGAACAGGATCTCCGG  
TGAGATATCGGACGCGTTTAAACAATCTGACTAGGATGAGAACTCTGTAT

>PGSC0003DMG400003429-(rev)LRR-RLKs\_549

GGAGAATAACAACCTTTTCTGGCTCACTTCCTGATTTGAAAAACCTCTCACAGCTCAATGAATTCAATGTGT  
CTTTCAATAGATTAACCGGTTTCGATCCCTTCGAGTTTAGGTTCGATTCTT

>PGSC0003DMG400003429-(rev)LRR-RLKs\_610

TTCAATGTGTCTTTCAATAGATTAACCGGTTTCGATCCCTTCGAGTTTAGGTTCGATTCTTAGCTTCTTCATT  
CTTGAAATTCACTCTGTGGCTCTGCTTTCTCTCTTAGTCCTTGTCTT

>PGSC0003DMG400003429-(rev)LRR-RLKs\_671

CTTCTTCATTTCTTGAAATTCACTCTGTGGCTCTGCTTTCTCTCTTAGTCCTTGTCTTCAAACAATAGCC  
TCACCAGTCAATCTGATAAACTTTCCGGCGGAGCAATAGCTGGAATAG

>PGSC0003DMG400003429-(rev)LRR-RLKs\_732

AAACAATAGCCTCACCAGTCAATCTGATAAACTTTCCGGCGGAGCAATAGCTGGAATAGTAATTGGCTC  
GATTATCGGATTGTTTACTACTACTATTAGTTTTGTTTATGTTAGTGAGATC

>PGSC0003DMG400003429-(rev)LRR-RLKs\_793

ATTGGCTCGATTATCGGATTGTTTACTACTACTATTAGTTTTGTTTATGTTAGTGAGATCAATTTATAGGAG

TAGAAAAGCTTCCGTCAAGTGAATGTGTCTCCTACGCCGAATCAAGTA

>PGSC0003DMG400003429-(rev)LRR-RLKs\_854

TTTATAGGAGTAGAAAAAGCTTCCGTCAAGTGAATGTGTCTCCTACGCCGAATCAAGTACTTTCAAGTCC

TCATGATTCAATAGTGACAGAAAATCATGATATCGAAAATGTTTTTTCGG

>PGSC0003DMG400003429-(rev)LRR-RLKs\_915

TTCAAGTCCTCATGATTCAATAGTGACAGAAAATCATGATATCGAAAATGTTTTTTCGGAGAGGAAAGTT

TGTGAAGATAGGACAAAAGGGATGGTGTGTTTTTGGGGAAAGTTTTGAGTT

>PGSC0003DMG400003429-(rev)LRR-RLKs\_976

AGGAAAGTTTGTGAAGATAGGACAAAAGGGATGGTGTGTTTTTGGGGAAAGTTTTGAGTTGTTTAGTTTG

GAGGATTTATTGATGGCGTCTGCGGAGGTTTTGGGGAAAGGGGCAACTGGA

>PGSC0003DMG400003543LRR-RLPs\_0

CTTTCTTTGTTTGTCCCTTCTTTGGACACACAATATATCCTCATGAATCCATTTAAAACTAATCTTGAAG

GCTCTTCTTTCATCAATTCTCATTACGATAAAAAAAAAAACCACACAG

>PGSC0003DMG400003543LRR-RLPs\_1364

GAGTGTGAGGCTTTTGGTCCCATCATTCCTTGAGTAATGTGATAATGTCTTTACTTTGAGGTCCTCGTTTT

CATTTTGTACTAGTAATTATTGTATCGTTTCAATTTTATCGGAAGGGAC

>PGSC0003DMG400003543LRR-RLPs\_1426

CCTCGTTTTCATTTTGTACTAGTAATTATTGTATCGTTTCAATTTTATCGGAAGGGACCAGTAAGTATTGT

ATAAATATATTTTTTCTGCAACCTTACCCCATGTATGGGGTTTTAGAT

>PGSC0003DMG400003543LRR-RLPs\_1488

AAGTATTGTATAAATATATTTTTTCTGCAACCTTACCCCATGTATGGGGTTTTAGATATGATCTATGGTA

GAGTTGTTATTGTTGTGAAGAGTGAGACAGAAATATAAGATTTCTGACT

>PGSC0003DMG400003543LRR-RLPs\_1541

TAGATATGATCTATGGTAGAGTTGTTATTGTTGTGAAGAGTGAGACAGAAATATAAGATTTCTGACTTGA

TGTGTTGAAGTAGTAATTGTGGGACAGTTGAGAAAATTTTATTAGCGGAT

>PGSC0003DMG400003543LRR-RLPs\_62

AATCTTGAAGGCTCTTCTTTCATCAATTCTCATTACGATAAAAAAAAAAACCACACAGAAAAAATCCAGA

AAATGGGTTGTTTTTCAATTTCTACTGTTCTGTTCTGTATAGTTCTCTAT

>PGSC0003DMG400003544LRR-RLPs\_1575

TCATGGATTCTATTTTGTCACTAAGTTTGTCCCACAATCCATTGACAGGACACATACCAAATCACTGGGA  
AATTTGACAACCTTTGCAGGAAATTAAGCTGAGAATGGGCTAACAG

>PGSC0003DMG400003544LRR-RLPs\_1638

CACTGGGAAATTTGACAACCTTTGCAGGAAATTAAGCTGAGAATGGGCTAACAGGTGAAATCCAA  
CAGAACTTGGGAATGCCAAGGAACTGAAAACAATTTACTTTCAAATAACA

>PGSC0003DMG400003551LRR-RLKs\_0

GTTAAAAAGTGCTGGTCCTTGTTTTGAAAAGTGCTCATTGACATTCTCCACTTCTCCCTCACTCTTCTT  
CTCTGTGCTACTCTGTGCCTCTGTGCAAAGTGAGGGGGCCTCTGCTAT

>PGSC0003DMG400003551LRR-RLKs\_1860

CTGAAGGTTTCAGTAGCTTATTGGGTATGCAATATTTGAATCTTTCTTCCAATTCCTTTTCTGGCCATATAC  
CATCAACATTTGGGTCTTGACTTCATTACTTGTACTTTCTTTGTCTA

>PGSC0003DMG400003551LRR-RLKs\_2294

GCTAATCTTGCCATGCTCTCTAGCTTGGTGAGTTTCAATGTGTCAAACAATAATTTGGGTGGCCAGATTC  
CGGAGATGTTGGGCTCCCGTTTTAACTCATTGAATTATGCTGGCAAC

>PGSC0003DMG400003551LRR-RLKs\_3658

GCTCTGTATAAGTTGTGAGAGTAAATTTGCAATGCAATGCAACGCAACAGTAGCTAGCTAGCAACTTAG  
TCGTTCAATTCATGCTTTTTTTTTCTGTAGATTTTTTTAAGGTAAAAGA

>PGSC0003DMG400003551LRR-RLKs\_3720

AACTTAGTCGTTCAATTCATGCTTTTTTTTTCTGTAGATTTTTTTAAGGTAAAAGAGAAACAATTTCT  
CTTTTATTGATTCTTGTTTTATGCTATTATTCAAACACCTCACTCCCC

>PGSC0003DMG400003551LRR-RLKs\_62

CACTCTTCTCTCTGTGCTACTCTGTGCCTCTGTGCAAAGTGAGGGGGCCTCTGCTATGGCCATTAACACT  
CATCTTCTCCACTTTATCATGCACCCATTTAACCTTCATTATAAACCA

>PGSC0003DMG400003659-(rev)OtherRLKsTM\_384

CCTATAGTATAAGCTTTGAAGATGACTCATTGAACTGACAGGAACTCCGAGGAAACAAGCACAAGTG  
GAAACAAGAGCATAGGCTTAACATATAATATCAGTTAAAGTTTGATTAAT

>PGSC0003DMG400003660-(rev)OtherRLKsTM\_64

CCACATTAGATACTGTCGTTCCCGTTCCGTTAATCCTAAATGCCGCCGTGCTCTGCCTTCCCGCCACTCT  
CCCTCTCCCTTCCCAAACCTTCTCCTCTCCACGCGCCGCGGCTTCCC

>PGSC0003DMG400003660-(rev)OtherRLKsTM\_704

GATGCAATATTGAAAGGTTCTTCGACCGTTTTTGGTGGAAATTTCTTCGATAGAGAGCTTGAAACAA  
CATCGCGGCTGTTAATTCATCTTCAAATGCCTAGCTCTTGGTGACAAC

>PGSC0003DMG400003710LRR-RLPs\_512

AAGTTTTAATGGTTAATCAATCTGAATCGATTGAGCTTCAACAAAACAATATCTCCGGTGAGTTACCTA  
ATTTGAATCAGCTCGGAAATCTGATCTTCTTAGATTTAAGCAATAACAG

>PGSC0003DMG400003710LRR-RLPs\_576

TTACCTAATTTGAATCAGCTCGGAAATCTGATCTTCTTAGATTTAAGCAATAACAGACTCGCCGGAAATTT  
CTTACGACAAATTTACCTGATTGATGATTGAACTCTCAATACGCAAC

>PGSC0003DMG400003714LRR-RLKs\_0

GCTCAACACATGGCGTTAGTCTTTGTCAGTGCTGCTTCTTCTCCTTCTGAAACTGAACTGAACTTT  
TTTTTTTTTCAGCTCATACGCTCCTCTTCCCACTTCCATAACAAAC

>PGSC0003DMG400003714LRR-RLKs\_122

CATTAACACCCACCATTTCTTGATTTTTCCCCATTTGATCTTCTTCTTCTCTCTATCATTACTCACCACCA  
CTCTTCTCATGTCAACGGCTACTTTTCTTCTCTCTCCGCCATTGG

>PGSC0003DMG400003714LRR-RLKs\_1220

TGACGAATTTTTCGTCGTTGAAGGTTCTTGATATCTCCGGGAATGCAATTTCTGGAActCTGCCAGATGA  
TATAGGGAATTTAAGGTTTCTTGAGGAGCTTAGACTGGGTAACAACACAT

>PGSC0003DMG400003714LRR-RLKs\_1281

GCCAGATGATATAGGGAATTTAAGGTTTCTTGAGGAGCTTAGACTGGGTAACAACACATTAActGGTGA  
TATTCCTGCTAGTATTGTGAACTTTGGTTCATTGGGGTACTTGATTTAGG

>PGSC0003DMG400003714LRR-RLKs\_1464

GTCTCTTAATGGGAATCGCTTTTCTGGTTCGATTCCGGATAGTTTGGGGAGTCTTATCAGCTGGAGTTTT  
TGGATTTGAGCATGAATGATTTGAATGGGAGTTTGCCTCAAACCTTAT

>PGSC0003DMG400003714LRR-RLKs\_1647

AGGAATTGGAAGCTTGCATGGGTTAGAGTTTTAAATGTTAGCAATTGTGGGTTCTCAGGGAACATTCC  
GACTAGTATCGGAAGTTTGTGAGGCTGACAActCTTGACGTGAGCAAGCA

>PGSC0003DMG400003714LRR-RLKs\_183

TTACTCACCACCACTCTTCTCATGTCAACGGCTACTTTTCTTCTCTCTCCGCCATTGGTGGTGGTGGCACT

TACATTGCTATTTTCCTGTGTTTTTCCATGGCCGAAAACGTTACAGA

>PGSC0003DMG400003714LRR-RLKs\_1830

ACAAGAGAACATGTTAACTGGGGATGGTCTGGAAGGTTTTAGCAGTTTATCTGGTCTGGAATATTGAA  
TCTGTCATCTAATGCCTTTTATGGACAAGTTCCGAAGACATATGGTTTTCT

>PGSC0003DMG400003714LRR-RLKs\_1891

TATTTGAATCTGTCATCTAATGCCTTTTATGGACAAGTTCCGAAGACATATGGTTTTCTTACATCCTTGAA  
AGTTCTTTCTATGTCTAAAAGTGGTATTAATGGCTCAGTTCCAGCAGAG

>PGSC0003DMG400003714LRR-RLKs\_2074

CCGAAGGATTTCTCACATTTATCTCATCTAAGGAAGCTTGATTTGGGCCACAATGGATTAACCGGGGAAA  
TCCCTGAAAACATCTCTAATTGTTTATCTTTGGCTACTCTCTTGTGGAT

>PGSC0003DMG400003714LRR-RLKs\_2135

CCGGGGAAATCCCTGAAAACATCTCTAATTGTTTATCTTTGGCTACTCTCTTGTGGATTCTAACCATATCT  
CAGGTCACATACCAGAGTCGTTGACGAAATTATCAAACCTGGAAATGC

>PGSC0003DMG400003714LRR-RLKs\_2196

TAACCATATCTCAGGTCACATACCAGAGTCGTTGACGAAATTATCAAACCTGGAAATGCTGGATCTCTCT  
TCAAATAATTTGAATGGATCAATTCCTTCAAGTCTGTCCCTGATTTCCAG

>PGSC0003DMG400003714LRR-RLKs\_244

GTGGTGGCACTTACATTGCTATTTTCCTGTGTTTTTCCATGGCCGAAAACGTTACAGAGACGGAAATGG  
CAGCCTTAATGTCGTTCAAACGGAATTTGGAAGACCCACTTGGGGTATTA

>PGSC0003DMG400003714LRR-RLKs\_2562

CAAAAAGTTAAGAGGTTTCAGCTGAAGGGAAGAAGCGAAGCCCAGGCCGTGCGAGTTCAGGGGGAGAA  
GGGGGCCGTGGAAGTGGAGAGAATGGAGGTCCAAAGCTTGTTATGTTTAAACAA

>PGSC0003DMG400003714LRR-RLKs\_2623

GGAGAAGGGGGCCGTGGAAGTGGAGAGAATGGAGGTCCAAAGCTTGTTATGTTTAAACAACAAGATCA  
CTTATGCAGAGACTTTAGAAGCGACACGACAATTTGATGAGGAAAATGTGTTG

>PGSC0003DMG400003714LRR-RLKs\_2989

GCATCGCATCAGGATGGCCATGTGCTCAATTGGCCAATGCGCCACCTGATTGCTCTTGGCATTGCTCGTG  
GCTTAACTTACCTTCATTAGTTTCATTGATCCATGGAGATGTAAAGCCA

>PGSC0003DMG400003714LRR-RLKs\_3172



AGCCTAGTAGCAACTCCAGCAGAGACTTCAACATCTTCCACCTCAGTTGGAAGCTCTAGGCTACATAGCAC  
CTGAAGTGGCATTAACTGGACAACCCACAAAAGAAGGTGATGTATACAGT

>PGSC0003DMG400003714LRR-RLKs\_3599

TTCCTTCACCAATGTGATATGAAAATTCAATTCTTTGCAATGAAATCAATTTGCAAGAAAATGTCCTTCAT  
TTTTCTCAGTTCAATATTGTTTCATGCATTTCTTCAATGTATTGCTACTC

>PGSC0003DMG400003714LRR-RLKs\_3656

AAAATGTCCTTCATTTTTCTCAGTTCAATATTGTTTCATGCATTTCTTCAATGTATTGCTACTCCATTCATTAT  
CATTTTTGTTGTACATTGTTTCATTCAAGAGTTGGCTGGTTTTGTGCA

>PGSC0003DMG400003714LRR-RLKs\_61

CTGAAACTTTTTTTTTTTTCAGCTCATACGCTCCTCTCTTCCCCACTTCCATAACAAACTCCATTAACACCCA  
CCATTCTTGATTTTTCCCCATTTGATCTTCTTCTTCTCTCTAT

>PGSC0003DMG400003714LRR-RLKs\_671

ACAACCTCCTTTCCGGTCATGTCTCTGGTAATGTTCCAGCAAGTCTCCGTTTCTCGATCTTTCTTCTAATC  
TCCTCTCCGGTGGCATTCCGGGTAACTTTTAGTTGGTTCTCAGCTCG

>PGSC0003DMG400003714LRR-RLKs\_915

CTCTAACATTTCCACATTAATACACTTGAGCACTAGTGATAATCATCTGCAGGGATTAATCCCGGCAACA  
ATCGGTTCACTTTCCAGTTTACAGGTAATCTCATTGTCGCAAAATCAACT

>PGSC0003DMG400003790LRR-RLKs\_1037

ACTCTTTAGCTCTAGCAGAAAATGACCTGCAAGGGTCATTGCCTTTATCATTCTCCTCTCTTGCAAAGTT  
ATCTGATTTGGGGTTGTCTGATAATAGTCTTTCTGGTGAAATCTCATCG

>PGSC0003DMG400003790LRR-RLKs\_1464

TATCCCTTGAAACCATCGACATCAATACCAACCGACTAAGTGGTGAGCTGCCGGACAGCATTCTGACCT  
CAGTGAGCTGAAGTTTCTTTCTGTATATACTAATGATTTCTCAGGCAGTG

>PGSC0003DMG400003790LRR-RLKs\_1769

CGGCTTGAAGGCAACAATTTATCTGGTAATCTTGCAGATGCATTTGGAGTGCACCCGAAACTTGTTTTCC  
TTTCTTTAGTGACAACCAACTTTCAGGTGAACTCTCACCTGACTGGGGG

>PGSC0003DMG400003790LRR-RLKs\_1952

GAGCTAGGGAACCTGAGAGCGTTGCGCGTGTTAGCTTTGGAAGGAAATGAATTGACTGGTGAAATTCC  
CTCTGAACTGGGAAGGTTAGACCTGCTCTATAATCTCAGCTTGAGTAAAAAC

>PGSC0003DMG400003790LRR-RLKs\_2013

AAATTCCTCTGAACTGGGAAGGTTAGACCTGCTCTATAATCTCAGCTTGAGTAAAAACAATCTTACTGG  
AGGCATCCCTCAGTCTGTTGGCAATTTAACTAAGCTCCAGTATCTTGATT

>PGSC0003DMG400003790LRR-RLKs\_2135

TCGACAAACAAGTTAAGTGGTAACACACCAGTAGATCTTGGGAAGTGTGAGAGCCTGTTGAGCTTGAAT  
CTTGGCAACAACCTCATTATCAGGTGGCATTCCATCTGACCTTGGTAATTTG

>PGSC0003DMG400003790LRR-RLKs\_2196

GCTTGAATCTTGGCAACAACCTCATTATCAGGTGGCATTCCATCTGACCTTGGTAATTTGATGCAGTTGAG  
TATTCTTTTGGACTTGAGTGGCAATTCCTAACGGGAACCATTCCACAAA

>PGSC0003DMG400003790LRR-RLKs\_2257

GCAGTTGAGTATTCTTTTGGACTTGAGTGGCAATTCCTAACGGGAACCATTCCACAAAACCTTGGCCAAA  
CTCACCTCATTAAATGCATCTCAACCTCTCACATAACAACCTCTCAGGTAG

>PGSC0003DMG400003790LRR-RLKs\_2379

TTCTCCAGCATTATCTCAGATGATCAGTCTTCAGGAGATGGATTTTTCTACAATGAGTTTTCTGGACCA  
ATCCCAACCGATGGAGTATTTCAAAGAGCACCCGCTAGATCTTTTCTTG

>PGSC0003DMG400003790LRR-RLKs\_2440

TTCTGGACCAATCCCAACCGATGGAGTATTTCAAAGAGCACCCGCTAGATCTTTTCTTGAAACTCTGGT  
TTGTGTGGAAATGTAGAGGGATTATCCTCATGTAATTTGGATACTCCCAA

>PGSC0003DMG400003790LRR-RLKs\_2501

AACTCTGGTTTGTGTGGAAATGTAGAGGGATTATCCTCATGTAATTTGGATACTCCCAATGACAAGTCCA  
GAAATAATAATCAAAGATCCTCATTGGGGTACTTGTACCGGTGGTCAGC

>PGSC0003DMG400003790LRR-RLKs\_2989

TTACTGTTCCAAGAATGGATGCATGTACTTGGTTTATGAGTACATAGAAAGAGGTAGCCTGGGGAAAGT  
TCTATATGACAATGAGATGGGAATGGAACCTGGATGGGGTACAAGAGTGAA

>PGSC0003DMG400003790LRR-RLKs\_3111

TTGTGCAAGGAATAGCTCATGCACTCGTTACTTGCATCATGACTGCTCTCCGCCATTGTTACCGTGAT  
GTATCATTGAATAACATTTTGTGTTGAATCAGAATTCGAGCCACGACTCT

>PGSC0003DMG400003790LRR-RLKs\_3294

CTTATGGCTATATGGCACCAGGTATGTTACATACTCATTACCTAATGCATCCATATTTCTGTTGATTAAGT

AGTATATTCATTGGAAGGATACTTCAATATTATTGTGTCTTTCTTCTTG

>PGSC0003DMG400003790LRR-RLKs\_3355

TTGATTAAGTAGTATATTCATTGGAAGGATACTTCAATATTATTGTGTCTTTCTTCTTGTGCAGAGCTTGC

ACTTACCATGCGTGTTACAGAAAAGTGTGATGTTTATAGTTTTGGAGTC

>PGSC0003DMG400003790LRR-RLKs\_3538

ACAACATTGTTTCCAGAAATACTTTTGAAGGATGTTCTTGACCAAAGACTTCCACCTCCCACAGGCCACTT

GGCAGAGGCAGTGGTTTTTGTGATCACGATTGCCTTGGCATGTACACGT

>PGSC0003DMG400003790LRR-RLKs\_3782

AATGAGAAGATAGAGCCTCATGTACAGGTGTGAAATGTACAGGCTGTAGAGTTTTAGTGTTGTAATGCA

ACTTCCTCAAGATCTAGAATCTATATAGTATCAAGGATGAAACCTTGTATC

>PGSC0003DMG400003790LRR-RLKs\_3843

GTAATGCAACTTCCTCAAGATCTAGAATCTATATAGTATCAAGGATGAAACCTTGTATCTATTCAAATTAC

TATGTTTTGGTTGCACTTTTCCCTAGAAAGAAAGAAATAATATCATCCT

>PGSC0003DMG400003790LRR-RLKs\_3904

TTCAAATTAATGTTTTGGTTGCACTTTTCCCTAGAAAGAAAGAAATAATATCATCCTGTTAATCATGAA

TGTTACAAAGTTGGTATATTAATTTGGACAAGTATGAATGTTACAAAGT

>PGSC0003DMG400003790LRR-RLKs\_3965

TAATCATGAATGTTACAAAGTTGGTATATTAATTTGGACAAGTATGAATGTTACAAAGTTGCACAACCTT

ATCCTAGTTTTCACTTTATTGCTAGGCAAAACACTAGCAAAAAGATACAA

>PGSC0003DMG400003790LRR-RLKs\_4026

CACAACCTTATCCTAGTTTTCACTTTATTGCTAGGCAAAACACTAGCAAAAAGATACAATGTGTTCACTTG

TAATAAAAATAGCAACCTAACAAAAATTTGGCAAAGAATACATCACACA

>PGSC0003DMG400003790LRR-RLKs\_4148

AACCAGGCATGGTACTTAGCATTCCACTCCACACTGCTTGAGTATAGGTCCCTTCTGCTTTGGTAGGAAT

GGGTCTATTCGTACCCAAACGAGTGAGAAGATTGAAGCAAGAAGGATTGA

>PGSC0003DMG400003790LRR-RLKs\_4453

GAGTGGTTGGTGGGATGAGAAGTGTGGTCCATTTGAAAAGGTAAAGCTCCCCAAATTCAGCGTCATCA

GCTGCTTTTGTGTTACAGTGAAGTTTGTGTCTACACCAGCAAGAACTTTAA

>PGSC0003DMG400003790LRR-RLKs\_5002

TTCGACAGAACCAAGAGCCCATCTCAGGACTTGGTGCAATCTATCTGATAGATTGATTGGTGCTGATCCC  
TTAAAAGCGGCTCTCTTCGGACAGCAATAAACCGATCTCCATCCTCTGCA

>PGSC0003DMG400003790LRR-RLKs\_5058

TTGGTGCTGATCCCTTAAAAGCGGCTCTCTTCGGACAGCAATAAACCGATCTCCATCCTCTGCAATGCAT  
CTTGAATCCAGTCAAAATGTCCTCTGTGACAGAACCATAAATCCATCCAA

>PGSC0003DMG400003790LRR-RLKs\_976

TCTTCGAAAGAACGATTTGAATTCAACTATTCCTTCTGAGCTTGGCTTTTGTACTAAACTCACTCTCTTAGC  
TCTAGCAGAAAATGACCTGCAAGGGTCATTGCCTTTATCATTCTCCTC

>PGSC0003DMG400003802LRR-RLPs\_260

TTCTAAAGGCAACGATATGAAAATAGTGGATGATATTATGGGGAGATATAGGGACGGAAAAATCCCTAT  
AGAAAAGTTTGAATTACTAGAGTTCGATGGTGATTCTGAAAATCTCTTCCG

>PGSC0003DMG400003802LRR-RLPs\_325

CTATAGAAAAGTTTGAATTACTAGAGTTCGATGGTGATTCTGAAAATCTCTTCCGTATGATTGATAAGTG  
GCTTGACATTGTACTTACAAATGGTGTAAGACCTTACCATATCATCAT

>PGSC0003DMG400003802LRR-RLPs\_390

AAGTGGCTTGACATTGTACTTACAAATGGTGTAAGACCTTACCATATCATCATATTCATACCCCTTGTT  
TATTTTTGCAATCTTCACGGTAAAATCTGTGAGAAAATTGGTTCTGGAA

>PGSC0003DMG400003802LRR-RLPs\_455

CTTGTTTATTTTTGCAATCTTCACGGTAAAATCTGTGAGAAAATTGGTTCTGGAATCTTGACTCTTTTGCC  
TAGTGTGTTGTGAATTGCAATTCTTTGAGAAAATTTCTCTATCTTA

>PGSC0003DMG400003802LRR-RLPs\_650

TTGCAAGGGGTTGGAAACAATGAATCCTCAAAGATTAAGTCGGTTTCCCTGAAGTTCTTGAAGATTCTG  
GTGTTGTGGGGGAATATGGGAGATTGATGCTCCAAATTTGGTATCACTTAA

>PGSC0003DMG400003802LRR-RLPs\_780

GAAGACATTCTCAACTTAAAATTGTGAGAGAGTCAAGACAAGTCAAGTACTCAAGAATCGTTCTTCAAT  
GCTTAGATAGTGACAATGTAAATGCAGCATGGTTTTGTAAGTTGAGGAAG

>PGSC0003DMG400003814LRR-RLPs\_0

TTTTTCATGCTGTAGCCATTAAAGCTTCCACCTATCTCCACACGAGAAGTTCGTTTGCTTCTCACGGAAAAG  
CAATACCCAAAAGTCTCTACTTTTTTCCCCTTATATAAACCCCATTTT

>PGSC0003DMG400003814LRR-RLPs\_1054

CCATTGTTCTCCGGTGTACAGATTTTATATATGAATAACAACCGGTTTCATGGGTCAGGTTCCGGGGATCA  
TGGTAGACCGGTTGTTATCGGCTAGTATACATGTTTTGTATTTGCAACAT

>PGSC0003DMG400003814LRR-RLPs\_1116

GGGGATCATGGTAGACCGGTTGTTATCGGCTAGTATACATGTTTTGTATTTGCAACATAATTTTCTAACC  
GGAATAGCTATCAATCCGGCCGCAGAAATCCGGTTCGGAGTTCATTGTG

>PGSC0003DMG400003814LRR-RLPs\_1178

TTCTAACCGGAATAGCTATCAATCCGGCCGCAGAAATCCGGTTCGGAGTTCATTGTGTTTGCAGTATAA  
TTGCATGGTTTTGCCGGTTCAGACCCCTTGCCATTGAAAGCCGGGAAGC

>PGSC0003DMG400003814LRR-RLPs\_124

TTACTCTCTCTTCACCTCTGCAACAATTAATTAATCATGAGGTTTTTGTGTTGATGTTTCTGTTTCATGTTA  
TTGTTATTCAACAATGTGGTGCAATGCTTCACCCCATTGATTTCTTG

>PGSC0003DMG400003814LRR-RLPs\_1240

CAGTATAATTGCATGGTTTTGCCGGTTCAGACCCCTTGCCATTGAAAGCCGGGAAGCAGAAGTCCCGG  
CCCACGGCTCAGTGTGGGCAATGGAAGGGGTAAAATAGACAAATCACAAGT

>PGSC0003DMG400003814LRR-RLPs\_1302

GTCCCGGCCACGGCTCAGTGTGGGCAATGGAAGGGGTAAAATAGACAAATCACAAGTATGTTTTTTTT  
AATTATGGTTTTGGTGGATTCATTGATTAATTTTGAATTAAGGGTAAAA

>PGSC0003DMG400003814LRR-RLPs\_1364

TTTTTTAATTATGGTTTTGGTGGATTCATTGATTAATTTTGAATTAAGGGTAAAAAAAATGTGGATA  
AAGAAGAAAAAATTAGAGTGAAAAAGGGTAAGAGTTTTAAGTTTAGTTA

>PGSC0003DMG400003814LRR-RLPs\_1426

ATGTGGATAAAGAAGAAAAAATTAGAGTGAAAAAGGGTAAGAGTTTTAAGTTTAGTTATTTGTATGTTT  
TTTTTTGGTATTTCTTGTAATTATAGATATATACTGATTTACCTTATTA

>PGSC0003DMG400003814LRR-RLPs\_1612

TTCTTTCTTTTTTATTCTGTTTACAACAGCCTTATTGTTCTGATGATAAAAGTGAAGTCTTTAGGGATAT  
AGAGTATCTTTTCTGTTTTTAGGAAATTATATGTGATATACAGAGA

>PGSC0003DMG400003814LRR-RLPs\_1670

GTCTTTAGGGATATAGAGTATCTTTTCTGTTTTTAGGAAATTATATGTGATATACAGAGATTGTATACA

GCCAAAATACAGCTGCACCAGCATATCTCTGTTCTTTGTGGTACTAAAC

>PGSC0003DMG400003814LRR-RLPs\_186

GTTTCATGTTATTGTTATTCAACAATGTGGTGCAATGCTTCACCCCATTGATTTCTTGGCTTACAAGCGA

TTCGTAAAACCCTCAATGATTTACCCGGTTCGAATTTTTCTCTTCTTG

>PGSC0003DMG400003814LRR-RLPs\_248

TACAAGCGATTTCGTAAAACCCTCAATGATTTACCCGGTTCGAATTTTTCTCTTCTTGGGATTTACTCCG

ACCCATGTAGCTTCGCCGGAGTTTATTGTGCTGGTGATAAAGTGATCG

>PGSC0003DMG400003814LRR-RLPs\_310

TTTACTTCCGACCCATGTAGCTTCGCCGGAGTTTATTGTGCTGGTGATAAAGTGATCGCGTTGAATCTGG

GTGACCCGAGAGCCGGGTCGCCGGGTCTAACCGGAAGATTAACCCGGCT

>PGSC0003DMG400003814LRR-RLPs\_372

GAATCTGGGTGACCCGAGAGCCGGGTCGCCGGGTCTAACCGGAAGATTAACCCGGCTATTGGGAAAC

TCTCTGCTTTAGCTGAGTTCCTGTCGTCCCGGTAAGGTATTCGGAGTATT

>PGSC0003DMG400003814LRR-RLPs\_434

GGAAACTCTCTGCTTTAGCTGAGTTCCTGTCGTCCCGGTAAGGTATTCGGAGTATTGCCGGAAAGTTT

TTCTCAGTTGAACAACCTAAGATTTCTCGGAGTTAGTCGAAATTTCTAT

>PGSC0003DMG400003814LRR-RLPs\_496

GAAAGTTTTCTCAGTTGAACAACCTAAGATTTCTCGGAGTTAGTCGAAATTTCTATCTGGACGGATTCC

GGCGGGTTTAGGTAAACTCCGGCGACTTCAAACCTTTGATCTTAGTTTC

>PGSC0003DMG400003814LRR-RLPs\_558

ACGGATTCCGGCGGGTTTAGGTAAACTCCGGCGACTTCAAACCTTTGATCTTAGTTTCAATCAGCTCACC

GGAAACATTCCATGGGCCATCGGAACCCTCCCGGCGCTCAACAATGTCAT

>PGSC0003DMG400003814LRR-RLPs\_62

ACGGAAAAGCAATACCCAAAAGTCTCTACTTTTTTCCCCTTATATAAACCCCATTTTAATTTACTCTCTC

TTCACCTCTGCAACAATTAATTAATCATGAGTTTTTTGTTGTTGATGT

>PGSC0003DMG400003814LRR-RLPs\_620

AGCTCACCGGAAACATTCCATGGGCCATCGGAACCCTCCCGGCGCTCAACAATGTCATTCTCTGTCAAA

CCATTTATCCGGTTCAGTACCGCCTTTTCGTATCCCTTAGATTAACCCGGC

>PGSC0003DMG400003814LRR-RLPs\_682

TGTCACAACCATTTATCCGGTTCAGTACCGCCTTTTCGTATCCCTTAGATTAACCCGGCTCGATCTCAAACA  
CAATGCTCTTTCTGGTTCGTTATTGCCAATGTCACCTCCTTCTTCACTT

>PGSC0003DMG400003814LRR-RLPs\_744

TCTCAAACACAATGCTCTTTCTGGTTCGTTATTGCCAATGTCACCTCCTTCTTCACTTCAATACCTCTCAAT  
GTCATCGAACCAGTTAACCGGTCCGGTCGACCATTTACTTACTCGGTT

>PGSC0003DMG400003814LRR-RLPs\_806

ACCTCTCAATGTCATCGAACCAGTTAACCGGTCCGGTCGACCATTTACTTACTCGGTTAAACCGGTTAAA  
CTATCTCGACCTTAGTATAAACCGGTTACCGGTTGTATCCCGGGGA

>PGSC0003DMG400003814LRR-RLPs\_868

CGGTTAAACTATCTCGACCTTAGTATAAACCGGTTACCGGTTGTATCCCGGGGA

>PGSC0003DMG400003814LRR-RLPs\_930

TAGATTTCCGATAGCAAATCTTCAGCTACAAAGAAACCAATTCACCAGTCGAATTTAC  
GTAACAATTCGGTGTGGACCTTAGCTTCAACCGGTTTTACGGCGAAAT

>PGSC0003DMG400003814LRR-RLPs\_992

CCGGTTAGTAACAATTCGGTGTGGACCTTAGCTTCAACCGGTTTTACGGCGAAATATCGCCATTGTT  
CTCCGGTGTACAGATTTTATATATGAATAACAACCGGTTTCATGGGTCAGG

>PGSC0003DMG400003822LRR-RLPs\_5551

TTTTTTTTCTTGCTGTATAGTCCTCCAAGTCCAAGTAAGGCCTTGATGCTCTTCTTCTTGGACTTGGACTT  
GGACTTTGACTTTCTTGAACCACCACAACAGCAACTGGGCCAGCAATC

>PGSC0003DMG400003822LRR-RLPs\_5612

GACTTGGACTTGGACTTTGACTTTCTTGAACCACCACAACAGCAACTGGGCCAGCAATCACATGTCATCT  
TTTGACGCTTCTCTGAAACAGGTGGATCATAGCCGTATAACGCCGGCCTG

>PGSC0003DMG400003822LRR-RLPs\_6039

CACAATCCAAGTTCAACATAAATGGTGCATTCGTCAGGACTGCAGCGACTCGAACCTATTTAGAAAAACA  
GCACAAATTACATAACATTAAGAAAAGGACTTAATAGGATGTCAAGGAAG

>PGSC0003DMG400003822LRR-RLPs\_6100

AGAAAAACAGCACAAATTACATAACATTAAGAAAAGGACTTAATAGGATGTCAAGGAAGCAAGCCAGA  
AACTAATACTAATACTAACC

>PGSC0003DMG400003822LRR-RLPs\_6222

GTTGATAGCCCGTCGTTTCTCACGGGAAACATAGACAAGGCGAGGTAGCTCCTTACCTTCAATGTCAA  
GTGCACCTTCACTGCCAAGATAAACTTGAATCATACCAGGATGGTCTCTGG

>PGSC0003DMG400003822LRR-RLPs\_6283

AATGTCAAGTGCACCTTCACTGCCAAGATAAACTTGAATCATACCAGGATGGTCTCTGGTGTGTTACCG  
GGCCACGGAGTTCATCTTGCATTACCCAGCCTTCTTCTGGTTTTTTCTG

>PGSC0003DMG400003822LRR-RLPs\_6466

AGTGAGTTTTCAATTTGCAGAAAAAATCTTATTTTAAGCCAAAGAACTTAAGCCCCGATAAATGATAC  
TCCTTCTATCCCAACTTATATGACATTCTTTACTTTGGGCACGTCCTAAA

>PGSC0003DMG400003822LRR-RLPs\_6527

AAATGATACTCCTTCTATCCCAACTTATATGACATTCTTTACTTTGGGCACGTCCTAAAATGTTGACACG  
ATTCCTTCTACAACCTTCTTTTTAAACCTTGATATGATTCAGTCAACATT

>PGSC0003DMG400003822LRR-RLPs\_6588

GTTGACACGATTCCCTTCTACAACCTTCTTTTTAAACCTTGATATGATTCAGTCAACATTGTAGGCACTGCA  
TCTCCTCTGATATAGTCGTATGAAATGAGACGAAGGAAGTAATAGATAC

>PGSC0003DMG400003822LRR-RLPs\_6771

TCTTTTCGTTGAAGTAGATATCAGGTGCTCTAGGCTCTACACTATATTTCTTACAAAATGGCACCCATCTC  
CTGGCAAATTCAGCTGTTTCTGCTAATGAATCAAACAACAGCATGGAAG

>PGSC0003DMG400003822LRR-RLPs\_7259

TATGGACTGATTAACTTGATGGAAGTGGAACTTTTCGCCAGAGTGGTTGCCGAGCTTCAGCCAAACTG  
CTTGAAATCAGTTAAGTCGTTATAATATTGAAATATACTGCAAGTTTTAT

>PGSC0003DMG400003822LRR-RLPs\_7320

CCAAACTGCTTGAAATCAGTTAAGTCGTTATAATATTGAAATATACTGCAAGTTTTATATGCTTAACTT  
GATCTGTTTCAATTCATACACACTCATTTTCATGTTGAAACATTGTAGTA

>PGSC0003DMG400003822LRR-RLPs\_7381

GCTTAACTTGATCTGTTTCAATTCATACACACTCATTTTCATGTTGAAACATTGTAGTATCTGATTCATTT  
GTTAATAATATTATATGTAAAAGTGTTCAAATTATTTAACTATACCAG

>PGSC0003DMG400003822LRR-RLPs\_7442

TGATTCATTTTGTTAATAATATTATATGTAAAAGTGTTCAAATTATTTAACTATACCAGTCAGTCACTGAG



TGATACATAACTACAAGTGACACAGACGATATATAACCGAAAATCCAAT

>PGSC0003DMG400003822LRR-RLPs\_7564

TTAAAAGTTGTAAGGAGAATGAGGAGAAGGTGGAAACAAGACCAGATATAATTTGATCGCTATGAACA  
AAACCAAATACCAGATTGACTGATTTGTTATAAATTTAAAGTATTTCTATAG

>PGSC0003DMG400003822LRR-RLPs\_7686

TGTTTTCTTTTCTTCTATGTTGTTTTCTCAATGATTCCTCACATAAAATCTTCTCATATTAACGACGATAT  
AACTTCAACACTATCAAAGAGAGGGCGGCAATTAGCTTGAATAATCAA

>PGSC0003DMG400003822LRR-RLPs\_7747

TAACGACGATATAACTTCAACACTATCAAAGAGAGGGCGGCAATTAGCTTGAATAATCAAACAACTTATC  
AATATTTTCTTCCACTACTAAGAATATATGTTAAATTTCCCTTCTAAGTC

>PGSC0003DMG400003822LRR-RLPs\_8113

GGGTAAACAAGATGTAAAGTGAAAAGAAAGAGTACATACAGAAAGTCATCATCTTCATCAGGTTGATCA  
TTTCCACCATTATTAACAAGACCTCTTTTTCTTGACGATTCTTCCATTTT

>PGSC0003DMG400003822LRR-RLPs\_8235

AACCCTTTCCTTCCATTCTGCATCACCATAACTTTCTTTCTGCTCATCCTCCAATTCCTTCCCAGCAACTGTA  
AGTGATTTTCCATTGAAATAAAACAAAATCATGACACATATATATAA

>PGSC0003DMG400003822LRR-RLPs\_8296

CCAGCAACTGTAAGTGATTTTCCATTGAAATAAAACAAAATCATGACACATATATATAAAGTGCAACAAT  
TACTCATTTTCGAAATTAAGTAATAGAGATCGATATAGCTTTACCGCTTCC

>PGSC0003DMG400003822LRR-RLPs\_8357

TGCAACAATTACTCATTTTCGAAATTAAGTAATAGAGATCGATATAGCTTTACCGCTTCCAACAATTGATTG  
ATTAAGCAGCAGCACCATTGGTGTGTTGTGATTATGCTCTCCATTCTCC

>PGSC0003DMG400003822LRR-RLPs\_8395

CGATATAGCTTTACCGCTTCCAACAATTGATTGATTAAGCAGCAGCACCATTGGTGTGTTGTGATTATGC  
TCTCCATTCTCTGCCAAACATAACAACCTTGCTTTTCAGTTCAAATGAG

>PGSC0003DMG400003834-(rev)LRR-RLPs\_1098

TGTAGTTAATTTGTTTCTATTTCAAATTGAATGCACTTATTCTTTTCTGCATTGGTGTACAGAGGTATTAGA  
TATTATTAACAGAACTTAGAGCATAATTTTAACTTGGATCTTATA

>PGSC0003DMG400003834-(rev)LRR-RLPs\_1159

GAGGTATTAGATATTATTAACAGAACTTAGAGCATAATTTTAACTTGGATCTTATAGGCTTGCAAAA  
GCAAAAACAATTTTTTAAGAAAGTAATGAGTATGGCAAATTTCTTAAAA

>PGSC0003DMG400003834-(rev)LRR-RLPs\_1342

CCATACTTTCTAGGTAGCCCGTTGATTTCTAATTTTCTCAAACCTGTCTCGTGACATCATAAGAGAAACA  
TAAAGTATCCGACATTGAGTCCAGGATGAATACAATCTCTTCATCACTG

>PGSC0003DMG400003834-(rev)LRR-RLPs\_1403

AAGAGAAACATAAAGTATCCGACATTGAGTCCAGGATGAATACAATCTCTTCATCACTGGACGTGCATG  
ATGATATAACTAAGGGTTTGTCTTCCACCACATCGAAGGGAAGTCAATGA

>PGSC0003DMG400003834-(rev)LRR-RLPs\_1586

GTTGCCAATATTCATAATCCATGATCGCTAGTTTACCTTTCACCTCTAACAACCTCGTAATACCACCACGAG  
TTAGATGCATTCAATAAATCAATATATTTTGAATTTTCGATTTTAAACAT

>PGSC0003DMG400003834-(rev)LRR-RLPs\_1647

CCACCACGAGTTAGATGCATTCAATAAATCAATATATTTTGAATTTTCGATTTTAAACATCAAATGCATCTA  
TAGTAAGTCTGTCTGGAAAACAAATTTATAGATAACTCCATTGATGCA

>PGSC0003DMG400003834-(rev)LRR-RLPs\_1769

CCCCGGGCTTGACAGAATAGGAGGGGTTATGCTTTGAGTCTCTCCATGATTTGTCTACTCCTAAAGT  
GAAAATCCAATGTTTTATGTACCCTTTTATAATATGCTTTGTTGTGGAAA

>PGSC0003DMG400003834-(rev)LRR-RLPs\_1830

TCCTAAAGTAAAATCCAATGTTTTATGTACCCTTTTATAATATGCTTTGTTGTGGAAAGAACTTTGTACT  
TCTTTTCTTCTGGGTCAAACCGAATGAACAGTACCACATGGAAGAACC

>PGSC0003DMG400003834-(rev)LRR-RLPs\_2379

AAGGACAATCTTTTTTAAATGGATTTAATTGAAAAGTAAGGCAAATATGTTAATTGAAACATATGAAGTA  
TTTTTTTTCGACCTTCTGGAATTTTTTTTTAAAAACAAACAAAGAAGAAA

>PGSC0003DMG400003834-(rev)LRR-RLPs\_2440

TATGAAGTATTTTTTTTCGACCTTCTGGAATTTTTTTTTAAAAACAAACAAAGAAGAAAGTCTAGGGGAT  
AATTTTATATAGTTTCTTTTTTACTCTTTTTGCTGACAAAGAACTTTAAT

>PGSC0003DMG400003834-(rev)LRR-RLPs\_2501

CTAGGGGATAATTTTATATAGTTTCTTTTTTACTCTTTTTGCTGACAAAGAACTTTAATTTTTGACCTTAT  
GTAGAAGAAAATTTTTAATTTTTAAGTAGCGCATGATGTTTTCTTCT

>PGSC0003DMG400003834-(rev)LRR-RLPs\_2684

ATGAACCATGATACACGTGCAACACACACAATATTAAGCATGATTTTTTTAGAAATATAGATTGAACT  
AACTTTTTATCCTTCATTCAAATTTTCACAATAGGCAAACAATCATAA

>PGSC0003DMG400003834-(rev)LRR-RLPs\_2745

GATTGAACTAACTTTTTATCCTTCATTCAAATTTTCACAATAGGCAAACAATCATAATATTATTTCGATT  
TTGCACACCTCTACTTTTCGATGCGAATCTAAATTAATCGGAATCTA

>PGSC0003DMG400003834-(rev)LRR-RLPs\_2806

TTATTTCGATTTTTGCACACCTCTACTTTTCGATGCGAATCTAAATTAATCGGAATCTAATGTATAAAAATA  
ATGATTCATTCAAATATTATTTGACCGTGTGACGAGGGAGGGAGATCT

>PGSC0003DMG400003834-(rev)LRR-RLPs\_305

ATTGGATGTGCAGGGTAGTATGCCTGATTCGTTATCTAGTGGTGTGGAATTGCAAATCATTGAGAAA  
GCTTTCTCTATCTCATCTAAGATTAGACGAAAACATGGTCCAGACTATACT

>PGSC0003DMG400003834-(rev)LRR-RLPs\_854

TCATCCAAGGAGACTCAACCTACTCTCAAATATTACTCCAATATTACACATTTTCATTGGTCGTTTAGTGTT  
TTTGACAAATTCCAGTCATTCTACTTCTCATAAAAGCTTACCTTGGCA

>PGSC0003DMG400003835-(rev)LRR-RLPs\_0

ATGGCTGACATATTGCCTGAATGTTTCATTCAAAAAATATTGTCTTCTTTAGTTTTGATGAAGCAGCGCG  
GATGAGCATTCTCTCCAAAACATGGCTGCAAGCCTGGTCGACTCTTCCC

>PGSC0003DMG400003835-(rev)LRR-RLPs\_330

TACCCCGCGCCTATTTTAACAATCTTGGCAGCAAATCTTTAAGAAAATTGGTTCTGAAGAGTTGTACTCT  
TTTGCTATTTTCGTTATCCAGTGGTGTGGAATCGCAATTCTTTGATA

>PGSC0003DMG400003835-(rev)LRR-RLPs\_396

ACTCTTTTGCCTATTTTCGTTATCCAGTGGTGTGGAATCGCAATCTTTGATAAAGCTTTCTCTATCTTAT  
GTGAAATTAGACGAAAATATGCTTCAGACTCTACTTAATAGTTGTCCC

>PGSC0003DMG400003835-(rev)LRR-RLPs\_462

TCTTATGTGAAATTAGACGAAAATATGCTTCAGACTCTACTTAATAGTTGTCCCTTGATTGTCTCTTTCATC  
TTTGAGTATTGTTTCGGACTTGGAAACAATCGAGCTAGTGAATCTTCAA

>PGSC0003DMG400003835-(rev)LRR-RLPs\_792

AAGTTTCTATCAAATCAATCTTGGTCTCAAGTTTCCCTTTATTTTTATGAATGCGCGGAGATTAAAAT

GAAAGATCTGCAACAACACCACAGAGTTGCTACGCCCCAGGTGGACATT

>PGSC0003DMG400003918-(rev)LRR-RLKs\_1952

TAACACAAGAATGAATGTGAACAAATAATGAGTCCATACATCTACCTGTAACATACAACAATGAGATAA

TAAGAAAATATCAAGATTTAAGACCGACCTTATTGACACAAAGAATTTGG

>PGSC0003DMG400003918-(rev)LRR-RLKs\_2013

ATGAGATAATAAGAAAATATCAAGATTTAAGACCGACCTTATTGACACAAAGAATTTGGAAATGGATTT

CATTTGAAGCCATTTCTACATGCTATATGTTTTTCTTGCATCAACTTTGA

>PGSC0003DMG400003918-(rev)LRR-RLKs\_2318

GATAACTTATGGATCCATTAATCACATAACACGCGACCCTTAAAATCTCTGCATAAGTTTTGGACCTTTG

GTTACGGTTTACTGTAAGGGATCATATCATTAGCAACTTAACTCAGAGA

>PGSC0003DMG400003918-(rev)LRR-RLKs\_2379

TGGACCTTTGGTTACGTTTACTGTAAGGGATCATATCATTAGCAACTTAACTCAGAGACTTACGTAACT

CCAAAACCTTTCTGGATACGTTGCATAACTGTGGAAATGTCCTTCTCACTT

>PGSC0003DMG400003918-(rev)LRR-RLKs\_3782

TCTTCAACAGATACTGCAAATCTAGCAATAGATCCTTCAACAGGTTACACAATGATGAGTATCGAGGTGA

GTATTTGTCAAGGAAATGATAGATCACCTCTCAGAACAACCTGAGTCCATT

>PGSC0003DMG400003918-(rev)LRR-RLKs\_3843

TCGAGGTGAGTATTTGTCAAGGAAATGATAGATCACCTCTCAGAACAACCTGAGTCCATTATTTCACTATTA

ACTTGCTTATAACGAAAACCATGCAAAGTAAAGCAGGTTAAACTATTCTC

>PGSC0003DMG400003918-(rev)LRR-RLKs\_4026

GACAAACATAACTCAGAAAATCATCAAATGCTGAAACAGCATAAATGACTGAGCTAGATCAACAATAAT

TATGAATTTCCAACTCAAGTTTTACCAATGTAACGCTCAACTAGGAGAAGA

>PGSC0003DMG400003918-(rev)LRR-RLKs\_4270

ATTAGACAATCATGGGCTCCAAAAGCTCAAGAAAAAATCAAAACATTCAGAACCGTGTTTATTTTTCAA

AGTGTTGCTTAGCGTTCGATAGCGTAGAAGTTAGAGCATTGACGAACTTTT

>PGSC0003DMG400003918-(rev)LRR-RLKs\_5002

GTAGCTATTCCGGTTATACTCGAATCTTGAGTCATCATCCATCTTGACACATTTTCTGCAAGCCATTCTTG

AACTAAATCCAATGACAACTATAACCATACAAATAGAGACAAAATTCAA

>PGSC0003DMG400003918-(rev)LRR-RLKs\_5673

CGCCGGCGCCGCCAGTTGAAATGGTTGTTGTTGTTCTAGTTGGTGAACGGTCTCGTGACCTTGTCAT  
AACTGTGACATAGTGGGGGCAGAGAGAAAGACGTCACCTTGTCGGAGTAT

>PGSC0003DMG400003918-(rev)LRR-RLKs\_5734

CCTTGTCATAACTGTGACATAGTGGGGGCAGAGAGAAAGACGTCACCTTGTCGGAGTATGACGTCAGTC  
AGCTATCTGACCGGCGAGACGGTGGACGGAGAGTACGAAGGGAGGTGAGTG

>PGSC0003DMG400003945-(rev)LRR-RLKs\_0

ATGAGAAAATTAGGTACATTTGTTCAATTGTGTTGTTCTTGTGTTGGTGTGTTTGTGTTGCTTGAATTGGAATT  
GGTATCTCCCATCACTGAAAAGGAGATCCTGCTTCAATTCAAGGGTAAC

>PGSC0003DMG400003945-(rev)LRR-RLKs\_366

AAGATTAACCTTCAGCTCTAATGCCTTTTCTGGTTCAATTCCTGAGTTTCTTGGGGATTTATCAAATATAAG  
GTTCTTGATTTGTCAAGAAATGTGTATAGTGGTGAATTCCTGTGTCT

>PGSC0003DMG400003958-(rev)LRR-RLKs\_1054

GATGGTTTACTCGTTTTTTTGGAGTTCCTTCATCCATAAATTAACAGTGCAAGTTTGAGAGAAAATAAAGT  
GTTACTAGTATATATATGAATTGTTGAATTCCTAACATAAGGAAAGCT

>PGSC0003DMG400003958-(rev)LRR-RLKs\_1178

GTACAACAGTAGAAGTGGCTCAAAATTGCTTTAAGTAGCAGATTCGAATTCGAAGTATCCCTTGTTAGAA  
TTCCTACTTCCGCCACTGTTGCACCCACACCCCTTTTCTGGTCTTTATT

>PGSC0003DMG400003958-(rev)LRR-RLKs\_1302

CTTGTTAATTATATTTTTGGTCTGAACAGCATACTGAAATTTCTTTTCCAAATAAGGTGATGAAAGAAATG  
CAAGAACTTCTTTTTTTCCCTTTCTACAATGATATGTGCTCTGAGATG

>PGSC0003DMG400003958-(rev)LRR-RLKs\_1488

ACAGAGATTGGGTTCTTGAAGAAGTTGAGTGTCTTGAATTGCAACGGAACAGGCTGACAGATAAAATT  
CCAGAGAACTTAGGAGTCCTCGGGACGTTGAAAAAGCTATATTTGGGATTC

>PGSC0003DMG400003958-(rev)LRR-RLKs\_1612

AGCTATCTGGTCCGATTCCATTAATAATTAGCTGCTGCTCCCCAGTTGGAGGTTCTAGAAGTACAAAATAA  
CACCTCTCTGGAGTTATTCCTCCAGGTTAGTTGCCCTTTTTGAGTTCTC

>PGSC0003DMG400003958-(rev)LRR-RLKs\_1674

CAAATAACACCCTCTCTGGAGTTATTCCTCCAGGTTAGTTGCCCTTTTTGAGTTCTCAACATTTTATAAAT  
CCTTTTTGCCTATCTTGAAGTTACATCTTTTGAATGTGTTTTGATTTT

>PGSC0003DMG400003958-(rev)LRR-RLKs\_1736

TTTTATAAATCCTTTTTGCCTATCTTGAAGTTACATCTTTTGAATGTGTTTTGATTTTAAACCTCTTTTTCTTC  
TTTTTATCTGGACTGTTTGTAGCTCTAAGGAGATTAATGAAAAAT

>PGSC0003DMG400003958-(rev)LRR-RLKs\_2728

TTGTTTCATCATTACATCTTCAGCATTCTCTACAAATTTCTCAGAATATTTTAAAGTTTGGAAATATTATGGT  
TGTATAATATTTTCCCATAATGTGGAGTCTTCTAAGAGTTCCATTGC

>PGSC0003DMG400003958-(rev)LRR-RLKs\_2790

ATATTATGGTTGTATAATATTTTCCCATAATGTGGAGTCTTCTAAGAGTTCCATTGCATAGGCAGTTTAT  
TACCACTAAAGTGCTTCTCACAGGAGTCAGGAACAGGAAGTGACTGTAG

>PGSC0003DMG400003958-(rev)LRR-RLKs\_3162

AAAGTAATACATGCAAGGCATAGTTTACTAAGTCACCCCTAGTTATTAGATGAAGGAGGAGTAGTTCTTT  
AATATAAAGGTATTGTTGGAAACAAGGAGTACTATTTTGTCTTGACTTCT

>PGSC0003DMG400003958-(rev)LRR-RLKs\_3224

AGTTCTTTAATATAAAGGTATTGTTGGAAACAAGGAGTACTATTTTGTCTTGACTTCTAAATAGACAATTA  
TTTTGGGATAATTTTTTATGCTAAAATGACACTTATTTGGGACGGAGGG

>PGSC0003DMG400003958-(rev)LRR-RLKs\_3286

AGACAATTATTTTGGGATAATTTTTTATGCTAAAATGACACTTATTTGGGACGGAGGGAGTAGTATGAAT  
ACAGAGAGAGATTGGACTTATTGCTTTAATTGAGAATTAAAGTTCCCTTG

>PGSC0003DMG400003958-(rev)LRR-RLKs\_3348

GTATGAATACAGAGAGAGATTGGACTTATTGCTTTAATTGAGAATTAAAGTTCCCTTGCCATCAAGGAAA  
GCAGTAGGACATGTCTCAAGAACCTCATTAAATATGTGCATTTAATAGTTC

>PGSC0003DMG400003958-(rev)LRR-RLKs\_3410

CAAGGAAAGCAGTAGGACATGTCTCAAGAACCTCATTAAATATGTGCATTTAATAGTTCTCCTATGTTTAC  
TATTTTCGAAACCAGTGCCTTTGATTTGATTAAAGATGAAATAGCACAGGT

>PGSC0003DMG400003958-(rev)LRR-RLKs\_3472

ATGTTCACTATTTTCGAAACCAGTGCCTTTGATTTGATTAAAGATGAAATAGCACAGGTGCACCATCACTG  
CATTAACTTCAGTTATTCATATTAGAACAACAGGCAACAGATATTTGGGC

>PGSC0003DMG400003958-(rev)LRR-RLKs\_3534

CATCACTGCATTAACTTCAGTTATTCATATTAGAACAACAGGCAACAGATATTTGGGCTAAGTTTTAGTAT

AGCTAAGGTCTCTAATTAATAAAAATCTTTAATACACTATGATGGCGAAT

>PGSC0003DMG400003958-(rev)LRR-RLKs\_3596

TTTTAGTATAGCTAAGGTCTCTAATTAATAAAAATCTTTAATACACTATGATGGCGAATGATTTCAACTTAC

CAACTATATTGTTTTGTGAGAATCAGGGAAAACCTACCCATGTTTTTT

>PGSC0003DMG400003958-(rev)LRR-RLKs\_3658

TCAACTACCAACTATATTGTTTTGTGAGAATCAGGGAAAACCTACCCATGTTTTTTGCGTTCTATCTTAA

TATGATTCCTTCATATTTCTTTTGACTGATACCAATCGTTATGCATC

>PGSC0003DMG400003958-(rev)LRR-RLKs\_372

ATGAACATCATAAAGTAACAAATATTACTCTGACAGATAAAGGACTTACTGGAAAGTTGTCACCAGCAAT

TGCTGAGCTGAAGTGTGCTGGTCTTTACTTGCATTATAATTCTTTAA

>PGSC0003DMG400003958-(rev)LRR-RLKs\_3720

TCTATCTTAATATGATTCCTTCATATTTCTTTTGACTGATACCAATCGTTATGCATCTTTCTAACAGGACT

AGGATATCTGCACAGCACCGAACCAGACAAACCTTCCATGGTTCATCG

>PGSC0003DMG400003958-(rev)LRR-RLKs\_3782

TAACAGGACTAGGATATCTGCACAGCACCGAACCAGACAAACCTTCCATGGTTCATCGCAACATATCTGT

GGAAAAAGTCCTCCTTGATCAACAGTTCCTCCACTAATACTGGACTGTG

>PGSC0003DMG400003958-(rev)LRR-RLKs\_3844

ATATCTGTGGAAAAAGTCCTCCTTGATCAACAGTTCCTCCACTAATACTGGACTGTGGCCTACTAAAGC

TACTTGCTGATGATGTTGTTTATTCAGCACTTAAGGTCAGTGCTGCACTA

>PGSC0003DMG400003958-(rev)LRR-RLKs\_3906

ACTAAAGCTACTTGCTGATGATGTTGTTTATTCAGCACTTAAGGTCAGTGCTGCACTAGGATATATGGCT

CCTGAATATATTACAACCTGGACGATTCACAGAAAAGAGCGATGTATATGC

>PGSC0003DMG400003958-(rev)LRR-RLKs\_3968

ATATGGCTCCTGAATATATTACAACCTGGACGATTCACAGAAAAGAGCGATGTATATGCATTTGGAGTAA

TTATCCTTCAAGTACTCTCTGGTAAAGGACTTCTGGACTGCTCAATGAGAC

>PGSC0003DMG400003958-(rev)LRR-RLKs\_4030

GGAGTAATTATCCTTCAAGTACTCTCTGGTAAAGGACTTCTGGACTGCTCAATGAGACTTGCTGCTGAAT

CTTTAACTTTGAGAACTTCATTGACCCTAATCTCAAGGGAGCATTCTCC

>PGSC0003DMG400003958-(rev)LRR-RLKs\_4092

TGCTGAATCTTTAACTTTGAGAACTTCATTGACCCTAATCTCAAGGGAGCATTCTCCATAAGTGAAGCA  
ACTATGCTAACTAACTTGCAGTAAGTTGCACCCTTGAGGATCCAGATAG

>PGSC0003DMG400003958-(rev)LRR-RLKs\_4154

GTGAAGCAACTATGCTAACTAACTTGCAGTAAGTTGCACCCTTGAGGATCCAGATAGCAGGCCAAGTA  
TGGTTTTAGTAAATGAAGAATTGAACAGGTCTAGTTGTGGTTGAAAAAGGA

>PGSC0003DMG400003958-(rev)LRR-RLKs\_4216

CCAAGTATGGTTTTAGTAAATGAAGAATTGAACAGGTCTAGTTGTGGTTGAAAAAGGAAAAATTGAAGT  
CCTTTTTGTTGCGGTTGAAATTTGTTGATGATTATTAACCATAGGGGAACAC

>PGSC0003DMG400003958-(rev)LRR-RLKs\_4278

TTGAAGTCCTTTTTGTTGCGGTTGAAATTTGTTGATGATTATTAACCATAGGGGAACACGTGCCATAGCGA  
TAGAGCTGCAGTTTTCTATCTATTATGCAATATCACTTGTTTCTGTATAT

>PGSC0003DMG400003958-(rev)LRR-RLKs\_434

CCAGCAATTGCTGAGCTGAAGTGTGGTCTTTACTTGCAATTATAATTCTTTAACAGGGGAAATACC  
AAAGGAACTGGGAATTTGACTGAGTTGAATGATCTTTATCTCAATGTG

>PGSC0003DMG400003958-(rev)LRR-RLKs\_4340

CATAGCGATAGAGCTGCAGTTTTCTATCTATTATGCAATATCACTTGTTTCTGTATATAATGAGGCAGATT  
GAACAAATTCTTTTGATGGTTTGAAGGTGAACTGGGACGCCCGTTGGC

>PGSC0003DMG400003958-(rev)LRR-RLKs\_4402

AGGCAGATTGAACAAATTCTTTTGATGGTTTGAAGGTGAACTGGGACGCCCGTTGGCATCCTTGACTG  
TTGTAGCTCTCAGAAGAGATAAAGAGGAAGCTAATGAACTTGACCATTAT

>PGSC0003DMG400003958-(rev)LRR-RLKs\_4464

TTGACTGTTGTAGCTCTCAGAAGAGATAAAGAGGAAGCTAATGAACTTGACCATTATTTGATCTTTTCA  
CTGTATTTAATGTCTTTTTCAGGGCCAATATTCTGATAAATGCATTAGT

>PGSC0003DMG400003958-(rev)LRR-RLKs\_4522

TTGATCTTTTCACTGTATTTAATGTCTTTTTCAGGGCCAATATTCTGATAAATGCATTAGTCTTTGTATCG  
AGTGATCCAAATTCAATACAGTGCCTATGGCATATGGGTACAGACAAA

>PGSC0003DMG400003958-(rev)LRR-RLKs\_558

ATCTTTCTGGGATTATAACCACCAGAACTTAGAAACATGGCAAGTCTACAAGGTTTGTAGCCTTTGTAAC  
ACCTTTCTGTTAATTTGAGGGAGAATGTTTCTTTTTTTTCGTAGCTC



>PGSC0003DMG400003958-(rev)LRR-RLKs\_620

TTGTAAACACCTTTCTGTTTAATTTTGAGGGAGAATGTTTCTCTTTTTTCGTAGCTCCACCTTTTTGCTG  
CCTTTGTGACTCGATCTGTCGTGATTTCTAAAAACAGTTGTATTAAT

>PGSC0003DMG400003958-(rev)LRR-RLKs\_682

CTTTTTGCTGCCTTTGTGACTCGATCTGTCGTGATTTCTAAAAACAGTTGTATTAATGATTTGTCATTTTC  
GAAGTTTTAAGATAAAATAATTATCCTTTTCTCATTCTACTTTTAATA

>PGSC0003DMG400003958-(rev)LRR-RLKs\_806

TTGTTCTTGAAGATCCTGTTTTGGTGACTCGAACCGACAACCTTAAAGTTGGAGGTAGAGAGTGCTTACA  
ACTTGAGCAACCCCTGCTATCAGGGAAATTGCTTGCTGTTTCATTTTACT

>PGSC0003DMG400003958-(rev)LRR-RLKs\_868

TGCTTACAACCTTGAGCAACCCCTGCTATCAGGGAAATTGCTTGCTGTTTCATTTTACTGTTTTTTGTGTGT  
GCTGCTGAATAATGAGTCTACATGAATTTAGGTAAACAGAGTAGACAGG

>PGSC0003DMG400003958-(rev)LRR-RLKs\_930

TTTGTGTGTGCTGCTGAATAATGAGTCTACATGAATTTAGGTAAACAGAGTAGACAGGTTGCAAAATTTTC  
TTAGAGATCTATGCAGATTTTTTGGTTCTGTAAAGATAGGACTTTGTGGG

>PGSC0003DMG400003958-(rev)LRR-RLKs\_992

AAAATTTCTTAGAGATCTATGCAGATTTTTTGGTTCTGTAAAGATAGGACTTTGTGGGGATTGATGGTTT  
ACTCGTTTTTTTTGAGTTCCTTCATCCATAAATTAACAGTGCAAGTTTGA

>PGSC0003DMG400003982-(rev)G-LecRK\_0

GAAAAGATAAAATCTATGGCTGCTTTGCTATGGTTATTAATCTTATCTGCATTTTCATGCAGTGACACTAGC  
ACAACAAAGACAGTTTAATATAACTCTTGGCTCTTCTCTAACACCTACT

>PGSC0003DMG400003982-(rev)G-LecRK\_1116

CTACAGGATTGTAACCTGTGAGGCTGCTCTGTTCAAAGACAGAGAGTGTAGAAAGCAAAGGCTGCCTCTG  
AGGTATGGAAGGAGAGAACTGGATAATTCTAATCTAGTATTGGTCAAGGTG

>PGSC0003DMG400003982-(rev)G-LecRK\_1178

GCCTCTGAGGTATGGAAGGAGAGAACTGGATAATTCTAATCTAGTATTGGTCAAGGTGGGCACTAATTT  
CATACCCAACAAAGGGGTGCCTAATCAGACGATTGAAGAAACAAAAGGCAA

>PGSC0003DMG400003982-(rev)G-LecRK\_1240

CTAATTTTCATACCCAACAAAGGGGTGCCTAATCAGACGATTGAAGAAACAAAAGGCAAAAAGCTAAGG

ATAGACATCCTAATTGCCAGCATTACATTGGCTGTCTTTGCTTTGTTGGTGT

>PGSC0003DMG400003982-(rev)G-LecRK\_1302

CTAAGGATAGACATCCTAATTGCCAGCATTACATTGGCTGTCTTTGCTTTGTTGGTGTAGGCATCTCTGG

ATTTCTCATTACAGAATTCATGTCTGGACTTACAGAAAAATCCAGGAT

>PGSC0003DMG400003982-(rev)G-LecRK\_1364

CATCTCTGGATTTCTCATTACAGAATTCATGTCTGGACTTACAGAAAAATCCAGGATAGTAGAAGTGTT

CAGTTATGTGAGGATGTTGCTCCACGAGCATTTTCCTATGCAGAACTAGA

>PGSC0003DMG400003982-(rev)G-LecRK\_1550

ATTGGCAGAAGGTCAGAAAGTGATAGCTGTTAAGAGACTAGACAAAGAATTGGTAGAAGGGGAAACA

GAGTTCCAAACTGAAATAAAAATCATTGGAAGGACACATCACCGAAATCTAGT

>PGSC0003DMG400003982-(rev)G-LecRK\_1798

TTGCTAGAGATATTGCAAGGGGCCTCTATATTTGCATGACGAGTGTGACACACAAATCATCCATTGTGA

TATAAAGCCTCAGAACATACTCATGGATGATCAGTACTGTGCAAAAATAT

>PGSC0003DMG400003982-(rev)G-LecRK\_1860

CATTGTGATATAAAGCCTCAGAACATACTCATGGATGATCAGTACTGTGCAAAAATATCTGACTTTGGAA

TGGCCAAGCTCTTAAAGAAAGACCAAAACAAGAACTTACACAGGGATAAG

>PGSC0003DMG400003982-(rev)G-LecRK\_2046

TTACAGTTTTGGTGTTCCTATTGGACTTGATTTGCAGGCGGAAGTTTGTTGATATGAGCCTTGATGAA

AATGAGGCAATTCTGAATTCTGGGTTTACAATTGCTTTGATGCAGGAGA

>PGSC0003DMG400003982-(rev)G-LecRK\_2108

TTGATGAAAATGAGGCAATTCTGAATTCTGGGTTTACAATTGCTTTGATGCAGGAGAGCTAGATAAACT

AGTCAGGGACGAGGAGGTTGATAGAAGACAATTCGAGAGAATGGTGAAAT

>PGSC0003DMG400003982-(rev)G-LecRK\_2170

GATAAACTAGTCAGGGACGAGGAGGTTGATAGAAGACAATTCGAGAGAATGGTGAAATAAGCATTGGT

GCATTCAAGAGGAACCATCACTTCGCCCTTCAATGAAGAAAGTTCTACTGAT

>PGSC0003DMG400003982-(rev)G-LecRK\_2294

GAAGGAACAGTAGAAATTCAGTGCCTCCTAGTCCTTCTTTCTAAGTGCCATATAGTTTTAACTTC

TTCACTTTTTTGTTTCAAGTATCCCAACTTTCCCATAGAGAGCAGAGTAC

>PGSC0003DMG400003982-(rev)G-LecRK\_2356

TTAAACTTCTTCACTTTTTGTTTCAAGTATCCCAACTTTCCCATAGAGAGCAGAGTACTTTATTATAATTGT  
ATCAATTTTCTACATCATTCTCCACCTCTTCTAGCCATCAGTTATCTT

>PGSC0003DMG400003982-(rev)G-LecRK\_2418

TTATAATTGTATCAATTTTCTACATCATTCTCCACCTCTTCTAGCCATCAGTTATCTTCTGCTGTGGTGTATC  
TCAAGGCTTATGTTTCCATTTTGAGATTTGTCCATATCAACACTTCT

>PGSC0003DMG400003982-(rev)G-LecRK\_2460

AGCCATCAGTTATCTTCTGCTGTGGTGTATCTCAAGGCTTATGTTTCCATTTTGAGATTTGTCCATATCAA  
CACTTCTCTTCAAATTTACTTGTAGTATTTGAATTGTAAATACTAATTT

>PGSC0003DMG400003982-(rev)G-LecRK\_372

TCCATGCTGGATACTGGCAACTTTGTGCTCTATAATTCTGATCACAGTATCATATGGCAAAGTTTTGACAA  
TCCAACAAACACCCTTTTACCAGGTCAGCATATATCAGCTGGACAAGAG

>PGSC0003DMG400003982-(rev)G-LecRK\_434

TTTTGACAATCCAACAAACACCCTTTTACCAGGTCAGCATATATCAGCTGGACAAGAGCTGTTCTCGAGT  
GCTTCAGTAGCAGATGATTCATACGGTATTTTCCGTCTCAAATGCAAGA

>PGSC0003DMG400003982-(rev)G-LecRK\_558

GGGAACCTCGTTCAGTACCCTGTCAATACACCAGATACTGCCCATATGCTTACTACTCAACACGCACTTC  
TAGAGTAGGGAATACTGTTACTGAATCTTGATGATGACGGCCTCCTC

>PGSC0003DMG400003982-(rev)G-LecRK\_620

ACGCACTTCTAGAGTAGGGAATACTGTTACTGAATCTTGATGATGACGGCCTCCTCTACTTGACAAT  
TCCACTAAGAGGCTAAGAAATCTAACCAGAGGAGGCTACCCTAGAGAAAG

>PGSC0003DMG400003982-(rev)G-LecRK\_682

TGCACAATTCCACTAAGAGGCTAAGAAATCTAACCAGAGGAGGCTACCCTAGAGAAAGGACCATCATCT  
ATATGATGAAAATTGATGCTGATGGTATTTTTCGAGTCTATTCACATTCTC

>PGSC0003DMG400003982-(rev)G-LecRK\_744

ATCATCTATATGATGAAAATTGATGCTGATGGTATTTTTCGAGTCTATTCACATTCTCTGAACCAACAGAA  
CAGCTCCGTGATATGGTCATCAACAAATGATGGCTGTAATCCAATAGGC

>PGSC0003DMG400003982-(rev)G-LecRK\_806

CCAACAGAACAGCTCCGTGATATGGTCATCAACAAATGATGGCTGTAATCCAATAGGCCTTTGTGGGCTT  
AATGGGTTTTGCACCAATATAGATGATCAAGCTAAATGTTTGTGTCTTCC

>PGSC0003DMG400003982-(rev)G-LecRK\_930

TTTGATTTTGTAAATGCCAGGAAATTGGAGCGCAGGCTGTGAAAGGAATTTACCCGCAGAAACCTGTCGG  
TTAAAGGAGAGCACTTCCAAATACTATGCTATGAGAACAGTTGAAAACACA

>PGSC0003DMG400003982-(rev)G-LecRK\_992

CTGTCGGTTAAAGGAGAGCACTTCCAAATACTATGCTATGAGAACAGTTGAAAACACAGGATGGGAAG  
ATAGTACTTATGTTGTTTTGGCCGGAACGACCAAGGAAGATTGAGACCAAGC

>PGSC0003DMG400003999G-LecRK\_0

ATGGCTGCTTTGCTATGGTTAATAATATTATCTGCATTTTCATGCAGTAGCACTAGCACAAACAAAGGCAGT  
TCAATATAACTCTTGGCTCTTCTCTAACACCTACTACCAATTCATCATGG

>PGSC0003DMG400003999G-LecRK\_1178

AAGGAGAGACTTGGGTAATTCTAATCTAGTATTGGTCAAGGTGGGCACTAGTTTCATATCCAAAGAAGG  
GGTGCCTAATCAGACGATTGAAGAAACAAAAGGCAAAAAGCTAAGGATAGA

>PGSC0003DMG400003999G-LecRK\_1240

AAGAAGGGGTGCCTAATCAGACGATTGAAGAAACAAAAGGCAAAAAGCTAAGGATAGACATCCTAATT  
GCCGCCATTACATTGGCTGTTTTTGCTTTGTTGGTGTAGGCATCTCCGGAT

>PGSC0003DMG400003999G-LecRK\_1302

CTAATTGCCGCCATTACATTGGCTGTTTTTGCTTTGTTGGTGTAGGCATCTCCGGATTCTCATTACAG  
AAATCATGTCTGGACTTACAGAAAAATCCAGGAGAGTAGAAGTGTTGAG

>PGSC0003DMG400003999G-LecRK\_1488

AAAGAAGCGTTAGGGAGGGGAGCATTTGGAACAGTATTTGCAGGAATTTTGGCAGAAGACCAGAAAGT  
GATAGCTGTTAAGAGACTAGACAAAGAATTAGTAGAAGGGGAAACAGAGTTC

>PGSC0003DMG400003999G-LecRK\_1798

CAAGGGGCCTCCTATATTTGCATGACGAGTGTGAAACACAAATCATCCATTGTGATATTAAGCCTCAGAA  
CATACTCATGAATGATCAGTTCTGTGCAAAAATATGTGACTTTGGAATGG

>PGSC0003DMG400003999G-LecRK\_1984

CACCAGAATGGCACCGAAATCTGCCAGTGACAGTGAAAGCAGACGTTTACAGTTTTGGTGTGTCCTAT  
TGGAATTGATCTGTAGGCGGAAGTGTGTAGATTGGAGCCTTGATGAAAATG

>PGSC0003DMG400003999G-LecRK\_2046

GTCCTATTGGAATTGATCTGTAGGCGGAAGTGTGTAGATTGGAGCCTTGATGAAAATGAGGCAATTCTT

GAATACTGGGTCTACAATTGCTTTGATGCAGGAGAGCTAGATAAACTAGTA

>PGSC0003DMG400003999G-LecRK\_2108

AATTCTTGAATACTGGGTCTACAATTGCTTTGATGCAGGAGAGCTAGATAAACTAGTAGGGGACGAGGA  
GGTTGATAGAAGACAATTCGAGAGAATGGTGAAAATAAGCATCTGGTGCAT

>PGSC0003DMG400003999G-LecRK\_496

AAGCAGATGATTCTTTCGGGATTTTCCGTCTCAAATGCAAGATGATGGGTACCTTGTTTCAGTATCCTGT  
CAATACACCAGATACTGCCCCATATGCTTACTACGCATCCTACATCCGTG

>PGSC0003DMG400003999G-LecRK\_558

TATCCTGTCAATACACCAGATACTGCCCCATATGCTTACTACGCATCCTACATCCGTGGAGTAAGGAATA  
ATTTTTCACTGAATCTTGATGATGACGGCCTCCTCTACTTGCTCAATTCC

>PGSC0003DMG400003999G-LecRK\_682

ATAGTCTAAAAATCTAACCAGAGGAGGCTACCGTAGAGAAAGGACCATCATCTATATGATGAAAATTG  
ATGCTGATGGTATTTTTCGAGTTTATTACATTCTCTGAACCAACAGAACA

>PGSC0003DMG400003999G-LecRK\_744

AAAATTGATGCTGATGGTATTTTTCGAGTTTATTACATTCTCTGAACCAACAGAACAGCTCCGTGATATG  
GCCATCAACAGATGATAGGTGTGATCCAAAAGGCCTTTGTGGGCTCAAT

>PGSC0003DMG400004000G-LecRK\_2457

AATCATTATTGTGATATTAAGCCTCAGAACATACTCATGAATGATCAGTTCTGTAGCAAAAATATCTGA  
CTTTGGAATGGCCAAGCTCTTAAAGAAAGACCAACAAGAACCTACACAG

>PGSC0003DMG400004000G-LecRK\_2649

TTTACAGTTTTGGTGTCTCCTATTGGAATTGATTTGTAGGCGGAAGTGTGTTGATATGAACCTCGATGA  
AAATGAGGCAATTCTTGAATACTGGGTTTACAATTGCTTTGATGCAGGAG

>PGSC0003DMG400004000G-LecRK\_390

GCTTACTACGAATCCCACATCAGTGGAGTAGGGAATAATGTTTCACTGAATCTTGATGATGACGGCCTCC  
TCTACTTGCTCAATCCAACAATAGTCTAAAAAATCTAACCAGAGGAGGC

>PGSC0003DMG400004000G-LecRK\_520

AAAGGACCATCATCTATATGATGAAAATTGATGCTGATGGTATTTTTCGAGTTTATTACATTCTCTGAAC  
CAACAGAACAGCTCACCGATTTGGTCATCAACAGATGATAGGTGTGATC

>PGSC0003DMG400004000G-LecRK\_585

CTGAACCAACAGAACAGCTCACCGATTTGGTCATCAACAGATGATAGGTGTGATCCAAAAGGCCTTTGT  
GGGCTCAATGGTTTTTGCACCAATATAGATGCTCAAGCTAAATGTATGTGT

>PGSC0003DMG400004000G-LecRK\_650

TTGTGGGCTCAATGGTTTTTGCACCAATATAGATGCTCAAGCTAAATGTATGTGTCTTCCGGGATTTGAC  
TTTGTAAATGCCAGGAAATTGGAGCGCAGGCTGTGAAAGGAATTTCCCCAC

>PGSC0003DMG400004000G-LecRK\_780

CAGTTAAAGGAGAACACTTCCAAATACTATGACATGAGAACAGTTGAAAACACAGCATGGGAAGATAG  
TTCTTATGTTATTTTTGCCGTAACGACCAAGGGAGATTGTGAACAAGCCTGT

>PGSC0003DMG400004000G-LecRK\_838

GGGAAGATAGTTCTTATGTTATTTTTGCCGTAACGACCAAGGGAGATTGTGAACAAGCCTGTCTACAGG  
ATTGTAAGTGTGAGGCTGCTCTGTTCAAAGACAGAGAATGTAGAAAAGCAAA

>PGSC0003DMG400004056LRR-RLPs\_2170

AACAAGTCATGTTCCAGAAGGAGTAAAACAATGTGAACAAGAAAGTACAGTAGATAGTAAAGAATCAG  
ACTCCAATTTAAAAAATGAAGATTTGAGTCAGAATCCCACCATATTATAGC

>PGSC0003DMG400004056LRR-RLPs\_2232

AATCAGACTCCAATTTAAAAAATGAAGATTTGAGTCAGAATCCCACCATATTATAGCTTCTTTGGGGCA  
TTCAGGACATGTTGTTAGTCATTTTACATTTTGTATGTCGCAAGAATAA

>PGSC0003DMG400004056LRR-RLPs\_372

ATTTGCTAGTTGATTCTAGTCTATGTTTTTTACCATTATTGACTTTTCTTGCTGTAGTTCAAATCAAGAA  
AACAGTAATGTCACAAAGCCATGCATGGATGTCCTCAATTTTTATTTT

>PGSC0003DMG400004056LRR-RLPs\_434

AAATCAAGAAAACAGTAATGTCACAAAGCCATGCATGGATGTCCTCAATTTTTATTTTTATTTTTAATAT  
AAAGAAATGGATCTTGGGCCTTACTCAACCGCATAAACTACATCATAGG

>PGSC0003DMG400004056LRR-RLPs\_930

GAGCTTCCAATTTCTAACACACCTTTTCTGGTAGTACTAGTAAATATATATGCTAGTATTCTATTGGTAAT  
TTGCAATATTTATTCCTAAAACCAAGTAGTTATATGTATTGAAATTAT

>PGSC0003DMG400004056LRR-RLPs\_992

TATTGGTAATTTGCAATATTTATTCCTAAAACCAAGTAGTTATATGTATTGAAATTATCGTTCTTGTATGTT  
AACTTGACATAACAGTGTAATAAATCTTTACACCGTAACATAAACTCT

>PGSC0003DMG400004146-(rev)LRR-RLKs\_0

CAAACATGAAAAAATTCATCTGTTTTGCTTGTTACTTTTTGAGTGTTTTTTCTTTGTTTCATCAAATAAG  
GATGAAGTTTCTATATTGTTAGCAATAAAGTCTAGTCTTGTTGATCCA

>PGSC0003DMG400004146-(rev)LRR-RLKs\_1178

CTTCTCAGGATCAATCCCATTAGGCCTGTCTAACTGTTCTTCACTCGTTTCGAGTTAGAATCCAAAATAATC  
TTCTATCAGGAATGATTCCGGTTGGGTTTGGAACTTCCTATGCTCCA

>PGSC0003DMG400004146-(rev)LRR-RLKs\_1364

TCTTTCTTTTATCGATGTCTCCTCGAACCACCTTGAATCATCTTGCCTTCTAGCATTGTTGTCCATTCTAGC  
CTGCAAACCTTCATAGTTTCCAATAACAATCTTAAAGGCAACATTCC

>PGSC0003DMG400004146-(rev)LRR-RLKs\_186

GTGTATTGCAACTCAAAAAGCTATGTAGAGAAGCTTGATTTGTCGAACATGAATCTTAGTGGCAGAGTTT  
CAGATCAAATTCAAGGACTTCAGAGTCTATCTTTACTTAATCTTTGTTGC

>PGSC0003DMG400004146-(rev)LRR-RLKs\_3081

CTAATAAAGACAAGTTAATCTTTGCTCATTACCAGTTATAGGCCTTCTATAAGTACCAAAAACCTTATTTTT  
CCACTTCAATATCTAGTATATCTTCATTTTCATTAGTTCAAATGTAAA

>PGSC0003DMG400004146-(rev)LRR-RLKs\_310

ACTTTTCCACTTCATTGCCAAAGTCATTAGCTAATCTGACATCTTTGAAGAGCATTGATGTGAGCCAGAAC  
AACTTTGTTGGGAACCTCCCTGATGGTATTGGAATGTGAATCCTGGTT

>PGSC0003DMG400004146-(rev)LRR-RLKs\_372

AGCCAGAACAACCTTTGTTGGGAACCTCCCTGATGGTATTGGAATGTGAATCCTGGTTTGAATATGTCA  
ATGTTTCAAGTAATAACTTCGAGGGGGTTCTCCCTGAGGATCTTGCCAAT

>PGSC0003DMG400004146-(rev)LRR-RLKs\_496

CGTTGCTCGAAGTCATGGATTTTCGAGGGAGTTTCTTTGAAGGTTCAATCCCTGGATGTTACAAGAATTT  
GAAGAATCTGAAGTTTCTTGGCTTATCAGGGAATAATCTTTCCGGAGATA

>PGSC0003DMG400004146-(rev)LRR-RLKs\_806

GTATCAAACAGTTTTGAAGGTAAGATTCCACCTGAAATTGGAAATATAACATCTTTAGTTTACTTGGAT  
CTTTCTGATAATAAGATCACTGGGGAGATTCCGAATGAATTAGCAGATTT

>PGSC0003DMG400004146-(rev)LRR-RLKs\_868

ACTTGGATCTTTCTGATAATAAGATCACTGGGGAGATTCCGAATGAATTAGCAGATTTGAAGAATTTGCA

GCTGCTAAATCTCATGTGCAATAACTTAACGGGTCCTATTCCTACCAAAC

>PGSC0003DMG400004190LRR-RLPs\_0

AATCCAACGACGCGCAGTGCAAGCTAAATAGCGCGTCGTGTAAAAAACCAATTTGAGGAAAATTACC

AAAGTGAGGATTCATTTACACACAGATCTTCTTCCTTCACTTCCATCATC

>PGSC0003DMG400004190LRR-RLPs\_1037

GCACATGTATAGTTGGAAATGATTGGAATTTATAGATTAGATGAAGTTGTAAGTGCAAGTTTATAGTTTG

AGCCAAAATAATTGGATTTTATGCATTAGCTGCTTTCTAAGTGTATGTTT

>PGSC0003DMG400004190LRR-RLPs\_1098

TATAGTTTGAGCCAAAATAATTGGATTTTATGCATTAGCTGCTTTCTAAGTGTATGTTTATGGCTTTCCTG

GAAGTAATTGGACTTTTTAGATTTTATGCAGCTTCTAAGCTCACGTTTA

>PGSC0003DMG400004190LRR-RLPs\_1159

GGCTTTCCTGGAAGTAATTGGACTTTTTAGATTTTATGCAGCTTCTAAGCTCACGTTTATATATTTTGAGT

GGAAGATTTTATGCTGTTTCTAAGTTTACTTATTGTGTTTCATCTGTT

>PGSC0003DMG400004190LRR-RLPs\_122

TCTCAATCTCGACTATAGTAATGTACGTATAGCTTTGCGTTTGGATTCCGGTTGATTCAGTAATTCTACTC

CCTGAAGGTGATTAACCCTATTCAAATGGCTCGCCATGGGCATCTACCT

>PGSC0003DMG400004190LRR-RLPs\_1525

TCCTTGAAAGTTAAACCGATTTATCATTCAATCAATGCCAATTTAATATCTCTCCATGATTACATTGTATT

AGTTAATTAATGGTAGTATAAGTAAGTATATAATCGATCACGAGTAT

>PGSC0003DMG400004190LRR-RLPs\_1586

TACATTGTATTAGTTAATTAATGGTAGTATAAGTAAGTATATAATCGATCACGAGTATTTTTATGGTTGT

CAGAAATAAGAATGTCCACTGTAGGTCTTGAGCCCATGATCATAAGGTT

>PGSC0003DMG400004190LRR-RLPs\_1769

CTTTCTCTGTTAACATTTTATTAAATGATTTACACAGTTTAAGGCCATTGATTGCATTTATGAGAAAACC

GAGGAGTTATCGTAGTACCTGAATGTATATGTTTACATGGACTAATTTG

>PGSC0003DMG400004190LRR-RLPs\_1830

TGAGAAAACCGAGGAGTTATCGTAGTACCTGAATGTATATGTTTACATGGACTAATTTGAACTTCTGGAA

TATGACTGTAGTGAAAGCTCTGAATGAAATTAAGGCATCTCTTGGATGGA

>PGSC0003DMG400004190LRR-RLPs\_2257



CTAGACTGTAAGATTCTTCTCTCTTTGTCTTTTTACTGGAATCTAGTTTTTACAAAACCTTCAGCTACTTCTT  
ACAGATTTTTTAACCTTGTACAAATTGAGAAGTTTCCCTAAGTTCCA

>PGSC0003DMG400004190LRR-RLPs\_2318

CAGCTACTTCTTACAGATTTTTTAACCTTGTACAAATTGAGAAGTTTCCCTAAGTTCCAATATGGATGTTTT  
TACACCTCCAGTCTTAATTGTTCAATTAACCAACTTAAAGAATTGTTT

>PGSC0003DMG400004190LRR-RLPs\_2379

ATGGATGTTTTTACACCTTCCAGTCTTAATTGTTCAATTAACCAACTTAAAGAATTGTTCTGCTTGGGTGTT  
GACTGTTACCTCAAAAAATGTGGGCGTTATCTATAATGTGCATAGTCAT

>PGSC0003DMG400004190LRR-RLPs\_2440

CTTGGGTGTTGACTGTTACCTCAAAAAATGTGGGCGTTATCTATAATGTGCATAGTCATTTTTTTCAAATT  
TGATACTACTATTTAAGGCAATAGTTAGTGGACAATTGTGCCTGTACTG

>PGSC0003DMG400004190LRR-RLPs\_3111

GGCCTTCTATACTTTTTAGGATTGTATTAGATGTATATCTCAACATCTACTTTCTGTTGCCTGTATCCTA  
CCTTTAGGTTTTCTTTGTCCATAGGAACCTCCACGTTGTCCCAGAAT

>PGSC0003DMG400004190LRR-RLPs\_3172

CCTGTATCCTACCTTTAGGTTTTCTTTGTCCATAGGAACCTCCACGTTGTCCCAGAATGTTAACTTTAAAA  
ATTACTTTTATTGCTTTGTTACCCAACATACTAATATGAAATTATATC

>PGSC0003DMG400004190LRR-RLPs\_3782

ACTATAAGAGAACTCATACGTATTGAAGGATGTTTTCCGGTTCTCCGCAACCTGTAAGTTGATTATTCTTG  
TTTAATTGCCTGTTGCTAGTGTATGAATTATATGCTAATTCAAGGAT

>PGSC0003DMG400004190LRR-RLPs\_3843

ATTATTCTTGTTAATTGTCCTGTTGCTAGTGTATGAATTATATGCTAATTCAAGGATAACACGTGCTGC  
AACTTGCAGATACTTAAACAATAATTATCTTACTGGAGGCATTCCAGCG

>PGSC0003DMG400004190LRR-RLPs\_3904

CACGTGCTGCAACTTGCAGATACTTAAACAATAATTATCTTACTGGAGGCATTCCAGCGCAACTTGCAAA  
TCTGACTAACTTGGAGATCTTGTAAGTTTCGGGAAGAAAGTTTCTCCGCG

>PGSC0003DMG400004190LRR-RLPs\_3965

ACTTGCAAATCTGACTAACTTGGAGATCTTGTAAGTTTCGGGAAGAAAGTTTCTCCGCGATTAGTGCTTG  
TCTTTTGGACAAATAACAATAATTTCTCTGTACTGGTTGATAAATATT

>PGSC0003DMG400004190LRR-RLPs\_4026

TAGTGCTTGTCTTTTGGACAAATAACAATAATTTCTCCTGTACTGGTTGATAAATATTATTATGCTTAATT  
TGATTGCTCTGGTTATTACAGGTATCTATCCTACAACAAGATGACAGG

>PGSC0003DMG400004190LRR-RLPs\_4209

TCTTAGCTACTCATTTATTACACTGTATGTGGACAGTTTGGACACAGAAAATTCAGAATTTTTGAAAGCA  
AATACAGAAACATTCTTAGCCTTAAGTTGAGATCTCTTTCTTTGATAGAT

>PGSC0003DMG400004190LRR-RLPs\_4270

TTGAAAGCAAATACAGAAACATTCTTAGCCTTAAGTTGAGATCTCTTTCTTTGATAGATTTTTGGGGCAAC  
CTGGTCTTTGTGCATGATTTAGACGCCACGTTAGATACGATCAGGGACC

>PGSC0003DMG400004190LRR-RLPs\_4331

TTGGGGCAACCTGGTCTTTGTGCATGATTTAGACGCCACGTTAGATACGATCAGGGACCTGTGTGTTATC  
ATGCAGTAGTTTAGTGCTGTTTTCTGTTATCAATAGATTGCTTTATTAAC

>PGSC0003DMG400004190LRR-RLPs\_4392

TGTGTTATCATGCAGTAGTTTAGTGCTGTTTTCTGTTATCAATAGATTGCTTTATTAACCTATAAAAAATATT  
AGCATATTGGATGTGATGTCCCAATGATTGTCTAGTGAGTGCAAGTCTT

>PGSC0003DMG400004190LRR-RLPs\_4697

CAGATGAACTCGGGACTAGCTAATGTGGTCTTGCAAGGGTGTTTCTTTCTTAAGGAGATAAATTTTGAG  
GATTGTGCAATTTATGGATGCTGTGACAAAAACATTAGTAGATGGACTTGA

>PGSC0003DMG400004190LRR-RLPs\_4758

ATTTTGAGGATTGTGCAATTTATGGATGCTGTGACAAAAACATTAGTAGATGGACTTGATGCTTGTTGGC  
TGACCTTATTGGACCTTATCCGTAATGATTTCTCCGACAAGTAGTAATG

>PGSC0003DMG400004190LRR-RLPs\_4819

CTTGTTGGCTGACCTTATTGGACCTTATCCGTAATGATTTCTCCGACAAGTAGTAATGTATAGAAATTGC  
CTGGAGAAATTAGATGCAAGAGTGTTCCCATCCTAGTAGGTTCTAATTT

>PGSC0003DMG400004190LRR-RLPs\_4880

TAGAAATTGCCTGGAGAAATTAGATGCAAGAGTGTTCCCATCCTAGTAGGTTCTAATTTTAGCACAAAAA  
ACACAATCCATTTCAATAGTAAACATCTCATGTACTCAAGATTTTCAGTT

>PGSC0003DMG400004190LRR-RLPs\_4941

GCACAAAAAACACAATCCATTTCAATAGTAAACATCTCATGTACTCAAGATTTTCAGTTGAGCTATGTAG

CAACAGCACAGTGATACAGGGACGCGTGAATGACATGTTCAACTTTAATT

>PGSC0003DMG400004190LRR-RLPs\_5002

GCTATGTAGCAACAGCACAGTGATACAGGGACGCGTGAATGACATGTTCAACTTTAATTATAGAAGATT

GTCTGTTAGAACATAATAGTTTTATTGGTATAATGTGTTAAAAAACTGTA

>PGSC0003DMG400004190LRR-RLPs\_5063

AGAAGATTGTCTGTTAGAACATAATAGTTTTATTGGTATAATGTGTTAAAAAACTGTATGTATAATTCA

AAAAAATATGAACACTGATGCATGCAAATCTTTAAGCGATTAAACAAAGC

>PGSC0003DMG400004190LRR-RLPs\_5124

TATAATTCAAAAAATATGAACACTGATGCATGCAAATCTTTAAGCGATTAAACAAAGCCGATTTTGCAC

CTGGTTGTCAATATCCATTGCATTTCTACCCATTTTCTTCTTTCTCCA

>PGSC0003DMG400004190LRR-RLPs\_5429

GAAATGGGAACCTTGTTTTGAAGCTTAACCCACATACTTCCTTTGACAAAACCTTTTATCACAATATTTTC

CTTTAAAGTGTTGGTGTGGAGCTAAACCACACAAGCTGAAACTAGGGC

>PGSC0003DMG400004190LRR-RLPs\_549

TAAACGTTCAAGTGAAAATAGTTAGATTTGTAGATTATATGCAGTTTGTGGTGAAATTTTGTAGTTTCA

GCGAAAACAATATTGAACGTTGTACATCTTATGTAATTTCAAGGTGTAA

>PGSC0003DMG400004190LRR-RLPs\_5490

CAATATTTTCTTTAAAGTGTTGGTGTGGAGCTAAACCACACAAGCTGAAACTAGGGCCTTCTCCATTTA

AGTGGTTGTTAGTGTTGTCAAAGTGATGCTTGAGCCATGACTTGAGGCT

>PGSC0003DMG400004190LRR-RLPs\_5551

TCTCCATTTAAGTGGTTGTTAGTGTTGTCAAAGTGATGCTTGAGCCATGACTTGAGGCTCTGCACAAGTT

TGCTCCAATGAAGGTGGTAACTGGTAAGGGATATTTTCCCAAACCAGCC

>PGSC0003DMG400004190LRR-RLPs\_5673

GCAACTTCTTTTCTGAGAATATTAGATTAATTTGTGAGGTCCATAGGTTTCTTCTTGATAGGGATTAAGC

AACAAATATTCAATAGATAGCGAGCAAACCGATATATTAGTTGTTAGCG

>PGSC0003DMG400004190LRR-RLPs\_5734

GGGATTAAGCAACAAATATTCAATAGATAGCGAGCAAACCGATATATTAGTTGTTAGCGAGACTGTACT

AATGATACATTATTGATTAGGAGTAAGAAGCTGTAAATTTAATGCAAGAAA

>PGSC0003DMG400004190LRR-RLPs\_5795

ACTGTACTAATGATACATTATTGATTAGGAGTAAGAAGCTGTAAATTTAATGCAAGAAAGCTAGCGACT  
AAGTCTGAGTTGAAATTTTAAAGGTAGATGTTCCCTTAAAGCTTGCCACTCA

>PGSC0003DMG400004190LRR-RLPs\_5856

TAGCGACTAAGTCTGAGTTGAAATTTTAAAGGTAGATGTTCCCTTAAAGCTTGCCACTCAGATTCAAATG  
CAAACCTTGATGACCAATGATCCTTGTAAGTTGCAATATCCTAGATGTTCC

>PGSC0003DMG400004190LRR-RLPs\_5917

TTCAAATGCAAACCTTGATGACCAATGATCCTTGTAAGTTGCAATATCCTAGATGTTCCCTTAAAGCTCAA  
ATGGTCCTTGACAGTTGCATATGTGAGTGTTTTGTTCCATTTATTTATTT

>PGSC0003DMG400004190LRR-RLPs\_5978

TAAAGCTCAAATGGTCCTTGACAGTTGCATATGTGAGTGTTTTGTTCCATTTATTTATTTATTTATTTTACG  
TTCTTCGCCCTTGATAAATCAGGTGTTACGCATCATTCCCTTCACTCTT

>PGSC0003DMG400004190LRR-RLPs\_6039

TTATTTTTACGTTCTTCGCCCTTGATAAATCAGGTGTTACGCATCATTCCCTTCACTCTTCTTGATTGTATACT  
GGTAGATTTTGCACCAAAAAGAAAAATAGTTCTGCATGCATTTGATA

>PGSC0003DMG400004190LRR-RLPs\_61

AAATTACCAAAGTGAGGATTCATTTACACACAGATCTTCTTCCTTCACTTCCATCATCTCTCTCAATCTCG  
ACTATAGTAATGTACGTATAGCTTTGCGTTTGGATTCCGGTTGATTCA

>PGSC0003DMG400004190LRR-RLPs\_610

TGTAGTTTCAGCGAAAACAATATTGAACGTTGTACATCTTATGTAATTTCAAGGTGTAAGCTTATAGTGT  
GAGTGGAAGTAATTGAATTTTGTAGTTCAAGTTGTAGTAATTGGATATTA

>PGSC0003DMG400004190LRR-RLPs\_671

TTATAGTGTGAGTGGAAGTAATTGAATTTTGTAGTTCAAGTTGTAGTAATTGGATATTATCCAGTTTCTA  
GGTGAAAGCTTATAGTTTGTAGTGGAATGAACCTGGATTTTATAGATTATG

>PGSC0003DMG400004190LRR-RLPs\_6771

TTCCATTTTTTCGTTAAATGATACAAATACATACCTAAATTATCGTATTATTTTTTTGAGTTTCACACCCTAA  
TTATAGTTATTATCTATGTGCAAAAACACTTCGCTGAGTAGCTGATG

>PGSC0003DMG400004190LRR-RLPs\_6832

TTCACACCCTAATTATAGTTATTATCTATGTGCAAAAACACTTCGCTGAGTAGCTGATGGTATGCATGCTT  
TATTAGGTGCCAAAGTGCCAGTCCATGTGGATAAATATTTTCACTGGAA

>PGSC0003DMG400004190LRR-RLPs\_732

CAGTTTCTAGGTGAAAGCTTATAGTTTGAGTGGAAATGAACCTGGATTTTATAGATTATGTGCAGTTTGTG  
GTGGATTCATGGTTTCTGCGGAAACAATTGAAAGTAAGTGGATTTTATGT

>PGSC0003DMG400004190LRR-RLPs\_793

CAGTTTGTGGTGGATTCATGGTTTCTGCGGAAACAATTGAAAGTAAGTGGATTTTATGTAATTTCTAAGA  
GAGAGCTTATAGTTTGAGTGAAAGTAAGTGGATTTTATGTAGTCCTAGAG

>PGSC0003DMG400004190LRR-RLPs\_854

TTTCTAAGAGAGAGCTTATAGTTTGAGTGAAAGTAAGTGGATTTTATGTAGTCCTAGAGCAACTTTATAG  
TTTGAGTTGTAGAAATTGGATTTTATAGATTTTTTCCCAGCTTCTAAGTG

>PGSC0003DMG400004190LRR-RLPs\_915

ACTTTATAGTTTGAGTTGTAGAAATTGGATTTTATAGATTTTTTCCCAGCTTCTAAGTGCAAATTTTTAGTT  
TGAGTTGAAATAATTGGATTTATTCTATAAATTATATGTGGTTTTCGAA

>PGSC0003DMG400004195-(rev)LRR-RLPs\_0

CTAAAACTCTTAACATAAATTGTTAAATATTTCTAACCTAAGTAGGTATTACCGAAAATCTTTAACACAGG  
GTGACATCGAGCTATGGAACATAAACAATTGGTAATTGCTTCACGCTAT

>PGSC0003DMG400004195-(rev)LRR-RLPs\_1037

GAAATCTATCTACCTGGTCACTATGTATCTGGTGACGATGAATCTCCAACTTCGTGTCAAGCACAATGA  
GTGGTTCAATCTCTCCTTCAATTTCACTTCTCACTTCACTACAAGTTATT

>PGSC0003DMG400004195-(rev)LRR-RLPs\_1098

GCACAATGAGTGGTTCAATCTCTCCTTCAATTTCACTTCTCACTTCACTACAAGTTATTGATCTTAACAAAC  
TAGTCGGACTAACAGGGCAAATTCCTGAGTCCATTGGGGTTCTCAAGA

>PGSC0003DMG400004195-(rev)LRR-RLPs\_1220

CTCAAAGAACTCAACTTACAAACCAATCAAATCTCTAGTACAATTCAGAGTCAGTATTCACATTGACGTC  
TCTAACAACTTGAACCTTGAAAATAACCACTTGACAGGGGAAATATCG

>PGSC0003DMG400004195-(rev)LRR-RLPs\_1403

AAAATCCCAGTTTCAATAACAAAACACTACATTCCATTTCCACAATCCACTTAGAAAAAAATCAACTTGTTGG  
AGAAATACAATTGCCTTTAACTCCTTCCCAATGGCCTTTAATTAACAACT

>PGSC0003DMG400004195-(rev)LRR-RLPs\_1464

AACTTGTTGGAGAAATACAATTGCCTTTAACTCCTTCCCAATGGCCTTTAATTAACAACTTTGGCTCTTGAC

AACAATGCACTTACTGGAGCTATACCTGATTCAATTGGTTATTTGACAA

>PGSC0003DMG400004195-(rev)LRR-RLPs\_1525

GGCTCTTGACAACAATGCACTTACTGGAGCTATACCTGATTCAATTGGTTATTTGACAACACTTTTCATCAC

TCTCTATATCAAATAATCAATTTACAGGACCTATTCCTTCTAGTTTGGG

>PGSC0003DMG400004195-(rev)LRR-RLPs\_1586

CTTTCATCACTCTCTATATCAAATAATCAATTTACAGGACCTATTCCTTCTAGTTTGGGAAACATAAAGCA

ATTGCAAATATTGAAGGTCAATAACAACAATTTGGCTGTTGAGATGTTG

>PGSC0003DMG400004195-(rev)LRR-RLPs\_1647

ACATAAAGCAATTGCAAATATTGAAGGTCAATAACAACAATTTGGCTGTTGAGATGTTGCCAACGACGA

TTTGTGGTCTTACTGAGCTAAGTGTTTTGTATGTTTCTCAAACAAGATTC

>PGSC0003DMG400004195-(rev)LRR-RLPs\_1708

AACGACGATTTGTGGTCTTACTGAGCTAAGTGTTTTGTATGTTTCTCAAACAAGATTCATGGACCATTAC

CTGGATGTCTCTATTCATTCAAGTACTTACTAGATGTGCGATGTACCGTT

>PGSC0003DMG400004195-(rev)LRR-RLPs\_1769

GGACCATTACCTGGATGTCTCTATTCATTCAAGTACTTACTAGATGTGCGATGTACCGTTCAAACGTACTGC

CACTCTTCCTATGGGAGTACACAAATAATAAGTAATAGTGATGGAGCCA

>PGSC0003DMG400004195-(rev)LRR-RLPs\_183

ACCTTCTGAGCCCATATGGTTCTGCCCTGACATCGCTTATCTAGTTAAGCTCAATAATTTGAATATGTTC

TTAAAAATATAATTTTTAGAGGCTTCATTGGTCAATTTGTTAATAAAAC

>PGSC0003DMG400004195-(rev)LRR-RLPs\_1830

AACGTAAGTCCAACTCTTCCTATGGGAGTACACAAATAATAAGTAATAGTGATGGAGCCAGAAATTCTGA

AGGAAGTCCAAAAATGCCTCAATTTGAAATGTTATGTATGTCTACAACAAC

>PGSC0003DMG400004195-(rev)LRR-RLPs\_1891

AATTCTGAAGGAAGTCCAAAAATGCCTCAATTTGAAATGTTATGTATGTCTACAACAACCAAAAAAAAAA

CTTGTGTTTATTTATTATCTCTATGTTATATGAGACTCCAAGTACTAGCCAGA

>PGSC0003DMG400004195-(rev)LRR-RLPs\_1950

CAAAAAAAAAACTTGTGTTTATTTATTATCTCTATGTTATATGAGACTCCAAGTACTAGCCAGAATCACTGGCT

AGTATGAAAAAATTCGAATACATAAAGTACTTTCTTTGTTTTATTTTTG

>PGSC0003DMG400004195-(rev)LRR-RLPs\_244

GAATATGTTCTTAAAAATATAATTTTTAGAGGCTTCATTGGTCAATTTGTTAATAAAACAAGAATATTATA  
GAATGGGAACAGTGATATCCTCCATAAATGAAACTCAACTACACTATTT

>PGSC0003DMG400004195-(rev)LRR-RLPs\_305

GAATATTATAGAATGGGAACAGTGATATCCTCCATAAATGAAACTCAACTACACTATTTGGTTAAGACTA  
TGTTTGTGACTATAATAGTGGAGAAATAATAGTAGAAAGGCTTTCCATAT

>PGSC0003DMG400004195-(rev)LRR-RLPs\_366

TAAAGACTATGTTTGTGACTATAATAGTGGAGAAATAATAGTAGAAAGGCTTTCCATATTATTTGTCATG  
ACATTTTTACTATTTTTTATTGCTTTAATTGTTATGAATTATTTTTCTTG

>PGSC0003DMG400004195-(rev)LRR-RLPs\_610

TACAAAAATATTTCCACAAAAACGAAAAATATACTAAGGGGAGACATAATATTGTGTTTTATAAAATGAT  
GTTGTAGTAATTTGTCTATTTGTTACTTTCTTTAAAATCAACATGGCTT

>PGSC0003DMG400004195-(rev)LRR-RLPs\_671

TAAAATGATGTTGTAGTAATTTGTCTATTTGTTACTTTCTTTAAAATCAACATGGCTTGTGCAGAACTT  
GACGACATGAGATGCTTAATGTATCGAGCTACCGAATCTATTATTGACA

>PGSC0003DMG400004195-(rev)LRR-RLPs\_854

ATATCTCTTATGATTATCAATATTAGTGCAAACAAGGCATGCCACCCTGATGATCTCAAGGGTCTCAATG  
ACTTCAAAGCTAGCATAACATTCGGATACTTCTGGCAGACTAAGCAAATGG

>PGSC0003DMG400004195-(rev)LRR-RLPs\_915

GTCTCAATGACTTCAAAGCTAGCATAACATTCGGATACTTCTGGCAGACTAAGCAAATGGATAGGCCAAG  
ATTGTTGCAATTGGCCAGGCATTTCTTGCAACTCTACAATAATAGAGTTG

>PGSC0003DMG400004384LRR-RLPs\_1054

TACTATGCCCATCGAGGCTGAGGCATATGATGTGTTAGGCGAACCAAAGTTCTACATTGGTAGCTAAAA  
AGATTGGAAATCTACAATTCTACATAAGGTGTAGGATCTCTTAACATGGTG

>PGSC0003DMG400004384LRR-RLPs\_1178

GCCTTTTGTGAAAACCGTGCGGGCGTGCCCCCTAAGCGGACAATATTGCACCATGTTAAGAGTATTTTTG  
GGTTGACTTAGCCCAACAAGATGAAGTTACTTACTCCCTACATCCCATT

>PGSC0003DMG400004384LRR-RLPs\_124

TCATAAAAAATCCCACATTTTCCATTGGGTAAATTTCTTGAATTTTTTTTTCAAGAATTTGATCTCTGTTT  
GCTTTTTCTGGTAAATCTTTCATCTTTACCCCCACTTTTTTAATTTTT

>PGSC0003DMG400004384LRR-RLPs\_1426

TCTAAACATGATGTTATTCTTTTTGTGACAACTAAAAGGAAAATGTGCTGCGAAAATTGAGACAGAGG  
GAGTCGAGTTTTTGGTCTTTGCTGGGATATGAACCTTGATCTTTCATGGTT

>PGSC0003DMG400004384LRR-RLPs\_1488

ACAGAGGGAGTCGAGTTTTTGGTCTTTGCTGGGATATGAACCTTGATCTTTCATGGTTTTTACTCACTTA  
GGGCTGTGTCTTCTGTCTCCCTGGGCCGTGGGCTATTCTCTAGTTTCTT

>PGSC0003DMG400004384LRR-RLPs\_186

ATCTCTGTTTGCTTTTTCTGGTAAATCTTTCATCTTTACCCCCACTTTTTTAATTTTTGTTTGATTTTGCTTGA  
GCATATGGTTATCTTATGATGGCCTTTTTGTTTTTCCCAAAAAGA

>PGSC0003DMG400004384LRR-RLPs\_248

GATTTTGCTTGAGCATATGGTTATCTTATGATGGCCTTTTTGTTTTTCCCAAAAAGATTCAATTTTTATTA  
ATTCTTGTTGTTTTATGTCTGCATTTTCAGCTAACAAATTGAATCTTG

>PGSC0003DMG400004384LRR-RLPs\_2790

CTTTTACAGAATGCTCTCAAGGAATCATTTTTTCGGTGCTATTCCTAAAGAATTCGGAAGACTCGATATGC  
TTGAAGTGCTTGACTTGAGGGATAATAATTTGAGTGGAACAATTCCAGC

>PGSC0003DMG400004384LRR-RLPs\_3224

AAAATTCGTCATTGGTAGGATTCTTTATTTGTTTTAGTACCCTATCTTCATATTCAGCTGGTTTTTTGCA  
TATCAGATGCTGGGTCAGATGCTGGATAGTATATCTTTGTGGCAACAC

>PGSC0003DMG400004384LRR-RLPs\_3348

TCTAATTGATCTAGCTCATTTCTCAATTTGATATTTTGCATGTCTTACAGCATCTGGCAAGGCAGCATGAA  
GCCATTCAAGACGATAACCTCCATTATTGAACCAATAAAATGTACTT

>PGSC0003DMG400004384LRR-RLPs\_3782

ATCCAGTAACCTTGCTGCTGCTCCTGCCAATATCAATGGACCGTTGGGTCTGTCAATCAAATGCCAAGA  
AGCAGTGGGTCGTTTCGTGCGGTGCCAAATTCCGATGGAACACATCCTAC

>PGSC0003DMG400004384LRR-RLPs\_4030

GAAAATCGGAAAGTACTTGGAAGTACGTAGTTGGGATTTGCATTGGAGTAATTTTGCTCATTCTTGCTGC  
TTCTGTGTTCTTAATCTGCCGAATCAGAGCGGCTAGAACAATTGGCCCTT

>PGSC0003DMG400004384LRR-RLPs\_4526

AAGGCTGGAATCCTCCCCTTATACTTCTAAAATGTCGCTGATCTTTCCTCATACTTGCTTTTGTCTAGCT



TATATCCCCCCTACAAAGTTGCTTTTCAACGACAACCATAGGAATGT

>PGSC0003DMG400004384LRR-RLPs\_4588

TTGTCTAGCTTATATCCCCCCTACAAAGTTGCTTTTCAACGACAACCATAGGAATGTGCAATCCTTTATG

TTAATCTATGATATTTTTCGTCTATTTAATTCTTTTGCCCGTGAAAAC

>PGSC0003DMG400004384LRR-RLPs\_62

CAGTCAACAAAAAATATTCAAATAAAATAAAATATTTTTTTGGGATTTTAATTCTACATTTTCATAAAAA

ATCCACATTTTCCATTGGGTAAATTTCTTGAATTTTTTTTTCAAGAA

>PGSC0003DMG400004396-(rev)L-LecRK\_0

AATATTTTGGGCAACGAAAACTTGAGTCTGCACTTGAAAATATAAAAACATTATAGAGTAGTGTAGCA

ACATACATTTGTTAACTATGGCTGTTTTTGCATCTGTATCATACTTTGTT

>PGSC0003DMG400004396-(rev)L-LecRK\_1116

AGTTCCATGACTAATGAATTTGAAAGAAGCACAGGACCAAAGAAGTTCTTGTACAGTGAGTTGGTTAGA

TGTACAAATTACTTTTCGCGGGAAGAGATGCTTGGGCAGGGTGGGTTTCGGA

>PGSC0003DMG400004396-(rev)L-LecRK\_1178

GGTTAGATGTACAAATTACTTTTCGCGGGAAGAGATGCTTGGGCAGGGTGGGTTTCGGAGGTGTTTATAA

AGGATATCTCAGTGAATCCAACCTCTATATTGCTGTTAAGAGGGTTTCAAG

>PGSC0003DMG400004396-(rev)L-LecRK\_124

TAATCCCCTTTGTCACCTTCATTGTCTTTCAATTTTGATAGTTTTAATCCCAATGATCAGAATATAACATATG

AGGCAGATGCTTATCCAAACGGTGTAATTCAGCTCACCAAAAACGAGC

>PGSC0003DMG400004396-(rev)L-LecRK\_1240

TTTATAAAGGATATCTCAGTGAATCCAACCTCTATATTGCTGTTAAGAGGGTTTCAAGGGAGTCAAAGCA

AGGAATAAAAGAGTATGCATCAGAAGTCAGGATCATCAGCCGGTTAAGAC

>PGSC0003DMG400004396-(rev)L-LecRK\_1364

ACATTTGGTGCAACTCATTGGTTGGTGCCATCAAAAAGAGAACTTCTACTTGTCTATGAGTTTATGCCT

AATGGAAGCTTAGATTACGATCTTCAAGGGAAGAAGCCATTTGACATG

>PGSC0003DMG400004396-(rev)L-LecRK\_1488

ATAAGATTCAAGATTGCTCAAGGCTTGGCCTCAGCGTTGCTTTATTTACACGATGAATGGGAACAATGTG

TGGTGCATAGGGACATAAAGTCGAGCAACATTATGTTGGATTCCAATTC

>PGSC0003DMG400004396-(rev)L-LecRK\_1550

ACAATGTGTGGTGCATAGGGACATAAAGTCGAGCAACATTATGTTGGATTCCAATTTCAACGCTAAACTT  
GGGGATTTTGGTTTGGCTAGGCTAGTTGACCATGATAAGGGATCCCAAAC

>PGSC0003DMG400004396-(rev)L-LecRK\_1736

GGAAACAGACGTCTATAGCTTTGGTGTGTCGCATTAGAAATAGCTTGTGGAAGGAAACCTATTGATCC  
TAAAGCTGAGGAGCATCAAGTAAATATTGTCGATTGGGTTTGGAGACTTTA

>PGSC0003DMG400004396-(rev)L-LecRK\_1798

TTGATCCTAAAGCTGAGGAGCATCAAGTAAATATTGTCGATTGGGTTTGGAGACTTTACGGGATGGGAA  
ATATTCGTGAAGCAGTTGATCCTAGACTCTCATCAGAGATCAATGAAGAGG

>PGSC0003DMG400004396-(rev)L-LecRK\_186

ATAACATATGAGGCAGATGCTTATCCAAACGGTGTAATTCAGCTCACCAAAAACGAGCAGGGTAGTGGT  
TTAAACGATAGCATAGGCCGAGCTACATATTCTAAAACACTCTATCTTTGG

>PGSC0003DMG400004396-(rev)L-LecRK\_2046

CCTGTACCGACATATTGCAGTCTGCCACAATATGGACCAACTACTTCATTTGCATCACCATACGACTCTAA  
TGGTCCTGGGATATCTGAAATACACTCTTCAGGGACTAGAGACTACACT

>PGSC0003DMG400004396-(rev)L-LecRK\_2108

CGACTCTAATGGTCCTGGGATATCTGAAATACACTCTTCAGGGACTAGAGACTACACTGGTTCTTCAAAT  
AACACAGCAGCTTCTGCAGCATCTTCGCCTTCCGCATCACTTTTGTACAC

>PGSC0003DMG400004396-(rev)L-LecRK\_2170

CTTCAAATAACACAGCAGCTTCTGCAGCATCTTCGCCTTCCGCATCACTTTTGTACACACGTTGATATTGT  
CTTATAAATGAACAGGTCTTTTATTTCCCTGCATTCAATCTTTCAATTG

>PGSC0003DMG400004396-(rev)L-LecRK\_2217

CTTTTGTACACACGTTGATATTGTCTTATAAATGAACAGGTCTTTTATTTCCCTGCATTCAATCTTTCAATT  
GCAGTGTCCAACCTTTTGGTCTATGTATTCTTTATTATTCTACTTTTA

>PGSC0003DMG400004396-(rev)L-LecRK\_248

TAGTGGTTTAAACGATAGCATAGGCCGAGCTACATATTCTAAAACACTCTATCTTTGGGACAAGGCTTCT  
GGGAATATCACCGATTTCACTACTCACTTCTCCTTTGGAATCAATCACT

>PGSC0003DMG400004396-(rev)L-LecRK\_310

AGGCTTCTGGGAATATCACCGATTTCACTACTCACTTCTCCTTTGGAATCAATCACTGGGAAAAAActTA  
TATGCTGATGGTCTTGCCTTCTCCTCGCTCCTGCAGGTTCAAGAATTC

>PGSC0003DMG400004396-(rev)L-LecRK\_434

TAAGAAGTCAGCCGCAGGAGGCGGCCTTGCCCTTGCAATTGATAGTCGACAAAATACATCGAAAAATCA  
TCCTTTTGTGCTGTTGAGTTTGACACCTTTAAGAACTATTATGATCCACC

>PGSC0003DMG400004396-(rev)L-LecRK\_496

AAAATCATCCTTTTGTGCTGTTGAGTTTGACACCTTTAAGAACTATTATGATCCACCAGGTGATCATGTA  
GGTGTCAACATCAACTCCATGGTATCTGTTGTTAATGTGACTTGGTTTA

>PGSC0003DMG400004396-(rev)L-LecRK\_558

GATCATGTAGGTGTCAACATCAACTCCATGGTATCTGTTGTTAATGTGACTTGGTTTAGTAGCATTCCAA  
ATGGTAAGAGAACTGATGCCTGGATTACTTATAATTCAACCTCAAAAAAT

>PGSC0003DMG400004396-(rev)L-LecRK\_62

TGTAGCAACATACATTTGTTTAACTATGGCTGTTTTTGATCTGTATCATACTTTGTTTTGATAATCCCCTT  
TGTCACCTCATTGTCTTTCAATTTTGATAGTTTTAATCCCAATGATCA

>PGSC0003DMG400004396-(rev)L-LecRK\_620

CATTCCAAATGGTAAGAGAACTGATGCCTGGATTACTTATAATTCAACCTCAAAAAATCTTAGTGTGTCT  
TCACCGGTTTCCAACCACAAGGGAATACCACAGTCACTTTCCTGCAGAC

>PGSC0003DMG400004396-(rev)L-LecRK\_682

GTGTTGTCTTCACCGGTTTCCAACCACAAGGGAATACCACAGTCACTTTCCTGCAGACTCTATCTTACAAT  
ATTGATCTGAGGGACTACTTGCCAGAATGGGTCACTTTTGGCTTCTCAG

>PGSC0003DMG400004396-(rev)L-LecRK\_806

AACAGGATCCCTCTTTGCATTACAAACATTTATTCTTGGAATTTTACTTCTTCTTTAAAATATAATGACAA  
CATAACAGATCCATTTGTGCCCTACCAAGCCCTGTGCCACATCCAGA

>PGSC0003DMG400004396-(rev)L-LecRK\_868

ATAATGACAACATAACAGATCCATTTGTGCCCTACCAAGCCCTGTGCCACATCCAGATGTATCCCTACC  
AACCCCAGATCCAGATCCAGATCCAGATCCTTCAAGCAAAAAACTGTCAG

>PGSC0003DMG400004396-(rev)L-LecRK\_930

TCCCTACCAACCCAGATCCAGATCCAGATCCAGATCCTTCAAGCAAAAAACTGTCAGGACTAGTAATTG  
GATTGATTTCTGGCGGTTGTGTTTCGGTAGCACTATCTGTTTTGATATTG

>PGSC0003DMG400004397-(rev)L-LecRK\_0

ATGGCTATTTTTGCATCTTTATCTGCTCTCACATACCTGTTTTGATAATCCCCTTTGTCACATCACTGTCCT

TCAATTTTGATAGTTTTAATCCCAATGATCAGAATGTAACATATGAG

>PGSC0003DMG400004397-(rev)L-LecRK\_1008

TTTGAAAGAAACACAGGACCAAAGAAGTTTTGTATGGTGAGTTGGCTAGATGTACAAATAACTTTTCG  
CGGGAAGAGATGCTTGGGCAGGGTGGGTTTGGAGGTGTTTATAAAGGATAT

>PGSC0003DMG400004397-(rev)L-LecRK\_126

GCTTATCCAGCAAATGGTGTAAATTCAGCTCACCAAAAACCAGCGCGATAGTGGTGCAAACCTATAGCATA  
GGCCGAGCCACATATTCAAAAACTCCATCTTTGGGACAAGGCCTCTGGG

>PGSC0003DMG400004397-(rev)L-LecRK\_1575

GCTCCTGAATGTGTCACCACTGGCAAAGCTAACAAGGAAACCGACGTCTATAGCTTTGGTATTGTCGTGT  
TAGAAATAGGTTGTGGAAGGAAAATGGGCTTGGAGACTTTACGGGATGGG

>PGSC0003DMG400004397-(rev)L-LecRK\_189

AGCATAGGCCGAGCCACATATTCAAAAACTCCATCTTTGGGACAAGGCCTCTGGGAATGTCACAGAT  
TTCCTACTACACTTCTCCTTTAGCATAAATTCACAGGGCATGAACATATAT

>PGSC0003DMG400004397-(rev)L-LecRK\_252

ACAGATTTCACTACACTTCTCCTTTAGCATAAATTCACAGGGCATGAACATATATGCTGATGGAATTG  
CCTTTTTCTCGCCCCTGCAGATTCAAGAATTACTGATAACTCAACCGCA

>PGSC0003DMG400004397-(rev)L-LecRK\_315

GGAATTGCCTTTTTCTCGCCCCTGCAGATTCAAGAATTACTGATAACTCAACCGCAGGAGGCGGCCTTG  
GCCTTGCAAATTATTATAGTCGACAAAATACATCAAGAAATCAATCTTTT

>PGSC0003DMG400004397-(rev)L-LecRK\_378

GGCCTTGGCCTTGCAAATTATTATAGTCGACAAAATACATCAAGAAATCAATCTTTTGTGCTGTCGAGTT  
TGACACCTTTAAGAACATTGATGATCCACCAGGTGATCATGTAGGCATC

>PGSC0003DMG400004397-(rev)L-LecRK\_441

GTCGAGTTTGACACCTTTAAGAACATTGATGATCCACCAGGTGATCATGTAGGCATCGACATCAACTACA  
TGGTATCTATTGTTAATGTGACCTGGTTTAGTAATATTCCGAATGGTACG

>PGSC0003DMG400004397-(rev)L-LecRK\_504

AACTACATGGTATCTATTGTTAATGTGACCTGGTTTAGTAATATTCCGAATGGTACGAGAACTGATGCCT  
GGATTACTTATAATTCAACCTCAAAAAATCTTAGTGTTGTCTTCACTGGT

>PGSC0003DMG400004397-(rev)L-LecRK\_567

GATGCCTGGATTACTTATAATTCAACCTCAAAAAATCTTAGTGTTGTCTTCACTGGTTTTCAACCACAAGA  
GAATACCACAGTCACTGTCCTGCAGACCCTATCTTACAATCTTGATCTG

>PGSC0003DMG400004397-(rev)L-LecRK\_63

TCACTGTCCTTCAATTTTGATAGTTTTAATCCCAATGATCAGAATGTAACATATGAGGCAGATGCTTATCC  
AGCAAATGGTGTAAATTCAGCTCACCAAAAACCAGCGCGATAGTGGTGCA

>PGSC0003DMG400004397-(rev)L-LecRK\_693

TATTTGCCAGAATGGGTCACTTTTGGCTTCTCAGGTGCAACAGGAACCTACTTTGCAATACAAACCATAT  
ATTCTTGGAATTTCACTTCTTCTTTAACTATAATGAAAACATAACAGAT

>PGSC0003DMG400004397-(rev)L-LecRK\_756

ACCATATATTCTTGGAATTTCACTTCTTCTTTAACTATAATGAAAACATAACAGATCCAGATGTACCCCA  
ACCAAGCCCTGTGCCAGAAGATACTCCAAGCAAAAATAAGTCAGGACTA

>PGSC0003DMG400004397-(rev)L-LecRK\_819

GTACCCCAACCAAGCCCTGTGCCAGAAGATACTCCAAGCAAAAATAAGTCAGGACTAGTGATTGGATTG  
ATTTCTGGTGGTTGTGTTTCAGTAGCAGTATCTGTTTTTATATTGTTTGCA

>PGSC0003DMG400004401L-LecRK\_0

GTTGTTTTTGCCTCTCTCAAATACTTCTTTCTTATCCCTTTAGTCACTTCACTCTCCTTCAATTTTGATACTTT  
TACACCCAATGATCACAATGTAACCTATGAGAGAGATGCTTCTCCA

>PGSC0003DMG400004401L-LecRK\_1008

AAGTTCTGGTACAGTGAGTTGGCTAGATGTACAAATAACTTTTCACAGGAAGAGATGCTTGGGTGGGG  
GGGATTCGGAGGTGTTTATAAAGGATATCTCAGTGAATCCAACCTTATATT

>PGSC0003DMG400004401L-LecRK\_1134

AAGAGGGTTTCAAGGGAATCACAGCAAGGAATAAAAGAGTATGTATCAGAAGTCAGGATCGTCAGCAG  
GTTAAGACATAAACATTTGGTGCAACTCATTGGTTGGTGCCATCAAAAAAGA

>PGSC0003DMG400004401L-LecRK\_126

GGTGCAATTCTACTCACCACAAACCTCCTCAATCGCAATATCAATGCTAGTATAGGTCGAGCTATTATTCA  
AAACCACTCCATCTATGGGACAAGGCCTCTCGAAATCTCACTGATTCA

>PGSC0003DMG400004401L-LecRK\_189

ATTATTCAAACCACTCCATCTATGGGACAAGGCCTCTCGAAATCTCACTGATTTCACTACACATTTCTCC  
TTTAGCATTAAATTCACAGGGAAGAGCTGAATATGGTGATGGTTTTGCCT

>PGSC0003DMG400004401L-LecRK\_2079

TATCCAAGTTAATATTGCCCTGTTAAGATCCTGCATTTTGTCTTCCATTAGCAGTGTCCATCTTTTCCTTTCT  
TACTTTTTGTTGTTTCTCTTCTAATGAAAGAGGATTGAATGGATTAC

>PGSC0003DMG400004401L-LecRK\_2110

TGCATTTTGTCTTCCATTAGCAGTGTCCATCTTTTCCTTCTTACTTTTTGTTGTTTCTCTTCTAATGAAAGA  
GGATTGAATGGATTACATTTTCTGTAATTTTAACTGTTCTATCAAAC

>PGSC0003DMG400004401L-LecRK\_252

ATTTCTCCTTTAGCATTAAATTCACAGGGAAGAGCTGAATATGGTGATGGTTTTGCCTTCTTCCTTGCCCCCT  
GCAGGTTCAACAATTCCTTATAATAACAACAAGAGGTGGAAGCCTTGGCC

>PGSC0003DMG400004401L-LecRK\_315

TTGCCCTGCAGGTTCAACAATTCCTTATAATAACAACAAGAGGTGGAAGCCTTGGCCTTACAAGTAATAA  
TGAGCGACTAAATTCATCCAGTAATCATTTTGTGCTGTGGAGTTTGACA

>PGSC0003DMG400004401L-LecRK\_378

GTAATAATGAGCGACTAAATTCATCCAGTAATCATTTTGTGCTGTGGAGTTTGACACCTATCAGAACCT  
GTATGACCCAAAGGGTGATCATGTAGGTGTCGATATCAACTCTATGCAAT

>PGSC0003DMG400004401L-LecRK\_504

TTAATGTGACTTGGTTTAGTAGCATTCCAAATGGTACGAAAAGTATGCCTGGATTACTTATAATTCTAAC  
TCAAAAAATCTTACTGTTGTCTTCACTGGTTTTCAACTCCAGTCTCCAA

>PGSC0003DMG400004401L-LecRK\_567

ATTCTAACTCAAAAAATCTTACTGTTGTCTTCACTGGTTTTCAACTCCAGTCTCCAAGGGAATAATATCAC  
AGTCACTGTCCTGCAGAACCTATCTTACAATCTTGATCTGAGGGAATAT

>PGSC0003DMG400004401L-LecRK\_63

TTTGATACTTTTACACCCAATGATCACAATGTAACCTATGAGAGAGATGCTTCTCCACAAAATGGTGCAA  
TTCTACTCACCACAAACCTCCTCAATCGCAATATCAATGCTAGTATAGGT

>PGSC0003DMG400004401L-LecRK\_693

GAATGGGTCACTTTTGGCTTCACTGGTGGAGGAGGAAATAGCTTTGCATTTCAAAGAATCTATTCTTGGA  
ATTTTACTTCTTCTTTAGATAATATGACAGATACAGGGGTAACCTTATCA

>PGSC0003DMG400004401L-LecRK\_756

TCTTGGAATTTTACTTCTTCTTTAGATAATATGACAGATACAGGGGTAACCTTATCAAACACCAAGCCAAA

GGATGCACCAATAAAAAGTAAGTTAGGACTTGTGGTTGGATTGATTCT

>PGSC0003DMG400004401L-LecRK\_819

AAGCCAAAGGATGCACCAATAAAAAGTAAGTTAGGACTTGTGGTTGGATTGATTCTGGTGGTTGTGTT  
TTGGTTGCAGTATGTGCTTTGGTGTGTTTGCATTTTGGAGAAAGAGTAAG

>PGSC0003DMG400004529-(rev)LRR-RLPs\_198

TCATTCAAGTTAAATTGCTCCTTACTTCGAAAAGGTAAAGTAAAATTTAGTATATTCTTTATATTTACACC  
TTTTTATTTTCGATTGTTAGTTCTGATTTTAAATTTCTTTCACAATTTT

>PGSC0003DMG400004529-(rev)LRR-RLPs\_528

CGGTGATTACAAGCTGCACAAATATAAAGAAAGTTCTTGTAAGAAGTGGAAAGTGAGTCCAAGAACCT  
AAAGGAGAGCAGGATCCATCATCTCCTATCTCTGTGTTGATCTGTAGATCT

>PGSC0003DMG400004553RLKWAX-EGF\_0

ATCCAGAGATCAAGGCTTGCCGCTTCAGTTGTTCTGTGTGTAACCTCTATATATCCCTTTAGCAATCTATA  
TGTTAGTTGGATGGACACAGATTAACATTCCATGCATTGATCATCTCTG

>PGSC0003DMG400004553RLKWAX-EGF\_124

TCGTTATGACTTCTAAAACGTGCAGGGTATTTGCAAGCAAATTTATGATCGGCCTCCGTTAGTAATTG  
TATTTCTGGTGTACAAATTCAAAGGAGGCATTTGTCAATGTACGATACG

>PGSC0003DMG400004553RLKWAX-EGF\_1302

TTTATGTGAAATAAACATAGCCAACCAACAATGTTTGGGACAAAGAATCGTGTTGTTATTGTTGTACTA  
GTTATATTATAGACATACATAAAAATGCCCTTTAATTTGGCCTCTGCGTA

>PGSC0003DMG400004553RLKWAX-EGF\_1488

ATTTGAATCCTACATGGTGTCTATGTTTTTCTCATTATTTCAACCTCAATATATTTTGAAGACAAACAAAA  
ACACCTCACATACAATATTATTTCCCCTGTTATTACACCTTTAAGAAT

>PGSC0003DMG400004553RLKWAX-EGF\_1550

ACAAACAAAAACACCTCACATACAATATTATTTCCCCTGTTATTACACCTTTAAGAATTTCCGCAATTTCTC  
CTCTGTGAATTTTGCATCATCATCTCTAACAATCTCCACCGCAACTC

>PGSC0003DMG400004553RLKWAX-EGF\_1674

TTCTACGATCAACCTAGCAATCATTGGTTGATCAAGATGAATAGGCATGGCAACTATAGGAACCCCAAA  
ATCTATACTTTCCATTGCTGAATTCCAACCACAATGACTTATAAATCCTCC

>PGSC0003DMG400004553RLKWAX-EGF\_186

AGTAATTGTATTTCTGGTGTACAAATTCAAAAGGAGGCATTTGTCAATGTACGATACGATTGAACGCTTT  
TTGCAAACACAAAACAATTTTCATGCCAATCAGATATAATTACTCCAACAT

>PGSC0003DMG400004553RLKWAX-EGF\_62

CAATCTATATGTTAGTTGGATGGACACAGATTAACATTCCATGCATTGATCATCTCTGTGGTTTCGTTATGA  
CTTCTAAAACGTGCAGGGTATTTGCAAGCAAAATTTATGATCGGCCTTC

>PGSC0003DMG400004553RLKWAX-EGF\_682

ATTTTGCATTTTGACATCAAACCACACAACATTCTTTTGGATGAGAATTTTCATTCCAAAGATTTCTGACTTT  
GGGCTTGCAGAAATTATATCCAACAGATAAAAAGCATTGTAAATCTCACA

>PGSC0003DMG400004553RLKWAX-EGF\_744

TTCTGACTTTGGGCTTGCAGAAATTATATCCAACAGATAAAAAGCATTGTAAATCTCACAGCTGCTCGTGGA  
ACTATTGGATATGTTGCTCCAGAATTGATCAACAGAAGCATTGAGAAAT

>PGSC0003DMG400004553RLKWAX-EGF\_806

CTCGTGGAACACTATTGGATATGTTGCTCCAGAATTGATCAACAGAAGCATTGAGAAATCTCTTACAAAGC  
TGATGTTTACAGCTTTGGAATGCTGCTAATGGAAATGCTGGACTTGAATA

>PGSC0003DMG400004561LRR-RLPs\_1037

TTGTGTCCGCATTTTGTTCATCTTTATTACTCTTTCTTTTTGGAAAGCTGTAATGACGAAATGTCCTGCATAT  
CAAATAAGATTCATGATTTGGTTCAGTCACTGTTTCATCCAAGTGGAG

>PGSC0003DMG400004561LRR-RLPs\_1159

GACATGCTGGTTAATATAAAGAATCATGACCTCTGGAGAATATCAAAAAGTTATATTAACACATTGCT  
ATGCTGAACCAAGTCGTGTAACCATGACCGAGGATCGTTTGGTTGAACTT

>PGSC0003DMG400004561LRR-RLPs\_122

TATTACTATGTGCTATTTTTGTTATTATTGTCTGTTGTTTCTTGATATTCATTAGTTCCTTTTTGGGATTGC  
ATGCTTAAGATTGTTTTGTTAAGCCGAGGATCTATCAGTAACAATT

>PGSC0003DMG400004561LRR-RLPs\_1220

CACATTGCTATGCTGAACCAAGTCGTGTAACCATGACCGAGGATCGTTTGGTTGAACTTTTAGATGCCAT  
CCTCGTGTATCTCCAATGTCTACTCAAGTGTGTTCTGAATCTATTTTCC

>PGSC0003DMG400004561LRR-RLPs\_1281

AGATGCCATCCTCGTGTATCTCCAATGTCTACTCAAGTGTGTTCTGAATCTATTTTCCCATCAATGACTCA  
ATGTGAGCTTCTTCAGAATGTATTTGGCAATTTAAGAGATTTCCATAG



>PGSC0003DMG400004561LRR-RLPs\_1464

TATGGCTCTGAGAGTAGTAAACATCTGTTTTACTCTTTTGAATTGTCAACTGGACAAATTCGATGAATCA  
GATGTCTCTCTAGTTAACTCCAAGCTAGCTAATCTACTTGTGGAGGTTAT

>PGSC0003DMG400004561LRR-RLPs\_1525

GATGAATCAGATGTCTCTCTAGTTAACTCCAAGCTAGCTAATCTACTTGTGGAGGTTATTCCTGTTGAACT  
GGAGGTTATGCACATATGTTGTACAAATTTGAAAGGTTCAAAGTCGGAA

>PGSC0003DMG400004561LRR-RLPs\_1708

ATTCATCTACAAGAGCACATGGTTAATGCTGGTACTCCTAGAGCTTCTACGTGTAACATTCATGTCATGAT  
AGAGTTCTTATTGATTATTCTTAGTGATGTGCTCAAGGACGTTATTCGT

>PGSC0003DMG400004561LRR-RLPs\_1769

ATGTCATGATAGAGTTCTTATTGATTATTCTTAGTGATGTGCTCAAGGACGTTATTCGTCATGACAAATTG  
TTTGTTCCTTGGCACGTGTTAGAGAACTGACCAAGGAGGTATTCGTTT

>PGSC0003DMG400004561LRR-RLPs\_183

TTTTGGGATTGCATGCTTAAGATTGTTTTGTAAAGCCGAGGATCTATCAGTAACAATTTATGTACCTTTG  
AGGTAGGGGTAGGTTTGATGTAAATTGTTTCTCTTGAGAAGTTGAAAGG

>PGSC0003DMG400004561LRR-RLPs\_1830

TGACAAATTGTTTGTTCCTTGGCACGTGTTAGAGAACTGACCAAGGAGGTATTCGTTCTTGTTTCGCAAC  
TTAGAAGAGAATATGAATGAAACAAGTGATGCAAATCTAAACTTGCTGGA

>PGSC0003DMG400004561LRR-RLPs\_1891

GTTTCGCAACTTAGAAGAGAATATGAATGAAACAAGTGATGCAAATCTAAACTTGCTGGAAAGTATTGAA  
CTCCTCAAGGAAGATCTCAAGAATGATTTCTTGAAAGCCCGTGCAGACTCA

>PGSC0003DMG400004561LRR-RLPs\_2074

AAAGACTTGGTCAATTCCAATGCTTCTTCAGTTTCTATGATAAAAGAAGAAATTAAGCAGGTGAAACAAG  
ACCTGGAAATCATAAGATCGTTCTTTGGGTATGGTGAGCAAGAGTTACAT

>PGSC0003DMG400004561LRR-RLPs\_2135

TGAAACAAGACCTGGAAATCATAAGATCGTTCTTTGGGTATGGTGAGCAAGAGTTACATAGAGATCTTT  
GGACTCACGTTCTAGATTTGTCATATGAGGCGGAACATGCCATTAECTCAA

>PGSC0003DMG400004561LRR-RLPs\_2196

AGATCTTTGGACTCACGTTCTAGATTTGTCATATGAGGCGGAACATGCCATTAECTCAATTCTTGCCCGA

GATCATGGTCTATTACAGCTTATCTTCATACTTCCTGATACCGTAGAAAA

>PGSC0003DMG400004561LRR-RLPs\_244

TGTACCTTTGAGGTAGGGGTAGGTTTGATGTAAATTGTTTCTCTTGAGAAGTTGAAAGGAAGGATTTTTT

TAAATTCCTTTTTAACTACTTTGGCTTGATTAGTGAGAATGGAAAGAGGAA

>PGSC0003DMG400004561LRR-RLPs\_2562

TAATGATAAGTCCATTGTTGATCATTTCGACGTTTGTGCTTGGTGCACAATCGACCAAGAACGTAATGAG

AAAAAGTTGTTGCAGAAAATTTCAATCAAGTTATTGGTTTGAAAGAAAG

>PGSC0003DMG400004561LRR-RLPs\_2623

CGTAATGAGAAAAAGTTGTTGCAGAAAATTTCAATCAAGTTATTGGTTTGAAAGAAAGATTCAGTGAG

AAGGACATAGATGATGACGTTGCTGATAAGCTGCGGAAACAACACTATTTGGA

>PGSC0003DMG400004561LRR-RLPs\_2745

ACGGTACCTTATTGTCTTGATGACATGTGGGATACTGTTTTTTTTTGATCAGACGAAAGTTTGGAGTTA

TTAGAGAAAAAGGTATTCGGAGAAGAACGTTGCCCTGATGAACTAAAGGA

>PGSC0003DMG400004561LRR-RLPs\_2928

AGTCATTTCAAGGAAGGAAAAGAAAGAGGCTTTGTGGCTTGAAGTTCTCGATAATTTGAGTTCCTTTATT

TTTAAGGATGAAGAGGAAGTGATGAAGGTTATACAATTAAGTTATGACCA

>PGSC0003DMG400004561LRR-RLPs\_2989

TCCTTTATTTTTAAGGATGAAGAGGAAGTGATGAAGGTTATACAATTAAGTTATGACCATTTGTCAGATC

ACGTAAAGCCGTGTTTGGTTTACCTTGCAAGTTATCCAAAGGACAAAGAT

>PGSC0003DMG400004561LRR-RLPs\_3050

TGTCAGATCACGTAAAGCCGTGTTTGGTTTACCTTGCAAGTTATCCAAAGGACAAAGATATAATGATCTC

CGAGTTGAAAGATTTATGGATTGCTCAAGGACTTGAGATGAAAAATGCAG

>PGSC0003DMG400004561LRR-RLPs\_3111

AATGATCTCCGAGTTGAAAGATTTATGGATTGCTCAAGGACTTGAGATGAAAAATGCAGAAGAAGTAGT

GGATGTGTTAATTTCCAGTAGTTTGGTAATACCTTTCAATAATTCTATTTG

>PGSC0003DMG400004561LRR-RLPs\_3233

AAATTCATGATCTTGTCATGACTTTTGTATATAAAATCTAGAAAGGAAAAGTTGTTTCACTTCATAGGA

GGTTCAAACGCTCCGTCTTCTTCTTCAAATCTGATTCCGCGTGGAATTA

>PGSC0003DMG400004561LRR-RLPs\_3294

CTTCATAGGAGGTTCAAACGCTCCGTCTTCTTCTTCAAATCTGATTCCGCGTGGAATTACCATTATTATA  
ATGAAGGTCTCTTTCATATGGATAGAAATTTTGTGGTGTTTAATCCAGA

>PGSC0003DMG400004561LRR-RLPs\_3355

ATTCATTATAATGAAGGTCTCTTTCATATGGATAGAAATTTTGTGGTGTTTAATCCAGAAAAGAAGAATC  
CTTATGTTAAACACCTCCTCTCTCTGAAGGTGTGTGATGGGGTTAAGAAT

>PGSC0003DMG400004561LRR-RLPs\_3416

AGAAGAATCCTTATGTTAAACACCTCCTCTCTCTGAAGGTGTGTGATGGGGTTAAGAATCGTCTTTCCTA  
CAAGAGTCACCTAAAACAGTTGAGGCTTCTCAAAGTTTGGATTTGAAGG

>PGSC0003DMG400004561LRR-RLPs\_3477

TCTTTCCTACAAGAGTCACCTAAAACAGTTGAGGCTTCTCAAAGTTTGGATTTGAAGGGCATAACATTG  
ACAGATTCTTTACTGAATGAAATCGGTATGCTCGTTCATTTGAAGTACTT

>PGSC0003DMG400004561LRR-RLPs\_3538

ATAACATTGACAGATTCTTTACTGAATGAAATCGGTATGCTCGTTCATTTGAAGTACTTAATCATTAGAC  
GAAGGCTAAAGCTCTCCCTCCGTCATTTTCAAACCTCTGCAATCTAGAA

>PGSC0003DMG400004561LRR-RLPs\_366

GAAAATGAAGGGCAAACAAAAGGGGAAGATAACAAAATCATTGGTATGTCATACAAAATTTAATTATTT  
TTTTATTACATAATTACATATTCCTGTAAGTATGTCTGTTTCTTTGTGT

>PGSC0003DMG400004561LRR-RLPs\_3660

TCTGGTGGTGGATAACCTGGAGGGATCATGCATGATACTATCGCCTTGCTTTTGGAGTCTTGCAAAGCTA  
CGAGATGTGCGGATGAAGTGTTGTGCTATCTTTGATCCAACCTGTGTTAGA

>PGSC0003DMG400004561LRR-RLPs\_3721

GCAAAGCTACGAGATGTGCGGATGAAGTGTTGTGCTATCTTTGATCCAACCTGTGTTAGACGAGGAGTCA  
AGGTTAGAAAATTTAGAACATTATGTGGTCTCTACCTTCCCGGTTTAGAA

>PGSC0003DMG400004561LRR-RLPs\_3782

AGGAGTCAAGGTTAGAAAATTTAGAACATTATGTGGTCTCTACCTTCCCGGTTTAGAAGAGACGGAGG  
ATATTTTCAAAGGTTTCTAATCTTGAAGCCGTTAGATTCAGGATCAAAC

>PGSC0003DMG400004561LRR-RLPs\_3843

GACGGAGGATATTTTCAAAGGTTTCTAATCTTGAAGCCGTTAGATTCAGGATCAAACAATTACCAGAT  
CGGTCAGGAGAGAAGATTTGTATTCCAAGATTGGATGTCCTTAACGAACT

>PGSC0003DMG400004561LRR-RLPs\_3904

TTACCAGATCGGTCAGGAGAGAAGATTTGTATTCCAAGATTGGATGTCCTTAACGAACTGAACAACCTCC  
ATTTAACTGCTTCTAGGGATTCATTGAGTGAATATACACATGGCTTCCCT

>PGSC0003DMG400004561LRR-RLPs\_3965

AACAACCTCCATTTAACTGCTTCTAGGGATTCATTGAGTGAATATACACATGGCTTCCCTTTGAGCTTGAAG  
AAGGTGATGTTGAAAGGGCTTGCTCTGACATCCGATTCATTGTCAAGAA

>PGSC0003DMG400004561LRR-RLPs\_4026

GAGCTTGAAGAAGGTGATGTTGAAAGGGCTTGCTCTGACATCCGATTCATTGTCAAGAATTGGTAGACT  
ACCCAACCTTCAAAAATAAGTCTAAAAGACGCAATCATCGAGGAGGGGAA

>PGSC0003DMG400004561LRR-RLPs\_4087

GGTAGACTACCCAACCTTCAAAAATAAGTCTAAAAGACGCAATCATCGAGGAGGGGAAAGAATGGAA  
CATGGAAGATGTCACCTTCAAGAATCTCAAATCTCTAAAATTGATTAATGTG

>PGSC0003DMG400004561LRR-RLPs\_4148

AATGGAACATGGAAGATGTCACCTTCAAGAATCTCAAATCTCTAAAATTGATTAATGTGTCATTTTCTGA  
ATGGCAGGTTGATGCAGAGAAATCCTTTCCCGTGCTTGAGAACTAGATA

>PGSC0003DMG400004561LRR-RLPs\_4209

ATTTTCTGAATGGCAGGTTGATGCAGAGAAATCCTTTCCCGTGCTTGAGAACTAGATATAACTATATGT  
GATATGCTTATGAACATACCAGACAGTTTTGGAGATATTGCGTCATTAAT

>PGSC0003DMG400004561LRR-RLPs\_427

AATTATTTTTTTCATTCACATAATTACATATTCCTGTAAGTATGTCTGTTTCTTTGTGTAACCTTAGATGGTG  
AATATAATCTTTATAACCTATAAGACTCAATGATTTAATCTTTCTGAT

>PGSC0003DMG400004561LRR-RLPs\_4270

ACTATATGTGATATGCTTATGAACATACCAGACAGTTTTGGAGATATTGCGTCATTAAGTTTATCCAAG  
TATGGTTCAGCCCTCAGCTTGAAGAGTCGATCTTCAAATTAAGGAATAT

>PGSC0003DMG400004561LRR-RLPs\_4392

TGAAGAAATGACTGGAGAAGACAAGCTTGAGGTAGAATTCTATGCTTGAGGTATGTTGAAGAATATGTT  
GAACTTTTACAAATGTTATGTGTTTTCCAATATATTACTTTTAACTTATAT

>PGSC0003DMG400004561LRR-RLPs\_4453

AATATGTTGAACTTTTACAAATGTTATGTGTTTTCCAATATATTACTTTTAACTTATATGTTCTTTGCGATC

AGATCGAGCTAGCTAGCGCATACAAATGATGAACCGATAGATTCTCAA

>PGSC0003DMG400004561LRR-RLPs\_4514

TCTTTGCGATCAGATCGAGCTAGCTAGCGCATACAAATGATGAACCGATAGATTCTCAAGACAACCTTTCT  
CCATAGATTTGTGCCTAATTAAGAGCTCCCCTTGCTGCAGCACCTCCCAT

>PGSC0003DMG400004561LRR-RLPs\_4575

CAACTTTCTCCATAGATTTGTGCCTAATTAAGAGCTCCCCTTGCTGCAGCACCTCCCATTATGAACACATT  
TTTGGGGCTTGCTTTCAAATGGAGACATGACGTGGTGGATTGGTAAAA

>PGSC0003DMG400004561LRR-RLPs\_4636

TGAACACATTTTTGGGGCTTGCTTTCAAATGGAGACATGACGTGGTGGATTGGTAAAATCCTGTTTAGC  
CCATTATTATGTTCAACTAAAGTAACTAAATTCATGTCATTATTTTTCT

>PGSC0003DMG400004561LRR-RLPs\_4697

CTGTTTAGCCATTATTATGTTCAACTAAAGTAACTAAATTCATGTCATTATTTTTCTGTTTCTCCAATTT  
GCTCTCCTTGTAATAATCTTCTGGTGTGCTTGTCTCTCGCCATGACT

>PGSC0003DMG400004561LRR-RLPs\_4819

CAAACACATTTGCTTTCTTAAGTTCAGTTATGCTAAGCAGAAATGTCGTCTCGTTGTGAGTTGTCAATCC  
GACTTTGAAGTAGAGATGGTTAAAGGTATAGAGGAAGCAGAAGAGGATT

>PGSC0003DMG400004561LRR-RLPs\_488

CTTAGATGGTGAATATAATCTTTATAACCTATAAGACTCAATGATTTAATCTTTCTGATATAAGTTAACT  
CTATGTACTAAATCATCTGCTATAGTTGATAAATGTAAGGGATTAAGAA

>PGSC0003DMG400004561LRR-RLPs\_4880

TTGTCAATCCGACTTTGAAGTAGAGATGGTTAAAGGTATAGAGGAAGCAGAAGAGGATTATGTTTGTAT  
AGAAACAACAAGGAGGCCCTGAATAAAGCTTAGTGAAGAAGAGTTCATTG

>PGSC0003DMG400004561LRR-RLPs\_4941

GTTTGTATAGAAACAACAAGGAGGCCCTGAATAAAGCTTAGTGAAGAAGAGTTCATTGCATGCCTTGT  
ATTAGTTTTCGACATTTCTGAAAAAATTGCTTCAGACATGGCCTCATTTCG

>PGSC0003DMG400004561LRR-RLPs\_5002

TGCCTTGTATTAGTTTTCGACATTTCTGAAAAAATTGCTTCAGACATGGCCTCATTTCGCTTGTCTTGT  
GTCATATTATTCTTGCAATTCTGCTTCGAAACATTAATAAACC

>PGSC0003DMG400004561LRR-RLPs\_5063

TGTCTCTTGTTGTCATATTATTCTTGCAATTCTGCTTCGGAAACATTAAAAATAACCCCATAAAGAAGGTA  
GTAAGGTTAGCGTTCATCCTACCTCCCCAGATCCACCTGTGGGATTA

>PGSC0003DMG400004561LRR-RLPs\_61

TTACTCTGTCTGTTGTTTCTTGACCTCGATTAGTATATTGTTTTGTTGTAATTTATGTTCTATTACTATGTG  
CTATTTTTGTTATTATTGTCTGTTGTTTCTTGATATTCATTAGTTC

>PGSC0003DMG400004561LRR-RLPs\_610

ACGAAAGTAAGAGCTTTTGTAGAGAGATAGCGCGTAAACAATGAGAGAGCTTAGTGCACCAGGCCG  
TCATTTTTGGTTAAGATTTGAGGTGTAACAGGACAAACATTTTGGCTTCT

>PGSC0003DMG400004561LRR-RLPs\_671

CAGGCCGTCATTTTTGGTTAAGATTTGAGGTGTAACAGGACAAACATTTTGGCTTCTCTATTAGGCTAT  
TCTGGAGAAAGTCCTCTGCACTTGTGACAGTTGCTTGTGTAATAATTA

>PGSC0003DMG400004561LRR-RLPs\_732

ATTAGGCTATTCTGGAGAAAGTCCTCTGCACTTGTGACAGTTGCTTGTGTAATAATTTAGAGCTATCACA  
TTTTCGCGAGTTTCACACCTCAACTATATTAGTCGTTCCCTTTTTCTATC

>PGSC0003DMG400004561LRR-RLPs\_793

GCTATCACATTTTCGCGAGTTTCACACCTCAACTATATTAGTCGTTCCCTTTTTCTATCTAAATTATCACCAT  
CTATGTATTAACATAATTTGAAACAACATTTGCTCTTGTGGCAGGTG

>PGSC0003DMG400004561LRR-RLPs\_854

AATTATCACCATCTATGTATTAACATAATTTGAAACAACATTTGCTCTTGTGGCAGGTGTCATCCGTTGTA  
CTTCGCGAGGACATTGTCAATCTTCTAGATTTTCATAGAGAGGTTAAATA

>PGSC0003DMG400004561LRR-RLPs\_915

ATCCGTTGACTTCGCGAGGACATTGTCAATCTTCTAGATTTTCATAGAGAGGTTAAATAGTTGGCGTGTT  
CGAATTTCTTGTACTTGTATCAATATAAAGAGTTGACATTGGAGCTGAC

>PGSC0003DMG400004667LRR-RLKs\_0

ATCAAAAGCTGTCACCTTAGCTTACTGATGAAAACTCATAAACCCAAAATTTTCAACAAACAATCCCAAA  
AAAAAAAAAAAAAACTTCAAAAATTTGAAGAATCATAGCAAAAAAAAAAGGTA

>PGSC0003DMG400004667LRR-RLKs\_1054

TTTGA AAAACAATAAGTTGCAGGGTCCAATGCCAGAGTTCAGAAAGGAGGTTAAGGTGGAGATTGAGG  
GTACTAATAGTTTTTGTGGATACTCCTAGACCTTGTAAATTCACAGGTTAT

>PGSC0003DMG400004667LRR-RLKs\_1116

TTGAGGGTACTAATAGTTTTTGTGGATACTCCTAGACCTTGTAAATTCACAGGTTATGACGCTTTTAGAT  
GTGGCGGGTGGTTTTGGATATCCAGGGTTTTGGCTGATTCTTGGAAAG

>PGSC0003DMG400004667LRR-RLKs\_124

TTGCCAAAAAATTCAAGAACAATAGCAAAAAAAAAAAAACTCCATTGTTGATTGTTCTAGATCTCTA  
AAACCTCCATTAATGGCACCCCAAGCTTTTTTTCTTGTTAACTTCTT

>PGSC0003DMG400004667LRR-RLKs\_1302

TAACTTGGTAAGCTACGTTTATCGGGTTTTATATCTCCTGCTTTTGCTAAATTGACTAGTTTGAGGAAT  
TTGTTCTTGAATGATAACAATCTTACCGGATCTATAACCGGAAAGTTTGG

>PGSC0003DMG400004667LRR-RLKs\_1364

TTGAGGAATTTGTTCTTGAATGATAACAATCTTACCGGATCTATAACCGGAAAGTTTGGCAGCGTTGCCTA  
TGCTTCTAACTCTTGATGTTTCTAATAACAATTTATCTGGTCCTGTACCT

>PGSC0003DMG400004667LRR-RLKs\_1426

GTTGCCTATGCTTCTAACTCTTGATGTTTCTAATAACAATTTATCTGGTCCTGTACCTGCGTTTCGATCAAA  
TGTGAAACTTATTAATGGTGGTAACGTGTTTCTTGAAAGAATATAAG

>PGSC0003DMG400004667LRR-RLKs\_1488

TTCGATCAAATGTGAACTTATTAATGGTGGTAACGTGTTTCTTGAAAGAATATAAGTGATGGACGGG  
GTAGTGGTGGATCACCGGGGTCTGGGTCAAGTAGTGATGGTGGAAATTCAT

>PGSC0003DMG400004667LRR-RLKs\_310

GTCTAAACCACCATCTGGTTGGGATGCTTCAAATCTTACTGTGATTGGAGTAAAGTTAATTGTGATAAA  
TCGAGTAATACTGTTGTTCCATTAATCTAGATTCTCAAGTCTTTCTGG

>PGSC0003DMG400004667LRR-RLKs\_3162

CAGGGTCCTTGCAACAAAGACAACCTCCGAAAGGCTATTGACCCAACCTTGATCCTGACGAGGAAAC  
ATATGAGAGCATTGTAAGTTGCCGAGTTAGCAGGCCATTGCACTGCACG

>PGSC0003DMG400004667LRR-RLKs\_3534

TTGCAGATGACATTAAGGCAACAATCAAGAAAGGCACACAATTCATTTGGTTAATTGGTTTCGTCTTAAC  
AACGCGTTTTACTTCGTCTTTTACAACCCTTTTGGTGATAGATCATTAG

>PGSC0003DMG400004667LRR-RLKs\_3596

GTCTTAACAACGCGTTTTACTTCGTCTTTTACAACCCTTTTGGTGATAGATCATTAGACCAAAGAAGCTA

AGGTGGATAGCAGAGTTTATTTGTGGTTTTGTTAGAAGAGAAAAATTGT

>PGSC0003DMG400004667LRR-RLKs\_3658

AAGAAGCTAAGGTGGATAGCAGAGTTTATTTGTGGTTTTGTTAGAAGAGAAAAATTGTATTAAATTCTTT

TAATCTTACATAGTTGATGTAAATAGATTTGAGTTCTTGTGTAAACATG

>PGSC0003DMG400004667LRR-RLKs\_372

GTGATAAATCGAGTAATACTGTTGTTCCATTAATCTAGATTCTCAAGGTCTTTCTGGGGTTTTGCCTTCT

GACCTTAATCAACTGTCAAATCTCAAACCTTTTCAGTTCAGAGGAATT

>PGSC0003DMG400004667LRR-RLKs\_3720

AATTCTTTTAATCTTACATAGTTGATGTAAATAGATTTGAGTTCTTGTGTAAACATGCAAAATATACTCTT

CTTATTAAGTTTTTTACTACAAGATTTCAATTATTTGTGCCACTAAGTG

>PGSC0003DMG400004667LRR-RLKs\_434

TTGCCTTCTGACCTTAATCAACTGTCAAATCTCAAACCTTTTCAGTTCAGAGGAATTCACCTTTCTGGGGT

TCTTCCATCTTTGCAAACATGTGCAATTTAGCTGAGATTTACTTGAAT

>PGSC0003DMG400004667LRR-RLKs\_62

ATCCCAAAAAAAAAAAAAAAAAAACTTCAAATTTTGAAGAATCATAGCAAAAAAAAAAGGTAATCTTTGCCAA

AAAAATTCAAGAACAATAGCAAAAAAAAAAAAAAAAAACTCCATTGTTGATTGTT

>PGSC0003DMG400004667LRR-RLKs\_992

AATGATTTTACTGGTGTATACCTGATTCAGTGATGAACTTCCTAACTTGTTGAATATATCTTTGAAAAA

CAATAAGTTGCAGGGTCCAATGCCAGAGTTCAGAAAGGAGGTTAAGGTG

>PGSC0003DMG400004722LRR-RLPs\_0

ATGCATTCAGAGGAAATGACTAAGATGGATGTTGATGGCACTACGGGAATTCACCTTTGAAGAAGATATA

ATCACGGAAATCCTAAGTAGGTTACCTGTCAAGTCTCTTTTTCGATTCAA

>PGSC0003DMG400004722LRR-RLPs\_1054

CTTTCATGATTCATAAATGTACACAACAACCTCATGACCCACTGCAATAGATTACGAAGTACCTTCACTTC

AAATTGAATGAGTTGTAGCTTTCAATTGCAAGACGCGTGACTTTTTCTGT

>PGSC0003DMG400004722LRR-RLPs\_1116

CTTCACTTCAAATTGAATGAGTTGTAGCTTTCAATTGCAAGACGCGTGACTTTTTCTGTTACATAACAAATA

AGGTGGCTTTCTAAGATAATTATCAATAATTGAGTGACAATATGAGAAA

>PGSC0003DMG400004722LRR-RLPs\_124



TTATAAGGTCTTGGATGACATTGATCTCTAAACCTTACTTTGTGCAAACGCATCACAATCATTCCAAGAAT  
AACCAAATTCCCAAAAAAATTGTCTTCAAGAAAATGCTTACTGTAGAT

>PGSC0003DMG400004722LRR-RLPs\_1426

AACACAACAAAACCTTTTTGGCCACTTGGTTAAGTCCATAGCTGAATTACATATGTAACCCGTGGATAAAA  
ATAAAAAGCAAAAAGACAAGAACAACAACAAAATTTGCATTGAGAAT

>PGSC0003DMG400004722LRR-RLPs\_1674

AAATTCTACGAACCTCTACAATTAGTTCATTGAAACGCAAATATGATGATGGTCCCAGCAAATATC  
CTCTCTACTTCAGTTTTTCACTCTTTTATATCTCTTTACAGTTACTTTTG

>PGSC0003DMG400004722LRR-RLPs\_186

TCCAAGAATAACCAAATTTCCCAAAAAAATTGTCTTCAAGAAAATGCTTACTGTAGATACCTCATTAGTTT  
GGTGTAGTTACTCTTACCACACACGAGTTCATGGAACATGAGCAGAGAT

>PGSC0003DMG400004722LRR-RLPs\_310

GCTCATGGGATGGAGTCGTATGCAATGACATGACTGGCCATGTCACTGAACTTGACGTCAGTCTATTCA  
GGGACGAGAGCTTGAACCTTGTCAAATTTTGACCATTACACCACTATTGT

>PGSC0003DMG400004722LRR-RLPs\_3472

AGGATGCATCCCAACAGGACGCCAATTTGATACATTCGAGAAGAAGTTCGTATGAAGGTAATGATAGGTT  
ACGTGGATTTCTAATTTGGAAGGTTGTGGAAACAGCAGGTTTCCCAAGAC

>PGSC0003DMG400004722LRR-RLPs\_3534

ATAGGTTACGTGGATTTCTAATTTGGAAGGTTGTGGAAACAGCAGGTTTCCCAAGACAAACAACACGA  
CACATGAGCTGGAACAAGAAAGTGATTCTACATTTCTGAGTGAACCTCAACT

>PGSC0003DMG400004722LRR-RLPs\_3658

AGTGGTTCTTATGGGATATGTGTGTGGACTTATTATTGGATTCTCCATAACATATTTAATGCTTTCAGCTA  
AAAATCCCGATTGGCTTTCTAGGATTGCTGATGAACTAGAATACAGAAT

>PGSC0003DMG400004722LRR-RLPs\_372

CTATTCAGGGACGAGAGCTTGAACCTTGTCAAATTTTGACCATTACACCACTATTGTTCTTTCAAGTAAC  
AGATTTGAAGGACTTATTCCAAGTATCATGAGAGAAGTTCATTGCTCTTC

>PGSC0003DMG400004722LRR-RLPs\_62

AGATATAATCACGGAAATCCTAAGTAGGTTACCTGTCAAGTCTCTTTTTCGATTCAAATGTGTTATAAGGT  
CTTGATGACATTGATCTCTAAACCTTACTTTGTGCAAACGCATCACAA

>PGSC0003DMG400004722LRR-RLPs\_682

AGGACCTCAATTCGCTACATTAAGAAATATTCATATGAAGGCAATAATGGATTACATGGATTTATGCAT  
TGCCAAATTCATCATTGCATATGTTGGAGGAATATCAGGGGTCATAAAGT

>PGSC0003DMG400004722LRR-RLPs\_744

TTATGCATTGCCAAATTCATCATTGCATATGTTGGAGGAATATCAGGGGTCATAAAGTTTTATGAGCTTA  
AGTTGGCTCGAACTTCATGATTATTACCCGTTGACATACTAATGACAAGG

>PGSC0003DMG400004722LRR-RLPs\_806

TGAGCTTAAGTTGGCTCGAACTTCATGATTATTACCCGTTGACATACTAATGACAAGGTGATATATAGAG  
TTGAAACGAGTTAGATATTTTTTCTTTTTGTTTTTCAGTAATCACCTCT

>PGSC0003DMG400004727LRR-RLPs\_0

CCAAGTTACTCTCTTCGTATCTCCACATTTTTAACTTTTACTAAGGAGCTAAGACTCACATCCCATG  
ATTTTAAATCGCTTCTTCAGAACTTGACCCAATTAAGAGAGCTTGATC

>PGSC0003DMG400004727LRR-RLPs\_1008

ATGACAACAACGTTACTTTGCCGAATCTCTTGATACGTTAGAATTGGCCGCATGTGAAGTGAAAGAGTT  
GGAGTTTCTAAGATCCGCAAAGAAGCTTTGGCAGTTGGATCTTTCAAATA

>PGSC0003DMG400004727LRR-RLPs\_1071

AAGAGTTGGAGTTTCTAAGATCCGCAAAGAAGCTTTGGCAGTTGGATCTTTCAAATATAAGATTCAAGG  
AAGAATTCCTGATTGGGCATGGTCTAACTGGATGTTTCATTGCAAGATCTT

>PGSC0003DMG400004727LRR-RLPs\_1197

TCCCACAATATGCTGACGAGTGTGGATTCAATTCCTCTTCAGTTTGCAGATACTATTGATTTGCGGTCCAA  
TTTGCTTCAAGGATCACTACCCATTCCATCAAATTCCACTACATTCTTC

>PGSC0003DMG400004727LRR-RLPs\_1260

CGGTCCAATTTGCTTCAAGGATCACTACCCATTCCATCAAATTCCACTACATTCTTCTTCATATCTAATAAT  
AGTCTCACTGGAGAAATTCCTTCATCTATTTGCAATTTGACAACACTG

>PGSC0003DMG400004727LRR-RLPs\_1764

TACAATGCCTTCTCAGGAACTTACCTTCGAGTTTGTTC AACATCTGAAAGCCATGAGGACAATTGATCT  
ATCATTGGAAGCATCAAGATATGGTGCAGATCGATATTACCAAGACTCG

>PGSC0003DMG400004727LRR-RLPs\_1827

ATTGATCTATCATTGGAAGCATCAAGATATGGTGCAGATCGATATTACCAAGACTCGATAGCTGTCGTAT

CCAAGGGATATGAGCGTGAAGTTGTGAGAATCTTGTTTTGTACACCACT

>PGSC0003DMG400004727LRR-RLPs\_189

CAGAAACAGGATTGTATGGGATAATACCTGAGAGTATATTTACCTGCCAACTTGAAATACTTGACTT  
AAGTTACAATGTTCACTCAATGGTATTTTTCAAAGGCCAAATGGAACA

>PGSC0003DMG400004727LRR-RLPs\_2394

CTATGTATTGGAATATCCATAGTATATTTTCATGATGTCAACTGGAAAACCGATATGGTTTGCAAGAATCA  
TTGTAGAGCTGGAGCACAAAATAATGATGGGAAGGAGAAAGAAGCAGCGA

>PGSC0003DMG400004727LRR-RLPs\_252

TTGACTTAAGTTACAATGTTCACTCAATGGTATTTTTCAAAGGCCAAATGGAACAGCAGTGCATCTCTC  
ATAGAGTTACATCTCAGTATGGTGAATTTTTCTGATAATTTTCCAGAGT

>PGSC0003DMG400004727LRR-RLPs\_315

CATCTCTCATAGAGTTACATCTCAGTATGGTGAATTTTTCTGATAATTTTCCAGAGTCTATTGGCTATCATC  
TAACTTCGCTGCGTTATTTGTCTCTTGTAAAGTTGCAACCTTAGAGGGC

>PGSC0003DMG400004727LRR-RLPs\_378

GCTATCATCTAACTTCGCTGCGTTATTTGTCTCTTGTAAAGTTGCAACCTTAGAGGGCCTATTCCTGAATCT  
CTTTCAAATCTCACCCGCATTGAGTATTTGGTCCTTTTCATATAACTCCC

>PGSC0003DMG400004727LRR-RLPs\_441

CTGAATCTCTTTCAAATCTCACCCGCATTGAGTATTTGGTCCTTTTCATATAACTCCCTGAATGGAACAATA  
CCATCAGGGATGTTATCCCTTCCATCACTAAATACAATAGTCTTGAGTA

>PGSC0003DMG400004727LRR-RLPs\_504

GAACAATACCATCAGGGATGTTATCCCTTCCATCACTAAATACAATAGTCTTGAGTAATAATCACTTATCT  
GGTCCCCTTGAAGATTTAAAGTCCAATTCATAATCTCGATATATTTAG

>PGSC0003DMG400004727LRR-RLPs\_567

ACTTATCTGGTCCCCTTGAAGATTTAAAGTCCAATTCATAATCTCGATATATTTAGAGGGCAACCAGCTG  
CAGGGTCATCTTCCCCTCAATTCAAAACCTTGTGAACCTAACAGGCC

>PGSC0003DMG400004727LRR-RLPs\_693

TTTCTTTCAATAATTTTAGTGGTCGTGTGGATGTCAGCTTCTTTTCAAACCTTAAACAGCTTCGGTATCTTA  
GTCTTTTCATATAATAATATCTCATTGACCAATGACAACAACGTTACTT

>PGSC0003DMG400004727LRR-RLPs\_756

GGTATCTTAGTCTTTCATATAATAATATCTCATTGACCAATGACAACAACGTTACTTTGCCCGAATCTCTT  
GATACGTTAGAATTGGCCGCATGTGAAGTGAAAGAGTTGGAGTTTCTAA

>PGSC0003DMG400004727LRR-RLPs\_882

CAAAGCTTCTTCGGCATTGGATCTTCTTTCAATAATTTTAGTGGTCGCGTGGATGTCAGCCTCTTTTCA  
AACCTTAAACAGCTTGTGGAACCTCGTCTTTCATATAATAATATCTCAT

>PGSC0003DMG400004727LRR-RLPs\_945

TCTTTTCAAACCTTAAACAGCTTGTGGAACCTCGTCTTTCATATAATAATATCTCATTGACCAATGACAAC  
AACGTTACTTTGCCCGAATCTCTTGATACGTTAGAATTGGCCGCATGTG

>PGSC0003DMG400004928-(rev)G-LecRK\_1054

GTGTTAGAAGGACACCCCTTAATTGCCAGAATGGAGATGGATTTCTCAAGTACTCTGATATAAAGCTACC  
TGATACACAGTATTCACGTTTTGATGCGAGAATGACTCCGAGAATGCG

>PGSC0003DMG400004928-(rev)G-LecRK\_1116

AAGCTACCTGATACACAGTATTCACGTTTTGATGCGAGAATGACTCCGAGAATGCGAGAAAGTTTGC  
CTAAAGAATTGTTCTTGATGGCTTACTCAAATCTTGATATACGCAATGGT

>PGSC0003DMG400004928-(rev)G-LecRK\_1364

TGATAAATATGAAGCATTAGCTGAATGAAGTAACTTACAATTATTAGCTTTAGTTGTGTTTTGCTTATC  
TATTTGTTAAAAAGTTCACATAGCATATATTTAGTTTATTTTACCCTCC

>PGSC0003DMG400004928-(rev)G-LecRK\_1426

TTGCTTATCTATTTGTTAAAAAGTTCACATAGCATATATTTAGTTTATTTTACCCTCCATTTTTTTTAGGCTC  
GAAGAAGAAAATGAAAGCACTTGTGCTGAGTTTATCACTGTTGAGCG

>PGSC0003DMG400004928-(rev)G-LecRK\_1488

TTTTTAGGCTCGAAGAAGAAAATGAAAGCACTTGTGCTGAGTTTATCACTGTTGAGCGGAGTGTCTGTC  
ATTGGCCTGATCATATGGCTGTATATTTGATAAAGACGAGGAAGAAGAAG

>PGSC0003DMG400004928-(rev)G-LecRK\_1550

GTCTGTCATTGGCCTGATCATATGGCTGTATATTTGATAAAGACGAGGAAGAAGAAGAGGAAGATGAT  
TCTGAAAGATGATCTAGAACTTCCACTGTTTTCCCTATCAACAGTAACTAA

>PGSC0003DMG400004928-(rev)G-LecRK\_1736

AGCATAACTTGTAGGTTTATTATATGTACTATAATTGACAGTAAACAGATAAGTAACACTTTGAATTATCA  
CTGTCAAGACATCCTTAGCTTCAATATGAGTCAGCTGTATGTTATGATA

>PGSC0003DMG400004928-(rev)G-LecRK\_1798

GAATTATCACTGTCAAGACATCCTTAGCTTCAATATGAGTCAGCTGTATGTTATGATATTGTAGGGAATC  
CTGGAGGGAGGACAAGAAGTAGCTATGAAGAGGCTCTCAAATCTTCCTC

>PGSC0003DMG400004928-(rev)G-LecRK\_186

TTGGGATTTTTTTCCCCAGGTAGTTTCGCGAATAATTGGTATGTTGGAATATGGTACAAGCACGACAACG  
TGCCTGATAAGTCTGTTGTATGGGTTGCCAATAGAGAACTCCACTCAAC

>PGSC0003DMG400004928-(rev)G-LecRK\_1860

AGGGAATCCTGGAGGGAGGACAAGAAGTAGCTATGAAGAGGCTCTCAAATCTTCCTCGCAAGGAGTC  
AACGAGTTCAAGAATGAAGTTAATTGTATTGCCAACTTCAGCATCGAAACC

>PGSC0003DMG400004928-(rev)G-LecRK\_1922

GGAGTCAACGAGTTCAAGAATGAAGTTAATTGTATTGCCAACTTCAGCATCGAAACCTTGTGAAGCTT  
ATAGGTTGCTGCGTTGAAGGAGAAGAGAAAATTCTGGTCTACGAATACATG

>PGSC0003DMG400004928-(rev)G-LecRK\_2170

ATTTCAAATGGAAGTAGATTCTGTTAACATACTAAAAGCAGTTAGAGCATCAGTTACTATACTAATTGTT  
GGAAGATCTGTAAACAGATGAAGACAAGAGCTCGATACTCGACTGGCCT

>PGSC0003DMG400004928-(rev)G-LecRK\_2232

CTAATTGTTGGAAGATCTGTTAACAGATGAAGACAAGAGCTCGATACTCGACTGGCCTAAGCGCTTCAA  
CATCATCAATGGAATTGCTAGAGGACTTTTGTATCTCCATCAAGATTCTCG

>PGSC0003DMG400004928-(rev)G-LecRK\_2356

AGAATTATCCATAGAGACCTCAAAGCTAGTAACATTTTGTAGACGCTGACATGAACCCCAAGATCTCGG  
ATTTTGGCATAGCTAGAAGTGTGATAGGGAATGAGACGGGTGCTAATACA

>PGSC0003DMG400004928-(rev)G-LecRK\_248

CGACAACGTGCCTGATAAGTCTGTTGTATGGGTTGCCAATAGAGAACTCCACTCAACAATACATCAGG  
TGTTATGCTGAAAATCGTTGATCCAGGACGACTTGCTCTTGTTACTTCTGC

>PGSC0003DMG400004928-(rev)G-LecRK\_2480

ATGTGGTTGGGACACAGTAAGTGATTTCACTACGACCTTTTAGCATTTATCTCATGTACTACTCATATA  
GTATCATCTGTGTAACACTATTTTCTGTTTGTATGTGATGCAGTGGCT

>PGSC0003DMG400004928-(rev)G-LecRK\_2542

ACTCATATAGTATCATCTGTGTAACACTATTTTCTGTTTGTATGTGATGCAGTGGCTACATGTCCCCAGA

GTATCTAATACATGGTGTTCCTCGATAAAAATCAGATGTATTTAGCTTT

>PGSC0003DMG400004928-(rev)G-LecRK\_2604

GTCCCCAGAGTATCTAATACATGGTGTTCCTCGATAAAAATCAGATGTATTTAGCTTTGGCGTGTTGGTTC  
TAGAGATAATCAGTGGTCTGAAGAAACAGAGGATTTTCCATGAAAGTCA

>PGSC0003DMG400004928-(rev)G-LecRK\_2666

TGTTGGTTCTAGAGATAATCAGTGGTCTGAAGAAACAGAGGATTTTCCATGAAAGTCACAGTATCAACC  
TTCTCGGACATGTAAGTTTTGTATGTTAAAAAGTACTTACATATTCAGATT

>PGSC0003DMG400004928-(rev)G-LecRK\_2728

ATCAACCTTCTCGGACATGTAAGTTTTGTATGTTAAAAAGTACTTACATATTCAGATTTTCAGACCACTCGT  
AAGGTAATTACAAGTGATAGTGTAAGTAACTGATAGTGTAAGTCT

>PGSC0003DMG400004928-(rev)G-LecRK\_2790

ACCACTCGTAAGGTAATTACAAGTGATAGTGTAAGTAACTGATAGTGTAAGTCTTACTAAGTGTCG  
GTGTATATAACTTAAATCTATTAACACGCTTCACTTGCTTGACTGATC

>PGSC0003DMG400004928-(rev)G-LecRK\_2852

AAGTGTCGGTGTATATAACTTAAATCTATTAACACGCTTCACTTGCTTGACTGATCTGTTATTAGCAGG  
TTTGAAACTTTATAAAGAAGGTAGACCATTGGAGCTGATTGATGTGCA

>PGSC0003DMG400004928-(rev)G-LecRK\_2914

ATTAGCAGGTTTGAAACTTTATAAAGAAGGTAGACCATTGGAGCTGATTGATGTGCATATTACAGATT  
CATGTTATTTTACTGAATTACTACGGATAATTCATGTCGCTCTATTATGTG

>PGSC0003DMG400004928-(rev)G-LecRK\_2976

ACAGATTCATGTTATTTTACTGAATTACTACGGATAATTCATGTCGCTCTATTATGTGTACAACATAGTCC  
AGAAGACAGGCCAGACATGTCTGAAGTGGTTGTGATGTTGGCTAATGAT

>PGSC0003DMG400004928-(rev)G-LecRK\_3038

ACATAGTCCAGAAGACAGGCCAGACATGTCTGAAGTGGTTGTGATGTTGGCTAATGATGCCATTTTGCC  
TGAAGCTAAGGAACCTGGTTTTTACACAGAAAGCAAATCCCTGATTCTGA

>PGSC0003DMG400004928-(rev)G-LecRK\_310

CATCAGGTGTTATGCTGAAAATCGTTGATCCAGGACGACTTGCTCTTGTTACTTCTGCTAATACGAGCAT  
ATGGTCTACTAATTCGTTGAGACCTTTGGCTGTGAAGAATCCAATTGCGC

>PGSC0003DMG400004928-(rev)G-LecRK\_3100

TTTTGCCTGAAGCTAAGGAACCTGGTTTTTACACAGAAAGCAAATTCCTGATTCTGAATATTCTACAAG  
CATGTATTCGAAAAACGAAATCACTATTACACAGTTAGATCCCCGGTAAA

>PGSC0003DMG400004928-(rev)G-LecRK\_372

ACGAGCATATGGTCTACTAATTCGTTGAGACCTTTGGCTGTGAAGAATCCAATTGCGCAGTTGTTGAATT  
CAGGGAATCTTATCATAAGAGATGCAAATGATACTAAGCCTGAGAACTTC

>PGSC0003DMG400004928-(rev)G-LecRK\_434

GTTGAATTCAGGGAATCTTATCATAAGAGATGCAAATGATACTAAGCCTGAGAACTTCCTGTGGCAGAG  
TTTTGATTATCCTACTAATACGCTCTTACCAGGCATGAAACTTGGTAAGAA

>PGSC0003DMG400004928-(rev)G-LecRK\_496

GGCAGAGTTTTGATTATCCTACTAATACGCTCTTACCAGGCATGAAACTTGGTAAGAACTTTGTGACTGG  
ACAGGAATTTTACCTGTCCTCATGGAAGAATGAATATGATCCGGCTCCAG

>PGSC0003DMG400004928-(rev)G-LecRK\_558

GTGACTGGACAGGAATTTTACCTGTCCTCATGGAAGAATGAATATGATCCGGCTCCAGGGAAATATACG  
TATCATTGTGATCCTACTGGATATCCTCAGAATGTCATGAGGAAAGGTAAA

>PGSC0003DMG400004928-(rev)G-LecRK\_744

AATACTATTTATACATTTAAGCTGGATTTTGATGAAAAGAAAGCAATTTACAGTTACGCGCTCGTGGATA  
AATCTGTTTTATCGAAATTAACCTTGAACAGTCATGGTATGCTTAAGCGT

>PGSC0003DMG400004928-(rev)G-LecRK\_992

CTTAGACAAGTTTGTGCCTAAAGATCAGAAAAATTGGTCAGTGACAAAGTGGTCCGGTGGATGTGTTAG  
AAGGACACCCCTTAATTGCCAGAATGGAGATGGATTTCTCAAGTACTCTGA

>PGSC0003DMG400004930-(rev)G-LecRK\_1302

TGGATTCTTCAGACATAGGTAAGAACTTATGTTAACGAAATTTCTAATGATGTGTTTTTGAACTTTTAAAT  
TTTTTAACATATGTAGACCATATTATATATGCAAAAGTAGTGGCCTATA

>PGSC0003DMG400004930-(rev)G-LecRK\_1674

AAGGTGGATATGGACCTGTTTATAAGGTATAAACTCAATTTTTTTTTTGGAAATAGTGACCAGGATAGAGAT  
GACTTTCATTCTGCAATACTCGCATCTTTGTAAAATATATTTCTTCTGA

>PGSC0003DMG400004930-(rev)G-LecRK\_1736

ATAGAGATGACTTTCATTCTGCAATACTCGCATCTTTGTAAAATATATTTCTTCTGATATACTTTTTCCAT  
TTCAAGGGAGTACTGGAAGAGGGACAAGAAATTGCTGTGAAGAGACTG

>PGSC0003DMG400004930-(rev)G-LecRK\_1798

CTTTTTCCATTTCAAGGGAGTACTGGAAGAGGGACAAGAAATTGCTGTGAAGAGACTGTCAAGGACTTC  
CATGCAAGGAATTGATGAATTCAAGAATGAAGTTACCTATATTGCCAAGCT

>PGSC0003DMG400004930-(rev)G-LecRK\_1922

CATAGAAATCTTGTGAGACTTCTGGGTTGCTGCATTCAAGGGGAAGAAAAAATGTTGATCTATGAATAC  
ATGCCTAATAAAAGCCTGGACTCATACATATTTGGTTAGGATTTCTAACCT

>PGSC0003DMG400004930-(rev)G-LecRK\_1984

TGAATACATGCCTAATAAAAGCCTGGACTCATACATATTTGGTTAGGATTTCTAACCTACTATAAAAGCA  
AAAATGAGTAATGAACCATGTTTTCAAATTAAGCTGCTAAAAAAAAGA

>PGSC0003DMG400004930-(rev)G-LecRK\_2046

TAAAAGCAAAAATGAGTAATGAACCATGTTTTCAAATTAAGCTGCTAAAAAAAAGAAGTTTTTTATTT  
TTTTTTGTAGATCAAACAAAGAAAAAGTTACTTGATTGGTCAAGGCGTTT

>PGSC0003DMG400004930-(rev)G-LecRK\_2108

TTTTATTTTTTTTTGTAGATCAAACAAAGAAAAAGTTACTTGATTGGTCAAGGCGTTTCGACATCATTAA  
TGAATTGCTCGTGGCTTATTGTATCTCCATCAAGATTCTAGACTACGTA

>PGSC0003DMG400004930-(rev)G-LecRK\_2356

GGGACACAGTAAGAATCGATCATAACAGAAGTACTCTCATATGAAATCCCCCTTCTTAAATTTCTCATGGT  
GTAGTTCTTTTTTTGGAACAGCGGTTACATGTCCCCTGAATATGCAGTAG

>PGSC0003DMG400004930-(rev)G-LecRK\_2542

GCAAGAAAAATAGAGGATTTGTCCATGAAGATCACAACTTAACCTTCTCGGTACGTAAGCACTCTATA  
CATTCTTGCTATATTACATATAGAATTTGTCATGATCTAAATTACTCAA

>PGSC0003DMG400004930-(rev)G-LecRK\_2914

GCAGACAGGAAGTTCGAAAAATGAAATAACAATGACAATGTTAGATCCTCGGTAGAGTACTGTGAATG  
AGGCAACTACTGTTGATAAGCATGAGTAACAAATTATTTTAGAGGGCGTGAT

>PGSC0003DMG400004930-(rev)G-LecRK\_2976

TGAATGAGGCAACTACTGTTGATAAGCATGAGTAACAAATTATTTTAGAGGGCGTGATAACGACATTGA  
AGCGCCTGAGAAGCGCTCAAGCATCACCTCAGGGATTAAGCGTGCCTTTGA

>PGSC0003DMG400004930-(rev)G-LecRK\_3162

TGTATCTTATCTTAGAAAGAAATGTAAATTCTAGTAAGCAAAAATGTCCAAATTATATAGCCTATGATAAT



ACATAAAATCGAATCAAACCGACAGATGCACGAGCTCTCCAATATCTGC

>PGSC0003DMG400004930-(rev)G-LecRK\_3224

TATGATAATACATAAAATCGAATCAAACCGACAGATGCACGAGCTCTCCAATATCTGCATGGAAGAGTC

CAATATGTCGTTGAAATTAAGGTCACAACTTTGGATTTCCATATTTGAG

>PGSC0003DMG400004930-(rev)G-LecRK\_3286

AAGAGTCCAATATGTCGTTGAAATTAAGGTCACAACTTTGGATTTCCATATTTGAGTAAAGAGAAGA

AGATAGGGAAAAAGGCCATAAGCCACATTGACCGTGCACGGCCTTTCATA

>PGSC0003DMG400004930-(rev)G-LecRK\_3348

GAGAAGAAGATAGGGAAAAAGGCCATAAGCCACATTGACCGTGCACGGCCTTTCATATCCATCTCCGC

CCATAATAAGGGAAAGTAACTAATCGGGTATGAATAGATAAGAAAGTGAG

>PGSC0003DMG400004963LRR-RLKs\_2480

CGGTCATCGCAGGAACCTTATGGTTACTTGGCACCAGGTATAATTTTCCCAATTCATAAGTGTTACTTCAAT

CTTTGAGCTTGATTGAGTAGATTAATTAATCCTTTATGTGCAAATAT

>PGSC0003DMG400004963LRR-RLKs\_2542

TACTTCAATCTTTGAGCTTGATTGAGTAGATTAATTAATCCTTTATGTGCAAATATCATCCCATAGTTG

AAGTGTTTCATATTGGCCTAATGTTACTCTAAATTGGCCATTTAATATAG

>PGSC0003DMG400004963LRR-RLKs\_2604

CCATAGTTGAAGTGTTTCATATTGGCCTAATGTTACTCTAAATTGGCCATTTAATATAGTGAAAAATTTAGA

ACATTGCCTAACGTTAAGAGTACATTTGACCCTTTTTTCGTTCTTAATTA

>PGSC0003DMG400004963LRR-RLKs\_2666

AAATTTAGAACATTGCCTAACGTTAAGAGTACATTTGACCCTTTTTTCGTTCTTAATTATGGCTTTTTATGTT

GTAAAAACATCACATATGCTCAAGTTTCTTGATTGAACTTTTCATTTA

>PGSC0003DMG400004963LRR-RLKs\_2728

TTTTTATGTTGTAAAAACATCACATATGCTCAAGTTTCTTGATTGAACTTTTCATTTAATACATGTTTAAGT

GTTGAAATTAGGCTAATGTTACTCAACTTTGGTGTAAACAGAGTATGCA

>PGSC0003DMG400004963LRR-RLKs\_3100

CTTCGTCTACCATGAATGAAGTTGTTTCAGTTGCTAATCGAAGCGGATCCTTGCAAGTTCAATTGTTGCA

ACATGTCAAATAAGAAGAAGAATGACACAGAAGAAGTGATCAATAAGCCA

>PGSC0003DMG400004963LRR-RLKs\_3162

TTGTTGCAACATGTCAAATAAGAAGAAGAATGACACAGAAGAAGTGATCAATAAGCCACCAAAGAACA  
TATGAGTTGTAAAAAATTTAGTGTATCAAAGGTATATAGAA

>PGSC0003DMG400004963LRR-RLKs\_3224

AGAACATATGAGTTGTAAAAAATTTAGTGTATCAAAGGTATATAGAATATGTGTACTGA  
GATATTACACCCTCAAAGAATCAGTCTTTATGTTTTCTAATAAATGGTA

>PGSC0003DMG400004963LRR-RLKs\_3286

TGTAAGGATATTACACCCTCAAAGAATCAGTCTTTATGTTTTCTAATAAATGGTACTACTTTTTATTAG  
TATATATATAGATTCTCCAATTAGTGTACCTTGCTTTTTTATATTTT

>PGSC0003DMG400004963LRR-RLKs\_3319

TCTTTATGTTTTCTAATAAATGGTACTACTTTTTATTAGTATATATATAGATTCTCCAATTAGTGTACCTG  
CTTTTTTATATTTTTGGCCTGTTGTAAGTATTTGGGAATTTTATGAA

>PGSC0003DMG400004963LRR-RLKs\_868

ATAAGCCGGCTTCCTAAGCTGCAAGTGTGCAACTTTACCATAACGCGCTATCAGGAGAGTTTCCAGCAG  
CACTTGCTAATTCAACAACCTTAACTATCCTGTCTCTTTATGACAATCTG

>PGSC0003DMG400004966LRR-RLKs\_2852

ATGTCACTGCACCTGTGTTGGTTCCCTCAAAAATAGCGCATTCTTGGAGGATTTGACATGAGTGTGACAA  
CATTTTTGAAGGATCCGAGCAACAATTGAATTGCACTAATAAGAGTGTGA

>PGSC0003DMG400004966LRR-RLKs\_310

GAGCTTTCGAGTAAAAAATTTCTGGGTTTGTTCCTTTTGATAAAATATGTTCACTTAATTCATTGGAAAA  
GCTCTCTCTGGGTTACAATTCACCTTTCTGGGGAAGTTACGGATGATTTG

>PGSC0003DMG400004966LRR-RLKs\_3472

CAAGATGTAATTAGATCCCCGTCTTTGCTCGTTTCACTCTTCAACCTGATCTCTGTCCTCCATGGAACGTC  
GAATCTTGTAGCAGTATGTAAAGTTTTGAAGATGGCCTCTTGGCCTTG

>PGSC0003DMG400004966LRR-RLKs\_3596

ATATAGTAGAAGCTAGATCCACTAGTATGTGGAATTAGATTGAATTTAGAGATGCATGGCATAAGTG  
CTATAAGATGTAATACTTGTATGTGCTAAATAAAAATGGTTTATGTTATTCA

>PGSC0003DMG400004972LRR-RLKs\_0

GTTTCATGCTCTAATAACTTCAGGGAAGCTATTTATGAAGATCCACATCTGGTGTCTCAAATTGGAATG  
CCTTAGATTCAGATCCTTGTGGATGGTCTGGAATTTTTGCTCAACGGCA

>PGSC0003DMG400004972LRR-RLKs\_1037

TTTTCGTCTTTTTGGGGGAGGGGGTGGATATCTGAAGCTTGAATCTTTATTTAAGCCGTTAACTATAC  
CCTTACTAAATGATTCTCTCTAAAATGTAATGTTCCAGGACTTACGAGC

>PGSC0003DMG400004972LRR-RLKs\_1098

TAACTATACCCTTACTAAATGATTCTCTCTAAAATGTAATGTTCCAGGACTTACGAGCATTATACATTCA  
AAACTTTTGAATATTTGAAGCTTGATTAATTTATATATCTTTTTAAT

>PGSC0003DMG400004972LRR-RLKs\_1159

TATACATTCAAACCTTTTGAATATTTGAAGCTTGATTAATTTATATATCTTTTTAATCTTCTAAGGAGCC  
CATAGTATCTCAATTAGCATAAGATTTGCTGCAACATTTTTGGCTGCA

>PGSC0003DMG400004972LRR-RLKs\_122

AGATCATGTCATAAAAATGTGAGAGAAGTGCCTTCTGCATATGGCGTTTTCGTTTTCTTCTATCTGTTTG  
TTGGATTGATTTTTCTCAATTGGATGCAACTTATTTCACTACTTTTTGA

>PGSC0003DMG400004972LRR-RLKs\_1220

TCTAAGGAGCCCATAGTATCTCAATTAGCATAAGATTTGCTGCAACATTTTTGGCTGCAGTTTGTCTGGA  
CATTTACAGAGGCTTAAAATTCAAAGATTATGGCTAATGTTTAATCTTTT

>PGSC0003DMG400004972LRR-RLKs\_1281

TTGTCTGGACATTTACAGAGGCTTAAAATTCAAAGATTATGGCTAATGTTTAATCTTTTTGTCGTCTTGAT  
TGATAGTGCTGGACTTCTGTTGACATGTATGTCTGTTGTACTTGAACCT

>PGSC0003DMG400004972LRR-RLKs\_1403

TTTAATACATTTGTTGTTCTCCTAGAAATTTACACAATTACTGAGTGAATGAAATCTTAAAGGGTTCAA  
CATGTATATTCAAAGTCATCACCGACGTTATCGGCAATATTCTGTATA

>PGSC0003DMG400004972LRR-RLKs\_1769

GTTCTTAATTCCAATCCACAAGAATTTTTATACTCTTTATATCAATTTCTGAGTGCCTATTATTTTGTCTT  
TCTATAGAACTAGCTTTCAAGGAAATTGCCTTCAAGCAAAGATCCC

>PGSC0003DMG400004972LRR-RLKs\_183

TATCTGTTTGTGGATTGATTTTTCTCAATTGGATGCAACTTATTTCACTACTTTTTGATACATGTTAGTAG  
CACAAGTACGCTTTACTAACGAGTTTACAACGTCTCCTGTCTATGTA

>PGSC0003DMG400004972LRR-RLKs\_1952

TAATCATTAGCCAAGCCTTTGAATCTTTTATGCATACATTAGTGTGCGAAAATGCAAGCTGGTCATGCTTA

CTTTTGATTGTATATCCTAAAGAGGCTTCTGCGAGTAAGTTCGCCATT

>PGSC0003DMG400004972LRR-RLKs\_2074

ACTAACAGTCGCAGTTGAACAGATCAACTTTAAAATAATTGAATTGATTGTTGTAACTTTTGCATTATAG  
GAGGCACTCCACCTTTCAAAGCAATCCAGCACAGAGCAATAATAAGCAC

>PGSC0003DMG400004972LRR-RLKs\_2135

GCATTATAGGAGGCACTCCACCTTTCAAAGCAATCCAGCACAGAGCAATAATAAGCACCGGACTGTTG  
AAGGAAGAGCCAAACATAAGTCTGCTTCAAACCTACCTGGCTTTTTGTGT

>PGSC0003DMG400004972LRR-RLKs\_244

CATGTTAGTAGCACAACCTGAGCCTTTACTAACGAGTTTACAACGTCTCCTGTCTATGTAATTTTGCAGTAA  
CATTTCTGGTGCTTCTTTGAAGGGTTTTCTTTGCCGAACTTGCATTTG

>PGSC0003DMG400004972LRR-RLKs\_2745

TGTTTTCCCTACCTCCATACCGAACACGCCCTTAATTCTTTCTCATATAGGATCTGATTCTTCAATTTAGTA  
CTACTAATGTTTCTGTTACTTCAGTTATCTTTACTATTATTGTTGTTA

>PGSC0003DMG400004972LRR-RLKs\_305

TTTGCAGTAACATTTCTGGTGCTTCTTTGAAGGGTTTTCTTTGCCGAACTTGCATTTGATTTCTTATTTGC  
AAGAACTGTAAGCTGTTCCCTCCATGAAAACTTATACTTGTAACTCC

>PGSC0003DMG400004972LRR-RLKs\_3172

CTAGACCCGACTTGTGAGCTCACACAGTGTATAGGATCACAAGTTCAGAAGCATTAAATTATAATTCACAT  
TTCTATTAGTAACAAATGTTTCTTTGTCAGATACTGAGATGCTAAAGGAC

>PGSC0003DMG400004972LRR-RLKs\_366

TTCTTATTTGCAAGAACTGTAAGCTGTTCCCTCCATGAAAACTTATACTTGTAACTCCGGTGCATAAAAG  
ATTTGGTAAAAGCTTAATGCTATGTATTGGTGATATGCAGGATATTGCA

>PGSC0003DMG400004972LRR-RLKs\_3660

CACAAGGATGTTGGTGTTTGAGTATGCATCTAACGGGACTTTATATGAACACCTCCATTGTGAGTGGA  
AAAATATTTTACACATTTGCTTACTGTATGTTTTAGAGGCTGAAATCCGA

>PGSC0003DMG400004972LRR-RLKs\_3721

GAGTGGAAAAAACTATTTTACACATTTGCTTACTGTATGTTTTAGAGGCTGAAATCCGAACTCTTTGAACT  
TATCACAGATGGAGAAGGATGCCAACTTTCTTGGACGCGGCGAATGAAA

>PGSC0003DMG400004972LRR-RLKs\_4087

ATCTTTGAACTCGCCGAGTTTCCTTACAAACAATTTGGGCTTACATTTTTCCATTTTTGTTTCCTTCAAGCT  
CAACCCTTGTGCTTTTTTAACCCGAGTAATAAAAGGCTGATTTTTTCAT

>PGSC0003DMG400004972LRR-RLKs\_4148

TCCTTCAAGCTCAACCCTTGTGCTTTTTAACCCGAGTAATAAAAGGCTGATTTTTCATACCCTTTTCTCTC  
AAAGTTTAATTTATCTGGTGCAGCTTGTGATTTTGAAAGTTGGAAAA

>PGSC0003DMG400004972LRR-RLKs\_427

TGCATAAAAGATTTGGTAAAAGCTTAATGCTATGTATTGGTGATATGCAGGATATTGCATGGAAATGTA  
CTGATTGGTACAATACCGAAGGAGATTGGCTTGTGAAAAATTTAAAGGTC

>PGSC0003DMG400004972LRR-RLKs\_4331

TTCCAAATTCTCTACAGAGCCGTCATCTTGACATGCAGGGTAACATCTATGCATTTGGAGTACTACTGCTC  
GAAATAATCAGCGGAAGACCTCCATATTGCAAAGACAAAGGGTGCTTAG

>PGSC0003DMG400004972LRR-RLKs\_4392

ACTACTGCTCGAAATAATCAGCGGAAGACCTCCATATTGCAAAGACAAAGGGTGCTTAGTAGATTGGGT  
AAGCATTTCTTTTCATGAAGTTTTTGTATAGGCATAGTACATAAATATACA

>PGSC0003DMG400004972LRR-RLKs\_4697

GGACTCGTGCTTTATGGAATCTGAAGTTGACTTTGATATGGCAGGCAAAGAATTCCTTGAATTACCAGA  
GGTATTGCCTTATGTTGTAGATCCCGAGTTGAAACATTTTCAGATACGAAG

>PGSC0003DMG400004972LRR-RLKs\_488

GAAATGTACTGATTGGTACAATACCGAAGGAGATTGGCTTGTGAAAAATTTAAAGGTCTTGGATTTGG  
GTTCTAACCAGCTCGCAGGACCAATTCCTCTCGAGCTTGGCAATTTGTCAA

>PGSC0003DMG400004972LRR-RLKs\_549

GGATTTGGGTTCTAACCAGCTCGCAGGACCAATTCCTCTCGAGCTTGGCAATTTGTCAAACATTATTAAG  
ATGTTAGTGCAATTTGAGTGTTTCGTTTTGTATGTGTACTTTTCGTTTTTGA

>PGSC0003DMG400004972LRR-RLKs\_61

ATTGGAATGCCTTAGATTAGATCCTTGTGGATGGTCTGGAATTTTTTGCTCAACGGCAGGAGATCATGT  
CATAAAAATGTGAGAGAAGTGCCTTCTGCATATGGCGTTTTTCGTTTTCTT

>PGSC0003DMG400004972LRR-RLKs\_610

ATTATTAAGATGTTAGTGCAATTTGAGTGTTTCGTTTTGTATGTGTACTTTTCGTTTTTGACTTGCATGAAGC  
TTCCTTATCTCATCTAGTTTTGTTATGTCTCTGCAGAAACCTTCAATCC

>PGSC0003DMG400004972LRR-RLKs\_671

TGCATGAAGCTTCCTTATCTCATCTAGTTTTGTTATGTCTCTGCAGAAACCTTCAATCCAATGGATTAACA  
GGTAAATTGCCCTCTGAGCTTGGTAAATTGATATACCTTCAGGAACTTC

>PGSC0003DMG400004972LRR-RLKs\_732

TGGATTAACAGGTAAATTGCCCTCTGAGCTTGGTAAATTGATATACCTTCAGGAACTTCGCCTGGACAGA  
AATAAGCTCAAAGGACCACTGCCTTCCAGTAATGGCTCAAATTTTACATC

>PGSC0003DMG400004972LRR-RLKs\_793

CTGGACAGAAATAAGCTCAAAGGACCACTGCCTTCCAGTAATGGCTCAAATTTTACATCTAGTGCGTATG  
GGATGTAAGTCGAATATGGACAGTGCTATTTCTTCAATTCTATGCGTTTT

>PGSC0003DMG400004972LRR-RLKs\_854

GTGCGTATGGGATGTAAGTCGAATATGGACAGTGCTATTTCTTCAATTCTATGCGTTTTTAATCTTTGGAT  
TTGCTGTTATGTAGGTTTTACATTATCATGTTGGTAGAAGATTTAATGT

>PGSC0003DMG400004972LRR-RLKs\_915

ATCTTTGGATTTGCTGTTATGTAGGTTTTACATTATCATGTTGGTAGAAGATTTAATGTTGCAAATGCTTT  
TGAGACGTGGTTCATTTGATTTTTCAATCTTGTACACTATGAAGTTGCC

>PGSC0003DMG400004972LRR-RLKs\_976

CAAATGCTTTTGAGACGTGGTTCATTTGATTTTTCAATCTTGTACACTATGAAGTTGCCTTTTTTCGTCTTT  
TTGGGGGAGGGGGTGGATATCTGAAGCTTGAAATCTTTTATTTAAGCC

>PGSC0003DMG400005044G-LecRK\_174

ACAAGTTATTCACACAAACTTAGAGTATTCATTTCAAATGATTTTCAGGCGTGGAAGCTACGGACTGAAA  
GCAACGGATTAGACTTAATGGATAAATCAGTTTTGGACTCAGATTCCTCT

>PGSC0003DMG400005044G-LecRK\_232

TACGGACTGAAAGCAACGGATTAGACTTAATGGATAAATCAGTTTTGGACTCAGATTCCTCTGCAACAGT  
GCTGAGATGCTTACATATTGGCCTGCTTTGTGTCCAGGATCATGCTGCTG

>PGSC0003DMG400005044G-LecRK\_290

CTCTGCAACAGTGCTGAGATGCTTACATATTGGCCTGCTTTGTGTCCAGGATCATGCTGCTGATAGGCCA  
TCAATGCCGTCTATCGTTCTTATGCTAAGTAGTGAGATGGATCTTCCTCA

>PGSC0003DMG400005044G-LecRK\_405

CCTCAACCAAAGCAACCTACATTTATATTTCAAAGATGGTTGAATTCTAATACCCAATCGCAAATCAGCAA

AACTCAGTCTGTTAATGATATTACTGTCTCTGTTGCAGAAGGACGATAA

>PGSC0003DMG400005103LRR-RLKs\_0

CTCATGGCCACCCTCTTGAGAAAAATTCTCCACTTTCTCTCTCGTGGATTTTCATGTTCCACAGAAACCA

AACATCAAACATAGCCATATCAAACCTTTCTTCTCTATTCTTCTTACTAG

>PGSC0003DMG400005103LRR-RLKs\_2623

AGCCAAAGTTTTGCATGTTAATGGTACTAAGGACTCTTCTCAGGTTGTAGCTGGGACGCATGGCTACATT

GCTCCTGGTAAATTTTTTCTTCCCTTTTCCATTTTCATAGTCACTTAA

>PGSC0003DMG400005103LRR-RLKs\_2684

GGCTACATTGCTCCTGGTAAATTTTTTCTTCCCTTTTCCATTTTCATAGTCACTTAAAAATTATTTGGCA

AATTCTAAATTTTATTCTTTCTTCATTGTTTGTCAACAACAGAGTATGC

>PGSC0003DMG400005103LRR-RLKs\_2745

ATTATTTGGCAAATTCTAAATTTTATTCTTTCTTCATTGTTTGTCAACAACAGAGTATGCTTACACAACCAAG

GTGACCGAGAAGAGTGATGTTTATAGCTTCGGGGTGGTGCTAATGGAA

>PGSC0003DMG400005103LRR-RLKs\_366

TCATTCTTTCTGAACAGAATCTATCTGGGGTTGTCTCTTTTGATTCACTATGCTCTCTGAAATCACTAGAAA

AAATTTCTCTTGGTACCAACTACTTGTATGGTAGAGTCAGTGACCATT

>PGSC0003DMG400005103LRR-RLKs\_61

ACAGAAACCAAACATCAAACATAGCCATATCAAACCTTTCTTCTCTATTCTTCTTACTAGCGAAAAAAAAAA

AAATGTCAGCCAGTGCCAACCTTTTCCGGCCATGCCCAATTTTATTGCT

>PGSC0003DMG400005103LRR-RLKs\_793

GCTTGAAAATCTTGAGCTTTTCATATAATGACTTGTGAGGCAAAATCCCAGATGGAATAATCAAACCTTACT

AAGCTTAAACAGCTTGAGATTTATTCTAATGGACTAACAGGAAAGTTCCC

>PGSC0003DMG400005103LRR-RLKs\_854

AAACTTACTAAGCTTAAACAGCTTGAGATTTATTCTAATGGACTAACAGGAAAGTTCCCTGTGGGGTTTG

GGAATCTCAGTAGCCTTGTCATTTTGTGCTTCAAGTAACAATCTTCAA

>PGSC0003DMG400005171-(rev)LRR-RLPs\_0

ATGAGAAAGCTAAGGCAAGTGGATATATACAATTTGTCCTTGGTATGGGAAGAGAATGATCGAGCAATT

TTTGATGAATCTCCAACAACATGCTAGTGAACCTGAAGACATTCCGCACT

>PGSC0003DMG400005171-(rev)LRR-RLPs\_130

ACGTGGATAATAGTACCCCAAGGTTCTGGTGGAGGTTTCCAAATATTGAAGAACTCAGCTGCCTCCGTAT  
TGAAGCTTTACCTAGTTGTCCTTTGTTTCCCTCAGTGGAAGTTCATATTC

>PGSC0003DMG400005171-(rev)LRR-RLPs\_195

CGTATTGAAGCTTTACCTAGTTGTCCTTTGTTTCCCTCAGTGGAAGTTCATATTCGGCTTCAATCTCTTAAT  
CTGGTTATAAGCCCTCGGGGATTATTGGATTCAGTTGGTTGGGAGAGC

>PGSC0003DMG400005171-(rev)LRR-RLPs\_260

TCTTAATCTGGTTATAAGCCCTCGGGGATTATTGGATTCAGTTGGTTGGGAGAGCTACTTTGTCTTCCCTT  
CAAATCTTAGGCATTTGTGCATTGGTGGTTGTTTCTAACGAAAGAAAT

>PGSC0003DMG400005171-(rev)LRR-RLPs\_325

TCCCTTCAAATCTTAGGCATTTGTGCATTGGTGGTTGTTTCTAACGAAAGAAATGACTTTAAACATTGCA  
AGATTGAAGAAGCTTGAGAGTCTCACATTAAAGGGAGGATTCCTTGGG

>PGSC0003DMG400005171-(rev)LRR-RLPs\_390

ATTGCAAGATTGAAGAAGCTTGAGAGTCTCACATTAAAGGGAGGATTCCTTGGGGGGAAATAAAGTA  
CCATTGCTGGGATGTTACAAATGTGGAGTTCCTGCACTCAAATACTTGCA

>PGSC0003DMG400005171-(rev)LRR-RLPs\_455

GTACCATTGCTGGGATGTTACAAATGTGGAGTTCCTGCACTCAAATACTTGGCATTACACTTTATGAGA  
ATGGAAGAATGGAAAGCTTCAGAGGAATCCTTTCCTGTGCTTGAGAAGTT

>PGSC0003DMG400005171-(rev)LRR-RLPs\_585

GAATGTCACTACTTCAAGGAGATCCCTATTAGCTTTGCCGATATTCCAACACTGCGACTTATTGTGCTGTT  
TGAGTGTACTGATTCACCTTGTGGCTTCAGCTGTGAACATAAAAAATGAA

>PGSC0003DMG400005171-(rev)LRR-RLPs\_645

ATTGTGCTGTTTGTGAGTGTACTGATTCACCTTGTGGCTTCAGCTGTGAACATAAAAAATGAAATAGAAGAAA  
ACACTGGATGTGATAGTCTCCAACCTCGGGGTAACAAATTCGTATAAATAA

>PGSC0003DMG400005171-(rev)LRR-RLPs\_65

AATTTTTGATGAATCTCCAACAATATGCTAGTGAACCTGAAGACATTCCGCACTTATGTTATACACGTGG  
ATAATAGTACCCCAAGGTTCTGGTGGAGGTTTCCAAATATTGAAGAACT

>PGSC0003DMG400005172-(rev)LRR-RLPs\_0

ATGGAAGTTGTTGAGACTTGTGAAAAGGAACTCTTCTGCTGGAGAGCCTTCCACCAAACGTAGTATT  
ACATCAATTTATGATGATGAAGAAGTAGTGGGCTTTGAGAAAGATGCAGAA



>PGSC0003DMG400005172-(rev)LRR-RLPs\_128

GAAGAAATTGATACGAGGAACAAAGGAACGGGATGTTATCTCCATCTATGGAATGCCTGGACTTGGTA  
AAACAACCTTTGGCAAGGAAGGTGTACAACAACCCCACTACTGTTAATTACTT

>PGSC0003DMG400005172-(rev)LRR-RLPs\_1587

CCTCCACGTAAATATAAACCTAAGTTTCCTTTGTTCCCATACCAGAAGTTCATACTCGCCTTCAGTCTGT  
TTCTCTGACGTTCTCATTAAATAGAGTCTTCAAGTCAGTTGGATGGGA

>PGSC0003DMG400005172-(rev)LRR-RLPs\_1652

AGTCTGTTTCTCTGACGTTCTCATTAAATAGAGTCTTCAAGTCAGTTGGATGGGAGAGGAATTTTGTGTT  
CCCTTCAAATCTTAGGCATTTGAACCTTCGCGGCTGTTTCTTGACGGAAG

>PGSC0003DMG400005172-(rev)LRR-RLPs\_1782

AAACATTGCAAGATTGAAGAAGCTTGAGAGTCTCAAATTACACATGGGATTTCTTTTATGAGATTACAG  
AGGCTTCGGAAGTGTGCTGGAATGTCACAAATGTGGAGTTTCCTGCACT

>PGSC0003DMG400005172-(rev)LRR-RLPs\_1847

TACAGAGGCTTCGGAAGTGTGCTGGAATGTCACAAATGTGGAGTTTCCTGCACTCAAATACTTGGGATT  
ATTCTTTGTGCAGATAGAAGAATGGAAAGCTTCAGAGGAATCCTTTCCTG

>PGSC0003DMG400005172-(rev)LRR-RLPs\_192

GGTAAAACAACCTTTGGCAAGGAAGGTGTACAACAACCCCACTACTGTTAATTACTTTGATGTTAAAGCAT  
GGTGTGCTGTGTCGCAAACATATAATAGGAGGGGATTATTGGTTGAGATT

>PGSC0003DMG400005172-(rev)LRR-RLPs\_2042

TAAGACGTATTGAACTGACTAACTGCATCGACTCTCTAGGGGTTTCAGCTATGAATATCAGAAGAGACAT  
TGAAGAAAACACAGGATGTGACAGTCTCCATGTTCTAATTGTAAACCGAA

>PGSC0003DMG400005172-(rev)LRR-RLPs\_2107

GACATTGAAGAAAACACAGGATGTGACAGTCTCCATGTTCTAATTGTAAACCGAATATAAATGTATTTAG  
AAGCAATTCAAAGTTGCTCTATTTCCACTTTTGTATTGTCACATTATCTG

>PGSC0003DMG400005172-(rev)LRR-RLPs\_2166

AATGTATTTAGAAGCAATTCAAAGTTGCTCTATTTCCACTTTTGTATTGTCACATTATCTGTTTTTTTTTAT  
TAGGAAACTTTTTAACTTGGAAGCTGAGATTGCAATTCAAACCTTTGCA

>PGSC0003DMG400005172-(rev)LRR-RLPs\_256

AAGCATGGTGTGCTGTGTCGCAAACATATAATAGGAGGGGATTATTGGTTGAGATTTTCAAACAAGCAA

CAAGTAATGAGAATGAAATCAAAGAGGATGTTGACATAGCTGACATGTTGC

>PGSC0003DMG400005172-(rev)LRR-RLPs\_320

AGCAACAAGTAATGAGAATGAAATCAAAGAGGATGTTGACATAGCTGACATGTTGCGCAAGAGTCTAA  
TAGGCAGAAGATACCTCATTGTATTAGATGATATTTGGGATGTCGAGGCATG

>PGSC0003DMG400005172-(rev)LRR-RLPs\_384

CTAATAGGCAGAAGATACCTCATTGTATTAGATGATATTTGGGATGTCGAGGCATGGGAAGATTTGGGA  
ATATGTTTCCCTGAAGGTGAATATGGAAGCAGAGTAATGGTCACAACACGA

>PGSC0003DMG400005172-(rev)LRR-RLPs\_448

TGGGAATATGTTTCCCTGAAGGTGAATATGGAAGCAGAGTAATGGTCACAACACGAATTGAACAAGTG  
GCTAAGCATCTTCAGGTCCACAGTGTTCTTATTCTTTAGCTTTCTAACGT

>PGSC0003DMG400005172-(rev)LRR-RLPs\_512

AGTGGCTAAGCATCTTCAGGTCCACAGTGTTCTTATTCTTTAGCTTTCTAACGTCCGAAGAGAGTTGG  
GAATTATTGGAGAAGAAGGTATTTGAGGAGAGAGTTGTCCCCCGGATCT

>PGSC0003DMG400005172-(rev)LRR-RLPs\_64

GTATTACATCAATTTATGATGATGAAGAAGTAGTGGGCTTTGAGAAAGATGCAGAAATTATAATGAAGA  
AATTGATACGAGGAACAAAGGAACGGGATGTTATCTCCATCTATGGAATGC

>PGSC0003DMG400005226LRR-RLPs\_0

CTTGATTTCTTCTTCCAACATAATTTTAATACTTTTAGTACAAAATGGGTTATCAAACACTTGCATTGT  
TTCTTTTATGTTCTTTCTATGTCAACTTGTTTTCTCCTCATTCTTAC

>PGSC0003DMG400005226LRR-RLPs\_122

CATTTGTGCCCGAGTGATCAAGCCCTTGCTCTCCTACAATTCAAGCATATGTTTGCCATTAATCCTAGTGC  
TTCTCATGATTGTTTCGACATAACAGGCGAATGGATGCAGTCATACTCG

>PGSC0003DMG400005226LRR-RLPs\_1342

ATCTTATCTTCTCCTTTGAAAAATAATCTTAGTGGACAGATTGCTTCAGCTGTCTGCAGTCTAAAAGCCT  
TGACAGTGCTAGATCTTGGAAGTAATAATTTGAAGGGAACAATCCCACG

>PGSC0003DMG400005226LRR-RLPs\_1464

GTTTGGGTGAGATGAGTGAACCTTTGGGTTGTTGATCTAAGCAACAACAGTCTTAGTGGGGCAATTAATA  
CAACATTTAGTATAGGAAACACGCTCAGAGTCATTAATTGCACGGGAATA

>PGSC0003DMG400005226LRR-RLPs\_1525

AATTAATACAACATTTAGTATAGGAAACACGCTCAGAGTCATTA AATTGCACGGGAATAAGCTAGAGGG  
GGAAGTCCCACGATCTTTGGTCAATTGCAAGAGTTTGAATGTCTAGATTT

>PGSC0003DMG400005226LRR-RLPs\_183

ATCCTAGTGCTTCTCATGATTGTTTCGACATAACAGGCGAATGGATGCAGTCATACTCGAAAACATTGTC  
ATGGAACAAGAGCACAGATTGTTGCTCATGGGATGGAGTTCATTGTGACG

>PGSC0003DMG400005226LRR-RLPs\_1830

GCCTTTTTGAGGATTTGAAAGCTATGAAGATAAATGATGAGATCACGAAAATCCCACAGTATGTGGGAG  
AAGACTTGTATTATCATTTTTCTGAAACAATTACAACAAAGGGGTTGGATC

>PGSC0003DMG400005226LRR-RLPs\_1891

TGTGGGAGAAGACTTGTATTATCATTTTTCTGAAACAATTACAACAAAGGGGTTGGATCTTGAATTTCTG  
GGAGTTTTGACTACAAACATAGTTATCAATCTCTCGAAGAATAGATTTGA

>PGSC0003DMG400005226LRR-RLPs\_2013

GTTGTATTCCAAGTTCATTGGAGATCTCATTGCACTTCGTACTTTGAATTTATCTCATAATGGCTTGGAG  
GGTGTACACCAACTTCGCTGCAATACTTATCTGTACTTGAATCATTAG

>PGSC0003DMG400005226LRR-RLPs\_244

AACATTGTCATGGAACAAGAGCACAGATTGTTGCTCATGGGATGGAGTTCATTGTGACGAGACAACGG  
GAAAGGTGATTGAGCTTAACCTCACTTGTAGCAATCTTCAAGGCAAATTTGA

>PGSC0003DMG400005226LRR-RLPs\_2794

AGACATGAGCTTTCTCCTTTGAGCTTCGGCCAGAATTTTTAGAACGTTTTTAAATAGAGATTGTTAGCTT  
GAGTTCAGCCTAATAATAAGTTGAGTAATTAGGCTCAACCGCAAAGTCA

>PGSC0003DMG400005226LRR-RLPs\_305

ACAACGGGAAAGGTGATTGAGCTTAACCTCACTTGTAGCAATCTTCAAGGCAAATTTGATTCCAACACTA  
GTCTCTTTCAACTCTCCAATCTCAAAAGGCTTGATTTGTCTTCGAATAAT

>PGSC0003DMG400005226LRR-RLPs\_366

CCAACACTAGTCTCTTTCAACTCTCCAATCTCAAAAGGCTTGATTTGTCTTCGAATAATTTTTCAGGATCGC  
TCATTTACCTAAATTTGGTGAGTTTTCTAATTTGACGCATCTTGATT

>PGSC0003DMG400005226LRR-RLPs\_427

TTCAGGATCGCTCATTTACCTAAATTTGGTGAGTTTTCTAATTTGACGCATCTTGATTTGTCACATTAG  
GTTTTAGATTCCGACCTCACAATTTAGAACTTCTCCTTAAGAACTTAAC

>PGSC0003DMG400005226LRR-RLPs\_488

TCACATTCAGGTTTTAGATTCGGACCTCACAATTTAGAACTTCTCCTTAAGAACTTAACCCAATTAAGAGA  
GCTTGACCTTTACGGTATGAGCATCTCTCCACCTTCTCTGAATTC

>PGSC0003DMG400005226LRR-RLPs\_61

ACTTGCATTGTTTCTTTTATGTTCTTTCTATGTCAACTTGTTTTCTCCTCATTCTTACCTCATTGTGCCCGA  
GTGATCAAGCCCTTGCTCTCCTACAATTCAAGCATATGTTTGCCAT

>PGSC0003DMG400005226LRR-RLPs\_610

TTCTTATTTAACAACCTCTACGACTTAGTGACACACTATTATGGGGGATACTGCCCGAAAGTGTTTTTACC  
TTTCAAACCTGGAAACACTTGATTTATCATACAATCCCCAACTCACAAT

>PGSC0003DMG400005226LRR-RLPs\_671

GTTTTTACCTTTCAAACCTGGAAACACTTGATTTATCATACAATCCCCAACTCACAATTAGGTTTCCCACG  
ATCAAATGGAATAGCAGTACATCTCTCATGTACTTATCTCTACCTGAA

>PGSC0003DMG400005226LRR-RLPs\_854

ATGAGATCTTGTAACCTCTCAGGTCCTATTATTAACCTCTTTGGAATCTCTCCACATACAAAGTTTGTAT  
CTCAGAAATAACCATCTTGAAGGACCAATTTCCAATTCTTCAAATTT

>PGSC0003DMG400005226LRR-RLPs\_976

AAACCTCAAGTTGTTATCACTTGGAATTAACAACCTTTATGGCCAACCTTGATTTTTATCCTCCAACAGAA  
GTTGGACTCAACTGAAGTGTTGAAGTTTCTTCCAATTCCTTAGTTGG

>PGSC0003DMG400005254-(rev)LRR-RLKs\_0

AAAGATTTAAAAGGTAATTGGCACCTTGCTTTTTAGTGGCCTACAATGGAAAGAATGACTTTATTGCCAA  
AAGGACTTTAGGCAAAGTATGCAATAAATCCTCTTCCCACTCACATTGAA

>PGSC0003DMG400005254-(rev)LRR-RLKs\_186

ATATGAAGAGGTAGTAAATCAAATGAAGTTTCCCTTTCATTGAACAACACAACCTCTCAGATCCCTTTCAT  
GCATATCATATAAAAGTAAGTAACTTGTGTGCCATATATTTAGAACTA

>PGSC0003DMG400005254-(rev)LRR-RLKs\_1860

ACTTCTTGTTAATGAATACATGCCTGCTGGTAGCTTGTGTCAGCGGCCTGCACGGTATAAATTGCTAACCTC  
TATCTAACGTATGTTGCTCAGACTTTCCAAAATGTTGCTGCACCCGTGT

>PGSC0003DMG400005254-(rev)LRR-RLKs\_1922

GCTAACCTCTATCTAACGTATGTTGCTCAGACTTTCCAAAATGTTGCTGCACCCGTGTTGGATCCTCCAAA

CATGTACCTGTCCACATTTTTGAAGAGTCCGAGCAGCACAACTCTAAA

>PGSC0003DMG400005254-(rev)LRR-RLKs\_248

CCTTTCATGCATATCATATAAAAGTAAGTAACTTGTGTGCCATATATTTTAGAACTAAAAGAGTCAGTAA  
GGCAAATCTTGGCTTTGTCGCAATAACCAAATGAATTTTTCTATTCT

>PGSC0003DMG400005254-(rev)LRR-RLKs\_2666

AGAAATTCGACAACCAGAAGGTGAAACGAGACCTTCCTCGGAGGACAGCAGGTCCAAGGACTCTAATG  
CACAAACACCTGAATGAAAAATGCAGTTTTAGTCATTCAGCTTTCAATTCTT

>PGSC0003DMG400005254-(rev)LRR-RLKs\_2728

CTAATGCACAAACACCTGAATGAAAAATGCAGTTTTAGTCATTCAGCTTTCAATTCTTGATCATTTAAGA  
ATGCAATTTATCTCCATTGCCAACTTTTGCATGTTCTTGGACATACAAG

>PGSC0003DMG400005254-(rev)LRR-RLKs\_310

AGTCAGTAAGGCAAATCTTGGCTTTGTCGCAATAACCAAATGAATTTTTCTATTCTGAGATAGAGTTCT  
TCCTTTTCGTTACTTCTTTAGCTGATACTATTTCTGGATTGTATAGTT

>PGSC0003DMG400005254-(rev)LRR-RLKs\_434

TGCATTGTGTTAAAGCTTTTTATTGTATTTGTTAATGGTTTCTTATAGCAATCTGATTTTATCTCTCTTTCA  
CAGTGGCTAATGAGCTCTGATTTTGTCTAATGCTCTTCAAAAATAGT

>PGSC0003DMG400005254-(rev)LRR-RLKs\_496

TCTCTTTTCACAGTGGCTAATGAGCTCTGATTTTGTCTAATGCTCTTCAAAAATAGTCAAGGAGAGAGG  
GAAGAAGTGAAGGACTGCTGTAAGTACTAGGATCTTGCTTTTGCATTTTGTCT

>PGSC0003DMG400005254-(rev)LRR-RLKs\_930

CCTTAGTCTAAGAGCCAATTATCTTAATGGAAGTGTTCCTTCTGATCTCCTTTTCGATACCGTCTCTCCAATC  
TGCTACCTTCAGCATAATAGCTTCTCTGGTGATATTCCTGTTTCTTT

>PGSC0003DMG400005395-(rev)LRR-RLPs\_7459

TTTGGGATGGGTGGGGGGGGGGGGGGGGGGGATTGTGGTTACCTTCAGAGTTATGGTTCATGTTTTCA  
AGGTTATATGTAGTTTGCCCAAGGGTAATATAGAGCCTTGTGAGCTCGGATA

>PGSC0003DMG400005395-(rev)LRR-RLPs\_7522

TTTCAAGGTTATATGTAGTTTGCCCAAGGGTAATATAGAGCCTTGTGAGCTCGGATAGATAGTCTTATGT  
GCTCAGACATATAGAGCCTTTTGTGCTCGATTGTATAGTTATAACAACAAG

>PGSC0003DMG400005395-(rev)LRR-RLPs\_7585

CTTATGTGCTCAGACATATAGAGCCTTTTGTGCTCGATTGTATAGTTATAACAAGGGTAGTATAGAGC  
CGAAAGAGTCCTCAACTATACAGAGCTGACGAGATCCTCAACTATACGAG

>PGSC0003DMG400005395-(rev)LRR-RLPs\_7900

GTGACTATTCTTACTCCCTTGCAAGATTCCCTTTAGTATTGTATTTGTATGACATTAGTTGGCCTAGTTAG  
GCCGAATTGATTGTTGAGCTGAATATGGTTTCTGAGGTTTAAGCCAAAA

>PGSC0003DMG400005395-(rev)LRR-RLPs\_7963

CTAGTTAGGCCGAATTGATTGTTGAGCTGAATATGGTTTCTGAGGTTTAAGCCAAAAACATGTAAGTAC  
GTTCTGACTATTTTTAGACTCCCTATTTGATTACTTATAGTACTTTTTATCA

>PGSC0003DMG400005395-(rev)LRR-RLPs\_8341

AGGCTTGCAGAGCTGGGTCATGTCATAGTACATCTCAGTCGAACGTATTGGCATTACTACTGTGTTATTA  
TTAAGCATGTCATGTTTGTGCTCTATATCATTTTGCTATTGTAGATATTA

>PGSC0003DMG400005395-(rev)LRR-RLPs\_8404

GTTATTATTAAGCATGTCATGTTTGTGCTCTATATCATTTTGCTATTGTAGATATTATAATGGTCTTGTCAG  
CCCGCATAGCAATTGATATGCTATTATTATGAACTGTTGGGTTAGCTA

>PGSC0003DMG400005395-(rev)LRR-RLPs\_8459

TATAATGGTCTTGTCAGCCCGCATAGCAATTGATATGCTATTATTATGAACTGTTGGGTTAGCTAAAATT  
GTTGTTGCTGCGGGATTCTATGATTATAGCTTTCCCAACCTTGACTTTTA

>PGSC0003DMG400005485LRR-RLKs\_0

AATAAAGATAAAAAATAAACCTAAACTAACCTACACTACCCATTAACCCCTTATACTACTACCCACTCC  
ACTCACAACCCACAGTCCCACATTAATCCATCACTCCCCTCAACCACA

>PGSC0003DMG400005485LRR-RLKs\_122

CACGTACCACACACTACTAAACATCAACAACACACCCCTTCAACCCATATACACAGAGTCACAAAAAAGC  
AAGAAGGACGACACTCAAGAAAACAAAAAGAAAACTTTCCATTTTATTT

>PGSC0003DMG400005485LRR-RLKs\_183

CAAAAAACGAAGAAGGACGACACTCAAGAAAACAAAAAGAAAACTTTCCATTTTATTTTATTATCCTCT  
TAAAAATTCACCAACACATTACATTCTCTTCTTTCTCATTATTATTT

>PGSC0003DMG400005485LRR-RLKs\_3147

CAGCTTGCTATATAGTAATTAGGAAGTCGAGAAAAAGAGATCTTACTGGACGGTCCTCAAGAGAAAGGC  
AGTCTGATCATTTTGTGATGAAGAACCAACTTTATTTAAGGATCCAATTT

>PGSC0003DMG400005485LRR-RLKs\_3757

TGGTGACTTTGGATTGGCAAATTTCTCTTCAAATCATCATGGAACAAACATACATCTATTGCACTAAAG  
GGTTCTATTGGTTATATCCCACCAGGTATGTCATTAATCCATGTTGATTT

>PGSC0003DMG400005485LRR-RLKs\_3818

GCACTAAAGGGTTCTATTGGTTATATCCCACCAGGTATGTCATTAATCCATGTTGATTTCTCTTGCATATC  
TATTTCCCTTATCAGGGGTGCTAACATGTAAGATGTTTGTGTACCTCAA

>PGSC0003DMG400005485LRR-RLKs\_4794

AAGGCAAATATACATAGAATTACAACCTTTGAAATAGATATTATTTACAATTAGTACTATAGATAGCCTCA  
CAAATGTGAATTGTAACCAAGAAATTAAGGGATATGATTGAGTTTTTTTT

>PGSC0003DMG400005538LRR-RLPs\_0

TATTCATCTATTCCACCATTCTCTGAATTTTTCTTCTCATTTAACAACTCTGAGGCTGTCAGAAACAGGAT  
TGTATGGGATAATACCTGAGAGTATATTCCACCTGCCAACCTGGAAA

>PGSC0003DMG400005538LRR-RLPs\_122

CTTTTCTTAGGTTTCAATTATAAGCTAAGTGGTTATTTTCCAAAGACCAAATGGAACAGCAGTGCATCTCT  
CGTAGAGTTATATCTCAGGGGCGTGAATTTTTCTGATAATTTGCCTGAG

>PGSC0003DMG400005538LRR-RLPs\_1281

GATAATCATCTCATTGGCACATTCCCGATGTGGTTGGGAACTCTACCAAAGCTGCAAGTTTTAAGCTTGC  
GGTTCAATGAATTGCATGGTTCCATCAGAACATCAAGGATTGAGAACATG

>PGSC0003DMG400005538LRR-RLPs\_1342

TAAGCTTGCGGTTCAATGAATTGCATGGTTCCATCAGAACATCAAGGATTGAGAACATGTTTCCAGAGCT  
TCGAATCATAGATCTCTCCTCCAATGGCTTCTCGGGAACTTACCCTTGA

>PGSC0003DMG400005538LRR-RLPs\_1464

TTGTTTCTACATCTGAAAGCCATGAGGACAATTGATCCATCAATGGAAGCACCAGTTATAGAGGAGAT  
ATATATTACCAAGATTCTATTACAGTTGCAACTAAGGGATTTGATCGTGAA

>PGSC0003DMG400005538LRR-RLPs\_1525

GAGGAGATATATATTACCAAGATTCTATTACAGTTGCAACTAAGGGATTTGATCGTGAAATTGTGAGAA  
TCCTGTATTTGTACACCGTTATCGATCTTTCAAGTAACAGATTTGAAGGAC

>PGSC0003DMG400005538LRR-RLPs\_183

GTGCATCTCTCGTAGAGTTATATCTCAGGGGCGTGAATTTTTCTGATAATTTGCCTGAGTCTCTTGGCTAT

CATCTAACTTCGGTGCGTTATTTGTCTCTTAAAAGTTGCAACCTTAGAG

>PGSC0003DMG400005538LRR-RLPs\_1952

CACATATGATCGGGTATTAGATACAAATGATACCGTATCTGTACTAGACGATGAAGAAAGCGATTCTGA

ATTCAGAGTGATTTTCGGAAAGGTGCTCTTATGGGATATGGAAGTGGACT

>PGSC0003DMG400005538LRR-RLPs\_2135

AATCATTCTAGAGATGGAGCACAAAATTATGAGGGGAAGGAGAAAGAAGCAGCGAAGGCAAAGGAAT

TACAGAAGAAGAAATAATCATTCTAGACAAGTTATAAGTTTTGACTTCAGGT

>PGSC0003DMG400005538LRR-RLPs\_2196

AGGAATTACAGAAGAAGAAATAATCATTCTAGACAAGTTATAAGTTTTGACTTCAGGTAACATAATCGGT

GCTATATACTTTTCATTTTTTTCATTTCCAATAATTTCAAAGGGTCAGC

>PGSC0003DMG400005538LRR-RLPs\_2257

CTAATCGGTGCTATATACTTTTCATTTTTTTCATTTCCAATAATTTCAAAGGGTCAGCATCAGTTGATGTT

TAACTAAAATATTTTGATTACAGCGAGGAGCTAGTGTCTATGGAAGTG

>PGSC0003DMG400005538LRR-RLPs\_2318

CAGTTGATGTTTAACTAAAATATTTTGATTACAGCGAGGAGCTAGTGTCTATGGAAGTGGAGAAAGGGA

AGAAGAAGTTATGGCAATGAATGGAAACGAATGCCAATCAGTTTTTAAGCA

>PGSC0003DMG400005538LRR-RLPs\_2379

GAAAGGGAAGAAGAAGTTATGGCAATGAATGGAAACGAATGCCAATCAGTTTTTAAGCAATAATAATT

GTCTAACTGAATATTTTCGTTGAACAGTCTTAGATGTGGCTTCAATTCTTAC

>PGSC0003DMG400005538LRR-RLPs\_2440

AATAATTGTCTAACTGAATATTTTCGTTGAACAGTCTTAGATGTGGCTTCAATTCTTACTGTGTAGTGTA

ATTACAAATTTATGTAGTGTGTTTCTGTTGATATATAAAATCTATGAAA

>PGSC0003DMG400005538LRR-RLPs\_2501

TGTAGTGTAATTACAAATTTATGTAGTGTGTTTCTGTTGATATATAAAATCTATGAAATTTCTCAGTCTT

ACTGCTTGTCTAAGATGAGGCAACGCTGGGGCACCTAAATCTCATTCC

>PGSC0003DMG400005538LRR-RLPs\_2562

TCTCAGTCTTACTGCTTGTCTAAGATGAGGCAACGCTGGGGCACCTAAATCTCATTCTAGTTACTACTGT

TAAGGCACTCATTGTAATTATGGATAATAAGATTGTTACGGCACTTATC

>PGSC0003DMG400005538LRR-RLPs\_2623



GTTACTGTTAAGGCACTCATTGTAATTATGGATAATAAGATTGTTACGGCACTTATCAATTATGTGGA  
AATGCAAATGATAATGCAAGTGAACCTCTGATTCATGCCTAGGTTAAAGA

>PGSC0003DMG400005538LRR-RLPs\_2684

TTATGTGGAAATGCAAATGATAATGCAAGTGAACCTCTGATTCATGCCTAGGTTAAAGAAAACCTCTGCTG  
CTACACTTTTTAGCTACTTCAGAAACAGTAAATTTGTTGTATTAACTTC

>PGSC0003DMG400005538LRR-RLPs\_2745

ACTCTGCTGCTACACTTTTTAGCTACTTCAGAAACAGTAAATTTGTTGTATTAACTTCATATTATTATGAG  
ACGAAGAAAGTATTATTTTTGACATTTTCCTGGAAAGACTTTGTGCAT

>PGSC0003DMG400005538LRR-RLPs\_2806

ATTATTATGAGACGAAGAAAGTATTATTTTTGACATTTTCCTGGAAAGACTTTGTGCATTGATTTGAGAAT  
GACAACATTTTGTGAACTTGGAATTGATTGATGATTTGATATGGAGGCA

>PGSC0003DMG400005538LRR-RLPs\_2867

ATTTGAGAATGACAACATTTTGTGAACTTGGAATTGATTGATGATTTGATATGGAGGCAGCAGTTCATAC  
TTGACTTTTCCCCTTTCCTCTCTCTTTTTGATAATAAAATTCGCAAGTAA

>PGSC0003DMG400005538LRR-RLPs\_2928

AGTTCATACTTGACTTTTCCCCTTTCCTCTCTCTTTTTGATAATAAAATTCGCAAGTAATTAATTTCAATATG  
AAAATTCAAAGTTAAAGGGATTTGTCTGATAAGTAACTTTTCATTGAA

>PGSC0003DMG400005538LRR-RLPs\_2989

AATTTCAATATGAAAATTCAAAGTTAAAGGGATTTGTCTGATAAGTAACTTTTCATTGAAATTTCCGCAGC  
AAGACTCATTGCAATACTTCATAATTCAAAGAAGTGCATTAATACTTCT

>PGSC0003DMG400005538LRR-RLPs\_305

CCTATTCCTGAATCTCTTTCAAATCTCACCCGCATTGAGTATTTGGGCCTTCGCAATAAACTCCCTGAATG  
GAACAATACCACCAGGGATGTTATCCCTTCCATCACTAAATGCAATAGA

>PGSC0003DMG400005538LRR-RLPs\_3050

TTCCGCAGCAAGACTCATTGCAATACTTCATAATTCAAAGAAGTGCATTAATACTTCTAGGTGCAAGAA  
AAAAGATAATTGGAGGGACTCTGTGCAAAAACCTGGTGTATTTCCT

>PGSC0003DMG400005538LRR-RLPs\_3416

GACTTAAGAATAACAAACATTAATTTCCCTATTTCTTTTCAAATTTACTATTGGTGAAGGTGGAATTTGGA  
AATAATTTCCCTATGCAATATGATTCTGGATTTGTTTTAATTTTTTTT

>PGSC0003DMG400005538LRR-RLPs\_3477

GGAATTTGGAAATAATTTCCCTATGCAATATGATTCTGGATTTGTTTTAATTTTTTTTTGTTTGTTAAGA  
AAGCCTTTTCTTCTCCTTTTGGAGTAGCTAGGAATTTGCTTTGCCAT

>PGSC0003DMG400005538LRR-RLPs\_366

TCCCTGAATGGAACAATACCACCAGGGATGTTATCCCTTCCATCACTAAATGCAATAGACTTGAGTTTTA  
ATCACTTATCTGGTCCGCTTGAAGATTTCAAGTCCAATTCATAATCTTG

>PGSC0003DMG400005538LRR-RLPs\_3660

TAGGGGGTATATTAGACCCTTTTCTGAATAAGAAAGTAAAACAACGTACAATTATATTTTAAGAAAA  
AAGATGATTCTCTACTCCTTTTTTAAGCTTGTCTTTAGAGAAATAAAA

>PGSC0003DMG400005538LRR-RLPs\_3904

CTCTTTTATATCTCCTTACAGTTACTTTTGCTTCGATCGAGGAAGCAACTTCCCTACTGAAAATGGAAAGC  
AACTTTCAAGAACCAGAACAACCTCCTTATTCGCTTCATGGACACCAAGT

>PGSC0003DMG400005538LRR-RLPs\_4026

TAACTCATGCAGGGACTGGTACGAAGTTATATGCTTAAATGGTAGGGTAAACACGTTAGAATATTACAA  
ATTCTAGTGTCATTGATACCCTCTATGCTTTTCCGTTTTTCATCTCTCCCTT

>PGSC0003DMG400005538LRR-RLPs\_4087

TATTACAAATTCTAGTGTCATTGATACCCTCTATGCTTTTCCGTTTTTCATCTCTCCCTTTTCTGAATATTT  
GAACTTAGCATGAACAAATTTTTTCAGGAATCATTCCCCCTGAGATCG

>PGSC0003DMG400005538LRR-RLPs\_427

TGAGTTTTAATCACTTATCTGGTCCGCTTGAAGATTTCAAGTCCAATTCATAATCTTGATAGAGTTAGAG  
GGCAATCAGTTGCAGGGTCATCTCCCCACTCAATTCAAAACCTTGTA

>PGSC0003DMG400005538LRR-RLPs\_4453

TTTATGATAATCACATTTCTGGCTCTATTCTAAAGAAATAGGAAAACCTGTCAATCTTTTTGGAGTTTAT  
CTTGAAACAAACCAATTAACAGGTCATATCCCTCCAGAAATAGGCAACT

>PGSC0003DMG400005538LRR-RLPs\_4514

TGGAGTTTATCTTGAAACAAACCAATTAACAGGTCATATCCCTCCAGAAATAGGCAACTTGACCAATGCA  
AAATTGTTCTATGCTCCCTTCAATGAATTATCTGGTCCCATTCCCGCAGA

>PGSC0003DMG400005538LRR-RLPs\_4575

ACCAATGCAAAATTGTTCTATGCTCCCTTCAATGAATTATCTGGTCCCATTCCCGCAGAAATAGGGAAGA

TGAAGTCACTTCAGGAATTAAGCTTACATACAAACAATCTTTCTGGTCTA

>PGSC0003DMG400005538LRR-RLPs\_4636

TAGGGAAGATGAAGTCACTTCAGGAATTAAGCTTACATACAAACAATCTTTCTGGTCTAATTCCAAGAAC

TACAGGTGACTTAATTGAGCTCAAATATCTACAACCTAATGATAATCAAC

>PGSC0003DMG400005538LRR-RLPs\_4758

GCTGGCCTAATTCCTAGAGAGATGGGGAATCTAGAAAACCTCAATGGTCTGGAATTATTCAATAATCAA

CTATTTGGCCTAATCCCTAGTGAGTTGGGGAATCTTAGTATCCTCTATCAT

>PGSC0003DMG400005538LRR-RLPs\_4819

ATAATCAACTATTTGGCCTAATCCCTAGTGAGTTGGGGAATCTTAGTATCCTCTATCATCTGACATTATCC

AATAATCAACTCACTGGTTCAATTCCTTCTTCTTTGGTAATTTGAGAA

>PGSC0003DMG400005538LRR-RLPs\_488

AGAGTTAGAGGGCAATCAGTTGCAGGGTCATCTTCCCCACTCAATTCAAAACCTTGTAACCTACAATAT

CTCTATCTTTCTTTCAATAATTTTAGTGGTTTTGTGGATGTCAGCTTCTT

>PGSC0003DMG400005538LRR-RLPs\_5124

GAGCTCCCTTTGTCTATTCGCAATTTAACATCACTACAGATTCTAAATTTGGGCAAAAACAATATAAAGG

GAGTAATTCGCAATGTTTTGGCAACATGAGTGGTCATCTTGAGGTTCTT

>PGSC0003DMG400005538LRR-RLPs\_5246

TATGCAGCCAACAATCTTTCTGTGACTCTTCCAATGACTTTTAGAACTGGAACACTTAGAAGCTTCAACTT

ACGTGGCAATAAACTAAAGGGGAAAATTCCTCAATCTTTGGCCAATTGC

>PGSC0003DMG400005538LRR-RLPs\_549

CTACAATATCTCTATCTTTCTTTCAATAATTTTAGTGGTTTTGTGGATGTCAGCTTCTTTTCAAACCTCAA

CAGCTTTCGTATCTTAGTCTTTCATATAATAATATCTCATTGACCAAT

>PGSC0003DMG400005538LRR-RLPs\_6039

CTGTTTCAAAAAGTTGCAGCGATGCTCGGGTGTTAGATACAAATGATACCGTATCTGGACTAGACGATG

AAGAAAGCAATTCTGAATTCAGAGTGATTTTTGGAAAGGTGCTCTTATGG

>PGSC0003DMG400005538LRR-RLPs\_61

AGAAACAGGATTGTATGGGATAATACCTGAGAGTATATTCCACCTGCCAACCTGGAAATACTTTTCTTA

GGTTTCAATTATAAGCTAAGTGGTTATTTTCAAAGACCAAATGGAACAG

>PGSC0003DMG400005538LRR-RLPs\_610

CAAACCTCAAACAGCTTTCGTATCTTAGTCTTTCATATAATAATATCTCATTGACCAATGACAACAACGTT  
AATGCTACTTTGCCGAATCTCTTATTGGGTTAGAATTGGCCGCATGTG

>PGSC0003DMG400005538LRR-RLPs\_6222

CGATATGGCTTGCTAGAATCATTGTAGAGATGGAGCACAAAATAATGAGGGGAAGGAGAAAGAAGCA  
GCAAAGGCAAAGGAATTACAGAAGAAGAAACAATCATTCTAGACAAGTAATA

>PGSC0003DMG400005538LRR-RLPs\_6283

GAAGCAGCAAAGGCAAAGGAATTACAGAAGAAGAAACAATCATTCTAGACAAGTAATAAGTTTTGACT  
TCAGGTAATAATAGGTGCGCTATACTATTCATTTTTTTCATTTCCAATAA

>PGSC0003DMG400005538LRR-RLPs\_6344

TTTTGACTTCAGGTAATAATAGGTGCGCTATACTATTCATTTTTTTCATTTCCAATAATTTCAAAGGCTC  
AGCATCAGTTGATGTTTAAATAAGATATTTTGATTACAGCGAGGAGCT

>PGSC0003DMG400005538LRR-RLPs\_671

CAACAACGTTAATGCTACTTTGCCGAATCTCTTATTGGGTTAGAATTGGCCGCATGTGAATTGAAAGAA  
TTCGAGTTTCTAAGATCCGCAAAGAAGCTTCAGCAGTTGGATCTTTCAA

>PGSC0003DMG400005538LRR-RLPs\_732

TTGAAAGAATTCGAGTTTCTAAGATCCGCAAAGAAGCTTCAGCAGTTGGATCTTTCAAATAATAAGATTC  
AAGGAAGAATTCCTAATTGGGCATGGTCGAACTGGATCTTTTCATTGCAC

>PGSC0003DMG400005538LRR-RLPs\_793

ATAAGATTCAAGGAAGAATTCCTAATTGGGCATGGTCGAACTGGATCTTTTCATTGCACGATCTTAATAT  
ATCCACAATATGCTGACGAGTGTGGATTCAATTCCTCTTCAATATCTAT

>PGSC0003DMG400005538LRR-RLPs\_854

TCTTAATATATCCACAATATGCTGACGAGTGTGGATTCAATTCCTCTTCAATATCTATATACTATTGATT  
GCGGTCCAATTTGCTTCAAGGTTCACTACCTATTCCATCAAATTCCAC

>PGSC0003DMG400005538LRR-RLPs\_915

ACTATTGATTTGCGGTCCAATTTGCTTCAAGGTTCACTACCTATTCCATCAAATTCCTACTACATTCTTCTTC  
ATATCCATAATAATCTCACTGGAGAAATTCCTTCATCTATTTGCAAC

>PGSC0003DMG400005538LRR-RLPs\_976

CATTCTTCTTCATATCCATAATAATCTCACTGGAGAAATTCCTTCATCTATTTGCAACTTGACATCACTGA  
TAATGCTGGATTTGGCGACAAACAATTTGTGTGGAGAAATTCTGCAGT

>PGSC0003DMG400005539LRR-RLPs\_0

ACAATTTATGACTATAAGAAGCTAAGACTCACAAACCCATGATTTTAAATCGCTTCTTCAGAACTTGACCCA  
ATTAAGAGAGCTTCATCTTAGTGGCATAAACATCTCTCCACCATTCT

>PGSC0003DMG400005539LRR-RLPs\_124

ATTTTTCTTCTCATTTAACAACTCTGAGGCTGACATATACAGGATTGTTTGGGATAATACCTGAGAGTATA  
TTCCACCTGCCAACCTGGAAATACTTTTCTTAGGTTTCAATTATAAGC

>PGSC0003DMG400005539LRR-RLPs\_1550

TTCGAATTTGTTTCAACATCTGAAAGCCATGAGGACAACCTGATCCATCAATGGAAGCATCAAATATGGT  
GGAGATTCATATTACCAAGACTCGATAGCTGTCGTATCCAAGGGATATGA

>PGSC0003DMG400005539LRR-RLPs\_1612

AATATGGTGGAGATTCATATTACCAAGACTCGATAGCTGTCGTATCCAAGGGATATGAGCGTGAAGTTG  
TGAGAATCTTGTTTTGTACATCACTATCGATCTTCAAACAACACATTTCG

>PGSC0003DMG400005539LRR-RLPs\_1674

GAAGTTGTGAGAATCTTGTTTTGTACATCACTATCGATCTTCAAACAACACATTTCGAAGGACATATTCC  
AACTATTATGGGAGATCTCATTGCACTCCGTGTGCTGAATATATCTCAT

>PGSC0003DMG400005539LRR-RLPs\_1798

GATTGGAAGGTCATATACCGCCATCACTTGAAGATTATCTTTGGTTGAATCATTGGACCTGTCAAGTAA  
CCATCTTGTAGGAGAGATACCAGCACAATTTGCTTCTTACATCTCTTG

>PGSC0003DMG400005539LRR-RLPs\_2170

GTATATTTTATGATGTCAAGTGAAAACCGGTATGGTTTGCAAGAATCATTGTAAAGCTGGAGCACAAA  
ATAATGATGAGAAGGAGAAAGAAGCAGCGAAGGCAAAGGAATTGCAGAAGA

>PGSC0003DMG400005539LRR-RLPs\_2232

GCACAAAATAATGATGAGAAGGAGAAAGAAGCAGCGAAGGCAAAGGAATTGCAGAAGAAGAAATAAT  
CACTAATAATATTACTGTTATTTCTTTAAGGAAAAGATGTAATAAGTTGTAGA

>PGSC0003DMG400005539LRR-RLPs\_2294

ATAATCACTAATAATATTACTGTTATTTCTTTAAGGAAAAGATGTAATAAGTTGTAGACTTACTATCGTTA  
AATCCTGTTTGCTTAAAGTGTGTAGCATCATTAGGGTGAGATAATCTTT

>PGSC0003DMG400005539LRR-RLPs\_2330

AAAAGATGTAATAAGTTGTAGACTTACTATCGTTAAATCCTGTTTGCTTAAAGTGTGTAGCATCATTAGG

GTGAGATAATCTTTAATGATAAGTTATATGCAATATAAAATCTTATGACC

>PGSC0003DMG400005539LRR-RLPs\_372

TTGTCTCTTAAAAGTTGCAACCTTAGAGGGCCTATTCCTGAATCTCTTTCAAATCTCACCCGCATTTGAGT

TATTTTGGGCCTTCGCAATAACTCCCTGAATGGAACAATACCACCAGGG

>PGSC0003DMG400005539LRR-RLPs\_434

CATTTGAGTTATTTTGGGCCTTCGCAATAACTCCCTGAATGGAACAATACCACCAGGGATGTTATCCCTTC

CATCACTAAATGCAATAGACTTGAGTTTTAATCACTTATCTGGTCCCTT

>PGSC0003DMG400005539LRR-RLPs\_496

TATCCCTTCCATCACTAAATGCAATAGACTTGAGTTTTAATCACTTATCTGGTCCCTTTGAAGATTTCAAGT

CCAATTCATAATCTGGATATATTTAGAGGGCAACCAGCTGCAGGGTC

>PGSC0003DMG400005539LRR-RLPs\_620

TCCCCACTCAATTCAAAACCTTGTGAACCTAACAGAACTTCCCTTTCTTTCAATAATTTTAGTGGTCGTGT

GGATGTCAGCTTCTTTTCAAACCTTCAAACAGCTTTCATATCTTAGTCT

>PGSC0003DMG400005539LRR-RLPs\_682

GTGGTCGTGTGGATGTCAGCTTCTTTTCAAACCTTCAAACAGCTTTCATATCTTAGTCTTTCATATAATAATA

TCTCATTGACCAATGACAACAACGTTACTTTGTCCGAATCTTTTATTG

>PGSC0003DMG400005539LRR-RLPs\_744

TATAATAATATCTCATTGACCAATGACAACAACGTTACTTTGTCCGAATCTTTTATTGAGTTAGAATTGGC

CGCATGTGAAGTGAAAGAGTTGGAGTTTCTAAGATCCGCAAAGCAGCTT

>PGSC0003DMG400005539LRR-RLPs\_930

ATGTTTTTCATTGCAAGATCTTAATATATCCACAATATGCTGACGAGTGTGGATTCAATTCCTCTTCAGTC

TGTAAATACTATTGATTTGCGGTCCAATTTACTTCAAGGTTCACTACCC

>PGSC0003DMG400005539LRR-RLPs\_992

TCTTCAGTCTGTAAATACTATTGATTTGCGGTCCAATTTACTTCAAGGTTCACTACCCATTCCATCAAATTC

CACAAGATTCATCTTCATATCCATAATAATCTCACTGGAGAAATTCC

>PGSC0003DMG400005542LRR-RLPs\_0

ATGGGGTATGCAGTTATTATGCTCTTAATTGTGTTTTTCTGTCATGAAGTTTCTTCAATATCCATATTACCT

CACAAACATCAAACCTTTCACTTCTAAAATTCAAGAACACCTTTACT

>PGSC0003DMG400005542LRR-RLPs\_63

ATATTACCTCACAAACATCAAACCATTTCACTTCTAAAATTCAAGAACACCTTTACTATAGATCCGTCAGC  
CTCTGGCGTTTTTACAGTAGAATCTTATTATTGTCCGAAGCCTTATCC

>PGSC0003DMG400005590LRR-RLPs\_0

ATTGATTTGAGCAATTTGGAGTATCTGGATCTCTCGTATAACAATATAGAGAGCTTTGTGACTACCAAAG  
GTACACGAATCAATGCAGTTGCTCTAATGTTGAATGTTTTATTTAACCT

>PGSC0003DMG400005590LRR-RLPs\_1054

ATATAGCGTCAGATTCTATTTGGAGGAGACTCACATCACTTGAGTACATCGATATTTTCATATAACCAATTT  
GATGTTCTCTGTCAATTCAGCCAATTTTCCAACCATACAAAATTGATCT

>PGSC0003DMG400005590LRR-RLPs\_1116

AACCAATTTGATGTTCTCTGTCAATTCAGCCAATTTTCCAACCATACAAAATTGATCTACTTGGATGTTAG  
TTCTAATAACAATAATTACAGATACCAAATTCAAAATCAGATCCCAAAT

>PGSC0003DMG400005590LRR-RLPs\_1178

GGATGTTAGTTCTAATACAATAATTACAGATACCAAATTCAAAATCAGATCCCAAATTTCCAGTTGGAG  
TTTTTTGCTATCAAAGGATGTAAACACCTTAAAAAATTGCCTTATTTCT

>PGSC0003DMG400005590LRR-RLPs\_1240

AGTTGGAGTTTTTTGCTATCAAAGGATGTAAACACCTTAAAAAATTGCCTTATTTCTTCACTACCAATAT  
GACTTGAGGATTCTTGCTATTGGAGGAAATCAATTGCCCGGGATCTTTC

>PGSC0003DMG400005590LRR-RLPs\_1302

TACCAATATGACTTGAGGATTCTTGCTATTGGAGGAAATCAATTGCCCGGGATCTTCCAACATGGTTGT  
TAGAAAATAACACCAGACTTGCAGGGATTTATAGTAGAGATAATGCTTTC

>PGSC0003DMG400005590LRR-RLPs\_1612

ATCTAGACCTATCTACAATTTCTTATTTGGAGGAGTTCCTAGTGATCTGGCAATTGGTTCTCCAGTATTA  
GCTTACCTTCGATTGTCACACAACAAGTTAAAAGGTCAAATTTTTCCAA

>PGSC0003DMG400005590LRR-RLPs\_1674

CCAGTATTAGCTTACCTTCGATTGTCACACAACAAGTTAAAAGGTCAAATTTTTCCAAGGATGTCAAAC  
CAAAGATGTTATTCTTTTTGTTCTTGAATGGAAATAACTTTGAGGGACCA

>PGSC0003DMG400005590LRR-RLPs\_1860

GAGATTCCGAGATGCATTAGGGATAATACAAGATTGTTACAACCTTGATTTATCCAAGAATCATCTCAAAG  
GTTCAATTCCAGTTGAGATTTGCAATTTAAAGCTCATTCAAGTCTTAGCT

>PGSC0003DMG400005590LRR-RLPs\_1984

CAGAAAACAGGCTTTCAGGCTTATTCTTCTTGTGTGAATTCTTTACCTCTTGAACACATCCATCTACAG  
AAAAATCAATTGGGTGGTGAATTGGAACATGCACTTTTCAACTTATCTT

>PGSC0003DMG400005590LRR-RLPs\_2480

GTTTTCAACAAAAGAACTCATACACTTATAAGGGAAGCATTCTAAAATATATGTCAGGTATGGATCTC  
TCAAGTAACAGATTAAGTGGTGAATTCCCGTTGAGCTAGGGAAGATGAG

>PGSC0003DMG400005590LRR-RLPs\_2542

TGGATCTCTCAAGTAACAGATTAAGTGGTGAATTCCCGTTGAGCTAGGGAAGATGAGTAATATACCTG  
CATTGAATCTATCGCACAAACCATCTCATCGGAAGAATACCAAATACCTTCT

>PGSC0003DMG400005590LRR-RLPs\_2914

TTAATGGAGGTGAGGAATCATCAGACTTGGAGGATATTCAGTGTTTTTACATTGGCTTTGTTGTGTCTTA  
TGGAGCGATCTTGTGGGATTAGCTGCGGCACTCTGCTTCAATCGTTATT

>PGSC0003DMG400005590LRR-RLPs\_3038

AAAAGCATGGTTTAGGATGATAGAGGCATTGATGTTTTATGGTTACTATTTTCTCTTGGACAACGTTGTT  
ACACCCATCAAGAGTATATGGTACAGGAATGTTGGTTAATTCTAGGTAGT

>PGSC0003DMG400005590LRR-RLPs\_62

TACCAAAGGTACACGAATCAATGCAGTTGCTCTAATGTTGAATGTTTTATTTTAACTTAACACATCCTAC  
AGAATAAAATACATCTCTACGGACTTTAGATTGAAAATTGTGGGATACA

>PGSC0003DMG400005590LRR-RLPs\_744

TAATAATTTTTGTTTATTACCAAACACAAGAAAATAAGTAACACAAGCCACCTAATTTTCTAGAAAATAT  
TTTCTTCGTATCGAACACATCCATAGAGACATAAAAAAATATAATAA

>PGSC0003DMG400005590LRR-RLPs\_806

AGAAAATATTTTCTTCGTATCGAACACATCCATAGAGACATAAAAAAATATAATAAGATGTCACCTTGT  
TATAGAAATTTGTTTTAGCTAAATGTTTCTTAATATATATATATAGGTTG

>PGSC0003DMG400005590LRR-RLPs\_868

TCACTTGTTATAGAAATTTGTTTTAGCTAAATGTTTCTTAATATATATATATAGGTTGGTGTGAACTCAA  
CATATTCAAGAGCTGGATTTTTCAGCCAATAGTTTTCGGGGAACACTGC

>PGSC0003DMG400005590LRR-RLPs\_930

GAACTCAAACATATTCAAGAGCTGGATTTTTCAGCCAATAGTTTTCGGGGAACACTGCCTTCATGTTTTG



GAAACTTGACATCACTTCGACGATTGAGTTTTGGGGGAATTACTTCAGA

>PGSC0003DMG400005590LRR-RLPs\_992

ATGTTTTGGAACTTGACATCACTTCGACGATTGAGTTTTGGGGGAATTACTTCAGAGGAAATATAGC

GTCAGATTCTATTTGGAGGAGACTCACATCACTTGAGTACATCGATATTTT

>PGSC0003DMG400005600LRR-RLPs\_1024

AAATGTTGTCTCTATTGAAATCAGGGGTTGCCAAAAGTCTCATGCTTACCACCCTTTGGTGAGCTGCCTT

GTCTAGAAAGTCTAGAATTATGGAGTGTGTCTGCGGAATTGGAGTATGT

>PGSC0003DMG400005600LRR-RLPs\_1088

CTGCCTTGTCTAGAAAGTCTAGAATTATGGAGTGTGTCTGCGGAATTGGAGTATGTTGATTCTGGATTCC

CTACAAGAAGAAGGTTTCCATCTCTGAGAAAAGTATTATAGGTTATTTT

>PGSC0003DMG400005600LRR-RLPs\_128

CTTTTATCGAAAGGAACTTGGAGCTAGAGGATGTAGGTAATGAAGTATGGAATGAATTATACTTGAGG

TCTTTCTTCCAAGAGATTGAAGTTAAATCTGATCAAAGTATTTCAGATG

>PGSC0003DMG400005600LRR-RLPs\_1280

AGGTGCCCTATGTTTGTATTCCACCCTTTCTTCTATCAAGAAATTGGTAGCTTATGGGGAGAAGTCAGA

TGCAATAGGTTTCAGTTCGCTATCTAATCTCAGGACTCTTACTTCCCTCC

>PGSC0003DMG400005600LRR-RLPs\_1344

GTCAGATGCAATAGGTTTCAGTTCGCTATCTAATCTCAGGACTCTTACTTCCCTCCGCATTGGCCATAACG

AAGAAGATACTTCGCTCAAAGAAGACATGTTCAAAGGCCTTGCAAATCT

>PGSC0003DMG400005600LRR-RLPs\_1408

CATAACGAAGAAGATACTTCGCTCAAAGAAGACATGTTCAAAGGCCTTGCAAATCTCAAGTACTTGAAA

ATCTCTTTCTTTAAGAATCTCAAAGAGCTGCCTACCAGCCTGGCTAGTCTC

>PGSC0003DMG400005600LRR-RLPs\_192

TGAGGTCTTTCTTCCAAGAGATTGAAGTTAAATCTGATCAAAGTATTTCAGATGCATGATCTCATTTCAT

GATTTGGCAACATCTCTATTTTCGGCAAGCACATCAAGCAGCAATATCC

>PGSC0003DMG400005600LRR-RLPs\_256

CATTCATGATTTGGCAACATCTCTATTTTCGGCAAGCACATCAAGCAGCAATATCCGTGAAATAAATGTA

AAAGAATACCCACATATGATGTCGATTGGTTTCGCAAAGTGGTGTCTTC

>PGSC0003DMG400005600LRR-RLPs\_384

CTTCTCACTTGCAAAAGTTTGTCTCGTTGAGGGTGCTTAATCTAAATAATTTAAGACTTAAGCATTACCG  
TCTTCCATTGGAGATCTAGTACATTTAAGATACCTAAACTTGTCTGGCA

>PGSC0003DMG400005600LRR-RLPs\_704

CTTGGTTGCTTTGCAGTGGGAAGGAAGAAAAGTTCTCAAATTGGTGAATTACGAAATCTGAATCTCTAT  
GGCTCAATTGAAATCACGCATCTTGAGAGAGTGAAGAATGATATGGATGCA

>PGSC0003DMG400005600LRR-RLPs\_832

CAATTTATCTGCAAAAGAAAATCTGCATTCTTTAAGCATGAGATGGGATGACGTTGAACGTGCACATAG  
ATATGAATCAGAAGAAGTTGAAGTGATTGAAGCCCTCAAACCACACTCCAA

>PGSC0003DMG400005600LRR-RLPs\_896

CATAGATATGAATCAGAAGAAGTTGAAGTGATTGAAGCCCTCAAACCACACTCCAATCTGACTTGTTTAA  
CAATCAATGGCTTTAGAGGAATCCGTCTCCAGACTGGATGAATCACTCA

>PGSC0003DMG400005600LRR-RLPs\_960

GTTTAAACAATCAATGGCTTTAGAGGAATCCGTCTCCAGACTGGATGAATCACTCAGTTTTGAAAATGT  
TGTCTCTATTGAAATCAGGGGTTGCCAAAAGTCTCATGCTTACCACCCT

>PGSC0003DMG400005689G-LecRK\_1054

ATGAGAACTATACCTTGAGCCTCTCAGATTGCAAGGCCAAGTGTGTGAATGATTGCTCGTGTGTTGCCTA  
TGCCTCAGTCGATAGTGACACCGAATTGGCTGTCAAATTTGGGGGAATG

>PGSC0003DMG400005689G-LecRK\_1178

GAGTTTTGTGACAGCACAAAACAGTCTAGCCAGAGATGTTTTCTTTCTTACAAGAAAAGGTAATTCTTGA  
GTACAAAGTTATTCAATAGAGTGAAAGATCAAAGACATGTTAATAATGT

>PGSC0003DMG400005689G-LecRK\_124

GAATTCTGATTGCTTTCATCCTCGTGTTATCCTGTCACTTTTTGCCTGCAGATTTCAACTCAATATTGAAG  
GGAGAAAGTTTAGCTGATTACCAACAGCTGGTCTCAGCAAATGGCTTCT

>PGSC0003DMG400005689G-LecRK\_1240

ATTCTTGAGTACAAAGTTATTCAATAGAGTGAAAGATCAAAGACATGTTAATAATGTTGCATCTCATAT  
TATGATTACTTTATCCAGCTCAAGATAAATTGTTTTGTGAGGGCATCACA

>PGSC0003DMG400005689G-LecRK\_1364

TGTCACCAATCTGCATTACTCTCATTTGCATGTCATTCCAAAATTACTAGTACTAGAACAAGAAATTTTC  
TCCGATCGCAATGCTGCAGGATTTGAGTTAATAAGAGTGTTCATCTTCAT

>PGSC0003DMG400005689G-LecRK\_1426

GAAATTTTCTCCGATCGCAATGCTGCAGGATTTGAGTTAATAAGAGTGTCATCTTCATTTCAAAAATACA  
CTCGAGCAAATGAACAACCATACCTTACAGAATCTTGTTTTGGAGGCTAT

>PGSC0003DMG400005689G-LecRK\_1674

AATGGTGGATATGGTTGACAATAGCAGTGTCCCTAATGGTATTTGCGTTTATTTGCTCCTTATTCTGTCTG  
ATACGAAGAAAACCTCAGAGCAAGAGGTGAGCAAAACATCAGCTCTAGCA

>PGSC0003DMG400005689G-LecRK\_1736

TTCTGTCTGATACGAAGAAAACCTCAGAGCAAGAGGTGAGCAAAACATCAGCTCTAGCATTAGTCTAAGG  
TGACACTTATTTGTCTTTGAAATCTTCAATTTTGCATTTGTCACCTAGGCA

>PGSC0003DMG400005689G-LecRK\_1798

TCTAAGGTGACACTTATTTGTCTTTGAAATCTTCAATTTTGCATTTGTCACCTAGGCAAAGTCAGACAAAT  
GGAGAAAATTTTATACGAGCTTGAAGATCCTAAGACCATTTCTGGCCAG

>PGSC0003DMG400005689G-LecRK\_1984

GAGACTATGAATATGGCCACAAACAATTTCTCGTCTTCTAATAAGTTGGGACAGGGCGGTTATGGACCT  
GTTTATAAGGTAAAAGTTTAGAAGCTTTTTGTCTTAAGCTGATTTTTAGAT

>PGSC0003DMG400005689G-LecRK\_2046

TGGACCTGTTTATAAGGTAAAAGTTTAGAAGCTTTTTGTCTTAAGCTGATTTTTAGATTTGCAAGTAGCAA  
AAATTTTCAGGGGATGTTGCTCGACGGACAAGAGATAGCCATCAAGAGAC

>PGSC0003DMG400005689G-LecRK\_2418

GATCCTAGCAGAAAAGATTTCACTAAAATGGAATACGCGTTTGAACATTATTGAAGGAGTTGCTCAGGGA  
CTACTTTATCTCCATAAGTATTCGAGGTTGAGGGTGATTCATAGAGATCTA

>PGSC0003DMG400005689G-LecRK\_248

AATGCAATTTTTAGTCCAGGCAAGTCAAGGAACCGCTACTTGGGTATATTTTCCACTCGGCCTAGTCTT  
GATTTGTAATGTTAATGGAGGAGGAGATGAAAAGGCTTTGTGGAT

>PGSC0003DMG400005689G-LecRK\_2480

TCAGGGACTACTTTATCTCCATAAGTATTCGAGGTTGAGGGTGATTCATAGAGATCTAAAAGCCAGCAAT  
GTCTTGCTTGATGACAATATGAACCCCAAATCTCAGATTTTGGTTTGGC

>PGSC0003DMG400005689G-LecRK\_310

CTAGTCTTGATTTGTAATGTTAATGGAGGAGGAGATGAAAAGGCTTTGTGGATAGCTAACAGAG

ACGATCCGATAACCGATACATCTGGAAGTCTTATGATAGCTCCTGATGGCA

>PGSC0003DMG400005689G-LecRK\_3658

CTCCCTTGTGATACAAAATAAAAACCACTGCTTGTCTCCTTCATCCAGATTTTACTTTTTCTAGCGTCGATA  
TTAAGTATGAGTTGTTGACAAAATAAAGTGAGTAAGCTTGTTAGAGCC

>PGSC0003DMG400005689G-LecRK\_372

AACAGAGACGATCCGATAACCGATACATCTGGAAGTCTTATGATAGCTCCTGATGGCAGATTAATAATTT  
CTCATAAAGAAGGTAATGTTACTTTGTTTCAGTGCTACACCAACAACAGCC

>PGSC0003DMG400005689G-LecRK\_3720

AGCGTCGATATTAAGTATGAGTTGTTGACAAAATAAAGTGAGTAAGCTTGTTAGAGCCTTTCAAGATTAT  
ACTGTGTCTAAACAATTTTTATACATTTGTTTTGAATGCAAATGAGGATT

>PGSC0003DMG400005689G-LecRK\_3782

AAGATTATACTGTGTCTAAACAATTTTTATACATTTGTTTTGAATGCAAATGAGGATTCAGAGTATCAATT  
GTAAGTAAATCAGAACTCATAAATGTAGTAATTGTTACTAGTTTTGCA

>PGSC0003DMG400005689G-LecRK\_62

TCTATTTTGACTGTAAACATTCATGTGTGGATTAGAGAGCTTCTCTCATATGGCTACCTACAGAATTCTGA  
TTGCTTTCATCCTCGTGTTATCCTGTCACTTTTTGCGTGCAGATTTCAA

>PGSC0003DMG400005730RLKWAX-EGF\_0

ATGAGCCCACCTAGTCACTCTTTGATGAGTTCTCACAAATGCATGATCAAAGCTTACTTCTTCACTCCAT  
CATCACCATCCTATGCTTCTTGAACACGTCCTCGCCATCGTATGGCCAA

>PGSC0003DMG400005730RLKWAX-EGF\_1037

TTTTCTCTCAAAGATAAAAATACATGTATTGATAAATTTGAAAATAATTTTTGTATAGAAAATTTAATTGA  
GAAATTGAATATTGTTAGTTGATTGTAGTGTCTTTTCTAGATTCTTAT

>PGSC0003DMG400005730RLKWAX-EGF\_1098

ATTTAATTGAGAAATTGAATATTGTTTAGTTGATTGTAGTGTCTTTTCTAGATTCTTATGTGGCTAGTTAA  
TTGTAGTATCATTCTAGTTTCGTATGTGGCTATCTATTTTGTGTCTA

>PGSC0003DMG400005730RLKWAX-EGF\_122

GGATAAACAGTATTCCACTTGTAATAGCTCCTACACCTGTGGGAATATTCAAAATATCAGCTTTCTTTCT  
GGGGAGGTGATCGACCTCAAGAATGTGGTCTTCCACAATTCGAGCTTGC

>PGSC0003DMG400005730RLKWAX-EGF\_1342

TTTAAACATTCAAACATTCTACATTACGTGATATCTATTGTTATGTGTTTATAAAAAGATCAAATTTATTTT  
TGGTATCTTATTCATATTTCAAGCCACTGGGAATGTTGTTGTTGTTGT

>PGSC0003DMG400005730RLKWAX-EGF\_1403

AAATTTATTTTTGGTATCTTATTCATATTTCAAGCCACTGGGAATGTTGTTGTTGTTGTTGTATTCATATTT  
CAAGCACTAAAATAATCAACACTATTTTAATATTATTTATTAATACTTA

>PGSC0003DMG400005730RLKWAX-EGF\_244

GTGAAGCCAATCAGGATCCCCTTATACATATCGATGGGCATAATTTCCGCGTACTTGACATCAATGGAGA  
CAATCAAACAATGAGAATTGCACGAAATGATCTTGAGGATGACATTTGTC

>PGSC0003DMG400005730RLKWAX-EGF\_2440

CAAACCACACAGAGAATGTATACCGCACTAGGCAAGCCCTATGGGACTGGCTCGACTCAGAAGACGTA  
GGATTACACTAGTATATTATAATTATTCAATTTATTTATCAACTAAAAAA

>PGSC0003DMG400005730RLKWAX-EGF\_2562

TAGGGCCTCTTTATAATGTTTGGCTTTAGGCCCAAACCTGTTGAGACGACCCTGATGAAATGTGTGATCA  
TCTCAACTTAAAACCTTAAGTTATTAGAAAGAACACATTTTTATTAGTTAA

>PGSC0003DMG400005730RLKWAX-EGF\_2623

GTGTGATCATCTCAACTTAAAACCTTAAGTTATTAGAAAGAACACATTTTTATTAGTTAATTATATTCTCAA  
CATTTCTGCATTAGGGTCGAGATTATGCCTGAATAACAGAAGGCACTGT

>PGSC0003DMG400005730RLKWAX-EGF\_2867

TAGATGTTGATGATTTGTTATACTACCAGAAGATCCTTTATTATGGTTCTATATCAATTCATCACTTGTTTA  
TTTCTGCATTACAGGCAATAATAGACATATCTCGGTGAAGATAGCCAT

>PGSC0003DMG400005730RLKWAX-EGF\_2928

TCACTTGTTTATTTCTGCATTACAGGCAATAATAGACATATCTCGGTGAAGATAGCCATAGGTAATTATCT  
TTATGACCTTGTTTCATGTTATATTGTCCCCACAACATATAGATGAGACT

>PGSC0003DMG400005730RLKWAX-EGF\_2989

GTAATTATCTTTATGACCTTGTTTCATGTTATATTGTCCCCACAACATATAGATGAGACTCTTTTTTCATCTG  
GTTAACAGGTATCTCTTCTGCTGGGATTGGAATAATATTAATCTGCTA

>PGSC0003DMG400005730RLKWAX-EGF\_305

CAATGGAGACAATCAAACAATGAGAATTGCACGAAATGATCTTGAGGATGACATTTGTCCTGATAGACT  
CGGTAACACTAGCTTTAATGATCCCCTATTACGCTATGGTCCTGATTTTGG

>PGSC0003DMG400005730RLKWAX-EGF\_3050

TTTTTCATCTGGTTAACAGGTATCTCTTCTGCTGGGATTGGAATAATATTAATCTGCTACATGATCTACTG  
GTTTGTCTTTAAGAAATCATCTGCTACATGCCTTTTGTACCAAAGCAG

>PGSC0003DMG400005730RLKWAX-EGF\_3111

TGATCTACTGGTTTGTCTTTAAGAAATCATCTGCTACATGCCTTTTGTACCAAAGCAGAGGAGGGAACA  
TCAGAATGTTGAGGCCTTCTCCGGCAATATGGATCCCTTGCCCCTAAGG

>PGSC0003DMG400005730RLKWAX-EGF\_3172

GAGGGAACATCAGAATGTTGAGGCCTTCTCCGGCAATATGGATCCCTTGCCCCTAAGGTATACAGCTA  
TTCAGACATTAGGAAAATGACAAATTCACCTCAAGAGAACTTGGACAAGG

>PGSC0003DMG400005730RLKWAX-EGF\_3416

CATGTGAACATAGTTACTCTGTTGGGATTCTGTTTCAATGGTCGAGAAAGAGCTCTTATTTATGAATTCAT  
GCCCAATGGATCACTCGATCAACACATTTATGGTGAAGATTCTAAGTTG

>PGSC0003DMG400005730RLKWAX-EGF\_3477

ATGAATTCATGCCCAATGGATCACTCGATCAACACATTTATGGTGAAGATTCTAAGTTGGGATGGGAAA  
AGTTGTACGAAATTGCACTTGGGATAGCTCGAGGACTGGAGTATTTGCACC

>PGSC0003DMG400005730RLKWAX-EGF\_3538

ATGGGAAAAGTTGTACGAAATTGCACTTGGGATAGCTCGAGGACTGGAGTATTTGCACCGAGGGTGCA  
ATGCACGAATACTGCATTTTCGATATAAAACCTCACAACATCCTTCTTGATGA

>PGSC0003DMG400005730RLKWAX-EGF\_366

GATAGACTCGGTAACACTAGCTTTAATGATCCCCTATTACGCTATGGTCCTGATTTTGGGATTCTCATCCT  
GTTCTATGCTTGTCTTTTCGATATACCTTCTGAATCGAAAAAATTCACC

>PGSC0003DMG400005730RLKWAX-EGF\_4087

CATCCAATTTCCACCAAAGCCTTTTATATGTTCTCCCTCGCGATCAGAAGGATCATCGATGATCCCTTTGG  
GGAAGCCAACAAAGCCCTTTGTATATTCTTCTTCGAGTTCAACACTTGA

>PGSC0003DMG400005730RLKWAX-EGF\_488

CAGCTGCAATAACACCGGAGAGTCCAGTCATGGTTTCTATCCAGATCAGTCATTTATATCATTCTGGGGA  
CCAAAGTATGGGAGTTGTGAGCGAAATGTCATAGTTCCTGTGTTGTTAAC

>PGSC0003DMG400005730RLKWAX-EGF\_61

TTCACTCCATCATCACCATCCTATGCTTCTTGAACACGTCCTCGCCATCGTATGGCCAAGAGGATAAACAG

TATTCCACTTGTAATAGCTCCTACACCTGTGGGAATATTCAAATATCA

>PGSC0003DMG400005730RLKWAX-EGF\_671

TGATGTGGTTTACAACAAAAGTGTATTATGTCTGGCTTGTGAGAGATCAGGTGGATTATGTTGGTCAGA

GACAGATTTTGC GGAGCCATCTTGCCTTTGTCAGGATCGAACTTATTCTTA

>PGSC0003DMG400005730RLKWAX-EGF\_732

TGGTCAGAGACAGATTTTGC GGAGCCATCTTGCCTTTGTCAGGATCGAACTTATTCTTACA ACTGCGGTT

ATAGATTACTGGCTCAAGGTGTGTTAATTAATCTCCCTATTCCTAATC

>PGSC0003DMG400005730RLKWAX-EGF\_793

ACTGCGGTTATAGATTACTGGCTCAAGGTGTGTTAATTAATCTCCCTATTCCTAATCTAGCTTAGTTCA

GTTTACCAAATATTACTTGAATTCAATTGGCAGCTAAGAGTTTTAGTAC

>PGSC0003DMG400005730RLKWAX-EGF\_854

GCTTAGTTCAGTTTACCAAATATTACTTGAATTCAATTGGCAGCTAAGAGTTTTAGTACTGAACTTCTGAA

ACCACTATTTTTTTTCTGTTGAAATAAGTACCATGATGAAATTGCAGT

>PGSC0003DMG400005730RLKWAX-EGF\_915

AACTTCTGAAACCACTATTTTTTTTCTGTTGAAATAAGTACCATGATGAAATTGCAGTGCCGTCTCGACC

ATAAAGCCACTAAAGCAATGGCTTGGGGCGCCAATTTTTTTGGGGCCTT

>PGSC0003DMG400005730RLKWAX-EGF\_976

CGTCTCGACCATAAAGCCACTAAAGCAATGGCTTGGGGCGCCAATTTTTTTGGGGCCTTCATTTTCTCTCA

AAGATAAAAATACATGTATTGATAAATTTGAAAATAATTTTTGTATAGA

>PGSC0003DMG400005896LRR-RLKs\_0

GAGAAATCAAAGGACAGAAGGAGACAGAGAAAAAAGGTGTCATGAATTTGACTTGTCTTTAGGGTT

TGATCCACA ACTCTTTGCTAAACTCATCTCTTTCTTACAAAATTCACTCA

>PGSC0003DMG400005896LRR-RLKs\_2928

GACCTTCCAATCCCTTCCTTCTCCAGCCAAAATAGAACAGAGTAACCAATGGAGCATTACGTTTTTCCTT

TTTGTTGTCGGTGTGCGCTAGCTACTAAATTGATATACCTCGGACATTG

>PGSC0003DMG400005896LRR-RLKs\_2989

GTTTTTCCTTTTTGTTGTGCGGTGTGCGCTAGCTACTAAATTGATATACCTCGGACATTGATGTATCAATCT

CGCATCATT CAGTGATATTCTCATTCTGTTCACTATCTTTGTTAAACAA

>PGSC0003DMG400005896LRR-RLKs\_3172

CTCCACAAAAGAAACAGAACTCTATCCCTTTAAAGATACTTTTCTCTTGAGGCATGGTACTGAAATAT  
GTTTGCGTAAAGCTGTTCAACAAGCATGTCATACCTGTTAATTTTGGTGT

>PGSC0003DMG400005896LRR-RLKs\_3660

CCCAATCACAGGCCTGACATGTCACACGTTGTGAATGTGCTTGGCCAACTAGTTGAGTCTTGAAACCCG  
TAGAAGAGTCGGATGACTATTCAGGAATTGACTACAGTCTACCTCTTCCA

>PGSC0003DMG400005896LRR-RLKs\_3721

GGAAACCCGTAGAAGAGTCGGATGACTATTCAGGAATTGACTACAGTCTACCTCTTCCAGAAATGTTGA  
AGGACTGGCAGGATGAAGACACTGGAGACTTACCAGTACTAGTCAAGATA

>PGSC0003DMG400005896LRR-RLKs\_3965

CATTTTCGACATGAATTTTGCTTTTGGCTCGTGAAAATAATCTATGGAGGCGTTGCGTCCAGTCTATATAT  
GGTGAATATACATATAACGGGTTGTCATGAATGATTGATCAAGAGATCA

>PGSC0003DMG400005896LRR-RLKs\_4026

GTCTATATATGGTGAATATACATATAACGGGTTGTCATGAATGATTGATCAAGAGATCAAATTGGTGTCG  
TCCAGATACAGAGCAAAAAACAGAAAAACTTTTCAATTTAATGTTGCTT

>PGSC0003DMG400005896LRR-RLKs\_4173

TGTAAAAGTTATATTTATAATAGGTTGGTCCAATTTGCTGTATAAGTTATTTACATGACACTCTTGAGAAT  
CTTATGCATGAATTTGAGAGTGATGCTCAAATTAATAATGCAAAAAAAG

>PGSC0003DMG400005896LRR-RLKs\_61

TAGGGTTTGATCCACAACCTTTTGCTAAACTCATCTCTTTCTTACAAAATTCACTCACATTATTAATAA  
AGGTACCATTTTTCCAACAATTTATAGTTATTATGTACTTGCATCTTT

>PGSC0003DMG400005972-(rev)LRR-RLPs\_0

AAAAATTGTATTGTTATTGAAACCAAATACTACATTAGACATGACAACCTTCTCATTGTACATTCATTTACA  
TTCTTCTACTTCTTTTTTCACTTCCATTCAAAGTAATCACATCATCAGC

>PGSC0003DMG400005972-(rev)LRR-RLPs\_1037

AGAGCTTGAACCTGTTAGAATTTTGACAACCTTACACCACCATTGATCTTTCAAGTAACAGATTTGTAGGG  
AATATTCCAAGTATTATGGGAGAACTCATTGCACTTCGGGTGTTGAATTT

>PGSC0003DMG400005972-(rev)LRR-RLPs\_122

AAACTGAAGCTGAGGCTTATCAAATGGAAGAGTACTAACTTATCTTCTACTTCTTATTGGATTCATGG  
TCCATTTCCAATCTCGAAAACCTTGTGTAATTGGACATTCATTGCCTGCA



>PGSC0003DMG400005972-(rev)LRR-RLPs\_1342

AATTCTCTACATTCCAGAACAACACTCATATGAAGGTAATGTTGGATTACATGGATTCCCAATTTTCAGATGG  
TTGTGGCAATGATCGTGTATCTGAAACAAATTACACCGTATCTTCTCTAG

>PGSC0003DMG400005972-(rev)LRR-RLPs\_1403

TTCAGATGGTTGTGGCAATGATCGTGTATCTGAAACAAATTACACCGTATCTTCTCTAGAAGATCAAGAA  
AGCAACTCTGAATTTCCCAATGACTTTTGGAAAGCTGCTCTGATGGGCTA

>PGSC0003DMG400005972-(rev)LRR-RLPs\_1525

GCAGTGGACTATGTATCGGAATGTCCATAATATATTTTCATGATCTCCACGGGAAATCCAAGATGGCTAGC  
AAGAATCATCGAAAACTGGAACACAAATTTATCATGCAAATGAGAAAGA

>PGSC0003DMG400005972-(rev)LRR-RLPs\_1708

GCTATTCAATCAAGCTCTACATTGATCTTTAGTTTATTGTAATTTGTAECTATTATGATATCTCATTGAGTG  
CTTCAGCTTCATGTGATATAATAACTGTACTATTTCCAGTGTGACT

>PGSC0003DMG400005972-(rev)LRR-RLPs\_1769

CTCATTGAGTGCTTCAGCTTCATGTGATATAATAACTGTACTATTTCCAGTGTGACTAACTGCAACATG  
TACTTTAATTTCTGCCTTTCTTACATTTAGACAGGAAACACAAAGGAC

>PGSC0003DMG400005972-(rev)LRR-RLPs\_183

GGATTCATGGTCCATTTCCAATCTCGAAAACCTGTGTAATTGGACATTCATTGCCTGCAATGCTGATGGA  
ACAATTTCCGGAGATCAATCTTTCTAATGCAACACTCTCAGGCTCTCTTGA

>PGSC0003DMG400005972-(rev)LRR-RLPs\_1830

CTGCAACATGTACTTTAATTTCTGCCTTTCTTACATTTAGACAGGAAACACAAAGGACCAAATAATAACT  
GGACAATATATGGGCAGTAGGCAAAAGAGAAAGAAACAAACCATAAAAT

>PGSC0003DMG400005972-(rev)LRR-RLPs\_1891

AATAATAACTGGACAATATATGGGCAGTAGGCAAAAGAGAAAGAAACAAACCATAAAATAGGTTACAT  
AATGAGAAACTAAATACACATTACATATGAGGTATGGTCAAAGAATCTGCCA

>PGSC0003DMG400005972-(rev)LRR-RLPs\_1952

GTTACATAATGAGAAACTAAATACACATTACATATGAGGTATGGTCAAAGAATCTGCCAAATTCATTCTT  
TGACATGAACCTTCTCGGGTTCAGGGGACTCGTATACGCACTCCCTACA

>PGSC0003DMG400005972-(rev)LRR-RLPs\_2013

TTCATTCTTGACATGAACCTTCTCGGGTTCAGGGGACTCGTATACGCACTCCCTACAATATAAACAAG

GTA

>PGSC0003DMG400005972-(rev)LRR-RLPs\_2074

ATAAACAAGGTA

GTCTCACTTGTTAACTAGCATCTATGGATACGAGTGATGAGTGAGACCATG

>PGSC0003DMG400005972-(rev)LRR-RLPs\_2135

TAAGTTTGGTCTCACTTGTTAACTAGCATCTATGGATACGAGTGATGAGTGAGACCATGACAAGCGTATT

TGGCGCCAAGAATATGGAGCTCGCTACCCAAAGAATGGTCAAAACTAGAG

>PGSC0003DMG400005972-(rev)LRR-RLPs\_2196

AAGCGTATTTGGCGCCAAGAATATGGAGCTCGCTACCCAAAGAATGGTCAAAACTAGAGTACAGGCCCT

AGCTAGTATCATCATAACGGCTTAAAAATTGGATTATACAAGGATATACAT

>PGSC0003DMG400005972-(rev)LRR-RLPs\_2257

CAGGCCCTAGCTAGTATCATCATAACGGCTTAAAAATTGGATTATACAAGGATATACATGTTCTGCGGCC

TGCAGGCACCAGGAAGAGTATAAGTTGTTATGCAATAATAGAAACGGAAA

>PGSC0003DMG400005972-(rev)LRR-RLPs\_2318

TCTGCGGCCTGCAGGCACCAGGAAGAGTATAAGTTGTTATGCAATAATAGAAACGGAAAAATAATAACA

ATGCACATGCAAAAGATGCCTATTTACGGAGTTGTGAAAGTAAATAACGT

>PGSC0003DMG400005972-(rev)LRR-RLPs\_2379

TAATAACAATGCACATGCAAAAGATGCCTATTTACGGAGTTGTGAAAGTAAATAACGTATCATATTTCC

TAATCTAGGTATATTTAACTCTCAGGTTTACATAAGGAAACAAAAAAAAC

>PGSC0003DMG400005972-(rev)LRR-RLPs\_244

GCTGATGGAACAATTTCCGAGATCAATCTTTCTAATGCAACACTCTCAGGCTCTCTTGATCACCTTGACTT

CACTTCATTTCCGAATCTCACGAGTTTCATTCTCAATGGCAACAACCTT

>PGSC0003DMG400005972-(rev)LRR-RLPs\_2440

CATATTTCTAATCTAGGTATATTTAACTCTCAGGTTTACATAAGGAAACAAAAAAAACATTGAAAGGCA

ATTCCAATGTGACTAGGCACCTCTCCACTTCCAGCATCTTTCTATTCTTT

>PGSC0003DMG400005972-(rev)LRR-RLPs\_2501

TGAAAGGCAATTTCCAATGTGACTAGGCACCTCTCCACTTCCAGCATCTTTCTATTCTTTATCATCCTTTTCT

ATACTCTGTCTGCTAATCAATCAATCAACTAGACCTCAAATCCTCAAT

>PGSC0003DMG400005972-(rev)LRR-RLPs\_2562

CATCCTTTTCTATACTCTGTCTGCTAATCAATCAATCAACTAGACCTCAAATCCTCAATCCTATATCGGTAG  
GGTTTGGTTTTATAAATTCTCCATATCCAGTCCGGACTATTCAGGTTA

>PGSC0003DMG400005972-(rev)LRR-RLPs\_2623

TATATCGGTAGGGTTTGGTTTTATAAATTCTCCATATCCAGTCCGGACTATTCAGGTTAATCTCATTCTAA  
TACTAAATAATGTCTTTCAAAGCAAGCAAATTAATTCCTCTAAAACCT

>PGSC0003DMG400005972-(rev)LRR-RLPs\_2684

CTCATTCTAATACTAAATAATGTCTTTCAAAGCAAGCAAATTAATTCCTCTAAAACCTCACATTTATTCCC  
AAATGAATAACTAGTCTAAATCCAATCAGTTAATGTCACCTCATATAGC

>PGSC0003DMG400005972-(rev)LRR-RLPs\_2745

CATTTATTCCCAAATGAATAACTAGTCTAAATCCAATCAGTTAATGTCACCTCATATAGCTCCTTTGTTTCCA  
TTGTATTCTGTTCTTGTATTCCAAAAGAAGTTAAAATTGTTAAAGTT

>PGSC0003DMG400005972-(rev)LRR-RLPs\_2806

CCTTGTTTCCATTGTATTCTGTTCTTGTATTCCAAAAGAAGTTAAAATTGTTAAAGTTTACATACCATGCG  
TCCTCCCACCAAGTCATAATGAGCATAATGCTGACCATTATCATCCCC

>PGSC0003DMG400005972-(rev)LRR-RLPs\_2867

CATACCATGCGTCCTCCCACCAAGTCATAATGAGCATAATGCTGACCATTATCATCCCCCAATACTTTGTA  
GGTGACCAAGTGCTCGGGGATAAGCTTTGCCGTTTCTGCTTGAACCAAT

>PGSC0003DMG400005972-(rev)LRR-RLPs\_2928

ATACTTTGTAGGTGACCAAGTGCTCGGGGATAAGCTTTGCCGTTTCTGCTTGAACCAATGTGTTGCAAGA  
AAAGAATTGTTAGAAAACCTTATCATCCTCTGACAGAAAAATGAGCGGAAG

>PGSC0003DMG400005972-(rev)LRR-RLPs\_2989

GTTGCAAGAAAAGAATTGTTAGAAAACCTTATCATCCTCTGACAGAAAAATGAGCGGAAGTACTATGAAA  
CATACCGCACACTGCTTCTGGTGGGCAGATTATGTCTTTATCTCCAGCAAC

>PGSC0003DMG400005972-(rev)LRR-RLPs\_305

ACCTTGACTTCACTTCATTTCCGAATCTCACGAGTTTCATTCTCAATGGCAACAACCTTAGTGGATCGATA  
CCATCGAATATTGGCAATGCCTCTAGTCTTGAAGTTGTTGTACTTCTCA

>PGSC0003DMG400005972-(rev)LRR-RLPs\_3050

CTATGAAACATACCGCACACTGCTTCTGGTGGGCAGATTATGTCTTTATCTCCAGCAACAGCCAACACGG  
GTACATTGGTTTTGTGAAGATTATCCTTGTAGAATATTTTACCACTTCTG

>PGSC0003DMG400005972-(rev)LRR-RLPs\_3111

CCAACACGGGTACATTGGTTTTGTGAAGATTATCCTTGTAGAATATTTTACCACTTCTGTCACGGAGTCCC  
CCTTCTCGAAAAGCTGTAGTCAACTGCAAATAAGTTTAGCAGGAATAG

>PGSC0003DMG400005972-(rev)LRR-RLPs\_3172

ACGGAGTCCCCCTTCTCGAAAAGCTGTAGTCAACTGCAAATAAGTTTAGCAGGAATAGTACCTGCCAG  
AAGATCTATTAGAAAATCTAAGTAAGAGGTACATGTGAAATCTCAAGAGAA

>PGSC0003DMG400005972-(rev)LRR-RLPs\_3233

CCTGCCAGAAGATCTATTAGAAAATCTAAGTAAGAGGTACATGTGAAATCTCAAGAGAACATAGAAAGG  
GCGTGATCCCCAAAGGAATTTTTTAACAAAAGAAAGTGAACCTTCAGGATC

>PGSC0003DMG400005972-(rev)LRR-RLPs\_3294

TAGAAAGGGCGTGATCCCCAAAGGAATTTTTTAACAAAAGAAAGTGAACCTTCAGGATCACCGTCAGAC  
TACAGCCCTTATAAATCAGTTATGATAAACTATCCTTACTTTGATGGAAAC

>PGSC0003DMG400005972-(rev)LRR-RLPs\_3355

CGTCAGACTACAGCCCTTATAAATCAGTTATGATAAACTATCCTTACTTTGATGGAAACACTCTTCCATTG  
AAGATCATCTATCAACACCGTTCCACAGTGTCAAGAAAACAACACAGGA

>PGSC0003DMG400005972-(rev)LRR-RLPs\_3416

TCTTCCATTGAAGATCATCTATCAACACCGTTCCACAGTGTCAAGAAAACAACACAGGAGTGAACTTGT  
GGGAGCAAAGAGTCAATAGTTCATCAAACAAAGAGTCAAATAAATATATT

>PGSC0003DMG400005972-(rev)LRR-RLPs\_3477

GAACTTGTGGGAGCAAAGAGTCAATAGTTCATCAAACAAAGAGTCAAATAAATATATTGGTATATGCA  
GCTCTTTGTCAGAAGAGAAAATATCTAGCTGGCAAATAAATATACAGCGGA

>PGSC0003DMG400005972-(rev)LRR-RLPs\_3538

TATATGCAGCTCTTTGTCAGAAGAGAAAATATCTAGCTGGCAAATAAATATACAGCGGATGTTTACTTGA  
TATAATTTTCTTTTTCAATCTGAAGATGTTAATAGTTCTTCGTCGCTCAT

>PGSC0003DMG400005972-(rev)LRR-RLPs\_3599

TTTACTTGATATAATTTTCTTTTTCAATCTGAAGATGTTAATAGTTCTTCGTCGCTCATTCTTTATGCGAAC  
AAATAAGAATTAAGAATCAACTCTCAGTCTCTCACATAGTTTGTTCC

>PGSC0003DMG400005972-(rev)LRR-RLPs\_366

TGGATCGATACCATCGAATATTGGCAATGCCTCTAGTCTTGAAGTTGTTGTACTTCTCAACAATTCATTTCC

AAGGGAAGATTCCATCTTCAATAGGCAAACCTTAGAAATCTTCAAACACT

>PGSC0003DMG400005972-(rev)LRR-RLPs\_3660

TTTATGCGAACAAATAAGAATTAAGAATCAACTCTCAGTCTCTCACATAGTTTGTTCCTACTGATTACCTT  
ATTGCTCAGAAGCCTATAAGGAAAGACCTTTTTAGTTTTTAGTACCGAC

>PGSC0003DMG400005972-(rev)LRR-RLPs\_3721

TGATTACCTTATTGCTCAGAAGCCTATAAGGAAAGACCTTTTTAGTTTTTAGTACCGACTCCTCTTGAGGC  
CAAGAAGGAGACCAACTAGACGAGACAGACCATTGTTTCATACTTCATAG

>PGSC0003DMG400005972-(rev)LRR-RLPs\_3782

CTCTTGAGGCCAAGAAGGAGACCAACTAGACGAGACAGACCATTGTTTCATACTTCATAGTTGGTTATA  
AGCAAGTACAAATCAAATTTCAATTTGGCTTGCCAAAGGACATACTTCAAA

>PGSC0003DMG400005972-(rev)LRR-RLPs\_3843

TGGTTATAAGCAAGTACAAATCAAATTTCAATTTGGCTTGCCAAAGGACATACTTCAAACCTTTGGCTGTT  
CTTCCTTGATAACGCTGCATGACTACTGTGAAAGATGAGATATACTAAT

>PGSC0003DMG400005972-(rev)LRR-RLPs\_3904

TTGGCTGTTCTTCCTTGATAACGCTGCATGACTACTGTGAAAGATGAGATATACTAATAATCATAATTA  
TAAGTACATTTGCCTTCCTAACTGATACCCATGAGGATGTATCTGAAAT

>PGSC0003DMG400005972-(rev)LRR-RLPs\_3965

TCATAATTAATAAGTACATTTGCCTTCCTAACTGATACCCATGAGGATGTATCTGAAATGTAGAATATTAG  
TTCAAACACTCAGACTCAACATATCATCCAGACAGAAAGTGGAGGGGAAAAG

>PGSC0003DMG400005972-(rev)LRR-RLPs\_4026

AGAATATTAGTTCAAACACTCAGACTCAACATATCATCCAGACAGAAAGTGGAGGGGAAAAGAATGTATTGG  
TGCAAAAACGCTGTAGACAGGAATGTGGGGCATAGCCAGATGGTCATTGAA

>PGSC0003DMG400005972-(rev)LRR-RLPs\_4087

TGTATTGGTGCAAAAACGCTGTAGACAGGAATGTGGGGCATAGCCAGATGGTCATTGAATCATTCTTCA  
GAACATGTAAGTTTCTCATACTGTTATCTTTAAAACACTCATACTAAATATCT

>PGSC0003DMG400005972-(rev)LRR-RLPs\_4148

ATTCTTCAGAACATGTAAGTTTCTCATACTGTTATCTTTAAAACACTCATACTAAATATCTATGCCTATAACA  
TTGAAACCTGCCTGCTCTCCATATAAATAAATTATAAAACAAGAGGAC

>PGSC0003DMG400005972-(rev)LRR-RLPs\_427

AATTCATTTCAAGGGAAGATTCCATCTTCAATAGGCAAACCTTAGAAATCTTCAAACACTTGATCTTCGAAA  
GAATCGTTTGAACCTCAACCATTCTTCTGAGTTAGGCCTTTGTACAAAC

>PGSC0003DMG400005972-(rev)LRR-RLPs\_4758

CAAGGTAATAAATAAGAATATGCTGAAAGGGCTTTTTGCTGCACAACGAGAGTTGAAAGACATTTA  
TTTTTAGCTTACAAGGGGTAGGAGCAGTCTGAGTGCAGACTTCGAAGATGT

>PGSC0003DMG400005972-(rev)LRR-RLPs\_488

ATCTTCGAAAGAATCGTTTGAACCTCAACCATTCTTCTGAGTTAGGCCTTTGTACAAACCTCATTATCTTG  
GCTCTAGCAGAGAATGCTCTGCAAGGAACATTGCCTATATCTTTGTCCT

>PGSC0003DMG400005972-(rev)LRR-RLPs\_4941

TTTCCAAGATAAAACCAGAAACATATTAATAATTATGTCATATCTGTATGATTCCCGGATGTAGTCAGTCT  
GAAAATATTTTTTTGAGACTGTGCCACTGCACATTAACAAGGAATCAGA

>PGSC0003DMG400005972-(rev)LRR-RLPs\_549

CATTATCTTGGCTCTAGCAGAGAATGCTCTGCAAGGAACATTGCCTATATCTTTGTCCTCTTTGATCAAGT  
TATCCCAGTTGGCGTTGTCCGATAATTTCTTTCTGGTGAGGTCTCATC

>PGSC0003DMG400005972-(rev)LRR-RLPs\_5612

TAAATAAAATGTTTAAATATTACTGTTTTCTTATCAACTGCAACTACAGAAAGGATTCTTTGTTACTTTTTC  
AAAACACTTGACATTAATTTATTAGTCTCTTAAGTGGCTCATAAGTA

>PGSC0003DMG400005972-(rev)LRR-RLPs\_5673

GTTACTTTTTCAAACACTTGACATTAATTTATTAGTCTCTTAAGTGGCTCATAAGTAGACCCGCCAGAT  
CACGTAAGTGTAACAACATTAATTCATATAAACAACGAATGAATCTTA

>PGSC0003DMG400005972-(rev)LRR-RLPs\_5856

TTACCATCTTTTGGTGCAGTTTGGGCCTTAATGTATTCCATCTAGAATGAAAATAAATAAATTAGACTAGT  
CAGAATAATAAATAAGAGTGAAAAATCAACAAATTCTGAATTTCACTTG

>PGSC0003DMG400005972-(rev)LRR-RLPs\_5917

TTAGACTAGTCAGAATAATAAATAAGAGTGAAAAATCAACAAATTCTGAATTTCACTTGGCTGCGTAATC  
TCAAGGACAATAATATCTTTATATTCTACAACATGGGAATCTGTCACCTC

>PGSC0003DMG400005972-(rev)LRR-RLPs\_61

TTCATTTACATTCTTCTACTTCTTTTTTCACTTCCATTCAAAGTAATCACATCATCAGCAAAAACCTGAAGCT  
GAGGCTCTTATCAAATGGAAGAGTACTAACTTATCTTCTACTTCCTTA

>PGSC0003DMG400005972-(rev)LRR-RLPs\_610

TTGATCAAGTTATCCCAGTTGGCGTTGTCCGATAATTTTCTTCTGGTGAGGTCTCATCAGATCTCATTTT  
ACCAATTGGACTGAGTTGATAGCTTTGCAGCTTCAAACATTTACATTA

>PGSC0003DMG400005972-(rev)LRR-RLPs\_6100

TCAAGCTGTTTCTGGAAATCTTCTATGGTAGTGGTTAGACGTTTCATGAAGGTCAACTAACGGAGAAACA  
GAACGTTGGCCTTCTCAATGATATTTACTAGCTTTTGGCTAAGATCCTTT

>PGSC0003DMG400005972-(rev)LRR-RLPs\_671

ATCTCATTTTACCAATTGGACTGAGTTGATAGCTTTGCAGCTTCAAACATTTACATTACTGATTTAGGAG  
ATAATCACTTCAACGACACATTCTAGTGTGGTTGGGAAATCTGTCAGA

>PGSC0003DMG400005972-(rev)LRR-RLPs\_6832

AGTGATAAAGAATTCTAACCTCCACTGAAGAGTAGGGTGCACATACTTGCCTCAAGTGATAAAAATGA  
ACTTAAAAGGATAAGAAGATGCATCAACAGAACTTTAAACAAAAAATAGAC

>PGSC0003DMG400005972-(rev)LRR-RLPs\_6893

AAAAATGAACTTAAAAGGATAAGAAGATGCATCAACAGAACTTTAAACAAAAAATAGACAAGAAATAAT  
CCCAGTGAAATCAAGTTGACACTAGTTATTGCATTAACCAGCAGACATTTA

>PGSC0003DMG400005972-(rev)LRR-RLPs\_6954

GAAATAATCCCAGTGAAATCAAGTTGACACTAGTTATTGCATTAACCAGCAGACATTTAGATTTGTCTCA  
CTAAAAAAGAAAAGATAGAAATCATCACTAGCAACTAAGCAAAAAAATCGC

>PGSC0003DMG400005972-(rev)LRR-RLPs\_7015

TTTGTCTCACTAAAAAAGAAAAGATAGAAATCATCACTAGCAACTAAGCAAAAAAATCGCCATCACAATTC  
ATATTTAGAAATGTACAATCACAGAGAGTGCTAGCCACATGACTACCAT

>PGSC0003DMG400005972-(rev)LRR-RLPs\_7076

TCACAATTCATATTTAGAAATGTACAATCACAGAGAGTGCTAGCCACATGACTACCATCAACACCTGAT  
TGATGCAGCCATAAAGCCATATAAAAAAAGGAAGATGAAATAGATAACA

>PGSC0003DMG400005972-(rev)LRR-RLPs\_7686

TTATGATCTATTAATGTGGCTATCAATGAACGATCCATGAAGATCCCCTAGTTCTGTTACCTATACAGG  
CATAAATCTGCAAATTAGAGTGTCCCGGCTACTCTTTCACGCAATACTG

>PGSC0003DMG400005972-(rev)LRR-RLPs\_7747

CCTATACAGGCATAAATCTGCAAATTAGAGTGTCCCGGCTACTCTTTCACGCAATACTGGACATACAACA

AAACAGAAGAATGCACAAAGAATGGAGAGAAGGCAGACGAGTATCATAACC

>PGSC0003DMG400005972-(rev)LRR-RLPs\_793

TGAAAGTTTTAAGCTTGAGATCAAACAAATTCCATGGACTCATTAGAACGTCAAGGATTGAGAACATGTT  
TCCCGAGCTTCGAATCATAGATCTATCTTATAATGCCTTCTCGGGAAACT

>PGSC0003DMG400005972-(rev)LRR-RLPs\_8052

TTTTATATAACAGTATTTGATAGAACACAAAATTTAAAATATTCAATAGTTGAATTAGATAAAATGGCGTC  
AAATATTCTTAATGCCTTCATGTCTTATATATTGGGACCAATTCTATAT

>PGSC0003DMG400005972-(rev)LRR-RLPs\_8296

CTATGACCACATTTAATTGATCGCAAAATTTAAAATTTGAACATATAGAAATGAAAGTGTGCAATATATT  
ATTTTTTTCAAATTGTCATACAGTTAAGAGTAACAGTTCAAATTAACAAA

>PGSC0003DMG400005972-(rev)LRR-RLPs\_8601

TAAAGCAGCAGTTCGGGGAGTTCCGGTATGAAATGACGGCGGGAGGAAGTCGCCGGCGGTGATTTGT  
GAGGTGGTGGTAATGGTTGTGGTGGCGGAAGATGGCGGCGATTTGAATCGCCG

>PGSC0003DMG400005972-(rev)LRR-RLPs\_8744

TAAACCATATTTTTTTGGGATTCGTGACAATTTGGATAAAGAAAATTAGTTTGATAAATCTTTACTCTTTT  
GACTTTGGAAGGTTTGAGACGTAAACTGTTTTTTTTTTTTTAATAATTT

>PGSC0003DMG400005972-(rev)LRR-RLPs\_915

CCTACGAGTATGTTTCAACATCTAAAAGCCATGATGAGAGTTGATCAAACAATGAAGGCACCAATATATC  
TTGGAGTGTACAGTTATTGCCATGATTCTATGACAGTTGCAACCAAGGGA

>PGSC0003DMG400005972-(rev)LRR-RLPs\_976

CAATATATCTTGGAGTGTACAGTTATTGCCATGATTCTATGACAGTTGCAACCAAGGGACGAGAGCTTG  
AACTTGTTAGAATTTTGACAACTTACACCACCATTGATCTTTCAAGTAACA

>PGSC0003DMG400005975RLKWAX-EGF\_0

GAAAAAACTATAGTATAGTATACAATTTTTTTTTGAGTATGGTATCATTAAATTCTTTATCAATTTTCTTG  
ATTCGTATCAAATGGTGTGTTTGTCTCAGTTGTAGCGCAGAATCAA

>PGSC0003DMG400005975RLKWAX-EGF\_122

TCAAATAACAGCAGTTGTGTGGATGAATTCAAATGTGGAAATCTTGGAAATGTGAGTTTTCCATTTTCT  
GTATCTTCAACCTGATTGTGGATTGTACAGTATAGATTGTGATGTTAC

>PGSC0003DMG400005975RLKWAX-EGF\_1647



CCTTCAAGAAAAGATCTTGAAGGGGATAGCAAGTACTTTGGGGTCCCCGTCTTCTCCTACTCTACTCTCC  
AAGAAGCCACCAATAATTTTGATCCCTCCCAAGAGCTTGGAGACGGAGGT

>PGSC0003DMG400005975RLKWAX-EGF\_1708

CTACTCTCCAAGAAGCCACCAATAATTTTGATCCCTCCCAAGAGCTTGGAGACGGAGGTTTTGGAAGTGT  
GTACTATGGTAATAAACACGTAAATCAATCATGACATTTTGAATCATAT

>PGSC0003DMG400005975RLKWAX-EGF\_1769

TGGAAGTGTGTACTATGGTAATAAACACGTAAATCAATCATGACATTTTGAATCATATTTAGAAAAGCA  
TTAGGCAGAGTTTTGCATTACTGTATTAAGAATGCAATGGTTTGGTAACA

>PGSC0003DMG400005975RLKWAX-EGF\_183

CCATTTTCTGTATCTTCACAACCTGATTGTGGATTGTACAGTATAGATTGTGATGTTACTCCCAATCCAAC  
AATTCGTCTCGGAGAAAATGTTTATAGTGTCTGAGACAACGAACTTT

>PGSC0003DMG400005975RLKWAX-EGF\_2074

GTCGTGAACCTCCTGTTTATGAATACATCCCGAATGGAACAGTTGCTGATCATCTCCATGGCGAGAA  
AGCAAAGAACGGAGCCCTTATATGGCCTATACGCATGAAGATTGCTATAG

>PGSC0003DMG400005975RLKWAX-EGF\_244

CCAATCCAACAATTCGTCTCGGAGAAAATGTTTATAGTGTCTGAGACAACGAACTTTGATGGTTTTCG  
AGTTTTAGATCATAGGCTTGAGGAATTATTGACGAGAAACAGTTGTGAAA

>PGSC0003DMG400005975RLKWAX-EGF\_305

TGGTTTTCGAGTTTTAGATCATAGGCTTGAGGAATTATTGACGAGAAACAGTTGTGAACTTTGATAGA  
AGTATATCGTTTTCAAATTCTCCTTCTGTCTCGTTTAGAATCAATGAACG

>PGSC0003DMG400005975RLKWAX-EGF\_366

TTGATAGAAGTATATCGTTTTCAAATTCTCCTTCTGTCTCGTTTAGAATCAATGAACGAAATCTTACTTTG  
TTTAGATGCAACAACAGTTTATAGATATCAACAGAAGCATGAGTGATAAT

>PGSC0003DMG400005975RLKWAX-EGF\_427

ATCTTACTTTGTTTATAGATGCAACAACAGTTTATAGATATCAACAGAAGCATGAGTGATAATTATTTTCGCGA  
ATATCTGAATTATACTAAATGTAGTGGCTTTAGTATATACTACAAGTATC

>PGSC0003DMG400005975RLKWAX-EGF\_488

TTTTCGCGAATATCTGAATTATACTAAATGTAGTGGCTTTAGTATATACTACAAGTATCCTAGTAGAGGA  
CGGGGAAATTCCTCTGATACACCAGAAGAAGATATCCGGATAACTGTTC

>PGSC0003DMG400005975RLKWAX-EGF\_549

AGTAGAGGACGGGGAAATTCCTCTGATACACCAGAAGAAGATATTCCGGATAACTGTTCTCCGATTCAA  
TTGCCAATTACATGGAACACTTCACAGCCAAATGATCAGAATAGTAGCTTG

>PGSC0003DMG400005975RLKWAX-EGF\_61

CAATTTTCTTGATTTTCGTATCAAATGGTGATGTTTGCTTCAGTTGTAGCGCAGAATCAAATTCAAAATAAC  
AGCAGTTGTGTGGATGAATTCAAATGTGGAAATCTTGGAAATGTGAGTT

>PGSC0003DMG400005975RLKWAX-EGF\_610

CGATTCAATTGCCAATTACATGGAACACTTCACAGCCAAATGATCAGAATAGTAGCTTGTTTGATCTGTT  
AACTGTGAATTTTGTGATTGAGTGGAGCCTGTCTGTTGATTGTAGTAAAT

>PGSC0003DMG400005975RLKWAX-EGF\_671

TGATCTGTAACTGTGAATTTTGTGATTGAGTGGAGCCTGTCTGTTGATTGTAGTAAATGTCACTATCAA  
GGAGGTCGATGTTTAAACCGATAGCAACAATAGATTTTCATTGTTCCACAGG

>PGSC0003DMG400005975RLKWAX-EGF\_732

CACTATCAAGGAGGTCGATGTTTAAACCGATAGCAACAATAGATTTTCATTGTTCCACAGGTAATATTTTATT  
TGCAATATGCTTGTCAATACAATACTCTGAGCTTTGTCTAATTCTACT

>PGSC0003DMG400005975RLKWAX-EGF\_793

ATATTTTATTTGCAATATGCTTGTCAATACAATACTCTGAGCTTTGTCTAATTCTACTTTGAATAGTTGCT  
TCTAGTTTTTTGTACTCCAGCTTCGAGAGTGCACATCTACACACCTCAA

>PGSC0003DMG400006027-(rev)LRR-RLPs\_0

TAGAGGTGTCTACTTGCTATTTAATTCAAATCAAATTCATTTCATTCAACAACACATTTTTACACTGTG  
AAAAAAAAAACTTCATTTTCTTCTCATAGCTTGAAAATCTCTATCAA

>PGSC0003DMG400006027-(rev)LRR-RLPs\_1302

CACCAAAACCAAGAGGACCACCACCACCTACTTGGAAGTCTTCGGGTTTCGCATAACAAGCGATCTCCGC  
CACCACCTAAATCAACTCCTCTTCCACCAGCACCTTACAAAAAGTCCC

>PGSC0003DMG400006027-(rev)LRR-RLPs\_2232

ATATCCCTCTCCACCGGTAATCGGAGTTTCCTACGCATCTCCACCACCACCAGTCATTCCATATTACTGA  
ACAGGGGTTATCAATTAGCCTTTGATTTTCCATTATCAAAAAAAAAAAAA

>PGSC0003DMG400006027-(rev)LRR-RLPs\_310

ATATTGGAAAACAGCAATGTTTTCTGATCCTTTTAACTTCACAGCTAATTGGACAGGACCTGATGTTTGTT

CGTATGGTGGAGTGTCTGTGCTCCTTCGTTAAACGATGATTCGATTAG

>PGSC0003DMG400006027-(rev)LRR-RLPs\_372

ATGTTTGTTCGTATGGTGGAGTGTCTGTGCTCCTTCGTTAAACGATGATTCGATTAGAGTTGTAGCTGG

CATTGATCTTAATCATGCTGACATTGCTGGTTCCTTAGTTGCAGAGCTTG

>PGSC0003DMG400006027-(rev)LRR-RLPs\_62

TTACTACTGTGAAAAAAAAAACTTCATTTTCTTCTTCATAGCTTGAAAATCTCTATCAAATCCAGCAATGCG

GCCTCCTAGCCGAGCGTATTTATCTCTTTTCTTGTTATCTCCCTCTTG

>PGSC0003DMG400006065LRR-RLKs\_0

ATGGAGAAGCACATTTTCTTATTGATTCTTCTCTTTCTAGTTCAATTTTCTGTATCATTTGCTAACTCAAAT

GTGACAGACAAAGAAGCTTTACTAGCTTTCCAAAATCTTATTACAAGT

>PGSC0003DMG400006065LRR-RLKs\_1037

GGGGCAAGTTCCTCCAGAATTAGAGAAGCTGTCAAATTTGAGGCAATTAACCTTGGCCAGAATTATAA

TATTATTGGTCAAATTCGAAGGCTATTTTAAACATGTCCTCTTTGGAAAT

>PGSC0003DMG400006065LRR-RLKs\_1098

AATTATAATATTATTGGTCAAATTCGAAGGCTATTTTAAACATGTCCTCTTTGGAAATGATTGCTTTCAAT

CTCAACAACCTCTCGGGTAGAATTCCAGCCACTACAGGTCTTCATCTT

>PGSC0003DMG400006065LRR-RLKs\_1159

TTGCTTTCAATCTCAACAACCTCTCGGGTAGAATTCCAGCCACTACAGGTCTTCATCTTCCGAACCTTGAA

AGACTTTACTTGTCTAAAAATCATCTCGAAGGGGAAATTCCTCCGCACA

>PGSC0003DMG400006065LRR-RLKs\_122

TACTCATTTTTTGGCCAACAATTGGACCAACAATACTTCTTTTTGCTCTTGGTTTGGTGTGAGTTGCAGTCC

AAAAAGGCAAAGGTTGTAGCCTTGGATCTTTCTAGTTTGAATCTTCG

>PGSC0003DMG400006065LRR-RLKs\_1220

GAACCTTGAAAGACTTTACTTGTCTAAAAATCATCTCGAAGGGGAAATTCCTCCGCACATCACAAATGCT

TCCAAACTTAAGACATTGGAGCTAAATAGTAACTTTTTTCAGTGGCAGTAT

>PGSC0003DMG400006065LRR-RLKs\_1281

ACAAATGCTTCCAAACTTAAGACATTGGAGCTAAATAGTAACTTTTTTCAGTGGCAGTATTCCAACTAATT

GGGAAATCTTCGTGAGCTGCAACTGCTGCACCTAGATCATAATCAACTT

>PGSC0003DMG400006065LRR-RLKs\_1342

CAACTAATTTGGGAAATCTTCGTGAGCTGCAACTGCTGCACCTAGATCATAATCAACTTACCAATGAACC  
AAGAGAGCATGAGTTGCTATTCTTCAGTTCTTTGGCGAACTGTAGGATGT

>PGSC0003DMG400006065LRR-RLKs\_1403

CAATGAACCAAGAGAGCATGAGTTGCTATTCTTCAGTTCTTTGGCGAACTGTAGGATGTTGCGAGATCTA  
GATATGAGTACCAATATGTTGAATGGTACTCTGCTCAATACTATCGGAAA

>PGSC0003DMG400006065LRR-RLKs\_1464

CGAGATCTAGATATGAGTACCAATATGTTGAATGGTACTCTGCTCAATACTATCGGAAATCTTTCATCTAC  
TATTGAATTCTTTGCAATAATAGATGCATACATCAATGGCCCCATCCCC

>PGSC0003DMG400006065LRR-RLKs\_1525

TTTCATCTACTATTGAATTCTTTGCAATAATAGATGCATACATCAATGGCCCCATCCCCACAGGTATAGGC  
AACATGAGCGGTCTAATATCTCTAAGCCTTCATGGAAACAACCTGGTGG

>PGSC0003DMG400006065LRR-RLKs\_1586

AGGTATAGGCAACATGAGCGGTCTAATATCTCTAAGCCTTCATGGAAACAACCTGGTGGGAGGTTTCCC  
TTCTGAGATTGGTAAGCTTAAACAACACTACAAGGACTATATCTAAATAACAA

>PGSC0003DMG400006065LRR-RLKs\_1647

GGTTTCCCTTCTGAGATTGGTAAGCTTAAACAACACTACAAGGACTATATCTAAATAACAATAAATTGCAGG  
GACATATTCCAGAGGTGGTATGTCGTTTATCTAATTTGGTTCAATTAGCT

>PGSC0003DMG400006065LRR-RLKs\_1708

AATTGCAGGGACATATTCCAGAGGTGGTATGTCGTTTATCTAATTTGGTTCAATTAGCTCTAGATGATAA  
TGAGCTCTTTGGGTTAATTCCAGCATGTATAGGAAATTTTAGCATGCTAC

>PGSC0003DMG400006065LRR-RLKs\_1769

AGATGATAATGAGCTCTTTGGGTTAATTCCAGCATGTATAGGAAATTTTAGCATGCTACAATATCTTTCAT  
TGAGTTATAACAATTTTGCATCAAAGCTTCCTTTGAGTCTTTGGAAGAT

>PGSC0003DMG400006065LRR-RLKs\_183

AGTTGCAGTCCAAAAGGCAAAGGGTTGTAGCCTTGGATCTTTCTAGTTTGAATCTTCGAGGTACAATTT  
CCCCGTCTTTGGCTAATTTGTCCTTTCTCAGAGAGCTTAATCTTGGGAAC

>PGSC0003DMG400006065LRR-RLKs\_1830

TATCTTTCATTGAGTTATAACAATTTTGCATCAAAGCTTCCTTTGAGTCTTTGGAAGATGAGTGGCCTTCT  
CCACCTAGACGTGTCACAAAATTCTATAGAGGGAGAAGTTCCACTGGAT

>PGSC0003DMG400006065LRR-RLKs\_1891

GTGGCCTTCTCCACCTAGACGTGTCACAAAATTCTATAGAGGGAGAAGTCCACTGGATATTGGAGAAC  
TGAAAGCAATTGTAGATCTATATCTTTCTAGTAACCGCCTTTCGGGCATGA

>PGSC0003DMG400006065LRR-RLKs\_1952

TGGAGAACTGAAAGCAATTGTAGATCTATATCTTTCTAGTAACCGCCTTTCGGGCATGATACCAAACAGT  
TTGGGGGAACTCCAAACCCTGGAGTCTCTTGACCTGTCAAACAATTCATT

>PGSC0003DMG400006065LRR-RLKs\_2013

CCAAACAGTTTGGGGGAACTCCAAACCCTGGAGTCTCTTGACCTGTCAAACAATTCATTTTCAGGCCAAA  
TTCCATTATCCTTTGCCAACTTGATAAGCTTAGAATTCATGGATTTGTCT

>PGSC0003DMG400006065LRR-RLKs\_2074

CAGGCCAAATTCCATTATCCTTTGCCAACTTGATAAGCTTAGAATTCATGGATTTGTCTTTAAATGCCTTG  
GCAGGTAATTCCTAAGTCTTTGGAAAACTCTTGTACCTTAAAGCCA

>PGSC0003DMG400006065LRR-RLKs\_2196

AATGTTTCATTTAATGAATTAGAAGGTGTAATACCTAGTGGTGGTGTGTTTGCAAATTCCACTTTGCAATC  
ATTTCTTGGTAACAAAGGCCTATGTGGAATGCACATATTGGATGTTCTT

>PGSC0003DMG400006065LRR-RLKs\_2257

CTTTGCAATCATTCTTGGTAACAAAGGCCTATGTGGAATGCACATATTGGATGTTCTTGCTTGCTGCTGC  
ACTAATCTTGGACATCAATCAAAGTTTAAGAAGCTTGTGCTAAAAATTG

>PGSC0003DMG400006065LRR-RLKs\_2318

TTGTGCTGTCACTAATCTTGGACATCAATCAAAGTTTAAGAAGCTTGTGCTAAAAATTGCTATTCCAGTG  
GTTACTTCATCCTTTCTAATATCCTTGTGTTGCTTCAATTTGGATGATGAA

>PGSC0003DMG400006065LRR-RLKs\_2379

ATTCCAGTGGTTACTTCATCCTTTCTAATATCCTTGTGTTGCTTCAATTTGGATGATGAAACGACAAAAGAA  
GGGAAATTCCAAAGACGTGGAAAAGGTACCGGAGGTCAAGACACATCAA

>PGSC0003DMG400006065LRR-RLKs\_244

GTACAATTTCCCGTCTTTGGCTAATTTGTCCTTTCTCAGAGAGCTTAATCTTGGGAACAACAACCTTTCAT  
GGCGCCATCCCTTATGGCATTGGCCACTTGCCCTCGCTTGCAGAGTGATTG

>PGSC0003DMG400006065LRR-RLKs\_2440

GACAAAAGAAGGGAAATTCCAAAGACGTGGAAAAGGTACCGGAGGTCAAGACACATCAATTAGTATCT

TATCACGAGATTCAAAGAGCTACAAATTATTTTGATGGATCAAACCTAATTG

>PGSC0003DMG400006065LRR-RLKs\_2562

GTGGGAGGTTCTGGCTCTGTGTACAAAGGTACATTATCTAGCGGAGTTGTGGTTGCAATAAAGGTTCTA  
GATTTGCAAATGAGGAAGTATGCAAGAGGTTTGATACTGAATGTGAAGTG

>PGSC0003DMG400006065LRR-RLKs\_2623

AGGTTCTAGATTTGCAAATGAGGAAGTATGCAAGAGGTTTGATACTGAATGTGAAGTGATGAGAAAT  
GTTAGGCACAGAAATCTTGTATCGGTGATTACTACTTGCTCTAGCGAATACA

>PGSC0003DMG400006065LRR-RLKs\_2684

GAGAAATGTTAGGCACAGAAATCTTGTATCGGTGATTACTACTTGCTCTAGCGAATACATTAGAGCTTTT  
GTCCTGCAGTATATGCCAAACGGGAGTCTTGAGAATTGGTTGTACAAAGA

>PGSC0003DMG400006065LRR-RLKs\_2745

AGAGCTTTTGTCTGCAGTATATGCCAAACGGGAGTCTTGAGAATTGGTTGTACAAAGAAGATTGCCAC  
TTGAACCTTCTCAAAGGGTTTCCATAATGTTTGATGTGGCTGTGGCTGTT

>PGSC0003DMG400006065LRR-RLKs\_2806

ATTGCCACTTGAACCTTCTCAAAGGGTTTCCATAATGTTTGATGTGGCTGTGGCTGTTGAATATATGCAT  
CACAGACATCACTCATATTGTTTATTGCGATCTAAAGCCAGCCAACG

>PGSC0003DMG400006065LRR-RLKs\_2867

ATATATGCATCACAGACATCACTCATATTGTTTATTGCGATCTAAAGCCAGCCAACGTTCTTTTGGATG  
AAGAAATGGTGGCACATGTTGGTGATTTTGAATTTCCAAAATCTTAGC

>PGSC0003DMG400006065LRR-RLKs\_2989

TAAGCAAGTCCATGGCATCTACCGAGACATTGGGCACTCTCGGATATATTGCACCAGGTATACTAGTCTC  
TTTCTTTTTTACTACACAAATTATAACTAAGCCCTTCCAAAATCTAAACA

>PGSC0003DMG400006065LRR-RLKs\_305

CAACTTTCATGGCGCCATCCCTTATGGCATTGGCCACTTGCCTCGCTTGCAGTGATTGATATTCAAACA  
ATCAGCTCCAAGGAAGTATTCCAACAAGCCTATTTCAACACCAGAAAGT

>PGSC0003DMG400006065LRR-RLKs\_3050

ACTAGTCTCTTTCTTTTTTACTACACAAATTATAACTAAGCCCTTCCAAAATCTAAACAAAAAGCAAGTGT  
TTGTTTGTGTTGTTATATTGGATGAATAATTTTTTTTCATCTTTTG

>PGSC0003DMG400006065LRR-RLKs\_3111

AAGCAAGTGTGGTTGTTGTTTGTGTTATATTGGATGAATAATTTTTTTCATCTTTTGTCTTTTAAGAAT  
ATGGCTTGGGAAGGAATAGTGTCCACTAGTGGCGATGTCTACAGCTATG

>PGSC0003DMG400006065LRR-RLKs\_3233

ATCATGCTAATGGAGGTTTTGGCAACAAGAAGACCAACTGATGCAGAGATATTCAACGAAAATCTTGGC  
TTGAGGGAGTGGATAAGGCGAGCATTTCAAAACTATCATAGAAGTTGTG

>PGSC0003DMG400006065LRR-RLKs\_366

ATTCAAAACAATCAGCTCCAAGGAAGTATTCCAACAAGCCTATTCAACACCAGAAAGTTCAAAGATTT  
CATTGGCTTTCAATAAACGCAGTGGTGAAATGTGGAATGGTTCATGGTAT

>PGSC0003DMG400006065LRR-RLKs\_427

AAAAGATTTTATTGGCTTTCAATAAACGCAGTGGTGAAATGTGGAATGGTTCATGGTATGTACCAGAAC  
TCAAGGTCTTGTATCTCACCAACAATAGTCTCACAGGCATAATCCCGCCTT

>PGSC0003DMG400006065LRR-RLKs\_488

ACCAGAACTCAAGGTCTTGTATCTCACCAACAATAGTCTCACAGGCATAATCCCGCCTTCTATTGGAAATT  
CCACAAAGTTGAGGAACCTCAGTTTGTACGGTAATAGAATCAATGGCAA

>PGSC0003DMG400006065LRR-RLKs\_549

ATTGGAATTCACAAAGTTGAGGAACCTCAGTTTGTACGGTAATAGAATCAATGGCAACATTCCGAAG  
GAGATTGGTAATCTTAGCCAACCTGCAGAGTTGCCTTGGGAGATAATCAA

>PGSC0003DMG400006065LRR-RLKs\_61

CTAACTCAAATGTGACAGACAAAGAAGCTTTACTAGCTTTCCAAAATCTTATTACAAGTCCTACTCATTTT  
TTGGCCAACAATTGGACCAACAATACTTCTTTTTGCTCTTGGTTTGGTG

>PGSC0003DMG400006065LRR-RLKs\_610

TTCCGAAGGAGATTGGTAATCTTAGCCAACCTGCAGAGTTGCCTTGGGAGATAATCAATTAACAGGTTT  
CATTCTGCAACACTGTTAATATCTCGTCGCTACTTATTGCATCTCTGA

>PGSC0003DMG400006065LRR-RLKs\_671

AACAGTTCCATTCTGCAACACTGTTAATATCTCGTCGCTACTTATTGCATCTCTGAAAATCAATAACC  
TTTCTGGTCTCTCTTGCTTGATGAAGGGAATATTGTGTCAAATCTGAA

>PGSC0003DMG400006065LRR-RLKs\_732

ATCAATAACCTTTCTGGTCTCTCTTGCTTGATGAAGGGAATATTGTGTCAAATCTGAAGCATCTAAGTAT  
ATCTAAGAACCAAATTTCTGGTATCATTCTTCCAATATTTGCCAACTC

>PGSC0003DMG400006065LRR-RLKs\_793

ATCTAAGTATATCTAAGAACCAAATTTCTGGTATCATTCCCTTCCAATATTTGCCAACTCAAAGAGCTCAA  
GTGTTGTCCATATCTTTCAACAAGATAACTGGAGATATACCCAAAAATA

>PGSC0003DMG400006065LRR-RLKs\_854

AGAGCTCAAAGTGTTGTCCATATCTTTCAACAAGATAACTGGAGATATACCCAAAAATATTGGTTGTTTA  
GCTAAGCTCGAGGTGTTCTATATCGGAGGTAACGCACTAAGTGGGACTTT

>PGSC0003DMG400006065LRR-RLKs\_915

GGTTGTTTAGCTAAGCTCGAGGTGTTCTATATCGGAGGTAACGCACTAAGTGGGACTTTTCCTGCTTCAT  
TGGGAAATATATCTACTCTTGAATATCTGGATTGTCCAAACAATTGCATA

>PGSC0003DMG400006065LRR-RLKs\_976

CTGCTTCATTGGGAAATATATCTACTCTTGAATATCTGGATTGTCCAAACAATTGCATAGGGGGGCAAGT  
TCCTCCAGAATTAGAGAAGCTGTCAAATTTGAGGCAATTAACCTTGCC

>PGSC0003DMG400006076LRR-RLPs\_1054

CCAAGTTCTCCTTTGTTTTCCGAATACAATGAGATCAAGATTAAGATTTGCAGCAGCACAAACGGAGTT  
GCTTGCCCCCAGATGGACGTTTTAAATGTCAACATTACAAGGTCATATGG

>PGSC0003DMG400006076LRR-RLPs\_1116

ACGGAGTTGCTTGCCCCCAGATGGACGTTTTAAATGTCAACATTACAAGGTCATATGGGGAGTGTCCAA  
CATTTGTGGATGCTTTGCTATGGAGTTGTAATCCTAGGAGACTCAACCTAT

>PGSC0003DMG400006076LRR-RLPs\_1302

CTTCTTCGGAAAGAAGCAACCCCTGGCATAGTCAATTGAAAGAAATCAAAGTTTTTGATGTGAAAAATCA  
AGAGCTGCAACTCGTAAGTGGGGAAGTGGCGATAAGCACCCCTTTCGGAGG

>PGSC0003DMG400006076LRR-RLPs\_682

CCAAGCACCAACTCTTGAACACTTGTTTTATAATGGTTATTTATCGGGAAATTTGGTTATCGTTGGATGTC  
AGAATCTAAAATCTTTAGAGCTATCATATGTGAAGATATGTAATGGATT

>PGSC0003DMG400006076LRR-RLPs\_744

TTGGATGTCAGAATCTAAAATCTTTAGAGCTATCATATGTGAAGATATGTAATGGATTTCTCCATAACCTT  
ATTTCTAGATCGCAATCCCTAGAAGTATTGAAGATTCAGTATTGTATGG

>PGSC0003DMG400006086LysMRLKs\_0

ACAAACACACATCTCTCCTCCAACAAAAAACAAGCAAAAAAATGATAACAAAAACAATATTTGGTTT



TTCACCTTCTTCTCTTATCATTTCATATTCAACCAAACATATGTTATG

>PGSC0003DMG400006086LysMRLKs\_1638

AATTTTGGTCTAGCTAAATCAGGGTGCAATGCTATAACAATGCACATTGTAGGTACTIONCAGGGGTACATCT

CCCCTGAGTACCTCACTGATGGGGTTGTATCCACTAAAATGGATGTTTTTC

>PGSC0003DMG400006086LysMRLKs\_1701

TACATCTCCCCTGAGTACCTCACTGATGGGGTTGTATCCACTAAAATGGATGTTTTCTCATTCGGGGTTGT

GTTGCTCGAGCTTGTGTCAGGGAAGGAGGCTATCGATGATGAAGGGAAA

>PGSC0003DMG400006086LysMRLKs\_1827

TGGGCAAAAATTAGCGATTTTTCTGAAGGGAGTGAAGAGAGGAAGGTGAGGAAATTGCAAGAATGGA

TGGATGAAAGTCTATTGAGGGAAGAATTAACAATGGAAAGTGTGTTGTGAATGTG

>PGSC0003DMG400006086LysMRLKs\_1890

TGGATGGATGAAAGTCTATTGAGGGAAGAATTAACAATGGAAAGTGTGTTGTGAATGTGATGACTGTGGC

TATTTTCATGTTTGAATAAAGATCCTTCAAGAAGGCCAGGGATGATTGAAATT

>PGSC0003DMG400006086LysMRLKs\_2079

GTCACAGCAAGATAGACTACATAATAGTACTTGCATATTATGTAAAGTTGTTTTGAAGTGGAGTAGCATT

TTGTGTTTTGAGGTTTGTACTTTACTTTAAAGTTTGCTTCTATATAAGTG

>PGSC0003DMG400006086LysMRLKs\_2142

TAGCATTTTGTGTTTTGAGGTTTGTACTTTACTTTAAAGTTTGCTTCTATATAAGTGTAAATATTACTCCTAT

ATTATCTTTTCTAGTAGTAGTGTAATCCAATTTTCAATAAGAGCAT

>PGSC0003DMG400006086LysMRLKs\_2236

GTAAATCCAATTTTCAATAAGAGCATGTTTAAAGGTTGTTCTAGTGGAATATATATTAGTACCACATAAGA

CACTTGTAATGAATTTATCTTTATGTTATGTTGCTTGGATTCTTCAAAAA

>PGSC0003DMG400006086LysMRLKs\_315

ATCAATCCCTTTTTATCCCCATCACATGTTCTTGCAATAACATCAACACAACCTTTTGGTAGCATATCTTATG

CTGGCTTAAACTACAATTTCAAAGAAGGTGACACTATGTATGAAATGT

>PGSC0003DMG400006086LysMRLKs\_378

TATCTTATGCTGGCTTAAACTACAATTTCAAAGAAGGTGACACTATGTATGAAATGTCAATATCCAATA

CCAAAATCTTACTACTTATCAATCTGTTGAGGCTGTTAATCCCACAGTTG

>PGSC0003DMG400006087LysMRLKs\_0

CACACACATCTCTCCTTCAACCAAACCAAGAAAATGATAACAAGACCAATATTTGTTTTTCACTTCTCTT  
ATTCTTATCATTTCATATTCAACCAAACATAATATGTTATGCACAAGA

>PGSC0003DMG400006087LysMRLKs\_124

CCAAGCATCACAGGATATACTTGTAATCCTAACCAATTCAATCCATGTCAAACCTTATGTGTTATACAGAGC  
TAGAGGACCAGACTTTCTTGATTTAGCCTCAATTGGTGATCTTTTTTCA

>PGSC0003DMG400006087LysMRLKs\_186

ATACAGAGCTAGAGGACCAGACTTTCTTGATTTAGCCTCAATTGGTGATCTTTTTTCAGTAAGTAGACTA  
ATGATAGCAAACCCTAGTAATATTTCCAACCCAAACACAACCTCTTGTTAA

>PGSC0003DMG400006087LysMRLKs\_248

GTAGACTAATGATAGCAAACCCTAGTAATATTTCCAACCCAAACACAACCTCTTGTTAATGATCAACCCCTT  
TTTATCCCCATCACATGTTCTTGTAACAACATCAACACAACATATGGTA

>PGSC0003DMG400006087LysMRLKs\_310

CAACCCCTTTTTATCCCCATCACATGTTCTTGTAACAACATCAACACAACATATGGTAGCATATCTTATGCT  
GGCTTAACTACACTTTCAAATCAGGTGACACTATGTATGGTATATCA

>PGSC0003DMG400006087LysMRLKs\_372

ATCTTATGCTGGCTTTAACTACACTTTCAAATCAGGTGACACTATGTATGGTATATCAACATCTAAATACC  
AAAATCTTACTACTTATCAATCTGTTGAGGCTGTTAATCCCACAGTTGT

>PGSC0003DMG400006087LysMRLKs\_558

ACAAAATCAACCAAGACTACTCATAAGTTATGTTTTTCAACCTAATGATAACATTTCTTCTGTGCGCCTCAA  
GATTCAGGGTAACCCCAATCTATAACACAAATTAATGGAAATAACAC

>PGSC0003DMG400006087LysMRLKs\_62

CACTTCTTATTCTTATCATTTCATATTCAACCAAACATAATATGTTATGCACAAGAGCCACCAAGCATC  
ACAGGATATACTTGTAATCCTAACCAATTCAATCCATGTCAAACCTTATG

>PGSC0003DMG400006088LysMRLKs\_1178

AGGTAAAAAACAACGTTACGTAAAATTCTGCATATATACGTATCCACTGCAGAATTGCTTTTGTGTAC  
TACTAGTAAAAATCATTATTCACCCCCTGCAACCCCTGCACCAGTAAA

>PGSC0003DMG400006088LysMRLKs\_1240

TTGTGTACTACTAGTAAAAATCATTATTCACCCCCTGCAACCCCTGCACCAGTAAATCAAGAAAATGAC  
AGAAAAGGAACTGTTATAGGGTTAGCAATTGGTTTAGGGGTTTGTGGGG

>PGSC0003DMG400006088LysMRLKs\_1302

GAAAATGACAGAAAAGGAACTGTTATAGGGTTAGCAATTGGTTTAGGGGTTTGTGGGGTTTTGTTGATT  
TTGGTTCTTGGTTTGTGTTTATAGAGAGAAAACAGTGAAGAAAGAAGGGTAT

>PGSC0003DMG400006088LysMRLKs\_1364

GTTGATTTTGGTTCTTGGTTTGTGTTTATAGAGAGAAAACAGTGAAGAAAGAAGGGTATAGTGATGTAGA  
AAGACAAAAAAGTTTGTATGCTGGATCAAAAAAGGGGTCTTTTGTGATAA

>PGSC0003DMG400006088LysMRLKs\_1426

ATGTAGAAAGACAAAAAAGTTTGTATGCTGGATCAAAAAAGGGGTCTTTTGTGATAAAGATGTTGAAG  
TGAATTTGTTGGCTGATGTATCTGAGTGTGTTGGATAAGTATAAAATGTATA

>PGSC0003DMG400006088LysMRLKs\_1488

GTTGAAGTGAATTTGTTGGCTGATGTATCTGAGTGTGTTGGATAAGTATAAAATGTATAAAATGGAACAA  
ATTTGGGAAGCAACAGATGGATTTGATGAAGGGTGTGTTGATACAAGGATCT

>PGSC0003DMG400006088LysMRLKs\_1550

GGAACAAATTTGGGAAGCAACAGATGGATTTGATGAAGGGTGTGTTGATACAAGGATCTGTGTATAAAG  
GAACAATTGATGGTGAAGTGTGTTGCAATCAAGAAAATGAAGTGAATGCTCG

>PGSC0003DMG400006088LysMRLKs\_1612

ATAAAGGAACAATTGATGGTGAAGTGTGTTGCAATCAAGAAAATGAAGTGAATGCTCGTGAAGAACTC  
AAAATACTGCAAAAGGTAACATTTTTACTCAATTTTCTATACTTTTGGTATC

>PGSC0003DMG400006088LysMRLKs\_1674

GAACTCAAATACTGCAAAAGGTAACATTTTTACTCAATTTTCTATACTTTTGGTATCTTTTCAAGAATTAC  
TTTTGTGTATTGATATTGAGAAAATGATAAACATGGACCGACCTGGGT

>PGSC0003DMG400006088LysMRLKs\_1736

CAAGAATTACTTTTGTGTATTGATATTGAGAAAATGATAAACATGGACCGACCTGGGTGAAGTAGAGT  
AGTAAGTACTTCATTTTTATCAGAGTTTTTCGAATTTGAGTCATCGGAATGC

>PGSC0003DMG400006088LysMRLKs\_1798

GTAGAGTAGTAAGTACTTCATTTTTATCAGAGTTTTTCGAATTTGAGTCATCGGAATGCGAAATTGTCTTTG  
TTAAGGAGCAATTTACTCTTCATAGGGAATTTTTCTATATATTTGGTAT

>PGSC0003DMG400006088LysMRLKs\_1860

TTGTCTTTGTTAAGGAGCAATTTACTCTTCATAGGGAATTTTTCTATATATTTGGTATGTTATCGAGAATT

GTTTTGTGTTACTAATTGATGTTTGAGAAAATGATAAAATGGTCTAGTA

>PGSC0003DMG400006088LysMRLKs\_1922

TCGAGAATTGTTTTGTGTTACTAATTGATGTTTGAGAAAATGATAAAATGGTCTAGTAATTAGAGGTTTT

GAATTTGAGTCTTTAAGTATAGAGTTATTTTGGTTAGGAAGCGTAGAGTT

>PGSC0003DMG400006088LysMRLKs\_1984

GAGGTTTTGAATTTGAGTCTTTAAGTATAGAGTTATTTTGGTTAGGAAGCGTAGAGTTATTTTGGTTAGG

AAGCGTGTATTCTGACATGAATTCAAATTTAATCGAACTTTATAATGGA

>PGSC0003DMG400006088LysMRLKs\_2046

TGGTTAGGAAGCGTGTATTCTGACATGAATTCAAATTTAATCGAACTTTATAATGGATATCGAACGCCG

AGTAAAAGGGGAAAAAACATGGTCCATATGTGTGGAGGGTTGATTCAT

>PGSC0003DMG400006088LysMRLKs\_2108

GAACGCCGAGTAAAAGGGGAAAAAACATGGTCCATATGTGTGGAGGGTTGATTCATAAAGTCTTTA

AGTATGTACTATTTGATAGTTTCCATCTTTAAGTTTGTCAAAAATTAGTAT

>PGSC0003DMG400006088LysMRLKs\_2170

TCTTTAAGTATGTACTATTTGATAGTTTCCATCTTTAAGTTTGTCAAAAATTAGTATCTTTAATTTTTCATA

AAATATTTATTGAATTTATCTGTTAGATTTGATGGGATTATGGGGGG

>PGSC0003DMG400006088LysMRLKs\_2725

TTTTTTTTAAGATATGAAGTGTCTGTATGCAATGTTTTCTGTTGTATATTTTAGATTTGAAAAGATTTTTTT

AGTGTTTATGATTAATATTTATTATTTTGTCAAATTTAATAAACAT

>PGSC0003DMG400006088LysMRLKs\_2787

AGATTTTTTTAGTGTTTATGATTAATATTTATTATTTTGTCAAATTTAATAAACATAAATTATTAAGTAG

TTGACGAAGATTAATAATGTTAACTTTTGATAAACTTAAAGAATCAAA

>PGSC0003DMG400006088LysMRLKs\_2849

TATTAAGTAGTTGACGAAGATTAATAATGTTAACTTTTGATAAACTTAAAGAATCAAATTCAAAACGT

TGATTACATATTTAAGGAGCTATTTTGAACCTGTTTCAGTGTTCTCCCACC

>PGSC0003DMG400006088LysMRLKs\_2911

AAAACGTGTTGATTACATATTTAAGGAGCTATTTTGAACCTGTTTCAGTGTTCTCCCACCTTAGAGGCTATTT

TTGTCATTTTCTCAATTGATATTTTAGTAATGTTAAAATTCCACTGCAG

>PGSC0003DMG400006088LysMRLKs\_3035

GTTTTTCCTCCAATGGATCAGATTAAGTATTTAATTA AAAATATATGTTTAATAATTTAAACTATTAGGTCT  
AGTGACCTGTGCTATTCTTGAGACATTAGTAGTACTTTATTTAAATAT

>PGSC0003DMG400006088LysMRLKs\_3097

TATTAGGTCTAGTGACCTGTGCTATTCTTGAGACATTAGTAGTACTTTATTTAAATATTTAAGTGGACCAT  
TATGCCATTGGGATTTGATAATTTATAATTTAAGCTAATCAACATCAT

>PGSC0003DMG400006088LysMRLKs\_3159

GTGGACCATTATGCCATTGGGATTTGATAATTTATAATTTAAGCTAATCAACATCATTTAATACTCAATT  
TATTTGTCCTCTGATGTCTATCTTTTCATTAAATACTCCTCTTTTTGTT

>PGSC0003DMG400006088LysMRLKs\_3221

TACTCAATTTATTTGTCCTCTGATGTCTATCTTTTCATTAAATACTCCTCTTTTTGTTCTCAATTATTCACTT  
TTTGTTCCTTTTTATTTTTGTCCTAAGGAGACCCTCGAGCGTG

>PGSC0003DMG400006088LysMRLKs\_3283

AATTATTCACTTTTTGTTTTCTTTTTATTTTTGTCCTAAGGAGACCCTCGAGCGTGTATCAAAAATAATT  
TTTTTATATATTATTTTTTCATAACTTGTTTATAAAGATTTTACTAG

>PGSC0003DMG400006088LysMRLKs\_3345

AAAAATAATTTTTTATATATTATTTTTTCATAACTTGTTTATAAAGATTTTACTAGATATATTGTTGTTGT  
GATAAGAATTGAGATATTA AAAATTAACAAGATGTCTAGAAACAATT

>PGSC0003DMG400006088LysMRLKs\_3469

TTCTTTTTTTGCCATAGAAAAGAGCATCTTTTATTAATAATTTATTTTATCAAGACAAAGTTCAAATAAAT  
TTTCTTCTAAATGAAATTTCTTTGTCTATGACTTTCTCCCAAAAAG

>PGSC0003DMG400006088LysMRLKs\_3531

CAAATAAATTTTCTTCTAAATGAAATTTCTTTGTCTATGACTTTCTCCCAAAAAGCGTCATGCTTTTAG  
CTTGGTTTGGCTGTACTACTTTGACTAGATTTATTAGTTGCCTATTA

>PGSC0003DMG400006088LysMRLKs\_3593

ATGCTTTTAGCTTGGTTTGGCTGTACTACTTTGACTAGATTTATTAGTTGCCTATTAATAAAGAAAACG  
TCATCAAGTCCTATTTTGCAACCGTTACTATAATTAGCGCTTCGCTACG

>PGSC0003DMG400006088LysMRLKs\_3655

AAGAAAACGTCATCAAGTCCTATTTTGCAACCGTTACTATAATTAGCGCTTCGCTACGAATAAATCAATA  
ACTTTTTTTTAAATCATGTATTATATAGTATTTTATTCAATTTCAAATAAT

>PGSC0003DMG400006088LysMRLKs\_4151

ACAAGGCCAAGAGTTGTCCACAAAGACATCAAACTAGCAACATTCTCCTAGACACCAACATGAGAGCC  
AAAGTTGCCAATTTTGGTCTAGCTAAATCAGGTTGCAATGCCATAACAATG

>PGSC0003DMG400006088LysMRLKs\_4399

TGATGAAGGGAAAGTCTTGTGGGCAAAAATTAGCGATTTTTCGGAAGGGAGTGAAGAGAGGAAGGTG  
AGGAAATTGCAAGAATGGATGGATGATAGTCTTTTGAGGGAAGAGTTAACAAT

>PGSC0003DMG400006095-(rev)LRR-RLPs\_1054

CTTTATCAGATTTCGACGATCTCTTGGTCTCAAGTTACCATTTACTTTTACAAAATGCGAGGAGATCAACATG  
AGAGATTTGCTACTGCAACCTAGAGTTGCTATCCCCAAAGTGGACATTT

>PGSC0003DMG400006095-(rev)LRR-RLPs\_1116

ATCAACATGAGAGATTTGCTACTGCAACCTAGAGTTGCTATCCCCAAAGTGGACATTTTAGATGTAAATT  
TTTCAAGGCCGAATTGGGAGTTTCCGACATTTGTGGATGCCTTGCTGTGG

>PGSC0003DMG400006095-(rev)LRR-RLPs\_1240

GTCATCCCAGGAAACTTAACCTACAATCAACAACCTACAATTTTTACATGTTTCATGTATCGTTTCATGCAG  
ATGAAGAATATGCGTCATGGTCAATTAAGAAGCAAAGCCTACAAT

>PGSC0003DMG400006095-(rev)LRR-RLPs\_1302

TTCATGCAGATGAAGAATATGCGTCATGGTCAATTAAGAAGCAAAGCCTACAATTTGATCAGAAA  
AGTAAGAGTTGGCATCCTGTAGAACACAAAAGAGGAAGAGATTTCCAATA

>PGSC0003DMG400006095-(rev)LRR-RLPs\_1350

GCCTACAATTTGATCAGAAAAGTAAGAGTTGGCATCCTGTAGAACACAAAAGAGGAAGAGATTTCCA  
ATAAGGACCAGTAGCAAGTCGAAGAAATATTTCTTTTTATTAGATTGGTGA

>PGSC0003DMG400006095-(rev)LRR-RLPs\_310

TAGAGTACATAGATGTTGAACTTTCAACATCATACCCCTCCCTATTTTTAAATTTCTTTGAAGCAAATTTT  
TACGAGAACTGGTCCTTACGGGTTGTGATCTGATGCATGTTTCGTTAT

>PGSC0003DMG400006095-(rev)LRR-RLPs\_372

GCAAATTTTTTACGAGAACTGGTCCTTACGGGTTGTGATCTGATGCATGTTTCGTTATCTAGTGCTAGTCA  
AGCGGTGACGTGTCATTCTTTGAGAAATCTTTCTCTATCTCTTGTACGC

>PGSC0003DMG400006226LRR-RLPs\_0

GTACAACCTCCATAATTCATTGCCCTAACCAAATGGCTACCATTATTATCTCTATTATTTTCATCCTTCAATT

ATTTTTGCAAATTGTCTAGTCCTTGCTAGTCCAATTCTTGGCCAAAG

>PGSC0003DMG400006226LRR-RLPs\_1024

AATCAGTTCTATGGAGCTGTGCCTGAACTCGTGTGCAAGCTCTGCAATTTGAAAAATTTGACGTTGAGTT

ACAATTACTTCACTGAAGTTGGACCGGAATGCAAGAAGTTAATTCAGAAA

>PGSC0003DMG400006226LRR-RLPs\_1088

TGAGTTACAATTACTTCACTGAAGTTGGACCGGAATGCAAGAAGTTAATTCAGAAAAAGGTTCTTGATG

TCAGGATGAATTGCATTCCGGGCTTGCCTATGCAAAGATCAGCAGAGGAAT

>PGSC0003DMG400006226LRR-RLPs\_1152

TGATGTCAGGATGAATTGCATTCCGGGCTTGCCTATGCAAAGATCAGCAGAGGAATGTGCTGCGTTTTT

CTGTAAGCCAAGATCATGTCCTGATGAAAAGTCAATGGGATTTGTTCCCTG

>PGSC0003DMG400006226LRR-RLPs\_1216

TTTTTCTGTAAGCCAAGATCATGTCCTGATGAAAAGTCAATGGGATTTGTTCCCTGTAGCATTGGCAGTTC

TGAGCAGAATCAACAGAACGCAAGTGAGACCGCGCCAGCGCCAAGAACT

>PGSC0003DMG400006226LRR-RLPs\_1344

TTTGAAACCGCATTTCGTTGTAAATGCTCTGTTCTTTCCATGTTTGCAGATTGAACTATGGCAGCAGGAAAT

GTAAATTTGCCAAGTTAACTTCCTTATCTCTGTTGATGCATATTATGT

>PGSC0003DMG400006226LRR-RLPs\_1408

AGGAAATGTAAATTTGCCAAGTTAACTTCCTTATCTCTGTTGATGCATATTATGTTTGTTAATTATAATAA

AATAATTACGTTTGGATGAGATGATCACATTGTTCAATAGAATTAGAG

>PGSC0003DMG400006226LRR-RLPs\_1464

TTGTTAATTATAATAAAAATAATTACGTTTGGATGAGATGATCACATTGTTCAATAGAATTAGAGATGGTA

GGTTGTGTAGCACAATGGCTCAACTAATGCATCTATGGTTTTGGATAGCA

>PGSC0003DMG400006226LRR-RLPs\_256

AGTAAACGTGTCGAGATTGCCTATCATGTCATCCAAAAGTTAAAGTCCAAAATCACATATGACCCTTTAC

ATATTACAAAAACATGGATTGGCTCTGATGTTTGTAAACAAGTACAAAGGT

>PGSC0003DMG400006226LRR-RLPs\_320

CTTTACATATTACAAAAACATGGATTGGCTCTGATGTTTGTAAACAAGTACAAAGGTTTTCGTTGTGCCAC

GGTTCCTGACTTAAAGGTAAAAGCACTAGCTGCTGTGGACTTCAATCAGT

>PGSC0003DMG400006226LRR-RLPs\_384

TGCCACGGTTCCTGACTTAAAGGTAAAAGCACTAGCTGCTGTGGACTTCAATCAGTACCAATTTGATGGC  
CCTGACCTTACTATTGACGGCTTTCTTGATGAATTACCAGACATAACAAT

>PGSC0003DMG400006226LRR-RLPs\_448

GATGGCCCTGACCTTACTATTGACGGCTTTCTTGATGAATTACCAGACATAACAATCTCCACGCAAATAC  
CAACAATTTTAAAGGTACAATCCCCAAGAAAATCGCGAATCTTCGTTAT

>PGSC0003DMG400006226LRR-RLPs\_512

CAATACCAACAATTTTAAAGGTACAATCCCCAAGAAAATCGCGAATCTTCGTTATCTCTATGAGCTAGA  
CCTTAGCAACAACAATATAATGGTGAATTCCCAAAAAACATTGTTTTTG

>PGSC0003DMG400006226LRR-RLPs\_576

GCTAGACCTTAGCAACAACAATATAATGGTGAATTCCCAAAAAACATTGTTTTTGGTGCCAAGAAATTG  
TATTTCTTGGACCTTAGGTTCAATTCATTTCCGGGTTGGTTCCCCCTGA

>PGSC0003DMG400006226LRR-RLPs\_64

CTTCAATTATTTTTGCAAATTGTCTAGTCCTTGCTAGTCCAATTCTTGCCAAAGTAGACAAGCTTTGGA  
GATAATCATCGGCGGAGGTGGTGGAGTACCTCCACCGGATAATCAAGAT

>PGSC0003DMG400006226LRR-RLPs\_640

AAATTGTATTTCTTGGACCTTAGGTTCAATTCATTTCCGGGTTGGTTCCCCCTGAAGTTTTCTTGTTAAAT  
CTCGATGTTCTGTTTCATCAACAACAACAATTTAATCCAAAACTTCCT

>PGSC0003DMG400006226LRR-RLPs\_704

TGTTAAATCTCGATGTTCTGTTTCATCAACAACAACAATTTAATCCAAAACTTCCTGATAACTTGGGATCA  
ACTCCAGTTCTTTACTTAACTTTAGCCAACAACAATTCACCGGTCCAA

>PGSC0003DMG400006226LRR-RLPs\_768

GGGATCAACTCCAGTTCTTTACTTAACTTTAGCCAACAACAATTCACCGGTCCAATTCCTCGTAGCATTG  
GTCAAGCTTGTAATCATTACGCGAAGTTCTGTTCTTGAACAACCAGCT

>PGSC0003DMG400006226LRR-RLPs\_832

AGCATTGGTCAAGCTTGTAATCATTACGCGAAGTTCTGTTCTTGAACAACCAGCTCACTGGATGCTTGC  
CTTATGAAATTGGGCTTTTAAAGTAAAGCCACAGTTTTCGATGCGAGCAAA

>PGSC0003DMG400006226LRR-RLPs\_896

GCTTGCCTTATGAAATTGGGCTTTTAAAGTAAAGCCACAGTTTTCGATGCGAGCAAAAATCAGTTAACAGG  
AAAAATACCTCATTCAATTTGGATGTTTAGCTAAGATGGAGATACTTAACT



>PGSC0003DMG400006226LRR-RLPs\_960

AACAGGAAAAATACCTCATTCAATTTGGATGTTTAGCTAAGATGGAGATACTTAACTTGGCACAAAATCAG  
TTCTATGGAGCTGTGCCTGAACTCGTGTGCAAGCTCTGCAATTTGAAAAA

>PGSC0003DMG400006255LRR-RLPs\_0

AAAAAATTTATTTCTCTCTTTTCATGAATGAAGCAAGACCAAAGAGGAGGACTTCCACAAGTCAGTCTTCC  
ACAGAATGAACCAAAGGGATAACATCAAACAAGTAAAAGGAGTTAATTC

>PGSC0003DMG400006255LRR-RLPs\_1178

AACACCAACTTTTTGGGTTTCATTACCAGAGTCCATTTGAACTTCAGAACCTGTCCAGGTTAGAGCTCTC  
CAATTGCAATTTCACTGGACAGTACCTTCAACAATGGCAAACCTTATCA

>PGSC0003DMG400006255LRR-RLPs\_124

TGTACAAACGCGTAGTTTTCTTTGACATTTCCAATAACCCTTCTCCTTATTAAGTTCCTTCTAACTGCGTA  
CTTTAGTCATATTCAAGCTAACAAGTTGCATGAATATGACAACTCTCT

>PGSC0003DMG400006255LRR-RLPs\_1240

AGAGCTCTCCAATTGCAATTTCACTGGACAGTACCTTCAACAATGGCAAACCTTATCAATCTTGTTCAATTT  
GGACTTCTCTTTGAACAACCTTCACTGGTTCTATCCCATATTTCCATAAA

>PGSC0003DMG400006255LRR-RLPs\_1302

TGTTCAATTTGGACTTCTCTTTGAACAACCTTCACTGGTTCTATCCCATATTTCCATAAATCCAAGAACTCGC  
CCACTTAGACCTATCTCGTAATGGTTTAACTGGTTTCCTCTCCCCGAC

>PGSC0003DMG400006255LRR-RLPs\_1364

AGAAACTCGCCCACTTAGACCTATCTCGTAATGGTTTAACTGGTTTCCTCTCCCCGACTCATTTTGAAGGA  
CTCTCAGAGCTTGTCTACAGATATTTAGGGAACAACCTTACTCAACGGGA

>PGSC0003DMG400006255LRR-RLPs\_1426

TTTGAAGGACTCTCAGAGCTTGTCTACAGATATTTAGGGAACAACCTTACTCAACGGGATCATTCTGAAT  
GTATCTTTGAGCTCCCCTCCTTGACAGACGCTTTTACTTAACAGCAATCAA

>PGSC0003DMG400006255LRR-RLPs\_1488

TCCTGAATGTATCTTTGAGCTCCCCTCCTTGACAGACGCTTTTACTTAACAGCAATCAATTTGTTGGCCAAG  
TCAACGATTTTACAATGCATCCTCCTCTCTGTATGTAATCGATTTGAG

>PGSC0003DMG400006255LRR-RLPs\_1550

TTGGCCAAGTCAACGATTTTACAATGCATCCTCCTCTCTGTATGTAATCGATTTGAGCAATAACCACTG

AATGGTTCAATTCCCAAGTCCATGTTTCAAATAGGGATGCTTAAGGTCC

>PGSC0003DMG400006255LRR-RLPs\_1612

AACCACCTGAATGGTTCAATTCCCAAGTCCATGTTTCAAATAGGGATGCTTAAGGTCTCTCATTGTCTTC

CAACTTCTTTAGTGGGACAGTTCACCTTGACCTCATAGGGAGGCTGAG

>PGSC0003DMG400006255LRR-RLPs\_1674

ATTGTCTTCCAACCTCTTTAGTGGGACAGTTCACCTTGACCTCATAGGGAGGCTGAGTAATCTTACAAG

ACTGGAGCTTTCTTACAATAACTTGACTGTTGATGCAAGTAGCATCAACT

>PGSC0003DMG400006255LRR-RLPs\_1736

CTTACAAGACTGGAGCTTTCTTACAATAACTTGACTGTTGATGCAAGTAGCATCAACTCCACCTCTTTTCAT

ATTTCCCAGTTGAGATTATTGAAACTAGCTTCTTGTCGGTTGCAAAAAG

>PGSC0003DMG400006255LRR-RLPs\_1798

CTCTTTCATATTTCCCAGTTGAGATTATTGAAACTAGCTTCTTGTCGGTTGCAAAAAGTTTCTGATCTTAA

AAGTCAGTCAAGGATGATCCACTTAGATCTTTCTGACAACCAAATACG

>PGSC0003DMG400006255LRR-RLPs\_186

TAACTGCGTACTTTAGTCATATTCAAGCTAACAAGTTGCATGAATATGACAACCTCTCTACTTTCTATGGCT

TTTCTTGATTCCCTTGTTTCAAATCTTATCAGGATATCACATTTTCTTG

>PGSC0003DMG400006255LRR-RLPs\_1860

CTGATCTTAAAAGTCAGTCAAGGATGATCCACTTAGATCTTTCTGACAACCAAATACGGGGGGCAATACC

AAATTGGATTTGGGGAATTGGTAGTGGAATCTGGCTCACCTGAATCTTT

>PGSC0003DMG400006255LRR-RLPs\_1922

GCAATACCAAATTGGATTTGGGGAATTGGTAGTGGAATCTGGCTCACCTGAATCTTTCCTTCAATCAGC

TGGAGTACGCAGAACAGCCATAACAATGTTTCCAGCTATCTTGTAGTCTTG

>PGSC0003DMG400006255LRR-RLPs\_1984

CAATCAGCTGGAGTACGCAGAACAGCCATAACAATGTTTCCAGCTATCTTGAGTCTTGGACTTTCATTCC

AATAAGCTAAAGGGTGACATACCAATTCCACCTTCTGTGCTGCATATTT

>PGSC0003DMG400006255LRR-RLPs\_2046

TTCATTCCAATAAGCTAAAGGGTGACATACCAATTCCACCTTCTGTGCTGCATATTTGGACTACTCGAGC

AATAATTCAGCAATTCCATCCTACTAGATATTGGCAATTATCTTGTA

>PGSC0003DMG400006255LRR-RLPs\_2108

TACTCGAGCAATAATTTTCAGCAATTCATCCTACTAGATATTGGCAATTATCTTGGTATATTTCTCTCACTT  
GCAAATAATCGGCTCGCAGGAAGAATTCCTGAATCTATATGCAATGCC

>PGSC0003DMG400006255LRR-RLPs\_2170

TCTCTCACTTGCAAATAATCGGCTCGCAGGAAGAATTCCTGAATCTATATGCAATGCCAGCTACCTTCAA  
GTTCTTGATTCTCTAACAAATGCCTTGAGTGGAACAATCCCACCATGTCT

>PGSC0003DMG400006255LRR-RLPs\_2232

ACCTTCAAGTTCTTGATTTCTCTAACAAATGCCTTGAGTGGAACAATCCCACCATGTCTACTGGAATATAGT  
ACAAATCATGGAGTGCTGAATCTAGGTAACAATAAACTCAATGGCGTCA

>PGSC0003DMG400006255LRR-RLPs\_2294

GAATATAGTACAAATCATGGAGTGCTGAATCTAGGTAACAATAAACTCAATGGCGTCATACCAGATTCAAT  
TTCCAATTGGTTATGCTCTACAACTTTAGACGTCAGTGAGAATAAGTTA

>PGSC0003DMG400006255LRR-RLPs\_2356

AGATTCATTTCCAATTGGTTATGCTCTACAACTTTAGACGTCAGTGAGAATAAGTTACAAGGTAGGCTG  
CCAAAATCGCTTGGAAGTCAAGTTGTTGGAGGTCCTGAATGTTGGAAA

>PGSC0003DMG400006255LRR-RLPs\_2418

GTAGGCTGCCAAAATCGCTTGGAAGTCAAGTTGTTGGAGGTCCTGAATGTTGGAAATAACAACTTG  
TTGATCGTTTCCCATGCATGTTGAGGAACTCAAATAGTCTGAGGGTTCTAG

>PGSC0003DMG400006255LRR-RLPs\_2480

AAACTTGTTGATCGTTTCCCATGCATGTTGAGGAACTCAAATAGTCTGAGGGTTCTAGTTTTGCGTTCCA  
ATCAATTCAATGGAAGTGTTCAGTGTGATGCAACCAGGAATAACTGGAAA

>PGSC0003DMG400006255LRR-RLPs\_2666

AATTTGAAAGGAATGATGGTTGCAGATGATTACGTGGAGACAGGACGCAATCATATCCAGTACAAGTTT  
CTCCAATAAGTAACTTATACTATCAGGACACAGTGATAATAACCATCAA

>PGSC0003DMG400006255LRR-RLPs\_2728

CAAGTTTCTCCAATAAGTAACTTATACTATCAGGACACAGTGATAATAACCATCAAAGGGCTAGAGTGG  
GAGCTTGTAATAATTCTCAGGGTCTACACAGCTATTGATTTCTCTTCAA

>PGSC0003DMG400006255LRR-RLPs\_2790

TAGAGTGGGAGCTTGTAATAATTCTCAGGGTCTACACAGCTATTGATTTCTCTTCAAATAGATTTCAAGG  
AGTGATAACCAGATACTATTGGGAATCTTAGCTCACTCTATGTTCTGAACC

>PGSC0003DMG400006255LRR-RLPs\_2852

TTTCAAGGAGTGATACCAGATACTATTGGGAATCTTAGCTCACTCTATGTTCTGAACCTATCACACAATGC  
CCTTGAAGGACCAATTCCAAAATTGATTGGGAAGCTACAAATGCTTGAA

>PGSC0003DMG400006255LRR-RLPs\_2914

ACACAATGCCCTTGAAGGACCAATTCCAAAATTGATTGGGAAGCTACAAATGCTTGAATCACTAGACCTG  
TCAACAAACCACCTATCCGGGGAGATCCCATCAGAGCTTGCAAGTTTCAC

>PGSC0003DMG400006255LRR-RLPs\_2976

TAGACCTGTCAACAAACCACCTATCCGGGGAGATCCCATCAGAGCTTGCAAGTTTCACATTCTTAGCAGC  
TTTGAACTTATCGTTCAACAAATTGTTTGGCAAATCCCATCGACTAATC

>PGSC0003DMG400006255LRR-RLPs\_310

CCTCTCAATGTTTTACGATCAAAGTCGTTGTTGCTACAGTTGAAGGGCAGCCTTCAGTATGATTCTACT  
TTGTCAAATGAATTGGCAAATGGAACGAGAAGACAAGTGAATGTTGCA

>PGSC0003DMG400006255LRR-RLPs\_3348

TTTGGTTTTCAAGAAAGTGATCCTTAAACCCATAAATGATGAGTTTATTTAATCCTTGCTTTGTTTAAATA  
AACACCAGGATCCAAATTCAAGTCAGTTTGTATTTCCTTGATGAATG

>PGSC0003DMG400006255LRR-RLPs\_3410

GTTTAAATAAACACCAGGATCCAAATTCAAGTCAGTTTGTATTTCCTTGATGAATGTATACAATTTTCT  
ACTATCAGAAACAGCACCCACTTTTGGATTAATAGCTTCCCACATTGC

>PGSC0003DMG400006255LRR-RLPs\_372

GATTCTACTTTGTCAAATGAATTGGCAAATGGAACGAGAAGACAAGTGAATGTTGCAATTGGGATGGA  
GTTAAATGTGATCTCTCTGGTCATGTGATTGCCTTGGAAGTGGATAATCAG

>PGSC0003DMG400006255LRR-RLPs\_496

TTTCTAGTGGAATTGAGAATTCAAGTGCTCTTTTCAGTCTTCAGTATCTTGAGAGGCTAAATTTGGCTTAC  
AACAGGTTTCAGTGTTGGCATAACAGTTGGTATAGCCAACCTCACGAACT

>PGSC0003DMG400006255LRR-RLPs\_62

AGTCTTCCACAGAATGAACCAAAGGGATAACATCAAACAAGTAAAAGGAGTTAATTCAATCTGTACAA  
ACGCGTAGTTTTCTTTGACATTTCCCAATAACCCTTCTCCTTATTAAGTTC

>PGSC0003DMG400006255LRR-RLPs\_620

GTACCTGAATTTATCCAATGCTGGTTTTGTGGGGCAAATTCGTATGATGTTATCAAGATTAACAAAGCCA

GTTACTCTAGATCTCTCAACTCTTTCCCTTACTCTGACCAGACACTAAA

>PGSC0003DMG400006255LRR-RLPs\_682

CAAAGCCAGTACTCTAGATCTCTCAACTCTTTCCCTTACTCTGACCAGACACTAAAACCTTGAGAATTCC

AATTTGAGACATTTTCATTGACAACCAACAGAGCTTAGAGAGCTTTACC

>PGSC0003DMG400006255LRR-RLPs\_744

GAGAATTCCAATTTGAGACATTTTCATTGACAACCAACAGAGCTTAGAGAGCTTTACCTGGATGGGGTT

GATCTTTCATCTCAGAGGACTGAGTGGTGTCAATCTTTATCTTCATATTTG

>PGSC0003DMG400006255LRR-RLPs\_868

ACTTGACCGTCTTGAGTTTGCATGCTTGTCAAATTTTCAGGCCCTATTGATGAATCACTTTCTAAGCTTCAG

ATTCTCTCTATCATCCGTCTTGACCAGAACAATCTCTCTACCACAGTTC

>PGSC0003DMG400006255LRR-RLPs\_930

AAGCTTCAGATTCTCTCTATCATCCGTCTTGACCAGAACAATCTCTCTACCACAGTTCAGGATATTTTGC

CAATTTACAATCTTGACTACCTTGTCCCTCGACTCTTGTAATCTGCAA

>PGSC0003DMG400006255LRR-RLPs\_992

ATATTTTGCCAATTTACAATCTTGACTACCTTGTCCCTCGACTCTTGTAATCTGCAAGGAGCTTTTCCTAA

AAAGATCTTTCAGGTACAAGTTTTAGAGATTTTGGACTTTCAAATAAC

>PGSC0003DMG400006268-(rev)LRR-RLPs\_0

AACCAAGCACTTGTCCATTTTTCTTTGACTATTTCTTCCCCTCATTTTCATCTTCTTTTCTACCTTCTCCCT

TCGCTTCAATCACAAAGTGGAAAAACAAGTTTGATGGATTATAAT

>PGSC0003DMG400006268-(rev)LRR-RLPs\_1037

TATTCCGATTTTTCTTCGAAATGGATCTTTGAGGAGATTATCACTAAGCTACACCAACTTTTCTGGTTCATT

ACCAGAGTCCATTTCGAACTTTCAAACCTGTCCAGGTTAGAGCTTTC

>PGSC0003DMG400006268-(rev)LRR-RLPs\_1098

TCTGGTTCATTACCAGAGTCCATTTCGAACTTTCAAACCTGTCCAGGTTAGAGCTTTCCAATTGCAATTT

CAATGGATCAATACCTTCCACAATGGCAAACCTTACCAATCTTGTTTAT

>PGSC0003DMG400006268-(rev)LRR-RLPs\_1159

ATTGCAATTTCAATGGATCAATACCTTCCACAATGGCAAACCTTACCAATCTTGTTTATATAGATTTCTCCT

TCAACAATTTCACTGGTTCATTCCATATTTCCAACAGTCCAAGAAAC

>PGSC0003DMG400006268-(rev)LRR-RLPs\_122

CTCCAAGACTTGAGCAATGAGATTTTTACTTTCTATGGATCTTCTTGATACCCTTTTTGCAAATTTTATT  
AGGTAATGAGATTTTCTTAGTTTCCTCTCAATGTCTTGATGATCAAAA

>PGSC0003DMG400006268-(rev)LRR-RLPs\_1220

AGATTTCTCCTTCAACAATTTCACTGGTTCTATTCCATATTTCCAACAGTCCAAGAACTCACCTACTTAGA  
CCTTTCACGTAATGGTCTAACTGGTCTTGTCTAGAGCTCATTTTGA

>PGSC0003DMG400006268-(rev)LRR-RLPs\_1281

ACCTACTTAGACCTTTCACGTAATGGTCTAACTGGTCTTGTCTAGAGCTCATTTTGAAGGACTCTCAGA  
GCTTGTTAACATAAAATTTAGGGAACAATTCCTCAATGGGACCCTTCCT

>PGSC0003DMG400006268-(rev)LRR-RLPs\_1342

GACTCTCAGAGCTTGTTAACATAAAATTTAGGGAACAATTCCTCAATGGGACCCTTCCTGCATATATATTT  
GAGCTCCCCTCCTTGACGAGCTTTTTCTTAACAACAATCAATTTGTTG

>PGSC0003DMG400006268-(rev)LRR-RLPs\_1403

ATATATATTTGAGCTCCCCTCCTTGACGAGCTTTTTCTTAACAACAATCAATTTGTTGGCCAAGTCCACG  
AATTCCGCAATGCATCCTCCTCTCCGTTGGATACGGTTGATTTGAGTAA

>PGSC0003DMG400006268-(rev)LRR-RLPs\_1464

CAAGTCCACGAATCCGCAATGCATCCTCCTCTCCGTTGGATACGGTTGATTTGAGTAACAACCACCTGA  
ATGGATCGATTCCCAAGTCCACATTTGAAATTGGGAGGCTTAAGGTCCTC

>PGSC0003DMG400006268-(rev)LRR-RLPs\_1525

ACCACCTGAATGGATCGATTCCCAAGTCCACATTTGAAATTGGGAGGCTTAAGGTCCTCTCACTTTCTTCC  
AACTCCTTAGGGGGATTGTGCCCTCGACCTCATTGGGAGGCTGAGCA

>PGSC0003DMG400006268-(rev)LRR-RLPs\_1586

ACTTTCTTCCAACCTCCTTAGGGGGATTGTGCCCTCGACCTCATTGGGAGGCTGAGCAACCTTTCAAGA  
CTGGAGCTTTCTTACAATAACTTGACTGTTGATGCAAGTAGCAGAAATTC

>PGSC0003DMG400006268-(rev)LRR-RLPs\_1647

CTTTCAAGACTGGAGCTTTCTTACAATAACTTGACTGTTGATGCAAGTAGCAGAAATTCAGCCTCTTTCAC  
ATTTCCCAGTTGAACATATTGAAACTAGCTTCTTGTAGGCTGCAAAAAG

>PGSC0003DMG400006268-(rev)LRR-RLPs\_1708

CCTCTTTCACATTTCCCAGTTGAACATATTGAAACTAGCTTCTTGTAGGCTGCAAAAAGTCCCTAATCTC  
AAGAACCAGTCAAGGCTGATCCACTTAGACCTTTCAGACAACCAATAA

>PGSC0003DMG400006268-(rev)LRR-RLPs\_1769

CCCTAATCTCAAGAACCAGTCAAGGCTGATCCACTTAGACCTTTCAGACAACCAAATAAGGGGAGCAAT  
ACCAAATTGGATTTGGGGAATTGGTAGTGGAATCTGGCTCACCTGAATCT

>PGSC0003DMG400006268-(rev)LRR-RLPs\_183

CAAATTTTATTAGGTAATGAGATTTTCTTAGTTTCCTCTCAATGTCTTGATGATCAAAAGTCATTGTTGCT  
GCAGTTGAAGGGAAGCTTCCAATATGATTCTACTTTGTCAAATAATTTG

>PGSC0003DMG400006268-(rev)LRR-RLPs\_1830

GGAGCAATACCAAATTGGATTTGGGGAATTGGTAGTGGAATCTGGCTCACCTGAATCTTTCCTTCAATC  
AGCTGGAGTACATGGAACAGCCTTACAATGCTTCCAGCAATCTTGTTGTC

>PGSC0003DMG400006268-(rev)LRR-RLPs\_1891

CCTTCAATCAGCTGGAGTACATGGAACAGCCTTACAATGCTTCCAGCAATCTTGTTGTCCTTGACTTGCAT  
TCCAACCGTTTAAAAGGTGACTTACCAATTCCACCTTCTCTGCTATCT

>PGSC0003DMG400006268-(rev)LRR-RLPs\_2013

GTGGACTATTCGAGCAATAATTTAAACAATTCCATCCACTAGATATTGGAAATTCTCTTGCTCTTGCCTC  
CTTTTTCTCGGTAGCAAACAATAACATCACTGGAATAATTCCTGAATCC

>PGSC0003DMG400006268-(rev)LRR-RLPs\_2074

CTCTTGCCTCCTTTTTCTCGGTAGCAAACAATAACATCACTGGAATAATTCCTGAATCCATATGCAATGTC  
AGCTACCTTCAAGTTCTTGATTTCTTAACAATGCCTTGAGTGGAACAA

>PGSC0003DMG400006268-(rev)LRR-RLPs\_2135

ATGCAATGTCAGCTACCTTCAAGTTCTTGATTTCTTAACAATGCCTTGAGTGGAACAATACCACGATGTC  
TACTGAATAATAGTACAACCTTTGGAGTGCTGAATCTAGGGAACAATAG

>PGSC0003DMG400006268-(rev)LRR-RLPs\_2196

CCACGATGTCTACTGAATAATAGTACAACCTTTGGAGTGCTGAATCTAGGGAACAATAGACTCCATGGT  
GTTATGCCAGATTCATTTCCAATTGGTTGTGCTCTAAAACTTTAGACCTC

>PGSC0003DMG400006268-(rev)LRR-RLPs\_2257

TCCATGGTGTATGCCAGATTCATTTCCAATTGGTTGTGCTCTAAAACTTTAGACCTCAGCAGGAATATC  
TTTGAAGGGAAGCTACCAAATCGCTCGTCAACTGCACGTTGTTGGAGG

>PGSC0003DMG400006268-(rev)LRR-RLPs\_2318

CAGGAATATCTTTGAAGGGAAGCTACCAAATCGCTCGTCAACTGCACGTTGTTGGAGGTCCTGAATGT

TGGAAATAACAGTCTTTTTGATCATTCCCATGCATGTTGAGGAACTCAAC

>PGSC0003DMG400006268-(rev)LRR-RLPs\_2379

CTGAATGTTGGAAATAACAGTCTTTTTGATCATTCCCATGCATGTTGAGGAACTCAACCAGCCTGAAGG

TCCTAGTCTTGCCTCCAATAAATTCAATGGAAATCTTACGTGTAATATA

>PGSC0003DMG400006268-(rev)LRR-RLPs\_244

CATTGTTGCTGCAGTTGAAGGGAAGCTTCCAATATGATTCTACTTTGTCAAATAATTTGGCAAGATGGAA

CCAGAACACAAGTGAATGTTGCAATTGGAATGGGGTTACATGTGACCTCT

>PGSC0003DMG400006268-(rev)LRR-RLPs\_2440

GCCTGAAGGTCCTAGTCTTGCCTCCAATAAATTCAATGGAAATCTTACGTGTAATATAACCAGAAATAG

TTGGAAGAATCTCCAGATCATAGATATAGCTTCCAACAATTTTACTGGTA

>PGSC0003DMG400006268-(rev)LRR-RLPs\_2501

CAGAAATAGTTGGAAGAATCTCCAGATCATAGATATAGCTTCCAACAATTTTACTGGTATGTTGAATGCA

GAATGCTTTTCAAATTGGAGAGGAATGATGGTTGCAGATGATTACGTGGA

>PGSC0003DMG400006268-(rev)LRR-RLPs\_2562

TTGAATGCAGAATGCTTTTCAAATTGGAGAGGAATGATGGTTGCAGATGATTACGTGGAGACAGGACG

CAATCATATCCAGTATAAGTTCTTCCAATAAGTAACTTGTACTATCAGGAC

>PGSC0003DMG400006268-(rev)LRR-RLPs\_2623

CAGGACGCAATCATATCCAGTATAAGTTCTTCCAATAAGTAACTTGTACTATCAGGACACAGTGACATT

AACCATCAAAGGCATGGAGCTGGAGCTTGTGAAGATTCTCAGGGTCTTCA

>PGSC0003DMG400006268-(rev)LRR-RLPs\_2684

AGTGACATTAACCATCAAAGGCATGGAGCTGGAGCTTGTGAAGATTCTCAGGGTCTTCACATCTATTGAT

TTCTCTTCAAATAGATTTCAAGGAATGATACCAGATACGTTTGGGCACCT

>PGSC0003DMG400006268-(rev)LRR-RLPs\_2745

TCTATTGATTTCTTCAAATAGATTTCAAGGAATGATACCAGATACGTTTGGGCACCTTAGCTCACTTTA

TGTTTTGAACCTGTCACACAACGCCCTCGAGGGACCAATTCCAAAATCA

>PGSC0003DMG400006268-(rev)LRR-RLPs\_2806

GCTCACTTTATGTTTTGAACCTGTCACACAACGCCCTCGAGGGACCAATTCCAAAATCAATTGGGAAGCT

ACAAATGCTTGAATCGTTAGACCTGTCACGAAACCACCTGTCCGGGGAGA

>PGSC0003DMG400006268-(rev)LRR-RLPs\_2867



TGGAAGCTACAAATGCTTGAATCGTTAGACCTGTCACGAAACCACCTGTCCGGGGAGATCCCCTCAGA  
GCTTTCAAGTCTCACATTCTTAGCAGCTTTGAATTTATCATTCAACAATTT

>PGSC0003DMG400006268-(rev)LRR-RLPs\_2928

CCCTCAGAGCTTTCAAGTCTCACATTCTTAGCAGCTTTGAATTTATCATTCAACAATTTGTTTGGCAGTATC  
CCATTGAGTAATCAATTTCAAACATTCTCAGCAGATTCCTATGAAGGA

>PGSC0003DMG400006268-(rev)LRR-RLPs\_2989

TTGGCAGTATCCCATTGAGTAATCAATTTCAAACATTCTCAGCAGATTCCTATGAAGGAAACAGAGGCCT  
ATGCGGGCTCCCTCTTAACGTCACCTTGCAAAGCGATGCTCCAGAGTTGA

>PGSC0003DMG400006268-(rev)LRR-RLPs\_305

AAGATGGAACCAGAACACAAGTGAATGTTGCAATTGGAATGGGGTTACATGTGACCTCTCTGGTCATGT  
GATTGCCTTGGAAGTGGATAATCAGACCATTTCTAGTGGAATTGAGAATGC

>PGSC0003DMG400006268-(rev)LRR-RLPs\_3050

CAGAGGCCTATGCGGGCTCCCTCTTAACGTCACCTTGCAAAGCGATGCTCCAGAGTTGAAACCAGCACC  
AAGTTTTCAAGATGACTCTTATGATTGGCAGTTCATATTTACGGGTGTGGG

>PGSC0003DMG400006268-(rev)LRR-RLPs\_3111

CCAGCACCAAGTTTTCAAGATGACTCTTATGATTGGCAGTTCATATTTACGGGTGTGGGATATGGAGTAG  
GGGCAGCAATCTCCATTGCACCTCTGTTGTTTTACAAGCAAGGGAGCAAA

>PGSC0003DMG400006268-(rev)LRR-RLPs\_3172

ATGGAGTAGGGGCAGCAATCTCCATTGCACCTCTGTTGTTTTACAAGCAAGGGAGCAAATACTTTGACA  
AACATTTGGAGAGAATGCTTAAACTGATGTTTCCAAGATACGGGTTCACTT

>PGSC0003DMG400006268-(rev)LRR-RLPs\_3233

CTTTGACAAACATTTGGAGAGAATGCTTAAACTGATGTTTCCAAGATACGGGTTCACTTACACCAGATTT  
GACCCTGGGAAGGTTGTAGCTGTGGAAGAATATGAAGATGAGACCCAGAT

>PGSC0003DMG400006268-(rev)LRR-RLPs\_3294

ACCAGATTTGACCCTGGGAAGGTTGTAGCTGTGGAAGAATATGAAGATGAGACCCAGATGATACCGA  
AGATGACGATGATGGGGGAAAAGAAGCATCTCTTGGGCATTATTGTGTCTTC

>PGSC0003DMG400006268-(rev)LRR-RLPs\_3355

ATACCGAAGATGACGATGATGGGGGAAAAGAAGCATCTCTTGGGCATTATTGTGTCTTCTGTAGTAAAC  
TTGATTTTCAGAGAAATGAAGCAATGCATGATCCTAAATGCACTTGTGATA

>PGSC0003DMG400006268-(rev)LRR-RLPs\_3416

TAGTAAACTTGATTTTCAGAGAAATGAAGCAATGCATGATCCTAAATGCACTTGTCATATGTCATCATCC  
CCCAATTCTTTTCCTCCTACACCATCCTCTTCTTCACCTTTATTAGTCAT

>PGSC0003DMG400006268-(rev)LRR-RLPs\_3477

TCATCATCCCCAATTCTTTTCCTCCTACACCATCCTCTTCTTCACCTTTATTAGTCATATATCACAAAAGT  
TTTGATTCTTAAGCTTCTTCACATCTGCACATTTGTAATCTGTATAT

>PGSC0003DMG400006268-(rev)LRR-RLPs\_3522

CCTTTATTAGTCATATATCACAAAAGTTTTGATTCTTAAGCTTCTTCACATCTGCACATTTGTAATCTGTA  
TATAGTTACAGGTAGCACAGGATTGATTCAAAGCAAATTAGTCTCTCT

>PGSC0003DMG400006268-(rev)LRR-RLPs\_366

GGTCATGTGATTGCCTTGGAAGTGGATAATCAGACCATTTCTAGTGGAATTGAGAATGCAAGTGCTCTTT  
TCAGTCTTCAGTTTCTTGAGAGGCTAAATTTGGCTTACAACAAGTTCAAT

>PGSC0003DMG400006268-(rev)LRR-RLPs\_427

GTGCTCTTTTCAGTCTTCAGTTTCTTGAGAGGCTAAATTTGGCTTACAACAAGTTCAATGTTAGCATACCA  
GTTGGTATAGGCAACCTCACCAACTGAAGTACCTGAATTTATCGAATG

>PGSC0003DMG400006268-(rev)LRR-RLPs\_488

TAGCATACCAGTTGGTATAGGCAACCTCACCAACTGAAGTACCTGAATTTATCGAATGCCGGTTTTGTT  
GGCCAAATTCCTATGATGTTATCAAGATTAACAAGGCTAATTACTCTTGA

>PGSC0003DMG400006268-(rev)LRR-RLPs\_549

GGTTTTGTTGGCCAAATTCCTATGATGTTATCAAGATTAACAAGGCTAATTACTCTTGATCTCTCAACTCT  
TTTCCCTGACTTTTACCAGCCACTAAAACCTTGAGAATCCCAATTTGAGT

>PGSC0003DMG400006268-(rev)LRR-RLPs\_61

CTACCTTCTCCCTTCGCTTCAATCACAAAGTGGAACAAAACAAGTTTGATGGATTATAATTCCTCCAAGACT  
TGAGCAATGAGATTTTTACACTTTCTATGGATCTTCTTGATACCCTTTT

>PGSC0003DMG400006268-(rev)LRR-RLPs\_610

TCTCAACTCTTTCCCTGACTTTTACCAGCCACTAAAACCTTGAGAATCCCAATTTGAGTCATTTCAATTGAGA  
ACTCAACAGAGCTTAGAGAACTTTACCTTGATGGGGTTGATCTTTCAT

>PGSC0003DMG400006268-(rev)LRR-RLPs\_793

TGCGTGATTGTCGAATTTAGGCCCTATTCATGAATCACTTTCTAAGCTTCACTTTCTCTTTTCATCCGGC

TTGACCAGAACAATCTCTCTACCACAGTTCCTGAATATTTTGCCAATT

>PGSC0003DMG400006268-(rev)LRR-RLPs\_915

TCGAGCATGACTACCTTGAACCTCGCCTCTTGTAAATTTGCAAGGAACATTTCTGAAAGAATATTTTCAGG

TGTCAGTTTTAGAGAGTTTGGACTTGTCAACTAACAAAGTTGCTTCGTGGT

>PGSC0003DMG400006268-(rev)LRR-RLPs\_976

TATTTTCAGGTGTCAGTTTTAGAGAGTTTGGACTTGTCAACTAACAAAGTTGCTTCGTGGTAGTATTCCGATT

TTTCTTCGAAATGGATCTTTGAGGAGATTATCACTAAGCTACACCAACT

>PGSC0003DMG400006279LRR-RLPs\_0

TTTGATCCCCCTCCATCCTGATCCCTGCCCTAATTTTCAGGACCTCAAATTTCAAACAACAGGAAGCAAGAA

CAGAGGAAAATCCATGGAAATTCAGAGTCCGATGAAGCTAAAGAGATTG

>PGSC0003DMG400006279LRR-RLPs\_1037

ATACACTTCATACTGCAATCTTGAATTTTTATTTACTATTGAATCATCACTATAGTAACTTTAACAGTTCAC

TACTTATAATCTGATAACTAAGTTGGTCAGTACTAAAGAGTTTGCAAT

>PGSC0003DMG400006279LRR-RLPs\_1098

TAACAGTTCACTACTTATAATCTGATAACTAAGTTGGTCAGTACTAAAGAGTTTGCAATGGATACAACAA

CATGTAAAATTTGGTTTGATTTACACATATCATACTTTTAGTTATGTTGA

>PGSC0003DMG400006279LRR-RLPs\_1159

ATACAACAACATGTAAAATTTGGTTTGATTTACACATATCATACTTTTAGTTATGTTGATAGGTTTTTCCAA

GTGTTTAAAGGTCATCTTTGGATTTGCAAGCGAACCATGAACACGTT

>PGSC0003DMG400006279LRR-RLPs\_122

TGTGATCGGAAGGCATAAAAAAGACCGAATCAGTGATTTACCCGATGCCATCCTTCTTCACATCCTCTCT

ATGGTGCCGGACGGAAAACAAGTTGTGCGAACCCAGCGTACTGGGTAAACG

>PGSC0003DMG400006279LRR-RLPs\_1647

GAATAAGCTGATATATATCAACCTATTTCTAATCTTAAGTACTTCAGGAAAGAAAATTTATTTAAGTGTTT

TTTTTAATAGCAATCTCCTCAGTCACTTTACCATCCCAACTGTGCTTCC

>PGSC0003DMG400006279LRR-RLPs\_183

ATCCTCTCTATGGTGCCGGACGGAAAACAAGTTGTGCGAACCCAGCGTACTGGGTAAACGATGGAGGTCT

CTTTGGATGTCTGTTCCAATGTCAATCGATTTCAACTTCCCCCAAAGTAA

>PGSC0003DMG400006279LRR-RLPs\_1952

TTAATAGGAGTAAGAGAATTCACCTCTTTCAATATTCGAACTCATCAGCACATCAAGAAGCGCCATGTCTA  
TAGTATTATTAATCTTCTGAACATTAGAAGCTGCTGCGCAGAATTCTCAGA

>PGSC0003DMG400006279LRR-RLPs\_2013

CCATGTCTATAGTATTATTAATCTTCTGAACATTAGAAGCTGCTGCGCAGAATTCTCAGATGATGCATCTGC  
CAGTTTCGAAATTGTATGACATCCCTGTTTCTGGTGCATCTGTCTAGCA

>PGSC0003DMG400006279LRR-RLPs\_2074

ATGCATCTGCCAGTTTCGAAATTGTATGACATCCCTGTTTCTGGTGCATCTGTCTAGCACTTGAAGCTTGA  
ATTTCTTTTGAAGCTCAACGCTCCATCTTTCATGATTTTCAGGCGATCGCT

>PGSC0003DMG400006279LRR-RLPs\_2196

CCCCAAGTGACAACCTTCATTCCCCTGAATATTGTCTTCTAATATCTTCTCGTTCCCAGCAGCCTTCTTTAAC  
ACCTGATTGACTAAAATCTGTACCTCTGCTTTTGTGCCATGAATGGTC

>PGSC0003DMG400006279LRR-RLPs\_2257

CCTTCTTTAACACCTGATTGACTAAAATCTGTACCTCTGCTTTTGTGCCATGAATGGTCTTACACTCTTACC  
AACTTCAGAACCTGTAGCATCTGATTTCTACCCAAATTACGAACACT

>PGSC0003DMG400006279LRR-RLPs\_2379

GTGCAGCTCGTCTTGAATTAATAATTTCCCTAGCATTTCCCTGATGCTTAATACCTTGCATATTAATCTGCA  
TACTTCATCTCTATGGCCTCGATGTTTGCATGTACGTCAATATGAAGG

>PGSC0003DMG400006279LRR-RLPs\_244

GGAGGTCTCTTTGGATGTCTGTTCCAATGTCAATCGATTTCAACTTCCCCCAAAGTAAAATCTAGTCGTC  
ACACTTGATTACCTGTGCTCCACACTTACAGAACTTCATTACTGTAAGT

>PGSC0003DMG400006279LRR-RLPs\_2440

ATTAATCTGCATACTTCATCTCTATGGCCTCGATGTTTGCATGTACGTCAATATGAAGGTTAATAATCATA  
TGTTATTATTTGGTACACTATCAATTCATTCGACTTTGGCTCTAATGAG

>PGSC0003DMG400006279LRR-RLPs\_2501

AATAATCATATGTTATTATTTGGTACACTATCAATTCATTCGACTTTGGCTCTAATGAGCAATCTCACACG  
TTCAGGCAAAGCTGCCAGTAAGTTGACTTCAACTTTAACTCTTGCTGTG

>PGSC0003DMG400006279LRR-RLPs\_2745

TCAAAGCAATGGATTCTTCTTCTTTGGGATTAACCAAGGGGTCCAACGAAAAATTCTAAATTGATAGTC  
TTCCTCCATGGATTTTCTCCTTCTACCAATTGATGAAATAGCTATATGA

>PGSC0003DMG400006279LRR-RLPs\_2806

TTGATAGTCTTCTCCATGGATTTTCTCCTTCTACCAATTGATGAAATAGCTATATGAATAGACAGCACC  
AAAATCCTCATGTGCCGTCAATCGAATTAATAATATGCCGTGAATCTAAT

>PGSC0003DMG400006279LRR-RLPs\_2867

AGACAGCACCAAAATCCTCATGTGCCGTCAATCGAATTAATAATATGCCGTGAATCTAATGAAAATGTTTC  
ATGCCCTTTAACCTTTAGTTGTTGTGGAAAATACGCTCTCAACTCTGTC

>PGSC0003DMG400006279LRR-RLPs\_2928

AAATGTTTCATGCCCTTTAACCTTTAGTTGTTGTGGAAAATACGCTCTCAACTCTGTCATTGCAAGTTTG  
CAACAAGATCATATCGCAAATTTTTCTCTTGAAATTTATACAGAGCAC

>PGSC0003DMG400006279LRR-RLPs\_2989

TGCAAGTTTGCAACAAGATCATATCGCAAATTTTTCTCTTGAAATTTATACAGAGCACATTGCAAATTTT  
CCTCCTGAATATCAGATTATTCAAAAATATAGTAGTTCTCCATTGAT

>PGSC0003DMG400006279LRR-RLPs\_305

TCTAGTCGTCACACTTGATTACCTGTCGTCACACTTACAGAACTTCATTACTGTAAGTCGTGCGATAAAA  
TACCCAGATTTACCGTTGGGGGATTTAGGTACGAACACTGTTATGCTAA

>PGSC0003DMG400006279LRR-RLPs\_3050

TGCAAATTTTCTCCTGAATATCAGATTATTCAAAAATATAGTAGTTCTCCATTGATTATCAAAAATTGTT  
GCACGCCCTCTAGCTTCTCATGCTAGTGAATTAAGCTGAAAATGTT

>PGSC0003DMG400006279LRR-RLPs\_3111

TCAAATTTGTTGCACGCCCTCTAGCTTCTCATGCTAGTGAATTAAGCTGAAAATGTTAACAGTATGTTA  
CCTTGACTTATGATTCAACTCTTTAATCTTTTTTTGTTGTTTGGATGTA

>PGSC0003DMG400006279LRR-RLPs\_3172

CAGTATGTTACCTTGACTTATGATTCAACTCTTTAATCTTTTTTTGTTGTTTGGATGTACCACATTGTAACA  
TTTGCTAATATGTTCCCTGAATTTAAAATTCTTCACCTTTTTGTTTT

>PGSC0003DMG400006279LRR-RLPs\_3233

ACATTGTAACATTTGCTAATATGTTCCCTGAATTTAAAATTCTTCACCTTTTTGTTTTATCCACAATCAACT  
CCTTGCCTTCATGCTTTCTTCTAAGGACAATAATTGGTTAATATAGT

>PGSC0003DMG400006279LRR-RLPs\_3294

CCACAATCAACTCCTTGCCTTCATGCTTTCTTCTAAGGACAATAATTGGTTAATATAGTGTATTCTTTCTTA

CAGAATCTGTTGGCAAGGTACACAGATGAGGATGAACTGAGCGAGAGG

>PGSC0003DMG400006279LRR-RLPs\_3355

ATTCTTTCTACAGAATCTGTTGGCAAGGTACACAGATGAGGATGAACTGAGCGAGAGGTTTGAGAAGC

ATAATGTAAATGCTCATTTCACATCTGAAGACCATCACGATCAATAACT

>PGSC0003DMG400006279LRR-RLPs\_3416

TGAGAAGCATAATGTAAATGCTCATTTCACATCTGAAGACCATCACGATCAATAACTTTTCTGGATCAT

CAAGTGAAAATAAGTTTGTGCTGCAATTGGTAAAATATTTGCTCAAGCA

>PGSC0003DMG400006279LRR-RLPs\_3477

TCTGGATCATCAAGTGAAAATAAGTTTGTGCTGCAATTGGTAAAATATTTGCTCAAGCATGCAGCCATGC

TAAAAGAGTTTGTCAATTGCTTCCACATACCAATGGATGTCTCCGGAGTAT

>PGSC0003DMG400006279LRR-RLPs\_3538

CAGCCATGCTAAAAGAGTTTGTCAATTGCTTCCACATACCAATGGATGTCTCCGGAGTATCGTAAAATGGC

ACAAAAGCTCTTAAGCTTTCCAATGCTCCTCTCCGCACGCTTCAGTTGTCT

>PGSC0003DMG400006279LRR-RLPs\_3599

TAAAATGGCACAAAAGCTCTTAAGCTTTCCAATGCTCCTCTCCGCACGCTTCAGTTGTCTTTTCTGACATAT

AACCTTTGTCCCTTACAACATACCTTACTAACAATGTGTTTATGCTCTA

>PGSC0003DMG400006279LRR-RLPs\_366

TGCGATAAAATACCCAGATTTACCGTTGGGGGATTTAGGTACGAACACTGTTATGCTAAGTATGTTGATT

TATGGGTTAGTTTCGCTACTAAAGTTGCTAAGGTGGAAGAATTTTTGCTT

>PGSC0003DMG400006279LRR-RLPs\_3660

TCTGACATATAACCTTTGTCCCTTACAACATACCTTACTAACAATGTGTTTATGCTCTAACAGCAAGAAA

GTTTGTGCTAAATGTTTTATTGACTTATACTCATTGTTTGTGAGAATAG

>PGSC0003DMG400006279LRR-RLPs\_3721

CAGCAAGAAAGTTTGTGCTAAATGTTTTATTGACTTATACTCATTGTTTGTGAGAATAGTTTTTCAAGATT

CAGTTATGTGTCCAAGGGCTTTGTTTTTGTGGCCTATGTTATTTTTAA

>PGSC0003DMG400006279LRR-RLPs\_3782

TTTCAAGATTCAGTTATGTGTCCAAGGGCTTTGTTTTTGTGGCCTATGTTATTTTTAATTGGTGAATGA

TTATTTCTCGACTTGGACAGTGAATGACCTTAGGAGGGAAGCAAGGCAG

>PGSC0003DMG400006279LRR-RLPs\_3843

GGTGAATGATTATTTCTCGACTTGGACAGTGAATGACCTTAGGAGGGAAGCAAGGCAGTGGAACCTT  
GTCCCAGCATGTTTTCTGGGGTATTACAAAAGGAAAGAAATAGCATGTGTAT

>PGSC0003DMG400006279LRR-RLPs\_3904

GAACCTTGTCCCAGCATGTTTTCTGGGGTATTACAAAAGGAAAGAAATAGCATGTGTATATCTGCAGAG  
TTCATATTAGATTAGTTTGTATCAGAACTTTTATGTTATTGAAGACTTTAT

>PGSC0003DMG400006279LRR-RLPs\_3945

AAGAAATAGCATGTGTATATCTGCAGAGTTCATATTAGATTAGTTTGTATCAGAACTTTTATGTTATTGAA  
GACTTTATGATAATCTGTATGGTAAATTGTTGAGTCCTGTACTGTTCTC

>PGSC0003DMG400006279LRR-RLPs\_427

ATGTTGATTTATGGGTTAGTTTCGCTACTAAAGTTGCTAAGGTGGAAGAATTTTTGCTTGGATTGTTATCT  
GTAAATGATCAAACCTTATGACTTCCCTTCGTATGCATTTAAGAATTCGT

>PGSC0003DMG400006279LRR-RLPs\_488

ATTGTTATCTGTAAATGATCAAACCTTATGACTTCCCTTCGTATGCATTTAAGAATTCGTTGCTTAAGGATTT  
GGAATTGAGGAATTGCCAACTTAACCCTCGTGCTACTGTTGATTGGAC

>PGSC0003DMG400006279LRR-RLPs\_549

CTTAAGGATTTGGAATTGAGGAATTGCCAACTTAACCCTCGTGCTACTGTTGATTGGACTAATCTAAGCT  
CTCTTAAAATTGGGTATATCGATTTGACAGATGATGCTATGGAAAAGATA

>PGSC0003DMG400006279LRR-RLPs\_61

GAAGCAAGAACAGAGGAAAATCCATGGAAATTCAGAGTCCGATGAAGCTAAAGAGATTGGTTGTGATC  
GGAAGGCATAAAAAAGACCGAATCAGTGATTTACCCGATGCCATCCTTCTTC

>PGSC0003DMG400006279LRR-RLPs\_610

ATCTAAGCTCTCTTAAAATTGGGTATATCGATTTGACAGATGATGCTATGGAAAAGATATTATCTGGTTC  
CCCGAACTTGAAAAGCTTGGAAGTAGATAATTTTTCCGGCCTACAACGTC

>PGSC0003DMG400006279LRR-RLPs\_671

ATCTGGTTCCCCGAACTTGAAAAGCTTGGAAGTAGATAATTTTTCCGGCCTACAACGTCTCGAAATTAAC  
TCTGTCAAGTTGACACAACCTGATGATAGAATCTTATTACAATGACAATGA

>PGSC0003DMG400006279LRR-RLPs\_732

GAAATTAACCTCTGTCAAGTTGACACAACCTGATGATAGAATCTTATTACAATGACAATGATGAGATTTGGC  
TTGAAATAGTAGCTCCCATCTTCAGCATTTAGAAGTTTTGGAATTGTGC

>PGSC0003DMG400006279LRR-RLPs\_793

AGATTTGGCTTGAAATAGTAGCTCCCCATCTTCAGCATTAGAAAGTTTTGGAATTGTGCAGTGAGATACG  
CATTGGCCAGAGAAATGTGCCTTCACTTGTCACTGCAATCTTTCGTTTAA

>PGSC0003DMG400006279LRR-RLPs\_854

TGAGATACGCATTGGCCAGAGAAATGTGCCTTCACTTGTCACTGCAATCTTTCGTTTAAATTTAATTTTG  
AGAATGAAGAACAAGACTTGGAGATGGAATTTAGCTGTTTGAAGGAACT

>PGSC0003DMG400006279LRR-RLPs\_915

TTTAATTTTGAGAATGAAGAACAAGACTTGGAGATGGAATTTAGCTGTTTGAAGGAACTTCTTCATAGTG  
TTGCCATGTCCAGAATCTTGAATTGGGTACCTGGTGCATCGAGGTTTAT

>PGSC0003DMG400006279LRR-RLPs\_976

TTCATAGTGTGGCCATGTCCAGAATCTTGAATTGGGTACCTGGTGCATCGAGGTTTATTCATACACTTCA  
TACTGCAATCTTGAATTTTTATTTACTATTGAATCATCACTATAGTAAC

>PGSC0003DMG400006280LRR-RLKs\_0

CCAAAGCCAAAAATTACTATCATATTTTATCAGTATCAATGGAATCTTTCAAAATACTTGTTCATCTTCTT  
CTTCTTCTTACCTTTGATGTTTTCCGAAGTATTCGAACTTCAATCACT

>PGSC0003DMG400006280LRR-RLKs\_62

GCATCTTCTTCTTCTTACCTTTGATGTTTTCCGAAGTATTCGAACTTCAATCACTAGTTATCTAAATGG  
CTACTTCTAACACAAGTCTTCTTTTTTCGCGTATTTCTTACTCGTGT

>PGSC0003DMG400006364-(rev)LRR-RLKs\_0

ATGAATCTTGCAAATTATGGGATTAGAGGTAATCTTCACCATCTAAATTTCACTTCTTTTCCTCATCTTCAA  
TTGATTAATTTTCCAGTAACTCACTCAATGGTACACTTCCAAAAAAC

>PGSC0003DMG400006364-(rev)LRR-RLKs\_122

GTTCAATCTTCAAGATTAAGTTTCTATATTTGAGTTACAATCAATTTGATGGAGTGATTCCACATGAAA  
TAGGGCTATTGAAGAATCTCAAGCAGTTAGACTTGTGATAAATCGTTT

>PGSC0003DMG400006364-(rev)LRR-RLKs\_1464

CGAATGAAAAGGAAAAGAAATAGAAGTATTCAGCTTAGAGAACCATCCAGAAATCTTTTTCAGTTAGG  
GGCTTTGATGGGAAAATAGCACATGAAAACATAATTGCAGCAACAGAAAAC

>PGSC0003DMG400006364-(rev)LRR-RLKs\_1891

TCAAGAGGGTTGATATTGTCAAGGGGATAGCAAACGCGTTGTGTTACTTGCATCACGCGTGTTACCTCC



TATAGTTCATAGAGACATATCAAGTAACAATGTTCTCTTAGATGATGAAG

>PGSC0003DMG400006364-(rev)LRR-RLKs\_2257

AAGGTAAATGAGAAGAGTGATGTTTACAGCTTCGGGGTGCTATCACTAGAAGTTATTCTAGGTCATCAT  
CCAGGTGATATTATTCAAGCTATATCATCATTTTTCGCCAGCATCAGGAGTG

>PGSC0003DMG400006364-(rev)LRR-RLKs\_61

CTCATCTTCAATTGATTAACTTTTCCAGTAACTCACTCAATGGTACTTCCAAAAACATGTTCAATCTTT  
CAAGATTAAGTTTTCTATATTTGAGTTACAATCAATTTGATGGAGTGA

>PGSC0003DMG400006364-(rev)LRR-RLKs\_854

TCTCTTGCTGGAACCTTGATTTACATGAGAATAGAATTTTCAGGAGAAATACCTATAGAAGTGGGGAAGTT  
GTCTAAACTTACAAAACCTTGACTTAGGTGCGAATAATATGAGTGGAACGAT

>PGSC0003DMG400006422LRR-RLPs\_0

ATGGTCAAAGGAAAAAGGAAGTGGGAGATGATGATGAGTTAAATTATTCTACATTTTTGGAGTTTTG  
AGAGAGAGGGCCATAGTAACGAATAAAGGCAATAAGTACCAGTATGACACC

>PGSC0003DMG400006422LRR-RLPs\_128

ATTGTTTACAAGTATGGATATGTCTAGCAATAAGCTTTCTGGGGATATTCTGTAAGTTTAAACAGGTCTT  
GTAGGATTAAGATCGTTTAAATTTTTCTAATAATAACCTAACTGGTAAGAT

>PGSC0003DMG400006422LRR-RLPs\_192

GGTCTTGTAGGATTAAGATCGTTTAAATTTTTCTAATAATAACCTAACTGGTAAGATTCCAAATGACATTGG  
TGACATGAAAGTCTTGGAAATCTGTTGATCTTTCAGAAAATAAATTTTAC

>PGSC0003DMG400006422LRR-RLPs\_256

ACATTGGTGACATGAAAGTCTTGGAAATCTGTTGATCTTTCAGAAAATAAATTTTACAATCAAATCCCACA  
AAGCTTTTCAAGTTTGTCCACTTTGAGCTTCTTGAATCTATTTGATAATA

>PGSC0003DMG400006422LRR-RLPs\_320

CCCACAAAGCTTTTCAAGTTTGTCCACTTTGAGCTTCTTGAATCTATTTGATAATAATTCGTTATGTATGAT  
ACCATTGAGCACTCAACCTCAAAGCTTTGATCTCACGAGTTTTCAAGG

>PGSC0003DMG400006422LRR-RLPs\_512

AGATGATGAGGGTGACAAAGATGAAGGGGATTGGTTTTACATTTCAATTGGTTATAGGATTTGCGCTAAA  
CTTTTGGGGTGTGTTGTTGTTCACTGCTTTTCAAGAGATCATGGAGACATGC

>PGSC0003DMG400006422LRR-RLPs\_64

TTTTGAGAGAGAGGGCCATAGTAACGAATAAAGGCAATAAGTACCAGTATGACACCATTTTGGCATTGT  
TTACAAGTATGGATATGTCTAGCAATAAGCTTTCTGGGGATATTCCTGTAA

>PGSC0003DMG400006458LRR-RLPs\_1098

TTTTGTTTAATTTCTTCCATATTTATGGAAAGAAATATATTTATCATTTACCTTTCTTCTATTTTACGCAACA  
ATAGTTATTATATGTTTCCTAGTTTTCAATTTGTTTATTTCAGTGTTG

>PGSC0003DMG400006458LRR-RLPs\_1525

TTAAATCCAAATCAACCGTCCTAACGTCATATTTTGTCGTTTCATCATTATTTTAAATTGACCCAATAGTAAG  
GATAAAGTCTATTAGTTTATTTTTTACTTCATTGATACATTTTAAAAA

>PGSC0003DMG400006458LRR-RLPs\_1586

CCAATAGTAAGGATAAAGTCTATTAGTTTATTTTTTACTTCATTGATACATTTTAAAAAATATATATATAAC  
AACTTGATAGGTTTTCTAATTATTCGTATTAACGCAATAGTATATTT

>PGSC0003DMG400006458LRR-RLPs\_1647

ATATATATAACAACCTTGATAGGTTTTCTAATTATTCGTATTAACGCAATAGTATATTTTTCTGGTTGTTAT  
ATGTATGTGTGGATTGTGGATTACTTAAATATAATTGACAAAATTC

>PGSC0003DMG400006458LRR-RLPs\_2013

TGTATCTATTTTCATACATGTATCGATTTTAAGTAGCATGAATTGTATCATAGATTAACACTTTATCATTTTA  
CTCTCTCTGTCCAACAATAGTAGTCCACTATTGACTTGGCATACCCCT

>PGSC0003DMG400006458LRR-RLPs\_2684

ACTAGACACAATGATTTTAGGGTAAGTCACATTCTTATTTGGTTGGACGATTTTCAATTATCATGTATCAC  
TTGTGTATATAAATACACAAACACACATCTGTATCTCTTCAAAGTTCCA

>PGSC0003DMG400006458LRR-RLPs\_2745

CATGTATCACTTGTGTATATAAATACACAAACACACATCTGTATCTCTTCAAAGTTCCACTCATCTGCCAT  
AGATACATAAATACATTGATACACATATATATCTCGTCAAAGCTAAGCA

>PGSC0003DMG400006458LRR-RLPs\_2989

CACATATATATCTCCTCAAAACTACTCACTCATTGCAATAGATGCACAAAAATATAGATACACATATACA  
CAAATATACATATGTATCTCTTCAAAGTTGCACTCTAATTTGCCATAGA

>PGSC0003DMG400006458LRR-RLPs\_3050

CACATATACACAAATATACATATGTATCTCTTCAAAGTTGCACTCTAATTTGCCATAGATGCACCAATACA  
TATAGTCCCTCTGTAAAGCGAGAGAGGGGGAGAGGGAGGAGAGTGGCGA

>PGSC0003DMG400006458LRR-RLPs\_3111

CACCAATACATATAGTCCCTCTGTAAAGCGAGAGAGGGGGAGAGGGAGGAGAGTGGCGAATTTGCTAC  
GAAAAAGGGAAATCTCATTGAGTTATGTAATTTTTTAAACTATAAATAGGT

>PGSC0003DMG400006458LRR-RLPs\_3355

AACTTGGTTGAGTTAGATATGCATTCCAATCAGCTCAACTCCATTCCCAACTCTATAGGTTGCTTATCAAA  
GCTCAAACCTTCTCAACATTTCTGGGAATCTCCTTCTTTCGCTCCCTAAA

>PGSC0003DMG400006458LRR-RLPs\_366

GGGAGCTATATCCAAATTACATATTTCCAACAATAATCTTCAGGTTGGTCAGCTTTCGTACACCTCAATTA  
ATTTTTGTGAAATATCTGTTATCTTCTATCAGCAATAAGCAATATGTAC

>PGSC0003DMG400006458LRR-RLPs\_4026

TTCTCCCCACCGGAGGTAGTGGAGCAAGGGATACGTGCAGTTAAGCAATACTTATGTGAAAAGATAAA  
TGGCATGCATGACAAGTCCCCTAAGAAGAAGTCATGGTTTGGAAAAGTAC

>PGSC0003DMG400006458LRR-RLPs\_427

ACCTCAATTAATTTTTGTGAAATATCTGTTATCTTCTATCAGCAATAAGCAATATGTACTAGATGACTCTG  
TTCATAGAGGTTAGGATAGATGAATAGATTCACCTAGTGTTTTTTTTTTT

>PGSC0003DMG400006458LRR-RLPs\_4270

CGTCTTCTATCTCAAAAACCTACTTCTCAAATAAGGGACATTGCAATTTGCTTGGATATCATATTGTGG  
TAGCTCTTAGCTTGTTTTCTTTTACGTTTGAAATCGTGCAATGTGTGCT

>PGSC0003DMG400006458LRR-RLPs\_4331

CATATTGTGGTAGCTCTTAGCTTGTTTTCTTTTACGTTTGAAATCGTGCAATGTGTGCTAGATCAAGCTGT  
ACATTATGTTCTGTAGATTTTGTGTTGCTTTGAGATTGTACAGATTTTCA

>PGSC0003DMG400006458LRR-RLPs\_4392

ATCAAGCTGTACATTATGTTCTGTAGATTTTGTGTTGCTTTGAGATTGTACAGATTTTCATAGATGATTAGC  
CTCATGAGTCATGGGTATGTTTGAGAGGTAGAGGTACAAATTTACCCGA

>PGSC0003DMG400006458LRR-RLPs\_4453

GATGATTAGCCTCATGAGTCATGGGTATGTTTGAGAGGTAGAGGTACAAATTTACCCGAACAGGGTGT  
TATATCAAATCATATGAATAATTACATCGAATCAAATTTGTTATCGTAAC

>PGSC0003DMG400006458LRR-RLPs\_4514

AGGGTGTATATCAAATCATATGAATAATTACATCGAATCAAATTTGTTATCGTAACAATATCACTTGT

ACAAAACTCATTGTTTCATTAATTATCAAACTCAAAAAAATTAT

>PGSC0003DMG400006458LRR-RLPs\_4575

TATCACTTGTACAAAACTCATTGTTTCATTAATTATCAAACTCAAAAAAATTATCTTACATAAACA  
GAACCATTAACAAAAACCCCAAAAAACAGAACATGACTCTTAGAAAGCA

>PGSC0003DMG400006458LRR-RLPs\_4636

TACATAACAGAACCATTAACAAAAACCCCAAAAAACAGAACATGACTCTTAGAAAGCAAACAGAACAA  
ATGAAAACTTGCCAGAATCACAAATTATGAATTAGTTTCTTGCACTTGCG

>PGSC0003DMG400006458LRR-RLPs\_4697

CAGAACAATGAAAACTTGCCAGAATCACAAATTATGAATTAGTTTCTTGCACTTGCGATTCATTCTTT  
GCAATCCGATTCACTTCTCCTGTAAACGACCATTCTCTAATGGTAGA

>PGSC0003DMG400006458LRR-RLPs\_4758

TCATTTCTTTGCAAATCCGATTCACTTCTCCTGTAAACGACCATTCTCTAATGGTAGACAAACTGGCTTC  
CATGCTCGCGATTTATTTGATCTTTCTCAAATTTGCACGAAGTTGTG

>PGSC0003DMG400006458LRR-RLPs\_488

GATGACTCTGTTTCATAGAGGTTAGGATAGATGAATAGATTCACTTAGTGTTTTTTTTTTGTCTTCGCTAGA  
ATTAATTGAACAACCACTTCGTTGATCACTATATGCTATCATGAATTAT

>PGSC0003DMG400006458LRR-RLPs\_5124

TGACCATTTAAATGTACAACCTAATAGTCTTTAATATATCACAAAGATTTGGGAGAAAAACAACAATATG  
TTATTTTGATGTACATATTGTTAATTTTTCTTATTCTCTCTAGCTAG

>PGSC0003DMG400006458LRR-RLPs\_5185

AACAATATGTTATTTTGATGTACATATTGTTAATTTTTCTTATTCTCTCTAGCTAGTGTGTAAGGGC  
TCAAAGAAGATGTCCTTTTATAACAAGGGGAAAGATGGTGTGAAACC

>PGSC0003DMG400006458LRR-RLPs\_5246

TGTAAGGGCTCAAAGAAGATGTCCTTTTATAACAAGGGGAAAGATGGTGTGAAACCAGGTTGTGG  
TGCGGTAGTGGAATTGCTCCACCCTAATCAAAGATCTCAGTTTCGAGCTCT

>PGSC0003DMG400006458LRR-RLPs\_5368

GTATGAAGAAAATCCTATTGGGAGTGCTATCCTCGGATGGGTCTTGCAAGTGTGCAATACAGATTTAAT  
CTAAGCTCCAATGCAGACTCCGAATATTGAGTGGAAAATCAAAAAATGGT

>PGSC0003DMG400006458LRR-RLPs\_5429

GATTTAATCTAAGCTCCAATGCAGACTCCGAATATTGAGTGGAAAATCAAAAAATGGTGGTGGGGAAG  
AGTTGTGGAGATAGATGATGAGAACACGCTATTTAAGTTAGAAATTTTTTT

>PGSC0003DMG400006458LRR-RLPs\_549

CTTCGCTAGAATTAATTGAACAACCACTTCGTTGATCACTATATGCTATCATGAATTATTTATTTATGAGA  
ATTTTATTCATGATGGAATATTTTAATCTTTGATTGGAAATTAAGTGA

>PGSC0003DMG400006458LRR-RLPs\_5490

TGGGGAAGAGTTGTGGAGATAGATGATGAGAACACGCTATTTAAGTTAGAAATTTTTTTTATTTGCTTCA  
AGGCTTATGTGACGCTTCCAATAGGATTTTCTTCATATTCAAGGTTCAAA

>PGSC0003DMG400006458LRR-RLPs\_5527

TATTTAAGTTAGAAATTTTTTTTATTTGCTTCAAGGCTTATGTGACGCTTCCAATAGGATTTTCTTCATATT  
CAAGGTTCAAACTGAACTTCTGATTAAGATGGAGAAGTCTCATCA

>PGSC0003DMG400006458LRR-RLPs\_610

ATTTATGAGAATTTTATTCATGATGGAATATTTTAATCTTTGATTGGAAATTAAGTGAAAAATATCTTTTT  
TTGAAATAAGTGGTGGCTAAAGTATTTGATATGAAGATAAGATAATTA

>PGSC0003DMG400006458LRR-RLPs\_671

AATATCTTTTTTTGAAATAAGTGGTGGCTAAAGTATTTGATATGAAGATAAGATAATTATGAAGAAAAAT  
GTTTTAGTCAAACCGAGTGAAGTTATTTTCTCATTTTGACCGGAGGCG

>PGSC0003DMG400006458LRR-RLPs\_732

AAGAAAAATGTTTTAGTCAAACCGAGTGAAGTTATTTTCTCATTTTGACCGGAGGCGAACTAGTTGAT  
TGCTTTGAATTGTATCAGTAGCACAAAGGACACTATTA AAAACACTATTGC

>PGSC0003DMG400006458LRR-RLPs\_793

CTAGTTGATTGCTTTGAATTGTATCAGTAGCACAAAGGACACTATTA AAAACACTATTGCATTTCATAAATG  
TACGATTAATTATATATTAGTTTATGTTCGATATTAATAGGTGGACGTGC

>PGSC0003DMG400006486LRR-RLPs\_0

ATGGCAAAAAGAGTTTGTGTTGATGGAGAAGACAGAATATCAGAATTGCCTGTGCATATCATTATCAC  
ATCTTATGCCGCACTGACCTCGACGTCGAAGAGGCGGCGATAAGTTGTATG

>PGSC0003DMG400006486LRR-RLPs\_1116

CTGAACAGGGCAATCTTCATCCTTGCCAAATTGCTATTTTGGATGGTTACAATACTTTACAAACACTCAAG  
CTCACTGGTGCCACCATCACAGACCAACAGTTTCGGGATGTATCCTATA

>PGSC0003DMG400006486LRR-RLPs\_1178

ACACTCAAGCTCACTGGTGCCACCATCACAGACCAACAGTTTCGGGATGTATCCTATAAGTTCCCAAACA  
TTTCAGAATTGGATCTAGCAAGATGCTATAAGCTGAAAAATATAGAGATC

>PGSC0003DMG400006486LRR-RLPs\_124

CCAAGAGATGGTACTATTGCTGGACTTCAAGACCTAATTTGATATTCAATCAATTTCAAGGCTACAAATA  
TAGGCCCTTGAAAATATGTCAAGTTGGTTGATCAATCTCTGCGATCCC

>PGSC0003DMG400006486LRR-RLPs\_1240

CCCAAACATTTCAGAATTGGATCTAGCAAGATGCTATAAGCTGAAAAATATAGAGATCCAGAGTGAAAA  
ACTCAAGAAATTCACCTTATTAGAAGAGTTGAACAGTCTGGAAAAAATCAC

>PGSC0003DMG400006486LRR-RLPs\_1302

GTGAAAACTCAAGAAATTCACCTTATTAGAAGAGTTGAACAGTCTGGAAAAAATCACGATTCAAGCTC  
CAAATTTATTGAAATTTGATTTTCATGGTAGTAAAATGCCCTTCACATATA

>PGSC0003DMG400006486LRR-RLPs\_1364

CAAGCTCCAAATTTATTGAAATTTGATTTTCATGGTAGTAAAATGCCCTTCACATATATGGATACTTCTTC  
CCTAGAAAGTGCCCGGCTCAATTTCTTCTTGCTGGCACAAACTTTGGA

>PGSC0003DMG400006486LRR-RLPs\_1426

TACTTCTTCCCTAGAAAGTGCCCGGCTCAATTTCTTCTTGCTGGCACAAACTTTGGATCAGTGGACAGCA  
GTTGGTACACGAGCCTTCAGCACTTTGTGAAAAAGTTCAACTATTCTAA

>PGSC0003DMG400006486LRR-RLPs\_1488

TGGACAGCAGTTGGTACACGAGCCTTCAGCACTTTGTGAAAAAGTTCAACTATTCTAAAGATTTTCATATT  
AATAATATTTTGCCACCAGGTAAATCAAAGTAGTTTACATTATTTTTGTG

>PGSC0003DMG400006486LRR-RLPs\_1550

TTCATATTAATAATATTTTGCCACCAGGTAAATCAAAGTAGTTTACATTATTTTTGTGCTTATGTCATTGAT  
TTATGCATTAATTGTTGAATTTGGTTTAAACTATGCCATTGACAAAAT

>PGSC0003DMG400006486LRR-RLPs\_1612

TGTCATTGATTTATGCATTAATTGTTGAATTTGGTTTAAACTATGCCATTGACAAAATTTCTGCAGACCAG  
AAGCATCCTTATTTATAAAAATCTAGGAGAAATTGTTATTCCACCAAGT

>PGSC0003DMG400006486LRR-RLPs\_1674

GCAGACCAGAAGCATCCTTATTTATAAAAATCTAGGAGAAATTGTTATTCCACCAAGTCACAAAGTCGAG

ATATTCATTGCATCCATGCTGCGTGTGAATCGATCATTGAAATAATAAT

>PGSC0003DMG400006486LRR-RLPs\_1736

AAGTCGAGATATTCATTGCATCCATGCTGCGTGTGAATCGATCATTGAAATAATAATGTTTCGAGTGTCC  
CTATATCATATCCATACTTCCATGTACAGATAGCAAAGCACTACAGGTAA

>PGSC0003DMG400006486LRR-RLPs\_1798

GAGTGTCCCTATATCATATCCATACTTCCATGTACAGATAGCAAAGCACTACAGGTAATTTCTTGCTTGTC  
TCTTGCTGTGTATAAACTAAGACATTAATTTGAGCTTACAATCAGAAA

>PGSC0003DMG400006486LRR-RLPs\_186

TACAAATATAGGCCCTTGAAAACATGTCAAGTTGGTTGATCAATCTCTGCGATCCCATGTGCGAAAAAA  
ATTTACATCTTGAACAATTCATCCTTACATATAATGGTCAAGAAGTGGAT

>PGSC0003DMG400006486LRR-RLPs\_1860

TTGCTTGTCTCTTGTGCTTGTATAAACTAAGACATTAATTTGAGCTTACAATCAGAAAATTTGTTGTAAA  
TGTTGATTGCTCGTCTCATAAGCATTATTGTATAATATATCTTATGTTT

>PGSC0003DMG400006486LRR-RLPs\_1984

TTAAATGCAGGCGATGTCCACACTAAAAGGGTGTATACAAAAGCAAATTGTGGCAAAGAATGTCCATC  
CGATACCGTCTGGCATCGTAACTTAAAAGAAGTCATCAGTTGTAGTGGGAC

>PGSC0003DMG400006486LRR-RLPs\_2046

GTCCATCCGATACCGTCTGGCATCGTAACTTAAAAGAAGTCATCAGTTGTAGTGGGACATCTGAGGAGG  
GAATGGCTGCCTCCATGTGGAATCTCTGGTTGAAATCCACGTCTTTATTTG

>PGSC0003DMG400006486LRR-RLPs\_2090

AGTTGTAGTGGGACATCTGAGGAGGGAATGGCTGCCTCCATGTGGAATCTCTGGTTGAAATCCACGTCT  
TTATTTGATCAAGTGAATAATTTCTGTGTTAGAATGGAAAGATGAAGCCTAG

>PGSC0003DMG400006486LRR-RLPs\_248

CGAAAAAATTTACATCTTGAACAATTCATCCTTACATATAATGGTCAAGAAGTGGATCCTCACGTGGAT  
ACTTGGATTGAATTGGCGGTTAACTCAACGTCACAGAGCTGGGAATTCA

>PGSC0003DMG400006486LRR-RLPs\_434

GCAGTTAAGCAGGTGCAATTTGAATTTGACAAAAGATTTTCTTGCTTGAGTCTCTTTCTTTGAATCATG  
TCCATATTTAGATGCCCAATTACAAAGAGTTATCGACAGATGCCCATC

>PGSC0003DMG400006486LRR-RLPs\_62

TCATCACATCTTATGCCGCACTGACCTCGACGTGCGAAGAGGCGGCGATAAGTTGTATGTTGTCCAAGAG  
ATGGTACTATTGCTGGACTTCAAGACCTAATTTGATATTCAATCAATTTCA

>PGSC0003DMG400006486LRR-RLPs\_992

GGTATAAGCAAATGTCATATTTTTGGCCTAGTACATCTCAAGTATTTGATGCTAGTTATTGCAAACCTCCA  
TAGTGTCATAGTCCAAGCTCCATATCTTCAATGCTTTAGATATACAGAA

>PGSC0003DMG400006487LRR-RLPs\_1364

TCTTATTCCACCAAGTCATAATGTCGAGATACTCATTGTACCCATCCTGAGCATTGAATTGATCATTGGAT  
CATTATTGCTCAACCGTCCCAGCATCATGTCCATACTTCCATGTACAGA

>PGSC0003DMG400006487LRR-RLPs\_930

TTATAAGCTGAAATATATAGAGATTCAGAGTGAAAACTCAACAAAGTCATCTTATCGAAGTTGGATAGT  
ATCAAAAAAATCATGATTCAAGCCCCAAATTTATCGCAATTTGATTTTGA

>PGSC0003DMG400006487LRR-RLPs\_992

TGGATAGTATCAAAAAAATCATGATTCAAGCCCCAAATTTATCGCAATTTGATTTTGGAGGGTGATAAAAT  
GCCCTTCTTATCTATGGATTCTTCTCCCTGGAAAGAGCCCGACTCAATT

>PGSC0003DMG400006498-(rev)RLKWAX-EGF\_0

TCTCAACAATGATAAAAAATTTCTTATGCTGGTTTTAGCTTAGAACACAAGTCAATGATCAATTCATAGTG  
TTAACATGGTATCAGAGCTACAGTGAGTGAATCTAGGAGTTTCTTTCA

>PGSC0003DMG400006498-(rev)RLKWAX-EGF\_4575

TCTTCATACCACCTAGATTGAAGGGGGTATTGAGCACATGAAGAATGATGATGCAGGATGATGTGTCAT  
TACTGATTGGACTAGAAGTTAGTTAATTAGAATTGGTTATAAGATATTTT

>PGSC0003DMG400006498-(rev)RLKWAX-EGF\_4636

TGTGTCATTTACTGATTGGACTAGAAGTTAGTTAATTAGAATTGGTTATAAGATATTTTCTCATTTACGGT  
TAGTTAGGTTGTTAGAACTCTAGTTAATAGTCAGGTTAAGTTAACTGTG

>PGSC0003DMG400006498-(rev)RLKWAX-EGF\_4697

CATTTACGGTTAGTTAGGTTGTTAGAACTCTAGTTAATAGTCAGGTTAAGTTAACTGTGGTTAGTAGAGT  
TGGTTACTACTGCTATATAAACATTGTAATTAGTACACTGGAATTTGTAA

>PGSC0003DMG400006498-(rev)RLKWAX-EGF\_4758

TAGTAGAGTTGGTTACTACTGCTATATAAACATTGTAATTAGTACACTGGAATTTGTAATGTTTGATCTTT  
TTCTCAAAACAATCTGAAATTCTCTCAACAATGGTGAAAGATTTCTTCT



>PGSC0003DMG400006498-(rev)RLKWAX-EGF\_4819

TTTGATCTTTTTCTCAAAACAATCTGAAATTCTCTCAACAATGGTGAAAGATTTCTTCTGTTGGTTTTAGCT  
TAGAACACAAGCCAGTGATCAATTCGTAGTGTTAACAGTATTTACAT

>PGSC0003DMG400006498-(rev)RLKWAX-EGF\_4880

TGGTTTTAGCTTAGAACACAAGCCAGTGATCAATTCGTAGTGTTAACAGTATTTACATGATATAATTGA  
AACGTTTCTTGAAAAGTCAAAGTTGTGATTCTTTATTATATGAATATATG

>PGSC0003DMG400006498-(rev)RLKWAX-EGF\_4941

TATAATTGAAACGTTTCTTGAAAAGTCAAAGTTGTGATTCTTTATTATATGAATATATGAAAGTTGAAGTC  
GAACAAACTATAGTTACCGATTTACTAAACCACAAAATACCAAAAACAA

>PGSC0003DMG400006498-(rev)RLKWAX-EGF\_5002

AGTTGAAGTCGAACAAACTATAGTTACCGATTTACTAAACCACAAAATACCAAAAACAAATTTACACCAA  
ATTATTTTATAATGATAATAATATAGTATTCTTACATATCAAAAACCAA

>PGSC0003DMG400006498-(rev)RLKWAX-EGF\_5063

TTACACCAAATTATTTTATAATGATAATAATATAGTATTCTTACATATCAAAAACCAAATTTGAACAACCG  
ATGTTTTTGTATACCATATTATTAGACCACCAACTTGATAGTTTCGAGTGA

>PGSC0003DMG400006498-(rev)RLKWAX-EGF\_5124

TGAACAACCGATGTTTTTGTATACCATATTATTAGACCACCAACTTGATAGTTTCGAGTGACTIONCGAGTTTGA  
CAAGAGATTTACATGATGAACATAGCCAGGACCAAGAAGGGTGAGTCATA

>PGSC0003DMG400006498-(rev)RLKWAX-EGF\_5185

CGAGTTTGACAAGAGATTTACATGATGAACATAGCCAGGACCAAGAAGGGTGAGTCATAGTCGCGTAA  
CCGCCAATAGAGTCAAATTAAGAGAGTTGACCCATTACACATACCATAC

>PGSC0003DMG400006498-(rev)RLKWAX-EGF\_5246

CGCGTAACCGCCCAATAGAGTCAAATTAAGAGAGTTGACCCATTACACATACCATACCCCTATGAAAT  
TTCATCCGCTATTTTCTGCTTGACTTCTTCGCTACTGATACCACTACAGA

>PGSC0003DMG400006498-(rev)RLKWAX-EGF\_5307

CTATGAAATTTTCATCCGCTATTTTCTGCTTGACTTCTTCGCTACTGATACCACTACAGATCACTAGGAGGG  
AGTGAGGATGTTTCAGGTCTGGATCCGCTCCTCTCCATTTCTTCTCT

>PGSC0003DMG400006498-(rev)RLKWAX-EGF\_5551

TTAAATATTTTTGCAATCCATTATATTTTCTCAAATATATAAAAAGAAAAATCTTTACTGCCCTACATATA

TATTTAAAACCTTTATAAATACTTTTACTTTTTTGAAAAAATTATAAT

>PGSC0003DMG400006498-(rev)RLKWAX-EGF\_5612

CCCTACATATATATTTAAAACCTTTATAAATACTTTTACTTTTTTGAAAAAATTATAATACAATCAAATATT

TTTATTATTCTAATAGAGTTTTAGGAACTACAGTGTCTATAGAGCAAT

>PGSC0003DMG400006498-(rev)RLKWAX-EGF\_5734

GGACTCCATTTAGGGAGTAAGAAAGAATTAAGTTGTTTGACAAGATTTATTTTACTCCTAAAATTAATA

AAAACAAACGTCAGGTCATAATTTTTAATTTTTTATTTGGCAAATATTAT

>PGSC0003DMG400006498-(rev)RLKWAX-EGF\_61

ATTCATAGTGTTTAAACATGGTATCAGAGCTACAGTGAGTGAATCTAGGAGTTTCTTTCACAGTATGGTGG

TGAAGAAGTGGAGAGATTCATCAGTCATAGTTGTAGATCGCTGAAGTTGAT

>PGSC0003DMG400006498-(rev)RLKWAX-EGF\_6100

GAACTTGGGGAAAATGGAGAGGAGCCGGATCCTTCAGGTCTGACCCTCATCAATATAATTTCAAAGAAA

ATGAGGTCTAATCCATTAATTATCAGTCATTTTCTCTCCTAGTCCTCTCT

>PGSC0003DMG400006498-(rev)RLKWAX-EGF\_6161

CAAAGAAAATGAGGTCTAATCCATTAATTATCAGTCATTTTCTCTCCTAGTCCTCTCTGAACTTTTCTTGA

TTACGCCATGTATAATATTCCAACAAATACAAACATGAGAATGACAGC

>PGSC0003DMG400006498-(rev)RLKWAX-EGF\_6222

ACTTTTCTTGATTACGCCATGTATAATATTCCAACAAATACAAACATGAGAATGACAGCACTTGCTCATT

TAACCTTGACATTATTTTCTGAAAAAATAATTATGTACTAAAGATTTT

>PGSC0003DMG400006498-(rev)RLKWAX-EGF\_6283

TTGCTCATTCTAACCTTGACATTATTTTCTGAAAAAATAATTATGTACTAAAGATTTTTCGATATATAATTG

GCTGCATAAAGTCGTCATTCTCCTTGACATAGTCCACATTAATAA

>PGSC0003DMG400006498-(rev)RLKWAX-EGF\_6344

ATATATAATTGGCTGCATAAAGTCGTCATTCTCCTTGACATAGTCCACATTAATAATTAGTCCTTCCAAT

TTACAAGTAGCTACTCCTATAAAAGTATCATATTTAGTATCAAAAAATC

>PGSC0003DMG400006498-(rev)RLKWAX-EGF\_6405

CCTTCCAATTTACAAGTAGCTACTCCTATAAAAGTATCATATTTAGTATCAAAAAATCACAACACACACA

TAGCATGGCTCCTAATTATGTGATGATGGTTGGTCTCATAATATTAATT

>PGSC0003DMG400006498-(rev)RLKWAX-EGF\_6466

AACACACACATAGCATGGCTCCTAATTATGTGATGATGGTTGGTCTCATAATATTAATTTGCTTTTCACTA  
TCTTTTGGTGATGATGCTATGTTATCAACACACAACAATCTCATAGCCA

>PGSC0003DMG400006498-(rev)RLKWAX-EGF\_6527

CTTTTCACTATCTTTTGGTGATGATGCTATGTTATCAACACACAACAATCTCATAGCCAAACCTAACTGCA  
AAAAAAGTTGTGGCAATGTCAGCATCCCTTTCCCATTTGGGGTTACCCA

>PGSC0003DMG400006498-(rev)RLKWAX-EGF\_6588

CCTAACTGCAAAAAAAGTTGTGGCAATGTCAGCATCCCTTTCCCATTTGGGGTTACCCAAGATTGCGTTT  
TATACAATCAATTCCTTGTCACTTGTAAATTACACTTTTCAACCTCCCCGG

>PGSC0003DMG400006498-(rev)RLKWAX-EGF\_6649

ATTGCGTTTTATACAATCAATTCCTTGTCACTTGTAAATTACACTTTTCAACCTCCCCGGCTTTTTTTCTATGA  
CTCTGCTATTCAAATCACAAACATATCTCTCACTGGGCAACTTACAA

>PGSC0003DMG400006498-(rev)RLKWAX-EGF\_6710

TTTTTTCTATGACTCTGCTATTCAAATCACAAACATATCTCTCACTGGGCAACTTACAATCTTTCAATTCAT  
ATCCAAAGATTGTTATGAATCCAGGATAAACACGGAGAATAACACACC

>PGSC0003DMG400006498-(rev)RLKWAX-EGF\_6771

TTTCAATTCATATCCAAAGATTGTTATGAATCCAGGATAAACACGGAGAATAACACACCCATGGATAACAT  
TAACACCATTGCTTGCTGTGAGTAACACTGCGAATAAGTTCATCGCGATT

>PGSC0003DMG400006498-(rev)RLKWAX-EGF\_6832

GGATAACATTAACACCATTGCTTGCTGTGAGTAACACTGCGAATAAGTTCATCGCGATTGGCTGTGACAC  
ATATGCTATAGTTCAGGGTTATTATTCAAAGTTTGAAAATATGACGACTA

>PGSC0003DMG400006498-(rev)RLKWAX-EGF\_6893

CTGTGACACATATGCTATAGTTCAGGGTTATTATTCAAAGTTTGAAAATATGACGACTATGCATTACTCCT  
ACATAACAGGATGTACGTCCATGTGCAATAGTCTTGATGATGCTGATAA

>PGSC0003DMG400006498-(rev)RLKWAX-EGF\_6954

CATTACTCCTACATAACAGGATGTACGTCCATGTGCAATAGTCTTGATGATGCTGATAATAACACATGTT  
CCGGAGTTGGTTGTTGCAAGACATCCATCCCTAAGGGAGCATGGAATGTT

>PGSC0003DMG400006498-(rev)RLKWAX-EGF\_7015

ACACATGTTCCGGAGTTGGTTGTTGCAAGACATCCATCCCTAAGGGAGCATGGAATGTTACTATAACACT  
AAGTAGTTATTATAATCACACTTATGTGAATGATAACCCTAGTTGCAGCT

>PGSC0003DMG400006498-(rev)RLKWAX-EGF\_7076

TATAACACTAAGTAGTTATTATAATCACACTTATGTGAATGATAACCCTAGTTGCAGCTATGCTTTTGTGG  
TCGAAGATACTAACCCCTTATGCTAATTTTTCGAAGAATAACCTCGAAAG

>PGSC0003DMG400006498-(rev)RLKWAX-EGF\_7137

GCTTTTGTGGTCGAAGATACTAACCCCTTATGCTAATTTTTCGAAGAATAACCTCGAAAGTTTGAAGAACA  
TGGATGAGCTTCCACTTGTGCTAGATTGGGTAATTGGTAAAGGAACATGT

>PGSC0003DMG400006498-(rev)RLKWAX-EGF\_7198

TGAAGAACATGGATGAGCTTCCACTTGTGCTAGATTGGGTAATTGGTAAAGGAACATGTGAAATAGCTA  
AGAGAAACTCGACTGCATATGGATGTAAGAGTGAAAACAGTGATTGTTATG

>PGSC0003DMG400006498-(rev)RLKWAX-EGF\_7259

AATAGCTAAGAGAAACTCGACTGCATATGGATGTAAGAGTGAAAACAGTGATTGTTATGATAGTTCAAT  
TGGATATGGATGTTCCCTGCATGCAAGGATATGATGGGAATCCATATCTGAA

>PGSC0003DMG400006498-(rev)RLKWAX-EGF\_7320

AGTTCAATTGGATATGGATGTTCCCTGCATGCAAGGATATGATGGGAATCCATATCTGAAAGATGGCTGT  
CAAGGTATGCATACTTTTACTTTTTGAACTTAGGTAGAAACACCCCCTAAA

>PGSC0003DMG400006498-(rev)RLKWAX-EGF\_7381

ATGGCTGTCAAGGTATGCATACTTTTACTTTTTGAACTTAGGTAGAAACACCCCCTAAATCCTAATCAAAG  
CTCAATTTACAATATAGTCACAAGTCTTACGTCAGGTTAACACCAAATA

>PGSC0003DMG400006498-(rev)RLKWAX-EGF\_7686

TCTATGCATAATTTTTTTTTGAATATTTACGTTATCATATGTTTGTACTCTACGAGTCTGCAGATATTGAC  
GAATGTATAGATCGGCAACCAGATTATAGATGTGCCAAAGATGCCATT

>PGSC0003DMG400006498-(rev)RLKWAX-EGF\_7747

CAGATATTGACGAATGTATAGATCGGCAACCAGATTATAGATGTGCCAAAGATGCCATTTGCCAGAATA  
CAGAAGGGAATTATACATGTATATGCCCTCCAGATTTTCAGTGGTAATGGTA

>PGSC0003DMG400006498-(rev)RLKWAX-EGF\_7808

CCAGAATACAGAAGGGAATTATACATGTATATGCCCTCCAGATTTTCAGTGGTAATGGTACTGTATGCAAT  
CGTGACAATCCTCAGAGAATAACTCAAAATATTTATTTTGTATAGGTAC

>PGSC0003DMG400006498-(rev)RLKWAX-EGF\_7869

GTATGCAATCGTGACAATCCTCAGAGAATAACTCAAAATATTTATTTTGTATAGGTACATCTCTTGACTT

CTTTCAAATGGATAACAATTTTCTATTAACGAACTACATACATCGACCT

>PGSC0003DMG400006498-(rev)RLKWAX-EGF\_7930

CTCTTGACTTCTTTCAAATGGATAACAATTTTCTATTAACGAACTACATACATCGACCTAAAATGTCAAAT

AAAGTTTATATATTTTTATAACAGGTGCTACAGCAGGGGTTGCTTTTGCG

>PGSC0003DMG400006498-(rev)RLKWAX-EGF\_7991

AATGTCAAATAAAGTTTATATATTTTTATAACAGGTGCTACAGCAGGGGTTGCTTTTGCGATTATTATTGTT

TTTGGCTGGTCATACACTGCATTCCAAAGGAGAAAGATGTCAAAGATGA

>PGSC0003DMG400006498-(rev)RLKWAX-EGF\_8052

TATTATTGTTTTTGGCTGGTCATACACTGCATTCCAAAGGAGAAAGATGTCAAAGATGAAGAAGAAGTTT

TTCCAGGAAAATGGTGGATTAGTTCTACAACAGCGACTTACAAGGGAAGA

>PGSC0003DMG400006498-(rev)RLKWAX-EGF\_8174

GATCAAGTCATAATAATAACAATAAAGATTTTCACAGCGGAAGAGCTTGAAAAGGCAACTAATGGCTTTG

ACAAAGATAGAGTTGTTGGACAAGGAGGTTTTGGAAGTGTTCACAAAGGAT

>PGSC0003DMG400006498-(rev)RLKWAX-EGF\_8235

TGGCTTTGACAAAGATAGAGTTGTTGGACAAGGAGTTTTGGAAGTGTTCACAAAGGATATCTGAAAGA

TAATTGCATCGTTGCCATAAAAAAATCTAAGGTAATTGATCGCAATCAGAT

>PGSC0003DMG400006498-(rev)RLKWAX-EGF\_8296

CTGAAAGATAATTGCATCGTTGCCATAAAAAAATCTAAGGTAATTGATCGCAATCAGATCGAACAATTCA

TAAATGAAGTCCTGTTCTTTCCCAAATCAACCATAGAAATGTGGTTAAG

>PGSC0003DMG400006498-(rev)RLKWAX-EGF\_8357

AACAATTCATAAATGAAGTCCTTGTCTTTCCCAAATCAACCATAGAAATGTGGTTAAGCTCTTAGGTTGT

TGCCTCGAGACGGAAGTTCCACTATTGGTGTATGAATTTATCAGCAATG

>PGSC0003DMG400006498-(rev)RLKWAX-EGF\_8479

ACACTTTCTGAACACTTACATGATAAATTGAAGGCGTGAATCTTTCTTTGGATATTCGTCTGAGAGTTGC

TGCAGAACTGCAGGAGTACTTTCCTACTTGCACTCAGCAGCTTACCCT

>PGSC0003DMG400006498-(rev)RLKWAX-EGF\_8540

TGAGAGTTGCTGCAGAACTGCAGGAGTACTTTCCTACTTGCACTCAGCAGCTTACCCTCCTATTATCCAT

AGAGATATTAAGTCAGTCAACATTCTTCTAGACAAAAGCTACACAGCCA

>PGSC0003DMG400006498-(rev)RLKWAX-EGF\_8601

TATTATCCATAGAGATATTAAGTCAGTCAACATTCTTCTAGACAAAAGCTACACAGCCAAAGTGTCTGAT  
TTCGGAGCATCCAGGTTGGTTCCTGCTGATCAAACAGAGTTATCTACATT

>PGSC0003DMG400006498-(rev)RLKWAX-EGF\_8723

TTCAAGGAACTCTAGGATATCTAGATCCTGAATACTTGCAAACAAATCAACTCAATGAAAAAAGTGACGT  
ATACAGTTTTGGAGTAGTGCTTGTAGAGCTCCTAACAGGTAGAAAGGCC

>PGSC0003DMG400006498-(rev)RLKWAX-EGF\_8784

AAGTGACGTATACAGTTTTGGAGTAGTGCTTGTAGAGCTCCTAACAGGTAGAAAGGCCCTATGTTTCGA  
AAGACCAGCAGAAGAGAGAAGTCTAGCTCAATATTTTCATATCTTCAGTGGA

>PGSC0003DMG400006498-(rev)RLKWAX-EGF\_8845

TGTTTCGAAAGACCAGCAGAAGAGAGAAGTCTAGCTCAATATTTTCATATCTTCAGTGGAGAAGGGTCTT  
TTGCTCGATATTCTAGACGACAATATAGTTTATGATAAGACAAATGAAGAG

>PGSC0003DMG400006498-(rev)RLKWAX-EGF\_8906

AGGGTCTTTTGCTCGATATTCTAGACGACAATATAGTTTATGATAAGACAAATGAAGAGAAATTGAAAA  
ATGTTGTTATGCTTGCACAGAGGTGCCTAAATGTTAAAGGGGGTGAGCGAC

>PGSC0003DMG400006498-(rev)RLKWAX-EGF\_8967

ATTGAAAAATGTTGTTATGCTTGCACAGAGGTGCCTAAATGTTAAAGGGGGTGAGCGACCTACAATGAA  
GGAAGTTGCAGCAGAATTGGAAGCTGGGTTGAGATTGAAGCACTCGTGGGC

>PGSC0003DMG400006498-(rev)RLKWAX-EGF\_9028

ACAATGAAGGAAGTTGCAGCAGAATTGGAAGCTGGGTTGAGATTGAAGCACTCGTGGGCTGAAACTGA  
TCGACATTCAGAGGAAAAAGAGTCCTTACTGCCTGGCACACAAAGATTGAGA

>PGSC0003DMG400006498-(rev)RLKWAX-EGF\_9089

AAACTGATCGACATTCAGAGGAAAAAGAGTCCTTACTGCCTGGCACACAAAGATTGAGATTTGGATACG  
AATATAGTGAACACAGTGC GGATGCTGATAGTATAACGAGTCATGTA ACTT

>PGSC0003DMG400006498-(rev)RLKWAX-EGF\_9150

TGGATACGAATATAGTGAACACAGTGC GGATGCTGATAGTATAACGAGTCATGTA ACTTTACCTTTTCT  
GGAGGAAGGTGATCGATCATGCATGTTGATTTTTCTCAACAATATAAACT

>PGSC0003DMG400006498-(rev)RLKWAX-EGF\_9211

CCTTTTCTGGAGGAAGGTGATCGATCATGCATGTTGATTTTTCTCAACAATATAAACTCAGAACGGCCA  
CGGCTTCAACATGAATTTCTTTTTTGT CATGGGCATGTTAGAAATAAGAA

>PGSC0003DMG400006498-(rev)RLKWAX-EGF\_9272

GAACGGCCACGGCTTCAACATGAATTTCTTTTTGTGCATGGGCATGTTAGAAATAAGAACTAAGTTTGAT  
TTAGTTACATCTCTTTATTTGTCCAGAGAAAGTAAATTTGAGTAACAAA

>PGSC0003DMG400006498-(rev)RLKWAX-EGF\_9333

AAGTTTGATTTAGTTACATCTCTTTATTTGTCCAGAGAAAGTAAATTTGAGTAACAAATTATGTGCTTAT  
TTATGTATCCTTGTAATAGTTGTACATTTTGATGTTCTTCTTACACTT

>PGSC0003DMG400006498-(rev)RLKWAX-EGF\_9381

TGAGTAACAAATTATGTGCTTATTTATGTATCCTTGTAATAGTTGTACATTTTGATGTTCTTCTTACACTT  
GAACATATCCTTCTTACATTGTTTTGTTGCTCAACCCATGTGTTTTGC

>PGSC0003DMG400006502LRR-RLKs\_0

CAGCACTTAGCCATGGCCTATTATCTTGACAAGATCTTTCTTCTCCTATTTCTCTTCACACTTAGTTCTTCTC  
CAAATCAGATAATATGACAGATATTGAAGCACTCTTTGCTATCAAG

>PGSC0003DMG400006502LRR-RLKs\_1054

ACAACGCGTTTTGGAGGGACATTTTCATGAGTTTTTCAGCAACCTTCAAGTAATCTGGTATATGCAGACTT  
GTCAAGGAATCGGTTTTTCAGGACATATCCCGATAGACATTGGGAAATTCA

>PGSC0003DMG400006502LRR-RLKs\_1116

GCAGACTTGTCAGGAATCGGTTTTTCAGGACATATCCCGATAGACATTGGGAAATTCATCAACTTGGAA  
GAGCTTAGGCTGAGCGGAAACCAACTCACAGGTATCATCCCTCCGACTATT

>PGSC0003DMG400006502LRR-RLKs\_124

AAATACTTGATCCCTTTGAATCTTTGATTTTCATGGAATGAGTCTGTTCCCTTTATGTCAATGGCAAGGTGTG  
GTATGTGGAACGCGAAGTCAACGAGTCACTGAACTAAACCTTCTTGACC

>PGSC0003DMG400006502LRR-RLKs\_1240

AGCTTTATAAGCTACGATATTTATATCTGTCCCAAACAAAGTCTCAGGTAGTATACCATCTTCCATTGCA  
AATCTGAGCCTTTTAACAGAGTTAAATCTTGATCATAACAATCTTAGAG

>PGSC0003DMG400006502LRR-RLKs\_1302

TCCATTGCAAATCTGAGCCTTTTAACAGAGTTAAATCTTGATCATAACAATCTTAGAGGTAGAATACCTTT  
AAGTGTGGAAAATGTCAAAATTTGTTGTATCTTAACCTGAACCGAAAC

>PGSC0003DMG400006502LRR-RLKs\_1364

AATACCTTTAAGTGTGGAAAATGTCAAAATTTGTTGTATCTTAACCTGAACCGAAACTATTTAATCGGTT

CAATACCCAAAGAAATTTGTCTCATCACTTCCTTAGTTGTTCTAAACCT

>PGSC0003DMG400006502LRR-RLKs\_1426

TAATCGGTTCAATACCCAAAGAAATTTGTCTCATCACTTCCTTAGTTGTTCTAAACCTTCTAGTAACAACCT

TGACTGGCGCCCTTCCCAAAGAAATCGGTAGCCTGAAAAATCTCTTAT

>PGSC0003DMG400006502LRR-RLKs\_1488

AGTAACAACCTTGACTGGCGCCCTTCCCAAAGAAATCGGTAGCCTGAAAAATCTCTTATCATTAGATGTCT

CTTTGAATAATCTCACTGGTGAATTCCTAGTACACTTGAGAGTTGTGTG

>PGSC0003DMG400006502LRR-RLKs\_1550

AGATGTCTCTTTGAATAATCTCACTGGTGAATTCCTAGTACACTTGAGAGTTGTGTGGCTATTGTTAATT

TAACAATGAAAAGGAATTTATTTTCGCGGGATCATTCTTCTACTTTCAA

>PGSC0003DMG400006502LRR-RLKs\_1612

TTGTTAATTTAACAATGAAAAGGAATTTATTTTCGCGGGATCATTCTTCTACTTTCAATTCACTAAAGAGT

CTTGAAGTTTTAGATCTTTCACAAAATAAGCTATCAGGTATGATTCCAA

>PGSC0003DMG400006502LRR-RLKs\_1674

CTAAAGAGTCTTGAAGTTTTAGATCTTTCACAAAATAAGCTATCAGGTATGATTCCAAAGTACTTGGAAG

GATTTGCCTTGCATTTCTTAACTTATCGTTTAATGATTTTGAAGGTGGC

>PGSC0003DMG400006502LRR-RLKs\_186

CAAGGTGTGGTATGTGGAACGCGAAGTCAACGAGTCACTGAACTAACCTTCTTGACCATAAGCTGGGT

GGTGTGTTATCACCATTGTTGGAAATTTGAGCTTCCTTGTACGACTAGAC

>PGSC0003DMG400006502LRR-RLKs\_1860

GGTGGTGTACCTGGCTTGAACTTTCCAATTGCAATTTAGTCATTCAAAGAAAATAAACTTTAAGCTTG

TTATTTTAGTAATATTAGGAATTTTGGGGCTAGTTGTTATGGTTTTTGCT

>PGSC0003DMG400006502LRR-RLKs\_1922

TAAGCTTGTTATTTTAGTAATATTAGGAATTTTGGGGCTAGTTGTTATGGTTTTTGCTTTTTTCTTCTATCG

ATTGAGAAGGCCCAAAGAACATTTCTTCATTAGATAACAATCTAAA

>PGSC0003DMG400006502LRR-RLKs\_2232

GAGGCCTTGAGAAATATTAGACATCGGAATTTAGTTAAGCTACTTACTGCATGTTCTGGTGTGATTATC

GTGGCAACGAATTCAAGGCATTGGTTTACGAGTTTATGGCCAATGGAAGT

>PGSC0003DMG400006502LRR-RLKs\_248



GCTGGGTGGTGTGTTATCACCATTGTTGGAAATTTGAGCTTCCTTGTACGACTAGACATCGAAAACAAT  
ACCATTTCTGGCAATATACCTCCTGAATTAGGCCGTTTGACAAGATTAAG

>PGSC0003DMG400006502LRR-RLKs\_2480

AATATCAATAGTTCATTGTGATCTCAAACCAAGTAATATACTCCTTGACAATGAATTGGTTGCCCATGTTG  
GGGATTTTGGATTGGCAAGATTCCTATATCTTACTGATGAAACCACTTG

>PGSC0003DMG400006502LRR-RLKs\_2542

CCCATGTTGGGGATTTTGGATTGGCAAGATTCCTATATCTTACTGATGAAACCACTTGTAAGAATTCAGAC  
AAACTCTCAACTTTTAAAGGATCTATTGGCTACATAGCTCCAGGTAAAT

>PGSC0003DMG400006502LRR-RLKs\_2666

CTCTATATAAATGCCTCTAAAGACTTTAGTGACTCTGGATGCAATGACATTAECTCAGTTGCCGCTATATT  
TTCATTGCAGAGTATGGTATGGGAAGCGAGGCATCAACGCAAGGTGATG

>PGSC0003DMG400006502LRR-RLKs\_2728

CGCTATATTTTCATTGCAGAGTATGGTATGGGAAGCGAGGCATCAACGCAAGGTGATGTGTATAGTTTT  
GGTATCGTCTTACTTGAAATGTTAACCGGGAAAAGGCCAACGGATGACATG

>PGSC0003DMG400006502LRR-RLKs\_2852

GCGGTGATTTAAGCCTTCATGATTTTGGTAGGACTGTCATGCCTGATGGAGCACTTGAAATAGTAGATCC  
ACTTCTTAATTTGGAAGAGGAAGAGATAAGCAGAGAGAGGTCTCAAATTC

>PGSC0003DMG400006502LRR-RLKs\_2914

GTAGATCCACTTCTTAATTTGGAAGAGGAAGAGATAAGCAGAGAGAGGTCTCAAATTCGAAGATTCATG  
AGAAGGCCAAAAATGGTAGAGGGTTTAATCTCCTTATTTGGAGTTGGTATT

>PGSC0003DMG400006502LRR-RLKs\_3077

AGGTTGTTAGAGAGTTGTGTTCTATAAGAGATTCTCTTGTGGTTGTACAATATGAAACACTTTTCTTGTT  
TTGTTTTTGTCTTGTAAGGTTCCAATAATTTAATGATGAATCATTG

>PGSC0003DMG400006502LRR-RLKs\_310

AAAACAATACCATTTCTGGCAATATACCTCCTGAATTAGGCCGTTTGACAAGATTAAGCCATCTATATTTG  
CAAACAATTCATTACATGGTGAAATTCCTGTCAATCTATCATTTTGTGTA

>PGSC0003DMG400006502LRR-RLKs\_372

CTATATTTGCAAACAATTCATTACATGGTGAAATTCCTGTCAATCTATCATTTTGTAGTAACCTCGTTGA  
GTTATGGGCACACAAGAACAATCTTGTAGGTGTGCTCCGAAGGAGCTT

>PGSC0003DMG400006502LRR-RLKs\_434

CCTCGTTGAGTTATGGGCACACAAGAACAATCTTGTAGGTGTGCTCCGAAGGAGCTTGGATTTCTCCC  
AAACTCAAATATTTTGATTTCAAGTTACAACAAGCTCATTGGTGAAATCCC

>PGSC0003DMG400006502LRR-RLKs\_496

TTCTTCCCAAACCTCAAATATTTTGATTTCAAGTTACAACAAGCTCATTGGTGAAATCCCGAAATCTTATGGT  
AACTTTTCAGGTCTCTTGAAATGTACCTTTTGTATAATGATCTTGTGG

>PGSC0003DMG400006502LRR-RLKs\_558

TCTTATGGTAACTTTTCAGGTCTCTTGAAATGTACCTTTTGTATAATGATCTTGTGGGTAAAATCCCTGA  
TGAGTTAGGGAAACTGAAAAGCTTGAAATATTTGACGCAGACTTCAAT

>PGSC0003DMG400006502LRR-RLKs\_62

TAGTTCTTCCTCAAATCAGATAATATGACAGATATTGAAGCACTCTTGCTATCAAGAATGAAATACTTG  
ATCCCTTTGAATCTTTGATTTCAATGGAATGAGTCTGTTCTTTATGTCA

>PGSC0003DMG400006502LRR-RLKs\_620

AATCCCTGATGAGTTAGGGAAACTGAAAAGCTTGAAATATTTGACGCAGACTTCAATAGGTTATCAGG  
TAGAATTCCGAGCTCACTATTCAATCTTTCTCCTTGAAAGTCATTGATGT

>PGSC0003DMG400006502LRR-RLKs\_682

TATCAGGTAGAATCCGAGCTCACTATTCAATCTTTCTCCTTGAAAGTCATTGATGTGTCAGATAACCAA  
TTCGAAGGTACTCTGCCTCGGGATTTAGGGATCAACCTTCCTAACCTGG

>PGSC0003DMG400006502LRR-RLKs\_806

TCTCAGCATTAGTGAGAATCAATTCAGTGGATCGCTTCCTTATTCACCTTTCAACCTCTCAGGACTCGCGT  
ACCTTCTTGTGGCAAAAATAACTTAGGAGGACGTGTTCTAGGTTTGA

>PGSC0003DMG400006502LRR-RLKs\_868

GACTCGCGTACCTTCTTGTGGCAAAAATAACTTAGGAGGACGTGTTCTAGGTTTGATAAGTTGCATAA  
TTTGTATATTTTAAGCATGGAAAATAATCAGTTTGGGAGTGACAAATCTG

>PGSC0003DMG400006502LRR-RLKs\_930

TTGCATAATTTGTATATTTTAAGCATGGAAAATAATCAGTTTGGGAGTGACAAATCTGATAATGAGTTGA  
CCCTCATGTCCTCCTTAACAAATGCAACTAACCTGAACTGGCTGTATCTG

>PGSC0003DMG400006563-(rev)LRR-RLKs\_2318

AAAAAGTACAAAGTTTTACCCAATAATAAATGAGAAGTGTGTGTGTGGGGTGGGGGGGGTGGGG

GGTAAAAAGATATAAATAGAGGGAACTATGAGCATAAAAGGAGTTTTTGTCT

>PGSC0003DMG400006563-(rev)LRR-RLKs\_2440

TGTTGAGTCTCTCATTTATTTCGTTGAAAGGAGGCCTGAACAAATGGAGAGGAAGGAAGTTTCTGTAAAA

TTTGAGTCCACTACATGCCTTATGACACATCTAATCTAAGTTGCTCGGACT

>PGSC0003DMG400006563-(rev)LRR-RLKs\_4209

CTTTGTTTATATCCAAAGTTTTTTTAAGACTTCAGATATTTTACGTTGAGGAACCTTGAAGGATCTCACTA

ACTTGATTAAGGTTGAAACTTCAAGGGGTTCAAACCTAGATAGTTTG

>PGSC0003DMG400006563-(rev)LRR-RLKs\_4270

GATCTCACTAACTTGATTAAGGTTGAAACTTCAAGGGGTTCAAACCTAGATAGTTTGGTCCAGTCTCT

CTTCAAGAGCTTCAATTCTGGAGGTCTCAGCCCTTACAGTTTTTGTGGG

>PGSC0003DMG400006563-(rev)LRR-RLKs\_5185

ATCAAGGGCTGCTTGGTTATCACAGACAAGATAATGGCTCAATTGTTTGATTTCTTTGTACAAGCTTTG

ATTTCTTATATTATCTGCAGTGAATCCTGAAATGAAAGGTAAAAGACAAA

>PGSC0003DMG400006563-(rev)LRR-RLKs\_6405

ATTCCATCTTCTTTTTCTTATCAGAACAAGAAAAGTTGTTAGTTTCTTTATGCGGCTGTGATAAACTTAAA

ATTGACATCGGTCAAGAACTTTTGTATTGCTATCTAAGTAGGTGATT

>PGSC0003DMG400006563-(rev)LRR-RLKs\_6466

ATAAACTTAAAATTGACATCGGTCAAGAACTTTTGTATTGCTATCTAAGTAGGTGATTTCCATCATTGA

CAGCCAAATGTAAAAAAATTTGAAGTTTGGAGCAAGGTTGGGGATCGC

>PGSC0003DMG400006563-(rev)LRR-RLKs\_7564

CCATCTTACTGCTTCTAGATTTATGTATATTCCTCAAGAATCTGTTGTGACAGACAACCCTTGTATATGTAT

AGTACATTATACATGAAGTGCCTTATCACTGTCCATAGAAATGCTACA

>PGSC0003DMG400006563-(rev)LRR-RLKs\_976

AGAAATTGCTCTTTGCAGGGATCCATTCTGATTTTCAGCAGAATTGCAAACCTAAGCTATCTGTAAGTGC

GAGTTTGTATTGTTTTGTTCTTCTTTTGTAAAGCTTTATCTGTATA

>PGSC0003DMG400006580-(rev)LRR-RLPs\_0

TATAGAACTTTAATTGTGAAGAGTTGCCTTATGTACTGTTACCAGTGTCTTTTTGGCAAATGGAAAAAT

TAAGGCATGCTCATGTTGATTGGGCTTTTTTGGTAATCAGGGACTCTT

>PGSC0003DMG400006580-(rev)LRR-RLPs\_396

AAGTGCTATTCCCTTCATTGCGGGACTACCAAGCCTGGAGTATCTTCAATTAGAAGAATGGAATTATGCA  
GAAGGGGAACCAATTTTTCTCAATCAGAAGAGTGGTGCCTTGGAGATAT

>PGSC0003DMG400006580-(rev)LRR-RLPs\_462

TGCAGAAGGGGAACCAATTTTTCTCAATCAGAAGAGTGGTGCCTTGGAGATATCACGGTCCATAACCT  
TAAGTTCTTGAAACTGGTGCGGTTAGGTATCTCAAAGTGGGATGCCTCGGA

>PGSC0003DMG400006580-(rev)LRR-RLPs\_528

CCTTAAGTTCTTGAAACTGGTGCGGTTAGGTATCTCAAAGTGGGATGCCTCGGAGGAATCATTTCCCCTG  
CTTGAAACACTTGTTATAAAAAATTGTAGTAAGCTAGAGGAGATCCCCCT

>PGSC0003DMG400006580-(rev)LRR-RLPs\_594

CCTGCTTGAAACACTTGTTATAAAAAATTGTAGTAAGCTAGAGGAGATCCCCCTTAGCTTTACCGATATT  
CCATCATTGAAACAGATTAAGTTGATTGGGTCTTGAAAGTATCTATGGA

>PGSC0003DMG400006580-(rev)LRR-RLPs\_66

AAAATTAAGGCATGCTCATGTTGATTGGGCTCTTTTTGGTAATCAGGGACTCTTTGAAGGATCCTCTAAA  
TTGGAAAATTTGAGGATATTAAAGAAAATTAGTGCATTTCCAATTGATAG

>PGSC0003DMG400006580-(rev)LRR-RLPs\_726

GAGAATTAAGGAAGAAGTCGAAGAGATTGAAGGATGTGATCGTATACACCTCGTCAAAGAACTGGCAG  
ATTAGTGAGGGTTTTAATAGCTAATTATTGCAGCCATGCTCATACTGAAGTC

>PGSC0003DMG400006580-(rev)LRR-RLPs\_792

AGATTAGTGAGGGTTTTAATAGCTAATTATTGCAGCCATGCTCATACTGAAGTCTAGCCCATTCTCTTTTA  
TTGTAACACGACTACTATTTGCTATGTTTGTTTTAATTGATAAAACTCT

>PGSC0003DMG400006580-(rev)LRR-RLPs\_852

ATTCTCTTTTATTGTAACACGACTACTATTTGCTATGTTTGTTTTAATTGATAAAACTCTTTTTATGTATGAT  
TGGAGACAAATATATATCAGTTGGTCTTTCACTGATTTCTTGTTTTT

>PGSC0003DMG400006625LRR-RLPs\_0

ATGAACAAATCTGGAGGAATCAAAGTACCTAAATTCATCGGTGCCTTAAAGAACTAAGGTATCTCAATC  
TATCTTCTGCGTCTTTTACTAGTTCAGTATCGTCATTCCCTTGAAACCTC

>PGSC0003DMG400006625LRR-RLPs\_1037

GAGCTCAACAATATAATATTCAATACCACAGGGATTTCAAATGTTGTTGCAGATTGGTTTGTAGAGTTGG  
ATTTGAAGCTTGATAATCTAGACATGGCTTACAACAACCTTGACAGGGAAA

>PGSC0003DMG400006625LRR-RLPs\_1098

TAGAGTTGGATTTGAAGCTTGATAATCTAGACATGGCTTACAACAACCTTGACAGGGAAAGTTCCCAAAG  
CTCAAATTTCAAGCCAACGTGGATTTAAGCACCAATCGCTCCGAGGGACCT

>PGSC0003DMG400006625LRR-RLPs\_1159

TCCCAAAGCTCAAATTTCAAGCCAACGTGGATTTAAGCACCAATCGCTCCGAGGGACCTCGCCCACAATG  
GTCTTCTAGTGTTACAACATTGTATCTAAGGGATGACTTATTTTCAGGAC

>PGSC0003DMG400006625LRR-RLPs\_122

AAATTTGTAAGTTCTTGATTTGGGAGGTTTAGATCTTAGCAAAGCTACTAATTATTGGGTTCAAAAAATC  
AATGATCATATTCCTTCTCTTGGAGTTACACTTGCCTCGATGTAACCT

>PGSC0003DMG400006625LRR-RLPs\_183

CAAAAAATCAATGATCATATTCCTTCTCTTGGAGTTACACTTGCCTCGATGTAACCTTTTACTTCCAT  
CTTCTTTTCCGTCTCTACATCTATCTTCTTTTGGTACTTGATCTTT

>PGSC0003DMG400006625LRR-RLPs\_244

TAGACTTCCATCTTCTTTTCCGTCTCTACATCTATCTTCTTTTGGTACTTGATCTTCCGACAATGCTTTC  
AATTCAAGTACATTCCTCAATGGATATTA AAACTTAATAACCTTGT

>PGSC0003DMG400006625LRR-RLPs\_305

GACAATGCTTTCAATTCAAGTACATTCCTCAATGGATATTA AAACTTAATAACCTTGTGCATCTTCACTT  
AAGCTCCAACAATATCTTTAGTGAACCTCCTGATGAGTTTGCAAAGCTC

>PGSC0003DMG400006625LRR-RLPs\_366

ATCTTCACTTAAGCTCCAACAATATCTTTAGTGAACCTCCTGATGAGTTTGCAAAGCTCAATTTATTTGAA  
TATCTTGATCTCTTCCATTTATGGTATCAATGGGACACTAAAGAGAA

>PGSC0003DMG400006625LRR-RLPs\_427

TTTATTTGAATATCTTGATCTCTTCCATTTATGGTATCAATGGGACACTAAAGAGAAGTTTGGGAAAAC  
TATGCAATTTGAAGACTTTGATCCTCTCCTACAACAACATCTTGAAAAC

>PGSC0003DMG400006625LRR-RLPs\_4575

AGTATTATGCAGTTTTTCAAGATTTTCAAGAGTCAAGATCGAAACGGAATTGATGCTACAAAATTTGTTA  
GGATTCATTTAAATGGCAGGCATTTTTTACCCTTTTTCATAATTGTTATC

>PGSC0003DMG400006625LRR-RLPs\_4636

AATTTGTTAGGATTCATTTAAATGGCAGGCATTTTTTACCCTTTTTCATAATTGTTATCATTCCAATACTAC

AGTCTACATTCAGCCCTTGTGGGCCACTTGAATTGCCAAGGAAGGTGG

>PGSC0003DMG400006625LRR-RLPs\_4697

TCCAATACTACAGTCTACATTCAGCCCTTGTGGGCCACTTGAATTGCCAAGGAAGGTGGAATCTGCAGCA  
CAGGGGGTTATCTGTTTTCTGGTCCCTGTTACACTATTGATATCCCTTCT

>PGSC0003DMG400006625LRR-RLPs\_4819

TAAGGCATGTTCTCACCTTCAGAATGCTTAATTTCCATTTTGTATTTTTTATGTCCATTTTCTGTTATCCA  
TGAAGTAGATATTTACTTTGATGCCTTTGCACTTTTTTCGATGGTCTC

>PGSC0003DMG400006625LRR-RLPs\_488

TTGGGAAAACATGCAATTTGAAGACTTTGATCCTCTCCTACAACAACATCTTGAAAACATAATCCATTTA  
ATCGATGCCTTATCTAAATGCCAAGCAACAGCTTGGACATTGGATTTT

>PGSC0003DMG400006625LRR-RLPs\_4880

TTCTGTTATCCATGAAGTAGATATTTACTTTGATGCCTTTGCACTTTTTTCGATGGTCTCCTATTGTTTTCTG  
CGTATCAACAATAATCTTGTAGACTAAATCGCCTAACTATTTAGAGGT

>PGSC0003DMG400006625LRR-RLPs\_4941

ATTGTTTTCTGCGTATCAACAATAATCTTGTAGACTAAATCGCCTAACTATTTAGAGGTATTGATGTTATA  
GACCGTAAATGATTATGCAACTATTCATGCATTTATGTTGGAAGCATGT

>PGSC0003DMG400006625LRR-RLPs\_5002

TGATGTTATAGACCGTAAATGATTATGCAACTATTCATGCATTTATGTTGGAAGCATGTACATTATCTCCT  
CTTGCAAGTCGAGATTAGGCCAGTTTGTATAATTTGGCATGATTTTTTC

>PGSC0003DMG400006625LRR-RLPs\_5063

ATTATCTCCTCTTGCAAGTCGAGATTAGGCCAGTTTGTATAATTTGGCATGATTTTTCTGCACTGAAATA  
GTGATTAGTTTGAACCTTTGGATGTACTCGATCAAAGATGCCAATTGACC

>PGSC0003DMG400006625LRR-RLPs\_5124

CACTGAAATAGTGATTAGTTTGAACCTTTGGATGTACTCGATCAAAGATGCCAATTGACCAAATATCAAAT  
AAGGAGAAAGGGAATGTCTATTTCTGTCTCCATGGCAGGAGATTAGTTA

>PGSC0003DMG400006625LRR-RLPs\_5185

ATATCAAATAAGGAGAAAGGGAATGTCTATTTCTGTCTCCATGGCAGGAGATTAGTTAAGTTAGTTATG  
TTTAGCAATTTTTTTTAAAGTACAACAACACTATACCGTAGTCCCTGAC

>PGSC0003DMG400006625LRR-RLPs\_5246

TTAGTTATGTTTAGCAATTTTTTTAAAGTACAACAACAACACTATACCGTAGTCCCTGACAAGTTGGGGTCG  
GCTATTTGAATCCCCACTTCTTCATTTAAGCTCATTCTTGTATCCAAC

>PGSC0003DMG400006625LRR-RLPs\_5307

GTTGGGGTCGGCTATTTGAATCCCCACTTCTTCATTTAAGCTCATTCTTGTATCCAACACTGACTTCTCTGCT  
TTTGCATGTCCAAGTTCTTGTGTTTCATATGTTGTTTAGGAGTTTGA

>PGSC0003DMG400006625LRR-RLPs\_5368

ACTTCTCTGCTTTTGCATGTCCAAGGTTCTTGTGTTTCATATGTTGTTTAGGAGTTTGATTGTTTTGGCTGT  
TGGGATTTGTACTGCAGGCACTTTACTCTGCCTAGACGTTTCTATTG

>PGSC0003DMG400006625LRR-RLPs\_549

AATCCATTTAATCGATGCCTTATCTAAATGCCAAAGCAACAGCTTGGACATTGGATTTTATTTTCAATGAC  
TTGACTGGAAATCTTCTGATGAATTACGCAACTTGTGGAAGCTAAAAG

>PGSC0003DMG400006625LRR-RLPs\_61

ATCTCAATCTATCTTCTGCGTCTTTTACTAGTTCAGTATCGTCATTCTTGAAACCTCTCAAATTTGTAAG  
TTCTTGATTTGGGAGGTTTAGATCTTAGCAAAGCTACTAATTATTGGG

>PGSC0003DMG400006625LRR-RLPs\_610

TTTCAATGACTTGACTGGAAATCTTCTGATGAATTACGCAACTTGTGGAAGCTAAAAGATCTTCAATTG  
AGGTATAACTCACTGATATGCACAATAGTTGAAACTATAGGGAACTTATC

>PGSC0003DMG400006625LRR-RLPs\_671

CTTCAATTGAGGTATAACTCACTGATATGCACAATAGTTGAAACTATAGGGAACTTATCATCCTTAGAGA  
CATTCTACCTCACATCTAACAAAATGAGTGGAAACCTCACCACGAATATT

>PGSC0003DMG400006625LRR-RLPs\_732

CCTTAGAGACATTCTACCTCACATCTAACAAAATGAGTGGAAACCTCACCACGAATATTGGGCAGCTCAT  
GTCATTGGTCTCATAGGACATCTTAGAGAATATGTGGGAAGGTATTGTCA

>PGSC0003DMG400006625LRR-RLPs\_793

GCAGCTCATGTCATTGGTCTCATAGGACATCTTAGAGAATATGTGGGAAGGTATTGTCAAAGAATCCCA  
TTTACTTGATCTTCCAACCTTGAAGAGTTTTCAATTGGCATGAACTTGG

>PGSC0003DMG400006625LRR-RLPs\_7930

CCTTTTAAAAGTCAACACTTATTCCTCTAACATTGTGAAGCACTTCCCAGTATAGCAGACTTGGACATCT  
CTAGGAACAATCAAATGGCACAATTTCTTATGCATGGGAGATAGATA

>PGSC0003DMG400006625LRR-RLPs\_7991

TTGGACATCTCTAGGAACAATCAAATGGCACAATTTCTTATGCATGGGAGATAGATATGAATCAGTG  
GACTACCTTAGCCTTCAATAATAACCAACTTATCGGACAAGTTCCTGATTT

>PGSC0003DMG400006625LRR-RLPs\_8052

AATCAGTGGACTACCTTAGCCTTCAATAATAACCAACTTATCGGACAAGTTCCTGATTTCTAGGGTAAGC  
TACCATATCTTTACTAGATAGATATGTCAGAGAATCGCCTATCCATCCAA

>PGSC0003DMG400006625LRR-RLPs\_8113

AGGGTAAGCTACCATATCTTTACTAGATAGATATGTCAGAGAATCGCCTATCCATCCAAATCCAGACTC  
ACTAGGCTCTCTTGGTTATCTGATGTTCTTAAGACTCTCAGGCAATGATT

>PGSC0003DMG400006625LRR-RLPs\_8174

TCCAGACTCACTAGGCTCTCTTGGTTATCTGATGTTCTTAAGACTCTCAGGCAATGATTTCAATTGAGAGC  
TGCCTTCGAGTTTGAGAAATTGCACGAAAATCATTAAACAATTATCTTAG

>PGSC0003DMG400006625LRR-RLPs\_8235

AATTGAGAGCTGCCTTCGAGTTTGAGAAATTGCACGAAAATCATTAAACAATTATCTTAGTAACAATCAGT  
TGTC AAGGCTTATCCCAGCTTGGCTAGGGGAAACAATGAGATTACTGTTA

>PGSC0003DMG400006625LRR-RLPs\_8296

ACAATCAGTTGTCAAGGCTTATCCCAGCTTGGCTAGGGGAAACAATGAGATTACTGTTATCCTTAGTGTA  
AGGAATAACAGGTTTTTCAGGCCACATTTCTTTTAAAGTTTGTAGCCTTTC

>PGSC0003DMG400006625LRR-RLPs\_8357

CTTAGTGTAAGGAATAACAGGTTTTTCAGGCCACATTTCTTTTAAAGTTTGTAGCCTTTCAGGTCTTCACAT  
ACTAAACCTTTCAAGAAACAACCTTATTTGGTTCTATCCTCTCTTGT

>PGSC0003DMG400006625LRR-RLPs\_8418

GTCTTCACATACTAAACCTTTCAAGAAACAACCTTATTTGGTTCTATCCTCTCTTGT

>PGSC0003DMG400006625LRR-RLPs\_8479

AAACTTGAAAGGCTTCAAGGTTGAGCTAACTGATGTAGAAGCTAGACATTATCAAGGGACATTGAAGCT  
TGAGGCAAATAAAGAAAAAAATTATGATAAAATCCTTTACCTAGTAAAA

>PGSC0003DMG400006625LRR-RLPs\_854

GAATCCCATTTACTTGATCTTTCCAACCTTGCAAGAGTTTTCAATTGGCATGAACTTGGTACAAATATAAC



CTTGGCATTCAATATCAGCCTGAATTGGAATCCTTCATTCAATCTGACA

>PGSC0003DMG400006625LRR-RLPs\_8540

TTGAAGCTTGAGGCAAAATAAAGAAAAAAATTATGATAAAATCCTTTACCTAGTAAAAATAGTATCGG

CCTCTTGAGCAACAGTTTGTCTAGAGAAATCCCAGTAGAGATAACAAACTT

>PGSC0003DMG400006625LRR-RLPs\_8601

AGTATCGGCCTCTTGAGCAACAGTTTGTCTAGAGAAATCCCAGTAGAGATAACAAACTTGGAACCTTGA

ACTTGTCCAGGAATCATTGAGAGGAAATATACCAACATATATCGGAAAGT

>PGSC0003DMG400006625LRR-RLPs\_8662

AACCTTGAACCTTGTCCAGGAATCATTGAGAGGAAATATACCAACATATATCGGAAAGTTACGTTGGTTT

GAAACGTTAGATCTTCAATAAATCAGTTAACAGGTTTTATCCCACCAAG

>PGSC0003DMG400006625LRR-RLPs\_8723

CGTTGGTTTGAACGTTAGATCTTCAATAAATCAGTTAACAGGTTTTATCCCACCAAGTATAGCTACTTT

AGAGTTTCTGAGTCATTGAGCTTGTGCATAGAATAAGTTGACAGGAAAT

>PGSC0003DMG400006625LRR-RLPs\_8784

TAGCTACTTTAGAGTTTCTGAGTCATTGAGCTTGTGCATAGAATAAGTTGACAGGAAATATTCCTACTAGT

ACTCAGTTTCAAACCAAAGTTGATCCAACAATTTTCCAAGGAAATGTTG

>PGSC0003DMG400006625LRR-RLPs\_8845

TCCTACTAGTACTCAGTTTCAAACCAAAGTTGATCCAACAATTTTCCAAGGAAATGTTGCACTTTGTGGTC

CTCCTTTGACTGAATGTGTTGGTGATGGAAC TACAACGACATCTGAAAG

>PGSC0003DMG400006625LRR-RLPs\_8906

CTTTGTGGTCCTCCTTTGACTGAATGTGTTGGTGATGGAAC TACAACGACATCTGAAAGTGGAAAGAAAT

GATGACGGAGAAACAGATGATGAAGATAAACTTGAGAAAGTATGGTTCTTT

>PGSC0003DMG400006625LRR-RLPs\_915

CAAATATAACCTTGGCATTCAATATCAGCCTGAATTGGAATCCTTCATTCAATCTGACATTCTTGACCATT

CAGACACGCTAATTAGGCACTGAATCCCACATTGGCTAAAGGATCAAA

>PGSC0003DMG400006625LRR-RLPs\_976

CTTGACCATTGACACGCTAATTAGGCACTGAATCCCACATTGGCTAAAGGATCAAAATGAGCTCAAC

AATATAATATTCAATACCACAGGGATTTCAAATGTTGTTGCAGATTGGTT

>PGSC0003DMG400006652LRR-RLPs\_1037

TCTTTGCCTGTGCATCACTACACCTTTATCTTGAGTCGAGAGTCTATGGAAACAACACAAGAGACAAC  
ATCGTCTAGAGAAAATGAGTACATAGGGGGTATTATTTTGTTAAGTCTTC

>PGSC0003DMG400006652LRR-RLPs\_1098

AGACAATAATCGTCTAGAGAAAATGAGTACATAGGGGGTATTATTTTGTTAAGTCTTCTCCGTCCTCTA  
AAAAGTAATTTGTGGGAAACACTACCAAAAATATGAAGTAACAAGTTGTT

>PGSC0003DMG400006652LRR-RLPs\_1220

AAGTGAGTAGTACTCATCCATGGACCACAAGTTGCGTAGTTAGTGATGTCAAGGTTGTATTATTTCTCT  
CCATTTATGCCAAATTTGGACAAAATAAATATTGTATAATAGTTACTATC

>PGSC0003DMG400006652LRR-RLPs\_1281

ATTTTCTCTCCATTTATGCCAAATTTGGACAAAATAAATATTGTATAATAGTTACTATCAAACAAGATTTG  
AAGACTTGAGTCTTTCTGGAAAATGACTCAAAACACTTTGGACAACCTT

>PGSC0003DMG400006652LRR-RLPs\_1403

TGCAATCACAATTAGTTAGTGGTAGATGTGGGGCAAATACCCCATTTTATTTGTCTGGATATGTTTCTTC  
TCTTTTCCATTACACCTTTTATTCATAAAATTATTCAAACATACTA

>PGSC0003DMG400006652LRR-RLPs\_1647

AGTTTCTCTCATTGGCAATTTCTTAGAAGTTCTGCAGAAATTTTTCCACATAATGGGACCAATTCACAT  
CATCTTACCTAACACACAATACGGCGATACTTACTAACCTCGAAATGAA

>PGSC0003DMG400006652LRR-RLPs\_1708

AATTTACATCATCTTACCTAACACACAATACGGCGATACTTACTAACCTCGAAATGAACACAACATCTAG  
AGAAAATGAGGACATAAAGAGTATTATTTTGTTAGGTCTTCTCCGTCCT

>PGSC0003DMG400006652LRR-RLPs\_183

TCAAAGCAATGTGGAACGAGTGGTTCATCACATGTTCTCAACCATTGGAGTCGTATTTCTTTAGTGGGT  
TTACGTGGGAATCAGTAGTCATAGGCTACAGTTGTGGACTAGTTGTTGGA

>PGSC0003DMG400006652LRR-RLPs\_1891

TCATTCATGGACCACATGTTCTGTAGTTAGTGATGCCAACGTTGTACTATTTTCTCACCATTTATCCCGAA  
GTTGAAAAAAAACAAATATTGTATAATTGGTACTATCAAACAAGACTTG

>PGSC0003DMG400006652LRR-RLPs\_1952

TTATCCCGAAGTTGAAAAAAAACAAATATTGTATAATTGGTACTATCAAACAAGACTTGACTTAAAGACT  
AGAGTCTTCTGGAAATTGAGTTGACAACACTTGGGACAACCTTCTTTTGC

>PGSC0003DMG400006652LRR-RLPs\_2013

TTAAAGACTAGAGTCTTCCTGGAAATTGAGTTGACAACACTTGGGACAACCTCTTTTGCAACCACAAATT  
AATTAGTACCCCATTTTATACCTCATAGTCCCATGCATAGACAAGTCAAC

>PGSC0003DMG400006652LRR-RLPs\_2074

CCACAAATTAATTAGTACCCCATTTTATACCTCATAGTCCCATGCATAGACAAGTCAACAACGTTACTTTA  
TGAAATAGTGTTTAGTTAACTGTTTACTTTATTTAATGTGGAGGTCGTT

>PGSC0003DMG400006652LRR-RLPs\_2196

AATAATTAAGAAATCGAATAGTACTTAATTAATTATAGCATCCTTTCTTAAATATATATGTGGATAATGCT  
AGTTGATTTGTAAGAAGAGAACAACATCCTGTTATTTGCTGAAAACAA

>PGSC0003DMG400006652LRR-RLPs\_2745

TCTTCTATATTCTTTGATCAGCAGCACTTCAGAAATCAATCTCTCAATTTTTTTGCTCTGTGGGTGCGTAAT  
TATTTTGAACGCCTCTTCTCCTATTTATGCTTTTGTTTCCTGAAGTCT

>PGSC0003DMG400006652LRR-RLPs\_2806

GGGTGCGTAATTATTTTGAACGCCTCTTCTCCTATTTATGCTTTTGTTTCCTGAAGTCTTCTACTCCTTCAG  
TGACTCCTCATTGTTCAACCACTTTATTTCAATTTAGAGTTCTTCTTA

>PGSC0003DMG400006652LRR-RLPs\_2867

TACTCCTTCAGTGACTCCTCATTGTTCAACCACTTTATTTCAATTTAGAGTTCTTCTTATACCTTTATTAATT  
AGAAGTCCTTCTTGAAACAGTTTCTCATCAACTCACTTTGCCAACGT

>PGSC0003DMG400006652LRR-RLPs\_2928

CCTTTATTAATTAGAAGTCCTTCTTGAAACAGTTTCTCATCAACTCACTTTGCCAACGTGTTCCCTTGCATTT  
TGTCATGTATCAAAATAATACTTATCCCAACATTTTCTTTTATTCCTT

>PGSC0003DMG400006652LRR-RLPs\_2989

TCCTTGCATTTTGTGATGTATCAAAATAATACTTATCCCAACATTTTCTTTTATTCCTTTCTCTGTTTTGTGTT  
GCTAATAAGTCTATGATTTTCTTCTCCTTTGATCATCATCTTGC

>PGSC0003DMG400006652LRR-RLPs\_305

TGTTGTGTGGAGCCTCATGTTTAAATATCTTAAGCCAAAATGGTTTGTGGAATTTTTTGTGACTCATG  
CCTCACAAAAGAAGGAGGCCAAATTAAGAAGAGAGCTCAGAGACGACGGA

>PGSC0003DMG400006652LRR-RLPs\_3111

TCCCACTGAAGCTTCCGCTTTGCTTCAGTTTAAAGCAACCTTTCAAGTTAAATCCGACTACTCCCAGTGTGA

TACTTCTTTCCCAAAAACAAAGTCTTTGAATGAGAGTGGAGATTGTTGT

>PGSC0003DMG400006652LRR-RLPs\_3172

CCCAGTGTGATACTTCTTTCCCAAAAACAAAGTCTTTGAATGAGAGTGGAGATTGTTGTACTTGGGACGG  
AGTTACATGTCACATGTTAACCGGTCCTTAGTTGTAGTCAGATTGTTGGC

>PGSC0003DMG400006652LRR-RLPs\_3233

TTGGGACGGAGTTACATGTCACATGTTAACCGGTCCTTAGTTGTAGTCAGATTGTTGGCAATTTTCATCC  
CAATAGCAGTCTCTTCGAACTTCATCATCTCCAGACACTAAATCTTGCTT

>PGSC0003DMG400006652LRR-RLPs\_3294

TTTTCATCCCAATAGCAGTCTCTTCGAACTTCATCATCTCCAGACACTAAATCTTGCTTACAATGACTTTTA  
TCCTTCTTCGATCCACATAACATTGGCCGATTGACGAATTTGAGGCA

>PGSC0003DMG400006652LRR-RLPs\_3355

AATGACTTTTATCCTTCTTCGATCCACATAACATTGGCCGATTGACGAATTTGAGGCATCTTAACCTTTCT  
CGTTCTTTCTTTGATGCAAAAAATCCCAACAGAAATCTCATATCTTTC

>PGSC0003DMG400006652LRR-RLPs\_3416

TTAACCTTTCTCGTTCTTTCTTTGATGCAAAAAATCCCAACAGAAATCTCATATCTTTCCAATTTGGTTTCA  
CTTGATCTTTCTATGAATTGATTACAACAAATTGATGAGAGAACATTT

>PGSC0003DMG400006652LRR-RLPs\_3477

ATTTGGTTTCACTTGATCTTTCTATGAATTGATTACAACAAATTGATGAGAGAACATTTGAAGCAATGCTT  
CACAATTGACAAATATGGAGGTACTATCTCTCCTTCTTGCAACATCT

>PGSC0003DMG400006652LRR-RLPs\_3599

TATCCCATACTTGTGAATATTTCTTCCTCCTTAAGGTACCTGGATGTTGAAGCTACTAATCTGCGAGGTGT  
TCTCACAGAGAGCCTTTTCTTCTGCCAAACTTGAAACACTCAAATTG

>PGSC0003DMG400006652LRR-RLPs\_366

GGACTCATGCCTCACAAAAGAAGGAGGCCAAATTAAGAAGAGAGCTCAGAGACGACGGACTTAATGGA  
AGATTGAGAGGGCCAACCTTGCTTTGTTTATTTATGGACTAATTAGTGAA

>PGSC0003DMG400006652LRR-RLPs\_3660

TGCGAGGTGTTCTCACAGAGAGCCTTTTCTTCTGCCAAACTTGAAACACTCAAATTGAGTGGTAATCA  
TCTTCTCAAAGGAGTTTTTCAAAGATCCACCCGAGAAACACTCTGTAA

>PGSC0003DMG400006652LRR-RLPs\_3721

TGGTAATCATCTTCTCAAAGGAGTTTTTCCAAAGATCCACCCGAGAAACACTCTGTTAATGGAATTGGAT  
ATTCATACACAGGAATCTCCGGTGAGCCGCCTGATTCAATTGGCACCTT

>PGSC0003DMG400006652LRR-RLPs\_3782

GAATTGGATATTCATACACAGGAATCTCCGGTGAGCCGCCTGATTCAATTGGCACCTTGAATTCATTGA  
ATATCTTGAATCTCCAAGGACGTCAATTCTCTGGCCATATTCCTGATTCC

>PGSC0003DMG400006652LRR-RLPs\_3843

ATTCATTGAATATCTTGAATCTCCAAGGACGTCAATTCTCTGGCCATATTCCTGATTCCATAGGCAACCTA  
ACACAAATTACAGAGTTGATTTAATCTTATAATCATTTCACTGGCCAT

>PGSC0003DMG400006652LRR-RLPs\_3904

AGGCAACCTAACACAAATTACAGAGTTGATTTAATCTTATAATCATTTCACTGGCCATATTCCTTCCACA  
ATCTCTAAATTGAAGCACCTCACAAAGTTTACTTCTTCGGTCCAACCTCCT

>PGSC0003DMG400006652LRR-RLPs\_3965

TCCTTCCACAATCTCTAAATTGAAGCACCTCACAAAGTTTACTTCTTCGGTCCAACCTCCTTTTCAGGTGAAAT  
TCCTGATGTTTTCTTAACATCCAAGAGCTACGCTTTTTAGATCTTTT

>PGSC0003DMG400006652LRR-RLPs\_4087

ATAACAGCGGTTTCGTTTCCCTCTTCAATTTCAAACCTTGACACATCTTCAACGGTTAGACTTGTTGAGTAAT  
TCCTTATCTGGCCCACTTCTTAATAATGCGAGCAATCTTCAAAAAGCTAA

>PGSC0003DMG400006652LRR-RLPs\_4148

GTTGAGTAATTCCTTATCTGGCCCACTTCTTAATAATGCGAGCAATCTTCAAAAAGCTAACCCAAGTGGAT  
TTGTATGACAACCTTACTGAATGGTACCATACCATCTTGGTTGTTTAGCCT

>PGSC0003DMG400006652LRR-RLPs\_4209

CAAGTGGATTTGTATGACAACCTTACTGAATGGTACCATACCATCTTGGTTGTTTAGCCTCCATCTGCTAAC  
ACTTTTTTTGTCGCTCAGTAGAAATCAATTTAGTGGACTACCCGATGAG

>PGSC0003DMG400006652LRR-RLPs\_4270

ATCTGCTAACACTTTTTTTGTCGCTCAGTAGAAATCAATTTAGTGGACTACCCGATGAGCTCAAACCAAAT  
CCAGCATTAAACAAAAGTGGATTTAAGCAATCACTTGTGAATCTCACACA

>PGSC0003DMG400006652LRR-RLPs\_4331

CAAACCAAATCCAGCATTAAACAAAAGTGGATTTAAGCAATCACTTGTGAATCTCACACACCTTTATAACCT  
TGACCTTTCATCAAATAACATCACCGGTCCATTTCCCGCTTCAATTTTA

>PGSC0003DMG400006652LRR-RLPs\_4392

TTTATAACCTTGACCTTTCATCAAATAACATCACCGGTCCATTTCCCGCTTCAATTTTAAGTTTGACACATC  
TTGAATAGTTAAACTTGTCGAGTTATTCCCTATCTGGCCCACTGCCTA

>PGSC0003DMG400006652LRR-RLPs\_4453

TTTGACACATCTTGAATAGTTAAACTTGTCGAGTTATTCCCTATCTGGCCCACTGCCTAGCAATGCAAGCA  
TGCTTCAAAGCTAACTTTTGTGGATTTGTCTTACAACCTTGCTAAATGG

>PGSC0003DMG400006652LRR-RLPs\_4575

CCATACCATCTTGGAACCTCCCTTTGCTATCTTTGTTGTGGCTCAATCATAATCAATTTAGTGGACTAGCCT  
ATGAGATCAAATAAAACCCAGCATTAGAATTTTGCATTTAAATAATA

>PGSC0003DMG400006652LRR-RLPs\_4636

TGGACTAGCCTATGAGATCAAATAAAACCCAGCATTAGAATTTTGCATTTAAATAATAATCAACTCAGT  
GGTTCTTTTCCTCAATCACTTGTGAATCTCACAAACCTTTTGGCCCTTGA

>PGSC0003DMG400006652LRR-RLPs\_4697

CAACTCAGTGGTTCTTTTCCTCAATCACTTGTGAATCTCACAAACCTTTTGGCCCTTGACCTTTCATCAAT  
AACATCACCATTGATGAGGGAATGAATATCATCTTTCCTAGCCTATCA

>PGSC0003DMG400006652LRR-RLPs\_4758

TTTCATCAAATAACATCACCATTTGATGAGGGAATGAATATCATCTTTCCTAGCCTATCATCTTTATTCTTAT  
CATCTTGTGGACTGAAGAATTTCCACACATCTTGAGAAATGTAAAGA

>PGSC0003DMG400006652LRR-RLPs\_4819

TTTATTCTTATCATCTTGTGGACTGAAGAATTTCCACACATCTTGAGAAATGTAAAGACACTTCAGGTCT  
TGGATAATTCTAACAATAATTTGTGGTCAAATCCCTAACTGGTTTAG

>PGSC0003DMG400006652LRR-RLPs\_4941

GCATGAGGTGGGACTTGTTCAGTTCCTAAACCTTCTCATAATTCATTGACAGGCCACCTACCACAATTT  
CATTACTATAACGTACAGTATCTTGATCTGAAATTTAACTCCCTTCAGG

>PGSC0003DMG400006652LRR-RLPs\_5002

ACCACAATTTCACTACTATAACGTACAGTATCTTGATCTGAAATTTAACTCCCTTCAGGGTCCACTACCTTC  
ATCCATTTGTAACATGAGCAAACCTTATCTTATTAGATTTATCACATAA

>PGSC0003DMG400006652LRR-RLPs\_5063

CCACTACCTTCATCCATTTGTAACATGAGCAAACCTTATCTTATTAGATTTATCACATAACTACTTCAGTGAC

TCAATTCCAAGTTGCTTGGGAAGCATGGCTAATTTAAGGGTGTTGGAC

>PGSC0003DMG400006652LRR-RLPs\_5124

ACTTCAGTGACTIONCAATTCCAAGTTGCTTGGGAAGCATGGCTAATTTAAGGGTGTTGGACTTAAGAAGGA

ACAATCTCACAGGGAGTATTCCCATTATGTGCACACAACACTTCATTGAGT

>PGSC0003DMG400006652LRR-RLPs\_5185

AAGAAGGAACAATCTCACAGGGAGTATTCCCATTATGTGCACACAACACTTCATTGAGTGCCATTGTTGT

AAATGGTAATCAATTTGAAGGACCTGTACCTGTGTCGTTGCTCAAGTGTA

>PGSC0003DMG400006652LRR-RLPs\_5368

GAACCCTCAAGAGCTGCAAGTCCTTATATTAAGTCAAACAAGTTCCATGGACCTATAAGTACTTGTCA

GACTAAGTTTTGCTTTCCCAAGTTGCGAATTTTTGATCCTTCATGTAATG

>PGSC0003DMG400006652LRR-RLPs\_5429

TACTTGTGAGACTAAGTTTTGCTTTCCCAAGTTGCGAATTTTTGATCCTTCATGTAATGATTTGAGTGGCTC

ACTTCCTGCAAAAGTTTTTGGAACTTCAAGGCAATGATCAAATTATA

>PGSC0003DMG400006652LRR-RLPs\_549

ATATGTATGTTATTTAATATCAATGGTTATGTTAGTCTGTTTCTGTTTCAAGTTGACAAAAGTGATCTAC

ACAGCCACTCATTAGCTCAGATTTTTCAAAAAGTTATGTATTTCTTAAA

>PGSC0003DMG400006652LRR-RLPs\_5490

TTCAGTGGCTCACTTCTGCAAAAGTTTTTGGAACTTCAAGGCAATGATCAAATTATATGGCGAAGACA

CAAGAGAGATCAAGTACATGGAACCATCTGAGGAGCCATCGTACGTATCG

>PGSC0003DMG400006652LRR-RLPs\_5551

GCGAAGACACAAGAGAGATCAAGTACATGGAACCATCTGAGGAGCCATCGTACGTATCGTATGAGGAT

TCAGTGTGTTTGGTGGTAATCAAAGGGCAGAATATTGAGCTACAAAGAATCA

>PGSC0003DMG400006652LRR-RLPs\_5612

TGAGGATTCAGTGTGTTTGGTGGTAATCAAAGGGCAGAATATTGAGCTACAAAGAATCAGCACAAATTAC

GACAACCATAGATCTCTCAAGCAACATTTTGAAGGTGTGATTCCGAAAAC

>PGSC0003DMG400006652LRR-RLPs\_5734

TAAAGGATCTCAGCTCACTTTGGCTACTCAATTTATCCCGTAACAATCTCAGAGGCGATATTCCAATGAA

ACTAGGACAATTGAGTATGCTTGAAGCTTTAGATATCTCTTGAATCGGC

>PGSC0003DMG400006652LRR-RLPs\_5917

AAAATCATCTCGTCGGACCAATTCCTCAAGGTCCACAATTCAACACATTTGAAAATGACTCATATGGTGG  
CAACCTTGATTTATGTGGTCTTCCTTTAACAAAGAAATGTGGAATGAGTG

>PGSC0003DMG400006652LRR-RLPs\_61

TTCTAGCAGTCTTAAACCTCTCTCAGAATGTTCTTGTCGGTCCAATTCCTCAAGGTCTACAATTCAACACA  
TTTGAAATGACTCGTATGGTGGCAACCTTGATTTATGTGGTCTTTCTT

>PGSC0003DMG400006652LRR-RLPs\_610

AGTGATCTACACAGCCACTCATTAGCTCAGATTTTTCAAAAAGTTATGTATTTCTTAAAGAACCAACACCA  
TCATATTTTAGGAACGCGGGGTTCTCATATATTAGCTTAGGTACAAAT

>PGSC0003DMG400006652LRR-RLPs\_671

ACCAACACCATCATATTTTAGGAACGCGGGGTTCTCATATATTAGCTTAGGTACAAATAACGTGAAAGT  
CAAATATATTCTCAAAAACAAGCTAAAAGAAAGACATATCTGCATTTGAA

>PGSC0003DMG400006652LRR-RLPs\_732

CGTGAAAGTCAAATATATTCTCAAAAACAAGCTAAAAGAAAGACATATCTGCATTTGAAGTTCGATTTTT  
GCCTTTTTTATATTCCGACATATTCATTCACCTTGACTTAAAGGGCGTGT

>PGSC0003DMG400006652LRR-RLPs\_854

ATCCTTGTAATGAGAATTGAGCATGAATGCTCAAGTGCCTGGACCTCGAGGAGGTGAAAACCTTATAAT  
ATGTATTTAACTTGTTTCTTCCATGATTTTAAACATCAAAGAATGAGTTGA

>PGSC0003DMG400006652LRR-RLPs\_915

TTTATAATATGATTTAACTTGTTTCTTCCATGATTTTAAACATCAAAGAATGAGTTGATTACATCTATAAA  
AGCAAAGACAGAAAACAGTGATCCTTCTATAACAATTAGTCTCTCAGT

>PGSC0003DMG400006652LRR-RLPs\_976

ACATCTATAAAAGCAAAGACAGAAAACAGTGATCCTTCTATAACAATTAGTCTCTCAGTTTTCTTGCCTG  
TGCATCACTACACCTTTATCTTGAGTCGAGAGTCTATGGAAACAACACA

>PGSC0003DMG400006655LRR-RLPs\_124

TTATCGGGTTAGACCTTAGTAGTAGTCTGCTTTGTGGAAGTATTCATCCAATAGCAGCCTCTTCCAACCT  
CATCATCTCCAAACACTAAACCTTTATAACAACCTCTTCAATTATTCTT

>PGSC0003DMG400006655LRR-RLPs\_1302

AATTCCTGATGTTTTCTTAACCTCAAAGAGCTACGTACTTTACATCTTTCTAATAACAGCTTCATCGGTTT  
GTTTCCCTCTTCAATTTTAAAGTTTGACACATCTTGAATACTTAGGATT



>PGSC0003DMG400006655LRR-RLPs\_1550

TATCTTCAGTATCGCTCCAACATAACCGATTAGAGGACTAGCCGATGAAGTGATCAAAACAAACCCAAC  
ATTAAGAAGAACTGCATTTAAGCAATAATCACCTCAGTGGTTCTTTTCCTC

>PGSC0003DMG400006655LRR-RLPs\_1798

GATTTTCCACACTTCTTGAGAAATGTAAAGACACTTCAGGTCTTGGATATTTCTAACAATAAGATTTGTGG  
TCAAATCCCTAACTGGTTTAGCGGCATGACGTGGGACTCATTGCAGTTC

>PGSC0003DMG400006655LRR-RLPs\_186

TTCCAACCTTCATCATCTCCAAACACTAAACCTTTATAACAACCTCTTCAATTATTCTTCAATCCCACATAGC  
ATTGGCCAATTGACGAATTTGAGGCATCTCAACCTTTCTCATTCTCAC

>PGSC0003DMG400006655LRR-RLPs\_1922

ACCTTTCTCATAATTCATTAACAGGCCACCTACCACAATTTGTTACTATAACCTACAATATCTTGATCTGA  
AATTTAACTTCCTTCAGGGGTCACTACCTTTATCCATTTGTAACATGA

>PGSC0003DMG400006655LRR-RLPs\_1984

CTTGATCTGAAATTTAACTTCCTTCAGGGGTCACTACCTTTATCCATTTGTAACATGAGGAACTTATCTT  
ATTAGATTTATCACACAACACTTTCAGTGACTCAGTTCCACATTGCTTG

>PGSC0003DMG400006655LRR-RLPs\_2046

ACTTATCTTATTAGATTTATCACACAACACTTTCAGTGACTCAGTTCCACATTGCTTGGGAATCATGGCTT  
CACTAACGGTGCTGAACTTAAGAAAGAACAACCTTCACAGGTAGTCTTCC

>PGSC0003DMG400006655LRR-RLPs\_2108

TCATGGCTTCACTAACGGTGCTGAACTTAAGAAAGAACAACCTTCACAGGTAGTCTTCTCCATTATGTGC  
ACAGAGCACTTCATTGAGTACCATTGTCGTAAATGGCAATCGATTTGAAG

>PGSC0003DMG400006655LRR-RLPs\_2170

TTATGTGCACAGAGCACTTCATTGAGTACCATTGTCGTAAATGGCAATCGATTTGAAGGACCTGTTCTTG  
TGTCGTTGCTCAAGTGTGATAGACTAGAAGTCCTTGATGTGGGGAACAAT

>PGSC0003DMG400006655LRR-RLPs\_2418

AATTTTTGATCTTTCTCATAATGATTTTAGTGGCTCACTTCCTGCAAAAGTTTTTGGAACTTCAAGGCAA  
TGATCAAATTAGATGGCGAAGATACAGGAAATATCAAGTACATGGAATC

>PGSC0003DMG400006655LRR-RLPs\_248

CCCACATAGCATTGGCCAATTGACGAATTTGAGGCATCTCAACCTTTCTCATTCTCACTTTGGTGGGAAA

ATCCCAACAGAAAACATACCTTTCTAATTTGGTTTTACTTGATCTTTC

>PGSC0003DMG400006655LRR-RLPs\_2480

TCAAGGCAATGATCAAATTAGATGGCGAAGATACAGGAAATATCAAGTACATGGAATCTATGTCTGAATT  
TGCCATTTGTCAGATCGTATGAAGATTCAGTGAGTTTGGTAATCAAAGGGC

>PGSC0003DMG400006655LRR-RLPs\_2542

TCGAATTTGCCATTTGTCAGATCGTATGAAGATTCAGTGAGTTTGGTAATCAAAGGGCAGGATATTGAG  
CTAGAAAGAATCAGCACAATTACGACAACCATCGATCTCTCAAACAACCAT

>PGSC0003DMG400006655LRR-RLPs\_2604

TATTGAGCTAGAAAGAATCAGCACAATTACGACAACCATCGATCTCTCAAACAACCATTTTGAAGGTGTC  
ATTCCGAAAACACTAAAGGATCTCAGCTCACTTTGGCTACTCAATTTATC

>PGSC0003DMG400006655LRR-RLPs\_310

GTGGGAAAATCCCAACAGAAAACATACCTTTCTAATTTGGTTTTACTTGATCTTCTGTGTATGGATTA  
CAACTTGATGAGAGAACATTTGAAACAATGCTTCACAACCTCACAATC

>PGSC0003DMG400006655LRR-RLPs\_372

TATGGATTACAACCTTGATGAGAGAACATTTGAAACAATGCTTCACAACCTCACAATCTGGAGGTACTAG  
CTCTCTCTTTGGCGACATCTCATCACTGATACCTGTAAGTATTCATCCC

>PGSC0003DMG400006655LRR-RLPs\_620

TGATGGGAAAATCCCAACAGAAATCTACATCTTTCCAATTTGGTTTCACTTGATCTTCTTATAGTTATA  
AATTCTTACAACCTTGATGAGATAACATTTGAAGCAATGCTTCACAACCT

>PGSC0003DMG400006655LRR-RLPs\_682

ATAGTTATAAATTCTTACAACCTTGATGAGATAACATTTGAAGCAATGCTTCACAACCTCACAATCTGGA  
GATACTTCTCTCTGGTATGTCAACATCTCATCTCCGATACCTGTGAATA

>PGSC0003DMG400006655LRR-RLPs\_806

TTCTTCCTTAAGATATGTGGATCTTGACATACTAATCTGCGAGGTGTTCTCACAGAGAGCTTTTTCTTG  
TGCCAAACTTGAAAGCCTCAAATTGAGTGGGAATGATCTTCTCAAAGG

>PGSC0003DMG400006655LRR-RLPs\_868

TTTTCTTGTGCCAAACTTGAAAGCCTCAAATTGAGTGGGAATGATCTTCTCAAAGGAGTTTTTCCAAA  
GATCCACCGGAGCAACACTCTGTTAATGGAGTTGGATATTTTCATCCACAG

>PGSC0003DMG400006655LRR-RLPs\_992

CTCCGGTGAGCTGCCTGATTCAATTGGCACCTTTAGTTCATTGAATATCTTGAACCTCGGAGGATGTCAA  
TTCTCTGGTTCATTCCCGATTCCATAGGCAACCTAACCCAAATTACGGA

>PGSC0003DMG400006667OtherRLKsTM\_248

TTGGGAGGAAGGAAAGTTGTGAATTTTGATCTCATCTACCCACCCATGGTATGTTTGAACATTTTTTTTT  
TTCGTGTGTTTCATAAATTAAGTCAGCTACTATGGAGAAGGAGGAGTGG

>PGSC0003DMG400006667OtherRLKsTM\_310

TTTTTTTTTTTCGTGTGTTTCATAAATTAAGTCAGCTACTATGGAGAAGGAGGAGTGGTATTTTGGTTCTA  
TAAAAAAGGATAAAGGTGAAAGAAAGCACTGACTTTCTGTTTGTGTACT

>PGSC0003DMG400006667OtherRLKsTM\_372

TTGGTTCTATAAAAAAGGATAAAGGTGAAAGAAAGCACTGACTTTCTGTTTGTGTACTTTGTTAATTTTT  
AATTTGTGTAATGGACGTGTTTAATAAGTGGTGTGTGGTGATGTGGAAA

>PGSC0003DMG400006667OtherRLKsTM\_434

TTAATTTTAAATTTGTGTAATGGACGTGTTTAATAAGTGGTGTGTGGTGATGTGGAAATGTAGATACTTT  
GTAAGAGCTTTTATGCTTCTGTAGTATTTTCAAAGTATCAGGGTTTGG

>PGSC0003DMG400006729-(rev)RLKWAX-EGF\_0

ATGGCTCCTAATTATGTGATGATAGTTGCTCTGATAACATTTATTTGCTTTTCACTATCTTTTGGTGACGAT  
GCTATGTTACCAACAAACAACCTATCTCATAGCCAAACCTAACTGCAAT

>PGSC0003DMG400006729-(rev)RLKWAX-EGF\_1116

TGGTTACTGAATGCAATCGTGACAATCCTCAGAGAAAAATTCAGAATATTTATCTTGTTATAGGTACC  
TTTCTCAACTTCTTTGGAATTCTGCAGGCAAGAGGTTAATTCCGTCAAAT

>PGSC0003DMG400006729-(rev)RLKWAX-EGF\_1178

TAGGTACCTTTCTCAACTTCTTTGGAATTCTGCAGGCAAGAGGTTAATTCCGTCAAATATTACTACTTGT  
TGATTATTTCTTTCACAACTGAACGGAAAAAGAAAACCACATGAGCAAC

>PGSC0003DMG400006729-(rev)RLKWAX-EGF\_1240

CTACTTGTTTGATTATTTCTTTCACAACTGAACGGAAAAAGAAAACCACATGAGCAACGATTTTATTTTCA  
TGAACTACATACATCAACCTAAATGTCTAATACAATGGCTTTATTGGGT

>PGSC0003DMG400006729-(rev)RLKWAX-EGF\_1302

TTATTTTCATGAACTACATACATCAACCTAAATGTCTAATACAATGGCTTTATTGGGTACATCTATATATGT  
TAGTAATATATTTTTATTACAGGTGTTACAATAGGGGTTGCTTTAATG

>PGSC0003DMG400006729-(rev)RLKWAX-EGF\_1364

CTATATATGTTAGTAATATATTTTTATTACAGGTGTTACAATAGGGGTTGCTTTAATGGTTTTTATAATATT  
TGGCTGGTCATATACTGCATTCCAAAGGAGAAGGATGTTAATTATGAA

>PGSC0003DMG400006729-(rev)RLKWAX-EGF\_1426

TTATAATATTTGGCTGGTCATATACTGCATTCCAAAGGAGAAGGATGTTAATTATGAAGAAGAAGTTTTT  
CCAAGAAAATGGTGGATTAGTTCTATTGCAACGACTCAAAGTAGGGGAAG

>PGSC0003DMG400006729-(rev)RLKWAX-EGF\_1488

AAGTTTTTCCAAGAAAATGGTGGATTAGTTCTATTGCAACGACTCAAAGTAGGGGAAGAGGGGTCAAGT  
AATACCAATACAGTAAACATTTTACAGCGGAAGAGCTACAAAGGGCAACT

>PGSC0003DMG400006729-(rev)RLKWAX-EGF\_1550

GTCAAGTAATAACCAATACAGTAAACATTTTACAGCGGAAGAGCTACAAAGGGCAACTAATGACTTTGA  
CAAAGATAGAGTTGTTGGTCAAGGAGGTTATGGAAGTGTGTACAAAGGATA

>PGSC0003DMG400006729-(rev)RLKWAX-EGF\_1612

ACTTTGACAAAGATAGAGTTGTTGGTCAAGGAGGTTATGGAAGTGTGTACAAAGGATATCTGAAAGATA  
ATTGCATCGTTGCCATAAAAAAATCTAAGGTAATTGATCGCAATCAAATTG

>PGSC0003DMG400006729-(rev)RLKWAX-EGF\_1798

GTTGTTGCCTCGAGACCGAAGTTCCACTACTGGTGTATGAATTTATCAGCAATGGAACACTTTCTGAACA  
CTTACATGATAAATTAAGGCGTCCGCTCTTTCTTTGGATATTCGTCTTA

>PGSC0003DMG400006729-(rev)RLKWAX-EGF\_186

CAGTTCCTTGTCATTTGTAATTAATCCTTTTCATCCTCCCAGCCTTTTTTAGGAAACAGCCGTATTGAAATC  
ACAAGCATATCTCTCGCTGGGCAACTTAAGGTCTTACAGTTCATATCC

>PGSC0003DMG400006729-(rev)RLKWAX-EGF\_1860

TCTGAACACTTACATGATAAATTAAGGCGTCCGCTCTTTCTTTGGATATTCGTCTTAGAGTTGCTGCAGA  
AACTGCTGGATTACTTTCTACTTACACTCAGCAGCTTACCCTCCTATC

>PGSC0003DMG400006729-(rev)RLKWAX-EGF\_1922

TGCTGCAGAACTGCTGGATTACTTTCTACTTACACTCAGCAGCTTACCCTCCTATTCATTCATAGAGATA  
TTAAGTCAGTCAACATTCTTCTAGACAAAAGCTACACAGCCAAAGTGTC

>PGSC0003DMG400006729-(rev)RLKWAX-EGF\_2046

TTTGGAGCATCCAGGTTGGTTCCTGCTAATCAAACAGAGCTATCTACATTGGTTCAAGGAACTCTAGGAT

ATTTAGATCCTGAATACTTGCAAACAAGTCAACTCACCGAAAAAAGTGAT

>PGSC0003DMG400006729-(rev)RLKWAX-EGF\_2108

TCTAGGATATTTAGATCCTGAATACTTGCAAACAAGTCAACTCACCGAAAAAAGTGATGTATATAGTTTC

GGAGTAGTGCTTGTAGAGCTCCTAACCGGTAGAAAGGCTCTATGTTTTCA

>PGSC0003DMG400006729-(rev)RLKWAX-EGF\_2232

CCAGAAGAAGAGAGAAGTTTAGCTCAATATTTTCATATCTTCAGTGGAAAAGGGTCATTTGTTTCGATATTC

TAGACGACAATATAGTCTGTGATGAGGGAAATGCAGGGCAATTGAAAAAT

>PGSC0003DMG400006729-(rev)RLKWAX-EGF\_2294

CGATATTCTAGACGACAATATAGTCTGTGATGAGGGAAATGCAGGGCAATTGAAAAATGTTGCTGTGAT

TGCACAAAGGTGCTTAAATGTTAAAGGGGATGATCGACCTACAATGAAGGA

>PGSC0003DMG400006729-(rev)RLKWAX-EGF\_2356

CTGTGATTGCACAAAGGTGCTTAAATGTTAAAGGGGATGATCGACCTACAATGAAGGAAGTTGCAGCA

GAATTGGAAGCTGGATCGAAATTGAAGCACTCATGGGCTCAAATTGATCAAC

>PGSC0003DMG400006729-(rev)RLKWAX-EGF\_2418

GCAGCAGAATTGGAAGCTGGATCGAAATTGAAGCACTCATGGGCTCAAATTGATCAACAGTCAGAGGA

GATTGAGTCCCTACTGCCTGGATTTGGATATGAATATAGTGAACATAGTATC

>PGSC0003DMG400006729-(rev)RLKWAX-EGF\_2472

CAACAGTCAGAGGAGATTGAGTCCCTACTGCCTGGATTTGGATATGAATATAGTGAACATAGTATCCAT

GTTGATAGTATAACGAACCATGCAACTATAACCATTTCCTGGAGGAAGGTGA

>PGSC0003DMG400006729-(rev)RLKWAX-EGF\_248

TATTGAAATCACAAGCATATCTCTCGCTGGGCAACTTAAGGTCTTACAGTTCATATCCAGAGATTGTTATC

GTGCTGGGATAAGCACGGATAATAACCAGCCATTTATAGTATTACCATC

>PGSC0003DMG400006729-(rev)RLKWAX-EGF\_310

ATTGTTATCGTGCTGGGATAAGCACGGATAATAACCAGCCATTTATAGTATTACCATCGTTGTTAACTGT

GAACAACACTGCGAATAGCTTCATCGCCGTTGGCTGTGACACGTATGCAA

>PGSC0003DMG400006729-(rev)RLKWAX-EGF\_372

TAACTGTGAACAACACTGCGAATAGCTTCATCGCCGTTGGCTGTGACACGTATGCAATTGTTTCAGGGTT

ATTATACCAAGTTTGGAACTAAAATCGAGTATCTCCCTTACATAACAGGA

>PGSC0003DMG400006729-(rev)RLKWAX-EGF\_434

TCAGGGTTATTATACCAAGTTTGGAACTAAAATCGAGTATCTCCCTTACATAACAGGATGCATGTCCATG  
TGCAATAGTATTGATGATGTTGGTCATGACACATGTTCTGGGGTTCGGTTG

>PGSC0003DMG400006729-(rev)RLKWAX-EGF\_62

TGGTGACGATGCTATGTTACCAACAAACAACCTATCTCATAGCCAAACCTAACTGCAATGAAAGTTGTGGC  
GATGTCAACATCCCTTTCCCATTTGGTATAACCCCAGATTGCGCTCTACG

>PGSC0003DMG400006729-(rev)RLKWAX-EGF\_620

TAATGATACTGATATGAAAAATGACCTTAGTTGCAGCTATGCTTTTGTGGTTCGATCAAGCTAATTTTAGCT  
TTTCTAAGACTTACCTCAGCAGTTTGCAGAAAGCAGAGAAGCTTCCTCT

>PGSC0003DMG400006729-(rev)RLKWAX-EGF\_682

ATTTTAGCTTTTCTAAGACTTACCTCAGCAGTTTGCAGAAAGCAGAGAAGCTTCCTCTCGTGCTAGATTG  
GGCAATTGGTGAAGAAACATGTGAAGTAGCTAAGATAAACTCGACTACAT

>PGSC0003DMG400006729-(rev)RLKWAX-EGF\_744

CTAGATTGGGCAATTGGTGAAGAAACATGTGAAGTAGCTAAGATAAACTCGACTACATATGGATGTAAG  
AGTAAAAACAGTGATTGTCAGGATAATTCAAATGGATATCGATGTTCTGC

>PGSC0003DMG400006729-(rev)RLKWAX-EGF\_806

ATGTAAGAGTAAAAACAGTGATTGTCAGGATAATTCAAATGGATATCGATGTTCTGCATGCAAGGATA  
TGATGGGAATCCATACCTGAAAGATGGTTGTCAAGGTATGTATATGTTTGT

>PGSC0003DMG400006729-(rev)RLKWAX-EGF\_868

AAGGATATGATGGGAATCCATACCTGAAAGATGGTTGTCAAGGTATGTATATGTTTGTGTCAGTCTCCTAAT  
ATGATTTTATATCAAATCTATCATTGCAAATGAATGTTTATGGTTGTG

>PGSC0003DMG400006729-(rev)RLKWAX-EGF\_930

CTCCTAATATGATTTTATATCAAATCTATCATTGCAAATGAATGTTTATGGTTGTGCTCTACGAGTCTGC  
AGATATCAATGAATGTGTAGATCGGAAACCAGATTATAGGTGTGTCAA

>PGSC0003DMG400006729-(rev)RLKWAX-EGF\_992

ACGAGTCTGCAGATATCAATGAATGTGTAGATCGGAAACCAGATTATAGGTGTGTCAAAAATGCCATTT  
GCAACAATACAGATGGGAGTTATACATGCACATGCCATCCAGATTTTCAGTG

>PGSC0003DMG400006792LRR-RLPs\_0

CAACAACAGACTATACGGAAAGTTCCCTCATGGATATCTGATGGTTTTCAAATCTTAGAATCCTCAGA  
TTAAGGTCAAATTCATTTCCGGAGAACTTCCTCTAGGAATGTCAAAACT

>PGSC0003DMG400006792LRR-RLPs\_650

GAGCTCCACTTGTAGTACTATGTCAAATGGAACTCGGACAATAGAACAGTACTAGAGAATGACAGCA  
GTGATGAATTTCTGATAAATGGTTTTATCTTAGTGTTGGATTGGGATTTA

>PGSC0003DMG400006880-(rev)LRR-RLPs\_128

TTGCCGGCAAATGCCTGTCTGCCGGCGGACCAAGCAGCATTGATGGATATCAAAGCAGCTCTTAAGGAG  
CCGTATTTGGGCATTTTCAACACATGGACCGGCAGCAACTGTTGCCAGGGC

>PGSC0003DMG400006880-(rev)LRR-RLPs\_192

AGGAGCCGTATTTGGGCATTTTCAACACATGGACCGGCAGCAACTGTTGCCAGGGCTGGCATGGTGTTA  
GCTGTGACCCGACTACTCAACGGGTTGCCGACATTGTTCTTCGGGGAGAAT

>PGSC0003DMG400006912RLKantifungi(GNK)\_0

CAAAAAACATAAATTTTCCCAAATATGAAAACACAACAGAAACCCAGAAAATAAGAAGAAAAAATG  
AAAAAAGGAAGATGATCACCTATTATTTCTAATGGCCAATGTCATCGTCAT

>PGSC0003DMG400006912RLKantifungi(GNK)\_122

TTTTGTGTTTAATCTTTTCGATTCTTCCGGCTGCTATTGCGAATCCTCGAACAGAGCTCGTTTATAAATTCT  
GCGGTGTGGAGCAAGCTGATAATGTTTCAGAATTCAACCAAATTATG

>PGSC0003DMG400006912RLKantifungi(GNK)\_1220

TTGGAAACAAAGAGTTGCTGGAAAGGGAAAGAATCATTCTTTTCGAAACGTAATAAAGGAAAGTAGG  
CCAAACAAATTAACAGAGGAAGTACATGTTTAACAAATTTGACAATGGCT

>PGSC0003DMG400006912RLKantifungi(GNK)\_1281

AAGTAGGCCAAACAAATTAACAGAGGAAGTACATGTTTAACAAATTTGACAATGGCTAGCTTGTTTTT  
GGTCTCATGGTTATCTTTTTTGGTTAAATTTGAATAAAGAGATGCAGTG

>PGSC0003DMG400006912RLKantifungi(GNK)\_1342

CTTGTTTTTGGTCCTCATGGTTATCTTTTTTGGTTAAATTTGAATAAAGAGATGCAGTGATGCAGTGA  
TGAAGAATGATCAATTTAGGGATGTCGCTACCAAAGTCGTCAAGGATGT

>PGSC0003DMG400006912RLKantifungi(GNK)\_1403

GCAGTGAACCTGAAGAATGATCAATTTAGGGATGTCGCTACCAAAGTCGTCAAGGATGTGGTAACCATG  
GCCCCAGTTCACGGTGGCTATGCAGAAGGACGAAGGAAAACATATGGTTTA

>PGSC0003DMG400006912RLKantifungi(GNK)\_1464

TAACCATGGCCCCAGTTCACGGTGGCTATGCAGAAGGACGAAGGAAAACATATGGTTTATCAGTTTATG

GCATGGCTATCTGCTGGAATACTTTGGACGAAAAAGCATGTTCTGATTGCC

>PGSC0003DMG400006912RLKantifungi(GNK)\_1525

AGTTTATGGCATGGCTATCTGCTGGAATACTTTGGACGAAAAAGCATGTTCTGATTGCCTTTCAAATGCA

AGCACAGCTGTTCTTGATTGTTTGCCATCCATTGAGGCACGCTCCCTTAG

>PGSC0003DMG400006912RLKantifungi(GNK)\_1586

TCAAATGCAAGCACAGCTGTTCTTGATTGTTTGCCATCCATTGAGGCACGCTCCCTTAGCGTTGGCTGCT

ATTTTCGTTACTCAGAATTTGAATCTAGCAATGGCTCGAATTTCTTTAAT

>PGSC0003DMG400006912RLKantifungi(GNK)\_1647

TTGGCTGCTATTTTCGTTACTCAGAATTTGAATCTAGCAATGGCTCGAATTTCTTTAATTCTAAAGGTCAG

CTCTACATCTCATGCTTGCCTTGAGAAATTTTATGGGACTTTAATCAT

>PGSC0003DMG400006912RLKantifungi(GNK)\_1708

TAAAGGTCAGCTCTACATCTCATGCTTGCCTTGAGAAATTTTATGGGACTTTAATCATCTGTGTATAATA

TCTTAAGACAATAGGCGTATTTTATCTTGTTTTAGCATCTTAAGTATTA

>PGSC0003DMG400006912RLKantifungi(GNK)\_1769

GTGTATAATATCTTAAGACAATAGGCGTATTTTATCTTGTTTTAGCATCTTAAGTATTATTTTTCCAGGTTA

CTATATTATACCCGCTTTAAGTAGTTAACTCTAGTTATCTGTTGTTTT

>PGSC0003DMG400006912RLKantifungi(GNK)\_183

TTATAAATTCTGCGGTGTGGAGCAAGCTGATAATGTTTCAGAATTC AACCAAATTATGCAAACGCAATT

GTAGCTATGGAACCCGAGATAAAATCCAACAAATTCTCAATTTACGGAGA

>PGSC0003DMG400006912RLKantifungi(GNK)\_1830

TTTCCAGGTTACTATATTATACCCGCTTTAAGTAGTTAACTCTAGTTATCTGTTGTTTTAAGTAAGTTAAC

CAAATAGTGTAATAAGTATACCCTTTTAGTGCACAAAAGGGAAACT

>PGSC0003DMG400006912RLKantifungi(GNK)\_1891

AGTAAGTTAACCAAATAGTGTAATAAGTATACCCTTTTAGTGCACAAAAGGGAAACTCACTTAAGAA

GGAATTCATTTTGCAGGAGCTATTTTCATGTACCTTGATTTATTCTTGTT

>PGSC0003DMG400006912RLKantifungi(GNK)\_1952

CTTAAGAAGGAATTCATTTTGCAGGAGCTATTTTCATGTACCTTGATTTATTCTTGTTGCTGTTGGTGTA

TGCATAATAGCTATTCTGGTTGGATATATTGTGGGCACAACTCTCCATG

>PGSC0003DMG400006912RLKantifungi(GNK)\_2013



TGTTGGTGTATGCATAATAGCTATTCTGGTTGGATATATTGTGGGCACAACCTCCATGAAAAACGAGTG  
AAACACCAGACGAAACATAATGGTGATTCTTCGGATCTTGAGTCATCTGT

>PGSC0003DMG400006912RLKantifungi(GNK)\_2074

AAACGAGTGAAACACCAGACGAAACATAATGGTGATTCTTCGGATCTTGAGTCATCTGTTATGAAAAGG  
AGCCTGCATTTCAAATATTCTACACTAGAGAAATCCACAGACAACCTTCAGT

>PGSC0003DMG400006912RLKantifungi(GNK)\_2135

TGAAAAGGAGCCTGCATTTCAAATATTCTACACTAGAGAAATCCACAGACAACCTTCAGTGAAGAACGCA  
AGATTGGCCAAGGTGGATTTGGTGAAGTCTTTAAAGTATAAAAGCATACTA

>PGSC0003DMG400006912RLKantifungi(GNK)\_2196

AGAACGCAAGATTGGCCAAGGTGGATTTGGTGAAGTCTTTAAAGTATAAAAGCATACTACTTCGTTTTCT  
TTTTTTTTTTTTCGTTTTTCTCACCCCTGTTTTGCTTCTCTGCTTTGAC

>PGSC0003DMG400006912RLKantifungi(GNK)\_2257

TCGTTTTTTTTTTTTTTTTTTTTCGTTTTTCTCACCCCTGTTTTGCTTCTCTGCTTTGACAATGTTAGTTCTGCT  
AAATAAGTCTAGAATATTTCTGAAGTAGGGGACTTTGCCAGATGGT

>PGSC0003DMG400006912RLKantifungi(GNK)\_2318

TGTTAGTTCTGCTAAATAAGTCTAGAATATTTCTGAAGTAGGGGACTTTGCCAGATGGTAGAGAAATTGC  
TATCAAACGGATGTTTTAACTACCAAATTCGGAATGAAGAGATATCCA

>PGSC0003DMG400006912RLKantifungi(GNK)\_2379

AGAAATTGCTATCAAACGGATGTTTTAACTACCAAATTCGGAATGAAGAGATATCCAATGAGATAGA  
CATTATTGGACAAGCCCAACACCAGCATTTAGTTCGTTTTCTTGGCTGTTG

>PGSC0003DMG400006912RLKantifungi(GNK)\_244

AACGCAATTGTAGCTATGGAACCCGAGATAAAATCCAACAAATTCTCAATTTACGGAGAAGGATTAGCT  
CCGAATCGAATTTTTCGTTTTGGCTCAATGTATGGATGATCTATCTAAAGAA

>PGSC0003DMG400006912RLKantifungi(GNK)\_2440

GAGATAGACATTATTGGACAAGCCCAACACCAGCATTTAGTTCGTTTTCTTGGCTGTTGTTTCACTGCCG  
ATGACAGCTTTCTTGTATATGAGTATCTAGAAAATAAAAGCCTTGATCTA

>PGSC0003DMG400006912RLKantifungi(GNK)\_2501

TCACTGCCGATGACAGCTTTCTTGTATATGAGTATCTAGAAAATAAAAGCCTTGATCTAATCTTATTTGGT  
ACGTATTTTATTCTTAAGATCTTTAATTCTTCTCCTCCTTTCCCGAAAA

>PGSC0003DMG400006912RLKantifungi(GNK)\_2562

CTTATTTGGTACGTATTTTATTCTTAAGATCTTTAATTCTTCTCCTCCTTTCCCGAAAAGTCATTTGTAAC  
TAACTA  
GAAATACTATCGTACTTAGTTGATTTTCTTGACTGTATGCATGGAAG

>PGSC0003DMG400006912RLKantifungi(GNK)\_2623

CATTTGTAAC TAGAAACTATCGTACTTAGTTGATTTTCTTGACTGTATGCATGGAAGAAAGATCCAAA  
GAAGAAGAAAGAATTGGATTGGAAGAAAAGGCTCAAATAGTCGAAGGGA

>PGSC0003DMG400006912RLKantifungi(GNK)\_2684

AGATCCAAAGAAGAAGAAGAATTGGATTGGAAGAAAAGGCTCAAATAGTCGAAGGGACAGCTGAA  
GGTTTAGAATACCTTCACAATGATTGCCAAGTTCGAATCATTACAGAGACAT

>PGSC0003DMG400006912RLKantifungi(GNK)\_2745

GCTGAAGGTTTAGAATACCTTCACAATGATTGCCAAGTTCGAATCATTACAGAGACATCAAACCTAGTA  
ATATCTTACTAGACTCGAAATATCGTCCCAAATTGCAGATTTTGGTCTT

>PGSC0003DMG400006912RLKantifungi(GNK)\_2806

AACCTAGTAATATCTTACTAGACTCGAAATATCGTCCCAAATTGCAGATTTTGGTCTTGCCAGGTTAGT  
GCATTTACTTTAGGTTTATTGCCTTCAAAAAGTCGAGCCTTCTTAGTCGT

>PGSC0003DMG400006912RLKantifungi(GNK)\_2867

CAGGTTAGTGCATTTACTTTAGGTTTATTGCCTTCAAAAAGTCGAGCCTTCTTAGTCGTGTTCAAGAGTTA  
TGTCACCAGGAAACATGGAGAACTACAAGTGTCTATTTTCATTTTTATT

>PGSC0003DMG400006912RLKantifungi(GNK)\_2928

TCAAGAGTTATGTCACCAGGAAACATGGAGAACTACAAGTGTCTATTTTCATTTTTATTAAGACGAGCTT  
AAATGGAGCAACATGGACAATGATAATTCATATATCTGACTTCGACTTGC

>PGSC0003DMG400006912RLKantifungi(GNK)\_2989

GACGAGCTTAAATGGAGCAACATGGACAATGATAATTCATATATCTGACTTCGACTTGCTTGGAATTGA  
GATGTAATTGTTATTTGTTATGTTATTGGTCTTTCCAGAGTTAACATCAGG

>PGSC0003DMG400006912RLKantifungi(GNK)\_305

GATTAGCTCCGAATCGAATTTTCGTTTTGGCTCAATGTATGGATGATCTATCTAAAGAAGATTGTCAGAT  
TTGTTTTTCTGCCATTAACCAATTGCCTGGTTGTTTTCCCATATCA

>PGSC0003DMG400006912RLKantifungi(GNK)\_3050

GGAATTGAGATGTAATTGTTATTTGTTATGTTATTGGTCTTTCCAGAGTTAACATCAGGGAAAAAGGAAG

TGCACCTCTTGTCATTGCAGGCACATTGTATGTAATGAAGCACTTAAATT

>PGSC0003DMG400006912RLKantifungi(GNK)\_3111

AAAAGGAAGTGCACCTCTTGTCATTGCAGGCACATTGTATGTAATGAAGCACTTAAATTTGGATTAACCT  
CTTACCACTCTTCATTTTGCCTAGCCCGTGCTAATCCCTATACCTGCAG

>PGSC0003DMG400006912RLKantifungi(GNK)\_3172

GATTAACCTCTTACCACTCTTCATTTTGCCTAGCCCGTGCTAATCCCTATACCTGCAGCGGATACATGGC  
TCCGGAGTACCTTGCTCAAGGACAATTAACAGATAAAGTGGATGTTTAT

>PGSC0003DMG400006912RLKantifungi(GNK)\_3233

GATACATGGCTCCGGAGTACCTTGCTCAAGGACAATTAACAGATAAAGTGGATGTTTATAGCTTTGGAG  
TTCTTATGCTGGAAATAGTAAGTGGACGGGAGTTCAACAAAATTCCAGCCG

>PGSC0003DMG400006912RLKantifungi(GNK)\_3355

GACACTCTAGACACCCTTGTAACCATTGTAATTTCCCCTCAACACTCAGCTTTTTTCGAATTTACTTCTAGAT  
GTAGTTACACAATCAGGTCATTTTATATTTCTATTTTTGACAGAATTT

>PGSC0003DMG400006912RLKantifungi(GNK)\_3416

TACTTCTAGATGTAGTTACACAATCAGGTCATTTTATATTTCTATTTTTGACAGAATTTGTGTGTTTGATAT  
TAGCTTATTAATTTAACGTGCAGGCTTGAAACATTTCAAGGAGAAAA

>PGSC0003DMG400006912RLKantifungi(GNK)\_3477

GTGTTTGATATTAGCTTATTAATTTAACGTGCAGGCTTGAAACATTTCAAGGAGAAAAGGGCATATCG  
GATAATAGATCCGAGTATGGAGATAGAAGATGTGAATGAAGTAGTAAGGGT

>PGSC0003DMG400006912RLKantifungi(GNK)\_3538

GCATATCGGATAATAGATCCGAGTATGGAGATAGAAGATGTGAATGAAGTAGTAAGGGTGGTTCAAAT  
TGCGCTGCTATGTAAGAGTCACCTATTATGCGTCCAGATATGTCAACA

>PGSC0003DMG400006912RLKantifungi(GNK)\_3599

TTCAAATTGCGCTGCTATGTAAGAGTCACCTATTATGCGTCCAGATATGTCAACAATCATTAAACTA  
CTTACACAAGAAAACCTTAGAAGTGCCTGTTCCCTTCAAAGCCTCCTTTCA

>PGSC0003DMG400006912RLKantifungi(GNK)\_366

TTGTCAGATTTGTTTTCTGCCATTAACCAATTGCCTGGTTGTTTTCCCATATCAGCGGTTCGAGTTTT  
CTTTGATGGGTGTTTCATGAGATTCGAGAATTATAGCTTTTTTTATGA

>PGSC0003DMG400006912RLKantifungi(GNK)\_3660

CATTAAACTACTTACACAAGAAACTTAGAAGTGCCTGTTCTTCAAAGCCTCCTTTCATTGATGATTCAT  
TTTATGGCTCCGAACAACATGGCTCTATTCATCAGCATCATCCCTCTGC

>PGSC0003DMG400006912RLKantifungi(GNK)\_3721

GATGATTCATTTTATGGCTCCGAACAACATGGCTCTATTCATCAGCATCATCCCTCTGCATCATCAGTTGA  
TTCTTGCAGATATTATGACACACACCAAGATAATGGCTCTTTTCATCGT

>PGSC0003DMG400006912RLKantifungi(GNK)\_3782

CATCAGTTGATTCTTGCAGATATTATGACACACACCAAGATAATGGCTCTTTTCATCGTTATCGTCATCAT  
CCCTCTGCATCCATTGATTCTTATTATGACACGGAAAGTGTTTTAGGAT

>PGSC0003DMG400006912RLKantifungi(GNK)\_3843

TCGTCATCATCCCTCTGCATCCATTGATTCTTATTATGACACGGAAAGTGTTTTAGGATGACAATGGTGCT  
CTCTTTATGGCCTCTGCAAAGACAGAGCTAGCCATTCTATTTACAAGG

>PGSC0003DMG400006912RLKantifungi(GNK)\_3904

CAATGGTGCTCTCTTTATGGCCTCTGCAAAGACAGAGCTAGCCATTCTATTTACAAGGAAAATGACGAA  
TTCTACAGAGCTCGAATCAGATAATTTGGAGATTATTATGAAGCTATCC

>PGSC0003DMG400006912RLKantifungi(GNK)\_3965

AATGACGAATTCTACAGAGCTCGAATCAGATAATTTGGAGATTATTATGAAGCTATCCGCCTGTAAAC  
GAGTGTATCCATTTCCAGCTTCGCGCTATAGTGCAGTGCTTTGATCAA

>PGSC0003DMG400006912RLKantifungi(GNK)\_4026

CTGTAAACGAGTGTATCCATTTCCAGCTTCGCGCTATAGTGCAGTGCTTTGATCAAGACCGGTAAA  
TCCCGGAATACTGCAAAGGCTGCTGGAAAGACCAGATAAGTAGATAATTA

>PGSC0003DMG400006912RLKantifungi(GNK)\_4087

CCGGTTAAATCCCGGAATACTGCAAAGGCTGCTGGAAAGACCAGATAAGTAGATAATTAAGTTATGTAT  
ATTGACTGTGTTAAGTTTTTTTATATCTTTATAATAGAAATTTTACCTATA

>PGSC0003DMG400006912RLKantifungi(GNK)\_4133

AAGTAGATAATTAAGTTATGTATATTGACTGTGTTAAGTTTTTTTATATCTTTATAATAGAAATTTTACCTA  
TAATACAAGTGACCTTAATGTTATTTAACCTACAATGATAGAATTTTG

>PGSC0003DMG400006912RLKantifungi(GNK)\_549

TTTTTTTTATTAATTTTATATTTGGGGATTTATGTTAAAAACAACAAGAATTGTTATATCCTATGTTG  
CTCGGATTCTCAAATTTGTTGTAGCACCCGTGTCGGATCTTCCGAAA

>PGSC0003DMG400006912RLKantifungi(GNK)\_61

AAAAAATGAAAAAAGGAAGATGATCACCTATTATTTCTAATGGCCAATGTCATCGTCATCGTTTTGTGTT  
TAATCTTTTCGATTCTCCGGCTGCTATTGCGAATCCTCGAACAGAGCTC

>PGSC0003DMG400006912RLKantifungi(GNK)\_671

TACTACTTTTGGAGTGTACATGCACCGTCAACATTTTTAAAGACTCTGAGCAACATAGGCAGATTCTCTC  
ATGTTAAATGTGATTTTCCTATTTGCACGCTATGATTTCCGATGAAGG

>PGSC0003DMG400006912RLKantifungi(GNK)\_732

AGATTCTCTCATGTTAAATGTGATTTTCCTATTTGCACGCTATGATTTCCGATGAAGGGGATAATTGAAC  
CGTTTTGGCATCATGTAGCTCCGTACTIONGATTAGAAATGTGTTACCATC

>PGSC0003DMG400006912RLKantifungi(GNK)\_793

ATAATTGAACCGTTTGGCATCATGTAGCTCCGTACTIONGATTAGAAATGTGTTACCATCTCATCTGATAGT  
TTAAGCCATTAGGACAAGGTATAGGGTATAGTTTTAGTTAGTTAATTAT

>PGSC0003DMG400006912RLKantifungi(GNK)\_854

ATCTGATAGTTTAAGCCATTAGGACAAGGTATAGGGTATAGTTTTAGTTAGTTAATTATATATTCAACAA  
GATCCCTAACATGATGGCCTAATTCTTTTTTCATGAGCAAAACACGTGGA

>PGSC0003DMG400006912RLKantifungi(GNK)\_915

ATTCAACAAGATCCCTAACATGATGGCCTAATTCTTTTTTCATGAGCAAAACACGTGGAAATTCTTTTAGA  
GAATGGGTGACGGTGTGTGTGTCTGTTTGATACCATACATGTTAGAAGT

>PGSC0003DMG400006912RLKantifungi(GNK)\_976

TTCTTTTAGAGAATGGGTGACGGTGTGTGTGTCTGTTTGATACCATACATGTTAGAAGTGTGTGACCCCT  
CATCTAAAATTAAGCTATTAGGGAAGGTTCACTTTATTTAAGTAATCAC

>PGSC0003DMG400006923LRR-RLKs\_0

TTTTGAGGACTGTGAAGTAAAAAATATTGATGAGAAGCCCATCTCTTTCTTCTGCAAGAACCGAACCCAA  
CGGAAAGGTCACCATTAATGGCGGAAACCTCATGAAACTCGCGACACTAC

>PGSC0003DMG400006923LRR-RLKs\_1037

TAAAATTCATCGGTTGTCTTCTCTAGAAGTTCTGGATATGAGTTCAAATTTCTTTTTGGTAAGGTTCCAT  
CTGAGATGTCTACAATGGTGAAGCTTCATACTTTGACATTTGATGGCAA

>PGSC0003DMG400006923LRR-RLKs\_1098

AAGTTCCATCTGAGATGTCTACAATGGTGAAGCTTCATACTTTGACATTTGATGGCAATTTTTTCAATGA

GAGTCTCCCTGAGTGGTTTGATTTGTTACCTAATATCACTATTTTAAGC

>PGSC0003DMG400006923LRR-RLKs\_1159

TTTTCAATGAGAGTCTCCCTGAGTGGTTTGATTTGTTACCTAATATCACTATTTTAAGCATGAAGAATAAT  
AGGTTGAAGGGTAAATTCCTCATTCAATTTCTAAAATCACAGGCCTAA

>PGSC0003DMG400006923LRR-RLKs\_122

ATCTTCTTCTCATTCAATGCATGTAGCATTAAATTCCTTCTTCTGTCTATAGCAACCCAATTCTCCATTTTT  
CTACATTATATACTACTCTACTTTACTCTTCTCCACTTTTGTGCT

>PGSC0003DMG400006923LRR-RLKs\_1220

GAAGAATAATAGGTTGAAGGGTAAATTCCTCATTCAATTTCTAAAATCACAGGCCTAACTGATATTATT  
CTGTCACATAATGCTCTTTCTGGTGAATTACCTGATTTAAGTGCTTTGTC

>PGSC0003DMG400006923LRR-RLKs\_1281

GATATTATTCTGTCACATAATGCTCTTTCTGGTGAATTACCTGATTTAAGTGCTTTGTCCAATTTGCATTTG  
TTGGATTTAAGAGAAAATCATTGGATTCTGAACTGCCACTGTTGCCA

>PGSC0003DMG400006923LRR-RLKs\_1342

ATTTGCATTTGTTGGATTTAAGAGAAAATCATTGGATTCTGAACTGCCACTGTTGCCACAAGGATTGAC  
CACTATTCTTCTTAGTAGTAATGCTTTCTCTGGTGAGGTCCCAGAAGAAT

>PGSC0003DMG400006923LRR-RLKs\_1403

AGGATTGACCACTATTCTTCTTAGTAGTAATGCTTTCTCTGGTGAGGTCCCAGAAGAATTTGGCAAATA  
AATCTACTTCAACACCTTGATCTGTCAAATAATGCTCTTACCGGAACGCC

>PGSC0003DMG400006923LRR-RLKs\_1464

GGCAAATAAATCTACTTCAACACCTTGATCTGTCAAATAATGCTCTTACCGGAACGCCGCTGCTGATTT  
GTTCTCTTTGCCAAGTATTAGTTACTTGAATTTAGCGTTTAAACGTTCTG

>PGSC0003DMG400006923LRR-RLKs\_1525

CTGCTGATTTGTTCTCTTTGCCAAGTATTAGTTACTTGAATTTAGCGTTTAAACGTTCTGAGTGGTTCCTTC  
CTGAACATCTCAACTGTGGGAGTGAACCTGGTTTTGTTGATATTTCTG

>PGSC0003DMG400006923LRR-RLKs\_1586

TGGTTCACCTCCTGAACATCTCAACTGTGGGAGTGAACCTGGTTTTGTTGATATTTCTGATAATAGACTGC  
TTGGTATGCTTCTTCTTCTGCTTGAACGCCAGTTCGGATAAGCGAATTGT

>PGSC0003DMG400006923LRR-RLKs\_1647

AATAGACTGCTTGGTATGCTTCCTTCTTGCTTGAACGCCAGTTCGGATAAGCGAATTGTAAAGGTCAGTG  
GAAACTGCTTGTGGATACACAATATCAGCACTCTGAGTCCTACTGCAA

>PGSC0003DMG400006923LRR-RLKs\_1708

AGGTCAGTGGAAACTGCTTGTGGATACACAATATCAGCACTCTGAGTCCTACTGCAAACAAGCTAGTTT  
GGCAAAGAAACAACCACTGGAAAAGAGATAGCAATATTGGTAGGTGTTG

>PGSC0003DMG400006923LRR-RLKs\_1769

AGCTAGTTTGGCAAAGAAACAACCACTGGAAAAGAGATAGCAATATTGGTAGGTGTTGTTGGGGGAA  
TTGTAATACTTGTGGTGTGTTTGGCTGTTGTTCTTCTCATCTTTTGTAGAAG

>PGSC0003DMG400006923LRR-RLKs\_183

TTCTCCATTTTTCTACATTATATACTACTCTACTTTACTCTTCTCCACTTTTGTGCTTCTTTAATTTACC  
TCTTAAGCCGTACAAGACCCATTTATTAGTGCTTCATTATAGAGTT

>PGSC0003DMG400006923LRR-RLKs\_1830

GGGGGAATTGTAATACTTGTGGTGTGTTTGGCTGTTGTTCTTCTCATCTTTGTAGAAGACAACATGCAC  
GTCACGATGTGGACCGGTACATGTTTCCCAAAGTTGTGCAAGATAATGGG

>PGSC0003DMG400006923LRR-RLKs\_1891

AACATGCACGTCACGATGTGGACCGGTACATGTTTCCCAAAGTTGTGCAAGATAATGGGCAACCCAATA  
TTTCTGCTGAGCTCCTGGCAAATGCTAGTAAGTTGTAGTTTGATTTCAATT

>PGSC0003DMG400006923LRR-RLKs\_1952

ACCCAATATTTCTGCTGAGCTCCTGGCAAATGCTAGTAAGTTGTAGTTTGATTTCAATTTCAAGTGCAACT  
GTAAATTTTTTCCGGGATTTGATAAGAGTTTCTTTAACTTATTTTACC

>PGSC0003DMG400006923LRR-RLKs\_2013

AGTGTCAACTGTAAATTTTTTCCGGGATTTGATAAGAGTTTCTTTAACTTATTTTACCTCAGGAATCATT  
CTCAAACAACAGCACTAGGATCACAAGGTGCCCCATCATATCGGGTGT

>PGSC0003DMG400006923LRR-RLKs\_2074

AGGAATCATTTCTCAAACAACAGCACTAGGATCACAAGGTGCCCCATCATATCGGGTGTCTCCATGGAA  
GAGTTGGAAGAAGCGACAGAAATTTTTGATAAATCAGCATTACTCGGTGA

>PGSC0003DMG400006923LRR-RLKs\_2135

TCCATGGAAGAGTTGGAAGAAGCGACAGAAATTTTTGATAAATCAGCATTACTCGGTGAAGGCTCCATT  
GGAAAAGTACTGCTCTGAAACTATTTATGACTCCCAAATAATTGTAGGAAG

>PGSC0003DMG400006923LRR-RLKs\_2196

GCTCCATTGGAAAAGTACTGCTCTGAACTATTTATGACTCCCAAATAATTGTAGGAAGAGGACTTAGCG  
TATTGTTTCCTTGCATATATCCATTCAAATTCATTTTATATTTTGTTCGG

>PGSC0003DMG400006923LRR-RLKs\_2257

GACTTAGCGTATTGTTTCCTTGCATATATCCATTCAAATTCATTTTATATTTTGTTCGGAAGAATAATATT  
TTGTTGCTTATTTAGCTTTTGTCCATATGATGCCATATTATTCCAGAG

>PGSC0003DMG400006923LRR-RLKs\_2318

GAATAATATTTTTGTTGCTTATTTAGCTTTTGTCCATATGATGCCATATTATTCCAGAGGTCTTGATCTCCG  
TTATCAATTGAAGCAAATCAAATTAGTTTTGTAGGTAGGTTTCATTGA

>PGSC0003DMG400006923LRR-RLKs\_2379

CTTGATCTCCGTTATCAATTGAAGCAAATCAAATTAGTTTTGTAGGTAGGTTTCATTGAATAACTCGTATC  
AGACAATTAACAGATGCACAAGTCGTCATATAGGCAGTTGATTAAAC

>PGSC0003DMG400006923LRR-RLKs\_244

TTTTAATTTACCTCTTAAGCCGTACAAGACCCATTTATTAGTGCTTCATTATAGAGTTCTCTGTTCTTTTT  
GCTTCTTTCTCTTGACCCCCAGAGTGGGTTTTTGTCTATTTGTTTTC

>PGSC0003DMG400006923LRR-RLKs\_2440

AACTCGTATCAGACAATTAACAGATGCACAAGTCGTCATATAGGCAGTTGATTAAACAGTTTTTTGCC  
TTTATGATTGATTGTCTGTGTTTCATGAATGCTATATGCATCTTGACTTTG

>PGSC0003DMG400006923LRR-RLKs\_2501

TTTTTGCCTTTATGATTGATTGTCTGTGTTTCATGAATGCTATATGCATCTTGACTTTGCAATTTAATACCA  
TATAATGGTGGTCACAGTTAAAAGTAATGTTTCGTTTTGATTTGGTATC

>PGSC0003DMG400006923LRR-RLKs\_2562

ATTTAATACCATATAATGGTGGTCACAGTTAAAAGTAATGTTTCGTTTTGATTTGGTATCTACTGAACTTTG  
ACAATTAATATCAATAAAGTCAGTGCGCTTGATTCGCTTATTTAAAGTG

>PGSC0003DMG400006923LRR-RLKs\_2623

CTGAACTTTGACAATTAATATCAATAAAGTCAGTGCGCTTGATTCGCTTATTTAAAGTGCATATGCAGTG  
AGTTGATATCTCTTCAAGCCTTCTGTCCCAGGATTTTTTCTTTCTTGGGA

>PGSC0003DMG400006923LRR-RLKs\_2684

TATGCAGTGAGTTGATATCTCTTCAAGCCTTCTGTCCCAGGATTTTTTCTTTCTTGGGATCAAGTTGGACA



ATTTTTATTTAACTAACACCCTTCTATGTCATTCTCTCTATCTCAGATT

>PGSC0003DMG400006923LRR-RLKs\_2745

AAGTTGGACAATTTTTATTTAACTAACACCCTTCTATGTCATTCTCTCTATCTCAGATTTACAAGGGAAAAT  
TAGAGAATGGAACCTATGTTGCTGTAAGGGAATTGACTGTTTCATAGAC

>PGSC0003DMG400006923LRR-RLKs\_2806

CAAGGGAAAATTAGAGAATGGAACCTATGTTGCTGTAAGGGAATTGACTGTTTCATAGACGATGCACTAG  
TTGGAATTTCAAACCTCGAATGGATTTGCTGTCAAAGTTTCGCCATCCCCA

>PGSC0003DMG400006923LRR-RLKs\_2867

TGCACTAGTTGGAATTTCAAACCTCGAATGGATTTGCTGTCAAAGTTTCGCCATCCCCATTTAGTTAGCCT  
TCTGGGTCCTGACTGATTGATGATGGGGTGCAAGATGACTCAACAGTCCAC

>PGSC0003DMG400006923LRR-RLKs\_2928

TAGTTAGCCTTCTGGGTCCTGACTGATTGATGATGGGGTGCAAGATGACTCAACAGTCCACAGACTTTTTCT  
GGTTTATGAATTTATTCCTTGTTGGAACCTCCGTGCTCGTCTTTCAGGTC

>PGSC0003DMG400006923LRR-RLKs\_2989

ACTTTTTCTGGTTTATGAATTTATTCCTTGTTGGAACCTCCGTGCTCGTCTTTCAGGTCAGTAGCGTAAAT  
ATTTTAGTACCAACAGTTGCATAGACATATACTTGATTGAATATGCAA

>PGSC0003DMG400006923LRR-RLKs\_305

CTGTTCTTTTTGCTTCTTCTCTTGACCCCCAGAGTGGGTTTTTGTCTATTTGTTTTCTTCTTCCAAAAT  
ATCTCTGCCAGGAAAAAGCAAACATTCCTTCAATGTGCAGTTTAGT

>PGSC0003DMG400006923LRR-RLKs\_3050

TAGCGTAAATATTTTAGTACCAACAGTTGCATAGACATATACTTGATTGAATATGCAAATGCTGCAGGTA  
TATTTCTGGTTATGCTGATTGCTAATTTTCAGATAACTATTTAGTATGAT

>PGSC0003DMG400006923LRR-RLKs\_3111

CTGCAGGTATATTTCTGGTTATGCTGATTGCTAATTTTCAGATAACTATTTAGTATGATAGTTTTGGTGAA  
TCTGTCTTTTTTTGAATATTGTGCGGGGGAAGGGGGTTAAGGATGAGAA

>PGSC0003DMG400006923LRR-RLKs\_3172

TTTTGGTGAATCTGTCTTTTTTTGAATATTGTGCGGGGGAAGGGGGTTAAGGATGAGAAACACATGAAT  
TTATTGCGTCTTTTGTATTTATTCTCTAGTAAGTACAAATACAGAGTATT

>PGSC0003DMG400006923LRR-RLKs\_3233

ACATGAATTTATTGCGTCTTTTGTTATTTATTCTCTAGTAAGTACAAATACAGAGTATTGTTATCTTCTGGA  
TAGTTTCTTTCCGTCTATTTGTCCAAGCTTGCATCTGAAATTTTACA

>PGSC0003DMG400006923LRR-RLKs\_3294

TATCTTCTGGATAGTTTCTTTCCGTCTATTTGTCCAAGCTTGCATCTGAAATTTTACAACAAAGTGAAAG  
ACAATTATTGTAGTTTGATGAAGCAATCTGTGTTAGCGTTTCATTGATT

>PGSC0003DMG400006923LRR-RLKs\_3355

AAAGTGAAAGACAATTATTGTAGTTTGATGAAGCAATCTGTGTTAGCGTTTCATTGATTTGTCGAGATAT  
ACTTGATCGTATGTTCTTTGCATGGTCTGTTAGCCGACACTTGCCTGCA

>PGSC0003DMG400006923LRR-RLKs\_3416

TCGAGATATACTTGATCGTATGTTCTTTGCATGGTCTGTTAGCCGACACTTGCCTGCAAAATGTTTTGAC  
CATCTTTTTCTTTGTGTTGTTCATTTTATTTATCCCGATATATCCAATG

>PGSC0003DMG400006923LRR-RLKs\_3477

ATGTTTTGACCATCTTTTTCTTTGTGTTGTTCATTTTATTTATCCCGATATATCCAATGAACCATAGGGAAT  
ACATGTTGACCTTGTGTAATCATCATTTTCACTTGCAGAACTACTC

>PGSC0003DMG400006923LRR-RLKs\_3538

CCATAGGGAATACATGTTGACCTTGTGTAATCATCATTTTCACTTGCAGAACTACTCCAGGAAAAGTC  
CTCAACTGGTCAGACAGGTTGGCGGTTCTGATTGGTGTGTTGCCAAGGCTGT

>PGSC0003DMG400006923LRR-RLKs\_3599

GGAAAAGTCCTCAACTGGTCAGACAGGTTGGCGGTTCTGATTGGTGTGTTGCCAAGGCTGTGCACTTTCTC  
CACACGGGTGTAATCCCTCCTTCATTCGGCAATAGCTTGAAGACAGATAGT

>PGSC0003DMG400006923LRR-RLKs\_366

TTCTTCCAAAATATCTCTGCCAGGAAAAAGCAAAACATTCCTTCAATGTGCAGTTTAGTTTGTTTGTGTTGT  
TTTTCTTGATGGGTCTTTGTCAAGATTTGTGTTTGGTTCAGAATTAGT

>PGSC0003DMG400006923LRR-RLKs\_3660

ACTTTCTCCACACGGGTGTAATCCCTCCTTCATTCGGCAATAGCTTGAAGACAGATAGTATATTGCTTGAT  
GAGCATCAGATTGCAAACTTAGTGATTATGGAATGTCAATCCTTATAG

>PGSC0003DMG400006923LRR-RLKs\_3721

ATTGCTTGATGAGCATCAGATTGCAAACTTAGTGATTATGGAATGTCAATCCTTATAGAAGAAAGTGA  
AAAAGTTGAGGTATGTTGAAATGATATTCATATGATGAAGGGTAGGGGTAA

>PGSC0003DMG400006923LRR-RLKs\_3904

TAATATCTGATACTGATGATATTCTTTTTTCAGGCAAAGGAGATGGCCACAACGCCTGGTATGTAACCTCT  
TTTGCCCAAATAGAGTCATACATCAGTCTGTTTGCAACTTCTATTCCTAG

>PGSC0003DMG400006923LRR-RLKs\_3965

TGTAACCTTTTTGCCCAAATAGAGTCATACATCAGTCTGTTTGCAACTTCTATTCCTAGAAAACTGATAG  
ATTTTTTCTTAGTGCCTCTTCTGACTATGGCATCCCTTAGAGATAGATA

>PGSC0003DMG400006923LRR-RLKs\_4026

AAACTGATAGATTTTTTCTTAGTGCCTCTTCTGACTATGGCATCCCTTAGAGATAGATAAAAATGCTTGGC  
AATGACAGTTCAAGAATGTTGAGCAGAGACATATTCTCAACATTAATAAT

>PGSC0003DMG400006923LRR-RLKs\_4087

AATGCTTGGCAATGACAGTTCAAGAATGTTGAGCAGAGACATATTCTCAACATTAATAATTTTGTGCATTT  
CTTCTCATGCAGGAACACGAGGAAGAAAGAGGATGATGTGTATAACTTTG

>PGSC0003DMG400006923LRR-RLKs\_4148

TGTGCATTTCTTCTCATGCAGGAACACGAGGAAGAAAGAGGATGATGTGTATAACTTTGGTTTCATATTA  
CTGGAGTCGCTGGTGGTCCTTTTTTTTAGTGGAAAAGGAGAAACATTTTT

>PGSC0003DMG400006923LRR-RLKs\_4209

TTCATATTACTGGAGTCGCTGGTGGTCCTTTTTTTTAGTGGAAAAGGAGAAACATTTTTGCTCAATGAAA  
TGGTATGGAACACTAATTTTGATTTTTGATATGCAACTCCTTTCTCATT

>PGSC0003DMG400006923LRR-RLKs\_427

GTTTGTGTTTTTTTTCTTGATGGTCTTTGTCAAGATTTGTGTTTGGTTCAGAATTAGTTAATTTTCACCC  
AAAAATATTCTATCCATTTGGAGTTTTCCGCAGATTTAGACATAAAAA

>PGSC0003DMG400006923LRR-RLKs\_4270

TCAATGAAATGGTATGGAACACTAATTTTGATTTTTGATATGCAACTCCTTTCTCATTGGCAGTAGCACA  
GAATGCTCTTCAGCATTGTTTCTACTGTGGATCACAACTTTCGTCCCG

>PGSC0003DMG400006923LRR-RLKs\_4331

CAGTAGCACAGAATGCTCTTCAGCATTGTTTCTACTGTGGATCACAACTTTCGTCCCGTTTGTAGTTAAG  
GAGTTTTGAAATGAATGTCTGTGACACTTACTATGACTTGGAAGGTAAG

>PGSC0003DMG400006923LRR-RLKs\_4392

TGTAGTTAAGGAGTTTTGAAATGAATGTCTGTGACACTTACTATGACTTGGAAGGTAAGCAGTAAAGTC

TTTTTTTTTCCGATGACAGACATCCTTTGGTAGCCAAGATGGTAGGCGTAA

>PGSC0003DMG400006923LRR-RLKs\_4453

GTAAGTCTTTTTTTTTTCCGATGACAGACATCCTTTGGTAGCCAAGATGGTAGGCGTAAAATTGTGGATC  
CTGCTGTGCTAACCACTAGCTCCCAAGAATCTTTGTCAATTGTAATATCA

>PGSC0003DMG400006923LRR-RLKs\_4514

TTGTGGATCCTGCTGTGCTAACCACTAGCTCCCAAGAATCTTTGTCAATTGTAATATCACTCACCAACAAA  
TGCATCTCTCCCGAGTCACAGAGTCGCCCTCATTTGAGGATGTCCTCT

>PGSC0003DMG400006923LRR-RLKs\_4575

CACCAACAAATGCATCTCTCCCGAGTCACAGAGTCGCCCTCATTTGAGGATGTCCTCTGGAACCTACAA  
TATGCAGCTCAAGTCCAGGCTACAGCCGATACAGATCAAAGATCTGATGC

>PGSC0003DMG400006923LRR-RLKs\_4636

AACCTACAATATGCAGCTCAAGTCCAGGCTACAGCCGATACAGATCAAAGATCTGATGCAACTTCATTGT  
CATGAGGTATTCAAGAAATTCAACTGCATCTCATCAGCAATACTTGCTCA

>PGSC0003DMG400006923LRR-RLKs\_4697

CTTCATTGTCATGAGGTATTCAAGAAATTCAACTGCATCTCATCAGCAATACTTGCTCATGCCGTTGTCTC  
AATTGGGATGCAGGCTGAATGCATGATGTTTGTGAAGCACAAAATGGTT

>PGSC0003DMG400006923LRR-RLKs\_4758

CCGTTGTCTCAATTGGGATGCAGGCTGAATGCATGATGTTTGTGAAGCACAAAATGGTTGCAAACCTCA  
GCCTCATGTTCAATCTTCTAGTCCTCGTTATCATTTTCTTTTGTATAAAAA

>PGSC0003DMG400006923LRR-RLKs\_4819

AAACCTCAGCCTCATGTTCAATCTTCTAGTCCTCGTTATCATTTTCTTTTGTATAAAAAATGTAAATTTGTCG  
ATTCTTTGGATTTTAGAATTTAGAAGTGGGTGATGTTGCAAAACAGAG

>PGSC0003DMG400006923LRR-RLKs\_488

AATTTTCACCCAAAATATTCTATCCATTTGGAGTTTTCCGCAGATTTAGACATAAAAAAATGCTTGACGT  
CTGCAAGAATTGAAGCTCAAATTGTTCCCTTCAGTTTATTCATAAATTT

>PGSC0003DMG400006923LRR-RLKs\_4880

TAAATTTGTCGATTCTTTGGATTTTAGAATTTAGAAGTGGGTGATGTTGCAAAACAGAGACTAGTCTTCA  
CATGAATTTGTATTACCCTCCTTCAGAAAGGATAGAAATGAAAGTGACAG

>PGSC0003DMG400006923LRR-RLKs\_4941

TAGTCTTCACATGAATTTGTATTACCCTCCTTCAGAAAGGATAGAAATGAAAGTGACAGAAGGCTTAGTA  
GCCGTGCAACCTCAAAAATTGCCCTTCATGCTTATGTGTAAGATAAGCAT

>PGSC0003DMG400006923LRR-RLKs\_5002

GGCTTAGTAGCCGTGCAACCTCAAAAATTGCCCTTCATGCTTATGTGTAAGATAAGCATAACATGTATATC  
AACATCAGACTAATAACTGATCTTCATTGCCCTTGGTACTTGCATTGATCC

>PGSC0003DMG400006923LRR-RLKs\_5051

AGATAAGCATAACATGTATATCAACATCAGACTAATAACTGATCTTCATTGCCCTTGGTACTTGCATTGATCC  
AGATATGAGAAAATCAAAGAGACTAGAGTCCCTCCAATTCTTCCTAAAC

>PGSC0003DMG400006923LRR-RLKs\_549

TGCTTGACGTCTGCAAGAATTGAAGCTCAAATTGTTCCCTTCAGTTTATTCATAAATTTCTGTTGAGTATT  
TAGAGGACTGTGTTAAATGGGGTGCCTAAAGATATTTGTCATAGTTGTA

>PGSC0003DMG400006923LRR-RLKs\_61

CGAACCCAACGGAAAGGTCACCATTAATGGCGGAAACCTCATGAAACTCGCGACACTACCTATCTTCTTC  
TCATTCAATGCATGTAGCATTAAATTCCTTCTTCTGTCTATAGCAACCCA

>PGSC0003DMG400006923LRR-RLKs\_610

GTTGAGTATTTAGAGGACTGTGTTAAATGGGGTGCCTAAAGATATTTGTCATAGTTGTATTCATGTGGGC  
TTTATTGATCCCAAATTCTCATCAATTAGGGTCCTATGAAACTCAAATTC

>PGSC0003DMG400006923LRR-RLKs\_671

CATGTGGGCTTTATTGATCCCAAATTCTCATCAATTAGGGTCCTATGAAACTCAAATTCCTTCAGTTAC  
GGAGGCACTTGAATATCCAGTGCAGTTGGATGTTTTGGAGAATTACAA

>PGSC0003DMG400006923LRR-RLKs\_732

CTTCAGTTACGGAGGCACTTGAATATCCAGTGCAGTTGGATGTTTTGGAGAATTACAATGGGGATTTTT  
GCAGTTTGGGTTCAACATTGAATATGAGCATTATTTGCGAGAATAACTCT

>PGSC0003DMG400006923LRR-RLKs\_793

GGGATTTTTGCAGTTTGGGTTCAACATTGAATATGAGCATTATTTGCGAGAATAACTCTGTTACTGAGCT  
CAAAATCAAGGGAGATAAGCTAGTAAAGGTCAATGAATTCCATGGAGTTG

>PGSC0003DMG400006923LRR-RLKs\_854

TACTGAGCTCAAAATCAAGGGAGATAAGCTAGTAAAGGTCAATGAATTCCATGGAGTTGCAGTTCCAAA  
CAATACCTTATCTGAACGTTTCTCCATTGATTCATTTGTTACCACTTTGAC

>PGSC0003DMG400006923LRR-RLKs\_915

GTTCCAAACAATACCTTATCTGAACGTTTCTCCATTGATTCATTTGTTACCACTTTGACAAGGTTAAGCAG  
TTTAAAAGTTCTCACTTTGGTTTCTTTGGGCATTTGGGGACCTCTCCCT

>PGSC0003DMG400006923LRR-RLKs\_976

GGTTAAGCAGTTTAAAAGTTCTCACTTTGGTTTCTTTGGGCATTTGGGGACCTCTCCCTGTTAAAATTCAT  
CGGTTGTCTTCTCTAGAAGTTCTGGATATGAGTTCAAATTTTCTTTTG

>PGSC0003DMG400006942-(rev)LRR-RLKs\_1116

GATTTGTTGGCTGCCACGAACAATTTTAGTACGTCGAGTGTGATAAACTCGACTAGGACAGGGACTACA  
TTTAGAGCTGTTCTACGTGATGGTTCTGCGCTTTCTATTAACGGCTTAAA

>PGSC0003DMG400006942-(rev)LRR-RLKs\_2046

TGATACATGAATGGGAAAGCACTATGAGATGTTTCACATCTGGTGAACACAAATGCATTATGGTATGTTCC  
TTCACCTCCCTTAGGTGCAAGTGAATCAGGCACGATACATATGGTTCTG

>PGSC0003DMG400006942-(rev)LRR-RLKs\_2108

GTATGTTCTTCACTTCCCTTAGGTGCAAGTGAATCAGGCACGATACATATGGTTCTGTGAAGTACTACC  
ACAGATATTGCTGTATTATACTGTGAAGTGTCAAACATTCTGAGGTGTT

>PGSC0003DMG400006942-(rev)LRR-RLKs\_2294

TCATACTTATGCATTAACAAGACAGTAAGCAAAAAGCTGTCACAGTTTATTTGAAAGCTATAATACCTAC  
TAATTTAACTGTTTATAACTGACCTGGGCATTGGCCTTTTTAGGGTCGAG

>PGSC0003DMG400006942-(rev)LRR-RLKs\_2356

ATACCTACTAATTTAACTGTTTATAACTGACCTGGGCATTGGCCTTTTTAGGGTCGAGATATATTCAGTAT  
GTCCCGTACAGTCATTTATGGTTTGTAAAGATCAAATCACCTAGGTTTC

>PGSC0003DMG400006942-(rev)LRR-RLKs\_2418

ATTCAGTATGTCCCGTACAGTCATTTATGGTTTGTAAAGATCAAATCACCTAGGTTTCCCTAATGGATTGG  
TTCGGTAGAATATCTGCCTCCACACTGATATTAATTCATCTAATCGGAA

>PGSC0003DMG400006942-(rev)LRR-RLKs\_2480

ATGGATTGGTTCGGTAGAATATCTGCCTCCACACTGATATTAATTCATCTAATCGGAATGCTATCAAGCA  
GAGTTATTAGTAATTACCCCTTCTGATTAATTTTGGATGATGTTGATCAG

>PGSC0003DMG400006942-(rev)LRR-RLKs\_2542

ATCAAGCAGAGTTATTAGTAATTACCCCTTCTGATTAATTTTGGATGATGTTGATCAGTAATTGTAGGTCC

TTTTGCAAAAATTGTGTCTGATTGGGAATAATTTTCACTAAAATGGAAG

>PGSC0003DMG400006942-(rev)LRR-RLKs\_2604

TGTAGGTCCTTTTGC AAAAATTGTGTCTGATTGGGAATAATTTTCACTAAAATGGAAGTTGAATGGGCTT

TCTGAAAGTTATGTGCCCTCTTAAATTTGATTTGGCAGCTGAAATTTTCA

>PGSC0003DMG400006942-(rev)LRR-RLKs\_2728

CTTGATTCTAATCTGCTTCTTTACAATCTCAGAAACATAATGCACAATTATAGTTTCCAAGTAGGAAAAAA

AAATCTTGTTGACAGTTGAAACTCTTTGCAATAGAAGTTATCAAGCCT

>PGSC0003DMG400006942-(rev)LRR-RLKs\_2790

AGGAAAAAAAATTCTTGTTGACAGTTGAAACTCTTTGCAATAGAAGTTATCAAGCCTCTTACTTTTTCCC

TCAAGCTCAAGCTCGGATGCGTGTTCCATATGCTCTCCTGCTTCCCTG

>PGSC0003DMG400006942-(rev)LRR-RLKs\_2852

CTTTTTCCCTCAAGCTCAAGCTCGGATGCGTGTTCCATATGCTCTCCTGCTTCCCTGAAAAGTCATTTTGT

AATATTTCAAACAACACTACTTGTAGTCTAATAATAGTAAATGAAGGGA

>PGSC0003DMG400006942-(rev)LRR-RLKs\_2885

TTCCATATGCTCTCCTGCTTCCCTGAAAAGTCATTTTGTAAATTTCAAACAACACTACTTGTAGTCTAATAA

TAGTAAATGAAGGGAAAAGGTCTGTTAGCAAGTTATCTCATATCTGTC

>PGSC0003DMG400006942-(rev)LRR-RLKs\_496

GAGGTAATGTTCCAGATTCGTTAAAGTATTGTGGAAGCTTGCAAACCTTTGATCTTTCTGGTAATCGGAT

TTCTGGTTCAATTCCTTCTGATATTTGACTTGGCTACCTTTCTGGTAA

>PGSC0003DMG400006942-(rev)LRR-RLKs\_806

TTTTGATTCGGTTGATTCGTTTGTATTTGGAGGAAATGATGGGCTTTGTGGTGGTCCGTTGGGGAAATGT

AGGAGGCTTAGTAAGAAAAGTTTAGCTATTATTATTGCTGCTGGTGTGTT

>PGSC0003DMG400007033-(rev)LRR-RLPs\_0

ATGGCCAGATCAGTTAACTCCATTTTCTTAACCTTCTTGACATAAGTTTAATATACACACTCTCACCTTAT

GTCAATGCAACAACCTTACAATCTGATATTCAAGTTCTAGTAGCCATC

>PGSC0003DMG400007033-(rev)LRR-RLPs\_248

AGACACTAATGCCACGAGCCGGATAATGGAGATTGATCTAGAAGGTGATGGACTAGAGGGGTTCTTGA

CATCGTCTATCGGGAACCTAACAGAACTTGTACTCTCAATCTAGGTAGGAA

>PGSC0003DMG400007033-(rev)LRR-RLPs\_310

TCTTGACATCGTCTATCGGGAACCTAACAGAACTTGTTACTCTCAATCTAGGTAGGAACAAGTTCAGGGG  
ACCAGTGCCAGAGAGTATTACTAATTTGAGGAACTCACAAGTCTTCAAC

>PGSC0003DMG400007073-(rev)G-LecRK\_1008

TTATTGTTGTTGTTATATTGTTGTAAACGTAGCTCTATAAGATAATGATTAGTGTGTCCAGTACAATAAGT  
GGGTCCACAGCTAGTAGTCCAATAAATGAGTACTTCCTATTTAATGTTA

>PGSC0003DMG400007073-(rev)G-LecRK\_1064

TCCAGTACAATAAGTGGGTCCACAGCTAGTAGTCCAATAAATGAGTACTTCCTATTTAATGTTAATTATAT  
TTTTCTTTTTCCCTTTTTGAAAAAATATTATGTTTTGGTTGAATTAAGA

>PGSC0003DMG400007073-(rev)G-LecRK\_126

GCTCAAGTTCAGCAGAAAACACCTTTAAATTCGTCAATGATGGCGAATTAGGAGATTATGTTGTAGAAT  
ACAGAGCAAATTATCGCGTTATTAGTATTTTCAATAACCCATTTTCAGCTC

>PGSC0003DMG400007073-(rev)G-LecRK\_378

TTTGGAACCTAACGGAAATCTCGTATTGGCGGATGCTGACGGTCAATCGCTTGGCAGACCAACACGGCC  
AATAAGGGGGTACCGGGTTCAAATTGTTACCTAACGGTAACATGGTGCTA

>PGSC0003DMG400007073-(rev)G-LecRK\_441

ACGGCCAATAAGGGGGTACCGGGTTCAAATTGTTACCTAACGGTAACATGGTGCTACATGACTCCAAG  
GGTAAATTCGTCTGGCAGAGTTTCAACTATCCCACTGACACATTACTAGTG

>PGSC0003DMG400007073-(rev)G-LecRK\_504

TCCAAGGGTAAATTCGTCTGGCAGAGTTTCAACTATCCCACTGACACATTACTAGTGGGCCAAACTCTCC  
GATTGTCCGGCCCGAATAAGCTTGTGAGCCGGCCTCGGTGAAAAAGAAT

>PGSC0003DMG400007073-(rev)G-LecRK\_63

TCTTCTGGCCTACTACACTTCTTGCCTCTCTTTCTTTCTCCCAAATATTTTCTTGCATTGCTCAAGTTC  
AGCAGAAAACACCTTTAAATTCGTCAATGATGGCGAATTAGGAGAT

>PGSC0003DMG400007073-(rev)G-LecRK\_882

GCCTACACTTTTGTAGAGATGAAGAAGCAGATGAATTCCGTTGGAAAGTAACTTACAGTAGGATTTGA  
AACGTCTAAATCTGTATACACATTATCCTTTACGAGCAAATTTACGGGTT

>PGSC0003DMG400007073-(rev)G-LecRK\_945

ATTTGAAACGTCTAAATCTGTATACACATTATCCTTTACGAGCAAATTTACGGGTTATATTATTATTGTT  
GTTGTTATATTGTTGTAAACGTAGCTCTATAAGATAATGATTAGTGTGT



>PGSC0003DMG400007234-(rev)LRR-RLKs\_0

CTCATCTTTACATACCTTATTTTCCTCAACCAATTTTTCTTACAATCTCTTAACCATGAACCATTTCTTTCTC  
ACTACAATTTTCTTCTTTCTCATAACAATTTTCACTTGTTTTCACTA

>PGSC0003DMG400007234-(rev)LRR-RLKs\_1525

ATTCTCAGCAAGTAACAGTGGCCTTGTTGGAAATCTCCCTGATTTTAAAGGATGTCAAAATCTCTATAAA  
ATCGAACTCGAAGGAAACAATCTCAATGGTAGTATTCCATGGGACATTGA

>PGSC0003DMG400007234-(rev)LRR-RLKs\_1891

CGTAGGAAACGAAGGTCTTTGTGGTACTATCATACATAATCCGTGCAGGACGGATGAACTCAAAGATGG  
AAAGACAGATTTTTCGAACCATTCAAAGAAAACAGATGGTGCATTGATAGT

>PGSC0003DMG400007234-(rev)LRR-RLKs\_2196

AGATCATCGGTATGGGGTCTGCAGGTACTTAACGGATCTATATTGTTAGTTATAATGAGTTCAGTTGAAC  
CCGCAATTTTTCATTAAGTATATGTGGTGGAAAAATCATACAAAATTGGT

>PGSC0003DMG400007234-(rev)LRR-RLKs\_2257

CAGTTGAACCCGCAATTTTTCATTAAGTATATGTGGTGGAAAAATCATACAAAATTGGTGTACATATATA  
TTTTTTTTAAAATGCTAACATCACCTAGACAAGTTGGCAATGTGGACTTT

>PGSC0003DMG400007234-(rev)LRR-RLKs\_2318

ACATATATATTTTTTTTTAAAATGCTAACATCACCTAGACAAGTTGGCAATGTGGACTTTTATCAATATAAC  
TCTCAAATGGAAAAGTATAAGATAGACTAGATCTTACCTTAAAATTGTT

>PGSC0003DMG400007234-(rev)LRR-RLKs\_2379

TCAATATAACTCTCAAATGGAAAAGTATAAGATAGACTAGATCTTACCTTAAAATTGTTACATAAATATTT  
AGTTTTGAGTGCACCTTCAAATAACTTCGATCCTTAAAGCCATTAAGAT

>PGSC0003DMG400007234-(rev)LRR-RLKs\_2440

ATAAATATTTAGTTTTGAGTGCACCTTCAAATAACTTCGATCCTTAAAGCCATTAAGATTATATTCTAGAT  
CTGCCTCTATCTATAGATATAATGTACAATTTCCACCTTGAACCTAGAA

>PGSC0003DMG400007234-(rev)LRR-RLKs\_2501

TATTCTAGATCTGCCTCTATCTATAGATATAATGTACAATTTCCACCTTGAACCTAGAATGGGGTCCGCGC  
GTAGTGGATGATCTGTAGTGTGAGCAAAGTCGAAATGTACAAAGTCTCT

>PGSC0003DMG400007234-(rev)LRR-RLKs\_2562

GGGTCCGCGCGTAGTGGATGATCTGTAGTGTGAGCAAAGTCGAAATGTACAAAGTCTCTTAAGCAATAG

TAGAATAAATATTACATTTCAAATCATGTTTTCAAATAAGTTGGAATCTT

>PGSC0003DMG400007234-(rev)LRR-RLKs\_2623

AGCAATAGTAGAATAAATATTACATTTCAAATCATGTTTTCAAATAAGTTGGAATCTTGAATACTAAGA  
TTATATTCTAGATTCGCCTCTGTCTGTGGGTATAATGTACCATTTCTAGG

>PGSC0003DMG400007234-(rev)LRR-RLKs\_2684

ATACTAAGATTATATTCTAGATTCGCCTCTGTCTGTGGGTATAATGTACCATTTCTAGGTGAAACTCAAAA  
TATGGTCCGCAACTAGTGGATGATTTATAGTGTTAGTGAAGTCGAACAT

>PGSC0003DMG400007234-(rev)LRR-RLKs\_2745

AAACTCAAATATGGTCCGCAACTAGTGGATGATTTATAGTGTTAGTGAAGTCGAACATATATAGAGAA  
ATGTGCAAATCTCTTTGACATTAGTAATTTTAAAAGAAGCTTGAATCTTG

>PGSC0003DMG400007234-(rev)LRR-RLKs\_2806

ATAGAGAAATGTGCAAATCTCTTTGACATTAGTAATTTTAAAAGAAGCTTGAATCTTGAATACTAAGAT  
TATATTCTAGATTTGTCTTTGTCTATAGATATAATGTACAATTTCAAGTG

>PGSC0003DMG400007234-(rev)LRR-RLKs\_2867

TACTAAGATTATATTCTAGATTTGTCTTTGTCTATAGATATAATGTACAATTTCAAGTGAAACTCAAATG  
GGTCCGCAACTAGTAGATGATCTATAGTGTTAGTGAAGTCGAACATAG

>PGSC0003DMG400007234-(rev)LRR-RLKs\_2928

ACTCAAATGGGGTCCGCAACTAGTAGATGATCTATAGTGTTAGTGAAGTCGAACATAGAGAAATCATG  
TGCAAAAATCTCTTAAAAGTACATGAGTAACTTCCAAAATAGTTTGAAAGC

>PGSC0003DMG400007234-(rev)LRR-RLKs\_2989

AAATCATGTGCAAAAATCTCTTAAAAGTACATGAGTAACTTCCAAAATAGTTTGAAAGCTTGAATACTAA  
GGTTATATTCTGAATCCACCTTTGTGTGTGCGTGTCTATATATAGGTACA

>PGSC0003DMG400007234-(rev)LRR-RLKs\_3050

GAATACTAAGTTATATTCTGAATCCACCTTTGTGTGTGCGTGTCTATATATAGGTACAGTGTACAAGGC  
GGAAATGCCAGGTGGCGATATCATAGCGGTGAAGAAGCTATGGGCGGGGA

>PGSC0003DMG400007234-(rev)LRR-RLKs\_3111

GTACAAGGCGGAAATGCCAGGTGGCGATATCATAGCGGTGAAGAAGCTATGGGCGGGGAAGCAACAT  
AAGGAGACGACGAGGAAACGACGTGGCGTGTGGCAGAGGTGGATGTGTTAGG

>PGSC0003DMG400007234-(rev)LRR-RLKs\_3172

CAACATAAGGAGACGACGAGGAAACGACGTGGCGTGTGGCAGAGGTGGATGTGTTAGGCAATGTAA  
GACATAGGAACATTGTGAGACTACTAGGTTGTTGTAGTAACAATGAATGTACT

>PGSC0003DMG400007234-(rev)LRR-RLKs\_3233

ATGTAAGACATAGGAACATTGTGAGACTACTAGGTTGTTGTAGTAACAATGAATGTACTATGTTGTTGTA  
TGAGTACATGCCTAATGGTAGCCTTGATGACTTGTTACATGACAAGAACA

>PGSC0003DMG400007234-(rev)LRR-RLKs\_3294

GTTGTTGTATGAGTACATGCCTAATGGTAGCCTTGATGACTTGTTACATGACAAGAACAAGATGCAAAT  
TTGGTTGGTGATTGGTTTACTAGGTACAAAATTGCACTTGGTGTTCACA

>PGSC0003DMG400007234-(rev)LRR-RLKs\_3355

GATGCAAATTTGGTTGGTGATTGGTTTACTAGGTACAAAATTGCACTTGGTGTTCACAAGGGATTGTT  
ATCTTCATCATGATTGTGACCCTGTCATTGTTTCATCGTGACCTAAAACCT

>PGSC0003DMG400007234-(rev)LRR-RLKs\_3416

GGATTTGTTATCTTCATCATGATTGTGACCCTGTCATTGTTTCATCGTGACCTAAAACCTAGCAACATTCTTC  
TTGATGGTGAAATGGAAGCTAGGGTTGCTGATTTTGGGGTTGCTAAAT

>PGSC0003DMG400007234-(rev)LRR-RLKs\_3477

CAACATTCTTCTTGATGGTGAAATGGAAGCTAGGGTTGCTGATTTTGGGGTTGCTAAATTGATTGAATGC  
GACGAATCGATGTCCGTCATTGCTGGATCTTATGGCTACATTGCACCCGG

>PGSC0003DMG400007234-(rev)LRR-RLKs\_3538

ATTGAATGCGACGAATCGATGTCCGTCATTGCTGGATCTTATGGCTACATTGCACCCGGTAAGTAATTC  
GAATCTCCCTTAATTTTTTAAACTATTTTCTAAGGTTGATTTAGCTGTCA

>PGSC0003DMG400007234-(rev)LRR-RLKs\_3599

AGTAATTCGAATCTCCCTTAATTTTTTAAACTATTTTCTAAGGTTGATTTAGCTGTCAAGAGGTTACAAT  
TAACTGACAACGTGCACGAATTTGAAATCTAATAGTTTCATGTTGTGT

>PGSC0003DMG400007234-(rev)LRR-RLKs\_3660

AGGTTACAATTTAACTGACAACGTGCACGAATTTGAAATCTAATAGTTTCATGTTGTGTTATATGTATGTT  
TGTAGTCTTTATAGGGTCCATACTCCGTATTAGTGGCGTTTCTATAAA

>PGSC0003DMG400007234-(rev)LRR-RLKs\_3721

TATGTATGTTTGTAGTCTTTATAGGGTCCATACTCCGTATTAGTGGCGTTTCTATAAAACCTGTCACGAA  
TTATTATAAATCGTGATGATTGAGCTAGTTGTCCGTAACATTATTACTT

>PGSC0003DMG400007234-(rev)LRR-RLKs\_3782

CTGTCACGAATTATTATAAATCGTGATGATTGAGCTAGTTGTCCGTAACATTACTTACGATGGGTAG  
TGGGAACCCCTAAAATATTACTTTTAGTGACAACCTTTTAAGGTGGCCATG

>PGSC0003DMG400007234-(rev)LRR-RLKs\_3843

GATGGGTAGTGGGAACCCCTAAAATATTACTTTTAGTGACAACCTTTTAAGGTGGCCATGAAAAAACAT  
CACCGAAAATCACATTTTTCATAGTCGATTTTTTAAAAAATTATCTTAAT

>PGSC0003DMG400007234-(rev)LRR-RLKs\_3904

AAAAACATCACCGAAAATCACATTTTTCATAGTCGATTTTTTAAAAAATTATCTTAATTTAATTTTCATAT  
TGTTTTTCCAACCTAACACTTTAAACATTATTATTATCTTTAACACTCA

>PGSC0003DMG400007234-(rev)LRR-RLKs\_3965

TAATTTTCATATTGTTTTTCCAACCTAACACTTTAAACATTATTATTATCTTTAACACTCAAAAAGTTCATCAA  
AATGTTTCCGATTTGCCAATATTAGTAACAATAATGATTATATACCCA

>PGSC0003DMG400007234-(rev)LRR-RLKs\_4026

AAGTTCATCAAAATGTTTCCGATTTGCCAATATTAGTAACAATAATGATTATATACCCAGTTAAATTGTTT  
TCTATAAATTTATCAATATTAAGCTTGATATTTATTA AAAAGATAGACA

>PGSC0003DMG400007234-(rev)LRR-RLKs\_4087

TAAATTGTTTTCTATAAATTTATCAATATTAAGCTTGATATTTATTA AAAAGATAGACATATGAATCTTTAT  
TATATAACTTTTTGAAAGATATTTTTCATTAACCAACCAAAATATTAAA

>PGSC0003DMG400007234-(rev)LRR-RLKs\_4148

TGAATCTTTATTATATAACTTTTTGAAAGATATTTTTCATTAACCAACCAAAATATTA AAAACACAATTTCATA  
AAAATATTTCCCCACAAAAGACTTGTGTGAACAAAAAATCGGATTTAT

>PGSC0003DMG400007234-(rev)LRR-RLKs\_4209

ACAATTTCATAAAAATATTTCCCCACAAAAGACTTGTGTGAACAAAAAATCGGATTTATTCAAGCTTATTA  
TTTTAATAAATAAATAAATAATTAAGGTTTGTGCTTTTTTTAT

>PGSC0003DMG400007234-(rev)LRR-RLKs\_4331

TTTTTACGTTGTGTTATGTTTATCCAAAATATTTTCGTCATCGATCGTGTCGGTTTAGTCCGTTGTGTAGG  
GTGACGAAAAGGGTCATGACTTGCCTGCTTAACGTGGTATCATGTCATA

>PGSC0003DMG400007234-(rev)LRR-RLKs\_4392

GTTGTGTAGGGTGACGAAAAGGGTCATGACTTGCCTGCTTAACGTGGTATCATGTCATATTGTATTTTTG

GTGAACTTCATCATTTTTGTTTGGTCCTTTTCAATGTGTCCACTTTCTTTG

>PGSC0003DMG400007234-(rev)LRR-RLKs\_4453

GTATTTTTGGTGAACCTTCATCATTTTTGTTTGGTCCTTTTCAATGTGTCCACTTTCTTTGTGAATCCTCTTCCT

TGGACGGACTTCAGAAATTCAGTAATTTTTGTACGGTTATATATTTG

>PGSC0003DMG400007234-(rev)LRR-RLKs\_4514

AATCCTCTTCCTTGGACGGACTTCAGAAATTCAGTAATTTTTGTACGGTTATATATTTGTATTGAGAAATT

CAGTTTAAAGTGTGTTGTTGGTTCAGTGATGATAGAAAAGGCCTAATTT

>PGSC0003DMG400007234-(rev)LRR-RLKs\_4575

TTGAGAAATTCAGTTTAAAGTGTGTTGTTGGTTCAGTGATGATAGAAAAGGCCTAATTTGAGCTCTTTCA

AGGGGGGGGGGGGAATATTTCCGTTGATCTTGTATAAGGGTGACATGGCA

>PGSC0003DMG400007234-(rev)LRR-RLKs\_4636

GCTCTTTCAAGGGGGGGGGGGGAATATTTCCGTTGATCTTGTATAAGGGTGACATGGCACCTAGAGGC

GAACTCACATGTATAGGTGGGGTGCACGTGCACCAGTTAACTTTGGAAAAAA

>PGSC0003DMG400007234-(rev)LRR-RLKs\_4758

ATGAACATATGTATATTTATTTTGAGAACTGACAACAAGTAGATATAATTAACAGTGTTCCCATGAAAA

GTATAGAATGACACTTGGAACAGGCCAATGCATCCGCCCTCGCGACCTAG

>PGSC0003DMG400007234-(rev)LRR-RLKs\_4819

CCATGAAAAGTATAGAATGACACTTGGAACAGGCCAATGCATCCGCCCTCGCGACCTAGGTTGAGCCT

AGTCAAACCACATTTTATAGTTTTTATTATAAGTGATTTCTAGATAAGGG

>PGSC0003DMG400007234-(rev)LRR-RLKs\_4880

TCGAGCCTAGTCAAACCACATTTTATAGTTTTTATTATAAGTGATTTCTAGATAAGGGATTCAAGTTTAG

AATCATTAGTAGAACAACCCATGATGCACCCAAAGTCTTCAAATCTT

>PGSC0003DMG400007234-(rev)LRR-RLKs\_4941

TCAAGTTTAGAATCATTAGTAGAACAACCCATGATGCACCCAAAGTCTTCAAATCTTAGATTGCGCTCT

GATGGCACCACCATTACCATTTTTATTTTTGCTCTTTTTCTCCGTGATT

>PGSC0003DMG400007234-(rev)LRR-RLKs\_5002

ATTGCGCTCTGATGGCACCACCATTACCATTTTTATTTTTGCTCTTTTTCTCCGTGATTTACTACTTATAATT

GTTTTAACCTTTTAGGGACCATGTCCACTATTGCGCGTGAATTATTC

>PGSC0003DMG400007234-(rev)LRR-RLKs\_5063

CTACTTATAATTGTTTTAACCTTTTAGGGACCATGTCCACTATTGCGCGTGAATTATCCCTTGGCTCTTGA  
GGCTTTTGATTTTCACTTTATGTTATTTCTTTGGGCCACAAAGATTT

>PGSC0003DMG400007234-(rev)LRR-RLKs\_5124

TTGGCTCTTGAGGCTTTTGATTTTCACTTTATGTTATTTCTTTGGGCCACAAAGATTTTCCCAAAGTATAA  
TATATGAATCTTCATGATTATAAAACCCTTTAATTTATTAGTCCTAGT

>PGSC0003DMG400007234-(rev)LRR-RLKs\_5185

CCAAAGTATAATATGAATCTTCATGATTATAAAACCCTTTAATTTATTAGTCCTAGTACTATATTCTTTA  
TTAAACATATAAATTCAAAAGTCAAATACTTTGGGCTATAAAAGCCAA

>PGSC0003DMG400007234-(rev)LRR-RLKs\_5246

TATATTCTTTATTAAACATATAAATTCAAAAGTCAAATACTTTGGGCTATAAAAGCCAAAATGTTATGATA  
ACTCGATTTCTTGTGTGCAAGATAGTTGTGATCTCACTTAATTATCTTA

>PGSC0003DMG400007234-(rev)LRR-RLKs\_5429

TTAATCTTTTTTACACTATATAAATAGTAAATAATATAAGATTCAGATCACTAATCTAACTTTGTACATT  
TATATATTTTTATGATGCAGAATATGCGTATACGTTGCAAGTGGACGA

>PGSC0003DMG400007234-(rev)LRR-RLKs\_5490

CTTTGTACATTTATATATTTTTATGATGCAGAATATGCGTATACGTTGCAAGTGGACGAAAAGAGTGACA  
TTTATAGCTATGGAGTGGTGCTAATGGAAATTTTGTCCGGAAAAAGATCG

>PGSC0003DMG400007234-(rev)LRR-RLKs\_5551

AGAGTGACATTTATAGCTATGGAGTGGTGCTAATGGAAATTTTGTCCGGAAAAAGATCGGTAGATTCGG  
AATTTGGCGATGGAAATAGCATTGTGGATTGGGTAAGGTCCAAGATGAAGA

>PGSC0003DMG400007234-(rev)LRR-RLKs\_5612

AGATTCGGAATTTGGCGATGGAAATAGCATTGTGGATTGGGTAAGGTCCAAGATGAAGATTAATAATG  
GTATAAATGATGTTTTAGATAAAAATATTGGTGCTTCGTGTCCTCGAGTGAG

>PGSC0003DMG400007234-(rev)LRR-RLKs\_5673

AAAAATGGTATAAATGATGTTTTAGATAAAAATATTGGTGCTTCGTGTCCTCGAGTGAGGGAGGAAATG  
ATGTTGATGCTTAGGGTGGCGTTGCTATGTACTAGCCGGAACCCGGCTGAC

>PGSC0003DMG400007234-(rev)LRR-RLKs\_5734

AGGAAATGATGTTGATGCTTAGGGTGGCGTTGCTATGTACTAGCCGGAACCCGGCTGACCGGCCTTCCA  
TGAGGGATGTTGTGTCCATGTTACAAGAGGCCAAGCCCAAGAGGAAGTTGC

>PGSC0003DMG400007234-(rev)LRR-RLKs\_5795

GCCTTCATGAGGGATGTTGTGCCATGTTACAAGAGGCCAAGCCCAAGAGGAAGTTGCCCGGAAGTG  
GTGGTGACAATTCAATTGCTCTTGTGTTGTTGGCACAAAAGGCCAATGTGGA

>PGSC0003DMG400007234-(rev)LRR-RLKs\_5856

GGAAGTGGTGGTGACAATTCAATTGCTCTTGTGTTGTTGGCACAAAAGGCCAATGTGGAGTGTTAATAT  
AATTGGAGATTTGGGGTTTCTTTTCTTTAGTCTTTTTTTTTTTTTCCAATTG

>PGSC0003DMG400007234-(rev)LRR-RLKs\_5917

GTTAATATAATTGGAGATTTGGGGTTTCTTTTCTTTAGTCTTTTTTTTTTTTTCCAATTGTGGGGGATTGGTA  
TAATCGTATAGGATAAGTACTCAATGTTTCCTTTTAAACTTTAATTA

>PGSC0003DMG400007281LRR-RLPs\_0

ATGCCGGCTCTACGCCGCAAATTTCTACCCTCTCAACGGTAACTTGAACAAAACGATCAACAGCTTCA  
TTGGTAACGGAAACCTCCAAGAAGCTCGGAAGCTCTTCGATCAAAGCCCC

>PGSC0003DMG400007281LRR-RLPs\_1152

CATGTGGCCATGGTGGGCTAGTCGAGGAAGGTGAGAGAATTTCAATTCTATGGTAACAGAGTACGGA  
TTGAAAGCAGAGATGGAACACTATGCATGTATGGTGGACTTGTATGGAAGGG

>PGSC0003DMG400007281LRR-RLPs\_128

AAATGTCGTATCATGGAATTCCTTATCGCTGGTTACTTCAAACACAATCTCATCCAACAAGCAGAGTAC  
CTGTTTGACAAAATGCCTCACAGAGATGTCGTTTCTTGGAACACCATGCT

>PGSC0003DMG400007281LRR-RLPs\_192

GAGTACCTGTTTGACAAAATGCCTCACAGAGATGTCGTTTCTTGGAACACCATGCTCTCCGGATATCGCA  
ACGCCAACAACCCAGAGAAAGTATATAGATGTTTTTAGATATGAACAGAT

>PGSC0003DMG400007281LRR-RLPs\_2417

ACAACCCCCCCCCCCCCCAATATATGTGAAGGTTAATGCAATTGGTGCTTATTATGAAGAATGCACAAC  
CATTGATTGAGATAAATATTACATGGCATGCCATCTCAATGTCACAATCC

>PGSC0003DMG400007281LRR-RLPs\_2481

CACAACCATTGATTGAGATAAATATTACATGGCATGCCATCTCAATGTCACAATCCATTTTAGCCTCCTCT  
CCACTTGTCTTCCGCTAATTAATAAGCAAAAATAACTACAATGAAC

>PGSC0003DMG400007281LRR-RLPs\_2545

CTCCTCTCCACTTGTCTTCCGCTAATTAATAAGCAAAAATAACTACAATGAACCTAAGCTAATTAACCT

AAGCAATATTCCATAACCAACAAATCTATAGAGAAGAGATGAGATGAGA

>PGSC0003DMG400007281LRR-RLPs\_256

ATCGCAACGCCAACAACCCAGAGAAAGTATATAGATGTTTTAGATATGAACAGATGTGGAGAAATGAG

ACCCAATGAGCTCACTTTTGCAGTGTCAATTAGCTCCTTCTTATATTTAGA

>PGSC0003DMG400007281LRR-RLPs\_2609

TTAAACTAAGCAATATTCCATAACCAACAAATCTATAGAGAAGAGATGAGATGAGAGTCAAAATTTAGG

AAGTTGTATTCTGCTCTTTGTCTGATGTTTTAAATCTTCTGATTTTCAGGA

>PGSC0003DMG400007281LRR-RLPs\_2673

TTAGGAAGTTGTATTCTGCTCTTTGTCTGATGTTTTAAATCTTCTGATTTTCAGGAAATGGTGCTTTCATCC

AAGTTTCATAGCCAAGTCCAAAACAATCCGCCCTGTCTTTATCACATC

>PGSC0003DMG400007281LRR-RLPs\_2737

TTTCATCCAAGTTTCATAGCCAAGTCCAAAACAATCCGCCCTGTCTTTATCACATCGGCAAATGGGAAT

GTATATTTTCCTTCTTGGAAGAGGATTTGTGTCAGTACCGCTGTTGAAAA

>PGSC0003DMG400007281LRR-RLPs\_2801

GGGAATGTATATTTTCCTTCTTGGAAGAGGATTTGTGTCAGTACCGCTGTTGAAAATTTTCGAGCAGGAG

AAGCAGTCGTCCAATGAAATCCTTCTTGATGAATGCCTCGTTGAGGTATTC

>PGSC0003DMG400007281LRR-RLPs\_2993

AGCATCCGCAGGGATGAAGCATTTGCCTTCAAGCCCAATCTGCCTTCAAATGCTGAAGAGGAATCTACTT

AACGTACCCAAGTTAAAATTGGTGAGATTGCAGAATCTACTGGTGTAGAA

>PGSC0003DMG400007281LRR-RLPs\_3057

CTACTTAACGTACCCAAGTTAAAATTGGTGAGATTGCAGAATCTACTGGTGTAGAAGGTGAGGGATATC

TTGCCAGGTCCCTTGCTGGCAGGGAAGCCACAGATGTCAGACTTGCTGCTA

>PGSC0003DMG400007281LRR-RLPs\_3185

GGAAGTCAAACCTTGGAGGCTTAGTAAAGCTATCTATCTAGGGAGACAACCTTTGTCGTGGTGTGACT

GATACTGGTCTCAACGCTATCGCTCGAGGTTGCCCTACTCTCAAACATCTT

>PGSC0003DMG400007281LRR-RLPs\_320

ATGAGACCCAATGAGCTCACTTTTGCAGTGTCAATTAGCTCCTTCTTATATTTAGATTACAAGCATTGAT

CCCTCAGCTTCAAGTCTCGTGCTCTGTTTGGGGATAAGTCTCAATGTC

>PGSC0003DMG400007281LRR-RLPs\_3249



TGACTGATACTGGTCTCAACGCTATCGCTCGAGGTTGCCCTACTCTCAAACATCTTTTCCTATGGGATTTG  
TCTTCTGTTGGTGATGAAGGCTTATCTGAGGTTGCTCATGAGTGTCATC

>PGSC0003DMG400007281LRR-RLPs\_3313

GGATTTGTCTTCTGTTGGTGATGAAGGCTTATCTGAGGTTGCTCATGAGTGTCATCTGTTAGAGAAGCTT  
GATCTTTTCCAATGCCCAACAATTACTGACAAGTCTTTACTCGAAATTGC

>PGSC0003DMG400007281LRR-RLPs\_3377

AAGCTTGATCTTTTCCAATGCCCAACAATTACTGACAAGTCTTTACTCGAAATTGCGGTGAACTGCCCCAA  
AATGACCTCTATAACAATGGATTCTTGTTCAAACATTGGGAATGAGTCT

>PGSC0003DMG400007281LRR-RLPs\_3441

GCCCCAAAATGACCTCTATAACAATGGATTCTTGTTCAAACATTGGGAATGAGTCTCTCAAAGCTGTCTGG  
TCAATATTGCCTGAACCTGAAGCTTGTTGTATTTAGAAATTGCCCACTCT

>PGSC0003DMG400007281LRR-RLPs\_3505

TGTCGGTCAATATTGCCTGAACCTGAAGCTTGTTGTATTTAGAAATTGCCCACTCTAGAATGAAGCTGTT  
ATCAAGATGTTTGCCATACTTCTCTGAGAATGCACATCCTGGATTTTTTT

>PGSC0003DMG400007281LRR-RLPs\_3569

GCTGTTATCAAGATGTTTGCCATACTTCTCTGAGAATGCACATCCTGGATTTTTTTGGTCTGGCTCCTTT  
GCCAGTAGTTTTTAGCTTCTAGCACTGCATTGCTGAGAAAATTGTGCTA

>PGSC0003DMG400007281LRR-RLPs\_3633

CTCCTTTGCCAGTAGTTTTAGCTTCTAGCACTGCATTGCTGAGAAAATTGTGCTACAATAAAAACCTTTT  
TCACCATCTCTTATGTTCTGTTTAGTTGGAGTGAATTTATTTGAAGG

>PGSC0003DMG400007281LRR-RLPs\_3689

CAATAAAAACCTTTTTTACCATCTCTTATGTTCTGTTTAGTTGGAGTGAATTTATTTGAAGGTTTTTTTT  
TGGGTTGGCCCTTCTCCTGTATCTGCAATATGGAGACTGTATGAA

>PGSC0003DMG400007281LRR-RLPs\_512

GAGATTTTGGATAAAGATGTTACGCCGTGGAATGTGTTGATTTTGGGTTATATGAAATTTGGGTGCACA  
AGTGAGGCGCAGAGGGCTTTTGGATATGATGCCTATGAGAAATTATTTACT

>PGSC0003DMG400007281LRR-RLPs\_64

GCTTCATTGGTAACGGAAACCTCCAAGAAGCTCGGAAGCTCTTCGATCAAAGCCCCACTTGACAAATGT  
CGTATCATGGAATCCCTTATCGCTGGTACTTCAAACACAATCTCATCC

>PGSC0003DMG400007281LRR-RLPs\_640

TTTGATCAATGGATATATTGAGAACAAGAAGCTTAATGAAGCTCGATTCATTTTTGATAAGATGAGTGAG  
AAAGATGTGGTTTCTTGGACAGCAATGATAAGAGGGTATGCGCAGTATGG

>PGSC0003DMG400007281LRR-RLPs\_704

AGTGAGAAAGATGTGGTTTCTTGGACAGCAATGATAAGAGGGTATGCGCAGTATGGAGAGTTTATGAA  
GGCTTTGAAATTATTTAAGTTGATGTTGAACTTGGGTTCTCGTCCTAATCAT

>PGSC0003DMG400007281LRR-RLPs\_768

TGAAGGCTTTGAAATTATTTAAGTTGATGTTGAACTTGGGTTCTCGTCCTAATCATTTTACGTTTTCAACT  
GTTTTAGATGCTTGCAGGCTACTCTGCTGTTCTGGTAGGCAATCAAG

>PGSC0003DMG400007281LRR-RLPs\_896

TGCATCTGAAGTCTGGTTTCCCTCTTGATGTCATCTTGTTGACCTCCCTTCTTGACATGTACGGTAAATGT  
GGAGACATTGAAGTTGCTTTCTGCATTTTTGAGTCAATCCCGGCAAGG

>PGSC0003DMG400007281LRR-RLPs\_960

GTAAATGTGGAGACATTGAAGTTGCTTTCTGCATTTTTGAGTCAATCCCGGCAAGGAATTTGGTAGCCTG  
GAATTCGATCATTGGAGGTTTTGCAAGACATGGGCTTGCAGAGAGGGCAA

>PGSC0003DMG400007299-(rev)RLKmalectin\_0

CTTCATTGTAGGTTGTTTCCCAGCATCCTATAGTTGATTAGCTAAACACTTGTTTCATGGATGCCAAGAAA  
TGACCTGGTCTTTGTACCAAAGCAAAGAAACCTCCAACCTCTCCTCTT

>PGSC0003DMG400007299-(rev)RLKmalectin\_1984

CCCTAGGAGGTGAATCAGGCACGACTAGTTGGCTACCGATTTATGGCAACTCTCATTCTTCTCTAGCAA  
ATCAGCTCCGGAAGAAGTGGTAGTGGTAGCACAACCATTTTCATCAGATG

>PGSC0003DMG400007299-(rev)RLKmalectin\_2170

CATATGTCATTGGAGTTGGTGGATTTGGAAAAGTGACAAAGGAGTTATCGATGGTGACACGAAAGTTG  
CAATCAAAGATCAAACCCATCTTCACAACAAGGGGTTAACGAATTTCAA

>PGSC0003DMG400007299-(rev)RLKmalectin\_2232

AAAGTTGCAATCAAAGATCAAACCCATCTTCACAACAAGGGGTTAACGAATTTCAAACCTGAAATCGAG  
TTGCTTTCAATGCTAAGGCATCGACATTTAGTGTCCCTAATCGGATTTTGT

>PGSC0003DMG400007299-(rev)RLKmalectin\_2294

AATCGAGTTGCTTTCAATGCTAAGGCATCGACATTTAGTGTCCCTAATCGGATTTTGTGAAGAGAATAAT

GAAATGGTGCTTGTCTATGACCACATGGCATATGGAACATTAAGGGAACA

>PGSC0003DMG400007299-(rev)RLKmalectin\_2356

AGAATAATGAAATGGTGCTTGTCTATGACCACATGGCATATGGAACATTAAGGGAACATCTTTATAAAG

GTAACAAAACACTATACTATCTTGGAAAGCAAAGGTTGGACATTTGTATTGGAG

>PGSC0003DMG400007299-(rev)RLKmalectin\_2418

TATAAAGGTAACAAAACACTATACTATCTTGGAAAGCAAAGGTTGGACATTTGTATTGGAGCAGCCAGAGGA

CTTCATTACCTTCATACAGGATATAAATACACCATTATTCATAGGGATGTG

>PGSC0003DMG400007299-(rev)RLKmalectin\_2480

CAGAGGACTTCATTACCTTCATACAGGATATAAATACACCATTATTCATAGGGATGTGAAAAGTACAAAC

ATTTTGTAAATGACAAGTGGGTTGCTAAGGTTTCAGATTTTGGACTTTC

>PGSC0003DMG400007299-(rev)RLKmalectin\_2604

ACAGGTCCAACATGAACCAAGGACATGTTTCAACAGTCGTAAAGGGTAGCTTTGGTTATTTGGATCCC

GAATACTTCAGAAGACAACAATTGACTGAAAATCAGATGTATACTCATTT

>PGSC0003DMG400007299-(rev)RLKmalectin\_2666

GGATCCCGAATACTTCAGAAGACAACAATTGACTGAAAATCAGATGTATACTCATTTGGGGTTGTCCTG

TTTGAAGTATTGTGTGCAAGGCCAGCGCTTAATCCAACCCGTTCAAAGA

>PGSC0003DMG400007299-(rev)RLKmalectin\_2728

TTGTCCTGTTTGAAGTATTGTGTGCAAGGCCAGCGCTTAATCCAACCCGTTCAAAGAACAAGTTAGTCT

TGCAGATTGGGCATTAGCTTGTCAAAGGAAAGGGAATTTAGAAGATATAA

>PGSC0003DMG400007299-(rev)RLKmalectin\_2790

GTTAGTCTTGCAGATTGGGCATTAGCTTGTCAAAGGAAAGGGAATTTAGAAGATATAATTGATCCACAT

TTGAAAGGAAAATCAATCCTGCATGCTTGAAAATATTTGCAGAAACAGCA

>PGSC0003DMG400007299-(rev)RLKmalectin\_2852

TCCACATTTGAAAGGAAAATCAATCCTGCATGCTTGAAAATATTTGCAGAAACAGCAGAGAAATGCTT

AGCTGATAACGGTGTAGATCGTCCATCCATGGGCGATGTATTATGGAATCT

>PGSC0003DMG400007299-(rev)RLKmalectin\_2914

AATGCTTAGCTGATAACGGTGTAGATCGTCCATCCATGGGCGATGTATTATGGAATCTTGAACATGCCTT

GCAATTAGAAGATAATCCAGATGGGGTCTTATCAACTCCGAGGCAACGA

>PGSC0003DMG400007299-(rev)RLKmalectin\_2976

CATGCCTTGCAATTAGAAGATAATCCAGATGGGGTCTTATCAACTCCGAGGCAACGAAAGATGTGGAT  
CATGACAATGCTGATCAACACAGTTTGATAGCAATGCATAGAAGCACTTTG

>PGSC0003DMG400007299-(rev)RLKmalectin\_3038

TGTGGATCATGACAATGCTGATCAACACAGTTTGATAGCAATGCATAGAAGCACTTTGAGCCTTGAAAG  
TGATAATGGTGCTGATAATAATAATAACAAAAATGATGTCTTTTCACAGAC

>PGSC0003DMG400007299-(rev)RLKmalectin\_3100

TTGAAAGTGATAATGGTGCTGATAATAATAATAACAAAAATGATGTCTTTTCACAGACTGTGAGTCCAAC  
AGGAAGGTAATAGCTTAACATAGGTTGTTCTTTCTTATCATTTTGTTATG

>PGSC0003DMG400007299-(rev)RLKmalectin\_3162

AGTCCAACAGGAAGGTAATAGCTTAACATAGGTTGTTCTTTCTTATCATTTTGTTATGATGAGAGTAAGA  
ATTTGTACAAATATTATACATACTCCTTATAGACTATATAAGGAATATTA

>PGSC0003DMG400007299-(rev)RLKmalectin\_3224

GAGTAAGAATTTGTACAAATATTATACATACTCCTTATAGACTATATAAGGAATATTATAGCAGGTTATT  
GAATAATGCTGCTATAGTGTATCTTTGAGATATCACAACAAATTTTGTA

>PGSC0003DMG400007299-(rev)RLKmalectin\_3286

AGGTTATTGAATAATGCTGCTATAGTGTATCTTTGAGATATCACAACAAATTTGTATTGTTTGATGTAT  
TTTAGACAAAGCCATTTTGTAACTCTCTTCATTCCAATTTATGTGACA

>PGSC0003DMG400007299-(rev)RLKmalectin\_3318

TTCGAGATATCACAACAAATTTGTATTGTTTGATGTATTTAGACAAAGCCATTTTGTAACTCTCTTCAT  
TCCAATTTATGTGACACTATTTTCTTACTGGGATTGAATCCCCATGTG

>PGSC0003DMG400007299-(rev)RLKmalectin\_496

CAGCACATGTTATGCTTAGGCTTCGTTTCAACCCAACGCCTTATCCTAATTTCAATATTTCAAATCATTTA  
TGACTGTTTCTGCTGGTAAAGTAACATTGTTAAATAATTTAGCGCGT

>PGSC0003DMG400007299-(rev)RLKmalectin\_558

AAATCATTTATGACTGTTTCTGCTGGTAAAGTAACATTGTTAAATAATTTAGCGCGTATATAACTGCAGA  
AGCCTTGTCACAGAGTAGCATTACCAAAGAGTACTTATTGTCTCCTGTG

>PGSC0003DMG400007299-(rev)RLKmalectin\_62

GCCAAGAAATGACCTGGTCTTTGTACCAAAGCAAAGAAACCTCCAACCTCTCCTCTTTGTATTGCGTAG  
GCGTACAGGATTGTTTATTGTCTGTACGCCTTTTTTTCTTTGTTTGT

>PGSC0003DMG400007299-(rev)RLKmalectin\_682

CTCCAAC TTTGGAGATCAAGATTAAGCCTTTTGGTGATTCATCATTTGCATTCATCAATGGAATTGAAATG  
ATCACCGCGCCAGATATATTTTATGGTCCGGATCCTCTGATGGTTGGAT

>PGSC0003DMG400007299-(rev)RLKmalectin\_806

TACAAGTATTCAAAATTCTATTACTCAGCAAAGTATATCTGTAAAGGAAAACAATATGGAGTTAGCATAT  
AGGCTCAATGTTGGTGGACAATACATTTCTCCGAAAATGATTCAGGTGG

>PGSC0003DMG400007299-(rev)RLKmalectin\_868

TAGCATATAGGCTCAATGTTGGTGGACAATACATTTCTCCGAAAATGATTCAGGTGGGTTAATGAGAA  
GTTGGTATGAAGATACTCCCTACTTATATGGTGCTTCAATAGGCATTACTA

>PGSC0003DMG400007299-(rev)RLKmalectin\_930

ATGAGAAGTTGGTATGAAGATACTCCCTACTTATATGGTGCTTCAATAGGCATTACTATGAGGAGCAAC  
AGGACAATTCAATACGATAACATGCCACCATACGTTGCACCACTTGCTATC

>PGSC0003DMG400007299-(rev)RLKmalectin\_992

GAGCAACAGGACAATTCAATACGATAACATGCCACCATACGTTGCACCACTTGCTATCTACAAGAGCTGT  
AGATCGATGGGTTATGATTCAAACCTCAACAAGAACTATAACCTCACTTG

>PGSC0003DMG400007307-(rev)RLKmalectin\_124

CATTGCTTTCCTGTACGCCTTTTTTTCTTTTTTGTAAACACCATGTAAACAAAAAATCGTATTTTGCTACTAT  
TCATATGCCTTTCCTCATTTCGCGATCATTACATGCTGCAATAGGT

>PGSC0003DMG400007307-(rev)RLKmalectin\_186

TTTGCTACTATTCATATGCCTTTCCTCATTTCGCGATCATTACATGCTGCAATAGGTGATCATACTCATT  
TTTCATAGCATGTGGTTCTGAAAATGGTGGAACAGATGAAGATGCTAG

>PGSC0003DMG400007307-(rev)RLKmalectin\_1860

AGTTATCGATGGTGACACAAAAGTTGCAATCAAAGATCAAATCCATCTTCAGAACAAGGTGTCAATGA  
ATTCCAGACTGAAATCGAGATGCTCTCAAAGCTAAGGCATCGACATTTAGT

>PGSC0003DMG400007307-(rev)RLKmalectin\_2356

GATGTGTACTCATAACGGTGTGCTGTTTGAAGTACTGTGTGCAAGGCCAGCACTTAACTCAAATCTTC  
CGAAAGAACAAGTTAGTCTTGCAAGATTGGGCATTAGCTTGTCAAAGGAAA

>PGSC0003DMG400007307-(rev)RLKmalectin\_2542

TTTGCAGAAACAGCTGAGAAATGCTTAGCTGATAATGGTATAAATCGTCCATCCATGGGTGATGTGCTAT

GGAATCTTGAATATGCCCTTCAGCTACAAGAAAATCCAGATGGAGTTTTTA

>PGSC0003DMG400007307-(rev)RLKmalectin\_2790

TACAGATGATGTCTTTTCACAAATTGTGAATCCAACAGGAAGGTAATAGCAAATATACACATATATATAA

GTAGTTGTTTCTTATGAATGGTTATGATAAGTATACAAAACGTACATTT

>PGSC0003DMG400007307-(rev)RLKmalectin\_2852

ATATATAAGTAGTTGTTTCTTATGAATGGTTATGATAAGTATACAAAACGTACATTTCACTATATATATT

ATGTATTAACTATATATATAAAGGAGTATAGCTGGCGCGCGGTTGATT

>PGSC0003DMG400007307-(rev)RLKmalectin\_496

CCGACTTCTTATCCTAATTTCAACGTTTCCAATTCATACATCTCTCTTTCTGCTGGTAAAGTTACGTTGTTG

AATAATTTCAAGCGGTATATAACTGCACAAGCATGGTCACAAAATTAC

>PGSC0003DMG400007307-(rev)RLKmalectin\_558

TACGTTGTTGAATAATTTCAAGCGGTATATAACTGCACAAGCATGGTCACAAAATTACATTATTAAAGAA

TACATTTTGTATCCTGTGGATTCTCCAACCTTTGGAGATCAAAAATTAGTCC

>PGSC0003DMG400007307-(rev)RLKmalectin\_868

GTCAATGTTGGTGGACAATTTATTCCTCCGAAAAATGATTCAGGCGGGTTAATGAGGAGTTGGTATGAA

GATACTCCCTATGTATATGGAGGTTCAAGGTGTTGGTATTGCTATGAGCACC

>PGSC0003DMG400007307-(rev)RLKmalectin\_930

GTATGAAGATACTCCCTATGTATATGGAGGTTCAAGGTGTTGGTATTGCTATGAGCACCAATGTGACAATT

CGTTATGCTGACTTACCATCATATGTTGCACCTCTTGCTGTGTACGATAG

>PGSC0003DMG400007307-(rev)RLKmalectin\_992

TGACAATTCGTTATGCTGACTTACCATCATATGTTGCACCTCTTGCTGTGTACGATAGTTGTAGATCGATG

GGTTTTGAGTCGAATATCAACATGAATTATAACCTTACTTGGGTTTTCA

>PGSC0003DMG400007389OtherRLKsTM\_0

TTGAAAGTCAATATATCTAGTTTTTATTTTCAGAAAATTTTTTGTACACCTCTGTTCTTCTCAACCTTTGA

GAACCTATAAATCTTTCATTATTCTCGAGTGTGCACATTTTCTTGATT

>PGSC0003DMG400007389OtherRLKsTM\_1426

GCATTGAAGGACATTGTTTGGACATGGCAAGGGACTGGTACTGGAAATGCTGATATTGATAACAAACA

GGACTTGGAGCAATAAAAATTTGGTACATGTGCATTTTTCTCCCTCTTCTTT

>PGSC0003DMG400007389OtherRLKsTM\_1488

CAAACAGGACTTGGAGCAATAAAAAATTTGGTACATGTGCATTTTTCTCCCTCTTCTTTGTGTTTGTGTTT  
CGCTCCCCCTGATCGGCTGATAGAAATAAATCAACGATCGGAGATATTC

>PGSC0003DMG400007389OtherRLKsTM\_1674

TTGTTTGTATGTTGTGATTCACTTAATTTCTCTAGTCATTCAAGCACAATTAATCCAAGCTTGTAGGGGA  
TCTTGTTCAAAGGATATATTTACCTCCCGGCTCCCTTTATCTATTTG

>PGSC0003DMG400007389OtherRLKsTM\_1716

AAGCACAATTAATCCAAGCTTGTAGGGGATCTTGTTCAAAGGATATATTTACCTCCCGGCTCCCTTTAT  
CTATTTGTAAGTTGCAAGTTGATGTTGCAACATGGACATTTTGTTCAGA

>PGSC0003DMG400007389OtherRLKsTM\_310

AGAGAAATCTCTGTGATGGGCCTTGTTTCGTCATCCCAATATTGTTGAACTCAAAGAAGTCATGGCTACGA  
AATCTAAAATCTTCTTTATAATGGAGTATGTTAAAGGGGGTGAGCTTTTC

>PGSC0003DMG400007389OtherRLKsTM\_62

CAACCTTTGAGAACTTATAAATCTTTTATTCTCGAGTGTGCACATTTTCTTGATTTGTTATCTTCTTCC  
GCGATATGGAGGAGAGACAATTGTTGTTTGAGAAGTATGAAATTGGGA

>PGSC0003DMG400007455G-LecRK\_1220

AGTCCACCTCTAGTTCACCTCCACGTGAATCAACTAGTCCACCACCTAGATCACCACCACCTCAATCTTC  
TAGTCCACCACCAGCCTCACCTCCACCTGAACCAACTCCTCCTTCTCCT

>PGSC0003DMG400007455G-LecRK\_2135

ACAGAGTCTGCTTTATTGAAGGTCAATGAATCAACACCTGAGAGAAATGGAACGAGCTCTAATTTCTCA  
ATTCTCCAGCAGACCCTGGCGGATTCAACAATGCAAAGACATGGTTTACT

>PGSC0003DMG400007455G-LecRK\_2806

GTTAAAAGAGAATGTACAGTTAAAACTTTACCACAACCTTGGGAATTAGTTTTAATGATCCCTAAAGCTGT  
GGCGGGATCATGGATGGCAATCTAAGCTCCACACCTTCTCCTACTCTTC

>PGSC0003DMG400007455G-LecRK\_2867

TAAAGCTGTGGCGGGATCATGGATGGCAATCTAAGCTCCACACCTTCTCCTACTCTTCCTAAAAGCGTA  
CATTAAACGAAAGGAAAATAAAAAAGAGAGATAACCAAACATGTAGTAA

>PGSC0003DMG400007455G-LecRK\_2928

AAAAGCGTACATTAACGAAAGGAAAATAAAAAAGAGAGATAACCAAACATGTAGTAATAATTTTCA  
GCTCATAGAAGTAGAAGACCTTCCAGTTGGCATTTCCTTTTTGTAATGTAAT

>PGSC0003DMG400007455G-LecRK\_3050

TATTACTTATGCAGTTTAGAATTGAGTTCTAAGGTCCTTTTTCATGCCATAAATTACCTCGTTATATAACTT  
TTTGGCATGAGTGTAATTATCATATCTGCATTAAGATTGTAATTAGT

>PGSC0003DMG400007455G-LecRK\_3111

TTATATAACTTTTTGGCATGAGTGTAATTATCATATCTGCATTAAGATTGTAATTAGTGTTCTGTTCCTTA  
ATCCTTTTATGTTATCCATGTTTATTTTTATTTTCAGTTCGTTTGTATG

>PGSC0003DMG400007455G-LecRK\_3172

TCTGTTCCCTAATCCTTTTATGTTATCCATGTTTATTTTTATTTTCAGTTCGTTTGTATGGCTGAAAAAATGT  
CTCCTCTTTCCTGCCCAAAGTTAGAGAGAAAGCAGGAGGTCAAAA

>PGSC0003DMG400007455G-LecRK\_3294

GTTACCATATGACGAATCGGATTGTGATATGAGATTGTGTGTTCCCTATCATATCACTTACATTCTTTTTATT  
GATCCCTACTCCACTAGCTGAACAGCTGTGGTAAATTAATGATGCAA

>PGSC0003DMG400007455G-LecRK\_3416

TGAGCTACTTCCAGAACCAACTTTGTCCTATTATCCCTACAAGAGGACTTGAAGTAAAAAGAGAAAATGG  
AACGTATAAATAGTTTAAGCTCGATGGAAGTAGAAAGATCTTAGTATTGG

>PGSC0003DMG400007455G-LecRK\_3477

AGAAAATGGAACGTATAAATAGTTTAAGCTCGATGGAAGTAGAAAGATCTTAGTATTGGATTTCCTTT  
GGTAATGTTATAATAACTTCCGCAATTTAGAATTGTGCCTCTGTTTTT

>PGSC0003DMG400007455G-LecRK\_3538

TTCCCTTTGGTAATGTTATAATAACTTCCGCAATTTAGAATTGTGCCTCTGTTTTTATGCATCTCGCAA  
ATTATCTCGATTATATGACCTTTTGGCAGTATAAATAATGAATTCTAA

>PGSC0003DMG400007455G-LecRK\_366

GAAAGGGTAAATTCTACATAATCTTGAATTTCTGTATCTTTTTCTTGATTTGGGTATCTGGATATTCGAAT  
TATTCTGTTTGGTGTGTGGGTGTTTCTTGAAACTGCATTTGATGATCT

>PGSC0003DMG400007455G-LecRK\_3660

ACTTCTCTAATTAGTAACTTAAAAGATGCTTTTGTAGCTGAATGTACCAAATGAGGCTCAAAATCAA  
AAGACTGAACAAAGCATGATTGGTTCCATTGAGAGAACAGAAAAAATTGT

>PGSC0003DMG400007455G-LecRK\_3721

AATCAAATAAGACTGAACAAAGCATGATTGGTTCCATTGAGAGAACAGAAAAAATTGTATGACTCAGT



TCTTTATACATTCTTGTATTGCACCATGTAGTTACATTCCCGAGAAAGAAA

>PGSC0003DMG400007455G-LecRK\_3782

GACTCAGTTCTTTATACATTCTTGTATTGCACCATGTAGTTACATTCCCGAGAAAGAAATATTTAATCCA  
TGAGCAGGCATAGTCGCCTTGAACATGAGTATATCTTCCACACTGAAGT

>PGSC0003DMG400007455G-LecRK\_3843

TTTTAATCCATGAGCAGGCATAGTCGCCTTGAACATGAGTATATCTTCCACACTGAAGTGAGCGCATCAG  
GCGCTGCATTTGTAGTGCATTATATGCTTTTCGATTGCCAATATTCACTC

>PGSC0003DMG400007455G-LecRK\_4026

TCAACTGCTCTTGTGAAGCATATAGTGAAAAAGCAAGTGACAACTGGTTTCTCCATATAACTAAGCTGA  
ATGTGTTAATCATCACTGACTTATTATGTTATACTGTTGAATAAGTAATG

>PGSC0003DMG400007455G-LecRK\_4087

CTAAGCTGAATGTGTTAATCATCACTGACTTATTATGTTATACTGTTGAATAAGTAATGAAAAGTTAAGA  
AAAGTAGACCAGGCGACGCGATTGTGATTTTCTATGTTCAATTCCTTCAT

>PGSC0003DMG400007455G-LecRK\_4148

AAGTTAAGAAAAGTAGACCAGGCGACGCGATTGTGATTTTCTATGTTCAATTCCTTCATTTTTGTTACTTG  
AGCTGCCTTTAATTATATAGTTAAAGTATGATACTCCTTTTTTATTTGG

>PGSC0003DMG400007455G-LecRK\_427

ATATTCGAATTATTCTGTTTGGTGTGTTGTGGGTGTTTCTTGAACTGCATTTGATGATCTGGGGTACTTTTA  
TTTTGGTCATAGTTGCTGGTGATATCATTATTTGGCTGCTTTGTTTAGA

>PGSC0003DMG400007455G-LecRK\_4331

GTCATCAAACATTCTTTTAGATGATAACTTTGAGGCCCATGTATGTCTAAGTCTTCGAACTCCTATATCCA  
CATTCTTTGTCTCGCGAGTTGTCTTTTACAATTAATTTACTTTCTACAG

>PGSC0003DMG400007455G-LecRK\_4392

CCTATATCCACATTCTTTGTCTCGCGAGTTGTCTTTTACAATTAATTTACTTTCTACAGGTTGCTGATTTTG  
GACTAGCTAAATTAGCTCAGGATGCAGAAAGTCATATCACAACACGTG

>PGSC0003DMG400007455G-LecRK\_4514

GTGGGAACATTTGGGTATGTTTCAGTGTCACTTTTATATTAAGTGGACAGCATAAGATAAATATTTTAT  
TCCATCTTTTTCAATTCACATATTTATTCTAATTCCTTAGATCTGACTC

>PGSC0003DMG400007455G-LecRK\_5063

AGTAGTAGGCCTCTAGTTGGTCTGCTAGTGAAGTTCCTCTTCTTTATTTTTCCCTTTTTTACCATGAAATGA  
TGCCTTATCCTGGGAAGAATGTGGTTGCAATGCTGTAAGCCTGAAACA

>PGSC0003DMG400007455G-LecRK\_5124

CCATGAAATGATGCCTTATCCTGGGAAGAATGTGGTTGCAATGCTGTAAGCCTGAAACATTGTGTCTGC  
ATTTTTTTTTAAATTTTACAACAATCAAACAGCTTGATCAAGTTATCCGCT

>PGSC0003DMG400007455G-LecRK\_5185

GTGTCTGCATTTTTTTTTAAATTTTACAACAATCAAACAGCTTGATCAAGTTATCCGCTTAATTTTATTGA  
TCCTTAATGTTAGAAAACGAAAAACCATTAACAGTAGCAGCCGAAA

>PGSC0003DMG400007455G-LecRK\_5307

TTGTATCTTTTATCATGCTGAATGTGTGAATTCCATTTACTATAGTTATTTTATTTTCGAACTCTTTCGTTTT  
CTTGTCGTCAGTGCCTAGTAGCAGTAGCCAGTTTACAAAGCTTTTAA

>PGSC0003DMG400007455G-LecRK\_5368

CTCTTTCGTTTTCTTGTCGTCAGTGCCTAGTAGCAGTAGCCAGTTTACAAAGCTTTTAATGCCTTGTATTCT  
GGTACTAGTTTCCACTACTAAATTTGAACCAGGCTTAAAAATAACTAC

>PGSC0003DMG400007455G-LecRK\_915

TGGTGAGATGTTAAACTTTAATCATCCACCTCCAAGTTATAGAATTTGTAGTTCCATTATCTGTGACTTC  
TCTCCTGGCTCGTTACTCTCTTTTCGACAAATGTAAATATAGTCTGTCCT

>PGSC0003DMG400007455G-LecRK\_976

CTGTGACTTCTCTCCTGGCTCGTTACTCTCTTTTCGACAAATGTAAATATAGTCTGTCCTAGCCTCACTACCA  
ATCTTATAGACTTATAATGGATTCTTCACCATCTCATGAAGAATCTGC

>PGSC0003DMG400007517-(rev)LRR-RLKs\_0

GGCATGTTGTTTTGCTCTCACTTTTTTACCACCAAAAACCTCTGTTTTTTTATTTGTTTTTTTGAAGAGTC  
TGACATAAAGCTGTTTGAACCTTTGAGTGAGTGAGTGAGTGAGTGAG

>PGSC0003DMG400007517-(rev)LRR-RLKs\_1037

TTTGTGAAAATTCATAAGGGGTTTCTGATTTTATTTTTTTGAAAGGAATGAGATTTGAACAAATTTAAG  
ATATTTCAAGAATTTTATCTATTTTAACTTTCTTGTTATGTTGATTTTGG

>PGSC0003DMG400007517-(rev)LRR-RLKs\_122

CAAGTTTTCTGTAAAATGAAGCAGCAAAGCATGAGGAATTGTACCACTTTCCAATGATTTGTGTTTTTATT  
TGTGAAAAAACCAAGTCCCAAATTCTTCTTTTATAAAAAAAGATCTCAT

>PGSC0003DMG400007517-(rev)LRR-RLKs\_1281

TCACTGGCTTGTAAGTATACCCGATTGTCCGGTATCTGCATTGGAGCCCGACTGACAAAACCTTTCTATTC  
CTAATACTTGAACCTGAGACCTCTAGTTAAGGATGAAAGTGCTTACAAG

>PGSC0003DMG400007517-(rev)LRR-RLKs\_1525

TTCAAATGATTGATTATTTGAATCAAGAATATAGAAAATAGTAGTACTAATATTACTTTTTAACTTTTTTTT  
TTAAACAGGCTTCTGCAGAGCAATAATATAACAGGACCAATTCCAAC

>PGSC0003DMG400007517-(rev)LRR-RLKs\_183

TGTTTTTATTTGTGAAAAACCAAGTCCCAAATTCTTCTTTTATAAAAAAAGATCTCATTTTTACTCTTTGT  
TTAGCTGTTTTCTTGTTAAGACAAATGGAAACAAGAAGTGTTTTTGG

>PGSC0003DMG400007517-(rev)LRR-RLKs\_1952

TATTTTCTCATACTTGAAGGGGAGCCTCGGAGCAACAGTAAGCTTGTCTCCTTGTTATCTATATAGGTCAC  
GCGTTCGAGTCAGGGGTAGGCTGCCTATAGTATACCCTTTGGGGTGCGG

>PGSC0003DMG400007517-(rev)LRR-RLKs\_2013

TATAGGTCACGCGTTCGAGTCAGGGGTAGGCTGCCTATAGTATACCCTTTGGGGTGCGGCCTTCCCCA  
GACCTTGTGTGAACGTGGAGTGCTTTGTGCACCTTTTTCTAATTGCTTTC

>PGSC0003DMG400007517-(rev)LRR-RLKs\_2074

TTTCCCAGACCTTGTGTGAACGTGGAGTGCTTTGTGCACCTTTTTCTAATTGCTTCTGTTTTCATGAGT  
ATATTTTGATGGGATTTTTGTTGTTTTTTCTAGAGACTTGTCTTTTA

>PGSC0003DMG400007517-(rev)LRR-RLKs\_2379

CAATGGAACAACAACATCCATGCCTTTGCCCTTCACTTTGAACAACCTCACAAAGTAAGAATCTTGAATCAT  
CCTCCTAAGTTTTTTTTCGAGCCAGCTTGTGTGCCCTCGACTATTCCA

>PGSC0003DMG400007517-(rev)LRR-RLKs\_244

TTACTCTTTGTTTAGCTGTTTTCTTGTTAAGACAAATGGAAACAAGAAGTGTTTTTGGTTTTGTGGTGTT  
GTTGAGTTTCTTGGTTTACTCTAATGCTATGCTTACTCCTGGTGGTGTT

>PGSC0003DMG400007517-(rev)LRR-RLKs\_2440

CTTGAATCATCCTCCTAAGTTTTTTTTCGAGCCAGCTTGTGTGCCCTCGACTATTCCACAAATCTTGGTTG  
TTGTCAAGTCTCCTGCTTTCAACGTCGTTATGATTAACACTACAACCTCA

>PGSC0003DMG400007517-(rev)LRR-RLKs\_305

TTGTGGTGTTGTTGAGTTTCTTGGTTTACTCTAATGCTATGCTTACTCCTGGTGGTGTTAATTATGAAGGT

TAGTTCCTTGTTATTTTAAATAAAGATTTAAACTTTGAGACATTATTGGA

>PGSC0003DMG400007517-(rev)LRR-RLKs\_3172

TGAAAGGCTTCTGGTTTACCCTTACATGTCTAATGGAAGTGTTGCTTCTCGTCTCAAAGGTAAAAAGAAA

CAACCTTAGAGAACTAAAGATTCTGCAAGTATTCTTAAATATGGTGGGAT

>PGSC0003DMG400007517-(rev)LRR-RLKs\_3233

AAAAAGAAACAACCTTAGAGAACTAAAGATTCTGCAAGTATTCTTAAATATGGTGGGATGGTTGAGATA

CCGTCATCCTTAACCATAGTAGGCTTATCTGTGTGAACCGGAATAGTCGAA

>PGSC0003DMG400007517-(rev)LRR-RLKs\_3477

CTACATGAACAGTGTGATCCAAAGATTATCCACAGGGATGTGAAGGCAGCAAACATATTGCTCGACGAT

GA CTGTGAGGCTGTTGTGGGAGATTTTGGATTGGCAAAGCTATTGGATCAT

>PGSC0003DMG400007517-(rev)LRR-RLKs\_3782

TGATTGGGTAAGTATTACACATTCCAAGATGTGACAAAACCCTCCGTTTCAATTTTTCTTACTTTTCGTTTT

AGTCTGTTTAGAAAAAAATGCCTACGACCATTCTATATCTACTAAGT

>PGSC0003DMG400007517-(rev)LRR-RLKs\_3843

CTTTTCGTTTTAGTCTGTTTAGAAAAAAATGCCTACGACCATTCTATATCTACTAAGTATGTTTTTTTATT

TCAACATTCTATTTTACCTTCAAAGGGTATTTGGTGACAAGATTCAAA

>PGSC0003DMG400007517-(rev)LRR-RLKs\_4026

AGAGTATCTCGATTCTTGTGGGGTTGATAATATCAATGTGCATATTTGTTGCAGGTAAAGAAGATTCAC

CTGGAGAAAAAGCTTGATTTGCTGGTGAGCAAGGACTTAAAGGACAAATA

>PGSC0003DMG400007517-(rev)LRR-RLKs\_4087

AAGATTCACCTGGAGAAAAAGCTTGATTTGCTGGTGAGCAAGGACTTAAAGGACAAATATGATCGGATC

GAGCTTGAGGAAATGGTACAAGTAGCTCTAATATGCACTCAGTATCACCCCT

>PGSC0003DMG400007517-(rev)LRR-RLKs\_4148

ATCGGATCGAGCTTGAGGAAATGGTACAAGTAGCTCTAATATGCACTCAGTATCACCCCTAGTCATAGAC

CAAAAATATCAGAAGTGTAAGAATGCTCGAAGGAGACGGACTTGCAGAGA

>PGSC0003DMG400007517-(rev)LRR-RLKs\_4209

TCATAGACCAAAAATATCAGAAGTGTAAGAATGCTCGAAGGAGACGGACTTGCAGAGAAATGGGAAG

CTTCTCAAAGAGCAGAATCTACGCGCTGCAGAGCCAATGAGTTCTCCTCTTC

>PGSC0003DMG400007517-(rev)LRR-RLKs\_4270

TGGGAAGCTTCTCAAAGAGCAGAATCTACGCGCTGCAGAGCCAATGAGTTCTCCTCTTCAGAAAGATAT  
TCTGATCTTACTGATGATTCTTCATTGCTTGTTCAAGCAATGGAATTATCA

>PGSC0003DMG400007517-(rev)LRR-RLKs\_4331

AAAGATATTCTGATCTTACTGATGATTCTTCATTGCTTGTTCAAGCAATGGAATTATCAGGACCAAGGTG  
ATGTAGATTATACAAGATAGTCAATTAGATGAAACAAAAAAGGGCATCTG

>PGSC0003DMG400007517-(rev)LRR-RLKs\_4392

ACCAAGGTGATGTAGATTATACAAGATAGTCAATTAGATGAAACAAAAAAGGGCATCTGAGATAGAAT  
GCTGAAGTAATATATGTATGTTATTGAGCTTGTTTTTTATTTCTTCTTTAGA

>PGSC0003DMG400007517-(rev)LRR-RLKs\_4453

ATAGAATGCTGAAGTAATATATGTATGTTATTGAGCTTGTTTTTTATTTCTTCTTTAGATAACTGAGAAGT  
CCTCGAGGGTCAATAGTGCACGGTTCATAACTCAGTGGATCATAGACAC

>PGSC0003DMG400007517-(rev)LRR-RLKs\_4514

ACTGAGAAGTCCTCGAGGGTCAATAGTGCACGGTTCATAACTCAGTGGATCATAGACACCCCCCTTACT  
CTTCTCCACTTATATACCAGACGTGGTAGGGTTCGATTGAGCTTGTATAT

>PGSC0003DMG400007517-(rev)LRR-RLKs\_4575

CCCTTACTCTTCTCCACTTATATACCAGACGTGGTAGGGTTCGATTGAGCTTGTATATATGATCATATGG  
AAGCTGCATAAAGGAATGGGATATGTTCAACTGTCTAGGAAAAAGATT

>PGSC0003DMG400007517-(rev)LRR-RLKs\_4636

GATCATATGGAAGCTGCATAAAGGAATGGGATATGTTCAACTGTCTAGGAAAAAGATTTATGAGCAAC  
TGACCTCCCAACCCACACCCACAACCCCTACTTTTTTTTCTCCTCCTGTT

>PGSC0003DMG400007517-(rev)LRR-RLKs\_4697

TGAGCAACTGACCTCCCAACCCACACCCACAACCCCTACTTTTTTTTCTCCTCCTGTTTTGAGTGATAATT  
TTTCTGGGATGTGGAATTGTAACCTTGAGCTTGTAAGAATAATATTGT

>PGSC0003DMG400007517-(rev)LRR-RLKs\_4758

GAGTGATAATTTTTCTGGGATGTGGAATTGTAACCTTGAGCTTGTAAGAATAATATTGTTGAAATTCAAT  
TTCAGCTTATAAATATTGTATCATAATTCTCATTGAAAAATATTGTTCAA

>PGSC0003DMG400007517-(rev)LRR-RLKs\_488

AATTATGAAGGTTGTTTCTTGTTGGTTTTCTCATAAAGATTGAACTTCATGACTTTTTTGTGAAAAAAT  
CATATGGGGTGTGTTGAAATTTTTGAAAGGAATGAGATTTTGATCAAATT

>PGSC0003DMG400007517-(rev)LRR-RLKs\_549

TTGAAAAAATCATATGGGGTGTGGAAATTTTTGAAAGGAATGAGATTTTGATCAAATTTTAGAAATATC  
AAGAATTTTGAATATGCTTACCCTTGTGGAGTTGATTATGAAGGTTAG

>PGSC0003DMG400007517-(rev)LRR-RLKs\_61

TTTGAAAGAGTCTGACATAAAGCTGTGGAACTTTGAGTGAGTGAGTGAGTGAGTGCAAGTTTT  
CTGTAAAATGAAGCAGCAAAGCATGAGGAATTGTACCACTTTCCAATGATT

>PGSC0003DMG400007517-(rev)LRR-RLKs\_732

GGTGATTGAATTTTTGAAAGGAATGAGATTTTGATCAAATTTTAGAAATATCAAGAATTTTGAATATG  
CTTACCCTTGTGGAGTTGATTATGAAAGGTTTAGTTCCTTGTGGTTTTT

>PGSC0003DMG400007517-(rev)LRR-RLKs\_793

TGAAATATGCTTACCCTTGTGGAGTTGATTATGAAAGGTTTAGTTCCTTGTGGTTTTTCTTCATTGAAG  
ATTGAACTTTATGACTTTTTATTTGAAAAAATCATATGGGGTGATTGA

>PGSC0003DMG400007517-(rev)LRR-RLKs\_854

TTCATTGAAGATTGAACTTTATGACTTTTTATTTGAAAAAATCATATGGGGTGATTGAATTTTTTGAAG  
GAATGAGATTTTGATCAAATTTTAGAAATATTAAGAATTTTGAATATG

>PGSC0003DMG400007606LRR-RLPs\_1008

GAGACTACACATACAAAACATTGATCCGATGATTATCTCTGAAGACATTTCTCTCCTAATCTTAAGGA  
GTTGAATTTATCAAATACTTGTATTCCATGGGAAGTTGTGAATTTGCTG

>PGSC0003DMG400007606LRR-RLPs\_1197

GAAGATGTTGTATTTCAAAATTAATAATCTACGTCTATATACGTGCAGAGATCTGGAAAGGTGGGAA  
TTAGCAGCTGGTAGTGATAATTTCCGATGCTTGAGAATTTAATACTGTTT

>PGSC0003DMG400007606LRR-RLPs\_126

GCTTGTTTTCTCTATGTTGGAGTTTTCTGAAGATATGGAGATTGATGTTCCAAGTTGATTAGGTTATG  
GATTTCAAGCAATTCGTAAAGGCAAGAAGCAATAAAAGATTAGAAGTG

>PGSC0003DMG400007606LRR-RLPs\_1260

TGGGAATTAGCAGCTGGTAGTGATAATTTCCGATGCTTGAGAATTTAATACTGTTTGAATTGCCTAAAC  
TAGAGGAGATTCCGGAGAGTATTGGAGAAGTAATGACACTAAAATTCATC

>PGSC0003DMG400007606LRR-RLPs\_1323

CCTAAACTAGAGGAGATTCCGGAGAGTATTGGAGAAGTAATGACACTAAAATTCATCCGAATAGTTAAT

TGCGGCTCTGGTGTAAGACAAGTGCAAAGAAAATTCAGGAAGAGCAAGAA

>PGSC0003DMG400007606LRR-RLPs\_1365

ACACTAAAATTCATCCGAATAGTTAATTGCGGCTCTGGTGTAAGACAAGTGCAAAGAAAATTCAGGAA  
GAGCAAGAAAGCTTGGGAAATTATGAGCTTGATGTTCAAATCTACCCCTAA

>PGSC0003DMG400007606LRR-RLPs\_189

AGGTTATGGATTCAGAGCAATTCGTAAAGGCAAGAAGCAATAAAAGATTAGAAGTGGTGGCAGAGGA  
GTATCTACAAGAGTTAATTGATAGAAGTCTAATTTTGGCTGATAACAATGG

>PGSC0003DMG400007606LRR-RLPs\_315

GGAATGATGAGAAGTTGCAAATTCATGATCTTCTTCGCCAACTATGCCTAAGTGAAACTCATACTGAAA  
ATGTTGTGCATGTCATGAATGGGAAAGTTCTCAAAGCCATAGATGGTCAA

>PGSC0003DMG400007606LRR-RLPs\_378

ACTGAAAATGTTGTGCATGTCATGAATGGGAAAGTTCTCAAAGCCATAGATGGTCAATGTTCGAGTTATC  
CTTCTGTCAAATTATGAAGAGAAGTATGATTATTTCCGCGACATAGCAGT

>PGSC0003DMG400007606LRR-RLPs\_441

GTTATCCTTCTGTCAAATTATGAAGAGAAGTATGATTATTTCCGCGACATAGCAGTGGTATTGTCCGTA  
CCTTTATTTCAATGGGTGTAGCTTTTCCAAAAGAGATGTGTTCCATTATT

>PGSC0003DMG400007606LRR-RLPs\_504

GTCCGTACCTTTATTTCAATGGGTGTAGCTTTTCCAAAAGAGATGTGTTCCATTATTTTCAGAGTTCAAGTT  
GATTAAGGTGTTGGACGTGTTACCAGTCTGTACGATTTCTCTAGTGTA

>PGSC0003DMG400007606LRR-RLPs\_567

TTCAAGTTGATTAAGGTGTTGGACGTGTTACCAGTCTGTACGATTTCTCTAGTGTAATACCTGAGCTTGT  
ACATTTGAGATATGTTGCTGCAAGAATTGAGGAAGGTCTTTCACTAGCC

>PGSC0003DMG400007606LRR-RLPs\_63

GTGTCCGAACGGTGCCAATCAATTCTGTCTCTGAGCTACAATTATTTGCCCCAGTATTTGAGGGCTTGTTT  
TCTCTATGTTGGAGGTTTTCTGAAGATATGGAGATTGATGTTTCCAAG

>PGSC0003DMG400007606LRR-RLPs\_693

AGAAATCTACAGACCATAATTCTTCAAAGATATTTCTCCAGACCAACAACGTTGAAGCAGCCAGTAGATA  
TCTGGAGTATGTCAGAGATAAGACATGTGGATATTCAATTTCACTATAT

>PGSC0003DMG400007606LRR-RLPs\_756

GTAGATATCTGGAGTATGTCAGAGATAAGACATGTGGATATTCAATTTCCACTATATATATCAAATCCTG  
TTGAAGCAGAACAACTTTGTGCCTTCTGAATAACTTGCAAACACTTTAT

>PGSC0003DMG400007606LRR-RLPs\_882

AACTCTCCTTTTGTGAGGAAATCATAAGAAGAACTCCCAATCTAAAAAGCTAAAGATTTTAGATATAT  
CTGAGCATTCTGATTGGGCTGTTATTCTTGATTCTCTCAGTATTTTACAG

>PGSC0003DMG400007634-(rev)LRR-RLKs\_0

TATATATTCATTTTTATCAATTTGGCATCTTCTTCACACCTCCAATGTTGACCAAACCTTTCCAAAATCAACT  
CATAATTCTAACCCCCACCTTTTTTTTTTCATGGAGTTTTCCCATTTTC

>PGSC0003DMG400007634-(rev)LRR-RLKs\_1302

CTGGTGAAATACCAAATCACTCGGAACTTGTCTAGTCTACGTTGATTGAGCTCTACAAGAATCAGCT  
TTCGGGTGAGATTCCATCTGGGGTTTGGACTTTGGTTGACATGACAAGTT

>PGSC0003DMG400007634-(rev)LRR-RLKs\_1364

AATCAGCTTTCGGGTGAGATTCCATCTGGGGTTTGGACTTTGGTTGACATGACAAGTTTGTGTTGAGTG  
ATAACTCATTTTCCGGGGAGCTACCAAGTAAAATTGCATTCAATTTTACG

>PGSC0003DMG400007634-(rev)LRR-RLKs\_1426

GTTGAGTGATAACTCATTTTCCGGGGAGCTACCAAGTAAAATTGCATTCAATTTTACGCGGTTAGAGATT  
AGTAACAACAGGTTTTCTGGTGAAATTCCTGTGGGGATATCTTCTTGGAG

>PGSC0003DMG400007634-(rev)LRR-RLKs\_1736

ATTCCAGCAGTTATAGTTTAAATCCCTGATCTTGTTGCTCTAGATTTGTCTCAGAATCAATTTTACAGGTCC  
AATTCCACCTCAACTAGGTGTAAAAAGGATCACTAGCCTTAACGTATCA

>PGSC0003DMG400007634-(rev)LRR-RLKs\_1798

TTCAGGTCCAATTCCACCTCAACTAGGTGTAAAAAGGATCACTAGCCTTAACGTATCATCGAATCAACT  
ACCGGGAATATCCCTGATGCATTTGCTAACCTAGCCTTTGAAAACAGTTT

>PGSC0003DMG400007634-(rev)LRR-RLKs\_1922

AACAATCCCAGTCTTTGTACCACCAACTCACTTCCATATCTTCCAAGTTGTAATAATGCGAAAGTCGCCAA  
TTCCAAAAGATTGTCCCATAGAGTCCTAGCCCTAATTCTAGTCCTTGCA

>PGSC0003DMG400007634-(rev)LRR-RLKs\_2294

AAAGTAGACTACATTCTGGAAAGGGAATTCTTGCTGAGGTTGAGATATTGGGATCAATTAGACATTCC  
AATATAGTGAAGTTATTGTGTTGTATATCAAGTGAGGATTCAAAGTTGCTC



>PGSC0003DMG400007634-(rev)LRR-RLKs\_2356

ACATTCCAATATAGTGAAGTTATTGTGTTGTATATCAAGTGAGGATTCAAAGTTGCTCGTTTACGAGTAC  
ATGGTAAATCACAGTCTTGATGGATGGCTTCATGGGAAGAAGAGAGTTTC

>PGSC0003DMG400007634-(rev)LRR-RLKs\_248

TGGGGTAACCCATTAGCACTTGACTCATGGAACCTACTTCTTCTCCTTGTAGCTGGCCGGAGATTGAGT  
GTGATGATGGGAAGGTTACCGGAATAATAATTCAAGAAAAAGATATTACT

>PGSC0003DMG400007634-(rev)LRR-RLKs\_2480

AGTAATAAAGTCATGGATTGGCCAAAAAGATTGGAGGTTGCCATTGGAGCTGCTCAAGGACTTTGTTAT  
ATGCACCATGACTGCACTCCTCCGATCATTATCGCGATGTAAAATCAAGC

>PGSC0003DMG400007634-(rev)LRR-RLKs\_2542

TTGTTATATGCACCATGACTGCACTCCTCCGATCATTATCGCGATGTAAAATCAAGCAATATCTTGTTGG  
ATTCTGATTTACAGCCAAAATAGCTGATTTCCGGTTAGCCAAGATTTT

>PGSC0003DMG400007634-(rev)LRR-RLKs\_2728

TAAAAGCAAAATCCAATCTTGAACCTCGTATTACCTCAATTCGTCAAAGAATGACTAACTAATAATCTA  
CTGTTTGGTTGCAGAGTATGCTTATACAACGAAAGTGAACGAGAAGATT

>PGSC0003DMG400007634-(rev)LRR-RLKs\_3224

TTAATTCCAATAAGGTAATAGATGATAGTAGTGATGATGGTCTAATAATTTCCACTGTGTAATATTGGAG  
ATGCCAAAGTAAACTGAGTTGTTGTAAAATGAGTGCCACTTAAGTAACGT

>PGSC0003DMG400007634-(rev)LRR-RLKs\_3286

TATTGGAGATGCCAAAGTAAACTGAGTTGTTGTAAAATGAGTGCCACTTAAGTAACGTACAAGTTTTGA  
GGATGTTGTTAGAATAGAAAACCCCTATAAGAACGTTGCTTTTCTAGTGTA

>PGSC0003DMG400007634-(rev)LRR-RLKs\_3348

GTTTTGAGGATGTTGTTAGAATAGAAAACCCCTATAAGAACGTTGCTTTTCTAGTGTACTCTTGAATTTGT  
TCACTGCTTGTAGATTGAGTGAAATGCATATTTAACTTTTGCTAGTTAT

>PGSC0003DMG400007634-(rev)LRR-RLKs\_558

TTAATCTGGGTGGTAATAATTTACCCGGAGATATCCCGCCGTCAGTCGGGAATTTGACGGAGCTGGAGA  
CCTTGTGTATGAATTTGAACTTGTGTTGATGGGAGTTTCCCGGCGGAAATCG

>PGSC0003DMG400007634-(rev)LRR-RLKs\_62

AAAATCAACTCATAATTCTAACCCCCACCTTTTTTTTTTTCATGGAGTTTTCCCATTTTCCGACAGGCATCTTC

GCCGGAAAACAGTCCCTTTATCTCATTTTACTACTAAACTTCATACCC

>PGSC0003DMG400007634-(rev)LRR-RLKs\_620

CTGGAGACCTTGTGTATGAATTTGAACTTGTTTGGATGGGAGTTTCCCGGCGGAAATCGGCAACTTAGCC

AATCTTGAAAGTTTGGGGTTGGAGTTTAATGAGTTTTCTCCGATGGCACTA

>PGSC0003DMG400007634-(rev)LRR-RLKs\_744

CGGAGTTTGGGAAGCTGAAGAAGATAAAGTATATTTGGATGAGAGATACGAAATTGATCGGTGAAATC

CCTGAAAGTTTCCGGGATTTTGAAAATCTTGAGCTTATTGATTTTGCTTACA

>PGSC0003DMG400007634-(rev)LRR-RLKs\_930

ACGGTAATCGGCTTTCAGGTCGAATCCCTGAACTTTTGATTCATCAAAGTTGATGGAACCTTGATGTTTC

CAACAACTATTTAACTGGAACAATCCCAGAAAGTTTGGAGGGTTTAAAC

>PGSC0003DMG400007634-(rev)LRR-RLKs\_992

GATGTTTCCAACAACCTATTTAACTGGAACAATCCCAGAAAGTTTGGAGGGTTTAAACATTTGGAAATTA

TGAATCTGTTTGGTAACCAATTGTATGGAGCAATTCCAGAGAGCATAGCC

>PGSC0003DMG400007684LRR-RLPs\_0

ATGAAACTCATCAACTTAGCCCTTAGTGGCTTCTTGTTTCATCATTTTCTTCTCTCAAACCCTCATTCAA

GCTTCAATCAAATATGAACCAAACCCTAGACTTTTCGATGCTTACATA

>PGSC0003DMG400007709LRR-RLKs\_0

CATCAATCCAATGCAATCCCTTCAGTCCAATCACTCAATAGAAAGTTAACTTTGTAAAACCCAATTGCTTA

CTTCGTTTCTTTTACATACATAATAAACAAAGGGATTCTCTTTTAAAA

>PGSC0003DMG400007709LRR-RLKs\_1037

CATAACACCTAAAGTAAACTCTTTTTTCTTCCCTTCATCAGTGGACTACCTAGTCAAAGTTTATCTGGAAC

CTTGTCACCTGGAATTGGAAACCTCACTAAATTGGAATCAATGTAAGTT

>PGSC0003DMG400007709LRR-RLKs\_1098

TATCTGGAACCTTGTACCTGGAATTGGAAACCTCACTAAATTGGAATCAATGTAAGTTCTTCACTGTATT

TTTCTTTAGTACTTCATTTGATTATATGTTAGCTAAATAGTAATACTA

>PGSC0003DMG400007709LRR-RLKs\_1159

TCACTGTATTTTCTTCTTAGTACTTCATTTGATTATATGTTAGCTAAATAGTAATACTATTCCCAATATCGT

GTAGATTGCTGCAAACAATGCTATTTATGGTCCTATTCCTGATGTGG

>PGSC0003DMG400007709LRR-RLKs\_122

ACTGACCACATCTCTGTATCTGTGAGTTTTTGGCCTATGTTTTGGCTTTTTCTGTTGTGTTTGTATCTTTGT  
GGTATATATTACTTAGTTAATAATAGAGGGAGAGGATGTTGATCTTGA

>PGSC0003DMG400007709LRR-RLKs\_1220

CCCAATATCGTGTAGATTGCTGCAAAACAATGCTATTTATGGTCCTATTCCTGATGTGGTTGGTAATTTAG  
AAAAGCTTCAGACACTTGATCTCTCCAACAACAAGTTTGATGGCGAAAT

>PGSC0003DMG400007709LRR-RLKs\_1281

GGTAATTTAGAAAAGCTTCAGACACTTGATCTCTCCAACAACAAGTTTGATGGCGAAATACCTGCTTCTT  
TCGGAGATCTCAATAATTTGAATTATTTGTGAGTTCAGGAAATTTTTCTT

>PGSC0003DMG400007709LRR-RLKs\_1342

CTGCTTCTTTGGAGATCTCAATAATTTGAATTATTTGTGAGTTCAGGAAATTTTTCTTATTTTTCACTGTT  
TCTTATCAAACACTACTTGAATCTTATTGTGTATCTTCGCTGTTGAGC

>PGSC0003DMG400007709LRR-RLKs\_1403

TTTTCACTGTTTCTTATCAAACACTACTTGAATCTTATTGTGTATCTTCGCTGTTGAGCAAGACAGACGATT  
AAACAACAATAGCCTCACAGGAACCATTCTCAATCTCTCTCAAACAT

>PGSC0003DMG400007709LRR-RLKs\_1464

GACAGACGATTAACAACAATAGCCTCACAGGAACCATTCTCAATCTCTCAAACATTGGAGGCCTCG  
CTCTCGTGTACGTCTCCATACCCTCCTTTACCATCGAAATTTGTTATGCT

>PGSC0003DMG400007709LRR-RLKs\_1525

GAGGCCTCGCTCTCGTGTACGTCTCCATACCCTCCTTTACCATCGAAATTTGTTATGCTTATCCTTGAAAG  
ACCGGTCTAAATACTCTAATGTTCTGTTTCTTCTCCTCGTACATTTTACT

>PGSC0003DMG400007709LRR-RLKs\_1586

TCCTTGAAAGACCGGTCTAAATACTCTAATGTTCTGTTTCTTCTCCTCGTACATTTTACTGATTTAGCTGATC  
TTGATTGTAGGGATGTTTCTTTAATAATCTAAGTGGTCCATTGCCCA

>PGSC0003DMG400007709LRR-RLKs\_1647

TTTAGCTGATCTTGATTGTAGGGATGTTTCTTTAATAATCTAAGTGGTCCATTGCCCAAATATCTGCAA  
GAGCTTTCAAGTGAGTCACCTTTTCTTCTTTCAATACATAATTGCTGCA

>PGSC0003DMG400007709LRR-RLKs\_1708

ATATCTGCAAGAGCTTCAAGTGAGTCACCTTTTCTTCTTTCAATACATAATTGCTGCAGTTGAAGTAGTA  
ATTCTCAATATTAATGAAATTGACTGGTTCATGACTCTGTATATATACT

>PGSC0003DMG400007709LRR-RLKs\_1769

TGAAGTAGTAATTCTCAATATTAATGAAATTGACTGGTTCATGACTCTGTATATATACTTCTCATTAAACAA  
TAATTATGTAGTGCTTCTAGGATAATGGAAAGTATTTATTTTTGATAGA

>PGSC0003DMG400007709LRR-RLKs\_183

TGTATCTTTGTGGTATATATTACTTAGTTAATAATAGAGGGAGAGGATGTTGATCTTGAATGGATATGGT  
GGAGAGTTTCATTGAAGGAGAAAAATAGCTCAAACATAGAATTTGTTGGG

>PGSC0003DMG400007709LRR-RLKs\_1830

TCATTAACAATAATTATGTAGTGCTTCTAGGATAATGGAAAGTATTTATTTTTGATAGATTAGTGAACCTT  
ATTATATTGAATTTAAGTTTCTCATCATGATTTTCAGAGTTATTGGAAA

>PGSC0003DMG400007709LRR-RLKs\_1891

AGTGAACCTTATTATATTGAATTTAAGTTTCTCATCATGATTTTCAGAGTTATTGGAAATCCTTTGATTTGT  
GGCCAAAGTTCGGGGAACAATTGTTTCAGCAGTCTATCCAGAACCGCTG

>PGSC0003DMG400007709LRR-RLKs\_1952

CTTTGATTTGTGGCCAAAGTTCGGGGAACAATTGTTTCAGCAGTCTATCCAGAACCGCTGTCCTTCCCGCC  
AGATAGTTTAGGAGGTCTGCATAACATCACTCACTTTCATTACCTTCCG

>PGSC0003DMG400007709LRR-RLKs\_2013

CTTCCCGCCAGATAGTTTAGGAGGTCTGCATAACATCACTCACTTTCATTACCTTCCGTTCTTTCAATTA  
AAAATGGAAAATAGTAACAGACACAGGAGGTTTTGCTATCTCTATTGT

>PGSC0003DMG400007709LRR-RLKs\_2074

CCTTTCATTTAAAAATGGAAAATAGTAACAGACACAGGAGGTTTTGCTATCTCTATTGTTGAAAATTGTATT  
GTCTGTTTTCTTCAATTTATAGATCAAAGAGCAGGAAGTAAAAACCAT

>PGSC0003DMG400007709LRR-RLKs\_2135

AAATTGTATTGTCTGTTTTCTTCAATTTATAGATCAAAGAGCAGGAAGTAAAAACCATCATGTGGCTGT  
TGCTTTTGGAGCAAGTTTTGGTGCTGCTTCTTGGTTTTAGTAGTCATAG

>PGSC0003DMG400007709LRR-RLKs\_2196

TGTGGCTGTTGCTTTTGGAGCAAGTTTTGGTGCTGCTTCTTGGTTTTAGTAGTCATAGCACTGGTTCTTT  
GGTGGCGCTACCGACATAATCAGCAGATCTTCTTTGATGTCAATGGTTA

>PGSC0003DMG400007709LRR-RLKs\_2257

CTGGTTCTTTGGTGGCGCTACCGACATAATCAGCAGATCTTCTTTGATGTCAATGGTTAGCTGATTTTCTT

TTGCTTTTTATCCATTTAAGATAATTCAATTTCTTTGATTTTTTGTTTT

>PGSC0003DMG400007709LRR-RLKs\_2318

TGATTTTCTTTTGCTTTTTATCCATTTAAGATAATTCAATTTCTTTGATTTTTTGTTTTTCTATTTCTGATTC  
ATTTGGTTATGTACATATTTTCTCGAATGTATTAAACTCCGTAGAT

>PGSC0003DMG400007709LRR-RLKs\_2379

CTATTTCTGATTCATTTGGTTATGTACATATTTTCTCGAATGTATTAAACTCCGTAGATTTGTCATTATTTG  
ATTATTTTTTTTTCAAGTAAGGGTGTTCAGAGTTTGGTGGCTTGTGGT

>PGSC0003DMG400007709LRR-RLKs\_244

GGATATGGTGGAGAGTTTCATTGAAGGAGAAAAATAGCTCAAACATAGAATTTGTTGGGATTAGTTCAT  
ATTCCAATATTATTAGATCTCAAGGTTACCACCTTAGTCTTTTTTCTTTAT

>PGSC0003DMG400007709LRR-RLKs\_2440

GTCATTATTTGATTATTTTTTTTTCAAGTAAGGGTGTTCAGAGTTTGGTGGCTTGTGGTTTAACTGGTTAT  
CTTAGCTTCTCAATATACATCTTTCATTTAATCTGACATAGAAAAGGTT

>PGSC0003DMG400007709LRR-RLKs\_2501

AACTGGTTATCTTAGCTTCTCAATATACATCTTTCATTTAATCTGACATAGAAAAGGTTTACATTGACATT  
GATTGTAATCTAGTAGTCTAGTATTATGAAGGACCCAAATTTGCAAG

>PGSC0003DMG400007709LRR-RLKs\_2562

CATTGACATTTGATTGTAAATCTAGTAGTCTAGTATTATGAAGGACCCAAATTTGCAAGTAGTAGATATC  
TAACAGCAGTTCTACATTTACATCGAGAATATGTTGAATAAAAATGCTATA

>PGSC0003DMG400007709LRR-RLKs\_2623

GTAGATATCTAACAGCAGTTCTACATTTACATCGAGAATATGTTGAATAAAAATGCTATAATCCACATCTTG  
GACTAGATAACTTCCCTGCTTTAGACCAGCTTAATTCATATCCTGACCA

>PGSC0003DMG400007709LRR-RLKs\_2684

CCACATCTTGGACTAGATAACTTCCCTGCTTTAGACCAGCTTAATTCATATCCTGACCAACCTTGTGAGGT  
GAATCAATTGTTATTTGCTCCCCCTCCATTGAGAAGAAGTTTTCCCTG

>PGSC0003DMG400007709LRR-RLKs\_2745

CTTGTCAGGTGAATCAATTGTTATTTGCTCCCCCTCCATTGAGAAGAAGTTTTCCCTGACAACTTATAG  
GGTGGTTGCATATTGTGGACAAATTTGGGGACTTGTCACTACTCATTC

>PGSC0003DMG400007709LRR-RLKs\_2806

AAACTTATAGGGTGGTTGCATATTGTGGACAAATTTGGGGACTTGTCACTACTCATTCTTTCTCATCCCT  
TTCCTTGAGCATTAGTATTTTTCGTCCGTCTGTCACCTGCTATTTCTAC

>PGSC0003DMG400007709LRR-RLKs\_2867

TTCATCCCTTTCCTTGAGCATTAGTATTTTTCGTCCGTCTGTCACCTGCTATTTCTACAGCTGTATCTGAG  
CAATGATTTCTCAAATGCAGAACAATATGATCCAGAGGTATGCTTGGG

>PGSC0003DMG400007709LRR-RLKs\_2928

CTGTATCTGAGCAATGATTTCTCAAATGCAGAACAATATGATCCAGAGGTATGCTTGGGTCACTTGAAAA  
GGTATGTCTTTAAAGAACTGCGAACTGCAACTGATCATTTTCAGCTCAAAA

>PGSC0003DMG400007709LRR-RLKs\_2989

ACTTGAAAAGGTATGTCTTTAAAGAACTGCGAACTGCAACTGATCATTTTCAGCTCAAAAAATATTTTGGG  
TAGCGGAGGATTTGGAGTTGTGTACAAGGGACGCTTAAATAATGGAACTG

>PGSC0003DMG400007709LRR-RLKs\_305

TAGTTCATATCCAATATTATTAGATCTCAAGGTTACCACCTTAGTCTTTTTTCTTTATCAAGAAGATTCCC  
TTTTTATTCATTCATTCTAATTATAGATGGATGCCCATTTCTCATAAT

>PGSC0003DMG400007709LRR-RLKs\_3050

TATTTTGGGTAGCGGAGGATTTGGAGTTGTGTACAAGGGACGCTTAAATAATGGAACTGTCGTGGCTGT  
CAAAAGATTAAAGGACTACAATGCTGTTGGTGGTCAAATCCAATTTTCAGAC

>PGSC0003DMG400007709LRR-RLKs\_3111

GTGGCTGTCAAAGATTAAAGGACTACAATGCTGTTGGTGGTCAAATCCAATTTTCAGACAGAAGTTGAG  
TTGATTAGTTTGGCTGTCCATCGAAATCTTCTCCGTCTTTGGGGTTTTTGT

>PGSC0003DMG400007709LRR-RLKs\_3172

AAGTTGAGTTGATTAGTTTGGCTGTCCATCGAAATCTTCTCCGTCTTTGGGGTTTTTGTCAACTGAAAGT  
GAACGGCTTCTTGTTTACCCCTATATGCCAAATGGAAGTGTAGCAGCAC

>PGSC0003DMG400007709LRR-RLKs\_3294

TAAAAGGTCAGCCTCTGGCCCGCATGTTTTGTTAGTAATAATTGCTATGCCTCCTAGCTTCAGATCATT  
CCTCCAACATATATGTTCTGTGAAGTTTGACCTTTAAGGAAGGTGTTTG

>PGSC0003DMG400007709LRR-RLKs\_3355

TCAGATCATTCTCCAACATATATGTTCTGTGAAGTTTGACCTTTAAGGAAGGTGTTTGTTAACTAATTC  
AACTGTGGTTACCTTTCTTTTACATTTTTAGGTGCCTGGTCACACCTTT

>PGSC0003DMG400007709LRR-RLKs\_3416

AACTAATTTCAACTGTGGTTACCTTTCTTTTACATTTTTAGGTGCCTGGTCACACCTTTCTAACTCATTATG  
GGAAGTTAACTAGAAAATACTCTCTTAAAGCTGCACAATTTTCTATTA

>PGSC0003DMG400007709LRR-RLKs\_3477

AACTCATTATGGGAAGTTAACTAGAAAATACTCTCTTAAAGCTGCACAATTTTCTATTACAGAAAGTGAG  
GCTTAACAGACTAACGTATTATCTTACAAGAACAAATCTTGTGAAGAAAT

>PGSC0003DMG400007709LRR-RLKs\_3538

GAAAGTGAGGCTTAACAGACTAACGTATTATCTTACAAGAACAAATCTTGTGAAGAAATGGACATTGGA  
TCTAATTCAACTTAAAAGTTAGCTCATGAGGTAAGTATTGCTCAAAGACC

>PGSC0003DMG400007709LRR-RLKs\_3599

ACATTGGATCTAATTCAACTTAAAAGTTAGCTCATGAGGTAAGTATTGCTCAAAGACCACAACCCATTC  
CCTCAACCTATGTGGGACTTCTTAAAGGTAGATGAGCTTAGCTGATCTTT

>PGSC0003DMG400007709LRR-RLKs\_366

AGAAGATTCCCTTTTTATTCAATTCATTCTAATTATAGATGGATGCCCATTTCTCATAATTGTGTAAAGATA  
GCAACTTTGGTGTTTTGAAGAAATATTGGAAGCTGAAAAGAGCAGGATT

>PGSC0003DMG400007709LRR-RLKs\_3660

AACCCATTCCCTCAACCTATGTGGGACTTCTTAAAGGTAGATGAGCTTAGCTGATCTTTAATTCCATACGC  
TGTAAGTGTAATCAGTTTCTTTTCTCCGATATGAGAGTGTCACTAGG

>PGSC0003DMG400007709LRR-RLKs\_3721

TTCCATACGCTGTAAAGTGTAATCAGTTTCTTTTCTCCGATATGAGAGTGTCACTAGGGCTTGAATACCA  
ACAAACAAAAATTGGATTCTTTTCCCTTAAGCTGGGACTTGATAATATT

>PGSC0003DMG400007709LRR-RLKs\_3782

TTGAATACCAACAAACAAAAATTGGATTCTTTTCCCTTAAGCTGGGACTTGATAATATTGCTTGTTAAGG  
ACTCCCCTCTTGCCTTCTCTCTATCCAAGTTAAACTTGTTAATTTTA

>PGSC0003DMG400007709LRR-RLKs\_3843

TTGTTTAAGGACTCCCCTCTTGCCTTCTCTCTATCCAAGTTAAACTTGTTAATTTTAGAGAGGTTATCCT  
CTTCTCATTCTCTCAGTTTTATGCAATTTGGAATAATGAAGGAAGAAA

>PGSC0003DMG400007709LRR-RLKs\_3904

GAGGTTATCCTCTTCTCATTCTCTCAGTTTTATGCAATTTGGAATAATGAAGGAAGAAAGTGAATAAAA

TTAAAATTTACCATTGCACATGATAAAGCTTTTGAAAAGAGAAAGAAGT

>PGSC0003DMG400007709LRR-RLKs\_3965

GAATTAATAATTAATTTACCATTGCACATGATAAAGCTTTTGAAAAGAGAAAGAAGTTTATTCATCTT

ATACAACAATTTGCTTCTAAAAGCATTATGAGACTTGTGATAATTTATG

>PGSC0003DMG400007709LRR-RLKs\_4026

ATTCATCTTATACAACAATTTGCTTCTAAAAGCATTATGAGACTTGTGATAATTTATGGCTTAAGGAGAT

TAAAGTGGGTTTGAACCATTCACGTAGTCCATATTTTACCCATATTTAT

>PGSC0003DMG400007709LRR-RLKs\_4087

TTAAGGAGATTAAAGTGGGTTTGAACCATTCACGTAGTCCATATTTTACCCATATTTATGTAGATGGATTC

CAGTTTATCTTCTTTAACCTGAAAAGAGCATATGCATCCCGAGCTTT

>PGSC0003DMG400007709LRR-RLKs\_4148

AGATGGATTCCAGTTTATCTTCTTTAACCTGAAAAGAGCATATGCATCCCGAGCTTTTTACGTTACGCT

TCAATAGAACGAATTATCTTTACTTCAATAATAGATATTAGGCCTTTCA

>PGSC0003DMG400007709LRR-RLKs\_4209

ACGTTACGCTTCAATAGAACGAATTATCTTTACTTCAATAATAGATATTAGGCCTTTCAGCAGGTTAGTTC

ACGAATTCTCTATTTTACGTAAGAGACGTGTTTGGGCCTGCTTTGAAGA

>PGSC0003DMG400007709LRR-RLKs\_427

TGTAAAGATAGCAACTTTGGTGTTTTGAAGAAATATTGGAAGCTGAAAAGAGCAGGATTTGTGGTTGCT

ATTGAGTGAAAACAGCATCTATCTTCTCTCTTTTTTTTTTTAGCAAATT

>PGSC0003DMG400007709LRR-RLKs\_4270

AGGTTAGTTCACGAATTCTCTATTTTACGTAAGAGACGTGTTTGGGCCTGCTTTGAAGACAGCCAGTAAC

TACTAGCACAAGATCCAGTATTTGAAAAGGTTCCATACCCATAAGGGTTC

>PGSC0003DMG400007709LRR-RLKs\_4392

AGCTTCAACCCACTGCTCGAGCAACTTGCTATCTATTTTAACTCAATCCACCCAAATCCGGTCCAATGCAC

CCATTTGCCACCACTATAACTGATACTATCTTTTATTTTTTTAGTACAAG

>PGSC0003DMG400007709LRR-RLKs\_4453

TCCAATGCACCCATTTGCCACCACTATAACTGATACTATCTTTTATTTTTTTAGTACAAGCTTTTAATGTTTG

ACCCATCCTATTTTGTGTCCCTTATCATATTTCTTCTTCTTGAAGTAT

>PGSC0003DMG400007709LRR-RLKs\_4514



TTAATGTTTGACCCATCCTATTTTGTGTCCCTTATCATATTTCTTCTTCTTGAAGTATATGGTAGGCCATC  
ATCAGCGACCACAGTGATGCAGTTTATTCTGGCGAACATTGCCTTCCA

>PGSC0003DMG400007709LRR-RLKs\_4575

GGTAGGCCATCATCAGCGACCACAGTGATGCAGTTTATTCTGGCGAACATTGCCTTCCATTAACCATGTC  
TTTTGTGGTTCCTAAATTTGCAGATCACATCCATGGCAGGCCAGTTTTGG

>PGSC0003DMG400007709LRR-RLKs\_4636

AACCATGTCTTTTGTGGTTCCTAAATTTGCAGATCACATCCATGGCAGGCCAGTTTTGGACTGGTCAAGG  
CGGAAAGGAATAGCAGTAGGTACAGCAAGAGGGCTAGTATATTTGCATGA

>PGSC0003DMG400007709LRR-RLKs\_4697

TGGTCAAGGCGGAAAGGAATAGCAGTAGGTACAGCAAGAGGGCTAGTATATTTGCATGAACAGTGTGA  
CCCCAAAATTATCCATCGTGATGTCAAAGCAGCGAACATTCTGTTGGATGAG

>PGSC0003DMG400007709LRR-RLKs\_4758

AGTGTGACCCCAAATTATCCATCGTGATGTCAAAGCAGCGAACATTCTGTTGGATGAGGAATTTGAAG  
CAGTTGTTGGAGATTTTGGGTTAGCAAAGCTCTTGGATCACCGGGATTCTC

>PGSC0003DMG400007709LRR-RLKs\_4819

ATTTGAAGCAGTTGTTGGAGATTTTGGGTTAGCAAAGCTCTTGGATCACCGGGATTCTCATGTAACGACT  
GCTGTCAGGGGCACAGTTGGTCACATTGCTCCAGAATATTTGTCAACGGG

>PGSC0003DMG400007709LRR-RLKs\_488

TGGTTGCTATTGAGTGAAAACAGCATCTATCTTTCTCTCTTTTTTTTTTAGCAAATTGGTTCTGTTCTGA  
TTCTGAGAGTGACCCTTATGGATGAAGAAGTGGTTTTGATGTAAAGA

>PGSC0003DMG400007709LRR-RLKs\_4880

GTAACGACTGCTGTCAGGGGCACAGTTGGTCACATTGCTCCAGAATATTTGTCAACGGGTCAATCGTCT  
GAAAAGACTGATGTGTTTGGGTTTGAATCTTGCTGCTTGAGCTAATTACA

>PGSC0003DMG400007709LRR-RLKs\_4941

AATCGTCTGAAAAGACTGATGTGTTTGGGTTTGAATCTTGCTGCTTGAGCTAATTACAGGTCAGAAGG  
CTGTGGACTTTGGACGAGGGGTGAACCAGAAAGGTGTTATGCTTGACTGGG

>PGSC0003DMG400007709LRR-RLKs\_5002

TCAGAAGGCTGTGGACTTTGGACGAGGGGTGAACCAGAAAGGTGTTATGCTTGACTGGGTAAAGAAAC  
TTCATGCAGAGAAAAAGCTGAACCTTATGGTGGACAAAGATTTGAAGAACAA

>PGSC0003DMG400007709LRR-RLKs\_5063

AAGAAACTTCATGCAGAGAAAAAGCTGAACCTTATGGTGGACAAAGATTTGAAGAACAACCTTTGACCGG  
ATTGAACTTGAAGAGATGGTTCAAGTTGCTCTTCTGTGTACCCAATTCATT

>PGSC0003DMG400007709LRR-RLKs\_5124

TTGACCGGATTGAACTTGAAGAGATGGTTCAAGTTGCTCTTCTGTGTACCCAATTCATTCCAACCTATCGG  
CCAAAGATGTCGGAGGTATTAAGGATGTTGGAAGGAGATGGATTAGCTG

>PGSC0003DMG400007709LRR-RLKs\_5185

AACTTATCGGCCAAAGATGTCGGAGGTATTAAGGATGTTGGAAGGAGATGGATTAGCTGAAAAATGGG  
AGGCTTCACAAAAAGTTGAGACACCTAGGTACAGAACATCTGAAAATACACC

>PGSC0003DMG400007709LRR-RLKs\_5246

AAATGGGAGGCTTCACAAAAAGTTGAGACACCTAGGTACAGAACATCTGAAAATACACCGAAGAGATA  
TTCTGATTATATAGAAGAATCATCACTAGTAGTCGAAGCAATGGAGCTTTCA

>PGSC0003DMG400007709LRR-RLKs\_5307

AGAGATATTCTGATTATATAGAAGAATCATCACTAGTAGTCGAAGCAATGGAGCTTTCAGGACCTAGAT  
GACAACATCTGATTCTATCCTTGAGTTGAAATATGAGAAATAGCTGTTGGA

>PGSC0003DMG400007709LRR-RLKs\_5368

ACCTAGATGACAACATCTGATTCTATCCTTGAGTTGAAATATGAGAAATAGCTGTTGGAATGCCTGTATT  
ATTAATCTGTAAAAAAGAACACAAAGCTCATGTATAATTCGATCAACACC

>PGSC0003DMG400007709LRR-RLKs\_5429

GCCTGTATTATTAATCTGTAAAAAAGAACACAAAGCTCATGTATAATTCGATCAACACCTAACTTCATACT  
TCTCTCCCTCTCAATTTTGATAAAATGTGCCATTCATTTTTTTGAAGATG

>PGSC0003DMG400007709LRR-RLKs\_549

TTCTGTTCTGATTCTGAGAGTGACCCTTTATGGATGAAGAAGTGGTTTTGATGTAAAGAATGTATTCTTG  
TTGTCTTAATGTTTTATGGGGAGGTTTTGTTAGGCAAGTAATCCATTTTC

>PGSC0003DMG400007709LRR-RLKs\_5490

ACTTCATACTTCTCTCCCTCTCAATTTTGATAAAATGTGCCATTCATTTTTTTGAAGATGGGGGCACAAGTC  
AGCCATCCTCATGTACAGTGGTCTGATTGTCATGGTGGATGAATCATGA

>PGSC0003DMG400007709LRR-RLKs\_5551

GGCACAAGTCAGCCATCCTCATGTACAGTGGTCTGATTGTCATGGTGGATGAATCATGAATAAGGTTTTTC

GGTTTTCTTCTTTTGTTTCATGTAAGTAAATGTTTAGTCTCGTCATAGTGA

>PGSC0003DMG400007709LRR-RLKs\_5612

AAGGTTTTCGGTTTTCTTCTTTTGTTTCATGTAAGTAAATGTTTAGTCTCGTCATAGTGAAGGGAAAAATGA

AAATATGAAGAAAGGTAGTAGTAGGTAGGGGTGTCAAAAATGAGCCGTT

>PGSC0003DMG400007709LRR-RLKs\_5648

AATGTTTAGTCTCGTCATAGTGAAGGGAAAAATGAAAATATGAAGAAAGGTAGTAGTAGGTAGGGGTG

TCAAAAATGAGCCGTTAATCGGATCATAATTTTATGGGTTGAGCTCAACAT

>PGSC0003DMG400007709LRR-RLKs\_61

CAATTGCTTACTTCGTTTTCTTTTACATACATAATAAACAAAGGGATTCTCTTTTAAAAAACTGACCACA

TCTCTGTATCTGTGAGTTTTTGGCCTATGTTTTGGCTTTTTCTGTTGTG

>PGSC0003DMG400007709LRR-RLKs\_610

GTATTCTTGTTGTCTTAATGTTTTATGGGGAGGTTTTGTTAGGCAAGTAATCCATTTTCTGACAAGGTAAA

TTGTAGAAAAGTAGAGAATGGACAGAAAGTGGTGTATGTTCTTGTATGT

>PGSC0003DMG400007709LRR-RLKs\_671

ACAAGGTAAATTGTAGAAAAGTAGAGAATGGACAGAAAGTGGTGTATGTTCTTGTATGTGGTTTTAACA

TTGATGGAGAGTTGTTATGCTTCTCTTCCCCTACTGGTATCAACTATGAA

>PGSC0003DMG400007709LRR-RLKs\_732

TTTTAACATTGATGGAGAGTTGTTATGCTTCTCTTCCCCTACTGGTATCAACTATGAAGGTAACTTCTTT

CCTACATTTCTTTCTCTCTTGGGGGTGAAAATCATCTTCATCTCACA

>PGSC0003DMG400007709LRR-RLKs\_793

TAAACTTCTTCTACATTTCTTTCTCTTGGGGGTGAAAATCATCTTCATCTCACATAATTATATGCAG

TTGTTGCCTTGATTGAAATTAAGAAGGCCTTACATGATCCTTACAATG

>PGSC0003DMG400007709LRR-RLKs\_854

ATTATATGCAGTTGTTGCCTTGATTGAAATTAAGAAGGCCTTACATGATCCTTACAATGTTCTTGAGAATT

GGGATGTCACTTCTGTTGACCTTGCAGTTGGAGAATGGTTACATGTTC

>PGSC0003DMG400007709LRR-RLKs\_915

CTTGAGAATTGGGATGTCACTTCTGTTGACCCTTGCAGTTGGAGAATGGTTACATGTTCAAATGATGGAT

ATGTTTCTTCTCTGTAAGTAGTTGAGCTTCAGTAATTTTCACTCTACATA

>PGSC0003DMG400007709LRR-RLKs\_976

ATGATGGATATGTTTCTTCTCTGTAAGTAGTTGAGCTTCAGTAATTTTCACTCTACATAATCATAACACCT  
AAAGTAAACTCTTTTTCTTCCCTTCATCAGTGGACTACCTAGTCAAAG

>PGSC0003DMG400007862-(rev)LRR-RLKs\_0

TTTTGTTATTTGTGGGTGATTGAGTCTTTTTCTTGCATTTTTATGCTTGAGGAAAACACTGACATTGATGTT  
TTGTTTTATTTGGTATTTGCAGTTTTGGGAACTTTTTGTGTTGGCTA

>PGSC0003DMG400007862-(rev)LRR-RLKs\_1037

GTTTGGAAATTTCTTAACAATTCTCCTTTTGTATTGGTTAAGTTGCTGCTATTAATAACTTATATGCTTCTCT  
GGGATCGCCATCCCTCCGGGCTGGGGTGCTGTTGGTGGAGACCCATG

>PGSC0003DMG400007862-(rev)LRR-RLKs\_1098

TATGCTTCTCTGGGATCGCCATCCCTCCGGGCTGGGGTGCTGTTGGTGGAGACCCATGTAATGGACTTT  
GGCAAGGGGTGCAATGTGACAATGGAAACATACTGACAATGTAAGGACTT

>PGSC0003DMG400007862-(rev)LRR-RLKs\_1159

ATGGACTTTGGCAAGGGGTGCAATGTGACAATGGAAACATACTGACAATGTAAGGACTTACCATTTACT  
ACATTGCGTAGATTTTTGTGGAAGTAAATGCTAATCCTACTTATCATGTT

>PGSC0003DMG400007862-(rev)LRR-RLKs\_1220

CATTTACTACATTGCGTAGATTTTTGTGGAAGTAAATGCTAATCCTACTTATCATGTTGTAGTCGACTCA  
ATGCTGCTAACTTGGGAGGTGAACTTGGGGATAACTTAGGCTCATTTTC

>PGSC0003DMG400007862-(rev)LRR-RLKs\_1281

AGTCGACTCAATGCTGCTAACTTGGGAGGTGAACTTGGGGATAACTTAGGCTCATTTTCTTCTCTCAAAA  
TAATGTAAGCTTCTCTCATATCTCCTAACTTAAAAGTTTGCTTGTGTTGTA

>PGSC0003DMG400007862-(rev)LRR-RLKs\_1342

CTCTCAAATAATGTAAGCTTCTCTCATATCTCCTAACTTAAAAGTTTGCTTGTGTTGTATGCATGTGTTTT  
CATAGACATAATACGTGAACACACTCAAACCTGGCCTCAGTTCGCAAG

>PGSC0003DMG400007862-(rev)LRR-RLKs\_1464

AACACTCCAACCTTAGAGAGTGGACATCTAGACACCTCAACTGGAACTAAACACTTCAACTGGTCCCCAC  
TGCATCTCGTGGTTTGGAGGTGTTTAGATGATCATTTTGTAGTCGGAGT

>PGSC0003DMG400007862-(rev)LRR-RLKs\_183

CAATGGATGGGAAGAGATTTGTTGTATGCTGTTTGAATTTGGAGATTTTGGTGTGGATTCTTTAGCTTT  
TGCTGTTCAGCTTTCAGATGAAGCTAACCTGGAGATGGTAAGGAACGAC

>PGSC0003DMG400007862-(rev)LRR-RLKs\_1830

TATGTAAGTTCTACCATTTGACTTATGAAGGATCCCCAGAAACACGAGAAAAAGAAAGAGGACATATTG  
ATAAACCTAGCTTTACTTATTGAGTAAACAGTTGATATTCTTTACCTTGG

>PGSC0003DMG400007862-(rev)LRR-RLKs\_1891

ACATATTGATAAACCTAGCTTTACTTATTGAGTAAACAGTTGATATTCTTTACCTTGGACAGTTTTCTTTC  
AGCTAACGCATTCACTGGAAGTATCCCTACTTCTTTGTCTTCCCTGAG

>PGSC0003DMG400007862-(rev)LRR-RLKs\_1952

AGTTTTCTTTCAGCTAACGCATTCACTGGAAGTATCCCTACTTCTTTGTCTTCCCTGAGTCAACTTTCAGCT  
ATGTAAGTATCACTTTTAGTGTAGATAAAAAGTTGCTTACTTCATAAA

>PGSC0003DMG400007862-(rev)LRR-RLKs\_2013

AACTTTCAGCTATGTAAGTATCACTTTTAGTGTAGATAAAAAGTTGCTTACTTCATAAAGAATCAAACCTCA  
GGTATTTGCTGTGTGTCTGCAGGTCTCTGAATGCCAACCATTTGACTG

>PGSC0003DMG400007862-(rev)LRR-RLKs\_2074

ATCAAACCTCAGGTATTTGCTGTGTGTCTGCAGGTCTCTGAATGCCAACCATTTGACTGGAGAAATTCCT  
GATTCCTTTCAGGCCTTACCGCTTTGGTCAATCTGTATGAAAGCAAACA

>PGSC0003DMG400007862-(rev)LRR-RLKs\_2257

TCAACAGTGATTTGTCAAGTAACAATATAAGTGGATCATTGCCACCATCTGTAAGAAATTTGTCTTCCTTG  
ACCACTCTGTGAGTAATTCAACATTATACAGTTTGTTTATAACTTCATA

>PGSC0003DMG400007862-(rev)LRR-RLKs\_2318

GTCTTCCTTGACCACTCTGTGAGTAATTCAACATTATACAGTTTGTTTATAACTTCATAGTTTGATCAATAT  
GATAAAACTAACTTCTTGATTTCCAGATATTTGCAGAATAATCAGCTT

>PGSC0003DMG400007862-(rev)LRR-RLKs\_244

TTTAGCTTTTGCTGTTTCAGCTTTCAGATGAAGCTAACCTGGAGATGGTAAGGAACGACAGTCGCCAAGT  
CTTCGTAGGCGTTTGGACATGAATTGAGTGATATACGAAAAAAAAAAGAT

>PGSC0003DMG400007862-(rev)LRR-RLKs\_2501

TTTACTCGAATATAATTCAGTTCCTACTAGAATGATAGAATCTTACTAACATCTCTTCACACTCCCTGTGTCCT  
TTATAGGAATGTGGAAAACAACCTGTTTTCTGGGCCCATACCTCAAAA

>PGSC0003DMG400007862-(rev)LRR-RLKs\_2684

TTTCTGTTTATGTTGAGTCAACATCTTGTATATTAATAATGTAATCTTGGTCACATTTAATATCAATGTATCC

CTCGTCGTTTGTGGAGATATCATTTGACATGTAACATATCCCACAAA

>PGSC0003DMG400007862-(rev)LRR-RLKs\_2928

TGTACCAGTGGTTATAACCAAACATATAACTTTTCTAGCTCCCAATATCCCCCTTTAAAGCTTGAGAACTT  
GTATCGTCTGTGCTATGCTTCATACACACAAGTAAGCCTTTCAGAAACT

>PGSC0003DMG400007862-(rev)LRR-RLKs\_2989

TTGAGAACTTGTATCGTCTGTGCTATGCTTCATACACACAAGTAAGCCTTTCAGAAACTGCTTGTTTACAA  
GTTCCCTGAAATCTTACTTAGTAAAAAATGGATGTGCTTGTATGCTATGT

>PGSC0003DMG400007862-(rev)LRR-RLKs\_305

TCGCCAAGTCTTCGTAGGCGTTTGGACATGAATTGAGTGATATACGAAAAAAAAAAGATTAGTATTTGA  
TGTTTCAGTTGAAAAATAGTAGTATTTAGAAACTGAAGTTGTGTTTCGACAT

>PGSC0003DMG400007862-(rev)LRR-RLKs\_3111

CTCGGACTCGTATTGGATCCTCCCAAAGTAATCCGACACTGGTGCAACAACATATTTGGAAAGTCCGAGC  
AACATAGCTTGTATGCTGCAAGGTCATTTTGTACAAAATGACCAGAAATA

>PGSC0003DMG400007862-(rev)LRR-RLKs\_3172

AGTCCGAGCAACATAGCTTGTATGCTGCAAGGTCATTTTGTACAAAATGACCAGAAATATAGGCTTAAT  
GTCTGACATGGATATGAATCCTAAACTTGCCCTTAGCATAAATGAAAGCTC

>PGSC0003DMG400007862-(rev)LRR-RLKs\_3599

ATTTAAGTTCACATTCCATGGTGGCTATACTCTAGTTAGGTCACCCACCTTAATCATATATCGAGCCCCTA  
ACTTTCAGGAGGCAAAAATAACATGGAAGTCAGGCAGTCTTATTTATTA

>PGSC0003DMG400007862-(rev)LRR-RLKs\_366

GTATTTGATGTTTCAGTTGAAAAATAGTAGTATTTAGAAACTGAAGTTGTGTTTCGACATGCATTTTAGTTT  
TTAAAAAGAGTTGTAAAACAATGTTTTGAAAAGAGGGATAACAAATTCA

>PGSC0003DMG400007862-(rev)LRR-RLKs\_427

ATTTTAGTTTTTAAAAGAGTTGTAAAACAATGTTTTGAAAAGAGGGATAACAAATTCATGTCCAAACGG  
GTAAGTAATTTCTGTGTAAATGCTCATAAGGGAATTCCAATTTTCATGTT

>PGSC0003DMG400007862-(rev)LRR-RLKs\_488

TCCAAACGGGTAAGTAATTTCTGTGTAAATGCTCATAAGGGAATTCCAATTTTCATGTTTTGTGCAATGCT  
GATTATGTGAGAATATGTAATTATCTAAGCGAGTTGTTGATTTGAGCTC

>PGSC0003DMG400007862-(rev)LRR-RLKs\_4941

TTAGTCTTTAGTGATAAGTGGTTTTCTTATGTGTAAACAGCTCCCCTAGTTGTGACGCCAAAAGAAAAG  
CAACCAAGAAGACCGGTTCCCGTTCCGAAGCCACAAGATGAGCAGCAGGT

>PGSC0003DMG400007862-(rev)LRR-RLKs\_5002

AAAGAAAAGCAACCAAGAAGACCGGTTCCCGTTCCGAAGCCACAAGATGAGCAGCAGGTAAATGTGCA  
AACCATGAGTGCAGTGCCAAAGAAGGATGATAGTGAGATAAACCTTGGCAGA

>PGSC0003DMG400007862-(rev)LRR-RLKs\_5368

AATGGAAAGGTACAACCTTCAATCGGCATGAATTTATTATGATGTACCAATTTATTAAGTGTAGTTTCCTA  
CTTCCACTAGATTGTCGAGAGTCTTGACTTACTGCTTTTTCTCTCCTTT

>PGSC0003DMG400007862-(rev)LRR-RLKs\_5429

TAGTTTCCTACTTCCACTAGATTGTCGAGAGTCTTGACTTACTGCTTTTTCTCTCCTTTTATTTCTCCATCAT  
GTTTGGTATTCTGGAATGCTAAATTATCAGCAAGTAGCATCAAAT

>PGSC0003DMG400007862-(rev)LRR-RLKs\_549

GTGCAATGCTGATTATGTGAGAATATGTAATTATCTAAGCGAGTTGTTGATTTGAGCTCAAAGTGAATG  
CATTTGCTTATTGTCCTTGATATTTGAACTAGTAGGTGGTCTTCTTGCT

>PGSC0003DMG400007862-(rev)LRR-RLKs\_5551

CTCTTTATCTCTAGTATAAATTGTTAGGTTGCTTAGATTTATCAAGAATGGTTGTGATACAAGCACAATTA  
TATGCAAAAAGGCCTTTTTTAATGGAAAATTCACCTTCATATATCCTTA

>PGSC0003DMG400007862-(rev)LRR-RLKs\_5612

AGCACAATTATATGCAAAAAGGCCTTTTTTAATGGAAAATTCACCTTCATATATCCTTAATTAGAGCACTC  
CTTAGCAAATCTATTAATGAATTCTACCTATTTTATCTGATATAATGT

>PGSC0003DMG400007862-(rev)LRR-RLKs\_5734

CTTGAATTACTTTAGCTAGTTGAGACCTGCTTAAGGACAAAAGTTGTAATTGCAATATTTCCCTCTAGGT  
TTCTTCTAGTTCTTTTCTTTTCTCGTTCCAAATTAATCTTCAACTAGT

>PGSC0003DMG400007862-(rev)LRR-RLKs\_5795

CCCTCTAGGTTTCTTCTAGTTCTTTTCTTTTCTCGTTCCAAATTAATCTTCAACTAGTATTTTTTTTCCAGTA  
ACCAACATCATCGATGAAATCTTGTCTTAGAAGTGATTTCAAAT

>PGSC0003DMG400007862-(rev)LRR-RLKs\_5856

TTTTTTTCCAGTAACCAACATCATCGATGAAATCTTGTCTTAGAAGTGATTTCAAATTTGTTAAAATGAA  
AAACAGCCTTTTATACTATTTTCTGCCTTGACTTGTCTCACTTTATAAG

>PGSC0003DMG400007862-(rev)LRR-RLKs\_5917

TTAAAATGAAAAACAGCCTTTTATACTATTTTCTGCCTTGACTTGTCTCACTTTATAAGAGGAACCGCCAG  
ATACTGCTGCATCTTTTTCTGGTCATGATTTAACTATTAAGGTAAG

>PGSC0003DMG400007862-(rev)LRR-RLKs\_6039

TATGCATGCTGTTTCATTTATATAAATTACTTGGGGATGTATATGCATTTCTCTGGCATTCAAATCTTACC  
GCTCTTCCTTCACTTGCACATATGCACCACATCATTCAAGTGGTTGCAAC

>PGSC0003DMG400007862-(rev)LRR-RLKs\_610

AAGTGAATGCATTTGCTTATTGTCCTTGTATATTTGAACTAGTAGGTGGTCTTCTTGCTTCTTATAAAGTTT  
GTACCTTTTGTAAAAAATTGAGGATAGGGTAAATGGTCGAGGGA

>PGSC0003DMG400007862-(rev)LRR-RLKs\_6466

GTTAGAGTACGTCAAATAACATTACATACATTTAATTATGCACATCATGTTTGTGCACACTCGCGTTCATG  
CGTGTGTGTATAAGTGTGGGACCTATAATAAGTGTCTGACACACA

>PGSC0003DMG400007862-(rev)LRR-RLKs\_6527

CGCGTTCATGCGTGTGTGTATAAGTGTGGGACCTATAATAAGTGTCTGACACACTATATGATAA  
ATCAGTGTCTATTAATACTGAACAATAAAATGGTTCTGGTATAGTGATAA

>PGSC0003DMG400007862-(rev)LRR-RLKs\_6588

ATATGATAAATCAGTGCTATTAATACTGAACAATAAAATGGTTCTGGTATAGTGATAAATCAATAACA  
AGCTCATTTTAGTCCTCAACTTTCTTGTGTTGTGTATATTACATGATAAA

>PGSC0003DMG400007862-(rev)LRR-RLKs\_6649

TCAATAACAAGCTCATTTTAGTCCTCAACTTTCTTGTGTTGTGTATATTACATGATAAAAAGCCACACAAA  
CGACCTGGAATGGTCTTAACTATATGCAAAATGTTAGATGTAGCTGTCT

>PGSC0003DMG400007862-(rev)LRR-RLKs\_671

TTATAAAGTTTGTACCTTTTGTAAAAAATTGAGGATAGGGTAAATGGTCGAGGGATTACAAGGTG  
GAGAATCGAACTCTCATCAATAAGGTAAGTTCTAGTAGCCAACCGATTC

>PGSC0003DMG400007862-(rev)LRR-RLKs\_6710

GCCACACAAACGACCTGGAATGGTCTTAACTATATGCAAAATGTTAGATGTAGCTGTCTTTGCTTCCTCT  
CCTTTCTTTCTTCTGCATGTCCAAGAAAAGATGAACAAAATTAATT

>PGSC0003DMG400007862-(rev)LRR-RLKs\_7015

TTGCTAAGCAGTCTGATTCTCATTTTTTAATTAGATTTGCATGAAAAAGTGAGGTAGACTGCTAGAGTAT



GTTTAAATTAATAATCATTCTTGTGGATGAAATGCAGGTATCTCCATGA

>PGSC0003DMG400007862-(rev)LRR-RLKs\_7076

CTAGAGTATGTTTAAATTAATAATCATTCTTGTGGATGAAATGCAGGTATCTCCATGAAGTCTGCGAGC

CACCTATTATTCATAGAACTTCAAGTCTGCCAATCTTCTGCTTGATGAG

>PGSC0003DMG400007862-(rev)LRR-RLKs\_7259

CAGGTAACCTGTGACCCCAATGTTATGGAGTAGAAAGAATTGAAATGCTTCCTTGGATTATTAGTTTCTCT

CTATGAGCTGCAAGTGGAAAGAAAAGTGAATTTCTAGTGTTTGATAGAAG

>PGSC0003DMG400007862-(rev)LRR-RLKs\_732

ACAAGGTGGAGAATCGAACTCTCATCAATAAGGTAAAAGTTCTAGTAGCCAACCCAGTTCAGCTACTAAG

ATTTCCCTATAAAGTTTGTACCTTCACTTGCATTGTCCTGACATTTTATTG

>PGSC0003DMG400007862-(rev)LRR-RLKs\_7320

TAGTTTCTCTATGAGCTGCAAGTGGAAAGAAAAGTGAATTTCTAGTGTTTGATAGAAGTGGACATGGG

AGCTGAATATATAATTTAAAAAAGGAACAGTAGTGATGGTCAAAGCGTTTT

>PGSC0003DMG400007862-(rev)LRR-RLKs\_7381

GACATGGGAGCTGAATATATAATTTAAAAAAGGAACAGTAGTGATGGTCAAAGCGTTTTCAACAAGATG

TTGGAATAAGGAGCAGTAAGAATGAATCCCGTAAATGTGTAAAGTATATT

>PGSC0003DMG400007862-(rev)LRR-RLKs\_7442

ACAAGATGTTGGAATAAGGAGCAGTAAGAATGAATCCCGTAAATGTGTAAAGTATATTCTTTGGGAAA

TGGTTGGTTACACCCTGTAGGATAGGGTGAAGTGTGTCGAAGGCGCGCT

>PGSC0003DMG400007862-(rev)LRR-RLKs\_7747

GTGCTCTTCTCATGATGTGTTTTATATGAACAGAAAATTGCTCTAGGATGCATGTGGATCATCTATCTTGC

TGTTATTTGTTGTTCTTTTGATAAAGTAGTCTTGCTTAGTCTTGGGTTT

>PGSC0003DMG400007862-(rev)LRR-RLKs\_7808

TCTATCTTGCTGTTATTTGTTGTTCTTTTGATAAAGTAGTCTTGCTTAGTCTTGGGTTTGATTACTGTTACG

TTCAATTAAGGTATGTTAAAACTATATCAAGTTGACATTACACTGAT

>PGSC0003DMG400007862-(rev)LRR-RLKs\_793

CTACTAAGATTTCCCTATAAAGTTTGTACCTTCACTTGCATTGTCCTGACATTTTATTGGGTTTGTAAAGTT

GAGGACTAACAGCTTTTGCGCCTATTCTGGTTAATTGCCTCTCAGGGA

>PGSC0003DMG400007862-(rev)LRR-RLKs\_8052

GGCAGAATGTCATATGACCGGTAAAAAGCCTTCTGCATCCTTTTGAGCTAATATAGGTGTGCCTCATT  
CTAAGTTAACACACCTGCATATCATATTCAGGACACGGAGTCGAGGAGAG

>PGSC0003DMG400007862-(rev)LRR-RLKs\_854

TTTGTAAGTTGAGGACTAACAGCTTTGCGCCTATTCTGGTTAATTGCCTCTCAGGGAAGTTCGTAGTT  
AGCCTTTGTTAATTGATTGGGTTCTAAATTTCCACATGGTTTGTCTGT

>PGSC0003DMG400007862-(rev)LRR-RLKs\_915

TTCGTAGTTAGCCTTTGTTAATTGATTGGGTTCTAAATTTCCACATGGTTTGTCTGTAAATTGATTGGATT  
CTAAATATTTATATGGTTTCATGGATCAGTTTCTGCACCTTCTCTTT

>PGSC0003DMG400007862-(rev)LRR-RLKs\_976

TTGATTGGATTCTAAATATTTATATGGTTTCATGGATCAGTTTCTGCACCTTCTCTTTATGTTTGGAAATT  
CTTAACAATTCTCCTTTTGTATTGGTTAAGTTGCTGCTATTAATAACT

>PGSC0003DMG400007876-(rev)LRR-RLPs\_1364

AAAATTGGACCTGAGTGATAACAATTTTCATGGTCCTTTGCCTCATTTTTCACCCAAGATGATGACGTTGA  
TTTTGGCAAGGAATTCGTTTAATGGTACCATTGCCCTGTATGTGAATC

>PGSC0003DMG400007876-(rev)LRR-RLPs\_1426

TGACGTTGATTTTGGCAAGGAATTCGTTTAATGGTACCATTGCCCTGTATGTGAATCACTTGTCATGAAT  
AACTCTCTGAGTCTTCTAGACCTATCTTCAAATTTCTATCAGGACAAC

>PGSC0003DMG400007876-(rev)LRR-RLPs\_1798

AGATTCTTATATTAAGCAGAAACAATGACGGAATTATCCCAGGGAGATTTGCCAGCTTAAATACCT  
ATGTATTTTGGACCTTAGTTCCAACGCACTATCAGGAGTCATTCCAAGGT

>PGSC0003DMG400007876-(rev)LRR-RLPs\_1860

AAATACCTATGTATTTTGGACCTTAGTTCCAACGCACTATCAGGAGTCATTCCAAGGTGTCTTGATAATCT  
CCACACCATGTCCGGAGAAGAGGAAGCCCCATCCTTTACTAATGGACCC

>PGSC0003DMG400007876-(rev)LRR-RLPs\_1922

TGATAATCTCCACACCATGTCCGGAGAAGAGGAAGCCCCATCCTTTACTAATGGACCCTATGCAAATTAC  
AGGATTCATGGAATGCTCGTTCGTAATGGATACTTTAAGGAGTTCATTTT

>PGSC0003DMG400007876-(rev)LRR-RLPs\_1984

CAAATTACAGGATTCATGGAATGCTCGTTCGTAATGGATACTTTAAGGAGTTCATTTTACTGGCCCCG  
GATAGCAATTGATCTAGCAAAGAACCATTTATCAGGGGAAATTCCTGTGG

>PGSC0003DMG400007876-(rev)LRR-RLPs\_2046

TGGCCCCGGATAGCAATTGATCTAGCAAAGAACCATTTATCAGGGGAAATTCCTGTGGAAATCACCAGG  
CTTACTGCACTGAGGGGCTTGAATTTATCAAGTAACAATTTTCAGAGGAGCA

>PGSC0003DMG400007876-(rev)LRR-RLPs\_2108

CACCAGGCTTACTGCACTGAGGGGCTTGAATTTATCAAGTAACAATTTTCAGAGGAGCAATTCCAGGTGA  
CATTCAAACTTGCAACTTTTGGAGTCTCTAGATCTTCCAGGAATCAGCT

>PGSC0003DMG400007876-(rev)LRR-RLPs\_2170

CAGGTGACATTCACAACTTGCAACTTTTGGAGTCTCTAGATCTTCCAGGAATCAGCTGTCATGCTCCTT  
CCTCCCCGTATGGGACATCTTATGTTTCTTGAGGTCGCGAATTTTTCTT

>PGSC0003DMG400007876-(rev)LRR-RLPs\_2232

TGCTCCTTTCCTCCCCGTATGGGACATCTTATGTTTCTTGAGGTCGCGAATTTTTCTTCAATGATTTGACA  
GGAGAAATTCAGTTGGAGGTCAATTCGCCACCTTTGAGAGTACTTCT

>PGSC0003DMG400007876-(rev)LRR-RLPs\_2294

TGATTTGACAGGAGAAATTCAGTTGGAGGTCAATTCGCCACCTTTGAGAGTACTTCTTATGTTGGGAAT  
GCAAACTTGTGTGGATTCCCAGTCTCACGATTCTGCTCGGATCATTTACA

>PGSC0003DMG400007876-(rev)LRR-RLPs\_2356

TTGGGAATGCAAACTTGTGTGGATTCCCAGTCTCACGATTCTGCTCGGATCATTTACATGAGGACATGGT  
TCACTGTAGTAACAATAATCAGGAGGTTTCAGGCCATTGAACACGAAGAAA

>PGSC0003DMG400007876-(rev)LRR-RLPs\_2418

GACATGGTTCCTGCTAGTAACAATAATCAGGAGGTTTCAGGCCATTGAACACGAAGAAAACAACAACTGG  
CTCGATGAATTTTCGTTCTACATTAGTATGGGAATTGGATTCAATACAGGT

>PGSC0003DMG400007876-(rev)LRR-RLPs\_2480

CAACTGGCTCGATGAATTTTCGTTCTACATTAGTATGGGAATTGGATTCAATACAGGTTTCTGGTTATTT  
GGGTTACTTTAATGTTGAAAGAGTCATGGAGATATGCCTATATGAGGTT

>PGSC0003DMG400007876-(rev)LRR-RLPs\_2542

GGTATTTTGGGTTACTTTAATGTTGAAAGAGTCATGGAGATATGCCTATATGAGGTTCTGGAAAACAT  
GGGCAATAAGATATATGTCTTTGCTGCCATCAGATTGAAAAATATTCAAG

>PGSC0003DMG400007876-(rev)LRR-RLPs\_2604

GAAAACATGGGCAATAAGATATATGTCTTTGCTGCCATCAGATTGAAAAATATTCAAGCAGCAAAGAGG

CTGACAAATTTCCCAAATTAAGCTGCTTCTCTTTACTATTCTCTGTTTCTT

>PGSC0003DMG400007876-(rev)LRR-RLPs\_744

AATCTTGTTTACCTTAATCTTTTCGAGAAGTCAGCTGAACGGTTCACTTCCAAATGCCTTTGGCAACATGCG

TTCACTTAGAGTTCTTGATCTTTCTGGGAAGTCTCTCCTAGGCAACAGT

>PGSC0003DMG400007876-(rev)LRR-RLPs\_806

CAACATGCGTTCACTTAGAGTTCTTGATCTTTCTGGGAAGTCTCTCCTAGGCAACAGTCCACATTCGTTTG

AGAAAATGAGTTCACTTACGGGCTATTTACCACCAACCCTGCCATCAA

>PGSC0003DMG400007876-(rev)LRR-RLPs\_930

AAATACTAGGATATTTCTGATAATCAAATGGAAGTCTTTAGCAAGAAGCATCACACAACCTTAAGCAAT

TAGTTGTCCTCAATGTTGCTCGGAACTCTTCAAGGACTCGATTACAGAA

>PGSC0003DMG400007899-(rev)OtherRLKsTM\_0

GAAACCTAAAGAAGCTAAGCCGTCTTTGAGTTTTACAAACCCTAGAGAGAGAAAACCTAAATCCAGTTTT

TGGTCCGATTTTCGGGAATGCAGAGAGATGAGAGGCAAATCCCTTTTTTC

>PGSC0003DMG400007899-(rev)OtherRLKsTM\_1008

TGCCCCTGAAGTACTTGGTAATCATGGATATGATGGTGCAACATCAGATATTTGGTCATGTGGAGTAATT

CTTTATGTGCTTTTAGCTGGTTTTTTACCATTTCAAGATGATAATATTAT

>PGSC0003DMG400007899-(rev)OtherRLKsTM\_1071

AGTAATTCTTTATGTGCTTTTAGCTGGTTTTTTACCATTTCAAGATGATAATATTATGGCTATGTATAAGA

AAATTCACAAGGGTGATTTTAAGTGTCCACCTTGGATGTCATCTGATGC

>PGSC0003DMG400007899-(rev)OtherRLKsTM\_1134

GTATAAGAAAATTCACAAGGGTGATTTTAAGTGTCCACCTTGGATGTCATCTGATGCAAAAAAGTTGATA

GTAAAGATGTTGGATCCGAATCCGAGAACTCGGATTACTGCTTCAAAGAT

>PGSC0003DMG400007899-(rev)OtherRLKsTM\_1197

GTTGATAGTAAAGATGTTGGATCCGAATCCGAGAACTCGGATTACTGCTTCAAAGATTATGGAGTCTAA

TTGGTTCAAGAAGACTGTGCCAAGGACTATGAGGAGTAAGGAGGAGGAAGA

>PGSC0003DMG400007899-(rev)OtherRLKsTM\_126

GATTTTAGGAGGCTTTAAGCCCCAAATTTCACTCGCTGGAGGAGGCCGGAATTGCCATCGGAATTGTCA

CCGAAACACGTTGAAGACGGGTGAACTCACTCACCCAACACCCTTTTCCA

>PGSC0003DMG400007899-(rev)OtherRLKsTM\_1260

GTCTAATTGGTTCAAGAAGACTGTGCCAAGGACTATGAGGAGTAAGGAGGAGGAAGAGTTTGCTCATG  
TGGGAGATGAAGATTGGGTAGGAAAGGTGAAAAAGATTGAGTCTTTGAATGC

>PGSC0003DMG400007899-(rev)OtherRLKsTM\_1323

TCATGTGGGAGATGAAGATTGGGTAGGAAAGGTGAAAAAGATTGAGTCTTTGAATGCTTTTCATATCAT  
TTCTTTGTCGGAGGGGTTTGATTTGTCTCCGTTGTTTGAGGAAAAGAAGAA

>PGSC0003DMG400007899-(rev)OtherRLKsTM\_1386

TATCATTCTTTGTCGGAGGGGTTTGATTTGTCTCCGTTGTTTGAGGAAAAGAAGAAGAAGGAGAAGGA  
ACAGTTGAGATTTGCAACAACAAAGCCAGCTAGCAGTGTGATTTCGAAGCT

>PGSC0003DMG400007899-(rev)OtherRLKsTM\_1449

GAAGGAACAGTTGAGATTTGCAACAACAAAGCCAGCTAGCAGTGTGATTTCGAAGCTCGAGGAAGTGG  
CTAAAACGTCGAAATTCAGCTTAAAGAGGAGTGATTCTAGTGTTAGATTGCA

>PGSC0003DMG400007899-(rev)OtherRLKsTM\_1512

AGTGGCTAAACGTCGAAATTCAGCTTAAAGAGGAGTGATTCTAGTGTTAGATTGCAGGGGAAAGAGA  
GTGGGAGGAAAGGGAAGTTGGGAATTTCTGCTGATATATTTGCTGTGACACC

>PGSC0003DMG400007899-(rev)OtherRLKsTM\_1575

AGAGAGTGGGAGGAAAGGGAAGTTGGGAATTTCTGCTGATATATTTGCTGTGACACCTTCATTTCTGGT  
TGTGGAGGTGAGGAAAGCTTGTGGTGACACATTGGAATATAATCAGTTCTG

>PGSC0003DMG400007899-(rev)OtherRLKsTM\_1638

TCTGGTTGTGGAGGTGAGGAAAGCTTGTGGTGACACATTGGAATATAATCAGTTCTGCAGCAAAGAGCT  
TAGGCCAGCACTCAAGGACATTGTTTGGAAATCAGCACCTGAGAATCCAAC

>PGSC0003DMG400007899-(rev)OtherRLKsTM\_1701

AGAGCTTAGGCCAGCACTCAAGGACATTGTTTGGAAATCAGCACCTGAGAATCCAACAATTGCTTGAGT  
TAATAAAAGCTACTATTAGATTCATGTGTTAGAGAACTTGAATTTGTTAG

>PGSC0003DMG400007899-(rev)OtherRLKsTM\_1827

TCTTTTTGTTATTGCTTAGATGTGTTCTTGAATTTGAGACTTAATCTCTGAAGTATGTCTCTTGAATTCATG  
TGTTTCGAGAGATGGAATTTGTTAATTTTTGTTCTTGTCTTGTGTT

>PGSC0003DMG400007899-(rev)OtherRLKsTM\_189

TTGTCACCGGAAACACGTTGAAGACGGGTGAACTCACTCACCCAACACCCTTTTCCACCTCAGTTATAAA  
CCCATTTGTTTTTCTTAACAAAAACTATATACCCTTTTGAATTCGTT

>PGSC0003DMG400007899-(rev)OtherRLKsTM\_1890

GAATTCATGTGTTTCGAGAGATGGAATTTGTTAATTTTTGTTCTTGTTCTTGTTGTTAGATGTGTTCTTGA  
AATTGAGACGGAGTCTCTTGAATTCGTGGTTGAGTGATTGAATCGTTT

>PGSC0003DMG400007899-(rev)OtherRLKsTM\_1953

TGTTCTTGAAATTGAGACGGAGTCTCTTGAATTCGTGGTTGAGTGATTGAATCGTTTAGTTTTGTTCTTGT  
TCTTGTTGTTAAATGTATTCTTGAAATTGAGACTGAATCTCTTGAATTC

>PGSC0003DMG400007899-(rev)OtherRLKsTM\_2016

GTTCTTGTTCTTGTTGTTAAATGTATTCTTGAAATTGAGACTGAATCTCTTGAATTCGTGTTTGAGTGATT  
GAATCGTTTAGTTTTGTTCTTGTTCTTGTTGTTAAATGTATTCTTGAAA

>PGSC0003DMG400007899-(rev)OtherRLKsTM\_252

TTATAAACCCATTTGTTTTTTCTTAACAAAACTATATACCCTTTTTGAATTCGTTCGTCGGCGGCCGGAG  
TTCCACCGGAAACACGTCGGAGACGAGTGAACACACCCCCACCCCC

>PGSC0003DMG400007899-(rev)OtherRLKsTM\_315

CGGCCGGAGTTTCCACCGGAAACACGTCGGAGACGAGTGAACACACCCCCACCCCCCTTCACTTCCAT  
TTAAACCCATCAAAAATTTTTTTTCAAAAATCGAACACCCTTTTCGATCTT

>PGSC0003DMG400007899-(rev)OtherRLKsTM\_378

CTTCCATTTAAACCCATCAAAAATTTTTTTTCAAAAATCGAACACCCTTTTCGATCTTGCTTCAGAAAAGTTC  
CCCGAACCCAGTGTTTTATAATGGGGCCAGAAGAAAAATGTGCTGTTTT

>PGSC0003DMG400007899-(rev)OtherRLKsTM\_441

GAAAAGTTCCCGAACCCAGTGTTTTATAATGGGGCCAGAAGAAAAATGTGCTGTTTTGTATGGTAAATA  
TGAGCTCGGACGAGTTTTGGGTCAAGGTTCTTTGCTAAAGTTTACCATGC

>PGSC0003DMG400007899-(rev)OtherRLKsTM\_504

TAAATATGAGCTCGGACGAGTTTTGGGTCAAGGTTCTTTGCTAAAGTTTACCATGCTCGTAACGTGGTA  
ACAGGGGAGAATATAGCAATGAAAGTTGTTGGAAAAGAGAAGGTGATAAA

>PGSC0003DMG400007899-(rev)OtherRLKsTM\_567

CGTGGTAACAGGGGAGAATATAGCAATGAAAGTTGTTGGAAAAGAGAAGGTGATAAAAGTAGGAATG  
ATGGAGCAAATCAAACGAGAAATCTCCGTCATGAAAATGGTGAAACATCCAAA

>PGSC0003DMG400007899-(rev)OtherRLKsTM\_63

CAGTTTTTGTTCCGATTCGGGAATGCAGAGAGATGAGAGGCAAATCCCTTTTTTCTAGTTTGATTTTA

GGAGGCTTTAAGCCCCAAATTTCACTCGCTGGAGGAGGCCGGAATTGCCA

>PGSC0003DMG400007899-(rev)OtherRLKsTM\_630

AATGATGGAGCAAATCAAACGAGAAATCTCCGTCATGAAAATGGTGAAACATCCAAACATTGTTCGAGCT  
TCATGAAGTTATGGCAAGCAAACGAAGATTTACTTCGCCATGGAGTACGT

>PGSC0003DMG400007899-(rev)OtherRLKsTM\_693

CGAGCTTCATGAAGTTATGGCAAGCAAACGAAGATTTACTTCGCCATGGAGTACGTTAAAGGTGGCGA  
ATTGTTGAAAAAGTAGCTAAAGGTAAGCTTAGAGAAGACAATGCTCGAGG

>PGSC0003DMG400007899-(rev)OtherRLKsTM\_756

TGGCGAATTGTTGAAAAAGTAGCTAAAGGTAAGCTTAGAGAAGACAATGCTCGAGGCTATTTCCAGCA  
GTTGATTTCTGCAATTGATTTTTGTCATAGCCGTGGTGTATCACAGGGA

>PGSC0003DMG400007899-(rev)OtherRLKsTM\_819

CCAGCAGTTGATTTCTGCAATTGATTTTTGTCATAGCCGTGGTGTATCACAGGGATTTAAAGCCTGAG  
AATTTGTTGTTAGATGAAGAAGGTAATCTTAAGGTAACCGATTTCCGGGCT

>PGSC0003DMG400007899-(rev)OtherRLKsTM\_882

GCCTGAGAATTTGTTGTTAGATGAAGAAGGTAATCTTAAGGTAACCGATTTCCGGGCTTAGTGCTTTTACT  
GATCATTTAAGACAAGATGGTTTATTGCATACAACCTGTGGTACTCCTGC

>PGSC0003DMG400007899-(rev)OtherRLKsTM\_945

TTTTACTGATCATTTAAGACAAGATGGTTTATTGCATACAACCTGTGGTACTCCTGCTTATGTTGCCCTG  
AAGTACTTGGAATCATGGATATGATGGTGCAACATCAGATATTTGGTC

>PGSC0003DMG400007915-(rev)LRR-RLPs\_0

ATGAGGTGGGACTCGTTGCAGTTCCTAAACCTTCTCATAATTTTAAACAGGCCACCTACCACAATTTCCG  
TTACCATAACCTACGGTATCTTGATCTGAAATTTAACTCCCTTCAGGGT

>PGSC0003DMG400007915-(rev)LRR-RLPs\_192

TCAGTCCACATTGCTTGGGAAGCATGGCTAGTCTTAAGGTGCTAGACTTAAGAAGGAACAATTTCCACA  
GGGAGTCTTCCCCATTATGTGCACACAGCACTACATTGAGTACCATTGTC

>PGSC0003DMG400007915-(rev)LRR-RLPs\_512

TTCCAAGTTGCGAATTTTTGATCTTTCGCATAATGATTTTCAGTGGCTCACTTCCTGCAAATGTTTTTGGAA  
ACTTCAAGGCAATGATCAAATTAGATGGCGAAGACACAGGAAATATCAA

>PGSC0003DMG400007915-(rev)LRR-RLPs\_576

TTTGAAACTTCAAGGCAATGATCAAATTAGATGGCGAAGACACAGGAAATATCAAGTACATGGAATCT  
ATGTTGAATTCGCTATTGGTCACATCGTATGAGGATTCAGTGAGTTTGGTA

>PGSC0003DMG400007915-(rev)LRR-RLPs\_640

AATCTATGTTGAATTCGCTATTGGTCACATCGTATGAGGATTCAGTGAGTTTGGTAATCAAAGGGCACGA  
TATTGAGCTAGAAAAGAAATCAGCACAATTATGACAACCATAGATCTCTCAC

>PGSC0003DMG400007915-(rev)LRR-RLPs\_768

TTTGAAGGTGTCATTCCGGAACACTAAAGGATCTCAGCTCACTTTGGTTACTCAATTTATCCAGTAACA  
ATCTCAGAGGCGATATTCCAATGAAACTAGGACTATTGAGTATGCTTGAA

>PGSC0003DMG400007915-(rev)LRR-RLPs\_832

GTAACAATCTCAGAGGCGATATTCCAATGAAACTAGGACTATTGAGTATGCTTGAAGCTTTAGATCTCTC  
TTGGAATCGGCTCATTGGAAAGATTCCACAGGAATTAACAAGAATGAACT

>PGSC0003DMG400007915-(rev)LRR-RLPs\_896

TCTCTTTGGAATCGGCTCATTGGAAAGATTCCACAGGAATTAACAAGAATGAACTTTCTAGCCTTCTTA  
AACCTCTCTCAAATCATCTCGTCGGACCAATTCCTCAAGGTCGACAATT

>PGSC0003DMG400007948LRR-RLKs\_0

TTAATAATTAATCCTAAAATAACTTATTTTCGACCGTGAAACATTATGGCCATGGCTGACACAGAAACAG  
AGAGAAAAATAGCCAGACTAAATATTGGAAGTCCCCACTTTTCTTTTTTC

>PGSC0003DMG400007948LRR-RLKs\_124

TCAAAAATCTTCACGTGAATCTGACTCTGCCTTTTGCCATATCTTCTTAGACAGCTGCTTCTCTTCACTC  
TTCCACCTCTACACATATTCCACAACAATTCAATCTGGAAAAAATTTTC

>PGSC0003DMG400007948LRR-RLKs\_1674

CGTATATCTTGACTTATTATTTATTAAGATGCGCATAAACTATACGAAAAATATTATTAATGCAATTATTT  
TGACGAGAAGTAAAATATAATAAAATGAACGGAGTATTTTGAAGGTGT

>PGSC0003DMG400007948LRR-RLKs\_1736

GCAATTATTTTGACGAGAAGTAAAATATAATAAAATGAACGGAGTATTTTGAAGGTGTTGTCCAATCAA  
ATAGGGTCCATACACCATAACCTATTGTTACAGTTTCTCAACCCCAATGTT

>PGSC0003DMG400007948LRR-RLKs\_186

CTCTTCACTCTTCCACCTCTACACATATTCCACAACAATTCAATCTGGAAAAAATTTCTTAAACAAGATGA  
AAATACAACAATTCTTACTACTTACCATTCTTCTGTTTTTATCTGTTTC



>PGSC0003DMG400007948LRR-RLKs\_1860

CAAACACAGAGAATCTTGCAGCTGACCCTGATGACATTTTTGGACACATATTTCTGTCATCGTAAAATAC  
TTTTATATTTGTTTAGTGTCTAATCATAGATTATAGTATTATTATTGAA

>PGSC0003DMG400007948LRR-RLKs\_1922

TAAAATACTTTTATATTTGTTTAGTGTCTAATCATAGATTATAGTATTATTATTGAAGCTAGTTCTGTCTG  
CATTAGAATGTTATTGTTTCACGTGTGGTTGCGTAACGTGAAGTTAA

>PGSC0003DMG400007948LRR-RLKs\_1984

GTTCTGTCTGCATTAAGAATGTTATTGTTTCACGTGTGGTTGCGTAACGTGAAGTTAATAAGAGTACGGT  
GGTTAGCATTAAATAATTCATAAAGTAATATAAATAATAGCTTTATTGCAT

>PGSC0003DMG400007948LRR-RLKs\_2046

AGTACGGTGGTTAGCATTAAATAATTCATAAAGTAATATAAATAATAGCTTTATTGCATATACTGAATTTTT  
TGGTCAATCTGACGTGGCATATGAAATAAAGTTTGACTGGTCAACCTGC

>PGSC0003DMG400007948LRR-RLKs\_2108

TGAATTTTTTGGTCAATCTGACGTGGCATATGAAATAAAGTTTGACTGGTCAACCTGCCACGTGTACAGG  
TTCCAAGTCATCAAGAGCAAAGCCACTTCACTGGACTTCATGTCTGAAAA

>PGSC0003DMG400007948LRR-RLKs\_2418

AATTCGGAAGCTGAATCACAACAACCACCACCACCACCGCCAAGCTAGTGCCAAGGCTGATGTCTATTC  
GTTTGGTGTCTTTTGTCTTGAACCTTAACGGGTAAGCATCCTTCAGAACA

>PGSC0003DMG400007948LRR-RLKs\_2480

TCTATTCGTTTGGTGTCTTTTGTCTTGAACCTTAACGGGTAAGCATCCTTCAGAACATCCATATCTAATG  
CCAGATGATATGTTACATTGGGTGAAGTCTACTAGAGAGGATCATGATG

>PGSC0003DMG400007948LRR-RLKs\_2666

CACCAGAGCAAAGACCAACAATGTGGCAAGTGTTAAAGATGATACAAGAGATTAAAGAAGCTGTTGTA  
ATGGAAGATAGTAATGAAATGGACCTTCTCACTGGCCCTCCTAAATCCTAAT

>PGSC0003DMG400007948LRR-RLKs\_2728

GTTGTAATGGAAGATAGTAATGAAATGGACCTTCTCACTGGCCCTCCTAAATCCTAATTCTTATTTAAATC  
TTAGTTATTATAAAATTGAATTTGTATTATATTCACTACATGAGACTTT

>PGSC0003DMG400007948LRR-RLKs\_2790

ATTTAAATCTTAGTTATTATAAAATTGAATTTGTATTATATTCACTACATGAGACTTTTCAATATTAGTAAT

TGCAAAAGAAAGGAACAAAAGGGGAAAGACTTATACTTTTGTTACATG

>PGSC0003DMG400007948LRR-RLKs\_2852

TATTAGTAATTGCAAAAGAAAGGAACAAAAGGGGAAAGACTTATACTTTTGTTACATGACCCTCATTAC  
CCTATTATATTGGATAACTATGTCTCACTTCCAAACAAATCGGTATGTTT

>PGSC0003DMG400007948LRR-RLKs\_2914

TCATTCACCCTATTATATTGGATAACTATGTCTCACTTCCAAACAAATCGGTATGTTTTATGCTAGTTGTCA  
GCCTACTACAACCCTCCTCCTTTATCTGGTCTCGGGATCAACATGTTT

>PGSC0003DMG400007948LRR-RLKs\_2957

CAAATCGGTATGTTTTATGCTAGTTGTCAGCCTACTACAACCCTCCTCCTTTATCTGGTCTCGGGATCAAC  
ATGTTTGTGTTGGCAGTGTTTTTCTCAATAACATATTTCAATTTGAC

>PGSC0003DMG400007948LRR-RLKs\_620

ACCATAATTTGTTACCGGTTCAATACCAGCTTCCATTTTCACTCTTCATAGGCTTAAAACCCTTGATCTCT  
CCTATAATAATCTCACCGGTTCAATACCAGTTGCAATCAACGGGTTGA

>PGSC0003DMG400007948LRR-RLKs\_868

ACGTTATCCCGGTTTTAAAACGGCGTCGTTTTTCAGACAATAAAGGACTTTGTGGTGAGATCGTACACAAA  
GAATGCCGTCCAATACAACCGTTTTTCAGTCCATCCACCGCTGCCTCCACT

>PGSC0003DMG400007999LRR-RLPs\_1220

CAGTTGAATTCTAATAGAGATCAATTTTGCATGTAAAGGACTCATCAAAGTTTTGATTGGAATACAGTT  
TAAATTGGTCTTAAAAACCTTTTCTTTAAATAATGGTATGGTGTCTAAAA

>PGSC0003DMG400007999LRR-RLPs\_1281

AATACAGTTTAAATTGGTCTTAAAAACCTTTTCTTTAAATAATGGTATGGTGTCTAAAACCGCCATGTTGT  
TCCAGGTTATTTCAAGGACAAGATTTTCTTTTCACTGTTTCTCAATCT

>PGSC0003DMG400007999LRR-RLPs\_2989

CAATGGATCATTGCATCAACTTCAATAAGCTGCCATCAAGTATTTGCCGGTTGCATAAGCTCAACAGCCT  
TAGTATCACTAATTGTGATAGTCTTTATGAACTTCCATCTGATTTAGGTG

>PGSC0003DMG400007999LRR-RLPs\_3111

TTACAACTCTACAAGTTATAAGGATATATGCCTGCCACATCTGAAAAGGCTTCCCCGGGAATTGGTC  
ATCTGGTAAAGCTGAAGTACCTTGACATTTACAATGTGTTGGTTTGAGA

>PGSC0003DMG400007999LRR-RLPs\_3416

GGTTGCCGAGGAGTGCTATACTCTTGATTGGCTATCTCAGTAATCAAGTTTTCAATCCCTTATCTTGGGT  
TTCTTCGTGTAAATGTAATAAGGCTCAGTCAATTTCCAGTTCTGTAT

>PGSC0003DMG400007999LRR-RLPs\_3477

TATCTTGGGTTTCTTCGTGTAAATGTAATAAGGCTCAGTCAATTTCCAGTTCTGTATTTCCCTTTGCA  
TGGGGTTCATTGTATCTCTTGTAATAATATATAGCAATATGTAATA

>PGSC0003DMG400007999LRR-RLPs\_3593

AATATGTAGATGGACTACATCTCAATAGCTGATCTTTCCTTTTCCTTAAAACCATAATGCTGGAAGCAAA  
ATTACCACAGGTAATCCAAGACTAAGGCGAGTTATCTGCTATAACATGT

>PGSC0003DMG400007999LRR-RLPs\_549

CATGTACTTGCGGATGTTTCATCATGTTAGGTTTAAATATGGAGCAGAGATTTGACGTGCTTGAGCATAGGC  
TTAAAGCTATAAAAATCGGAGTTGACGATAAAAGTGGTGGTGGTGGTGGGA

>PGSC0003DMG400008036LRR-RLPs\_1088

TATTCCTTGTTGGCTTTCAAATTTCAAACACCTACTCTGGATCTCCCTGAATTGGCTCCTTAGTAAGGGT  
AACACGGTGTACAAAGCATTATGCGTTAGCATGGTTCGGGAAAAGATCA

>PGSC0003DMG400008036LRR-RLPs\_1152

TAAGGGTAACACGGTGTACAAAGCATTATGCGTTAGCATGGTTCGGGAAAAGATCATTAGAAAATTCTG  
GTATTTGATCATAAACATACATGTCCCATTTTCGCGATCTTTTTTTGTTTT

>PGSC0003DMG400008036LRR-RLPs\_1216

TTCTGGTATTTGATCATAAACATACATGTCCCATTTTCGCGATCTTTTTTTGTTTTAATTAATTAAGCTTG  
TAATTTCCATTGAACAGAGTGTGATATCTCATAATAACTTGCGATCTC

>PGSC0003DMG400008036LRR-RLPs\_1267

GTTTTAATTAATTAAGCTTGTAATTTCCATTGAACAGAGTGTGATATCTCATAATAACTTGCGATCTCTG  
TTTATGGAGTATTGCTCAGTTGTAAATTTACGTTACTTTTATGTTATGG

>PGSC0003DMG400008036LRR-RLPs\_256

TTGATTTCAATGGCTTTCAACTTAGCGCGTTGACACTTGATGGCTTCCTTGATCAGCTTCCTGATATAGCT  
ATTTTCCATGCTAATTCAAACAATTTGGTGGGACTCTGTCTCCTAAAA

>PGSC0003DMG400008036LRR-RLPs\_832

TGTTGAATTTGCTAGAAATCAGATGTATGGGATAGTGCCTGATGTGATTTGTGCCCTGGGGAATTTGG  
CAAATTTATCGTTGTCCGATAACTATTTACAGGATTTGGGCCAATTTGCT

>PGSC0003DMG400008036LRR-RLPs\_896

TTTGCAAATTTATCGTTGTCGATAACTATTTACAGGATTTGGGCCAATTTGCTTGAGATTGATAGAA  
AATGGAGTGCTTGATTTGAGGAATAATTGTATTCCTGGTTTTCCATTCA

>PGSC0003DMG400008146-(rev)LRR-RLKs\_0

AGTTGTTCAAGTTTGTATCTTTCTTCTATTTGTAATAAACTGCAATTTTTATCACTTCTGCAACTTATTTG  
TTGTTTTTGGTACATGGGGTTCATTCTTGAGTAGTAAAGATTGCATC

>PGSC0003DMG400008146-(rev)LRR-RLKs\_1037

CTGAGAGTATTTTTACTATGGAAAAGCTTGAATTTTTAGTTCTGACTAATAATAAGTTGACTGGCACTATT  
CCTGATTCAATTGTGAATTGCAAAGGCCTTTCAAGCATTAGAATTGGGA

>PGSC0003DMG400008146-(rev)LRR-RLKs\_1098

TGGCACTATTCCTGATTCAATTGTGAATTGCAAAGGCCTTTCAAGCATTAGAATTGGGAATAACAAGCTG  
ATAGGTGGTATCCCTAAAGGAATTGGAAATATAAGTAGTCTTGCTTATTT

>PGSC0003DMG400008146-(rev)LRR-RLKs\_1159

AACAAGCTGATAGGTGGTATCCCTAAAGGAATTGGAAATATAAGTAGTCTTGCTTATTTGAAGCAGAT  
AATAATACACTTTCCGGGGAAATCGTCTCAGGATTTGCGAAATGCTCTAAT

>PGSC0003DMG400008146-(rev)LRR-RLKs\_122

TATTGTTCTGTTTCATTTTCAAGATTCTTGAATGGGTCATTTCTTTAAGTTGTTCAAGTTTGTATCTTTG  
TTTTCTAAACCCTTCTGTTTCTACTCTAGTTGTCTCTACAAGGTTTC

>PGSC0003DMG400008146-(rev)LRR-RLKs\_1220

AAGCAGATAATAATACACTTTCCGGGGAAATCGTCTCAGGATTTGCGAAATGCTCTAATCTCACTCTTCTT  
AATTTAGCTTCGAATGGATTTTCCGGAATCTCACTCCAGAGTTTGGTG

>PGSC0003DMG400008146-(rev)LRR-RLKs\_1281

CACTCTTCTTAATTTAGCTTCGAATGGATTTTCCGGAATCTCACTCCAGAGTTTGGTGAGCTCGATAATC  
TACAGGAGTTGATTGTTCCGGGGAATAATCTCTATGGAGAGATTCCAAC

>PGSC0003DMG400008146-(rev)LRR-RLKs\_1342

CTCGATAATCTACAGGAGTTGATTGTTCCGGGGAATAATCTCTATGGAGAGATTCCAATTCAGTTCTGA  
GGTGCAAGAATCTCAACAAGCTTGATTTAAGTAACAACAAGTTCAATGGA

>PGSC0003DMG400008146-(rev)LRR-RLKs\_1403

CAGTTCTGAGGTGCAAGAATCTCAACAAGCTTGATTTAAGTAACAACAAGTTCAATGGAACCATTCCAG

GAGATATATGCAACACAACCAAATTGCAGTTCTTGTTGTTGGGACAGAATT

>PGSC0003DMG400008146-(rev)LRR-RLKs\_1464

CATTCCAGGAGATATATGCAACACAACCAAATTGCAGTTCTTGTTGTTGGGACAGAATTCCTTGAAAGG

GGAAATACCCCGTGAGATAGGGAAGTGCCTGAAACTGCTTGAGTTGCAAAT

>PGSC0003DMG400008146-(rev)LRR-RLKs\_1525

TTGAAAGGGGAAATACCCCGTGAGATAGGGAAGTGCCTGAAACTGCTTGAGTTGCAAATGGGGAGTAA

CTATCTTACTGGAAGCATCCCTTCTGAGATTGGTCATATGAAGAACTTACAG

>PGSC0003DMG400008146-(rev)LRR-RLKs\_1586

GGAGTAACTATCTTACTGGAAGCATCCCTTCTGAGATTGGTCATATGAAGAACTTACAGATTTTCATTGAA

TTTGAGTCATAATCATCTCCATGGACAGTTGCCTAAGGATCTTGAAAAC

>PGSC0003DMG400008146-(rev)LRR-RLKs\_1647

TTCATTGAATTTGAGTCATAATCATCTCCATGGACAGTTGCCTAAGGATCTTGAAAACCTTGACAAGTTG

GTTTCTTTAGATGTATCTAATAATCAGCTGTCGGGGAATATTCCGTTGGA

>PGSC0003DMG400008146-(rev)LRR-RLKs\_1708

GACAAGTTGGTTTCTTTAGATGTATCTAATAATCAGCTGTCGGGGAATATTCCGTTGGAATTGAAAGGCA

TGTTGAGCTTGATAGAGGTTAACTTTTCGAGCAATCAATTCACAGGACCA

>PGSC0003DMG400008146-(rev)LRR-RLKs\_1769

TGAAAGGCATGTTGAGCTTGATAGAGGTTAACTTTTCGAGCAATCAATTCACAGGACCAATACCTGCTTT

TGCTCCATTTGAGAAGAGCTTAAATTCAAGCTTTCTTGAAACAAAGGGC

>PGSC0003DMG400008146-(rev)LRR-RLKs\_1830

ACCTGCTTTTGCTCCATTTGAGAAGAGCTTAAATTCAAGCTTTCTTGAAACAAAGGGCTCTGTGGTGAG

CCTTTGAGTAGTGATTGTGGATATGATTTTGAACACAACGGTAATCATCA

>PGSC0003DMG400008146-(rev)LRR-RLKs\_1891

TGTGGTGAGCCTTTGAGTAGTGATTGTGGATATGATTTTGAACACAACGGTAATCATCACCGAGTTTCCT

ACCGGCTCATCTTGCTGTTGTTGTTCTGGTTTGGCAATTTTACAGTT

>PGSC0003DMG400008146-(rev)LRR-RLKs\_1952

GAGTTTCCTACCGGCTCATCTTGCTGTTGTTGTTCTGGTTTGGCAATTTTACAGTTGTCACAGTGTT

GTTTTACTATACATGATGAGGGAGAAACAAGAGAAAACCACCATGGAAG

>PGSC0003DMG400008146-(rev)LRR-RLKs\_2013

CACAGTGGTTGTTTTACTATACATGATGAGGGAGAAACAAGAGAAAACCACCATGGAAGATGGAAATA  
CCACTGATGAAACTTGTAGCAAACCAGTGATCATAGCAGGGAATGTTTTCGA

>PGSC0003DMG400008146-(rev)LRR-RLKs\_2074

GGAAATACCACTGATGAAACTTGTAGCAAACCAGTGATCATAGCAGGGAATGTTTTCGATGAAAATCTC  
AAGCAAGCAATAGATTTTGATGCAGTTGTAAAGGCAGTCAGGAAAGATACA

>PGSC0003DMG400008146-(rev)LRR-RLKs\_2135

AAAATCTCAAGCAAGCAATAGATTTTGATGCAGTTGTAAAGGCAGTCAGGAAAGATACAAATAAGATTA  
GTACTGGAACCTTCAGTGATGTGTATAGAGCAGACATGCCTTCCGGGATGA

>PGSC0003DMG400008146-(rev)LRR-RLKs\_2196

TAAGATTAGTACTGGAACCTTCAGTGATGTGTATAGAGCAGACATGCCTTCCGGGATGATTTTGTATGT  
AAGAGCCTAAAGTCGATGGACAAGACTATAGTTCATCACCAGAGCAAGAT

>PGSC0003DMG400008146-(rev)LRR-RLKs\_2257

TTGTATGTTAAGAGCCTAAAGTCGATGGACAAGACTATAGTTCATCACCAGAGCAAGATGATCAGAGAG  
CTTGAAAAGCTAAGTAAACTCTGTCATGATAATCTGACGAGGCCTCTCGGG

>PGSC0003DMG400008146-(rev)LRR-RLKs\_2318

TCAGAGAGCTTGAAAAGCTAAGTAAACTCTGTCATGATAATCTGACGAGGCCTCTCGGGTTTGCAATCTA  
TGAGGAAGTTGTTCTACTCTTACATCAATACTATCCCAATGGGACATTGG

>PGSC0003DMG400008146-(rev)LRR-RLKs\_2379

TGCAATCTATGAGGAAGTTGTTCTACTCTTACATCAATACTATCCCAATGGGACATTGGCTCAGTTTCTC  
ATGAGTTTAGCCAGAAACCTGAGTACGAACCTGACTGGCCTACAAGACT

>PGSC0003DMG400008146-(rev)LRR-RLKs\_2440

CAGTTTCTTCATGAGTTTAGCCAGAAACCTGAGTACGAACCTGACTGGCCTACAAGACTTTCCATTGCCA  
TTGGCGTTGCAGAAGGGTTAGCGTTCCTTCATCATGTGGCCATAATCCAT

>PGSC0003DMG400008146-(rev)LRR-RLKs\_2501

CCATTGCCATTGGCGTTGCAGAAGGGTTAGCGTTCCTTCATCATGTGGCCATAATCCATCTTGATGTTTCT  
TCAGGGAATGTGTTTCTTGATTCTAAATTCACCCCTTTGGTTGCTGAAG

>PGSC0003DMG400008146-(rev)LRR-RLKs\_2562

TGATGTTTCTTCAGGGAATGTGTTTCTTGATTCTAAATTCACCCCTTTGGTTGCTGAAGTTGAAATATCCC  
GACTTCTTGATCCATCTAGAGGGACTGCAAGTATTAGTGCTGTTGCTGG

>PGSC0003DMG400008146-(rev)LRR-RLKs\_2623

GAAATATCCCGACTTCTTGATCCATCTAGAGGGACTGCAAGTATTAGTGCTGTTGCTGGCTCATTGGAT  
ACATTCCCCCAGGTATATTCTATGGCTTGAAAGACTTGGCTAATCATTTT

>PGSC0003DMG400008146-(rev)LRR-RLKs\_2867

TTTTGTATATTCTATCTGCCAGACAAACAAATTGAAACGGAGGGAGCATTTCCTTTTGTGGAAAATATCT  
GGTGTCTGACTAGTTCCTTTTCTTCAACAGAGTATGCATATACAATGC

>PGSC0003DMG400008146-(rev)LRR-RLKs\_2928

GAAAATATCTGGTGTCTGACTAGTTCCTTTTCTTCAACAGAGTATGCATATACAATGCAAGTAACAGCTC  
CCGAAATGTTTATAGCTATGGCGTTGTTTTGCTCGAGATCCTTACCAC

>PGSC0003DMG400008146-(rev)LRR-RLKs\_2989

GTAACAGCTCCCGGAAATGTTTATAGCTATGGCGTTGTTTTGCTCGAGATCCTTACCACCCGACTACCCG  
TTGATGAAGCTTTTGGTGAAGGAGTTGATCTGGTCAGGTGGGTACATGGT

>PGSC0003DMG400008146-(rev)LRR-RLKs\_305

TTCTTTTGGGGAAAAAAGGGAAGAAATTGAAGATTTTCTTGAAAAAACAACCTTAAAAATGGTAACTTT  
GAGGTTGTTCACTGTTTTGCTGGTGGGGTTGTTGTTAAGGTCTCAATTTG

>PGSC0003DMG400008146-(rev)LRR-RLKs\_3050

GACTACCCGTTGATGAAGCTTTTGGTGAAGGAGTTGATCTGGTCAGGTGGGTACATGGTGCTTCTGCGA  
GAGGAGAAACACCAGAGCAGATACTTGATGCAAGACTTAGCACCATTTCTT

>PGSC0003DMG400008146-(rev)LRR-RLKs\_3111

TTCTGCGAGAGGAGAAACACCAGAGCAGATACTTGATGCAAGACTTAGCACCATTTCTTTGCTTGGAG  
GAAAGAAATGCTTGCAACTCTAAAAGTCGCATTGATGTGCACCGATACCAT

>PGSC0003DMG400008146-(rev)LRR-RLKs\_3172

GCTTGGAGGAAAGAAATGCTTGCAACTCTAAAAGTCGCATTGATGTGCACCGATACCATTCCAGCAAAA  
CGACCAAGAATGAAGAAGGTGATAGAAATGCTTCAAGAGGTTACACAGAGT

>PGSC0003DMG400008146-(rev)LRR-RLKs\_3233

CAGCAAAACGACCAAGAATGAAGAAGGTGATAGAAATGCTTCAAGAGGTTACACAGAGTTGAATCAAA  
ACTCGTATCATCCAAAAGTCTCTGCTTAATCTCAGACCTGCAGATCATGAAA

>PGSC0003DMG400008146-(rev)LRR-RLKs\_3294

AATCAAAACTCGTATCATCCAAAAGTCTCTGCTTAATCTCAGACCTGCAGATCATGAAAACCCCTGTAGA

AATACAAAACGGTATGAATTCAGTCTTAGCGTAGACTAGTGGTCTAA

>PGSC0003DMG400008146-(rev)LRR-RLKs\_3355

CCCTGTAGAAATACAAAACGGTATGAATTCAGTCTTAGCGTAGACTAGTGGTCTAAAAATAGTTAAA  
CTATGTATATTGTCTGAGGTTGCTGTTCTTCTCTGATGATCAGCTCCGAG

>PGSC0003DMG400008146-(rev)LRR-RLKs\_3416

ATAGTTAAACTATGTATATTGTCTGAGGTTGCTGTTCTTCTCTGATGATCAGCTCCGAGGTTGTAATTTTG  
ATTTTCATATTGGAGCGAGTAAGGAGGTTATATGGTAAGGGTTAAAACC

>PGSC0003DMG400008146-(rev)LRR-RLKs\_3477

TGTAATTTTGATTTTCATATTGGAGCGAGTAAGGAGGTTATATGGTAAGGGTTAAAACCAGAAACAGTT  
CTTGATATGTACCATTCTGTACAAGGCCTTCAATCATATATACTTCTTTTT

>PGSC0003DMG400008146-(rev)LRR-RLKs\_3538

AAACAGTTCTTGATATGTACCATTCTGTACAAGGCCTTCAATCATATATACTTCTTTTTTCTTGTCTATGTG  
TAAATGGAGCTTTGGCATTTCATATGCAACAGTAAAATCTTTATGTAT

>PGSC0003DMG400008146-(rev)LRR-RLKs\_3573

CTTCAATCATATATACTTCTTTTTTCTTGTCTATGTGTAATGGAGCTTTGGCATTTCATATGCAACAGTAA  
AATCTTTATGTATATATAATATACAGTAGATGTTGAACCCTCTTGGTG

>PGSC0003DMG400008146-(rev)LRR-RLKs\_366

GGTAACTTTGAGGTTGTTCACTGTTTTGCTGGTGGGGTTGTTGTTAAGGCTCAATTTGGGATTGTAAAG  
GCTCTTCATGAACAAGCCATTTTGGGAAGCAATTGGCAAAGAGCTAGCAAT

>PGSC0003DMG400008146-(rev)LRR-RLKs\_427

ATTGTAAAGGCTCTTCATGAACAAGCCATTTTGGGAAGCAATTGGCAAAGAGCTAGCAATACCTGGTTGG  
GATCTGAATAGCACTGATTTCTGTTCTTGGCATAGCATTAGTTGCAGCAGC

>PGSC0003DMG400008146-(rev)LRR-RLKs\_488

CTGGTTGGGATCTGAATAGCACTGATTTCTGTTCTTGGCATAGCATTAGTTGCAGCAGCTCAAACAGTTC  
AATGGTGGAAAGGCTGAATCTTTCGGGTTTTTCGATTACAAGGTAATGTGA

>PGSC0003DMG400008146-(rev)LRR-RLKs\_549

AAACAGTTCAATGGTGGAAAGGCTGAATCTTTCGGGTTTTTCGATTACAAGGTAATGTGACTCTAATATCT  
GAGCTCAAAGGATTGAAATGGCTGGACCTTCTAATAACAATTTCCAAGG

>PGSC0003DMG400008146-(rev)LRR-RLKs\_61



GCAACTTATTTGTTGTTTTGGTACATGGGGTTCATTCTTGAGTAGTAAAGATTGCATCTTTATTGTTCTG  
TTTCATTTTCAAGATTCTTGAAATGGGTCATTTCCTTAAGTTGTTCAA

>PGSC0003DMG400008146-(rev)LRR-RLKs\_610

CTAATATCTGAGCTCAAAGGATTGAAATGGCTGGACCTTTCTAATAACAATTTCCAAGGTTCAATCCCAC  
AAGCATTGGGAATTTGTCTGAGCTTCAGTTTCTTGATTTGTCTTTAAC

>PGSC0003DMG400008146-(rev)LRR-RLKs\_671

CAATCCCACAAGCATTGGGAATTTGTCTGAGCTTCAGTTTCTTGATTTGTCTTTAACATGTTTAGAAAC  
TCTATTCTGGTGAATTAGGTAAGCTCAAGAACCTTAGAGCATTGAATC

>PGSC0003DMG400008146-(rev)LRR-RLKs\_732

GTTTAGAACTCTATTCCTGGTGAATTAGGTAAGCTCAAGAACCTTAGAGCATTGAATCTTTCAAACAAT  
ATGCTCACTGGTTCAATACCTGATGAGCTTGAAGGGATGGAGAATTTGCT

>PGSC0003DMG400008146-(rev)LRR-RLKs\_793

TCAAACAATATGCTCACTGGTTCAATACCTGATGAGCTTGAAGGGATGGAGAATTTGCTTTATTCCAAT  
TATTTACCAATAAATTGAGTGGTTTTATTCCAATGTGGATTGGGAATTTG

>PGSC0003DMG400008146-(rev)LRR-RLKs\_854

ATTTCCAATTATTTACCAATAAATTGAGTGGTTTTATTCCAATGTGGATTGGGAATTTGACTAATCTTAGA  
GTGTTTGCAGCCTATGAGAATGAGTTTAGTGGTGATATTCCAGTTAACT

>PGSC0003DMG400008146-(rev)LRR-RLKs\_915

TAATCTTAGAGTGTTCAGCCTATGAGAATGAGTTTAGTGGTGATATTCCAGTTAACTTAGGCTTACAT  
TCTGAGCTTTTGTGTTAAATCTTCATTCAAATCAGCTTGAAGGGACAAT

>PGSC0003DMG400008146-(rev)LRR-RLKs\_976

GGCTTACATTCTGAGCTTTTGTGTTAAATCTTCATTCAAATCAGCTTGAAGGGACAATTCCTGAGAGTAT  
TTTTACTATGGAAAAGCTTGAATTTTTAGTTCTGACTAATAATAAGTTG

>PGSC0003DMG400008185LRR-RLPs\_528

GTGAGTATACCAATTCTCAAATATGATGATGAGGTGAAATTCGTAGATGATCTCAATAAATGTATACAGC  
AGGAGTTCAATAACAAGGTATGTCTTATTCCACTAGCTATATAAGTAATT

>PGSC0003DMG400008185LRR-RLPs\_594

CAGCAGGAGTTCAATAACAAGGTATGTCTTATTCCACTAGCTATATAAGTAATTGCTACATGATATTCTA  
ATCAGGCTCTACTCTCTTTCCGTTTTAGATACTTATTTAAGTGCATC

>PGSC0003DMG400008185LRR-RLPs\_660

TCTAATCAGGCTCTACTCCTCTCTTTCCGTTTTAGATACTTATTTAAGTGCATCAACTTTCTTTTACTTAATA  
ATCTAGTCATCTCTCTCTTTTGCATTCTCTGTTTCCTGCAGGAA

>PGSC0003DMG400008185LRR-RLPs\_792

GATGACTACGAAGCTAGTGATGACGACGAAGCTGAACCTAGTCATGCCAGAAGTTAGGAAGCTGGTAA  
GAAAAACTCAATGAAATAATGCAAGTAAAACCTTGAACATCACCTGATACCT

>PGSC0003DMG400008185LRR-RLPs\_858

AAGAAAACTCAATGAAATAATGCAAGTAAAACCTTGAACATCACCTGATACCTATGCTCGTGATGGAG  
GTAATTAACAAGGAGAGGCAGATCTACATTATTGTAACCTATCGGTTTCATG

>PGSC0003DMG400008185LRR-RLPs\_923

GGAGGTAATTAACAAGGAGAGGCAGATCTACATTATTGTAACCTATCGGTTTCATGTCAACCTACTAGCTA  
TTGGCTATAGATCTAGTATATGTATTAGTAATATCTAAAAAATAGTTGAT

>PGSC0003DMG400008296LRR-RLks\_124

CAAATTCATAGAATGCAAGTCATTTTCCTTGGTGTGAATGGATGACTAGTTGACTGCCACTGAAAGCAGT  
GATTCACTGTACGATTCACTAAGAAATGTGTATAAAGGCTTCATTGTCAG

>PGSC0003DMG400008296LRR-RLks\_186

AAAGCAGTGATTCACTGTACGATTCACTAAGAAATGTGTATAAAGGCTTCATTGTCAGCATAAGTTTTTT  
CAGTGAGTGAAGCTTCTTTCTTTTGAACAATGATGTCAAAGACAGTTGT

>PGSC0003DMG400008296LRR-RLks\_3534

ACCACAAATAATATTTTGTCAATGGTGAATGTTTCAAATACATTCCATTTTAGCATCATTGAGTAGTAACA  
TCACTTCTGTCAATCACAATATGCAGCACAGCAGATTTTTTTTTTCTTT

>PGSC0003DMG400008296LRR-RLks\_3720

TAGAACATATAATCTGTAAAGTATTATTTTAAATGATAATGTCAGTTTTAATCTATCCAAAAATCTAGCGC  
CAGTTTTTACATGCTCCTAATTTAATTTGAGACCTCACTTACATGAAAT

>PGSC0003DMG400008296LRR-RLks\_3782

ATCTAGCGCCAGCTTTTACATGCTCCTAATTTAATTTGAGACCTCACTTACATGAAATGTTATCTATGCAA  
CAGAGTTTGCATATATGAGGAAAGTGACCACAAAAGTAGATGTATTCAG

>PGSC0003DMG400008296LRR-RLks\_4030

TTCAGATTGTGGATCCTAATCTAGCTTCATATGTCTCCAAGAAACAGGATGTACTAGAGGGACTTCTTAA

CTTGGCTTTGTCCTGCACCTCTGCTGATCCTGAAGATAGACCTGACATGG

>PGSC0003DMG400008296LRR-RLKs\_4092

CTTCTTAACTTGGCTTTGTCCTGCACCTCTGCTGATCCTGAAGATAGACCTGACATGGAACAAGTTCTGTC

TTCTCTTTCAAAGCTAAGTAAGATGGACTGCATGCCTTCACATTTGGTA

>PGSC0003DMG400008296LRR-RLKs\_4216

ATTAAATTTGATGTAGAAGAAGCTGGAATATCATCACTCTTAAAGTGAACCACCACCAAGTTTCTCATGG

GGCTAATGGAAGTTCATAACTTAAATGTATTTACTATTTAAATAAA

>PGSC0003DMG400008296LRR-RLKs\_4278

TTCATGGGGCTAATGGAAGTTCATAACTTAAATGTATTTACTATTTAAATAAAATTTTCCGTATTTCC

AAGCCATAAATGATCTCTCGAGTATTCCTGCTTTACTAGAGAGATATAA

>PGSC0003DMG400008296LRR-RLKs\_4333

AAATTTTCCGTATTTCAAGCCATAAATGATCTCTCGAGTATTCCTGCTTTACTAGAGAGATATAATGGAAC

TGTCCCGTCAGATTATTTGAAGTTGACATGCATCATGAAAATGAACAA

>PGSC0003DMG400008296LRR-RLKs\_434

CACTTGTGGATTGGACGGATGCAAATCACCATTGCAACTGGTCTGGAATCATATGTGATCCTTCTTCAAG

CCATGTCATCAACATTTGCTTATTGAGACGCAGCTCAAAGGCGAAATTT

>PGSC0003DMG400008296LRR-RLKs\_620

ATATCCCACCCAGCTGGGGTATTGCACAGACCTGGTTGAGCTCGTTTTTTACCAAACCTCTTTTTTGGT

GAAATTCCTGCCGAGCTGGGAAACCTAAAAAACTGCAGTATATAGATT

>PGSC0003DMG400008296LRR-RLKs\_744

AAATAACTTTCTAAATGGGAGTATACCTGATAGTATATGCAACTGCACTGAATTGTCGTTAGTAGGCTTC

ATCAACAACAATCTCACAGGCAAATTACCGTCTGAAATTGGTAAGTTGGC

>PGSC0003DMG400008296LRR-RLKs\_806

TAGGCTTCATCAACAACAATCTCACAGGCAAATTACCGTCTGAAATTGGTAAGTTGGCCAATCTTCAGTT

GTTTGTAGCTTATACAAACAATTTGGTTGGTTCTATTCTACCTCCATTG

>PGSC0003DMG400008394-(rev)LRR-RLPs\_0

CTTCTTTGAGTACTCTACAAACAACCTACCAAAGAAGACTTACTTTGAGAAGACTTTGGTGCAGAGGAA

GAAGACTTTGTGAAGGAGCAAACACAACAATGGCCGATCCTGTAATTGGT

>PGSC0003DMG400008394-(rev)LRR-RLPs\_1708

CAGAACGTTTGTGCACACTGTTTTGGAGAAGCAATTATACGTCTAAAGATATGCTGTTGAACTTTAAGTT  
CTTGAGAGTTTTAGATTTGTCCAGTTCAGGAATCAAGGAGTTGTCAGCCA

>PGSC0003DMG400008394-(rev)LRR-RLPs\_1769

CTTTAAGTTCTTGAGAGTTTTAGATTTGTCCAGTTCAGGAATCAAGGAGTTGTCAGCCAAAATGGGGAA  
GCTGATATACTTGAGATATCTTGATCTCTCGAACACTGAGATCACAGCCTT

>PGSC0003DMG400008394-(rev)LRR-RLPs\_183

AGGGATTTCAACAAAGATCTCGAAATGTTGACACAAAATGTATCCTTAATCCAAGCTTTCATTCATGATG  
TTGAAACACCACAAGTTGAGAAACAACAGTCTATCGAACAAATGGCTCAAC

>PGSC0003DMG400008394-(rev)LRR-RLPs\_2318

TGATGAGCATGTGTTGGATGGTCTTCAACCGCATCCTAACTTGAAAACCTTAGCAGTAGTGGACTATTTA  
GGGACTAAATTCCTTCATGGTTCAGTGAAGAGTCTCTACCAAATTTGGT

>PGSC0003DMG400008394-(rev)LRR-RLPs\_2379

GACTATTTAGGGACTAAATTCCTTCATGGTTCAGTGAAGAGTCTCTACCAAATTTGGTCAAGTTGAAAT  
TAAGTGGTAGCAAAGGTGCAAAGAAATTCCATCCCTTGCCAACTGAAA

>PGSC0003DMG400008394-(rev)LRR-RLPs\_244

TTCATGATGTTGAAACACCACAAGTTGAGAAACAACAGTCTATCGAACAAATGGCTCAACAGGCTTGAGA  
GAGTTGCTGAAGATGCTGAAAATGTGTTTGATCGATTGAGATATGAATCTC

>PGSC0003DMG400008394-(rev)LRR-RLPs\_2806

TGAACTTGTGCAGCAACTTGACATCTCTCGTAAAGCTTAGTGTCTATGATATGAAAGAGCTCACTTGTCTT  
CCAGATGAGATACTACGTAACAACGTTTCTCTTCAACAGATAACGATTT

>PGSC0003DMG400008394-(rev)LRR-RLPs\_2867

CACTTGTCTTCCAGATGAGATACTACGTAACAACGTTTCTCTTCAACAGATAACGATTTTCAACTGCGGA  
GAGTTTCGTGAATTGCCACAAAGCTTGTACAATCTCCATTCTCTTAAGAG

>PGSC0003DMG400008394-(rev)LRR-RLPs\_2928

AACTGCGGAGAGTTTCGTGAATTGCCACAAAGCTTGTACAATCTCCATTCTCTTAAGAGATTAGACATTT  
ACAACTGCACCAATTTAGTTCTCTTCTGTTCCCAATGGAGACAACACTAT

>PGSC0003DMG400008394-(rev)LRR-RLPs\_2989

TAGACATTTACAACACTGCACCAATTTAGTTCTCTTCTGTTCCCAATGGAGACAACACTATTTGACTTCCCTCG  
AATTCTTTTTCTTATACAATTGTAATGGATTGATCAGTTTACCAATTG

>PGSC0003DMG400008394-(rev)LRR-RLPs\_3050

GACTTCCCTCGAATTCTTTTTCTTATACAATTGTAATGGATTGATCAGTTTACCAATTGGAATGCTAGATC  
AATGCCGGTCTCTAGAGTTTTTGTGTGTCAGCTGCTGTAACAACCTGGT

>PGSC0003DMG400008394-(rev)LRR-RLPs\_3111

ATGCTAGATCAATGCCGGTCTCTAGAGTTTTTGTGTGTCAGCTGCTGTAACAACCTGGTTTCATTCCCTTT  
ACATGTGTGGGAAATGCCTTCATTTTCATTTTTGGATATAACAGAATGT

>PGSC0003DMG400008394-(rev)LRR-RLPs\_3172

CATTCCCTTTACATGTGTGGGAAATGCCTTCATTTTCATTTTTGGATATAACAGAATGTCCCAAATTGATT  
AGTGTACCCAAAGTGGGCCTTCACCATCTCACCGGGTTATTGAGATTGG

>PGSC0003DMG400008394-(rev)LRR-RLPs\_3355

AGCAGCTGTTGTCCCTTCGTGATCTGGAGGTGTACGGACGTGGGCACTGGGATTCTCTGCCCTATCAGA  
TTATGCAACTATCTGACCTAAGAGAGATCACAATAGCTGATTTTGAATTG

>PGSC0003DMG400008394-(rev)LRR-RLPs\_3416

CTATCAGATTATGCAACTATCTGACCTAAGAGAGATCACAATAGCTGATTTTGAATTGAGGCTCTTCTCT  
CCTAGACTTGACAACCTTACTTCTCTTGAAAGTTTGACTCTAGTGAGGTG

>PGSC0003DMG400008394-(rev)LRR-RLPs\_3477

GCTCTTCCTCCTAGACTTGACAACCTTACTTCTCTTGAAAGTTTGACTCTAGTGAGGTGCAAACAGCTACA  
ACATCTGAACTTCTCAGATGCCATGCCCAAATTACGGCTTCTGTGTATA

>PGSC0003DMG400008394-(rev)LRR-RLPs\_3660

TTATATTTACATGACTGCGAAAACTAGAGCATCTACCGTCCCGAGATGCCATGCGACGCCTCACTAAAT  
TATGGAACATGGGAATTAAGGCTGCCCAAAGTTAGAAGAAAGTTTCACC

>PGSC0003DMG400008394-(rev)LRR-RLPs\_3721

TCACTAAATTATGGAACATGGGAATTAAGGCTGCCCAAAGTTAGAAGAAAGTTTCACCAACTACTCCCA  
GTGGTCCAAAATTTCCCATATTTCAAATATTGAATTAGGTGGGCGGAGAA

>PGSC0003DMG400008394-(rev)LRR-RLPs\_3843

ACAACCGTAAGTCTCGTTTTCTTTCACTTACTGAGTCGCTCGCATTTTTAATTAGAATATTATTTCCAC  
GAGTTCCAAAAAAGAAGTTTGGTAAGTAATGTAATAATTTTTCTTGAA

>PGSC0003DMG400008394-(rev)LRR-RLPs\_3904

TTATTTTCCACGAGTTCCAAAAAAGAAGTTTGGTAAGTAATGTAATAATTTTTCTTGAAATTATTTTGACA

TAAAAAAAAAAGTTAGATTAATCAATTGCATCTGTTGCTATGCTGGA

>PGSC0003DMG400008394-(rev)LRR-RLPs\_3965

TATTTTGACATAAAAAAAAAAAGTTAGATTAATCAATTGCATCTGTTGCTATGCTGGATTCTGCTTGCC  
ACTTGAAGTGAATTGCTGTTATTCTAAAATTATGTTTCTTTTCCTTAT

>PGSC0003DMG400008394-(rev)LRR-RLPs\_4026

CTGCTTGCTCACTTGAAGTGAATTGCTGTTATTCTAAAATTATGTTTCTTTTCCTTATAGGTAGCTGGTTC  
AAAACGTCTCTGTGGTAAATCAAGCCAAATCGTATGAGCAGCAGGCAA

>PGSC0003DMG400008394-(rev)LRR-RLPs\_4453

CTTTTCTCTCATGAAATAATTTTAATGTTTAACGGGACTTGTCGTGTTTCACAGAGGAACCACCACTGTTA  
TTTTGTATGAAGAACAATCTTCAACTGTAGACTCATTATGGGACACTTT

>PGSC0003DMG400008394-(rev)LRR-RLPs\_4758

AATAATCTTTATGTCTTCTGCAGTTCTGGTTTTATTTTCATGCTTAAGACAGTACAACCTTTTATGAATATAT  
GAAACACTTCTCGTTACTTTCACCTCACAGGACAATTTCTCCGTTTCAT

>PGSC0003DMG400008394-(rev)LRR-RLPs\_4819

TATGAATATATGAAACACTTCTCGTTACTTTCACCTCACAGGACAATTTCTCCGTTTCATTAACACTTCCGCA  
AATGAAGGACTTCAACAAAGATAGTTGTCATGAATATTTTTGCAAAGG

>PGSC0003DMG400008394-(rev)LRR-RLPs\_4880

AAACTTCCGCAAATGAAGGACTTCAACAAAGATAGTTGTCATGAATATTTTTGCAAAGGGTGACCCATTG  
GCTCTTAAAATGTCCTTAGCAGTATATGTTTCATCTTAAACAGGTTTTCT

>PGSC0003DMG400008394-(rev)LRR-RLPs\_5063

GCCAAAATAACTTTTTACCATTTCCCGTGTTCAGATTCATGTTTGAAACTCCAGCATGGACCTTCGAAA  
TGCTACTTGTGTTAGAGATGTGTTTGAGTGTTCATGATTGGCAAGGGAAA

>PGSC0003DMG400008394-(rev)LRR-RLPs\_61

GCAGAGGAAGAAGACTTTGTGAAGGAGCAAACACAACAATGGCCGATCCTGTAATTGGTGCTACTGTTC  
AAGTTTTGCTTGAAAAGTTGATTTCTCTCACTATCGAGGAGGTCAACAGCT

>PGSC0003DMG400008394-(rev)LRR-RLPs\_732

ATCCAGCAAATCTTTGAAAAGAGAATTTGGTTGTGTCTACCTGAAATGTCTGAAACGAAGTGCTTTCTTG  
AACAAATCCTCGAATCATTGATAGAGAGGAGAATTGAGGTTGAAAGGAGA

>PGSC0003DMG400008394-(rev)LRR-RLPs\_793

GCTTTCTTGAACAAATCCTCGAATCATTGATAGAGAGGAGAATTGAGGTTGAAAGGAGAGATATAATAG  
TCAAGAAGCTACAAGATGAATTGAGAGGAAAAAATATTTGCTAGTCCTGG

>PGSC0003DMG400008394-(rev)LRR-RLPs\_854

TATAATAGTCAAGAAGCTACAAGATGAATTGAGAGGAAAAAATATTTGCTAGTCCTGGATGATTTGTG  
GTGTGTTGACTCTACATCATGGCATGAGTTCGTTGACACCTTGAGAGGAAT

>PGSC0003DMG400008403LRR-RLKs\_1403

CGGTGACATTGGAGGGCTCACTGAATTAATTCCTTGTGAGTTTGGTTTTTAAATCCAATAAACTTCTGTT  
GATTATTAGCAATAAGGTTGTATTTGTCACCATAATTTGCTCACTTCAG

>PGSC0003DMG400008403LRR-RLKs\_1464

AACTTCTGTTGATTATTAGCAATAAGGTTGTATTTGTCACCATAATTTGCTCACTTCAGTTGCTAAACTTGT  
ATTGCAGAGACCTGTCGTTCAACCGAGGACTTACAGGTTCTCTTTCTC

>PGSC0003DMG400008403LRR-RLKs\_1586

CGGATAGGAGATCTGCAGAACTAAACATATTGTAAGACTACGAAAACCTTGATCATCTTGATTGTATAGT  
GTATACCTGCTATGTACATAAAATTGACATTTATAATATTTTCGTCATAG

>PGSC0003DMG400008403LRR-RLKs\_1708

TGATCATTTGATCAGCTTTCTCCTCGTAATTTGATCATGATTCAATGACATACATAACTTACATGTACGT  
GAATATATCTATTTACTTTTCAGAATCCTTGCGGGCTGTAGCTTCAGT

>PGSC0003DMG400008403LRR-RLKs\_1769

TACATGTACGTGAATATATCTATTTACTTTTCAGAATCCTTGCGGGCTGTAGCTTCAGTGGTAGTATACCG  
ATGGAGTTGGGAAGACTTGCTGAGTTATCATTCTTGTAAGAATTTCTCA

>PGSC0003DMG400008403LRR-RLKs\_1830

TAGTATACCGATGGAGTTGGGAAGACTTGCTGAGTTATCATTCTTGTAAGAATTTCTCAGCCATATTAAC  
TTGTGATCATTTTAGGTGTATCGTCAACTCATTTAGTTCCATGTCAATTT

>PGSC0003DMG400008403LRR-RLKs\_1891

CATATTAACCTGTGATCATTTTAGGTGTATCGTCAACTCATTTAGTTCCATGTCAATTTCTTGACAGGGC  
ACTTAACCTCAAATAATTTACCGGTGAGATTCCACAACTCTTGCAAT

>PGSC0003DMG400008403LRR-RLKs\_2440

GTGAGTAGAACTGACCGTCTTATTTATCCTATCTTTCATGCTACTTCACCTTCTGTTTTGGATTATATGTTT  
GTACTCTTTTATCTGTTGCTGGTATTCATGTACCTAACATATACAGT

>PGSC0003DMG400008403LRR-RLKs\_2623

GTAGAGTTGTAAGTATACTTTTTCCCATCATTGCTCACTCAATTTCTGCTTCAAATCAATAACTTGTAGAT  
TGAAGTTGTACTTTTGTGCACTTATTTCTGTTTTCAGGAACTTAGCTC

>PGSC0003DMG400008403LRR-RLKs\_2684

AACTTGTAGATTGAAGTTGTACTTTTGTGCACTTATTTCTGTTTTCAGGAACTTAGCTCACAACGAACTGT  
CCGGTCCACTACCAGATTTAACTGGAATGAATCCCTTAATTATCTGTA

>PGSC0003DMG400008403LRR-RLKs\_3111

ACAAGTGTGAGTATCGCGATCCTAACTGAATATTCCATGTGTATTACCTGCAATGAAGAGGTTGTAATGA  
TCGTAATAACTTATGCAGGAACTGAGGAACAACGCATTGAATGATACGT

>PGSC0003DMG400008403LRR-RLKs\_3233

AACATGGGTGGCATCAGTGGCAGGCAACTCACACTTGTTGATTTACAAAACAACGAGATCTCCTCAATA  
ACACTTGGCTCTGGTTACAAAATACCTTGATGTGAGATGGCTCATTCTC

>PGSC0003DMG400008403LRR-RLKs\_3294

CCTCAATAACACTTGGCTCTGGTTACAAAATACCTTGATGTGAGATGGCTCATTCTCCTTTTTCGTCAA  
TTAGATTATGTTTTGTCTCTTTCTTTCTCCTTGATTGCTTTGTGGTTGT

>PGSC0003DMG400008403LRR-RLKs\_3355

TTTTCGTCAATTAGATTATGTTTTGTCTCTTTCTTTCTCCTTGATTGCTTTGTGGTTGTCGTCAGACTGATTG  
GAAACCCTGTATGTGACACGGCCCTTGAAACACAACTACTGCCAG

>PGSC0003DMG400008403LRR-RLKs\_3416

TCAGACTGATTGAAACCCTGTATGTGACACGGCCCTTGAAACACAACTACTGCCAGCTTCAGCAGC  
AATCTGCAAAGCCTTACTCAACCAGCCTAGCTAACTGTGGGAGCAAATCAT

>PGSC0003DMG400008403LRR-RLKs\_3599

TCTACTTTAGAGGACCCTCTTTTAGGGAGTTGTCCAATGATAATACGTTCCATTCACTCGAAATGAGCCTG  
TGGGTGAAGTTGGATCTCACGCCCGTTCAGTTTCTCTGCAGAACCCT

>PGSC0003DMG400008403LRR-RLKs\_366

GCAGAAATCGGATGATCCTTGTGGAACATCTTGGGAAGGTGTAACCTGCAACAACCTCAAGGGTAACTGC  
ATTGTGAGTATGCTTTTTCTCTTCCAATATCTAGGGATCGTTTGGTTTACG

>PGSC0003DMG400008403LRR-RLKs\_3843

TCACGAGTTTGGACCGTACTATTTTATAGCATCTCCTTACACTTTCCAAGGTATAATTACTGAGTTTCTTTA



CAACTGTAACCTTAGACCAATATACTGACTTAATACTAAAACCTGTTT

>PGSC0003DMG400008403LRR-RLKs\_3904

GAGTTTCTTTACAACCTGTAACCTTAGACCAATATACTGACTTAATACTAAAACCTGTTTCAGCCGAACGTG

GAGAACTTCTATTAGCTCAAGACAAGTTATAGGAATAGCTACCGGGTG

>PGSC0003DMG400008403LRR-RLKs\_4026

CCATCCTGGTCCTCTTGCTTGTGCTCTTGCAATATATGCTATTCAACAAAAGAACTTGCTGAAAGAGCT

ATTGGATTGAGTAGACCATTTGGTAATGTCATCTCTTATAGAAAAAAC

>PGSC0003DMG400008403LRR-RLKs\_4087

TGAAAGAGCTATTGGATTGAGTAGACCATTTGGTAATGTCATCTCTTATAGAAAAAACAGATGAGTTAT

AACTATATATACATTCAAGCCTCTCTATAACAGTCATCCTATATGATAAC

>PGSC0003DMG400008403LRR-RLKs\_4148

ATGAGTTATAACTATATATACATTCAAGCCTCTCTATAACAGTCATCCTATATGATAACATTTCACTATAAC

GACCAAGTTTTCTTTAGAACTGATTTTTTCATGTTATGTTGAATTATAT

>PGSC0003DMG400008403LRR-RLKs\_4209

TTCACTATAACGACCAAGTTTTCTTTAGAACTGATTTTTTCATGTTATGTTGAATTATATGTTCTCTTTAACA

ATATTTGCTATAGCAGCCAAAAAATATCAGAACAAACGACGCCTTT

>PGSC0003DMG400008403LRR-RLKs\_427

GTAACCTGCATTGTGAGTATGCTTTTTCTCTTCCAATATCTAGGGATCGTTTGTTTACGTTCTAGTTATAC

GATGACTAATAACACATGAATTGTTATGCATGATTGTATAATTTAAGTG

>PGSC0003DMG400008403LRR-RLKs\_4270

TCTCTTTAACAATATTTGCTATAGCAGCCAAAAAATATCAGAACAAACGACGCCTTTATAAAGAGGTT

TGACTGTATGTCCAGAATGCAAGTAGGATTGAACTCAAATGTCTGATTAC

>PGSC0003DMG400008403LRR-RLKs\_4331

AAAGAGGTTTACTGTATGTCCAGAATGCAAGTAGGATTGAACTCAAATGTCTGATTACTTTGACCTTCC

TTGTCCAGCATCATGGGCTCCAAGTGGCAACGACAGTGAAGGTGCACCAC

>PGSC0003DMG400008403LRR-RLKs\_4392

TGACCTCCTTGTCCAGCATCATGGGCTCCAAGTGGCAACGACAGTGAAGGTGCACCACAACCTAAAGGG

AGCAAGATGGTTTTCTTATGATGAACTTAAGAAATGCACGGGTAACCTTCTC

>PGSC0003DMG400008403LRR-RLKs\_4453

CTAAAGGGAGCAAGATGGTTTTCTTATGATGAACTTAAGAAATGCACGGGTAACCTCTCGGAGAGAAAT  
GAGATTGGTTCCGGTGGCTATGGGAAGGTTTGCTATGAAAATCCATTGTTT

>PGSC0003DMG400008403LRR-RLKs\_4514

AGAGAAATGAGATTGGTTCCGGTGGCTATGGGAAGGTTTGCTATGAAAATCCATTGTTTTAGAATAAAT  
TAAAGAGGATAAACTCTTCAGCTGCTTTTCTTATTCGCGTGTGTTCTGTTT

>PGSC0003DMG400008403LRR-RLKs\_4575

GAATAAATTAAGAGGATAAACTCTTCAGCTGCTTTTCTTATTCGCGTGTGTTCTGTTTCTAGGTCTACA  
GAGGAACCCTCGCGAATGGGCAAGTAATTGCTATCAAAGGGGCTCAACA

>PGSC0003DMG400008403LRR-RLKs\_4636

TAGGTCTACAGAGGAACCCTCGCGAATGGGCAAGTAATTGCTATCAAAGGGGCTCAACATGGTTCCATG  
CAAGGTGGACAAGAGTTCAAGACGGAAATTGAGTTGCTTTCACGGGTTTCAT

>PGSC0003DMG400008403LRR-RLKs\_4697

GTTCCATGCAAGGTGGACAAGAGTTCAAGACGGAAATTGAGTTGCTTTCACGGGTTTCATCACAAGAACC  
TAGTTGGTCTGGTTGGATTCTGTTTTGAGCAAGGCGAACAAGTACTGGTAT

>PGSC0003DMG400008403LRR-RLKs\_4819

GAGTATATGCCAAATGGTTCCTCACTCAGGGAGAATCTGTCAGGTAAGTTACATCCTCCTATACATTAAGGC  
TACTTCCTATTTATAGTAATTTACTACTAAAAAGTTCCTAATATTTCCATT

>PGSC0003DMG400008403LRR-RLKs\_488

CTAGTTATACGATGACTAATAACACATGAATTGTTATGCATGATTGTATAATTTAAGTGCATTTCCGCCTT  
TAGATGCTCTTATCCACGTATTACTCGTACATGTATTGTTGTTCCACAT

>PGSC0003DMG400008403LRR-RLKs\_4880

ATTAAAGGCTACTTCCTATTTATAGTAATTTACTACTAAAAAGTTCCTAATATTTCCATTTCTCTGTAGAAGT  
TAATTTCCACTATGCTCTACAGGGAAAACGAGCATTTATCTAGATTGG

>PGSC0003DMG400008403LRR-RLKs\_5124

CAGCAAAGGTCGGGGATTTTGGCTTGCCAACTTGATCAGATAGCTCAAAGGGTCATGTTTCTACTCA  
AGTTAAAGGCACATTGGTCAGTACCACATCCTGCACATTTTCGCTTTCTA

>PGSC0003DMG400008403LRR-RLKs\_5246

TCAAGAAAAGATTGAATTTTGTGAACTCGTGAAGCATGAAATTGAATTTAAGACTATTGACTACATTG  
CAGGGTTATCTAGATCCTGAGTACTATATGACTCAACAATAACCGAGAA

>PGSC0003DMG400008403LRR-RLKs\_549

TTTCCGCCTTTAGATGCTCTTATCCACGTATTACTCGTACATGTATTGTTGTTCCACATTCTATCTGTGAAA  
AATAATATATAGATTCTCGTCTAAGTTATACAAGGTTTTAGTTTCCAA

>PGSC0003DMG400008403LRR-RLKs\_5612

GAGTGAAGTGGTAAAAATGCTTGAAAGTATTCTGCAAATGATGGTCTGGAAACAAATTCTACGTCTGC  
ATCATCATCGATAACAGATTTTGGGACAGCAATAGCTGCTTCTAGACATCC

>PGSC0003DMG400008403LRR-RLKs\_5673

ACGTCTGCATCATCATCGATAACAGATTTTGGGACAGCAATAGCTGCTTCTAGACATCCTTATAATAAAG  
AGGCTCTACAGAGAAAGGAGATAAATGATACTCATGCTTTTGATTACAGT

>PGSC0003DMG400008403LRR-RLKs\_5734

ATAATAAAGAGGCTCTACAGAGAAAGGAGATAAATGATACTCATGCTTTTGATTACAGTGGTGGATACA  
CTCTTCCAACAAATGTGGAACCAAAATAGTGACAACCAAAAAAAGGACTT

>PGSC0003DMG400008403LRR-RLKs\_5795

TGGATACACTCTTCCAACAAATGTGGAACCAAAATAGTGACAACCAAAAAAAGGACTTGTCTCTACTGT  
CTCTCATTCTTTAATTTATTCTCTATTAATAAATAATTGGAAAATTGGTGAA

>PGSC0003DMG400008403LRR-RLKs\_5856

CTCTACTGTCTCTCATTCTTTAATTTATTCTCTATTAATAAATAATTGGAAAATTGGTGAAAGGGATAAGAGA  
ATTTAGTTGTTGATTGTCCCTATATTGGCTACTTTTCGCGAAAACAAT

>PGSC0003DMG400008403LRR-RLKs\_5917

GGATAAGAGAATTTAGTTGTTGATTGTCCCTATATTGGCTACTTTTCGCGAAAACAATCACGTATATTAT  
CAAGATCGAAGTTCAGATTTTCTATTGCCAAGGCTTACAGTCTAGTAGT

>PGSC0003DMG400008403LRR-RLKs\_5978

CGTATATTATCAAGATCGAAGTTCAGATTTTCTATTGCCAAGGCTTACAGTCTAGTAGTATCAGTGAGAG  
TCTCCTATACTAAGTGTGAGTTCGATTTTACTGTCCCCTATCCTCAA

>PGSC0003DMG400008403LRR-RLKs\_6039

CAGTGAGAGTCTCCTATACTAAGTGTGAGTTCGATTTTACTGTCCCCTATCCTCAAATGTAATAGAAA  
AGAGTTATAAGGAAAAAAGATTTTGTACATCAAGGCAAAGATTTTGT

>PGSC0003DMG400008403LRR-RLKs\_61

AATGGCAGCCACTCGGCTGTTACTCTGCTTTATCATCTTCTCGTCTGGCATCGATTTTATATATACTGTTAC

AGATCCCAGAGATGGTAAGAAGCTTTGTATAAAAATTGTCGGATCCAGTA

>PGSC0003DMG400008403LRR-RLKs\_610

TATCTGTGAAAAATAATATATAGATTCTCGTCTAAGTTATACAAGGTTTTAGTTTCCAATATTAACTTCG  
CATGACTAGTGCAGAGTTTAATATCGGAAACAAAACATCATGTTAGTTA

>PGSC0003DMG400008403LRR-RLKs\_6100

GTAATAGAAAAGAGTTATAAGGAAAAAAAAGATTTTGTACATCAAGGCAAAGATTTTGTATATCAAGGC  
TTACAGTCTAGTGGTACACGTAAGAGGTCTTCCATACACTAAGTGTGAGTT

>PGSC0003DMG400008403LRR-RLKs\_6161

ATCAAGGCTTACAGTCTAGTGGTACACGTAAGAGGTCTTCCATACACTAAGTGTGAGTTTCGATTTTTTAC  
TATCTCCTTTCCCGTTCCATGATTCTACAATGTAATAGAAAAAATAAAA

>PGSC0003DMG400008403LRR-RLKs\_671

TTAAACTTCGCATGACTAGTGCAGAGTTTAATATCGGAAACAAAACATCATGTTAGTTATATGGAAACTA  
TATTATCTTACAAGTTTTAAGATTGAAAACCAAATGTAGTATAAGTAATA

>PGSC0003DMG400008403LRR-RLKs\_732

TGGAAACTATATTATCTTACAAGTTTTAAGATTGAAAACCAAATGTAGTATAAGTAATACGAAAATTTAT  
ACATAAAGTTAATTTTTTAGGAAAAAATACATAATTAGACATCCTTCGCT

>PGSC0003DMG400008450LRR-RLPs\_0

ATGCATGACTTTTGTATATAAAATCTAGAAAGGAAAAGGTGTTTGACTTCATAGGAGGTTCAAACGCTC  
CGTCTTCTTCTTCTGGTGTGATGGCACGAGGAATTACCATTTCGTTATGTT

>PGSC0003DMG400008450LRR-RLPs\_189

CACCTGAGGCTTCTTAAAAGTTTGGATTTGAAGGGCCTAACATTGACAGATTCTTTGCTGGATGAAATTG  
GTATGCTCGTTCATTTGAAGTACTTAATCATTTCAGACGAAGGCAAAGCT

>PGSC0003DMG400008450LRR-RLPs\_378

ATGATACTATCACCTTGTTTTTGGAGTCTTGCAAAGCTACGAGATGTGCGGATGATGGAATGTGCTCTCT  
TTGAACCAACTGTGTTAGATGAGGACTCAAGGTTAGAAAATTTGAGAACA

>PGSC0003DMG400008450LRR-RLPs\_63

AACGCTCCGTCTTCTTCTTCTGGTGTGATGGCACGAGGAATTACCATTTCGTTATGTTAAACACCTCTTCTC  
TCTGAAGGTGTATGATGGGATTCATGATTGTCTTTCCTACAACAGTCAC

>PGSC0003DMG400008450LRR-RLPs\_693

TTGAGCTTGAAGAAAATGAGGTTGCAAGGGCTCGCTCTGACATCCGATTCATTGTCAAGAATTGCTAGA  
CTACCCAACCTTCAAAAATAAGTCTAAAAACGCAATCATCGATGGGGGG

>PGSC0003DMG400008450LRR-RLPs\_936

GATATAATTACATGTGAGAAGCTTATGGACATCCCAGATAGTTGTGGAGATATTGCGTCATTAGAGCTTA  
TCAAAGTATGGTTTAGCCCTCAGCTTAAAGAGTCAATTCTTCAATATTAA

>PGSC0003DMG400008482RLKWAX-EGF\_0

ACTAAACATGCAACACAGACAAATTGCTCTGTTTTTTCATTTACTTGTCTGTGCTAATAATCTTGACATC  
AACCTCCGCCCATCCCACGGCAGACAGTCCCGTATCTCCTACTACAAT

>PGSC0003DMG400008482RLKWAX-EGF\_1037

AATTTTCCGGTTCGAATGAACCTTTAAGCTTAAATTGGATCCGCTTCCCGGCTGAGGCAAGCTAGATAT  
CCGTCTAGGTAACCTTGATTTCTTACTTTTAGTACTCAGGTTGAAGTCAGT

>PGSC0003DMG400008482RLKWAX-EGF\_1098

GCTAGATATCCGTCTAGGTAACCTTGATTTCTTACTTTTAGTACTCAGGTTGAAGTCAGTGACGGAGTCGG  
AATTATTAATAATTGGCTCCGCCCTGGCTGAGGCAAGCTAGATAAACTTC

>PGSC0003DMG400008482RLKWAX-EGF\_1159

CGGAGTCGGAATTATTAATAATTGGCTCCGCCCTGGCTGAGGCAAGCTAGATAAACTTCAACAAATTATT  
TTATTTCCATACTCTTACTAGAACAGTGACATTCTTTTCATATATATTAC

>PGSC0003DMG400008482RLKWAX-EGF\_122

CAAAAGGTACAAATATCGCCAAACCAGGATGCCCAAAGCAGTGTGGGAACGTTACAGTTCCGTATCCTT  
TTGGTATTGGATCAGATTGTGCCATAGACTCAAGTTTCGAGATCAACTGTA

>PGSC0003DMG400008482RLKWAX-EGF\_183

GTATCCTTTTGGTATTGGATCAGATTGTGCCATAGACTCAAGTTTCGAGATCAACTGTACAGGGTCTGGT  
GCAAACTCTATAGATCACACATCAAAATCTACGATATCTCAGACTCTGA

>PGSC0003DMG400008482RLKWAX-EGF\_2074

TGCCTTTTAAACACCACACACTAGAAATTAATGAATCGAAGTACCTAATTATCTGCCTGATTGAAGCGTG  
GACACAACGATAGAGGTGAAGATGACTCCTCACTAATGTTTTGCTCTCAT

>PGSC0003DMG400008482RLKWAX-EGF\_2135

TGAAGCGTGGACACAACGATAGAGGTGAAGATGACTCCTCACTAATGTTTTGCTCTCATCAAAATTTGAC  
TAATTCAAACACTTATCACTATATAATAGTCACCCATCAACCTGACTTGT

>PGSC0003DMG400008482RLKWAX-EGF\_2196

AAATTTGACTAATTCAAACACTTATCACTATATAATAGTCACCCATCAACCTGACTTGTGGTATAGTGGG  
GAGGAACTATTCCAGATTTAGTGAGAGATTTTAAGTTTCGAACTCTAAAT

>PGSC0003DMG400008482RLKWAX-EGF\_2257

TATAGTGGGGAGGAACTATTCCAGATTTAGTGAGAGATTTTAAGTTTCGAACTCTAAATATAGAGAAAA  
TTCTGTTAGGAGCGTCATCTCAAATGGGCCTTGCAGTGCATGATTTAGAT

>PGSC0003DMG400008482RLKWAX-EGF\_2318

AGAGAAAATTCTGTTAGGAGCGTCATCTCAAATGGGCCTTGCAGTGCATGATTTAGATTTAATCAGAG  
CTCTAGTGTAGGATCAAACATCAAATTTAAGAAGATATTTTCTTTATCTTG

>PGSC0003DMG400008482RLKWAX-EGF\_2379

AATCAGAGCTCTAGTGTAGGATCAAACATCAAATTTAAGAAGATATTTTCTTTATCTTGTATTTAACTAA  
GTTAATACATGTAATTTTACTAAAAATATTTTGCCTTATATTTAACTT

>PGSC0003DMG400008482RLKWAX-EGF\_244

GGGTCTGGTGCAACACTCTATAGATCACACATCAAATCTACGATATCTCAGACTCTGAAATACGCGTAT  
CAAATATGCTGTACCAGAGATGTTACTCAGAAACAGGACAGCTTTTAGAA

>PGSC0003DMG400008482RLKWAX-EGF\_2440

TTTAAACTAAGTTAATACATGTAATTTTACTAAAAATATTTTGCCTTATATTTAACTTTTTTTTTCTTTCATT  
CTCGGTAGGAAATATGGTTCAAAGACTCCAATTATAATCGAAAT

>PGSC0003DMG400008482RLKWAX-EGF\_2501

TTTTCTTTCATTCTCGGTAGGAAATATGGTTCAAAGACTCCAATTATAATCGAAATTATTATTACACA  
CGCAAACCTTTGCAAGAGTCCTATATCCCCTCTAAAATATTTTTTTAACT

>PGSC0003DMG400008482RLKWAX-EGF\_2562

TTATTACACACGCAAACCTTGCAAGAGTCCTATATCCCCTCTAAAATATTTTTTTAACTAGAATTACTCTAC  
CCCTGAGTGCTTAGGTGACAAAGAAAATCTAATACACTCAATTTGAGA

>PGSC0003DMG400008482RLKWAX-EGF\_2623

AATTACTTACCCCTGAGTGCTTAGGTGACAAAGAAAATCTAATACACTCAATTTGAGAGAGAAAGCAC  
GAAAAAATGCTAAAGTTTTTTATTTTGCATAATATTAGTCGGAGACAAGT

>PGSC0003DMG400008482RLKWAX-EGF\_2684

GAAAGCACGAAAAAATGCTAAAGTTTTTTATTTTGCATAATATTAGTCGGAGACAAGTTTATATTGAGA

AACATGGCCTAATTGTCCATCCTTTCTAAGTGTGATTTCTATGTTATGTA

>PGSC0003DMG400008482RLKWAX-EGF\_2806

GCCGTGCCTTAGGGCATATCGGTTGATTGAAGTAGATTCTGATTCATATGTAATGCTTAATTAGATACTC

ATAGTTGCCATTAATGACAAAGTAATTAATCCTGGAATTTTCGTATGGTA

>PGSC0003DMG400008482RLKWAX-EGF\_2867

TAGATACTCATAGTTGCCATTAATGACAAAGTAATTAATCCTGGAATTTTCGTATGGTATAATCACAACTT

GTGCTAGTTGTAAAACAAAGAAGATATAAAGACAGAGCCAAAGGGATTA

>PGSC0003DMG400008482RLKWAX-EGF\_2989

TTAATGTGGTATGTTTCTCTGTTTGGCATGTTAGATATTGATGAATGTCGAAATTCAATTTCCAATACGTG

TGAACACAACAATTGTATAAACACGCTGGGGAGTTACAAATGTTTTTGT

>PGSC0003DMG400008482RLKWAX-EGF\_305

TACGCGTATCAAATATGCTGTACCAGAGATGTTACTCAGAAACAGGACAGCTTTTAGAACCAGATAATCC

AACATGGTTACGTTTCGAAAAATTAACACCATACAGTTTCTCAGCACTTA

>PGSC0003DMG400008482RLKWAX-EGF\_3050

CCAATACGTGTGAACACAACAATTGTATAAACACGCTGGGGAGTTACAAATGTTTTTGTCCAAAAGGAT

ACACTGATGATGGTGAAAACAATGGTCGTGTCTGTATTGCAACAAACTCCG

>PGSC0003DMG400008482RLKWAX-EGF\_3111

AAAAGGATACACTGATGATGGTGAAAACAATGGTCGTGTCTGTATTGCAACAAACTCCGAGTTCCCATG

GATCAAGTTTTCTGTTGGTAAGTTTCTCACGCATATATATATATATATATG

>PGSC0003DMG400008482RLKWAX-EGF\_3172

TTCCCATGGATCAAGTTTTCTGTTGGTAAGTTTCTCACGCATATATATATATATATATATATATATATG

AAGTGATCAAAGGAATTCACCTCCTGTTGTTATAAAACACAGGTATGG

>PGSC0003DMG400008482RLKWAX-EGF\_3416

AATCTCCTCTAAAAGGGTGGTGTGGAAGCAACCAAATTTTTACAGCTGACGAGTTGAAGAAGGCAAC

AAATAACTATGCTAGTGATAGAATTCTTGGTCGTGGCGGAAATGGAATTGT

>PGSC0003DMG400008482RLKWAX-EGF\_3477

AAGGCAACAAATAACTATGCTAGTGATAGAATTCTTGGTCGTGGCGGAAATGGAATTGTCTATAAAGGT

ATTCTACCTGATAACCGTATAGTTGCTATTAAGAAATCTAAGACTGTGGAT

>PGSC0003DMG400008482RLKWAX-EGF\_366

AGATAATCCAACATGGTTACGTTTCGAAAAATTAACACCATACAGTTTCTCAGCACTTAACATGTTTACCG  
TAATTGGATGCGATGAATCTGCTATAATGACTGGAGATAACTTTCGTAA

>PGSC0003DMG400008482RLKWAX-EGF\_3660

GTCGTGAGACTCTTTGGATGTTGTTTGGGAAGATGAAGTGCCTTACTGGTTTACGAATATGTTTCTCATG  
GAACTCTTACGAGCATATCCACAATCAAATGGAGCGCCTTGTTATCT

>PGSC0003DMG400008482RLKWAX-EGF\_427

ATGTTTACCGTAATTGGATGCGATGAATCTGCTATAATGACTGGAGATAACTTTCGTAACGGATGTTACG  
CTTCTGTACTAATTCCAGTGGTGTTAATGTTGTTGTAGGAAGGTGTATG

>PGSC0003DMG400008482RLKWAX-EGF\_4270

AAGATAGGCCTACGATGAAGGAAGTGGCTATGGAACCTGAGAGTTTAAGAAAGTTCCTAGCCTTTGG  
ACTAATGGAAACGAACATGAAGATGAGAAGGAAGTTGAATTAACAGATCTTT

>PGSC0003DMG400008482RLKWAX-EGF\_4392

ACAATTCCAATTGACTCTAATATAGGTATGGACAACCTCTCTGGACAATATCCTAGCTCCTACATAAATAG  
CAGCACCATCTTTTCTGGACAATATAGTTCGGATAGTTCTTCATTACTA

>PGSC0003DMG400008482RLKWAX-EGF\_4453

ACATAAATAGCAGCACCATCTTTTCTGGACAATATAGTTCGGATAGTTCTTCATTACTACACAATACAAAT  
ATCCCGCGGTGATCGATCCAGAATAAAAGGTCAATATATATGTGAAGAT

>PGSC0003DMG400008482RLKWAX-EGF\_4514

CAATACAAATATCCCGCGGTGATCGATCCAGAATAAAAGGTCAATATATATGTGAAGATTTTTCTCTGTT  
TTGTAAGTTCCTTTTTAGCTATCTTTCTTTCTTGTTGAATGTTGTTATGT

>PGSC0003DMG400008482RLKWAX-EGF\_4575

TTCTCTGTTTTGTAAGTTCCTTTTTAGCTATCTTTCTTTCTTGTTGAATGTTGTTATGTATTTTTATTTGCGTC  
TGAATTTAATAATCAATTTATTGTTGATTGTATTGTATTAGTGACA

>PGSC0003DMG400008482RLKWAX-EGF\_4613

TCTTGTTGAATGTTGTTATGTATTTTTATTTGCGTCTGAATTTAATAATCAATTTATTGTTGATTGTATTGT  
ATTAGTGACAAGAACTTTTAGTACATTGAGCTTTAGAAATTATTTCCG

>PGSC0003DMG400008482RLKWAX-EGF\_488

GATGTTACGCTTCTGTACTAATTCCAGTGGTGTTAATGTTGTTGTAGGAAGGTGTATGGGTACAGGGT  
GCTGTCAAATAGAAATACCTAAAGGATTGAAATACTTCAGCACGACGATGG



>PGSC0003DMG400008482RLKWAX-EGF\_549

TACAGGGTGCTGTCAAATAGAAATACCTAAAGGATTGAAATACTTCAGCACGACGATGGACAGTGTGGA  
AAATCACACCGGAATTTGGTCTATTAATCGATGTGGATACGCGTTTTTAGG

>PGSC0003DMG400008482RLKWAX-EGF\_61

ATCTTGACATCAACCTCCGCCCATCCCACGGCAGACAGTCCCGTATCTCCTACTACAATCACAAAAGGTA  
CAAATATCGCCAAACCAGGATGCCCAAAGCAGTGTGGGAACGTTACAGTT

>PGSC0003DMG400008482RLKWAX-EGF\_610

AGTGTGGAAAATCACACCGGAATTTGGTCTATTAATCGATGTGGATACGCGTTTTTAGGTGAGGCAAGC  
CGATTCCAATTCAAGGGCGAGCATGATCTTACTGATAATAATCTTAAAAAC

>PGSC0003DMG400008482RLKWAX-EGF\_671

AGGCAAGCCGATTCCAATTCAAGGGCGAGCATGATCTTACTGATAATAATCTTAAAAACAGGATTTTGG  
ATAATGTTCTATTGTGTTAGATTGGGCTATCGGAAATAATCTTACTTGTG

>PGSC0003DMG400008482RLKWAX-EGF\_732

GATTTTGGATAATGTTCTATTGTGTTAGATTGGGCTATCGGAAATAATCTTACTTGTGTTGACGCACAA  
AAGCGCAACGATTATGCTTGCCTCGTTAATAGCCATTGTGTTGATTCCGA

>PGSC0003DMG400008482RLKWAX-EGF\_793

GACGCACAAAAGCGCAACGATTATGCTTGCCTCGTTAATAGCCATTGTGTTGATTCCGACACTGGCCTTG  
GTGGATATCGGTGCCATTGTGACCCGGGATATGAAGGCAATCCATATATC

>PGSC0003DMG400008482RLKWAX-EGF\_854

CTGGCCTTGGTGGATATCGGTGCCATTGTGACCCGGGATATGAAGGCAATCCATATATCCATCCAGGCT  
GCTCAGGTAACCTGATTTCAATTGAAGTCGGAATTATCACTAACGATTTCAA

>PGSC0003DMG400008492LRR-RLPs\_0

CTTTTTCTTGTTACTTGCTTCATAAAATATAATGAAGCCCTCCTCCTCTATACTTCCATTCTTTCTTTTT  
CTCTCTTGTTTCTTTTTCAACTCTTTCATCTGAAAGATGCCATCC

>PGSC0003DMG400008492LRR-RLPs\_1008

TGGTGCTCCATTGCCGCCCTGTAAATAATCATCACTAGTATCCTGTCTATGTATTTCAACTTGTTCTCTTTG  
AATGTTGATGAATAATTAAGCGACGAAACTCAAGGCTTAAAAATGTAC

>PGSC0003DMG400008492LRR-RLPs\_1068

TTGTTCTCTTTGAATGTTGATGAATAATTAAGCGACGAAACTCAAGGCTTAAAAATGTACTTTAATTAATT

TATGAATGAATGTTATCCTTTTTTAGTAACCTTCTCGATGGATGATTATA

>PGSC0003DMG400008492LRR-RLPs\_315

AGACCTTACATACCTTACAACATTCAGTATCCACAATGTACGTAATCTCACCGGTCCAATTCCATCAACAA  
TTGTTAAACTGACTAATCTCGAATTCTTCAGAATTAGTCAAACAAACAT

>PGSC0003DMG400008492LRR-RLPs\_378

ATCAACAATTGTTAAACTGACTAATCTCGAATTCTTCAGAATTAGTCAAACAAACATTTTCAGGACCTGTCC  
CTGAAGTTCTTAGTAAGTTGAAAAGCTTAACGTACATTAACCTTGCCTA

>PGSC0003DMG400008492LRR-RLPs\_441

ACCTGTCCCTGAAGTTCTTAGTAAGTTGAAAAGCTTAACGTACATTAACCTTGCCTATAATAAGCTTGTTG  
GAACTATTCCACCTTCGCTATCTCAACTTCCACACTTGGAGTTTTTAGG

>PGSC0003DMG400008492LRR-RLPs\_504

GCTTGTTGGAACCTATTCCACCTTCGCTATCTCAACTTCCACACTTGGAGTTTTTAGGATTGGATAGGAACA  
AACTTAGTGGAACCAATCCCGGAGTCTTTTAGAAAAGTTAGCACCAAATCT

>PGSC0003DMG400008492LRR-RLPs\_567

TAGGAACAAACTTAGTGGAACCAATCCCGGAGTCTTTTAGAAAAGTTAGCACCAAATCTAACGTATCTTTAC  
CTTGACATAACCAACTTACAGGGATTGTACCAACTTCATTTGCTGGCTG

>PGSC0003DMG400008492LRR-RLPs\_63

TCTTTCTTTTTCTCTTGTCTTTTTCAACTCTTTCATCTGAAAGATGCCATCCAAATGACAAAAAAGCC  
CTCCTAGAATTCAAAAAAGGTCTAGGCAATCCTGAAGACTTGGGTAA

>PGSC0003DMG400008492LRR-RLPs\_693

TGCGACAATTGACTTGTCAAGGAACATGCTTGAAGGGGATATTTTCATTTTTGTTTGGTAAAGATAAGACT  
ACATTTGAAATGCTTTTGGATAGGAATAAGTTTGAATTCGACTTCTCAA

>PGSC0003DMG400008492LRR-RLPs\_756

TAAGACTACATTTGAAATGCTTTTGGATAGGAATAAGTTTGAATTCGACTTCTCAAAGTTGACGTTTGGG  
AAGAGATTATGGAGGTTGGATTTAAATCATAACAAGATTTATGGGAGTAT

>PGSC0003DMG400008492LRR-RLPs\_819

GTTTGGGAAGAGATTATGGAGGTTGGATTTAAATCATAACAAGATTTATGGGAGTATTCAAAAATAAT  
AGCCAAGAATCCGTGGCAAATCTGAATGTGAGTTATAATAGACTTTGTGG

>PGSC0003DMG400008492LRR-RLPs\_882

AATAATAGCCAAGAATCCGTGGCAAATCTTGAATGTGAGTTATAATAGACTTTGTGGCGAGATTCCAAA  
GGGTGAGTATATGAAGAAATTTGAGATATATGAGTATCTTCACAACAAATG

>PGSC0003DMG400008492LRR-RLPs\_945

TCAAAGGGTGAGTATATGAAGAAATTTGAGATATATGAGTATCTTCACAACAAATGCTTGTGTGGTGC  
TCCATTGCCGCCCTGTAAATAATCATCACTAGTATCCTGTCTATGTATTC

>PGSC0003DMG400008493G-LecRK\_124

TTTGGCTAAGTAGATTTTATAGTAGTTGATTTTTTTTTTCTATTTCTTTTCATTAATTTGCAGAAATATTAG  
GTGCTACAAAGTTAAAATTTGAATATTTGAGCAATGGGTTGGAATT

>PGSC0003DMG400008493G-LecRK\_1240

TGATATATGAATACTTGAAGAATAACAGCCTTGCCAGTGCTTTACTAGGTAATGTTCTCACAGATCAGTT  
TTAAAAAAAAACTTATTTTGAACCAAATGAACATGACATAGTTGAAGTTA

>PGSC0003DMG400008493G-LecRK\_1302

GATCAGTTTTAAAAAAAAACTTATTTTGAACCAAATGAACATGACATAGTTGAAGTTAGGAATGTTAAAT  
GAGCGGATTGGACTGAATCTGGACGAGTTAAAATTGTTATTTTCAGTTCT

>PGSC0003DMG400008493G-LecRK\_1736

AGAGGTTATCTTGCTCCGGAGTATGCCTTGTTTGGACAACCTCACAAAAAGGCTGATGTTTATAGTTTTG  
GAGTTCTTGTACTTGAAATCATAAGTGAAGAAGCAGTAGTAAATCAGCA

>PGSC0003DMG400008493G-LecRK\_1984

AGGACAGCTTCTGGAAATCATTGATCCAGAGCTAACAGAGTATCCAGAACTGAATTACTGCGGTTTCAT  
CAAAGTTGCTCTCTTTTGCACACAAGCAGCACCTACCCAAAGACCTAATAT

>PGSC0003DMG400008493G-LecRK\_2356

ATAATGTCGTTATTCTAACGTGGGCTATCGAGGAGTAAATGTATTGTCTCTCATTAGACCTAGCTTTTTTC  
ATACATTTTCTCATGTAATGTAAAGTTGGCAGTAGCTGATAAGGGAGAA

>PGSC0003DMG400008493G-LecRK\_2418

GCTTTTTTCATACATTTTCTCATGTAATGTAAAGTTGGCAGTAGCTGATAAGGGAGAAAGAGAGACAATC  
ACACAGAATGAGCTACTATGTAACCTCAAATTTTCAGATATGAAGATGAAG

>PGSC0003DMG400008493G-LecRK\_2480

AGACAATCACACAGAATGAGCTACTATGTAACCTCAAATTTTCAGATATGAAGATGAAGTTTACAGCAGA  
GACTATGAACACAGTAAAGGATAGAACTAGGAGAACTTTTCTCTATGCA

>PGSC0003DMG400008493G-LecRK\_2542

CAGCAGAGACTATGAACACAGTAAAGGATAGAACTAGGAGAACTTTTCTCTATGCACATATTAGCTC  
CTAAACTAGAAATGAAGGTAAAACTTCCTGATAGGAGTTATTCTCAAAC

>PGSC0003DMG400008493G-LecRK\_2604

TTAGCTCCTAAACTAGAAATGAAGGTAAAACTTCCTGATAGGAGTTATTCTCAAACATATAA  
AAAGGACGACTGCTTTACAAGATCAACACAGTAGCATTTCATTGTGCAG

>PGSC0003DMG400008493G-LecRK\_2666

AAACATATAAAGGACGACTGCTTTACAAGATCAACACAGTAGCATTTCATTGTGCAGCAGAGAATAAA  
CCTTCAAGGTGCAGCAGTAGTAGCTTGAGGCTTTCAGAGGAAGCAACAGA

>PGSC0003DMG400008493G-LecRK\_310

ACTCTTATTTCTGTTTTCTCAATTACATGCTTAAACAAATCGTTCTTATAAAATTTAGAACCCAGAAAATT  
TAAAGATTTGACGCTTCTGCTCTACTTTTTGTAGTCCATCCAAATTTG

>PGSC0003DMG400008493G-LecRK\_3162

TAGAGATTTGACAAACCATAAAACCAAAGACATAGTTCTGTGCAGATTAGCTAATAAAACTCACCAAAG  
CACAAATACTCAGCATAGATTGTACTAAAGGTTATCAGCACATTTTGATCT

>PGSC0003DMG400008493G-LecRK\_3224

ACCAAAGCACAAATACTCAGCATAGATTGTACTAAAGGTTATCAGCACATTTTGATCTCTTGTGGAACC  
TTCCACTTTCAATTTTTTTAATTTACACCTCTTACTTAGTGTTAACTCTA

>PGSC0003DMG400008493G-LecRK\_3286

TGGAAACCTTCCACTTTCAATTTTTTTAATTTACACCTCTTACTTAGTGTTAACTCTAAATCATATGAAATG  
TAAACAGATAAATGTAGAACTGGTTTTCTCTGTGTGCCTGCCTTGGT

>PGSC0003DMG400008493G-LecRK\_3348

ATATGAAATGTAAACAGATAAATGTAGAACTGGTTTTCTCTGTGTGCCTGCCTTGGTTGAGTCGAAAGT  
ACCAATACAATGACTTTTTAAAAACAAAAGTAACTTAAAAAGAGAGTAA

>PGSC0003DMG400008493G-LecRK\_3410

TCGAAAGTACCAATACAATGACTTTTTAAAAACAAAAGTAACTTAAAAAGAGAGTAAAAAGTACCATG  
ATAAAAATTGGATAGTACTTTTACCAAGTAACTAGGTTAATCTCCCTCT

>PGSC0003DMG400008493G-LecRK\_3472

TACCATGATTAATAATTGGATAGTACTTTTACCAAGTAACTAGGTTAATCTCCCTCTCTCAACACTCATA

TCCTATAACCGAAGATTTGAAAGCAACGATTAGGAAGAGAAGGTAAGTACTAG

>PGSC0003DMG400008493G-LecRK\_3534

ACACTCATATCCTATAACCGAAGATTTGAAAGCAACGATTAGGAAGAGAAGGTAAGTACTAGATGCACGACAC

ATCAGACCAGTGATAATTTTCCTTCCAGCTAAAGCAACTGTTTGGAAAACA

>PGSC0003DMG400008493G-LecRK\_3596

ACGACACATCAGACCAGTGATAATTTTCCTTCCAGCTAAAGCAACTGTTTGGAAAACAAACACCCAGCAC

AAGCAAATTTATGCCAAACTAGTTAACAAACCATGACTTTAAGCAAAAAT

>PGSC0003DMG400008493G-LecRK\_3658

CCCAGCACAAGCAAATTTATGCCAAACTAGTTAACAAACCATGACTTTAAGCAAAAATGCCTCGGAAAG

ATTTCTAATTTATATAGCTATAGGTCTCACCTTCTCCTTCTCCCGGTTAGC

>PGSC0003DMG400008493G-LecRK\_496

ATGTGAGGGTTTTTTCCTATAACTCATTGAGATCAGCAACAGGTCCTTCCATCCATCTAACAAAATAGG

AGGTGGTGGTTTTGGAGTTGTGTATAAGGTAATCATCTCGTTTATGGTGT

>PGSC0003DMG400008493G-LecRK\_558

AAAATAGGAGGTGGTGGTTTTGGAGTTGTGTATAAGGTAATCATCTCGTTTATGGTGTGCATGCCTTTTAA

TGGTCCTTGTGGATGCTAGTTATTAAGTAGTGAGTTTTAACTTATATACG

>PGSC0003DMG400008493G-LecRK\_62

TTCAATCACAACAAGAAATCATGTACGTATAGATTATTATCTAAATTTTCATGTTTTTCCCATTTGGCTAAG

TAGATTTTATAGTAGTTGATTTTTTTTTTCTATTTTCCTTTTCATTAAT

>PGSC0003DMG400008493G-LecRK\_620

CCTTTTAATGGTCCTTGTGGATGCTAGTTATTAAGTAGTGAGTTTTAACTTATATACGTTCAAAGTTTAAA

AGAATCTTTTCACAGTCAAGTCACTTAAAAGATAAATATAATAATTTAT

>PGSC0003DMG400008493G-LecRK\_682

AAGTTTAAAAGAATCTTTTCACAGTCAAGTCACTTAAAAGATAAATATAATAATTTATCCATTCGAAATGG

GATTAGCTAGTAAGTAGATGCATTTAAGGGTGTAGCCTAATGATTAATA

>PGSC0003DMG400008493G-LecRK\_744

TCGAAATGGGATTAGCTAGTAAGTAGATGCATTTAAGGGTGTAGCCTAATGATTAATAAAGTGGGATGA

GACCAATGAGATTTTTAGGTTCAAATCTCAACGGAGGCCCAAAAAGGGTGT

>PGSC0003DMG400008493G-LecRK\_806

GGGATGAGACCAATGAGATTTTTAGGTTCAAATCTCAACGGAGGCCCAAAAAGGGTGTAGCCTAGATA  
GACACCTTCCAATGTAACCTAAGCTTTGGTGGGTAGAGTACCGATGGAATAGT

>PGSC0003DMG400008493G-LecRK\_868

TAGATAGACACCTTCCAATGTAACCTAAGCTTTGGTGGGTAGAGTACCGATGGAATAGTCGAGTTACATG  
TAATCTCATACGAACACCACCATCATAAAAAAAGAAAGTAAAATAAGATAG

>PGSC0003DMG400008493G-LecRK\_930

TTACATGTAATCTCATACGAACACCACCATCATAAAAAAAGAAAGTAAAATAAGATAGATTACCTGCTAC  
ATTAATAATATATATATGTTAAATCTTTTATGTATTTCCACTCTCTGTAC

>PGSC0003DMG400008493G-LecRK\_992

CCTGCTACATTAATAATATATATATGTTAAATCTTTTATGTATTTCCACTCTCTGTACTTGTGCAACTTTGTT  
CTTTAAATGTAGGGAGTTTTGAGAGATGGAACCTTGTGTTGCCATTAA

>PGSC0003DMG400008499-(rev)RLKWAX-EGF\_0

ATGCTAATTTTGACATTAGCCACTGCCCAAAAATTATCCCCTCTAACACCACTTCTCCTCCGCCGACAAA  
CACCACATCTCCGCCAACCAACACCACGACGACGACGATCACTAAAGCT

>PGSC0003DMG400008499-(rev)RLKWAX-EGF\_1054

TTTAGATATGATAAGTACCGTAAAATGTAATCTTCTCAAGTCAATACGATAAACAAGTTAATTTTAAAT  
GTTTGTCAAACCTTCGCATGCATAATCTTAGTTATAAGACAAGAGAGAGT

>PGSC0003DMG400008499-(rev)RLKWAX-EGF\_1116

TTTTAAATGTTTGTCAAACCTTCGCATGCATAATCTTAGTTATAAGACAAGAGAGAGTTATTCGAATGAT  
AAGCACCCGAGTCATCAAGAGAGCAAAGGTGAGAGCTCCTGGGGAGGGAG

>PGSC0003DMG400008499-(rev)RLKWAX-EGF\_1178

CGAATGATAAGCACCCGAGTCATCAAGAGAGCAAAGGTGAGAGCTCCTGGGGAGGGAGAGAAAAAAA  
AATAAAAAAGATTATTATAAATTGGGACAAAGAGAATAAAACTATTTTATTGG

>PGSC0003DMG400008499-(rev)RLKWAX-EGF\_1240

AAAAAATAAAAAAGATTATTATAAATTGGGACAAAGAGAATAAAACTATTTTATTGGGGAAAAAATA  
CTAACAATTTGAGTTAAGACTTTTTTGGAGTGAATCAGTCTAGCAATAAGG

>PGSC0003DMG400008499-(rev)RLKWAX-EGF\_1302

AAAAATACTAACAATTTGAGTTAAGACTTTTTTGGAGTGAATCAGTCTAGCAATAAGGTCGCTATTA  
TATCTTTTTTTTTTATATAGAAATGATTAAATATTCAAAGTTGTACAAAT

>PGSC0003DMG400008499-(rev)RLKWAX-EGF\_1364

TATTAACCTTATCTTTTTTTTTTATATAGAAATGATTAATATTCAAAGTTGTACAAATATTAGTTAGCTTTT  
AAAATATTTAAGATATGTGATAATGAATATGGTTTAAATACTTGAAA

>PGSC0003DMG400008499-(rev)RLKWAX-EGF\_1488

GTGACGCTAATTAATACTCCTACTTGCCATTAGTTAACAAAATAATGTAGGACCGTACAACCTCACACG  
TAAATACGTACAAAATAAAGATAAAAAAATCAAAGTGTACAAAATTAATT

>PGSC0003DMG400008499-(rev)RLKWAX-EGF\_1550

TTCACACGTAAATACGTACAAAATAAAGATAAAAAAATCAAAGTGTACAAAATTAATTTATTTGATCCAC  
CAGCCAACGTAATATATATTTTATGTACACTATGATTTTGACCGATGAAAA

>PGSC0003DMG400008499-(rev)RLKWAX-EGF\_1612

TGATCCACCAGCCAACGTAATATATATTTTATGTACACTATGATTTTGACCGATGAAAAGAAATTAATCTATCT  
AATGTCATGATTTTTATTTACCTTATTGATCGATTAATCTTTCTTTAA

>PGSC0003DMG400008499-(rev)RLKWAX-EGF\_1674

TTACTATCTAATGTCATGATTTTTATTTACCTTATTGATCGATTAATCTTTCTTTAATTTTGGGTGACGCAT  
CGTTTGGTTAATTGTACCCAGATATTGATGAATGTGCGAATCCAAAT

>PGSC0003DMG400008499-(rev)RLKWAX-EGF\_1736

GGGTGACGCATCGTTTGGTTAATTGTACCCAGATATTGATGAATGTGCGAATCCAAATACTAATTCATGT  
GAACAAAATTGTATAAACATACCGGGGAGTTACAATTGTTTCATGTCCAAA

>PGSC0003DMG400008499-(rev)RLKWAX-EGF\_186

ATTGGCTTAGGATCTGGTTGTGCCTTGATCCGAATTTTGAAATCAATTGTGATACTAATACAACAGATT  
CTCCAACACCATTCATAGGGAATATTCAAGTGTATGACATCTCTGACGCT

>PGSC0003DMG400008499-(rev)RLKWAX-EGF\_434

CGTACCTAATTATAAATTTTCTCTTGAAACCTTATAAACTTGAATTTTGAATTCACCTATATATACAGGTTT  
ACCGTTGTTGGTTGTGATGAAGCTGCTATAATTTGAAGGTGACTTT

>PGSC0003DMG400008499-(rev)RLKWAX-EGF\_496

ATACAGGTTACCGTTGTTGGTTGTGATGAAGCTGCTATAATTTGAAGGTGACTTTGCTAATGGCTGC  
CCCGCATCTGTATTAGTTGAGTCAGGTAAGGAAGGTGTATGGG

>PGSC0003DMG400008499-(rev)RLKWAX-EGF\_558

ATGGCTGCCCCGCGATCTGTATTAGTTGAGTCAGGTAAGGAAGGTGTATGGGTATTGGTTGCT

GCCAAATAACAATACCAAAGGCTTGAAAAATTTCAACACAATGATGCAA

>PGSC0003DMG400008499-(rev)RLKWAX-EGF\_62

GCCGACAAACACCACATCTCCGCCAACCAACACCACGACGACGATCACTAAAGCTGCGATCATTAC

AAAAGCAGGATGTCCGAAAAAGTGTGGGAACCTAACAGTTCCGTACCCTTT

>PGSC0003DMG400008499-(rev)RLKWAX-EGF\_620

GGTTGCTGCCAAATAACAATACCAAAGGCTTGAAAAATTTCAACACAATGATGCAAAGTTCCGCCACAA

AATCACACTGGAGTTTGGTCTTTCAATCCATGTGGCTATTCATTTCTTGGT

>PGSC0003DMG400008499-(rev)RLKWAX-EGF\_744

CTAGTCGATTCGAATTCATGGGTTTACAAGATCTAGGCGATCTTACTTTTAAAAAGAGGATTTTAGATAA

TGTCCCTATTGTGTTAGATTGGGCTATTGGAACCTTACTTGTGTTGAAG

>PGSC0003DMG400008499-(rev)RLKWAX-EGF\_806

TTAGATAATGTCCCTATTGTGTTAGATTGGGCTATTGGAACCTTACTTGTGTTGAAGCACAAAAAGTA

GTAACAATTATGCTTGTGTTGAATAATAGCCAATGTGTTGATTCCAACACT

>PGSC0003DMG400008499-(rev)RLKWAX-EGF\_992

TGTCAAGGTAACCTCATTCTCTACTTCCCTCACATGTTTCAACTTACTTTTATGTGTAAAATTTAGATATG

ATAAGTACCGTAAAATGTAATTCTTCTCAAGTCAATACGATAAACAAG

>PGSC0003DMG400008508-(rev)G-LecRK\_0

TTTAAATTTATTTTAGCAATCACTCATTCTACCAGCAAATTGTGCAGCCATAGAAATGAAGAATAGCAGT

TCAATTCTGATACTTGTGCATTTTTATGCTTTAGCCTCATCACTAATC

>PGSC0003DMG400008508-(rev)G-LecRK\_1037

GATTATCCAGTGGCTGTGTAACAGACGAAAAGGTGCAGTGTGATGCAATTAAGTGAAGACAAAGATAGT

TTATGGATAACTTCAATTGTGAGAGTACCTGCTTCTCATAATACTAATATC

>PGSC0003DMG400008508-(rev)G-LecRK\_1098

AAGATAGTTTATGGATAACTTCAATTGTGAGAGTACCTGCTTCTCATAATACTAATATCACAGTTGGGAC

AGCCTCACAGTGTAGATCTGCATGTTTCAACGATTGCTCTTGCACTGCTT

>PGSC0003DMG400008508-(rev)G-LecRK\_122

TCCCTAGGAGGGGACACCATTTCTGTGAATGAATCTGTTTCTTCAGGCCAAACAATTATCTCTTCAGGTG

GGAACCTTGAGCTTGGTTTCTTCAGACCAGGCGACTCTCGCTCCTACTAC

>PGSC0003DMG400008508-(rev)G-LecRK\_1220



ACTTATGATGGTTCCGGTACCTGTTCCATCTGGACAGGGGATCTGTTCAATCTGGAACAACCTCAGCACAA  
CTGAGTCAAAAAGGACAATATTTGTCAAACGCGGCTCACCTGAAGGTTAG

>PGSC0003DMG400008508-(rev)G-LecRK\_1281

TCAGCACAACCTGAGTCAAAAAGGACAATATTTGTCAAACGCGGCTCACCTGAAGGTTAGAATAGCATAT  
TAACATAGCTTGATTCTTTATTTTCATATAAGTACTATGTTATGGATAGAAT

>PGSC0003DMG400008508-(rev)G-LecRK\_1342

TAGCATATTAACATAGCTTGATTCTTTATTTTCATATAAGTACTATGTTATGGATAGAATTCCTTATTAACCA  
TTAGCACTTAACAACAATGATTCTCCTTTCAGCTCAAACCTAAAGCTAA

>PGSC0003DMG400008508-(rev)G-LecRK\_1403

CTTATTAACCATTAGCACTTAACAACAATGATTCTCCTTTCAGCTCAAACCTAAAGCTAAGAAGTCGATGAA  
GCTAAAAGCAATCCTTTCGTCAATATCAGTTTTGATGTTTCTACTCATA

>PGSC0003DMG400008508-(rev)G-LecRK\_1464

AGTCGATGAAGCTAAAAGCAATCCTTTCGTCAATATCAGTTTTGATGTTTCTACTCATAGGCAGCATTAG  
CTACATTTACTATAAAAGAAGAATTGCAAAAAGAGCAGGTAGTTGCTGAA

>PGSC0003DMG400008508-(rev)G-LecRK\_1525

CAGCATTAGCTACATTTACTATAAAAGAAGAATTGCAAAAAGAGCAGGTAGTTGCTGAATGAATCTTACT  
CTGAAAGATATTTTCTCTTATAGCATTTTGAACCTACTTTCAAAGGTCAT

>PGSC0003DMG400008508-(rev)G-LecRK\_1586

AATCTTACTCTGAAAGATATTTTCTCTTATAGCATTTTGAACCTACTTTCAAAGGTCATTCTCAATCAGATA  
GAAGTAAAGGTATTCAAGGGGCACATAAATCTCACTGGCACAAGCTG

>PGSC0003DMG400008508-(rev)G-LecRK\_1769

ACTTGGAGACTATTTTGGAAAGCTACAGACAACCTCTCAAATGCGAATAAGCTCGGACAAGGAGGATTCCG  
GTCCTGTTTACAAGGTTCAAACCTCATTCTACATCTATATGGACTGGCAT

>PGSC0003DMG400008508-(rev)G-LecRK\_183

CTTCAGGTGGGAACCTTTGAGCTTGGTTTCTTCAGACCAGGCGACTCTCGCTCCTACTACATAGGCATATG  
GTACAAGAACTATACCCTCAAGCAGTAGTATGGGTAGCAAATAGGGATA

>PGSC0003DMG400008508-(rev)G-LecRK\_1830

AGGATTCGGTCCTGTTTACAAGGTTCAAACCTCATTCTACATCTATATGGACTGGCATGGCCATATTGAC  
CTATAGTAATGAGATGAATTTTTTTTGCAGGGTATCTTCCGGGCGAAA

>PGSC0003DMG400008508-(rev)G-LecRK\_2074

CAATGCAACGGAACAAATATTACTTTATGAATATATGCCGAATAAAAGTTTAGATACATTCATATTTGGT  
GAGTTAGCCTTGTTAAGTTCTTTATTCTCAAAGTCATACATTTCTTATAA

>PGSC0003DMG400008508-(rev)G-LecRK\_2135

ATATTTGGTGAGTTAGCCTTGTTAAGTTCTTTATTCTCAAAGTCATACATTTCTTATAATGATCTAATTTTA  
TTGACGTACCAAACCTTTGTCATGGTAACGATGCAAGATGGAACACTTT

>PGSC0003DMG400008508-(rev)G-LecRK\_244

AGGCATATGGTACAAGAACTATACCCTCAAGCAGTAGTATGGGTAGCAAATAGGGATAAACCCTTGA  
TAGTGCTGATGCTAACTTGATAATTAGTCAAGGTAACCTGGTGCTTCTCGA

>PGSC0003DMG400008508-(rev)G-LecRK\_2440

AAAGTAACAGAAGCAAATACAAAGAAAGTAGTGGGGACCTAGTAAGTATTATATCTCTTCCTGTCATTA  
ATTTCTTACAAAAGGAGCTTTGGATAAGATCTTATACTCAAATGTTTTGTT

>PGSC0003DMG400008508-(rev)G-LecRK\_2501

TGTCATTAATTTCTTACAAAAGGAGCTTTGGATAAGATCTTATACTCAAATGTTTTGTTACCTGATGAAA  
TCTAGCGGCTATATGTCTCCTGAATATGCACTAGATGGATTGTTTTCCA

>PGSC0003DMG400008508-(rev)G-LecRK\_2562

CCTGATGAAATCTAGCGGCTATATGTCTCCTGAATATGCACTAGATGGATTGTTTTCCATCAAATCAGAC  
GTATTCAGTTTTGGAGTAGTCGTA CTGAGATAATCAGTGGAAGAAGGAA

>PGSC0003DMG400008508-(rev)G-LecRK\_2745

CCATGACTTAATTATTATATCTTCTTCTTAGCTTTGTTTCTCTGATAGAAAAATTATCACAGGCATGGAAAT  
TGTGGACAGAAAAAACTGAGATACAATTAATAGAGAAGTCACTACTTG

>PGSC0003DMG400008508-(rev)G-LecRK\_2806

GGCATGGAAATTGTGGACAGAAAAAACTGAGATACAATTAATAGAGAAGTCACTACTTGAATCATGCAA  
CAAAAGTGAAGCATTGAAGTGCATAAATATTGCACTCCTGTGTGTACAAGA

>PGSC0003DMG400008508-(rev)G-LecRK\_2867

TCATGCAACAAAAGTGAAGCATTGAAGTGCATAAATATTGCACTCCTGTGTGTACAAGAAGATCCAAAT  
CATCGTCCTAATATGTCAGATGTCATTTAATGCTGGGAGGGGAAGGTACT

>PGSC0003DMG400008508-(rev)G-LecRK\_305

CCACTTGATAGTGCTGATGCTAACTTGATAATTAGTCAAGGTAACCTGGTGCTTCTCGATAGACTTCAA

ACTCAATTTGGTCTGCACTTACTGAGAACATCAATCCAAATATTTTCAGTT

>PGSC0003DMG400008508-(rev)G-LecRK\_3111

GACGTTAGCAGGAATAGTGAAGGCATTTAATTCGTATGGAAAGGGCTAGGGGTGGCACTAGCTAGGAC

TTAAAGATGAGCCATATTATACTTTTTTATCCTTGTTAACCTCTACTTTGGT

>PGSC0003DMG400008508-(rev)G-LecRK\_3172

CTAGGACTTAAAGATGAGCCATATTATACTTTTTTATCCTTGTTAACCTCTACTTTGGTCCTAAAAGAGTC

CAGGGATAATTGTGTGTCGGTACTTGGCCAAATGTCGTCTTCTCTATAA

>PGSC0003DMG400008508-(rev)G-LecRK\_3233

TAAAAGAGTCCAGGGATAATTGTGTGTCGGTACTTGGCCAAATGTCGTCTTCTCTATAATAGTTAGGACA

AAAGGTGGAAATGTTGGGAAAACTTTCAAGTGTGTGACTCAAACATAT

>PGSC0003DMG400008508-(rev)G-LecRK\_3294

GTTAGGACAAAAGGTGGAAATGTTGGGAAAACTTTCAAGTGTGTGACTCAAACATATAACAATTTTGCT

TTAGAATGTAGTAGGTCTTAGCAATCAAGTACAAGAGTAATTTGATTATT

>PGSC0003DMG400008508-(rev)G-LecRK\_3355

AATTTTGCTTTAGAATGTAGTAGGTCTTAGCAATCAAGTACAAGAGTAATTTGATTATTCCTGATGCCTTC

AAATGTACAAGCAATGTAATTTTTCTTCTTATTCAATATCTTATTGGC

>PGSC0003DMG400008508-(rev)G-LecRK\_366

GACTTCAAACACTCAATTTGGTCTGCACTTACTGAGAACATCAATCCAAATATTTTCAGTTGCTGCAGTTCTT

CGTGATGATGGGAATTTTATTTTGAGTGATGTGTCAAAGGCATCAATGC

>PGSC0003DMG400008508-(rev)G-LecRK\_427

TGCAGTTCTTCGTGATGATGGGAATTTTATTTTGAGTGATGTGTCAAAGGCATCAATGCCCTTACTACTTT

GGCAAAGTTTTGATCACCCAACACACACTTTTTTGCCTGGTGCTAAGAT

>PGSC0003DMG400008508-(rev)G-LecRK\_488

TTACTACTTTGGCAAAGTTTTGATCACCCAACACACACTTTTTTGCCTGGTGCTAAGATTGGATATGATAA

ACGGACACAAAGAAAACAGTTTTTGGTTTCATGGAAGAATTCGAGTGAT

>PGSC0003DMG400008508-(rev)G-LecRK\_549

GATATGATAAACGGACACAAAGAAAACAGGTTTTGTTTTCATGGAAGAATTCGAGTGATCCGGCACCAG

GAATGTATTCTCTAGAAATGGACCCAAAAAATGCTCAATATGTTATAAAAT

>PGSC0003DMG400008508-(rev)G-LecRK\_61

GAATAGCAGTTCAATTCTGATACTTGTGCATTTTTATGCTTTAGCCTCATCACTAATCTTCCCTAGGAG  
GGGACACCATTTCTGTGAATGAATCTGTTTCTTCAGGCCAAACAATTAT

>PGSC0003DMG400008508-(rev)G-LecRK\_610

GGCACCAGGAATGTATTCTCTAGAAATGGACCCAAAAAATGCTCAATATGTTATAAAATGGAATAGGAC  
TACAGAGTATTGGGCAAGTGGTTCATGGGATGGCCAAAGATTCGGCTTAGT

>PGSC0003DMG400008508-(rev)G-LecRK\_732

CTGAGATGAGCTTAACTACATATATAATTACAGCTATATCGACAATGAGAATGAGTCATATTTTACATA  
CTCCCTTTACAATAGTACAATCACATCAAGATTGATAATGGATGTCTCGG

>PGSC0003DMG400008508-(rev)G-LecRK\_793

TTTTACATACTCCCTTTACAATAGTACAATCACATCAAGATTGATAATGGATGTCTCGGGACAAATTAAGC  
AACTGTCATGGTTGGATGGTAGCATTGATTGGAATTTATTCTGGACTCA

>PGSC0003DMG400008508-(rev)G-LecRK\_854

CAAATTAAGCAACTGTCATGGTTGGATGGTAGCATTGATTGGAATTTATTCTGGACTCAACCAAGAGAAT  
CTTGTCAGGTTTATGCTATATGTGGGGCATTGGAGTTTGTGATGAAGCT

>PGSC0003DMG400008508-(rev)G-LecRK\_976

TGCAACCTGCAATTGTTTGAGTGGTTTCAAGCAAAGATCAGATGCAGAATGGAATTCAAATGATTATTCC  
AGTGGCTGTGTAACAGACGAAAAGGTGCAGTGTGATGCAATTACTGAAGA

>PGSC0003DMG400008523G-LecRK\_0

CACACCCAAAAATCAACTTGTTTGACTACTTTCATGGACTCTGAAGAGAAAAGTATACCTCCGTCAACA  
CTTATTTTCTCTTATTGTTTCGTTTCATCATCTTCTTTACCATGGAAATGA

>PGSC0003DMG400008523G-LecRK\_1054

CGGTTTCAAAGCAAGATCTGATGCAGAATGGAATTCAAATAATTATTCCAGTGGCTGTGTAAGAGTAAG  
AGACCAAGAGGTGCAGTGTAAACGGAATTACTGAAGACAAGGATAGCTTTTG

>PGSC0003DMG400008523G-LecRK\_1116

GAGTAAGAGACCAAGAGGTGCAGTGTAAACGGAATTACTGAAGACAAGGATAGCTTTTGGATGAATTCA  
ATAGTGCATTACCTGCTTCTCAAGATACTAATATCACAGTTGCGGAAGCCT

>PGSC0003DMG400008523G-LecRK\_1178

AATTCAATAGTGCATTACCTGCTTCTCAAGATACTAATATCACAGTTGCGGAAGCCTCACAGTGTAGAT  
CTGCATGTTTCAACAATTGCTCTTGCACTGCTTATACCTATGATGTTTCT

>PGSC0003DMG400008523G-LecRK\_124

CAATCATTGTTTCTAGTACTTTTTTTGTGCTTTAGTCTCGGTACCAATCTTTCTATCGGAGAAGACACCAT  
TTCTATGAATGAATCTGTTTCTCAGGGCAAACAATTATCTCTTCAAG

>PGSC0003DMG400008523G-LecRK\_1240

GTGTAGATCTGCATGTTTCAACAATTGCTCTTGCCTGCTTATACCTATGATGTTTCTGGTGCATGTTTCAT  
TTTGGACCGGGGATCTGTTCAATCTACAACAACCTCAGCAAAAACCTGAAAC

>PGSC0003DMG400008523G-LecRK\_1302

CATGTTCAATTTTGGACCGGGGATCTGTTCAATCTACAACAACCTCAGCAAAAACCTGAAACAGAAAAAACTAT  
CTTTGTCAAAAAGTGGCTCACCTGAAGGTTAGAATAACATAAAAATAACTTA

>PGSC0003DMG400008523G-LecRK\_1364

AAAACCTATCTTTGTCAAAAAGTGGCTCACCTGAAGGTTAGAATAACATAAAAATAACTTAGCTTAATAAGTA  
TCGAGGTCCACTTTTGCATTATGTTTTTCGAGAAAGATGTTAAACATATC

>PGSC0003DMG400008523G-LecRK\_1426

AATAAGTATCGAGGTCCACTTTTGCATTATGTTTTTCGAGAAAGATGTTAAACATATCTGACTTGTTTTTG  
GCTCTCTACTTTTCAGATCAAACCTAAGGCTAAGAAATCGATGAAGCTGGT

>PGSC0003DMG400008523G-LecRK\_1488

TTGTTTTTGGCTCTCTACTTTTCAGATCAAACCTAAGGCTAAGAAATCGATGAAGCTGGTAGTTCTACTTTCA  
TCCACAACAGCTTTTATCGTTCTATTCATAGGAAGCTTTAGTTACATTT

>PGSC0003DMG400008523G-LecRK\_1550

CTACTTTTCATCCACAACAGCTTTTATCGTTCTATTCATAGGAAGCTTTAGTTACATTTACTATAGAAGAAG  
AAGAAGAAGAATGACAAAAGGAACAGGTATTTACTGAATGAATCTCACT

>PGSC0003DMG400008523G-LecRK\_1612

TAGAAGAAGAAGAAGAAGAATGACAAAAGGAACAGGTATTTACTGAATGAATCTCACTCTGGAAAATA  
TTTCGTTTCGTACCTTTTTTTAACTTAATTTGCTTTCTCAATCTTATTGAGGT

>PGSC0003DMG400008523G-LecRK\_1674

AAAATATTTTCGTTTCGTACCTTTTTTTAACTTAATTTGCTTTCTCAATCTTATTGAGGTAATGAGGTCATTCT  
GTTTTTCTTATTCCCTTTTCCCTAAATGATACTCAAGGGACACAAATAT

>PGSC0003DMG400008523G-LecRK\_1736

AGGTCATTCTGTTTTTCTTATTCTTTTCCCTAAATGATACTCAAGGGACACAAATATCTCACTTGGACAA

GATTGGAGGAGGAGAAATCATTGATGTTCCATACTTTTGTGGAGACC

>PGSC0003DMG400008523G-LecRK\_1798

CTTGACAAGATTGGAGGAGGAGAAATCATTGATGTTCCATACTTTTGTGGAGACCATTTTGGTAGCT

ACAGATAACTTCTCGAATGCAAATAAGCTCGGACAAGGAGGATTTGGTCC

>PGSC0003DMG400008523G-LecRK\_186

AAGACACCATTTCTATGAATGAATCTGTTTCTCAGGGCAAACAATTATCTCTCAAGTGGGACCTTTGA

GCTTGTTTCTTCACACCAGGTAACTCTTTAAATATTATCTAGGCATAT

>PGSC0003DMG400008523G-LecRK\_1860

TGGTAGCTACAGATAACTTCTCGAATGCAAATAAGCTCGGACAAGGAGGATTTGGTCCTGTTTACAAGG

TTAAAATATAATTATTGCACCTCTGTGTACTGGTATGGCTTAATTGACCAA

>PGSC0003DMG400008523G-LecRK\_1922

TACAAGGTTAAAATATAATTATTGCACCTCTGTGTACTGGTATGGCTTAATTGACCAATAGTAATGAGAT

GAACAACCTTTAACAGGGTATCTTTCCAGGCGGAAAAGAAATTGCAGTGA

>PGSC0003DMG400008523G-LecRK\_1984

AATGAGATGAACAACCTTTAACAGGGTATCTTTCCAGGCGGAAAAGAAATTGCAGTGAAAAGGTTATCT

AGTCATTCAGGACAAGGCATAGATGAATTTAAGAATGAAGTGACTTTAATT

>PGSC0003DMG400008523G-LecRK\_2046

GTTATCTAGTCATTCAGGACAAGGCATAGATGAATTTAAGAATGAAGTGACTTTAATTGCAAACTTCAA

CACAGAAATCTGGTCAGGCTTTTGGGCTATTGCATCAACGGAAAGGAACA

>PGSC0003DMG400008523G-LecRK\_2108

AACTTCAACACAGAAATCTGGTCAGGCTTTTGGGCTATTGCATCAACGGAAAGGAACAAATTTTACTGTA

TGAATATATGCCAAATAAAAGTTTAGATACATTCATATTTGGTAAGTTTG

>PGSC0003DMG400008523G-LecRK\_2170

TTACTGTATGAATATATGCCAAATAAAAGTTTAGATACATTCATATTTGGTAAGTTTGCCAAGGTATGTTG

TTTATTCTCAAGCACCTATACTATTGACAAGATTTAATCTTTGTCATGA

>PGSC0003DMG400008523G-LecRK\_2232

GGTATGTTCTTTATTCTCAAGCACCTATACTATTGACAAGATTTAATCTTTGTCATGATATTTATGCAAGAT

GGAGAACTTTGCAAATTATTGGATTGGAAGAAGCGCTATGACATCATA

>PGSC0003DMG400008523G-LecRK\_2356

GTATTGGACGAGGTCTTGCTTATCTCCACCATGATTCACGACTAAGGATCATTTCATAGAGATTTAAAAAC  
CAGCAACATTTTACTAGATGAGGATATGAATCCCAAGATTGCAGACTTTG

>PGSC0003DMG400008523G-LecRK\_2418

TTAAAAACCAGCAACATTTTACTAGATGAGGATATGAATCCCAAGATTGCAGACTTTGGCTTGGCGAGG  
ATTGTTGAAGGAAGAAGAACAAGCAAGACAGAGAAAATAGTTGGGACC

>PGSC0003DMG400008523G-LecRK\_248

ACCTTTGAGCTTGGTTTCTTCACACCAGGTAACCTTTTTAAATATTATCTAGGCATATGGTACAAGAATAT  
TTCATCGCAAAGTGTAGTTTGGGTAGCAAATAGGGAGACACCAGTTAGT

>PGSC0003DMG400008523G-LecRK\_2480

GGCGAGGATTGTTGAAGGAAGAAGAACAAGCAAGACAGAGAAAATAGTTGGGACCTAGTAAGTA  
TAACATCCTTCCTATTGATCATTTTTCCCTTTTGCTTTTGTAATAACATCTA

>PGSC0003DMG400008523G-LecRK\_2542

AAGTATAACATCCTTCCTATTGATCATTTTTCCCTTTTGCTTTTGTAATAACATCTAACACGTTTTTCGACAT  
GGTGTAAATCAAGTGGCTATATGTCTCCTGAATATGCATCAGATGGTC

>PGSC0003DMG400008523G-LecRK\_2604

GTTTTCGACATGGTGTAAATCAAGTGGCTATATGTCTCCTGAATATGCATCAGATGGTCTGTTTTCCCTCAA  
GTCAGATGTATTAGTTTCGGAGTAGTCATACTTGAGATGATCAGTGGA

>PGSC0003DMG400008523G-LecRK\_2666

TTCCCTCAAGTCAGATGTATTAGTTTCGGAGTAGTCATACTTGAGATGATCAGTGGACGAAAGAACAC  
AGGATTTTACCAATCAGAAGAAGCATTAACTTGTTAGGTTATGTAAGTGC

>PGSC0003DMG400008523G-LecRK\_2728

AGAACACAGGATTTTACCAATCAGAAGAAGCATTAACTTGTTAGGTTATGTAAGTGCAGAAACTCAGA  
CCTACATCATTTTTGTCCTTTTGAAGTTTTGATATCTAACTGGAAGTTA

>PGSC0003DMG400008523G-LecRK\_2790

ACTCAGACCTACATCATTTTTGTCCTTTTGAAGTTTTGATATCTAACTGGAAGTTATCACAGGCATGGA  
GAATGTGGATAGAAGAAAGGGCAATGCAATTAACAGAGAAGTCATTACT

>PGSC0003DMG400008523G-LecRK\_2852

AGGCATGGAGAATGTGGATAGAAGAAAGGGCAATGCAATTAACAGAGAAGTCATTACTAGAATCATGC  
AATAGAAGTGAAGTGATGAAGTGATCAATGTTGCACTCTTGTGCGTGCAAG

>PGSC0003DMG400008523G-LecRK\_2976

TTCAAATGATCGTCCTAAAATGTCAGATGTCATTGTAATGTTGGTAGGAGAAGGTACGAGTCTTCAGAG  
ACCTAATAGACCAGCTTTTGTAAATAAGAACACACGCGTCTAGCAGACCATC

>PGSC0003DMG400008523G-LecRK\_3038

TTCAGAGACCTAATAGACCAGCTTTTGTAAATAAGAACACACGCGTCTAGCAGACCATCTTCTCCCTCAA  
AGTCTCTAACAATCAAGTGACAATTACAGAAGAAGGAGGACGGTAGTAAT

>PGSC0003DMG400008523G-LecRK\_310

CAAGAATATTTTCATCGCAAACCTGTAGTTTGGGTAGCAAATAGGGAGACACCAGTTAGTGATGCTGCTCA  
CTTGACAATTATTCAAGGCAACCTAGTGCTTCTCGATAAATTTCAAAGCTT

>PGSC0003DMG400008523G-LecRK\_3100

CCCTCAAAGTCTCTAACAATCAAGTGACAATTACAGAAGAAGGAGGACGGTAGTAATGGTGTGAGATC  
ATCTTAATTTTCATTTATATATGATACAATTGTAATGTTTTCTGCAGACT

>PGSC0003DMG400008523G-LecRK\_3162

TGAGATCATCTTAATTTTCATTTATATATGATACAATTGTAATGTTTTCTGCAGACTTCTAAAGCACGAG  
CAGAAAATAATCTATATTTTGTAGTATCTTGATTGTAATTTGTAGCC

>PGSC0003DMG400008523G-LecRK\_3203

ATGTTTTCTGCAGACTTCTAAAGCACGAGCAGAAAATAATCTATATTTTGTAGTATCTTGATTGTAAT  
TTGTAGCCATGACATTGTTATCCTTACACATATATTACATGCACTTTTC

>PGSC0003DMG400008523G-LecRK\_372

CTGCTCACTTGACAATTATTCAAGGCAACCTAGTGCTTCTCGATAAATTTCAAAGCTTAGTTTGGTCAACA  
AATATTTCAAGGAGTGACCTCCAAAAAATTTAGTCATAGCAGTTCTTT

>PGSC0003DMG400008523G-LecRK\_434

TGGTCAACAAATATTTCAAGGAGTGACCTCCAAAAAATTTAGTCATAGCAGTTCTTTGTGACGATGGAA  
ATTTGATTTTGTAGTGATTTGTCATCAAACCTCATCAATACCGTTACTACTT

>PGSC0003DMG400008523G-LecRK\_496

CGATGGAAATTTGATTTTGTAGTGATTTGTCATCAAACCTCATCAATACCGTTACTACTTTGGCAAAGTTTTG  
ACTACCCAACACATGCATTTTACCTGGTGGTAAGGTTGGATATGACAA

>PGSC0003DMG400008523G-LecRK\_558

AAAGTTTTGACTACCCAACACATGCATTTTACCTGGTGGTAAGGTTGGATATGACAAACGCACACAAAG



AAAACAGGTTCTGATTTTCATGGAAGGATTTGAACGATCCGTCACCTGGAT

>PGSC0003DMG400008523G-LecRK\_62

CGTCAACACTTATTTTCTTATTGTTTCGTTTCATCATCTTCTTTACCATGGAAATGAAGAACAATCATTCCG  
TTTCTAGTACTTTTTTTGTGCTTTAGTCTCGGTACCAATCTTTCTATC

>PGSC0003DMG400008523G-LecRK\_620

ACACAAAGAAAACAGGTTCTGATTTTCATGGAAGGATTTGAACGATCCGTCACCTGGATTGTTTTCCATGG  
AATTAGACCCACGGCGTGCCCAACTTGTTATAAAATGGAATAGGACAACA

>PGSC0003DMG400008523G-LecRK\_682

TTCCATGGAATTAGACCCACGGCGTGCCCAACTTGTTATAAAATGGAATAGGACAACACAGTATTGGGC  
AAGTAGTTCATGGAATGGCCGGACGTTTCAGCTCAGTACCTGGGATGAGGTT

>PGSC0003DMG400008523G-LecRK\_744

ATTGGGCAAGTAGTTCATGGAATGGCCGGACGTTTCAGCTCAGTACCTGGGATGAGGTTAAACTACATAT  
TCAATTACAGCTATATCGACAATGAGAATGAGTCATATTTTACATATTCCC

>PGSC0003DMG400008523G-LecRK\_806

TACATATTCAATTACAGCTATATCGACAATGAGAATGAGTCATATTTTACATATTCCCTTTATAATAGTGA  
AATCCCATCAAATTTATCATGGATGTCTCAGGACAAATTAAGCAACTC

>PGSC0003DMG400008523G-LecRK\_868

TAATAGTGAAATCCCATCAAATTTATCATGGATGTCTCAGGACAAATTAAGCAACTCTTATGGTCGACT  
AGTTTGGATGATTGGTATCCATTCTGGGCTCAACCAACGGAACAATGTGA

>PGSC0003DMG400008523G-LecRK\_930

GGTCGACTAGTTTGGATGATTGGTATCCATTCTGGGCTCAACCAACGGAACAATGTGATGTTTACGCCAA  
TTGTGGGGCATTGGAGTTTGAACAATGTTAATTCATCCTGCAATTGCT

>PGSC0003DMG400008523G-LecRK\_992

TACGCCAATTGTGGGGCATTGGAGTTTGAACAATGTTAATTCATCCTGCAATTGCTTGAGCGGTTTCA  
AAGCAAGATCTGATGCAGAATGGAATTCAAATAATTATTCCAGTGGCTGT

>PGSC0003DMG400008524G-LecRK\_0

GTGAAGTTTCTCCACTTGCCATAATCTTGTCTCCAACCCATTAAGAGAAAAAAAAAATTAACAACAGA  
GCAAGAAAAGTTGGAGCTCAAGAAGGTGAATGATACTCAAAGAAGTGAAA

>PGSC0003DMG400008524G-LecRK\_1008

GCCCCTTCTTTTGTACACTTTTTAGCTAGTTTTCTCAAATGCATGAAAAGGAAGAGATGCTCTATTTCA  
TCTTTTAAGTTCAATTCTTGAGGCTATATCTTGAATTCATTTTATTTTT

>PGSC0003DMG400008524G-LecRK\_1071

CTATTTTCATCTTTTAAGTTCAATTCTTGAGGCTATATCTTGAATTCATTTTATTTTTTTTAAATAAATAAAAT  
TGAGGGCCTAAGAAAGAGATTACAATGTGGGGAATCGAATACTCACA

>PGSC0003DMG400008524G-LecRK\_1134

TAAATAAAATTGAGGGCCTAAGAAAGAGATTACAATGTGGGGAATCGAATACTCACACAGGCAGACAA  
TCAACTGAGTTACGAGATTCTCCTTTATCTTGATTTCACATGATTTGCTATA

>PGSC0003DMG400008524G-LecRK\_1197

GACAATCAACTGAGTTACGAGATTCTCCTTTATCTTGATTTCACATGATTTGCTATATTTTGTGTGATTCA  
AGTTGTCTATCTATTTTAGCTTTAGGTTATCAGTTCTGTTCTATTTT

>PGSC0003DMG400008524G-LecRK\_1701

AATGGATTTAAAGAACCTTCGGTATATATGTTAGCAAGTGGGGAGACTAATTGGTGGACGTTTGATAGA  
GAGTTTAATTCCCGGAGGAAAATCCCTGATTTACCATCAGATGTGTGCTTC

>PGSC0003DMG400008524G-LecRK\_1764

GATAGAGAGTTTAATTCCCGGAGGAAAATCCCTGATTTACCATCAGATGTGTGCTTCACATTTGGCGATA  
AGGAATCGCTATGTGCAGGCACACATTTACTTGTTCGGGTAGGGAAATC

>PGSC0003DMG400008524G-LecRK\_189

TTAAACTTTATTTTGGAGTAAATATAATGTGTATGTTATTCATTTGTTTTTTGTGGCTTTTATGGTTCTTG  
AGTGATTGATTTTTGGATTTTCATCTTGGTTGTTGAATGTTATTTGCT

>PGSC0003DMG400008524G-LecRK\_1953

CCAAGATGTTTATTTGCATCAGCTACTTGTGGCACCTCTGCTTTTGTGCTGGTGGTGGTATTATGGC  
GAACAGTGAGGTCTATGACACAGCTGAGAAATACAACCCCGATAGCAGA

>PGSC0003DMG400008524G-LecRK\_2016

ATTATGGCGAACAGTGAGGTCTATGACACAGCTGAGAAATACAACCCCGATAGCAGATCGTGGGACCC  
ACTACCGAGGATGAAGAGGAAGAGGAAGCTTTGTTTCAGGATGTTACATGGAC

>PGSC0003DMG400008524G-LecRK\_2457

GCTGCTTCATCGTCAGCCTCTTATTCGGGTAATTCATGGCTATATATACTTGCTGTCCAGATCCTGATGC  
AATTGAGTTGCAGTGGCAACCTCTTGACAGTGGTCGAAATCGACTTAGT

>PGSC0003DMG400008524G-LecRK\_252

TGGTTCTTGAGTGATTGATTTTTGGATTTTCATCTTGTTGTTGAATGTTATTTGCTTTTTGTGTGTGTGTG  
TGTGTGGATTTTCATGGTTCTTGAGTTTAATCTGATTCAATAATGAATT

>PGSC0003DMG400008524G-LecRK\_2520

CCTGATGCAATTGAGTTGCAGTGGCAACCTCTTGACAGTGGTCGAAATCGACTTAGTAGCTTTATCTTAA  
ACTGTTCTGTTATGGTAGCTTGAATAATGTCATTTATCTAGCAAACAACCT

>PGSC0003DMG400008524G-LecRK\_2583

ATCTTAAACTGTTCTGTTATGGTAGCTTGAATAATGTCATTTATCTAGCAAACAACCTTGTGTATTATGATC  
AAAATATATAAGTGGCATATGGCCACTGGTTTATGATATTTCTTGCATA

>PGSC0003DMG400008524G-LecRK\_2646

TTATGATCAAATATATAAGTGGCATATGGCCACTGGTTTATGATATTTCTTGCATATATTCACCTAATGTT  
TGCTCTGCTATGTTTGATGTAATTTGCATTTATTGTTGCATTATTATGA

>PGSC0003DMG400008524G-LecRK\_567

CCTAAAAAGAAAAGTTGTGTCTTACTACTCTCAACATCATCTCGTTGTCTAGCAAGATATGTCTAGTTCTC  
CCTCTACTTACCTATCCATTAGGAAAGTGGAACTTTCTTGACCTTCGAA

>PGSC0003DMG400008524G-LecRK\_756

TCAAGCACAATACTTTGATTTCTTTTTAAAGTTTTAGACAGAGGTGGAGCCAAGATTTAAAATTTATGAG  
TTTTAGATTCTTTTTATGTTACTGGGTTCTAAATTGATAAAATGTATAAA

>PGSC0003DMG400008524G-LecRK\_819

TTATGAGTTTTAGATTCTTTTTATGTTACTGGGTTCTAAATTGATAAAATGTATAAAATTCAAAAGATTTTAA  
AGACAAATACAAGATTTAAACTAAAACCTACTGGATTCAGACTGAACCT

>PGSC0003DMG400008524G-LecRK\_882

AGATTTTAAAGACAAATACAAGATTTAAACTAAAACCTACTGGATTCAGACTGAACCTGTAGCTGATATTC  
TAGCTCCGCCCTAGACTTTTTTATTAGCATCCTCAAATACTAAAGTGGT

>PGSC0003DMG400008581-(rev)LRR-RLKs\_1178

TAACTCACTAAGCTTATCATGTTTAAACAATGCTTTCTCTGGTCCAATTCCAACCTGGTTTATCAACCTGCAC  
GTCCCTCGTTCGTGTAAGAATGCAGAACAATCTTCTTTCGGGGACGAT

>PGSC0003DMG400008581-(rev)LRR-RLKs\_1612

AGTTAGTAACTTTGAACCTTCGAAACAACCAATTAACGGTCCAATTCCAAGAGCTATTTCCATGATGCC

CACATTAGCTATTCTAGATCTATCCAATAATTCTTTAACTGGTGGGATAC

>PGSC0003DMG400008581-(rev)LRR-RLKs\_1860

CTATGTGGTGGAGTGCTTCTCCATGTTCTCATAATGCAGCATAACACATCAAAGCAGAAGAGCTTGCACG

CGAAGCACATCATCACAGGATGGCTAACTGGTGTAGCAGCTCTTCTGCTT

>PGSC0003DMG400008581-(rev)LRR-RLKs\_1922

CTTGCACGCGAAGCACATCATCACAGGATGGCTAACTGGTGTAGCAGCTCTTCTGCTTTTTTTGACAGCA

GGTCTTGTAGCTAGATCTCTATAACAAGAGATGGCATGAAAATGGGAGCTG

>PGSC0003DMG400008581-(rev)LRR-RLKs\_558

AATTTCTTCGAAGGTTCAATTCCTAAATCTTATAGGAATTTGGGGAAATTGAAGTTTTTAGGTCTTTCAGG

GAACAATTTGACTGGCTACATTCCGGGAGAGCTGGGGCAGCTTTCGTCG

>PGSC0003DMG400008581-(rev)LRR-RLKs\_620

TCTTTCAGGGAACAATTTGACTGGCTACATTCCGGGAGAGCTGGGGCAGCTTTCGTCGCTTGAGACTGT

AGTACTGGGATACAATCTTTTTGAAGGTGGAATTCCAGCTGAATTTGGAAA

>PGSC0003DMG400008596-(rev)LRR-RLPs\_1159

AAGTGTATTGGGAGGCCTTACGCAGTAAGGAAAAACATGAATGGCAGGCAATTCTTGATGGAAACC

CCCTTGTTGCAGGTGAAGATGGTAATGGAGAAAATAGCATAAAGAAAATCCT

>PGSC0003DMG400008596-(rev)LRR-RLPs\_2928

CCAATTTCAGTTCCTTCTGTTCCAGTGGAGAGAATTATTTGACTTCCCTCCAAAGTTTTAGTTATGG

AACTGTGATGGATTGACCAGTTACCAAATGGGATGCTAGAGCATTGTC

>PGSC0003DMG400008596-(rev)LRR-RLPs\_3477

ACTTCTCAATTGCCATGCTCAAATTACGGCATCTCCAGATACAGGATTGTCCATTGTTAGAACTCTGTTG

TATGGGCTTGGCAACCTTGTTTCTTTCAGGAGTTAGTTTTACAGAAAT

>PGSC0003DMG400008596-(rev)LRR-RLPs\_3538

AACTCTGTTGTATGGGCTTGGCAACCTTGTTTCTTTCAGGAGTTAGTTTTACAGAAATGCGAGAAACTA

GAGCATCTGCCATCCGGAGATGCCATGCAACGCCTCACCAAATTACGGTA

>PGSC0003DMG400008596-(rev)LRR-RLPs\_3782

TTAAGTAAGTCTCTGTTCCCTCTTTCAGTTTCTGAGTCGATTTTTTTGTTCTTCTTTTCCACGAGTTACTCTC

CTTCTTTTTAACAACTTTTCATTCCCCAACTAATACATGTTATGG

>PGSC0003DMG400008596-(rev)LRR-RLPs\_3843

CGAGTACTCTCCTTCTTTTTAACAACTTTTCATTCCCCAACTAATACATGTTATGGTACTGAAGAATTG  
CAGATTTTTTATCACTCACTTGAACTAACTGTTCTTCTTCTTCTC

>PGSC0003DMG400008596-(rev)LRR-RLPs\_3904

CTGAAGAATTGCAGATTTTTTATCACTCACTTGAACTAACTGTTCTTCTTCTTCTTATCGTCATCAA  
AAGAGGAATATACATTCCCGTCCTTAATAATGTAATATGTTCCCTT

>PGSC0003DMG400008596-(rev)LRR-RLPs\_3965

ATCGTCATCAAAGAGGAATATACATTCCCGTCCTTAATAATGTAATATGTTCCCTTCTCATAGGTAAC  
TAGATCAAATGTCATGCTGGAACGTTGCTAGCTGTGGTATATCAAGTCA

>PGSC0003DMG400008596-(rev)LRR-RLPs\_4026

CATAGGTAAGTATGATCAAATGTCATGCTGGAACGTTGCTAGCTGTGGTATATCAAGTCAAATTTATGGT  
TGGTAATCAGGCTGGCTAAAATTTTCATTTAGACTTGGTAGAGGAATGCT

>PGSC0003DMG400008596-(rev)LRR-RLPs\_4087

ATTTATGGTTGGTAATCAGGCTGGCTAAAATTTTCATTTAGACTTGGTAGAGGAATGCTATAACAAATTT  
GTCGCTTCTTTTCACTGGTCATTATTGACTGTTTAACTAGGTTGGCTGT

>PGSC0003DMG400008596-(rev)LRR-RLPs\_4148

AACAAATTTGTCGCTTCTTTTCACTGGTCATTATTGACTGTTTAACTAGGTTGGCTGTGTTTTGTATGCAT  
GCAATGTAAGCTTGGTTGCGTTTCTAGCACCATGAGGGACGTTCCATCC

>PGSC0003DMG400008596-(rev)LRR-RLPs\_4209

TTTGATGCATGCAATGTAAGCTTGGTTGCGTTTCTAGCACCATGAGGGACGTTCCATTTGGTTTAA  
GGATTCTCTACTCTCATTGGACCAAACATCTCCATGTAAGCTTCTTCCCA

>PGSC0003DMG400008596-(rev)LRR-RLPs\_4270

TTGGTTAAGGATTCTCTACTCTCATTGGACCAAACATCTCCATGTAAGCTTCTTCCCAGTTATTAATCTCC  
TAGATCCCATAGTTTCTTTTGTAAATCGTGCAGCAAAGAGTATCTTT

>PGSC0003DMG400008596-(rev)LRR-RLPs\_4331

TATTAATCTCCTAGATCCCATAGTTTCTTTTGTAAATCGTGCAGCAAAGAGTATCTTTAATCCTCAAATA  
TTATAATGCTCTTCGATATTGGGTATAGTGTGTTAGCATGTTGGACAG

>PGSC0003DMG400008596-(rev)LRR-RLPs\_4453

ACTAATAGTTGTACATATCTATGTAATAGCTCTAAATATTTGTGTAATTACTGTGTCAATTGCTTTCCACAT  
GTAGGAGATATCAGGGATAAATGTAGCATATTTTTATAGATATTACAG

>PGSC0003DMG400008596-(rev)LRR-RLPs\_4514

GCTTTCCACATGTAGGAGATATCAGGGATAAATGTAGCATATTTTTATAGATATTACAGATATTTAGGGG  
TGTAAGTGGCAACTTCTAATTTAATGGAAGAGCTCTTAATTTGAGAGCAT

>PGSC0003DMG400008596-(rev)LRR-RLPs\_4575

ATTTAGGGGTGTAAGTGGCAACTTCTAATTTAATGGAAGAGCTCTTAATTTGAGAGCATTTCATTAGCAA  
ATTCGACTCTGGATAAAGACAATTTCTTTCTTTGAGGAAAATGAAGT

>PGSC0003DMG400008596-(rev)LRR-RLPs\_4636

ATTCAGCAAATTCGACTCTGGATAAAGACAATTTCTTTCTTTGAGGAAAATGAAGTATTTGATTGAC  
AAAACATTGGCTTATCATGGTTGACACAATCAGTTTCTTTTGCATAAGAG

>PGSC0003DMG400008596-(rev)LRR-RLPs\_4697

TTGATTGACAAAACATTGGCTTATCATGGTTGACACAATCAGTTTCTTTTGCATAAGAGAAGGTGAAACA  
TAGAGGGGGGAAAACGACCTTCTGCAAGACAATTTTATTATCGACTATCT

>PGSC0003DMG400008596-(rev)LRR-RLPs\_4758

GGTGAAACATAGAGGGGGGAAAACGACCTTCTGCAAGACAATTTTATTATCGACTATCTGGTGAAATAG  
TATAGGTAACAAAGCCATTTTCATCATAAGCCTTAGATGCAAGACAGATTTT

>PGSC0003DMG400008596-(rev)LRR-RLPs\_4819

TGAAATAGTATAGGTAACAAAGCCATTTTCATCATAAGCCTTAGATGCAAGACAGATTTTCATTTTGGTAAA  
AAATGTGACTTCAGTTGATAGTAGAGGCTTTTCCAAATTTTGTGACGGT

>PGSC0003DMG400008596-(rev)LRR-RLPs\_4880

TTTGGTAAAAAATGTGACTTCAGTTGATAGTAGAGGCTTTTCCAAATTTTGTGACGGTCTTCACTCTTCA  
ATAGTATTTTCTTTAATTTTCATGGGACTTATCGGAACATTGTTTACAT

>PGSC0003DMG400008596-(rev)LRR-RLPs\_4941

TCACTCTTCAATAGTATTTTCTTTAATTTTCATGGGACTTATCGGAACATTGTTTACATTGGTGCCTTTGGG  
GACGGTGATTGCACAAGCTGATTAGGTCTTGTCTTCTCCTAAAATTTT

>PGSC0003DMG400008596-(rev)LRR-RLPs\_5063

TTTTTAGTGGTTTTTTTTTTTTTTTTTTGGTTGAAAACAGAGTAATATATATGTTATGTAATATGCATCGTTAC  
ATTGTTACCAGCAAGTGGCAAACAGGACACCTACTATTGGTGTTCTG

>PGSC0003DMG400008596-(rev)LRR-RLPs\_5795

ACTATTACATGAGTTAATTACAGAGGGCATACTATTACTAGTACTATTACATGAGTTGCTTGCAAAAAGAT

ATCTTAGATAGTCTAACAAATGGAGTTCCTTCTTTGTCTGCTTCTAGTTT

>PGSC0003DMG400008596-(rev)LRR-RLPs\_5856

GCAAAAGATATCTTAGATAGTCTAACAAATGGAGTTCCTTCTTTGTCTGCTTCTAGTTTGTCTGGATACAAA

CACCGGAGGAACTTCCATGCACAAAAAAGAGTTGATTTGATCCATTTTA

>PGSC0003DMG400008596-(rev)LRR-RLPs\_5978

GCCTTCCTTTGCTAGAGCGTCTTTTTAGTGGTACTTGTAAATGACCCGCGTCTCCATTTCCAAGAAAGAA

CTGTGTGCCAAACTGACTTTTTTCCCCTTGTGTTTCAGATGGTTGAAC

>PGSC0003DMG400008596-(rev)LRR-RLPs\_6039

CAAGAAAGAACTGTGTGCCAAACTGACTTTTTTCCCCTTGTGTTTCAGATGGTTGAACAACGGCATGGA

AAAAAGACTATGAAGTTTCATAGTCATGATTGTCAAGGAAAATTGCATTT

>PGSC0003DMG400008596-(rev)LRR-RLPs\_6100

CGGCATGGAAAAAAGACTATGAAGTTTCATAGTCATGATTGTCAAGGAAAATTGCATTTGTAATTCAT

TTGCATTTGGCTGGAAGTGAATTGAGATACTATTCTGTATGTGGAAAAT

>PGSC0003DMG400008596-(rev)LRR-RLPs\_6161

TAAATTCATTTGCATTTGGCTGGAAGTGAATTGAGATACTATTCTGTATGTGGAAAATTCTGGACTAAG

ATCTGTCAGCTGAGGACTTTTCGTGCATTGTGTACATGCTACACTTGCCTT

>PGSC0003DMG400008596-(rev)LRR-RLPs\_6222

TGGACTAAGATCTGTCAGCTGAGGACTTTTCGTGCATTGTGTACATGCTACACTTGCCTTTTCTTGTATATA

GAGATTTTGTCTCCAGCAAACAGTTTTTTAATTATTTTTTTAACGTTGT

>PGSC0003DMG400008596-(rev)LRR-RLPs\_6283

CTTGTATATAGAGATTTTGTCTCCAGCAAACAGTTTTTTAATTATTTTTTTAACGTTGTGTGGGGTTAGGT

TTGACCCCTACCACGTCTGTAACATCCAAAAAGTTGCAAAGCAGAAGG

>PGSC0003DMG400008596-(rev)LRR-RLPs\_6344

GGGGTTAGTTTGACCCCTACCACGTCTGTAACATCCAAAAAGTTGCAAAGCAGAAGGGGACATGGA

CCTAACTCCAGCAAACAGTTTATATTCGCTTAACTGTTGTATCATTGTCTA

>PGSC0003DMG400008596-(rev)LRR-RLPs\_6405

ACATGGACCTAACTCCAGCAAACAGTTTATATTCGCTTAACTGTTGTATCATTGTCTAGTTGATAGCTTC

TTTAATGTATCTCTGTTTTCTTTTCGAAATTTATCTTGGCTTATGTTAG

>PGSC0003DMG400008596-(rev)LRR-RLPs\_6457

TTGTCTAGTTGATAGCTTCTTTAATGTATCTCTGTTTTCTTTTCGAAATTTATCTTGGCTTATGTTAGTGCAT  
ACTATGATGGATTAATATAAAAACATGTGTTCCAAATCAACATTTCC

>PGSC0003DMG400008596-(rev)LRR-RLPs\_671

GCAAAGAGAATTTACAATGATGAACACATCAAGCAAACCTTTGAAAAGAGAGTTTGGCTGTGTCTACCT  
GAAATGTCGGAGACTAAGAGCTTTCTTGAAGTATCCTCGAATCATTGACA

>PGSC0003DMG400008596-(rev)LRR-RLPs\_732

GTCTACCTGAAATGTCGGAGACTAAGAGCTTTCTTGAAGTATCCTCGAATCATTGACAGAGAGGAAAG  
TTAAGGTCCAGAGCAGAGATATAATTGTCATGAAGCTCCGAGATGAACTGG

>PGSC0003DMG400008822L-LecRK\_1134

GGTATGAAGGAATTTATTTTCGGAGATTGTAAGCATTGGTCGTATGCAACACAGGAATGTAGTACAACATA  
TTGGGTTATTGCAGGCGAAAAGGGGAGTTGATTTTGATATATGAATACATG

>PGSC0003DMG400008822L-LecRK\_126

CAGTTCACATCTACTGATCTTTTGTGTTAACAATTCAGGAACACAAAATCAGGGCCATGCTTTCTATCC  
AAATCCAATTCATTTCAAGAACTCACCTAATGGTTCTGTATTTTCTTTC

>PGSC0003DMG400008822L-LecRK\_1323

AGAGTCATTAGAGGTGTAGCCTCTGGACTTTTTTCTACACGAAGAATGTGATCACGTAGTGATTGATA  
GAGATGTTAAGGCCAGTAACGTCTTGTTAGATGGTGAACATAAATGGCAAG

>PGSC0003DMG400008822L-LecRK\_1386

ATTCATAGAGATGTTAAGGCCAGTAACGTCTTGTTAGATGGTGAACATAAATGGCAAGTTAGGAGATTTT  
GGACTCGCGAGGCTATATGGTCATGGGACCGATCCTCAGTCTACTCGTGTT

>PGSC0003DMG400008822L-LecRK\_1887

CTAACATTTGAACATCGCGGAGGTTTTGATGATTTTGTCAAGTCGTATCCAACCTCTTTGGGCTATGCATA  
TTCCGGCTCTCCATCTGTAACAGACTCCTTTCTCTCTGGTGGCCGATGA

>PGSC0003DMG400008822L-LecRK\_189

TTCTATCAAATCCAATTCATTTCAAGAACTCACCTAATGGTTCTGTATTTTCTTTCTCCACTACTTTTCGTGT  
TCGCGATAAGGTCTGATTATGGAATTTGAGTGGTCATGGACTGGTT

>PGSC0003DMG400008822L-LecRK\_315

ATCGCGCCACATAAAGGACTTCAGGGGTCTTTGGCAAATCACTATCTTGGTCTTTTTAACTCTAATAATAA  
TGGAATGGATTAACCATGTCATTGGAGTTGAGCTCGATACAATCTAT



>PGSC0003DMG400008822L-LecRK\_378

AATAATAATGGAATGGATTAACCATGTCATTGGAGTTGAGCTCGATACAATCTATAGCGAGGATTTT  
GGTGATATCAATGACAATCATGTTGGAATTGATATAAATGGATTGAGGTCT

>PGSC0003DMG400008822L-LecRK\_504

ATTCACACAGCAGGTTATTTTGATGATACTGGTTTTTTTCATAACTTGACTTTAATTAGTGGCAAAGAAAT  
GCAAGTTTGGATTGATTACGATGGGAGGACTAAGCAAATGAATGTAACA

>PGSC0003DMG400008822L-LecRK\_567

AAAGAAATGCAAGTTTGGATTGATTACGATGGGAGGACTAAGCAAATGAATGTAACAGTAGCTCAGTTA  
CATATGGAAAAACCAGTTAGACCACTTTTGGCTTTGAAACATGATCTTTTCG

>PGSC0003DMG400008822L-LecRK\_630

CAGTTACATATGGAAAAACCAGTTAGACCACTTTTGGCTTTGAAACATGATCTTTCGTCGATTCTTGATCA  
GACTATGTATGTTGGTTTTTCATCCTCAACAGGTTTCAGTCCCAACACAT

>PGSC0003DMG400008822L-LecRK\_693

CTTGATCAGACTATGTATGTTGGTTTTTCATCCTCAACAGGTTTCAGTCCCAACACATCATTATATCTTGGG  
ATGGAGCTTCAAGACAAATGGGAAAGCTCAAGAACTCTCGCAACTTCCT

>PGSC0003DMG400008822L-LecRK\_819

CCTCGTCTTGGGAGTAAAGGGACATCAAGATTTGTAACGATTGGTTTGCCTATAATCTCGTTGGTTTCAG  
TTGTTGCAGCTGTGTTAGCGGTGGTTTATTATGTAAGAAGGAAGAAGTAT

>PGSC0003DMG400008897-(rev)L-LecRK\_0

ACTAGATTTGACTATATTGTGTGATTATTTTTCATATATACATATTGAAGTTTGGCTGGCCTCAAGAAAAT  
GACATTACAGAGTATACATTGTAGACTTGAACATTGGGAGATAAATAGT

>PGSC0003DMG400008897-(rev)L-LecRK\_126

TGTGATTGTAGAAAGTTAACCCCGCGAACATTATTATCAGTTCTATCCCTATAAGAGTTTTGAGCAGACA  
TGGAGAAATTGTTTTTAGCCATGATTTTTCAGTTTCTTGTTTTACTTTTT

>PGSC0003DMG400008897-(rev)L-LecRK\_1701

CATGGGACAGATCCTCAAACACTACGCATATCGTTGGAACCTCGGATACCTTGCCCCAGAGCATAACAAGA  
ACAGGCAAAGCCACAACACTAGCACTGATGTGTATTCAATTTGGGGCATTITTA

>PGSC0003DMG400008897-(rev)L-LecRK\_1764

ACAAGAACAGGCAAAGCCACAACACTAGCACTGATGTGTATTCAATTTGGGGCATTITTTACTTGAGGTGGCTT

GTGGGAGAAGGCCAATAGATCAAAGGGTATCGGACGAGGACCTCGTTTTG

>PGSC0003DMG400008897-(rev)L-LecRK\_63

AAGAAAATGACATTACAGAGTATACATTGTAGACTTGAACATTGGGAGATAAATAGTCATATTTGTGATT  
GTAGAAAGTTAACCCCGCGAACATTATTATCAGTTCTATCCCTATAAGAG

>PGSC0003DMG400008897-(rev)L-LecRK\_630

GAGTTTGACACGCTACAGAACCGTGAATTTGATGATATTGACAGCAACCATGTAGGCATTGACATCAAT  
GGCCTAAAATCTGTAATAGCCAAGCCGGCCGTTATTATACCAGTAATGAG

>PGSC0003DMG400008897-(rev)L-LecRK\_693

ATCAATGGCCTAAAATCTGTAATAGCCAAGCCGGCCGTTATTATACCAGTAATGAGAAATCCTTCAATA  
ACTTAACTCTTGCTAGTGGCCAGCCAATGCAAGTTTGGGTGGAATATGAT

>PGSC0003DMG400008897-(rev)L-LecRK\_819

GATAAGCATATGAATGTCACAATGGCTCCACTGCACGTTGCAAACCAGACCGTCCTCTCCTGTCCTTAG  
TCTACGATCTTTCATCTGTCATGGATGAAAACGTGTCTATAGGCTTCTCA

>PGSC0003DMG400008897-(rev)L-LecRK\_882

TCCTTAGTCTACGATCTTTCATCTGTCATGGATGAAAACGTGTCTATAGGCTTCTCAGCATCCACCGGTGC  
AGTTGTTTCAACACATTATATCCTTGGATGGAGCTTTAAAATGAATGGA

>PGSC0003DMG400008897-(rev)L-LecRK\_945

ACCGGTGCAGTTGTTTCAACACATTATATCCTTGGATGGAGCTTTAAAATGAATGGAGTGGCTCAAGGG  
CTTGATCTCTCTCAACTTCTAAGCTTCTCGAGTAGTACCTAAGAAAGAA

>PGSC0003DMG400008925-(rev)LRR-RLPs\_0

ATGGATCCTAATGAGGTAATGAGAAGGTTACCTAATCTTCGGAAATTGAGATGCATATCAGTTGACTCG  
GAGGACTGCTGTCATTTTCCATCACTGGAGTGTGTGAGTCGACTTGAATCA

>PGSC0003DMG400008925-(rev)LRR-RLPs\_132

CACTATGGTCAGTCATTTTCTTCTGTAAAGTTCAACTTCCCCTCAAATCTCAAAGACTGACATTGCCAAA  
GTTTCAGCTACCATGGACTGAAATTTCAAGAATTGGTAGCTTACCACAC

>PGSC0003DMG400008925-(rev)LRR-RLPs\_198

CCAAAGTTTCAGCTACCATGGACTGAAATTTCAAGAATTGGTAGCTTACCACACCTTGAGGTTCTCAAAC  
TACTTGCCCGAGCCTTTGAGGGTGTGCAATGGGACATGAAAGACGGAGAG

>PGSC0003DMG400008925-(rev)LRR-RLPs\_264

AAACTACTTGCCCGAGCCTTTGAGGGTGTGCAATGGGACATGAAAGACGGAGAGTTCCTGAAACTAAG  
ATTCTTGAAGTTAGACTCTTTGAACATTGAACAATGGAACATCTCATCTGAT

>PGSC0003DMG400008925-(rev)LRR-RLPs\_396

CTTGAGCATCTTGTTCTGCAAAGTTGTAAGAACTTAAGGAGTTCCTTCATGCTTAGGCGATGTTTCAA  
CGCTACACAGTGTTGAGCTACACTGGTGCAGCCGTTCTTCTGTGAACTCG

>PGSC0003DMG400008925-(rev)LRR-RLPs\_66

TCGGAGGACTGCTGTCATTTTCCATCACTGGAGTGTGTGAGTGCAGTGAATCACTCAAGATATTACACT  
ATGGTCAGTCATTTTCTTCTGTAAGTTCAACTCCCCTCAAATCTCAAA

>PGSC0003DMG400009029LRR-RLPs\_0

GGTTATCCCTCGAGTAACAAGACAGTCGAATATAAAAACACTGTTCCACAAAACACACACACATTGTTT  
ACTTCACTTTTTTTCAGTTGAGATTTTCTTCACTTGCAGTCTCTCCGGCGG

>PGSC0003DMG400009029LRR-RLPs\_248

ATGCTCTGTACGAGTCTACTTTTTTGGTCATGTGATTACACAGATCTGTGCTGGATTTTAGTAATTTTTCTT  
GTTAATGTGCTTTCGTTTGTGGTTTTAGGTAGTTTTTTTTTATGTTT

>PGSC0003DMG400009029LRR-RLPs\_2914

TCTCTGGCTGAATTATGTAGGGTACGAGAGAGAGAACTGCTATTTATGTTGAACCTTCTTTTGTATGTA  
GACTTGATAATCTCCTCTTTTTTCTTTTTCTTTTTTTTTATATTTCCAT

>PGSC0003DMG400009029LRR-RLPs\_372

TTTTGGGGTTTTGGTAGAGTAGGTTGCAACTACTGGGAGGAGGACTACAACTTCACTGTTAGGTATAAA  
GTTTTTATTTTTCTCGTGAGGTTTGTGTTTGTAGGGGTAAAAGAGGGAT

>PGSC0003DMG400009029LRR-RLPs\_434

GTATAAAGTTTTTATTTTTCTCGTGAGGTTTGTGTTTGTAGGGGTAAAAGAGGGATTTTGTGTTTGTATT  
ACAAGTTTCTGATGTTTTAGCGGCTCTGTAAATTGTATATATGCTGCTC

>PGSC0003DMG400009029LRR-RLPs\_496

TTTTGTATTACAAGTTTCTGATGTTTTAGCGGCTCTGTAAATTGTATATATGCTGCTCTGCGCTGCTCATAT  
TATTCTTCGGTAATGTATTGTGGGGTATTTTTTTGTATCCAAGAAAG

>PGSC0003DMG400009029LRR-RLPs\_558

CTGCTCATATTATTCTTCGGTAATGTATTGTGGGGTATTTTTTTGTATCCAAGAAAGTTTTTATGTGTTAT  
AGTGTGGTGAAATGGAATACATCTGTTGAGTATAACATTTTTGGTTTT

>PGSC0003DMG400009029LRR-RLPs\_620

TATGTGTTATAGTGTGGTGAAATGGAATACATCTGTTGAGTATACCATTTTTGGTTTTGAGTGTTTTTTAC  
ATTGTTGGATATGAATGTGGTGCATTGCAAGGTGGTTTATAAAAGAATT

>PGSC0003DMG400009029LRR-RLPs\_682

GTTTTTTACATTGTTGGATATGAATGTGGTGCATTGCAAGGTGGTTTATAAAAGAATTAGAAAATTCAAT  
CTCGTTTTCGATGATGGATGATTGTAGAACTTTGCCATTCTTTGGACAC

>PGSC0003DMG400009029LRR-RLPs\_806

TTGGTGTGTTTGTGGTGAACTATTGAGTTGTCAAACAATTATATCTGATTCTATATGAGGAAGAATTTG  
AGCTCTCAAATTTGGTTTCGATATATGTTAGTTTTTCTTACGTGGAGTA

>PGSC0003DMG400009029LRR-RLPs\_868

AGAATTTGAGCTCTCAAATTTGGTTTCGATATATGTTAGTTTTTCTTACGTGGAGTAGGTGTGCACGAA  
CTTGTTCTTGCCTGGTACTTTGTTTTTGGTTGTTATGTTCTTAACTGCCA

>PGSC0003DMG400009068-(rev)LRR-RLKs\_0

CGTGATTAAGAGTGGTTAATTTCCCTTTCCCTTTTCGTAATAGTAATGTGTGTCTTCCCTTAGTGAAGAGC  
TTCAAAAAAATGGCGGAAATGGTGGAAAATGCTCTTCTGGTGCTCCCTG

>PGSC0003DMG400009068-(rev)LRR-RLKs\_122

TTACTGGCACCCACTTCCCCTCTTCTTCTAAATCCAAGCAAATTGTAAAGAATTGATTTTGTGTATTACTG  
TTAACTTAACTTCTTCATATCATAGTAGTAGTCCACTTTTGTCT

>PGSC0003DMG400009068-(rev)LRR-RLKs\_1342

AGTTGGATTCCGTGGTTCGATTCTGGAACACTCTTAGCCGCTTGTCTGATCTTCAGATCTTGAGTTAA  
GGTCTAATAGTTTTAGTGGTAGTTTACCTACTGATTTTGCTAAACTTGG

>PGSC0003DMG400009068-(rev)LRR-RLKs\_1403

TTGAGTTAAGGTCTAATAGTTTTAGTGGTAGTTTACCTACTGATTTTGCTAAACTTGGAAATCTTACTTC  
TATTTATCTTCAATCCAATAACTTTCAAGGTCCATTGCCTGCTGATTTT

>PGSC0003DMG400009068-(rev)LRR-RLKs\_1769

CTTCTCCTGCAAATTTTTACCTTCATTTCTCCAGTTCCTCCTCCAAGTGTCCACCAAAAAAGAAATCG  
TTAAACTCCGTGAACCTGCAATACTTGGGATTGTAATTGGAGGGTGT

>PGSC0003DMG400009068-(rev)LRR-RLKs\_183

GTGTATTACTGTTAACTTAACTTCTTCATATCATAGTAGTAGTCCACTTTTGTCTCCACGTGCTTTTC

CCACTCTTTTCGCTTCGTTGTTAACCAAATACATACATATACCCCATT

>PGSC0003DMG400009068-(rev)LRR-RLKs\_2013

GTCAGCATGGAGTAGGGAATCTCGCATTCTTTGAGGGTTGTAATCTTGCATTTGACCTTGAAGATCTGTT  
GAGAGCTTCAGCGGAAGTGCTTGGAAAGGGAACATTTGGCACTACATATA

>PGSC0003DMG400009068-(rev)LRR-RLKs\_2318

AGTGCATCTTTGATGCTGCATGGTATGTTGAGCACCCAACCTTCTACTACTCTTGCAGTTTTATTTTTGAAC  
CGAACCATAGAGAACTGATTATCAGGACCAAAAAGATAATGCAGATCAT

>PGSC0003DMG400009068-(rev)LRR-RLKs\_2379

ATTTTTGAACCGAACCATAGAGAACTGATTATCAGGACCAAAAAGATAATGCAGATCATTTTTAGCTATG  
ATGTGTCTTGTGCAGTAGTATTTGAAATTGCTTGTAGGCTAATTCCAACG

>PGSC0003DMG400009068-(rev)LRR-RLKs\_2501

ACCAATTACCTTTGAATTAATAGAGTATCTGCTGTTGTTGCCTCTTGATAGTTTTTTAATCACCAATAGT  
TTATAGGACAGCATAAGTGTCTCGAAGCCATAACTACATGCCACTTTT

>PGSC0003DMG400009068-(rev)LRR-RLKs\_2562

TCACCAATAGTTTATAGGACAGCATAAGTGTCTCGAAGCCATAACTACATGCCACTTTTAGGCCATGTCT  
TAGTGCAACTTCTGTTTTAATTTGTCAAATTCAAGAACATCATGTTGCT

>PGSC0003DMG400009068-(rev)LRR-RLKs\_2623

GCCATGTCTTAGTGCAACTTCTGTTTTAATTTGTCAAATTCAAGAACATCATGTTGCTCGCGAACTTTGC  
TTTGGTGTTACAGTCAACTTTTATCATTATTAGGTGGATAGTCTCTTAA

>PGSC0003DMG400009068-(rev)LRR-RLKs\_2684

CGAACTTTGCTTTGGTGTTACAGTCAACTTTTATCATTATTAGGTGGATAGTCTCTTAACTGCACCTTCAA  
GTATTCCTATCATTATATCTGATGCACTCTGTAATTGCAGCAAAGAGGT

>PGSC0003DMG400009068-(rev)LRR-RLKs\_2989

ATGGGTCCAATTGCTACACCAATCGTGAGAGCTGCTGGTTATCAACCTCCAGAAGTTACAGATTCAAGA  
AAAGTATCTCAAACCACTGATGTCTACAGCTTTGGCGTCCTAATACTTGAA

>PGSC0003DMG400009068-(rev)LRR-RLKs\_305

TTTTTTGCTTTCTTCTTCTTCAAATTAAGTGCCTTTCAATCATTTATTGTCTCTCACCCACTCCCCCCTTCT  
TCTCATTTAATCATTGTCTCTCTCTAGCTACTTACTTAATTCTGCA

>PGSC0003DMG400009068-(rev)LRR-RLKs\_3462

TATTTAGTGATTAGTTACTGTTCTATATGCTCAATTGTTTCATTGTTATAAGTTTTTTCCTCAGACTTCTGTC  
AAAACATTATTTTCAGCTACAAAATTGAATAGAAATATTTACTTGATC

>PGSC0003DMG400009068-(rev)LRR-RLKs\_427

TACTTCCCATCATTTCCTCTTCATCTACTCCTTCTTTTCAGTTTACTCTACCAAGTGTGGATTGTTTTGCCTC  
ACTGGTACTTGCTAGTATACTATAACAGTTTCTGAATTTTGTGGGGT

>PGSC0003DMG400009068-(rev)LRR-RLKs\_488

GATTTTTTGCCTCACTGGTACTTGCTAGTATACTATAACAGTTTCTGAATTTTGTGGGGTTTTCCGTTTTCTC  
CATTTTGATGTGATTTGGCTATCTGGGTATTGCTATTCAGGTTCAATT

>PGSC0003DMG400009068-(rev)LRR-RLKs\_61

AGTGAAGAGCTTCAAAAAAATGGCGGAAATGGTGGAAAATGCTCTTCTGGTGCTCCCTGCCTTACTGGC  
ACCCACTCCCCTCTTCTTCTAAATCCAAGCAAATTGTTAAAGAATTGATT

>PGSC0003DMG400009114RLKWAX-EGF\_0

CAAAGTGTGAATAGCAAAAAGGAATGGTCATTTCTCACAGGCTCCAGTCAAACCTCCCCACACCC  
CCACCTAAAAAAAAGTGATTGAACTTTGACTTTTTGCCTTGGTTCTCT

>PGSC0003DMG400009114RLKWAX-EGF\_1037

AGACTGCATACACCGAACCCAGGATTTAAAGACTTTTCGAGCACACTAATATTACTTTCAGCTACTTAAA  
ATAAAAACAGCGAAAAAAGCTTCAAACCTAGATTTGAACCCTTGTCTCAC

>PGSC0003DMG400009114RLKWAX-EGF\_122

AATCCCTGACCAGATTTTGGATAATTAGCTTTTGTAAATTGCAGTCCTGCTCCTCTGATGAAATGGTTGCT  
CCATAGTGTATTTGCAGATAACATGTTTGTAAAGAAATGCTCTGTATTCT

>PGSC0003DMG400009114RLKWAX-EGF\_1403

TTGTTGTAATGTTCAACTAGGAATACCTTTTCGAGTTATCTGTTTTAACAAAATCAATCCCCATATATGA  
GGTTGAAGATATGGTTTGTTCAGATTGTAGATGGTGGTAAAATTATTG

>PGSC0003DMG400009114RLKWAX-EGF\_1464

CCCATATATGAGGTTGAAGATATGGTTTGTTCAGATTGTAGATGGTGGTAAAATTATTGAAGTTATATGG  
TATTGTGAGAACAGAAACATCTCCTTAAATGATGTAACCTGGCATCCGAGC

>PGSC0003DMG400009114RLKWAX-EGF\_1525

GTTATATGGTATTGTGAGAACAGAAACATCTCCTTAAATGATGTAACCTGGCATCCGAGCAATTTAACTGT  
ACTTTCAAGTTTCAAATTAAGGTGTCATGATTTACGACAGATTAGGTTGT

>PGSC0003DMG400009114RLKWAX-EGF\_1586

TTTAACTGTACTTTCAAGTTTCAAATTAAGGTGTCATGATTTACGACAGATTAGGTTGTCAATTAAGCTG  
GTCGAAGATGAGACATGGTTCTTTCATTTATTATATCCACTCTCTATGG

>PGSC0003DMG400009114RLKWAX-EGF\_1647

ATTAAAGCTGGTCGAAGATGAGACATGGTTCTTTCATTTATTATATCCACTCTCTATGGGGTCTGTCCCTT  
GAAGTTATAAGAAAATTTGGATCTCTTTTGTATTCAACTCTCCCCTGGG

>PGSC0003DMG400009114RLKWAX-EGF\_1708

TCTGTCCTTTGAAGTTATAAGAAAATTTGGATCTCTTTTGTATTCAACTCTCCCCTGGGTCCTCTTCTTATG  
CTTATCAGTTTCAATTCTCAGCAACTTATTTTGTAGATGTAGCATCTGT

>PGSC0003DMG400009114RLKWAX-EGF\_183

AATGGTTGCTCCATAGTGTATTTGCAGATAACATGTTTGTGAAGAATGCTCTGTATTTCTGTTCTTGTATTA  
CTTGTATTTTGCACAAACATATCCGAAGCCCAAACAATACTCAGTGTT

>PGSC0003DMG400009114RLKWAX-EGF\_1952

AAAGCAATATGTTTACCATTTATAGAATCTGCGTTCATTGCACTATATAGCTGTAAGCTATTTCTTCAAGA  
CTCAATGATTTTACATCCTCTAACTTTATGTTTCCTTTGTGATTGCCT

>PGSC0003DMG400009114RLKWAX-EGF\_244

TCTTGTATTACTTGTATTTTGCACAAACATATCCGAAGCCCAAACAATACTCAGTGTTCTTCTTCTTGTGG  
TGATATTCATAACATCAACTTCCCTTTTCGATTGAAATCTGATCCTGG

>PGSC0003DMG400009114RLKWAX-EGF\_305

TCTTCTTGTGGTGATATTCATAACATCAACTTCCCTTTTCGATTGAAATCTGATCCTGGGAATTGTGGAGA  
TTCAAGATTCCAGCTTGATTGCCAGAACAATCGTACTGTCATTACTTTT

>PGSC0003DMG400009114RLKWAX-EGF\_3294

CAAGACCTTTTATAGCTCCTCGTGAGATTGCTGGAGACAGTATTGAGACAATACAAATTTCCAGTGACGT  
ATAGGTGGTTGGCTACTTACTGTGCTGTGCAAACTAGAGTCAAATTC

>PGSC0003DMG400009114RLKWAX-EGF\_3355

CAGTGACGTATAGGTGGTTGGCTACTTACTGTGCTGTGCAAACTAGAGTCAAATTCACCTAATTTAGT  
TCACGGCATCCAATATCTATCAGAAGAGCTCAATCTCAGGCCAACATTCC

>PGSC0003DMG400009114RLKWAX-EGF\_366

ATTGTGGAGATTCAAGATTCCAGCTTGATTGCCAGAACAATCGTACTGTCATTACTTTTAATTCAAGAAA

ATACAACGTCCTCGAAATCAACTATGATGAGTTCTTGATCAGAGCAATTG

>PGSC0003DMG400009114RLKWAX-EGF\_427

TTCAAGAAAATACAACGTCCTCGAAATCAACTATGATGAGTTCTTGATCAGAGCAATTGACCCTGGTTTG

GAGCACAAAACAGTAACTGTACTTCTTCTCCTAATTATCTCACCACAAA

>PGSC0003DMG400009114RLKWAX-EGF\_488

CCTGGTTTGGAGCACAAAACAGTAACTGTACTTCTTCTCCTAATTATCTCACCACAAAATTATCCTTACTCC

TCAACTTTTGACTTTGGTATTTTCGATCATTCCCATTATCTATGTCTAT

>PGSC0003DMG400009114RLKWAX-EGF\_549

ATCCTTACTCCTCAACTTTTGACTTTGGTATTTTCGATCATTCCCATTATCTATGTCTATTGTTCCGGCCACTGT

AAATTCTTCGCGATATGTGGAGACTACTTTCTGTGGATCACTGAACA

>PGSC0003DMG400009114RLKWAX-EGF\_61

CCCACACCCCCACCTAAAAAAAAGTGATTGAACTTTGACTTTTTGCCTTGGTTCTCTATAATCCCTGAC

CAGATTTTGGATAATTAGCTTTTGTTAATTGCAGTCCTGCTCCTCTGAT

>PGSC0003DMG400009114RLKWAX-EGF\_610

TTCGGCCACTGTAAATTCTTCGCGATATGTGGAGACTACTTTCTGTGGATCACTGAACAAGAGTCATAGC

TATGTTGCCATAGGAGAGGGCATGTTGATTTTCGATTTGGCTGAGAGTTG

>PGSC0003DMG400009114RLKWAX-EGF\_671

AGTCATAGCTATGTTGCCATAGGAGAGGGCATGTTGATTTTCGATTTGGCTGAGAGTTGCAGAGTGGAA

ATGGTGGGTTGGGGTTCGGCTCGTGGGCTTTTCGGGGGATAATACTTCTCTT

>PGSC0003DMG400009114RLKWAX-EGF\_732

GAGTGGAAATGGTGGGTTGGGGTTCGGCTCGTGGGCTTTTCGGGGGATAATACTTCTCTTTTCGAGCATTG

AAGGTGCCCTCAGTTATGGATTTGAACTTTCTTGAAGCGTACCTTCTTGT

>PGSC0003DMG400009114RLKWAX-EGF\_793

GAGCATTGAAGGTGCCCTCAGTTATGGATTTGAACTTTCTTGAAGCGTACCTTCTTGTGCAGAGAATGT

GAAGCGAGTCAAGGCAACTGTTTTGCTGAAGGTGACGGCTTTACTTGCAG

>PGSC0003DMG400009114RLKWAX-EGF\_854

AGAGAATGTGAAGCGAGTCAAGGCAACTGTTTTGCTGAAGGTGACGGCTTTACTTGCAGCCACCGCTGC

TATGATGACTCGGGGTTTGATCTTCCCCTCCCTTGTAAGTCAAATTCATT

>PGSC0003DMG400009114RLKWAX-EGF\_915



ACCGCTGCTATGATGACTCGGGGTTTGATCTTCCCCTCCCTTGTAAGTCAAATTCATTTTACATTTCACTA  
TGTTCAACTTATACCCCCTTGTTGGGATAGCCTTACCACTAGGTAGAGG

>PGSC0003DMG400009114RLKWAX-EGF\_976

ACATTTCACTATGTTCAACTTATACCCCCTTGTTGGGATAGCCTTACCACTAGGTAGAGGTAAGACTGCAT  
ACACCGAACCCAGGATTTAAAGACTTTTCGAGCACACTAATATTACTTTC

>PGSC0003DMG400009180LRR-RLKs\_122

GCTGTGACTGAGGTGGAAGAGGAGAAAACGACGCCGTGAAGATGAGGTTGCTGCTGCTGCTGCCGATA  
CTCATCGGCATTTTTCTGTATTGTGCTAATTATGCCATTGCCGACACAGATC

>PGSC0003DMG400009180LRR-RLKs\_1769

TCGACTCTCTGTCTTCTCTCAATACATTGTAAGCCGTATCTTCTCTCATGCCATTGCTTGTGTGTTTTAATA  
TTACAAAGTTGTGGTCATAACTCATATATGAGGTGTTGTAGGTAAAAC

>PGSC0003DMG400009180LRR-RLKs\_183

GCCGATACTCATCGGCATTTTTCTGTATTGTGCTAATTATGCCATTGCCGACACAGATCCAAATGACGGTC  
AGCTATTGCTTTTAATCATTCTCATTTATTGTTCCCTATCTGTTTGTCTG

>PGSC0003DMG400009180LRR-RLKs\_2013

TATGTGGTTGTCCCAGTTAAGTCAACTAAGAAGCTGTATACATTTGAGATATTCTTAAGTCAAGTCTTAA  
AAACCTCTAAATGACTAGTTATCATTCTCTGTCTCATAGTTTTTGATTG

>PGSC0003DMG400009180LRR-RLKs\_2074

CAAGTCTTAAAACTCTAAATGACTAGTTATCATTCTCTGTCTCATAGTTTTTGATTGATTGATCTGTATG  
CTTCAGGGATTTCTCATTCAATGCTATGACGGGTGATCTTCCTCAAAG

>PGSC0003DMG400009180LRR-RLKs\_244

AATGACGGTCAGCTATTGCTTTTAATCATTCTCATTTATTGTTCCCTATCTGTTTGTCTGTATGCTTACTGAT  
CATTAAATGGAGGTTGATTGATTTGGAAAGTCAATGAGTAATCTACCTG

>PGSC0003DMG400009180LRR-RLKs\_305

TGCTTACTGATCATTAAATGGAGGTTGATTGATTTGGAAAGTCAATGAGTAATCTACCTGACAATGAACTC  
GGCAACCGTCGCAAATTTGTTTGATATTTTCCTTACCATATATATGTAAA

>PGSC0003DMG400009180LRR-RLKs\_3111

AATGGAAATTTTATGAAAGTGAATTTGGAGAATCAATCTTAACCTTTGTGCTTTATCACTGCCTGTGGTGT  
ATAGCTAATAGTGGATCAACACAGCTACTGTCTTCGCTATAAAAGAAAA

>PGSC0003DMG400009180LRR-RLKs\_3172

CCTGTGGTGTATAGCTAATAGTGGATCAACACAGCTACTGTCTTCGCTATAAAAGAAAAACACCAAAGTA  
AAAACAACTTTATATCGAAATGTAAAACCGCTAAGGCTGATAGGTCCTA

>PGSC0003DMG400009180LRR-RLKs\_3355

GAACTGATGTTTAGACTCTGTATTGCCTGTTGAAGCTGATAGTGGGATAAAGCGAACTTCAGCTTTTTTG  
ATAATGAAGAAAACCTTCAGCTTTTTGATCTCTTCAATGGATCTGGTTCT

>PGSC0003DMG400009180LRR-RLKs\_3416

GCTTTTTTGATAATGAAGAAAACCTTCAGCTTTTTGATCTCTTCAATGGATCTGGTTCTATGCTTGTTATAA  
GTTAGCTCCCCTTGATGGTTTTCTTCCTATAAACTACTATTCATAA

>PGSC0003DMG400009180LRR-RLKs\_366

AATGAACTCGGCAACCGTCGCAAATTTGTTTGATATTTTCCTTACCATATATATGTAAAAATGCGACAAGT  
TCCTTTCTGATCAGGGCATGAATCATATAGAGGGAGCTCTCTTGGATTC

>PGSC0003DMG400009180LRR-RLKs\_4087

TTTGGCGTGTTTATAGGGCTCAGTTTGATGATGGAAAGGTATGATTTCTCTCTTATGACTAACTGACTA  
TCTATGTGAAGAAAATGGCTCTCTCTAATTGGATAAAAAATTCATATCAT

>PGSC0003DMG400009180LRR-RLKs\_4148

AACTGACTATCTATGTGAAGAAAATGGCTCTCTCTAATTGGATAAAAAATTCATATCATGAATTTTTTATG  
TGCTGCGAATGAATGTTTAAGCAAGATAGTTGAAATGACAGATAAATGT

>PGSC0003DMG400009180LRR-RLKs\_4209

ATTTTTTATGTGCTGCGAATGAATGTTTAAGCAAGATAGTTGAAATGACAGATAAATGTTCAATATGAAA  
AAGTACCTATCTAAAGAAAATGAAAGAAAGAAGTTTGATCATTAAAAAATT

>PGSC0003DMG400009180LRR-RLKs\_427

TGCGACAAGTTCCTTTCTGATCAGGGCATGAATCATATAGAGGGAGCTCTCTTGGATTCTTATATATTAT  
GTATGTATTGGCCATGTCCGGTGGACTTTTAGTACTGTTGAATCTTTGCAT

>PGSC0003DMG400009180LRR-RLKs\_4270

AATATGAAAAAGTACCTATCTAAAGAAAATGAAAGAAAGAAGTTTGATCATTAAAAATTAGTTGAAAAA  
TTATGTTTGTTCAAAACCTCAGTTCGGAGCTACTATCATCTTGTCTGTGTA

>PGSC0003DMG400009180LRR-RLKs\_4778

TTTCCTTGACCATTGGTTGAAATACTAGCTCTGTCATATATTTTCTGGTATGTGTAGTCAAACAATAATG

AAGTTTCTTTTCCTGGGGGGGGGGGGGGGGGGGAAAAAAGAGTTTTGGAA

>PGSC0003DMG400009180LRR-RLKs\_5467

AGTTTTTTTTTCGGGGGGGGGGGGGGGGGATAGAATGAAGCTTATGGAATAGTTACTTTCTCCTGAAGA  
GGAAGTGGAGAGTTATATATTGTGAACTCCAATACTAAGCACTTAGTAATTA

>PGSC0003DMG400009180LRR-RLKs\_5529

TGAAGAGGAAGTGGAGAGTTATATATTGTGAACTCCAATACTAAGCACTTAGTAATTAAGCTGTGTTC  
CTATGTTTAAATCAGACTTAATCATTTATTATGAAGGCCATTAAATAATTC

>PGSC0003DMG400009180LRR-RLKs\_5591

TGTGTTCCCTATGTTTAAATCAGACTTAATCATTTATTATGAAGGCCATTAAATAATTCAGATTTCTGGAGC  
ATTGATGATCAGTAACATGCAAGAAGATGATACATTATCTGAACATTAA

>PGSC0003DMG400009180LRR-RLKs\_5653

TTCTGGAGCATTGATGATCAGTAACATGCAAGAAGATGATACATTATCTGAACATTAAGAAAAGAAA  
ATATGTGTTGCGAGCCATTGTTTATCCACCCTGTTTAAATACTGATCTTT

>PGSC0003DMG400009180LRR-RLKs\_5715

AAAGAAAATATGTGTTGCGAGCCATTGTTTATCCACCCTGTTTAAATACTGATCTTTCCATCTTCTTCTTC  
TCAAGTTTCTAGAGTAGTAGCTAAAATAAGCATCCTTTGCAGGTATCT

>PGSC0003DMG400009180LRR-RLKs\_5777

CTTCTTCTTCTCAAGTTTCTAGAGTAGTAGCTAAAATAAGCATCCTTTGCAGGTATCTGCACGAAGTTTGT  
TCACCATCTTTGGTTACAAGAATATCAAGTCTGCAAATATTGTACTTG

>PGSC0003DMG400009180LRR-RLKs\_5839

GAAGTTTGTTACCATCTTTGGTTACAAGAATATCAAGTCTGCAAATATTGTACTTGATGCAGAACTCA  
ATCCTCATCTATCAGACTGTGGATTGGCAAGTCTAATTGCTGATGCAGAT

>PGSC0003DMG400009180LRR-RLKs\_5901

AGAACTCAATCCTCATCTATCAGACTGTGGATTGGCAAGTCTAATTGCTGATGCAGATCAGGTAAGCTAT  
AGCTCCTAGCTTTAGGATTTCTTTGCTAAGTCTCATTTGTTGGATGTTG

>PGSC0003DMG400009180LRR-RLKs\_5963

TAAGCTATAGCTCCTAGCTTTAGGATTTCTTTGCTAAGTCTCATTTGTTGGATGTTGCTATATCTTCTAAT  
GTATGAATGTGGGTTCTGATTGACTAATGCATATGCATAAGGGTGCTC

>PGSC0003DMG400009180LRR-RLKs\_6025

ATCTTCTAATGTATGAATGTGGGTTCTGATTGACTAATGCATATGCATAAGGGTGCTCATGCACATGCCT  
ATATGCCTGTACTTGCATCCTCTTTGCCTATTCATCTGTCCTTGTAGAAA

>PGSC0003DMG400009180LRR-RLKs\_6087

ACATGCCTATATGCCTGTACTTGCATCCTCTTTGCCTATTCATCTGTCCTTGTAGAAAAGAAACCAGAAAT  
TTGATTCAGATCTTCGATATAAGTCATCCACAGTATCATAACTATAGAA

>PGSC0003DMG400009180LRR-RLKs\_6149

ACCAGAAATTTGATTCAGATCTTCGATATAAGTCATCCACAGTATCATAACTATAGAAGGCGTATACTCTT  
TACCATGAACTATCAAATATCAAAAAAGGAATTTTGTGGCCATGTAAA

>PGSC0003DMG400009180LRR-RLKs\_6211

TATACTCTTTACCATGAACTATCAAATATCAAAAAAGGAATTTTGTGGCCATGTAAAATTAGATTGACT  
CAGAAGCTGAGAAGTATCTACTAGTTTTTCGCAAGGGGTCTTATTTCT

>PGSC0003DMG400009180LRR-RLKs\_6273

AGATTGACTCAGAAGCTGAGAAGTATCTACTAGTTTTTCGCAAGGGGTCTTATTTCTCTTTTTTCAGCTAG  
TATAGATTTTCATCATAAAGCCAGTTTCCTGAGATATTCACATGACTAT

>PGSC0003DMG400009180LRR-RLKs\_6335

TTCAGCTAGTATAGATTTTCATCATAAAGCCAGTTTCCTGAGATATTCACATGACTATCAATCTCTTGTCG  
TAGGCATTGAACCATAATACAGGATCGGGATATGGTGCCCCCGAAGTTG

>PGSC0003DMG400009180LRR-RLKs\_6397

CTCTTGTCGTAGGCATTGAACCATAATACAGGATCGGGATATGGTGCCCCCGAAGTTGCTATGTCCGGTC  
TCTGTACCATAAAAAGTGATGTGTACAGCTTTGGAGTGGTTATGTTGGAA

>PGSC0003DMG400009180LRR-RLKs\_6459

GTCCGGTCTCTGTACCATAAAAAGTGATGTGTACAGCTTTGGAGTGGTTATGTTGGAACCTTACCAGGA  
CGAAAACCTTTTGATAGGTAATGTTATTTAGCATCCCATGATATTATGAT

>PGSC0003DMG400009180LRR-RLKs\_6521

TTACCGGACGAAAACCTTTTGATAGGTAATGTTATTTAGCATCCCATGATATTATGATGTAAGTTTCTTAA  
AGAAACAGTACAAATTTGAAGTTTCAGAAAATTTTCTGATGATATTCTC

>PGSC0003DMG400009180LRR-RLKs\_6583

GTTTCTTAAAGAAACAGTACAAATTTGAAGTTTCAGAAAATTTTCTGATGATATTCTCTGTTCTCTTAATG  
CAGCGCAAGAACAAGATCTGAACAATCTCTAGTTAGATGGGCAACACCT

>PGSC0003DMG400009180LRR-RLKs\_6645

CTCTTAATGCAGCGCAAGAACAAGATCTGAACAATCTCTAGTTAGATGGGCAACACCTCAGCTGCACGA  
TATTGATGCCCTAGCTAAGATGGTTGATCCAGCACTCGAGGGGCTCTATCC

>PGSC0003DMG400009180LRR-RLKs\_6707

TGCACGATATTGATGCCCTAGCTAAGATGGTTGATCCAGCACTCGAGGGGCTCTATCCTGTAAATCTCT  
ATCACGCTTTGCTGATGTAATAGCTCTCTGTGTCCAGGTAATATTTTCGAA

>PGSC0003DMG400009180LRR-RLKs\_671

GCGGGACAGGGTAGTGGAGGTGGGCCGCCAAAACAAGTGAGGTTAAAAATGATCAAGGGCATTATAA  
CCTAAAAGACTCTTCTCCCAGTGATAATACACATATAGGTTTCATGGCTTGATC

>PGSC0003DMG400009180LRR-RLKs\_6769

AAATCTCTATCACGCTTTGCTGATGTAATAGCTCTCTGTGTCCAGGTAATATTTTCGAACTGGAAGTGAAT  
GATTAGCTTTCAGAAATCTGCTACTTAGTTTTTCATTAATCTAGTTCCTTA

>PGSC0003DMG400009180LRR-RLKs\_6831

AAGTGAATGATTAGCTTTCAGAAATCTGCTACTTAGTTTTTCATTAATCTAGTTCCTTAATTATCTCAATGG  
ACCTCTCATTTTTTTTTTCTTTGTGGCAGCCTGAGCCCGAGTTCAGGCCA

>PGSC0003DMG400009180LRR-RLKs\_6893

TCTCAATGGACCTCTCATTTTTTTTTTCTTTGTGGCAGCCTGAGCCCGAGTTCAGGCCACCTATGTCGGAAG  
TGGTTGAAGCATTAGTTCGGCTAGTGCAACGAGCAAACATGAGCAAGAG

>PGSC0003DMG400009180LRR-RLKs\_6955

TGTCGGAAGTGGTTGAAGCATTAGTTCGGCTAGTGCAACGAGCAAACATGAGCAAGAGGACATTTGGT  
GCTGATCAGGGTACTTCAAGGGGTGAAACAGATGGCCCGGACTATGAACCAT

>PGSC0003DMG400009180LRR-RLKs\_7017

TTTGGTGCTGATCAGGGTACTTCAAGGGGTGAAACAGATGGCCCGGACTATGAACCATAGTTTCCATGT  
GACGTTGAGTACTCAACATGTTGCCTATTCTAACACGTGGAGGTGTTTTTT

>PGSC0003DMG400009180LRR-RLKs\_7079

TCCATGTGACGTTGAGTACTCAACATGTTGCCTATTCTAACACGTGGAGGTGTTTTTTTTTTGTTTCTATT  
CATGAGAAATGACTTCGAGCCTGTTGTTTTGCAGACTTGGAGTGCATT

>PGSC0003DMG400009180LRR-RLKs\_7141

TGTTTCTATTCATGAGAAATGACTTCGAGCCTGTTGTTTTGCAGACTTGGAGTGCATTGTACCAAACGA

GACGCTAAAATCTGTTTCATAGTGCATAATTTATTTTCAGTTCTTTTCCTC

>PGSC0003DMG400009180LRR-RLKs\_7203

CAAAACGAGACGCTAAAATCTGTTTCATAGTGCATAATTTATTTTCAGTTCTTTTCCTCTTCCTTCTAATTTG  
TTCTTACCAGCGGGATTAAGAAATAATATTATTTTCATATTTTCATAT

>PGSC0003DMG400009180LRR-RLKs\_7264

CTTCTAATTTGTTCTTACCAGCGGGATTAAGAAATAATATTATTTTCATATTTTCATATGGTGTACATTAC  
AAACTATCATCTGAACAAACATGTATGTACTAGTGCCTTATTCCAACA

>PGSC0003DMG400009180LRR-RLKs\_793

CGCACTTGTTGCGTTTCACCATGTTTATTGATGTCTTGTAGATATACCACTCGTTAACAGTTTGATTACTCT  
TCAAGCTATTATTAATGAAAAGAACTTTTTGTTTGAACAGTATAAGA

>PGSC0003DMG400009181LRR-RLKs\_0

GGAGGAATTGAGGAGAGGAGAATAGTATGGTAAAGTCTCTCTCTCTCTCTCTCTCCCACGTATATTACAC  
GCTTTCAAATATCCATAGAATAAACAAAGTCCACCAGCCATCTATCTATC

>PGSC0003DMG400009181LRR-RLKs\_2790

CAAACATAGTAGGTTGTGGAGGCTTTGGTCTGGTCTATAAGGCAACTTTAGCAGATGGAACTATGTTGG  
CTGTTAAGAACTTTCAGGAGATACGGGTTTAATTGAAAGAGAATTTAAAG

>PGSC0003DMG400009181LRR-RLKs\_310

GCATCTTCAACTGTCTTTCTTCTTCATCTTTAGTTGTCTAAAAATAATAATGATCATGGATAATAAAGACA  
GCCGCCACCAATCTGGTCTGACATATCATCAATTTGAGCAGCCATGCT

>PGSC0003DMG400009196LRR-RLKs\_0

GGTTATGCCTCAAATTGATGGTGGTTTGTATGGTTAGGCAAAGGAAGGATGATGACGGAGGTGGAGG  
ATACCGGCCGGTCACCAGTTACGTTTGCATGTTCTTCATCATCATCATCATC

>PGSC0003DMG400009196LRR-RLKs\_1054

GAAGTCTCCCTCTCTCTGAGTAGAGTGATGTTGATCGTTGCAGTTTGTGGTGGTCTTATGTCTCGTGA  
TTGTGTTAATTCTTATCATTGCGCGCCGCAGCAGCAGCCAAAATAATTC

>PGSC0003DMG400009196LRR-RLKs\_1116

GTCTCGTGATTGTGTTAATTCTTATCATTGCGCGCCGCAGCAGCAGCCAAAATAATTCACAACCTACCAG  
CCGGGCTGTTGAGTCAAATAATATTGATGGGGATCAAACATGACCTTTT

>PGSC0003DMG400009196LRR-RLKs\_1178

CTCACCAGCCGGGCTGTTGAGTCAAATAATATTGATGGGGATCAAACATGACCTTTTCATCATCAGCTC  
TTCCTGATATGACGATGAGCGGCAATCCAACCTTATGCAAGACACGATAAC

>PGSC0003DMG400009196LRR-RLKs\_124

AGAAGAAGATCATACAATGCATTGTGTCTCATTTTCCTTGTTGTTGTTGTATCCTTGATCACATTTGTATC  
GGCTCAACCGGACGATGACGACACCGGCCAGATGATCATCATTATCTT

>PGSC0003DMG400009196LRR-RLKs\_1364

TCCTTCGTTAGAGATGACAGGACAAGATTTGATCTACAGGACTTGCTAAGAGCATCCGCGGAGGTGCTT  
GGCAGTGGGAACCTGGGGTCTCTTACAAGGCACTACTTATGGATGGCCAA

>PGSC0003DMG400009196LRR-RLKs\_1426

GGTGCTTGGCAGTGGGAACCTGGGGTCTCTTACAAGGCACTACTTATGGATGGCCAAGCCGTTGTGGT  
GAAGAGGTTTAAGCAAATGAACCATGTCGCTAAAGAAGACTTCCACGAGCA

>PGSC0003DMG400009196LRR-RLKs\_1488

TTGTGGTGAAGAGGTTTAAGCAAATGAACCATGTCGCTAAAGAAGACTTCCACGAGCACATGAGGAGG  
TTGGGCAGACTAAGCCACCCGAACCTACTCCCCCTTGTCGCCTATTATTATA

>PGSC0003DMG400009196LRR-RLKs\_1550

AGGAGGTTGGGCAGACTAAGCCACCCGAACCTACTCCCCCTTGTCGCCTATTATTATAGGAAAGAAGAG  
AAGCTGCTTGTATGACTATGCCTCCAATGGTAGCTTGGCCAGTCACCTC

>PGSC0003DMG400009196LRR-RLKs\_1612

AGAAGAGAAGCTGCTTGTATGACTATGCCTCCAATGGTAGCTTGGCCAGTCACCTCCATGGTATGTAT  
ATGTATATTAATTAATTAGAGTATATACGTGAGTTTAAATTATTAATTAC

>PGSC0003DMG400009196LRR-RLKs\_1674

GTATGTATATGTATATTAATTAATTAGAGTATATACGTGAGTTTAAATTATTAATTACTCGGCTCTGTGTG  
TGTATATATATGTAGGCAATCACTCTAGGCTGGACTGGTCAAGCCGCTT

>PGSC0003DMG400009196LRR-RLKs\_1736

CTCTGTGTGTATATATATGTAGGCAATCACTCTAGGCTGGACTGGTCAAGCCGCTTGAAAATCATAAA  
AGGAGTTGCAAAGGCGTTGGCCTACCTTCACAATGAGCTGCCAAGCCTAG

>PGSC0003DMG400009196LRR-RLKs\_1798

ATCATAAAAGGAGTTGCAAAGGCGTTGGCCTACCTTCACAATGAGCTGCCAAGCCTAGCACTTCCGCAT  
GGTCACCTCAAGTCATCAAATGTAATTCTGGACAAATATTCTAATCCGTTG

>PGSC0003DMG400009196LRR-RLKs\_186

ATTTGTATCGGCTCAACCGGACGATGACGACACCGGCCAGATGATCATCATTATCTTCCCGATGCAAAG  
AGCTCTTCGGAGGCCCTCTTCAACTTTAAAAGCTCACTATCTACATCTTC

>PGSC0003DMG400009196LRR-RLKs\_1860

TCCGCATGGTCACCTCAAGTCATCAAATGTACTTCTGGACAAATATTCTAATCCGTTGTTGATGGATTACA  
CATTGGTGCCCCTGGTGAATCTTTCCCAAGTCCAACATCTTCTAGTGGC

>PGSC0003DMG400009196LRR-RLKs\_1922

TGGATTACACATTGGTGCCCCTGGTGAATCTTTCCCAAGTCCAACATCTTCTAGTGGCCTTACAAAGCTCCC  
GAGTATGCACAACAAGGCCGCATCACAAGGAAGACTGATGTTTGGAGCC

>PGSC0003DMG400009196LRR-RLKs\_1984

AAAGCTCCCGAGTATGCACAACAAGGCCGCATCACAAGGAAGACTGATGTTTGGAGCCTTGGGATTCTA  
ATACTAGAGACCCTCACCGGTAAACTCCCAACAACTACCTTGCTCTCAGC

>PGSC0003DMG400009196LRR-RLKs\_2046

GATTCTAATACTAGAGACCCTCACCGGTAAACTCCCAACAACTACCTTGCTCTCAGCACTGGCTATGGC  
ACCGAATTGGCTACCTGGGTCGACACCATCATTAAAGATAATGAATCGGC

>PGSC0003DMG400009196LRR-RLKs\_2108

GCTATGGCACCGAATTGGCTACCTGGGTCGACACCATCATTAAAGATAATGAATCGGCTTTTGACAAAG  
AGATGGACCAGCTCACTCATCAAGGACAGATCCAAAAGCTCTTCAACATTG

>PGSC0003DMG400009196LRR-RLKs\_2170

GACAAAGAGATGGACCAGCTCACTCATCAAGGACAGATCCAAAAGCTCTTCAACATTGGAGTGGCTTGC  
TGTCAGAAGATTTGGATAACAAGGTGGGATCTCAAGGAAGCTATTGAAAGT

>PGSC0003DMG400009196LRR-RLKs\_2232

GGCTTGCTGTCAAGAAGATTTGGATAACAAGGTGGGATCTCAAGGAAGCTATTGAAAGTATAACAAGCCTT  
AAATGACAAGGTCGACGATCAAGTTGATGTTGGATTTTAATTTAACATCG

>PGSC0003DMG400009196LRR-RLKs\_2294

AAGCCTTAAATGACAAGGTCGACGATCAAGTTGATGTTGGATTTTAATTTAACATCGATCGTACGTACA  
ACAATACATATACTCAACCCATTAGTTAATCCCCTCTCTATATTTATA

>PGSC0003DMG400009196LRR-RLKs\_2356

TACGTACAACAATACATATACTCAACCCATTAGTTAATCCCCTCTCTATATTTATATGTGCATTACATAT



CATGTTTGTACACATTTTCATTGTATAGTACTTCTCTAAATTA

>PGSC0003DMG400009196LRR-RLKs\_2418

CATTACATATCATGTTTGTACACATTTTCATTGTATAGTACTTCTCTAAATTA

TGCATGCCAATCGATCGGTCTCTCACTCCATAAGTATTCGACCCTACC

>PGSC0003DMG400009196LRR-RLKs\_2467

ATTACTCAAGGCGTAACTAGACTTGCATGCCAATCGATCGGTCTCTCACTCCATAAGTATTCGACCCTACC

ATTTGCAAGTATATATGTACATCTAGAACTTTGTTTAGCTCTAAAATTT

>PGSC0003DMG400009196LRR-RLKs\_248

ATGCAAAGAGCTCTTCGGAGGCCCTCTTCAACTTTAAAAGCTCACTATCTACATCTTCAGGTAAAGGAAA

AGATGTTCTCGGGTCTTGGGTTCCATCGACAAGTCCCTGTACCGGGAACA

>PGSC0003DMG400009196LRR-RLKs\_310

AAAGGAAAAGATGTTCTCGGGTCTTGGGTTCCATCGACAAGTCCCTGTACCGGGAACAATGCCAATTGG

TTGGGAGTAATTTGCTTCGAAGGGGATGTATGGGGTTTGCAACTAGAAAAC

>PGSC0003DMG400009196LRR-RLKs\_372

CAATTGGTTGGGAGTAATTTGCTTCGAAGGGGATGTATGGGGTTTGCAACTAGAAAACCTTGGACCTCTC

AGGTGCAATTGATATAGATTCATTGCTTCCTTTGCATTTCTCCGGACCCT

>PGSC0003DMG400009196LRR-RLKs\_434

ACCTCTCAGGTGCAATTGATATAGATTCATTGCTTCCTTTGCATTTCTCCGGACCCTAAGCTTTATGAAC

AACAATTCAAGGGGGGAATGCCTGATTGGAACAACTTGGTGCCCTCA

>PGSC0003DMG400009196LRR-RLKs\_496

TTTATGAACAACAACCTTCAAGGGGGGAATGCCTGATTGGAACAACTTGGTGCCCTCAAGTCATTGTACT

TGTCCAATAATAACTTCTCTGGTCAGATCCCCGATGATGCCTTCAAGGGT

>PGSC0003DMG400009196LRR-RLKs\_558

ATTGACTTGTCCAATAATAACTTCTCTGGTCAGATCCCCGATGATGCCTTCAAGGGTATGACTTATCTCA

AGAAACTTTATTTGGCCAACAACCAATTCCTGTTAACATTCCCACCTC

>PGSC0003DMG400009196LRR-RLKs\_62

TGGAGGATACCGGCCGGTCACCAGTTACGTTTGCATGTTCTTCATCATCATCATCATCAAGAAGAAG

ATCATACAATGCATTGTGTCTCATTTTCCTTGTGTTGTTGTATCCTTGA

>PGSC0003DMG400009196LRR-RLKs\_620

CTTATCTCAAGAACTTTATTTGGCCAACAACCAATTCCTGGTAAACATTCCCACCTCCCTCGCTACCTCCT  
GCCCCAGGCTCTTCGAGTTGACCCTCGAAAACAACAAATTCCTGGCT

>PGSC0003DMG400009196LRR-RLKs\_682

GCTACCTCCTGCCCCAGGCTCTTCGAGTTGACCCTCGAAAACAACAAATTCCTGGCTCTATACCTGATT  
CCGCCGTGGCCTTCTCAAACCTCAATGTATCCAACAACCAACTCGAG

>PGSC0003DMG400009196LRR-RLKs\_744

ACCTGATTCGCCGTGGCCTTCTCAAACCTCAATGTATCCAACAACCAACTCGAGGGTCCAATCCCTC  
CTTCTCTTTCTTTAATGGATCCAACAACATTCGCAGGTATCATTGGTTA

>PGSC0003DMG400009196LRR-RLKs\_806

CAATCCCTCCTTCTCTTTCTTTAATGGATCCAACAACATTCGCAGGTATCATTGGTTAATTTAATTATGTAC  
CGATCTAGCCTTTTTAATTTATTATTATTATACATATACATGACAGGG

>PGSC0003DMG400009196LRR-RLKs\_868

AATTATGTACCGATCTAGCCTTTTTAATTTATTATTATTATACATATACATGACAGGGAACAAAGGCATGT  
GTGGGAAGCCTTTGGAATCAGTTTGCAACTCCCCAATTCCAGAAGCAAA

>PGSC0003DMG400009196LRR-RLKs\_930

AAGGCATGTGTGGGAAGCCTTTGGAATCAGTTTGCAACTCCCCAATTCCAGAAGCAAATACTACTACTCC  
GCCTAACAGTCTCAACTCTACCATCAGCACCCAATTATCTGGTGATATAA

>PGSC0003DMG400009196LRR-RLKs\_992

ACTACTCCGCCTAACAGTCTCAACTCTACCATCAGCACCCAATTATCTGGTGATATAAATAAGAAGTCTCC  
CTCTCTCCTGAGTAGAGTGATGTTGATCGTTGCAGTTTGTGGTGGTC

>PGSC0003DMG400009230-(rev)LRR-RLPs\_0

CTTGACTGGAAGCTGCACACCAAAGACCATTTCTTCATTCTTCACGCGTATTCTCTCATGAAAACTCTATT  
TAGACTAATCCTCCCACTTTGTCCTTTCATCATTTTTTACCATGGCT

>PGSC0003DMG400009230-(rev)LRR-RLPs\_1037

CCCCTATACTACATCTAGGTTCCCAACCAACCCAGAAATCTACAACTAGGCTGAAAAATTGAGTCATA  
GAAATGGCCGAGAATAATCAACAGATATCAGACATCTACCAAAAAGAATA

>PGSC0003DMG400009230-(rev)LRR-RLPs\_1098

TGAGTCATAGAAATGGCCGAGAATAATCAACAGATATCAGACATCTACCAAAAAGAATAAAAACAGAAA  
ACACTCTCAAGCTGAAATTGATAAAGGGGAGATGACCGGAAAATCCAAAAT

>PGSC0003DMG400009230-(rev)LRR-RLPs\_1159

AACAGAAAACACTCTCAAGCTGAAATTGATAAAGGGGAGATGACCGGAAAATCCAAAATCTGGCACAC  
CTATTTTTTTTTGGACGGAAATGAACAGCCATAGAGAAGTGCCTCCAACCAAT

>PGSC0003DMG400009230-(rev)LRR-RLPs\_1220

GGCACACCTATTTTTTTTTGGACGGAAATGAACAGCCATAGAGAAGTGCCTCCAACCAATCATTTAAGTTC  
TTTTGCGCTACTTGAAATGATCCTGCCTGATTATTGCAACAAACTCTGAA

>PGSC0003DMG400009230-(rev)LRR-RLPs\_1281

TTTAAGTTCTTTTGCCTACTTGAAATGATCCTGCCTGATTATTGCAACAAACTCTGAATGCAAACTGTCC  
TCTTTCTGCTTCCATATTTCTCCGTTGGCATGTATTAACCATGATATTT

>PGSC0003DMG400009230-(rev)LRR-RLPs\_1342

CAAAGTGCCTCTTTCTGCTTCCATATTTCTCCGTTGGCATGTATTAACCATGATATTTGAGGGGAAAGTT  
GTGCGTACAAATCTGCAAGTAATATATGATATTTAAACTAATCAAAGAC

>PGSC0003DMG400009230-(rev)LRR-RLPs\_1403

GGGGAAAGTTGTGCGTACAAATCTGCAAGTAATATATGATATTTAAACTAATCAAAGACGTGCCCAAAA  
GCAACAAATTTCTGGTTGCAAGAACTGCAACAAACAAGAATATATACATTT

>PGSC0003DMG400009230-(rev)LRR-RLPs\_1464

GCCCCAAAGCAACAAATTTCTGGTTGCAAGAACTGCAACAAACAAGAATATATACATTTAGAATGTCTA  
GACTATGATAAGTCTTCTATTAATGCTCTACAAAGAGAGTTATCAAGTATC

>PGSC0003DMG400009230-(rev)LRR-RLPs\_1525

AATGTCTAGACTATGATAAGTCTTCTATTAATGCTCTACAAAGAGAGTTATCAAGTATCACCTAAGTTTAT  
CCACACCTATTACTACTTCATAACAACAAGAGGGTTATCAAGTATCAC

>PGSC0003DMG400009230-(rev)LRR-RLPs\_1586

CTAAGTTTATCCACACCTATTACTACTTCATAACAACAAGAGGGTTATCAAGTATCACCTAAAACCTTTTA  
TCACAATAGTCAGTATGTGTAACCTTTTTGCATTGTTGCACAGACTAGA

>PGSC0003DMG400009230-(rev)LRR-RLPs\_1647

AAAACCTTTTATCACAATAGTCAGTATGTGTAACCTTTTTGCATTGTTGCACAGACTAGAATGATAAGGCA  
CATGGATTTTTCTGATCAAGCTCAGTGTAATACTGTACTACTAGGAGG

>PGSC0003DMG400009230-(rev)LRR-RLPs\_1708

GATAAGGCACATGGATTTTTCTGATCAAGCTCAGTGTAATACTGTACTACTAGGAGGAGGGTCTGGA

TCTCTTGTACTATGAAGAACCAATGTACCAGAGAGCACAGTTAAAAAGCCA

>PGSC0003DMG400009230-(rev)LRR-RLPs\_1769

GGTCTGGATCTCTTGTACTATGAAGAACCAATGTACCAGAGAGCACAGTTAAAAAGCCACAAAGCGCTG

AAACTATGTTGCTAACACTCTGACCAGACCAATCCTGAGAGAAAGACATGA

>PGSC0003DMG400009230-(rev)LRR-RLPs\_1830

AAGCGCTGAAACTATGTTGCTAACACTCTGACCAGACCAATCCTGAGAGAAAGACATGACATTAGAAAT

GAAAATGAGAGAAGGCCTCCTTGCATCCCGAACATAAACTTTCAGAATACC

>PGSC0003DMG400009230-(rev)LRR-RLPs\_1891

TTAGAAATGAAAATGAGAGAAGGCCTCCTTGCATCCCGAACATAAACTTTCAGAATACCTTAAACATTAT

GGCACTGGCTAAAATTGTAAGTGATGTGAACATGGCATAATATATTGGAG

>PGSC0003DMG400009230-(rev)LRR-RLPs\_1952

AAACATTATGGCACTGGCTAAAATTGTAAGTGATGTGAACATGGCATAATATATTGGAGAAACCACAGC

AGTGTTAAATGTGTCCAATGCCTGCAAGAGTCAAATTCAGGCATTTGTCCA

>PGSC0003DMG400009230-(rev)LRR-RLPs\_2013

ACCACAGCAGTGTTAAATGTGTCCAATGCCTGCAAGAGTCAAATTCAGGCATTTGTCCAATTTACAATAC

AAGTCTAAGCCAAGATTCAATAACATGTAGTTTCTATAGTAATCCCTGTA

>PGSC0003DMG400009230-(rev)LRR-RLPs\_2074

TTACAATACAAGTCTAAGCCAAGATTCAATAACATGTAGTTTCTATAGTAATCCCTGTAAATATTAGCTCA

AGCATTGAACAAATGCCAATGAGTGTGAGTTCATAAGTTTTCCAATTA

>PGSC0003DMG400009230-(rev)LRR-RLPs\_2135

TATTAGCTCAAGCATTGGAACAAATGCCAATGAGTGTGAGTTCATAAGTTTTCCAATTACAATTGACTTG

TAAAAAGAAATGGATCTTGGGTCTTACTCAACCTCAAAGATAGCTCAA

>PGSC0003DMG400009230-(rev)LRR-RLPs\_2196

ATTGACTTGTAAGAAAGAAATGGATCTTGGGTCTTACTCAACCTCAAAGATAGCTCAAGAGATCACCCA

TGTGGTGAGAATTGTTCAAGCCATATTAAGATCTCTTCATACTACTAC

>PGSC0003DMG400009230-(rev)LRR-RLPs\_2379

TCTTTTACTAATTGTTGGTTTTTAGCAGAGAAATTTGGAAAATAACAGAGCAAGACTGAGAGGAAAAT

GCTGCAATGCTATCAAAGGGAACTTTTTATTTCAGCTTACTCTACATTTAC

>PGSC0003DMG400009230-(rev)LRR-RLPs\_2440

AGGAAAATGCTGCAATGCTATCAAAGGGAACTTTTTATTCAGCTTACTCTACATTTACGGGGAACCTGA  
AATAAAAAACAGTAAAAATATGATCATTATCCTAGCCTGGAGTATCTTCA

>PGSC0003DMG400009230-(rev)LRR-RLPs\_2867

AAGGCTAGCTAGCTAACAACTTTAACTAAGATTTATTCAAAAACAACACAGCTAAACAAAGTTACTGTA  
GTCCAAAAGCATAATTCTAAGGGGTCGTTTGGTTTGAATATGAGTTATGA

>PGSC0003DMG400009230-(rev)LRR-RLPs\_305

TTGCTGGAACGACCTCGAGAATCGGGTGCTCAGCCTCTCACTTCCAAACATGAATCTCAGTAGACAGCTC  
CCAGATGCCTTCAAATATTGCTCCTCTTTGACTTCTCTTGATCTCTCTGG

>PGSC0003DMG400009230-(rev)LRR-RLPs\_366

AGACAGCTCCCAGATGCCTTCAAATATTGCTCCTCTTTGACTTCTCTTGATCTCTCTGGTAACAAGTTCTCC  
GGTCCCATTCTTCGGAGATTTGTAGCTGGACTCCTTTTTTAGTAAAC

>PGSC0003DMG400009230-(rev)LRR-RLPs\_4331

CCCCGCCTTTTAAAACACTGCTACATACTATAAGGAGAAGTAGAAAGTCTACCTTATTTAAGTAATTTA  
GTTGAGTAATTATACATGTAACAGAAACCATCACAAACACCCAAGTTTGA

>PGSC0003DMG400009230-(rev)LRR-RLPs\_4514

CTCATAACCTACAACAGAGCAACAAACAACTTAAAATGACTGCTACATGCAATTTTTACCAATTGACTT  
ATGAGAAGGACTAGTTCCTATATTTTCTTACTTCTCATGAGGAATAAT

>PGSC0003DMG400009230-(rev)LRR-RLPs\_4575

AATTGTACTTATGAGAAGGACTAGTTCCTATATTTTCTTACTTCTCATGAGGAATAATTTTATCATATTTT  
ATTGGCAACAGAAGCACTCTCTAAGTCAGTTCGGCAAAGAGAAGTCTG

>PGSC0003DMG400009230-(rev)LRR-RLPs\_4636

TATCATATTTTATTGGCAACAGAAGCACTCTCTAAGTCAGTTCGGCAAAGAGAAGTCTGCAATAGTAGCT  
CAATTAATACAAAAAATTAAGAGAGGAACCAATTCATAAACTGTTATTT

>PGSC0003DMG400009230-(rev)LRR-RLPs\_4697

ATAGTAGCTCAATTAATACAAAAAATTAAGAGAGGAACCAATTCATAAACTGTTATTTATCGAGTTTTTT  
AAGCAAATACATGAGTATTATTCAAAGATAGTGAATTCGATTGATAA

>PGSC0003DMG400009230-(rev)LRR-RLPs\_4758

CGAGTTTTTTAAGCAAATACATGAGTATTATTCAAAGATAGTGAATTCGATTGATAAAGAAGTCATAA  
AATAACTCGACCTCGAACTAACAATGACTAGATAAAAGCTTATTTCAACT

>PGSC0003DMG400009230-(rev)LRR-RLPs\_4819

AAGTCATAAAATAACTCGACCTCGAACTAACAAATGACTAGATAAAAGCTTATTTCAACTAGCAACTTAGA  
CTTATTTTAAATTTATGTAAAAGACAAAACTAATAAAATAAAGTAATAG

>PGSC0003DMG400009230-(rev)LRR-RLPs\_4880

CAACTTAGACTTATTTTAAATTTATGTAAAAGACAAAACTAATAAAATAAAGTAATAGCACTGCAATCTT  
TTATTGAGTTACACACCTACTAGTCAAGGAAAAACAACAGCAACCCTGG

>PGSC0003DMG400009230-(rev)LRR-RLPs\_4941

CTGCAATCTTTTATTGAGTTACACACCTACTAGTCAAGGAAAAACAACAGCAACCCTGGATGCCTTATAA  
ATTATAACAGATCAAAGTATAGTCACTTGTACAAGTATAGTGGCAGGAAA

>PGSC0003DMG400009230-(rev)LRR-RLPs\_5002

GCCTTATAAATTATAACAGATCAAAGTATAGTCACTTGTACAAGTATAGTGGCAGGAAAAGACATCTACT  
AGCATGCAAACACGTTACAGCACCTAAAGCTCTGGAGTAATATTTCAAG

>PGSC0003DMG400009230-(rev)LRR-RLPs\_5124

CCATACATCCATTTATACCTAAATGAGAAGTTTTCTTTACTTCAGTGACAACCTAGCAATGGATAAAGGACC  
CAGGACCAGTTTGACTCTTCACAACCTAAAAAATATGATCCATTTAGTG

>PGSC0003DMG400009230-(rev)LRR-RLPs\_5185

GATAAGGACCCAGGACCAGTTTGACTCTTCACAACCTAAAAAATATGATCCATTTAGTGGTCAAATTATG  
CTATTCCAACACCAAGGAGAAAGATAGAATTTGGATAACGTTAAGTTTAA

>PGSC0003DMG400009230-(rev)LRR-RLPs\_5246

CAAATTATGCTATTCCAACACCAAGGAGAAAGATAGAATTTGGATAACGTTAAGTTTAAAAGATAAGGC  
GTCTTGCAAACCTGTCAATTTAGCTTCAAGGTTAACTCAGTCAGTTCAGAGC

>PGSC0003DMG400009230-(rev)LRR-RLPs\_5307

GATAAGGCGTCTTGCAAACCTGTCAATTTAGCTTCAAGGTTAACTCAGTCAGTTCAGAGCTACAACTAAA  
GCACGGTTGTGACACATGTTTCTCCCTCCTTCCTTCGCTTTCTTAATT

>PGSC0003DMG400009230-(rev)LRR-RLPs\_5368

CAAATAAAGCACGGTTGTGACACATGTTTCTCCCTCCTTCCTTCGCTTTCTTAATTCTTGAGTAGAAGT  
ACAGACTCTGTAGGGATATAGATCAATACAATAGAGGCACTAACCGTC

>PGSC0003DMG400009230-(rev)LRR-RLPs\_5429

TGAGTAGAAGTACAGACTCTGTAGGGATATAGATCAATACAATAGAGGCACTAACCGTCAAGGACCCAA

AGATGGAGCAAACACCAATATAGACCATAATATTTGTCCGACCATAGCGAG

>PGSC0003DMG400009230-(rev)LRR-RLPs\_5673

CTTCAAGGAAATACAGCACAGTACATTAGCACACCTGGTTGTGTAGCTAATGCCCATATTTTCATCCACTG

AATTGAGATCATGTTACAGAGGTGCATGAAGAACAATGACAACGGAACCT

>PGSC0003DMG400009230-(rev)LRR-RLPs\_5856

GCTAGAACAGCACTGCAGCAAAGCGCCAAATTATATGGAAGAAAACCGAATAAGCCATTGCCAGAAA

ATAATAAGGCCGAGTGGAAAATTTACCTCACAATTATACTTAAAGCTCCAAG

>PGSC0003DMG400009230-(rev)LRR-RLPs\_5917

CCAGAAAATAATAAGGCCGAGTGGAAAATTTACCTCACAATTATACTTAAAGCTCCAAGCGGTGTCACA

AGAACTGCTGGCGCATAAATGTAAGCCACGAAATTTGCAAATTCTCCAACA

>PGSC0003DMG400009230-(rev)LRR-RLPs\_6039

CACTGCAAGGATTATGGTAAACATTGCACTCTATATTAGAATAACAAATTCAGGAACATATTCTCTAACA

TTTAAGAAGCAATTCAGACTTACTAGTTACCATCCCAATCCACCAAAGA

>PGSC0003DMG400009230-(rev)LRR-RLPs\_61

AAAACCTCTATTTAGACTAATCCTCCCCTTTGTCCTTTCATCATTTTTTACCATGGCTAAATCTACAATATT

TTTTCTCCTTTTTCTTTCATTTTCAGTGTTACTTCACAATGTTACTG

>PGSC0003DMG400009230-(rev)LRR-RLPs\_6100

TCTCTAACATTTAAGAAGCAATTCAGACTTACTAGTTACCATCCCAATCCACCAAAGAGGCTGCCGTAG

ATAACCATATCCGCCCGAGCCTTCAGCAAGAAACAAGTATCTTATTGTCA

>PGSC0003DMG400009230-(rev)LRR-RLPs\_6161

CTGCCGTAGATAACCATATCCGCCCGAGCCTTCAGCAAGAAACAAGTATCTTATTGTCAAATAGACAGAG

CAACAGAGTTCATATAATCAGCTTTTAACTAAATTCTATTTAATGCTGC

>PGSC0003DMG400009230-(rev)LRR-RLPs\_6222

TAGACAGAGCAACAGAGTTCATATAATCAGCTTTTAACTAAATTCTATTTAATGCTGCTACAGAAAAGC

ATCTTCTATATATAAACTTTACAAGATGTCCCAATATATCTACTTTTAA

>PGSC0003DMG400009230-(rev)LRR-RLPs\_6283

CAGAAAAGCATCTTCTATATATAAACTTTACAAGATGTCCCAATATATCTACTTTTAAATGTGTAAAGTAG

CTGATAAATTACAATGTCAAGGAAATTCATTCAGCTTATTACAGTGCAG

>PGSC0003DMG400009230-(rev)LRR-RLPs\_6466

TGCTTGAGCTCATTCTCTCTGTAATACATGTATTAGTACTACCTAATACAGCAGTCTGTGTTTATTCGG  
AAATGATAGATCAAATAATTTGGAATTACCAACAACAATCATTTAGTG

>PGSC0003DMG400009230-(rev)LRR-RLPs\_6527

TGTTTATTCGGAAATGATAGATCAAATAATTTGGAATTACCAACAACAATCATTTAGTGAAGCAGAAGCA  
TGAGTGCATATATTTAAATTGTTGGCCATTCTACAAGCGGTAECTATCA

>PGSC0003DMG400009230-(rev)LRR-RLPs\_6588

GCAGAAGCATGAGTGCATATATTTAAATTGTTGGCCATTCTACAAGCGGTAECTATCAAAGGTATTAAG  
TTTAAACAGGTGCTGCTGGAGTCGCTCTGATTGCTAAAACAATGTCATTA

>PGSC0003DMG400009230-(rev)LRR-RLPs\_6649

GGTATTAAGTTTAAACAGGTGCTGCTGGAGTCGCTCTGATTGCTAAAACAATGTCATTAGTCCTAGATAA  
CTGCCACCGAAATCTAGGCAGCTGACTGGTCAACATTCAGAAGAATATGA

>PGSC0003DMG400009230-(rev)LRR-RLPs\_671

ATTTTCAGGATTGTCTGATTTTGAATATGGAGGAAACAGACATCTCTGCGGTGGACCATTAGCCAAATGT  
GGTTGAAGATGGCAGAAAGTTAGCCAAGTTTTGGCTAATTGTATCTTTTA

>PGSC0003DMG400009230-(rev)LRR-RLPs\_6710

CCTAGATAACTGCCACCGAAATCTAGGCAGCTGACTGGTCAACATTCAGAAGAATATGAATCTTTTGCA  
AATACTTCTCCAATATTATTCAAGGACTACTTACTTGCATGATAAGTGTG

>PGSC0003DMG400009230-(rev)LRR-RLPs\_6771

TCTTTTGCAAATACTTCTCCAATATTATTCAAGGACTACTTACTTGCATGATAAGTGTGAAGTGTCAATTC  
CAATATAAGTAACTTGATATTCATTTTCCAGAAATGTACACCCAATAC

>PGSC0003DMG400009230-(rev)LRR-RLPs\_6893

CCCTTCGGAGAGAAGTGCAAATTCATTCTTGAGTTCAGAACAAGTTTTCTTTATTCCCAAACGGATA  
ACTGCTTTGTAAGATGCAATATCACCTTTTATAAGCAGTCATTGTGTAT

>PGSC0003DMG400009230-(rev)LRR-RLPs\_6954

CAAACGGATAACTGCTTTGTAAGATGCAATATCACCTTTTATAAGCAGTCATTGTGTATTAGTAATACTCA  
TTGTGACTCTACATTTGCTGGAAGTGTTACCCCATTTGCTCTTATTTTAC

>PGSC0003DMG400009230-(rev)LRR-RLPs\_7015

GTAATACTCATTGTGACTCTACATTTGCTGGAAGTGTTACCCCATTTGCTCTTATTTTACAGTCGGGCACCT  
ACAACATGGTGTACCAACAGAGCATAACATAATCTTAAACTGACTTAA



>PGSC0003DMG400009230-(rev)LRR-RLPs\_7076

TCGGGCACCTACAACATGGTGTACCAACAGAGCATAACATAATCTTAAACTGTACTTAAGCAGAAAACA  
AATGAAGTAAGAATTTTCAGGTGTAAAACATGTGTTTCACCCGCAAACTA

>PGSC0003DMG400009230-(rev)LRR-RLPs\_7137

AGAAAACAAATGAAGTAAGAATTTTCAGGTGTAAAACATGTGTTTCACCCGCAAACTAAAATGGGGAC  
AGCAGAAAAGCAGGTACCACCATACCAGTACAAAAGCAAACCCAACATTAT

>PGSC0003DMG400009230-(rev)LRR-RLPs\_7198

ATGGGGACAGCAGAAAAGCAGGTACCACCATACCAGTACAAAAGCAAACCCAACATTATCAGTCTGTTA  
CCACTTGATATTTCAAAGTAAGAAGTAAAAGAACAATCTATTCATCAAGCA

>PGSC0003DMG400009230-(rev)LRR-RLPs\_7259

GTCTGTTACCACTTGATATTTCAAAGTAAGAAGTAAAAGAACAATCTATTCATCAAGCATAATCTCCAATT  
CCATACATCTATAAACAGCATCTGATATATGGTAAATTGGTAATGCAGT

>PGSC0003DMG400009230-(rev)LRR-RLPs\_732

GCCAAATGTGGTTGAAGATGGCAGAAAGTTAGCCAAGTTTTGGCTAATTGTATCTTTTATAGCCTATCTA  
GATTTCTGTTTCCTGTCATTTTCATAATTGTATTGTATGGTGAAAATGTCT

>PGSC0003DMG400009230-(rev)LRR-RLPs\_7320

ATCTCCAATTCCATACATCTATAAACAGCATCTGATATATGGTAAATTGGTAATGCAGTAAAATGGTTAG  
AAATATCAATCTTCAATCGACTAATTTTGACTTGATCATGTAATAGTCGG

>PGSC0003DMG400009230-(rev)LRR-RLPs\_7381

AATGGTTAGAAATATCAATCTTCAATCGACTAATTTTGACTTGATCATGTAATAGTCGGTGTGAGCTTTAT  
GAGTCCACTATATTCATTCTACATATCTGGGCCCATTTCAATTTCAATA

>PGSC0003DMG400009230-(rev)LRR-RLPs\_7442

TCAGCTTTATGAGTCCACTATATTCATTCTACATATCTGGGCCCATTTCAATTTCAATACTACAGGAATTTT  
ATATTAAGAAAACTAGGGGTTTTCTAGAGTTAAGAGATTCTCAAAT

>PGSC0003DMG400009230-(rev)LRR-RLPs\_7503

ACAGGAATTTTATATTAAGAAAACTAGGGGTTTTCTAGAGTTAAGAGATTCTCAAATGTCACACTTCT  
TTTCTGTACACTAACATACAAGGTTTTAACCTTATTCCCAATTAGCTAGC

>PGSC0003DMG400009230-(rev)LRR-RLPs\_7564

CACACTTCTTTTCTGTACACTAACATACAAGGTTTTAACCTTATTCCCAATTAGCTAGCGTCATCTACAATA

AATCATTTACTTCAACTGTGATTCTTACCTAATTTGCCTTAGTTGAGA

>PGSC0003DMG400009230-(rev)LRR-RLPs\_793

GCCTATCTAGATTTCTGTTTCCTGTCAATTCATAATTGTATTGTATGGTGAAAATGTCTACAATTCCATGCC

TTTTAAGTTAACAATGCAACACTGGCTTCTTCCTGTGTCCATTCCAC

>PGSC0003DMG400009230-(rev)LRR-RLPs\_7991

GAAAAGGATTAGCCAAATATGGAAGATTCATACTTTCCTGATAAAATCTAGTTATCCTAAATGTTATATC

CAAATATGATAAATAAATTAGGGCAAACACCTACAACAACCTGCGTTTGT

>PGSC0003DMG400009230-(rev)LRR-RLPs\_8052

TGTTATATCCAAATATGATAAATAAATTAGGGCAAACACCTACAACAACCTGCGTTTGTATAATTTTAAGC

AAGGTCAACCTTCTAACCTTAGCAAGAAGTAATGCATTGCAACACACA

>PGSC0003DMG400009230-(rev)LRR-RLPs\_8296

GACAAAGTTCAAATCAACAAAAGCAATAGATTATTGACAATTAGACCTAAAACACTTTGCTATCAAG

AAAATGAATTACTCACTGGCCCGAGTACCAGAGGCGCCTGCCTTCTGAAG

>PGSC0003DMG400009230-(rev)LRR-RLPs\_8479

ACCAGTCAAATTAGCACTGTACATGATCCCAATATTATATCTAAACTATTGGGCAACAATTTTGAATTTA

ATTCTCATCTGAACTTTCCAAGAACAACAACTTTCAACACCCAAAAGGT

>PGSC0003DMG400009230-(rev)LRR-RLPs\_854

AATTCCATGCCTTTTAAGTTAACAATGCAACACTGGCTTCTTCCTGTGTCCATTCCACAAGTTATTGTAC

ACAACACAAAGGAACAGAAATGTTAATACTCGAACTATCATTGCCTTGC

>PGSC0003DMG400009230-(rev)LRR-RLPs\_8601

CCCTGGATATACTCAACAAGACAACACTCAAGTAAGACTAAAATAGCAAGAAAACGAAATGGGCAAG

TTTGAAATACTTAAAACCGCTGTAGCTTTACTCAATTACCCTATAATTGTAG

>PGSC0003DMG400009230-(rev)LRR-RLPs\_8662

GGGCAAGTTTGAAATACTTAAAACCGCTGTAGCTTTACTCAATTACCCTATAATTGTAGAGCTGAGAATG

AAAAACAGCAAGAAAACGAAATGGGTATATGAGAAAATTGGCGAAAAC

>PGSC0003DMG400009230-(rev)LRR-RLPs\_915

GTTATTGTACACAACACAAAGGAACAGAAATGTTAATACTCGAACTATCATTGCCTTGCTCAAGACTGTT

CTTCGCGTACAGAACAATTTATCAACAGAATACTAATCTACCATTTTTT

>PGSC0003DMG400009230-(rev)LRR-RLPs\_976

AAGACTGTTCTTCGCGTACAGAACAATTTATCAACAGAATACTAATCTACCATTTTTTTTACCCACTATACT  
ACATCTAGGTTCCACCAAACCCAGAAATCTACAACTAGGCTGAAAA

>PGSC0003DMG400009238LRR-RLKs\_1403

TCAGTCCAATAATCTAGTTGGAGAAATCCAAGTAACATTTACAGTTGAACAGATTGCAGAGGCTCAAT  
TTCAGCTCGAATTCATTGACTGGTTCCATTCCAAGTTCGTTATCAAGTTT

>PGSC0003DMG400009238LRR-RLKs\_1586

TAGTAACTTAAATGTGCTGTTAGAACTCCAATTTGGAGGGAACCAACTCAGTGGGCCTATTCCTGATATG  
CCTTTGAGTTTACAGATTTCTTTGAATCTGAGTCACAATCTTTTTCAAGG

>PGSC0003DMG400009238LRR-RLKs\_1647

CCTGATATGCCTTTGAGTTTACAGATTTCTTTGAATCTGAGTCACAATCTTTTTCAAGGACCTATACCAAG  
TAGTTTTTCTAGATTGACTTCATTGGAAGTTTTGGATCTCTCTTACAAC

>PGSC0003DMG400009238LRR-RLKs\_1708

CTATACCAAGTAGTTTTTCTAGATTGACTTCATTGGAAGTTTTGGATCTCTCTTACAACAGGTTCTCGGGT  
CAGATTCCAGACTACCTGACGGGAATGGGAGGCTTGACTAGGTTGGTGC

>PGSC0003DMG400009238LRR-RLKs\_1830

TCAAACAATCAACTGTCTGGAGTTGTTCCAAAGTTTGGAAAGCTTTGTCAGTGTTGAGACAGATGGAAAT  
GGGGGTCTGATCTATCCTTCCCAGTTGTGCCACCACAAGCTGCTGCAAAA

>PGSC0003DMG400009238LRR-RLKs\_1891

ATGGAAATGGGGGTCTGATCTATCCTTCCCAGTTGTGCCACCACAAGCTGCTGCAAAAAAGAGAAAAT  
CAATAGTTGTTGCAGTTGTTGTCCCAATTGCATGTGTAGCAACAATTGCCG

>PGSC0003DMG400009238LRR-RLKs\_1952

GAGAAAATCAATAGTTGTTGCAGTTGTTGTCCCAATTGCATGTGTAGCAACAATTGCCGTTTTCGTGGTG  
ATTGCTATTTCAATCTCTAGAAGATATTACAGGATCAATGATGAACATTT

>PGSC0003DMG400009238LRR-RLKs\_2867

CTTAAACTTCATTATATCCTCCCACCATGAAACGGTGTGAACTGTCTTTTCGATATCTAAAGTGAAACA  
GTGTGTCAGTATAGCCTAGAGAGGGAGGAGCGGGTTAAAATGTAACATG

>PGSC0003DMG400009238LRR-RLKs\_2928

AAGTGAAACAGTGTGTCAGTATAGCCTAGAGAGGGAGGAGCGGGTTAAAATGTAACATGAGAAGCCTC  
AAAGTTGAGCATATATTAAGTGATGCATTTCTTTTTGTGTTACAGAATATG

>PGSC0003DMG400009238LRR-RLKs\_3515

AGTAGTTACATAACTTTGAATATGATGTTAGTTCTCAGTGTAACATAGTCCATTTTTCTTGTTTCATGTGTA  
ATATATATATATATTATATATAAAAAGGTCTTTGGGAGTGAATCCAATTT

>PGSC0003DMG400009238LRR-RLKs\_366

AATAATTCTTCCCTTACCAAAGTCACCTTTTCATTGTTCTCTATTTCTAGCTCTGAATTCTTGCCTTTTATTT  
GTCAAATTGATACTTTGGAGTCTCTTGATGTTTCCCAAACCTTTTGG

>PGSC0003DMG400009238LRR-RLKs\_610

CTTTGGACTTTTCTTACAATAACATGAATGGGAAAGTTGACTTGCAGTTGGATGGATTAGACTCACTCAA  
GAGTTTGAACCTTAGCTTTAACATGTTTAATGGTCCAGTTCCTACCAGTC

>PGSC0003DMG400009238LRR-RLKs\_671

CTCACTCAAGAGTTTGAACCTTAGCTTTAACATGTTTAATGGTCCAGTTCCTACCAGTCTTGGAAAATTTA  
TTCTTCTGGAGGAGCTTCATCTTTCTGCAAATTCTTTTGAAGGTGAATT

>PGSC0003DMG400009238LRR-RLKs\_732

GGAAAATTTATTCTTCTGGAGGAGCTTCATCTTTCTGCAAATTCTTTTGAAGGTGAATTCCCCACTCAAAT  
TGTGAACTTTGGCAACTTAACTTTGATTGACCTATCTCTAAACAGCCTA

>PGSC0003DMG400009238LRR-RLKs\_793

CCACTCAAATTGTGAACTTTGGCAACTTAACTTTGATTGACCTATCTCTAAACAGCCTATCTGGTGTAATT  
CCTGATAGATTAGGTGAACTTTCCAAATTGCAAGTTTTGATTTTGTGTCAG

>PGSC0003DMG400009238LRR-RLKs\_854

TGGTGTAATTCCTGATAGATTAGGTGAACTTTCCAAATTGCAAGTTTTGATTTTGTGTCAGCCAATAATTTGA  
GTGGCACAATCCCACAATCCCTTAGGAATATCACAACGCTGACGCGTTT

>PGSC0003DMG400009324-(rev)LRR-RLPs\_1159

TGTCTAAAAAGGAAAAAGCAAAGAAATAAGACGTATACAGAGGCTGACTTCTTCATAGGATTTCTCATA  
TAAAAAAAACATTGATTTCTAGGATATGGGTTATTTTAAATTACAAATT

>PGSC0003DMG400009324-(rev)LRR-RLPs\_122

TCAGCTGAGCAAACCAGACACTTTGAATTGGTCAATATATCTTTACTGGATTCAATACATGGCGGAAGCT  
TTTCTTCAAGTTCTGCTAGAAAATCTCAATTCTTTCATAAGAGGGGAAACT

>PGSC0003DMG400009324-(rev)LRR-RLPs\_1525

AATTGTAACAAATTCCTTGTGTCCACACTACTTGGAACAGGTTTTGTGTAACTGAACCAAAGTCTACG

GAAGGGACAAAGAGGAGGATGAGATAGTGAAAATCTTGATAAACAATGTT

>PGSC0003DMG400009324-(rev)LRR-RLPs\_183

GCGGAAGCTTTTCTTCAAGTTCTGCTAGAAAATCTCAATTCTTTCATAAGAGGGAAACTTGTATTGCTTTT

CGGTTTCGAAAAGGAATTTGAAAAGCTGTCCAGTGTGTTTTCCACAATT

>PGSC0003DMG400009324-(rev)LRR-RLPs\_1830

AAGAAGTTCTCCTCGTGTGCGAGGACTTGGCTTCATTCAGAAGAAGCTCCAAGAGTTATTGAATGGAAA

ACGATACTTGCTTGTCTTAGATGATGTTTGGAAATGATGATCTAGAAAAGTG

>PGSC0003DMG400009324-(rev)LRR-RLPs\_244

TATTGCTTTTTCGGTTTCGAAAAGGAATTTGAAAAGCTGTCCAGTGTGTTTTCCACAATTCAAGCTGTACTT

CAAGATGCTCAAGAGAAGCAATTGAAGGACAAGGCAATTGAGAATTGGT

>PGSC0003DMG400009324-(rev)LRR-RLPs\_2867

ATGTGCATAATTGCTACTCACTTAATTGTTTGCCAAAACAAACAAGTAACTTAGTAGTCTGCGAAATCTT

GTTCTTGATGGCTGTCCATTGACTTCTACTCCACCAAGGATAGGGTTGT

>PGSC0003DMG400009324-(rev)LRR-RLPs\_2989

ACATGCCTTAAGACTCTAGGTTTCTTTATTGTGGGAAGCAAGAAAGGTTATCAACTTGGTGAAGTAAAA

ACCTAAATCTCTGCGGCTCAATTTCAATCACACACCTTGAGAGAGTGAAG

>PGSC0003DMG400009324-(rev)LRR-RLPs\_305

AGCTGTACTTCAAGATGCTCAAGAGAAGCAATTGAAGGACAAGGCAATTGAGAATTGGTTGCAGAAAC

TAAATTCTGCTGCGTATGAAGTTGATGACATATTGGGCGAATGTAAAAATGA

>PGSC0003DMG400009324-(rev)LRR-RLPs\_3050

AACTGAAAAACCTAAATCTCTGCGGCTCAATTTCAATCACACACCTTGAGAGAGTGAAGAACGATACGG

ATGCAGAAGCCAATTTATCTGCAAAGCAAATCTGCAATCTTTAAGCATGA

>PGSC0003DMG400009324-(rev)LRR-RLPs\_3111

CGATACGGATGCAGAAGCCAATTTATCTGCAAAGCAAATCTGCAATCTTTAAGCATGAGTTGGGATAA

CGATGGACCAAACAGATATGAATCCGAAGAAGTTAAAGTGCTTGAAGCCCT

>PGSC0003DMG400009324-(rev)LRR-RLPs\_3355

TGCTTGCTTACCACCCTTTGGGGAGCTGCCTTGCTAGAAAAGTCTAGAGTTACAAAACGGGTCTGCGG

AGGTGGAGTATGTTGAAGAGGATGATGTCCATTCTAGATTCTCCACAAGA

>PGSC0003DMG400009324-(rev)LRR-RLPs\_3416

GGTCTGCGGAGGTGGAGTATGTTGAAGAGGATGATGTCCATTCTAGATTCTCCACAAGAAGAAGGTTTC  
CATCCCTGAAAAAATTCGTATATGGTTCTTTCGTAATTTGAAAGGGTTGG

>PGSC0003DMG400009324-(rev)LRR-RLPs\_3477

AAGGTTTCCATCCCTGAAAAAATTCGTATATGGTTCTTTCGTAATTTGAAAGGGTTGGTGAACAGGAA  
GGAGAAAACAAATTCCCATGCTCGAAGAGATGGCGATTTTACATTGCC

>PGSC0003DMG400009324-(rev)LRR-RLPs\_3538

AAACAGGAAGGAGAAAACAAATTCCCATGCTCGAAGAGATGGCGATTTTACATTGCCCTCTGTTTGT  
TTCCAATCCTTCTTCTGTCAAGAAATTAGAAGTTCACGGCAACACAAAA

>PGSC0003DMG400009324-(rev)LRR-RLPs\_366

CAGAACTAAATTCTGCTGCGTATGAAGTTGATGACATATTGGGCGAATGTAAAAATGAGGCAATAAGA  
TTCGAGCAGTCTCTATTAGGGTTTTATCATCCAGGGATTATCAGTTTCCGT

>PGSC0003DMG400009324-(rev)LRR-RLPs\_4087

AGTATATATTAGTGAGTTATTTGTAATTGTTTCTTGGGTTATTTTTTTGTCAGTCTCTCACAGGTTACAATT  
CCTGCCATTGGATTATTATAGCAAAGTTTGACTGTATGAGGAAACATT

>PGSC0003DMG400009324-(rev)LRR-RLPs\_4148

AGGTTACAATTCCTGCCATTGGATTATTATAGCAAAGTTTGACTGTATGAGGAAACATTTAAAAA  
AAGAAGGTAAATCGTTTAACATGACTTTTTTTTTACTGTTTAATTTAATA

>PGSC0003DMG400009324-(rev)LRR-RLPs\_4181

AAAGTTTGACTGTATGAGGAAACATTTAAAAAAGGAAGGTAAATCGTTTAACATGACTTTTTTTT  
TACTGTTTAATTTAATATAAAAGGATTGTACTAATTTTCTATTTGAAAAC

>PGSC0003DMG400009324-(rev)LRR-RLPs\_427

CAATAAGATTCGAGCAGTCTCTATTAGGGTTTTATCATCCAGGGATTATCAGTTTCCGTCACAAAATTGG  
GAAAAGGATGAAAGAGATAATGGAGAACTAGATGCAATTGCTGAGGAAA

>PGSC0003DMG400009380LRR-RLKs\_1054

TAACGAGTCTCAAGACACTTGAACCTGCTTACAACCCTTTTGCGCCGAGTCAGTTTCCTCCTGAACTCGGT  
AACTTGACGAATCTTGAGACATTATGGCTAAGTATGTGTAATCTTGTTG

>PGSC0003DMG400009380LRR-RLKs\_1860

AACCTACAAATATCAAGAAACAAATTCTCAGGGGTTATACCTAGTGAAGTAGGAAAGTTGAAGAACTTA  
GTTGAGTTTTCTGCGAGTCATAATGAGCTAACGGGAGAAGTTCCAGACACA

>PGSC0003DMG400009380LRR-RLKs\_248

AACTGGACAGGTGTCACCTGTAATGACGCCGAGATTCTCCTTCCGTCGTCGCTGTTAACCTCTCCGGTG  
CTTCTCTCGCCGGAACCTTCCGGTCTTCTCTGCCATCTTACTTCGCTT

>PGSC0003DMG400009380LRR-RLKs\_3100

TGTCCAAACTATATCACTGGCTTTAGTCATTTTTACCGATATATTGGCACATCTAGCTTATATTTTTGGAAA  
GATTGCAATTTCATTTTAAAGTAGCCAAAACATAAGTGAAATTC

>PGSC0003DMG400009380LRR-RLKs\_3720

GAATTCTACAACCCTTTATGAATCTATATTACGAGGATTCATCATGAATTAACAAATTTTACGCTAGCTGT  
CAGCCTACCGCAACACAGATGGGGTGGGTACTGAAAGTTGTAAGTATTC

>PGSC0003DMG400009380LRR-RLKs\_3782

GCTAGCTGTCAGCCTACCGCAACACAGATGGGGTGGGTACTGAAAGTTGTAAGTATTCTTAACTAATGC  
CTTTGATTAAGTTTGTAAACTTAGGTCCTACTTTGCTGTCCATCATTAC

>PGSC0003DMG400009380LRR-RLKs\_620

TTGGGTCTGTTTTAAGGGTGAATATAAGATCTATAGTTAGTGTATATAACATGGTATGTGTAGAAAAAG  
ACAGTCCAGTGCACAAAACATCTCACGTTAGCAAGCTGCGGGGAAGGGGCT

>PGSC0003DMG400009380LRR-RLKs\_682

GAAAAAGACAGTCCAGTGCACAAAACATCTCACGTTAGCAAGCTGCGGGGAAGGGGCTGTAAGCAATG  
ATTTAGCTGAACCAACATAACCCGTATGGATTTGCTTGTGGTGTTATAGTA

>PGSC0003DMG400009380LRR-RLKs\_744

GCAATGATTTAGCTGAACCAACATAACCCGTATGGATTTGCTTGTGGTGTTATAGTAACTCTAAATTATT  
GATTGTTTGAATAAAAATGCAGATGGAACGAAATGAATATTATGATCTT

>PGSC0003DMG400009380LRR-RLKs\_806

TAAATTATTGATTGTTTGAATAAAAATGCAGATGGAACGAAATGAATATTATGATCTTTTATTGCAGATTT  
TGTTATTCTTGTGTTTCATTAGTATATTATGATCTTTTATTGCAGGTA

>PGSC0003DMG400009380LRR-RLKs\_868

TGCAGATTTTGTATTCTTGTGTTTCATTAGTATATTATGATCTTTTATTGCAGGTACCTTGATCTTAGTG  
GATGCTATTTTTCGGGGAATATTCCGGCAAGTTTCGGAAGATTCAGGC

>PGSC0003DMG400009380LRR-RLKs\_992

GGAGACTCTTATTCTGACTGAGAACATTCTTACTGGTGAAGTTCCTCCTGCATTAGGTAATGTAACGAGT

CTCAAGACACTTGAACCTTGCTTACAACCCTTTTGCGCCGAGTCAGTTTCC

>PGSC0003DMG400009417-(rev)C-LecRK\_0

AATTAACACTCTGTCTGAACAACACTTTCTTCTTCAAAGAAATTCAACTAACCATTGGAGACTCCAAATG

TGAACTCTTGACCTTTCTCTCTCTAAAAAAACCCTATCCACCCACCCC

>PGSC0003DMG400009417-(rev)C-LecRK\_1037

GTTCTTGGAATATTCTTAGAACAATATTCTATTTGACTGATCGATTATCCTTCTAAGAAATCCTGGTGGTC

ATAGTCACCTGATTGAATTTAATTTATTCGGTTCGACAAAGGAGCAGAAG

>PGSC0003DMG400009417-(rev)C-LecRK\_1098

CCTGGTGGTCATAGTCACCTGATTGAATTTAATTTATTCGGTTCGACAAAGGAGCAGAAGTAGATTCTGCT

CATTTTCATGCATAAAGGCATGCTTAGGTTGCTCTTAAAGTGAAACTTTGG

>PGSC0003DMG400009417-(rev)C-LecRK\_1159

GATTCTGCTCATTTTCATGCATAAAGGCATGCTTAGGTTGCTCTTAAAGTGAAACTTTGGTTCTATTTGAGG

GAGATAATATATATGCTTTTATGGTGGATTAATGATGGCCTTGATGAAT

>PGSC0003DMG400009417-(rev)C-LecRK\_122

ATCCACAATGCCCAACCCACACTCAAATCATTCTAGGTTTTGCTATACAGTGAGAACAAGTGATGATA

CTGATGGCTGTAAACCTCTGTTCCCTTTGTTTCTACTTACTTGTTTTCT

>PGSC0003DMG400009417-(rev)C-LecRK\_1220

CTATTTGAGGGAGATAATATATATGCTTTTATGGTGGATTAATGATGGCCTTGATGAATAATGTTGTCCA

GTTCCCTTCTATTGAGGAACCTCCCTTGGAGTTTCTTTTGTGTTTAT

>PGSC0003DMG400009417-(rev)C-LecRK\_1281

TGTTGTCCAGTTCCTTCTATTGAGGAACCTCCCTTGGAGTTTCTTTTGTGTTTATGATATGCATTTCA

CCATTTTTTTTCTAAAAAACTGCACTAGATGTCGGGAGGACTCATG

>PGSC0003DMG400009417-(rev)C-LecRK\_1342

TATGCATTTACCATTTTTTTTCTAAAAAACTGCACTAGATGTCGGGAGGACTCATGAGGTGATGCAT

AGAGCTCACCTGGTAGTTGTCTAAGAGGAGGAGGTGGCCAGATGAAGCAT

>PGSC0003DMG400009417-(rev)C-LecRK\_1403

GTGATGCATAGAGCTCACCTGGTAGTTGTCTAAGAGGAGGAGGTGGCCAGATGAAGCATGTGACACTT

ACAATTTACCAGTTAGAGGTTTTGCTATTACATTAGGCAATGGAATGACGA

>PGSC0003DMG400009417-(rev)C-LecRK\_1464



GACACTTACAATTTACCAGTTAGAGGTTTTGCTATTACATTAGGCAATGGAATGACGAGAATAACAGC  
GTGTTTTATGTTGATCAGCATGTAGAGCAGCAGTAATTGCGCTAGTATTCT

>PGSC0003DMG400009417-(rev)C-LecRK\_1525

ATAACAGCGTGTTTTATGTTGATCAGCATGTAGAGCAGCAGTAATTGCGCTAGTATTCTAGCTTGATAGT  
ACTACATCTTTCATTTGAGATAGCACATCATTTTCTTTTCAAATGGGCAT

>PGSC0003DMG400009417-(rev)C-LecRK\_1586

CTTGATAGTACTACATCTTTCATTTGAGATAGCACATCATTTTCTTTTCAAATGGGCATAGACTGAAAGCA  
ATAGGGAAAATAATGATGATCCAACCTTATCCTACTTTTGCCCCCTGCT

>PGSC0003DMG400009417-(rev)C-LecRK\_1647

ACTGAAAGCAATAGGGAAAATAATGATGATCCAACCTTATCCTACTTTTGCCCCCTGCTATTCTTGAATAT  
TGATGGTTTTTACAGGATATTTGCAGTCATGTGGAATGTGATTCTTACA

>PGSC0003DMG400009417-(rev)C-LecRK\_1708

TCTTGAATATTGATGGTTTTTACAGGATATTTGCAGTCATGTGGAATGTGATTCTTACTATATGC  
CTCTTTAGTAAGACCTGTGCTTTCAAGTCTCAAGTTATCCCTGCAACTT

>PGSC0003DMG400009417-(rev)C-LecRK\_1769

CTCTATATGCCTCTTTAGTAAGACCTGTGCTTTCAAGTCTCAAGTTATCCCTGCAACTTATGGTGTTAGAC  
ATACTGGTACACGTGTAGAAATGTCATGCCAAGAACCATCTAGCTGTTC

>PGSC0003DMG400009417-(rev)C-LecRK\_183

GTGATGATACTGATGGCTGTAAACCTCTGTTCCCTTTGTTTCTACTTACTTGTGTTTCTGCTTCACCTCTGT  
GCTTCCACTTCTGTAAGTAAAGAAAAGATTATAGTACCTTTTATTTAG

>PGSC0003DMG400009417-(rev)C-LecRK\_1830

GGTGTTAGACATACTGGTACACGTGTAGAAATGTCATGCCAAGAACCATCTAGCTGTTTCATTTAAGTTTC  
CACAATTACGAAGAACCCTTTCTTTTCCATTCGCTCTGTAGGAAGAAGAAC

>PGSC0003DMG400009417-(rev)C-LecRK\_1891

TTAAGTTTCCACAATTACGAAGAACCCTTTCTTTTCCATTCGCTCTGTAGGAAGAAGAACAAGTTCTAGTT  
TTTATTGAACTCGCATGGGTTTTAAAAAAGACGTATATTTGTTGGTACA

>PGSC0003DMG400009417-(rev)C-LecRK\_1952

AGTTCTAGTTTTTATTGAACTCGCATGGGTTTTAAAAAAGACGTATATTTGTTGGTACATCAGTGAATAA  
GGCTGTGGATCATCTCAGAGAAAAGTACTAATTGAGTGAACACAATTAG

>PGSC0003DMG400009417-(rev)C-LecRK\_244

TTCACCTCTGTGCTTCCACTTCTGTAAGTAAAGAAAAGATTATAGTACCTTTTATTTAGAGAAAAGGGTGT  
CTGAATATGTTATCAGAATTCATGTTAGTGTGTGAATTTGGAGAAAGTT

>PGSC0003DMG400009417-(rev)C-LecRK\_2501

TTTTTTAAAAAAACAATTAGGAGTCCAAGCTGAACGAAAAGAGAAGAAAACACTGGAGCTTAATTTTTTT  
TTTAAAGATTCAGTGTCTCTTCTTTTTCGTTCAGCTTGGACAAGCTTA

>PGSC0003DMG400009417-(rev)C-LecRK\_2928

CGTGAATCTTTCAATCTTCAAATCTTGGAGACCTTATCTGAAATGAATTCTAATTTTGAAGCTGATCCCTC  
AATTGTAACCTTTGTAAAAAAGTAAATAAATCCATTAATGAAGA

>PGSC0003DMG400009417-(rev)C-LecRK\_2989

CTGATCCCTCAATTGTAACCTTTGTAAAAAAGTAAATAAATCCATTAATGAAGATAAAGATACTT  
TTAGGGTGAAAAGTCATCTTCAGTTGTGGTATTAGAAATAACTAGTTCAG

>PGSC0003DMG400009417-(rev)C-LecRK\_305

AAAAGGGTGTCTGAATATGTTATCAGAATTCATGTTAGTGTGTGAATTTGGAGAAAGTTTTGATTTTTAT  
TTTTTTGAATTTTTTTTCAGGTCCCTAATAAGACACTTGATTCACAAATAG

>PGSC0003DMG400009417-(rev)C-LecRK\_3355

TGGAGATCATGTGGCTAAATGGATGGGGTTAGTGCAGGGATGGCAAGTTTGAGCCACTTTTATAACATT  
AGGAACACATATAAACTGATAGAATAACATTAGGGGTATAGATGAACTGAT

>PGSC0003DMG400009417-(rev)C-LecRK\_3416

ATAACATTAGGAACACATATAAACTGATAGAATAACATTAGGGGTATAGATGAACTGATAGTATAATGG  
AGGGTAAAATTAACCTTTTCAATAGTACAGGAAGTGAGGGACAAATATGA

>PGSC0003DMG400009417-(rev)C-LecRK\_3477

TATAATGGAGGGTAAAATTAACCTTTTCAATAGTACAGGAAGTGAGGGACAAATATGACCCTTTTCCTA  
ATTTCTTTTCTTCTTCTTAGATAAATGAAGAAGTTAGATCAAGTATTATT

>PGSC0003DMG400009417-(rev)C-LecRK\_3538

CTTTTCCTAATTTCTTTTCTTCTTCTTAGATAAATGAAGAAGTTAGATCAAGTATTATTAACACTAGTGC  
AACTGAACTTATTTGGACCTCTCAACGCGTGGTTTTCTTAGTGTATG

>PGSC0003DMG400009417-(rev)C-LecRK\_3599

AACTAGTGCAACTGAACTTATTTGGACCTCTCAACGCGTGGTTTTCTTAGTGTATGTTTTTTATTTTTA

ACTGGTCAAGTTATTATGTCTCATCTCTTTGGCACTGTTGTTTATTGT

>PGSC0003DMG400009417-(rev)C-LecRK\_366

GATTTTTATTTTTTTGAATTTTTTTCAGGTCCTAATAAGACACTTGATTCACAAATAGTTTCATCTTCTGG

GAATCAAAGTCATGATGATGGTAATGTTTTGGAATTAATTAGATTATT

>PGSC0003DMG400009417-(rev)C-LecRK\_4148

TGGTAAGTGATTGCAGACCAATTTATTTCTAATTGTTTCTTTCACCCAGTGTAATTTTGCAAAGTAGGAGC

AAAACCCTTCCCTGATATAGTGTGGTTATACTATGTGATTAAGCTT

>PGSC0003DMG400009417-(rev)C-LecRK\_427

TCATCTTCTGGGAATCAAAGTCATGATGATGGTAATGTTTTGGAATTAATTAGATTATTGTTCTGTCTATT

TCCTTGGAAGTATAGATTGGCTTGTGTTGATTAGATTAGGGCTCTTTT

>PGSC0003DMG400009417-(rev)C-LecRK\_4697

GGCTGTGAAAAGATTGAAGAGGTGCGGTATTCAGAGGAAGAAAGAGTTCTACTCTGAGATTGGAAGG

GTTGCAAGACTTCATCATTCAAATCTGGTATCTATCAAAGGATGTTGCTATCA

>PGSC0003DMG400009417-(rev)C-LecRK\_4758

GGAAGGGTTGCAAGACTTCATCATTCAAATCTGGTATCTATCAAAGGATGTTGCTATCATCATGGTGACC

GCTATATTCTGTACGAGTTTATTATCAATGGACCCCTGGATAGGTGGCTA

>PGSC0003DMG400009417-(rev)C-LecRK\_488

TCTGTCTATTTCCCTTGGAAGTATAGATTGGCTTGTGTTGATTAGATTAGGGCTCTTTTTAGAATCAGTAA

TGGAGTTGCATCTATAATCATCTTTTCAACATAATGTTCAACTACTATA

>PGSC0003DMG400009417-(rev)C-LecRK\_5185

AATGCATTATCTATATTGTTAAGAAAAAAGGTGTGTTATCTGTCTTGCAATATTCCTTTTCGTATTTTCTT

TTTTCTTCCCTAGATTTTTCATTCAGAAGAAAGTCAAATACTGCACAT

>PGSC0003DMG400009417-(rev)C-LecRK\_5246

CGTATTTTCTTTTTTCTTCCCTAGATTTTTCATTCAGAAGAAAGTCAAATACTGCACATCTTGACCAAGATA

CTTCTTGTTAACATATAATGCAATTAATAAATGAAAACCTTTTTAGTT

>PGSC0003DMG400009417-(rev)C-LecRK\_549

GAATCAGTAATGGAGTTGCATCTATAATCATCTTTTCAACATAATGTTCAACTACTATATGTTACTTTGTG

TATAATATGTTGGGATTTCTTACTGGTGCTTCTTATGTAAATTGTAATG

>PGSC0003DMG400009417-(rev)C-LecRK\_5490

CGTGTTTCCTTTCAGGTTTGGGGTGGATCTTTCCTTCTCAATTATCACATACTCGGTTAGGTCGCCCCGTG  
TGTGTGTCTTTCATCTAAGTGTGAGCAGGAACTCTTTCATGAATC

>PGSC0003DMG400009417-(rev)C-LecRK\_5551

GTCGCCCCGTGTGTGTGTCTTTCATCTAAGTGTGAGCAGGAACTCTTTCATGAATCTCACTAAAATAT  
TGTAGGAAAGCTATGATTGATTTCTATTCGGGGATTCAATTAACTA

>PGSC0003DMG400009417-(rev)C-LecRK\_5673

ATGACTCTATTTATTGGTGACAGAATTGTTGGACTTTTATCTAGGGAATATTCCTTGACATGGAAATTAT  
GGCAAATAAATTTTCAGGGGTTTGTGGGACTACTCACCACTAACCCC

>PGSC0003DMG400009417-(rev)C-LecRK\_5734

TGGAAATTATGGCAAATAAATTTTCAGGGGTTTGTGGGACTACTCACCACTAACCCCCAACAACAAT  
ATACATGGAAGAAATATTGAAGTGTACAAAAGAAGCCAATATATTATTC

>PGSC0003DMG400009417-(rev)C-LecRK\_5856

ATTATTCACGATGATAGAGTGAAATAATTAGCATAAGATAGACCAAACCTTAGGCTTATCTACATCACCA  
GATTTAATATATGCAATGTATTATGTATGGTCCCTGGTAGTTTAACTTTT

>PGSC0003DMG400009417-(rev)C-LecRK\_6039

AGGCCACTTGAGTAAGCTGGGTTCAATTCATAATGTACATACTTTTAAAGATTTCAATAGTTTGCAAGTA  
GGTCTTTGTAATTTTATATGCTTCAAGGAATTCAGACAGAAGTGGGTGA

>PGSC0003DMG400009417-(rev)C-LecRK\_61

ACTCCAAATGTGAACCTTGACCTTCTCTCTCTAAAAAAACCCTATCCACCCACCCCATATCCACAATGC  
CCAACCCACACTCAAATCATTCTAGGTTTTGCTATACAGTGAGAAC

>PGSC0003DMG400009417-(rev)C-LecRK\_610

TTACTTTGTGTATAATATGTTGGGATTTCTTACTGGTGCTTCTTATGTAAATTGTAATGTGTGCATATCTAT  
GTGTCATTTGCTAATTTAACTAGCATAGTGAACCTTTGAGTTTGGAG

>PGSC0003DMG400009417-(rev)C-LecRK\_6100

TTGCAAGTAGGTCTTTGTAATTTTATATGCTTCAAGGAATTCAGACAGAAGTGGGTGAGAAAAGATGG  
AATACTTAAGGAAATGGATACCAGCGACATCTTAGTAAGAAAATAAAAACCT

>PGSC0003DMG400009417-(rev)C-LecRK\_6161

AAAGATGGAATACTTAAGGAAATGGATACCAGCGACATCTTAGTAAGAAAATAAAAACCTGCATATTACT  
GTCCTGTTGTCTTCATGAGTTTTTGTCTGAGTGTCTTGCCTTGTCTAGG

>PGSC0003DMG400009417-(rev)C-LecRK\_6222

ATATTACTGTCCTGTTGTCTTCATGAGTTTTTGTCTGAGTGTCTTGCCTTGTCTAGGGCGGATGTCTAT  
GGAAAGTGAAGTCATAGAAAATAGGATGTCTATGGAGGTCACTGTTATA

>PGSC0003DMG400009417-(rev)C-LecRK\_6405

GTCATATTTGTTAAAAAAGGGAAAATAAACAGAGACAATTCAGGGTCTATTACTAGTTTATTACCTTTGT  
AATTTATGGAATTGAAGGATCTAGCAAGTATGTTAATCAACTGCATAAGG

>PGSC0003DMG400009417-(rev)C-LecRK\_6466

TACCTTTGTAATTTATGGAATTGAAGGATCTAGCAAGTATGTTAATCAACTGCATAAGGTGAAAATGACT  
GGTCTGGTTGTATTTTTAACCATGAAAGGTGGTGATAGTTGTAAAACCTC

>PGSC0003DMG400009417-(rev)C-LecRK\_6527

AAAATGACTGGTCTGGTTGTATTTTTAACCATGAAAGGTGGTGATAGTTGTAAAACCTCTGTTTTGTGTC  
ACTGTGTCAGCTAGTGCACAAGAGGATGTGCGAGTGGCCAAAGCATGACA

>PGSC0003DMG400009417-(rev)C-LecRK\_6588

TTTTGTGTCAGTGTGTCAGCTAGTGCACAAGAGGATGTGCGAGTGGCCAAAGCATGACATTGTTTGTTT  
GCTATCTCTATGATGGCAGTTTCTTTGCTTATATTGTTAGTGCTTACTTTC

>PGSC0003DMG400009417-(rev)C-LecRK\_6649

GTTTGTTTGCTATCTCTATGATGGCAGTTTCTTTGCTTATATTGTTAGTGCTTACTTTTCATCAAATGTGACA  
GGTTTCTTCATGACAAAATGAAGCCACAAGTTGTGCATAGGGATATCC

>PGSC0003DMG400009417-(rev)C-LecRK\_671

TGCATATCTATGTGTCATTTGCTAATTTAACTAGCATAGTGAACTTTTGAGTTTGGAGAAAATAAAGGC  
TGGCGAATCCAATCTTGTTTATCAAGTTGCTATAGGTTTAAGGTCTACAA

>PGSC0003DMG400009417-(rev)C-LecRK\_732

AATAAAGGCTGGCGAATCCAATCTTGTTTATCAAGTTGCTATAGGTTTAAGGTCTACAACCTGGGGTATT  
TTGTGCCAAACTATTATTCATAAATCAAGATTTTGAGAACTACGTCACTT

>PGSC0003DMG400009417-(rev)C-LecRK\_7381

AGTCCATGATGGTTGAGATGTAATACAACAATACTGTATCACCAAAGCCAGTATGCTTTCATCTGCT  
GCTGCTTTGCATTGTTTACTTGTAGCACCTGTATTTCTAAAATTTGTTTC

>PGSC0003DMG400009417-(rev)C-LecRK\_793

TGGGGTATTTTGTGCCAAACTATTATTCATAAATCAAGATTTTGAGAACTACGTCACTTCCCAGCATCATT

AAGCTCAGGCCATAAAAGACTGTCTCGCAACCAGTTATCCCTCGAAAAA

>PGSC0003DMG400009417-(rev)C-LecRK\_854

CAGCATCATTAAGCTCAGGCCATAAAAGACTGTCTCGCAACCAGTTATCCCTCGAAAAAATAAAAATAGA

AGATGAACTTGCAACTATTTATTAATCAGCTTCCTACTTCTAAAGAAAAT

>PGSC0003DMG400009417-(rev)C-LecRK\_915

AAAAATAGAAGATGAACTTGCAACTATTTATTAATCAGCTTCCTACTTCTAAAGAAAATTAATTGACCAG

CCTCTCGATTCCGGTTTACAAAGTTATGGATTCCCATTCTCCAAGACAG

>PGSC0003DMG400009417-(rev)C-LecRK\_976

ATTGACCAGCCTCTCGATTCCGGTTTACAAAGTTATGGATTCCCATTCTCCAAGACAGTTGTTCTTGGAA

TATTCTTAGAACAAATATTCTATTTGACTGATCGATTATCCTTCTAAGAA

>PGSC0003DMG400009532-(rev)LRR-RLPs\_0

ATGGATCGAATTTCCGAATTACCAGAGCCAATTTAGAGTACATCTTGTCTTTTCTTGTTTACAAAAATGT

TGCACAATTAAGTATGTTGTCCAAGACTTGGAACAAGGTTTGCAATTCA

>PGSC0003DMG400009532-(rev)LRR-RLPs\_1008

TGCTTTGTCTCAGGAACCACTGACAGTGATGTCACAAAATTTCTTGTAACCTCAATCAGTCCATGGTTGT

TGAATTAACATGCAAAAGTGACAAGGTAATAATCTTTTTAATTCCCACA

>PGSC0003DMG400009532-(rev)LRR-RLPs\_1071

ATGGTTGTTGAATTAACATGCAAAAGTGACAAGGTAATAATCTTTTTAATTCCCACATATTCTTTAGTTG

TTGTTATATATTATGGATTTCTCACAAGTTGTTTACTTTTGCTGATACA

>PGSC0003DMG400009532-(rev)LRR-RLPs\_1134

TTTAGTTGTTGTTATATATTATGGATTTCTCACAAGTTGTTTACTTTTGCTGATACAGGCACTAGTTATACC

AAAAGACATGAGAGGAAGCTTGCTTCCTCCCCTTTACGGTACTAATCG

>PGSC0003DMG400009532-(rev)LRR-RLPs\_1197

AGTTATACCAAAGACATGAGAGGAAGCTTGCTTCCTCCCCTTTACGGTACTAATCGTGTTTCATGTAAAT

ATTGGAAGTCCATTGATAAACTGTTTCGATTGTCGACATTCTTGATAGTAT

>PGSC0003DMG400009532-(rev)LRR-RLPs\_126

TATTTGAAATTTGATGGTGATTTTTCTTTACGCCATCAAATACAAACCAAAGCTGGTGGATGTTGTGCA

TCAAACCCTAGAAAATCGTCGAAAGCTGAAGATTGCCGTACACAAGTGT

>PGSC0003DMG400009532-(rev)LRR-RLPs\_1260

TGTAAATATTCTGAAGTCCATTGATAAACTGTTTCGATTGTTCGACATTCTTGATAGTATGCTTTGGATTCTC  
CTCAACTGGACACCCTATCTTATTTCAAACCTGACTTAAAGATCCTAAT

>PGSC0003DMG400009532-(rev)LRR-RLPs\_1323

GATTTCTCCTCAACTGGACACCCTATCTTATTTCAAACCTGACTTAAAGATCCTAATGGTAAGACATTTAT  
CTTTCAAAGGTACTGACTTTGTAAAAAACGTTTTTTTAGATGCAAGGT

>PGSC0003DMG400009532-(rev)LRR-RLPs\_1386

ACATTTATCTTTCAAAGGTACTGACTTTGTAAAAAACGTTTTTTTAGATGCAAGGTTTCTTGCAATTCTTT  
TCCCTTTTAACATGCCTATTTCTTTCTTTCTTTAGCAGTATAAGTAAT

>PGSC0003DMG400009532-(rev)LRR-RLPs\_1449

CAATTTCTTTCCCTTTTAACATGCCTATTTCTTTCTTTCTTTAGCAGTATAAGTAATTAAGTCTGCAGTTACT  
TGAACATAACAAGTCAATTAAGTCTAGTATAAGGATACTGAGATTCTG

>PGSC0003DMG400009532-(rev)LRR-RLPs\_1512

TGCAGTTACTTGAACATAACAAGTCAATTAAGTCTAGTATAAGGATACTGAGATTCTGAAATTCTTTTCGCG  
TCCCCCAAAGCTGTTTATTTTAAAAAATTGCGAGAATATATGTGAAA

>PGSC0003DMG400009532-(rev)LRR-RLPs\_1575

TTTCGCGTCCCCCAAAGCTGTTTATTTTAAAAAATTGCGAGAATATATGTGAAAATTTTCGGGTTAAT  
AATTATTGGATTGTGCTTTGTCTCTGCGGCTAGTGGATAAATTTGAAGTT

>PGSC0003DMG400009532-(rev)LRR-RLPs\_1638

GGTTAATAATTATTGGATTGTGCTTTGTCTCTGCGGCTAGTGGATAAATTTGAAGTTATATGTAGCTGGT  
TAACTCAAAAAAATATGTTGTTAACAACAAGACAACGAAATCAGGGTCA

>PGSC0003DMG400009532-(rev)LRR-RLPs\_1701

AGCTGGTTAACTCAAAAAAATATGTTGTTAACAACAAGACAACGAAATCAGGGTCATAAGATTGTATT  
GAAAATTGCACTTCTTAACAAGCCGTGCATGCTACATTTGCAGCAATAACT

>PGSC0003DMG400009532-(rev)LRR-RLPs\_1764

TGTATTGAAAATTGCACTTCTTAACAAGCCGTGCATGCTACATTTGCAGCAATAACTCTACTAGAAAAGA  
GACTGGTGTCTTGATATTTGTTTTCATGACTGATTCTTTATGAAGACAG

>PGSC0003DMG400009532-(rev)LRR-RLPs\_1827

GAAAAGAGACTGGTGTCTTGATATTTGTTTTCATGACTGATTCTTTATGAAGACAGTTTTTATATTCATG  
CGTTTGTGATTGTCAATACTTATTGACTTTTCTGGTTTTACAGTTTAT

>PGSC0003DMG400009532-(rev)LRR-RLPs\_189

GTTGTGCATCAAACCCTAGAAAATCGTCGAAAGCTGAAGATTGCCGTACACAAGTGTGGCTACCATTA  
ACGATTGGATCTCATGAGGTATACAATTGTTGGATTGATACTTGTAGTT

>PGSC0003DMG400009532-(rev)LRR-RLPs\_1890

TATTCATGCGTTTGTGTATTGTCAATACTTATTGACTTTTCTGGTTTTACAGTTTATATATGAAGATGCATT  
AGATGAAGATGAGAAGCCTTGTGTACATCTCAACCTTGGAATGTTG

>PGSC0003DMG400009532-(rev)LRR-RLPs\_1953

AGATGCATTAGATGAAGATGAGAAGCCTTGTGTACATCTCAACCTTGGAATGTTGGAGGCATAAGTT  
AAAGCAAGTCAAATACAAAACATTACATGTATGGAACAAAAACAGGAGTT

>PGSC0003DMG400009532-(rev)LRR-RLPs\_2016

TAAGTTAAAGCAAGTCAAATACAAAACATTACATGTATGGAACAAAAACAGGAGTTGAGAACTACTT  
GTACGCAAACCCAGATATCCCGGAGATAATTGAGGTTCTGGCCCAGTATT

>PGSC0003DMG400009532-(rev)LRR-RLPs\_2059

CAAAAACAGGAGTTGAGAACTACTTGTACGCAAACCCAGATATCCCGGAGATAATTGAGGTTCTGGC  
CCAGTATTCATCGATCCACAGTATTCATCCACAGATTCGTAATTGGATAA

>PGSC0003DMG400009532-(rev)LRR-RLPs\_252

CCATTAACGATTGGATCTCATGAGGTATACAATTGTTGGATTGATACTTGTAGTTTGTAAATATCAAAG  
AACTACATCTATCAATTAATCTCATCTTTACAAATTGCCTGAGATGATC

>PGSC0003DMG400009532-(rev)LRR-RLPs\_315

ATCAAAGAACTACATCTATCAATTAATCTCATCTTTACAAATTGCCTGAGATGATCTTTAATGCAAAGC  
CCTAAATGTGCTGAGGCTGATTGGATTTAACATTATTGAATTGCCTTGT

>PGSC0003DMG400009532-(rev)LRR-RLPs\_378

GCAAAAGCCCTAAATGTGCTGAGGCTGATTGGATTTAACATTATTGAATTGCCTTGTAAGTATAAATT  
TGCCATCTCTGCGAGAGTTTTATCTTGACAGTGTAATTTTGGACGACAAC

>PGSC0003DMG400009532-(rev)LRR-RLPs\_441

ATAAATTTGCCATCTCTGCGAGAGTTTTATCTTGACAGTGTAATTTTGGACGACAACCTTCTCGAGCTAT  
ATGCACAACCTGTTCTAATTTAGTGGTTTTGTATTTGGTGGGCTGTCAT

>PGSC0003DMG400009532-(rev)LRR-RLPs\_504

CGAGCTATATGCACAACCTGTTCTAATTTAGTGGTTTTGTATTTGGTGGGCTGTCATGGATTTAACAGTTT



GCAAGTTGGTGAAAATTTACCTAAACTGAAAAAATTGAAATTGGAATAT

>PGSC0003DMG400009532-(rev)LRR-RLPs\_567

AACAGTTTGCAAGTTGGTGAAAATTTACCTAAACTGAAAAAATTGAAATTGGAATATTCTTATCATCAAG

TCCAATTCGTTGATATTAGTTCAACTAATCTTGAACAACTTACCATCTAC

>PGSC0003DMG400009532-(rev)LRR-RLPs\_63

AAAAATGTTGCACAATTAAGTATGTTGTCCAAGACTTGGAACAAGGTTTGCAATTCAATCTCCTATTTGA

AATTTGATGGTGATTTTTTTCTTTACGCCATCAAATACAAACCAAAGCTG

>PGSC0003DMG400009532-(rev)LRR-RLPs\_630

CATCAAGTCCAATTCGTTGATATTAGTTCAACTAATCTTGAACAACTTACCATCTACGGCAATTGTGATTA

CCTAAAGGCAGTTGAAATAACTGCTTCTAAAGCCCTTAAGACTCTGTAC

>PGSC0003DMG400009532-(rev)LRR-RLPs\_693

TGTGATTACCTAAAGGCAGTTGAAATAACTGCTTCTAAAGCCCTTAAGACTCTGTACCTCCAGCGTGTGC

CGATAACCCAAAAAATTCTTTCTTGCCTTGGAATCTAGACAAGTGTGAG

>PGSC0003DMG400009532-(rev)LRR-RLPs\_756

CGTGTGCCGATAACCCAAAAAATTCTTTCTTGCCTTGGAATCTAGACAAGTGTGAGTTATTTTTTTGCCA

CACATTGAAGACTCTAAAGATTGCAAGTTTCCTGCTCAAACAGCTGACG

>PGSC0003DMG400009532-(rev)LRR-RLPs\_819

TTTTGCCACACATTGAAGACTCTAAAGATTGCAAGTTTCCTGCTCAAACAGCTGACGGTACATCAATGTC

CTAACCTAATCGCTGTTGAATTAGACTCCTAATTTGATAAGGTTTTCG

>PGSC0003DMG400009532-(rev)LRR-RLPs\_882

CAATGTCCTAACCTAATCGCTGTTGAATTAGACTCCTAATTTGATAAGGTTTTCGTACAATTGTCATTC

ATTGCCAACCTGCAACTGAAAGCTTCAGCTTCAGCTTCATTGGAAGCA

>PGSC0003DMG400009532-(rev)LRR-RLPs\_945

TGTCATTCATTGCCAACCTGCAACTGAAAGCTTCAGCTTCAGCTTCATTGGAAGCAAAAATTTGCTTTGT

CTCAGGAACCACTGACAGTGATGTCACAAAATTTCTTGCTAACTTCAAT

>PGSC0003DMG400009561LRR-RLKs\_0

AAAAATAATATTCTTTCTCCACCTTTCTTTTGGCTTCAAACCTACATAAAAAGGTAGCATTCTTTCATTTG

TAGGAGCCCTTTGAGAGGGCGCGCACCTGCAAGTGCGCGCACCAGAAA

>PGSC0003DMG400009561LRR-RLKs\_1054

ATCTCTTTAGAATTATAAAAGAATTGTCTTAATAGAAACCAACAACACTTTTTTTTTTTTTTTGAGAAAAAA  
AATAACTTGATAGACAATCCTCTCTTCTTTCAAGTTCTTGTGAAAG

>PGSC0003DMG400009561LRR-RLKs\_1116

GAGAAAAAAATAACTTGATAGACAATCCTCTCTTCTTTCAAGTTCTTGTGAAAGGATTCATAGAAC  
AAACTTCTGTAACAGGTACGCGATTTTACTATGGCTTAATTAATATG

>PGSC0003DMG400009561LRR-RLKs\_1178

TCATAGAACAACTTCTGTAACAGGTACGCGATTTTACTATGGCTTAATTAATATGATGTATGTAGTT  
CGTCTTTATATGTGATTACATCTAGTGAAACCAAATTCAGTATTGATATA

>PGSC0003DMG400009561LRR-RLKs\_1240

ATGTAGTTCGTCTTTATATGTGATTACATCTAGTGAAACCAAATTCAGTATTGATATATTATCTAACTAAA  
CATAAGTATTTTTCTTCTTCTTCTTATAAAATAGGCAATGATGGTC

>PGSC0003DMG400009561LRR-RLKs\_1302

CTAACTAAACATAAGTATTTTTCTTCTTCTTCTTATAAAATAGGCAATGATGGTCTTTGTGGTCCTCCT  
TTAGCAAATCATGCAATAAGGAAGATGAACAAAAAAGCAAGAATCA

>PGSC0003DMG400009561LRR-RLKs\_2356

TAAGTTTTCAAATTGTGACATTCTACTTGCTTAGTTAAGATCACAAAATTAATAAAAAAAAAAATCTTTATT  
TTTTTAAACCTATTTACTCACTTAGATTAAGACACTTAAATTGAAAG

>PGSC0003DMG400009561LRR-RLKs\_2418

ATCTTTATTTTTTTAAACCTATTTACTCACTTAGATTAAGACACTTAAATTGAAAGGAAGGATGTACTC  
CCTGCATCTATCTTTACTTGCCAGTATATGGGATGTCCAATAATACTT

>PGSC0003DMG400009561LRR-RLKs\_3596

AATAAGTGATAGAAAAATGAAGTACTTAATTTTTGTTTGCATATTGTAATTTGCCTTTATGAATCTAT  
AGTCTAGGTGTGTTTCTTTATTTATTTTATTATTTCATTCATCAAGCT

>PGSC0003DMG400009561LRR-RLKs\_62

CTTTCATTTGTAGGAGCCCTTTGAGAGGGCGCGCACCTGCAAGTGCAGCGCACCAGAAAAAACA  
AAAAGTTTTAAAAATAAAGAAGACTGTCTCTTCTCTATGCAATCATGG

>PGSC0003DMG400009561LRR-RLKs\_744

GTTTGAGGGTCCAATTCCTCCTTCTATTACATCTATATTTTCTGCTTATGATGGTAATTCCTACCTCTT  
TCCTTTTTATATTTCAATTAATTATTGTGTCCAATGAATTAACACTT

>PGSC0003DMG400009561LRR-RLKs\_806

CCTACCTCTTTTCCTTTTTATATTTTCATTAATTATTGTGTCCAATGAATTAACACTTTTTTTGTTTATCATCA  
TTATGCCATGTTTTCTTCCAATCCTAGATCATTAAAAAGATCATA

>PGSC0003DMG400009561LRR-RLKs\_868

TGTTTATCATCATTATGCCATGTTTTCTTCCAATCCTAGATCATTAAAAAGATCATATCATTGGCTACATA  
ATAAACAAAAGATCATTAGATTCGGGTCATCCATGTGTGTCAACTCGG

>PGSC0003DMG400009561LRR-RLKs\_930

TGGCTACATAATAAACAAAAGATCATTAGATTCGGGTCATCCATGTGTGTCAACTCGGATCCATGTAAAT  
AATAAGGGAAGAGACACAACACTATTCAGATTATTTCTGAAAAGTAGTAGTA

>PGSC0003DMG400009689RLKmalectin\_2728

TGAAGGAAGATAAATTTGGTGAAAGATTGTATACAATTGTA CTCTTTTTTTCTTAGCTCCTCTTTTAATTC  
CACTTTTTTGTTTCAATCATGTGAAGATTGTA CTTTATTTTTTAA

>PGSC0003DMG400009689RLKmalectin\_2771

CTTTTTTTCTTAGCTCCTCTTTTAATTCAC TTTTTTGTTTCAATCATGTGAAGATTGTA CTTTATTTTTT  
TAAACTATAGTTTTACATGTA CTACAATATAAAAATTATTCCAGCA

>PGSC0003DMG400009689RLKmalectin\_434

TTAGCTGATAGTACAAGGTCTAGTGATTCACCCCTTATCAAACCGCTAGAGTTTTTACCCAACTTCTAG  
TTATAAATTCCTATTACTAAAGTTGGAAGGCATTGGATCCGCTTCAT

>PGSC0003DMG400009689RLKmalectin\_62

CTTTACTACCCCTCCCAAATAAAATAAAATAAAATAAAAAGCTTGATTTGGCTTCTATTCACCCATTC  
CAAATCTGGGCAATCTCATTCTTGGAGCATATTTAATCAAAAAGGTTCA

>PGSC0003DMG400009689RLKmalectin\_868

GGGTGGACCAGCTGTATCGTCTGAAAACGATACATTATGGAGGAGTTGGGTGCCTGATCGGGGGTACT  
TGACACAGCCGGATTTTGCAAAGTCCTTGTCGAAGATTGGATCTGTTAAGTA

>PGSC0003DMG400009689RLKmalectin\_930

GGTACTTGACACAGCCGGATTTTGCAAAGTCCTTGTCGAAGATTGGATCTGTTAAGTATTTAGTGGGTG  
GAGCAACATCAGATATAGCACCCGAGTGTTTATGGTACTTGTACTAAGA

>PGSC0003DMG400009755LRR-RLPs\_0

ATGGACAAACCAAGTTATAAAGGAGATGGATATTACCAAGACTCGGTAGTTGTTGTATCAAAGGGATTG

AAGCTTGAAGTTGTGAGAATTTTGTCTTTGTACACAGTTATAGATCTTTCA

>PGSC0003DMG400009755LRR-RLPs\_1008

GAATAAGAAGATGTTGGCGTAATGGATTTGATTTTAGTTTCTTTTAGTTTAATAAGTAAGCTTCTTCTTA  
ACTTGGAAAATGTCATATTATGAATTTTTGATGATATATAAAGTTTATT

>PGSC0003DMG400009755LRR-RLPs\_1071

TCTTCTTAACTTGGAAAATGTCATATTATGAATTTTTGATGATATATAAAGTTTATTTAAGTTTCTAATGTT  
ATTCAATAAATGTTGTGTGATTGAATGAAATGTATACATTTCTCTGA

>PGSC0003DMG400009755LRR-RLPs\_1134

TCTAATGTTATTCAATAAATGTTGTGTGATTGAATGAAATGTATACATTTCTCTGATCCCTAACTTACAAT  
TCAAAGAATCTAGGAGGGACTTAGTCATGAATAAATTTTTGAACAAG

>PGSC0003DMG400009755LRR-RLPs\_1197

ACTTACAATTCAAAGAATCTAGGAGGGACTTAGTCATGAATAAATTTTTGAACAAGCTGAAGAATGTGT  
TATCTTGTCCCTATTTAGCTCGAGAAAGAAGTGAAGTCAGAGTGTTGGGT

>PGSC0003DMG400009755LRR-RLPs\_1260

AATGTGTTATCTTGTCCCTATTTAGCTCGAGAAAGAAGTGAAGTCAGAGTGTTGGGTGTCCCTGGATTGC  
TCACTGCTGCCTCAACGTGTGCTGAGGTTTTGCAGCAGTCTAAAGAGAGA

>PGSC0003DMG400009755LRR-RLPs\_1323

GGATTGCTCACTGCTGCCTCAACGTGTGCTGAGGTTTTGCAGCAGTCTAAAGAGAGAGCGTTGAGAAGA  
GCTAAATTAGAGGAAGATATTTATCGTGTGATAGAGGAAAGAGCATTAAACA

>PGSC0003DMG400009755LRR-RLPs\_1383

TTGAGAAGAGCTAAATTAGAGGAAGATATTTATCGTGTGATAGAGGAAAGAGCATTAAACAAGGAAGAA  
TAACGAGTTCGTGACAAGTGATTACATTTACTGGCCAAGGGAATTGCTTTAA

>PGSC0003DMG400009755LRR-RLPs\_189

TTCATAATGGATTGCAAGGTCCTATACCACCATCACTTGGGAAGCTTATCTGTAGTGGAATCACTGGACC  
TTTCGTTTAAACCATCTTTCGGGAGAGATACCACAACAACCTTGCTTCTCTT

>PGSC0003DMG400009755LRR-RLPs\_63

GGATTGAAGCTTGAAGTTGTGAGAATTTTGTCTTTGTACACAGTTATAGATCTTTCAAACAACAAATTTG  
AAGGACATATTCCTGGTATTCTGGGAGATCTCATTGCGATTCCGGTACTG

>PGSC0003DMG400009755LRR-RLPs\_630

TCATTGAAGAACTGGAACACAAAATTATCATGCAAAGGAGAAAGAAGCGGCAAAGTCAAAGGAACTAC  
AGAAGAAGAGATAATCATTCTAGACAAGTTACCAATAAAGAAGGATTTCGAT

>PGSC0003DMG400009755LRR-RLPs\_693

ACTACAGAAGAAGAGATAATCATTCTAGACAAGTTACCAATAAAGAAGGATTTCGATTTCAGAACTTCA  
GGTATTCAAGCTAAGATCTACACTATCTTTATTAGTTTATTCTAACTACTA

>PGSC0003DMG400009755LRR-RLPs\_756

ACTTCAGGTATTCAAGCTAAGATCTACACTATCTTTATTAGTTTATTCTAACTACTAATATATTAGTTTACA  
CGTTTTTTGTTAATAACAACAATAATGCTCAATATGAAGCATA

>PGSC0003DMG400009755LRR-RLPs\_819

TAGTTTACACGTTTTTTGTTAATAACAACAATAATGCTCAATATGAAGCATATTCGTGTTTCTTTCA  
ACTTCAAGAAGCTAAAGATTTGAAAAGCTTGGCAGTTGTTATAACAGT

>PGSC0003DMG400009755LRR-RLPs\_882

TTTCTTTCAACTTCAAGAAGCTAAAGATTTGAAAAGCTTGGCAGTTGTTATAACAGTGGCTACTAAATTC  
AATCAGTGATCAACTCTCAAGTATTTGACTCACTATCTTATTTTTTCAGA

>PGSC0003DMG400009755LRR-RLPs\_945

TAAATTCAATCAGTGATCAACTCTCAAGTATTTGACTCACTATCTTATTTTTTCAGATGCCAAGAATAAGA  
AGATGTTGGCGTAATGGATTTGATTTTAGTTTCTTTTTAGTTTAATAAG

>PGSC0003DMG400009843LRR-RLKs\_1054

TTCTTATTAGTCCTCCACCTCAGCACAAACACAAAAAGTTGGTGTCGTTTTGGGTTTTGTAGTTGGAACA  
TTGATTTTGATTGCAGCTGTTCTCTGTCTTTTTGCTTTTGTGAAAAAGA

>PGSC0003DMG400009843LRR-RLKs\_124

CCAGTCCATTTTTAGACCTCCTTTCACGCACAAAATGACAACAACAACACTAACTTGGCCACTAGTCA  
ACTAAACCAATCACTCGACATTTTTAGTTGCATAACTTGCAATGTCTC

>PGSC0003DMG400009843LRR-RLKs\_1612

GGCTTGTTATCTATGATTATCAGCCTAATGGCAGTCTCTTCAATCTAATTCATGGTAAAGTTTCTAACTTTT  
TAATATATCATTACTAGTTCTACAAATTATTCATCTGAAATGGATCAA

>PGSC0003DMG400009843LRR-RLKs\_1674

TCTAACTTTTTAATATATCATTACTAGTTCTACAAATTATTCATCTGAAATGGATCAATGTTTATTTTTATT  
TTTGGTAATTCTGCTAATTGGTCAATGTGAAGTCAATTTGGTGGACC

>PGSC0003DMG400009843LRR-RLKs\_1798

ATGGAGAAAAAAGTGGAAGAGTGAGTTGTCTGTGGCTACTGGCTAATCACTATCTAGCTTCTTTTTTTTT  
TCTTTACAGAAATTAGTTGTAGTGTTTTGGATCTTTCAGTGGTTGCTATG

>PGSC0003DMG400009843LRR-RLKs\_186

CACTAGTCAACTAAACCAAATCACTCGACATTTTTAGTTGCATAACTTGCAATGTCTCCATTGATGCTTCT  
GCTCTGTTTTCTTCTCAACTAATCTACAGTTTCTACTTTTGTTCTTCT

>PGSC0003DMG400009843LRR-RLKs\_2232

AAATGTTCTCTGTTTCTTAAATATTAATTTACTCAAGTGAACGTTAACGTTGTTAGATAGAAGGATTAAG  
GGAAAGAACTAGAACATCCTTGGGAATTCTTAATGTAGTGACAGAAATG

>PGSC0003DMG400009843LRR-RLKs\_2294

AGGATTAAGGGAAAGAACTAGAACATCCTTGGGAATTCTTAATGTAGTGACAGAAATGGTATGAATTTG  
CTTAATTTACATTATTTTGAATCCTAGGTATTGCATTTTTTGTATCCCCTT

>PGSC0003DMG400009843LRR-RLKs\_2356

GAATTTGCTTAATTTACATTATTTTGAATCCTAGGTATTGCATTTTTTGTATCCCCTTGTGATACGCTATCA  
AGAAATTGGAATTTCACTTTCATAGATTACTCTGCTCAAGAAGATTGA

>PGSC0003DMG400009843LRR-RLKs\_2418

TACGCTATCAAGAAATTGGAATTTCACTTTCATAGATTACTCTGCTCAAGAAGATTGATTCCTCTATATAA  
TTCTGTGTGTTAAGTGTTGGTCTTTTACCTAAATCCTGATAATCTG

>PGSC0003DMG400009843LRR-RLKs\_248

GATGCTTCTGCTCTGTTTTCTTCTTCAACTAATCTACAGTTTCTACTTTTGTTCTTCTTCTGCTGCTGCT  
GCTACCTCTACCCCTTCTGCTCCATTCAACTCTTTGCTTCCCTCCGA

>PGSC0003DMG400009843LRR-RLKs\_2852

CACGCCTGGGTCTGACGTATATGCCTATGGCATTCTGTTATTAGAGCTTTTAACGGGCAAACCTCCATCTC  
AGCATCCACATCTCTCTCCCCTGATGTACCGGATTGGGTTAGAGCTAT

>PGSC0003DMG400009843LRR-RLKs\_310

CTGCTGCTGCTGCTACCTCTACCCCTTCTGCTCCATTCAACTCTTTGCTTCCCTCCGACGCTGTTTCGTTATT  
GTCATTCAAGTCAAAAGCTGACCTTGACAACAAGCTTCATTACACAC

>PGSC0003DMG400009843LRR-RLKs\_3162

CTGAATTGCAGTTACACCATTAATCAGCGAGGGTACATGGTCAATTGTAAGTAAGTGCATCTCCCCTT

GGCAAAGTGCCATTGATCGACAACATATCTGTAATTGAGTTTTTTCCAGA

>PGSC0003DMG400009843LRR-RLKs\_3224

TCCCCCTTGCAAAGTGCCATTGATCGACAACATATCTGTAATTGAGTTTTTTCCAGATAGACCAAATGA  
CTTATCAACTATAATGGTGCTTGTACCTTCACTACTCAGCAGTAAACACC

>PGSC0003DMG400009843LRR-RLKs\_3286

CCAAATGACTTATCAACTATAATGGTGCTTGTACCTTCACTACTCAGCAGTAAACACCTAAAAGTACAG  
GTTAAGGTCTATCTGCTAGAACATGGTCAACTTAGTCACTGAAGATTATG

>PGSC0003DMG400009843LRR-RLKs\_3348

ACTGACAGGTTAAGGTCTATCTGCTAGAACATGGTCAACTTAGTCACTGAAGATTATGACACATTTTGT  
CCCCCTGTCGAAATCCCTCTTTTTTGGTCACACAAACATATGGTGCCTAT

>PGSC0003DMG400009843LRR-RLKs\_558

CAACTCCGAATACTCAATCTTAGGAATAACTCACTTTCCGGTCTATTCTGATCTTTCGGGTCTTCCTAAC  
CTGAAAAGTCTGTTTCTTGATCATAATTTTTTCTCCGGAAGTTTCCCC

>PGSC0003DMG400009843LRR-RLKs\_620

TCTTCTAACCTGAAAAGTCTGTTTCTTGATCATAATTTTTTCTCCGGAAGTTTCCCCTTTTCTGTTCTTCT  
ATTCACCGTCTTGTTATTCTTGATCTTCTCGTAACAATCTCACTGG

>PGSC0003DMG400009843LRR-RLKs\_930

CGGAACCCTAGTCTTTGTGGTGAGGTTGTTGATAAGCCGTGCCGTTCCGGCACCGTTCTTTGATTGCCTT  
CCTCTGCTGCCTCTCCGCCACACCGTTATACCAAACGCACAGTCGCAG

>PGSC0003DMG400009899LRR-RLPs\_122

CAGAGCTATGAATTCAGACATACTTTGTGATGAAAATGAAAAAATGCTCTTATCAAGTTCAGACAGGG  
TTTCAGGGATCCATCACAGTCAATGATCATGTCTGCTTGGATGGTCGAGGA

>PGSC0003DMG400009899LRR-RLPs\_1220

GATGCCTCCTTTTCAACTTGACATTATTGGCCTGATGTCTTGCCAACTTGGTACACAGTTTCTCAGTGGC  
TTCATACACAAAAGGATTACTCATTTATCGATATCTCTCATGGTAGCAT

>PGSC0003DMG400009899LRR-RLPs\_1281

CCTCAGTGGCTTCATACACAAAAGGATTACTCATTTATCGATATCTCTCATGGTAGCATCTCAAATGAAGT  
GCCTGATTGGTTCTGGAGTCTCTGCAAAGGTACAGCACATGAACCTT

>PGSC0003DMG400009899LRR-RLPs\_1342

CAAATGAAGTGCCTGATTGGTTCTGGAGTCTCTCTGCAAAGGTACAGCACATGAACCTTTCTCTCAACTA  
TTTCAGAGGGGAAGTACCTCAAGTTACATCAAGACTTGATAGTCTTGAAA

>PGSC0003DMG400009899LRR-RLPs\_1403

TCTCAACTATTTTCAGAGGGGAAGTACCTCAAGTTACATCAAGACTTGATAGTCTTGAAAACTAGACCTG  
AGCCAAAACAACCTTTTCTGGTCCTTTACCTCATTTTTTCGTCCAAGATGAA

>PGSC0003DMG400009899LRR-RLPs\_1525

TGTTGATTTTGTCCCGGAATTCTTTAATGGCGCCATTTCCCTGTATGTGAATCACTTGTCATGAATAATT  
CTCTTATGTTTTAGACCTATCGTTCAATAATCTATCAGGAACACTTT

>PGSC0003DMG400009899LRR-RLPs\_1586

CATGAATAATTCTCTTATGTTTTAGACCTATCGTTCAATAATCTATCAGGAACACTTTCAGACTGTTGGA  
GATATGGGAACAATCTGGCAGTATTAAAGTTAGGCTATAATAATCTGTC

>PGSC0003DMG400009899LRR-RLPs\_1708

GTGAAATACCTCATTCTTTTGGATATCTTGAAACTCTCAGGTATCTGCAACTGAAAAACAACAGGCTGTC  
CAAAAATCTGCCTTCATCACTGAAGAACCTACAAGGACTAAAAATTCTTG

>PGSC0003DMG400009899LRR-RLPs\_1769

CAGGCTGTCCAAAATCTGCCTTCATCACTGAAGAACCTACAAGGACTAAAAATTCTTGATCTTTCCGGA  
AATTGTTTATCTGGAAAGATACCATCTTTCTTAGGGGAGACTTCACAAAA

>PGSC0003DMG400009899LRR-RLPs\_183

AGACAGGGTTTCAGGGATCCATCACAGTCAATGATCATGTCGTCTTGGATGGTCGAGGAAAATTGCTGC  
AACTGGAAAGGTGTTGAATGTGACAACACAACCGGATACGTGATCACTCTT

>PGSC0003DMG400009899LRR-RLPs\_1830

CTTTCCGGAATTGTTTATCTGGAAAGATACCATCTTTCTTAGGGGAGACTTCACAAAATCTATTGGTTCT  
TTTGTTAAGAAAGAACAAGTTCGATGGAAACATTCCCCTACAGATTTGC

>PGSC0003DMG400009899LRR-RLPs\_1891

TATTGGTTCTTTTGTAAAGAAAGAACAAGTTCGATGGAAACATTCCCCTACAGATTTGCCAGCTCAAAAA  
CTTGATTATTTTGGACCTTAGTTCCAATTCTCTATCAGGCACCATTTCAA

>PGSC0003DMG400009899LRR-RLPs\_1952

GCTCAAAAACCTTGATTATTTTGGACCTTAGTTCCAATTCTCTATCAGGCACCATTTCAAAGTGTGTTAAAA  
ATTTCTAATGATGGCTGGGGTAGAGGAGCTCCCTTCCTTGTTTATGG



>PGSC0003DMG400009899LRR-RLPs\_2013

TGTGTAAAAATTTCTAATGATGGCTGGGGTAGAGGAGCTCCCTTCCTTGGTTTATGGTCCCTATGAAG  
AATACAGGAAGGATGTGGCGTTGATGCTAAAAGAGAGAGGCTATGATTAT

>PGSC0003DMG400009899LRR-RLPs\_2074

CCTATGAAGAATACAGGAAGGATGTGGCGTTGATGCTAAAAGAGAGAGGCTATGATTATAGTTTTGCCT  
TTATGGCGGTGATTGATCTATCAGATAACCATTTATCAGGGGAAATTCCTG

>PGSC0003DMG400009899LRR-RLPs\_2135

TTTTGCCTTTATGGCGGTGATTGATCTATCAGATAACCATTTATCAGGGGAAATTCCTGAGGAAATCACC  
ACACTTGTTCAATTGCAGGTATTGAATTTATCAAGGAATAATTTAACTGG

>PGSC0003DMG400009899LRR-RLPs\_2196

GAAATCACCACACTTGTTCATTGCAGGTATTGAATTTATCAAGGAATAATTTAACTGGAGCAATTCCT  
GTAAGATTAGTAAAATGCAATCTTTGGAAGCTCTTGATGTTTCCTGGAAT

>PGSC0003DMG400009899LRR-RLPs\_2257

CAATTCCTTGTAAGATTAGTAAAATGCAATCTTTGGAAGCTCTTGATGTTTCCTGGAATCGTCTGTCATCC  
TTCTTGCTTCCAGCATAGTGGAGCTTTCCAGGCTCGAGATCGCGAATT

>PGSC0003DMG400009899LRR-RLPs\_2318

TCTGTCATCCTTCTTGCCTTCCAGCATAGTGGAGCTTTCCAGGCTCGAGATCGCGAATTTTTCGTTCAATA  
GTTTGACAGGAAAAATTCCAATAGGTGGTCAATTTTTAACCTTTGAAAA

>PGSC0003DMG400009899LRR-RLPs\_2379

TCGTTCAATAGTTTGACAGGAAAAATTCCAATAGGTGGTCAATTTTTAACCTTTGAAAATAGTTCTTATAT  
TGGGAATCCAGATTTGTGTGGCATGCCACTTTCCAAAAGCTGCTCGGGA

>PGSC0003DMG400009899LRR-RLPs\_244

ATTGCTGCAACTGGAAAGGTGTTGAATGTGACAACACAACCGGATACGTGATCACTCTTGACCTGCACC  
AGCAATTCTTGCAAGGTGAGTTTGGGACTTACTTGCTTGGCTTGTCTCATT

>PGSC0003DMG400009899LRR-RLPs\_2440

GTTCTTATATTGGGAATCCAGATTTGTGTGGCATGCCACTTTCCAAAAGCTGCTCGGGACATTTTCTTGA  
GGACATTACTCACTGTAACTCTCCAAGAAAAAAGACGTGCAGGCCATTC

>PGSC0003DMG400009899LRR-RLPs\_2623

TCATCACAAGTTTCTGGTTATTTGGGCTACTCTATTAGTGAAAACATCTTGGAGACATTCCTATATGAGG

TATCTTAATAAAATGGGCAACAATATTTATGTGTTTGTAGCCATAAGAT

>PGSC0003DMG400009899LRR-RLPs\_2684

CTATATGAGGTATCTTAATAAAATGGGCAACAATATTTATGTGTTTGTAGCCATAAGATTACCAAATAAG

CATAAACCATCAAAGATGAAAGATTGAAGTTCTTTCAGGGATTGCTGAAT

>PGSC0003DMG400009899LRR-RLPs\_2745

CCAAATAAGCATAAACCATCAAAGATGAAAGATTGAAGTTCTTTCAGGGATTGCTGAATAAGGTAATGA

AGGTCTTATTTCTGGTGCAACTTTCTTTTGTGTTTTGTTTTCTAGGAGCT

>PGSC0003DMG400009899LRR-RLPs\_2806

GGTAATGAAGGTCTTATTTCTGGTGCAACTTTCTTTTGTGTTTTGTTTTCTAGGAGCTCTTCTGGTTTTGT

TTTTGTAAAATCTTCTAAGTACTATATTGTGTATGCCTAGTTGCATTG

>PGSC0003DMG400009899LRR-RLPs\_2867

TCTGGTTTTGTTTTGTAAAATCTTCTAAGTACTATATTGTGTATGCCTAGTTGCATTGTTTCATCTCGTGG

GATTGTACTAGGTATGTTGTTGTTGTAGTCATAATTGTATTCTATGAT

>PGSC0003DMG400009899LRR-RLPs\_2917

GTTGCATTGTTTCATCTCGTGGGATTGTACTAGGTATGTTGTTGTTGTAGTCATAATTGTATTCTATGATA

TGTTTTGTGGATATCTAAGTAACTTGAGAATACTATTACTAATGTTTT

>PGSC0003DMG400009899LRR-RLPs\_305

CCTGCACCAGCAATTCTTGCAAGGTGAGTTTGGGACTTACTTGCTTGGCTTGTCTCATTTAAGACACTTAG

ACTTAAGCCAAAATGATTTCTTGAGGCCTTGTTTCTGATTTCAATTTG

>PGSC0003DMG400009899LRR-RLPs\_366

AGACACTTAGACTTAAGCCAAAATGATTTCTTGAGGCCTTGTTTCTGATTTCAATTTGCAAATTTAAGTA

CCTAGAGTATCTCAATTTGCACAAAACCAAGTTTAGGGGATCAATCCCT

>PGSC0003DMG400009899LRR-RLPs\_427

AATTTAAGTACCTAGAGTATCTCAATTTGCACAAAACCAAGTTTAGGGGATCAATCCCTGAGTGTCTTGG

AAATCTGTGCGGTTGCAGTTACTTGATCTTGGTGATGGTTTATCACTCC

>PGSC0003DMG400009899LRR-RLPs\_488

GTGTCTTGAAATCTGTGCGGTTGCAGTTACTTGATCTTGGTGATGGTTTATCACTCCGGGTTGATAGT

CTTGAATGGATTCAGCATCTTCCAATATGAGGATTCTTGACCTGAGTGG

>PGSC0003DMG400009899LRR-RLPs\_61

ATTTACTACTAGTCCTTCTTCTTGTAGCTAGTAGTACTATATTAGATGGATTGTTATTATGCAGAGCTATG  
AATTCAGACATACTTTGTGATGAAAATGAAAAAATGCTCTTATCAAGT

>PGSC0003DMG400009899LRR-RLPs\_915

ATCCGAGGAAAGCTTCCGTCTTTTGAGAACATGACTTCAGTTACTTCTCTTGATATCTCAAGGAATTCTCT  
TGTAGGCAAATAACCGCCAACCCTGCCTTCAAAGTTGAAACATTTGGAT

>PGSC0003DMG400009899LRR-RLPs\_976

GGAATTCTCTTGTAGGCAAATAACCGCCAACCCTGCCTTCAAAGTTGAAACATTTGGATCTTTCATCCAAT  
AATCTGGAGGGTCTTTAGCAAGAAGCATCGCACAACTTAGGCAATTAG

>PGSC0003DMG400009941-(rev)LRR-RLKs\_0

CTTCAAATACCCTTGAACCTATCCTAAAATTTGTACAAACCAGACTAAACTAACAGTGTAATAATGTCACT  
CCCCAAAAAATATCCCTTTTCTCAAATTTTCATTTTTTTTGTITTC

>PGSC0003DMG400009941-(rev)LRR-RLKs\_1037

AAGACTGAAAATCAAATTGTGTTGAAATACTCAATAGTAATAGTTGTTTCTTGAGTGACGTGCAGAGTGC  
CAGTATATAAGTAAAAAGTGAATGGAGTGAGAATATCATAAAAAGTTTCT

>PGSC0003DMG400009941-(rev)LRR-RLKs\_1098

GCAGAGTGCCAGTATATAAGTAAAAAGTGAATGGAGTGAGAATATCATAAAAAGTTTCTTTGAGAAAAA  
CTGTATTTATAGTGAATGATGTTAGAGTATGTGTTAATAGAGAGGTTTTT

>PGSC0003DMG400009941-(rev)LRR-RLKs\_1159

GAGAAAACTGTATTTATAGTGAATGATGTTAGAGTATGTGTTAATAGAGAGGTTTTTGTATAACATA  
GATGTATATGTGCAAAATATTATGTATATAAAGTTTTGAAGTCATATATCT

>PGSC0003DMG400009941-(rev)LRR-RLKs\_1342

CGCATACCTTCTGAACTATCTGGTTTAGAGAGTTTGATGTCGTTTGATTTGTCTTTAATCAACTGACCGG  
AGAAATACCAGAGAGTTTTGTGAAGTTGCAGAATTTGACATTGATTAAC

>PGSC0003DMG400009941-(rev)LRR-RLKs\_1464

GTTTAGAAACAACCTGCATGGTCCAATTCCCCCTTTTATTGGTGACCTTCAAATCTTGAAGTGTTGCAGA  
TTTGGGGAAACAATTTTACTCTTGAATTGCCCGAAAATCTTGGGCGTAA

>PGSC0003DMG400009941-(rev)LRR-RLKs\_1525

GTGTTGCAGATTTGGGGAAACAATTTTACTCTTGAATTGCCCGAAAATCTTGGGCGTAACGGGAGGTTTT  
TGTTTTCTTGATATTTCTATTAATCATTTTACTGGAAGGATACCACCTGAT

>PGSC0003DMG400009941-(rev)LRR-RLKs\_1586

GGAGGTTTTTGTCTTGATATTCTATTAATCATTTTACTGGAAGGATACCACCTGATTTGTGTAAAGGA  
GGGAAGTTAAAGACACTGATTCTAATGGAAAATTACTTCTTTGGTCCAA

>PGSC0003DMG400009941-(rev)LRR-RLKs\_1647

GTGTAAAGGAGGGAAGTTAAAGACACTGATTCTAATGGAAAATTACTTCTTTGGTCCAATTCCTGAACA  
ACTTGGTGAGTGCAAATCGCTTGCTCGAATTCGCGTTAGGAAGAATTACTT

>PGSC0003DMG400009941-(rev)LRR-RLKs\_1891

CTTCCAACAACCTGGATCACGGGAACATTCCTCCATCATTAGGGAACCTGAAGAATCTAGTCACTCTAT  
CACTTGATATGAACAGATTATCTGGTGAAATTCCTCAAGAAATTGCGAGT

>PGSC0003DMG400009941-(rev)LRR-RLKs\_1952

TCACTCTATCACTTGATATGAACAGATTATCTGGTGAAATTCCTCAAGAAATTGCGAGTTTGAATAAACTC  
GTGACCATCAACTTGAGTGGTAACAATTTAACAGGTGAAATCCCAAGTT

>PGSC0003DMG400009941-(rev)LRR-RLKs\_2013

GAATAAACTCGTGACCATCAACTTGAGTGGTAACAATTTAACAGGTGAAATCCCAAGTTCAATTGCGCTT  
TGTTCAAGAGCTAACATTGGTTGACTTGAGCAGAAACCAACTGGTTGGTGA

>PGSC0003DMG400009941-(rev)LRR-RLKs\_2318

ATTTTGTAGGAAATCCAAAACCTCTGTTCGCCTCATGCTACTTTTTGCCCGTCAGCTTCCAATTCACCACAA  
AACGCGCTCAAAATCCATTCTGGGAAGTTCACAACTATCCAATTGGTGA

>PGSC0003DMG400009941-(rev)LRR-RLKs\_3050

CATCAGAGTGCATGTCCTCTATTGCTGGCTCATATGGTTACATTGCTCCAGGTAAACTAATACGGTTACA  
ATATTTATCATATTTATAACAATTATGAATTTCCGTATTAGTTTTCTTTA

>PGSC0003DMG400009941-(rev)LRR-RLKs\_3111

ACGGTTACAATATTTATCATATTTATAACAATTATGAATTTCCGTATTAGTTTTCTTTTATTACTGGCTCATAT  
GGTCATCATATTTATAACAATTTGGTGGCATATAATGTAGTTACAGGT

>PGSC0003DMG400009941-(rev)LRR-RLKs\_3172

ACTGGCTCATATGGTCATCATATTTATAACAATTTGGTGGCATATAATGTAGTTACAGGTAAAAATTAATG  
ATAATCTTAAAATGTGATACTAATAACTTGCTATAATAGATTAAATTATG

>PGSC0003DMG400009941-(rev)LRR-RLKs\_3233

AAATTAATGATAATCTTAAAATGTGATACTAATAACTTGCTATAATAGATTAAATTATGATGATACTATGA

AGTTTGTATGCTATTGTGCATATAACCTTGAGCTATGTTGCTCAAACCTC

>PGSC0003DMG400009941-(rev)LRR-RLKs\_3294

GATACTATGAAGTTTGTATGCTATTGTGCATATAACCTTGAGCTATGTTGCTCAAACCTCTTAAAAAATGTC

AGTGGGGTACATGTCGGATCCTCCAAAAGTAATACTTTTTTGGAGGATT

>PGSC0003DMG400009941-(rev)LRR-RLKs\_3355

AAAAAATGTCAGTGGGGTACATGTCGGATCCTCCAAAAGTAATACTTTTTTGGAGGATTCGACACGGAT

GCAACATCATTTTTTTGAAGAATACAAGCAAATAGATCCTTAAGTCCTTTT

>PGSC0003DMG400009941-(rev)LRR-RLKs\_3416

ACACGGATGCAACATCATTTTTTTGAAGAATACAAGCAAATAGATCCTTAAGTCCTTTTATATACCTGTGT

TATTGGTCAATATTTTCCTATTTTCATGAAAGATACACTTCACTAACTTT

>PGSC0003DMG400009941-(rev)LRR-RLKs\_3477

ATACCTGTGTTATTGGTCAATATTTTCCTATTTTCATGAAAGATACACTTCACTAACTTTTAGTACCAATTAC

CAAGACCTATGAACTTTTAGAATTTACTGAACTGGGGTTAAAAATAGT

>PGSC0003DMG400009941-(rev)LRR-RLKs\_3965

GTGTTGAAGAAGAGAGTTGTGCTAGGCCTACCATGAGGGAAGTTGTTCCACATGCTTACAAATCTTCCTC

AGTCTACTACTACTCTCCTTGCCCTTTGAAATTGCGCGGATATCAAGT

>PGSC0003DMG400009941-(rev)LRR-RLKs\_4026

TCTTCTCAGTCTACTACTACTCTCCTTGCCCTTTGAAATTGCGCGGATATCAAGTGTCTGGTTGAAA

ACTCGTGGAGTTTGAGGCCGGGAACACGAGTCTCATGAGTCTATTTGGG

>PGSC0003DMG400009941-(rev)LRR-RLKs\_4148

CGGGGAACAAAAAATTGTGCAAGTAGAGATATGTATTTGAAATGTATTGCTTGTTTTATATTTTTGAA

GTTGTAGGCAAGTTGTTGTATAAAAAGGGGCATGAAAAAAGAAGGAAAA

>PGSC0003DMG400009941-(rev)LRR-RLKs\_4209

ATTTTTGAAGTTGTAGGCAAGTTGTTGTATAAAAAGGGGCATGAAAAAAGAAGGAAAAAACTCCTTT

AATTACTTATTATGGGTATTGAGTATGAATATGTGGCCTTAGGAAATAAAT

>PGSC0003DMG400009941-(rev)LRR-RLKs\_4270

ACTCCTTTAATTACTTATTATGGGTATTGAGTATGAATATGTGGCCTTAGGAAATAAATTTCAAGATGGC

AATTAGTCAATACTTGCTTTTAATAACATGGCCTATGTAATGTTCTTAAG

>PGSC0003DMG400009941-(rev)LRR-RLKs\_61

TAATGTCACCTCCCCAAAAAATATCCCTTTTCCTCCAAATTTTCATTTTTTTTTGTTTTCTCCATTAATGCAAA  
CTCTGATCTTGAAACCCTTTTGAAGCTCAAAGAATCCATGGTTGCTC

>PGSC0003DMG400009941-(rev)LRR-RLKs\_854

GAAGTTGCATACTTTGTTTCTACAAGTGAACAGACTTACAGGTATTCATGAACTCACTATTTGTTAATTAG  
TTATACAATCAAATCTATCTTTAATAACGTCGTTTGTCTGAATATATTC

>PGSC0003DMG400009941-(rev)LRR-RLKs\_915

TGTTAATTAGTTATACAATCAAATCTATCTTTAATAACGTCGTTTGTCTGAATATATTCTAGTTGCCATGGT  
TGAATATTGTTGTAGGAAACATATTTGTCACAAATCATTTTCCAAGAT

>PGSC0003DMG400009941-(rev)LRR-RLKs\_976

GTTGCCATGGTTGAATATTGTTGTAGGAAACATATTTGTCACAAATCATTTTCCAAGATGTAAGACTGAA  
AATCAAATTGTGTTGAAATACTCAATAGTAATAGTTGTTTCTTGAGTGAC

>PGSC0003DMG400010032RLKWAX-EGF\_0

TGGATATGCGCTGCGTGTGCGTAAAAGAAGCTTCTTCCCCGCTGTATTTTAAAGTCTTCCCTCCGTGTATC  
TCCGATTACTATTTGATAGCTTCATTGTTAGGAAATTAACCCAGTTTT

>PGSC0003DMG400010032RLKWAX-EGF\_1220

TCGGTGATGGCTTCCGCGACGGTGATGGGTGCCGTAAAGGTTAGTTCTTTTTTTTTCCAAGTGTTAAAT  
AGTTAATCTGCAACATTATTCACCTCCATGTTGTTGAATTGTGTGGATCA

>PGSC0003DMG400010032RLKWAX-EGF\_1281

TGTTAAAATAGTTAATCTGCAACATTATTCACCTCCATGTTGTTGAATTGTGTGGATCATCTTAATTTAAAT  
GTTTAAAGATAAGACCCCTTTATTTAATATATATAAAAAGAGATGGGAA

>PGSC0003DMG400010032RLKWAX-EGF\_1342

TTAATTTAAATGTTTAAAGATAAGACCCCTTTATTTAATATATATAAAAAGAGATGGGAAGTTCAAATGG  
AGATGTTAAATTTGAAGTTCAAATTCATAAAATCTTACTTTTATTCTA

>PGSC0003DMG400010032RLKWAX-EGF\_1403

TCAAATGGAGATGTTAAATTTGAAGTTCAAATTCATAAAATCTTACTTTTATTCTACATAACATATAT  
TTCGTTTCAATGATATTAATTTCAAATTTGAACTCAAGAGTTCCATCTA

>PGSC0003DMG400010032RLKWAX-EGF\_1464

TAACATATATTTGTTTCAATGATATTAATTTCAAATTTGAACTCAAGAGTTCCATCTACAGGTATTGATA  
GATATTTTAAATTTTAGTACTTGGAGACATATCATTAAATGGAAATGCCG

>PGSC0003DMG400010032RLKWAX-EGF\_1525

GGTATTGATAGATATTTTAAATTTTAGTACTTGGAGACATATCATTAAATGGAAATGCCGTGAACTCAA  
ATGTCTACTAAATTTGGTACATGGCAATTCAATAGAGACAACGTTTATTA

>PGSC0003DMG400010032RLKWAX-EGF\_1586

GAACTCAAATGTCTACTAAATTTGGTACATGGCAATTCAATAGAGACAACGTTTATTATATTAGGGGTA  
AAATTCAAAGTTAATTGCTAGATGGCCTAATTGTTGTTTACTATGGGCA

>PGSC0003DMG400010032RLKWAX-EGF\_2013

CTCATGCGACTTGGGTTGTGTTGATATTCTTTTGTACTCGAATTTATAGTCTCTAGCGGGTTTTTATTA  
AGATAAAAAATTTATTTACGAACAATTATGGGGGTTTCAGTTTTATCT

>PGSC0003DMG400010032RLKWAX-EGF\_2074

TTTTTATTAAGATAAAAAATTTATTTACGAACAATTATGGGGGTTTCAGTTTTATCTTATCATTCTAAT  
AAAGTAATGAATTTCTAGTAATTTATAAGTATGAAGAAAATAGATATT

>PGSC0003DMG400010032RLKWAX-EGF\_2196

ATGATCATTACCAATGAGAATGTTTATATGATGCAAAAATATAAAAGCTAAAAAAATGAGTTTTCAA  
CTCAAACCTCCTTTAACAAATGTATATTTAACTTTTTCACATTCCATCAA

>PGSC0003DMG400010032RLKWAX-EGF\_2257

GTTTTCAAACCTCAAACCTCCTTTAACAAATGTATATTTAACTTTTTCACATTCCATCAAAAAAATTGGAAA  
AAATAAATTTCTTTAAAAATGACATTCTAGTCTACTGTGTTCTCCTCA

>PGSC0003DMG400010032RLKWAX-EGF\_2318

AAATTGGAAAAAATAAATTTCTTTAAAAATGACATTCTAGTCTACTGTGTTCTCCTCACCTTTTCATATTC  
ACCCACAGTTTCCATTCCCATTACCCTACATATTAGTTTAGATTATAC

>PGSC0003DMG400010032RLKWAX-EGF\_2379

CTTTCATATTCACCCACAGTTTCCATTCCCATTACCCTACATATTAGTTTAGATTATACGTCCAACAATAGT  
TGTCTACTGTTGATTTGATACACCCCTTAAGAAACAATAAATGATAGA

>PGSC0003DMG400010032RLKWAX-EGF\_2623

TCTAAATTGGATAAGTATTGTTAGACAACCTATTTTTAAAGTAATAAATAACAATTGTTGAAAAAATGGAG  
TACATAAATACTTCGATGGAAGTTTGATTTTCTCAGAATGTATCTTAATT

>PGSC0003DMG400010032RLKWAX-EGF\_2745

GGCCTAATTCTTCTTGATGATCAATTCAACCTCGAATAAAAAGATATAATATGAAAAATAATTTTCTTC

GTAATAACATACCCTTGATCTCTCTTTTTTTTGTTCATATGGGACATT

>PGSC0003DMG400010032RLKWAX-EGF\_2806

AATTTTCTTCGTAATAACATACCCTTGATCTCTCTTTTTTTTGTTCATATGGGACATTGGGACTTGGTCTC

ACTAACTTTTTCCCACTAGGTTCTTAACCGGCCTGCCACCATTTCGG

>PGSC0003DMG400010032RLKWAX-EGF\_2867

GACTTGGTCTCACTAACTTTTTCCCACTAGGTTCTTAACCGGCCTGCCACCATTTCGGCGTATTAGGCTT

TTAGGTATTACCCACAGTACCTTCCACTTTCCTTTCTTCTCCTAGCTC

>PGSC0003DMG400010032RLKWAX-EGF\_2989

GCACATGGACCCAAGACAAATAATATTATTCTTGTGAAGATATTTGATTCCATAAGAAGCATTAAAAAA

GTTTGTGATTTTAAATGCACATTTTGTGGATATAAAATAATGTTGTTAG

>PGSC0003DMG400010032RLKWAX-EGF\_305

TTCGGAAAATAGCATTTATTGACAAACAATGAACTCCCCACCAACATCAACTGCACCCCTTAATTTCTC

AATAAATGGTCTTCAACAAGTCAAACCTTCTACTTTTTTTTTTCTTT

>PGSC0003DMG400010032RLKWAX-EGF\_3050

TTAAAAAAGTTTGTGATTTTAAATGCACATTTTGTGGATATAAAATAATGTTGTTAGCATTAAATATGAT

GTGTCATTCTTCTCCATAGACAAGAAAGGAAGAAAGGAAGAGTGTTG

>PGSC0003DMG400010032RLKWAX-EGF\_3111

TTAATATGATGTGTCATTCTTTCTTCCATAGACAAGAAAGGAAGAAAGGAAGAGTGTTGACTTTGTAACA

TTGTTATAAAGAAGTTGTCGGTACAATGATATTTCTATCACCAGTCACC

>PGSC0003DMG400010032RLKWAX-EGF\_3355

GTTGAATTGAGCTCTCAAATGAATTTGCTTGTCTTGAAGAGTTGAACACTTCAATTAGTTATCTTACCCAA

TTGCATATTGCATGATACGTTCAAAGATCTTACTTTTAAAAAAAATAAA

>PGSC0003DMG400010032RLKWAX-EGF\_3416

TCTTACCCAATTGCATATTGCATGATACGTTCAAAGATCTTACTTTTAAAAAAAATAAAATAAAGAAGCAT

TTACTTGTTTGTCTCTGACTCGAAGATGGTGAATGATGAGGTTTGAAT

>PGSC0003DMG400010032RLKWAX-EGF\_3477

AAAGAAGCATTACTTGTTTGTCTCTGACTCGAAGATGGTGAATGATGAGGTTTGAATTACTCTATTCC

GTAGATTATCAATTGGACAATCCCCAGGTCAATGATTTTCTTGCCTTTTT

>PGSC0003DMG400010032RLKWAX-EGF\_3538



CTCTATTCCGTAGATTATCAATTGGACAATCCCCAGGTCAATGATTTTCTTGCCTTTTTAAGTTTATTTTGA  
GGGGGACAGCACATGTTTGAACGGGTGAAAGTCAGAGGATGAACAAGA

>PGSC0003DMG400010032RLKWAX-EGF\_3599

GTTTATTTTGAGGGGGACAGCACATGTTTGAACGGGTGAAAGTCAGAGGATGAACAAGACCTGGATTG  
TTGAATAATTCATATTTTATTATTGAGTAAGCGTTATGATAAAAGGATCTG

>PGSC0003DMG400010032RLKWAX-EGF\_3660

TGGATTGTTGAATAATTCATATTTTATTATTGAGTAAGCGTTATGATAAAAGGATCTGGAATCGATTCCC  
CGTCTTAAACTAAACGTGTAATGAGACGGCTTATTATTATGCCAGTTTA

>PGSC0003DMG400010032RLKWAX-EGF\_4087

GATGTTCTAAGATACTTTGCCATATGCTCCTTCCTTCTACCTCTTCTCTATGATTATCTTCAGTATGTCGTC  
TTTATACTAACTTCTTCTTTATATTTGTCTCTCAAATCAGTTTCAAG

>PGSC0003DMG400010032RLKWAX-EGF\_4148

CAGTATGTCGTCTTTATACTAACTTCTTCTTTATATTTGTCTCTCAAATCAGTTTCAAGATGCAATCCTTCC  
AGATACCTCTCTGGCCGATGTGGTGGAACTACCAGAATTGGTGTGCTC

>PGSC0003DMG400010032RLKWAX-EGF\_4392

TCAATTTGGCAACACCTCAATTACCAAATGCGCACTCTTTAGTTTTCTATAAATGAGCTTGCAAGCCATCA  
CAGATTGATTTTGTGTTCTTCATATGTACGCAAAGAGTTGCTGACTGA

>PGSC0003DMG400010032RLKWAX-EGF\_4453

CAAGCCATCACAGATTGATTTTGTGTTCTTCATATGTACGCAAAGAGTTGCTGACTGATCAGTCATCAG  
TAAACTCCGAGCCTGCTTACTTTTACAGACGTTTGATTTAATATAACTA

>PGSC0003DMG400010032RLKWAX-EGF\_4514

AGTCATCAGTAAACTCCGAGCCTGCTTACTTTTACAGACGTTTGATTTAATATAACTAGTGAGTTTGATC  
TCTTCTGGTCTAATGAAATTTCAACCACCTACAGGGATTATTGCTGGA

>PGSC0003DMG400010032RLKWAX-EGF\_5917

AAAAGAAGTTTGCTCTAGGTAGAAAATTGAGGGGGATCACCTGTAATCTATTACCACCTTTTCTTGCCTT  
CTAATCTAGTGATAATAATATCAAAGAGTATTAGAGCACTTCTCTTTGTA

>PGSC0003DMG400010032RLKWAX-EGF\_5978

TCTTGCCTTCTAATCTAGTGATAATAATATCAAAGAGTATTAGAGCACTTCTCTTTGTATCGAAATTTTATT  
GCTTCATACGCAGAATTATACATCATGAAGAATGTGAAATAGTATTTG

>PGSC0003DMG400010032RLKWAX-EGF\_61

TCCGTGTATCTCCGATTACTATTTGATAGCTTCATTGTTAGGAAATTAACCCAGTTTTTTCAGAGCTGTTT  
TTGGAGATGAGATATTTCAAATTTTGGACTCTTTAATTGCTACTATTT

>PGSC0003DMG400010032RLKWAX-EGF\_610

TACTGTGGAGCTGCTGGTTCTAATGGCCCGCGTGTTTCTTATCCATTTGGGTTCTCAGATGGTTGTGGGA  
TTCGTTTAGATTGTAAGTAGTGGAGAAATCAGAATTGGGGAATAT

>PGSC0003DMG400010032RLKWAX-EGF\_6161

AAGTGTAATCCTACATCATAACATCATCTTCAAGAATTTGAGTACCCCGGACATGTAAATAATTAATAAA  
GACATAAGTATTATATAACAGGATTAATTGTTTACACTAATAGAAATGCC

>PGSC0003DMG400010032RLKWAX-EGF\_6222

ATTAATAAAGACATAAGTATTATATAACAGGATTAATTGTTTACACTAATAGAAATGCCCATGCTTTGAAT  
TTAGCAAATTTAATTTGCAAATAACAACAATGAAAAGCAAGAATCTTTT

>PGSC0003DMG400010032RLKWAX-EGF\_6466

CGATCTTCTCCTCCGCTGCTTCAATCCCCTTCTCAGCCGTCCTAATCCTTTCTCTGCCGCTGCGATTCCCT  
TGTCTGCCGCTCAAATCCCTCCTTCACTAATTCTTCTGCCTCCTCTT

>PGSC0003DMG400010032RLKWAX-EGF\_6710

AGCTGCCGCCGCTGTTTGGTAGGAGGATTTGTGTTTGCATTTAGCACACAACGGGATGGGAAAGTCCT  
TACTGTAAGTGAAGTAGTGGTGGAGCCATGGATTTGCTCTCTGTGCAATC

>PGSC0003DMG400010055LRR-RLKs\_0

GACTGACAAGACAGTAATAAAATGATTTTCTGGCATAAAAAGCTATAGTTTTGTTCTCAATCTAAAAGA  
TTATTAGAAGAAAGAAAATCCAATAGAGGGGTTTGTCTCTCTGGTATTCA

>PGSC0003DMG400010055LRR-RLKs\_1054

GTAAATCCTTATTGCTTTACTTATCTTTTTCTTTTATCCTTTTCAAACCTTGAGATTGATTTTGGTATTTAA  
CCTTTTGATTCAGGGACTTATCCTTCAATCACTTGAGTGGACCGGTA

>PGSC0003DMG400010055LRR-RLKs\_1116

TTGGTATTTAACCTTTTGATTCAGGGACTTATCCTTCAATCACTTGAGTGGACCGGTACCTAGGTTCCCTG  
CTAAGAAATTCAGTAAGCTAATTAACAGTTTATTCATGTCTTGTTAAT

>PGSC0003DMG400010055LRR-RLKs\_1178

GGTCCCTGCTAAGAAATTCAGTAAGCTAATTAACAGTTTATTCATGTCTTGTTAATAGAAAGCTGGAA

TGTTAAGAATAATTTATGTTGTTCTGTGATTGTAGCATTGTTGGAAATCC

>PGSC0003DMG400010055LRR-RLKs\_124

AGTTTCTGTTTCTTTCTTGAATTTAATGGAAAAGAAAAGAGAGATAAAGGTTGCATTCTTGTATGTGGC

TACATTCTTGGTTCTTTGGAGTTCTGCAGCAGGATTGCTTCTCCTAAAG

>PGSC0003DMG400010055LRR-RLKs\_1240

AGCTGGAATGTTAAGAATAATTTATGTTGTTCTGTGATTGTAGCATTGTTGGAAATCCATTGATCTGTGA

GACGGGTCTGAACCAGACTGCTATGGAATGCAATTGCTGCCAATGTCAA

>PGSC0003DMG400010055LRR-RLKs\_1302

ATCTGTGAGACGGGGTCTGAACCAGACTGCTATGGAATGCAATTGCTGCCAATGTCAATGACATTGAAT

GGTTCAGAATGTATGCATTATAGAATGCCATTTTCCAAATCTAACCATTTT

>PGSC0003DMG400010055LRR-RLKs\_1364

ATTGAATGGTTCAGAATGTATGCATTATAGAATGCCATTTTCCAAATCTAACCATTTTTTTCTTACCTGTAAT

TTTTGATTTTTCATTTCTTCTGTTTCACCTCACTTTATTGCTCCGTGT

>PGSC0003DMG400010055LRR-RLKs\_1426

TACCTGTAATTTTTGATTTTTCATTTCTTCTGTTTCACCTCACTTTATTGCTCCGTGTTTGTATCCAGCTTC

GCCTTCTGGGAAGCAAAAAGGTCATAAAATCGCGCTTGTATTTGGCT

>PGSC0003DMG400010055LRR-RLKs\_1488

TATCCAGCTTCGCCTTCTGGGAAGCAAAAAGGTCATAAAATCGCGCTTGTATTTGGCTCGACTCTTGGTT

GCATTTTTTTGCTCGTTCTTGGAAATTGGACTCTTTCTATGGTCAAGGCAT

>PGSC0003DMG400010055LRR-RLKs\_1550

TCTTGGTTGCATTTTTTTGCTCGTTCTTGGAAATTGGACTCTTTCTATGGTCAAGGCATAGACACAATCAAC

AAGCCTTTTTTGATGTTAAAGGTTGGTCATCTGTTCTAAACTTAAGCTC

>PGSC0003DMG400010055LRR-RLKs\_1612

ACAATCAACAAGCCTTTTTTGATGTTAAAGGTTGGTCATCTGTTCTAAACTTAAGCTCAATGTTCTCATGA

AAGTTATGATCATTGCTTCATACTCATTTGTATAATTTGCTATTATTAG

>PGSC0003DMG400010055LRR-RLKs\_1674

TTCTCATGAAAGTTATGATCATTGCTTCATACTCATTTGTATAATTTGCTATTATTAGATCGGCATCATGAA

GAAGTTTCCCTTGGAAATTTAAGAAGATTTCAATTCAAGGATCTCCAA

>PGSC0003DMG400010055LRR-RLKs\_1736

GCATCATGAAGAAGTTTCCCTTGGAATTTAAGAAGATTTCAATTCAAGGATCTCCAAATTGCAACCAAC  
AACTTCAGCAACAAAAACATTTTAGGAAAAGGTGGTTTTGGTAATGTTTA

>PGSC0003DMG400010055LRR-RLKs\_1798

CAACCAACAACCTTCAGCAACAAAAACATTTTAGGAAAAGGTGGTTTTGGTAATGTTTATAAAGGCCATCT  
CCCAGACGGTACTCCTGTGGCTGTAAAGAGGCTAAATGATGGCAATGCAA

>PGSC0003DMG400010055LRR-RLKs\_186

TATGTGGCTACATTCTTGTTCTTTGGAGTTCTGCAGCAGGATTGCTTCTCCTAAAGGTGTCAACTTTGA  
AGGTAATTAGTATTATTTTGATAAAATTCTGCATAATGTATACTGAAAA

>PGSC0003DMG400010055LRR-RLKs\_1860

GGCCATCTCCAGACGGTACTCCTGTGGCTGTAAAGAGGCTAAATGATGGCAATGCAATTGGTGGTGAG  
AAACAATTCCAAACAGAAGTCGAAATGATAAGCTTAGCAGTGCATCGTAAC

>PGSC0003DMG400010055LRR-RLKs\_1922

TGGTGAGAAACAATTCCAAACAGAAGTCGAAATGATAAGCTTAGCAGTGCATCGTAACCTCCTCAGGCT  
CTATGGATTTTGTATGACACAGTCGGAGAAGCTTTTGGTTTACCCTTTTAT

>PGSC0003DMG400010055LRR-RLKs\_1984

TCAGGCTCTATGGATTTTGTATGACACAGTCGGAGAAGCTTTTGGTTTACCCTTTTATGTCCAATGGTAGT  
GTAGCTTCGCGTCTCAGAGGTAAAAAAAACATATGAAATTAGCAAAGTG

>PGSC0003DMG400010055LRR-RLKs\_2046

AATGGTAGTGTAGCTTCGCGTCTCAGAGGTAAAAAAAACATATGAAATTAGCAAAGTGGCATTTCAGAT  
ATCTTATTTGTCTTTTGTGCTGAAATATAGTCCATGTTACTTTCTATAGTAAA

>PGSC0003DMG400010055LRR-RLKs\_2108

TTCAGATATCTTATTTGTCTTTTGTGCTGAAATATAGTCCATGTTACTTTCTATAGTAAAACCTGTGTTGGATT  
GGGGAACAAGGAAGCGAATAGCTATAGGAGCTGCTCGAGGACTGTTAT

>PGSC0003DMG400010055LRR-RLKs\_2170

GTGTTGGATTGGGGAACAAGGAAGCGAATAGCTATAGGAGCTGCTCGAGGACTGTTATATCTTCACGA  
ACAATGTGATCCAAAGATAATTCATAGAGATGTTAAAGCAGCAAATATATTG

>PGSC0003DMG400010055LRR-RLKs\_2232

TCACGAACAATGTGATCCAAAGATAATTCATAGAGATGTTAAAGCAGCAAATATATTGCTCGATGACTTT  
TGTGAGGCGGTTGTGGGAGATTTTGGGCTGGCAAAGCTTTTGGATCACCA

>PGSC0003DMG400010055LRR-RLKs\_2294

ATGACTTTTGTGAGGCGGTTGTGGGAGATTTTGGGCTGGCAAAGCTTTTGGATCACCAGGATTCACATG  
TCACAACCTGCTGTGCGCGGTACAGTAGGGCATATTGCCCTGAATACCTGT

>PGSC0003DMG400010055LRR-RLKs\_2356

TCACATGTCACAACCTGCTGTGCGCGGTACAGTAGGGCATATTGCCCTGAATACCTGTCAACAGGACAA  
TCATCTGAGAAAACAGATGTGTTTGGATTTGGGATCCTTCTACTTGAGCTG

>PGSC0003DMG400010055LRR-RLKs\_2418

AGGACAATCATCTGAGAAAACAGATGTGTTTGGATTTGGGATCCTTCTACTTGAGCTGATCACAGGAAT  
GAGAGCTATAGAATTTGGAAAAGCAGCTAACCAAAGGGAGTAATGCTTGA

>PGSC0003DMG400010055LRR-RLKs\_248

CAACTTTGAAGGTAATTAGTATTATTTTGATAAAATTCTGCATAATGTATACTGAAAATACTAAGTTTTCA  
TCTGAGATGTTCTCTTTTTCTTTTTTTTTCTCAGTGCAAGCTTTAAT

>PGSC0003DMG400010055LRR-RLKs\_2480

CAGGAATGAGAGCTATAGAATTTGGAAAAGCAGCTAACCAAAGGGAGTAATGCTTGATTGGGTAAGT  
ATCAATTGACATGCCTCAAATAAGTTCAACACTTTCTATATTTGAAAACAT

>PGSC0003DMG400010055LRR-RLKs\_2666

GTTTCGCGACATTGTATATATCCTGTTAAGTGTAAACATTTGGTTTACATTATATCAGGTTAGGAAAATTCA  
TCAAGAGAAGAACTTGATGTCCTTGTTGATAAAGATTTGAGAATCAAC

>PGSC0003DMG400010055LRR-RLKs\_2728

GAAAATTCATCAAGAGAAGAACTTGATGTCCTTGTTGATAAAGATTTGAGAATCAACTATGATCGAATC  
GAGCTAGAGGAAATGGTTCAAGTTGCTCTCCTCAGCACACAATATCTTCC

>PGSC0003DMG400010055LRR-RLKs\_2790

ATCGAATCGAGCTAGAGGAAATGGTTCAAGTTGCTCTCCTCAGCACACAATATCTTCCAGGACACAGAC  
CAAAAATGTCTGAAATCGTTGAAATGCTTGAAGGTGATGGACTTGCAGAGA

>PGSC0003DMG400010055LRR-RLKs\_2852

CACAGACCAAAAATGTCTGAAATCGTTGAAATGCTTGAAGGTGATGGACTTGCAGAGAGATGGGAAGC  
ATCCCAAAAATTTGATGGTAGTAACAAGTACAAAATAAGAGCTATCCTCA

>PGSC0003DMG400010055LRR-RLKs\_2914

GGAAGCATCCCAAAAATTTGATGGTAGTAACAAGTACAAAATAAGAGCTATCCTCATCCGAGAGATT

TTCAGATCTCACCGATGATTCATTGTTACTTGTACAAGCCATGGAGTTGTC

>PGSC0003DMG400010055LRR-RLKs\_2976

AGAGATTTTCAGATCTCACCGATGATTCATTGTTACTTGTACAAGCCATGGAGTTGTCTGGTCCTAGGTG

AGCAAGTCATTTACGTATATTTATAAAAAAAGTAGAATTCACACTTAGA

>PGSC0003DMG400010055LRR-RLKs\_3038

CCTAGGTGAGCAAGTCATTTACGTATATTTATAAAAAAAGTAGAATTCACACTTAGAGAGGTAATTTAT

TAAACTATGTGGTAATGTATAGTAATGAACCATCAAAGATTCAAAGAACT

>PGSC0003DMG400010055LRR-RLKs\_310

AAGTTTTTCATCTGAGATGTTCTCTTTTTCTTTTTTTTTCTCAGTGCAAGCTTTAATGGCCATAAAAGTTG

CTTTGAAGGATCCTCACGGGGTCTTGATAATTGGGATAGTACTTCTG

>PGSC0003DMG400010055LRR-RLKs\_3100

TAATTTATTAAACTATGTGGTAATGTATAGTAATGAACCATCAAAGATTCAAAGAACTTTGATGTGTTCT

GTTATTTTTTTTTGTTTCTTTATTGTATATGTTTCATCTTTAAGTTAAATGA

>PGSC0003DMG400010055LRR-RLKs\_3146

ATTCAAAGAACTTTGATGTGTTCTGTTATTTTTTTTTGTTTCTTTATTGTATATGTTTCATCTTTAAGTTAAATG

ATTTCAATCGAGAGTTCGATTTTTTTTTCTGGTACAACCTGTATTTG

>PGSC0003DMG400010055LRR-RLKs\_372

ATAAAAGTTGCTTTGAAGGATCCTCACGGGGTCTTGATAATTGGGATAGTACTTCTGTTGATCCATGTA

GTTGGGCTATGGTACTTGTCTTCTGAGAGTTTGGTTATTGGCTTGTA

>PGSC0003DMG400010055LRR-RLKs\_434

TCCATGTAGTTGGGCTATGGTACTTGTCTTCTGAGAGTTTGGTTATTGGCTTGTAAGTATTTCTTGCAA

AGATGAAATCTTTTTCTTTGTTGTGTCTTTGCAATTCAAAGTTGAAT

>PGSC0003DMG400010055LRR-RLKs\_496

TTCTTGCAAAGATGAAATCTTTTTCTTTGTTGTGTCTTTGCAATTCAAAGTTGAATTATTTTTTTTACCTT

TCTGTATTATGCAGAGGGGCACCAAGCCAGAATCTGTCTGGTACTTT

>PGSC0003DMG400010055LRR-RLKs\_558

TTTTTACCTTTCTGTATTATGCAGAGGGGCACCAAGCCAGAATCTGTCTGGTACTTTTTCTCCTAGCATT

GGCAATTTGACAAATCTTCAGATTATGTGAGTTACTAAAATCAGTGATT

>PGSC0003DMG400010055LRR-RLKs\_62

CTAAAAGATTATTAGAAGAAAGAAAATCCAATAGAGGGGTTTGTCTCTCTGGTATTCATTTGAGTTTCTG  
TTTCTTTCTTGAAATTTAATGGAAAAGAAAAGAGAGATAAAGGTTGCATT

>PGSC0003DMG400010055LRR-RLKs\_620

CCTAGCATTGGCAATTTGACAAATCTTCAGATTATGTGAGTTACTAAAATCAGTGATTTGAACCTTTCTTG  
ATTGTTTCTGTTACTTTTTTTGAATAACCATTTTTTTTTTCTTTTGAAC

>PGSC0003DMG400010055LRR-RLKs\_682

CCTTTCTTGATTGTTTCTGTTACTTTTTTTGAATAACCATTTTTTTTTTCTTTTGAACAGATTGCTGCAGAAT  
AACAATATAACAGGACCAATCCCAAAGAAATTGGAAGGCTCTCAA

>PGSC0003DMG400010055LRR-RLKs\_744

TGCTGCAGAATAACAATATAACAGGACCAATCCCAAAGAAATTGGAAGGCTCTCAAACCTTCAGACTC  
TTGATCTTTCTGATAACTTCTTCACTGGTGATATTCCTGTTTCTTTGGGAC

>PGSC0003DMG400010055LRR-RLKs\_806

CAGACTCTTGATCTTTCTGATAACTTCTTCACTGGTGATATTCCTGTTTCTTTGGGACACTTGAGTGACCTC  
AAGTACATGTAAGAATCTTAACAGAGAGCCAGTTCTCATACTAACTT

>PGSC0003DMG400010055LRR-RLKs\_868

GAGTGACCTCAAGTACATGTAAGAATCTTAACAGAGAGCCAGTTCTCATACTAACTTCATTTTTCTATCT  
TCCAACAGTTTCAATATCAGTTTCCTTATATTAATTTGTTTCAGGAGGCT

>PGSC0003DMG400010055LRR-RLKs\_930

TTTCTATCTTCCAACAGTTTCAATATCAGTTTCCTTATATTAATTTGTTTCAGGAGGCTCAACAATAACAGTC  
TATCAGGAGAAATTCCAGTCTCATTAGCCAACATGTCACAGCTTACTC

>PGSC0003DMG400010055LRR-RLKs\_992

AATAACAGTCTATCAGGAGAAATTCAGTCTCATTAGCCAACATGTCACAGCTTACTCTAGTGAAATCC  
TTATTGCTTTACTTATCTTTTTCTTTTATCCTTTTCAAACCTTGAGATT

>PGSC0003DMG400010120RLKmalectin\_1054

ACTAAGTATCACTTTGCTTGTAATCTTCTACATTTCTGTACGTTCTATTGATGTTACTTTGGGTGCTAACT  
TAGAAGACCAAATACTGGGCATGAGTAACCTGTATGTATCTCATATT

>PGSC0003DMG400010120RLKmalectin\_1116

GTGCTAACTTAGAAGACCAAATACTGGGCATGAGTAACCTGTATGTATCTCATATTGTTATGGCTTGT  
ACTTGTTTGCATTCTAGTTCAATCTCGTTATGTGTCAATTGTTAATGTA

>PGSC0003DMG400010120RLKmalectin\_124

GGTGGAGTTCGGCACAGCGACGGCGGAGTTCAGAACATCAGTGCTATTGAGAAGAAAGACGAATCAAA  
GCCGTCAACGTCTCTTCACAAGCTCACCGTCAGTAGTTTGTATTCATATTAG

>PGSC0003DMG400010120RLKmalectin\_1240

CATTTTGTGTGGGTTTCATCATAAATCAATTAACCTTTATGTTGGTTGTCAATCCATTGGACCCCTTCTTTAGC  
CAAGCTATTTTCTGTTATTCTCTTAGTGTAATGTCTTATTTCTTTAT

>PGSC0003DMG400010120RLKmalectin\_1302

CTTCTTTAGCCAAGCTATTTTCTGTTATTCTCTTAGTGTAATGTCTTATTTCTTTATCAATCAAAAGGGCT  
CTTAATAGAAGTCAAGTATGTTAAACGAGTGATTCTGTTTATTGCAAG

>PGSC0003DMG400010120RLKmalectin\_1488

TTTAAGAGATCAAGATGGAGGGGGTGTAATGCTAATGTCTTGATGGAGTATGTTGAATTCAGATTTTT  
TCGAGTCAAGGCAAGTGAAACTAACTAAAACAAATTTTTCGAGTCAGGGC

>PGSC0003DMG400010120RLKmalectin\_1550

AGATTTTTTCGAGTCAAGGCAAGTGAAACTAACTAAAACAAATTTTTTCGAGTCAGGGCAAGTGAAACTA  
ACTAAACTACTTGTCTCTTTATACATAGGTAGTTCTTTGATTGAAGGAA

>PGSC0003DMG400010120RLKmalectin\_1612

GAAACTAACTAAACTACTTGTCTCTTTATACATAGGTAGTTCTTTGATTGAAGGAATGAAGAGCAGAC  
ATGAGGATACATCACCATGATGAAGAACTTCCTTCAGGTTTCATTCGTAGC

>PGSC0003DMG400010120RLKmalectin\_1736

TAGTGATCTTCAAATGTGTCAATTCAGAGCTCAATCTTAATATTCTCCTATACTATGTTAATTATATCATC  
ACAAGTTGTTGTATCCGAGTTTGGATGATAGTGGGTGAGGTTGTATCT

>PGSC0003DMG400010120RLKmalectin\_1798

TTATATCATCACAAGTTGTTGTATCCGAGTTTGGATGATAGTGGGTGAGGTTGTATCTAAAATGAAAGAA  
ACATTTCTGATCCTTATGTGCAGATTGTTACAAGTAAAACACTAGAAAG

>PGSC0003DMG400010120RLKmalectin\_186

ATCAAAGCCGTCAACGTCTCTTCACAAGCTCACCGTCAGTAGTTTGTATTCATATTAGCAAATTCATCATC  
GCCGATTGCCTCATATTCAATCAGATTGAATTCGAACTGTACGACCATG

>PGSC0003DMG400010120RLKmalectin\_1860

TGAAAGAAACATTTCTGATCCTTATGTGCAGATTGTTACAAGTAAAACACTAGAAAGTGTGATAATCT



CAAGAAGAGAATTATTGTTGTATACAGAAAGTTAGTGTTTGAGATCTCGT

>PGSC0003DMG400010120RLKmalectin\_1922

GATAATCTCAAGAAGAGAATTATTGTTGTATACAGAAAGTTAGTGTTTGAGATCTCGTTTCAGCTTCAGT

CAACAAATATCGATCTAGATTTTAGGTAGATGGTTGAGAATGATGTTGAC

>PGSC0003DMG400010120RLKmalectin\_1984

GCTTCAGTCAACAAATATCGATCTAGATTTTAGGTAGATGGTTGAGAATGATGTTGACACTGCCTTTGCA

TTTAAAAATGCACCTTTTTGGTGCAACTTAAACAAGAACATCTAACAGAA

>PGSC0003DMG400010120RLKmalectin\_2046

CCTTTGCATTTAAAAATGCACCTTTTTGGTGCAACTTAAACAAGAACATCTAACAGAAAAATGTTTTGCTA

TAGCTTAAGTTTCTGCGAAGCTAGAGAGATTAATAAGACATGAAATAAA

>PGSC0003DMG400010120RLKmalectin\_2108

GTTTTGCTATAGCTTAAGTTTCTGCGAAGCTAGAGAGATTAATAAGACATGAAATAAAAAATTTGGGTGT

TGCTAAAGGAGAAAGCAGTTCCCATCTTTAATGAGGTTTTATCAATGTG

>PGSC0003DMG400010120RLKmalectin\_2170

TTGGGTGTTGCTAAAGGAGAAAGCAGTTCCCATCTTTAATGAGGTTTTATCAATGTGTATGAAAGTTGG

TGGATATACATTCATTCTTTATGCACTGCTGATAAATTCTTAACTGTCAA

>PGSC0003DMG400010120RLKmalectin\_2232

AAAGTTGGTGGATATACATTCATTCTTTATGCACTGCTGATAAATTCTTAACTGTCAAACAGGTTTTGTCA

GTTTAGATTGTGGAGGCAAAGACAATTTACAGATGAACTTGGTCTTGA

>PGSC0003DMG400010120RLKmalectin\_2294

GTTTTGTCAGTTTAGATTGTGGAGGCAAAGACAATTTACAGATGAACTTGGTCTTGAATGGACTCCTGA

TACTCAAATGATTAGCGGAGTTATAGTCAATCTCTCTGTAGCAAATGAGA

>PGSC0003DMG400010120RLKmalectin\_2356

ACTCCTGATACTCAAATGATTAGCGGAGTTATAGTCAATCTCTCTGTAGCAAATGAGACGAGGACACAAT

ATATGGCCTTGAGATACTTTCCAGCCGATAACAGGAAGTATTGCTATACA

>PGSC0003DMG400010120RLKmalectin\_248

TTCATCATCGCCGATTGCCTCATATTCAATCAGATTGAATTCGAACTGTACGACCATGCCGTTTGGTGACT

ACTAATATCCATTTTATTCAATTGTTGGCCTTGTATGGGTGTATGTTC

>PGSC0003DMG400010120RLKmalectin\_2480

ATGTGATTCCCCAACAGGTACCTTGTAAGAGCAACTTTTCTATATGGAACTTTGATAACGACAATGTT  
TACCCATATCTCAGTTGGGGCAACTCATTGGGCTACAATAGTTATACCTG

>PGSC0003DMG400010120RLKmalectin\_2542

ACAATGTTTACCCATATCTCAGTTGGGGCAACTCATTGGGCTACAATAGTTATACCTGATGCTAATACAA  
TGGAGTACCAAGAGGTAATATATCTAGCCAAGGAACCTCCGTAAGTGTC

>PGSC0003DMG400010120RLKmalectin\_2604

TAATACAATGGAGTACCAAGAGGTAATATATCTAGCCAAGGAACCTCCGTAAGTGTCTGTTTATCTAAT  
GCAACCACTGCATTTTCCTTCATTTCTAGTTTCTACGCTTGAGCTCTGAC

>PGSC0003DMG400010120RLKmalectin\_2666

TATCTAATGCAACCACTGCATTTTCCTTCATTTCTAGTTTCTACGCTTGAGCTCTGACAATTTAATGGTTCA  
ATATATATTACTGAATTTGAGAATGATTTTTTCATGAGCGTCTCTGCA

>PGSC0003DMG400010120RLKmalectin\_2728

TAATGGTTCAATATATATTACTGAATTTGAGAATGATTTTTTCATGAGCGTCTCTGCAAGGATAAATTTTG  
GCACAGAGAGTGATGATCCTGTCAGGTATGTTTCAGTTCTTCAGTTATT

>PGSC0003DMG400010120RLKmalectin\_2790

TAAATTTTGGCACAGAGAGTGATGATCCTGTCAGGTATGTTTCAGTTCTTCAGTTATTATGGCAGCTCCA  
AATCTATGTTCTTGCACATTCTGTATACTTTTAGAATGTGATAGCTAT

>PGSC0003DMG400010120RLKmalectin\_2852

CAGTTCCAAATCTATGTTCTTGCACATTCTGTATACTTTTAGAATGTGATAGCTATTGACATTTTTGAAT  
TGAAACAAACAGGCTTAGGCACTGTCCCTAGCATGCTCTTCTTCTCGC

>PGSC0003DMG400010120RLKmalectin\_2914

ATTTTTGAATTGAAACAAACAGGCTTAGGCACTGTCCCTAGCATGCTCTTCTTCTCGCTTATTGTTTTTTTT  
CGATTTCCAAAATTTAATCTTCCCTAATGTCCTTATTCTCCTAGGT

>PGSC0003DMG400010120RLKmalectin\_2976

TGTTTTTTTTCGATTTCCAAAATTTAATCTTCCCTAATGTCCTTATTCTCCTAGGTACCCTGATGACCCAT  
TCGATAGAATATGGACGTTATTGGGTACAGGCTCGGTTTTCTCAAGC

>PGSC0003DMG400010120RLKmalectin\_3038

TGATGACCCATTCGATAGAATATGGACGTTATTGGGTACAGGCTCGGTTTTCTCAAGCTCCGCCCTGAT  
TACAAGGTGGTACTTGAACCCTCATCAATAATATGAAAGTTCAGATAGTT

>PGSC0003DMG400010120RLKmalectin\_310

TTGGTGACTACTAATATCCATTTTATTCAATTGTTGGGCCTTGATGGGTGTATGTTCTAGAGTTCTATCTT  
TTATGTTGTTTGAATTGATGCATGTGTTTCTATATCACATAGTCTGAT

>PGSC0003DMG400010120RLKmalectin\_3100

CCCCTGATTACAAGGTGGTACTTGAACCCTCATCAATAATATGAAAGTTCAGATAGTTAATTAACAAAC  
CGTTAAAAATTGACTCGTGATTTGAAGTTTGAACAGTTTTGACCAACCCC

>PGSC0003DMG400010120RLKmalectin\_3162

AACTAAACCGTTAAAAATTGACTCGTGATTTGAAGTTTGAACAGTTTTGACCAACCCCCAGAGTACATTG  
AATGATTTTGGTGC GTGCTACTCACCATTCCACAACTTCAGCCAACTAC

>PGSC0003DMG400010120RLKmalectin\_3224

GTACATTGAATGATTTTGGTGC GTGCTACTCACCATTCCACAACTTCAGCCAACTACCTTTCTAGGGGA  
ATTCGGATTATTGGAACCTCACTTATGAACTACAAAACAAAATAATTTGTT

>PGSC0003DMG400010120RLKmalectin\_3286

CTAGGGGAATTCGGATTATTGGAACCTCACTTATGAACTACAAAACAAAATAATTTGTTAACGTTTTATG  
TTCTGATATTATGAAAAATATATAAACGTTAAATTTGATTTTTGTGGCTT

>PGSC0003DMG400010120RLKmalectin\_3326

AAAACAAAATAATTTGTTAACGTTTTATGTTCTGATATTATGAAAAATATATAAACGTTAAATTTGATT  
TTGTGGCTTTAATATTATTTATTGCTATAGATTATATTTTTTAATTATG

>PGSC0003DMG400010120RLKmalectin\_372

GTTCTATCTTTTATGTTGTTTGAATTGATGCATGTGTTTCTATATCACATAGTCTGATCTTGTGTCCAATAA  
AATTGGTGCAGAATTGCAGATAGCAACCAAATTAGCTGTTGTGGAGTT

>PGSC0003DMG400010120RLKmalectin\_434

TGTCCAATAAAATTGGTGCAGAATTGCAGATAGCAACCAAATTAGCTGTTGTGGAGTTCGATTTTTGATC  
TCCTATTTGAAGGTAAACAATAACTTAGTAGTTAATTGAAACTGTATT

>PGSC0003DMG400010120RLKmalectin\_496

TTTTGATCTCCTATTTGAAGGTAAACAATAACTTAGTAGTTAATTGAAACTGTATTTATTATATAAAA  
CTCAAATTTCAATTACTAGGCCAATTCTTTTCGTGATCTCTGCTGCCG

>PGSC0003DMG400010120RLKmalectin\_558

CATATAAACTCAAATTTCAATTACTAGGCCAATTCTTTTCGTGATCTCTGCTGCCGAAGTCAGGCTAGT

GAATCAATAGAGTGTACTTTTACAGTTTATGCAGTGAACCTTGAGACTTC

>PGSC0003DMG400010120RLKmalectin\_682

ACTTATGCAAATCTGATATTCAAGTTCCTAATGTACCTACATTTTATCACTCTTATTTCTTCTAGAAATTC

GATGAACATTAACATAGGTATTGGTCTGCTCCAGCTCATTGACACT

>PGSC0003DMG400010120RLKmalectin\_806

AACTGTATTTCATACAATGAGCAATTGTGAATAGAGGATATATGCAGTGAACCTTGAGACTTCGCGCACTT

ATGCAAATCTGATATTCAAGTTCCTAATGTACCTACATTTTATCACTTC

>PGSC0003DMG400010120RLKmalectin\_930

TTCTTCTAGTAAATTCGATGAACATTAACATAGGTATTGGTCTGCTCCAGCTCATTGACACTGTACAAC

TGTATTTCATACAATGAGCAATTGTAGAATAGAGGATATATATTCGCAG

>PGSC0003DMG400010183-(rev)LRR-RLPs\_0

ATGTCATTGTCAATGACCATCTTGTATTTCAATTTGTGTTGTTTTGACCGAGTGAGTATAAAGGCGCTATAT

TGCAGCTGCATTTCTCCTAAAAAGCAGTTGAGTTTAAAATACAAGACA

>PGSC0003DMG400010183-(rev)LRR-RLPs\_1054

TGAGACTGCTTGGATTGTCAGTAAATAGCTTCTCCGGGGAGTTCCTCCTTCTTGTACAATTTGTCATCC

CTGGAATTAATAGCACTTTCCTTCAACCACTTTTCTGGTAATCTCAGAT

>PGSC0003DMG400010183-(rev)LRR-RLPs\_1116

TTGTCATCCCTGGAATTAATAGCACTTTCCTTCAACCACTTTTCTGGTAATCTCAGATCTGATTTAGGCCAC

TACTTCCCTAATCTCCAAAGACTTCACTTGGGGAAGTCAATTCCAT

>PGSC0003DMG400010183-(rev)LRR-RLPs\_124

AAAGCAAAAATAGTTAGTCAACACTTACCTTGCATGCACCAGAGAGTCGTGACTTTTGAAATTCAATTC

AAGAACTGGATAGTTTTTTAATGCATATTTTAAAGAAAAGCTTAGGTGGA

>PGSC0003DMG400010183-(rev)LRR-RLPs\_1240

CCATACCATCCTCTTTGGCCAATGCTTCAAATTGCTACAGCTTGATTTCCCTGTAAACAAATTCAGTGA

AATATACTAAAGGGTTTTGATAACTTGCAGAATTTGTTGTGGCTCAATG

>PGSC0003DMG400010183-(rev)LRR-RLPs\_1302

TTCACTGGAAATATACTAAAGGGTTTTGATAACTTGCAGAATTTGTTGTGGCTCAATGTTGGGAGTAACC

ATCTTGGATACGGTAAGAATGATGACCTTGACTTTGTAAATTCTCTTACC

>PGSC0003DMG400010183-(rev)LRR-RLPs\_1364

GAGTAACCATCTTGGATACGGTAAGAATGATGACCTTGACTTTGTAAATTCTCTTACCAACTGCAGCAGT  
CTACAAATGCTCCATTTTGGAGACAACCAGTTTGTAGGTACATTACCTCA

>PGSC0003DMG400010183-(rev)LRR-RLPs\_186

TCAATTTCAAGAACTGGATAGTTTTTTAATGCATATTTTAAAGAAAAGCTTAGGTGGATAGAGAACCAAA  
CTCAGAATCAATGTGCTAACAAAATATTTTATTGTTGATATATCATTGGC

>PGSC0003DMG400010183-(rev)LRR-RLPs\_248

GAACCAAACCTCAGAATCAATGTGCTAACAAAATATTTTATTGTTGATATATCATTGGCAGCTTATTTTATA  
ATCGTGTGTCTTATACCACGTAGTGACTCTCCATTACCAAAAACAACAT

>PGSC0003DMG400010183-(rev)LRR-RLPs\_310

TATTTTATAATCGTGTGTCTTATACCACGTAGTGACTCTCCATTACCAAAAACAACATTCATCTCTTGCTCC  
TTGACATTTTCCAGAATGGAAATTTTCTCAATGAGTTTTAATTCCCAC

>PGSC0003DMG400010183-(rev)LRR-RLPs\_558

GATCCATCAAGAGTTTTCGCCTCTTGGAACCAATCCGTTTATTTATGTCAGTGGACTGGAGTAAAATGTG  
GCCTGACACAGGAAAGGGTGAGTCTGGCAGGTACAATCTCAGATCATCTC

>PGSC0003DMG400010183-(rev)LRR-RLPs\_62

GCGCTATATTGCAGCTGCATTTCTCCTAAAAAGCAGTTGAGTTTAAAATACAAGACAAAGCAAAGCAA  
AAATAGTTAGTCAACACTTACCTTGCATGCACCAGAGAGTCGTGACTTTTG

>PGSC0003DMG400010183-(rev)LRR-RLPs\_620

AAAATGTGGCCTGACACAGGAAAGGGTGAGTCTGGCAGGTACAATCTCAGATCATCTCGGAAATCTTTC  
TTTGCTCAATTCTCTTGACCTGGCAGAAAATTCATTCCATGACGGAATTCC

>PGSC0003DMG400010230-(rev)LRR-RLKs\_122

GTTGAAAAGAAGCCCCTGTTTTGAAATCACCCCTGCAAACCTGCAGTCAAGAAAAAAAAAGAAAAGATATTA  
CACTATTTTTCACAAAAAAAAGATTGATTTTTTCTTGTGTGATTCAATT

>PGSC0003DMG400010230-(rev)LRR-RLKs\_1403

TCTTATAAATTTATATGTGTTGCTTTGCTATCGACAAGCCTGTTGAAATGATAATGACAGACAAAGTGCA  
AACACTGAGTTGTGAGTTTTTCTGTTTGTGGTTCTTCGGATATTGTTAAC

>PGSC0003DMG400010230-(rev)LRR-RLKs\_1586

GAACTTGAAATCTGACTCACTTAAAATCACTGTAAGCTTCAGCTATACTTATATGCTTCTCATTGTTTCT  
TTAGCTCATATTCTGACCTCATCATCTGAAAAAAGATTGTTCCAATC

>PGSC0003DMG400010230-(rev)LRR-RLKs\_1647

CATTTGTTTCTTTAGCTCATATTCCTGACCTCATCATCTGAAAAAAGATTGTTCCAATCATTGATGGTTTTT  
TCTACTTACGAAATGCTTTCATGATTCTGGTCTTAGTCTAGAAATAAT

>PGSC0003DMG400010230-(rev)LRR-RLKs\_1769

TTAGTGTGCTATGTCATGGAACATACTTCCCTATCTTGGTAGACACTATCTTATCACTATAACAATTTGA  
AATTGCACTAAATTTACATGTCTGGTCAGTACAGGTTCCCTTTTTTCGT

>PGSC0003DMG400010230-(rev)LRR-RLKs\_183

AGATATTACACTATTTTTACAAAAAAAAGATTGATTTTTCTTGTGTGATTTCAATTTCTTCTCAATCT  
CTGTTATTTCTTTAATTTTTTTCAAAAAAGAAAAAATAAATTTTGT

>PGSC0003DMG400010230-(rev)LRR-RLKs\_1891

CCATTTGTTACTTAGGAGATGTCTCAAAATATAAAGAGCGTCATATACATTGGGATATTTAGCATATTTG  
GTCATGCAAATTGCACCAAAGAAAACTTTACCTTTTTTTTTTTCCCAAAG

>PGSC0003DMG400010230-(rev)LRR-RLKs\_1952

GCATATTTGGTCATGCAAATTGCACCAAAGAAAACTTTACCTTTTTTTTTTTCCCAAAGAAAAATGTATAA  
AGTGAATTGGGTAGATTTCTGGTAATCAATGTTTCACCTTCTGTTCTGC

>PGSC0003DMG400010230-(rev)LRR-RLKs\_244

CTTCTTCAATCTCTGTTATTTCTTTAATTTTTTTCAAAAAAGAAAAAATAAATTTTGTCCCACCACCTGCA  
TTTTCTATTGCAGTTATTTGATTTTTGGCTTTTTTTCAAGAAATGTG

>PGSC0003DMG400010230-(rev)LRR-RLKs\_2623

AATGCATAAAATCCATCATTTGAGGAACATATACCAATATACTACTTTCATACTAACTACCTCCTGCTATA  
AGTTTGGTATTAACATTAATTAAGTGCAAGCAATTATCCCATGGAGTT

>PGSC0003DMG400010230-(rev)LRR-RLKs\_2745

ACTGAAGATCTTTGAGACATTTTCTATGCATAGTGTGTCCCACTAATCTCTCATACTTTCCTTACAATAGT  
GAAGCAACTATGATGGTGATTGTGCGAAAGCAATGCCATGGGGCACTTG

>PGSC0003DMG400010230-(rev)LRR-RLKs\_2806

CTTACAATAGTGAAGCAACTATGATGGTGATTGTGCGAAAGCAATGCCATGGGGCACTTGATACTTTCCTG  
TCTCCAACCCTAATATTCATAGGGGATTAGAGTTTAGTGTCTTAAAGTT

>PGSC0003DMG400010230-(rev)LRR-RLKs\_2989

TATTTGTTTATTTTGTGCGACTTTTCTGTACATTAACCACTAAAATTGCTGGAAATGTGGTTACTCTTTCCCA

TGAGTAGAAGAACAACACTTGGATATTATCATATTCCTGTTTCGTAGCATG

>PGSC0003DMG400010230-(rev)LRR-RLKs\_305

CACCACCTGCATTTTCTATTGCAGTTATTTGATTTTTGGCTTTTTTCAAGAAATGTGACGAATTGTCATT

TCCAGTTCTGCAATAAAAAGCAGAAAAAGATTTCAATTCTTGTCTGGTA

>PGSC0003DMG400010230-(rev)LRR-RLKs\_3050

ACTCTTTCCCATGAGTAGAAGAACAACACTTGGATATTATCATATTCCTGTTTCGTAGCATGAAACTTCAGCCA

GCTATATGAATAAATTTATTCTATTCATCCCGTTGACTCTGTTTGAATT

>PGSC0003DMG400010230-(rev)LRR-RLKs\_3111

ACTTCAGCCAGCTATATGAATAAATTTATTCTATTCATCCCGTTGACTCTGTTTGAATTCTGGATCGAGAT

ACTCATCTTGGACAAGTACCTTCAGCTTTACCCTTGTAAGTACTGATGTCAG

>PGSC0003DMG400010230-(rev)LRR-RLKs\_3172

GGATCGAGATACTCATCTTGGACAAGTACCTTCAGCTTTACCCTTGTAAGTACTGATGTCAGATTACAGACTA

CCTCTTAATATGCTAATGTTTTATTTCTCAATCACGCACTTTTAAGTTCC

>PGSC0003DMG400010230-(rev)LRR-RLKs\_3233

TACAGACTACCTCTTAATATGCTAATGTTTTATTTCTCAATCACGCACTTTTAAGTTCCATACTCCGCTCTG

AAAATTTGGTGCCTTTTTCTTGCAGCATCTGGCATGGCAGTTTGTGGC

>PGSC0003DMG400010230-(rev)LRR-RLKs\_3355

TATAAGACTATAGGCTCCTTTCTCAGACCAATTAAGGGATGCTAGCATGGTATTTTAGTTTTTTCACACT

GTAAGTAACTAAATAGTTTTTCCACCTTATGCTTTCTAAATAAGTTT

>PGSC0003DMG400010230-(rev)LRR-RLKs\_3416

TTTTCACACTGTAAGTAACTAAATAGTTTTTCCACCTTATGCTTTCTAAATAAGTTTAATGGTTCAGAA

GCAACTTTTTTGTTCCTAAAAGGTTCCCGCGTTTTTGGATGCTCAGG

>PGSC0003DMG400010230-(rev)LRR-RLKs\_3477

TGGTTCAGAAGCAACTTTTTTGTTCCTAAAAGGTTCCCGCGTTTTTGGATGCTCAGGCAGACTTCTGCT

CTGACAACCTACCAAGTGAGTGAGAATATTTTGTGACATATCTTTTATT

>PGSC0003DMG400010230-(rev)LRR-RLKs\_3538

GACTTCTGCTCTGACAACCTACCAAGTGAGTGAGAATATTTTGTGACATATCTTTTATTGGATTTCAAAGA

ATTGTACACAAAAAAGTATTTTATTCTTTTTGTTTTGCAG

>PGSC0003DMG400010230-(rev)LRR-RLKs\_3660

TCAACTAGGCCTCACAATATCCACGATGTAGAGAATCAAGCAAACATTGAACGCCGTAAGTTAGCTGAG  
CAATCCAGTAACTTTGCTGCTGCTCCTGCTAACGGAGGGAAACCATTGGGA

>PGSC0003DMG400010230-(rev)LRR-RLKs\_3843

GGAGCTCCTCCTCCTCTGACTACACCATCACGGACCACACCTGATCATCATCCGCCTCCAAATCCTGG  
GGGACACTCTAATGATGCTGTAAACAGCCAATTGCTAGTCAAGCCCCA

>PGSC0003DMG400010230-(rev)LRR-RLKs\_4026

GCTGTTTTTGTGTGCCTGATAATCATCTGCAAGAGCAAAGCTGCGCAAACAATAGGCCCTTGGAAGACT  
GGATTGAGTGGACAGCTGCAGAAAGCATTTATTACAGGTACTTTTGATTA

>PGSC0003DMG400010230-(rev)LRR-RLKs\_4331

ATTTTGCAGGGGTCCCAAAACTAAACAGGCCGGAGCTTGAAAATGCATGCGAGGATTTTAGCAACATAG  
TTTGCCATCAAGATGCATTTACAGTCTACAAGGGA ACTCTATCGAGTGGAG

>PGSC0003DMG400010230-(rev)LRR-RLKs\_4392

CAACATAGTTTGCATCAAGATGCATTTACAGTCTACAAGGGA ACTCTATCGAGTGGAGTAGAGATTGC  
TGTTGTGTCAACTGCTATAAATTCTTTGAAAGATTGGTCCAAGCGTTCTGA

>PGSC0003DMG400010230-(rev)LRR-RLKs\_4453

GAGATTGCTGTTGTGTCAACTGCTATAAATTCTTTGAAAGATTGGTCCAAGCGTTCTGAATTGGCCTTCA  
GGAAGAAGGTTAGTAGTTGCCATCTCCTTCACAAATAAAAAACTGCTTCA

>PGSC0003DMG400010230-(rev)LRR-RLKs\_4697

ATTTTGTTAATCTAATTGGATATTGCGAGGAAGATGAGCCTTTCACTAGGATGATGGTCTTCGAGTATGC  
AACAAATGGAACACTTTTCGAGCATCTGCATGGTAAACTAGTTAATAGTT

>PGSC0003DMG400010230-(rev)LRR-RLKs\_4758

CGAGTATGCAACAAATGGAACACTTTTCGAGCATCTGCATGGTAAACTAGTTAATAGTTCAAGTTTCAAG  
CTTCAAGCTAATCATTTTTGTGATTTGGTTTTGATTAATGCAGTCTACAT

>PGSC0003DMG400010230-(rev)LRR-RLKs\_4819

AGTTTCAAGCTTCAAGCTAATCATTTTTGTGATTTGGTTTTGATTAATGCAGTCTACATGTTTTGTTGTTTC  
AGATGATGAACTTGAACCTCTTACTGGCCTGCAAGGGTACGAGCTAT

>PGSC0003DMG400010230-(rev)LRR-RLKs\_5002

TGTGAATTCACACTCCATATTTTTTACAGACGATTATGCTGCTAAGGTATGCTTTATTTTCGTATAACCACATT  
GAATTTAGAAACGTTTTACTTCGTGTAATGTCTTGAATTGAACGGATC



>PGSC0003DMG400010230-(rev)LRR-RLKs\_5063

TATACCACATTGAATTTAGAAACGTTTTACTTCGTGTAATGTCTTGAATTGAACGGATCTTTTTTTATTTAC  
ACAGATTACAGAGCTTGCTTTCTGGTCAGATATAATGGTGAAGTCAAA

>PGSC0003DMG400010230-(rev)LRR-RLKs\_5124

TTTTTATTTACACAGATTACAGAGCTTGCTTTCTGGTCAGATATAATGGTGAAGTCAAAGTCCTCTAGTGG  
TGATCTAGAGAACTCTGAGCTGCGACCACTTTCTGATCCCGAAACAAAC

>PGSC0003DMG400010230-(rev)LRR-RLKs\_5185

CCTCTAGTGGTGATCTAGAGAACTCTGAGCTGCGACCACTTTCTGATCCCGAAACAAACGTCTATAACTT  
TGGGATTTTGTGCTGGAAGTAATTTCTGGAAAGTCACCTTATACGGAAC

>PGSC0003DMG400010230-(rev)LRR-RLKs\_5246

CTATAACTTTGGGATTTTGTGCTGGAAGTAATTTCTGGAAAGTCACCTTATACGGAACGAGATTCTCTTA  
TGAGCTGGGTATCTATCTAACTCTATTTTATACGAAAATCCCTTATTTT

>PGSC0003DMG400010230-(rev)LRR-RLKs\_5307

GATTCTCTTATGAGCTGGGTATCTATCTAACTCTATTTTATACGAAAATCCCTTATTTTCTTCGGTGTTTAA  
TATAGACTAGTGAAACGTTCTTCTCTGCTTTTGTAGGCGGAGCAAT

>PGSC0003DMG400010230-(rev)LRR-RLKs\_5612

CTATCTCCCCTGTGGTGGGCTGAACTTGAGATCCTATCCTCTGAGGCAGCCTAATACTGACTATTGTGT  
CTACTTTTGTATGTAAGTAGAGAGTTGCTTTGCTATGCATAAATGTTCT

>PGSC0003DMG400010230-(rev)LRR-RLKs\_5673

ACTATTGTGTCTACTTTTGTATGTAAGTAGAGAGTTGCTTTGCTATGCATAAATGTTCTGAATTATACTTC  
ACTTAATGTCAACTGCAAGTCCTGTGTACCACATTTTCTGTTCTAAAT

>PGSC0003DMG400010230-(rev)LRR-RLKs\_61

CACCATTCCCCATATTTTCCCTCTTGTTCCCTCAACCATATTTCTGAGAAAAAAAATAGTTGAAAAGA  
AGCCCCTGTTTTGAAATCACCCCTGCAAACCTGCAGTCAAGAAAAAAAAGA

>PGSC0003DMG400010230-(rev)LRR-RLKs\_732

ACTGGGAAAAATGAGAGACCCCAATTTTGTCCATTGTATCAATAGGGTTAATAGTTTTTCTTTTAACTGT  
AATATAGTTTTACATTGTAAAAATTGAATGATAAGCAAACAGTGGTGTA

>PGSC0003DMG400010240-(rev)G-LecRK\_1116

ACTAGTGATTATAATGAAGGAGTTGGGCCTATGAAAATAAGTGAATGCAAAAATAGGTGCAACAAAGA

TTGCAAATGTGTGGGCATTTTCTACAAACAAGAGTCATCAAAGTGCTTGTT

>PGSC0003DMG400010240-(rev)G-LecRK\_1178

CAAAGATTGCAAATGTGTGGGCATTTTCTACAAACAAGAGTCATCAAAGTGCTTGTTGTACCTGAGCTA  
GGGGCTTTGGTTAAAGTGGAAAATTCCTCCCATGTTGGCTACATCAAGAT

>PGSC0003DMG400010240-(rev)G-LecRK\_1240

CTGAGCTAGGGGCTTTGGTTAAAGTGGAAAATTCCTCCCATGTTGGCTACATCAAGATCTCAAAGTAGAT  
GAAGTTACTGATTTATATTTATATCAAGCAAGCATGTTATATTTTTT

>PGSC0003DMG400010240-(rev)G-LecRK\_1296

ATCTCAAAGTAGATGAAGTTACTGATTTATATTTATATCAAGCAAGCATGTTATATTTTTTAAATTCA  
GTAATAATAATGTAACCTTTTGTCAAATATAATAAATAAATAAATGCAC

>PGSC0003DMG400010240-(rev)G-LecRK\_310

TTGGTACTAATGGGAATTTGGTACTAACTGATGTCGATGGCACGGTAGCTTGGCATACCAATACTGCCA  
ACAAAGGTGTAACAGGGCTAAACTTTTGCCTAATGGCAACTTGGTTTTAC

>PGSC0003DMG400010240-(rev)G-LecRK\_496

AAAGTTTAAGGGCTAAAGGCCCATCTAAGCTTGTTAGTAGAAAGTCCAGTAAAGAACCTGTTGATGGGC  
CTTATAGTTTTGTCCTAGAAGGGAGACATTGGGCCATGTATTATATAAGTG

>PGSC0003DMG400010240-(rev)G-LecRK\_682

CCAATTTTGATTTCTATTGTGAGCCAGAATATGGTGAAAATTATGCTTTTGAGCTAGGATTTAGGATTAA  
CATGACCAATTCTCCTAGCTCTGGTACTTCTATATTTACTAGGCCCAAAT

>PGSC0003DMG400010240-(rev)G-LecRK\_744

AGGATTAACATGACCAATTCTCCTAGCTCTGGTACTTCTATATTTACTAGGCCCAAATACAATAGTACATA  
CACTATGTTTAGAGTTGATATGGATGGTAATTTAAGAATGTACACTTAT

>PGSC0003DMG400010328-(rev)LRR-RLPs\_1586

AAAGAGCTTAAAGTCTCATCATTTTCATCAAAGAGCTTAGAGCCTCATCATTCTTCAGTTTCTGAATATT  
TTTACTGAGTTACTGCACTGTTTAGCGTAATGGAATGACCTGAGTGTT

>PGSC0003DMG400010328-(rev)LRR-RLPs\_1647

CTTGAATATTTTACTGAGTTACTGCACTGTTTAGCGTAATGGAATGACCTGAGTGTTGGGATTGTGGT  
TTCAGTTGTCGATTGTGTTGCTCCAAAATCTTAGGTTTCCACCTGTTTGT

>PGSC0003DMG400010328-(rev)LRR-RLPs\_2867

AGCTAGGTAGATGGGTGAAGGAGGAATTTAGTGGGGTAGAGGTTTCAGAGATGAGGGATTACAAAAT  
GTTGTTAGAACCGAGGGGAACCTCCAAATTCTAATAGTAGGATTCTGAAGGTGG

>PGSC0003DMG400010328-(rev)LRR-RLPs\_305

TTGATTTTGATGCTACAAAATACTTGGATCAAGTGTCGTGCAACCCAAGCTACAAAAGGGCATATGG  
ACAAGTATCTGACATGGGTCAACTCTGCTTTGCAAAGTTTAAAGGCCAGA

>PGSC0003DMG400010328-(rev)LRR-RLPs\_3050

GTAGAGGAGGCTTAGGGCTTACATGGTATCTGATGTTCTCTCTCTTGAATATTTATTTTTTCAAAAATC  
AAGTAACGATTATATAAGGGAAAAGAGAAAAAATACCCGAACCTGTATC

>PGSC0003DMG400010328-(rev)LRR-RLPs\_3416

CCCACCCCGTGTCTGAGCCAGGATTTTTTTTTTGTAGTTGAGTAGATACACAAATTATGTTTTTCCTACTC  
ATGAGTGGGTGCACGCACTTGGCTAAAGTTGTGTGCATAATATTTTCA

>PGSC0003DMG400010328-(rev)LRR-RLPs\_3721

GCAATTAATCATATTAGCATTTTATAACTATAAAAAACAATCATATAAATCACTATAGACATAGAGAAG  
TCAATAAAATAATTTTAGTTACTAGTTAAATTAATAAAAAACAATACAT

>PGSC0003DMG400010328-(rev)LRR-RLPs\_3782

ATAGAGAAGTCAATAAAATAATTTTAGTTACTAGTTAAATTAATAAAAAACAATACATATCACAATAAA  
AGTAATAAAATAATAATTAATAAAAGAATTACCGCGAAACATTATAAA

>PGSC0003DMG400010328-(rev)LRR-RLPs\_3965

AAGGGCAAAAAAATTGACCAAAAATCCAAAAGGGTTTGAAATCAAAGGGCAACATTTAAACGGTAG  
AGGAGATGCTGTTTAAATTAGGGTAGCGCCTTACAAGGCGCAACTCCCTATG

>PGSC0003DMG400010328-(rev)LRR-RLPs\_4026

ACGGTAGAGGAGATGCTGTTTAAATTAGGGTAGCGCCTTACAAGGCGCAACTCCCTATGCGCCTTACAA  
GGCGCAAGAAAACAGAGCCACCATCATTGTTTATTTTTTCCATGTCAGTAC

>PGSC0003DMG400010328-(rev)LRR-RLPs\_4819

AAAAAATGATAGATACAGTTTCTTGCGGGTTGCCAATCTTCTCAACCTTATGTATCACTCTCTGCCATATT  
ATTGCACTTCTATATCTGGCATTAGAGACTTGCTCATGTATGTCTCTGC

>PGSC0003DMG400010328-(rev)LRR-RLPs\_5368

ATCGGTGCTCTCATAGTAAAGAAGGCTTCGCTCAAGGAGTGATAGATTTGGACGGAGTCTTGCTTTGA  
TGCTAAGGAGACGAGATCCATCGATCTGAATAAGTCTAGTACACCTTTCTC

>PGSC0003DMG400010328-(rev)LRR-RLPs\_5551

CTAATAACTGGATCTATAGTTTGTCCCTTCCCTTACAAATACATGCATTTTTTGACCTTGATATCTACTT  
GCCAATACTTGTTTCATCCTTGTTGTTAGGACCCACCGGTAGTAATC

>PGSC0003DMG400010328-(rev)LRR-RLPs\_6039

TATATGGCTGTACTTTTTATTTGATTGATCAATTTACAGTAAACACTTAGTATTTGTAGGGGTGTCAA  
AAATGAGCCCACCTATAGGTAACCCGCCCAACCCGCCATAATTTAAG

>PGSC0003DMG400010328-(rev)LRR-RLPs\_6588

TCTAGTATCTTGTCTCATTCACTAACCAGAAACACCTCAATTGTTGTTCCAGGATGTTTTTTAGCATTGG  
TTATTTGTTCCAGTTCTACCAAGTGCTTCTTTTAGGCTTTTCGTTTTT

>PGSC0003DMG400010328-(rev)LRR-RLPs\_6649

TTTAGCATTGGTTATTTGTTCCAGTTCTACCAAGTGCTTCTTTTAGGCTTTTCGTTTTTCTATATCCGTTAC  
CCTTTTCTGATCATACTTACCAATCCAGCAATCTGATTATGTATAAT

>PGSC0003DMG400010328-(rev)LRR-RLPs\_7137

CAATGATTATTTGTACACTTGGCACCTAATTATTGGACTACTTTGTAACAACTCTAACAGCCATTTTGCT  
CTTCATGTGCCTTCCTTGTGCCTAGGTTGAGAATCTTCTAGACCTTGTA

>PGSC0003DMG400010328-(rev)LRR-RLPs\_7198

CCATTTTGCTCTTCATGTGCCTTCCTTGTGCCTAGGTTGAGAATCTTCTAGACCTTGTAACACTGGTTAGG  
TTGAGAATCTTCTAGACCTTCTGATTAGGTTTCCTAGAACTTTTGTCT

>PGSC0003DMG400010328-(rev)LRR-RLPs\_7259

ACTGGTTAGGTTGAGAATCTTCTAGACCTTCTGATTAGGTTTCCTAGAACTTTTGTCTTTTTGGCACAAA  
TCTTTTGGTTCTTGAAAAGAAATGTTGGAGAAGGTTCAATTCGGTTAGC

>PGSC0003DMG400010328-(rev)LRR-RLPs\_7381

GTCCGGCATGCAGCTCGAATATGTTTATATGATAAGTCACTTATGTATTCTTTTGTTCCTAATTTCTCCAA  
GTTAAGATTTTTCTCAGAGAGAGTCTAGAACATGGATAATGAGTAGTG

>PGSC0003DMG400010328-(rev)LRR-RLPs\_7564

TTTCATTCAGTCGATCAAGGAAGCCATATATCCCGAATCTTAAAATTTAGATCCACAACCGATTTGAGC  
AACTTAGTCTAAAATAAGTCGACCCAAACATGTTGAAAGAAGTTGCAATT

>PGSC0003DMG400010328-(rev)LRR-RLPs\_7625

ATTTGAGCAACTTAGTCTAAAATAAGTCGACCCAAACATGTTGAAAGAAGTTGCAATTCTCTCAGAAAA

TTGAGCACTCCACGTCTGTAATATTCTTGTCCATATCCCCACTTTCCTT

>PGSC0003DMG400010328-(rev)LRR-RLPs\_7686

CTCAGAAAATTGAGCACTCCACGTCTGTAATATTCTTGTCCATATCCCCACTTTCCTTCCCTCCGTGTGGTA

AATACTTTAGGGAATTTGTAGAAGAACAAGTAGTAGGAGAAGTCAAA

>PGSC0003DMG400010328-(rev)LRR-RLPs\_7991

GTGTTGTATATATTTACGGCAGGTGATGTCAATCCCCTTCGAGGCAAAGAAAGAGTGTAAAGAAAGCAGC

CATAAAATGCCCACTCCATCACCTCAAAGTGGTCAAATTTTCGGGGTTTTA

>PGSC0003DMG400010328-(rev)LRR-RLPs\_8235

AAACACACGCAAGCTTCGAGAAATCTTGCTAAGCTCCAGCTTGAATGTGAAGTGCCTCCGGCTATTGAG

TTGGTCATACTTTAATGAAAATAATAATGTTATTAGGGTTAAATTTGTGAT

>PGSC0003DMG400010328-(rev)LRR-RLPs\_976

TTATTGGATGACATATCCTCTCGTCTCTTGTGCGTTCTCTCTCAGCTGGAGGTCCTTACAGTAGATGCTTG

TATATCATTGGTTAGTGAACAAAGTTTGTGTCTATCTACTCTTGTTTTA

>PGSC0003DMG400010348-(rev)LRR-RLKs\_0

ATGAACACCAACATTATTCCTAGTACCTCAATACAAAATTCTGAGGATATTTTCAGAATTACCTATGACCAC

CACCAACATCTCTGGTTATTCATCAACGGATAAGAATTCTTCGAAAATA

>PGSC0003DMG400010348-(rev)LRR-RLKs\_1037

AATAAGGCTCAAATACTTGTACAATGTGTCTTGGACGTTCAAGATATATCATTTTTAGAACAAATGTTTTA

TTGCCTCAAACAGTATATATATATATGGAACAAAAAATATGGAAAATAG

>PGSC0003DMG400010348-(rev)LRR-RLKs\_1098

CAATGTTTTATTGCCTCAAACAGTATATATATATATGGAACAAAAAATATGGAAAATAGTGTTTCAGCAAA

TAAATATTAATCCTTTTATGTTTCGATTCTCTGTGTCTTCATTTCTTCGT

>PGSC0003DMG400010348-(rev)LRR-RLKs\_1159

TTCAGCAAATAAATATTAATCCTTTTATGTTTCGATTCTCTGTGTCTTCATTTCTTCGTCATTAAATGCAAC

GTCGCCACAATAACCAGAAGTGATCATAGGACATTTAGGTTGACATT

>PGSC0003DMG400010348-(rev)LRR-RLKs\_122

TTATCCAATTACCGTTGATGACTATTCGTTATCTTATATATATTTTCATGGGATGCAAAGATAAATACTAGTG

AGAAATTACAAAATCACTCCATCAAGTCTAAGTTGATGGTTGGTCAGCA

>PGSC0003DMG400010348-(rev)LRR-RLKs\_1220

TTAAATGCAACGTCGCCACAACCTAACCAGAAGTGATCATAGGACATTTAGGTTGACATTTTTGGCAAACA  
TTCATAAAGGCAATATTAGCACTGACACTGACGAAGCAAGAAATGTGAT

>PGSC0003DMG400010348-(rev)LRR-RLKs\_1281

TGGCAAACATCTCATAAAGGCAATATTAGCACTGACACTGACGAAGCAAGAAATGTGATAACTTCTCGTT  
GTTGGGTTAGGATGTTGCATAATTTGTCACCTCTATATATATTGATTCTA

>PGSC0003DMG400010348-(rev)LRR-RLKs\_1342

CTTCTCGTTGTTGGGTTAGGATGTTGCATAATTTGTCACCTCTATATATATTGATTCTACAGTTACTTCTTC  
GAACATTGCAAGGTGAATACTACTGGATATATGGATCGTAAGACAATT

>PGSC0003DMG400010348-(rev)LRR-RLKs\_1403

GTTACTTCTTCGAACATTGCAAGGTGAATACTACTGGATATATGGATCGTAAGACAATTGTGTTTTACGG  
TTTAGTGTGCGAGGTGAGTGTGCATGATGTCAGATTTTGTGAGTGGCTTACA

>PGSC0003DMG400010348-(rev)LRR-RLKs\_1464

GTTTTACGGTTTAGTGTGCGAGGTGAGTGTGCATGATGTCAGATTTTGTGAGTGGCTTACACTTACATACAA  
GTAAATGATGTGCTAAACCTATTAATTATTACCAATCTCAAATAGCATTG

>PGSC0003DMG400010348-(rev)LRR-RLKs\_1525

TACATACAAGTAAATGATGTGCTAAACCTATTAATTATTACCAATCTCAAATAGCATTGATGAAAAAATTC  
TCTCAAGTTTCATAAACAAACATACAATGTTTTTGCAGTGTATTTACT

>PGSC0003DMG400010348-(rev)LRR-RLKs\_1708

ATTTGTGCTTTCCCGATCTAAGAAAACTGGACCAATATGTTGATTTTGCCACATCAAACCATAATTTAT  
ACTGTAAACACCCAAATAAAGCCACAGGAACACCAACACAAGCTGCAAT

>PGSC0003DMG400010348-(rev)LRR-RLKs\_2074

TTTTAGCAATATGGGAATGCAATTATCACTGTTATTACCGCCTGGCACAGTTAATCCAGCAGCAAAGACC  
ATGGTGGCAATCAAAGTAGCGACAATCATAAAGAATTTGCAGTGTCTTT

>PGSC0003DMG400010348-(rev)LRR-RLKs\_244

ATGGAATTTTGAGTTCCTTGATAGTGAATCCCAAAAATACAAGGTTTATTTTCTTTCCCTATTTAAT  
TTCAAAAATACATATGTTATTGATGATATTGCCAATTATTATTTTTTT

>PGSC0003DMG400010348-(rev)LRR-RLKs\_2745

CAATTTTTTTTTTTGTTTCTAGTCAATAGTAATATGAATTTTACACATCATATTAGGCCTCTTATTGTAATTT  
GAAGTAATTCCGTTGACCCATCCCTGTGTAACACACTTGTGGAGATG

>PGSC0003DMG400010348-(rev)LRR-RLKs\_305

CCTATTTTAATTTCAAAAATACATATGTTATTGATGATATTGCCAATTATTATTTTTTTATTACATATTTCA  
AACTTTTATTTAATCAATTCTTAGATGTAAGTAAATTTTGTTTTGT

>PGSC0003DMG400010348-(rev)LRR-RLKs\_366

TACATATTTTCAAACTTTTATTTAATCAATTCTTAGATGTAAGTAAATTTTGTTTTGTCATTTTGGTTTAGC  
AGTAGGAATGGCGGTCCTATAAGAAGGTCACCTAATAGGACAAGCTC

>PGSC0003DMG400010348-(rev)LRR-RLKs\_4026

TTGGAATACAGCACTTGGGAGGTAGTATTGCATCTCCTAGCAAGAAATTTGAATTTTCTTCTTTTTCACT  
CTTCGACCAATTTGGTACTCATATATATTTATATTTCCCCACTTTACAG

>PGSC0003DMG400010348-(rev)LRR-RLKs\_4087

CTTTTTCACTCTTCGACCAATTTGGTACTCATATATATTTATATTTCCCCACTTTACAGGAAAGATACCAGT  
GGAGCTAGGTAATCTTAAGAACTACAGATTCTGTCATTAACGACTG

>PGSC0003DMG400010348-(rev)LRR-RLKs\_488

GATACCAACCATTTGGCAAAGAAATTGATCCAAACAATCAAGGATTAGATAGGCATGTTTTCTCTCTTTT  
ATTCTCCAAATTATCATCAATATATTAATTAGTAATATTGTATCTCCCAT

>PGSC0003DMG400010348-(rev)LRR-RLKs\_5063

GCAACAATAGTTGATCTGTCAAAAAATGATTTTAATGGTAAGATCCCTAGCACACTAGGGGGTCTGGAT  
AGATTGATGAACTTTCTCTAGCACATAATAAATTAGATGGGCCTATTCCA

>PGSC0003DMG400010348-(rev)LRR-RLKs\_5124

GTCTGGATAGATTGATGAACTTTCTCTAGCACATAATAAATTAGATGGGCCTATTCCAGATTCATTTGG  
CAAATGCTGGCCTTGGAATTCTTGATTTGAGCATTAAACAATGTTAGTG

>PGSC0003DMG400010348-(rev)LRR-RLKs\_549

CTCTCTTTTATTCTCCAAATTATCATCAATATATTAATTAGTAATATTGTATCTCCCATTTTCAATCACATTA  
GTTTACATATTATATGAGTGTGTTCCGGTACGGAGGAAACATATGGTT

>PGSC0003DMG400010348-(rev)LRR-RLKs\_5551

TGATGTGTCTCTGATAAAATGTCATGAAAGAATTTCTATTATGAACTTGAACAAGCAACCGAAAGATTC  
AATGAAAGCAACTTGCTTGGTAACGGGAGTTTCTGCAAGGTCTACAAAGG

>PGSC0003DMG400010348-(rev)LRR-RLKs\_61

CTATGACCACCACCAACATCTCTGGTTATTCATCAACGGATAAGAATTCTTCGAAAATAACTTATCCAATT

ACCGTTGATGACTATTCGTTATCTTATATATATATTTTCATGGGATGCAAAG

>PGSC0003DMG400010348-(rev)LRR-RLKs\_610

TCAATCACATTAGTTTACATATTATATGAGTGTGTTCCGGTACGGAGGAAACATATGGTTTTCAATTATTTT

ATGTTTGATTAGTGGGAATATTTTCTCATGTTCTTTGAAAATGAGAAAA

>PGSC0003DMG400010348-(rev)LRR-RLKs\_6100

AGCAACCATTGGATATATTGCTCCAGGTATTA AAACTTTTACATCTTTCTCATGTTTTTCAGAATACCCAAA

ACATTAATTCTTTTCCCCGATATATATGATCAGTTTTAGCCTATTACTC

>PGSC0003DMG400010348-(rev)LRR-RLKs\_6161

AATACCCAAAACATTAATTCTTTTCCCCGATATATATGATCAGTTTTAGCCTATTACTCGATAGTTAGGAA

GCATTTTTGATCATTTTCAACCCATGATTGCAGAGTATGGACAAGATGG

>PGSC0003DMG400010348-(rev)LRR-RLKs\_6222

TAGTTAGGAAGCATTTTTGATCATTTTCAACCCATGATTGCAGAGTATGGACAAGATGGAATGGTATCCA

CGAGCTGTGATGTTTATAGTTTTCGGCATCCTGATGATGGAGACATTTACA

>PGSC0003DMG400010348-(rev)LRR-RLKs\_6283

TGGTATCCACGAGCTGTGATGTTTATAGTTTTCGGCATCCTGATGATGGAGACATTTACAAGAACCAAACC

AGGTGATGAAATATTTACTGGAGACTTGAGCATAACGACGTTGGGTAAGTG

>PGSC0003DMG400010348-(rev)LRR-RLKs\_6344

AACCAAACCAGGTGATGAAATATTTACTGGAGACTTGAGCATAACGACGTTGGGTAAGTGATTCTTTTCCA

TATGAGATTCATAAGGTGGTGGATGCTAATTTGGTAGAGCTAGAGGATGA

>PGSC0003DMG400010348-(rev)LRR-RLKs\_6405

TCTTTTCCATATGAGATTCATAAGGTGGTGGATGCTAATTTGGTAGAGCTAGAGGATGAACGGATTGAC

GCAAAGATGCAGTGTTTGTGTCTATCATAGAGTTAGCTTTGAGCTGCACT

>PGSC0003DMG400010348-(rev)LRR-RLKs\_6527

AGTGTCACCTGATGCAAGAATTAGTATGGAAGATTCTTTTCAACACTTCAAAGATCATGCTCCAGTTG

GTCAATAGTCAACCGCTAGGTGAAATTAGACCATCCTCTTATGATTGATGC

>PGSC0003DMG400010348-(rev)LRR-RLKs\_6588

CTCCAGTTGGTCAATAGTCAACCGCTAGGTGAAATTAGACCATCCTCTTATGATTGATGCTTGATTACCTAT

GTCAATTCTGCTATTTAAGATGAATTCAGTTTTGACTTCATATTATGT

>PGSC0003DMG400010348-(rev)LRR-RLKs\_6649



GATTACCTATGTCAATTCTGCTATTTAAGATGAATTCAGTTTTGTACTTCATATTATGTACTTTTTCACTTTC  
TAAACATCACAGATTTCTTTCAACCATATGCTAGCTGGAATGGTGAT

>PGSC0003DMG400010348-(rev)LRR-RLKs\_671

CAATTATTTTATGTTTGATTAGTGGGAATATTTTCTCATGTTCTTTGAAAATGAGAAAAATGATAAATAGT  
TGCATCTATCATATATATATAATAAAAAGATCTCTTTAGACAATGACA

>PGSC0003DMG400010348-(rev)LRR-RLKs\_6710

TTTTTCACTTTCTAAACATCACAGATTTCTTTCAACCATATGCTAGCTGGAATGGTGATTTTCCAGCTACTG  
GAGTTCACAATTAGTCTTTCTAATCCATAATTAATTGTCTCCTGGATA

>PGSC0003DMG400010348-(rev)LRR-RLKs\_732

GATAAATAGTTGCATCTATCATATATATATAATAAAAAGATCTCTTTAGACAATGACAACGCTCAATATA  
ATTCATCTCATCTTGTTTATATTTTTTCAGGATTCGTCAAACAGTTCAG

>PGSC0003DMG400010348-(rev)LRR-RLKs\_793

GCTCAATATAATTCATCTCATCTTGTTTATATTTTTTCAGGATTCGTCAAACAGTTCAGAGGCGATCTTCA  
ACACACCACACAATTTCAATGAACATACTCAAGGGTATGGCTATTCCAA

>PGSC0003DMG400010348-(rev)LRR-RLKs\_854

GCGATCTTCAACACACCACACAATTTCAATGAACATACTCAAGGGTATGGCTATTCCAATGAAGCGATTA  
CATTGAGAAGTTTGAAGAGTAGGAGAGAAAATGAAGATGAAGCTCCTGCT

>PGSC0003DMG400010348-(rev)LRR-RLKs\_915

AAGCGATTACATTGAGAAGTTTGAAGAGTAGGAGAGAAAATGAAGATGAAGCTCCTGCTCAGTTACAG  
TCTTCTTCAATACCCCAACCAACTGCCTCTATATTGAATCTGCCTAGTTCG

>PGSC0003DMG400010350-(rev)LRR-RLKs\_0

ATGCAACTTCATGGTACCATTCTCCATACCTTGAAACCTCTCATTCTGGTTTCCATTATAATCGACAAC  
AACACTTTCATGGAGAGTTGCCAAAAGAGTTGGCTTATTTACAGAGG

>PGSC0003DMG400010350-(rev)LRR-RLKs\_124

AACTGATCTCGGTAAGAAGTAATAACTTTACTGGTGCCATTCCAACATTTCTAAGTCTGTTACCAAACCTT  
CGCATTGTGCATCTTTGAGCAACCAATTTTTCGGGGAAATCCCATCTT

>PGSC0003DMG400010350-(rev)LRR-RLKs\_1302

GGTGCCATATCTTTACGTTCTCAAGTTCTAACATGTCAACTCATATATTTCCCCTCTTGACAGGAGAGAT  
ACCAATGGAAGTACTGTTATCTTCAGAACTACTGTTTCTGTCATTAGAC

>PGSC0003DMG400010350-(rev)LRR-RLKs\_186

CCAAACCTTCGCATTGTGCATCTTTCGAGCAACCAATTTTTCGGGGAAATCCCATCTTCCCTTTCCAATAT  
AACACAGCTGCAAGTGTGGATATGTCCAAAAATTTCTCGATGGGGAG

>PGSC0003DMG400010350-(rev)LRR-RLKs\_1922

TGTGATAAAGATGGATTTGTCACAAAATGAGTTGACTGAATATATTCCAAAATCCATCCAAGGCTTGTCG  
AACCTTCAAGAACTTAAGTTAGGTGGCAACATGATAAAAGGAATCATACC

>PGSC0003DMG400010350-(rev)LRR-RLKs\_2170

TGAATTTGAGCTTACCTTCAAGCTTGTGGACTCTTCAAGATCTCATAGAATTCAATATTTTCGTCCAATTTAT  
TAAGTGGGAAAGTTTCTATGGAGATTGGAATTTAAAGGTTGCAACAC

>PGSC0003DMG400010350-(rev)LRR-RLKs\_2232

TCCAATTTATTAAGTGGGAAAGTTTCTATGGAGATTGGAAATTTAAAGGTTGCAACACTAGTTGATCTGT  
CAAAAAATGATTTTAGTGGTAAGATCCCTAGCACGCTAGGGGCTCTGGAT

>PGSC0003DMG400010350-(rev)LRR-RLKs\_2294

TGATCTGTCAAAAAATGATTTTAGTGGTAAGATCCCTAGCACGCTAGGGGCTCTGGATAGATTGATGAA  
ATTTTCTCTAGCACATAATAAATTAGATGGCCTATTCCAGATTCATTTGGC

>PGSC0003DMG400010350-(rev)LRR-RLKs\_2356

TGATGAAATTTTCTCTAGCACATAATAAATTAGATGGCCTATTCCAGATTCATTTGGCAAAATGCTGGCCT  
TAGAATTCTTGGATTTGAGCAATAACAATCTTAGCGGTGAAATTCCAAA

>PGSC0003DMG400010350-(rev)LRR-RLKs\_2418

TGCTGGCCTTAGAATTCTTGGATTTGAGCAATAACAATCTTAGCGGTGAAATTCCAAAGTCATTAGAAGC  
TCTCGTGTATCTCAAATACTTGAACCTTCTCATTTAATGAACTCAGTGGAA

>PGSC0003DMG400010350-(rev)LRR-RLKs\_248

TTCCAATATAACACAGCTGCAAGTGTGGATATGTCCAAAAATTTCTCGATGGGGAGATCCCTCAAGAA  
CTCGGTGAACTTCATCACATGACTTTGTTCAATCTGGAAAATAACCAGCT

>PGSC0003DMG400010350-(rev)LRR-RLKs\_2480

TTAGAAGCTCTCGTGTATCTCAAATACTTGAACCTTCTCATTTAATGAACTCAGTGGAAAGATTCCCACAG  
GTGTTCTTTTGCAAATGCCACAGGTCAATCCTTCTGTCCAATTATGCA

>PGSC0003DMG400010350-(rev)LRR-RLKs\_2604

GTGGTGATTCTAAGTTTCATGTTTCACCATGCGTCATCAAATCTCCGAAGAGGTCAAAGAGAAAAAAGA

TAATCTTGGTTTTGTACATCCTTTTAGGAGTGGGTATACTATTTCTCTCAT

>PGSC0003DMG400010350-(rev)LRR-RLKs\_2666

AAAAAGATAATCTTGGTTTTGTACATCCTTTTAGGAGTGGGTATACTATTTCTCTCATTAGCCCTCGCATA  
TGTATTTTTAAGATGGAGAAAGATAAAGAAGAATGCAGATCAAGCAGAT

>PGSC0003DMG400010350-(rev)LRR-RLKs\_2790

TTCCGGTAAAAGGGAAATATGAAAGAATTTCTTACTATGAACTTGAACAAGCAACAGAAGGATTGACG  
AAAGCAACCTGCTTGGTAGTGGGAGTTTCAGCAAGGTTTTCAAAGGGATAC

>PGSC0003DMG400010350-(rev)LRR-RLKs\_2976

TTGATACTGAATGTGAGATGTTGCGCAACCTCCGCCATCAAATCTTACAAAAGTCATCACCAGCTGCTC  
CAACCCTCACTTCAAAGCCTTGGTATTAGAATATATGCCAAATGGGACAC

>PGSC0003DMG400010350-(rev)LRR-RLKs\_3038

AGCTGCTCCAACCCTCACTTCAAAGCCTTGGTATTAGAATATATGCCAAATGGGACACTTGAAAAATGGC  
TATACAATCACAACCTTTTTCTTAGACATGTTGCAGAGATTAAGTATACTG

>PGSC0003DMG400010350-(rev)LRR-RLKs\_310

CTCAAGAACTCGGTGAACTTCATCACATGACTTTGTTCAATCTGGAAAATAACCAGCTTACTGACTCTATA  
CCACCATCAATCTTTAACATTACAACAATGAAAAAGATTGGTCTCACCT

>PGSC0003DMG400010350-(rev)LRR-RLKs\_3100

AAAATGGCTATACAATCACAACCTTTTTCTTAGACATGTTGCAGAGATTAAGTATACTGATAGATGTTGCA  
TCTGCAATAGACTATCTCCACAATGGCTATTCAACACCTGTGGTGCATTG

>PGSC0003DMG400010350-(rev)LRR-RLKs\_3162

ATGTTGCATCTGCAATAGACTATCTCCACAATGGCTATTCAACACCTGTGGTGCATTGTGACTTGAAACC  
AAGCAACATCTTGCTAGATCATGAAATGGTTGGTCATGTCAGCGATTTTG

>PGSC0003DMG400010350-(rev)LRR-RLKs\_3286

TGCAAAATTGTTAGGTGCAGGGGAAGATTTTGTTCAAACAAGGACAATAGCAACCATTGGATATATTGC  
TCTAGGTATCGTAATTATAGATTAGTACTCAGTTTTAGCATGTTCCCTCGGT

>PGSC0003DMG400010350-(rev)LRR-RLKs\_3348

ATATTGCTCTAGGTATCGTAATTATAGATTAGTACTCAGTTTTAGCATGTTCCCTCGGTAAGTAAAGTTT  
TTTTGTGATTATCTTTTACCATGATTGCAGAATATGGACAAGATGGAAT

>PGSC0003DMG400010350-(rev)LRR-RLKs\_3410

AGGAAGTTTTTTGTGATTATCTTTTACCATGATTGCAGAATATGGACAAGATGGAATAGTCTCCACCAG  
CTGTGATGTTTATAGTTTAGGCATTGTGATGATGGAGACATTCACAAGAA

>PGSC0003DMG400010350-(rev)LRR-RLKs\_3472

TCCACCAGCTGTGATGTTTATAGTTTAGGCATTGTGATGATGGAGACATTCACAAGAAGGAGACCAAGT  
GATGAAATATTTACCGGAGGAATGAATATACGATGTTGGATTAATGATTCT

>PGSC0003DMG400010350-(rev)LRR-RLKs\_3534

ACCAAGTGATGAAATATTTACCGGAGGAATGAATATACGATGTTGGATTAATGATTCTTTCCGAGTGGT  
ATTCATAAGGTGGTGGATTCTAATTTGATACAACCATGGGATGAACAAAT

>PGSC0003DMG400010350-(rev)LRR-RLKs\_3596

CGAGTGGTATTCATAAGGTGGTGGATTCTAATTTGATACAACCATGGGATGAACAAATCGATGCAAAGA  
TGCATTGTTTGCATCTATCATGAAATTAGCTTTGAGTTGCACTGTAGTGA

>PGSC0003DMG400010350-(rev)LRR-RLKs\_3658

GCAAAGATGCATTGTTTGCATCTATCATGAAATTAGCTTTGAGTTGCACTGTAGTGACACCTGATGCAA  
GAATTAGCATGACAGATGCTCTTTCAACACTCGAAAAGATCAGACTCCAG

>PGSC0003DMG400010350-(rev)LRR-RLKs\_372

GACTCTATACCACCATCAATCTTTAACATTACAACAATGAAAAAGATTGGTCTCACCTACAATAATCTTAC  
GGGTAAGCTTCCAGCAACTATATGTGACCATCTTCCAACTTGGAAGAG

>PGSC0003DMG400010350-(rev)LRR-RLKs\_434

TAATCTTACGGTAAGCTTCCAGCAACTATATGTGACCATCTTCCAACTTGGAAGAGCTTACCTCTCA  
GCCAATCACATACATGGCGTTATTCCACCAAACATAGGAAAATGCAGAAA

>PGSC0003DMG400010350-(rev)LRR-RLKs\_558

CAAATCTTGTCATTATCTAGAAATGAGCTCACTGGAAGTGTACCAAGAGAGATAGGCAATTTAACGGCA  
CTTACAAGCTTATACCTTGGAACCTTGCATCTGGAAGGTATTATGATACTT

>PGSC0003DMG400010350-(rev)LRR-RLKs\_62

AATCGACAACAACACTTTCCATGGAGAGTTGCCAAAAGAGTTGGCTTATTTACAGAGGTTGAAACTGAT  
CTCGGTAAGAAGTAATAACTTTACTGGTGCCATTCCAACATTTCTAAGTCT

>PGSC0003DMG400010350-(rev)LRR-RLKs\_620

AACGGCACTTACAAGCTTATACCTTGGAACCTTGCATCTGGAAGGTATTATGATACTTACTTTCAATTTTA  
TCTTCTGCCAAATTGGTACTAATCATGTATTTTCTCACTTGACAGGAG

>PGSC0003DMG400010351-(rev)LRR-RLKs\_0

GATTAGGCAAAACACAAAACACTATTCATATTGACTAATGTGCCAGAGTTTATGTAATCAAAGTACTAAAT  
ACTCGTTTAGTCTCATATTACTTGGCCTTGTTAACTAGTAAAAGTTGA

>PGSC0003DMG400010351-(rev)LRR-RLKs\_1037

TAATAACTTAACTGGTGCCATTCCAACATCTTTAGGTTTGCTAGTAGACCTTCGCATTTTGCGCCTGTCTA  
GCAATCAATTTCCGGAAAAATCCCATCTTCCCTTCCAATCTAACAAA

>PGSC0003DMG400010351-(rev)LRR-RLKs\_1098

CGCCTGTCTAGCAATCAATTTCCGGAAAAATCCCATCTTCCCTTCCAATCTAACAAAGCTGGAAGTGTT  
GAGAATAACGGGAAATTTCTCGAAGGAGAGATCCCTCGAGAACTTGGT

>PGSC0003DMG400010351-(rev)LRR-RLKs\_1159

TGGAAGTGTTGAGAATAACGGGAAATTTCTCGAAGGAGAGATCCCTCGAGAACTTGGTGATCTTCATT  
ACATGACTGCTTTAAATCTGGAAAGTAACCATCTTACTGGCTCTATACCAC

>PGSC0003DMG400010351-(rev)LRR-RLKs\_122

CTCTTTAAGTCTTAACCTAAAGTATACTCCAAAACTAATGGCAGTACTCAAATGCAAGGCCACAAGTA  
CTTATCAGAAAGACCAAGACTTAAATTTGAGGTTCAAGTTTCTTGACAT

>PGSC0003DMG400010351-(rev)LRR-RLKs\_1220

TCTTCATTACATGACTGCTTTAAATCTGGAAAGTAACCATCTTACTGGCTCTATACCACCATCAATTTATAA  
CATTACAACCATGCGAATCATTGGTCTTACCAACAATAATCTTACTGG

>PGSC0003DMG400010351-(rev)LRR-RLKs\_1281

TCAATTTATAACATTACAACCATGCGAATCATTGGTCTTACCAACAATAATCTTACTGGTGAGCTTCCAAC  
AACTATATGTGACTATCTTCCAACTTGGAAAGGCTTACCTCTCAACA

>PGSC0003DMG400010351-(rev)LRR-RLKs\_1342

AGCTTCCAACAACACTATATGTGACTATCTTCCAACTTGGAAAGGCTTACCTCTCAACAAACATCCTAGGT  
GGCATTATTCCACCAAACCTTGGAAAAATGCAAAAAGCTCAAAGTCTTGT

>PGSC0003DMG400010351-(rev)LRR-RLKs\_1403

CATCCTAGGTGGCATTATTCCACCAAACCTTGGAAAAATGCAAAAAGCTCAAAGTCTTGTCTGCTGTC  
AATGAGTTCACTGGAACCTATACCGAGGGAGTTAGGCAACATAACAAATCT

>PGSC0003DMG400010351-(rev)LRR-RLKs\_1464

TTGTCTGTCAATGAGTTCACTGGAACCTATACCGAGGGAGTTAGGCAACATAACAAATCTTGCAGAATTAT

ACCTTGGATTGCTGCACTTCGAAGGTAGTATTACATCTCCTAGCAAGAAT

>PGSC0003DMG400010351-(rev)LRR-RLKs\_1525

CAGAATTATACCTTGGATTGCTGCACTTCGAAGGTAGTATTACATCTCCTAGCAAGAATATTTAATTTTTT

TCTTTTTCACTTTTCCACCAATTTAGTACTCATATATATATTTCCCCAC

>PGSC0003DMG400010351-(rev)LRR-RLKs\_1586

TTAATTTTTTTCTTTTTCACTTTTCCACCAATTTAGTACTCATATATATATTTCCCCACTTAACAGGAGAGAT

ACCAGTGGAGCTAGGTAATCTTAAGAACTACAGATTCTGTCATTAT

>PGSC0003DMG400010351-(rev)LRR-RLKs\_1647

AACAGGAGAGATAACCAGTGGAGCTAGGTAATCTTAAGAACTACAGATTCTGTCATTATCCGGCTGTAA

GCTTACTGGTTCCATCCCCACAAGCATTTTCAACATGTCAGCGCTGCGGGC

>PGSC0003DMG400010351-(rev)LRR-RLKs\_1708

GGCTGTAAGCTTACTGGTTCCATCCCCACAAGCATTTTCAACATGTCAGCGCTGCGGGCAGTCGTACTTG

ACGAAAACATGCTTTCAGGTAATCTACCAGCAGATTTAGGCAGTGGGATC

>PGSC0003DMG400010351-(rev)LRR-RLKs\_1769

TCGTACTIONGACGAAAACATGCTTTCAGGTAATCTACCAGCAGATTTAGGCAGTGGGATCCCCAGCCTAG

AAACATTGTTTTGTGCAAACAACATCTGAGTGGATTTATATCTGCTACTA

>PGSC0003DMG400010351-(rev)LRR-RLKs\_183

CCACAAGTACTTATCAGAAAGACCAAGACTTAAATTTGAGGTTCAAGTTTCTTGACATCTCATTAAACAT

AAAATACATTTTCCCTGTATTGTCGCCATTTTCTATTCTTCACTAAAAG

>PGSC0003DMG400010351-(rev)LRR-RLKs\_1830

CAGCCTAGAAACATTGTTTTGTGCAAACAACATCTGAGTGGATTTATATCTGCTACTATCTCAAATGCTT

CAAGACTCAGTGAGATTGATCTTTCATCAATAGTTTCACAGGTCCAAT

>PGSC0003DMG400010351-(rev)LRR-RLKs\_1891

TCAAATGCTTCAAGACTCAGTGAGATTGATCTTTCATCAATAGTTTCACAGGTCCAATCCTCAATCACT

TGGTAACTTAGAAAACCTTGAGGTTTTGGACCTGCAGGTGAACAATTTT

>PGSC0003DMG400010351-(rev)LRR-RLKs\_1952

CTCAATCACTTGGTAACTTAGAAAACCTTGAGGTTTTGGACCTGCAGGTGAACAATTTTGTGAGCGATTC

AGCATTGAGCTTCTGACATCTTTGACACACTGTAGGAACTGAGAGAAC

>PGSC0003DMG400010351-(rev)LRR-RLKs\_2013

CAGCGATTCAGCATTGAGCTTCCTGACATCTTTGACACACTGTAGGAACTGAGAGAACTCACCTTTGCT  
AAGAATCCCTTGGAAGGTTTTTCCCTGCATCAATTGGAAATTTCTCTGA

>PGSC0003DMG400010351-(rev)LRR-RLKs\_2074

ACCTTTGCTAAGAATCCCTTGGAAGGTTTTTCCCTGCATCAATTGGAAATTTCTCTGATTTTCTGCAATTT  
TTCGAAGGATGGACTTGTAAGCTGAAAGGCTCCATTCCTGGAGAAATT

>PGSC0003DMG400010351-(rev)LRR-RLKs\_2135

TTCTGCAATTTTTCGAAGGATGGACTTGTAAGCTGAAAGGCTCCATTCCTGGAGAAATTGGTAATCTTAC  
CGGTGTGATAAGGATAAATTTTACAAAATGATTTGACTGGACATATTC

>PGSC0003DMG400010351-(rev)LRR-RLKs\_2196

TAATCTTACCGGTGTGATAAGGATAAATTTTACAAAATGATTTGACTGGACATATTCAAAACTATCC  
AAGGCATGCTGAACCTTCAAGAATTTTACCTAGAGAGCAACAAGATAGA

>PGSC0003DMG400010351-(rev)LRR-RLKs\_2257

AAAATATCCAAGGCATGCTGAACCTTCAAGAATTTTACCTAGAGAGCAACAAGATAGAAGGAGTCATA  
CCAGATTCTATCTGCAATTTAAAGAATCTTGGAGCATTATTCTTGTCAGGT

>PGSC0003DMG400010351-(rev)LRR-RLKs\_2318

GAGTCATACCAGATTCTATCTGCAATTTAAAGAATCTTGGAGCATTATTCTTGTCAGGTAATCAATTTTCT  
GGTCGCGTGCCACCTTGCTTAGGAAAAGTTACCAGTATGAGATATCTTT

>PGSC0003DMG400010351-(rev)LRR-RLKs\_2379

TCAATTTTCTGGTCGCGTGCCACCTTGCTTAGGAAAAGTTACCAGTATGAGATATCTTTCTCTAGCTGATA  
ACATGCTTAATTCGAGTTTACCCGAAAGCTTGGGGAGCCTTCCTGATCT

>PGSC0003DMG400010351-(rev)LRR-RLKs\_244

CATTAACATAAAATACATTTTCCCTGTATTGTCGCCATTTTCTATTCTTCACTAAAAGAACTTGTCGAACT  
AACTCGATATTGACACTCTAAACCAAAATATACTCCATAGACTAATGT

>PGSC0003DMG400010351-(rev)LRR-RLKs\_2440

CTAGCTGATAACATGCTTAATTCGAGTTTACCCGAAAGCTTGGGGAGCCTTCCTGATCTCATAGAGTTCA  
ATTTTTCATCCAATTTATTGCATGGCAAATTCCTATTGAGATTGGAAAT

>PGSC0003DMG400010351-(rev)LRR-RLKs\_2501

TAGAGTTCAATTTTTCATCCAATTTATTGCATGGCAAATTCCTATTGAGATTGGAAATTTAAAGTCTGCA  
ACACTCATTGATCTGTCAAAAATGATTTTTTTGGTATGATCCCTAGCA

>PGSC0003DMG400010351-(rev)LRR-RLKs\_2562

AAAGTCTGCAACACTCATTGATCTGTCAAAAAATGATTTTTTTGGTATGATCCCTAGCACTCTAGAGGGT  
CTGGATAGATTGATTAGTCTTTCTCTAGCACATAATAAATTAGATGGGCC

>PGSC0003DMG400010351-(rev)LRR-RLKs\_2623

CTAGAGGGTCTGGATAGATTGATTAGTCTTTCTCTAGCACATAATAAATTAGATGGGCCTATTCCAGATT  
CATTTAGAAAAATACTGGCCTTGAATACTTGGATTTGTCCAGTAACAAT

>PGSC0003DMG400010351-(rev)LRR-RLKs\_2684

TTCCAGATTCATTTAGAAAAATACTGGCCTTGAATACTTGGATTTGTCCAGTAACAATCTTAGTGGTGA  
AATCCCAAAGTCATTAGAAGCTCTTGTGTATCTCAAATACTTGAACCTCT

>PGSC0003DMG400010351-(rev)LRR-RLKs\_2745

TAGTGGTGAAATCCCAAAGTCATTAGAAGCTCTTGTGTATCTCAAATACTTGAACCTCTCATTTAATGAAT  
TCAGTGGAGAAATCCCACGGGTGGTCCTTTTGCAAATGCCACAGATCA

>PGSC0003DMG400010351-(rev)LRR-RLKs\_2806

TTAATGAATTCAGTGGAGAAATCCCACGGGTGGTCCTTTTGCAAATGCCACAGATCAATCTTTCTTGTC  
CAATTATGGGCTCTGTGGTGATTCTAAGTTTCATGTTTCACCATGCGTC

>PGSC0003DMG400010351-(rev)LRR-RLKs\_2867

CTTTCTTGCCAATTATGGGCTCTGTGGTGATTCTAAGTTTCATGTTTCACCATGCGTCATCAAATCTCCCA  
AGAGGTCAAAGAAAAAAAAGGCAATTTTGGTTTTGTACATCCTTTTGG

>PGSC0003DMG400010351-(rev)LRR-RLKs\_2928

CAAATCTCCAAGAGGTCAAAGAAAAAAAAGGCAATTTTGGTTTTGTACATCCTTTTGGGAGTAGGTAT  
GCTATTTCTTGCAATTAGCCGTCACATATGTATTTTGGAGATTGAGAAAGAA

>PGSC0003DMG400010351-(rev)LRR-RLKs\_2989

GTAGGTATGCTATTTCTTGCAATTAGCCGTCACATATGTATTTTGGAGATTGAGAAAGAAAAAAAAGAATG  
CAGGTCAAGCTGATGTGTCTCTGATAAAATGTCATGAAAGAATTTCTAT

>PGSC0003DMG400010351-(rev)LRR-RLKs\_305

CTTGTCGAACTAACTCGATATTGACACTCTAAACCAAATATACTCCATAGACTAATGTCAGTATATTGGT  
ATTCGTGTGAATTTGATATCAATCATGACTATATGAAAAGTCCACATAT

>PGSC0003DMG400010351-(rev)LRR-RLKs\_3111

TGAACTTGAACAAGCAACCGAAGGATTCAATGAAAGCAACTTGCTTGGTAACGGGAGTTTCAGCAAGGT



CTACAAAGGGATACTTAAGGATGGTACTCTTTTGGCTTCAAAGGTATTCAA

>PGSC0003DMG400010351-(rev)LRR-RLKs\_3172

AGCAAGGTCTACAAAGGGATACTTAAGGATGGTACTCTTTTGGCTTCAAAGGTATTCAATGTGCAATTG

GAGGGTGCATTCAAAGTTTTGATACAGAATGTGAGATGTTGCGCAATCTC

>PGSC0003DMG400010351-(rev)LRR-RLKs\_3538

GAAATGGTTGGCCATGTCAGTGATTTTGGCATTGCAAAATTGTTAGGTGCAGGGGAGACTTTTGTCAA

ACAAGGACAATAGCAACCATTGGATATATTGCTCCAGGTTTTTAAACTTTT

>PGSC0003DMG400010351-(rev)LRR-RLKs\_3599

TTGTTCAAACAAGGACAATAGCAACCATTGGATATATTGCTCCAGGTTTTTAAACTTTTACAGATTCCTCA

TGTTTTTAGAATACCTGAAAAATATTAATTATTTCCCATAAATATGAT

>PGSC0003DMG400010351-(rev)LRR-RLKs\_366

GTATATTGGTATTCGTGTGAATTTGATATCAATCATGACTATATGAAAAGTCCACATATGGTGAATAATG

CCAAAGAAATATGACTTGAGAATTTCCATGGACTGGTTGAGGGGAGGAGA

>PGSC0003DMG400010351-(rev)LRR-RLKs\_3660

AGATTCCTCATGTTTTTAGAATACCTGAAAAATATTAATTATTTCCCATAAATATGATCAGTTTTTACATA

TTCCTCGATAATTAGGAAGCTTTTTTTTATATCATTTTCAACCATGAT

>PGSC0003DMG400010351-(rev)LRR-RLKs\_3721

GTTTTCACATATTCCTCGATAATTAGGAAGCTTTTTTTTATATCATTTTCAACCATGATTGCAGAGTATGGA

CAAGATGGAATAGTATCCACGAGCTGTGATGTTTATAGTTTCGGCATC

>PGSC0003DMG400010351-(rev)LRR-RLKs\_3782

CAGAGTATGGACAAGATGGAATAGTATCCACGAGCTGTGATGTTTATAGTTTCGGCATCCTGATGATGG

AGACATTTACAAGAATCAGACCAGGTGATGAAAGATTTACTGGTGACTTGA

>PGSC0003DMG400010351-(rev)LRR-RLKs\_3843

GATGATGGAGACATTTACAAGAATCAGACCAGGTGATGAAAGATTTACTGGTGACTTGAGCATAACGAC

GTTGGGTAAGCGATTCTTTTCCAGATGAGATTCATAAGGTGGTGGATGCTAA

>PGSC0003DMG400010351-(rev)LRR-RLKs\_3904

ATACGACGTTGGGTAAGCGATTCTTTTCCAGATGAGATTCATAAGGTGGTGGATGCTAATTTGGTACAG

CTAGAGGATGAACGAATTGACGCAAAGATGCAGTGTCTGTTGTCTATCATA

>PGSC0003DMG400010351-(rev)LRR-RLKs\_3965

TGGTACAGCTAGAGGATGAACGAATTGACGCAAAGATGCAGTGTCTGTTGTCTATCATAGAGTTAGCTT  
TGAGCTGCACTTTAGTGACACCTGATGCAAGAATTAGTATGGAAGATTCTC

>PGSC0003DMG400010351-(rev)LRR-RLKs\_4026

GTTAGCTTTGAGCTGCACTTTAGTGACACCTGATGCAAGAATTAGTATGGAAGATTCTCTTTCAACTTC  
AAAAGATCAGGCTCCTGTTTGTCAATAGTCGCCGCTAGGTGGAATTAGA

>PGSC0003DMG400010351-(rev)LRR-RLKs\_4087

TCAAACTTCAAAGATCAGGCTCCTGTTTGTCAATAGTCGCCGCTAGGTGGAATTAGACCATCCCCTTA  
TGATTGATGCTTGATTACCTATGTCAATTCCGCTATTTAAGATGAATTCA

>PGSC0003DMG400010351-(rev)LRR-RLKs\_4148

ATCCCCTTATGATTGATGCTTGATTACCTATGTCAATTCCGCTATTTAAGATGAATTCAGTTTTGACTTCA  
TATTATGACTCTTTCACCTTCAAACATCACAGATTTCTTTCAACCA

>PGSC0003DMG400010351-(rev)LRR-RLKs\_4209

TTTGTACTTCATATTATGTACTCTTTCACCTTCAAACATCACAGATTTCTTTCAACCATATGGTAGCTGGA  
ATGGTGATTTTCCATCTACTGGAGTTTACAATTAGTCTTTCTAAATAT

>PGSC0003DMG400010351-(rev)LRR-RLKs\_427

TGAATAATGCCAAAGAAATATGACTTGAGAATTTCCATGGACTGGTTGAGGGGAGGAGACTGGACTGT  
TGACTCAGACTCACTAATACTTGTAGTACTAAAAAATTTACTCTCAA

>PGSC0003DMG400010351-(rev)LRR-RLKs\_4270

TGGTAGCTGGAATGGTGATTTTCCATCTACTGGAGTTTACAATTAGTCTTTCTAAATATTGACTCTTAA  
GTCTTAACCAAAAAACTCTGAAGACTAAACAACACTATAGGGCCTCC

>PGSC0003DMG400010351-(rev)LRR-RLKs\_4331

AACTCTTAAGTCTTAACCAAAAAACTCTGAAGACTAAACAACACTATAGGGCCTCCAGGTTGCCTGT  
AGCATAGCCAATACCATTTTCCAGTCCATAATAATGCAGTAACCTGTTCC

>PGSC0003DMG400010351-(rev)LRR-RLKs\_488

GGACTGTTGACTCAGACTCACTAATACTTGTAGTACTAAAAAATTTACTCTCAATGAATTTGATAT  
CATTAGATATACATAATCTAAGATCATTTATTTGCCTCATCGATCAA

>PGSC0003DMG400010351-(rev)LRR-RLKs\_549

AATTTGATATCATTAGATATACATAATCTAAGATCATTTATTTGCCTCATCGATCAATCTTGTTTTAGT  
AAAAAGAGAGATATCAATCTGCTATTAGTTATGGGAAGAAGTTGCAAT

>PGSC0003DMG400010351-(rev)LRR-RLKs\_61

GTAATAAATACTCGTTTAGTCTCATATTACTTGGCCTTGTTAACACTAGTAAAAGTTGACACTCTTTAAGT  
CTTAACCTAAAGTATACTCCAAAACTAATGGCAGTACTCAAAATGCAA

>PGSC0003DMG400010351-(rev)LRR-RLKs\_671

TCTCTTTGCACTTGTGGTTTTTCATTCTGCTCCATACTTCATTCTCTACTGTTCCAAATATTAGTACTGATGA  
AGCTGCTCTTCTTGATTAAAATCTCACATTTCTTTTAGTCCTAACAA

>PGSC0003DMG400010351-(rev)LRR-RLKs\_732

AGTACTGATGAAGCTGCTCTTCTTGATTAAAATCTCACATTTCTTTTAGTCCTAACAAACATCTTAGCAACC  
AACTGGTCTTCTTCCACCCCTGTTTGACCTGGATTGGAATCACTTGC

>PGSC0003DMG400010351-(rev)LRR-RLKs\_915

CCTCCACACCTTGGAACCTCTCATTTCTGTTTCCCTCAATATTAATAACAACAGATTCCATGGGAATTTA  
CCCCAAGAGTTGGCTCATTGTCAGAGGTTGAAATTGATTGATGTCACA

>PGSC0003DMG400010351-(rev)LRR-RLKs\_976

ATGGGAATTTACCCCAAGAGTTGGCTCATTGTCAGAGGTTGAAATTGATTGATGTCACAAGTAATAACTT  
AACTGGTGCCATTCCAACATCTTTAGGTTTGCTAGTAGACCTTCGCATT

>PGSC0003DMG400010400LRR-RLKs\_1054

CAAACAACAGTTTTACTGGACCGATTCCCATGATGTTAGGTAACCTGGTGAACCTTATAACTCTAAATCT  
GCAAAATAATCTGTTGGAAAACAAGCCTGGAGCCACACAACCTTGACTTCC

>PGSC0003DMG400010400LRR-RLKs\_1116

CTAAATCTGCAAAATAATCTGTTGGAAAACAAGCCTGGAGCCACACAACCTTGACTTCCTGAATTCATTGG  
TAACCAGCAGGAATCTGGTGTACCTGATTCTTGAATCTAATCCTTTGAAT

>PGSC0003DMG400010400LRR-RLKs\_1178

TTCATTGGTAACCAGCAGGAATCTGGTGTACCTGATTCTTGAATCTAATCCTTTGAATGGAATTTTTCCAG  
AATCAATAGGAAATTTATCAAGCAATATCAGGGTCCTTGATGCAGCAAA

>PGSC0003DMG400010400LRR-RLKs\_1240

TTTTTCCAGAATCAATAGGAAATTTATCAAGCAATATCAGGGTCCTTGATGCAGCAAACCTGTGGAATTAG  
AGGCAGTATGCCAACAAACATTGGAACTTAAGTGGCTTGATTTTCCTGG

>PGSC0003DMG400010400LRR-RLKs\_1612

CAAGTTTCTGGAGATTAGTAAAGCTTGATGGTCTGAACATATCGAGAAACCTGCTGCATGGTTTCTTCCC

TTCTGATGTGGGAACTCTGAAAGCAATGAGCATCATGGACCTCTCTTTCA

>PGSC0003DMG400010400LRR-RLKs\_1674

TTCTTCCCTTCTGATGTGGGAACTCTGAAAGCAATGAGCATCATGGACCTCTCTTTCAATAGGTTTTTTGG

TGAAATACCCAATTCCATAGGGTCCCTTCAATATCTAGTTTCACTAGAT

>PGSC0003DMG400010400LRR-RLKs\_1736

GTTTTTTGGTGAATACCCAATTCCATAGGGTCCCTTCAATATCTAGTTTCACTAGATATGTCAAGAAATG

CATTCCAAGGTCCCATACCGGACACATTTAGCGATCTAATAGTTCTTGA

>PGSC0003DMG400010400LRR-RLKs\_1922

TCTCAAGTATCTCAATGTTTCTTTCAACAACCTTGCAAGGAGAAGTTCCAAAGAAAGGGGTGTTTGCAAAT

GTTAATTACCGGTTCTTGATGGGAAATCCAAGACTTTGTGGAGCAATTGA

>PGSC0003DMG400010400LRR-RLKs\_2728

AAGAAGGAAACATGGCTCAAACCAAGACTCTCGGAACTATTGGTTACATTGCTCCAGGTATGATAATCA

TGTCTTGAATGAAGGTGTCCTATGTTGGTTACTTTTTCCCTTATGTCTA

>PGSC0003DMG400010400LRR-RLKs\_3038

GGACATCTCTCTCTTTCTGATGCTGTACTGGACATTCTGGATGCTGACCTTGTTAGCGACATTGGCTTT

ACAACAGATGAAAACCAAAGCGAAATCAAACAATTGCTGGTTTTGATAA

>PGSC0003DMG400010400LRR-RLKs\_3224

TGCAGCTAAACAAGATAAGAGCTGAATTAACCAAGCTTTAACTCAATCCCATTCAAATTTTCAGAAAGAG

GATTGATGCAGCAACAAGCAAATTCAGTTTTCCACCTTCTATGACCTGTC

>PGSC0003DMG400010400LRR-RLKs\_3286

AGAAAGAGGATTGATGCAGCAACAAGCAAATTCAGTTTTCCACCTTCTATGACCTGTCAAACATCTGTT

ATTTCTTAATATTTTCTTTCTGTTTAGTGTAGGGGCATTTAATATTATA

>PGSC0003DMG400010400LRR-RLKs\_3348

CATCTGTTATTTCTTAATATTTTCTTTCTGTTTAGTGTAGGGGCATTTAATATTATAAGAATGTTACATTTT

AGCATTGATCGTTTGCCCCTAAGTCAGTCATTACTCCCTCTATTTCAT

>PGSC0003DMG400010400LRR-RLKs\_3410

TGTTACATTTTAGCATTGATCGTTTGCCCCTAAGTCAGTCATTACTCCCTCTATTTCATTATTGCATTAGAAT

ATGCATTGGTTGACTTTCAATTTGTTGTAGTATGGTGGGAGTTAATGGA

>PGSC0003DMG400010400LRR-RLKs\_3472

GCATTAGAATATGCATTGGTTGACTTTCATTTGTTGTAGTATGGTGGGAGTTAATGGAAATTCCTTTTGCT  
GCCGTTTGGACCATTAAGTTGGTGCATTACTCCATAGAGTAATTGCATAT

>PGSC0003DMG400010400LRR-RLKs\_3534

CTTTTGCTGCCGTTTGGACCATTAAGTTGGTGCATTACTCCATAGAGTAATTGCATATGTTACTAATTCCT  
TGGTGCAATTGCAGCAGGTTTCAGCCGTTGGTGGCTGTAAGCTTTTTTAT

>PGSC0003DMG400010400LRR-RLKs\_3569

TACTCCATAGAGTAATTGCATATGTTACTAATTCCTTGGTGCAATTGCAGCAGGTTTCAGCCGTTGGTGGC  
TGTAAGCTTTTTTATCCATTACTTCTTACTCTTACTCCTCAATTATC

>PGSC0003DMG400010400LRR-RLKs\_372

TCAAGAACTTGGCCTGTTAAGTCAACTTAGAATTTTGCCTCAACGACAATAATCTGACAGGAAAGATT  
CTACCTTTATTAGGAACTTATCAAAGCTGGAATATTTTTATCTGCATGA

>PGSC0003DMG400010400LRR-RLKs\_930

TTACTTAAATGGGCATCTCCATATGATCTTGGTACTTGGCTACCTAAGTGCAGGAGATTTTCCTTTGGA  
GATCTACCCTCTGCAATATGCAATGCTTCAAAGCTTTGAAAATCTTGAA

>PGSC0003DMG400010400LRR-RLKs\_992

TCCTTTGGAGATCTACCCTCTGCAATATGCAATGCTTCAAAGCTTTGAAAATCTTGAAGTTGCAAACAAC  
AGTTTTACTGGACCGATTCCCATGATGTTAGGTAACCTGGTGAACCTTAT

>PGSC0003DMG400010427RLKWAX-EGF\_0

AAATGAATCTTGAAATTGTATGTTTGTGTTGCTTCTTTCATGGCTTATGGTTTTAGATCATTCAACAGCA  
GCTACATCTCTTGCAAAGCCTGGTTGTGAAGAGAGATGTGGTAACCTAA

>PGSC0003DMG400010427RLKWAX-EGF\_1037

GTGTATCCAATTTAGGCCTTGCCCCTGGCAGAACAGAATTGGGTCAAGTTGAGGTATACCATATTCTGTA  
TAAAGTAATCCTAATTTTTTTCGTTTTGTCACACTCTTATCGCCAACAAG

>PGSC0003DMG400010427RLKWAX-EGF\_1098

TATTCTGTATAAAGTAATCCTAATTTTTTTCGTTTTGTCACACTCTTATCGCCAACAAGACCTGCTCCTGTA  
TATGCACAGAATAGGGCTTCGATGAGCACTAGATGTAAAGGAGTTCTT

>PGSC0003DMG400010427RLKWAX-EGF\_1159

CTGCTCCTGTATATGCACAGAATAGGGCTTCGATGAGCACTAGATGTAAAGGAGTTCTTGAACCCTTATG  
AGTAATTAGAAGAGTGCTGAATTGGACCATCCTCAAATAGATGGATATGA

>PGSC0003DMG400010427RLKWAX-EGF\_122

ATTCCTTATCCATTTGGATTGAGTGCTAGTTGCTCCCTTAACTCGTGGTACTTGATAAAGTGCGATAAAAG  
TTATAATCCTCCTAAGCCTTTTATGAATTCATTTCTGCAAGTTGAACTT

>PGSC0003DMG400010427RLKWAX-EGF\_183

GCGATAAAAGTTATAATCCTCCTAAGCCTTTTATGAATTCATTTCTGCAAGTTGAACTTCAAAGTGAGGT  
GATATCTGTGTCAATTGAAAACCAAATCATTACCTCAGTTTCAATAG

>PGSC0003DMG400010427RLKWAX-EGF\_244

AAGTGAGGTGATATCTGTGTCAATTGAAAACCAAATCATTACCTCAGTTTCAATAGTGAATTTTTGC  
AACAAATCGAGTGAAGGTAGTAAAATCATCACAACGGGGACAGATTTGTC

>PGSC0003DMG400010427RLKWAX-EGF\_2684

AGGCTAGGTGGAGTAATCGCTCTGGAACAAGTTCTTCGACTGGATCAATGCATGTATGACAGAAGTCC  
CCCTCCCCCCTTCCATTCGTGCATTTAGAATCTAAAGCATCATTCTAACA

>PGSC0003DMG400010427RLKWAX-EGF\_2745

GAACTGCCCCCTCCCCCCTTCCATTCGTGCATTTAGAATCTAAAGCATCATTCTAACATTGTTTGGTATGT  
TATCAGCCATTCAACGATGCACAAATTGCACAGACATGGTAATCTATA

>PGSC0003DMG400010427RLKWAX-EGF\_2806

GTTTGGTATGTTATCAGCCATTCAACGATGCACAAATTGCACAGACATGGTAATCTATATGAAGCGATCT  
CCCACAATCGCTCTCTTCAGTAAGTCACCTTCTGTATTTCTTCCTAGCCA

>PGSC0003DMG400010427RLKWAX-EGF\_2867

AAGCGATCTCCACAATCGCTCTCTTCAGTAAGTCACCTTCTGTATTTCTTCCTAGCCATTTGAAAACCTCAA  
CACTGTCAGAACTAAATCAAGGAAATGGTAGACATCCTTATTTTGATG

>PGSC0003DMG400010427RLKWAX-EGF\_2928

TGAAAACCTCAACACTGTCAGAACTAAATCAAGGAAATGGTAGACATCCTTATTTTGATGCTTTGTGGTTC  
CAAAGTTATCTATCTCTGCCTTTCTACCCTTTTCACTCGCAGAAAGACT

>PGSC0003DMG400010427RLKWAX-EGF\_2989

TTGTGGTTCCAAAAGTTATCTATCTCTGCCTTTCTACCCTTTTCACTCGCAGAAAGACTCGAAAATCTCCTT  
CAAATAGAGAATTCTAGCTTATTGGCTAACTCTCGTCACTCCTATCT

>PGSC0003DMG400010427RLKWAX-EGF\_305

AATTTTTGCAACAAATCGAGTGAAGGTAGTAAAATCATCACAACGGGGACAGATTTGTCTGGAAGTCCT

TTTTATTACGCGAAGGATAGGAATAAGTTGATGCTTGTTGGTTGTGGAAAT

>PGSC0003DMG400010427RLKWAX-EGF\_3050

AAAATCTCCTTCAAATAGAGAATTCTAGCTTATTGGCTAACTCTCGTCACTCCTATCTCCACAGGTGTAT  
TCATAAGTATCGGAGTTTTGCTTCTACTGTTTGGGAGCTATTTATTGTA

>PGSC0003DMG400010427RLKWAX-EGF\_3111

ACAGGTGTATTCATAAGTATCGGAGTTTTGCTTCTACTGTTTGGGAGCTATTTATTGTACAAAACAGTCA  
AGAAGAGAAGGAACATAAGACAAAGACAAAGGTTTTTTAAGCGAAATGGC

>PGSC0003DMG400010427RLKWAX-EGF\_3172

AAACAGTCAAGAAGAGAAGGAACATAAGACAAAGACAAAGGTTTTTTAAGCGAAATGGCGGCCTCTTA  
CTACAACAGCAGCTATCATCCAATAATGAAGGTACTATTGACAAAGGAAAAC

>PGSC0003DMG400010427RLKWAX-EGF\_3294

TTCACTGCTAAAGAGCTGGAGAAGGCAACAGACCACTTCAATGAAAATCGCATACTTGGCCGTGGAGGT  
CAAGGTACAGTATACAAGGGCATGTTACCTGATGGAAAGATTGTAGCAGTG

>PGSC0003DMG400010427RLKWAX-EGF\_366

GAAGTCCTTTTTATTACGCGAAGGATAGGAATAAGTTGATGCTTGTTGGTTGTGGAAATGGTCTTGTGAC  
ACAGAAACAAAATATTCTCTCGGGGTGTACATCGATCTGTACTGAAGGTG

>PGSC0003DMG400010427RLKWAX-EGF\_427

TCTTGTGACACAGAAACAAAATATTCTCTCGGGGTGTACATCGATCTGTACTGAAGGTGCTACGTTGACA  
GGATGTTATGGCATCAACTGTTGTCAATCTCTAGTCCCTTTTGATCTAAG

>PGSC0003DMG400010427RLKWAX-EGF\_4428

GGCACGTAAATATTATGCCTACAATAAGTGGCCGAAAATACCTCTAGCACCGAAATAACAAACAATTTTC  
ATTTGACATAAAGTTTATTTTTTCATATAATAATATAACATGAGTTATGC

>PGSC0003DMG400010427RLKWAX-EGF\_488

ACGTTGACAGGATGTTATGGCATCAACTGTTGTCAATCTCTAGTCCCTTTTGATCTAAGTTCATACAAAGC  
AAACTTCACTAACTCGGGGATTCAGCAAGGGGCTTACCCGAGATGTAGT

>PGSC0003DMG400010427RLKWAX-EGF\_549

CATACAAAGCAAACCTTCACTAACTCGGGGATTCAGCAAGGGGCTTACCCGAGATGTAGTGCAGTTTTCTT  
GGTAGACCAAACCTTGGGTTCCAGATGAAGTTGCACAGCCCTTTGTTTTTC

>PGSC0003DMG400010427RLKWAX-EGF\_61

TTCAACAGCAGCTACATCTCTTGCAAAGCCTGGTTGTGAAGAGAGATGTGGTAACCTAACCAATTCCTTAT  
CCATTTGGATTGAGTGCTAGTTGCTCCCTTAACTCGTGGTACTTGATAAA

>PGSC0003DMG400010427RLKWAX-EGF\_610

AGTTTTCTTGGTAGACCAAACCTGGGTTCCAGATGAAGTTGCACAGCCCTTTGTTTTCTTGGTCATGCTC  
CTGTTGTTGGCTCTGGACTCTCCAATCCAAAGAGTTAGAAGCCGGGTT

>PGSC0003DMG400010427RLKWAX-EGF\_671

GGTCATGCTCCTGTTGTTGGCTCTGGACTCTCCAATCCAAAGAGTTAGAAGCCGGGTTGCTCTGTGACA  
AATCTGAGGCTGTTGTTAAGTTGGAAGATGGTACTTCTGTGGCAAATTTG

>PGSC0003DMG400010427RLKWAX-EGF\_732

TCTGTGACAAATCTGAGGCTGTTGTTAAGTTGGAAGATGGTACTTCTGTGGCAAATTTGCAGTGTGCTG  
TGGACCTGGAACACAAGGAAATCCATACTTCTCTAATGGATGCCAAGGTA

>PGSC0003DMG400010427RLKWAX-EGF\_793

GTGTCGCTGTGGACCTGGAACACAAGGAAATCCATACTTCTCTAATGGATGCCAAGGTACATAATCATT  
GATATATATGTGTAGTTGTTAGCTCTCTGTTGCATTCAATAGTATCATGC

>PGSC0003DMG400010427RLKWAX-EGF\_854

TAATCATTTGATATATATGTGTAGTTGTTAGCTCTCTGTTGCATTCAATAGTATCATGCATATGCACATCA  
GGTCAGGTGAATAGTTTTTAGGAGAAAGATTGACTATACGTTTACGAGA

>PGSC0003DMG400010427RLKWAX-EGF\_915

ATGCACATCAGGTCAGGTGAATAGTTTTTAGGAGAAAGATTGACTATACGTTTACGAGACTAGATTGAA  
CACTATTCTAGATCAAATCAACATAAGTAGTTTTAGCATAGGTTGAGTTTT

>PGSC0003DMG400010427RLKWAX-EGF\_976

AGATTGAACACTATTCTAGATCAAATCAACATAAGTAGTTTTAGCATAGGTTGAGTTTTTTGTGTATCCAA  
TTTAGGCCTTGCCCTGGCAGAACAGAATTGGGTCAAGTTGAGGTATAC

>PGSC0003DMG400010447-(rev)LRR-RLPs\_1037

AAAATTTCTTTCTGGAAAGTTACCGAGTGTAATTGGAAAGCTATGGAAATTAGAAGATCTCGATCTCTC  
AGAAAATCGATTTGAAGGAGAAGTATATGAGGTTTTCAATACTATGAATG

>PGSC0003DMG400010447-(rev)LRR-RLPs\_1098

CGATCTCTCAGAAAATCGATTTGAAGGAGAAGTATATGAGGTTTTCAATACTATGAATGATTTTCCTCCA  
ATAGGCTCAGGAAATTGTTCTTCTTTGAGGACCTTAAGACTAAATGACAA



>PGSC0003DMG400010447-(rev)LRR-RLPs\_1159

TTTCCTCCAATAGGCTCAGGAAATTGTTCTTCTTTGAGGACCTTAAGACTAAATGACAACAACTGATTG  
GAAATCTTCCAAAAAGTTTTGGGCAGCTTCCAAATCTACAATTCTGTTTC

>PGSC0003DMG400010447-(rev)LRR-RLPs\_1220

AACTGATTGGAAATCTTCCAAAAAGTTTTGGGCAGCTTCCAAATCTACAATTCTGTTTCATGTCCAATAAC  
AGGTTGGAAGGGGTGTTAACAGAAGAACATTTACCAACTTGACAAATT

>PGSC0003DMG400010447-(rev)LRR-RLPs\_2196

ACCTCGGTGTGTTAATAATTTACAGCAATGGTGAATGGGAGGAAGGAAATTAGAGATGGGGACGACG  
AGATGGATTATTCTTATTATGTTGGAGTTTTTCAGGGAAAGTGCAAGAGTAGC

>PGSC0003DMG400010447-(rev)LRR-RLPs\_2623

GTGAGCACTCAACTTCAAAGCTTTAGCCCTTTTAGTTTTACTGGAATAAACTGTGTGGGCTTCCACTCGT  
GAAGCGTTGCAGTAAAAATCCTGAGGTTGAAAATGAAGAAGAAGAAGAT

>PGSC0003DMG400010447-(rev)LRR-RLPs\_2745

TGATAATGAAGTGGAATGGTCTACGTTTCCATGGCAATAGGATTTATTGTGGCTTTTTGGGGTGTAAGT  
GCTCCTTTGCTTTTCATAAGACCATGGAGACATGCCTATTATGGGTTTTT

>PGSC0003DMG400010447-(rev)LRR-RLPs\_2806

GGTGTAAGTGCTCCTTTGCTTTTCATAAGACCATGGAGACATGCCTATTATGGGTTTTTAGATAGAAAAT  
GGAAATCATGGCACACATAATTTGTAAAGATAAGACATTAGGGAGATTTT

>PGSC0003DMG400010447-(rev)LRR-RLPs\_2867

ATAGAAAATGGAAATCATGGCACACATAATTTGTAAAGATAAGACATTAGGGAGATTTCTATTTATGTAT  
ACTGGATGAAATTTGTTTATATCTCATGAAAATCCATCACCATTTCGGCGT

>PGSC0003DMG400010447-(rev)LRR-RLPs\_2928

TTTATGTATACTGGATGAAATTTGTTTATATCTCATGAAAATCCATCACCATTTCGGCGTTCCTTTGAATTAA  
GACATTTTTATATTTGTTGTCTCCATACAAATATGAGAAATTTGACAAT

>PGSC0003DMG400010447-(rev)LRR-RLPs\_2982

GGCGTTCCTTTGAATTAAGACATTTTTATATTTGTTGTCTCCATACAAATATGAGAAATTTGACAATTTGA  
TTTGGCAAGGTTTGAGTTATGGAATGAACAAAGGAAATTAACAGTTCCT

>PGSC0003DMG400010447-(rev)LRR-RLPs\_427

TGAAAATCTTGATAGTTTGGACATGTCTGGTGTGGATTTAAGTGAAGCAACAACTGGACTGAGGTGAT

TAGCATGCTTCCTTCTTTGGTTAATCTTCGTTTTTCGAATTGTAGCCTTCA

>PGSC0003DMG400010447-(rev)LRR-RLPs\_488

GAGGTGATTAGCATGCTTCCTTCTTTGGTTAATCTTCGTTTTTCGAATTGTAGCCTTCATTCAATACCTCCT  
TTGTTTGATCATAACAGTTCTGTTCTTGAAAATCTTGATCTTTCTTTG

>PGSC0003DMG400010447-(rev)LRR-RLPs\_610

TAACTTTGGCTCTCCGATTCCCGGGTGGGTTTTAGTTTTGGTAGTCTTGTCTCTTGAATTCACTGGAA  
GTAATTCACTGGTTCATTTCTGAAGTCTTTTAACTTGACTTCTTT

>PGSC0003DMG400010447-(rev)LRR-RLPs\_854

GTTGGTGATTTTACCAAGCTTACATATCTTAGTCTTGCTTCCAATAATCTGAACTCCACTATCCCAAATGG  
CTCTATGGATGCAAGAATCTTGAAACACTTATCATGAAGGATAACAGTC

>PGSC0003DMG400010447-(rev)LRR-RLPs\_915

TCCCAAATGGCTCTATGGATGCAAGAATCTTGAAACACTTATCATGAAGGATAACAGTCTTGAGGGAAC  
AGTTTCAGACTCGATTTCAAATCTGACATCTCTAACTAGTATCGATATGTC

>PGSC0003DMG400010466-(rev)L-LecRK\_0

CGTGTTTCCTTTGGATTCTCTGCTTCATTCACACCCCTCTTCTTCACCCCCATAATCCTCACTCTTCTCCCC  
TGTTTCCAGCTTTCTTCAAAAATTTCACTATTTTCTAAGCTAAAAA

>PGSC0003DMG400010466-(rev)L-LecRK\_124

GCTAAAATCAAATCTTTGTGCAATTTGATCTTCATTGTGCAATGGGGTTTTGCTAAAATCTAGCAATGA  
AGTCAATTCTGAAGAACTTTCCAGCAACATTCCTGTAAAAGTCATCCTG

>PGSC0003DMG400010466-(rev)L-LecRK\_1364

AGTTTCAGTTCATCATTTGATGCAACTCCAACTCGGGGGAGGTGGTGGCTCCACCACCACCGCCAACG  
ACTAGTTTGATGAACCAACGGCAGATTCTGTCGCGTTGCCACCACCTTCT

>PGSC0003DMG400010466-(rev)L-LecRK\_1426

GCCAACGACTAGTTTGATGAACCAACGGCAGATTCTGTCGCGTTGCCACCACCTTCTATGGCTCCATCA  
GAGTCTAATAGTAGTACACCAGGTGTATTACAAGAAAAGAGAAGTAGGAA

>PGSC0003DMG400010466-(rev)L-LecRK\_1488

CTCCATCAGAGTCTAATAGTAGTACACCAGGTGTATTACAAGAAAAGAGAAGTAGGAAATGTCATAGCA  
ATTTTTGTAAACAAGGTCCTGGAGCTGTTGTTGGTGTGGTGACTGCTGGTG

>PGSC0003DMG400010466-(rev)L-LecRK\_186

AGCAATGAAGTCAATTCTTGAAGAACTTTCCAGCAACATTCTGTAAAAGTCATCCTGTTGTAGTGTGTT  
CTCTCTTGTCTACTTTCTTGCATTTTCACTGTTTCTAAGCTCAAAAAAT

>PGSC0003DMG400010466-(rev)L-LecRK\_1984

TATGTCTAATGGGAGTCTTGATAAGGTGTTATTTGAATCAAGAATGGTTCTTTCATGGTCACATAGGCGA  
AAAATTTGATAGGTGTTGCTTCTTCTTGGCATATTTGCATCAAGAATG

>PGSC0003DMG400010466-(rev)L-LecRK\_248

AGTGTGTTCTCTCTTGTCTACTTTCTTGCATTTTCACTGTTTCTAAGCTCAAAAAATAGCTAAAAATCAAA  
TCTTTGTGCAATTTGATTTTCAATTGTGTAATGGGGTTTTGCTAAATCA

>PGSC0003DMG400010466-(rev)L-LecRK\_496

CTACCCTTTTGTATCTTCACCAAATTCTTGTGATTTGGTGTGAAAAATCTTACCTTTTATACAATTTGATC  
TTCATTCTCTGATGGGTTTTGCTAGAATCTAGCAATGACATCAAATCT

>PGSC0003DMG400010466-(rev)L-LecRK\_558

CAATTTGATCTTCATTCTCTGATGGGTTTTGCTAGAATCTAGCAATGACATCAAATCTTGAAAAAAATTC  
AGGGACTTTCTTGTATGGTTCATCTTATTGTTCTGTTTCTGTAGTATTA

>PGSC0003DMG400010466-(rev)L-LecRK\_62

TCTTCTCCCCCTGTTCCAGCTTTCTTCAAAAAATTTCACTATTTTCTAAGCTAAAAAAAAGCTAAAAATC  
AAATCTTTGTGCAATTTGATCTTCATTGTGCAATGGGGTTTTGCTAAA

>PGSC0003DMG400010466-(rev)L-LecRK\_620

AAAAAATTCAGGGACTTTCTTGTATGGTTCATCTTATTGTTCTGTTTCTGTAGTATTAGTTCAACATTTGGT  
AAAATGATTTGATTTGAAAATTTAACACTGAGTAGTTTAAAGCTT

>PGSC0003DMG400010484-(rev)RLKWAX-EGF\_0

TTTTTCTTTTTTCGGTCTGTATTTTCTCTTTGGATGACCACAATCAAGTTGATCAAAAACACGTTCTCCGC  
ATTCTTGCAAGTAAGCAATTCTGGTTTTATATAATGGTATCGTTGCAA

>PGSC0003DMG400010484-(rev)RLKWAX-EGF\_1134

GTCAAGCCAGTACTTCCCACATTGGATTTATGATCAACTCGACAACGGAAAGGAGATTGAAGTACTAGA  
CGAGACACATGAAGACATAAAGAAGCTGACTTTAGTTGCTTTGTGGTGCAT

>PGSC0003DMG400010484-(rev)RLKWAX-EGF\_126

TAACTAAATTATTGATTGTTGGTATTTGCAGAAATCATCCCTTGGATACTTCCCATAGCTGGTAAGTC  
ACACCTTTCGTCTTTCAAATTTATTACTAGAAATTATTCTAATGTCAAA

>PGSC0003DMG400010484-(rev)RLKWAX-EGF\_1378

AATCTAATTAGTTCTTCAATAAGCTCTACTGAGTCTGTGAAGTTGCTTGAGAGTTGTTCTGATTCTGCAA  
AATAGATGTAATTGTTGCTTGATATCACACATTATGTACAAAATTCGTG

>PGSC0003DMG400010484-(rev)RLKWAX-EGF\_189

GGTAAGTCACACCTTTCGTCTTTCAAATTTACTAGAAATTATTCTAATGTCAAATGATGGTGCAGAT  
GTTGGTGGTTGAATTTTAAATTTAACCATTCACAACTTTTCTTGCTTA

>PGSC0003DMG400010484-(rev)RLKWAX-EGF\_252

GTGCAGATGTTGGTGGTTGAATTTTAAATTTAACCATTCACAACTTTTCTTGCTTATTGTGATGGTTGT  
ACACAGGGTTTAGCATCGTGGCAAGAATCATTCTATTTCCATTCATAGT

>PGSC0003DMG400010484-(rev)RLKWAX-EGF\_315

ATGGTTGTACACAGGGTTTAGCATCGTGGCAAGAATCATTCTATTTCCATTCATAGTTGTATTTCTAATGA  
TTGAGTTACGAAGAAGACATTTGTCTATTTATGATGCAATTGAAAGTTT

>PGSC0003DMG400010484-(rev)RLKWAX-EGF\_378

TCTAATGATTGAGTTACGAAGAAGACATTTGTCTATTTATGATGCAATTGAAAGTTTCTGCATGGTGAG  
AACAAATTCGCGCCCATTAGATATTCCAACCTCCAACATAAGAAAGATGAC

>PGSC0003DMG400010484-(rev)RLKWAX-EGF\_63

GTTCTCCGCATTCTTGCAAGTAAGCAATTCTGGTTTTATATAATGGTATCGTTGCAAGTTAAATTAATAA  
ATTATTGATTGTTGGTGATTTTGCAGAAATCATCCCTTGGATACTTCCC

>PGSC0003DMG400010484-(rev)RLKWAX-EGF\_693

GAGATGTAAGCGTGCTCTCGTGTATGACTTCATGCCTAACGGATCACTTGAAAAGTACATCACATCTCAA  
GAAGAAGGAGCTGATCAACTGTTAAGTTGGGACAGAAAGTTTGAAATTGC

>PGSC0003DMG400010484-(rev)RLKWAX-EGF\_756

ATCTCAAGAAGAAGGAGCTGATCAACTGTTAAGTTGGGACAGAAAGTTTGAAATTGCTCTTGGAGTTGC  
TCGAGGTATTGAATACTTGCATCGAGGTTGTGACATTCAGATTCTACACTT

>PGSC0003DMG400010484-(rev)RLKWAX-EGF\_882

CAAGCCACACAACATACTTTTGGATGAGAATTTCAATCCAAAATCTGATTTTGGTCTTGCAAATAT  
ACCCCGCAGATAAGAGCATTGTTACTCTAACAGCAGCCAGGGGAACAAT

>PGSC0003DMG400010503-(rev)OtherRLKsTM\_130

TTGTTGGCTATGGATGGTGAAGGAGCATATAATTGCAGTGTCTCCAGGTGTGGAAGACATGGCCCTAGA

ATTCATTTTCCCTTCAGGCTTCACCACCAGCCAGAATATTGTGGCTATCCA

>PGSC0003DMG400010503-(rev)OtherRLKsTM\_260

TATCTTGTGACCTCAAAAACCGAACCATACTCATACTTCCCAATCACTTACACTAATTGTTGAAGAAATT  
GATTATATGTCTCAGCAGATTAGGCTTTCTGATCCTGAACGTTGTCTCA

>PGSC0003DMG400010503-(rev)OtherRLKsTM\_325

GAAATTGATTATATGTCTCAGCAGATTAGGCTTTCTGATCCTGAACGTTGTCTCATTCTCAAGCTATTGCA  
CCTTAATTTATCAGAATCTCCTTTCTCCTTCACTGTTGCCGAGCCTTAT

>PGSC0003DMG400010503-(rev)OtherRLKsTM\_390

ATTGCACCTTAATTTATCAGAATCTCCTTTCTCCTTCACTGTTGCCGAGCCTTATCTTACACTAGAAAACAT  
TTCAATTTTCAAATGTTCTGGTATGCCAGCATATTATCGGAACTACTA

>PGSC0003DMG400010503-(rev)OtherRLKsTM\_455

AAAACATTTCAATTTTCAAATGTTCTGGTATGCCAGCATATTATCGGAACTACTATTCAGATTGTGCCTCT  
GACAAAACACTATTTGCTGTTTCTACTCTTTATATTCACTCCCCCATA

>PGSC0003DMG400010503-(rev)OtherRLKsTM\_520

GCCTCTGACAAAACACTATTTGCTGTTTCTACTCTTTATATTCACTCCCCCATACTTGCATAAAGATT  
CATGAAATTCCATCATACGGTATGACGACTTACAGTGTGATAAGACTC

>PGSC0003DMG400010503-(rev)OtherRLKsTM\_585

AAAGATTCATGAAATTCCATCATACGGTATGACGACTTACAGTGTGATAAGACTCAGTTGGCTTAATACA  
AACTGTAGCTACTGTGAAGGTCTTGAAAAGGATTGTGGCTTCAAGAACTA

>PGSC0003DMG400010503-(rev)OtherRLKsTM\_65

TATAAGCCGTGTCAGTCGAGATGACCATCTTTTTCTCTTGCACTTATTTCTCATCATCATAGTATTGTTGG  
CTATGGATGGTGAAGGAGCATATAATTGCAGTGTCTCCAGGTGTGGAA

>PGSC0003DMG400010503-(rev)OtherRLKsTM\_715

CTGACTACTCAGTGTTCGACCGACCATTCACTACAAAAGGTATTGACAAACCTATCTTTAATGCCATGAT  
CATGTACTTCTCTATTCCATAACAAAAAATTGATTTAATTCTGACAGGC

>PGSC0003DMG400010503-(rev)OtherRLKsTM\_773

TTAATGCCATGATCATGTACTTCTCTATTCCATAACAAAAAATTGATTTAATTCTGACAGGCGGCGGAAA  
GAAACCACTGATTGCAGGTATGTACTCTTGTGAGTTTTGGTATTAATTTT

>PGSC0003DMG400010504-(rev)OtherRLKsTM\_0

TTCTTTTGGGAATTATTATGATGGCATTCTATGAGTGTTATAGCTCAAGCAAATTGAAAGAGAGAATCA  
AGCCAGAGTTGAAAAGTTTTTGGAAAGACTATAGAGATCGCAGACCGACTA

>PGSC0003DMG400010504-(rev)OtherRLKsTM\_1197

TCCACAAAGACTGGAGAATTTAAGGCAAATGGACAGCTGAAGAGAGTGATTGGTACTGTAACTTAACA  
AAACCAGGCATTGATTTTATAGAAGAATCAAACCAGAAAGGGAAGTGTA

>PGSC0003DMG400010504-(rev)OtherRLKsTM\_126

CTTATGCAGATATTA AAAAGATAACAAATCAGTTTCAGGAAATATTGGGAGAGGGAGCTTACGGGATCG  
TTTATAAAGGAACACTTTCGAATGAAATTCACGTTGCTGTAAAAATTCTCA

>PGSC0003DMG400010504-(rev)OtherRLKsTM\_1260

TTAACAAAACCAGGCATTGATTTTATAGAAGAATCAAACCAGAAAGGGAAGTGTAACCGAAATCGAA  
TTCTGAGGAAGAGAGCAAATAACTTGTCTCTTATACCAGGATCTACAAGG

>PGSC0003DMG400010504-(rev)OtherRLKsTM\_1386

GTGGAGTTATCGTAATTGATGGCTTGAACATAGTAGTTCAGTGATTCATTCCAATCACGTGGCAGTATTG  
TGATTATGGCGGATCTCCTTCACAGCTCAATTCATAATTTTTAAGGCCA

>PGSC0003DMG400010504-(rev)OtherRLKsTM\_1449

AGTATTGTGATTATGGCGGATCTCCTTCACAGCTCAATTCATAATTTTTAAGGCCACAGTGCTTTGGATC  
ACTTTTCAATCGAAAGGGAAAATTGATGTTATGAATATCCCCACAATA

>PGSC0003DMG400010504-(rev)OtherRLKsTM\_1512

TTTGGATCACTTTTCAATCGAAAGGGAAAATTGATGTTATGAATATCCCCACAATAAAGGGACACACT  
GATTTCTTTGTTCTGCTAATGGGGTTTCTCTTTAAAGTTCCTAGTCATCT

>PGSC0003DMG400010504-(rev)OtherRLKsTM\_1575

ACACACTGATTTCTTTGTTCTGCTAATGGGGTTTCTCTTTAAAGTTCCTAGTCATCTTTCTTATGTTGGAGT  
TGGAATATCTAATGGGCGCGAAATTGTTCTCACCGTGCAGGAACTTT

>PGSC0003DMG400010504-(rev)OtherRLKsTM\_1701

CATCATAAATCGACAAATGCCTTCTCGTAACTTAATCATTAGAAATACAATACTATGCATGGAAATAGAAC  
GATTCTTGGCACAATGCTAAGCCCTGTGTACAACCATCACAAATAAGCAA

>PGSC0003DMG400010504-(rev)OtherRLKsTM\_1764

ATAGAACGATTCTTGGCACAATGCTAAGCCCTGTGTACAACCATCACAAATAAGCAAGAAAAGTTTGTG  
AATGGTTAAATTA AAAAATTCAACCACCAACGTCTGCTCCATTTGACATT

>PGSC0003DMG400010504-(rev)OtherRLKsTM\_1800

ACAACCATCACAAATAAGCAAGAAAAGTTTGTGAATGGTTAAATTAATAAATTCAACCACCAACGTCTGC  
TCCATTTTCGACATTAGAATGATTTCTAGTAATAAATTTGAAAGACGAAAG

>PGSC0003DMG400010504-(rev)OtherRLKsTM\_189

GGATCGTTTATAAAGGAACACTTTCGAATGAAATTCACGTTGCTGTAAAAATTCTCAATGATTCTGAAGG  
AAATGGGGAAGAATTTATTAATGAAGTTGCAGCAATGGGGAAAATCCATC

>PGSC0003DMG400010504-(rev)OtherRLKsTM\_378

TGCCAAATCAGTCACTTGACAAGCTCATTTTTCCGACAAGTTTCAAAGATAATATCACCCTTACTTGGAAG  
AAGCTTCATGATATTGCTATGGGAATAGCAAAAGGGCTAGAGTATCTTC

>PGSC0003DMG400010504-(rev)OtherRLKsTM\_441

CTTGGAAGAAGCTTCATGATATTGCTATGGGAATAGCAAAAGGGCTAGAGTATCTTCATCAAGGATGTG  
ACCAACAAATCCTTCATTTTCGATATCAAGCCTCAAAAATATTCTGTTAGAC

>PGSC0003DMG400010504-(rev)OtherRLKsTM\_504

GATGTGACCAACAAATCCTTCATTTTCGATATCAAGCCTCAAAAATATTCTGTTAGACCATAACTTGAACCC  
AAAGATCTCTGATTTTGGTCTTGCCAAGTTATGCTCTAAAGAGAAAAGT

>PGSC0003DMG400010504-(rev)OtherRLKsTM\_63

AGAATCAAGCCAGAGTTGAAAAGTTTTTGGAAAGACTATAGAGATCGCAGACCGACTAGATATACTTATG  
CAGATATTA AAAAGATAACAAATCAGTTTCAGGAAATATTGGGAGAGGGAG

>PGSC0003DMG400010504-(rev)OtherRLKsTM\_630

TCTATGACTGAAGCTAGAGGAACCATGGGTTATATTGCACCAGAAGTGTGTTGCAAGCAATTTTCGGAACA  
GCGTCTCATAAATCTGATGTTTAAAGCTTTGGAATGCTGCTTCTTGAAATG

>PGSC0003DMG400010504-(rev)OtherRLKsTM\_693

GGAACAGCGTCTCATAAATCTGATGTTTAAAGCTTTGGAATGCTGCTTCTTGAAATGGTTGGAGGGAGG  
AAGAATTTTGATGCAAAGGCGGATACTAGCCAAATGAACTTTCCCGAGTGG

>PGSC0003DMG400010504-(rev)OtherRLKsTM\_945

ATCAAAGTTGTA ACTCAAATGCTAGAAAGGAGATGAAAGGTCAAATCCATATGCCAAAGAGTTATGCAAA  
CTCAAATAGAAATATTAGCATTTGCATCCTGAATATGCCATGAAGTCATT

>PGSC0003DMG400010519LRR-RLPs\_0

TCAGTTCAAGTCTCGAGACATTTCAAATCAACATGTCTTGGATGACCGTCTGCAGCTAAACCATAACGA

AAATCGTATGGTGCTCCAAACAGATTTTTTCCATTTCTATAGCCTACTTC

>PGSC0003DMG400010519LRR-RLPs\_1426

TATAAGTTGCATTTTTTTTTTATGTTTTTCGTAGTTTCCAATATAGTAGAAGTTCCTTAAATTTGTCAGTATA

TTTTATTTAGATACTTGAACACTACAACATGTTTCCTATTAAGCACCTGA

>PGSC0003DMG400010519LRR-RLPs\_2170

CAAAAGAGCAAGTCAGGCCCGAGACTACAAGCTGCTGTATTTCAAAGCATCTCAATGGATTAGAGAAAA

ACCTTGACCCACGAGTGTTAAGCTAGTAATATTATAGCTATTGACAGAAGG

>PGSC0003DMG400010519LRR-RLPs\_2232

GAGAAAAACCTTGACCCACGAGTGTTAAGCTAGTAATATTATAGCTATTGACAGAAGGCTTGAAAATTG

TACTACTTATGTAATGATATGTGTAATTCATTGTTATTTCACTCGTTCA

>PGSC0003DMG400010519LRR-RLPs\_248

ACTAGTATGGCGTTGTAAGATAACACCATACTGGCAACATATGACATTTTGATCAATCCAAGGCATATTT

TTTTCTTTTTTTGTAATGGTATCAGGCTAACTTGTATGTGCTTCAACTG

>PGSC0003DMG400010519LRR-RLPs\_2604

TCATGCTCCACACTTTCCACTGCATGTTCAACAATTAACATATCAGAAAAAATGTA AAAACAGATTAACA

AAATGTTAAAAGCTAAACTCTCATACACGCCCATGTGAAGGTAAAAAGCA

>PGSC0003DMG400010519LRR-RLPs\_2666

GATTAACAAAATGTTAAAAGCTAAACTCTCATACACGCCCATGTGAAGGTAAAAGCAATGTATAACATT

CACACATAGTCCGCCTTCGATTAAGGTATGCACTGACCACCCAAAGTCT

>PGSC0003DMG400010519LRR-RLPs\_2728

ATAACATTCACACATAGTCCGCCTTCGATTAAGGTATGCACTGACCACCCAAAGTCTGCCGTTTTGAGT

TCACCCTAAAAGCAGAAATATTAAAGCTGTCATTTTACTGCAATGCATTG

>PGSC0003DMG400010519LRR-RLPs\_2790

TTTTGAGTTCACCCTAAAAGCAGAAATATTAAAGCTGTCATTTTACTGCAATGCATTGTATATACTGTTTA

GCAATGCTAAGTTTGTACCTCAATATCTTCTCTGTGTATTGTGTGATTC

>PGSC0003DMG400010519LRR-RLPs\_2914

GACAGTATATTGAAAGTTCGTAAGAATTGAGAAGAAGCAATGCAGAAGAGGCAACGACAAGTTACCGG

GTCATAAAAGTAACCATAAGTATTTCAACTTCACGACGAAGCTGATGTTCAA

>PGSC0003DMG400010519LRR-RLPs\_2976



TACCGGGTCATAAAAGTAACCATAAGTATTTCAACTTCACGACGAAGCTGATGTTCAACCAGGGACTGTT  
TTAGCTGGCTCTTGAACAACACTTTTAACGCGACGATATGATTGCTATGT

>PGSC0003DMG400010519LRR-RLPs\_310

GCATATTTTTTTTTCTTTTTTTGTAATGGTATCAGGCTAACTTGTATGTGCTTCAACTGGATAACAAGATTGT  
GCATTTTCAACACTAAGAATAATAAATAATCTAGAAGGTGATAGACTA

>PGSC0003DMG400010519LRR-RLPs\_3100

AAGAAACAACCTTAGTATTGGAATGTGATTGTAGAATGTTAAGTCTATCGAATAGAATTCGAAAA  
ATCTTTTAAGCCATGTCCACAAGATATCATCCCCAACCTCCCACCAATCCA

>PGSC0003DMG400010519LRR-RLPs\_3162

TCGAAAAATCTTTTAAGCCATGTCCACAAGATATCATCCCCAACCTCCCACCAATCCATAGCAATTATAAC  
AAATATGTTGAATGAGAGATTCTCACTCGCAGTGCATAAATCCGAGGCA

>PGSC0003DMG400010519LRR-RLPs\_3286

AAAAGTAAGTAGGTTTATCAGCCATTCTTAACATGTAAAGGTTTAAAGGACTTACATACATGACCGAACT  
TTCCTCATCCAAGAGGCTTCCCAATGTTGAAATCATTAAAGTGTCCGCCTC

>PGSC0003DMG400010519LRR-RLPs\_3348

ACCGAACTTTCCTCATCCAAGAGGCTTCCCAATGTTGAAATCATTAAAGTGTCCGCCTCTTTTTATTAGCCT  
CTGATGAAGTCTGCAGAAGTTGAAAATTCTATAGTCCATTTAAAAGATC

>PGSC0003DMG400010519LRR-RLPs\_3410

TATTAGCCTCTGATGAAGTCTGCAGAAGTTGAAAATTCTATAGTCCATTTAAAAGATCAGTTAATTAATA  
ATAACAATAAATTCTTGTTGTTGTTGTTGTGTACAGTATAACAGATCAGT

>PGSC0003DMG400010519LRR-RLPs\_3472

AATTAATAACAATAAATTCTTGTTGTTGTTGTTGTGTACAGTATAACAGATCAGTTAATTAATAATAA  
CAATAACTTGTTCTTTTAATTTTCATGATAACATATGGTTATTTACATC

>PGSC0003DMG400010519LRR-RLPs\_3534

TAAAATAACAATAACTTGTTCTTTTAATTTTCATGATAACATATGGTTATTTACATCACAAAGTTGTACG  
ATCCAGCTGAGCAAGAATCAAGATGCTCTTTTGATTCCATTTAGTGCGG

>PGSC0003DMG400010519LRR-RLPs\_3596

AGTTGTACGATCCAGCTGAGCAAGAATCAAGATGCTCTTTTGATTCCATTTAGTGCGGGAAGAAGATAT  
GTCAAGGAAGACAATTTGCTTCAAAGCTCCAAGAATCAGGCTTAAATGCA

>PGSC0003DMG400010519LRR-RLPs\_3658

AAGATATGTCAAGGAAGACAATTTGCTTCAAAGCTCCAAGAATCAGGCTTAAATGCATTGGTAGAAGA  
TTATCTCAATTAAGTGCACCTCTGTTTCATACAGTCCTCTTAGAGGACTTCA

>PGSC0003DMG400010519LRR-RLPs\_3720

TAGAAGATTATCTCAATTAAGTGCACCTCTGTTTCATACAGTCCTCTTAGAGGACTTCATGAACAAGCAATC  
AACCACAAGTGATCGCAACTAACATACAAGCTTAACTCAATCAACAAT

>PGSC0003DMG400010519LRR-RLPs\_3782

CAAGCAATCAACCACAAGTGATCGCAACTAACATACAAGCTTAACTCAATCAACAATGTGTACAACAAA  
TTTTAACTAACCTCAACATTCTTCCTTTAGCAAGGTGGTACGCTTGTGAA

>PGSC0003DMG400010519LRR-RLPs\_3844

ACAACAAATTTTAACTAACCTCAACATTCTTCCTTTAGCAAGGTGGTACGCTTGTGAAACTATCAAGTACA  
ACTCAACTCAATCTACATACTAATTTATTATAAGCTCAAAAATAACCAA

>PGSC0003DMG400010519LRR-RLPs\_3906

TCAAGTACAACCTCAACTCAATCTACATACTAATTTATTATAAGCTCAAAAATAACCAAACACAGTGAGGT  
CAGAGCATGTTACTAGAAATTTTATTTTTCTTTACGACAGAAACAAACAT

>PGSC0003DMG400010519LRR-RLPs\_868

GTGCATAAACTTAGACATCTAAGAACATTAGACCTTAGTGAAAACAGATTTTCAGGAGGAATAAACAAA  
GGGATCTTCATGTTACTTGAATTAAGTCACGTAAGCATTTCAGTAAACCGG

>PGSC0003DMG400010519LRR-RLPs\_930

AAACAAAGGGATCTTCATGTTACTTGAATTAAGTCACGTAAGCATTTCAGTAAACCGGTTACAGTGTTT  
GAGGTGGTAGAATTCTCTGATAAAGAATCACAGCTTCACACGTTAGACGT

>PGSC0003DMG400010523-(rev)LRR-RLPs\_0

GTTCTTTAGTGGTGACTCTCAATGAAGTACCTACTTTTCAGCTTACTCTCTCTATACTCACTACTACTGCTAC  
TCAGTACTGATTCTTTTCACACATACTGTGCCTGTAAACCCTGTCCAG

>PGSC0003DMG400010523-(rev)LRR-RLPs\_1054

TGTATCTCGAGTCTTGGGGGTTTGACACAGCTCAACTTGTACGTAATGAATTACGATATGGTATCTCGC  
CTAGACTGGTTTTTTTCAGAGAGGTTATGTTTGTGGACTTGAGTTATAAT

>PGSC0003DMG400010523-(rev)LRR-RLPs\_1116

TATCTCGCCTAGACTGGTTTTTTTCAGAGAGGTTATGTTTGTGGACTTGAGTTATAATGAGCTATCAGGG

AAGATTCCAAGTAGGATTGTTGAGGCATCGGACAAGTCTGGACTTCTACT

>PGSC0003DMG400010523-(rev)LRR-RLPs\_1178

TATCAGGGAAGATTCCAAGTAGGATTGTTGAGGCATCGGACAAGTCTGGACTTCTACTTCTTGACCTGTC

TCACAATCAGTTCTCTGGTAATATTCCTGTAACGATAACAGAATTGAAGA

>PGSC0003DMG400010523-(rev)LRR-RLPs\_1240

GACCTGTCTACAATCAGTTCTCTGGTAATATTCCTGTAACGATAACAGAATTGAAGAGCTTGCAAGCAT

TGTTTCTGTCTTATAATCTTCTTGTTGGGCGAAATACCAGAAAGGATTGGT

>PGSC0003DMG400010523-(rev)LRR-RLPs\_1302

GCAAGCATTGTTTCTGTCTTATAATCTTCTTGTTGGGCGAAATACCAGAAAGGATTGGTAATTTGACCTAT

CTACAGGTGATTGATCTCTCACATAACTTCCTCACTGGCTCGATTCTTT

>PGSC0003DMG400010523-(rev)LRR-RLPs\_1364

TGACCTATCTACAGGTGATTGATCTCTCACATAACTTCCTCACTGGCTCGATTCTTTGAACATCGTAGGA

TGTTTCCAATACTACTGGTGCTGATACTAAACAGTAATAATCTTTCTGGGG

>PGSC0003DMG400010523-(rev)LRR-RLPs\_1426

ATCGTAGGATGTTTCCAATACTACTGGTGCTGATACTAAACAGTAATAATCTTTCTGGGGAAATTCAGCCAG

TGCTTGATGCGTTGGATAGTCTTAAGATATTTGATATAGGAAACAACAAG

>PGSC0003DMG400010523-(rev)LRR-RLPs\_1488

TCAGCCAGTGCTTGATGCGTTGGATAGTCTTAAGATATTTGATATAGGAAACAACAAGATTTCTGGTGA

GATCCCACTGACATTGGCAGGCTGCAAGTCGTTGGAAGTTGTTGACTTGAG

>PGSC0003DMG400010523-(rev)LRR-RLPs\_1550

CTGGTGAGATCCCCTGACATTGGCAGGCTGCAAGTCGTTGGAAGTTGTTGACTTGAGCTCTAACAATCT

CTCAGGGTCTCTAAATGATGCAATAACCAAATGGTCGAACCTCAAATTCC

>PGSC0003DMG400010523-(rev)LRR-RLPs\_1612

AACAATCTCTCAGGGTCTCTAAATGATGCAATAACCAAATGGTCGAACCTCAAATTCCTCTCCCTTGCTCG

GAACAAGTTCAGTGATCTCTGCCAAGTTGGTTGTTTACATTTTCAGGCT

>PGSC0003DMG400010523-(rev)LRR-RLPs\_1674

CCTTGCTCGGAACAAGTTCAGTGATCTCTGCCAAGTTGGTTGTTTACATTTTCAGGCTATTCATACTCTGG

ATTTTTCTGGAAACAAGTTCCTCGGGATATATACCAGATGGTAACTTTAA

>PGSC0003DMG400010523-(rev)LRR-RLPs\_1736

ATACTCTGGATTTTTCTGGAAACAAGTTCTCGGGATATATACCAGATGGTAACTTTAACACTAGTCCAAA  
TTTCTACAACGGCGACATTAGGAAAACCATTCTGCAGTACCATCAATTT

>PGSC0003DMG400010523-(rev)LRR-RLPs\_1798

AGTCCAAATTTCTACAACGGCGACATTAGGAAAACCATTCTGCAGTACCATCAATTTAGCTCGAAGCC  
TGGATATCAAACCTTCACTCATTGCTGATGAACTAGTTTGAGCTTCAAC

>PGSC0003DMG400010523-(rev)LRR-RLPs\_186

ACTAATCTTTTTTACCTCTACCTTACCTCCATGGCAGAATCAGTTCTTGAACCTTGTACAACCTTTATTC  
CTTCAAAGTTTCAATCTTTATCCTATTCTTCTTGATTTTCCCTTTCTT

>PGSC0003DMG400010523-(rev)LRR-RLPs\_1860

TCGAAGCCTGGATATCAAACCTTCACTCATTGCTGATGAACTAGTTTGAGCTTCAACTATAACCTGACA  
ACCACAATTGGAATTGATCTGTCTGACAATTTGCTTCATGGTGAAATTCC

>PGSC0003DMG400010523-(rev)LRR-RLPs\_1922

ACCTGACAACCACAATTGGAATTGATCTGTCTGACAATTTGCTTCATGGTGAAATTCAGAGGGTCTGTT  
CGGATTACATGGTTTGGAGTACCTTAATTTGTCATACAATTTTCTTAATG

>PGSC0003DMG400010523-(rev)LRR-RLPs\_1984

GGTCTGTTCCGATTACATGGTTTGGAGTACCTTAATTTGTCATACAATTTTCTTAATGGTCCAGTCCAGG  
GAGTTTAGGGAAGTTGCAGAAGCTAAAAGCACTTGATTTATCACATAAT

>PGSC0003DMG400010523-(rev)LRR-RLPs\_2046

AGTTCAGGGAGTTTAGGGAAGTTGCAGAAGCTAAAAGCACTTGATTTATCACATAATTCTTTATCTGGC  
CACATCCCTGAAAACATTACTGTCCTCAGAAATTTGACAGTTTTAAATCT

>PGSC0003DMG400010523-(rev)LRR-RLPs\_2108

TATCTGGCCACATCCCTGAAAACATTACTGTCCTCAGAAATTTGACAGTTTTAAATCTGTCTTATAATTGTT  
TCTCTGGTGTATTCCGACAAAGCGAGGTTATTGGAAATTTCTGGAG

>PGSC0003DMG400010523-(rev)LRR-RLPs\_2170

TATAATTGTTTCTCTGGTGTATTCCGACAAAGCGAGGTTATTGGAAATTTCTGGAGCATTGCTGGGA  
ATCCAGACTTATGTATGGAATCATCTGGTAATGTCTGTCAAAGAACTTTG

>PGSC0003DMG400010523-(rev)LRR-RLPs\_2232

TGCTGGGAATCCAGACTTATGTATGGAATCATCTGGTAATGTCTGTCAAAGAACTTTGCCTGTAGAGCCA  
GGGAAGAAATTTGAAGAGGAAATGGAAGAGGGACCATTATCAGTTTGGAT

>PGSC0003DMG400010523-(rev)LRR-RLPs\_2294

TAGAGCCAGGGAAGAAATTTGAAGAGGAAATGGAAGAGGGACCATTATCAGTTTGGATTTTCTGTATA  
AGTGCTTTAGTTAGCTTCTATGTTGGCATTGTTGTTTTATTTTGTTTCATCTC

>PGSC0003DMG400010523-(rev)LRR-RLPs\_2356

TGTATAAGTGCTTTAGTTAGCTTCTATGTTGGCATTGTTGTTTTATTTTGTTTCATCTCGAACAAAGAAGCTG  
TATTCTGCAAACAAAAAGTTTAGCAGGTTGAAAGTGATAAGTGATCACA

>PGSC0003DMG400010523-(rev)LRR-RLPs\_2418

AAGAAGCTGTATTCTGCAAACAAAAAGTTTAGCAGGTTGAAAGTGATAAGTGATCACATTGTACAGCAA  
CTTATGAATTGTATCATATAGCAAACACTGCTTCAAGCATATCTTGTTTACT

>PGSC0003DMG400010523-(rev)LRR-RLPs\_2464

TAAGTGATCACATTGTACAGCAACTTATGAATTGTATCATATAGCAAACACTGCTTCAAGCATATCTTGTTT  
ACTAATCAGCCCTTCATTTTTTTAACTAGTTAACAATGCTTCACGTTG

>PGSC0003DMG400010523-(rev)LRR-RLPs\_248

CCTCTTATTCCTCAAAGTTTCAATCTTATCCTATTCTTCTTGATTTTCCCTTCTTGAACCCATTTTCATCT  
GCATTTCTCTTTCTTTTGATACTAATGCAACTGAGGCTGTCAATC

>PGSC0003DMG400010523-(rev)LRR-RLPs\_310

CCATTTTCATCTGCATTTCTCTTTCTTTTGATACTAATGCAACTGAGGCTGTCAATCTTGAAACAGAAGA  
GGACATGGGTTTGCTTTTGTCTTCAAGTTACAGTTTCGAGAAACCCCT

>PGSC0003DMG400010523-(rev)LRR-RLPs\_372

AACAGAAGAGGACATGGGTTTGTCTTTGTTCTTCAAGTTACAGTTTCGAGAAACCCCTTACCAAGCTGG  
GATGTCAATGTTCTCTATCAAACACTGGACTGGTGTACCCGGTCTAACCA

>PGSC0003DMG400010523-(rev)LRR-RLPs\_434

CAAGCTGGGATGTCAATGTTCTCTATCAAACACTGGACTGGTGTACCCGGTCTAACCCAGACCGGACGGG  
TCACTGGACTTAACCTCACAAGGTTTAACTTGTGAGGACAGGTTTCATCCTT

>PGSC0003DMG400010523-(rev)LRR-RLPs\_496

GGACGGGTCACTGGACTTAACCTCACAAGGTTTAACTTGTGAGGACAGGTTTCATCCTTGTGTTGTGTAATC  
TTACTTTTCTTGAACCCCTTGTTGTCTCATAATAGCTTTAACAATTCA

>PGSC0003DMG400010523-(rev)LRR-RLPs\_558

GTGTAATCTTACTTTTCTTGAACCCCTTGTTGTCTCATAATAGCTTTAACAATTCAATACCTTCTTGTTT

ATGGAAGTTGTGGAGCCTTAAGACCTTAGATCTTAGCTATAATATGCT

>PGSC0003DMG400010523-(rev)LRR-RLPs\_620

CTTCTTGTTTATGGAAGTTGTGGAGCCTTAAGACCTTAGATCTTAGCTATAATATGCTTACTCTTCTTATTC

CTAGTACATTTGCAACAACACTATGAGTAAGTTAATTGAGCTTGACCTTA

>PGSC0003DMG400010523-(rev)LRR-RLPs\_682

CTTCTTATTCCTAGTACATTTGCAACAACACTATGAGTAAGTTAATTGAGCTTGACCTTAGTCATAACATGTT

GAGTGATGAAATCCCAATGTGGATAGGGAATGTCTCAATGTCACTTGAA

>PGSC0003DMG400010523-(rev)LRR-RLPs\_744

TAACATGTTGAGTGATGAAATCCCAATGTGGATAGGGAATGTCTCAATGTCACTTGAAAACTTAACTTA

GGGTTTAATAGTTTTTCATGGGGATATACCTAAGAGCTTGTTGAATTTGAT

>PGSC0003DMG400010523-(rev)LRR-RLPs\_806

TTAACTTAGGGTTTAATAGTTTTTCATGGGGATATACCTAAGAGCTTGTTGAATTTGATGTCTTTGAAGTAT

CTTGACTTGTCTCACAATAGTTTGATGGGAAATGTGGGTGATTTTAACC

>PGSC0003DMG400010523-(rev)LRR-RLPs\_868

TTGAAGTATCTTGACTTGTCTCACAATAGTTTGATGGGAAATGTGGGTGATTTTAACCAAGAATTGGTCT

CACTTAATCTTGAGTCTAATTTGTTATCGGGTACTTTGCCTTGTTTATAT

>PGSC0003DMG400010523-(rev)LRR-RLPs\_930

ATTGGTCTCACTTAATCTTGAGTCTAATTTGTTATCGGGTACTTTGCCTTGTTTATATTCGTCAAGGGAAT

CACTTACACTTCTTAATTTAGCAAACAATTCGATTCTTGAGGTATACC

>PGSC0003DMG400010523-(rev)LRR-RLPs\_992

CAAGGGAATCACTTACACTTCTTAATTTAGCAAACAATTCGATTCTTGAGGTATACCAACGTGTATCTC

GAGTCTTGGGGGTTTGACACAGCTCAACTTGTCACGTAATGAATTACGAT

>PGSC0003DMG400010577-(rev)RLKmalectin\_0

TTTTATTGTAGGCAAACACTATTCCTCTTCAACTTGTTTGTTTATAGCAAACGAACATGTTTCTCTCTCAGCTA

TTCATTCTCTTATTGTGTATTCAAACAATCATCATATCTGTTGCCACT

>PGSC0003DMG400010577-(rev)RLKmalectin\_1403

TAACGTTGCTGTTTATTACATTAGGCATAATGCAGAAATAAAGTCTGGCAAGACGTATAATGGAATATCT

TCAGGAGAGCATCAGTGTCTCAATTTTCACTGGATGAGATGGAAAGATC

>PGSC0003DMG400010577-(rev)RLKmalectin\_1647

GGGGAGAAAGAGTTTTGGACGGAAATCAATATGTTATCTACGCACCGCCATGAGAACCTTCTCTCCCTC  
ATTGGTACTGCATTGAAGGTCATGAGATGTTATTAGTTTATGATTATATG

>PGSC0003DMG400010577-(rev)RLKmalectin\_1708

TCTCCCTCATTGGTACTGCATTGAAGGTCATGAGATGTTATTAGTTTATGATTATATGCCTCGAGGATCA  
CTTGCTGACAACCTGTACAAAATGGACAGAAATAGCTCATCTCTCTCTT

>PGSC0003DMG400010577-(rev)RLKmalectin\_183

GGACGATTATGGATTGGAGATTCAACTTTCCTCATTCTACACTTAACTGGAAAATCTATTAATTC  
AAGAGTACCTTGCCAAGTTGCCTTGTGGATCCAGTTCCTTATAAGTCT

>PGSC0003DMG400010577-(rev)RLKmalectin\_244

CTATTAATTCAAGAGTACCTTGCCAAGTTGCCTTGTGGATCCAGTTCCTTATAAGTCTGCTCGAACGTCT  
CGCCATCAGTTTACCTACAAATTTTCAGTGAAACCAGGACACAAGTTCT

>PGSC0003DMG400010577-(rev)RLKmalectin\_2745

GGTTACCTTGCTGAGTCTCTTTCTCCAAGAGTGGCCGGACAGTAATTGCGGTTAAGCAATTGAGTTCTG  
AAAGCTTTCAAGGGTGGCAGGTGATTCTCTGTGCTAAATATGTGAACTT

>PGSC0003DMG400010577-(rev)RLKmalectin\_2867

AGTTTAAGTTTTCTAATTGAAGCTATTTCTAGTTTATGCCTGGCATTAGCTGCAATTACTCTCTTCTTTATT  
GTCTGTCTGAGAGAAATATAGATTTACGTAGAAGCACTTGACATTGAT

>PGSC0003DMG400010577-(rev)RLKmalectin\_305

TCGAACGTCTCGCCATCAGTTTACCTACAAATTTTCAGTGAAACCAGGACACAAGTTCTTACGCCTGCACT  
TCAAACCAGCTTCATACAAAGGTTTCATCAAGTCCAAACCCATTTTTAC

>PGSC0003DMG400010577-(rev)RLKmalectin\_3538

TTTTCTTACTGGGCCCTTTTTGGTTTACACACACTGTTTTGCCTAAAGTTTTGGAGCTATTTATCACAGAG  
AGACAACACCTGACGTATAACAGTGAAAACATTAGAGAAAGGTTGTTA

>PGSC0003DMG400010577-(rev)RLKmalectin\_3843

GTTGGGCTTCTGCACTTGAAATTCTACTTCTCTTGAAGCACATGCATCTTGTGCTTACAAGTTTAAACAT  
ATAGTCAAGTGTATTATTTGTTTTCTACAGGACACTTGTACGTGAAGAG

>PGSC0003DMG400010577-(rev)RLKmalectin\_3904

GTTTAAACATATAGTCAAGTGTATTATTTGTTTTCTACAGGACACTTGTACGTGAAGAGCGATGTCTATG  
CTTTTGGTGTCTTTTTAGTGAAATGCTAACAGGTTTACGAGTAATAGAC

>PGSC0003DMG400010577-(rev)RLKmalectin\_4270

GCTTCTCCTTCTAATCCAAGGAACCGGGCCTATCCACTCCTTAGAAGAGCAGAGTGAATATGATACTACT  
TTTAAACAATATGAAGAAGCTACAATATTGTTAAAATTTCAACTGTGAGT

>PGSC0003DMG400010577-(rev)RLKmalectin\_4819

ATTAGTCTCTCAAAGAATTCTGAGAGTTAACAGACATAATATTCTAGAATATGATTTTTTTTTCAATCAT  
TGATCAATGGATCGGGTCTTATCTTTACTGCTCCTTGTTCTAACCTGAA

>PGSC0003DMG400010577-(rev)RLKmalectin\_61

TCTCTCAGCTATTCACTTCTTATTGTGTATTCAAACAATCATCATATCTGTTGCCACTAACATTCATGAAG  
AAAACATTGCCATATCATGTGGTGCCTCTGGCAATCCCCTGCACCAG

>PGSC0003DMG400010577-(rev)RLKmalectin\_915

GGTGCTCACTGCCATTTCGAATTTCTGTAATCTCACATGGAACATTCCACTTGATTTGGGATTCAGATACCT  
TGTTAGGCTTCACTTTTGTGAAATTGAACCTACAATGATAAATGAAGGC

>PGSC0003DMG400010700-(rev)LRR-RLPs\_0

ATGGGCATTGGAAAACCTGCATTGTTTCTGCTATGCGCGTTTCTCTGTCAACTTGTTTTCTCCTCATCTTTA  
CCTCATTTGTGCCTCAATGATCAAGCCCTTGCTCTTCTTCAATTCAAA

>PGSC0003DMG400010700-(rev)LRR-RLPs\_1008

GCAACTTGGATTATTAGATTGTTTCAGCCAATTCCCTAACAGGTCCCATTCTTCTAATGTAAGTGGTATGC  
AAAACCTATATTCACTCTTCTTGTCATCAAACCTCTTGAATGGGACTAT

>PGSC0003DMG400010700-(rev)LRR-RLPs\_1071

TGGTATGCAAAACCTATATTCACTCTTCTTGTCATCAAACCTCTTGAATGGGACTATACCTTCTGGATAT  
TCTCCCTCCCTTCAATAGGGATTTAGACTTGAGTGATAACCATTTAAG

>PGSC0003DMG400010700-(rev)LRR-RLPs\_1134

CTGGATATTCTCCCTCCCTTCAATAGGGATTTAGACTTGAGTGATAACCATTTAAGTGAAAATATTCAGG  
AGTTCTATTCCGAATCATTGTATCGAGTTTCTCTAAAACAAAATCAGCT

>PGSC0003DMG400010700-(rev)LRR-RLPs\_1197

TATTCAGGAGTTCTATTCCGAATCATTGTATCGAGTTTCTCTAAAACAAAATCAGCTGCAAGGTCTTATTC  
CAAAGTCACTCTTAGATCTGCAGGGCCTACAATTTCTTCTCCTTTACG

>PGSC0003DMG400010700-(rev)LRR-RLPs\_1260

TCCTATTCAAAGTCACTCTTAGATCTGCAGGGCCTACAATTTCTTCTCCTTTACGAAATAATCTCAGTG



GACAGATTGCTTCAACCATCTGCAATCTGACAAAACCTGTTAGTGCTAGA

>PGSC0003DMG400010700-(rev)LRR-RLPs\_1386

CAGCAATAATTTGGAGGGAACAATCCCCTACTATGTTTGGGTGAGATGAGTGGACTTTGGATTTTGGATTT

AAGCAACAATAGTCTTAGCGGGAAAATTAATACAACCTTTTAGTATAGGAAA

>PGSC0003DMG400010700-(rev)LRR-RLPs\_1449

GGATTTAAGCAACAATAGTCTTAGCGGGAAAATTAATACAACCTTTTAGTATAGGAAACCAACTTATAGTC

ATTAATTTGACGGGAATAAGCTAGAGGGGAAAGTTCCGCAATCTTTGAT

>PGSC0003DMG400010700-(rev)LRR-RLPs\_1512

TATAGTCATTAATTTGACGGGAATAAGCTAGAGGGGAAAGTTCCGCAATCTTTGATCAATTGCACATAT

TTGGAAGTTGTTGATTTAGGTAACAATGAGTTGAGTGACACATTTCTAA

>PGSC0003DMG400010700-(rev)LRR-RLPs\_1575

CACATATTTGGAAGTTGTTGATTTAGGTAACAATGAGTTGAGTGACACATTTCTAAATGGTTGGGAGCC

CTACCTTATTTGCAGATTTTGAATTTGAGATCAAATAAGTTCTATGGCCC

>PGSC0003DMG400010700-(rev)LRR-RLPs\_1638

GGGAGCCCTACCTTATTTGCAGATTTTGAATTTGAGATCAAATAAGTTCTATGGCCCTATAAAAGATTCA

AGGACTGATAACTTGTGCTCAAATTCGAGTCATAGATCTCTCAGCCAA

>PGSC0003DMG400010700-(rev)LRR-RLPs\_1701

AGATTCAAGGACTGATAACTTGTGCTCAAATTCGAGTCATAGATCTCTCAGCCAATGGATTTAGTGGA

GATTTACCAGTGAGTCCTTTTTTGAAGATTTTGAAGCCATGAAAATGATT

>PGSC0003DMG400010700-(rev)LRR-RLPs\_1764

TAGTGGAGATTTACCAGTGAGTCCTTTTTTGAAGATTTTGAAGCCATGAAAATGATTGGATGAGAGCAG

TGGAACCCGAGAGTATGTAGGAAATATATATTCTTATTATTACACGAATTC

>PGSC0003DMG400010700-(rev)LRR-RLPs\_1827

GAGCAGTGAACCCGAGAGTATGTAGGAAATATATATTCTTATTATTACACGAATTCCTTTGACAGTGACA

ACAAAGGGACTGGATCTTGAACCTTCTCGAGTTTTGACTACAGACATGAT

>PGSC0003DMG400010700-(rev)LRR-RLPs\_1953

TCTCTCAAGGAATAGATTTGAAGGTCATATCCCAAGCATTATTGGAGATCTCGTTGGGCTTCGTACGTTA

AACTTATCTCATAATGTCTTGAAGGTGATATACCAGCATCACTGCACCA

>PGSC0003DMG400010700-(rev)LRR-RLPs\_2016

TACGTAACTTATCTCATAATGTCTTGGGAAGGTGATATACCAGCATCACTGCACCAGTTATCTGACTTG  
AATCATTGGATCTCTCATCCAACAAAATCAGTGGAGAAATCCACAACA

>PGSC0003DMG400010700-(rev)LRR-RLPs\_2205

AGGAAACAATTTGATACGTTTGAGAACAGTTCATACCAAGGAAATGATGGGTTACGTGGATTTTCACTCT  
CAAAGGATTGTGGTGGTGATGATGGGGTAGCACAAACGACGAATCCAGTT

>PGSC0003DMG400010700-(rev)LRR-RLPs\_2422

TATACATAATGTTGTCAACTCAATATCCAGCATGGTTTTGAGAAATGGATGTAGAATTGGAACACAAAAT  
TCTTACGAGAATGAAAAGGCATAAGAAAAGATATTAGTGTGTTACCTCCA

>PGSC0003DMG400010700-(rev)LRR-RLPs\_252

CTTGATCTCAGTCGCAGCCAACCTTCGAGGCGAGTTTCATTCCAACAGTAGCCTCTTAACTCGTTCATTT  
CACCTAAATTTGGTGAGCTTTCTAGTTTGACTCATCTTGATTTGTCATA

>PGSC0003DMG400010700-(rev)LRR-RLPs\_315

GTTCAATTCACCTAAATTTGGTGAGCTTTCTAGTTTGACTCATCTTGATTTGTCATATTCACTTTTACAGG  
TATAATGCCAGCAGAAATATCTCATCTTTCTAAATTGCACGTTCTTAG

>PGSC0003DMG400010700-(rev)LRR-RLPs\_378

TTTTACAGGTATAATGCCAGCAGAAATATCTCATCTTTCTAAATTGCACGTTCTTAGTATCGAGAGTGATC  
CATATGAGCTTAGATTTCGAACCTCACAATTTTGAAGTCTCCTTAAGAA

>PGSC0003DMG400010700-(rev)LRR-RLPs\_504

CCGATTAAGAGTGCTCCACCTTAGCTCTGTGAACATCTCTCAACCATTCTCTTAAATTCTCTTCTTATTT  
AACAAATCTAGGACTTTCAGACACGCAGATATACGGGATATTGCCCGA

>PGSC0003DMG400010700-(rev)LRR-RLPs\_567

TTCTTATTTAACAAATCTAGGACTTTCAGACACGCAGATATACGGGATATTGCCCGAAGGAGTTTTCCAC  
CTTTCCAACCTGGAATCTCTTGATTTATCAGACAATCCCCAGCTCACTGT

>PGSC0003DMG400010700-(rev)LRR-RLPs\_693

TCCCACAACCAATGGAATAGCAGTGCATCACTTATGAAGTTATATCTCAGTGGTGTGAATGCTACTGGT  
ACGATACCAGAATCATTTGGTCATCTAACTTCACTGCATAGATTGAGAAT

>PGSC0003DMG400010700-(rev)LRR-RLPs\_756

TACTGGTACGATACCAGAATCATTTGGTCATCTAACTTCACTGCATAGATTGAGAATAGCTTCTTGTAATC  
TCTCAGGGTCTATTCTAAACCTCTCTGGAATCTCACCAACATAGAGGT

>PGSC0003DMG400010700-(rev)LRR-RLPs\_819

TTGTAATCTCTCAGGGTCTATTCTAAACCTCTCTGGAATCTCACCAACATAGAGGTTTTGGACCTTGGTT  
ATAACCATCTTGAAGGACCAATTTCTGATTTCTTTAGATTTGGAAAGAT

>PGSC0003DMG400010700-(rev)LRR-RLPs\_882

CCTTGGTTATAACCATCTTGAAGGACCAATTTCTGATTTCTTTAGATTTGGAAAGATCAGGTCGTTATCAC  
TTAGAAATAACAACCTTAATGGCCAACCTTGAGTTTTTATCCTTTAACAG

>PGSC0003DMG400010701RLKWAX-EGF\_124

TTCATAACATCAGTTATCCCTTTGATTGAAAAGTGATCCAAAGCACTGCGGCCTTGAAAATTATGAATT  
GAGCTGTGAAGGAAATCGCGCCATATTAACAATACTGCTAAATGATTGGA

>PGSC0003DMG400010701RLKWAX-EGF\_186

TATGAATTGAGCTGTGAAGGAAATCGCGCCATATTAACAATACTGCTAAATGATTGGAATGGATCACTG  
AACTACTATGTTCAAGCCATCAATTACGATAACTCCACTATCCGCCTTGTA

>PGSC0003DMG400010701RLKWAX-EGF\_1860

AGGGAAAGGAGATTGAAGTACTAGACGAGACACATGATGACGTAAAGAAGCTGACCTTAGTTGCTTTG  
TGGTGCATACAAATGAATCCACTTGATCGTCCCTCAATGACTAAAGTAGTGG

>PGSC0003DMG400010701RLKWAX-EGF\_2046

GTTCATTAGAATTCAATTTAATTAGTTCTTCAACAAGCTCAACTGAGTCTGTGAAGTTGCTTGAGAGTTGT  
TCTGATTCTGCAAAAATAGATGTAATTGTTGCTTGACATCACATATTAT

>PGSC0003DMG400010701RLKWAX-EGF\_2096

GTGAAGTTGCTTGAGAGTTGTTCTGATTCTGCAAAAATAGATGTAATTGTTGCTTGACATCACATATTAT  
GTACGTAATTCGTGTTGTTCTGAATAAAATATCAAGTTCATGCTAAATTT

>PGSC0003DMG400010701RLKWAX-EGF\_310

CTGGTATAAGAGAACAAGTTATTTGCTCTCTTCCTCAGAATTTGATTACGGTTAACACTGCCCTTCTTGGT  
TTTGATTCTATTATATATAACAATGTCTGATTATGTTCAATTTACCAGTAC

>PGSC0003DMG400010701RLKWAX-EGF\_372

CTTCTTGGTTTTGATTCTATTATATATAACAATGTCTGATTATGTTCAATTTACCAGTACCAATCACTCTCTCA  
ACTGTCCATTTGCCATAAATTCTCCAGTCTTTGTGGAAATCACTAAT

>PGSC0003DMG400010701RLKWAX-EGF\_558

ATGACTAAATTATCACCATCCGATTTGAAAGTCGGGTGTAGTGTAGACCTCATGTCAATGACTTCATGGC

GTATTCAGGATGCAAATGCTAGCATTCTATTTAAGTTTGCATAATGCT

>PGSC0003DMG400010701RLKWAX-EGF\_620

TTCATGGCGTATTCAGGATGCAAATGCTAGCATTCTATTTAAGTTTGCATAATGCTTTGGCATATGGAT

TTGAGCTTTCATGGTTTAGTTACGTTTATTGTGGCAAGTGCGCCGATCC

>PGSC0003DMG400010701RLKWAX-EGF\_682

CATATGGATTTGAGCTTTCATGGTTTAGTTACGTTTATTGTGGCAAGTGCGCCGATCCATATCTATGTGTA

GGGGAAAATTCAAGTGATGTTCAATTGTTTGGATATCGGCTGCACAGCTT

>PGSC0003DMG400010701RLKWAX-EGF\_744

CTATGTGTAGGGGAAAATTCAAGTGATGTTCAATTGTTTGGATATCGGCTGCACAGCTTACATTGATAGTA

AGCAGTCGACTTCTATTGTCAATTCTGTTTTATATAACAGTAGCTAGTT

>PGSC0003DMG400010701RLKWAX-EGF\_806

TGATAGTAAGCAGTCGACTTCTATTGTCAATTCTGTTTTATATAACAGTAGCTAGTTGCAAGTTAGATTA

ACTGTGTTATTGATTCTTGGTGTCTTGCAGCAATCATCACATGGATAC

>PGSC0003DMG400010701RLKWAX-EGF\_868

GTTAGATTAAGTGTGTTATTGATTCTTGGTGTCTTGCAGCAATCATCACATGGATACCTCCCATAGCTGG

TAAGCCACATCTTTCGTCTTCAAATATATTACTAGAAATCATTTT

>PGSC0003DMG400010701RLKWAX-EGF\_930

CATAGCTGGTAAGCCACATCTTTCGTCTTCAAATATATTACTAGAAATCATTTAATGTCGAAATGA

TGGTTGTACACAGGGCCTAGCATTGTGGCAAGAATCGTTCTATTTCCAT

>PGSC0003DMG400010701RLKWAX-EGF\_992

TCGAAATGATGGTTGTACACAGGGCCTAGCATTGTGGCAAGAATCGTTCTATTTCCATGCATAGTTGTAT

TTCTAATGATTAAGTTACGAAGAAGGCATTTGTCGATTTATGATGCAATT

>PGSC0003DMG400010746RLKmalectin\_122

AATGTGAGTGAACATTACACAAAACACCTCAATGACAAAAAGTTAAAGGTAAACCAACAAAAGATCA

ATTAAGATCCACTTTTAGAGAGTCTTGAACCTCACTAAATATTATACTACA

>PGSC0003DMG400010746RLKmalectin\_1769

ACGTTCTCTTTGGATCCTACGTTTTTAAAGAGTCTTTAGTCCTGTTAGTAATTTATATGCCAATAGAAAAT

ATAGTGAACCTTATAGAATCTTTTTTAAATTTGTAATATTGGTCTAA

>PGSC0003DMG400010746RLKmalectin\_183

AAAGATCAATTAAGATCCACTTTTAGAGAGTCTTGAACCTTCACTAAATATTATACTACAAATTTATCAAAC  
AAAACACAACCTTATCTTCTTCTTCTTCTTTCATCTTCCATGGGTTT

>PGSC0003DMG400010746RLKmalectin\_1830

CAATAGAAAATATAGTGAACCTTATAGAATCTTTTTTTAAAATTGTAATATTGGTCTAATATGCACTTAAA  
TGGAGCGACAATGATCAGTGAGGATTCATATAGCGTAACTTGCTTGGGA

>PGSC0003DMG400010746RLKmalectin\_2928

ACCTGACAGTCAGCTACAGATAAGAGATGATAAACTTTAACACAGCATTAGACAGAAATGGAAACTCA  
GATCAGTGCTTAAAGTATAGTCTTCCAGTCAATTTTATATTTTACTTTA

>PGSC0003DMG400010746RLKmalectin\_3477

TAACTTTATTTAGCGTATAACGCTTCATAATTTGGCTACTCCAAATTTTGAGTATCCAACATGGATAGTTG  
GTAGTCTTCTTATATATTTTACTGTCATAAAACACCTTGTATCAATTT

>PGSC0003DMG400010746RLKmalectin\_3538

TGGATAGTTGGTAGTCTTCTTATATATTTTACTGTCATAAAACACCTTGTATCAATTTTAGAAATTTTGTT  
TCTTTGTGGCAGAGATGTACAGAATAACAGCCTAACTGGAGAAATACC

>PGSC0003DMG400010746RLKmalectin\_366

TATGTGTTCTTACATCTTACCCTTACTATACCACATAATCTTGAATAAAAAATCAATCTTGGCTTCAA  
ATAACCTGAATTTCAATAGAATTGAAATTTTTTTTTTGGCCACATAGAG

>PGSC0003DMG400010746RLKmalectin\_3782

AGACTGATTATATTCCTTAGTTGGATATCTATATCATAAATAAAGTTTCATTTTTTATGTCACATTATGCT  
AGGAAGAGAGCAAATAAAATTCATGAATTTTCATAAATTTCTTGTAAG

>PGSC0003DMG400010746RLKmalectin\_427

CTTGGCTTCAAATAACCTGAATTTCAATAGAATTGAAATTTTTTTTTTGGCCACATAGAGACATTTTCTACTT  
GATTTTCATTAGGTCAAGATAGAGGGTTTTTTTATTTATATATATAGA

>PGSC0003DMG400010746RLKmalectin\_488

ATTTTCTACTTGATTTTCATTAGGTCAAGATAGAGGGTTTTTTTATTTATATATATAGATAGTGAACCTTCA  
GTGTTTCTTCTTTGGTATAATATTAGTGGGAGCTAGATGAGCTTAAA

>PGSC0003DMG400010746RLKmalectin\_549

GTGAACCTCTAGTGTCTTCTTTTGGTATAATATTAGTGGGAGCTAGATGAGCTTAAATGACTAGACAG  
AGTTGCTCGGATGAAAAACACCCTCACCTCTAATCCTTAGTGGTTGTTTG

>PGSC0003DMG400010746RLKmalectin\_5612

ATTGATCTCTGGAAGAAAGCCTTTTTCTTCTGAGGAATATGGTGCTGATTGGAGCATTGTTCACTGGGTA  
AAGTTTATCATACTTCTTTCTATACATTTTCAGGGATGCTATGCCATCCAC

>PGSC0003DMG400010746RLKmalectin\_5673

CACTGGGTAAAGTTTATCATACTTCTTTCTATACATTTTCAGGGATGCTATGCCATCCACTGTGATAATAAC  
ATATAGTTGAGCTTCAGCAGGGAAACATGGCCAGTGAGGATTCATATAG

>PGSC0003DMG400010746RLKmalectin\_6161

CAGAAGATACTCTATCAAGTTCTGGATGAGCTGTAGTATGCATGCCAATAAAATGTTGGGAGTGTTACG  
AAACTGCTAATTAGAAAACTGAAATAAATTGAATACAATCTGCTGATCCC

>PGSC0003DMG400010746RLKmalectin\_6222

GTGTTACGAAACTGCTAATTAGAAAACTGAAATAAATTGAATACAATCTGCTGATCCCAATCATGTTGA  
AGCATATGATCATCCATCTTCATTGTTAAATTGTTAGAGGCATAGAGCAT

>PGSC0003DMG400010746RLKmalectin\_6283

TCATGTTGAAGCATATGATCATCCATCTTCATTGTTAAATTGTTAGAGGCATAGAGCATACTTCAAGTTAA  
TTACATTATGCTTCAACAGATCTGACTGGCAATATTTTGCAGGCAAGAT

>PGSC0003DMG400010746RLKmalectin\_6344

TTCAAGTTAATTACATTATGCTTCAACAGATCTGACTGGCAATATTTTGCAGGCAAGATCATTGATTGCGA  
AAGGAGACGTGATAAGTATCATGGATCCTGCACTAGTAGGACATGTCAA

>PGSC0003DMG400010746RLKmalectin\_6649

CAAGCTTCCTCGACGTAGAAAGCCCTGACATATCCAATAGCTCACTTACCCCTTCTGCTAGGTGAACAAG  
TAACTAACAAGAACAATTGCCAATCACTAGTGTTTAACTTCTTGGTTTA

>PGSC0003DMG400010746RLKmalectin\_6710

GTGAACAAGTAACTAACAAGAACAATTGCCAATCACTAGTGTTTAACTTCTTGGTTTATGTCCTTGCTC  
GTTATTTTTGGTTTTGGATGTACATTAGTACATAATGTCTATTATTGT

>PGSC0003DMG400010746RLKmalectin\_6893

GGCAATAGTCAGTACATTATGTCTCAACTCAGAACTACAGTATCTAACCATATACCTCTTAAGTTGCATG  
AAAGTAGCATCATTGAGCAATGTTTCATCCTCTATCTCTACTTGTGTA

>PGSC0003DMG400010940-(rev)LRR-RLPs\_1008

ATGTTGCGATATTTACAAGTGGGTAACAATCCGTTGAATGGCATTCTGCCCAATTCTATTGGGAATCTTT

GATCTACTATTCAAACATTGATATAGGAGATGCTCACATCAACGGCCCC

>PGSC0003DMG400010940-(rev)LRR-RLPs\_1134

ACAAGTATAGGCAACATGAGCGGTCTTACAGCCATAGACATTGAAGGAAACAACCTAACAGGGAGTATT  
CCTTCTGAGATTGGTAAGCTTAAACAACCTCCAAGGTCTGTATCTATATAAT

>PGSC0003DMG400010940-(rev)LRR-RLPs\_1197

AGTATTCCTTCTGAGATTGGTAAGCTTAAACAACCTCCAAGGTCTGTATCTATATAATAATAAATTGCAGG  
GACATATCCAGAGGCCGTATGCCATTTATCTAATTTGGTACAACCTATTT

>PGSC0003DMG400010940-(rev)LRR-RLPs\_1260

TTGCAGGGACATATTCCAGAGGCCGTATGCCATTTATCTAATTTGGTACAACCTATTTCTGAATGGTAATG  
AGCTCTCTGGATTAATTCCAGAATGCTTAGGAAATCTTAGCATGCTACAA

>PGSC0003DMG400010940-(rev)LRR-RLPs\_1323

GGTAATGAGCTCTCTGGATTAATTCCAGAATGCTTAGGAAATCTTAGCATGCTACAAAAGCTTTATTTGA  
ATTCTAACAAATTTTCATCTAAATTTCCGTTGAGCCTTTGGAAGATGAGT

>PGSC0003DMG400010940-(rev)LRR-RLPs\_1386

TATTTGAATTCTAACAAATTTTCATCTAAATTTCCGTTGAGCCTTTGGAAGATGAGTGGTCTCCTCTATCTA  
AGAGTGTACGAAATTCAATTGAGGGAGAATTTCCATTAGATATTGGA

>PGSC0003DMG400010940-(rev)LRR-RLPs\_1449

CTCTATCTAAGAGTGTACGAAATTCAATTGAGGGAGAATTTCCATTAGATATTGGAGGACTGAAAGCC  
ATTGTAGAACTACATCTTACCAGTAACCACTTTTCAGGAATGATACCAAGC

>PGSC0003DMG400010940-(rev)LRR-RLPs\_1575

GGGGAACCTCCAAAACCTGCAGTCTTTGACCTATCGAACAAATTCATTTTTTGGCCAAATTCATTATCCTT  
TGCCAACTTGATAAGCTTAGAATACTTGGATTTGTCTTCAAATGCGTTG

>PGSC0003DMG400010940-(rev)LRR-RLPs\_1638

TTATCCTTTGCCAACTTGATAAGCTTAGAATACTTGGATTTGTCTTCAAATGCGTTGTCAGGTAATCC  
TAAGTCTTTGGAAAACTCTCATACCTTAAAAGCATTAAATGTTTCATTT

>PGSC0003DMG400010940-(rev)LRR-RLPs\_1701

ACTATTCCTAAGTCTTTGGAAAACTCTCATACCTTAAAAGCATTAAATGTTTCATTTAATGATTTAGAAGG  
TCAAATACCGAGTGGTGGTGTGTTTGCAAATTCCTTTGCAATCATT

>PGSC0003DMG400010940-(rev)LRR-RLPs\_189

CTTGCATATTTGCCCTTGTTTCGATAATCAATTAACAGGTTCCATTCCCGCAACACTGTTTAATATCTCGTCG  
CTACTTGCTGTATCTCTGTCAATCAATAGCCTTTCTGGTCCTCTCATG

>PGSC0003DMG400010940-(rev)LRR-RLPs\_1953

CTGATATTCTTGTTTCGTTTCAATTTGGATAATAAAACGACAGAAGAAAGGGAAGTCCAAAGATGTGGAG  
AAGGTACCGGAGATCGGGACTCATCAATTAGTTTCTTATCACGAGATTCAA

>PGSC0003DMG400010940-(rev)LRR-RLPs\_252

ATCTCGTCGCTACTTGCTGTATCTCTGTCAATCAATAGCCTTTCTGGTCCTCTCATGCTAGATGAAGGGAA  
TATTGTGTCCAATCTGTACTTTTTAAGTATATCTTACAACCAAATATCT

>PGSC0003DMG400010940-(rev)LRR-RLPs\_315

GAAGGGAATATTGTGTCCAATCTGTACTTTTTAAGTATATCTTACAACCAAATATCTGGTTGCATTCTTC  
CAACATATGCCAACTCACAGAGCTCAAAGTTTTGTCCATATCTTTCAAC

>PGSC0003DMG400010940-(rev)LRR-RLPs\_378

ATTCTTCCAACATATGCCAACTCACAGAGCTCAAAGTTTTGTCCATATCTTTCAACAATATAACTGGAGA  
CATACCCAGAAATATTGGTTGTTTATCCAAGCTCGATGGGTTTTATATT

>PGSC0003DMG400010940-(rev)LRR-RLPs\_441

ACTGGAGACATACCCAGAAATATTGGTTGTTTATCCAAGCTCGATGGGTTTTATATTGGCCATAATCCAA  
TAAAAGGGACTATTCCCCTTCATTGGGAAATATTTCCACTCTGCATGAT

>PGSC0003DMG400010940-(rev)LRR-RLPs\_504

AATCCAATAAAAGGGACTATTCCCCTTCATTGGGAAATATTTCCACTCTGCATGATGTTTACTGTGCGAAA  
CAATCTCATAGTGGGGGGAATTCCTCCGGAATTAGGAAAGCTATCAAAT

>PGSC0003DMG400010940-(rev)LRR-RLPs\_567

TGTCGAAACAATCTCATAGTGGGGGGAATTCCTCCGGAATTAGGAAAGCTATCAAATTTGAGGCAATTA  
ACCTTTGACAATAATTCTAATCTTATTGGTCAAATTCCAAGGCTATTTTC

>PGSC0003DMG400010940-(rev)LRR-RLPs\_630

CAATTAACCTTTGACAATAATTCTAATCTTATTGGTCAAATTCCAAGGCTATTTTCAACATATCTTCTTTG  
GAAGTGATTTCTTTCCATTACAACAACCTCTTGGGGAGAATTCCAACC

>PGSC0003DMG400010940-(rev)LRR-RLPs\_693

TCTTCTTTGGAAGTGATTTCTTTCCATTACAACAACCTCTTGGGGAGAATTCCAACCACTACAGGTCTTCA  
TCTTCCGAACCTTAAAGAACTTGACTTGGCAGTGAATCAGCTTGAAGGG



>PGSC0003DMG400010940-(rev)LRR-RLPs\_756

GGTCTTCATCTTCCGAACCTTAAAGAACTTGACTTGGCAGTGAATCAGCTTGAAGGGGAAATTCCATTGT  
TCATAACAAATGCTTCCAAGCTTGAAATGCTGGAGCTAAATAATAACTTT

>PGSC0003DMG400010940-(rev)LRR-RLPs\_819

CCATTGTTCATAACAAATGCTTCCAAGCTTGAAATGCTGGAGCTAAATAATAACTTTCTGAAAGGAACTA  
TTCCTACTAATTTAAGAAATCTTCGTGAGCTGCGATATCTGCTCCTACAT

>PGSC0003DMG400010940-(rev)LRR-RLPs\_882

GGAECTATTCTACTAATTTAAGAAATCTTCGTGAGCTGCGATATCTGCTCCTACATACTAATCAACTTAC  
CAATGAACCAAGAGACTGTGAGTTGTTATTCTTCAATTCTTTGGCGGAC

>PGSC0003DMG400010940-(rev)LRR-RLPs\_945

CAACTTACCAATGAACCAAGAGACTGTGAGTTGTTATTCTTCAATTCTTTGGCGGACGGTAAGATGTTGC  
GATATTTACAAGTGGGTAACAATCCGTTGAATGGCATTCTGCCCAATTCT

>PGSC0003DMG400010950-(rev)LRR-RLPs\_0

CATTTTTCTATTAATATTTGCACTAATGGAGAAAGCCTTCACATTTTTCTCTTGACAATACTCTTGTTGCT  
TTCCTATGTTATGACCCAAACCAACATTACTACTGATCAATTAGCTC

>PGSC0003DMG400010950-(rev)LRR-RLPs\_132

AATCCCAAATTAGTTCAGACCTTTTCATTATTTGGATGAAAGTTGGTCTCCTGCTATTAATGTTTGTCAGT  
GGGTAGGAGTCACTTGTGACTACCGTCACCAGAGAGTGAAGTCCTTGAA

>PGSC0003DMG400010950-(rev)LRR-RLPs\_198

TCAGTGGGTAGGAGTCACTTGTGACTACCGTCACCAGAGAGTGAAGTCCTTGAATCTATCCAGAATGGC  
TCTTACCGACAGGACTCCTCGTGATTTTGAAACCTCACATTTCTTGTTTC

>PGSC0003DMG400010950-(rev)LRR-RLPs\_330

AAGGAACAATTTCCATGGAAATTTGCCTCAAGAAATGGTACGCTTACGTCGGCTTAAATTTCTTAAGTTA  
AGTTTCAACAACCTTGAGAGGGGAAATTCCTTCTTGGTTTGGGTTTTTACA

>PGSC0003DMG400010950-(rev)LRR-RLPs\_396

GTTAAGTTTCAACAACCTTGAGAGGGGAAATTCCTTCTTGGTTTGGGTTTTTACACCAACTTCAAGTTCTAA  
ATCTTGAAATAATAGTTTCACTGGTTCCATTCTCCGTCCTCTCAA

>PGSC0003DMG400010950-(rev)LRR-RLPs\_528

GGAGACTTTAGAAATATCTGCCAATTTACTTGAAGGAAACATTCCGGAAGAGATTGGCAATCTTCAGAA

CCTGAAATTCTTGCCATACAATATAATAAGCTTACGGGTTCTATACCATT

>PGSC0003DMG400010950-(rev)LRR-RLPs\_594

GAACCTGAAATTCTTGCCATACAATATAATAAGCTTACGGGTTCTATACCATTACAATTTTCAATATTTCTAGTATCCAAGTCATTGCATTTACAAACAATAGCTTATCAGGAAATCT

>PGSC0003DMG400010950-(rev)LRR-RLPs\_66

GTTGCTTTCATGTTATGACCCAAACCAACATTACTACTGATCAATTAGCTCTTCTCTTTGAAATCCC  
AAATTAGTTCAGACCTTTTCATTATTTGGATGAAAGTTGGTCTCCTGC

>PGSC0003DMG400010950-(rev)LRR-RLPs\_660

TATTTCTAGTATCCAAGTCATTGCATTTACAAACAATAGCTTATCAGGAAATCTCCCAATGGTTTATGCA  
ATGGTCTCCCGACACTCAAAAAGCTTTATCTATCAACAAACAAACTTCA

>PGSC0003DMG400010950-(rev)LRR-RLPs\_726

ATGCAATGGTCTCCCGACACTCAAAAAGCTTTATCTATCAACAAACAACTTCATGGTCATATGCCTACAA  
GCTTGTCAAATTGTTCACAACTTCAAATATTGTCTCTATCCGGAAATAA

>PGSC0003DMG400010950-(rev)LRR-RLPs\_792

TACAAGCTTGTCAAATTGTTCACAACTTCAAATATTGTCTCTATCCGGAAATAATTTTGATGGACCAATAC  
ATAGTGAAATTGGAAGAGTGAGTAACTTGCATATATTGTATCTCGGATC

>PGSC0003DMG400010950-(rev)LRR-RLPs\_858

AATACATAGTGAAATTGGAAGAGTGAGTAACTTGCATATATTGTATCTCGGATCCAACCATTTACAGGT  
ATATATGTTTTATCTTTCTAGTTTCTGGACACGTGTGTGGTCATCTAAAT

>PGSC0003DMG400010950-(rev)LRR-RLPs\_924

AGGTATATATGTTTTATCTTTCTAGTTTCTGGACACGTGTGTGGTCATCTAAATTGACATAAATTGTTTCA  
AATTATCATTGTATTAATAAGATTTATAATTAATTACATGAATATCG

>PGSC0003DMG400010952-(rev)LRR-RLPs\_1024

CCATGATGGAAATATTCCAACGCACATGTAACATCTATGATAATGCTTAGTCTCTGGCTGATATCTAGGA  
AGTAGTTGTGTGAATACAAATACTTTTCAAGACTTCCATTAAGCATATAC

>PGSC0003DMG400010952-(rev)LRR-RLPs\_1088

CTAGGAAGTAGTTGTGTGAATACAAATACTTTTCAAGACTTCCATTAAGCATATACTCAAGCACTAAAGC  
CTTAAATCAAGGTTGGAGCAACTAGTGATGACTTTACGAGATTCCTAT

>PGSC0003DMG400010952-(rev)LRR-RLPs\_1216

CTGCGCAAACTTCACATTCTGTATCAGAACTCTTGAATGTCGCTTCCAGTTGCAGATTGAACACTTTAGC  
TGCAATGGCAGTCCCCTTCAGAGAACCCCTTTGTAAACAGAGCCAAAA

>PGSC0003DMG400010952-(rev)LRR-RLPs\_1277

ACACTTTAGCTGCAATGGCAGTCCCCTTCAGAGAACCCCTTTGTAAACAGAGCCAAAACTTCCAGAACC  
AATCAGATTACTGATTCACTTAGCGAGAGTACTAATCTGATTGGTTCTGG

>PGSC0003DMG400010952-(rev)LRR-RLPs\_256

CGAGAGAAGACGTTGAAGCTTTCCAACCTGGCTCTTACAGGCAGAATCCCCGTGATTTTGGAACCCCTCA  
CATTTCTTATTTCTCTTGACTTGGGAAGCAACCATTTCCATGGAAATTTG

>PGSC0003DMG400010952-(rev)LRR-RLPs\_384

AATGGCACATTTGCGTCGGCTAAAGTTTCTTGATTTAAGTTTAAACAGCTTCAGAGGGGAAATTCCTTCT  
TGGTTTGGGTTTTTACACCAACTTCAAGTTGTAAAGGAGTAACAGTTATA

>PGSC0003DMG400010952-(rev)LRR-RLPs\_448

CCTTCTTGGTTTGGGTTTTTACACCAACTTCAAGTTGTAAAGGAGTAACAGTTATACTGGTTCCATTCTC  
CGTCACTCTCGAACGCCTCAAGTTGGAGACTTTACAAATACCTGCCAA

>PGSC0003DMG400010952-(rev)LRR-RLPs\_512

ATTCTCCGTCCTCTCGAACGCCTCAAGTTGGAGACTTTACAAATACCTGCCAATTTACTTCAAGGAA  
ACATCCCCGAAGAGATTGGCAATCTCCACAACCTGAATTGATTATCCATA

>PGSC0003DMG400010952-(rev)LRR-RLPs\_576

AAGGAAACATCCCCGAAGAGATTGGCAATCTCCACAACCTGAATTGATTATCCATAGAAAATAATCAGCT  
TACGGGTTCTATACCATTACAATATTCAATATTTCTAGAATTGAAGTCA

>PGSC0003DMG400010952-(rev)LRR-RLPs\_640

TCAGCTTACGGTTCTATACCATTACAATATTCAATATTTCTAGAATTGAAGTCATTTTCAATTTTATATAA  
TAGCCTATCAGGAGATCTTCCAATGGTTTATGCAGTGATCTCCAAT

>PGSC0003DMG400010952-(rev)LRR-RLPs\_704

TCATATAATAGCCTATCAGGAGATCTTCCAATGGTTTATGCAGTGATCTCCAATACTCAAAGAGCTTG  
ATCTATCAATAAACAAGCTTCATGGGTCATATGCCTACAAGCTTGTCAAA

>PGSC0003DMG400010952-(rev)LRR-RLPs\_768

AGCTTGATCTATCAATAAACAAGCTTCATGGGTCATATGCCTACAAGCTTGTCAAATTGTTCAAATTAGC  
AAAAACAAAGAGACGTACCGGGTACAATATAACCAAATGTTGCTAAGGTT

>PGSC0003DMG400010952-(rev)LRR-RLPs\_896

TAAATAAATCACTCTCATCTTCACGGAGCAGTTTTGAAAAACCAAAGTCACTTAGGTGGGTAACCATATC  
CTCATCCAACAAGACGTTACTAGGCTTTAGATCACAATGAATCACAGGTA

>PGSC0003DMG400010952-(rev)LRR-RLPs\_960

CATATCCTCATCCAACAAGACGTTACTAGGCTTTAGATCACAATGAATCACAGGTAAAGAGCACCCATGA  
TGAAATATTCCAACGCACATGTAACATCTATGATAATGCTTAGTCTCTG

>PGSC0003DMG400010963-(rev)RLKWAX-EGF\_0

ACCAAAACATTTAAAAATCACAATATGGATCCCCTTGTAAGTTATTACTTTTTTCGTTTGTGCGAGAAGT  
GGGGAAGCCTTAGCAGGTCCTATTTCAAAGTATAATGATGTTTGCAGA

>PGSC0003DMG400010963-(rev)RLKWAX-EGF\_1054

GCGATTGCTCTTCTGGTTATGAAGGCAACCCTTACCTCCTTCATGGATGCCAAGGTACTATTCCCCTGTTC  
ATTTCTCTTTTTGTTTTGCGATTTAACTTGTGTATATTACTACCTCC

>PGSC0003DMG400010963-(rev)RLKWAX-EGF\_1116

CCCCTGTTCATTTCTCTTTTTGTTTTGCGATTTAACTTGTGTATATTACTACCTCCGTTTTAGCATAACGTA  
TCTTATTTTCGTTTTTAGTCTGTTTCAACGAGGAGCTTCATGTTTT

>PGSC0003DMG400010963-(rev)RLKWAX-EGF\_1178

TAGCATACGTATCTTATTTTCGTTTTAGTCTGTTTCAACGAGGAGCTTCATGTTTTCTATATTTAGTAAG  
TTTTAATTCCTATATTCTCATATTTACGCTTAATAAGACTCCCTTA

>PGSC0003DMG400010963-(rev)RLKWAX-EGF\_124

TGTGTCATCATAAGATATGATTCAACCAGAGAATGAGGCAGTAATACATACCAGTATACATGAAGATGC  
ATATAACCATGTGGTCATTTTTCATTCTTCTGATGGGGATGCTTTCTAAAG

>PGSC0003DMG400010963-(rev)RLKWAX-EGF\_1240

ATTTAGTAAGTTTTTAATTCCTATATTCTCATATTTACGCTTAATAAGACTCCCTTATAGGAATGACATGG  
AAATTCAAAATCACAGAATTTAAAGTACTTTTAGGGGTTGTTTCAGTA

>PGSC0003DMG400010963-(rev)RLKWAX-EGF\_1302

AATGACATGGAAATTCAAAATCACAGAATTTAAAGTACTTTTAGGGGTTGTTTCAGTACAAAAATTAATA  
ACGCAGAGATTAGTAATCTAGAGATTATTTTTATCAAGTGTGGTTCA

>PGSC0003DMG400010963-(rev)RLKWAX-EGF\_2418

ATAACAATATCCCCTGTACCTCTTATTTAACTTGTTTTTAGCATGTAACATGTCTTATTTTCTAAGTTAC

TAATCTCATTTTTTATAATGATTTCTTGTTAATTTCCGCAGACATTG

>PGSC0003DMG400010963-(rev)RLKWAX-EGF\_248

AACCCAAGTTTCAGCTATAAGAATATGGTCATCATCAGCAATATTATCTTCACAAAGGCCGCGATGCCCA  
GAAAGATGTGGCAACGTAACCATTCTTTTCCATTTGGAATAGGAAAAGA

>PGSC0003DMG400010963-(rev)RLKWAX-EGF\_2480

TTCTAAGTTACTAATCTCATTTTTTATAATGATTTCTTGTTAATTTCCGCAGACATTGATGAGTGTGCAAGT  
CCAAAAAGGAATCGTTGTCCGAACAATACTCGCTGTGTTAATACTCTT

>PGSC0003DMG400010963-(rev)RLKWAX-EGF\_2976

TATTTTTGTGATCCTGGTAGCAGTTTGTCTTTGGCTATGCAAATGGCTCCGGAAGAGGGAAGAAAACAA  
AGCTAAGCAAAAGTATTTCAAGAGGAATGGTGGATTGCTTTTGCGACAACG

>PGSC0003DMG400010963-(rev)RLKWAX-EGF\_310

GATGCCCAGAAAGATGTGGCAACGTAACCATTCTTTTCCATTTGGAATAGGAAAAGAGTGTGCTTCA  
ATGAAGCATTTGAAGTGAGATGCGATAACAACACTGCTTTTATAAATGATT

>PGSC0003DMG400010963-(rev)RLKWAX-EGF\_3348

TGTCAAGGTACTGTTGATTTTTGTACTAGGCTCTTGCTACCATTTTATTATGAATGGAAGAAGAGAGAAA  
CACGATTCGACGATAGAGAAATTTATAATGCCTAAAGAGGATTGAAGAGA

>PGSC0003DMG400010963-(rev)RLKWAX-EGF\_3534

CAGTCGCACACACAGAGCTACTACATCAACTCGTGCTCCTATTTCACTTCAACCATAATAAACGAACAGTTT  
AGGATAACTCATTAGCCACTCATGAACCAAAGATAACTCAAATACAAT

>PGSC0003DMG400010963-(rev)RLKWAX-EGF\_3596

GAACAGTTTAGGATAACTCATTAGCCACTCATGAACCAAAGATAACTCAAATACAATTGAACTTAGTAC  
TTCATCACACTTTTAACATTTAAGTTTACTGTTTACAACAGGTAAGTGGT

>PGSC0003DMG400010963-(rev)RLKWAX-EGF\_372

TGCTTCAATGAAGCATTTGAAGTGAGATGCGATAACAACACTGCTTTTATAAATGATTTGTCTGTGCAAC  
ACATATCAATGGACTCCATCACTATTTATATTACTTTTACTCCTCTCCAC

>PGSC0003DMG400010963-(rev)RLKWAX-EGF\_3844

TCAGATTCTCCGCACCCAGTAATAATATTATCGTGGGATCATCGGGTGCGAATTGCTGCAGAAATAGCA  
GGGGCACTATCTTACATGCACTCATGTGCTTCTACTCCCATTCTTCACAG

>PGSC0003DMG400010963-(rev)RLKWAX-EGF\_4154

GGTGTAATTCTTGCAGAGCTTCTAACAAGTCAAAGAGTTGTCACCTCAAACCAACCAGAAGATCCAGGTT  
TGGTTATCCGTTTACATTAGCATTGAAAGAAAAGTGTATAATTGAGATT

>PGSC0003DMG400010963-(rev)RLKWAX-EGF\_434

TGTGCAACACATATCAATGGACTCCATCACTATTTATATTACTTTTACTCCTCTCCACTACAACAACTCATC  
TGGAAAGAACATTTACAATGATTATCTTCAAGCAAACAGCGACGAGTA

>PGSC0003DMG400010963-(rev)RLKWAX-EGF\_496

ACAACCTCATCTGGAAAGAACATTTACAATGATTATCTTCAAGCAAACAGCGACGAGTATTTTCAGTATTTTC  
CAACAAGAACAACCTTAGTAGCCATTGGTTGTGACATTTATGCTTATGCCA

>PGSC0003DMG400010963-(rev)RLKWAX-EGF\_558

AGTATTTCCAACAAGAACAACCTTAGTAGCCATTGGTTGTGACATTTATGCTTATGCCAAAGATTTAGACA  
CCGGTAGTAGAGACAGCATTGTAAGTCAATGTGCTTCTTTCTGTGGCAAC

>PGSC0003DMG400010963-(rev)RLKWAX-EGF\_62

TCGAGAAGTGGGGAAGCCTTAGCAGGTCCTATTTCAAAGTATAATGATGTTTGCAGAATTTTGTGTCAT  
CATAAGATATGATTCAACCAGAGAATGAGGCAGTAATACATACCAGTATA

>PGSC0003DMG400010963-(rev)RLKWAX-EGF\_620

TTTAGACACCGGTAGTAGAGACAGCATTGTAAGTCAATGTGCTTCTTTCTGTGGCAACTCCACTTATAAT  
GTTTCATCCTCTTCACCTTCATCATCTTATTGCACTGGGAATAGCGGTTG

>PGSC0003DMG400010963-(rev)RLKWAX-EGF\_682

CTTATAATGTTTCATCCTCTTCACCTTCATCATCTTATTGCACTGGGAATAGCGGTTGTTGTCAGTCTGAAT  
TATCAAAAATAGTACCAAGAGACTTCAATATGTACATACAAACAATTA

>PGSC0003DMG400010963-(rev)RLKWAX-EGF\_744

CAGTCTGAATTATCAAAAATAGTACCAAGAGACTTCAATATGTACATACAAACAATTAACACGGCGGAA  
ACATCTTGGACAACCTAGCAATTGCAACTATTACTTAGTTGTGGAAAAGGGC

>PGSC0003DMG400010963-(rev)RLKWAX-EGF\_806

GGCGGAAACATCTTGGACAACCTAGCAATTGCAACTATTACTTAGTTGTGGAAAAGGGCAGTTCTGAGTT  
TGACTTCACTCAGTTACGTGGTAAGTGCAAACAAGATGATCATTATGAAGG

>PGSC0003DMG400010963-(rev)RLKWAX-EGF\_868

CTGAGTTTGACTTCACTCAGTTACGTGGTAAGTGCAAACAAGATGATCATTATGAAGGAAGGATGGCGC  
TGGACTGGGTAATTGGCAATCTTAGTTGCAACAAGCCACAAGAATGCCAA

>PGSC0003DMG400010963-(rev)RLKWAX-EGF\_930

ATGGCGCTGGACTGGGTAATTGGCAATCTTAGTTGCAACAAAGCCACAAGAATGCCAAAATATGCATGT  
ACAAAGAATAGTAGGTGCATCGATGATACTACTAGACCTGCTGGGGGATAC

>PGSC0003DMG400010964LRR-RLPs\_0

AGGACAGAATCTATTAAGGCATAATGGTACCAATTGGCTCAGACCAACATATATGCAAGTGGAGCAAA  
GCTTTCAGAAACATGCCTTGTCTTAGGTTACTCATTGTCAAAGGGCAGGAG

>PGSC0003DMG400010964LRR-RLPs\_1054

AGGGAATTGAAAAGCTTAGATCTCAGTGGATGCAATTTATCTGATAACCAAAGTCTGCTCTTATGAACT  
TGCCTTCTTTACTAGAACTGAATCTGAGCAGAAACAAGTTTATTTTCATTA

>PGSC0003DMG400010964LRR-RLPs\_1116

TATGAACTTGCCTTCTTTACTAGAACTGAATCTGAGCAGAAACAAGTTTATTTTCATTACCTGATATCATCA  
GTCGACTTTCTCAGCTTCGATATCTCAACATAACACAGTGTGAGGAACT

>PGSC0003DMG400010964LRR-RLPs\_1240

GAACTTCCCAAAGTACCTCAGAGTATAGAGGAATTATATGCAGAAGATTTTTTGGCCAAGCAAAGTATC  
GCAAAGCTACAAATGTACCCGAGATTGAATTTGGTGTGATTCCACAAATTAC

>PGSC0003DMG400010964LRR-RLPs\_1302

AAGTATCGCAAAGCTACAAATGTACCCGAGATTGAATTTGGTGTGATTCCACAAATTACAGTTTTGATCAA  
CAATCTTATACAAGGGAGAGCAATGGTAGCTCAGTTTTGGATGAGATTCT

>PGSC0003DMG400010964LRR-RLPs\_1364

TTGATCAACAATCTTATACAAGGGAGAGCAATGGTAGCTCAGTTTTGGATGAGATTCTCGGTTCAATTCT  
TTCACTCAACATGGATAATGTGGTCCAGTCTCTCTCAACTCCAATTACA

>PGSC0003DMG400010964LRR-RLPs\_1426

TCATTTCTTTCACTCAACATGGATAATGTGGTCCAGTCTCTCTCAACTCCAATTACAGGGTGACTTGTTT  
CATCGTCTTTCTGAATGTGCAATTCCCACGTGGTTTAGGCACCAGAGT

>PGSC0003DMG400010964LRR-RLPs\_1488

GACTTGTTCCATCGTCTTTCTGAATGTGCAATTCCCACGTGGTTTAGGCACCAGAGTGTTAAGGAAAAG  
ATGTTGCTTGAACCTCCTATTAATTGGTATAATGATAAGTTCAAGGGCTT

>PGSC0003DMG400010964LRR-RLPs\_1550

AGGAAAAGATGTTGCTTGAACCTCCTATTAATTGGTATAATGATAAGTTCAAGGGCTTTGCTATATGCTG

TGCCACTCTCATGGGAGCAGGTGTGTTGAATCCTGATTCAGGGCTATCCA

>PGSC0003DMG400010964LRR-RLPs\_1860

GTATAGCCTATTTGAGGCATCTATCCATGGGCGCATTGTGAGACAGTGGGGAGTTCATATGATCTATGA

GGATGAAAGTACATTTTTGCAGGAAAATATGGAAGTGTGGTTTCACACC

>PGSC0003DMG400010964LRR-RLPs\_1922

TCTATGAGGATGAAAGTACATTTTTGCAGGAAAATATGGAAGTGTGGTTTCACACCACTTAAGCTGAA

GAGAGGCTAAATTAGCTGTATATGCTGGGATATTGAGGGAATTACCAAGA

>PGSC0003DMG400010964LRR-RLPs\_1984

AAGCTGAAGAGAGGCTAAATTAGCTGTATATGCTGGGATATTGAGGGAATTACCAAGAAACCGAGTTT

AAGGTA ACTCAATGCCTATTATTATTGAAGTTTAATAAATTGAATTTTGAAT

>PGSC0003DMG400010964LRR-RLPs\_2046

GAGTTTAAGGTA ACTCAATGCCTATTATTATTGAAGTTTAATAAATTGAATTTTGAATACAGTTAGATTAA

CAATTTCAATTTCAATGTGGTTAAGTATTTGGTTAATAATGTTGGTAAAA

>PGSC0003DMG400010964LRR-RLPs\_2108

TTAGATTAACAATTTCAATTTCAATGTGGTTAAGTATTTGGTTAATAATGTTGGTAAAAATTAGGCCAAACT

AATGATTTACTTAGCATTAAATGAATTAATAAGGCAAGTCAATAATTACG

>PGSC0003DMG400010964LRR-RLPs\_2170

GGCAAAACTAATGATTTACTTAGCATTAAATGAATTAATAAGGCAAGTCAATAATTACGTTAAAATTATTA

GTAAATGGCAGTTAACAGGTTTGAAAAATATATGAGTCAATCTGATAGCT

>PGSC0003DMG400010964LRR-RLPs\_2232

AATTATTAGTAAATGGCAGTTAACAGGTTTGAAAAATATATGAGTCAATCTGATAGCTTAATAGTTATAC

CAATATAATAGTTACATTTTTATTTTTTTTTTACCTGGATAGCTCTATATG

>PGSC0003DMG400010964LRR-RLPs\_248

CCACATGACTTTTAGTTCTCTTGTGAAGTTTTCAAGGAGCCAAAGGTATTATTTACTCCTTTAGAAACAA

ATCATATGTGAAAAAAGAATCATTGCTAAAGCTGAAGTTTCTATTCAT

>PGSC0003DMG400010964LRR-RLPs\_2914

ACATTATTCTTGATGTTGTATATCCTCGATCATTTTTGTAGCAACCAATTCGAAATAAACTAGTTGATATA

CTGACCTTCAAGCGGGAACCTAATATTAGGGATGGTTGTGTAACAAATC

>PGSC0003DMG400010964LRR-RLPs\_2976



GTTGATATACTGACCTTCAAGCGGGAACCTAATATTAGGGATGGTTGTGTAACAAATCTTCAAATCTTA  
AGTGAATAGTACCTCTCCTTGTTAAATTTACTGTATAATATTACAATT

>PGSC0003DMG400010964LRR-RLPs\_3038

AAATCTTAAGTGAATAGTACCTCTCCTTGTTAAATTTACTGTATAATATTACAATTAAGAATTAATTA  
GCAGTAAGTGTTTTAGAAAATAAGACTGTATTAGGCACCACCAAAGG

>PGSC0003DMG400010964LRR-RLPs\_310

TAGAAACAAATCATATGTGAAAAAAGAATCATTGCTAAAGCTGAAGTTTCTATTCTCTCTTTATGA  
ACAGGCATTTGATAAGTTGACAGTTCTCAATTTAAGTTTTCTAGAAAT

>PGSC0003DMG400010964LRR-RLPs\_3100

ATTAAATTAGCAGTAAGTGTTTTAGAAAATAAGACTGTATTAGGCACCACCAAAGGTTGTGATAGGG  
TGGTAAGTACCCTTTTATCCTAAATCACAGCTCTCGGATTTGAGCCCTGAG

>PGSC0003DMG400010964LRR-RLPs\_3162

GATAGGGTGGTAAGTACCCTTTTATCCTAAATCACAGCTCTCGGATTTGAGCCCTGAGATTTGATTGGAG  
GCACTTACCCTCAAATAGGATTTACCTGCACAAATTCATATTAGTCG

>PGSC0003DMG400010964LRR-RLPs\_3224

GATTGGAGGCACTTTACCCTCAAATAGGATTTACCTGCACAAATTCATATTAGTCGGGCCAGAGGCA  
GTGTCATTTGTTTGAGCTCAAAGAGGAGACGAACATTGAGCAACCCGTCA

>PGSC0003DMG400010964LRR-RLPs\_3348

TATTCTGTATGTATCAGGTGCATCCTTTTTCTTTTCTTATTCTTAATGTTTCTCCTTGTAATATTAGTTC  
TATGTTCTTCCGATCCTTTATATTGGGTTTGATTGCTCAATCAAGC

>PGSC0003DMG400010964LRR-RLPs\_3410

AATATTAGTTCTATGTTCTTCCGATCCTTTATATTGGGTTTGATTGCTCAATCAAGCTCTCCGGGGTTTTT  
GCAATTTAAAATGTCCAAGGAAAAAAAAGTACTTCATCTGTTTCAAT

>PGSC0003DMG400010964LRR-RLPs\_3472

CGGGGTTTTTGCAATTTAAAATGTCCAAGGAAAAAAAAGTACTTCATCTGTTTCAATTTGTTTGTCTGAT  
CAAGAGTGACTTTATATCTTATTCTTAATCTGTGATTTGTAGGATGGT

>PGSC0003DMG400010964LRR-RLPs\_3534

TTGTCTGATCAAGAGTGACTTTATATCTTATTCTTAATCTGTGATTTGTAGGATGGTCGGAGCAAAGTT  
GATGAGTGCACAAGTAGTGTGTATCTAGACAGATTTGTGAGCAGGGGA

>PGSC0003DMG400010964LRR-RLPs\_3596

GCAAAAGTTGATGAGTGCACAAGTAGTGTGTATCTAGACAGATTTGTGAGCAGGGGAAGCACTTCTCT  
GTTAGTCATTGATCTGGCTAATCTGGATTCGTGCTGAATAGAGTTACTAAA

>PGSC0003DMG400010964LRR-RLPs\_3658

CTTCTCTGTTAGTCATTGATCTGGCTAATCTGGATTCGTGCTGAATAGAGTTACTAAAGGGGTAAAGCGT  
TTTCTCCAAAAGGTTCTCTTGCATTCACAAGTCTCCAACCCAAGATATCA

>PGSC0003DMG400010964LRR-RLPs\_3720

TAAAGCGTTTTCTCCAAAAGGTTCTCTTGCATTCACAAGTCTCCAACCCAAGATATCAGGAAAGCGCTAC  
CATATTAATGAGGAGATTTTAAAGATGATGAACTCTCCTCCTCTGCCACA

>PGSC0003DMG400010964LRR-RLPs\_3782

AGCGCTACCATATTAATGAGGAGATTTTAAAGATGATGAACTCTCCTCCTCTGCCACAATCGTCATCTCCT  
CCTCCTCCATCGTCACCACCATCACTTTCGCCGGCTCTTTCTCCGTCTT

>PGSC0003DMG400010964LRR-RLPs\_3844

TCATCTCCTCCTCCTCCATCGTCACCACCATCACTTTCGCCGGCTCTTTCTCCGTCTTGTGTTGCTTCACTTTC  
TATCAAAAATTAAGTGTCTTTATTCATCTCCTCCAGACTATATTT

>PGSC0003DMG400010964LRR-RLPs\_3906

GCTTCACTTTCTATCAAAAATTAAGTGTCTTTATTCATCTCCTCCAGACTATATTTAGAAATTTTAGTG  
TCTTTATTGCTTGTAGCATCATATATGGATTTTCTTATATCGTCTTAA

>PGSC0003DMG400011045-(rev)LRR-RLPs\_0

ATGGCCGATCTTGTAATTGGTGCTACTGTTAAAGTTGTGCTTGATAAACTGCTTTCTCTCACTATTGAGGA  
GGCCAAGAGTTTAAGGAACTGCAAGAAAAATCTAAGAATTCTGACAAAA

>PGSC0003DMG400011045-(rev)LRR-RLPs\_1098

GTGTTGGGAGGCCTCTTATGCAACAAGGAAAAACATGAATGGCGGGCAGTTCTTAATGGCAATCCCCTT  
GTTGCGGGGGAAGATGATAACGGGGAAAATAGCATAAAGAAGATCCTAAAA

>PGSC0003DMG400011045-(rev)LRR-RLPs\_1647

ATATCTGAAGAACTGTTGTTGAGCTTTCAGTTCTTGAGAGTTTTAAATTTGTCCAGGTCAGGCATCAAGG  
TATTGTCAGCCAAAATCGGCAAGCTAATACTTGAGATATCTTGATCTC

>PGSC0003DMG400011045-(rev)LRR-RLPs\_183

GTTGAACAATGGCTCAAGATGCTTGAGAGAGTTGCTGAAGATGCTGAAAACGTGTTTGACGAATTCAGA

TATGAATATCTCAAAGCACAAGTCATGAACATCCGAACCAAATAATGGAA

>PGSC0003DMG400011045-(rev)LRR-RLPs\_1830

AGAATCAATAGCTGTTTCTCACTTAGGAAGCTTCCAGAAGAAATGGCAAATATGATAAGTTTGAGACAC

ATATATTGCATCTATCATTACCCAACATATCTTTATTTTGCGGGTCGGAGA

>PGSC0003DMG400011045-(rev)LRR-RLPs\_1891

TGAGACACATATATTGCATCTATCATTACCCAACATATCTTTATTTTGCGGGTCGGAGATCAAGGTTTATA

GGTAATTATCAGTTTCAGATGCCACTTAATATGGGGCAATTGACTAGTC

>PGSC0003DMG400011045-(rev)LRR-RLPs\_2013

CAGACGCTACAGTTTTTCTATGTAGGTTTAGCGAAAGGTCGTCTGAATAGAAGAATTAGGTCATTTGAAA

AACCTTAGAGGTGAATTGACAATCAAACATCTCCAATTAGTCGTAAATAAA

>PGSC0003DMG400011045-(rev)LRR-RLPs\_2318

GTTTCAGTGAAGGATTGCTACCAAATTTGGTCAAGTTGAAATTAAGTGGCTGCAAAGGTGCAAAGAAAT

CCCATCACTTGCCCACTGAAGTTCCTTCGGCATCTTGAAGTATAGGATT

>PGSC0003DMG400011045-(rev)LRR-RLPs\_2379

AAAGAAATCCCATCACTTGCCCACTGAAGTTCCTTCGGCATCTTGAAGTATAGGATTCCTTGAATTGG

AATGCATTGGATCTACATTTTATGGCGTTGATGTTAATGATAATGGATCA

>PGSC0003DMG400011045-(rev)LRR-RLPs\_2684

TGAATTAAGCATTGAAGGAGTTGACAGTGAAATGCCATTGTTGAACTTGTGTAGCAACTTGACATCTCTG

GTAAAGCTTACTGTGAATGATGTGAAAGAGCTCACTTGTCTTCCTGATGA

>PGSC0003DMG400011045-(rev)LRR-RLPs\_2745

ACATCTCTGGTAAAGCTTACTGTGAATGATGTGAAAGAGCTCACTTGTCTTCCTGATGAGATGCTACGCA

ATAACCTTTCTCTTCAACAATACTATTGGTCACACACTGCAGAGAGTTTCGT

>PGSC0003DMG400011045-(rev)LRR-RLPs\_2989

ATTTATCACTGTGTTTTGGATTGACCAGTTTACCAAGTGAATGCTAGAGCATTGTCGGTCTCTACAGAC

TTTGAAGGTCAGCTGCTGTGACAACTTAGTTTCCTTGCCTTTACACGTAT

>PGSC0003DMG400011045-(rev)LRR-RLPs\_3050

TCTACAGACTTTGAAGGTCAGCTGCTGTGACAACTTAGTTTCCTTGCCTTTACACGTATGGGAAATGCCTT

CAATTTATATTTGGGTTTATCAAATTGTCCCAAGTTGATTAGTGTACC

>PGSC0003DMG400011045-(rev)LRR-RLPs\_3111

GAAATGCCTTCAATTTTCATATTTGGGTTTATCAAATTGTCCCAAGTTGATTAGTGTACCCACAGGGGGCC  
TTCACCACCTCACAGGGTTAAAGGTATTGGAAATTGGTCCTTTCTCAGAG

>PGSC0003DMG400011045-(rev)LRR-RLPs\_3172

CAGGGGGCCTTACCACCTCACAGGGTTAAAGGTATTGGAAATTGGTCCTTTCTCAGAGATGGTGGATT  
TTGAGGCATTCCAATTGATTTTTAATGGCATTCAACAGCTATCGTCCCTTC

>PGSC0003DMG400011045-(rev)LRR-RLPs\_3233

GGTGGATTTTGAGGCATTCCAATTGATTTTTAATGGCATTCAACAGCTATCGTCCCTTCATACATTGGAG  
GTGTATGGATGGACGCGTTGGGATTCTCTGCCTTATCAGCTTATGCAACT

>PGSC0003DMG400011045-(rev)LRR-RLPs\_3294

ACATTGGAGGTGTATGGATGGACGCGTTGGGATTCTCTGCCTTATCAGCTTATGCAACTCTCTGCCCTAA  
CAAAGATCCATATACATGATTTGGAATTGAGGCTCTTCCTCATAGACTT

>PGSC0003DMG400011045-(rev)LRR-RLPs\_3355

CTGCCCTAACAAAGATCCATATACATGATTTGGAATTGAGGCTCTTCCTCATAGACTTGACAACCTTACT  
TCTCTTGTAACATTACATCTAATGGGGTGCAAAGGCTACAACATGTGG

>PGSC0003DMG400011045-(rev)LRR-RLPs\_3416

CAACCTTACTTCTCTTGTAACATTACATCTAATGGGGTGCAAAGGCTACAACATGTGGACTTCTCAGAT  
GTCATGCCCAAATTACGGTATCTGGAGATCCGTTATTGTCTATTGTTAGA

>PGSC0003DMG400011045-(rev)LRR-RLPs\_3477

TTCTCAGATGTCATGCCCAAATTACGGTATCTGGAGATCCGTTATTGTCTATTGTTAGAAGGTCTGTCGG  
ATGGGCTTGGCAACCTTGTTTCTTTGAAAGAATTAAGTTTACGTAAGTGC

>PGSC0003DMG400011045-(rev)LRR-RLPs\_3599

AAAACATAACATCTGCCATCCAGATATGCCATGCTGCGCCTCACTAAATTATGGAAACTAATAATTAAT  
GGCTGCCCCGAGTTAGAAGAAAGTTGCACCAATCGGAGTAGCCCCAACTC

>PGSC0003DMG400011045-(rev)LRR-RLPs\_3721

AGTGGTCCAACATTTCCCATATTCCAAAAATTGAAGTAGGCGGGAGGATAATTCAGAACTTACGTAAGT  
CTCTGTTTCTCTTTCACCTTTTTGATCTGTAAAATTTTTAAATATTATTTTC

>PGSC0003DMG400011045-(rev)LRR-RLPs\_3753

GAAGTAGGCGGGAGGATAATTCAGAACTTACGTAAGTCTCTGTTTCTCTTTCACCTTTTTGATCTGTAAAAT  
TTTTAAATATTATTTTCCCCGAGTTCCAGAAAAGAAGTTATGCATGTAG

>PGSC0003DMG400011045-(rev)LRR-RLPs\_61

CTATTGAGGAGGCCAAGAGTTTAAGGAACTGCAAGAAAAATCTAAGAATTCTGACAAAATATGTATCCA  
TGATTCAAGCTCTCATTTCATGATGCTGAAAGACGACAAGTTGATGATCAGG

>PGSC0003DMG400011045-(rev)LRR-RLPs\_610

CTAAGAGAATTTTCAATGATGAACACATCAAGCAGCAGTTCGAAAAGAGAGTTTGGTTGTGCCTACCTG  
AAATGTCAGAACTAAGAGCTTTCTTGAACAAATCCTTGAATCATTGACAG

>PGSC0003DMG400011045-(rev)LRR-RLPs\_671

CCTACCTGAAATGTCAGAACTAAGAGCTTTCTTGAACAAATCCTTGAATCATTGACAGAGAGGAAAGTT  
GAGGTTCAAAGGAGAGATTTAATAGTTAAGAAGCTACAAGATGAATTGGA

>PGSC0003DMG400011045-(rev)LRR-RLPs\_732

AGGAAAGTTGAGGTTCAAAGGAGAGATTTAATAGTTAAGAAGCTACAAGATGAATTGGAAGGAAAAAT  
GTATTTGCTTGTCTAGATGATATGTGGCGTGTGACTCTATATCGTGGCAT

>PGSC0003DMG400011045-(rev)LRR-RLPs\_915

CGTATGAAGCAGGTGGCATCCATAGTAGCAGAAGATCTTCATATGTTGCGAAGATTAGCAAGAGATCAT  
TGTTGGTCCATTTTCAAACAAAGAGCGTTTGTGATGGGGAAGTTCCGCAG

>PGSC0003DMG400011045-(rev)LRR-RLPs\_976

GAGATCATTGTTGGTCCATTTTCAAACAAAGAGCGTTTGTGATGGGGAAGTTCCGCAGGAAATAATGA  
GCATGGAGAACAAGATAGTTGAAATGTGTCAAGGTCTACCATTGGCTGCAA

>PGSC0003DMG400011071L-LecRK\_1364

TTTGTGCTTGTATGAGTTTATGCCTAATGGAAGTTTGGATAACTTCTTGTGTTGATGAGCCAAAAATGG  
TGTTGAAATGGGAACAAAGGTTCAAGATTATCAAAGGGGTTGCTTCTGG

>PGSC0003DMG400011071L-LecRK\_1426

CAAAAATGGTGTGAAATGGGAACAAAGGTTCAAGATTATCAAAGGGGTTGCTTCTGGTTACTTTACTT  
ACATGAAGGCTATGAACAAGTCGTGCTACATCGAGACATTAAGGCTAGTA

>PGSC0003DMG400011071L-LecRK\_310

GACTAATAGGCCATGCTTTTTACTCTTCACCTTTCCATTTCAAGCCTACTAATGCCTCTACCTTCTTTCTC  
AACGTGTTTCGCTTTGGCCATAGTCCCCGAGTATCCAAAACCTCGGGG

>PGSC0003DMG400011108LRR-RLPs\_1240

TAGTATTGAAGAATATGGCTAGCCTTATTGAGTGGGAAGGGAGTTGAAGTTGGAGTAAGAATGTTTCCTA

GGCTTGAGAAGTTGAGGATTAGTAACTGTCCCCTGTTAGAAAGTACTCCGA

>PGSC0003DMG400011108LRR-RLPs\_1302

TTTCTAGGCTTGAGAAGTTGAGGATTAGTAACTGTCCCCTGTTAGAAAGTACTCCGAATCAATTTGAAA

TCCTATGTGAATTAGAGATTGTTGGAGTTGACAGTGAAATGCCATTGTTG

>PGSC0003DMG400011108LRR-RLPs\_1488

CTTCCCGATGAGATGCTACGCAACAATGTTTCTCTTCAACACCTATTGGTCTCACTCTGCGGAGAGTTTCG

TGAATTGCCACAAAGCTTATACAATCTCCGTTCTCTTAAGAGCTTAGAA

>PGSC0003DMG400011108LRR-RLPs\_1612

CCAGCTGCACCAATTCAGTTCTTTTCTGTTCCAGTGGAGAGAGCTATTTGACTTCCCTCCAAAGTCTT

GAGTTATCCAATTGTAATGGATTGACCAGTTTACCAAGTGGAATGCTAG

>PGSC0003DMG400011108LRR-RLPs\_2232

GCTCTGTCGGATGGGCTCGGCAACCTTGTCTTTGGAAGAGATAAGTTTATGTAAGTGTGAAAAATGG

AGCATCTGCCATCCAGAGATGCCATGCAACTCCTCACTAAATTATGGAACC

>PGSC0003DMG400011108LRR-RLPs\_434

CATCAAGGAGTTGTCAGCCTCAATCAGCAAGCTAATATACTTAAGATATCTTGATCTCTCCTACAATAAG

ATCAGAGCCTTACCCAGCTCCATTTGCAAGCTCTACAATTTGCAAACCTT

>PGSC0003DMG400011108LRR-RLPs\_682

TTAATATGGGGCAATTGACTAGTCTTCAGACGCTACAGTTTTTCTATGTAGGTTTAAAGAAAGGTCGTCG

AATAGAAGAAGTGGTTGTTGAAAAAAGTGGTGAATTGACGATCG

>PGSC0003DMG400011108LRR-RLPs\_868

TCTACAAGCTGGTGTATTCATGGTCCCGTGATGAATCAGAAGGCTGTGAGATCAATCATGAGCATGTGT

TGGATGGTCTTCAACCACATCCGAACCTGAAAACCTTAGCAGTTGTGGACT

>PGSC0003DMG400011108LRR-RLPs\_930

CATGTGTTGGATGGTCTTCAACCACATCCGAACCTGAAAACCTTAGCAGTTGTGGACTATTTAGGGACTA

AATTTCTTCATGGTTCAGTGAAGAATTGCTACCAAATTTGGTCATGTTG

>PGSC0003DMG400011116LRR-RLPs\_252

AAGTTTTGTGAATTGCCACAGAGCTTGACAATCTCCATTCCCTTGAGAGCTTACGAATATCCTTCTGCC

CAATTTAGTTCTTTTCTGTTCCAGTGGAGAGAATTATTTAACTTCC

>PGSC0003DMG400011116LRR-RLPs\_315

TTCTGCCCAATTTTAGTTCTTTTCTGTTCCAGTGGAGAGAATTATTTAACTTCCCTCCGAAGGCTTCAC  
TACTTTATTGTGATGGATTGACCAGTTACCAAATGGAATGCTAGAA

>PGSC0003DMG40001116LRR-RLPs\_567

ACAGGAGGCCTTCACCATCTCACTGGGTTATGGGATTTGAAAATTGGTCCTTCTCAGAGATTGTGGATT  
TTGAGGCATTCCAATTGATTTTAAATGGCATTAGCCGCTATTGTCCCTT

>PGSC0003DMG400011160-(rev)LRR-RLKs\_0

AAAAAATCTCTCTTCCCTCTCTGAGTCCTCTCACTTTCAGTATTTCTTCATATCATCTCCACACCTGAT  
TCTCTTACACCAAAAACACAGTACAAAAAATTAGTAAAAAATAAT

>PGSC0003DMG400011160-(rev)LRR-RLKs\_1098

TGTTAAACAGTCTTCAGTATCTGTAAGTGTATTAACCTTCAAATTTTCATTTTTGTGTGATTATGATTAT  
GTTTTTAGAGTTGAATGGTCTAAAACACACATGCAGTATCACGTTTTT

>PGSC0003DMG400011160-(rev)LRR-RLKs\_1159

ATTATGATTATGTTTTAGAGTTGAATGGTCTAAAACACACATGCAGTATCACGTTTTTGCGAGTTTGCTA  
CGAATTATCACCTAAAACATATCTCAACGCCATCTCATAGTTGTGTTTT

>PGSC0003DMG400011160-(rev)LRR-RLKs\_122

TTGAAAAAAAACACAAACAACTCAGATAAAGCAAAGGAGAAACAGAGTTGGTACAAATACCAACA  
AAATAGACAGACTGATAAAGAACCTGTTTCTTTTCTTTTACTCCCTCTCA

>PGSC0003DMG400011160-(rev)LRR-RLKs\_1220

GAGTTTGCTACGAATTATCACCTAAAACATATCTCAACGCCATCTCATAGTTGTGTTTTGATAAATAGTTG  
GTGATGGTTTAAGAAGGAAAATTGAACACATGATAGTTTAGGTAGAAAA

>PGSC0003DMG400011160-(rev)LRR-RLKs\_1281

TAAATAGTTGGTGATGGTTTAAGAAGGAAAATTGAACACATGATAGTTTAGGTAGAAAACGTGCGAAAT  
CTTGATACTTCAAAGTGTGGTTTTTACCATTATCTTGTTTTTCCGAGTA

>PGSC0003DMG400011160-(rev)LRR-RLKs\_1708

TTAAAGCTTTTTTTGTTTAAAGGAAATTGAATAGTTTGTCTGTTTAGGGTATTATTATATTTTAACTTAT  
TATTCATTTTTATTTATTTAGTATGACGATGATATGCAATGAGCTTA

>PGSC0003DMG400011160-(rev)LRR-RLKs\_183

ACCAACAAAATAGACAGACTGATAAAGAACCTGTTTCTTTTCTTTTACTCCCTCTCACTTTTTTTTTTAG  
TTTTTGACTGAAAAAAGACACAATTTTAAATCATTATATGAACCAA

>PGSC0003DMG400011160-(rev)LRR-RLKs\_1830

TGAAAGTGGGGATTCATATTGTTGACTCCAACCTGTTTGGGACTGAGGCATTGTTGTCGTCGTCGGATA  
GTGTTTTTTTTTTTTTTTTGTATAAAGAAATGATTAGTGTGTTCTGATTAGG

>PGSC0003DMG400011160-(rev)LRR-RLKs\_2013

TGAACTTAAATGAATGTGGGGATTCATTATGCGGACCCCACTTCTTTGGAACTGAGGCGTTGTTGTTGT  
CAAATAGTGTGTCTGTTTTGTGTAAAGGAAATGAATAGTGTGTTCTGTTC

>PGSC0003DMG400011160-(rev)LRR-RLKs\_2074

TGTTGTTGTCAAATAGTGTGTCTGTTTTGTGTAAAGGAAATGAATAGTGTGTTCTGTTCTGGGTATTATT  
ATATTCCTACTTATATTTCACTTTTATTTAATCTAGTGTGACGATGATA

>PGSC0003DMG400011160-(rev)LRR-RLKs\_2135

GGTTATTATTATATTCCTACTTATATTTCACTTTTATTTAATCTAGTGTGACGATGATATGCAGTGAGCTTA  
AATGAAAGTGGTTATTCATATTGTCGACGCCCACTTGTGGGACTGA

>PGSC0003DMG400011160-(rev)LRR-RLKs\_2196

CAGTGAGCTTAAATGAAAGTGGTTATTCATATTGTCGACGCCCACTTGTGGGACTGAGGCGTTGTTGT  
CATTGTTGCCGTTGAATAGTGTGTTCTGTTTAGGGGTCTTTTTATCTTC

>PGSC0003DMG400011160-(rev)LRR-RLKs\_2257

CGTTGTTGTCATTGTTGCCGTTGAATAGTGTGTTCTGTTTAGGGGTCTTTTTATCTTCTAACTTATTTTC  
ACTTTTATTTAATCTAGTATGACAATGATATGCAATGAGCTTAAATGA

>PGSC0003DMG400011160-(rev)LRR-RLKs\_2379

GCGGGGATTCATATCGTGGACTCTAACTTGTGGGACTGAGGCGTTGTTGTTTTGTTTTATTGTTGA  
ATAGTGTGTTCTGATTTTATGAACCTCTTATTCTTTTCAGGGACTTGTCTT

>PGSC0003DMG400011160-(rev)LRR-RLKs\_244

TTTTTTTTTAGTTTTGACTGAAAAAAGACACAATTTTAAATCATTATATGAACCAAATGTTAAATAAAT  
TCATGGGGTTTGCTTAATATATGTGTTGAATAATTTGATTTCACTTTC

>PGSC0003DMG400011160-(rev)LRR-RLKs\_2440

CATTGTTGAATAGTGTGTTCTGATTTTATGAACCTCTTATTCTTTTCAGGGACTTGTCTTCAATAATCTGAG  
TGGACCTATTCCTAAATTTCTACGAGAACTTTCAAGTATGGATTCTC

>PGSC0003DMG400011160-(rev)LRR-RLKs\_2501

AATAATCTGAGTGGACCTATTCCTAAATTTCTACGAGAACTTTCAAGTATGGATTCTCTGCCCACTCTT



ATTATGTTACTTATAATTGTGTTCTTTTGTACATACAAATTGTCTTGTT

>PGSC0003DMG400011160-(rev)LRR-RLKs\_2562

CCCAACTCTTATTATGTTACTTATAATTGTGTTCTTTTGTACATACAAATTGTCTTGTTAAAGTTCTAATTGT  
GATTTTTCTTTATCCTTGATGTTTTCGTAGTGTCGTGGGTAACCCTT

>PGSC0003DMG400011160-(rev)LRR-RLKs\_2623

AGTTCTAATTGTGATTTTTCTTTATCCTTGATGTTTTCGTAGTGTCGTGGGTAACCCTTTGATATGTGGAA  
ATCACTCTGCTGAGACTTGCTTCGGATCGGTTAACCTGATGCCCTTTC

>PGSC0003DMG400011160-(rev)LRR-RLKs\_2684

ATATGTGGAAATCACTCTGCTGAGACTTGCTTCGGATCGGTTAACCTGATGCCCTTTCGTTTCGACATTG  
ATTCCACCGGTAAAGTTTAGAAAAGTTTCTCATGATTCAACAATGTTTAG

>PGSC0003DMG400011160-(rev)LRR-RLKs\_2745

TCGACATTGATTCCACCGGTAAAGTTTAGAAAAGTTTCTCATGATTCAACAATGTTTAGACATAAATACA  
ATTTAATTATCTTAAACTTCTTTCTGTTGTAACCAGGTAAGCGAAACTCG

>PGSC0003DMG400011160-(rev)LRR-RLKs\_2806

ATAAATACAATTTAATTATCTTAAACTTCTTTCTGTTGTAACCAGGTAAGCGAAACTCGAAAAGACTAGCC  
ATTGCTATAGGACTTAGTGTCAGCTTCATCTCTCTTTTCCTCTTGGGAT

>PGSC0003DMG400011160-(rev)LRR-RLKs\_2867

AAGACTAGCCATTGCTATAGGACTTAGTGTCAGCTTCATCTCTCTTTTCCTCTTGGGATTCCGATTCCATAA  
TTTGAAAAGGAACCAAAACAGGAAACAGTCTATTCTGAACATTAATGG

>PGSC0003DMG400011160-(rev)LRR-RLKs\_2928

GGATTCATAATTTGAAAAGGAACCAAAACAGGAAACAGTCTATTCTGAACATTAATGGTGAGTCTTAG  
TAGCATTTTGTGTATTTGATGACGGTTCAAAGTTATTTACGTTTCGTATTT

>PGSC0003DMG400011160-(rev)LRR-RLKs\_2989

AGTCTTAGTAGCATTTTGTGTATTTGATGACGGTTCAAAGTTATTTACGTTTCGTATTTTGTCCAGATAT  
GCAAGAGGAGGATCTAGTTAGACTAGGGAATCTCAGAAGCTTCACATT

>PGSC0003DMG400011160-(rev)LRR-RLKs\_305

GTTAAATAAATTCATGGGGTTTGCTTAATATATGTGTTGAATAATTTGATTTCACTTCTTGGGTTTTTTTT  
TTTTATCGTCAATGGCTTCCATTTTCTTGATTTTTGTTCTCTCTTTGC

>PGSC0003DMG400011160-(rev)LRR-RLKs\_3050

GTTCCAGATATGCAAGAGGAGGATCTAGTTAGACTAGGGAATCTCAGAAGCTTCACATTTAAAGAACTT  
CAACGTGCGACAAACAGTTTCAGCTCTAAGAACATTCTTGGTGCTGGAGGA

>PGSC0003DMG400011160-(rev)LRR-RLKs\_3111

AAGAACTTCAACGTGCGACAAACAGTTTCAGCTCTAAGAACATTCTTGGTGCTGGAGGATTTGGCAATG  
TTTACCGTGGAAGTTGGGGGATGGCTCGTTGGTCGCGGTGAAACGATTGA

>PGSC0003DMG400011160-(rev)LRR-RLKs\_3172

TGGCAATGTTTACCGTGGAAGTTGGGGGATGGCTCGTTGGTCGCGGTGAAACGATTGAAAGATATTA  
GTGGAAGTCTGGAGAGTCACAGTCCCGACGGAATTGGAGCTTATAAGCTT

>PGSC0003DMG400011160-(rev)LRR-RLKs\_3233

GATATTAGTGGAAGTCTGGAGAGTCACAGTCCCGACGGAATTGGAGCTTATAAGCTTGGCAGTACAT  
AGAAATTTGCTCAGATTAATTGGTTATTGTGCTACCCCAAACGAGAGACTT

>PGSC0003DMG400011160-(rev)LRR-RLKs\_3294

CAGTACATAGAAATTTGCTCAGATTAATTGGTTATTGTGCTACCCCAAACGAGAGACTTCTCGTGTATCCT  
TTCATGTCTAATGGCAGTGTGGCATCAAGACTTAGAGGTAAACACCTTG

>PGSC0003DMG400011160-(rev)LRR-RLKs\_3355

CGTGTATCCTTTCATGTCTAATGGCAGTGTGGCATCAAGACTTAGAGGTAAACACCTTGTGTACTCTTTTC  
AGCCAATCGCATGCCTTACACATTGTACTCCTTCGTTTCTATTGTTG

>PGSC0003DMG400011160-(rev)LRR-RLKs\_3660

AAAACCAGCACTAGATTGGAATACTAGGAAGAGAATTGCAATTGGAAGTCAAGAGGTCTTCTTTACCT  
CCACGAGCAATGTGATCCAAAGATAATCCACAGAGATGTGAAGGCGGCAAA

>PGSC0003DMG400011160-(rev)LRR-RLKs\_3721

CTTTACCTCCACGAGCAATGTGATCCAAAGATAATCCACAGAGATGTGAAGGCGGCAAATGTCCTATTA  
GATGACTTCTGTGAAGCTGTTGTCGGGGACTTTGGCCTTGCAAAGCTCCTC

>PGSC0003DMG400011160-(rev)LRR-RLKs\_3782

TCCTATTAGATGACTTCTGTGAAGCTGTTGTCGGGGACTTTGGCCTTGCAAAGCTCCTCGATCATGCTGA  
CTCTCATGTTACCACAGCTGTTGTCGGAACAGTTGGCCATATAGCGCCAG

>PGSC0003DMG400011160-(rev)LRR-RLKs\_3843

TCATGCTGACTCTCATGTTACCACAGCTGTTGTCGGAACAGTTGGCCATATAGCGCCAGAGTACCTTTCC  
ACCGGTCAATCATCCGAAAAACGGATGTGTTTGGATTTGGTATCCTCTT

>PGSC0003DMG400011160-(rev)LRR-RLKs\_3904

TACCTTTCCACCGGTCAATCATCCGAAAAACGGATGTGTTTGGATTTGGTATCCTCTTATTAGAGCTTAT  
AACTGGGATGAGAGCTCTTGAATTGGGAAAAACAGTAAACCAGAAAGGA

>PGSC0003DMG400011160-(rev)LRR-RLKs\_3965

TAGAGCTTATAACTGGGATGAGAGCTCTTGAATTGGGAAAAACAGTAAACCAGAAAGGAGCAGTACTT  
GAATGGGTATGTATGTTGCTTTATTCATCTACCAGTTATTGAATTCTATGTT

>PGSC0003DMG400011160-(rev)LRR-RLKs\_4026

AGTACTTGAATGGGTATGTATGTTGCTTTATTCATCTACCAGTTATTGAATTCTATGTTGCTCGAACTCTC  
CAAAAATGCACTACTTTTGAAGGCTTCGATACGCATGTGTTTTTCATTTT

>PGSC0003DMG400011160-(rev)LRR-RLKs\_4087

TCGAACTCTCCAAAAATGCACTACTTTTGAAGGCTTCGATACGCATGTGTTTTTCATTTTTGAAGAGTCCGA  
GCAACCAATATTTCTTTAAATAAAAGTGAAAAATGGAGCTCCAGTAGC

>PGSC0003DMG400011160-(rev)LRR-RLKs\_4148

AAGAGTCCGAGCAACCAATATTTCTTTAAATAAAAGTGAAAAATGGAGCTCCAGTAGCATCACTTACTT  
AGTGATTTTTTAACCTTTGTTAGTCGGACTCTTCAAATGTAGACTGGTG

>PGSC0003DMG400011160-(rev)LRR-RLKs\_4209

CACTTACTTAGTGATTTTTTAACCTTTGTTAGTCGGACTCTTCAAATGTAGACTGGTGCATATCGAATCC  
TCGAAAAAACTAGTACATTTTTTGATAATCTGATACGGATGCAACAACA

>PGSC0003DMG400011160-(rev)LRR-RLKs\_427

CTGTTTTACCCTTTTCTTTGTTTTTCATATGAAGCTAGGAATCATGAAGGTAAACAAAAAAAAGAATCCC  
ATTTGCTTATTTTTAGTTTTTTGTTTTCAAATTTGATCTTGTTGTTT

>PGSC0003DMG400011160-(rev)LRR-RLKs\_4270

TATCGAATCCTCGAAAAAACTAGTACATTTTTTGATAATCTGATACGGATGCAACAACATTTTTGTAGAGT  
TCGAGCAAAGTAGGTTTTAACAAAAAGAGTCTTGCTTAGATTTTCTCAT

>PGSC0003DMG400011160-(rev)LRR-RLKs\_4331

TTTGTAGAGTTCGAGCAAAGTAGGTTTTAACAAAAAGAGTCTTGCTTAGATTTTCTCATGAACTGCTGCT  
TAACAACAAGTGTGGCTTGATTGCAGGTTAAGAAAATGCAGCATGAGAAG

>PGSC0003DMG400011160-(rev)LRR-RLKs\_4392

ACTGCTGCTTAACAACAAGTGTGGCTTGATTGCAGGTTAAGAAAATGCAGCATGAGAAGAACGTCGAA

GCTCTCATCGACAGAGAGCTTGGGAGCAACTACGACAGGATCGACGTAGGGG

>PGSC0003DMG400011160-(rev)LRR-RLKs\_4453

CGTCGAAGCTCTCATCGACAGAGAGCTTGGGAGCAACTACGACAGGATCGACGTAGGGGAGATGTTAC

AAGTGGCTATACTCTGTACTCAATACCTACCGTCCCACCGTCCCAAGATGTC

>PGSC0003DMG400011160-(rev)LRR-RLKs\_4514

ATGTTACAAGTGGCTATACTCTGTACTCAATACCTACCGTCCCACCGTCCCAAGATGTCTGAGGTGGTCC

GAATGCTCGAAGGTGATGGCCTTGCTGAAAAATGGGCTGCATCTCATAAC

>PGSC0003DMG400011160-(rev)LRR-RLKs\_4575

AGGTGGTCCGAATGCTCGAAGGTGATGGCCTTGCTGAAAAATGGGCTGCATCTCATAACTATGATGGCT

TTTCTCTAACCAAAAACAGTAACAAAACCTCAGACTAAACATTCTATGGTGC

>PGSC0003DMG400011160-(rev)LRR-RLKs\_488

AAAGAATCCCATTTGCTTATTTTTCAGTTTTTTGTTTTCAAATTTGATCTTGTTGTTTTGATGTATAGTGG

AAGCTTTGATTGCTATAAGGAGAAGTTTGGATGACCCAAAAAGAGCTT

>PGSC0003DMG400011160-(rev)LRR-RLKs\_4880

ATGACCCTCGGCTCGTAATAGCAAATATCCAAAAGGAAAAGAAATTGAACATAGGTACCTAATTCTTTT

CAAATTTTTATAAGTTAGTACCACAATTAACCTCTATCAAAAAGCATGTTG

>PGSC0003DMG400011160-(rev)LRR-RLKs\_4941

AATTCTTTTCAAATTTTTATAAGTTAGTACCACAATTAACCTCTATCAAAAAGCATGTTGGAGAGGAAAAA

GAAAGTAGTTCTTTTTTAAAATTTTTTTTTGTTGGTTTTCTTTAGATGGT

>PGSC0003DMG400011160-(rev)LRR-RLKs\_5002

GAGGAAAAAGAAAGTAGTTCTTTTTTAAAATTTTTTTTTGTTGGTTTTCTTTAGATGGTGTGAAAATAGGA

GTTTGCTATGTTTGATAAAAGTACACTTTTAAGGAGTTTATGGGACTAA

>PGSC0003DMG400011160-(rev)LRR-RLKs\_5039

TTGTTGGTTTTCTTTAGATGGTGTGAAAATAGGAGTTTGTCTATGTTTGATAAAAGTACACTTTTAAGGAG

TTTATGGGACTAATGTAATAACCCTCTTCATCAAAAGTATCAATCTTTA

>PGSC0003DMG400011160-(rev)LRR-RLKs\_61

TCCACACCTGATTCTTTACACCAAAAACACAGTACAAAAAATTAGTAAAAAAAATATTTGAAAAAA

AAACACAAACAACTCAGATAAAGCAAAAGGAGAAACAGAGTTGGTACAA

>PGSC0003DMG400011160-(rev)LRR-RLKs\_671

AAAATCTTGTTATTGCACTGTATGTTAATAGTATTTTTTTTTTTTGGGAATTTTATGGTACTATATGATTAT  
ATTGGTTGTTAAAGATTGAACTTTTACTGTTTTATCAACTAAAAAAG

>PGSC0003DMG400011160-(rev)LRR-RLKs\_732

TATATGATTATATTGGTTGTTAAAGATTGAACTTTTACTGTTTTATCAACTAAAAAAGTGTTTTTTTTTGT  
TTGTAGAGGAGCTCCAAGTCAAGGTTTATCTGGGGTTTTGTCTGGGAT

>PGSC0003DMG400011205LRR-RLKs\_0

ATGTCTATGATTGTTTCTGATCCATTTTCATGTATTAGAAAGTTGGAATTCCTCCAACATTCATGTATGTAAT  
TGGACAGGAATTGTATGTGACAAGAAAATTCATAGAGTTGTTGAGCTT

>PGSC0003DMG400011205LRR-RLKs\_1922

TGTTTATAAAGGAGTGCTGAAGAACAACATGAGCATAGCTGTTAAAGTGATTGACACAAAAGGAGGTG  
GAGAGATATCAGGGAGTTTCAAAGGGAATGTCAAATCTTGAAAAGGACTAG

>PGSC0003DMG400011205LRR-RLKs\_2108

TCTGATGTCAAACGGAAGCCTAGAGAACCATCTGTACCCGAGCCATGGGCTGAGACATCAACTTGACTT  
AGCTCAATTGGTTAACATTTGCAGTGATGTAGCAGAAGGAGTGTCGTATCT

>PGSC0003DMG400011205LRR-RLKs\_2356

ATACTAATCCTATCGACGAATCAGTTAATTACAACCAACAGATGGATTACTTTGTGGATCAATTGGTTAC  
ATTGCTCCTGGTTAGTAACAAATAATAGTTCTATTCTATGATTCTATCT

>PGSC0003DMG400011205LRR-RLKs\_2418

ATTGGTTACATTGCTCCTGGTTAGTAACAAATAATAGTTCTATTCTATGATTCTATCTAATTCATTTCAATT  
TATATGACTAAAGTTTCTGTTTCTTTGATTGTAGAATATGGAATGGGA

>PGSC0003DMG400011205LRR-RLKs\_2852

ACAGTATGTTTCAAGTTCTTCAAACAGTGTTACTGAAGATGTCACAACAAAAGTTGAACAGTTTTTTTTT  
TAATATCTAACAATGTACCTTTTAACTTTATTCATTGTACTTCTATGTT

>PGSC0003DMG400011205LRR-RLKs\_2914

TTTTTTTTTAAATATCTAACAATGTACCTTTTAACTTTATTCATTGTACTTCTATGTTCTTTTTTTTTTACCTT  
TTAATTGTTCTTCTTGGGGTGCGGACCTTCTCTGGATTCTACGT

>PGSC0003DMG400011205LRR-RLKs\_2950

TTATTCATTGTACTTCTATGTTCTTTTTTTTTTACCTTTTAAATTGTTCTTCTTGGGGTGCGGACCTTCTCT  
GGATTCTACGTGAACGTGGGATGGTTCGTGCACCAAGACTACCCTTC

>PGSC0003DMG400011205LRR-RLKs\_744

AATAATCTTGGTGGGGAGTTGCCTCCTATTATCGGTAACATCTCCAAGAACCTTGCACAGATACATCTCG  
ACGATAATCTTATCTATGGTCCTATCCCAACACAAATTTGAGTCTTGTA

>PGSC0003DMG400011205LRR-RLKs\_806

ACATCTCGACGATAATCTTATCTATGGTCCTATCCCAACACAAATTTGAGTCTTGTAATATTACTCTATT  
GAACTTGTCTAGTAATCATCTGAATGGTACAATTCCTCCTGAGTTGTG

>PGSC0003DMG400011209LRR-RLPs\_0

GCGACTACTAGGTGACCATCATACTATGCCTATAAATGACAAGAGATGTTCCCTCCTACTTCATTACAAAA  
CAAGCAAATATGAAGAACAATTCACTTCAACTTATCTTTCTCATATTGT

>PGSC0003DMG400011209LRR-RLPs\_1098

AACATCTTCAGCTGAGGTATAACTCACTGACAGGCACAATACCTGAAAGTATAGGGAACTTATCATCCTT  
GGAGACATTTTACCTCACATCTAACAAAATGAGTGGGAACATCACCACGA

>PGSC0003DMG400011209LRR-RLPs\_1159

ATCATCCTTGGAGACATTTTACCTCACATCTAACAAAATGAGTGGGAACATCACCACGAGTATCGGCCAG  
CTCATGTCGTTGGTCTCGTTGGATATCTCGGAGAATATGTGGGATGGTAT

>PGSC0003DMG400011209LRR-RLPs\_1220

ATCGGCCAGCTCATGTCGTTGGTCTCGTTGGATATCTCGGAGAATATGTGGGATGGTATTGTCACTGAA  
GCTCATTTGATGTATCTTTCCAAGAGTTTTTCAGTTGGGATGAAA

>PGSC0003DMG400011209LRR-RLPs\_1647

TTGAGGGACCTCTCCACTATGGTCTTCTAATGTTACAACATTGTATCTGAGGGATAACTTGTTTTAGGA  
CCTATTCTCTCAACATTTATGAAGCACTTCCCAATATAGGAGACTTGG

>PGSC0003DMG400011209LRR-RLPs\_1708

GTTTTAGGACCTATTCTCTCAACATTTATGAAGCACTTCCCAATATAGGAGACTTGGACATCTCCAGGA  
ACAATCTAAATGGCACAATTCCCTTATGCATAGGTGATATGAATCAGTT

>PGSC0003DMG400011209LRR-RLPs\_2806

CTTTGCTGTTGTTGGTTTGGGATACATAGTTGGTTTTTGGGCATTTTTTGGCACTTTGATCTTCAAGAAAA  
GATGGAGAATTGCTTATTGCAGATTCATTGAGATGTGTATCTTGGAGTT

>PGSC0003DMG400011209LRR-RLPs\_2867

TTCAAGAAAAGATGGAGAATTGCTTATTGCAGATTCATTGAGATGTGTATCTTGGAGTTCTATGAAATGT

CTTGTAGTTTTGTGAAAAAATGATAGGAGTCTAATAAGCTATGTTGCTC

>PGSC0003DMG400011209LRR-RLPs\_305

AACAAGACCGGACATGTCGTAAAGATTGATCTTAGGAACAAATACTCAACAGAACATGAATTGAGAGGT  
GTGATTAATCCATCTTTACTTAAGTTACAACAATTGAGATACTTAGACTTA

>PGSC0003DMG400011209LRR-RLPs\_3050

ATACGACAATATTTTTAGAGAGTCCGAGCAACTTAGCTAATAAGTGGAGCTATAGGAGTTTGTCTCTGCA  
ATTCTGCTATATGCTATGTTTTAGTTTCAATATAGCACATATTACTACTT

>PGSC0003DMG400011209LRR-RLPs\_3111

GTCTCTGCAATTCTGCTATATGCTATGTTTTAGTTTCAATATAGCACATATTACTACTTTTTCTATATGTAA  
AATAATGCTACCTAAGTATTGGCACTTATAGAAATGCCAGTGTTTTGG

>PGSC0003DMG400011209LRR-RLPs\_3172

TCTATATGTAAAATAATGCTACCTAAGTATTGGCACTTATAGAAATGCCAGTGTTTTGGGTAGAGTTACG  
ACATGAGTGGTCAGTTGAACACTTTTACGTCGGTCAAATAAATACTTCTT

>PGSC0003DMG400011209LRR-RLPs\_3233

AGAGTTACGACATGAGTGGTCAGTTGAACACTTTTACGTCGGTCAAATAAATACTTCTTATATATGTATA  
CATGTTCAACAAGACTATTGTAGTACATATAATTAGGAAGTTGTTAAATA

>PGSC0003DMG400011209LRR-RLPs\_3281

TAATACTTCTTATATATGTATACATGTTCAACAAGACTATTGTAGTACATATAATTAGGAAGTTGTTAAAT  
AGTATCTAAGACTATTCTTATACTTAATTTGCATGCATCTACTTGTATA

>PGSC0003DMG400011209LRR-RLPs\_366

TGAGAGGTGTGATTAATCCATCTTTACTTAAGTTACAACAATTGAGATACTTAGACTTAAGCATGAACAA  
TTTTGAAGGAATCAAAGTACCGGAATTCATCGGTCGCCTTAATGAACTAA

>PGSC0003DMG400011209LRR-RLPs\_671

TTAAACATTCCTTCTTCTTTCCATTACTAAATCTTACTTCCCTTTTGGTACTTGATCTTCCAACAATGCTTT  
TAGTTCATGTACATTCCCTCAATGGATATTTAACTTAGTAGCCTT

>PGSC0003DMG400011209LRR-RLPs\_732

CCAACAATGCTTTTAGTTCATGTACATTCCCTCAATGGATATTTAACTTAGTAGCCTTGTGTATCTTGACT  
TAAGCTCCAACAATATGTGTAGTGAAGTTGTTGATGAGTTTGGTAAGC

>PGSC0003DMG400011251G-LecRK\_1037

ATATGGTAATGCATTTGTGACATCTTATCGAAAAGATTAAGTTGAAAACATGTGTTTCATAACTTAGTTTT  
GTTTTTTAACACGACCTCTCATGTGCTTCTTGAATCCTTGATATTGGAT

>PGSC0003DMG400011251G-LecRK\_1342

TGGATATTGGGATGGACGCATATTCACAGGCGTTACAGATATGAAGCCCGAGTATCTACATGGTTTCAA  
GCTTTACAATGAAGGAGATAAGCTATACTTCACTTACACTGTATCAGATCC

>PGSC0003DMG400011251G-LecRK\_1403

GGTTTCAAGCTTTACAATGAAGGAGATAAGCTATACTTCACTTACACTGTATCAGATCCTTCTGATTTGGT  
GAGGTTCCATATTAGTCCAACCGGATACGAGCTGGAACAAAGGTGGGAT

>PGSC0003DMG400011251G-LecRK\_1647

GATTTGTACCGAAAGATTTGGGGCAGTGGAATGCGAGGAACTGGTCAGAAGGGTGTGTTAGGAGGAA  
AGAAGTGAATGCAGAGGAAATAACAGTGTCTTGAAGAGTGGTAGTGAAAGA

>PGSC0003DMG400011251G-LecRK\_1708

GAGGAAAGAAGTGAATGCAGAGGAAATAACAGTGTCTTGAAGAGTGGTAGTGAAAGAAGGACGG  
ATTCTTTGAGATTGAGAAAATCAAGTTGCCGATTTTGCTGATACTGCATATTT

>PGSC0003DMG400011251G-LecRK\_183

TTAGTGGTGAAAAATGGTCGTGGCGATTTAATGTGGACGAGTAATGTTGCTGCTATGAATAATAATTGT  
ACAGCACATCTTTCTGATTATGGAAATCTTATGATGTTTAATGGCAATAAC

>PGSC0003DMG400011251G-LecRK\_1952

GAAGGCGGAAACACTCTCTATGTTTCGCCTTGCTGATTCTGAATTTGGTAAAAATGTGTACTATTTTTCTG  
TTGTTATTCATATAATCATTTTAGATGTTCTTATTATAAACTTTCTTGA

>PGSC0003DMG400011251G-LecRK\_2013

ATTTTTCTGTTGTTATTCATATAATCATTTTAGATGTTCTTATTATAAACTTTCTTGAAACAGCTGGAAGC  
AACAAGACAGTCAAATTGTGGTAATATCCGTTATGGTAGCCGGGGCT

>PGSC0003DMG400011251G-LecRK\_2074

CAGCTGGAAGCAACAAGACAGTCAAATTGTGGTAATATCCGTTATGGTAGCCGGGGCTTTTCTTGTAT  
GTATGGTAGTTTTTCTACTATGCAAGTACAAAGCCAAAACGCGAGGTAAGA

>PGSC0003DMG400011251G-LecRK\_2135

TCTTGTATGTATGGTAGTTTTTCTACTATGCAAGTACAAAGCCAAAACGCGAGGTAAGATTGCAGAAAA  
GCTGGTGTTTTACGACAGTCATTTATTGTTATGCAATATACCTATATCTTC



>PGSC0003DMG400011251G-LecRK\_2196

GCAGAAAAGCTGGTGTTTTACGACAGTCATTTATTGTTATGCAATATACCTATATCTTCTTCAATGTCCCA  
TTTTCAGTGTCCAATAAGATCAACCAAATGGAGACAAGCGTTCCAATA

>PGSC0003DMG400011251G-LecRK\_244

ATAATTGTACAGCACATCTTTCTGATTATGGAAATCTTATGATGTTTAATGGCAATAACAGGGAGTTGTG  
GCAGAGTTTTACCATCCTACAGATACATTTTTACCAGAAATGAGATTTT

>PGSC0003DMG400011251G-LecRK\_3294

TATTACTGGAGATCATCTGTGGACGGAGGAACACAAGCTATCGTTCAAATGAACACTCTGGCATTATTG  
GTTATGTATGTCCAATAACTACTTCTCGATATCTGTTGTGAAGTTAAATCT

>PGSC0003DMG400011251G-LecRK\_3355

CATTATTGGTTATGTATGTCCAATAACTACTTCTCGATATCTGTTGTGAAGTTAAATCTTTAACAACAATT  
CTACGTTTTTTCTTTTTAGGCATGGCAGAAGTGGGATGAAGGTACACC

>PGSC0003DMG400011251G-LecRK\_427

TCTTGTATCGTGTGATCATCTTATCTGAAATCTTTTATTTACTTAATTTTGTGTTTGTACATGCCCCCTCACGT  
GTGGATGAATTTTTATATAATGTGTGGTGGTGAGACTCTCTGATAG

>PGSC0003DMG400011251G-LecRK\_549

TGTTGCGTTTGTGACATCTCATTTAAAAGCTTAATTGAGAATGTGCTTTTTTATTTTACGTAATTTTGTGTTT  
GAACCCCTCACGTGTTTACTCGTGGAAAGTTGAAAGACAGAAGGGTT

>PGSC0003DMG400011251G-LecRK\_610

AATTTTGTGTTTGAACCCCTCACGTGTTTACTCGTGGAAAGTTGAAAGACAGAAGGGTTGTTGGTCAGTC  
ACGGACTATTTGATTTTATTATGACGATTCAATGTTAATGACCTCATTCA

>PGSC0003DMG400011251G-LecRK\_671

TGGTCAGTCACGGACTATTTGATTTTATTATGACGATTCAATGTTAATGACCTCATTCAATATTTTTTTTTT  
TTGATCCTTCACTATCGTGGGCTGGATGGATAGCTAGTAGTTGTGAGT

>PGSC0003DMG400011251G-LecRK\_732

ATTTTTTTTTTTTATGATCCTTCACTATCGTGGGCTGGATGGATAGCTAGTAGTTGTGAGTAACAGTCCCCTT  
TTTATAGATTAAGGTGATGATTTTTTATGATTTGGGTGGCAGTGAGACT

>PGSC0003DMG400011251G-LecRK\_793

CAGTCCCCTTTTTATAGATTAAGGTGATGATTTTTTATGATTTGGGTGGCAGTGAGACTCAAAACCTAAG

AACTCAGCTTGCCCTGATATGGTAATGCATTTGTGCCATCTCATCCAAAA

>PGSC0003DMG400011251G-LecRK\_854

AAACCTAAGAACTCAGCTTGCCCTGATATGGTAATGCATTTGTGCCATCTCATCCAAAAGATTAAGTTGA

AAATATGTTTTCTTCACTTAATTTATTTTTAGCATGCCCCCTCACATG

>PGSC0003DMG400011251G-LecRK\_915

TTAAGTTGAAAATATGTTTTCTTCACTTAATTTATTTTTAGCATGCCCCCTCACATGTTTCTTGAATCTTT

GATATTGGGTGGTAGTGAGACTTGAAACCTAAGAACTCTACTTGAC

>PGSC0003DMG400011251G-LecRK\_976

TCTTGAATCTTTGATATTGGGTGGTAGTGAGACTTGAAACCTAAGAACTCTACTTGCACTGATATGGTAA

TGCATTTGTGACATCTTATCGAAAAGATTAAGTTGAAAACATGTGTTTCA

>PGSC0003DMG400011304-(rev)RLKWAX-EGF\_448

ATCTATGTCTCCTGATTCAATACATGTCCCTGCAGCCAGAGGGTTCTCTTAAGCTATGTTGCCAATGTCAA

CGGCCGCCTGTCAGTAGTTGGAAAAAGAGGAAGGCTCTCACATGCTGTA

>PGSC0003DMG400011304-(rev)RLKWAX-EGF\_512

ATGTCAACGGCCGCCTGTCAGTAGTTGGAAAAAGAGGAAGGCTCTCACATGCTGTAATTATGTACAGTA

ATGATTAACCTGCTGCTGTTATTTCCATCATAAACAGGCAATCCTATTTTT

>PGSC0003DMG400011304-(rev)RLKWAX-EGF\_569

TTATGTACAGTAATGATTAACCTGCTGCTGTTATTTCCATCATAAACAGGCAATCCTATTTTTGTTTCAATA

AACTTCCAAATCACATTGAATATATCCTGATAGTATTGCAGTTTGTAT

>PGSC0003DMG400011353-(rev)LRR-RLPs\_1037

CAGTCTGGTTCATCTGACTTTAATACTTCAAAGATTAGAGCTTTTTGTTTCTTTTAGCTTCTTTTTTTT

GAGGTGAACTTCTGGGAATTAATTTTCGGATTTTGATTGAATGAGC

>PGSC0003DMG400011353-(rev)LRR-RLPs\_1098

CTTCTTTTTTTTGAGGTGAACTTCTGGGAATTAATTTTCGGATTTTGATTGAATGAGCTAATGTCAATAA

TTTCTTGTACTTCTTCCCCAGAATTCTACATTTGCATTCTATCTTTAC

>PGSC0003DMG400011353-(rev)LRR-RLPs\_122

AGGAAGAAAAAGGACTACTGTAAATCTCTCTCTACTGTGAAATTACACTTTTGCCTTCCCCCTCCATTA

CCGTACAACAATGGCGTATGCATTCCCGGAGGAAGTACTAGAACACGTC

>PGSC0003DMG400011353-(rev)LRR-RLPs\_1403

TTCCATATGTTTGTCTTGGTTCTCTGGTGGGATTAATTTGTTTTATCAGGAGGGAGTTTTGTAATGGA  
GTATAGTTGTAGTTCAATGTTGAAATGGTTAAGTGGGTTAGGAATATGA

>PGSC0003DMG400011353-(rev)LRR-RLPs\_1464

TTGTAATGGAGTATAGTTGTAGTTCAATGTTGAAATGGTTAAGTGGGTTAGGAATATGAAATGGTGATT  
TATTGAAATTCCAATAGGAATATGATTCTAAATCTTTCTTATTTATCTTGT

>PGSC0003DMG400011353-(rev)LRR-RLPs\_1525

TGGTGATTTATTGAAATCCAATAGGAATATGATTCTAAATCTTTCTTATTTATCTTGTTTCATATCGTCTGT  
GATTATTATCATTGTTGTTTTCTGTTGAGTCTGTTGATTTGCTTCA

>PGSC0003DMG400011353-(rev)LRR-RLPs\_183

CCCTCCATTACCGTACAACAATGGCGTATGCATTCCCGGAGGAAGTACTAGAACACGTCTTCTCCTTCCTC  
ACCACCGACAAGGACCGTAACGCAGTATCTCTAGTCTGCAAATCATGGT

>PGSC0003DMG400011353-(rev)LRR-RLPs\_2196

GGTATGTTCTAAATGTTTTGAAGTCTTAATTGATGTTCTTGATACTGCAACTGCAAACATGTTTTTTTTTCT  
TATAAAGAAGAAGAGGCAATGAGATTGTAACATCATACTTGCTGTGAT

>PGSC0003DMG400011353-(rev)LRR-RLPs\_2257

TTTTTTTTTCTTATAAAGAAGAAGAGGCAATGAGATTGTAACATCATACTTGCTGTGATGACATTTAGTAT  
ATATTCTTAGTGAAGAATAAGAAAAACCTAACTGCTACAGATCAACCA

>PGSC0003DMG400011353-(rev)LRR-RLPs\_2318

CATTTAGTATATATTCTTAGTGAAGAATAAGAAAAACCTAACTGCTACAGATCAACCAATCAACCACAA  
CTTAATCCCAATTTAGTTGGTCTCAGCTTTATGGGTCCTCTTAAACCATA

>PGSC0003DMG400011353-(rev)LRR-RLPs\_2379

CAACCACAACCTAATCCCAATTTAGTTGGTCTCAGCTTTATGGGTCCTCTTAAACCATATTGCTATATTCA  
GGTCATTTTCGTTCCGATGCTAAATTATTTGTCTTTACGCAATAATTGC

>PGSC0003DMG400011353-(rev)LRR-RLPs\_2440

GCTATATTCAGGTCATTTTCGTTCCGATGCTAAATTATTTGTCTTTACGCAATAATTGCCAAGGATAGGAA  
AAAAGTAGTTCATTCTGTAGATAAACTTCACCTATGCTGGTTAGGAAAA

>PGSC0003DMG400011353-(rev)LRR-RLPs\_2501

AGGATAGGAAAAAGTAGTTCATTCTGTAGATAAACTTCACCTATGCTGGTTAGGAAAATTCCAGGCTA  
CATATATTTGATATTATATTGCTAAGCAGCTCACTTTCCTTGGAAGTTGAA

>PGSC0003DMG400011353-(rev)LRR-RLPs\_2562

CCAGGCTACATATATTTGATATTATATTGCTAAGCAGCTCACTTTCCTTGGAAGTTGAAGCCAATTGTTAC  
ATGCTTCATATTGTGATCTGGACGAATGGGTTTCAGTTTTTAATACTTG

>PGSC0003DMG400011353-(rev)LRR-RLPs\_2623

CAATTGTTACATGCTTCATATTGTGATCTGGACGAATGGGTTTCAGTTTTTAATACTTGTGCCTACCCAAT  
GCACGTAAAAATTCATCTAAATGTGATGGTTCTATGCTGAAAAATGTAT

>PGSC0003DMG400011353-(rev)LRR-RLPs\_2684

CCTACCCAATGCACGTAAAAATTCATCTAAATGTGATGGTTCTATGCTGAAAAATGTATCTATTCTTCCCT  
AGTAGCTTCCCCAACTGGTTCTGTAATATAAACTCCAGTATCAAGTTT

>PGSC0003DMG400011353-(rev)LRR-RLPs\_2745

ATTCTTCCCTAGTAGCTTCCCCAACTGGTTCTGTAATATAAACTCCAGTATCAAGTTTAAGTGCTGAATT  
ACTTTTCTTGTAATATATGTGACTGCAGGTGCTGGACTACATTGAAGAT

>PGSC0003DMG400011353-(rev)LRR-RLPs\_2806

GTGCTGAATTACTTTTCTTGTAATATATGTGACTGCAGGTGCTGGACTACATTGAAGATACTGGTCTTGA  
GGAAGTTGCTGCCAATTGTAAGGACCTTCAAGAGCTGAGGGTGTTTCCTT

>PGSC0003DMG400011353-(rev)LRR-RLPs\_3782

TGAAGTAGAGACTCCCGAGCTCATA CGCCATCAATTTTATTCTTGGCTGAGAGCTACTTTACAGCAGGTA  
GTTTTTAATAAAGAATTTGAACTCTGAGTTTCTGTGTATCATCTAGAGTA

>PGSC0003DMG400011353-(rev)LRR-RLPs\_3904

AATTATTCGTTTTCTTGGGTGGGATTTTGCTTGGGGGGTTTGGGGGGCATATTTTTGCCATGTATGTGT  
TATTTCCAGACTTTGCTTCATTATGTAGTTCCTTTATTTATTCTATTGA

>PGSC0003DMG400011353-(rev)LRR-RLPs\_427

TGCTGACTTTAATCTTGTACCGGAAGGTTGGGGAGCTTATGTTTATCCTTGGGTTTTGGCTATGTCTAGG  
TCTTATCCATGGCTTGAAGAAATTAAGCTTAAGAGGATGGTAATTACTGA

>PGSC0003DMG400011353-(rev)LRR-RLPs\_61

CTCTAAAATACAGCAAATCTAAGCTCGTTAATGTGCGATTGAGATCTGAGAGAAGAAGAAGAAGGAAGAA  
AAAGGACTACTGTAAATCTCTCTCTCACTGTGAAATTACACTTTTGCCCTT

>PGSC0003DMG400011353-(rev)LRR-RLPs\_610

TGATGGGTTTACTACTGATGGACTCGCTGCTATTGCTGCTAACTGCAGGTGAAATTTTTGTCTTACTTGA

CATTTCTCTTCTGTTTTGCTCACTTTAAAGTAGTTAGTGGTGAGAGAAG

>PGSC0003DMG400011353-(rev)LRR-RLPs\_671

TCTTACTTGACATTTCTCTTCTGTTTTGCTCACTTTAAAGTAGTTAGTGGTGAGAGAAGTCTTAATCTGTA  
AAGTAATTAGATCTAATTTTGGGTATTAGTTTGGACAATGACTTGTATT

>PGSC0003DMG400011353-(rev)LRR-RLPs\_732

TTAATCTGTAAAGTAATTAGATCTAATTTTGGGTATTAGTTTGGACAATGACTTGTATTGTTGTTAAATCT  
TAAGCTTTTGGATGAATGCAGTAAGCATTTTGGGGGTTTGTATAATCC

>PGSC0003DMG400011353-(rev)LRR-RLPs\_793

TGTTAAATCTTAAGCTTTTGGATGAATGCAGTAAGCATTTTGGGGGTTTGTATAATCCCTTGCTAAACAC  
GAGAATGAAGAAGCACTTTTCTTGCAGCTGTTTGTCTGTTTATAGGAT

>PGSC0003DMG400011509-(rev)LRR-RLKs\_0

ATGAAAACATGGAATGCATCCACACACTTTTGCCATTGGTCTGGTGTAACTTGTGGACGTAAACATGTTA  
GAGTCATTAACCTAAACGTCGAGAACCACAAACTAGATGGCCCATTGTCA

>PGSC0003DMG400011509-(rev)LRR-RLKs\_1054

ACTTACTTACTGGTACTATTCCAATTAATTTTGGTAAAGTTAAGAACTGCAGATTTTGGATTTGTCTCAG  
AATAGATTTTCAGGGAATATTCCATCATCTCTAGGAAATCTTAGTGTAG

>PGSC0003DMG400011509-(rev)LRR-RLKs\_1240

ATTACATGATTGAGATATATGTTGCTAAAATAACCTGTTAGGACAGATACCTAAGGACCTTTTTGCTCTC  
TCTTCTTAGTTGCTGTAGACATTTCTGAGAACCATTTAGATGGTTTCA

>PGSC0003DMG400011509-(rev)LRR-RLKs\_1550

TTCTAGAAATAATTTGTCTGGCCAAGTACCAAATACTTGGGAAGATTTCAAGTTTCAACTCTGAATTTAT  
CATTCAATGATTTTGAAGGAGTGTACCAAATGAAGGCATCTTTAAGAA

>PGSC0003DMG400011509-(rev)LRR-RLKs\_1612

TGAATTTATCATTCAATGATTTTGAAGGAGTGTACCAAATGAAGGCATCTTTAAGAATGCAACTGCAAT  
ATCAGTAATTGGGAATCCAAACTTTGTGGGGGTGTGCCTGACATACATC

>PGSC0003DMG400011509-(rev)LRR-RLKs\_1674

ACTGCAATATCAGTAATTGGGAATCCAAACTTTGTGGGGGTGTGCCTGACATACATCTCCGGAATGT  
GACATCAAAGATCAAAAAAATCGGTTTCGAGGTTTATCCTCAAGATTGTC

>PGSC0003DMG400011509-(rev)LRR-RLKs\_1736

GGAATGTGACATCAAAGATCAAAAAAATCGGTTGAGGTTTATCCTCAAGATTGTCATCTCTGTTGTC  
TTTGGTATACTAGGACTTGGTATGCTTGCTCACTTTACTATTTTGCTTCTT

>PGSC0003DMG400011509-(rev)LRR-RLKs\_1798

CTGTTGTCTTTGGTATACTAGGACTTGGTATGCTTGCTCACTTTACTATTTTGCTTCTTGTTAAAGAAACCG  
AAAAGGGTGCCTGTTTCAAGTTCATTGGGTGAGTCTCTCATAAATGTGT

>PGSC0003DMG400011509-(rev)LRR-RLKs\_186

ATCCCTTCAGAGATTGGTCGTTTGAGAAGACTACACCGATTGTATCTTGGAACAACACTATTTTCATGGAG  
AGATCCCCTCAAATTTATCAAGGTGCTTGAATCTTGTATCCCTTGCCTT

>PGSC0003DMG400011509-(rev)LRR-RLKs\_1860

AAGAAACCGAAAAGGGTGCCTGTTTCAAGTTCATTGGGTGAGTCTCTCATAAATGTGTCTTACAGAAGTT  
TGCTTCAAGCTACTAATGGATTCTCTGAAGACAACCTGATTGGTGCTGGG

>PGSC0003DMG400011509-(rev)LRR-RLKs\_248

TCATGGAGAGATCCCCTCAAATTTATCAAGGTGCTTGAATCTTGTATCCCTTGCCTTGAAGGTAACAAG  
TTAGTAGGAAGCCTTCGTCCGAGCTAGGTTCCCTTGTCCAAACTCGAGTA

>PGSC0003DMG400011509-(rev)LRR-RLKs\_2480

CTCTGGTCTTGTTAGAGGAACAATTGGTTACACTGCTCCAGGTAACAATTAATACATAAACAAACACTCG  
AACGCCCTTTTTTCTCTCATTTCTTCTATTTTTTCTTGAAAATGATAAA

>PGSC0003DMG400011509-(rev)LRR-RLKs\_2542

AACACTCGAACGCCCTTTTTTCTCTCATTTCTTCTATTTTTTCTTGAAAATGATAAATTCATAGCAAACC  
ACACTGCTTAACCATAACTTTCTTCGACAGAGTTACTTTATCAATATC

>PGSC0003DMG400011509-(rev)LRR-RLKs\_2604

TAGCAAACCACACTGCTTAACCATAACTTTCTTCGACAGAGTTACTTTATCAATATCATAAACCATCTCTT  
AATTGTTACACACATACTGCCATTACTTTTATAAAAATCAAGTCATACT

>PGSC0003DMG400011509-(rev)LRR-RLKs\_2666

ACCATCTCTTAATTGTTACACACATACTGCCATTACTTTTATAAAAATCAAGTCATACTAAGTTATGTCCCTA  
TTAGGAAAGTTATTGTTCCCTTGTCTTTTTTCTTTTGTGAATTTAGA

>PGSC0003DMG400011509-(rev)LRR-RLKs\_2728

TATGTCCCTATTAGGAAAGTTATTGTTCCCTTGTCTTTTTTCTTTTGTGAATTTAGAATATGGGATGGGA  
AGCGAGCTATCGACTTGTGGTGATGTGTACAGCTTCGGGATCCTTTTAC

>PGSC0003DMG400011509-(rev)LRR-RLKs\_310

GTAACAAGTTAGTAGGAAGCCTTCGTCCGGAGCTAGGTTCCCTGTCCAAACTCGAGTACTTGTTACTCAC  
TCGAAACAACCTTGACAGGTGAAATCCCTTCTTCTTTTGAAACTTAACAT

>PGSC0003DMG400011509-(rev)LRR-RLKs\_62

ACATGTTAGAGTCATTAACCTAAACGTCGAGAACCACAAAACCTAGATGGCCCATTGTCATCCTTCATTGGG  
AACATGAGTTTCTCAGGTCTCTATACCTGTGCAACAATAGCTTCCGTGG

>PGSC0003DMG400011509-(rev)LRR-RLKs\_744

AGAAATCAACTTACTGGAAGTGTACCAAGTCTTGAGAACCTGAATGAGCTTCAACAGTTAACAATTCCCG  
GGAATTATCTTGGAACCTGGAGAATCAGATGATTTAAGTTTCATCGCCTCT

>PGSC0003DMG400011509-(rev)LRR-RLKs\_806

AATTCCCGGGAATTATCTTGGAACCTGGAGAATCAGATGATTTAAGTTTCATCGCCTCTCTGACTAACGCA  
TCTCGTTTCAGAATTTTGGAGATTCAGTTCAATAGTTTTGGAGGGGTTCT

>PGSC0003DMG400011509-(rev)LRR-RLKs\_868

CTAACGCATCTCGTTTCAGAATTTTGGAGATTCAGTTCAATAGTTTTGGAGGGGTTCTGCCTGCATCCTTC  
AGAAATCTTCAACTGAGCTTCAAGTTGTGCAGTTGTCATACAACAGAA

>PGSC0003DMG400011509-(rev)LRR-RLKs\_992

TGGTAACATACCGTCTGAGATTGGAAAGTTCGTCAACGTGGAAGAATTTCAAGGTGAGGGAAAACCTACT  
TACTGGTACTATTCCAATTAATTTGGTAAAGTTAAGAAAACCTGCAGATTTT

>PGSC0003DMG400011513-(rev)LRR-RLPs\_0

ATAAATAGCAAAACAAACACAAAATGAAAAGATAACTCCTCTTTCTTTCCAATAAGATTAGAACCTTAAA  
CTTCTCCGATGGCCAGCGACGACTCTCATCTGCAAAACGACGTCGTTTCT

>PGSC0003DMG400011513-(rev)LRR-RLPs\_1488

GTCTGAAGCTTGTTTCATTGACACTTAGGACATTGAAGTTGTTGGATTGCTACAAAGTTGGTGATGACTCC  
ATCTTATCCTTGCCAACTACTGCAAAAATCTTGAGACACTTGTTATTGG

>PGSC0003DMG400011513-(rev)LRR-RLPs\_1550

ATGACTCCATCTTATCCTTGCCAACTACTGCAAAAATCTTGAGACACTTGTTATTGGTGGTTGCCGTAAC  
ATATCAGATGAGCCTATGAAGTCACTGGCAGCTTCTTGTAAGTAATAGTC

>PGSC0003DMG400011513-(rev)LRR-RLPs\_2108

TTGCCTAAGACCTAAAATATGACTTTGGAAGCTCCTGATGTCAGTCCCTTGTTCCCATTAATTTGCCTTTT

GTAAAGCATCAAGTGTTTTGTTGTAGATTATTTCCCTGCTTTTCAGTTT

>PGSC0003DMG400011513-(rev)LRR-RLPs\_2170

TTGCCTTTTGTTAAGCATCAAGTGTTTTGTTGTAGATTATTTCCCTGCTTTTCAGTTTTTTTTTCCCCTGCTT

TTCAGTTATTTGATATCAAACCTCTGTATATCATCCTTGTAACACTAC

>PGSC0003DMG400011513-(rev)LRR-RLPs\_372

GATTCTGATCTTTCAGTTATTGCTACTGCTTTCTCTTGCTTACGGATTCTCAATCTTCAGAACTGTAAAGGT

TCGTTTTTGTATTTTTAAAAGTTTTATAGTTTGAAAGTTGTTGAATT

>PGSC0003DMG400011513-(rev)LRR-RLPs\_434

CTGTAAAGGTTTCGTTTTGTATTTTTAAAAGTTTTATAGTTTGAAAGTTGTTGAATTTGAATGTTTCATTG

CTGAAGTGAACCTGAGCTACTGCAGGAGAGGCCAAATGCACCAGTGAGT

>PGSC0003DMG400011513-(rev)LRR-RLPs\_496

TGTTTCATTGCTGAAGTGAACCTGAGCTACTGCAGGAGAGGCCAAATGCACCAGTGAGTAGTAGTATGTG

TAGTGATATTTACATTTAGTACTGATTTAAAATATTGAATTTGTCTTTGT

>PGSC0003DMG400011513-(rev)LRR-RLPs\_558

GTATGTGTAGTGATATTTACATTTAGTACTGATTTAAAATATTGAATTTGTCTTTGTGTGGGGTGGTGG

AGCAGGGATTTCACTTAAAGGGTTTGAAATACATAAAACATAATTTAAC

>PGSC0003DMG400011513-(rev)LRR-RLPs\_62

ACCTTAAACTTCTCCGATGGCCAGCGACTCTCATCTGCAAAACGACGTCGTTTCTGTCCACTGTATAA

ACGACAGTCTCGGCGACGACGAGCTTCGGGCCGACTGTGCGAGGCTCGG

>PGSC0003DMG400011513-(rev)LRR-RLPs\_744

TAGGTGTATTGTTCCCAACTTGGACATCAAGGAAATTTGAGGTTTGACTAAAATCTATTGTTTGAAATG

TTAAAGGTTTTGACCCGATATGGCGAAGACTGGCTCTTCCTCTTTTCTAT

>PGSC0003DMG400011580LRR-RLKs\_488

TTAGGGTAGTAGGTGGCAATGCGTTGTCTTGTGTCCGTTTCATATTAGTAGTCATACTATTGCTCATTCTG

TTACTATCTATTTGATTCCTTATACCTCGATTGTGTACTGTTTTGTTGT

>PGSC0003DMG400011580LRR-RLKs\_549

GCTCATTCTGTTACTATCTATTTGATTCCTTATACCTCGATTGTGTACTGTTTTGTTGTAGTTTTGTTCTGC

TATTCTCTATTGTTTTGCTATTATCTGTTGATTCTTGTACTTCCATT

>PGSC0003DMG400011611-(rev)LRR-RLPs\_1116



TGCAATTTGATGAAATTGGAAGTGGTGTATTTGGGGAGAAACAACCTTTAGGGGAGAAATTCCGCAATGT  
CTAGTTAATATCAGTGGACTCGAGGTATTGAAAATAGAAGATAATAATCTC

>PGSC0003DMG400011611-(rev)LRR-RLPs\_124

TCCAGAACATTTACATCTATGACAACCTTTTAAATGGTTCATTCTGCCTCATTGAGCAATTTGACCAAC  
TTGTCTATTTTGTCTCTTTATCAGAATAATCTTTCTGGCTCGATTCTTA

>PGSC0003DMG400011611-(rev)LRR-RLPs\_186

TTGACCAACTTGTCTATTTTGTCTCTTTATCAGAATAATCTTTCTGGCTCGATTCTACAGAAATAGGTTAT  
TTAAGGTTTCTTACTTCTCTAGATTTGGGTACTAATTCTCTTAATGGT

>PGSC0003DMG400011611-(rev)LRR-RLPs\_1922

TAAGGTGCTAAATTTGTCTCATAACAGATTGCAAGGTAATATACCATCATCACTTGAAAGTTTATATTTAG  
TCGAATCATTGGATCTTTCATTCAACCAGCTTTCAGGAGAGATAACCACA

>PGSC0003DMG400011611-(rev)LRR-RLPs\_2170

GAGGGTCCAGTTTCAAAGGTTGTGGAAGTAATTGGATACCAGAGACAAATAATAGAGATTATGAG  
CCAGATGATGAAGAAAGCAATTCTGAATTTCTAAATGATTTTTGGAAAGCTG

>PGSC0003DMG400011611-(rev)LRR-RLPs\_310

TTCCTACTTCATTGGGAAATTTGACCAACTTATCTAGTTTGTTTCTTAATGGGAATCACCTTTCTGGCTTTA  
TTCCCGCTTTATTGGGAAATTTGACCAGCCTTTCTATTCTGTATCTTC

>PGSC0003DMG400011611-(rev)LRR-RLPs\_496

TTTTGGCTAAGAATTCTCTAAGTAGTGCTATTCCTGCCTCATTGGGAAATTTGACTAGCTTATCTGGTTTG  
TATCTTAATGAGAATCACCTTATTGGCTCTATCCCCCTTCATTGGGAA

>PGSC0003DMG400011611-(rev)LRR-RLPs\_558

TCTGGTTTGTATCTTAATGAGAATCACCTTATTGGCTCTATCCCCCTTCATTGGGAAATTTGACCAGTCT  
GTCTATTCTTTATCTTAATCAGAATAACCTTTCTGGATCCATTCTGAA

>PGSC0003DMG400011611-(rev)LRR-RLPs\_62

TGACTTGACACCAATCAGATTTTCAGGCACAATCCCATCACAAATCGGCTCACTATCCAAGCTCCAGAAC  
ATTTACATCTATGACAACCTTTTAAATGGTTCATTCTGCCTCATTGAG

>PGSC0003DMG400011611-(rev)LRR-RLPs\_930

CTTTATGCTAACAACCTTTCTGGTTTCGATTCCAAGTGAGTTGGGGAATATAGGAAGACTAGTTACTATGT  
ATTTAAATATTAATCAACTCATTGGTTCAATTCCGGATTCTTTGGCAAC

>PGSC0003DMG400011611-(rev)LRR-RLPs\_992

TACTATGTATTTAAATATTAATCAACTCATTGGTTCAATTCCGGATTCTTTGGCAACTTGAGAACTTGC  
AATGGATGTATCTCCACAACAACAATCTCACTGAGAAAATTCCTTCATC

>PGSC0003DMG400011708-(rev)LRR-RLPs\_0

GTGTTACATATGATTTTGTCTTTAAGTCAGTAAAGTTGGTTCTTTGTATATGTGGTTGGGAAAAATTTATG  
TAGGAGATATTTATCTCAAGTTCACATTTCTATTTTTTTTTGCGGGGCCA

>PGSC0003DMG400011708-(rev)LRR-RLPs\_1054

GGTTATTCAAGTTATGTTAATCTGTTTCTGTTTCAAGTTGACAGAAGTTATCTACACAGCCATGCACTCAT  
TAGCAGGCTCTTCAAAAATGTCAATGGGTATGTGTTGGATCTTCAAAAG

>PGSC0003DMG400011708-(rev)LRR-RLPs\_1178

GCATTTTTAAGGAACTAACACAGATGCAACATCATTATATAGAAGAGTCCGAGCAACATAGCTCATTAGT  
ACAGCAAAAAGCAAAAAGCAGTAAGCATATTGAGTTTGGTTCATGATTGA

>PGSC0003DMG400011708-(rev)LRR-RLPs\_1240

TCATTAGTACAGCAAAAAGCAAAAAGCAGTAAGCATATTGAGTTTGGTTCATGATTGAAATCACTTGATT  
CAATTGTTTCATCATTACTCTCCATTTATCGTAATCACTCGTAATTGATGA

>PGSC0003DMG400011708-(rev)LRR-RLPs\_1302

ACTTGATTCAATTGTTTCATCATTACTCTCCATTTATCGTAATCACTCGTAATTGATGAATCACACTTAAAC  
GTATGATGATGCTTCACCTACATAAGGTAGAAAACTAAAAATGTCTA

>PGSC0003DMG400011708-(rev)LRR-RLPs\_1364

CACTTAAACGTATGATGATGCTTCACCTACATAAGGTAGAAAACTAAAAATGTCTACTACTTTGGTTA  
TTTTCCATCTCTTCATGTTTGAAGTGTATCATATTTGTCCTTTTCCCCTT

>PGSC0003DMG400011708-(rev)LRR-RLPs\_1426

TTTGGTTATTTCCATCTCTTCATGTTTGAAGTGTATCATATTTGTCCTTTTCCCCTTGTAGTCTTTGTGGAA  
ATTGGTTTAAAGACTTTGGTGGAAATATTGATAAAAGTTTCCCTCGTT

>PGSC0003DMG400011708-(rev)LRR-RLPs\_1488

TCTTTGTGGAAATTGGTTTAAAGACTTTGGTGGAAATATTGATAAAAGTTTCCCTCGTTACCTTAATGTAAA  
AAGTCTTATGGAAAATTATAGAATGTACCTAACAAGTTTGAAAACAGCA

>PGSC0003DMG400011708-(rev)LRR-RLPs\_1550

TAATGTA AAAAGTCTTATGGAAAATTATAGAATGTACCTAACAAGTTTGAAAACAGCACAAGAGACAAC

TACTTGGAATTTCTCTTAAAATTTCTCAACAGGTGGAATGATCTTCACCA

>PGSC0003DMG400011708-(rev)LRR-RLPs\_1612

AGACAACACTTGGAAATTTCTCTTAAAATTTCTCAACAGGTGGAATGATCTTCACCAAGTTATTCAAAC

ATATTTGAGATAATTAATAAATTATTTGAGATAAAGGAATTGAAATAGG

>PGSC0003DMG400011708-(rev)LRR-RLPs\_1674

ATTCAAAACATATTTGAGATAATTAATAAATTATTTGAGATAAAGGAATTGAAATAGGTAGTTGAGTCAA

TAATAAGTTGCTTAATATTTAAAATAAGTAGAGTGTCAAATGGGGC

>PGSC0003DMG400011708-(rev)LRR-RLPs\_1736

TGAGTCAATAATAAGTTGCTTAATATTTAAAATAAGTAGAGTGTCAAATGGGGCTACACGTGCAA

TGCGCGTGCTTCGAGACTTTCCAAGTTGTGAATTTTGTGATCTTTCTTGTA

>PGSC0003DMG400011708-(rev)LRR-RLPs\_1798

CGTGCAATGCGCGTGCTTCGAGACTTTCCAAGTTGTGAATTTTGTGATCTTTCTTGTAATGAATTCAGTGG

ATCACTTCCTGGAAAAGTTTTGGAACTTCAAGGCAATGATCAAATTA

>PGSC0003DMG400011708-(rev)LRR-RLPs\_1860

ATTCAGTGGATCACTTCCTGGAAAAGTTTTGGAACTTCAAGGCAATGATCAAATTAGATGGTGAAGA

CACAAGAGAGATCAAGTACATGAAACCATCTGAGAAGTCATTTTACATAAT

>PGSC0003DMG400011708-(rev)LRR-RLPs\_1922

GTGAAGACACAAGAGAGATCAAGTACATGAAACCATCTGAGAAGTCATTTTACATAATGTATGAGGACT

CGGTGAGATTGGTGATCAAAGGCCAGGAAATCGAGCTAGAAAGAATCAACA

>PGSC0003DMG400011708-(rev)LRR-RLPs\_1984

GAGGACTCGGTGAGATTGGTGATCAAAGGCCAGGAAATCGAGCTAGAAAGAATCAACACAATTATGAC

AGCCATAGATATCTCAAGCAACCATTTTGAAGGTGTCATTCCGAAAACACTA

>PGSC0003DMG400011708-(rev)LRR-RLPs\_2046

TATGACAGCCATAGATATCTCAAGCAACCATTTTGAAGGTGTCATTCCGAAAACACTAAAGAATCTCAAC

GCTCTTTGGCTACTCAATTTATCCCGTAACAATCTCAAAGGTGATATTCC

>PGSC0003DMG400011708-(rev)LRR-RLPs\_2108

ATCTCAACGCTCTTTGGCTACTCAATTTATCCCGTAACAATCTCAAAGGTGATATTCCAATGGAATTAGGG

CAATTGAATACGCTTGAAGCTTTAGAACTCTTTGGAATTGGCTCACTG

>PGSC0003DMG400011708-(rev)LRR-RLPs\_2170

GAATTAGGGCAATTGAATACGCTTGAAGCTTTAGAACTCTCTTGGAAATTGGCTCACTGGAAAGATTCCAC  
AGGAATTGACAAGAATGAACCTTCTGGCATTCTTAAACCTCTCTCAAAT

>PGSC0003DMG400011708-(rev)LRR-RLPs\_2294

TTATTGGACCAATTCCTCACGGTCAACAATTCAACACATTTGGAAATGACTCGTATGGTGGCAACCTTGA  
TTTATGTGGTCTCCCTTTATCGAAGAAATGTGGAACAAGTGATTCATCGC

>PGSC0003DMG400011708-(rev)LRR-RLPs\_2480

GGAATCCGTAGTCATAGGCTACAGTTTTGGACTAGTTGTTGGAACTGTCATGTGGAGTCTCATGTTTAA  
ATATCGTAAACCAAATGGTTTGTAGAATTTTTTGTGCAATCGTGCCTC

>PGSC0003DMG400011708-(rev)LRR-RLPs\_2604

AAATAGAAGGCCAAAGAAGAAAGCTCAGAGACAACGGACTTAATGTTGGAATAATCTCATCAACATGC  
ATTTGATATTTTGTCTTTTACTTTGTCTGAATTTTCTCATCTGTTATTTGC

>PGSC0003DMG400011708-(rev)LRR-RLPs\_2664

CAACATGCATTTGATATTTTGTCTTTTACTTTGTCTGAATTTTCTCATCTGTTATTTGCTTCGACTACTGAA  
TTGAAGTTATAAAAGCAGTTTTCTTTGCTTGTGCAGCACTTTATTTT

>PGSC0003DMG400011708-(rev)LRR-RLPs\_372

AACAGTCTTATGGAATGCGAGTAGAGATTGCTGTACACTTTCTCTCCCTGATGTCAACATCTCATCTCCGA  
TACCTATGAATTTGTCTTCTCCTTAAGGTACGTGGATCTTGAATATAC

>PGSC0003DMG400011708-(rev)LRR-RLPs\_496

ATACAAATTAGGTATTTGAATTTACCGGCCATATTTCTTTCACAATCTCTAAATTGAAGCAGCTCACAAG  
TTTAGATCTTTCATCTAACTACTTTTTCAGGTGAAATGCTCGACGTTTTT

>PGSC0003DMG400011708-(rev)LRR-RLPs\_558

GCTCACAAGTTTAGATCTTTCATCTAACTACTTTTTCAGGTGAAATGCTCGACGTTTTCTCTAACCTCCAAG  
AGCTTACATCTTCTGACAACATGAATTATGCGGTTCTTAAACCTTTTCG

>PGSC0003DMG400011708-(rev)LRR-RLPs\_62

AAATTTATGTAGGAGATATTTATCTCAAGTTCACATTTCTATTTTTTTTTGCGGGGCCATTGAATGGTAAGT  
GTTTGGATTGGAATCTCCCTAGTTTGATTCATCTTCTCTATCATTGA

>PGSC0003DMG400011708-(rev)LRR-RLPs\_620

ACCTCCAAGAGCTTACATCTTCTGACAACATGAATTATGCGGTTCTTAAACCTTTTCGCATAATTCATTAA  
CAAGCCACCTAGCTACCACAAGTTCATTACAACAATCTAGAGTATCTTG

>PGSC0003DMG400011708-(rev)LRR-RLPs\_744

TAAATTTAACTTCTTTCAGGGTCCACTACCTTCATCCATTTGTAACATGAGCTAGCTTGAATTTCTAGATTT  
ATCACACAACAACCTTCAGTAACTCGATTACAAGTTGCTTGGGAAGTAT

>PGSC0003DMG400011708-(rev)LRR-RLPs\_806

TTCTAGATTTATCACACAACAACCTTCAGTAACTCGATTACAAGTTGCTTGGGAAGTATGGCTAGTTTAAG  
GGTGTGGACTTAAGAAGGAACAATTCAGAGGGAGTCTTCCACCATTAT

>PGSC0003DMG400011708-(rev)LRR-RLPs\_992

TAGTTGTAGTTTGTATATGTTTGATAGCTACATAATTATGTGTGTGTTATTTTAGTATCAATGGTTATTCA  
AGTTATGTTAATCTGTTTCTGTTTCAAGTTGACAGAAGTTATCTACACA

>PGSC0003DMG400011792RLKWAX-EGF\_0

CTCAAACCATGCAGCATAAGAAAATTGTTAGTATGTATTTTTCTTTTTTCATGTGTTTGCTTTTAATCTTGA  
GATCAGCCAACGCCCAAACACCAACAACAATACAGATTCTACTACAA

>PGSC0003DMG400011792RLKWAX-EGF\_1037

GAAATTTCTAGGTCATTAATAAATAAAGTTTTTTAAGGACAAGAATTCTCATGAGTCAATTCAGGTTACA  
TACCAACTCAATTTTTAATGGATTGAAATGAGTTGAAGTAATGAATGAGC

>PGSC0003DMG400011792RLKWAX-EGF\_1159

ATCGATGACCCGCCAAACCTAAATGGATTGGACGAGTTGAATTACGACAATAGGGTTTTCCCTATTTCT  
TACTCCACCATCACTACTCACTAGAAATAAAAAAGTAGTACCTTATCTGC

>PGSC0003DMG400011792RLKWAX-EGF\_122

ACAAAACCAGGATGTCCACAAAAGTGTGGAAACCTAACAGTTCCATATCCATTTGGAATTGGGTCAGGT  
TGTGCGTTAGACCCCGTATTTGAGATCGAATGCAACGTCACAACACCCTTC

>PGSC0003DMG400011792RLKWAX-EGF\_1220

CCTATTTCTTACTCCACCATCACTACTCACTAGAAATAAAAAAGTAGTACCTTATCTGCCTGATTGAGGTG  
TGGACCTACCACATTGGACGTGAATTTACTCAATGGACAAGTCGAGTC

>PGSC0003DMG400011792RLKWAX-EGF\_1281

GATTGAGGTGTGGACCTACCACATTGGACGTGAATTTACTCAATGGACAAGTCGAGTCAGATACGAGC  
TGATGTAAAATGAATTAGATGAGAATGAATAGTATATTTGACTCAATCAGT

>PGSC0003DMG400011792RLKWAX-EGF\_1342

ATACGAGCTGATGTAAAATGAATTAGATGAGAATGAATAGTATATTTGACTCAATCAGTAATTGATAAG

GATAAAAATGGGTAAACTCCTTACTATTTTTCCCTTTTAGGGTATGTTTGG

>PGSC0003DMG400011792RLKWAX-EGF\_183

GGTCAGGTTGTGCGTTAGACCCCGTATTTGAGATCGAATGCAACGTCACAACACCCTTCATAGGGAACG

TTCAAGTGACGACATCTCCGACTCAGAAATGCGCATATCTAACTCTGTAG

>PGSC0003DMG400011792RLKWAX-EGF\_2074

TTATACACTCTACTAAACGAGCAGTGCAATTTGTGGATACCCATGACTCATGAGTTATCTGTTTTCTATAT

TTTATAAGAGCTAATATACGTGTTCCATCCATATTTGACCACTTTAAATG

>PGSC0003DMG400011792RLKWAX-EGF\_2135

TTTTCTATATTTTATAAGAGCTAATATACGTGTTCCATCCATATTTGACCACTTTAAATGATTGGATAGTCAA

CCATTTAAATACATTGGGTGCGAGCGGATAACCATAAAATTTACCCAT

>PGSC0003DMG400011792RLKWAX-EGF\_2196

TGGATAGTCAACCATTTAAATACATTGGGTGCGAGCGGATAACCATAAAATTTACCCATTTTGTACCCCC

TATTCATCCATCACTAACGCATTGATCATTCACTCTCTCCAAAATTAGTA

>PGSC0003DMG400011792RLKWAX-EGF\_2257

TGTCACCCCTATTCATCCATCACTAACGCATTGATCATTCACTCTCTCCAAAATTAGTACTCCCTCCGTCTT

ATTTTAAATTTTCCCCTTTAGCTCTTTTCATGCTCATTATGAATAATA

>PGSC0003DMG400011792RLKWAX-EGF\_2318

CCCTCCGTCTTATTTTAAATTTTCCCCTTTAGCTCTTTTCATGCTCATTATGAATAATAATATATATAAGGTA

TACTTTATTAATTTATTTATTTGTTAGATATTTTTTGAAAATTGA

>PGSC0003DMG400011792RLKWAX-EGF\_2379

ATATATAAGGTATACTTTATTAATTTATTTATTTGTTAGATATTTTTTGAAAATTGAGTTTATTA AAAAG

AAAATACTTTTAAATGCAAATTAAGGGTATAGTTGGGTCTATTGTCA

>PGSC0003DMG400011792RLKWAX-EGF\_244

AGGGAACGTTCAAGTGACGACATCTCCGACTCAGAAATGCGCATATCTAACTCTGTAGTCTGGAGTTGT

TACTCATCCGATGGAACACTTTTACTCCCAAATAATCCCATATCGATGAA

>PGSC0003DMG400011792RLKWAX-EGF\_2440

TTATTA AAAAGAAAATACTTTTAAATGCAAATTAAGGGTATAGTTGGGTCTATTGTCAAGTTTAACTTG

AATTCCTAAAATGTCAATTATTTTAGATTACTCCGTCCGTCCAATAGT

>PGSC0003DMG400011792RLKWAX-EGF\_2501

TTAACCTTGAATTCCTAAAATGTCAATTATTTTTAGATTACTCCGTCCGTCCAATAGTATTCATAGTTTGA  
CCATGATCTTTAAGAAATTACTCACCTTTATAAAGTAAGAAATGTTTT

>PGSC0003DMG400011792RLKWAX-EGF\_2684

AGCTCATCGATCTAAATAAAGATAATTTTGAAAAGAAAAAAAAATAATTTTTTTAATTATTTATGGAACTA  
TTTACTTTAGATTGAATGCAAAGCTAAAAACACTATATAATTGAATGTG

>PGSC0003DMG400011792RLKWAX-EGF\_305

TGGAGTTGTTACTCATCCGATGGAACACTTTTACTCCCAAATAATCCCATATCGATGAAAATAGGACCAA  
CACACCCTTACAGTATATCAAACGTAAACAAATTCACTGTCGTTGGTTGT

>PGSC0003DMG400011792RLKWAX-EGF\_3050

AGATGAAAGTCATCTTAGATCATTTATCAAAGAGCTCTAACTTTGATTAGGCAAAGAAACAACCTTCAGT  
GAAAAACATGTTTCTCTCAGTAAGTTCACCCCAATTAGCTAACTTGTTAG

>PGSC0003DMG400011792RLKWAX-EGF\_3111

AACTTCAGTGAAAAACATGTTTCTCTCAGTAAGTTCACCCCAATTAGCTAACTTGTTAGCCATCATATTGC  
CTTCTTTAAGGCAATGTTGGAATAAATAGTTCCCATTAATAATTTAAGTG

>PGSC0003DMG400011792RLKWAX-EGF\_3172

ATCATATTGCCTTCTTTAAGGCAATGTTGGAATAAATAGTTCCCATTAATAATTTAAGTGTTATATTTGTTG  
AAGAATTTTCATGACTTTCCAGAGGGATTGAGTTCCTTGTTGATCATG

>PGSC0003DMG400011792RLKWAX-EGF\_3233

ATATTTGTTGAAGAATTTTCATGACTTTCCAGAGGGATTGAGTTCCTTGTTGATCATGTTGATGATGATT  
TGAGAATCAGATTCGATAATGACTTGATGGAAGTTATTGACGAGCACCA

>PGSC0003DMG400011792RLKWAX-EGF\_3294

GATGATGATTTGAGAATCAGATTCGATAATGACTTGATGGAAGTTATTGACGAGCACCATCACATCCGTT  
ATTGTTCTGAGATAATGATCATTAACTAGATTAGCTAGTGAACCTATGCA

>PGSC0003DMG400011792RLKWAX-EGF\_3355

ACATCCGTTATTGTTCTGAGATAATGATCATTAACTAGATTAGCTAGTGAACCTATGCAAAAATATAAGA  
TATAAAGGCAAAGCGCAAGGGATTAATGTGGTATATTTCTCTGCTTTGCA

>PGSC0003DMG400011792RLKWAX-EGF\_3416

AATATAAGATATAAAGGCAAAGCGCAAGGGATTAATGTGGTATATTTCTCTGCTTTGCATGTATCAGATA  
TTAATGAATGTGCTCATTCAAGTACCAATATGTGTGAACACGAATGCATA

>PGSC0003DMG400011792RLKWAX-EGF\_3477

TATCAGATATTAATGAATGTGCTCATTCAAGTACCAATATGTGTGAACACGAATGCATAGACAAGCCAG  
GGAGTTACACTTGTACTTGTCCAGAAGGATTCAGTGGTGATGGCAGAAAGG

>PGSC0003DMG400011792RLKWAX-EGF\_3538

CAAGCCAGGGAGTTACACTTGTACTTGTCCAGAAGGATTCAGTGGTGATGGCAGAAAGGATGATCGTG  
GTTGTATTGCACCAAACCTCGAACTATGAGTTCCCATGGATCAAGTTTTCTAT

>PGSC0003DMG400011792RLKWAX-EGF\_3599

GATCGTGGTTGTATTGCACCAAACCTCGAACTATGAGTTCCCATGGATCAAGTTTTCTATTGGTATGTTTCT  
CAAAAATTGAACTTAGCTTGTATTGAAGTGATTAAAGGAATTCATCT

>PGSC0003DMG400011792RLKWAX-EGF\_366

TAGGACCAACACACCCTTACAGTATATCAAACGTAAACAAATTCAGTGTGTTGGTTGTGATGACGGTTC  
TGACTAAATGATTTTTACTTCGCTAGTGGTTGTGGCTCTCTCTGCAGTC

>PGSC0003DMG400011792RLKWAX-EGF\_3660

GTATGTTTCTCAAAAATTGAACTTAGCTTGTATTGAAGTGATTAAAGGAATTCATCTCCTTTAAATTTT  
GTTGTTATAAATACAGGTATGGGAGTCGGCTTTATATCCCTTGTGGTTG

>PGSC0003DMG400011792RLKWAX-EGF\_427

TGACGGTTCTGTACTAAATGATTTTTACTTCGCTAGTGGTTGTGGCTCTCTCTGCAGTCATAATTCTAGTG  
ATGCTGTTAATGAAGGAACATGTAAGCAAGAAAATGGTTGTTGTCAAAT

>PGSC0003DMG400011792RLKWAX-EGF\_4636

AATTCTTGATGATAGAGTTGTAAGAGAAGGAGGTGTTGAGCAACTTCAAAGATAGCTGAGCTCATTAA  
GGGTTGCCTTCAGTTGCACGGGGAAGATAGGCCTACGATGAAGGAAGTGGC

>PGSC0003DMG400011792RLKWAX-EGF\_4758

TGGAACCTGAGAGTTTAAGAAAGTTCAGTCCCTTGGACTAATGAACACGGACATGAAGATCATAATG  
AAGTTGAATTAACGATCTGTATATAATTCCAATTGATTCTAATACAGGTA

>PGSC0003DMG400011792RLKWAX-EGF\_4819

TCATAATGAAGTTGAATTAACGATCTGTATATAATTCCAATTGATTCTAATACAGGTATCGACAACCTCT  
CTGGACAATATCCCAGTTCCTACACAAATAACAGCCTCTTCTGGGACA

>PGSC0003DMG400011792RLKWAX-EGF\_488

AATTCTAGTGATGCTGTTAATGAAGGAACATGTAAGCAAGAAAATGGTTGTTGTCAAATAGATATAACA



AAGGGGATGAAATCCTTCGGAATAACAATGACTACCGTGTATAACCCACACA

>PGSC0003DMG400011792RLKWAX-EGF\_4880

GACAACTTCTCTGGACAATATCCCAGTTCCTACACAAATAACAGCCTCTTCTGGGACAATATAGTTCAG

ATAAATCTTCATTACTACTCAATACAAATATCCCGCGGTGATCCAAAATA

>PGSC0003DMG400011792RLKWAX-EGF\_4941

ATAGTTCAGATAAATCTTCATTACTACTCAATACAAATATCCCGCGGTGATCCAAAATAAATGTCAATAT

GATAATTAGTGATGATATAATTTTCTATGTTTTGTAAGTTTCTTTTCTG

>PGSC0003DMG400011792RLKWAX-EGF\_5002

ATGTCAATATGATAATTAGTGATGATATAATTTTCTATGTTTTGTAAGTTTCTTTTCTGGCTATCTTTCTTTC

ATATTGAATGTATGTTGTTATGTATTTTATTTGCTTTTGAATTTAAT

>PGSC0003DMG400011792RLKWAX-EGF\_549

ATATAACAAAGGGGATGAAATCCTTCGGAATAACAATGACTACCGTGTATAACCCACACAGGAGTTTGGT

CTTTCAATCCATGTGGCTACGCGTTCCTTGGTGAGGCCAATAGCTTTCAAT

>PGSC0003DMG400011792RLKWAX-EGF\_61

TTTAATCTTGAGATCAGCCAACGCCAAAACACCAACAACAATACAGATTCTACTACAATCACAAAACCA

GGATGTCCACAAAAGTGTGGAAACCTAACAGTTCCATATCCATTTGGAAT

>PGSC0003DMG400011792RLKWAX-EGF\_610

AGTTTGGTCTTTCAATCCATGTGGCTACGCGTTCCTTGGTGAGGCCAATAGCTTTCAATTCAGGGATTG

ACGGATCTAAATGATACGAATTTGTAGAGAGGATTAACCGTAATGTTCC

>PGSC0003DMG400011792RLKWAX-EGF\_671

CAGGGATTGACGGATCTAAATGATACGAATTTGTAGAGAGGATTAACCGTAATGTTCTGTCGTGCTA

GATTGGACCATCGGAAATCTTACTTGTGTTGAAGCAAAGAAAAGCAAAGAT

>PGSC0003DMG400011792RLKWAX-EGF\_732

TCGTGCTAGATTGGACCATCGGAAATCTTACTTGTGTTGAAGCAAAGAAAAGCAAAGATTATGCTTGTTT

GGTTAATAGCCAGTGTGTGGATTCCGACACTGACAGTATTGGTGGATATC

>PGSC0003DMG400011792RLKWAX-EGF\_793

TGCTTGTTTGGTTAATAGCCAGTGTGTGGATTCCGACACTGACAGTATTGGTGGATATCGATGCAGTTGT

AACCCGGGATATGAAGGCAATCCATACATCAATCCAGGCTGCCAAGGTAA

>PGSC0003DMG400011792RLKWAX-EGF\_854

TGCAGTTGTAACCCGGGATATGAAGGCAATCCATACATCAATCCAGGCTGCCAAGGTAATTGACTTGAT  
GTCCTAATTACTTTTATTACTAAGCTAGAAAGTGATTTTTTTTTTTTTGTTT

>PGSC0003DMG400011792RLKWAX-EGF\_915

GACTTGATGTCCTAATTACTTTTATTACTAAGCTAGAAAGTGATTTTTTTTTTTTTGTTTAAATAAAGAGAAA  
CAAAGTATAAGAAGAAGTGATTTAATAGGTTGGGTGGTAGGAGAGAAA

>PGSC0003DMG400011792RLKWAX-EGF\_976

ATAAAGAGAAACAAAGTATAAGAAGAAGTGATTTAATAGGTTGGGTGGTAGGAGAGAACTGAAATTT  
CTAGGTCATTAATAAATAAAGTTTTTAAAGGACAAGAATTCTCATGAGTCAA

>PGSC0003DMG400011793RLKWAX-EGF\_1037

TTATGCTTGTCTAGTTAATAGCCAGTGTGTGGATTCCCACACTGACATTGGTGGATATCGGTGCAGCTGT  
AACCCGGGATATGAAGGCAATCCATACATCAGTCCGGGCTGCCAAGGTAA

>PGSC0003DMG400011793RLKWAX-EGF\_1098

TGCAGCTGTAACCCGGGATATGAAGGCAATCCATACATCAGTCCGGGCTGCCAAGGTAATTAACCTCAT  
GTCCTTACTTTTACATACTTCAAAGAGAGTACAATTAGTGCATTATTCATA

>PGSC0003DMG400011793RLKWAX-EGF\_1159

AACTTCATGTCCTTACTTTTACATACTTCAAAGAGAGTACAATTAGTGCATTATTCATAATTCAAAGAGAG  
TTGATTCATATTTGACTCACTTTTTAATGATTATATAACCAACCTACTT

>PGSC0003DMG400011793RLKWAX-EGF\_122

TAGACATTATCAAAGTCTTGCCTTTAGAATGTAATCCCTCTTCTCACGTCTTCCAATTAACCTCCTTTAT  
ATGTATGAAAAAAGTTTTACTCAATTACATATCCTCCAAAATCATGC

>PGSC0003DMG400011793RLKWAX-EGF\_1220

TCAAAGAGAGTTGATTCATATTTGACTCACTTTTTAATGATTATATAACCAACCTACTTAAAATGGATTGA  
ATTGGCGGATAACCATAATTTTAAACCACTTTGCCACCCTTATTCATCA

>PGSC0003DMG400011793RLKWAX-EGF\_1281

AATGGATTGAATTGGCGGATAACCATAATTTTAAACCACTTTGCCACCCTTATTCATCACTAATACATTGA  
TTATTCGCTCTGACCAAATAAATACTCCCTCTGTCTCATTTTAAATTTT

>PGSC0003DMG400011793RLKWAX-EGF\_1342

AATACATTGATTATTCGCTCTGACCAAATAAATACTCCCTCTGTCTCATTTTAAATTTTTCTTTAGCTCAT  
TTCATGTTCAATAAGAAAAATAAATAAATAAAGGTATACTTTATTA

>PGSC0003DMG400011793RLKWAX-EGF\_1403

TCTTTAGCTCATTTTCATGTTTCATTAAGAAAAATAAATAAAATAAAAGGTATACTTTATTAATTATTTAGAT  
ATTTTTGAAAATTGAGTTTATTAATAAAAGAAAATACTTTTTAACGCTA

>PGSC0003DMG400011793RLKWAX-EGF\_1464

TTATTTAGATATTTTTGAAAATTGAGTTTATTAATAAAAGAAAATACTTTTTAACGCTAAGGGTATAGTTT  
TCAATTGTCAAGTTTAACTTTTCCCAAGATGATACTATACTCCCTCCGT

>PGSC0003DMG400011793RLKWAX-EGF\_1525

GGTATAGTTTTCAATTGTCAAGTTTAACTTTTCCCAAGATGATACTATACTCCCTCCGTCCAATAGTATTCT  
TAGTTTGAACATACTCTTTAAGAAATTACTCACCTTTATAAAGTAAGA

>PGSC0003DMG400011793RLKWAX-EGF\_1586

AATAGTATTCTTAGTTTGAACATACTCTTTAAGAAATTACTCACCTTTATAAAGTAAGAAATGTTTTCACT  
AATTAAATTACCGTTAGTTTAAATATTAGTATCAATTTAATATAGTTTTT

>PGSC0003DMG400011793RLKWAX-EGF\_1647

TGTTTTCACTAATTAATTACCGTTAGTTTAAATATTAGTATCAATTTAATATAGTTTTTTGGTTATGTAAAA  
GTTTCATTGATCTAAATAAGGATAAATTTGAAAAGAAAAAATGATATT

>PGSC0003DMG400011793RLKWAX-EGF\_1708

GTTATGTAAAAGTTCATTGATCTAAATAAGGATAAATTTGAAAAGAAAAAATGATATTTTTTCACTATTT  
ATGGAATTATTTATTTTGGATTGAATGTAAACCTAAAAACACTATATAA

>PGSC0003DMG400011793RLKWAX-EGF\_1769

TTCATATTTATGGAATTATTTATTTTGGATTGAATGTAAACCTAAAAACACTATATAATTGAATGTAAAA  
TTAAAAACACTATTTCTCTGTCCCAGTTTATATCGCTTAATCTTCTGA

>PGSC0003DMG400011793RLKWAX-EGF\_183

ACTCTCCTTTATATGTATGAAAAAGTTTTACTCAATTACATATCCTCCAAAATCATGCATCCTAAGCAAA  
TTTCTTTACTTTTTTCTTTTCAATGTGTGCGCTAATCTTGAGATTAGC

>PGSC0003DMG400011793RLKWAX-EGF\_1830

GAATGTAAAATTAATAACACTATTTCTCTGTCCCAGTTTATATCGCTTAATCTTCTGAGACACTGATCTTC  
TTGCTTTTACTACTAGCTTGAAAGTGAACCTCTCCTTTTAATACTAAA

>PGSC0003DMG400011793RLKWAX-EGF\_1891

CACTGATCTTCTTGCTTTTACTACTAGCTTGAAAGTGAACCTCTCCTTTTAATACTAAAAACAATGCTTT

AATAGGTAGGGTCACAATAATTGGTAGGAATCAAATATATAAACATC

>PGSC0003DMG400011793RLKWAX-EGF\_1952

ACAAATGCTTTAATAGGTAGGGTCACAATAATTGGTAGGAATCAAATATATAAACATCATTGGGACAC

TATCACTAGAAATTAECTAATAATGCGTAGTCCTTTATCTGCCTTATTGG

>PGSC0003DMG400011793RLKWAX-EGF\_2013

TGGGACACTATCACTAGAAATTAECTAATAATGCGTAGTCCTTTATCTGCCTTATTGGAACGTGGACCC

TAACACTTGAGGTGAAGTTTACTCATCACTAGGGGTGCTAAACAGGCGGA

>PGSC0003DMG400011793RLKWAX-EGF\_2074

CGTGGACCCTAACACTTGAGGTGAAGTTTACTCATCACTAGGGGTGCTAAACAGGCGGATCAAATTACA

TATTGGTTGATCAAAAATGGATAAATTATCTGACCCGATCTATATTTAAGG

>PGSC0003DMG400011793RLKWAX-EGF\_2135

AAATTACATATTGGTTGATCAAAAATGGATAAATTATCTGACCCGATCTATATTTAAGGCAAGTAAAAT

GGATAAACCCAAAAGATAATATAGATATTCATAAATTATCCGACCAACCC

>PGSC0003DMG400011793RLKWAX-EGF\_2562

ATTGATAGATACTCATAATTTATTCATATTTTACGTGGATAGTATGTTGATCCATATTTGACCAATTTTTAA

ATGATTAATAACCAACCCATTTAAAATGGAAGAAGAAAGCTAACGTT

>PGSC0003DMG400011793RLKWAX-EGF\_2623

CCAATTTTTAAATGATTAATAACCAACCCATTTAAAATGGAAGAAGAAAGCTAACGTTTAAAGATTATCT

ATTGGTAAAAATTGAAGGGAAAGTAAATTTTTTTTTTAAAAAAGATTATCT

>PGSC0003DMG400011793RLKWAX-EGF\_2684

AGATTATCTATTGGTAAAAATTGAAGGGAAAGTAAATTTTTTTTTTAAAAAAGATTATCTAAGTTTAAAGGC

TGACGTGATGTCTTTAACCTATCACTCATCTAAAAGAATTGAGATCATG

>PGSC0003DMG400011793RLKWAX-EGF\_2745

GTTTAAAGGCTGACGTGATGTCTTTAACCTATCACTCATCTAAAAGAATTGAGATCATGTGGCAAGCGAG

GGGTGTTTTAAATCCAGTTGGTCAAGTGAAGAAAGTTTCTAAGGCTAT

>PGSC0003DMG400011793RLKWAX-EGF\_2806

GCAAGCGAGGGGTGTTTTAAATCCAGTTGGTCAAGTGAAGAAAGTTTCTAAGGCTATCAATAGTTTA

GTGACAAAATTAATAATTCTCGCTAAGTTTGTAGGTGTTTTCAATACTTCT

>PGSC0003DMG400011793RLKWAX-EGF\_2867

ATAGTTTAGTGACAAAATTAATAATTCTCGCTAAGTTTGTAGGTGTTTTCAATACTTCTCTCTTCTTCAAAA  
GGACTTTAACTTTAGTGAAGAACATGTTTCTCCAGTGAGTTCACCCC

>PGSC0003DMG400011793RLKWAX-EGF\_2928

CTTCTTCAAAGGACTTTAACTTTAGTGAAGAACATGTTTCTCCAGTGAGTTCACCCAATTAGCTAACT  
TGTCAACCACCATATTGCCTTCTTATGGCAATGTTGGAATATATAGTT

>PGSC0003DMG400011793RLKWAX-EGF\_2989

TTAGCTAACTTGTCAACCACCATATTGCCTTCTTATGGCAATGTTGGAATATATAGTTCCCACTAGAAGT  
GAAGTTCATGTTTGTAGAAGAATTTTCATCACTTGCCAAGAGGGGCTG

>PGSC0003DMG400011793RLKWAX-EGF\_3050

CACTAGAAGTGAAGTTCATGTTTGTAGAAGAATTTTCATCACTTGCCAAGAGGGGCTGGGTTCCCTTGT  
GATCATGTGGATGATAATGCTATGATCTTCCATATTCATCTTATAAATCC

>PGSC0003DMG400011793RLKWAX-EGF\_366

AGCTGCTAACATCACAAAACCAGGATGTCCAAGAAAATGTGGAAATCTAACAGTTCATATCCATTTGGA  
ATTGGGTCAGGTTGTGCCTTAGACCCCGTGTGAGATCGAATGCAACGT

>PGSC0003DMG400011793RLKWAX-EGF\_4392

GTTTGTACTTTAAAAGATCGTTTGGTGTGATGGATAAGAAAAATAATTTCCGGGATAAATTTAAGTG  
CCCCTCAGATCTTAGCTCTATCAAATATTTATATGCCAATAAACAATAAA

>PGSC0003DMG400011793RLKWAX-EGF\_4453

TTTTAAGTGCCCTCAGATCTTAGCTCTATCAAATATTTATATGCCAATAAACAATAAACATAAATTCTACT  
ACTTTAGCCTTTTGGTAATAATGTAACTAAGATGAGTTTAAACAGAG

>PGSC0003DMG400011793RLKWAX-EGF\_4514

TAAATTCTACTACTTTAGCCTTTTGGTAATAATGTAACTAAGATGAGTTTAAACAGAGGAATATGGCTA  
GTGATGATTTATATGATCGATAGTGATTCGCAAGTCTATTAATGTAGTAG

>PGSC0003DMG400011793RLKWAX-EGF\_4575

ATATGGCTAGTGATGATTTATATGATCGATAGTGATTCGCAAGTCTATTAATGTAGTAGTTATAATGCTT  
AATTAATACTCTTTGATAGTTACCCTTAAAACTTCTGCAAATAAATAT

>PGSC0003DMG400011793RLKWAX-EGF\_4636

ATAATGCTTAATTAATACTCTTTGATAGTTACCCTTAAAACTTCTGCAAATAAATATGTTAAAAGATAA  
GATATAATTAAGGCAAAGCGGAGGGATTAATGTGGTATATTTCTCTG

>PGSC0003DMG400011793RLKWAX-EGF\_4697

TAAAAGATAAGATATAATTAAGGCAAAGCGCGAGGGATTAATGTGGTATATTTCTCTGTTTTGCATGTC  
AGATATTGATGAATGTGCTGATTCAAGTACTAATATGTGTGAACACAATT

>PGSC0003DMG400011793RLKWAX-EGF\_4758

TTGCATGTCAGATATTGATGAATGTGCTGATTCAAGTACTAATATGTGTGAACACAATTGCATAAACACT  
CCCGGAAACTTCACTTGTTCTGCTTAAAAGGCTACACTGGCGATGGCAA

>PGSC0003DMG400011793RLKWAX-EGF\_4819

ATAAACACTCCCGGAAACTTCACTTGTTCTGCTTAAAAGGCTACACTGGCGATGGCAAAAAGAATGGC  
CGTGGCTGTAATGCCCAAACCTCGAACTCTGAGTTCCCATGGATCAAGTTT

>PGSC0003DMG400011793RLKWAX-EGF\_488

CAACACCCTTCATAGGTGAGTTGCAAGTCTACGACATCTCTGACTCAGAAATGCGCATATATAATTCTGT  
AGGCCAGAGGTGTTACTCATCCGAAGGAACACTTTTACTCCTAGATGATT

>PGSC0003DMG400011793RLKWAX-EGF\_4880

AGAATGGCCGTGGCTGTAATGCCCAAACCTCGAACTCTGAGTTCCCATGGATCAAGTTTTCTATTGGTAA  
GTTTCTCAGAAATTCAACTTGTTTCTACTTGCATTTTCTTCCCAAGGCC

>PGSC0003DMG400011793RLKWAX-EGF\_549

TAATTCTGTAGGCCAGAGGTGTTACTCATCCGAAGGAACACTTTTACTCCTAGATGATTCTCCAAATTTG  
GATTTAGGAGACACATACCCTTACAGTTTCTCAGATCTTAACAAATTCAC

>PGSC0003DMG400011793RLKWAX-EGF\_5734

TCAAGTCATACACAATAACTCTTATCGGATATATAGTATGTTTAGAAGAATAGCACTCTGTGATTATTAC  
AATAAATTGACCTACCATGTGCTTCTTATTGAATTTTTTTTTTTACTTA

>PGSC0003DMG400011793RLKWAX-EGF\_5795

CGATTATTACAATAAATTGACCTACCATGTGCTTCTTATTGAATTTTTTTTTTTACTTATATCTATATGTATA  
CACAGTAGTGATAAATGAGTATATATATTTTTGTTGTTATGAACATAG

>PGSC0003DMG400011793RLKWAX-EGF\_5856

TCTATATGTATACACAGTAGTGATAAATGAGTATATATATTTTTGTTGTTATGAACATAGGTATGGGAGTT  
GGCTTTATATCCCTAGTGGTTGGGGCAATTTTGCTCTATTTCTGTATCAA

>PGSC0003DMG400011793RLKWAX-EGF\_5917

ATGGGAGTTGGCTTTATATCCCTAGTGGTTGGGGCAATTTTGCTCTATTTCTGTATCAAGAAACGAAAAC

TCATTAAGTAGGGAAAAGTTCTTCCAACAAAATGGTGGTTTACTCTTG

>PGSC0003DMG400011793RLKWAX-EGF\_5978

AACGAAAACCTCATTAAGTAGGGAAAAGTTCTTCCAACAAAATGGTGGTTTACTCTTGAAACAACAAA

TCTCCTCTATCAAGGGTGGTGTGGAAGCGACCAAATTTTTACAGTTGACG

>PGSC0003DMG400011793RLKWAX-EGF\_6039

ACAACAAATCTCCTCTATCAAGGGTGGTGTGGAAGCGACCAAATTTTTACAGTTGACGAGTTGAGGAA

GGCTACGAATAACTATGCCAGTGATAGAATTCTTGGTCATGGTGGAAATGG

>PGSC0003DMG400011793RLKWAX-EGF\_610

CCAAATTTGGATTTAGGAGACACATACCCTTACAGTTTCTCAGATCTTAACAAATTCACCATCGTTGGTTG

TGATGATTTGTCTTTTTATCTGGCTCTAACTTCGCTATTGGATGTGGC

>PGSC0003DMG400011793RLKWAX-EGF\_6100

TTGAGGAAGGCTACGAATAACTATGCCAGTGATAGAATTCTTGGTCATGGTGGAAATGGAATCGTATAC

AAAGGTATACTACCTGATAAAAGCATAGTTGCTATTAAGAAATCTAAGTAT

>PGSC0003DMG400011793RLKWAX-EGF\_6161

TCGTATACAAAGGTATACTACCTGATAAAAGCATAGTTGCTATTAAGAAATCTAAGTATGTGGATGAGA

ATCAAGTTGAACAGTTCATCAATGAGGTAGTTATTCTTACTCAAGTAAACC

>PGSC0003DMG400011793RLKWAX-EGF\_6222

GGATGAGAATCAAGTTGAACAGTTCATCAATGAGGTAGTTATTCTTACTCAAGTAAACCATAGAAACGTC

GTTAGACTCTTTGGATGTTGTTTGAAGCTGAAGTCCCTTACTGGTTTA

>PGSC0003DMG400011793RLKWAX-EGF\_6283

AGAAACGTCGTTAGACTCTTTGGATGTTGTTTGAAGCTGAAGTCCCTTACTGGTTTACGAATACGTTT

CTCATGGAACTCTTTCTGAGCATATCCACAACCAAATGGAGCGCCTTGG

>PGSC0003DMG400011793RLKWAX-EGF\_6405

ATCTTTGCAAATCGGTTGAGAATTGCTTCAGAGACTGCAAGTTCCTTACTTACCTTCATTCATCTGCAT

CCATGCCAATAATTCATAGAGATGTCAAATCTACCAATATATTATTGGA

>PGSC0003DMG400011793RLKWAX-EGF\_6466

TCATCTGCATCCATGCCAATAATTCATAGAGATGTCAAATCTACCAATATATTATTGGATGATGTTTACAC

AGCAAAGTTGCAGATTTGGAGCTTCAAGATTAGTCCCTCTTGAACAA

>PGSC0003DMG400011793RLKWAX-EGF\_6527

ATGTTTACACAGCAAAAGTTGCAGATTTGCGAGCTTCAAGATTAGTCCCTCTTGAACAAACACATGTTGC  
TACATTGGTTCAAGGAACGTTAGGGTACTTAGATCCTGAATATCTCCACA

>PGSC0003DMG400011793RLKWAX-EGF\_6588

ACATGTTGCTACATTGGTTCAAGGAACGTTAGGGTACTTAGATCCTGAATATCTCCACACAGGTCAATTG  
ACAGACAGAAGTGACGTTTATAGTTTTGGAGTAGTTCTTGCGGAACTTTT

>PGSC0003DMG400011793RLKWAX-EGF\_6649

GGTCAATTGACAGACAGAAGTGACGTTTATAGTTTTGGAGTAGTTCTTGCGGAACTTTTAAACAGGGATG  
AAACCTATTTTGAGGGGAACAAGTGACGAGGATAAATGTTTGGTGAATAT

>PGSC0003DMG400011793RLKWAX-EGF\_671

TCGTTGGTTGTGATGATTTGTCTTTTTATCTGGCTCTAACTTCGCTATTGGATGTGGCTCTTTCTGTACTG  
ATAATTCTAGTCATGCTGTTATTGAAGGAACATGTAAGGATGGAGTTG

>PGSC0003DMG400011793RLKWAX-EGF\_6710

CAGGGATGAAACCTATTTTGAGGGGAACAAGTGACGAGGATAAATGTTTGGTGAATATTTTGTAACGT  
CGATGAAAAATAATAGCTTATTTCAAATTCTTGATGATAGAGTTGTAAGAG

>PGSC0003DMG400011793RLKWAX-EGF\_6771

TGTAACGTCGATGAAAAATAATAGCTTATTTCAAATTCTTGATGATAGAGTTGTAAGAGAAGGAGGTGT  
TGAGCAACTTCAAGAGATCGGTGAGCTCATCAAGAGTTGCCTTCACTTGCA

>PGSC0003DMG400011793RLKWAX-EGF\_6832

GGAGGTGTTGAGCAACTTCAAGAGATCGGTGAGCTCATCAAGAGTTGCCTTCACTTGACGCGGGAAGA  
TAGGCCTACGATGAAGGAAGTGGCTATGGAACTTGAGAGTTTAAAGAAAGTTC

>PGSC0003DMG400011793RLKWAX-EGF\_6954

TAGCCCTTGACTAATGCACACGGACATGAAGATCAGAATGAAGTTTAAAGTTTGGATTAATCTTCATTAG  
TACCCAATACAAATATCCCGCGGTGATCCAAAATAAAATGTCAATATGAT

>PGSC0003DMG400011793RLKWAX-EGF\_7015

CTTCATTAGTACCCAATACAAATATCCCGCGGTGATCCAAAATAAAATGTCAATATGATAATTAGTGGGG  
ATATATTTTTGTGTGTTTTGTAAGTTTCATTTCTGGCCTATCTTTAATTA

>PGSC0003DMG400011793RLKWAX-EGF\_7076

TTAGTGGGGATATATTTTTGTGTGTTTTGTAAGTTTCATTTCTGGCCTATCTTTAATTAATTTTCATATTGGA  
TGTTCTTATGACTATATTTTCTTTTGAATTTAATCATCAATATAAGA



>PGSC0003DMG400011793RLKWAX-EGF\_732

TTTCTGTAAGATAATTCTAGTCATGCTGTTATTGAAGGAACATGTAAGGATGGAGTTGGTTGTTGTCAA  
TTAGAAATACGAAAGGGGATTAATATTTTCGGAACAACAATGGAATCCAG

>PGSC0003DMG400011793RLKWAX-EGF\_793

TGTTGTCAATTAGAAATACGAAAGGGGATTAATATTTTCGGAACAACAATGGAATCCAGAAATAATCAT  
ACAAGAGTTTCGTCTTTCAATCCATGTGGCTATGTGTTCCCTGGTGAGGCC

>PGSC0003DMG400011793RLKWAX-EGF\_854

ATAATCATAACAAGAGTTTCGTCTTTCAATCCATGTGGCTATGTGTTCCCTGGTGAGGCCAGTCGTTTTCAT  
TTCCGGGGATTGAAGGATCTAAATGACACGGATTTTGTAGAGAGGATTA

>PGSC0003DMG400011793RLKWAX-EGF\_915

TCGTTTTCATTTCCGGGGATTGAAGGATCTAAATGACACGGATTTTGTAGAGAGGATTAACGACAATGTC  
CCTATCGTGCTAGATTGGACCATCGGAAATCTTACTTGTGTTGAAGCAAA

>PGSC0003DMG400011793RLKWAX-EGF\_976

GACAATGTCCCTATCGTGCTAGATTGGACCATCGGAAATCTTACTTGTGTTGAAGCAAAGATTATGCTTG  
TCTAGTTAATAGCCAGTGTGTGGATTCCCACACTGACATTGGTGGATATC

>PGSC0003DMG400011833-(rev)LRR-RLKs\_0

CTCTTCTTCTTGTTCCTTACTTTTCACTACTACTACTGATGCAAGTCCCAATGGGGAAAAAACTTTT  
TCAGCCTTTGTACATCACTACTACTTTCTTGATTTTTCTATCTTTGAT

>PGSC0003DMG400011833-(rev)LRR-RLKs\_1037

GGTACTGAATTTTGCAGGGAGTTATTTCAAGTGGTCCAATTCCTTCTGAGTATGGCTCATTCAAGAATCTT  
GATTTCACTTAGCTGGAATTTCTTTGAGTGGTAAAATACCACCAGA

>PGSC0003DMG400011833-(rev)LRR-RLKs\_1098

AAGAATCTTGATTTCACTTAGCTGGAATTTCTTTGAGTGGTAAAATACCACCAGAATTAGGGATGC  
TGAAAACAGTAATTCATATGGAGATTGGTTATAATTTTTATGAAGGAACC

>PGSC0003DMG400011833-(rev)LRR-RLKs\_1159

TAGGGATGCTGAAAACAGTAATTCATATGGAGATTGGTTATAATTTTTATGAAGGAACCATACCTTGGG  
AACTTGGGAATATGAGTAAGCTTCAGTATCTTGATATTGCTAGTGCAAAT

>PGSC0003DMG400011833-(rev)LRR-RLKs\_122

TTGTTTTCCCTGTTTGTAGCTGTTGATCCTTTTACACAAGGACTCTTGAGCTTAAAACTGAAATTTCTTGATA

ATTCCAACAGTTTGAAAGATTGGATTTTGCCTTCTGGTTCAACTGATA

>PGSC0003DMG400011833-(rev)LRR-RLKs\_1220

ACCTTGGGAACTTGGGAATATGAGTAAGCTTCAGTATCTTGATATTGCTAGTGCAAATTTATCTGGTTCA

ATACCAAAGAGCTGACTAATTTGACCAATCTTGAGTCACTTTTTTTGTT

>PGSC0003DMG400011833-(rev)LRR-RLKs\_1281

TCTGGTTCAATACCAAAGAGCTGACTAATTTGACCAATCTTGAGTCACTTTTTTTGTTTAGAAATCAGCT

TAGTGGTAAATCCCATGGGAGTTTGGAAAAATCATATCTTTATCAAGT

>PGSC0003DMG400011833-(rev)LRR-RLKs\_1342

GAAATCAGCTTAGTGGTAAATCCCATGGGAGTTTGGAAAAATCATATCTTTATCAAGTTTGGATCTTTC

TGATAATTATCTTTCAGGCCCAATCCCCGAGAGTTTCTCGGAGTTGAAAA

>PGSC0003DMG400011833-(rev)LRR-RLKs\_1403

GGATCTTCTGATAATTATCTTTCAGGCCCAATCCCCGAGAGTTTCTCGGAGTTGAAAAATCTAAACTTGC

TTAGTGTTATGTACAATGACTTAAGTGGAACTGTTCTGAAGGAATTGC

>PGSC0003DMG400011833-(rev)LRR-RLKs\_1464

CTAAACTTGCTTAGTGTTATGTACAATGACTTAAGTGGAACTGTTCTGAAGGAATTGCAAAGCTTCCAC

AGCTTGATACACTTCTTTTATGGGACAATTGGTTTAAAGGTTCACTCCCA

>PGSC0003DMG400011833-(rev)LRR-RLKs\_1525

AGCTTCCACAGCTTGATACACTTCTTTTATGGGACAATTGGTTTAAAGGTTCACTCCCAAAGACTTGGG

CAAATATTCAAAGCTGAAATATGTTGATGTTTCAACAACTATTTAGTTG

>PGSC0003DMG400011833-(rev)LRR-RLKs\_1586

AGACTTGGGCAAATATTCAAAGCTGAAATATGTTGATGTTTCAACAACTATTTAGTTGGTAGCATTCCA

CCAAGTATATGTTTCAGGTGGGATGTTACAAAGGTTGATCCTTTTTTCAA

>PGSC0003DMG400011833-(rev)LRR-RLKs\_1647

AGCATTCCACCAAGTATATGTTTCAGGTGGGATGTTACAAAGGTTGATCCTTTTTTCAAATAATTTCACTGG

TGGACTCTCTCCATCACTTTCCAATTGTTCTCTCTTGTTCGGATCCGT

>PGSC0003DMG400011833-(rev)LRR-RLKs\_1708

ATTTCACTGGTGGACTCTCTCCATCACTTTCCAATTGTTCTCTCTTGTTCGGATCCGTATCGAAGACAATT

TATTCTCAGGTGATATCTCATTGAACTTTGGCAAGTTTCTGATTTGT

>PGSC0003DMG400011833-(rev)LRR-RLKs\_1769

CGAAGACAATTTATTCTCAGGTGATATCTCATTGAACTTTGGCAAGTTTCCTGATTTGTCATATGTTGATA  
TGTCTAGAAATAGGTTCACTGGAGGGATTCTACTGATATTGCCTTAGC

>PGSC0003DMG400011833-(rev)LRR-RLKs\_183

AATTCTTGATAATTCCAACAGTTTCAAAGATTGGATTTGCCTTCTGGTTCAACTGATAAAATTCATGCAT  
GTTCTTGGTCTGGTGTGAAATGCAATGAAAATTCTTCTTTGATTATTGG

>PGSC0003DMG400011833-(rev)LRR-RLKs\_1830

TATGTTGATATGTCTAGAAATAGGTTCACTGGAGGGATTCTACTGATATTGCCTTAGCTTCCAATCTTGA  
ATACTTCAATGTGTCTAATAATCCAAATCTTGGAGGCGTAATCTCGGAG

>PGSC0003DMG400011833-(rev)LRR-RLKs\_1891

CCAATCTTGAATACTTCAATGTGTCTAATAATCCAAATCTTGGAGGCGTAATCTCGGAGAAGACATTGTC  
TTTGTATGCACTACAGAATTTCTCAGCTACAAATTGTAGCATTTTCAGGAG

>PGSC0003DMG400011833-(rev)LRR-RLKs\_1952

GACATTGTCTTTGTATGCACTACAGAATTTCTCAGCTACAAATTGTAGCATTTTCAGGAGATTTTCCTCCTTT  
TGGACCTTGCAAATCCTTACTGGTTCTTGAATTGAGTACGAACAATGT

>PGSC0003DMG400011833-(rev)LRR-RLKs\_2013

TTTCCTCCTTTTGGACCTTGCAAATCCTTACTGGTTCTTGAATTGAGTACGAACAATGTTTCCGGGATTCT  
CCCTCAAAGCATAAGCAACTGCCAAAATCTTGTGAGCTTAGACTTGGCT

>PGSC0003DMG400011833-(rev)LRR-RLKs\_2074

CCGGGATTCTCCCTCAAAGCATAAGCAACTGCCAAAATCTTGTGAGCTTAGACTTGGCTAACAACAATTT  
AAGTGGTCAGATACCTGTTGGACTTGCTAGCCTTCTGATATTAGTGTTG

>PGSC0003DMG400011833-(rev)LRR-RLKs\_2135

CAACAATTTAAGTGGTCAGATACCTGTTGGACTTGCTAGCCTTCTGATATTAGTGTTGTAGACCTGTCAC  
ACAATAGTTTTAGCGGTTCTATTCCGGCCAAGTTCGGAAGTTCTTCCAG

>PGSC0003DMG400011833-(rev)LRR-RLKs\_2196

GACCTGTCACACAATAGTTTTAGCGGTTCTATTCCGGCCAAGTTCGGAAGTTCTTCCAGCTTGCAACTTCT  
TAATGTGTCATTCAACGATCTCTCAGGTTTGATTCTTTTGATAAGAGT

>PGSC0003DMG400011833-(rev)LRR-RLKs\_2257

TGCAACTTCTTAATGTGTCATTCAACGATCTCTCAGGTTTGATTCTTTTGATAAGAGTTTTAAGGTGATG  
GATAGTAGTGCCTTCTGGGGTAATCCTAAGCTTTGTGGGACACAGTTGA

>PGSC0003DMG400011833-(rev)LRR-RLKs\_2318

TAAGGTGATGGATAGTAGTGCCTTCTGGGGTAATCCTAAGCTTTGTGGGACACAGTTGAGGCCTTGTCG  
TGGACCGAATGGACTGGAGTTAGGAAGCAGAAAGACACAGAAGCTGGCATG

>PGSC0003DMG400011833-(rev)LRR-RLKs\_2379

CCTTGTCTGTGGACCGAATGGACTGGAGTTAGGAAGCAGAAAGACACAGAAGCTGGCATGGGTTCTCAT  
AACCTGTGGAATCATAGTGTGGCTATTACAGCTGCATTTTTCGGAGTATTT

>PGSC0003DMG400011833-(rev)LRR-RLKs\_244

ATTCATGCATGTTCTTGGTCTGGTGTGAAATGCAATGAAAATCTTCTTTGATTATTGGATTGGATCTTTC  
TGTGAAAATCTTGGTGGGGTTTTGTCAGAGAATCAATTTAGTGTTTTT

>PGSC0003DMG400011833-(rev)LRR-RLKs\_2440

TTCTCATAACCTGTGGAATCATAGTGTGGCTATTACAGCTGCATTTTTCGGAGTATTTACTTCAGAAGA  
AGAGGTCAAGGGCAGTGGAAAATGGTTTTCTTTTAGTGGATTTCTCGGT

>PGSC0003DMG400011833-(rev)LRR-RLKs\_2501

CTTCAGAAGAAGAGGTCAAGGGCAGTGGAAAATGGTTTTCTTTAGTGGATTTCTCGGTTTACAGCAA  
TGATGTTTTGAGGAGCTTCAATTCTATTGAAGAAGCCACAGATATGGTGCC

>PGSC0003DMG400011833-(rev)LRR-RLKs\_2562

ACAGCAAATGATGTTTTGAGGAGCTTCAATTCTATTGAAGAAGCCACAGATATGGTGCCACCCTTGGA  
GGTTCTGATTGCAAAGCTGTTCTGCCAACAGGAATTACCGTCTTGGTGAAG

>PGSC0003DMG400011833-(rev)LRR-RLKs\_2623

CCTTGGCAGGTTCTGATTGCAAAGCTGTTCTGCCAACAGGAATTACCGTCTTGGTGAAGAAGATCGAAT  
GGAGACCGGAGAGAATGAATGCTATGATGGACTTGATATCAAGAATGGGCA

>PGSC0003DMG400011833-(rev)LRR-RLKs\_2684

GATCGAATGGAGACCGGAGAGAATGAATGCTATGATGGACTTGATATCAAGAATGGGCAATGCAAGGC  
ACAAGAATATGACCAGATTGTTGGGATTTTGCTACAACAAGTGTATGGCTTA

>PGSC0003DMG400011833-(rev)LRR-RLKs\_2745

GCAAGGCACAAGAATATGACCAGATTGTTGGGATTTTGCTACAACAAGTGTATGGCTTACCTGTTGTGT  
GACTACTTGCTAATGGAAATCTGGCTGAAAGGATCAGGACGAAGAGAGAT

>PGSC0003DMG400011833-(rev)LRR-RLKs\_2806

TGTTGTGTGACTACTTGCCTAATGGAAATCTGGCTGAAAGGATCAGGACGAAGAGAGATTGGGCGACC

AAGCATAAAATCATTGTGGCAGTTGCTAAGGGGCTGTGTTACCTGCATCATG

>PGSC0003DMG400011833-(rev)LRR-RLKs\_2867

GGCGACCAAGCATAAAATCATTGTGGCAGTTGCTAAGGGGCTGTGTTACCTGCATCATGATTGCTACCC

CGCGATACCTCATGGGGATTTGAAGACAAATAACATTGTGTTTGTATGAAAA

>PGSC0003DMG400011833-(rev)LRR-RLKs\_2928

TGCTACCCCGCGATACCTCATGGGGATTTGAAGACAAATAACATTGTGTTTGTATGAAAACATGGAACCTC

ATTTGACTGAATTCGGTGTAAATTCTTGATTCAATTAATAATGGTCCG

>PGSC0003DMG400011833-(rev)LRR-RLKs\_2989

TGGAACCTCATTTGACTGAATTCGGTGTAAATTCTTGATTCAATTAATAATGGTCCGTCGGTAGCAAG

AGTTGGAAATGAAGCAGGTATGCACCTATACTTTGATGTAGTCTGCATTA

>PGSC0003DMG400011833-(rev)LRR-RLKs\_305

TGGATCTTTCTGTGAAAAATCTTGGTGGGGTTTTGTGAGAGAATCAATTTAGTGTTTTTTCAGACCTTGTT

GAGCTGAATTTGAGTCACAACCTCATTTTCTGAGAACTCCCTGTTGGGA

>PGSC0003DMG400011833-(rev)LRR-RLKs\_3050

GGTAGCAAGAGTTGGAAATGAAGCAGGTATGCACCTATACTTTGATGTAGTCTGCATTAATATTTGTAA

TTAGTTAGCAATCTTAATATAAGATTAGTTATTAGACAGAATTCGGTTGC

>PGSC0003DMG400011833-(rev)LRR-RLKs\_3111

ATTTGTTAATTAGTTAGCAATCTTAATATAAGATTAGTTATTAGACAGAATTCGGTTGCTCCAAGGAGAC

GCGACTTGACTGTTGCTCCAAGGCTCCGCTTCAATTCTAATTGAAGTGTT

>PGSC0003DMG400011833-(rev)LRR-RLKs\_3172

CAAGGAGACGCGACTTGACTGTTGCTCCAAGGCTCCGCTTCAATTCTAATTGAAGTGTTTAATGATCTTA

ATTTGAATGACATAGCGAGAATTCCTATTACTGGTTGTGAATCTTGTTT

>PGSC0003DMG400011833-(rev)LRR-RLKs\_3233

ATGATCTTAATTTGAATGACATAGCGAGAATTCCTATTACTGGTTGTGAATCTTGTTTAATTGTGTCAA

CAGGTGAAATCGAACGAGCTATACAGGAAGAACTTTACAGGGACATATA

>PGSC0003DMG400011833-(rev)LRR-RLKs\_3294

TTGTGTCAAACAGGTGAAATCGAACGAGCTATACAGGAAGAACTTTACAGGGACATATACAACCTTGGT

GAGCTCATTCTGGAAATCTTAACCAACGGGAAGCTGTCAAATGCAGCGACG

>PGSC0003DMG400011833-(rev)LRR-RLKs\_3355

ACTTTGGTGAGCTCATTCTGGAAATCTTAACCAACGGGAAGCTGTCAAATGCAGCGACGAGCATTGAGA  
ACACCTCCAAGGAGGTTCTTTTGAGAGAGGTTTTGGATGAGAATGATGTTG

>PGSC0003DMG400011833-(rev)LRR-RLKs\_3416

CATTCAGAACACCTCCAAGGAGGTTCTTTTGAGAGAGGTTTTGGATGAGAATGATGTTGCTCCATCGAG  
CTCGGTCCAAGAGGAAATAAACTGGTTCTTGAAGTTGCTTCACTTTGCAC

>PGSC0003DMG400011833-(rev)LRR-RLKs\_3477

CCATCGAGCTCGGTCCAAGAGGAAATAAACTGGTTCTTGAAGTTGCTTCACTTTGCACCAGAGTTAGAC  
CCTCAGATAGGCCATCAATGGAAGATGCACTAAAGCTTGTTACTGGTTTG

>PGSC0003DMG400011833-(rev)LRR-RLKs\_3538

GAGTTAGACCCTCAGATAGGCCATCAATGGAAGATGCACTAAAGCTTGTTACTGGTTTGAAGAAACAAA  
GCTAATGATGTTCTTGAAGTAGGATGCCAATATTTAGACATGATTAGAAAT

>PGSC0003DMG400011833-(rev)LRR-RLKs\_3599

GAAACAAAGCTAATGATGTTCTTGAAGTAGGATGCCAATATTTAGACATGATTAGAAATTTGAAGCACA  
AAATATGTTGTAAAAGTCTTTTATTTAGTTGTTTTTTGTTACTTCATCT

>PGSC0003DMG400011833-(rev)LRR-RLKs\_366

AGACCTTGTTGAGCTGAATTTGAGTCACAACCTCATTTCTGAGAACTCCCTGTTGGGATTTTCAAGTTGA  
GAAATTTGAGAAGCTTGGATATTAGCAGGAACAATTTTCTGGTCATTT

>PGSC0003DMG400011833-(rev)LRR-RLKs\_3660

TGAAGCACAAAATATGTTGTAAAAGTCTTTTATTTAGTTGTTTTTTGTTACTTCATCTGGTCAAGAAGTT  
GATGCCTTTTCTTTTGTGAGGAATAGAATGTTTTGATGTAAAGTAGAGG

>PGSC0003DMG400011833-(rev)LRR-RLKs\_3721

TCAAGAAGTTGATGCCTTTTCTTTTGTGAGGAATAGAATGTTTTGATGTAAAGTAGAGGAATGTAAGTAA  
GTTCTATCCTCAGCAATATAAGGTCTGTTATTCTATTTTTTTTTTTTTTTT

>PGSC0003DMG400011833-(rev)LRR-RLKs\_427

TTCAAGTTGAGAAATTTGAGAAGCTTGGATATTAGCAGGAACAATTTTCTGGTCATTTCCCAAGTGGGA  
TTTCAAATCTTGATTCTTGTGATTCTTGATGCTTTTGTAAACAGCTTC

>PGSC0003DMG400011833-(rev)LRR-RLKs\_488

CAAGTGGGATTTCAAATCTTGATTCTTGTGATTCTTGATGCTTTTGTAAACAGCTTCTCTGGTCCTTTGC  
CTAAAGATGCTTCAGAAATTGAGTCACTCAAGGTACTGTTAGGGTTTG

>PGSC0003DMG400011833-(rev)LRR-RLKs\_61

AAAAAACTTTTTCAGCCTTTGTACATCACTACTACTTTCTTGATTTTTCTATCTTTGATTCTTGTTTTCCCTG  
TTTTAGCTGTTGATCCTTTTACACAAGGACTCTTGAGCTTAAAAACT

>PGSC0003DMG400011833-(rev)LRR-RLKs\_610

TTGTTTTTTTTGAGAATTATGGACAACCTTTCTTCCACATCTGATCACATAACAACACACTAGCATTACAAA  
GTGTAGTCGTTAAAAGAGTCTTGTTTATAGATGGAGAGATAGTTCTCTC

>PGSC0003DMG400011833-(rev)LRR-RLKs\_671

GCATTACAAGTGTAGTCGTTAAAAGAGTCTTGTTTATAGATGGAGAGATAGTTCTCTCCATAGTTTCTA  
TACTTTCTTTTAGAGTTTTTAATGGTCAAAAACAAGTTTGAATTATGTTT

>PGSC0003DMG400011833-(rev)LRR-RLKs\_732

TAGTTTCTATACTTTCTTTTAGAGTTTTTAATGGTCAAAAACAAGTTTGAATTATGTTTTTTCACGAGTTTC  
ACACTCTAACTATCAATTTTAATACATAGATGGTAATAGTTCAGGTAA

>PGSC0003DMG400011833-(rev)LRR-RLKs\_793

TCACGAGTTTCACACTCTAACTATCAATTTTAATACATAGATGGTAATAGTTCAGGTAAAAAAAAGTGAA  
CAACTAATAGTTGGATTGTGAAATTTCCAAAAATAGATAGTTTAGCCGCA

>PGSC0003DMG400011833-(rev)LRR-RLKs\_854

AAAAGTGAACAATAATAGTTGGATTGTGAAATTTCCAAAAATAGATAGTTTAGCCGCATCTTTCTTTTAT  
ACTATTAGTTTTATGCCTGTTTTAGTATAGTTCTGTTTGTCTATTCATT

>PGSC0003DMG400011833-(rev)LRR-RLKs\_915

TTTCTTTTATACTATTAGTTTTATGCCTGTTTTAGTATAGTTCTGTTTGTCTATTCATTTATCGTCGTTCAAG  
ATTTGCTTTGTTGGATTCTGCATGACGCGTTGTTATTTTCGATCCCAA

>PGSC0003DMG400011833-(rev)LRR-RLKs\_976

TCGTCGTTCAAGATTTGCTTTGTTGGATTCTGCATGACGCGTTGTTATTTTCGATCCCAACAGGTAAGTGAAT  
TTTGCAGGGAGTTATTTAGTGGTCCAATTCCTTCTGAGTATGGCTCAT

>PGSC0003DMG400011864LRR-RLPs\_0

AAGCATTCTTCTTCTTCTTCTTCTTCTCCTCCTCACTTGGTTTATTCTCAACTAGGCCAGTGTTTTTCTGTT  
AAACGGTTCCTTCTCAATTTCCATCTTCTATATGTGATCAAATTCA

>PGSC0003DMG400011864LRR-RLPs\_1037

ATTTGAACATGTTTAGACAGTATGCTCGTCGATTGGTTGGTGTCTGTTTACTATGATTTTCAGGGTCAAA

TGATGTGTGATTTCATGTTGTGAATCAATAATCGCTAGATAACCCTGAG

>PGSC0003DMG400011864LRR-RLPs\_1098

CAGGGTCAAATGATGTGTGATTTCATGTTGTGAATCAATAATCGCTAGATAACCCTGAGGGGTAGCTCG  
GCTGGTAAAGGCTGAGGGGCAAAGCCCTTTGGTCGCCAGTTCGAGCCCCCT

>PGSC0003DMG400011864LRR-RLPs\_122

AATGGACTACAAATTACTTCTCCACCTGCAAATTTCCCTAAACAATCCCACCATTACCAAGAATAACCA  
AATCTAAGCTGCAATTTAAGCATAAAGCTACAATCTTTGTCCAAAATGA

>PGSC0003DMG400011864LRR-RLPs\_1281

TATCCACCTTGAAACAGTGGGACCCGGAGGGTACAGCTAGTCGGGGAGTGGGTTGGTAAAGGCTGAG  
GAGCATGCTCTTTGGCGCCAGCTGTAACCCCGGAAACCACGGTTAAAAAAA

>PGSC0003DMG400011864LRR-RLPs\_1342

GCTGAGGAGCATGCTCTTTGGCGCCAGCTGTAACCCCGGAAACCACGGTTAAAAAAAATAAAAAAA  
TAAAAAATAATCGCTAGATGTGTTGTGTGATTCTTTTTGAGTACTGCTAT

>PGSC0003DMG400011864LRR-RLPs\_1708

TCATTATAAATAAAATGCTAAGCCGTTTAGGAATTTCTCATTGATATCCTTAACGAAGTCTATGAGAATTG  
TGACATCCATGACGGAGGGCACACCAACAAGGGTGGGTCAAGACGAGTA

>PGSC0003DMG400011864LRR-RLPs\_1769

ATGAGAATTGTGACATCCATGACGGAGGGCACACCAACAAGGGTGGGTCAAGACGAGTAATGGCAGG  
CTTTTAGCTTGGAAGCTTCCGAAGAAGGGGTGCACATGACACCTTAAGGGAA

>PGSC0003DMG400011864LRR-RLPs\_183

AGAATAACCAAATCTAAGCTGCAATTTAAGCATAAAGCTACAATCTTTGTCCAAAATGATCCCTAAAAGT  
TCAATCTGGGAACAATGAAGAAGCAAAAGCCAATTCAGGAACCCATT

>PGSC0003DMG400011864LRR-RLPs\_2135

CACCAACGTCATAAAAAGGAAAAAGCTAGTGCTGATGTGTCGTCAAACTCAATGATGATTTTTTTTTAAA  
ATTGAACGGAAAATGACATTTACAGAACATTAATATTTAATATTATTA

>PGSC0003DMG400011864LRR-RLPs\_2257

CATTTGCTAAGATTCTTACATTGTCTTAGTTAAATTTATCCCGTGATTGTGCTTTCTCTACTTGGGAGATA  
TACAAGTTCTGAAAAATGAGTCTGCTTATGCACTTTGCACATCTCTTG

>PGSC0003DMG400011864LRR-RLPs\_2318



CTTGGGAGATATAACAAGTTCTGAAAAATGAGTCTGCTTATGCACTTTGCACATCTCTTGCACTTGGCATG  
CTTCTGACCTTGAGTTTGTGAAAAGAAAAGATATTGCAGAGTCCAGCTT

>PGSC0003DMG400011864LRR-RLPs\_244

CCTAAAAGTTCAATCTTGGGAACAATGAAGAAGCAAAGCCAATTCAGGAACCCATTTCAACCCCTTTG  
ATCTACTTTCTGAAGAAATCGTCTTTTCAGTTCTTGATTGTCTTAATGAC

>PGSC0003DMG400011864LRR-RLPs\_305

ACCCCTTTGATCTACTTTCTGAAGAAATCGTCTTTTCAGTTCTTGATTGTCTTAATGACAACCCATTGGACA  
AGAAATCATTTTCTCTTGTGTTGCAAATCTTTTTATGCTATTGAGTCTC

>PGSC0003DMG400011864LRR-RLPs\_3477

AAGGGTTGGCTCCTAATGGATTTCTCGGTCATCAAAAAGAAATTGCCCAAAAATTTGTCAAATTGTCCTA  
GCTTCAAGCACTACTTTTAGATGTACATATATATGACTTTTTTTCCCTAA

>PGSC0003DMG400011864LRR-RLPs\_366

CCCATTGGACAAGAAATCATTTTCTTGTGTTGCAAATCTTTTTATGCTATTGAGTCTCATCATAGGAAAA  
TCTTGAAACCCTTTAGGCCAGAACACTTGACAAAGGTTCTTAGCAGATA

>PGSC0003DMG400011864LRR-RLPs\_3843

AAATCCTCTACCTTTTGCCACTTGAGCTAGGCCTTGGGGGCAAGGTAACCTCGGATTTTATGCACCCAGAA  
TTCTACCTAATTGTCAGATGTCCCAAAGAAGTGGACTATTGTGCAAGTCA

>PGSC0003DMG400011864LRR-RLPs\_427

CATAGGAAAATCTTGAAACCCTTTAGGCCAGAACACTTGACAAAGGTTCTTAGCAGATACCCACAAGTTA  
CCCATCTGGATCTTTCCCTTTGTCCTAGAATTACAGACGGTTCCTAACA

>PGSC0003DMG400011864LRR-RLPs\_4453

GACTTAGGGAAGCTTGACATACTTGTGCGCAAATACTTGCGTATCAATTTCCCATATAACGAATTC  
TTGTGCCTCCCTTACTTCTCTTAGGATGGAGTCTTGTACTCTAGTCCCA

>PGSC0003DMG400011864LRR-RLPs\_4819

TTATCCACATTGGCATGTGCTGCTCAAATCTTAAGGAGCTTGACTTATATAGGTATGTATTTACAGTTCA  
TGGGATATTATTTGAGATAGTGAATACTATATATCTTGTGCAGTTTTTTT

>PGSC0003DMG400011864LRR-RLPs\_488

CACAAGTTACCCATCTGGATCTTTCCCTTTGTCCTAGAATTACAGACGGTTCCTAACAGTTATAGCTAAT  
TTCTGTAAGGAAATGTTGAGGTCAATCAATCTTTCTAGGTCTAAGTTTT

>PGSC0003DMG400011864LRR-RLPs\_4880

TCACAGTTCATGGGATATTATTTGAGATAGTGTAACTATATATCTTGTGCAGTTTTTTTTTATATTCTTTTC  
TTTTTGTGATGGATTGGCTAAACTCACTTTTTAACTATGGAGTACAAG

>PGSC0003DMG400011864LRR-RLPs\_5368

AACTGGAGCATTGACATCTAATATGAGCTGGCCATCTGTCAATTACACAGATAAATTTATCCTTCACTTCA  
GTGACGGACGTGGGGCTGTTGTCTCTTTCCAGCATCAGCGGTCTACAGA

>PGSC0003DMG400011864LRR-RLPs\_549

TATAGCTAATTTCTGTAAGGAAATGTTGAGGTCAATCAATCTTTCTAGGTCTAAGTTTTTTACCCATGTGG  
GGTTGTGCAATTTGGTGATGAATTGTGGGAATTTGGTTGAGATTGATTT

>PGSC0003DMG400011864LRR-RLPs\_5673

TCTTTCTCATATTTATCATTACCTACTTTTTCTCTGAAAATATGTGAGGTACTTCTATGGTTGTCGAAATAT  
GCCGTCGTATGAATCAATTAGAATTACATATTTTAGCTTAACATGACA

>PGSC0003DMG400011864LRR-RLPs\_5917

TGCTCTAGTCATTAATTATCTTTCTTTTATTGGTTAAACACAGGCTGAAGTAGATCCAATATACTGGAAAA  
TTCAGCTGGACAATTTAGACTGAAGATTTGAGCCATTTATGCGAGTTGT

>PGSC0003DMG400011864LRR-RLPs\_5978

TACTGGAAAATTCAGCTGGACAATTTAGACTGAAGATTTGAGCCATTTATGCGAGTTGTCCTAAGATGG  
ATAGTCGCCCCAGAACCTCCGGAGTCCTTACTTCATCTGTTAGCACTTCAT

>PGSC0003DMG400011864LRR-RLPs\_6039

TAAGATGGATAGTCGCCCCAGAACCTCCGGAGTCCTTACTTCATCTGTTAGCACTTCATCAGGCAAGGTG  
CATTGTTTCATGGCGACTGTTTTGCATGTTAAGTGTCTGCTACTTGTTTCGT

>PGSC0003DMG400011864LRR-RLPs\_61

TGTTTTTCTGTTAAACGGTTCCTTCTCAATTTCCATCTTCTATATGTGATCAAATTCACAAATGGACTACA  
AATTACTTCTCCACCTGCAAATTTCCCTAAACAATCCCACCATTAC

>PGSC0003DMG400011864LRR-RLPs\_610

ACCCATGTGGGGTTGTCGAATTTGGTGATGAATTGTGGGAATTTGGTTGAGATTGATTTGTCAAATGCT  
ACTGAGTTGAAGGATGTGGGTGCTGCTGCATTAGCTGAGGCAAAGAAGCTTG

>PGSC0003DMG400011864LRR-RLPs\_6100

GGCAAGGTGCATTGTTTCATGGCGACTGTTTTGCATGTTAAGTGTCTGCTACTTGTTTCGTCTGTATCCTCTA

AACACTCTGTAAATTTCAAAAACCGGGAAAAACTCAATGTCCATT CAGC

>PGSC0003DMG400011864LRR-RLPs\_6161

GTATCCTCTAAACTCTGTAAATTTCAAAAACCGGGAAAAACTCAATGTCCATT CAGCATTGCCCGGC

GTGAAATCAATTTTGTCAACAATGTTATGAGATGGATTAACAGATCCAA

>PGSC0003DMG400011864LRR-RLPs\_6222

TGCCCGGCGTGAAATCAATTTTGTCAACAATGTTATGAGATGGATTAACAGATCCAAATCATGTTTAT

TGTTTAGCAATCAATATCTGGGTTTGTGAATGCTTATTCCTCTTGACTAA

>PGSC0003DMG400011864LRR-RLPs\_6275

ATCCAAATCATGTTTATTGTTTAGCAATCAATATCTGGGTTTGTGAATGCTTATTCCTCTTGACTAATGTG

ATTCGCGTGAAGTTACTTCAAATTTACTCTCAATTAATAGTTATTTG

>PGSC0003DMG400011864LRR-RLPs\_671

CAAATGCTACTGAGTTGAAGGATGTGGGTGCTGCTGCATTAGCTGAGGCAAAGA ACTTGGAGAAGTTG

TGGTTGGTGAGGTGTAAGTCTTAACTGATATTGGACTTGGGTGTATTGCTG

>PGSC0003DMG400011864LRR-RLPs\_732

GAAGTTGTGGTTGGTGAGGTGTAAGTCTTAACTGATATTGGACTTGGGTGTATTGCTGTTGGCTGCAG

GAAGCTCAGATTGCTTAGCCTGAGATGGTGTTTGGGTGTTGGTGATCTTGG

>PGSC0003DMG400011864LRR-RLPs\_793

GGCTGCAGGAAGCTCAGATTGCTTAGCCTGAGATGGTGTTTGGGTGTTGGTGATCTTGGTGTGGGGTTG

ATTGCAGTCAAGTGTAAGGAGATTAGGAGTTTGGATCTTTCTTACTTGCCG

>PGSC0003DMG400011864LRR-RLPs\_976

TGTTGGTTATGTTTCTGTTTCTGTTTTTCATGGTAAGTTAGTTTGTCTAAGTAGTTCATTTGAACATG

TTTAGACAGTATGCTCGTCGATTGGTTGGTGTTCTGTTTACTATGATT

>PGSC0003DMG400011900-(rev)LRR-RLPs\_1488

AGAAGCCTTTCCACCAACTTGAGGTCTCTGATAAGGACAGATGGTGAAAAATCTATTGATATGATTCC

CTTCTGTCAGATTAGTGAATTGCGACTTCTTAAAGTCTTGGATTTGAGTT

>PGSC0003DMG400011900-(rev)LRR-RLPs\_1550

ATGATTCCCTTCTGTCAGATTAGTGAATTGCGACTTCTTAAAGTCTTGGATTTGAGTTCTTATTATGTGGA

GTTTTTGTGGTTAGCTACATTCAAACCACTTATTCATCTGAAGTACCTC

>PGSC0003DMG400011900-(rev)LRR-RLPs\_1612

TTATGTGGAGTTTTTGTGGTTAGCTACATTCAAACCACTTATTCATCTGAAGTACCTCGCAGTTCGGGCAG  
GTGATTCTATTTTGATCCAGGATCACATCTGCCCCATATAGAACTTT

>PGSC0003DMG400011900-(rev)LRR-RLPs\_1674

TTCGGGCAGGTGATTCTATTTTGATCCAGGATCACATCTGCCCCATATAGAACTTTAATTGTGAAGAA  
TTCTCCTTATGTATGGTTACCAGTGTCTTTTTTGCAAATGGAAAAATTAA

>PGSC0003DMG400011900-(rev)LRR-RLPs\_1736

GTGAAGAATTCTCCTTATGTATGGTTACCAGTGTCTTTTTTGCAAATGGAAAAATTAAGGCATGCTCATT  
TGGTTGGGCTGTTTTGATAAGCAGGGACTCTTGAAGGATCCTCTAAA

>PGSC0003DMG400011900-(rev)LRR-RLPs\_186

TTTTGCATATTTTTGCTCACTTCTACAATTTAAAAGAGATCAAGCAAATTAATGCAGAGGTGACTGAG  
ATGTGGTCAACGGACATTCTCTTAATCCTCACTACGTGGCTGCTCCAT

>PGSC0003DMG400011900-(rev)LRR-RLPs\_2418

CAGCTGTGAGAATTAAGGAAGAAATCAAAGAGATTGAAGGATGTGATCGTATACACCTCGTCAAAGAA  
CTGACAGATTGGGAGGCATATAGCAATTTGTCGCAGCTGTGCTTATACTGAA

>PGSC0003DMG400011900-(rev)LRR-RLPs\_310

ACATCTGCCAGCTCGACATAGCAATCTTGTGACTGATGAGGAGGTAGTGGGTTTTGAGAATAAAGCAGA  
AAAATAATTGCTTATCTGATTAGAGGTACAAATGAGCTAGACGTCATCCC

>PGSC0003DMG400011900-(rev)LRR-RLPs\_744

GAATAGTCGTAACAACCTCGACTTGAAGAAGTGGGTAAGCAAGTTAAGTACCATACTGATCCTTATTCTCT  
TCCATTCTCACAAACAGAAGAGAGTTGCCAATTGTTGCAGAAAAAAGTGT

>PGSC0003DMG400011900-(rev)LRR-RLPs\_930

GACTCCCCCTAGTGGTTGTCTTGGTAGCTGGAATAATCAAAAAAAGGAAAATGGAAGAATCTTGGTGGAA  
ATGAGGTGAAATATGCTTTATTTGACTATCTTGATAGTGAGTGCGAAGAAT

>PGSC0003DMG400011900-(rev)LRR-RLPs\_992

TGGTGGAAATGAGGTGAAATATGCTTTATTTGACTATCTTGATAGTGAGTGCGAAGAATATAGTCTGGCG  
ACTATGCAGTTGAGTTTTGATAACTTACCCGATTGTTAAAGCCTTGTCTT

>PGSC0003DMG400011932-(rev)LRR-RLKs\_1220

TTCTTTAACCAAATCAATTTAAGAGAAAACAATCTCCAGGGGAGAGTTCCTTCCAGTTTAGGCAAATGC  
CACAAATTTGGAAGTGTGGATCTTGGTTCAAATAACCTTAGTGGGTTTCAT

>PGSC0003DMG400011932-(rev)LRR-RLKs\_1464

GATAACAAGTTGCAGGGCCAGATTCTACCAGTATAGGTACTTGTGTGAACTTGAAGCACTAGACTTG  
AACAAACAACAACCTTTCAGGGTAGTATTCTTCAACCATGAATAGTTTGCGA

>PGSC0003DMG400011932-(rev)LRR-RLKs\_1525

TAGACTTGAACAACAACAACCTTTCAGGGTAGTATTCTTCAACCATGAATAGTTTGCGAGGCCTGGAAC  
TTAGTCCTTTTCTCACAACAATCTGTCAGGTGGAATCCCGGGATTCTG

>PGSC0003DMG400011932-(rev)LRR-RLKs\_1708

ACAGGAGGCATCTTTAGTAATGCTACTGTGGTTTCCATCATAGGAAATAGAAATCTCTGTGGGGGTGTA  
CCAGAGTTGGACCTTCCGGCTTGCAATTGTAGAGGTAAAGAAAGAAAGGAAA

>PGSC0003DMG400011932-(rev)LRR-RLKs\_183

AATCTGAGCTTTCTTTATATCCTTAAGCTCCAAAATAATAGTTTTTCAGGTGAAATCCCATCAGAGATTGG  
CTACTTACATAAGTTACACGTTTTACGCCTTGATAATAACTCATTCACT

>PGSC0003DMG400011932-(rev)LRR-RLKs\_2562

TATTGGTTATACACCTCCAGGTAATAATAAATCAAGTTTTCTGCTGGCTGTCATATGTATGTCTTTTGATA  
AGAATATCTCTAATTCTGTAGTATTTCTTGTTGACAGAATTAGGTATGG

>PGSC0003DMG400011932-(rev)LRR-RLKs\_2623

TCTTTTGATAAGAATATCTCTAATTCTGTAGTATTTCTTGTTGACAGAATTAGGTATGGGAAGCGACGCCT  
CAATCTATGGAGATGTATACAGCTTTGGCATTCTGCTCTTGGAAATGTT

>PGSC0003DMG400011932-(rev)LRR-RLKs\_2684

AGCGACGCCTCAATCTATGGAGATGTATACAGCTTTGGCATTCTGCTCTTGGAAATGTTTACCGGGAGG  
AAACCAACTGATGAAATGTTCAAAGACAATTTAAACCTTCATAACTATGCC

>PGSC0003DMG400011932-(rev)LRR-RLKs\_488

TACCTTTTCCGCAAGCAAGAATAATTTGTTAGGGAAAATACCTGATGAATTATGTCAATTGCTCAACTTA  
AAGTACTTTGTAGTGAATGAGAACAACCTTGAGTGGTACCCTGCCTCCTTG

>PGSC0003DMG400011932-(rev)LRR-RLKs\_549

CTCAACTTAAAGTACTTTGTAGTGAATGAGAACAACCTTGAGTGGTACCCTGCCTCCTTGTCTTTTCAATCT  
TTCCTCTATCGTGGCCATAGATGTTGGAACAAACCATTTAGAAGGAAAA

>PGSC0003DMG400011932-(rev)LRR-RLKs\_732

GTAACTGGAAATATTCCGGTAACATTGTCAAATGCTACGAATCTTCAGTCTCTTATTGCTAGTAGAAATG

GACTCACAGGAAAAGTACCACCCCTTGGAATTTGCTGAAAATGCGGAGA

>PGSC0003DMG400011932-(rev)LRR-RLKs\_976

TACCTGCATCTGTTAGTAATCTTTCGACTGAGATTATAGAGCTTTCGCTGTCTTATAATCAGATTTCTGGA  
GAAATCCCAAGAGGGATATCCAATCTCAAGAAGCTTCAGGCTTTCTTTG

>PGSC0003DMG400011989-(rev)LRR-RLKs\_1098

TATCTCCGTGCCAACAACTTTCTGGTTCTATTCCAAAAGAACTTGCATATTTGGATAACTTGGTTATTAT  
GCAAATGGATGAAAATCAGTTTTTCAGGCCATTTGCCTGAGCATCTTTGC

>PGSC0003DMG400011989-(rev)LRR-RLKs\_1281

AGCTTTAGCAAGTGCTCGAGTTTCAAAGAGTTTCGCTTGGATAACAACAGTTTTACTGGGAATTTATCTG  
AAGCTTTTGGCATCCATCCACACCTTTACTTCATTAATTTGAGTGAAAAT

>PGSC0003DMG400011989-(rev)LRR-RLKs\_1464

GCCAGAAATAACATTAGTGGTAGCATACCACCAGAGATTGGAAACCTCAAAGGGCTTCAAGGACTTGAT  
CTTTCATCCAATCATTTGGTTGGACAGATACCTAGGGAATTAGGAAAATTG

>PGSC0003DMG400011989-(rev)LRR-RLKs\_1525

GACTTGATCTTTCATCCAATCATTTGGTTGGACAGATACCTAGGGAATTAGGAAAATTGACCTCTCTGGT  
TAAGCTTCTGTACAAAACAACAATTTCTGGCAATATTCCTATAGAAC

>PGSC0003DMG400011989-(rev)LRR-RLKs\_1586

CTCTCTGGTTAAGCTTTCTGTACAAAACAACAATTTCTGGCAATATTCCTATAGAACTTGGGTCACTGA  
CAAAGTTAGAGTCCCTAGATCTGTCAAACAATAAATTGAATGGGTCGAT

>PGSC0003DMG400011989-(rev)LRR-RLKs\_183

TCATGGACACTAAGTAGTCCTGCTGGTACCAAGAATTCTTCCAGAATTGAAGCGACGAGTTCTGATGCAT  
GCAGGGGCTGGTATGGAGTTGTATGCGTTAATGGTCGGGTAAACAGGTTG

>PGSC0003DMG400011989-(rev)LRR-RLKs\_1830

AATCTTCTTGATGGAGAAATACCTGCTCAGTTAGCTAGTTTGCTGGACTTGGCGAACTTCAATCTTTCCCA  
CAACAGCCTTTCTGGGCGCATTCTGAAGAATTTGAAAGTTTGACCGGT

>PGSC0003DMG400011989-(rev)LRR-RLKs\_1891

ATCTTTCCACAACAGCCTTTCTGGGCGCATTCTGAAGAATTTGAAAGTTTGACCGGTTTGCAGGATGT  
TATCTTGCATACAATGAGTTGGAAGGTCCAATCCCTAATAATAAAGCTT

>PGSC0003DMG400011989-(rev)LRR-RLKs\_2013

ATGAATGCCTCATTAGAAGGTAATAAAGGTCTTTGTGGTAATGTGACTGGATTCCAACCTTGCAAAGG  
CCATCTTCTATTGTGAAGAAGCACTCAATGGCGAAGGGACTTAAACTCATC

>PGSC0003DMG400011989-(rev)LRR-RLKs\_2318

AGCCACAAAGGAGTTTGATGCAATGTTTTGCATCGGAAAAGGAGGATCTGGAAGCGTTTACAAGGTAA  
AGCTTCCAACGCTTGAGAATGTAGCTGTGAAGAGACTTCATTCTTCATTTGA

>PGSC0003DMG400011989-(rev)LRR-RLKs\_2379

AAGGTAAAGCTTCCAACGCTTGAGAATGTAGCTGTGAAGAGACTTCATTCTTCATTTGAGGTTACCCATC  
GCAAAGCTTCATGAATGAGATAAGGTCATTGACAAGGATCAAGCATCGC

>PGSC0003DMG400011989-(rev)LRR-RLKs\_2562

ATGGAGAAGGGTAGCTTGTCTAGTATTTTGAGCAGTGAAGTAGAGTCCAAGAAATTGGATTGGCTTACA  
AGGGTGAATGCCATCAAAGGTGTTGCTTATGCTTTATCTTACATGCACCAT

>PGSC0003DMG400011989-(rev)LRR-RLKs\_2623

GGCTTACAAGGGTGAATGCCATCAAAGGTGTTGCTTATGCTTTATCTTACATGCACCATGATTACTCACC  
CGCGATTGTTTCATCGAGACATATCAAGCAGTAATGTTTTGCTTGATTCCG

>PGSC0003DMG400011989-(rev)LRR-RLKs\_2806

GTA CTGCACTTGCAGGCACATATGGCTATGTAGCACCAGGTAAGATCTAACTTCTTATCCTTTTTTTAGTT  
CATGAGTTATTTCTGCACAGTCTATGTTGTTTCTATCTCATTGGA ACT

>PGSC0003DMG400011989-(rev)LRR-RLKs\_2867

TTTTTTAGTTCATGAGTTATTTCTGCACAGTCTATGTTGTTTCTATCTCATTGGA ACTTTATTGTTTCAGA  
GCTTGCCTATAACAATGAAGGTGACGGAAATGTGTGACGTCTATAGCTT

>PGSC0003DMG400011989-(rev)LRR-RLKs\_2989

GAGTATTAGCATTGGGGGTAATCAAAGGAAAGCATCTTGGGGATTATATACTGTGCTAGCAAATTCAT  
CGTCTAGAGATCATGTGCAGCTTAGCGATTTGCTAGATGAACGCCTTCCAT

>PGSC0003DMG400011989-(rev)LRR-RLKs\_3050

AAATTCATCGTCTAGAGATCATGTGCAGCTTAGCGATTTGCTAGATGAACGCCTTCCATATCCTGAAGAT  
AGCGTAAAGAGTTGGTTTTATCATCAAGCTAGCAAGCTCATGTTTGCTTG

>PGSC0003DMG400011989-(rev)LRR-RLKs\_3111

CCTGAAGATAGCGTAAAGAGTTGGTTTTATCATCAAGCTAGCAAGCTCATGTTTGCTTGAAACTCCAAAA  
TCAAGGCCAACAAATGCACTTCATCTCCAGTATGTTGTCAATGGATCCACC

>PGSC0003DMG400011989-(rev)LRR-RLKs\_3233

TTTCTCAAATAACCTCTATGAAGGCGAAAAGCGTCCCCGAGATGTAAGGTGTCTATGTATGGGGAAAAA  
AAGAAGCAAGTTTTGACACCAAGTGGTTGTGAAGTAAGAATAAGAAGCTAT

>PGSC0003DMG400011989-(rev)LRR-RLKs\_3294

GGGAAAAAAGAAGCAAGTTTTGACACCAAGTGGTTGTGAAGTAAGAATAAGAAGCTATTATTACTGG  
GACTAGTATTTGTCTATTTTATTGTTAGTTGTGCTTATCTAGTTTGTGTTT

>PGSC0003DMG400011989-(rev)LRR-RLKs\_3355

TTACTGGGACTAGTATTTGTCTATTTTATTGTTAGTTGTGCTTATCTAGTTTGTGTTTCAACCTGAAGGAT  
TCTGAGCTCTTGTACTAGAGGTAATACAATATCAAATAAAATGTAATA

>PGSC0003DMG400011989-(rev)LRR-RLKs\_3392

GTGCTTATCTAGTTTGTGTTTCAACCTGAAGGATTCTGAGCTCTTGTACTAGAGGTAATACAATATCAA  
ATAAAATGTAATATTTCAATTTTCTTGTGCCAATTAGTGCTAATAAAAAT

>PGSC0003DMG400011989-(rev)LRR-RLKs\_427

AGCTCGCTAATCTTGTCTACCTTGACTTGTCTGTCAATCATATTTCTGGGCACAATCCCACCACAAATCAGT  
TCACTAACAAAGCTTGAGACCCTCCACATCTTTGGCAACCAATTAATG

>PGSC0003DMG400011989-(rev)LRR-RLKs\_488

ACAAATCAGTTCACCTAACAAAGCTTGAGACCCTCCACATCTTTGGCAACCAATTAATGGTTCCATTCCGA  
GGGAAATAGGTGCGCCTAAGGTCTCTTACTGATCTAGCTTTGAGTTCTAA

>PGSC0003DMG400011989-(rev)LRR-RLKs\_732

GAAGCTTATATTAGTAGAAATCAATTAACAGGTCATATTCCTCCAGAAATAGGTAACCTTGATCAATGCAA  
AATTGTTCTATGCTTTCTACAATAACTTGTCTGGTCCTATTCCTGATGAA

>PGSC0003DMG400011989-(rev)LRR-RLKs\_793

TCAATGCAAATTTGTTCTATGCTTTCTACAATAACTTGTCTGGTCCTATTCCTGATGAAATAGGGAAAATG  
AAGTCACTTGAGTACTTAAGCTTCCAGACAAACAATCTCTCCGGTCCAA

>PGSC0003DMG400011989-(rev)LRR-RLKs\_854

AGGGAAAATGAAGTCACTTGAGTACTTAAGCTTCCAGACAAACAATCTCTCCGGTCCAATCCCAAAAACA  
ACAGGTGACTTAACTGAGCTCAAACCTTGCACCTTTATTCCAACGAACT

>PGSC0003DMG400011989-(rev)LRR-RLKs\_976

CTGGTCCCATTCTAGTGAGTTGGGGAAACTGAAAAAATTGAATGATCTGCAATTATCCAATAATCAACT



TACCGGTCCTATTCCTGGTTCATTTGGCAATTTGAGAACTTGCAATTC

>PGSC0003DMG400012218LRR-RLKs\_1098

CCTCTTCTGGTTTTGTCAAATTGGAATGGTTTAGATTAGATCCTTGTGGTTGGGCTGGAGTCTTTTGTC

TATGGCTCAAGATCATGTCATAAAAATGTGAGTTAATTGTCTTCAATTT

>PGSC0003DMG400012218LRR-RLKs\_1159

TCTTTTGTCTATGGCTCAAGATCATGTCATAAAAATGTGAGTTAATTGTCTTCAATTTTATGTGCTATACA

TGGATAGTTGTTTGGTTAATGATTTTTCTCAACTAAAATGCAATCTA

>PGSC0003DMG400012218LRR-RLKs\_122

ATATTTTGTCCCTTATAATTTTAAACATATAGTTTTTAAACCCAAAATTCTTCTTCTCAGCACATAAATTCT

CTGTTTCTAGACACCAAATCTCTCTTTGAACCCAAGTTTTATTTTTT

>PGSC0003DMG400012218LRR-RLKs\_1281

GAATCTTTTATGGACTCAAGTTTAGTGCAAATGAGTCTCTAATACGCATTTCCACTGGATCGTGTGACAG

AAACATTTCTGACGCTTCGTTGAAGGGATTTCTTTCACCCAACCTTGCATT

>PGSC0003DMG400012218LRR-RLKs\_1342

GTGTGACAGAAACATTTCTGACGCTTCGTTGAAGGGATTTCTTTCACCCAACCTTGCATTTACTCTCCTCTT

TGCAAGAATTGTAAGTTATTTCCGAATAGATTTATAAGAATTACGTAGT

>PGSC0003DMG400012218LRR-RLKs\_1403

CTCTCCTCTTTGCAAGAATTGTAAGTTATTTCCGAATAGATTTATAAGAATTACGTAGTTCTGGTTGTTCTT

TTATGTGGTTTTGTAAAGGTTATGCTATGCACTGGCAATATGCAGAA

>PGSC0003DMG400012218LRR-RLKs\_1464

TGGTTGTTCTTTTATGTGGTTTTGTAAAGGTTATGCTATGCACTGGCAATATGCAGAATTTTGCATGGAA

ATGTGCTGATTGGCACAATTCCTAAGGAGATTGGCCTATTGAAAAACCT

>PGSC0003DMG400012218LRR-RLKs\_1525

TTGCATGGAAATGTGCTGATTGGCACAATTCCTAAGGAGATTGGCCTATTGAAAAACCTGAAGGCGTTG

GATTTGGGTGCTAACAGCTAACAGGACCAATTCCTCCGAGCTTGGCAAT

>PGSC0003DMG400012218LRR-RLKs\_1647

GACAAACATTATGAAAATGTTAGTCTAACTTGAATTTTTAGGTTTCAAGTTGACTTGCCTTTACCTATCCTT

GTTGAAGCTCCCTTACTTTTCTAGCTTGCATGTGTCTCTGCAGAAACC

>PGSC0003DMG400012218LRR-RLKs\_1769

CAATCTAATGGATTAACAGGGAAATTGCCTGCTGAGCTTGGTAACTTGAAATACCTTGAGGAACTTCGG  
TTGGATAGGAATAAACTCCAAGGACTAGTGCCTGCTAATACTGGATCAGAT

>PGSC0003DMG400012218LRR-RLKs\_183

CACATAAATTCTCTGTTTCTAGACACCAAATCTCTCTTTGAACCCAAGTTTTATTTTTATAACTAAGTTGG  
TGACACTTAATAGTAGATTCCACTCAAAGGGGTTGTTACTGATTTAGA

>PGSC0003DMG400012218LRR-RLKs\_1891

TACATCTGGTGTACGTGGAATGTGAGTTGATTAGCTACATCTTGTACTTTATCGTTTTTCTTTTGAATTTTC  
TGGTATGTGGATAGGGATTAATCCATGATTCTCTGTTTACTTACAAGA

>PGSC0003DMG400012218LRR-RLKs\_1952

TTTGAATTTTCTGGTATGTGGATAGGGATTAATCCATGATTCTCTGTTTACTTACAAGATATTTTTGGTTG  
TCCTTAGAGCGTTTTCCGTCTTGGCCCTCTAGGATTCTGTCAGATATTT

>PGSC0003DMG400012218LRR-RLKs\_2013

TTTTTGGTTGTCCTTAGAGCGTTTTCCGTCTTGGCCCTCTAGGATTCTGTCAGATATTTGAAGGATTGAGC  
GACCAAGAATCTAATTTTCTGATCTTTATGACAGTCATTGTCGGGGAT

>PGSC0003DMG400012218LRR-RLKs\_2074

AGGATTGAGCGACCCAAGAATCTAATTTTCTGATCTTTATGACAGTCATTGTCGGGGATGATGATGACA  
GAGTTCAGAAAAGAGATGCTTATGGGATGATGTCTGTTCTTTCTGTCAGCA

>PGSC0003DMG400012218LRR-RLKs\_2196

GTTTGATATGTACTGCCTGCAGATTGACACTGATGGCTGTTTTACTTGAATCTAGTGTAGTACATTCAGT  
GTCAGCATAGAAAGTGGGGGTTAAACAGTGTTGTTTGTGGTGAATTGGG

>PGSC0003DMG400012218LRR-RLKs\_2257

ACATTCAGTGTGTCAGCATAGAAAGTGGGGGTTAAACAGTGTTGTTTGTGGTGAATTGGGGTACCCCAAT  
GGAGTGTTTTTTTTGCTATAGCCTTTAATATTTGACCAAATGAGAGCAATGT

>PGSC0003DMG400012218LRR-RLKs\_2379

CTGAGTTCAGAATGTATGTTTCAAAGTTTAAACGATGATGTTCTTGGAAATGATCTGTATTTCTATAAAG  
AAACAATGAGTAAACTGTTTGTATGTAGCCTTATGTCCATCACATGTATCT

>PGSC0003DMG400012218LRR-RLKs\_2440

TCTATAAAGAAACAATGAGTAAACTGTTTGTATGTAGCCTTATGTCCATCACATGTATCTTTATCTGACTGT  
TTTTTCTTTTCTGTTTTACCATTTTAGGTATGCCTCTGGTGCCAGCA

>PGSC0003DMG400012218LRR-RLKs\_2501

ATCTGACTGTTTTTTCCTTTCTGTTTTACCATTTTAGGTATGCCTCTGGTGCCAGCACTACTGGTTTTGT  
CGCACATCCCAGCTCAAAGTGGCTGATTTCTCATTCAACTTTCTTAT

>PGSC0003DMG400012218LRR-RLKs\_2623

GAAGCATACCAAAGTGTGGGTTACCTTCAAAGTCAGTTCTTAATTCTACGCCATAAATCTTGTTTTAT  
CTTATCTTCTCTATTCTGAATGCCTGTTAGTTTTGTTGCTGTAAATCT

>PGSC0003DMG400012218LRR-RLKs\_2684

CTTGTTTTATCTTATCTTCTCTATTCTGAATGCCTGTTAGTTTTGTTGCTGTAAATCTATATCCAAAGTAG  
CACTCTGATGCTCTACTAGTGTTGTTTCTTACCTTTTCGGTTTTCTT

>PGSC0003DMG400012218LRR-RLKs\_2745

ATCCAAAGTAGCACTCTGATGCTCTACTAGTGTTGTTTCTTACCTTTTCGGTTTCTTAATGCCTGTTATT  
TTGTGTGTCTATAGATCTAGCTTTCAAGGAAATTGCCTTCAGCACAAA

>PGSC0003DMG400012218LRR-RLKs\_2867

CCCGAAGCAACGGTCTGCTGCTTTATGTGGTAAGTAAACAATCATAGTTACAATTTTCAACACTACGCAT  
TGTTTGTGCAGCTCAGTCTAGGAGAATTGATATCTCAACCTTTTTTCTTT

>PGSC0003DMG400012218LRR-RLKs\_2928

ACTACGCATTGTTTGTGCAGCTCAGTCTAGGAGAATTGATATCTCAACCTTTTTTCTTTAATATTTGCAGT  
CAAATAGATTTATTTATTTTAGTAAGAAGTGAAGTGGTTGTTTTGACAT

>PGSC0003DMG400012218LRR-RLKs\_2989

TATTTGCAGTCAAATAGATTTATTTATTTTAGTAAGAAGTGAAGTGGTTGTTTTGACATTGCATTATAGGT  
AGCACTCCGCCTCCCACTAGCCATGCATCGACACTCAGCAATAAGCACC

>PGSC0003DMG400012218LRR-RLKs\_3172

TGGTAACAGGAGTTATGGTGGGTTCTCTTTCATTGTAGGTCTTGTGACTGGCCTTCAGAGGCTTAAGAA  
CAAATCGTCAATCATACTTTGGAAGAAATCAGGAAGTGAGAAAGATCATA

>PGSC0003DMG400012218LRR-RLKs\_3233

GCTTAAGAACAAATCGTCAATCATACTTTGGAAGAAATCAGGAAGTGAGAAAGATCATATGACAATTTA  
TGTAGGTTAGTACTATCATGCAATTGAACTTGAGCACTTAGTACTTTCAA

>PGSC0003DMG400012218LRR-RLKs\_3355

CATTGAGCCTAATCTTCGTTTCTGTTTACCGCTGATGTTTCTTTGTAGATACTGGTATGCTGAAAGATGTT

GTAATATACAGCAGACAAGAAGCTTGAGGTAGCTTGTGAAGATTTTCAGCA

>PGSC0003DMG400012218LRR-RLKs\_3416

GAAAGATGTTGTAATATACAGCAGACAAGAAGCTTGAGGTAGCTTGTGAAGATTTTCAGCAACATCATTGG  
ATCCTCACCAGATAGCATAGTTTACAAAGGAACCATGAAAGGTGGACCTGA

>PGSC0003DMG400012218LRR-RLKs\_3538

TTGCTGTAATATCCCTTTGCGTCAAAGAAGAGCACTGGACAGCCTATCTAGAAGCTTTATTTTCAGAAAGA  
GGCGAGACTCAATTCTTTTTTTCATGATCGCTATTTATCTCTTCCAAAAGT

>PGSC0003DMG400012218LRR-RLKs\_3599

TCAGAAAGAGGCGAGACTCAATTCTTTTTTTCATGATCGCTATTTATCTCTTCCAAAAGTTTGCATCTTAAG  
TTCCATGCTCTAACTTCTGTTAATTTACATTTAGGTGGCAGAATTGGCC

>PGSC0003DMG400012218LRR-RLKs\_3660

GCATCTTAAGTTCCATGCTCTAACTTCTGTTAATTTACATTTAGGTGGCAGAATTGGCCAGAATAAATCAC  
GAGAACGCTGGGAAACTTCTAGGCTATTGCAGAGAGAGTAGTCCCTTTA

>PGSC0003DMG400012218LRR-RLKs\_3782

AGGATGTTGGTGTGTTGAATATGCATCTAATGGGACATTATATGAACACCTTCATTGTGAGTAAAGTGAAA  
TAGTTTTCGCATGCACTTCATTTTATGTTTTCCAAAGCGAACTCCTAACT

>PGSC0003DMG400012218LRR-RLKs\_3843

AAAGTGAAATAGTTTTCGCATGCACTTCATTTTATGTTTTCCAAAGCGAACTCCTAACTCTTTGAATGTAT  
CATAGATGGAGAAGGATGCCAACTATCTTGGACACGCCGGATGAAAATA

>PGSC0003DMG400012218LRR-RLKs\_4026

TCAGAACTGAATTCAAATTCTGTATATCTCACCGAAGATTTTTCTCCCAAGGTAAACGAGAGACCATTATT  
TATCATTATCGTATAAAACAGTCCTAAACAACCTCATCCCATTTTTATTTC

>PGSC0003DMG400012218LRR-RLKs\_4087

GACCATTATTTATCATTATCGTATAAAACAGTCCTAAACAACCTCATCCCATTTTTATTACCTTAAGCTTGT  
GTACCCACCCCATTATGCTCTTAAGCAGTCTACAAAAGGCACTGGCAT

>PGSC0003DMG400012218LRR-RLKs\_4148

CTTAAGCTTGTGTACCCACCCCATTATGCTCTTAAGCAGTCTACAAAAGGCACTGGCATTTTATAATTGTC  
TTCTCAAAGTTTATTTTCAATTTGGTGCAGCTTGTTGATTTTGAAAGCTGG

>PGSC0003DMG400012218LRR-RLKs\_4209

TATAATTGTCTTCTCAAAGTTTATTTTCATTTGGTGCAGCTTGTTGATTTTGAAAGCTGGAAGTCGATAATT  
TCCAGATCAGAAAAGAATTCAGGTGCTATCAGTAGTGAAGGAGCAATAT

>PGSC0003DMG400012218LRR-RLKs\_4270

GTCGATAATTTCCAGATCAGAAAAGAATTCAGGTGCTATCAGTAGTGAAGGAGCAATATGTGTCCTTCC  
AAATACTCTCGAGAGCCGTCATCTCGATGTCCAGGGTAACATTTATGCATT

>PGSC0003DMG400012218LRR-RLKs\_4331

GTCCTTCCAAATACTCTCGAGAGCCGTCATCTCGATGTCCAGGGTAACATTTATGCATTTGGAGTACTTCT  
ACTGGAATAATCAGTGGGAGACCTCCATATTGCAAAGACAAAGGGTGTC

>PGSC0003DMG400012218LRR-RLKs\_4392

GAGTACTTCTACTGGAAATAATCAGTGGGAGACCTCCATATTGCAAAGACAAAGGGTGCTTAGTAGATT  
GGGTAAGCATTTCTTTTCATGTGAAATTTTTCCTACTGTAAAAAGACTTCC

>PGSC0003DMG400012218LRR-RLKs\_4453

AGTAGATTGGGTAAGCATTTCTTTTCATGTGAAATTTTTCCTACTGTAAAAAGACTTCCCTGGTAGAACCA  
GCTTCTAAACGCGTTGGCAGGACCTAAAGTCGACCTTTTATGTGCAGGC

>PGSC0003DMG400012218LRR-RLKs\_4514

GGTAGAACCCAGCTTCTAAACGCGTTGGCAGGACCTAAAGTCGACCTTTTATGTGCAGGCTAAGGAATTT  
CTTGAAGTGCCGGAGGTTTTATCCTACGTTGTGGATCCCGAGTTGAAACAT

>PGSC0003DMG400012218LRR-RLKs\_4575

AGGAATTTCTTGAAGTGCCGGAGGTTTTATCCTACGTTGTGGATCCCGAGTTGAAACATTTCAAACAGGA  
AGACCTCAAAGTGATATGTGAGGTGATCAACCTTTGCATCCACCCGACTA

>PGSC0003DMG400012218LRR-RLKs\_4636

CAAACAGGAAGACCTCAAAGTGATATGTGAGGTGATCAACCTTTGCATCCACCCGACTACGAGTAGGAG  
GACATCCATGAAGGACCTGTGTGCTATTCTGGAGAGCAACATTGACACTTC

>PGSC0003DMG400012218LRR-RLKs\_4697

AGTAGGAGGACATCCATGAAGGACCTGTGTGCTATTCTGGAGAGCAACATTGACACTTCCATCACTGCA  
GAGCTCAAGGCGTCTTCGTTGGCATGGGCCGAGCTTGCACTTTTCATCCTAA

>PGSC0003DMG400012218LRR-RLKs\_4758

TCACTGCAGAGCTCAAGGCGTCTTCGTTGGCATGGGCCGAGCTTGCACTTTTCATCCTAACTGACAGAAG  
GCTAACACAGTATATATATCTGAAATATGTAATTGTCTAGCGCTTTCTCCT

>PGSC0003DMG400012218LRR-RLKs\_4819

GACAGAAGGCTAACACAGTATATATATCTGAAATATGTAATTGTCTAGCGCTTCTCCTTTTCGTTTTTTG  
ACCTCTCGATTTTCGTTCCCAATGTGTTCTGGAGTGATGGTTGAGTTCAT

>PGSC0003DMG400012218LRR-RLKs\_488

TTTCTGGGTTTTTCTTCTTTTTGTTGATTGCTTAAGTTCTTGGAGACTGTTTCTTTAGATGGGTTCCCTCAG  
TTCTGGGGTTTTGTAGAACTTAGTGTGTTCTTGTGGTGAGGAATTAT

>PGSC0003DMG400012218LRR-RLKs\_4880

TCGTTTTTTGACCTCTCGATTTTCGTTCCCAATGTGTTCTGGAGTGATGGTTGAGTTCATGTAAATTTTGAG  
TCTGTAGGATAAAATTAGAGTTGAAGAGAAGCTACTGTTGATTCTTTGT

>PGSC0003DMG400012218LRR-RLKs\_4941

AAATTTTGAGTCTGTAGGATAAAATTAGAGTTGAAGAGAAGCTACTGTTGATTCTTTGTAAACAAAGTG  
GTTCTTGTTAAAATGAATGAGTGTTTCATAGTGAATGAGGCACCAACCATAT

>PGSC0003DMG400012218LRR-RLKs\_5002

ACAAAGTGGTCTTGTTAAAATGAATGAGTGTTTCATAGTGAATGAGGCACCAACCATATTTTTTGAGTTT  
CAAAGAACTCGCTCGAGTTCTCGAGTCGCAACTCAAATATAGGTTTTGG

>PGSC0003DMG400012218LRR-RLKs\_5045

GAGGCACCAACCATATTTTTTGAGTTTCAAAGAACTCGCTCGAGTTCTCGAGTCGCAACTCAAATATAG  
GTTTTGGACTTAACTCAACTCCAAAAGAAAAGTACAATACAGACTTTCTT

>PGSC0003DMG400012218LRR-RLKs\_549

GGTTCCTCAGTTCTGGGGTTTTGTAGAACTTAGTGTGTTCTTGTGGTGAGGAATTATTTGGGGGAAAA  
GATGAGACTTTGTGTTGTATTTCAAGTTTTAGTCACTGTTGGACTAGTTC

>PGSC0003DMG400012218LRR-RLKs\_61

AGGCCACACTTCCTTATTCCGCCGCTCCTTCTATTATCTCCTTCTCATTCTGCTTGATATTTGTTCC  
CTTATAATTTTAACATATAGTTTTTAACCCCAAATTCCTTCTTCTC

>PGSC0003DMG400012218LRR-RLKs\_610

GGGGGAAAAGATGAGACTTTGTGTTGTATTTCAAGTTTTAGTCACTGTTGGACTAGTCTTGGGATCTGT  
GATGCTTTTCCATCAAATGAAGGTGTGTATTATCAACTCAAGTTCAGATC

>PGSC0003DMG400012218LRR-RLKs\_732

GATGTAGTTACTGCTGCAAAGATTCAATTTTTGTCTTTAATTGAGCATTTAGTGTGTAATGCAGTGTTG

TTTCGGAAAGATCTTGTATTTTCTTGTTTTGAGATACTTGCTGTATTTT

>PGSC0003DMG400012218LRR-RLKs\_793

TGCAGTGTTGTTTCGGAAAGATCTTGTATTTTCTTGTTTTGAGATACTTGCTGTATTTTGTATGTCATATATT  
CTTGCTACCATGGTTCAAATTGTCTATTGGAAATAGTCTCTCTACCCT

>PGSC0003DMG400012218LRR-RLKs\_915

AAAGGTAGGGGTAAGATCTGTGTAGTGCGTACTATGTTATTTGTTGTTGTAGATAGTTGCTGTATTT  
TATGAGATTGTAATTCAAAGAGTAGGTAGTTTATTGTGAGTGAATCTGAT

>PGSC0003DMG400012307-(rev)LRR-RLKs\_0

TTTTTCCATGAACAAGAAGAACACAAGTGAAAAAATCAAGAAAATGTGAGAATTTTTCTACAAAAAAA  
TTCCCAGTGTCTTGGTTTTGGCATTCAAATGGAAAGTTAAAGCGCAAAGAA

>PGSC0003DMG400012307-(rev)LRR-RLKs\_1037

TTGTTGGATTTTGTAAATCAGTTGCCTCATTTCACCCCTTGAAGTGGGATGCAAATTCTTCAGTTTGCAA  
GAACTGGACTGGAGTGGGGTGTAATGAAGATGGTTCTAGAGTGATAGCA

>PGSC0003DMG400012307-(rev)LRR-RLKs\_122

AAAAGAAAAGCTTCTTCTACTACAGATTCTGACTAGCAGCTACTTTCATTTTAAAATTACACCCTTTTGAC  
CCTAACTCCCCTATTTCAAACCTTGAGTGACCTCCAATTTTTTTAA

>PGSC0003DMG400012307-(rev)LRR-RLKs\_1281

ATAACCTCAAAAATTTGTCTTATCTTTACCTTCATTACAACAATTTCTCAGGTCCTCTGCCTTTTGATTCTC  
TGTTTGGCAAATCTCACCAGTTTGAAGTGTCAAACAACAGATTCA

>PGSC0003DMG400012307-(rev)LRR-RLKs\_1403

GGCACCATTCTAGCTCGATATCGGGTTTAAAGTCATCTTACTGCCCTTAATCTTGCTAACAACTCACTTTCT  
GGTTCAATTCCTGATCTGCATTTGCCCAACTTGCAGCTACTGAATTTG

>PGSC0003DMG400012307-(rev)LRR-RLKs\_1464

ACTCACTTTCTGGTTCAATTCCTGATCTGCATTTGCCCAACTTGCAGCTACTGAATTTGTCAAACAATAAC  
CTTATAGGTACTGTGCCTAAATCACTTCAAAAATTCCCAAAGAATGTGT

>PGSC0003DMG400012307-(rev)LRR-RLKs\_1525

AAACAATAACCTTATAGGTACTGTGCCTAAATCACTTCAAAAATTCCCAAAGAATGTGTTTCATTGGTAAT  
AATATGTCTTACTTACTATCCTGTTTCGAATTCCTTATTGTTCCCT

>PGSC0003DMG400012307-(rev)LRR-RLKs\_1586

ATTGGTAATAATATGTCTTTACTTGACTATCCTGTTTCGAATTCTTCTATTGTTTCCCTGCCTCAGCAACCA  
AATCCAAAATTCAAGAATGATGGTAAATTGAGTGAGAGGGCTTTGCTT

>PGSC0003DMG400012307-(rev)LRR-RLKs\_1647

CTCAGCAACCAAATCCAAAATTCAAGAATGATGGTAAATTGAGTGAGAGGGCTTTGCTTGGGATTATAG  
TAGCTAGTAGTGTAATTGGGATTCTTGGATTTGGTTTCTTGATGGTTGTTT

>PGSC0003DMG400012307-(rev)LRR-RLKs\_1708

GATTATAGTAGCTAGTAGTGTAATTGGGATTCTTGGATTTGGTTTCTTGATGGTTGTTTGTGTTTAGAA  
GAAAGAAAGATGATGGTTCGTTTCCAGCAAGATGGAGAAGGGAGATAT

>PGSC0003DMG400012307-(rev)LRR-RLKs\_1769

TGTTTTAGAAGAAAGAAAGATGATGGTTCGTTTCCAGCAAGATGGAGAAGGGAGATATGTCTCCTGAT  
AAGGCGATTTCAAGGAGTCAAGATGCTAATAATAGATTGGTTTTCTTTGAG

>PGSC0003DMG400012307-(rev)LRR-RLKs\_183

CCCTTTTGACCCTAACTTCCCCTATTTCAAACCTTGTGAGTGACCTCCAATTTTTTAATCACATTTTTTCAG  
AACCCACATTGCTTTTTGCAGACACCATTCTTGGGAATTTGACTCT

>PGSC0003DMG400012307-(rev)LRR-RLKs\_1830

CTCCTGATAAGGCGATTTCAAGGAGTCAAGATGCTAATAATAGATTGGTTTTCTTTGAGGGTTGTAAC  
TGCATTTGATTTAGAAGATTTGCTTAGAGCTTCCGCGGAGGTATTGGGGA

>PGSC0003DMG400012307-(rev)LRR-RLKs\_1891

TTGTAECTATGCATTTGATTTAGAAGATTTGCTTAGAGCTTCCGCGGAGGTATTGGGGAAGGGCACGTT  
GGTATGGCGTATAAAGCAATATTAGAAGATGCTACCACAGTGGTAGTGAA

>PGSC0003DMG400012307-(rev)LRR-RLKs\_1952

GGCACGTTTGGTATGGCGTATAAAGCAATATTAGAAGATGCTACCACAGTGGTAGTGAAGAGGTTGAA  
AGATGTAGGTGCTGGGAAGAAGGAGTTTGAGCAGCAAATGGAGGTTGTGGGA

>PGSC0003DMG400012307-(rev)LRR-RLKs\_2013

GGTTGAAAGATGTAGGTGCTGGGAAGAAGGAGTTTGAGCAGCAAATGGAGGTTGTGGGAAGTATAAA  
ACATGAAAATGTAGTCGAGCTTCGAGCATATACTATTCAAAGACGAAAAGC

>PGSC0003DMG400012307-(rev)LRR-RLKs\_2074

TATAAACATGAAAATGTAGTCGAGCTTCGAGCATATACTATTCAAAGACGAAAAGCTTACTGTCTCT  
GACTATTCAGTGAGGGTAGTGTTGCTGCAATGCTCCATGGTATGATCAC



>PGSC0003DMG400012307-(rev)LRR-RLKs\_2135

ACTGTCTCTGACTATTTTCAGTGAGGGTAGTGTGCTGCAATGCTCCATGGTATGATCACTTTATGCACTCT  
CTAAATTTTATAGTTTTGAACTTTTCAACTTTGTCACATTTTGTAGCA

>PGSC0003DMG400012307-(rev)LRR-RLKs\_2196

TATGCACTCTCTAAATTTTATAGTTTTGAACTTTTCAACTTTGTCACATTTTGTAGCATATTCATACTGCTC  
CGTTATTTGCTTTGAATCAGTAGATTAGTTAGTATTTTTGAGTATGA

>PGSC0003DMG400012307-(rev)LRR-RLKs\_2257

TTCATACTGCTCCGTTATTTGCTTTGAATCAGTAGATTAGTTAGTATTTTTGAGTATGATTGTTAAAACAA  
GTTATTTGTTATCCCAAACACTATGTTGACTCTAACTAAGTTGCTACGACT

>PGSC0003DMG400012307-(rev)LRR-RLKs\_2318

GTTAAAACAAGTTATTTGTTATCCCAAACACTATGTTGACTCTAACTAAGTTGCTACGACTCTTCAAAAAATG  
CCGCGGGGTGCATGTCCGATCCTCAAATAGTGCACCTTTAGAGTATCC

>PGSC0003DMG400012307-(rev)LRR-RLKs\_244

ACATTTTTTCAGAACCCACATTGCTTTTTGCAGACACCATTCTTGGGAATTTGACTCTTTTTTCTCACACC  
TATATACATATATACACATGCATCTTCATATTGTTGTTGTCAGAGT

>PGSC0003DMG400012307-(rev)LRR-RLKs\_2440

CAAGGGTGTGACAACATTCTTGGAGAGTCCGAGTTACATAGTCCCTAAGTGAGTTCTTACAATCAGACAT  
GTTAGTTTAGTGAATTGAAAAACATAAAGCAATTA AAAACAACATAGAAT

>PGSC0003DMG400012307-(rev)LRR-RLKs\_2501

ATCAGACATGTTAGTTTAGTGAATTGAAAAACATAAAGCAATTA AAAACAACATAGAATCTTCCAAACTG  
AAGGCCAACTAATATAATTTGTTGTGTTATGGGTAGGGCCAAGATGGGAA

>PGSC0003DMG400012307-(rev)LRR-RLKs\_2562

TCCAAACTGAAGGCCAACTAATATAATTTGTTGTGTTATGGGTAGGGCCAAGATGGGAATCCACATATA  
TTATATGCTCCATATATTCTTTCCAGCTTAATAGTTAGTTGTACCCACA

>PGSC0003DMG400012307-(rev)LRR-RLKs\_2623

CACATATATTATATGCTCCATATATTCTTTCCAGCTTAATAGTTAGTTGTACCCACAGGATGATAATATA  
TATATCCGTATCAAAAAAAAAAAAAATGTGGATGATCCTAACATGTGGTT

>PGSC0003DMG400012307-(rev)LRR-RLKs\_2684

ATGATAATATATATATCCGTATCAAAAAAAAAAAAAATGTGGATGATCCTAACATGTGGTTTACGCATCTCT

GTGGGGCAGTGACTCCTTTCTGTAAACAAAATAAGCAAAATCCTATCTCT

>PGSC0003DMG400012307-(rev)LRR-RLKs\_2745

CGCATCTCTGTGGGGCAGTGACTCCTTTCTGTAAACAAAATAAGCAAAATCCTATCTCTATTTTAAAATCC  
ATACAAATCATTGTCACCTTCTCCTTTGTCAGTACTAGAGTCTTTCAGCTATT

>PGSC0003DMG400012307-(rev)LRR-RLKs\_2806

TTTAAAATCCATACAAATCATTGTCACCTTCTCCTTTGTCAGTACTAGAGTCTTTCAGCTATTACACTATTTGACT  
GAATTATTTTCATAGCATGTGGATAATCATTCTGCTTTTGTATCTGT

>PGSC0003DMG400012307-(rev)LRR-RLKs\_3477

TATGTTGTTGTGGATAATCATTCTGCTTTTTATCTACTTTCTATAGCAAGTCAAATAGTTCATGATTTTG  
TCGAGGTCCCAGCGTCCTTTTTCCCAATTCTTTGTCCACCAGGCAAAT

>PGSC0003DMG400012307-(rev)LRR-RLKs\_3538

TCATGATTTTGTGCGAGGTCCCAGCGTCCTTTTTCCCAATTCTTTGTCCACCAGGCAAATGCACATGATGTC  
AAAGTGCATGAATGGCTAAGCTTTTCTGATAATTTATTTGGAGTTGGTT

>PGSC0003DMG400012307-(rev)LRR-RLKs\_3599

ACATGATGTCAAAGTGCATGAATGGCTAAGCTTTTCTGATAATTTATTTGGAGTTGGTTGGCATCTTTCAT  
TACAATTTTCACTGGTGGGACCTGATTTAATTAAGTACTAGGAGTTTAGGTT

>PGSC0003DMG400012307-(rev)LRR-RLKs\_3660

CATCTTTCATTACAATTTTCACTGGTGGGACCTGATTTAATTAAGTACTAGGAGTTTAGGTTAAGGAATCCTAA  
GCTAATGTCAACCTTAATATGCTTAGAATCTATTGAGAACATTACAACA

>PGSC0003DMG400012307-(rev)LRR-RLKs\_3721

GGAATCCTAAGCTAATGTCAACCTTAATATGCTTAGAATCTATTGAGAACATTACAACAAAATCTTTTTG  
GTTATTTGCTTATTTACTCCCCTAATTTGCTGTTAGAGCTAGGACTTC

>PGSC0003DMG400012307-(rev)LRR-RLKs\_3782

ATTCTTTTTGGTTATTTGCTTATTTACTCCCCTAATTTGCTGTTAGAGCTAGGACTTCTGTTTGTCTTCTC  
AAACGAAATGAAGTGAATGGAACTTGTAGAAAGTGTATTTTCCTT

>PGSC0003DMG400012307-(rev)LRR-RLKs\_3843

TTTGTCTTCTCAAACGAAATGAAGTGAATGGAACTTGTAGAAAGTGTATTTCTTTTGTATCTCAGT  
TATGCTAACCTAATTTTCATCCGCCGTAACCTTTTGTGAACAAAAGGAA

>PGSC0003DMG400012307-(rev)LRR-RLKs\_3904

GTATCTCAGTTATGCTAACCTAATATTTTCATCCGCCGTAACTTTTGTGAACAAAAGGAAAAGAAAAGAAG  
ATCATTGTGTAATGAGTAGCTTCCCACTTAGATGATAAGTCCTGCAAGG

>PGSC0003DMG400012307-(rev)LRR-RLKs\_3965

GAAAAGAAGATCATTGTGTAATGAGTAGCTTCCCACTTAGATGATAAGTCCTGCAAGGGATATTCTAA  
ACTTTTAAGCACTTCGCGATTTGCTTATTCTAAGTTAAAGGATCGACCAGG

>PGSC0003DMG400012307-(rev)LRR-RLKs\_4026

TATTCTAAACTTTTAAGCACTTCGCGATTTGCTTATTCTAAGTTAAAGGATCGACCAGGAGCTACAAGGA  
TACTGATTACTCTAATATTTGGCATGTTATAGAATGATAATTTAAATATG

>PGSC0003DMG400012307-(rev)LRR-RLKs\_4087

CTACAAGGATACTGATTACTCTAATATTTGGCATGTTATAGAATGATAATTTAAATATGAACAAATGAGA  
GACAAAGGATTGAACGCGCGATCCTTTGCTTTTGTAAATTTGGGATGGT

>PGSC0003DMG400012307-(rev)LRR-RLKs\_4148

CAAATGAGAGACAAAGGATTGAACGCGCGATCCTTTGCTTTTGTAAATTTGGGATGGTTACCTGTGGT  
ATCAGAGGTCGTTTGGTAGGCAGGATAAGGTGAGATATTCTAGGATTGACT

>PGSC0003DMG400012307-(rev)LRR-RLKs\_4209

CCTGTGGTATCAGAGGTCGTTTGGTAGGCAGGATAAGGTGAGATATTCTAGGATTGACTGTGCTACCAG  
TTATTCTCCTTTTCAATTCTCTACCTTTTGTAGGCAGTTCATATCATTGT

>PGSC0003DMG400012307-(rev)LRR-RLKs\_427

CTGCTACTTCCTTTTATGAGGTTTTGAATTAAGTTGTGAGCTTTAGATTCTTGTGGGTTGAGGGTGTGT  
TGGAGAGTTTTTGAATAGTTGAAAAGTTTTGAACTTTAGAATCTTGA

>PGSC0003DMG400012307-(rev)LRR-RLKs\_4270

GCTACCAGTTATTCTCCTTTTCAATTCTCTACCTTTTGTAGGCAGTTCATATCATTGTGATCTCTGTGTTAC  
CTGTTATCAAATATTGCTTTTGTATTTCGATCGTGTTGACACCTATT

>PGSC0003DMG400012307-(rev)LRR-RLKs\_4331

TCTCTGTGTTACCTGTTATCAAATATTGCTTTTGTATTTCGATCGTGTTGACACCTATTTAAATGCAACTTA  
TAGGTAAACGGGGAGAAAACAGGATCCCTTTAGACTGGGAACTCGAC

>PGSC0003DMG400012307-(rev)LRR-RLKs\_4392

AATGCAACTTATAGGTAAACGGGGAGAAAACAGGATCCCTTTAGACTGGGAACTCGACTTCGGATAGC  
AACTGGAGCAGCGAGAGGTATTGCTAGGATACATGCTGAGAATGGTGGCAA

>PGSC0003DMG400012307-(rev)LRR-RLKs\_4453

CGGATAGCAACTGGAGCAGCGAGAGGTATTGCTAGGATACATGCTGAGAATGGTGGCAAGCTAGTCCA  
CGGAAACGTCAAATCCTCAAATATCTTTCTGAACTCTAAACAATACGGTTGT

>PGSC0003DMG400012307-(rev)LRR-RLKs\_4514

TAGTCCACGGAAACGTCAAATCCTCAAATATCTTTCTGAACTCTAAACAATACGGTTGTGTATCTGATGTT  
GGTCTGTCAACAATAATGAGTTCGTTAGCTCATCCAGTTGCACGTGCTG

>PGSC0003DMG400012307-(rev)LRR-RLKs\_4575

ATCTGATGTTGGTCTGTCAACAATAATGAGTTCGTTAGCTCATCCAGTTGCACGTGCTGCTGGTTTTTCGC  
GCTCCAGAAGTAACAGACACACGTAAAGCCACTCAACCTTCTGATGTGTA

>PGSC0003DMG400012307-(rev)LRR-RLKs\_4636

GGTTTTCGCGCTCCAGAAGTAACAGACACACGTAAAGCCACTCAACCTTCTGATGTGTACAGCTTTGGTG  
TGTTGTTATTAGAGCTCTTGACAGGCAAGTCCCCATCCATAACAACAAC

>PGSC0003DMG400012307-(rev)LRR-RLKs\_4697

GCTTTGGTGTGTTGTTATTAGAGCTCTTGACAGGCAAGTCCCCATCCATAACAACAACGGAGATGAGG  
TCATACACTTAGTCCGATGGGTTTCATTCAGTTGTCCGAGAGGAGTGGACTG

>PGSC0003DMG400012307-(rev)LRR-RLKs\_4758

AGATGAGGTCATACACTTAGTCCGATGGGTTTCATTCAGTTGTCCGAGAGGAGTGGACTGCTGAAGTATT  
CGACTTGCAACTATTGAGGTACCCGAACATAGAGGAAGAGATGGTGGAAAT

>PGSC0003DMG400012307-(rev)LRR-RLKs\_4819

GAAGTATTCGACTTGCAACTATTGAGGTACCCGAACATAGAGGAAGAGATGGTGGAAATGTTACAGAT  
AGCAATGTCTTGTGTGGTAAGGATGTCAGATCAAAGACCAAAAATGTTTGAG

>PGSC0003DMG400012307-(rev)LRR-RLKs\_488

AGGGTGTTGTTGGAGAGTTTTTGAATAGTTGAAAAAGTTTTGAACTTTAGAATCTTGATGCTTGCTTAC  
TTCATCTTATGTGACTTATAAAAGCTAAGTTCTTGAGGGGGTTTTTTGA

>PGSC0003DMG400012307-(rev)LRR-RLKs\_4880

TACAGATAGCAATGTCTTGTGTGGTAAGGATGTCAGATCAAAGACCAAAAATGTTTGAGGTTGTTAAAA  
TGATCGAGAACGTTTCGTTCCACGAGCTTAGAGAATGAGCATTTCATCTGAAG

>PGSC0003DMG400012307-(rev)LRR-RLKs\_4941

TGTTAAAATGATCGAGAACGTTTCGTTCCACGAGCTTAGAGAATGAGCATTTCATCTGAAGGAAAAGCAGA

AACTTCAACACCAAGAGCAGAAGCTACACCTGTGCCTGATACACAATCTGA

>PGSC0003DMG400012307-(rev)LRR-RLKs\_5002

AAAGCAGAACTTCAACACCAAGAGCAGAAGCTACACCTGTGCCTGATACACAATCTGATTCTCAATGA  
GTTGGCCATTTTTATCATAGTTTACCATCTTAATTCATGTTGAAAATGCTT

>PGSC0003DMG400012307-(rev)LRR-RLKs\_5063

CTCAATGAGTTGGCCATTTTTATCATAGTTTACCATCTTAATTCATGTTGAAAATGCTTACTTCACTCTCT  
CAGTGAAATATTGAATACTTTGTAACCTAATCCAATAGGCACCTTTATT

>PGSC0003DMG400012307-(rev)LRR-RLKs\_5124

CTTCACTCTCTCAGTGAAATATTGAATACTTTGTAACCTAATCCAATAGGCACCTTTATTTAAGGTATTCTT  
GAAATAGTACTTTGATTACAAATCTAAGTTCTCTTTCTCACTCTCAAA

>PGSC0003DMG400012307-(rev)LRR-RLKs\_5185

AAGGTATTCTTGAAATAGTACTTTGATTACAAATCTAAGTTCTCTTTCTCACTCTCAAAGTACCATCTCTTC  
CATGTTCTTGATGCAATGATCACAAGAACATGGTTGATGTGGGACGAA

>PGSC0003DMG400012307-(rev)LRR-RLKs\_5246

ACCATCTCTCCATGTTCTTGATGCAATGATCACAAGAACATGGTTGATGTGGGACGAATTCAAGATTTA  
GAGTCAGTAAGTTCGGAGTAGGTGTGCATTATTTGTATGCATTTGTATC

>PGSC0003DMG400012307-(rev)LRR-RLKs\_5307

CAAGATTTAGAGTCAGTAAGTTCGGAGTAGGTGTGCATTATTTGTATGCATTTGTATCTTCTTCTTTTTTT  
CGATTGTAGTAGTACTTGTTTTCTTTCCTTCAACTATTGAGTTATTTG

>PGSC0003DMG400012307-(rev)LRR-RLKs\_5359

TTGTATCTTCTTCTTTTTTTTCGATTGTAGTAGTACTTGTTTTCTTTCCTTCAACTATTGAGTTATTTGTAATG  
CTACTTGTTCTTCTTCTTAATTGTTGTAACATGGTTTTTTTTCTTCG

>PGSC0003DMG400012307-(rev)LRR-RLKs\_549

CTTGCTTACTTCATCTTATGTGACTTATAAAAGCTAAGTTCTTGAGGGGGTTTTTTGAATTAAGTTTTG  
AGCTTTAGATTTCTTTTGTGGATTGAGGGTGTGTTGTAGAATGTTTGAA

>PGSC0003DMG400012307-(rev)LRR-RLKs\_61

AAAAAAAATTCCCAGTGTCTTGTTTTGGCATTCAAATGGAAAGTTAAAGCGCAAAGAACAAAAAGAAA  
AGCTTCTTCTACTACAGATTCTGACTAGCAGCTACTTTCATTTTAAAATTA

>PGSC0003DMG400012307-(rev)LRR-RLKs\_610

TAAAGTTTTGAGCTTTAGATTTCTTTTGTGGATTGAGGGTGTTGTAGAATGTTGAAATAGTTGAAAA  
GTTTTGAACTTTAGATTCTTGATGCTCTTTTCTTTTCTTATGTGTCTAC

>PGSC0003DMG400012307-(rev)LRR-RLKs\_671

AGTTGAAAAGTTTTGAACTTTAGATTCTTGATGCTCTTTTCTTTTCTTATGTGTCTACAAAAGCTAAGTTC  
TTGAGGGTTTTTTTTTGAATTAAGTTTTGAGCTTTAGATTTCTTTT

>PGSC0003DMG400012307-(rev)LRR-RLKs\_732

AAGCTAAGTTCCTTGAGGGTTTTTTTTGAATTAAGTTTTGAGCTTTAGATTTCTTTTGTGGATTGAGGA  
TGTTTGCTGAGTTTTTGAAGTTTTGAACTTTAGATTCTTGATGCTCT

>PGSC0003DMG400012307-(rev)LRR-RLKs\_793

GGATTGAGGATGTTTGCTGAGTTTTTGAAGTTTTGAACTTTAGATTCTTGATGCTCTTTTGTCTCTCT  
ATGTGACTACAAAAGCTAAGTTTTTGAAGGGTTGGGGGCATTCAGAGT

>PGSC0003DMG400012307-(rev)LRR-RLKs\_854

TTGTTCTTCTTATGTGACTACAAAAGCTAAGTTTTTGAAGGGTTGGGGGCATTCAGAGTCTTGAAATGG  
TTAAAGTTTTGAGCTTTAGGGAGTGGTGGGGGATTGTTTCTTTGGGTTTC

>PGSC0003DMG400012307-(rev)LRR-RLKs\_915

TTGAAATGGTTAAAGTTTTGAGCTTTAGGGAGTGGTGGGGGATTGTTTCTTTGGGTTTCTTGGTGGGATT  
GTTTCTGTTGTCACAAGGCACTGTTGCTCTTCTTGAAAATGATAAGCAAG

>PGSC0003DMG400012307-(rev)LRR-RLKs\_976

GGTGGGATTGTTTCTGTTGTCACAAGGCACTGTTGCTCTTCTTGAAAATGATAAGCAAGCATTGTTGGAT  
TTTGTTAATCAGTTGCCTCATTGACCCCTTTGAACTGGGATGCAAATTC

>PGSC0003DMG400012443LRR-RLKs\_0

CTTTGTCTAATCTTAATAATAACTGTTCTTTGATTTGAAATCTCAATCTCTATCAGCTTAATTAATAACTG  
TACAATCTTTTTTTTTCTTTATTAGATTCTGTCCCTCTTTCTTGAAT

>PGSC0003DMG400012443LRR-RLKs\_3172

ACATGGAAAATGGAAGCTTGGACTATTGGCTACATGAAAGAGTTGACGGGAGCTCATTAACATGGGAC  
ATTAGGTTAAAGATTGCACAAGGAGCAGCTCACGGATTAGCATATTTGCATA

>PGSC0003DMG400012443LRR-RLKs\_61

ATTAATAACTGTACAATCTTTTTTTTTCTTTATTAGATTCTGTCCCTCTTTCTTGAATTAATAACTAAAAGAGTT  
TGCTTGAGTTGAAAGTTGGGTTCTTGCTTCTCTTACAAGTGATGGGG

>PGSC0003DMG400012514-(rev)LRR-RLKs\_0

AAGAAATTGGTAGCTTGCAAATCTGATACCTTTCTTTGAGAGACAATAAATTGCAAGGATCAATACC  
TAGCTCAATGAGCAGCGTGACATCTTTGGAATTTCTAGACCTTTCTCATA

>PGSC0003DMG400012514-(rev)LRR-RLKs\_1037

TTCCTCTACTACTCTTTTAGGTTTTGTCTTTGCTGGTTTCTTTACTCAAATTTCCCAAGTTGTTGAATTTCTT  
CATGTTTCGTTTCGTTTTGGGCTTAATAAGCAAAGGTGGCTTTTTGTT

>PGSC0003DMG400012514-(rev)LRR-RLKs\_1098

GTTGAATTTCTTTCATGTTTCGTTTCGTTTTGGGCTTAATAAGCAAAGGTGGCTTTTTGTTATTTCTGAACTTA  
AAACTTATAAATGTTAAGAATAAGCTACATTTATTTAGAGTAATGTG

>PGSC0003DMG400012514-(rev)LRR-RLKs\_1159

TTCTGAACTTAAACTTATAAATGTTAAGAATAAGCTACATTTATTTAGAGTAATGTGCCTGACAATGTT  
CGAAAATTAGGAACTTGTATTGTTTTAGCTTGAGTAGGGGGCTGCAC

>PGSC0003DMG400012514-(rev)LRR-RLKs\_122

AATGTTTCAGGATTAATCCCACGTCTTTGGAGAAGCTTCAAATCTCAAGTATTTCAATAAGTTAGTTGG  
TGAAATCCCCTCGAGCGGTCCATTCAAGAACCTCTCCGGTCAGTCTTTC

>PGSC0003DMG400012514-(rev)LRR-RLKs\_1220

TGACAATGTTTCGAAAATTAGGAACTTGTATTGTTTTAGCTTGAGTAGGGGGCTGCACACCGCGCAAG  
TACAGAGTGATAGACAAGGAGGGACTTTTTCTTTGTTGAAAGGTATTGGCC

>PGSC0003DMG400012514-(rev)LRR-RLKs\_1281

CGCGCAAGTACAGAGTGATAGACAAGGAGGGACTTTTTCTTTGTTGAAAGGTATTGGCCCAAATCTTTTA  
ATAAATCTCATATTGTTAGGATCTTGATTAGATTCAACTGATGTGTCGAA

>PGSC0003DMG400012514-(rev)LRR-RLKs\_1342

AATCTTTTAATAAATCTCATATTGTTAGGATCTTGATTAGATTCAACTGATGTGTCGAATCTCCTGAATGA  
AGGATTCAGATCTTCACCATGGATGATAGAACTCCTCCCGGAAGTGAAG

>PGSC0003DMG400012514-(rev)LRR-RLKs\_1403

TCCTGAATGAAGGATTCAGATCTTCACCATGGATGATAGAACTCCTCCCGGAAGTGAAGGCAGGAGTAA  
AGCCTATTGATTCACCAGTTTGCTAATGTACTTGGTAAAGCCTATTGATTC

>PGSC0003DMG400012514-(rev)LRR-RLKs\_1464

AGGAGTAAAGCCTATTGATTCACCAGTTTGCTAATGTACTTGGTAAAGCCTATTGATTCACCAGTTTGCT

AATGTA CTTGGTAAAGCCTATTGATTCAC CAGTTTGCTAACTTACTTGTT

>PGSC0003DMG400012514-(rev)LRR-RLKs\_1525

CAGTTTGCTAATGTA CTTGGTAAAGCCTATTGATTCAC CAGTTTGCTAACTTACTTGTTGGCTACCCGCAC  
TTTGTAACCAGAATAGGGCTCTGGGAGGGAGTTGTCAGTGTATTGGGAG

>PGSC0003DMG400012514-(rev)LRR-RLKs\_1708

TATACATTCCGTA CTTCTAACCCAACTCAAGCCGAAGAACTCATATATCTTTTGACTCTATTTATGTAGG  
CACCTGATATTTATGAGGTTTCACTCACCC CAGTTACCTATTTGAGGTC

>PGSC0003DMG400012514-(rev)LRR-RLKs\_1769

TTTATGTAGGCACCTGATATTTATGAGGTTTCACTCACCC CAGTTACCTATTTGAGGTCTAGGTCAAGATT  
TTAATAATCATGACGGTCCTTGATCCAACAGGATATTGGCTAGATGGAA

>PGSC0003DMG400012514-(rev)LRR-RLKs\_183

AGTTAGTTGGTGAAATCCCTCGAGCGGTCCATTCAAGAACCTCTCCGGTCAGTCTTTCATATCCAATGA  
AGCATTGTGTGGTTCTCCAAGATTCCTGTTCCCCCATGCCACACTAGTAC

>PGSC0003DMG400012514-(rev)LRR-RLKs\_1830

GGTCAAGATTTTAATAATCATGACGGTCCTTGATCCAACAGGATATTGGCTAGATGGAAAGCTTGGACC  
TCGAGAATCTGTGTACCGCCATTTTTCCTTGGACTGTGAAATCACGTGTTT

>PGSC0003DMG400012514-(rev)LRR-RLKs\_1891

CTTGGACCTCGAGAATCTGTGTACCGCCATTTTTCCTTGGACTGTGAAATCACGTGTTTCCACTCTTATTA  
TCCTACATGGATATATTTTGTCTTAATTATTA AAAATTTGCTCTCAATT

>PGSC0003DMG400012514-(rev)LRR-RLKs\_1952

ACTCTTATTATCCTACATGGATATATTTTGTCTTAATTATTA AAAATTTGCTCTCAATTAATTCTTCTACTC  
ACTCAATATTTAATACAAATATGCAGAAACCCCAAATAGATGAGCAA

>PGSC0003DMG400012514-(rev)LRR-RLKs\_2013

ATTCTTCTACTCACTCAATATTTAATACAAATATGCAGAAACCCCAAATAGATGAGCAAATGTGTTGTGTT  
TGAAGTACTGATAGCATATGACATACATTGGCACGCGTTGATTAAACAT

>PGSC0003DMG400012514-(rev)LRR-RLKs\_2074

GTGTTGTGTTTGAAGTACTGATAGCATATGACATACATTGGCACGCGTTGATTAAACATCACATATGCAA  
TAAAGTGAATAATATTATATATACAAGTGACAAGTGAAACTAACAGCCAC

>PGSC0003DMG400012514-(rev)LRR-RLKs\_244



ATCCAATGAAGCATTGTGTGGTTCTCCAAGATTCCTGTTCCCCCATGCCACACTAGTACTTCAAAGTATCT  
ATCCAAGATGAAAAAACTACTTGCTCTAATTCTACCAGCTGGAGTTGCA

>PGSC0003DMG400012514-(rev)LRR-RLKs\_2623

AAGGTTGATACGGTATTTACTAAAGTGAATAATATTATATACTGGGGTATAGAATAATATTATACTGT  
TGTGGAAATGATTTAAGGTGTAAACTGAAAATATGCTTAGAGGGTGCAAC

>PGSC0003DMG400012514-(rev)LRR-RLKs\_2684

TTATACTGTTGTGGAAATGATTTAAGGTGTAAACTGAAAATATGCTTAGAGGGTGCAACGTGTTATGTTT  
GGAAGGTCACATTATTCCAGAAACGAAATACACATGCATTTGGAGCCAAT

>PGSC0003DMG400012514-(rev)LRR-RLKs\_2745

GTTATGTTTGGAAAGGTCACATTATTCCAGAAACGAAATACACATGCATTTGGAGCCAATGTGTTTTACGA  
GTGCCTTATCTTTTTGACATATGAATTTGTATTGTTGTTTATTCAAATGT

>PGSC0003DMG400012514-(rev)LRR-RLKs\_2806

GTTTTACGAGTGCCTTATCTTTTTGACATATGAATTTGTATTGTTGTTTATTCAAATGTATAATGAGACAAT  
CAATGAATGTGTTTGAAGGAAAATGTTTTTTTCAGAAAACAAGTTGA

>PGSC0003DMG400012514-(rev)LRR-RLKs\_305

CAAAGTATCTATCCAAGATGAAAAAACTACTTGCTCTAATTCTACCAGCTGGAGTTGCACTTGTATTAGTC  
TCCATCGCCTTTGTGATTATATTGTATGGATAAGGTGTATAAGAGGTAA

>PGSC0003DMG400012514-(rev)LRR-RLKs\_3355

CCAGATCTAGGACCCAGGACCCAACCTTCGACACTCGAACCAAGACCCAACCTCGACCTTGACTCCGGACC  
CAGGATACGACTTCAAATCGAGACCCAATTTAGAATCCCGACCTAGGAC

>PGSC0003DMG400012514-(rev)LRR-RLKs\_3416

CTCCGGACCCAGGATACGACTTCAAATCGAGACCCAATTTAGAATCCCGACCTAGGACCCGATTCTCTGA  
TCATGTACCCGACCTTGACACCCAACCTCGAGATAGGAGTTCAAATCGGG

>PGSC0003DMG400012514-(rev)LRR-RLKs\_3477

GATTCTGATCATGTACCCGACCTTGACACCCAACCTCGAGATAGGAGTTCAAATCGGGATCTGACCCCG  
ACACAATAAATGATCCAGGATTCGACCTCGACTACCGAATCTGACTTCCA

>PGSC0003DMG400012514-(rev)LRR-RLKs\_3538

CTGACCCCGACACAATAAATGATCCAGGATTCGACCTCGACTACCGAATCTGACTTCAAATAACAACCTC  
GACCCCAACACCCAACCCGGAATTCGACTTTCAAATTGGGACCCGCCTTT

>PGSC0003DMG400012514-(rev)LRR-RLKs\_3599

TAACAACCTCGACCCCAACACCCAACCCGGAATTCGACTTTCAAATTGGGACCCGCCTTTTGAATCAGGAT  
TTGACCCCTACATCCAACCCCAACTCCCGACTACGAAGATCAATCTGGGA

>PGSC0003DMG400012514-(rev)LRR-RLKs\_366

TGTATTAGTCTCCATCGCCTTTGTGATTATATTGTATGGATAAGGTGTATAAGAGGTAAAAGAAAGCAAG  
CAGTCGATTCATCGTATGTCGTCTCAACAAGAGGAAGAATTCATACTAT

>PGSC0003DMG400012514-(rev)LRR-RLKs\_3843

GAAACCAACCCAACCCAACCCAAAAGTTGGGTCTCAAATTGAGGTTGGGAGTCGGGTCTCGAATCGAGA  
ATCAGGAGTTGGATCTAGCATTAGTGATGAGAATCGGTACCCGAGAGTTGA

>PGSC0003DMG400012514-(rev)LRR-RLKs\_3904

AATCGAGAATCAGGAGTTGGATCTAGCATTAGTGATGAGAATCGGTACCCGAGAGTTGAGTTAGGGTG  
GAAAATTGAAGTGTGCTGAAAAAACTCTTCGACGCATCCTAATTCTCATTGA

>PGSC0003DMG400012514-(rev)LRR-RLKs\_3965

TAGGGTGGAAAATTGAAGTGTGCTGAAAAAACTCTTCGACGCATCCTAATTCTCATTGAATTCAGGGCCC  
AAATCATTAAATAAGGACTCATCCTCGACCATTTGGTTTCATATTAGATAA

>PGSC0003DMG400012514-(rev)LRR-RLKs\_4026

TCAGGGCCCAAATCATTAAATAAGGACTCATCCTCGACCATTTGGTTTCATATTAGATAAAAAGGAAACTAA  
AAATGGGGCACTTGTAAGCAATTGAAAAGAGACCAGAACTACGTGAAAA

>PGSC0003DMG400012514-(rev)LRR-RLKs\_4087

GGAAACTAAAAATGGGGCACTTGTAAGCAATTGAAAAGAGACCAGAACTACGTGAAAAGATGTTTCA  
TATATAAGCAAACATTATTATTGTGGACCAAGGGAAGTTATATACATAAAAAG

>PGSC0003DMG400012514-(rev)LRR-RLKs\_4148

TGTTTCATATATAAGCAAACATTATTATTGTGGACCAAGGGAACTTATATACATAAAAAGAAATGGCCTAA  
ACCCCTTTCACCTATTAGCTCCACCCCTGCGTCCGATACTCAACACACA

>PGSC0003DMG400012514-(rev)LRR-RLKs\_4209

ATGGCCTAAACCCCTTTCACCTATTAGCTCCACCCCTGCGTCCGATACTCAACACACATAACTCATTCTAC  
AGTTCTTTGTAAAATTGTGTATAATTAGCCTTGTAACATTCAAATC

>PGSC0003DMG400012514-(rev)LRR-RLKs\_427

GAAAGCAAGCAGTCGATTCATCGTATGTCGTCTCAACAAGAGGAAGAATTCATACTATGAATTGCTCC

GAGCAACTGATTCACTCAGTGAGAGTAATTTGATTGGTTCTGGGAGTTTCG

>PGSC0003DMG400012514-(rev)LRR-RLKs\_4270

ACTCATTCTACAGTTCTTTGTAAAATTGTGTATAATTAGCCTTGTAACATTCAAATCCTTAATATACCCT  
TTTCTTTTCAAATCCCTCTTCGTTATGAACTAAATATCTATGGACT

>PGSC0003DMG400012514-(rev)LRR-RLKs\_4331

TAATATACCCTTTTCTTTCAAATCCCTCTTCGTTATGAACTAAATATCTATGGACTATATTTAGAATAT  
TACTTCAAATCATCACAAAAAATGTAAAAGATGATTAATACTACT

>PGSC0003DMG400012514-(rev)LRR-RLKs\_4392

ATTTAGAATATTTACTTCAAATCATCACAAAAAATGTAAAAGATGATTAATACTACTAACTACTATTCC  
AGGCTGTTATTTGCTGAAGAAAATTTTGATTTGATCAACAAAACGTTAC

>PGSC0003DMG400012514-(rev)LRR-RLKs\_4453

CTACTATTCCAGGCTGTTATTTGCTGAAGAAAATTTTGATTTGATCAACAAAACGTTACTAACATTAGTCA  
AGTCACACGGTCCCCTTAGAGGAAAATGGAGAAAAGACAATGAAGACC

>PGSC0003DMG400012514-(rev)LRR-RLKs\_4514

ACATTAGTCAAGTCACACGGTCCCCTTAGAGGAAAATGGAGAAAAGACAATGAAGACCAAATGGAG  
ATCAACTGATCACTGCTATTTAAAGTCTCATAGCCCCATTGTAAGTACTAGCCAT

>PGSC0003DMG400012514-(rev)LRR-RLKs\_4575

AATGGAGATCAACTGATCACTGCTATTTAAAGTCTCATAGCCCCATTGTAAGTACTAGCCATGCCAAGTTCTTT  
CTAATTTGTAAAGTACTAAAATGGAGAAAGCCACCAACACTTTTTTTCTT

>PGSC0003DMG400012514-(rev)LRR-RLKs\_4636

CAAGTTCTTTCTAATTTGTAAAGTACTAAAATGGAGAAAGCCACCAACACTTTTTTTCTTCTTGTTCCTTG  
GTTGTGGCTAGTATAGCCATGACTCACACCAATATTACCAATGATCAA

>PGSC0003DMG400012514-(rev)LRR-RLKs\_4697

TGTTTCACTTGGTTGTGGCTAGTATAGCCATGACTCACACCAATATTACCAATGATCAATTAGCTCTTCTT  
TCTTTAAAATCCCAAATCATTCTGACCCCTTCACTTGTGGATGAAA

>PGSC0003DMG400012514-(rev)LRR-RLKs\_4758

AGCTCTTCTTTCTTTAAAATCCCAAATCATTCTGACCCCTTCACTTGTGGATGAAAGTTGGTCTCCAAC  
TACTTATGTCTGCTATTGGGTTGGCATTACTTGTCTTCCCACCATCG

>PGSC0003DMG400012514-(rev)LRR-RLKs\_4819

TGGTCTCCAACACTTATGTCTGCTATTGGGTTGGCATTACTTGTCTTCCCACCATCGAGTGACGATGCT  
GAATATTTCCAACATGGCTCTTACAGGCAAAATTCCTCCTGATTTCTGGG

>PGSC0003DMG400012514-(rev)LRR-RLKs\_488

ATTGCTCCGAGCAACTGATTCACTCAGTGAGAGTAATTTGATTGGTCTGGGAGTTTCGGCTCTGTTTAC  
AAAGGAATCCTCAGAGAAGGGACTTCTATTGCAGCTAAAGTTTTCAATCT

>PGSC0003DMG400012514-(rev)LRR-RLKs\_4880

TGACGATGCTGAATATTTCCAACATGGCTCTTACAGGCAAAATTCCTCCTGATTTCTGGGAATCTCACATTT  
CTTGTCTCTTGACTTGAGTGGCAACAATTTCTATGGAAATTTGCCTC

>PGSC0003DMG400012514-(rev)LRR-RLKs\_4941

TCTCACATTTCTGTTTCTTGGACTTGAGTGGCAACAATTTCTATGGAAATTTGCCTCAAGAAATGGCAC  
GTCTACGTCGGTTAAGGTTTGTATGCTTGGTTTTAACAACTTCAATGG

>PGSC0003DMG400012514-(rev)LRR-RLKs\_5002

GAAATGGCACGTCTACGTCGGTTAAGGTTTGTATGCTTGGTTTTAACAACTTCAATGGGGAGGTTTCCTT  
CATGGTTCGGGGTCTTACACCAACTTCAAGTTCTGAATATAAGGAATAAT

>PGSC0003DMG400012514-(rev)LRR-RLKs\_5063

AGGTTCTTCATGGTTCGGGGTCTTACACCAACTTCAAGTTCTGAATATAAGGAATAATAGTTTTAGTGG  
TTCCATTCCTCTTCAATTTCTAATATCTCTACGCTTCAAACCTTTGGATT

>PGSC0003DMG400012514-(rev)LRR-RLKs\_5124

TTTTAGTGGTTCCATTCCTCTTCAATTTCTAATATCTCTACGCTTCAAACCTTTGGATTTGACATACACCTCC  
TTAGGGGGCCAAATGCCAAAAGAAATTGGAAATCTTCAAATCTAAG

>PGSC0003DMG400012514-(rev)LRR-RLKs\_5185

ACATACACCTCCTTAGGGGGCCAAATGCCAAAAGAAATTGGAAATCTTCAAATCTAAGGGTTTTACGA  
ATATCTGGTAACAATCTTATAGGTTCTATCCCTCTGTCTCTCTCAAATGCC

>PGSC0003DMG400012514-(rev)LRR-RLKs\_5246

TTTTACGAATATCTGGTAACAATCTTATAGGTTCTATCCCTCTGTCTCTCTCAAATGCCACAAGGTTGATG  
ACTTTAGAACTTTCTGTCAATTACCTTGAAGGAAACATCCCCAAAGAGA

>PGSC0003DMG400012514-(rev)LRR-RLKs\_5307

AAGGTTGATGACTTTAGAACTTTCTGTCAATTACCTTGAAGGAAACATCCCCAAAGAGATTGGAGAACTT  
CAAACCTAAAAGTTTTGGCAATACAAGCTAATCAACTTATAGGTTCTAT

>PGSC0003DMG400012514-(rev)LRR-RLKs\_5368

GGAGAACTTCAAAACCTAAAAGTTTTGGCAATACAAGCTAATCAACTTATAGTTCTATACCATTCTCGA  
TCTTCAACATTTTCGGAATTAAGTCATTGGATTTTCATATAATACCTTA

>PGSC0003DMG400012514-(rev)LRR-RLKs\_5429

CATTCTCGATCTTCAACATTTTCGGAATTAAGTCATTGGATTTTCATATAATACCTTATCAGGAGATCTTC  
CTACTGATATGTGTGATCGACTTCCAATGCTGAAAGTGCTTTATCTAG

>PGSC0003DMG400012514-(rev)LRR-RLKs\_549

TCTGTTTACAAAGGAATCCTCAGAGAAGGGACTTCTATTGCAGCTAAAGTTTTCAATCTGCAATTACAAG  
CGGCATTTAGGAGTTTTGATACAAAATGCCAATTTTTGCGCAACCTCCGT

>PGSC0003DMG400012514-(rev)LRR-RLKs\_5490

AGGAGATCTTCTACTGATATGTGTGATCGACTTCCAATGCTGAAAGTGCTTTATCTAGGTTTCAACGAG  
CTACACGGTCATATGCCTCTAAGCTTGGCAAAGTGTCAAACCTTCAAAC

>PGSC0003DMG400012514-(rev)LRR-RLKs\_5551

TTCAACGAGCTACACGGTCATATGCCTCTAAGCTTGGCAAAGTGTCAAACCTTCAAACCTTTGTTTTATC  
TGATAACAAGTTTGATGGACCCATACATAGTGAAATTGGACATTTAAGT

>PGSC0003DMG400012514-(rev)LRR-RLKs\_5612

TTGTTTTATCTGATAACAAGTTTGATGGACCCATACATAGTGAAATTGGACATTTAAGTAATTTGCAGGA  
TTTGTCTCTCGAAAATAACCATTTTGAAGTTTGGCATTGAATACTAGCT

>PGSC0003DMG400012514-(rev)LRR-RLKs\_5673

TTTGCAGGATTTGTCTCTCGAAAATAACCATTTTGAAGTTTGGCATTGAATACTAGCTTGTGGTTATTTT  
TCTTCTAACTAACTACTTCTGAAAAATTTCAATCACATAATTTTTCTT

>PGSC0003DMG400012514-(rev)LRR-RLKs\_5734

TGGTATTTTTCTTCTAACTAACTACTTCTGAAAAATTTCAATCACATAATTTTTCTTTTGCAGGGAGAAT  
TCCACAAGAAATCGGGAATCTTGATAATTTGGTGTCCATAAATCTTAT

>PGSC0003DMG400012514-(rev)LRR-RLKs\_5795

GCAGGGAGAATTCCACAAGAAATCGGGAATCTTGATAATTTGGTGTCCATAAATCTTATGGCAAACCAG  
ATTACCGATTGTATCCCAATCTCCATATTCAATATCTCGTCACTACAGTTT

>PGSC0003DMG400012514-(rev)LRR-RLKs\_5856

CAAACCAGATTACCGATTGTATCCCAATCTCCATATTCAATATCTCGTCACTACAGTTTCTCTCATTGGATG

ACAACAATCTCCTTGGGCCCTTGCCAGGGGAGGTTGGCAACTTGACCA

>PGSC0003DMG400012514-(rev)LRR-RLKs\_5978

TTGCAGTATCTACTTCTTAATGAAAATATGCTTACAGGTAAGTTATTGCAGCTATCTTGCTACAAGTGAAC

TAACAAAGTTTAAAATCATTACACGTTGTTGCTTAATTATATCTCCATA

>PGSC0003DMG400012514-(rev)LRR-RLKs\_6039

ACAAGTGAACAAAGTTTAAAATCATTACACGTTGTTGCTTAATTATATCTCCATACATACATTGACA

GGTGAAATACCGAAAGAGGTAAGCAATCTCATTGACTTGGCTGAAATGG

>PGSC0003DMG400012514-(rev)LRR-RLKs\_61

ATCAATACCTAGCTCAATGAGCAGCGTGACATCTTTGGAATTTCTAGACCTTTCTCATAACAATGTTTCAG

GATTAATTCCCACGTCTTTGGAGAAGCTTCAAAATCTCAAGTATTTCAA

>PGSC0003DMG400012514-(rev)LRR-RLKs\_610

AATTACAAGCGGCATTTAGGAGTTTTGATACAAAATGCCAATTTTTGCGCAACCTCCGTCATAGGAATCT

CACCAAAGTCATCACTAGTTGTTCAAACCTTGAATTTAAGGCTTTGGTAC

>PGSC0003DMG400012514-(rev)LRR-RLKs\_6100

TACATTGACAGGTGAAATACCGAAAGAGGTAAGCAATCTCATTGACTTGGCTGAAATGGGGTTGGGTTT

CAACAAGTTTACTGGTTCCTTCCAATAGAGATCTTCAACATATCAGGGAT

>PGSC0003DMG400012514-(rev)LRR-RLKs\_6161

TTGGGTTTCAACAAGTTTACTGGTTCCTTCCAATAGAGATCTTCAACATATCAGGGATAGAAACAATTC

AACTTACTTCCAATAATCTGACAGGAACCCTACCATTAAACATGGGTTCT

>PGSC0003DMG400012514-(rev)LRR-RLKs\_6222

AAACAATTCAACTTACTTCCAATAATCTGACAGGAACCCTACCATTAAACATGGGTTCTACGTTACCCAAC

ATTGAAGTTCTTTATCTAGGTCGTTTAAATCTTTTTGGGACTATACCTC

>PGSC0003DMG400012514-(rev)LRR-RLKs\_6283

GTTACCCAACATTGAAGTTCTTTATCTAGGTCGTTTAAATCTTTTTGGGACTATACCTCATTCTCTTCAA

TTGTTCCAACTCACTCATCTAGACCTTGCTGTAAACAGACTCACCGG

>PGSC0003DMG400012514-(rev)LRR-RLKs\_6344

TCTCTTCAATTGTTCCAACTCACTCATCTAGACCTTGCTGTAAACAGACTCACCGGTATGATTCCAAC

CTCTCTTGAATATTTGACTCAACTCAAGTACCTATTCTTGGGGGGAAAC

>PGSC0003DMG400012514-(rev)LRR-RLKs\_6405

TGATTCCAACCTCTCTTGAATATTTGACTCAACTCAAGTACCTATTCTTGGGGGGAAACTATTTAATAAGT  
GACTAAGTTAAGCTTCTTGACTTCCTTATCAAATTGTAGAGATTTAG

>PGSC0003DMG400012514-(rev)LRR-RLKs\_6466

TTTAATAAGTGACTAAGTTAAGCTTCTTGACTTCCTTATCAAATTGTAGAGATTTAGAATTTCTTTCTTT  
ATCTTTGAACCCTCTGAATGGAGTGATTCCAGTTTCTATAGGAAACCT

>PGSC0003DMG400012514-(rev)LRR-RLKs\_6527

TTTCTTTCTTTATCTTTGAACCCTCTGAATGGAGTGATTCCAGTTTCTATAGGAAACCTTCCAGTGCTTCT  
CCTCTATGGTTTAGAGCTTTTGAATGTGGAATTAAGGGGAAATTCCT

>PGSC0003DMG400012514-(rev)LRR-RLKs\_6588

CCAGTGCTTCTCTCTATGGTTTAGAGCTTTTGAATGTGGAATTAAGGGGAAATTCCTAAAGGAATTGG  
GAACTTAAGCAGCTTAGTAGACCTCGACCTTCTGGAAATGGCATAACTG

>PGSC0003DMG400012514-(rev)LRR-RLKs\_6649

AGGAATTGGGAACTTAAGCAGCTTAGTAGACCTCGACCTTCTGGAAATGGCATAACTGGATCGATTCC  
CGCAACAATTAGAAATTTGAGATTCCTCAGCGCTTTAAGTTGAGTCAAAA

>PGSC0003DMG400012514-(rev)LRR-RLKs\_6710

TCGATTCCCACAACAATTAGAAATTTGAGATTCCTCAGCGCTTTAAGTTGAGTCAAAAACAACTTTCTG  
GATCTATTGGAGAAGATCTATGTAAATTGCAGAACTTAGGCTATTTACAC

>PGSC0003DMG400012514-(rev)LRR-RLKs\_6771

AACTTTCTGGATCTATTGGAGAAGATCTATGTAAATTGCAGAACTTAGGCTATTTACACTTGACTCAAAA  
TAACTTTCAGGATCTATTCCTAATTGTTTGGGGAACCTTAACTTTCCTTC

>PGSC0003DMG400012514-(rev)LRR-RLKs\_6832

GACTCAAATAAACTTTCAGGATCTATTCCTAATTGTTTGGGGAACCTTAACTTTCCTTCAAGAGATATTC  
TAGGTTCCAACAAATTGTATTCGAACATACCAGCAGGTTTAGGGAAACCT

>PGSC0003DMG400012514-(rev)LRR-RLKs\_6893

GAGATATTTCTAGGTTCCAACAAATTGTATTCGAACATACCAGCAGGTTTAGGGAAACCTCAAAAATCTCT  
TGAGGCTAGACTTATCCTCAAACAACCTGGGTGGCTCATTACCTCTGGAG

>PGSC0003DMG400012514-(rev)LRR-RLKs\_6954

AAAATCTCTTGAGGCTAGACTTATCCTCAAACAACCTGGGTGGCTCATTACCTCTGGAGATTGGAAACCT  
AAAGGCTGTCATATATATGGATCTATCAATGAATGCACTCTCAAATGGCA

>PGSC0003DMG400012514-(rev)LRR-RLKs\_7015

TGGAACCTAAAGGCTGTCATATATATGGATCTATCAATGAATGCACTCTCAAATGGCATAACCCGGAGA  
AATTGGTGGCTTGCAGAATCTAATACACCTTTCTTTGAGAGACAACAAGTT

>PGSC0003DMG400012514-(rev)LRR-RLKs\_7137

AAGGATCAATACCTGGCTCAATGACCAGCATGTCAGCTTTGGAATTTCTAGACCTTTCTCAGAACAATGT  
CTCAGGATTAATTCCCAAGTCTATGGAGAAGCTACAAAATCTCAAGTATT

>PGSC0003DMG400012514-(rev)LRR-RLKs\_7198

GAACAATGTCTCAGGATTAATTCCCAAGTCTATGGAGAAGCTACAAAATCTCAAGTATTTCAACGTTTCA  
TTCAACAAGTTGGTTGGTGAAATCCCCACTGGCGGTCTTTCAAGAACCT

>PGSC0003DMG400012514-(rev)LRR-RLKs\_7259

AACGTTTCATTCAACAAGTTGGTTGGTGAAATCCCCACTGGCGGTCTTTCAAGAACCTCTCCAGTCGGT  
CATTCATGTCCAATGAAGCATTGTGTGGTTCTATAAGATTTTCGTGTTCCG

>PGSC0003DMG400012514-(rev)LRR-RLKs\_732

GAGTACATGTCCAATGGGAGCCTCGATAAGTGGTTATATTCGCACAACACTACTCCTTATACATCAACCATC  
ATGATATTTTCGCTTCAAATAGGCTAGTTTTGTGTCTTTAATTCATAACAT

>PGSC0003DMG400012514-(rev)LRR-RLKs\_7320

CCAGTCGGTCATTCATGTCCAATGAAGCATTGTGTGGTTCTATAAGATTTTCGTGTTCCGCATTGCAACAAT  
AGTACTTCAAACATAGATCCAAGAGGAAAAAGGTACTTCTATTTCTAC

>PGSC0003DMG400012514-(rev)LRR-RLKs\_7381

TTGCAACAATAGTACTTCAAACATAGATCCAAGAGGAAAAAGGTACTTCTATTTCTACTAGCTGGAATA  
CTAGTTGTATTAATTCCTATCGTCTTTCTGCTTGTATGGATAAGGTATAT

>PGSC0003DMG400012514-(rev)LRR-RLKs\_7442

GCTGGAATACTAGTTGTATTAATTCCTATCGTCTTTCTGCTTGTATGGATAAGGTATATAAAAGGTAAAA  
GAAAGCAAGCAGTTGACTCATCTTTGTCGTCTCAACCAGAGAAAGAATT

>PGSC0003DMG400012514-(rev)LRR-RLKs\_7503

AAGGTAAGAAAGCAAGCAGTTGACTCATCTTTGTCGTCTCAACCAGAGAAAGAATTTCATACTATG  
AATTGCTCCGAGCAACTGATTCCTCAGTGAGAGTAATTTGGTTGGTTCTG

>PGSC0003DMG400012514-(rev)LRR-RLKs\_7625

AGTTTCGGCTCTGTTTACAAAGGAATCCTCAGAGATGGGACTCCTATTGCAGCTAAAGTTTTCAATCTGC



AATTGCAAGCGGCATTTAAGAGCTTTGATACAGAATGTCAAGTTTTGCGC

>PGSC0003DMG400012514-(rev)LRR-RLKs\_7686

TCAATCTGCAATTGCAAGCGGCATTTAAGAGCTTTGATACAGAATGTCAAGTTTTGCGCAACCTCCGTCA

TAGGAATCTCACCAAAGTCATAACTAGTTGTTCCAACCTTGAATTTAAGG

>PGSC0003DMG400012514-(rev)LRR-RLKs\_7808

TTGGTACTTGAGTACATGTCCAATGGGAGCCTCGATAAGTGGTTATATTCGCACAACACTACTCCTTAAACA

TAAACCATCGACTAAGTATAGTGATAGATGTGGCATGTGCGTTGGAGTAT

>PGSC0003DMG400012514-(rev)LRR-RLKs\_7869

CCTTAAACATTAACCATCGACTAAGTATAGTGATAGATGTGGCATGTGCGTTGGAGTATCTCCACCATGG

CTGCTCATTGCCCGTGATTCACTGTGATTTGAAGCCTAGTAACATCTTGT

>PGSC0003DMG400012514-(rev)LRR-RLKs\_793

TCAACCATCATGATATTTGCTTCAAATAGGCTAGTTTTGTGTCTTTAATTCATAACATAATAGCTTCAAGT

GGTACTCTTTTAGTTTCAATAACTTGTCTATGTCCAGAATTTTCATCC

>PGSC0003DMG400012514-(rev)LRR-RLKs\_7930

CCACCATGGCTGCTCATTGCCCGTGATTCACTGTGATTTGAAGCCTAGTAACATCTTGTGGATGAGGAT

ATGGTTGCCACATAAGTGATTTTGGCATTTCAAAAGCTTTCTGATGA

>PGSC0003DMG400012514-(rev)LRR-RLKs\_8052

AGAGTGCTTCATACACTAAAAGCTAGCAACATTGGGCTATATTGCACCAGGTATGTAAGTCTCTTAACTA

ATTTCTTTTGAATACTTCTCTCAAATGCTGACTTTAAAAATTGGCTGATT

>PGSC0003DMG400012514-(rev)LRR-RLKs\_8113

TCTTAACTAATTTCTTTTGAATACTTCTCTCAAATGCTGACTTTAAAAATTGGCTGATTGTAGAGTATGGA

TTGGAGGGATTGGTGTCAACAAAATGTGATGTTTATAGTTATGGCATCA

>PGSC0003DMG400012514-(rev)LRR-RLKs\_8174

AGAGTATGGATTGGAGGGATTGGTGTCAACAAAATGTGATGTTTATAGTTATGGCATCATGTTGATGGA

AATATTTACACGCACAAAGCCTAGTGATGAAATGTTTATGATGGAGATTTTAG

>PGSC0003DMG400012514-(rev)LRR-RLKs\_8296

TGAAGCAATGGGTGAGCAATTCCTCCACAGGCAATAATGGAAGTTATCGATGCCAACTTAATAACGC

CACATGATAATCACTTAATGAGAAAGATAGATTGTGTGGTATCCATCATGA

>PGSC0003DMG400012514-(rev)LRR-RLKs\_8357

AATAACGCCACATGATAATCACTTAATGAGAAAGATAGATTGTGTGGTATCCATCATGAAAGTGGCAAT  
GGATTGTTGTGTTGAATCTCCTAAAGGAAGAATTGACATGAAAGATGTTGG

>PGSC0003DMG400012514-(rev)LRR-RLKs\_8397

TGTGTGGTATCCATCATGAAAGTGGCAATGGATTGTTGTGTTGAATCTCCTAAAGGAAGAATTGACATG  
AAAGATGTTGGGAGGTAAAGAAGATCAAGATTCAACTTCTTGCATGTTGA

>PGSC0003DMG400012514-(rev)LRR-RLKs\_854

TAGCTTCAAGTGGTACTCTTTTAGTTTCAATAACTTGTCTATGTCCAGAATTCATCCAAGTGGTACTCTT  
TTGGTTTCTTCATCTCTCAAGTCAATTCACTATTATTCGATTGCTTT

>PGSC0003DMG400012514-(rev)LRR-RLKs\_915

GTGGTACTCTTTTGGTTTCTTCATCTCTCAAGTCAATTCACTATTATTCGATTGCTTTCTGAATTGCTCTTA  
ACAATTGTTGTCCAGGTCTCAACTTTCATTAGTGATTCATCTTGAA

>PGSC0003DMG400012514-(rev)LRR-RLKs\_976

GAATTGCTCTTAACAATTGTTGTCCAGGTCTCAACTTTCATTAGTGATTCATCTTGAATCTTCCTCTACTA  
CTCTTTTAGGTTTTGTCTTTGCTGGTTTCTTACTCAAATTTCCCAAG

>PGSC0003DMG400012588-(rev)LRR-RLKs\_0

ATGGGCTCATCTAGTCTCTTCATCAAGTACTATGTTGTCTTGCTTTTCATGATGAAATTATGTACCCTGTCC  
ATAGCCGAAGATGGTTCTACGGTAGGCTATCATGGCACAGAAAGGGAG

>PGSC0003DMG400012588-(rev)LRR-RLKs\_1054

GAAATGGAAATTTTGGAAATTGTTACAAGGCAATGTTGGTAGATGGACCAACTGTTGTGGTGAAGCGTT  
TGAGGGTTTTGAAACCTTTAACAATGACGAATTTGTGAGACAAGTAAGAG

>PGSC0003DMG400012588-(rev)LRR-RLKs\_1116

AAGCGTTTGAGGGTTTTGAAACCTTTAACAATGACGAATTTGTGAGACAAGTAAGAGCTATTGGTGAT  
ATAAAGCATCCAAATTTGTTGCCTATTCTTGGTTATTACTATAACAAGGGAT

>PGSC0003DMG400012588-(rev)LRR-RLKs\_1178

TGGTGATATAAAGCATCCAAATTTGTTGCCTATTCTTGGTTATTACTATAACAAGGGATGAGAAGTTGCTT  
CTCTTGAAATCTGCACCTAACGGAAGCTTATAACAACCGCATTACGGTAT

>PGSC0003DMG400012588-(rev)LRR-RLKs\_124

TTTGGGCGATTGAGCTGAATTCAACAATCCTAAATTGCTCCAAAAAGTTGGAACAGCCTCATGTGTTA  
CATGAATAAACTCCAAATTTGGTATGGTATTAGCTGTATCAACGGTCGAG

>PGSC0003DMG400012588-(rev)LRR-RLKs\_1240

AGTTGCTTCTCTTCAAATCTGCACCTAACGGAAGCTTATACAACCGCATTACGGTATCTTACTGTGATCC  
ACTTTTCTTTGTAGTCTATCATATAACATTTATAATTACTCAAATACAT

>PGSC0003DMG400012588-(rev)LRR-RLKs\_1302

CTGTGATCCACTTTTCTTTGTAGTCTATCATATAACATTTATAATTACTCAAATACATAACTGATTTTTTTTTT  
TCCGTGGTTGGTTGAACAATAGGAGGAAAAGGGACTAGAGATAGGAT

>PGSC0003DMG400012588-(rev)LRR-RLKs\_1364

GATTTTTTTTTTCCGTGGTTGGTTGAACAATAGGAGGAAAAGGGACTAGAGATAGGATACCATTTTCGAT  
GGAGCTCAAGATTATCCGTTGCTCGTGGTGTGCTCGAGCACTAGAGCATC

>PGSC0003DMG400012588-(rev)LRR-RLKs\_1426

TTTCGATGGAGCTCAAGATTATCCGTTGCTCGTGGTGTGCTCGAGCACTAGAGCATCTACACCTGAACG  
TCAGTTCCTCCCAATTCGTTGTTCCCATGGCAACCTAAAATCCACCAAT

>PGSC0003DMG400012588-(rev)LRR-RLKs\_1488

CCTGAACGTCAGTTCCTCCCAATTCGTTGTTCCCATGGCAACCTAAAATCCACCAATGTTTTACTTGACG  
AAAATGATGATGTTTCGTGTTGCTGACTTTGGTCTCACTTCCCTTATTGC

>PGSC0003DMG400012588-(rev)LRR-RLKs\_1550

TACTTGACGAAAATGATGATGTTTCGTGTTGCTGACTTTGGTCTCACTTCCCTTATTGCACTTCCCATCGCT  
ACTCAACGAATGGTTTCCTATCGATCACCCGAATATCTGGCTTCCAAGA

>PGSC0003DMG400012588-(rev)LRR-RLKs\_1612

CCCATCGCTACTCAACGAATGGTTTCCTATCGATCACCCGAATATCTGGCTTCCAAGAAAGTGTCCAAGA  
AATCTGATATTTGGAGCTTTGGTTGCCTTCTCCTGGAATTATTAACAGGT

>PGSC0003DMG400012588-(rev)LRR-RLKs\_1674

GTCCAAGAAATCTGATATTTGGAGCTTTGGTTGCCTTCTCCTGGAATTATTAACAGGTATTTGTTTTCTT  
GATTGATCAGGCAGAATCAAATATTTGCGTATATATACTACATTATTAG

>PGSC0003DMG400012588-(rev)LRR-RLKs\_1736

GTTTTTCTTGATTGATCAGGCAGAATCAAATATTTGCGTATATATACTACATTATTAGTTATCTAGCGATG  
TATATATTTAGAGCATACAATACATATATTTTGATGGTATATTATATTG

>PGSC0003DMG400012588-(rev)LRR-RLKs\_1798

CTAGCGATGTATATATTTAGAGCATACAATACATATATTTTGATGGTATATTATATTGATCACATTGTTGT

ATACCATTGATATATATAAGTAAATAGAAAATGTACCATCGGGCTGATA

>PGSC0003DMG400012588-(rev)LRR-RLKs\_186

ATGTGTTACATGAATAAACTCCAAATTGGTATGGTATTAGCTGTATCAACGGTCGAGTCACTGGACTTG

TGCTAGAAAATCTTGGCCTTACTGGGAAACTCGAGGCAAATGCACTTGTC

>PGSC0003DMG400012588-(rev)LRR-RLKs\_1860

CATTGTTGTATACCATTGATATATATAAGTAAATAGAAAATGTACCATCGGGCTGATACTCAAACCACT

TATAATCAAATTATAATAAGAGACTTTGACACAAGTGTGTGCGCTATAA

>PGSC0003DMG400012588-(rev)LRR-RLKs\_1922

AAACCACTTATAAATCAAATTATAATAAGAGACTTTGACACAAGTGTGTGCGCTATAATTGTAACAGGTA

GAATTTCTTCACATTCTGCTCCACCGGGGGTGACCGGTGCGGATCTGTGC

>PGSC0003DMG400012588-(rev)LRR-RLKs\_1984

AACAGGTAGAATTTCTTCACATTCTGCTCCACCGGGGGTGACCGGTGCGGATCTGTGCAGTTGGGTTCA

TAGGGCGGTCCGAGAAGAATGGACGGCTGAGATTTTCGACACGGAAATTGC

>PGSC0003DMG400012588-(rev)LRR-RLKs\_2046

GGGTTCATAGGGCGGTCCGAGAAGAATGGACGGCTGAGATTTTCGACACGGAAATTGCTGTTTCAGAGA

AGTGCCAACTCAGGAATGTTGAAATTGTTGCAGACTGCTATAAGCTGTTGTG

>PGSC0003DMG400012588-(rev)LRR-RLKs\_2108

CAGAGAAGTGCCAACTCAGGAATGTTGAAATTGTTGCAGACTGCTATAAGCTGTTGTGATAAGTCGCCG

GAAAACGACCGGAGATTAGTGAGCTGTTGAGGGAAATGGAAAGTATTAAC

>PGSC0003DMG400012588-(rev)LRR-RLKs\_2170

GTCGCCGAAAAACGACCGGAGATTAGTGAGCTGTTGAGGGAAATGGAAAGTATTAACGGGGCGGTA

CCCGAATCGGAAGACGAAGATGATCTCTCCTTCTCAATGGATCAATCTATGAC

>PGSC0003DMG400012588-(rev)LRR-RLKs\_2207

AGGGAAATGGAAAGTATTAACGGGGCGGTACCCGAATCGGAAGACGAAGATGATCTCTCCTTCTCAAT

GGATCAATCTATGACAGATGACTCCATAGCAACTGCAACTCCGTCTCGATAA

>PGSC0003DMG400012588-(rev)LRR-RLKs\_248

TGGACTTGTGCTAGAAAATCTTGGCCTTACTGGGAAACTCGAGGCAAATGCACTTGTCAATCTCACTCAA

TTACAAACACTTAGCTTCAAGAACAATTCCATATCAGGGAACTTGATGAA

>PGSC0003DMG400012588-(rev)LRR-RLKs\_310

TCACTCAATTACAAACTTAGCTTCAAGAACAATTCCATATCAGGGAACCTTGATGAACTTCTCCAACAAC  
CAAAATTTGAACAACATTGATTTATCCGGTAACAGATTTGACGGAGAAA

>PGSC0003DMG400012588-(rev)LRR-RLKs\_372

TCCAACAACCAAAATTTGAACAACATTGATTTATCCGGTAACAGATTTGACGGAGAAAATTCACCTTCTCT  
TCTAACACTTAATTCGTTAGAGTCATTGCAGGTACAGAATAACAAATTG

>PGSC0003DMG400012588-(rev)LRR-RLKs\_434

ACCTTCTCTTCTAACACTTAATTCGTTAGAGTCATTGCAGGTACAGAATAACAAATTGAACGGTCCAATTC  
CCAGTTTTAATCAGTCAACTTTGAAAGTTTTCAATGTCTCAAACAACAA

>PGSC0003DMG400012588-(rev)LRR-RLKs\_496

GTCCAATCCCAGTTTTAATCAGTCAACTTTGAAAGTTTTCAATGTCTCAAACAACAATCTTTCTGGTGAA  
ATTCCAAGCACAATAGCTCTTCAAAAATTTGGTCCGTCCTCGTACTTAA

>PGSC0003DMG400012588-(rev)LRR-RLKs\_558

TCTGGTGAAATCCAAGCACAATAGCTCTTCAAAAATTTGGTCCGTCCTCGTACTTAAGTAACCATGATTT  
ATGTGGTCCTCCTTTTACTAACACAACGTGCATCACGATCAAGGATAAT

>PGSC0003DMG400012588-(rev)LRR-RLKs\_62

TACCCTGTCCATAGCCGAAGATGGTTCTACGGTAGGCTATCATGGCACAGAAAGGGAGGCTCTTTGGGC  
GATTCGAGCTGAATTCAACAATCCTAAATTGCTCCAAAAAAGTTGGAACAG

>PGSC0003DMG400012588-(rev)LRR-RLKs\_620

CCATGATTTATGTGGTCCTCCTTTTACTAACACAACGTGCATCACGATCAAGGATAATGAGTCATCTACAC  
CAACTCCAAGTGATAGTTCACATAATGAATCTTCAAATAGTTCAAAATT

>PGSC0003DMG400012588-(rev)LRR-RLKs\_682

CATCTACACCAACTCCAAGTGATAGTTCACATAATGAATCTTCAAATAGTTCAAATTTATCCATGTTAACT  
CCAATCTGGTAGTAATTAACGTTGTGGGCATTGTTGTTCTTTTATATC

>PGSC0003DMG400012588-(rev)LRR-RLKs\_744

ATGTTAACTCCAATCTTGGTAGTAATTAACGTTGTGGGCATTGTTGTTCTTTTATATCTAGTCATTTACTAC  
TTTAAAAAAACAAAAAAGCTTAAGAAAATGCTGATGAATAGTAATACA

>PGSC0003DMG400012588-(rev)LRR-RLKs\_806

CATTTACTACTTTAAAAAAACAAAAAAGCTTAAGAAAATGCTGATGAATAGTAATACAAGATTAACGGA  
GGTTGATAAAATGGAGACTAGCAAAGCTGAGATCACAACAACGCCAACAGA

>PGSC0003DMG400012588-(rev)LRR-RLKs\_868

TAACGGAGGTTGATAAAATGGAGACTAGCAAAGCTGAGATCACAACAACGCCAACAGAAACCAGGAGT  
GTGGAATCAAGAAGTGTGGCATCAGAGGTTGAATTAGAGAAAGGCAAATTGA

>PGSC0003DMG400012588-(rev)LRR-RLKs\_930

AGGAGTGTGGAATCAAGAAGTGTGGCATCAGAGGTTGAATTAGAGAAAGGCAAATTGATATTCTTAGG  
TAGTGAAATAAATTTTGAATTAGATGACTTACTGAGAGCTTCAGCAGAAGGT

>PGSC0003DMG400012588-(rev)LRR-RLKs\_992

CTTAGGTAGTGAAATAAATTTTGAATTAGATGACTTACTGAGAGCTTCAGCAGAAGGTTTGGGAAATGG  
AAATTTTGGAAATTGTTACAAGGCAATGTTGGTAGATGGACCAACTGTTGT

>PGSC0003DMG400012594-(rev)LRR-RLKs\_1708

CTCCAACACCCACTTCTCCAGGTTTGTAAAATAATTTATGTTTTATGGGTTAAGGCACTGCGCCCCCCCC  
CCAAAGGAAGAAGGCAAAGGGCTGACTGTTTTAGGGGAAGAGATTTGC

>PGSC0003DMG400012594-(rev)LRR-RLKs\_1891

ACTGTTTGATAGGTTTGAATAAATAGATTAACCTTACAAGTGATATTGAAGAGTGGATAGAAGTGCCT  
ACATCAGGAAATGCAACTGTATGCATTGGATATTGTGACTATAAAAGGACC

>PGSC0003DMG400012594-(rev)LRR-RLKs\_1952

AGTGCCTACATCAGGAAATGCAACTGTATGCATTGGATATTGTGACTATAAAAGGACCCAAACTTCAG  
AATTTATTGTCATACATTCTCTCAATCTTTCCCATGTGTCTTATTCTC

>PGSC0003DMG400012594-(rev)LRR-RLKs\_2074

ATGGTATCGGAGCTTTGGTGAAAAATTAGTTTCAGTGCATTTACCAGCAACACGCGGGAGAAAAATCTC  
CTTGCTGTGCAATTCTCATTGACCATGACTGCTGTCAAATGTATCCTTGC

>PGSC0003DMG400012594-(rev)LRR-RLKs\_2379

TCAATTTTTTTTTGAACTACTTGTGTTAAGTTTTTGTCCATCAAAAAAAGGGAATTAACCTAAATTTT  
GAAATTCCTAGGTGTGGGAAACAGTGCAACCGGGGCGATTGCTGGCGG

>PGSC0003DMG400012594-(rev)LRR-RLKs\_3477

TTCAACCTAAAATGGGAACTTGAACCAGTTTACTTGACATCTTGAACCTTGCCTTACAGTAAAATTTTTT  
CTTGTAGAGCGGCCAGAGTCAGATCCACCACTTGGCTGGCCAATAAGGA

>PGSC0003DMG400012594-(rev)LRR-RLKs\_3904

TCTTGCTCGACTTGCAAATGATGATGATGTCATGTTGCTAGATTGGGTAAGGATTTACTAACCTACATGC

TCTAGTTATTCTACTTCTAGCTTATGTCTTTTTCTCTTTTCTTTTATACGT

>PGSC0003DMG400012594-(rev)LRR-RLKs\_3965

CCTACATGCTCTAGTTATTCTACTTCTAGCTTATGTCTTTTTCTCTTTTCTTTTATACGTTGAAACTTTATACT  
ACTTACAATTGCTAATTTTTATCGTGCAACTGACTTCAAACATGGAA

>PGSC0003DMG400012594-(rev)LRR-RLKs\_4087

GAGCACGGGTGAGAAGATCTCACTTTCCTGCATGCATCTCCCTATAAGCAGAACTCTATCATTGCTGCAC  
TCAACATGATGAAAAGCTGATTTGTAGACCCACTACAAATTAGGACTGGC

>PGSC0003DMG400012594-(rev)LRR-RLKs\_4148

TTGCTGCACTCAACATGATGAAAAGCTGATTTGTAGACCCACTACAAATTAGGACTGGCGAATAAGACA  
CTGTCATGTCCATTCTCTTCCCCTGCGTTTTCTTTAATATCCCCAATCCC

>PGSC0003DMG400012594-(rev)LRR-RLKs\_4209

ATAAGACACTGTCATGTCCATTCTCTTCCCCTGCGTTTTCTTTAATATCCCCAATCCCGTTCCTGTTCTGTT  
ATCCCTTCCCTACCCCGTATGTAACCCACATCCCATAATCTCGTTT

>PGSC0003DMG400012594-(rev)LRR-RLKs\_4392

ATTACACACACTCATAGCTCTCTTTGTTCTTTACTCAAGTCTCAGGGCTGCAGTTCTGTTTAAAGTAAAAA  
GTTTTATATTGACCCCCCTCCCCCAAAAAAATAAATTAATAATAAA

>PGSC0003DMG400012594-(rev)LRR-RLKs\_4453

AAAGTAAAAAGTTTTATATTGACCCCCCTCCCCCAAAAAAATAAATTAATAATAAAAAAAAATTGT  
TAGCTCTAGTAGGTTTTGCATTGCAGTTTGGCATGTATGATTTCTGTAAT

>PGSC0003DMG400012594-(rev)LRR-RLKs\_488

TTATTTTCTGAACATTTTGCTTAGTCAAGAAAGGCCACCTTCTATTTTAGAACATGTTAGTGGCTCTGTAC  
TCTGTAGTACTATTTCTCTTGTAGTTATATGGAAATAGGGATAGACT

>PGSC0003DMG400012594-(rev)LRR-RLKs\_5002

CTTTGGGAGGATCCTCTAGAAAGGGAACCCACCTTTAGGACTTGGGAGTGCAGAAGATGGTCAATTCT  
TTCATATGGTTGAACCGTTGAAGTATAGAAAATTGAAAGACAAGTGGCTA

>PGSC0003DMG400012594-(rev)LRR-RLKs\_5063

TCAATTCTTTCATATGGTTGAACCGTTGAAGTATAGAAAATTGAAAGACAAGTGGCTATCTGAACTTGG  
AAAGTAAATAAAGTGGCTATCTGAACTTGGAAATTCAATATGGTTCAAAT

>PGSC0003DMG400012594-(rev)LRR-RLKs\_5124

TGAACTTGGAAAGTAAATAAAGTGGCTATCTGAACTTGGAAATTCAATATGGTTCAAATATGAGCACAG  
AGAATCAGGAGCCTCATGCTCTCTGATTTTCTGTCTTTTCAGTCTCCCTAT

>PGSC0003DMG400012594-(rev)LRR-RLKs\_5185

GAGCACAGAGAATCAGGAGCCTCATGCTCTCTGATTTTCTGTCTTTTCAGTCTCCCTATAGGGCTGCTTAT  
CAAAAATCTCAACAACCTTCTATGGTGAATGCTTTGTTATTTTAGTGATG

>PGSC0003DMG400012816-(rev)RLKmalectin\_1037

GGTTGTGGTTAATTCTATGAGTATGTTATTGGATGTAAGATACGATTCTAATTATTCGTAACCAAATTGC  
ACGTGCTCGTCAGTATAATCCTGTATATTTGCAAAATTTCTAATCGCTT

>PGSC0003DMG400012816-(rev)RLKmalectin\_2806

CAGTCACTGAAACTTGCACTTGGACTTCCCCTTCGTTTTGGGTGGAATGGTGATCCATGTTTTCCGCAACA  
ACATCCATGGAGTGGAGTAGATTGTCAGTTTGACAACCTCCAGCAATAAA

>PGSC0003DMG400012816-(rev)RLKmalectin\_2867

TTCCGCAACAACATCCATGGAGTGGAGTAGATTGTCAGTTTGACAACCTCCAGCAATAAATGGGTCATCG  
ATGGGCTGTACGTTTTTGACCTTGACCTTAGATAGAAAAGTTCCGCCATT

>PGSC0003DMG400012816-(rev)RLKmalectin\_2928

GGTCATCGATGGGCTGTACGTTTTTGACCTTGACCTTAGATAGAAAAGTTCCGCCATTCCACACACGTG  
CGCAAGCACACACACGTAACACTGTAACACTCACATTGACATATATTCCTGC

>PGSC0003DMG400012816-(rev)RLKmalectin\_2989

ACACACGTGCGCAAGCACACACACGTAACACTGTAACACTCACATTGACATATATTCCTGCTATTGATTTTCT  
GCACCCCAATTTAAAAGTTTTGCTGGACGATACTTGGCTTTCTTTCTAT

>PGSC0003DMG400012816-(rev)RLKmalectin\_305

ATTTGTGTTTGAATTCAATTTTTTTTGGTTTGATTGATTAATGTTAACTCAGAGCAGCATTGGACTCAAA  
ATGCTCAAATTTTATATTTTATGATCTTCTTCTTTGCTTTTCAGGATTGATT

>PGSC0003DMG400012816-(rev)RLKmalectin\_3050

TTGATTTTCTGCACCCCAATTTAAAAGTTTTGCTGGACGATACTTGGCTTTCTTTCTATATTATGTGATTTT  
ATTATTTTATTTAATGTGTCCTCTGTATCTGTTTTTCATGTAAGCAC

>PGSC0003DMG400012816-(rev)RLKmalectin\_3111

TATGTGATTTTATTATTTTATTTAATGTGTCCTCTGTATCTGTTTTTCATGTAAGCACAGTGACCTGGACA  
ACCAAGGTTTACGAGGTTTCTTACCAGATGATGTTTCTCAATTGCGTC



>PGSC0003DMG400012816-(rev)RLKmalectin\_3172

TGACCTGGACAACCAAGGTTTACGAGGTTTCTTACCAGATGATGTTTCTCAATTGCGTCATCTTCAGAGC  
ATGTAAGTTTAAATGCTGTTTTTAAAAAAAATCTATTTGGATGAAA

>PGSC0003DMG400012816-(rev)RLKmalectin\_3233

CTTCAGAGCATGTAAGTTTAAATGCTGTTTTTAAAAAAAATCTATTTGGATGAAAGATGTGTATCTT  
CCAACGATCTTCTACTACTTAAAATGGAGTTGATGATCAATAAGAGTTT

>PGSC0003DMG400012816-(rev)RLKmalectin\_3294

TGTGTATCTTCCAACGATCTTCTACTACTTAAAATGGAGTTGATGATCAATAAGAGTTTTAGCCAATATAT  
TGACACTTTTTCAAATTATTTGGACATAATTTGTCTGAAGGAATTACA

>PGSC0003DMG400012816-(rev)RLKmalectin\_3355

GCCAATATATTGACACTTTTTCAAATTATTTGGACATAATTTGTCTGAAGGAATTACATACTAAGCGGTT  
AAATAACTTCCAGTTTAAAGAGGTTTTCAATATTTGAGCATCTTTTAGAA

>PGSC0003DMG400012816-(rev)RLKmalectin\_3416

CTAAGCGGTTAAATAACTTCCAGTTTAAAGAGGTTTTCAATATTTGAGCATCTTTTAGAATGTCTTTGGTT  
CATGTATATTGCAATGCCGGCGTCCACTTCTCAAACATGATCTTCTCTA

>PGSC0003DMG400012816-(rev)RLKmalectin\_366

TGGACTCAAAATGCTCAAATTTCATATTTGATCTTCTTCTTTGCTTTCAGGATTGATTTTTGTCTACCTGG  
TTAGGTTCTTTTATGTTTATTTTTTCTTTTGTATGATGTGAATTTGA

>PGSC0003DMG400012816-(rev)RLKmalectin\_3660

GTGCTTTTCTGTACTTGATATTAGATTTCTTAGCTGCCAGAGTAATAGTATATGAAAATATGGAAACAGA  
ATATTTTTGTAATCTACGTTGTGAATATGTTAGGCATACAATATATAATT

>PGSC0003DMG400012816-(rev)RLKmalectin\_3721

GGAAACAGAATATTTTTGTAATCTACGTTGTGAATATGTTAGGCATACAATATATAATTATTGTTCTTTAT  
CATCTATATGGGCCGCGGAGTAGTGAATGTGCATACTGTTTGTGGTT

>PGSC0003DMG400012816-(rev)RLKmalectin\_3782

TGTTCTTTATCATCTATATGGGCCGCGGAGTAGTGAATGTGCATACTGTTTGTGGTTGTTTATATGATA  
AAATCCTCACTTTGTGATTACCTAACAAAAGTTGCACAACAGGGATCTT

>PGSC0003DMG400012816-(rev)RLKmalectin\_3843

TTATATGATAAAATCCTCACTTTGTGATTACCTAACAAAAGTTGCACAACAGGGATCTTTCATACAATTCC

TTCAACGGGTCGATTCCTGAAAGCCTTGGGGAATTGACGTCGTTACTGA

>PGSC0003DMG400012816-(rev)RLKmalectin\_4087

GCGTTAGGCGGAAGGCTCTTGACAGAGCTAGCTTCAAGTATGTTCTCCTAATTGCACGTTCTTAGCATA

AGGCTTCTTTTTAGTGAAGCATCCTTCAGAAATTGCATCGTAACTATAGA

>PGSC0003DMG400012816-(rev)RLKmalectin\_4453

CAAATGAATAGAAACAGAGGGAGCATCACTTTCACTTAGTTTTCTTTGTCCAACCTTTTTATCATCAAAA

ATACATACTACTTATGGTCGATATTCAATTTCTAGATGCGTCGATGAAG

>PGSC0003DMG400012816-(rev)RLKmalectin\_4514

ATCATCAAAAATACATACTACTTATGGTCGATATTCAATTTCTAGATGCGTCGATGAAGGTCTCCTTGTC

CCATTTTGTGTTGATGATAACTGTGAAAAGAACAAGAAGTCTACAATC

>PGSC0003DMG400012816-(rev)RLKmalectin\_4575

CTCCTTGTACCATTTTGTGTTGATGATAACTGTGAAAAGAACAAGAAGTCTACAATCATAGCATTG

TTAGAACACATTATAAGTTAAGGTTAAACAAGTGTACCGTTAAACTCCAT

>PGSC0003DMG400012816-(rev)RLKmalectin\_4636

AGCATTGATTAGAACACATTATAAGTTAAGGTTAAACAAGTGTACCGTTAAACTCCATTGATTAGCAT

CCACAACCTGGCGGTTAGGCCTGACACCAACTTCCACAATCCACTAGCTAC

>PGSC0003DMG400012816-(rev)RLKmalectin\_4697

ATTTAGCATCCACAACCTGGCGGTTAGGCCTGACACCAACTTCCACAATCCACTAGCTACTTCGATGGATG

GGCGTTAACTATTACCACATATTCAACAAATAAATATGCTAGGCTTCTTT

>PGSC0003DMG400012816-(rev)RLKmalectin\_4758

CGATGGATGGGCGTTAACTATTACCACATATTCAACAAATAAATATGCTAGGCTTCTTTCTGATAGCTAG

GTAAACGGGGGTTAACTAGGGTCTTTCTGGGCCACGTCCTGTCTTTTG

>PGSC0003DMG400012816-(rev)RLKmalectin\_4819

GATAGCTAGGTAAACGGGGGTTAACTAGGGTCTTTCTGGGCCACGTCCTGTCTTTGAGGCTATAACC

AATTAACGTAAGTCCAAATTCTAACAGTAACATTTAGCATATTTCTTAA

>PGSC0003DMG400012816-(rev)RLKmalectin\_488

AAGGACTTTAAAGGGTGTCTAAATTATGTAGTTTTAACGTGTTTTGAGTAACTTTCTTCTTTGATATTCGT

GATGTCTGGGCCAGTTTGAGCGCAACTCAACTAATGGATGATGCAAAAT

>PGSC0003DMG400012816-(rev)RLKmalectin\_4880

GCTATAACCAATTAACGTAAGTCCAAATTCTAACAGTAACATTTAGCATATTTCTTAAAAGAAATGCTGC  
GGTAATAGGTGTCAGTGTCTGTTTGTTTAAGGCAGAGATGCTAATTTAA

>PGSC0003DMG400012816-(rev)RLKmalectin\_4941

GAAATGCTGCGGTAATAGGTGTCAGTGTCTGTTTGTTTAAGGCAGAGATGCTAATTAACCTTACTATTC  
ATGTGGTGAAACTAATATGACAATTCATCGGTGTATTAACCTCGAGGATCA

>PGSC0003DMG400012816-(rev)RLKmalectin\_5002

TTACTATTCATGTGGTGAAACTAATATGACAATTCATCGGTGTATTAACCTCGAGGATCAGATAAAAAAAC  
TGTGAATTTTTTTGTTTCATTAGTACTTATGCTAAATACTTACTTTGGATG

>PGSC0003DMG400012816-(rev)RLKmalectin\_5063

TAAAAAACTGTGAATTTTTTTGTTTCATTAGTACTTATGCTAAATACTTACTTTGGATGCTTTCAGTTTTAC  
TGATAATGCAGGCCTTTGTGGTATTCCTGGGTTACCAACATGTGGACC

>PGSC0003DMG400012816-(rev)RLKmalectin\_5307

GCTGGTAAGAGTTTTTCAACATAACATGCTCTATATCCATATTCAAATGTATTTCCCATCTCTCCATGTAT  
TGTTGTCAACATGGTGTTTTAAAGAAATGAATTTGAGTGAAGATGTA

>PGSC0003DMG400012816-(rev)RLKmalectin\_5368

CTTCCATGTATTGTTGTCAACATGGTGTTTTAAAGAAATGAATTTGAGTGAAGATGTATCTCTACACGAT  
GAAATTAACGAGTTTCATGCTTCTCATAGATGAATCACTGTGTTTTT

>PGSC0003DMG400012816-(rev)RLKmalectin\_549

TGATATTCGTGATGTCTGGGCCAGTTTGAGCGCAACTCAACTAATGGATGATGCAAAATTGTGTTTGAAT  
TCGATTTGTTTGGTTTGATTGTCTAATGTAACTAATTGCAAGTACTTAG

>PGSC0003DMG400012816-(rev)RLKmalectin\_5673

AAACTTCTTTCACGTCAAGAGGATTCAACAATTTATACATATACCAACAAAAACATTGTTTCGTATCCTACT  
CATAGTATAATTTTTTGACAAAGGAAGGATCGTATGAATCCCATCCGCA

>PGSC0003DMG400012816-(rev)RLKmalectin\_5734

GTATCCTACTCATAGTATAATTTTTTGACAAAGGAAGGATCGTATGAATCCCATCCGCAGACCTTGTAAC  
TCCATCGCAAGCTTAGTGAGAAGATTTCCAGATACAATGCTGCTGTTTTG

>PGSC0003DMG400012816-(rev)RLKmalectin\_5856

GCTAGAAAATGTGTATAGTGGTTATGCAGATCAGGAATCAATTATAAATGCCATAGATGTAATTCAGTG  
CAAGAGATCTATGTTGTTGCGACTCTCAAAAATGTCGACGGGTGCGTGTC

>PGSC0003DMG400012816-(rev)RLKmalectin\_6039

GTCGGAGACAGTGTGTTGTATATTTAACTATATACATGTATTCTTGTCATCAGTTTTGGAGCTTTTGGTT  
AAAGACACTCGTGTAAGTGTGAAATGGTGAATTCAGTAGAACCACAG

>PGSC0003DMG400012816-(rev)RLKmalectin\_6071

ATACATGTATTCTTGTCATCAGTTTTGGAGCTTTTGGTTAAAGACACTCGTGTAAGTGTGAAATGGTGA  
ATTCAGTAGAACCACAGAATGTGATCGCATTATACGGTCTCAATTGAAC

>PGSC0003DMG400012816-(rev)RLKmalectin\_732

TTTTCAATATTGGAATTGAAGCAAATTGAAGAAAACATAGCAGCATTCTCAAAAAAAAAACCAACTTT  
TGTTGTTCTGCTTTAAGTCGCCTCGTCTCAGCTCCTTTTATGTTTCTTAT

>PGSC0003DMG400012816-(rev)RLKmalectin\_793

ACCAACTTTTGTGTTCTGCTTTAAGTCGCCTCGTCTCAGCTCCTTTTATGTTTCTTATGCAATGTGAATTT  
AGTTGTAATTATGTAGCTGTAATTGTGTCTGCATTAATAATGTTTTAGT

>PGSC0003DMG400012817-(rev)LRR-RLKs\_1054

GAATTAAGCTCTTTGGTAATAGGCTAAATGGAACCTTACCTAAAGATCTTGGTAAATTTTCGCCATTGG  
TATGGATTGATGTTTCAAACAATGAGTTTTCAGGTGAAATTCGATGAAT

>PGSC0003DMG400012817-(rev)LRR-RLKs\_1364

CATTTTCTGGTGTAAATCGCGAAAACATAGCTGGTGCATCGAATTTATCAGCTTTGATTTTGTCAAAGAAC  
GAATTTTCGGGTAATATTCCTGAAGAGATTGGCTTTTTGGAAAGTTTGG

>PGSC0003DMG400012817-(rev)LRR-RLKs\_1860

TGGTTTATGTGGAGATATTGGAGTTTATGTGATGGAAAAGATGAAGGTAAAACCTGCTGGTTATGTATG  
GTTACTGAGATTGCTTTTCATACTTGCTGTTTTGGTGTGTTGTAGTTGGGGT

>PGSC0003DMG400012817-(rev)LRR-RLKs\_2914

GAGTAATTTTGGTCCATTCTTGAGCTATGTTGCTCAAATCCTTCAAAAAAATGTGGCATGTCTTTGTCCGA  
TTCTCCCAAAGGTATTCAATTTTGGAGGATCCAATACAGGTGTAACAAC

>PGSC0003DMG400012817-(rev)LRR-RLKs\_2976

TTTGTCCGATTCTCCCAAAGGTATTCAATTTTGGAGGATCCAATACAGGTGTAACAACATTTTGGAGGA  
TCCGAGCAACATAGTACTTGAGTGCCCTTATACATTAACACTCAGGTTTG

>PGSC0003DMG400012817-(rev)LRR-RLKs\_3038

TTGGAGGATCCGAGCAACATAGTACTTGAGTGCCCTTATACATTAACACTCAGGTTTGTCCAAGAACAG

GTCATTCTTTGTTTACATTTGCTTTCTGGTTCTCGTAGAGCTCCTCCGGT

>PGSC0003DMG400012817-(rev)LRR-RLKs\_3534

TATTACCACGAAGACGCATCAGATCAAGGAAATGTAGCTTAAAGATAGTCAACATATCTTTGCTTAGATG

TAGCGACATGGACAGTGATGATTCATATGGTCGAGACTCGAGACCAACTT

>PGSC0003DMG400012817-(rev)LRR-RLKs\_3596

CTTAGATGTAGCGACATGGACAGTGATGATTCATATGGTCGAGACTCGAGACCAACTTGTCTGGCATTG

AGGCATAGTCGTTGTATCGTGAAAGTGAAGATGTGTGAATTTTTTTTATTTG

>PGSC0003DMG400012817-(rev)LRR-RLKs\_3658

GGCATTGAGGCATAGTCGTTGTATCGTGAAAGTGAAGATGTGTGAATTTTTTTTATTTGCTAATTGCTTAA

TACTTTGCTATCAATACTTGATTTTTGGTTAATTTTGGAGAGAAGGGGA

>PGSC0003DMG400012817-(rev)LRR-RLKs\_3689

GTGAAGATGTGTGAATTTTTTTTATTTGCTAATTGCTTAATACTTTGCTATCAATACTTGATTTTTGGTTTAA

TTTTGGAGAGAAGGGGAAAACAGAGTTGAGATGAAGTGTAAAAGGATG

>PGSC0003DMG400012817-(rev)LRR-RLKs\_806

CGAGCTGGCTCACTGAGTTAACTAGTGTTGAGCAAATTGAGCTGTACAATAACTCGTTTTCCGGCGAGTT

TCCGGTGAATGGGTGGTCAGATATGACCTCGTTGAGGCGGGTCGACCTGT

>PGSC0003DMG400012817-(rev)LRR-RLKs\_992

TTTATGAGAATCAATTGTATGGTGAGTTACCTATAGCCATTGCAAATTCACCCAATTTATATGAATTAAG

CTCTTTGGTAATAGGCTAAATGGAACCTTACCTAAAGATCTTGGTAAAT

>PGSC0003DMG400012929LRR-RLKs\_1647

TACAACCTAAGATGTCCTTAAAGCTGCTCATGATTATTCGTTGAAGTATTCTCTAGGCACATTTAACAATT

TCTGTCATGGTTTCAAGCATTCTTTGATAAATATTAATGATCCCAAATT

>PGSC0003DMG400012929LRR-RLKs\_1708

TTTAAACAATTTCTGTCATGGTTTCAAGCATTCTTTGATAAATATTAATGATCCCAAATTATATGCTTTTAAAG

TCGTTAGCTGCTTACTGTCCTTATCTTCTTTTATCAAGAATAGGCAA

>PGSC0003DMG400012929LRR-RLKs\_2440

AACTAAGTGGAGAAGTCCACGACGTTAAGCTTTCTGATAGGTAAATATAAAACAAAAAAGATAATAAGT

AAGACACGAAATTTTCATCAGATTCCAAGACTTGGTAAGTCATTCCCTGTTT

>PGSC0003DMG400012929LRR-RLKs\_2501

TAATAAGTAAGACACGAAATTCATCAGATTCCAAGACTTGGTAAGTCATTCCCTGTTTCCTTTAGTCTGT  
TTGTCTTGTTATTACAGAGGTGTTGTTAATGTACCTATAATTTGTATTG

>PGSC0003DMG400012929LRR-RLKs\_2684

TATTTTCAGAACCTTGCACTTCACAAAAACATTAATGTTCAATTTGAACTCCAGTCCGTTTTCTTAACTTCA  
ATCTTTGTGTACAAGTCTTCTCCACATAATCCTTACCTTTTTGCTCGT

>PGSC0003DMG400012929LRR-RLKs\_4183

TCAAATGATGTAGTTCAATAGTTGGAAAGTTCTGTATGAATTCTTGATTGCCCATCACCTATTCAATCTT  
TTGAAACTACACTCCTCTATTCTCTCATTCTACCAAGTGAAGTTGCTAC

>PGSC0003DMG400012929LRR-RLKs\_793

AACTACCACCGAACCCGAACCCTAATGAGGAGGAGGTGGGGTTTGTAGGAAAACGGAAATCGGGAAAT  
GGGTCAATGGTGGTTTTCTTTGCTCTCCGGCGTATCGGTTGTGATTGGGGTGA

>PGSC0003DMG400012929LRR-RLKs\_854

GGGAAATGGGTCAATGGTGGTTTTCTTTGCTCTCCGGCGTATCGGTTGTGATTGGGGTGATGTTTGTTC  
GTGTTGGTGTGAGGAGAAAATGGAAGTTGGATGAGGATAAAAATAGGAAA

>PGSC0003DMG400012929LRR-RLKs\_915

TTTGTTCAGTGTTGGTGTGAGGAGAAAATGGAAGTTGGATGAGGATAAAAATAGGAAAAGAAAAGTT  
GGAGAAGCCAGAGGAGGGGCAAAAAGGGTAAATATGTAGTGTTAGACGAGGGG

>PGSC0003DMG400012955-(rev)LRR-RLKs\_0

CACCCCATCCAACAGAGAAATACAGAGAGAAAGAGCAAAAATACAAAAGAGACACCAACTCATTGCC  
ACTCTACCCCGAAATATAAAAACCCTAATTTCCCTCTGTTTTTTCTCCTTT

>PGSC0003DMG400012955-(rev)LRR-RLKs\_1281

CAGTTTTTTGGAATATTTGCATTTCTTAGATCAGTATATGTTGTTGTTGTTGAATGATCATAATCAAATAC  
ACCTTTTATTTGTATAGTGTGTTTTGTGGATGCCTTGAACCTTCATGCCTC

>PGSC0003DMG400012955-(rev)LRR-RLKs\_1403

AATTTTTGGAGGTGGACTAAAATTGGAACTTTCTTGTTGTTTAGGCATTGAACTTTTACAGTTATGCAA  
AGTTGCGGGGACTCTTCACTTTTGATGCCGCACCGTGTCCGATTTTCCA

>PGSC0003DMG400012955-(rev)LRR-RLKs\_1586

ATAACAGTTGTGAATGTAAAATCTCGTTCTTTTTGTTTTCTTGTCAGGTTATAATTAGTTTTCTTGTGTGAG  
TAGTGGTTGACAATCTATATAACAGAGAATAGAAATCTTCAGCTTACG

>PGSC0003DMG400012955-(rev)LRR-RLKs\_1647

TCTTGTGTGAGTAGTGGTTGACAATCTATATAACAGAGAATAGAAATCTTCAGCTTACGCCAAATACAGA  
AAAGTTTGCTTTTTGTGTAAGTAGGTTTTAAAAAAATGTTTAAACAAA

>PGSC0003DMG400012955-(rev)LRR-RLKs\_1708

AAATACAGAAAAGTTTGCTTTTTGTGTAAGTAGGTTTTAAAAAAATGTTTAAACAAAACCAAATTTTG  
AACAACTTTTACCGCCAGCTTTTTGTTCCTCAACAGAACGTGAGC

>PGSC0003DMG400012955-(rev)LRR-RLKs\_183

TCTCTGTCTGAAGTCTGAAGTCTTTCTTGAATTTCTATGGTGCTCTCCATAGTCATCCTTAAGCTTTTC  
TTCCTTTTACCCTTTTTCAGATTTTCTTCTTTATCTCAATGCCTCA

>PGSC0003DMG400012955-(rev)LRR-RLKs\_2135

TGTGTCGTTATCAAGGTTCTAAGGCATACTTTTCTTATGTTTATATATTTGTCATTCATGCTTAGGACTAA  
ACATATATATTTTTATTTTTCTCCCTTTTCGCCTTTTCCATTAAAG

>PGSC0003DMG400012955-(rev)LRR-RLKs\_2318

CTTGAAAAGTGAAAATGTTGAATTTTTCTTCTGCTTCCAATATCCAATGCTATAGCACAAATATTTGTACCT  
ACAGTAAAATGAGTTTTATTTTCTTAATGAGCTATTTGCTCTTAATAT

>PGSC0003DMG400012955-(rev)LRR-RLKs\_244

CTTAAGCTTTTCTCCTTTTACCCTTTTTCAGATTTTCTTCTTTATCTCAATGCCTCATTTTTAGCACTTAAA  
TCACATTCTCAGCCCAATGACTCTCTCTCAATCTCTCTCTTTACTC

>PGSC0003DMG400012955-(rev)LRR-RLKs\_2440

TCATCTTTCTATTTTGTATCACTGCATTACACCGTCCAGGGCTCCCCCTCCCTCCAGTGTAGGCCACTC  
ATGATGACGTTGGGCCTTAGAATCAGAAAATAATTGATGACTACATTT

>PGSC0003DMG400012955-(rev)LRR-RLKs\_2501

GTAGGCCACTCATGATGACGTTGGGCCTTAGAATCAGAAAATAATTGATGACTACATTTCTTTTTTGATA  
AGGAATTGATGCCAACATTCCTGTCTTCATTATTATCAAATCAGTACTCA

>PGSC0003DMG400012955-(rev)LRR-RLKs\_2867

TCCAGAAGTTGAATGGTGCCGTTGAGTGATGACTGATATTTTATTCTTCTCATCTTGCATTTATTCTTTGA  
GGAAGCGACTCTCAGATCAGCTAGATAGTTTTGTATACTTGTCTCACTT

>PGSC0003DMG400012955-(rev)LRR-RLKs\_2928

TATTCTTTGAGGAAGCGACTCTCAGATCAGCTAGATAGTTTTGTATACTTGTCTCACTTATATACTTTTTTG

CCTTCTAATTTTTTTTTGGCTATATAGTATTTCTACCATATTATTTAG

>PGSC0003DMG400012955-(rev)LRR-RLKs\_2989

ATACTTTTTTGCCTTCTAATTTTTTTTTGGCTATATAGTATTTCTACCATATTATTTAGCTAGAAATAGTTGC

ACTTAGACCTGAAAGTTAAATTGGATGTTTAATAACAATGCACATTT

>PGSC0003DMG400012955-(rev)LRR-RLKs\_3233

GAGTTCTAAATATTTTCATCGAACCACCTATTAGGTTCACTGCCATCCTCCATAGGAAATTGTGCAGTTGTG

GATCTGAGCAGAAATATGCTCGTGAATGGTATATCAGCTATTGAGAGCT

>PGSC0003DMG400012955-(rev)LRR-RLKs\_3294

TGCAGTTGTGGATCTGAGCAGAAATATGCTCGTGAATGGTATATCAGCTATTGAGAGCTGGGAAGCCAA

TTTGAAATTATTGATTTGAGTTCAAATAGGTTAACTGGAAATATTCCCAC

>PGSC0003DMG400012955-(rev)LRR-RLKs\_4270

CCAATTCCTTGAGTTTCTCTAATGATCACTTGCTCACAGCGAACTCGAGATCTCTGTCTGGGCAAATTGA

GTCTGGTACAGAAATTGTTGAGCATGTTTTCCAGAGGGAGTAACTGCA

>PGSC0003DMG400012955-(rev)LRR-RLKs\_4453

TCTCCAGGCTCTCCAATAGCTTCTCCCTCGTTTCGTCGACACAGTTGAACAACCGGTGACATTGGATGT

GAATTCACCGGATCGATTGGCTGGGGAATTGTTCTTCTGGATGGTTCA

>PGSC0003DMG400012955-(rev)LRR-RLKs\_4819

ATTTTAGCAGACTACATACCAGGAGATAGTTTGGCGTTGCATCTCTATGGTAAGATTTACTTATGAATAA

CTTCAACAATGATTTCCATGTCTTCCATTGTTGTTGGTTACTGTTATT

>PGSC0003DMG400012955-(rev)LRR-RLKs\_488

AAACGGGTCTTTCAAATCTATCAGCATGTCCAAAGTCATTTTCATGGTGTGTTTTGTGATGAAAACCTCCGA

TTATGTTTTCTCATTCTCTTGACGGGCTTGGGCTTGTGGGTGACTTGA

>PGSC0003DMG400012955-(rev)LRR-RLKs\_4941

AAAGTTACCTTTTGTGCTGGTGGTGGTGATTATCTTGTGTTAGGACCAATATCTAGTATCCTTCGCATAA

ATAGTTTCTATAGCAGCATAGCTTATTTCTTGTGGTGGTTTTCTAATTG

>PGSC0003DMG400012955-(rev)LRR-RLKs\_5002

CTTCGCATAAATAGTTTCTATAGCAGCATAGCTTATTTCTTGTGGTGGTTTTCTAATTGCTGAGATCTCGT

GTTTTGTGGGATTGTTTGATAAAAATTATGGAGGATAAAGTTGACTTGG

>PGSC0003DMG400012955-(rev)LRR-RLKs\_5185



TGCAGATAGTGATGAGATCTTATTTGGATCTGTCGTCTTATGAATCCAGTGGTAGAGTTGTTGATCAA  
ATGGAAAAGGAAAAAATACAACCTGCAATTGTAGAATCTGAATGTTTTT

>PGSC0003DMG400012955-(rev)LRR-RLKs\_5246

GTTGATCAAATGGAAAAGGAAAAAATACAACCTGCAATTGTAGAATCTGAATGTTTTTACAAAATTATG  
TTTGTTAGAATGTATGTGCAGATCTTATGTGTCATCTGGTAACCTTCAA

>PGSC0003DMG400012955-(rev)LRR-RLKs\_5368

GAACTCCAAAAGGTACAAAAGATCTCTGGTTCATAATTGCCGTACGCCAACAGCCACACATCAATAGC  
CCATCAAATTAGGGAGTAGACCTATTCTACGATCTCGTTAACATGACCT

>PGSC0003DMG400012955-(rev)LRR-RLKs\_5551

TCATGATGGTAAAACCTTGATAAATATGGAGAGTTGGCTTTGTCATAGTATCCCCGGTGCAGTGAGGACT  
GATTACTTGTAGACATGTTGGGGGCTGTTGGAATCTTTTACTTTTTGTAAT

>PGSC0003DMG400012955-(rev)LRR-RLKs\_5612

TGAGGACTGATTACTTGTAGACATGTTGGGGGCTGTTGGAATCTTTTACTTTTTGTAATTTTTCGCAGTTT  
TAAATTTTAAATGAATGTCTACTTTTTACAGAGACAACCCCTCGGAGGT

>PGSC0003DMG400012955-(rev)LRR-RLKs\_5673

TTCGCAGTTTTAAATTTTAAATGAATGTCTACTTTTTACAGAGACAACCCCTCGGAGGTACTCCCCGTTAT  
CCTTCAACCAAAGGTAAAAGTTGCCATTGAAGTTGCTCGGGGTTTGGC

>PGSC0003DMG400012992LRR-RLKs\_124

TTCCTAGAGAGTTGGGAAATTTGAAAAGCCTCACTTTTTTGGATTTATCAATTAATCATCTTACTGGTCCT  
ATTCTAGTGAGTTGGGGAATCTGATAAATCTCACAGAGATAGATTTAT

>PGSC0003DMG400012992LRR-RLKs\_1612

CATACAATGAGTTGGAAGGTCCAATCCCCAATAATAAAGCTTTTATGAATGCTTCATTAGAAGGTAACAA  
AAGTCTTTGCGGCAATGTATCAGGACTCCAGCCCTGTGAAAGACCATCTC

>PGSC0003DMG400012992LRR-RLKs\_1674

GGTAACAAAAGTCTTTGCGGCAATGTATCAGGACTCCAGCCCTGTGAAAGACCATCTCCTGTGGTGAAC  
AAGCACTCAATGGCGCAAGTCATCCTCATCACTGTACTTCTGTTATGGGA

>PGSC0003DMG400012992LRR-RLKs\_1736

GGTGAACAAGCACTCAATGGCGCAAGTCATCCTCATCACTGTACTTCTGTTATGGGAGTACTACTCTG  
CTATGTGTTTTATTGGTGTCTCTTTATGTGTAATAAAAAGAAGGAGAGT

>PGSC0003DMG400012992LRR-RLKs\_1798

TACTACTGCTATGTGTTTTTCATTGGTGTCTCTTTATGTGTAATAAAAGAAGGAGAGTTAGAGACGTTGA  
AAGAAGGGATGGTGATGGTTGGCTTCAATATCCATGTTAGATGGAAAGG

>PGSC0003DMG400012992LRR-RLKs\_2108

GATTAAGCACCGAAACATTGTGAACCTCTATGGCTATTGTTTCGAAAGCACAACATTCACTCTTGGTTTAC  
GAGTATGCGGAGAGGGGGAGTTTGTCTAGTACTTTGAGTGATGAAGTTGA

>PGSC0003DMG400012992LRR-RLKs\_2170

TGGTTTACGAGTATGCGGAGAGGGGGAGTTTGTCTAGTACTTTGAGTGATGAAGTTGAGTCCAAGAAAT  
TGGATTGGTTTTAAAGGGTGAATATCATCAAGGGTGTGCTTTTGCTTTAT

>PGSC0003DMG400012992LRR-RLKs\_2232

AAGAAATTGGATTGGTTTTAAAGGGTGAATATCATCAAGGGTGTGCTTTTGCTTTATCTTACATGCACC  
AGGATTGTTTCATCGAGACATATCAAGCAGTAATGTTTTGCTTGATTCAGA

>PGSC0003DMG400012992LRR-RLKs\_2294

CATGCACCAGGATTGTTTCATCGAGACATATCAAGCAGTAATGTTTTGCTTGATTCAGAGTATGAAGCTCA  
TGTTGCAGACTTTGGCATATCAAAGCTTCTCAATCCAGACTCATCCAATT

>PGSC0003DMG400012992LRR-RLKs\_2356

GAAGCTCATGTTGCAGACTTTGGCATATCAAAGCTTCTCAATCCAGACTCATCCAATTGCACAACGCTTG  
CAGGGACATATGGTTATGTTGCACCTGGTAATTAAGTTTAAAATATTTCA

>PGSC0003DMG400012992LRR-RLKs\_2418

AACGCTTGCAGGGACATATGGTTATGTTGCACCTGGTAATTAAGTTTAAAATATTTTCATGAACTAAAGCC  
AAACTCCATTGTTTATATCTCATTACACGTTTATATTGTTTTGGAAA

>PGSC0003DMG400012992LRR-RLKs\_2480

CTAAAGCCAAACTCCATTGTTTATATCTCATTACACGTTTATATTGTTTTGGAAATTGTATTGTTTCAGA  
GCTTGCATATACTATGAAGGTTACGCAAATGTGTGATGTATATAGCTT

>PGSC0003DMG400012992LRR-RLKs\_2542

ATTGTTTCAGAGCTTGCATATACTATGAAGGTTACGCAAATGTGTGATGTATATAGCTTTGGAGTATTATC  
TTTGGAGATAATCAAAGGAAAGCATCTTGGGGAATACATTACCGTGCTAG

>PGSC0003DMG400012992LRR-RLKs\_2604

GTATTATCTTTGGAGATAATCAAAGGAAAGCATCTTGGGGAATACATTACCGTGCTAGTAAATTCATCGA

CTATAGATCATGAGCAACTTAGTGATTTGTTGGATGAACGCCTTCATAT

>PGSC0003DMG400012992LRR-RLKs\_2666

TTCATCGACTATAGATCATGAGCAACTTAGTGATTTGTTGGATGAACGCCTTCATATCCTGAAGATAGA

GTAAAAGAGGTTTTGATTTTTATCATCAAGCTAGCATGCTCTTGTTTGCT

>PGSC0003DMG400012992LRR-RLKs\_2728

AAGATAGAGTAAAAGAGGTTTTGATTTTTATCATCAAGCTAGCATGCTCTTGTTTGCTTGAACTCCAAA

ATCGAGGCCCAATGCACTTCATCTCTCATAAGTTATCATCGATGGATG

>PGSC0003DMG400012992LRR-RLKs\_2775

TCTTGTTTGCTTGAACTCCAAAATCGAGGCCCAATGCACTTCATCTCTCATAAGTTATCATCGATGGA

TGTACGTCCATCTACTCATGTAAAGCTAGTTCAATTCTTTAATCCGTGA

>PGSC0003DMG400012992LRR-RLKs\_372

ACTGATTTGGATTTATCCACTAATCATTTTACTGGTCCAATTCCTGGTGTGTTGGGGAATCTGATAAATCT

CACAAAGATAGATTTATCTAAAAGTCACTTACTGGTTCAATTCCGATT

>PGSC0003DMG400012992LRR-RLKs\_558

CCTAGTGAGTTGGGTAATTTGAAGAACCTCAATGGTCTGTCCTTATACGAAAATCACTTACTGGTCCAA

TTCCTGCTTCTTTGGCAATTTGAGAAGCTTGCAATTTTTGTATCTCAAT

>PGSC0003DMG400012992LRR-RLKs\_620

TGGTCCAATTCCTGCTTCTTTGGCAATTTGAGAAGCTTGCAATTTTTGTATCTCAATGCCAACAACTTA

CTGGTCCAATTCCTGCTTCTTTGGCAATTTGAGAACTTGCAATTTCT

>PGSC0003DMG400012992LRR-RLKs\_682

ACAACTTACTGGTCCAATTCCTGCTTCTTTGGCAATTTGAGAACTTGCAATTTCTGTATGTGAGTGTC

AACAACTTTCTGGTTCTATTCCAAAAGAACTTGCATATTTAGATAACT

>PGSC0003DMG400012992LRR-RLKs\_744

GTGAGTGCAACAACTTTCTGGTTCTATTCCAAAAGAACTTGCATATTTAGATAACTTGGAAGAGCTGA

TAATAAGTGAAAATCAGTTTTCAGGTCATTTGCCTGAGCATCTTTGCCAA

>PGSC0003DMG400012992LRR-RLKs\_806

AGAGCTGATAATAAGTGAAAATCAGTTTTCAGGTCATTTGCCTGAGCATCTTTGCCAAGGTGGGAACTT

GAGAACTTACGGTGAATAGTAACAAGTTGTCTGGGCCAATACCAAGAAG

>PGSC0003DMG400012992LRR-RLKs\_868

GGAAACTTGAGAACTTCACGGTGAATAGTAACAAGTTGTCTGGGCCAATACCAAGAAGCATGTCCAAGT  
GCTCGAGTTTCAAAGGGTTCGCTTTGATAACAACAGTTTTACTGGAAATT

>PGSC0003DMG400012992LRR-RLKs\_992

TGAAGCTTTTGGTATCTATCCGGAGCTGCAATTTATTAATTTGAGCAAAAATGATTTTCATGGTGAECTCA  
GTAGCAACTGGGGGAAATGCAAGAAGTTGACTGATTTTCGAGTAGCCAG

>PGSC0003DMG400013198LRR-RLKs\_0

GATTCTCTCCATTTACACATCCTCACATGCTATGTTTCACTACTCTTTCTTCTACTAGTATTTATCTCTTTCTT  
TTCCCTTTTCTCTTCATTTAACTTGAAAAAAGTTGAGGGGAGGAA

>PGSC0003DMG400013198LRR-RLKs\_1037

CTGGGAAGATTCCAGTTTCAATTAGTAAGTTAAGCATGCTTGAGGAGATTAATCTTAGTCATAACCTTAT  
TAATGGGACTATTCCTGATGAATTAGGTAGTCTCTTAAGGCTTACTGTTC

>PGSC0003DMG400013198LRR-RLKs\_1098

TAACCTTATTAATGGGACTATTCCTGATGAATTAGGTAGTCTCTTAAGGCTTACTGTTCTTGATTTATCTA  
ATAATACCATAAATGGAACCTTCTGCTAGTTTCTCAAACCTTTTCAGC

>PGSC0003DMG400013198LRR-RLKs\_1159

GATTTATCTAATAATACCATAAATGGAACCTTCTGCTAGTTTCTCAAACCTTTTCAGCTCTTTCTACTTTG  
GATTTAAAGAGTAATCTTCTTGATAGCCAAATCCCAGATACCATGTAT

>PGSC0003DMG400013198LRR-RLKs\_122

AAAAGAAGAGTTTAGCATTCTTTGTTAAGTTCTTCTTCTGATTGGAGATTCTGAACTTGTTTTAAGTTT  
ATGGATAGGTGGGATACTTCACTGAGTGGATTTTACAACCTTTTC

>PGSC0003DMG400013198LRR-RLKs\_1220

TTTCTACTTTGGATTTAAAGAGTAATCTTCTTGATAGCCAAATCCCAGATACCATGTATAGAATGAAAAAC  
CTTTTCAGTGCTGGATTTGAGTAACAACAATTCATTGGTCATATTCCAG

>PGSC0003DMG400013198LRR-RLKs\_1281

AATGAAAAACCTTTCAGTGCTGGATTTGAGTAACAACAATTCATTGGTCATATTCCAGCTACTATTGGA  
AATATTTCTAGGCTCACCTCACTTGATTTATCTGGAAACAATTTCACTGG

>PGSC0003DMG400013198LRR-RLKs\_1342

ACTATTGGAAATATTTCTAGGCTCACCTCACTTGATTTATCTGGAAACAATTTCACTGGTGAAATTCCAAA  
CTCTCTTGTTTCTTTGGCAAATCTGACTTCTTTGGATGTGTCTTATAAC

>PGSC0003DMG400013198LRR-RLKs\_1403

AAATCCAAACTCTCTTGTTCCTTTGGCAAATCTGACTTCTTTGGATGTGTCTTATAACAATCTTTCTGGGA  
TTGTCCCATCTCTTCTTTCTAGAAAGTTCAATGCAAGTGCTTTTGTTG

>PGSC0003DMG400013198LRR-RLKs\_1464

TCTTTCTGGGATTGTCCCATCTCTTCTTTCTAGAAAGTTCAATGCAAGTGCTTTTGTTGGAAATTTAGAGC  
TTTGTGGATATAGTCCATCAACTCCATGTGCTTCACCACCCCCTCAAAC

>PGSC0003DMG400013198LRR-RLKs\_1525

AATTTAGAGCTTTGTGGATATAGTCCATCAACTCCATGTGCTTCACCACCCCCTCAAACCTTCCTTCTCCT  
GTTAGTGGGGTTGTCAAGCCTCACCGCCATCGTAAACTTAGTACCAAA

>PGSC0003DMG400013198LRR-RLKs\_1586

TTCCTTCTCCTGTTAGTGGGGTTGTCAAGCCTCACCGCCATCGTAAACTTAGTACCAAAGATATCATTCTC  
ATAGCATCAGGTGCTCTTCTAGTTGTTCTGCTTCTTTTGCTGCTGCATGT

>PGSC0003DMG400013198LRR-RLKs\_1647

TATCATTCTCATAGCATCAGGTGCTCTTCTAGTTGTTCTGCTTCTTTTGCTGCTGCATGTTACTTTGCTGCTT  
GATTAGGAAAAAGGCAAATTCGAGAGCGAAAAATGGTAGCAAAGCCGG

>PGSC0003DMG400013198LRR-RLKs\_1708

CTTTGCTGCTTGATTAGGAAAAAGGCAAATTCGAGAGCGAAAAATGGTAGCAAAGCCGGTGGCCTAGC  
TACCACTACAGGAAGAGGTGCGAAGTCAGTTCAGCTGTAGGAGGAGCTGAA

>PGSC0003DMG400013198LRR-RLKs\_1769

GCCTAGCTACCACTACAGGAAGAGGTGCGAAGTCAGTTCAGCTGTAGGAGGAGCTGAAGTTGAATCA  
GGTGAAGCTGGTGGAAAGCTAGTCCATTCGATGGACCTTCGTGTTTGACG

>PGSC0003DMG400013198LRR-RLKs\_183

TTTTAAGTTTATGGATAGGTGGGATACTTCACTGAGTGGATTTACAACCTTTTCGATTCTTGAATT  
TATATTCAGAAATTAAGATGGGTCTAGCTGGGTTTCATGACAAGAAAAA

>PGSC0003DMG400013198LRR-RLKs\_1830

TGAATCAGGTGAAGCTGGTGGAAAGCTAGTCCATTCGATGGACCTTCGTGTTTGACGCGGACGACTT  
GTTGTGTGCCACTGCAGAGATCATGGGGAAGAGCACTTACGGGACAGCATA

>PGSC0003DMG400013198LRR-RLKs\_1891

GACGACTTGTTGTGTGCCACTGCAGAGATCATGGGGAAGAGCACTTACGGGACAGCATATAAGGCAAC

ATTGGAGGATGGTAATCAAGTTGCAGTGAAGAGGCTACGCGAGAAGATCACG

>PGSC0003DMG400013198LRR-RLKs\_1952

AGGCAACATTGGAGGATGGTAATCAAGTTGCAGTGAAGAGGCTACGCGAGAAGATCACGAAAGGGCA

GAAAGAATTTGAAGCTGAGGTTGCTGAATTAGGAAAGATTCGACACCCAAATA

>PGSC0003DMG400013198LRR-RLKs\_2013

AGGGCAGAAAGAATTTGAAGCTGAGGTTGCTGAATTAGGAAAGATTCGACACCCAAATATTTTGGCGCT

TAGAGCTTACTTGGGACCAAAGGAGAAAAGCTTCTTGTGTATGATTA

>PGSC0003DMG400013198LRR-RLKs\_2074

TTGGCGCTTAGAGCTTACTTGGGACCAAAGGAGAAAAGCTTCTTGTGTATGATTATATGTCTAATG

GAAGTCTCTCATCCTTTCTTCATGGTAAAATTGTCTACACTCACTCACTG

>PGSC0003DMG400013198LRR-RLKs\_2135

TGTCTAATGGAAGTCTCTCATCCTTTCTTCATGGTAAAATTGTCTACACTCACTCACTGTTTGTGTATAT

TCCTTTGGTGTTCCTTATCATGTGACAATCCTAACATCATACTTGT

>PGSC0003DMG400013198LRR-RLKs\_2196

TGTTTGTATATTCCTTTGGTGTTCCTTATCATGTGACAATCCTAACATCATACTTGTGTTCTCTATATGC

AGCTAGAGGTCCCGAGACAACGATAGACTGGCCAACAAGGATGAGGAT

>PGSC0003DMG400013198LRR-RLKs\_2257

TCTCTATATGCAGCTAGAGGTCCCGAGACAACGATAGACTGGCCAACAAGGATGAGGATTGCTATCGGT

ATAACAAAAGGAATCTGCTTTCTGCATACCAAAGAAAACATAATTCATGGG

>PGSC0003DMG400013198LRR-RLKs\_2318

CTATCGGTATAACAAAAGGAATCTGCTTTCTGCATACCAAAGAAAACATAATTCATGGGAATCTTACATC

AAGCAACATTTTACTTGATGAGCAAAACAATCCAAAGATTGCAGATGTTG

>PGSC0003DMG400013198LRR-RLKs\_2379

TCTTACATCAAGCAACATTTTACTTGATGAGCAAAACAATCCAAAGATTGCAGATGTTGGACTCTCCAAG

CTTATGACCACTGCTGGAAACACCAACGTGATTGCCACTGCAGGCACGCT

>PGSC0003DMG400013198LRR-RLKs\_244

TTCTTGAATTTATATTCAGAAATTAAGATGGGTCTAGCTGGGTTCATGACAAGAAAAGGAAAAATGG

AAGCTTTCTTCTTGGCATAATACTCTGTTCTTGTGTTGTTGTGATTGTG

>PGSC0003DMG400013198LRR-RLKs\_2440

CTCTCCAAGCTTATGACCACTGCTGGAAACACCAACGTGATTGCCACTGCAGGCACGCTAGGTTATCGTG  
CACCAGAGCTTTCTAAAATCAAGAATGTAAGCACCAAGACTGATGTCTAT

>PGSC0003DMG400013198LRR-RLKs\_2501

GTTATCGTGCACCAGAGCTTTCTAAAATCAAGAATGTAAGCACCAAGACTGATGTCTATAGTCTTGGAGT  
GATCATTTTGGAGCTCTTAACTGGAAAATCCCCTAGCGAGGCAACGGATG

>PGSC0003DMG400013198LRR-RLKs\_2562

TCTTGGAGTGATCATTTTGGAGCTCTTAACTGGAAAATCCCCTAGCGAGGCAACGGATGGTCTCGATTTG  
CCTCAGTGGGTAGCTTCTATTGTGAAAGAGGAGTGGACTAATGAAGTGTT

>PGSC0003DMG400013198LRR-RLKs\_2623

CTCGATTTGCCTCAGTGGGTAGCTTCTATTGTGAAAGAGGAGTGGACTAATGAAGTGTTTGATGTGGAA  
CTTATGAGGGATGCACCTAATATTGGTGATGAGTTGCTTAACACATTGAAA

>PGSC0003DMG400013198LRR-RLKs\_2684

ATGTGGAACCTTATGAGGGATGCACCTAATATTGGTGATGAGTTGCTTAACACATTGAACTAGCTTTGCA  
TTGTGTTGATCCACACCAACTGCTCGACCCGAAGCTCCGCAAGTATTAC

>PGSC0003DMG400013198LRR-RLKs\_2745

AGCTTTGCATTGTGTTGATCCACACCAACTGCTCGACCCGAAGCTCCGCAAGTATTACAGAAATTGGAG  
GAGATAAAACCAGAGGTGGTGTTAGCAGCCACTAGTTCTGGAGATGATGG

>PGSC0003DMG400013198LRR-RLKs\_2806

AAATTGGAGGAGATAAAACCAGAGGTGGTGTTAGCAGCCACTAGTTCTGGAGATGATGGCACAACAGT  
TCAAGAAAAGAGTGATGAATAATAATCTCACAAGGCTGATTGGAAATTTTTG

>PGSC0003DMG400013198LRR-RLKs\_2867

CAACAGTTCAAGAAAAGAGTGATGAATAATAATCTCACAAGGCTGATTGGAAATTTTTGAGCTTTTTACT  
TGATATCTATTTGTTTATTCTTTTCAATTTTTTTTTTACAGTTAGTAGTGGAA

>PGSC0003DMG400013198LRR-RLKs\_2928

CTTTTTACTTGATATCTATTTGTTTATTCTTTTCAATTTTTTTTTTACAGTTAGTAGTGGAAATGCTGTTTTATAC  
CAAGATCTACTAAAAAACTGTATATAGGAGATTGTGATTGCTGCATA

>PGSC0003DMG400013198LRR-RLKs\_2981

GTGGAAATGCTGTTTTATACCAAGATCTACTAAAAAACTGTATATAGGAGATTGTGATTGCTGCATAGGT  
TTTACTGATGAAGAAAAACATTTTATTCAATTCTTTCAATAAAAATAAACG

>PGSC0003DMG400013198LRR-RLKs\_366

TTCTGTTTTCTATTATATCAGCTGGGAGGAATTCAGATGGGGTATTGTGACTCAATCTGATTTTCAAG  
CTTTAAAAGCTATTAAGCATGAATTGATTGATTTTAGGGGAATATTGAA

>PGSC0003DMG400013198LRR-RLKs\_427

GATTTTCAAGCTTTAAAAGCTATTAAGCATGAATTGATTGATTTTAGGGGAATATTGAAGAGCTGGAATG  
ACAGTGGTCTTGGAGCTTGTGCTGGTGGTTGGGTAGGAATTAAGTGTGTT

>PGSC0003DMG400013198LRR-RLKs\_488

GCTGGAATGACAGTGGTCTTGGAGCTTGTGCTGGTGGTTGGGTAGGAATTAAGTGTGTTAATGGGGAA  
GTAATAGCTATACAGTTACCCTGGAAGGGATTGGGTGGAAGAATATCTGAAA

>PGSC0003DMG400013198LRR-RLKs\_549

TGGGGAAGTAATAGCTATACAGTTACCCTGGAAGGGATTGGGTGGAAGAATATCTGAAAAAATTGGGC  
AATTACAAGCTCTTAGAAAGCTTAGTCTTCATGACAATGTTATTGCTGGTCC

>PGSC0003DMG400013198LRR-RLKs\_61

TTATCTCTTTCTTTCCCTTTCTCTTCATTTAACTTGAAAAAGTTGAGGGGAGGAAGAAAAAGAAGA  
GTTTAGCATTCTTTGTTTAAGTTCTTCTTCTGATTGGAGATTCTGAACT

>PGSC0003DMG400013198LRR-RLKs\_610

ATTGGGCAATTACAAGCTCTTAGAAAGCTTAGTCTTCATGACAATGTTATTGCTGGTCCTGTTCCAACCTC  
TCTTAGCTTCTACCAAATCTCAGAGGTGTTTACCTTTTCAATAATCGG

>PGSC0003DMG400013198LRR-RLKs\_671

TTCCAACCTCTCTTAGCTTCTACCAAATCTCAGAGGTGTTTACCTTTTCAATAATCGGCTTTCGGGTCAA  
TCCCACCATCAATTGGAAGAATCCCTCTTCTACAGACTCTTGATCTTA

>PGSC0003DMG400013198LRR-RLKs\_732

TTCGGGTTCAATCCCACCATCAATTGGAAGAATCCCTCTTCTACAGACTCTTGATCTTAGCAACAATCAGC  
TCAGTGGTACTATCTCTCCAGTCTTGCAAACCTCCACCAGGTTATACAG

>PGSC0003DMG400013198LRR-RLKs\_793

AACAATCAGCTCAGTGGTACTATCTCTCCAGTCTTGCAAACCTCCACCAGGTTATACAGACTCAACTGA  
GCTACAATGCACTTTCAGGGTCAATCCAGTAAGTTTCACTCAATCTCCT

>PGSC0003DMG400013198LRR-RLKs\_854

TCAACTGAGCTACAATGCACTTTCAGGGTCAATCCAGTAAGTTTCACTCAATCTCCTTCTTACTTTTC



TTGCACTTGAACATAACAATCTATCTGGATCAATTCCTGATACTTGGG

>PGSC0003DMG400013198LRR-RLKs\_915

TCTTACTTTTCTTGCCTTGAACATAACAATCTATCTGGATCAATTCCTGATACTTGGGGCAGTGTGGTTG

TGAACAAGTCTTATCAACTTCAGTATCTTACACTTGATCACAATCTTTT

>PGSC0003DMG400013198LRR-RLKs\_976

AGTGTGGTTGTGAACAAGTCTTATCAACTTCAGTATCTTACACTTGATCACAATCTTTTATCTGGGAAGAT

TCCAGTTTCAATTAGTAAGTTAAGCATGCTTGAGGAGATTAATCTTAGT

>PGSC0003DMG400013383G-LecRK\_1116

GTGTCCTTGTTTTGGAGAAATTGTTGTATGGATATTGGTCACCAGGTAAGTGGTTGTTATGTATTTGAG

AGTTGATAGTAGAGAGAACGATATATCGAATTTTCATAGGCATGACTAGTT

>PGSC0003DMG400013383G-LecRK\_1674

CTGAGAAGGGTAGAAGGATACTTGTGTATGAGTATGTACCTAATGGTTCATTGGGTGAATTCCTCTTCCA

AAAGTCTCTGATCCAGTCACCAGATGGACAGAAACCTATACTCGATTGGA

>PGSC0003DMG400013383G-LecRK\_1736

CTCTTCCAAAAGTCTCTGATCCAGTCACCAGATGGACAGAAACCTATACTCGATTGGAATATAAGGTACA

GGATTGCGCTTGGTGTGGCACGAGCAATTGCCTATCTACACGAAGAGTGT

>PGSC0003DMG400013383G-LecRK\_1798

AAGGTACAGGATTGCGCTTGGTGTGGCACGAGCAATTGCCTATCTACACGAAGAGTGTGGTGGTGGT

ATTGCATTGTGATATCAAGCCTGAAAATATTCTCTTAGGCGATGATTTCTG

>PGSC0003DMG400013383G-LecRK\_1860

AATGGGTATTGCATTGTGATATCAAGCCTGAAAATATTCTCTTAGGCGATGATTTCTGCCCAAAGGTGTC

TGATTTTGGGCTAGCTAAGCTAAAGAAGAAAGAGGAGATGATGACCATGT

>PGSC0003DMG400013383G-LecRK\_2418

CTTCATAATTCCTCAAATGCTGCCTCAACAAGTTGCAGTAAGCATGTATTCCATGTTGTTTTGTATTGT

AATAAAAGAAAGTAGATAGGAATTTGGATCATGTTGTGTTTTGTCTGTT

>PGSC0003DMG400013383G-LecRK\_434

GATGGAAGCTTGGTTTATGGAACTGGAACAGTTTTTTGAACCCAACTGATACTTATCTTCCGACCCAGA

ACATCACCGGAACAAATTTAACTTCCGCTAATGGAAAATTCCAGTTTGAT

>PGSC0003DMG400013383G-LecRK\_496

GACCCAGAACATCACCGGAACAAATTTAACTCCGCTAATGGAAAATCCAGTTTGATGGATCGAATTCG  
AATACCCTTTTCTTCAATGGAAACGATAGTTATTTCACTTTTTCCAAAA

>PGSC0003DMG400013383G-LecRK\_558

CGAATTCGAATACCCTTTTCTTCAATGGAAACGATAGTTATTTCACTTTTTCCAAAAATGCCCTTCAGAGG  
TTGGAGGAAACAGGGGAAGTACTCAAGTTAATGGAAAATTTGTTTCGT

>PGSC0003DMG400013468-(rev)RLKantifungi(GNK)\_0

CTGTAATGGGGTCTTGGTTAAACCTTCAAATTCCTTAATTTTTTAGGATTCTTCTGTTCAAGCACTATTT  
TTTACAAATACCCTTTTGCTAATTTGGATTCTTGAAAAGTTCTAGGA

>PGSC0003DMG400013468-(rev)RLKantifungi(GNK)\_1037

TACAGTTACTTCTTGGTTCATCTAGCTAATGAAATTAACAAAAAAGATTCCTTTTTCTGGTTATAGAGGG  
TAGTTTCCTATTGTGGTATGGTACTTCTTGGTATCTAGCTTATGAAAT

>PGSC0003DMG400013468-(rev)RLKantifungi(GNK)\_1098

TTATAGAGGGTAGTTTCCTATTGTGGTATGGTACTTCTTGGTATCTAGCTTATGAAATAAAAAAAGGAA  
AAAGGTTCTTTTTGATATGTAGCTGGTATTCGGAGTAGTTTGCTGTTG

>PGSC0003DMG400013468-(rev)RLKantifungi(GNK)\_1159

AAAAAGGAAAAAGGTTCTTTTTGATATGTAGCTGGTATTCGGAGTAGTTTGCTGTTGTTGGTACAGTT  
ACTTCTTGTTGTTAGCCTATGAAATGCAAAAAGTTGCTCAATTGACAGA

>PGSC0003DMG400013468-(rev)RLKantifungi(GNK)\_122

TACTATAACAACTTATTGTTGTTAGGGTGGTGAATTTTTGTACATTTTCTTGAAATGGAACCGAATTCA  
CCTGTGAGATTCAAATTAGGTAAGCAATCTTCATTAGCACCAGAGAGGA

>PGSC0003DMG400013468-(rev)RLKantifungi(GNK)\_1220

GGTACAGTTACTTCTTGTGTTTAGCCTATGAAATGCAAAAAGTTGCTCAATTGACAGATATTTCTTCTCT  
TTAGCCCATCTTACTTTTGTAGTTATTATTTAGTGTCTGGGTCAGTCTG

>PGSC0003DMG400013468-(rev)RLKantifungi(GNK)\_1525

CCTTACTATGATATGATGAAAACCCATTTGGTTTGTGATGTTTGATTATCACTATGATCTTCTGTGCGTT  
TGCTGTCATTGGTACAGTTACTTCTTGGTATCTAGCTTATGAAATTAG

>PGSC0003DMG400013468-(rev)RLKantifungi(GNK)\_1586

TTCTGTGCGTTTGTGTCATTGGTACAGTTACTTCTTGGTATCTAGCTTATGAAATTAGAAAAAAGGTTTT  
TTTTCTGGGGGTTATTGCGAGTAGTATTGCTCAAATTGATAGCTATTTT

>PGSC0003DMG400013468-(rev)RLKantifungi(GNK)\_1647

AAAAGGTTTTTTTTCTGGGGTTATTGCGAGTAGTATTGCTCAAATTGATAGCTATTTCCCTCCCTTAGC  
CCATCTTACTCTTACCTTTACTGTTGTTATTTGAAGTTTGGGTCAGTTT

>PGSC0003DMG400013468-(rev)RLKantifungi(GNK)\_1708

TTCCCTTAGCCCATCTTACTCTTACCTTTACTGTTGTTATTTGAAGTTTGGGTCAGTTTGTGGACACACTAC  
TTATTCACCTGGTTTTTGTATGTCCTACCAGCAAATTGGGAAAGGGT

>PGSC0003DMG400013468-(rev)RLKantifungi(GNK)\_183

ACCGAATTCACCTGTGAGATTCAAATTAGGTAAGCAATCTTCATTAGCACCCAGAGAGGGGGCGAAGA  
AGTATTAGGAGGTGAAGATGATGGATTTGTTATTGATATTGATCCAAGGGT

>PGSC0003DMG400013468-(rev)RLKantifungi(GNK)\_2074

CTTGCAATCTTTAGGCAGATAGAAATAATTCACGATTCGGGTTCCGGACCTTAGTCCCAGGATTGTCAGT  
CTAGCTCTTCAATGTTTAGGCCACTCTTGGGGCATTACTATGGTTATTCT

>PGSC0003DMG400013468-(rev)RLKantifungi(GNK)\_2135

ATTGTCAGTCTAGCTCTTCAATGTTTAGGCCACTCTTGGGGCATTACTATGGTTATTCTGAGATCTGAGAT  
GGCGCATCATGGCGAAGAATAAATATCAAACAGAGCAATGGTTGGCGGA

>PGSC0003DMG400013468-(rev)RLKantifungi(GNK)\_2196

GATCTGAGATGGCGCATCATGGCGAAGAATAAATATCAAACAGAGCAATGGTTGGCGGATAACTATCCC  
ATGTCACGTGCATATTGTAGAATCGCATGTTTTGTGTGCTTTAAGATATTT

>PGSC0003DMG400013468-(rev)RLKantifungi(GNK)\_2257

ACTATCCCATGTCACGTGCATATTGTAGAATCGCATGTTTTGTGTGCTTTAAGATATTTCTTTTGATAGAC  
TCATTGGCTTTAAGATGTTTTATGTTTTACAAAGTTACATGCTGTGTG

>PGSC0003DMG400013468-(rev)RLKantifungi(GNK)\_2318

TTTGATAGACTCATTGGCTTTAAGATGTTTTATGTTTTACAAAGTTACATGCTGTGTGACCTTTGTTGAG  
ATGAGGACATATGCATGAAGATTTAACAGTTGTTCTTCATCTAATCTGA

>PGSC0003DMG400013468-(rev)RLKantifungi(GNK)\_2379

CTTTGTTGAGATGAGGACATATGCATGAAGATTTAACAGTTGTTCTTCATCTAATCTGATTAACAGATACT  
ATAATTTGTTTTTATTGTCGTTCTCCTTGCTCCCCTCACAAATATGGA

>PGSC0003DMG400013468-(rev)RLKantifungi(GNK)\_244

GGCGAAGAAGTATTAGGAGGTGAAGATGATGGATTTGTTATTGATATTGATCCAAGGGTTAGGTTGAT

GTATTCGGCGAATGAGGGTGATATAGAAGGGATAAAGGAGATTTTGGAAATCA

>PGSC0003DMG400013468-(rev)RLKantifungi(GNK)\_2440

AACAGATACTATAATTTGTTTTATTGTCGTTCTCCTTGCTCCCCTTCACAAATATGGACAATTTGATTTCT  
TAAAGTATTAAGGACACTTTTAGATGGATTCAATCTGAAAATTTTGAG

>PGSC0003DMG400013468-(rev)RLKantifungi(GNK)\_2501

ATTTGATTTCTTAAAGTATTAAGGACACTTTTAGATGGATTCAATCTGAAAATTTTGAGTGCCTGTTTTT  
CCTTATTAGTTTACATTTTTGGGAACAATCTAATCTTGCTTGAACAGC

>PGSC0003DMG400013468-(rev)RLKantifungi(GNK)\_2562

TCCTGTTTTTTCCTTATTAGTTTACATTTTTGGGAACAATCTAATCTTGCTTGAACAGCCCCTGGCAGATG  
GAATACATTATAAAAATCATGCAGTGATCAAGCTACTAGAGAAACATGG

>PGSC0003DMG400013468-(rev)RLKantifungi(GNK)\_2623

CTGGCAGATGGAATACATTATAAAAATCATGCAGTGATCAAGCTACTAGAGAAACATGGTGCCAAGCCT  
CCAGTAAGTTTGCATTCCATTCAAGCTCTACTGATCAGGGAAAAACCTTTT

>PGSC0003DMG400013468-(rev)RLKantifungi(GNK)\_2684

CCAAGCCTCCAGTAAGTTTGCATTCCATTCAAGCTCTACTGATCAGGGAAAAACCTTTTATTTTCATATTGT  
GATAAGAGTTGCTTGGTTTGATGATTGTCTAAATTAATTTTCATCCAGA

>PGSC0003DMG400013468-(rev)RLKantifungi(GNK)\_2745

TTCATATTGTGATAAGAGTTGCTTGGTTTGATGATTGTCTAAATTAATTTTCATCCAGATGGCTCCCATGC  
ATGTTAAGACTTGCCGTGAAGTTCCAGAATACGAGATTGATGCTAAAGA

>PGSC0003DMG400013468-(rev)RLKantifungi(GNK)\_2806

GCTCCCATGCATGTTAAGACTTGCCGTGAAGTTCCAGAATACGAGATTGATGCTAAAGAACTTGATTTC  
CTAATAGCATTGAGTTGAGCAAGGTAATATATTTTGTGTTTTCACTCTTG

>PGSC0003DMG400013468-(rev)RLKantifungi(GNK)\_2867

TTGATTTCACTAATAGCATTGAGTTGAGCAAGGTAATATATTTTGTGTTTTCACTCTTGTGTCCTGCGGAT  
GCGTGCTATTTTCGGTTGATTCTCTACCCCCCCCCCTTTTTTTTTT

>PGSC0003DMG400013468-(rev)RLKantifungi(GNK)\_305

GGTTGATGTATTCGGCGAATGAGGGTGATATAGAAGGGATAAAGGAGATTTTGGAAATCAGGGACTGAT  
GTTAATTTTAGGGATATTGATGAGAGGACTGCACTTCATGTTGCTGCTTGTC

>PGSC0003DMG400013468-(rev)RLKantifungi(GNK)\_3599

CCCCCCCCCCCCCTTTTTTTTTTCTATGGAGTTCTACACTAAAATTCATTTTTATTCTGCCATCATTGT  
TAGTATCATTCTCCAACCTGAGACTCTGTAGTCTGTACTGGCTTTTC

>PGSC0003DMG400013468-(rev)RLKantifungi(GNK)\_366

GACTGATGTTAATTTTAGGGATATTGATGAGAGGACTGCACTTCATGTTGCTGCTTGTCATGGTTCAAGT  
GATGTTGTGAAGTTGTTGCTTGATAATGGGGCTGAAGTTGATCCGAAAGA

>PGSC0003DMG400013468-(rev)RLKantifungi(GNK)\_3721

TTTTTCTAGTCTTATCTATTTGATTTACTGTTGCATATTTCTATGTCTGTTATCTTGGATGATTCTAGTG  
ACAAAGGGTTTACTTAATGTAACCTCGATGATCACCTTAGAGTTTGAA

>PGSC0003DMG400013468-(rev)RLKantifungi(GNK)\_3782

ATGATTCTAGTGACAAAGGGTTTACTTAATGTAACCTCGATGATCACCTTAGAGTTTGAATTAGTAAGATT  
GTACTATTGGAATGGAAGCAGCATTGCATGAGGCAAGTATGAGTAGATAA

>PGSC0003DMG400013468-(rev)RLKantifungi(GNK)\_3843

AGTAAGATTGTACTATTGGAATGGAAGCAGCATTGCATGAGGCAAGTATGAGTAGATAACGGATGTTC  
AATGGAGGAAAACCTGAGGCTAGCCTCATCTGATCACATCTTAGATTGATCTG

>PGSC0003DMG400013468-(rev)RLKantifungi(GNK)\_427

GGTTCAAGTGATGTTGTGAAGTTGTTGCTTGATAATGGGGCTGAAGTTGATCCGAAAGATCGGTGGGG  
GAGTACGGTATGATGATCAATCCCATTATGGTTTTGTTGATGTTTGATTGTT

>PGSC0003DMG400013468-(rev)RLKantifungi(GNK)\_4880

TAATATTAGAGCTTCTGCAGGAGCGCATTTAGAGATGAGCTTGCCTGCTCCAGAAGATGAGACATCCT  
AATGTGGTGCAATTTCTCGGTGCTGTAACACAAAGTAGTCCTATGATGATA

>PGSC0003DMG400013468-(rev)RLKantifungi(GNK)\_5002

GACGGAGTACTTACCAAAGGTCTTACTTATTAACCTTAAACGGTTTGCATAATTATTTGACAACATTTT  
TATACTGTTTTCTCCCTTATACTAGTTCTATCCATTTTTTCAGTTTA

>PGSC0003DMG400013468-(rev)RLKantifungi(GNK)\_5063

ACAACATTTTTATACTGTTTTCTCCCTTATACTAGTTCTATCCATTTTTTCAGTTTACATTCTCTTTTCTTC  
TTTTTGACAATATGTTTGAAACTTTTCCAACAAACCTATCACTTTG

>PGSC0003DMG400013468-(rev)RLKantifungi(GNK)\_5368

CTAAAAAAAACAATTTTTTTTATTATGCATTACTTATAAACTTTGAGTTAATGTTCAAAAATACACTTAA  
AAGTATTCGTTTTTTTGGAGTTTACCACCTGCACTATGCGAGTTTCCTA

>PGSC0003DMG400013468-(rev)RLKantifungi(GNK)\_5612

ATGAATAGTTCTGGTAGAAAACCTCGTACACTTGATAGATCCGGTATGAAAGTCGAAAACTGGAATACT  
TTAGGTGTGTTTTGACTGTTCACTCTAAAGCTTTTTGTGGATGTAAAATC

>PGSC0003DMG400013468-(rev)RLKantifungi(GNK)\_5673

GGAATACTTTAGGTGTGTTTTGACTGTTCACTCTAAAGCTTTTTGTGGATGTAAAATCTCAATGTCTTGT  
AGTCCTTTGATTGGAGCATTACTGCTGGGTATAAAAATTCTCATATATA

>PGSC0003DMG400013468-(rev)RLKantifungi(GNK)\_5734

AATGTCTTGTAGTCCTTTGATTGGAGCATTACTGCTGGGTATAAAAATTCTCATATATAATATTTGGTTTT  
AGGGGAATGAACTATCTCCATGAACATAAAGAAGCAATTATTCATCGTG

>PGSC0003DMG400013468-(rev)RLKantifungi(GNK)\_5795

ATTTGGTTTTAGGGGAATGAACTATCTCCATGAACATAAAGAAGCAATTATTCATCGTGATCTTGAGCCT  
TCGTAAGTTTCACTTCCGTCAGGTTACCTGAATTACATTTTGTCTATACT

>PGSC0003DMG400013468-(rev)RLKantifungi(GNK)\_61

AAGCACTATTTTTTACAAATACCCTTTTGCTAATTTTGGATTCTTGAAAAGTTCTAGGAATTACTATAACA  
AACTTATTGTTGTTAGGGTGGTGTAATTTTGTACATTTTCTTGAAATG

>PGSC0003DMG400013468-(rev)RLKantifungi(GNK)\_610

AATTTTGAAAAAAGGTTGTTTTTTGGGTATGTAGCTGGTTAGTGAGAACAGTTTGCATTGTTACTTGG  
TATCTAGCTTATGAAATTTTAAAAAGGGGGTTCTTTTTTTGGGTATGTA

>PGSC0003DMG400013468-(rev)RLKantifungi(GNK)\_6527

AACAGTTTGTGGCACTCTTGTGGACCATATCTTTATTTTATGTTAAGAGTGTGTGAATGCAAGGAGCAT  
TGTGTTCCGTGTTCTTAAAAGTGAAAGCACAAAACCTAGAAGTGAACATA

>PGSC0003DMG400013468-(rev)RLKantifungi(GNK)\_6588

CAAGGAGCATTGTGTTCCGTGTTCTTAAAAGTGAAAGCACAAAACCTAGAAGTGAACATATACTTTTTTAA  
AATGAAATCGAAATGAGTGCTCAATCTGTAGAAAATCAGAGATTGTGTAT

>PGSC0003DMG400013468-(rev)RLKantifungi(GNK)\_671

GTTACTTGGTATCTAGCTTATGAAATTTTAAAAAGGGGGTTCTTTTTTTGGGTATGTAGCTGGTTATTGA  
GAGTAGTTTGGTATTGTTGGTACACTTTTGAAATGAAAAGAAAAAAA

>PGSC0003DMG400013468-(rev)RLKantifungi(GNK)\_732

TGGTTATTGAGAGTAGTTTGGTATTGTTGGTACACTTTTGAAATGAAAAGAAAAAAAAGTTCCTTTTG

GGGCATGTAGCTGGTTATTGAGAGCTATGTTGCTCAGACTCTTTAAAAAG

>PGSC0003DMG400013468-(rev)RLKantifungi(GNK)\_7503

ACCTGGTACTTGCAACAGTGACATAGTAAACGTACTTAAAAAGAACACAAAAAACTAATAAGAACTGA

ACAGACCTACAATTATAAAATCAAACCTATTCAGAATTGGCGTTCCTTTTCCT

>PGSC0003DMG400013468-(rev)RLKantifungi(GNK)\_7564

AGAACTGAACAGACCTACAATTATAAAATCAAACCTATTCAGAATTGGCGTTCCTTTTCCTCCGTATAGGT

GGCGGCCTCTTTCCACCTCTCTGTTGCACATAAACTCCTACACATCTAC

>PGSC0003DMG400013468-(rev)RLKantifungi(GNK)\_7686

ATCATGATCCCCCTTTTCTGTAGGTTGTTTTGTGTAAGGAAAGCATCCTAGTCGACATGCTACACGAAAA

AAGAGGGCCTTAGACTTTCCAAAGCTGTTTCTATATCCAATTGGTAAAGC

>PGSC0003DMG400013468-(rev)RLKantifungi(GNK)\_7747

ACACGAAAAAGAGGGCCTTAGACTTTCCAAAGCTGTTTCTATATCCAATTGGTAAAGCTAGTGGAGGT

AGAAGGCCATATACGGGTTAAGCCGAGCCCAATAGCTTTTGCTCAAACAAT

>PGSC0003DMG400013468-(rev)RLKantifungi(GNK)\_7808

GTGGAGGTAGAAGGCCATATACGGGTTAAGCCGAGCCCAATAGCTTTTGCTCAAACAATGTATCTTGTT

AAGAGATTCATTAAATATGTATACATATGAAATTTAGAACCCCAATGCATA

>PGSC0003DMG400013468-(rev)RLKantifungi(GNK)\_7869

ATCTTGTTAAGAGATTCATTAAATATGTATACATATGAAATTTAGAACCCCAATGCATATGAAGTCGTCG

TTCTAAATTTACAATCCATAAAGTTGAAATCCTGGCTCTACGTTAGTTG

>PGSC0003DMG400013468-(rev)RLKantifungi(GNK)\_793

TTCTTTTGGGGCATGTAGCTGGTTATTGAGAGCTATGTTGCTCAGACTCTTTAAAAAGGCGACGAGGG

CGTGCCTGATTCTCCAAAAGTAGTGCATAGTTGAGGAATAAGACATGGGTG

>PGSC0003DMG400013468-(rev)RLKantifungi(GNK)\_8052

TACTTAGATGGTAGCATTTAAACAAACTGGGATCTTGGAAAATGTCCTTATTGTCTTCTTTTTTCTGTATA

TAAATTTTACCATCTCATGGTCATCAATTTGCTGCTGTCTCCAATATGT

>PGSC0003DMG400013468-(rev)RLKantifungi(GNK)\_854

GACGAGGGCGTGCCTGATTCTCCAAAAGTAGTGCATAGTTGAGGAATAAGACATGGGTGTGGCATCAA

TTTTGGAGAGTCCGAGTAAGGTGTAGTTACTTCTTGGTATCTAGCTTATGAA

>PGSC0003DMG400013468-(rev)RLKantifungi(GNK)\_8601

ATTGTTTTGATGTAGTTTCTGTTCTTTTTTAGTATGTTTTGTTATGCTTCTTTAGCATTTTGTCTTGGCTT  
CTTCTCTCCATTTTTTTTTCCGAACTGCTTTTATTTGAGCCGAGG

>PGSC0003DMG400013468-(rev)RLKantifungi(GNK)\_8845

GGTGTATGTGTTTGTATCTTTTACATTTTGGTCATCAATGAATCAAACCTTTACCATTTGTTTCATCGA  
ATAGAGACATATTAGCTCTAAATCACTCGAATTTTCATGCTTTTGTGAA

>PGSC0003DMG400013468-(rev)RLKantifungi(GNK)\_9028

ACTATTAGTGGACGAGTTAGTTATAATTAGCTCAGATGTAACCTTTTGTTCAGTGTGGTTACTTGACTC  
AATAATGTCCCAAACAAGTTGGGGTTCGACTATATGAATCTGAGCTAATC

>PGSC0003DMG400013468-(rev)RLKantifungi(GNK)\_9089

TACTTGACTCAATAATGTCCCAAACAAGTTGGGGTTCGACTATATGAATCTGAGCTAATCACCACATTCCC  
ATTTAATTTTCATCTCAGTCCAACATTATTACACAAAACCTTAATCTCGCC

>PGSC0003DMG400013468-(rev)RLKantifungi(GNK)\_915

GCATCAATTTTGGAGAGTCCGAGTAAGGTGTAGTTACTTCTTGGTATCTAGCTTATGAAACACAAAAGA  
GTTTCTTTTTTTGGGTATGTAGCTGGTTATTAGTGTAGTTTACTGTGTTT

>PGSC0003DMG400013468-(rev)RLKantifungi(GNK)\_9381

GGTCTACGCGCCACATCTAAGTAAATTTCTGGATAAAGTTTTCTACTTCTCCACATTGTCTGCAAAAATA  
TTCAGTTGCTTTTAGTACATAGTCTGTTGGATTATTTTCTAGTTTCAA

>PGSC0003DMG400013468-(rev)RLKantifungi(GNK)\_976

ACAAAAGAGTTTCTTTTTTTGGGTATGTAGCTGGTTATTAGTGTAGTTTACTGTGTTTGGTACAGTTACT  
TCTTGGTTCATCTAGCTAATGAAATTAACAAAAAAGATTCTTTTTCT

>PGSC0003DMG400013489-(rev)LRR-RLKs\_0

GTTACTAACACATTCCTAGATCTCACGGTTCCAGAATCCAGGCTTTTTTAGTCATTGTTTTGTTTTTTTC  
CTTCTCGAGAAAAATTCTGTCTTTATTTCTTTTAAGCTCAAATG

>PGSC0003DMG400013489-(rev)LRR-RLKs\_122

GCCAGTTTTAGCATAATTGAGTAAAAGAAATAAACTTGGCATTGGGTGTTTTGAGGTTTTCCAGTTCTT  
GAAAGTGCTAGTTGTGTAAAGACTGAACTTTGTCATTTGGGTGTTTGA

>PGSC0003DMG400013489-(rev)LRR-RLKs\_2013

ATAAATTTGAAGGCGAAATACCACTTCTTCGAAGACCTGAAGAATTTGAATTATTTGTGAGTTCATGA  
ATTTTCATTTTCACTTATTATTACTTTCAAGACTCCAACCATATAT



>PGSC0003DMG400013489-(rev)LRR-RLKs\_2074

AGTTCATGAATTTTCATTTTCACTTATTATTATTCACCTTTCAAGACTCCAACCATATATTTCACTCTGTCAGA  
TTGAATACATCATGTTACCTATTGACTCAAATCTTCTGTTTCGTCCT

>PGSC0003DMG400013489-(rev)LRR-RLKs\_2135

CACTCTGTCAGATTGAATACATCATGTTACCTATTGACTCAAATCTTCTGTTTCGTCCTCATCCCTGTGATT  
GACTTAGCTGATCATTGCTTGCAGGGATGTCTCTTATAATAATCTAAG

>PGSC0003DMG400013489-(rev)LRR-RLKs\_2379

GTACGGCTGTACCTGTAAATCTCGATGCTTAGTTGATAAAAAATCCATTATTA AAAAATACATTACAAAATCC  
TTTTGGGTAAACTGGTACTTGAAAAGTATTTTATTAGTATTCCGCACTA

>PGSC0003DMG400013489-(rev)LRR-RLKs\_2440

TCACAAAATCCTTTTGGGTAAACTGGTACTTGAAAAGTATTTTATTAGTATTCCGCACTATAGTGAGATTGA  
CTTCTCTTCATGGCTTTCAGAGTGCTCGGGAATCCTTTAATTTGTGGT

>PGSC0003DMG400013489-(rev)LRR-RLKs\_2623

CTGGCAGGTACATATAGCATTTTCATGCTCAAGTCCCTTCCCTTGACCTGAAAATGGACAACCTGTAAA  
ACATATTATACATACTGAGGAAGTTTTGCTATTTGTGTTATTGAAAATGT

>PGSC0003DMG400013489-(rev)LRR-RLKs\_2928

TTACTTTCCCCCTCTTCTCTATGATAATTTGAGATTTTATTAGTTCTGCATTTCTGATTCTTTTCCTGCCAC  
AGATATATAAGTTGAGCCAAGTGAGCTTTTCATTATTGTCTGAGTGA

>PGSC0003DMG400013489-(rev)LRR-RLKs\_2989

TTTTCTGCCACAGATATATAAGTTGAGCCAAGTGAGCTTTTCATTATTGTCTGAGTGATTGGTGTAGGT  
ATCATGTGAATATTTTTTAAGCTAGGATGTTACAGAGTCACCTGCTTGT

>PGSC0003DMG400013489-(rev)LRR-RLKs\_3172

TTTTGTTTTAGAGAGGACATGAGTGGTCAAGTAATAGGAATTGGGGATAAATTCTGTGTTTACCATAATC  
AATAAACCTGTTGAATATGAAGAACTTTTGAACCCCGTCAATTAGAAAAT

>PGSC0003DMG400013489-(rev)LRR-RLKs\_3294

TGCCCTTTGGCATACTCAGTAGTTCTGGTCAATTTTCTAGTAAGGACTCAGAAAAGTTGTTTGAATTTTCG  
TTGTTATCGGGACAAGTCTGATCCACTACAGGCTACCTTAAACATTTA

>PGSC0003DMG400013489-(rev)LRR-RLKs\_3599

CTTGACTTTGGTTGTCTGATTCATATAAGTGGATCAGTTTTGGGACCTTTTGGCCAACCTCTATTATTTTC

TCCCTGTCTCACTTCTCAAAGATTTTCTCCATCTGTCTCTAACTAGT

>PGSC0003DMG400013489-(rev)LRR-RLKs\_366

GTTTGAGGTTTTCAATCTTGAATGATCTAGTTGTGTAAAGACTGAACTTTGTCATTTGGGTGTTGAG

GTTTTTTCAGTTTCTAGAAAGAGCTAGTTGTATAAAGACTGGAACCTTAT

>PGSC0003DMG400013489-(rev)LRR-RLKs\_3660

CTATTATTTTCTCCCTGTCTCACTTCTCAAAGATTTTCTCCATCTGTCTCTAACTAGTCCTCAAAGCTGTAT

CTGAGTAACGACTTCTCAAATGCAGATCATTGTTATCCAGAGGTATG

>PGSC0003DMG400013489-(rev)LRR-RLKs\_4209

GTTACTACTCCCTTATTCAATTTTGTGACAGATAATTAATAGGATACAGAGTTTAAAATTTTAATTCCAC

TCATTTATTACATTGGAGGAGAAGAATTTTTTAAATAGTGGTTATTA

>PGSC0003DMG400013489-(rev)LRR-RLKs\_4270

TTTAATCCACTCATTATTACATTGGAGGAGAAGAATTTTTTAAATAGTGGTTATTATACTTGTTAAAG

AGAACATCATATAAATTTTAGAATGTGGATAGTATGAATTTGAGTTCTT

>PGSC0003DMG400013489-(rev)LRR-RLKs\_4453

TAATTTAAAAGAAGTCATGTTAGTGAACAGTTCCTACTTCCCAATGTATTGCCATTAACATCAGTGAGT

GCTCTGAAAACCAGCAACCGCTGTCATTGGTGAATTGAGGCCATAAGATT

>PGSC0003DMG400013489-(rev)LRR-RLKs\_4514

TCAGTGAGTGCTCTGAAAACCAGCAACCGCTGTCATTGGTGAATTGAGGCCATAAGATTCTGGTTAAGT

ACAAGCTTAGATGTTACGACCCACCCTTACCTCAGTCCATCCTTGAGCCCCG

>PGSC0003DMG400013489-(rev)LRR-RLKs\_4575

GGTTAAGTACAAGCTTAGATGTTACGACCCACCCTTACCTCAGTCCATCCTTGAGCCCCGCGGTGGGCTGC

CCACCTTAACATACTCTGTACTGCTGTAGTTATATGATAAGACATTATCA

>PGSC0003DMG400013489-(rev)LRR-RLKs\_4636

GTGGGCTGCCACCTTAACATACTCTGTACTGCTGTAGTTATATGATAAGACATTATCAGTTTGCTGCTG

GCTGAAGCCATTGTTGTATGTTTCTGCATGTTGAAAGCCAAGCTCATT

>PGSC0003DMG400013489-(rev)LRR-RLKs\_4697

TTGCTGCTGGCTGAAGCCATTGTTGTATGTTTCTGCATGTTGAAAGCCAAGCTCATTGCTTTTCTGGAA

CTTCATCAGCTACTTTTTAATAGTTTCCAAGTAACTAAATTTTGTGTCA

>PGSC0003DMG400013489-(rev)LRR-RLKs\_4758

TTTTCTGGAACCTTCATCAGCTACTTTTTAATAGTTTCCAAGTAACTAAATTTGTGTCAGTTGAAGCTGATA  
CATATATTGGCTTGATTGAAAATGCATTGTGGTTTCTAAATTTGCAGA

>PGSC0003DMG400013489-(rev)LRR-RLKs\_5124

TGCTCCAGAATATTTGTCTACTGGCCAATCGTCTGAAAAACTGACGTTTTTGGGTTTGAATCTTGCTAC  
TTGAGCTGATTACAGGCCAGAAAGCTATGGACTTTGGTCGAGGGGCCAA

>PGSC0003DMG400013489-(rev)LRR-RLKs\_5246

AGAAAGGTGTTGTTATGCTTGATTGGGTGCGTCTCTCTCTTTCTCTTTCTCTGGATGTTGTAAGTACTGAGTAC  
TTTTTGAAATATGTACTGTGGGTTGTGAGAGGAATAAGCTATACAGAGG

>PGSC0003DMG400013489-(rev)LRR-RLKs\_5307

TACTGAGTACTTTTTGAAATATGTACTGTGGGTTGTGAGAGGAATAAGCTATACAGAGGCAGGTTGTGC  
GTCTCTCTCTCTCTCTCTCTCATAGCTGTTTTCTTTTCAGTTATAAGG

>PGSC0003DMG400013489-(rev)LRR-RLKs\_5368

GGTTGTGCGTCTCTCTCTCTCTCTCTCATAGCTGTTTTCTTTTCAGTTATAAGGAGTTGTAGGTTCA  
AACCTCAGATATAGCTAGCAAGTATTGTGTACATCTAGTTTACAAGGC

>PGSC0003DMG400013489-(rev)LRR-RLKs\_5429

TTGTAGGTTCAAACCTCAGATATAGCTAGCAAGTATTGTGTACATCTAGTTTACAAGGCTCTTTTTCCATT  
AGCATACTTCAACGAACTCTCTCGTTTAATTACTGCTAATGATATGCAG

>PGSC0003DMG400013489-(rev)LRR-RLKs\_5490

TTTTTCCATTAGCATACTTCAACGAACTCTCTCGTTTAATTACTGCTAATGATATGCAGGTGAGAAATCTG  
CATCAAGAGGAGAAATTGAACCTTATGGTAGATAGCAATTTGAAAAATA

>PGSC0003DMG400013489-(rev)LRR-RLKs\_5551

GAGAAATCTGCATCAAGAGGAGAAATTGAACCTTATGGTAGATAGCAATTTGAAAAATAACTTTGACCA  
GATTGAGCTAGAAGAGATGGTTAAAGTTGCCCTTCTATGCACCCATTTCAA

>PGSC0003DMG400013489-(rev)LRR-RLKs\_61

TTGTTTTTTTTCTTTCTCGAGAAAAATTCTGTCTTTATTTCTTTTAAGCTCAAATGTTGCCAGTTTTAGC  
ATAATTGAGTAAAAGAAATAAACTTGGCATTGGGTGTTTTGAGGTT

>PGSC0003DMG400013489-(rev)LRR-RLKs\_854

TTTGTGGAGGGGTTGAAAATGGATAAAAAGGGCATTTTTTTTAATGATAAATTACGAGGTTTTGTTAGA  
AAAATTACTTTGTTGAGTAGGTGAGATTGTAGAAATTTGTACTGGAAAGAA

>PGSC0003DMG400013500LRR-RLKs\_0

ATGGTTGGTTCTTTACCTCTCAAATCGGAAATTTAAAGGCTGCAACACTGATAAATCTGTCAATGAATC  
AATTCTCAAATGGAATTCCTATAGAAATTGGAGGATTGCAGAATCTGGTG

>PGSC0003DMG400013500LRR-RLKs\_186

TTGGAATTCCTAGACCTTTCATAAAAAATATATCGGGAACCATTCTATGTCTTTGGAGAACTTCAAAA  
CATGATGTATTTCAATGTTTCTGTCAACAAGTTGCATGGTGAAATTCCC

>PGSC0003DMG400013500LRR-RLKs\_248

ACTTCAAACATGATGTATTTCAATGTTTCTGTCAACAAGTTGCATGGTGAAATTCCTCGGAGGGTCCG  
TTCAACAACCTCTCGAGTCAGTTTTTCATCAACAATGAAGCATTGTGTGG

>PGSC0003DMG400013500LRR-RLKs\_434

GCTTGTCTATTTCTTATCCTCGGAGTTGCACTTGTATTTGTTCTATTACCCTTTTGTGTATGGATAAG  
GTATAGAAGAGGTAAGAAATACCCTCAACAAGATGATTCATTGTCTAT

>PGSC0003DMG400013500LRR-RLKs\_682

TTGCAGTTAAAGTGTTAATCTGCAACTGGATGTGGCATTAAAGAGTTTCGATACAGAATGTGATGGTTT  
GTGCAACCTTCGCCATAGGAATTCATAAAAGTCATCACTAGTTGTTCCA

>PGSC0003DMG400013500LRR-RLKs\_806

TGATTTTAAGGCTTTAGTGCTCGAGTATATGCCTAATGGGAGTCTTGAGAAGAATTTGTATTCTCACAAC  
TACTTCTTGACATCCAGCAAAGACTATGCATAATGATAGATGTGGCATG

>PGSC0003DMG400013500LRR-RLKs\_867

TCTCACAACACTTCTTGACATCCAGCAAAGACTATGCATAATGATAGATGTGGCATGTGCATTGGAAT  
ATCTCCACCATTGTAACATCCGGCAATACGAAATAATTGAAGAGGCTTAG

>PGSC0003DMG400013524RLKantifungi(GNK)\_1054

TAACAAGGATATATCAGCTATATTACAAAGTTAAATTATGCCCTTTTTTCCTAATATTTTTTACATTTTCAG  
TGTGTACAAATCAATCTTAGTCTAATATAGGATGCTGCAGTAGTTTCA

>PGSC0003DMG400013524RLKantifungi(GNK)\_124

GTAAGATTTTTGAGTTTTAAGTGTCTTTTGCTTTCATTTTTCTGTTATGTGTTTTTCCAAAGAACTGCT  
CAAATTGAGAATTCTCTGTATTCACTGAGGATTTTGTAAAT

>PGSC0003DMG400013524RLKantifungi(GNK)\_1240

TGAAGCTGCCTCATCATTTCTCATTTTTTCCATATTATACAATAGTTCAAACACTGCTTTTAAATACAATGA

TTTGATGTTCTTATATTTGATTGATTTCTCTTATTAGATCTTGCAAGTC

>PGSC0003DMG400013524RLKantifungi(GNK)\_1302

AATACAATGATTTGATGTTCTTATATTTGATTGATTTCTCTTATTAGATCTTGCAAGTCGCGCAATGGAGAA  
AGCAGTGACATTAGTTGCATTTAGGCTATTTGTCGTTCTGTGCGATTTTA

>PGSC0003DMG400013524RLKantifungi(GNK)\_1364

AATGGAGAAAGCAGTGACATTAGTTGCATTTAGGCTATTTGTCGTTCTGTGCGATTTTACTTCTACCAAATG  
TATCAGAGGCAGAACCAAGATCTCAGATGATCCAGATCATATGTAGTAC

>PGSC0003DMG400013524RLKantifungi(GNK)\_1426

TACCAAATGTATCAGAGGCAGAACCAAGATCTCAGATGATCCAGATCATATGTAGTACGCAACCTGAGC  
ATAATACAACAGCTTTTGTCCCGAATTTTGTGTCGTTCTGTGCGATTTTACTTCTACCAAATG

>PGSC0003DMG400013524RLKantifungi(GNK)\_1488

CCTGAGCATAATACAACAGCTTTTGTCCCGAATTTTGTGTCGTTCTGTGCGATTTTACTTCTACCAAATG  
GAACTCAAGGCTATGGAATTGCACTCACCGGGAGTGGACCGGATGCTAAC

>PGSC0003DMG400013524RLKantifungi(GNK)\_1612

GACTAGCACAATGTTATGGTGATCTTTCTTTACTTGACTGTGTCCTATGCTATGCTGAAGCTCGCACTGTC  
CTTCTCAATGTTTTCTTTCAATGGAGGTGCAATTTATCTAGATGGAT

>PGSC0003DMG400013524RLKantifungi(GNK)\_1798

GTGAAAATAGAACCAGAAAGGATTCTTTGTTCCAACAAACAGCTAGGCGGGCTGTTTCAGCAGGCGGTA  
GCTAGTGACCAAACAATAATGGCTATTCCCGTGCTGAATTGGCAGTGCCTG

>PGSC0003DMG400013524RLKantifungi(GNK)\_186

AGAAACTGCTCAAATTGAGAATTCTCTGTATTCACTCTGAGGATTTTGTAAATTTTGTGCAATT  
ACTATATCTTAATTTCTTCTAATATGATTAAGATATATGAAAGATGATT

>PGSC0003DMG400013524RLKantifungi(GNK)\_1860

GCGGTAGCTAGTGACCAAACAATAATGGCTATTCCCGTGCTGAATTGGCAGTGCCTGGGGCAATGAAC  
GAGACAGCTTATGTCCTAGCTGATTGCTGGAAAACACTGAGTGCTAACTCG

>PGSC0003DMG400013524RLKantifungi(GNK)\_2046

GCGTTGTATACTGGATGCTTCTGAGGTAAGTCAAGATGTTAATTTTCTTAATGCTATTGCTAGCAGTGAAG  
ACTCATCGCAAATGGTAATCTTTACTTTGTCTTCTTCTTTTCTTCA

>PGSC0003DMG400013524RLKantifungi(GNK)\_2108

CAGTGAAGACTCATCGCCAAATGGTAATCTTTACTTTGTCTTCTTCTTTTTCTTCAAGTCAATCACCGAA  
ACTGTTATCTAGACCATGTAGCTGATATATTGACGGATTTTCAGTGGT

>PGSC0003DMG400013524RLKantifungi(GNK)\_2294

TATGTGGAAGAACAACAATAACAGAAGAAGAGAAAAGGTAAAACATTTTGGTGATATTTTCAGCTAAG  
GCTTTAGCTTTGAATGTCTCTTAAAGCAACTAAGGAGTTTGAGATTTTCAGG

>PGSC0003DMG400013524RLKantifungi(GNK)\_2356

GCTAAGGCTTTAGCTTTGAATGTCTCTTAAAGCAACTAAGGAGTTTGAGATTTTCAGGTTCCAATGATGT  
GGAGAAGTTAGTGAAGACCCTTAACGACAGCAGCCTGAACTTCAAGTATT

>PGSC0003DMG400013524RLKantifungi(GNK)\_2542

CAGTTTATAAGGTAGTGAGCTGAAAATGCTTAGCTCGTTAACATCTTTCATGTTTTTCAGTTTATTCACATA  
ATCACATCAGAGTAAGTCTATAATATTCTTATTATATTGTAGGGAGTTC

>PGSC0003DMG400013524RLKantifungi(GNK)\_2604

ATTCACATAATCACATCAGAGTAAGTCTATAATATTCTTATTATATTGTAGGGAGTTCTACAAGACGGGA  
GAGAGATAGCCGTCAAAGGCTGTTCTTCAACAACAACACAGAGCTGCA

>PGSC0003DMG400013524RLKantifungi(GNK)\_2666

AGACGGGAGAGAGATAGCCGTCAAAGGCTGTTCTTCAACAACAACACAGAGCTGCAGATTTTTACAA  
CGAAGTCAATATTATTAGCAGTGTTGAGCACAAAATTTAGTAAGGTTATT

>PGSC0003DMG400013524RLKantifungi(GNK)\_2728

TTTACAACGAAGTCAATATTATTAGCAGTGTTGAGCACAAAATTTAGTAAGGTTATTAGGATGCAGCTG  
TTCCGGACCTGAAAGCCTTCTTGTGTATGAGTTCCTCCCGAACCAGAGTC

>PGSC0003DMG400013524RLKantifungi(GNK)\_2790

TGCAGCTGTTCCGGACCTGAAAGCCTTCTTGTGTATGAGTTCCTCCCGAACCAGAGTCTTGATCGGTTTA  
TCTTTGGTGAGTAGAAGACTTTGTGACTTTGGCACACTCGATTCTTAGTG

>PGSC0003DMG400013524RLKantifungi(GNK)\_2852

TCGGTTTATCTTTGGTGAGTAGAAGACTTTGTGACTTTGGCACACTCGATTCTTAGTGGCATGAAATTAA  
TAGAATTCACCTTGTATGTTGAAATTGGCAGACTCTACCAAAGGCAAAC

>PGSC0003DMG400013524RLKantifungi(GNK)\_3162

ATAAGCACCGCTATAGCTGGGACTTTGTTAGTGATTCTTTACTTTACCATTAAATCGTAGCTCAAACCT  
TATGTTTCGCTAAACATTAACAGCCAGCAGTGTAATTAGTTATCTCATCA

>PGSC0003DMG400013524RLKantifungi(GNK)\_3224

CTCAAAACTTATGTTTCGCTAAACATTAACAGCCAGCAGTGTAAATTAGTTATCTCATCATATGGTTAATTTT  
CCATTATTTTCCTTGCAGAGGTTATATGGCACCAGAATACTTAGCTCAT

>PGSC0003DMG400013524RLKantifungi(GNK)\_3286

GTTAATTTTCCATTATTTTCCTTGCAGAGGTTATATGGCACCAGAATACTTAGCTCATGGCCAATTAAC TG  
AAAAGGCAGATGTTTACAGCTTTGGTGTCTTTTATTGGAGATTGTTAC

>PGSC0003DMG400013524RLKantifungi(GNK)\_3472

TGAACCAATTCTTCTAGTTACTTGAATCTATAACAATTGCAGACAAGAATGTTTTGCTCATTGATTTAACTA  
CTGTCGTGGATGAAACAGACGTGGCAGCATTTCAGCATGCGAGAGTAG

>PGSC0003DMG400013524RLKantifungi(GNK)\_3844

GAGATGATTGAGCTTCAATTGCAAACATTTCTCACAGCTCATTCTACCCCAGATGATGTGTCAGTGGCCTC  
AAACTGAGACATGATATAAATCTGCTAGAGAACGGATCTCGTGAATCTC

>PGSC0003DMG400013524RLKantifungi(GNK)\_3906

AGTGGCCTCAAACCTGAGACATGATATAAATCTGCTAGAGAACGGATCTCGTGAATCTCAAGTATCTTCTT  
GCCTCATGTTCTTTTTTTGAATACTCTAGGAGCAGATGTTTGTAGCAAC

>PGSC0003DMG400013524RLKantifungi(GNK)\_4154

GGTAAGATTGTAGTACAAGATTAATATAGTTTATCTTGATTATGAGAATGGTTTGCTTCCAACAGTGTA  
AAATGATCGCTTGGTCATTGATGTTTTGTATTTCTGTTATACAAATTGGT

>PGSC0003DMG400013524RLKantifungi(GNK)\_558

CTTTTCAAATTGATGAGTTTAACTTTTATATATTGAAAGTTAGATTATTAATAAAGTGGCATTAAAGTAAC  
ATGGAAAAAAAAAATCATTTTTTTGGAAAGGGGGGAATTATATTGTTCAA

>PGSC0003DMG400013524RLKantifungi(GNK)\_930

ATCTTTTTAAATTAATAAACAATTTTAGATTATTTTTTAATTAATAAATATGAGTTTGTTAATGAAAAG  
AATAAATATGCTATATTTATTAGATGACGAAGATATATATATGCCACT

>PGSC0003DMG400013524RLKantifungi(GNK)\_992

TAATGAAAAGAATAAATATGCTATATTTATTAGATGACGAAGATATATATATGCCACTTTTTTAACAAGG  
ATATATCAGCTATATTACAAAGTTAAATTATGCCCTTTTTTCTAATATT

>PGSC0003DMG400013525LRR-RLKs\_1159

ATCTTATTTAACATATGCTTGCATGTTTCTTGGTTTCATTAGTTATTTCAATCTTATCCAATATTCAATGAT

CTTAAATGTTTAATTTTGTGTTTTGTAGATTTGCAATGATACTTGCTA

>PGSC0003DMG400013525LRR-RLKs\_1220

ATATTCAATGATCTTAAATGTTTAATTTTGTGTTTTGTAGATTTGCAATGATACTTGCTATAAGCCTAAACT

ATTGGATGTAGAGCAAGAAAAAGTTCAACTTGTTCTGCCCAATTATTA

>PGSC0003DMG400013525LRR-RLKs\_1281

AGCCTAAACTATTGGATGTAGAGCAAGAAAAAGTTCAACTTGTTCTGCCCAATTATTATTTTCTAAAAA

AAAGATACCTACTTTGTCATTTGGAATGATTTGAAAAACGGTGGTTGGAA

>PGSC0003DMG400013525LRR-RLKs\_1342

TTCTAAAAAAAGATACCTACTTTGTCATTTGGAATGATTTGAAAAACGGTGGTTGGAAATCGAGGTGA

TTTTGACATTTCTTGAAAAGTTGCTCTTGTTATCTGTTTAAATGTGGTAG

>PGSC0003DMG400013525LRR-RLKs\_1525

TGATGTTTCTTTTTGTCATCTGATAAGTTGAAATGGTTGACATATATATACATGAAATGAATGAAGAG

TGAATCAGCATTGAGGCAAATGCAGACAATGAATCTTTTAAAAACTGTGA

>PGSC0003DMG400013525LRR-RLKs\_1586

AATGAAGAGTGAATCAGCATTGAGGCAAATGCAGACAATGAATCTTTTAAAAACTGTGATAAAATAAAA

TGTTTATACAAAATTATGTCATTCATGTTGTCGTATTATGATTAATTATCA

>PGSC0003DMG400013525LRR-RLKs\_1769

TTTGTATCGGCTGTTTCATTCTTTGTGCGGAGGAAGTTCTAAACAAAAGAGAGGTACAAATTTCTAAG

TCAAATCATTTTCTTTCTTTCCGACAAAAGAAATCTCATTTAAGTCTGAT

>PGSC0003DMG400013525LRR-RLKs\_1830

ATTTCTAAGTCAAATCATTTTCTTTCTTTCCGACAAAAGAAATCTCATTTAAGTCTGATTGATCAAATGGC

AATTTGACTTGAATTTGCTTCGATGATATAGAGAAGAAGCAGCTAGGAG

>PGSC0003DMG400013525LRR-RLKs\_1891

ATCAAATGGCAATTTGACTTGAATTTGCTTCGATGATATAGAGAAGAAGCAGCTAGGAGCTCATAAG

AACGGTTAATAAATCAAACCTGAATATTTCTATGAACTCTTGAGAAGGC

>PGSC0003DMG400013525LRR-RLKs\_2074

AATTTTCTTTGAACATTATATTCATTTTCTTATACTAATGAGATTTGCCTGACAATAGTCGTGTTTATACA

TGAAATAGGGGATCTTGCCAGACGGGCAGGTTGTTGCTATAAAGAGGC

>PGSC0003DMG400013525LRR-RLKs\_2318



AGTGTATGAGTACGTGCCCAATCATAGTCTTGCGGATTACGTCTTTGGTAAGTATCCAATCCACCTAAAT  
TTATGAAATCTTAAATTGGTGTAGTCGTCTCTCGTTATGTAAATGCCTTT

>PGSC0003DMG400013525LRR-RLKs\_2379

CACCTAAATTTATGAAATCTTAAATTGGTGTAGTCGTCTCTCGTTATGTAAATGCCTTTGTTTTGCACTGA  
ATCAGACACAAAGAACCTTCAGCCACTTACATGGAGTCAAAGATACAAA

>PGSC0003DMG400013525LRR-RLKs\_2501

TGTATTGGGTACTGCTGAGGGATTGGCTTATCTTCATGAAGAATCGAAATTAAGGATCATCCACCGTGAC  
ATAAAGTTGAGCAATGTTCTTCTAGATGAAGATTCATGGCAAAAATAGC

>PGSC0003DMG400013525LRR-RLKs\_2562

CACCGTGACATAAAGTTGAGCAATGTTCTTCTAGATGAAGATTCATGGCAAAAATAGCTGATTTTGGTC  
TAGCCAGGTTATTTCTGAAGATAAGAGCCACATTAGCACAGCTATTGCT

>PGSC0003DMG400013525LRR-RLKs\_3416

CAACTCTAGTTTTTCTGTGATGAAGTACTACTACTCTCCATTTTCTTACTGATATTTGTTTAT  
AGTCTTATTTAGTCAACTTCCTTTTGTGAATACCCCAGTGAGCTATT

>PGSC0003DMG400013525LRR-RLKs\_3477

ATATTTGTTTATAGTCTTATTTAGTCAACTTCCTTTTGTGAATACCCCAGTGAGCTATTTCAATTTCTAATGT  
AAAAATTTTGTATAGTATCTGCAGGAGTTCCAATTAAGTATATCTACT

>PGSC0003DMG400013525LRR-RLKs\_671

TTTATGGGTTAGCTCAATGTTGGGAATTTGTGAATGGAAGTGCTTGTCAAAGGTGTCTTTCTGATGCAGT  
TTTGAAGATTGGTTCTTGTACTCCTAAGGAAGAAGGAAGGGTGTGAATA

>PGSC0003DMG400013525LRR-RLKs\_732

TGATGCAGTTTTGAAGATTGGTTCTTGTACTCCTAAGGAAGAAGGAAGGGTGTGAATACTGGTTGTTA  
TGTTAGGTATTCTACTCAGAGGTTCTTAATAATTCTGCAAGTGATACTCC

>PGSC0003DMG400013525LRR-RLKs\_854

CTGCTGGAATGGAGGTATGTTCTTTCTTTCTTGAATGTATGAAATGAATAAATTGTTTTCGTTTAGTTGT  
GCGATCATTTACCTAAAAGTGTAAGCTATTAGAGATAGTACTTTTTCC

>PGSC0003DMG400013525LRR-RLKs\_915

GTTTAGTTGTGCGATCATTTACCTAAAAGTGTAAGCTATTAGAGATAGTACTTTTTCCGTGACATATGTC  
ATATCTTTACATGGTATCATTGGGTCTGACCGTGAAGGGGTGTTAGAAT

>PGSC0003DMG400013644LRR-RLPs\_124

TGGACAGAAAAGCCACTAAATAGTGTGAGTCAATTTCTTTCCTTAAATAATTGTTTGGAGTTTTGTTTTAA  
TGGGAAGGTTTTTTTTTCATTCATTTTTATGAGTGTTTTTCCGTGTTT

>PGSC0003DMG400013644LRR-RLPs\_1240

GTTACATCTATTTGCTGCACCGTATTTCTAGTGAATTTGATTATATAATTTGTTGTGTTGACTCAAAGTTCG  
AATTTTTTGATCAAGAAGACACTGGTTTCTTGTGTGTAGGTCAAGAT

>PGSC0003DMG400013644LRR-RLPs\_186

TTGTTTTAATGGGAAGGTTTTTTTTTCATTCATTTTTATGAGTGTTTTTCCGTGTTTTTGAAAACAGTTGTT  
TTACATATAGGAAAATACGGCGAAAAATAAGCTTTACTTTGCATGCC

>PGSC0003DMG400013644LRR-RLPs\_2170

GATTCGTTTAGGATGCTCTCAAGTTTGCGGGCCTTAAAACCGATGGAAATCCTTTGGAAGTGCCACCAG  
GAAACATCGTTGAGAAGGGAGCACAGGTTTAATTTGTTTCGTTTAACTA

>PGSC0003DMG400013644LRR-RLPs\_2294

GCTTCTGAATTAGTGTAGTATTTAATTATCTTAGCTCTTCTCTTGATATATCAATCACTAATGTTTTATT  
CCTCAGGCTGTTGTACAATATATGTCTGATCTGGTTGCCAATAGAGA

>PGSC0003DMG400013644LRR-RLPs\_2356

ATGTTTTATTTCTCAGGCTGTTGTACAATATATGTCTGATCTGGTTGCCAATAGAGAGGTAAAGGCGCA  
ACCCGTAAAGAAGAAGAAGAAATCATGGACTCAAATATGCTGCTTTTCAA

>PGSC0003DMG400013644LRR-RLPs\_2852

CAGCGAGATTCAATCAACTTTCTTGTGTTCCAGATAAGCTCTAATCCACCACGTGGTTTTTTATTCTCATT  
TCATGTAATAATTCTTTAATGCTCTTTCCTGTATTTTCTCGATTAT

>PGSC0003DMG400013682LRR-RLKs\_1054

TGATCAAGTTCATATCATCAGCAGATCATCAATCCATTTCCCAATCAATGTGAGACTCTTAACTTCTTT  
CACGCCATCTCCAAAACGGAGATGAACCTGACTCTGACACCATATA

>PGSC0003DMG400013682LRR-RLKs\_1116

ACACTTCTTTCACGCCATCTCCAAAACGGAGATGAACCTGACTCTGACACCATATAAAGATATGACGT  
TTGCATCTAACTAAATCTCAAAAGTTAACTCACGAGGAAAAAATTGTCAA

>PGSC0003DMG400013682LRR-RLKs\_1178

TATGACGTTTGCATCTAACTAAATCTCAAAAGTTAACTCACGAGGAAAAAATTGTCAAAGTCCATATTAG

CAGACAATCAACACATTCCCCATATGGCGCTTTAACCCACATTCTAACAA

>PGSC0003DMG400013682LRR-RLKs\_1240

CATATTAGCAGACAATCAACACATTCCCCATATGGCGCTTTAACCCACATTCTAACAAATAGTTCTTCGTCA  
TATTGGCATTAGAAGAATTGTAGTTCATAACAATTTTTATATAGTTTTT

>PGSC0003DMG400013682LRR-RLKs\_1302

TCTTCGTCAATATTGGCATTAGAAGAATTGTAGTTCATAACAATTTTTATATAGTTTTTAAATATCTAAATTT  
TAACTTCAAATATTAAGTTAATCTAAACATGCTCTCATTTTTGTTC

>PGSC0003DMG400013682LRR-RLKs\_1364

ATCTAAATTTTAACTTCAAATATTAAGTTAATCTAAACATGCTCTCATTTTTGTTCAATTTGGTACAATAAT  
ACAGGTAATGATCTTTGTGATGGTCCATTATCGAAATGCACGAGTGAA

>PGSC0003DMG400013682LRR-RLKs\_186

CAACTAGTCTATGCAATGTCGGTGGCTTATCGTTATAGCAACCACAATCGCCAGTATCGTCATCACCATC  
ACCATCTCTAATCCTCGTTGTGTTATTACTAGTCGTTGTCCCGATC

>PGSC0003DMG400013682LRR-RLKs\_2170

CTACCAGTTTATTATATTAACTCAATCTATTTTGACCTTTTTTTTTATTCAATTCATTTCAAACAGAGTTGAG  
ATATGCAACTCAAATCTTTGAAGAGGGCTCATTTGTTGTTCTCTCT

>PGSC0003DMG400013682LRR-RLKs\_2232

ACAGAGTTGAGATATGCAACTCAAATCTTTGAAGAGGGCTCATTTGTTGTTCTCTCTACCTACTCTACTA  
GCTAGAGTGATGATCTGATGTGTGATTATCTCATCTAAGATATTACATT

>PGSC0003DMG400013682LRR-RLKs\_2294

ACTCTACTAGCTAGAGTGATGATCTGATGTGTGATTATCTCATCTAAGATATTACATTTTTACTATGATGA  
ATTCTGTGATCATCTCATTACACATTGTTTATTTTTTTCAGGTAATAAA

>PGSC0003DMG400013682LRR-RLKs\_2356

CTATGATGAATTCTGTGATCATCTCATTACACATTGTTTATTTTTTTCAGGTAATAAATCGCGGGGGCAAC  
CAAGTCTTGATTGGCCAACTCGATTGAAAATTGTAAAGGGAGTAGCCAA

>PGSC0003DMG400013682LRR-RLKs\_248

TCACCATCACCATCTCTTAATCCTCGTTGTGTTATTACTAGTCGTTGTCCCGATCAAATCAGATAGTTC  
TGAGGCAGAAATCCTCTTTGATTTAGCAAGTCCTTGCAAAAAAATGG

>PGSC0003DMG400013682LRR-RLKs\_2976

AGAGAGATGGGGATGATGATTTTTACTCTACAAGAGGATTATCTGATGATTATACGCAAGTTTCGATGA  
ACATTTGAAGAGTGTTGGTTATACATACTCATAGTTCGTGTGTAACACCTT

>PGSC0003DMG400013682LRR-RLKs\_3038

TCGATGAACATTTGAAGAGTGTTGGTTATACATACTCATAGTTCGTGTGTAACACCTTTTTATTAATTTGT  
TCAAAAATCATCAATGGTAAATATGGGATGGGACTTTTATTTTGTTTGA

>PGSC0003DMG400013682LRR-RLKs\_310

CAGATAGTTCTGAGGCAGAAATCCTCTTTTCGATTTAGCAAGTCCTTGCAAAAAAATGGCGCAACAGCTA  
ATTGGAATACGAAAGTATCGCCTTGCGATAAAAATACAGATAAACCCAATT

>PGSC0003DMG400013682LRR-RLKs\_3100

TTAATTTGTTCAAAAATCATCAATGGTAAATATGGGATGGGACTTTTATTTTGTGGATGCATGGTTGGG  
GGTCGTATATATTGGTCAATGAAACCACAAAATAAATAAATATGAAAACA

>PGSC0003DMG400013682LRR-RLKs\_3162

TGGTTGGGGTTCGTATATATTGGTCAATGAAACCACAAAATAAATAAATATGAAAACAAAAAAGAG  
ATAGAAAAAATGAAGTTCAGTGTTTTTTTGTGCGATTCAATTGAAGCAAAG

>PGSC0003DMG400013682LRR-RLKs\_3224

AAAGAGATAGAAAAAATGAAGTTCAGTGTTTTTTTGTGCGATTCAATTGAAGCAAAGGAACATGTAAA  
TTGTCCTTGATGAATCTAGTTTAGCTAGTTGCCTTCACTTTTTTTCTTTTT

>PGSC0003DMG400013682LRR-RLKs\_3286

ATGTAAATTGTCCTTGATGAATCTAGTTTAGCTAGTTGCCTTCACTTTTTTTCTTTTTGAACTTTATCTAG  
TTTATTATATTTGGGGTTGTAATAAATTAATCCAAAAGCATGCAAGAA

>PGSC0003DMG400013682LRR-RLKs\_372

ACAGCTAATTGGAATACGAAAGTATCGCCTTGCGATAAAAATACAGATAAACCCAATTGGGATAGTGTT  
ATTTGCGAAAACGGATTGTTTTTCGGGTTGCAATTGGAGGGTAAAGGCTTA

>PGSC0003DMG400013682LRR-RLKs\_434

TAGTGTTATTTGCGAAAACGGATTGTTTTTCGGGTTGCAATTGGAGGGTAAAGGCTTAAGTGGGACAAT  
AGATGTGGATGCTCTTAAAGATTTGCCTAATTTAGGACCATAAGTGTTAT

>PGSC0003DMG400013682LRR-RLKs\_992

TAAAATGTAGTCGTAAAGATATGTCATGTATGCCTAACTCCACCTTAGAAGCTAGCAAGGATTGATCAAG  
TTCATATCATCAGCAGATCATCAATCCATTTCCAATCAATGTGAGACTC

>PGSC0003DMG400013766LRR-RLPs\_0

ATGAAGAGTGCTACAATTAGCAATTTGCCCTGTAATGTCTTGGATAAAATCTTGGGAGCTTGCCTTTGA  
AAGATGCAGTGAAGACCAGTATCTTGTCAAAGGTTGGAGGTACAAATGG

>PGSC0003DMG400013766LRR-RLPs\_1040

CACCCTCCTACTTTCTCATAAACTTATTGATATGGTTTCTTCATCTGAATCCGCCTAACTGTTACCAAATT  
TTTTGCAGGAAGCAGTAGGCATTGTGGTGGAACTGTTATAACAATTCT

>PGSC0003DMG400013766LRR-RLPs\_1105

CCAAATTTTTTGCAGGAAGCAGTAGGCATTGTGGTGGAACTGTTATAACAATTCTTACGAGCCAAAGCA  
ATCTCATGTGGTGCTATGAAGCTGCTTAAAAGTGTGGAAATGCGTTATTTT

>PGSC0003DMG400013766LRR-RLPs\_1170

AGCAATCTCATGTGGTGCTATGAAGCTGCTTAAAAGTGTGGAAATGCGTTATTTTATTGGTTTTGAGATG  
GAAATAGAATTTGTGAAGTTTATATTGGCATCTGCACCAGTACTTAAGGA

>PGSC0003DMG400013766LRR-RLPs\_1235

AGATGGAAATAGAATTTGTGAAGTTTATATTGGCATCTGCACCAGTACTTAAGGAAATCTTCATTTGGAG  
TAGTGGGCAGTTTCATCGGGGTACACAGATGATGGATGAGATAAAACAAT

>PGSC0003DMG400013766LRR-RLPs\_1282

CTTAAGGAAATCTTCATTTGGAGTAGTGGGCAGTTTCATCGGGGTACACAGATGATGGATGAGATAAAA  
CAATTCATCGAGAATCACCCAATGTTAGATTCAAATTCGAAGAAATGTGA

>PGSC0003DMG400013766LRR-RLPs\_130

CAGAACTTGATTTTCGTAGTGAGTTTTTCACATCTTCAACGACAACCAAGAAGCCAAGAAAATCATTTA  
CCAAGTCCTACGACTGCATCAAGGACCAATACTAAAGTTTACTCTCCAAC

>PGSC0003DMG400013766LRR-RLPs\_195

ATTTACCAAGTCCTACGACTGCATCAAGGACCAATACTAAAGTTTACTCTCCAACATCCTAATTTGATATG  
CTATCGTGATATTTATAATTGGATGCTCTTCTTGTCAAAGAAAAACGTC

>PGSC0003DMG400013766LRR-RLPs\_260

GATATGCTATCGTGATATTTATAATTGGATGCTCTTCTTGTCAAAGAAAAACGTCAGGAACTCACCTTC  
AAATATTCACAGGCAACAAATATCATTACCTTCTTATCTTTTCACATT

>PGSC0003DMG400013766LRR-RLPs\_325

CCCTTCAAATATTCACAGGCAACAAATATCATTACCTTCTTATCTTTTCACATTCAGCAACTAAGACATC

TGGACCTTGATATGTGCTTCTCCACCCTCCACCTGATTTCAAAGGGT

>PGSC0003DMG400013766LRR-RLPs\_390

AGACATCTGGACCTTGATATGTGCTTCTCCACCCTCCACCTGATTTCAAAGGGTTTGCAAAGCTTATTAG  
TATTAATCTTCAACATGTCATTTTTGATCCAACAATATTTAGGAATCTC

>PGSC0003DMG400013766LRR-RLPs\_455

TATTAGTATTAATCTTCAACATGTCATTTTTGATCCAACAATATTTAGGAATCTCATAACCAAATGCCCAT  
GCTTGAAAGTTTGATGTTGACTAGGTGCACCGCATTTGACGTTCTTGA

>PGSC0003DMG400013766LRR-RLPs\_520

GCCCATTGCTTGAAAGTTTGATGTTGACTAGGTGCACCGCATTTGACGTTCTTGAAATTGATGCCCTAA  
TCTCAAATGCTTCGACTTTCTTGGAACATCGAAGTTTATTTGCTTCAAGA

>PGSC0003DMG400013766LRR-RLPs\_585

CCTAATCTCAAATGCTTCGACTTTCTTGGAACATCGAAGTTTATTTGCTTCAAGAATGTCCCTATGCTTAA  
AACCGTTGCTGTATGTCTCAATCAAATTTTGATGGATACGTCAACTTTT

>PGSC0003DMG400013766LRR-RLPs\_65

TTTGAAAGATGCAGTGAAGACCAGTATCTTGTCAAAGGTTGGAGGTACAAATGGGTAACGCGTGCGAG  
AACTTGATTTTCGTAGTGAGTTTTTACATCTTCAACGACAACCAAGAAGC

>PGSC0003DMG400013766LRR-RLPs\_650

GCTTAAACCGTTGCTGTATGTCTCAATCAAATTTTGATGGATACGTCAACTTTTTGTTCTAATCTTACAA  
AGTTCTCCATTTTCATGCCTTCCCTGGAGGAACTTGAAGTAGGCGGTTT

>PGSC0003DMG400013766LRR-RLPs\_715

TTACAAAGTTCTTCCATTTTCATGCCTTCCCTGGAGGAACTTGAAGTAGGCGGTTTCATCATTAGAGGTAAT  
GTACATTTGTGATAATATTACTTATGATAGTTGGTACTTATTATAATCAT

>PGSC0003DMG400013766LRR-RLPs\_780

GTAATGTACATTTGTGATAATATTACTTATGATAGTTGGTACTTATTATAATCATATGATGTGTCTTCAAC  
CAATTTTTTTACATGCTTCTAGTACTTGAACATGGGAGGTATACCAGAG

>PGSC0003DMG400013766LRR-RLPs\_845

TTCAACCAATTTTTTTACATGCTTCTAGTACTTGAACATGGGAGGTATACCAGAGAATCCCCGGCTGCTC  
TAAACAATGTCAAATCCCTATGTATTTTCGGACATGTCTTTCAGAAGTGT

>PGSC0003DMG400013766LRR-RLPs\_910

CTGCTCTAAACAATGTCAAATCCCTATGTATTTCCGGACATGTCTTTCAGAAGTGTTGAGGAGGTTTCTAGT  
GCAGTTTACTTGATTACAAGCTGCCCTAAATTACAAGAACTTACAATTG

>PGSC0003DMG400013766LRR-RLPs\_975

TCTAGTGCAGTTTACTTGATTACAAGCTGCCCTAAATTACAAGAACTTACAATTGAATGTGTAAGCACCCCT  
CCTACTTTCTCATAAACTTATTGATATGGTTTCTTCATCTGAATCCGC

>PGSC0003DMG400013882G-LecRK\_1037

ACAATGGTTCTTGAGAGATGGCTCTCATGGATGTTTGAGGAAGAAAATGAAGAGGTGTGCAACAATG  
GTGAGGGATTGTACATTAAGTCATGTAAAGGTCCCCGACACAGGTGCAAC

>PGSC0003DMG400013882G-LecRK\_1098

AACAATGGTGAGGGATTGTACATTAAGTCATGTAAAGGTCCCCGACACAGGTGCAACTAGGATGAAC  
AAGAGCATGGGATTGAAGGAATGTGAAGAGTTGTGTCTGAAGAATTGCTCC

>PGSC0003DMG400013882G-LecRK\_305

TCCTGTCAATGGCACATCTGGGATTCTCACCATCGATTCAACTGGAAATCTTGTTGTACATCTCGATGCG  
GAAACAAAACTGTAGCCTGGAGAACAAATGTTTCTTCAGCTACAAAACG

>PGSC0003DMG400013882G-LecRK\_3599

AATTCCTTTTTCTGTACTTTGCTTTCATAGTATTAGAGAGATTTATTGGTGGGTTATACACAACATTTAACA  
TGCTAGTCCATTCTTGATTCAAACACTAGTGGGGTTGGGCTTTAATAGCA

>PGSC0003DMG400013882G-LecRK\_366

CTCGATGCGGAAACAAAACTGTAGCCTGGAGAACAAATGTTTCTTCAGCTACAAAACGAGCAGACTCG  
TATACTGCTAAGCTGGAGGATTCAGGGAATTTTATATTGTTTCAAGACTCC

>PGSC0003DMG400013882G-LecRK\_3965

TTTTCAATTTTTTTATTGATTTGCAGGATAGTAATTTGGTTGTGGAGTTTTGTCAATAAATGAGATATTTA  
ACTATTATTAGTTGGTTATGTTTTCTCAAAAAGTTATGGATAAGAAA

>PGSC0003DMG400013882G-LecRK\_4026

GAGATATTTAACTATTATTAGTTGGTTATGTTTTCTCAAAAAGTTATGGATAAGAAAATACAAACATGT  
AAGTTATCTTATGTAAGATTTTAACTTTTGTTCATAATTAGATCATGA

>PGSC0003DMG400013882G-LecRK\_4209

TCTTTCTGTGATGAGTATCTGTAAAAGTAATATCAACTAGTCTGTTGAAAATCTTTTAGCATTAAATGCAT  
TGAATCATTGAAGACTTATATCATACTTTGGGAAGTAATGAGCACTAGA

>PGSC0003DMG400013882G-LecRK\_427

CAGACTCGTATACTGCTAAGCTGGAGGATTCAGGGAATTTTATATTGTTTCAAGACTCCAAAATGGATGT  
TACTGAGTGGCAGAGCTTTGATTATCCTACCAATACTTTGCTTCCTTCAA

>PGSC0003DMG400013882G-LecRK\_4270

TTAAATGCATTGAATCATTGAAGACTTATATCATACTTTGGGAAGTAATGAGCACTAGATACATTTGATA  
CTCAGATAACAGAAATACATATACACGTCAGACAACCTAACGAACATAAGG

>PGSC0003DMG400013882G-LecRK\_4331

CATTTGATACTCAGATAACAGAAATACATATACACGTCAGACAACCTAACGAACATAAGGTGCGGTAATT  
GTCACCTCGTTGATCGAAGATGATGCTGTTTCTGTAGTAATCAAGTCTGAG

>PGSC0003DMG400013882G-LecRK\_4392

CGGTAATTGTCACCTCGTTGATCGAAGATGATGCTGTTTCTGTAGTAATCAAGTCTGAGTTACGGGTAAT  
GAAGGGCTTCTTCGGGGAGGGAACCGTTGCTTCAATACTTAGCATGGACA

>PGSC0003DMG400013884RLKWAX-EGF\_1194

CAAAGGGTGTTGTTGCTATTGTTGTACTAGTTTTAAAAACACACCTAGAAGCTAACTGACCAAGTGTTCGA  
ATACAATAGCCAAAACGCTCGTGATAACTTAATTTGCCTGTAAAATTTTCG

>PGSC0003DMG400013884RLKWAX-EGF\_630

TGACTCTCACAGCTGCTCGAGGAACGATTGGCTATGTAGCTCCAGAGTTGATCAGCAGAAGCATTGGAA  
CAATCTCATACAAAGCTGATGTTTACTGCTTTGGAATGCTGCTAATGGAAA

>PGSC0003DMG400013885G-LecRK\_1098

AGCCTAAAAATCAAGTGGCCTGGGAATTGCGAGATGGGTCTAATGGTTGTGTTTCGTTTTCATAAATTGG  
ATTGCAAAACTGATAAATTTAACATATTGAGGAACATGAAGTTGCCAGATA

>PGSC0003DMG400013885G-LecRK\_1342

TTGGAGCACCGAACTTGTTGACATGCGGCAGTATGCGGCGGCGGAAGGTGGCCAAGTTCTCTACGTTA  
GGGTGGCTACTTCTGATGCAGGTATCATCCTATTTTTCTACTTCTTTTTTCG

>PGSC0003DMG400013885G-LecRK\_1403

TACGTTAGGGTGGCTACTTCTGATGCAGGTATCATCCTATTTTTCTACTTCTTTTTTCGCTTAGTACAATGA  
TAACGAATTAACGATTAATAATCGATAAAAAATAGTTGTATTTAAATC

>PGSC0003DMG400013885G-LecRK\_1464

TAGTACAATGATAACGAATTAACGATTAATAATCGATAAAAAATAGTTGTATTTAAATCGTATTTAAAAG



AATCTGTACAATTAATTTTAAGTAATTTGGGGTTGGAATTTGATTGTTAG

>PGSC0003DMG400013885G-LecRK\_1525

ATTAAAAAGAATCTGTACAATTAATTTTAAGTAATTTGGGGTTGGAATTTGATTGTTAGATAATCCACTTC  
TGTGTTAGGATCAAATTTTGGGGATGATTTGAGTCGACTCGGCTGCACG

>PGSC0003DMG400013885G-LecRK\_1586

AATCCACTTCTGTGTTAGGATCAAATTTTGGGGATGATTTGAGTCGACTCGGCTGCACGAGTGGAGTTT  
GTTGGAATTTTTTATTTACTTGTAGTTGGATGATATTTCAACACAGAGA

>PGSC0003DMG400013885G-LecRK\_1647

TGGAGTTTGTGGAATTTTTTATTTACTTGTAGTTGGATGATATTTCAACACAGAGAAGTAGAGTAAA  
ATAGAAAGGGTGATGAAATTTTTGGAAAATTTTTGTGGAAGTTTGGAG

>PGSC0003DMG400013885G-LecRK\_1708

TAGAGTAAAATAGAAAGGGTGATGAAATTTTTGGAAAATTTTTGTGGAAGTTTGGAGAGTATTTCCA  
TGATTGGAAATATGCAATTTAATACTTTTTATCTCAATTTATGTGCTACAC

>PGSC0003DMG400013885G-LecRK\_1769

TATTTCCATGATTGGAAATATGCAATTTAATACTTTTTATCTCAATTTATGTGCTACACTTTTTAGTTTGTCT  
ACAAAGGAATGATGCATTTTTTTTTGGTAAGTAAACATTTTATTTGTC

>PGSC0003DMG400013885G-LecRK\_1830

TTTAGTTTGTCTACAAAGGAATGATGCATTTTTTTTTGGTAAGTAAACATTTTATTTGTCAAGTAAACGTTA  
CAAAACAACATTTTTATATTTAGTACTAACAATTTATTATCTTTAATTA

>PGSC0003DMG400013885G-LecRK\_2074

ATGTTTTGCACATTTTTGTCTGGAGAATTCAAGTTTGATGCAAAGTTAATTTATTTAATTCATTCGGCGAAC  
TTGCTGTTCTTATGTTCTCTGAATTATCCACTATATAAACTGTATATA

>PGSC0003DMG400013885G-LecRK\_2135

TTCGGCGAACTTGCTGTTCTTATGTTCTCTGAATTATCCACTATATAAACTGTATATATTGTTTTGTGTTT  
GAATTTATTTCCATAAATTCAAAAGTCGAGGACAAGTTGAAAAATCTG

>PGSC0003DMG400013885G-LecRK\_2196

GTTTTGTGTTTGAATTTATTTCCATAAATTCAAAAGTCGAGGACAAGTTGAAAAATCTGTATGTCTCAAAA  
TTGTTACTCATTTTTGCATGTCATCCGATCCAAATATCCTTGAATTATA

>PGSC0003DMG400013885G-LecRK\_2257

TGTCTCAAATTGTTACTCATTTTTGCATGTCATCCGATCCAAATATCCTTGAATTATATTATTCTTTTGCA  
TTTTAATAAGAAGCATATTACACATTATAATAATTTAATTTACTCT

>PGSC0003DMG400013885G-LecRK\_2318

ATTCTTTTGTCAATTTAATAAGAAGCATATTACACATTATAATAATTTAATTTACTCTTTTCTGATTGAGTT  
CCAAAGTTGGCAAACCTTAGCCCTTGATCAAAGATAAACCATGTGCAT

>PGSC0003DMG400013885G-LecRK\_2379

TCTGATTGAGTTCCAAAGTTGGCAAACCTTAGCCCTTGATCAAAGATAAACCATGTGCATGCAGTTAGTTT  
TGCTCTAATAGATGAAATTATAAAAATATATTTTACTTTTTTTGAATTCT

>PGSC0003DMG400013885G-LecRK\_2440

AGTTAGTTTTGCCTCTAATAGATGAAATTATAAAAATATATTTTACTTTTTTTGAATTCTTCTTTTCTATTTTA  
TTTTTTGGGTATTGCTATTTTTTTAAAATTCCCCCCCCAAACGTCA

>PGSC0003DMG400013885G-LecRK\_2501

TTTTCTATTTATTTTTTTGGGTATTGCTATTTTTTTAAAATTCCCCCCCCAAACGTGCATGCAGAAATTAAT  
TAGAGTATTTATTTTGAAAATAAATACTCTATTCCCTTTAAACAACA

>PGSC0003DMG400013885G-LecRK\_2562

CAGAAATTAATTAGAGTATTTATTTTGAAAATAAATACTCTATTCCCTTTAAACAACACGTATAGTTGTC  
TTTTAATATCCTTGGTCCCCTTTTTAAATTCCCTTTCACGTTACCTACT

>PGSC0003DMG400013885G-LecRK\_2928

CGAAAAGTATAAAAAACCTAACCATATCTACCAATCCCATCAACAATTTGCCTTCAATAGGGACTTAA  
TTTTATTTATTTACTATATTTGGACTTTCTTTTTCTCATTTGATTTGATA

>PGSC0003DMG400013885G-LecRK\_3050

GATGATTAGTATTTGGAAAATATGTTACACAGTCAAGTATCTCAAGGCTCTAAAAGTAATCAGCCACCTA  
ATTCCACCTTCTTCCAATCACCTATTCATAAATTTGAACAAACATTATA

>PGSC0003DMG400013885G-LecRK\_3111

AGCCACCTAATCCACCTTCTTCCAATCACCTATTCATAAATTTGAACAAACATTATAGATTTATTGTCAC  
AATTCAGCTCGTAATTAACGTTGAGATTGAAATATTAATAATAAAAGG

>PGSC0003DMG400013885G-LecRK\_3172

TTTATTGTCACAATTCAGCTCGTAATTAACGTTGAGATTGAAATATTAATAATAAAAGGTAACAAAGTAAT  
CAAATGTGCATTTGCTTTTTCTTTGTACTTTCCTTTTAAATCTGCA

>PGSC0003DMG400013885G-LecRK\_3294

CTTAAGAGGAAACTTTTAATTATGGTGGGAAATAAAGTTTCAAATAAAGCTTATTTAGCTCTAAATTATT  
TTCAATTAATTGGTCCCACAATAAATGGGTCCCACAAAGAGATACTCCT

>PGSC0003DMG400013885G-LecRK\_3355

CTAAATTATTTTCAATTAATTGGTCCCACAATAAATGGGTCCCACAAAGAGATACTCCTTTGCAAATCAAA  
ACGGTGACGAAGCAATTCCTGGTGGTGTAAATGGGCCCTTACATGGCC

>PGSC0003DMG400013885G-LecRK\_3599

ACACGTTTGGGAAAAGGTACATACACGTTTGAAAAGTAAGGTTTGGTGGGGTAAATTAATTCAAATAT  
TACAAAGGGATTAAGAAGTATATATTAAGCTAACTATTTTTTTTTTACCAAG

>PGSC0003DMG400013885G-LecRK\_3782

ATCATGTTTAGTGACACCATTGGACTGTAGTCTTTTCAATTCAAACCTTTTCTATTGTCACCGAAAATGATT  
TGAACAACACTATAGGTTTTTCATACATAAATAGACATTCAAATTTGGC

>PGSC0003DMG400013885G-LecRK\_3843

GAAAATGATTTTGAACAACACTATAGGTTTTTCATACATAAATAGACATTCAAATTTGGCCTAAGTAAACA  
CCTTAACTTTAGTATACATACCTAGACACCTCAAATTATTTCTCCGTGT

>PGSC0003DMG400013885G-LecRK\_4026

AGCATGGGTGTCCATGAGACATAGTGGGACGAGTTGGAGGCGTCTAGATATGCTCTTTTGAAGTTGGA  
GTGCTTCCTTTGTCAGCTGAGGTCAAGTTTGAGTGTTTCTTTATGTATTATG

>PGSC0003DMG400013885G-LecRK\_4087

AGTTGGAGTGCTTCCTTTGTCAGCTGAGGTCAAGTTTGAGTGTTTCTTTATGTATTATGCTAGTAAAAAAT  
GATGATCTTCTTTTTGCAGCACTAACTCTTGAATAAAAATTAAGCATGA

>PGSC0003DMG400013885G-LecRK\_427

AATCACAGAAATTGGTACCCTTCTTCTCGTCGATGGCCAACTGGAAATCCCGTCTGGTCTTCCGATCAA  
ACTCCGGCGACCAACGTAGTAGCCCAACTCCTTGACTCCGGGAACCTTTGT

>PGSC0003DMG400013885G-LecRK\_4514

AAGAACTTCTGATGAATGCAACTATTATCCAAGTAAAAGAGAATTTTCTGGTGAACTTCCACGGAAGA  
GTTTGAATTGCCATTATTTGATTCAGCACCTAGCTACGGCTACAGAAA

>PGSC0003DMG400013885G-LecRK\_4575

CACGGAAGAGTTTGAATTGCCATTATTTGATTCAGCACCTAGCTACGGCTACAGAAAATTTTTCTGAT

GCGACTAAGTTGGGCCAAGGTGGATTTGGTTGTGTTTACAAGGTAAAATC

>PGSC0003DMG400013885G-LecRK\_4880

ACAGAAATCTAGTCCGGCTTCTTGGCTGTTGTGTTGAAATGGAAGAGAAGATGCTGATCTATGAATACC  
TGGAGAATAAAAGTTTAGATTCAATTTTATTCAGTAAGTCTTTTTCGTTGT

>PGSC0003DMG400013885G-LecRK\_4941

TGAATACCTGGAGAATAAAAGTTTAGATTCAATTTTATTCAGTAAGTCTTTTTCGTTGTATCGTCAAGAGA  
GTAGTGTTCACATCATTTACTTACATGCTTATATAATTTGTGAGTCAC

>PGSC0003DMG400013885G-LecRK\_5002

CGTCAAGAGAGTAGTGTTCACATCATTTACTTACATGCTTATATAATTTGTGAGTCACATTTGAATATGC  
TCCTCAGATAAACAGAAAAGCTCGCTGCTCGATTGGCAAAGCGGTTCA

>PGSC0003DMG400013885G-LecRK\_5063

TTGAATATGCTCCTCAGATAAACAGAAAAGCTCGCTGCTCGATTGGCAAAGCGGTTCAATATTATTTGT  
GGCATTGCTCGGGGGCTTCTATACCTTCACCAAGATTCAAGATTTAGGAT

>PGSC0003DMG400013885G-LecRK\_5124

ATTATTTGTGGCATTGCTCGGGGGCTTCTATACCTTCACCAAGATTCAAGATTTAGGATTATCCACAGAG  
ACCTTAAAGCAAGCAATATTCTGCTTGATAAGGATTTGACCCCAAATA

>PGSC0003DMG400013885G-LecRK\_5490

AACCGGGAAGAAGAACAGGGGATTCTATTATCAAACAACCAACTCAACCTTCTTGGACATGTAAGTCC  
ACAGATCATATGTTAGCTTCATTATTGGTAATACATTCATTATTTGATTCA

>PGSC0003DMG400013885G-LecRK\_5551

GTAAGTCCACAGATCATATGTTAGCTTCATTATTGGTAATACATTCATTATTTGATTCATTTCTGATAAACA  
AAGTAATCGATTATGCAGGCGTGGAGACAATGGAAAGAAGGGAGCGGC

>PGSC0003DMG400013885G-LecRK\_5673

AGAGCTACTAGATCCATCTTTTGGAGAATCATTTTCTCCGTCTGAAGTAATGAGATGCATACAGGTTGGA  
CTGTTGTGTGTCCAGGAACAAGCGGAAGACAGACCAAACATGGCCACTGT

>PGSC0003DMG400013885G-LecRK\_5734

CAGGTTGGACTGTTGTGTGTCCAGGAACAAGCGGAAGACAGACCAAACATGGCCACTGTGGTTTTGAT  
GTTAGGCAGTGAAAACGCGTCACTACCTCAGCCTAAAAACCCAGGATTTTGC

>PGSC0003DMG400013885G-LecRK\_5795

TTTTGATGTTAGGCAGTGAAAACGCGTCACTACCTCAGCCTAAAAACCCAGGATTTTGCCTTGGAAGAA  
GACCCGTTGATTCTGATTCATATTCGACTAATTATGAAGAACTTGCACTG

>PGSC0003DMG400013885G-LecRK\_5917

AATCAAGTTACAGTTACCATGATAGATCCCCGGTAGTTGATGGTGACGCCCTCAGAAAGTGTATATTACT  
ACAAGAGGTTACAATTTTCTTTGTATACTTTCTCAGTTTTTGCTTTTT

>PGSC0003DMG400013885G-LecRK\_6039

GTAAGTTTTGTGTAAGATAAAGAGTATAATTAGGTCTTTTTTCTCATTACATACAATTGTGGGTTCAAAA  
ATCTCTTTTTTCATCATCAATGTAATAGTCCAATCATTCTTTTCCATA

>PGSC0003DMG400013885G-LecRK\_6072

GTCTTTTTTCTCATTACATACAATTGTGGGTTCAAAAATCTTTTTTTCATCATCAATGTAATAGTCCAAT  
CATTCTTTTCCATATCCTTAATTGAAATCCATTGTAAATTACTGTGC

>PGSC0003DMG400013886G-LecRK\_0

GCCTCATCAGAACCTTCTTCTTTTGTGTTTTCTATACCCTTTACCATTCTCCTTTGTAAAATTCCCAATTT  
TCTCCATTCTTGAATTGTGGCATCATCTTTCCATTTCCAAATTCT

>PGSC0003DMG400013886G-LecRK\_183

TTCTCCTCATTCTGTTTAGGTGGTGACAGAGTTACGCGAGGAGAGATTTATAAAGATGGTGATAACATCA  
CTTCTAAAGGAGGGGATTTTGTGTTGGGGTTCTTTAGTCCTGCAAATACC

>PGSC0003DMG400013886G-LecRK\_2928

ATATGTGGACGTAGAAATACAAGCTTTCCGGACAGATGAGCATTGAGGCATCATTGGATATGTAAGTCTG  
ACTAATTTCTCCACCTATTTCAATCATTTTAGTCAAGAACAAGCTGTCTAA

>PGSC0003DMG400013886G-LecRK\_2989

TAAGTCTGACTAATTTCTCCACCTATTTCAATCATTTTAGTCAAGAACAAGCTGTCTAAATAATGGGGCTA  
ATTTCTTGTGTGATGAGCTATGACGGAGTGGTCATCTTTCTCATATTTT

>PGSC0003DMG400013886G-LecRK\_3050

AATGGGGCTAATTTCTTGTGTGATGAGCTATGACGGAGTGGTCATCTTTCTCATATTTTCTGGTGGAAA  
ATATTTGAGGCATGGGAGAAGTGGGAAGAAGGTAGACCAATGGACCTGGT

>PGSC0003DMG400013886G-LecRK\_3416

TAGTGTACTAATAGGTAGATGATTGGTTAATGCTTGTTCTTCTAACATACCTGCTTCATTTAAGAGAATG  
GGATCAAGTAGTGTAAGTATGCCAAGTTATACTTGGAACTATGTTTCATA

>PGSC0003DMG400013886G-LecRK\_3538

TTTTTGTTAGCTAGGTACACTTTAGCACATCATGTGTATTGTAATTAGAAGGTGGTTCAGCTCTCAAAGCT  
GAAAGAGAGATATGTCACAACCTTGTTCAATTAGTATGGCTGAAGTTTT

>PGSC0003DMG400013886G-LecRK\_3599

TCTCAAAGCTGAAAGAGAGATATGTCACAACCTTGTTCAATTAGTATGGCTGAAGTTTTTTTCTTTACTGT  
TTGTAGATGGAGATGCTCCACCAATCGAGCAAACCCCACTTGTCATATC

>PGSC0003DMG400013886G-LecRK\_3782

AAACCCCTGCTCCTATGCAATAGCTCGAAACCACATAAATCAAGCATTTCATCGGTCCGTATATATCAC  
TGTATAATCAAGGAACAGAATTACATGCTTGTTATCTCCTATCACTTCA

>PGSC0003DMG400013886G-LecRK\_3843

TATATATCACTGTATAATCAAGGAACAGAATTACATGCTTGTTATCTCCTATCACTTCAAGAAACCATTTT  
GCAGTTCTTCTAAAGCTTGAGAACTAGTATTTTGTCCATTGAAGCACAA

>PGSC0003DMG400013886G-LecRK\_3904

AAACCATTTTGCAGTTCTTCTAAAGCTTGAGAACTAGTATTTTGTCCATTGAAGCACAAAGCAATAGTTATT  
ACCAGGTTCTGCATAACTTGAACTATCTGTAGGGAGATCAGCTTGTGTT

>PGSC0003DMG400013886G-LecRK\_3965

AATAGTTATTACCAGGTTCTGCATAACTTGAACTATCTGTAGGGAGATCAGCTTGTGTTCCCTTTGAGAC  
AGAAGGGGAAATGGAATTATTTACTATGTAATTAATCAGTGTCAATTTAG

>PGSC0003DMG400013886G-LecRK\_4003

GTAGGGAGATCAGCTTGTGTTCCCTTTGAGACAGAAGGGGAAATGGAATTATTTACTATGTAATTAATC  
AGTGTCAATTTAGTGGTGGTTGACTTGTTCATGTAACTCAAATATGGAAG

>PGSC0003DMG400013886G-LecRK\_61

AAATTCCAATTTTCTCCATTCTTGAATTGTGGCATCATCATTTCCATTTCCAAATTCTTGAATGGCCACTG  
GCTTTAGATTTCCCCCTTTTGGTTCTTATTTCTTTTCATTCTTTCTT

>PGSC0003DMG400013887G-LecRK\_0

AAAAATTTACAAGTTACACGCTTTATATTTTGGTTAAGCACGCACGCCACGTAGTTAATGTGGTGCGTA  
AAAGTCACACCTTTGAAAGGTTTGGTATGTAAGAGATTCCCATGGCTG

>PGSC0003DMG400013887G-LecRK\_1037

GGAGAGTTCTATGGGAAAGCTTTCAATATCCTACGGATTCTCTTACAGCTCATGAAAATGGGCACTGA

TAAGCGTACTAACACAACAACACTCTCCTGAACTCATGGGGGAGTCCTGATG

>PGSC0003DMG400013887G-LecRK\_1098

GGGCACTGATAAGCGTACTAACACAACAACACTCTCCTGAACTCATGGGGGAGTCCTGATGATCCATCCGT

TGGGAGCTTTTCAGCTGGAATTCAACATCGATACATTCCTCAGTTTCTTAT

>PGSC0003DMG400013887G-LecRK\_1159

CCATCCGTTGGGAGCTTTTCAGCTGGAATTCAACATCGATACATTCCTCAGTTTCTTATTTGGAAAAACAG

TTCTCCTTACTGGCGGGGCGGTCCATGGAATAAACAGATATACATAGGA

>PGSC0003DMG400013887G-LecRK\_122

GAGTGTGTAGAAGTGATTTGGCTAAGAGTTCACAGATTAAGTATTAGGCCTATTTTCTACAGTAAA

CTGTTTTTCCCGTAAACATTTTGCAGAGATGGTTGGTGTGTCATTGAGTC

>PGSC0003DMG400013887G-LecRK\_1220

GGAAAAACAGTTCTCCTTACTGGCGGGGCGGTCCATGGAATAAACAGATATACATAGGATTACCAGAAA

TGAATTCTTTCTATCTCTATGGTATTGACCTAGTAATTGATAATGCTGGCA

>PGSC0003DMG400013887G-LecRK\_1281

ACCAGAAATGAATTCTTTCTATCTCTATGGTATTGACCTAGTAATTGATAATGCTGGCACAGCATACCAA

ACTTATTCAGACCCAAATCAGTCTAGGATACTCTATTATTCCTTGAATTC

>PGSC0003DMG400013887G-LecRK\_1342

GCATACCAAACCTTATTCAGACCCAAATCAGTCTAGGATACTCTATTATTCCTTGAATTCAACAGGGTCTTA

CCAGGAGAAGGTTTGGGATCAAAGTAAGAAGGATTGGGTGGTAACATGG

>PGSC0003DMG400013887G-LecRK\_1403

CAGGGTCTTACCAGGAGAAGGTTTGGGATCAAAGTAAGAAGGATTGGGTGGTAACATGGGCAAATCCC

CGAACAGAGTGTGATTTTTATGCCAAGTGTGGGACATATGGAAGCTGTAATC

>PGSC0003DMG400013887G-LecRK\_1464

AAATCCCCGAACAGAGTGTGATTTTTATGCCAAGTGTGGGACATATGGAAGCTGTAATCCAATGAATTCT

CCAATATGCAGTTGTATACAAGGTTTCAAACCAAAAAATGATGGAGAATG

>PGSC0003DMG400013887G-LecRK\_1525

ATGAATTCTCCAATATGCAGTTGTATACAAGGTTTCAAACCAAAAAATGATGGAGAATGGAAGAAGGGA

GATTGGTCTGGTGGATGCATCAGAAGTACTGCACTAGACTGTGAAAGGAAC

>PGSC0003DMG400013887G-LecRK\_1586

AGAAGGGAGATTGGTCTGGTGGATGCATCAGAAGTACTGCACTAGACTGTGAAAGGAACAAAAGTAT  
ATTGAGAAGGACAAGCAGGACGGGTTTCTGAAGCTGCAGACAATGGGAGTGC

>PGSC0003DMG400013887G-LecRK\_1647

AACTGATATTGAGAAGGACAAGCAGGACGGGTTTCTGAAGCTGCAGACAATGGGAGTGCCAGATTTTG  
TAATTTCCGGTACCTTCTGCAAAAAAAGACTGTGAGAGTACTGTTTGAGTAA

>PGSC0003DMG400013887G-LecRK\_1708

GATTTTGTAAATTTCCGGTACCTTCTGCAAAAAAAGACTGTGAGAGTACTGTTTGAGTAACTGTTCTGCA  
CTGCATATTCATACTACAGAGGCATAGTTGTATGCATTGGAATAGAAGC

>PGSC0003DMG400013887G-LecRK\_1769

GTTCTGCACTGCATATTCATACTACAGAGGCATAGTTGTATGCATTGGAATAGAAGCTTAGTTGATAT  
TCAAGAATACTCCAGGGATGGGGCGGCTAGTTTGTTTCATTTCGCCTTGCCT

>PGSC0003DMG400013887G-LecRK\_183

TACAGTAACTGTTTTTCCCGTAAACATTTTGCAGAGATGGTTGGTGTGTCATTGAGTCAATACCCGTAG  
GAAAAGGACAATCCATTAAATTCACATCAGAAATTGTCAACATGATACAA

>PGSC0003DMG400013887G-LecRK\_1830

AGTTGATATTCAAGAATACTCCAGGGATGGGGCGGCTAGTTTGTTTCATTTCGCCTTGCCTACTCTGAACTT  
GGTAACATACTTCTTTACAACCTTGAGCTTTCAATTGTTTAGCTTGTTTT

>PGSC0003DMG400013887G-LecRK\_1891

TCTGAACTTGGTAACATACTTCTTTACAACCTTGAGCTTTCAATTGTTTAGCTTGTTTTTTTTTTTTTGGAAC  
TACAAGGAGTTGAAATTTAAAGTCTTCTTGTCTTTGAAGAATATAAC

>PGSC0003DMG400013887G-LecRK\_1952

TTTTTTTGGAACTACAAGGAGTTGAAATTTAAAGTCTTCTTGTCTTTGAAGAATATAACCAAGACTCCCAA  
TAAAATCTATAAAACCATCGAATTAGGCTCAAATTCTCAATTAATGTAT

>PGSC0003DMG400013887G-LecRK\_244

TACCCGTAGGAAAAGGACAATCCATTAAATTCACATCAGAAATTGTCAACATGATACAAAATCCTGCCT  
TATATTCTCAGAGCTAAACATATCAGCCCAAGTAATTTTTCAGTATTGCA

>PGSC0003DMG400013887G-LecRK\_2501

ACCAGTTTCAAAAAAATAAAAATCAATTAGTTCTATCACTTCCATGGAAAGAAAGATATGCTCAAGAAC  
AGTCTATGGCTCATACATGTTTGCAGCTGCAAATGACAAGAAAGACATTC



>PGSC0003DMG400013887G-LecRK\_2562

CTCAAGAACAGTCTATGGCTCATACTGTTTGCAGCTGCAAATGACAAGAAAGACATTCCTGTAGCAGCT  
ATTGCAACCACAGTCTCAATAGGCTCAATAACAGTTATCTTGTGTGGATA

>PGSC0003DMG400013887G-LecRK\_2928

TTAGCGAATGCCACTGACAGTTTTACCCAGCTAGCAAGCTGGGGCAAGGAGGCTTTGGTCCAGTCTAC  
AAAGTAATGTTTCTTGATGCATCTCTGCAGTGTCTGACAAATGAACACAA

>PGSC0003DMG400013887G-LecRK\_305

TCCTGCCCTTATATTCTCAGAGCTAAACATATCAGCCCAAGTAATTTTTCAGTATTGCAGGTATCAAATGC  
ACAAGAAGTACTCAGAAACATAGTAAGCTGTAGACGTAGAAGCAAAATG

>PGSC0003DMG400013887G-LecRK\_3111

AAAAGGCTTTCACAGTCTTCTGGTCAGGGGCTACAGGAGTTTATGAATGAGGTCGTTGTGATTTCTAGA  
CTACAACATCGTAATCTTGTTAGACTCCTTGGCTGTTGCACAGAGAGAGGG

>PGSC0003DMG400013887G-LecRK\_3416

GGTTCACACCAGGAAAAGTTCCTTGATTGGAGTAAACGAGCCATCATTATTGAAGGAACTGGTCGAGGC  
CTCCTTTACCTTCACAGAGACTCAAGACTACGAATTATTCATAGAGATCTG

>PGSC0003DMG400013887G-LecRK\_3477

GTCGAGGCCTCCTTTACCTTCACAGAGACTCAAGACTACGAATTATTCATAGAGATCTGAAGGCAAGCA  
ACATCCTGTTGGATGAATACCTAAACCCAAAAATTCGGATTTTGGCATGG

>PGSC0003DMG400013887G-LecRK\_3599

AGGATTTTTGGAGGCAATCAAGATCAGGCCAGCACTATAAGAGTTGTTGGCACATAGTATGTTTGCCT  
GCTTCCTCCATTTTTTCATGGATGAACTGCCATCATTAGTCATTGAGTTTC

>PGSC0003DMG400013887G-LecRK\_366

TATCAAATGCACAAGAAGTACTCAGAAACATAGTAAGCTGTAGACGTAGAAGCAAAATGGCCACTTAAC  
AAATCATTTGAGACATGGGTCCAGCAATTAATTGACACCCAATTGAAAAGT

>PGSC0003DMG400013887G-LecRK\_3660

TTTGCAGTGGTTACATGGCCCCTGAATATGCAATGTACGGAAGATTCTC  
ATGCAGTGGTTACATGGCCCCTGAATATGCAATGTACGGAAGATTCTC

>PGSC0003DMG400013887G-LecRK\_3721

TGTAATATCTTATGCAGTGGTTACATGGCCCCTGAATATGCAATGTACGGAAGATTCTCAGAAAAATCAG

ATGTCTACAGCTTCGGTGTGTTGATCTTGGAATTGTCAGTGGAAGGAAG

>PGSC0003DMG400013887G-LecRK\_4087

GCTTTGAAAAACAGATGGTGAGATGTGGACATATTGGATTATTATGTGTTCAAGAATATGCAGAAGATA

GGCCAAATGTCTCCACAGTTCTGTCAATGCTCACTAGTGATATTGCTGAAC

>PGSC0003DMG400013887G-LecRK\_4209

CCTACTCCTAAACAACCTGCATTTACCGGAGGACATGCTTCACCACAGCAAGTATCTTCTAAAAGCCAAG

GGTCCGTGAATGCTGATACCATTACTATATTGGAACCACGATAGGATACA

>PGSC0003DMG400013887G-LecRK\_427

CACTTAACAAATCATTTGAGACATGGGTCCAGCAATTAATTGACACCCAATTGAAAAGTAAACGGATGA

GAACATAAAAAAGATAAGTATCCAAGAACCTTATTTGACTAAAGGAAAAGA

>PGSC0003DMG400013887G-LecRK\_4331

GTTTTCAACAGGCAGGCAAAGATCATTACTTTTCCTTAAAATGGTAACAGTAGCATAGTATTTCTTGAATG

TGCATAGGGTAAAACACGCTCCTTTGCAATAACTTGCAAAACACACAAAA

>PGSC0003DMG400013887G-LecRK\_4392

TCTTGAATGTGCATAGGGTAAAACACGCTCCTTTGCAATAACTTGCAAAACACACAAAAGAGGTAAAAG

TGCACTAGCTATGTGATGAATTAATTACAGAGTGAGCATGGAGAACATGAA

>PGSC0003DMG400013887G-LecRK\_4575

AAAAAGAATCGCAAATCCCAATTAACAAGTTCAAATAATGGCAATCAAAGACTTGAAAAATCATACCTA

CTGTACTGATACACGAAACGGCGTCGGCGAAAAATAGCCACTCGTTTTAC

>PGSC0003DMG400013887G-LecRK\_4636

TCATACCTACTGTACTGATACACGAAACGGCGTCGGCGAAAAATAGCCACTCGTTTTACCACTGTTTTTCT

TAGAAAATTACAGAGAAGTGAATTGGTGAATTAATCAATGTTGAGGAAA

>PGSC0003DMG400013887G-LecRK\_4697

CTGTTTTTCTTAGAAAATTACAGAGAAGTGAATTGGTGAATTAATCAATGTTGAGGAAAAGTTAACTCTG

CACTATTTTAGGTCATTCACACAAGTTATTTGGGTGTTGGTTAAAGACTA

>PGSC0003DMG400013887G-LecRK\_4758

TTAACTCTGCACTATTTTAGGTCATTCACACAAGTTATTTGGGTGTTGGTTAAAGACTATAATTGTTTCAT

TTTTGTTTTAATTTGCATAAACTAATGTGAACTTACCTAAATCTCAC

>PGSC0003DMG400013887G-LecRK\_488

ACGGATGAGAACATAAAAAAGATAAGTATCCAAGAACCTTATTTGACTAAAGGAAAAGAAAGGTCATCC  
TTGAGGTTCTCAGCTCTTACACTTCAAATGATAAGACTGTACCTTTTGGAA

>PGSC0003DMG400013887G-LecRK\_549

GGTCATCCTTGAGGTTCTCAGCTCTTACACTTCAAATGATAAGACTGTACCTTTTGGAAAGTAAAGAAGTT  
AGAATGAGCATATCTATGCTTTTTTCATCTTTTACTCTATTGTTTTTATGT

>PGSC0003DMG400013887G-LecRK\_61

TGGTGCGTAAAAGTCACACCTTTGGAAAGGTTTGGTATGTAAAGAGATTCCCATGGCTGGGGAGTGTGT  
AGAAGTGATTTGGCTAAGAGTTCACAGATTAAGTATTAGGCCTATTT

>PGSC0003DMG400013887G-LecRK\_610

AAAGAAGTTAGAATGAGCATATCTATGCTTTTTTCATCTTTTACTCTATTGTTTTTATGTAGTTTTTTCCAGT  
GCCAATACTTCAGACACCATTAGCAGTAGTGAGCCTGTGAGAGACTCA

>PGSC0003DMG400013887G-LecRK\_671

TTTTTTCCAGTGCCAATACTTCAGACACCATTAGCAGTAGTGAGCCTGTGAGAGACTCAGAAACTGTATT  
TTCTAGAGGCCAAAAGATTTAAACTGGGTTTTTTTAGCCCCAGGAATTCTG

>PGSC0003DMG400013887G-LecRK\_732

AACTGTATTTTCTAGAGGCCAAAAGATTTAAACTGGGTTTTTTTAGCCCCAGGAATTCTGCAAAACGTTAT  
GTAGGGATTATGTTAACCTACCATCACCAACACCAACTGTAGTATGGGT

>PGSC0003DMG400013887G-LecRK\_793

AAACGTTATGTAGGGATTATGTTAACCTACCATCACCAACACCAACTGTAGTATGGGTAGCTAACAGAG  
ATGAGCCTTTACACGATTCTAGTGGAATACTCACAATATCAGAAGATAGC

>PGSC0003DMG400013887G-LecRK\_854

CTAACAGAGATGAGCCTTTACACGATTCTAGTGGAATACTCACAATATCAGAAGATAGCAATCTTGTCAT  
GTTGAATGGACAGAAGGAGATAATTTGGTCATCCAGTATTTCAAACCTCTA

>PGSC0003DMG400013887G-LecRK\_915

TCTTGTCATGTTGAATGGACAGAAGGAGATAATTTGGTCATCCAGTATTTCAAACCTCTATGAAGAATTCC  
ACAGCACAACCTCTGGACACTGGAAACTTAGTCTTGAAAGACAGCTCAAA

>PGSC0003DMG400013887G-LecRK\_976

AAGAATTCCACAGCACAACCTCTGGACACTGGAAACTTAGTCTTGAAAGACAGCTCAAATGGGAGAGTT  
CTATGGGAAAGCTTTCAATATCCTACGGATTCTCTCTTACAGCTCATGAAA

>PGSC0003DMG400013898LRR-RLPs\_0

CCCCTTTGGCTTCAAGGCTTACAAGTCATCGTCCGCTAGTATATATATCTATGAGAACCCTTTTAATGTAA  
AAGCTCAAAAAAGTTGTATTATTGTTCTTGAAACCAAGTACTCTACCTA

>PGSC0003DMG400013898LRR-RLPs\_1054

GTAGACTTAGAAATCTTCAACAACCTTGATCTTCGAAAGAATCGTTTGAGTTCAACCATTCTTCTGAGTTA  
GGTCTTTGTAATAACCTCATTCTTGGCTCTAGCAGAGAATATCCTGC

>PGSC0003DMG400013898LRR-RLPs\_1116

TCTGAGTTAGGTCTTTGTAATAACCTCATTCTTGGCTCTAGCAGAGAATATCCTGCAAGGACCATTGCC  
TATATCCTTGTCCGCGGTGACCAAGTTATCTGACTTGAACCTGTCTGAT

>PGSC0003DMG400013898LRR-RLPs\_1178

ACCATTGCCTATATCCTTGTCCGCGGTGACCAAGTTATCTGACTTGAACCTGTCTGATAATTTCTTTCTG  
GTGAGGTTCAATCATATCTCATTACCAATTGGACTGAGCTGACATCTTT

>PGSC0003DMG400013898LRR-RLPs\_124

ACATGACAACCTTCTCACAGTACCTTCTTTACATTCTACTTGTGCTTCTTCTTTTTTCACTTCCATTACAAT  
TACATCATCAGCAACAACCTGAAGCTGAAGCTCTTGTCAAATGGAAGA

>PGSC0003DMG400013898LRR-RLPs\_186

CCATTACAATTACATCATCAGCAACAACCTGAAGCTGAAGCTCTTGTCAAATGGAAGATGAACTTATCTT  
CTGCTTCTTTCTTGGATTCATGGTCCATTTTGAATCTCGGAAACTTGTGC

>PGSC0003DMG400013898LRR-RLPs\_2108

TCTCTCTCGCAATGCCTTACAGGAACTTGCCGACAAGTCTATTTCAACATTTGAACGCCATGAAGACA  
ACTAATCAAACAAGAATGCACCAATTGAAGGAAGCCACTATTACCAAGA

>PGSC0003DMG400013898LRR-RLPs\_2170

TGAAGACAACCTAATCAAACAAGAATGCACCAATTGAAGGAAGCCACTATTACCAAGACTCGGTAGTTG  
TTGTAATGAAGGACGCATGTTTGAAGTTGTGAGAATCTTGTATTTATACA

>PGSC0003DMG400013898LRR-RLPs\_248

CTTATCTTCTGCTTCTTTCTTGGATTCATGGTCCATTTTGAATCTCGGAAACTTGTGCAATTGGACATCTAT  
TGTCTGCAATGCTGGTGGAAACAATTTCCGATATCAATCTTTCTGATGC

>PGSC0003DMG400013898LRR-RLPs\_2790

ACTCAAACCTCAAATGGCTAGCAAGAATCATGGAAGAGTTGGAACACAAAATTATTACGCGAAGTAGA

AAGAAGCAACGAGGTAAAAGGCATTATAGAAGAAGAAAATAATCGCTTCTA

>PGSC0003DMG400013898LRR-RLPs\_2852

AAGTAGAAAGAAGCAACGAGGTAAAAGGCATTATAGAAGAAGAAAATAATCGCTTCTAGACAAGTTAC

CAACTGAGTAGGATTTGATTTTCAGAACTTTGGGTATTCAAGTTAAGGTCTAT

>PGSC0003DMG400013898LRR-RLPs\_2914

AGTTACCAACTGAGTAGGATTTGATTTTCAGAACTTTGGGTATTCAAGTTAAGGTCTATGCTGATTTTTAGT

TTATAGTAGCTATATGTATTGATATATATACACTTTTCGTTACAACAACA

>PGSC0003DMG400013898LRR-RLPs\_2960

GTTAAGGTCTATGCTGATTTTTAGTTTATAGTAGCTATATGTATTGATATATATACACTTTTCGTTACAACA

ACAGTTAATCGATACTTTATACTAGGTATATTTTTCTTTCCAATAATTT

>PGSC0003DMG400013898LRR-RLPs\_930

GAACTTCAGCTTGGTGTCAACATGTTTTCGGGCTTAATTCCTGATGAAATTTCTCTGATCAGCAGTCTTGA

AGTTGTTGACTTTTTCAATAATCACTTCAAGGAAAGATTCCATCTTCT

>PGSC0003DMG400013928OtherRLKsTM\_0

TTTCATCTCACCATTTCTATGGCCATTCTTGTTCAAAAACTCACTTTTTATTTTTCTTTAATTTTCATTTTTTC

CCTTTCTTTCCAACCCATTTCTTCACTTTCCACTATTGCCATTTCC

>PGSC0003DMG400013928OtherRLKsTM\_1116

CCAATGCCAACGCCATCTCAGTGAATACGAGAAATGTGGCATTCTCGTGGTAGGTTGTGTTGGATCCT

TAATGATGTTGAGTGTTGTTGTTATAATGTTTCTCAAGTATTGCAAGATT

>PGSC0003DMG400013928OtherRLKsTM\_1426

AAGTGACGAATAACTTCTCCGAAGAGCACAAAATCGGGACAGGAAGCTTTGGTTCTGTTTATCATGCTA

CATTAGATGATGGTCGCGAAGTAGCCATAAAAAGGGCAGAAGCTTCAGCCT

>PGSC0003DMG400013928OtherRLKsTM\_1612

TAGACTTCTTGTCACGACTCAATCACAAGAACCTCGTTACACTATTTGGCTATTGTGAAGACAACAACGA

ACGCGTCTTGGTTTTCGAGTACATGAACAATGGCACTCTCCATGACCATC

>PGSC0003DMG400013928OtherRLKsTM\_1984

TGGACCCTGAGTACTACAGATTGCAACAATTGACAACAAAGAGTGATGTGTATAGTTTTGGAGTAATGA

TGCTAGAGTTGTTGTCAGGTTACAAGGCAATTCACAAGAATGAGAACGGTG

>PGSC0003DMG400013928OtherRLKsTM\_372

TTGCTTACAAATCTTGATTCTGGAAATCCCATGTTTGTGGAATTGTTAATGGAACCAATAGGCTTCAGTG  
TTGGCAGTGGCATGGATTGAGTTTGTCAAATAACAGTTGATAACTTCA

>PGSC0003DMG400013928OtherRLKsTM\_434

GCTTCAGTGTTGGCAGTGGCATGGATTGAGTTTGTCAAATAACAGTTGATAACTTCAAATCTTGCTGTT  
GGAGAAGATTTTGTGGGTTGTTGCCATCGGGTCAAATTCAATGTCT

>PGSC0003DMG400013928OtherRLKsTM\_744

GTTAATGGGAAAGTGGTTGCTGGGGTGAAAATGGTTTTAGTCTCCCTTCAACTTTGAGTGAGATATCTT  
TTGAAACATTAGAAGCAAACAAGATATTTTTGTGGCATTGTGACCTCA

>PGSC0003DMG400013928OtherRLKsTM\_806

GATATCTTTTGAACATTAGAAGCAAACAAGATATTTTTGTGGCATTGTGACCTCAAATTATTCATTGT  
TCTGTTGGGGAAATGAGATTTTCAATTCAAATCCAGTAGTCTTTGAAGA

>PGSC0003DMG400013928OtherRLKsTM\_868

ATTCATTGTTCTGTTGGGGAAATGAGATTTTCAATTCAAATCCAGTAGTCTTTGAAGAAGCTGTTCCAGG  
ACCATGTACCACTTCATGTCCTTGTGCACCTTTAGGTAACCTATGCTAAGT

>PGSC0003DMG400013953-(rev)LRR-RLKs\_1054

TCAGATACTGGAGCTAAATAATAACTTTCTGACAGGAACTATTCCTAATAATTTGGGAAATCTTCGTCAG  
CTGCAAATGCTGCTCCTATATAATAATCAACTTACCAATGAATCAAGAGA

>PGSC0003DMG400013953-(rev)LRR-RLKs\_1116

TTCGTCAGCTGCAAATGCTGCTCCTATATAATAATCAACTTACCAATGAATCAAGAGAGCGTGAGTTGTT  
ACTCTTCAATTCTTTGGCGGACCGTAGGATGTTGAAATATCTACAAGTGG

>PGSC0003DMG400013953-(rev)LRR-RLKs\_1178

GAGTTGTTACTCTTCAATTCTTTGGCGGACCGTAGGATGTTGAAATATCTACAAGTGGGTAACAATCCCT  
TGAATGGCGTTCTGCCAATTCAATTGGGAATCTTTCATCTACTATTGAA

>PGSC0003DMG400013953-(rev)LRR-RLKs\_124

ATGGCATTGGCCATATGCCTCGCTTGCAGTCATTGACGTTAAAAACAATCAGCTCAACAGAAGTATACC  
AACAAAGTCTATTTCAAACCGGAGAGTTCAAGTAATTTCAATTGGATTTC

>PGSC0003DMG400013953-(rev)LRR-RLKs\_1240

CAATCCCTTGAATGGCGTTCTGCCAATTCAATTGGGAATCTTTCATCTACTATTGAAAACCTTTCATATAG  
AAGATGCACACATCAATGGCCTCATCCCCAAAAGTATAGGCAACATGAC

>PGSC0003DMG400013953-(rev)LRR-RLKs\_1364

CTTACATCCCTAAGCCTTGACGATAACAACCTTGACAGGGAGTATTCCTTCTGAGATTGGTAAGCTTAAAC  
AACTCCAAGGGCTGTATCTATATAACAATAAATTGCAGGGACATATTCCA

>PGSC0003DMG400013953-(rev)LRR-RLKs\_1426

GCTTAAACAACCTCCAAGGGCTGTATCTATATAACAATAAATTGCAGGGACATATTCCAGAGGGGGTATG  
CCTTTTATCTAATTTAGACATATTAGCTCTAGAAGGTAATGAGCTCTCTGG

>PGSC0003DMG400013953-(rev)LRR-RLKs\_1488

GGGTATGCCTTTTATCTAATTTAGACATATTAGCTCTAGAAGGTAATGAGCTCTCTGGATTAATTCCAGA  
ATGCTTTGGAAATCTTAGCTACAACATCTTTATTTGGATTCTAATAAATT

>PGSC0003DMG400013953-(rev)LRR-RLKs\_1550

ATTCCAGAATGCTTTGGAAATCTTAGCTACAACATCTTTATTTGGATTCTAATAAATTTTCATCAAAATTC  
CGTTGAGCCTTTGGAAGATGAATGGTCTTCTCTATCTAGACGTGTAC

>PGSC0003DMG400013953-(rev)LRR-RLKs\_1674

TTCAATAGAGGGAGAAGTTCCCCAGGATATTGGAGGACTGAAAGCCATTGTAGAACTACATCTTTCCAG  
TAACCACTTTTCAGGCATGATATCAACCAGATTCGAGGAATTCCAAAATCT

>PGSC0003DMG400013953-(rev)LRR-RLKs\_1736

TTTCCAGTAACCACTTTTCAGGCATGATATCAACCAGATTCGAGGAATTCCAAAATCTGCAGTATCTTGAC  
CTATCGAACAATTCATTTTTTTGGCCGAATTCCATTATCATTGCGCAACT

>PGSC0003DMG400013953-(rev)LRR-RLKs\_1798

TATCTTGACCTATCGAACAATTCATTTTTTTGGCCGAATTCCATTATCATTGCGCAACTTGATAAACTTGAA  
TTCTTGAATCTGTCTTTAAATGCATTGTCAGGTAATTCCTAAGTCA

>PGSC0003DMG400013953-(rev)LRR-RLKs\_186

AGTATACCAACAAGTCTATTTCAAACCGGAGAGTTCAAGTAATTTCAATGGATTTCAATGAACTCAGTG  
GTGAAATCTGGAGAGGCCCTTGGTATGTACCCGAACCTCATAGTCTTAAAT

>PGSC0003DMG400013953-(rev)LRR-RLKs\_2107

GGAATGCACATATTGGAGATTCCTGCTTGCTATCACTAATCCTGGAAAACAATCAAAGCTTAAGGAG  
GTTTTGCTAAAAATTGTTACTCCAGCGGTTACTTCATCCTTTCTGATATTC

>PGSC0003DMG400013953-(rev)LRR-RLKs\_2172

GGAGGTTTTGCTAAAAATTGTTACTCCAGCGGTTACTTCATCCTTTCTGATATTCTTGTTGGTTTCAATTTG

GATAATGAAACGACAAAAGAAAGGGAAGTCCAAAGATGTGGAGAAGGT

>PGSC0003DMG400013953-(rev)LRR-RLKs\_2432

CCATAAAGGTTCTGGATTTGGAAAATGAGCAGGTATGCAAAGGTTTAATACCGAATGCGAAGTGATG

AGAAATGTTAGACACAAAAATCTTGTTCCAGTGATTACTACATGTTCTAGTG

>PGSC0003DMG400013953-(rev)LRR-RLKs\_248

ACTCAGTGGTGAAATCTGGAGAGGCCCTTGGTATGTACCCGAACTCATAGTCTTAAATTTTAGGAACAAT

AGCCTCACGGGTATAATCCCTCCTTCTATTGGAAATGCCACAAAAATGAT

>PGSC0003DMG400013953-(rev)LRR-RLKs\_2497

ATGAGAAATGTTAGACACAAAAATCTTGTTCCAGTGATTACTACATGTTCTAGTGACTATATAAGAGCCT

TTGTTTTGCGATATATGCCCAATGGAAGTCTTGAGAATTGGCTGTACAAA

>PGSC0003DMG400013953-(rev)LRR-RLKs\_2692

CATGGTCATGTCCTCCAATAGTTCATTGCGACTTAAAGCCATCCAATGTACTTTTGGATGAAGATATAG

TGGCTTATGTTGGTGAATTTGGAATCTCTAAAATTTTATCCATAAGCAAG

>PGSC0003DMG400013953-(rev)LRR-RLKs\_2752

GAAGATATAGTGGCTTATGTTGGTGAATTTGGAATCTCTAAAATTTTATCCATAAGCAAGTCCATTGATG

GTGTTCTTCCCGAGCTGCATGTTAATATGATGCTTTTTGCTTACCTGTAG

>PGSC0003DMG400013953-(rev)LRR-RLKs\_434

GCTTGCATTTTTTTCCTTGTTCAATAATCAATTAACAAGTTCATTCCCGCAACACTGTTTAATATCTCGTC

ACTACTTGTCGTAACCTGGCAAAGAATAGCCTTTCTGGTCCTCTCTT

>PGSC0003DMG400013953-(rev)LRR-RLKs\_496

ATATCTCGTCACTACTTGTGTAACCTCTGGCAAAGAATAGCCTTTCTGGTCCTCTCTTGCTAGATGAAGGC

AATATTGTGTTGAATCTGTACTTTTTAAGTATATCTCACAACCAAATTT

>PGSC0003DMG400013953-(rev)LRR-RLKs\_558

GATGAAGGCAATATTGTGTTGAATCTGTACTTTTTAAGTATATCTCACAACCAAATTTCTGGTTGCATTCC

TTCCAACATATGCCAACTCACGGAGCTCCAAGTTTTGTCCTTATCTTTC

>PGSC0003DMG400013953-(rev)LRR-RLKs\_620

TTGCATTCTTCCAACATATGCCAACTCACGGAGCTCCAAGTTTTGTCCTTATCTTTCACAACATAATTG

GAGACATACCCAGAAATATTAGTTGTTTATCCAACTCGAGAAGTTTTA

>PGSC0003DMG400013953-(rev)LRR-RLKs\_682



ACATAATTGGAGACATACCCAGAAATATTAGTTGTTTATCCAAACTCGAGAAGTTTTATATTGTTGATAAT  
CTAATAAAAGGACTATTCCATTCATTGGAAATATTCCACTCTACATACT

>PGSC0003DMG400013953-(rev)LRR-RLKs\_744

GTTGATAATCTAATAAAAGGACTATTCCATTCATTGGAAATATTCCACTCTACATACTCTTAACTGTGCGAA  
ACAATTGGATAGTGGGGGGAATTCCTCCGGAATTAGGGAAGCTATCAAA

>PGSC0003DMG400013953-(rev)LRR-RLKs\_806

ACTGTCGAAACAATTGGATAGTGGGGGGAATTCCTCCGGAATTAGGGAAGCTATCAAATTTGATGAAAT  
TATGCTTTGACAATAATTCTAATCTTATTGGTCAAATTCCAGAGGCTATTT

>PGSC0003DMG400013953-(rev)LRR-RLKs\_868

ATGAAATTATGCTTTGACAATAATTCTAATCTTATTGGTCAAATTCCAGAGGCTATTTTCAACATATCTTCT  
TTGGAAGTGATTGGTTTCAGTTTCAATAACCTCTCCCAACCTTGAAG

>PGSC0003DMG400013953-(rev)LRR-RLKs\_930

CATATCTTCTTTGGAAGTGATTGGTTTCAGTTTCAATAACCTCTCCCAACCTTGAAGGACTTTACTTGGG  
AGTCAATCAGTTCAAAGGGAAATTCCATTGTTTATAACAAATGCTTCCA

>PGSC0003DMG400013953-(rev)LRR-RLKs\_992

TTACTTGGGAGTCAATCAGTTCAAAGGGAAATTCCATTGTTTATAACAAATGCTTCCAAGCTTCAGATAC  
TGGAGCTAAATAAATACTTTCTGACAGGAACTATTCCTAATAATTTGGGA

>PGSC0003DMG400013955-(rev)LRR-RLPs\_0

ATGAAGCAAGAACTCTTGAAGATGTTCACTACTGGTGATATGGTAGCTTTTATCGAAGAAATCAAAGAA  
GTAACCTCTGAACATGCAGTGTCAAAGATATGTATGCCGATGGTGACCTT

>PGSC0003DMG400013955-(rev)LRR-RLPs\_124

AAGAAAGCATTGAGGGACATGTATTGGAGATCGAAGTCTCTAGTCAATCATCTGTCATATCGAGGTCAG  
TAACTGGCTTAGATTGAACATTGGAAACAAATGGAGAAAATGATGACCAAA

>PGSC0003DMG400013955-(rev)LRR-RLPs\_1488

ATCCTTCAAAGAAAACCCACTTCTATTCCATTTTGTGAAACACAACCCAAGTAGTAGTGTAGTACTGTCAA  
CTGGATAAATTCCTTTTCTTATTTTCTCATACTTAATAATCTGTTTTT

>PGSC0003DMG400013955-(rev)LRR-RLPs\_1550

TACTGTCAACTGGATAAATTCCTTTTCTTATTTTCTCATACTTAATAATCTGTTTTTACATTAATCTTTTTG  
CTACTTATTTTCTCATCCATTAATCTGTTTTTCGCATTTTGAATA

>PGSC0003DMG400013955-(rev)LRR-RLPs\_1736

AAATCACACATGACAATGTGTGTAGTAGCGTGTGTACGTTTGATTTTCTTCAAAGAAAACATTTAAAT  
TTCTTCCATTTTGTGCTAATTAGTGAACGTATGTTGTGTAACACAGCCTT

>PGSC0003DMG400013955-(rev)LRR-RLPs\_1798

ATTAAAATTTCTTCCATTTTGTGCTAATTAGTGAACGTATGTTGTGTAACACAGCCTTGTAAGGTTGATT  
GAAAGATTGACTCCCATTGACTTTGCTCTTAACAATTATTCTTTCTATA

>PGSC0003DMG400013955-(rev)LRR-RLPs\_186

AGGTCAGTAACTGGCTTAGATTGAACATTGGAAACAAATGGAGAAAATGATGACCAAATAGATGAAGA  
AGTTGATTTTGAAGTTTCAAAGACAAATGATATGATTTTTGAAAGCTTTGAA

>PGSC0003DMG400013955-(rev)LRR-RLPs\_1860

GGTTGATTTGAAAGATTGACTCCCATTGACTTTGCTCTTAACAATTATTCTTTCTATATTATGACTTTTATT  
TCGTTCTGTGAAACACAACCCAATTAGTGTCTTTTTTTTTATTTTGCT

>PGSC0003DMG400013955-(rev)LRR-RLPs\_1922

GACTTTTATTTCTGTTCTGTGAAACACAACCCAATTAGTGTCTTTTTTTTTATTTTGCTATTTATTTTCCTCCTT  
TTAATCTGTCTTTACATTAATCTGTTTTACATTTTGGAAATTAGT

>PGSC0003DMG400013955-(rev)LRR-RLPs\_1984

ATTTTCCTCCTTTTAATCTGTCTTTACATTAATCTGTTTTACATTTTGGAAATTAGTCCATACTTTTCAGCA  
TTTTATTTGTTTTGGTGCTATATATATAGTGGAGTAACTTTGATCAT

>PGSC0003DMG400013955-(rev)LRR-RLPs\_2046

ACTTTTCAGCATTTTATTTGTTTTGGTGCTATATATATAGTGGAGTAACTTTGATCATTGGAAATACCACA  
AACACAAATTAATTGCCTTGAAATATTCTATATCATATGGAGAAGCACA

>PGSC0003DMG400013955-(rev)LRR-RLPs\_2108

AATACCACAAACACAAATTAATTGCCTTGAAATATTCTATATCATATGGAGAAGCACATTTTCTTATTGAT  
TCTTCTCTTTCTAATTCAATTTCTGTATCATTTGCTTCCTCAAATGAG

>PGSC0003DMG400013955-(rev)LRR-RLPs\_2170

CTTATTGATTCTTCTCTTTCTAATTCAATTTCTGTATCATTTGCTTCCTCAAATGAGAGTGACCAACAAGC  
TCTATTAGCTTTCCAAAATCTTATTACAAGTCCTAATCATTTTTTGGC

>PGSC0003DMG400013955-(rev)LRR-RLPs\_2232

ACCAACAAGCTCTATTAGCTTTCCAAAATCTTATTACAAGTCCTAATCATTTTTTGGCCACTAATTGGACC

AAAAATACTTCTTTTTGCTCTTGGTATGGTGTCACTTGTAGTCCAAAAA

>PGSC0003DMG400013955-(rev)LRR-RLPs\_248

TGAAGAAGTTGATTTTGAAGTTTCAAAGACAAATGATATGATTTTTGAAAGCTTGAAGCTTCCAAAAA

TCTATCGAGGAGATCATAAGAGAATATGGCAATGGATCCTATGTTGGTGT

>PGSC0003DMG400013955-(rev)LRR-RLPs\_2480

TATGGACTTGGCCACTTGCCTCGCTTGGGAGTGATTGATATTCAAAACAATCAGTTAACGGAAGTATAC

CAACAAGTCTATTTCAAATCGGAGAGTTCAAATAATTTCAATTGGCTTTC

>PGSC0003DMG400013955-(rev)LRR-RLPs\_2790

CAGCTTGCATTTCTGTCCTTGATCGATAATCAATTAAGTGGTTCCATTCTACATCACTTTTTAATATCTCG

TCACTTCTTGTCTATCTCTGAGAAATAATATCCTTTCTGGTCCTCTC

>PGSC0003DMG400013955-(rev)LRR-RLPs\_2852

TAATATCTCGTCACTTCTTGTCTATCTCTGAGAAATAATATCCTTTCTGGTCCTCTCTTGTAAACGAAGG

AAATATTGTTTCAAATCTGAACCTTTAAGTATATCTTACAACCAAAT

>PGSC0003DMG400013955-(rev)LRR-RLPs\_2976

GGTTGCATTCTTCCAACATATGCCAACTCACAGAGCTCAAAGTTTTGTCCATATCTTCAACAATATAGC

TGGAGACATACCCAGAAATATTGGTTGTTTATCCAACTCGAGAAATTT

>PGSC0003DMG400013955-(rev)LRR-RLPs\_3038

CAATATAGCTGGAGACATACCCAGAAATATTGGTTGTTTATCCAACTCGAGAAATTTTATATGGGTGAT

AATCCAATAAAAGGGACTATCCCCTTCAATTGGGAAATATTTCCACTCT

>PGSC0003DMG400013955-(rev)LRR-RLPs\_310

CCAAAAATCTATCGAGGAGATCATAAGAGAATATGGCAATGGATCCTATGTTGGTGTGAGACTTAC

AAGAAATTGATAGAGTTTCTCTGGATAATATAATTGTCGAGAAGTTAAGAG

>PGSC0003DMG400013955-(rev)LRR-RLPs\_3100

TGGGTGATAATCCAATAAAAGGGACTATCCCCTTCAATTGGGAAATATTTCCACTCTGCATGATCTTTAC

TGTCAAACAATCGGATAGTGGGGGGAATTCCTCCGGAATTAGGGAAGC

>PGSC0003DMG400013955-(rev)LRR-RLPs\_3162

GATCTTTACTGTCAAACAATCGGATAGTGGGGGGAATTCCTCCGGAATTAGGGAAGCTATCAAATTTG

AGGCAATTAACCTTTGACAATAATTCTAATCTTATTGGTCAAATTCAGAG

>PGSC0003DMG400013955-(rev)LRR-RLPs\_3224

AAATTTGAGGCAATTAACCTTTGACAATAATTCTAATCTTATTGGTCAAATTCCAGAGGCTATTTTCAACA  
TATCTTCTTTGGAAGTGATTGGTTTCACTTTAAACAACCTCTCCGGGAG

>PGSC0003DMG400013955-(rev)LRR-RLPs\_3286

TTTTCAACATATCTTCTTTGGAAGTGATTGGTTTCACTTTAAACAACCTCTCCGGGAGAATTCCAACCACT  
ACAGGTCTTCATCTTCCGAACCTTAAAGTACTTGAGTTGGGAGTCAATC

>PGSC0003DMG400013955-(rev)LRR-RLPs\_3410

GGAAGGGGAAATTCATTGTTTCATAGCAAATGCTTCCAAGCTTCAGAACTGGAGCTAAATAATAACTTT  
CTGACAGGAACTATTCCTAATAATTTGGGGAATCTTCGTGAGCTGCAAGC

>PGSC0003DMG400013955-(rev)LRR-RLPs\_3472

ATAACTTTCTGACAGGAACTATTCCTAATAATTTGGGGAATCTTCGTGAGCTGCAAGCACTGCTCCTACA  
TACCAATCAACTTACCAATGAACCAAGAGAACGTGAGTTGTTATTCTTCA

>PGSC0003DMG400013955-(rev)LRR-RLPs\_3534

CTCCTACATACCAATCAACTTACCAATGAACCAAGAGAACGTGAGTTGTTATTCTTCAATTCTTTGGCGGA  
CTGTAAGATGTTGCGATATCTACAAGTGGGTAAAAATCCGTTGAATGGC

>PGSC0003DMG400013955-(rev)LRR-RLPs\_3596

TTTGGCGGACTGTAAGATGTTGCGATATCTACAAGTGGGTAAAAATCCGTTGAATGGCATTCTGCCCAAT  
TCAATTGGGAATCTTTCATCTACTATTGAAAACATTTATATAGGATATGC

>PGSC0003DMG400013955-(rev)LRR-RLPs\_3658

TGCCCAATTCAATTGGGAATCTTTCATCTACTATTGAAAACATTTATATAGGATATGCACACATCAATGGC  
CTCATCCCCACAAATGTAGGCAACATGAGCGGTCTTACAGTCATAGACA

>PGSC0003DMG400013955-(rev)LRR-RLPs\_372

ACTTCACAAGAAATTGATAGAGTTTCTCTGGATAATATAATTGTCGAGAAGTTAAGAGAAAGGGGGAGT  
TTGAGAACTCAACAAGGAGATAATTTACATGGATCAACTGTCGGTGAAAAA

>PGSC0003DMG400013955-(rev)LRR-RLPs\_3720

ATCAATGGCCTCATCCCCACAAATGTAGGCAACATGAGCGGTCTTACAGTCATAGACATTCAAGGAAAC  
AACTTGACAGGGAGTATTCCTTCTGAGATTGGTAAGCTTAAACAACCTCCAA

>PGSC0003DMG400013955-(rev)LRR-RLPs\_3782

AGGAAACAACCTTGACAGGGAGTATTCCTTCTGAGATTGGTAAGCTTAAACAACCTCCAAGGGCTGTATCT  
AGATAAAAATAAATTGCAGGGACATATTCAGAGGCGGTATGCCATTTATC

>PGSC0003DMG400013955-(rev)LRR-RLPs\_3906

TTGGTAAACTATTTCTGAATGGTAATGAGCTCTCTGGATTAATTCCAGAATGCTTAGGAAATCTTAGCAT  
GCTACAAAAGCTTTATTTGTATTCTAATAAATTTTCATCAAAATTTCCA

>PGSC0003DMG400013955-(rev)LRR-RLPs\_3968

TCTTAGCATGCTACAAAAGCTTTATTTGTATTCTAATAAATTTTCATCAAAATTTCCATTGAGCCTTTGGAA  
GATGAGTAGTCTTCTCTATCTAAGTGTGTCACTGAATTCAGTAGAGGG

>PGSC0003DMG400013955-(rev)LRR-RLPs\_4030

GCCTTTGGAAGATGAGTAGTCTTCTCTATCTAAGTGTGTCACTGAATTCAGTAGAGGGAGAAGTTCCATC  
AGATATTGGAGGAATGAAAGCCATTGTAGA ACTACATCTTTCCAGTAACC

>PGSC0003DMG400013955-(rev)LRR-RLPs\_4092

GTTCCATCAGATATTGGAGGAATGAAAGCCATTGTAGA ACTACATCTTTCCAGTAACCACTTTTCAGGAA  
TGATACCAAGCACATTCGGGGA ACTCCAAAAACCTGCAGTATCTTGACCT

>PGSC0003DMG400013955-(rev)LRR-RLPs\_4154

TTCAGGAATGATACCAAGCACATTCGGGGA ACTCCAAAAACCTGCAGTATCTTGACCTGTGCAACAATTC  
ATTTTTGGCAAAAATTCCATTATCCTTTGCCAACTTGATAAGCTTAGAA

>PGSC0003DMG400013955-(rev)LRR-RLPs\_434

GGGGAGTTTGAGAACTCAACAAGGAGATAATTTACATGGATCAACTGTCGGTGAAAAATCTTTATCATT  
TGAAGAAGGAAGAGGAGTCCGGAAGAAAGTGCTAAGATTTTCACCAAGGCG

>PGSC0003DMG400013955-(rev)LRR-RLPs\_4464

AGATTCCTGCTTGTGCTATCACTAATCCTGGAAAACAATCAAAGCTTAGGGAGGTTCTGCTAAAATTTGT  
TACTCCAGTGGTTATTGCATCCTTTCTGATATTCTTGTTGGTTTCAATTT

>PGSC0003DMG400013955-(rev)LRR-RLPs\_4526

AAATTTGTTACTCCAGTGGTTATTGCATCCTTTCTGATATTCTTGTTGGTTTCAATTTGGATAATGAAACG  
ACAGAAGAAAGGAAAGTCCAAAGAGGTAGAGAAGGTACTGGAGATCGGG

>PGSC0003DMG400013955-(rev)LRR-RLPs\_4588

AATGAAACGACAGAAGAAAGGAAAGTCCAAAGAGGTAGAGAAGGTACTGGAGATCGGGACTCATCAA  
TTAGTTTCTTATCACGAGATTCAACGAGCAACAAATAATTTTGATGAATCCAA

>PGSC0003DMG400013955-(rev)LRR-RLPs\_4774

CATTAAGGTTCTGCATTTGGACAATGAGCAAGTATGCAAGAGATTTGATACCAAATGCAAAGTGACGAG

AAATGTTAGACACAGAAATCTTGTCCAGTGATTACTACATGTTCTAGTGA

>PGSC0003DMG400013955-(rev)LRR-RLPs\_496

TATCATTTGAAGAAGGAAGAGGAGTCCGGAAGAAAGTGCTAAGATTTTCACCAAGGCGTGGCTCAAAG  
CTTCGTTTGAGCTCTTCCATGACAAGTGTGGGGTAGTTTCCAAAAAATCACT

>PGSC0003DMG400013955-(rev)LRR-RLPs\_5230

GAGACATTGGGCACTCTTGGATACATTGCACCAGGTATAATAAATCTTCTCTTTGATTTTCTTATCAT  
AGTTAAGCATTCTAGAAGTAAAAAGCAAGTCTTCATTTATGCAGAAT

>PGSC0003DMG400013955-(rev)LRR-RLPs\_5296

TATCATAGTTAAGCATTCTAGAAGTAAAAAGCAAGTCTTCATTTATGCAGAATTATTGTTGTATTTCAAT  
TGAGTAACTTTTCTTCAATCCGTTTTTAAGAATATGGCTCAGAGGGAAT

>PGSC0003DMG400013955-(rev)LRR-RLPs\_62

CAAAGAAGTAACTCCTGAACATGCAGTGTTCAAAGTATGTATGCCGATGGTGACCTTCATGAAGAAAG  
CATTGAGGGACATGTATTGGAGATCGAAGTCTCTAGTCAATCATCTGTCAT

>PGSC0003DMG400013955-(rev)LRR-RLPs\_682

TAAACTTTCTAGAATTTTGTAGAGTAAATATCTTTGATATTTATACTTAAGAAATATCTAGATGTTCTAG  
ATAAGTAGATATTTGTAGTAAAGTATAGAAATATCTAGGTTCTTGTTAC

>PGSC0003DMG400013955-(rev)LRR-RLPs\_744

ATGTTCTAGATAAGTAGATATTTGTAGTAAAGTATAGAAATATCTAGGTTCTTGTTACATAGTTAGAAGA  
TAAGAATATCTAGATTTTTCTTGTAGAAGTATCTAGAAGCATCCCTATAC

>PGSC0003DMG400013956-(rev)LRR-RLKs\_1008

TCTCTGTTTAATAGATCAAAAAGTGCCATGATCCACTTTTTGGCAGTTTTTTCCTCACTTGTTTCTGTGAGG  
ATCAGGAACTCGGTAATTAAGTGCAGTTTATTCTCCTATTATATTTT

>PGSC0003DMG400013956-(rev)LRR-RLKs\_1071

TCTGTGAGGATCAGGAACTCGGTAATTAAGTGCAGTTTATTCTCCTATTATATTTTATCTACAAGTTAGG  
CATGTGTACAGATTGTTTGCATCAGTAACAGATTGATACCGAATTCAA

>PGSC0003DMG400013956-(rev)LRR-RLKs\_1129

TCTACAAGTTAGGCATGTGTACAGATTGTTTGCATCAGTAACAGATTGATACCGAATTCAAAGGAAAAAT  
ATATGGTGGCTCATTTTGCAGCTGCTATATTCAGGATGGAGCCGGTAATA

>PGSC0003DMG400013956-(rev)LRR-RLKs\_252

AAGTTCATGGCTTATAGCGAGACATTGGGGACTCTTGGATACATTGCACCAGGTATAAAAAATCTACTCT  
CATTGATTTTCTCTTATCATAATAAAGCCTCTCCAAGTTATAGAAGTAAA

>PGSC0003DMG400013956-(rev)LRR-RLKs\_315

CTACTCTCATTGATTTTCTCTTATCATAATAAAGCCTCTCCAAGTTATAGAAGTAAAAGAGAATTATTGT  
TGTATTTCAATTGAGTAACTTTTCTCAATCCATTTTTAAGAATATGGC

>PGSC0003DMG400013956-(rev)LRR-RLKs\_504

AAAAGAAGGCCAACAGATGAAGAGATATGCAATGGAAATCTTGACTTGAGGAAATGGATTACACTATC  
ATTTTCAGGTAGTATGATGGACGTTGTGGATGTCAATCTTTTTTGTGAGGAA

>PGSC0003DMG400013956-(rev)LRR-RLKs\_567

CTATCATTTTCAGGTAGTATGATGGACGTTGTGGATGTCAATCTTTTTTGTGAGGAAGAACAAATCACTA  
GTAAAAGTGAAATGTGCATAGCGTCCATGATAGAATTGGGTTTACTGCTC

>PGSC0003DMG400013956-(rev)LRR-RLKs\_693

GAAACGCCAGAATCAAGAGTGACCATGAAAGAAGTAGTGAAGAGGCTTAACAAAATCAAGAACGCATT  
TCTGAAACATAGAAGTGATCAGCATCTGTTCTTTACTGAGCTGCAAATCAG

>PGSC0003DMG400013956-(rev)LRR-RLKs\_756

GCATTTCTGGAAACATAGAAGTGATCAGCATCTGTTCTTTACTGAGCTGCAAATCAGTTGAGAAAGTAAT  
TATGTGAGGGCGTTAGGCCAGCGGTAACAAGGAATGCAACTCATGCATAC

>PGSC0003DMG400013956-(rev)LRR-RLKs\_819

AAGTAATTATGTGAGGGCGTTAGGCCAGCGGTAACAAGGAATGCAACTCATGCATACTATTAACATAT  
CTTTTTCCGCAGTCCCATAGATTAAGAAGTTAAGCCTGCTAATGTATTAGT

>PGSC0003DMG400013956-(rev)LRR-RLKs\_882

ACATATCTTTTTCCGCAGTCCCATAGATTAAGAAGTTAAGCCTGCTAATGTATTAGTGAGAACTAAAATG  
ATATGATTAATATGTAATTCACATTAGATTTCTTATCTTTAACACATTTT

>PGSC0003DMG400013956-(rev)LRR-RLKs\_945

TAAAATGATATGATTAATATGTAATTCACATTAGATTTCTTATCTTTAACACATTTTGTGCACTCTCTGTT  
AATAGATCAAAAAGTGCCATGATCCACTTTTTGGCAGTTTTTTCTCA

>PGSC0003DMG400013989-(rev)OtherRLKsTM\_0

TTCAGTGTGAACTTTGTTCTTAGTTACTCTTTATGATTTCAATCAGGTAAACATAGACATTGGGTTGTTAC  
AAGTTAAAGTATCCTCTTCAGTATTCTCTAGTTCATTAAGGACCAAG

>PGSC0003DMG400013989-(rev)OtherRLKsTM\_1054

GAAAGATCGGTAAGGCTGAGTTCAAAGCCCTAACTGGTTCCCTCCTGATGCTCACAGGCTGATATCGA  
AAATATTAATCAAATCCTAGCACAGAATGTCCATTTCTAAGATAATGG

>PGSC0003DMG400013989-(rev)OtherRLKsTM\_1116

ATATCGAAAATATTAAATCAAATCCTAGCACAGAATGTCCATTTCTAAGATAATGGAGAATTCTTGGT  
TCAAGAAAGGGTTGCAGCTGAAACCTATAAATGCTGATACTGAATTGAAG

>PGSC0003DMG400013989-(rev)OtherRLKsTM\_1178

TTCTTGGTTCAAGAAAGGGTTGCAGCTGAAACCTATAAATGCTGATACTGAATTGAAGCCTGAAGAGGC  
AGCGATTGATGATGCAGGTTTTGGTATCGGTGAGAGTACCGACTCAATAAC

>PGSC0003DMG400013989-(rev)OtherRLKsTM\_124

TGCTGAAAGATGTGCTTAAGAGCTAGTAAGTCTTTCTTTGAAATTGAAGCACTATTGGAGCTATCCAATA  
AACTTGATGAGATTGCACCATTATTTCCAACGTCGTCACGTTCACTCAT

>PGSC0003DMG400013989-(rev)OtherRLKsTM\_1240

AAGAGGCAGCGATTGATGATGCAGGTTTTGGTATCGGTGAGAGTACCGACTCAATAACAGAAGCAAAG  
CCAGAACTGGTCAAGCCTGCACACTTGAATGCTTTTGATATAATATCTTTCT

>PGSC0003DMG400013989-(rev)OtherRLKsTM\_1302

GCAAAGCCAGAACTGGTCAAGCCTGCACACTTGAATGCTTTTGATATAATATCTTTCTCAACAGGTGTTG  
ACTTGTCTGGCTTGTTTGAAGAAAGAGATAAAAAGAGGGGAAGTTATATTT

>PGSC0003DMG400013989-(rev)OtherRLKsTM\_1364

AGGTGTTGACTTGTCTGGCTTGTTTGAAGAAAGAGATAAAAAGAGGGGAAGTTATATTTACATCAAAGCA  
ACCGGCGAAAACAATCATCTCAAAGCTAGAGGATGTAGCTAGGCGTTTGAC

>PGSC0003DMG400013989-(rev)OtherRLKsTM\_1426

CAAAGCAACCGGCGAAAACAATCATCTCAAAGCTAGAGGATGTAGCTAGGCGTTTGACGTTGAAGGTG  
ATGAAAAGGATGGAGGACTATTGAAGTTGGAAGGATCTAAAGAAGGAAGAA

>PGSC0003DMG400013989-(rev)OtherRLKsTM\_1488

AAGGTGATGAAAAGGATGGAGGACTATTGAAGTTGGAAGGATCTAAAGAAGGAAGAAAAGGGGTGT  
TGTCTATTGATGCAGAAATCTTTGAGGTA ACTCCAAATTTTCACTTTGTTGAG

>PGSC0003DMG400013989-(rev)OtherRLKsTM\_1550

GGTGTGTTGCTATTGATGCAGAAATCTTTGAGGTA ACTCCAAATTTTCACTTTGTTGAGATGAAGAAATCG



AATGGAGATACGATAGAGTACAAGAAGACAATGATAAAGGATGTAAGACC

>PGSC0003DMG400013989-(rev)OtherRLKsTM\_1612

AGAAATCGAATGGAGATACGATAGAGTACAAGAAGACAATGATAAAGGATGTAAGACCAGCATTGGAA  
GACATTGTATGGACTTGGCAAGGTGACGAGCCGCGGCCTCAGCAACTAGCAG

>PGSC0003DMG400013989-(rev)OtherRLKsTM\_1674

TTGGAAGACATTGTATGGACTTGGCAAGGTGACGAGCCGCGGCCTCAGCAACTAGCAGAGGAAGAAAT  
TTTGCAGACTTATCAGGGGTACTCATTTGACACTAATTCACCTCAGAAGAAT

>PGSC0003DMG400013989-(rev)OtherRLKsTM\_1736

AGAAATTTTGCAGACTTATCAGGGGTACTCATTTGACACTAATTCACCTCAGAAGAATGCATAATAGAGA  
GAGAAGTATAAATCTGATGTAACCTTGATCTTTTTCCATTTTCTGTGCTAT

>PGSC0003DMG400013989-(rev)OtherRLKsTM\_1798

AATAGAGAGAGAAGTATAAATCTGATGTAACCTTGATCTTTTTCCATTTTCTGTGCTATTAATGATGTATTT  
ATATTTGAATAATAGAATATTAAGTCCACTCTAATTTCTTTTATGTTCT

>PGSC0003DMG400013989-(rev)OtherRLKsTM\_186

ATCCAATAAACTTGATGAGATTGCACCATTATTTCCAACGTCGTCCACGTTCACTCATCAAATGCCAAACC  
CGACTAGATTCTTTCACGGTCAAATTGTATCGTATCACCATCTTAGTGA

>PGSC0003DMG400013989-(rev)OtherRLKsTM\_248

TGCCAAACCCGACTAGATTCTTTCACGGTCAAATTGTATCGTATCACCATCTTAGTGAAGATGGTTGAGT  
TGTTCACTTATTGATAAATATTGTGTTGAAAATAGCTAGTTTGATTACTC

>PGSC0003DMG400013989-(rev)OtherRLKsTM\_310

GGTTGAGTTGTTCACTTATTGATAAATATTGTGTTGAAAATAGCTAGTTTGATTACTCGGGGTTTGTGGA  
AGTTGAGATGGAGAGTAAGGGGAGTAGTATACTAATGGAAAGGTATGAGT

>PGSC0003DMG400013989-(rev)OtherRLKsTM\_372

TTTGTTGAAGTTGAGATGGAGAGTAAGGGGAGTAGTATACTAATGGAAAGGTATGAGTTAGGGAGATT  
GTTAGGACAAGGTACTTTTGCTAAGGTCCATCATGCGAGAGACGTCAAGACT

>PGSC0003DMG400013989-(rev)OtherRLKsTM\_434

GAGATTGTTAGGACAAGGTACTTTTGCTAAGGTCCATCATGCGAGAGACGTCAAGACTAGCATGAATGT  
GGCTATTAAGATCATCGATAAGGAGAAGATTGTAAAAGTTGGGATGATTGA

>PGSC0003DMG400013989-(rev)OtherRLKsTM\_496

TGAATGTGGCTATTAAGATCATCGATAAGGAGAAGATTGTAAAAGTTGGGATGATTGATCAAATCAAAT  
GCGAGATTTACAGCAATGAAATTGGTTAGGCATTCTAATATTGTGCAGCTCT

>PGSC0003DMG400013989-(rev)OtherRLsTM\_558

ATCAAATGCGAGATTTACAGCAATGAAATTGGTTAGGCATTCTAATATTGTGCAGCTCTATGAGGTGATG  
GCCAGCAAAAAGAAGATTTATTGTGTAATGGAATATGTCAAAGGAGGCGAG

>PGSC0003DMG400013989-(rev)OtherRLsTM\_62

GGTTGTTACAAGTTAAAGTATCCTCTTCAGTATTCTCTAGTTCATTAAGGACCAAGGGAATGCTGAAA  
GATGTGCTTAAGAGCTAGTAAGTCTTTCTTTGAAATTGAAGCACTATTGG

>PGSC0003DMG400013989-(rev)OtherRLsTM\_620

GGTGATGGCCAGCAAAAAGAAGATTTATTGTGTAATGGAATATGTCAAAGGAGGCGAGTTGTATAACA  
AAGTGTCTAAAGGGAGGTTAAAGGAAGATGTTGCAAGGAAGTTATTTACAGCA

>PGSC0003DMG400013989-(rev)OtherRLsTM\_682

ATAACAAAGTGTCTAAAGGGAGGTTAAAGGAAGATGTTGCAAGGAAGTTATTTACAGCAATTGATTAATG  
CTATTGATTTCTGTCATAGTAGAGGTGTTTATCACCGAGACCTAAAACCGG

>PGSC0003DMG400013989-(rev)OtherRLsTM\_744

ATTAATGCTATTGATTTCTGTCATAGTAGAGGTGTTTATCACCGAGACCTAAAACCGGAGAATCTATTGC  
TTGATGAAAATGGGAATCTAAAGATTTACAGATTTTGGATTGAGTGCTCTT

>PGSC0003DMG400013989-(rev)OtherRLsTM\_806

TCTATTGCTTGATGAAAATGGGAATCTAAAGATTTACAGATTTTGGATTGAGTGCTCTTGCAGAATCTAAA  
TGCCAAGACGGCTTACTGCATACTAAATGTGGGACACCAGCTTATGTTGC

>PGSC0003DMG400013989-(rev)OtherRLsTM\_868

AATCTAAATGCCAAGACGGCTTACTGCATACTAAATGTGGGACACCAGCTTATGTTGCACCAGAAGTGA  
TAAACAGGAGAGGCTATGACGGTGCTAAAGCTGATATTTGGTCATGTGGGG

>PGSC0003DMG400013989-(rev)OtherRLsTM\_930

GAAGTGATAACAGGAGAGGCTATGACGGTGCTAAAGCTGATATTTGGTCATGTGGGGTGATATTATAT  
GTCCTTTTGGCTGGATATCTTCCTTTCCAGGATTCAAATTTTATGGAGATG

>PGSC0003DMG400013989-(rev)OtherRLsTM\_992

ATTATATGTCCTTTTGGCTGGATATCTTCCTTTCCAGGATTCAAATTTTATGGAGATGTACAGAAAGATCG  
GTAAGGCTGAGTTCAAAGCCCTAACTGGTTCCCTCCTGATGCTCACAG

>PGSC0003DMG400014060-(rev)RLKWAX-EGF\_1088

GTACGAGTGAAATCTACTTTCCACATTGGCTCTATCGACGAATTGAGCTAGATGAAGAGCTCCAATTAAT  
TGGGATAATGAATGAAGAGGAGAAAGAATGTGCAAGAAAGATGGTGATGG

>PGSC0003DMG400014060-(rev)RLKWAX-EGF\_1216

TGGTGCATACAGACTGATCCCTCAAGTCGACCATCGATGAGCAAAGTTGTGGAAATGTTAGAAGGGAAC  
CTAGACTTTCTGCAAATTCCTCCAAAGCCTTACCTATATTCTTCTCAAGA

>PGSC0003DMG400014060-(rev)RLKWAX-EGF\_1280

GGAACCTAGACTTTCTGCAAATTCCTCCAAAGCCTTACCTATATTCTTCTCAAGAACAGAGGTAATTTCA  
TCGGAAGTCGAACTGGCCTAGTCTTAATTTGTTGTAAACTTTTAGCAA

>PGSC0003DMG400014060-(rev)RLKWAX-EGF\_1344

AATTTTCATCGGAAGTCGAACTGGCCTAGTCTTAATTTGTTGTAAACTTTTAGCAAAAGCTGTATTTTTCTT  
CGACAACTGAATTTACTAATTTCTCTATCCTATTTTATGAGACACA

>PGSC0003DMG400014060-(rev)RLKWAX-EGF\_1398

AAAGCTGTATTTTTCTTCGACAACTGAATTTACTAATTTCTCTATCCTATTTTATGAGACACACTTTCCT  
TTGTAATCTGTTTTCTACTGTATCCAGTTGAAGTTCAAATAATCAAG

>PGSC0003DMG400014064RLKWAX-EGF\_1054

TGCATTTAGGGTTTGAACCTTGTCTGTTAACCTGTGGTTATGCCAGCAGTATTTTCTGTATCTTACTT  
GTTGAAATTTAGAGTTAGACTACTGACTGCAGCCGCCTTTTCTGCTAT

>PGSC0003DMG400014064RLKWAX-EGF\_1116

TATCTTACTTGTGAAATTTAGAGTTAGACTACTGACTGCAGCCGCCTTTTCTGCTATGTTCTCTATGTTTC  
ATCGGCTTATCTTTAACTTAGTTCAATTAGAGAGTAAATCTTGTCCAA

>PGSC0003DMG400014064RLKWAX-EGF\_1178

TCTATGTTTCATCGGCTTATCTTTAACTTAGTTCAATTAGAGAGTAAATCTTGTCCAAAAGAGTTTCGTTG  
TGGAAGAGTGGAACCACAAGTTATCTTTTCCACCTCATGTTCTATTTT

>PGSC0003DMG400014064RLKWAX-EGF\_124

ATCCATTTAAACCATTTAATGATCTGACCCATTTAATTCGACCCACTAAATCATTAAAAAGTCGTCATTCTC  
TCTTAATGGTTGTGTTTCTGATATCAAGGACGTGTCACTCGATCATCG

>PGSC0003DMG400014064RLKWAX-EGF\_1240

GTTTCGTTGTGGAAGAGTGGAACCACAAGTTATCTTTTCCACCTCATGTTCTATTTTGTGAGTCTACAACAA

TATTACTTTGACTTTCAAATACACAAATAAAGTATGCTGATTGATCGT

>PGSC0003DMG400014064RLKWAX-EGF\_1302

CTACAACAATATTACTTTGACTTTCAAATACACAAATAAAGTATGCTGATTGATCGTTATTTTCAAAGTT

ATAAGAACTACTCGAGTTGTCATGCCTTTAGCTTTTAGTGTCATAAACA

>PGSC0003DMG400014064RLKWAX-EGF\_1364

TTCAAAGTTATAAGAACTACTCGAGTTGTCATGCCTTTAGCTTTTAGTGTCATAAACAAGAATTAATCAA

AGCCATAGTATTCAAGCTAGTGATCTTCCTGCAAATTCATCCTTCACCT

>PGSC0003DMG400014064RLKWAX-EGF\_1488

AACCAAATTCTACTGATTTGTTTGATCTGTTGACTCCTAGTTTTACATTAGATTGGAATTGTCGTTAATTAT

TCCAATCTTCATAGAGAAGGGCGATGCGAAAGTGACATCGAAAAC

>PGSC0003DMG400014064RLKWAX-EGF\_1550

CGTTAATTATTCCAATCTTCATAGAGAAGGGCGATGCGAAAGTGACATCGAAAACAACCTCTTTTGC

TGCAGAGGTATTGGATATAAGAAACCTGTCAGTTGCTTGTGTATGTCTGG

>PGSC0003DMG400014064RLKWAX-EGF\_186

CGTCATTCTCTCTTAATGGTTGTGTTTCTGATATCAAGGACGTGTCACTCGATCATCGCCCTTTTAAGTTT

GTTGAGGTATCAAGAATTTACTTGCTGTCAAAGTGTAATGGATCGATAT

>PGSC0003DMG400014064RLKWAX-EGF\_2108

TATGCTCCAAAAGATACAGCTATACAGACATCAAGCGAATCACCAATCACTTCAAAAACAACTAGGCC

AAGGAGGATTTGGTAATGTATACAGAGGAAATTTGCGTAACGGGAGTCAA

>PGSC0003DMG400014064RLKWAX-EGF\_2232

CAGTGAAGGTCCTGAATGAACTAAAAGGCAATGGTGAAGATTTCAATTAATGAGGTTGCAAGTATTAGCA

GGACATCACATGTTAACATCGTGAGCCTTGTGGGATTTGTTTTGAGGGTC

>PGSC0003DMG400014064RLKWAX-EGF\_2356

AAGAGCTCTTTTATATGAGTTCATGCCAAATGGGTCTCTTGAAAAGTTTATCTATGAGGAAAGATCCGAC

AGTGTTCCCAATTAGGCTGGCCAATATTGTATGAAATTGCATTAGGCAT

>PGSC0003DMG400014064RLKWAX-EGF\_248

TTTAAGTTTGTGAGGTATCAAGAATTTACTTGCTGTCAAAGTGTAATGGATCGATATCTGAGAATCTTTC

GAAGCACATGATTGGTTTTGGTTGTGGTGGAGAAAATGGGAATGATTGG

>PGSC0003DMG400014064RLKWAX-EGF\_2728

TGGAATGATGGTCCTAGAGATGGTTGGAGGAAGAAAGAATGTTGATGTTGGAGTTGATCGTACAAGTG  
AAATCTACTTCCCACATTGGCTCTATTGACGAATTGAACTAGACGAAGAGCT

>PGSC0003DMG400014064RLKWAX-EGF\_2790

CAAGTGAAATCTACTTCCCACATTGGCTCTATTGACGAATTGAACTAGACGAAGAGCTTCAACTAATCGG  
GATAATGAATGAAGAGGAGAACGAATGTGCAAGAAAGATGGTGATAGCAA

>PGSC0003DMG400014064RLKWAX-EGF\_2976

AAGGGAACTAGACTCTTTGCAAATGCCTCCCAAGCCTTACCTATATTCTCCCTCAAGATCAGAGGTAGA  
TTCATCAATAATAGAACTGACAACAACAACAATTAGGAAAAAATAC

>PGSC0003DMG400014064RLKWAX-EGF\_372

TTGCAATGTTTGCTGAGGATGAGAGCTTTGAGTCTGCATTACAAGTGTGTGAAAAACATGTAATGGCAC  
CAGTAGAAATAATGCTTGGAGATGAGGGAAGTAATCGAGATGTTGACTATC

>PGSC0003DMG400014064RLKWAX-EGF\_434

ATGGCACCAGTAGAAATAATGCTTGGAGATGAGGGAAGTAATCGAGATGTTGACTATCTGGTGCTTTTG  
AGAAGGGGGTTTAGATTGAAATGGACTGCTAGTAATTGCAGTGAATGTGCA

>PGSC0003DMG400014064RLKWAX-EGF\_496

GCTTTTGAGAAGGGGGTTTAGATTGAAATGGACTGCTAGTAATTGCAGTGAATGTGCAGAAAGTGGAG  
GACATTGCGGATTTGATGTTATCGATTATAAATTCGAATGTTTCTGCACTGA

>PGSC0003DMG400014064RLKWAX-EGF\_558

GTGGAGGACATTGCGGATTTGATGTTATCGATTATAAATTCGAATGTTTCTGCACTGACAGGCCTCATGC  
TTGGAATTGCCACCTACCAGTAAGCCCCTATCTAGTAGTTAATTTTCCA

>PGSC0003DMG400014064RLKWAX-EGF\_620

CCTCATGCTTGGAATTGCCACCTACCAGTAAGCCCCTATCTAGTAGTTAATTTTCCAGTATAATTATGCA  
GAACCTTATCTTATGATTAGGCACCGTGCTTTAGGTTCTTTTCTTGTGA

>PGSC0003DMG400014064RLKWAX-EGF\_682

AATTATGCAGAACCTTATCTTATGATTAGGCACCGTGCTTTAGGTTCTTTTCTTGTGATTACCAAGCGCAC  
AAAAAAGTATCGTTTGATGATCTAGACATCAAGATACTGCTGCATTAAG

>PGSC0003DMG400014064RLKWAX-EGF\_744

CAAGCGCACAAAAAAGTATCGTTTGATGATCTAGACATCAAGATACTGCTGCATTAAGCATTGGATTAT  
TGTTAACCAAAAAATTTTGCAGCCAACCTTTTAAAAAAAAGATAAATA

>PGSC0003DMG400014064RLKWAX-EGF\_806

TGGATTATTGTTAACCACAAAATTTTGCGCAGCCAACCTTTAAAAAAAAGATAAATATAAAAATTGGTG  
GTAGGGGAAGGGGAAATGGTGGGAAGGGATTACAAGATAGGGAATCGAACA

>PGSC0003DMG400014064RLKWAX-EGF\_930

CAAGGTGAAACTTTATGTATCCAACCAATTGAGGTACGGAGATTTCCCTGTGCTGCCAAGTTAATATTCT  
CGTAGCAGCTAATACTTCTCTGATGAATGGTGTCTTGTCTGATTAATT

>PGSC0003DMG400014281-(rev)LRR-RLKs\_0

ATGGCTACTGGGTTTTCTTCTACTACTGCCATTGTTGTCTTTCTTCTCTGTTTCTGTGTTTCTAATGTTGTT  
TACAAAGAACAGAGGAGGACCCAGAAAGACAAATCTTGTTTTCTTTC

>PGSC0003DMG400014281-(rev)LRR-RLKs\_1037

TTCTGGTGCATTGCCTTATTGGCTTGGGAAGATGGACTCAGATGGATGCATTGTTGCTTTCGAGTAACCGG  
TTTTCTGGGAAAATTCCGGCTGAGATTGGGAATTGTTCTATGTTGAGTCA

>PGSC0003DMG400014281-(rev)LRR-RLKs\_1098

AGTAACCGGTTTTCTGGGAAAATTCCGGCTGAGATTGGGAATTGTTCTATGTTGAGTCATATTAGTTTGA  
GCAATAACTTACTGACTGGTCCAATACCTAAGGAGCTTTGCAATGCCGTG

>PGSC0003DMG400014281-(rev)LRR-RLKs\_1159

TTAGTTTGAGCAATAACTTACTGACTGGTCCAATACCTAAGGAGCTTTGCAATGCCGTGGCACTCGCGGA  
TATTGAGCTTGGCAATAACTTTCTCACAGGCACCATTGATGACACATTTG

>PGSC0003DMG400014281-(rev)LRR-RLKs\_122

GAGTTCTCTTGAAAATCCTTATGTTTTGTCTACATGGACCCCAACAATTTACATTGCAAATGGGATGGTG  
TTTTCTGCCAAAATGGTCAAGTTGTTTCCCTTATTCTTTCTTCTTTGTC

>PGSC0003DMG400014281-(rev)LRR-RLKs\_1220

ACTCGCGGATATTGAGCTTGGCAATAACTTTCTCACAGGCACCATTGATGACACATTTGTCAAGTGTGGC  
AATCTGAGTCAGTTGGGATTAATGGATAATAGTATTGCTGGGATGATTCC

>PGSC0003DMG400014281-(rev)LRR-RLKs\_1281

AAGTGTGGCAATCTGAGTCAGTTGGGATTAATGGATAATAGTATTGCTGGGATGATTCCGGAGTATCTA  
TCACAGCTTCTTTGGTGGTTCTTGATTTGGATTCCAACAATTTGACAGGT

>PGSC0003DMG400014281-(rev)LRR-RLKs\_1342

AGTATCTATCACAGCTTCTTTGGTGGTTCTTGATTTGGATTCCAACAATTTGACAGGTCCAATTCCGGTG

AGTCTCTGGAATTCGACTTATATGTTGGCGTTTTCTGCTGCGAATAACC

>PGSC0003DMG400014281-(rev)LRR-RLKs\_1403

AATTCCGGTGAGTCTCTGGAATTCGACTTATATGTTGGCGTTTTCTGCTGCGAATAACCGGTTATGGGGT  
ACTCTACCGGTGGAGATTGGCAATGCTGTGTCATTGCAGAGTCTTGTCT

>PGSC0003DMG400014281-(rev)LRR-RLKs\_1464

TTATGGGGTACTCTACCGGTGGAGATTGGCAATGCTGTGTCATTGCAGAGTCTTGTCTTAGTAACAATC  
AGATAACTGGTGTCAATCCTAAGGAGATTGGTAATTTAACCTCTCTTTCA

>PGSC0003DMG400014281-(rev)LRR-RLKs\_1525

GTAACAATCAGATAACTGGTGTCAATCCTAAGGAGATTGGTAATTTAACCTCTCTTTCAGTGTTGAACTTG  
AATTCCAATCTTCTTGAGGGTTACATTCCTGATGAGTTGGGTGATTGTG

>PGSC0003DMG400014281-(rev)LRR-RLKs\_1586

GTTGAACTTGAATCCAATCTTCTTGAGGGTTACATTCCTGATGAGTTGGGTGATTGTGTCTCTCTTACAA  
CATTGGATCTTGGGAATAACAGGCTGCGTGGGTGCGATACCGGAGACACT

>PGSC0003DMG400014281-(rev)LRR-RLKs\_1647

TCTCTTACAACATTGGATCTTGGGAATAACAGGCTGCGTGGGTGCGATACCGGAGACACTGGGGCATCTG  
CCTCAGTTACAGTGTCTTAGTCCTTTCACACAATGATCTTAGTGGTGCTATT

>PGSC0003DMG400014281-(rev)LRR-RLKs\_1708

GGCATCTGCCTCAGTTACAGTGTCTTAGTCCTTTCACACAATGATCTTAGTGGTGCTATTCTTCTAAGATT  
TCCAAGTATTACCGGCAAGTTAGTATCCCTGATTGAGTTATGTGCAGC

>PGSC0003DMG400014281-(rev)LRR-RLKs\_1769

TTCTAAGATTTCCAAGTATTACCGGCAAGTTAGTATCCCTGATTGAGTTATGTGCAGCATCATGGAGTTT  
ATGATCTGTCTCACAACAAATTGTCTGGCTCAATACCTGAAGAGCTAGG

>PGSC0003DMG400014281-(rev)LRR-RLKs\_183

TGGGATGGTGTCTTCTGCCAAAATGGTCAAGTTGTTCCCTTATTCTTCTTCTTGTCACTCAAAGGGCC  
TATTTACCCACATTGCTTCATTGAAGAGTTAAGAGTGTTGGATTTG

>PGSC0003DMG400014281-(rev)LRR-RLKs\_1830

CATGGAGTTTATGATCTGTCTCACAACAAATTGTCTGGCTCAATACCTGAAGAGCTAGGGAGTTGTGTTG  
TTATAGTGGATCTTTGCTCAGCAATAACATGCTATCTGGAGAGATACCA

>PGSC0003DMG400014281-(rev)LRR-RLKs\_1891

GTTGTGTTGTTATAGTGGATCTTTTGCTCAGCAATAACATGCTATCTGGAGAGATACCACGATCACTCGC  
CCGCCTGGTGAACCTCACTACGTTAGACTTAACCGGGAATTTGTTAACAG

>PGSC0003DMG400014281-(rev)LRR-RLKs\_1952

ATCACTCGCCCGCCTGGTGAACCTCACTACGTTAGACTTAACCGGGAATTTGTTAACAGGCACCATTCCA  
AAGGAATTTGGCAACTCACATAAGCTGCAAGGATTTTATCTGGGGAATAA

>PGSC0003DMG400014281-(rev)LRR-RLKs\_2013

ACCATTCAAAGGAATTTGGCAACTCACATAAGCTGCAAGGATTTTATCTGGGGAATAACCAGCTTACA  
GGATCAATCCCTGAAAGCATTGGCCAAGTAAATAGTTTGGTGAAGCTGAAT

>PGSC0003DMG400014281-(rev)LRR-RLKs\_2074

AGCTTACAGGATCAATCCCTGAAAGCATTGGCCAAGTAAATAGTTTGGTGAAGCTGAATTTGACAGGGA  
ACATGCTTTCAGGTCCAATACCCTCAAGTTTTGGGAAGTTAAATGGGCTGA

>PGSC0003DMG400014281-(rev)LRR-RLKs\_2135

GACAGGGAACATGCTTTCAGGTCCAATACCCTCAAGTTTTGGGAAGTTAAATGGGCTGACTCACTTAGA  
TTTGAGCTCAAATATACTTGACGGTGAACCTCCTCAGTCGCTTTCAGGAT

>PGSC0003DMG400014281-(rev)LRR-RLKs\_2196

CACTTAGATTTGAGCTCAAATATACTTGACGGTGAACCTCCTCAGTCGCTTTCAGGATGGTAAACCTTGT  
TGGCCTTATGTTTCAGCAGAACAGGCTTTCGGGCAGTCTAGATAAGCTA

>PGSC0003DMG400014281-(rev)LRR-RLKs\_2257

TAAACCTTGTTGGCCTTTATGTTTCAGCAGAACAGGCTTTCGGGCAGTCTAGATAAGCTATTCTCAAACCTCT  
GCAGCATGGAGACTTGAGATTATTAATTTGGGTACTAACTCCTTCACTG

>PGSC0003DMG400014281-(rev)LRR-RLKs\_2318

CTCAAACCTCTGCAGCATGGAGACTTGAGATTATTAATTTGGGTACTAACTCCTTCACTGGAGACTTGCCA  
CCATCATTGGGCAACTTGTCGATTTGACGTTTCTTGATCTCCATGCAAA

>PGSC0003DMG400014281-(rev)LRR-RLKs\_2379

GACTTGCCACCATCATTGGGCAACTTGTCGATTTGACGTTTCTTGATCTCCATGCAAACAGTTTAACTGG  
TGAAATTCCAGTTGAGCTAGGAAATCTTGTGCAACTTGAGTATTTGGAT

>PGSC0003DMG400014281-(rev)LRR-RLKs\_244

TCAAAGGGCCTATTTACCCACATTGCTTCATTGAAGAGTTTAAAGAGTGTTGGATTTGAGTAATAACCA  
GTTGTCTGGTGAGTTACCAATTCATCTCAGTGAACCTTCTCTTTTAGAAA



>PGSC0003DMG400014281-(rev)LRR-RLKs\_2440

GTTTAACTGGTGAAATTCCAGTTGAGCTAGGAAATCTTGTGCAACTTGAGTATTTGGATGTCTCAGGCAA  
CAGTCTCTCTGGCAAATTTCCCGAAACAATATGTGCCCTTCCCAATTTAG

>PGSC0003DMG400014281-(rev)LRR-RLKs\_2501

CTCAGGCAACAGTCTCTCTGGCAAATTTCCCGAAACAATATGTGCCCTTCCCAATTTAGATATACTAAATT  
TTACGGATAACAACTGAAAGGAGCTATACCGAGGAATGGAATTTGCCA

>PGSC0003DMG400014281-(rev)LRR-RLKs\_2562

ATACTAAATTTTACGGATAACAACTGAAAGGAGCTATACCGAGGAATGGAATTTGCCAGAATCTTTCA  
AAAGTCTCAGTGGCTGGGAACAAAGATCTCTGTGGGGGAATCGTGGCTCTA

>PGSC0003DMG400014281-(rev)LRR-RLKs\_2623

ATCTTTCAAAGTCTCAGTGGCTGGGAACAAAGATCTCTGTGGGGGAATCGTGGCTCTAAAATGCCCTG  
CCAATAGTTTTGTTAAAAGATCATTGTTGTTAATGTCTGGGGGAATCTTAT

>PGSC0003DMG400014281-(rev)LRR-RLKs\_2684

ATGCCCTGCCAATAGTTTTGTTAAAAGATCATTGTTGTTAATGTCTGGGGGAATCTTATCAGTGGTGGCT  
GGGACTATAATTATCACTCTTACTATTGTCATTGTGATAAGGATATGGGT

>PGSC0003DMG400014281-(rev)LRR-RLKs\_2745

GTGGTGGCTGGGACTATAATTATCACTCTTACTATTGTCATTGTGATAAGGATATGGGTTAATAGAAGCA  
GCAGAAAGAGTGATCCCGAGGATAGCAAACCTTGACAGTGATGATCAGCAC

>PGSC0003DMG400014281-(rev)LRR-RLKs\_2806

ATAGAAGCAGCAGAAAGAGTGATCCCGAGGATAGCAAACCTTGACAGTGATGATCAGCACCTTTATTTCT  
TAGGCAGCAGCAAGTCGAAAGAGCCTCTTAGCATCAATGTGGCCACGTTTG

>PGSC0003DMG400014281-(rev)LRR-RLKs\_2867

TTATTTCTTAGGCAGCAGCAAGTCGAAAGAGCCTCTTAGCATCAATGTGGCCACGTTTGAGCAGCCTCTT  
CTCAAGCTGACCTTGGTTGATCTTCTTGAAGCCACCAACAACCTTTTGCAA

>PGSC0003DMG400014281-(rev)LRR-RLKs\_2928

CAGCCTCTTCTCAAGCTGACCTTGGTTGATCTTCTTGAAGCCACCAACAACCTTTTGCAAGACTAAAATTGT  
TGGTGATGGAGGGTTTGGAACTGTCTATAAGGCTACTTTACCTAATGCT

>PGSC0003DMG400014281-(rev)LRR-RLKs\_2989

CTAAAATTGTTGGTGATGGAGGGTTTGGAACTGTCTATAAGGCTACTTTACCTAATGCTAAGACAGTTGC

AGTTAAGAAGCTAAACCAAGCAAAAACCTCAGGGTCACCGCGAATTTTTAG

>PGSC0003DMG400014281-(rev)LRR-RLKs\_305

TAATAACCAGTTGTCTGGTGAGTTACCAATTCATCTCAGTGAACCTTCTCTTTTAGAAACAATTAACCTG  
GTTCTAACTGTTTTACTGGAGAAATATCGCCGGAGTTTGGACGGTTGAC

>PGSC0003DMG400014281-(rev)LRR-RLKs\_3050

GACAGTTGCAGTTAAGAAGCTAAACCAAGCAAAAACCTCAGGGTCACCGCGAATTTTTAGCTGAAATGGA  
AACTCTAGGCAAAGTGAAACATCGAAATCTTGTTCTTTGCTTGGGTACTG

>PGSC0003DMG400014281-(rev)LRR-RLKs\_3111

GAAATGGAACTCTAGGCAAAGTGAAACATCGAAATCTTGTTCTTTGCTTGGGTACTGTTCTTATGGTG  
AGGACAAAGTGCTTGTATGAGTATATGGTTAATGGGAGCTTGGACCAC

>PGSC0003DMG400014281-(rev)LRR-RLKs\_3172

CTTATGGTGAGGACAAAGTGCTTGTATGAGTATATGGTTAATGGGAGCTTGGACCACTGGTTGAGAA  
ACCGTACTGGAACACTTGACGTGCTGGATTGGAGCAAACGACTTAAGATTG

>PGSC0003DMG400014281-(rev)LRR-RLKs\_3233

GTTGAGAAACCGTACTGGAACACTTGACGTGCTGGATTGGAGCAAACGACTTAAGATTGCAGTAGGAG  
CTGCTCGTGGTTTGGCATTCTTCATCATGGATTCACACCACACATTATTCA

>PGSC0003DMG400014281-(rev)LRR-RLKs\_3294

GTAGGAGCTGCTCGTGGTTTGGCATTCTTCATCATGGATTCACACCACACATTATTCACAGGGACATTA  
AGCCAAGTAACATCTTGCTCAACGAAGACTTTGAGGCCAAAGTTGCAGAT

>PGSC0003DMG400014281-(rev)LRR-RLKs\_3355

GGGACATTAAGCCAAGTAACATCTTGCTCAACGAAGACTTTGAGGCCAAAGTTGCAGATTTTGGGTTGG  
CAAGGTTGATCAGCGCCTGTGAGACGCATGTAAGCACTGATATTGCTGGTA

>PGSC0003DMG400014281-(rev)LRR-RLKs\_3416

TGGGTTGGCAAGGTTGATCAGCGCCTGTGAGACGCATGTAAGCACTGATATTGCTGGTACATTCCGGTTA  
CATTCTCCCGAGTATGGGCAGACATGGCAGTCTACAACAAAAGGAGATGT

>PGSC0003DMG400014281-(rev)LRR-RLKs\_3477

TTCGGTTACATTCTCCCGAGTATGGGCAGACATGGCAGTCTACAACAAAAGGAGATGTTTATTCTTTCCG  
GCGTGATCCTTCTGAATTGCTGACAGGGAAAGAGCCAACAGGACTCGAT

>PGSC0003DMG400014281-(rev)LRR-RLKs\_3538

ATTCTTTCGGCGTGATCCTTCTTGAATTGCTGACAGGGAAAGAGCCAACAGGACTCGATTTCAAAGATGT  
CGAAGGTGGAAACTTGGTTGGTTGGTACTCCAGAAGATCAAGAAAGGTC

>PGSC0003DMG400014281-(rev)LRR-RLKs\_3599

CAAAGATGTGAAGGTGGAAACTTGGTTGGTTGGTACTCCAGAAGATCAAGAAAGGTCATTCAGCTG  
ATGTTCTTGATCCAACAATACTTGATGCAGATTCAAAGCAGATGATGCTTCA

>PGSC0003DMG400014281-(rev)LRR-RLKs\_366

ATTAACTTGGTTCTAACTGTTTTACTGGAGAAATATCGCCGGAGTTTGACGGTTGACGGAGATGAAG  
TACTTGACCTTTCAGGCAATGCACTGACTGGAAAAATTCCAGCCCACTT

>PGSC0003DMG400014281-(rev)LRR-RLKs\_3660

TCAGCTGATGTTCTTGATCCAACAATACTTGATGCAGATTCAAAGCAGATGATGCTTCAGACATTACAGA  
TTGCTACAATATGTCTCTCTGATAATCCGGCTAATCGCCCGTCTATGCTC

>PGSC0003DMG400014281-(rev)LRR-RLKs\_3699

TCAAAGCAGATGATGCTTCAGACATTACAGATTGCTACAATATGTCTCTCTGATAATCCGGCTAATCGCC  
CGTCTATGCTCCATGTCTTCAAGTTCTTGAAAGGAATCAATGGGGAATAA

>PGSC0003DMG400014281-(rev)LRR-RLKs\_427

AGATGAAGTTACTTGACCTTTCAGGCAATGCACTGACTGGAAAAATTCCAGCCCACTTGGTCAGCTTAC  
TAAGCTACAAGTTTTGGCACTTGGAAATAACCTTCTTCTGGTTCTTTAT

>PGSC0003DMG400014281-(rev)LRR-RLKs\_488

TCAGCTTACTAAGCTACAAGTTTTGGCACTTGGAAATAACCTTCTTCTGGTTCTTTATCTGCAACACTTTT  
TACAAAGCTTCAATCTTTAACTTCTTTTGATGTTTCTAATAACACCCT

>PGSC0003DMG400014281-(rev)LRR-RLKs\_549

GCAACACTTTTTACAAAGCTTCAATCTTTAACTTCTTTTGATGTTTCTAATAACACCCTTTCTGGTATTATTC  
CACCTGAAATTGGGGGATTGAGAAGCCTTACTGATCTTTACATTGGG

>PGSC0003DMG400014281-(rev)LRR-RLKs\_61

CTAATGTTGTTTTACAAAGAACAGAGGAGGACCCAGAAAGACAAATCTTGTTTTCTTTCAGGAGTTCTCT  
TGAAAATCCTTATGTTTTGTCTACATGGACCCCCACAATTTACATTGCA

>PGSC0003DMG400014281-(rev)LRR-RLKs\_610

CTGGTATTATTCCACCTGAAATTGGGGGATTGAGAAGCCTTACTGATCTTTACATTGGGGAAAACAGATT  
CTCTGGCCATTTGCCAGCAGAAATTGGTGAACCTTCAAGACTCGAGATTT

>PGSC0003DMG400014281-(rev)LRR-RLKs\_671

AAACAGATTCTCTGGCCATTTGCCAGCAGAAATTGGTGAACCTTCAAGACTCGAGATTTTCTTGGCTCCTT  
CATGTTTACTTGAAGGTCCATTGCCTGAATCCATCTCAAAGTTGAAATC

>PGSC0003DMG400014281-(rev)LRR-RLKs\_732

TTGGCTCCTTCATGTTTACTTGAAGGTCCATTGCCTGAATCCATCTCAAAGTTGAAATCTTTGAAAAGATT  
TGACCTTTCTTATAACCCATTGAAGTGTTCAATCCCAAAGCTATAGGT

>PGSC0003DMG400014281-(rev)LRR-RLKs\_793

TGAAAAGATTTGACCTTTCTTATAACCCATTGAAGTGTTCAATCCCAAAGCTATAGGTAGTCTTGAGAA  
TTTGACTATACTGAACCTTGCTTACTCTGAGATCAATGGTTCAATACCTT

>PGSC0003DMG400014281-(rev)LRR-RLKs\_854

TCTTGAGAATTTGACTATACTGAACCTTGCTTACTCTGAGATCAATGGTTCAATACCTTCTGAGCTTGGAA  
AGTGTAGAACTTGATGTCAGTAATGCTTTCTTTCAACTCACTCTCTGG

>PGSC0003DMG400014281-(rev)LRR-RLKs\_915

GAGCTTGGAAAGTGTAGAACTTGATGTCAGTAATGCTTTCTTTCAACTCACTCTCTGGGTCTTTGCCTGA  
AGAACTTGCAGAGTTGCCTGTGCTATCTTTTTCTGCAGAAAACAATCAG

>PGSC0003DMG400014281-(rev)LRR-RLKs\_976

CTTTGCCTGAAGAACTTGCAGAGTTGCCTGTGCTATCTTTTTCTGCAGAAAACAATCAGCTTTCTGGTGCA  
TTGCCTTATTGGCTTGAAGATGGACTCAGATGGATGCATTGTTGCTTT

>PGSC0003DMG400014576-(rev)LRR-RLKs\_0

CTTGCAATTAATTGCCCCACAATTGTCACATTATTTCAACATTAATTACTATCACCACCTTTCTCTCTTCTTC  
ACCTTTCCTCTGTTTTTTCTCTTCACTCTTCAATGGCTACTACTAC

>PGSC0003DMG400014576-(rev)LRR-RLKs\_1037

CTCAGAAAAATGGGTACACATTCTTGAAGGTGAGAAGATTGTGTACTCGTCTAGCCCGTATCCGAATA  
CGGGCCAGACGAGCGGGTTCGAGAGAGGGAAAATGGTGTTTTTCGAAGGGG

>PGSC0003DMG400014576-(rev)LRR-RLKs\_1098

TCCGAATACGGGCCAGACGAGCGGGTTCGAGAGAGGGAAAATGGTGTTTTTCGAAGGGGCGAAGAGG  
TTTGAGCTTGAGGATTTGTTGAGAGCTTCACTGAAATGTTGGGAAAAGGGGG

>PGSC0003DMG400014576-(rev)LRR-RLKs\_1159

AAGAGGTTTGAGCTTGAGGATTTGTTGAGAGCTTCACTGAAATGTTGGGAAAAGGGGGATTGGGAC

TGCTTATAAGGCTGTGTTGGATGATGGAAATGTTGTTGCTGTGAAAAGATTG

>PGSC0003DMG400014576-(rev)LRR-RLKs\_122

TACTCATGAACTTCCATTACACTTTTCTCTCATTCTTCTTCTTCCACCTTCTTGAATCTTCCCCAAACCC

AGATATTGCACCATTACTAGCTTTCAAATCAGCTTCAGATGAAACAA

>PGSC0003DMG400014576-(rev)LRR-RLKs\_1220

TTGGGACTGCTTATAAGGCTGTGTTGGATGATGGAAATGTTGTTGCTGTGAAAAGATTGAAAGAGTTGA

ATGTTTGTGGGAAAAGAGAATTTGAGCAACAAATGGAAGTTTTAGGAAGAC

>PGSC0003DMG400014576-(rev)LRR-RLKs\_1281

AGAGTTGAATGTTTGTGGGAAAAGAGAATTTGAGCAACAAATGGAAGTTTTAGGAAGACTTAGACACC

CAAATTTGGTTAGTTTCAAAGCATACTACTTTGCTAGAGATGAGAAGTTGTT

>PGSC0003DMG400014576-(rev)LRR-RLKs\_1342

AGACACCCAAATTTGGTTAGTTTCAAAGCATACTACTTTGCTAGAGATGAGAAGTTGTTGGTGTATGAGT

TCATGACTAATGGCAACTTGTGTTTGGCTTCTTCATGGTAAGTTTTGTTCT

>PGSC0003DMG400014576-(rev)LRR-RLKs\_1403

TGTATGAGTTCATGACTAATGGCAACTTGTGTTTGGCTTCTTCATGGTAAGTTTTGTTCTTCAAGAAATTCA

ATAGTACTAACATATTTTAAAATGGAGCAACTTTGCTGGATTACACTGA

>PGSC0003DMG400014576-(rev)LRR-RLKs\_1586

ATGTGATCTTTAGGATTGTTTTGTTGAAATCGATTGATTTGGGTGATAAAGTTTGGCAACTAGTAGCAAA

AGTCACATGTGGTTGGTTTGTGTCTTGTGTTTTTTTTTTTTGGATTTTAGTT

>PGSC0003DMG400014576-(rev)LRR-RLKs\_1647

AGTAGCAAAAGTCACATGTGGTTGGTTTGTGTCTTGTGTTTTTTTTTTTTGGATTTTAGTTGCTTTTTTTGGCT

GCAACTGTCAATAAGGCCTGGTCTCTAATGCATATAAGAATAGAAACC

>PGSC0003DMG400014576-(rev)LRR-RLKs\_1769

AATTTGGATAGTTTCAAAGCATATACTTTGCTAAAGATTGAGTAGTTGTTGGTGGAGTTTGGTGTATGAT

TTCATCACTTGTGTTTGGCTTATTCATTTGTTTTGTGTCTTTTTTTTTTTTT

>PGSC0003DMG400014576-(rev)LRR-RLKs\_183

TTCCCCAAACCCAGATATTGCACCATTACTAGCTTTCAAATCAGCTTCAGATGAAACAACTCACTCTATA

ACTGGAACTCATCAACTCACCCCTGTTCTTGGACTGGTGTATCTTGTCT

>PGSC0003DMG400014576-(rev)LRR-RLKs\_1830

GTGTATGATTCATCACTTGTTTTGGCTTATTCATTTGTTTTGTGTCTTTTTTTTTTTTTTTGGATTTTAGTTG  
CTTTTTTTGGCTGCAACTGTCAATAAGGCCTGGTCTCTAATGCATA

>PGSC0003DMG400014576-(rev)LRR-RLKs\_1891

TGGATTTTAGTTGCTTTTTTTGGCTGCAACTGTCAATAAGGCCTGGTCTCTAATGCATATAAGAATAGAA  
ACCTAAATTTGGATAGTTTGAAAGCATATTACTTTGCTAAAGATTGAGTA

>PGSC0003DMG400014576-(rev)LRR-RLKs\_2135

AAAGAAAAGTGTGATCTTTAGTTTTTTGTTGTAGAATAGATTATTGATTGACCAATAAGGATTATAGTGG  
AGTTGTAAGTACTTCGTCATCTTTAATCAGACATTTCAAGTTCGAGCCTT

>PGSC0003DMG400014576-(rev)LRR-RLKs\_2196

TTATAGTGGAGTTGTAAGTACTTCGTCATCTTTAATCAGACATTTCAAGTTCGAGCCTTGAGTATGGACTT  
GCCCTTGTTAGGTAACGGTTTGTCCCTATGTGGGACTTCCTAGCGCAA

>PGSC0003DMG400014576-(rev)LRR-RLKs\_2257

GTATGGACTTGCCCTTGTTAGGTAACGGTTTGTCCCTATGTGGGACTTCCTAGCGCAAACCTGTATCCAG  
CTCCAATGCAGTTGCCGTACACCGGATGGGTAAAAAGGAGAAGATTATTG

>PGSC0003DMG400014576-(rev)LRR-RLKs\_2318

TGTATCCAGCTCCAATGCAGTTGCCGTACACCGGATGGGTAAAAAGGAGAAGATTATTGATTGATTTGG  
TGGTAAAGTTTGGCAAGTAGTATAGCATAATCACATGGGGTTTGGAGTTTGG

>PGSC0003DMG400014576-(rev)LRR-RLKs\_244

TCACTCTATAACTGGAACCTCACTCAACTCACCCCTGTTCTTGGACTGGTGTATCTTGTCTTAACAATAGAGT  
TTCTAGACTTGTTCTTGAAGGTCTTAATCTAAAAGGGTCTTTCCAAAAT

>PGSC0003DMG400014576-(rev)LRR-RLKs\_2501

GGAATAAAGATGGGATGCCTCAACTAGACGGTATTTGCTTTAGTTAATGTTTCTATTTACATAATTGA  
AACTAGCCATGTGGGGATACTGAAAATCTATGTTGCTCGGACTCTTCAA

>PGSC0003DMG400014576-(rev)LRR-RLKs\_2562

CATAATTGAAACTAGCCATGTGGGGATACTGAAAATCTATGTTGCTCGGACTCTTCAAAAATGTTCGATGA  
GGCATTTTTGGAGGATCCGACATGGGTAAAGTCCTACATAGTCTTTTCAAG

>PGSC0003DMG400014576-(rev)LRR-RLKs\_2623

TGTCGATGAGGCATTTTTGGAGGATCCGACATGGGTAAAGTCCTACATAGTCTTTTCAAGCTAAAATA  
GAATATTGGAGTTTCTGGTCAAGGTATGTTGGTTCATTAACAATCTTTGT

>PGSC0003DMG400014576-(rev)LRR-RLKs\_2684

AAAACTATAGAATATTGGAGTTTCTGGTCAAGGTATGTTGGTTCATTAACAATCTTTGTCACATAAGCTAT  
TCTTGATTTTCAAATGTAGGGAACTTAAATTATTTAACAATCTTTATCA

>PGSC0003DMG400014576-(rev)LRR-RLKs\_2928

GGGCCAAGCAAAGAAAGAAATTCACACTTTTTAGGCAAGAGATGCCCTACTGTCCCATTGTGCTCTAC  
AGTTTTTTTGCTTGTCTTTTTGACCTCACTTAGTATTCATATCTTGCAACT

>PGSC0003DMG400014576-(rev)LRR-RLKs\_2989

TGCTCTACAGTTTTTTTGCTTGTCTTTTTGACCTCACTTAGTATTCATATCTTGCAACTGTTTTGGTAGGTA  
GATAGTGAAATATAACCTCTTGTTTTTTCTGATTCAAATGGTAAAGA

>PGSC0003DMG400014576-(rev)LRR-RLKs\_305

ACAATAGAGTTTCTAGACTTGTTCTTGAAGGTCTTAATCTAAAAGGGTCTTCCAAAATCTTGTATTTCTC  
AAAGAGTTAAGAGTATTGAGCTTGAAATATAACAATTTTTCCGGTTCTG

>PGSC0003DMG400014576-(rev)LRR-RLKs\_3172

AATTTTCTCATTTTAGAAATATGAACAATTATGTACTATTCTACCATCAAAGTCTATTGTGTCAACTT  
CATACTCCTTGTCTCTCTGCCCATGTTTTGTTCTTTTGTCTAGTTA

>PGSC0003DMG400014576-(rev)LRR-RLKs\_3233

TGTGTCAACTTCATACTCCTTGTCTCTCTGCCCATGTTTTGTTCTTTTGTCTAGTTAAAAGTTGCCCTTT  
ATCTTTCTATAACAATTCTCCCTCCGTTTCAATTTGTTTGTCTGGTT

>PGSC0003DMG400014576-(rev)LRR-RLKs\_3416

AAACATGTCATGTGGCCGAAAACGGGAAGAGGCCAAATAAGCGAAAATGTGCAAGTGCTCCATTTTATA  
GTAGTTTGAGTAAATGTTTTGATGGGCATGAATCTTCTTGCTACAGGTAACA

>PGSC0003DMG400014576-(rev)LRR-RLKs\_366

TGTATTTCTCAAAGAGTTAAGAGTATTGAGCTTGAAATATAACAATTTTTCCGGTTCTGTTCCGAATCTTT  
CGAACCTTACTGCTTTGAAGCTGCTGTTTCTTTCCATAATGAGCTTTC

>PGSC0003DMG400014576-(rev)LRR-RLKs\_3660

ATCAACTAACATCCTCATTGACAAGAGTGGCAATGCACGTGTCTCCGACTTTGGTCTAGCCATCTTCGCC  
ACACCATCTTCCGTCCCAAAAACCAATGGCTACCGAGCCCCTGAAGTCGC

>PGSC0003DMG400014576-(rev)LRR-RLKs\_4148

ATTCTGTTTCTGACTCTCCTGCTGTTTCTGAAGATAATACATGTGGTGCAGCTAGTCAGTAGTAAGAGTTT

TTTTTCTTCTTATTTTTCTAGTTTGTTATTCTGAGTTATGTAAATTAA

>PGSC0003DMG400014576-(rev)LRR-RLKs\_4209

GTAAGAGTTTTTTTTCTTCTTATTTTTCTAGTTTGTTATTCTGAGTTATGTAAATTAACCTCTTAGTTTTAA

TCCTTTTATCTATAAGATATAAGAGAAAATTTAGGAGAAGTTTTATA

>PGSC0003DMG400014576-(rev)LRR-RLKs\_427

CCGAATCTTTCGAACCTTACTGCTTTGAAGCTGCTGTTTCTTCCATAATGAGCTTCTGGGGAGTTTTCT

GAGTCGTTTACCTCGCTTTTTAAGCTTTATAGACTTGATCTGTCGTAT

>PGSC0003DMG400014576-(rev)LRR-RLKs\_488

GGGAGTTTTCTGAGTCGTTTACCTCGCTTTTTAAGCTTTATAGACTTGATCTGTCGTATAATAAGTTTTCC

GGTGAGATTCCGGCGAAGGTGAATCGTTTGACCCATTTGCTTACTCTTC

>PGSC0003DMG400014576-(rev)LRR-RLKs\_549

TAAGTTTTCCGGTGAGATTCCGGCGAAGGTGAATCGTTTGACCCATTTGCTTACTCTTCGTCTTGAAGGA

AATGGGTTTTCCGGTGAGATTTCTGGGGTTAATCTACCTAATCTTCAAGA

>PGSC0003DMG400014576-(rev)LRR-RLKs\_61

TCTCTCTTCTTACCTTTCACTCTGTTTTTCTCTTCACTCTTCAATGGCTACTACTCTACTCATGAACTT

CCATTACACTTTTCTCTCATTCTTCTTCTTACCCTTCTTGAA

>PGSC0003DMG400014576-(rev)LRR-RLKs\_610

CTTGAAGGAAATGGGTTTTCCGGTGAGATTTCTGGGGTTAATCTACCTAATCTTCAAGAGTTTAACGTTT

CTGGTAACAAACTCGTTGGAGAAATACCCATTTGCTATCTCGTTTCCCG

>PGSC0003DMG400014576-(rev)LRR-RLKs\_671

TTAACGTTTCTGGTAACAAACTCGTTGGAGAAATACCCATTTGCTATCTCGTTTCCCGGAATCTGCATTT

TCGAAGAACCGGTTCTTTGTGGTTCTCCGTTGCCAAACTGTACGGCGG

>PGSC0003DMG400014576-(rev)LRR-RLKs\_732

ATCTGCATTTTCGAAGAACCGGTTCTTTGTGGTTCTCCGTTGCCAAACTGTACGGCGGCGGTTCCCTCGT

GAACCGTCGTCGTCGGCAGGAGCTTTAGCTTCTCCGGTTAGTCCTAAAAC

>PGSC0003DMG400014576-(rev)LRR-RLKs\_793

GTTCTCGTGAACCGTCGTCGTCGGCAGGAGCTTTAGCTTCTCCGGTTAGTCCTAAAACCTACCATTGCAT

CTTCTCCGAGCTCATTGCCGGTGACCTCTGCAACTTTGAGTCCAAAAAAT

>PGSC0003DMG400014576-(rev)LRR-RLKs\_854



CCATTGCATCTTCTCCGAGCTCATTGCCGGTGACCTCTGCAACTTTGAGTCCAAAAAATACCCATCATAGT  
AGTGGTAAAATGAGCTCATTGGCCATAATCGCCATTATACTAGGTGATG

>PGSC0003DMG400014576-(rev)LRR-RLKs\_915

CCATCATAGTAGTGGTAAAATGAGCTCATTGGCCATAATCGCCATTATACTAGGTGATGTGTTGGTTCTA  
TGTGTTGTGTGTATTTTTCTCTACTGTTTCTTCTGCATTAGGAAAGTTTC

>PGSC0003DMG400014576-(rev)LRR-RLKs\_976

TTGGTTCTATGTGTTGTGTGTATTTTTCTCTACTGTTTCTTCTGCATTAGGAAAGTTTCTTCTCAGAAAAAT  
GGGTACACATTCTTGAAGGTGAGAAGATTGTGTACTCGTCTAGCCCC

>PGSC0003DMG400014577-(rev)RLKWAX-EGF\_1008

GGATCATCGAAATATTGAAGCATTCTCAAGAACAACGGGCCATATGCTCCGATGAGATATAGTTATTCA  
GACATCAAAGGATGACTAGTAGCTTCAAAAACAACTAGGCCAAGGAGG

>PGSC0003DMG400014577-(rev)RLKWAX-EGF\_1701

TGGAGGAAGGAAAAATGTTGTTGATCGAACGAGTGAAGTCTACTTTCCAGATTGGCTTTATCAACGAAT  
TGAAGTAGATGAAGAACTTCAACTAATCGGGATAATGAATGAAGAGGAGAA

>PGSC0003DMG400014577-(rev)RLKWAX-EGF\_1764

ACGAATTGAACTAGATGAAGAACTTCAACTAATCGGGATAATGAATGAAGAGGAGAAAGAATGTGCAC  
GAAAAATGGTGATAGTGAGTCTATGGTGCATTCAAACCTGGTCCTTCAAATAG

>PGSC0003DMG400014577-(rev)RLKWAX-EGF\_1827

TGCACGAAAAATGGTGATAGTGAGTCTATGGTGCATTCAAACCTGGTCCTTCAAATAGACCATCTATGACT  
AAAGTTGTCGAAATGTTGGAAGGGAACCTTAACTCTTGCAAATTCCTCC

>PGSC0003DMG400014577-(rev)RLKWAX-EGF\_189

ACTGCTCCACATCCGATGATCGAATTGGAAGGAGTAAAGTATCAAGTACTTGAAAAACAGAATGCTTTT  
GTCAAATTACGGATCCTGTTCTTGAAAATCTCTTAAAGGAAAAGAGTTGT

>PGSC0003DMG400014577-(rev)RLKWAX-EGF\_252

GCTTTTGTCAAATTACGGATCCTGTTCTTGAAAATCTCTTAAAGGAAAAGAGTTGTCGATCTTTGATA  
GAAATCTATCTCTCCAATATCTCCTATAATCACCTATAGTGTCTACCCT

>PGSC0003DMG400014577-(rev)RLKWAX-EGF\_315

TTCGATAGAAATCTATCTCTCCAATATCTCCTATAATCACCTATAGTGTCTACCCTTTTCTCACCTTGTTA  
AATGCAATACTAGTAATGATATCTCGTACGAGGGCTTTTCAGAGTTAC

>PGSC0003DMG400014577-(rev)RLKWAX-EGF\_378

ACCTTGTTTAAATGCAATACTAGTAATGATATCTCGTACGAGGGCTTTCAGAGTTACAATGGTTGCGAAA  
GTTTCACATTATACTATAACCATTTCGTCGGTTTCTTCTGTTGGATCTACT

>PGSC0003DMG400014577-(rev)RLKWAX-EGF\_441

TGCGAAAGTTTCACATTATACTATAACCATTTCGTCGGTTTCTTCTGTTGGATCTACTCTTCTACTAAATGT  
TCAATGATTCATTTGCCTATGGTGTGTCAGGTTATGAATCAAATCGAAC

>PGSC0003DMG400014577-(rev)RLKWAX-EGF\_504

ACTAAATGTTCAATGATTCATTTGCCTATGGTGTGTCAGGTTATGAATCAAATCGAACAAATAGTAACTTGT  
CGATATGTTGGCTGCTGATGTTACTCTAGGATGGACAGTGTCTAATACA

>PGSC0003DMG400014577-(rev)RLKWAX-EGF\_567

AACTTGTTTCGATATGTTGGCTGCTGATGTTACTCTAGGATGGACAGTGTCTAATACATGTAATCATTGTTA  
TTCGAGTGGAGGACGATGTCAAGTTGATAGTAACAACAAATTTCTTTGT

>PGSC0003DMG400014577-(rev)RLKWAX-EGF\_630

CATTGTTATTCGAGTGGAGGACGATGTCAAGTTGATAGTAACAACAAATTTCTTTGTTCTGTTACTGATC  
AAGGCAAAGGTATTCAAGAAGTAAAATATGCTTGATTCCTTCATCTTAGT

>PGSC0003DMG400014577-(rev)RLKWAX-EGF\_693

ACTGATCAAGGCAAAGGTATTCAAGAAGTAAAATATGCTTGATTCCTTCATCTTAGTACTCTTTATTTATT  
CGTTTTTCGTATTGCAGGAAAGCATCTTCGTAGAATATGGATCATTGTT

>PGSC0003DMG400014577-(rev)RLKWAX-EGF\_756

TATTTATTCGTTTTTCGTATTGCAGGAAAGCATCTTCGTAGAATATGGATCATTGTTTTAGCCACAGGTAA  
CTTTTTGTAAAAGTACTAGTTGCATTGTCTCGAATAGAGACTCTTC

>PGSC0003DMG400014577-(rev)RLKWAX-EGF\_819

ACAGGTAACCTTTTTGTAAAAGTACTAGTTGCATTGTCTCGAATAGAGACTCTTCACCGGTGTATGACT  
TCATTTTCCTCTGTATAGTTGCAGTTTTTCGGTTGCATTGGAATTTTGAT

>PGSC0003DMG400014577-(rev)RLKWAX-EGF\_945

GTTCTGCTTTAGAAAAAGATTTTCTGGCATAAGTACCTCAGGTTTTGGGAATCAGAAGCTGAGGATCAT  
CGAAATATTGAAGCATTCTCAAGAACAACGGGCCATATGCTCCGATGAG

>PGSC0003DMG400014717-(rev)LRR-RLPs\_1037

GTTCTTAAGCTTTGCAAACCACACCATCCCTCTGCAATGTCCAACACAAACGAATCAGATCGATACATAA

CCATCACAACGGTAAAAAGATTATGCAATCACACCTTGATCTTTGCCAAC

>PGSC0003DMG400014717-(rev)LRR-RLPs\_1098

GATACATAACCATCACAACGGTAAAAAGATTATGCAATCACACCTTGATCTTTGCCAACACGAGCTTAAA

CCTGTCATAATCATTGAGTGAGGCCGTCTCTTCTGCACGATCGACTTCC

>PGSC0003DMG400014717-(rev)LRR-RLPs\_1159

GAGCTTAAACCTGTCATAATCATTGAGTGAGGCCGTCTCTTCTGCACGATCGACTTCCTTCCTCAGGAA

CTGGACTCCCCTTGGTCTTCACATATGCGAGGACATAAAGCAAATGAGA

>PGSC0003DMG400014717-(rev)LRR-RLPs\_122

TCATTAATTAATGAGTTTAAATTTAAGATAATTATTTAACATCATATATAAGAGATTTGTGTATCTAATTA

AATATTTAAAAAATAAAAGTGATATTGTGCGTAATTTTTTAACTAG

>PGSC0003DMG400014717-(rev)LRR-RLPs\_1281

TAATCAAGTTCTTACGTAACCCTGTCGTTAGCCAAATGACTCAAATTACCATTTCTGGATGATGAAAACC

GTTTTCTTAATTAATAAATTCAAATTTGAATACTGCAATTCAGCCAACGT

>PGSC0003DMG400014717-(rev)LRR-RLPs\_1464

ATTAACACATAGTCTAGTCACTTTAGTATTTAGTATTGTAACCTCTAGTGCTACAAAGAGTTAAGTTTAGTA

GTGACGATTCATGAGATTAACCTCTAAATTTGTGATGACTGAAAATCA

>PGSC0003DMG400014717-(rev)LRR-RLPs\_1525

AAGTTTAGTAGTGACGATTCATGAGATTAACCTCTAAATTTGTGATGACTGAAAATCAGAAAGTAACAC

AAGATGCTGTTCTATCTTATGAAAAAGATTAGAAAGGTGAAACTCTACTT

>PGSC0003DMG400014717-(rev)LRR-RLPs\_1586

AAGTAACACAAGATGCTGTTCTATCTTATGAAAAAGATTAGAAAGGTGAAACTCTACTTCTTTTTAAGCT

TTGTATTCTAATTGATAGAATTTATTTCTGTATGATAGTTTTGTTTTAC

>PGSC0003DMG400014717-(rev)LRR-RLPs\_1647

TTTTAAGCTTTGTATTCTAATTGATAGAATTTATTTCTGTATGATAGTTTTGTTTTACTTGGAAAAAGTGG

GAGTAGATGTGCAACACATGGATAAAGACAATAAAAAGACAAAAGCAC

>PGSC0003DMG400014717-(rev)LRR-RLPs\_1708

GGAAAAAGTGGGAGTAGATGTGCAACACATGGATAAAGACAATAAAAAGACAAAAGCACAAACCCA

AATTTGACTAAAGAATGACAACATTTTCTCTAATAAAAATTGAACAGACAAAG

>PGSC0003DMG400014717-(rev)LRR-RLPs\_183

GTATCTAATTAATATTTAAAAAATAAAAGTGATATTGTGCGTAATTTTTTTAAACTAGAGGTAAATTA  
GTATATATGGCACTAAAGTATGTCTAACTAGGTAGTTTTTCCAATAATGA

>PGSC0003DMG400014717-(rev)LRR-RLPs\_1830

TGAATAAGAGTTTAGAAAAAATGGGAGTAGATGTGTAACACATGGATAAAGACAATTAAGACAAA  
AGCACAACAACCCAAATTTGACTAAAGAATGACAATAATTTGAGTGACTT

>PGSC0003DMG400014717-(rev)LRR-RLPs\_1891

AGACAAAAGCACAACAACCCAAATTTGACTAAAGAATGACAATAATTTGAGTGACTTTTCTCTTACAA  
AAACAAAGAAAGGTGACTTTCTGAGATAATTATCTATAGTTGAATGACCA

>PGSC0003DMG400014717-(rev)LRR-RLPs\_1952

CTCTTACAAAAACAAAGAAAGGTGACTTTCTGAGATAATTATCTATAGTTGAATGACCACGTGAGAAATC  
AACTCTTGACGTCTACTACATATGAATTAGAGATAATGTAGTTTAGAAAA

>PGSC0003DMG400014717-(rev)LRR-RLPs\_2013

TGAGAAATCAACTCTTGACGTCTACTACATATGAATTAGAGATAATGTAGTTTAGAAAATTATTAATTTA  
AGACTGAAAATTGTTGAAACAAATATGTCTATATCATATGCTAAGGCAGA

>PGSC0003DMG400014717-(rev)LRR-RLPs\_2074

ATTAATTTAAGACTGAAAATTGTTGAAACAAATATGTCTATATCATATGCTAAGGCAGAGTGGTCATGAT  
CAATGTGTGATAACAAAATTTTTGCCACTTCGGTTAAGTCCTTGCT

>PGSC0003DMG400014717-(rev)LRR-RLPs\_2135

GGTCATGATCAATGTGTGATAACAAAATTTTTGCCACTTCGGTTAAGTCCTTGCTGAATTAGTGTTG  
GTCTTTAATTATAATTTACGTACAATATAAAATCCCATGAACCCGAAAC

>PGSC0003DMG400014717-(rev)LRR-RLPs\_2196

ATTAGTGTGGTCTTTAATTATAATTTACGTACAATATAAAATCCCATGAACCCGAAACAATAAACTCAAA  
ATATGATGATGGTTCCAGCAAAATACTCTCTTCACTTCAGTGTCTCAC

>PGSC0003DMG400014717-(rev)LRR-RLPs\_2257

TAAACTCAAATATGATGATGGTTCCAGCAAAATACTCTCTTCACTTCAGTGTCTCACTCTTTTATATCTC  
TTTACAGTTACTTTTGCTTCGACTGAGGAAGCAACTGCCCTCTTGAAA

>PGSC0003DMG400014717-(rev)LRR-RLPs\_244

GTAAATTAAGTATATATGGCACTAAAGTATGTCTAACTAGGTAGTTTTTCCAATAATGAATTCATGAAAA  
ATGCTTTTTTCTTTCTAGCTCCAATGGTGAACAAGGTTTGATCCTTTC

>PGSC0003DMG400014717-(rev)LRR-RLPs\_2562

GAATCTTAATCTTAGCATGAACAATTTCTCTGGCATCATTCCACCTGAGATTAGTAATCTCACTAATCTTG  
TCTATCTTGATTGAAACATCAATCAGATTTTCAGGAACAATTCCACCACA

>PGSC0003DMG400014717-(rev)LRR-RLPs\_2623

ACTAATCTTGTCTATCTTGATTGAAACATCAATCAGATTTTCAGGAACAATTCCACCACAAATCGGATCACT  
AACCAAGCTTCAGATCCTCCGTATATTTGACAACCATTTAAATGACTCT

>PGSC0003DMG400014717-(rev)LRR-RLPs\_305

TCATGAAAATGCTTTTTTCTTTTCTAGCTCCAATGGTGAAACAAGGTTTGATCCTTTCCTTTTCAGGAAC  
AAGGTGGGTTAACATTGTATCACATCAAGATGTCGATTCATTTTTTGCC

>PGSC0003DMG400014717-(rev)LRR-RLPs\_3355

AAAGAATGTTTCTTGATGAAAACAATCTCACTGAGGAAATTCCTTATCTATGTGCAATTTAAAATCACTT  
GATATTTGTTTTGCGGAGAAACAACCTGAAGGGAAAAGTTCCGCAAT

>PGSC0003DMG400014717-(rev)LRR-RLPs\_3416

AAAATCACTTGATATTTGTTTTGCGGAGAAACAACCTGAAGGGAAAAGTTCCGCAATGTTTGGGTAAT  
ATTAGCGGCCTCCAGGTTATGACGATGTCACGTAATAATCTTAATGGAGA

>PGSC0003DMG400014717-(rev)LRR-RLPs\_3477

TTGGGTAATATTAGCGGCCTCCAGGTTATGACGATGTCACGTAATAATCTTAATGGAGAGATCCCTTCAT  
CTATTTCCAATTTAAAATCACTACAAATTCTAGATTTGGGAAGAAATAGT

>PGSC0003DMG400014717-(rev)LRR-RLPs\_3538

TCCCTTCATCTATTTCCAATTTAAAATCACTACAAATTCTAGATTTGGGAAGAAATAGTCTGGAGGGAGC  
AATTCCACAATGTTTTGGCAATATTAATACCCTACAGGTTTTTGATATGC

>PGSC0003DMG400014717-(rev)LRR-RLPs\_3599

GGAGGGAGCAATTCACAATGTTTTGGCAATATTAATACCCTACAGGTTTTTGATATGCAGAACAACAAA  
TTTTCTGGGACTCTTCCAACAAATTTAGCATTGGAAGTTCACCTATAAG

>PGSC0003DMG400014717-(rev)LRR-RLPs\_366

TTTCAGGAACAAGGTGGGTTAACATTGTATCACATCAAGATGTCGATTCATTTTTGCCCTCAATGAAAC  
GGAGAAATTTTAACCCGATTTTTGAGCCTTTCATCTTTCTTAATCAAGA

>PGSC0003DMG400014717-(rev)LRR-RLPs\_4026

ACAATGATGGTACCAAGTTATGAAGGAGATGGAAGTTACGAAGACTCGATAGTTGTTGCATCGAAGGG

ATTGAAGCTTGAAGTTTTGAGAATTTTGTCTTTGTACACAGTTATCAATCTT

>PGSC0003DMG400014717-(rev)LRR-RLPs\_4087

CGAAGGGATTGAAGCTTGAAGTTTTGAGAATTTTGTCTTTGTACACAGTTATCAATCTTTCAAACAACAA

ATTTGAAGGACATATTCCTAGTGTTCTAGGAGATCTCATTGCTCTTCGGG

>PGSC0003DMG400014717-(rev)LRR-RLPs\_427

CAATGAAACGGAGAAATTTTAACCCCGATTTTTGAGCCTTTCATCTTTCTTAATCAAGACCTAACAACCGC

CGAGGAGCACCTCAACATATGATTGTGCACAGTAACTGAGACTCCTATT

>PGSC0003DMG400014717-(rev)LRR-RLPs\_488

TAACAACCGCCGAGGAGCACCTCAACATATGATTGTGCACAGTAACTGAGACTCCTATTGCACCTAAGG

TCAACTTCAATTCACCAAACTAAAGTTTATCTTTGTGTAGTCATTGTAGA

>PGSC0003DMG400014717-(rev)LRR-RLPs\_61

GGGATTTGGGGAGGGAGCAACAGAACGAAGTGAGAGAAAACTTTTTGAATTGATAATTTATCATTAAAT

TAATGAGTTTAAATTTTAAGATAATTATTTAACATCATATATAAGAGATTT

>PGSC0003DMG400014717-(rev)LRR-RLPs\_854

GAATGGAGGAGAAGACGATCTACGGCTGCAAGTGTGCATGAAGACAATATATGAAATAACTTAGCAAA

CATTCTTTGAAACAAACAGTTCACAATTCATAGATCAGAAAAATAATTTCCC

>PGSC0003DMG400014717-(rev)LRR-RLPs\_915

TAGCAAACATTCTTTGAAACAAACAGTTCACAATTCATAGATCAGAAAAATAATTTCCCAGCACGTCTAA

AACAAGCAAAAATGGAAAAGAAAAACAAAACAGTTCCAAAGGTAGATAAA

>PGSC0003DMG400014717-(rev)LRR-RLPs\_976

CACGTCTAAAACAAGCAAAAATGGAAAAGAAAAACAAAACAGTTCCAAAGGTAGATAAAAAGTTCTTAA

GCTTTGCAAACACACCATCCCTCTGCAATGTCCAACACAAACGAATCAGA

>PGSC0003DMG400014718-(rev)LRR-RLPs\_1088

ATTACGTGGATTCCCCATTTCAAAGGTTGTGGCAATAATCCTGTGTCAGAGACGAACTGTACAGTGTCT

GCGCTAGAAGATCAAGAAAGAAATTCTGAATTTTTCAATGATTTTTGGAA

>PGSC0003DMG400014718-(rev)LRR-RLPs\_128

AAGTGGCCTCCAGGTTCTAGTGATGTCACATAATAATCTCAGTGGAAAGATGCCTCCATCTATTTCCAAT

TTAACGTCACTACAAATTCTAGATTTGGGCAGAAACAATCTGGAGGGAGC

>PGSC0003DMG400014718-(rev)LRR-RLPs\_192

TCCAATTTAACGTCACTACAAATTCTAGATTTGGGCAGAAACAATCTGGAGGGAGCAATTCCACAATGTT  
TTGGCAATATTAGTAATCTCCAGGTTTTTGATATGCAGAATAACAAACTT

>PGSC0003DMG400014718-(rev)LRR-RLPs\_256

AATGTTTTGGCAATATTAGTAATCTCCAGGTTTTTGATATGCAGAATAACAAACTTTCTGGGACTCTTCCA  
ACAAATTTTAGCATTGGAAGTTCACTTATAAGTCTCAACTTGCATGACA

>PGSC0003DMG400014718-(rev)LRR-RLPs\_448

ATCATCTCATTGACACATTCCCATGTGGTTGGGAACCTTGACAGAGCTGAGAGTTCTAAGATTGACATC  
AAATAAACTGCAAGGACCTATAAGATCTTCAGGGGCTGAAATCATGTTTC

>PGSC0003DMG400014718-(rev)LRR-RLPs\_512

GACATCAAATAAACTGCAAGGACCTATAAGATCTTCAGGGGCTGAAATCATGTTTCCTGATCTTCGAATC  
ATAGATCTCTCTAACAATGCCTTTTCAAAGACTTACCAACGAGTCTGTT

>PGSC0003DMG400014718-(rev)LRR-RLPs\_576

CGAATCATAGATCTCTCTAACAATGCCTTTTCAAAGACTTACCAACGAGTCTGTTTCAACAATTGAAAG  
GCAGGAGGACTGTTGATCAAACAATGAAGACACCAAGTTATCTAGGAGGT

>PGSC0003DMG400014718-(rev)LRR-RLPs\_64

TGGAAGTGTTGTGTATGCCGAGAACCAATTTGAAGGGAAAAGTCCGCAATGTTTGGGTAATATAAGTG  
GCCTCCAGGTTCTAGTGATGTCACATAATAATCTCAGTGGAAAGATGCCTC

>PGSC0003DMG400014718-(rev)LRR-RLPs\_640

TGAAAGGCAGGAGGACTGTTGATCAAACAATGAAGACACCAAGTTATCTAGGAGGTAGATATAACTAC  
CAAGACTCGGTAGTTGTTGTAACAAAGGGATTGAAGCTTGAAGTTGTGAGAA

>PGSC0003DMG400014719-(rev)LRR-RLPs\_1134

TGGTTGGGAACCTTGCCAGAGCTGAGAGTTTTAAGATTGACATCGAATAAATTGCATGGACCCATAAGA  
TCTTCAGGTGCTGAAATCATGTTTCCTGATCTTCGAATCATAGATCTCTCT

>PGSC0003DMG400014719-(rev)LRR-RLPs\_126

AACCAGAATAATTCCTTATTGACTTCATGGATGCCAAGTTTTAATGCATGTGAGGACTGGTATGGAGTTA  
TATGCTTTAATGGGAGGGTAAACACGTTGAATATTACAAATTCTAGTGTC

>PGSC0003DMG400014719-(rev)LRR-RLPs\_1260

GCCTTCTCGAAAGACTTACCAACGAGTCTGTTTCAACATTTGAAAGGCATGAGGACAATTGATCAAACAA  
TGAAGGTACCAAGTTATGAAGGACATGGAGATTACCAAGACTCGACAATT

>PGSC0003DMG400014719-(rev)LRR-RLPs\_1323

CAAACAATGAAGGTACCAAGTTATGAAGGACATGGAGATTACCAAGACTCGACAATTGTTGTAACAAAG  
GGATTGAAGCTTGAAGTTGTGAAAATTTTGTTCGTTGTACACAGTTATCAAT

>PGSC0003DMG400014719-(rev)LRR-RLPs\_1386

ACAAAGGGATTGAAGCTTGAAGTTGTGAAAATTTTGTTCGTTGTACACAGTTATCAATCTTTCAAACAACA  
AATTTGAAGGACATATTCCTTGTGTTCTGGGAGATCTCATTGCGATTCCG

>PGSC0003DMG400014719-(rev)LRR-RLPs\_1764

TCAAAGGTTGTGGCAATGATCCTGTGTCAGAGACAACTTTACAGGGTCTGTGCTAGAAGATCAAGAA  
AGAAATTCTGAATTGTTCAATGATTTTTGAAAGCAGCTCTGATGGGCTAT

>PGSC0003DMG400014719-(rev)LRR-RLPs\_189

GGAGTTATATGCTTTAATGGGAGGGTAAACACGTTGAATATTACAAATTCTAGTGTATTGGTACTCT  
ATGCTTTTCCGTTTTTCATCCCTCCCTTTTCTTGAAAGTCTTGATCTTAGC

>PGSC0003DMG400014719-(rev)LRR-RLPs\_1947

TGGCTTGCAAGAATCATTGAAGAACTGGAACACCAAATTAACACACGAAGGAGAAAGAAGCAGAGAGG  
TCAAAGGAATTACAGAAGAAGAAATAATCGCATCTACACAAGTTACCAGTAA

>PGSC0003DMG400014719-(rev)LRR-RLPs\_252

ACACTCTATGCTTTTCCGTTTTTCATCCCTCCCTTTTCTTGAAAGTCTTGATCTTAGCATGAACAATTTCTCG  
GGAACCATTCCACCTGAGGTTGGTAATCTCACTAATCTTGCTATCTT

>PGSC0003DMG400014719-(rev)LRR-RLPs\_315

AATTTCTCGGGAACCATTCCACCTGAGGTTGGTAATCTCACTAATCTTGCTATCTTGACTTGAACATTAA  
TCAGATTTAGGAACAATCCCACCACAAATCGGTTCACTGGCCAAGCTT

>PGSC0003DMG400014719-(rev)LRR-RLPs\_756

ACAGGAAAAGTTCCACAATGTTTGGGTAATATCATTGCCTCAAGGTTATGACGATGTCACATAATAATC  
TCAGTGGAGAGATCCCTTCATCTATTTCCAATTTAACATCACTACAAATT

>PGSC0003DMG400014719-(rev)LRR-RLPs\_819

AATAATCTCAGTGGAGAGATCCCTTCATCTATTTCCAATTTAACATCACTACAAATTCTAGATTTGGGCAG  
AAACCATCTGGAGGGAGCAATTCACAATGTTTTAGCAATATTAGTAGC

>PGSC0003DMG400014719-(rev)LRR-RLPs\_882

TTGGGCAGAAACCATCTGGAGGGAGCAATTCACAATGTTTTAGCAATATTAGTAGCCTCCAGGCTCTTG



ATATGCAGAATAACAACTTTCTGGGACTCTTCCAACAAATTTTAGCATT

>PGSC0003DMG400014719-(rev)LRR-RLPs\_945

GCTCTTGATATGCAGAATAACAACTTTCTGGGACTCTTCCAACAAATTTTAGCATTGGAAGTTCACCTAT

AAGTCTCAACTTTTCATTGCAATGAACTCGAGGGGGAAATCCCTCGATCA

>PGSC0003DMG400014736-(rev)LRR-RLPs\_1024

GAGTTTGCCCACTTTGAGCTACTTGAATCTATCTGATAACAATTTGTCAGGTATGATACCAGTGAGCACT

CAACTTCAAAGCTTTGATTCCACGAGTTTTCAAGGAAACAAACTCTGCGG

>PGSC0003DMG400014736-(rev)LRR-RLPs\_1152

TCTTGGTGAAGTGCAGTTCGGATGGTAATATTTCCAATAACAAGCATGAAGATGATGAGAGTGACAAAG

ATGAAGTAGATTGGTTTTACATTTCAATGGCTATAGGATTTGCACTAAGCT

>PGSC0003DMG400014736-(rev)LRR-RLPs\_1216

CAAAGATGAAGTAGATTGGTTTTACATTTCAATGGCTATAGGATTTGCACTAAGCTTTTGGGGTGTGGT

GGTTCATTGTTTTAAGAGGTCATGGAGACATGCTTATTTTCGTTTGTAT

>PGSC0003DMG400014736-(rev)LRR-RLPs\_128

CAACGAGCATTGGAGACCTTGAAGAAAGAAATACACGATCCATCGGATATCCATCTTCTGGATTGTCTG

GAAAAGATTGTTGTGAATGGGAAGGGGTCGTGTGCAACAATCTATCTCGT

>PGSC0003DMG400014736-(rev)LRR-RLPs\_1280

GTTTGTGGTTCATTGTTTTAAGAGGTCATGGAGACATGCTTATTTTCGTTTGTATGCTTACATTTCTCATG

TTAGCAATCATGTTGTTTCATTGTATATTCAAATGAATGTTTCTTAAG

>PGSC0003DMG400014736-(rev)LRR-RLPs\_1344

TTCTCATGTTAGCAATCATGTTGTTTCATTGTATATTCAAATGAATGTTTCTTAAGATGTTCAAACAATGTT

GTTTCTTTCATAGTTCCAATTTTCTTTTTTCAATCACAGAGTTGTGAG

>PGSC0003DMG400014736-(rev)LRR-RLPs\_256

TGAACTACATCTAGGTTATGTAAGTTCATGAAGAGATTGGGCGAGGTATGTTTTTTGATAGGCTCGA

GTTTACTTATCCAAGGATAAATAGCCTTGAGTGGCTGCCAAGTCTTTCGAG

>PGSC0003DMG400014736-(rev)LRR-RLPs\_320

CTCGAGTTTACTTATCCAAGGATAAATAGCCTTGAGTGGCTGCCAAGTCTTTCGAGTCTTGAGAACCTAC

AGATGGTAAGTGTGATCTTAGCAAAGTTAATGAATGGCTACAGGTTATT

>PGSC0003DMG400014736-(rev)LRR-RLPs\_384

ACCTACAGATGGTAAGTGTTGATCTTAGCAAAGTTAATGAATGGCTACAGGTTATTAACATGCTTCCTTC  
TCTTGTTGATCTTCGTTTATCCAGTTGTAGTCTTCATCATATAACACCTC

>PGSC0003DMG400014736-(rev)LRR-RLPs\_448

TCCTTCTCTTGTTGATCTTCGTTTATCCAGTTGTAGTCTTCATCATATAACACCTCTACTTGATCATCAAAAT  
TTTTCTTCACTCAAATTTCTTGATCTTTCTTTCAATTACAAATTAAG

>PGSC0003DMG400014736-(rev)LRR-RLPs\_512

CATCACAATTTTTCTTCACTCAAATTTCTTGATCTTTCTTTCAATTACAAATTAAGCTCTTCTGTTCCGAAAT  
GGGTTTTCAACCTCCCAAATCTCATTTTTCTTGACCTGAGTTACTGT

>PGSC0003DMG400014736-(rev)LRR-RLPs\_576

TTCCGAAATGGGTTTTCAACCTCCCAAATCTCATTTTTCTTGACCTGAGTTACTGTAATTTTACTAGCCCAT  
TTCCTGATGGTCCAGTTAACTTGACTTCTCTCACAACCTTCAAGGCTT

>PGSC0003DMG400014736-(rev)LRR-RLPs\_64

CTTGTTTTTTATTTTGAAAAATACCAAGTTTGTCAATTTGTGTAGGGATTTGTAGAGAAAACGAGCAACGA  
GCATTGGAGACCTTGAAGAAAGAAATACACGATCCATCGGATATTCCATC

>PGSC0003DMG400014736-(rev)LRR-RLPs\_640

TAGCCCATTTCTGATGGTCCAGTTAACTTGACTTCTCTCACAACCTTCAAGGCTTCTGGAAACTTTTTCAA  
TTGTCGTTTACCCAAATGGTTGTTTGATTTAATAATCTTGAACATCT

>PGSC0003DMG400014736-(rev)LRR-RLPs\_704

TTTTTCAATTGTCGTTTACCCAAATGGTTGTTTGATTTAATAATCTTGAACATCTTGAGCTTTCTAGTAAT  
ATGCTTTCTGGAAAGTTACCAAATGTAATTGGAAAGTTAGGGAAATTA

>PGSC0003DMG400014736-(rev)LRR-RLPs\_768

CTAGTAATATGCTTTCTGGAAAGTTACCAAATGTAATTGGAAAGTTAGGGAAATTAGAATACCTTGATCT  
CTCATATAATCAATTTGAGGGAGATATTCCTATAAGTGTAACACGTCTTG

>PGSC0003DMG400014736-(rev)LRR-RLPs\_832

TGATCTTCATATAATCAATTTGAGGGAGATATTCCTATAAGTGTAACACGTCTTGCAGGATTAAGATCA  
TTAATCTTTCCAAAATAACCTAACTGGTAGGATTCCAAATGACATTGG

>PGSC0003DMG400014736-(rev)LRR-RLPs\_896

AGATCATTTAATCTTTCCAAAATAACCTAACTGGTAGGATTCCAAATGACATTGGTGACATGAAAGTCT  
TGAAAACCTGTTGATCTTTCAGAAAATCAACTTTATGGTCAAATCCCACAA

>PGSC0003DMG400014736-(rev)LRR-RLPs\_960

AAGTCTTGAAAAGCTGTTGATCTTTTCAGAAAATCAACTTTATGGTCAAATCCCACAAAGCTTTTCGAGTTTG  
CCCACTTTGAGCTACTTGAATCTATCTGATAACAATTTGTCAGGTATGA

>PGSC0003DMG400014738-(rev)LRR-RLPs\_0

ATGGTGACGGATAAAGGCAACAAGTACCAGTATGACACCATTTTGGTGTTGTTTACAAGTACGGATATG  
TCTAGAAATAACCTTTCTGGGGATATTCCTGTAAGTTTAATAGGTCTTGCA

>PGSC0003DMG400014738-(rev)LRR-RLPs\_132

TTTGATTTTTCTAATAATAACCTAACTGGTAGGATTCCAAATAACATTGGTGAAATGAAAGTCTTGGAATT  
TGTTGATCTTTTCAGAAAATCAATTTTACGATCAAATCCCACAAAGCTTT

>PGSC0003DMG400014738-(rev)LRR-RLPs\_198

GAATTTGTTGATCTTTTCAGAAAATCAATTTTACGATCAAATCCCACAAAGCTTTTCAAGTTTATCCACTTTG  
AGCTTATTGAATCTATCTGATAATAATTTGTCAGGTGTGATACCATTG

>PGSC0003DMG400014738-(rev)LRR-RLPs\_264

ACTTTGAGCTTATTGAATCTATCTGATAATAATTTGTCAGGTGTGATACCATTGAGCACTCAACTTCAAAG  
CTTTGATCCCACGAGTTTTCAAGGAAACAAACTCTGCGGACTTCCACTC

>PGSC0003DMG400014738-(rev)LRR-RLPs\_459

GATTGGTTTTACATTTCAATGGCTATAGGATTTGCGCTAAGCTTTTGGGGTGTTTGTGGTTCACTGCTTTT  
CAAGAGATCATGGAGACATGCTTATTTTCATTTCTAGATCGTAGCTGA

>PGSC0003DMG400014738-(rev)LRR-RLPs\_66

ATGTCTAGAAATAACCTTTCTGGGGATATTCCTGTAAGTTTAATAGGTCTTGCAGGATTAAGATCATTG  
ATTTTTCTAATAATAACCTAACTGGTAGGATTCCAAATAACATTGGTGAA

>PGSC0003DMG400014739-(rev)LRR-RLPs\_0

GCTATAAATACATATTACTTGGCCTAGCGAAAAATATAAGCAAACACATACTTTACCCAAATACTTTTCAC  
TTGCAAGTCTAAACATTACACACCATGAAAGTGTTAGCAATAACACTA

>PGSC0003DMG400014739-(rev)LRR-RLPs\_1054

TAGGGAAATTAGGATACCTTGAACCTCTCAGGAAATCTGTTTGAGGGAGATATATATGAATTATTCAATGT  
TAGGAGTAATTTCTTTTCAGTGCCATTGCGAAATACTTCTTCTTTATCTA

>PGSC0003DMG400014739-(rev)LRR-RLPs\_1116

TTCAATGTTAGGAGTAATTTCTTTTCAGTGCCATTGCGAAATACTTCTTCTTTATCTACTTTGAGACTAGGT

TGGAATAAACTCACAGGAGCTCTCCGGAAAGTGTGGCCAACTTTCA

>PGSC0003DMG400014739-(rev)LRR-RLPs\_1178

GAGACTAGGTTGGAATAAACTCACAGGAGCTCTCCGGAAAGTGTGGCCAACTTTCAATGCTAGAAGA  
CTTTCCATCTATAACAATAGGTTGGAAGGCGTTGTAACGGAAAGTCATTT

>PGSC0003DMG400014739-(rev)LRR-RLPs\_1240

TAGAAGACTTTTCCATCTATAACAATAGGTTGGAAGGCGTTGTAACGGAAAGTCATTTCTCTAAATTAAC  
ACATTTACAATACTTTTATGCATCTAGAAATAATCTGACTTTAAAAGTGA

>PGSC0003DMG400014739-(rev)LRR-RLPs\_1302

AAATTAACACATTTACAATACTTTTATGCATCTAGAAATAATCTGACTTTAAAAGTGAGTCGGAATTGGA  
TTCCGTCTTTTCAAGCCACAACAATGTTAATAGGCGGCTGGAATATAGGC

>PGSC0003DMG400014739-(rev)LRR-RLPs\_1364

GAATTGGATTCCGTCTTTTCAAGCCACAACAATGTTAATAGGCGGCTGGAATATAGGCCCTTCGTTTCCC  
ATGTGGCTCCGAACCTCAGAACCAGATAATGTATGTGACATATCAGATTG

>PGSC0003DMG400014739-(rev)LRR-RLPs\_1488

ATACAAGGTGAGGTTCCAACCTGTTCTGGAACCTGTCTTCTCAAATTCGATTACTCAATCTTTCTCATAA  
CCACTTTGTTGGTGAGGTTCCAATCATCTCAACAGATGAGCAGAGTGGT

>PGSC0003DMG400014739-(rev)LRR-RLPs\_1550

TTCTCATAACCACTTTGTTGGTGAGGTTCCAATCATCTCAACAGATGAGCAGAGTGGTTCTCCGCTAATG  
TACTTGGCTTCCAACAATTTTAGTGGACCATTACCATTGATTTCAACCAA

>PGSC0003DMG400014739-(rev)LRR-RLPs\_1612

CGCTAATGTACTTGGCTTCCAACAATTTTAGTGGACCATTACCATTGATTTCAACCAATGTAAGAGAGCT  
AGATCTCTCAAGCAATTCTTTTCCAAGGTTTATCTAACTTTTTGTGTG

>PGSC0003DMG400014739-(rev)LRR-RLPs\_1674

AGAGAGCTAGATCTCTCAAGCAATTCTTTTCCAAGGTTTATCTAACTTTTTGTGTGAAGCAAAGAATG  
GATCATACAAATTGAGAATCTTAAACCTCGGGGGAAATGATTTATCAGAA

>PGSC0003DMG400014739-(rev)LRR-RLPs\_1736

AAAGAATGGATCATACAAATTGAGAATCTTAAACCTCGGGGGAAATGATTTATCAGAAGAAATTCCTGA  
TTGTTGGATGAATTGGCCGAGTTGAAAGTTTTAATCTTGAGGGACAATAA

>PGSC0003DMG400014739-(rev)LRR-RLPs\_186

AATGAGCAACAAGCGTTGGAGACCTTGAAGAAAGAAGTAGACGATCCCTCAAATATTCTCTCTTCTTGG  
GTTGTCGGAAAAGATTGTTGTGAATGGGAAGGGGTCGTGTGCAACAATCTC

>PGSC0003DMG400014739-(rev)LRR-RLPs\_1922

AAATAGACTTAACGGTCCGTTTCCTTCATCCTTGGAAAAGTGCACAAAAGTGCATAAAATAGATTTAGCT  
GAGAATGAGTTTATTGGAAAATTACCATCTTGGTTGGGAATGAGGTTTCC

>PGSC0003DMG400014739-(rev)LRR-RLPs\_1984

ATTTAGCTGAGAATGAGTTTATTGGAAAATTACCATCTTGGTTGGGAATGAGGTTTCCAACCTTGATAGT  
CCTTATCCTTCGGTCCAATAAATTCGATGGTGAATTGCCTCAAGAACTT

>PGSC0003DMG400014739-(rev)LRR-RLPs\_2108

CCTCAAAGATCTTCAAATCTTAGACCTTGCAAACAATACATTTGTTGGAATCATACCGAGGTGTATTGGC  
AATTTGAGTTCGATGGTTAAAAAAAAAAGGAATTGGAAGATGATGAAGA

>PGSC0003DMG400014739-(rev)LRR-RLPs\_2170

GTATTGGCAATTTGAGTTCGATGGTTAAAAAAAAAAGGAATTGGAAGATGATGAAGACTTAAATTACT  
CTTATTATATAGGAGTTCTGATAGAGAGTGCAATAGTGACGACTAAAGGCA

>PGSC0003DMG400014739-(rev)LRR-RLPs\_2232

AATTACTCTTATTATATAGGAGTTCTGATAGAGAGTGCAATAGTGACGACTAAAGGCAACATGTACCAG  
TATGACACCATTTTGGCGTTGTTTACAAGTATGGATATGTCTAGCAATAAT

>PGSC0003DMG400014739-(rev)LRR-RLPs\_2294

GTACCAGTATGACACCATTTTGGCGTTGTTTACAAGTATGGATATGTCTAGCAATAATCTTTCTGGAGAT  
ATTCCTATAAGTGTAACACGTCTTGCAGGATTAAGATCATTTAATCTTTC

>PGSC0003DMG400014739-(rev)LRR-RLPs\_2356

CTGGAGATATTCCTATAAGTGTAACACGTCTTGCAGGATTAAGATCATTTAATCTTTCCAAAATAATCTG  
ACTGGTAGGATTCAAATGACATTGGTGTGCATGAAAGTCTTGGAAATCTG

>PGSC0003DMG400014739-(rev)LRR-RLPs\_2418

AATAATCTGACTGGTAGGATTCCAAATGACATTGGTGTGCATGAAAGTCTTGGAAATCTGTTGATCTTTCAG  
AAAATCAACTTTATGGTCAAATCCCGCAAAGTTTTTCGAGTTTGACCACT

>PGSC0003DMG400014739-(rev)LRR-RLPs\_248

TTCTTGGGTTGTCGGAAAAGATTGTTGTGAATGGGAAGGGGTCGTGTGCAACAATCTCACTCGTCATGT  
GATTGTGCTAAGCATTTATTTGATTGGTTTGAAGTTCGAGATATCTAAGGAT

>PGSC0003DMG400014739-(rev)LRR-RLPs\_2542

GCTACTTGAATCTATCTGATAACAATTTGTCAGGTATGATACCATTGAGCACTCAACTTCAAAGCTTTGAT  
CCCATGAATTTTCAAGGAAACAAACTCTGCGGACTTCCACTCTTGGTGA

>PGSC0003DMG400014739-(rev)LRR-RLPs\_2604

AGCTTTGATCCCATGAATTTTCAAGGAAACAAACTCTGCGGACTTCCACTCTTGGTGAAGTGCAGTTCGA  
ATGGTAATATTCCAAATCACAAGTATGAAGATGGTGAGAGTGACAAAGAT

>PGSC0003DMG400014739-(rev)LRR-RLPs\_2666

CAGTTCGAATGGTAATATTCCAAATCACAAGTATGAAGATGGTGAGAGTGACAAAGATGAAGTGGATT  
GGTTTTACATTTCAATGGCTATAGGATTTGCACTAAGCTTTTGGGGTGTTTG

>PGSC0003DMG400014739-(rev)LRR-RLPs\_2790

TCATTGTTTTTCAAGAGATCATGGAGACATGCTTATTTTCGTTTTCTAGACCGTAGCTGGGAAATGTTACT  
TGCAAAGTTACCAATATGTTGAGAGATATGGTTTAGGATATTTCTATCT

>PGSC0003DMG400014739-(rev)LRR-RLPs\_2852

AATGTTACTTGCAAAGTTACCAATATGTTGAGAGATATGGTTTAGGATATTTCTATCTTCAAAGTTACTG  
TGC GTGCTTACATTTCTCATGTTAGAAATCATTTTGTATTCAATATGTA

>PGSC0003DMG400014739-(rev)LRR-RLPs\_2914

AAGTTACTGTGCGTGCTTACATTTCTCATGTTAGAAATCATTTTGTATTCAATATGTAGACTTTTATGTCTT  
AACAACTTCCTCAAATGAATGTTTCTTAAGATGTTCAAACAATGGTGT

>PGSC0003DMG400014739-(rev)LRR-RLPs\_310

GTCATGTGATTGTGCTAAGCATTTATTTGATTGGTTTGGAGTCGAGATATCTAAGGATCAATAACCTAGA  
GTGGTTGACAAGTCTTTGAGTCTTGAGAACTTGGAGATGGAAAGTGTG

>PGSC0003DMG400014739-(rev)LRR-RLPs\_372

AACCTAGAGTGGTTGACAAGTCTTTGAGTCTTGAGAACTTGGAGATGGAAAGTGTGATCTTAGCAAA  
GCTAATAATTGGCCACAGGTTATTAACATGCTTCCTTCTCTTGTGATCTT

>PGSC0003DMG400014739-(rev)LRR-RLPs\_434

TAGCAAAGCTAATAATTGGCCACAGGTTATTAACATGCTTCCTTCTCTTGTGATCTTCGTTTATTCAATTG  
TAGTCTTCATCATATAGCACCTCTACTTGATCATCACAATATTTCTC

>PGSC0003DMG400014739-(rev)LRR-RLPs\_496

TATTCAATTGTAGTCTTCATCATATAGCACCTCTACTTGATCATCACAATATTTCTCACTCAAGTCTCTCG

ATCTTTCTGAGAATCGCAACTTAAATTCTTTTGTCCCAAATGGGTTT

>PGSC0003DMG400014739-(rev)LRR-RLPs\_558

AAGTCTCTCGATCTTTCTGAGAATCGCAACTTAAATTCTTTTGTCCCAAATGGGTTTTCTACCTCCCAAT  
CTTGTTTCTCTTGACCTGAGTGATTGTAATTTTATTGGCCCGTTACCT

>PGSC0003DMG400014739-(rev)LRR-RLPs\_62

ACTTTTCACTTGCAAGTCTAAAACATTACACACCATGAAAGTGTTAGCAATAAACTATGGGTTCTCTTGT  
TTTTATTTTGACAAATACCAAGTTTGTGTTGTGTAGGGATTTGCAG

>PGSC0003DMG400014739-(rev)LRR-RLPs\_744

TTACCCAAATGGTTGTTTGAATTAATCTTGAACATCTTGACCTTTCTACTAGTGGCATTGAAGGTGT  
GATACAGAGTAAGAGCGGAAACATAACAAAACCTTAAACATCTTGATCTT

>PGSC0003DMG400014739-(rev)LRR-RLPs\_806

TGAAGGTGTGATACAGAGTAAGAGCGGAAACATAACAAAACCTTAAACATCTTGATCTTTCTAGCAATAA  
CCTCAACTACACTATACCAAATTGGCTCTATCAATGCAAAGATCTAGAATC

>PGSC0003DMG400014739-(rev)LRR-RLPs\_868

GCAATAACCTCAACTACACTATACCAAATTGGCTCTATCAATGCAAAGATCTAGAATCACTTCAACTTGG  
ATTAAATCGTCTTGAAGGAACAGTTTCAAGTCTGATTTCAAATTTGAGCT

>PGSC0003DMG400014739-(rev)LRR-RLPs\_930

CAACTTGGATTAATCGTCTTGAAGGAACAGTTTCAAGTCTGATTTCAAATTTGAGCTCAATAACTATTAT  
TGACCTTTCTAATAATATGCTTTCTGGAAAGTTACCAAATGTAATTGGA

>PGSC0003DMG400014739-(rev)LRR-RLPs\_992

AACTATTATTGACCTTTCTAATAATATGCTTTCTGGAAAGTTACCAAATGTAATTGGAAAGTTAGGGAAA  
TTAGGATACCTTGAACCTCTCAGGAAATCTGTTTGGAGGAGATATATATGA

>PGSC0003DMG400014740-(rev)LRR-RLPs\_0

GGCCTAGTGAAAAATATAAGCAAACAATAACACACAAAAAATACTTTTCACTTGCAAGTCTAAAACA  
TTGCACACCATGAAAGTGTTAGCAATAAACTATGGGTTCTCTTGT

>PGSC0003DMG400014740-(rev)LRR-RLPs\_1054

TGGTTTTGGAAATTGTCTCCTCAAATTCGATTAATCTTTCTCACAACCAATTTGTTGGTGAGGTTCC  
AATCATCTCGACAGATGAGCAAAGTGATTCTTGGCTATTAATGTACTTG

>PGSC0003DMG400014740-(rev)LRR-RLPs\_1116

TGAGGTTCCAATCATCTCGACAGATGAGCAAAGTGATTCTTGGCTATTAATGTACTTGGGTTCCAACAAT  
TTTAGTGGACCAATACCATTGATTTCAACAAATGTAAGAGAGCTAGATCT

>PGSC0003DMG400014740-(rev)LRR-RLPs\_124

TTGACAAATACCAAGTTTGTGTTTGTGTAGGGATTTGCAGAGACAATGAGCAACAAGCGTTGGAGACC  
TTGAAGAAAGAAGTATATGATCCCTCGAATCGTCTCGCTTCTTGGGTAGTC

>PGSC0003DMG400014740-(rev)LRR-RLPs\_1426

TCTATGGAGGTTTTGAGTAATTTGCGATCATTAGACTTACGAAGAAATAGACTTAACGGTCCGTTTCCTT  
CATCCTTGGAAAACCTCACAAAACCTGCATAAAAATAGATTTAGCTGAGAAT

>PGSC0003DMG400014740-(rev)LRR-RLPs\_1550

TTTTTGGAAAATTACCATCTTGGTTGGGAATGAGGTTTCCAACCTTAATAGTTCTTATCCTTCGGTCCAAT  
AAATTTGATGGTGAATTGCCTAAAGAACTATGTCACCTCAAAGATCTTC

>PGSC0003DMG400014740-(rev)LRR-RLPs\_1674

CTTAGACCTTGCAAACAATACATTTGTTGGAATCATACCAAGGTGTATTGGCAATTTGAGTGCGATGGTC  
AAAGTAAAAAAGAAAGTACTGGAAGATGATTTGAGTTAAATTATTCCTC

>PGSC0003DMG400014740-(rev)LRR-RLPs\_1736

CGATGGTCAAAGTAAAAAAGAAAGTACTGGAAGATGATTTGAGTTAAATTATTCCTCTCGTTATGGAA  
CTTTGATAGAGAGTGCAATGGTGATGACTAAAGGCAACATGTACCAGTATG

>PGSC0003DMG400014740-(rev)LRR-RLPs\_1798

TATGGAACCTTTGATAGAGAGTGCAATGGTGATGACTAAAGGCAACATGTACCAGTATGATACAATTTTG  
GTGTTGTTTACAAGTTTGGATATGTCTAGCAATAATCTTTCTGGAGATATT

>PGSC0003DMG400014740-(rev)LRR-RLPs\_1922

TAAGTGTAACACGTCTTGCAGGATTAAGATCATTTAATCTTTCAAAAAATAATCTGATTGGTAGGATTCC  
AAATGACATTGGTGATATGAAAGTCTTGGAACTCTGTTGATCTTTCAGAAA

>PGSC0003DMG400014740-(rev)LRR-RLPs\_1984

AGGATTCCAAATGACATTGGTGATATGAAAGTCTTGGAACTCTGTTGATCTTTCAGAAAATCAACTTTATG  
GTCAAATCCCACAAAGCTTTTCAAGTTTGACCACTTTGGACTGCTTGAAT

>PGSC0003DMG400014740-(rev)LRR-RLPs\_2046

ACTTTATGGTCAAATCCCACAAAGCTTTTCAAGTTTGACCACTTTGGACTGCTTGAATCTATCTGATAACA  
ATTTGTCAGGTATGATACCATTGAGCACTCAACTTCAAAGCTTTGATCC



>PGSC0003DMG400014740-(rev)LRR-RLPs\_2108

CTGATAACAATTTGTCAGGTATGATACCATTGAGCACTCAACTTCAAAGCTTTGATCCCACGAGTTTTCAA  
GGAAGTAAACTTTGCGGGCTCCCACTCTTGGTGAAGTGCAGTTCGAATG

>PGSC0003DMG400014740-(rev)LRR-RLPs\_2170

AGTTTTCAAGGAAGTAAACTTTGCGGGCTCCCACTCTTGGTGAAGTGCAGTTCGAATGGTAATGTTCCAA  
ATCACGAATATGAAGATGAGGAGAGTGACAAAGATGAAGTGGATTGGTTT

>PGSC0003DMG400014740-(rev)LRR-RLPs\_2294

TTTCAATGGCTATAGGATTTGCACTAAGCTTTTGGGGTGTGGTTCATTGCTTTTCAAGAGATCATG  
GAGATATGCTTATTTTCGTTTTCTAGACCATGGCTGGGAAATGTTGCTTG

>PGSC0003DMG400014740-(rev)LRR-RLPs\_2356

AGATCATGGAGATATGCTTATTTTCGTTTTCTAGACCATGGCTGGGAAATGTTGCTTGCAAAGTTACCAG  
TATGTTGAGAGATATGATTAAGGATATTGCTATCATCAAAGTTAGTTTG

>PGSC0003DMG400014740-(rev)LRR-RLPs\_2418

GTTACCAGTATGTTGAGAGATATGATTAAGGATATTGCTATCATCAAAGTTAGTTTGTGTGCTTACATTT  
CTCATGTTAGAAATCATGTTGTTTCATTTTGTATTCAAATATGTAGACT

>PGSC0003DMG400014740-(rev)LRR-RLPs\_2453

TGCTATCATCAAAGTTAGTTTGTGTGCTTACATTTCTCATGTTAGAAATCATGTTGTTTCATTTTGTATTC  
AAATATGTAGACTTTTATGTCTTAATAACTTCCTCAAATGAATGTTTC

>PGSC0003DMG400014740-(rev)LRR-RLPs\_248

AAGATTGTTGTGAATGGGAAGGGTTCGTGTGCAACAATCTCACTCGTCATGTGATTGAGCTAAGCATTT  
ATAGTGATCAGATCGAGTCGAGATATCTAAGGATCAATAGCCTAGAGTGGT

>PGSC0003DMG400014740-(rev)LRR-RLPs\_310

AGCATTTATAGTGATCAGATCGAGTCGAGATATCTAAGGATCAATAGCCTAGAGTGGTTGACAAGTCTT  
TCGAGTCTTGAGAACCTAGAAATGTATAATGTGGATCTTAGCAAAGCTAAT

>PGSC0003DMG400014740-(rev)LRR-RLPs\_372

AAGTCTTTCGAGTCTTGAGAACCTAGAAATGTATAATGTGGATCTTAGCAAAGCTAATGAATGGCTACA  
AGTTATTAACATGCTTCCTTCTTGTGTTTATCTTCGTCTATACAAATGTAG

>PGSC0003DMG400014740-(rev)LRR-RLPs\_434

GGCTACAAGTTATTAACATGCTTCCTTCTTGTGTTTATCTTCGTCTATACAAATGTAGTCTTCAAGTCTTG

AGCTCCGTTATGGTGGCATTGAAGGTGCGATACAGAGTAAGAGTGGAA

>PGSC0003DMG400014740-(rev)LRR-RLPs\_496

TCAAGTCTTGAGCTCCGTTATGGTGGCATTGAAGGTGCGATACAGAGTAAGAGTGGAAACATAACAAA  
ACTTAAACATCTTGATCTTTCTAGCAATAACCTTAACTCCACTATACCAAAT

>PGSC0003DMG400014740-(rev)LRR-RLPs\_558

AACAAAACCTTAAACATCTTGATCTTTCTAGCAATAACCTTAACTCCACTATACCAAATTGGCTCTATCAAT  
GTAAAGATCTAGAATCACTTTTCTTGATCAAATCGTCTTGAGGGAAC

>PGSC0003DMG400014740-(rev)LRR-RLPs\_620

TCTATCAATGTAAAGATCTAGAATCACTTTTCTTGATCAAATCGTCTTGAGGGAACAGTTTCAAGTCTG  
ATTTCAAATTTGAGCTCAATAATTAGTATTGACCTTTTTGATAATATGC

>PGSC0003DMG400014740-(rev)LRR-RLPs\_682

TCAAGTCTGATTTCAAATTTGAGCTCAATAATTAGTATTGACCTTTTTGATAATATGCTTTCCGGAAAGTT  
ACCAAATGTAATTGGAAAGTTAGGGAAATTAGGATCGCTTGAACCTCA

>PGSC0003DMG400014740-(rev)LRR-RLPs\_744

CGGAAAGTTACCAAATGTAATTGGAAAGTTAGGGAAATTAGGATCGCTTGAACCTCTCAGTAAATCAATT  
TGAGGGAGATATATCTGAATTATTCAATTTTATGAGTAATTTCTTTCCAT

>PGSC0003DMG400014740-(rev)LRR-RLPs\_806

ATCAATTTGAGGGAGATATATCTGAATTATTCAATTTTATGAGTAATTTCTTTCCATAGAATTTGGAAAT  
AGTTCTTCTTAACTGTGTTGAGTCTAGACAATAATAAACTCACAGGAG

>PGSC0003DMG400014740-(rev)LRR-RLPs\_868

TTTGGAAATAGTTCTTCTTAACTGTGTTGAGTCTAGACAATAATAAACTCACAGGAGCTGTTCCGGAAA  
GTGTTGGCCATCTTTCAATGCTACAAGGCCCTTTGTTTCCCACGTGGCTC

>PGSC0003DMG400014740-(rev)LRR-RLPs\_930

TCCGGAAAGTGTTGGCCATCTTTCAATGCTACAAGGCCCTTTGTTTCCCACGTGGCTCAGAACTCAAAAA  
AAGATATTGAATGTCGACATATCAGATGGTGAATACAAGGTGAGGTTCC

>PGSC0003DMG400014740-(rev)LRR-RLPs\_992

CTCAAAAAAAGATATTGAATGTCGACATATCAGATGGTGAATACAAGGTGAGGTTCCAACCTGGTTTT  
GGAAATTGTCTCCTCAAATTCGATTACTCAATCTTTCTACAACCAATTTG

>PGSC0003DMG400014753-(rev)LRR-RLPs\_1054

GTTTGAGGGAGATATATCTGAATTATTCAATGTTAGGAGTAATTCCTTTCAGTGGGATTGCGAAATACT  
TCTTCTTTATATACTTTGAGACTAGGCTGGAATAAACTCACAGGAGCTCT

>PGSC0003DMG400014753-(rev)LRR-RLPs\_1116

GAAATACTTCTTCTTTATATACTTTGAGACTAGGCTGGAATAAACTCACAGGAGCTCTCCGAAAAGTGT  
GGGCCAATTTTCAATGCTAGAATACATTTCCATCTCTAACAATAGGTTGG

>PGSC0003DMG400014753-(rev)LRR-RLPs\_1178

AAAAGTGTGGGCCAATTTTCAATGCTAGAATACATTTCCATCTCTAACAATAGGTTGGAAGGTGTTGTAA  
CAGAAAGTCATTTCTCTAAATTAACACATTTACAATCCTTCTCTGCATCT

>PGSC0003DMG400014753-(rev)LRR-RLPs\_124

TGTTTCTGTAGGGATTTGTAGAGAAAACGAGCAACGAGCGTTGGAGACCTTGAAGAAAGAAGTATATG  
ATCCCTCGAATATTCTCTCCTCTTGGGTTGTCGGGAAAGATTGTTGTGAATG

>PGSC0003DMG400014753-(rev)LRR-RLPs\_1240

TGTTGTAACAGAAAGTCATTTCTCTAAATTAACACATTTACAATCCTTCTCTGCATCTAGAAATAATCTGA  
CTTTAAAAGTGAGTCGGACTTGGATTCCACCTTTTCAAGCCTTTGAAAT

>PGSC0003DMG400014753-(rev)LRR-RLPs\_1302

ATAATCTGACTTTAAAAGTGAGTCGGACTTGGATTCCACCTTTTCAAGCCTTTGAAATTGAAATAGGCAG  
CTGGAATATAGGCCTTTCGTTTCCCATGTGGCTCCAAACTCAGAACCAGA

>PGSC0003DMG400014753-(rev)LRR-RLPs\_1488

CTTCTCAAATTCGATTACTCAATCTTCTCATAACCACTTTGTTGGTGAGGTTCCATTCATCTCGACAGATA  
ATGAGCAGAGTGATTATCCGCCATTAATAAACTTGTCTTCCAACAATT

>PGSC0003DMG400014753-(rev)LRR-RLPs\_1550

TCGACAGATAATGAGCAGAGTGATTATCCGCCATTAATAAACTTGTCTTCCAACAATTTTAGTGGACCAA  
TACCATTGATTTCAACCAATGTAAGAGAGCTAGATCTCTCCAACAATTCT

>PGSC0003DMG400014753-(rev)LRR-RLPs\_1612

TGGACCAATACCATTGATTTCAACCAATGTAAGAGAGCTAGATCTCTCCAACAATTCTTTTCCAAGGTT  
TATCTAACTTTTTATGTGAAGCAAAGAATGGATCTTACAAATTGAGAAT

>PGSC0003DMG400014753-(rev)LRR-RLPs\_1674

CAAAGGTTTATCTAACTTTTTATGTGAAGCAAAGAATGGATCTTACAAATTGAGAATCTTAAACCTCGG  
GGGAAATGATTTATCAGAAGAGATTCTGATTGTTGGATGAATTGCCTG

>PGSC0003DMG400014753-(rev)LRR-RLPs\_186

TATATGATCCCTCGAATATTCTCTCTCTTGGGTTGTCGGGAAAGATTGTTGTGAATGGGAAGGGGTCGT  
GTGCAACAATCTCACTCATCATGTGATTGATCTAAGCATTCTATTGATT

>PGSC0003DMG400014753-(rev)LRR-RLPs\_1860

TGAGTAATTTGCTATCATTAGACTTGCGAAGAAATAGACTTAACGGTCCGTTTCCTTCATCCTTGAAAA  
CTGCACAAAAGTGTATAAAATAGATTTAGCTGAGAATGAGTTTATCGGAA

>PGSC0003DMG400014753-(rev)LRR-RLPs\_1922

TTGGAAAAGTGCACAAAAGTGTATAAAATAGATTTAGCTGAGAATGAGTTTATCGGAAAATTACCATCTT  
GGTTGGGAATGAAGTTTCCAACCTTGATAGTCCTTATCCTTCGGTCCAAT

>PGSC0003DMG400014753-(rev)LRR-RLPs\_1984

ACCATCTTGTTGGGAATGAAGTTTCCAACCTTGATAGTCCTTATCCTTCGGTCCAATAAATTCAATGGTG  
AATTGCCTCAAGAACTTTGTCACCTCAAAGATCTTCAGATTTTAGACCT

>PGSC0003DMG400014753-(rev)LRR-RLPs\_2108

AACAATACATTTGTTGGAATCATACCAAGGTGATTGGCAATTTGAGTGCGATGGTCAAAGTACTAGAA  
GATGATTTGAGTTAAATTATCCTCTTATTTTGGAACTTTGATAGAGAGT

>PGSC0003DMG400014753-(rev)LRR-RLPs\_2170

ACTAGAAGATGATTTGAGTTAAATTATCCTCTTATTTTGGAACTTTGATAGAGAGTGCAATAGTGACG  
ACTAAAGGAAACATGTACCAGTATGACACAATTTTGGCGTTGTTTACAAG

>PGSC0003DMG400014753-(rev)LRR-RLPs\_2294

GATATGTCTAGCAATAATCTTTCTGGAGATATTCCTATAAGTGTAACACGTCTTGCAGGATTAAGATCATT  
TAATCTTTCCAAAATAACCTAACTGGTAAGATTCCAAATGACATTGGT

>PGSC0003DMG400014753-(rev)LRR-RLPs\_2418

TGAAAGTCTTGAATCTGTTGATCTTTCAGAAAATCAACTTTATGGTCAAATCCCACAAAGCTTTTCGAGT  
TTGACCACTTTGGGCTACTTGAATCTATCAGATAACAATTTGTCAGGTA

>PGSC0003DMG400014753-(rev)LRR-RLPs\_248

GGGGTCGTGTGCAACAATCTCACTCATCATGTGATTGATCTAAGCATTCTATTGATTGGCCTTATTCGAG  
ATATCTAAGGATCAATAACCTAGAGTGGTTGACAAGTCTTTCGAGTCTT

>PGSC0003DMG400014753-(rev)LRR-RLPs\_2480

TTTTCGAGTTTGACCACTTTGGGCTACTTGAATCTATCAGATAACAATTTGTCAGGTATGATACCATTGAG

CACTCAACTTCAAAGCTTCAATTCCACGAGTTTTCAAGGAAACAAACTC

>PGSC0003DMG400014753-(rev)LRR-RLPs\_2542

ACCATTGAGCACTCAACTTCAAAGCTTCAATTCCACGAGTTTTCAAGGAAACAAACTCTGCGGAGTTCCA  
CTCTTGGTGAAGTGCAGTTCAGATGACAATATTCCAAATCACGAATATGA

>PGSC0003DMG400014753-(rev)LRR-RLPs\_2604

GAGTCCACTCTTGGTGAAGTGCAGTTCAGATGACAATATTCCAAATCACGAATATGAAGTTGATGAGA  
GTGACAAAGATGAAGTGGATTGGTTTTACATTTCAATGTCTATTGGATTG

>PGSC0003DMG400014753-(rev)LRR-RLPs\_2728

AAGCTTTTGGGGTGTGGTTCATTGCTTTTCAAGAGATCATGGAGACATGCTTATTTTCGTTTTCTAG  
ATCGTAGCTGGGAAATGTTACTTCCAAAGTTACCACTATGTTGAGAGAT

>PGSC0003DMG400014753-(rev)LRR-RLPs\_2790

GTTTTCTAGATCGTAGCTGGGAAATGTTACTTCCAAAGTTACCACTATGTTGAGAGATATGACTTAGGAT  
ATTTCTATCATCAAAGTTAGTGTGTCAGTGTGCTTACATTTCTCATGTT

>PGSC0003DMG400014753-(rev)LRR-RLPs\_2852

CTTAGGATATTTCTATCATCAAAGTTAGTGTGTCAGTGTGCTTACATTTCTCATGTTAGCAGTCATGTTG  
TTTCATTTGTATTCAAATATGTAGACTTTTATGTTTTAATAACTTCCT

>PGSC0003DMG400014753-(rev)LRR-RLPs\_2896

ACATTTCTCATGTTAGCAGTCATGTTGTTTCATTTTGTATTCAAATATGTAGACTTTTATGTTTTAATAACT  
TCCTCAAATGAATGTTTCTTAAGATGTTCAAACAATGTTGTTTCTTTC

>PGSC0003DMG400014753-(rev)LRR-RLPs\_310

TTATTCGAGATATCTAAGGATCAATAACCTAGAGTGGTTGACAAGTCTTTCGAGTCTTGAGAACCTAGAA  
ATGGAGAGCGTTGATCTTAGCAAAGCTAATGAATGGCTACAGGTTATTAA

>PGSC0003DMG400014753-(rev)LRR-RLPs\_372

ACCTAGAAATGGAGAGCGTTGATCTTAGCAAAGCTAATGAATGGCTACAGGTTATTAACATGCTTCCTTC  
TCTTGTTGATCTTCGTTTATAACAATTGTAGTCTTCATCATATAACACCTC

>PGSC0003DMG400014753-(rev)LRR-RLPs\_434

CTTCCTTCTTGTGATCTTCGTTTATAACAATTGTAGTCTTCATCATATAACACCTCTACTTGATCATAAAA  
AAATTTCTTCACTCAAATCTCTCGATCTTCTGGGAATTACAACCTT

>PGSC0003DMG400014753-(rev)LRR-RLPs\_496

TGATCATAAAAAAATTTCTTCACTCAAATCTCTCGATCTTTCTGGGAATTACAACCTTAATTCATCTGTTCC  
AAAATGGGTTTTCAACCTCCCAATCTTGTCTCTTGACCTGAGTGA

>PGSC0003DMG400014753-(rev)LRR-RLPs\_62

AAAGTGTTAGCAATAACACTATGGGTTCTCTGTTTTTATTTTGACAAATACCAAGTTTGTTGTTTCTGTA  
GGGATTTGTAGAGAAAACGAGCAACGAGCGTTGGAGACCTTGAAGAAA

>PGSC0003DMG400014753-(rev)LRR-RLPs\_620

AATTTTACTGGCCGTTTCTGACGGTCCAGTTAACTTGACTTCTCTCACAACTTCATGGCTTCTAGAAA  
CTCTTTCAACTGTCGTTTACCTAAATGGTTGTTTGATTTGAATAATCTT

>PGSC0003DMG400014753-(rev)LRR-RLPs\_682

TTCTAGAAACTCTTTCAACTGTCGTTTACCTAAATGGTTGTTTGATTTGAATAATCTTGAACATGTTGTGCT  
CTATCGTAGTGGCATTGAAGGTGCGATACAGAGTAAGAGCGGAAACAT

>PGSC0003DMG400014753-(rev)LRR-RLPs\_744

ATGTTGTGCTCTATCGTAGTGGCATTGAAGGTGCGATACAGAGTAAGAGCGGAAACATAACAAAACCTTA  
AATATCTCGAAATTTCTTACAATAACCTCATCTCCACTATACCAAATTGGC

>PGSC0003DMG400014753-(rev)LRR-RLPs\_806

AAACTTAAATATCTCGAAATTTCTTACAATAACCTCATCTCCACTATACCAAATTGGCTCTATGGATGCAA  
AGATCTAGAATCACTTGCCTTGGTGGAAATCATCTTGAGGGAACAGTT

>PGSC0003DMG400014753-(rev)LRR-RLPs\_868

TGGATGCAAAGATCTAGAATCACTTGCCTTGGTGGAAATCATCTTGAGGGAACAGTTTCAAGTCTGATT  
TCAAATTTGAGCTCAATAATTAATATTGACCTTTCTAATAATATGCTTTC

>PGSC0003DMG400014753-(rev)LRR-RLPs\_930

GTCTGATTTCAAATTTGAGCTCAATAATTAATATTGACCTTTCTAATAATATGCTTTCTGGAAAGTTACCA  
AATGTAATTGGAAAGTTAGGGAAATTAGGATCGCTTGACTTCTCAGGAA

>PGSC0003DMG400014753-(rev)LRR-RLPs\_992

AAGTTACCAAATGTAATTGGAAAGTTAGGGAAATTAGGATCGCTTGACTTCTCAGGAAATCTGTTTGAG  
GGAGATATATCTGAATTATTCAATGTTAGGAGTAATTTCTTTTCAGTGGGA

>PGSC0003DMG400014829LRR-RLPs\_0

CAAATATCGAAATTTTCTTAACTACTTTGCACGAAAAACAAAGGGAGTAGAAAGAGGAGGAAGAAA  
TAGTATTCGTAGATTACATCTGAGCTTGACAACAAATTATGCAAGATTTTGA

>PGSC0003DMG400014829LRR-RLPs\_1403

CGTTTACTTTGCTTGCTGTTGCTGGAAAATTCGTGCTGGATTAGCATTGTTATGCATTTGACATACAT  
GAACTTATTGTGTTTAGGTTTTATGACCTTGAAATGTAGTTCCTTATTT

>PGSC0003DMG400014829LRR-RLPs\_1525

GTTAAAAATGACTTTTTAGTGTTGCTGTAACCCCATCCCCGCCCTCGTGTATAGTAGACGACCAAAT  
GAAAGGATAGTTTGCTTGAATAGTGCATTTTATTTGGTCATAGTATAC

>PGSC0003DMG400014829LRR-RLPs\_1586

CGACCAAATGAAAGGATAGTTTGCTTGAATAGTGCATTTTATTTGGTCATAGTATACCCTTTGATCTTA  
TCTTCTTGGTAAAAGGATAAGTGTGATAGATTTCCCTTAGCTATTTGTGT

>PGSC0003DMG400014829LRR-RLPs\_1647

TTTGATCTTATCTTCTTGGTAAAAGGATAAGTGTGATAGATTTCCCTTAGCTATTTGTGTTGGGGATAGATT  
GTTTTTTAAGGCCAGTTTGTAGATGCATTTGTAATCATGCACCCTCTT

>PGSC0003DMG400014829LRR-RLPs\_1769

TGTTTCAGTTATTAATGTTAAAATAGCCTTACCGTTTCTCAAAGAGTATACGCTTCCATCTTGCGTAGAG  
AAAACACATAATGTTTCATGGCATGACAATTATGTTTCAATTCATTATTG

>PGSC0003DMG400014829LRR-RLPs\_1952

ATACACTGAACTTGCTTCAGTTCTGACTGGCAATTTGGCATCATATTTGTTTTGCATTCACCTGGAGCAG  
CAATAAAGTAACTGTCTCCGTGTGACCTATAGGTCACCTGATTCGAGCCG

>PGSC0003DMG400014829LRR-RLPs\_2074

GAAGTAGCCACTAATGCTTGCATTAGGAGGGTAGGTTGTCTACATCACACCCTTGTGTGAACAATGGA  
TACTTTGTGCACCAGGCTGCCCTTTTGTTCACCTGAATAAAGGGCCTGT

>PGSC0003DMG400014829LRR-RLPs\_2135

ACAATGGATACTTTGTGCACCAGGCTGCCCTTTTGTTCACCTGAATAAAGGGCCTGTAATTAATAAAA  
TAACATTATGTGAGGAATTTGGGTTTACAGCTTCATTTTGGTGTTATTT

>PGSC0003DMG400014829LRR-RLPs\_2196

TAACTAAATAACATTATGTGAGGAATTTGGGTTTACAGCTTCATTTTGGTGTTATTTTCAACAGGAGA  
GTGAAGTCTATTTGCCTAGAAAGCTGTTCACTGCTCACAACCTGAAGGCCT

>PGSC0003DMG400014829LRR-RLPs\_2867

AGTTAGTGTATAGAGCTCGATGCTGTAACCTCATGAGCATTAGCTAAAGCCATCTCGCTGTATCTTTGT

CAAGCTTAATGGTATGTATTTCTGTATTGGAACCCCAAAAACCTCTTAAAA

>PGSC0003DMG400014829LRR-RLPs\_2928

TATCTTTGTCAAGCTTAATGGTATGTATTTCTGTATTGGAACCCCAAAAACCTCTTAAAAGGGGTTTTCTTA

TCTACAATGTTATAAAGAATTTTGGCACCTTTTATGCCATGACTACTGC

>PGSC0003DMG400014829LRR-RLPs\_3037

ATGACTACTGCCTTCCACAATTGTGTGAAAGCATATTTGATATGAACCATACCAGCAAGCATGTCATTG

TGGAGGAGACGAGAACCAGAATAATTTTCTACATCAATGGCATCTATGTC

>PGSC0003DMG400014875-(rev)RLKmalectin\_2480

CAGAATTGAGGATCGATGAAACCAGATGATTTGTGGCCTCGTTGTTGTTAGCATTCCATCTTATTCTACTT

CATTCTGTCTAATGTAATTGTGTATCAAAACAGTGTGTAATAGTCAGTG

>PGSC0003DMG400014875-(rev)RLKmalectin\_2542

ATTCTACTTCATTCTGTCTAATGTAATTGTGTATCAAAACAGTGTGTAATAGTCAGTGTTCCAGCTTTAATTT

CTGCATTGGATAATAGGCAAATGCCTCTTGACAATGCATCTGTATTGA

>PGSC0003DMG400014875-(rev)RLKmalectin\_2585

GTGTAATAGTCAGTGTTCCAGCTTTAATTTCTGCATTGGATAATAGGCAAATGCCTCTTGACAATGCATCT

GTATTGATAGTATATAATATTCATAATAAAGTCTCGTGTCTATTCTCCCA

>PGSC0003DMG400014875-(rev)RLKmalectin\_682

GTTGGGGTTCTAATATTACCGACGATACGGATACCATGAGGAGAAAATGGGTAGCTGATGATGATTAC

TTACTTATCAAAAGATTTGCTAAGAACCCTCCAATGTATAGTGGTAGTCTT

>PGSC0003DMG400014875-(rev)RLKmalectin\_744

TGATTACTTACTTATCAAAAGATTTGCTAAGAACCCTCCAATGTATAGTGGTAGTCTTAACTATGATCAAG

TAAGAGGGGCTACTCCGTATGATGCTCCTGATTTGGTTTATAAAAACCTGC

>PGSC0003DMG400014875-(rev)RLKmalectin\_806

ATGATCAAGTAAGAGGGGCTACTCCGTATGATGCTCCTGATTTGGTTTATAAAAACCTGCCAAAGAAATGA

ATAGTAATCATACTGAGACTCAAAGTAACATAACTTGGCGTTTAGAGGTGA

>PGSC0003DMG400014875-(rev)RLKmalectin\_868

GAAATGAATAGTAATCATACTGAGACTCAAAGTAACATAACTTGGCGTTTAGAGGTGAAAAGGAATGCT

ACATTTTTTGTACGTCTACACTTTTGTGACATTGTTAGTGTTCAGCGGAAT

>PGSC0003DMG400014917LRR-RLKs\_1984



ATTGAATGTGTCCCATGTGCTTGAATCCTTGAGTGAAGGATGAGTTTTGTTTGC GACTTGATAATGTGT  
AGGATTTTTGCCTAATTGTATCAGCTGATAGGATAGTCTTTATTATGTAT

>PGSC0003DMG400014917LRR-RLKs\_2046

TAATGTGTAGGATTTTTGCCTAATTGTATCAGCTGATAGGATAGTCTTTATTATGTATCATAGATGAAAA  
GTTATCTGCATAAAGGGTAAACCAACAACCTAACATTTTCCATCCATTC

>PGSC0003DMG400014917LRR-RLKs\_2170

GATGTTAAAGCACATCGTAGTATATTAACCTATAATGATCCAGCCCAAGTCAATTTGCAGACTTTAACGA  
TTTACTGCCGATGCAATAATCATATGTTGACAGCATATCGAACCTGGTAG

>PGSC0003DMG400014917LRR-RLKs\_2480

TGTCTCTCAAAAAAGTCTAGATATTACATCGTTTTATTATGTCTTTTAGAGATGTATTACCTGATTTGCATA  
TACTAATATTCAAGAATTTGCGAATCGCTCCGCCTGGTGCAGTTTGAC

>PGSC0003DMG400014917LRR-RLKs\_2976

TAATTTACCTGTTTTTAAATTATGTAGCTGGAATTTGACAGTACAGTAACTTACCTTTTGCATTCTGAAGA  
AGTTGAGGAGTGTTTTGTTTCTGCATCTTTTTTCCAAATTGTTTTGCC

>PGSC0003DMG400015081LRR-RLKs\_0

ACACAACAAGTTGCAAGGATCTATACCTGACTCAATGAGCAACATGATAGGTTTGAATACCTAGACATT  
TCTCATAATAATATATCAGGAACCATTCCTATGTCTTTGGAGAACTTCA

>PGSC0003DMG400015081LRR-RLKs\_1024

TTATTCTTTTTTTTCCAATCAAGAAAGTATATTGCATCTTTTAATTAATTGTTTGACTGTAGAGTATGGACT  
GGATGGACTGGTGTCAATAAAATGTGATGTCTATAGTTACGGGATTAT

>PGSC0003DMG400015081LRR-RLKs\_1152

AAACATTTACTAGGAGAAAGCCTAGTGATTTTGAGGGAGATCTTAGCTTGAAGCAATGGGTGAGTTATT  
CACTCCCAAAGGCAGTACTGAACGTTATGGATGCCAACTTGGTTACACCAA

>PGSC0003DMG400015081LRR-RLKs\_1216

TTATTCACTCCCAAAGGCAGTACTGAACGTTATGGATGCCAACTTGGTTACACCAATGGATAATCGCTTA  
CAGAAGGAGTTAGATATCGTGGCATCAATCATGAAAGTAGCATTAGATTG

>PGSC0003DMG400015081LRR-RLKs\_1395

AGATCAAGATTCAACTTCTTGCATGCTGAGCATGTTCTCTGAATCTCTTGTCCGAATTGATCACTTTTTTG  
TTTTGTTTTAGCACTTGATTTGTGCATGATTCTGTTTTTCAGAAATGCT

>PGSC0003DMG400015081LRR-RLKs\_192

CCTCTCGAGTCAATTTTTATCAACAATGAAGCATTGTGTGGTTGGTCAAGGTTAATGTCCGGCCATGC  
CCCACCTCATCAACGCATAGATCAAATAGGAAAAAATTGCTAGTTCTATT

>PGSC0003DMG400015081LRR-RLKs\_256

CCATGCCCCACCTCATCAACGCATAGATCAAATAGGAAAAAATTGCTAGTTCTATTTCTTTTGCTAGGAAT  
AGCACTTTTATGTGCTCCTACTACCCTTGTGTTTGTATGGATAAGGTAT

>PGSC0003DMG400015081LRR-RLKs\_320

TAGGAATAGCACTTTTATGTGCTCCTACTACCCTTGTGTTTGTATGGATAAGGTATAGAAGAGGTAAAAG  
ATCTCCTCAACGAGCTGATTCATTGTCTATCACAACAACGGAAAGAATTT

>PGSC0003DMG400015081LRR-RLKs\_384

TAAAAGATCTCCTCAACGAGCTGATTCATTGTCTATCACAACAACGGAAAGAATTTACTACTATGAACCTG  
CTCCAAGCAACTGATTCTTAGCGAGAGTAATCTGATTGGTTCTGGAAG

>PGSC0003DMG400015081LRR-RLKs\_64

GACATTTCTCATAATAATATATCAGGAACCATTCTATGTCTTTGGAGAACTTCAAACCTTGAAGTATTT  
CAATGTTTCCGTCAACAAGTTGCACGGTGAAATACCCTCAGAGGGTCCT

>PGSC0003DMG400015081LRR-RLKs\_640

CTTGTGAAAGTCATCACCAGTTGTCCAACCTTGATTTTAAGGCTTTAGTGCTCGAGTATATGCCTAATGG  
AAGTCTTGATAAGTATTTGTATTCCCACAACCTACTTCCTAGACATCAGA

>PGSC0003DMG400015081LRR-RLKs\_704

CTAATGGAAGTCTTGATAAGTATTTGTATTCCCACAACCTACTTCCTAGACATCAGACAGAGACTAAGCAT  
TATGATAGATGTGGCATGTGCGTTGGAATATCTCCATGATGGTTGCTCCT

>PGSC0003DMG400015081LRR-RLKs\_768

AAGCATTATGATAGATGTGGCATGTGCGTTGGAATATCTCCATGATGGTTGCTCCTCTCCGGTGATTCAT  
TGTGATCTGAAGCCTAGTAACGTCTTGCTGGACGAGGATATGGTTGCCCA

>PGSC0003DMG400015081LRR-RLKs\_896

ACTTTGGTATTTCAAACCTGCTTGGTGAAGATGAGACTGATTTATACACTAAAACCTTAGCAACATTTGG  
TTATATAGCACCGGGTACGTCTCTTTGTTTTTGCTAATTTGAACATTGAT

>PGSC0003DMG400015081LRR-RLKs\_960

ATTTGGTTATATAGCACCGGGTACGTCTCTTTGTTTTTGCTAATTTGAACATTGATTTTCTTCTTATTCTTT

TTTTCCAATCAAGAAAGTATATTGCATCTTTTAATTAATTGTTTGA

>PGSC0003DMG400015121-(rev)LRR-RLPs\_0

TGGAAATCAAAACCATTTAATGTTTTGCATGATTGATGTGATACGTTTGCACCTTGCAGTGAACACTTGA

GAAAAGTGATATCGTAAAGACTTGGGCAAATACCAATTGTTCCGGTCAACT

>PGSC0003DMG400015121-(rev)LRR-RLPs\_1054

GTTTTGTCCATATCTTACAACAATATAACTGGAGACATACCCAGAAATATTGGTTGTTTATTCCAAACTC

GAGGAGTTTTATATTGGTGATAACCTAATAAAAGGGACTATTCCCCTT

>PGSC0003DMG400015121-(rev)LRR-RLPs\_1116

TCCAAACTCGAGGAGTTTTATATTGGTGATAACCTAATAAAAGGGACTATTCCCCTTCATTGGGAAATA

TTTCCACTCTGCATAATCTTCACTGTGAAACAATCAGATAGTAGGGGGG

>PGSC0003DMG400015121-(rev)LRR-RLPs\_1178

GGGAAATATTTCCACTCTGCATAATCTTCACTGTGAAACAATCAGATAGTAGGGGGGATTCTCCGGA

ATTAGGGAAGCTATCAAATTTGAGGGAATTAAGCTTTGACAATAATTCTAA

>PGSC0003DMG400015121-(rev)LRR-RLPs\_124

AACATAAGTATTGCTATATAGTAATACATTTGAAAAGCAAATCAAGCTTAGAATCAATAGTAACAGCATG

AAGAAGAACATTATCTTATTGATTCTTCTTTCTAATTCAATTTTCTTT

>PGSC0003DMG400015121-(rev)LRR-RLPs\_1302

ATTGGTCAAATTCAGAGGCTATTTTCAACATATCTTCTTTGGAAGTGATTGGTTTCAGTTTCAATAACCT

CTCCGGGAGAATTCCAACCACTACAGGTCTTCATCTTCCCAATCTTGAA

>PGSC0003DMG400015121-(rev)LRR-RLPs\_1364

CAATAACCTCTCCGGGAGAATTCCAACCACTACAGGTCTTCATCTTCCCAATCTTGAAGGACTTTACTTGG

GAGCAAATCAGTTCAAAGGGGAAATTCCATTGTTTATAACAAATGCTTC

>PGSC0003DMG400015121-(rev)LRR-RLPs\_1488

CTTCAGATACTGGAGCTAAATAATAACTTTCTGACAGGAACTATTCCTAATAATTTGGGAAATCTGCGTG

AGCTGCGAGGACTGCTCCTATATAATAATCAACTTACCAATGAATTAAGA

>PGSC0003DMG400015121-(rev)LRR-RLPs\_1550

TCTGCGTGAGCTGCGAGGACTGCTCCTATATAATAATCAACTTACCAATGAATTAAGAGAGCGTGAGTT

GTTATTCTTCAATTCTTTGGCGGACTGTAGGATGTTGCAATATCTACAAGT

>PGSC0003DMG400015121-(rev)LRR-RLPs\_1612

GTGAGTTGTTATTCTTCAATTCTTTGGCGGACTGTAGGATGTTGCAATATCTACAAGTGGGTCCAATCC  
GTTAAATGGCGTCTTCCAATTCTATTGGAAATCTTTCATCTACTATTG

>PGSC0003DMG400015121-(rev)LRR-RLPs\_1674

TCCAATCCGTAAATGGCGTCTTCCAATTCTATTGGAAATCTTTCATCTACTATTGAAAACCTTTATATA  
GTAGATGCACACATCAATGGCCTCATCCCCAAAAGTATAGGCAACATG

>PGSC0003DMG400015121-(rev)LRR-RLPs\_1798

GTCTTACATCCCTAAGCCTTGACGGAAACAACCTTGACAGGGAGTATTCCTTCTGAGATTGGTAAGCTTAA  
ACAACCTCAAGGGCTGTATCTAGATAACAATAAATTGAAGGGACATATTC

>PGSC0003DMG400015121-(rev)LRR-RLPs\_186

ACAGCATGAAGAAGAACATTATCTTATTGATTCTTCTCTTTCTAATTCAATTTCTTTATCACTTTCTTCCTC  
AAATAAGACTGACCAACAAGCTCTACTAGCTTTCCAAAATCTTATTA

>PGSC0003DMG400015121-(rev)LRR-RLPs\_1860

AAGCTTAAACAACCTCAAGGGCTGTATCTAGATAACAATAAATTGAAGGGACATATTCAGAGGCCGTA  
TGCCATTTATCTAATTTGGTTCAATTATTTCTGAATGTTAATGAGCTCTCT

>PGSC0003DMG400015121-(rev)LRR-RLPs\_1922

GGCCGTATGCCATTTATCTAATTTGGTTCAATTATTTCTGAATGTTAATGAGCTCTCTGGATTAATTCCAG  
AATGCATAGGAAATCTTAGCATGCTACAATATCTTTATTTGGGTTCTAA

>PGSC0003DMG400015121-(rev)LRR-RLPs\_1984

TAATTCAGAATGCATAGGAAATCTTAGCATGCTACAATATCTTTATTTGGGTTCTAATAAATTTTCATCA  
AAATTTACGTTGAACCTTTGGAAGATGAGTGGTCTTCTCTATCTAGACG

>PGSC0003DMG400015121-(rev)LRR-RLPs\_2046

TTTTCATCAAATTTACGTTGAACCTTTGGAAGATGAGTGGTCTTCTCTATCTAGACGTATCACAGAATTC  
AATGGAGGGAGAAGTTCCATCAGATATTGGAGCACTGAAAGCCATTGTA

>PGSC0003DMG400015121-(rev)LRR-RLPs\_2108

ACAGAATTCAATGGAGGGAGAAGTTCCATCAGATATTGGAGCACTGAAAGCCATTGTAGAACTACATCT  
TTCCAGTAACCACTTTTCAGGAATGATTCCAAGCACATTCGGGGAACTCCA

>PGSC0003DMG400015121-(rev)LRR-RLPs\_2170

TACATCTTTCCAGTAACCACTTTTCAGGAATGATTCCAAGCACATTCGGGGAACTCCAAAACCTACAGTA  
TCTTGACCTGTGCAACAATTCATTTTTTGGCAAAATTCATTATCCTTTG

>PGSC0003DMG400015121-(rev)LRR-RLPs\_2232

CTACAGTATCTTGACCTGTGCAACAATTCATTTTTGGCAAATTCATTATCCTTTGCCAACTTGATAAGC  
TTAGAATACTTGGATTTGTCTTCAAATGACTTGTGAGGACTACTATTCCT

>PGSC0003DMG400015121-(rev)LRR-RLPs\_2294

CTTGATAAGCTTAGAATACTTGGATTTGTCTTCAAATGACTTGTGAGGACTACTATTCCTATGTCTTTGGAAA  
AACTCTCCTACCTTAAAAGCATTAAATGTTTCATTTAATGATTTAGAAGG

>PGSC0003DMG400015121-(rev)LRR-RLPs\_248

CTTTCTTCTCAAATAAGACTGACCAACAAGCTCTACTAGCTTCCAAAATCTTATTACAAGTCCTAATCAT  
TTTTTGGCCAATAATTGGACCAAAAATACTTCTTTTTGCTCTTGTTT

>PGSC0003DMG400015121-(rev)LRR-RLPs\_3224

GATACATTGCACCAGGTATAAAAAATCTACTCTCATTGATTTTCTTTTATCATAATTAAGCCTCACCAAGT  
GTAGAAGTAAAAATAGAATTATTGTTGTGTTTCAACTGAGTAAATTTT

>PGSC0003DMG400015121-(rev)LRR-RLPs\_3286

TCACCAAGTTGTAGAAGTAAAAATAGAATTATTGTTGTGTTTCAACTGAGTAAATTTTCTTCATTCCTTTTC  
TAAGAATATGGCTCGGAGGGAATAGTGTCTGCTAGTGGTGATGTTTAT

>PGSC0003DMG400015121-(rev)LRR-RLPs\_3472

GGAAATCTTGACTTGAGGAAATGGATTACACTATCATTTTCGGGGAGTATGATGGACGTTGTGGATGCC  
AATCTTTTTTCTGAGGAAGAACAAATCACTAGTAAAAGTGAAATCTGCATA

>PGSC0003DMG400015121-(rev)LRR-RLPs\_3720

TTCTTTGCTGAGCTGCAAATTAATATGATGCTGTTTGTTCCTTAATAAAGTTGTTGTATAGTACTACTGA  
AGTCTTTGAGTAGTTTTGGACCTATTTTACTCTATATATTTGTGATTA

>PGSC0003DMG400015121-(rev)LRR-RLPs\_3782

TACTACTTGAAGTCTTTGAGTAGTTTTGGACCTATTTTACTCTATATATTTGTGATTATGTTTTGAATGCTT  
GAAAGAAACCAGAAATAAAGGTGTTTAGCTGCACTATTTTGTTTTTTG

>PGSC0003DMG400015121-(rev)LRR-RLPs\_62

ACACTTGAGAAAAGTGATATCGTAAAGACTTGGGCAAATACCAATTGTTTCGGTCAACTCAACAACATAA  
GTATTGCTATATAGTAATACATTTGAAAAGCAAATCAAGCTTAGAATCAAT

>PGSC0003DMG400015121-(rev)LRR-RLPs\_682

AACTCAGAGTCTTAAATCTCAGGAATAATAGCCTCACCGGTATAATCCCTCCTTCTATTGGAAATGCCAC

AACATTGATGAACTTCAGTTTGTCTGGGAATAGAGTCAGCGGCAACATTC

>PGSC0003DMG400015121-(rev)LRR-RLPs\_806

GGAGGTCGTAATCTGAGCCAGCTTGCAATTTTTCTCTGTCCGATAATCAACTAACAGGTTCCATTCCCG  
CAACTGTTTAATATCTCGTCACTACTTGCCGTATCTGTGTTACACAA

>PGSC0003DMG400015121-(rev)LRR-RLPs\_868

CCATTCCCGCAACTGTTTAATATCTCGTCACTACTTGCCGTATCTGTGTTACACAATAGCCTTTCTGGTC  
CTCTGTTGCTAGATGAAGGCAATATTGTGTCAAATCTGTACTTTTTTA

>PGSC0003DMG400015121-(rev)LRR-RLPs\_930

CTTTCTGGTCCTCTGTTGCTAGATGAAGGCAATATTGTGTCAAATCTGTACTTTTTTAAGTATATCTCACA  
ACCAAATTTCTGGTTGCATTCCTTCCAACATATGCCAACTCACAGAGCT

>PGSC0003DMG400015157LRR-RLKs\_1612

GATTTTGGCCTTGCAAAGGCTGTCCAGATGCTCATAACATATTACAACCTCAAATGTGGCAGGAACTA  
TAGGATACATCGCTCCAGAATATCATCAGACACTGAAGTTCACTGATAAG

>PGSC0003DMG400015157LRR-RLKs\_1674

AGGAACTATAGGATACATCGCTCCAGAATATCATCAGACACTGAAGTTCACTGATAAGTGTGATATATAC  
AGCTTCGGGGTGCTGCTAGGCGTGCTAGTTATGGGAAAGCTTCCATCTGA

>PGSC0003DMG400015157LRR-RLKs\_186

TACTCACCTGATCACAGTGCTCTTTTGCTTGCCAAAAGGCTTAGGCATCCCTGCTCACCGCAATGCTC  
TTGAGAACCCATGCAACTCCGTTGGAATATCATGCGAAAACGACTCAC

>PGSC0003DMG400015157LRR-RLKs\_2046

TAAAAGTTTGTGATGAACTAAGAGAATATTTCTTGTGTATGACGGTCCTTGTGTATTCTGTTACATCTCC  
AATATGAGAGACTGTCCTTGTGTGTTTTGTTTCCTCTCCAAAATGAGAA

>PGSC0003DMG400015157LRR-RLKs\_2108

TACATCTCCAATATGAGAGACTGTCCTTGTGTGTTTTGTTTCCTCTCCAAAATGAGAAGTTTATATTTAGC  
TGTATGAAAGTTCTTTGCAGAAGTTTCCTCTGCTATATTATAAAGCATG

>PGSC0003DMG400015157LRR-RLKs\_2141

TTTTGTTTCCTCTCCAAAATGAGAAGTTTATATTTAGCTGTATGAAAGTTCTTTGCAGAAGTTTCCTCTGCT  
ATATTATAAAGCATGGTACGAAATGTGAATCGAATTCTTTCCACTAGA

>PGSC0003DMG400015157LRR-RLKs\_682

AATCTCCGGCTCCTCAACATTTTCAGGCAATAGTTTCCTTGAAGGTACGGTGCCTGCCGTGAGTCAAGTTG  
AGCACTTATCAGCAGACTTAAATCGAAAAGATTATGTTCCCTAAGCGTTAC

>PGSC0003DMG400015157LRR-RLKs\_744

TCAAGTTGAGCACTTATCAGCAGACTTAAATCGAAAAGATTATGTTCCCTAAGCGTTACATTCTTGCTGAG  
AATGAAAGAAGGCCAAGGCACACCCCTGCAATGGCACCAGAGTCCAAATC

>PGSC0003DMG400015157LRR-RLKs\_806

TTGCTGAGAATGAAAGAAGGCCAAGGCACACCCCTGCAATGGCACCAGAGTCCAAATCAGGATATGCC  
CAAGCTCCAGGACCTAGTACAGTTGTAGTACCAGTAAAAAAGACAAACACA

>PGSC0003DMG400015157LRR-RLKs\_868

TATGCCCAAGCTCCAGGACCTAGTACAGTTGTAGTACCAGTAAAAAAGACAAACACAACAAGATCAGA  
AGGAAGGTAGGCGCCTGGATTCTTGGATTCTTTGCTGGAGTTTTTCGCTGGG

>PGSC0003DMG400015157LRR-RLKs\_930

GATCAGAAGGAAGGTAGGCGCCTGGATTCTTGGATTCTTTGCTGGAGTTTTTCGCTGGGGGCTTATCGGC  
GTTGGTCTTCTCTGTCTCTTCAAGGTGCTTATGTTTTAATCAGAGGGAT

>PGSC0003DMG400015162LRR-RLKs\_1488

TCTGATTATATGCCTGCTGGAAGTTTATCAGCTCTTCTCCATGGTACGCTGCTCTTATTATTTTTAGTTAAA  
AGTATGTCAAACCTGTTTCGTTTTAGTGTATAATTTGCTCTATTATATG

>PGSC0003DMG400015162LRR-RLKs\_1550

TTTAGTTAAAAGTATGTCAAACCTGTTTCGTTTTAGTGTATAATTTGCTCTATTATATGTTACTGCAATTCTG  
TGTCTGTTGTTTGTCTCTGAACACTTAAAAGTTCCATTTTTTACCAAT

>PGSC0003DMG400015162LRR-RLKs\_1612

TGCAATTCTGTGTCTGTTGTTTGTCTCTGAACACTTAAAAGTTCCATTTTTTACCAATGTTTTAAAACTTTA  
ATGGCAATAAAGATAGTAGCATTCAATTCTTGCTAGATTTTAGTGACT

>PGSC0003DMG400015162LRR-RLKs\_2046

TGGAACAATGACTTTTTTATTATGATTTATTTCGAATCGAGAGCATATCGGATACAATCTCTCTATCTTAAC  
GGACACACTTGTTAGATTACACTTTTACTCTTTCTTTTTTATGAAACGA

>PGSC0003DMG400015162LRR-RLKs\_2108

TATCTTAACGGACACACTTGTTAGATTACACTTTTACTCTTTCTTTTTTATGAAACGAACGTTACAATGCAA  
CAGACTAGCATGATTCCCTGCCTTAATAAATGATGAAATGAGTTTAAA

>PGSC0003DMG400015162LRR-RLKs\_2170

TACAATGCAACAGACTAGCATGATCCCTGCCTTAATAAATGATGAAATGAGTTTAAAAAGTGAAAAA  
GAAGGCTTCTTTCTTGTTCAAAGATTTACCTTTTAAATTGCTACATTGCTT

>PGSC0003DMG400015162LRR-RLKs\_2232

GGAAAAAGAAGGCTTCTTTCTTGTTCAAAGATTTACCTTTTAAATTGCTACATTGCTTGTGTCTATGCCTT  
AAGGTCTTTGCTCCATAGTTCTCAATTTTTT GCCACAATCAACAACTA

>PGSC0003DMG400015162LRR-RLKs\_2294

CTATGCCTTAAGGTCTTTGCTCCATAGTTCTCAATTTTTT GCCACAATCAACAACTACCTCTATTATTGTA  
GTTATATAATATATATATATTTTTTTTTTATTATACATAGGGGAAATGGGGG

>PGSC0003DMG400015162LRR-RLKs\_2356

TATTATTGTAGTTATATAATATATATATTTTTTTTTTATTATACATAGGGGAAATGGGGGAGGGAATAACAA  
AGTGTGTGGAGTTTGGTGATATCAAATATATTAATTAATTAATTAATCTT

>PGSC0003DMG400015162LRR-RLKs\_2480

TTTCTAATCCCACAATTTTCAAATCATGATTTAATTAGTAGTAATTGCTGTAAGTCTAAACAATACTACCAT  
ACTTAAAAGTTTATATTACTTTGGCTTTAAGCTATTTGGTGGTTATAA

>PGSC0003DMG400015162LRR-RLKs\_2542

ATACTACCATACTTAAAAGTTTATATTACTTTGGCTTTAAGCTATTTGGTGGTTATAACTGTCTGATTATTA  
TTCATCTAATCTTGATTCTTTTGCTTTACTTTATTCATCATTGTTTCT

>PGSC0003DMG400015162LRR-RLKs\_2666

GTCCCCATTTTTCTTCTTTTGTGAAATAACGTGCTGCTTTACTCTATTGTCCATTGATTCTTGCTGTCACC  
CATTTTCTTCTCTTTTTTTTTTGGTGAAGTAAAGTGCAAAGAAAAGC

>PGSC0003DMG400015162LRR-RLKs\_2728

TTGCTGTCACCCATTTTCTTCTTTTTTTTTTGGTGAAGTAAAGTGCAAAGAAAAGCTAATAATACAATG  
TGCCTCTTGAGTCTTGAGTAGTTCAACTGCTTTGAATTTGAATCCAAC

>PGSC0003DMG400015162LRR-RLKs\_3162

GATAACCAAGATGCATGTGTATCCGATTACGGATTGAACCCTTTTTCTCTACCTCAGCACCAGTGAACC  
ACCGTGTGCAGGATATCGTGCACCTGAGGTTCTTGAACTCGAAAAGTC

>PGSC0003DMG400015162LRR-RLKs\_992

AACAGCTGCCATTGTTGGAATAATTATAGGTTCAATAATTGGGGTTCTCCTACTCTTGTTACTCCTTTTCTT



CTGTTTAAAACGAAGAAAAACGACACATCAAAGGTACAAAAACCTCC

>PGSC0003DMG400015170RLKantifungi(GNK)\_1098

GCAGTGTCTACCTGATTTGTCAGCTGTAAATTGTGTCACCTGCCTGAAAACCTGCTTTTTCTGGAATCCGTA  
ACCTCTCTGTCTATTGCCAAGGTACCACGTGGAGTCAGAATACTACT

>PGSC0003DMG400015170RLKantifungi(GNK)\_2318

AAATGAGGCACTGCTTATCTATGAGTTCATGCCCAACAAAATCCTGGACTTCTTCCTTTTTGGTTTGACGT  
TCACTTATTTGGCATATTAGTATATGCCACAAAGAAGCAATTAATTCAC

>PGSC0003DMG400015170RLKantifungi(GNK)\_2623

ATATCTGACTTTGGAATGGCAAAGATGTTTAGCGGAAATCAACGAGAAGCCAATACAAATAGAGTTATT  
GGAACCTAGTAAGATGATGCAACAATGCAAAAATCTGTTGGTACTATTTAA

>PGSC0003DMG400015170RLKantifungi(GNK)\_2684

GAGTTATTGGAACCTAGTAAGATGATGCAACAATGCAAAAATCTGTTGGTACTATTTAAAACAACATTAT  
AGTGTAAGATTGATGCTAAGGACCATTTTTACTTCTGCCATTTTTACAG

>PGSC0003DMG400015170RLKantifungi(GNK)\_2745

CAACATTATAGTGTAAGATTGATGCTAAGGACCATTTTTACTTCTGCCATTTTTACAGTGGATATATGGC  
CCCTGAGTATGCTATGGAGGGACTTTTTCTACTAAATCAGATGTTTTC

>PGSC0003DMG400015170RLKantifungi(GNK)\_2928

TATGGTCAGAGTCTCCTTAATTTGTAAGTATACTTCTTCTCCATTTTTATTTTTGCTTATGTCAATTTCAAC  
TTGCATGAAGCATCCTAAAATCTTGAAAATTCAGGCGTGGAAGT

>PGSC0003DMG400015170RLKantifungi(GNK)\_2989

GTCAATTTCAACTTGCATGAAGCATCCTAAAATCTTGAAAATTCAGGCGTGGAAGTTGTGGTGTGAA  
GAGCATGGATTAGAGCTAATGGACCCTTGCTTATCACAGTCTTGTGTGAC

>PGSC0003DMG400015170RLKantifungi(GNK)\_305

TTCCGTCTCGACTCCTTAGACCAATTCTTCCTTGAAGTTAATGTTTTGTGGGAAAAAACTTCATCAAAT  
TGTTTTTTCATGATCAGACTGTTGACTTCGTCGTCCTTGTAGTTTTGAG

>PGSC0003DMG400015170RLKantifungi(GNK)\_3111

CTGAGATAACAAAATGCATCCATATCGGACTACTCTGCGTTCAACAAGATCCAGCAGATAGACCTACCAT  
GTCCTCTGTGGTTTTATGCTGGAAAACGACACTAAAACATTTCCACAAC

>PGSC0003DMG400015170RLKantifungi(GNK)\_3172

ACCTACCATGTCCTCTGTGGTTTTTATGCTGGAAAACGACACTAAAACATTTCCACAACCATCACAACCTG  
CATTTTCTATTGGGAGACTTGCCGTGAGATCAGCTGAGCCTCGATCTAA

>PGSC0003DMG400015170RLKantifungi(GNK)\_3233

TCACAACCTGCATTTTCTATTGGGAGACTTGCCGTGAGATCAGCTGAGCCTCGATCTAATGATCAGTTAT  
GTTCCGTTAACGAGGTCACCTTATCAATTCTATCACCCCGATGACCATTA

>PGSC0003DMG400015170RLKantifungi(GNK)\_3294

ATCAGTTATGTTCCGTTAACGAGGTCACCTTATCAATTCTATCACCCCGATGACCATTAATATAGGGTCCA  
TCAAGGATCTGTCTCCTCTCCATTTTCCCAAGTTTCTACTTCGATTGG

>PGSC0003DMG400015170RLKantifungi(GNK)\_3352

AATATAGGGTCCATCAAGGATCTGTCTCCTCTCCATTTTCCCAAGTTTCTACTTCGATTGGTGCACATGA  
CATATGTTGAATTAATGACTACGATTTAATTGACCAAAATAAATCCCTA

>PGSC0003DMG400015170RLKantifungi(GNK)\_732

CCCTGATAAAGTTTATGGAGTATTCCTCTGTAGAGGAGACGTTGTACCTAATGACTGCAAAAACACTGCATT  
GACGTGGCAAGAGAGCGGATCCAACGTGAATGTCCGCTCAAGAAGCAGGC

>PGSC0003DMG400015171RLKantifungi(GNK)\_0

GTTTCGAGCAGATTCATCTTCTCCTATTACTTTAGACATAATTC AACAGCAAGTTACTATAGTCAAGA  
ATGGCGTCGGTTTTGGTTTTGTGTTTGTGCAGTACCCAAACATTAATTC

>PGSC0003DMG400015171RLKantifungi(GNK)\_1054

TTTAAGGTTTTGGCGCACACCCTCAAAGAAAATCATCTACTAATAGAGTTATGGCTGAATGATTAGTGTG  
CATGTATCAAATATAATTTCTCCAACCTTATAGTTAAGATAGTCATGCATA

>PGSC0003DMG400015171RLKantifungi(GNK)\_1116

TTAGTGTGCATGTATCAAATATAATTTCTCCAACCTTATAGTTAAGATAGTCATGCATACTTTTACACATCA  
CGAAGTAACAGTTGAATTCAGCTTTTAATTGATCAACTACTTTTTTTTCA

>PGSC0003DMG400015171RLKantifungi(GNK)\_1178

CACACATCACGAAGTAACAGTTGAATTCAGCTTTTAATTGATCAACTACTTTTTTTTTCAGGC AAAAATACTT  
CAAAGACGAAGCTTATTAGTATCATTATAGGTGTTACACTAGCAATTTT

>PGSC0003DMG400015171RLKantifungi(GNK)\_124

TTTGTTGTTCCATTCACTACTGCTTGTGGGTGTCAAAGCACAGATGCAGGTGAATCCCTTATACTACGATT  
GTTCAATGCCCAATAATTATTCAGAAAGAAGCAAATTCCAATCAAATCT

>PGSC0003DMG400015171RLKantifungi(GNK)\_1240

AAAATACTTCAAAGACGAAGCTTATTAGTATCATTATAGGTGTTACTACTAGCAATTTTAGCTGTTGTACTG  
GCAGGAACTTGCTTTTACCTTCTAAAAAGAAGAAGACGAATAGAGAAAG

>PGSC0003DMG400015171RLKantifungi(GNK)\_1302

GTTGTACTGGCAGGAACTTGCTTTTACCTTCTAAAAAGAAGAAGACGAATAGAGAAAGGTAAATTTTCC  
TTTGGCATTGTTGGATTGAAAAGAAAATAGTTATAGTTTCAGCTAACCAATC

>PGSC0003DMG400015171RLKantifungi(GNK)\_1364

ATTTTCCTTTGGCATTGTTGGATTGAAAAGAAAATAGTTATAGTTTCAGCTAACCAATCAAAGTTGAATCT  
TTACAGAGAGGAATGAAAAGAGTCAAGAACTTCAATTGCTTGACATAAT

>PGSC0003DMG400015171RLKantifungi(GNK)\_1426

GTTGAATCTTTACAGAGAGGAATGAAAAGAGTCAAGAACTTCAATTGCTTGACATAATAGGAGAAACAT  
TTGATGAGAATGATGATTTTGGCTCAGAAAAGAAGGGGAGATCCAGAGAGT

>PGSC0003DMG400015171RLKantifungi(GNK)\_1488

GAAACATTTGATGAGAATGATGATTTTGGCTCAGAAAAGAAGGGGAGATCCAGAGAGTTTCCAGTTGT  
AAAAGTAGACCTCATTGAGCGGCTACACAAAATTTTCTGAAGAAAACAAG

>PGSC0003DMG400015171RLKantifungi(GNK)\_1612

GAGAAGGTGGATTTGGTCCTGTGTACAAGGTAATAATTCCTATCATTATAATGACCTAGGTAGTCTCTCA  
AGTCTTAGTCTAGTGAATCTAGTTGCTAGAGGGGGTCAGTTTTTCCGTGA

>PGSC0003DMG400015171RLKantifungi(GNK)\_1674

AGTCCTCAAGTCTTAGTCTAGTGAATCTAGTTGCTAGAGGGGGTCAGTTTTTCCGTGAAATTTGGGTTA  
TTAATGTTGTGTATAACATTACAGGGTACTACTACCATATGGCATAACAA

>PGSC0003DMG400015171RLKantifungi(GNK)\_1736

TTGGGTTATTTAATGTTGTGTATAACATTACAGGGTACTACTACCATATGGCATAACAATTGCAATCAAAA  
GGCTGTCCAGAACGTCCGGTCAGGGACTGAAAGAGTTCAAGAATGAAGTT

>PGSC0003DMG400015171RLKantifungi(GNK)\_186

ACTACGATTGTTCAATGCCCAATAATTATTCAGAAAGAAGCAAATCCAATCAAATCTTAACCGATTGCT  
GTACAGATCACTGTACAATAATGGTAGCGATTTTCATCTATACAAAAGCCA

>PGSC0003DMG400015171RLKantifungi(GNK)\_1860

TAATTGCCAGATTACAACACAGAAATCTCGTGAGGCTCTTGGGTTGCTGTTTAGAGGGAATCGAAGCAC

TGCTTATCTATGAGTTCATGCCCAACAAAAGCCTGGACTTCTTCCTTTTTG

>PGSC0003DMG400015171RLKantifungi(GNK)\_1922

GAAGCACTGCTTATCTATGAGTTCATGCCCAACAAAAGCCTGGACTTCTTCCTTTTTGGTTTGTCTCGAC  
TAATTTGGCATATTAGTATATACCACAAAGAGGCAATTAATTTACTAAC

>PGSC0003DMG400015171RLKantifungi(GNK)\_1984

GTCCTCGACTAATTTGGCATATTAGTATATACCACAAAGAGGCAATTAATTTACTAACTTCATACTTCCTT  
TTTCTAGAATCAAGAGAAAACAAGATTCTGGATTGGAGACAACGTCTCC

>PGSC0003DMG400015171RLKantifungi(GNK)\_2046

TACTTCCTTTTTCTAGAATCAAGAGAAAACAAGATTCTGGATTGGAGACAACGTCTCCACATTATTAAG  
GAATAGCAAAGGGCATTCTGTATCTACACGAGGATTCTCGACTAAGAATC

>PGSC0003DMG400015171RLKantifungi(GNK)\_248

CGATTGCTGTACAGATCACTGTACAATAATGGTAGCGATTCATCTATACAAAAGCCAGTGAAGGAGAA  
GACCCTGACAAAGTTTATGGACTATTCCTCTGTAGAGGAGACGTTGTACCT

>PGSC0003DMG400015171RLKantifungi(GNK)\_2728

ATCCATATCGGACTACTCTGCGTTCAACAAGATCCAGCAGATAGACCTACCATGTCCTCAGTAGTGTTTA  
TGCTGGAAAATGACTACTAAACACTTCCACAGCCATCACAACCTGCATTT

>PGSC0003DMG400015171RLKantifungi(GNK)\_434

CAGGCAATTATATGTTTTGATGAGTGGTCCGTTATTCTAATGTATCTTTCGCGTCCATGTTAGACAC  
CTCGGTTTCTAGGATCCTGTATAACACACAAAATGTTTCACGGCCAGAA

>PGSC0003DMG400015171RLKantifungi(GNK)\_496

GTTAGACACCTCGGTTTCTAGGATCCTGTATAACACACAAAATGTTTCACGGCCAGAACAAATTTATGGGT  
AATTTGAGTGCAATGTTTGATAATGTTATCACTCAAGCTATTACCGTCAA

>PGSC0003DMG400015171RLKantifungi(GNK)\_558

TTATGGGTAATTTGAGTGCAATGTTTGATAATGTTATCACTCAAGCTATTACCGTCAATCTCAATCTGAAA  
TATGCTGACAATTCTGATGAAATTAACGATTTTCAAAGATTGTATGGCA

>PGSC0003DMG400015171RLKantifungi(GNK)\_62

TAGTCAAGAATGGCGTCGGTTTTGGTTTTGTGTTTGTGCAGTACCCAAACATTAATTCTGATTTTGTTGTT  
CCATTCACTACTGCTTGTGGGTGTCAAAGCACAGATGCAGGTGAATCCC

>PGSC0003DMG400015171RLKantifungi(GNK)\_682

GCAGTGTCTACCGGATTTGTCAGCTGTAGATTGTGTCACCTGCCTGAAAAGTCTTTTTCTCAAATGAGTA  
TAACTCTTTGACACCAAATAACCAACAGGAGTTAGAGTTCTTCATGC

>PGSC0003DMG400015171RLKantifungi(GNK)\_744

AAATGAGTATAACTCTTTGACACCAAATAACCAACAGGAGTTAGAGTTCTTCATGCAAGCTGCAATTT  
AAGGTACGAGCTATATCAACTCCTCACCAGTTTACCGCCATTGACCATCC

>PGSC0003DMG400015171RLKantifungi(GNK)\_806

TGCAATTTAAGGTACGAGCTATATCAACTCCTCACCAGTTTACCGCCATTGACCATCCAGGGAAACGAAG  
ACCAAGGTATGGGATCTTCTATAAGTTAATTACATGCTTTAATTTTACTC

>PGSC0003DMG400015171RLKantifungi(GNK)\_868

AAACGAAGACCAAGGTATGGGATCTTCTATAAGTTAATTACATGCTTTAATTTTACTCTGAAGCCAAATTT  
CCCAGAAATCTATATGGAGGTACTGTTTCTCACATTAATACTAATCACTT

>PGSC0003DMG400015171RLKantifungi(GNK)\_930

GCCAAATTTCCAGAAATCTATATGGAGGTACTGTTTCTCACATTAATACTAATCACTTCAAATGTATATTA  
AAAGCTTTTTAATCATAATCATATACTGCATGGTCCATATCAAATGTTT

>PGSC0003DMG400015171RLKantifungi(GNK)\_992

TGTATATAAAAGCTTTTTAATCATAATCATATACTGCATGGTCCATATCAAATGTTTGTCGTTTAAGGTTT  
TGCGCACACCCTCAAAGAAAATCATCTACTAATAGAGTTATGGCTGA

>PGSC0003DMG400015276-(rev)LRR-RLKs\_0

GCTGTCTATAACTATTTTTCAACTTTTTAATGTGTTTGACATTGTTTGAATTATACCCCAATGTTCAATTT  
TACTTCACCTACTACATACTAACTGGTAAATTCTCAATCTATTAGAGT

>PGSC0003DMG400015276-(rev)LRR-RLKs\_1054

GATGAGGTTATCTGGTGTAGGGCTGTTTTGGTGATACGGAACGAGACAGGGGAGAGGAAGTTGACTGT  
ATTAGAGGGCTGACTGTATTTTTTCGAAATAGTTTAACCATTTTTGTTAAT

>PGSC0003DMG400015276-(rev)LRR-RLKs\_1116

GACTGTATTAGAGGGCTGACTGTATTTTTTCGAAATAGTTTAACCATTTTTGTTAATCGCTAAAAGAAG  
GTCATTCAGAACTCGTTGGCTCCAGAATGGGGCAGCTCCAGAGGTGCTAA

>PGSC0003DMG400015276-(rev)LRR-RLKs\_1488

ATTAGCTAATTCAATTAATACTTAAAAGATCCATGTGATTATGGAGCAGTTAATATTGTTGTTATTACATCT  
TTAACATTTCCAATTTCCATTTTGACAGGTAATATTTCAATAGAGAAT

>PGSC0003DMG400015276-(rev)LRR-RLKs\_1550

ATTACATCTTTTAACATTTCCAATTTCCATTTTGACAGGTAATATTTCAATAGAGAATGTGGTAAAGAGAA  
GTTATTGGTCCAAGAGTACAGAAGATCCAGAAAAACATTGGACTTAAT

>PGSC0003DMG400015276-(rev)LRR-RLKs\_1984

TCATCAACTTTCTTTTACTTTTGGGAAAATGTCTAAAGTTAACCCTCCTGAACGAAATACCTTAATTTTAT  
CTTTCATTATACTTTGAGATTATTCATATCCTTATCCTTAGTAAAACG

>PGSC0003DMG400015276-(rev)LRR-RLKs\_2046

TTAATTTTATCTTTCATTATACTTTGAGATTATTCATATCCTTATCCTTAGTAAAACGTCTCGTGTTATACTT  
CGAGGTCATTCATATTCATTTCTGATTCTAAACTATGAACTCATGAT

>PGSC0003DMG400015276-(rev)LRR-RLKs\_2108

GTGTTATACTTCGAGGTCATTCATATTCATTTCTGATTCTAAACTATGAACTCATGATCAAATGACTTTTGA  
GGTGGGCTTTCCCTTCTCTATAGTGCTACTGTGAAAATTGAAATTGCT

>PGSC0003DMG400015276-(rev)LRR-RLKs\_2852

ATACTTGCACAAAAAGAAGGATATGATGAAATGTTGAAGCTTACTGAATTGGCTTGCAGTGTACAGAT  
GAGGCACCAGAAAAGAGGCCTAAAATGAGTGAAGTGTTGAGAAGAATTGAA

>PGSC0003DMG400015276-(rev)LRR-RLKs\_2914

TACAGATGAGGCACCAGAAAAGAGGCCTAAAATGAGTGAAGTGTTGAGAAGAATTGAAGAGATTGAG  
CTTGAACCAAAGAATTTAGTCACTGATGTGGAAGATGATTCAGTCTCTTAGTT

>PGSC0003DMG400015276-(rev)LRR-RLKs\_2976

TTGAGCTTGAACCAAAGAATTTAGTCACTGATGTGGAAGATGATTCAGTCTCTTAGTTGAAGACTTGGAA  
CTTCCCTCCCAAAGTGAATCAAGCCGTAGCCGCAACAACAACATATCC

>PGSC0003DMG400015276-(rev)LRR-RLKs\_3100

TAATTTATCAGGTGGAGCTTGAACAATATATTCAGTATAATCTCATCAAATGAAATCGGAGTCTGAAGA  
GAATTTCAAGTAGAGTCTGAACAATATATTCATATAATCTCATCAAGTG

>PGSC0003DMG400015276-(rev)LRR-RLKs\_3162

TCTGAAGAGAATTTCAAGTAGAGTCTGAACAATATATTCATATAATCTCATCAAGTGGAGTCTGAAAAA  
AATAGAGTGAATGCATACATTATCGTAACCCAATCCTATGGGAGTAAAGA

>PGSC0003DMG400015276-(rev)LRR-RLKs\_3224

CTGAAAAAATAGAGTGAATGCATACATTATCGTAACCCAATCCTATGGGAGTAAAGAAAGGGTAAAAT

ATGCACGTACTTTACTCTGATTCCAACCAATGGGATCTTTGAGAGAATAGA

>PGSC0003DMG400015276-(rev)LRR-RLKs\_62

ATGTTCAATTTTACTTCACCTACTACATACTGGTAAATTCTCAATCTATTAGAGTATTACTTACTTATC

TATTATTCTTCTACGTCAAGGTTGCCACGACCAGAAATGCGTAGGACG

>PGSC0003DMG400015276-(rev)LRR-RLKs\_992

TTATCCTAGCTAGTGCCAGTTATTCTGAGGGGAAAGTTATTACTACTTAGATTGAATTAGATGATGAGGT

TATCTGGTGTAGGGCTGTTTTGGTGATACGGAACGAGACAGGGGAGAGGA

>PGSC0003DMG400015283-(rev)LRR-RLPs\_1037

GCGGAATTTGTTATGGCTCAATGTTTGAATAACCATCTTGGATATGGTAAGCATGATGACCTTGACTTT

GTAAATTCTCTTACCAACTGCAGCAGTCTACAAATGCTCCATTTTGGAGG

>PGSC0003DMG400015283-(rev)LRR-RLPs\_1159

ACCAGTTTGGAGGTACATTACCTCATTCAATAGGCAACCTTTCTAGTCAGTTACAACGCCTACTCTTCTTC

GAAAATAGAATTGGTGGAACATACCAAGAGAGATCTCAAACCTGGTGA

>PGSC0003DMG400015283-(rev)LRR-RLPs\_122

GTTTCTTGTTTCTATTGTCATTTTCTCTCCAACATGCTGCATCAGCTGCTTTTCTTAGCAATGAAACTGA

TAATCTTGCCTTACTTGGATTCAAGTCCCAAATAACCGAGGATCCATC

>PGSC0003DMG400015283-(rev)LRR-RLPs\_1281

TTGAATCTACTCGACATTGGTTCCAACAATTTTATAGGTAGTATTCCAGATTCTATTGGAAGACTTACAAA

CTTGGGAGCTCTCAACTTGGTTAACAATCTCTTGACAGGGGTCATCCCT

>PGSC0003DMG400015283-(rev)LRR-RLPs\_1342

GACTTACAACTTGGGAGCTCTCAACTTGGTTAACAATCTCTTGACAGGGGTCATCCCTTTTTCAATAGG

AAACCTCACTGAACTCGTCTATCTTTATTTGGGACTTAACAGGTTAGAGG

>PGSC0003DMG400015283-(rev)LRR-RLPs\_1525

ACCTGACAGGAACTATAACCACAACAACCTTTTTGCTCTCTCATCCCTCACAGATATTTTTGCATCTAATAACT

CTTTGACTGGTCCATTACCAGTGGATATTGGTAACTGGAATCATCTTA

>PGSC0003DMG400015283-(rev)LRR-RLPs\_1586

ATCTAATAACTCTTTGACTGGTCCATTACCAGTGGATATTGGTAACTGGAATCATCTTACTTATCTTGATT

TTCTTACAACAATCTTTGGGTATGATTCCACAACTCTTGAAAATG

>PGSC0003DMG400015283-(rev)LRR-RLPs\_183

AATGAAACTGATAATCTTGCCTTACTTGGATTCAAGTCCCAAATAACCGAGGATCCATCAAGAGTTTTCG  
TCTCTTGAATGATTCTGTTCATTTCTGTCAGTGGACTGGAGTAAAATGT

>PGSC0003DMG400015283-(rev)LRR-RLPs\_2257

AGGGAACTTTTCCCTCTGATGGAACGGTCGTTGCTGTGAAGGTA CAACTCCAGCATGAAGGTGCTT  
CAAAAAGCTTCTTAGCAGAATGCCAAGCATTGAGAAACATAAGGCACCGGA

>PGSC0003DMG400015283-(rev)LRR-RLPs\_2501

GAATGAGAAGAGTAGCTTGACCACACTTCAGAGAATGAATATCATAATAGATGTGGCCTCTGCACTTCA  
TTATCTTCACCATGAGTGCCAAACACCCATGATTCCTGTGATATAAAACC

>PGSC0003DMG400015283-(rev)LRR-RLPs\_2745

ACCATTGGCTATGCAGCTCCAGGTAATTTTTATATGTAAACAAAACTATGAATATACCATATGGTTTCTT  
GTAACAATAGTGGTTTATTTATGAGATGATCAATTTGCTTGTTCAGAA

>PGSC0003DMG400015283-(rev)LRR-RLPs\_2806

ATGGTTTCTGTAAACAATAGTGGTTTATTTATGAGATGATCAATTTGCTTGTTCAGAAATACGGCATGGG  
TAGTAAGGTCTCCGTTGTAGGAGATATGTACAGTTTTGGGATCCTAATAT

>PGSC0003DMG400015283-(rev)LRR-RLPs\_2867

CGGCATGGGTAGTAAGGTCTCCGTTGTAGGAGATATGTACAGTTTTGGGATCCTAATATTGGAAATATT  
CACTGGAAGAAGACCCACAGACACTTTGTTCCAAGCAAGTTCTACCCTCCA

>PGSC0003DMG400015283-(rev)LRR-RLPs\_2928

GAAATATTCCTGGAAGAAGACCCACAGACACTTTGTTCCAAGCAAGTTCTACCCTCCACCACTTTGTAG  
AAACAGCATTGCCAGAGAAAGTTATGGAGATTCTAGACAAAACAGCTTTT

>PGSC0003DMG400015283-(rev)LRR-RLPs\_3050

TGGTGAGATGAGTAAAGCAACCTGTGGCGAAGAATACTGGGGCAATATCAAGAAAGAACAGATGGAAT  
GCTTGGTTGGCATACTTGAGATCGGTGTTGCATGTTTCAGCTGAATCCCCAAG

>PGSC0003DMG400015283-(rev)LRR-RLPs\_3165

CCAAGAGACAGATTGACCATGACACAAGTTTACAGTAAGTTGACACTAATAAGAGAAAAATTCCTACAA  
AGGGGAGATGGAGGGCACAGGCTACAAGTAAAAGCATTGGATTTAATCTAA

>PGSC0003DMG400015283-(rev)LRR-RLPs\_549

GTCCTAGACCACAACACTCTAGTGGGAAAGATTCCTTACCAAGTTGGATCTTTAACGAAGTTAGTGAAC  
TGTACCTCAGAAATAACAACCTGACAGGAATCATTCCAGGTTCTATTGGA



>PGSC0003DMG400015283-(rev)LRR-RLPs\_610

TAGTGAACCTGTACCTCAGAAATAACAACCTGACAGGAATCATTCCAGGTTCTATTGGAAATCTTACATC  
TTTAGAGAAGCTGCATTTATCGTACAACAATCTAGAAGGAGAAGTGCCAG

>PGSC0003DMG400015283-(rev)LRR-RLPs\_671

TCTTACATCTTTAGAGAAGCTGCATTTATCGTACAACAATCTAGAAGGAGAAGTGCCAGTTTCTTTAGCT  
CGATTAACCAAGTTGAGGATTCTTGGACTGTCAGTAAATAGCTTATCTGG

>PGSC0003DMG400015283-(rev)LRR-RLPs\_732

TCTTTAGCTCGATTAACCAAGTTGAGGATTCTTGGACTGTCAGTAAATAGCTTATCTGGGGAGTTCCCTC  
CTCCGTTGTACAATTTGTCATCCCTGGAACATAATCACTTTCCCTTAAC

>PGSC0003DMG400015283-(rev)LRR-RLPs\_854

CTTTTCTGGTAATCTCAGATCTGAGTTAGGCAACTACTCCCTAATCTCAAATACTTTACTTGGCGAACT  
GTCAATTCATTGGTTCCATACCATCCTCCTTGGCCAATGCTTCAAAT

>PGSC0003DMG400015283-(rev)LRR-RLPs\_915

TTGGCGAACTGTCAATTCATTGGTTCCATACCATCCTCCTTGGCCAATGCTTCAAATGCTAGAGCTTGA  
TTTTCTGTAAACAATTTCACTGGAATATACCTAAGGGTTTTGGTAAC

>PGSC0003DMG400015283-(rev)LRR-RLPs\_976

TAGAGCTTGATTTTCTGTAAACAATTTCACTGGAATATACCTAAGGGTTTTGGTAACTTGCAGGAATTT  
GTTATGGCTCAATGTTTGGAAATAACCATCTTGGATATGGTAAGCATGATG

>PGSC0003DMG400015345LRR-RLPs\_192

CATGAACAATCTTAAATTGCTAGATTTATCACGCAACAACCTCAGTAACTCGATTCCAAGTTGCTTGGGA  
AGCATGTCTAGTCTAACAGTGTGGACTTAAGAAGGAACAATTTACAGG

>PGSC0003DMG400015345LRR-RLPs\_256

TTGGGAAGCATGTCTAGTCTAACAGTGTGGACTTAAGAAGGAACAATTTACAGGGAGTCTTCCCCCA  
TTATGTGTGCAGAACACTTCATTGAGAACCATTGTCTTGAATGGCAATCAA

>PGSC0003DMG400015345LRR-RLPs\_320

CCCCATTATGTGTGCAGAACACTTCATTGAGAACCATTGTCTTGAATGGCAATCAATTTGAAGGAACTCT  
CCCTGTGTCGTTGCTCAACTGTAGTGGTTTAGAAGTTCTTGATATGGGGA

>PGSC0003DMG400015345LRR-RLPs\_448

ATAAATGACACATTTCTGCTTGGATAGGAACACTTGAACAACCTGCAGGTCTTAATATTAAAGTCCAATG

TGTTCCATGGACCAATTACTACTTGTCTCAGACTACACTTTGCTTTCCCAAG

>PGSC0003DMG400015345LRR-RLPs\_512

CCAATGTGTTCCATGGACCAATTACTACTTGTCTCAGACTACACTTTGCTTTCCCAAGTTGCGAATTTTTGAT  
CTTTCGCGTAACGAATTCAGTGGCTCAATCCCTGCAAAGGTTTTTGGAA

>PGSC0003DMG400015345LRR-RLPs\_576

TTTTGATCTTTCGCGTAACGAATTCAGTGGCTCAATCCCTGCAAAGGTTTTTGGAACTTCAAGGCAATG  
ATTAATTAGATGGTGAAGACACAGGACAGATCGAGTACATGGAACCATC

>PGSC0003DMG400015345LRR-RLPs\_64

TTGTTGTACCTAAACCTTTCGCATAATTCTTTAACAGGCCACCTACAACCTATTTTCATTTCCATAATCTAGAG  
TATCTTGATCTTAAATTTAACTTCCTTCAGGGTCCACTACCTTCATCC

>PGSC0003DMG400015345LRR-RLPs\_640

GCAATGATTAATTAGATGGTGAAGACACAGGACAGATCGAGTACATGGAACCATCTATGTTTCACACA  
TTATATGATGATTCCGTGAGTTTGGTGATCAAAGGCCAGGATATTGAGCTA

>PGSC0003DMG400015345LRR-RLPs\_704

ACACATTATATGATGATTCCGTGAGTTTGGTGATCAAAGGCCAGGATATTGAGCTAGAAAGAATCAGCA  
AAATTATGACAACCATAGACCTCTCGAGCAACCATTTTGAAGGTGTCATTC

>PGSC0003DMG400015347LRR-RLPs\_1054

TTGGTTCGTTTCCTTCTACAATTGTAAGCTTGACACATCTTCAATACTTAGACTTGCAAGTAATTCCTAT  
CTGGCCCACTGCCTAATAATTTTAGCATGCTTCAAAGCTAACCCAAC

>PGSC0003DMG400015347LRR-RLPs\_1178

TTTGTCTACAACGCACTGAATGGGACCATACCATCTTCGGTGTGTTAGCCTCCCTTTGCTACCTCAATTAT  
GGCTCGATAATAATCGATTTAGTGGACTACCCACTGAGCTCAAACAAT

>PGSC0003DMG400015347LRR-RLPs\_1240

CTCAATTATGGCTCGATAATAATCGATTTAGTGGACTACCCACTGAGCTCAAACAATCCCAACATTAGA  
AAGCCTAGATTTAAGCCATAATCAACTCAGTGGTTCTTTTCCTCAATCAC

>PGSC0003DMG400015347LRR-RLPs\_1302

ACATTAGAAAGCCTAGATTTAAGCCATAATCAACTCAGTGGTTCTTTTCCTCAATCACTTGTGAATCTCAC  
AAGCCTTTCTACCCTCGACCTTTCATCAAATAACATCACCATCGATGAG

>PGSC0003DMG400015347LRR-RLPs\_1364

GAATCTCACAAGCCTTTCTACCCTCGACCTTTCATCAAATAACATCACCATCGATGAGGGAATACAAATCA  
CTTTTCTAGCCTACAAGATTTGTGGTTATCATCTTGTGAACTGAAGGA

>PGSC0003DMG400015347LRR-RLPs\_1674

CTTAAATTTAACTCCCTTCAAGGTCCAATACCTTCATCCATTTGTAACATGAACGATCTTCAATTTCTAGAT  
TTATCACGCAACGACTTCAGTAACTCGATTCCAAGTTGCTTGGGAAGC

>PGSC0003DMG400015347LRR-RLPs\_1798

CTAGTCTAACAGTGTGGACTTAAGAAGGAACAATTTCACTGGGAGTCTCCATCGTTATGTGCGCAGA  
GCACTTCATTGAGTACCATTTACTTGAATGGTAATCAATTTGAAGGAACTC

>PGSC0003DMG400015347LRR-RLPs\_186

TTGCTGCAGTTGCTGCAGTTAACCGGTTATGTTATTGGATTGGACCTTAGTTGCAGTATGCTTACTGGAA  
CTATTCATCCCAATAGCAGCCTCTTCCAACCTTCATCATCTCCGGACACTA

>PGSC0003DMG400015347LRR-RLPs\_1860

GCGCAGAGCACTTCATTGAGTACCATTTACTTGAATGGTAATCAATTTGAAGGAACTCTCCCTATGTCGT  
TGCTCAACTGTAGTGATTTAGAAGTTCTTGATATGGGGAATAACGCTATA

>PGSC0003DMG400015347LRR-RLPs\_2108

TGATCTTTCGCGTAACAAATTCAGTGGCTCACTCCCTGCAAAGTTTTTGGAACTTCAAGGCAATGATT  
AAATTAGACGGTGAAGGTACAGGAGAGATCAAGTACATGGAACCATCTGA

>PGSC0003DMG400015347LRR-RLPs\_2170

CAATGATTAATTAGACGGTGAAGGTACAGGAGAGATCAAGTACATGGAACCATCTGAGATGTCATCTG  
ATGATTCTGTGAGTTTGGTGATCAAAGGGCAGGATATTGAGCTAGAAAGAA

>PGSC0003DMG400015347LRR-RLPs\_2232

TCATCTGATGATTCTGTGAGTTTGGTGATCAAAGGGCAGGATATTGAGCTAGAAAGAATCAGCACAATT  
ATGACAACCATAGACCTCTCGTGTAACCATTTTGAAGGTGTCATTCCGAAA

>PGSC0003DMG400015347LRR-RLPs\_248

TACTGGAACTATTCATCCCAATAGCAGCCTCTTCCAACCTTCATCATCTCCGGACACTAAACCTTGCTCACA  
ATGCCTTCTTTTCTTCAATCCACACAACATTGGCCGATTGACGAATTT

>PGSC0003DMG400015347LRR-RLPs\_2480

TGGAAAGATTCCGCAGGAATTGACAAGGCTAACATTTCTGGAAAAGTTAAACGTTTCTCAGAATGTTCTC  
TTCGGACCAATTCCTCTTGGTCCACAATTCAACACATTTGAAAATGACTC

>PGSC0003DMG400015347LRR-RLPs\_2728

AATCAGTAGTCATAGGCTACAGTTGTGGACTAGTTGTTGGAAGCTGTTGTGTGGAGCCTCATGTTTAAATA  
TCGTAAGCCAAAATGGTTTGTGCAATTTTTGAAGGCATTTATCCCAAGA

>PGSC0003DMG400015347LRR-RLPs\_310

TTGCTCACAATGCCTTCTTTTCTTCAATCCCACACAACATTGGCCGATTGACGAATTTGAGGCATCTCAAC  
CTTTCTCATTCAATTCTTTGAAGGGGAAATTCCAACAGAAATCTCATAACC

>PGSC0003DMG400015347LRR-RLPs\_372

CATCTCAACCTTTCTCATTCAATTCTTTGAAGGGGAAATTCCAACAGAAATCTCATACTTTCCAATTTGGTT  
TCACTTGAACCTAATTGTTATGGATGTGAACTTGATGAGAGAACATTT

>PGSC0003DMG400015347LRR-RLPs\_434

CAATTTGGTTTCACTTGAACCTAATTGTTATGGATGTGAACTTGATGAGAGAACATTTGAAACAATTCTTC  
AAACTTCACAAATCTGGAGGTAGTTTCTCTCTTTGGTGTCAACATCTC

>PGSC0003DMG400015347LRR-RLPs\_496

CAATTCTTCAAACTTCACAAATCTGGAGGTAGTTTCTCTCTTTGGTGTCAACATCTCATCTCCGATACCTC  
TGAATATATCTTCATCCTCCTTAAAGTATGTAGATCTTGGATTACTA

>PGSC0003DMG400015347LRR-RLPs\_558

CCGATACCTCTGAATATATCTTCATCCTCCTTAAAGTATGTAGATCTTGGATTACTAATCTGCGAGGTGT  
TCTCACAGAGAGCTTTTTCTTCTGCCAAAATTGGAAATGCTCTATTTG

>PGSC0003DMG400015347LRR-RLPs\_62

CTGAAGCTTTTGCTTTGCTTCACTTCAAACAATCCTTTCAAATCTCTGACCAACCTACATGTTGGGATGAT  
ATCCCAAAAACAAAGTCTTGAATGAGAGTAGGGATTGCTGCAGTTGCT

>PGSC0003DMG400015347LRR-RLPs\_620

GCGAGGTGTTCTCACAGAGAGCTTTTTCTTCTGCCAAAATTGGAAATGCTCTATTTGAATTACAATGATC  
TTCTTAAAGGAGGTTTACCAAAGATCCACCCGAGCAACACTCTGTTGGA

>PGSC0003DMG400015347LRR-RLPs\_744

CATATTTCAATCACAGGAATCTCCGGTGAGCTGCCTGATTCAATTGGCACCTTCAGTTCCTTGAATCGCTT  
GAACATGTATGGATGCCAATTATCTGGCCGCGTTCCTGATTCCATTGGC

>PGSC0003DMG400015347LRR-RLPs\_806

GAATCGCTTGAACATGTATGGATGCCAATTATCTGGCCGCGTTCCTGATTCCATTGGCAATCTTACACAA

ATTAGGTATTTGGCTTTCAGTTATAATCATTTACCGGCCATATTCCTTC

>PGSC0003DMG400015347LRR-RLPs\_868

TTACACAAATTAGGTATTTGGCTTTCAGTTATAATCATTTACCGGCCATATTCCTTCCACAATATCTAAAT

TGAAGCACCTCAGCTATCTAAAGCTTTCGTCCAACCTCTTTTCAGGTG

>PGSC0003DMG400015347LRR-RLPs\_992

TCCCGACATTTTTCTAACCTCCAAGAGCTACGTTCTTTATATCTTCATAACAACAGTTTCATTGGTTCGTT

TCCTTCTACAATTGTAAGCTTGACACATCTTCAATACTTAGACTTGTC

>PGSC0003DMG400015348LRR-RLPs\_198

AACAAATTCAGTGGCTCACTCCCTGCAAAGTTTTTGGAACTTCAAGGCAATGATTAATTAGATGGTG

AAGACACAGGACAGATCAAGTACATGAAAGCATTTGACACATCGTATGAG

>PGSC0003DMG400015348LRR-RLPs\_264

GGTGAAGACACAGGACAGATCAAGTACATGAAAGCATTTGACACATCGTATGAGGATTCTGTGAGTTTG

GTGATCAAAGGCCAGGAAATTGCGCTAGAAAGAATCAGCACAATTATGACA

>PGSC0003DMG400015348LRR-RLPs\_330

TTGGTGATCAAAGGCCAGGAAATTGCGCTAGAAAGAATCAGCACAATTATGACAACCATAGACCTCTCG

AGCAACTATTTTGAAGGTGTCATTCCGAAAACACTAAAGGATCTCAGCTCA

>PGSC0003DMG400015348LRR-RLPs\_594

CTGAAAAGTTAAACGTTTCTCAGAATGTTCTTTCGGACCAATTCCTCTTGGTCCACAATTCAACACATT

TGAAAATGACTCGTATGGCGGTAACCTTGATCTATGTGGTCCTCCTTTA

>PGSC0003DMG400015348LRR-RLPs\_66

TTTCTGCTTGGATAGGAACACTTGAACAACACTGCAGGTCTTAATATTAAGTCTAATATGTTCCATGGAC

CAATTAGTACTTGTGACTACGTTTTGCTTCCGAAGTTGCGAATTTTT

>PGSC0003DMG400015349LRR-RLPs\_0

ATGGGAATTCTGTTTTTCTTTTATTCACTTGTCTGTTTTTTGTTGGTAATTAGTGAAAGCTTTTCTTCTCCT

CTGTGATGATGCATCATGTTTGCTCTCCCACTGAAGCTTTTGCTTTG

>PGSC0003DMG400015349LRR-RLPs\_1008

AACCTCCAAGAGCTACGTTTTTATATCTTCATAACAACAGCTTCATCGGTTTCGTTTCTTCTACAATTGTA

AGCTTGACACATCTTCAAGACTTAGACTTGTCGAGTAATCCCTATCT

>PGSC0003DMG400015349LRR-RLPs\_1071

ACAATTGTAAGCTTGACACATCTTCAAGACTTAGACTTGTCGAGTAATCCCTATCTGGCCCACTGCCTAA  
TAATGTGAGCATGCCTCAAGAGCTAACCAAAGCTGGATCTGTCGTACAAC

>PGSC0003DMG400015349LRR-RLPs\_1134

CTGCCTAATAATGTGAGCATGCCTCAAGAGCTAACCAAAGCTGGATCTGTCGTACAAGCTCACTGAATGGTA  
CCATACCATCTTCGGTGTTAGCCTCCCTTTGCTATCTTCATTGTCTCTC

>PGSC0003DMG400015349LRR-RLPs\_1197

AATGGTACCATACCATCTTCGGTGTTAGCCTCCCTTTGCTATCTTCATTGTCTCTCCAACATAATCAATTT  
AGTGGACTAGCCGATGAGTTCAAACAAAGCTCAACATTAGATTACCTA

>PGSC0003DMG400015349LRR-RLPs\_126

TTCAAACAATCTTTTCAAATCTTAACCAACCTAGCTGTTGGGTTGAGATTAATCTGCCAGATATGACCTT  
TGTTGATATCCCAAAAACAAAGCTTGGAATGAGAGTAGGGATTGCTGC

>PGSC0003DMG400015349LRR-RLPs\_1260

AATCAATTTAGTGGACTAGCCGATGAGTTCAAACAAAGCTCAACATTAGATTACCTAGATTTAAGCCATA  
ATCAACTCAGTGGTTCATTTCTCAATCACTTGCGAGTCTCACAAACCTT

>PGSC0003DMG400015349LRR-RLPs\_1323

AGCCATAATCAACTCAGTGGTTCATTTCTCAATCACTTGCGAGTCTCACAAACCTTTCTACCCTCACCTT  
TCATCAAATAACATCACCTTCGATGAGGGAATACACATCACTTTTCT

>PGSC0003DMG400015349LRR-RLPs\_1386

CTCACCTTTTCATCAAATAACATCACCTTCGATGAGGGAATACACATCACTTTTCTAGCCTACAAGATTT  
GCATTTATCGTCTTGTGAACTGAAGGATTTTCCACACTTCTTGAGAAAT

>PGSC0003DMG400015349LRR-RLPs\_1449

CAAGATTTGCATTTATCGTCTTGTGAACTGAAGGATTTTCCACACTTCTTGAGAAATGTAAAGACACTTAC  
GGTCTTGATATTTCTAACAATAAGATTCGTGGCCAAATCCCAAAGCTGG

>PGSC0003DMG400015349LRR-RLPs\_1512

ACACTTACGGTCTTGGATATTTCTAACAATAAGATTCGTGGCCAAATCCCAAAGCTGGTTTAGTAGCATAA  
GGTGGGACTACTTGTACTACCTAAATCTTTTCGCATAATTCTTTAACAGGC

>PGSC0003DMG400015349LRR-RLPs\_1575

AGCATAAGGTGGGACTACTTGTACTACCTAAATCTTTTCGCATAATTCTTTAACAGGCCACCTACAACAATT  
TCATTTCCATAATCTAAGGTATCTTGATCTTAAATTTAACTCCCTTCAG

>PGSC0003DMG400015349LRR-RLPs\_1638

CAACAATTTCAATTCATAATCTAAGGTATCTTGATCTTAAATTTAACTCCCTTCAGGGTCCACTCTCTTCA  
TCCATTTGTAACATGAGCGATCTTAAATTTCTAGATTTATCACTCAAC

>PGSC0003DMG400015349LRR-RLPs\_1701

CTCTCTTCATCCATTTGTAACATGAGCGATCTTAAATTTCTAGATTTATCACTCAACAACTTCAGTAACTTG  
ATTCCAAGTTGCTTGGGAAATCTTCAATTTCTAGATTTATCACGCAAC

>PGSC0003DMG400015349LRR-RLPs\_378

CTTGCTCGCAATGACTTCTATTCTTCTTCAATCCACATAACATTGGCCGATTGACGAATTTGAGGCATCT  
CAACCTTTCTCAATCTTTCTTTGTAGGGGAAATTCCAACAGAAATATCA

>PGSC0003DMG400015349LRR-RLPs\_441

AGGCATCTCAACCTTTCTCAATCTTTCTTTGTAGGGGAAATTCCAACAGAAATATCATACTTTCCAATTT  
GGTTTCACTTGAACCTAATTGTTATGAATGTGAACCTTGATGAGAGAACA

>PGSC0003DMG400015349LRR-RLPs\_567

ACAATTCTCAAACCTTCACAAATCTGGAGGTAGTTTCTCTCTGTGGTGTCAACATCTCATCTTCAATACC  
TGTGAATATTTCTTCTTTCTCCTTAAGGTACGTGGATCTTAGACATACT

>PGSC0003DMG400015349LRR-RLPs\_630

TCAATACCTGTGAATATTTCTTCTTTCTCCTTAAGGTACGTGGATCTTAGACATACTAATCTGCGAGGTTT  
TATCACAGAGAGCTTTTTCTTCTGCCAGGATTGGAAAGGCTCTATTTG

>PGSC0003DMG400015349LRR-RLPs\_945

CACCTCACATCCCTAGATCTCTCGTCCAACCTCTTTTCAGGTGAAATCCCGATATTTTTCTAACCTCCAA  
GAGCTACGTTTTTTATATCTTCATAACAACAGCTTCATCGGTTGTTT

>PGSC0003DMG400015351LRR-RLPs\_0

ATGTAACTGGTCATGTTATCGGATTGGACCTTAGTTGCAGTCTGCTTAATGGAACCTTTCATCCCAATAG  
CAGCCTCTTCCAACCTCCATCATCTCCAGACACTAGACCTTGCTTACAAT

>PGSC0003DMG400015351LRR-RLPs\_1054

TGCGGCTCGGTAATAATCGATTTAGTGGACTACCCAATGAGCTCAAACAAACCCAAAATTAGAACGCC  
TGGGTTTAAGCCATAATCAACTCAGTGGTTCTTTTCTCAATCACTTGCGA

>PGSC0003DMG400015351LRR-RLPs\_1116

GAACGCCTGGGTTTAAGCCATAATCAACTCAGTGGTTCTTTTCTCAATCACTTGCGAATCTCACAAACCT

TTCTACCCCTTGACCTTTCATCGAATAACATCACCGGTGATGCTGGAATA

>PGSC0003DMG400015351LRR-RLPs\_1178

CACAAACCTTCTACCCCTTGACCTTTCATCGAATAACATCACCGGTGATGCTGGAATAAATATCACCTTTC

CTAGCCTAGAAATTTTGCAGTTATCATCTTGTGAACTGAAGGATTTTCC

>PGSC0003DMG400015351LRR-RLPs\_124

TCTATTCTTCTTCAATCCCGCATAACATTGGCCGATTGAGGAATTTGAGGCATCTCAACCTTCTTATTCTT

TCTCTGGAGGGGAAATCCCAACAGAAATATCATACCTTTCCAATTTGG

>PGSC0003DMG400015351LRR-RLPs\_1240

TCACCTTTCCTAGCCTAGAAATTTTGCAGTTATCATCTTGTGAACTGAAGGATTTCCACACTTCTTGACA

AATGCAAAGAACTTCATGTCTTGGATATTTCTAACAATAAGATTCGTG

>PGSC0003DMG400015351LRR-RLPs\_1302

TTCTTGACAAATGCAAAGAACTTCATGTCTTGGATATTTCTAACAATAAGATTCGTGGCCAAATCCCAA

ACTGGTTTAGTAGCATAAGGTGGGACTACTTGTACTACCTAAATCTTTCCG

>PGSC0003DMG400015351LRR-RLPs\_1488

TTTAACTCCCTTCAGGGTCCACTCTCTTCATCCATTTGTAACATGAGCGATCTTAAATTTCTAGATTTATCA

CTCAACAACTTCAGTAACTTGATTCCAAGTTGCTTGGGAAGCAAGGCT

>PGSC0003DMG400015351LRR-RLPs\_1550

AGATTTATCACTCAACAACTTCAGTAACTTGATTCCAAGTTGCTTGGGAAGCAAGGCTAAACTAAGAGTG

TTGGACTTAAGAAGGAACAATTTCATAGGGAGTCTTCCCCGTTATGTGC

>PGSC0003DMG400015351LRR-RLPs\_1612

TAAGAGTGTTGGACTTAAGAAGGAACAATTTCATAGGGAGTCTTCCCCGTTATGTGCGAAGAGCACTT

CATTGAGTACCATTGTCTTGAATGACAATCACTTTGAAGGAATTCTCCCTA

>PGSC0003DMG400015351LRR-RLPs\_1736

GTTGCTCAACTGTAGTGGTTTAGAAGTTCTTGATATGGGGAATAATGCTATAAATGACACATTTCCAGCT

TGGCTAGGAACACTTCAACAACTGCAGGTCTTAATATTAAGTCTAATAT

>PGSC0003DMG400015351LRR-RLPs\_186

TCTTATTCTTCTCTGGAGGGGAAATCCCAACAGAAATATCATACCTTTCCAATTTGGTTTCACTTGACCTT

TTATGTTATGGATGTGGTCTCCAACCTTGATGAGAGAACATTTGAAACA

>PGSC0003DMG400015351LRR-RLPs\_1860



CATGGACCAATTAGTACTTGTCTGAGACTACATTTTGCTTTCCCAAGTTGCGAATTTTTGATCTTTCACGTAAT  
GAATTCAGTGGCTCTCTCCCTGCAAAAGTTTTTGAAACTTTAAGGCA

>PGSC0003DMG400015351LRR-RLPs\_1922

TTCACGTAATGAATTCAGTGGCTCTCTCCCTGCAAAAGTTTTTGAAACTTTAAGGCAATGATTAAATTA  
GACGATGAAGTCTCAGGAGAGATCAAGTACATGAAAACATTCGGGACTGT

>PGSC0003DMG400015351LRR-RLPs\_1984

TTAAATTAGACGATGAAGTCTCAGGAGAGATCAAGTACATGAAAACATTCGGGACTGTATATTCCACAC  
CGTATGAGGATTCTGTGAGTTTGGTGATCAAAGGCCAGGATATTGAGCTAG

>PGSC0003DMG400015351LRR-RLPs\_2046

TCCACACCGTATGAGGATTCTGTGAGTTTGGTGATCAAAGGCCAGGATATTGAGCTAGAAAGAATCAGC  
ACAATTATGACAACCGTAGACCTCTCGAGCAATCATTTTGAAGGTGTCATT

>PGSC0003DMG400015351LRR-RLPs\_2108

AATCAGCACAATTATGACAACCGTAGACCTCTCGAGCAATCATTTTGAAGGTGTCATTCTATAACACTA  
AAGGATCTCAGCTCACTTTGGCTACTCAATTTATCCCATAACAATCTCAT

>PGSC0003DMG400015351LRR-RLPs\_2356

CTCATAATCTTCTTATTGGACCAATTCCTCAAGGTCCACAGTTCAACACATTTGAAGATGACTCGTATGGC  
GGTAACCTTGATCTATGTGGTCCTCCTTTATCAAACCAATGTGGAACGA

>PGSC0003DMG400015351LRR-RLPs\_2418

TCGTATGGCGGTAACCTTGATCTATGTGGTCCTCCTTTATCAAACCAATGTGGAACGAGTGATCCATCAG  
ATGCTTCTCAGCCAGTATTGGACTCTGAAGAAGATGAAAACAAGTCATAT

>PGSC0003DMG400015351LRR-RLPs\_248

ACTTGACCTTTTATGTTATGGATGTGGTCTCCAACCTTGATGAGAGAACATTTGAAACAATTCTTCAGAACT  
TCAGAAATCTGGAGGTACTATCTCTCTATGGTGTCAACATCTCATCTCC

>PGSC0003DMG400015351LRR-RLPs\_372

CCTGTGAATATTTCTTCATCCTCCTTAAGGAACATGGATCTTGGACATACTAATCTGCGAGGTGTTCTCCC  
AGAGAGTCTTTTCTTTCTGCCAAAATTGAAACGCTCTATTTGAGTGAC

>PGSC0003DMG400015351LRR-RLPs\_434

TGTTCTCCAGAGAGTCTTTTCTTTCTGCCAAAATTGAAACGCTCTATTTGAGTGACAATGATCTTCTCA  
AAGGAGTTTTACCAAAGATCCACCCGAGCAACACTCTGTTGATGTTGGA

>PGSC0003DMG400015351LRR-RLPs\_558

TCCTACACAGGAATCTCTGGTGAGCTGCCTGATTGAGTTGGCACCTTCAGTTCCTTGAATCAATTGAACCT  
CCGAGGATGTCAATTCTCTGGTTCATTCTGATTCCATTGGCAATCTT

>PGSC0003DMG400015351LRR-RLPs\_620

ATTGAACCTCCGAGGATGTCAATTCTCTGGTTCATTCTGATTCCATTGGCAATCTTACACAAATTTGGC  
GTTTGGATTTCCGTAATAATCATTTCACCGGCAATATTCTTCCACAAT

>PGSC0003DMG400015351LRR-RLPs\_682

AAATTTGGCGTTTGGATTTCCGTAATAATCATTTCACCGGCAATATTCTTCCACAATCTCTCAATTGAAG  
CAGCTCACATGTCTATATCTTTCGTCCAACCTTTTTTCAGGTGAAATTC

>PGSC0003DMG400015351LRR-RLPs\_744

CAATTGAAGCAGCTCACATGTCTATATCTTTCGTCCAACCTTTTTTCAGGTGAAATTTCCCGACATTTTCTCT  
AACCTCCAAGAGCTAAGTTGTGTATATCTTCGTAACAACAGCTTCATC

>PGSC0003DMG400015351LRR-RLPs\_868

CGTTTCCTTCTACAATTGTAAGCTTGCCACATCTTCTAGACTTAGACTTGTCGAGAAATTCCTATCTGGC  
CCACTGCCTAATAATTTTAGCATGCTTCAAACCTAAACGAACTGCATT

>PGSC0003DMG400015351LRR-RLPs\_930

CTATCTGGCCACTGCCTAATAATTTTAGCATGCTTCAAACCTAAACGAACTGCATTTGTTGTACAACCT  
GCTAAATGGTACCATACCATCTTCGGTGTTTAGCCTCCCTTTACTAGTT

>PGSC0003DMG400015351LRR-RLPs\_992

GTACAACTCGCTAAATGGTACCATACCATCTTCGGTGTTTAGCCTCCCTTTACTAGTTGAGTTGCGGCTCG  
GTAATAATCGATTTAGTGGACTACCCAATGAGCTCAAACAAACCCAAA

>PGSC0003DMG400015352LRR-RLPs\_0

ATGATGGAGACTGAAGAAAACATTGTAACCTGTTGGTGCTGGCATAGCTGGTCTTGCTACTTCTTTGGCCC  
TTCACAGGTAATAATTGCTATTCTAAAATACTTGTTCATAATTACATCA

>PGSC0003DMG400015352LRR-RLPs\_1008

TCTATAGAGATGTATAAATTTCTAACCATTGATATAAAGACTCCTCACAAACGTTGAAGTAATGCAAACC  
TCCGATTTTCACAACATCGATCTTCGTAGAGAACAATCACATTTGTTTAC

>PGSC0003DMG400015352LRR-RLPs\_1071

GCAAACCTCCGATTTTCACAACATCGATCTTCGTAGAGAACAATCACATTTGTTTACGAAGGACTTAAGT

ATGAATAGCATATTCAGAGGATGCTACATACCCAATTTTTGTATTGTTTC

>PGSC0003DMG400015352LRR-RLPs\_1134

CTTAAGTATGAATAGCATATTCAGAGGATGCTACATACCCAATTTTTGTATTGTTTACAAGTACAGAGT  
GACGTGATTTAATGTCCAAATCCCTATGATTTCAACAATGAAATTAAGT

>PGSC0003DMG400015352LRR-RLPs\_1323

ACATTTTTATTTTTGAAGTCAATAGTCATCTAAAGTCAGTTATATTACGTTGCAGTGTGGAGTATGAAAGT  
CGTTGTGTGAGGAGAAAAGATCTGTTGGAGACATTAGCTAATGAACTGC

>PGSC0003DMG400015352LRR-RLPs\_1386

ATGAAAGTCGTTGTGTGAGGAGAAAAGATCTGTTGGAGACATTAGCTAATGAACTGCCTCAAGGTGCG  
ATTAGATATTCTTCAAAGGTCGATTCCATTGAAGAATCTGGACCATTGAAAT

>PGSC0003DMG400015352LRR-RLPs\_1449

GTGCGATTAGATATTCTTCAAAGGTCGATTCCATTGAAGAATCTGGACCATTGAAATTGGTACATCTTGC  
AGATGGTTCCACTATTAGAACCAAGGTAAATCTTCTCTGAAATCCGTAA

>PGSC0003DMG400015352LRR-RLPs\_1512

ATCTTGCAGATGGTTCCACTATTAGAACCAAGGTAAATCTTCTCTGAAATCCGTAACCTGGAATCCCTAT  
TATTGGAACTTCAACCAACGTGATAATTCAAACGTGTATTTGACCATT

>PGSC0003DMG400015352LRR-RLPs\_1575

ATCCCTATTATTGGAACTTCAACCAACGTGATAATTCAAACGTGTATTTGACCATTATCTCAATTCCTTTC  
GTTAGTCTAGTACGTGACTAACTTTGATAAGCTTCAATTAAGGCCTTA

>PGSC0003DMG400015352LRR-RLPs\_2518

AGGACAGTGTGTTATCGCAAAGTGCCTTGGAGAAGCCTTGATAAAACCAATAACAGAACAAGAAGAC  
GATGAATCTATGAATATTAGGAAAGGACTCGAGAAGTATGCTAAAGAGAGAA

>PGSC0003DMG400015352LRR-RLPs\_2565

CCAATAACAGAACAAGAAGACGATGAATCTATGAATATTAGGAAAGGACTCGAGAAGTATGCTAAAGA  
GAGAAGATGGAGAAGTTTTACATTTATCAGTGCTGCTTATTTATCTGGTTTC

>PGSC0003DMG400015352LRR-RLPs\_2612

ACTCGAGAAGTATGCTAAAGAGAGAAGATGGAGAAGTTTTACATTTATCAGTGCTGCTTATTTATCTGGT  
TTCATACAAGAGAGTGATAACAAGATAATCAGTTTCTTAAGACAACATTT

>PGSC0003DMG400015352LRR-RLPs\_2757

TTTTGGCTGGAGTCACTATATCAGTTACACTAAGAATAGCTAACTTCGACTGCGGAAGATTAAGTGTTC  
TTAGTAGCTCAATTGGATCCTTTAGAAGCTATGAATATCCTTTATGGACT

>PGSC0003DMG400015352LRR-RLPs\_2818

AACTGTTTCTTAGTAGCTCAATTGGATCCTTTAGAAGCTATGAATATCCTTTATGGACTTTGTTTAATATCT  
ATCTAGCATAACATGTTCTGGTTTAGTTATGTCTAAGAATTGTAAGACC

>PGSC0003DMG400015352LRR-RLPs\_2940

ATCGGATCCTTATTTTGCAATAATAAAATTGTGTCCTTCATCAAAGATATCCAATAACATCAGTTGTTTAG  
AAGCAAATATGGTAAAAGCTGCATTTTATTATTATCATGGAAAAACAGT

>PGSC0003DMG400015352LRR-RLPs\_3001

AGTTGTTTAGAAGCAAATATGGTAAAAGCTGCATTTTATTATTATCATGGAAAAACAGTGTAAGGTAA  
ATCTCTGAAGTATAGAATAAGTGTTCCTTATCTGAGATCATTTTCGTGCA

>PGSC0003DMG400015352LRR-RLPs\_3184

AAAGTAAAGAAGACTTACAATTAGAGATATGGACACGTAATATATATCCTGTATAATAAGTAATGTTGG  
AATAATCTCATGAATATTTTTTGTGGTCTATGTAAGAACATTGTTATTTTT

>PGSC0003DMG400015352LRR-RLPs\_3245

AATGTTGGAATAATCTCATGAATATTTTTTGTGGTCTATGTAAGAACATTGTTATTTTTAGCATTGCTTC  
GACTACTGATTTAGTTATTTCCATCTCATCATATTTGTCCTTTTTTTC

>PGSC0003DMG400015352LRR-RLPs\_3306

CATTTGCTTCGACTACTGATTTAGTTATTTCCATCTCATCATATTTGTCCTTTTTTCCCCTGTAGTCTTTG  
AGGAAATTGGCTTAAAGACTTGGAAGTTTTTTAAACATCTATTTCTA

>PGSC0003DMG400015352LRR-RLPs\_3367

CTGTAGTCTTTGAGGAAATTGGCTTAAAGACTTGGAAGTTTTTTAAACATCTATTTCTACTACAACACTACAT  
GGATGTGAAAAGTCTTGTGGAAAATTATAGAATATGACTCACAAGTTTG

>PGSC0003DMG400015352LRR-RLPs\_3428

ACAACATCATGGATGTGAAAAGTCTTGTGGAAAATTATAGAATATGACTCACAAGTTTGAAAAATTCCAC  
ACGGTATCAAAAATGTTACGTTTCGTCTAAGTAGATGTAGGAGTTAAATC

>PGSC0003DMG400015352LRR-RLPs\_3489

AAATTCCACACGGTATCAAAAATGTTACGTTTCGTCTAAGTAGATGTAGGAGTTAAATCATGTCTTTAAT  
AATTGTTAATTTTTTATTTTTCTCACTCCACTTAGTCAAGCAACAGTATC

>PGSC0003DMG400015352LRR-RLPs\_3550

GTCTTTAATAATTGTTAATTTTTATTTTTCTCACTCCACTTAGTCAAGCAACAGTATCTCTCATTGGAAAT  
TTGTTACAATTCTGCAGCAAATGTTCTACCGTGTGTCTTACATAATGG

>PGSC0003DMG400015352LRR-RLPs\_3611

TCATTGGAAATTTGTTACAATTCTGCAGCAAATGTTCTACCGTGTGTCTTACATAATGGGACCAATTCACA  
TTGACTTAGGTGACACACTGCAGAGATAGTCGATAACCTTGAAATGAAA

>PGSC0003DMG400015352LRR-RLPs\_3672

CCAATTCACATTGACTTAGGTGACACACTGCAGAGATAGTCGATAACCTTGAAATGAAACAACATTTAGA  
GAAAACAAATATGGAATAATTGGTACTAGCCACTAGGGGTGTACATGATC

>PGSC0003DMG400015352LRR-RLPs\_378

CTCTCTAGAATATGATATTTATGATATAATAGCGCTATTAGTTGAGTGACGATTTGAGAAATAACTCGAT  
GGAAGGCGTGTCTTGTATGTAATATGTAGGTTGGGGCTGCGGAGTGTGT

>PGSC0003DMG400015352LRR-RLPs\_3977

TTTGGGTACTATTCATCCCAATAGCAGCATCTTCCAGCTCCATCATCTCCGGACACTAAACCTTGCTTACA  
TGACTTCTATTCTTCTTCAATCCACATAACATTGGCCGATTGACGAAT

>PGSC0003DMG400015352LRR-RLPs\_4038

CTTGCTTACATGACTTCTATTCTTCTTCAATCCACATAACATTGGCCGATTGACGAATTTGAGGCATCTC  
AACCTTTCTGGTTCTTTCTTTGAAGGGGAAATCCCAACAGAAATATCAT

>PGSC0003DMG400015352LRR-RLPs\_4099

GAGGCATCTCAACCTTTCTGGTTCTTTCTTTGAAGGGGAAATCCCAACAGAAATATCATACTTTTCTATT  
TGGTTTCACTTGGACTTAATTGTTATGAATGTGAACTTGATGAGAGAAC

>PGSC0003DMG400015352LRR-RLPs\_4160

CTTTCTATTTGGTTTCACTTGGACTTAATTGTTATGAATGTGAACTTGATGAGAGAACATTTGAAACAAT  
TCAGAACTTCACAAATCTAGAGGTACTATCTCTCCATGGTGTCAACATC

>PGSC0003DMG400015352LRR-RLPs\_4221

TTGAAACAATTCAGAACTTCACAAATCTAGAGGTACTATCTCTCCATGGTGTCAACATCTCATCTTCAATA  
CCTGTGCATATTTCTTCATCCTCCTTAAGGTACATGGATCTTGGACATA

>PGSC0003DMG400015352LRR-RLPs\_4282

ATCTTCAATACCTGTGCATATTTCTTCATCCTCCTTAAGGTACATGGATCTTGGACATACTAATCTGCGAG

GTGTTCTCACAGAGAGCTTTTTCTTCTGCCAGGATTGGAAAGGCTCTA

>PGSC0003DMG400015352LRR-RLPs\_4465

GGAGTTGGATATTTCTAACACAGGAATCTCCGGTGAGCTGCCTGATTCAGTTGGCACCTTGAGTTCCTTG

AATATCTTGAACCTCAAAGGATGCCAATTCTCTGGTTCATTCTGATTC

>PGSC0003DMG400015352LRR-RLPs\_4526

AGTTCCTTGAATATCTTGAACCTCAAAGGATGCCAATTCTCTGGTTCATTCTGATTCCATTGGCAATCT

TACACAAATTAAGTATTTGGATTTAGTAATAATCATTTACCAGCCAT

>PGSC0003DMG400015352LRR-RLPs\_4587

TTGGCAATCTTACACAAATTAAGTATTTGGATTTAGTAATAATCATTTACCAGCCATATTCCATCCACA

ATCTCTCAGTTGAAGCAGCTCACATATCTACATCTTTGTCCAACCTCT

>PGSC0003DMG400015352LRR-RLPs\_4648

TCCATCCACAATCTCTCAGTTGAAGCAGCTCACATATCTACATCTTTGTCCAACCTTTTTTCAGGTGAAAT

TCCCGACATCTTCTAACCTCCAAGAGCTAAGTTATTTATATCTTGG

>PGSC0003DMG400015352LRR-RLPs\_4770

ACAACAGCTTCATCGGTTCTTTCTTCTACAATTGTAAGCTTGCCACATCTACAAGACTTAGACTTGTCG

AGTAATCCCTATCTGGCCACTGCCTAATAATGTGAGCATGCTTCAA

>PGSC0003DMG400015352LRR-RLPs\_4831

AGACTTGTCGAGTAATTCCCTATCTGGCCACTGCCTAATAATGTGAGCATGCTTCAAAGCTAACCAAA

CTGAATTTGTCCTACAACCTCAATGAATGGTACCATACCATCTTCTGTGTT

>PGSC0003DMG400015352LRR-RLPs\_5136

TCACCGTCGATGAGGGAATACAAATCACTTTTCTAGCCTACAAGATTTGTGGTTATCATCTTGTGAACT

GAAGGATTTCCACACTTCTTGAGAAATGTGAAGTCACTTTGGGTCTTGG

>PGSC0003DMG400015352LRR-RLPs\_5197

TTGTGAACTGAAGGATTTTCCACACTTCTTGAGAAATGTGAAGTCACTTTGGGTCTTGGATATTTCTAACA

ATAAGATTCGTGGCCAAATCCCAAATGGTTTAGCGGCATGAGGTGGGA

>PGSC0003DMG400015352LRR-RLPs\_5319

ACTTGTGGTACCTAAACCTTTGCATAATTCTTTAACAGGCCACCTACAACAATTTCAATTTCCATAATCTAT

GGTATCTTGATCTTAATTTAACTCCCTTCAGGGTCCACTCTCTTCATC

>PGSC0003DMG400015352LRR-RLPs\_5380

CCATAATCTATGGTATCTTGATCTTAATTTAACTCCCTTCAGGGTCCACTCTCTTCATCCATTTGTAACATG  
ATCAAGCTTGAATTTCTGGATTTATCACGCAACAACCTTCAGTATCTCG

>PGSC0003DMG400015352LRR-RLPs\_5441

TTTGTAACATGATCAAGCTTGAATTTCTGGATTTATCACGCAACAACCTTCAGTATCTCGATTCCAAGCTGC  
TTGGGAAGCATGTCTAGTCTAAAAGTGTGGACTTAAGAAGGAGCAATT

>PGSC0003DMG400015352LRR-RLPs\_5502

TCCAAGCTGCTTGGGAAGCATGTCTAGTCTAAAAGTGTGGACTTAAGAAGGAGCAATTTCACTGGGAA  
TCTTTCTCCATTATGTGCGAAGAGCACTTCATTGAGTACCATTGTCTTGAA

>PGSC0003DMG400015352LRR-RLPs\_5563

ACTGGGAATCTTTCTCCATTATGTGCGAAGAGCACTTCATTGAGTACCATTGTCTTGAATGACAATCACT  
TGAAGGAACCTCCCTGTGTCGTTGCTCAACTGTAGCGGTTTAGAAGTT

>PGSC0003DMG400015352LRR-RLPs\_5624

ACAATCACTTTGAAGGAACCTCCCTGTGTCGTTGCTCAACTGTAGCGGTTTAGAAGTTCTTGATATGGG  
GAATAACGCTATAAATGACCTATTTCCATCTTGGCTAGGAACACTTCAAG

>PGSC0003DMG400015352LRR-RLPs\_567

TTTGATGCATTGGGCATTGGGGGCTCTCTTAGACAACGTTCTTATCAATTACTGGGTAAGCTTCTCT  
TATTATTAGTTAGGATTTAGGACTTAATTGAAGTTCAATTTCGAATT

>PGSC0003DMG400015352LRR-RLPs\_5685

TGATATGGGGAATAACGCTATAAATGACCTATTTCCATCTTGGCTAGGAACACTTCAAGAACTGCAGGT  
CTAATATTAAGTCCAATGTGTTCCATGGACCAATTAGGACTTGTGACAGAC

>PGSC0003DMG400015352LRR-RLPs\_5746

CTGCAGGTTCTAATATTAAGTCCAATGTGTTCCATGGACCAATTAGGACTTGTGACACTACGTTTTGCT  
TCCAAGTTGAGAATTTTTGATCTCTCTCATAATGAATTCAGTGGCTCA

>PGSC0003DMG400015352LRR-RLPs\_5807

CGTTTTGCTTTCCAAGTTGAGAATTTTTGATCTCTCTCATAATGAATTCAGTGGCTCACTTCTGCAAATT  
TTTTTGAAACTTCAAGGCAATGATTAAATTAGAGGGTGAAGACACAG

>PGSC0003DMG400015352LRR-RLPs\_5868

TCCTGCAAATTTTTTTGAAACTTCAAGGCAATGATTAAATTAGAGGGTGAAGACACAGGACAGATTGA  
GTACATGAAACCACACGAAAATACAATTTACACATCGTATGACGATTCTGT

>PGSC0003DMG400015352LRR-RLPs\_5929

CAGATTGAGTACATGAAACCACACGAAAATACAATTTACACATCGTATGACGATTCTGTGAGTTTGGTGA  
TCAAAGGCCAGGATGTTGTGCTAGAAAGAATCAGCACAATTATGACAACC

>PGSC0003DMG400015352LRR-RLPs\_5990

GTTTGGTGATCAAAGGCCAGGATGTTGTGCTAGAAAGAATCAGCACAATTATGACAACCATAGACCTCT  
CGAGCAACCATTTTGAAGGTGTCATTCAGCAAACACTAAAGGATCTCAGCT

>PGSC0003DMG400015352LRR-RLPs\_6051

AGACCTCTCGAGCAACCATTTTGAAGGTGTCATTCAGCAAACACTAAAGGATCTCAGCTCACTTTGGCTT  
CTCAATTTATCCCATAACAATCTCACAGGTGATATTCCAATGGAATTGGG

>PGSC0003DMG400015352LRR-RLPs\_6112

CTTTGGCTTCTCAATTTATCCCATAACAATCTCACAGGTGATATTCCAATGGAATTGGGGAAATTGAATAC  
GCTTGAAGCGTTAGATCTCTCTTGAATAGGCTCACTGGAAAGATTCCG

>PGSC0003DMG400015352LRR-RLPs\_63

TTGGCCCTTCACAGGTAATAATTGCTATTCTAAAATACTTGTTCAATAATTACATCATCTACTTCCAAAAGT  
TTGATTTAGAAGGGCATATGCATTTGAACGAGCATTTATGCCCTCCAC

>PGSC0003DMG400015352LRR-RLPs\_630

TTCCTCTTTATTATTAGTTAGGATTTAGGACTACTAATTGAAGTTCAATTTCGAATTTTTATGAGATTTTGT  
GGTCATATGTGTTTTCCGGAGTTCTAGCTCTGGAAAAAAAAAAGTTACT

>PGSC0003DMG400015352LRR-RLPs\_6417

ACCATTGGACTCTGAAGAAGATGAAGACGAGTCATATTTTTTAAGTGGATTTACTTGGGAATCAGTAGTC  
ATAGGCTACAGTTTTGGACTAGTTGTTGGAAGTGTGTTGTGGAGCCTCAT

>PGSC0003DMG400015352LRR-RLPs\_693

AGATTTTGTGGTCATATGTGTTTTCCGGAGTTCTAGCTCTGGAAAAAAAAAAGTTACTGATTGTCCAAAAT  
GCATTCGAGTTGATGTGCAGGTTTAAAAGTTTCTCAGCGGATTCAGGTGC

>PGSC0003DMG400015352LRR-RLPs\_819

CAAGGAGGTATCATTTGTGGGGAATAACAGGTTAGCATTATACCAATTTTCATATTAGTTGGGGTCGGTT  
ATATAAGTCCTTTCATCTATTCGTGTTTATGTATGTTTCAATTTGTTCCAA

>PGSC0003DMG400015352LRR-RLPs\_882

GTCGGTTATATAAGTCCTTTCATCTATTCGTGTTTATGTATGTTTCAATTTGTTCCAACACTAGATAATCTAG



CATGTGAGACAAATTAGGAATTCTCTAAAATTAGAGGTTTTTTGAGTA

>PGSC0003DMG400015352LRR-RLPs\_945

ATAATCTAGCATGTGAGACAAATTAGGAATTCTCTAAAATTAGAGGTTTTTTGAGTATCGCAATCTATAG

AGATGTATAAATTTCTAACCATTGATATAAAGACTCCTCACAAACGTTGA

>PGSC0003DMG400015353LRR-RLPs\_0

ATGCGGAAATTGAATTTTGGAAATAATCATTTACCGGCTATAATCCTTCCACAATCTCTAAATTGAAGCA

CCTCACATCCCTAGACCTTTCGTCCAACCTCTTTTCAGGTGAAATTCCC

>PGSC0003DMG400015353LRR-RLPs\_1116

AGTACTTGTCAGAGTAGGTTTTGCTTCCCAAGTTGCGAATTTTTGATCTTTCGCATAACAAATTCAGTGG

CTCTCTACCTGCAAAAGTTTTTGGAACTTCAAGGCAATGATTAAATTA

>PGSC0003DMG400015353LRR-RLPs\_1178

ATTCAGTGGCTCTCTACCTGCAAAAGTTTTTGGAACTTCAAGGCAATGATTAAATTAGACGGTGAAGAC

ACACGAGAGATCATGTACATGATGCCATCTATAATGCCATTTTACTCATC

>PGSC0003DMG400015353LRR-RLPs\_124

TTTTTTCTAACCTCCAAGAGCTATGTTATTTATCTCTTTTTGACAACAGCTTCATCGGTTTCGTTTCTTCTAC

AATTGTAAGATTGACACAACCTTCAACACTTAGACTTGTCGCACAACCT

>PGSC0003DMG400015353LRR-RLPs\_1240

GTGAAGACACACGAGAGATCATGTACATGATGCCATCTATAATGCCATTTTACTCATCATCATATGAGGA

TTCTGTGAGTTTGGTGATCAAAGGGCAGGATATTGAGCTAGAAAGAATCA

>PGSC0003DMG400015353LRR-RLPs\_186

TTTCTTCTACAATTGTAAGATTGACACAACCTTCAACACTTAGACTTGTCGCACAACCTCACTGAATGGTAC

CATACCATCTTCGGTCTTTAGCCTCCCTTTGCTATCTTCATTGTGCGCTC

>PGSC0003DMG400015353LRR-RLPs\_248

GAATGGTACCATACCATCTTCGGTCTTTAGCCTCCCTTTGCTATCTTCATTGTGCGCTCCAACATAATCAATT

TAGTGGACTAGCCGATGAGTTCAAACAAACCCAACATTAGAACACCT

>PGSC0003DMG400015353LRR-RLPs\_310

ATAATCAATTTAGTGGACTAGCCGATGAGTTCAAACAAACCCAACATTAGAACACCTAGATTTAAGCCA

TAATCAACTCAGTGGTTCTTTTCTCAGTCACTTGCGAGTCTCACAAACC

>PGSC0003DMG400015353LRR-RLPs\_372

TTAAGCCATAATCAACTCAGTGGTTCTTTTCCTCAGTCACTTGCGAGTCTCACAAACCTTTCTACCCTCATC  
CTTTCATCAAATAACATCACCGTCAATGAGGGAATACAAATCACTTTT

>PGSC0003DMG400015353LRR-RLPs\_434

TACCCTCATCCTTTCATCAAATAACATCACCGTCAATGAGGGAATACAAATCACTTTTCCTAGCCTAGAAG  
TTTTACAGTTATCGTCTTGTGAACTGAAGGATTTTCCACACTTCTTGAC

>PGSC0003DMG400015353LRR-RLPs\_496

GCCTAGAAGTTTTACAGTTATCGTCTTGTGAACTGAAGGATTTTCCACACTTCTTGACAAATGTGAAGTC  
ACTTAGGATCTTGGATATTTCTAACAATAAGGTTTCGTGGCCAAATCCCAA

>PGSC0003DMG400015353LRR-RLPs\_62

ATTGAAGCACCTCACATCCCTAGACCTTTCGTCCAACCTCTTTTCAGGTGAAATCCCGATATTTTTTCTAA  
CCTCCAAGAGCTATGTTATTTATCTCTTTTTGACAACAGCTTCATCGG

>PGSC0003DMG400015353LRR-RLPs\_682

GCCACCTACAACCTATTTCAATTTCCATAATCTAGAGTATCTTGATCTTAAATTTAACTCCCTTCAAGGTCCAA  
TACCTTCATCCATTTGTAACATGAACGATCTTCAATTTCTACTTTTAT

>PGSC0003DMG400015353LRR-RLPs\_930

AGTACCATTGTCTTGAATGGTAATCAATTTAAAGGAACTCTCCCTGTGTCGTTGCTCAACTGCAGTGGTTT  
AGAAGTTCTTGATTTGGGGAATAACGCTATAAATGACACATTTCTGCT

>PGSC0003DMG400015353LRR-RLPs\_992

CAGTGGTTTAGAAGTTCTTGATTTGGGGAATAACGCTATAAATGACACATTTCTGCTTGGCTAGGAACA  
CTTCAACAACCTGCAGGTCTTAATATTAAAGTCCAATGTGTTCCATGGACC

>PGSC0003DMG400015391LRR-RLKs\_1403

CATTTTCTTCTTGCAGACTTTGATGTTGATACAGGCAGTGGGTTACCTGTCCGAGCTGTTATTGGCATTGT  
ACTCGCTTCAATTGTGGTGGTTCTGCTAGTTTTATTTGCTCTGTGGAAG

>PGSC0003DMG400015391LRR-RLKs\_1830

TACTGACGTTTGAATATTCTTCTCATTTACAGAACTCAGAGCCCTTGATTTACAAACAGGTCATTTTAGA  
CTTAGACAAATTAAGCTGCTACAAATAACTTCGATCCTGCCAACAAAA

>PGSC0003DMG400015391LRR-RLKs\_1891

TCATTTTAGACTTAGACAAATTAAGCTGCTACAAATAACTTCGATCCTGCCAACAAAATTGGTGAAGGA  
GGGTTTGGACCAGTTTACAAGGTATCAATTCTCTATCCATACTGATTTTG

>PGSC0003DMG400015391LRR-RLKs\_3050

GAGTATTTGCTTTGATACCTCCAAAGAAAATATTAGAATCAGAGTTGTTTCATTAGTTCTGATTCTTTTAT  
CCTGATATGCGGATGTCAATGTTTGTCTTTGTCATGCAGGCTTA

>PGSC0003DMG400015391LRR-RLKs\_3599

CTACATTTTGATTCCATCATGTAATTATCTAACTCTATCTTCACACAGGTCCCACATAATTTCTTTTCGTGT  
ATACTCCAATTTGTTCAATTGTGGTCCATGATGTTTTGTAAAATGT

>PGSC0003DMG400015422LysMRLKs\_0

GTTTCGAGCAAAAGTAGCATGCTTCCAAGAAGATCTCCTTATACATGTAACGCTGTTTGAAAATAATCAAA  
AGTAAGTATCATTGTGGAATTTACAACGTATGTTGTTGTATCAATCGAG

>PGSC0003DMG400015422LysMRLKs\_1037

CAAAGCCAAAACCATGTACTATATATCACCTCTTATTGAAACATACTTTGTGATAGCAAATAATATTTACC  
AAGGATTATCAACCTGTAATGCATTAGTACGTCGAAATGAATATGATGA

>PGSC0003DMG400015422LysMRLKs\_122

GTGGAATTATGACAATAAACCAATATTGCTCCAAGTAAAATATTGCTTTCACCATTTGAGACACACATA  
GTAGATGAAACGTCTACTAAATCAAATTTCTAAACTCATTTCTTCTTATG

>PGSC0003DMG400015422LysMRLKs\_1220

ACAAGTTGCAAAAGGCTCAAAGTATTTGATGACTTATTCAATTGACGTTGGCGATGACATCCTTAAAGTT  
GGCAAAAGATTTAATGTTAGTGTAACGAACATAGTTGAATCAAATGGATT

>PGSC0003DMG400015422LysMRLKs\_1281

CTTAAAGTTGGCAAAAGATTTAATGTTAGTGTAACGAACATAGTTGAATCAAATGGATTCTTGGATGAA  
AATTCTGTTCTGTATCCTTTTACAACCATTCTAATCCCCTGCCTTCTGAA

>PGSC0003DMG400015422LysMRLKs\_1342

TGGATGAAAATTCTGTTCTGTATCCTTTTACAACCATTCTAATCCCCTGCCTTCTGAACCATCAAATTTAG  
ATACCAGAAATGAGAATTATAGAAAACCTGTTAGGTCCTTTTCACCTC

>PGSC0003DMG400015422LysMRLKs\_1403

ATCAAATTTAGATACCAGAAATGAGAATTATAGAAAACCTGTTAGGTCCTTTTCACCTCCACCGGTAGCT  
AATGCTTCAAAGGGAAAATCAAAGAGAAATCTTTACATAGGTAGTGGAGT

>PGSC0003DMG400015422LysMRLKs\_1708

ACTTTGACTCCAAGAACCGGATAAAGGGATCTGTATACTGGGGAGGGTTTAAAGGGGAAATCTTAGCA

GTCAAAATAGCAATCATGGATGTATCTAGAGAAGTGAACATGCTGCATAAGA

>PGSC0003DMG400015422LysMRLKs\_1769

CTTAGCAGTCAAAATAGCAATCATGGATGTATCTAGAGAAGTGAACATGCTGCATAAGATCAATCACTTC  
AATCTAATAAAGCTTTGTGGCTATTGTGAACATAAAGGTTGCTTCTTTCT

>PGSC0003DMG400015422LysMRLKs\_2074

TCGACAGCAACATACGAGCAAAGATTGCAAACCTTCAGTCTTGCTAAAGAAACGGATAAATCAGGCACGA  
GTTGGGAGCTTGTTGGGACAACAGGATACATGGCGCCTGAGTACGTTGAGA

>PGSC0003DMG400015422LysMRLKs\_2196

GGGTCAGTGACTTCAAAGATGGACATTTATGCCTTTGGAGTTGTAAGTTGGAATTAGTCACCGGAAAA  
GATGCTGTAATTGTAGAGGAAAGTGGAGAAATTCTGCTTTCTGCTGCAGTA

>PGSC0003DMG400015422LysMRLKs\_2257

CCGAAAAGATGCTGTAATTGTAGAGGAAAGTGGAGAAATTCTGCTTTCTGCTGCAGTAGCTGCAATAA  
TGGAAGGAGAAAATGCAGAAATTGAACTGGATGGATTCATCAAAGCAGATA

>PGSC0003DMG400015422LysMRLKs\_2318

TGCAATAATGGAAGGAGAAAATGCAGAAATTGAACTGGATGGATTCATCAAAGCAGATATGAGGGGAAG  
ATGATGATTTGGAAATAGCATTTCGGTAGCCAACCTAAGCTTAAGATGCTT

>PGSC0003DMG400015422LysMRLKs\_2379

AGGGAAGATGATGATTTGGAAATAGCATTTCGGTAGCCAACCTAAGCTTAAGATGCTTACTCGAGAA  
CCAACAAATCGTCCAAGCATGGAAGAGCTAGTATCATGTCTACTGAAGATT

>PGSC0003DMG400015422LysMRLKs\_2440

CTCGAGAACCAACAAATCGTCCAAGCATGGAAGAGCTAGTATCATGTCTACTGAAGATTCAAGTTAATG  
TACATAAGGCAGAACAAACCAGTCAGAATTAAGAATATGGACATAGGAGGG

>PGSC0003DMG400015422LysMRLKs\_2501

AGTTAATGTACATAAGGCAGAACAAACCAGTCAGAATTAAGAATATGGACATAGGAGGGGTTAAACTA  
ACTCCAGCCTTGTTTTTTTTTGCATTTGTTCTAGAGCCTAGACTAAGGCTG

>PGSC0003DMG400015422LysMRLKs\_2562

TAAACTAACTCCAGCCTTGTTTTTTTTTGCATTTGTTCTAGAGCCTAGACTAAGGCTGTATGTTTTAAGAT  
TCAGACGTCTAAATTCTGAATACGAACCTGTATATTAAGTTCTATTGG

>PGSC0003DMG400015422LysMRLKs\_2623

TGTTTTAAGATTCAGACGTCTAAATTCTGAATACGAACCTGTATATTAAGTTCTATTGGCCGTTGAATGAG  
CCCTCGACCACCATGTGGTAGCCAATATTGAACTACTGACTGATCTT

>PGSC0003DMG400015422LysMRLKs\_2684

GTTGAATGAGCCCTCGACCACCATGTGGTAGCCAATATTGAACTACTGACTGATCTTGAGTATACTCT  
TCAAAACATCAACTTTATCATCGATGCCATGACGTTCCCTCGATGCCTCGT

>PGSC0003DMG400015422LysMRLKs\_2745

GTATACTCTTCAAAACATCAACTTTATCATCGATGCCATGACGTTCCCTCGATGCCTCGTTCAGTGTGTACA  
TCAACATTTGCTCCCCTTCCAATACATTGTTCAAAAATGTATCAAAAAGT

>PGSC0003DMG400015422LysMRLKs\_2806

AGTGTGTACATCAACATTTGCTCCCCTTCCAATACATTGTTCAAAAATGTATCAAAAAGTACATTAATACGT  
GTAAAATACAAAGCTAAACATTGACATAATGCAATCAGGATAATCAAAA

>PGSC0003DMG400015422LysMRLKs\_2867

ATTAATACGTGTAAAATACAAAGCTAAACATTGACATAATGCAATCAGGATAATCAAAAAGAAAATGGCA  
AAAACAGAAAAGTAAAAGGACCCTTTGAATCCAGATTTTCAGTCTGCCCC

>PGSC0003DMG400015422LysMRLKs\_2928

AAATGGCAAAAACAGAAAAGTAAAAGGACCCTTTGAATCCAGATTTTCAGTCTGCCCCCAGACAACAA  
CTTAATTTTATCTAATACTTTCTCAAATTATACAGTCATAGAATTCTTCAT

>PGSC0003DMG400015422LysMRLKs\_2989

GACAACAACCTTAATTTTATCTAATACTTTCTCAAATTATACAGTCATAGAATTCTTCATAGCTAAAATTAAT  
AATAGACCTAAACAAAAGCTTACAAGAAACGGGTTAACAATTGCTTTG

>PGSC0003DMG400015422LysMRLKs\_3050

CTAAAATTAATAATAGACCTAAACAAAAGCTTACAAGAAACGGGTTAACAATTGCTTTGTGTACTTTTT  
GACAAACATCCAAGTTATAATATTTAATTATGGTGTGTACCATTTTCTTA

>PGSC0003DMG400015422LysMRLKs\_3111

TACTTTTTGACAAACATCCAAGTTATAATATTTAATTATGGTGTGTACCATTTTCTTAAACGACACAAAT  
TCATTGTCTGACCTAAACAACCGTGCAAACAAATGCTTAACGATGCATC

>PGSC0003DMG400015422LysMRLKs\_3172

CGACACAAATTCATTGTCTGACCTAAACAACCGTGCAAACAAATGCTTAACGATGCATCATCTAGTCTTAT  
ATTTTTGGAACGATCTTTTTCTAATATTCATCAAATGGTAAAAATATCC

>PGSC0003DMG400015422LysMRLKs\_3233

CTAGTCTTATATTTTTGGAACGATCTTTTTCTAATATTCATCAAATGGTAAAAATATCCAAAACAACCTAA  
ACAACAACAATCACATGTAGATTCTAAAGAAGTTAACACATACTAAC

>PGSC0003DMG400015422LysMRLKs\_3294

AACAACCTAAACAACAACAATCACATGTAGATTCTAAAGAAGTTAACACATACTAACCAAAACAGTTT  
TCTGTTTCATTTTATGGTCTTGAATTAATGTATCAGAATCTTACATGGAG

>PGSC0003DMG400015422LysMRLKs\_3355

AAACAGTTTTCTGTTTCATTTTATGGTCTTGAATTAATGTATCAGAATCTTACATGGAGAAAAACATTGGC  
CCCAATTCTGCTAACCAAGTGAGGCTCCACAGCTGTCACACACTGCATGT

>PGSC0003DMG400015422LysMRLKs\_366

TGTTGTTGTTTTATTCTCTTGATGCCCTTGAATGGAAACATAAGAATAATAACAATTCTTGATAATACA  
ATGACACATTTACATAGTCTAGTCAGTCAAAAATTATTGTCACATCTAC

>PGSC0003DMG400015422LysMRLKs\_3904

GAAAGAAAACCTGAAGGCACTGAAAGCATAGAAACAATTGTCAGAACCTCATTTAAGCATTCTAGTTTTTC  
CCCCATCAGGAGCAATTTGGCAAGGGCAGGGTCCAATGGGAACTTCACCA

>PGSC0003DMG400015422LysMRLKs\_3965

TAGTTTTTCCCCATCAGGAGCAATTTGGCAAGGGCAGGGTCCAATGGGAACTTCACCATTTTTCGTCCA  
AGTCCATTAAATCCCCAACATCGTTCAGTGCACCTAGTAACCACAACCTG

>PGSC0003DMG400015422LysMRLKs\_4026

TTTCGTCCAAGGTCCATTAAATCCCCAACATCGTTCAGTGCACCTAGTAACCACAACCTGATACATGGAGT  
TAAGAATGTTATCTTGAGGAGGTGGATCCATAAAATCAAATCCAACAAG

>PGSC0003DMG400015422LysMRLKs\_4087

ACATGGAGTTAAGAATGTTATCTTGAGGAGGTGGATCCATAAAATCAAATCCAACAAGTTTTGAATTTT  
GAGAGACTTGAGCAGCAATACCACATTCCCAAGATTTGTCTGTTGAATCT

>PGSC0003DMG400015422LysMRLKs\_4148

TTGAATTTTGAGAGACTTGAGCAGCAATACCACATTCCCAAGATTTGTCTGTTGAATCTCTGGCACAGGG  
CTTTGCAGCATTTCATTCTCATAAGCATTCTCTGTATAAAGTCTGTAACA

>PGSC0003DMG400015422LysMRLKs\_427

TGATAATACAATGACACATTTACATAGTCTAGTCAGTCAAAAATTATTGTCACATCTACATTGATTTCTTT

AATAAAAATCCACTTGACTTTGTAGTCTTCTGATAGGATGACACATTCC

>PGSC0003DMG400015422LysMRLKs\_4331

GAACACTTGTAAGCATCCATACCCATACGGGGATTGTACACCTTCATTTTAACATAGCCTGTATCAATG  
ACATAGAAAATTCCATCAATGGTCAAGGACGTCTCAGCGATATTAGTAGC

>PGSC0003DMG400015422LysMRLKs\_4392

GTATCAATGACATAGAAAATTCCATCAATGGTCAAGGACGTCTCAGCGATATTAGTAGCAACAATGCATT  
TGCAGCCCCATCTTCAGCATTCTGGAAAATTTTTGCTTGCAGATCAGCA

>PGSC0003DMG400015422LysMRLKs\_4453

CAATGCATTTGCGAGCCCCATCTTCAGCATTCTGGAAAATTTTTGCTTGCAGATCAGCAGGCAGTTGAGA  
GTATATAGGAAGAATTAACAGCTTGGGTACTGGTTGCTTTGTTGATGAGA

>PGSC0003DMG400015422LysMRLKs\_488

TGATTTCTTTAATAAAAATCCACTTGACTTTGTAGTCTTCTGATAGGATGACACATTCCTTAAACAAATTTT  
CTGGATCAAATTAAGTTCGAATGAGACATAATATATACAAAATTTAAT

>PGSC0003DMG400015422LysMRLKs\_5307

TTCGATTTTGTAATAACTACTGACAGCTAAGTGCTGCGAGAATCTGGCTTTTCCCTTAAAATCAACCGCACC  
ATCCTCACCCACTACAACAGTATCTGCATCAATCTCATCAACACTCTTC

>PGSC0003DMG400015422LysMRLKs\_549

AAACAAATTTTCTGGATCAAATTAAGTTCGAATGAGACATAATATATACAAAATTTAATAATGTTTAACG  
CGTTTATACTTACATTATACATAATCCAACAAAATATATTCACAAGACCA

>PGSC0003DMG400015422LysMRLKs\_5673

TCTTCATCATCATCAAACCTCCGTTTGCACCTTGTTACCTCTAACAGCTCCAGATCTCAAAGCTGACGATT  
CTCCCAGTTTTTGCCAAGGATTTTTTTTTCTAGTTCGTGAATAATCATT

>PGSC0003DMG400015422LysMRLKs\_5856

TTAGAAGTTGAAGATCTTACCGATGCCCTAATTGGAATTGGAGAAGGAGCCACAATGTCCCACGGAGAA  
GAAGCAGCAACAGCATATGAATGTTCTTCGCTACTGGTTCTCTTTCTCCTT

>PGSC0003DMG400015422LysMRLKs\_5917

ACGGAGAAGAAGCAGCAACAGCATATGAATGTTCTTCGCTACTGGTTCTCTTTCTCCTTCTCACTTCCATG  
GATTTGCTTCTTCTATCCCTCTCCGCCATATATGTTTGTGTTGAATTTGA

>PGSC0003DMG400015422LysMRLKs\_61

ATAATCAAAGTAAGTATCATTGTGGAATTCACAACGTATGTTGTTGTATCAATCGAGTCGTGGAATTA  
TGACAATAAACCAATATTGCTCCAAGTAAATATTGCTTTCACCATTTG

>PGSC0003DMG400015422LysMRLKs\_610

TGTTTAACGCGTTTATACTTACATTATACATAATCCAACAAAATATATTCACAAGACCAATTCCTCCATGTT  
CATATACTTAATCAAGAAAACAACAGCTATGAATTGGTTTCTGAATAT

>PGSC0003DMG400015422LysMRLKs\_671

TCCTCCATGTTTCATATACTTAATCAAGAAAACAACAGCTATGAATTGGTTTCTGAATATTCTCTGCATACT  
AACTTTCTAATTTTCATGTACCAAAGCTCAACAAGAATACTCAGGTAAT

>PGSC0003DMG400015449LRR-RLPs\_1240

GAACAAGGAAAGATATGAGTTTTGATGATAGGAACAATTGTTTGCCTGGTAGAGCAAACAAAAGTCTC  
AAAAAGAATGTCAACCTATTGTGAGTAAGCCTATTGATTGTAGTAAGGCTA

>PGSC0003DMG400015449LRR-RLPs\_1302

AAGTCTCAAAAAGAATGTCAACCTATTGTGAGTAAGCCTATTGATTGTAGTAAGGCTAAATGTGGAGGG  
CCTTTAACAAAATCTCCTCCTAGTAAGAAAATGAAGTGCCACCAAACCA

>PGSC0003DMG400015449LRR-RLPs\_1488

CCTCCACCAACACAAGTCGTTTCATCGCCCCCTCTAGTACATTCTCCACCACCACCTGTTCACTCCCCTCCA  
CCACCTCTAGTACATTCTCCACCACCACGTGTCCATTCTCCTCCTGTT

>PGSC0003DMG400015449LRR-RLPs\_1550

CTCCCCTCCACCACCTCTAGTACATTCTCCACCACCACGTGTCCATTCTCCTCCTGTTTCTCCTCCACCACTA  
CCCGTCCACTCCCCTCCATCACTACCTGTCAACTCCCCTCCACCACC

>PGSC0003DMG400015449LRR-RLPs\_1612

CTCCACCCTACCCGTCCACTCCCCTCCATCACTACCTGTCAACTCCCCTCCACCACCTATAGTACATTCTC  
CACCACCACGTGTCCATTCTCCTCCCGTGTCCCTCTCCACCACCACCTC

>PGSC0003DMG400015449LRR-RLPs\_1674

GTACATTCTCCACCACCACGTGTCCATTCTCCTCCCGTGTCCCTCTCCACCACCACCTCTTGTCCAATCTCCA  
CCGCCACTACATATCAACTCCCCTCCACTACCTATAGTACATGCTCCA

>PGSC0003DMG400015449LRR-RLPs\_1736

CCAATCTCCACCGCCACTACATATCAACTCCCCTCCACTACCTATAGTACATGCTCCACCACCACATGTCC  
ATTCTCCTCCTGTTTCTCCTCCACCACCACCTCATGTCCAATCTCCACC



>PGSC0003DMG400015449LRR-RLPs\_1798

CACATGTCCATTCTCCTCTGTTTCCTCTCCACCACCACCTCATGTCCAATCTCCACCGCCACCTCTAGTAC  
ATTCTCCACCACCACCTGTCCACTCTCCTTCTCCACATGTTTCCTCTC

>PGSC0003DMG400015449LRR-RLPs\_186

CTTTGAAAAATGCAGGTGTATCGATGTTTTTTCAGTTTGTTGCTGATCTCTGCTGTTCTGTTTTCTTTCTCT  
TGTGCACTCTCTGATCATGAAGCATCATTGCTTGCACGACGACAACTC

>PGSC0003DMG400015449LRR-RLPs\_1860

CCTCTAGTACATTCTCCACCACCACCTGTCCACTCTCCTTCTCCACATGTTTCCTCTCCACCACCACCTATCC  
AATCTCCACCGCCACCTCCAGTACATTCTCCACCACCACCTGTCCAC

>PGSC0003DMG400015449LRR-RLPs\_1922

ACCACCTATCCAATCTCCACCGCCACCTCCAGTACATTCTCCACCACCACCTGTCCACTCTCCACCTCCACC  
TATTTCTCTCCACCGCCACCTGTCCATTCCCCTCCACCACCACCCGT

>PGSC0003DMG400015449LRR-RLPs\_1984

CACCTCCACCTATTTCTCTCCACCGCCACCTGTCCATTCCCCTCCACCACCACCCGTCCACTCTCCTCCTCC  
ACCTGTTTCCTCTCCACCACCACCTGTCTACTCCCCTCCACCACCAC

>PGSC0003DMG400015449LRR-RLPs\_2108

TCACTCTCCTCCTCCACCACCACCCGTCCACTCTCCTCCTCCTGTTTCTTCCCCACCACCACCTGTCCACTCT  
CCTCCACCTCCGGTACTCACCACCACCACCTTTTGAACATGTTGT

>PGSC0003DMG400015449LRR-RLPs\_2170

CTGTCCACTCTCCTCCACCTCCGGTACTCACCACCACCACCTTTTGAACATGTTGTCCTTCCACCAAATA  
TTGGTTCAATTTACGCATCGCCACCGCCACCAATCTTCCAAGGATATT

>PGSC0003DMG400015449LRR-RLPs\_2294

AAGCAATGAATGAAGCTTCGTCTCGTTTCCACCTTTTTAGTACGTATAATATTTAGTACATGCAGAATTAC  
ATAATCATTTTTCTTAATGTAAGATTATTATCTAATATATGGTGATGTT

>PGSC0003DMG400015449LRR-RLPs\_2333

GTACGTATAATATTTAGTACATGCAGAATTACATAATCATTTTTCTTAATGTAAGATTATTATCTAATATAT  
GGTGATGTTTTTCTTTCTTTAACTGATACAATATAATCTTGGAAAAG

>PGSC0003DMG400015449LRR-RLPs\_248

TTCTTTCTCTTGTGCACTCTCTGATCATGAAGCATCATTGCTTGCACGACGACAACTCTCAACACTTCTTGA

AAATGGTAATTTACCCGATAAATATGAATTCGAGGTGAATGTAGAATA

>PGSC0003DMG400015449LRR-RLPs\_930

TGTATTCCCAGTAGCATTGGGAAGATGTTGAATTTGGATGAGATTGTGTTTATGAACAATGATCTTGGTG  
GATGTTTGCCTGTTGAAGTCGGGTTGTTAAAGAATGTAACAATGTTTAAT

>PGSC0003DMG400015449LRR-RLPs\_992

TCTTGGTGGATGTTTGCCTGTTGAAGTCGGGTTGTTAAAGAATGTAACAATGTTTAATGCTGCTGGGAAT  
TTGCTTTCTGGGATATTGCCAAAGACACTTGATGGTCTTTCACATGTTGA

>PGSC0003DMG400015458LRR-RLKs\_0

TAAGAAAAAATGAAGACATAAATTTCAACAATATCCATACACCTAATATCCAAAAAATGTTAAAGA  
TTGCTCTTTTCTTCTTCTCCTCTTCTTTACTCAGTTTTATCTAATCAA

>PGSC0003DMG400015458LRR-RLKs\_122

CTCCAATTTAGAACACAAAGCTTTACTTGATCTTAGATCATCTTTAGGCATCAGAGCAAAAACTGGCCA  
AGAAAATCCAACCCTTGTACCAATTGGACTGGAATCCATTGCAACAATGA

>PGSC0003DMG400015458LRR-RLKs\_1403

CATTTTATTGTTTTGGAAGGTATGCTATAGAGGGAATTCAAACGAAAGAGTCATATCGAATGTTAGTCCT  
GTTGTGGAAGGAGGCAATAATCAGGCACCAGTAAAGTTCTCTCGTGATAC

>PGSC0003DMG400015458LRR-RLKs\_1464

GTTAGTCCTGTTGTGGAAGGAGGCAATAATCAGGCACCAGTAAAGTTCTCTCGTGATACATCTGGTTCA  
ATTGAATCATTTACTTATGATCAGATACTAAAAGCCACAAGCAACTTCAAT

>PGSC0003DMG400015458LRR-RLKs\_1891

GATTA AAAATTGCAACAGGAGCTGCAGAAGGCTTAGTTTTTTGCATCATGAGTGTAATCCTCCCCTTGT  
TCATAGGTATTTTTTTCTTCCACTTTGTTGCATTCTTGTTTGATAATGTT

>PGSC0003DMG400015458LRR-RLKs\_1952

TCCCCTTGTTTCATAGGTATTTTTTTCTTCCACTTTGTTGCATTCTTGTTTGATAATGTTGTACACCAAGCTAA  
TTATATTCTGCATTTTCTGGTTCTTGAAGAGATGTTCAAGCTAGCAG

>PGSC0003DMG400015458LRR-RLKs\_2013

ACACCAAGCTAATTATATTCTGCATTTTCTGGTTCTTGAAGAGATGTTCAAGCTAGCAGTATCCTTCTCGA  
CGATAAATTTGAAGTAAGGCTGGGAAGTTTGAGCAACGTGTGTGCACAG

>PGSC0003DMG400015458LRR-RLKs\_2074

TCCTTCTCGACGATAAATTTGAAGTAAGGCTGGGAAGTTTGAGCAACGTGTGTGCACAGGAAGGTGATA  
GCCAGAATTTGATCACAAAGTTTTCCGCACGACAAAGTAAGTATTACTAT

>PGSC0003DMG400015458LRR-RLKs\_2318

TGACAATAAACAGGAATCCTGAGGGAGAGCCTGCTGGTATGTACTATTCTTTTCGTAAAAGAACGTATA  
GTTGAATAGAGTTATTTATCTGAATTTCTCATATGCTGCCTTTATACATGG

>PGSC0003DMG400015458LRR-RLKs\_2440

AGGATCTTCATTTACAAGTTGCAGTACTTATGATGTATACTGTTTCGGGAAGGTCTTGCTCGAGCTTGTA  
ACTGGTAAGGTTGGCGTAAGTCATTTAGATGATGCCTCAACCAAGGAGTG

>PGSC0003DMG400015458LRR-RLKs\_2501

GAGCTTGTAACCTGGTAAGGTTGGCGTAAGTCATTTAGATGATGCCTCAACCAAGGAGTGGTTGGACAAA  
CTTCTTCCTTTTCATCACTATACGCGAGAAAGAACTACTGTCCAAGATAGTC

>PGSC0003DMG400015458LRR-RLKs\_2562

TGGACAAACTTCTTCCTTTTCATCACTATACGCGAGAAAGAACTACTGTCCAAGATAGTCGATCCATCTCTA  
ATTATAGATGATGACTTACTTGAAGAGATGTGGGCTGTAGCAATAGTAG

>PGSC0003DMG400015458LRR-RLKs\_2867

AGTGTTAATGCTAGTGGCCAAATAAGCAAAGAAGCTGGCATGAACCTGAAACAGTCAGGAAGAGTAGG  
ATTATCTCATTCTATTAGCAGTGGGAACGAACATTCATCATCGTGTAAGAGA

>PGSC0003DMG400015458LRR-RLKs\_2928

GAGTAGGATTATCTCATTCTATTAGCAGTGGGAACGAACATTCATCATCGTGTAAGAGATCATCGAGTG  
AGATTTTCCCGAACCTCAGGACACACTAGATATAGAGAGACAAGACATGA

>PGSC0003DMG400015458LRR-RLKs\_3050

TAGCCATCCAGCACGAATCTATGCCAAATGCATTTCTGCAGGCAGGGGTTTTGTAAGTATCAGGAGCTTT  
GATTTTTTATTAGATGAGCGGCAGTACTATGATCATTCTGAAGACATGGG

>PGSC0003DMG400015458LRR-RLKs\_3111

AGGAGCTTTGATTTTTTATTAGATGAGCGGCAGTACTATGATCATTCTGAAGACATGGGGCCTACACGCT  
ACACACATGTTATGCGGTTGGTAAACTCTTTCTTCTGCAACAGCCGATC

>PGSC0003DMG400015458LRR-RLKs\_3294

TTTCTTTTAGTGTGTCACAAATGCTCATGTGCTTTGTAAATTTTCAAAAAGTTTACTCTTGTTCTGTGATG  
ATAGAACAAGTATATAATTGTGTCAAGAGGTACACTATCTAATCCAG

>PGSC0003DMG400015458LRR-RLKs\_3355

TTCCTGTGATGATAGAACAAGTATATAATTGTGTCAAGAGTGACACTATCTAATCCAGATTCACATTCC  
ATGATCTCATATTTTGAATTGCATGAAAAAGTATGATATAAATGAATA

>PGSC0003DMG400015458LRR-RLKs\_3594

TATGTTGTTGTAATTGGATAAATAGGGCATCAAACTGTTATAGTGTGTCAATCCCTTGGTGGCCTAAAT  
AAGGACAAGTAACTCAATACATGTAGATGCACCTGAAAGTTACAATGAGC

>PGSC0003DMG400015458LRR-RLKs\_488

TGATTTTCTGTCTTTGTTTAAACAATTCAATTACAGGAACTGTTCTTTAGAAGTTGGAAAGTTGAGTTCTTT  
AAGGGTTCTTAATCTTTCTTGGAAATCACTTACAGGTTCAATTCCAAG

>PGSC0003DMG400015458LRR-RLKs\_549

TTGAGTTCTTTAAGGGTTCTTAATCTTTCTTGGAAATCACTTACAGGTTCAATTCCAAGTTCTGTTTCAGAT  
ATTAAGAATCTGTCTGTTCTTGATTTGTCTTCAAATTTCTTGTCTGGA

>PGSC0003DMG400015458LRR-RLKs\_61

TGTTAAAGATTGCTCTTTTCTTCTTCTTCTTCTTCTTACTCAGTTTTATCTAATCAAATCTCCAATTTAGA  
ACACAAAGCTTTACTTGATCTTAGATCATCTTTAGGCATCAGAGCAA

>PGSC0003DMG400015458LRR-RLKs\_610

CTGTTTCAGATATTAAGAATCTGTCTGTTCTTGATTTGTCTTCAAATTTCTTGTCTGGACAAATCCCAGTTG  
AGTTTGTTTCATTTCTTGGACTTGAGTTACTTAATTTGTCAAATAACA

>PGSC0003DMG400015458LRR-RLKs\_793

GCTATAATTACTTGTGAGGGTCATTGCCTGAGGGTTTATTAAGAATGAGAAATTTGAGTAAATTGTTAGT  
TGAAATAATGAGCTAGAGGGTGCATTGTCAAGTACTTTGTTTACTTCAA

>PGSC0003DMG400015458LRR-RLKs\_854

ATTGTTAGTTGGAAATAATGAGCTAGAGGGTGCATTGTCAAGTACTTTGTTTACTTCAAATGATTCTGTG  
TTGGAGTATATAAATCTTAGTTGGAATCGATTCTGAAGGCAAAGTTCTCTGA

>PGSC0003DMG400015458LRR-RLKs\_915

GATTCTGTGTTGGAGTATATAAATCTTAGTTGGAATCGATTCTGAAGGCAAAGTTCTCTGATGTTTTGTGGT  
CATTGTCTGATCATTTAAGGGTTCTTGATATATCAGGGAACAATTTTACT

>PGSC0003DMG400015476G-LecRK\_0

TCCAAGTATTGTTTTGGGGGGTTGGGGCTGGGGAAAAGTCTAGACTAAGATGAAAATTTTACAATGTT

AACATTTCTCTCTCTGTTCCATTTGACAATCATTATCCATTCTTGTTC

>PGSC0003DMG400015476G-LecRK\_1054

TCAATGGAATAGACGTCAGTCGATGGATCATGTAATGAAGGTACCACAAAGTGAAATGGGGACTCAGA  
GTGGTTGGGCTGGAGCTACTCCACATCAGCAGGGAGCTAGTTCAAGCGGCGA

>PGSC0003DMG400015476G-LecRK\_1116

CTCAGAGTGGTTGGGCTGGAGCTACTCCACATCAGCAGGGAGCTAGTTCAAGCGGCGAATTTGGCTCA  
GGTTATTCAGGCCAAGCAGTGCCATTGCCTTCTCAATCACCTAACATGGGAC

>PGSC0003DMG400015476G-LecRK\_1178

GGCTCAGGTTATTCAGGCCAAGCAGTGCCATTGCCTTCTCAATCACCTAACATGGGACTTGGTGGTTTCT  
CCCAGAGCCAATTCAGTTATGAGGAGCTAGCTAAGGCCACAGATGGATTT

>PGSC0003DMG400015476G-LecRK\_124

AGGTAAAAACTTTTATTTATTTATTTATTTATTTCCCATATTATATAATGCAAGTAACATTGTTTCATGGAAA  
TATCGTAGGGACATTGAAGAATCGTTGAGAAGAGCAGTTAACGGGAGA

>PGSC0003DMG400015476G-LecRK\_1240

TGGTTTCTCCCAGAGCCAATTCAGTTATGAGGAGCTAGCTAAGGCCACAGATGGATTTTCTCAGGCCAAT  
CTGTTAGGACAAGGTGGTTTCGGATACGTGCATAAAGGTGTTTTGAATGA

>PGSC0003DMG400015476G-LecRK\_1302

AGGCCAATCTGTTAGGACAAGGTGGTTTCGGATACGTGCATAAAGGTGTTTTGAATGATGGAAGAGTG  
GTTGCCATCAAGAGTTTGAAAGCAGGAAGTGGACAAGGAGAACGAGAATTTTC

>PGSC0003DMG400015476G-LecRK\_1364

AGAGTGGTTGCCATCAAGAGTTTGAAAGCAGGAAGTGGACAAGGAGAACGAGAATTTCAAGCTGAGGT  
TGAGATCATTAGCAGAGTTCATCATCGTCATCTTGTGTCCCTCGTTGGATAT

>PGSC0003DMG400015476G-LecRK\_1426

TGAGGTTGAGATCATTAGCAGAGTTCATCATCGTCATCTTGTGTCCCTCGTTGGATATTGCATTGCTAAT  
GGACAACGCATGTTGGTCTATGAATATGTTGACAACAAAACCTTGGAGTT

>PGSC0003DMG400015476G-LecRK\_1488

TTGCTAATGGACAACGCATGTTGGTCTATGAATATGTTGACAACAAAACCTTGGAGTTTCACCTTCATGG  
TACATTCTTTCCTATTCAATACTCACTACTTCTTCTACGATCATGTTAAT

>PGSC0003DMG400015476G-LecRK\_1550

CTTCATGGTACATTCTTTCCTATTCAATACTCACTACTTCTTCTACGATCATGTTAATTTTATTGTGAAATAA  
GAGAATCCTTTTCCTAGTTGATTCCCAAATTTGATTCAATATATTT

>PGSC0003DMG400015476G-LecRK\_1612

TTGTGAAATAAGAGAATCCTTTTCCTAGTTGATTCCCAAATTTGATTCAATATATTTCTTAATTCTAGTTT  
TGATAAGGGTGAATCAAATTCATTATTGCAGGAAAAGGTCAACCTGT

>PGSC0003DMG400015476G-LecRK\_1674

ATTCTAGTTTTGATAAGGGTGAATCAAATTCATTATTGCAGGAAAAGGTCAACCTGTCATGGATTGGG  
AGACCAGACTTAAAATTGCTTTGGGATCAGCTAAAGGACTTGCTTATCTCC

>PGSC0003DMG400015476G-LecRK\_1736

GATTGGGAGACCAGACTTAAAATTGCTTTGGGATCAGCTAAAGGACTTGCTTATCTCCATGAAGATTGTA  
TGAACATTCTAATCTACACTTTCACCTCTCTGTCTCTCTTTATCTCTC

>PGSC0003DMG400015476G-LecRK\_186

TTCATGGAAATATCGTAGGGACATTGAAGAATCGTTGAGAAGAGCAGTTAACGGGAGATAGATAGATA  
TTGAGGGAATTTTTATCATTGTTAAAAATATGGATTCATCTCCTGGAAGT

>PGSC0003DMG400015476G-LecRK\_1860

TCATTTCTTGATATATACATGCAGGCCAATATAGAATTATCCACCGCGACATCAAGGCTGCAAATATTCTA  
CTAGACCTCAATTATGAAGCCTTGTAATTAATGATCAGCCACATTTG

>PGSC0003DMG400015476G-LecRK\_1922

AATATTCTACTAGACCTCAATTATGAAGCCTTGTAATTAATGATCAGCCACATTTGATATGTCAATGAA  
GATATGAAGAGCAAGTTTTATGTTAAAACCTCGCGTTTTTGTTTAAGAA

>PGSC0003DMG400015476G-LecRK\_1984

GTCAATGAAGATATGAAGAGCAAGTTTTATGTTAAAACCTCGCGTTTTTGTTTAAGAAAGGTTTATTAAC  
CATCACAATGCCTTTTAGATTTAAAGGAAAATTTTGGTTTATTAGGTGGC

>PGSC0003DMG400015476G-LecRK\_2046

TTATTAACCATCACAATGCCTTTTAGATTTAAAGGAAAATTTTGGTTTATTAGGTGGCAGATTTTGGATTG  
GCTAAGCTTACTTCGGATAACAACACTCATGTATCAACTCGTGTTATGG

>PGSC0003DMG400015476G-LecRK\_2108

TTTGGATTGGCTAAGCTTACTTCGGATAACAACACTCATGTATCAACTCGTGTTATGGGAACATTCGGGT  
GAGTCAAGCATAGCTACTTAGTCGTATAAACTTGTATTCAACAATCAGA

>PGSC0003DMG400015476G-LecRK\_2170

ATTCGGGTGAGTCAAGCATAGCTACTTAGTCGTATAAACTTGTATTCAACAATCAGAACCAATTATGTA  
TTTTAACATACTTCAGATGTCTCTAAGCTAGAAAGTTACTTGCAGGTA

>PGSC0003DMG400015476G-LecRK\_2232

ATTATGTATTTAACATACTTCAGATGTCTCTAAGCTAGAAAGTTACTTGCAGGTA

>PGSC0003DMG400015476G-LecRK\_2294

TCCTGAATATGCATCAAGTGGCAAACAACTAACAGAGAAGTCAGATGTGTTTTCATATGGAGTAATGCTGTT  
GGAGCTCATAACCGCAAAAAACCTGTTGATCCTAGCAATATGATGGAGGA

>PGSC0003DMG400015476G-LecRK\_2356

TGCTGTTGGAGCTCATAACCGCAAAAAACCTGTTGATCCTAGCAATATGATGGAGGACAGTTTAGTAG  
ATTGGGTTTGTCTAGATCCTCAGTTCACATTTGATTGCGCCAAGATGTGC

>PGSC0003DMG400015476G-LecRK\_2418

TTAGTAGATTGGGTTTGTCTAGATCCTCAGTTCACATTTGATTGCGCCAAGATGTGCTTAGACTTTTAAAC  
TTTTGTTTGAGGTATTGATCTAATATATGAATGTATACAGGCTAGGCC

>PGSC0003DMG400015476G-LecRK\_248

TAGATATTGAGGGAATTTTATCATTTGTAAAAATATGGATTCATCTCCTGGAAGTCTCCTCCAATGA  
TACTGATTCTAAAGAAACCCCTTCTTCAAATGGAAGTCCGCCTTCATCT

>PGSC0003DMG400015476G-LecRK\_2480

ACTTTTAACTTTTGTGTTGAGGTATTGATCTAATATATGAATGTATACAGGCTAGGCCCTTCTTACAAGAG  
CACTGGAAGAGGAAAAATATGATGGATTGGTAGACCCACGTCTTGAAGG

>PGSC0003DMG400015476G-LecRK\_2542

TTACAAGAGCACTGGAAGAGGAAAAATATGATGGATTGGTAGACCCACGTCTTGAAGGGAACCTTGTAT  
ACAGATGAGCTACATCGCATGATAGGTTGTGCTGCTTCTAGCATTGCGCCACT

>PGSC0003DMG400015476G-LecRK\_2604

TTTGATACAGATGAGCTACATCGCATGATAGGTTGTGCTGCTTCTAGCATTGCGCCACTCTGCTAAAAGAC  
GTCCCAAATGAGTCAGGTATGATTACCCTCTCTAGAAGATAACAAATAC

>PGSC0003DMG400015476G-LecRK\_2666

TAAAAGACGTCCCAAATGAGTCAGGTATGATTACCCTCTCTAGAAGATAACAAATACTGCATATTTACA

TTATGATTTAACATGTTGTAGCATATTTTGGTGGTTTGCTTATATGGACT

>PGSC0003DMG400015476G-LecRK\_2728

TATTTACATTATGATTTAACATGTTGTAGCATATTTTGGTGGTTTGCTTATATGGACTCGAGAAATTCATA

TCTTTACATGATATCAGAGTAAGGTTTCATCTCCGTTTGGACAAAATGAC

>PGSC0003DMG400015476G-LecRK\_2790

AAATTCATATCTTTACATGATATCAGAGTAAGGTTTCATCTCCGTTTGGACAAAATGACTTGTTTCACTTAT

ATAAATATTATGTATTATGAACAGATTGTACGTGCATTGGAAGGCAATT

>PGSC0003DMG400015476G-LecRK\_2852

TTCACCTTATATAAATATTATGTATTATGAACAGATTGTACGTGCATTGGAAGGCAATTCATCGTTGGAGG

ACTTGAACGATAATCCAAAACCAAGCAAGGTTCTAGCTTTGCCGCGTCA

>PGSC0003DMG400015476G-LecRK\_2914

GTTGGAGGACTTGAACGATAATCCAAAACCAAGCAAGGTTCTAGCTTTGCCGCGTCAAATGGGGCACC

CACTCAGAGCTATGATACTGGTATGTATAATGCTGACATGATGAAGTTCAG

>PGSC0003DMG400015476G-LecRK\_2976

GGGCACCCACTCAGAGCTATGATACTGGTATGTATAATGCTGACATGATGAAGTTCAGGAAAATGATTA

TGCCAACCCAAGAATTCAGCAGCAGTCCAAGTGAGTAATGAATCAACCCTT

>PGSC0003DMG400015476G-LecRK\_3038

ATGATTATGCCAACCCAAGAATTCAGCAGCAGTCCAAGTGAGTAATGAATCAACCCTTCTCCTCCTCCTC

AAGCAACGATTCAACACGCGGGCAAGAGTAAAAAAGAATGTACCTAAA

>PGSC0003DMG400015476G-LecRK\_310

CTCCAATGATACTGATTCTAAAGAAACCCCTTCTTCAAATGGAAGTCCGCCTTCATCTTCAGATTCAAAAA

ATGATTCTCCTTCGTCTTCGTCTTCGTCTTCGTCTTCATCTCCACCACC

>PGSC0003DMG400015476G-LecRK\_3100

CTCCTCCTCAAGCAACGATTCAACACGCGGGCAAGAGTAAAAAAGAATGTACCTAAAGCTTGAGATAT

TTTTTCAAACATATTCTTGGCTGGAAGTTATAACAGAGATTTGGGATTAC

>PGSC0003DMG400015476G-LecRK\_3162

GAGATATTTTTTCAAACATATTCTTGGCTGGAAGTTATAACAGAGATTTGGGATTACAAAAATTAATGT

TTATGATGAACATTCACTACTCATATCTTGATTTGAATAACAAAGATTAT

>PGSC0003DMG400015476G-LecRK\_3224



ATTAATGTTTATGATGAACATTCACTACTCATATCTTGATTTGAATAACAAAGATTATAGGATCAGAATAC  
AATTATACTTTTTTTGTTTCAATATGTACATACAATTTATTCTACAAA

>PGSC0003DMG400015476G-LecRK\_372

ATTCAAAAATGATTCTCCTTCGTCTTCGTCTTCGTCTTCATCTCCACCACCAAAAATGAATCTC  
CACCTTCATCACCACCACCACAATCTCCTCCTCCATCTCCTAATGCAT

>PGSC0003DMG400015476G-LecRK\_434

AATGAATCTCCACCTTCATCACCACCACCACAATCTCCTCCTCCATCTCCTAATGCATCACCACCTCCAAA  
AATGATTCTCCTCCGCCTTCTTCACCACCACCATCCTCTTCTGAATCT

>PGSC0003DMG400015476G-LecRK\_496

ACCTCCAAAATGATTCTCCTCCGCCTTCTTCACCACCACCATCCTCTTCTGAATCTAATTCATCACCATC  
AAAAGATAATAATAATAATAATCAATCCCCAAATCCTTCTTCTAATAC

>PGSC0003DMG400015476G-LecRK\_558

CATCACCATCAAAGATAATAATAATAATAATCAATCCCCAAATCCTTCTTCTAATACACCTTCACAATCA  
CCACCACCATCATCCACGTATAATACTCCATCAACCCCAAATAGTCCTA

>PGSC0003DMG400015476G-LecRK\_62

CAATGTTAACATTTCTCTCTGTTCATTTGACAATCATTATCCATTCTTGTTCTTCATTGAGGTAAAAA  
CTTTTATTTATTTATTTATTTATTCCCATATTATATAATGCAAGTAAC

>PGSC0003DMG400015476G-LecRK\_620

TCACAATCACCACCACCATCATCCACGTATAATACTCCATCAACCCCAAATAGTCCTAAAAATCCTCCATC  
ATTTCTATTATTTTCTCCACCACCGCTGCTTCTTCACGTGAATCGCCT

>PGSC0003DMG400015476G-LecRK\_682

TCCTCCATCATTCTATTATTTTCTCCACCACCGCTGCTTCTTCACGTGAATCGCCTGCACCTCCTCATGC  
ACATTTGTCTCCTCCTCCACGCTCAGGATCTAATCAACCATCACCTGC

>PGSC0003DMG400015476G-LecRK\_744

CTCCTCATGCACATTTGTCTCCTCCTCCACGCTCAGGATCTAATCAACCATCACCTGCAAACGATGATTCC  
TCAAGTACTGTTGGTATAGTAGCTGGAATTGCTGTCTGGAGGCATCGTCA

>PGSC0003DMG400015476G-LecRK\_806

GATGATTCTCAAGTACTGTTGGTATAGTAGCTGGAATTGCTGTCTGGAGGCATCGTCATAATTGCATTAA  
TCATTCTATGTGTATGGTGTAGTAAAAGGAAGAAGAAACAGAGATACTAT

>PGSC0003DMG400015476G-LecRK\_868

TGCATTAATCATTCTATGTGTATGGTGTAGTAAAAGGAAGAAGAAACAGAGATACTATATGGCTCCTGG  
ACCTAAAGGTATGTTACTAATTACTAATAAAAGTGTGTTTAAAGCATAGTA

>PGSC0003DMG400015476G-LecRK\_930

CTCCTGGACCTAAAGGTATGTTACTAATTACTAATAAAAGTGTGTTTAAAGCATAGTATTACTTTTTAATT  
TTCGATTAAATATGTTTTTGATTAGGTGGTGTATCCATACTACAATAACA

>PGSC0003DMG400015476G-LecRK\_992

TTTTTAATTTTCGATTAAATATGTTTTTGATTAGGTGGTGTATCCATACTACAATAACAACAATCAATGGAA  
TAGACGTCAGTCGATGGATCATGTAATGAAGGTACCACAAAGTCAAATG

>PGSC0003DMG400015547-(rev)RLKmalectin\_0

CATCTTTTCTCTCTCTTTTACCCTCCATGAATGGGCTGAACAACATAACTCCACTCCCCATACACAGAA  
AGAGTCAACACCACCAAACCCTCAAAAATATTAATTCTTGGCACAAA

>PGSC0003DMG400015547-(rev)RLKmalectin\_124

TATACAAAATGGCCCCTTTTGACTTCATGAATTGCTAGTTCACATTCTAGAAAATGATGTTTTTGTTTTCTT  
TGAATTTAAAATTCTATTAATTTGTTTGTCTGAGGTGGGGTTTTCA

>PGSC0003DMG400015547-(rev)RLKmalectin\_186

TTGTTTTCTTTGAATTTAAAATTCTATTAATTTGTTTGTCTGAGGTGGGGTTTTTCAGTTAAAGCATCAAC  
CTGCCTGTTAATGTTCCAAAATCCAAGATATCATTCTGTTTTTCTTCT

>PGSC0003DMG400015547-(rev)RLKmalectin\_248

AAGCATCAACCTGCCTGTTAATGTTCCAAAATCCAAGATATCATTCTGTTTTTCTTCTGTGCTACCTGAAA  
AAATAAAAATAAAAACAAATATTTTCTGGTACCCCTCAAGAGTTTTTCT

>PGSC0003DMG400015547-(rev)RLKmalectin\_2480

ACTGCTTGATGAGAGTTTTATGGCAAAGTTGCTGATTTTGGACTATCCAAGACAGGGCCTGAGCTTGAT  
CAAACCTCATGTTAGCACAGCTGTGAAAGGAAGTTTTGGCTACCTAGATCC

>PGSC0003DMG400015547-(rev)RLKmalectin\_2976

CTCTCTCCACAAGTCGATGATTTCAAGTCAAGTTGATCCCGGTGCTTCTGCTGCTCATAATGGAACACCAA  
ATTTGGATGACCTCTCTGGTGTTCATGAGTAGGGTTTTCTCACAATTA

>PGSC0003DMG400015547-(rev)RLKmalectin\_3038

AACACCAAATTTGGATGACCTCTCTGGTGTTCATGAGTAGGGTTTTCTCACAATTAGTCAAGTCTGAG

GGTAGATAATTAAGTAAAAAGGTACATACAGTGTTTAGGTGTTTGTTAAT

>PGSC0003DMG400015547-(rev)RLKmalectin\_310

TACCTGAAAAAATAAAAATAAAAACAAATATTTCTGGTACCCCTCAAGAGTTTTCTTCTGATTTATGTT  
CTGTTTGTTTCATTATTGATTTGGGTTTCTCTTTTTATCAGTCTTGGAG

>PGSC0003DMG400015547-(rev)RLKmalectin\_3162

CTTTTGTTTGTTGGATCATATAAAGATTGATCTTTCTTTCTTTTGTAACAGTTTATTCTACGAATTTCCGAG  
TTTTAACTAGGAATGTATATCTGAAAATATGCATTGTTCTACCTGTGG

>PGSC0003DMG400015547-(rev)RLKmalectin\_372

ATTTATGTTCTGTTTGTTTCATTATTGATTTGGGTTTCTCTTTTTATCAGTCTTGGAGCTCTTTGAATGAAA  
AAGGTGACATCTTACCCTTCTGTTGATGTTTCTTCTGATGGGTATT

>PGSC0003DMG400015547-(rev)RLKmalectin\_434

TTTGAATGAAAAGGTGACATCTTACCCTTCTGTTGATGTTTCTTCTGATGGGTATTTTCATATATTGTGC  
TTCTGTGGTGATGAAATAGTTGTTCTTTGAGTTACTTTTCTTTTCAAG

>PGSC0003DMG400015547-(rev)RLKmalectin\_62

ATACACAGAAAGAGTCAACACCACCAAACCCTCAAAAATATTAATTCTTGGCACAAATATTTATACAAA  
ATGGCCCCTTTGACTTCATGAATTGCTAGTTCACATTCTAGAAAATGAT

>PGSC0003DMG400015603LRR-RLPs\_0

CAGATCATCATCACTGCAACGCCGCGCTTATCTCCTCTTCTGGAAGTCTCCCTTCGTTCCCTCTCACTGTCT  
AACTCACTCATTGAGTCTCTCCATGGGCTCATCTTCTACATTCTCTCT

>PGSC0003DMG400015603LRR-RLPs\_1037

GCTCTTGTTTTTTCACAATGCCAAGTTAGTGGCAGGCAAGGCTTTAGTATTTGGGGAAAGGGTCTAACT  
TAAGTGGGTTTCCAGTTTTGGCGGATACTGGAAGAGGTCAGGAATCATGA

>PGSC0003DMG400015603LRR-RLPs\_1098

GGTCTAACTTAAGTGGGTTTCCAGTTTTGGCGGATACTGGAAGAGGTCAGGAATCATGAGGTCTTGTGT  
GAAAATTCTCAACTTAATAGAAAAGTTTGAAGTTATTGGAGTGCTTGGCAG

>PGSC0003DMG400015603LRR-RLPs\_1159

TCTTGTTGAAAATTCTCAACTTAATAGAAAAGTTTGAAGTTATTGGAGTGCTTGGCAGTATGACAGAGA  
CCTGATATTCAACCATGAATGGAGAACTTAAGGCTCTTTATATGGAACCT

>PGSC0003DMG400015603LRR-RLPs\_122

GCTCTCATCCAACGGTACTTTCTCTACTCTATTAGCTCACTCGAACTTACAATTATGACTAAATTCTCACT  
TTTTTCGTAATTTTTAGGTGAATTTGAATTTAATGGTAGAAAAGTC

>PGSC0003DMG400015603LRR-RLPs\_1220

TGACAGAGACCTGATATTCAACCATGAATGGAGAACTTAAGGCTCTTTATATGGAACCTTTAAGCTGTA  
CATCCTGCAACGGATTACCCTCTTTTTGTTGAGTTATTCGTGACTAAGAA

>PGSC0003DMG400015603LRR-RLPs\_1281

TAAGCTGTACATCCTGCAACGGATTACCCTCTTTTTGTTGAGTTATTCGTGACTAAGAAAATGAGTTAACA  
CGGTAATGTTTCAGCATTTTAGAGGCTTAGATTTAAACTTAGAAGTGC

>PGSC0003DMG400015603LRR-RLPs\_1342

TGAGTTAACACGGTAATGTTTCAGCATTTTAGAGGCTTAGATTTAAACTTAGAAGTGCAAGGCACCTTA  
CAGCCAAACAGGATTGCCATTTTCATTTGCAGCCTTTTGATATCATTTT

>PGSC0003DMG400015603LRR-RLPs\_1403

GGCACCTTACAGCCAAACAGGATTGCCATTTTCATTTGCAGCCTTTTGATATCATTTTAGATGTTCTGCT  
GCCTGCACTCGTATGAATGTATTTGTTGACATTTTGACTGAGTGACA

>PGSC0003DMG400015603LRR-RLPs\_1464

ATGTTCTGCTGCCTGCACTCGTATGAATGTATTTGTTGACATTTTGACTGAGTGACACTGACCTGTTTT  
TTAGGTTCCCAATTGTTGCAATCATTGTAATCAATTAATATGCTTTAA

>PGSC0003DMG400015603LRR-RLPs\_1525

GACCTGTTTTTTAGGTTCCCAATTGTTGCAATCATTGTAATCAATTAATATGCTTTAATTATCTAATATAA  
ATTAGCATTGAAAATTATATTTCTCTTTAAGAGCCATTTTCTAACA

>PGSC0003DMG400015603LRR-RLPs\_1586

ATCTAATATAAATTAGCCATTGAAAATTATATTTCTCTTTAAGAGCCATTTTCTAACAGCTTTTGAGATAT  
AGGTTCTGCAACTTCACAAATTCATTCTCTTGAACCAACTTTGGTTGT

>PGSC0003DMG400015603LRR-RLPs\_1647

TTTTGAGATATAGGTTCTGCAACTTCACAAATTCATTCTCTTGAACCAACTTTGGTTGTAAAGCGGCTTGC  
TCAACACAACCATAAATCTGGTTTTTCATCTTTTAGTTGCCAAATATAGT

>PGSC0003DMG400015603LRR-RLPs\_1708

AGCGGCTTGCTCAACACAACCATAAATCTGGTTTTTCATCTTTTAGTTGCCAAATATAGTTCTATGCTTAAG  
GGACACCGGACATGTAGTGTGTGGTAGTTTTTTTTTTTTAAAAAAAAT

>PGSC0003DMG400015603LRR-RLPs\_1769

TATGCTTAAGGGACACCGGACATGTAGTGTGTGGTAGTTTTTTTTTTTTAAAAAAAATTAGTGAGAAGA  
TGATGACTTGTTCCGCAACTTATGGCATCCTCATTTAACTATCTTTTGAA

>PGSC0003DMG400015603LRR-RLPs\_183

AAATTCTCACTTTTTTCGTAATTTTTAGGTGAATTTGAATTAATGGTAGAAAAGTCGGATACGGATTG  
CAGAAATCGTTGAGCAGTTCATCCAGTTATTGTTTGATTCATATTTTCGC

>PGSC0003DMG400015603LRR-RLPs\_1830

GTGAGAAGATGATGACTTGTTCCGCAACTTATGGCATCCTCATTTAACTATCTTTTGAAAATCAAGAGGA  
TTACTAGGAGGAATGCTCTTGTCTTTTTAGTTGTTTTACTGGTGAAAGT

>PGSC0003DMG400015603LRR-RLPs\_1891

TCAAGAGGATTACTAGGAGGAATGCTCTTGTCTTTTTAGTTGTTTTACTGGTGAAAGTTAATGGAATGT  
TATTAATATTGTGTAGAAATATTCTTAATGATTATGTTATATTGATTAAG

>PGSC0003DMG400015603LRR-RLPs\_2196

ACATTATATAAAAAAAGGTTTTGAGATGAAGGTCTTCAATGAAGTTGAAGACCGTGCTCATCAACATTC  
TAAATATATGTTGGATTTTCTCTATGTGAAGATTAGTGATTGAAAGCGAA

>PGSC0003DMG400015603LRR-RLPs\_2257

TCAACATTCTAAATATATGTTGGATTTTCTCTATGTGAAGATTAGTGATTGAAAGCGAAGGAGGGTTTAT  
TGGTAATAAATGCTTGAGGACACTTCAATGGCATCCTAATCAACAACGGA

>PGSC0003DMG400015603LRR-RLPs\_2318

AGGGTTTATTGGTAATAAATGCTTGAGGACACTTCAATGGCATCCTAATCAACAACGGAATATCCTAGAA  
AGAATAGTTGTGCTGGGGATAGAAATAGAATAGCACTTATATGGATGAGG

>PGSC0003DMG400015603LRR-RLPs\_2379

ATCCTAGAAAGAATAGTTGTGCTGGGGATAGAAATAGAATAGCACTTATATGGATGAGGTCATGAGCCT  
CCCTTCAGTAACTTACTTCAGTGTGATCATCCTGTGAAATTTTCATGAAA

>PGSC0003DMG400015603LRR-RLPs\_244

ATACGGATTGCAGAAATCGTTGAGCAGTTCATCCAGTTATTGTTTGATTCATATTTCCGCCGATTTGTATAA  
GTAGTAGAAGAAAATGCTTGCAATTGAGACGTGTAATTGTTAGAGCTGC

>PGSC0003DMG400015603LRR-RLPs\_2440

ATGAGCCTCCCTTCAGTAACTTACTTCAGTGTGATCATCCTGTGAAATTTTCATGAAAAAAGAGAAA

ATTGAAATGTTGAAGAGGAACAAGAAAAATGTTGGTGAGAACGTTGGAGA

>PGSC0003DMG400015603LRR-RLPs\_2501

AAAGAGAAAATTGAAATGTTGAAGAGGAACAAGAAAAATGTTGGTGAGAACGTTGGAGAAAAGTGG  
GCCACAACAACAAAAGAAAGTTGAGGGAAAGAGGAGATCTTAGAGTTTTATTT

>PGSC0003DMG400015603LRR-RLPs\_2562

ACTAGGGCCACAACAACAAAAGAAAGTTGAGGGAAAGAGGAGATCTTAGAGTTTTATTTACAAGGGC  
AAATTTGGAATTATATACATGAATTGAGGGTACAAAAGTAATATCCTTGTT

>PGSC0003DMG400015603LRR-RLPs\_2745

ACAGGCCCTAAGAATCCAAAAGATTAGGAAATAATCCTTATTATTGTAGGCTAAAAGTTCTATTTAGGAG  
TCTTCTTGATGGTTGTAAGCATCAATTAAGAAAGTTGTTATTCCCTT

>PGSC0003DMG400015603LRR-RLPs\_305

ATTTGTATAAGTAGTAGAAGAAAATGCTTGCAATTGAGACGTGTAATTGTTAGAGCTGCTTCGTCGTCTA  
GTACTGGTCCGAGACGTTTCGACGAATACTCGGAGAGTTTACAAGGAATCA

>PGSC0003DMG400015603LRR-RLPs\_3050

CTATGTGGATGATGTCCAAGAGATTTAACTTAGCATATACCTTCCGGTGGTTGAATTATAGATTCCTTTAC  
ATGTGTCGAAAAACACTTTCTTTTATTATTCAATTACCAGTAACCTTTT

>PGSC0003DMG400015603LRR-RLPs\_3111

ATTCCTTTACATGTGTGCGAAAAACACTTTCTTTTATTATTCAATTACCAGTAACCTTTTAGAAGAAAAAAA  
TTTCAACGCTGCTTTTCTTTTCCATGATCATTCACTACTAATTAGACGA

>PGSC0003DMG400015603LRR-RLPs\_3294

GCATGCTTGACGTTAAGTGAATCATTAAAAATATTGTGTAAATTATTCATAATAATTATGTTTTATTAGTT  
AGGAGAGCGGGAATTAGTAACTTTCCTTCTTAATTTAGTTTCAGAATTT

>PGSC0003DMG400015603LRR-RLPs\_366

CGTCGTCTAGTACTGGTCCGAGACGTTTCGACGAATACTCGGAGAGTTTACAAGGAATCACAGCTCAAA  
CGCCAGCATTGCCTGTTGACAGAATTGTTTCGTTTGTGTGCCGGCTGGTG

>PGSC0003DMG400015603LRR-RLPs\_427

AGCTCAAACGCCAGCATTGCCTGTTGACAGAATTGTTTCGTTTGTGTGCCGGCTGGTGCCTTTGTGGTT  
ATCTCTTTTGGTATTGACATTTTGCCTATTTTCATCTCTTTTCTACTGA

>PGSC0003DMG400015603LRR-RLPs\_4331

TGTGATCACGATGTAAAATATTTGCCTTGACTTGTTAAATTCTTGAGTCCCACCTCTTTAGAAAGTTCAA  
CATATAAAGATCAAAGCTTTACCGTGATTTATGATTAAAAAACATTTTG

>PGSC0003DMG400015603LRR-RLPs\_4392

GAAAGTTCAACATATAAAGATCAAAGCTTTACCGTGATTTATGATTAAAAAACATTTTGTGCATACTGAT  
ATTGCCTGAAGGAACTTTCCAATCTGTTTCATTTATAAGCTTCCCCCA

>PGSC0003DMG400015603LRR-RLPs\_4453

CATACTGATATTGCCTGAAGGAACTTTCCAATCTGTTTCATTTATAAGCTTCCCCACCAAGTGCGCGA  
CACACAAAACCAAAGTTTTACTGCATCTTCCTTGATTGTGATTCTAC

>PGSC0003DMG400015603LRR-RLPs\_488

TTTGTGGTTATCTCTTTTGGTATTGACATTTTGCCTATTTTCATCTCTTTTTCTACTGATAGGCTTATAGCTT  
TAATTTCTTATGCTGAATTGAGCTTTTGGAGGAGATTTTGCCTTTGA

>PGSC0003DMG400015603LRR-RLPs\_5185

TAACACGTGATTTATGGTCATGCTTTGTATTGTATTTCTCATCTCCGCCTTGGCACTTCAGGAGCAATCA  
CGTCTATTTGGTGTTAATTTATGTTTGCAGTGTCTATGTGATATACTGG

>PGSC0003DMG400015603LRR-RLPs\_5246

GGAGCAATCACGTCTATTTGGTGTTAATTTATGTTTGCAGTGTCTATGTGATATACTGGCAAATAACTCTG  
GTATTCAAAGCTCCAGCTGAACAGCACTGGCTTAGGAGATGAGGTCTT

>PGSC0003DMG400015603LRR-RLPs\_5429

TGGTAAATTATTGCTTAAATTTGCTGCAATGGTTTGTCTGAATTTTGCAGGGAGCCAAAGCCATTGGTG  
AAATGCTGAAAAAAATTCAACTTTGCGTGTCTTGAATAAACAATAAT

>PGSC0003DMG400015603LRR-RLPs\_549

GGCTTATAGCTTTAATTTCTTATGCTGAATTGAGCTTTTGGAGGAGATTTTGCCTTTGAGTACATTCGGTT  
ATCACTACTAGTGTGGAGCAATAAATAAATAAAGGAGTTAAAAATTAC

>PGSC0003DMG400015603LRR-RLPs\_5490

CCATTGGTGAAATGCTGAAAAAAATTCAACTTTGCGTGTCTTGAATAAACAATAATCTGATTGACTA  
TTCTGTATGTTATTAAGCAGAATTGTAATTTGATTTTCTAGTTATTAA

>PGSC0003DMG400015603LRR-RLPs\_61

TCTCACTGTCTAACTCACTCATTGAGTCTCTCCATGGGCTCATCTTCTACATTCTCTGTGCTCTCATCCA  
ACGGTACTTTCTCTACTCTATTAGCTCACTCGAACTTACAATTATGA

>PGSC0003DMG400015603LRR-RLPs\_610

ACATTCGGTTATCACTACTAGTGTGGAGCAATAAATAAAATAAGGAGTTAAAAATTACTTCTTTCAATA  
TATGTTACACCTTTTAACTCAGACACAGAAAAAGAAGACTTTTGAATTTA

>PGSC0003DMG400015603LRR-RLPs\_6405

AGGGGGTTTCTTAATGTTCTCACCAACAATCCGAGGTTGAAGCTAGATCTGTTCCGCCAAAATGGAAA  
TGGGCTACTGTTTACATATTACTATATATCATTAAACATACACCTGTATAT

>PGSC0003DMG400015603LRR-RLPs\_6466

AAATGGAAATGGGCTACTGTTTACATATTACTATATATCATTAAACATACACCTGTATATTCAAAGGTGTTT  
GAAAAGATTCTTTATGTGCAGGAACCTTTATATGCAGGGGAACCTCTGTTG

>PGSC0003DMG400015603LRR-RLPs\_6527

AAAGGTGTTTGAAAAGATTCTTTATGTGCAGGAACCTTTATATGCAGGGGAACCTCTGTTGGTGATGAAGG  
AGTACGGGCATTAATCTCGGGCCTATCTTTGCGTAAAGGTTTGCTTATTGG

>PGSC0003DMG400015603LRR-RLPs\_6588

GATGAAGGAGTACGGGCATTAATCTCGGGCCTATCTTTGCGTAAAGGTTTGCTTATTGGATATAATTAAC  
CATTCTCTCTAAACACATATTGGCGTTGTTTCCTGTGCATCTTTTTTGAA

>PGSC0003DMG400015603LRR-RLPs\_671

CTTTCAATATATGTTACACCTTTTAACTCAGACACAGAAAAAGAAGACTTTTGAATTTATGGTCTAAAGTA  
CTAGAGTACTTGATTATTGGTGACCTATAAAGTTAAATTGTTTCCAAT

>PGSC0003DMG400015603LRR-RLPs\_7442

GCACAACCTTAAACGTTAATATTTCAACAGTGAGAAACCTAACTGTGCTCCTCTTGGATTATAGTAGAACT  
GTCTGCATCCACCATAATTAACCTGTGTTTATTGGAATCAAAGGAAAGC

>PGSC0003DMG400015603LRR-RLPs\_7503

AGTAGAACTGTCTGCATCCACCATAATTAACCTGTGTTTATTGGAATCAAAGGAAAGCTTTGTGGTCGA  
AGCAGAAAGATAAAAAATTGATGATTGGAGGAAATTGGTACGGATTCAGT

>PGSC0003DMG400015603LRR-RLPs\_7808

ACCATATCCTTGGTAGATTAGACCAAACCTAGCTAATGTTGATTACCCATTCCGGAAACTTAAGGCTATGG  
TTACAATGACAGAGTACAGTGTCTACAAGCAACAAGTCCTGCACAAGAA

>PGSC0003DMG400015603LRR-RLPs\_7869

AGGCTATGGTTTACAATGACAGAGTACAGTGTCTACAAGCAACAAGTCCTGCACAAGAACTTGGAAAGA



ACTCTCTAAGTTAGCTCGCAAAAAAATTTACTGCCTTCATTTGTGTCAATA

>PGSC0003DMG400015603LRR-RLPs\_854

GATTA AAAAGGGAAGTGTGCAATGTTTGCTTCCATTATGTATCTGTAATGGTTTTAATTTCTGTTTTCT  
TGTATTGAAATTGTTTTGCATCCTTTTGCCTAGTTTAAGCTCAAT

>PGSC0003DMG400015603LRR-RLPs\_8784

TTTCATGGAAAAGTAAAAGATCTCATGCTTGGGTGGTGCAGGTAATGCATGGATTGTTTCATATATGCC  
TTCTTTAACTATCTCTTTTAGCATGCTCACTTAATTTTGTTCAGATCGG

>PGSC0003DMG400015603LRR-RLPs\_8845

ATATATGCCTTCTTTAACTATCTCTTTTAGCATGCTCACTTAATTTTGTTCAGATCGGAGCCAAAGGTGC  
AGAATATTTTGCCGATATGTTGAAGTACAATAGTACCATATCAACTCTA

>PGSC0003DMG400015603LRR-RLPs\_8967

CTTGCGAGCCAATGGACTTAGAGACGAGGTTTCATTCAAAGTTTATAGTTCTTCTATTGTGCCACAATCTT  
TAATTTCCCTCAAAGTACATAACCATTTCTTTTTTCAGGGTGCAATCTG

>PGSC0003DMG400015603LRR-RLPs\_9028

CCACAATCTTTAATTTCCCTCAAAGTACATAACCATTTCTTTTTTCAGGGTGCAATCTGCCTTGCTCGGAGT  
TTAAAAGTGGTCAATGAATCTTTGACGACACTCAATTTAGGGTTCAAT

>PGSC0003DMG400015603LRR-RLPs\_915

TCTGTTTTTCTTGTATTGAAATTGTTTTTGCATCCTTTTGCCTAGTTTAAGCTCAATTGCAATGCACCTT  
ATAACTGTGGCAAAAAATATGAAATTGCAAATGGTAAATTTGACATTC

>PGSC0003DMG400015603LRR-RLPs\_9699

TGATATTATAAAAAATGTTCTTTTCTGAACTTTTTTTTTTGCCTGATAACGTTAGTGGCAAGTACATAG  
AGATTACTTCTATTCACCATTTTCAGATTCATTCTCTGGTTTGAACTCT

>PGSC0003DMG400015603LRR-RLPs\_976

CAATGCACCTTATAACTGTGGCAAAAAATATGAAATTGCAAATGGTAAATTTGACATTCTTGCTCTTGTG  
TTTTTACAATGCCAAGTTAGTGGCAGGCAAGGCTTTAGTATTTGGGGAA

>PGSC0003DMG400015666LRR-RLKs\_1860

GATGACCATTTGTTTTCTTGATCTTGTTATCTGTTACTGAACTGGTGCTGTTGTGTAAACGTTGCTGCAT  
TTGGCTGATGTGTTGTAGTTGCATTATTGTGCCCAATTGTGTTTCAGCCA

>PGSC0003DMG400015666LRR-RLKs\_1922

TTGCTGCATTTGGCTGATGTGTTGTAGTTGCATTATTGTGCCCAATTGTGTTTCAGCCACTAAAATTTATGT  
TTTTTTTTTACATTATTGTGCTGTTGTTGCATTGTTGTTTCATGTTTAA

>PGSC0003DMG400015666LRR-RLKs\_2852

GTCTCCAGAAAGCAGATGTCTACAGCTTTGGTGTCTTGTGTTGGAACCTTAACAGGGAAGGCTCCCA  
CACATTCGGTACTGAATGAGGAAGGTGTCGACCTACCAAGATGGGTGCAA

>PGSC0003DMG400015666LRR-RLKs\_558

CAC TTCATGATTTGCGTAACTTGTACCTTCAAATAATCTATTTTCCGGTCCAATTCCTGATTCAATCTTCT  
CTCTTACCAATCTTGTCCGCCTTAATCTTGCTCATAACAATTTCTCCG

>PGSC0003DMG400015666LRR-RLKs\_806

CAGCTAAACGGGTCAATTCCTAGTAACTTGCGGGTCAACCCAAGGATGCTTTTTTGGGTACTTCACTTT  
GTGGTAAGCCACTTGATTCATGTGATGGTAGTAGTAGTAGTAGTAGTAGT

>PGSC0003DMG400015666LRR-RLKs\_868

TTCATTTGTGGTAAGCCACTTGATTCATGTGATGGTAGTAGTAGTAGTAGTAGTATTGGAGAAGG  
TAAAAAGAAGAACTTTCTGGTGGAGCAATTGCTGGTATAGTAATTGGTTG

>PGSC0003DMG400015672LRR-RLPs\_0

CTTCCTTCTCTAAAAGCTAAAGGTTCTCAGTTTTGCTAAAATTTACACATTGCAGCAAAAAATTCTCT  
AATTTTCCAATCAACATGACTCAAGGTATGCAAATTCTCTTTTTGTT

>PGSC0003DMG400015672LRR-RLPs\_1054

AGGATGTGACTTAGTGGTCGATGAAGTATGAGGGAAATCGTGAGGTTAAGAAAATGCTTGGTAATTTCT  
ATTTATCTGCCTAGGATTTGGTGGGCAGAGACTCAGAGTTACATGATTCAT

>PGSC0003DMG400015672LRR-RLPs\_1116

AATTTCTATTTATCTGCCTAGGATTTGGTGGGCAGAGACTCAGAGTTACATGATTCATGTGTTGGTGGGA  
GGTACTACATATTTAGTGTAATATTCTATGTGCACGCAAGGTGGCTCGGA

>PGSC0003DMG400015672LRR-RLPs\_1178

TGGTGGGAGGTACTACATATTTAGTGTAATATTCTATGTGCACGCAAGGTGGCTCGGACATCACTGTCGT  
TAAAGATAAGACTACTAACTTAAGGGACTAATTTGATTTTTTTTTCT

>PGSC0003DMG400015672LRR-RLPs\_1240

ACTGTCGTTAAAGATAAGACTACTAACTTAAGGGACTAATTTGATTTTTTTTTCTCCATATTCTTCTAA  
CAGATGGAACAAGATGTGTCATTGAAGGGGATAGTGAAGATAGAATCA

>PGSC0003DMG400015672LRR-RLPs\_1426

CTAGTATTTTGTCTCGAAACTGGAGATATATTTGGGCAACATTTCCAAATCTGGTGCTGGATGACCGCTT  
CCTTCATAATTTTATAGGAAAGCTCCAATTCAACTTCACAGAAGCGGTAG

>PGSC0003DMG400015672LRR-RLPs\_1488

GACCGCTTCCTTCATAATTTTATAGGAAAGCTCCAATTCAACTTCACAGAAGCGGTAGATTGTATTCTGTT  
ATTGCATATGGGGAACATTGTGAAGTTTGTCTTGACACTAGAGGAGTT

>PGSC0003DMG400015672LRR-RLPs\_1550

TATTCTGTTATTGCATATGGGGAACATTGTGAAGTTTGTCTTGACACTAGAGGAGTTTTTACTGCAAATT  
CTTCATATGCAATTATCGATAGATGGATTCTTTATGTCACCAGAAATGG

>PGSC0003DMG400015672LRR-RLPs\_1674

AAGATGCTAACCTTCACATTTCAAATGATGATACCTATACTCTGCCTTCTTCTATTTTTATTTGTTCAACCT  
TGACATATTTGAAACTCTCCAAGTGTCTTCAGACCACCCAATCCC

>PGSC0003DMG400015672LRR-RLPs\_1736

TTGTTCAACCTTGACATATTTGAAACTCTCCAAGTGTCTTCAGACCACCCAATCCCTTTCTTGGTTTTCA  
GAATCTTATTACCCTTCGTCTGGAAGGGTCAACCTTTGTGCCAGCCAC

>PGSC0003DMG400015672LRR-RLPs\_1798

TTGGTTTTCAGAATCTTATTACCCTTCGTCTGGAAGGGTCAACCTTTGTGCCAGCCACATCATTTTGTGTT  
ATCAAGGCTCCCCTTCTTGCCAGATTGGATTTGATCTTGTGTCGTGGTA

>PGSC0003DMG400015672LRR-RLPs\_1860

TTTTGTGTTATCAAGGCTCCCCTTCTTGCCAGATTGGATTTGATCTTGTGTCGTGGTACGCAATACCTAAA  
CATTGTTTCACCAGGGCTGAAGTTCTTGTACATTCAGGACAGTCACTCA

>PGSC0003DMG400015672LRR-RLPs\_1922

ATACCTAAACATTGTTTCACCAGGGCTGAAGTTCTTGTACATTCAGGACAGTCACTCATATCTCGTGCTAG  
ATTGCTTTATGAACTGCAAGAATATAAGACTGTAAAACCTGAATTTAA

>PGSC0003DMG400015672LRR-RLPs\_1984

TCGTGCTAGATTGCTTTATGAACTGCAAGAATATAAGACTGTAAAACCTGAATTTAACAGAGTGGTTGA  
TGATCCAACAAATGATAAAATATCAACTTTGGAGAAGCTTCTTGTTAGCT

>PGSC0003DMG400015672LRR-RLPs\_2170

CTCTTGATATCTTATAGTGATGGCAATTTTCGTATGATTCTAATTATTGTGTTTTCTTCAAAGCGTGCACGC

ATTGTTCCGAATGGGCAACCTTCTACACTCAACTGCTTGTGGCATCTAT

>PGSC0003DMG400015672LRR-RLPs\_2356

CCAATTTGAGGAACTCCGTATTTTCGGTAAGAAAAGAAAATATATGCACGATCTGGTTCCTTTTTGCACT  
TCATAATTGTGAACATGAGAATCTAAAATAGCTTGGTATTTTCTTCATAT

>PGSC0003DMG400015672LRR-RLPs\_2418

TTTGCACTTCATAATTGTGAACATGAGAATCTAAAATAGCTTGGTATTTTCTTCATATACATATTAGGTCC  
ATGCTACAAGTGACAATGCTGAAGCAATCTTGAAGTATCTTGATACGCC

>PGSC0003DMG400015672LRR-RLPs\_248

TTGATAAAGTAACTTAGATTCTCATTATTTATTGAGTTGTGTCTTTCAATTGATCCCAAAAAGTTTAATTT  
ACTCCTATTATGTAGTGGAAGAACAAGACACTAAAGAAAGAAAAAAT

>PGSC0003DMG400015672LRR-RLPs\_2480

ATTAGGTCCATGCTACAAGTGACAATGCTGAAGCAATCTTGAAGTATCTTGATACGCCATCCTGCCTGGA  
ACAACCACTCGACAAGCTAGAGCACATTTTCATCAACTTTTTTAAGAGAT

>PGSC0003DMG400015672LRR-RLPs\_2542

TGCCTGGAACAACCACTCGACAAGCTAGAGCACATTTTCATCAACTTTTTTAAGAGATCAAAAAGTGAAC  
TGCTTTTTGTAAAGCTATTGCTTCTCGCACTCCATCTCTTTTAAAGATG

>PGSC0003DMG400015672LRR-RLPs\_2604

AACTGAACTGCTTTTTGTAAAGCTATTGCTTCTCGCACTCCATCTCTTTTAAAGATGTGCATTGACCAGG  
TTGCAGACATAGACGTTGATATTGCCTTAGAATTGATGCGTTTCGCCAG

>PGSC0003DMG400015672LRR-RLPs\_2666

TTGACCAGGTTGCAGACATAGACGTTGATATTGCCTTAGAATTGATGCGTTTCGCCAGGGCTTCTCCGAG  
GGCAGAGCTATTCTATTCTCGGATAACTCTGTGATTTGAGTGTTGGAAGG

>PGSC0003DMG400015672LRR-RLPs\_2728

TCTCCGAGGGCAGAGCTATTCTATTCTCGGATAACTCTGTGATTTGAGTGTTGGAAGGCAGACTGATGTT  
TATCCGTTGTCAATTAGTTTTGTTAAAACAAGGGATGAATTGGCAAATTT

>PGSC0003DMG400015672LRR-RLPs\_2790

CTGATGTTTATCCGTTGTCAATTAGTTTTGTTAAAACAAGGGATGAATTGGCAAATTTGTAAAAAATGT  
GTGGTACCTTTGTGCATATGTTCTTCACTAGATGTTTTTGATGCTCAGCA

>PGSC0003DMG400015672LRR-RLPs\_2852

AAAAATGTGTGGTACCTTTGTGCATATGTTCTTCACTAGATGTTTTGATGCTCAGCATGCGTCGATGTGT  
TTGATATGACTAGATGTCTTTTGCTATATTTCTTTGTATTCTACTTCTG

>PGSC0003DMG400015672LRR-RLPs\_2914

TCGATGTGTTTGATATGACTAGATGTCTTTTGCTATATTTCTTTGTATTCTACTTCTGATTCAAGTTGCACT  
GGCTATTGAGAAATAGGGTGTCTGATGGTTTAGCATAAAGTGTATTT

>PGSC0003DMG400015672LRR-RLPs\_2946

CTATATTTCTTTGTATTCTACTTCTGATTCAAGTTGCACTGGCTATTGAGAAATAGGGTGTCTGATGGTTT  
AGCATAAAGTGTATTTTTTTTACACCATTGTGTATATTGCTTGTTAAG

>PGSC0003DMG400015672LRR-RLPs\_310

GTTTAATTTTACTCCTATTATGTAGTGGAAGAACAAGACTAAAGAAAGAAAAAATATGCTTTGAGAA  
TTAGGTTTCAAGGCTTAAGCCCTGAAGTGAGGCTAAAAATGCATACTTTT

>PGSC0003DMG400015672LRR-RLPs\_372

TTTGAGAATTAGGTTTCAAGGCTTAAGCCCTGAAGTGAGGCTAAAAATGCATACTTTTCCGAAGAGGCG  
CCACTAAACAAATGACAATTGATATTTCACTTTGTAGTTAAAAAATCAA

>PGSC0003DMG400015672LRR-RLPs\_434

AGAGGCGCCACTAAACAAATGACAATTGATATTTCACTTTGTAGTTAAAAAATCAATTTATTTGATCAT  
ATATGTGGCATTTCGTGCTTATAATTATTAGTGTGTTGTTTTTTCTTCT

>PGSC0003DMG400015672LRR-RLPs\_496

TTTGATCATATATGTGGCATTTCGTGCTTATAATTATTAGTGTGTTGTTTTTTCTTCTGTTTCGCGTGTTTTCA  
TTAAAGCCTATGCTTTATTTGCACGTTATGCTTAAAGCCGTTGTGCT

>PGSC0003DMG400015672LRR-RLPs\_558

GCGTGTTTTATTAAAGCCTATGCTTTATTTGCACGTTATGCTTAAAGCCGTTGTGCTTTTTGGTTTTTGAT  
AACACTTGTAGAAGCACCTTTAGTGGTCGTTTGATAGAGTGATAAAA

>PGSC0003DMG400015672LRR-RLPs\_62

AAATTCTCTAATTTTCCAATCAACATGACTCAAGGTATGCAAATTCTCTTTTTGTTGTTTTTTTTGGATT  
ATGAAAGTGGATTTGAGTCTATAGTTGAAGAAAAATAGCATTTTTCTC

>PGSC0003DMG400015687-(rev)LRR-RLPs\_0

ATGGATGGAGATGTTGTTATTGTTGTTGGAAAGAAGAAAGGACTATGTTCCATTGATCATAAGTGTTAG  
TAACTATGACTATGTTCCAAAAAGGACTGAAGTAGTTATACATATCAGCAA

>PGSC0003DMG400015687-(rev)LRR-RLPs\_1159

ATCAGTAGCTAACTGCAACCTCAGTGGAGTCCTACCTCTTCAAGGTAATTTAGACATACGTAAATAGAA  
CAATGAATAGTCGAGAACAATGAATAATTTAGAACCAATCCATGTTTCTA

>PGSC0003DMG400015687-(rev)LRR-RLPs\_122

ATGTTAAATTCAAAATTTAATCTATTTGCCTCGCGAAAACCTTAACTGTTTAGCATGTCTGATTTTAAGTTTC  
TTCGTGATTTGTTTACAGGTTTCAAGAAACCTGGACAACTAGAAATAC

>PGSC0003DMG400015687-(rev)LRR-RLPs\_1220

TAAATAGAACAATGAATAGTCGAGAACAATGAATAATTTAGAACCAATCCATGTTTCTAATATTTTCTGC  
ATAACAACCTATATAAGAACATGAATAACAATCATCTTCATTTTATAGGCT

>PGSC0003DMG400015687-(rev)LRR-RLPs\_1281

ATTTTCTGCATAACAACCTATATAAGAACATGAATAACAATCATCTTCATTTTATAGGCTTGTGTGATCTAA  
AATATCTTGAAGAACTAAGTCTCCGCCTAACTACTTCATTGGAGAAGT

>PGSC0003DMG400015687-(rev)LRR-RLPs\_1403

CTGCATGTCTTGGAAACTTAACACCTCTTCGGGTAATAGATCTCAGTCAAATTACTTTATTGGAAATATT  
GCCTTATCTCCACTTCGAAGTCTTGTCCCTTGAATATCTCTTGTTAGCA

>PGSC0003DMG400015687-(rev)LRR-RLPs\_1464

TGGAAATATTGCCTTATCTCCACTTCGAAGTCTTGTCCCTTGAATATCTCTTGTTAGCAAACAACAAGTTT  
GAAATACCAATTTTATTTCGAGCCATTTGCTAACCATTCAAACTTAAGT

>PGSC0003DMG400015687-(rev)LRR-RLPs\_1525

CAACAAGTTTGAAATACCAATTTTATTTCGAGCCATTTGCTAACCATTCAAACTTAAGTTTGTCTTGTCTT  
TGTTATTCTAAAAGCTGGACTCCAAATTTCCAATTGGAAGCCTTGTCTT

>PGSC0003DMG400015687-(rev)LRR-RLPs\_183

TTTTAAGTTTCTTCGTGATTTGTTTACAGGTTTCAAGAAACCTGGACAACTAGAAATACTTGATTTGTCAT  
TGAACCTACTGAACCGCAGCATCTTTAAGTCTCTTAGTCAACTTTCATC

>PGSC0003DMG400015687-(rev)LRR-RLPs\_1891

GGTCCATTTATCCGAACTCATGATATTCAAATGTCCAACAATATGCTTGAAGGCTTGTTCCTTCAAGT  
TTTGGTGGCATGAAAGACCTTCAATGCTTGGATTTGTCAGGCAATAAGC

>PGSC0003DMG400015687-(rev)LRR-RLPs\_2684

CATAATGCAGAATCCATGGGACACAGATGTATACTACAGTCCATCATTTGGATATGGAGACTTCGAGAT

GTTTGGAGGAAATACCTTGATAGACGTAGATGACTCATTTCGAGACAACATC

>PGSC0003DMG400015687-(rev)LRR-RLPs\_2745

TTCGAGATGTTTGGAGGAAATACCTTGATAGACGTAGATGACTCATTTCGAGACAACATCAACAATTCAT

TTCCAAATAGTTTTGGCGCGTGGGTTGGAGTAGAGTTCACAACCAAATAT

>PGSC0003DMG400015687-(rev)LRR-RLPs\_3111

ACAGCTCTAGAAGTTTTAGCGTGGCACACAATAATTTAACAGGTATGACTCCACAGCGTACAGCGCAG

TTTGCAACTTTTGATGAAAGCAGTTATGAGGGAAATCCTGTTCTTTGTGGT

>PGSC0003DMG400015687-(rev)LRR-RLPs\_3172

CAGCGCAGTTTGCAACTTTTGATGAAAGCAGTTATGAGGGAAATCCTGTTCTTTGTGGTCTCCATTGCA

CATCAGTTGCACAGAGGCCAAAGAGATTCCAACATACCTTCCTGCACCAG

>PGSC0003DMG400015687-(rev)LRR-RLPs\_3233

TCCATTGCACATCAGTTGCACAGAGGCCAAAGAGATTCCAACATACCTTCCTGCACCAGATTTCTCCGAA

GATGATGCTTCTTTTTAGATATGGAGTGGTTCTGTATTTCAATTTCTTGT

>PGSC0003DMG400015687-(rev)LRR-RLPs\_3477

AGTTCATGACTTTTCATAATTATGTAACATTTCAATTTATGTAAATGTATGTGTGAGTTGTTCTTGGAAATGT

GGTGCCTATCTAGTCCATTAATACTAGTGAATGTTGTGTTGATTTGCTT

>PGSC0003DMG400015687-(rev)LRR-RLPs\_3599

GCCTTCTTTAAGCATTGCCAGATTAATTAATTTTCGAAATATAAAAATGTGTCATATTTTTTAGAAC

AGACGAATAGCCAAATTCCTCAGTGCAATTAATGGTTTGAAAAATATG

>PGSC0003DMG400015687-(rev)LRR-RLPs\_3660

TTTTTAGAACAGACGAATAGCCAAAATTCCTCAGTGCAATTAATGGTTTGAAAAATATGTATACTGCTCA

ATGAGCCATTTCTTCTATATGGTCCACTGAAATAAGTGCTAAAGACTTGG

>PGSC0003DMG400015687-(rev)LRR-RLPs\_3782

AACTCCTAAAGTAGCTGAATTTTTTTGACATTAGCACACAAAATTATAACTAAAAAAGAAAGAAGAA

GAAAATGGCTAAGGAATTAATTTTTGTTGACTAGTTAAGCACAATAATTA

>PGSC0003DMG400015687-(rev)LRR-RLPs\_4087

CAAATTGAAACGGAGGGAGTATATAGCAATAGAAGTGTTCATGAAACTCCATACAAGTGATACTAA

TGGGAAATGTTTCCTCATGAGTAAGTGCTCAAGTCAAGTCAATGATGGTG

>PGSC0003DMG400015687-(rev)LRR-RLPs\_4148

GATACTAATGGGAAATGTTTCCTCATGAGTAAGTGTCTCAAGTCAAGTCAATGATGGTGCTAGTCAACTC  
AAATTGCAAGCAATGTTTTGATGAAAATTAGAGAAAAATATAGAGATAGA

>PGSC0003DMG400015687-(rev)LRR-RLPs\_4209

AGTCAACTCAAATTGCAAGCAATGTTTTGATGAAAATTAGAGAAAAATATAGAGATAGAAGAACAACAA  
GACATATTAAGAGTAAAATAAAGAAGTTGAAAGGGACATAACAAGAAAAG

>PGSC0003DMG400015687-(rev)LRR-RLPs\_4270

AACAACAAGACATATTAAGAGTAAAATAAAGAAGTTGAAAGGGACATAACAAGAAAAGTAGTTGCAC  
AAAATTCCACTCTAGTCTACATCAATTATTGCACTATTCCTTAAGATGCCTG

>PGSC0003DMG400015687-(rev)LRR-RLPs\_4331

GTTGCACAAAATTCCACTCTAGTCTACATCAATTATTGCACTATTCCTTAAGATGCCTGCTACCTCTACCA  
GCACAGATAACGAACAAGCTTCTTTTTCTTATATATAGTTCGGATATA

>PGSC0003DMG400015687-(rev)LRR-RLPs\_4392

ACCTCTCACCAGCACAGATAACGAACAAGCTTCTTTTTCTTATATATAGTTCGGATATATCTTATAGTGTT  
GTCAACTTGTAGGTAAAGAAGCAAAACATGGCTAATAGCAAGATAGTAG

>PGSC0003DMG400015687-(rev)LRR-RLPs\_4453

TTATAGTGTGTCAACTTGTAGGTAAAGAAGCAAAACATGGCTAATAGCAAGATAGTAGATTGGTGGTT  
GTTGATTTTGTTTCATGGCAAATGGATGGTTGTGTTGTTATTGTTGTTTGAA

>PGSC0003DMG400015687-(rev)LRR-RLPs\_4514

TGGTGGTTGTTGATTTTGTTTCATGGCAAATGGATGGTTGTGTTGTTATTGTTGTTTGAATGAAGAAAAGA  
CTGCTCTTTTGCAACTCAAGGCAAACATAAACTACAGTACAGGCAACGAT

>PGSC0003DMG400015687-(rev)LRR-RLPs\_4575

AAGAAAAGACTGCTCTTTTGCAACTCAAGGCAAACATAAACTACAGTACAGGCAACGATTACTTGTTCATC  
GTGGGGGGCTAATGAAACCTCGGATTGTTGTCAATGGGAGGGAATTGTTT

>PGSC0003DMG400015687-(rev)LRR-RLPs\_4636

CTTGTCATCGTGGGGGGCTAATGAAACCTCGGATTGTTGTCAATGGGAGGGAATTGTTTGAACAACAC  
CACCAGAAGAGTCGTAGAATTGTCCATTATTGCTAAGCAAATTAGTCAAGA

>PGSC0003DMG400015687-(rev)LRR-RLPs\_4697

AACAACACCACCAGAAGAGTCGTAGAATTGTCCATTATTGCTAAGCAAATTAGTCAAGAAGAACAACACTA  
AGAAATGTTACAGATAGAGATGATATGTTGAGGAACTGGCTTTTTAATGCA



>PGSC0003DMG400015687-(rev)LRR-RLPs\_4758

AACAATAAGAAATGTTACAGATAGAGATGATATGTTGAGGAACTGGCTTTTTAATGCATCTCTATTTTT  
TCCCTTCAAAAATCTCAAAGCTTTGATCATACTGGACATTCATTAGCAG

>PGSC0003DMG400015687-(rev)LRR-RLPs\_4819

TCTATTTTTTCCCTTCAAAAATCTCAAAGCTTTGATCATACTGGACATTCATTAGCAGGCTGGGTGAAGA  
ATGAAGGTATGTTCTCTATATACGCTCCATAATATAGAACGAAAGA

>PGSC0003DMG400015687-(rev)LRR-RLPs\_4880

TGGGTGAAGAATGAAGGTATGTTCTCTCTATATACGCTCCATAATATAGAACGAAAGAGATTATACTAC  
TCCCTCCGTTTTATATTATATGGCGATGTTTACTAGGCTCAAAGAACC

>PGSC0003DMG400015687-(rev)LRR-RLPs\_4941

TTATACTACTCCCTCCGTTTTATATTATATGGCGATGTTTACTAGGCTCAAAGAACCCTAAAAGCTTGT  
GGTTGTAAACATGTAATGATAATTCTATTGTGTTGACTTTTTTTAAAC

>PGSC0003DMG400015687-(rev)LRR-RLPs\_5734

TTTGAAACCTATGTGATATGTGAGGTTGTGATGGAAGAAAAACCCTTACAATCTCTCTCTGTGAAGTTCA  
GATTAAAGTACTTTTTCAAAAAAATTCTACACAAGACAATGTCATCACAT

>PGSC0003DMG400015687-(rev)LRR-RLPs\_610

CGACAGATCTAAATGTATCTAGAATGACGTTGAAGAAGCTTGATATAAGGTACAACAGATTCCGGAGTT  
TTATACCAAATGAAGGTATATATACAATTACTGAAGTTTTTCTCCTTCAA

>PGSC0003DMG400015687-(rev)LRR-RLPs\_6283

AAGAAAGAATGTCACATAAAATGAAACGGAGGGAGTATGATCGCAATACAACTGAATTACAGCTTCC  
AAAGGTTTAACTATATACTGGTTTAAAGAATGTTAAGTTCATTGTACAATCT

>PGSC0003DMG400015687-(rev)LRR-RLPs\_6344

CAGCTTCAAAGGTTTAACTATATACTGGTTTAAAGAATGTTAAGTTCATTGTACAATCTACTTGACTCTGT  
CACATAATTTAGCATGTCCATTTTAAAGTTTCTTGTTAATTTGGTAACAG

>PGSC0003DMG400015687-(rev)LRR-RLPs\_6405

TTGACTCTGTCACATAATTTAGCATGTCCATTTTAAAGTTTCTTGTTAATTTGGTAACAGGTTTCGAGAAAC  
TGAGACGACTGAGGAACTAGAAAGACTTGACTTGTCGGGGAATCAGTT

>PGSC0003DMG400015687-(rev)LRR-RLPs\_6466

TTCGAGAACTGAGACGACTGAGGAACTAGAAAGACTTGACTTGTCGGGGAATCAGTTCAATCGCAG

CATCTTTCAGTCCCTTAGTCAGCTTTCATCTCTCAAGTCACTGAACCTCTCA

>PGSC0003DMG400015687-(rev)LRR-RLPs\_6527

ATCGCAGCATCTTTCAGTCCCTTAGTCAGCTTTCATCTCTCAAGTCACTGAACCTCTCAAGTAACAACAAA

ATTGGATCAGGTTCTGAGAGATTGTCAGGGTTAGACAAGCTGGAAATCC

>PGSC0003DMG400015687-(rev)LRR-RLPs\_6588

TAACAACAAAATTGGATCAGGTTCTGAGAGATTGTCAGGGTTAGACAAGCTGGAAATCCTAGATTTGAC

CTATAACAATCTAGAGGATGAAAATGTTCTCTCTGCTCTAGGTAAGTAAAC

>PGSC0003DMG400015687-(rev)LRR-RLPs\_6649

GATTTGACCTATAACAATCTAGAGGATGAAAATGTTCTCTCTGCTCTAGGTAAGTAACTTATAAAAATG

TTCTAAAAAAGCTCTTCTTTTATCATCCATACCTTCCTAACATTATTAT

>PGSC0003DMG400015687-(rev)LRR-RLPs\_671

CCGGAGTTTTATACCAAATGAAGGTATATATAACAATTAAGTGAAGTTTTCTCCTTCAATTGATTTTATTCT

ACCTCCTTGACATCTTGCTATGTAAATATATCTTATTGGTACCCAAT

>PGSC0003DMG400015687-(rev)LRR-RLPs\_6710

ATAAAAATGTTCTAAAAAAGCTCTTCTTTTATCATCCATACCTTCCTAACATTATTATTATGAATTCCTGG

ACAGAGTTGAATAAATCTAGAACGACATTGAAGAAGCTCGATATAAGG

>PGSC0003DMG400015687-(rev)LRR-RLPs\_6771

TGAATTCCTGGACAGAGTTGAATAAATCTAGAACGACATTGAAGAAGCTCGATATAAGGTACAACAGAT

TCCAGAGTTTTATACCAAATGAAGGTACTTAAAGTTTCTTCTTTCAGTTGA

>PGSC0003DMG400015687-(rev)LRR-RLPs\_6832

CAACAGATTCCAGAGTTTTATACCAAATGAAGGTACTTAAAGTTTCTTCTTTCAGTTGATTTTATTGTTAG

AAAAACCATAGATTACACGCGGAGATATTATTCTAGGTGTCTCAGTATC

>PGSC0003DMG400015687-(rev)LRR-RLPs\_6893

TTATTGTTAGAAAAACCATAGATTACACGCGGAGATATTATTCTAGGTGTCTCAGTATCAGTGTCTTGGT

TAAAAATATGCTGTTCCACCATTTTAGGTGTCATTTGTTAGTTACTATTA

>PGSC0003DMG400015687-(rev)LRR-RLPs\_6954

TGTCTTGGTTAAAAATATGCTGTTCCACCATTTTAGGTGTCATTTGTTAGTTACTATTACTTCACACGTCTA

CGCTGCACTTTTGTAACACCTATGGCTACATGTTGATGATTCTTTTAT

>PGSC0003DMG400015687-(rev)LRR-RLPs\_7015

TCACACGTCTACGCTGCACTTTTGTAACACCTATGGCTACATGTTGATGATTCTTTTATGTTTCTTTTGCAC  
GAAAGAGTTGGGAGCTTTAAGAAATATAGAGTACTTATTGTTGGATGG

>PGSC0003DMG400015687-(rev)LRR-RLPs\_7076

TTCTTTTGCACGAAAGAGTTGGGAGCTTTAAGAAATATAGAGTACTTATTGTTGGATGGAAACACATTG  
GATGAGAACTTTCTCAGGAGCAGTACTGGTGTAAATGTCATCTCTTAAAGTA

>PGSC0003DMG400015687-(rev)LRR-RLPs\_7137

ACACATTGGATGAGAACTTTCTCAGGAGCAGTACTGGTGTAAATGTCATCTCTTAAAGTATTATCAGTAGC  
TCAATGTAACCTCAATGGAACCTCTACCACTTCAAGGTAATTTTCAGACATA

>PGSC0003DMG400015687-(rev)LRR-RLPs\_7198

ATCAGTAGCTCAATGTAACCTCAATGGAACCTCTACCACTTCAAGGTAATTTTCAGACATAGCATCGATCCTT  
TAAATTTTCGTCTTTCTAGATAGTGCTACGTAGGATTGATGTCACGTTA

>PGSC0003DMG400015687-(rev)LRR-RLPs\_7259

ATCGATCCTTTAAATTTTCGTCTTTCTAGATAGTGCTACGTAGGATTGATGTCACGTTAATCTTGTGTAAA  
CGGGACAAAATTTTCAGAAATTTGGTTCCATAGTAGTCTATATTTTCTGC

>PGSC0003DMG400015687-(rev)LRR-RLPs\_7320

CTTGTGTAAACGGGACAAAATTTTCAGAAATTTGGTTCCATAGTAGTCTATATTTTCTGCATAACAAAATAG  
AACATGTATAACAATTATCTACTTGTTTCATTTTATAGGCTTGTGTGATC

>PGSC0003DMG400015687-(rev)LRR-RLPs\_7381

AACAAAATAGAACATGTATAACAATTATCTACTTGTTTCATTTTATAGGCTTGTGTGATCTAAAATATCTTG  
AAGAACTAAGTCTCAGCAGCAACAGCTTCACTGGAAAACCTCCCTACATG

>PGSC0003DMG400015687-(rev)LRR-RLPs\_7442

AAATATCTTGAAGAACTAAGTCTCAGCAGCAACAGCTTCACTGGAAAACCTCCCTACATGTCTTGAAACT  
TAGCGTTTCTTCGAGTAATTGATCTCACTCATAATCAGTTTACTGGAAAC

>PGSC0003DMG400015687-(rev)LRR-RLPs\_7503

TTGGAAACTTAGCGTTTCTTCGAGTAATTGATCTCACTCATAATCAGTTTACTGGAAACATTGCTTTATCT  
CCACTTTCAAGTCTCTTGTCCCTTGAATACCTCTTGATAGCAAACAACA

>PGSC0003DMG400015687-(rev)LRR-RLPs\_7564

TGCTTTATCTCCACTTTCAAGTCTCTTGTCCCTTGAATACCTCTTGATAGCAAACAACAACCTTTGAAGTACC  
AATTTCAATTCGAGTCATTTGCTAACCACTTCAAAAACCTTAAGTTTGTTCAT

>PGSC0003DMG400015687-(rev)LRR-RLPs\_7625

TTTGAAGTACCAATTTCAATTCGAGTCATTTGCTAACCACTTCAAACCTTAAGTTTGTTCATTGCTGACTACAA  
CTCGGTAATTGTACAAACTACGTCTAAAAGTTGGATCCCGGAGTTTCAA

>PGSC0003DMG400015687-(rev)LRR-RLPs\_7686

CTGACTACAACCTCGGTAATTGTACAAACTACGTCTAAAAGTTGGATCCCGGAGTTTCAATTAGAAGCCTT  
ATCTTTATTCAACTGCTCTCAAATGCCAACTTTCTTCATTCTCAACATC

>PGSC0003DMG400015687-(rev)LRR-RLPs\_7747

AGAAGCCTTATCTTTATTCAACTGCTCTCAAATGCCAACTTTCTTCATTCTCAACATCACTTGAGACTTCT  
TCGTCTCTCGAAATGCAACATTGGTGGAGACTTTCCAAATTGGTTATT

>PGSC0003DMG400015687-(rev)LRR-RLPs\_7808

TTGAGACTTCTTCGTCTCTCGAAATGCAACATTGGTGGAGACTTTCCAAATTGGTTATTAGAAAACAATC  
CTAAACTTGGAGAAGTTTACTTGGATGGAAATGCATTCCTGGATCTCTT

>PGSC0003DMG400015687-(rev)LRR-RLPs\_7869

AAAACAATCCTAAACTTGGAGAAGTTTACTTGGATGGAAATGCATTCCTGGATCTCTTCAATTGCCATT  
ACTTCCTAATCTGAAAACCTTCGATATCTCAAACAACAAGATTCGGGGGG

>PGSC0003DMG400015687-(rev)LRR-RLPs\_793

AAATCACAAGCTTAAAAGAACTGAAAAGTCACAAAATCATTTACAAATTCCACAGGCTCCATTTGCATTT  
GATGAGATGTGTATAAAATATAAATACATAGACTTACATGGAAAGATGTT

>PGSC0003DMG400015687-(rev)LRR-RLPs\_7930

ATTGCCATTACTTCCTAATCTGAAAACCTTCGATATCTCAAACAACAAGATTCGGGGGGAACTTCCTGCTA  
ACATTGGGTCCATTTTCCCAAATCTCGTGATATCAACAATGTCCAACAA

>PGSC0003DMG400015687-(rev)LRR-RLPs\_7991

CTTCCTGCTAACATTGGGTCCATTTTCCCAAATCTCGTGATATCAACAATGTCCAACAATATGCTTGAAGG  
CTTGTTGCCTTCAAGTTTTGCTGACATGAAAAACCTTAAATGCTTGGAT

>PGSC0003DMG400015687-(rev)LRR-RLPs\_8052

TGCTTGAAGGCTTGTTCCTTCAAGTTTTGCTGACATGAAAAACCTTAAATGCTTGGATTTGTCATACAAT  
AAGTTAAAAGGAGAGCTACCGACAAGATTGGCTCGTAAAGGATCCAAGT

>PGSC0003DMG400015687-(rev)LRR-RLPs\_8113

GTCATACAATAAGTTAAAAGGAGAGCTACCGACAAGATTGGCTCGTAAAGGATCCAAGTTATATTTACT

GAGATTGTCGAATAACATGTTGAAAGGGGAAATATTTCCAGTTTCAGCCAA

>PGSC0003DMG400015687-(rev)LRR-RLPs\_8174

TATTTACTGAGATTGTCGAATAACATGTTGAAAGGGGAAATATTTCCAGTTTCAGCCAACATCAACAATT

TCGAATACTTATACTTGGATGGGAACAACCTCTCCGGCCCAATTCCACAG

>PGSC0003DMG400015687-(rev)LRR-RLPs\_8235

TCAACAATTTGAATACTTATACTTGGATGGGAACAACCTCTCCGGCCCAATTCCACAGAAGTTATCCACT

GCTCCTTTACGTACATTGGACTTAAGTTACAACAACCTGTCAGGTAACA

>PGSC0003DMG400015687-(rev)LRR-RLPs\_8296

GTTATCCACTGCTCCTTTACGTACATTGGACTTAAGTTACAACAACCTGTCAGGTAACATACCGTCCTGGC

TTGGTAATATCTCCTCCTAACCTCCCTTGCATTGTCCAAAACCATCT

>PGSC0003DMG400015687-(rev)LRR-RLPs\_8357

CCGTCCTGGCTTGGTAATATCTCCTCCTAACCTCCCTTGCATTGTCCAAAACCATCTAAATGGTCATATT

CCACCTGATTTCTGTAGGCTTGAAGGACTTGAGGTGTTAGATATCTCT

>PGSC0003DMG400015687-(rev)LRR-RLPs\_8418

ATGGTCATATTCCACCTGATTTCTGTAGGCTTGAAGGACTTGAGGTGTTAGATATCTCTGAAAACAACCT

TGTTGGTGTGATTCCATCATGTTTTAGTAGTTTCTGGGACTTAAAACATG

>PGSC0003DMG400015687-(rev)LRR-RLPs\_8479

AAACAACCTTGTTGGTGTGATTCCATCATGTTTTAGTAGTTTCTGGGACTTAAAACATGTGTATTTGAGTA

AAAACAAGCTACAAGGGGAATTCAACATGTTCTCAAACCTCAGATTTAAG

>PGSC0003DMG400015687-(rev)LRR-RLPs\_854

TTTGCATTTGATGAGATGTGTATAAAATATAAATACATAGACTTACATGGAAAGATGTTATTTTAATAACT

CTCTTTGTCAACATTTTGGTTAAAATATGACATTCCACCATTTTAGGC

>PGSC0003DMG400015687-(rev)LRR-RLPs\_8540

TATTTGAGTAAAACAAGCTACAAGGGGAATTCAACATGTTCTCAAACCTCAGATTTAAGAGTGTTGGATC

TCGGAGATAACAACCTTCAGTGGTTCCATTCCAAAATGGTTGGGACGTTCT

>PGSC0003DMG400015687-(rev)LRR-RLPs\_8601

TGTTGGATCTCGGAGATAACAACCTTCAGTGGTTCCATTCCAAAATGGTTGGGACGTTCTGGTATAACCAC

CTTACTTTTGAAAGGAAATAATCTTCAAGGCACCATTCCCACAGAATTGT

>PGSC0003DMG400015687-(rev)LRR-RLPs\_8662

TATAACCACCTTACTTTTGAAAGGAAATAATCTTCAAGGCACCATTCCCACAGAATTGTGTCATGCTAGT  
GACTTAAGAATTATGGATCTTTCTCACAATAATCTCTCGGGACCTATTCC

>PGSC0003DMG400015687-(rev)LRR-RLPs\_8723

CATGCTAGTGAAGTAAGAATTATGGATCTTTCTCACAATAATCTCTCGGGACCTATTCCCTCGTTGCTTTGG  
GAACATAATGCAACAAGAATATGTCATAGAAGACAAATACAGTCCAGCA

>PGSC0003DMG400015687-(rev)LRR-RLPs\_8784

GTTGCTTTGGGAACATAATGCAACAAGAATATGTCATAGAAGACAAATACAGTCCAGCATTGGATATTC  
AGGATTCCAGACGTTTGGAGGAGACGCTGCGATAGAGGTAGAATTCTCGA

>PGSC0003DMG400015687-(rev)LRR-RLPs\_8845

TGGATATTCAGGATTCCAGACGTTTGGAGGAGACGCTGCGATAGAGGTAGAATTCTCGATCCAGTATTC  
ATCGACAATCATGTTTCTAGATACCTATGTATGGGTTGGAGCAGAATTTAT

>PGSC0003DMG400015687-(rev)LRR-RLPs\_8906

CAGTATTCATCGACAATCATGTTTCTAGATACCTATGTATGGGTTGGAGCAGAATTTATGACCAAACACA  
TTACATATTCCTATGAAGGTAGCATGTTTTATTATATGTCCGGAATTGAT

>PGSC0003DMG400015687-(rev)LRR-RLPs\_8967

CCAAACACATTACATATTCCTATGAAGGTAGCATGTTTTATTATATGTCCGGAATTGATCTTTCTTGCAAC  
CAGTTAAGTGGTCACATACCTAAGGAGCTCAGTAATCTTACTCAAATTC

>PGSC0003DMG400015687-(rev)LRR-RLPs\_9028

TTCTTGCAACCAGTTAAGTGGTCACATACCTAAGGAGCTCAGTAATCTTACTCAAATTCGTGCGTTGAAC  
TTGTCACATAACCACATAACTGGAACAATACTATCAGCATTCTCGAAGCT

>PGSC0003DMG400015687-(rev)LRR-RLPs\_9089

GCGTTGAACTTGTCACATAACCACATAACTGGAACAATACTATCAGCATTCTCGAAGCTTCTGAATATCG  
AGAGTTTGGACTTGTCATACAACAACCTTGACTGGGAATATCCCACTCAA

>PGSC0003DMG400015687-(rev)LRR-RLPs\_9150

TGAATATCGAGAGTTTGGACTTGTCATACAACAACCTTGACTGGGAATATCCCACTCAACTTCTAGATTT  
GACAACTCTAGCAGTGTGTTAGTGTGGCACACAATAATTTAACAGGTATGA

>PGSC0003DMG400015687-(rev)LRR-RLPs\_9211

TCTAGATTTGACAACTCTAGCAGTGTGTTAGTGTGGCACACAATAATTTAACAGGTATGACTCCACAGCCT  
ATTGCACAGTTTGGAACTTTTAATGAAAGCAGTTATGAAGGAAATCCTTT

>PGSC0003DMG400015687-(rev)LRR-RLPs\_9272

CCACAGCCTATTGCACAGTTTGGAACCTTTAATGAAAGCAGTTATGAAGGAAATCCTTTTCTTTGTGGTCC  
TCCACTGCTCATCAGTTGCTCGGAGCCTAAAGAGATACCGAAATCACCT

>PGSC0003DMG400015687-(rev)LRR-RLPs\_9333

TTTGTGGTCCTCCACTGCTCATCAGTTGCTCGGAGCCTAAAGAGATACCGAAATCACCTCTTGAACCAGA  
ATGTTGTGAAGACGATACTGGTTTTCTAGATATAGAGTCATTCTATATTT

>PGSC0003DMG400015687-(rev)LRR-RLPs\_9394

TGAACCAGAATGTTGTGAAGACGATACTGGTTTTCTAGATATAGAGTCATTCTATATTTTCAATTTCTTGTGG  
CATTTGCAAATGTGGTGCTCGTAACGGTTGTAGTCCTCTGGGTGAACCC

>PGSC0003DMG400015687-(rev)LRR-RLPs\_9455

TTTCTTGTGGCATTGCAAATGTGGTGCTCGTAACGGTTGTAGTCCTCTGGGTGAACCCCTACTGGAGAA  
ATGTTTGGTTTTATTATGTTGAGTATTACATGTATTCTTGCTATTACTTT

>PGSC0003DMG400015706LRR-RLPs\_0

ATGAAGAGTGCTAGGAGATCTGATGTAGATACACTTAGCAACAATTTGCCTCGTGATATTCTGGATGGA  
ATTCTGGGGCACTTGCCTTTGAAAGATGCAGTGAAGAGTAGTATCTTGTGCG

>PGSC0003DMG400015706LRR-RLPs\_1008

ACTTGATTGCAAGCTGCCCCAAATTACAAGAGCTGACTATTGAATGTGTACGTACTCTCTCCTCCCTAAG  
GTAATTTGATAATAATTTGTCCTTTGTATCCGGCCTGACAACCTCCTGAA

>PGSC0003DMG400015706LRR-RLPs\_1071

CCCTAAGGTAATTTGATAATAATTTGTCCTTTGTATCCGGCCTGACAACCTCCTGAATTTTTTTTTTAGGAAA  
TAATGAACGATGTTGTGGGACCTGTTGCAGTTGTACAATACTTACAAG

>PGSC0003DMG400015706LRR-RLPs\_1134

TTTAGGAAATAATGAACGATGTTGTGGGACCTGTTGCAGTTGTACAATACTTACAAGACCATCAAAGCTT  
GTATGATTCTGTGAAGCTGCTTCGGAGAGTGCATATGAATACGTTTAGTG

>PGSC0003DMG400015706LRR-RLPs\_1197

AAAGCTTGATGATTCTGTGAAGCTGCTTCGGAGAGTGCATATGAATACGTTTAGTGGTTTTGAGATAG  
AAATGGAATTTGTGAGGCTTATATTAGCATCTGCACCTGCACTTGAGAAAA

>PGSC0003DMG400015706LRR-RLPs\_126

TGGAGGTATAAATGGGCCACACGTCAAGAGCTTGAGTTTGATTATCACTTTTTCGAGTTGTTTGCACATT

TTCAAGAAGCTAAAACAATCATTTATCAAGTACTCTTACTCCATAAAGGA

>PGSC0003DMG400015706LRR-RLPs\_1260

AGATAGAAATGGAATTTGTGAGGCTTATATTAGCATCTGCACCTGCACTTGAGAAAATTTTCTTTGGAA

TTTTTCATGTTTCCTTCATCAGCCGGGTAGACAACTGATGGATAAGATGA

>PGSC0003DMG400015706LRR-RLPs\_1323

TTTGGAATTTTTCATGTTTCCTTCATCAGCCGGGTAGACAACTGATGGATAAGATGAAGCAATTCACCA

AGCATCACCTAATGTTGAATTCACATTTGAAGAAGTTGTTGCAGAAGATC

>PGSC0003DMG400015706LRR-RLPs\_1376

ATGAAGCAATTCACCAAGCATCACCTAATGTTGAATTCACATTTGAAGAAGTTGTTGCAGAAGATCGTA

GACCAATTGAACCCCAAGAAGTCATGGAAGCACCATATGACTTTGATTAG

>PGSC0003DMG400015706LRR-RLPs\_189

GCACATTTTCAAGAAGCTAAAACAATCATTTATCAAGTACTCTTACTCCATAAAGGACCTATACTGAAGTT

TAAACTTGGAGGGTCTAATTTGATAAGATTTCGTGATATTGATCATTGG

>PGSC0003DMG400015706LRR-RLPs\_252

CTGAAGTTTAAACTTGGAGGGTCTAATTTGATAAGATTTCTGTGATATTGATCATTGGATACTTTTCTTGTC

AAAGAAAAATGTCGAGGAATTCCTCTTCGTGTAAGATCAAACAACGAT

>PGSC0003DMG400015706LRR-RLPs\_315

TTCTTGTCAAAGAAAAATGTCGAGGAATTCCTCTTCGTGTAAGATCAAACAACGATTATCATTTACCTTC

TCACCTTTTACATTCCGGAAACTAAGGCTTTTGGAAAGTTCAAATTCG

>PGSC0003DMG400015706LRR-RLPs\_378

TTACCTTCTCACCTTTTACATTCCGGAAACTAAGGCTTTTGGAAAGTTCAAATTCGCTTATTCCACCCTCCA

CCGATTTCAAAGGGTTAAGAAGCTTGTTAATCTTGGTCTTCATTGT

>PGSC0003DMG400015706LRR-RLPs\_441

CACCCTCCACCGGATTCAAAGGGTTAAGAAGCTTGTTAATCTTGGTCTTCATTGTGTCACCTTTCTTCC

GACAGTATTAACAATCTTATCTCTCAATGCCCGTTTCTTGAAATATTG

>PGSC0003DMG400015706LRR-RLPs\_504

TTTCTCCGACAGTATTAACAATCTTATCTCTCAATGCCCGTTTCTTGAAATATTGAAGTTGAATTGGTG

CACAACTTCGACACCCTTGAAATTGATGCTGCTAATCTCAAATGCTTT

>PGSC0003DMG400015706LRR-RLPs\_567



AATTGGTGCACAACTTCGACACCCTTGAAATTGATGCTGCTAATCTCAAATGCTTTGAATTTAGAGGAA  
CGTCAAAGTCCATTTGCTTCAAAAATGCCCTATGCTTAAGGAAGTTACT

>PGSC0003DMG400015706LRR-RLPs\_63

GATGGAATTCTGGGGCACTTGCCTTTGAAAGATGCAGTGAAGAGTAGTATCTTGTCGAAAGATTGGAG  
GTATAAATGGGCCACACGTCAAGAGCTTGAGTTTGATTATCACTTTTTTCGAG

>PGSC0003DMG400015706LRR-RLPs\_630

AGAGGAACGTCAAAGTCCATTTGCTTCAAAAATGCCCTATGCTTAAGGAAGTTACTATATGGCTCAATT  
CACAAGTTTCGACAGATCTATCAGCTCCTGTTTGTCTAATCTTATAAAC

>PGSC0003DMG400015706LRR-RLPs\_693

CTCAATTCACAAGTTTCGACAGATCTATCAGCTCCTGTTTGTCTAATCTTATAAACTTCTTCTATTACATG  
CCTTGCCTAATGGAAGTGGATATAAGTGGTGTTCATTAAGGTAATA

>PGSC0003DMG400015706LRR-RLPs\_756

TATTACATGCCTTGCCTAATGGAAGTGGATATAAGTGGTGTTCATTAAGGTAATAGTCGAGTGAAGTT  
AGCTACTTATCATAACTAAATTATGTATTTGATTCGTATCTTGAACAAAT

>PGSC0003DMG400015706LRR-RLPs\_819

TGAAGTTAGCTACTTATCATAACTAAATTATGTATTTGATTCGTATCTTGAACAAATTTTGGACATGCTTAT  
AGGATTTAACAATGGGAGGTCTGTCAGGGAATTCTCCGACTGTTTTGA

>PGSC0003DMG400015706LRR-RLPs\_882

CATGCTTATAGGATTTAACAATGGGAGGTCTGTCAGGGAATTCTCCGACTGTTTTGAACAATGTCAAATC  
TCTCAGAATTCAGAGAATGTTATTCGAAAACAGTGAGGAGGTTTTAGGTG

>PGSC0003DMG400015706LRR-RLPs\_945

TCAAATCTCTCAGAATTCAGAGAATGTTATTCGAAAACAGTGAGGAGGTTTTAGGTGCTGTTTACTTGAT  
TGCAAGCTGCCCAAATTACAAGAGCTGACTATTGAATGTGTACGTACTC

>PGSC0003DMG400015707LRR-RLPs\_0

ATGAATATGAGGAGTGGAGGAAGCTCTGGTGCAGATAGGATTAGCAGTTTGCCTTGTGATCTTCTTCAG  
AAGATATTAGGATGCTTGTCTTTGGATGATGCCGTAAGGACAAGTGTTTTG

>PGSC0003DMG400015707LRR-RLPs\_1037

GCGTGTGTACACATCCCTTGCATCAAAGAAATGGCAATGACACATAGTGCAATGAAGCGGCTCAAAA  
GCGTGGATATGACCCTCCTGTACTAGGTTAATAAACTGAAACAGAATTCT

>PGSC0003DMG400015707LRR-RLPs\_1098

GCTCAAAGCGTGGATATGACCCTCCTGTACTAGGTTAATAAACTGAAACAGAATTCTTGAAGCATGT  
ATTGGCATATGCAACTAACTTGAGAAAATATACATTGCGACTTCTGCAGA

>PGSC0003DMG400015707LRR-RLPs\_1159

AAGCATGTATTGGCATATGCAACTAACTTGAGAAAATATACATTGCGACTTCTGCAGATATCCGTCATA  
GGGGAATGAAAATGATGGAGGAGATGAAGCAATCCCTTGAGCATCACCT

>PGSC0003DMG400015707LRR-RLPs\_122

AACAAAATGGAGGTACAAGTGGGTAGTACGTTCCGAAGTAGTGTGGATTATAACATCAACAAAGAACT  
CCTCCTGAAAACAAGTATTTATAAAGTCCTATTGATGCATCAAGGAGAAGT

>PGSC0003DMG400015707LRR-RLPs\_1220

TCCGTCATAGGGGAATGAAAATGATGGAGGAGATGAAGCAATCCCTTGAGCATCACCTAATGTAGAAT  
TTATCTATCATTGAGATTGATCTATCTTCGTAGCAATAACAATATTGT

>PGSC0003DMG400015707LRR-RLPs\_1281

TGTAGAATTTATCTATCATTGAGATTGATCTATCTTCGTAGCAATAACAATATTGTTTATCCGAGATT  
CTTATTTTCCTTTTAAATTCATTGTTTGTGGATCTCTTCATAAAGGA

>PGSC0003DMG400015707LRR-RLPs\_1342

ATCCGAGATTCTTATTTTCCTTTTAAATTCATTGTTTGTGGATCTCTTCATAAAGGAAAATATTTTAAATTT  
TTGGATGGACGATGTTCTCAGAATTGAGTTTGTCAATGTAATAAAA

>PGSC0003DMG400015707LRR-RLPs\_1403

ATATTTTAAATTTTGGATGGACGATGTTCTCAGAATTGAGTTTGTCAATGTAATAAAAAGGAACCTAAA  
GGTTTTTGTATTTAGTTGAAATTATTGAATTATTAGTCATGTAAGGCTAT

>PGSC0003DMG400015707LRR-RLPs\_1464

GAACCTAAAGGTTTTTGTATTTAGTTGAAATTATTGAATTATTAGTCATGTAAGGCTATGCATGCGTACTT  
GTTTAAATATGTATTCATGTAAATTTGAATATTGTCTTTATTCGAAATT

>PGSC0003DMG400015707LRR-RLPs\_1525

ATGCGTACTTGTAAATATGTATTCATGTAAATTTGAATATTGTCTTTATTCGAAATTCTCAAAGAATAT  
TGAATACTTTGAAAGTTGATAACCACATTTGCTTAGTACTATTGGTTA

>PGSC0003DMG400015707LRR-RLPs\_1586

CCAAAGAATATTGAATACTTTGAAAGTTGATAACCACATTTGCTTAGTACTATTGGTTAGCTTTCTAATC

TCAGTTTTTCAGAGGTGCCTACTAACTCTCATTAGTACTCGACCACGAAG

>PGSC0003DMG400015707LRR-RLPs\_1647

TTTCCTAATCTCAGTTTTTCAGAGGTGCCTACTAACTCTCATTAGTACTCGACCACGAAGAGTACTAGGAG

ATCCAGTATCGATTCAATTAGCAACTTTCCCCGCAATATTTTGGACGGAA

>PGSC0003DMG400015707LRR-RLPs\_1708

TACTAGGAGATCCAGTATCGATTCAATTAGCAACTTTCCCCGCAATATTTTGGACGGAAATTCTAGGGTGA

TTGTTGTGTCTTATCAAAGATTGGAGGAATAAAGGGGTCACACGTCAAG

>PGSC0003DMG400015707LRR-RLPs\_1769

CTAGGGTGATTGTTGTGTCTTATCAAAGATTGGAGGAATAAAGGGGTCACACGTCAAGAGCTTGCGTT

TGATTATCACTTTTTTCAAGTCGTTTGCACATGGTCAAGAAGCTAAGACAA

>PGSC0003DMG400015707LRR-RLPs\_183

AAAGAACTCCTCCTGAAAACAAGTATTTATAAAGTCCTATTGATGCATCAAGGAGAAGTACATAAATTTA

GCCTCTTGTACCCTAGCTCCAACCTTTTTTCTGATATTGATAATTGGATT

>PGSC0003DMG400015707LRR-RLPs\_1830

CTTGCGTTTGATTATCACTTTTTTCAAGTCGTTTGCACATGGTCAAGAAGCTAAGACAATCATTTACCAA

TCTTATTACTCCATAAAGGATCTATACTGAGGTTTAACTTAGAGGCTC

>PGSC0003DMG400015707LRR-RLPs\_1891

ATTTACCAAATCTTATTACTCCATAAAGGATCTATACTGAGGTTTAACTTAGAGGCTCTAACTTGATAAG

ATCTCCTAATATTGATTGTTGGATACTTTTCTTGTCAAAAAGAAATGTC

>PGSC0003DMG400015707LRR-RLPs\_1952

ACTTGATAAGATCTCCTAATATTGATTGTTGGATACTTTTCTTGTCAAAAAGAAATGTCGTGGAATTCACC

CTCCGTGTAAGCTTAGGCAACAAATTTCAATTTACATTATTACTTTTTAC

>PGSC0003DMG400015707LRR-RLPs\_2013

GGAATTCACCCTCCGTGTAAGCTTAGGCAACAAATTTCAATTTACATTATTACTTTTTACATTCCAGCCACTA

AGGCATTTGGAAGTTCAAATTGCTTGGTCCACCCATTTCTAAAAATT

>PGSC0003DMG400015707LRR-RLPs\_2135

ACTCGGAACCTAAGACTCGAGCCTCGAGATCCAATCCCTTACCCGAGGTGAGACTAGATACATGAACTC

GAGACTCGGCAACCAAGTGTAGCTCTAGCAATCGAGACCCGGGAGCGACAT

>PGSC0003DMG400015707LRR-RLPs\_2196

ATGAACTCGAGACTCGGCAACCAAGTGTAGCTCTAGCAATCGAGACCCGGGAGCGACATCTGAGCGTC  
AATCCTGACTCAGGACCCGATCCAATCTTTAATCGAAACCAGATATTCAAGA

>PGSC0003DMG400015707LRR-RLPs\_2257

GAGCGTCAATCCTGACTCAGGACCCGATCCAATCTTTAATCGAAACCAGATATTCAAGACTCGAGATTTG  
AGCCCTAAGGCACAATATGGGCTAGAATTAGATTAATATTGGGCTAAATT

>PGSC0003DMG400015707LRR-RLPs\_2318

CGAGATTTGAGCCCTAAGGCACAATATGGGCTAGAATTAGATTAATATTGGGCTAAATTGAAGACA  
TTAAAATTTGGGTTATATTTGATTGGACTAAAATCAGCCCAATATAAAAATT

>PGSC0003DMG400015707LRR-RLPs\_2379

AGACAACTTTAAAATTTGGGTTATATTTGATTGGACTAAAATCAGCCCAATATAAAAATTATCTCATGCCCA  
AGTCCCAACCTCATAAAAATTTGGATGGATTGGACGGGTTATCAATTTT

>PGSC0003DMG400015707LRR-RLPs\_244

ATAAATTTAGCCTCTTGACCCTAGCTCCAACCTTTTTTCTGATATTGATAATTGGATTCTGTTTTTGT  
CAAAAAATGTCCAGGAATTATCACTTGCATTTCTTACATGTTTTCGCC

>PGSC0003DMG400015707LRR-RLPs\_2440

CTCATGCCCAAGTCCCAACCTCATAAAAATTTGGATGGATTGGACGGGTTATCAATTTTTGAGCCAGATT  
CTGCTAACCATTAAGCGAGGAGTTAAAACACCAAACATCACTCTGGCGAA

>PGSC0003DMG400015707LRR-RLPs\_2562

ATGAGACTAAAAAGTAGAGGGCAGCTTTTCGATCTCTCTCCAGCGGACTCTGCTATCGTTAAGCGTCCAA  
ATTCAACTCTCTAAAGGTGAAATCCCAACATTGACACAAAGTTCGAAACT

>PGSC0003DMG400015707LRR-RLPs\_2623

AGCGTCAAATTCAACTCTCTAAAGGTGAAATCCCAACATTGACACAAAGTTCGAAACTCGGTAGATAAC  
CGATCTGGCCGTTTTTCTGGTACGAATGCCAATTGATTTCTTCAACAGAA

>PGSC0003DMG400015707LRR-RLPs\_2684

GTAGATAACCGATCTGGCCGTTTTTCTGGTACGAATGCCAATTGATTTCTTCAACAGAATCTAGGTTGAA  
ATTTCTAGCTTATTTGATTTTGATATTCTGTTGTATTTGAAAAGAAAAGTA

>PGSC0003DMG400015707LRR-RLPs\_2745

TAGGTTGAAATTTCTAGCTTATTTGATTTTGATATTCTGTTGTATTTGAAAAGAAAAGTAGCAAACAGTCTC  
GATTAGGGATCAGGTGAAAAGTCATATGTAGTCATGTTTACAGAAATTG

>PGSC0003DMG400015707LRR-RLPs\_2806

AAACAGTCTCGATTAGGGATCAGGTGAAAAGTCATATGTAGTCATGTTTACAGAAATTGTGAATTTTCAT  
TAGTTGGGTAGAGAATAGTACTCTGGCCCTAAGTTGAGATTTCTAGCTTG

>PGSC0003DMG400015707LRR-RLPs\_2867

AATTTTCATTAGTTGGGTAGAGAATAGTACTCTGGCCCTAAGTTGAGATTTCTAGCTTGTTTCATTGACT  
ATGCTCTTGATAGGAAATAATTATACCCCTTAACAACAAACCAGCGCG

>PGSC0003DMG400015707LRR-RLPs\_2928

TCATTGACTATGCTCTTGATAGGAAATAATTATACCCCTTAACAACAAACCAGCGCGCAACGACTGAA  
AAGCCGTTGTTGCTTTTGCTTGCACTCGAAAATCTCTCTTTCGCCTCT

>PGSC0003DMG400015707LRR-RLPs\_2989

ACGACTGAAAAGCCGTTGTTGCTTTTGCTTGCACTCGAAAATCTCTCTTTCGCCTCTCCTCCCTGTCTC  
AATTCTGATAGATTAGCTTCTCCTTCGTACAAGCTACTATTTGTGAGT

>PGSC0003DMG400015707LRR-RLPs\_305

GTTTTTGTCGAACAAAAATGTCCAGGAATTATCACTTGCATTTCTTACATGTTTTCGCCTCCCTTCTCACCT  
ATTCAAATTCAGGATCTAAAGCACCTGGAACCTAATAGTTGTAAATT

>PGSC0003DMG400015707LRR-RLPs\_3050

TCCCTGTCTCAATTCTGATAGATTAGCTTCTCCTTCGTACAAGCTACTATTTGTGAGTAACAAACACTTTT  
CTATAGCAGACCGGGTGAAAAGTCAAATGTAGTACTATCAAGCAGTTT

>PGSC0003DMG400015707LRR-RLPs\_3111

CAAACACTTTTCTATAGCAGACCGGGTGAAAAGTCAAATGTAGTACTATCAAGCAGTTTGAAACAGGGG  
AAATATATTATCAAATGGTGAATTTTCCCTTGTTATCTACCTGTTAACCTT

>PGSC0003DMG400015707LRR-RLPs\_3172

AACAGGGGAAATATATTATCAAATGGTGAATTTTCCCTTGTTATCTACCTGTTAACCTTTAGAATGTTATA  
TTCCTTTGTGAAAAAAGTTGATCTCATGTTTCTATGTTTACCACTATA

>PGSC0003DMG400015707LRR-RLPs\_3233

GAATGTTATATTCCTTTGTGAAAAAAGTTGATCTCATGTTTCTATGTTTACCACTATATTTTGTCTAGTGG  
TAAGTGTGCCACCCAGTTGCGTGGATTAGACATACATCTTAAAGATT

>PGSC0003DMG400015707LRR-RLPs\_3294

TTGTCTAGTGGTAAGTGTGCCACCCAGTTGCGTGGATTAGACATACATCTTAAAGATTACGACTAATAG

TCTTCGCAAACCCCTTTGAAGTCAGGTGGAGGGTGGGAAGAAGCACATATCA

>PGSC0003DMG400015707LRR-RLPs\_3355

GACTAATAGTCTTCGCAAACCCCTTTGAAGTCAGGTGGAGGGTGGGAAGAAGCACATATCAAGTTCCACAT

GTCTTAGTTGCTGGAATGTAAAAGATAGGTAAATGATATTTGTTGCCTGA

>PGSC0003DMG400015707LRR-RLPs\_3416

TTCCACATGTCTTAGTTGCTGGAATGTAAAAGATAGGTAAATGATATTTGTTGCCTGAGAATATTTGAA

GGGTGAATTCCTAGACATTTTTTTTTGACAAGAAGAGCATCTAGTAATAAA

>PGSC0003DMG400015707LRR-RLPs\_3477

ATATTTGAAGGGTGAATTCCTAGACATTTTTTTTTGACAAGAAGAGCATCTAGTAATAAATATCAGGAAGA

CATGTCAAATTAGGACATTGAACTGTAAATTTAGTATTGGTACTTGATG

>PGSC0003DMG400015707LRR-RLPs\_3538

TCAGGAAGACATGTCAAATTAGGACATTGAACTGTAAATTTAGTATTGGTACTTGATGTAGTCGTAGGA

CTTGGTAAATGATTGTCTTGGCTTCTTGGTTGTCGTTGAAAGATGTGAAA

>PGSC0003DMG400015707LRR-RLPs\_3599

GTCGTAGGACTTGGTAAATGATTGTCTTGGCTTCTTGGTTGTCGTTGAAAGATGTGAAAACTAACTACA

AAAATCAAGTTCTGCACGTGTTACCCATTTGTACCGCAAGTCTTTTGACA

>PGSC0003DMG400015707LRR-RLPs\_366

CCTTCTCACCTATTCAAATTTAGGATCTAAAGCACCTGGAACCTAATAGTTGTAAATTCCACCCTCCTCCC

AACTTTAAAGGTTTTCGAAGTCTTGTTACCCTTAACTTTCAAGTTGTA

>PGSC0003DMG400015707LRR-RLPs\_3660

CTAACTACAAAAATCAAGTTCTGCACGTGTTACCCATTTGTACCGCAAGTCTTTTGACAAGATACTGGTCT

TCATTGTATCTTTCAAAGACAAGCTCCCTAGAATTTTATCCAGGACAT

>PGSC0003DMG400015707LRR-RLPs\_3721

ATACTGGTCTTCATTGTATCTTTCAAAGACAAGCTCCCTAGAATTTTATCCAGGACATTACACGGCAAAT

TGCTAATTGTAGCACTCTTCATGGTTAATACACACATTTGCACACAAC

>PGSC0003DMG400015707LRR-RLPs\_3782

CACGGCAAATTGCTAATTGTAGCACTCTTCATGGTTAATACACACATTTGCACACAACCTAATAATTCA

AATTTGAAATAAAGAAAATATCCAAATTCTCATAATTACACATTTCAAC

>PGSC0003DMG400015707LRR-RLPs\_3843

TAATAATTCAAATTTGAAATAAAGAAAATATCCAAATTCTCATAATTACACATTTCAACAATGTATGCATA  
GTCTTTTATAACTACTAGTTCACATTTTCGATTGCATAGAAGTTTATCA

>PGSC0003DMG400015707LRR-RLPs\_3904

TGTATGCATAGTCTTTTATAACTACTAGTTCACATTTTCGATTGCATAGAAGTTTATCATTTTGCCAATATA  
GAAGGGAGAAAATAATTAATGATGAATGAGAGAGTACCTGAAAAATGT

>PGSC0003DMG400015707LRR-RLPs\_3965

TTGCCAATATAGAAGGGAGAAAATAATTAATGATGAATGAGAGAGTACCTGAAAAATGTTGGTTGGAG  
ACAATAATGGTGAAAGCATGAATTTAATCTAGCAGATTCAATAATGTGTGTA

>PGSC0003DMG400015707LRR-RLPs\_4026

GTTGGAGACAATAATGGTGAAAGCATGAATTTAATCTAGCAGATTCAATAATGTGTGTATATATATACAT  
AAAAGGATATTTACCTCAATACACAATACATTTTTTTGGCGAGGGGGAC

>PGSC0003DMG400015707LRR-RLPs\_4087

TATATACATAAAAGGATATTTACCTCAATACACAATACATTTTTTTGGCGAGGGGGACTAGGAAGCTAT  
TTCCATTTCTAGAAAAGATCTTGTAGATATCTATTCTTTGCAATTGGAA

>PGSC0003DMG400015707LRR-RLPs\_4148

GGAAGCTATTTCCATTTCTAGAAAAGATCTTGTAGATATCTATTCTTTGCAATTGGAAAACCTTCATTAG  
ATCAATTAGCTCATTCTCATCTTTGGAATGTCAGCTATTTCCATTTCTT

>PGSC0003DMG400015707LRR-RLPs\_4209

CCTTCATTAGATCAATTAGCTCATTCTCATCTTTGGAATGTCAGCTATTTCCATTTCTTGAAAAGATTTTA  
TAGAAATTTATACTTAACATATGAGATATCTACTCTTGCAAATTTTTT

>PGSC0003DMG400015707LRR-RLPs\_4270

AAAAGATTTTATAGAAATTTATACTTAACATATGAGATATCTACTCTTGCAAATTTTTTTTACCCAAATCCA  
CCCTGATTACTATCTAAATTATGAATAGATCGGAAGAAAGCATAAATA

>PGSC0003DMG400015707LRR-RLPs\_4331

ACCCAAATCCACCCTGATTACTATCTAAATTATGAATAGATCGGAAGAAAGCATAAATAGGCCCCAAAAA  
TCATTAGGAGTTCCGCCCTACGACTTTTGTATAGTGGTAAGTGTGCTGC

>PGSC0003DMG400015707LRR-RLPs\_4392

CCCCAAAATCATTAGGAGTTCCGCCCTACGACTTTTGTATAGTGGTAAGTGTGCTGCCCATGTTGCAT  
GGATTAGACATATATCTCGGGTTTGGGTTTGAACCGATGAAACCTACTA

>PGSC0003DMG400015707LRR-RLPs\_4453

ATGTTGCATGGATTAGACATATATCTCGGGTTTGGGTTTGCAACCGATGAAACCTACTATTGAAGCCGAG  
AAGAATACACATCCAGATTATAGTCTTCTCAGCTTAAATAGTAGGTTTCA

>PGSC0003DMG400015707LRR-RLPs\_4514

GAAGCCGAGAAGAATACACATCCAGATTATAGTCTTCTCAGCTTAAATAGTAGGTTTCATCAGTTGCAAA  
CCACGATTTATGCCTAATCCACGCAACACAGGCAACACACTTACCACTAG

>PGSC0003DMG400015707LRR-RLPs\_4575

AGTTGCAAACCACGATTTATGCCTAATCCACGCAACACAGGCAACACACTTACCACTAGACAAAAACCCT  
AGGGGCGGAACTCCCAAGGATTTTGGAGCCTATGTCTGCTTACTTCCAAT

>PGSC0003DMG400015707LRR-RLPs\_4636

AAAAACCCTAGGGGCGGAACTCCCAAGGATTTTGGAGCCTATGTCTGCTTACTTCCAATTTGTTTATAAT  
TCTATAATAATCTGGGTGGATTTTGGTAAAAAAAAAAATTGTTAAAGTAG

>PGSC0003DMG400015707LRR-RLPs\_4697

GTTTATAATTCTATAATAATCTGGGTGGATTTTGGTAAAAAAAAAAATTGTTAAAGTAGATATCTCATAT  
GTTAAGTATAGATTTCTGTAAAATCTTTTTATAGAAATGGAAATAGTTGT

>PGSC0003DMG400015707LRR-RLPs\_4758

ATCTCATATGTTAAGTATAGATTTCTGTAAAATCTTTTTATAGAAATGGAAATAGTTGTCTGACGTTCCAA  
AGATAGAGAATGAGCTAATTGCTCTAATGTAGGTTTTGCCAATTGCAAG

>PGSC0003DMG400015707LRR-RLPs\_4819

GACGTTCCAAAGATAGAGAATGAGCTAATTGCTCTAATGTAGGTTTTGCCAATTGCAAGAATAGATTTCT  
ACAAGATCTTTTTCTTGAAATGGATATAACTTCCTTGGCTCCCCTCGCCA

>PGSC0003DMG400015707LRR-RLPs\_488

CTTTGAGCCCATGTCAATTTCAAGTCTTCCTTTCAAGTAGCCATTACTTGAGCATGTATTAATGGTTTGCT  
GCAGTGAGTTTGATAGCTTCATTATTGAGGGCCCCAATCTAAAAATCTT

>PGSC0003DMG400015707LRR-RLPs\_4880

TAGATTTCTACAAGATCTTTTTCTTGAAATGGATATAACTTCCTTGGCTCCCCTCGCCAAAAAAAAAAGTG  
ATGTGCATTTAGGTGAAATATCCTTATAGTTGTATATACATATACATTG

>PGSC0003DMG400015707LRR-RLPs\_4941

AAAAAAAGTGATGTGCATTTAGGTGAAATATCCTTATAGTTGTATATACATATACATTGTTAAATCTTCTA



GATTAAATTCATGAAAGCACCATTGTTGTCTCCAATCAACATTTTCCTC

>PGSC0003DMG400015707LRR-RLPs\_5002

AAATCTTCTAGATTAATTCATGAAAGCACCATTGTTGTCTCCAATCAACATTTTCCTCATAACCTCGCATT  
CATCATTATTTTTCCCTCCGATAATGGCGAAATGATAAACCTCCATCA

>PGSC0003DMG400015707LRR-RLPs\_5063

ACCCTCGCATTATCATTATTTTTCCCTCCGATAATGGCGAAATGATAAACCTCCATCAATTGAAAAAGTT  
GAACTAGCTAGTAGTTATATAAGACTATGCATACATTGTTAAAATGTGT

>PGSC0003DMG400015707LRR-RLPs\_5124

TGAAAAAGTTGAACTAGCTAGTAGTTATATAAGACTATGCATACATTGTTAAAATGTGTATTTATGAGAA  
TTTGATATTTTCTTTATTCCAGATCTGAATTATTAGAGTTGTCTACAAA

>PGSC0003DMG400015707LRR-RLPs\_5185

TTATGAGAATTTGGATATTTTCTTTATTCCAGATCTGAATTATTAGAGTTGTCTACAACTTGTGTATTTAA  
CCACGAAGAGTGCTACAATTTGCCCTGTAATGTCCTGGATAAAAATTCT

>PGSC0003DMG400015707LRR-RLPs\_5246

TGTGTATTAACCACGAAGAGTGCTACAATTTGCCCTGTAATGTCCTGGATAAAAATTCTAAGGAGCTTGT  
CTTTGAAAGATGCAGTAAAGACTAGTATCTTGTCAAAGACGGGAGGAAC

>PGSC0003DMG400015707LRR-RLPs\_5307

GGAGCTTGTCTTTGAAAGATGCAGTAAAGACTAGTATCTTGTCAAAGACGGGAGGAACAAATGGGTA  
ACATGTGCACAACCTGATTTTCTTAGTGATTTTCACTTCTTTCAACAACAA

>PGSC0003DMG400015707LRR-RLPs\_5368

ATGGGTAACATGTGCACAACCTGATTTTCTTAGTGATTTTCACTTCTTTCAACAACAATAAAGTAGCCAA  
GACAGTCATTTACCAAGTCCTACGAATCCATCAAGGACCAATACTAAAG

>PGSC0003DMG400015707LRR-RLPs\_5429

AAGTAGCCAAGACAGTCATTTACCAAGTCCTACGAATCCATCAAGGACCAATACTAAAGTGTACCGCTCC  
AAGATTATCCTGATATCCCCCTATTTGACGTGTTATCTTGATATTTATTA

>PGSC0003DMG400015707LRR-RLPs\_549

ATGGTTTGCTGCAGTGAGTTTGATAGCTTCATTATTGAGGGCCCAATCTAAAATCTTTGAATTCAGCG  
GCAGAGCAAATTCCTTTGCTTTAGAAGAACCCTCTGCTTGAGGAAATT

>PGSC0003DMG400015707LRR-RLPs\_5490

TACCGCTCCAAGATTATCCTGATATCCCCCTATTTGACGTGTTATCTTGATATTTATTACTGGATGCTCTTC  
TTGTCAAAGAAAAGTGTCTAGGACTTCGCTCTTCAAATATTCTCTGGC

>PGSC0003DMG400015707LRR-RLPs\_5551

GGATGCTCTTCTTGTCAAAGAAAAGTGTCTAGGACTTCGCTCTTCAAATATTCTCTGGCAACAAATATCAT  
TTACCTTCTTATCTTTTTACATTCCAGCAACTAAGACATCTGGAAGTGG

>PGSC0003DMG400015707LRR-RLPs\_5612

CAAATATCATTTACCTTCTTATCTTTTTACATTCCAGCAACTAAGACATCTGGAAGTGGATATGTGATTCTT  
CCACCTCCACCTGATTTCAAAGGGTTAGCAAAGCCTATTAGTCTGAA

>PGSC0003DMG400015707LRR-RLPs\_5673

ATGTGATTCTTCCACCTCCACCTGATTTCAAAGGGTTAGCAAAGCCTATTAGTCTGAATCTTCAAAGTGT  
CAGTTTTGATCCAACAATATTAAGGTATCTCACATCCAATGCCATTG

>PGSC0003DMG400015707LRR-RLPs\_5734

TTCAAAGTGTGAGTTTTGATCCAACAATATTAAGGTATCTCACATCCAATGCCATTGCTTGAAAGTTTG  
AGGTTGACTAGGTGCGCCGAATTTGATATTCTTGAAGTTGATGCCGCCA

>PGSC0003DMG400015707LRR-RLPs\_5795

TGAAAGTTTGAGGTTGACTAGGTGCGCCGAATTTGATATTCTTGAAGTTGATGCCGCCAATCTCAAATGC  
TTCGACTTTCTTGAACATCAGAGTCCATTTGCTTCAAGAATGCCCCGAT

>PGSC0003DMG400015707LRR-RLPs\_5856

CTCAAATGCTTCGACTTTCTTGAACATCAGAGTCCATTTGCTTCAAGAATGCCCCGATACTTAGAAGCG  
TCATTGTGTGGCTCAACTCAAGTCACGAGTTTTGATGGATCCGTCACCTT

>PGSC0003DMG400015707LRR-RLPs\_5917

TTAGAAGCGTCATTGTGTGGCTCAACTCAAGTCACGAGTTTTGATGGATCCGTCACCTTTTTGTTCTAATC  
TTACAAAGTTATTCCATTTACATGTCTTCCATGGAGGAACTGGAAGTGG

>PGSC0003DMG400015707LRR-RLPs\_5978

TGTTCTAATCTTACAAAGTTATTCCATTTACATGTCTTCCATGGAGGAACTGGAAGTGGCGTTTCATCAG  
TAGAGGTAATGTACATTTGTGATGATATTAATTATAGTCTACAAATGAA

>PGSC0003DMG400015707LRR-RLPs\_6039

GGTTCATCAGTAGAGGTAATGTACATTTGTGATGATATTAATTATAGTCTACAAATGAAAGTTGGTACAT  
ATCATAATCAAATGATGTATCTTTTACCGATTTTGGACTTGCTTCTAGTA

>PGSC0003DMG400015707LRR-RLPs\_61

TTCTTCAGAAGATATTAGGATGCTTGTCTTTGGATGATGCCGTAAGGACAAGTGTTTTGTCAACAAAATG  
GAGGTACAAGTGGGTAGTACGTTCCGAACTAGTGTTTGATTATAACATCA

>PGSC0003DMG400015707LRR-RLPs\_610

AATTCAGCGGCAGAGCAAATCCCTTTGCTTTAGAAGAACCCTCTGCTTGAGGAAATTGTATTGGGCAT  
GCCTTTTAACATGTTGGAGGTAATCATCATCATTGAAATATCTGTCTGAT

>PGSC0003DMG400015707LRR-RLPs\_6100

TTGGTACATATCATAATCAAATGATGTATCTTTTACCGATTTTTGACTTGCTTCTAGTACTTGGCCATGGG  
AGGTATAACCAGAGAATCTGCCGAGTGCTCTAAACAATGTCAAATCTCTC

>PGSC0003DMG400015707LRR-RLPs\_6161

TGGCCATGGGAGGTATAACCAGAGAATCTGCCGAGTGCTCTAAACAATGTCAAATCTCTCTGTATTTTGA  
TATGTCTTTCAGAAATATAATGTTGACGAGGTTTCAAGCACAGGTTACTT

>PGSC0003DMG400015707LRR-RLPs\_6222

TATTTTGGATATGTCTTTCAGAAATATAATGTTGACGAGGTTTCAAGCACAGGTTACTTGATTACAAGCT  
GCCCTAAATTACAAGAACTTACCATTGAATGTGTAAGCACTCTCCTATTT

>PGSC0003DMG400015707LRR-RLPs\_6283

TTACAAGCTGCCCTAAATTACAAGAACTTACCATTGAATGTGTAAGCACTCTCCTATTTTCTCATTGAACG  
TATTAATATGGTTTCTTCATCTGAACCTGCCTAACTGTTATCAAATATA

>PGSC0003DMG400015707LRR-RLPs\_6344

TCATTGAACGTATTAATATGGTTTCTTCATCTGAACCTGCCTAACTGTTATCAAATATATTCTAGGGAGTA  
GTAGGCATTGCTGTGGAATCGATCTGTTATACAATTCTTACGAGCCAAA

>PGSC0003DMG400015707LRR-RLPs\_6405

CTAGGGAGTAGTAGGCATTGCTGTGGAATCGATCTGTTATACAATTCTTACGAGCCAAATCAATCTCGTG  
TGGTGCTGTGAAGCTGTGCATTATTTTATTGGTTTTGAGATGGAAATGGA

>PGSC0003DMG400015707LRR-RLPs\_6466

AATCTCGTGTGGTGCTGTGAAGCTGTGCATTATTTTATTGGTTTTGAGATGGAAATGGAATTTGTGAAAT  
TGATATTGGCATCTACACCTGCACTGAAGGAGATCTTTGATGGATGAGAT

>PGSC0003DMG400015707LRR-RLPs\_6527

TTGTGAAATTGATATTGGCATCTACACCTGCACTGAAGGAGATCTTTGATGGATGAGATGAAACAATTCC

ATTGAGAATCACCCAACGTTTTAGATTCAAATTTGAAGAAATATGTACAG

>PGSC0003DMG400015707LRR-RLPs\_6588

AACAATTCCATTGAGAATCACCCAACGTTTTAGATTCAAATTTGAAGAAATATGTACAGGTCTGGAAGCTT  
GATTTGACTTATTGAGGTAGATTTGTCTTCAATATCAGCTTCCCTTCA

>PGSC0003DMG400015707LRR-RLPs\_6649

CTGGAAGCTTGATTTGACTTATTGAGGTAGATTTGTCTTCAATATCAGCTTCCCTTCAACATCAATCGAT  
GAAGTTAATTTCTTATATGATCATCAAGTAATTGAAATAATCTATCAGT

>PGSC0003DMG400015707LRR-RLPs\_6683

GTCTTCAATATCAGCTTCCCTTCAACATCAATCGATGAAGTTAATTTCTTATATGATCATCAAGTAATTGA  
AATAATCTATCAGTGTCACCTTTTTAAATAAGAAAGTCATTCGACTAT

>PGSC0003DMG400015707LRR-RLPs\_671

ATTGGGCATGCCTTTAACATGTTGGAGGTAATCATCATCATTGAAATATCTGTCTGATGCACTACTAGAT  
TTTCTCGTAATTTAGCTAATTTGTGCGCACTTTGTTTTAGTCCTTTA

>PGSC0003DMG400015707LRR-RLPs\_732

ACTACTAGATTTTCTCGTAATTTAGCTAATTTGTGCGCACTTTGTTTTAGTCCTTTACAGTACCAGAGCC  
TCAGTTAACTAGACAACATCAAAATTTGAATTTCAAGAATTTGAT

>PGSC0003DMG400015707LRR-RLPs\_793

GTACCAGAGCCTCAGTTAACTAGACAACATCAAAATTTGAATTTCAAGAATTTGATCTTTACTATGGT  
TGACTGGGTTGCATACGTGCTTGACTTGATCAATCGATGCCCAACATA

>PGSC0003DMG400015707LRR-RLPs\_854

TTACTATGGTTGACTGGGTTGCATACGTGCTTGACTTGATCAATCGATGCCCAACATAGAAAGGCTTCT  
AATTACGGTATGTCTCAGTTTTCATCTTTTGATTGTAAAGAGGTTGATTT

>PGSC0003DMG400015707LRR-RLPs\_915

AAGGCTTCTAATTACGGTATGTCTCAGTTTTCATCTTTTGATTGTAAAGAGGTTGATTTTTAGCTTCTTCT  
ATAATTAATCTTCTTTTCCCTTCTCAAGTCTGATGCTTTCGAAGCGT

>PGSC0003DMG400015707LRR-RLPs\_976

AGCTTCTTCTTATAATTAATCTTCTTTTCCCTTCTCAAGTCTGATGCTTTCGAAGCGTGTGCGTGTGTACA  
CATCCCTTGCATCAAAAGAAATGGCAATGACACATAGTGCAATGAAG

>PGSC0003DMG400015806LRR-RLKs\_0

ATTTATGAGCTTTGTGCTTGAGGGGTAGTCAACAAAGTGTGAGCTTTCCCAAAAAGAAAAACCCCAAGA  
AACAAAGTTCTTCCACTTCCTTCACTCATCACATTTTCTCTTTTTTCTCTT

>PGSC0003DMG400015806LRR-RLKs\_1054

GTGGCATCACTATTGATTGGGTATTTTCAAGGGAAAAAGAAGAGACATGCTGATGAAGAAGAGGAGGA  
ATTTGAGGAAGTTGAAGATGAGGAAGCTGGTTGTGGTGAGGGGAAGCTCATC

>PGSC0003DMG400015806LRR-RLKs\_1116

GGAGGAATTTGAGGAAGTTGAAGATGAGGAAGCTGGTTGTGGTGAGGGGAAGCTCATCTTGTTTCAGG  
GAGGTGAGCATCTGACTCTGGAGGATGTGCTGAATGCGACGGGGCAAGTCAT

>PGSC0003DMG400015806LRR-RLKs\_1178

TTCAGGGAGGTGAGCATCTGACTCTGGAGGATGTGCTGAATGCGACGGGGCAAGTCATGGAGAAGACT  
AGTTATGGGACTATTTATAAGGCAAATTAGCTGATGGTGGAAGTATAGCTT

>PGSC0003DMG400015806LRR-RLKs\_124

TCAATGGCACTTCAGAGGGTCTTCTTCTCTCCTTCTACATTGTCTTTTTTCATAGCCTTCACTACTACTTCTG  
CTGCATCTGATGTTTCAGCTTCTGTTACAGAACATTAACCCTCACTT

>PGSC0003DMG400015806LRR-RLKs\_1240

AAGACTAGTTATGGGACTATTTATAAGGCAAATTAGCTGATGGTGGAAGTATAGCTTTGAGGTTGTTG  
AGGGAAGGCAGTTGTAAGGATGGAGGTACATGTTTAACTGTGATTAGACAG

>PGSC0003DMG400015806LRR-RLKs\_1302

GTTGTTGAGGGGAAGGCAGTTGTAAGGATGGAGGTACATGTTTAACTGTGATTAGACAGCTGGGAAGAG  
TTCGACACGAGAATTTAATTCCTTTGAGAGCCTTCTATCAAGGGAAGAGAGG

>PGSC0003DMG400015806LRR-RLKs\_1364

GAAGAGTTCGACACGAGAATTTAATTCCTTTGAGAGCCTTCTATCAAGGGAAGAGAGGAGAGAAGCTTC  
TCATATATGATTATCTCCCAAACAGGAATCTTCATGAACTCTTACATGGTA

>PGSC0003DMG400015806LRR-RLKs\_1426

AAGCTTCTCATATATGATTATCTCCCAAACAGGAATCTTCATGAACTCTTACATGGTAAATTCTAGCTTCTT  
TATGTTCTCATGTTTGCTCTTTCAAGTTTTACTAATGAAAATCAATGC

>PGSC0003DMG400015806LRR-RLKs\_1488

CTAGCTTCTTTATGTTCTCATGTTTGCTCTTTCAAGTTTTACTAATGAAAATCAATGCAAGCTCAATTACGT  
TGACGTTATTGTATTAAGTGTTCCTCATAGGGAAGTAGCAATAGTTC

>PGSC0003DMG400015806LRR-RLKs\_1550

TCAATTACGTTGACGTTATTGTATTAAGTGTTCCTCATAGGGAAGTAGCAATAGTTCTTAGGCTCATTTC  
CAGCAGCTTTGGTTATTTGCTTGAGAGACTAAGATATGTGGGCTTCAAG

>PGSC0003DMG400015806LRR-RLKs\_1612

GCTCATTTCAGCAGCTTTGGTTATTTGCTTGAGAGACTAAGATATGTGGGCTTCAAGTTGTTGCCTTTTC  
ACACGGTGGGGTTGTAATTGAAGTATTAGTGCATAAATAGATCATTAC

>PGSC0003DMG400015806LRR-RLKs\_1674

TGCCTTTTCACACGGTGGGGTTGTAATTGAAGTATTAGTGCATAAATAGATCATTACAAACAGCCTGAAA  
AATATAAATGTAGCTGAACTTAGCATCTTAAGAGAAACTGAATTAGTTAT

>PGSC0003DMG400015806LRR-RLKs\_1736

GCCTGAAAAATATAAATGTAGCTGAACTTAGCATCTTAAGAGAAACTGAATTAGTTATTGAATGCACAAT  
ATAGAGATATTACGTTACACGAATATAGAGAATGTTCCATTTATTCTGAC

>PGSC0003DMG400015806LRR-RLKs\_1798

TGCACAATATAGAGATATTACGTTACACGAATATAGAGAATGTTCCATTTATTCTGACCGATATCCTTTTC  
GCTAAGTTAAGTTGATCCAACCTATATCCTCTCCTGTGCATCATCTTCC

>PGSC0003DMG400015806LRR-RLKs\_186

TACTACTTCTGCTGCATCTGATGTTACAGCTTCTGTTACAGAACATTAAACCCTCACTTCAGGGTAACTG  
ATAATTTGTTGTTATCTTCATGGAATATTTACAGTTCCTCTTTGTCAATG

>PGSC0003DMG400015806LRR-RLKs\_1860

ATCCTTTTCGCTAAGTTAAGTTGATCCAACCTATATCCTCTCCTGTGCATCATCTTCCAATACACGAACTGC  
CATATGTATACCTGTTTGGTCAACAAAGAAAAAGTATCCCTATCATAT

>PGSC0003DMG400015806LRR-RLKs\_1922

CACGAACTGCCATATGTATACCTGTTTGGTCAACAAAGAAAAAGTATCCCTATCATATATACTTACTCATC  
CAAGAAAAATGGAAAAAAAAGAACTAGCACATTATCATTAACTGCCG

>PGSC0003DMG400015806LRR-RLKs\_1984

TTACTCATCCAAGAAAAATGGAAAAAAAAGAACTAGCACATTATCATTAACTGCCGATGCAACTATCA  
GATGCCTTGATCAACCATTCAATTTATAATTTGCTTTAAAGAACTCTGTG

>PGSC0003DMG400015806LRR-RLKs\_2046

AACTATCAGATGCCTTGATCAACCATTCAATTTATAATTTGCTTTAAAGAACTCTGTGGCCCTAGATCAAC

TGATGAAAGCTCATTCCAAGCATTTGAGCTTGGTGTAGTAAGCTTCTT

>PGSC0003DMG400015806LRR-RLKs\_2108

TAGATCAACTGATGAAAGCTCATTCCAAGCATTTGAGCTTGGTGTAGTAAGCTTCTTTAGTTCCTTTTGC

TTGATGCAATCTATTGATGCTCTGGTTGTTTCCTGTTCCCTCATTCTTG

>PGSC0003DMG400015806LRR-RLKs\_2170

TCCTTTTGCTTGATGCAATCTATTGATGCTCTGGTTGTTTCCTGTTCCCTCATTCTTGTACTGCTAATTTAGC

AGTAGTTTGGTCATTGAGAGTAGTTTGCGCCAATAAATGTTGGAACC

>PGSC0003DMG400015806LRR-RLKs\_2232

GCTAATTTAGCAGTAGTTTGGTCATTGAGAGTAGTTTGCGCCAATAAATGTTGGAACCCACAAATTTTT

ATATCCTTGTTTCGTTCAACCTTAATAGCTCTAAGGATTAGTGAATTTGAT

>PGSC0003DMG400015806LRR-RLKs\_2294

AAATTTTTATATCCTTGTTTCGTTCAACCTTAATAGCTCTAAGGATTAGTGAATTTGATTATGATATTTTCTG

ATTGTCTACAGAATCAAGAGTTGGGAAGCCAGTGTTGAATTGGGCTAG

>PGSC0003DMG400015806LRR-RLKs\_2356

ATATTTTCTGATTGTCTACAGAATCAAGAGTTGGGAAGCCAGTGTTGAATTGGGCTAGAAGACACAAAA

TAGCATTGGGCATAGCCAGAGGACTAGCACACCTTCATGGTCTGGAAACTC

>PGSC0003DMG400015806LRR-RLKs\_2418

CACAAAATAGCATTGGGCATAGCCAGAGGACTAGCACACCTTCATGGTCTGGAAACTCCCATTACTCAT

GGGAATGTTAGATCAAAGAATGTTCTTGTTGATGAATTCTTCGTTGCCAGG

>PGSC0003DMG400015806LRR-RLKs\_248

GTAACACTGATAATTTGTTGTTATCTTCATGGAATATTTAGTTCCTCTTTGTCAATGGAGAGGTCTCAAA

TGGGTTTTACCAATGGTACTTCTTTGCTCTGTAGTGACCTATCTTCAC

>PGSC0003DMG400015806LRR-RLKs\_2480

TACTCATGGGAATGTTAGATCAAAGAATGTTCTTGTTGATGAATTCTTCGTTGCCAGGCTTACTGAATTC

GGACTTGACAAAATAATGATCCCAGCTGTAGCTGATGAAATTGTATCAGT

>PGSC0003DMG400015806LRR-RLKs\_2542

CTGAATTCGGACTTGACAAAATAATGATCCCAGCTGTAGCTGATGAAATTGTATCAGTTGCAAAGCTG

AAGGTTACAAGGCACCAGAGCTGCAAAGGATGAAGAAGTGCAACTCAAGAA

>PGSC0003DMG400015806LRR-RLKs\_2604

AAAGCTGAAGGTTACAAGGCACCAGAGCTGCAAAGGATGAAGAAGTGCAACTCAAGAAGTGATGTTTA  
CGCTTTTGGTATCCTACTGTTGGAGATTCTTCTAGGAAAGAAACCTGGTAAG

>PGSC0003DMG400015806LRR-RLKs\_2666

TGTTTACGCTTTTGGTATCCTACTGTTGGAGATTCTTCTAGGAAAGAAACCTGGTAAGAATGGTAGAAAC  
GGGACAATGTTGATTTGCCTGCACTAGTTAAAGTTGCAGTTCTGGAAGA

>PGSC0003DMG400015806LRR-RLKs\_2728

GTAGAAACGGGGACAATGTTGATTTGCCTGCACTAGTTAAAGTTGCAGTTCTGGAAGAAACGACTATGG  
AGGTATTCGACATGGAGCTTTTGAAGGGAATTAGGAATCCAATGGAAGAAG

>PGSC0003DMG400015806LRR-RLKs\_2790

ACTATGGAGGTATTCGACATGGAGCTTTTGAAGGGAATTAGGAATCCAATGGAAGAAGGTTTGGTACA  
GGCCTTGAGACTTGCAATGGGATGTTGTGCTCCTGTTGCTACTGTAAGACCG

>PGSC0003DMG400015806LRR-RLKs\_2852

GGTACAGGCCTTGAGACTTGCAATGGGATGTTGTGCTCCTGTTGCTACTGTAAGACCGTCGATGGATGA  
AGTAGTAAGGCAGTTAGAGGAGAATAGACCTAGAAACCGGTCTGCGTTGTA

>PGSC0003DMG400015806LRR-RLKs\_2914

TGGATGAAGTAGTAAGGCAGTTAGAGGAGAATAGACCTAGAAACCGGTCTGCGTTGTACAGCCCTGCT  
GAAACTAGGAGTGGAAGTGGTACTCCCTTTTAAGCTCATGTTGTGACTTTAG

>PGSC0003DMG400015806LRR-RLKs\_2976

CCTGCTGAAACTAGGAGTGGAAGTGGTACTCCCTTTTAAGCTCATGTTGTGACTTTAGTAATGAATATTG  
TCGCATATTATGCCTGTTTTTCCTCCTAAAGGAAAGAGGGCTAAATGGCT

>PGSC0003DMG400015806LRR-RLKs\_3038

GAATATTGTCGCATATTATGCCTGTTTTTCCTCCTAAAGGAAAGAGGGCTAAATGGCTATAGCTTTCTTAC  
TTACTATTTCAACTATTTACCTTTGGCTTTGCATTGTTGGGGAATATCT

>PGSC0003DMG400015806LRR-RLKs\_310

GGTCTCAAATGGGTTTTACCAATGGTACTTCTTTGCTCTGTAGTGACCTATCTTCACCTCAATGGACAAG  
TCTTTCTCTTTACAGAAACCCATCTTTGCATCTTGTCTCTACAGTTA

>PGSC0003DMG400015806LRR-RLKs\_3100

CTTTCTTACTTACTATTTCAACTATTTACCTTTGGCTTTGCATTGTTGGGGAATATCTTATCATAGACAAAC  
TGACAATAGACAATGTGTCACATTAGGCATCAAATTGGATATTACAGT



>PGSC0003DMG400015806LRR-RLKs\_3162

ATAGACAAACTGACAATAGACAATGTGTACATTAGGCATCAAATTGGATATTACAGTGTGCCTTTCTTT  
TTTTCAATTTGTTCTGCATTAGCCTACCTTCTATAAATATATATATGCA

>PGSC0003DMG400015806LRR-RLKs\_372

ATGGACAAGTCTTTCTTTACAGAAACCCATCTTTGCATCTTGTTTCTCTACAGTTACCATCAGCTAATCT  
CTCTGGAACACTCCCTAGGGAGCTTGGTGAGCTTTCTACACTGCAAAG

>PGSC0003DMG400015806LRR-RLKs\_434

CAGCTAATCTCTCTGGAACACTCCCTAGGGAGCTTGGTGAGCTTTCTACACTGCAAAGTCTTTATCTTGGT  
GTGAATGGACTACATGGGTCCATCCCTCTTGAGCTTGGCTACAGCTCTT

>PGSC0003DMG400015806LRR-RLKs\_496

TATCTTGGTGTGAATGGACTACATGGGTCCATCCCTCTTGAGCTTGGCTACAGCTCTTCTTTCTGATAT  
TGAGTTGAGTGGCAATAGTCTTACTGGGACACTTCCAACCTCAATATGG

>PGSC0003DMG400015806LRR-RLKs\_558

TTCTGATATTGAGTTGAGTGGCAATAGTCTTACTGGGACACTTCCAACCTCAATATGGAATCTTTGTGAG  
AAGATGGTTTTCTTTCAAGATTCATGGTAATTCTTTGTCTGGTTCTCTTCC

>PGSC0003DMG400015806LRR-RLKs\_62

CCCAAGAAACAAGTTCTTCCACTTCCTTCACTCATCACATTTTCTCTTTTTTCTCTTTTCAATGGCACT  
TCAGAGGGTTCTTCTCTCCTTCTACATTGTCTTTTTTCATAGCCT

>PGSC0003DMG400015806LRR-RLKs\_620

TTTGTGAGAAGATGGTTTTCTTTCAAGATTCATGGTAATTCTTTGTCTGGTTCTCTTCTAACCCTGCATTAC  
CTGATGCTACTTGTAAGAATTTGCAGTTTCTTGATTTTGGGCAAAAACA

>PGSC0003DMG400015806LRR-RLKs\_682

CCTGCATTACCTGATGCTACTTGTAAGAATTTGCAGTTTCTTGATTTTGGGCAAAACAGGTTTTCTGGGG  
ATTTTCTCTGTTTATAACTAGGTTTAATGGTCTTAAAGAGCTTGATTTA

>PGSC0003DMG400015806LRR-RLKs\_744

TTCTGGGGATTTTCTCTGTTTATAACTAGGTTTAATGGTCTTAAAGAGCTTGATTTAGGGGATAACAATT  
TTTCTGGTCCTGTTCTGAGACATTAGCTGCATTAAGCTGGAAAAATT

>PGSC0003DMG400015806LRR-RLKs\_806

ATAACAATTTTTCTGGTCCTGTTCTGAGACATTAGCTGCATTAAGCTGGAAAAATTGAATCTCTCACAT

AATAATTTTAGTGGGGTGTTGCCAAATTTGGGGAATCTAAGTTTGGTG

>PGSC0003DMG400015806LRR-RLKs\_868

CTCTCACATAATAATTTTAGTGGGGTGTTGCCAAATTTGGGGAATCTAAGTTTGGTGTGGATGTTTTG

AGGGAAATAATCCTACTCTTTGTGGACATCCTTTGGGGCCCTGTAGTGGA

>PGSC0003DMG400015806LRR-RLKs\_930

TGTTTTGAGGGAAATAATCCTACTCTTTGTGGACATCCTTTGGGGCCCTGTAGTGGAAGCTCTGGAATG

AGTCCTGGTGAATTGCTGGTATTGTTATTGGTCTAATGGCTGCATTGGT

>PGSC0003DMG400015806LRR-RLKs\_992

CTGGAATGAGTCCTGGTGAATTGCTGGTATTGTTATTGGTCTAATGGCTGCATTGGTGGTTGTGGCATC

ACTATTGATTGGGTATTTCAAGGGAAAAGAAGAGACATGCTGATGAAG

>PGSC0003DMG400015814-(rev)LRR-RLKs\_0

ATGCCAATGTCGAGGCGATTCTTGGACCTCCCAAATCTTGTTGTCTTTCTAACCTTTTTCTTCTATTACAT

AACCTTGCTCTTCCTCAAATGAAGTTGATGTCCTGTTTTCTTGGCTT

>PGSC0003DMG400015814-(rev)LRR-RLKs\_1037

TAACAACAACATTTCTGGTTCAATCCCATCTGTTCTTTCTAATGCGACAACTTGTTACAGTTTCAGATGG

ATACGAATCAGATTCAGGCTCAATTCCTCTGGAAATGGGGCAGTTGAA

>PGSC0003DMG400015814-(rev)LRR-RLKs\_1098

TTTCAGATGGATACGAATCAGATTCAGGCTCAATTCCTCTGGAAATGGGGCAGTTGAAGGAGCTAAAT

ATATTCTTTGCTTGGCAGAACAAGCTTGAAGGAAGCATTCCCTCCTGCATTG

>PGSC0003DMG400015814-(rev)LRR-RLKs\_1159

AGCTAAATATATTCTTTGCTTGGCAGAACAAGCTTGAAGGAAGCATTCCCTCCTGCATTGGGTGGTTGCAG

AAGCCTACAAGCTCTGGATTTATCACATAATTCTCTTACTGGTAGCTTAC

>PGSC0003DMG400015814-(rev)LRR-RLKs\_122

TTCTACTAATTCACCAATTCCTCAAACATTCTCAAACCTGGAATCCTTCAGATTCCACTCCTTGAAATGGTC

TCATATAGTTTGTCTTCTAATCTTTTCGTTACACAAATTGATATTCA

>PGSC0003DMG400015814-(rev)LRR-RLKs\_1220

TGGTTGCAGAAGCCTACAAGCTCTGGATTTATCACATAATTCTCTTACTGGTAGCTTACCTCCTGACCTTT

TTCAGTTAACTAATTTAACGAAGCTTCTGTTGATTTCCAATGATATTTT

>PGSC0003DMG400015814-(rev)LRR-RLKs\_1281

CCTGACCTTTTTAGTTAACTAATTTAACGAAGCTTCTGTTGATTTCCAATGATATTTCTGGTTTTATCCCA  
CCTGAGATAGGTAATTGTAGCTCTCTTATTCGTATACGACTTATTGGC

>PGSC0003DMG400015814-(rev)LRR-RLKs\_1342

GTTTTATCCACCTGAGATAGGTAATTGTAGCTCTCTTATTCGTATACGACTTATTGGCAATAAACTTAGC  
GGACAAATTCCAAGAGAGATAGGATTTCTAGACAACCTAAGTTTTCTTG

>PGSC0003DMG400015814-(rev)LRR-RLKs\_1403

TAAACTTAGCGGACAAATTCCAAGAGAGATAGGATTTCTAGACAACCTAAGTTTTCTTGATCTCTCTGAG  
AACCACTTACAGGATCCGTTCTGAGGAGATTGGCAATTGCAAGACT

>PGSC0003DMG400015814-(rev)LRR-RLKs\_1464

CTCTCTGAGAACCACCTTACAGGATCCGTTCTGAGGAGATTGGCAATTGCAAGACTGCAAATGCTCA  
ATCTATCTAATAACTCTAAGTGGGAATTTACCTAGCTCTCTTTCTTCT

>PGSC0003DMG400015814-(rev)LRR-RLKs\_1525

AAATGCTCAATCTATCTAATAACTCTAAGTGGGAATTTACCTAGCTCTCTTTCTTCTCTCAGTAGGCTA  
GAGATTTTGGATGTTTCCTTGAATCAGTTTAACGGACAGATTCCAGCAA

>PGSC0003DMG400015814-(rev)LRR-RLKs\_1586

CAGTAGGCTAGAGATTTTGGATGTTTCCTTGAATCAGTTTAACGGACAGATTCCAGCAAGCTATGGTCAA  
CTTGCTAACCTTAACCGGCTTGTTCTTAGTAAGAATGCCTTCTCTGGATC

>PGSC0003DMG400015814-(rev)LRR-RLKs\_1647

TATGGTCAACTTGCTAACCTTAACCGGCTTGTTCTTAGTAAGAATGCCTTCTCTGGATCGATTCCCCAAC  
TCTCGGCAATTGTTCAAGCCTTCAATTGCTTGATCTCAGCAGCAATGAG

>PGSC0003DMG400015814-(rev)LRR-RLKs\_1708

TTCCCCAACTCTCGGCAATTGTTCAAGCCTTCAATTGCTTGATCTCAGCAGCAATGAGTTCTCAGGGAAC  
ATGCCAGTGGAATTGTTTGACATTGACACTTGACATTGCCTTGAATT

>PGSC0003DMG400015814-(rev)LRR-RLKs\_1769

CTCAGGGAACATGCCAGTGGAATTGTTTGACATTGACACTTGACATTGCCTTGAATTTAAGCTGGAAC  
ATCTTGAGTGGGGTAGTCCCACCGCAGATATCTGCCTTAAACAACTTTC

>PGSC0003DMG400015814-(rev)LRR-RLKs\_183

TGTAAATGGTCTCATATAGTTTGTCTTCTAATCTTTTCGTTACACAAATTGATATTCAGTTTATTCAGCTG  
GCTCTTCCTTTCTTCTAATCTTTTCGTTTACAATCCTTGCAAAAA

>PGSC0003DMG400015814-(rev)LRR-RLKs\_1830

AGCTGGAACATCTTGAGTGGGGTAGTCCCACCGCAGATATCTGCCTTAAACAAACTTTCAGTACTAGATC  
TTTCCCACAACAAGCTTGAAGGAGACCTATTGTCTCTTTCGGGGCTTGAA

>PGSC0003DMG400015814-(rev)LRR-RLKs\_1891

TACTAGATCTTCCCACAACAAGCTTGAAGGAGACCTATTGTCTCTTTCGGGGCTTGAAAATCTGGTTTCC  
TTGAATGTTTCTACAACAATTTTACCGGCTACCTCCCTGATAATAAGT

>PGSC0003DMG400015814-(rev)LRR-RLKs\_1952

TCTGGTTTCCTGAATGTTTCTACAACAATTTTACCGGCTACCTCCCTGATAATAAGTTATTCAGGCAATT  
ATCATCAGCAGAGATGGCTGGCAACAAAGGTTTGTGCTCATTGGGACA

>PGSC0003DMG400015814-(rev)LRR-RLKs\_2013

TTCAGGCAATTATCATCAGCAGAGATGGCTGGCAACAAAGGTTTGTGCTCATTGGGACATGATTCTTGT  
TCTTGAGCAATGTTGAAGGCGGGGAATGATGAGTAATAGCAATGTAAGA

>PGSC0003DMG400015814-(rev)LRR-RLKs\_2074

ATTCTTGTCTTCTGAGCAATGTTGAAGGCGGGGAATGATGAGTAATAGCAATGTAAGACGGTCATGGA  
GGCTGAAATTGGCAATTGCACTCCTTCTGTGGTGACTATAGCTTTGGCAC

>PGSC0003DMG400015814-(rev)LRR-RLKs\_2135

GTCATGGAGGCTGAAATTGGCAATTGCACTCCTTCTGTGGTGACTATAGCTTTGGCACTCCTTGGAATG  
CTGGCAGTGTACAGAGTGAGAAAAATGAGCAGAGAAGATAATGATTCTGA

>PGSC0003DMG400015814-(rev)LRR-RLKs\_2196

CTTGGAATGCTGGCAGTGTACAGAGTGAGAAAAATGAGCAGAGAAGATAATGATTCTGAATTGGGAGG  
AGGGGATTCATCAGCTTGAAGTTTACTCCATTCCAGAAGTTGAATTTTTCG

>PGSC0003DMG400015814-(rev)LRR-RLKs\_2257

TGGGAGGAGGGGATTCATCAGCTTGAAGTTTACTCCATTCCAGAAGTTGAATTTTTCGGTTGAACAAA  
TTTTGAGATGCCTAGTGGAATCCAATGTTATTGGAAAGGGATGCTCCGGCG

>PGSC0003DMG400015814-(rev)LRR-RLKs\_2318

TGAACAAATTTTGAAGATGCCTAGTGGAATCCAATGTTATTGGAAAGGGATGCTCCGGCGTAGTTTATCG  
TGCAGAACTAGAAAATGGTGAAGCAATTGCAGTCAAGAAGCTATGGCCAAC

>PGSC0003DMG400015814-(rev)LRR-RLKs\_2379

GTTTATCGTGCAGAACTAGAAAATGGTGAAGCAATTGCAGTCAAGAAGCTATGGCCAACCACATTGGCA

ACTGGATACAACCTGCCAAAATTCAAAGTCAGGAATTAGTGGATGTGTTCCG

>PGSC0003DMG400015814-(rev)LRR-RLKs\_244

TTATTCAGCTGGCTCTTCCTTTCTTCTAATCTTTCGTCTTTACAATCCTTGCAAAAACCTGATCATTCTGG  
TGCTAATCTCACTGGAACAATCCCACAGGATATTGGAGATTGTGTTT

>PGSC0003DMG400015814-(rev)LRR-RLKs\_2440

CATTGGCAACTGGATACAACCTGCCAAAATTCAAAGTCAGGAATTAGTGGATGTGTTCCGCGATTCTTTCTC  
AACCGAGATAAAAACCTTGGCTCCATCCGTCACAAGAACATCGTTAAGT

>PGSC0003DMG400015814-(rev)LRR-RLKs\_2501

TTCTTTCTCAACCGAGATAAAAACCTTGGCTCCATCCGTCACAAGAACATCGTTAAGTTCTTAGGTTGCT  
GCTGGAATCAAAACACTAGATTGCTCATGTATGACTACATGCCTAATGG

>PGSC0003DMG400015814-(rev)LRR-RLKs\_2562

TTAGGTTGCTGCTGGAATCAAAACACTAGATTGCTCATGTATGACTACATGCCTAATGGAAGCCTAGGTA  
GCCTTCTACACGAACGAAGTGATGGATGTTTGGAGTGGGAATTGAGATAC

>PGSC0003DMG400015814-(rev)LRR-RLKs\_2623

GCCTAGGTAGCCTTCTACACGAACGAAGTGATGGATGTTTGGAGTGGGAATTGAGATACAAGATTGTCC  
TAGGTGCAGCTCAAGGGCTTGCTTATTTACACCACGATTGTACACCTCCAA

>PGSC0003DMG400015814-(rev)LRR-RLKs\_2684

GATTGTCCTAGGTGCAGCTCAAGGGCTTGCTTATTTACACCACGATTGTACACCTCCAATTGTTTCATAGG  
GACATCAAGGCCAACAAACATTCTCATTGGCCTTGACTTTGAGCCATACAT

>PGSC0003DMG400015814-(rev)LRR-RLKs\_2745

GTTTCATAGGGACATCAAGGCCAACAAACATTCTCATTGGCCTTGACTTTGAGCCATACATTGCAGATTTTG  
GTATAGCCAAAACCTCGTCGATGATGGAGATTTTGCTCGATCTTCCAATACA

>PGSC0003DMG400015814-(rev)LRR-RLKs\_2806

CAGATTTTGGTATAGCCAAAACCTCGTCGATGATGGAGATTTTGCTCGATCTTCCAATACAGTAGCTGGCTC  
CTACGGATACATAGCACCAGGTTCCGGCACAAGTCGTAGTACCACTTTACA

>PGSC0003DMG400015814-(rev)LRR-RLKs\_2989

ATATGGATACATGATGAAGATAACAGAGAAAAGTGATGTTTATAGCTTTGGAGTAGTTGTGTTAGAGGT  
GTTAACAGGAAAGCAGCCAATTGATCCTACAATACCGGATGGAGTACACAT

>PGSC0003DMG400015814-(rev)LRR-RLKs\_3050

TTAGAGGTGTTAACAGGAAAGCAGCCAATTGATCCTACAATACCGGATGGAGTACACATTGTGGATTGG  
GTGAGGCAGAAAAGAGGCAGTGATGAAGTTTTAGATGTGAGCTTATGTGCT

>PGSC0003DMG400015814-(rev)LRR-RLKs\_3111

TGGATTGGGTGAGGCAGAAAAGAGGCAGTGATGAAGTTTTAGATGTGAGCTTATGTGCTCGTCCCGAA  
TCAGAAGTTGATGAGATGATGCAGACTATAGGAGTAGCTATGCTGTGTGTTA

>PGSC0003DMG400015814-(rev)LRR-RLKs\_3294

TTGAAAGAGAAGAGTACCAAAAAGTTGATATGCTCCTTAAAGATGGAGGAGACAATAAGAGTAGTAGT  
GATGGAGGGCCATCTTCAAAGATGCATAGCTTGTACTTGCAAAGCAATAATA

>PGSC0003DMG400015814-(rev)LRR-RLKs\_3355

TAGTAGTGATGGAGGGCCATCTTCAAAGATGCATAGCTTGTACTTGCAAAGCAATAATACAAGCTTTTCT  
GCATCTTCATTGTTACATTCTTCTTCTCCAACACCAAGAATATTGGTTT

>PGSC0003DMG400015814-(rev)LRR-RLKs\_3414

CAAGCTTTTCTGCATCTTCATTGTTACATTCTTCTTCTCCAACACCAAGAATATTGGTTTCAAATAGACTT  
TTGTTTCTTTCTTATAGTTAGATTTGTTTTCTCATTTTTCTTCCCGGG

>PGSC0003DMG400015814-(rev)LRR-RLKs\_366

CTTGTAACACTTGATGTTAGTTCAAATGGTCTTGTGGTACCATACCGAAAACCTATTGGTAACCTTATAAA  
TCTTGAAGATTTGATTTTGAACCTAATCAACTAACAGGGGAAATTCCA

>PGSC0003DMG400015814-(rev)LRR-RLKs\_427

ACCTTATAAATCTTGAAGATTTGATTTTGAACCTAATCAACTAACAGGGGAAATCCAGGAGAGGTTGG  
CAGTTGCATTAACCTGAAAAATCTTATTATCTTTGACAATATGTTTAGCG

>PGSC0003DMG400015814-(rev)LRR-RLKs\_488

AGAGGTTGGCAGTTGCATTAACCTGAAAAATCTTATTATCTTTGACAATATGTTTAGCGGAAATCTTCTT  
CCGAACTTGGAAAACCTTGGAGTTTTAGAAAATATAAGAGCAGGAGGGAA

>PGSC0003DMG400015814-(rev)LRR-RLKs\_549

AATCTTCTTCCGAACTTGGAAAACCTTGGAGTTTTAGAAAATATAAGAGCAGGAGGGGAACAAAGATATT  
AGTGGGAAAATCCGGATGAGCTTGGGAATTGCAAGAACTTGATAGTGTTG

>PGSC0003DMG400015814-(rev)LRR-RLKs\_61

TTCTATTACATAACTTTGCTCTTCTTCAAATGAAGTTGATGTCCTGTTTTCTTGGCTTCATTCTACTAATTC  
ACCAATTCCTCAAACATTCTCAAACCTGGAATCCTTCAGATTCCAATC

>PGSC0003DMG400015814-(rev)LRR-RLKs\_610

AAGATATTAGTGGGAAAATTCCGGATGAGCTTGGGAATTGCAAGAACTTGATAGTGTTGGGACTTGCTG  
ATACGAAAATTTACAGGTTTCGCTTCTCCATCGTTGGGTAACCTGGGAAAGC

>PGSC0003DMG400015814-(rev)LRR-RLKs\_671

ACTTGCTGATACGAAAATTTACAGGTTTCGCTTCTCCATCGTTGGGTAACCTGGGAAAGCTTCAGGTATTA  
TCTATTTATACTACAATGCTTTCTGGCAAATACCTTCAGAAATAGGCAA

>PGSC0003DMG400015814-(rev)LRR-RLKs\_732

CAGGTATTATCTATTTATACTACAATGCTTTCTGGCAAATACCTTCAGAAATAGGCAACTGCTCAGAGCT  
AGTTGACTTGTATTTATACCAAATAGTCTGTCAGGTTCACTGCCTGCT

>PGSC0003DMG400015814-(rev)LRR-RLKs\_793

GCTCAGAGCTAGTTGACTTGTATTTATACCAAATAGTCTGTCAGGTTCACTGCCTGCTGAGTTGGGAAA  
GCTTCAGAAAGTAGAAAAGATGTTGTTTTGGCAAATAATCTTGATGGGC

>PGSC0003DMG400015814-(rev)LRR-RLKs\_854

GTTGGGAAAGCTTCAGAAAGTAGAAAAGATGTTGTTTTGGCAAATAATCTTGATGGGCTAATTCCTGA  
TGAAATTGGGAATTGCAAAGTTTGGTTATTCTTGATCTTTCTTTGAATTT

>PGSC0003DMG400015814-(rev)LRR-RLKs\_915

ATTCCTGATGAAATTGGGAATTGCAAAGTTTGGTTATTCTTGATCTTTCTTTGAATTTTTAAGCGGGAG  
CATTCCGTGGTCATTTGGGAACCTTACTAATCTCCAAGAGTTGATGATT

>PGSC0003DMG400015814-(rev)LRR-RLKs\_976

TAAGCGGGAGCATTCCGTGGTCATTTGGGAACCTTACTAATCTCCAAGAGTTGATGATTAGTAACAACA  
ACATTTCTGGTTCAATCCCATCTGTTCTTTCTAATGCGACAAACTTGTTAC

>PGSC0003DMG400015824-(rev)LRR-RLPs\_0

ATGGACTATGCAATTGTGCTCTTACTTGTTTTCTCTGTCATGAAGTATTTACTGTTTCTTCATCCAAATTA  
CCTCATCTCTTTCACAAACATCAAACCAGTTCACTTCTAAAATTCAAG

>PGSC0003DMG400015824-(rev)LRR-RLPs\_1098

CTTCCCAACTCAATTCAAACCTTGTGAACCTAACAGATCTTGATCTTTCTTTCAATAATTTTCATGTGGAT  
GTCAGCCTCTTTTCAGACCTCAAACAGCTTTTGTATCTTAGTCTTTCA

>PGSC0003DMG400015824-(rev)LRR-RLPs\_1159

TTCATGTGGATGTCAGCCTCTTTTCAGACCTCAAACAGCTTTTGTATCTTAGTCTTTCATACAATACTATTG

ATGAAAAGGAAGTTAATTCTACTTTGCCTGAGTCACTTGAGTACTTAC

>PGSC0003DMG400015824-(rev)LRR-RLPs\_1220

CAATACTATTGATGAAAAGGAAGTTAATTCTACTTTGCCTGAGTCACTTGAGTACTTACTATTGGCCGCAT  
GTGAAGTGAAAGAATTGGCGTTTCTAAGATCTGCAAACATCTTTCCAA

>PGSC0003DMG400015824-(rev)LRR-RLPs\_1342

TGGATCTTTCAAATAATAAGCTTCAAGGAAGAATTCCTGATTGGGCATGGTCTAACTGGATGTCATTGAC  
AACTCTTAATATATCCCACAATATGCTGACGAGTGTGGATACAATTCCTC

>PGSC0003DMG400015824-(rev)LRR-RLPs\_1403

GTCATTGACAACCTCTTAATATATCCCACAATATGCTGACGAGTGTGGATACAATTCCTCTTCAGATTGTAT  
ATACTATTGATTTACGATCCAATTTGCTTCAAGGTTCACTACCTGTTCC

>PGSC0003DMG400015824-(rev)LRR-RLPs\_1586

TATTTGCAATTTAACATCACTTGTAATGCTAGATTTGGCAAGAAACAATTTACGTGGAGAAATTCCGCCA  
TGTTTGGGAAAAATCACTGCCCTCCAAGTTTTGGATATGCGCCACAACAA

>PGSC0003DMG400015824-(rev)LRR-RLPs\_2135

TTATCGTGAAATTGTGAGAATCTTGTATTTGTACACAGTTATCGATCTTTC AAGTAATAAATTTAGGGGG  
CAAATTC AAGTATCATGGGGGATCTCATTGCAGTTCACATAATGAATTT

>PGSC0003DMG400015824-(rev)LRR-RLPs\_2318

ATTGGACCTATCAGGAAACCAGCTTTCAGGAGAGATACCACAACAACCTGGCTTCTCTTACGTATCTTTCA  
TTCTTAAATCTCTCCACAATCATCTCCAAGGATGCATCCCTCAAGGACC

>PGSC0003DMG400015824-(rev)LRR-RLPs\_61

CATCCAAATTACCTCATCTCTTTCACAAACATCAAACCAGTTCACCTTCTAAAATTCAAGAACACACTTACTG  
TAGATACCTCAGCCTCTTATCTCTGTCAAGAGCCTTATCCAAAAACGA

>PGSC0003DMG400015824-(rev)LRR-RLPs\_610

CTTCTCATTTAACAACTCTTAGGCTGGGAGATACAGCATTGTATGGGATAATACCTGAGACTATATTTCA  
CCTGCCAAACTTGGAACACTTCACTTATGGGAAAATTTTCAGCTCAGTG

>PGSC0003DMG400015824-(rev)LRR-RLPs\_671

TATATTTACCTGCCAAACTTGGAACACTTCACTTATGGGAAAATTTTCAGCTCAGTGGTTATTTTCCAA  
AGACCAAATGGAACAGCAGCACATCTCTCCAGAAGTTACAACCTCAGTTT

>PGSC0003DMG400015824-(rev)LRR-RLPs\_793



TGAATTTTCCTCATAATTTGCCCGAGTCTATTGGCTATCTAACTTCACTGCGTTATTTGTATCTTCAAATT  
GCAACCTTAGAGGGCCTATTCTGAATCTCTTTTGAAGCTCACTTGCA

>PGSC0003DMG400015824-(rev)LRR-RLPs\_976

TTCCATCACTAAGTCGTTTAGTCTTGAGCAATAACCACTTTTCTGGTCAATTTGAGGATTTCAATTCCAATT  
CCAATCACTAATCTTGATTGATTTAAGCAATAATCAGTTGCAAGGCC

>PGSC0003DMG400015853-(rev)LRR-RLPs\_0

CAAAAATATAGATAGAAGACAGCACCACCCACACACAAACCTCATTGTTTTGTACCTCATCCTCCTTCTAC  
CTCTTTTTTCTCTCTTTTTGCCCTATTCAATAGGGTTTCCAAATGATCT

>PGSC0003DMG400015853-(rev)LRR-RLPs\_1037

CTGATGAATGCCTTTTTGAGGTATTGAGGCGCCTTTCTGATGGCAAAGAGAGGAGTGCCTCTGCTTGCG  
TTTCCAAGCGCTGGCTTATGCTTTTAAGCAGCATCCACGGGGATGAAACAG

>PGSC0003DMG400015853-(rev)LRR-RLPs\_1098

TGCTTGCCTTCCAAGCGCTGGCTTATGCTTTTAAGCAGCATCCACGGGGATGAAACAGTCATCTCAGAT  
CTCAATCCATCTTTGGAGACCGAGGAAAGATCTATCCAAACCGCCCTTGT

>PGSC0003DMG400015853-(rev)LRR-RLPs\_1159

ATCTCAGATCTCAATCCATCTTTGGAGACCGAGGAAAGATCTATCCAAACCGCCCTTGTTAAGCCCGTGG  
ACTGTGTTAAGAAGGGTGAGGTATTGGACTCTAATGGTGCAGAAGTTGCT

>PGSC0003DMG400015853-(rev)LRR-RLPs\_122

TGCTACCTGATTTTCTGATGCAATCAGTTGTTCAAGCTCTTTTAATTGTGTTTCTTTTGGTTGATCTGTCAA  
TTTTTGCTCTCCATAGAGGGTTTTTTGGTCCTGGACAGTGCAGATTCT

>PGSC0003DMG400015853-(rev)LRR-RLPs\_1220

AGCCCGTGGACTGTGTTAAGAAGGGTGAGGTATTGGACTCTAATGGTGCAGAAGTTGCTGATGCTGAA  
TCTCAAGATATTGAAGGAGAGGGTCATCTTTCCAGGTGCCTTGATGGAAAGA

>PGSC0003DMG400015853-(rev)LRR-RLPs\_1281

TGCTGAATCTCAAGATATTGAAGGAGAGGGTCATCTTTCCAGGTGCCTTGATGGAAAGAAAGCAACAGA  
TGTCCGACTTGCTGCTATTGCTGTTGGAACCTCAAGCCATGGAGGGTTAGG

>PGSC0003DMG400015853-(rev)LRR-RLPs\_1342

GCAACAGATGTCCGACTTGCTGCTATTGCTGTTGGAACCTCAAGCCATGGAGGGTTAGGGAAGCTTTCT  
ATTCGGGGAAGCAACCCAATCCGTGGTGTGACTGATACTGGCCTTAAGGCT

>PGSC0003DMG400015853-(rev)LRR-RLPs\_1464

TGCTCGAGGTTGTCCTTCTCTTAGGGCTCTTCTCTCTGGAATGTATCTTCTGTTAGTGACGAAGGTTTAA  
TTGAGATTGCTCAGGGATGTCATCTCTTAGAGAAGCTTGATCTTTGCCA

>PGSC0003DMG400015853-(rev)LRR-RLPs\_1525

GAAGGTTTAATTGAGATTGCTCAGGGATGTCATCTCTTAGAGAAGCTTGATCTTTGCCAATGCCCTGCAA  
TACTGATATGTCTTTGATGGCTATCGCAAAGAATTGCCTAATTTGACC

>PGSC0003DMG400015853-(rev)LRR-RLPs\_1586

GCCCTGCAATTACTGATATGTCTTTGATGGCTATCGCAAAGAATTGCCTAATTTGACCTCTCTAACGATA  
GAATCTTGTTCAAAGATTGGAAATGAACTCTTCAAGCTGTAGGTCGTT

>PGSC0003DMG400015853-(rev)LRR-RLPs\_1647

TCTAACGATAGAATCTTGTTCAAAGATTGGAAATGAACTCTTCAAGCTGTAGGTCGTTTTT GCCCGAAG  
TTGAAGTTTGTGTCTCTCAAAAAGTCCCACTCATTGGAGATCAAGGAAT

>PGSC0003DMG400015853-(rev)LRR-RLPs\_1708

TGCCCGAAGTTGAAGTTTGTGTCTCTCAAAAAGTCCCACTCATTGGAGATCAAGGAATTGCAAGTCTCT  
TTTCATCTGCTGGTAATGTTTTGACAAAGGTGAACTTTACGCATTGAAC

>PGSC0003DMG400015853-(rev)LRR-RLPs\_1769

CAAGTCTCTTTTCATCTGCTGGTAATGTTTTGACAAAGGTGAACTTTACGCATTGAACATCAGTGACATC  
TCCCTTGCTGTTATTGGACATTATGGCATTGCCGTGACTGACATAGTCC

>PGSC0003DMG400015853-(rev)LRR-RLPs\_183

TGATCTGTCAATTTTTGCTCTCCATAGAGGGTTTTTTGGTCCTGGACAGTGCAGATTCTACTTCCCCAGTG  
TTTTCAACCATACTCATGTCTAAAGTCTTCAATTTTAGTGGTATGATC

>PGSC0003DMG400015853-(rev)LRR-RLPs\_1830

CAGTGACATCTCCCTTGCTGTTATTGGACATTATGGCATTGCCGTGACTGACATAGTCCTTATTGGTCTTC  
AAACATAAATGAGAGAGGATTTTGGGTCATGGGTAATGGCCAAGGTTT

>PGSC0003DMG400015853-(rev)LRR-RLPs\_1891

ATTGGTCTTCAAACATAAATGAGAGAGGATTTTGGGTCATGGGTAATGGCCAAGGTTTGCAGAAGCTG  
AGGTCGCTTGCTATAACTGCTTGCCATGGAGTACTGATTTGGGACTTGAA

>PGSC0003DMG400015853-(rev)LRR-RLPs\_1952

AGAAGCTGAGGTCGCTTGCTATAACTGCTTGCCATGGAGTACTGATTTGGGACTTGAAGCTCTTGGTAA

AGGTTGTCCAAACTTGAAGCTGTTCTGCCTGCGAAAATGTACAATCCTGT

>PGSC0003DMG400015853-(rev)LRR-RLPs\_2013

TCTTGGTAAAGGTTGTCCAAACTTGAAGCTGTTCTGCCTGCGAAAATGTACAATCCTGTCAGATAATGGC

TTGGTTGCTTTTGCCAAAGGTTTCAGTTGCACTAGAGAACCTCCAATTAGA

>PGSC0003DMG400015853-(rev)LRR-RLPs\_2074

GATAATGGCTTGGTTGCTTTTGCCAAAGGTTTCAGTTGCACTAGAGAACCTCCAATTAGAAGAATGCCACA

GGATCACCCAGGCTGGGTTTGTGGTGTCTTTTGAGCTGTGGTAAGAAG

>PGSC0003DMG400015853-(rev)LRR-RLPs\_2135

AATGCCACAGGATCACCCAGGCTGGGTTTGTGGTGTCTTTTGAGCTGTGGTAAGAAGTTAAAGGTTCC

TGTCCATGGTGAATTGCTTTGGTGTAAAGAGTTAGCCTGTCGATTTCCAT

>PGSC0003DMG400015853-(rev)LRR-RLPs\_2196

AAAGGTTCTGTCCATGGTGAATTGCTTTGGTGTAAAGAGTTAGCCTGTCGATTTCCATCTGTGCTACCTT

GCAACTACTGCAGTCTTTGTCTATTCGCAACTGCCCTGGAGTTGGTAA

>PGSC0003DMG400015853-(rev)LRR-RLPs\_2257

GTGCTACCTTGCAACTACTGCAGTCTTTGTCTATTCGCAACTGCCCTGGAGTTGGTAATGCTACGCTGG

CCATAGTGGGTAGGCTGTGCCCAAAGTACTCATTGGAGTTGAGTGGC

>PGSC0003DMG400015853-(rev)LRR-RLPs\_2318

CTACGCTGGCCATAGTGGGTAGGCTGTGCCCAAAGTACTCATTGGAGTTGAGTGGCCTTCTTGAAG

TAACTGATGAGGGTCTTTCCCTCTTGTTCAGAGCTGTGAAGCTGGTTTGG

>PGSC0003DMG400015853-(rev)LRR-RLPs\_2379

TCTTGAAGTAACTGATGAGGGTCTTTCCCTCTTGTTCAGAGCTGTGAAGCTGGTTTGGTCAAGGTGAAT

CTAAGCGGATGTGTTAATGTTACAGACAGATCAGTTTCATTCATAACTGA

>PGSC0003DMG400015853-(rev)LRR-RLPs\_244

TTCCCCAGTGTTTTCAACCATACTCATGTCTAAAGTCTTCAATTTTAGTGGTATGATCTTCATCCTTGTCT

GGGTTTTGCTTAAAAATTCAATCTTTATCTTAATTATTGTTTTTTCT

>PGSC0003DMG400015853-(rev)LRR-RLPs\_2440

AAGGTGAATCTAAGCGGATGTGTTAATGTTACAGACAGATCAGTTTCATTCATAACTGAGTTGCATGGG

GGAAGTCTCGAGTCTCTTAATGTTGATGAGTGTCCATATGTTACTGATGCG

>PGSC0003DMG400015853-(rev)LRR-RLPs\_2501

TGCATGGGGGAAGTCTCGAGTCTCTTAATGTTGATGAGTGTCCATATGTTACTGATGCGACCTTGTTAGC  
AATTTCCAACAACACTGTTGGTTGCTCAAGGAACTTGATATTTCAAAGTGTG

>PGSC0003DMG400015853-(rev)LRR-RLPs\_2562

CTTGTTAGCAATTTCCAACAACACTGTTGGTTGCTCAAGGAACTTGATATTTCAAAGTGTGGAATAACTGAT  
TCAGGTATTGCATCTTTGGCCAGTACAGTGC GACTTAATTTGCAGATCCT

>PGSC0003DMG400015853-(rev)LRR-RLPs\_2623

ATAACTGATTCAGGTATTGCATCTTTGGCCAGTACAGTGC GACTTAATTTGCAGATCCTCTCATTGTCGG  
GTTGCTCTATGCTTTTCGGACAAAAGTGTACCCTTTCTGCAGAAGTTGGGG

>PGSC0003DMG400015853-(rev)LRR-RLPs\_2684

CATTGTCGGGTTGCTCTATGCTTTTCGGACAAAAGTGTACCCTTTCTGCAGAAGTTGGGGCAGACACTTGT  
GGGCTTAAACATCCAGCACTGCAATGGGGTCAGTAGCAGGTGTGTTGATC

>PGSC0003DMG400015853-(rev)LRR-RLPs\_2745

GACACTTGTGGGCTTAAACATCCAGCACTGCAATGGGGTCAGTAGCAGGTGTGTTGATCTTCTCTTGGA  
ACAACCTGAGGTGTGATATCCTTTCTTAAGTGCACAGGGTTTAAGGATG

>PGSC0003DMG400015853-(rev)LRR-RLPs\_2806

CTCTTGGAACAACACTCTGGAGGTGTGATATCCTTTCTTAAGTGCACAGGGTTTAAGGATGAATGCAACTTA  
CAAGTTGAGCTCCTTTGAAGATGGAGCTTAGTAAGGAAGTTTAAGTAGTC

>PGSC0003DMG400015853-(rev)LRR-RLPs\_2867

TGCAACTTACAAGTTGAGCTCCTTTGAAGATGGAGCTTAGTAAGGAAGTTTAAGTAGTCTTTCTTTGTTA  
GTGGTAGCATAAAGTTTTTTGGTCCATGATCTTGGGTCTTCTAATAGTCC

>PGSC0003DMG400015853-(rev)LRR-RLPs\_2928

TCTTTGTTAGTGGTAGCATAAAGTTTTTTGGTCCATGATCTTGGGTCTTCTAATAGTCCAGTATCTCGGCT  
CCTTTTTCCAGGGATGTGGTTGGTTCTTTTTTTGCAGCTTCTTCACT

>PGSC0003DMG400015853-(rev)LRR-RLPs\_2989

TATCTCGGCTCCTTTTTCCAGGGATGTGGTTGGTTCTTTTTTTGCAGCTTCTTCACTAAAGCTGTTTATG  
GGAATTTTTTTTTCTGTTTTTCCAACCATACTCCCTGAGATACAAA

>PGSC0003DMG400015853-(rev)LRR-RLPs\_305

CATCCTGTCTGGGTTTTGCTTAAAATTCAATCTTTATCTTAATTATTGTTTTTTCTCTAGTGTTTTAGAT  
TTTAGTTTTTTCTTTTTGAGTTCATCTGTTATTAATTTTATGTAAC

>PGSC0003DMG400015853-(rev)LRR-RLPs\_3050

AGCTGTTTATGGGAATTTTTTTTCCCTGTTTTTCCAACCACTCCCTGAGATACAAATGCTGAGTTTTTG  
GATTAAGAGATTCATGTCTGGTCCTAGTCCTAGTACTTGTGTCACTA

>PGSC0003DMG400015853-(rev)LRR-RLPs\_3111

CTGAGTTTTTGGATTAAGAGATTCATGTCTGGTCCTAGTCCTAGTACTTGTGTCACTAGTTTTTAGCTTCT  
ACCCTTGCATTGATTACCAAATCTTGCAGCGGTAGAAGCTTTTCAATA

>PGSC0003DMG400015853-(rev)LRR-RLPs\_3172

TTTTAGCTTCTACCCTTGCATTGATTACCAAATCTTGCAGCGGTAGAAGCTTTTCAATATTGTCTTAGTGTT  
TTATGTGTGTGCACTTGTAGTTTTACCGAGTCTTTCACGTTGTTGAAC

>PGSC0003DMG400015853-(rev)LRR-RLPs\_3233

GTCTTAGTGTTTTATGTGTGTGCACTTGTAGTTTTACCGAGTCTTTCACGTTGTTGAACCTTTCAACTCGTG  
ATGTTGGGTTATGTTTGTGTGTTGTTCTTGTGGTTGCTTTTGGGCAG

>PGSC0003DMG400015853-(rev)LRR-RLPs\_3294

TTCAACTCGTGATGGTTGGGTTATGTTTGTGTGTTGTTCTTGTGGTTGCTTTTGGGCAGTTGTAGGTATA  
GATGCCTCTCTTTCATGGGCTTTTGGCCATGGCAGCAAGTTCCTTTTCTG

>PGSC0003DMG400015853-(rev)LRR-RLPs\_3355

GTAGGTATAGATGCCTCTCTTTCATGGGCTTTTGGCCATGGCAGCAAGTTCCTTTTCTGCCATGACAACCC  
TCTGGGGTTGTTTTTCTTTTTACCAAGCCTTAGTTTTGCAGGCCTCTC

>PGSC0003DMG400015853-(rev)LRR-RLPs\_3416

ATGACAACCCTCTGGGGTTGTTTTTCTTTTTACCAAGCCTTAGTTTTGCAGGCCTCTCTTGTCTTTAACT  
CCCAAATGTAACCTCGTTTTGTACTTGTGGAAATGTTAGTTTTGACTT

>PGSC0003DMG400015853-(rev)LRR-RLPs\_3462

TTGCAGGCCTCTCTTGTCTTTAACTCCCAAATGTAACCTCGTTTTGTACTTGTGGAAATGTTAGTTTGTAC  
TTATGTCTTTTATTCAATAAAAAAAAAAGAAAAAAAAAGTTAGGTTGTAT

>PGSC0003DMG400015853-(rev)LRR-RLPs\_366

AGTGTTTTAGATTTTAGGTTTTTCTTTTTGAGTTCATCTGTTATTAATTTTATGTAACCTTCTCTTTGAGAC  
TAGTGGGGTTTCTACATCTGGATCCTTGATTTTATCCTAAGTGTGAT

>PGSC0003DMG400015853-(rev)LRR-RLPs\_427

TCTCTTTGAGACTAGTGGGGTTTCTACATCTGGATCCTTGATTTTATCCTAAGTGTGATTTTACTTTGATCT

ATCTAGATATGATACAATTGAATCTCTCTTGTTCCTTTACTAGTGC

>PGSC0003DMG400015853-(rev)LRR-RLPs\_488

TACTTTGATCTATCTAGATATGATACAATTGAATCTCTCTTGTTCCTTTACTAGTGCAAAATCCATATA

AAATGTTAATGATATGCTAATCTAGGAAAAAATGGGCAATAATGACT

>PGSC0003DMG400015853-(rev)LRR-RLPs\_549

AATTCCATATAAAATGTTAATGATATGCTAATCTAGGAAAAAATGGGCAATAATGACTGGAAAATTCAT

TGATGGATATTTATGTTGAAAATCAATTATTTTTTCCCATGTTTGACTG

>PGSC0003DMG400015853-(rev)LRR-RLPs\_61

CTCCTTCTACCTCTTTTTTCTCTTTTTGCCCATTCAATAGGGTTTCCAAATGATCTCTTGCTACCTGATT

TTCTGATGCAATCAGTTGTTCAAGCTCTTTAATTGTGTTTCTTTTG

>PGSC0003DMG400015853-(rev)LRR-RLPs\_610

AAAATTCATTGATGGATATTTATGTTGAAAATCAATTATTTTTTCCCATGTTTGACTGAAATATTTTTTTC

ATAGAACTCTTCAAACTGATTAACCTGGCATATGGAGTATCTTGTAT

>PGSC0003DMG400015853-(rev)LRR-RLPs\_671

ATATTTTTTTCATAGAACTCTTCAAACTGATTAACCTGGCATATGGAGTATCTTGTATTTCTGTGATATAT

GCTCTAAATCTGGATCTGATCAGACTTGTATGTGAAGTGGGTTTGGCC

>PGSC0003DMG400015853-(rev)LRR-RLPs\_732

CTGTGATATATGCTCTAAATCTGGATCTGATCAGACTTGTATGTGAAGTGGGTTTGGCCTTTCTCAAGAT

TTGTTTGGTCTCAATTGTGATCTTTGGCTGATGTTCTTTACCATATTCTG

>PGSC0003DMG400015853-(rev)LRR-RLPs\_793

TCTCAAGATTTGTTTGGTCTCAATTGTGATCTTTGGCTGATGTTCTTTACCATATTCTGGATTTCAAGGTGAT

GATGCTTTTTACCATGGTGGGGCTGTGTACCCAAGTCCAAGGAATCC

>PGSC0003DMG400015853-(rev)LRR-RLPs\_854

TTTCAGGTGATGATGCTTTTTACCATGGTGGGGCTGTGTACCCAAGTCCAAGGAATCCAGTCTATTTCT

GTCCCTGGGAATCATGTGGATGTCTATTTTCTCCTTGCAAGAGGTCTC

>PGSC0003DMG400015853-(rev)LRR-RLPs\_915

TCTATTTCTGTCCCTTGGGAATCATGTGGATGTCTATTTTCTCCTTGCAAGAGGTCTCGTGTTGCGGTCC

CTTTTGTTCCTACTGAAAAGAAGCAGAAGTTGTCTTCCATTGATGTCCT

>PGSC0003DMG400015853-(rev)LRR-RLPs\_976

GTTGCGGTCCCTTTTGTTCCTGAAAAGAAGCAGAAGTTGTCTTCCATTGATGTCCTACCTGATGAATG  
CCTTTTGGAGGTATTGAGGCGCCTTTCTGATGGCAAAGAGAGGAGTGCC

>PGSC0003DMG400015878-(rev)LRR-RLPs\_1040

GAGATTGAATGACAAAGACATATTCAATCTCCAACAGATTTTACTGAGCGAGCTAAATCTTAAGCATTGG  
GAAGCTAGCAGTGATAACTTCCCTAATCTAAAATGCCTTATTCTGAAGAA

>PGSC0003DMG400015878-(rev)LRR-RLPs\_1105

ATTGGGAAGCTAGCAGTGATAACTTCCCTAATCTAAAATGCCTTATTCTGAAGAATTGCGAGTTCCTACA  
AGAAATTCCAACAGATTTTGGGGAAATTTGTACTTTGGAATCAATTGAAT

>PGSC0003DMG400015878-(rev)LRR-RLPs\_1170

CTACAAGAAATTCCAACAGATTTTGGGGAAATTTGTACTTTGGAATCAATTGAATTACATGATTGCACCA  
CTATTTCTGAGGATTCTGCCAGAAATATCGAACAAGAACAAGAGGATATG

>PGSC0003DMG400015878-(rev)LRR-RLPs\_1221

GAATTACATGATTGCACCACTATTTCTGAGGATTCTGCCAGAAATATCGAACAAGAACAAGAGGATATG  
GGAAATAATATCCTTAAGGTCTACATTCGTAGCTGCCACAGTAAGTTTTAA

>PGSC0003DMG400015878-(rev)LRR-RLPs\_260

TGTTGTGAGAACTCCATTTTACCAGGACAAAAGCCTAATTTTCGTGCTTCAGTATTGAAAAGTATATTG  
AAGATGCTTATAAGCTCTTACCCCTGTAGCCAGATCTATGTACTGCTT

>PGSC0003DMG400015878-(rev)LRR-RLPs\_325

ATATTGAAGATGCTTATAAGCTCTTACCCCTGTAGCCAGATCTATGTACTGCTTTTCTAACTTGGATCTA  
CCTTTTGAACCCCGTATTAAGCTTCTCCCTATATTGCCATCTACCGTC

>PGSC0003DMG400015878-(rev)LRR-RLPs\_390

GATCTACCTTTTGAACCCCGTATTAAGCTTCTCCCTATATTGCCATCTACCGTCATGATCCTATAATACAT  
GAATTTTCTCTTGTTCACCATCTCAGGGTATTGGCCATCTTTCT

>PGSC0003DMG400015878-(rev)LRR-RLPs\_455

AATACATGAATTTTCTTGTTCACCATCTCAGGGTATTGGCCATCTTTCTGCCTGGTTTACTCAAT  
CTCAGAGCTTCTGAATTTGCAAACCTAATTTGTGATGCTAATATAAT

>PGSC0003DMG400015878-(rev)LRR-RLPs\_520

ACTCAATCTCAGAGCTTCTGAATTTGCAAACCTAATTTGTGATGCTAATATAATGTATATAACTTTACCTC  
GGAAGATATGGATGATGAAGAACTTGAGGTATATACGTTTAAGGGCAG

>PGSC0003DMG400015878-(rev)LRR-RLPs\_65

AGGTTTCATAAGGACGTCTTCTGGAAGTCATGAAAGCTTGAAGAAGTAGCTAAACATTATTTGGAGGA  
TCTTATCAGCAGGAACTTGATAATGGCTAGAAAAAAAAGATTCAATGGTGA

>PGSC0003DMG400015878-(rev)LRR-RLPs\_650

TCCAAGTCCTAGAATAGATAAGAATCTTGTGACAGGGATGCCAAATCTAGAGGAACTTTTTGGTCTTTGT  
TACTCTAGTTGTACAAATGAAGTTTTTCTAGCATCCCCAATTTAAAGAG

>PGSC0003DMG400015878-(rev)LRR-RLPs\_715

TTTGTTACTCTAGTTGTACAAATGAAGTTTTTCTAGCATCCCCAATTTAAAGAGATTGACCATTCACGCA  
CCTTTAATGGTAGACAATGTTCCATATCATCTCTTGGATATGTTCGAGCT

>PGSC0003DMG400015878-(rev)LRR-RLPs\_780

CACGCACCTTTAATGGTAGACAATGTTCCATATCATCTCTTGGATATGTTCGAGCTTAAGAAAAGTTGAGG  
CATTCAAGCTTTCCTGGAGATATGTTTTTGCAAAGCCCATCAAAGATTT

>PGSC0003DMG400015878-(rev)LRR-RLPs\_845

TGAGGCATTCAAGCTTTCCTGGAGATATGTTTTTGCAAAGCCCATCAAAGATTTGTTTTTCCAAAATCAC  
TTAGAAGATTGTCTTTAGCTAGGTGTTATAAGTTTATTTGGGAGGAGAT

>PGSC0003DMG400015878-(rev)LRR-RLPs\_910

AATCACTTAGAAGATTGTCTTTAGCTAGGTGTTATAAGTTTATTTGGGAGGAGATATCATCAACTTTTATC  
AAGTTGCCACATCTTGAAGAGCTCAAACCTTAAATATTGTTCGAGCCGATG

>PGSC0003DMG400015878-(rev)LRR-RLPs\_975

TTTATCAAGTTGCCACATCTTGAAGAGCTCAAACCTTAAATATTGTTCGAGCCGATGATGATATATGGAGAT  
TGAATGACAAAGACATATTCAATCTCCAACAGATTTTACTGAGCGAGCTA

>PGSC0003DMG400015957-(rev)LRR-RLPs\_126

AATTTTACGTATCCTTATAATTTCTTCACTGGTGAAGTCCGGTGTATTTGGGATTGCCGGAGTTTCATGA  
TGAACGGAATTGTTTGCCAAAATACCGGTGCAACTGTCTCCGGGACAG

>PGSC0003DMG400015957-(rev)LRR-RLPs\_504

TCACCATTGCCGTATTGTGTACGCTCACCTCCACCTCACTTGCAGGCCTTCGACCACTCCCTTGCAGGCCT  
CCTCTTCTCCTCCTTCACATTTTTTCTGTCATCTAATGAAACCCACAAA

>PGSC0003DMG400015957-(rev)LRR-RLPs\_567

GCAGGCCTCCTCTTCTCCTCCTTCACATTTTTTCTGTCATCTAATGAAACCCACAAATCTAATAGCTTCCTA



TGCTTTTCTTTTCTATTTTCTGTTGGTCCTAAACTCGACGAAGCCC

>PGSC0003DMG400015957-(rev)LRR-RLPs\_624

TCTAATAGCTTCTATGCTTTTCTTTTCTATTTTCTGTTGGTCCTAAACTCGACGAAGCCCCAATTCATCT

GTCTTCGGCCTCTCCTTCTTGATCTCACCAATCTAATCGCTTCCTAA

>PGSC0003DMG400015957-(rev)LRR-RLPs\_63

GTGGCACATTATATGCTTTCTAGAACAATTTCAAAAAGTATTTGTCAGCTTCTAAGCTTCAGAATTTTAC

GTATCCTTATAATTTCTTCACTGGTGAAGTCCGGGTGATTTGGGATTG

>PGSC0003DMG400015977-(rev)OtherRLKsTM\_0

CATAATTTTTTCTCCATTCCATTGGATTCAATTTTCCCAACACAAACACACCTCCTCTAACCTGGCTAAT

TTCCCCCTATGATTAGCCAGGGGAAATCACCAGGCGAATACACGATGA

>PGSC0003DMG400015977-(rev)OtherRLKsTM\_1054

ACCTCGTAGTGTTTTGATATTGTGGATGATTTGGATGCAGAGTGTTCTTGAAGACACAAAGAACAGAG

TTCATCAACAATAATGAAGCTTACTTGGTTGAGTGCTTTCGATATCATTTTC

>PGSC0003DMG400015977-(rev)OtherRLKsTM\_1116

AACAGAGTTCATCAACAATAATGAAGCTTACTTGGTTGAGTGCTTTCGATATCATTTCTCTTCTCCTGGT

TTTGATCTCTCTAGCTTGTTCGAGAAAGATAAGAGTCATAGGTCGGATG

>PGSC0003DMG400015977-(rev)OtherRLKsTM\_124

CCCATAATTTCAATTTCTTCGTGCACTTGGATGCATCATCTATCCTCTTGCAGGATGATGAGCATGAAGAG

CGCGAAAACAGAGAAAAAAGGGACAATTTTGATGCATAAGTATGAGATT

>PGSC0003DMG400015977-(rev)OtherRLKsTM\_1612

CATGTTGTACAAGTGACAAAAAATCAGGAGATACTGCAGAATACAGCCTTCATTTAAAGATATAGTTT

GGACATGGCTGGGCAATGAGCAACAACAAGTGGAAAATCAAGAAATCAAGA

>PGSC0003DMG400015977-(rev)OtherRLKsTM\_1674

ATAGTTTGGACATGGCTGGGCAATGAGCAACAACAAGTGGAAAATCAAGAAATCAAGACTTAAGAGGT

AAAGATATGAAAACAAAACAAGTTGTGGGGGTAAAGTTTCCTCTGTGAGAC

>PGSC0003DMG400015977-(rev)OtherRLKsTM\_1736

AGAGGTAAAGATATGAAAACAAAACAAGTTGTGGGGGTAAAGTTTCCTCTGTGAGACCTACAGGTCA

CGATTTTCGAGTTGTGGATTGAGTTCATTGATGTTTACGTGGAGGTAGTTTGCC

>PGSC0003DMG400015977-(rev)OtherRLKsTM\_186

CATGAAGAGCGCGAAAACAGAGAAAAAAGGGACAATTTTGATGCATAAGTATGAGATTGGTAAATTGT  
TAGGCCAAGGTACATTTGCCAAAGTTTATCATGCAAGGAACCTAAAAACAGG

>PGSC0003DMG400015977-(rev)OtherRLsTM\_1860

TTACGATTTACAACCCTTGGATGAGAGCCTTCTCCATATCTCGTGCATCGAGCTATTTCTGTTTTTTTTAAA  
TCATGTAGGCATTATAATCATAGCATTTTTTGTCATTGCTCTTTTTGT

>PGSC0003DMG400015977-(rev)OtherRLsTM\_2108

TTTTCAAGAGGATCGATTTAGTTTTAGTCATTCAATTTACTTGTCTACCATTTTGCATTAAGAGGAAACA  
GTGACATTTATTGCAACCAAGTAGCATTCTGAAAACAGAATCATGCAC

>PGSC0003DMG400015977-(rev)OtherRLsTM\_2170

GAGGAAACAGTGACATTTATTGCAACCAAGTAGCATTCTGAAAACAGAATCATGCACAAATCAAGTGC  
TAAAGCAAAACAGAAAAAGTGATCGATTTGAAACAAGAGATTCTGAGAAAA

>PGSC0003DMG400015977-(rev)OtherRLsTM\_2232

CAAGTGCTAAAGCAAAACAGAAAAAGTGATCGATTTGAAACAAGAGATTCTGAGAAAATGCTCAGCAT  
GCAAGAAGTTGAATCTTGATCTTCTGTAGCATCCCTACAACATCTTTCATGT

>PGSC0003DMG400015977-(rev)OtherRLsTM\_2513

TTCAAGTTAAGATCTCCCTCAAATCACTAGGCTTCTCCTGGTAAATGTTTCCAGCAACATAATCCCCTA  
ACTATAGACATCACATTTTATTGACACCAATCCATCCAGTCCATACTCT

>PGSC0003DMG400015977-(rev)OtherRLsTM\_310

ACTGTAGCTGTTAAGGTAATTGACAAAGAAAAAGTCCTGAAAGTTGGCCTAATTGACCAAATCAAACGT  
GAAATTTCTGTTATGAGATTAATTAGACATTCAAATGTTGTTGAACTTTAT

>PGSC0003DMG400015977-(rev)OtherRLsTM\_434

TAATGGCTAGCAAAGCAAAAATTTATTTTGAATGGAATATGTTAGAGGTGGTGAATTATTCAATAAGG  
TTGCTAAAGGGAGGCTTAGGGAATCAGCAGCGCGAAAGTACTTTCAACAAT

>PGSC0003DMG400015977-(rev)OtherRLsTM\_496

AATAAGGTTGCTAAAGGGAGGCTTAGGGAATCAGCAGCGCGAAAGTACTTTCAACAATTAATCGCGTCT  
GTTGATTTCTGTCATAGTCGAGGGGTATATCATAGGGACTTGAAACCTGAA

>PGSC0003DMG400015977-(rev)OtherRLsTM\_558

CGCGTCTGTTGATTTCTGTCATAGTCGAGGGGTATATCATAGGGACTTGAAACCTGAAAACATACCTCTC  
GATGAAACTGGAAACCTAAAGTTTCTGATTTTGGGTTGAGTGCCCTTTT

>PGSC0003DMG400015977-(rev)OtherRLKsTM\_62

CCTGGCTAATTTCCCCTATGATTAGCCAGGGGAAATCACCAGGCGAATACACGATGATTCACCCATAAT  
TTCAATTTCTTCGTGCACTTGGATGCATCATCTATCCTCTTGCAGGATGA

>PGSC0003DMG400015977-(rev)OtherRLKsTM\_744

GGTCATAAATAAGAGAGGATATGATGGCGAAAAGGCGGATATTTGGTCATGTGGGGTGATTTTGTGGT  
ATTGTTATCTTCCATTTTCATGACACAAATTTAATGGAAATGTATAAGAAAA

>PGSC0003DMG400015977-(rev)OtherRLKsTM\_806

TGTTTGTATTGTTATCTTCCATTTTCATGACACAAATTTAATGGAAATGTATAAGAAAATTAGTAAAGGGAT  
ATTTAAATGCCCTGAATATTTTCCATATGAAGTGAAAAAACTACTTTCA

>PGSC0003DMG400015977-(rev)OtherRLKsTM\_992

AAGAAAGGATTCAAACAAATTGATAAACCCTAGTTTTGGATCAAGAACATGACGATGATTCACCTCGT  
AGTGTTTTTGTATTGTGGATGATTTGGATGCAGAGTGTTCTTGAAGACAC

>PGSC0003DMG400016015-(rev)LRR-RLKs\_124

TTTCTTCTATATCAGCTACTATTTTCTCAAATGAGACTGATCAAGAAGCTCTATTAGCTTTTCGAAATCTTG  
TTACGAGTGATTCTAGTCAATTTTTAGCCAATAATTGGACCAAAAATA

>PGSC0003DMG400016015-(rev)LRR-RLKs\_1612

ACTTTCATATTGGAGATGCACAAATCAATGGATTCATTCCCCTAGTACAGGCAACATGAGTGGTCTTAC  
AACGCTAGTTCTTCAAGATAACAATTTGACAGGAAACATTCTCTCGTGAGA

>PGSC0003DMG400016015-(rev)LRR-RLKs\_1674

GGTCTTACAACGCTAGTTCTTCAAGATAACAATTTGACAGGAAACATTCTCTCGTGAGATCGGTAAGCTTA  
AACAACTCCAAGGTTTATTTCTAGTTAACAATGAACTGCAGGGGGATATA

>PGSC0003DMG400016015-(rev)LRR-RLKs\_2356

TATGTGGAAGGCAAATATTGGAGGTTCTGCTTGTGCTGTCACTACTCTGAACAACAACAACCAAAATC  
GAAGAGGCTTGTGCTAAAAATTGTCACTCCGGTGGTTATTTATTCTTTT

>PGSC0003DMG400016015-(rev)LRR-RLKs\_2666

CACATTACCTAGTGGAATTGTGGTTGCAATAAAGGTACTGGATTTGGAAAATGAGGAAGTATGCAAAAAG  
GTTTGATACTGAATGTGAAGTGGTGAGAAATGTTAGACACAGAAATCTTGT

>PGSC0003DMG400016015-(rev)LRR-RLKs\_3100

CTCTTGGATATATTGCACCAGGTATACTACTATACTAGTCTCTTCCATTTCACTTATGTATCGAAGACCTT

TCATTATTGTTACATCGGATGAGTAATGCTTTTTTCATTTTCATTCTT

>PGSC0003DMG400016015-(rev)LRR-RLKs\_3348

TGAGGGAGTGGATAACGCGAGCATTCCAAAGAACTATGATGGAAGTTGTGGACGCGGATATTTTTCATG  
ATGGAGAAAAAATCACTTCCAAAAGTGAACCTCTGCATACTTCCATGATAG

>PGSC0003DMG400016015-(rev)LRR-RLKs\_372

GAGCTAAATCTCACGAACAACAACCTCCATGGTAACATCCCTTATGGCATTGGCCACTTGCCCTCGTTTAC  
GAGTGATTGATATTCAGAACAACCAGCTCCAAGGTAGTATTCCAACAAGT

>PGSC0003DMG400016015-(rev)LRR-RLKs\_434

TCGTTTACGAGTGATTGATATTCAGAACAACCAGCTCCAAGGTAGTATTCCAACAAGTCTATTTCAACAC  
CGGAGTGTTCAAATCATTTCATTGGCTTTCAATAAACTCGGTGGTGAAT

>PGSC0003DMG400016164LRR-RLKs\_0

GGGGTAACTAAGAAATACTGCTGTGAGTGACAGGAAGAGAAGACTTAAACGTAGTAATAATTGCAGTA  
TGCAAAGAGAGAAACCTTCTTGAACCTTCTTCTCCATTGACTACTACTTTTT

>PGSC0003DMG400016164LRR-RLKs\_1037

TGATAGACATAACCAATAGACATTCAAAGAGTTGCTGGCGAAAACATCTGGTTTTTGTAAAGAAAAGG  
ATAGGTTTGTGCGTTGTTTGAAGTTGTGGATCAATTCTTCTTTGGATGG

>PGSC0003DMG400016164LRR-RLKs\_1098

AGAAAAGGATAGGTTTGTGCGTTGTTTGAAGTTGTGGATCAATTCTTCTTTGGATGGTTGACATTATT  
GGTAGTAGCTGAAATATTGTTTGGATGGAGAAGACGAGTGTTTAGTTGTT

>PGSC0003DMG400016164LRR-RLKs\_1159

GACATTATTGGTAGTAGCTGAAATATTGTTTGGATGGAGAAGACGAGTGTTTAGTTGTTCTTTCAACTCC  
TAATAGCTTTTACGATTCTGCAATACTGCTACAGTTTGCTTATATGGGGT

>PGSC0003DMG400016164LRR-RLKs\_122

CAGCACAACAAAGAACAGCTTTTATTTGTGTTTTTTTCTTCAAGATTTGCTTTGTAAAGCTTATTTTTTGC  
TTAATTCAAAGTAAAGTTTCAATCTTTGGTTCAAACCTCTGCTCTTTCT

>PGSC0003DMG400016164LRR-RLKs\_1220

TTCAAACCTAATAGCTTTTACGATTCTGCAATACTGCTACAGTTTGCTTATATGGGGTTTGCAGTTCGAA  
GTACGTCGTTGCATGCTTTACATTATTAATAGAGGGCATTATGTAATGC

>PGSC0003DMG400016164LRR-RLKs\_1281

GCAGTTCGAAGTACGTCGTTGCATGCTTTACATTATTAATAGAGGGCATTATGTAATGCTGTATTATGCTT  
TTCATGTGATTGATCTATATCATCAACCACTACCATCTTCTTCTTGTTCC

>PGSC0003DMG400016164LRR-RLKs\_1342

TATTATGCTTTTCATGTGATTGATCTATATCATCAACCACTACCATCTTCTTCTTGTTCTTTGTACTTCAATT  
ATCGCACTTTCTTTGGTGTAGTTACTGGTCCTTTTCTTAGAATGCTT

>PGSC0003DMG400016164LRR-RLKs\_1403

TGTACTIONCAATTATCGCACTTTCTTTGGTGTAGTTACTGGTCCTTTTCTTAGAATGCTTTGTCATACTTTCTA  
TAGTATTTTGCTATGATCCCTTCACCTCAGTTATTTCTTTTTCGATC

>PGSC0003DMG400016164LRR-RLKs\_1647

GGGTATGTTGTTGTTGTTCTTGCATCAAATATCTCTTTTACATATTTAATTAGGCTTAGCTGTTCTCCTTGA  
GGTTATACTAATTTTGATCGTAGTAACCTTTCTAATATATTATGCAGA

>PGSC0003DMG400016164LRR-RLKs\_1708

GTTCTCCTTGAGGTTATACTAATTTTGATCGTAGTAACCTTTCTAATATATTATGCAGAACTGCCATTTGTC  
ATTACCAAGGAAGATAGTGCTTTATGTTACAGTGATGAAGGGGAACAG

>PGSC0003DMG400016164LRR-RLKs\_1769

TGCCATTTGTCATTACCAAGGAAGATAGTGCTTTATGTTACAGTGATGAAGGGGAACAGGTTTACTTGAT  
CTATAGAATTGAACAGCAACTGCAATATGGAAGTTCCTTGCAATTCTG

>PGSC0003DMG400016164LRR-RLKs\_183

TATTTTTTTGCTTAATCAAAGTAAAGTTTCAATCTTTGGTTCAAACCTGCTCTTTCTTTCACAGCCTAAA  
AAGATTGGTGCTTGCTTAAAGTACTTAACTTACTCAGCTCTTGTTTT

>PGSC0003DMG400016164LRR-RLKs\_1830

TTACTTGATCTATAGAATTGAACAGCAACTGCAATATGGAAGTTCCTTGCAATTCTGATATTAGCATGT  
CTCTACTCATCTGTCTCACCTGATCAGCAGGGTACACATTTCTCCATT

>PGSC0003DMG400016164LRR-RLKs\_1891

ATTAGCATGTCTACTCATCTGTCTCACCTGATCAGCAGGGTACACATTTCTCCATTTTCTACTTTAGCA  
AACTAACAAAGAGATGCCCTTAGCTGTCTTTAGTCTTTTATCTATTCA

>PGSC0003DMG400016164LRR-RLKs\_1952

CTACTTTAGCAAACAACTAACAAAGAGATGCCCTTAGCTGTCTTTAGTCTTTTATCTATTCAAAGGTATAAATA  
AAAATTTAGAGGGGTTAGATAATTTTGCTTGTGCTGACTTAATGTTGTC

>PGSC0003DMG400016164LRR-RLKs\_2013

GGTATAAATAAAAAATTTAGAGGGGTTAGATAATTTTGCTTGTGCTGACTTAATGTTGTCTGTATTCTGCTC  
GTAAAGTAGTGTGACATTCGTTATTTTGAATCTCTTGATCAGGAGATG

>PGSC0003DMG400016164LRR-RLKs\_2074

TATTCTGCTCGTAAAGTAGTGTGACATTCGTTATTTTGAATCTCTTGATCAGGAGATGCACTGTTTGCAT  
TGAAGAGTTCACTAAATGCTTCAAATGATCAACTTTCTGATTGGAATCA

>PGSC0003DMG400016164LRR-RLKs\_2135

CTGTTTGCATTGAAGAGTTCACTAAATGCTTCAAATGATCAACTTTCTGATTGGAATCAGAATCAAGTTA  
ATCCATGCACTTGGTCAAAGATAACTTGTGACGATAACAGCAATGTCTTG

>PGSC0003DMG400016164LRR-RLKs\_2196

ATCAAGTTAATCCATGCACTTGGTCAAAGATAACTTGTGACGATAACAGCAATGTCTTGATGGTGTAAGT  
TGAAGTTACTTTGCGAGCCATATTGATCACCATGTACATGATAAAAATTAT

>PGSC0003DMG400016164LRR-RLKs\_2257

GGTGTAAGTTGAAGTTACTTTGCGAGCCATATTGATCACCATGTACATGATAAAAATTATGGTCCCAAACA  
CTTGAAAAGTTGGTAACTACCATTCTGAAATCCTATATTTAATGTTGTC

>PGSC0003DMG400016164LRR-RLKs\_2318

TCCCAAACACTTGAAAAGTTGGTAACTACCATTCTGAAATCCTATATTTAATGTTGTCTGTGCTTTATTTG  
CAGGTCGTTGTCAAATATGGGGTTCACTGGCACTTTAACTCCAAGATT

>PGSC0003DMG400016164LRR-RLKs\_2379

TGCTTTATTTGCAGGTCGTTGTCAAATATGGGGTTCACTGGCACTTTAACTCCAAGATTAGGTGTTCTAGT  
GCATCTTAATACTCTGTACGTATAGAGAATTTGTGGAATTATTTTCAAT

>PGSC0003DMG400016164LRR-RLKs\_2440

GTGTTCTAGTGCATCTTAATACTCTGTACGTATAGAGAATTTGTGGAATTATTTTCAATTGAATGCTAATG  
TGTATCTATGATGTACTTATAGAGATCAGGTGTGCACTTTAATCATAAC

>PGSC0003DMG400016164LRR-RLKs\_2501

AATGCTAATGTGTATCTATGATGTACTTATAGAGATCAGGTGTGCACTTTAATCATAACGTCAGTAGATA  
AATCACTCCATTTACGAAAAGTAACTAGGTAAGTGTGATCAACTGAAACAAACA

>PGSC0003DMG400016164LRR-RLKs\_2684

TTAGGTTGTCTCTGTACTGTTTCGTAAGTAGTGTGTCATTCGTTATTTTGAATCTCTGACCTTTGATTGG

ATGATAATTTTGAGTTTCTTGTTCTTAGGGGAGGAAATAACATTGAAC

>PGSC0003DMG400016164LRR-RLKs\_2745

CTTTGATTTGGATGATAATTTTGAGTTTCTTGTTCTTAGGGGAGGAAATAACATTGAACTTTCAATTTGAA  
ACCATTGTGGAAAATGTGATGGTCAAATAAAAATATGGTTTGTTAGGTT

>PGSC0003DMG400016164LRR-RLKs\_3172

AAGTCTATATTTATCGATTTCTTCATCAAGCTGATATTAATCTACTCATGATATTGGCACATTACTAACTG  
CTCTTGTTGGGGACTGGTGATTGCTTGATCTTTGCCCGTGCATGGT

>PGSC0003DMG400016164LRR-RLKs\_3477

CATTTCTTGCCGTTATCACATTATTCTCGTAGTGCCTCTGATAAGCATTCTAAGGTCATAACTGGTAACA  
TTTTCTAAGATCTCCTAAAATAAGTTTTTCATCCTTGCTGTAGGAAGT

>PGSC0003DMG400016164LRR-RLKs\_3538

ACTGGTAACATTTTCTAAGATCTCCTAAAATAAGTTTTTCATCCTTGCTGTAGGAAGTTCTACTTTAGTG  
AGATCTGTGAACTCATCAATTTTCTTGCTTAGTTGTGTTATGTATTG

>PGSC0003DMG400016164LRR-RLKs\_366

ATGGTGTTTTGACTTTAGATATGGTGGGTTTTGTCTTTTCTGATTTGACTTGACATATGGAAGCAAAAAG  
TGAACTTTTTCTTGAAAAATTTGTTCTTGATGGATTTTGTGAATTTGT

>PGSC0003DMG400016164LRR-RLKs\_3843

ATTTCAATTGATTATTGTTTTTTTTAAACTGAGTTTTACATTTGGTGTGTTGACTTGGGAGTCTATTATAATG  
TTTCTTTGAATAGTTTTTGGAGTCAAACAATCTGTCTGGGACTATCC

>PGSC0003DMG400016164LRR-RLKs\_427

GCAAAAAGTGAACTTTTTCTTGAAAAATTTGTTCTTGATGGATTTTGTGAATTTGTGGATGTGGGGT  
TCTTTCTTTTTGGGTGGAGAGGGGAGTTGCTAATTGTTGTTTTTTGTG

>PGSC0003DMG400016164LRR-RLKs\_4697

TGAAAGAGCAAATACCACATTTTGAACACAAAGTATTTACCTTAGAAGTTAGACGTTGCCGGATATGTT  
TGGCAGTTGGCTGGTTTATGCACCCTGGTACAATTCTAAATTCTAAAGTT

>PGSC0003DMG400016164LRR-RLKs\_4758

GGATATGTTTGGCAGTTGGCTGGTTTATGCACCCTGGTACAATTCTAAATTCTAAAGTTGATATTCTGGC  
AGGTTCTCCAGTAAATCAAAGACTGGTCTCGTAATTGGTATCGTTGGTG

>PGSC0003DMG400016164LRR-RLKs\_488

ATGTGGGGTTCTTTTCTTTTGGGTGGAGAGGGGAGTTGCTAATTGTTTGTGATAACATATGTG  
AAATAGAAGGAGGTCAAGTTTAAATTGTTAACCATAGGCAAGGGGCATAG

>PGSC0003DMG400016164LRR-RLKs\_4941

GCTACAAACGTGAAATCTATGTTGATGTTCCAGGTCCTTATCACCTGTTTTACACAGTATTAACCTCAATA  
TGTGTTTGTAGCTCATCAAAGAAATACTCCCTCCATTTCAATTTGTTT

>PGSC0003DMG400016164LRR-RLKs\_5246

TCTCCTGAAAAAAAAGAAAGAAGAAGGCTGAAGTAGTTACCTATTGCTACATTTCTTTGTTCCATCTTA  
CATTGGAGACTAGATTTTTATGAGCATTACTTTAGTTCACTTGCAGTGT

>PGSC0003DMG400016164LRR-RLKs\_5307

TCCATCTTACATTGGAGACTAGATTTTTATGAGCATTACTTTAGTTCACTTGCAGTGTAAGATGGTATAG  
GTCCATTGAGTATGTTGTGACGTTTTCTTGTGTCTGTTCCGGTGTGCCC

>PGSC0003DMG400016164LRR-RLKs\_549

ACATATGTGAAATAGAAGGAGGTCAAGTTTAAATTGTTAACCATAGGCAAGGGGCATAGTTGATTTCCG  
ATATGGTCTCTCGACTAATAGTTATTATGTCAGAAAGTTCCTTTCTTTGTC

>PGSC0003DMG400016164LRR-RLKs\_61

TGCAGTATGCAAAGAGAGAACCTTTCTTGAACCTTCTTCCATTGACTACTTTTTTACAGCACAACA  
AAGAACAGCTTTTATTTGTGTTTTTTCTTCAAGATTTGCTTTGTAAAG

>PGSC0003DMG400016164LRR-RLKs\_610

GATTTCCGATATGGTCTCTCGACTAATAGTTATTATGTCAGAAAGTTCCTTTCTTTGTCGAAGAAAATTGG  
AGTCAAGAGGAAAGACTTTATGAGATAACAACGGTTAGTTGAGTGACCA

>PGSC0003DMG400016164LRR-RLKs\_671

AGAAAATTGGAGTCAAGAGGAAAGACTTTATGAGATAACAACGGTTAGTTGAGTGACCATGTGAGAAA  
TCAAACCAAAGGGACAGTGGAAAAAAGAATGAACTTGGATTTTTGTGAGTC

>PGSC0003DMG400016164LRR-RLKs\_732

TGAGAAATCAAACCAAAGGGACAGTGGAAAAAAGAATGAACTTGGATTTTTGTGAGTCTGGTTAAGTT  
TTAGGAATTACAATGGTTGAGAAGGAGATTTGAATATGTACACAGTCAGTG

>PGSC0003DMG400016164LRR-RLKs\_793

GTTAAGTTTTAGGAATTACAATGGTTGAGAAGGAGATTTGAATATGTACACAGTCAGTGTGTTTAGCTACA  
ACAACCTTTGTTGTTTCATTTGTTGGAGTTTCTTTGAAGAACTTGTGTC



>PGSC0003DMG400016164LRR-RLKs\_854

TTAGCTACAACAACCTTTGTTGTTTCATTTGTTGGAGTTTCTTTTGAAGAACTTGTGTCTTTCCTTAATA  
AGTTACTGAAAGTTTTTTGTAATAGTTCATTACTCACTTGATGTATTT

>PGSC0003DMG400016164LRR-RLKs\_915

TCTCCTTAATAAGTTACTGAAAGTTTTTTGTAATAGTTCATTACTCACTTGATGTATTTTGAAGAAAATGGG  
GGAATTATATATCAGTTTTGTTATATCTTCAAAGAATTTCTTGTGGTTA

>PGSC0003DMG400016164LRR-RLKs\_976

AGAAAATGGGGGAATTATATATCAGTTTTGTTATATCTTCAAAGAATTTCTTGTGGTTATCTGATAGACAT  
AACCAATAGACATTCAAAGAGTTGCTGGCGAAAACATCTGGTTTTTGT

>PGSC0003DMG400016357-(rev)LRR-RLPs\_1302

GTAACCTCGAGGTATCAACTTAATCTCTATCCTTCAGAAGATCACATTTTATATATCCATAAATTTCTACC  
TCCTTCATCTTTAAAGCTTTTAACTTTAATTCTTCATTTTTGAAAATT

>PGSC0003DMG400016357-(rev)LRR-RLPs\_1426

GATTCAAGTCTACTGCATCGCTGGGATGTAAAATAGAAGCTTTTACTTTCATAGTTTGTTATTCTGTGCG  
AACTCAACAAAATTTGATTTCACTTATCTGTAGTATGTAGAAATAAATT

>PGSC0003DMG400016357-(rev)LRR-RLPs\_1798

CAGAACTGCTTAATTTGATGAGTCATGACTTCGTATCGACAATTTTACAACTAACTCTACTAACTAAAA  
CTGTGGGCTGGAACCTTGTGTATTCCAGCATCTAACATTGTTCTTTTCC

>PGSC0003DMG400016357-(rev)LRR-RLPs\_186

CCACTATGTTTGGGTGAGATGAGTGAACCTTATGATTTTAGATTTAAGCAACAATAGTCTTAGAGGGACA  
ATTAATACAACCTTTTAGTATAGGAAACCAACTTATAGTCATTAATTGACG

>PGSC0003DMG400016357-(rev)LRR-RLPs\_1922

CTCTGCGCCAATATAAATTCTTGAGAGTTGCACATAACGCCCAAATGATTCTGTTGCGACTCAAGCAAT  
AGTTGTGCTACTTCATTTCCCACTTAATAGCTCCACCAAGTCTACAAGC

>PGSC0003DMG400016357-(rev)LRR-RLPs\_2046

ATCAGAGCCCCCAAGACAGTAGCATCAGCTTCAAAGGCATCTTCTTTATGAAGTCGTATGCTTCCTGC  
AGTAGATCAACCTCACAACCATAACGTTTCATCTTAGCTGCAAGTCCAAA

>PGSC0003DMG400016357-(rev)LRR-RLPs\_248

AGGGACAATTAATACAACCTTTTAGTATAGGAAACCAACTTATAGTCATTAATTGACGGGAATAAGCTA

GAGGGGAAAGTCCCACAATCATTGATCAATTGCACATATTTGGAAGTTCTT

>PGSC0003DMG400016357-(rev)LRR-RLPs\_2480

ACGCAGTTTAAAATACATGCAAGGCCTGCTAACAAGCTTTCATTAATGATAAGCACGAGCAAAAATTA  
AAGACCATCGATTTGAGCGACAGAATCAAAGACCACCCCGAAATAGGGACA

>PGSC0003DMG400016357-(rev)LRR-RLPs\_3844

TTATACACAAATTCTTTGATAGTGACAACAAAGGGACTGGATCTTGAACCTCCTCAAGTTTTGACTATGG  
ACATAATTATCGATCTCTCAAGGAATAGATTTGATAGTAAGTATTATTAG

>PGSC0003DMG400016357-(rev)LRR-RLPs\_3906

GACTATGGACATAATTATCGATCTCTCAAGGAATAGATTTGATAGTAAGTATTATTAGAGATGTAATTGG  
ACTTCGTACGTTGAACTTCTCTCATAATAACTTGAAAGGTCATATACCAG

>PGSC0003DMG400016357-(rev)LRR-RLPs\_3968

GTAATTGGACTTCGTACGTTGAACTTCTCTCATAATAACTTGAAAGGTCATATACCAGCATCAATGCAAC  
ATTTATCTATACTTGAATCATTGGATCTCTCATCCAACAAAATCGTCGGA

>PGSC0003DMG400016357-(rev)LRR-RLPs\_4154

GTTGGATGCATCCCCAAAGGAAAACAATTTGATACGTTTGAGAACAGTTCATACCAAGGGAATGAAGGA  
CTACGTGGATTTCTCTCTCAAAGATTGTGGTGGTGATGATGGGGTACCA

>PGSC0003DMG400016357-(rev)LRR-RLPs\_4216

TGAAGGACTACGTGGATTTCTCTCTCAAAGATTGTGGTGGTGATGATGGGGTACCACAAGCGACAAG  
TCAAGTTGAGCTAGATCAAGGAGGAGATTCACCAATGATCAATTGGCAGGA

>PGSC0003DMG400016357-(rev)LRR-RLPs\_4278

CGACAAGTCAAGTTGAGCTAGATCAAGGAGGAGATTCACCAATGATCAATTGGCAGGAGGTTCTCATG  
GGTTACGTTGTGGACTAGTTATTGTATTGTCCGTAATATACATAATGTAA

>PGSC0003DMG400016357-(rev)LRR-RLPs\_434

ATTCTAAGACTGAGATCAAATAAGTTCTTTGGCCCTATAAAAGATTCATCGACTTACAAGTTTTGCTCAAA  
TTCGAATCATAGATCTCTCATCCAATGGATTTAGTGGAATTTACCAGT

>PGSC0003DMG400016357-(rev)LRR-RLPs\_4402

AAATCCAGTGTGATTTTCGAGGATGGTTGATCAATTGGAACACAGAATCATTACGAGAATGAAGAAACA  
CAAAAAAGATATGTAACCTCTAGGTATTCAACTTGATCTTTTTTCATTCAA

>PGSC0003DMG400016357-(rev)LRR-RLPs\_496

TTGCTCAAATTCGAATCATAGATCTCTCATCCAATGGATTTAGTGGAATTTACCAGTGAGCCTTTTTGAG  
AATTTTGAAGCTATGAAAATAAATGGTGAGAAAAGTGGAACCCGAGAGT

>PGSC0003DMG400016357-(rev)LRR-RLPs\_558

CTTTTTGAGAATTTTGAAGCTATGAAAATAAATGGTGAGAAAAGTGGAACCCGAGAGTATGTAGCAGAT  
ATGAATAACGTTTATTACGCAAATTCCTTTATAGTTACAACAAAGGGGCTG

>PGSC0003DMG400016357-(rev)LRR-RLPs\_620

AGCAGATATGAATAACGTTTATTACGCAAATTCCTTTATAGTTACAACAAAGGGGCTGGATCTAGAACTA  
CCTCGAGTTTTGACTACCAACATAATTATCGATCTCTCAAGGAATAGATT

>PGSC0003DMG400016357-(rev)LRR-RLPs\_682

TAGAACTACCTCGAGTTTTGACTACCAACATAATTATCGATCTCTCAAGGAATAGATTTGAAGGTCATAT  
CCCAGGCATTATTGGAGATCTCATTGGACTTCGTACTTTGAACCTATCTC

>PGSC0003DMG400016357-(rev)LRR-RLPs\_744

GGTCATATCCCAGGCATTATTGGAGATCTCATTGGACTTCGTACTTTGAACCTATCTCATAATCGCTTGGA  
AGGTCACATAACCAGCATCACTGCACCAGTTATCTGTGCTTGAATCATTG

>PGSC0003DMG400016365-(rev)OtherRLKsTM\_1302

GAGAAATAATTCTTTAGGGGGTATCATAGAGCTTAATTGTTTCAGCAATGGTTAGTCTTGTTCGCTTGAT  
CTGGCTACGAACGGGTTCCGTGGGTTAGTTCCTGAATATCTTCCTGACTG

>PGSC0003DMG400016365-(rev)OtherRLKsTM\_1364

CGCTTGATCTGGCTACGAACGGGTTCCGTGGGTTAGTTCCTGAATATCTTCCTGACTGTCTGAAGGTTGCA  
AACTATCAATCTGGCTAGAACTCTTCACTGGACAACACTGCCGAAAGTT

>PGSC0003DMG400016365-(rev)OtherRLKsTM\_1488

GAATTTTCATAGCCTTTTCATCCCTTTCAGTCTCAAACAACAGTATGCATAATATTGATGCTGCTCTCAGAA  
TTTTACAGCATTGCAAGAACTTGTCTACGCTGGTCCTTACTCTGAATTT

>PGSC0003DMG400016365-(rev)OtherRLKsTM\_1550

CTCTCAGAATTTTACAGCATTGCAAGAACTTGTCTACGCTGGTCCTTACTCTGAATTTTCGGGATGAGGA  
GTTGCCTACTGATCCTAGCCTGCAGTTTAGTGAGCTGAAAGCTCTCATTA

>PGSC0003DMG400016365-(rev)OtherRLKsTM\_1612

GATGAGGAGTTGCCTACTGATCCTAGCCTGCAGTTTAGTGAGCTGAAAGCTCTCATTATTGCCAATTGCA  
GGCTCACTGGAGTTGTTCTCAGTGGTTGAGAAGTAGCTCAAACTGCAA

>PGSC0003DMG400016365-(rev)OtherRLKsTM\_1674

CAATTGCAGGCTCACTGGAGTTGTTCTCAGTGGTTGAGAAGTAGCTCAAACCTGCAACTGTTGGACTT  
GTCGTGGAATCGTTTGACGGGAACACTTCCACCTTGGATTGGAGATTCCA

>PGSC0003DMG400016365-(rev)OtherRLKsTM\_2046

AAGGTTACATGTTTTGGATCTAAAATGGAACAACCTTATCTGGGACAATACCAAGTAGCTTGTCTGGTATG  
GCGAGCGTAGAGAATTTGGATCTATCCCACAACAATCTGATTGGCAACAT

>PGSC0003DMG400016365-(rev)OtherRLKsTM\_2294

GACTCTGCGGTGAACATGGTAACCCCTGTCGAAATGGCAGCCAAGTTCCTCGTGACTCGGTTGCCAAAG  
GAAAGAGGCGCAAAGGAACTGTCATTGGCATGGGTATTGGTATTGGTCTTG

>PGSC0003DMG400016365-(rev)OtherRLKsTM\_248

TGTCAAGTACCCTTTTCTTGTCTTGTCCATTTGTACTTTTGTGGTGTCTTTCTTTGATTTTGAAGCTTGATA  
CAGAGAGAAATGAACAATCTTGATGTAAAAAATTGTGTAGTTTCACC

>PGSC0003DMG400016365-(rev)OtherRLKsTM\_310

GAAGCTTGATACAGAGAGAAATGAACAATCTTGATGTAAAAAATTGTGTAGTTTCACCAAATATGTGAA  
AAGTCCTTTTTCTCCTTTTTTGTGTTCTTTTTGAGTTTTAAGAAGATGGGT

>PGSC0003DMG400016365-(rev)OtherRLKsTM\_3565

CTTCCTGGAATTGAAGAATATATACTATGTTTCTTCTCAAACATGTACAAATAACATTGTGAATTTTGGAT  
GTGACTTTATCTTACCTAATAATAGATGAACATCAGTTTATTCCTTCTT

>PGSC0003DMG400016365-(rev)OtherRLKsTM\_372

ATGTGAAAAGTCCTTTTTCTCCTTTTTTGTGTTCTTTTTGAGTTTTAAGAAGATGGGTGTGTTGCAACTTG  
GTGTGATCTTTTTGTTTCTTGGGATTTGCTTACAAGCTCAATCTCAAAA

>PGSC0003DMG400016365-(rev)OtherRLKsTM\_682

TCTGAATCTTTAGGTAATTTGGATGAGCTAAGAACCCTTAATTTATCTCACAATTTCTTAAAGGACCTGT  
TCCTTTTACACTGTTGCATTTGTCTAAATTGGAAGTATTAGACTTGAGC

>PGSC0003DMG400016409RLKantifungi(GNK)\_704

TTTGGGAGCAGCTGCTTTTCGTTGGTTTTGGTGTGGGAGAACAACAAATCCAGAAGAAGAGAAAAG  
GTAAATGCTTTTGTGCCAAAATATCAATGATGTACATATTGTTGAGTATAT

>PGSC0003DMG400016409RLKantifungi(GNK)\_832

ATTTGCACTCAACTGTACCGAGACAACCTTCAAGAATTAACCTTGAGGCGTTGTGGCCTACTCATGTTTTTC

CTCGGAAATTTGAACTTGTTAGGTGCAAATGATGTTGAGAAATTGGTGA

>PGSC0003DMG400016424-(rev)LRR-RLPs\_0

GTTTTTTGAACATTTTAGTGCAACAATGGGCTACGTAAACCGTATATTTTTATGCTATTTCCCTTCCTCTG  
CCATCTTTCTTTCTCCTCATCCTTACCCCATTTGTGCCCAAAGATCA

>PGSC0003DMG400016424-(rev)LRR-RLPs\_1024

CTCAGGTTGTTATCACTTGCAAATAACATCTTTGACTTCAAATCCTTCCAATGTAAGTGGTATGCAAAC  
GTACAATCACTCATATTGTCATCAAACCACTTGAATGGGACTATACCTT

>PGSC0003DMG400016424-(rev)LRR-RLPs\_1087

TGCAAAACGTACAATCACTCATATTGTCATCAAACCACTTGAATGGGACTATACCTTCCTGGATATTCTCC  
CTCCCTTCACTTGACTTGTTAGACTTGAGTGATAACCATTTCAGTGGAA

>PGSC0003DMG400016424-(rev)LRR-RLPs\_128

CTCTTCTACAATTCAAGCACATGTTTACTATAGATGCTTTTGATCGTTGTTTCGACATAACAGGCCAACCG  
TTATATCCAAAACTCTTTCGTGGAACAAGAGCACAGATTGTTGCTCTT

>PGSC0003DMG400016424-(rev)LRR-RLPs\_192

CCAACCGTTATATCCAAAACTCTTTCGTGGAACAAGAGCACAGATTGTTGCTCTTGGGAAGGAGTTTAT  
TGTGACGAGACGACAGGAAAAGTGATTGAGCTTAACCTCGCTTGCAGCAA

>PGSC0003DMG400016424-(rev)LRR-RLPs\_256

GTTTATTGTGACGAGACGACAGGAAAAGTGATTGAGCTTAACCTCGCTTGCAGCAAACCTTCAAGGCAAG  
TTTCACTCCAACAGTAGTGTCTTTCAACTCTCCAATCTCAAAGGCTTGAT

>PGSC0003DMG400016424-(rev)LRR-RLPs\_320

GCAAGTTTCACTCCAACAGTAGTGTCTTTCAACTCTCCAATCTCAAAGGCTTGATTTTTCTAATAATAATT  
TCTCTGGATCGTACATTTTCGCTAAATTTGGTGAGTTTTCTAGTTTGA

>PGSC0003DMG400016424-(rev)LRR-RLPs\_384

TAATAATTTCTCTGGATCGTACATTTTCGCTAAATTTGGTGAGTTTTCTAGTTTGACGCAACTTGATTTGTC  
ATATTCAGGTTTTACAGGTATAATACCAGCACAAATATCTCGTCTTTC

>PGSC0003DMG400016424-(rev)LRR-RLPs\_448

GATTTGTCATATTCAGGTTTTACAGGTATAATACCAGCACAAATATCTCGTCTTCTAAATTACAAGTTCTT  
CGTATCCAGAGTTATTCAGATGGTCTTAGATTCAAACCTCACAATTTT

>PGSC0003DMG400016424-(rev)LRR-RLPs\_512

AAGTTCTTCGTATCCAGAGTTATTCAGATGGTCTTAGATTCAAACCTCACAATTTTGAAGTCTCCTTAAG  
AACTTGACCCAATTAAGAGAGCTTGACTTTGACAATGTGAACATCTCTT

>PGSC0003DMG400016424-(rev)LRR-RLPs\_64

TTCCTCTGCCATCTTTCTTCTCCTCATCCTTACCCCATTTGTGCCCAAAGATCAAGCTCTTGCTCTTCTAC  
AATTCAAGCACATGTTTACTATAGATGCTTTTGATCGTTGTTTCGAC

>PGSC0003DMG400016424-(rev)LRR-RLPs\_640

CCTCTGAATTTCTCTTCTTATTTGACAACCTCTACACCTTCGGAACACACAGTTCTACGGGGTATTGCCCGA  
AAGAGTTTTCCACCTTTCCAACCTTGAATCTCTTGATTTATCAGACAAT

>PGSC0003DMG400016424-(rev)LRR-RLPs\_704

TGCCCGAAAGAGTTTTCCACCTTTCCAACCTTGAATCTCTTGATTTATCAGACAATCTCCAGCTCACTGTT  
AAGTTTCCACAACCAAATGGAATAGCAGTGCATCACTCATGGAGTTAG

>PGSC0003DMG400016424-(rev)LRR-RLPs\_832

AGTGTGAATGCTACTGGTAGGATACCTGAATCATTTGGTCATCTAACTTCACTGCGTAGATTGAGAATAG  
TTTCTTGTAATCTCTCAGGCTCTATTCTAACTTCTATTGAATCTCACC

>PGSC0003DMG400016424-(rev)LRR-RLPs\_960

GGAATTGTACCTTGTTATAACCATCTTGAAGACCCATTTCTGATTTCTTTAGATTTGGAAAGCTCAGGT  
TGTTATCACTTGCAAATAACATCTTTGACTTCAAATTCCTTCCAATGTA

>PGSC0003DMG400016433-(rev)LysMRLKs\_1037

GATGATGTCATAGTTTTTTTTCTTTTAAATCTCTATTTCTGAAATGTATTGCAGATCAAAATGGAACCTATCC  
ACCATTAAGGACTTCTACAAGGTATTCTCCAACCCCAATGAGCTCCTA

>PGSC0003DMG400016433-(rev)LysMRLKs\_1464

CAGTAGTAATAAGCATGTTCTGGTAATTTTATTGTTTTGAATCTACTGATGTATGCTTAATTACCTGTCA  
AACTCTATGGTGGAAATTCCTGTTTGTGTTTCTCATTCTCTAGCCTT

>PGSC0003DMG400016433-(rev)LysMRLKs\_1525

TTACCTGTCAAACCTCTATGGTGGAAATTCCTGTTTGTGTTTCTCATTCTCTAGCCTTAGGCATGAGGAA  
TCATCATCATCATCATAATGACTTGTTAAAGATATTACTCTATTTT

>PGSC0003DMG400016433-(rev)LysMRLKs\_1586

GCATGAGGAATCATCATCATCATCATAATGACTTGTTAAAGATATTACTCTATTTTCAATTTGTTAATT  
AGATATAAGCTTCCTGCAATCGATCCTGATTAATGATAAAATTATGTC

>PGSC0003DMG400016433-(rev)LysMRLKs\_1647

ATTTGTTAATTAGATATAAGCTTCCTGCAATCGATCCTGATTAATGATAAAATTATGTCAACTGTTCTGTG  
GAAGCAATGTTTTGGTTCATCCTTAGAATAAACCTTGAGTTTCTTTAA

>PGSC0003DMG400016433-(rev)LysMRLKs\_1769

GACTCAGGTCAAGCAAATTTGAGAATTCTTCAGAAGGGGGATCTCTTAATAAGGGTGCTTCTCCAGAG  
ATCCCGAGGATTGCTGTGGATAAATCAGTAGAATTTTCCTATGATGAACTT

>PGSC0003DMG400016433-(rev)LysMRLKs\_1830

CTCCAGAGATCCCGAGGATTGCTGTGGATAAATCAGTAGAATTTTCCTATGATGAACTTGCTAATGCCAG  
TGACAACTTCAGCACAGCCTACAAGATTGGCCAAGGTGGTTTTGCATCTG

>PGSC0003DMG400016433-(rev)LysMRLKs\_2928

GCAAAGGTATGAGAGTCCGAAACTAGAACTATGAAAACAAAAACCATGTGTACTAATTCATTTGAAGA  
TTTTGCCTTGCAGGTTGCTGACTTTGGACTCACAAAAGTATAGAACTGA

>PGSC0003DMG400016433-(rev)LysMRLKs\_3172

TACTTGCCTTTGTGCAGGTATGGTCAATTTGGTGATGTTTCACCAAAAATTGATGTATATGCATTTGGGG  
TTGTGCTTTATGAATTAATATCTGCTAAACAAGCTATTATCAGAAATAGT

>PGSC0003DMG400016433-(rev)LysMRLKs\_3233

CATTTGGGGTTGTGCTTTATGAATTAATATCTGCTAAACAAGCTATTATCAGAAATAGTGAAATTGCTACT  
GAATCAAAGGGGCTTATTGGATTGGTAACTTTGAATCATTTCCTCACTC

>PGSC0003DMG400016433-(rev)LysMRLKs\_3294

AATTGCTACTGAATCAAAGGGGCTTATTGGATTGGTAACTTTGAATCATTTCCTCACTCACCAAATTTAAC  
CTCAAACCACTAAAAGAGTCAAACCTTAACCTTTAATTGGCAATATTTT

>PGSC0003DMG400016433-(rev)LysMRLKs\_3538

TTACAAGTGTATTAATGTTAACGCGATTATATAACTAACCTCAGCTAGTTTGAAATTTATACGTACTION  
TGAATTGATTGATTAACGTGATTATATAGGTGGCTCTTCTTGCCAAGG

>PGSC0003DMG400016433-(rev)LysMRLKs\_3843

GGAAATTAGAAGCAGAAGTTTACAGAAGTAACTACTAGTACATTTGTTTACATCAACCATATGATACAGTA  
CTATAAGTACTTTGCCATATTTAAAAAAGGAACCTGTATGGCT

>PGSC0003DMG400016433-(rev)LysMRLKs\_3904

GATACAGTACTATAAGTACTTTGCCATATTTAAAAAAGGAACCTGTATGGCTGTATATCGCTC

CTTTGAGTAGGCACTTGTCTGTAATATTAATAAATCATGCTCAACGCTAA

>PGSC0003DMG400016433-(rev)LysMRLKs\_3943

AAAAGGAACCCTGTATGGCTGTATATCGCTCCTTTGAGTAGGCACTTGTCTGTAATATTAATAAATCATG  
CTCAACGCTAATAGTATGTTTATATCCCCTGGAAGAAGTGTATTAAAGAG

>PGSC0003DMG400016433-(rev)LysMRLKs\_976

CAAATAGGTCGGAAGCTCGGGATTGTCACCTGAATATCTGTTACTATATGCCAAAATGTTGGATGATGTC  
ATAGTTTTTTTTCTTTAAATCTCTATTTCTGAAATGTATTGCAGATCAAA

>PGSC0003DMG400016685-(rev)LRR-RLKs\_0

GAACATTTCTTCTTCTTCTCCACCATTTCTGCTCTGCTCACTCTTCCCCTCCACCATTGAAGAAACATGCG  
TTTTCTTCTCCTTCTTCTTCTTCCCTTATTCTCCATTTCCATCTCCT

>PGSC0003DMG400016685-(rev)LRR-RLKs\_1364

TTTCAACAAGTAGAACTTCAAGATAATCTTCTCACTGGTACATTTCCAGTGACTGGTTCTGTTTCATCAAGT  
CTTGGACAGATTTGTCTGTGCGAATAATCGTTTCACGGGGCCTTTGCCAT

>PGSC0003DMG400016685-(rev)LRR-RLKs\_1426

TCATCAAGTCTTGGACAGATTTGTCTGTGCGAATAATCGTTTCACGGGGCCTTTGCCATCGAGCATTGGAA  
ATTTTACTGGTGTTCAAAAGTTGCTTCTTGATGGGAACAAGTTTTCTGGT

>PGSC0003DMG400016685-(rev)LRR-RLKs\_1736

ATGTATCGCGGAATCAGTTAGTTGGGAGTATTCCTGCACCTATTGCAGCAATGCAGAGTTTAACCTCGGT  
TGATTTTTCGTATAACAACCTATCTGGATTGGTTCCGGGTACTGGTCAGT

>PGSC0003DMG400016685-(rev)LRR-RLKs\_2356

ACAAATCTTTTGGTTTATGAGTACATGCCTAATGGGAGCCTTGGTGAATGCTTCATGGAAAGAAAGGT  
GGTCACTTGCATTGGGATACCAGGTATAAGATAGCATTGGAGGCTGCAAAG

>PGSC0003DMG400016685-(rev)LRR-RLKs\_2728

AGAAGTTTATTATTGTTGTAAGTTGACAACTAAAATTGTGATTTATCAGTCTCTTCAAGTGGTTATTATGG  
TACTTCTTGATCCTTTAAAGCTGGTAATGATCAGTCTCCTTGTTAAAAC

>PGSC0003DMG400016685-(rev)LRR-RLKs\_2790

TTATTATGGTACTTCTTGATCCTTTAAAGCTGGTAATGATCAGTCTCCTTGTTAAAACATGGAACAACATG  
ACACGAATATCAGTCCTTGATTGGTAGTTAACAAGAACAACAACAACAA

>PGSC0003DMG400016685-(rev)LRR-RLKs\_2852



AACAACATGACACGAATATCAGTCCTTGATTGGTAGTTAACAAAGAACAACAACAATGATAACTACG  
TGTCGAAAATGAATGCCTCTGTTTCATAGATGAGCTGCTAACTGGTGCTTTG

>PGSC0003DMG400016685-(rev)LRR-RLKs\_2914

AACTACGTGTCGAAAATGAATGCCTCTGTTTCATAGATGAGCTGCTAACTGGTGCTTTGATGAATTCAAAT  
TTGGTACTTGCTGTTTGGCGTTAAGTTGTTTCATTTTGACTTACAAAGT

>PGSC0003DMG400016685-(rev)LRR-RLKs\_2976

ATTCAAATTTGGTTACTTGCTGTTTGGCGTTAAGTTGTTTCATTTTGACTTACAAAGTTTGCTTATTGCTTG  
AAACACAATCTCTCTTTTTTTGTATGTGCCTAATTCGTTTTTCATTTG

>PGSC0003DMG400016685-(rev)LRR-RLKs\_3038

TTATTGCTTGAAACACAATCTCTCTTTTTTTGTATGTGCCTAATTCGTTTTTCATTTGAACTGTGCAGAATA  
TGCATACACACTCAAGGTAGATGAGAAGAGTGATGTATACAGCTTTGG

>PGSC0003DMG400016685-(rev)LRR-RLKs\_3162

GTTCTGTTAGAATTGGTGAGCGGGAAAAAGCCAGTTGGGGAATTTGGTGATGGCGTTGACATAGTCCA  
ATGGGTAAGGAGGATGACCGATGGGAAAAAAGAAGGAGTTCTAAAGATCCTT

>PGSC0003DMG400016685-(rev)LRR-RLKs\_3224

AGTCCAATGGGTAAGGAGGATGACCGATGGGAAAAAAGAAGGAGTTCTAAAGATCCTTGATCCAAGAC  
TCTCAACAGTTCCCTTCATGAGGTGATGCATGTGTTCTATGTTGCAATGCT

>PGSC0003DMG400016685-(rev)LRR-RLKs\_3596

TAGAGGATGTAGTTCTCTCCTTTAGTTTTATTATCAGTTTTATTGGGGGTTGGTTTATTTATTAGGCTATA  
AGCTTTTCCTAGGAAGTGAGTTTCATTGTACAGTAAGATTGGCTAAGG

>PGSC0003DMG400016685-(rev)LRR-RLKs\_3658

TTAGGCTATAAGCTTTTCCTAGGAAGTGAGTTTCATTGTACAGTAAGATTGGCTAAGGTATCTGAGTAAC  
TTTATCCTTCAAATTTCCCATTTGCTGTTTAGCTTTTTGATATTGAAAG

>PGSC0003DMG400016709LRR-RLKs\_0

CGACACCTATAGATACACACTGCCAGTGGAGTCTTCTTGATAAATTTTTCTCTCTCTCTTCATTAAGG  
AATGCTTGAATCGGAGAGTCTCTTAACGATGGTGACACCTACCGCTAC

>PGSC0003DMG400016709LRR-RLKs\_1403

CACTAGCCTGTAATGTTGACTCCTTGTTATGAGTTTGTTTTGTTTGAAAACCTCCCGTTTTATGACTGTCTC  
ACTGGAAATATAATCATTGTCAATGCAGGAATCTTGCAAACAACAATA

>PGSC0003DMG400016709LRR-RLKs\_1586

GACTCACTAGGCACTTTCCAAAACAAAATAACATTTGCTTGGTCTTCTCTTTATTCTATTGAATCATTCA  
GGCAACTATTTAAAATAGCTTACCCTACGATTCATTTTTTCAGGAATC

>PGSC0003DMG400016709LRR-RLKs\_1647

GAATCATTTTCAGGCAACTATTTAAAATAGCTTACCCTACGATTCATTTTTTCAGGAATCTTAGCCATAACT  
CACTCTCTCAAACAATTGGAGAATTGTTACCAATCACTCCGATCTGGG

>PGSC0003DMG400016709LRR-RLKs\_1708

AGCCATAACTCACTCTCTCAAACAATTGGAGAATTGTTACCAATCACTCCGATCTGGGAGCTTTGTAAG  
TGTTCTACTTAATCTTTAATTGATTGATCCTTTCTGGTAATTTTTTTTCC

>PGSC0003DMG400016709LRR-RLKs\_1769

CTTTGTAAGTGTTCTACTTAATCTTTAATTGATTGATCCTTTCTGGTAATTTTTTTTCTTTTCTTTTTTT  
CTAATAGAGTTCATTCATTGCCACACTTGAAGGGCCTTTTTCTTA

>PGSC0003DMG400016709LRR-RLKs\_1830

TTCTTCTTTTTTTCTAATAGAGTTCATTCATTGCCACACTTGAAGGGCCTTTTTCTACACCAGTCCAATT  
AGTTACTAGCTTGAATTCATAACACCATGGTGTCTCCGACCCACAGTA

>PGSC0003DMG400016709LRR-RLKs\_2013

CTCAAAACAAATATAGGATATAATCATATACAAATGCCTTTTTAGAATCATTATCTGCTTAATTTAATGA  
ACAATGAAGTCTGGAGGCTTGTAAGTCCAACATTTTATTTTCTTCGT

>PGSC0003DMG400016709LRR-RLKs\_2135

CCTTTTTATGTGGAAATTCGTTTTGATTGTATTAGGATAGGTGCCCTGCTCCTCTTGAAGCTTTCAGTTG  
CCTTTTGTTTTCAATTTATTTGTTCTTTCAGAATCCCATTTAAGTAAACC

>PGSC0003DMG400016709LRR-RLKs\_2196

CTTTCAGTTGCCTTTTGTTTTCAATTTATTTGTTCTTTCAGAATCCCATTTAAGTAAACCTACATTAGAGCTCA  
GTACTCCTGCTACAAAGAGCTTTCTGGCGATATTGATTCCTCATGTC

>PGSC0003DMG400016709LRR-RLKs\_2379

GATCTGTCCTCGAATAATTTTTCTGGAGATCTCCCCTCTTCATTCAGTTCGTTGACAAATCTTCCATACTG  
TAAGCATAATAACTTTCTACTAATAGGATTTGCTGTTCCGTTACTTGA

>PGSC0003DMG400016709LRR-RLKs\_244

ATAGAAATAGCTGTAAGCAAGACACCCTTTTCACCCTTTTGCCAGTAGTGGTGATTGTGGTAGTGGTTTT

T T A C T C A T C T T T T G T T G T G G A A G G A A A C A C T G A T C C G A A T G A T T G T G A G T

>PGSC0003DMG400016709LRR-RLKs\_2440

T T T C C A T A C T G T A A G C A T A A T A A C T T T C T A C T A A T A G G A T T T G C T G T T C C G T T A C T T G A C T T A C C C A T G A A A

T T G G C A T C T C T T G T A G T C A T C T G G A A A C A A T C A G C T A A G T G G C C C T C

>PGSC0003DMG400016709LRR-RLKs\_2562

A A T A T C C T G G T T G G T C T A C C G T T G A C T A A T T T G T A A G T T T C A A T A C C T C T T C T T G A A T T A A T G G G C T T A G C

T C G T T C G A T T C A A T G C C A G T A G A G T G T T T T A T G G G T A A A A C A A A C C T T

>PGSC0003DMG400016709LRR-RLKs\_2684

T G C A G A A A T G T T G C A A G A A T C A T T T C A A T G G A T G G A T C C C G A A T G A G C T T C T A T C T A T C C C T A A C T T C A

T G T A A G T A A T T T C A C A T C C T A T A T A T T C T T A C A T G G T T T A G A A T G T T A C A

>PGSC0003DMG400016709LRR-RLKs\_2745

C T A A C T T C A T G T A A G T A A T T T C A C A T C C T A T A T A T T C T T A C A T G G T T T A G A A T G T T A C A G T T T C A A G G G G T

G T G A C A T A A C A T C T A A T A T G A C A G A T A C G A T G G G A A T T C C T T T G C A A A T

>PGSC0003DMG400016709LRR-RLKs\_305

A G T G G T T T T T A C T C A T C T T T T G T T G T G G A A G G A A A C A C T G A T C C G A A T G A T T G T G A G T T T C T T C A C T G G T

T G A A A A T C T T G G A T C C G T T T T A G A G C T T C A T T A G T G A T T T T G A G C T T A

>PGSC0003DMG400016709LRR-RLKs\_3233

A C A G T T G T G G T G T G A T G T G C C A T C T T A A T T T G G A A A T T G G T A C A A A C T T G G T T G A T T T C T C A T G T A T G C T

G T T T A A T C T T A G T G A A T A T G G A G G T A C A A G A G C A A A G G G C G A A T C C T G T G

>PGSC0003DMG400016709LRR-RLKs\_3599

T T C T T A C T T T C C T A C T T G T G A T G T G C A T T C A A A C T A T T T G A A G C T G A A C A A T A T T G A A T A A A T T C A A T C T

G T C T C T C A T C G A C A T C T T T C A T T T T G A T G C T T C G G A G A A T C A C A T A C

>PGSC0003DMG400016709LRR-RLKs\_366

C T T C A C T G G T T G A A A A T C T T G G A T C C G T T T T A G A G C T T C A T T A G T G A T T T T G A G C T T A G T G G T T T G G G T G

T T T T T C T G T T T T C T T G A T T G T G T T G A A G G A G G A G G T T T T T T T T G T T T

>PGSC0003DMG400016709LRR-RLKs\_3782

G C C A C T C C A C C T A T C A C C T A T T G C T A A G A T G C T T T A A C A T A G T A T C A A G C C G T T A C A C G T G T G G G A C A A

T G T T G C G T T A C C T A A T G T C C A A C C T C G G G T A A A T G A G C C T G T A A A G A T A T

>PGSC0003DMG400016709LRR-RLKs\_427

GGTTTGGGTGTTTTCTGTTTTCTTGATTGTGTTGAAGGAGGAGGGTTTTTTTTGTTTTTTGTTTGTAC  
TCTGTGAATGTTGTGATATAAGAATGCCTTTCTTGATTGTTGAAT

>PGSC0003DMG400016709LRR-RLKs\_4514

CACAAAGTTGATTGCCACAGTAGGCTCATATTCTGATGAACACATGTCAATTGTTCACTCCTCTGGGTG  
GTCTGGCCACATCTTTGCTTTTATCTGTCTTGATGTTTGTGATGGGTGTA

>PGSC0003DMG400016709LRR-RLKs\_488

TTGTTTGTCACTCTGTGAATGTTGTGATATAAGAATGCCTTTCTTGATTGTTTGAATGCCTGATTTGGT  
TAATGGGGGTAATGTATTTGTTGCCCTTTTTCTGGGATCTTTTTCTC

>PGSC0003DMG400016709LRR-RLKs\_5246

CGGGTTAGAGTAGCACTTGGCACTGCTCGAGCTTTAGAGTATGCTATAGCTGTATAGTATTTTACCTCTC  
TTGCCCTTTCTTGTTGGGTTAGCTTAAACTTGACCGTCTTCTTTTCAG

>PGSC0003DMG400016709LRR-RLKs\_5429

ACTAGATGAAGAGCTCAATCCCCATTTATCAGATTGTGGGTTAGCAGCTTTGACTCCAAACACAGAACGC  
CAGGTGAGTAAAGAAGATTTAATCTACGTCGTCGTTTTAACAGAAGGTGT

>PGSC0003DMG400016709LRR-RLKs\_549

CTGATTTGGTTAATGGGGGTAATGTATTTGTTGCCCTTTTTCTGGGATCTTTTTCTCCCTTTTTGTTGG  
GTTTCCTAGTCAATGCAAGTCAAAGATTGATGCGTTAGTACAAAAAAT

>PGSC0003DMG400016709LRR-RLKs\_5490

ACAGAACGCCAGGTGAGTAAAGAAGATTTAATCTACGTCGTCGTTTTAACAGAAGGTGTTGATAATATT  
GGGTGGTACGTGATGCATATAATGTTTGTGAGGTGATGTCAATCAACTTAC

>PGSC0003DMG400016709LRR-RLKs\_5551

ATAATATTGGGTGGTACGTGATGCATATAATGTTTGTGAGGTGATGTCAATCAACTTACCTAGTACTGTA  
GTAGGAGCAATATTAATAAGCAACTATTTCTAGGTAGATCTTTACAGACT

>PGSC0003DMG400016709LRR-RLKs\_5795

TTCCCCCTGCTTGAATCCATTTAGTTCTGTGAATTATTTCTGTGAAAAGAGAACCTTCTTGACAGAAG  
TTCGGGTGAAGGAAGCTAATGTGGGAAGGCTAATTGACTCTGTTATGGG

>PGSC0003DMG400016709LRR-RLKs\_61

CATTAAGGAATGCTTGAATCGGAGAGTCTCTAACGATGGTGACACCTACCGCTACTGACGATGTT  
ACCTTCTGTCAATTCCTGTCTTTCTTTGCCATGCTTCTTCTTCTCCT

>PGSC0003DMG400016709LRR-RLKs\_610

CTTTTTGTTGGGTTTCCTAGTCAATGCAAGTCAAAGATTGATGCGTTAGTACAAAAAATATGGATTCTTG  
ATCTTTATACTAAAAATTATATGACTGGGATTTTCTGTGATTATAATGTG

>PGSC0003DMG400016709LRR-RLKs\_6344

TTTACTTGCATGTTCTTTCATTTGGAACATAACAGTTGTTAACATGTGAAGCTTAAAAGATGAAACCACTT  
CTAAAATATCTTTGATGGAGGCGTAAGTCAATGATCATAGGGAATTTAC

>PGSC0003DMG400016709LRR-RLKs\_6405

GAAACCACTTCTAAAATATCTTTGATGGAGGCGTAAGTCAATGATCATAGGGAATTTACCACTTAAGGA  
CCAAACTTGACATTCTAACCCGTCAAATAAATGATACACTACCAGTTTTT

>PGSC0003DMG400016709LRR-RLKs\_6588

GCTCATGGCTCAGTGCTGAAGTGAATCGATGTGCTTCAGCAAATAGATGACCTTTCCTACACATACCCGG  
TGATTCTTGGAATGGCGAGAGCACCCATCTTGTTAAGTTAGTTTGGGAA

>PGSC0003DMG400016709LRR-RLKs\_6649

CATACCCGGTGATTCTTGAATGGCGAGAGCACCCATCTTGTTAAGTTAGTTTGGGAACTTCCAAGGC  
GTAATCCTTGCATACCATGGTCCATAGTGGCTTTGGGTGCTTAGTCTTTAA

>PGSC0003DMG400016709LRR-RLKs\_671

GGATTCTTGATCTTTATACTAAAAATTATATGACTGGGATTTTCTGTGATTATAATGTGAGGACGCATGC  
AATTGAATTTGAATGCTAAACTGGTTGATTTGGTAAGATAATATGTTTT

>PGSC0003DMG400016709LRR-RLKs\_6710

TCCAAGGCGTAATCCTTGCATACCATGGTCCATAGTGGCTTTGGGTGCTTAGTCTTTAAATGAGAAATTC  
TTAATTAAGCTTTTCTTGATCTAAGGTGACTTCAAGACTCACGAAGAAAA

>PGSC0003DMG400016709LRR-RLKs\_6771

GAGAAATTCTTAATTAAGCTTTTCTTGATCTAAGGTGACTTCAAGACTCACGAAGAAAAATCTGATGGAC  
TCGACAAAATTATAATGAATACTTGCTCATTGACATATCTGAAGTGAATT

>PGSC0003DMG400016709LRR-RLKs\_6832

CTGATGGACTCGACAAAATTATAATGAATACTTGCTCATTGACATATCTGAAGTGAATTACTTTACTTGCA  
ATAATTTGAATGCGACTGTTTTCTCCTTGGTAATAACTTTTGACATCTA

>PGSC0003DMG400016709LRR-RLKs\_6893

TTTACTTGCAATAATTTGAATGCGACTGTTTTCTCCTTGGTAATAACTTTTGACATCTATTTCTGTACAGC

CTGAACCAGAGTTTCGACCCCAATGTCTGAAGTTGTGCAAGCACTGG

>PGSC0003DMG400016709LRR-RLKs\_7320

GTATATTTTCAAACCATCTTGGGCTACTGGATATAATTTATTGTCAATAAGAACATTGCTACACATTATCA  
TTCTGTGTTTGTATATTACAGTTTTTCCAATAACTTTTGGCTAGCCT

>PGSC0003DMG400016709LRR-RLKs\_7356

TTTATTGTCAATAAGAACATTGCTACACATTATCATTCTGTGTTTGTATATTACAGTTTTTCCAATAACT  
TTTGGCTAGCCTAAGAGCTAACTGTAGTGTGCATCGGTCGGTTCGGTT

>PGSC0003DMG400016709LRR-RLKs\_793

TGCCCTTCTTGGTGTCTTCTTGTATTTAATTAGTTTTAGAGCCAACACTAGCTTAAGATTGAGGCTGTA  
CTTGTTGAATCTTGATAAGATATATATTGAATCTTGGTTTTCTTGTGG

>PGSC0003DMG400016808-(rev)LRR-RLPs\_2074

CTTTTATTCTTTGGATTAACCTGAAATTTGATCAATACTTCGTACAGAATAACTCAATTAATAATCTTTTAA  
GCTAATATTACCCAACCTATTTATTTTGGAGTAACATTTTGTAAATAAAA

>PGSC0003DMG400016808-(rev)LRR-RLPs\_2135

TAATCTTTTTAGCTAATATTACCCAACCTATTTATTTTGGAGTAACATTTTGTAAATAAAAAATTCTCAAATGGA  
AAAAATACAAGTAAGGAGGGGCAAAAAATACAAGCTAATTGTACAAAG

>PGSC0003DMG400016808-(rev)LRR-RLPs\_2196

TCTCAAATGGAAAAATACAAGTAAGGAGGGGCAAAAAATACAAGCTAATTGTACAAAGCATTCTCTCT  
GAGCAACATATTTCTTGAGAAGGGCCTAACTAATATTGTACCCTATTTTTT

>PGSC0003DMG400016808-(rev)LRR-RLPs\_2257

TTTCTCTTGAGCAACATATTTCTTGAGAAGGGCCTAACTAATATTGTACCCTATTTTTTTTTTAATGATTGC  
TTTTCAAGAACTTCAAGTGCAATTATAAATAATTCAAACATTCCAAA

>PGSC0003DMG400016808-(rev)LRR-RLPs\_2318

TTAATGATTGCTTTTCAAGAACTTCAAGTGCAATTATAAATAATTCAAACATTCCAAAAAATTGCATGC  
AAGGAGTAAGAAAATAGAGATATTGATAAGCGTATTTTACATGACATCT

>PGSC0003DMG400016808-(rev)LRR-RLPs\_2867

AAAACTCCCCTAAAATGTAGACATAAATTTGTGTTGTTTTCATTATGGTCTTTGTCATCATTGTCTCTCCC  
ACGAGTCTCGGGTTTGGAGATCCACACCGCCACATGGCATTATTGAAAT

>PGSC0003DMG400016808-(rev)LRR-RLPs\_2928

TTGCCTCCCCACGAGTCTCGGGTTTGAGATCCACACCGCCACATGGCATTATTGAAATAATATATTTTAG  
TCAACTGTCAAGTTTAAGGTGTTTTAGTTATTCTACCTTTTATTTATAG

>PGSC0003DMG400016808-(rev)LRR-RLPs\_2989

TATATTTTAGTCAACTGTCAAGTTTAAGGTGTTTTAGTTATTCTACCTTTTATTTATAGTACTAGCTAATGA  
CAACACTTTTACATAGTTTATGAACATGTATTTTCCATAAAAAAATAA

>PGSC0003DMG400016808-(rev)LRR-RLPs\_3050

CTAGCTAATGACAACACTTTTACATAGTTTATGAACATGTATTTTCCATAAAAAAATAAAAAACAATTTCTA  
ATTTCCACAAAATATTTTGTGACTCTCATAATCTAAAGCAGTAAATT

>PGSC0003DMG400016808-(rev)LRR-RLPs\_5002

TTCATTTGTTGTATAAAGATGAACTAGAGCATGAGGCGTTGTTACAAATGAGGGGAGATAATGATGAAC  
CAACAGAGCACTCCATTTGGACAAGGAGGAACAGATATGATGATAGTGAAC

>PGSC0003DMG400016808-(rev)LRR-RLPs\_5063

TGATGAACCAACAGAGCACTCCATTTGGACAAGGAGGAACAGATATGATGATAGTGAACACCATAATG  
AAGCCAGTTGCTCGTCTTCTAAGAAACAAAGGTCTGGTACTACTGTTGATGT

>PGSC0003DMG400016808-(rev)LRR-RLPs\_5124

CATAATGAAGCCAGTTGCTCGTCTTCTAAGAAACAAAGGTCTGGTACTACTGTTGATGTGCCAGTTAATC  
CAGAAACTTTGCAGCTCTTCCGACAAGTCCTGGATTTTCGCTTAAATAA

>PGSC0003DMG400016808-(rev)LRR-RLPs\_5185

CAGTTAATCCAGAACTTTGCAGCTCTTCCGACAAGTCCTGGATTTTCGCTTAAATAAAGGTATATATAA  
CTCATGATTTGGTAGTGAAATTGTGTTCTCTCTCTCTTTTTATGTAATT

>PGSC0003DMG400016808-(rev)LRR-RLPs\_5246

GTATATATAACTCATGATTTGGTAGTGAAATTGTGTTCTCTCTCTCTTTTTATGTAATTCTCTCCTGTTAGC  
TACAAATTAAGTGTTCTTCCATAACCAATACATTTTTATTTTCATTC

>PGSC0003DMG400016808-(rev)LRR-RLPs\_5307

CTCCTGTTAGCTACAAATTAAGTGTTCTTCCATAACCAATACATTTTTATTTTCATTCTTAGTCACCAAT  
TAGTGCCAGAAAGTGCAGGCAACACTAACAGTCCAAGACTGGGAATCT

>PGSC0003DMG400016808-(rev)LRR-RLPs\_5368

AGTCACCAAATTAGTGCCAGAAAGTGCAGGCAACACTAACAGTCCAAGACTGGGAATCTAAGGGGTTA  
AGAAGGAACCTTGCATGTTGAATATGAAATGGTAAGTAATAAGAGATGTAAT

>PGSC0003DMG400016808-(rev)LRR-RLPs\_5429

GGGGTTAAGAAGGAACCTTGCATGTTGAATATGAAATGGTAAGTAATAAGAGATGTAATTGCATCTTTA  
TTGATCCTCAAGTAAAGCAACCTTCTGGAAATGTGTGTTTGAGAATCCCCG

>PGSC0003DMG400016808-(rev)LRR-RLPs\_5490

CATCTTTATTGATCCTCAAGTAAAGCAACCTTCTGGAAATGTGTGTTTGAGAATCCCCGAGCTATTTTAAT  
TCTCCTTAAAGTTTTGAATTAATATTCGTTTCGATGGATATTTTGTCTCT

>PGSC0003DMG400016808-(rev)LRR-RLPs\_5551

CTATTTTAATTCTCCTTAAAGTTTTGAATTAATATTCGTTTCGATGGATATTTTGTCTCTGAATTAAGTTTCT  
AAGTTCCAAGACGAAATGAATATAGAAATGTGTATTAGAACGGATCAA

>PGSC0003DMG400016808-(rev)LRR-RLPs\_5612

ATTAAGTTTCTAAGTTCCAAGACGAAATGAATATAGAAATGTGTATTAGAACGGATCAATTGGGGGAGT  
TAATTGAATGGATGGAGTAATTGATCCCTTGATCATGTCTTTCTGCAGATG

>PGSC0003DMG400016808-(rev)LRR-RLPs\_5673

GGGGGAGTTAATTGAATGGATGGAGTAATTGATCCCTTGATCATGTCTTTCTGCAGATGCATACCCAACC  
GATATCGAGATTTCACTGTGTTATCACTTGAAGGTGTTATAAGTTCATAG

>PGSC0003DMG400016808-(rev)LRR-RLPs\_5734

TACCCAACCGATATCGAGATTTCACTGTGTTATCACTTGAAGGTGTTATAAGTTCATAGAGAAAATGCAA  
AGTGTTATTCCCAAAGGTAGGATCCATGACTTACTACTCGTTCAGTTTGA

>PGSC0003DMG400016808-(rev)LRR-RLPs\_5795

AAAATGCAAAGTGTTATTCCCAAAGGTAGGATCCATGACTTACTACTCGTTCAGTTTGATGCTCTTGCTA  
ATTGTTATATTCGGGGAAATTGCTGCTTTAAAAACAAAACTTTATGTGG

>PGSC0003DMG400016808-(rev)LRR-RLPs\_5856

CTCTTGCTAATTGTTATATTCGGGGAAATTGCTGCTTTAAAAACAAAACTTTATGTGGGATGCGTCAGT  
TTAAATACTTCTGCATCAAACATTTTCATGTTCGAAAGGTATTGATCATGC

>PGSC0003DMG400016808-(rev)LRR-RLPs\_5917

TGCGTCAGTTTAAATACTTCTGCATCAAACATTTTCATGTTCGAAAGGTATTGATCATGCTCTAACTTTAGC  
TATACACTTTTGTAAGTATTGCTCTGTCAGATTGTTATATTAGCAGAAA

>PGSC0003DMG400016808-(rev)LRR-RLPs\_5978

TAACCTTAGCTATACACTTTTGTAAGTATTGCTCTGTCAGATTGTTATATTAGCAGAAATCTCTTTTAAAT



GTAAATATCTCTTTTGTATGGCAGGTAAGTTGGGAATAAGATGAAAC

>PGSC0003DMG400016808-(rev)LRR-RLPs\_6039

TCTTTTTAAATGTAAATATCTCTTTTGTATGGCAGGTAAGTTGGGAATAAGATGAAACAATCAAAGATG  
CAGTACAGCTTGAGACGGTGGGGGAAGCTGGAGTGAAGTTGAGGTTTCGTC

>PGSC0003DMG400016808-(rev)LRR-RLPs\_610

GACTGGTGAGTTGAAAACACATAAACTGAAAAGAAACCATATGTGTATTGCATTATGGGACAAACCTCA  
AAAAATGAGTCAAACAGAATCTTAATTATAATTTTGCATATTTCCGAATT

>PGSC0003DMG400016808-(rev)LRR-RLPs\_6100

TCAAAGATGCAGTACAGCTTGAGACGGTGGGGGAAGCTGGAGTGAAGTTGAGGTTTCGTCTCCCTCGTG  
ATCTCTTTCAGTTCTCTTGTAATTTTGTAGGAAAATGTGAAATATTGTG

>PGSC0003DMG400016808-(rev)LRR-RLPs\_671

AAACCTCAAAAATGAGTCAAACAGAATCTTAATTATAATTTTGCATATTTCCGAATTATATATTTATAT  
CAGTAAGAAGGAAAACACTATTCTGATTGATTTATGTTTATAACTTATT

>PGSC0003DMG400016808-(rev)LRR-RLPs\_6710

CTTTTTATCTTACTGTCTGCTCTCTAGCTTATTGACTTGTGATCTTTATGAAAGTAATAAGTAGCATCTGTA  
TCTCGATTACTTATATAAGTGGTTTGTAAACAAGTTTCACTCTTTTGGT

>PGSC0003DMG400016808-(rev)LRR-RLPs\_6771

TAGCATCTGTATCTCGATTACTTATATAAGTGGTTTGTAAACAAGTTTCACTCTTTTGGTTTTTGATTACTTC  
TGCAGTACAACTGGGACCATGGTACTTTTAGAACAACGCTGGTAACT

>PGSC0003DMG400016808-(rev)LRR-RLPs\_6832

TTGATTACTTCTGCAGTACAACTGGGACCATGGTACTTTTAGAACAACGCTGGTAACTCCGCCTGTGAA  
GGACACATGTTTCCTCTGTTTGTAAACAGAACAACACTAGTAATTTGTTGTTT

>PGSC0003DMG400016808-(rev)LRR-RLPs\_7137

CTTACCATTGAGAATGTGATACAAAGTTCTCCAACCATTCAGATTTTGAACAGAATTATCCGACCATTCA  
GAATGTGATACAGAATTATCCGACCATTGAGAATTTGATATAGAATTTA

>PGSC0003DMG400016808-(rev)LRR-RLPs\_7198

CGACCATTGAGAATGTGATACAGAATTATCCGACCATTGAGAATTTGATATAGAATTTACTATTAATATT  
TCTTTGGTACCTTTTGTCTCTCCGCTCTATAAAACAAAGGTCACATGT

>PGSC0003DMG400016808-(rev)LRR-RLPs\_7259

ATTAATATTTTCTTTGGTACCTTTTGCTGTCTCCGCTCTATAAAACAAAGGTCACATGTGAATCTGCAGCC  
ACAAGATTAGGCATAGTATGTAGAGCTGTTCTTAATCGACTCCTCATT

>PGSC0003DMG400016808-(rev)LRR-RLPs\_732

ATATTTATATCAGTAAGAAGGAAAACCTATTCTGATTGATTTATGTTTATATAACTTATTCACGATTTATGTC  
TCAAATTGCTCTACTAATTTTTATTCTGATTCTTTATCTGTATATAT

>PGSC0003DMG400016808-(rev)LRR-RLPs\_7320

ATCTGCAGCCACAAGATTAGGCATAGTATGTAGAGCTGTTCTTAATCGACTCCTCATTTGATCCGATCTCC  
AAGGGAGAAAGTTAGAGGAAAACGTCTGTATGGAGCTATGTTGCGCGG

>PGSC0003DMG400016872-(rev)LRR-RLKs\_1116

TCGATTAACGACTTATATGGGTCTATTCCATTTTCATTTAGTATCTCACTGAATTGGTTCAGTTACAGCTC  
TTTCAGAATTCTTTAAGTGGAACCTATCCCAAGGTCTCGGGAACCTAT

>PGSC0003DMG400016872-(rev)LRR-RLKs\_1178

GTTACAGCTCTTTTCTAACAACCTCACAGGAGGAATTCCTCCGAATAT  
GTTGTTGATTTTTCTAACAACCTCACAGGAGGAATTCCTCCGAATAT

>PGSC0003DMG400016872-(rev)LRR-RLKs\_124

TGAAAAAGAATTTAAACGATGAGTTTAAACAATCTTGAAAATTGGAATCCTAGTGATGAGACGCCATGTA  
GATGGAAAGGTGTAAATTGCACTTCTGATTATAATCCAGTTGTGCAATCTC

>PGSC0003DMG400016872-(rev)LRR-RLKs\_1240

GACTTTGGGTTGTTGATTTTTCTAACAACCTCACAGGAGGAATTCCTCCGAATATTTGTAGGAATTCT  
AATTTGATTTGGCTTAATCTTGTTCAAATAACTTGCATGGAGACATTC

>PGSC0003DMG400016872-(rev)LRR-RLKs\_1302

AGGAATTCTAATTTGATTTGGCTTAATCTTGTTCAAATAACTTGCATGGAGACATTCCATCTGGTGTAT  
TAAGTGTGACTCATTGGTACAACCTTCGTCTTGACGGTAACTGGCTACAA

>PGSC0003DMG400016872-(rev)LRR-RLKs\_186

CCATGTAGATGGAAAGGTGTAAATTGCACTTCTGATTATAATCCAGTTGTGCAATCTCTTGATTTGAGTTT  
TATGAATCTTTAGGCACTTTGAGTTCTAGCATTGGTGGTCTCGTAAGT

>PGSC0003DMG400016872-(rev)LRR-RLKs\_2108

GGATGTCAGCAGCTTTATTGGAAACAACGGGCTTTGTGGTGGTCGTTTAGGTGGATGTAACGAATATCC  
TCCGTTCAATTCTGATCCTCCAATAAAAAATGCAGGTGCTCCAAGAGGAAA

>PGSC0003DMG400016872-(rev)LRR-RLKs\_248

TTTGAGTTTTATGAATCTTTCAGGCACTTTGAGTTCTAGCATTGGTGGTCTCGTAAGTTTAACCATACTTG  
ACTTGTCTTTCAATGGATTCACGGGAGAAATTCCGAAAGAAATAGGGAA

>PGSC0003DMG400016872-(rev)LRR-RLKs\_2480

AGCAGTCATGCAATCTGGACGAAAAATCGCTGTTAAAAAGCTGGCTTCTAACAGAGAGGATAATAACAT  
AGAAAAGAGTTTCCGAGCAGAGATTTCAACTCTCGGAAAGATTAGGCATCG

>PGSC0003DMG400016872-(rev)LRR-RLKs\_2914

TTGCTGGATCATATGGCTACATAGCCCCTGGTATGTACATTTTATTATTTTTTTCATTAGAACTTGTGTAGT  
ATAGCCCGTCTACTGTCTGCGAATAATGTCAAGAAACATATGCCTGTCT

>PGSC0003DMG400016872-(rev)LRR-RLKs\_2976

TTGTGTAGTATAGCCCGTCTACTGTCTGCGAATAATGTCAAGAAACATATGCCTGTCTAGATTGCTCTAA  
CAAGACTAATATATTTTAGGTAAGCAATGATTATAACTCTTCATCGAAAA

>PGSC0003DMG400016872-(rev)LRR-RLKs\_3038

TGCTCTAACAAGACTAATATATTTTAGGTAAGCAATGATTATAACTCTTCATCGAAAAATCTCACGTATAG  
TTCCTCCCATGAGCTGACTAGTGTATGTTAGTTTTCTCACACTTTGAC

>PGSC0003DMG400016872-(rev)LRR-RLKs\_310

CCATACTTGACTTGTCTTTCAATGGATTCACGGGAGAAATTCCGAAAGAAATAGGGAACTGCTCGAAAA  
TGCAGAGTCTTCAGCTTCATGATAATGAATTTTATGGGCAGATTCCTGATG

>PGSC0003DMG400016872-(rev)LRR-RLKs\_3348

GAACAATACAACACTAGTAGAAAAAAGTGCAGAGCATAACATGCAAGGAATGATATTTGAAGTAAGGGTAA  
TACTATTTGATGAACTATTTGAAGAGAGTAAGCAGACGCGTCTACTTTGTTT

>PGSC0003DMG400016872-(rev)LRR-RLKs\_3534

TATAGTTACGGAGTAGTCCTTTTGGAGTTGCTAACAGGAAGAACACCGGTGCAGCCACTCGATCAAGGA  
GGTGATCTTGTCACCTTGTGTGAGGCATTATATTAGAGACAATTCGTTGACA

>PGSC0003DMG400016872-(rev)LRR-RLKs\_3596

TCAAGGAGGTGATCTTGTCACTTGTGTGAGGCATTATATTAGAGACAATTCGTTGACACCAGGGGTACT  
CGATATCCGATTGGATTTGACAGATAAACTACTGTTAGTCACATGCTTAC

>PGSC0003DMG400016872-(rev)LRR-RLKs\_496

CAGAGGAGTTTGGGAGACTTTCTTCTTTAGTTTCTTTTGTTCATACACCAATAATCTCACTGGTTCACTC

CCTCGATCACTCGGGAACTAAAAAGTTGGAAACATTTGAGTGGGGC

>PGSC0003DMG400016872-(rev)LRR-RLKs\_558

GGTTCCTCCCTCGATCACTCGGGAACTAAAAAGTTGGAAACATTTGAGTGGGGCAGAATCCGCTT

TCTGGAACCTTACCTGCTGAGATTGGTGATTGCAAGAGCTTACAAGTTCTT

>PGSC0003DMG400016872-(rev)LRR-RLKs\_62

TTCCGCGATGATGGTTTGTCTGCAGAAGGATTGAATGCTGAAGGAATGTACCTGCTTGAGTTGAAAA

GAATTTAAACGATGAGTTTAAACAATCTTGAAAATTGGAATCCTAGTGATGA

>PGSC0003DMG400016882-(rev)LRR-RLPs\_0

ACTCAGTTGGTAAAACAGGACGGGAGTACTATGCTATGTAGTAGTGCACACATCATTTGCTTCCATTTT

TTCCGGCGTAACAGATTTATCAAATTCATCAGCCTAAAACAAAGGTATTC

>PGSC0003DMG400016882-(rev)LRR-RLPs\_122

CTTCTTCTTCTATCTACTGATTTAGCCCTAATTTGCTGTTGAGCAAGAAAATTGTAATTTTTTACTTGCTCC

ACTGTGTTGAAGTTCCATTTTAGGTTAATTTTGGTGTGATTTGAATCA

>PGSC0003DMG400016882-(rev)LRR-RLPs\_1464

TGCTAGTTGCTAAAACAGGATGAGGACTATGGGAAATAACTTGTTTTGTTTGATCCCACTCATTCTTCT

ACCACTGCTCTCTGTAAAGTGATTTAGGTGCGCCACTTTATTATCCATG

>PGSC0003DMG400016882-(rev)LRR-RLPs\_1891

GGGATTATCCATAAATGTTGATCAATTGAATGTCACAGTGGGATTTGAAGTACTTAAGTGTCAAAATCAA

ATGATTCCTTGAAGACCGTGCCTTAATTAGTAGAAGAACAAGCATAACA

>PGSC0003DMG400016882-(rev)LRR-RLPs\_1952

CAAAATCAAATGATTCCTTGAAGACCGTGCCTTAATTAGTAGAAGAACAAGCATAACACACCTATTACA

ACTAAATAAAGAAATATCTAAGGTGTTTGTGTTGAAAGTTTCTTTGAGAT

>PGSC0003DMG400016882-(rev)LRR-RLPs\_2013

CCTATTACAACTAAATAAAGAAATATCTAAGGTGTTTGTGTTGAAAGTTTCTTTGAGATCTTGAAGAAG

TTTTCGAAAATATGTTTCTTTTGGAGTCTTCAGAAAAGCTATTTCTTGAG

>PGSC0003DMG400016882-(rev)LRR-RLPs\_2196

TGTTTGCATGGTTTTAAAGAAAGGATTATTCAGAAAATTTCTTTCAAAGTTATCCGTTCAACTCTTATAA

AACTCTGCGATGAATACATTAGCTAATTGTTGAAGTTTGTATTAGACC

>PGSC0003DMG400016882-(rev)LRR-RLPs\_2501

CTCTATGGATGCTAAAAAGTTTTCTACTTGGTGGCATATTGTTACATTTGGCCCTTTTATATGAATCAGG  
TGGACCAGCAAAAATCCTCAAAAAGAGCCTTATTTGGACCTTTGAGGCA

>PGSC0003DMG400016882-(rev)LRR-RLPs\_2623

ACATCTTTTACAATCTCATTACAAAAAATGAGTGTTATGGTAAGTCATGTGCTTCTTTCATAGTAACTGT  
GTAATGTGATAAAAATGAACCATTTTATTTGCTTCTTTCATTGTTTTCA

>PGSC0003DMG400016882-(rev)LRR-RLPs\_2684

TAGTAACTGTGTAATGTGATAAAAATGAACCATTTTATTTGCTTCTTTCATTGTTTTCACTGATGTGTGCTT  
CTTTCGACATTTTTTGACGATAATTAGTCCCCTAGTTTTCAATTTATG

>PGSC0003DMG400016882-(rev)LRR-RLPs\_2989

GTGTTTGTGGATGAAATCCTCTCTCAGAAGAGTTCGAATGGCCATTCCTGCCCTTGAGCATAACCAAGT  
AAATGACTACTTAAATCGTAGACATTGCTCATAATTGGTCAAAAATTGGC

>PGSC0003DMG400016882-(rev)LRR-RLPs\_3050

TAACCAAGTAAATGACTACTTAAATCGTAGACATTGCTCATAATTGGTCAAAAATTGGCCAGCATATCTG  
TAACTATTCTCTTAACACAAATTATAGTAGCATCATTTAAAGAAAAACAG

>PGSC0003DMG400016882-(rev)LRR-RLPs\_3233

CTTGGGTTGTACATTGACATCTTTGCATTTTTGTAAGCACTCTTGTATGCATGTATGTATGTTATAAACT  
AAAAATACACATTTTTCTCATTGGATGAATGTCTTCTTCTTTGTTACT

>PGSC0003DMG400016882-(rev)LRR-RLPs\_3294

GTTATAAACTAAAAATACACATTTTTCTCATTGGATGAATGTCTTCTTCTTTGTTACTATGCAGAAGCAA  
CATATACCATCCAACCTTCTTTGCAATGCAGAACTTGAGGTGGACAATA

>PGSC0003DMG400016882-(rev)LRR-RLPs\_3355

GCAGAAGCAACATATACCATCCAACCTTCTTTGCAATGCAGAACTTGAGGTGGACAATATCAGCAACTTA  
CCAGCACAGATTGTTGACAAGATTCTGTCCCATTTATCACTTAGGGATGC

>PGSC0003DMG400016882-(rev)LRR-RLPs\_3416

AGCAACTTACCAGCACAGATTGTTGACAAGATTCTGTCCCATTTATCACTTAGGGATGCTGTGAGGACAA  
GTGTCTTGTCAACTAAATGGAGAAACAAATGGGTTACTCTTCCAAACCTT

>PGSC0003DMG400016882-(rev)LRR-RLPs\_3477

TGAGGACAAGTGTCTTGTCAACTAAATGGAGAAACAAATGGGTTACTCTTCCAAACCTTGTATTTGACAA  
TCAATCTCTTTTGATCTCATCCCAAGACCAAACCTTCATAAAAAATAAGA

>PGSC0003DMG400016882-(rev)LRR-RLPs\_3538

ATTTGACAATCAATCTCTTTTGATCTCATCCCAAGACCAAACCTTCATAAAAAATAAGATAGTAAACATTG  
TTGATCATGTTCTCTTACTTCATTCTGGTCCCATACACAAGTTCAAGCT

>PGSC0003DMG400016882-(rev)LRR-RLPs\_3599

GTA AACATTGTTGATCATGTTCTTACTTCATTCTGGTCCCATACACAAGTTCAAGCTTCTCATCGGGAT  
CTTCAAGGGGTATGTGATATTGATAGATGGATTCTCTTCTATCAAGG

>PGSC0003DMG400016882-(rev)LRR-RLPs\_366

TTTGTAAGACATTGTTGAAAATTTATATGATTCTAATGTTTTTTTTTTCAGAATTAATGATGGTTAATTAGA  
GGGTTATAGCTTCTAATGTATAACTTGTCGTGATCCACAACCATTTG

>PGSC0003DMG400016882-(rev)LRR-RLPs\_3660

CTCATCGGGATCTTCAAGGGGTATGTGATATTGATAGATGGATTCTCTTCTATCAAGGGGTGCTGTGAA  
GGAATTTATTCTGGAAATATGGAAAGGCCATCGCTACAACTCCATTCTT

>PGSC0003DMG400016882-(rev)LRR-RLPs\_3721

TGCTGTGAAGGAATTTATTCTGGAAATATGGAAAGGCCATCGCTACAACTCCATTCTTCTATATATCTTT  
GTCAAAAGTTGAACCACTTGGAGCTTTTTAATTGTCTTCTAAAACCACC

>PGSC0003DMG400016882-(rev)LRR-RLPs\_3782

ATATATCTTTGTCAAAAGTTGAACCACTTGGAGCTTTTTAATTGTCTTCTAAAACCACCTCTCACATTCAAGT  
GGTTTTAAAAGCTTGAAAAGTCTCGATCTTCAGCACATCACTATGGAA

>PGSC0003DMG400016882-(rev)LRR-RLPs\_3843

TCACATTCAGTGGTTTTAAAAGCTTGAAAAGTCTCGATCTTCAGCACATCACTATGGAACAGGATGCATT  
TGAGCAACTCGTATCGAGATGCCATTTACTTGAGCGGCTTACACTGATGA

>PGSC0003DMG400016882-(rev)LRR-RLPs\_3904

GGATGCATTTGAGCAACTCGTATCGAGATGCCATTTACTTGAGCGGCTTACACTGATGAATTTGAGGGT  
TTCTCCGATCTTAAAATCCATGCACCGAATCTTCTTCTTTGACGTTGG

>PGSC0003DMG400016882-(rev)LRR-RLPs\_3965

TTTGAGGGTTTCTCCGATCTTAAAATCCATGCACCGAATCTTCTTCTTTGACGTTGGAGGCGTCTTTGA  
AGACATCAATTTATGAACACATTCAATCTTGCCATCGTTTCTATTGGG

>PGSC0003DMG400016882-(rev)LRR-RLPs\_4026

GCGTCTTTGAAGACATCAATTTATGAACACATTCAATCTTGCCATCGTTTCTATTGGGCTATATGTAAAT

CCTGGATTTGACAAAAATCTTGCTCTAGGCAGTGCTGGAAATTTGGTCA

>PGSC0003DMG400016882-(rev)LRR-RLPs\_4087

ATATGTAAATCCTGGATTTGACAAAAATCTTGCTCTAGGCAGTGCTGGAAATTTGGTCAAGTTTTTTGCTC

ATTTGCCTCGTCTTCAAAGGCTTGAAGTACAGAGCTTTTTCTTGAAGGT

>PGSC0003DMG400016882-(rev)LRR-RLPs\_4148

TTTTTGTCTATTTGCCTCGTCTTCAAAGGCTTGAAGTACAGAGCTTTTTCTTGAAGGTATTCTTCATACTT

ACTTTTGTGCTATGATTGTAGATTTCCAGAGAGTTGATGGCAACTTC

>PGSC0003DMG400016882-(rev)LRR-RLPs\_4209

TCTTCATACTTACTTTTGTGCTATGATTGTAGATTTCCAGAGAGTTGATGGCAACTTCTCTTCCAAGCA

TTTGTTCCTGTAAAATTTAGCATAAAATGATGTTTGACAACCAAAAAGT

>PGSC0003DMG400016882-(rev)LRR-RLPs\_4270

TTCCAAGCATTGTTCCTGTAAAATTTAGCATAAAATGATGTTTGACAACCAAAAAGTATGGAGCTGGA

TCTTTACTTTGCGGTGTTTGCTTGTCTAACATAATGCAATATCATTAGG

>PGSC0003DMG400016882-(rev)LRR-RLPs\_4331

GGAGCTGGATCTTTACTTTGCGGTGTTTGCTTGTCTAACATAATGCAATATCATTAGGGTCAAATCATT

AATACTACCATGTGAAAATGACTTGTGTCCTGCAGTGCAACTCATATTT

>PGSC0003DMG400016882-(rev)LRR-RLPs\_4392

CAAATCATTTAATACTACCATGTGAAAATGACTTGTGTCCTGCAGTGCAACTCATATTTTATTATGAATCT

CCAACCTTCACTGCCATTAGTACTCGCGGGTCCTTATTTGAAACAATT

>PGSC0003DMG400016882-(rev)LRR-RLPs\_4453

TTATGAATCTCCAACCTTCACTGCCATTAGTACTCGCGGGTCCTTATTTGAAACAATTGTAATCGCTCTTT

GTTATCTACTATTTCAAATACACCATCATCACATCTTGCCACTACTT

>PGSC0003DMG400016882-(rev)LRR-RLPs\_4514

AATCGCTCTTTGTTATCTACTATTTCAAATACACCATCATCACATCTTGCCACTACTTTCTACCACTGTCAT

TGTCTTCATTTAAATTCCTGAAAATTGTTAGGAATGGGTTTTCTA

>PGSC0003DMG400016882-(rev)LRR-RLPs\_4575

TACCACTGTCATTGTCTTCATTTAAATTCCTGAAAATTGTTAGGAATGGGTTTTCTATTGAAGAGATTC

CTCCCTTGTTTTATGATATATCTTGTGCCAACCTAACAGAACCTTACTG

>PGSC0003DMG400016882-(rev)LRR-RLPs\_4636

GAAGAGATTCCCTCCCTTGTTTTATGATATATCTGTGCCAACCTAACAGAACCTTACTGTTCTTATTTTCTT  
AACTAAAATGTAAAATTTCTCTAATGGATGCCTTTGCCAAGTTTATCT

>PGSC0003DMG400016882-(rev)LRR-RLPs\_4697

CTTATTTTCTTAACTAAAATGTAAAATTTCTCTAATGGATGCCTTTGCCAAGTTTATCTCCCCGCATTATTT  
ATTGGATGCTTGAAATGGAGAACTCTGTCAATCTTTGGAGAAAATGT

>PGSC0003DMG400016882-(rev)LRR-RLPs\_4758

CCGCATTATTTATTGGATGCTTGAAATGGAGAACTCTGTCAATCTTTGGAGAAAATGTATACTAATCAT  
TGTTATGTCTGCAGTATCTGGCTGACAATAAAGTGCCAGGAAGACTACCT

>PGSC0003DMG400016882-(rev)LRR-RLPs\_4819

ACTAATCATTGTTATGTCTGCAGTATCTGGCTGACAATAAAGTGCCAGGAAGACTACCTACGCCTTGTGA  
CGAGCTAAGTTTTCTTTCAATACGCATAAATTTCAACCATTTGGATGAGT

>PGSC0003DMG400016882-(rev)LRR-RLPs\_4880

GCCTTGTGACGAGCTAAGTTTTCTTTCAATACGCATAAATTTCAACCATTTGGATGAGTGTTTGGCAGCA  
CTTTGCCTTCTCAGAAGTCCCCTAACCTACAAGAGCTTGAGATGTTGGT

>PGSC0003DMG400016882-(rev)LRR-RLPs\_4941

TTGGCAGCACTTTGCCTTCTCAGAAGTCCCCTAACCTACAAGAGCTTGAGATGTTGGTGAGTTTCAAT  
ATCACTTGAACCTTCATTAGGACCAATCATAAACTGGCTTCAACATACTTC

>PGSC0003DMG400016882-(rev)LRR-RLPs\_5002

GTTTCAAATATCACTTGAACCTTCATTAGGACCAATCATAAACTGGCTTCAACATACTTCACTGCATGGATA  
ATATTCATGTACCCAACCTATTTTGCAGCATGTAACTTTTACAGCAT

>PGSC0003DMG400016882-(rev)LRR-RLPs\_5063

TGCATGGATAATATTCATGTACCCAACCTATTTTGCAGCATGTAACTTTTACAGCATCTGCCGAACCTGT  
CTTTAAGCTCTGTACATTCATGCCATTGTCATTTTGTAGGCACGCACAG

>PGSC0003DMG400016882-(rev)LRR-RLPs\_5124

GCCGAACCTGTCTTTAAGCTCTGTACATTCATGCCATTGTCATTTTGTAGGCACGCACAGAAGAACAAGT  
ACTTTGAGAACAGTTGCCAGTGTTATGGAAGAGGATTACCAGAATTGTAT

>PGSC0003DMG400016882-(rev)LRR-RLPs\_5185

GAACAAAGTACTTTGAGAACAGTTGCCAGTGTTATGGAAGAGGATTACCAGAATTGTATGTTCAATCAA  
TTGAGGCATGTTAAGATTGCTGGTATAACTGGGCTTAAACAAGAGCTAAAT



>PGSC0003DMG400016882-(rev)LRR-RLPs\_5246

TCAATCAATTGAGGCATGTTAAGATTGCTGGTATAACTGGGCTTAAACAAGAGCTAAATTTTCGTCAATTT  
TCTGCTTTCAAATTCACCTGTTCTTGAAAGAATGACAGTCAAGCCAGCTT

>PGSC0003DMG400016882-(rev)LRR-RLPs\_5307

CGTCAATTTTCTGCTTTCAAATTCACCTGTTCTTGAAAGAATGACAGTCAAGCCAGCTTCAGCTGACGGT  
GCATGGGAGATGCTAAAAGAGTTGCTTCGCTTCAGGAGAGCTTCTGTACA

>PGSC0003DMG400016882-(rev)LRR-RLPs\_5368

GCTGACGGTGCATGGGAGATGCTAAAAGAGTTGCTTCGCTTCAGGAGAGCTTCTGTACAAGCTGAAATT  
GTTTACGTTGACCCTTAATTTATAGCATATATAAGCTGGGGAGCCTGTGGT

>PGSC0003DMG400016882-(rev)LRR-RLPs\_5429

CTGAAATTGTTTACGTTGACCCTTAATTTATAGCATATATAAGCTGGGGAGCCTGTGGTCTAGTAAGATC  
TAGGCGTATTTACTATATTAGTTTAGCATCTAGTGTAGAAACTAAGCTAG

>PGSC0003DMG400016882-(rev)LRR-RLPs\_5490

AGTAAGATCTAGGCGTATTTACTATATTAGTTTAGCATCTAGTGTAGAAACTAAGCTAGACCGTCTGCTG  
AAATGGAAGCACCAATGTGATCGGTAGCAGAAAGATGATTATAAATACTGA

>PGSC0003DMG400016882-(rev)LRR-RLPs\_5551

CGTCTGCTGAAATGGAAGCACCAATGTGATCGGTAGCAGAAAGATGATTATAAATACTGAACTTGTTTCGT  
TCAGTGTGTGAACTTTTCAGACATCCTCGTACAAGTCTTGGTTTTTCTGA

>PGSC0003DMG400016882-(rev)LRR-RLPs\_5612

TTGTTTCGTTTCAGTGTGTGAACTTTTCAGACATCCTCGTACAAGTCTTGGTTTTTCTGAACAATTCAACTA  
GTTGCGTAGTTGTACTTGTCTGTTGATAGCCCTCTGATTGTGTCTTGT

>PGSC0003DMG400016882-(rev)LRR-RLPs\_5673

AATTCAACTAGTTGCGTAGTTGTACTTGTCTGTTGATAGCCCTCTGATTGTGTCTTGTCTTCGGTACAA  
GTATTCTAAAAAATGTGTTATTATTGTCTTGTGATGAAGATAGCTGAACTA

>PGSC0003DMG400016882-(rev)LRR-RLPs\_5734

TTCGGTACAAGTATTCTAAAAAATGTGTTATTATTGTCTTGTGATGAAGATAGCTGAACTAATGCTTCTCAGT  
ATTGTTTTCTTACATCCTTATATCTGAATATGTGCCCTCAGAATGGATC

>PGSC0003DMG400016882-(rev)LRR-RLPs\_61

TTCCATTTTTTCCGGCGTAACAGATTTATCAAATTCATCAGCCTAAAACAAAGGTATTCTTCTTCTTCTTCT

ATCTACTGATTTAGCCCTAATTTGCTGTTTCAGCAAGAAAATTGTAATT

>PGSC0003DMG400016882-(rev)LRR-RLPs\_976

AATCTTGCGAAGAAATTTTCCAAAAATTGTGTTTCTTTGAATCTTCTGAAACACTTTTTAAAAAAAATAT

TTTTTATGAAGTGTITTTAGGGTGCTCCCACTCACAGATCTTCAATAA

>PGSC0003DMG400016899LRR-RLPs\_1302

CCTTAGAGTACCTGCAGTAAAGCCTCTTGTTTGTGGATGAAAAAACTGCTACTGCCTGACTTAGTCGGAC

TCCAACGTGGGTACCGAACACCCGGTGGAAAAAAAATCACTACTACT

>PGSC0003DMG400016899LRR-RLPs\_1364

AGTCGGACTCCAACGTGGGTACCGAACACCCGGTGGAAAAAAAATCACTACTACTACTATTTTATTT

ATTTATGAGTGACAACAATTGAGCACTATCATCAATGTTTTTGTGTAAA

>PGSC0003DMG400016899LRR-RLPs\_1426

TTTTATTTATTTATGAGTGACAACAATTGAGCACTATCATCAATGTTTTTGTGTAAACCTGGTTATCTTGG

CCTAGCACACGCAAGTTATGACTTGTACCTTTCAAATTTATTTCTCTT

>PGSC0003DMG400016899LRR-RLPs\_1488

GTTATCTTGGCCTAGCACACGCAAGTTATGACTTGTACCTTTCAAATTTATTTCTCTTCCTTATTTCTTTATG

TTGCATTATGAATTGTAAATACTAGTATTAATTAGGACACTTATAT

>PGSC0003DMG400016899LRR-RLPs\_1545

TCCTTATTTCTTTATGTTGCATTATGAATTGTAAATACTAGTATTAATTAGGACACTTATATATGGGTTTC

ACCCACCTCTAGTAATCATAATTCCTCATCAGTAGTCGGGGATTCTCA

>PGSC0003DMG400016899LRR-RLPs\_992

AAGTTCTAGATGTGAGTTTCAATTCATAATGGGGCATTTCCTGATACCCTTTCTTGTGTTGAGTGGCATT

GAGGTTCTCAACTGGGACATAACAAGTTATCTGGAGATTACCAGACT

>PGSC0003DMG400017034G-LecRK\_0

GCTAACCACAAAACCACTACACTTCAATGTAATCCTTCTGTCTCTTAATTAATAGTACCGTTTATGTACTAT

TTGATGAATGTAAAAACATTTAAAAAGACTCACTTGATAGGTAAGTCA

>PGSC0003DMG400017034G-LecRK\_1054

AGCAACTCTAGTTTGTCAATTTCTTTGAGATTTCAGTATGACAAGATTGCATTGTACTTATACTCTGGGAA

ATCGAAGTACTCGTATTGGGAATATACACCTTTGGAATTAGATGGCCTG

>PGSC0003DMG400017034G-LecRK\_1116

CTCTGGGAAATCGAAGTACTCGTATTGGGAATATACACCTTTGGAATTAGATGGCCTGAATATCACATAT  
GTTGAGTTAACTTCTAACGCGCTGGAGATATTCAACAACGAAAATCGTAG

>PGSC0003DMG400017034G-LecRK\_1178

TCACATATGTTGAGTTAACTTCTAACGCGCTGGAGATATTCAACAACGAAAATCGTAGAATTGGAAGGA  
TAACATCAGACAAGCCAGAGCCCTTGAGATTTTTAGCATTGGGAAATAGCA

>PGSC0003DMG400017034G-LecRK\_124

TTTAAGGAGTGGGGGGGACACTACTAATGTTGTAACATTATAATCATGCCAACTTTTTATTTTCTTTCAT  
CTTGCTATACATTCCTAACAAACAACAAGTCCTGGAGCAAAGCCTAT

>PGSC0003DMG400017034G-LecRK\_1240

GGAAGGATAACATCAGACAAGCCAGAGCCCTTGAGATTTTTAGCATTGGGAAATAGCACAGGGAATTT  
GGGATTCTACTATTACTCATCTGACAAAGGAAAGTTTGAAGCTTCATATCAA

>PGSC0003DMG400017034G-LecRK\_1302

GAATTTGGGATTCTACTATTACTCATCTGACAAAGGAAAGTTTGAAGCTTCATATCAAGCACTAAACACT  
AGCTGTGATCTTCCGTTGGCATGTAAACCTTACGGTATATGTACATTTTC

>PGSC0003DMG400017034G-LecRK\_1364

TAAACACTAGCTGTGATCTTCCGTTGGCATGTAAACCTTACGGTATATGTACATTTTCAGAGAAGTGTTCT  
TGCATAAGACTAATAAAAAGAGGAGATGGATTGCTTTCTGATTGCACTG

>PGSC0003DMG400017034G-LecRK\_1426

AAGTGTCTTGCATAAGACTAATAAAAAGAGGAGATGGATTGCTTTCTGATTGCACTGAAAATGTAAGA  
ATTTGTGGAAGAAATGATTCCCAAATGCTAGAATTACAAGGCGTTACGAGT

>PGSC0003DMG400017034G-LecRK\_1488

TGTAAGAATTTGTGGAAGAAATGATTCCCAAATGCTAGAATTACAAGGCGTTACGAGTGTATTAAGAAG  
CAATCCTTATAAGATCAATGTGACCAAAGAAATATGTGCAAATTTGTGCTT

>PGSC0003DMG400017034G-LecRK\_1550

TAAGAAGCAATCCTTATAAGATCAATGTGACCAAAGAAATATGTGCAAATTTGTGCTTGGATAACTGTAC  
ATGTGTTGCAGCATTACATTTTTCTTATGAGAATGATCCCGCGAAACCTG

>PGSC0003DMG400017034G-LecRK\_1612

AACTGTACATGTGTTGCAGCATTACATTTTTCTTATGAGAATGATCCCGCGAAACCTGGAGAATGCTATG  
TGTATGGACTAGCTAGAGGAGTTAAACAATCGAAAGAGATGGAAGATTG

>PGSC0003DMG400017034G-LecRK\_1674

ATGCTATGTGTATGGACTAGCTAGAGGAGTTAAACAAATCGAAAGAGATGGAAGATTGAGTTATATGG  
TGAAGGTACCAAAGGGAAGCTGATCAAGGTCATGATAAGCACTCTCATTGGAA

>PGSC0003DMG400017034G-LecRK\_1736

ATATGGTGAAGGTACCAAAGGGAAGCTGATCAAGGTCATGATAAGCACTCTCATTGGAAGAAATGGATTC  
CAATTGTTGTAGGAGTGGTTGATGGAGTTGTATTACTTGTTTTAGGAG

>PGSC0003DMG400017034G-LecRK\_1798

TGGATTCCAATTGTTGTAGGAGTGGTTGATGGAGTTGTATTACTTGTTTTAGGAGGAGTTGGATACT  
ATGTAATCCGAAAGAGAAGAAAGTCGTGCGTAGATACTGGTCACAGCAAT

>PGSC0003DMG400017034G-LecRK\_186

TTCTTTCATCTTGTCTATACATTCTAACAACAACAAAGTCCTGGAGCAAAAGCCTATTGATTCACCAGTT  
TGCTAACCTACTTTGTGCGCTATGTGCACTCTGTAACCAGAATAGAGCT

>PGSC0003DMG400017034G-LecRK\_1860

TGGATACTATGTAATCCGAAAGAGAAGAAAGTCGTGCGTAGATACTGGTCACAGCAATTGATATTGTAT  
AGATAAAATTTTGATTTCAAGATAACATTTTCTACATCGAGATAGCAATTA

>PGSC0003DMG400017034G-LecRK\_1922

ATTGTATAGATAAAATTTTGATTTCAAGATAACATTTTCTACATCGAGATAGCAATTAACCGATTCTCATG  
AAAAATCAAGGATGAAGCTCGAGTGACAGATACTAACTTGTAGCCAAA

>PGSC0003DMG400017034G-LecRK\_1984

ATTCTCATGAAAAATCAAGGATGAAGCTCGAGTGACAGATACTAACTTGTAGCCAAAACTTAAATTTT  
TGAAGTTGGCTTGGCTTGAATTGCCTGAGATTGAGTAGAATTCGAAG

>PGSC0003DMG400017034G-LecRK\_2046

TAAATTTTGAAGTTGGCTTGGCTTGAATTGCCTGAGATTGAGTAGAATTCGAAGAAATAGAAGTGT  
CAAAGGTATGCAAGCAATCTTTTCAGGGTTAAAATGTTGTTACTTCACAA

>PGSC0003DMG400017034G-LecRK\_2108

AGAAGTGTCAAAGGTATGCAAGCAATCTTTTCAGGGTTAAAATGTTGTTACTTCACAAGAGATTTTTCGA  
TTCCTAACTGACATGTTGAATTTGTTGATGTCTAAGGTTAATTAGAGAG

>PGSC0003DMG400017034G-LecRK\_2169

ATTTTTCGATTCTAACTGACATGTTGAATTTGTTGATGTCTAAGGTTAATTAGAGAGAAACTCTACG

ATATTCTATACTTCAAAAATTGACTTACAAAATGCGCGGCCAAATGTCC

>PGSC0003DMG400017034G-LecRK\_248

TCACCAGTTTGCTAACCTACTTTGTCTGGCTATGTGCACTCTGTAACCAGAATAGAGCTCTGGACTTAAAA  
CCACCCACTTTTTGAAGTTTGAAGGCGGCGCCTAACTAGTGAGTAACA

>PGSC0003DMG400017034G-LecRK\_310

ACTTAAAACCACCCACTTTTTGAAGTTTGAAGGCGGCGCCTAACTAGTGAGTAACATTCCACACATGA  
AAATTTATGAGCTTTTTTATCTCATTTGCTGGTTGGCTCATGGATACTGC

>PGSC0003DMG400017034G-LecRK\_372

ACACATGAAAATTTATGAGCTTTTTTATCTCATTTGCTGGTTGGCTCATGGATACTGCACCTCTGATATTC  
ACATTGGTTATCAGGTAAGTCTTGCTATACCAACATCATATTGCAAAGG

>PGSC0003DMG400017034G-LecRK\_434

CTGATATTCACATTGGTTATCAGGTAAGTCTTGCTATACCAACATCATATTGCAAAGGATTCATAGGCAG  
GGCTTTTCTAATGGAAACTGATCACAACCAAATTGGACCAAATTTTAGAG

>PGSC0003DMG400017034G-LecRK\_496

ATAGGCAGGGCTTTTCTAATGGAAACTGATCACAACCAAATTGGACCAAATTTTAGAGGTGGAATCAGT  
GTTGAAGCCAATAATGATAAATACACATGTTCACTTGATGTTTTTCTGGGA

>PGSC0003DMG400017034G-LecRK\_558

AATCAGTGTTGAAGCCAATAATGATAAATACACATGTTCACTTGATGTTTTTCTGGGAGATGTCAAGGTT  
TGGAGTTCTGGTCATTTGTCACAATTCTACACAATAGACAAATGTACT

>PGSC0003DMG400017034G-LecRK\_62

TATGTAATTTGATGAATGTAAAAACATTTAAAAAGACTCACTTGATAGGTAAGTCACTATTTTAAGGA  
GTGGGGGGGACACTACTAATGTTGTAACATTATAATCATGCCAAACTTTT

>PGSC0003DMG400017034G-LecRK\_620

TCAAGTTTTGGAGTTCTGGTCATTTGTCACAATTCTACACAATAGACAAATGTACTTGAGCTAACTCA  
GTATGGAGACTTATTGTTGAAAGGGGTCTAGATGACAGAATTGGATGGA

>PGSC0003DMG400017034G-LecRK\_682

CTAACTCAGTATGGAGACTTATTGTTGAAAGGGGGTCTAGATGACAGAATTGGATGGAAAGCTGGAAC  
TTCAGGACAAGGTGTCAAGGTAATTAATTGTCAATCTTTAGATATAAGTTGT

>PGSC0003DMG400017034G-LecRK\_744

TGGAACCTCAGGACAAGGTGTCAAGGTAATTAATTGTCAATCTTTAGATATAAGTTGTATATGCAAACAA  
AAGGGAAATAACATTTCTTAGTATATGTTTTTTGAGGTAAAACATAAAA

>PGSC0003DMG400017034G-LecRK\_806

GCAAACAAAAGGGAAATAACATTTCTTAGTATATGTTTTTTGAGGTAAAACATAAAAAGAACAAATTAT  
TATGTGCAACAATGCTAATATATGACTTCTTCTGCAGAGACTGAACTTAC

>PGSC0003DMG400017034G-LecRK\_868

CAAATTATTATGTGCAACAATGCTAATATATGACTTCTTCTGCAGAGACTGAACTTACTTGGGACAGGTA  
ATTTGGTGTTAGTTGATGCTATGAACTTGATTAATGGCAAAGTTTCAAT

>PGSC0003DMG400017034G-LecRK\_930

GACAGGTAATTTGGTGTTAGTTGATGCTATGAACTTGATTAATGGCAAAGTTTCAATTTTCCAACAAAT  
ATTATGCTTTGGGGTCAGAGACTAAGCTCAAGAAGCTCGGTTAACGTCTTT

>PGSC0003DMG400017034G-LecRK\_992

CAACTAATATTATGCTTTGGGGTCAGAGACTAAGCTCAAGAAGCTCGGTTAACGTCTTTCCCTAGCAACTC  
TAGTTTGTCATATTCTTTTGAGATTCAAGTATGACAAGATTGCATTGTACT

>PGSC0003DMG400017062LRR-RLPs\_0

TGAGTTTGTAACATATTCTTTGCTAACTCACAACTTCCAAATATCTAATAGTGAATTGAAGATATGGCT  
GAATCTCTCCTTCGAATTCTGTAAAGAGTCTGACTTCTTTTCATCCAAG

>PGSC0003DMG400017062LRR-RLPs\_122

GAAGTTGGATTGATTCTTGGTTTTAAGGACGAATTCGAAAAGCTTCAAAGAACGTTTACGATGATCCAA  
GCTGTGCTTGAAGATGCTCAGGAGAAGCAACTGAAGGACAAACCAATTGAA

>PGSC0003DMG400017062LRR-RLPs\_183

TGATCCAAGCTGTGCTTGAAGATGCTCAGGAGAAGCAACTGAAGGACAAACCAATTGAAAACCTGGCTG  
CAGAATCTCAATGTTGCTGCATATGAAGCTGATGACATCTTGGATGAATGTA

>PGSC0003DMG400017062LRR-RLPs\_244

CTGGCTGCAGAATCTCAATGTTGCTGCATATGAAGCTGATGACATCTTGGATGAATGTAAAACCTGAGAC  
AGCAAGACTCAAACAGACTAACTATTGGAGTTATCATCTAAAGGCTACCGC

>PGSC0003DMG400017062LRR-RLPs\_2684

AATTTTCTATTATTCATAGTGAACAAACAATAACTACATCATAATAATAAGATTTCAAATACAATTCATT  
GGCTTTTCTATACATGAAAGTAATAATTACTTTTATGAACTTTATAA

>PGSC0003DMG400017062LRR-RLPs\_2745

TACAATTCATTGGCTTTTCCTATACATGAAAGTAATAATTACTTTTATGAACTTTATAATATAAAATGCACA  
TAAATTTTCATTAAGTTAAATACTACTACATTAATTAAGTTATTCAAA

>PGSC0003DMG400017062LRR-RLPs\_2867

AATTTAGAGAAGGGGAAAAGGTTTAGTTAAGTATTTAGATACATGTTTTCATGTACCAAATAAATGCACA  
TACTTTTATGGATTTTTTCATCTTTTAGTTATTTATTTTACACCTTGTC

>PGSC0003DMG400017062LRR-RLPs\_305

ACTGAGACAGCAAGACTCAAACAGACTAACTATTGGAGTTATCATCTAAAGGCTACCGCTTCCGTTACA  
AGATTGGGAAAAGATGAAAACATTATGAAGAACTAGATGCAATTGCT

>PGSC0003DMG400017062LRR-RLPs\_3050

TTAAATATTTTATAATATTTGGAATTAATGTAGGGTAAAATGCTACTCTTTATCTCTTTATTGTGCAAAAAT  
CTTCTCTGGTTTTTGCTACAGAGCTTGAATTTTGTAACAATATTCTCA

>PGSC0003DMG400017062LRR-RLPs\_3111

TGTGCAAAAATCTTCTCTGGTTTTTGCTACAGAGCTTGAATTTTGTAACAATATTCTCATGTGAACATTAC  
TTGTACCAGGTTCTGTATTAAGTAAAACAAGTTTATGGGAGGGGCAA

>PGSC0003DMG400017062LRR-RLPs\_3233

AGGAAGATGAGATAGTGAAAATCTTGATAAACAATGCCCAACAACCTTCAGTCCTCCAATACTTGGTTT  
GGGGGGACTAGGAAAGACCACTCTTGCCCAAGTGGTCTTCAATGATCCGA

>PGSC0003DMG400017062LRR-RLPs\_3294

ACTTGGTTTGGGGGGACTAGGAAAGACCACTCTTGCCCAAGTGGTCTTCAATGATCCGAGAGTTACTGA  
GCATTTCCATCCCAAAATATGGATTTGTGTCTCGGATGATTTTGATGAGAA

>PGSC0003DMG400017062LRR-RLPs\_3355

GTTACTGAGCATTTCCATCCCAAAATATGGATTTGTGTCTCGGATGATTTTGATGAGAAGAGGTTGATAA  
AGGCAATCGTAGAATCTATTGAAGGAAAGTCACTCAGTGATATGGACTTG

>PGSC0003DMG400017062LRR-RLPs\_3660

TTTGACCCATATGAATTGTCAAATCTGTCTCAAGAAGATTGTTTGTGCGTTGTTCAACCAACGTGCATTTG  
AGCACCTAGAAGAAATAAATCCTAACCTTGAGGCTATCGGAAAGGAGAT

>PGSC0003DMG400017062LRR-RLPs\_3782

TGAAAAAATGTGGTGGTGTCCCTCTAGCAGCCAAGACTCTCGGAAGTATTTTGCCTTCAAGAGAGAAG

AAAGAGTATGGAAACATGTGAGAGATAGCGAGATTTGGAATTTGCCTCAAG

>PGSC0003DMG400017062LRR-RLPs\_3965

AATGCTTTGCATATTGTGCGGTGTTCCCAAAGGACACCAAATGGAAAAGGAAAATCTAATCTCTCTTTG  
GATGGCACACGGTTTTCTTTCATCGAAAGGAACTTGGAGCTAGAGGATG

>PGSC0003DMG400017062LRR-RLPs\_4209

AGCAAGAGCATCAAACAGCAATATCCGTGAAATAAATGTAAAAAATACTCAGATATAAAGTCTATTGG  
TTTTGCTGCAGTGGAGTCTTCTACTCTCATTGCTGGTGGAGAACTTTGT

>PGSC0003DMG400017062LRR-RLPs\_427

GGATCGAATCAAGTTTCATTTGAAATAAGGCCTATAGAGAGACAAGCTGCTAGACCTCAAACAGGTGC  
GTATCTTAAATATTCTCACACAAATTAGTATTACAATTACAACATAATTTA

>PGSC0003DMG400017062LRR-RLPs\_4270

TCTATTGGTTTTGCTGCAGTGGAGTCTTCTACTCTCATTGCTGGTGGAGAACTTTGTCTCGTTGAGGGT  
TCTTAATCTGCGTTACTTAGAACTCAATCAGTTACCGTCTTCCATTGGA

>PGSC0003DMG400017062LRR-RLPs\_4392

TCTAGTACATTTAAGATACATGGACCTCTTACAATAGAGAAATGTGTAGTCTTCCAAAGCAGTTATGC  
AAGCTTCAAATCTGCAGACTCTTGATCTACAGTATTGCATCTCACTTTG

>PGSC0003DMG400017062LRR-RLPs\_4575

ATTGGATTGTATGCCACCAAGGATAGGATCTTTGACATGCCTTAAGACTCTAAGTCGCTTTGTTGTGGGA  
TGGAAGAAAGGCGGTCAACTTGGGGAAGTAACTGAATCTGTATGG

>PGSC0003DMG400017062LRR-RLPs\_4636

GTTGTGGGATGGAAGAAAGGCGGTCAACTTGGGGAAGTAACTGAATCTGTATGGCTCAATTGA  
AATCAGCCATCTTGAGAGAGTGAAGAATGATAAGGATGCAAAGAAGCCAAT

>PGSC0003DMG400017062LRR-RLPs\_4697

CAATTGAAATCAGCCATCTTGAGAGAGTGAAGAATGATAAGGATGCAAAGAAGCCAATTTATCTGCAA  
AAGAGAATCTGCGATCTTTAATCATAGATTGGGATTGGCTTGAACACGTA

>PGSC0003DMG400017062LRR-RLPs\_4819

TATGAATCAGAAGAAGTTGAAGTGCTTGAAGCCCTCAAACCACACTCCAATCTGACTTCTTTAAAAATCA  
ATGGCTTCAAAGGAATCCGTCTCCCATATTGGATGAATCACTCAGTTTTG

>PGSC0003DMG400017062LRR-RLPs\_4880



TAAAAATCAATGGCTTCAAAGGAATCCGTCTCCCATATTGGATGAATCACTCAGTTTTGAAAAATGTTGT  
CTCTATTGAAATCAGCAGTTGCGCAAAGTCTCATGCTTACCACCCTTG

>PGSC0003DMG400017062LRR-RLPs\_5063

ATGTTGATGTTGATTCTGGGAGGTTTCCATCCTTGAGGACACTTGTTATAGTGAACCTTAGTAATCTAAA  
AGGATTGCTAAAAAAGGAAGGAGAAGAGCAATTCTTTGTGCTTGAAGAGA

>PGSC0003DMG400017062LRR-RLPs\_5185

ATAATTCTCTATTGCCCTATGTTTGTATTCCGACCCTCCCTTCATTGAAAGTTTGTATGTCAGATGCCTCA  
AGTTGAGGTCCACATCTAATCTTAGTGCTTACTTCCCTCAACATT

>PGSC0003DMG400017062LRR-RLPs\_5307

CGGTAACATGAAGCTACTTCACTCCCAGAAGAGATGTTCAAAGCCTTGCAAATCTCACATACTTGGAA  
ATCTCTGTGTTCTACAATCTTAAAGAGCTGCCTAGCAGCCTGGCTAGTCT

>PGSC0003DMG400017062LRR-RLPs\_5368

TACTTGAAATCTCTGTGTTCTACAATCTTAAAGAGCTGCCTAGCAGCCTGGCTAGTCTCAATGCTTTGAA  
GCGTCTGGATATTTATTATTGTGACACACTAGAGAGTCTCCCCGAGGAA

>PGSC0003DMG400017062LRR-RLPs\_5429

ATGCTTTGAAGCGTCTGGATATTTATTATTGTGACACACTAGAGAGTCTCCCCGAGGAAGGGGTGAAAG  
GTTTAACTTCACTTACACAGTTATCTCTCCACTACTGCAAGATTCTAAAAT

>PGSC0003DMG400017062LRR-RLPs\_549

TTCATATTTGACAATTATCAAGTTCATGTATGTTTTGGGCTGAGGGTAAGTTTCAAATATTTTTTCTAATC  
TAAATGTTTCGTTAAACAGATTGATTCCGATTCGTTTATTGGGTTCAA

>PGSC0003DMG400017062LRR-RLPs\_5490

GGTGAAAGGTTTAACTTCACTTACACAGTTATCTCTCCACTACTGCAAGATTCTAAAATGTTTACCGGAG  
GGATTGCAGCACCTAACAGCCCTCACAACCTTAAACAATTACTGAATGTCC

>PGSC0003DMG400017062LRR-RLPs\_5673

GTATCTGCATATTCGTAACATATTAGTATTTATAATTCTTTCTTTGTTTGTGAATCTTTTTGGTTTCTCCCATT  
GGATGTAATTGTTTGTAGGGTTGTTTGTGAGTCTCTCTCAT

>PGSC0003DMG400017062LRR-RLPs\_61

AGATATGGCTGAATCTCTCCTTCGAATTCTGTTAAAGAGTCTGACTTCTTTCATCCAAGGGGAAGTTGGA  
TTGATTCTTGGTTTTAAGGACGAATTCGAAAAGCTTCAAAGAACGTTTAC

>PGSC0003DMG400017062LRR-RLPs\_610

TTTTCTAATCTAAATGTTTCGTTAAACAGATTGATTCCGATTGTTTATTGGGTTCAAATCTATTACCTGT  
ATGTGTTTAGTGAAGTTTTTAACATATATATACATGCTGATATATATG

>PGSC0003DMG400017062LRR-RLPs\_671

CTATTACCTGTATGTGTTTAGTGAAGTTTTTAACATATATATACATGCTGATATATATGGGCTCAGATAAA  
TCCATAGCTTACTCATAGAATATCCCCGAGTCTAAATGACAAACAAAG

>PGSC0003DMG400017062LRR-RLPs\_732

CTCAGATAAATCCATAGCTTACTCATAGAATATCCCCGAGTCTAAATGACAAACAAAGCTTCAGTTGTTT  
TAGACCTTACTAGTTTCTGGGTGCCTTGCACGTTTGTCCATACAA

>PGSC0003DMG400017062LRR-RLPs\_793

TCAGTTGTTTAGACCTTACTAGTTTCTGGGTGCCTTGCACGTTTGTCCATACAACTATTATAAAGTT  
GAGTTTATTATAACAATATTAATTTTACCAATTTATATTTTATTCATT

>PGSC0003DMG400017062LRR-RLPs\_854

ATTATAAAGTTGAGTTTATTATAACAATATTAATTTTACCAATTTATATTTTATTCATTAAATAAAATTCAT  
AATAATTAATGGCCATTGAAAACAAATTAAGATAATATATATAGCC

>PGSC0003DMG400017062LRR-RLPs\_915

ATAAAATTCATAATAATTAATGGCCATTGAAAACAAATTAAGATAATATATATAGCCTCTAAAGATAT  
GATCAATATATATACCGATATGATTTATCCTCAATAACTACATATATAAG

>PGSC0003DMG400017062LRR-RLPs\_976

TAAAGATATGATCAATATATATACCGATATGATTTATCCTCAATAACTACATATATAAGTAGCTACTTAAC  
AGAAACCACATCGATAAGAAAAGTATTACACCCTCTGTCCCAATTTATG

>PGSC0003DMG400017072LRR-RLPs\_0

TATGCCACCAAGGATAGCATCTTGACATGCCTTAAGACTCTTGATCACTTTGCAGTGGGAAGGAAGAA  
AAGTCCTCAAATTAGTGAATTAAGAACTTGAATCTCTATGGCTCAATTGA

>PGSC0003DMG400017072LRR-RLPs\_1094

TTGCTCACATTTCTGATGTGTTTCTTTATCAGTATTCTAGTTAGATGTAATTTTCTGATTTTCTTTTGGAA  
GCAAATCAACTATTTGTAACATCTATTTGTATTATACTTGAATTTTCT

>PGSC0003DMG400017072LRR-RLPs\_130

CTTGAGAGAGTGAAGAATGATATGGATGCAAAAGAAGCCAATTTATCTGCAAAAGAAAATCTGCATTCT

TTAAGCATGACTTGGGATGAAGATGAACGTCCACATAGATATGAATCAGAA

>PGSC0003DMG400017072LRR-RLPs\_195

TTCTTTAAGCATGACTTGGGATGAAGATGAACGTCCACATAGATATGAATCAGAAGAAGTTGAAGTGCT

TGAAGCCCTCAAACCACACTCCAATCTGACTTGTTAAGAATCAGTGGCTT

>PGSC0003DMG400017072LRR-RLPs\_455

ACGGGTCTGCGGAATTGGAGTATGTTGATTCTGGATTCCTACAAGAAGAAGGTTTCCATCTCTGAGAA

AACTTTTTATAGGCGAATTCATAATCTGAAAGGATTGCTGAAAAAGGAAG

>PGSC0003DMG400017072LRR-RLPs\_520

AGAAAACTTTTTATAGGCGAATTCATAATCTGAAAGGATTGCTGAAAAAGGAAGGAGAAGAGCAATTC

CCTATGCTTAAAGAGGTGGAGATTGATGAGTGCCCTGTGTTTGTTATTCT

>PGSC0003DMG400017072LRR-RLPs\_585

ATTCCTATGCTTAAAGAGGTGGAGATTGATGAGTGCCCTGTGTTTGTTATTCTACCTTTCTTCTGTCA

AGAAATTGGAATTTGTGGGGGAGGCAGATGCAACAGGTTTCAGGTCCAT

>PGSC0003DMG400017072LRR-RLPs\_65

AGAAAAGTCCTCAAATTAGTGAATTAAGAACTTGAATCTCTATGGCTCAATTGAAATCACGCATCTTGA

GAGAGTGAAGAATGATATGGATGCAAAGAAGCCAATTTATCTGCAAAG

>PGSC0003DMG400017072LRR-RLPs\_650

CTGTCAAGAAATTGGAATTTGTGGGGGAGGCAGATGCAACAGGTTTCAGGTCCATATCTAATCTTAGGG

CTCTTACTTCCCTCCACATTAGCTTTAACAAAGAAGCTACTTCACTCCCAG

>PGSC0003DMG400017072LRR-RLPs\_715

AGGGCTTACTTCCCTCCACATTAGCTTTAACAAAGAAGCTACTTCACTCCCAGAAGAGATGTTCAAAA

GCCTTGCAAATCTCAAACACTTGAAAATCTCTTTCTTTAAGAATCTCAA

>PGSC0003DMG400017072LRR-RLPs\_780

CAAAAGCCTTGCAAATCTCAAACACTTGAAAATCTCTTTCTTTAAGAATCTCAAAAAGCTGCCTATCAGCC

TGGTAGTCTCAATGCTTTGAAGAGTCTGGAAATTAATATTGTGGCAC

>PGSC0003DMG400017072LRR-RLPs\_845

TCAGCCTGGCTAGTCTCAATGCTTTGAAGAGTCTGGAAATTAATATTGTGGCACACTAGAGGGTCTCCC

CGAGGAAGGGGTGAAAGGTTAACTTCACTCACACAGTTATCCATAACAT

>PGSC0003DMG400017072LRR-RLPs\_910

CTCCCCGAGGAAGGGGTGAAAGGTTTAACTTCACTCACACAGTTATCCATAACATACTGTGACATGCTAC  
AATGTTTACCTGAAGGATTGCAGCACCTAACAGCCCTCACAAATTTATCA

>PGSC0003DMG400017081LRR-RLPs\_0

CAACAGTAATGCATTATTGATCACACTGTTATGTAAATAAATATGGAGTACAAGTTCAGCTAGATAGTT  
AGATATATGCAATGGAGTACCAACAATTGATAATAGCTTTCTGCTTCTAT

>PGSC0003DMG400017081LRR-RLPs\_1054

AGGTAACAACCTTTACTGGTAATGTTCCCTCAACTATCTCAAATTAAGCAAACCTCGTATATTTAGATCTCT  
CTTCCAACCATTTTCGAGGCTCGATTCCAGAATCTATTGGCAACCTCAC

>PGSC0003DMG400017081LRR-RLPs\_1116

TAGATCTCTCTTCCAACCATTTTCGAGGCTCGATTCCAGAATCTATTGGCAACCTCACTGCAATCACAGAG  
CTGGCACTTTCAGATAACAGCTTCACAGGAAATGTTCCCTCAACTATCC

>PGSC0003DMG400017081LRR-RLPs\_1178

ATCACAGAGCTGGCACTTTCAGATAACAGCTTCACAGGAAATGTTCCCTCAACTATCCGAAAGCTGAACA  
AACTTAGCTACTTATCTCTCTCTTCCAATAATTTTGAAGGCTCGATTCCA

>PGSC0003DMG400017081LRR-RLPs\_124

TTTTGTGCAACAATCTCAGCTTACATATGCTGGGAAACATCTCTGTCCCCCCCCATGAAGCTGTTTATTT  
GCTTCAACTTAAGCAAGGCCTCACAGTTGATCCAAATGCTTATCGCAAT

>PGSC0003DMG400017081LRR-RLPs\_1240

GCTGAACAACTTAGCTACTTATCTCTCTTCCAATAATTTTGAAGGCTCGATTCCAGACATCTTTGCCA  
ACTTTTCAGAGCTATCATTTTTAGATTTTGACACTAACAGTTTCACTGG

>PGSC0003DMG400017081LRR-RLPs\_1302

TCTTTGCCAACTTTTCAGAGCTATCATTTTTAGATTTTGACACTAACAGTTTCACTGGCCCCCTCCCTTTTTC  
GATTGCAACCTTGACACGCCTTGAAAGTTTATACTTGCAAAACAATT

>PGSC0003DMG400017081LRR-RLPs\_1364

CTCCCTTTTTCGATTGCAACCTTGACACGCCTTGAAAGTTTATACTTGCAAAACAATTCATAACTGGACC  
ACTTCCCTCTAATATAAGCGGATTTCAAGAGCTACAAATACTCGATTTG

>PGSC0003DMG400017081LRR-RLPs\_1426

AACTGGACCACTTCCCTCTAATATAAGCGGATTTCAAGAGCTACAAATACTCGATTTGTCGTTTAATTGTT  
TCACTGGCGCAACACCCCTTGTTATTCCATCTTCCATCCTTGTTTTT

>PGSC0003DMG400017081LRR-RLPs\_1550

TATGTTCAACACAATCAATTAACCGGGAAATTGCCAAATGAGCTCATGAGTAATTATGTAGAATACTCTA  
ACATTGATCTTTCATACAACAAGCTGCAAGGTGAAATCCCGATTGGATG

>PGSC0003DMG400017081LRR-RLPs\_1612

ATACTCTAACATTGATCTTTCATACAACAAGCTGCAAGGTGAAATCCCGATTGGATGTTTTCTACAAGCA  
TGGGTAGACTGGATCTCTCACATAACTTCCTCACAGGCTTTGAAAAACA

>PGSC0003DMG400017081LRR-RLPs\_1674

CTACAAGCATGGGTAGACTGGATCTCTCACATAACTTCCTCACAGGCTTTGAAAAACAAGTATGGCCCTC  
AGGGTCCTTACAATACCTTAATTTGGAGAACAATTTCTTCAAGGGACTT

>PGSC0003DMG400017081LRR-RLPs\_186

TGTTTTATTGCTTCAACTTAAGCAAGGCCTCACAGTTGATCCAAATGCTTATCGCAATGGTTGTGACAGC  
GAGGCCGAAGCCAAGACTTTGTCCTGGAATGCTACAAGAGATTGTTGTGA

>PGSC0003DMG400017081LRR-RLPs\_1860

GTTCAATCCCAGACTGTTTGGGTAECTCAATAGCTTCATTTCTATTTTAGACTTACGAATGAACAATTTT  
CATGGAGAAATACCAAGATTCTTACCTACAGGGTTACAGTATCTTGGTT

>PGSC0003DMG400017081LRR-RLPs\_1922

AACAATTTTCATGGAGAAATACCAAGATTCTTACCTACAGGGTTACAGTATCTTGGTTTATATGGCAATC  
AATTGAGGGGACAAGTCTCGCGATCCTTGGTTAACTGTACAAGCTTGGAA

>PGSC0003DMG400017081LRR-RLPs\_2046

TTGATTTGGGGAACAACAAGTTAAATGACACGTTCCCATATGGCTGGAGAACTTCCAAACCTACAAG  
TTCTGATTCTTAAATCAAATCTCTTTCACGGTCCAATTGGTGATTGGAGT

>PGSC0003DMG400017081LRR-RLPs\_2108

CTACAAGTTCTGATTCTTAAATCAAATCTCTTTCACGGTCCAATTGGTGATTTGGAGTCCGAGTTTCCATT  
TCCTGAGTTACGGATCTTTGACCTTTCCTGCAATGGGTTCACTGGAECT

>PGSC0003DMG400017081LRR-RLPs\_2170

GTTTCCATTTCTGAGTTACGGATCTTTGACCTTTCCTGCAATGGGTTCACTGGAECTTTGCCATCTAATTT  
TTTCAAAAATTTTAGAGGTATGATGGATTTGGATGAAGAAAATACAGA

>PGSC0003DMG400017081LRR-RLPs\_2232

CATCTAATTTTTTCAAAAATTTTAGAGGTATGATGGATTTGGATGAAGAAAATACAGAAATTAECTCAAGC

TAGTAATAGGACTCACAGAGATTACCTGTACCACGTTAGTTTGGTGATAA

>PGSC0003DMG400017081LRR-RLPs\_2294

ACTCAAGCTAGTAATAGGACTCACAGAGATTACCTGTACCACGTTAGTTTGGTGATAAAAGGTAATGAG

TATGATATGGGAATCACGTCAATTATGACGAGTGTTGATTTATCAAGCAAC

>PGSC0003DMG400017081LRR-RLPs\_2418

TTGAAGGAGATATTCCAAATTCATTGGAAATCTGAGCTCACTTGTGCTACTCAACCTGTCTCACAACAG

CTTCCTTGGTCGTATTCTGCAGAATTTGCACAATTGCAGCAGCTCGAAT

>PGSC0003DMG400017081LRR-RLPs\_248

GTGACAGCGAGGCCGAAGCCAAGACTTTGTCCTGGAATGCTACAAGAGATTGTTGTGAATGGGGTGGT

GTTACTTGCAATGCATTTACAGGTCATGTCATAGGCCTCGATCTTTCTTCGA

>PGSC0003DMG400017081LRR-RLPs\_2480

CACAACAGCTTCCTTGGTCGTATTCTGCAGAATTTGCACAATTGCAGCAGCTCGAATCATTAGATCTCTC

AATGAACAGACTCATTGGAGAAATTCAGGTCTATTATCGAGTTTGACA

>PGSC0003DMG400017081LRR-RLPs\_2542

AGATCTCTCAATGAACAGACTCATTGGAGAAATTCAGGTCTATTATCGAGTTTGACATTTCTTGAGGTC

TTAAACCTTCTACAATCATCTGGCTGGGCGCATTCTATTGGGAAACA

>PGSC0003DMG400017081LRR-RLPs\_2666

AATACATTTCCAAATGATTCGTGTTGTGGAATCCTGATTTATGTGGATTTCCACTGTCAAAGAATGTG

GAAACAATAACGAGTCACCACTTGAACATGATGATGATGATGATTCATAT

>PGSC0003DMG400017081LRR-RLPs\_2728

AGAATGTGGAACAATAACGAGTCACCACTTGAACATGATGATGATGATGATTCATATTTTATGAGTGG

GTTACATGGGAAGCAGTGGTAATAGGTTATGGTTGTGGTATGATATTTGG

>PGSC0003DMG400017081LRR-RLPs\_2790

TGAGTGGGTTACATGGGAAGCAGTGGTAATAGGTTATGGTTGTGGTATGATATTTGGATTGTTGATAG

GAGGCCTCATGTTTCTATTGAAAAACCAAATGGTATGTGAACTTTGCTG

>PGSC0003DMG400017081LRR-RLPs\_2914

TATTGCTCAACACATTGCTGCTAACAAGCGAACAAGGCAAAGAAGAGACGTGGTTTAAGAATGAATTA

GCAATATAGCAGGTATGCATCAAACAAAACCTTTATGTCAATTTTTTATTT

>PGSC0003DMG400017081LRR-RLPs\_2976

TGAATTAGCAATATAGCAGGTATGCATCAAAACAAAACCTTTATGTCAATTTTTATTTTTCTAAATATTC  
AGAAATTCAGAAAAGTCATTAAGTCCTTTAATACTCAATTTGTCCTG

>PGSC0003DMG400017081LRR-RLPs\_3038

CTAAATATTCAGAAATTCAGAAAAGTCATTAAGTCCTTTAATACTCAATTTGTCCTGTAGAAAGGTTGC  
AGGAAAGTCGGACAAGTTTATCAGTGGATGCATCTGTTTCTTACTTTAT

>PGSC0003DMG400017081LRR-RLPs\_310

GGTGGTGTTACTTGCAATGCATTTACAGGTCATGTCATAGGCCTCGATCTTTCTTCGAGCTGTCTTAGGG  
GAACCATCAATGCTAACAGCACCTCAAAAACTTGGTCATCTCCAAAGA

>PGSC0003DMG400017081LRR-RLPs\_3100

AAGGTTGCAGGAAAGTCGGACAAGTTTATCAGTGGATGCATCTGTTTCTTACTTTATGACCATGGTTGC  
CAAATACATAATAAGTTACAGTTGATTTCTATAGTTTTGTGTCAAATAAT

>PGSC0003DMG400017081LRR-RLPs\_3147

CTTACTTTATGACCATGGTTGCCAAATACATAATAAGTTACAGTTGATTTCTATAGTTTTGTGTCAAATA  
ATAAGTTAGCTTTAGACACAGCAACCTCTTACTCTGTTTGGATGGTTG

>PGSC0003DMG400017081LRR-RLPs\_372

TCTTAGGGGAACCATCAATGCTAACAGCACCTCAAAAACTTGGTCATCTCCAAAGACTCAACCTTGCC  
TTCAACAAGTTGAGTGACTTTCCACTTGGAATAGCATTAGTGAACCTCAG

>PGSC0003DMG400017081LRR-RLPs\_434

ACCTTGCCTTCAACAAGTTGAGTGACTTTCCACTTGGAATAGCATTAGTGAACCTCAGTAGTATGACGCA  
TCTCAATCTTTCACATTCTGGAAATATGATATGGGAGATGCAGATCCCAG

>PGSC0003DMG400017081LRR-RLPs\_496

ATGACGCATCTCAATCTTTCACATTCTGGAAATATGATATGGGAGATGCAGATCCCAGCAGTATTATCAA  
ACTTGTCTAAATTGGTTTCACTTGATCTCTCCTGGCATTTCCTGAATTC

>PGSC0003DMG400017081LRR-RLPs\_558

ATTATCAAACCTGTCTAAATTGGTTTCACTTGATCTCTCCTGGCATTTCCTGAATTCGAATTTGGTCTAAC  
AACCTTCAGAAGTTTGCTTCACTAAACCAATTTGGAGGTACTGTTG

>PGSC0003DMG400017081LRR-RLPs\_62

AGATAGTTAGATATATGCAATGGAGTACCAACAATTGATAATAGCTTTCTGCTTCTATTCATTTTTGTGC  
AACAAATCTCAGCTTACATATGCTGGGAAACATCTCTGTCCCCCCCCATG

>PGSC0003DMG400017081LRR-RLPs\_620

TTGGTCTAACAACTTCAGAAGTTTGCTTCACACTAAACCAATTTGGAGGTACTGTTGCTTGACAACGTG  
GACATTTTTGGGAACATAAGTGAGTTACCTAAGAACCTTTCTTCTTCCCT

>PGSC0003DMG400017081LRR-RLPs\_682

ACAACGTGGACATTTTTGGGAACATAAGTGAGTTACCTAAGAACCTTTCTTCTTCCCTTAGGTACTTAAGT  
CTTCGAGGCACCGGCATGTTTGGGAACATAAGCGAGTCTCAGATTTTTTC

>PGSC0003DMG400017081LRR-RLPs\_744

TACTTAAGTCTTCGAGGCACCGGCATGTTTGGGAACATAAGCGAGTCTCAGATTTTTCATCTACCAA  
TGCAAGTGCTGAGATTGGGAGATAATCCTTTATTAACAGACACTTTGCCA

>PGSC0003DMG400017081LRR-RLPs\_806

ACCAAATTGCAAGTGCTGAGATTGGGAGATAATCCTTTATTAACAGACACTTTGCCAAATTTCCATCGG  
AATTTCAAGTGGAAAGTGTTTAGAGTTGGACTTCTCTAATACTGGTATTTT

>PGSC0003DMG400017081LRR-RLPs\_868

TCCATCGGAATTTCAAGTGGAAAGTGTTTAGAGTTGGACTTCTCTAATACTGGTATTTTTGGGAAGGTACC  
TGGTTCAATTGCTAATCTCCATTCTCTTTGGCGTTTGAACCTCTTAATTG

>PGSC0003DMG400017081LRR-RLPs\_930

AAGGTACCTGGTTCAATTGCTAATCTCCATTCTCTTTGGCGTTTGAACCTCTTAATTGCAATTTATCCGGCT  
CGATTCCAGAATCCCTTGGCGACCTCACTGCAATCAGAGAGTTGATAC

>PGSC0003DMG400017081LRR-RLPs\_992

TTATCCGGCTCGATTCCAGAATCCCTTGGCGACCTCACTGCAATCAGAGAGTTGATACTTACAGGTAACA  
ACTTTACTGGTAATGTTCCCTCAACTATCTCAAAATTAAGCAAACCTCGTA

>PGSC0003DMG400017087-(rev)LRR-RLPs\_0

TTTTGTTTCAATTCCTCTCAATATTGACTTGATGGAAGCTTATACTGCTGTAATTTCTTCTTCAAACCTCT  
GATCAACCAAATATTTCACTACTTTTCATGATCACAGTACTGAAAT

>PGSC0003DMG400017087-(rev)LRR-RLPs\_1008

TTTTAGGAATAAGTATATTTAATACATGTCTCGCCAATTGTATTTTTGTATTTGTAAACAGTAACTAAT  
GATGTAAGTGTGTAACATCTATTTGTTTTATGTGATAGTTTCGAAATAA

>PGSC0003DMG400017087-(rev)LRR-RLPs\_1071

TAACTAATGATGTACTCGTGTAAACATCTATTTGTTTTATGTGATAGTTTCGAAATAAATAAGGATGTTCAA



TCTATTATGCATTGCCTATGGAGTACACTTTGAATCTGTTTTCTCTGT

>PGSC0003DMG400017087-(rev)LRR-RLPs\_1134

ATGTTCAATCTATTATGCATTGCCTATGGAGTACACTTTGAATCTGTTTTCTCTGTTCATGTATAATACAT

GTTTTTCGTTGATGGACGGTGCTTTATGTGATGGATATCGATAACATT

>PGSC0003DMG400017087-(rev)LRR-RLPs\_126

TTCTCTTGACAGGGATGGCAAATCTAGAGGAATTTTACAATCTTTGTTACTCTAGTTGTACAAATGAA

GTCTTTTCTAGCATCCCCAATTTAAAGAGATTGACCATTCACGCACCTTT

>PGSC0003DMG400017087-(rev)LRR-RLPs\_315

GCTTTCCTGGAGATATAATTATGAAAATCCCATCAAAGATTTGTTTTTCCGGAATCACTTAGAAGATTGT

CTTTAACTAGGTGTTCTAAGTTTATTTGGGAAGAGATATCATCAACTTT

>PGSC0003DMG400017087-(rev)LRR-RLPs\_378

AAGATTGTCTTTAACTAGGTGTTCTAAGTTTATTTGGGAAGAGATATCATCAACTTTTATCATGTTGCCAC

ATCTTGAAGAGCTCAAACCTTAAACATTGTCTAGCCGATGATGATGTATG

>PGSC0003DMG400017087-(rev)LRR-RLPs\_441

GTTGCCACATCTTGAAGAGCTCAAACCTTAAACATTGTCTAGCCGATGATGATGTATGGAAATTGAGTGAC

AAAGACATATTCAAAGCTTGAAGTTGTTGTTACTGAGCGATGTAAATCT

>PGSC0003DMG400017087-(rev)LRR-RLPs\_567

TTGGGAAGCTAGAAGTGATAACTTCCCTAATCTAAAACGCCTTGTTCTGAAGAAATGCAAGCACCTGCA

AGAAATTCCAACAGATTTTGGGGAAATTTGTACTTTGGAATTGATTGAGTT

>PGSC0003DMG400017087-(rev)LRR-RLPs\_63

TCAAACCTTGATCAACCAAATATTTCACTACTTTTCATGATCACAGTACTGAAATGCTCGATTCTCTTGT

GACAGGGATGGCAAATCTAGAGGAATTTTACAATCTTTGTTACTCTAG

>PGSC0003DMG400017087-(rev)LRR-RLPs\_630

CCTGCAAGAAATCCAACAGATTTTGGGGAAATTTGTACTTTGGAATTGATTGAGTTACATGATTGCACC

ACTACTGCTGAGGCTTCTGTGAGAAAGATCAAACAAGAACAAGACGACTT

>PGSC0003DMG400017087-(rev)LRR-RLPs\_693

TTGCACCACTACTGCTGAGGCTTCTGTGAGAAAGATCAAACAAGAACAAGACGACTTGGATAATAATAT

CCTTAAGGTCTACATCCATAACAGCTACAGTAAGTTATAATTCTCTCTTAA

>PGSC0003DMG400017087-(rev)LRR-RLPs\_819

TTCGATTCTTCACATTATTTAAACCTCATTTTTATTAATCATACTTCTTTGAAATTAAGATGATGACTTG  
TACTTTTTATCTTGCTTATGCAGCGGATCAAAGAGATCATCTAATGCT

>PGSC0003DMG400017087-(rev)LRR-RLPs\_882

GATGACTTGTACTTTTTATCTTGCTTATGCAGCGGATCAAAGAGATCATCTAATGCTATCTCCGAATTCA  
GAACCTTGTAGTTCATATTTTTGTTTTAATATTCTGATCGTTTGTTAAT

>PGSC0003DMG400017087-(rev)LRR-RLPs\_945

CGAATTCAGAACCTTGTAGTTCATATTTTTGTTTTAATATTCTGATCGTTTGTTAATTTGATGTTTTAGGAA  
TAAGTATATTTAATACATGTCTCGGCCAATTGTATTTTTGTATTTTTGT

>PGSC0003DMG400017105RLKWAX-EGF\_0

ATGTCCATGTGCAATAGTATTGATGATGTTGTTTCATGACACATGTTCTGGGGTCGGTTGTTGCAAGACAT  
CCATCCCTAAGGGAGCATGGAATGTCACCATAACACTAAGCAGCTATTAT

>PGSC0003DMG400017105RLKWAX-EGF\_1008

GATGAAGAAGAAGCTTTTCCAAGAAAATGGTGGATTAGTTCTATTGCAACGACTCAAAGTAGGGGAAG  
AGGGATCAAGTAATACCAATACAGTAAACATTTTCACAAAGGGCAACTAATG

>PGSC0003DMG400017105RLKWAX-EGF\_1071

GGAAGAGGGATCAAGTAATACCAATACAGTAAACATTTTCACAAAGGGCAACTAATGACTTTGACAAAG  
ATAGAGTTGTTGGTCAAGGAGGTTATGGAAGTGTGTACAAAGGATATCTCA

>PGSC0003DMG400017105RLKWAX-EGF\_1197

ATTGCATCGTTGCCATAAAAAATTCTAAGGTAATTGATCGCAATCAAATTGAACAATTCATAAATGAAGT  
CCTTGTCTTTTACAAATCAACCATAGAAATGTGGTTAAGCTCTTAGGTT

>PGSC0003DMG400017105RLKWAX-EGF\_126

AATGATACTGATATGAAAGATGACCTTAGTTGCATCTATGCTTTTGTGGTCGATCAAGCTAATTTTAGCTT  
TTCTAAGACTTACCTCAGCAGTTTGCAGAAAGAAGAGAAGTTTCCTCTC

>PGSC0003DMG400017105RLKWAX-EGF\_1260

ATGAAGTCCTTGTCTTTTACAAATCAACCATAGAAATGTGGTTAAGCTCTTAGGTTGTTGCCTTGAGAC  
GGAAGTTCCACTACTGGTATATGAATTTATCAGCAATGGAACACTTTCTT

>PGSC0003DMG400017105RLKWAX-EGF\_1323

TTGAGACGGAAGTTCCACTACTGGTATATGAATTTATCAGCAATGGAACACTTTCTTTGGATATTCGTCTT  
AGAGTTGCTGCAGAAACTGCTGGAGTACTTTCTACTTACACTCAGCAG

>PGSC0003DMG400017105RLKWAX-EGF\_1449

CTCCTATCATTCATAGAGATATTAAGTCAGTCAACATTCTTCTAGACAAAAGCTACACAGCCAAAGTGTCT  
GATTTTAGAGCATCCAGGTTGGTTCCTGCTGATCAAACAGAGCTATCTA

>PGSC0003DMG400017105RLKWAX-EGF\_1512

AAGTGTCTGATTTTAGAGCATCCAGGTTGGTTCCTGCTGATCAAACAGAGCTATCTACATTGGTTCAAGG  
AACTCTACGATATTTAGATCCTGAATACTTGCAAACAAGTCAACTCAACG

>PGSC0003DMG400017105RLKWAX-EGF\_1575

TTCAAGGAACTCTACGATATTTAGATCCTGAATACTTGCAAACAAGTCAACTCAACGAAAAAAGTGATGT  
ATACAGTTTCGGAGTAGTGCTTGTAGAGCTCCTAACCAGTAGAAAGGCTC

>PGSC0003DMG400017105RLKWAX-EGF\_1638

GTGATGTATACAGTTTCGGAGTAGTGCTTGTAGAGCTCCTAACCAGTAGAAAGGCTCTATGTTTTCAAAG  
ACCAGAAGAAGAGAGAAGTTTAGCTCAATATTTCTTATCTTCAGTGGAAA

>PGSC0003DMG400017105RLKWAX-EGF\_189

TTTAGCTTTTCTAAGACTTACCTCAGCAGTTTGCAGAAAGAAGAGAAGTTTCCTCTCGTACTAGATTGGG  
CAATTGGTGAAGAAACATGTGAAATAGCTAAGAGAAATTCGACTACATAT

>PGSC0003DMG400017105RLKWAX-EGF\_252

GATTGGGCAATTGGTGAAGAAACATGTGAAATAGCTAAGAGAAATTCGACTACATATGGATGTAAGAG  
TAAAAACAGTGATTGTCAGGATAATTCAAATGGATATCGATGTTCTGTATG

>PGSC0003DMG400017105RLKWAX-EGF\_693

TCTCAACTGTTTGGAAATTCTGCAGGCAAGAGGTTAATTCCGTCAAATATTACTACTTGTTAATTATTTCT  
TTCACAACTGAACGAAAAAGAAGACCACAGATTGTGGAAGTGTGGAG

>PGSC0003DMG400017105RLKWAX-EGF\_756

ATTATTTCTTTCACAACCTGAACGGAAAAAGAAGACCACAGATTGTGGAAGTGTGGAGATTAATATGGGC  
AACGATTTTATTTTCATGAACTACATACATCAGCCTAAATGGCTAATACAA

>PGSC0003DMG400017105RLKWAX-EGF\_945

TTTAATGGTTTTATAATATTTGGCTGGTCATATACTGCATTCCAAAGGAGAAAAATGTTAATGATGAAG  
AAGAAGCTTTTCCAAGAAAATGGTGGATTAGTTCTATTGCAACGACTCAA

>PGSC0003DMG400017106G-LecRK\_0

CGAAGTATTAATAAATCACAAACACATTATACTTACATCCCTATATAATCTCCTTTAACAAATGGCTCCT

AATTATGTGATGATAGTTGCTCTGATAACATTTATTTGCTTTTCACTAT

>PGSC0003DMG400017106G-LecRK\_1054

TACGTTTGTACTCTACGAGTCTGCAGATATCGACGAATGTATAGATCGGAAACCAGATTATAGATGTGCC

AAGGATGCCATTTGCCAGAATACAGAAGGGAGTTATACATGCATATGCCC

>PGSC0003DMG400017106G-LecRK\_1116

GATGTGCCAAGGATGCCATTTGCCAGAATACAGAAGGGAGTTATACATGCATATGCCCTCCAGATTCA

GTGGTAATGGTACAGTATGCAATCGTGACAATCCTCAGAGAATAACTCAA

>PGSC0003DMG400017106G-LecRK\_1178

GATTTCAAGTGGTAATGGTACAGTATGCAATCGTGACAATCCTCAGAGAATAACTCAAATATTTATTTG

TTATAGGTACCTCTCTTAACTTCTTTCAAATCGATAACAATTTTATTTTC

>PGSC0003DMG400017106G-LecRK\_124

TGGTGATGATGCTATGTTACCAACGTCACACAACAATCTCATAGACAAACCTAAGTACTGCAATAAAAGT

TGTGGAAATGTCAACATCCCTTTCCATTTGGTATGACCCCAGATTGCGC

>PGSC0003DMG400017106G-LecRK\_1240

TTATTTTGTATAGGTACCTCTCTTAACTTCTTTCAAATCGATAACAATTTTATTTTCACGAACTATATACAT

CGACCTAAAATGTCTAATAAAGTTTAAATATTTTTATACAGGTGCTA

>PGSC0003DMG400017106G-LecRK\_1550

AGAAAAGGCAACTAATGGCTTTGACAAAGATAGAGTTGTTGGTCACGGAGGTTTTGGAAGTGTGTACAA

AGGATATCTGAAAGATAATTGCATCGTTGCCATAAAAAATCTAAGGTAATT

>PGSC0003DMG400017106G-LecRK\_1798

CAGCAATGGAACACTTTCTGAACACTTACATGATAAATTTAAGGCGTCAACTCTTTCTTTGGATATTCGTC

TGAAAGTTGCTGCAGAACTGCTGGAGTACTTTCCTACTTGCACTCTGC

>PGSC0003DMG400017106G-LecRK\_186

ATAAAAGTTGTGGAAATGTCAACATCCCTTTCCATTTGGTATGACCCCAGATTGCGCTCTACGCAATCA

GTTCTTGTCACCTGTAATACTCCTTTCATCCTCCCAGCCTTTTTTAG

>PGSC0003DMG400017106G-LecRK\_1860

ATATTCGTCTGAAAGTTGCTGCAGAACTGCTGGAGTACTTTCCTACTTGCACTCTGCAGCTTACCCTCCT

ATCATCCATAGAGATATAAAATCAGTCAACATTCTTTTAGACAAAACT

>PGSC0003DMG400017106G-LecRK\_1922

TACCTCCTATCATCCATAGAGATATAAAATCAGTCAACATTCTTTTAGACAAAACTACACAGCCAAAGT  
GTCTGATTTTGGAGCATCCAGGTTGGTTCCTGCTGATCAAACAGAGTTA

>PGSC0003DMG400017106G-LecRK\_2046

CATTGGTTCAAGGAACTCTAGGATATCTAGATCCTGAATACTTGCAAACAAATCAACTTAATGAAAAAG  
TGATGTATACAGTTTCGGAGTAGTGCTTATAGAGCTCCTAACCGGTAGAA

>PGSC0003DMG400017106G-LecRK\_2108

GAAAAAGTGATGTATACAGTTTCGGAGTAGTGCTTATAGAGCTCCTAACCGGTAGAAAGGCTTTATGT  
TTTGAAAGACCAGAAGAAGAGAGATGTCTAGCTCAATATTTTCATATCTTCA

>PGSC0003DMG400017106G-LecRK\_2170

TTTATGTTTTGAAAGACCAGAAGAAGAGAGATGTCTAGCTCAATATTTTCATATCTTCAGTGGAAAAGGGT  
CATTTGTTTCGATATTCTAGACAGCAACATAGTCTGTGATGAGGTAAATGC

>PGSC0003DMG400017106G-LecRK\_2232

AAAAGGGTCATTTGTTTCGATATTCTAGACAGCAACATAGTCTGTGATGAGGTAAATGCAGGGCAATTGA  
AAAATGTTGCTGTGCTTGCCCAAAGGTGCTTAATTCTTAAAGGGGATGATC

>PGSC0003DMG400017106G-LecRK\_2294

CAATTGAAAAATGTTGCTGTGCTTGCCCAAAGGTGCTTAATTCTTAAAGGGGATGATCGACCTACTATGA  
AGGAAGTTGCAGCAGAATTGGAAGCTGGATCAAATTGAAGCACTCGTGG

>PGSC0003DMG400017106G-LecRK\_2356

TACTATGAAGGAAGTTGCAGCAGAATTGGAAGCTGGATCAAATTGAAGCACTCGTGGGCTCAAATG  
ATCAGCAGTCCGAGGAGATTAAGTCCTTACTGCCTGGATTTGGATATGAATA

>PGSC0003DMG400017106G-LecRK\_2418

AAACTGATCAGCAGTCCGAGGAGATTAAGTCCTTACTGCCTGGATTTGGATATGAATATTGTGAACACA  
GTATCCATATTGATAGTGTAAACGAGCCATGTAACCTTACCATTTCTGGAG

>PGSC0003DMG400017106G-LecRK\_2480

GAACACAGTATCCATATTGATAGTGTAAACGAGCCATGTAACCTTACCATTTCTGGAGGAAGGTGATCAA  
TCATGCATGTTAATTTTGTCTCAGAAGCACGAGCTCAAACGGCCACGGCT

>PGSC0003DMG400017106G-LecRK\_2542

GTGATCAATCATGCATGTTAATTTTGTCTCAGAAGCACGAGCTCAAACGGCCACGGCTTCAACATGAATT  
TCTTTTTCTCTTGGGCATGTTAGAAATATGAACTAAGTTTGATAAGTTG

>PGSC0003DMG400017106G-LecRK\_2604

CATGAATTTCTTTTTCTCTTGGGCATGTTAGAAATATGAACTAAGTTTGATAAGTTGCATCTCTTTTATT  
GTCCAGACATAATAAATTTGAGTAACAAATTAATGTCAAGTGTAGTTA

>PGSC0003DMG400017106G-LecRK\_2665

CTCTTTTATTTGTCCAGACATAATAAATTTGAGTAACAAATTAATGTCAAGTGTAGTTATTTATTATGTATC  
CGAGTAAAAATCAACACATTTTGAGAGAATCTATGTATTATTTTATGC

>PGSC0003DMG400017106G-LecRK\_310

CAGCAGTATTGAAATCACAAGCATATCTCTCTCTGGGCAACTTAAGGTCTTACATTTTCATATCCAGAGATT  
GTTATCGTGATGGGATAAGCACGAATAGAACCAAGCCATATATAGTATT

>PGSC0003DMG400017106G-LecRK\_372

CCAGAGATTGTTATCGTGATGGGATAAGCACGAATAGAACCAAGCCATATATAGTATTACCATCGTTATT  
AACTGTGGACAACACTGCGAATAGCTTCATCGCCGTTGGCTGTGACACGT

>PGSC0003DMG400017106G-LecRK\_496

AATTGTCCAGGGTTATTATACCAAGTTTGGAACTGAAATCGAGTATCTCCGCTACATAACAGGATGCATG  
TCCATGTGCTATAGTATTGATGAAGCTGATGATGATACATGTTCTGGGGT

>PGSC0003DMG400017106G-LecRK\_558

GATGCATGTCCATGTGCTATAGTATTGATGAAGCTGATGATGATACATGTTCTGGGGTTCGGTTGTTGCAA  
GACATCCATCCCTAAGGGAACATCGAATGTCAATATAACACTAAGCAGCT

>PGSC0003DMG400017106G-LecRK\_62

ATGGCTCCTAATTATGTGATGATAGTTGCTCTGATAACATTTATTTGCTTTTCACTATCTTTTGGTGATGAT  
GCTATGTTACCAACGTCACACAACAATCTCATAGACAAACCTAAGTAC

>PGSC0003DMG400017106G-LecRK\_620

TGTTGCAAGACATCCATCCCTAAGGGAACATCGAATGTCAATATAACACTAAGCAGCTATAATAATTATA  
ATGATACTAATATGACAAATGACCCTAGCTGCAGCTATGCTTTTGTGGTC

>PGSC0003DMG400017106G-LecRK\_682

TAATTATAATGATACTAATATGACAAATGACCCTAGCTGCAGCTATGCTTTTGTGGTCGATCAAGCTAATT  
TTAACTTTTCTAAGAGTTACCTCAGCAGTTTACAGAACACGAAGAAGCT

>PGSC0003DMG400017106G-LecRK\_744

AAGCTAATTTTAACTTTTCTAAGAGTTACCTCAGCAGTTTACAGAACACGAAGAAGCTTCCTCTTGTGCTA

GATTGGGCAGTTGGTGAAGACAAATGTGAAATAGCTAAGAGAAACTCGA

>PGSC0003DMG400017106G-LecRK\_868

ATATGCATGTAAGAGTAACAACAGCTATTGCCATGATGATTCAAATGGTTATCGATGTTCCCTGCATGCAA  
GGATATGATGGGAATCCATACCTGAGTTGTCAAGGTATGTATATGTTTGA

>PGSC0003DMG400017106G-LecRK\_930

GCATGCAAGGATATGATGGGAATCCATACCTGAGTTGTCAAGGTATGTATATGTTTGAGAGTTTCCTAAT  
ATGATTTTAATTATATCAAATCTATCATTTTGGAAATGAATGTTTACGTT

>PGSC0003DMG400017106G-LecRK\_992

TTCCTAATATGATTTTAATTATATCAAATCTATCATTTTGGAAATGAATGTTTACGTTATCATACGTTTGT  
CTCTACGAGTCTGCAGATATCGACGAATGTATAGATCGGAAACCAGAT

>PGSC0003DMG400017277G-LecRK\_0

ATGATTGCAGAGCAGAGAGTGTATCTTCCTATCCTTCTCTTCATTTGTCTCCACTCCTTTTCATCCCGGTTT  
GCTTTCTCGCAACTTTTCTGGAATAATGTTAGTGTTTTGAATTCT

>PGSC0003DMG400017277G-LecRK\_1037

TTATCATAGTCTTATAGAGCTCAGCGACACCACATATTTTGCATTTGAGATCAACTTTTATGCAAGTTCAA  
ACATGTGGTTTGGAGGAACAAAGATGGAAAATTGCAAAGCGGCCTGTTT

>PGSC0003DMG400017277G-LecRK\_1159

GTAAGTCTCCTGCAAAGCTGCTGTTTGGTCTAAACTCTAAGGAAAACTGCTTATTACTGAATGAAGT  
ATTATCTCTTAAGGACAAGTGGTCTGGTAGTGACAAGACAAAAGTTTTTC

>PGSC0003DMG400017277G-LecRK\_122

TACTGGACTTTCCAATTCTTGATCAATTTGCCATATGTTAGAGTTTACAATACCTCCGAGCCTTCTGAAA  
TGACGCCTATTATTCGGAGCAGAAAGGATAGCCCTCAGTTTCTCTTTGC

>PGSC0003DMG400017277G-LecRK\_1220

GAATGAAGTATTATCTCTTAAGGACAAGTGGTCTGGTAGTGACAAGACAAAAGTTTTTCTCAAGGTGCA  
GAATTCGCAAAGTCTCAGTATCAGCCGCAATCGTTTCTCAAAGAAAGCA

>PGSC0003DMG400017277G-LecRK\_1281

AAGGTGCAGAATTCGCAAAGTCTCAGTATCAGCCGCAATCGTTTCTCAAAGAAAGCAATCAAGACCTC  
TGAAAGTGATTGTAGCATCTGCTCTTGCTGCTTTAGTGGGAATAATTTA

>PGSC0003DMG400017277G-LecRK\_1342

CAAGACCTCTGAAAGTGATTGTAGCATCTGCTCTTGCTGCTTTAGTGGGAATAATTTTAAGTATTAGTGC  
ATGGTTTGTCTTTTCAAAAAGAGGACACTGTCTGTCAAGGCTGGGGATT

>PGSC0003DMG400017277G-LecRK\_1403

TATTAGTGCATGGTTTGTCTTTTCAAAAAGAGGACACTGTCTGTCAAGGCTGGGGATTTTCTGGATTTA  
GCACCAATCTTACCGGGAATCCTAACTCGATTCTCTTACAATGAGTTGAA

>PGSC0003DMG400017277G-LecRK\_1647

GATTCATTCTTAACAGAGGTAAGATAGTTGGTAGCATTACCATGTCAATTTGGTAAACTCATTGGCT  
TTTGTGCTGAAAAAGATCACTGGGTTCTGATCTATGAGTACATGGTAAAT

>PGSC0003DMG400017277G-LecRK\_1769

ATCATTGGATAGGTGGATTTCTCATGAAAAGCAAGAAAATGGGCTTACATGGCTTACGAGGCAAAGGAT  
AATATCAGATATTGCAAAGGATTAGCGTATCTTCATGATGAATGCAATCA

>PGSC0003DMG400017277G-LecRK\_1830

CAAAGGATAATATCAGATATTGCAAAGGATTAGCGTATCTTCATGATGAATGCAATCATAAGATAATTC  
ATTTGGACATCAAACCACACAACATCCTCTTAGATCAAATTTCAATGCT

>PGSC0003DMG400017277G-LecRK\_1952

GATATCTGATTTTGGGTTGTCGAAACTAATTGAGAAAGACAAAAGCAAAGTTGTTACTAGAATGAGAGG  
AACACCAGGGTATTTAGCTCCTGAATGGTTGAGGTCTGTAATAACCGAGAA

>PGSC0003DMG400017277G-LecRK\_2013

ATGAGAGGAACACCAGGGTATTTAGCTCCTGAATGGTTGAGGTCTGTAATAACCGAGAAAGTAGATGT  
ATATGCCTTTGGAATTGTGCTCTTGGAAGTTCTTTGTGGGCGAAAGAATTTG

>PGSC0003DMG400017277G-LecRK\_2074

TAGATGTATATGCCTTTGGAATTGTGCTCTTGGAAGTTCTTTGTGGGCGAAAGAATTTGGATTGGTCGCA  
GGCTGACAAAGATAATGTCCATTTGCTTAGTGTCTTTAAGAGAAAAGCAG

>PGSC0003DMG400017277G-LecRK\_2135

TTGGTCGCAGGCTGACAAAGATAATGTCCATTTGCTTAGTGTCTTTAAGAGAAAAGCAGAACAAGATCA  
GCTCATTGATATGGTTGACAAAAACAACGAGGATATGCAGATCCACAGGGA

>PGSC0003DMG400017277G-LecRK\_2196

CAAGATCAGCTCATTGATATGGTTGACAAAAACAACGAGGATATGCAGATCCACAGGGAAGCTGTGAT  
GAAAATGATGAGCCTCGCAGCATGGTGTGTGCAAGGTGATTTCAACAAGAGG



>PGSC0003DMG400017277G-LecRK\_2257

CTGTGATGAAAATGATGAGCCTCGCAGCATGGTGTGTGCAAGGTGATTTCAACAAGAGGCCTTCCATGT  
CATTGGTGGTTAAGGTAAGTACTGGAAGGTTTGGTGTCTGTTGAAACCAACTTGG

>PGSC0003DMG400017277G-LecRK\_2318

TTCCATGTCATTGGTGGTTAAGGTAAGTACTGGAAGGTTTGGTGTCTGTTGAAACCAACTTGGATTTCATTTTC  
ACAAACCTAACTGAGGCTGGGGCAGGCAACCAACAGATGGAAGTCCCTAT

>PGSC0003DMG400017277G-LecRK\_2379

TTCAATTTCACAAACCTAACTGAGGCTGGGGCAGGCAACCAACAGATGGAAGTCCCTATCAGTTCAATA  
CTGCCTTCAGTTTTATCTGGACCAAGGTAACAATATGCTTGAGAATTATG

>PGSC0003DMG400017277G-LecRK\_244

TCTATTGCCCCCTTCTAACTAACGGTACCACAGAATGCCTTCTTGGTATCCTTTTGTATCACAACAGATTCA  
ACGGGGTTTCAAGTGTTCGCCAGTTAGTTTGGTCTGCTAACAGGAACC

>PGSC0003DMG400017277G-LecRK\_2440

GTTCAATACTGCCTTCAGTTTTATCTGGACCAAGGTAACAATATGCTTGAGAATTATGACAATATTTCCA  
ATTCTAGTGTAACCTTCATAAATGTAATATTCAGTAACTTTGCATTAGTT

>PGSC0003DMG400017277G-LecRK\_366

CCAGTGAAAGTCAATGCAACGTTGCAACTAGGCCAAAATGGCAACTTGGTCTTGACAGACTCTGATGGC  
ACTCTTGTGGTCCACTAATACTACTGGAAAATCTGTTTCTGGCTTAAAC

>PGSC0003DMG400017277G-LecRK\_427

CTGATGGCACTCTTGTGGTCCACTAATACTACTGGAAAATCTGTTTCTGGCTTAAACATGACAGAAAT  
GGGAAATCTTGTGCTCTTTGATAAGAGAAAACAAGCAATTTGGCAGTCTT

>PGSC0003DMG400017277G-LecRK\_549

GATCATCCAACAGATTGTTTGTTCCTCGGGGCAGAAGTTGGTTTCTGGTAGGAAGCTGATAGCAAGCATT  
TCAGGATCCAATCAGTCCTTTTCTTTACTGTTCTTAATGGACGCCTGGTG

>PGSC0003DMG400017277G-LecRK\_61

CATCCCGTTTTGCTTCTCGCAACTTTTCTGGAATAATGTTAGTGTGTTTGAATTCTACTACTGGACTTT  
CCAATTCTTGATCAATTTGCCATATGTTAGAGTTTACAATACCTCCG

>PGSC0003DMG400017277G-LecRK\_610

CAAGCATTTTCAGGATCCAATCAGTCCTTTTCTTTACTGTTCTTAATGGACGCCTGGTGTCTTCCATAGAT

ACCAACCCACCTCAGTATTATATCGCTTCAAGTGGGGATTATAGTCCTC

>PGSC0003DMG400017277G-LecRK\_671

TTCCATAGATACCAACCCACCTCAGTATTATATCGCTTCAAGTGGGGATTATAGTCCTCTTTACGATTTTG

ACGGTCGAACCTTTACTGCTCTACAAGACCCTGATACATCCCAATTCAT

>PGSC0003DMG400017277G-LecRK\_732

TACGATTTTGACGGTCGAACCTTTACTGCTCTACAAGACCCTGATACATCCCAATTCATAAAGCTTGGGCC

TGATGGACATTTAAGGTTATACCAGTCGGATGCATTTGATTGGAAACAG

>PGSC0003DMG400017277G-LecRK\_854

AGATGAGGTCATGAATTCATATCTGGGGAACCTGTGGGTACCCAATGGCGTGTGGAAGATATAGCATTG

TACAAATGATGGGCAATGTAATTGTCCGGTAGAAGGAACTTCTTCAGGCC

>PGSC0003DMG400017277G-LecRK\_915

AGCATTGTACAAATGATGGGCAATGTAATTGTCCGGTAGAAGGAACTTCTTCAGGCCAATAAATAGG

AACCCGGATCTCGGGTGTTACAGCTAACATCTATTTCTTGCAACTCTTCA

>PGSC0003DMG400017277G-LecRK\_976

TAAATAGGAACCCGGATCTCGGGTGTTACAGCTAACATCTATTTCTTGCAACTCTTCACATTATCATAGT

CTTATAGAGCTCAGCGACACCACATATTTTGCATTTGAGATCAACTTTT

>PGSC0003DMG400017278G-LecRK\_1054

AGTTTTTCTTAAGGTGCAGAATTCCTCAAATGCACCAGTCATTTCCCCTAGACAGAAATTGCCTTTCAAAG

TTATCATAGGATGTACTTTGATTGGGATAATTTTATTCTTTTCAAGTTTG

>PGSC0003DMG400017278G-LecRK\_1116

CTTTCAAAGTTATCATAGGATGTACTTTGATTGGGATAATTTTATTCTTTTCAAGTTTGTCTGCTCTTTCCA

AAAAGAGATCGGAGAAACGCAAAGCTGGTGATTTTCTGGATCTAGAAC

>PGSC0003DMG400017278G-LecRK\_1178

GCTCTTTCCAAAAGAGATCGGAGAAACGCAAAGCTGGTGATTTTCTGGATCTAGAACCAATCTTACCG

GGAATCCTAATTCGATTCTTACAATGAGCTGAAAATAATTACACAAGAT

>PGSC0003DMG400017278G-LecRK\_124

AAGCTGGGCCACATACATAGATTCTGATCCACCTCAGTATTACTACACTTCAGAAAATCCCAATAGTCCTT

ATTGGAGTTTTGATGGTCATACCCTTACTGCTTTACAATATCCTCCTAC

>PGSC0003DMG400017278G-LecRK\_1240

CTTACCGGGAATCCTAATTTCGATTCTCTTACAATGAGCTGAAAATAATTACACAAGATTTTCAGCATAAAG  
CTCGGGAAAGGAGGATTTGGCTCTGTATATGAAGGAACACTGAGAAATGG

>PGSC0003DMG400017278G-LecRK\_1302

GCATAAAGCTCGGGAAAGGAGGATTTGGCTCTGTATATGAAGGAACACTGAGAAATGGCACCAAATA  
GCTGTGAAGCATCTGGATGGAGTAGGTCAAGTAAAGGAATCATTCTTAACAG

>PGSC0003DMG400017278G-LecRK\_1364

AAAATAGCTGTGAAGCATCTGGATGGAGTAGGTCAAGTAAAGGAATCATTCTTAACAGAAGTAAAGAC  
AGTCGGTGGCATTACCATATCAATCTGGTAAAACTCCTTGGATATTGTGCC

>PGSC0003DMG400017278G-LecRK\_1488

AAAGCCACAGGCTTCTAATCTATGAGTACATGGTGAATGGATCGTTGGATAGGTGGATCACGCAAGAAA  
ATGGGCTTACATGGAACACAAGGCAGAGGATAATATCAGATATTGCGAAAG

>PGSC0003DMG400017278G-LecRK\_1612

AGCTTATCTACATGAGGATTGCAGCCATAAGATAATTCATTTGGACATTAACCACAAAACATCCTTATA  
GATCAAATTTCAATGCTAAGATATCTGATTTTGGTCTGTCTGAAGCTAAT

>PGSC0003DMG400017278G-LecRK\_1674

TCCTTATAGATCAAATTTCAATGCTAAGATATCTGATTTTGGTCTGTCTGAAGCTAATTGAGAAAGACAA  
AAGCAAAGTTGTGACTAGAAATGAGAGGAACGCCGGGTATATAGCCCCTG

>PGSC0003DMG400017278G-LecRK\_1736

AAAGACAAAAGCAAAGTTGTGACTAGAAATGAGAGGAACGCCGGGTATATAGCCCCTGAATGGTTGAG  
CTCAATAATCACTGAAAAAGTTGATGTGTATGCTTTTGAATTGTGCTCTTG

>PGSC0003DMG400017278G-LecRK\_1798

GTTGAGCTCAATAATCACTGAAAAAGTTGATGTGTATGCTTTTGAATTGTGCTCTTGAAACTCTCTGT  
GGACGAAAGAATTTGGACTGGTCCCAAATGATGAAGAAGATGTCCATTT

>PGSC0003DMG400017278G-LecRK\_1860

CTCTCTGTGGACGAAAGAATTTGGACTGGTCCCAAATGATGAAGAAGATGTCCATTTGCTAACTGTTTT  
TACGAGAAAAGCAGAACAAGAGCAGCTCACAGATATGGTTGACAGAAACG

>PGSC0003DMG400017278G-LecRK\_1922

ACTGTTTTTACGAGAAAAGCAGAACAAGAGCAGCTCACAGATATGGTTGACAGAAACGAGGATATGCA  
GCTCCACAGAGAAGCAGTGACAGAAATGATGAGCCTTGCTGCGTGGTGTCTA

>PGSC0003DMG400017278G-LecRK\_2046

GCGATTTCTCCAAGAGGCCTTCCATGTCATTGGTGGTTAAGGCACTCGAAGGTTTGGTGACTGTTGAAAC  
CAACTTAGATTATAATTTTCAGAAATGTACCTAAGGTTGGGGCAGGCAACC

>PGSC0003DMG400017278G-LecRK\_2108

GTTGAAACCAACTTAGATTATAATTTTCAGAAATGTACCTAAGGTTGGGGCAGGCAACCAACCGAGGGAA  
GCCGCTATCAGCTCAAATTGCCATCAGTTTTATCGGGACCGAGGTAAACA

>PGSC0003DMG400017278G-LecRK\_2170

GAGGGAAGCCGCTATCAGCTCAAATTGCCATCAGTTTTATCGGGACCGAGGTAAACAGTATGTCTAAT  
TCTAGCACAAATTCTTACGGTGTATTAGATTACAATTCATGAATGTAATAT

>PGSC0003DMG400017278G-LecRK\_2232

GTCTAATTCTAGCACAAATTCTTACGGTGTATTAGATTACAATTCATGAATGTAATATTCAGTAACTTTGC  
ATTAGATTTTTTGAGTTTCATGTAATTATCATGTAGAAGCTCCTCAATT

>PGSC0003DMG400017278G-LecRK\_2294

TAACTTTGCATTAGATTTTTTGAGTTTCATGTAATTATCATGTAGAAGCTCCTCAATTCATATGTGACAGG  
AGATATAATATTGCATTAGCTTTTCCTCATTTTTTGTAAGGGAAGTATC

>PGSC0003DMG400017278G-LecRK\_2343

TCCTCAATTCATATGTGACAGGAGATATAATATTGCATTAGCTTTTCCTCATTTTTTGTAAGGGAAGTATC  
AAGACTCGAGAACAGCATGAATCGGATATCGAGGGCCAGATGCTCTGCC

>PGSC0003DMG400017278G-LecRK\_248

ATAGCTCAATACATACAGCTTGGGCATGATGGACATTTACGCGTATACCAATTGGACAACCTTGAACAG  
AATTTGGTTTCTGGTCAGAAGCTGACAGCAAGCGTTTCAGCAGACAATTCG

>PGSC0003DMG400017278G-LecRK\_310

TGAACAGAATTTGGTTTCTGGTCAGAAGCTGACAGCAAGCGTTTCAGCAGACAATTCGAGTCAAGGTTT  
ATTTTCTTACTGTTCTCAATGGAAGCTGGGCCACATACATAGATTCTGA

>PGSC0003DMG400017278G-LecRK\_372

AAGGTTTATTTTCTTACTGTTCTCAATGGAAGCTGGGCCACATACATAGATTCTGATCCACCTCAGTAT  
TACTACACTTCAGAAAATCCAATAGTCCTTATTGGAGTTTTGATGGTC

>PGSC0003DMG400017278G-LecRK\_434

CCTCAGTATTACTACTTCAGAAAATCCAATAGTCCTTATTGGAGTTTTGATGGTCATACCCTTACTGC

TTTACAATATCCTCCTACATCGATAGCTCAATACATACAGCTTGGGCAT

>PGSC0003DMG400017278G-LecRK\_558

GACATTTACGCGTATACCAATTGGACAACCTTGAAAAAATATGCTCGGCCTTAATTGGAAAGAGGTAG

GTGACATTTTGACACTCTCTGACTGTAGGTACCCAATGGTGTGTGGGAGAT

>PGSC0003DMG400017278G-LecRK\_62

CAACAAAGCATTTCAGCAGACAATTCGAGTCAAGGTTTATTTTCTTACTGTTCTCAATGGAAGCTGGG

CCACATACATAGATTCTGATCCACCTCAGTATTACTACACTTCAGAAAAT

>PGSC0003DMG400017278G-LecRK\_620

GAGGTAGGTGACATTTTGACACTCTCTGACTGTAGGTACCCAATGGTGTGTGGGAGATACAGCATTGT

GTAGATGGAGGACAATGTACTTGTCCAGTTGAAGTTAACTTCTTCAAGCCA

>PGSC0003DMG400017278G-LecRK\_682

CATTTGTGTAGATGGAGGACAATGTACTTGTCCAGTTGAAGTTAACTTCTTCAAGCCATTTTCTGAGAGG

ATGCCTAATCTCGGATGCACTGAGCTGACGCCCATTTCTTGTGACTCTTT

>PGSC0003DMG400017278G-LecRK\_744

CTGAGAGGATGCCTAATCTCGGATGCACTGAGCTGACGCCCATTTCTTGTGACTCTTTGCAGTATCATAG

TCTTGTAGAGCTAAAGAATACTGACTATTTTTCATTTTCGGTTCAATGATG

>PGSC0003DMG400017278G-LecRK\_806

TATCATAGTCTTGTAGAGCTAAAGAATACTGACTATTTTTCATTTTCGGTTCAATGATGAACTAAACTCGAG

CGTATTTTGGCTTAAAGGGAAAAAGATTGAAGATTGCCAAAGGGGCATGT

>PGSC0003DMG400017278G-LecRK\_868

AAACTCGAGCGTATTTTGGCTTAAAGGGAAAAAGATTGAAGATTGCCAAAGGGGCATGTCTGAGTAACTG

TTCTTGCAAAGCTGCTGTTTATGATCCGTATCTGAATGTGAGTCTACTACG

>PGSC0003DMG400017278G-LecRK\_930

GTAAGTGTCTTGCAAAGCTGCTGTTTATGATCCGTATCTGAATGTGAGTCTACTACGAGGGAACTGTTT

GTTACTGAATGAAGTCTTCTCTCTCATAGACAGTGCAGTAGGAAGCGGCA

>PGSC0003DMG400017278G-LecRK\_992

AACTGTTTGTACTGAATGAAGTCTTCTCTCTCATAGACAGTGCAGTAGGAAGCGGCACGACAGTTTTTC

TTAAGGTGCAGAATTCCTCAAATGCACCAGTCATTTCCCCTAGACAGAAA

>PGSC0003DMG400017282G-LecRK\_0

GAAAAAACTACTTGAATAAAAGGATGAATTTTAAGATTGATACTGATCAATCAAACAGAGCCTTCTTTCT  
GAAAAAATAGTACAATGGTGCTTAATTATAGTGCCATTCTTTTCATGGC

>PGSC0003DMG400017282G-LecRK\_1054

GCGGTTGATCAGACTAACTTTCTCCAGCAAATAAATTACAGGCAGCCAAACCAGGGGTGTGTCCTTATA  
ACACCTATCTCTTGTGAACATTCCCAATATCATATTTTGATGGAGCTTAAG

>PGSC0003DMG400017282G-LecRK\_1116

CCTTATAACACCTATCTCTTGTGAACATTCCCAATATCATATTTTGATGGAGCTTAAGTACATAGCTTATAT  
TCCCCTCTATTTGCAATATGGTACCAACAAAACAGATTTGGAGAATTG

>PGSC0003DMG400017282G-LecRK\_1364

CCAATAAGACCACTCTTTTCATCAAGGTGCAGAGCTCTTTAACTTACAAGCCTCTCCATCACTTGTCTCT  
CAGAGAAGAAATCAAAGCGTGTCTCAGCAATTGTAGGATCCACCATCG

>PGSC0003DMG400017282G-LecRK\_186

TTCCTCCATTTCTGGATCAATAGCCGCGCCCGCTCCTATGTAGTGAATTCCACAGATGGAGCCCACTG  
ACACCCATCCTATCGAGAGAAAGGAACGAGACTCTGTTTGTCTGTGGTTT

>PGSC0003DMG400017282G-LecRK\_2170

GAGAAAGTGGATGTTTATAGCTTTGGGGTTGTGATTTTGGAAATCATCTGCGGCCGGAAGAATTTGGAT  
CGTCATCAAGATGAGGATGATATGCATTTGCTTAGTTTGTTCATGAGAAAA

>PGSC0003DMG400017282G-LecRK\_2232

TTTGGATCGTCATCAAGATGAGGATGATATGCATTTGCTTAGTTTGTTCATGAGAAAAGCAGAGGAGAG  
ACAACCTTTGGAAATGGTGGACAAGAACAGTGAAGACATGCAGCTACATAG

>PGSC0003DMG400017282G-LecRK\_2542

GTGGTTGGTATCAGTTTGCCACTTCCATCACAGTTGTCAGGACCTAGGTAAATTCTTAGTAGTATTTATCA  
TCAAGACTGAATAGCTAATACGAAAAGCCATTTTGTGTTTTTCATAATT

>PGSC0003DMG400017282G-LecRK\_2604

TATTTATCATCAAGACTGAATAGCTAATACGAAAAGCCATTTTGTGTTTTTCATAATTCCTTATTATATCAA  
TACTATTTAGAAAACATAATTTAGAAAAGTAGAACACACTGTCTACTA

>PGSC0003DMG400017282G-LecRK\_2666

ATTATATCAATACTATTTAGAAAACATAATTTAGAAAAGTAGAACACACTGTCTACTAGAAAAATGTTAG  
TTTTCGTGCAGTCGAATTAACCTTATTGAGTATTGATAAATGGATTGCCTC

>PGSC0003DMG400017282G-LecRK\_2697

TAGAAAAGTAGAACACACTGTCTACTAGAAAAATGTTAGTTTTCTGTCAGTCGAATTAACCTATTGAGTA  
TTGATAAATGGATTGCCTCCTCCGTATTGATGAATTAATTTGATTGCGC

>PGSC0003DMG400017282G-LecRK\_682

TCAGCAACAAATTGGAGTGAAGGTTTGTTCACATTTGAAGTTCAACTATTTGGCTTTTTAGCATAACATTA  
GTCAAATCCACGTCAACTCTATGTCTCAAGACTTGGTGGGGATAATGGT

>PGSC0003DMG400017282G-LecRK\_744

ATACATTAAGTCAAATCCACGTCAACTCTATGTCTCAAGACTTGGTGGGGATAATGGTTCCCGTTTCCT  
GGACTAATCTTTGATTTCGAAAATAATTATTTTCAACGGGACATTAATCTT

>PGSC0003DMG400017282G-LecRK\_806

CGTTTCCTGGACTAATCTTTGATTTCGAAAATAATTATTTTCAACGGGACATTAATCTTAAATTTTGCATTT  
CAAATACTAGATTCATGAGGTTTGGGAATGATGGGCATTTAAGGGTGT

>PGSC0003DMG400017282G-LecRK\_992

ATCCAACCGTGTGTGGGAATTACTCTGTTTGTGCAAATGGGCAGTGCACCTGTCCTCAAACCGCGGTTGA  
TCAGACTAACTTTCTCCAGCAAATAAATTACAGGCAGCCAAACCAGGGGT

>PGSC0003DMG400017283LRR-RLPs\_0

ATGCAGATGACCAGTATGAGGTTTCTCAAATCCGGAATGCATATGTTTGCCAGGGACCTGAATTTCTTC  
CTGATGAGTTGAGGTGGCTTGATTGGCATGGATATCCTTCCAAAAGTCTG

>PGSC0003DMG400017283LRR-RLPs\_1008

CCGGCTGCAAGCATAAGTTGTCTCACTCGACTTAAAGCCCTTGCATTGGCTGGTTGTAGGAGGCTTGAG  
AGTTTACCGAACTTCCTCCAGGTATAGAAAAGATATATGCTGATGAATGC

>PGSC0003DMG400017283LRR-RLPs\_1197

CATGAACTTGTAATAAATAAATGGCATGCCTCTGTGGTTGATTCATTGTTGAAGCAGATGCTCAAGGTAA  
GTATGCTTCCAAGCCACAACCTACTATACCCACATGAAAATATAAATGA

>PGSC0003DMG400017283LRR-RLPs\_1386

AGGTAAATAACATTCTTTTACGGTGCATGCAGAGACTATACATGAATGGCACATCTAGTATGTATTTTC  
CTGGTGTGGAGATTCTGAGTGGTTTACATGCAAGAACTGGGGGACTAAA

>PGSC0003DMG400017283LRR-RLPs\_1575

TTTGACATGATGACTCCTTTCATTTTAGGGAAATTAATGTCTGAATGATCCCTTCAGTTTTCTGACTGCCAA

ATGGCTAAAAAATTTCCAAGGACTTGTGATATGGTTAAGGTTACAAGC

>PGSC0003DMG400017283LRR-RLPs\_1638

ACTGCCAAATGGCTAAAAAATTTCCAAGGACTTGTGATATGGTTAAGGTTACAAGCCATGATGGTTTGC

AGCACAAATTTCCGACATGCATCGGCTTAATAGGAAGTGAAAAACCTGTT

>PGSC0003DMG400017283LRR-RLPs\_1701

GGTTTGCAGCACAAATTTCCGACATGCATCGGCTTAATAGGAAGTGAAAAACCTGTTGGTTTAGGTAAT

ACTTTCCTAGCCCATGTACCACTTCCAAGTTCTTGCCGTTCAAGGATGTT

>PGSC0003DMG400017283LRR-RLPs\_1764

GGTAATACTTTCCTAGCCCATGTACCACTTCCAAGTTCTTGCCGTTCAAGGATGTTCTCGATAACAATCT

TAATAACCTCATTGAGCTTGAGGTTGGTGTCTGTGATGATTTGCATAAG

>PGSC0003DMG400017283LRR-RLPs\_1812

AAGGATGTTCTCGATAACAATCTTAATAACCTCATTGAGCTTGAGGTTGGTGTCTGTGATGATTTGCATA

AGGATTTGGTGGTCAAAGGTTTGGGAGTGCCTTGTGTATGAGAATTGA

>PGSC0003DMG400017283LRR-RLPs\_252

AGGATGCCAGATTTTTTCAGTTATGCCTAATCTTGAGAGACTGGTTCTTGAAGAATGCACAAGTTTGGTAG

AAATCAATTTTTCTATTGGAGATCTTGAAAGCTAATCTTGCTGAATCTG

>PGSC0003DMG400017283LRR-RLPs\_378

TGCAGAAATTTGAAGACCCTACCAAAGAGAATTCGATTGGAAAAGCTTGAAATTCTCGTTCTTTCAGGCT

GCTCAAAGTTGAGAACATTCCCAGAAATAGAAGAGAAAATGAATCGTTTA

>PGSC0003DMG400017283LRR-RLPs\_441

TCAGGCTGCTCAAAGTTGAGAACATTCCCAGAAATAGAAGAGAAAATGAATCGTTTAGCAGAACTGTAT

TTGGGCGCGACTGCTTTGAGTGAACCTGCATCAGTTGAGAACCTTTCA

>PGSC0003DMG400017283LRR-RLPs\_63

TTTCTTCTGATGAGTTGAGGTGGCTTGATTGGCATGGATATCCTTCCAAAAGTCTGCCTATTAGCTTTAA

GGGAGACCAACTTGTTAGTTGAAATTGAAAAAAGGCGCATCATACAA

>PGSC0003DMG400017283LRR-RLPs\_945

AATCTTGGGTTCTTACCATCTTTGGAGGGATTGATTCTCGATGGTAACAATTTTTCCAATAATCCGGCTGC

AAGCATAAGTTGTCTCACTCGACTTAAAGCCCTTGCAATTGGCTGGTTGT

>PGSC0003DMG400017284G-LecRK\_0



AAAAAAGGCACAACAGAAAGAACTCATATATTTTAGAAAAATATGTTTGTAGAAAAGAGACTGTATTTT  
CCTATCCTTCTCTTCATTACCTTCTCTTTTGTTTCGTCTCGATTTACTATA

>PGSC0003DMG400017284G-LecRK\_1098

ACAGGAAAACCTTCTTCAGACCATTTTCTGAGAGGAAACCAGATCTTGGATGTTACAGCTGACTTCCATT  
TACTGCAACTCTTTGCAGTATCATAGTTTCATAGAGCTCAAGAATACTAC

>PGSC0003DMG400017284G-LecRK\_1220

ATTTTTCATTTAACATTGATCAGGAACTAAATTCGAGCAAATTGTGGCTTGGGCAGAAAAAGTTGGAAG  
ATTGCAAAGGGCCTGTCTGAGTAACTGTTCTTGCAAAGCTGCTGTTTTTG

>PGSC0003DMG400017284G-LecRK\_1342

TATAATTGGAATGGGGCTCGAAGAGGGAACTGTTTGTACTGAATGAAGTTTTCTCTCTCACAGACAGC  
GAAGAAGGAAGAGGCAAGACAGTATTTATTAAGGTGCAAATACCTCAGAG

>PGSC0003DMG400017284G-LecRK\_1586

TCAGAAAGAGGGGCACATGAGTCCAGAAAGGCTGCGGATATTTTGGATTTAGCACCAATCTTACCGGGAA  
TTCTAACTCGATTCTTACAATGAACTGAAAATAACTACAGATGATTTCA

>PGSC0003DMG400017284G-LecRK\_2257

ATTGTCCTCTTGAAATTCTCTGTGGCGAAAAATTTGGATTGGTCCCAAGCTGATGAAGAAGATGTA  
CATTTGCTAAGTGTCTTTAGGCGAAAAGCGGAACAAGAGAAGCTCATCGAT

>PGSC0003DMG400017284G-LecRK\_2318

AAGATGTACATTTGCTAAGTGTCTTTAGGCGAAAAGCGGAACAAGAGAAGCTCATCGATATGGTTGACA  
AAAATGAGGATATGCAGCTCCACAGGGAAGCAGTGACAGAAATGATGAGCC

>PGSC0003DMG400017284G-LecRK\_244

AATTCTACTGCAGGGCTTGCCGGGCTTTCCTCTTTCTGGATCAACAGGCCCTCTTCTTGTAAATCCAC  
CGAGGACTTCTTTGTTTTCTGTGACACCCATACTTCAGCGAAAAAATGCT

>PGSC0003DMG400017284G-LecRK\_2745

TATAATTCATGAAATGTAATGTTTCAGTAACTTCTATATTAATTTTTGAGCTTCATGTTACTATCATGTAGA  
GGCTTCTCAATCCATGTGCGAAAATAAGTATAATATTGTACGTGGTGG

>PGSC0003DMG400017284G-LecRK\_2790

TTGAGCTTCATGTTACTATCATGTAGAGGCTTCTCAATCCATGTGCGAAAATAAGTATAATATTGTACGT  
GGTGGTGCAGCTACTGAATTCAAACCAGATGAACTGTTCTTGGATCTTAA

>PGSC0003DMG400017284G-LecRK\_305

TTAATTCCACCGAGGACTTCTTTGGTTTTCGTGACACCCATACTTCAGCGAAAAAATGCTGGCTCACGATTC  
CTCTGTGGCTTCTACTGCAATTACAATGCCACAGAATGCCTTCTTGGTA

>PGSC0003DMG400017284G-LecRK\_366

CTCAGATTCTCTGTGGCTTCTACTGCAATTACAATGCCACAGAATGCCTTCTTGGTATCCTTTTGTACCA  
CAACGAGAACAATATGATAGATAAACCCAGTTAGTTTGGTCTGCTAA

>PGSC0003DMG400017284G-LecRK\_61

TGTATTTTCTATCCTTCTCTTCATTTACCTTCTTTTTGTTTCGTCTCGATTTACTATATCACAATCTTTACAG  
GACAACAAGATCAGTCTTTCAAATTCTACAGCAGGGCTTGCCGGGC

>PGSC0003DMG400017284G-LecRK\_610

TTAAACTTGACAGAAATGGGAAATCTTGTTCTTTGATAAGAGAAAGCGCACAATTTGGCAGTCTTTTG  
ATCATCCTACAGACTCTTTGCTTCCAGGGCAGAATTTGGTTTCCGGGCAG

>PGSC0003DMG400017284G-LecRK\_671

AGTCTTTTGATCATCCTACAGACTCTTTGCTTCCAGGGCAGAATTTGGTTTCCGGGCAGAAGCTCATAGC  
AAGCGTTTCAGCAACCAATCGGAGTCAAGGTTTGTCTTCTTACTGTTC

>PGSC0003DMG400017284G-LecRK\_793

AATGGAAGCTGGGCTGCTTACACAGATACTGTTCCGCCTCAATACTACTACATTTATCCTATGCTGATA  
GTTCTTATTACAGTTTTGATGGTCAAACCTTTACTGCTTCACACAATCCT

>PGSC0003DMG400017284G-LecRK\_854

ATGCTGATAGTTCTTATTACAGTTTTGATGGTCAAACCTTTACTGCTTCACACAATCCTACTAACTCGACA  
GCTCAATTCATGAAGATTGGGCCTGATGGACATTTAAAGGTATACCAAT

>PGSC0003DMG400017284G-LecRK\_915

TAACTCGACAGCTCAATTCATGAAGATTGGGCCTGATGGACATTTAAAGGTATACCAATGGTCTGTAGTT  
GATTGGAAAGAAGTATCTGACATTTTGTGCCAAATGTAGAAAACCTGTGG

>PGSC0003DMG400017284G-LecRK\_976

TCTGTAGTTGATTGGAAAGAAGTATCTGACATTTTGTGCCAAATGTAGAAAACCTGTGGGTACCCAATG  
GTATGTGGAAGTTATAGCATTTGTACAAATAACGGGCAATGTACTTGTCCG

>PGSC0003DMG400017286G-LecRK\_0

AATCAGGCAGATGTTATCTTCCATTGGTTAGTTGAGAAATGTGATTTGGAAAACATTTCTTCTGACTTG

ACGCGTAAATGATTCGCAAAATTGGGTATCACTGAACTCCACACATCTC

>PGSC0003DMG400017286G-LecRK\_1054

GTCGGACCTTTAATGCTTTACAATCTCTTGATAAATCAGCAGCTCAATTCATGAAGATAGGGCCTGATGG

ACATTTAAAGGTATACCGATGGTTTATAGCTGATTGGAACGAAGTATCTG

>PGSC0003DMG400017286G-LecRK\_1116

CCTGATGGACATTTAAAGGTATACCGATGGTTTATAGCTGATTGGAACGAAGTATCTGACATTTTCTCGC

AATATGTAGAAAAGTGTGGGTACCCAATGGTATGTGGAAGTTACAGCATT

>PGSC0003DMG400017286G-LecRK\_1178

TTTCTCGCAATATGTAGAAAAGTGTGGGTACCCAATGGTATGTGGAAGTTACAGCATTGTACAAATAAC

GGGCAATGTACTTGTCCGCTACAGGAGAACTTCTTCAGGTCATTTTCTGA

>PGSC0003DMG400017286G-LecRK\_124

GTATTCTTAGCCACAACATTATGAACTACTGGAAGATGCTAACCTACATGTAAAATACAGTTTGGATATT

CTGTATGCTCATTCTTTCTTCAACTATACACCACAAGATTCCATCTATT

>PGSC0003DMG400017286G-LecRK\_1364

TTTCGTAGAGCTCAAGAATACTACATATTTTTTCAATTAACATTGATCAGGAACTAAATTCGAGCAGATTAT

GGCTTGGGCAGGCAAAGTTGGAAGATTGCAAAGGGCCTGCCTGAGTAA

>PGSC0003DMG400017286G-LecRK\_1426

GCAGATTATGGCTTGGGCAGGCAAAGTTGGAAGATTGCAAAGGGCCTGCCTGAGTAACTGTTCTTGCA

AAGCTGCTGTTTTGAATATGGTTGGAATGGGACTCACAGAGGGAACTGTT

>PGSC0003DMG400017286G-LecRK\_1488

TCTTGCAAAGCTGCTGTTTTGAATATGGTTGGAATGGGACTCACAGAGGGAACTGTTTGTACTGAATG

AAGTTTTCTCTCTCAAAGACAGCGAAGAAGGAAGAGGCAATACAGTATTT

>PGSC0003DMG400017286G-LecRK\_1550

ACTGAATGAAGTTTTCTCTCTCAAAGACAGCGAAGAAGGAAGAGGCAATACAGTATTTCTTAAGGTGCA

GAATTCCTCAAAGCCGCAGACTCAGTCTCTAATCATTCTGGAGGAAAGAA

>PGSC0003DMG400017286G-LecRK\_1612

AGGTGCAGAATTCCTCAAAGCCGCAGACTCAGTCTCTAATCATTCTGGAGGAAAGAAATCAAGACCTT

CCAAAGTGATAATAGGATCTACTCTTGCAGCTTTCTTTGGGATAATTTTAA

>PGSC0003DMG400017286G-LecRK\_1736

AGCTACTTGCTTTGTTATTTTCAGAAACAGGACCCGTGAGTCCAGAAAGGCTGCGGATATTTTGATCTA  
GCACCAATCTTACCGGGAATCCTAACTCGATTCTCTTACAATGAGCTGAA

>PGSC0003DMG400017286G-LecRK\_1798

TGGATCTAGCACCAATCTTACCGGGAATCCTAACTCGATTCTCTTACAATGAGCTGAAAATAATTACAGA  
TGATTTCAGTATAAAGCTCGGGGAAGGAGGATTTGGCTGTGTTTATGAAG

>PGSC0003DMG400017286G-LecRK\_186

TGGATATTCTGTATGCTCATTCTTTCTTCAACTATACACCACAAGATTCCATCTATTTTATTGGTTTTGATT  
AGGAAACAATGTTTGCAGAACAGAGACTGTGTTTTCTATCCTTCTC

>PGSC0003DMG400017286G-LecRK\_1860

ATTACAGATGATTTCAGTATAAAGCTCGGGGAAGGAGGATTTGGCTGTGTTTATGAAGGAACACTGAGA  
AATGGCACCAAATAGCTGTGAAGAATCTGGATGGTGTAGGTCAAGTACAG

>PGSC0003DMG400017286G-LecRK\_1922

ACTGAGAAATGGCACCAAATAGCTGTGAAGAATCTGGATGGTGTAGGTCAAGTACAGGAATCATTCTT  
AACAGAAGTAAAGGCAGTCGGTGGCATTACCATATCAATCTGGTAAAAC

>PGSC0003DMG400017286G-LecRK\_2108

GGATAGGTGGATTACGCATGAAAATCAAGAAAATGGGCTTACATGGAACACAAGGCAGAGGATAATAT  
CAGATATCGCCAAAGCGTTAGCATATCTACATGAGGATTGTAGCCATAAGAT

>PGSC0003DMG400017286G-LecRK\_248

TGGTTTTGATTAGGAAACAATGTTTGCAGAACAGAGACTGTGTTTTCTATCCTTCTCTTCATTTATCTCCT  
CTTATGTTTCTCAATTTGTTATATCACAATCTTCTCGGGAATTCAG

>PGSC0003DMG400017286G-LecRK\_310

TTTATCTCCTTATGTTTCTCAATTTGTTATATCACAATCTTCTCGGGAATTCAGCATCAGTCCTTCGA  
ATTCTACTGCAGGGCTTGCCGGGCTTGCCGGGCTTGCCGGGCTTTCTC

>PGSC0003DMG400017286G-LecRK\_372

AGTCCTTCGAATTCTACTGCAGGGCTTGCCGGGCTTGCCGGGCTTGCCGGGCTTTCTCTTTATGGATCA  
ACAGGCCGTCTCTTAGGGTTAATTCCACGGCTGACGGCTTCTTTACTTTG

>PGSC0003DMG400017286G-LecRK\_434

ATGGATCAACAGGCCGTCTTAGGGTTAATTCCACGGCTGACGGCTTCTTTACTTTGACAACACCCATA  
CTTCAGCGGGGAAATGCTGGCCACGATTCTCTGTGGCTTCTACTGCAT

>PGSC0003DMG400017286G-LecRK\_496

CACCCATACTTCAGCGGGGAAATGCTGGCCACGATTCCCTCTGTGGCTTCTACTGCATTTACAATGCTAC  
AGAATGCCTTCTTGGTATCCTTTTGTACCACAACAAATATGACGAGCCGA

>PGSC0003DMG400017286G-LecRK\_558

AATGCTACAGAATGCCTTCTTGGTATCCTTTTGTACCACAACAAATATGACGAGCCGAATGGTGTGATAG  
ATAAACCCCAGTTAATTTGGTCTGCTAACAGGAACCATCCAGTGAAAGTC

>PGSC0003DMG400017286G-LecRK\_62

TCTGACTTGACGCGTAAATGATTTCGAAAATTGGGTATCACTGAACTCCACACATCTCAAAAGTATTCTT  
AGCCACAACATTATGAACTACTGGAAGATGCTAACCTACATGTAAAATAC

>PGSC0003DMG400017286G-LecRK\_682

CAACCTTGGAAGTAGGACAAGATGGCAACTTGGTCTTGACAGACTCTGATGGCACTCTTGTTTGGTCCAC  
TCATACAAGTGGCAAATTTGTTTCAGGCGTAACTTAACAGATATGGGAA

>PGSC0003DMG400017286G-LecRK\_744

TGGTCCACTCATACAAGTGGCAAATTTGTTTCAGGCGTAACTTAACAGATATGGGAAATCTTGTGCTCT  
TTGATAAGAGAAAGCGCGCAATTTGGCAGTCTTTTGATCATCCTACAGAC

>PGSC0003DMG400017286G-LecRK\_930

CGGAGTCAAGGTTTGCTTGTCTTACTGTTCTCAATGGAAGCTGGGCCGCTTACACGGATACTGATCCGC  
CTCAATATTACTACATCTTACTATCTTGAGAGCCCTTATTACAGTTTT

>PGSC0003DMG400017286G-LecRK\_992

TGATCCGCCTCAATATTACTACATCTTACTATCTTGAGAGCCCTTATTACAGTTTTGATGGTTCGGACCTT  
TAATGCTTTACAATCTCTTGATAAATCAGCAGCTCAATTCATGAAGAT

>PGSC0003DMG400017291LRR-RLKs\_0

TTTCTCTTCTCTATTATTACTATACTATAACAAAATGCCAATAAGGAAGTGAAGAGCTGAAACT  
CTTTGGATTTTTGTAAGTGTGTTTGTACAATCTAATAGTAGCTGGAAAT

>PGSC0003DMG400017291LRR-RLKs\_1037

TATGTTTTAGTCTGTTCCCTATTAAATTGAAATTATGTTGTTTCGGACTCTCCGAAAATGTAGCAGCACCTG  
TTCAACTCCTCCAAAATACTTCTTTTGGAGGATCTGTCACATACTT

>PGSC0003DMG400017291LRR-RLKs\_1098

GCAGCACCTGTTCAACTCCTCCAAAATACTTCTTTTGGAGGATCTGTCACATACTTGAATATTTTT

GAAGAGTCCGAGTAGCATAGAGGTGAAGATTTGATTTTTTTTAAAGCAG

>PGSC0003DMG400017291LRR-RLKs\_1159

CTATATTTTTGAAGAGTCCGAGTAGCATAGAGGTGAAGATTTGATTTTTTTTAAAGCAGCAACAATTA

TCTGCAGTTTTAAGTAGCTTCTTTGCAAGAGAAAAGATTAAACTTTTCT

>PGSC0003DMG400017291LRR-RLKs\_122

GCATAATGAAGATTTTGTCTTCAATCTCTGTTATTTTCTTTTTCTGTTTTCTCACAGTTTTAGCAGC

AACTTCAAATCTAAGCTCCACAAGAAGAAGGTAACCCCATAGTAA

>PGSC0003DMG400017291LRR-RLKs\_1220

ACAATTAATCTGCAGTTTTAAGTAGCTTCTTTGCAAGAGAAAAGATTAAACTTTTCTTTTACAAGTTT

GAAAGGTTGAGACTTTTTACAAGTTGAACTGATTAGTGTGTGAATAGG

>PGSC0003DMG400017291LRR-RLKs\_1281

TTACAAGTTTGAAAGGTTGAGACTTTTTACAAGTTTGAAGTATTAGTGTGTGAATAGGAAATGAAATGT

GTGGACTTTAAGTACCACTTTTCTATGAGTTGACTGAAAATTGAGTCAAC

>PGSC0003DMG400017291LRR-RLKs\_1342

ATGAAATGTGTGGACTTTAAGTACCACTTTTCTATGAGTTGACTGAAAATTGAGTCAACTTCTTATATGGC

AGCCAGCTGTAATGAGGTGTCTGGAGTGTGGACATTATTTTTGTAAAG

>PGSC0003DMG400017291LRR-RLKs\_1403

CTTATATGGCAGCCAGCTGTAATGAGGTGTCTGGAGTGTGGACATTATTTTTGTAAAGTATTTCAAAAC

TCAAAGACATTTCACTTTCAAAAAAATTCTACAAGATAATTTTTAAAAA

>PGSC0003DMG400017291LRR-RLKs\_1464

TTCAAACACTCAAAGACATTTCACTTTCAAAAAAATTCTACAAGATAATTTTTAAAAAATACTTGTTGTA

ACAAATTACATGTCTTATAATTCAGGTTACTAATTGAATTTTGTATGT

>PGSC0003DMG400017291LRR-RLKs\_1525

ACTTGTTGTAACAAATTACATGTCTTATAATTCAGGTTACTAATTGAATTTTGTATGTATAATTAATTACC

TGTAATTAGTTTCTAGTTATCTTGAAAAGTACTAATTATCTTTTGAAA

>PGSC0003DMG400017291LRR-RLKs\_1586

AATTAATTACCTGTAATTAGTTTCTAGTTATCTTGAAAAGTACTAATTATCTTTGAAACAGTTAGTGTAAT

GAAGTTAAAGCTTTTCTCAAATTACCAAACAAATCAACATTGTATA

>PGSC0003DMG400017291LRR-RLKs\_1647

GTTAGTGTAATGAAGTTAAAGCTCTTTCTTCAAATTACCAAACAAATCAACATTGTATACTTCCTGTTTAT  
GTTAAACTTGCATGTAATGCAATGAAGTAGTCAAAAACAACTAACTAAAT

>PGSC0003DMG400017291LRR-RLKs\_1708

TCCTGTTTATGTTAAACTTGCATGTAATGCAATGAAGTAGTCAAAAACAACTAACTAAATATGCCACAGAG  
CTTTGAAAGCACAGAATATTTTCAGCAAATATTCCACCAGAATTCGCGCAA

>PGSC0003DMG400017291LRR-RLKs\_1769

GCCACAGAGCTTTGAAAGCACAGAATATTTTCAGCAAATATTCCACCAGAATTCGCGCAACTTCGCCATCT  
TAAGCACTTGTAAGTCCTTGTTACAGAATTATCACTCAATAGACTGAAGC

>PGSC0003DMG400017291LRR-RLKs\_183

AGTTTTAGCAGCAACTTCAAATCTAAGCTCCCACAAGAAGAAGGTAACCCCATAGTAATCTTTTTTCAGT  
TTCTACATGTTCCCATTTTTGTTTTCTTGAAAATGTCAGAAAAAGTTTCA

>PGSC0003DMG400017291LRR-RLKs\_1830

TCGCCATCTTAAGCACTTGTAAGTCCTTGTTACAGAATTATCACTCAATAGACTGAAGCACCTGATATTAC  
TATGTTGAAAACCTTAGGAGCTGCACTAATCCAACCTACTAAATGATGATT

>PGSC0003DMG400017291LRR-RLKs\_1891

CTGATATTACTATGTTGAAAACCTTAGGAGCTGCACTAATCCAACCTACTAAATGATGATTATGCAGGGACC  
TCAGTCGCAATTATCTCAATGGTTCAATCCCATTTCATGGGCGTCACTG

>PGSC0003DMG400017291LRR-RLKs\_1952

GCAGGGACCTCAGTCGCAATTATCTCAATGGTTCAATCCCATTTCATGGGCGTCACTGCGCTTGCTTGA  
CCTGTACATACTATTTCTCACCTAACTATTCTTCATTAGTGCTTAAATT

>PGSC0003DMG400017291LRR-RLKs\_2013

CTTGCTTGACCTGTACATACTATTTCTCACCTAACTATTCTTCATTAGTGCTTAAATTTTTCTTCTGTT  
TAGAATAAGCTATTTGACATGAAAATAATTGTTATTTGAATGTGCAG

>PGSC0003DMG400017291LRR-RLKs\_2074

TCTCTTCTGGTTTGAATAAGCTATTTGACATGAAAATAATTGTTATTTGAATGTGCAGTTCTTTCATGGG  
AAACCACTTGTCTGGTCCATTTCCAAAAGTTCTCACCAGAATTACGACG

>PGSC0003DMG400017291LRR-RLKs\_2135

CTTTCATGGGAAACCACTTGTCTGGTCCATTTCCAAAAGTTCTCACCAGAATTACGACGCTTAGGAACCT  
GTAAGATCAAATTTCTTCTGATGCCTACTTGTCATTTTCAGTGTTGTA

>PGSC0003DMG400017291LRR-RLKs\_2196

TAGGAACCTGTAAGATCAAATTTCTTCTGATGCCTACTTGTCATTTTCAGTGTTGTATACTTGCACTTAA  
TCTGTTTTACTATTGAATTTAAGTTTTATTTATGACTGCATAAAGTAT

>PGSC0003DMG400017291LRR-RLKs\_2257

CTTGCACTTAATCTGTTTTACTATTGAATTTAAGTTTTATTTATGACTGCATAAAGTATTTACACAATCGAG  
TTTAAGTTCTATTCGCTGACTATATAAGTAATTACAAGTAAAATCTCT

>PGSC0003DMG400017291LRR-RLKs\_2318

ACACAATCGAGTTTAAGTTCTATTCGCTGACTATATAAGTAATTACAAGTAAAATCTCTATGATAAACACT  
AATTGGTAACCTGATAAAAATGTTAACTTAAGTCATTTACCATTTCAAT

>PGSC0003DMG400017291LRR-RLKs\_2379

GATAAACACTAATTGGTAACCTGATAAAAATGTTAACTTAAGTCATTTACCATTTCAATATGGCGATTTCAT  
TGATTCAACATATATATTATACTGTAATTTGGTACTGAAGTGAGAATGC

>PGSC0003DMG400017291LRR-RLKs\_244

TTTTTCAGTTTCTACATGTTCCATTTTGTCTTGGAAAATGTCAGAAAAAGTTTCAAACTTTTTGTGTT  
TTGAAGTTTGCTGCTTAGTTTTTCAATTACCCATATGTTTCAGTTTGT

>PGSC0003DMG400017291LRR-RLKs\_2440

GGCGATTTCATTGATTCAACATATATATTATACTGTAATTTGGTACTGAAGTGAGAATGCGGAAAAAAGAT  
CTCTATATGTCATGTCTGTCTGCAACAACAACATACCTAGTGAAATCTCG

>PGSC0003DMG400017291LRR-RLKs\_2684

GGCATTTTATTTCAAAGTTAACTGCTGCTCTGACAAGAATTTTTGATCACCTGTATTTGATTCCATGAGA  
AATAAAATGCCTCTTCTATAACTTTCAATACAGGAGCATTGAAGGAAAT

>PGSC0003DMG400017291LRR-RLKs\_2745

TTCCATGAGAAATAAAATGCCTCTTCTATAACTTTCAATACAGGAGCATTGAAGGAAATAAATTTTCAGG  
AACAACTCCAGAAATCGGCAACTTGGTTCATATGGAAAACTGTAAT

>PGSC0003DMG400017291LRR-RLKs\_2806

ATTTTCAGGAACAATACCTCCAGAAATCGGCAACTTGGTTCATATGGAAAACTGTAATTCTCTTTTTCT  
GTTTTAATTTTGTCTGGAAATCTTATTCGTTTCACGTTGTATTAATG

>PGSC0003DMG400017291LRR-RLKs\_2867

TCTTTTTCTGTTTTAATTTGTTCTGGAAATCTTATTCGTTTCACGTTGTATTAATGCATCTGTGCCTTAA



TTCTCAGCGTGCTATCGTCAAATAAATTAACCGGAGCTTTGCCAGCC

>PGSC0003DMG400017291LRR-RLKs\_2928

TCTGTGCCTTAATTCTCAGCGTGCTATCGTCAAATAAATTAACCGGAGCTTTGCCAGCCACACTAGCCAA  
GCTAACCAACTTAACTGATATGTGAGTTCACAGTTTTAAACTCTTTCTCA

>PGSC0003DMG400017291LRR-RLKs\_2989

ACTAGCCAAGCTAACCAACTTAACTGATATGTGAGTTCACAGTTTTAAACTCTTTCTCATTGGTCATTCCCT  
TCTGTCCCTTGTGAATTGTGATGGATGATCACATAATTAACCTTTGCCG

>PGSC0003DMG400017291LRR-RLKs\_305

CTTTTTGTGTTTTGAAGTTTGCTGCTTAGTTTTTTCAATTACCCATATGTTTCAGTTTGTGGAAAATTGAAA  
AAGTTTGGAACCTTCTGTTTCAGTGAAGTCTGTTGTTTAGTTTTTTCAA

>PGSC0003DMG400017291LRR-RLKs\_3050

TGGTCATTCTTCTGTCCCTTGTGAATTGTGATGGATGATCACATAATTAACCTTTGCCGATATATTAGGAG  
GATAAACGACAACAATTTTACTGGAAAGATACCAAATTTATCAGCAGC

>PGSC0003DMG400017291LRR-RLKs\_3111

ATATTAGGAGGATAAACGACAACAATTTTACTGGAAAGATACCAAATTTATCAGCAGCTGGACAAAAA  
TTGAGAACTGTAAGCTTTCTTTTTCTTTACTTTTCAGACTTCAGTAGAT

>PGSC0003DMG400017291LRR-RLKs\_3355

ACAGGCTGTTTCCACGGCTTGAACCTCATGGAAACAGCCTCTTTCTGGAATATTAGAAGTTTATACCCCAA  
TTTTCTGCATATTTACAGTTATTGCTGTGATCTCATGAACCTCCAATT

>PGSC0003DMG400017291LRR-RLKs\_3416

ATACCCCAATTTTTCTGCATATTTACAGTTATTGCTGTGATCTCATGAACCTCCAATTATACTATAATTTTT  
GCAGGCATATAACAAGGCTGTTCTCTTGAGGGTCCCATTCCCTCCTCT

>PGSC0003DMG400017291LRR-RLKs\_3477

ACTATAATTTTTGCAGGCATATAACAAGGCTGTTCTCTTGAGGGTCCCATTCCCTCCTATATCTTTCTGA  
CAAGTTTAATTGATTTGTAAGCCAATGTGAAACTCCTTTTTGATGTCA

>PGSC0003DMG400017291LRR-RLKs\_3538

ATCTTTCTGACAAGTTTAATTGATTTGTAAGCCAATGTGAAACTCCTTTTTGATGTCATTTGTGGTTGCTT  
TGAGAAGTAAAATAATTTGTTATTTTTTTCTTTCATGAATTTCAGAAG

>PGSC0003DMG400017291LRR-RLKs\_3599

TGTGGTTGCTTTGAGAAGTAAAATAATTTGTTATTTTTTTCTTTCATGAATTCAGAAGGATCAGTGATCT  
AAAAAGTGAAAATCTGGTTTTCCACCATTAGATAACCTAGAATCCATA

>PGSC0003DMG400017291LRR-RLKs\_366

GAAAATTGAAAAGTTTGGAACCTTCTGTTTCAGTGAAGTCTGTTGTTTAGTTTTTCAATTACCCATGTTT  
CATTTTCTTGAAAATTTAGAAAAGTTTGAACTTCTGTTTCATTGA

>PGSC0003DMG400017291LRR-RLKs\_3660

TCAGTGATCTAAAAGTGAAAATCTGGTTTTCCACCATTAGATAACCTAGAATCCATAAAAATACTGTG  
AGTTTCTTACTTTTTCTTCTTTAATGGACTGCTTGAAGGACATTTTCAT

>PGSC0003DMG400017291LRR-RLKs\_3721

AATACTGTGAGTTTCTTACTTTTTCTTCTTTAATGGACTGCTTGAAGGACATTTTCATTTTCGATTTTCGGAA  
TCAATTTCTGATCAAAGATTCTGAATTCCTCTTGTGCAATGCAGAGTA

>PGSC0003DMG400017291LRR-RLKs\_3782

CGATTTTCGGAATCAATTTCTGATCAAAGATTCTGAATTCCTCTTGTGCAATGCAGAGTACTAAGAAATTG  
CTTAATTCATGGAGAAATGCCTGAATATATTGGGGAAATGAAGAAATTGA

>PGSC0003DMG400017291LRR-RLKs\_3843

AAGAAATTGCTTAATTCATGGAGAAATGCCTGAATATATTGGGGAAATGAAGAAATTGAAGACACTGTA  
AGTTTGAAAAAATTCAATCACTTTTTTTTTGGTTCAGTTTTCTGCATGTTG

>PGSC0003DMG400017291LRR-RLKs\_3904

ACACTGTAAGTTTGAAAATTTCAATCACTTTTTTTTTGGTTCAGTTTTCTGCATGTTGATACCTTTTCTGT  
TTTCATGCTATATAGTATATACACATTCTTCAAGATTCTGAATCTTTT

>PGSC0003DMG400017291LRR-RLKs\_3965

ACCTTTTCTGTTTTTCATGCTATATAGTATATACACATTCTTCAAGATTCTGAATCTTTTTTAGCTGAAATTT  
GTTTTTCCATGGAACCTACTATTTTCTGCTTTGTGATTTTAGGGACCT

>PGSC0003DMG400017291LRR-RLKs\_4026

AGCTGAAATTTGTTTTCCATGGAACCTACTATTTTCTGCTTTGTGATTTTAGGGACCTTAGTTTTAACAGC  
CTGTCTGGTGAGATTCCATCAACTTTTGTACACCTATCCAAAGTAGAT

>PGSC0003DMG400017291LRR-RLKs\_4087

GTTTTAACAGCCTGTCTGGTGAGATTCCATCAACTTTTGTACACCTATCCAAAGTAGATTTTATGTAAGTG  
GATATTCTCAGATATCTTTATTTCTTTGTAGCCAGATGCTTATCAATA

>PGSC0003DMG400017291LRR-RLKs\_4148

TATGTAAGTGGATATTCTTCAGATATCTTTATTTCTTTGTAGCCAGATGCTTATCAATATTAGGCTTCTGTT  
TTTTCTTTCTCTAATTGTTCTGGTACTTTGCAGATATTTGACAGCG

>PGSC0003DMG400017291LRR-RLKs\_4209

AGGCTTCTGTTTTTTCTTTCTCTAATTGTTCTGGTACTTTGCAGATATTTGACAGCGAACAACTTACTG  
GACTTGTTCTGGATGGATTTTAACCAGAAACAAGAACATGTGTGTGT

>PGSC0003DMG400017291LRR-RLKs\_4514

TTGAGATGGATGGAGTATAAATGTGCAAAAACTTGATTGCTCTTTAAAGTTTTCACTTACTGACCTACA  
TGCTTTTATGCAAGTAGAGGCTTTAGAATGTATTCAATATTGAGTAATCT

>PGSC0003DMG400017291LRR-RLKs\_4575

TGACCTACATGCTTTTATGCAAGTAGAGGCTTTAGAATGTATTCAATATTGAGTAATCTATTTTTGCCAAA  
AAAAGAATGGTGAAAAGGAACTAAAAAATGTAAAAGATCATCTCTAAG

>PGSC0003DMG400017291LRR-RLKs\_4636

TTTTGCCAAAAAAGAATGGTGAAAAGGAACTAAAAAATGTAAAAGATCATCTCTAAGCTTCAAAAAG  
TTATTAGTATTATGGACTTGCGAACTTCTAGTCTAATTTTGTGTCTATT

>PGSC0003DMG400017291LRR-RLKs\_4697

TCAAAAAGTTATTAGTATTATGGACTTGCGAACTTCTAGTCTAATTTTGTGTCTATTTTGCTTCACAGA  
GATGTTTCAACTAACAAATTTTACATGGGAAACCTCACCTTTTGAATGTC

>PGSC0003DMG400017291LRR-RLKs\_5978

ATATTTGATGTCTACTTGCAGGTAAATTCATGCTCTGGGGGAAGGTGAAATGTGTGTGAATTTTCATGTT  
TGCTGCCACCAGTGTATTTATTCAATCTTCTTGAGACAGGAAAAGCTGGT

>PGSC0003DMG400017291LRR-RLKs\_6039

TTTCATGTTTGCTGCCACCAGTGTATTTATTCAATCTTCTTGAGACAGGAAAAGCTGGTGTGAAGGATTT  
TAACATTGCAAAGAGGCTGGTGGCCTGGTAAGCCCATTGTGAAGACG

>PGSC0003DMG400017291LRR-RLKs\_61

AGCTGAACTCTTTGGATTTTTGTACTGTTTTTTGTACAATCTAATAGTAGCTGGAAATGAGCATAATGAA  
GATTTTGTTTCTCAATCTCTGTTATTTTCTTTTTCTTGTTTTCTTC

>PGSC0003DMG400017291LRR-RLKs\_6283

GTATGTTCTTTACTCTCTTCAAGTTTATATCTGTCTTGCTTACAGTTGTATGCTCAACTCTTCTTTAATGAA

TGCCATAGGGATCATAGGACATTATTCTAATGTACTAGTCCTTAAAA

>PGSC0003DMG400017291LRR-RLKs\_6344

TTCTTTAATGAATGCCATAGGGATCATAGGACATTATTCTAATGTACTAGTCCTTAAAAAACCTTTCCGA  
GACCAAATTACTCTACATACCAAGGCTTAATAAGTTTTGTTAACCATCT

>PGSC0003DMG400017291LRR-RLKs\_6771

CTTTCCGTGCAGAGTTTCCCCCTCCTCTGCCTGCTCGTCTGCCTGCTCATCTGCCTGCAGATCAAAAGAGT  
AAAATTAATGTTGGCATACTAGCCGGCATAATAGCTGGATCAGTATTTT

>PGSC0003DMG400017291LRR-RLKs\_6832

TCAAAAGAGTAAAATTAATGTTGGCATACTAGCCGGCATAATAGCTGGATCAGTATTTCTTGTCCTTCTG  
ATTATTGGTATCTTGTACAAGGGAGGCTGTCTAGGCGAAAATGTATCTAC

>PGSC0003DMG400017291LRR-RLKs\_732

AGAGAGTACAAATTACTCATATGTTTCATTTTCTTGGAAAATATCAGAAAAAGTTTGGAGCTTTCTGTTCA  
TTGAAGAGTGCTGCTTAGTTTTTTCAATTACCCATATGTTTCATTTTCTT

>PGSC0003DMG400017291LRR-RLKs\_7503

CCTCTTAAGAGAGAAAATGAAAGACTAAAATCTTAAATTTTATAAACCTTCAAAGGAAGTGTGAATATTC  
GCCTGTAATGAGGAGACTGTACAGGCAATGCTCTATTACCATATGTGTTT

>PGSC0003DMG400017291LRR-RLKs\_7564

TGAATATTCGCCTGTAATGAGGAGACTGTACAGGCAATGCTCTATTACCATATGTGTTTCTATAGCCCTG  
AGAAGTTGGAGTAATTTACTGATCTTTTCCATCAACTAAGATGCAGAGT

>PGSC0003DMG400017291LRR-RLKs\_7625

ATAGCCCTGAGAAGTTGGAGTAATTTACTGATCTTTTCCATCAACTAAGATGCAGAGTTCTTATCTTCGC  
GACATAGGATTCAATCTATTATAATCTTACTTGCTGATCATAAGCTGCA

>PGSC0003DMG400017291LRR-RLKs\_793

TTTCTGTTCAATTGAAGAGTGCTGCTTAGTTTTTTCAATTACCCATATGTTTCATTTTCTTGATGTGCAGTGAT  
AGCATTGAAAGTGATTGCAAAAAAGTTTGGGAAAAAAGATTGGGATTT

>PGSC0003DMG400017291LRR-RLKs\_854

TGTGCAGTGATAGCATTGAAAGTGATTGCAAAAAAGTTTGGGAAAAAAGATTGGGATTTTAAACAAAGAT  
CCTTGTAGTGGAGAAGGAAATTGGAGTACTGCTATTACTGTAAAGGATTT

>PGSC0003DMG400017291LRR-RLKs\_915

ACAAAGATCCTTGTAGTGGAGAAGGAAATTGGAGTACTGCTATTACTGTTAAAGGATTTGAGAGCTATG  
TTGCTTGTGATTGCTCTTTTAACAACAATTCCACCTGCCATATCACCTCCA

>PGSC0003DMG400017291LRR-RLKs\_976

GAGCTATGTTGCTTGTGATTGCTCTTTTAACAACAATTCCACCTGCCATATCACCTCCATGTATGTTTTAGT  
CTGTTCCCTATTAAATTGAAATTATGTTGTTTCGGACTCTCCGAAAATG

>PGSC0003DMG400017293RLKANKrepeat\_0

TCTGACTCATAGTATCCACCTTTGCTTCTCACTCGTTCCTTATTATTGATTGTTTTAGATAGATTGTTTCGAG  
AACCTTCTCGACTTCTTCGATTACTCGAACCATAATTGCGTAAACAGT

>PGSC0003DMG400017293RLKANKrepeat\_1037

TTTATTTGAACTCTTGAAAGCTGTATTGGAAAGAGATGTTCTAATAACTTGTTTTCCAAATGAGAAGAGT  
GTTTTACAAATTTAGACAAAGGAGTACGTCTGTTTCTGGAGAAGATTTAT

>PGSC0003DMG400017293RLKANKrepeat\_1098

GAGAAGAGTGTTTTACAAATTTAGACAAAGGAGTACGTCTGTTTCTGGAGAAGATTTATGAATTCTTAAT  
AGTGTTAATCATTAGTATAGTGATGCTTTGTGAACTGAGTTAGACTCCA

>PGSC0003DMG400017293RLKANKrepeat\_1159

ATTCTTAATAGTGTTAATCATTAGTATAGTGATGCTTTGTGAACTGAGTTAGACTCCAAGTTGCACACTG  
ATGTCTACAGAGTGGAACATATGTGTGGCTATCTTGAGGTCTATTTTTG

>PGSC0003DMG400017293RLKANKrepeat\_122

AAGTTTTTCACTATGGAGTCAAAGTCGCAGTCAAGGTTCCGCTGGGCAGACAATCATCTCTGGCGCCG  
GAGAAAGACGGCGTTCCGACGACTCAGTTACCGCCGGCCATGGAGTCGAT

>PGSC0003DMG400017293RLKANKrepeat\_1220

TTGCACACTGATGTCTACAGAGTGGAACATATGTGTGGCTATCTTGAGGTCTATTTTTGGCTACTCACAG  
TAGTGTAGTGCAGTGACAAAGTATGATTAATAGCCTCTTGCAGATGCAA

>PGSC0003DMG400017293RLKANKrepeat\_1281

TACTCACAGTAGTGTAGTGCAGTGACAAAGTATGATTAATAGCCTCTTGCAGATGCAATATATTACAAG  
AATAATGATGTGGTCAAGCTTTTGGAAAGTACATGGAGTAAAACCTGCGGT

>PGSC0003DMG400017293RLKANKrepeat\_1342

TATTACAAGAATAATGATGTGGTCAAGCTTTTGGAAAGTACATGGAGTAAAACCTGCGGTATGTGTGCAC  
AACTAGATTGTCCGATCTAAATGCACTATGGTAATATGGCATAACCATTTA

>PGSC0003DMG400017293RLKANKrepeat\_1403

GTGTCGACAACACTAGATTGTCCGATCTAAATGCACTATGGTAATATGGCATAACCATTTACCTTATCTGTTT  
TACTTTTTACTTTAGGTGGCTCCCATGCATGTAGAAAATGCTCGTGAAA

>PGSC0003DMG400017293RLKANKrepeat\_1464

TTATCTGTTTTACTTTTTACTTTAGGTGGCTCCCATGCATGTAGAAAATGCTCGTGAAATTCCAGAGTATG  
AAATTGATCCAAGAGAACTTGATTTTAGTAATAGTGTCAACATAACAAA

>PGSC0003DMG400017293RLKANKrepeat\_1525

CCAGAGTATGAAATTGATCCAAGAGAACTTGATTTTAGTAATAGTGTCAACATAACAAAAGTAACAACTT  
TTTCTCTTTGACTTGATAATTATGCTTATTTGATCATTGCTCACTTTACC

>PGSC0003DMG400017293RLKANKrepeat\_1586

TAACAACTTTTTCTCTTTGACTTGATAATTATGCTTATTTGATCATTGCTCACTTTACCCTTTTGTTATTTGT  
GTTGTGTTATTGCATTAGATGTCCGCTGATTTTTGCTGTTTTTTTCAG

>PGSC0003DMG400017293RLKANKrepeat\_1647

TTTGTTATTTGTGTTGTGTTATTGCATTAGATGTCCGCTGATTTTTGCTGTTTTTTTCAGAACGGAATGCTTG  
CCTTTGGTAACAAGTATACTGGCATGTTTTTCAAGTTTATTGCCAAGC

>PGSC0003DMG400017293RLKANKrepeat\_1708

CGGAATGCTTGCCTTTGGTAACAAGTATACTGGCATGTTTTTCAAGTTTATTGCCAAGCTCTGTTTCCCCT  
TTAGTTATCTTAGTTGATCAACCTGCCACAATTATACAGCAGATACTGT

>PGSC0003DMG400017293RLKANKrepeat\_1769

TGTTTCCCCTTAGTTATCTTAGTTGATCAACCTGCCACAATTATACAGCAGATACTGTTGTTTAGGTTTCA  
TTATTTAACCATTCCAAATGTTATTCATCCATCGCAACATGTATGACC

>PGSC0003DMG400017293RLKANKrepeat\_183

TGGCGCCGGAGAAAGACGGCGTTTCCGACGACTCAGTTACCGCCGGCCATGGAGTCGATGAAGGTATT  
GATTCCGGTTTGAGGTTAATGTACATGACTAATGACGGTGATTTGGAAGGTA

>PGSC0003DMG400017293RLKANKrepeat\_1830

TTTAGGTTTCATTATTTAACCATTCCAAATGTTATTCATCCATCGCAACATGTATGACCTAATTTGACTAG  
CTGGGGCATTGAGATGAGAAGGTTTAAAATGATAGTTTGGAAATTTGA

>PGSC0003DMG400017293RLKANKrepeat\_2013

AAATATATTACCTTAGCTTTTTGAAGAGGGAAAGTATTTGTGAGATAGGCTACAGGTAAGTAGATCAAG

AATTTGAGGTTGAACGAAGTATCTGCTGTTATTATTGTATTTGTTTCTAGA

>PGSC0003DMG400017293RLKANKrepeat\_2074

AGATCAAGAATTTGAGGTTGAACGAAGTATCTGCTGTTATTATTGTATTTGTTTCTAGAACTGTTTGTTT  
TAATCCTACCTGTTATTTCTAATTTCTTGTCTGTTGCTATGTATCTGGG

>PGSC0003DMG400017293RLKANKrepeat\_2135

CTGTTTGTTTAATCCTACCTGTTATTTCTAATTTCTTGTCTGTTGCTATGTATCTGGGATAAAAGCAGATG  
AACTTTCAACTGCAATATATTTTCATATCATATCTTTAATGATTGT

>PGSC0003DMG400017293RLKANKrepeat\_2196

AAAAGCAGATGAACTTTCAACTGCAATATATTTTCATATCATATCTTTAATGATTGTAGGGTACGTATT  
GTGTTGCTCTGTGGCGTGGAAGTCTGTTAAGAACTTGGTGA

>PGSC0003DMG400017293RLKANKrepeat\_2257

GGTACGTATTGTGTTGCTCTGTGGCGTGGAAGTCTGTTAAGAACTTGGTGAAGAATTGTTC  
ACCGACGAAGATAAAGTGTGGGTTGGTCATAGACTATCTATGATGTTGGAA

>PGSC0003DMG400017293RLKANKrepeat\_2318

AATTGTTACCGACGAAGATAAAGTGTGGGTTGGTCATAGACTATCTATGATGTTGGAATTAGAACATTC  
CTCATTTGACAGTTCATAAAAAGTACTAAAGACTCTTTTCTTTGTTTTCT

>PGSC0003DMG400017293RLKANKrepeat\_2379

AGAACATTCCTCATTTGACAGTTCATAAAAAGTACTAAAGACTCTTTTCTTTGTTTTCTAACTGTTTTTCAG  
CAAGGCATTTGGGGATGAGCTTGCCTTACTACAGAAGATACGCCACCC

>PGSC0003DMG400017293RLKANKrepeat\_244

AGGTATTGATTCCGTTTTGAGGTTAATGTACATGACTAATGACGGTGATTTGGAAGGTATGGAGGAACT  
TTTGGACTCCGGTACCAGTGTGAACTACAAGGATATCGATGGACGGACTGC

>PGSC0003DMG400017293RLKANKrepeat\_2440

CTGTTTTTCAGCAAGGCATTTGGGGATGAGCTTGCCTTACTACAGAAGATACGCCACCCAAATGTAGTCC  
AGTTTCTTGGTGCTGTGACACAGAGTAGCCCAATGATGATCATCACAGAG

>PGSC0003DMG400017293RLKANKrepeat\_2501

ATGTAGTCCAGTTTCTTGGTGCTGTGACACAGAGTAGCCCAATGATGATCATCACAGAGTATCTGCCTAA  
GGTACTTTTCATTTAAAAGAACAATTCACCACTTCTGGAGTTATCTCCA

>PGSC0003DMG400017293RLKANKrepeat\_2562

TCTGCCTAAGGTA CTTTTTCATTTAAAAGAACAATTCACCACTTCCTGGAGTTATCTCCAGAAAGTCAAAT  
CAAGAACGACCATGCATCAAATAGTATAATTGATGGTTAAGTATCAAC

>PGSC0003DMG400017293RLKANKrepeat\_2745

CCATGGTTCTGTTTTGTTTGTTGATCAAAGGAAATAATCTCCATTATTTATGTCAACTAAATTCATTAAAGT  
CGTTGAGAAAGCCTTTGAAGTCCCTGCTGATTTAAAATATAACCATTGA

>PGSC0003DMG400017293RLKANKrepeat\_2806

TTCATTAAAGTCGTTGAGAAAGCCTTTGAAGTCCCTGCTGATTTAAAATATAACCATTGATTCTGTTCTGTA  
TTCAGGGAGATCTTCGTGCATTCTGAAACGGAAAGGTGCATTAAAGCC

>PGSC0003DMG400017293RLKANKrepeat\_2867

CTGTTCTGTATTCAGGGAGATCTTCGTGCATTCTGAAACGGAAAGGTGCATTAAAGCCAATAACGGCT  
GTGAAATTTGCACTGGACATTGCAAGGTCAGTTTACTGGCTGATGTCCTGA

>PGSC0003DMG400017293RLKANKrepeat\_2928

TAACGGCTGTGAAATTTGCACTGGACATTGCAAGGTCAGTTTACTGGCTGATGTCCTGAATTTCCACTTG  
AGAATCTTATTAGTATTACATGCATGCTGTTACCAGGTGCTTGAATTTG

>PGSC0003DMG400017293RLKANKrepeat\_305

GAGGAACTTTTGGACTCCGGTACCAGTGTGAACTACAAGGATATCGATGGACGGACTGCGTTGCATATT  
GCCGCTTGCCAGGGTTACGCTGATGTTGTTGATTTTCTGCTTAAAAATGGC

>PGSC0003DMG400017293RLKANKrepeat\_3050

TAAGGTGTCTGTTGATAAATGGCCATTAATACAGGAACACCAACTACAGTCTCTCCGTTCTATGTATAAT  
TTAGAATTGTTACATTCATTTTGTATCTCTTCATGCATTTGTGTTTTT

>PGSC0003DMG400017293RLKANKrepeat\_3111

TATGTATAATTTAGAATTGTTACATTCATTTTGTATCTCTTCATGCATTTGTGTTTTTTCACAAATGTTGATC  
TCAACAGTACAGTGCTGGCCATTGGGGTTCCATTATGATTATAAATC

>PGSC0003DMG400017293RLKANKrepeat\_3172

CAAATGTTGATCTCAACAGTACAGTGCTGGCCATTGGGGTTCCATTATGATTATAAATCTTCATTAGAAA  
GCAAAGTAGTGGCACAGCTTCCTGATCAGTTGCAGAAGAAGCTGTGTACA

>PGSC0003DMG400017293RLKANKrepeat\_3233

CATTAGAAAGCAAAGTAGTGGCACAGCTTCCTGATCAGTTGCAGAAGAAGCTGTGTACATAAATATGTT  
GAGAAATCTGAATTTGTCTTTCTTATAGTTGCGTCTATGTGTCTCATATAG



>PGSC0003DMG400017293RLKANKrepeat\_3416

ATTCATCGAGACCTGGAGCCCGAGTATGTTATTATAGTCTTCCTGACTGTTTCCCAGTGGCCAGTCACGT  
GCTTTGTTTGTCTTTAGTGGCTGAACTAAGTCTGACAAATGTATGATAA

>PGSC0003DMG400017293RLKANKrepeat\_3477

CAGTCACGTGCTTTGTTTGTCTTTAGTGGCTGAACTAAGTCTGACAAATGTATGATAAACTTTTAATTC  
TGAGTGAAATGACAGAAACATATTACGGGATGATTCTGGACTTCTGAAA

>PGSC0003DMG400017293RLKANKrepeat\_3599

TGCAGATTTTGGACTTAGTAAGCTGATGAAATTTACCAAACTGTCAAGGAAGATAGACCATTGGCGCG  
TCAAGAGGATTCATGTGAGTATATCCCAGCATTTTATGCTGTTGAAGAAAT

>PGSC0003DMG400017293RLKANKrepeat\_366

TGCATATTGCCGCTTGCCAGGGTTACGCTGATGTTGTTGATTTTCTGCTTAAAAATGGCGCTCATGTGGA  
TGCCATGGATCGCTGGGGCAGTACGGTATACTTCATTATTACTCTGTATT

>PGSC0003DMG400017293RLKANKrepeat\_3660

TTGGCGCGTCAAGAGGATTCATGTGAGTATATCCCAGCATTTTATGCTGTTGAAGAAATATATTCACACT  
AATGATTTGTTACTGCTACTTTGTTGTCACTTTTTTGTTACTCTTATATT

>PGSC0003DMG400017293RLKANKrepeat\_3721

ATTCACACTAATGATTTGTTACTGCTACTTTGTTGTCACTTTTTTGTTACTCTTATATTTTGTTCCTTTTTCT  
TTATGTAAAGCGTATATGAACAATGGCTTTAGGGTCAAATGTCTCA

>PGSC0003DMG400017293RLKANKrepeat\_3782

GTTCTTTTTTTCTTTATGTAAAGCGTATATGAACAATGGCTTTAGGGTCAAATGTCTCATGGTTCTACTTTT  
CCTTTTAATTTTGATGAAACACATTTTCACCTCCGTTTCCTCTCTAA

>PGSC0003DMG400017293RLKANKrepeat\_3843

GTTCTACTTTTCCTTTAATTTTGATGAAACACATTTTCACCTCCGTTTCCTCTCTAAGATTCAGCATATG  
GTCCTTGAATCTTTATTTGAAACTGAAAGTGTATATGGTCCTTGA

>PGSC0003DMG400017293RLKANKrepeat\_3904

TTCAGCATATGGTCCTTGAATCTTTATTTGAAACTGAAAGTGTATATGGTCCTTGAATCTTTGCCAG  
TAAATACTAACTGTTTCATGTTTAGACACTTCAATAGCTGTGCTAGTGA

>PGSC0003DMG400017293RLKANKrepeat\_3965

CTTTTGCCAGTAAATACTAAACTGTTTCATGTTTAGACACTTCAATAGCTGTGCTAGTGAATGAAACTCTAG

GATTTGGGATAGAAGGAGTATATTGATTTTGTTCATCAAAAGAA

>PGSC0003DMG400017293RLKANKrepeat\_4026

GAAACTCTAGGATTTGGGATAGAAGGAGTATATTGATTTTGTTCATCAAAAGAATTATTCTCTTG

ACATTTGGCAATAGAATTTGAAGAGGAGAATTACAAAGTTATTTTAGAAA

>PGSC0003DMG400017293RLKANKrepeat\_4087

ATTCTCTTGACATTTGGCAATAGAATTTGAAGAGGAGAATTACAAAGTTATTTTAGAAAAAGGTATGCA

TAAGTACTGGTTGCCTCAAATTTAGTTGATAACACTCCTATTTAATCAT

>PGSC0003DMG400017293RLKANKrepeat\_4148

AGGTATGCATAAGTACTGGTTGCCTCAAATTTAGTTGATAACACTCCTATTTAATCATTGTAGAACTATG

GGTCTTTCTATGCATGTTTTAAACAAGGCAATTGGTGTGATATAAAATT

>PGSC0003DMG400017293RLKANKrepeat\_427

TCATGTGGATGCCATGGATCGCTGGGGCAGTACGGTATACTTCATTATTACTCTGTATTTAGATATCACT

AACTTGATAGTATACGTTTTAAAGCTGGTCAAACCAGCAGCTCAAAGC

>PGSC0003DMG400017293RLKANKrepeat\_4392

TTGATATTGCAAGAGGTAAGCTCTTCTAATTCTTAATACTTTCTCTCATGCATACACTACTGAAAAAGGC

TCTCCAGTTGTGCCCTGTCTGGAAGAAAAAATGTTAGTTTGTTCGTGGG

>PGSC0003DMG400017293RLKANKrepeat\_4453

TGAAAAAGGCTCTCCAGTTGTGCCCTGTCTGGAAGAAAAAATGTTAGTTTGTTCGTGGGCAGCTGGCTA

TCACTTCTTGCTTCATAGATATTTTCAGTTTTTACTTTATGTAAGTGAAC

>PGSC0003DMG400017293RLKANKrepeat\_4514

GCTGGCTATCACTTCTTGCTTCATAGATATTTTCAGTTTTTACTTTATGTAAGTGAAGTGGTGTGTAAT

GTGTGCTAATGGGCATGATATCAGACTGATGGCCACCAACAGGTTAAT

>PGSC0003DMG400017293RLKANKrepeat\_4575

TGATGTGTAATGTGTGCTAATGGGCATGATATCAGACTGATGGCCACCAACAGGTTAATATGTATGCATT

CTAGATCTCATCTCATGGAGGAAAAAGGCAACGGGGTCCTCCATATTTTG

>PGSC0003DMG400017293RLKANKrepeat\_4697

GTCAATGTTAGTTGTGTCTAAAAAGATTGTATTGCCATCTACTGTCTCCTATTCTTATTTCTTGCAAATTA

TGCTTATTCTACCTATTAATTCAGTTGGAACACCTGGACTGTTCCAG

>PGSC0003DMG400017293RLKANKrepeat\_4758

TTGCAAATTTATGCTTATTCTACCTTATTAATTCACCTTGGAACACCTGGACTGTTCCAGCATGTTTGTAAT  
CCCTTAATATTTAAGAGGGCCGTCGGGTAATTTAGACATGTATACGCC

>PGSC0003DMG400017293RLKANKrepeat\_4819

TGTTTGTAATCCCTTAATATTTAAGAGGGCCGTCGGGTAATTTAGACATGTATACGCCTTGATATGCTT  
CCGTTCCACAGATGATTGAAGGCTGTCCACCATTTCCATGAAGCAGGA

>PGSC0003DMG400017293RLKANKrepeat\_488

GATACACTAACTTGTAGTATATACGTTTAAAAGCTGGTCAAACCAGCAGCTCAAAGCAGTTTTTGCT  
AATGTTATTTGGGAATACTTCCATGCCCTTTCATCAATCCTGATTCGAT

>PGSC0003DMG400017293RLKANKrepeat\_4880

GATATGCTTCCGTTCCACAGATGATTGAAGGCTGTCCACCATTTCCATGAAGCAGGAAATTGAGGTGG  
CCAAAGCATATGTTGCAAATGAACGCCCTCCCTTAGAGCTTCACAAAAG

>PGSC0003DMG400017293RLKANKrepeat\_4941

TTGAGGTGGCAAAGCATATGTTGCAAATGAACGCCCTCCCTTAGAGCTTCACAAAAGTTGTATGCTCA  
TGGATTGAGAGAGTAAGTCCCTGTGTTTCTTCAATTCCTTCAATTGTA

>PGSC0003DMG400017293RLKANKrepeat\_5002

GTATGCTCATGGATTGAGAGAGTAAGTCCCTGTGTTTCTTCAATTCCTTCAATTGTATTTAAAGTGATT  
ATTTCAACAGGTTAATTGAGGACTGCTGGGAGGAGCAACCATCAAAAAG

>PGSC0003DMG400017293RLKANKrepeat\_5063

TAAAGTGATTATTTCAACAGGTTAATTGAGGACTGCTGGGAGGAGCAACCATCAAAAAGACCGACTTTT  
CAGCGAATAATTATCAGGTTGGAAGAAATCAACCGTATTCTTTTGCATAGA

>PGSC0003DMG400017293RLKANKrepeat\_5124

CGACTTTTCAGCGAATAATTATCAGGTTGGAAGAAATCAACCGTATTCTTTTGCATAGAAGACGTTGGAA  
GGTATGAACCTCTCTCACCCAATCCCCTTCAGTTCAGTATTTCCAAAGTT

>PGSC0003DMG400017293RLKANKrepeat\_5185

ACGTTGGAAGGTATGAACCTCTCTCACCCAATCCCCTTCAGTTCAGTATTTCCAAAGTTCGGTCATGTATA  
GTAAATCAAGCTTCGGTACAGTAAATTCTGGTTCAGAAGGTGGAGTTGG

>PGSC0003DMG400017293RLKANKrepeat\_5246

GTCATGTATAGTAAATCAAGCTTCGGTACAGTAAATTCTGGTTCAGAAGGTGGAGTTGGCGTGGCTGTA  
TAAATCTCAGAAAATAGCCAAGTCCAAATTCAGCCCAAAATTAAGATTGAG

>PGSC0003DMG400017293RLKANKrepeat\_5307

TGGCTGTATAAATCTCAGAAAATAGCCAAGTCCAAATTCAGCCCAAATTAAGATTGAGATTCTTTTGCA  
ATCCAAAAGCATGAAAAATTTTAAAGACTAGATCTGAAACTCGATTACTA

>PGSC0003DMG400017293RLKANKrepeat\_5368

TCTTTTGCAATCCAAAAGCATGAAAAATTTTAAAGACTAGATCTGAAACTCGATTACTAGGATGTAGGCA  
ACTAACTTTGACAATTGCTCCTCAATTGTTTGCCTGAAGCATGAGAAATT

>PGSC0003DMG400017293RLKANKrepeat\_5429

ATGTAGGCAACTAACTTTGACAATTGCTCCTCAATTGTTTGCCTGAAGCATGAGAAATTGCTCTTGAGTT  
GTTTTCTGAAGCATAGAATTCGTTTCAATTAATATAAGGAGTTTACCCACT

>PGSC0003DMG400017293RLKANKrepeat\_549

TTTTTGGCTAATGTTATTTTGGGAATACTTCCATGCCCTTTCATCAATCCTGATTGATAAGTGATTACCA  
GCATTTTCGCTCCAGTCTAGTATTCAACTTTTCAAACCGTCTTAGTCA

>PGSC0003DMG400017293RLKANKrepeat\_5490

TCTTGAGTTGTTTTCTGAAGCATAGAATTCGTTTCAATTAATATAAGGAGTTTACCCACTCCTCTTGATACT  
TTTAGACGAAGGTAGCATTAAAAAGGAGAAAGGAGGTACTAATTAAG

>PGSC0003DMG400017293RLKANKrepeat\_5551

TCTTGTATACTTTTAGACGAAGGTAGCATTAAAAAGGAGAAAGGAGGTACTAATTAAGAGCACTCCTT  
CAATACTGAGTTATAACATGTCCTTATTGGCAGTACTGGTGAAGTACTGATGCT

>PGSC0003DMG400017293RLKANKrepeat\_5612

CACTCCTTCAATACTGAGTTATAACATGTCCTTATTGGCAGTACTGGTGAAGTACTGATGCTCTTGCTCAAAGG  
CTGATAAAGTTAGATACTTCGCTATTAGGTAGTACCGGTTACTGAATTA

>PGSC0003DMG400017293RLKANKrepeat\_5673

TGCTCAAAGGCTGATAAAGTTAGATACTTCGCTATTAGGTAGTACCGGTTACTGAATTACCACACCGAGT  
ACAAAAATTCTGAAATTTACTCCCTGAATACCGTACCGGTTACTGAATAC

>PGSC0003DMG400017293RLKANKrepeat\_5734

ACACCGAGTACAAAAATTCTGAAATTTACTCCCTGAATACCGTACCGGTTACTGAATACCGGATTCTGG  
CTCAGCTCGGTAATTCGGCTTCCGGTGATTTATTCCACCATTAGTGGGGG

>PGSC0003DMG400017293RLKANKrepeat\_5795

GATTCCTGGCTCAGCTCGGTAATTCGGCTTCCGGTGATTTATTCCACCATTAGTGGGGGTTATGTTTCTGT

TTAATCAATGACCTCTTATAGCTGCACCAAAGCAAAGAACAGAAAAAT

>PGSC0003DMG400017293RLKANKrepeat\_5917

AAGAAAGAGAAGCTTGGAGGAAAGAATACTCGCAAATGTCTTCGGTTTTTTATTAATTTATAGTTACATTA

TGGGAGTAATTTTGGGAACAAAAGTGAGGAAAATTCCTGTTTACCATTC

>PGSC0003DMG400017293RLKANKrepeat\_5978

GTTACATTATGGGAGTAATTTTGGGAACAAAAGTGAGGAAAATTCCTGTTTACCATTCATTCCATAGTC

TCTCTAGGAAATTGATTATCAATACTTACCCTCACCTGTTTATTCTCACT

>PGSC0003DMG400017293RLKANKrepeat\_6039

TCCATAGTCTCTCTAGGAAATTGATTATCAATACTTACCCTCACCTGTTTATTCTCACTGTCATGTTTATTA

TTGGACAAATGAGGAATGTTGTTACTGTTTATACTGTCTTAATATATA

>PGSC0003DMG400017293RLKANKrepeat\_61

GATTGTTCGAGAACCTTCTCGACTTCTTCGATTACTCGAACCATTAATTGCGTAAACAGTTGAAGTTTTTCA

CTATGGAGTCAAAGTCGCAGTCAAGGTTTCCGCTGGGCAGACAATCATC

>PGSC0003DMG400017293RLKANKrepeat\_610

GTGATTACCAGCATTTTTCGCTCCAGTCTAGTATTCAACTTTTTCAAACCGTCTTAGTCATTTGGAAATTCCT

ATCAGGAATTACAGTTTTTTTTTTTTTTTATAACTGAGAAATGTATGG

>PGSC0003DMG400017293RLKANKrepeat\_6100

CATGTTTATTATTGGACAAATGAGGAATGTTGTTACTGTTTATACTGTCTTAATATATATGACAAAGGATA

GTCTCGTGCCTTCCATAGTCTCTCTAGGAAATTGGAATTATTAATAACG

>PGSC0003DMG400017293RLKANKrepeat\_6161

ACAAAGGATAGTCTCGTGCCTTCCATAGTCTCTCTAGGAAATTGGAATTATTAATAACGTGTCCCCTTATC

TGTTTATTCTCACTGTCATGTTTATTATTGGAACAAATGAGGAATGTTG

>PGSC0003DMG400017293RLKANKrepeat\_6222

TCCCCTTATCTGTTTATTCTCACTGTCATGTTTATTATTGGAACAAATGAGGAATGTTGTTACTGTTTATAC

TGTCTTAAATAATATATGAACAAAAGGATAGTCTCGTGCCTTCCATAG

>PGSC0003DMG400017293RLKANKrepeat\_6283

ACTGTTTATACTGTCTTAAATAATATATGAACAAAAGGATAGTCTCGTGCCTTCCATAGTCTCTCTAGGAA

ATTGAATATTAATACGTGCCCTTATCTGTTTATTCTCACTGTCATGTTT

>PGSC0003DMG400017293RLKANKrepeat\_6344

TCTCTAGGAAATTGAATATTAATACGTGCCCTTATCTGTTTCATTCTCACTGTCATGTTTATTATTGGAACAA  
ATGAGGAATGTTGTTACTGTTTGTACTGTCTTAAATTGTATATGAACA

>PGSC0003DMG400017293RLKANKrepeat\_6405

TATTGGAACAAATGAGGAATGTTGTTACTGTTTGTACTGTCTTAAATTGTATATGAACAAAAGGATAGTC  
TCGTGCGCTAAGCTCTTGTTACTTATGGGTCCAAGGAAGGGCTGGACCAT

>PGSC0003DMG400017293RLKANKrepeat\_6466

AGGATAGTCTCGTGCCTAAGCTCTTGTTACTTATGGGTCCAAGGAAGGGCTGGACCATATTGAGTATA  
TGTACATAATCTTACTACTTTGCATTTCACTACTCCAACTCCCCTTTATT

>PGSC0003DMG400017293RLKANKrepeat\_6527

TGAGTATATGTACATAATCTTACTACTTTGCATTTCACTACTCCAACTCCCCTTTATTAATTATCTTTGAA  
TATACAAAATATATTTTACTTCAATCAGTTCCAATGTAGTCAAC

>PGSC0003DMG400017293RLKANKrepeat\_6588

ATTATCTTTGAATATACAAAATATATTTTACTTCAATCAGTTCCAATGTAGTCAACTTGGGTTTCTTCA  
CAAGTTTTTGTACATAGTGCAGCTTCATGACCACTTTCTCAGCCTCT

>PGSC0003DMG400017293RLKANKrepeat\_6649

GGGTTTCTTACAAGTTTTTGTACATAGTGCAGCTTCATGACCACTTTCTCAGCCTCTGATTGTGTTACTT  
GCAGGCATGCGCACTTAATATTTTTCAGAACTGAAGGCCATCTTGAA

>PGSC0003DMG400017293RLKANKrepeat\_671

TGGAAATTCCTATCAGGAATTACAGTTTTTTTTTTTTTATAACTGAGAAATGTATGGGACCCACCCTTT  
GGACCAATCACCAGGAATTACAGCTTTTTGCTTATATTTAACTCAGGTA

>PGSC0003DMG400017293RLKANKrepeat\_6710

TTGTGTTACTTGCAGGCATGCGCACTTAATATTTTTCAGAACTGAAGGCCATCTTGAAGTTTGATCATTC  
GAATTCAAAGAGTCGCTCATCTCGCCCAACCGTCTGATGAGATGTGCTT

>PGSC0003DMG400017293RLKANKrepeat\_6771

TTGATCATTCGAATTCAAAGAGTCGCTCATCTCGCCCAACCGTCTGATGAGATGTGCTTGCCTTGCAGCT  
ACATTTTTGATCGATTAATTCTTTATGTGCGTGCTTCCAACCTTTTTTATT

>PGSC0003DMG400017293RLKANKrepeat\_6893

ATCTTCTTTTTCTTTCTTTGGGCGACTATGGTTTGGAGAGAGGGTGACGCCATGACGGTATGGCTTCC  
ATTGCTGTTGTACTGGAAGTTTGTATGAATGACACTATTCACCTTCTAATGT

>PGSC0003DMG400017293RLKANKrepeat\_6954

ATGGCTTCCATTGCTGTTGACTGGAAGTTTGATGAATGACACTATTCACCTTCTAATGTAGCTATCGCAA  
CTGTACAAATTTTAGCAAACACTTTTTTCTCTATAATAAAAAATTTCTT

>PGSC0003DMG400017293RLKANKrepeat\_7015

CTATCGCAAACGTACAAATTTTAGCAAACACTTTTTTCTCTATAATAAAAAATTTCTTATCTTTTCAGAGT  
AGTTAATTATGATGGAACCTAGTTTTTATTTGGTTATATATATATATGCG

>PGSC0003DMG400017293RLKANKrepeat\_7076

CTTTTCAGAGTAGTTAATTATGATGGAACCTAGTTTTTATTTGGTTATATATATATATGCGGCAATTGCATCA  
AAACACAATTAGAAATGCCAACAAAGAGAATAGTCTAGTCCAATCTATT

>PGSC0003DMG400017293RLKANKrepeat\_7137

AATTGCATCAAAACACAATTAGAAATGCCAACAAAGAGAATAGTCTAGTCCAATCTATTTTCTTTTTTGGGA  
TGACAAGGAAACCAACAGCCTTTTACAAAACCCATCTTTACATAGTTG

>PGSC0003DMG400017293RLKANKrepeat\_7198

CTTTTTGGATGACAAGGAAACCAACAGCCTTTTACAAAACCCATCTTTACATAGTTGTGATACTTAATG  
TGTTCTAGGATTCAAGTGACAATCTAAAACATGAACATTGCATCTTA

>PGSC0003DMG400017293RLKANKrepeat\_7259

ATACTTAATGTGTTCTAGGATTCAAGTGACAATCTAAAACATGAACATTGCATCTTATAAAGTTTACTA  
GTAAAGCAGCATAAAAGGAATTCTCACATTTATTTGAAAGTGTCATCAT

>PGSC0003DMG400017293RLKANKrepeat\_732

CCCACCCTTTGGACCAATCACCAGGAATTACAGCTTTTTGCTTATATTTAACTCAGGTAATGCCTATTTTTG  
CATATCTAGGGTGTGTTGGAGCTAGGGAAAATGTGGGATTGGGTGCAA

>PGSC0003DMG400017293RLKANKrepeat\_7320

AAGTTTACTAGTAAAGCAGCATAAAAGGAATTCTCACATTTATTTGAAAGTGTCATCATCACTTAGTTCAT  
CTTCAATGCTAGAAACATCCATTCTAGCAGATGCTTGCTTTGCCCACTT

>PGSC0003DMG400017293RLKANKrepeat\_7381

CTTAGTTCATCTTCAATGCTAGAAACATCCATTCTAGCAGATGCTTGCTTTGCCCACTTAACAATCTTCTCA  
GCTTCTCTATTAATCTTCTCTTGCTCCTCCATAGCTTTCTTCATCAAC

>PGSC0003DMG400017293RLKANKrepeat\_7442

CAATCTTCTCAGCTTCTCTATTAATCTTCTCTTGCTCCTCCATAGCTTTCTTCATCAACTTCTCTTGATTTTTC

GACGAAAATATACTCATGTCCGATAAAAACTCATCATCCTTCCCC

>PGSC0003DMG400017293RLKANKrepeat\_7503

CTCTTGATTTTTCGACGAAAATATACTCATGTCCGATAAAAACTCATCATCCTTCCCCATTTTCAGCCCCAT  
ACTCACATTCTATTCTCTTTCCCTTTTTATTAACCCCTTCTTAGG

>PGSC0003DMG400017293RLKANKrepeat\_7564

TTCAGCCCCATACTCACATTCTATTCTCTTTCCCTTTTTATTAACCCCTTCTTAGGTGAACACCAAAAA  
CATCCAGTTTTCGCTGGTGGAGACAAACAATCCTTCGAAGAATCCGAT

>PGSC0003DMG400017293RLKANKrepeat\_7625

AACACCAAAAACATCCAGTTTTCGCTGGTGGAGACAAACAATCCTTCGAAGAATCCGATGGAGATGATA  
TTGGCCCAGATGAAGATGTTTTCCCTCTTTCCCATTTGTGATTTTCGAGA

>PGSC0003DMG400017293RLKANKrepeat\_7686

AGATGATATTGGCCCAGATGAAGATGTTTTCCCTCTTTCCCATTTGTGATTTTCGAGAAAACATCATTTT  
CAATCGACGTTGATTCGTCTGTTTTCAACAACTCATCTTCCAAATT

>PGSC0003DMG400017293RLKANKrepeat\_7747

ACATCATTTTCAATCGACGTTGATTTCTGTCTGTTTTCAACAACTCATCTTCCAAATTAACCTTAGAATCT  
TTCTCTCAACTGGGCTTCTTCAATTTTCTCATTTTCATCATCGATT

>PGSC0003DMG400017293RLKANKrepeat\_7808

CCTTAGAATCTTTCTCTCAACTGGGCTTCTTCAATTTTCTCATTTTCATCATCGATTTTCTCCGTTTTAGG  
GGTGGTTGGGAACTCCGAGGAACCGAACTCCTGGAATTTCTTGCGA

>PGSC0003DMG400017293RLKANKrepeat\_793

GCCTATTTTTGCATATCTAGGGTGTGTTGGAGCTAGGGAAAATGTGGGATTGGGTGCAATGGCATTGTC  
TACCTTGTTAAATATTCGTTTGGATAGATTGTGCTCGTTTTGTGAGCTTTT

>PGSC0003DMG400017293RLKANKrepeat\_7930

GTAGAGGGTTTTGGAGTTGCCGGAGCAGCAGGAAGGGATTTGAGTTTGCGAAAACGAGTTTCGAGCTG  
AGTGGGGAGTACAGAGTCGGTAAAACCAGAACAATTAATGGCAGCAACTTGT

>PGSC0003DMG400017293RLKANKrepeat\_7991

CGAGCTGAGTGGGGAGTACAGAGTCGGTAAAACCAGAACAATTAATGGCAGCAACTTGTTCAAGAACA  
GATTGATCCATTGCTTGTGACAGAAGCTCTTCTACAGCTTTTTTATTGTCGC

>PGSC0003DMG400017293RLKANKrepeat\_8052



AAGAACAGATTGATCCATTGCTTGTGACAGAAGCTCTTCTACAGCTTTTTTCATTGTCGCTATCGGAAAGA  
AAAGAGAAATCCGCCATGAATGAAGTCTCTAAAATACCAAAAACAGAGAA

>PGSC0003DMG400017293RLKANKrepeat\_8113

TCGGAAAGAAAAGAGAAATCCGCCATGAATGAAGTCTCTAAAATACCAAAAACAGAGAATTTAAGTTGA  
TTTTTCGGAGTGTAATTCTCCAAAATTAGGGTGCGGTTGAGGTAATTTGGG

>PGSC0003DMG400017293RLKANKrepeat\_8174

TAAGTTGATTTTTCGGAGTGTAATTCTCCAAAATTAGGGTGCGGTTGAGGTAATTTGGGAGTTACATCAA  
TGGAGCTTCTCTCAGGCTCTCACTGCTAAAACGGCTAATTCATGTTTT

>PGSC0003DMG400017293RLKANKrepeat\_8235

TTACATCAATGGAGCTTCTCTCAGGCTCTCACTGCTAAAACGGCTAATTCATGTTTTTGGAACGTTGTA  
TTCCAGTCAAAAAGTGTGGGAGATGGGACCCATCATATTATTTTATTT

>PGSC0003DMG400017293RLKANKrepeat\_854

GCATTGTCTACCTTGTTAAATATTCGTTTGGATAGATTGTGCTCGTTTTGTGAGCTTTTAAGAAGTGCTTC  
TAAGCAAATAAGCCAATGTGAAGGTTAATATGGCTTACATGTTATCTT

>PGSC0003DMG400017293RLKANKrepeat\_915

GAAGTGCTTCTAAGCAAATAAGCCAATGTGAAGGTTAATATGGCTTACATGTTATCTTAATAACAGTAA  
CAGGAAAGTATTAATTGATGAAAAATTAGTTTGATACATCACATTAECTT

>PGSC0003DMG400017293RLKANKrepeat\_976

TAACAGTAACAGGAAAGTATTAATTGATGAAAAATTAGTTTGATACATCACATTAECTTATTTTATTTGAA  
CTCTTGAAAGCTGTATTGGAAAGAGATGTTCTAATAACTTGGTTTCCAA

>PGSC0003DMG400017315-(rev)G-LecRK\_1054

CATTTACTGCAACTCCTCGCATTATCATAGTTTTGTAGAGCTCAAGAATACTACATATTTTGTATTTAGCT  
CAATCTGAACTAAGTTCGAAGATATTTTGGCTTGAGGGGAAAAAGTT

>PGSC0003DMG400017315-(rev)G-LecRK\_1116

TATTTAGCTCAATCTTGAACCTAAGTTCGAAGATATTTTGGCTTGAGGGGAAAAAGTTGGAAGATTGCA  
AAAGGGCTTGCTGAGAACTGTTCTTGCAAAGCTGCTGTTTTTGTATATG

>PGSC0003DMG400017315-(rev)G-LecRK\_1178

GATTGCAAAGGGCTTGCTGAGAACTGTTCTTGCAAAGCTGCTGTTTTTGTATATGATTGGGAAGGG  
GCTCAAAGAGGGAACTGTTTGTACTGAATGAAGTTTTCTCTCTCACAGAC

>PGSC0003DMG400017315-(rev)G-LecRK\_124

TACAGCAGGGCTTGCCGGGCTTCTCTTTCTGGATAAACAGGCCATCTCTTATTGTTAATTCCACCACCG  
ATGGCTTCTTTGGTTCAACAACACCCATACTTCAGCGGGGAAATGCTGG

>PGSC0003DMG400017315-(rev)G-LecRK\_1302

AAGAAGGAAGAGGCGAGACAGTATTTCTTAAGGTGCAGAATACCTCAAGGGCGCAGACTCAGTCTCTA  
ATTATTCTGGAGGAAAGAAATCAAGACCTTTGAAAGTGATAATAGGATCTA

>PGSC0003DMG400017315-(rev)G-LecRK\_1550

ACTCGATTCTCTTACAATGAGCTGAAAATAATTACAGATGATTTTCAGTAGAAAGCTCGGGGAAGGAGGA  
TTTGGCTGTGTTTATGAAGGAAGACTGAGAAATGGCACTAAAGTAGCTGTG

>PGSC0003DMG400017315-(rev)G-LecRK\_1736

ATTCACCATATCAATCTGGTAAACTCATTGGATTTTGTGCCGAAAAAAGCCACAGACTTCTAATCTACG  
AGTTCATGGTGAATGGATCGCTGGATAGGTGGATTACGCATGAAAATCAA

>PGSC0003DMG400017315-(rev)G-LecRK\_186

CCACCACCGATGGCTTCTTTGGTTCAACAACACCCATACTTCAGCGGGGAAATGCTGGCCCACGATTCAT  
CTGTGGATTCTACTGCAGGTACAATACCACAGAATGCCTTCTTGGTATCC

>PGSC0003DMG400017315-(rev)G-LecRK\_1860

ATGGGCTTACATGGAACACAAGGCAGAGGATAATATCAGATATCGCCAAAGGGTTAGCGTATCTACATG  
AGGATTGTAGCCATAAGATAATTCATTTGGACATCAAACCGCAAACATCC

>PGSC0003DMG400017315-(rev)G-LecRK\_1922

CTACATGAGGATTGTAGCCATAAGATAATTCATTTGGACATCAAACCGCAAACATCCTTCTAGATCAGT  
ATTTCAATGCTAAGATATCAGATTTTGGGTTGTGCGAAGCTAATTGAGAAA

>PGSC0003DMG400017315-(rev)G-LecRK\_2108

TCAGTAATTACTGAGAAAGTTGATGTGTATGCTTTTGAATTGTGCTCTTGAAATTCTCTGTGGGCGAA  
AGAATTTGGATTGGTCCCAAGCTGATGAAGAAGATGTCCATTTGCTAAGT

>PGSC0003DMG400017315-(rev)G-LecRK\_2170

TGGGCGAAAGAATTTGGATTGGTCCCAAGCTGATGAAGAAGATGTCCATTTGCTAAGTGTCTTTAGGCG  
AAAAGCGGAACAAGAGCAGCTCATAGATATGGTTGACAAAAACAATGAAGA

>PGSC0003DMG400017315-(rev)G-LecRK\_2232

TTAGGCGAAAAGCGGAACAAGAGCAGCTCATAGATATGGTTGACAAAAACAATGAAGATATGCAGCTC

CACAGGAAAGCAGTGACAGAAATGATGAGCCTTGCTGCATGGTGTCTACAGG

>PGSC0003DMG400017315-(rev)G-LecRK\_2418

AAACAAACTTGAATTATGATTTACACATGTACCAGAGGTTGGGGCAGGCAACCAACAGAGGGAAGTC

ATTATCAGTTCAAATTTCTTTAATTTTATCGGGACCAAGGTAAACAATAT

>PGSC0003DMG400017315-(rev)G-LecRK\_248

CGATTCATCTGTGGATTCTACTGCAGGTACAATACCACAGAATGCCTTCTTGGTATCCTTTTGTACCACAA

CAAATACAACGAGGAGAACGGTATGATAGATAAACCCAGTTAGTTTGG

>PGSC0003DMG400017315-(rev)G-LecRK\_2480

GAAGTCATTATCAGTTCAAATTTCTTTAATTTTATCGGGACCAAGGTAAACAATATGCTTAAGATTTTG

GATTTGAAAGAACCAAATATGGTTGCTTAATGTCAAATATTGCAACATT

>PGSC0003DMG400017315-(rev)G-LecRK\_2519

GGACCAAGGTAAACAATATGCTTAAGATTTTGGATTTGAAAGAACCAAATATGGTTGCTTAATGTCAAAT

ATTGCAACATTTTCAATTCTAGCATAACTTTTTTATGGTGTATGAGATTA

>PGSC0003DMG400017315-(rev)G-LecRK\_310

GTACCACAACAAATACAACGAGGAGAACGGTATGATAGATAAACCCAGTTAGTTTGGTCTGCTAACAG

GAACCATCCAGTGAAAGTCAATGCAACCTTGCAACTAGGCCATGATGGCAA

>PGSC0003DMG400017315-(rev)G-LecRK\_434

GTCTTGACGGACTCTGATGGCACTCTTGTTTGGTCCACTAATACTACTGGAAAATCTGTTTCTGGCTTAAA

CTTAACAGAAATGGGAAATCTTGCTCTTTGATAAGAGAAAGCGCGCA

>PGSC0003DMG400017315-(rev)G-LecRK\_558

GGCAGTCTTTTGATCATCCTACGGATTCTTTGCTTCCAGGGCAGAATTTGGTTTCCGGACGGAAGCTCAT

AGCAAGCGTTTCAGCAACCAATCATAGTCAAGGTTTGCTTGCTCTTAGTG

>PGSC0003DMG400017315-(rev)G-LecRK\_62

TGTTTCGTCTCGATTTACTATATCACAATCTTTACAGGACAACAAGATCAGTCTTTCAAATTCTACAGCAGG

GCTTGCCGGGCTTTCCTCTTTCTGGATAAACAGGCCATCTCTTATTGTT

>PGSC0003DMG400017315-(rev)G-LecRK\_682

CAATGGAAGCTGGGCTGCTTACACGGATACTGTTCCGCCTCAATACTACTACTTTCATCCTATGCTGAT

AGTTCTTATTACAGTTTTGATGGCCAAAGCTTTACTGCTTTACACTATCC

>PGSC0003DMG400017315-(rev)G-LecRK\_744

ATGCTGATAGTTCTTATTACAGTTTTGATGGCCAAAGCTTTACTGCTTTACACTATCCTACTAAATCAAAA  
GCTCAATTCATGAAGATTGGGCCTGATGGACATTTAAAGGTATACAAAT

>PGSC0003DMG400017315-(rev)G-LecRK\_806

AAATCAAAAGCTCAATTCATGAAGATTGGGCCTGATGGACATTTAAAGGTATACAAATGGTCTGTAGTT  
GATTGGAACGAAGTATCTGACATTTTGTGCGCCATATGTGGATAACTGTGGG

>PGSC0003DMG400017315-(rev)G-LecRK\_868

TGTAGTTGATTGGAACGAAGTATCTGACATTTTGTGCGCCATATGTGGATAACTGTGGGTACCCAATGGTA  
TGTGGAAGTTATAGCATTGTACAAATAACGGGCAATGTACTTGTCCGCC

>PGSC0003DMG400017315-(rev)G-LecRK\_992

GAGAACTTCTTCAGACCATTTTCTGAGAGGAAACCAGATCTTGGATGTTACAGCTGACTTCCATTTACT  
GCAACTCCTCGCATTATCATAGTTTTGTAGAGCTCAAGAATACTACATAT

>PGSC0003DMG400017317-(rev)LRR-RLPs\_1037

AATGCTTCTCTATAACGATGTCTCACTTCTCCTTGCTAAATTCTGCTGGATTCTCTTTACCCATACTTGTTA  
CTACAATATTCATTGAGCCCTGATTTCTTTTTGTATGCCTCATTGCAT

>PGSC0003DMG400017317-(rev)LRR-RLPs\_1098

CATACTTGTTACTACAATATTCATTGAGCCCTGATTTCTTTTTGTATGCCTCATTGCATTCCAAAATAATTA  
ATGGAAATAAATAGAATCACCATCAGTGTCTCAACAGCTTCTAGGAAT

>PGSC0003DMG400017317-(rev)LRR-RLPs\_1159

CAAAATAATTAATGGAAATAAATAGAATCACCATCAGTGTCTCAACAGCTTCTAGGAATTCGGAATTTCA  
TGAAAAGATGGGCTTCACAGATCTTGTTAAACCATTTCTTCTGTACAA

>PGSC0003DMG400017317-(rev)LRR-RLPs\_1220

GGAATTCATGGAAAAGATGGGCTTCACAGATCTTGTTAAACCATTTCTTCTGTACAATTTGTTGGGCAT  
GGTTATAATAACACTTCATTTAATGTAATTGGGAAAGAGAGAACTCCTG

>PGSC0003DMG400017317-(rev)LRR-RLPs\_1281

TGTTGGGCATGGTTATAATAACACTTCATTTAATGTAATTGGGAAAGAGAGAACTCCTGCTTAATTGAAA  
TTTAGGCAAATACACACAGTTGTCTAAGATATTACTTATCCTTTGAGGTA

>PGSC0003DMG400017317-(rev)LRR-RLPs\_1342

TAATTGAAATTTAGGCAAATACACACAGTTGTCTAAGATATTACTTATCCTTTGAGGTATGCAGACATGA  
AGCTAGAGTCATAGAGAAAATTGCAGAAGATATAATGGCTAGATTGGGTA

>PGSC0003DMG400017317-(rev)LRR-RLPs\_1464

CAGAGACATGCAAGCAATGCTAGAAATCTTGTTGGAATGGAGTTACACATGCACCAAGTATATAAAATG  
CTTGACGTTGGGTCTGGTGGAGTTCGCTTCCTTGGGATACTGGGAATGAGT

>PGSC0003DMG400017317-(rev)LRR-RLPs\_2379

ATACACCAATTGATACAAGAAATGGGCTGGCACATTGTTTCGTCAAGAAGCTTCTTACAATCCAAGAATAT  
GTAGTAGGTTGTGGAAGCGCGAAGATATTTGTCCTGTACTCGAACGAAAT

>PGSC0003DMG400017317-(rev)LRR-RLPs\_2440

CAAGAATATGTAGTAGGTTGTGGAAGCGCGAAGATATTTGTCCTGTACTCGAACGAAATTTGGTACGTA  
GTTGTAAACTTATGACTTCTTACATAATTTTCCTTTTCTCATCCACCTTTA

>PGSC0003DMG400017317-(rev)LRR-RLPs\_2501

GGTACGTAGTTGTAAACTTATGACTTCTTACATAATTTTCCTTTTCTCATCCACCTTTAATACTCTTGCTTAT  
TAGGCAACTGACAAGATTGAAGGCATATCGCTGCACCTGACTAATGA

>PGSC0003DMG400017317-(rev)LRR-RLPs\_2562

ACTCTTGCTTATTAGGCAACTGACAAGATTGAAGGCATATCGCTGCACCTGACTAATGAAGAAGAAGTT  
AATTTTGGTGGCAAGGCCTTCATGCAGATGACCAGTATGAGGTTTCTCAA

>PGSC0003DMG400017317-(rev)LRR-RLPs\_2745

TGGCATGGATATCCTTCAAAAAGTCTGCCAAATAGCTTTAAGGGAGACCAACTTGTTAGTTTGAAATTGA  
AAAAAAGCCGCATCATACAACTTTGGAAAACCTCAAAGGATCTAGGAAAA

>PGSC0003DMG400017317-(rev)LRR-RLPs\_3355

TTGGTTTAGAGGAGCTCCACTGCACTCACACAGCCATCCAAACAATTCCATCCTCTATGTCTCTTCTTAAA  
AACCTTAAACATTTATATCTCCGTGGATGTACTGCTTTGAGTTCACAAG

>PGSC0003DMG400017317-(rev)LRR-RLPs\_3416

TCTTCTTAAAAACCTTAAACATTTATATCTCCGTGGATGTACTGCTTTGAGTTCACAAGTAAATAGCTCAA  
GTTGTGGCCAGAAGTCTATGGGTGTAAATTTTCAGAATTTGTCGGGTCT

>PGSC0003DMG400017317-(rev)LRR-RLPs\_3477

AATAGCTCAAGTTGTGGCCAGAAGTCTATGGGTGTAAATTTTCAGAATTTGTCGGGTCTTTGTTTATTGA  
TCATGTTGGATCTTAGTGACTGCAAAATTTTCAGATGGAGGCATTTTAAGT

>PGSC0003DMG400017317-(rev)LRR-RLPs\_3599

TCTTGGGTTCTTACCGTCTTTGGAGGGATTGATTCTCGATGGTAACAATTTTCCAATATTGCGGCTTCAA

GCATAAGTCGTCTCACTCGACTTATAGCCCTTGCATTGGCTGGTTGTAG

>PGSC0003DMG400017317-(rev)LRR-RLPs\_3660

GCGGCTTCAAGCATAAGTCGTCTCACTCGACTTATAGCCCTTGCATTGGCTGGTTGTAGGAGACTTGAGA  
GTTTACCGGAACTTCCTCCAAGTATAAAAAAGATATATGCTGATGAATGC

>PGSC0003DMG400017317-(rev)LRR-RLPs\_3721

GACTTGAGAGTTTACCGGAACTTCCTCCAAGTATAAAAAAGATATATGCTGATGAATGCACGTCTTTGAT  
GAGCATTGATCAGCTAACCAATATCCAATGTTGCATAGACTTTTCATTCA

>PGSC0003DMG400017317-(rev)LRR-RLPs\_3782

GTCTTTGATGAGCATTGATCAGCTAACCAATATCCAATGTTGCATAGACTTTTCATTCACAAAATGTCATC  
AACTTGTAATAAAATAAACACACGCCTCCATGGTTGATTTCATTGTTGAA

>PGSC0003DMG400017317-(rev)LRR-RLPs\_3843

AAATGTCATCAACTTGTAATAAAATAAACACACGCCTCCATGGTTGATTTCATTGTTGAAGCAGATGCACA  
AGGTAAGTACACTTCCAAGCCACAACCTCTACTATATCACATATGAATCTT

>PGSC0003DMG400017317-(rev)LRR-RLPs\_3904

AGATGCACAAGGTAAGTACACTTCCAAGCCACAACCTCTACTATATCACATATGAATCTTGGCAAATAACA  
TTCTTTTACGGGGCATGCAGGGACTATACATGAATGGCTCATTAGTAT

>PGSC0003DMG400017317-(rev)LRR-RLPs\_3965

CAAATAACATTCTTTTACGGGGCATGCAGGGACTATACATGAATGGCTCATTAGTATGTGCTTCCCTG  
GTGTGGAGATTCCCAGTGGTTTACATACAAGAACTCGGGGACTGAATCA

>PGSC0003DMG400017317-(rev)LRR-RLPs\_4087

CTCAGTGGCCCTGCCAAAAATTGGTACACACCCACATTCAGGGGGATAACTATTTGTGTTGTTTTGAC  
ATGATGACTCCTTTTCATTTACCGGAAATATAAGTCGGATGATGCCTTCAG

>PGSC0003DMG400017317-(rev)LRR-RLPs\_4148

GTTTTTGACATGATGACTCCTTTTCATTTACCGGAAATATAAGTCGGATGATGCCTTCAGTATTCTTAATGT  
CAAATGCCTAAAAAATTCAGGACTTGTGATGGGGTTTAGGTTTCAACA

>PGSC0003DMG400017317-(rev)LRR-RLPs\_4209

TTCTTAATGTCAAATGCCTAAAAAATTCAGGACTTGTGATGGGGTTTAGGTTTCAACAACCCATGACGG  
TTTTTACGCAGATTTGGCAAGTGTGTAGGCTCAATAGGAAGTGAAAAAC

>PGSC0003DMG400017317-(rev)LRR-RLPs\_4270

CCATGACGGTTTTTCACGCAGATTTGGCAAGTGTGTAGGCTCAATAGGAAGTGAAAAACCTGTTGGTTT  
AGATAATACTTACCTAGCCCATGTACCATTTTCATCAGTATCCGAAGTATGA

>PGSC0003DMG400017317-(rev)LRR-RLPs\_4331

GTTGGTTTAGATAATACTTACCTAGCCCATGTACCATTTTCATCAGTATCCGAAGTATGATGATAATTACAT  
TTTTAATGACTTCATTGAGCTTGAGGTTTCGTGTCGGTTCTGGTATCATT

>PGSC0003DMG400017317-(rev)LRR-RLPs\_4385

TATGATGATAATTACATTTTTAATGACTTCATTGAGCTTGAGGTTTCGTGTCGGTTCTGGTATCATTATCC  
GGATTTAGTGGTCAAAGGTTTGGGAGCGCGTCTTGTGTATGAGAATTGA

>PGSC0003DMG400017317-(rev)LRR-RLPs\_488

TGCCAATGGGTAAGTATCTATCATGAAACCAAACCTCATCGTCATATGTTAATCTGAATACTTAGTTCATTT  
CTATTTTGCATCGGAGGGCCTTTTCCCTTTTTCATTAAATAGAATTATC

>PGSC0003DMG400017317-(rev)LRR-RLPs\_549

TAGTTCATTTCTATTTTGCATCGGAGGGCCTTTTCCCTTTTTCATTAAATAGAATTATCGTAGATTTCTGTT  
CATATTTTTTTAATAAAAATCCAATAGACAACCTGTATTTATATCATAA

>PGSC0003DMG400017317-(rev)LRR-RLPs\_610

AGATTTCTGTTCATATTTTTTTAATAAAAATCCAATAGACAACCTGTATTTATATCATAATCAAGTTACAAGG  
GAATGGATATACCAAACCTGCCAAACCAGATAAGGGAATTTATAGAGG

>PGSC0003DMG400017317-(rev)LRR-RLPs\_671

AAGTTACAAGGGAATGGATATACCAAACCTGCCAAACCAGATAAGGGAATTTATAGAGGGCGTCTCTCT  
GTTTACAACCTGATTCACATTTAATGTAGCAAATGTGGCTACGGTGAAGAC

>PGSC0003DMG400017317-(rev)LRR-RLPs\_732

GTCTCTCTGTTTACAACCTGATTCACATTTAATGTAGCAAATGTGGCTACGGTGAAGACACATTTGGGGA  
GTTGGCGAATTACCTCTGTGGGATGAGGGATATATATACAATAGGAAATA

>PGSC0003DMG400017317-(rev)LRR-RLPs\_793

ATTTGGGGAGTTGGCGAATTACCTCTGTGGGATGAGGGATATATATACAATAGGAAATAGTCCGTTAGG  
GTTTCATGCTATGAAGTTGTCTTAGTTGCTTTCTAGGTTAACTCTCAAATA

>PGSC0003DMG400017317-(rev)LRR-RLPs\_854

CCGTTAGGGTTCATGCTATGAAGTTGTCTTAGTTGCTTTCTAGGTTAACTCTCAAATAAGTAAAGATGA  
CAAAAAAGAGTATAACCAAACCTGATGTACTCCGTCTTCTTCTGTCTAATCC

>PGSC0003DMG400017317-(rev)LRR-RLPs\_915

TAAAGATGACAAAAAAGAGTATAACCAACTGATGACTCCGTCTTCTTCTGTCTAATCCTCAAGTTTGAC  
ATTCTAAACTTGTTTCATCCAGTATGTTTGTTAACTTGTATCCAAAGTTGG

>PGSC0003DMG400017317-(rev)LRR-RLPs\_976

AAGTTTGACATTCTAAACTTGTTTCATCCAGTATGTTTGTTAACTTGTATCCAAAGTTGGTTAATGCTTCTCT  
ATAACGATGTCTCACTTCTCCTTGCTAAATTCTGCTGGATTCTCTTTA

>PGSC0003DMG400017318-(rev)G-LecRK\_0

ATAAAATTATGACTTATATTTTCTTTCCTCGTGAAAATTTCTTCAGGCCATCTTCTGAGAGGAAACCAGAT  
CTTGATGTTTACAGCTGACTTCCATTTACTGCCCTCTTTGCAGTACC

>PGSC0003DMG400017318-(rev)G-LecRK\_1054

GCTAATTGAGAAAGACAAAAGCAAAGTTGTGACTAGAATGAGAGGAACACGGGGTTATTTAGCCCCTG  
AATGGTTGAGCTCAGTAATCATTGAGAAAGTTGATGTTTATGCTTTTGGAAAT

>PGSC0003DMG400017318-(rev)G-LecRK\_1116

CCCCTGAATGGTTGAGCTCAGTAATCATTGAGAAAGTTGATGTTTATGCTTTTGGAAATTGCCTCTTGGA  
AATTCTCTGTGTGCGAAAGAATTTGGATTGGACCCAAGCTGATGAAGAAG

>PGSC0003DMG400017318-(rev)G-LecRK\_1178

CTCTTGAAATTCTCTGTGTGCGAAAGAATTTGGATTGGACCCAAGCTGATGAAGAAGATGTCCATTTGC  
TAAGTGATTTAGGAGAAAAGCTGAACAAGAGCAGCTCATGGATATGGTT

>PGSC0003DMG400017318-(rev)G-LecRK\_124

TTTCATAGAGCTCAAGGATACCGCATATTTTTTCAATTCAGTATAATCATGAACCAAGTTTCGATCATATTTT  
GGCTTGAGGAGAAAAAGTTGGAAGATTGCAAAGGGCCTGTCTGAGAAA

>PGSC0003DMG400017318-(rev)G-LecRK\_1240

CCATTTGCTAAGTGTATTTAGGAGAAAAGCTGAACAAGAGCAGCTCATGGATATGGTTGACAAAAACAA  
CGAAGATATGCAGCTCCACAGGGAAGCAGTGACAGAAATGATGAGCCTAGC

>PGSC0003DMG400017318-(rev)G-LecRK\_1426

AGGTTTGGTGACTGTTGAAACCAACTTGGATTATGATTTACACACGTACCTGAGGTCTGGGCAGGAAA  
CCAACAGAGGGAAGCCATTATCAGTTCAAAAATTCCTTCAATTTTATCGGG

>PGSC0003DMG400017318-(rev)G-LecRK\_1488

CAGGAAACCAACAGAGGGAAGCCATTATCAGTTCAAAAATTCCTTCAATTTTATCGGGACGAAGGTAAA



CAATATGCTTAAGGTTTTGTCTTTTTAGGAACCAATTTGTGGTGCATAAT

>PGSC0003DMG400017318-(rev)G-LecRK\_1550

AGGTAAACAATATGCTTAAGGTTTTGTCTTTTTAGGAACCAATTTGTGGTGCATAATGTCAAATATTGCA  
ACATTTCCAATTCTAGCATAACTTAAGGTTTATGAGATTATAATTCATG

>PGSC0003DMG400017318-(rev)G-LecRK\_1594

TGTGGTGCATAATGTCAAATATTGCAACATTTCCAATTCTAGCATAACTTAAGGTTTATGAGATTATAAT  
TCATGAACTGTAATGTTTCAGTAACTTCTATATTAATTTTTGAGCTTCA

>PGSC0003DMG400017318-(rev)G-LecRK\_186

TCATATTTTGGCTTGAGGAGAAAAAGTTGGAAGATTGCAAAGGGCCTGTCTGAGAACTGTTTCATGCA  
AAGCTGCTGTTTTGAATATAATTTGTATGGGAATCGAAGAGGGAGCTGTT

>PGSC0003DMG400017318-(rev)G-LecRK\_248

TCATGCAAAGCTGCTGTTTTTGAATATAATTTGTATGGGAATCGAAGAGGGAGCTGTTTGTACTGAATG  
AAGTCTTCTCTCATAGACAACAACGGACAAGGAAGAGGCAAGACAGTA

>PGSC0003DMG400017318-(rev)G-LecRK\_310

ACTGAATGAAGTCTTCTCTCATAGACAACAACGGACAAGGAAGAGGCAAGACAGTATTTCTTACGGT  
GCAGAATCAGTCTTCAATCATTCTGGAAGAAAGAAATCAAGACCTTTCCA

>PGSC0003DMG400017318-(rev)G-LecRK\_372

TTACGGTGCAGAATCAGTCTTCAATCATTCTGGAAGAAAGAAATCAAGACCTTTCCAAGTGATTATAGG  
ATCTACTCTGCAGCTTTCTTCGGGATAATTTAAGCATAGCTACTTGCT

>PGSC0003DMG400017318-(rev)G-LecRK\_434

ATTATAGGATCTACTCTTGCAGCTTTCTTCGGGATAATTTAAGCATAGCTACTTGCTTTGTTATCTTCAA  
AAGAGGATACATGAGTCCAGAAAGGCTGCGGGTTTTCTTGATCTGGAA

>PGSC0003DMG400017318-(rev)G-LecRK\_496

TATCTTCAAAAAGAGGATACATGAGTCCAGAAAGGCTGCGGGTTTTCTTGATCTGGAACCAATCTTACCA  
GGAATTCTAACTCGATTCTTACAATGAGCTGAAAGTAATTACAAAAGA

>PGSC0003DMG400017318-(rev)G-LecRK\_558

TCTTACCAGGAATTCTAACTCGATTCTTACAATGAGCTGAAAGTAATTACAAAAGATTTAGTAGTAA  
GCTCGGGGAAGGAGGATTTGGATCTGTTTATGAAGGAACACTGAGAAATG

>PGSC0003DMG400017318-(rev)G-LecRK\_62

AAACCAGATCTTGGATGTTACAGCTGACTTCCATTTACTGCCCTCTTTGCAGTACCATAGTTTCATAGA  
GCTCAAGGATACCGCATATTTTTCATTTTCAGTATAATCATGAACCAAGT

>PGSC0003DMG400017318-(rev)G-LecRK\_620

AGTAGTAAGCTCGGGGAAGGAGGATTTGGATCTGTTTATGAAGGAACACTGAGAAATGGCACCAAAT  
AGCTGTGAAGCATCTGGATGGTCTAGGTCAAGTAAAGGAATCATTCTTAACA

>PGSC0003DMG400017318-(rev)G-LecRK\_744

TTAAGGCAGTCGGTGGCATTACCATATCAATCTGGTAAACTCATTGGATTTTGTGCAGAAAAAAGCCA  
CAGGTTTCTTATCTATGAGTACATGGTAAATGGATCATTGGATAGGTGGA

>PGSC0003DMG400017318-(rev)G-LecRK\_806

AAAAGCCACAGGTTTCTTATCTATGAGTACATGGTAAATGGATCATTGGATAGGTGGATTACGCATGAG  
AATCAAGAGAATGGGCTTACATGGAACACGAGGCAGAGGATAATATCAGAT

>PGSC0003DMG400017318-(rev)G-LecRK\_868

GCATGAGAATCAAGAGAATGGGCTTACATGGAACACGAGGCAGAGGATAATATCAGATATCGCCAAAG  
GCTTAGCGTATCTACATGAGGATTGCAGCCATAAGATAATTCCTTTGGACAT

>PGSC0003DMG400017318-(rev)G-LecRK\_930

CCAAAGGCTTAGCGTATCTACATGAGGATTGCAGCCATAAGATAATTCCTTTGGACATCAAACCACAAAA  
CATCCCTCTAGATCAATATCTCAATGCTAAGATATCAGATTTTGGGTTGT

>PGSC0003DMG400017327-(rev)G-LecRK\_0

AGAGACGCGTTCCCAAAGAAAGGCATTATTAGAACACAGGAGGAGTTGCTAGCAAAGCAGATTTCAA  
ACATTTTCTTTTGTAGCTTTAGTAAGAAATGATTGCAGAGCAGAGATTGTA

>PGSC0003DMG400017327-(rev)G-LecRK\_1054

TGTACAAGTAATAGGAAATGTAGATGTCCGCCAGAGCGAAATTTCTTCAGGCCATTAGATGAGAGGAAT  
ATAGATGATGGATGTTTACAGCTGACTTCCATTTACTGCAACTCTTCGCAG

>PGSC0003DMG400017327-(rev)G-LecRK\_1178

ATAGTTATGTGGAGCTCAAGAATACCACATATTTTGCATTTGAGTTCAGTGATGACCGAATTTCCGGGTAT  
ATTACCGTTTGAGGGGAAAAAGTTGGAAGATTGCAAAGGGGCTTGTCTGA

>PGSC0003DMG400017327-(rev)G-LecRK\_124

CATCATGTCCTGGTCATCATTTATTTTCAGTTTTTTTTCATTCAGGTTTGCTTCATCCAGATTTTCATGGTACC  
TAAATGGCAGTTATTTGAATTCTACTGCTGGACTTTCCACTTCATGG

>PGSC0003DMG400017327-(rev)G-LecRK\_1240

TCGGGTATATTACCGTTTGAGGGGAAAAAGTTGGAAGATTGCAAAGGGGCTTGTCTGAGAACTGTTCC  
TGCAAAGCTGTTGTCTTCAGATATGATTCCGGATGGGGCTACAACCTGGGAGC

>PGSC0003DMG400017327-(rev)G-LecRK\_1302

CTGTTCTGCAAAGCTGTTGTCTTCAGATATGATTCCGGATGGGGCTACAACCTGGGAGCTGTTTATTACTG  
AATGAGGTCTTTTCTCTCGTAGACACCGACGACGGAATGGACAAGAGAGT

>PGSC0003DMG400017327-(rev)G-LecRK\_1364

TATTACTGAATGAGGTCTTTTCTCTCGTAGACACCGACGACGGAATGGACAAGAGAGTATTTCTTAAGGT  
GCAGAATTCCTCAAACACTCAGAATCAGTCTAAAACCATTTCTGGAGGAA

>PGSC0003DMG400017327-(rev)G-LecRK\_1426

CTTAAGGTGCAGAATTCCTCAAACACTCAGAATCAGTCTAAAACCATTTCTGGAGGAAAAAATCAAGA  
CCTCACATAGTGATAATAGGATCTACTCTTGCAGCTTTCTTTGGGATAATG

>PGSC0003DMG400017327-(rev)G-LecRK\_2356

ATGGATATTGTTGACAAAAACAATGAGGATATGCAGATCCACAAAGAAGCAGTGACAGAAATGATGAG  
CATTGCTGCGTGGTGTCTACAGGGAGATTTACCAAGAGGCCTTCCATGTCT

>PGSC0003DMG400017327-(rev)G-LecRK\_2418

GATGAGCATTGCTGCGTGGTGTCTACAGGGAGATTTACCAAGAGGCCTTCCATGTCTTTGGTGGTCAA  
GGCATTGGAAGGTTTGGTGTCTGTTGAAACAACTTGGATTATGATTTAC

>PGSC0003DMG400017327-(rev)G-LecRK\_2542

CTACCCGAGGTTGAGGATGACAACCAACAGAGGGAAGACACTATCAGTTTAATATTGCCTTCAATTTTAT  
CTGGTCCAAGGTGAACAACACTAGCCTAAGAGGTTGTAAGTTTTTTTTTCT

>PGSC0003DMG400017327-(rev)G-LecRK\_2604

AATTTTATCTGGTCCAAGGTGAACAACACTAGCCTAAGAGGTTGTAAGTTTTTTTTTCTTTCCCAAGTCTAT  
GTCTTTCTTTTGTGAAAATGTATTTCCATGCTTCATCACCAGATCCATC

>PGSC0003DMG400017327-(rev)G-LecRK\_2728

TCTTGACATAAATTTGGCTAACAGGTAAACTATGTCATAATGTAAAAGGTAACTTAATTAGCTTTGAT  
AGATAACCAATTAACGTCTCGTGGCAGAGATGGATAGCATTTTCTTTCTA

>PGSC0003DMG400017327-(rev)G-LecRK\_2790

GCTTTGATAGATAACCAATTAACGTCTCGTGGCAGAGATGGATAGCATTTTCTTTCTAATTTGCATCTTTG

TGGTCAATACATCTTCATATGCAGCACATTTTATATTTCTAAGAGTAAG

>PGSC0003DMG400017327-(rev)G-LecRK\_2830

GATAGCATTTTCTTTCTAATTTGCATCTTTGTGGTCAATACATCTTCATATGCAGCACATTTTATATTTCTA  
AGAGTAAGGGGTCTACTTATTCTGTGTTATGTACAGAGAAAAGTGCAG

>PGSC0003DMG400017327-(rev)G-LecRK\_372

TGAATGCCTTCTCGGGATCTTCTTTGCATTCCCGGACAGCTCCTCTACTGACAACAAATTCATGGATCCCC  
AGTTGGTTTGGTCTGCTAATCGAGACCGTCCAGTGAATGCCAATGCAAC

>PGSC0003DMG400017327-(rev)G-LecRK\_496

CAACTAGGAAAAGATGGCAACTTGGTCTTGGGAAGACTCTGATGGCACTTTTGTGGTCCACTAATACTA  
CTGGAAAATCTGTTTCTGGCTTAAACATGACAGAAACGGGGGAATCTCGTG

>PGSC0003DMG400017327-(rev)G-LecRK\_62

TTTCAAACATTTTCTTTTGTAGCTTTAGTAAGAAATGATTGCAGAGCAGAGATTGTATTTTCATCATGTC  
CTGGTCATCATTTATTTTCAGTTTTTTTCATTCAGGTTTGCTTCATCCC

>PGSC0003DMG400017330-(rev)G-LecRK\_0

AAACAACCCAACATCTTAAATTTAAGTTCAATCATTTTTTCATCTCAATGATGAACTAAAGGCCCTTGCCT  
TCTTTGGAAAACCAAAAATTGGTCTTTATGGCATTAAAGCCAGTTTTTA

>PGSC0003DMG400017330-(rev)G-LecRK\_124

TCTTCTTCTTCATTCTTTCTTGTCTTTTCATTTGATAACTAGCCAACCTTATGATTATCCATCTGCAAATCTT  
TCTACAACCTGGATCAACAGTGTCTTCTGCAGACCATTCAAGTGAATT

>PGSC0003DMG400017330-(rev)G-LecRK\_1364

ATCCGAGATCTTTTCACTAGCGAATAATGAGAAGGACAAGACAAGGTATGATTCCCATGCATTTATAAAA  
GTACAGGTTGAACCTGAAATAGCTGCTGCTAAAGAGAAAAGGCGTGTTAA

>PGSC0003DMG400017330-(rev)G-LecRK\_1426

TTATAAAAGTACAGGTTGAACCTGAAATAGCTGCTGCTAAAGAGAAAAGGCGTGTTAATGGTGTCTATAC  
TGGGCTCTGTTATAGGAGTTCCATCTTAGGGATCATAGTTGGAATTGCAG

>PGSC0003DMG400017330-(rev)G-LecRK\_186

TCTGCAAATCTTTCTACAACCTGGATCAACAGTGTCTTCTGCAGACCATTCAAGTGAATTTCACTGATGGCTC  
AACAAATAAGAGCCATACTACTCAGAGGAACTTTTGGTCCAAAATATGCT

>PGSC0003DMG400017330-(rev)G-LecRK\_1984

GATTAGCCTACCTTCACGAAGAATGCAGGCAAAGATTCTGCATTTGGATATTAAGCCCCAAACATACT  
ATTGGATGAGAAGTACAACGCTAAACTTGCTGACTTTGGGCTTTCAAAGC

>PGSC0003DMG400017330-(rev)G-LecRK\_2418

CAAAGCGATTTACGAAGAGGCCATCAATGTTCGATGGTGGTCAAGGCCATGGAGGGTGTATAGATGT  
TGACAAGGATCTAGACTACAGCTTTAGACCACAACTGTTTCCGCAATACCA

>PGSC0003DMG400017330-(rev)G-LecRK\_248

TGATGGCTCAACAATAAGAGCCATACTACTCAGAGGAACTTTTGGTCCAAAATATGCTTGTGGTTTCTAC  
TGTAATGGAAATTGTGATACTTACCTCTTTGCCATATTCATTGTGCAAAC

>PGSC0003DMG400017330-(rev)G-LecRK\_2480

AGATGTTGACAAGGATCTAGACTACAGCTTTAGACCACAACTGTTTCCGCAATACCATATATCAGTTTT  
GCAGATTCAACTCCTTTATTGCCTTCGATCCTATCAGGTCCAAGGTGAGG

>PGSC0003DMG400017330-(rev)G-LecRK\_2542

TCAGTTTTGCAGATTCAACTCCTTTATTGCCTTCGATCCTATCAGGTCCAAGGTGAGGAGGAAGTTCCTTG  
GAATTTTTGTTAATTTCTTTTTTTTATGCTATTGCAGCTTGCTCGCTGC

>PGSC0003DMG400017330-(rev)G-LecRK\_2598

GGAGGAAGTTCCTTGGAATTTTTGTTAATTTCTTTTTTTTATGCTATTGCAGCTTGCTCGCTGCTGTGTA  
ATTACTTCTCCAATGTTCAAAAGTTATGATTGTTTTCTTCAATTTATT

>PGSC0003DMG400017330-(rev)G-LecRK\_310

GTTTCTACTGTAATGGAAATTGTGATACTTACCTCTTTGCCATATTCATTGTGCAAACCAACAGTGCTTCC  
CGAATTACTCTTCCCGCGATTGGGTTCCACAAGTTGTTTGGTCTGCTA

>PGSC0003DMG400017330-(rev)G-LecRK\_372

AGTGCTTCCCGAATTACTCTTCCCGCGATTGGGTTCCACAAGTTGTTTGGTCTGCTAACAGGAATAAAC  
CTGTTAGGATCAATTCTACTTTGGAAGTTACAGCACAAGGAGATTTGGTG

>PGSC0003DMG400017330-(rev)G-LecRK\_620

GTTTCATCACCCAAGTATGCTTTGGTTCAGGGCAGAGGTTAGTACCAGGGATGAAGCTAACAGCAAG  
TGTTTCAACAACAAATTGGACTGAGAGAGGTTTGTCTCTCTCTTTTAC

>PGSC0003DMG400017330-(rev)G-LecRK\_682

CAGCAAGTGTTCACAACAAATTGGACTGAGAGAGGTTTGTCTCTCTCTTTTACCGATGATGGTTTT  
GTTGCTTTGGTAGAGTCAAATCCTCCCAAACATACTTTGACGTGACTA

>PGSC0003DMG400017330-(rev)G-LecRK\_744

GATGGTTTTGTTGCTTTGGTAGAGTCAAATCCTCCCAAACATACTTTGACGTGACTATTGGAAGATTGA  
ATGCAAGTAGAGGCTCAAATTATGTTGTGTATTTGAATGGTAGTCTAGCT

>PGSC0003DMG400017330-(rev)G-LecRK\_806

AAGATTGAATGCAAGTAGAGGCTCAAATTATGTTGTGTATTTGAATGGTAGTCTAGCTTTACTCTCAAAC  
TCTAGTAATTCCAGCAATTCACAGACACTGGTTTCATTTAGTCTAGCGAC

>PGSC0003DMG400017330-(rev)G-LecRK\_930

GCTCAATATATGAGACTGGAGTCTGATGGACACTTGAAAGTGTATGAGTGGCAAAGTGGGTGGACTGA  
GATGGATGATCTCCTCACAGTTTTAACGGCGAGTGTTATTACCCCATGGCC

>PGSC0003DMG400017330-(rev)G-LecRK\_992

GACTGAGATGGATGATCTCCTCACAGTTTTAACGGCGAGTGTTATTACCCCATGGCCTGTGGAAGATA  
TGGCATTGCTCAAGGGGGCAGTGCAGTTGTCCCAAATCGAGCTCTAATTC

>PGSC0003DMG400017331-(rev)G-LecRK\_0

TTTTAACTCATCTTCCTCTAGTGTTCTTAATGGCTTTATGCAAGATTATTCCTTTTGCCTTCATCCTTCTTTG  
TTGTTCTTGTTATCTGATATCGGGCCAACGTTTCGATTACCCCACTG

>PGSC0003DMG400017331-(rev)G-LecRK\_1302

TCTTTTCACTAATGAATAATGAGAAGGACAAGACAAGGTATGACTCTGTCGCGTTTATAAAAAGTACAGG  
TTTAAGCTAAACCAGCTGCTGCAATAGGGAAAAAATCGTGTTTTATGTACA

>PGSC0003DMG400017331-(rev)G-LecRK\_1364

GTACAGGTTTAAGCTAAACCAGCTGCTGCAATAGGGAAAAAATCGTGTTTTATGTACAAAAATGAATCT  
ATGGGAGGACATGGATGGAACTTAGCAAATTATGCACGGGATCTTGAATA

>PGSC0003DMG400017331-(rev)G-LecRK\_1426

TGAATCTATGGGAGGACATGGATGGAACTTAGCAAATTATGCACGGGATCTTGAATAAGTTCATGCTA  
GACATGAACTATATGAAGGTATTATTACATAAATAAATGGTTGGATAAGCC

>PGSC0003DMG400017331-(rev)G-LecRK\_1488

CATGCTAGACATGAACTATATGAAGGTATTATTACATAAATAAATGGTTGGATAAGCCAAATTAGTGTTA  
AGAGTTCTCTGTATTCTTCATTTCTTCTTCTCTGTATTACACTTTCA

>PGSC0003DMG400017331-(rev)G-LecRK\_1537

GGATAAGCCAAATTAGTGTTAAGAGTTCTCTGTATTCTTCATTTCTTCTTCTCTGTATTACACTTTTCAT

TTCTGTTTGTATCTGTAATTTCAATTCAATAGACAATAATAAGACA

>PGSC0003DMG400017331-(rev)G-LecRK\_558

ACCCGACAGATGCTTTAGTTCCAGGGCAGAAGTTAGTATCCGGGATGAAACTAACAGCAAGTGTTTCAA  
CAACAACTGGACCAAAGGAGGTTTGTTCCTCTCTGCTATCGATAATG

>PGSC0003DMG400017331-(rev)G-LecRK\_620

GTTTCAACAACAACTGGACCAAAGGAGGTTTGTTCCTCTCTGCTATCGATAATGGTTTGGTTGCTTT  
CATAGAGTCAAATCCTCCCAAACATACTTTGACGCGACTATTGGTGGA

>PGSC0003DMG400017337-(rev)LRR-RLPs\_1008

CATCTTACCGGAGAACTCCCTGATTTTTGGGACGAAGTGCCAATTTTGTACACATTAGACCTTTCAAACA  
ACAATTTTATTGGCCGCGTCCCAAGCACCTTAAGTACCCTTAATTCCCTC

>PGSC0003DMG400017337-(rev)LRR-RLPs\_1071

TCAAACAACAATTTTATTGGCCGCGTCCCAAGCACCTTAAGTACCCTTAATTCCCTCAGATTCTTAATGCT  
GAGTAACAATCATCTTTCTGGGGAATTCCTCGTGGTTTCCAAAATTTT

>PGSC0003DMG400017337-(rev)LRR-RLPs\_1134

TTAATGCTGAGTAACAATCATCTTTCTGGGGAATTCCTCGTGGTTTCCAAAATTTCTCTTCAATGATCAC  
TCTTGATCTTGGGAACAACCAATTTTCAGGAGAAATTCCTTCCTGGATA

>PGSC0003DMG400017337-(rev)LRR-RLPs\_1197

ATGATCACTCTTGATCTTGGGAACAACCAATTTTCAGGAGAAATTCCTTCCTGGATAGGGGAAAAGATG  
CCAGTTTTGTTGGCCTTGAGCCTTCGATCGAACATGTTCAAAGGAGAGATT

>PGSC0003DMG400017337-(rev)LRR-RLPs\_1260

AAGATGCCAGTTTTGTTGGCCTTGAGCCTTCGATCGAACATGTTCAAAGGAGAGATTCCAAGGGAATTC  
TGCAATATGACATCACTTCATTTTATAGATGTTGGTTCCAACAATCTCTCC

>PGSC0003DMG400017337-(rev)LRR-RLPs\_630

CAAACCTTAACGTTTCAGGCGTGCTGGATTTTCAGATACTCTCCCTGATTGGTTGTGGGAAATGAACTGGG  
AACTTGAAGAACTGGATTTTGGCTATAATCAACTTAGGGGCAGAGTGCCA

>PGSC0003DMG400017337-(rev)LRR-RLPs\_693

AACTGGGAACTTGAAGAACTGGATTTTGGCTATAATCAACTTAGGGGCAGAGTGCCAACCTACTCTAAAA  
TTAAGCCTGGTTCCACTGTCTATTTGATGTCTAACATTTTGGAGGGTCCA

>PGSC0003DMG400017337-(rev)LRR-RLPs\_756

CTAAAATTTAAGCCTGGTTCCACTGTCTATTTGATGTCTAACATTTTTGAGGGTCCAATTCCACCTTGGTC  
CTCAAATGTAGCCTCGATAAGCCTGAGAAACAATTCATTTTCAGGACCT

>PGSC0003DMG400017337-(rev)LRR-RLPs\_945

GGAACCATTCCCTTGTCCATTAGCAAAATCACCAGCTTGGTAACTTTGATTCTCTCGAACAATCATCTTAC  
CGGAGAACTCCCTGATTTTTGGGACGAAGTGCCAATTTGTACACATTA

>PGSC0003DMG400017645-(rev)LRR-RLKs\_1037

TTCCAGGAAGTGTGTCTTGTAGCAACAATCTAAAATTTGTCGATTTTTCGAGTAATTTATTGATGGGAAA  
GTTGCCTGCTTGTCTTGGATCAAGTTCAAGTTCAAGAAACAGGACAGTGA

>PGSC0003DMG400017645-(rev)LRR-RLKs\_1098

GATGGGAAAGTTGCCTGCTTGTCTTGGATCAAGTTCAAGTTCAAGAAACAGGACAGTGATTAATGTTTG  
GAATTGTTTGTCAAGTACTAGTACTAAGTCTCAACATCCACATACATTTTG

>PGSC0003DMG400017645-(rev)LRR-RLKs\_1830

CAACAAACAGTTTTGATCCAATAATCTGGTTGGAGAAGGTTCCCAGGGTCAGGTAAAAATGTTGATTC  
ATTATAAATAGCAAAAAAATGATATTTATTACTATATCCTGTCCATATTA

>PGSC0003DMG400017645-(rev)LRR-RLKs\_2074

CAACCTGAACAACACTTGACATTTTAGAAAACTAAAGATAGTAATATGGATATGCTTTTCTTAAATCTTG  
GTGAATACAAACTTGTGTTTTGAACATTGGGATTGATGTTATTATTAAT

>PGSC0003DMG400017645-(rev)LRR-RLKs\_2745

TGAGAATGTTTTGTTGGATGAAACTCTTACTGCTAGAATAAGCAGCTACAATATATCGTTGCCACCTAAG  
GTAATGCGATTAAATCACTATACGTAAATCTTGCAGAACTGTATTTTTG

>PGSC0003DMG400017645-(rev)LRR-RLKs\_2806

CCACCTAAGGTAATGCGATTAAATCACTATACGTAAATCTTGCAGAACTGTATTTTTGACCATCTAAATT  
TTTACAGGTTGGTTCGGAAAGTCCTCTTGTGCTGGACCCGACCATTTTACC

>PGSC0003DMG400017645-(rev)LRR-RLKs\_2867

CATCTAAATTTTTACAGGTTGGTTCGGAAAGTCCTCTTGTGCTGGACCCGACCATTTTACCAGGTATTATTCT  
GCAGCTACATTCACCTTACTTTCTCTATTTTCGTGCTATCATTCTGAAT

>PGSC0003DMG400017645-(rev)LRR-RLKs\_2928

GTATTATTCTGCAGCTACATTCACCTTACTTTCTCTATTTTCGTGCTATCATTCTGAATTGTCTGCTAATATA  
AACTTCATATTCAGCGCGAAAGAAGCAGAAAAGGAAGACATTTATCA



>PGSC0003DMG400017645-(rev)LRR-RLKs\_2989

TCTGCTAATATAAACTTCATATTCAGCGCGAAAGAAGCAGAAAAGGAAGACATTTATCAGTTGGGAGTT  
ATTCTACTAGAAGTTATTATTGGTAGACCAATCAACTCTCGAAGCGAAGCA

>PGSC0003DMG400017645-(rev)LRR-RLKs\_3050

TGGGAGTTATTCTACTAGAAGTTATTATTGGTAGACCAATCAACTCTCGAAGCGAAGCAGAGGACCTTA  
AGCTTCAGGTATCAATAACAATATCCTAATAACTCTCAAACGATAGAAATA

>PGSC0003DMG400017645-(rev)LRR-RLKs\_3111

GGACCTTAAGCTTCAGGTATCAATAACAATATCCTAATAACTCTCAAACGATAGAAATATATCATATCGTC  
ACTCAACTAATAGTAATTATTCAGAAAGTCACCTTTCTTCTTGATTCA

>PGSC0003DMG400017645-(rev)LRR-RLKs\_3172

TCATATCGTCACTCAACTAATAGTAATTATTCAGAAAGTCACCTTTCTTCTTGATTGAGATGTTCTTCTGA  
AATAATAACGATTTGTTGAGTGACCATATGAGAAATCAACTCGAGAAA

>PGSC0003DMG400017645-(rev)LRR-RLKs\_3233

TGTTCTTCTGAAATAATAACGATTTGTTGAGTGACCATATGAGAAATCAACTCGAGAAATAAGAGATATG  
CGATAAAGAAATTAGAAGAATGCACACGAATACAAATGTCTTACATGATA

>PGSC0003DMG400017645-(rev)LRR-RLKs\_3294

AGAGATATGCGATAAAGAAATTAGAAGAATGCACACGAATACAAATGTCTTACATGATATGAAGCAATA  
CACATGTTTACATATTGCATAAGAGTCTAGTCTATTTACACAATCTATCTA

>PGSC0003DMG400017645-(rev)LRR-RLKs\_3355

AAGCAATACACATGTTTACATATTGCATAAGAGTCTAGTCTATTTACACAATCTATCTAACAACCTTGAAC  
CAAATTGCCTTTTATGACATTCAGGTGGAGACTGCCTTAGCGGAATCAC

>PGSC0003DMG400017645-(rev)LRR-RLKs\_3660

GGAAACCTCAGTGGGAACCAAAGTGGGAACTTAGTGGAAAAATAAGTGGAAATCTTAATAATAAGTT  
GTACTGATAAGAGAGAACTGTCATTATATTGTTATATCTTGTTGTTTAGTCA

>PGSC0003DMG400017645-(rev)LRR-RLKs\_3721

ATAAGTTGTACTGATAAGAGAGAACTGTCATTATATTGTTATATCTTGTTGTTTAGTCATTTGTATGCATC  
TTGTATAGCATAGTTCAGTAACTTACTGAATAAATGTTTTTGC GTTCTA

>PGSC0003DMG400017645-(rev)LRR-RLKs\_3782

TGTATGCATCTTGTATAGCATAGTTCAGTAACTTACTGAATAAATGTTTTTGC GTTCTACATCACAAAAAA

AATGTACCCAAGTTTACAATACAAAGCAAATTTTCATGGAAGTTGAGAA

>PGSC0003DMG400017645-(rev)LRR-RLKs\_3843

TCACAAAAAATGTACCCAAGTTTACAATACAAAGCAAATTTTCATGGAAGTTGAGAATCTCGGGGAT

CTCGCGAAAACTTATCAACACCCGGTGTTCATCAACTCAATGAAGACA

>PGSC0003DMG400017645-(rev)LRR-RLKs\_3904

TCGGGGATCTCGCGAAAACTTATCAACACCCGGTGTTCATCAACTCAATGAAGACATAAAATGTATC

TTCATGTGCTTTGTTATGTCTAAGTCCTTCAAATAAGTAACTAGCGGAA

>PGSC0003DMG400017645-(rev)LRR-RLKs\_3965

AAATGTATCTTCATGTGCTTTGTTATGTCTAAGTCCTTCAAATAAGTAACTAGCGGAAGATATAACTAA

AGTAAATAACAATGCAGTCTCTACAGTCATGATATGATTCAATATCGTAT

>PGSC0003DMG400017645-(rev)LRR-RLKs\_4026

TATAACTAAAGTAAATAACAATGCAGTCTCTACAGTCATGATATGATTCAATATCGTATCAGAGCAGGCA

AAAATCATCGGTTTCATATCTCACCACCAGAAATTTTCATGTGCGCTTGGC

>PGSC0003DMG400017645-(rev)LRR-RLKs\_4087

GAGCAGGCAAAAATCATCGGTTTCATATCTCACCACCAGAAATTTTCATGTGCGCTTGGCACATTATAAGA

CCTTTACACGTGAGGGGGCGTGTGAGGATATAATAAAGTAAACTAAA

>PGSC0003DMG400017645-(rev)LRR-RLKs\_4148

ATTATAAGACCTTTACACGTGAGGGGGCGTGTGAGGATATAATAAAGTAAACTAAAAGTATGTCTC

TCCAACAATTGAACTTCTAGATGAAATGCTCACAACATACCTTTGTTGAC

>PGSC0003DMG400017645-(rev)LRR-RLKs\_4209

TATGTCTCTCCAACAATTGAACTTCTAGATGAAATGCTCACAACATACCTTTGTTGACTCAAAGGGTACT

TCTTGAAGTATAACTTCGCCTTTCCTATACCATTTTCAGCAGCCACGCC

>PGSC0003DMG400017645-(rev)LRR-RLKs\_4270

AAAGGGTACTTCTTGAAGTATAACTTCGCCTTTCCTATACCATTTTCAGCAGCCACGCCTGCCACGGTGG

CTGCATGCAACAGCAGAATCTGCTGTTTCATCGTTGGTGCTCCAAGAGCAC

>PGSC0003DMG400017645-(rev)LRR-RLKs\_4331

CCACGGTGGCTGCATGCAACAGCAGAATCTGCTGTTTCATCGTTGGTGCTCCAAGAGCACCGACATCAAT

TACCAATTCCAGCCACAACAGCTGAATTGGCTGATCAGGCTGCTGCTTCTA

>PGSC0003DMG400017645-(rev)LRR-RLKs\_4392

ACATCAATTACCAATTCCAGCCACAACAGCTGAATTGGCTGATCAGGCTGCTGCTTCTATCTCTGCATTCT  
CCAGCACCCAAAGAACAATAGCAGAGTAGTCAAGTATTCCCAAGTATCT

>PGSC0003DMG400017645-(rev)LRR-RLKs\_4514

CTCTCCAGCCATTACTTTGTCGACACTACTAAAAATCACTATTTTCTCCAAGAAATTTCTCACTGATATTT  
TGATTAAATCGGTGAGAAAAGAGTAATGTTTTCGTACAAAAAACTAG

>PGSC0003DMG400017645-(rev)LRR-RLKs\_4575

CACTGATATTTTGATTAAATCGGTGAGAAAAGAGTAATGTTTTCGTACAAAAAACTAGAAAGTTTACCA  
CTATTTCAATTGAGAATCTGTTCCACCATGCATATTTCCAGTGAECTGA

>PGSC0003DMG400017645-(rev)LRR-RLKs\_4697

TGGTGGAATGAGTGAAAAACATGTTCTATAACACAAATTTCTACTAATTCACCGTGGAAAAAATCTAT  
TACTACTACTCATCATTAGTACTTCATCCGTTTCATCTTATGTTGAACTT

>PGSC0003DMG400017645-(rev)LRR-RLKs\_4785

GTACTTCATCCGTTTCATCTTATGTTGAACTTGATTGATTAGGCGCGGCTAAGAGCAACATGGGAAGTCT  
TAAAGTTCAATTTTTTCCAAATATAGAAAAAGACCCTTTTTATAACGTAC

>PGSC0003DMG400017645-(rev)LRR-RLKs\_61

ATCTCATCATTTAAAAATCCCTTTTCTCTATGTATCATTACTCACTCTATTATAGATTCTTGAATTATTTT  
TCCTCACTTCTCTTAAATCACTTCAAAAAACAAAAAAGTGCTCAC

>PGSC0003DMG400017645-(rev)LRR-RLKs\_854

TTTCACTGAATTTGAGTAACAATATCTTTAGATCAGAAATACCTAATGGACTCAACAAGTTTACTCATTG  
CAAAATCTTGATTTGTCTTCTAACAACCTTGTGGTCCAATGCCTGCTT

>PGSC0003DMG400017662RLKmalectin\_2440

AGTATCATGCCTCAAACTTGTAGTACCCAAAAGAGGGAACAAGAAAGTAGCAGAAGATGGTTAAACT  
GATCTAACCTCAGCATGTTAAGAAGGAAAACAGAAAAAAATCACTCACCA

>PGSC0003DMG400017662RLKmalectin\_2623

CATAGGAAAATCCACCAGTAAGCAATTAAGAAGTCAAGGAACAAGAAGATCATATTAGTTAGAACAA  
GTATTTTCCAGAAATATGATAGCACAAGAAACATCAGCTATTTTAGAATGTG

>PGSC0003DMG400017662RLKmalectin\_2684

AGAACAAGTATTTTCCAGAAATATGATAGCACAAGAAACATCAGCTATTTTAGAATGTGAAGAAAAGTT  
CAGAGATTTAGGCATATAGACATAAGGATTAAGATGGACTAGAACTATGCA

>PGSC0003DMG400017662RLKmalectin\_3355

TACAACCAAATTGACTCTGAATTACCAAATCAAGTTCATATATTTTTAAGTAAGAGGCTGAATATTTTAA  
CATGAATAATATGCTAGTAGCCAAAACAAACCTTTGAGCAAACATCATC

>PGSC0003DMG400017662RLKmalectin\_3904

AGGATAACAAGCCATTTTAGTGCCTATTCAAATGAATATAATAGTGAACATCATGAATAAGATAACAAGC  
CAACTTAGTGCCTAATCAAATGACTATAATAATGAACATCATGAAGAAGG

>PGSC0003DMG400017662RLKmalectin\_4026

AACAAGCCAACCTTAGTGCCGATTCATAGACACTAAATAACAGCATAGTTCTAGCTTTTAACTTTTTTAGAC  
AGGGTTCTAGCTTTTTAACTTTATAAAATTTTGAAGCTTCTTCACAACT

>PGSC0003DMG400017662RLKmalectin\_4209

ATTTTAAAAGCAATGTCAAATCAAAGAAGAAAAATAATCGCAGGAAACTATACTATCTGCAACGTGG  
CCATGAATCAGAAGACCTGTTAGCAGGGGAGTTCATGAACAGAAGTACCAG

>PGSC0003DMG400017662RLKmalectin\_4819

AATGAACTTCCTGTGCGAACAGTTTTATCTTCCAGACTGCCAGTTAAGTCATCAGAAGCCTTGTGCACTAT  
CTCCTCAGCATCCTCCGACTGTCCGGCTTCATAATTTTTAGCACTCACA

>PGSC0003DMG400017662RLKmalectin\_4941

CTGAAATCTTTTGATCCTACACTTTGAATAGAGAATTTGCCATCACTTATAACAAGGCCCGTTACAGTGCCAT  
AGATAAGCTCGGTACACTGAATGTGTTTCATTAGCTGTTAAGGAGAGAC

>PGSC0003DMG400017662RLKmalectin\_5490

GCATAGGTTTATTTTACATAGCCATAGATGTTTTCAACATCTTTATGTTGGTGAACAAAGACTTGGGTGA  
CATTCCGACATTTTACATAGCCTCGAGGTAGTGGTAAATTCTGCGTGACC

>PGSC0003DMG400017662RLKmalectin\_5673

ATGTCCTATATGACAAAAAAATGCTGCACCGCATATTACAAATAGAGATTTTAGAGACATCCAAGCAAC  
CACCTACCCTACCTTACCTTCCCTCCCTTTGGAGTGATGACAAAAAAAT

>PGSC0003DMG400017662RLKmalectin\_5734

CCAAGCAACCACCTACCCTACCTTACCTTCCCTCCCTTTGGAGTGATGACAAAAAAATCAAATAACAGTT  
CATCAAATCCAAATTGGTAGGGTTCCATCCAGAATATTCAAACCAACAA

>PGSC0003DMG400017662RLKmalectin\_6710

GGTAAGGAGTATATGCTCCTCGGGATTCGAAAATCTTCAAGTCCTGTACAATTGACACGTGTCAGATCTG

ATTAGATGTTTGTGGACCCAATGAATTGATAGTTGTATCCCTTGCGTTTG

>PGSC0003DMG400017666-(rev)LRR-RLPs\_1647

AAATTCAAATTCAAGAATGATTTCTTTTTTATAAAGAACAAATTTGGAGTCCCCACCCCCTCTCTTGCTT  
CAATTATTGAATTGCAAAAGTAATAAACAGTCAAGAAACCAGACTGAC

>PGSC0003DMG400017666-(rev)LRR-RLPs\_2013

GTGCATTTCTCTCTTCAGCTTTGAATGTTTTCTTTGATAGGCTTTCTCCTCATGGTGATCTGCTTAACATGT  
TTCGGAAGCATAAGGATCATGTTTCAGCTCTTACACAAACTGGAGGACA

>PGSC0003DMG400017666-(rev)LRR-RLPs\_2074

GCTTAACATGTTTCGGAAGCATAAGGATCATGTTTCAGCTCTTACACAAACTGGAGGACATTTTGCTTGGT  
CTTCAGATTGTGCTAAGTGATGCAGAGAATAAGCAAGCATCAAATCGACA

>PGSC0003DMG400017666-(rev)LRR-RLPs\_2623

CATTGTGACGACACGTAAAGCGAGTGTTGCCTTGATGATGGGTAGTGAGGCAATCAACGTGGGGACTTT  
GTCTGATGAAGCCTCTGGGATCTATACAAACGACATTCACTAGAAAACAG

>PGSC0003DMG400017666-(rev)LRR-RLPs\_3233

AAAGGATCGCACATGTTGGAACAATGTTGGCACATGTCCTATTCAATAGGAAATGATGGTGACTTTGAG  
AAATTGAAATCACTCTTTAAATCAGAGCAGCTGAGGACATTAGTTCCAATC

>PGSC0003DMG400017666-(rev)LRR-RLPs\_3721

TAGTGGGAGCCAAGCTTCTGTAGGTGGTCGTGGTGGTTTGAGAATGAAAGATTTGGGTGAAGCACAT  
AACTTGTATGGATCTGTATCAGTTGTAGAGTTTCAAATGTAGTTGATAGAA

>PGSC0003DMG400017666-(rev)LRR-RLPs\_427

TTTTGCTATTTCTTTGGTCCCTCTTCTTCTTGTCCATTACTTTGTTTTCCGTTGGGAATTTTCTTTAACTGG  
TATGGAGGTTCAACCATATCATAACGCGTCGCAATGTTTAAAGCCC

>PGSC0003DMG400017666-(rev)LRR-RLPs\_4514

CCTTGAAGACAATATGCATATCTGGTTGCCAGAAATTGAAATTGGATACCCAGTTGGTGAGATGAGTA  
TGTTTCTCGAGTTTTGAGAGTGCATGCATGTGATTATATAGATGATATAT

>PGSC0003DMG400017666-(rev)LRR-RLPs\_4575

GATGAGTATGTTTCTCGAGGTTTTGAGAGTGCATGCATGTGATTATATAGATGATATATCACCTGAGTTG  
CTCCAAGAGCACGCAAATTGTGGGTACAGTATTGCCACAACCTTACTAG

>PGSC0003DMG400017666-(rev)LRR-RLPs\_4697

TTTTGATTCTACTGCCACTGAAAGTCTCACTATTTGGAATTGTGAGAATGTTGAAAACTATCGGTGGC  
ATGTAGGGGGACCCAGATGACGTCACTGAAAATTAAGTTATGCTATAAGC

>PGSC0003DMG400017666-(rev)LRR-RLPs\_4758

ATCGGTGGCATGTAGGGGGACCCAGATGACGTCACTGAAAATTAAGTTATGCTATAAGCTGAAGCGTCT  
GCCAGAACATATGCAGGAACTCCTTCCATTTCTTAAGAACTATATCTGTT

>PGSC0003DMG400017666-(rev)LRR-RLPs\_488

TTCTTTAACTGGTATGGAGTTCAACCATATCATACGCGTCGCCAATGTTAAAGCCCTTTTGTGATGTC  
ATTTAGTGTAGTGATGTACTTTCATGCTGTGATTTTAAAGAATTGCT

>PGSC0003DMG400017666-(rev)LRR-RLPs\_5063

GTTGGGAGTTGCCTTCTCTATTCAAAGCCTTAGCATAGAGAATCTGAAAACATTAAGCAGCCAACTTCT  
CAAAGCCTCACCTCTTCAATATATATGTATTCAGGGTAATTTACCTC

>PGSC0003DMG400017666-(rev)LRR-RLPs\_5185

ATTCAGTCCATGCTGGAACAAGGCCAGTTTTCTCCTTTTCGCACCTCACTTCGCTTCAAAGTCTACAAT  
CAGGAATTTGCCTAATCTCCAATCACTTCCCGAATCAGCACTGCCCTCC

>PGSC0003DMG400017666-(rev)LRR-RLPs\_5490

ATCCCTGTGATGATTAACAATAAGTGTCTCACAAATGTAAGCTTTTCTTTTCTCATAAGCCTTCTAT  
TTTTTTAACTTCCTTTGCTTTTATGTTAATTCTTTTTCTTTATTACA

>PGSC0003DMG400017666-(rev)LRR-RLPs\_5551

AAGCCTTCTATTTTTTTAACTTCCTTTGCTTTTATGTTAATTCTTTTTCTTTATTACATTCTTGTTGCGCAGT  
ATGGAGCGTCTATTGCCACTCTGAAACTGAGAAATCATCTTCAGAT

>PGSC0003DMG400017666-(rev)LRR-RLPs\_5612

CTTGTTGCGCAGTATGGAGCGTCTATTGCCACTCTGAAACTGAGAAATCATCTTCAGATTAGAATGATTT  
TAATTTTAGATCTCAATAGCAATTAATGTTACATATCTTACTCGAATATT

>PGSC0003DMG400017666-(rev)LRR-RLPs\_5673

GAATGATTTAATTTTAGATCTCAATAGCAATTAATGTTACATATCTTACTCGAATATTTTTATCACTTGAA  
CTTTCATCTCAATAGCAATTCATGTATGCTTGTAATTTCCCTTTTCAG

>PGSC0003DMG400017666-(rev)LRR-RLPs\_5734

TATCACTTGAACCTTTCATCTCAATAGCAATTCATGTATGCTTGTAATTTCCCTTTTCAGTCAGTTAGAGTG  
ATGCACATGTCCACTATCGAATTCAAAACCTAATAGAATTCAAAGGT

>PGSC0003DMG400017666-(rev)LRR-RLPs\_5795

AGTTTAGAGTGATGCACATGTCCACTATCGAATTCAAAACCTAATAGAATTCAAAGGTGTACCATACAC  
AAGGTTTGGTTCCTATGTATCAAAAATACAAATGTTTGCCTCCCAATAAA

>PGSC0003DMG400017666-(rev)LRR-RLPs\_5856

ACCATACACAAGGTTTGGTTCCTATGTATCAAAAATACAAATGTTTGCCTCCCAATAAAATTTAACACCTAA  
AAACATCAGCAATATTCAGGTTTTTATTAATGATGCAGCCCCATCATAG

>PGSC0003DMG400017666-(rev)LRR-RLPs\_5917

TAACACCTAAAAACATCAGCAATATTCAGGTTTTTATTAATGATGCAGCCCCATCATAGAGATCGATTGG  
GAATACATGTGATGATTAAGAAATGGCTCTCCAACCTGATGTAAGTTAT

>PGSC0003DMG400017666-(rev)LRR-RLPs\_5978

ATCGATTGGGAATACATGTGATGATTAAGAAATGGCTCTCCAACCTGATGTAAGTTATTCTTTTCCATC  
AGAAGCTTTTTATTTTGTGATTCTTTTCTTTTAAAACCTTGTTGAGCA

>PGSC0003DMG400017666-(rev)LRR-RLPs\_6039

TTTTCCATCAGAAGCTTTTTATTTTGTGATTCTTTTCTTTTAAAACCTTGTTGAGCAGTGTGGAATGTCT  
ATTGTTCAAATCATAAATGTTGATTGGGAGAACCATTAAAACGAGTGC

>PGSC0003DMG400017666-(rev)LRR-RLPs\_61

TTGGAAGATGCAAAATATTCAACATCTCAATGTGAATATATCAAATATGGTGGCTTCCAAATCTTTGACA  
AATATTGCTACCAAATTTCCACATTTGTGGCTTCCAAATCTTTACAAAA

>PGSC0003DMG400017666-(rev)LRR-RLPs\_6100

GTGGAATGTCTATTGTTCAAATCATAAATGTTGATTGGGAGAACCATTAAAACGAGTGTACTCCGATAG  
ATGTAAGTTATTCTATTCCCTTGGTATTATTTGATTGTTTGTAAATTCTC

>PGSC0003DMG400017666-(rev)LRR-RLPs\_6222

TGCTTGTTTGTTAATTCTTCTTGACCTTACTTTCGTTTGCTGGATTTGGGTAATAGGCCCAAATGTGTACT  
TTGTTTTCGTATCAATAAAAGTCTAAATTTTCATCAAAAAAAAAAATAAA

>PGSC0003DMG400017666-(rev)LRR-RLPs\_6283

AAATGTGTACTTTGTTTTCGTATCAATAAAAGTCTAAATTTTCATCAAAAAAAAAAATAAAAAATCTTCTTA  
ACCAGTGTGTACCATCTATTGCTTCTGTGAAGTCGACAAAATATCTTTA

>PGSC0003DMG400017666-(rev)LRR-RLPs\_6344

AATCTTCTTAACCAGTGTGTACCATCTATTGCTTCTGTGAAGTCGACAAAATATCTTTAGATCAGGATGAA

ATCTTTATATTTGTAAAAGAAATCTAACATAGGTAGGAGTTGAGATAAT

>PGSC0003DMG400017666-(rev)LRR-RLPs\_6405

TCAGGATGAAATCTTTATATTTGTAAAAGAAATCTAACATAGGTAGGAGTTGAGATAATTTGCTCAAGAA  
AATTGATTGCTTAATATATGTTAGGGTCTAAGAAATGCAACCTCACATTC

>PGSC0003DMG400017666-(rev)LRR-RLPs\_6466

GCTCAAGAAAATTGATTGCTTAATATATGTTAGGGTCTAAGAAATGCAACCTCACATTCTCAATCAGGTA  
GCCAAGACATTGATAAGAGTTGTATCAGCTTCAAATTTAAGAAAGTAAAA

>PGSC0003DMG400017666-(rev)LRR-RLPs\_6527

AATCAGGTAGCCAAGACATTGATAAGAGTTGTATCAGCTTCAAATTTAAGAAAGTAAAAACGACTGCTT  
GCTTCCATTATTTATGCCATGTTATATAAAGTTATCTGTTGATCCAAAATT

>PGSC0003DMG400017666-(rev)LRR-RLPs\_6588

GACTGCTTGCTTCCATTATTTATGCCATGTTATATAAAGTTATCTGTTGATCCAAAATTTTCATTTTTCTTG  
ATCTTCTTCTATCTTTAGTTTTACATGTCTTCTGATTGAGTTATAATA

>PGSC0003DMG400017666-(rev)LRR-RLPs\_6649

CATTTTTCTTGATCTTCTTCTATCTTTAGTTTTACATGTCTTCTGATTGAGTTATAATACATGCCTTGATTCT  
ATAGAAGATGAGAAATTGTCAAATGCCTTTATGAAGTGCTTGCTAAG

>PGSC0003DMG400017666-(rev)LRR-RLPs\_6710

TGCCTTGATTCTATAGAAGATGAGAAATTGTCAAATGCCTTTATGAAGTGCTTGCTAAGTTGATGTCGCC  
TAATTCACATTTCACTGAATTAATTTCTGACTCAAGTTTATGCATATGTT

>PGSC0003DMG400017666-(rev)LRR-RLPs\_6771

GATGTCGCCTAATTCACATTTCACTGAATTAATTTCTGACTCAAGTTTATGCATATGTTTGCTCTAACCTTG  
AAAAGGAAAAACGTCCAATGATATGGATATTTTATTTTTTAAGAATAC

>PGSC0003DMG400017666-(rev)LRR-RLPs\_6832

CTCTAACCTTGAAAAGGAAAAACGTCCAATGATATGGATATTTTATTTTTTAAGAATACAAAGTCGCAAT  
AAAAAATTCATGGTATTAATTTTATGATATGGATCACCGCTGAGAACTTTG

>PGSC0003DMG400017666-(rev)LRR-RLPs\_6893

AGTCGCAATAAAAAATTCATGGTATTAATTTTATGATATGGATCACCGCTGAGAACTTTGCCTGAGGTATA  
AATTTATATTTTCCCTGTTTAGAAATGTTTCCCGTAGCTCCTAATTGTGA

>PGSC0003DMG400017666-(rev)LRR-RLPs\_6954



TGAGGTATAAATTTATATTTTCCCTGTTTAGAAATGTTTCCCGTAGCTCCTAATTGTGATGCTTCATTTACA  
CATTTTTAAAATTTTATCTTATAACAACATAAAAGTGTGTCAAAGTAA

>PGSC0003DMG400017666-(rev)LRR-RLPs\_7015

CTTCATTTACACATTTTTAAAATTTTATCTTATAACAACATAAAAGTGTGTCAAAGTAAATTAGATGTTACA  
GACTTGGCTCTTCTTTGTTAATTTACTTTCTTCAATTTGATCAGAAA

>PGSC0003DMG400017666-(rev)LRR-RLPs\_7076

TAGATGTTACAGACTTGGCTCTTCTTTGTTAATTTACTTTCTTCAATTTGATCAGAAAATATTTCTCTAAA  
GGCATGTTGATTTTATTATTTTACACGATTTCTGTTTGTGTTACTTTT

>PGSC0003DMG400017666-(rev)LRR-RLPs\_7137

ATTTCTCTAAAGGCATGTTGATTTTATTATTTTACACGATTTCTGTTTGTGTTACTTTTTCGATTTCTAATTT  
GTTTTATGAATGTTTTTTACAGTTTAAATTTTGTGCTTCCTGAAGT

>PGSC0003DMG400017666-(rev)LRR-RLPs\_7198

GATTTCTAATTTGTTTTATGAATGTTTTTTACAGTTTAAATTTTGTGCTTCCTGAAGTTTTCTGGGTGAGC  
ATGTTCTCTCCTTTGAACTATGAATGCATCTTAACAATAATTTAATT

>PGSC0003DMG400017666-(rev)LRR-RLPs\_7259

TCTGGGTGAGCATGTTTCTCTCCTTTGAACTATGAATGCATCTTAACAATAATTTAATTATTGAATGCATC  
TTAAGTGTTTATACCGCTAACGAAGATATTTAAACCGTTGAAGAGATTC

>PGSC0003DMG400017666-(rev)LRR-RLPs\_732

CCTTGACTTAGGAGGTCATACAATCAGTAAGATCAATGACTTGCTTTTGTGGAAGAATAACTATGATGA  
TTGAACGTCTGCAATTCGTTTGTCTGCAGGTGGAGATATACCGCCGTTGT

>PGSC0003DMG400017666-(rev)LRR-RLPs\_7320

TGAATGCATCTTAAGTGTTTATACCGCTAACGAAGATATTTAAACCGTTGAAGAGATTCCTTGAATGGT  
AGAAAAATAAAGCAAAATCAGTATACAGTGTAATTGATCGATTATGTTTC

>PGSC0003DMG400017666-(rev)LRR-RLPs\_7381

TTGAATGGTAGAAAAATAAAGCAAAATCAGTATACAGTGTAATTGATCGATTATGTTTCAAGCTACTTCT  
GGACTCTTCGACAAACTAAAATTAGTATAGATTGTTAATATTGATGTTGC

>PGSC0003DMG400017666-(rev)LRR-RLPs\_7442

GCTACTTCTGGACTCTTCGACAAACTAAAATTAGTATAGATTGTTAATATTGATGTTGCTGATGCTAATAA  
TCACTTGGCTATCATATGTCTCTGTTTCGATGCTGGGGTGATTTTACTG

>PGSC0003DMG400017666-(rev)LRR-RLPs\_7503

ATGCTAATAATCACTTGGCTATCATATGTCTCTGTTTCGATGCTGGGGTGATTTTACTGTTATAGTGAGCC  
GAATATCCTTGTTTAAGTTCCTGGTAGCGAAGAAGCTTTAGAAACAAGT

>PGSC0003DMG400017666-(rev)LRR-RLPs\_7686

GTCATTTTCAATAGACTGTTGGTTGTGGTTTCTCTGTTGCAACAAAACACTAAAAAAAACACTACCTTTTAC  
ATATATGTGCTTGAAGGATGCAGCCCGTGATTTTGTGCGCACTCAGACTA

>PGSC0003DMG400017666-(rev)LRR-RLPs\_7808

ACCAATCCAAGCTATTTTATGAATAAAATGTGATCAATTAACCAACCAATGTATGACCAATGATGTTTTTC  
TAGCTTTACCCACGTGGCAAGGGAAAAATCAAAGGCAAGGTGGAAAACG

>PGSC0003DMG400017666-(rev)LRR-RLPs\_7869

GATGTTTTTCTAGCTTTACCCACGTGGCAAGGGAAAAATCAAAGGCAAGGTGGAAAACGGGCCACCACA  
TCGAGAAATAGAAGTACTGACTAATCCTAAATCAAAGGGTCAAGAAGTCAATAC

>PGSC0003DMG400017690-(rev)LRR-RLKs\_1342

GCTGAGTGAAGACCAGGTGACTGGACTGGACTCTTTTTTTGTACGACAAACAGAGATAAATAAGTAATA  
ATATAAAATGTTAAGAATAATATGAATCAACTTGAATAAAAAATATATTCTA

>PGSC0003DMG400017690-(rev)LRR-RLKs\_1403

AAGTAATAATATAAAATGTTAAGAATAATATGAATCAACTTGAATAAAAAATATATTCTAAAAGTTTCAAT  
TATTATCTGATTAACAAAGTTGTGCTTGCTTGGTCTCTCTCGATATAGAC

>PGSC0003DMG400017690-(rev)LRR-RLKs\_2257

CCTTCCTCCTACGCCCTCATCGTCATCTTCAGGTTTGTGACATAATTTGTGTTTATGCTGTTATGAAATTG  
TGCTACCTCTCCTTTTTCCCTATTCCAATTTAGTTTTCATGAAAATCC

>PGSC0003DMG400017690-(rev)LRR-RLKs\_244

CATTCTATTTCTTCCGGTTTTTTTTCTTCTTTTTGTTCTTTTTCAGTTTGGTTATTTTTTTTCAATGTTTCA  
AATCTTTAGCATATATATCTGAAGTTTAGTTAAATCAGAAATGAT

>PGSC0003DMG400017690-(rev)LRR-RLKs\_2440

GAAAGCTGAAGAGATGAGCCCCAGACTGGATTCCCTTATGAAAGCACTTTCTTTATGAAAAAACTACC  
ATTACGTTAGGCACTATAAATTAGTTTATTTAGATCAATTATACAGGTATT

>PGSC0003DMG400017690-(rev)LRR-RLKs\_2501

AAACTACCATTACGTTAGGCACTATAAATTAGTTTATTTAGATCAATTATACAGGTATTGGGGTCTTGTG

GTTATCCAGCATTTCATGACTTTCCAAAATAAAAAATTCAAATAAGCTTGG

>PGSC0003DMG400017690-(rev)LRR-RLKs\_5429

ATGTTTCAGGAGGATTTAACCATTTCATTGCTAAAATTGCACGAGCATGTAGGTTATAATTAGAGTGGATT  
ACTTTCATTATCTTATTCTTGCAGGTGCTTCAACAGTTAGGTTGCCAAAT

>PGSC0003DMG400017690-(rev)LRR-RLKs\_5673

AACTGCCATATTAATGTCACTTCAGTCATGTTGTTTTGGGGGTAGATATAGTATACTTTAGGACAGGTA  
CTCATTTCAGGAGCATCCTTGAGAAAGGCTAGTCTTATGTGGGATCGCCAT

>PGSC0003DMG400017690-(rev)LRR-RLKs\_5795

TGGAGAAGGAAAAGGAGATGGTCAAACCTGTTAGGAAGTGACTATTAATAATTAAGCTTTTCTGAACCT  
CTTGCGTCTCTGATGGATACAAAACTGTAATAGCAACATGAACACTAATA

>PGSC0003DMG400017690-(rev)LRR-RLKs\_5856

CTGAACCTCTTGCGTCTCTGATGGATACAAAACTGTAATAGCAACATGAACACTAATAGACAGCAATGC  
CACTAATGTCAATCAGAAACACTTGGCTGTGTTGAGCCTCATGCACTGA

>PGSC0003DMG400017690-(rev)LRR-RLKs\_6405

CAGGGCCAAGATGATCTTTCATTTATTCTGCCATCAGCACATATAGGACCGACTCTTTTGAGGGAAAATC  
CTCTTTGTATCCTTGATCTGTAATCGGTATATGTCATCTTCTTTTTTTT

>PGSC0003DMG400017690-(rev)LRR-RLKs\_6466

GGGAAAATCCTCTTTGTATCCTTGATCTGTAATCGGTATATGTCATCTTCTTTTTTTTTGGGTTAATTGGTA  
TATGTCATCTTTGTGCATACCATTTTCCTTCTTTTTTTGTTTCAGTCA

>PGSC0003DMG400017713LRR-RLKs\_0

CAAAAACAATCTTTTAATTATTAGCAATGATGATAGTTCCCACAATTTTAATTTTCCTTCAGTTTATTACTA  
TCTTATATTTTTTACAGTTACATTTGCTACCACTGAGGAAGCAACTG

>PGSC0003DMG400017713LRR-RLKs\_1037

ATTCCCGATTCTTTCGGCAATTTGAGAACTTGAAAATTTGTTTCTCCGTAACAACAACTTTCTGGTTCT  
ATTCCAAAAGAACTTGCATATTTGGACAACCTTGGTTGTGATGGAAATG

>PGSC0003DMG400017713LRR-RLKs\_1098

TTTCTGGTTCTATTCCAAAAGAACTTGCATATTTGGACAACCTTGGTTGTGATGGAAATGGATGAAAATCA  
GTTTTTCAGGCCATTTGCCTGAGAATCTTTGCCAAGGTGGGAACTTGTGA

>PGSC0003DMG400017713LRR-RLKs\_122

CTTCTAAAATGGAAAGCAACTTTCCAAAACCAGAACAATTCCTTATTGACTTCGTGGACGCTAAGCGGTC  
GTGCTGGTACCAACAGAATTGGAGCGGCGAGTTCTAATGCGGTACGGAC

>PGSC0003DMG400017713LRR-RLKs\_1220

TTCACGGTGAATAGTAACAAGCTAACAGGGCCAATACCAAGAAGCTTGAGCAACTGCTCAAGTTTCGAA  
AGGGTTCGCTTTGATAACAACAGTTTTACTGGGAATTTATCTGAAGCTTTT

>PGSC0003DMG400017713LRR-RLKs\_1281

GTTTCGAAAGGGTTCGCTTTGATAACAACAGTTTTACTGGGAATTTATCTGAAGCTTTTGGTATCTATCCG  
GAGCTGCAGTTCATTAATTTGAGCGAAAATGATTTTCATGGCGAACTAA

>PGSC0003DMG400017713LRR-RLKs\_1342

TATCTATCCGGAGCTGCAGTTCATTAATTTGAGCGAAAATGATTTTCATGGCGAACTAAGCAGCAACTGG  
GGGAAATGCAAGAATTTGACTGATCTTCGGATAGCCAGAAATAGAATTGG

>PGSC0003DMG400017713LRR-RLKs\_1403

AGCAACTGGGGGAAATGCAAGAATTTGACTGATCTTCGGATAGCCAGAAATAGAATTGGTGGTCGCAT  
ACCACCAGAGATTGGAAACCTCAAAGGGCTTCAAGGACTAGATCTTTCATCC

>PGSC0003DMG400017713LRR-RLKs\_1464

GTCGCATACCACCAGAGATTGGAAACCTCAAAGGGCTTCAAGGACTAGATCTTTCATCCAATCATTGGT  
TGGGAAGATTCCTAGGGAATTTGGAAAATTGACCTCTCTGGTTAATCTTC

>PGSC0003DMG400017713LRR-RLKs\_1525

TCATTTGGTTGGGAAGATTCCTAGGGAATTTGGAAAATTGACCTCTCTGGTTAATCTTCTTTTGCAAAACA  
ACCAAATTTCTGGCAATATTCCTATGGAACCTGGGTCATTGACAAAAGTT

>PGSC0003DMG400017713LRR-RLKs\_1586

TTGCAAAACAACCAAATTTCTGGCAATATTCCTATGGAACCTGGGTCATTGACAAAAGTTAGATTACCTTG  
ATCTTTCAGACAATAGATTGAATGGTTCGATCCCAACGTTTATAGGAGAT

>PGSC0003DMG400017713LRR-RLKs\_1647

ATTACCTTGATCTTTCAGACAATAGATTGAATGGTTCGATCCCAACGTTTATAGGAGATTACCATCACCTG  
TTTCACTTGAACCTGAGCAACAACAAATTTGGCCAAAATATTCCGAAGG

>PGSC0003DMG400017713LRR-RLKs\_1708

CCATCACCTGTTTCACTTGAACCTGAGCAACAACAAATTTGGCCAAAATATTCCGAAGGAGATAGGGGG  
TATAACTCAACTTAATGTACTTGATTTGAGCCATAATGTTCTGGTTGGAGA

>PGSC0003DMG400017713LRR-RLKs\_1769

ATAGGGGGTATAACTCAACTTAATGTACTTGATTTGAGCCATAATGTTCTGGTTGGAGAAATACCCCCTC  
AGTTAACCAATTTGAAGGTCTTGAAAGCTTAAATATTTCCCACAACGGC

>PGSC0003DMG400017713LRR-RLKs\_183

TAAGCGGTCCTGCTGGTACCAACAGAATTGGAGCGGCGAGTTCTAATGCGTGTACGGACTGGTATGGA  
GTTACATGTTCTAATGGTAGGGTAAACATGTTGAATATGACAAATGCTGGTA

>PGSC0003DMG400017713LRR-RLKs\_1952

TACAATGAGTTGGAAGGTCCAATACCTAATAATAAAGCTTTCACAAATGCCTCATTGCAAGGTAATAAAG  
CTCTTTGTGGCAATGTAACAGGTTTCGTGCCATGCAACATAACCATCTTCT

>PGSC0003DMG400017713LRR-RLKs\_2013

GTAATAAAGCTCTTTGTGGCAATGTAACAGGTTTCGTGCCATGCAACATAACCATCTTCTATGGTGAAGAA  
GCACTCAATGGCGAAGGGACTTAAACTCATCCTCATCACTGTACTTCCTA

>PGSC0003DMG400017713LRR-RLKs\_2074

GGTGAAGAAGCACTCAATGGCGAAGGGACTTAAACTCATCCTCATCACTGTACTTCCTATTCTGGGAGC  
ATTAGTGCTTCTTTGTGCTTTTCGCTGGTGCTCTCTTTATGCGTGACCAAAG

>PGSC0003DMG400017713LRR-RLKs\_2135

CTGGGAGCATTAGTGCTTCTTTGTGCTTTTCGCTGGTGCTCTCTTTATGCGTGACCAAAGAAGAAGAGTTG  
GAGACATTGAAAGACGGGATTCCATAGACAAAGATGATGGTCTGCTTTCA

>PGSC0003DMG400017713LRR-RLKs\_2196

GAAGAGTTGGAGACATTGAAAGACGGGATTCCATAGACAAAGATGATGGTCTGCTTTCAATATCCTCAT  
TACATGGAAATTCATTATACTGGGATATCTTAAAAGCCACAGAGGAGTTTG

>PGSC0003DMG400017713LRR-RLKs\_2257

ATCCTCATTACATGGAAATTCATTATACTGGGATATCTTAAAAGCCACAGAGGAGTTTGATGCAACATTT  
TGCATTGGGAAAGGAGGGTTTCGGAAGTGTTTACAAGGTAATCTTCCATC

>PGSC0003DMG400017713LRR-RLKs\_2318

GCAACATTTTGCATTGGGAAAGGAGGGTTTCGGAAGTGTTTACAAGGTAATCTTCCATCATTGGGAAAT  
GTAGCTGTGAAGCGACTTCATTCTTCATTTGAGATTAAGCATCGCAAGAGC

>PGSC0003DMG400017713LRR-RLKs\_2379

TGGGAAATGTAGCTGTGAAGCGACTTCATTCTTCATTTGAGATTAAGCATCGCAAGAGCTTCATGAATGA

GGTAAGGGCATTGACAGGGATTAAGCATCGGAACATTGTGAGACTCTATG

>PGSC0003DMG400017713LRR-RLKs\_244

GTATGGAGTTACATGTTCTAATGGTAGGGTAAACATGTTGAATATGACAAATGCTGGTATCATTGGCAC  
ACTCTATGATTTCCATTTTCTTCACTCCCTTTTCTTGATTATCTTGATCT

>PGSC0003DMG400017713LRR-RLKs\_2440

CATGAATGAGGTAAGGGCATTGACAGGGATTAAGCATCGGAACATTGTGAGACTCTATGGCTTTTGTTT  
GAATGCACAACACTCGTTCTTGGTTTACGAGTATGTGGAGAGGGGGAGTTT

>PGSC0003DMG400017713LRR-RLKs\_2562

CTAGTATTTTGAGCAACGAAGTAGAGTCTAAGAAATTGGATTGGCTTACAAGGGTGAATATCATCAAAG  
GTATTGCTTATGCTTTATCCTACATGCACCACGATTGCTCACCCCCGATTG

>PGSC0003DMG400017713LRR-RLKs\_2623

CATCAAAGGTATTGCTTATGCTTTATCCTACATGCACCACGATTGCTCACCCCCGATTGTTTCATCGGGACA  
TATCAAGCAGTAATGTTTTGCTTGACTCCGAGTTTGAAGCTCGTGTTTC

>PGSC0003DMG400017713LRR-RLKs\_2684

CATCGGGACATATCAAGCAGTAATGTTTTGCTTGACTCCGAGTTTGAAGCTCGTGTTTCTGATTTTGGCA  
TAGCTAAGATTCTCAAGCCAGACTCATCCAATTGACTGCACTTGCAGGC

>PGSC0003DMG400017713LRR-RLKs\_2806

ATATGGCTATGTAGCACCAGGTAAGATCTAACTTCTTATCCTTATTTTAGTTCATGAACTATATCTGCACA  
CTCTATATTGTTTCTATCTCATTGCAACTTTATTGTTTCAGAGCTTGC

>PGSC0003DMG400017713LRR-RLKs\_2867

TATCTGCACACTCTATATTGTTTCTATCTCATTGCAACTTTATTGTTTCAGAGCTTGCCTATACATTGAAG  
GTGACGGAAATGTGTGACGTCTACAGCTTTGGAGTATTAGCATTGGAG

>PGSC0003DMG400017713LRR-RLKs\_2989

AATCAAAGGAAAGCATCTTGGGGAATACCTTACTCTTCTAGCAAATCCATCAACAAGAGATGTGCAGCT  
AAGTGATTTGCTAGATGAACGCCTTCCACATCCTGAGGATGAAGTAAAAGA

>PGSC0003DMG400017713LRR-RLKs\_305

ATTGGCACACTCTATGATTTTCCATTTTCTTCACTCCCTTTTCTTGATTATCTTGATCTTAGCATGAACCAAC  
TCTCTGGCACTATCCACCTGAAATAGGAAAGCTCACTAATCTTTTC

>PGSC0003DMG400017713LRR-RLKs\_3050

GTGCAGCTAAGTGATTTGCTAGATGAACGCCTCCACATCCTGAGGATGAAGTAAAAGAGTTTTTGGTTT  
TCATCGTCAAGCTAGCAATCTCGTGTGGTTGCTTGAAAATCCAAAATCAAGG

>PGSC0003DMG400017713LRR-RLKs\_3111

TTTTGGTTTTTCATCGTCAAGCTAGCAATCTCGTGTGGTTGCTTGAAAATCCAAAATCAAGGCCAACGATGCA  
CTTCATCTCTCATATGTTATCAATGGATCCACCCAATCATCAGATTCCAT

>PGSC0003DMG400017713LRR-RLKs\_3172

AACGATGCACTTCATCTCTCATATGTTATCAATGGATCCACCCAATCATCAGATTCCATGAAAGTGAGATT  
CCTCGAAATGTAAGGTGCCCTGGTATGGAAAAGATTATGCTCAGCACCA

>PGSC0003DMG400017713LRR-RLKs\_3233

AAGTGAGATTCCTCGAAATGTAAGGTGCCCTGGTATGGAAAAGATTATGCTCAGCACCAAGTGGTTGTG  
AAGTAACAAGTATGTTGATCAGAACTTTACAGCAAAATATTATTAAGATT

>PGSC0003DMG400017713LRR-RLKs\_3294

TGGTTGTGAAGTAACAAGTATGTTGATCAGAACTTTACAGCAAAATATTATTAAGATTAGCCTTTCTGT  
ATTGTTGAGTTGCTTATATAGATTACTTATTTCAATTTGAAGGTTTCAGA

>PGSC0003DMG400017713LRR-RLKs\_3354

GCCTTTCTGTATTGTTGAGTTGCTTATATAGATTACTTATTTCAATTTGAAGGTTTCAGAGCCTTTGTACTA  
GAATATATACAAATTACAGTAATATACTGATGTTAAGTAATAAAAAGCA

>PGSC0003DMG400017713LRR-RLKs\_366

GCATGAACCAACTCTCTGGCACTATCCCACCTGAAATAGGAAAGCTCACTAATCTTTTCTATCTTGACTTG  
TCCATCAATCAGATTTGCGGCACAATTCCACCACAAATCAGCTCATTA

>PGSC0003DMG400017713LRR-RLKs\_427

TCTTGACTTGTCCATCAATCAGATTTGCGGCACAATTCCACCACAAATCAGCTCATTAACAAAGCTTGGG  
ACTCTCCACATCTTTGTCAACCAATTAATGGTTCCATTCCGGAGGAAAT

>PGSC0003DMG400017713LRR-RLKs\_610

TGTTTCTTTGGGGAATTTGAACAACCTGTCTGTTTTGAGTCTGTATGAGAACCATCTTTCTGGTTCCATTC  
CAGCAGAAATAGGAAAACCTGTCAATCTTGTTGAACTTTTACTTGATT

>PGSC0003DMG400017713LRR-RLKs\_671

GGTTCATTCCAGCAGAAATAGGAAAACCTGTCAATCTTGTTGAACTTTTACTTGATTCAAACAACCTAAC  
TGGTCATATTCCTCCAGAAATCGGAGAACTTGTCAATCTCGATAGAGTT

>PGSC0003DMG400017713LRR-RLKs\_732

ACAACCTTAACTGGTCATATTCCTCCAGAAATCGGAGAACTTGCAATCTCGATAGAGTTTATCTTGATTCA  
AACCAATTAACCTGGTCATATTCCTGCCGAAATAGGGAAGATGAAGTCAC

>PGSC0003DMG400017713LRR-RLKs\_793

TCTTGATTCAAACCAATTAACCTGGTCATATTCCTGCCGAAATAGGGAAGATGAAGTCACTTGAGGAGTTG  
AGCATAAACACCAACAATTTTTCTGGTCCAATTCCCAAACTATAGGAGA

>PGSC0003DMG400017713LRR-RLKs\_976

ATTGGGGAATCTGAAAAAAGTGAATTATCTGCAGTTATCCACTAATCAACTTTCTGGTCCGATTCCCGATT  
CTTTCGGCAATTTGAGAACTTGAAAATTTTGTCTCCGTAACAACAA

>PGSC0003DMG400017716-(rev)LRR-RLPs\_0

ATGTGTATAGTAGATTCGTGCAGTTGTTTCAGTTGAACCTAAGCAACAACAAGTTTGACCAGAAAATTC  
CAAAGGAGATAGGGAGGATAACACAGCTTAATGTACTTGATTTGAGCTAT

>PGSC0003DMG400017716-(rev)LRR-RLPs\_1098

CATAAGGCTATGTGGCACCTGGTAAGTTTTAAATAGTTCATGAACTACAGCCAAATACTCCACTGTTTTTA  
TCTCATTTACACTTTTAAATTGGTAATATTGTTCTGGAAATTGTATTGC

>PGSC0003DMG400017716-(rev)LRR-RLPs\_1159

ACTGTTTTTATCTCATTTACACTTTTAAATTGGTAATATTGTTCTGGAAATTGTATTGCTCAGAGCTTGCAT  
ATACAATGAAGGTTATGAAAATGCGTGATGTGTTAAGAATTCATCACC

>PGSC0003DMG400017716-(rev)LRR-RLPs\_122

TCTTCTGGTTGTCGATATACCCCTCAGTTAGCTAATTTGAAGGTGTTGGTAACTTAAATCTTCCCACA  
ATGGCATATCTGGACTCATTCTAGAGAACTTGAACTTTGACTGGTTT

>PGSC0003DMG400017716-(rev)LRR-RLPs\_183

CTTCCCACAATGGCATATCTGGACTCATTCTAGAGAACTTGAACTTTGACTGGTTTGCAGGATGTGG  
TATTGTCATACAATGAGTTGGAAGGTCCAATCCCTAACAGTAAGGCTTTT

>PGSC0003DMG400017716-(rev)LRR-RLPs\_1830

GTTTCTTGAATATGTTGATCTTAGCGTGAATCAGCTCTCTGGTATCATCCCCTGCAATAGGAAACCTCACT  
AATCTTGTCTATCTTGACCTGTCGATCAACCAGATTACTGGTTCAATTC

>PGSC0003DMG400017716-(rev)LRR-RLPs\_305

CAATGCCTCATTGGAGGGTAATAAAGGTCTTTGCGGCAATGTTGCAGGACTAGATCCCTGTCAAATGCC



ATCTTATGTGGTGAAGAAGCACTCAATGGCAAAGGGACGTATACTCATCCT

>PGSC0003DMG400017716-(rev)LRR-RLPs\_3111

AGTTGGGGAATTTGAAAAACCTCAATGTTCTAAAACCTACAAGAAAATCAACTTACTGGTCCAATTCCTGC

TTCCTTTGGCAATTTGAGAACTTGCAATTCTGTATCTCCGCGAGAACAA

>PGSC0003DMG400017716-(rev)LRR-RLPs\_3172

AATTCCTGCTTCCTTTGGCAATTTGAGAACTTGCAATTCTGTATCTCCGCGAGAACAACCTTTCTGGTTC

TATCCAAAAGAACTTGCATATTTGGATAACTTGGTAGACCTGATAATA

>PGSC0003DMG400017716-(rev)LRR-RLPs\_3233

TTTCTGGTTCATTCCAAAAGAACTTGCATATTTGGATAACTTGGTAGACCTGATAATAAGTGAAAATCA

ATTTTCAGGCCATTTGTCTAAGCATCTTTGCCAAGGTGGGAAACATGAGA

>PGSC0003DMG400017716-(rev)LRR-RLPs\_3294

TGAAAATCAATTTTCAGGCCATTTGTCTAAGCATCTTTGCCAAGGTGGGAAACATGAGAACTTCACAATG

AACAGTAACAAGCTGACAGGGCCAATACCAAGCAGCTTGAAAAAGTGCTC

>PGSC0003DMG400017716-(rev)LRR-RLPs\_3355

TTCACAATGAACAGTAACAAGCTGACAGGGCCAATACCAAGCAGCTTGAAAAAGTGCTCTAGTTTAAAA

TTTGTCCGCTTAACAACAACAGTTTCACTGGGAATTTATCTGAAGCTTTTG

>PGSC0003DMG400017716-(rev)LRR-RLPs\_3416

GTTTAAAATTTGTCCGCTTAACAACAACAGTTTCACTGGGAATTTATCTGAAGCTTTTGGCATCCATCCAG

AGCTGCAGTTCATTGATTTGAGCGACAAAGTTTTTCACGGTGCACTTAG

>PGSC0003DMG400017716-(rev)LRR-RLPs\_3477

ATCCATCCAGAGCTGCAGTTCATTGATTTGAGCGACAAAGTTTTTCACGGTGCACTTAGCAACAACCTGGG

GGAAATGCGAAAATTTGATTGATCTGCGTGTAGCCAGAAATAACATTAGT

>PGSC0003DMG400017716-(rev)LRR-RLPs\_366

CAAATGCCATCTTATGTGGTGAAGAAGCACTCAATGGCAAAGGGACGTATACTCATCCTCATCACTGTAC

TTCCTGCTATGGGAGCACTAATACTGCTATGTGTTTTTGTGTTGTGTTG

>PGSC0003DMG400017716-(rev)LRR-RLPs\_3660

CATTTGATTGGGCAGATTCCAAAGGAATTTGAAAATTAAGATCTCTAGTTAATCTTTTTCTGCAAAACA

ACCGAATTTCAAGTAATATACTGAGGAACTTGGGTTACTAACAAGTTA

>PGSC0003DMG400017716-(rev)LRR-RLPs\_3721

TGCAAAACAACCGAATTTAGGTAATATACCTGAGGAACTGGGTTACTAACAAGTTAGAGTCCCTTG  
ATCTATCAGACATCAGATTGAACGGGTCAATCCCGATGTGTATAGTAGATT

>PGSC0003DMG400017716-(rev)LRR-RLPs\_3782

GTCCCTTGATCTATCAGACATCAGATTGAACGGGTCAATCCCGATGTGTATAGTAGATTTTCGTGCAGTTG  
TTTCAGTTGAACCTGAGCAACAAGTTTGGCCAGAAAATCCAAAGGAGAT

>PGSC0003DMG400017716-(rev)LRR-RLPs\_3843

GTGCAGTTGTTTCAGTTGAACCTGAGCAACAAGTTTGGCCAGAAAATCCAAAGGAGATAGGGAGGAT  
AACACAGCTTAATGTACTTGATTTGAGCTATAATCTTCTGGTTGGAGGTATA

>PGSC0003DMG400017716-(rev)LRR-RLPs\_3904

GGAGGATAACACAGCTTAATGTACTTGATTTGAGCTATAATCTTCTGGTTGGAGGTATACCCCTCAGTT  
AGCCAATTTGAAGGTGTTGGTAACTTGAATCTTCCACAATGGCCTAT

>PGSC0003DMG400017716-(rev)LRR-RLPs\_3965

CCCTCAGTTAGCCAATTTGAAGGTGTTGGTAACTTGAATCTTCCACAATGGCCTATCTGGACGCATTC  
CTAGAGAACTTGAACTTTGACTGGTTTGCAGGATGTGGTATTGTCATA

>PGSC0003DMG400017716-(rev)LRR-RLPs\_4026

GGACGCATTCTAGAGAACTTGAACTTTGACTGGTTTGCAGGATGTGGTATTGTCATACAATGAGTTG  
GAAGGTCCAATCCCTAATAATAAGGCTTTTATCAATGCCTCATTGGAGGGT

>PGSC0003DMG400017716-(rev)LRR-RLPs\_4148

TAAAGTCTTTGTGGCAATGTTGCAGGACTAGATCCCTGCGAAATGTCGTCTTCTGTGGTGAAAATATAC  
TCAATGGCAAAGGGACGTAACTCATCCTCATCACTGTACTTCCTGTTAT

>PGSC0003DMG400017716-(rev)LRR-RLPs\_4209

AAAATATACTCAATGGCAAAGGGACGTAACTCATCCTCATCACTGTACTTCCTGTTATGGGAGCACTAA  
TATTGCTCTGTGTTTTTGTGTTGTGTTGGTTCTGTGTGATAAAAAGAAGG

>PGSC0003DMG400017716-(rev)LRR-RLPs\_427

TCACTGTACTTCCTGCTATGGGAGCACTAATACTGCTATGTGTTTTTGTGTTGTGTTGTTTATGTGTGAT  
AAAAGAAGGAGAGTTGGAGACGTTGAAAGATGGGATGATGGTTGGCTTT

>PGSC0003DMG400017716-(rev)LRR-RLPs\_4270

GAGCACTAATATTGCTCTGTGTTTTTGTGTTGTGTTGGTTCTGTGTGATAAAAAGAAGGAGAGTTAGAGA  
CGTTGAAAGACGGGATGATGGTTGGCTTTGATAACCATGTTAGATGGAA

>PGSC0003DMG400017716-(rev)LRR-RLPs\_4331

AGTTAGAGACGTTGAAAGACGGGATGATGGTTGGCTTTCGATAACCATGTTAGATGGAAAGACATTGTA  
CAGGGACATCTTAAATGCCACAGAGGAATTTGATGCAAAATTTTGCATCAG

>PGSC0003DMG400017716-(rev)LRR-RLPs\_4392

ACATTGTACAGGGACATCTTAAATGCCACAGAGGAATTTGATGCAAAATTTTGCATCAGGCATGGAGGG  
CATGGAAGTGTTTACACAATAAACCTTCCATCATTAGGGAATATAGCTGTG

>PGSC0003DMG400017716-(rev)LRR-RLPs\_4453

ATGGAGGGCATGGAAGTGTTTACACAATAAACCTTCCATCATTAGGGAATATAGCTGTGAAGAGACTTC  
ATTCTTCATTTGAGAATACTCATCCCAAAGCTTTATGAATGAAGTAAGGG

>PGSC0003DMG400017716-(rev)LRR-RLPs\_4575

TTGACTGGGATTAAGCACGGGAACATTGTGAACCTCTACGGCTATTGTTGGAATGCACAAAACCTCGTTCT  
GTGTTTACGAGTATGTGGAGAGAGGGAGTTTGTCTAGTATTCTGAGCAAT

>PGSC0003DMG400017716-(rev)LRR-RLPs\_4636

ACTCGTTCTGTGTTTACGAGTATGTGGAGAGAGGGAGTTTGTCTAGTATTCTGAGCAATGAAGTTGTGT  
CCAAGAAATTGGATTGGCTTAAAAGGGTGAATATCATCAAGGGTGTGCTT

>PGSC0003DMG400017716-(rev)LRR-RLPs\_4697

AGTTGTGTCCAAGAAATTGGATTGGCTTAAAAGGGTGAATATCATCAAGGGTGTGCTTTTTGCTTTGTC  
TTACATGCACTAGGACTGGTCACCACCGATTGTTCTCGAGACATATCGAG

>PGSC0003DMG400017716-(rev)LRR-RLPs\_4758

TGCTTTGTCTTACATGCACTAGGACTGGTCACCACCGATTGTTCTCGAGACATATCGAGCAGTAATGTGT  
TGCTTGATTCTGAGTATGAACTTGTGTTGCATACTTTAGAATAGCAAAG

>PGSC0003DMG400017716-(rev)LRR-RLPs\_4819

GTAATGTGTTGCTTGATTCTGAGTATGAACTTGTGTTGCATACTTTAGAATAGCAAAGATTCTCAAGCC  
AGACTCAACCAATCACACTGCGCTTGCAGGCACATATGGCTATGTGGCAC

>PGSC0003DMG400017716-(rev)LRR-RLPs\_549

ATAACCATGTTAGATGGAAAGGCATTGTACAGGGACATCTTAAATGGCACAGAGGAATTTGATGCAAAA  
CTTTGCATCAGGCATGAAAGGCATGGAAGTGTTTACAAAATAGACCTTCCA

>PGSC0003DMG400017716-(rev)LRR-RLPs\_61

AGAAAATTCAAAGGAGATAGGGAGGATAACACAGCTTAATGTACTTGATTTGAGCTATAATCTTCTGG

TTGTCGATATACCCCCTCAGTTAGCTAATTTGAAGGTGTTGGTAAACTTAA

>PGSC0003DMG400017716-(rev)LRR-RLPs\_610

ATGCAAAACTTTGCATCAGGCATGAAAGGCATGGAAGTGTTCACAAAATAGACCTTCCATCATTAGGGA

ATATAGCTGTGAAGAGACTTCATTCTTCATTTTCAGAATACTCATCCCAAAA

>PGSC0003DMG400017716-(rev)LRR-RLPs\_671

ATTAGGGAATATAGCTGTGAAGAGACTTCATTCTTCATTTTCAGAATACTCATCCCAAAAAGCTTTATGAAT

GAAGTAAGGGCATTGACTGGGATTAAGCACGGGAACATTGTGAACCTCTA

>PGSC0003DMG400017716-(rev)LRR-RLPs\_793

GCTATTGTTCTGAATGCACAAAACCTCGTTCTTGGTTTACGAGTATGTGGAGAGGGGAGTTTGTCTAGTATT

TTGAGCAATGAAGTTGAGTCCAAGAAATTGGATTGGCTTAAAAGGGTGAA

>PGSC0003DMG400017716-(rev)LRR-RLPs\_854

TCTAGTATTTTGAGCAATGAAGTTGAGTCCAAGAAATTGGATTGGCTTAAAAGGGTGAATATCATCAAG

GGTGTCTGCTTTTGCTTCATCTTACATGCACCGGGACTGTTACCACCGATT

>PGSC0003DMG400017716-(rev)LRR-RLPs\_915

TCATCAAGGGTGTCTGCTTTTGCTTCATCTTACATGCACCGGGACTGTTACCACCGATTGTTTCATCGAGAC

ATATCGAGCAATAATGTGTTGCTTGATTTTGAGTATGAACTTGTGTTG

>PGSC0003DMG400017716-(rev)LRR-RLPs\_976

TCATCGAGACATATCGAGCAATAATGTGTTGCTTGATTTTGAGTATGAACTTGTGTTGCAGACTTTGGA

ATAGCAAAGATTCTCAAGCTAGACTCAACCAATCACACTGCGCTTGCAGG

>PGSC0003DMG400017718-(rev)LRR-RLPs\_1302

GGGCTTTTAGGACTTGATCTTTTCATCAAATCATTGATTGGACAGATTCCAAAGGAATTTGGAAAATTAA

CCTCTCTAGTTAATCTTTTTTTACAAACCAACCAAAATTTCTGGCAATATA

>PGSC0003DMG400017718-(rev)LRR-RLPs\_1364

AAAATTAACCTCTCTAGTTAATCTTTTTTTACAAACCAACCAAAATTTCTGGCAATATACCTGAGGAACTTG

GGTCACTGACAAAGTTAGAGTCCCTCGATCTATCAGACAACAGATTGAA

>PGSC0003DMG400017718-(rev)LRR-RLPs\_1426

AGGAACTTGGGTCACTGACAAAGTTAGAGTCCCTCGATCTATCAGACAACAGATTGAATGGGTCAATAC

CGATGTGTATAGTAGATTTTCGTGCACTTGTTTCAGTTGAACCTGAGCAACA

>PGSC0003DMG400017718-(rev)LRR-RLPs\_1488

TCAATACCGATGTGTATAGTAGATTCGTGCACTTGTTTCAGTTGAACCTGAGCAACAACAAGTTTGCC  
AGAAAATTCCTAAGGAGATAGGGAGGATAACTCAGCTCAATGTACTTGAT

>PGSC0003DMG400017718-(rev)LRR-RLPs\_1550

GTTTGGCCAGAAAATTCCTAAGGAGATAGGGAGGATAACTCAGCTCAATGTACTTGATTTAAGCTATAA  
TCTTCTGGTTGGAGATATACCCCTCAGTTAGACAATTTGAAGGTGTTGGT

>PGSC0003DMG400017718-(rev)LRR-RLPs\_1674

TTAAATCTTCCACAATGGCCTATCTGGGCGCATTCCCAGAGAAGTTGATACTTTGACTGGTTTGCAGG  
ATGTCATATTGTCATACAATGAGTTGGAAGGTCCAATCCCTAATAATAAG

>PGSC0003DMG400017718-(rev)LRR-RLPs\_1922

TTCACTGTACTTCCTGTTATGGGAGCACTAGTACTGCTCTGTGTTTTTCATTGGTGTCTCTTTATGTGTAAT  
AAAAGAAGGAAAGTTAGAGACGTTGAAAGAAGGGATGATGATGGTTGG

>PGSC0003DMG400017718-(rev)LRR-RLPs\_1984

TATGTGTAATAAAAGAAGGAAAGTTAGAGACGTTGAAAGAAGGGATGATGATGGTTGGCTTTCAATAT  
CCATGTTAGATGGGAAGGCATTGTACAGGGACATCTTAAATGCCACAGAAGA

>PGSC0003DMG400017718-(rev)LRR-RLPs\_2108

GATGCAAATTTTGCATCGGGCAAGGAGGACACGGAAGCGTTTACAAAGTAAGCCTTCTATCATTAGGG  
AATATAGCTGTGAAGAGACTTCATTCTTCATTTCAGAATACACATCCCAA

>PGSC0003DMG400017718-(rev)LRR-RLPs\_2170

ATTAGGGAATATAGCTGTGAAGAGACTTCATTCTTCATTTCAGAATACACATCCCAAAGCTTCATGAAT  
GAAGTAAGGGCATTGACTGGGATTAACACCGGAACATTGTGAACCTCTA

>PGSC0003DMG400017718-(rev)LRR-RLPs\_2604

GCTATGTCGCACCTGGTAAGTTTTAAATAGTTCATGAACTATAGCCAAACACTCCATTGTTTTTATCTCAT  
TTACACGTTTTAATTGTTAATATTGTTTTGAAAATTGTATTATTCAGAG

>PGSC0003DMG400017718-(rev)LRR-RLPs\_2666

TTATCTCATTACACGTTTTAATTGTTAATATTGTTTTGAAAATTGTATTATTCAGAGCTTGCATATACTAT  
GAAGGTTACGCAAATGTGTGATGTGTATAGCTTTGGAGTATTATCATT

>PGSC0003DMG400017718-(rev)LRR-RLPs\_3100

GTGAAGTAAGTATTTCAATTGCTGGGACTAGTATTTTTAGGGTTCTCATTTTGTACTGTATTTAAGACC  
TTATATTACAGTCGCACATAGTTCGTCTTGGAAGTTTTTCATTTCGATTTTC

>PGSC0003DMG400017718-(rev)LRR-RLPs\_3162

TTTAAGACCTTATATTACAGTCGCACATAGTTCGTCTTGGAAGTTTTTCATTTCGATTCAAAGATTTTACCTG  
TATGTATAGAAGCTAGAAAATGACCCTTCTGCTCAAGCTTTTTTCCC

>PGSC0003DMG400017718-(rev)LRR-RLPs\_434

GAAAAACCTCAATGAACTGGAAGTAGATGAAAATCAACTTACTGGTCCAATTCCTGCAGAAATAGGGAA  
GATGAAGTCACTTGTGGAGTTGAGATTAAACAAAAACAATCTTCTGGTCC

>PGSC0003DMG400017718-(rev)LRR-RLPs\_806

TGATTTGGAAGTACAAGAAAACCAACTTAGTGGTCCAATTCCTGCTTCCTTTGGCAATTTGAGAACTTG  
CAATTTTTGTATCTCCACACCAACAACTTTCTGGTTCTATTCCAAAAGA

>PGSC0003DMG400017718-(rev)LRR-RLPs\_930

GCATTTTTGGATAACTTGGTTGAGCTGATAATAAATGAAAATCAGCTTTCAGGCCATTTGCCTGAGCATG  
TTTGCCAAGGTGGGAACTTGAGAAGTTCACGGTGAATAATAACAAGCTC

>PGSC0003DMG400017728-(rev)RLKWAX-EGF\_0

GGCAGGTATAGATTTTATAAAATAATAGGAGATAAACTTGCAACACACATCTCTATGATCTATTTCTGAG  
AAGAATAGATCGGTCAGCATATGAAAAAGACATCTGTATGATATATTGGC

>PGSC0003DMG400017728-(rev)RLKWAX-EGF\_1088

TGCATACAAACAAATCCGATACAACGCCCTTCGATGAGTAGAGTATTAGAAATGCTGGAAGGTGAAGTT  
GAAGTGCTAGAAGTACCTCCTCAGCCTATTCAATCTCAGCCGATTGTTCTT

>PGSC0003DMG400017728-(rev)RLKWAX-EGF\_1216

GGGAAGTTCTATGGCATTTCGTCTGATTCAATGGCTTTGTTAGAAAATCCTGCTGATAATCCCATTGAA  
GTAGACATTTGTTCTGATTGACTATAGTTGATGACTTGATGTAATGTTTA

>PGSC0003DMG400017728-(rev)RLKWAX-EGF\_1280

ATTGAAGTAGACATTTGTTCTGATTGACTATAGTTGATGACTTGATGTAATGTTTATGTGAAACAAATAT  
AGCCGACGCAACAATGTTTGGGACAAAGGTGTGTGTTGCTATTGTCATAC

>PGSC0003DMG400017728-(rev)RLKWAX-EGF\_1344

AAATATAGCCGACGCAACAATGTTTGGGACAAAGGTGTGTGTTGCTATTGTCATACTAGTTATGCAAGG  
GGAAGTTACCAACCACATGAAAGTTGTAGTAAATGACCGACTATCCACTT

>PGSC0003DMG400017728-(rev)RLKWAX-EGF\_1408

CAAGGGGAAGTTACCAACCACATGAAAGTTGTAGTAAATGACCGACTATCCACTTATGCGAGACAGAT

GATAGTCTAAGATTGTAATTTTTGTTTGTTTAACCACTGCAAAATCAACTT

>PGSC0003DMG400017728-(rev)RLKWAX-EGF\_1472

CAGATGATAGTCTAAGATTGTAATTTTTGTTTGTTTAACCACTGCAAAATCAACTTCAGGTCTACAAAACA

GAAGTTGGAAAAATCTTAATTCTTACACTTCAATTTTCAGACAATTTTGA

>PGSC0003DMG400017728-(rev)RLKWAX-EGF\_1536

CAAAACAGAAGTTGGAAAAATCTTAATTCTTACACTTCAATTTTCAGACAATTTTGAAAGCATGCAAACTT

GAAACTTTTTGTTTGAAGTTTGAACATAATTCTAACTTTAGAAAGAGAGTG

>PGSC0003DMG400017728-(rev)RLKWAX-EGF\_1600

AAACTTGAAACACTTTTTGTTTGAAGTTTGAACATAATTCTAACTTTAGAAAGAGAGTGCAGCTGTAATCCTTT

TCTGAAGTGATTTCAGTCTGAGATCATGGTACCTGCAATATGCAGAAGCC

>PGSC0003DMG400017728-(rev)RLKWAX-EGF\_1643

TTAGAAGAGAGTGCAGCTGTAATCCTTTTCTGAAGTGATTTCAGTCTGAGATCATGGTACCTGCAATATGC

AGAAGCCAAGAGAATAATGCTCCGACATTCTTAAAATTCATGTTCCAAT

>PGSC0003DMG400017728-(rev)RLKWAX-EGF\_256

TGAAGGCTTTTTGCAAACACAAAACAATTTTCATGCCAATCAGATATAACTACTCCACATAAAGAGAATG

ACCATAGGATTCAAAGAAAAATTAGGCGAGGGAGGTTACGGCAGTGTATA

>PGSC0003DMG400017728-(rev)RLKWAX-EGF\_320

AGAATGACCATAGGATTCAAAGAAAAATTAGGCGAGGGAGGTTACGGCAGTGTATACAAAGGAAAGCT

TCGTAGTGGAAGAGATGTAGCAGTGAAGATGTTGAACAAGCCTAAAGCTGGT

>PGSC0003DMG400017728-(rev)RLKWAX-EGF\_64

TCTGAGAAGAATAGATCGGTCAGCATATGAAAAAGACATCTGTATGATATATTGGCTCAAGAGGAAGTT

AACTTTTTGACTTCTTAATCTTGCAGCGTATTCGGGCGCAAAATTTGTAAT

>PGSC0003DMG400017728-(rev)RLKWAX-EGF\_768

TTGCAAATTATATCCAACAGATAATAGCATTGTGAATCTCACAGCTGCTCGTGGAACAATTGGATATGT

AGCTCCAGAGTTGATCAGCAGAAGCATCGGAGCAATCTCTTACAAAGCTG

>PGSC0003DMG400017728-(rev)RLKWAX-EGF\_896

AGCTTTGGAATGTTGTTAATGGAAATGCTGGACTTGAAGAGACATGAAGTTGCAAATGAAGAAAATCC

AGCCAATATTTTCCTTTTTATATTTACAACAAGTTCAACAAGGGGAAGGAG

>PGSC0003DMG400017728-(rev)RLKWAX-EGF\_960

ATTCCAGCCAATATTTTCCTTTTTATATTTACAACAAGTTCAACAAGGGGAAGGAGATTCTGGTGCATGA  
AGAAGCAAATGATGATGAAAAGAAGATGGCTAGAAAGCTGAGTTTAGTTG

>PGSC0003DMG400017836-(rev)OtherRLsTM\_0

AGAGTGTTTGCCTTTTTAGTTAAAAGCTTTAATAGTTAATTGCTCACTCACATGCTACCTGAAACGCCTG  
TGTATAGCATGTTAATCTCACAACACACCTTCTTATGCTCCCTCTTAC

>PGSC0003DMG400017836-(rev)OtherRLsTM\_122

TCCATTTTTGGGCGTGTCTGCCTCTTCATTGCTTCTTCTCAATTTTCCTTTTTTTTTCTTTGTTATTGCTTCAA  
CTTATCTAATTTTATCTCTCTTTTTTGGTACATATTTTCTACTTTT

>PGSC0003DMG400017836-(rev)OtherRLsTM\_3111

TGTTTTCCATTTTTTCTGTAAATAGCTACTTGGTTTTCAAAGTGGCATTGTTAGCATATTTAATTTGAGT  
CAGTGTATTACTGTAGTTAAGCACGATATATCCCCTGTATCAACTCC

>PGSC0003DMG400017836-(rev)OtherRLsTM\_4209

ATGAAGGTATGTTTTATCTGCCTCTGATTTCTCCTCTAAATGATATAGATTTTACATCCACAAGTTGCCAG  
GTTTTGCCCATTTGACTATTCTAAACATGACGTTGATGTTGCAGATTGC

>PGSC0003DMG400017836-(rev)OtherRLsTM\_427

TGAGTTCTGAATTTTGGTCCCAGATTTGATAATTTGTAGCACTCAAATCAGATTGATTCATCTGGTGTGT  
GTGTGTGTGAGGGAATGAGACTATTACATTCTGAATTTTGTACTCGT

>PGSC0003DMG400017836-(rev)OtherRLsTM\_488

TCTGGTGTGTGTGTGTGTGAGGGAATGAGACTATTACATTCTGAATTTTGTACTCGTGTTTTTATGCCA  
AACTGAAATTTGTGCCTTGAGTTCTCTAGCTTGGTTTTGTTTTAGCAAT

>PGSC0003DMG400017836-(rev)OtherRLsTM\_5490

AAATTTATTAATATGCATCTAAAATGTGTACAAATATGTGATTCTTACGAGTCTTGTGTAATAAAGACTTA  
ATAGAATTATTTCTGATCTTTATGCATGGTGTACGAATTGCAGCCTCC

>PGSC0003DMG400017836-(rev)OtherRLsTM\_5551

TAAAGACTTAATAGAATTATTTCTGATCTTTATGCATGGTGTACGAATTGCAGCCTCCATGATTGGGAG  
TAGGCCGAACTCTCCTACATTATCCTTTAGTTCAAGCTTTGCTGCTTATA

>PGSC0003DMG400017836-(rev)OtherRLsTM\_6283

GACACATATCCACTCGAGTCATGGGAACTTTGGGTAAAATATTCATCTGACTTAATATTTGTATTTTCAT  
TAGGCCATCCTTCATCCCGTTTATGACTGACGAAGTCCCAAACCCCTTA



>PGSC0003DMG400017836-(rev)OtherRLKsTM\_6344

GTATTTTCATTAGGCCATCCTTCATCCCGTTTATGACTGACGAAGTCCCAAACCCCTTAAGCAGATCAGCT  
GCTTCATGCTGGTCTGCTTTCCTGGAGTATAATTTTTTTTCTTTTGAA

>PGSC0003DMG400017836-(rev)OtherRLKsTM\_6405

CAGATCAGCTGCTTCATGCTGGTCTGCTTTCCTGGAGTATAATTTTTTTTCTTTTGAATGCCTTATTTATT  
TTACTCGAAAGGTGTTATTACATAGTGGACGGATTGTCCTCAATCAA

>PGSC0003DMG400017836-(rev)OtherRLKsTM\_6466

CCTTATTTATTTTTACTCGAAAGGTGTTATTACATAGTGGACGGATTGTCCTCAATCAATTGAAACTGACT  
ATGCATATCAAACCCATTCTCTTAACATTTTATTCTTCTGTTGTACAC

>PGSC0003DMG400017836-(rev)OtherRLKsTM\_7259

AGCACGGCGTGATGTTTGGGTTACGGCCTGGATCCCACTAATTGAAGTTTCCATCTTTGATTTTGATAAA  
TGTTTCTGCAAATGTCTATTTTCGCCATCCATGCTGGATATACTAGATT

>PGSC0003DMG400017836-(rev)OtherRLKsTM\_7503

CTGGGAAGAAGTGTGCGCAACAAGATATCTGAATAGGGATTTCATCTTATGTAAGAAGATTGTATTTATT  
GTAACATGCTAATTGTTCATAAAAGGAATCATAGTTCTTTGTCTTCTGGT

>PGSC0003DMG400017864-(rev)LRR-RLKs\_122

CAAATCTCACATTTCTTCTTCTTCTGATCCCAACAACAACAACGTAGTCGTCTTGCAAACCAACTGGTCTTC  
TTCAATTCCATCATCAGTTTGCACCTGGATAGGGATCACTTGCAACGG

>PGSC0003DMG400017864-(rev)LRR-RLKs\_1769

TGCACGTAGAACCAAACCTGAAGGGCACAATCCCGGAAGAAATTGGAAACCTGAGTAGCTTAGGTGTGC  
TAGCTCTGTCTCATAATGACTTGACTGGTTCGATACCTGAGCAGTTGAGAAG

>PGSC0003DMG400017864-(rev)LRR-RLKs\_183

AACTGGTCTTCTTCAATTCCATCATCAGTTTGCACCTGGATAGGGATCACTTGCAACGGGCGCCATAGAG  
TCACTGCTTTAGACATTTCTAGCATGCAACTTCATGGAACCATTCCTCCA

>PGSC0003DMG400017864-(rev)LRR-RLKs\_1830

GGTGTGCTAGCTCTGTCTCATAATGACTTGACTGGTTCGATACCTGAGCAGTTGAGAAGCATGAAGAAT  
CTTCAAGAATTTTACTTAGAAAATAACAGCCTAAGTGGAAACAATACCTGAT

>PGSC0003DMG400017864-(rev)LRR-RLKs\_2074

TGACTTCCACCTTACCTGAAACCCTGTGGAGCCTTCAAGATCTCTTGGAACCTCAATGCATCAGCAAATCT

GTTTAGCGGGCACATACCTCCTGAGGTTGGTAATCTAAAGGCTGTGTCAC

>PGSC0003DMG400017864-(rev)LRR-RLKs\_2135

AGCAAATCTGTTTAGCGGGCACATACCTCCTGAGGTTGGTAATCTAAAGGCTGTGTCACCTAATTGATCTG

TCAAGAAATGATTTTTCTGGTAATATTCCTAGTACTATAGGGGCTCTTGA

>PGSC0003DMG400017864-(rev)LRR-RLKs\_2196

ATTGATCTGTCAAGAAATGATTTTTCTGGTAATATTCCTAGTACTATAGGGGCTCTTGAAAAGTTGATTA

GTCTTTCCATGGCACACAATAAATTGGAAGGGCCTATTCCGAGTTCATTC

>PGSC0003DMG400017864-(rev)LRR-RLKs\_2318

GAAAATGGTGGGCTTGGAATTCTGGATTTTTCTTACAACAATCTTACTGGTGAAATTCCAAAGTCACTT

GAAACTCTCACATCTCAATTACTTTAACATCTCTTTTAACAAATTAAG

>PGSC0003DMG400017864-(rev)LRR-RLKs\_244

GCCATAGAGTCACTGCTTTAGACATTTCTAGCATGCAACTTCATGGAACCATTCTCCACACCTTGGAAT

CTCTCATTCTCTTATCCCTTGACATTAGTAACAACACTTTCCATGGAG

>PGSC0003DMG400017864-(rev)LRR-RLKs\_2806

GGATACTTAAAGATGGGAATCTTTGGCAGCTAAGGTATTCAATGTGCAATTGGAGGGAGCATTCAAGA

GCTTTGAAACAGAATGTGAGATACTACGCAACCTTCGCCATAGAAATCTAA

>PGSC0003DMG400017864-(rev)LRR-RLKs\_2928

AGAGTGATCACTAGTTGTTCCAACCCAGACTTCAAAGCCTTAGTATTGGAATACATGCCCAATGGAACAC

TTGATAAGTGGCTACACTCTCATGACTTGTTCTTAGACATGTTGAAGAGG

>PGSC0003DMG400017864-(rev)LRR-RLKs\_61

TTGATCACTTTACTGCTTCTTTGGCTAACATTGCCACTGATGAAGCTGCTCTTCTTGCCTTCAAATCTCACA

TTTCTTCTTCTTCTGATCCCAACAACAACGCTAGTCGTCTTGCAA

>PGSC0003DMG400017864-(rev)LRR-RLKs\_732

GTAGATATTTGTGACAATCTACCAAATCTGAAGTACTTTTACTCTCAACAAACAACCTGGATGGCCTAAT

ACCACCAAATTTACAGAAATGCTCAAAGCTACAACCTGCTGACATTGTCT

>PGSC0003DMG400017941LRR-RLPs\_0

CTGCAATCAAGTCCCCTTTTATTTATTGTTAGCTTTCGGCAAAGATTGTATCTTCCTAGTAGGAAATAA

TACAAACATTATCTTATGTAGAACCCATGGAGAAAAGACTGCGACTTTC

>PGSC0003DMG400017941LRR-RLPs\_122

ACAAATTTTCTCTAAAAAAGGTGTTTTCTCAACCTCAAATCTCTTTTCTTCAGTCTCTTGTCATTCTTG  
GTTTGATCAATTTTTTTTTTTGTTTCTAGTGTCAAAAGGAAGTCTGCA

>PGSC0003DMG400017941LRR-RLPs\_1464

CTTTAATAAACTTAGTTATTTAAGTCGTTGAGCTTGAGTTGAAACAATTGTGAAGAGCTAAACTTGAATA  
AATGGTACTCTTGCAATTTAACTCATCTGACTGTGCCAATATAAAAAGTCC

>PGSC0003DMG400017941LRR-RLPs\_1708

CATTCTCCAGTTTCTGAATATTTTACTGAATTACTGCGCTTGTTAGCGTAATGGAATGACCTCAGAG  
TGTTGGGATTGTGGTTTCAGTTGTCGATTGTGTTGCTCCAAAATCTTAG

>PGSC0003DMG400017941LRR-RLPs\_183

TCATTCTTGTTGTTTGATCAATTTTTTTTTTTGTTTCTAGTGTCAAAAGGAAGTCTGCATTGCACAAGAAG  
ATCGTATCAGTCAGTTACCTGATGAAATTCTGGTATATATATTGTCTTT

>PGSC0003DMG400017941LRR-RLPs\_2928

TAATACCATAGGAAGTGTTGATGTGGCTTTTGCTTGCACCTCCATATAGTGCATGAAAAGACAAATACA  
AGCTAAATGATATAGGCTCTAGACACTGTGTCCAAAAGATAGAATTTTTC

>PGSC0003DMG400017941LRR-RLPs\_2989

ACAAATACAAGCTAAATGATATAGGCTCTAGACACTGTGTCCAAAAGATAGAATTTTCTTCTACTTTTTA  
GGCCCTTTTCTAAATCTTGAGCGGTGATCCGCCACTTGCCCCACCAGGC

>PGSC0003DMG400017941LRR-RLPs\_3050

CTACTTTTTAGGCCCTTTTCTAAATCTTGAGCGGTGATCCGCCACTTGCCCCACCAGGCCACCATCCATGC  
CCCCACCTCCGTGTCTGAGCCAGGAATTTTTTTTTTTGTAGCTGAGTAG

>PGSC0003DMG400017941LRR-RLPs\_3172

ACACAAATTATGTTTTCTACTCATGAGTGGGTTACGCACTTGGCTAAAGTTGTGTGCATAATTTTTTC  
AATAAAAATCAAGCAATAAATGTAAAAAATTATCTAGGGTGTGTTTTGT

>PGSC0003DMG400017941LRR-RLPs\_3233

TAATTTTTCAATAAAAATCAAGCAATAAATGTAAAAAATTATCTAGGGTGTGTTTTGTATTGAGAAAAA  
TGTTTATCTATTTTCATGTTTTGTTGGTCAATATATTTTGTGAAATATTT

>PGSC0003DMG400017941LRR-RLPs\_3355

TCTAGGAAAACAAGCTCCTTAAAAATGAGGAAATTTACTTTCCTAATGGAAGTAGAAAACATAAGTTCCA  
AAGCAATTAATCATATTAGCATTTATAACTATAAAAAACAAACAATCAT

>PGSC0003DMG400017941LRR-RLPs\_3416

TAAGTTCAAAGCAATTAATCATATTAGCATTTATAACTATAAAAAACAAACAATCATATAAATCACTAT  
AGACATAGAGAAGTCAATAAAAATAATTTTAGTTACTAGTTAAATTA

>PGSC0003DMG400017941LRR-RLPs\_3599

GAAATATTATAAAAAAACTATTGATAATCTCAACCAAAAAAACTTGAAAGGAAAAATATGAGTACGT  
AGCCAAAAGGGCAAAAAAATTGACCAAAGTTCCAAAAGGGCAACAAAAAT

>PGSC0003DMG400017941LRR-RLPs\_3721

GTTTGAAACCAAAGGGCAACATTTAACGGTAGGGGAGACGCTGTTTAAATTAGGGTAGCAATGCGC  
AACTCCCTATGCGCCTTACAAGGCGCAAGCAAACAGAGCCACCATCATTGTT

>PGSC0003DMG400017941LRR-RLPs\_3782

AATGCGCAACTCCCTATGCGCCTTACAAGGCGCAAGCAAACAGAGCCACCATCATTGTTATTTTTCCAT  
GTCAATACTTACGGTGGTACCTTTTGCCTACAAAATAGTTTAGGGGTC

>PGSC0003DMG400017941LRR-RLPs\_3843

TTTTTCCATGTCAATACTTACGGTGGTACCTTTTGCCTACAAAATAGTTTAGGGGTCGTAGGGACACC  
ACAAAGAATAAGTGTGTAAGTGGAAAACCGAGACAAGTCCATAGGGTTTT

>PGSC0003DMG400017941LRR-RLPs\_3904

AGGGACACCACAAAGAATAAGTGTGTAAGTGGAAAACCGAGACAAGTCCATAGGGTTTTATGCCTTTT  
CCCCTGTGTTATTTAAAAAGCACCAAGAGGGCTCCAACCTTACAAGTA

>PGSC0003DMG400017941LRR-RLPs\_4026

AGATTCTGTGGTTCTGTCAACCTCCCAGTCATGCAATCTCCTTCTTAATCTAATATTAAGATAGCCTTTC  
TCTGTATTCTTCAATCACATCTTTTTATGGATAGCTATGAGATGTAA

>PGSC0003DMG400017941LRR-RLPs\_4453

AGAATATAGCTCTATTTATATGCTCTTTGAATCAACTTGCCACATATTTCTCCTTGCATTATCGAACCGTCT  
TTGCACCTTAAAAAATGATAGATACAGTTTCTTGCGGGTTGCCAATCT

>PGSC0003DMG400017941LRR-RLPs\_4575

TCCACCTTATGTATCACTCTCTGCCATATTATTGCACTTCTATATCTGGCATTAGAGACTTGCTCATGTAT  
GTCTCAGCCTGGATTCTCAATTTAAATGCAGTCAAGTACTGTCTCAA

>PGSC0003DMG400017941LRR-RLPs\_4636

TGCTCATGTATGTCTCAGCCTGGATTCTCAATTTAAATGCAGTCAAGTACTGTCTCAAAGTGTAAATAGTA

GAGATCTGTGATGCATGACCTTCCGCTCCTCAAGTCCAAATAGAAATAGG

>PGSC0003DMG400017941LRR-RLPs\_4697

GTAATAGTAGAGATCTGTGATGCATGACCTTCCGCTCCTCAAGTCCAAATAGAAATAGGGTATAGTCTGC  
ATATTGTGTACATGAGAAATTTCCATATTTTCATTTGTACAACCTTTCCCC

>PGSC0003DMG400017941LRR-RLPs\_5063

TAACTTGAGAATGAATCATTTCATCGGTGCTCTCATAGTAAAGAAGGCTTCACTCAAGGAGTGACAGATTT  
GGACGGAGTCTTGGCTTTGATGCTAAGGAGACCAGTGTTATCAAAGGCGA

>PGSC0003DMG400017941LRR-RLPs\_5490

CGTTTTGAGCCTCGCTTCAGGGTTTAAGCGCACCTAAAGCGCGCATTTGATAAACTGAAGGAGACAAG  
ATCCATCGATCTGAATAAGTCTGGTACACCTTTCTCAAGTCCAGCTAACAA

>PGSC0003DMG400017941LRR-RLPs\_5917

ATTATCTACCCATCTGGCCCTAAAGTTGTTATCACCCTAGACCATCCTGAGAAAATTTCTTAGTAGCCAA  
CACTCTTCCCGTGATAATAGCTCAAGGTCATTGTAGCTGGAAGGCGCCT

>PGSC0003DMG400017941LRR-RLPs\_61

TAGGAAATAATACAAACATTATCTTATGTAGAACCCTGGAGAAAAGACTGCGACTTTCCAACAAATTTT  
CTCTAAAAAAGGTGTTTTTCTCAACCTCAAATCTTTTTCTTCAGTCTCT

>PGSC0003DMG400017941LRR-RLPs\_7930

TCATGGTTCATCAGTGATTGTTACATAGTTTTATGTTATACTGATTCCCCAAAGTTTAATTCTTTTCATTTA  
ACCTGTGTCCTGTTCAAATTTTCTTTTATTAACCTTTACTGACTCATC

>PGSC0003DMG400017941LRR-RLPs\_7991

CTTTTCATTTAACCTGTGTCCTGTTCAAATTTTCTTTTATTAACCTTTACTGACTCATCTTATTATTTTTTTAT  
TTAATTTTAATTTGTGCTGTATATTTACGGCAGTTGATGTCAA

>PGSC0003DMG400017941LRR-RLPs\_8235

TTTGAAAATGTTGTTGCTCTTGAGAAAATCATTATTGATCCAGGTACTCCATTTTTTTATCGTACCCCTCC  
GTGCCCTAGCGAAATCAAACACACGCAAACCTTCAAGAAATCTTGCCAA

>PGSC0003DMG400017941LRR-RLPs\_8418

ATGTTATTAGGGTTAAATTTGTGATACATATCGGAGGTGAATTTTTATTTCTTAGTAGATGTTCCCTCATGC  
TTTGTTCATAATTGGGTGATTTTCACTTTTTGTGAGGTTTATATTGCT

>PGSC0003DMG400017943LRR-RLKs\_2728

TATTGGTTTCATGCACTCATAGTTCTCCATATTATTTTGAAGCAAGATGCAACTTGCAAGTTGTTGAATGT  
CAGATTAGTTGTTCCGGTGCTATACATAATTTTCAATCTAACTGTTTATA

>PGSC0003DMG400017943LRR-RLKs\_2790

GTTGAATGTCAGATTAGTTGTTCCGGTGCTATACATAATTTTCAATCTAACTGTTTATACAAGAAAGTTCTT  
TTCTTTTCATTGCTCCTTGTATTGATTATAGGCAACAAGGACTTGGGA

>PGSC0003DMG400017946G-LecRK\_0

AGCTATGCAAAATTTCCACGCGACATATCAACATAGTAGCAAATAGATTATGAAGCTTCATATTCTGAAC  
ATCTCCATGAATCCATCTGCAAGTGAAATCAAATCCATCTGCTATCTCA

>PGSC0003DMG400017946G-LecRK\_1342

AGAGTTTGGTGCTACTGGGCAAGATATCTATGTAAAGTTGGACTCTTCTGAGTTAGGTATAAATCTGTTT  
CTTTACTTTTTTCATGTAAGGCTGTTAAGTATGCTACATTAGATTTTGTGA

>PGSC0003DMG400017946G-LecRK\_1403

AATCTGTTTCTTTACTTTTTTCATGTAAGGCTGTTAAGTATGCTACATTAGATTTTGTGAGCAAGTTGAGGT  
TTCTCTACATTATTTGAAAAACAAAACAATATCTTTTTTCCTTCTTATG

>PGSC0003DMG400017946G-LecRK\_1464

AAGTTGAGGTTTCTCTACATTATTTGAAAAACAAAACAATATCTTTTTTCCTTCTTATGAATTTATTTCTGT  
CATCAGGTAECTCCAGTACAGGGAAAGTAAAGAACTGAGAATCAGCT

>PGSC0003DMG400017946G-LecRK\_1525

TTTATTTCTGTCATCAGGTAECTCCAGTACAGGGAAAGTAAAGAACTGAGAATCAGCTTGCCACTGGC  
AGCATTAGGTCTGTTCTAGTACTATGCTTAATCATGTACATAAGGCAAAA

>PGSC0003DMG400017946G-LecRK\_1647

AGAAGAATCAGCAATATTTTAGAAAAGGTAAACCTCAGAGGTTTTGCTGCTTTTGAATTTGTGGTGC GTT  
TTTTCTGGAGTTACATTTGGTAAATATCATAATTTTTCTCTTTACGTCCA

>PGSC0003DMG400017946G-LecRK\_1708

TGGTGC GTTTTTCTGGAGTTACATTTGGTAAATATCATAATTTTTCTCTTTACGTCCA ACTAAGTCCTTAT  
TTAACAGGAAGAAGACCAAGAATCTCTGAAATGTTGTGCACTAAAGA

>PGSC0003DMG400017946G-LecRK\_1769

TAAGTCCTTATTTAACAGGAAGAAGACCAAGAATCTCTGAAATGTTGTGCACTAAAGAAAGGAAAGAT  
AAAGAGCTAGATTTACCGTTGTTGATTTTGAAACTATATCTCATACTACC

>PGSC0003DMG400017946G-LecRK\_1830

GGAAAGATAAAGAGCTAGATTTACCGTTGTTTGATTTTGAAACTATATCTCATACTACCAATAACTTTTCA  
TTGAACAACAAGCTTGGAGAGGGAGGTTTTGGACCTGTTTACAAGGTAA

>PGSC0003DMG400017946G-LecRK\_1891

TAACTTTTATTGAACAACAAGCTTGGAGAGGGAGGTTTTGGACCTGTTTACAAGGTAACGATTTTAACT  
TCAGCTCTTCTGTTTCATCCAAAAGAAGCTGCCTAAAATGGAATTTCCGA

>PGSC0003DMG400017946G-LecRK\_1952

ATTTTAACTTCAGCTCTTCTGTTTCATCCAAAAGAAGCTGCCTAAAATGGAATTTCCGAACCTTTAAAAGG  
AAACACATGTTTCAGTAAGAAAATTGATATGTCATTCTCCTATTTTCATC

>PGSC0003DMG400017946G-LecRK\_2013

CTTTAAAAGGAAACACATGTTTCAGTAAGAAAATTGATATGTCATTCTCCTATTTTCATCTAAACAGCAATG  
TCAAATCTCGTTTATTGTTTGTGAGTAAAATATTCTGGATAAGCTGAT

>PGSC0003DMG400017946G-LecRK\_2074

AACAGCAATGTCAAATCTCGTTTATTGTTTGTGAGTAAAATATTCTGGATAAGCTGATTCAACTAATTC  
CTGGATATCTAGGGTATGCTGGAAGATGGGCAAGAAATTGCAGTAAAGA

>PGSC0003DMG400017946G-LecRK\_2135

AACTAATTTCTGGATATCTAGGGTATGCTGGAAGATGGGCAAGAAATTGCAGTAAAGAGACTTTCAAG  
ATACTCAGCACAGGGAAGCTGATGAGTTCAAGAATGAGGTTATCTTCATTGC

>PGSC0003DMG400017946G-LecRK\_2196

CTTTCAAGATACTCAGCACAGGGAAGCTGATGAGTTCAAGAATGAGGTTATCTTCATTGCTAAACTCCAGC  
ATCGGAATCTTGTGAAGCTTCTTGTTGCTGTATCCAAGCAGAGAAAAGA

>PGSC0003DMG400017946G-LecRK\_2257

AACTCCAGCATCGGAATCTTGTGAAGCTTCTTGTTGCTGTATCCAAGCAGAGAAAAGATGTTGGTTTAT  
GAGTACATGCCAAATAATAGCTTGGATTGGTTCTTTTTGGTTGGTTCTC

>PGSC0003DMG400017946G-LecRK\_2318

TTGGTTTATGAGTACATGCCAAATAATAGCTTGGATTGGTTCTTTTTGGTTGGTTCTCACTTCTCTCAACT  
CTTAATACATTTGGTTATCTGTAGTAATAGTTCAATCAGCTGCAGATG

>PGSC0003DMG400017946G-LecRK\_2379

TTCTCTCAACTCTTAATACATTTGGTTATCTGTAGTAATAGTTCAATCAGCTGCAGATGGATTTGGCCATC

ATCAGATGGAGTTGGTTATCACTTTTCTGAACTCTTGATTTTTGCAGAT

>PGSC0003DMG400017946G-LecRK\_2440

TTTGGCCATCATCAGATGGAGTTGGTTATCACTTTTCTGAACTCTTGATTTTTGCAGATACAGATAGGAG  
GTCACTGCTTGATTGGCCTAAGTGCTCCATATTATTAATGGAATTGCTC

>PGSC0003DMG400017946G-LecRK\_2623

GCAACGTTTTGCTAGACATTGACATGAACCCGAAGATATCTGACTTTGGCATGGCAAGAAGTTTTGGAG  
GAAATGAGACTGCAGCCATGACAAAAACAGTGGTTGGGACATAGTAAGAAT

>PGSC0003DMG400017946G-LecRK\_2806

TCCTACAGTGGGTACATGTCCCCGGAGTATGCAGAAAAAGGAGAATTTTCAGTGAAATCAGATGTATAT  
AGCTTTGGAGTTCTAGTACTGGAGATTTTAAGCAGGAAGAGAAATAGAGGG

>PGSC0003DMG400017946G-LecRK\_2867

ATGTATATAGCTTTGGAGTTCTAGTACTGGAGATTTTAAGCAGGAAGAGAAATAGAGGGTTCTTGCATC  
CAGACCATGACCATAATCTTCTAGGACATGTAGGTGATCTTCTTTTCTATC

>PGSC0003DMG400017946G-LecRK\_2928

CTTGCATCCAGACCATGACCATAATCTTCTAGGACATGTAGGTGATCTTCTTTTCTATCTTATATGTTAAGT  
AAAATAATAGCATCTAACTGCATGATAGTAAATGTTTCAGGTGTGGAT

>PGSC0003DMG400017946G-LecRK\_3172

AGGCCGAATATGGCATCAGTTGTGCTCATGTTGGGTAGTGATGTCGCACTACCCTTGCCTAAAGAGCCA  
GGCTTTTTCAATGGCAGGAACCGATTCACTGAAGCTGACAGTTCATCTAGC

>PGSC0003DMG400017946G-LecRK\_3416

AACAAGAACTACTGGTTGTTCAACTAAATAGTTTTACTCAAGAATCTGTGGCATGGTATTAAGCATGACA  
ACTTGACACTCAGTATGCTGTATATAAAGATAGGAGCAGCAGAGTTGTGA

>PGSC0003DMG400017946G-LecRK\_3477

AGCATGACAACTTGACACTCAGTATGCTGTATATAAAGATAGGAGCAGCAGAGTTGTGAGAAGAGCTA  
AAAGCATTCTCTACATACAAAAGCACCTAGTACATTTGCTTATGAAAGAAGA

>PGSC0003DMG400017946G-LecRK\_3538

AGAGCTAAAAGCATTCTCTACATACAAAAGCACCTAGTACATTTGCTTATGAAAGAAGAACAACCTTATTC  
TGATAAAGACTTTCAGCCTCCCTTGGGGAAGTAAGAACAATTTTTCTTT

>PGSC0003DMG400017946G-LecRK\_366



TCAATGACACATCCAGTGCCTAAATCTTACCAGACAAGGAATTCTTACTCTTCTAAATGGTTCTGGCAG  
AATCATTGGTCTCCAATCCACTAGACATGGGAAAAATCCAGTAGCAC

>PGSC0003DMG400017946G-LecRK\_3843

TTGTGAGTACTGACTCTAGTAATCACAAGGATTAAGATATTTATCCTACAAACCTTTAAACACCTCTATTA  
CAAAACACAAAGCAATAACCCTATTGTCCACTTTATCAACTACCTCTAA

>PGSC0003DMG400017946G-LecRK\_3904

ACCTCTATTACAAACACAAAGCAATAACCCTATTGTCCACTTTATCAACTACCTCTAAGTAGAATAGACT  
TCAACAAACACCACTCAGCTAACTCAAGCCAAAACTTAACTAGCACTA

>PGSC0003DMG400017946G-LecRK\_3965

AGAATAGACTTCAACAAACACCACTCAGCTAACTCAAGCCAAAACTTAACTAGCACTAATATGGAATG  
GCATGATCTATCTTCCCGTATAACATAGGAATAGATTCTTAATAAAAGACC

>PGSC0003DMG400017946G-LecRK\_4026

ATGGAATGGCATGATCTATCTTCCCGTATAACATAGGAATAGATTCTTAATAAAAGACCATAAGACACTA  
GACTCAAATAACAACCTCAGACTCTGCAAGACTAAATTGGGTCCCTCATT

>PGSC0003DMG400017946G-LecRK\_4087

AAGACTAGACTCAAATAACAACCTCAGACTCTGCAAGACTAAATTGGGTCCCTCATTACGTGTCAGAG  
TAGTTCTTTCTTTAAAACGGGTTTTGCTTTTGAATAATCCTAATTGCAA

>PGSC0003DMG400017946G-LecRK\_4148

GTGTCAGAGTAGTTCTTTCTTTAAAACGGGTTTTGCTTTTGAATAATCCTAATTGCAAAGCTAGGTTGTT  
TCTTGTCAACAAACAACCTTAGCAGCATGTCATTGGTCGAGGACTGTTGT

>PGSC0003DMG400017946G-LecRK\_4209

CTAGGTTGTTTCTTGTCAACAAACAACCTTAGCAGCATGTCATTGGTCGAGGACTGTTGTCCTTTCTGTGCC  
TCTACTGCAGTGTCCACCAACCACTGCAGTTTCTACAGCTTTAGAACTG

>PGSC0003DMG400017946G-LecRK\_4270

TTTCTGTGCCTCTACTGCAGTGTCCACCAACCACTGCAGTTTCTACAGCTTTAGAACTGCACTTCATTGAC  
TTGTCCTTTACGACAAAAACATAGAGGACTAGGTCCCTTTACTAGATCC

>PGSC0003DMG400017946G-LecRK\_4453

GATGATAAATTATTGCCCATGTCTACATATCTTTTGTGTTGCACATCCCCCTATCAACATGCGTCCCTTGTC  
GGAAAGACCTGATCCCTTGATCTGAACATGCTTACATGTCATCAGTGT

>PGSC0003DMG400017946G-LecRK\_4514

CGTCCCTTGTCGAAAGACCTGATCCCTTGATCTGAACATGCTTACATGTCATCAGTGTATCTTCCTCCTT  
TTGACATTATAGAAAAGTAAGAACAGTAAATCAAGCAAATCACATGCA

>PGSC0003DMG400017946G-LecRK\_4575

CTTCCTCCTTTTGACATTATAGAAAAGTAAGAACAGTAAATCAAGCAAATCACATGCATTCTGGGTAAA  
TTCATGGCCACTAGACAATACTAATATGAACAAACAGGCAGAAAGAAAGG

>PGSC0003DMG400017946G-LecRK\_4636

CTGGGTAAATTCATGGCCACTAGACAATACTAATATGAACAAACAGGCAGAAAGAAAGGAACGAGAAA  
CAAACATTCTTGGTTTTCCAACCTCCGCCTTCTCACTTTTCCATTGGTCAAAC

>PGSC0003DMG400017946G-LecRK\_610

TCTGAAAACCTGGTTTTTCATCGTTCCCTTTTCGTTCATGGAAGAGCACAAATGATCCTTCCAGGGGTCAGTTT  
ACCTGGACATTCGATACTGGTGGATTTCGTACAAACATTCATTATGAATGG

>PGSC0003DMG400017946G-LecRK\_671

GGTCAGTTTACCTGGACATTCGATACTGGTGGATTTCGTACAAACATTCATTATGAATGGTTCATTGAAC  
TCTACAGAGCTAGACAATGGAATGGTCGAGTCTTTCCTAATGCACCATCT

>PGSC0003DMG400017946G-LecRK\_732

CCATTGAACTCTACAGAGCTAGACAATGGAATGGTCGAGTCTTTCCTAATGCACCATCTAGTGACACTTC  
GTGGAATGGTTATAACTATACTACTTATCTGATCCTAATGAAATATCAT

>PGSC0003DMG400017949-(rev)G-LecRK\_0

TATATATCAGCTATTTTCATCAATAATCCCAAAGGAGAATCGTGCAATTTCTTTAGTAAAACAAGGATGA  
TGAAAGCAGACATGTTTCATTTGTTATTATTATCTTACATGTTTTGTGTT

>PGSC0003DMG400017949-(rev)G-LecRK\_1586

AGGAGAATCAGAATCAACAACGTTTTAGTGAAGGTAAACCGGATGTTTTGCTACTTTGAAATTTGAAAT  
AAGTGGCTTGAATTGATGGTAAATCCTAGAAATTCCTCTTAACATCCAATT

>PGSC0003DMG400017949-(rev)G-LecRK\_1647

TTTGAAATAAGTGGCTTGAATTGATGGTAAATCCTAGAAATTCCTCTTAACATCCAATTAAGTCCTTATTT  
TGACAGGAAGCTCTGAAATGTTGTACATTAATAAGAGCAAAAATGATGA

>PGSC0003DMG400017949-(rev)G-LecRK\_1708

GTCCTTATTTTGACAGGAAGCTCTGAAATGTTGTACATTAATAAGAGCAAAAATGATGATCTAGATTTAC

CATTGTTTGATTTTGCCACTATCTTGGAGGCTACCAATAACCTTTCTTTG

>PGSC0003DMG400017949-(rev)G-LecRK\_2684

AAGATCTTTAAACCAAAGAGCTACTTACACTCTACTAAAAAGCTAACTTTCTTTATTTGTGATTTAAAAAA

AAGAAGAGATACTTACTTTCTTTGTTTGACGTTATCCTACAGCGGCTAC

>PGSC0003DMG400017949-(rev)G-LecRK\_2745

ATTTAAAAAAGAAGAGATACTTACTTTCTTTGTTTGACGTTATCCTACAGCGGCTACATGTCTCCGGA

GTATGCAGAAGAAGGGAAATTCTCAGTAAATCAGATGTTTTTAGCTTTG

>PGSC0003DMG400017949-(rev)G-LecRK\_2867

GTTGTAATTCTGGAGATTTTAAGCGGGACGAGAAATAGAGGGTTCATTCATCCAGACCATCACCATAAT

CTTCTAGGACATGTAGGAACTCATCTTATACTTACAGCGTAAAAATCATGT

>PGSC0003DMG400017949-(rev)G-LecRK\_2928

ACCATAATCTTCTAGGACATGTAGGAACTCATCTTATACTTACAGCGTAAAAATCATGTTAGTTAAAATTA

TAGCATCTAACTGCATGATGTGAAATGTATGTTTCAGGTGTGGATCCACT

>PGSC0003DMG400017949-(rev)G-LecRK\_2989

GTTAAAATTATAGCATCTAACTGCATGATGTGAAATGTATGTTTCAGGTGTGGATCCACTTCAAAGAAGGC

AGGGTTATGGAAGTAATAAATACACATCTAAAGGAGTTATGCAACAACCT

>PGSC0003DMG400017949-(rev)G-LecRK\_3050

AAAGAAGGCAGGGTTATGGAAGTAATAAATACACATCTAAAGGAGTTATGCAACAACCTATGTGAAGT

GCAAAGATCAGTCCATGTAGGTCTATTGTGTGTGCAGCAGTGTCCAGAAGAT

>PGSC0003DMG400017949-(rev)G-LecRK\_3294

TTGGCGAACATTCTGGAATCAATTAAGCATCACACTATTGGATGCTAGATAGGATATATATATATATAT

TTTCATTGTTTGCTTGTAGAGGCTAGTGTCACGGACTTAGAGTCTCACTA

>PGSC0003DMG400017949-(rev)G-LecRK\_3477

AGGCTTTATTTACTTTATTCTTTACTTCACAGAGCTCAACACAGCTTCCAGTTGTACAACCAAACAACCTTA

AAGTGAATTTGTCAAATGTACAAGTGCTTTCTCAGTCTAATAATTCTTC

>PGSC0003DMG400017949-(rev)G-LecRK\_3631

AATGAGTTGAGACAATTTGTCATAATTGTACAAAGGGCATTGGACAGCTCTTTTTCAAACAAGTACAGT

TGATAGTATTTAATTAACAACCTTGACGGTGATCAACAGGTTGGTCAATC

>PGSC0003DMG400017949-(rev)G-LecRK\_61

CAAGGATGATGGAAAGCAGACATGTTCAATTTGTTATTATTATCTTACATGTTTTGTGTTTTGATTCTTACT  
AGAGCTGCAGATAATATACGTAGAGATGAACCTTTAAGAGATGGAGAAA

>PGSC0003DMG400017949-(rev)G-LecRK\_854

ACATGGGTTTCTAGAGCTTTGACATGGAATAATCTAACTCAGAATTGGGATAACTTTGGTAGCGCACCA  
GCAGACAACTGTGACATTTATTCCCAATGTAACGCATATGGTTTGTGCAA

>PGSC0003DMG400017949-(rev)G-LecRK\_915

AGCGCACCAGCAGACAACTGTGACATTTATTCCCAATGTAACGCATATGGTTTGTGCAACAGTGGCAATT  
CTCCAATCTGCAGTTGTTTGGATAAATTTGAACCCAAAGATCCAACAGAA

>PGSC0003DMG400017949-(rev)G-LecRK\_976

GTGGCAATTCTCCAATCTGCAGTTGTTTGGATAAATTTGAACCCAAAGATCCAACAGAATGGGTAAGGG  
GAAATTGGTCAGGTGGCTGTGTTAGAAAGACACCAGTATTGAATTGCCAAA

>PGSC0003DMG400017966-(rev)LRR-RLPs\_1798

CTTTGGTTGAATCATTGGACCTGTCAAGTAACCATCTTGTAGGAAAGATACCAGAACAATTTGCTTTACTT  
ACTTCTCTTGAAGTCTTCAATCTTTCCTACAATCATCTTGAAGGGTGCA

>PGSC0003DMG400017966-(rev)LRR-RLPs\_1984

GATTCCCACTTTCAAAGGCTGTGGTAATGATTCAGTATCAGAGACAAATGATACCGTTTCTGAACTAAA  
TGATGAAGAAAGCAATTCTGAATTTCTGAATGATTTTTGGAAAGGTGCTC

>PGSC0003DMG400017966-(rev)LRR-RLPs\_310

TAACATCACTGAATAATTTGTTTCTTATTTTCTGCAATATCTGGGGGCCTATTCTGAATCTCTTTCGAATC  
TCACTCTCATAGAGTATTTGTTCTTACAGGTAACCTCCTCAATGGAA

>PGSC0003DMG400017966-(rev)LRR-RLPs\_372

CTTTCGAATCTCACTCTCATAGAGTATTTGTTCTTACAGGTAACCTCCTCAATGGAACAATACCATCATC  
GATATTCTCCCTCCTTCACTAACTGATTTAGAATTGAGTAATAACCAT

>PGSC0003DMG400017966-(rev)LRR-RLPs\_496

CTGGTCAGCTTGAGGATATCAAGTCCAATCACTATTATCTATTGATCTAGGCAATAATCAGCTGCAAGG  
CCATCTTCCCGAGTCAATTCAAACCTTGTGAACCTCACAACCTCTTGATC

>PGSC0003DMG400017966-(rev)LRR-RLPs\_620

TTTCAATAATTTTAGTGGTAGTGTGGATGTCAGCTTCTTTTCAGACCTCAAACATCTTTCATCTCTTGGTCT  
TTCATATAATAGCATCTCATTCAAAATGAAAACAGAGTTAATTTTAC

>PGSC0003DMG400017966-(rev)LRR-RLPs\_682

CTCTTGGTCTTTCATATAATAGCATCTCATTACAAATGAAAACAGAGTTAATTTTACTTTGCCTGAGTCA  
CTTCTGTACTTACGGTTGGCTGCCTGTGAAGTGAAAGAATTGGGGTTTC

>PGSC0003DMG400017966-(rev)LRR-RLPs\_744

CCTGAGTCACTTCTGTACTTACGGTTGGCTGCCTGTGAAGTGAAAGAATTGGGGTTTCTAAGATCCGTAA  
AGAAGCTTGAGGACTTAGATCTTTCTAATAATAAGCTTCAAGGAAGATTT

>PGSC0003DMG400017966-(rev)LRR-RLPs\_806

ATCCGTAAAGAAGCTTGAGGACTTAGATCTTTCTAATAATAAGCTTCAAGGAAGATTTCCAGATTGGGCA  
TCGTCTAACTGGATGTTTTATTGAAAACCTTAATCTATCCCACAACAT

>PGSC0003DMG400017966-(rev)LRR-RLPs\_868

ATTGGGCATCGTCTAACTGGATGTTTTATTGAAAACCTTAATCTATCCCACAACATGCTGACAAGTGTG  
GACTTAACTCCTTTTCAATCTTTACAAACAATTGATTTGCGATCCAATT

>PGSC0003DMG400017966-(rev)LRR-RLPs\_992

TCAAGGGTCCCTATCTATGCCACCAAATCCACAACATACTTCTTCATATCAGAAAATAATCTTAGTGGAG  
AAATTCCTTCGTCTATTTGCAACTTGACATCATTAGTAATGCTTGATTT

>PGSC0003DMG400017967-(rev)LRR-RLPs\_1008

TTCCTGAGTTGAGAATTTTAAGCTTGAGATCGAACAAGTTGCATGGACCCCTTAGAACCTTAGGAAGTG  
AAAATATGTTTCTTGAGCTTCAAATCTTAGATCTCTCTTGCAATGCTTTCT

>PGSC0003DMG400017967-(rev)LRR-RLPs\_1071

GAAGTGAAAATATGTTTCTTGAGCTTCAAATCTTAGATCTCTCTTGCAATGCTTTCTCTGAAAACCTACCG  
ACAAGATTGTTTCGACATCTGAAAGCCATGAGGACAACCTGATCAATCAA

>PGSC0003DMG400017967-(rev)LRR-RLPs\_1134

ACTTACCGACAAGATTGTTTCGACATCTGAAAGCCATGAGGACAACCTGATCAATCAATGAAGGCATTAA  
GTTTTGAATTCATCCATATTACCTAGACTCGGTAGATGTCGTAACAAAGG

>PGSC0003DMG400017967-(rev)LRR-RLPs\_126

GGAAGAAATAGGAAATCTTGTCATCTTGTTCAAGTTTTTTCTTGATACAAACCAATTAACAGGTCATATA  
CCAGAAGAAATAGGAAAACCTTGTCATCTTGTTCAAGTTTATCTTGATGA

>PGSC0003DMG400017967-(rev)LRR-RLPs\_1575

TTCAGAACAATTCATACAAAGATAATGATGGATTACGTGGATTCCCACTTTTCGAAAGATTGTGGTAACTA

TGATGGGGTATTAGAGACAAATGATACCATAGCTGTGCTAGACGATCAAG

>PGSC0003DMG400017967-(rev)LRR-RLPs\_1827

TTGAGAAGCTGGAACACAAAATTATTAACCTAAGGAGAAAGAAGCAACGGTGTCAAAGGAATTATAGA  
AGATGAAGTAATCGCTTCTGGACAAGTTACCAACGGAGCAAGATTTGATTCA

>PGSC0003DMG400017967-(rev)LRR-RLPs\_189

TCATATACCAGAAGAAATAGGAAAACCTTGTCATCTTGTTCAGTTTATCTTGATGAAAATCAATAAACA  
GGTCATATTCCGGCAGAAATAGGGAAGATGAAGTCACTTCAGGAATTAAT

>PGSC0003DMG400017967-(rev)LRR-RLPs\_1890

ATAGAAGATGAAGTAATCGCTTCTGGACAAGTTACCAACGGAGCAAGATTTGATTCAAGTTAATATCTAT  
GCTGGTCTGTAAATTTATTGTGAGTATTTGGTATTCATACTAAGCATGTT

>PGSC0003DMG400017967-(rev)LRR-RLPs\_1953

TATCTATGCTGGTCTGTAAATTTATTGTGAGTATTTGGTATTCATACTAAGCATGTTTGTATTTTCATTAAG  
TAGAAGCTTTTAAAAAAGATTAGACTTTGTTGATGTTTTAAGCTAGTA

>PGSC0003DMG400017967-(rev)LRR-RLPs\_2016

TTCATTAAGTAGAAGCTTTTAAAAAAGATTAGACTTTGTTGATGTTTTAAGCTAGTAAAAGTTTGACTATG  
TATACCGTGCGACAGAGGAGTAATTATATGAATAAAATTATAAATCTTT

>PGSC0003DMG400017967-(rev)LRR-RLPs\_252

ATAAACAGGTCATATTCCGGCAGAAATAGGGAAGATGAAGTCACTTCAGGAATTAATCTTATCACGTAA  
CAATCTTTCTGATCTAATTCCAAAACTATAGGCGACTTAACAGAGCTCAA

>PGSC0003DMG400017967-(rev)LRR-RLPs\_315

ACGTAACAATCTTTCTGATCTAATTCCAAAACTATAGGCGACTTAACAGAGCTCAAACCTTCTGTACCTTT  
ATAGCAATCAACCCTTTGGCCCAATTCCTAGTGAGTTAGGGAACCTGAA

>PGSC0003DMG400017967-(rev)LRR-RLPs\_441

CAATACTCTGTTATTATCCAATAATGAACTCAGTGGTTCAATTCCGTCATCCTTTGGTAATTTGAGAACT  
TGCAAGTTCTGTCTCTCAATGACAACAATCTGATTGAGGAAATTCCTTC

>PGSC0003DMG400017967-(rev)LRR-RLPs\_504

GAGAACTTGCAAGTTCTGTCTCTCAATGACAACAATCTGATTGAGGAAATTCCTTCATCTATTTGCAATT  
TGACATCACTGGCAACCCTGTATTTGTCAAGAAACAATTTGAAAGGAAA

>PGSC0003DMG400017967-(rev)LRR-RLPs\_567

TTGCAATTTGACATCACTGGCAACCCTGTATTTGTCAAGAAACAACCTGAAAGGAAATATTATGAAATGC  
TTGGGTAATATCAGTGCCCTCCAGTATGTGATGATGTCACATAATAATCT

>PGSC0003DMG400017967-(rev)LRR-RLPs\_63

GGGGAATTTGAGCAGGTTGACCTATTTGCATCTTTATGAGAATCAGCTTTCTGGCTCTATTCCGGAAGAA  
ATAGGAAATCTTGCAATCTTGTTGAGTTTTTCTTGATACAAACCAATT

>PGSC0003DMG400017967-(rev)LRR-RLPs\_819

GCAACACAACAATCTTTCTGGGACTCTCCAATTGACTTTTAGAGCTGGAACACTTAGAAGCTTCAACTT  
GCATGGCAATAAACTAAAGGAAAAAATCCCAAATCTTTGGCCAATTGCA

>PGSC0003DMG400017968-(rev)LRR-RLPs\_0

ATGTTCTCCCTCCATCACTAAGTTATTTAAGATTGGGTTCTAATCAATTTTCTGGTCAGCTTGAGGATTTT  
AAGTCCAATACACTAGTCTGGATTCAGTTACAGGGCAATCGGCTGCAA

>PGSC0003DMG400017968-(rev)LRR-RLPs\_260

TATCTCATTGACTAATGAAAAGGAAGTTAAATCCAGTTTGCCGGAGTCACTTGAGTACTTACGTTTGGCT  
GCGTGTGATGTGAAAGAATTGGAGTTTCTAAGATCCGCAAAGCAGCTTTC

>PGSC0003DMG400017968-(rev)LRR-RLPs\_325

TGGCTGCGTGTGATGTGAAAGAATTGGAGTTTCTAAGATCCGCAAAGCAGCTTCCGATCTGGATCTTTC  
AAATAATAAACTTCAAGGAAGAGTTCCTGATTGGGCATGGTCTACTTGA

>PGSC0003DMG400017968-(rev)LRR-RLPs\_390

CTTTCAAATAATAAACTTCAAGGAAGAGTTCCTGATTGGGCATGGTCTACTTGAATTTTTTTCAGTGTCAA  
CTCTCAATCTATCCCACAATATGTTGACAAGCATGGATTCAATTCCTCTA

>PGSC0003DMG400017968-(rev)LRR-RLPs\_455

GTCAACTCTCAATCTATCCCACAATATGTTGACAAGCATGGATTCAATTCCTCTACAATCTGGATATATAA  
TTGATTTGCGGTCCAATTTTCTTAAAGGATCACTACCTATTCCAGGGAA

>PGSC0003DMG400017968-(rev)LRR-RLPs\_520

ATATAATTGATTTGCGGTCCAATTTTCTTAAAGGATCACTACCTATTCCAGGGAATTCCACAGCATTCTTC  
TTCATATCAGAAAATAATCTTAGTGGGGAAATTCCTTCATCTATTTGCA

>PGSC0003DMG400017968-(rev)LRR-RLPs\_910

TCCCCATGTGGTTGGGAACTCTGCCATATCTGCAAGTTTTAAGCCTGAGATCAAACAAGTTGCATGGATC  
TATTAGAACTTCAAGGATAGAAAATGTAACAAACTCAATTCCAGCAGAAG

>PGSC0003DMG400017969-(rev)LRR-RLPs\_1054

GGTGAGCTTGAGGATTTCAAGTCCAATTCAGTAAATATTTTCTTAGGAGGCAATCAGCTGCAAGGT  
CAAATTACCAAGTCAATTCAAACCTTGAGAACCTAAAAGTTCCTTCAATA

>PGSC0003DMG400017969-(rev)LRR-RLPs\_1116

GCAAGGTCAAATTACCAAGTCAATTCAAACCTTGAGAACCTAAAAGTTCCTTCAATAATTTTAGTGGA  
ATGTGGATATCAGCTTGTTTTCAAACCTCAAACAACCTTTGGGTCTTAGT

>PGSC0003DMG400017969-(rev)LRR-RLPs\_124

AATTCAAGGAAACATTTACTATAAATCTCTATGCTTCTTAGATGTTATTTCCGCGGTCAGAAGCCTTAT  
CCAAAACGAGTTCATGGAACATGAGCAGAGATTGTTGTTTATGGGATG

>PGSC0003DMG400017969-(rev)LRR-RLPs\_1240

CATATAATAAGATATCATTGATCAATGAGAACAAAGTTAATTTTACATGGCCTGAATCTCTTAATACGTTA  
GAATTTGCTGCATGTGAAGTGAAGAATTGGAGTTTCTAAGATCCGCAA

>PGSC0003DMG400017969-(rev)LRR-RLPs\_1302

AATACGTTAGAATTTGCTGCATGTGAAGTGAAGAATTGGAGTTTCTAAGATCCGCAAACCAGCTTTTG  
GATTTGGATCTTTCAAATAATAAGATTCAAGGAAGAATTCCTGATTGGGCA

>PGSC0003DMG400017969-(rev)LRR-RLPs\_1364

GCTTTTGGATTTGGATCTTTCAAATAATAAGATTCAAGGAAGAATTCCTGATTGGGCATGGTCTAACTGG  
ATGTTTTATTGTACTCTCTTAATCTATCCCACAATATGCTGACCAGTGT

>PGSC0003DMG400017969-(rev)LRR-RLPs\_1426

CTAACTGGATGTTTTATTGTACTCTCTTAATCTATCCCACAATATGCTGACCAGTGTGTATTCAATTCCTC  
TTCAACATCATTTAACAATTGATTTGCGGTCAAATTTACTTCAAGGTT

>PGSC0003DMG400017969-(rev)LRR-RLPs\_1674

AAGGGAGAAATTCCGCAATGTTTGGGTAATATTAGTGGCCTCGAGGTTCTGGATATGCACAACAAAAAA  
CTTTCTGGGAATATTCCAACAATTTTCAGCAATGGAAGTTCACTGAGAAGC

>PGSC0003DMG400017969-(rev)LRR-RLPs\_1736

CAAAAACTTTCTGGGAATATTCCAACAATTTTCAGCAATGGAAGTTCACTGAGAAGCCTCAACTTGCAT  
GGAAATAAACTAGAGGGGAAAATTCGCCGATCTTTGGCCAATTGCGAAGA

>PGSC0003DMG400017969-(rev)LRR-RLPs\_248

CATATGCGATGAGATGACTGGCCATGTCATTGAACTTGACCTCGGTTGCAGCCGTCTTGTTGGAAAGATT



GATTCCAATAGCAGCCTATTCCAACCTCTCTCATCTCCAAAGACTCAACCT

>PGSC0003DMG400017969-(rev)LRR-RLPs\_2728

CAAGAATCATTGTAGAGATGGAACACAAAATAATGACGGGAAGGAGAAAGAATCAGCGAAGGAAAAA

GAATTGCAGAAGAAGAAATATGTAACATTTTACTGTATGCATTTCTTGTTTCA

>PGSC0003DMG400017969-(rev)LRR-RLPs\_2790

AAAAAGAATTGCAGAAGAAGAAATATGTAACATTTTACTGTATGCATTTCTTGTTTCAGTGAAGTGTATA

ATTTACAAATTTATGCAGTTTATTGCATCTTCTCAGCAACATCGCGTAAT

>PGSC0003DMG400017969-(rev)LRR-RLPs\_310

GAAAGATTGATTCCAATAGCAGCCTATTCCAACCTCTCTCATCTCCAAAGACTCAACCTTTCTTGGAATGAA

TTCCACGGTTCTCATATCTAGCCTAAATTTGGTAGGTTCTTGAGCTTGA

>PGSC0003DMG400017969-(rev)LRR-RLPs\_372

TGGAATGAATTCCACGGTTCTCATATCTAGCCTAAATTTGGTAGGTTCTTGAGCTTGACACATCTTGATCT

TTACAACTCCAATTTCTCAGGTCAAATTCCTTCTGAAATCTCTCATCTT

>PGSC0003DMG400017969-(rev)LRR-RLPs\_434

TCTTGATCTTTACAACCTCCAATTTCTCAGGTCAAATTCCTTCTGAAATCTCTCATCTTTCCAACCTTACACTCT

CTTTGTCTCTATGGTACAGGTAGTCTACGACTTGAGCTCACGATTT

>PGSC0003DMG400017969-(rev)LRR-RLPs\_496

ACTTACACTCTCTTTGTCTCTATGGTACAGGTAGTCTACGACTTGAGCTCACGATTTTAAATTGCTTCTTC

AGAAGTTGACTCAATTAAGAGAGCTTGATCTTACTTTTCATAAACATCT

>PGSC0003DMG400017969-(rev)LRR-RLPs\_992

CAGGGATGTTCTCCCGGCTTCCATCACTAAGTCGTTTATACTTGAGTAATAACCACTTTTCTGGTGAGCTT

GAGGATTTCAAGTCCAATTCAGTAAATATTTTCTTAGGAGGCAATC

>PGSC0003DMG400018024LRR-RLKs\_0

GGTTTCACTACGGACGAACAATCTCAAGGGATCCTTACCACGCGAGATTGGCAACTTAACCAAGATGCA

AATTTTAATTCTAGACGAGAATAGGTTTACTGGTACGTATACATTCAATTT

>PGSC0003DMG400018024LRR-RLKs\_1054

TTGGTTCTTTACCTCTGGAAATTGGAAATCTAAAGGCTGCAATATATATGGATCTGTCAATGAATCAATTC

ACAAATGGAATTCCTAGAGAAATTGGAGGATTGCAAAATCTGGTATATC

>PGSC0003DMG400018024LRR-RLKs\_1116

AATCAATTCACAAATGGAATTCCTAGAGAAATTGGAGGATTGCAAATCTGGTATATCTTTATTTGGAAC  
ACAACAAGTTGCAAGGATCTATACCTGACTCAATCAGCAACATGGTAAGT

>PGSC0003DMG400018024LRR-RLKs\_1178

TTTGGAACACAACAAGTTGCAAGGATCTATACCTGACTCAATCAGCAACATGGTAAGTTTGGAAATTCCTA  
GACATTTACATAATAATATATCGGGAACATTCCCATGTCTTTGGAGAA

>PGSC0003DMG400018024LRR-RLKs\_124

GATAGCAATCTGAACAGTTTAAGAGGTAAACTCATTCTTTCTTCAGGTGAAATACCCAAAGAGATAAGA  
AATCTCGTTGAGTTGGAGAAGCTTGGTCTTGGATCTAATAGTTTTAGTGGT

>PGSC0003DMG400018024LRR-RLKs\_1302

CAATACCTCAAGTATTTCAATGTTTCTGACAACAAATTGTATGGTGAAATACCCTTGGGGGGTCCTTTCA  
AGAACCTCTCGAGTCAGTTTTTCAGCGACAATGAAGCATTGTGTGGTTCT

>PGSC0003DMG400018024LRR-RLKs\_1364

TCCTTTCAAGAACCTCTCGAGTCAGTTTTTCAGCGACAATGAAGCATTGTGTGGTTCTTCAAGATTTAGTG  
TCCCGCGATGCCCCACTTCATCAAAGCACAGATCAAATAGGAAACAAAT

>PGSC0003DMG400018024LRR-RLKs\_1488

GCTCTATTTCTTATGCTGGGAATTGCACTTGTATTTGTTCTATAGCCTTTCTGTTTCATATGGATAAGGTAT  
AGAAGAGGTAAAAGAGCTCCTCAACAAGCTGATTCATTGTGTATTGTA

>PGSC0003DMG400018024LRR-RLKs\_1550

GATAAGGTATAGAAGAGGTAAAAGAGCTCCTCAACAAGCTGATTCATTGTGTATTGTAACAACAGAAAG  
AATTTCACTATGAACTGCTCCAAGCAACTGATACGCTTGGCGAGAGTAA

>PGSC0003DMG400018024LRR-RLKs\_186

GATAAGAAATCTCGTTGAGTTGGAGAAGCTTGGTCTTGGATCTAATAGTTTTAGTGGTTCACTTCCAATG  
GAGATCTTCAACATATCACGATTGAGACATATTGCTCTTACAAACAATAA

>PGSC0003DMG400018024LRR-RLKs\_248

TTCCAATGGAGATCTTCAACATATCACGATTGAGACATATTGCTCTTACAAACAATAATCTATCAGGAACT  
CTACCACCAAACATAGGTTCTACCTTACCCAACATTGAAGGACTTTATC

>PGSC0003DMG400018024LRR-RLKs\_372

TGGCTTAACCAATCTTGTTGGGACTATTCCTCATTCTATCTCCAATTGTTCAAAGCTTACTATTCTAGAGCT  
TTCACAAAACAAAACACTCACAGGATTGATTCCAATTCTCTTGGATATT

>PGSC0003DMG400018024LRR-RLKs\_434

TTCTAGAGCTTTCACAAAACAAAACACTCACAGGATTGATTCCCAATTCTCTTGGATATTTGACTCATCTAAA  
CATCTTAAACTTGCGGAGAAAACAATTTAACCAGTGATTCATTTTTAAG

>PGSC0003DMG400018024LRR-RLKs\_496

TCATCTAAACATCTTAAACTTGCGGAGAAAACAATTTAACCAGTGATTCATTTTTAAGCTTCCTCACTTCCT  
TAACCAATTGCACAAGATTAACAGTTGTTTCTCTATCTTTCAACCCTC

>PGSC0003DMG400018024LRR-RLKs\_558

CTCACTTCCTTAACCAATTGCACAAGATTAACAGTTGTTTCTCTATCTTTCAACCCTCTAAATGCCATGCTT  
CCGGTCTCCGTAGGGAACCTTCTCCAAATCTCTTCTAACCTTTTATGCC

>PGSC0003DMG400018024LRR-RLKs\_62

AGATGCAAATTTTAATTCTAGACGAGAATAGGTTTACTGGTACGTATACATTCAATTTAAGTGATAGCAA  
TCTGAACAGTTTAAGAGGTAAACTCATTCTTTCTTCAGGTGAAATACCCA

>PGSC0003DMG400018024LRR-RLKs\_620

TGCCATGCTTCCGGTCTCCGTAGGGAACCTTCTCCAAATCTCTTCTAACCTTTTATGCCGATGCTTGCAACA  
TTAACGGCAAGATTCCAAATGAAGTTGGAAACTTAAGCAACTTATTA AAA

>PGSC0003DMG400018024LRR-RLKs\_682

CTTGCAACATTAACGGCAAGATTCCAAATGAAGTTGGAAACTTAAGCAACTTATTA AACCTTGATCTTTCT  
GATAATAACTTGATTGGATCAATTCCTACATCAATTCACA ACTTGAGAA

>PGSC0003DMG400018024LRR-RLKs\_744

GATCTTTCTGATAATAACTTGATTGGATCAATTCCTACATCAATTCACA ACTTGAGAAGCCTTCAGCGCTT  
CAACTTGAGTTACAACAAGCTTACGGGATTTATTGGAGATAATTTATGT

>PGSC0003DMG400018024LRR-RLKs\_806

TCAGCGCTTCAACTTGAGTTACAACAAGCTTACGGGATTTATTGGAGATAATTTATGTAAATTGCAACAT  
TTGGGAGAAATTTACTTGGGACAAAATCAACTTTCAGGATCTATTCCTAA

>PGSC0003DMG400018024LRR-RLKs\_868

TGCAACATTTGGGAGAAATTTACTTGGGACAAAATCAACTTTCAGGATCTATTCCTAATTGTTTAGGGAA  
TGTTACTTCCCTTAGATTGATATATCTTACTTCCAATAAATTGAGTTCCA

>PGSC0003DMG400018024LRR-RLKs\_930

TTAGGGAATGTTACTTCCCTTAGATTGATATATCTTACTTCCAATAAATTGAGTTCCAATATAACCAACAAG

CTTAGGAAATCTTAAAGATCTAGTGGTTCTTGACTTATCGTCAAACAAC

>PGSC0003DMG400018024LRR-RLKs\_992

ACCAACAAGCTTAGGAAATCTTAAAGATCTAGTGGTTCTTGACTTATCGTCAAACAACATGGTTGGTTCT  
TTACCTCTGGAAATTGGAAATCTAAAGGCTGCAATATATATGGATCTGTC

>PGSC0003DMG400018045LRR-RLPs\_1024

ACTTGTGAGTAATTCCTTATCTGGCTCACTTCCTAATAATGCGAGCAATCTTCAAACGCTAACCCAACTG  
GATTTGTCTGACAACTCGCTGAATGGTACCATAACCATCTTGGGTGTTTA

>PGSC0003DMG400018045LRR-RLPs\_1088

CCAACTGGATTTGTCTGACAACTCGCTGAATGGTACCATAACCATCTTGGGTGTTTAACCTCCCTTTGGTAC  
ATTCATTGTCGCTCCATTATAATCAACTCAGCGGTTCTTTTCCTCAATC

>PGSC0003DMG400018045LRR-RLPs\_1152

TTGGTACATTCATTGTCGCTCCATTATAATCAACTCAGCGGTTCTTTTCCTCAATCACTTGTGAATCTCACA  
AACCTTAAAACCTTGACCTTTCATCAAATAACATCACCATTGATGAG

>PGSC0003DMG400018045LRR-RLPs\_1216

ATCTCACAACCTTAAAACCTTGACCTTTCATCAAATAACATCACCATTGATGAGGGAATGAATATCACC  
TTTCTTAGCCTATCAACTTTATTCTTATCATCTTGTGAGCTGAAGCATT

>PGSC0003DMG400018045LRR-RLPs\_128

CGGGTTAGACCTTACTTGTAGTCTGCTTCGTGGAAGTATTCATCCCAATAGCACCCCTCTTCCAACCTTCATC  
ATCTCCACACACTAAACCTTTATGGCAATGACTTCAATTATTCTTCAAT

>PGSC0003DMG400018045LRR-RLPs\_1280

TATCACCTTTCTTAGCCTATCAACTTTATTCTTATCATCTTGTGAGCTGAAGCATTTCATACTTCTTGAG  
AAATGTAAAGACACTTGCGTACTTGGATATTTCTAACAATAAGATTTG

>PGSC0003DMG400018045LRR-RLPs\_192

CTTCATCATCTCCACACACTAAACCTTTATGGCAATGACTTCAATTATTCTTCAATCCCACATAACATTGGC  
CGATTGAGGAATTTGAGGCATCTCAACCTTTCTAATTCTTTCTTTAGT

>PGSC0003DMG400018045LRR-RLPs\_256

ACATTGGCCGATTGAGGAATTTGAGGCATCTCAACCTTTCTAATTCTTTCTTTAGTGGGAAAATCCCAACA  
GAAATCTCATACTTTCTAATTTGGTTTCACTTGATCTTTCTTCTTATT

>PGSC0003DMG400018045LRR-RLPs\_320

CCCAACAGAAATCTCATACCTTTCTAATTTGGTTTCACTTGATCTTTCTTCTTATTTTTATGGACTACAACCTT  
GATGAGAGAACATTTGAAGCAATGTTTCAAACCTTCACAAATCTGGA

>PGSC0003DMG400018045LRR-RLPs\_4072

TTGATCTGAAATTTAATTCCTTTCAGGGTCCACTACCTTCATCCATTTGCAACATGAATTCGCTTATCTTAT  
TAGATTTATCACACAACACTTTCAGTGACTCAGTTCTACATTGCTTGG

>PGSC0003DMG400018045LRR-RLPs\_4135

TTATCTTATTAGATTTATCACACAACACTTTCAGTGACTCAGTTCTACATTGCTTGGGAAGCATGGTTAGT  
CTAACGGTGCTAGACTTAAGAAGGAACAATTTACAGGGAGTCTTCCCC

>PGSC0003DMG400018045LRR-RLPs\_448

CTCTCTTCTTGTCAACATCTCATCTCCGATACCTGTGAATATTTCTTCTCCTTAAGGTACCTGGATCTTG  
GTTATACTAATTTGCGAGGTGTTCTCACAGAGAGCTTTTTCTTCTGC

>PGSC0003DMG400018045LRR-RLPs\_4576

TGATTAATTAGATGACGAAGACACAAGAGGGATCACGTACATGGAATCTAAGTCGAATAATTTTTTCATT  
ACAGGCATCGTATGAGGATTCAGCGAGTTTGGTAATCAAAGGGCAGGATA

>PGSC0003DMG400018045LRR-RLPs\_4639

TTTCATTACAGGCATCGTATGAGGATTCAGCGAGTTTGGTAATCAAAGGGCAGGATATTGAGCTACAAA  
GAATCAGCACAATAATGACAACCATAGATCTCTCAAGCAACCATTTTGAAG

>PGSC0003DMG400018045LRR-RLPs\_4765

TTCCGGAAACACTAAAGGACCTCAGCTCACTTTGGCTACTCAATTTATCCCATAACAATCTCATAGGTTAT  
ATTCCAATGGAATTGGGACAATTGAATAAGCTTGAAGCTTTAGATCTCT

>PGSC0003DMG400018045LRR-RLPs\_5080

ATTCATCACATGTTCTCAACCAGAAGATGAAGGCGAGTCATATTTTTTTAGTGGATTTACGTGGGAATC  
AGTAGTCATAGGCTATAGTTTTGGACTAGTTGTTGGAAGTGCATGTGGA

>PGSC0003DMG400018045LRR-RLPs\_512

GGATCTTGGTTATACTAATTTGCGAGGTGTTCTCACAGAGAGCTTTTTCTTCTGCCAAACAGCTTGGAA  
ATGCTCTATTTGAGATTCAATGATCTTCTCAAAGGAGTTTTTCAAAGAT

>PGSC0003DMG400018045LRR-RLPs\_704

AATTGGCGCCTTCAGTTCCTTGAATATCTTGAACCTCCATGATTGTCAATTCTCTGGTTCCATTCCTGATTC  
CATAGGCAACCTAACCAGAATTACGGAGTTGGCTTTGTCTTATAATCA

>PGSC0003DMG400018045LRR-RLPs\_768

CCCGATTCCATAGGCAACCTAACCGAATTACGGAGTTGGCTTTGTCTTATAATCATTTCACCGGCCATAT  
TCCTTCCACAATCTCTAAATGGAAGCACCTCACACGTTTGGATCTTTCT

>PGSC0003DMG400018045LRR-RLPs\_832

GCCATATTCCTTCCACAATCTCTAAATGGAAGCACCTCACACGTTTGGATCTTTCTGACAACCTCCTTTTCA  
GGTGAAATTCCTGATGTTTTCTCTAACCTCAAAGAGCTACGTTATTTAC

>PGSC0003DMG400018045LRR-RLPs\_896

CTTTTCAGGTGAAATTCCTGATGTTTTCTCTAACCTCAAAGAGCTACGTTATTTACATCTTTCTAGTAACAG  
CTTCATCGGTTTGTTCCTCTTCAATTTCAAACCTTGACACATCTTCA

>PGSC0003DMG400018045LRR-RLPs\_960

AGTAACAGCTTCATCGGTTTGTTCCTCTTCAATTTCAAACCTTGACACATCTTCAACGGTTAGACTTGTC  
GAGTAATTCCTTATCTGGCTCACTTCTAATAATGCGAGCAATCTTCAA

>PGSC0003DMG400018101RLKantifungi(GNK)\_1302

CTGCAAGAGCTAGGTGCTCCATGGCTTGCTATTTCTAGCAAAGGAAATATTTGTTACTTGTATAAATA  
TTTTTTAGCTAACATTTGGTCTGGTGTTCATTTTTTTTTTCAGGACCAA

>PGSC0003DMG400018101RLKantifungi(GNK)\_1550

CTTGAATTCATAAATCAGTTTCTGTTTGTTCATGTTCTGATGGATCTTCTGCTTATCGCGATATGTATATA  
TATAGGTACAAATAGGATTCATAAGATTCCACTGGCTCTTGAGACGTC

>PGSC0003DMG400018101RLKantifungi(GNK)\_1922

GAGTCTTCTGGTTTTCGATCATGTATCTAACAGGAACCTTGATCAATTGCTTTTCGGTAACTATTCTTCAA  
GTTTAATCTAACTAGTAGTAGTATTTTACTATACTTAAATATTTTAGAG

>PGSC0003DMG400018101RLKantifungi(GNK)\_1984

ATTCTTCAAGTTTAATCTAACTAGTAGTAGTATTTTACTATACTTAAATATTTTAGAGACAGGTTCAATAAT  
TTGATTGATTTTTCTTGAAGATAAGAACAAACGTCAATTTTTAAGCTG

>PGSC0003DMG400018101RLKantifungi(GNK)\_2046

GTTCAATAATTTGATTGATTTTTCTTGAAGATAAGAACAAACGTCAATTTTTAAGCTGGAAGGAGCGATT  
TGATATTATATTGGGAATAGCAGAAGGATAACACATCTTCATGAAGGAA

>PGSC0003DMG400018101RLKantifungi(GNK)\_248

CATAACCTATTTCAATCCTTTACAAATATGTTTTATTTGTTACAGAAATACCAAATTGTTTCATTGTACAAAT

GGAAAATAGCTTAGGATCAATCTTTGTCCTGTTTAAAAAAAAAACGAA

>PGSC0003DMG400018101RLKantifungi(GNK)\_2542

AACCATCCTTATTCAGTAACAACCTTAAGCTTTTAGACGATCAGTTGGTCATATAGTTTGTGCTTTTTTAACT  
CTTGTAATATATAGGTGTGGAGAAATTACAAGTTGAATAAGATTACGG

>PGSC0003DMG400018101RLKantifungi(GNK)\_2604

TTTTTAACTCTTGTAATATATAGGTGTGGAGAAATTACAAGTTGAATAAGATTACGGAGTCAATTGACA  
GTAGGCTGATGAGTGAAGTTCAAGAAGAGGAGGCATCGCGTGTGCTTCAG

>PGSC0003DMG400018101RLKantifungi(GNK)\_310

TTGTACAAATGGAAAATAGCTTAGGATCAATCTTTGTCCTGTTTAAAAAAAAAACGAAGAAAATTGAATT  
CTTATTACTATAATTTAATGCCTTATGCACCAAGATACCTTGAACATGTT

>PGSC0003DMG400018101RLKantifungi(GNK)\_372

ATTGAATTCTTATTACTATAATTTAATGCCTTATGCACCAAGATACCTTGAACATGTTACGTTTCATCTCTTT  
AATTATCTTCATATTTATGATTTCTCCGTCTCTTTGTGATCCTAGAAC

>PGSC0003DMG400018101RLKantifungi(GNK)\_434

TCATCTCTTTAATTATCTTCATATTTATGATTTCTCCGTCTCTTTGTGATCCTAGAACTTCTGTTGCTAATGT  
TTCTTGCAAGCCTCGAGCAAATGTGGCGAATAATGTTGATTTAATAC

>PGSC0003DMG400018101RLKantifungi(GNK)\_496

GTTGCTAATGTTTCTTGCAAGCCTCGAGCAAATGTGGCGAATAATGTTGATTTAATACAAAATTTACAC  
AAGTTATGGAGACTCTCCATGATTTCAATTATGGAAAATAAGTCTGCAACA

>PGSC0003DMG400018117LRR-RLPs\_0

TATAGTTATAGAGATATAAAAGAGAGAGAGAAAAAAAGGGGAAAAAAATATCGAGATGCGATCTTAC  
CGTGTAATCGGTTATTCATGGATTAGTTCGTCAGCCGGCCTGGCCTGCTCT

>PGSC0003DMG400018117LRR-RLPs\_1054

TCAACTGCATGATGTCTTGTTGCATTTCTGTGCTACTTGATATACTGTAAATTGAACTACTAATGATACTTTT  
ACCCCTATACTGTTTGCACATCCATGTCAAATGCGTAGTTTGATATTT

>PGSC0003DMG400018117LRR-RLPs\_1116

TGATACTTTTACCCCTATACTGTTTGCACATCCATGTCAAATGCGTAGTTTGATATTTCAATTCACGCGTG  
GAAGTAGCAGAAGTTTGATGGAGATCATATTGTAGAGCTATATAAAAGT

>PGSC0003DMG400018117LRR-RLPs\_1178

TCACGCGTGGAAGTAGCAGAAGTTTGATGGAGATCATATTGTAGAGCTATATAAAAGTGTGGTGTCT  
TTCTTTTTCCCTCCCTGGGTTGAGGGTTAGTTTCAACCTATGATTGA

>PGSC0003DMG400018117LRR-RLPs\_124

GTTGACGAAAAAGTTAGAGCTCACTGTTCTTCACAATCAAACCTCCCTCCCAATTCATTTGATAATC  
TCCAGTAGCCATGGATCAAACCTACCAATTCCTCTCTCTAC

>PGSC0003DMG400018117LRR-RLPs\_1240

TGTTTCTTTCTTTTTCCCTCCCTGGGTTGAGGGTTAGTTTCAACCTATGATTGAACTGCCAACTACA  
GGTCTTTGGGTTAATCAAAGTGTATATTCATCTCAATGGCTTGT

>PGSC0003DMG400018117LRR-RLPs\_1302

CCAAACTACAGGTCCTTTGGGTTAATCAAAGTGTATATTCATCTCAATGGCTTGTGCGTGGTAAAA  
GTTTGATAACTTTTTCTGGTTGCGGCCAGCATAATTTGAGGTACCACAA

>PGSC0003DMG400018117LRR-RLPs\_1364

TGGTAAAAGTTTGATAACTTTTTCTGGTTGCGGCCAGCATAATTTGAGGTACCACAAATTTACTGTCAC  
GTGCTGGGACAAGTTGCGTTTAGAGGGTCTGAAGATGGAGTTTTGCACCA

>PGSC0003DMG400018117LRR-RLPs\_1426

ACTGTCACGTGCTGGGACAAGTTGCGTTTAGAGGGTCTGAAGATGGAGTTTTGCACCATTCATGCTTT  
ACTCGGAGCACTCATCTAAGTTATCTTATTTATTTTTTACAATCAGAA

>PGSC0003DMG400018117LRR-RLPs\_1488

CATGCTTACTCGGAGCACTCATCTAAGTTATCTTATTTATTTTTTACAATCAGAAGCTGTTATCAAAC  
TCTGTTACATTGCTTACTGCTTCTTACTATTGTAACTGATCATCTTT

>PGSC0003DMG400018117LRR-RLPs\_1550

TTATCAAACCTCTGTTACATTGCTTACTGCTTCTTACTATTGTAACTGATCATCTTTGGCTTTTTGAGAT  
GCTTTTTCTTTATGAAACAAGACTCAATCTTAAAAAGAATGACACTA

>PGSC0003DMG400018117LRR-RLPs\_1612

TTTTGAGATGCTTTTTCTTTATGAAACAAGACTCAATCTTAAAAAGAATGACACTATCACTACTGGGGA  
GTCAATACTTTTTCTTAGACGGGGATATTTCAAATGCTTTTTAGATA

>PGSC0003DMG400018117LRR-RLPs\_1674

TACTGGGGAGTCAATACTTTTTCTTAGACGGGGATATTTCAAATGCTTTTTAGATACTTTCAAAGTTAA  
GAAATCAATATCCATATCCAAAAGAATCAAGTGTGCACTGAGCTGGTT



>PGSC0003DMG400018117LRR-RLPs\_1736

CAAAGTTAAGAAATCAATATCCATATCCAAAAGAATCAAGTGCTGCACTGAGCTGGTACTTTGAACCTC  
ACCATGCTTGAAGTTGCAATTTGGTACCTTCACTACGATTTGATCATAGG

>PGSC0003DMG400018117LRR-RLPs\_1798

TGAACCTCACCATGCTTGAAGTTGCAATTTGGTACCTTCACTACGATTTGATCATAGGACGGAACCCCAA  
TGCATATGATTAAGGGGCTACTAGGTTTCTTTTACTGGTAAGGTGCAA

>PGSC0003DMG400018117LRR-RLPs\_1922

CTTCTGAACCTACTCTAATATCTGATTATGCTAAATGTTAATTGAGCACCGGTTCTCTTCTTGTCTTTAT  
CTCTTCTAGGAGAAGAACATTTACTTGTGCGCATTATTTTCTCATTCT

>PGSC0003DMG400018117LRR-RLPs\_1984

TGTCCTTTATCTCTTCTAGGAGAAGAACATTTACTTGTGCGCATTATTTTCTCATTCTGGTTCCACTTTGTTT  
CTTGAATTATAACATTGTTCTGCACTTTCGCCTCCTGATAGCTGTCT

>PGSC0003DMG400018117LRR-RLPs\_2108

GGATCCAAAGTCTCCCAAATATAGTATTGTAATTCCTACATTCCAGTTTATCTGTCTGTTTTTGCTTTCTG  
CTGATTGATTGACCACTTCCAAAGTTAAATCTGATATTGATTAGTTCA

>PGSC0003DMG400018117LRR-RLPs\_2790

TCTAAGATCAATCTGTTTACTATTATTGGAAGCGAAAAGGGATAGCTAATTTTGATAGAGTTAG  
CAGTGAATGTGATTTTGTTCATATTTACTATTTGAATTGGCAGAAAATTCC

>PGSC0003DMG400018117LRR-RLPs\_2852

AGAGTTAGCAGTGAATGTGATTTTGTTCATATTTACTATTTGAATTGGCAGAAAATTCCAATACTATTACCT  
GAGCTACAGAATTTTATAGCAAGTGTAAGCTCTAAAAAATTTGCTTTT

>PGSC0003DMG400018117LRR-RLPs\_2914

CTATTACCTGAGCTACAGAATTTTATAGCAAGTGTAAGCTCTAAAAAATTTGCTTTTTCATCATAATATAG  
GTGTTTAATCACTCAACTACTACTACATCTATAATTAGTAGGGGTCAGC

>PGSC0003DMG400018117LRR-RLPs\_2976

ATAATATAGGTGTTTAATCACTCAACTACTACTACATCTATAATTAGTAGGGGTCAGCTATATGGATCCTC  
ATAAATACTTTCTTGTACACTTGAAGCAATATGCTAACTACCTTAAA

>PGSC0003DMG400018117LRR-RLPs\_3038

TGGATCCTCATAAATACTTTCTTGTACACTTGAAGCAATATGCTAACTACCTTAAAACCCAAATCTGAA

TGATGTCCATTGTGATGTGTCGCCGACAATCCATTCTATTTAGAGAAGC

>PGSC0003DMG400018117LRR-RLPs\_3100

AAATCTGAATGATGTCCATTGTGATGTGTCGCCGACAATCCATTCTATTTAGAGAAGCAGTTGTCACTTG

ATCATTGAAGCTAGTCCCATTGCTAAAATCTATATATAGTTTAAACAACAT

>PGSC0003DMG400018117LRR-RLPs\_3162

GTCACTTGATCATTGAAGCTAGTCCCATTGCTAAAATCTATATATAGTTTAAACAACATCTGTATCCACTGG

ACAGGTAACACCAATTTGTGTCCTGATACTTCTCTGCCACTGCCTATT

>PGSC0003DMG400018117LRR-RLPs\_3224

ATCCACTGGACAGGTAACACCAATTTGTGTCCTGATACTTCTCTGCCACTGCCTATTAATTGCATCATAT

CCCTCATTGAATCCACTTCAAGAATTCTTCCATCTGACAATTGCATAAT

>PGSC0003DMG400018117LRR-RLPs\_3286

GCATCATATCCCTCATTGAATCCACTTCAAGAATTCTTCCATCTGACAATTGCATAATAGTTTCCACTGTAA

CATATATTTATCAAAGTCCAACATTGTTCTTCGTGATAGTTGAATGA

>PGSC0003DMG400018117LRR-RLPs\_3348

TCCACTGTAACATATATTTATCAAAGTCCAACATTGTTCTTCGTGATAGTTGAATGAGAACAAAATCAA

GCTGTTTGGCATTTCAAATGTTTGAATTTTCTGCTTCTTAATTTTTTGG

>PGSC0003DMG400018117LRR-RLPs\_3410

AAAATCAAGCTGTTTGGCATTTCAAATGTTTGAATTTTCTGCTTCTTAATTTTTTGGGGAAAACAGGTGG

TTCCTGATTCAATTGCGAGCTTGGAAAACCTTGAGGAGCTGCACCTTTC

>PGSC0003DMG400018117LRR-RLPs\_3472

AACAGGTGGTTCCTGATTCAATTGCGAGCTTGGAAAACCTTGAGGAGCTGCACCTTCTTCAAATCTTTT

GGAATCACTGCCAGACTCCATTGGTCTGTTGTTTAGTTTGAAGATCTTAG

>PGSC0003DMG400018117LRR-RLPs\_3534

AATCTTTTGAATCACTGCCAGACTCCATTGGTCTGTTGTTTAGTTTGAAGATCTTAGATGTCTCTGGAAA

CAAGCTTGTCACCTTGGCAGATAGCATTGTCATTGCAGGTAATAGTGG

>PGSC0003DMG400018117LRR-RLPs\_3596

CTCTGGAAACAAGCTTGTCACCTTGGCAGATAGCATTGTCATTGCAGGTAATAGTGGTTCAGAAATAAG

CTATTTACCCGTTTTCCAGCCTGAATACACTATTTTGTACTCTTGTTAG

>PGSC0003DMG400018117LRR-RLPs\_3658

GAAATAAGCTATTTACCCGTTTTCCAGCCTGAATACACTATTTTGTACTCTTGTTAGTTCTCTCAGATACT  
CTTTGTTATGGTTGTGTTTGCAGGTCGTTAGTGGAATTTGATGCAGGC

>PGSC0003DMG400018117LRR-RLPs\_3720

CTCAGATACTCTTTGTTATGGTTGTGTTTGCAGGTCGTTAGTGGAATTTGATGCAGGCTTCAACAAGCTTT  
CTTATTTGCCAACAAATATTGGCTATGAACTGGTAAATGTAAAAAGGCT

>PGSC0003DMG400018117LRR-RLPs\_3782

ACAAGCTTTCTTATTTGCCAACAAATATTGGCTATGAACTGGTAAATGTAAAAAGGCTTTCACTTTCTTTT  
AACAAAGCTCCGTTCCCTACCCACTTCCATTGGTGAGATGAAGTCCCTAC

>PGSC0003DMG400018117LRR-RLPs\_3844

CTTTCTTTTAAACAAGCTCCGTTCCCTACCCACTTCCATTGGTGAGATGAAGTCCCTACGCCTTTTAGATATG  
CACTTTAATGAACTACATGGGCTTCCACATTCATTTGGGAACTTGACA

>PGSC0003DMG400018117LRR-RLPs\_3906

TTTAGATATGCACTTTAATGAACTACATGGGCTTCCACATTCATTTGGGAACTTGACAAATCTTGAGATCC  
TCAACCTAAGCAACAATTTCAAGTATCTCACTAAGCTTCCCTGACACAAT

>PGSC0003DMG400018117LRR-RLPs\_3968

TTGAGATCCTCAACCTAAGCAACAATTTCAAGTATCTCACTAAGCTTCCCTGACACAATTGGTGACTTGATA  
AATCTTAAGGAACTTGATCTGAGTAACAATCAGATTCATGAACTGCCTG

>PGSC0003DMG400018117LRR-RLPs\_4030

GACTTGATAAATCTTAAGGAACTTGATCTGAGTAACAATCAGATTCATGAACTGCCTGATACAATTAGTC  
GGCTTGACAACCTCACTGTGCTTAAGTTGGATGAAAACCCTCTTGATGATA

>PGSC0003DMG400018117LRR-RLPs\_4092

AATTAGTCGGCTTGACAACCTCACTGTGCTTAAGTTGGATGAAAACCCTCTTGATACCTCCAAAAGAA  
GTTGTAGTTGAAGGGGTTGAAGCTGTAAAGGCTTATATGATTAAGCGTCG

>PGSC0003DMG400018117LRR-RLPs\_4154

CAAAAGAAGTTGTAGTTGAAGGGGTTGAAGCTGTAAAGGCTTATATGATTAAGCGTCGGCTTGACATAC  
TGTTGGCAGAAGAGCCAGAAATTATGCTTGAAGAGGTGGGGCAGACACCGA

>PGSC0003DMG400018117LRR-RLPs\_4216

GACATACTGTTGGCAGAAGAGCCAGAAATTATGCTTGAAGAGGTGGGGCAGACACCGACAGGCTTATT  
AACTCGAAGTACCTCCTGGTTGAGTGGTACTGTTTCAAATGTTCTTGAACT

>PGSC0003DMG400018117LRR-RLPs\_4278

CTTATTAACCTCGAAGTACCTCCTGGTTGAGTGGTACTGTTTCAAATGTTCTTGGAAGTGTGCAGGGTATT  
TGGGTGGTGGAGGGAAGTCAGATCCAGACCATTATCTCAACCAACAGTT

>PGSC0003DMG400018117LRR-RLPs\_434

CACGGTCAATGCTCAAACCCCTGGGTGAGCGGCCTTTTCACGAGCTTGTTGATACTGCCAGGGTGAAGT  
TAGCTGAGATCGAGGCGGATATGTCCAAACGTCTTGAGGAGATTGTCTTGT

>PGSC0003DMG400018117LRR-RLPs\_4340

CAGGGTATTTGGGTGGTGGAGGGAAGTCAGATCCAGACCATTATCTCAACCAACAGTTATGACTTATGA  
GGCTAATGATTTCTTTCTTTTAAGCCTTTTCACTTCTGTCTGTTCCGTT

>PGSC0003DMG400018117LRR-RLPs\_4402

CTTATGAGGCTAATGATTTCTTTCTTTTAAGCCTTTTCACTTCTGTCTGTTCCGTTGAAAGAATATGGTT  
GATATGGACCAGCTACGCCTTTCTTTCTTTTAATTTTTTCAGTTTG

>PGSC0003DMG400018117LRR-RLPs\_4464

GAATATGGTTGATATGGACCAGCTACGCCTTTCTTTCTTTTAATTTTTTCAGTTTGATGTGTGAAGAGA  
ATTGAAGGATGTTGGTGTGTTTGCAGTCTGAACATTTATATGTTACAATA

>PGSC0003DMG400018117LRR-RLPs\_4526

GTGAAGAGAATTGAAGGATGTTGGTGTGTTTGCAGTCTGAACATTTATATGTTACAATAATACAACTAGT  
GTTTTTTGCTCTCTAGCTTCTAAAAATGTCTGTGTTGAATATTTTAATCA

>PGSC0003DMG400018117LRR-RLPs\_4588

AAACTAGTGTGTTTTGCTCTCTAGCTTCTAAAAATGTCTGTGTTGAATATTTTAATCAGACTTGACAAGGG  
ATCAAGGCCCAATAGCAGAGGGAGCAAATATAATCTCTCGCGAGTTCCT

>PGSC0003DMG400018117LRR-RLPs\_4650

TGACAAGGGATCAAGGCCCAATAGCAGAGGGAGCAAATATAATCTCTCGCGAGTTCCTGTTATGCAAG  
GTGTCTATTTGATGGAAGTTTTATATCAATTCTTTTTCTGGCAAAGTAAC

>PGSC0003DMG400018117LRR-RLPs\_4704

TCCTGTTATGCAAGGTGTCTATTTGATGGAAGTTTTATATCAATTCTTTTTCTGGCAAAGTAACAGGAT  
TTAGGAATCAAACCTACCTCTCTCAAATGTATGAGTAGTCGTTACGCC

>PGSC0003DMG400018117LRR-RLPs\_62

TCTTACCGTGTAATCGGTTATTCATGGATTAGTTCGTCAGCCGGCCTGGCCTGCTCTTATAGTTGACGA

AAAAGTTAGAGCTCACTGTTCTTCACAATTCAAACCTCCCTTCCAATT

>PGSC0003DMG400018117LRR-RLPs\_620

GTAGAAAGGCTATGGAGAAGGAGAAAGAGGAGTATAAGGCGTTGATAGCTTTGGATGAGTTGCACGA  
GGCGTATGAGAAGATGTTGAAGGATGCGGAACAGAGGTTGGAGAAGATTTATG

>PGSC0003DMG400018117LRR-RLPs\_744

TGCTGTTTCTGGTGGTGTGGAATCAATTGGAGAGTCTTCTGGTGAGAAGAGTTCTGAGTTGAATGA  
GGAAGTGAATGAGGAAGTGATCGGGATTTTGCAGGAGGCATTAGGGAAGAG

>PGSC0003DMG400018117LRR-RLPs\_806

TGAATGAGGAAGTGAATGAGGAAGTGATCGGGATTTTGCAGGAGGCATTAGGGAAGAGTGTGGAAAG  
GGTTGATTTGTCCGGCAGGCAGCTGAGGATGCTGCCTGAAGCTTTTGGGAAGA

>PGSC0003DMG400018117LRR-RLPs\_930

CTCCTTAATTGTGCTTAATTTGTCCAACAACCAGCTTACGGTATGCCCTAGTTCAGATAATCTTTCATGTTT  
CTTGCTTCGACTCGTTTTACTTGGATTTGAACTTGTGGTATGTATTA

>PGSC0003DMG400018117LRR-RLPs\_992

TTTCATGTTTCTTGTCTTCGACTCGTTTTACTTGGATTTGAACTTGTGGTATGTATTAATTTCAACTGCAT  
GATGTCTTGTTGCATTTTCGTGCTACTTGATATACTGTAAATTGAACTA

>PGSC0003DMG400018163-(rev)LRR-RLPs\_0

GTCAAGTTAGGACACTGTAACTTTCCTCCTATCTCTTAGCAAATATATTAGCTTCATGCTACTCATAAG  
TTTCATTTTAAGTAAAAACCAGCCCCACAAATTCTTTCATAAATTAT

>PGSC0003DMG400018163-(rev)LRR-RLPs\_1116

CACTCTCTGGTAACTTCTTAACAGGAAGCATCCCGAGTAACTTCTGTCTCCGTGATTCAAGCTTAAGCCTA  
CTCATTCTGGCTGACAATAAGCTGTCTGGGAACTTCCCGTTGGAGTTAT

>PGSC0003DMG400018163-(rev)LRR-RLPs\_124

TTGTTAATTTAAGTTCCGAGGTTGTGTTCCATTCACAAATATTGGCATGGGAAGTGTCTTTTTTCTTATCT  
GCTGTTTTTCTTGACAGCAGTTAGTGTGTTCTTGCTGTTTCTTCAGC

>PGSC0003DMG400018163-(rev)LRR-RLPs\_1364

ATACCTCCTGAAATAGGAAACTTGACTAACTTGAAGATTTGTACCTGTTTCATAACATGCTCTCTGGTG  
GAATTCAGTTGAAATAGGAAAGCTTCAAAGGCTGCGTGAACCTATACCTC

>PGSC0003DMG400018163-(rev)LRR-RLPs\_1426

CTCTGGTGGAATTCCAGTTGAAATAGGAAAGCTTCAAAGGCTGCGTGAACCTACCTCTACGAAAACCA  
GTTGTCAGGAAGTATTCCAAGAGAGTTGACAACTGCTCCAGCTTAACAAG

>PGSC0003DMG400018163-(rev)LRR-RLPs\_1736

TTTCGATTTCTCTCAGAGATGGACCTGATTACTCTTTACAACAATTCCTTTGAAGGTCCACTTCCTGAATCT  
CTTCCCTTCTGAAAAATATCAGCAAAATTAACCTTTTCTCACAATAAG

>PGSC0003DMG400018163-(rev)LRR-RLPs\_1798

TCCTGAATCTCTTCCCTTCTGAAAAATATCAGCAAAATTAACCTTTTCTCACAATAAGTTCAGTGGAACA  
TTTTCCCTTAGCTGGTTTAGATTCTCTGACAGCTCTTGACTTAACAAA

>PGSC0003DMG400018163-(rev)LRR-RLPs\_186

TTTCTTATCTGCTGTTTTTCTTGACAGCAGTTAGTGTTGTTCTTGCTGTTTCTTCAGCAGATGGTTCATCTG  
ATTGATATCGCCTTTTGAGAATAAAGTCAGAACTTGTTGATCCAAATG

>PGSC0003DMG400018163-(rev)LRR-RLPs\_1860

GTGGAAACATTTTCCCTTAGCTGGTTTAGATTCTCTGACAGCTCTTGACTTAACAAACAACAGTTTCTCT  
GGTCCTATCCCTCTGAGCTAGCTTTGTCAAAAATCTAACCCGTCTTC

>PGSC0003DMG400018163-(rev)LRR-RLPs\_2232

CAGAACTTGAAACTCTCAAAGTACTCAAACCTTCTCTAAGTTACAACAGATTATCAGGCCCCATACCA  
CCAGAACTAGGCAATCTCACAAGTCTAAATGTCTTGAATCTTCGAAGAA

>PGSC0003DMG400018163-(rev)LRR-RLPs\_3100

GAGGTGTTTTGTTTTGTTTTGTCTCTCTACTTTGTAATTCTTTTGTCATGTGTTGAGATTAATTTGTTTAT  
GTGGGGGTTTACATGTAAAGAACAATCACCTTATGAAAACCTCCCATCA

>PGSC0003DMG400018163-(rev)LRR-RLPs\_496

AATCTCTCCTGCATTAGGAGAGCTTCATAACTTGAGGAATTGCTTCTTTTCTCTAATTTTCTCACTGGTG  
AGATTCCTTCGGATATCGGTCGTTTGAGGAAGTTGCAAGTTCTTAGAAT

>PGSC0003DMG400018163-(rev)LRR-RLPs\_558

TCACTGGTGAGATTCCTTCGGATATCGGTCGTTTGAGGAAGTTGCAAGTTCTTAGAATTGGAGCCAACAT  
GCTGACAGGACAATTGATACCAGAAATTGGTAAACTTTCTGAGTTGAGAG

>PGSC0003DMG400018163-(rev)LRR-RLPs\_62

TACTCATAAGTTTCCATTTAAGTAAAACCAGCCCCACAAATCTTTCATAAATTATGCATTTGTTAATTT  
AAGTCCGAGGTTGTGTTCCATTCACAAATATTGGCATGGGAAGTGTT

>PGSC0003DMG400018163-(rev)LRR-RLPs\_682

GGCTGTTGCTTATTGCCAATTCAGTGGAAAGATACCAAATGAGATTGGTAATTTGAAGCAGCTGATAAA  
TCTTGACTTGCAGCAAAACAGTCTTAGTGGCCCCATACCAGATGCAATTGG

>PGSC0003DMG400018171-(rev)LRR-RLKs\_1426

GTTCTTGTGGCAAAATCGTCTTGAAGGGAAAATCCCTTCTTCAATTTCTCGTGCCATAATCTCGAGGCTA  
TTGACTTGTGCGAGAATGCATTGACTGGTTCGATTCCTAAAGAGATATT

>PGSC0003DMG400018171-(rev)LRR-RLKs\_3224

GTTCAAGTCCATGGTGGAGCTAGAGGGTGAAGGGAGTTCATTTGAACCCTCTTCGTACATAATCACA  
CACATATATAAGAACTATTTTTTCAATATATATATATATGGAAATTGGAAG

>PGSC0003DMG400018171-(rev)LRR-RLKs\_3534

AGGATTCATATAGCCAACCCCAAGTTTGCCTTTGGATTTTTTCCGTTTTTCTTTATAGAAAAAAGAAGA  
ACTGAATGCGAGGTAGCAGAAGAGAACAGATATAAAGCACTGCAAACAG

>PGSC0003DMG400018171-(rev)LRR-RLKs\_3596

AAAAGAAGAACTGAATGCGAGGTAGCAGAAGAGAACAGATATAAAGCACTGCAAACAGAGAGCAAGA  
AGGAGAATTCAGTTTAAGTTGCTTCCATACGGATGGAATTGTGTCACTATTTT

>PGSC0003DMG400018171-(rev)LRR-RLKs\_3658

CAAGAAGGAGAATTCAGTTTAAGTTGCTTCCATACGGATGGAATTGTGTCACTATTTTGACAATATATGC  
ATGTGAAGCCATGTGCTAGCTTTAACTATGTGCAAAACCAAGTTTGTGCAT

>PGSC0003DMG400018171-(rev)LRR-RLKs\_3844

TACTTAGGATGGGGAATACTCTAAAAAAACCATAACCAAGTTAGTGGTCACACTTTACAGCCAAGCAT  
GGACACATTGCTGCTGTCTCCATACCCCTTTGGCCATTGCTTGTGTCCGA

>PGSC0003DMG400018171-(rev)LRR-RLKs\_4464

AATGTCCGATACTTCATCATTTTCTACTCGTCTTCATCTGTCACTCCAGCTCAGTTGCTACGCCTCCAAGG  
GTCTTTTAATTGCTCTTACTCACTCATCCTCCTCCGTTAGCTATAG

>PGSC0003DMG400018171-(rev)LRR-RLKs\_62

TAGCTGTTCTTGGATCCGGAGATTCTGGCAACTTTTTCAAATTTTTATATGTAACCTACATAAAATCCATT  
AGCCACAAGACATGATTTGGTTTTCTCTCTTTGTCTCTCCTCCCTAG

>PGSC0003DMG400018184-(rev)L-LecRK\_0

TAGGAATCAAATAAATTAGTCAAAGGATGATCAGAACTTAGTCATCTTCATCATTTTCAGAGAAACAGCA

CTCATCTCTAATTCCTTCAAAGTACCATGTAATTAACACATAATTTCCC

>PGSC0003DMG400018184-(rev)L-LecRK\_1860

TGATTGATTGGGTTAGACAAAAGTACAGGGAAGGGCGATTATGTGAGGCAGCAGCAGATAAAAGGATT  
AAGGGGCAGTGTTTACAGAGGAAGAAATGGAAGCTATGTTGAAACTAGGACTTA

>PGSC0003DMG400018184-(rev)L-LecRK\_2232

CTTTGTATTGTTCTTACATGCTTTTGAACCTCTAACTTAGCATTAGTTGCAAATAGTTATGGATATGCAATT  
ACTCAAGATATCAAACTGCTATGTCTTTGCGCTACCTTAAAGGGTCA

>PGSC0003DMG400018184-(rev)L-LecRK\_2291

TGGATATGCAATTACTCAAGATATCAAACTGCTATGTCTTTGCGCTACCTTAAAGGGTCAACATCCATG  
GCAATTAGCAAACGTCTATACGCATTAAGATTCGCCTCGGTGGAATAACG

>PGSC0003DMG400018184-(rev)L-LecRK\_372

CTCAAATTCCTGTAAAATCCGCTTCAAATCCACTTCAATTCGTCCTCTTTCTCTACCCAGTTCATCTTCTC  
TGTACTIONCCTGATGATTCCTCTAGTCCCGGATTCGGAATTGCTTTTG

>PGSC0003DMG400018184-(rev)L-LecRK\_682

CCAAACGGCTGGGTATTATAGTTCTTCTGGTAATGATAGTGATTCTTTTGTGCCTTTAAATTTGCGGTCTG  
GGCAAATATACATGCTTGGATTGAGTTTAAACGGACCTGAATTCGAGAT

>PGSC0003DMG400018184-(rev)L-LecRK\_744

TGCGGTCTGGGCAAATATACATGCTTGGATTGAGTTTAAACGGACCTGAATTCGAGATTAATGTTACTAT  
TGCTCCGGCGGGTATGTCACGGCCTGTTAGAACTTTGTTGAGTTATAGAA

>PGSC0003DMG400018253-(rev)LRR-RLKs\_0

TCATTTCTGGAGCTCTTTTATTCACTCTGTTTGGTTTTTTCATCATTAAATGGGCAGGGTTTCTTGAATATTTG  
GAGATTATAGGATGGAGGGGTGTTCTTAAATAGTTGAAAGAATTGATT

>PGSC0003DMG400018253-(rev)LRR-RLKs\_1159

GCTTACTGGTGAACCTCCTTCAACTTTTAAATTGTGCTCCTCACTTTTCAGTCTCAATCTTGGTAACAATGA  
GCTATCGGGTGATTTCTTACATACTGTTATCAGTTCATTGACAAATCT

>PGSC0003DMG400018253-(rev)LRR-RLKs\_122

TATGCAGTTGGTTGGTGTCTGGTGTGTTTTTTCAGTAAGATTAGCTACAAAAGATCCTAAAGAATTGATTT  
TTATGCAGTTGGTTGTGCTTTTTTTTCAGTATGAGGAGTCGTAAAAGATGT

>PGSC0003DMG400018253-(rev)LRR-RLKs\_1281



GGTATCTTACTTGCCATTCAATAACATAACTGGTCATGTACCAAGGTCTTTGGTTAACTGTACAAAACCTT  
CAGGTGCTCGACCTCAGTTCCAACGCATTGATTGGGAATGTACCTTTTG

>PGSC0003DMG400018253-(rev)LRR-RLKs\_1342

TACAAAACCTTCAGGTGCTCGACCTCAGTTCCAACGCATTGATTGGGAATGTACCTTTTGAGTTGTGTTTA  
GCAGCCTCGGGGTTTCCACTGGAGACGATGTTGTTAGCCAGTAATTATCT

>PGSC0003DMG400018253-(rev)LRR-RLKs\_1403

TTGTGTTTAGCAGCCTCGGGGTTTCCACTGGAGACGATGTTGTTAGCCAGTAATTATCTTACTGGAACTG  
TGCCTAACAGCTTGAACATTGTAGGAACCTCAGGAAGACTGATCTCAGC

>PGSC0003DMG400018253-(rev)LRR-RLKs\_1464

CTGGAAGTGTGCCTAACAGCTTGAACATTGTAGGAACCTCAGGAAGACTGATCTCAGCTTCAATTACCT  
GACTGGTTTCGATCCCATTGGAGATTTGGACCCTTCAAATCTTTCGGAAT

>PGSC0003DMG400018253-(rev)LRR-RLKs\_1708

CAATTGTACCAACTTGGTTTGGGTTTCGTTGTCCAGCAATCAACTTTCTGGAGAGATACCACAAGGAATT  
GGGAATCTTGCAAATCTTGCTATCCTTCAGTTGGGTAATAACTTACTTAC

>PGSC0003DMG400018253-(rev)LRR-RLKs\_1769

CAAGGAATTGGGAATCTTGCAAATCTTGCTATCCTTCAGTTGGGTAATAACTTACTTACTGGACCGATCC  
CTCGGGGATTAGGTAAGTGCAGGAACCTTGATATGGCTAGATTTGAATAGC

>PGSC0003DMG400018253-(rev)LRR-RLKs\_183

AATTGATTTTTATGCAGTTGGTTGTGCTTTTTTTTCAGTATGAGGAGTCGTAAAAGATGTCAAGAATATTTT  
TCACTACTGGGGTGATGAAATTTTTGTCTTTATCATAATACTTCTGAG

>PGSC0003DMG400018253-(rev)LRR-RLKs\_1830

GACCGATCCCTCGGGGATTAGGTAAGTGCAGGAACCTTGATATGGCTAGATTTGAATAGCAATGCTCTAA  
CAGGTTTGATCCCTCTTGAACCTTGCTGATCAAGCTGGCCATGTTAATCCGG

>PGSC0003DMG400018253-(rev)LRR-RLKs\_1891

TGCTCTAACAGTTTGATCCCTCTTGAACCTTGCTGATCAAGCTGGCCATGTTAATCCGGGAAAGGTTTCT  
GAAAAACAGTTTGCTTTTGTGAGAAATGAGGGTGGAACCTGAATGCAAGAG

>PGSC0003DMG400018253-(rev)LRR-RLKs\_1952

AAGGTTTCTGAAAAACAGTTTGCTTTTGTGAGAAATGAGGGTGGAACCTGAATGCAAGAGTGCTGGTGG  
ACTGATTGAGTTTGAGGGTATCCATGAAGAGAGGCTTGAGATTTTGTCTATG

>PGSC0003DMG400018253-(rev)LRR-RLKs\_2074

TCACTTGTGTCCATCAACTAGGATCTATTCTGGCAGGACGATGTACACCTTCACGAGCAATGGGAGCATG  
ATTTACCTTGATCTTTCCTACAATTCTTTATCAGGAACTATTCCTGATGA

>PGSC0003DMG400018253-(rev)LRR-RLKs\_2135

GGGAGCATGATTTACCTTGATCTTTCCTACAATTCTTTATCAGGAACTATTCCTGATGAACTTCCTTCAAG  
TTCTAAATTTGGGACACAACAATTTAACTGGAACCATTCCATTCATCTT

>PGSC0003DMG400018253-(rev)LRR-RLKs\_2196

TTCTTCAAGTTCTAAATTTGGGACACAACAATTTAACTGGAACCATTCCATTCATCTTTGGAGGTCTAAA  
GATAGTTGGAATTGTTGATCTGTCACATAACAACCTACTGGGATTCATT

>PGSC0003DMG400018253-(rev)LRR-RLKs\_2257

GAGGTCTAAAGATAGTTGGAATTGTTGATCTGTCACATAACAACCTACTGGGATTCATTTACCCTCGTT  
AGCAAGCCTTTCATTTCTTAGTGATCTTGATGTTTCAAACAACAACCTAT

>PGSC0003DMG400018253-(rev)LRR-RLKs\_2318

ACCCTCGTTAGCAAGCCTTTCATTTCTTAGTGATCTTGATGTTTCAAACAACAACCTATCGGGAATGATTC  
CTTCTGGTGGACAGTTGGCTACATTTTCAGCTTCAAGATCCGAAAACAA

>PGSC0003DMG400018253-(rev)LRR-RLKs\_2379

GGAATGATTCCTTCTGGTGGACAGTTGGCTACATTTTCAGCTTCAAGATCCGAAAACAATTTGGGCCTTT  
GTGGCGTCTCCCTTCCCTTGTGGCCCAGGCAATGAACACCATTTCATCC

>PGSC0003DMG400018253-(rev)LRR-RLKs\_244

AGAATATTTTTCACTACTGGGGTGATGAAATTTTTTGTCTTTATCATAATACTTCTGAGTTGTGGTTTTTTT  
GTGGTGGTGTCAAATGCAAGAACACTGCCTGAAAATGATCAAGTAGAG

>PGSC0003DMG400018253-(rev)LRR-RLKs\_2440

TGGGCCTTTGTGGCGTCTCCCTTCCCTTGTGGCCCAGGCAATGAACACCATTTCATCCAGTATTTACCAT  
AACAAAGCCTACAACCTATAGGAATGGTGGTTCGTATTATGGTATCGTTTG

>PGSC0003DMG400018253-(rev)LRR-RLKs\_2501

TATTTACCATAACAAGCCTACAACCTATAGGAATGGTGGTTCGTATTATGGTATCGTTTGTATCTATTACTA  
TTATTATCCCACTTGTTATCTGAAATATAAGAATAACTGCACCACAAAG

>PGSC0003DMG400018253-(rev)LRR-RLKs\_2559

GTATCTATTACTATTATTATCCCACTTGTTATCTGAAATATAAGAATAACTGCACCACAAAGTCTAATTGA

ATTACCCATTTGATAAGATAATATATCTTCCAAAGACCCCTAAATAAA

>PGSC0003DMG400018253-(rev)LRR-RLKs\_305

GTGGTTTTTTTTGTGGTGGTGTCAAATGCAAGAACTGCCTGAAAATGATCAAGTAGAGAGGTTATTAG

ACTTCAAGAAGTCCTCTGTTGAATCTGATCCAAATGGATTCTTGAATGAAT

>PGSC0003DMG400018253-(rev)LRR-RLKs\_488

TTGAGCTTAATCTGTCTAGTGTGGGCTTGGTGGTCCACTTCACCTCACTGATCTCATGGCTTTGCCTACT

TTGCTAAGAGTTAAGTTTAATGGCAACCATTTCTATGGCGATCTTTCCT

>PGSC0003DMG400018253-(rev)LRR-RLKs\_549

TTTGCCTACTTTGCTAAGAGTTAAGTTTAATGGCAACCATTTCTATGGCGATCTTTCCTCAATAGCTAGTT

CTTGTGGCTTTGAGTTTCTTGATTTATCAGCTAATAGTTTTAGAGCCTT

>PGSC0003DMG400018253-(rev)LRR-RLKs\_61

TTGAATATTTGGAGATTATAGGATGGAGGGGTGTTCTTAAATAGTTGAAAGAATTGATTTTTATGCAGTT

GGTTGGTGTCTGGTGTGTTGTTTCAGTAAGATTAGCTACAAAAGATCCTAA

>PGSC0003DMG400018253-(rev)LRR-RLKs\_610

ATAGCTAGTTCTTGTGGCTTTGAGTTTCTTGATTTATCAGCTAATAGTTTTAGAGCCTTTGTTGAAGTCTT

GTGATAAAATTAAGTACCTAAATGTCTCTGGGAATTCAATTCAAGGGGT

>PGSC0003DMG400018253-(rev)LRR-RLKs\_732

TTCTAAAGTTTGGACCTTCACTGTTGCAGCTTGACTIONTCAAGTAACACCATTTAGATTTTGGCATTTTA

AGTTATGCACTGTCCAATTGCCAGAATTTGAATCTGCTTAATTTTTCT

>PGSC0003DMG400018253-(rev)LRR-RLKs\_793

TGGCATTTTAAGTTATGCACTGTCCAATTGCCAGAATTTGAATCTGCTTAATTTTTCTCAAATAACTTAAT

TGGAGAACTCAATGATCTTGATTTTGGGACTTGTCAAAATCTCACTGT

>PGSC0003DMG400018253-(rev)LRR-RLKs\_854

AATAACTTAATTGGAGAACTCAATGATCTTGATTTTGGGACTTGTCAAAATCTCACTGTCCTAAATTTGTC

TTTCAACAACCTTACCTCAACTGAGTTTCCAGCCTCTTTGGCAAATTGC

>PGSC0003DMG400018253-(rev)LRR-RLKs\_915

TAAATTTGTCTTTCAACAACCTTACCTCAACTGAGTTTCCAGCCTCTTTGGCAAATTGCCAGAGCCTCAAT

ACACTGAACATTGGCCATAATTCGATCCGAATGGAGATTCCTAGCAAGT

>PGSC0003DMG400018263-(rev)LRR-RLKs\_0

GAGATATTATCCTCTTGCTGTTAGAGAACAGTTTAATCCTCAAACAAACCAAACTTGTGGTTTCTCT  
TTCTTCCCATTACTCTTCTTTCTCTTTCTTTTAGTACACATATTGGC

>PGSC0003DMG400018263-(rev)LRR-RLKs\_1037

CCCACCTCATTTATGCCAGCTAAATAATATCTTCGATTTTTAAAAATAAAATAAAATTTAAACACTAGAA  
TAATTAAGGAACTATTTCCAAAAAACAGCAAATATTTTTTTTCTTAA

>PGSC0003DMG400018263-(rev)LRR-RLKs\_1098

AACACTAGAATAATTAAGGAACTATTTCCAAAAAACAGCAAATATTTTTTTTCTTAAAAATCTTAATT  
AGTAAGAAAGTACAAAAATATGTAAGTACTGTTACTGTATTTACTCTTCCAT

>PGSC0003DMG400018263-(rev)LRR-RLKs\_1159

AATCTTAATTAGTAAGAAAGTACAAAAATATGTAAGTACTGTTACTGTATTTACTCTTCCATTTTGGTCAGTTC  
ATGTGTATATATAATAATAAACTAAAATGCTTATTATCTAATGAACT

>PGSC0003DMG400018263-(rev)LRR-RLKs\_1220

TGGTCAGTTCATGTGTATATATAATAATAAACTAAAATGCTTATTATCTAATGAACTAGGTTAAAATTA  
AATCATATTAATTTTGTTAAATGACATTGCTAATTGTAATTTGAGGTAC

>PGSC0003DMG400018263-(rev)LRR-RLKs\_1708

ATCCTGTTCTTGAAGCACCATTTTGCTTGTGATCATGCATTGCATGCACACAAATATTTTGGACTGTTGAA  
AAAGTTTTAAATTTCTGTTCTGATTATCTGTTTCCTTAATAGGGATCTA

>PGSC0003DMG400018263-(rev)LRR-RLKs\_1769

GACTGTTGAAAAAGTTTTAAATTTCTGTTCTGATTATCTGTTTCCTTAATAGGGATCTATCATAACAACAA  
GGCTTGACAGGTTCACTCCCTCAATCAATTGGAAATTTGAAGAGTTTAT

>PGSC0003DMG400018263-(rev)LRR-RLKs\_2196

GTCAGTGAGGATTTATATAGCCGACCCCAACTGTTTGGGGACTAACGCTTAGTTATTTTTGTTGTTGTA  
GTAATTCTTGATCCCTTTACGTTGTCAAAGTGTGAAGTCTTAGAGCTTC

>PGSC0003DMG400018263-(rev)LRR-RLKs\_2440

CAGCTTCTGTTGGTAATTTATCAAAGTTACATTGGCTGGACTTAGCTGATAATAAGCTCAGTGGACCTCTT  
CCAGTTTCACCTGGTCTAGACATGCTTGTTCACACAAAGCATTGTGAG

>PGSC0003DMG400018263-(rev)LRR-RLKs\_2501

TGGACCTCTTCCAGTTTCACCTGGTCTAGACATGCTTGTTCACACAAAGCATTGTGAGTAATACTGATTA  
CTGTCAGTTTCTTAAGTAACACCTTCGTCTCTCATTTTCATCTGATATA

>PGSC0003DMG400018263-(rev)LRR-RLKs\_2867

TGCACAGGCTGCTTGACCAAACCAGCTTACTGGAAAAATACCCCCTTCATTAGGACTCGTGCAGACTCT  
GGAGGTGGTGTAAAGTATTTCCAAAATCCATCATGCTCTTAAAGAATTCTA

>PGSC0003DMG400018263-(rev)LRR-RLKs\_366

ACCTAGCACAGTTTAACATGTTATATCGTAAGTTACTTATTGTAAATAGTTCTTGTTTTAGATGATCTGAG  
TTATGAAAGCAAATTGTTTTCAATTCCTTTCTTTTTTTTTTTAGTAGGGA

>PGSC0003DMG400018263-(rev)LRR-RLKs\_3904

ACAAGATCAATGGAACCCTGAATATTGCATCCAATATAGCAGTCAATTAAACTGATTGATTTGCAGAA  
CAATTCCATCGATGCATATACAGTAAGACCTGGATTCCTTTTCAAATAA

>PGSC0003DMG400018263-(rev)LRR-RLKs\_427

ATGATCTGAGTTATGAAAGCAAATTGTTTTCAATTCCTTTCTTTTTTTTTTTAGTAGGGAATATATTAGTGTC  
CACTATTTAACTCCAATTTATTTTGATCCCTTTTTCGAGTTCATTAC

>PGSC0003DMG400018263-(rev)LRR-RLKs\_4514

AAGATCATTTCAACCGTACAGGGATTGCCACAATTGGATTTGCACTTAGCAACCAGACTTACAAACCCCC  
ACCAAAGTTTGGACCATTCTTTTTCAGTGGTGAAAGCTACAAATACTTCG

>PGSC0003DMG400018263-(rev)LRR-RLKs\_488

ATATTAGTGTCCACTATTTAACTCCAATTTATTTTGATCCCTTTTTCGAGTTCATTACTTAAAAGGTCATT  
CAATTATTGAACATAGTTATGTTTTTCGTTGTTTTGTATCAGAAAAG

>PGSC0003DMG400018263-(rev)LRR-RLKs\_549

AAAAGGTCATTTCAATTATTGAACATAGTTATGTTTTTCGTTGTTTTGTATCAGAAAAGTCAAATATGATT  
TTCTTCATCAATTTCAATTCATCCGTATGTTCTGAATTTTTTAAAAATAATT

>PGSC0003DMG400018263-(rev)LRR-RLKs\_61

TGGTTTCTCTTTCTCCATTACTCTTCTTTCTCTTTCTTTTTAGTACACATATTGGCCCCTAAGAAGAAAC  
TAAGGTTGCATGGTGGTGGATTTAAACAATGGTCCAAACAAGAACAA

>PGSC0003DMG400018263-(rev)LRR-RLKs\_610

AAATATGATTTTCTTCATCAATTTCAATTCATCCGTATGTTCTGAATTTTTTAAAAATAATTAGTGTATGGTATT  
TTTGTTCAAAAATAAAATGATTGGTGCAGATGTTGTGTTAGAGCCACT

>PGSC0003DMG400018263-(rev)LRR-RLKs\_6100

AACAGTTGATTTGTAATTTTCGCAGAGTAGAAAACCTGAAACCTGAACACTTGATATCAACATTGTTTGA

AGAATCTGTAACAGAACATTTAATTAATACGAGCTGCTTTGTACATTTAT

>PGSC0003DMG400018263-(rev)LRR-RLKs\_6771

TGTACATTCTGTGAACCTCTGTGTGCGGCGTAAACAGCCTTGTATGTTTCAACTGTTTGCTTCTGATAATC  
CAGGAGCTAGACTCCGTGGATTCAAATGAGTGATTTTATTGTACGTAT

>PGSC0003DMG400018263-(rev)LRR-RLKs\_976

CTCTGTCAAAAATTCATTTTTCTTAGCTCGACAACGTCACATGTTTAATTCAATGTTACCCACCTCATT  
TATGCCAGCTAAATAATATCTTCGATTTTTAAAAATAAAAATAAAATT

>PGSC0003DMG400018264-(rev)LRR-RLKs\_0

ATGGTAGTTTCTATGGCAATGATGCTGCGAATTTTCGTGAGTTTTCTGGTTGTTTTGATCCAAGTTCTGTC  
AGTAGCAGCACGAACTAATCCTGTTGATTGTAAGTTGCTTTTGTCTTC

>PGSC0003DMG400018264-(rev)LRR-RLKs\_1037

GTAATGTGTGCTTTTGGTGCTAGCTGTAATAAATTTGGTCCATCTCTGGGACAGGCAATGCACTTCTA  
AACAGAGAAATCAGTTCATGAGGAGTTCAATCCATACTGCTATTCTTGTG

>PGSC0003DMG400018264-(rev)LRR-RLKs\_1098

GCACTTCTAAACAGAGAAATCAGTTCATGAGGAGTTCAATCCATACTGCTATTCTTGTGTTTTATACGTTA  
TCAAAGTTGAACTGTTGTGTTTACCATATCTATCTGTATATGATTTCT

>PGSC0003DMG400018264-(rev)LRR-RLKs\_1159

TTATACGTTATCAAAGTTGAACTGTTGTGTTTACCATATCTATCTGTATATGATTTCTTTCAACCCTTCTT  
CTGGTATATGCTCTAAAACAGCCCCATTCTGTATTATGCAGATCTTTG

>PGSC0003DMG400018264-(rev)LRR-RLKs\_122

TATCAAATGTTTCTTAACAGTGTACAGAGATATTTGATTTATCTGTGAGTACTGGTGTCAAATCTTAGT  
TCCTTTTTGTAATCATATGAAGAACTTGTCTCTTAATTGCAATAATCTT

>PGSC0003DMG400018264-(rev)LRR-RLKs\_1220

CAACCCTTCTTCTGGTATATGCTCTAAAACAGCCCCATTCTGTATTATGCAGATCTTTGAACTCTAACAAA  
TTTACTGGAGGAATACCTGCTACCATTGGCTATCTGACAGAGCTTTATT

>PGSC0003DMG400018264-(rev)LRR-RLKs\_1281

CTCTAACAAATTTACTGGAGGAATACCTGCTACCATTGGCTATCTGACAGAGCTTTATTGGCTCGATTTAT  
CTGACAATCAGATAGAAGGAAACATTCCAGTCTCTAGTGGGAGCAACCC

>PGSC0003DMG400018264-(rev)LRR-RLKs\_1342

CTCGATTTATCTGACAATCAGATAGAAGGAAACATTCCAGTCTCTAGTGGGAGCAACCCTGGTCTTGATA  
TGCTTGTTAACTAAACTTGTACGCATCTCCTTTTTCTTGATGTTGT

>PGSC0003DMG400018264-(rev)LRR-RLKs\_1403

GTCTTGATATGCTTGTTAACTAAACTTGTACGCATCTCCTTTTTCTTGATGTTGTTTCGTCTCTCAAC  
TGCATTTTCTAAGATTATTTACATTTCTTCAGTCACTTTGGGAAGAAT

>PGSC0003DMG400018264-(rev)LRR-RLKs\_1586

GTTCCATCGAATTGGAGAATGGAGTGAATGAATAATTTGTCCGTAAATATTGGGGACCTCACTTGTAGT  
TGAGCTTGCCTTTTGATATTCTTGTTAGTGCATGTTTTACTTCTGAGAG

>PGSC0003DMG400018264-(rev)LRR-RLKs\_1708

GTCATGTGAAAGAAGCTTGATAATTATATCACAAACAACCTTTCTTTACGGTTTCCTCATGCTTGTATATT  
CCAACCTGTAGGCTAGTTGAGAACAACAGGTTTACCGGGTAATCCCAG

>PGSC0003DMG400018264-(rev)LRR-RLKs\_1769

CTTGATATTCCAACCTGTAGGCTAGTTGAGAACAACAGGTTTACCGGGTAATCCCAGATACATTAGGA  
TTTGTCCAGACGATGGAAGTGCTGTAAGTATTGCTATCTTGTGCTTTCCC

>PGSC0003DMG400018264-(rev)LRR-RLKs\_183

AAATCTTAGTTCCTTTTTGTAATCATATGAAGAACTTGTCTCTTAATTGCAATAATCTTGAGGGAACATTA  
AATATTTCTGTTCTTCTTAGATATGGTCAATTAAGTGTCTAGTGAC

>PGSC0003DMG400018264-(rev)LRR-RLKs\_1830

ACATTAGGATTTGTCCAGACGATGGAAGTGCTGTAAGTATTGCTATCTTGTGCTTTCCCTTTATCATCTAG  
TAAAGTTGCTTTCTGAATTGTTTCTGGTATTGCAATAGTCGTCTTGACA

>PGSC0003DMG400018264-(rev)LRR-RLKs\_1891

TATCATCTAGTAAAGTTGCTTTCTGAATTGTTTCTGGTATTGCAATAGTCGTCTTGACAGGAATTCATTCA  
GTGGATCTGTTCCACAAAACCTCAACAATCTCACACATGTCAATGAACT

>PGSC0003DMG400018264-(rev)LRR-RLKs\_1952

AATTCATTCAGTGGATCTGTTCCACAAAACCTCAACAATCTCACACATGTCAATGAACTGTAAGTAGAAA  
ATGAAACAATTTTCTGAACCTACTGTAGGTCCTTCTGATTTTTTGAAGTA

>PGSC0003DMG400018264-(rev)LRR-RLKs\_2013

AAGTAGAAAATGAAACAATTTTCTGAACCTACTGTAGGTCCTTCTGATTTTTTGAAGTAGTATATTTTGAC  
CATGTATTACAGCGACATATCAAACAACAATTTGAATGGCCTTTTGCCG

>PGSC0003DMG400018264-(rev)LRR-RLKs\_2074

ATATTTTGACCATGTATTACAGCGACATATCAAACAACAATTTGAATGGCCTTTTGCCGAATCTCACTGGC  
ATGAATGTCCTCAACTACTTGTAAGTTGCTTATCCTAAGTTTTGTGTCT

>PGSC0003DMG400018264-(rev)LRR-RLKs\_2135

TCTCACTGGCATGAATGTCCTCAACTACTTGTAAGTTGCTTATCCTAAGTTTTGTGTCTTTATCCCTTTGAG  
TTGACAATCCATTATTCTCAACATAGTACTATAAATATTTCTCCCCAA

>PGSC0003DMG400018264-(rev)LRR-RLKs\_2196

ATCCCTTTGAGTTGACAATCCATTATTCTCAACATAGTACTATAAATATTTCTCCCCAATCACGATTCACGG  
GCACTTTTTTTTTGCAGGGACATGAGTAGTAATACATTTAATGCATCA

>PGSC0003DMG400018264-(rev)LRR-RLKs\_2257

ACGATTCACGGGCACTTTTTTTTTGCAGGGACATGAGTAGTAATACATTTAATGCATCAGATATTCCATCA  
TGGATCCTAAGCCTGCAATCATTAAACAACATTGTATACTCTCTCTCTCT

>PGSC0003DMG400018264-(rev)LRR-RLKs\_2318

TATTCCATCATGGATCCTAAGCCTGCAATCATTAAACAACATTGTATACTCTCTCTCTCTCTCTTTTTACTAG  
ATTTGGGAACGTGCGTTGCACGTTTATCCCAAATACTTATATAAAT

>PGSC0003DMG400018264-(rev)LRR-RLKs\_244

GGGAACATTAAATATTTCTGTTCTTCTTAGATATGGTCAATTAAGTGTCTAGTGACGAACTGATTCAA  
TATTTTATACAGCTGCTGCTTTAAAGTCTCTCAAGGATTCTTGGTATGG

>PGSC0003DMG400018264-(rev)LRR-RLKs\_2440

TGTATTGCAAATGACATATTTTATCCCTTCAAATCTTTGGTATTTACAAAGAAAAATCTATCATTGTTTCT  
ATAGGAACTACATATATCTTCTAATTAATAAAAAAATATACCTTTAACT

>PGSC0003DMG400018264-(rev)LRR-RLKs\_2501

TCATTGTTTCTATAGGAACTACATATATCTTCTAATTAATAAAAAAATATACCTTTAACTATAAAATTGACTA  
AAAGTTAATAAAGTAAAAATAACTAACTATTGCACAAATTCAATATTC

>PGSC0003DMG400018264-(rev)LRR-RLKs\_2928

GTAAAAACATAATGAATATAATTGGTGGGAATTACATACATATAATGAAGAGTTAGTGGTAATTTATGTA  
TACTAATATGATGATTTACTATTTACTACTATTTAATTTATTAACAATT

>PGSC0003DMG400018264-(rev)LRR-RLKs\_2989

ATTTATGTATACTAATATGATGATTTACTATTTACTACTATTTAATTTATTAACAATTTATAACATTTAAAT



ATAATGTAGAAATAAAACCGTTATCTAAGGATAAAATATGTAAAAGA

>PGSC0003DMG400018264-(rev)LRR-RLKs\_305

ACTGATTCAATATTTTATACAGCTGCTGCTTTAAAGTCTCTCAAGGATTCTTGGTATGGTCCTTCCAATTG

GACAGGAGAAGATCCCTGTGGGAGTAGTTGGGAAGGAGTTGGATGCAGA

>PGSC0003DMG400018264-(rev)LRR-RLKs\_3050

TAACATTTAAATATAATGTAGAAATAAAACCGTTATCTAAGGATAAAATATGTAAAAGAATTCAAATATA

TTAAATGTGTAGTGAAAAATCATTATGACTAATTATTAATAAAATTCATAG

>PGSC0003DMG400018264-(rev)LRR-RLKs\_3111

TCAAATATATTAATGTGTAGTGAAAAATCATTATGACTAATTATTAATAAAATTCATAGTAACTATGATTA

TGAAAAATCATTACTATTACTACATGGAAGATGTAAAGATGGTTGTTTT

>PGSC0003DMG400018264-(rev)LRR-RLKs\_3172

ACTATGATTATGAAAAATCATTACTATTACTACATGGAAGATGTAAAGATGGTTGTTTTTTCTTGCTAAT

AATAACTTACAATTTAATAATGAGTATTGAATTGTAAGTCTAGCTGGAA

>PGSC0003DMG400018264-(rev)LRR-RLKs\_3233

TCTTGCTAATAATAACTTACAATTTAATAATGAGTATTGAATTGTAAGTCTAGCTGGAAATAGGAGTGTT

AACTACCATAATACGAACAATCAAATTCATTGAATCCCAAATAAATAT

>PGSC0003DMG400018264-(rev)LRR-RLKs\_3416

CGTAATTCAACTTTTGACTTAGATTCTTCCCACCTTTAATAATACTAGTTCTCGACACGTGCGTTGCACGTG

CATCCCATATTAAGTAATATAATTCATAATTAATTGGAGGTTAATGA

>PGSC0003DMG400018264-(rev)LRR-RLKs\_3477

CGTTGCACGTGCATCCCATATTAAGTAATATAATTCATAATTAATTGGAGGTTAATGAGCAACAAATTA

TATGGATATGCTCCATGTATGAAATTCAAAAGTCCATGTTATATGGATAT

>PGSC0003DMG400018264-(rev)LRR-RLKs\_3538

AACAAATTATATGGATATGCTCCATGTATGAAATTCAAAAGTCCATGTTATATGGATATGCTCCATGAAA

TGAGGAAAAGAAGTTGCATGTTATCAGAAGTCCAAAAGTCCAGGTAAGAT

>PGSC0003DMG400018264-(rev)LRR-RLKs\_3599

TCCATGAAATGAGGAAAAGAAGTTGCATGTTATCAGAAGTCCAAAAGTCCAGGTAAGATGGATATACTC

CATGTATGAAATTAATTAATGAATTTAATCATTAAATAACTAACGAAAATT

>PGSC0003DMG400018264-(rev)LRR-RLKs\_366

CTTCCAATTGGACAGGAGAAGATCCCTGTGGGAGTAGTTGGGAAGGAGTTGGATGCAGAAATTCACGA  
GTGATTCTATGTAAGAATTCGGTGTGTATCCTTTTGTCAACTGCTTAAAAT

>PGSC0003DMG400018264-(rev)LRR-RLKs\_3660

ATATACTCCATGTATGAAATTAATTAATGAATTTAATCATTAACTAACGAAAATTATAATGCCATAA  
CTACAGAATCAAAATGCAATTGCTAGACTTCTAATTCAGTAAATAAAAT

>PGSC0003DMG400018264-(rev)LRR-RLKs\_3843

GTAAATTCGTAATTCAACTTTTAAGTTATGAGCTTCCCACTGTTAATATAAAATATAAAATAATAATATGA  
TTTATTGGTTAATTATATTTTAATTTAGTGTGGGGGTAAAATCGTAATT

>PGSC0003DMG400018264-(rev)LRR-RLKs\_3965

ACTTTTAAGTTATGAGCTTCCACTTTTAGTATTACTAGTATCTGGACACGTGCCATGTTATTTTGTTCAAAC  
TTATTCATTAAGATGGAGGGAATATAAATAGTTAAATATATTGGTTT

>PGSC0003DMG400018264-(rev)LRR-RLKs\_4026

TTTGTTCAAACCTTATTCATTAAGATGGAGGGAATATAAATAGTTAAATATATTGGTTTTAAAAAATGAA  
AGCTTATACTTACTAAAATAAAAAAATTACAACACATATCAATTCTCTCT

>PGSC0003DMG400018264-(rev)LRR-RLKs\_4087

AAAAATGAAAGCTTATACTTACTAAAATAAAAAAATTACAACACATATCAATTCTCTCTTTACATATAAAG  
TAGAAACAACCTGCTAAAAGTATAACAAGAATATTTGAATCCTAAAATTA

>PGSC0003DMG400018264-(rev)LRR-RLKs\_4148

ACATATAAAGTAGAAACAACCTGCTAAAAGTATAACAAGAATATTTGAATCCTAAAATTAATTAATACAT  
GTTGGAATAATAACATAAACATTGTGCATTACAATAAATCTGTATTGA

>PGSC0003DMG400018264-(rev)LRR-RLKs\_4209

ATATTACATGTTGGAATAATAACATAAACATTGTGCATTACAATAAATCTGTATTGAACTTTGTTTAGT  
GAAGTTGATGTTACTGGCTAATCGAACTCTAGACGCCAATAGCTTTAGA

>PGSC0003DMG400018264-(rev)LRR-RLKs\_427

TTCACGAGTGATTTCTATGTAAGAATTCGGTGTGTATCCTTTTGTCAACTGCTTAAAATTACAGAAATCAT  
ATGGTTGATGCCATCTTTCTCAATTCAGAACACTGTCAAGTATGGATT

>PGSC0003DMG400018264-(rev)LRR-RLKs\_4270

TTTGTTTAGTGAAGTTGATGTTACTGGCTAATCGAACTCTAGACGCCAATAGCTTTAGATACTTTCCATTC  
TCTCAAATTGTTGCTTTCTCTTCAAGAACAAAAAAGAAGATGAAATTA

>PGSC0003DMG400018264-(rev)LRR-RLKs\_4331

CTTCCATTCTCTCAAATTGTTGCTTCTCTTCAAGAACAAAAAGAAGATGAAATTAATTAATAAATTAA  
AATTATGCAAGAGCCTATAAAAATGGTGAGAAAGAATTCAAGAATCCTT

>PGSC0003DMG400018264-(rev)LRR-RLKs\_4392

AATAAATTAATAATTATGCAAGAGCCTATAAAAATGGTGAGAAAGAATTCAAGAATCCTTCTTGCCTTTT  
ATAGCTATTTTTGAGTAAGAATTCAAGAATCCTTCTTGTTTTTTTATA

>PGSC0003DMG400018264-(rev)LRR-RLKs\_4453

TTGCCTTTTATAGCTATTTTTGAGTAAGAATTCAAGAATCCTTCTTGTTTTTTTATAGCTATATTTCAATT  
TTCATTCCTTGAACCTTTTCTTTCATTAGTCTACATTTAATTATTCA

>PGSC0003DMG400018264-(rev)LRR-RLKs\_4575

GCAACTCTCCTATTCTCCAAACTATTTAGCAATGAATAACGCACACTTAAATTTGATTAATGGGTAAATC  
ATTAAGGGCTACATTTAAATTGGACTTTTGAATATCTACAGATTCACAA

>PGSC0003DMG400018264-(rev)LRR-RLKs\_4636

TGGGTAAATCATTAAGGGCTACATTTAAATTGGACTTTTGAATATCTACAGATTCACAAATCTCATGTAA  
ATTTAAATACAATTACTACTATTTCAATTAGATTAGGCATTTTATTTTAA

>PGSC0003DMG400018264-(rev)LRR-RLKs\_4697

CTCATGTAAATTTAAATACAATTACTACTATTTCAATTAGATTAGGCATTTTATTTTAAATTAATATAAGAG  
AAAAATTGTAATCTAACTTTAAACACTTGTTTTATTTTTCTCCATTTT

>PGSC0003DMG400018264-(rev)LRR-RLKs\_4758

AAATATAAGAGAAAAATTGTAATCTAACTTTAAACACTTGTTTTATTTTTCTCCATTTTATTCATGTTTAG  
TACATTCACCTCAGACTAATATTCTACTTTGAACAGAAATAACACAAA

>PGSC0003DMG400018264-(rev)LRR-RLKs\_4819

TTCATGTTTAGTACATTCACCTCAGACTAATATTCTACTTTGAACAGAAATAACACAAAGCAATAAATATA  
TAGAGATACATATCCAAGCCATAATAAATGTCATTATTTTTTATTATG

>PGSC0003DMG400018264-(rev)LRR-RLKs\_488

CAGAAATCATATGGTTGATGCCATCTTCTCAATTTCAGAACACTGTCAAGTATGGATTTGAACGGTCAG  
CTATCTGGAGACGTCCAAGGATTATCTGAATTGGAGACTTTGTAGGTCTT

>PGSC0003DMG400018264-(rev)LRR-RLKs\_4880

AATAAATATATAGAGATACATATCCAAGCCATAATAAATGTCATTATTTTTTATTATGGATACATTCACC

TCAGTTCTCACTCCATGAATTTCCGTAACATTTTCATTAATTTGACTGGA

>PGSC0003DMG400018264-(rev)LRR-RLKs\_4941

TACATTCACCTCAGTTCTCACTCCATGAATTTCCGTAACATTTTCATTAATTTGACTGGAAACATAATAAGT

ATCATTATCTTTTAGTTGGAATATGAATGTCAAAGAGTGCCCTCTCTTT

>PGSC0003DMG400018264-(rev)LRR-RLKs\_5002

CATAATAAGTATCATTATCTTTTAGTTGGAATATGAATGTCAAAGAGTGCCCTCTCTTTTTTTGTGTGGAT

AATTTAGTGATTTTATATTTATGTATATTAATTTTGAAGAGATAATACA

>PGSC0003DMG400018264-(rev)LRR-RLKs\_5063

TTGTGTGGATAATTTAGTGATTTTATATTTATGTATATTAATTTTGAAGAGATAATACATTTTTATTATTAT

TTATTTAGATTAGATGTTGTATCTATTACATTTTAATTAAGTATAGGG

>PGSC0003DMG400018264-(rev)LRR-RLKs\_5124

TTTATTATTATTTATTTAGATTAGATGTTGTATCTATTACATTTTAATTAAGTATAGGGGTAAAATTGTAAT

TTAACTTTGAAGATAGGTGCTTCCCACTTTTAGTAATTAGTAAAAATT

>PGSC0003DMG400018264-(rev)LRR-RLKs\_549

AACGGTCAGCTATCTGGAGACGTCCAAGGATTATCTGAATTGGAGACTTTGTAGGTCTTCCTTTCACATT

TCGTGTTTCTACTTCACTCCCTTTTTCTTTTGACGGAGCAATACTTTGT

>PGSC0003DMG400018264-(rev)LRR-RLKs\_5551

ATATAATATAATATATGATATGATGTGTGTGTGTATGCACGACCATGAGCAGGTGCATGTGTGTATGGG

GCTCGTGTATATGCCTGCATCCATTTGAATATGGACTGATTTTATTTTTTC

>PGSC0003DMG400018264-(rev)LRR-RLKs\_5612

TGTATGGGGCTCGTGTATATGCCTGCATCCATTTGAATATGGACTGATTTTATTTTTCTTGTTTTTATGGA

TTCAATTCCTAGATGTTCTTTTTAACCGTTTGACTGACCTTGTATTGT

>PGSC0003DMG400018264-(rev)LRR-RLKs\_5673

GTTTTTATGGATTCAATTCCTAGATGTTCTTTTTAACCGTTTGACTGACCTTGTATTGTCAGGGTGTGGA

AGACACGGGACTTCAGGGATCAGTTCCAGCTAACCTTTTCAGCCTACAC

>PGSC0003DMG400018264-(rev)LRR-RLKs\_5734

GGGTGTTGGAAGACACGGGACTTCAGGGATCAGTTCCAGCTAACCTTTTCAGCCTACACCAGTTGCAGA

CAGTGCAAGTGTCCCTTTACTTTGTGTCGTTTTTGTATGAAGTATAGATT

>PGSC0003DMG400018264-(rev)LRR-RLKs\_5795

GTTGCAGACAGTGCAAGTGTCCCTTTACTTTGTGTCGTTTTGTATGAAGTATAGATTGAGTATCTGAA  
GTTGAATTTATCTTTGCTGAAATTTCCGAACTCTGTATTATGCTGATAGT

>PGSC0003DMG400018264-(rev)LRR-RLKs\_5856

GTATCTGAAGTTGAATTTATCTTTGCTGAAATTTCCGAACTCTGTATTATGCTGATAGTTGTTGACAATGT  
GCTCGTTGCTTACAGCATCTTGAGGAATAACAACTCAACGGCTCTCTT

>PGSC0003DMG400018264-(rev)LRR-RLKs\_5917

TTGACAATGTGCTCGTTGCTTACAGCATCTTGAGGAATAACAACTCAACGGCTCTCTTGAACTGGAAC  
CACATATAGCAACCAGTTGAAGCTCATTGATGTGCAAATAATCTTATCG

>PGSC0003DMG400018264-(rev)LRR-RLKs\_5978

AACTGGAACCACATATAGCAACCAGTTGAAGCTCATTGATGTGCAAATAATCTTATCGAATCATTACT  
CAAAGACCAGGGTATCCCTTTCAGATAAAGTACGCACTATTCCATGATTC

>PGSC0003DMG400018264-(rev)LRR-RLKs\_6039

TCATTTACTCAAAGACCAGGGTATCCCTTTCAGATAAAGTACGCACTATTCCATGATTCTTCAAGCCATAA  
AATCTCCAAGTTGATAAGAAACACCATACGCGAGACAGTTTTTTGCCTA

>PGSC0003DMG400018264-(rev)LRR-RLKs\_61

AAGTTCTGTCAGTAGCAGCACGAACTAATCCTGTTGATTGTAAGTTGCTTTTGTCTTCTCTATCAAATGT  
TTCTTAACCAGTGTACAGAGATATTTGATTTATCTGTGAGTACTGGTGT

>PGSC0003DMG400018264-(rev)LRR-RLKs\_610

TTTACATTTCTGTTTCTACTTCACTCCCTTTTTCTTTTGACGGAGCAATACTTTGTCAGTTCTAATTATG  
GACTGCTCCTTATAGGGATCTATCATACAACAAAGATTTGACCGGAT

>PGSC0003DMG400018264-(rev)LRR-RLKs\_6100

CAAGCCATAAAATCTCCAAGTTGATAAGAAACACCATACGCGAGACAGTTTTTTGCCTAGCTTGTTGTGT  
CGTGTGATTATTCTATGCTCAACTTGACTATATACTCGTTTATTTACTTT

>PGSC0003DMG400018264-(rev)LRR-RLKs\_6161

TTGTTGTGTCGTGTGATTATTCTATGCTCAACTTGACTATATACTCGTTTATTTACTTTTTCTATGCAGGC  
TTGCAGGCAATCCTATCTGCAATGAAAGAGGAGAAGGGAGAAAACTT

>PGSC0003DMG400018264-(rev)LRR-RLKs\_6222

CCTATGCAGGCTTGCAGGCAATCCTATCTGCAATGAAAGAGGAGAAGGGAGAAAACTTACTGTATGG  
AAACTCAACAACTGAGACATACTCAACCCACCAGAGAATTGCTTGCCAAC

>PGSC0003DMG400018264-(rev)LRR-RLKs\_6283

TGTATGGAAACTCAACAACTGAGACATACTCAACCCCACCAGAGAATTGCTTGCCAACTGAGTGCAGC  
TCTAATCAAGTTTCTAGTCCTACCTGTAAATGTGCCTTCCATATACAGGA

>PGSC0003DMG400018264-(rev)LRR-RLKs\_6344

AGTGCAGCTCTAATCAAGTTTCTAGTCCTACCTGTAAATGTGCCTTCCATATACAGGAAACCTAGTCTTC  
AGAGCTCCTTCCTTTCAAACCTGGGAAATAGAACTACTTATGAGACTC

>PGSC0003DMG400018264-(rev)LRR-RLKs\_6405

CCTAGTCTTCAGAGCTCCTTCCTTTCAAACCTGGGAAATAGAACTACTTATGAGACTCTCCAAAAGTCTT  
TGTTGCTTTTCTTCCAAAACGTCAACTGCCTGTGGAATCAGTTTCCCT

>PGSC0003DMG400018264-(rev)LRR-RLKs\_6466

CAAAAGTCTTTGTTGCTTTTCTTCCAAAACGTCAACTGCCTGTGGAATCAGTTTCCCTCCGTAACCCAAT  
AAGAGATTTAAATGACCACCTTGTAATACAGCTGCAAGTTTTTCCATCT

>PGSC0003DMG400018264-(rev)LRR-RLKs\_6527

GTAACCCAATAAGAGATTTAAATGACCACCTTGTAATACAGCTGCAAGTTTTTCCATCTAGCCAAGATCG  
TTTCACTTGGACTGGTGTCTGGAATAGCTTCTGTGCTTAGTAATCAGA

>PGSC0003DMG400018264-(rev)LRR-RLKs\_6588

CCAAGATCGTTTCACTTGGACTGGTGTCTGGAATAGCTTCTGTGCTTAGTAATCAGACTTTCAAGACCC  
CATCGTCATTTGGACCTTCTTCTTATTGGTGAACCTATAAATACTT

>PGSC0003DMG400018264-(rev)LRR-RLKs\_6649

TTCAAGACCCCATCGTCATTTGGACCTTCTTCTTATTGGTGAACCTATAAATACTTTGTCGGTAATAG  
AACTATTTCTTTTCTATTATCACTCATTCTCATCTCCTACATATA

>PGSC0003DMG400018264-(rev)LRR-RLKs\_671

GTTCTAATTATGGACTGCTCCTTATAGGGATCTATCATACAACAAAGATTTGACCGGATATCTTTCTCAGT  
CTATTGGAAAATTGACAAAGTTATCAAATTTGTAAGTGAATGTGAATAA

>PGSC0003DMG400018264-(rev)LRR-RLKs\_6710

TCGGTAATAGAACTATTTCTTTTCTATTTATCACTCATTCTCATCTCCTACATATATGTGCAGCCTAATC  
TATAATTACAGAAAGTTGGTGGCTGAAGAAACAATATATATTTGAAA

>PGSC0003DMG400018264-(rev)LRR-RLKs\_6771

TGCAGCCTAATCTATAATTACAGAAAGTTGGTGGCTGAAGAAACAATATATATTTGAAATCTTGATGATT

AAGTTTGTATGTACTTTTCGTTTGACAGAAGAATTTACTGTATTTTAAAGA

>PGSC0003DMG400018264-(rev)LRR-RLKs\_6832

TTGATGATTAAGTTTGTATGTACTTTTCGTTTGACAGAAGAATTTACTGTATTTTAAAGACTTTGAACGTGA

ATAGCAACTATTACAGATCTACTGTTTTGATAACTATATCAATCCTTTC

>PGSC0003DMG400018264-(rev)LRR-RLKs\_6893

TTGAACGTGAATAGCAACTATTACAGATCTACTGTTTTGATAACTATATCAATCCTTCTGAAGTATTCAA

TTTGAAGTACAAGACCCAAAAAAATTGTCTAGTCATTGAATTTGAGA

>PGSC0003DMG400018264-(rev)LRR-RLKs\_6954

AAGTATTCAATTTAGAAGTACAAGACCCAAAAAAATTGTCTAGTCATTGAATTTGAGACAAAGATACG

ATAAAAAAACTAAAAATTTAGGCTACGTGCATGTGATGGATCAACTTTCGT

>PGSC0003DMG400018264-(rev)LRR-RLKs\_7015

AAGATACGATAAAAAAACTAAAAATTTAGGCTACGTGCATGTGATGGATCAACTTTCGTTTCATTGTTACT

AGTGATTTTTCTGTTAGAGTTTGCATAAACTTCAATGGATTTATTAATAA

>PGSC0003DMG400018264-(rev)LRR-RLKs\_7076

ATTGTTACTAGTGATTTTTCTGTTAGAGTTTGCATAAACTTCAATGGATTTATTAATAACGTTTTAGTATA

GACGCAGGTTATTCTGATCGGTCTCCTTAGAAAACTGGTTCATTAATT

>PGSC0003DMG400018264-(rev)LRR-RLKs\_7137

TTTTAGTATAGACGCAGGTTATTCTGATCGGTCTCCTTAGAAAACTGGTTCATTAATTGACAGCTGAAA

ATTCAAATTATTGTTTGAACATTATGGAGCTACATCTAAACGTTTCATG

>PGSC0003DMG400018264-(rev)LRR-RLKs\_7198

CAGCTGAAAATTCAAATTATTGTTTGAACATTATGGAGCTACATCTAAACGTTTCATGTTACTGAAGTCT

GAGGCTGTGCTTGCTGTTTTCTAGGGGAATCCACAGGATCAAAAAAATC

>PGSC0003DMG400018264-(rev)LRR-RLKs\_7259

ACTGAAGTCTGAGGCTGTGCTTGCTGTTTTCTAGGGGAATCCACAGGATCAAAAAAATCAGTTAGTACA

GGCATTATTATTGGAGCTACAGTTGGTGGTTCTGTCCTTGCAATTTTAGCA

>PGSC0003DMG400018264-(rev)LRR-RLKs\_732

CTTCTCAGTCTATTGGAAAATTGACAAAGTTATCAAATTTGTAAGTGAATGTGAATAATCATCACTCGA

GTATCACTTACCAGCTAATCTCGTGATAATATGCTGATGTTTTCTTGAT

>PGSC0003DMG400018264-(rev)LRR-RLKs\_7381

AATCATTGGTATTTATGCTTTCCGGCAAAGAAAAGAGCTGAAGATGCTGCAAAGAGGAGCGATCCTTT  
TGGTAAGAGTTGGAACAACTATTAGGCCATTTACCTATTACTTCATCTTA

>PGSC0003DMG400018264-(rev)LRR-RLKs\_7442

GATCCTTTTGGTAAGAGTTGGAACAACTATTAGGCCATTTACCTATTACTTCATCTTACGGTTGTTGTTG  
CTATCTTCCTTCTTAATGCAGCATCCTGGGACTCAAATAAACATAGTGG

>PGSC0003DMG400018264-(rev)LRR-RLKs\_7503

GTTGTTGTTGCTATCTTCCTTCTTAATGCAGCATCCTGGGACTCAAATAAACATAGTGGTGCTGTTCCACA  
GCTGACAGGAGCTAGATTTTTCTCATTTGACGAACTAAAAAATGGACT

>PGSC0003DMG400018264-(rev)LRR-RLKs\_7564

CTGTTCCACAGCTGACAGGAGCTAGATTTTTCTCATTTGACGAACTAAAAAATGGACTAATAATTTTTCA  
GAAACCAATGTTATTGGTTGTGGTGGTTATGGAAAGGTCAGCTTTTATG

>PGSC0003DMG400018264-(rev)LRR-RLKs\_7625

TAATTTTTCAGAAACCAATGTTATTGGTTGTGGTGGTTATGGAAAGGTCAGCTTTTATGCTCTGATACT  
AAGCATGTGTTCTGTTAGCAGTACTGCAGCCTTCATTCGTTCTGATCTT

>PGSC0003DMG400018264-(rev)LRR-RLKs\_7686

CTGATACTAAGCATGTGTTCTGTTAGCAGTACTGCAGCCTTCATTCGTTCTGATCTTAATCATCTTAGA  
CTTAGTAGTTAGTACTACCAGTTTCTTTGTCAAAGTGTGAGGCTATTTA

>PGSC0003DMG400018264-(rev)LRR-RLKs\_7747

TCATCTTAGACTTAGTAGTTAGTACTACCAGTTTCTTTGTCAAAGTGTGAGGCTATTTACAGACGATAATG  
AACTGATTGTATATTTGGATGGAGAAGTCTTGATTCTTCCACCCAAGAT

>PGSC0003DMG400018264-(rev)LRR-RLKs\_7808

GACGATAATGAACTGATTGTATATTTGGATGGAGAAGTCTTGATTCTTCCACCCAAGATAATTCACATAT  
TTTGGTTTCGGATGTAATACAATAGCTCTAATCTATTTAATTAATAAGAT

>PGSC0003DMG400018264-(rev)LRR-RLKs\_7869

TTCACATATTTTGGTTTCGGATGTAATACAATAGCTCTAATCTATTTAATTAATAAGATCCGGTAAGTATG  
GATATTTTTTATCTGTTTGTACCAGCTTCTCTTCCACTGAAAAGAAA

>PGSC0003DMG400018264-(rev)LRR-RLKs\_793

ATCACTCGAGTATTCATTACCAGCTAATCTCGTGATAATATGCTGATGTTTTCTTGATTTTCATGACAGGA  
TCCTTGTTGGTTGTGGATTTTCTGGACCAATACCAGACTCCATAGGATC



>PGSC0003DMG400018264-(rev)LRR-RLKs\_7930

GGTAAGTATGGATATTTTTATCTTGTGGTACCAGCTTCTCTTCCACTGAAAAGAAAATTTCTCGACTAC  
AATTGAAACTGTATTAAGTTTTAACTGTAGAAGTGTGGCTCTACAG

>PGSC0003DMG400018264-(rev)LRR-RLKs\_7991

TTCTCGACTACAATTGAAACTGTATTAAGTTTTAACTGTAGAAGTGTGGCTCTACAGGTTTACAGAGG  
AAGTCTTCTGAACAGAGAATTGGTTGCAATAAAAGAGCTCTACAAGGGT

>PGSC0003DMG400018264-(rev)LRR-RLKs\_8052

TTACAGAGGAAGTCTTCTGAACAGAGAATTGGTTGCAATAAAAGAGCTCTACAAGGGTCTATGCAGGG  
CACACATGAGTTCAAACTGAGATAGAGCTTCTCTCAAGGGTTCATCACAA

>PGSC0003DMG400018264-(rev)LRR-RLKs\_8113

ATGCAGGGCACACATGAGTTCAAACTGAGATAGAGCTTCTCTCAAGGGTTCATCACAAGAATGTCGTT  
GGCCTTGCTGGCTTTTGTTCGATCAAGCTGAACAGATGCTTGTGTACGAG

>PGSC0003DMG400018264-(rev)LRR-RLKs\_8235

CATTCTAATGGCACCTAAAAGACGGTCTTTCAGGTATATGTTGATCCCTTCTTGTGATTAATTGAAAC  
TAGCTCCTTTAACTTAACCAAAATGCAAATGGAATGAAATTTGTACTT

>PGSC0003DMG400018264-(rev)LRR-RLKs\_8296

TAATTGAACTAGCTCCTTTAACTTAACCAAAATGCAAATGGAATGAAATTTGTACTTGTAGGTAAGAC  
TGGGGTCAGGTTAGATTGGATGAGGAGATTGAAGATAGCCATTGGAGCAG

>PGSC0003DMG400018264-(rev)LRR-RLKs\_8418

AGAGGTTTGCAGTATTTGCATGACCATGTCAATCCCCCATTGTACACAGGGACATCAAGTCCAACAATA  
TTTTGCTAGCTGATCACCTAAACGCAAAAGTTGCTGATTTTGGCCTGTCC

>PGSC0003DMG400018264-(rev)LRR-RLKs\_8479

CCAACAATATTTTGTAGCTGATCACCTAAACGCAAAAGTTGCTGATTTTGGCCTGTCCAAGCTTCTAGGT  
GAAAGGGGTCATATTACCACTCAAGTCAAAGGAACAATGGTAAGTAAAG

>PGSC0003DMG400018264-(rev)LRR-RLKs\_854

CATGACAGGATCCTTGTGGTGTGGATTTTCTGGACCAATACCAGACTCCATAGGATCTCTGACCCAGC  
TGTTTTTCTGTAAGCATTATGTGGCACTCTTGTACTTTGAATGTGCGA

>PGSC0003DMG400018264-(rev)LRR-RLKs\_8540

GCTTCTAGGTGAAAGGGGTCATATTACCACTCAAGTCAAAGGAACAATGGTAAGTAAAGATTCTATAAA

CACCTGCCTGAACTTGTTTCGTTTTAGAATAATGTATGCTCCCTCAAATTT

>PGSC0003DMG400018264-(rev)LRR-RLKs\_8601

TCTATAAACACCTGCCTGAACTTGTTTCGTTTTAGAATAATGTATGCTCCCTCAAATTTCTGATGTCCAGA

AAGTTCAGAAATTAATGTGTCGATAATTTCTAGTCCTGTAATAACCAT

>PGSC0003DMG400018264-(rev)LRR-RLKs\_8662

GATGTCCAGAAAGTTCAGAAATTAATGTGTCGATAATTTCTAGTCCTGTAATAACCATTACAAGCACTA

TTTCATTGTCTAGTAAGAACACCTGAAGCTCCTCTTTCTCATCGACCAC

>PGSC0003DMG400018264-(rev)LRR-RLKs\_8723

CAAGCACTATTTTCATTGTCTAGTAAGAACACCTGAAGCTCCTCTTTCTCATCGACCACCCTTCCCTCCACT

AAAAATGAGTAAATAAATAAGTAGGAACAGGAAAATACGAAAACGTTT

>PGSC0003DMG400018264-(rev)LRR-RLKs\_8784

TTCCCTCCACTAAAAATGAGTAAATAAATAAGTAGGAACAGGAAAATACGAAAACGTTTTATTTATTTCT

TGATATTCTCTCAAGGTAAGGGACTTGTAGGTAATGATGCTTAAAAACAC

>PGSC0003DMG400018264-(rev)LRR-RLKs\_8845

TTTATTTCTTGATATTCTCTCAAGGTAAGGGACTTGTAGGTAATGATGCTTAAAAACACCAAATTTAAGG

AGAAATACTACCTTGATTAGGAAACAATGAGTTATTGCCCATAGCAGATA

>PGSC0003DMG400018264-(rev)LRR-RLKs\_8906

AATTTAAGGAGAAATACTACCTTGATTAGGAAACAATGAGTTATTGCCCATAGCAGATAGAAGCTTTTTA

ACGTTTCATATAATGTGATCTTGCCATGTATGAAAGGAAACAAGTTGAGAT

>PGSC0003DMG400018264-(rev)LRR-RLKs\_8967

AGCTTTTTAACGTTTCATATAATGTGATCTTGCCATGTATGAAAGGAAACAAGTTGAGATGTTGCAGAAAA

ATGTGTCAGTATTTACCTTATAATCTATGTCCTTTTGATGGTTGCCTTTT

>PGSC0003DMG400018264-(rev)LRR-RLKs\_9028

TGCAGAAAAATGTGTCAGTATTTACCTTATAATCTATGTCCTTTTGATGGTTGCCTTTTATTTATTAGGGA

TACATGGATCCTGAATATTACATGACAAACCAGTTGACAGAGAAGAGTG

>PGSC0003DMG400018264-(rev)LRR-RLKs\_915

TGACCCAGCTGTTTTTTCTGTAAGCATTATGTGGCACTCTTTGACTTTGAATGTGCGACCAGTACGTGAC

ATATTTTACCAGAATGCAAGGGTCATACACTATCTGCTTAAAATTGTTA

>PGSC0003DMG400018264-(rev)LRR-RLKs\_9150

GTTTTAGCTTTGGAGTGGTGTGCTGCTGAGATAGTCACAGGAAAAGTTCCTATTGATAAAGGAAGATAT  
ATTGTCAAGGAAGTGAAGGATGCAATGGACATGACAAAAGATTTGTATAAC

>PGSC0003DMG400018264-(rev)LRR-RLKs\_9211

GAAGATATATTGTCAAGGAAGTGAAGGATGCAATGGACATGACAAAAGATTTGTATAACCTTCATGAAA  
TTTTGGATCCTGCAGTTTGTTCGGGTGCAACTCCTAGAAGCTTAGAGAAGT

>PGSC0003DMG400018264-(rev)LRR-RLKs\_9272

TCATGAAATTTGGATCCTGCAGTTTGTTCGGGTGCAACTCCTAGAAGCTTAGAGAAGTTTGTGGATCTA  
GCACTCAAGTGTGTTGAAGAAAAGGAGTCAATAGACCTAAAATGAGTGA

>PGSC0003DMG400018264-(rev)LRR-RLKs\_9333

GTGGATCTAGCACTCAAGTGTGTTGAAGAAAAGGAGTCAATAGACCTAAAATGAGTGAAGTGGTGAA  
ACAGATTGAATATATTATGGAGATCGAAGGCCTGAACCCCGATGATGAATCT

>PGSC0003DMG400018264-(rev)LRR-RLKs\_9394

TGGTGAAACAGATTGAATATATTATGGAGATCGAAGGCCTGAACCCCGATGATGAATCTGCATCTACTT  
CAGCAACCTATGAAGGAGCAAACAAAGGCTTGAACCATCCTTATACTGAAA

>PGSC0003DMG400018264-(rev)LRR-RLKs\_976

AGTACGTGACATATTTTACCAGAATGCAAGGGTCATACACTATCTGCTTAAAATTGTTAACGTAATGTGT  
GCTTTTGGTGCTAGCTGTACTCAAATTTTGGTCCATCTCTGGGACAGGCA

>PGSC0003DMG400018308LRR-RLPs\_0

GTTGTTAGACTTTTCAGATTTTTCATTTGATCTTTGTCTGTACTTTGATCAATATTCTGAAGATGAGTGTATC  
TAAAAAATTCATTCAACAGCTTATTCTGTTTGACATATTCATCGCGCT

>PGSC0003DMG400018308LRR-RLPs\_1037

GACGTAATAAGTTGAATGAATCCATCCCGGGAGCTGTTGGAAAACTTTTAAGTATTGTTCTTTTGGATTT  
ATCTTGGAACAGAATCACGGGATCAGTCCCTGATCTTTTTCTGTTATCGT

>PGSC0003DMG400018308LRR-RLPs\_1098

TTTGGATTTATCTTGGAACAGAATCACGGGATCAGTCCCTGATCTTTTTCTGTTATCGTCGTTGAGGGAAT  
TATATCTTTCTCATAATCAGTTAACTGGTGTAACGGAGAGTATTGGATG

>PGSC0003DMG400018308LRR-RLPs\_1525

TTGACCTTCTTAAACCTTTCTTACAATGATATAGGAGGAAATGTACCATATCTCTCAAAGAAGATGACTG  
ATCTTCTTTGCATAGATTTGGCTACAAACAAATTCACCGGTCCAGTACCA

>PGSC0003DMG400018308LRR-RLPs\_1647

ATTCCTACCAGTGTTATAACAGTTGATCTCTCCAACAACATGTTTTCCGGTACCATCTCCTTCATTTGTGA  
CAATTTTGATTATTTGGGATATCTTGACCTCTCAGACAACAGGTTGTC

>PGSC0003DMG400018308LRR-RLPs\_1708

TTCATTTGTGACAATTTTGATTATTTGGGATATCTTGACCTCTCAGACAACAGGTTGTCCGGAGAGCTTCC  
TCACTGCTGGACGCTTAGAAGTATCGTGCATCTTAACTTAGGGACTAAT

>PGSC0003DMG400018308LRR-RLPs\_1891

CAAAACAATCATTTAACAGGAGAACTACCTCAGTCCCTGGCAAATTGCAAAAAGTTGAGGGTTATAGAT  
GTTTCGGTCTAATAACTTGTCTGGTGAAATTCCAGCATGGATTGGGAATAAC

>PGSC0003DMG400018308LRR-RLPs\_1952

TTATAGATGTTCCGGTCTAATAACTTGTCTGGTGAAATTCCAGCATGGATTGGGAATAACATATCTGATAT  
CATTATTGTTATCTTAAAATCCAACAGGTTTAGTGGAAGCATACTTCAA

>PGSC0003DMG400018308LRR-RLPs\_2074

ATATGCCAGCTAAAAGAACTTCAAATCTTGGACTTATCTGAAAATAAGATATCCGGGATCATACCAAAAT  
GTATCAACAACCTCACTGCAATGACGGAAGAAGAGAGCACAATGCACCAA

>PGSC0003DMG400018308LRR-RLPs\_2135

TACCAAAATGTATCAACAACCTCACTGCAATGACGGAAGAAGAGAGCACAATGCACCAAATCAAGAGTT  
GGTATTTTCAGGTCGATGATCAAGGTGATGTCAAATAAATGCCTCATACG

>PGSC0003DMG400018308LRR-RLPs\_2379

TCTTGTAGGTTTGCACGGTTTGAACCTGTCGAGAAACAACCTTAACCAGCAGCATCCCTCTGAGAATTGGT  
CAAATGAGGGAACTAAATTTCTTGACTTAAGCACAAATGATCTTACAGG

>PGSC0003DMG400018308LRR-RLPs\_244

TCTTCGTGGGGAAATGAAGGATTTAATCAAGATTGTTGCACATGGAGAGGTGTCCAGTGTGACAATCAA  
ACCAGTAATGTCATTAGACTCGATCTTCGTGGTCCCTTCTGGCCTCAATGCA

>PGSC0003DMG400018308LRR-RLPs\_2440

AGAATTGGTCAAATGAGGGAACTAAATTTCTTGACTTAAGCACAAATGATCTTACAGGGGAAATTCCT  
GCTAGCCTTTCACAGTTAAGTCACCTGGGAGTTTTGAACTTGTCTTACAAC

>PGSC0003DMG400018308LRR-RLPs\_2501

AAATTCCTGCTAGCCTTTCACAGTTAAGTCACCTGGGAGTTTTGAACTTGTCTTACAACAACCTTGTCTGGT

CGAATCCCTTTAGGCGAACACTTACTGACTTTCAACAACAGATCTTACA

>PGSC0003DMG400018308LRR-RLPs\_2623

GGAAATCATGGACTTTGCGGCCGTCCACTAACAGAAGCTTGCTCTCTGGAGGAACTGCCTCCAGACTCA  
ACGTTGAGTGATGAGGACGAGTTTATAACTCCAGAGTTTTATATTAGTATG

>PGSC0003DMG400018308LRR-RLPs\_2684

CAGACTCAACGTTGAGTGATGAGGACGAGTTTATAACTCCAGAGTTTTATATTAGTATGGGAATCAGCTT  
TATTTCTTCATTTTTGGGAGTCTCAGCTCTGATGTTGAATAGAAGGTGGA

>PGSC0003DMG400018308LRR-RLPs\_2745

AATCAGCTTTATTTCTTCATTTTTGGGAGTCTCAGCTCTGATGTTGAATAGAAGGTGGACTTATGGTCTAC  
TCAGATACTAGGAAATCAATAATGTAACATCACACAGTTAAATGTAGGT

>PGSC0003DMG400018308LRR-RLPs\_2806

TATGGTCTACTCAGATACTAGGAAATCAATAATGTAACATCACACAGTTAAATGTAGGTTTACTTAAATA  
CCATGATAAGGAGCTATGTAATCTTGAGTTCTTGAAACTTTGCACTTGCC

>PGSC0003DMG400018308LRR-RLPs\_366

CGTTGCCACTGAGCCATTGATAGGTAAGATAAGTCCTGCCTTACAAGTATTGATGCAATTAAGTATTTG  
GATCTTAGTTACAATCGAATTCAGGAGGTATACCGACTTTCTTGGTTC

>PGSC0003DMG400018308LRR-RLPs\_488

TGAGTAAGTTGGAATACCTCAACTTATCTTGTGTTGGTGATGATTTTACGACAGTTCCTAATCTTGGCGAT  
CTTTCTAGCTTAAACACCCCTGATTTGAGCTATAATGATTTCTATCTG

>PGSC0003DMG400018308LRR-RLPs\_61

ATGAGTGTATCTAAAAAATTCATTCAACAGCTTATTCTGTTTGACATATTCATCGCGCTGTCAGTTACCTG  
TGGTGTGTTGTTTCTCAGCTCAGGAGTTGGTGATGGGAATATCAAGTGCCTT

>PGSC0003DMG400018308LRR-RLPs\_610

AATAACCTTGAATGGATTTGCGGTCTTTATCAATTGAGATACCTTGCTCTACGTTATGTTAATAATCTGAA  
TAGTTGTGTATATACCTGGCTGTTAAGTTAAGCAATCTGACTCACCTT

>PGSC0003DMG400018308LRR-RLPs\_793

AAACACCTTGATCTGTCTCGGAATGCGCTTGGAGGTGGCTTCCCTAGATGTCTTGGTAACAGTAGTAATT  
TGAAGTTATTGCGACTGTCTTCCAACAATCTAGACGGGCAGCTACCTGAG

>PGSC0003DMG400018308LRR-RLPs\_854

GTAGTAATTTGAAGTTATTGCGACTGTCTCCAACAATCTAGACGGGCAGCTACCTGAGATAATGAATAA  
CTTGTCATGCGTGTACATTCTCTCGAGTACCTGAACTTAGAAGAGAATC

>PGSC0003DMG400018367-(rev)LRR-RLKs\_0

CTCTGTTAAAACAATGCTTTGCTTGCATTTTTAGTTTTGTTCTTTTGTTCAGCTCAATATCATGATGTT  
TTTTCTCAGCTTCTCCTCATTATTTCTTCATAATTCACTTCATATT

>PGSC0003DMG400018367-(rev)LRR-RLKs\_1159

ATTAATTTACAAACAACCTCATACACAAACAAAAACCTTAAAAATAACCTAATCGTTTCACTTACAT  
TCTCAAAAAACTTGCATGCCGCAGTTACCAATTCTACTAACAGTGGACA

>PGSC0003DMG400018367-(rev)LRR-RLKs\_122

GTGGGTTTTTCCTTCTTGTACTGTACTTCAATTTTTACTTCTCCTTCTTCAACTGTCCAGAGTTAGTTTT  
TTTTTTGTTTCTAGATTTGTTCTATCCTTTTCTCAATTTTTGAATA

>PGSC0003DMG400018367-(rev)LRR-RLKs\_1220

TCACTTACATTCTCAAAAACTTGCATGCCGCAGTTACCAATTCTACTAACAGTGGACAAGCTGTCATTAT  
TTCAGAAAAAAAAAAGAAAAAGAGACAGTCCCAGGAAATTGAAGGGGGA

>PGSC0003DMG400018367-(rev)LRR-RLKs\_1281

CTGTCATTATTTAGAAAAAAAAAAGAAAAAGAGACAGTCCCAGGAAATTGAAGGGGGAGAAGAGGA  
AATGAAGTACTGACTCCTAGGTTGCTAGTCAAGTGTAGGGGGCTATGGCCTCG

>PGSC0003DMG400018367-(rev)LRR-RLKs\_183

GAGTTAGTTTTTTTTTTTTGTTTCTAGATTTGTTCTATCCTTTTCTCAATTTTTGAATACCCATTTTGTATCA  
GTTGGGTGTCATTGATTTGCTTCTTTTTGGTTGTGTTATGATGAAT

>PGSC0003DMG400018367-(rev)LRR-RLKs\_2440

TGACACCAAGACAAAATCATTTCAATATTTCCATAGAGGTTTTTAATTGTCCATAACTGGTGGATTAATTG  
TATACTTGCAGTGATTTGTCAAGTAACAGTTTCAGCGGAGCTTTGCCGT

>PGSC0003DMG400018367-(rev)LRR-RLKs\_2745

CGTCACCATTTTAACTCAAATATTAATTCCAGGTCCATAGAATGATATAATATCGTACTAATATCTCCCAT  
CTTTTGTGTCCCTCCAGGAATGTGGAGAATAACCTGTTTTCTGGGCC

>PGSC0003DMG400018367-(rev)LRR-RLKs\_3843

GGCCCAAAGTCTTTTTTATACTATCGGAGATCTGATATGTTGAGGAGTATATTTATGTTGCAAACCAGA  
TTATGCTTACAGGTTTATGGCACTGACTTAGATTAGAATTGCTAGTGGGC

>PGSC0003DMG400018367-(rev)LRR-RLKs\_4026

TAGCCAAATTTTGATATCATCAGCACAATTACCTAAAAAAGAATAATCCTAACACTATGCTGCTCAATTT  
AACAAATTGGATAAAAAAACATCTAGCCTACACAATAAATTGGAAAAAAT

>PGSC0003DMG400018367-(rev)LRR-RLKs\_4087

TGCTCAATTTAACAATTGGATAAAAAAACATCTAGCCTACACAATAAATTGGAAAAAATGTGACGTATAC  
AAGCTAAAGGATTATAGTAGCACAAAACCATATGACACCCATATATGATG

>PGSC0003DMG400018367-(rev)LRR-RLKs\_4209

TATGTCACGCTGGACCATGGACTGCCAAGCTGGATCATGGACTGCATTTTGGTCATATTTAAGTTCACTA  
GCGGGCTAACATTTATTTAAGTTTTGAACACAGGCGTGATTTTCATATCA

>PGSC0003DMG400018367-(rev)LRR-RLKs\_4270

AGTTCACTAGCGGGCTAACATTTATTTAAGTTTTGAACACAGGCGTGATTTTCATATCATGTTGTTCAATA  
AGATTTGTTTGCCGGGAAATTTGATTTATTGAACAATATTGGTAAGGGT

>PGSC0003DMG400018367-(rev)LRR-RLKs\_4331

TTGTTCAATAAGATTTGTTTGCCGGGAAATTTGATTTATTGAACAATATTGGTAAGGGTACATATTGATCC  
ATGCTAGGAAGATGTATCAGTTGTTTCATTATTTTTTTCAAGTGTCTTA

>PGSC0003DMG400018367-(rev)LRR-RLKs\_5368

TCTCTATTACAATCATAAACGCCCTACAAAAGATTCGTGAATTTGATATCTGTTTTTGCAACATTCAGAAC  
TAATAAGCTATGACTCTTAACCTCTTCTACTCTTTGATGATAAGTGGAC

>PGSC0003DMG400018367-(rev)LRR-RLKs\_6344

GGCATTTTCTTCAAATAAAACAACACCATTGATCAACTGTTGTCATAGAACAATCAACATTCAAGTTGCAT  
GAGCTTATCATTCTGATTTGTACCTTAGTTTTGTCATTTGCTGTATAGC

>PGSC0003DMG400018367-(rev)LRR-RLKs\_671

TTATTTTGGGTAAACGTTTTCAAGTCGGGGGCGAGCTGGAGTTATCGAAATTGGTCGGTTAAATGAATA  
GTCTTTATCCATTTCCGGAATTAAGTTGGGGCATGACGTTAGATATGAGGT

>PGSC0003DMG400018367-(rev)LRR-RLKs\_7015

ATCTGATGTTGAAGAGTTATTTGGCCGTGATCTATAAGAAATTTCTGTAAGCAGTACTAATAATAATTTA  
GCACTGGAAGGTAGCAAAGAACTCAAATCACAACTAGTCCTGAACTTTC

>PGSC0003DMG400018367-(rev)LRR-RLKs\_7076

AATAATTTAGCACTGGAAGGTAGCAAAGAACTCAAATCACAACTAGTCCTGAACTTTCATGCCATGTAC

ATACTACATGACATAAATGATAAAATACTGTTGGGAGATGGTCTTTATAA

>PGSC0003DMG400018367-(rev)LRR-RLKs\_732

AATGAATAGTCTTTATCCATTTCCGGAATTAAGTTGGGGCATGACGTTAGATATGAGGTTGCATAGGAA

ATGGATTAGGTAGAAGATTAGTAGGTAATGGAGTGTTGTCTTGCTTATCCT

>PGSC0003DMG400018367-(rev)LRR-RLKs\_7320

CCACCCGTTAATTATTATTAGTGGGATTGCTAGGTGATCTAATTCTTAGATTTGCATGACAAGCGAGTTA

AAGCAAATTTTAAATCTCATGTATTAATTATATTTGTTCTTTTATGCAAT

>PGSC0003DMG400018367-(rev)LRR-RLKs\_7503

TTCTCCTTGATGAAGAGTTGGCTGTGCATATCTCTGACTGTGGTTTAGCTCCACTGATATCATCAGGTGCC

GTGAGCCAGGTAACCTACCATCCAAATATTATGGATCAGACATTTACCT

>PGSC0003DMG400018367-(rev)LRR-RLKs\_7564

ATCAGGTGCCGTGAGCCAGGTAACCTACCATCCAAATATTATGGATCAGACATTTACCTCTTGGGGTGGAA

ATGGTCATTTTCTGCTTGCATTTCCAGTTGAAAGAAAAGCAAGTTTCAGG

>PGSC0003DMG400018367-(rev)LRR-RLKs\_793

CATAGGAAATGGATTAGGTAGAAGATTAGTAGGTAATGGAGTGTTGTCTTGCTTATCCTTTGATGCTGG

TAGTCGTAGTATTTCCCTTGGTAGTTTCTCGTCCTTGGATTTGTGTTACTA

>PGSC0003DMG400018367-(rev)LRR-RLKs\_854

GATGCTGGTAGTCGTAGTATTTCCCTTGGTAGTTTCTCGTCCTTGGATTTGTGTTACTATTATTGCACTGTT

TTGTTGCGGTTACCGTTTGTTTTTTCTTCTCAGAATGCTTTGCCATG

>PGSC0003DMG400018367-(rev)LRR-RLKs\_9028

TTAATCAAACCTTGGGTACAAATGAGGAAAAAGGTAACATGGAAAATGATTTATTTCTGTACAGAAAA

TAAAATAAAAAGTAAAAGGAAGGAGCTGTACTGTGTCAAATAGGAACTCT

>PGSC0003DMG400018367-(rev)LRR-RLKs\_9089

ACAGAAAATAAAAATAAAAAGTAAAAGGAAGGAGCTGTACTGTGTCAAATAGGAACTCTACACATGGT

GTCTTTTGTTTTTTATAGCCACTAGATTATGAATTATTTACCAGTTTAAGGA

>PGSC0003DMG400018367-(rev)LRR-RLKs\_915

ATTGCACTGTTTTGTTGCGGTTACCGTTTGTTTTTTCTTCTCAGAATGCTTTGCCATGCTTTCTATAGTATT

TCGCCACTATTTCTTCACTTCTGTTATTTCTTTTTTCGATATGCCTT

>PGSC0003DMG400018385LRR-RLPs\_0



GGCGATCTTTCTAGCTTAAACACCCTTGATTTGAGCTATAATGATTTCTATCTGTGAATAACCTTGAATG  
GATTTGCGCTCTTTATCAATTGAGATACCTTGCTCTACGTTATGTTAAT

>PGSC0003DMG400018385LRR-RLPs\_126

GAATAGTTGTGTATATACCTGGCTGTTAAGTTAAGCAATCTGACTCACCTTGATCTCTCTGGTAATACTT  
TATATGGTCAAATTCCTGATGCTTTTTGGAGTATTAATAAATCCTTAAAA

>PGSC0003DMG400018385LRR-RLPs\_1323

ATGGGAATGCTGCATCTTCAAACAATCATTGACAGGAGAACTACCTCAGTCCCTGGCAAATTGCAAG  
AAGTTAAGGGTTATAAACGTTCACTAATAACTTGTCTGGTCAAATTCCA

>PGSC0003DMG400018385LRR-RLPs\_1386

TGCAAGAAGTTAAGGGTTATAAACGTTCACTAATAACTTGTCTGGTCAAATTCCAGAATGGATTGGG  
AGTAACATATCTGATATCATTATTGTTATCTTAAAATCCAACAGGTTTAGT

>PGSC0003DMG400018385LRR-RLPs\_1638

CACCAAATAAAGAGTTGGTATTTTCAGGTCGATGATCAAGGTGAAGTCAAAGTAAATGCCTCATACGAT  
GAGACTGCAGTTTTGATGTGGAAGGGACGACAATTTGAATACAGCAGCATA

>PGSC0003DMG400018385LRR-RLPs\_1701

TACGATGAGACTGCAGTTTTGATGTGGAAGGGACGACAATTTGAATACAGCAGCATACTTGGTATGGTG  
AAGAGCATCGATCTTCAAGCAACAACATGGTGGGAGAAATCCCGGTTGTA

>PGSC0003DMG400018385LRR-RLPs\_1827

TCTCTGTAGTTTTGCACGGTTTTGAACCTGTCGAGCAACAACCTTAACCGGCAGCATCCCTCTGAGGATTG  
GTGAAATGAGGGCACTAAATTTCTTGACTTAAGCATAAATGATCTTACA

>PGSC0003DMG400018385LRR-RLPs\_189

TAATACTTTATATGGTCAAATTCCTGATGCTTTTTGGAGTATTAATAAATCCTTAAAACACCTTGATCTGTCT  
CGGAATGCGCTTGGAGGTGGCTTCCCTAGATGTCTTGGTAACAGTAGT

>PGSC0003DMG400018385LRR-RLPs\_1890

AGGATTGGTCAAATGAGGGCACTAAATTTCTTGACTTAAGCATAAATGATCTTACAGGGGAAATTCCA  
GCTAGCCTTTCACAGTTAAGTCACCTGGGAGTCTTGAACCTTGCATACAAC

>PGSC0003DMG400018385LRR-RLPs\_1953

ATTCCAGCTAGCCTTTCACAGTTAAGTCACCTGGGAGTCTTGAACCTTGCATACAACAACCTTGTCTGGTCG  
AATACCTCTAGGCGAACACTCACTGACTTTCAACAACAGATCCTACATT

>PGSC0003DMG400018385LRR-RLPs\_2016

TCTGGTCGAATACCTCTAGGCGAACACTCACTGACTTTCAACAACAGATCCTACATTGGAAATCATGGAC  
TTTGGCGCTATCCACTAACAGACACTTGCTCTCTGGAGGAACTGCCTCGA

>PGSC0003DMG400018385LRR-RLPs\_2079

CATGGACTTTGCGGCTATCCACTAACAGACACTTGCTCTCTGGAGGAACTGCCTCGAGATTCAACGTTGA  
GTGATGAGGATGAGTTTATAACTCCAGAATTTTATGTTAGTATGGGAATC

>PGSC0003DMG400018385LRR-RLPs\_2142

ACGTTGAGTGATGAGGATGAGTTTATAACTCCAGAATTTTATGTTAGTATGGGAATCAGCTTTATTTCTG  
CATTTTTGGGAGTTTCAGCTCTGATCTTAAATAGAAGGTGGACTTATGGT

>PGSC0003DMG400018385LRR-RLPs\_2205

ATTTCTGCATTTTTGGGAGTTTCAGCTCTGATCTTAAATAGAAGGTGGACTTATGGTCCACTCAGGTACTA  
GGAAATCAATAATGTAACATCACACAGTTAAATGCAGCTTTACTTACAT

>PGSC0003DMG400018385LRR-RLPs\_2241

AATAGAAGGTGGACTTATGGTCCACTCAGGTACTAGGAAATCAATAATGTAACATCACACAGTTAAATG  
CAGCTTTACTTACATACCAATTTGTTAAGGGCACATACAACAACCTTTTTT

>PGSC0003DMG400018385LRR-RLPs\_441

ACTGATATTGTAGCTAAGTTTGCATCTTTGAGAGAGCTGAGGCTTGGACGTAATAAGTTGAATGAATCC  
ATCCCGGGAGCTGTTGGAAAACCTACCAAGTCTTGTTCTTTTGGATTTATCT

>PGSC0003DMG400018385LRR-RLPs\_882

CTGCGGAATCAGAACAACATTTCCGAGCTTGAATTTTCAGCCTCTGGAATTTTCAGGTAACGTTCCCTAGTT  
GGTTCTGGGAACAGTTACCTGGATTGACCTTCTTAAACCTTTCTTACAAT

>PGSC0003DMG400018452-(rev)G-LecRK\_0

CTTCAACCATGTTAACAGTTAGAACTTGCCTTCTTTAATTTCTCCCCATTGATATCATGGCTCTCTATTTCC  
TACTTGTGTTGTTTATCTTTGGATCCGCTAGAGCTCAATCAAATCC

>PGSC0003DMG400018452-(rev)G-LecRK\_1178

GTGATTGTGATGCTGCTCTTTTCGATGAAACTGGCCAGTGTATGAAACACAAGCTTCTCTGAGGTATGT  
TAAAGGTGCTCCTGAAGGATCTCGCACTGCTTACTTCAAAGTCAGCAATC

>PGSC0003DMG400018452-(rev)G-LecRK\_2356

CCTCCATGTCCAAGTCCCAGTAGTTAATTTAGTAGTTGTAAGTGGTTTGGTTTATTATATTGTTGTTTTCT

TCAATAACATCTTTTAATGGAAATTTTAGTGAGGATATATAGTTAGTT

>PGSC0003DMG400018452-(rev)G-LecRK\_2418

GTTGTTTTCTTCAATAACATCTTTTAATGGAAATTTTAGTGAGGATATATAGTTAGTTCAACATACATGAG

TTCAGATTATGTTTTATTTAATGAGATCATTTCAGGCCCTATGGGTG

>PGSC0003DMG400018452-(rev)G-LecRK\_2604

TATTACACTAGGAGATTATCAAAATTATGCTTCCATCATATGTTGGGAGTTGCGAAAATTTAGACATAT

ATACAAGTATATGTGGGAATATTTAAGGTGTTGAGAGCCACTAGATTTGG

>PGSC0003DMG400018452-(rev)G-LecRK\_2666

AGACATATATACAAGTATATGTGGGAATATTTAAGGTGTTGAGAGCCACTAGATTTGGAGCTTCTAATTA

AGGTGGATAACACTTCAATATAGTAACATGATTGCTGATATTATGCAGGG

>PGSC0003DMG400018452-(rev)G-LecRK\_2728

TCTAATTAAGGTGGATAACACTTCAATATAGTAACATGATTGCTGATATTATGCAGGGAAAGGGTATTCC

TTGATAGTATTGTGGTTAAAGGCTTAAAGCAAGGAAGACTCTTTATCAAA

>PGSC0003DMG400018452-(rev)G-LecRK\_310

GCTGATTCTACCTTAGCTTTCATTGATGGAATTGTAGTTCTGAAAACAAATAACAGTGAGGATAAGACTG

TTGCTAGTTCGTCAGAATCTGCTTCTTATGCCAACTTGCTTGATAACGGT

>PGSC0003DMG400018452-(rev)G-LecRK\_372

TAAGACTGTTGCTAGTTCGTCAGAATCTGCTTCTTATGCCAACTTGCTTGATAACGGTAACTTTGTTCTTT

ACAATCAAGATCATGAACTATCTATGAGAGCTTCAGTTTTCTACTGA

>PGSC0003DMG400018452-(rev)G-LecRK\_558

TCACTCCTCAGGGAGATTTGCCTCTGGATGCAGGATGATGGGAACCTTGTTGCATACCCCAGAACTTG

TTTCGGCCAGTAGATGCCTATTGGTCTTCACAAATGTACTGTGATGGTTG

>PGSC0003DMG400018452-(rev)G-LecRK\_62

CTCTCTATTTCTTACTTGTGTTGTTTATCTTTGGATCCGCTAGAGCTCAATCAAATCCACCTAGTACAATAA

GATTAGGATCTTCTTTCATCCCCTGGACAATCTGTAGCATGGTACT

>PGSC0003DMG400018452-(rev)G-LecRK\_620

GAAACTTGTTTCGGCCAGTAGATGCCTATTGGTCTTCACAAATGTACTGTGATGGTTGCAGAAATCTCCT

GCTTCTTAACAGCACTGGCATCTTATTTCTGATCAATGACACTGATTCTT

>PGSC0003DMG400018452-(rev)G-LecRK\_682

AATCTCCTGCTTCTTAACAGCACTGGCATCTTATTTCTGATCAATGACACTGATTCTTCAGTACTTCGACAA  
TTATACACTCCACTTGTACAGAATAACAGAGCTATTTATCGGGCCACT

>PGSC0003DMG400018457-(rev)G-LecRK\_0

GGAATACTACTGCCATTTAAAATTGGAAATGTCCAAGTTAGTATACAAAAGAATACTTAGCAAAGAGTAT  
ATCTATATTCTCATCCTTGTGTCATGGCTAACTTAACATTTACTTTTCATG

>PGSC0003DMG400018457-(rev)G-LecRK\_2232

GATGTCAACGTCTCAACCGAGGATGAAATCTTTCTCCTAATTGGGTACACAAATGCTTTGTGCGAGAATG  
ATATCAGAAAGCTAGTGGGAGATAAGGAAGTAGATCATGCGAAGTCCTTG

>PGSC0003DMG400018457-(rev)G-LecRK\_2294

CGAGAATGATATCAGAAAGCTAGTGGGAGATAAGGAAGTAGATCATGCGAAGTCCTTGGAGAGGATG  
GTGAAGGTTGGATTGTTATGCATTCACGATAATCCTGATCTGCGCCCTTCTAT

>PGSC0003DMG400018457-(rev)G-LecRK\_310

AAACTGTTGTTTGGACTGCAAATAGAGATGATCCTCCACTTCATTTGGATGCATATATCGAGTTCACAAA  
GGGAGGCCAACTTATACTATGGACAAAACAGAACAAAAAATCATTGCAG

>PGSC0003DMG400018457-(rev)G-LecRK\_372

TTCACAAAGGGAGGCAAACCTTATACTATGGACAAAACAGAACAAAAAATCATTGCAGAATCTCCACAG  
CCAGTAACTTCAGCATCCATGCTTGATTCTGGTAACTTTGTTATCTATAAC

>PGSC0003DMG400018457-(rev)G-LecRK\_434

TCCACAGCCAGTAACTTCAGCATCCATGCTTGATTCTGGTAACTTTGTTATCTATAACAAAACAATTGTTG  
TTTGGGAAAGTTTTGATTATCCAACAGACACCATCCTGGCCGGTCAGCG

>PGSC0003DMG400018457-(rev)G-LecRK\_496

CAATTGTTGTTTGGGAAAGTTTTGATTATCCAACAGACACCATCCTGGCCGGTCAGCGTCTAACATTGGG  
CCAGAGCCTTGTCTCTAGTGTTACTGAAGTTGATCATTCAAGTGGAAGAT

>PGSC0003DMG400018457-(rev)G-LecRK\_62

AAGAGTATATCTATATTCTCATCCTTGTGTCATGGCTAACTTAACATTTACTTTTCATGTTGTTGATGCTTCC  
ATTTGTGTTTGCAGCTATTCAAGTTGGAGCTCAGCAACAGCCCTCCAA

>PGSC0003DMG400018574LRR-RLPs\_1054

GTCTGCCAGAACGTATGCAGGAACTCCTCCATCTCTTAAGGAAATGTATCTGTTTAATTGTCCAGAAGT  
AGAGTTTTTCTGAAGGAGGATTACCCTCCAATTTGCAAGTCCTTCAGA

>PGSC0003DMG400018574LRR-RLPs\_1116

CCAGAAGTAGAGTTTTTCTGAAGGAGGATTACCCTCCAATTTGCAAGTCCTTCAGATTGTCAATTGCA  
AGAAACTAGTGATCGGAAGAAAGGAGTGGCATTACAGAGACTTCCCTGT

>PGSC0003DMG400018574LRR-RLPs\_1178

CAATTGCAAGAACTAGTGATCGGAAGAAAGGAGTGGCATTACAGAGACTTCCCTGTCTCATAGAGTT  
AGTGATCGAAGAGATTCTTGCTTGTGAGAATTGGGAGTTGCCTTCTCTAT

>PGSC0003DMG400018574LRR-RLPs\_124

TATCGATTCTAGAGTTGCAAATGTGGTTGATAGAAGGGAAGCTGCGAAAGCAAAGATGAGGGAGAAG  
AATCATGTTGAGAAGTTATCTCTGGAGTGGAGTGAAAGTAGTGCCGACAATT

>PGSC0003DMG400018574LRR-RLPs\_1240

TAGAGTTAGTGATCGAAGAGATTCTTGCTTGTGAGAATTGGGAGTTGCCTTCTCTATTCAAAGACTAAC  
CATAGACAGTCTGAAAACATTAAGCAGCCAACATCTCAAAGCCTCACCT

>PGSC0003DMG400018574LRR-RLPs\_1302

AGACTAACCATAGACAGTCTGAAAACATTAAGCAGCCAACATCTCAAAGCCTCACCTCTCTCAATATC  
TACGTATTGCTAATTTACCTCAAATTCAGTCACTGCTGGAACCAGGGCGG

>PGSC0003DMG400018574LRR-RLPs\_1364

TCAATATCTACGTATTGCTAATTTACCTCAAATTCAGTCACTGCTGGAACCAGGGCGGCTTCCGTCATCTC  
TTTCTGAGCTACATTTATATAGACATCATGAGCTCCATTCACCTTGGTCT

>PGSC0003DMG400018574LRR-RLPs\_1426

CGTCATCTCTTTCTGAGCTACATTTATATAGACATCATGAGCTCCATTCACCTTGGTCTTTGCCACCTCACTT  
CGCTTCAAAGCTTACACATCGGGAATTGCCATAATCTCCAATCACTTT

>PGSC0003DMG400018574LRR-RLPs\_1612

TTTCAAATCAGTACTTCCCTCCTCCCTCTCTGAGCTGGACATCTCCATTGCCCTAATCTCCAATCTCTTCT  
AGTAAAAGGGATGCCCTTCCCTCTCTAAACTATCTATTTCTAACT

>PGSC0003DMG400018574LRR-RLPs\_248

AACTGAAAGAGACATACTTGACGATCTACACCCACATACAAACATAAAGGAACTCCGAATCACCGGATA  
TAGAGGGAAGAAATTTCAAATTGGCTAGCTGATCCTTTGTTTCTTAAGCT

>PGSC0003DMG400018574LRR-RLPs\_310

CCGGATATAGAGGGAAGAAATTTCAAATTGGCTAGCTGATCCTTTGTTTCTTAAGCTAGTTAAATTGTC

TCTTAGAAACTGCAAGGACTGTGATACCTTGCCAGCACTAGGACAGCTTC

>PGSC0003DMG400018574LRR-RLPs\_372

AAATTGTCTCTTAGAAACTGCAAGGACTGTGATACCTTGCCAGCACTAGGACAGCTTCCTTCTTTGAAAA

TCCTTTCCATTAGAGGGATGCACCGAATAACAAAGGTGACAGAAGAATTC

>PGSC0003DMG400018574LRR-RLPs\_496

GTAGTTCGTCATCCAAAAAGTCTTTTAACTCTCTTGAGGAGCTTGAATTTGCATATATGTCGAAGTGGAA

GCAATGGCACGTACTAGGTAATGGAGAGTTCCTTACACTTAAGAACCTTT

>PGSC0003DMG400018574LRR-RLPs\_558

AAGTGGAAGCAATGGCACGTACTAGGTAATGGAGAGTTCCTTACACTTAAGAACCTTTCAATTA AAAAT

TGCCCTGAACTCAGTGTGGAGATACCCATCCA ACTTGAGGGAATGAAGCAG

>PGSC0003DMG400018574LRR-RLPs\_620

TAAAAATTGCCCTGAACTCAGTGTGGAGATACCCATCCA ACTTGAGGGAATGAAGCAGATTGAGCGATT

ATCTATTGTTGATTGTA ACTCTCTTACCTCTTTTCCTTTTAGCATTCTGCT

>PGSC0003DMG400018574LRR-RLPs\_682

AGCGATTATCTATTGTTGATTGTA ACTCTCTTACCTCTTTTCCTTTTAGCATTCTGCTGAGTACCTGAATA

CAATATACATATCTGGTTGCCAGAAATTGAAATTGAAGGCGCCAGTTG

>PGSC0003DMG400018574LRR-RLPs\_744

ACCTTGAATACAATATACATATCTGGTTGCCAGAAATTGAAATTGAAGGCGCCAGTTGGTTATTGTAACA

TGCTTCTAGAGGATTTGAGAGTGGAAAGAATGTGAATGTATAGATGATGTA

>PGSC0003DMG400018574LRR-RLPs\_806

TTGTAACATGCTTCTAGAGGATTTGAGAGTGGAAAGAATGTGAATGTATAGATGATGTATCACCTGAGTT

GCTCCCAAGAGCACGCAAATTGAGTGTAGAGAGTTGCCACAACCTTACTAG

>PGSC0003DMG400018574LRR-RLPs\_930

TTGATTCCACTGCCACCGAAAGTCTCTTTATTTGGAATTGTATGAATGTTGAAAACTTTTCGGTGGCATG

TGGGGGGACCCAAATGACGTCACTGAGTATTGCCAGTGTAGGAAGCTG

>PGSC0003DMG400018574LRR-RLPs\_992

GGTGGCATGTGGGGGGACCCAAATGACGTCACTGAGTATTGCCAGTGTAGGAAGCTGAAGTGTCTGC

CAGAACGTATGCAGGAACTCCTTCCATCTCTTAAGGAAATGTATCTGTTTAA

>PGSC0003DMG400018577LRR-RLPs\_0

TTTCCAAATTGGCTAGCTGATGTTTCGTTTCTTAAGCTAGTAGAATTGTCTCTTATAAACTGCAAGAAGCTG  
TTATTCCTTGCCAGCACTAGGACAGCTTCCTTGTTGAAATTCCTTTCC

>PGSC0003DMG400018577LRR-RLPs\_1008

GAATTGCCTTCCTTTATTCAAAGACTTACCATATACAATCTCAAACATTAAGGAGCCAAGATATCAGAA  
GCCTCACCTCTCTTCAATATCTATGTATTGGTAAGTTATCTCAACTTCAG

>PGSC0003DMG400018577LRR-RLPs\_1071

ATCAGAAGCCTCACCTCTCTTCAATATCTATGTATTGGTAAGTTATCTCAACTTCAGTCAATGCTAGAAGA  
AGGGCAGCTCACTTCACTTCAAAGTCTAGACATCAATAATTGCCCTAAT

>PGSC0003DMG400018577LRR-RLPs\_1260

CTCCAATCCCTTCCAGTAAAAGGGATGCCCTCTTCCCTCTCTAAACTATCAATTCGCGACTGTCCATTGCT  
CACACCATTACTAGAATTTGACAAGGGGAATACTGGCCAAATATTGCT

>PGSC0003DMG400018577LRR-RLPs\_1307

ATCAATTCGCGACTGTCCATTGCTCACACCATTACTAGAATTTGACAAGGGGAATACTGGCCAAATATT  
GCTCAAATCCCACCATAGTGATCGATGAGGATTCCATGTGATGATTAAT

>PGSC0003DMG400018577LRR-RLPs\_189

TTTAACGCTCTTGAGAAGCTTGATTTGAAGATATGCCGGAGTGGAAGCAATGGCATGTACTAGGAAAT  
GGAGAGTTCCTTACACTTGAGAAGCTTTTAATTATAAATTGCCCTGAACTC

>PGSC0003DMG400018577LRR-RLPs\_252

GGAAATGGAGAGTTCCTTACACTTGAGAAGCTTTTAATTATAAATTGCCCTGAACTCAGTTTGGAAACAC  
CCATCCAACCTTTCATGTTTAAAAAGGTTTGAAGTTGATGGTTGTCATAAG

>PGSC0003DMG400018577LRR-RLPs\_315

GAAACACCCATCCAACCTTTCATGTTTAAAAAGGTTTGAAGTTGATGGTTGTCATAAGGTTGGAGATGCTC  
AAATGTTTAGATCCCAACTTGAGGGAATGAAGCAGATTGTTGAATTAGAT

>PGSC0003DMG400018577LRR-RLPs\_378

GATGCTCAAATGTTTAGATCCCAACTTGAGGGAATGAAGCAGATTGTTGAATTAGATATTAGTGATTGTA  
ACTCTATTACCTCCTTTCCTTTTAGCGTTCTTCTCATTACCTTGAAGAGA

>PGSC0003DMG400018577LRR-RLPs\_441

GATTGTAACCTATTACCTCCTTTCCTTTTAGCGTTCTTCTCATTACCTTGAAGAGAATAGTTATATCTGGT  
TGCCAGAAATTGAAATTGGAGCAGCCAGTTGGTGAGATGAGTATGCTT

>PGSC0003DMG400018577LRR-RLPs\_504

ATATCTGGTTGCCAGAAATTGAAATTGGAGCAGCCAGTTGGTGAGATGAGTATGCTTCTCGAGGATTTG  
TCACTGCAAGAATGTGATTGTATAGATGATATATCACCTGAGATGCTCCCA

>PGSC0003DMG400018577LRR-RLPs\_630

CGCAGATTGTTTGTATGTAATTGCCAGAACCTTACTAGGCTTTTTATTCTACTGCCACTGAAAGTCTCTA  
TATTGCTTATTGTGTGAATCTTGAATACTTTTCGGTGGCATGTGGGAAG

>PGSC0003DMG400018577LRR-RLPs\_693

AGTCTCTATATTGCTTATTGTGTGAATCTTGAATACTTTTCGGTGGCATGTGGGAAGACCCAGATGATGT  
ATTTCCAGAACGTATGCAGGAACTCCTCCCATCTCTTAAGACACTGATT

>PGSC0003DMG400018577LRR-RLPs\_756

ATGATGTATTTTCCAGAACGTATGCAGGAACTCCTCCCATCTCTTAAGACACTGATTCTATCTAATTGTCC  
AGAAATAGAGTCCTTTCCTGAAGGAGGATTGCCCTTCAATTTACAAAAA

>PGSC0003DMG400018577LRR-RLPs\_819

AATTGTCCAGAAATAGAGTCCTTTCCTGAAGGAGGATTGCCCTTCAATTTACAAAAACTTCATATCTACA  
ATTGCAAGAACTGGTGAATGGCCGAAAGGAGTGGCATTACACAGACTT

>PGSC0003DMG400018577LRR-RLPs\_882

ATCTACAATTGCAAGAACTGGTGAATGGCCGAAAGGAGTGGCATTACACAGACTTCCCTGTCTCAGA  
AAGTTAAGCATCTACCATGATGGCAGTGAAGAAGAGATTGTTGGTGGTGAG

>PGSC0003DMG400018577LRR-RLPs\_945

CTCAGAAAGTTAAGCATCTACCATGATGGCAGTGAAGAAGAGATTGTTGGTGGTGAGAATTGGGAATT  
GCCTTCTTTATTCAAAGACTTACCATATACAATCTCAAACATTAAGGAGC

>PGSC0003DMG400018677-(rev)L-LecRK\_122

CTTCATATTTTTCTCTTGTTCCTTCAACTCATATCACAAGCCAAAATCATAACATTTGACCAACAATATGGTGA  
CCTTTTGATCATAATATGTCCCCCTTCTTCAAATCAAACATCCTGC

>PGSC0003DMG400018677-(rev)L-LecRK\_1281

TTGACAATTATCAACCGTTTAAGGCATAAACATCTTGTCAAATTACTTGGTAAGTATTTTGAACCTTTTAC  
TTTTATGCTTTTTTTTTGAGTATTTGTTCTTTGTTCAAGCTCAGATAAA

>PGSC0003DMG400018677-(rev)L-LecRK\_1342

AACTCTTACTTTTTATGCTTTTTTTTTGAGTATTTGTTCTTTGTTCAAGCTCAGATAAAGGAGGAATGTTAT



GATCTTAAGATTTTGATATATATGCTTATTGAGTTTAAGCGTAATTGG

>PGSC0003DMG400018677-(rev)L-LecRK\_1403

AGGAATGTTATGATCTTAAGATTTTGATATATATGCTTATTGAGTTTAAGCGTAATTGGTTGATAGATTCCG  
TCATGTCATTGGAATTTTATTCATGTTCTATGTATAGGTAGCAAATCT

>PGSC0003DMG400018677-(rev)L-LecRK\_1464

GATAGATTCGTCATGTCATTGGAATTTTATTCATGTTCTATGTATAGGTAGCAAATCTACTAAGATTCTA  
CTGAAAAAAGAGACAGGTTTTACACATAATCATTCTTCGTTTTGAGGA

>PGSC0003DMG400018677-(rev)L-LecRK\_1525

TAAGATTCTACTGAAAAAAGAGACAGGTTTTACACATAATCATTCTTCGTTTTGAGGACACTTTTTATTT  
ATTGAGTCGTGTTTCTTATCCTTCCTCGACATAGTAACCGCTTTCATAT

>PGSC0003DMG400018677-(rev)L-LecRK\_1708

TAGTCGTTTTGATAGGACTTTTTTTATTGAGTCGTATTTCTTCTCCTTCTTCAACATAGTGATTTGTTTCATG  
TTTTTTTTCAAATTTTATAACTTTTCGACCACAAGTGCATGTTTCATC

>PGSC0003DMG400018677-(rev)L-LecRK\_1769

ATTTGTTTCATGTTTTTTTTCAAATTTTATAACTTTTCGACCACAAGTGCATGTTTCATCCATCTTCGTTTTGA  
ACGAAAGCTTAAATTAATTTTATTAATTATGGTACCAAGAATATTT

>PGSC0003DMG400018677-(rev)L-LecRK\_183

CAATATGGTGACCCTTTTGATCATAACATATGTCCCCCTTCTTGAAATCAAACATCCTGCACAAATAAGCAA  
TCAAGCACTTCAAATCACCCCTGACACAGCTTCTCTGCTTACCAAATG

>PGSC0003DMG400018677-(rev)L-LecRK\_1891

TTGTGTTCTAAGGAGTTCCATTTTGACTCATGTTAGGCCATCTCCATCTTGAAAATGGTCCCAATAATTA  
TATCCAACACTACAAGATAAGTGAAAAAAGTTAAAATCTTTGATGCAA

>PGSC0003DMG400018677-(rev)L-LecRK\_2013

TGCAAGTGTCAAAAATGGTGTGCTCATGTACCTTTTACAATAGTTTGAAAGTGATAAACATATACTTTTTT  
GTCTCAAAATATTTATTTATATATTTTTATACGCCTTTTAAGAAAACAT

>PGSC0003DMG400018677-(rev)L-LecRK\_2257

GAGGTAGGGGTGATTAATTTTAACTTGAATTTTAAAATATAATCCAAAGTTTCTTGAGGACCTACTAA  
CTAATAATTTTAGTGCCCTCTTGATGAAAAATCCAAAGTAATAAATATTA

>PGSC0003DMG400018677-(rev)L-LecRK\_2318

ACCTACTAACTAATAATTTTAGTGCCCTCTTGATGAAAAATCCAAAGTAATAAATATTAAATTCTTAGCTG  
GAAGACAGAAGAGCACTGATTCCATTTCTTTGTCTTTTTGGTTTTCTA

>PGSC0003DMG400018677-(rev)L-LecRK\_244

AAATAAGCAATCAAGCACTTCAAATCACCCCTGACACAGCTTCCTCTGCTTACCAAATGTTCAATAATTCA  
GGCAGAATCCTATTAACCGGCCTTTCAAACCTATGGGTAGACAATGATA

>PGSC0003DMG400018677-(rev)L-LecRK\_2501

TCGAGTAATTCTAATCATTTAAATTAATTATATGAAAAAAATTGTCTAGTATTTTTGTTTCGATTAAATTTG  
AATCATTGTTTGAACAACTTTTTTTGTAGGGAAGCTTCCTGTCTTT

>PGSC0003DMG400018677-(rev)L-LecRK\_2623

AAATCACTTTCATTCAAATGTCACCTATTATGATAAGTTTGGTACTTTCTAATATTAATATAATATAATTGG  
ACAATTGCTTCAAAATGCACTCAACTCCAATTAAGACTAAGATTGTAA

>PGSC0003DMG400018677-(rev)L-LecRK\_2867

ATAGTATTGATAAGATATATTTATAGATTATTATTATTGTAGTAACAATTTAGCTTATATATGCATTAACA  
ATTTAACTGCATCTGTGTGAGCTCGCTCAAATTGTCTGTCCTTAATCC

>PGSC0003DMG400018677-(rev)L-LecRK\_2928

TGCATTAACAATTTAACTGCATCTGTGTGAGCTCGCTCAAATTGTCTGTCCTTAATCCGAATAAAGAAG  
GAGGGTTGTTGAGGATCACTCAGAAACACCATTCTCTATCCCATAAGAGT

>PGSC0003DMG400018677-(rev)L-LecRK\_305

CAATAATTCAGGCAGAATCCTATTAACCGGCCTTTCAAACCTATGGGTAGACAATGATATTTCAAGGACA  
GCGTCATTCAACACATCATTCCCTAGTAAACATATATAGACCGGATAACCA

>PGSC0003DMG400018677-(rev)L-LecRK\_3050

GAGTAAGGCTGCATCAATTCATAGATCATTATTATTGTAGTCATAATTTGGCCTATATGTATATCTACTAA  
TAACAATTTCAACTCTGTCATCAGTGTGATCTCGCTCACATTGTCGGTC

>PGSC0003DMG400018677-(rev)L-LecRK\_3355

AACCTCCTTTACCTTCTAATGAGAACGTAACCTAAATGTTGCATGTAGTTATCATTTAGGTGACCTGCAGG  
TAATGGTATAAAAGTTCTTTTACGCTTTTCAGTGTATATATATGGTAATC

>PGSC0003DMG400018677-(rev)L-LecRK\_3416

GACCTGCAGGTAATGGTATAAAAGTTCTTTTACGCTTTTCAGTGTATATATATGGTAATCACATGCATATTA  
TTGTGACAGGATGGAGCCATAAGCATGGTAAGCTACTACTTGTATATGA

>PGSC0003DMG400018677-(rev)L-LecRK\_366

TCAAGGACAGCGTCATTCAACACATCATTCTAGTAAACATATATAGACCGGATAACCAAACACCAGCTG  
AAGGTCTAGCTTTCTTGATATGTCCAAATTTGATTTGCCACTAAATAGC

>PGSC0003DMG400018677-(rev)L-LecRK\_4377

TATTTCTCAGCCTTTTATGTTAAATCCATCCTATACATTGTTCTTCTGCGGTTTGACTGTTTGATTTGTTG  
TATTA AAAATGACATGTATTGCATAATTTCTAAAAAGAAGTTGTTTCG

>PGSC0003DMG400018677-(rev)L-LecRK\_61

AAGCCCTTACATCTCTATACTTCTTTTCACTACACAATATGGAATTTTTGACACCAAAAATCTTCATATTTT  
TCTCTTGTTTTCAACTCATATCACAAGCCAAAATCATAACATTTGACC

>PGSC0003DMG400018677-(rev)L-LecRK\_610

ATATAAACAGTGTTAAATCCGTTAAGTCGGAACCTTAAACACCACATGGAATTGAACTAGCTCCAATAGG  
TGCTAGATTTTACAATATATGGATACACTATGATGGATTCAAGAAAGTAC

>PGSC0003DMG400018677-(rev)L-LecRK\_671

TCCAATAGGTGCTAGATTTTACAATATATGGATACACTATGATGGATTCAAGAAAGTACTTGATGTGTAC  
ATTATTGAACAAATGACGAAAAATGGGACAACACCAACAAGGCCAAAAGT

>PGSC0003DMG400018694LRR-RLPs\_1054

ATATGCATATCTCGTTGCAAGAAATTGAAATTGGAGATGCCAGTTGGCGAGATGAGTTATTGTAACATG  
TTTCTCGATTATTTGAGCGTGGCAGAATGTGATTATATATCACCTGAGTTG

>PGSC0003DMG400018694LRR-RLPs\_1116

TAACATGTTTCTCGATTATTTGAGCGTGGCAGAATGTGATTATATATCACCTGAGTTGTGCCAAAGAGCA  
CGCCAATTGAGAGTACAGGATTGCCACAACCTTACTAGTTTTTTGATTCC

>PGSC0003DMG400018694LRR-RLPs\_1178

AAAGAGCACGCCAATTGAGAGTACAGGATTGCCACAACCTTACTAGTTTTTTGATTCTACTGCGACTGA  
AACTCTCTATATTCGGGGATGTGAGAATGTTGAAAACTTTTCGGTGGCAT

>PGSC0003DMG400018694LRR-RLPs\_124

CTGTCATCTTGTTATAATCTTGAGGAGCTACCGCTGCAGATGGAGAAGTTGATTAACCTGCATCACCTTG  
ACATAAGCAACAGTTTTTCGCTTGAAGATGCCGCTACATCTAAGCAAGTTG

>PGSC0003DMG400018694LRR-RLPs\_1240

GCGACTGAAACTCTCTATATTCGGGGATGTGAGAATGTTGAAAACTTTTCGGTGGCATGTGGGGGGACC

CAGATGACGTCACTGATTATTGATGGCTGTAAGAAGCTGAAGTGGCTGCCA

>PGSC0003DMG400018694LRR-RLPs\_1302

GGGGACCCAGATGACGTCACTGATTATTGATGGCTGTAAGAAGCTGAAGTGGCTGCCAAAACGTATGC

AGGAACTCCTTCCATCTCTTAAGCAACTGCAACTGATTGATTGTCCAGAAAT

>PGSC0003DMG400018694LRR-RLPs\_1364

GTATGCAGGAACTCCTTCCATCTCTTAAGCAACTGCAACTGATTGATTGTCCAGAAATAGAGTCCTTTCCT

CAAGGAGGATTGCCCTTCAATTTACAACGACTTTGGATCAGAAATTCCA

>PGSC0003DMG400018694LRR-RLPs\_1426

TCCTTTCCTCAAGGAGGATTGCCCTTCAATTTACAACGACTTTGGATCAGAAATTCCAAGAACTGGTGA

ACAGACGAAAGGAGTGGTGTTCGAGAGACTCCCCTGTCTCAACTTGTTA

>PGSC0003DMG400018694LRR-RLPs\_1488

ACTGGTGAACAGACGAAAGGAGTGGTGTTCGAGAGACTCCCCTGTCTCAACTTGTTAGAGATCTCTCA

TGATGGCAGTGACGAAGAGATTGTTGGTGGTGAGAATTGGGAGTTGCCTTC

>PGSC0003DMG400018694LRR-RLPs\_1550

TCTCTCATGATGGCAGTGACGAAGAGATTGTTGGTGGTGAGAATTGGGAGTTGCCTTCTCTATTCAA

AACTTACAATAACAATGTGAAAACATTAAGCAGCCAACATCTCAAAGCC

>PGSC0003DMG400018694LRR-RLPs\_1612

ATTCAAAACTTACAATAACAATGTGAAAACATTAAGCAGCCAACATCTCAAAGCCTCACCTCTCTTC

AATATCTATGTATTGAGGGTAATTTTCTCAAATTCAGTCAATGCTGGAA

>PGSC0003DMG400018694LRR-RLPs\_1674

CTCTCTTCAATATCTATGTATTGAGGGTAATTTTCTCAAATTCAGTCAATGCTGGAAGAAGAGCTTCCCT

CCTCTCTTCTCACCTCACTTCGCTTCAAAGTCTACACATCGGGAATTT

>PGSC0003DMG400018694LRR-RLPs\_1922

TCTCCCATTGTCCTAATCTCCAATCCCTTCCGGTAAAAGGGATGCCCTCTTCCCTCTCTCAACTAAGTATTT

ACAAGTCCCATTGCTCACACCGTTACTAGAATTTGACAAGGGGGGAAT

>PGSC0003DMG400018694LRR-RLPs\_1984

CTAAGTATTTACAAGTCCCATTGCTCACACCGTTACTAGAATTTGACAAGGGGGGAATACTGGCTAAATA

TTGCTCAAATTTCCACCATAGTGATCGATGAGGAATCCCTGTGATGATTA

>PGSC0003DMG400018694LRR-RLPs\_2108

GAATGGCTCTCCAAGTATGTAAGTTATTCTTTCCATCATAAGCTTTTACTTTTGTACTTCACTTTGC  
ATTTTTGTTAATCCTTTTCCTTTTTTAAACCTTTTGGAGCAGTGTGGA

>PGSC0003DMG400018694LRR-RLPs\_2170

TTCACCTTGCATTTTTGTTAATCCTTTTCCTTTTTTAAACCTTTTGGAGCAGTGTGGAATGTCTATTGCTCAA  
ACCACGGCTGCCGACCAAAAAGTCTCATATTTCCACCATAAATGTT

>PGSC0003DMG400018694LRR-RLPs\_2215

TGAGCAGTGTGGAATGTCTATTGCTCAAACCACGGCTGCCGACCAAAAAGTCTCATATTTCCACCATAA  
ATGTTTCATTGGGAGAACCTCTAATGATTCAAACATGTGGTGCTCCAATAG

>PGSC0003DMG400018694LRR-RLPs\_248

GCCTCCAAGTGCTAGTGGGAGCCAAGTTTCTTCTAAGTGGTTGGAGGATGGAAGATTTGGGTGAAGTAC  
ATAACTGCACGGATCTCTATCAGTTGTAGAGTTGCAAATGTGGTTGATA

>PGSC0003DMG400018694LRR-RLPs\_310

GAAGTACATAACTTGCACGGATCTCTATCAGTTGTAGAGTTGCAAATGTGGTTGATAGTAGGGAAGCT  
GTGAAGGCAAAGATGAGGGAGAAAAATCATGTTGACAAGTTATCTTTGGAG

>PGSC0003DMG400018694LRR-RLPs\_372

GGAAGCTGTGAAGGCAAAGATGAGGGAGAAAAATCATGTTGACAAGTTATCTTTGGAGTGGGTTGGAA  
GTAGTAGTGCCGACAAGTCACAACTGAAAGAGACATACTTGATGAGCTACG

>PGSC0003DMG400018694LRR-RLPs\_496

CATAAAAACATAAAGAAGTCAAGATCACCGGATATAGAGGGACAACATTTCCAAATTGGCTAGCTGAT  
CCTTTGTTTCTTAAGCTGGTGAATTGTCTCTTAGCAACTGCAAGGACTGT

>PGSC0003DMG400018694LRR-RLPs\_62

TGACATATATTGAAAAGTTGCCTGATTCTGTTTGTGGATTGTATAACTGGAGACACTTCTCCTGTCATCT  
TGTTATAATCTTGAGGAGCTACCGCTGCAGATGGAGAAGTTGATTAAT

>PGSC0003DMG400018694LRR-RLPs\_682

ATAACAGAGGTGACGGAAGAATTCTATGGCAGTTTGTCTCCAAAAGCCTTTTAACTGTCTTGAGGACC  
TTGAATTTGAAGATATTCCGGAGTGAAGCAATGGCACGTACTAGGAAAT

>PGSC0003DMG400018694LRR-RLPs\_744

TGAGGACCTTGAATTTGAAGATATTCCGGAGTGAAGCAATGGCACGTACTAGGAAATGGAGAGTTCC  
CTACACTTGAGAAGCTTTTCATTATAAATTGCCAGAACTCAGTTTGGAGAC

>PGSC0003DMG400018694LRR-RLPs\_806

AGTTCCCTACACTTGAGAAGCTTTTCATTATAAATTGCCCAGAACTCAGTTTGGAGACACCCATCCAACCTT  
TCATGTTTAAAAAGGTTTCATGTTGTTGGTTGTTCTAAGGTTGGAGTTG

>PGSC0003DMG400018694LRR-RLPs\_868

ATCCAACCTTTCATGTTTAAAAAGGTTTCATGTTGTTGGTTGTTCTAAGGTTGGAGTTGTTTTTGATGATGC  
TCAACTGTTTATATCCCAACTTGAGGGAATGAAACAGATTGTTGAACTA

>PGSC0003DMG400018694LRR-RLPs\_930

TGATGATGCTCAACTGTTTATATCCCAACTTGAGGGAATGAAACAGATTGTTGAACTATTTATTAGTGAT  
TGTAACCTGTTACCTCCTTTCTTTTAGCATACTGCCCACTACCTTGAA

>PGSC0003DMG400018722LRR-RLPs\_1054

TATGGAATAACAGAGGTGACGGAAGAATTCTATGGCAGTTTGTCTCCAAAAAGCCTTTTAAACGCTCTTG  
AGAAGCTTGATTTGAAGATATGCCGGAGTGGAAGCAATGGCATGTACTA

>PGSC0003DMG400018722LRR-RLPs\_124

ATCTTTGTATAAGGTTGGAAGAGAACAAAGGATCGCACATGTTGGAACAATGTCGGCACATGTCCTATT  
CAATAGGAGAAGGTGGTGAGTTTGAGAAATTGAAATCACTCTTTAAATCAG

>PGSC0003DMG400018722LRR-RLPs\_1426

ATATCTGGTTGCCAGAAATTGAAATTGGAGCAGCCAGTTGGTGAGATGAGTATGTTTCTCGAGGAATTG  
AAACTGCAAGAATGTGATTGTATAGATGATATATCACCTGAGATGCTCCCA

>PGSC0003DMG400018722LRR-RLPs\_186

TCCTATTCAATAGGAGAAGGTGGTGAGTTTGAGAAATTGAAATCACTCTTTAAATCAGAGCAGCTGAGG  
ACATTACTTGCAATCAATATCCAGCTCTATGATTACAAAATTAAGCTAAGC

>PGSC0003DMG400018722LRR-RLPs\_2232

AATTCGCGACTGTCCATTGCTCACACCATTACTAGAATTTGACAAGGGGGAATACTGGCCAAATATTGCT  
CAAATTCCTACCATAACGATCGACGAGGATTCCATGTGATGATTA AAAAG

>PGSC0003DMG400018722LRR-RLPs\_2294

ATATTGCTCAAATTCCTACCATAACGATCGACGAGGATTCCATGTGATGATTA AAAAGAATGACTCTCCA  
ACTGATGTAACCTATTCTTTTCCATCATAAGCTTTTTACTTTTATTTACA

>PGSC0003DMG400018722LRR-RLPs\_2356

ACTCTCCAACCTGATGTAACCTATTCTTTTCCATCATAAGCTTTTTACTTTTATTTACATCACTTTGCATTTTT

GTTAATTATTTTCCTTTTTTAAACCTTTTTGAGCAGTCTATTGCTCA

>PGSC0003DMG400018722LRR-RLPs\_2409

TTACATCACTTTGCATTTTTGTTAATTATTTTCCTTTTTTAAACCTTTTTGAGCAGTCTATTGCTCAAACCAT

GGCTACTGACCAAAAATTGCTCATATTTCCACCATAAATGTTTCATTG

>PGSC0003DMG400018722LRR-RLPs\_248

GCTGAGGACATTACTTGCAATCAATATCCAGCTCTATGATTACAAAATTAAGCTAAGCAAGAGGGTGT

GCATAACATATTGCCAAGACTAACATCCTTAAGGGCATTATCGTTGTCACG

>PGSC0003DMG400018722LRR-RLPs\_372

GAGATTGTTGAGTTGCCAAATCACTTGTTTATTGAATTAAGCTCCTGAGATTTTTGGATATTTCTCGGAC

AAAGATTAAGGTTGCCAGATTCCATTTGTGGATTGTATAACTTAGTG

>PGSC0003DMG400018722LRR-RLPs\_434

TTCTCGGACAAAGATTAAGGTTGCCAGATTCCATTTGTGGATTGTATAACTTAGTGACACTTCTCCTGT

CATCTTGTGCTGATCTTGAGGAGCTACCGCTGCAGATGGAGATGTTGAT

>PGSC0003DMG400018722LRR-RLPs\_496

TTCTCCTGTCATCTTGTGCTGATCTTGAGGAGCTACCGCTGCAGATGGAGATGTTGATCAACTTGCGTCA

TCTTGACATAAGCAACATTTCTCTCTTGAAGATGCCACTATATCTGAGCA

>PGSC0003DMG400018722LRR-RLPs\_558

TTGCGTCATCTTGACATAAGCAACATTTCTCTCTTGAAGATGCCACTATATCTGAGCAAGTTGAAAAGCCT

CCAAGTGTTAGTGGGAGCCAAGTTTCTTTAGGTGGTTTCGAGAATGGAAG

>PGSC0003DMG400018722LRR-RLPs\_682

GGGTGAAGTACATAACTTGTACGGATCTCTATCGGTTGTAGAGTTGCAAATGTGGTTGATAGTAGGGA

AGCTGTGAAGGCAAAGATGAGAGAGAAGATTCATGTTGGCAAGTTATCATT

>PGSC0003DMG400018722LRR-RLPs\_744

GTAGGGAAGCTGTGAAGGCAAAGATGAGAGAGAAGATTCATGTTGGCAAGTTATCATTGGAGTGGAGT

GAAAGTAGTAGTGTGACAATTCACAACTGAAAGAGACATTCTTGATGAGC

>PGSC0003DMG400018722LRR-RLPs\_806

TGGAGTGAAAGTAGTAGTGTGACAATTCACAACTGAAAGAGACATTCTTGATGAGCTACGCCACAT

AAAAACATAACAAGAAGTCCGAATCACCGGATATAGAGGGGACAAAAATTC

>PGSC0003DMG400018722LRR-RLPs\_868

CCCACATAAAAACATACAAGAAGTCCGAATCACCGGATATAGAGGGGACAAAATTTCCAAATTGGCTA  
GCTGATGTTTCGTTTCTTAAGCTAGTAGAATTGTCTCTTATAAACTGCAAG

>PGSC0003DMG400018752-(rev)LRR-RLKs\_0

TTGAGAAGTTGTTCTGTCTGGTTCAAATCACGAATTTCTTGAGAAAAAAAAAATCCTTGACAAGATGGAG  
AAAAGCTATGTTCTTTTCCTTATCTTATTAGTATTTCAAGAATCAATTTT

>PGSC0003DMG400018752-(rev)LRR-RLKs\_1860

GGAAGCTTCTATTGACATTGGAAAATTGAAATCTATTGAAGGTATAGATTTTTCAAGCAACCAACTTTCC  
GGTGTGATTCCAAGTACATTTGGAGACCTTATAGGCCTGAGGTATCTTTC

>PGSC0003DMG400018752-(rev)LRR-RLKs\_1922

AACTTTCCGGTGTGATTCCAAGTACATTTGGAGACCTTATAGGCCTGAGGTATCTTTCCTCTCAAACAAC  
TCGTTACGGAGTGCAATTCCTTCATCATTGGCAGTTTGTTAAGTTTGA

>PGSC0003DMG400018752-(rev)LRR-RLKs\_2046

CTTGGATTTATCTTCAAATGAGTTATCAGGAAACATCCCAAAGTCCTTAGAAAACTTCAGTTCCTTAATG  
AAATCAATCTTTCCTACAACCATTTAGAAGGTGAAATACCTTCTAGTGG

>PGSC0003DMG400018752-(rev)LRR-RLKs\_248

TTGGTATCACTTGTAATCCACAAAACCAAAGAGTCATAGCTTTAAATCTCCCAAACATGAATCTTCAAGG  
CAAAATTTACCATCAATAGCTAACTTATCCTTCTTACTAACTTAACT

>PGSC0003DMG400018752-(rev)LRR-RLKs\_2914

TTAGGTGAAAACAACCTCCATGGCACAACTAACACATTGGGCACTATTGGCTACATTGCACCAGGTAAA  
CAATTCTTCTCTGACTACTCTACCTTATATAAGGCATATTTTTGGTCATTC

>PGSC0003DMG400018752-(rev)LRR-RLKs\_2976

AGGTAAACAATTCTTCTCTGACTACTCTACCTTATATAAGGCATATTTTTGGTCATTCTTCTCTGAAAAA  
TAGAATATTGGTCAATTAAGTTGATTTCCGGTGCTACTTACTATGCCTG

>PGSC0003DMG400018752-(rev)LRR-RLKs\_3038

CTCTGAAAATAGAATATTGGTCAATTAAGTTGATTTCCGGTGCTACTTACTATGCCTGAATCTAACGCTA  
GGCTAAGTCTTGAACCTTTGAGCTGACCGTTCATTTCTTAGTAGCAAGA

>PGSC0003DMG400018752-(rev)LRR-RLKs\_3162

TTCTCTTTGCCCTTTATTGGTTGTATCAACTAACTGCCCTTCCATATAGATCGTAGCAACATGAAACTAT  
TATTAATAGATTCTCGCTTCTTATTAATCTTGAAAAGTTCTAGCTTA



>PGSC0003DMG400018752-(rev)LRR-RLKs\_3224

ATGAAACTATTATTAATAGATTCTCGCTTCCTATTAATCTTGAAAAGTTCTAGCTTAGTCTTTTTTTTTTTG  
TTAGAATTATCTTTTTAATTAGACCGGACCCACTTTTATACTTATCC

>PGSC0003DMG400018752-(rev)LRR-RLKs\_3286

TTTTTTTTTTGTTAGAATTATCTTTTTAATTAGACCGGACCCACTTTTATACTTATCCTACAAGTGCTATTGG  
GGACCCACTCAAAAAAAAAAAAACTTGAACCTAGAAAAGTCCACCCCT

>PGSC0003DMG400018752-(rev)LRR-RLKs\_3348

AGTGCTATTGGGGACCCACTCAAAAAAAAAAAAACTTGAACCTAGAAAAGTCCACCCCTTAATAGATTAG  
GGTAGAATCAACTGGATTTAACTTATATCTACTGATAGTATAGAATATATG

>PGSC0003DMG400018752-(rev)LRR-RLKs\_3782

AATATGAAAGATGTAGTGAATAGACTTGGTAAAATTAAGAGGACCTCTTCTTGAAACAAAGAAGAAA  
AAATCTTAGGAGTAAAATTTGTTTATTTTATGTTTATGGTTTATGTTATTC

>PGSC0003DMG400018752-(rev)LRR-RLKs\_868

TTTTATATAACTCAGAATGCAATAAGTGGTACAATCCACTTTCATTGAGTAATATTTCCACATTGCAATTT  
CTTGGTTGTGTGAACAACCATATAAGTGGTACAATCCTAAAGAATTA

>PGSC0003DMG400018752-(rev)LRR-RLKs\_930

ATTGCAATTTCTTGGTTGTGTGAACAACCATATAAGTGGTACAATCCTAAAGAATTAGGAAATTTACCG  
AACTTGAAGATGTTGGGATTTGATTTCAATAATCTTACTGGTGAATACC

>PGSC0003DMG400018806-(rev)LRR-RLPs\_1037

AAGGACTCTCAAGAGTCCTGTAATTATTTCTCGTGTAGTACAGTTTTACATGTGGTCAAGAGTGTTACAC  
TATTCACTGAGTTTTGGAGAAAGTACATTCTCACATAATTCTTTTAGAGA

>PGSC0003DMG400018806-(rev)LRR-RLPs\_2623

GAAATTGACATAGTTGGCTTATACTAACACTTGTTACTTGTGAAGTCTGTGAGGCTGGTTATGCTGACT  
GTTCTCAAGCTTCATAGTTGTGAGGGCATAACATCAGCTTCCATGGCTGC

>PGSC0003DMG400018806-(rev)LRR-RLPs\_4209

TAGTATTTATGTTATACTCACATTTCCAAATTAACCTGAAGTATATTTATCTTGTCAAAATATAACTATTAG  
GGTAAACGTCTTTCTTGGTATCATAAGCTCTAAGTTTCTTTCAACATT

>PGSC0003DMG400018806-(rev)LRR-RLPs\_4636

TTGTCAATATTGTGGTAGACTATTGAAGAAATTCACAACAAATCAAGTATTATATTTTCGGTTACCCATTCT

CCCTCCCCCGTGCCCCCTCCCCCTCCTGGGAAAGGGGGGGAGGGACCG

>PGSC0003DMG400018806-(rev)LRR-RLPs\_4697

TACCCATTCTCCCTCCCCCGTGCCCCCTCCCCCTCCTGGGAAAGGGGGGGAGGGACCGGGTGAGAGAA  
AGAGTAATATATTCAAGTTGCGACCTCCCGGGGAAAAGGGGGCTGAGAGAG

>PGSC0003DMG400018806-(rev)LRR-RLPs\_4880

TGCCAGATCTGTTTTAGGCTAACACCTATTCAGAAAAGTTTTTTTTTTTTAATATTGGAAGTGATATATTT  
CTGCCTATTCAACTTGAAAGATCCGGCTGTATCTATGTAACATTTGTA

>PGSC0003DMG400018806-(rev)LRR-RLPs\_5124

GCACTTAGTTGCCGATATCTTGAACAAGTCTCTTTAGATGGTTGTGATCATCTTGAAGTAGCATCATTTTG  
CCCAGTAAGTGATCATCGGGTCCTCCTCTTTTCTTTACCTCATCTCTG

>PGSC0003DMG400018806-(rev)LRR-RLPs\_6283

CTTCAGTTTTTTGGCAGTTAAGGTGTTTGACCATTCTTCTTGGAAAAGAAATGTGATCTTTAGTACCATAA  
GCTGTTTCTCTGTTGTGGCGAAGAAGTCAAATTTGAAGTTTTTCATTAA

>PGSC0003DMG400018806-(rev)LRR-RLPs\_6344

AGTACCATAAGCTGTTTCTCTGTTGTGGCGAAGAAGTCAAATTTGAAGTTTTTCATTAAGAAGAACCAAA  
AGTTTAATTTTTCAATACAAAATACCATTATAATTTTCTTACCAAGTTAT

>PGSC0003DMG400018806-(rev)LRR-RLPs\_7503

AGGCACATCCTTATTGCGTTTGGGATAAACTTTTTGGATCTGCATGATACATTGATGGGCTTTTTTTGGCT  
TACTGCCCCACCACCCACCCTCCTTTTTTTTTTTAAACCCCTCTCTA

>PGSC0003DMG400018806-(rev)LRR-RLPs\_7564

TTTTTTGGCTTACTGCCCCACCACCCACCCTCCTTTTTTTTTTTAAACCCCTCTCTAAGCTTATATATATA  
TGTTATGTTGTAGGTCCTAAAGTTGCAAGCATGCAAGTATCTCACTG

>PGSC0003DMG400018806-(rev)LRR-RLPs\_8235

ACTGGAATGTCCAAGATTAAGTAGCCTCTTTCTTCAGGTATTCTTGCATCTTCAATTTGGCATTTCCTTGC  
TGGCTTTTTAATTGTTGTAGTGGTAGCTTTGCTGCAAAAGTGTTCTTT

>PGSC0003DMG400018806-(rev)LRR-RLPs\_8296

ATTTTCTTTGCTGGCTTTTTAATTGTTGTAGTGGTAGCTTTGCTGCAAAAGTGTTCTTTCTAGTTGGTCTTT  
ATCATTTTGCTTGCTTTTTTTCCCTGTTGAGGTAGTAATAGTTTT

>PGSC0003DMG400018806-(rev)LRR-RLPs\_8357

AGTTGGTCTTTATCATTTTGCTTGTGCTTTTTTCCCCTGTTGAGGTAGTAATAGTTTTTTACCTTAGCATG  
AAGGATATGCAAAGTGTACAACCATTACAAATGTCAGTCCCCTCCTA

>PGSC0003DMG400018806-(rev)LRR-RLPs\_8479

TTGTAGGGACTTTATGAGTTATATCAATGATTCAACTTCATTTACAATTTCTTTTTACACCAAAGACTCAT  
CCATTTAGGATAGGAGGATCCTCGTTGGTCTATTTTACAAAACATTCT

>PGSC0003DMG400018806-(rev)LRR-RLPs\_8540

CAAAGACTCATCCATTTAGGATAGGAGGATCCTCGTTGGTCTATTTTACAAAACATTCTCGTCTGCCTCTG  
GTTGAGTGGTGGTATGGAGAATATGCATACCCTTAAGCTTGATATTC

>PGSC0003DMG400018806-(rev)LRR-RLPs\_8906

TTCTTGGAGCATGATGTACTTGTGTTAAAATTACTGAAATGAGAATTTGAACTCTCAACTGATGCTTATTT  
GCTTGAATATTGGAAGTCAAGTGAAGTCTTAGTTTTTTTTT

>PGSC0003DMG400018806-(rev)LRR-RLPs\_8967

ATGCTTATTTGCTTGAATATTGGAAGTCAAGTGAAGTCTTAGTTTTTTTTTTCTTTAGAAGTT  
TTTGCTTTCTCTGAGCTGTATTTCCGTTGTTGCTTCTATCATTACACGC

>PGSC0003DMG400018806-(rev)LRR-RLPs\_9028

TTTAGAAGTTTTTGCTTTCTCTGAGCTGTATTTCCGTTGTTGCTTCTATCATTACACGCCTCGGACTTACCT  
CAAAGACATGCCACTTTCTAGTGTAGAGCTCGTGAAATCGATTGCCTT

>PGSC0003DMG400018806-(rev)LRR-RLPs\_9089

CGGACTTACCTCAAAGACATGCCACTTTCTAGTGTAGAGCTCGTGAAATCGATTGCCTTTCTTTCCATCAT  
GTCTTGTTAAAAACTACTTTGATGAACTCCCTTGAAAAATCGTTGGCAC

>PGSC0003DMG400018806-(rev)LRR-RLPs\_915

AATTTTATTGAATATTAGAGTGAAGTTGGCCATAGTAGAGAACTAATACAGAATTCATTTAAGCAACCCA  
AGCCTAATTACAAGGATCAGTTGATGTTATAGGGGCGGCTCACTAATTAA

>PGSC0003DMG400018806-(rev)LRR-RLPs\_9150

TTTCCATCATGTCTTGTTAAAAACTACTTTGATGAACTCCCTTGAAAAATCGTTGGCACACCCGGAAGGT  
GCTTGTGCAATTGAAATCTTCTGACACAATTGTGATGTGGAGTTATTCT

>PGSC0003DMG400018806-(rev)LRR-RLPs\_9394

TTTTGATGTTAAGAATATGCCCTGTATTGATTTTTGTGTATCATTTTATTGATACAAACAAGGGCTCTTTTG  
TGAATTTGCTGATAATCCTTTTTTCCACTTAAACAGATTTGTCCACTG

>PGSC0003DMG400018806-(rev)LRR-RLPs\_976

AGCAACCCAAGCCTAATTACAAGGATCAGTTGATGTTATAGGGGCGGCTCACTAATTAATTAAGGACTC  
TCAAGAGTCCTGTAATTATTTCTCGTGTAGTACAGTTTTACATGTGGTCAA

>PGSC0003DMG400018806-(rev)LRR-RLPs\_9821

GCCTTGTAAGGGAAATATTAGTTAATAGTGGCCTGCTTGCCCTTTTCAGTTAATGGGAAAAACGCAGG  
TTGCCAGGCTCAAGTGTGTAAATTTTGGTTGCCCTAAAAATAAGGTTACA

>PGSC0003DMG400018806-(rev)LRR-RLPs\_9869

AGTTAATGGGAAAAACGCAGGTTGCCAGGCTCAAGTGTGTAAATTTTGGTTGCCCTAAAAATAAGGTT  
ACAAAATATAGCCCAAAAATAGAGTAGTCAGTCGGCTCATGTCTTTGGGAT

>PGSC0003DMG400018811-(rev)LRR-RLKs\_0

ATAAAAGGGGCACTAGTAATTTTAGTAATTGAAAAGCAAGTGTATAGAGAGAGATAATGAGAGAGAAA  
GAGTAAGTACTACTACTGCTACTATCCCATATAGCTGTAATGTTGCAGGT

>PGSC0003DMG400018811-(rev)LRR-RLKs\_1037

TTGTAGTAATCTTTTCGAGTTAAATCTTGATGGGGAGTTGTCTCCTGCAATTGGACAGCTCAAAGGCCTT  
ATATCTATGTAATATCTTCTCCATTATCCACATTTTCCCTTTTTGTTT

>PGSC0003DMG400018811-(rev)LRR-RLKs\_1098

AAAGGCCTTATATCTATGTAATATCTTCTCCATTATCCACATTTTCCCTTTTTGTTTGATCTTTTGACTTA  
GTGTACATTTAGATTATGTTTGTTAATTTATTTATTTTTCGTAGTGA

>PGSC0003DMG400018811-(rev)LRR-RLKs\_1159

TCTTTTGACTTAGTGTACATTTAGATTATGTTTGTTAATTTATTTATTTTTCGTAGTGATGTAAGGGGAAAT  
CGCCTTTCTGGCCAGATACCAGATGAGATTGGTGACTGTTTCAGCACTG

>PGSC0003DMG400018811-(rev)LRR-RLKs\_122

GATTTTTGCAGTTGCAGACCCCTTCTTGGCACAAGCTCTTTAACTTTTATCTTCTCAAATAATTCTCTCT  
CTCTCTCTCTCTTTTTTCTTTTTTACATTGTGAGGAAACTGAATA

>PGSC0003DMG400018811-(rev)LRR-RLKs\_1220

TAAGGGGAAATCGCCTTTCTGGCCAGATACCAGATGAGATTGGTGACTGTTTCAGCACTGAAAAACTTGT  
AAGTATAAAATGCTTCTGATTCTTGTGTTATTATTTGGAAAATAAGTAACC

>PGSC0003DMG400018811-(rev)LRR-RLKs\_1281

AAACTTGTAAGTATAAAATGCTTCTGATTCTTGTGTTATTATTTGGAAAATAAGTAACCATTTTTTCCCTT

AGGGACCTATCCTTCAATGAGCTTTATGGTGATATCCCTTTTCCATA

>PGSC0003DMG400018811-(rev)LRR-RLKs\_1342

TTTTTCCCTTAGGGACCTATCCTTCAATGAGCTTTATGGTGATATCCCTTTTCCATATCAAAACTTAAGC

AACTGGAATATCTGTAAGTTTTGATACTCTTCTTCTTAGGTGTTGT

>PGSC0003DMG400018811-(rev)LRR-RLKs\_1403

AAAACCTTAAGCAACTGGAATATCTGTAAGTTTTGATACTCTTCTTCTTAGGTGTTGTATCATTTGCTTTC

CAAGATTGTCAATTGATCATGCTTGTCTTCTTCAACTTAGGATTTTAA

>PGSC0003DMG400018811-(rev)LRR-RLKs\_1464

CATTTGCTTTCCAAGATTGTCAATTGATCATGCTTGTCTTCTTCAACTTAGGATTTTAAAGAATAATCAGTT

GATTGGACCAATTCCATCTACATTGTCACAGATCCCCAACTTGAAGGT

>PGSC0003DMG400018811-(rev)LRR-RLKs\_1525

AATAATCAGTTGATTGGACCAATTCCATCTACATTGTCACAGATCCCCAACTTGAAGGTCTTGTAAGTATA

TTCTCTTCTGCTTTGTCATGATATTGGTAGATTATGAATAATTTCAATT

>PGSC0003DMG400018811-(rev)LRR-RLKs\_1586

TGTAAGTATATTCTTCTGCTTTGTCATGATATTGGTAGATTATGAATAATTTCAATTTAATCCAAGAACT

TCCTCCAGGGACCTAGCTCAAAATAGGTTAAGTGGAGAAATTCCTAGG

>PGSC0003DMG400018811-(rev)LRR-RLKs\_1647

ATCCAAGAACTTCCTCCAGGGACCTAGCTCAAAATAGGTTAAGTGGAGAAATTCCTAGGCTGATATACT

GGAATGAAGTCCTGCAGTATTTGTGAGTGTTTTAATTCAGTGCTCCTCTTC

>PGSC0003DMG400018811-(rev)LRR-RLKs\_1708

GATATACTGGAATGAAGTCCTGCAGTATTTGTGAGTGTTTTAATTCAGTGCTCCTCTTCTTGGTTTCTA

GAATACCTTAGGAGACTACCATTTTGTATATGGATGATCATATCTGTTG

>PGSC0003DMG400018811-(rev)LRR-RLKs\_1769

TTGGTTTCTAGAATACCTTAGGAGACTACCATTTTGTATATGGATGATCATATCTGTTGTATGTTTTTCATT

GTATAGGGGACTGCGTGGCAACAACCTGGGTGGATCACTTTCTCCTGA

>PGSC0003DMG400018811-(rev)LRR-RLKs\_183

TAATTCTCTCTCTCTCTCTCTCTTTTTTCTCTTTTTACATTGTGAGGAACTGAATACCCATTGTATGTAT

TAGTGTGAGGCCTATCTGCCACAAGGATGTGATGGAACACTATGCTT

>PGSC0003DMG400018811-(rev)LRR-RLKs\_1830

TGTTTTTCATTGTATAGGGGACTGCGTGGCAACAACTTGGGTGGATCACTTTCTCCTGATATGTGTCAGC  
TCACCGGCCTGTGGTACTTGTAAGTTTGTAAATCTTTATGCTCTTCAGATC

>PGSC0003DMG400018811-(rev)LRR-RLKs\_1891

TGTGTCAGCTCACCGGCCTGTGGTACTTGTAAGTTTGTAAATCTTTATGCTCTTCAGATCTTACTATAGCTC  
CTTTAGCTGATGACATTAACCATCGTTCATTGTTTTGTGCAGTGATGTT

>PGSC0003DMG400018811-(rev)LRR-RLKs\_1952

ACTATAGCTCCTTTAGCTGATGACATTAACCATCGTTCATTGTTTTGTGCAGTGATGTTCCGGAACAATAGT  
TTGACTGGTTCCATTCTCAAATATTGGCAACTGTACTGCTTTCCAGG

>PGSC0003DMG400018811-(rev)LRR-RLKs\_2013

GAACAATAGTTTACTGGTTCCATTCTCAAATATTGGCAACTGTACTGCTTTCCAGGTTCTGTAAGTAT  
CTATAACAAATGAATGAAGTTGGACTATTTTCTAAATGTTTGGTTGGCA

>PGSC0003DMG400018811-(rev)LRR-RLKs\_2074

CTGTAAGTATCTATAACAAATGAATGAAGTTGGACTATTTTCTAAATGTTTGGTTGGCATAACACCTTGTT  
TTGTGCTATCAGAGATTTGTCTTATAATGACTTGACTGGAGAGATTCT

>PGSC0003DMG400018811-(rev)LRR-RLKs\_2135

ACACCTTGTTTTGTGCTATCAGAGATTTGTCTTATAATGACTTGACTGGAGAGATTCTTTCAACATTGGT  
TTCCTGCAAGTAGCGACCTTGTAAGTTTATGCTGCTTCTCTTTATCACA

>PGSC0003DMG400018811-(rev)LRR-RLKs\_2196

CAACATTGGTTTCTGCAAGTAGCGACCTTGTAAGTTTATGCTGCTTCTCTTTATCACAAGCCATTCA  
ATATGGTTATAAGTTTGAAGTGACTTTCATCATTCCAGGTCTTTGCAA

>PGSC0003DMG400018811-(rev)LRR-RLKs\_2257

GCCATTCATTATATGGTTATAAGTTTGAAGTGACTTTCATCATTCCAGGTCTTTGCAAGGTAATCGCCTT  
TCAGGGCAGATCCCTTCTGTCATTGGATTGATGCAAGCTCTTGCAAGTTT

>PGSC0003DMG400018811-(rev)LRR-RLKs\_2318

TAATCGCCTTTAGGGCAGATCCCTTCTGTCATTGGATTGATGCAAGCTCTTGCAAGTTTGTGAGTTTTTG  
TGTCTTGTATCTCAATCCAATGCTACTGAATCATGAACGAGATTTCTT

>PGSC0003DMG400018811-(rev)LRR-RLKs\_2379

TGAGTTTTTGTGCTTGTATCTCAATCCAATGCTACTGAATCATGAACGAGATTTCTTGAAACCAAAAA  
ATGCATCTGTTATTTAAGTTTTTCTGACCCTTTTACTGACAGGGACTTG

>PGSC0003DMG400018811-(rev)LRR-RLKs\_244

CATTGTATGTATTAGTGTGAGGCCTATCTGCCACAAGGATGTGATGGAACACTATGCTTCCTCTGCTAAA  
ACCCACAACCCCAAACTCTTTTTCACTTCACATTTAATCACAATTCCT

>PGSC0003DMG400018811-(rev)LRR-RLKs\_2440

AAACCAAAAAATGCATCTGTTATTTAAGTTTTTCTGACCCTTTTACTGACAGGGACTTGAGCTGCAATATG  
TTGAGTGGAACAATTCCTTCAATTCTTGGGAATTTGACTTACACAGAAA

>PGSC0003DMG400018811-(rev)LRR-RLKs\_2501

CTGCAATATGTTGAGTGGACAATTCCTTCAATTCTTGGGAATTTGACTTACACAGAAAAATTGTTAGTA  
CTATAATAATTTAATTTAAGAGCAATTTGGATCATTTTGTGCTTCCTAAA

>PGSC0003DMG400018811-(rev)LRR-RLKs\_2562

TTGTTAGTACTATAATAATTTAATTTAAGAGCAATTTGGATCATTTTGTGCTTCCTAAATTGTATACTGGAT  
CAATTACTGTAAGTTCGCATTGTATTGCAGGTATCTACATGGGAACAA

>PGSC0003DMG400018811-(rev)LRR-RLKs\_2623

GTATACTGGATCAACTACTGTAAGTTCGCATTGTATTGCAGGTATCTACATGGGAACAAGCTATCTGGTT  
CCATTCCTCCAGAGCTGGGAAATATGACAAAGCTTCACTACTTGTATGAA

>PGSC0003DMG400018811-(rev)LRR-RLKs\_2684

TATCTGGTTCATTCTCCAGAGCTGGGAAATATGACAAAGCTTCACTACTTGTATGAATGCTTTCTATTA  
ATCATTTTTTGTGGCTTTGTTTTGTTCTTCCTGTTCAAACCCTTTTAA

>PGSC0003DMG400018811-(rev)LRR-RLKs\_2745

CTTTCTATTAATCATTTTTTGTGGCTTTGTTTTGTTCTTCCTGTTCAAACCCTTTTAAATGAATGCAAGCAT  
TTGTTTGATTAGTGAGCTTTTAGGCAACCACTGATTTGATTGATACA

>PGSC0003DMG400018811-(rev)LRR-RLKs\_2806

GAATGCAAGCATTGTTTGATTAGTGAGCTTTTAGGCAACCACTGATTTGATTGATACAAAGCTGTTTTG  
AGAATTTTTTATAAGAGACTTTCCTCAATCTCAAGGCTCAAAGATGGTAA

>PGSC0003DMG400018811-(rev)LRR-RLKs\_2867

GCTGTTTTGAGAATTTTTTATAAGAGACTTTCCTCAATCTCAAGGCTCAAAGATGGTAATTTGCAGAGAA  
TTGAATGATAACCAACTTACTGGACGCATACCACCAGAACTTGGAAGCT

>PGSC0003DMG400018811-(rev)LRR-RLKs\_2928

TGCAGAGAATTGAATGATAACCAACTTACTGGACGCATACCACCAGAACTTGGAAGCTGACGGAGTTG

TTTGACTTGTAATCCCGTTTCTCTTCATCTTCTACTTTGGACTTGTTAAC

>PGSC0003DMG400018811-(rev)LRR-RLKs\_2989

CGGAGTTGTTTGACTTGTAATCCCGTTTCTCTTCATCTTCTACTTTGGACTTGTTAACATCATTATTTATTT  
ACTTATGTGGTATGTTTCAGAAATGTTGCAAACAACCACCTTGATGG

>PGSC0003DMG400018811-(rev)LRR-RLKs\_305

TCTGCTAAAACCCCAACCCCAAAACTCTTTTTCACTTCACATTTAATCACAATTCCTCAGTGAAATTATT  
CTGTTGCTCTCTAATTTCAATTTCAATGTCGGTAAGTCCAAGAACT

>PGSC0003DMG400018811-(rev)LRR-RLKs\_3050

CATTATTTATTTACTTATGTGGTATGTTTCAGAAATGTTGCAAACAACCACCTTGATGGGCCCATACCTTC  
CAATCTTAGCTCATGTACCAATTTGAATAGTCTGTGAGTGTTTTTCATA

>PGSC0003DMG400018811-(rev)LRR-RLKs\_3111

CCATACCTCCAATCTTAGCTCATGTACCAATTTGAATAGTCTGTGAGTGTTTTTCATATCCGATGTGTTTC  
AATTATGTATGATCATGCTTGTGGGAGTTATTGACACCTAATTTGG

>PGSC0003DMG400018811-(rev)LRR-RLKs\_3172

CGATGTGTTTCAATTATGTATGATCATGCTTGTGGGAGTTATTGACACCTAATTTGGTTGCAGCAACGT  
TCATGGAAACAAATTGAATGGTACAATTCACCTGCTTTTCAAAGCTG

>PGSC0003DMG400018811-(rev)LRR-RLKs\_3233

GCAGCAACGTTTCATGGAAACAAATTGAATGGTACAATTCACCTGCTTTTCAAAGCTGGAAAGTATGA  
CCTATCTGTAAGTTCTTACTTTTTGAATTTTTCTTTTAGAGAAATATGTGC

>PGSC0003DMG400018811-(rev)LRR-RLKs\_3294

AAGTATGACCTATCTGTAAGTTCTTACTTTTTGAATTTTTCTTTTAGAGAAATATGTGCAAGGTTATCTAG  
TTATCATTCTACCCATTCGCGCTGTTAAGGAAGATTGTAACTTACTGT

>PGSC0003DMG400018811-(rev)LRR-RLKs\_3355

GGTTATCTAGTTATCATTCTACCCATTCGCGCTGTTAAGGAAGATTGTAACTTACTGTGCCAATTTTATA  
TTAAATTTTACCAACGTTGTATTATTTGCACAGAATTCATTTTATTT

>PGSC0003DMG400018811-(rev)LRR-RLKs\_3416

CAATTTTATATTTAAATTTTACCAACGTTGTATTATTTGCACAGAATTCATTTTATTTATCTTGCTCTCAA  
TCGTTACTGGCTTATCCTTGCATGAAGAATCATTCTATTGTGCGAGA

>PGSC0003DMG400018811-(rev)LRR-RLKs\_3477



CTTGCTCTCAAATCGTTACTGGCTTATCCTTGCATGAAGAATCATTCTATTGTGCGAGAGCTTTCAGCTAT  
GTGTGTCATATAATTTTTTTAATTATTAAGTATTTATTTAGAGCCTCT

>PGSC0003DMG400018811-(rev)LRR-RLKs\_3538

TTCAGCTATGTGTGTCATATAATTTTTTTAATTATTAAGTATTTATTTAGAGCCTCTGCATCATCTAGTT  
ATGCGAATTTCAATTGCTTATTCTGCATACTCTGAGCATTAACTGCAT

>PGSC0003DMG400018811-(rev)LRR-RLKs\_3599

ATCATCTAGTTATGCGAATTTCAATTGCTTATTCTGCATACTCTGAGCATTAACTGCATCTTTTTTTTTGTT  
AATTGCTCAAGTAATCTCTCCTCCAACAACCTCAAAGGCCCAATTCCA

>PGSC0003DMG400018811-(rev)LRR-RLKs\_366

GTGAAATTATTCTGTTGCTCTCTAATTTCAATTTCAATGTCGGTAAGTCCAAGAAGTGGTTTTTCAATTC  
AAAGGAGCTGAGTTAGTGCAAACACTTGAGGTTTTGAGTTTTGACAGA

>PGSC0003DMG400018811-(rev)LRR-RLKs\_3660

TTTTTTTTGTTAATTGCTCAAGTAATCTCTCCTCCAACAACCTCAAAGGCCCAATTCCAATTGAGCTTTCTC  
GTATTGGGAATGTAGATACACTGTAAGTGCAAACCTTTCTCATCCACTT

>PGSC0003DMG400018811-(rev)LRR-RLKs\_3721

TGAGCTTTCTCGTATTGGGAATGTAGATACACTGTAAGTGCAAACCTTTCTCATCCACTTTCATTTCTCTCAT  
TGCAATTATGGTTGCGGGAAAAGCACGTTTTGACAGTTTAAGAACTCT

>PGSC0003DMG400018811-(rev)LRR-RLKs\_3782

ATTTCTCTCATTGCAATTATGGTTGCGGGAAAAGCACGTTTTGACAGTTTAAGAACTCTTCAACATTTTTT  
TGGCTTAGGGACTTATCAAACAACAGGATCAGTGGTCGTATACCTTTGT

>PGSC0003DMG400018811-(rev)LRR-RLKs\_3843

AACATTTTTTTGGCTTAGGGACTTATCAAACAACAGGATCAGTGGTCGTATACCTTTGTCCCTCGGTGATT  
TGGAACATCTTCTTAAACTGTGAGCATAACCGTCAGGTTGTTATGTTAT

>PGSC0003DMG400018811-(rev)LRR-RLKs\_3904

CTCGGTGATTTGGAACATCTTCTTAAACTGTGAGCATAACCGTCAGGTTGTTATGTTATCATCATATATCT  
GTTGTACTTACATTCCTTTGTCAATGCTGTAGGAACTTAAGCAAGAAC

>PGSC0003DMG400018811-(rev)LRR-RLKs\_4026

AATAAATGGAACTTGCCAGCTGAATTTGGCAATTTAAGGAGCATCATGGAGATGTATGGAACCTTGCT  
AAATTTAGTTACTTCAAATTTATGGTTTGCTTGATTTTCAGCTTTTTGACC

>PGSC0003DMG400018811-(rev)LRR-RLKs\_4087

ACCTTGCTAAATTTAGTTACTTCAAATTTATGGTTTGCTTGATTTTCAGCTTTTTGACCGCACTCTTAATTG  
TAGTGATCTGTCAAGCAATCACCTCTCTGGTCCCTTGCCTCAGGAACT

>PGSC0003DMG400018811-(rev)LRR-RLKs\_4148

ACTCTTAATTGTAGTGATCTGTCAAGCAATCACCTCTCTGGTCCCTTGCCTCAGGAACTGGTCAGCTTCC  
AAATCTGTACTTGCTGTAAGTACTTTAGATTTACTTCGAGACTCTCATC

>PGSC0003DMG400018811-(rev)LRR-RLKs\_4209

GTCAGCTTCAAATCTGTACTTGCTGTAAGTACTTTAGATTTACTTCGAGACTCTCATCCTCTTAGCCATTG  
GTAATAATCTGTACAGTGAATAAGTATGAACTTCTAAACTGGGAAAGT

>PGSC0003DMG400018811-(rev)LRR-RLKs\_427

TTTTTCAATTCAAAGGAGCTGAGTTAGTGCAAACACTTGAGGTTTTGAGTTTTGACAGAGACTTGAGTCT  
CAGAGAACTACCATGACATCATTTTTACTTCAAAGATGTAATCTTTTTCT

>PGSC0003DMG400018811-(rev)LRR-RLKs\_4270

CTTAGCCATTGGTAATAATCTGTACAGTGAATAAGTATGAACTTCTAAACTGGGAAAGTTAGATTTTTAAA  
TTATTTTTGGATGCCATTTTTCAAGAAAGTAGAGATGAAGTGGTGTGTTGTTGC

>PGSC0003DMG400018811-(rev)LRR-RLKs\_4331

GATTTTAAATTATTTTTGGATGCCATTTTTCAAGAAAGTAGAGATGAAGTGGTGTGTTGCGATTGGTTTAT  
ATTATCTGGCTACATATGTTAATTACTTTGGTGTGTTGTCTCAGTTTTTTCTT

>PGSC0003DMG400018811-(rev)LRR-RLKs\_4392

TTGGTTTATATTATCTGGCTACATATGTTAATTACTTTGGTGTGTTGTCTCAGTTTTTCTTTATATTGCATTATT  
GTACGGGGCTCATAGGGCATCATTTCTCTATCTTCTTTCTTTTCCTTG

>PGSC0003DMG400018811-(rev)LRR-RLKs\_4453

TATTGCATTATTGTACGGGGCTCATAGGGCATCATTTCTCTATCTTCTTTCTTTTCCTTGAGGCCTTATTCTA  
CAAATAATGAACAGGAACTGGAAAACAACAATTTATCAGGCGATGT

>PGSC0003DMG400018811-(rev)LRR-RLKs\_4514

GCCTTATTCTACAAAATAATGAACAGGAACTGGAAAACAACAATTTATCAGGCGATGTGATGTCCTTAG  
CCAGTTGTCTCAGTCTAAATGTCCTGTGAGTTTTCAAGCTAGTAGTATTA

>PGSC0003DMG400018811-(rev)LRR-RLKs\_4575

TGTCCTTAGCCAGTTGTCTCAGTCTAAATGTCCTGTGAGTTTTCAAGCTAGTAGTATTACACCAGTACAAA

TGTTTTGTAAATCTAATCAACCGTTTTTTGGCAGAAATGTCTCATACAA

>PGSC0003DMG400018811-(rev)LRR-RLKs\_4636

CCAGTACAAATGTTTTGTAAATCTAATCAACCGTTTTTTGGCAGAAATGTCTCATACAATAATCTGGGAG

GGAATATTCCAACAGGCAATAATTTCTCTAGATTTTCACCAGACAGGTAA

>PGSC0003DMG400018811-(rev)LRR-RLKs\_4697

ATCTGGGAGGGAATATTCCAACAGGCAATAATTTCTCTAGATTTTCACCAGACAGGTAAGTGGAGCGAT

GAAGATTCCATTGATCTTCCTCGTCATATGCCAAGTTCACACAAGTC

>PGSC0003DMG400018811-(rev)LRR-RLKs\_4758

GGAGCGATGAAGATTCCATTGATCTTCCTCGTCATATGCCAAGTTCACACAAGTCACAAGCATTTA

TTGGTTTGTAAAAATTCTTTGCTTCTAATTTTTCTTTTGCTATGTTT

>PGSC0003DMG400018811-(rev)LRR-RLKs\_4819

AAGCATTTATTGGTTTGTAAAAATTCTTTGCTTCTAATTTTTCTTTTGCTATGTTTCCAATAAAGCTTCA

TAGGAAATCCAGATCTGTGTGGGTATTGGCTCACTTCTCCCTGTCAT

>PGSC0003DMG400018811-(rev)LRR-RLKs\_488

CTTGAGTCTCAGAGAACTACCATGACATCATTTTTACTTCAAAGATGTAATCTTTTCTTTGAGGTTCTTCT

TCTTTGGGGTTCTTGAATTTCTTCAGCTTTGGTTCTGTGGTGTCTGA

>PGSC0003DMG400018811-(rev)LRR-RLKs\_4880

AATAAAGCTTCATAGGAAATCCAGATCTGTGTGGGTATTGGCTCACTTCTCCCTGTCATGCATCTCATCCA

GCAGAGCGAGGTATGATCAAAGTGTAGCCATCATTTGACCTTTATTCTA

>PGSC0003DMG400018811-(rev)LRR-RLKs\_4941

ATCTCATCCAGCAGAGCGAGGTATGATCAAAGTGTAGCCATCATTTGACCTTTATTCTATTGCATTCTTGA

AGTTTCATTTCACTTTAGACACTTGCAACATTTATTAAGCGCGATGGAC

>PGSC0003DMG400018811-(rev)LRR-RLKs\_5002

GCATTCTGAAGTTTCATTTCACTTTAGACACTTGCAACATTTATTAAGCGCGATGGACAGATATTGATTA

ATGAGGAATTACCCCTTGTTGAGCAAATTTAATTCTGTGTTAGTCTGG

>PGSC0003DMG400018811-(rev)LRR-RLKs\_5063

ATATTGATTAATGAGGAATTACCCCTTGTTGAGCAAATTTAATTCTGTGTTAGTCTGGTAGTAGGGTGC

ACGATCACGGTTTCTCTGTTTACAATCCTTGATTGTAACACTTGGATGT

>PGSC0003DMG400018811-(rev)LRR-RLKs\_5124

GTAGGGTGCACGATCACGGTTTCCTCTGTTCAACAATCCTTGATTGTAACACTTGGATGTGTGCAGTAACA  
CTTGATGTGTGCACATATTAATAATTAACATGAAATAATATTCATTTGCTG

>PGSC0003DMG400018811-(rev)LRR-RLKs\_5185

GCAGTAACACTTGGATGTGTGCACATATTAATAATTAACATGAAATAATATTCATTTGCTGGAGTTACATTG  
ACGTAAAGATGCCTTAGCTGTCAAATGAAACTGCATTAGTTTTATCCCCA

>PGSC0003DMG400018811-(rev)LRR-RLKs\_549

GAGGTTCTTCTTTTGGGGTTCTGAATTTCTCAGCTTTGGTTCTGTGGTGTCTGATGATGGTGAGTG  
AGTAGAGTAGAGTAGTATAACATTCTGCTTCTTATGTTCTAGTTTAATG

>PGSC0003DMG400018811-(rev)LRR-RLKs\_5734

TTTTATACTCTACCAAATGACCCCTAAGTGCATAAATATTTAACAGTTGTCTAATGAAAAAAGATGAA  
TTCATTGGACAATTGCAGTTTCAATTTCTAAAGCTGCTATACTTGGTAT

>PGSC0003DMG400018811-(rev)LRR-RLKs\_5795

AAAAGATGAATTCATTGGACAATTGCAGTTTCAATTTCTAAAGCTGCTATACTTGGTATTGCTCTGGGTG  
GCTTGGTGATTCTTCTGATGATACTAGTAGCAGCATGCCGGCCACAGAAT

>PGSC0003DMG400018811-(rev)LRR-RLKs\_5856

CTCTGGGTGGCTTGGTGATTCTTCTGATGATACTAGTAGCAGCATGCCGGCCACAGAATCCTGCACCTTT  
CATGGAAGGATCTATTGATAAACCAGGTACAATATTTTCTGGACGGTTGG

>PGSC0003DMG400018811-(rev)LRR-RLKs\_5917

TGCACCTTCATGGAAGGATCTATTGATAAACCAGGTACAATATTTTCTGGACGGTTGGATAGTGTTTGG  
AGACGTTTCATGTCTTAAGGACAGTCATCAGAGTTAATTGAAGTTGCCATG

>PGSC0003DMG400018811-(rev)LRR-RLKs\_5978

AGTGTTTGGAGACGTTTCATGTCTTAAGGACAGTCATCAGAGTTAATTGAAGTTGCCATGTATTGATTATT  
TAACGTTTTTGTGAACAGTTTATTACTCATCTCCAAAGCTTGTGATCCT

>PGSC0003DMG400018811-(rev)LRR-RLKs\_6039

TTGATTATTTAACGTTTTTGTGAACAGTTTATTACTCATCTCCAAAGCTTGTGATCCTTCATATGAACATG  
GCACTTCATGTTTACGAGGACATTATGAGGATGACTGAGAACTTGAGT

>PGSC0003DMG400018811-(rev)LRR-RLKs\_61

AGAGAAAGAGTAAGTACTACTACTGCTACTATCCCATATAGCTGTAATGTTGCAGGTCTGATTTTTGC  
AGTTGCAGACCCCCTTCTTGGCACAAGCTCTTTTAACTTTTATCTTCTCA

>PGSC0003DMG400018811-(rev)LRR-RLKs\_610

ATGGTGAGTGAGTAGAGTAGAGTAGATAACATTCTGCTTCTTATGTTCTAGTTTAATGTTTTGTTTAAAT  
GTTGAAAAGACAAAGTGCCTTTTTTTAATCATTTTTTAAATGGTGTTT

>PGSC0003DMG400018811-(rev)LRR-RLKs\_6100

ATATGAACATGGCACTTCATGTTTACGAGGACATTATGAGGATGACTGAGAAGTTGAGTGAGAAGTATA  
TAATTGGTTGTGGAGCATCAAGTACTGTATATAAATGTGTTTTGAAAATT

>PGSC0003DMG400018811-(rev)LRR-RLKs\_6161

GAAGTATATAATTGGTTGTGGAGCATCAAGTACTGTATATAAATGTGTTTTGAAAATTGCAAACCTGTA  
GCTATCAAGAAATTGACTCTCACAACCCGCAATACTTGAAGGAGTTTGA

>PGSC0003DMG400018811-(rev)LRR-RLKs\_6222

AAACCTGTAGCTATCAAGAAATTGACTCTCACAACCCGCAATACTTGAAGGAGTTTGAGACTGAACTTG  
AGACAGTTGGGAGTATTAAGCATCGTAATCTTGTCTGCCTCCAAGGATAT

>PGSC0003DMG400018811-(rev)LRR-RLKs\_6283

CTGAACTTGAGACAGTTGGGAGTATTAAGCATCGTAATCTTGTCTGCCTCCAAGGATATTCTCTTTCTCCA  
TCTGGCCATCTTCTTTTCTATGACTACATGGAAAATGGTAGCCTTTGGG

>PGSC0003DMG400018811-(rev)LRR-RLKs\_6344

TCTTTCTCCATCTGGCCATCTTCTTTTCTATGACTACATGGAAAATGGTAGCCTTTGGGATTTGCTTCATG  
GTTAGTAAATCCAAAATGGTTTAGGTGATTTGGTTCATTGAACTTGTGT

>PGSC0003DMG400018811-(rev)LRR-RLKs\_6405

TTGCTTCATGGTTAGTAAATCCAAAATGGTTTAGGTGATTTGGTTCATTGAACTTGTGTTTTAAGCATTTT  
GTAATAATCCCTCTTATATCTTTTTTGCAGGTCCTACAACAAAGAAGAA

>PGSC0003DMG400018811-(rev)LRR-RLKs\_6466

TAAGCATTTTCGTAATAATCCCTCTTATATCTTTTTTGCAGGTCCTACAACAAAGAAGAAAAAACTTGATTG  
GGTACTCGCCTTCGAATTGCATTGGGATCAGCTCAAGGGCTTGCTTAT

>PGSC0003DMG400018811-(rev)LRR-RLKs\_6527

AACTTGATTGGGTTACTCGCCTTCGAATTGCATTGGGATCAGCTCAAGGGCTTGCTTATCTTCACCATGAT  
TGTAGCCCTCGAATTATCCACCGTGATGTTAAATCATCAAATATCTTGT

>PGSC0003DMG400018811-(rev)LRR-RLKs\_6588

TCACCATGATTGTAGCCCTCGAATTATCCACCGTGATGTTAAATCATCAAATATCTTGTGGACAAAGACT

TTGAGGCTCATCTGACTGATTTTGGCATTGCCAAAAGCTTATGCATATC

>PGSC0003DMG400018811-(rev)LRR-RLKs\_6649

GACAAAGACTTTGAGGCTCATCTGACTGATTTTGGCATTGCCAAAAGCTTATGCATATCAAAGACCTATA  
CGTCCACATACATTATGGGAACCATTGGTTACATTGATCCAGAGTATGCT

>PGSC0003DMG400018811-(rev)LRR-RLKs\_671

TTGTTTAAATGTTGAAAAGACAAAGTGTCTTTTTTTAAATCATTTTTTAAATGGTGTTTTTGATTAATCCCA  
CGTTTTGTAGTTGTTATTTGTTAAAGGTTTATTTTTTTGTCTCATTAT

>PGSC0003DMG400018811-(rev)LRR-RLKs\_6710

AGACCTATACGTCCACATACATTATGGGAACCATTGGTTACATTGATCCAGAGTATGCTCGCACTTCTCG  
CTTGACAGAGAAGTCTGATGTTTACAGCTATGGAATTGTTCTATTGGAAT

>PGSC0003DMG400018811-(rev)LRR-RLKs\_6771

CACTTCTCGCTTGACAGAGAAGTCTGATGTTTACAGCTATGGAATTGTTCTATTGGAATTGCTCACTGGA  
AGGAAAGCTGTAGATAATGAATCTAATCTACACCATATGGTATGCTCTTG

>PGSC0003DMG400018811-(rev)LRR-RLKs\_6832

CTCACTGGAAGGAAAGCTGTAGATAATGAATCTAATCTACACCATATGGTATGCTCTTGTAATTTAGTTA  
ATATGAACTTGTGCTATGATGTATCTTCATATAATTATATAAAGATTCAA

>PGSC0003DMG400018811-(rev)LRR-RLKs\_6893

ATTTAGTTAATATGAACTTGTGCTATGATGTATCTTCATATAATTATATAAAGATTCAATTGATCTCAACA  
GTTTTGCATATGTTACAGATTCTAACTAAGGCAGCAAACAATGCTGTAA

>PGSC0003DMG400018811-(rev)LRR-RLKs\_6954

GATCTCAACAGTTTTGCATATGTTACAGATTCTAACTAAGGCAGCAAACAATGCTGTAATGGAAACAGTG  
GATCCTGAGATCACAGGCACATGCAAAGATCTTGCAGATGTGAAGAAGGT

>PGSC0003DMG400018811-(rev)LRR-RLKs\_7015

GAAACAGTGGATCCTGAGATCACAGGCACATGCAAAGATCTTGCAGATGTGAAGAAGGTTTTTCAGCTT  
GCCCTTCTATGTTCCAAAAGACAGCCTGCTGAGAGACCAACAATGCATGAA

>PGSC0003DMG400018811-(rev)LRR-RLKs\_7076

TTCAGCTTGCCCTTCTATGTTCCAAAAGACAGCCTGCTGAGAGACCAACAATGCATGAAGTGGCAAGAG  
TACTTGAAAGCCTAATACCCGTCGCTGAAACGAAACAGCCAAATCCAACCC

>PGSC0003DMG400018811-(rev)LRR-RLKs\_7137

GGCAAGAGTACTTGAAAGCCTAATACCCGTCGCTGAAACGAAACAGCCAAATCCAACCCCCTCACTTGC  
ATTACTTCCATCTGCTAAGGTACCTTGTTACATGGATGAATATGTCAACCT

>PGSC0003DMG400018811-(rev)LRR-RLKs\_7198

TCACTTGCATTACTTCCATCTGCTAAGGTACCTTGTTACATGGATGAATATGTCAACCTCAAGACACCCCA  
TCTAGTGAATTGTTTCATCCATGAGCACTTCAGATGCCCAACTTTTCCTC

>PGSC0003DMG400018811-(rev)LRR-RLKs\_7259

AGACACCCCATCTAGTGAATTGTTTCATCCATGAGCACTTCAGATGCCCAACTTTTCCTCAAGTTTGGAGA  
GGTCATATCCCAGAATAGTGGCTGAAAATAACATGAGAGTAGATTTCTTG

>PGSC0003DMG400018811-(rev)LRR-RLKs\_732

GATTAATCCCACGTTTTGTAGTTGTTATTTGTTAAAGGTTTATTTTTTTGTCTCATTATTATAATAATAATT  
GGAAAATAGGTTCTGCATTGTTGGAGATTAAGAAGTCAATTAGGGACG

>PGSC0003DMG400018811-(rev)LRR-RLKs\_7320

GTTTGGAGAGGTCATATCCCAGAATAGTGGCTGAAAATAACATGAGAGTAGATTTCTTGAGATTTTGTG  
TAAAAATGTAGTGCCATTATCATATTATTATTGTAGGTAGTTGTTGTAAGA

>PGSC0003DMG400018811-(rev)LRR-RLKs\_7381

ATTTTGTGTA AAAATGTAGTGCCATTATCATATTATTATTGTAGGTAGTTGTTGTAAGATGATGCATGCAA  
TAGTGGTCCAGTCTACTTTTTCCACTACATAGGTCTAGTGTGTGTA AAAA

>PGSC0003DMG400018811-(rev)LRR-RLKs\_7442

ATGCATGCAATAGTGGTCCAGTCTACTTTTTCCACTACATAGGTCTAGTGTGTGTA AAAAATATTTCACTTT  
TTACCATGATGAAATTGGAAGAGGTAGCACTTAGTAGAGTATTGTAATA

>PGSC0003DMG400018811-(rev)LRR-RLKs\_7503

ATTTCACTTTTTACCATGATGAAATTGGAAGAGGTAGCACTTAGTAGAGTATTGTAATATTGGTTTTTGG  
GACCACTGATGCTGAGTATGGACTATACTGTCTGTAAAATTTTTGGCACA

>PGSC0003DMG400018811-(rev)LRR-RLKs\_7564

GGTTTTTGGGACCACTGATGCTGAGTATGGACTATACTGTCTGTAAAATTTTTGGCACACACTTTGAGGT  
GGCCTTAGCACTGCCCTCTGTGTATAGCAATAATGGATTGCATTGTGGA

>PGSC0003DMG400018811-(rev)LRR-RLKs\_7625

CTTTGAGGTGGCCTTAGCACTGCCCTCTGTGTATAGCAATAATGGATTGCATTGTGGACCTAAGTTTGA  
CAGTCTGCCGCTCTCTTGCAGCTGCAGTACATTAGTGCATTTATTTGG

>PGSC0003DMG400018811-(rev)LRR-RLKs\_7686

TAAGTTTGACAGTCTGCCGCTCTCTTGCAGCTGCAGTACATTAGTGCATTTATTTGGTGGACTACTCAG  
AAACACGAAAAATAATTTTGACATTTTAATTATTACTCTACTTCCTCAG

>PGSC0003DMG400018811-(rev)LRR-RLKs\_793

TAATAATAATTGGAAAATAGGTTCTGCATTGTTGGAGATTAAGAAGTCAATTAGGGACGTGGAGAATGT  
GTTATATGACTGGACTGATTCTCCTTCATCTGATTACTGTGCCTGGAGAGG

>PGSC0003DMG400018811-(rev)LRR-RLKs\_854

GAGAATGTGTTATATGACTGGACTGATTCTCCTTCATCTGATTACTGTGCCTGGAGAGGTGTTACCTGTG  
ATAATGTCACCTTCAATGTTGTTCAACTGTAAGCCATAACTCAAAAAACA

>PGSC0003DMG400018811-(rev)LRR-RLKs\_915

TTACCTGTGATAATGTCACCTTCAATGTTGTTCAACTGTAAGCCATAACTCAAAAAACACTCTTGTTACAT  
TATTATCATTGGGATTCTTTAGTATAAAGTTGTAATCTTTTGACATTA

>PGSC0003DMG400018811-(rev)LRR-RLKs\_976

CTTGTTACATTATTATCATTGGGATTCTTTAGTATAAAGTTGTAATCTTTTGACATTATCTTGTAAGTAATC  
TTTCGAGTTTAAATCTTGATGGGGAGTTGTCTCCTGCAATTGGACAGC

>PGSC0003DMG400018849LRR-RLKs\_1464

CTTGAGCAAAAACAATTTCACTGGTCCAATTCCAGAAGATTTAGGGAATACTGCGACATTGGCGTATTTG  
AACATATCGGAGAATCCATTCAACAGTGAATTACCGGAGAGTATCTGGAG

>PGSC0003DMG400018849LRR-RLKs\_1769

CGGGAATCATTCCCTGGGAAATTTCTGCAATTCCTCCTTAACAGAGGTTGATTTGTCTCACAATTTTCTC  
ACTGGAACAATTCCTTCGAATTTGCCAATTCCACTACCATAGAAAAC

>PGSC0003DMG400018849LRR-RLKs\_1830

CAATTTTCTCACTGGAACAATTCCTTCGAATTTGCCAATTCCACTACCATAGAAAACCTCAACGTATCCT  
ACAATCAGCTCACTGGTCCAGTTCCTTCTCAGGCTCAATTTTCTCCAG

>PGSC0003DMG400018849LRR-RLKs\_2318

CAGGCGGAGAGACCATAGCAGTAAAGAACTATGGGGAAAACAGAAGGAAACGATCAGGAAAAGGC  
GAGGCGTTTTAGCTGAGGTGGATGTGTTAGGCAATGTGAGGCACAGGAACATCG

>PGSC0003DMG400018849LRR-RLKs\_2684

TGGAGGCTAGAGTGGCTGATTTTGGTGTGCTAAGTTGATTGATTGATGAATCTATGTCCGTGATTGC



TGGATCTTATGGCTACATCGCACCAGGTAAGTTAGTACTCCCTCCGTTTC

>PGSC0003DMG400018849LRR-RLKs\_2745

CGTGATTGCTGGATCTTATGGCTACATCGCACCAGGTAAGTTAGTACTCCCTCCGTTTCAACTTGACATG

AAATTTAACAAAGTAATATTCAACTTTTTATCGTGTTCTTTAATTTAATT

>PGSC0003DMG400018849LRR-RLKs\_2806

CTTGACATGAAATTTAACAAAGTAATATTCAACTTTTTATCGTGTTCTTTAATTTAATTATAATGGCAGG

AATATTTGTCTGTTTGTGGATGGAATTACATGATTGTTTTGGAGTTCA

>PGSC0003DMG400018849LRR-RLKs\_2989

TCTGTAGGGTGACGAAAAAGAGTTCACCTGCGTGCTAAAACGTGGTGTCAATAGCATGATGTAT

ATTGTTTTTTTTTCGTCCACTATCGTCATTAAATCTTCTTTGCCACACA

>PGSC0003DMG400018849LRR-RLKs\_3111

TGTCAAATTCCTCAACTGCTTCATACTAGTGGAATCTTCTTTAATCATAACCAGATCTTGGAGGCACTAA

TTCATTTTTTTGAATTTGAGCGCCACAATATAATATAAATATCTAAATGT

>PGSC0003DMG400018849LRR-RLKs\_3233

AAACTTTTATTAGGAAGTTAAAATAATATTCTTATGAAGATTCTAATATTAGTGTAGTGAAACAGGTAAT

ATAATTTTTTTTTCTTAATAAAGGGTATCAAGTATTTCTTTCTCATACTT

>PGSC0003DMG400018849LRR-RLKs\_3477

ACACTTTTTGTTATTCTTTTGGACCCACCAAGATTTTGTCTTAGTTACTTATCTGTGATTAACCCTTTGATT

ATTAGTATATAATATAGTACTAGTACTACATTCCTTGACTTTAATGC

>PGSC0003DMG400018849LRR-RLKs\_3538

ACCCTTTGATTTATTAGTATATAATATAGTACTAGTACTACATTCCTTGACTTTAATGCTTAAAGTCAACCA

TTTTTGGGCACTAGTAGACAGAGTGTTATGATAACAAATTATTTTTAT

>PGSC0003DMG400018849LRR-RLKs\_3599

AAAGTCAACCATTTTTGGGCACTAGTAGACAGAGTGTTATGATAACAAATTATTTTTATATAGTTATTGTA

CTAAATATGTTTGTGATACAGAATATGCATACACATTGCAAGTTGATG

>PGSC0003DMG400018849LRR-RLKs\_3965

GGCCATCGATGAGGGATGTTATATCTATGTTGCAAGAGGCTAAGCCCAAGAGGAAGTTGCCTGAAACT

GGTGATAATGCAATTGCTGCTATTCCTTTGGCTCAAAAAGCTAATGTGGAGT

>PGSC0003DMG400018849LRR-RLKs\_4026

TGAAACTGGTGATAATGCAATTGCTGCTATTCCTTTGGCTCAAAAAGCTAATGTGGAGTGTTGATATTAT  
AGGAGGAGATTTGGGGTTGTTTTGATTTTACAACCTACTGATGAATTGTG

>PGSC0003DMG400018849LRR-RLKs\_4177

TTTTATTTGCTTCTTAAATTTTTGCATAGTAGGAAATCCCGAGTGTTGTCATTCCAATGTTGTGATGAAA  
TGGGTATCTTTTCCAACAAATTAATCTTCGATAGCATACTTGTCTAGAC

>PGSC0003DMG400018849LRR-RLKs\_732

GAAGTTTTTGCACTTGGCTGGAAATTTATTGAATGGTCCTGTTTTGCCTGAGTTGGGTTTTTTGAAGCAG  
CTTGAACATGTAGAAATTGGTTATCAGAATTTCACTGGAGTTGTCCCTGC

>PGSC0003DMG400018861LRR-RLPs\_462

TCTTTCATACTTGAGTATTGTTTCGGGTTTGACTACGAACTTATAAAGATCAAGTCGGATTCCCTGAAGG  
TCTTGAAGATTCATCAATATTGCGGGATATGGGAGATTAATGCTCCAGAT

>PGSC0003DMG400018861LRR-RLPs\_528

AAGGTCTTGAAGATTCATCAATATTGCGGGATATGGGAGATTAATGCTCCAGATTTAGTATCACTTGACT  
ATGCAGGGAATGAAATTCCTGAACTCAACATTGTAAGAGAGTCAAGTCAA

>PGSC0003DMG400018861LRR-RLPs\_594

GACTATGCAGGGAATGAAATTCCTGAACTCAACATTGTAAGAGAGTCAAGTCAATTGGAGAACTCAAAA  
ATAATTCTTCATTGCATCTCCAGATTAATAACGACATGGTTTTGTAAGTTG

>PGSC0003DMG400018861LRR-RLPs\_717

AAGTTTCTATCAAATTCATCCTCTTGGTCTGAAGTTAACCTTTGTTTATTCAAATGCGATGAGATCAACAT  
GACAGATTTGCAAATGGATCTGAAGGAGAGAAAGAGAAGACAAATATGA

>PGSC0003DMG400018865-(rev)LRR-RLPs\_244

CATGACTGGAAATGTCATTGAGCTTAACCTCAGTTGCAGCGGGATTGTAGGAAAGATTGATTCCAATAG  
CAGCCTCTTCCAACCTCTCTCATCTCCAAACGCTTGATCTCTCTTATAATCA

>PGSC0003DMG400018865-(rev)LRR-RLPs\_2920

CTGTGAAAATGATAACATTTTGTAACCTTGGAAATTGATTTATAATTTAATTATTTTCTAATGAGATCTGGT  
GGGTTAGTGCTGGTATGATCGTATCCGATTTATGATTTGATATGAAGGC

>PGSC0003DMG400018865-(rev)LRR-RLPs\_305

TCCAATAGCAGCCTCTTCCAACCTCTCTCATCTCCAAACGCTTGATCTCTCTTATAATCACTTCTCTAAATCTC  
ACATCTCACCTGAATTCGGTAGATTCTCAAACCTTGACATATTTTGAT

>PGSC0003DMG400018865-(rev)LRR-RLPs\_366

TCTCTAAATCTCACATCTCACCTGAATTCGGTAGATTCTCAAACCTTGACATATTTTGATCTTTCCTGGGCAG  
ATTTCTCAGGTCAAATTCCTTCTGAAATCTCTCATCTTTCCAAGTTAC

>PGSC0003DMG400018865-(rev)LRR-RLPs\_427

TTCCTGGGCAGATTTCTCAGGTCAAATTCCTTCTGAAATCTCTCATCTTTCCAAGTTACTCTCTCAGTCT  
CTACAGTTCTATTGGTCTACGACTCGCAGCCCATGATTTTAAATTGCT

>PGSC0003DMG400018865-(rev)LRR-RLPs\_61

TGTTTCTTCATCCATACTACCTCATCTCTCATAAACATCAAATCATTTCCCTTCTAAAATTCAAGCAGTC  
GCTTACTATAAATACCTCAGCCTCTTATTATTGTGAGAATCCTTATCC

>PGSC0003DMG400018865-(rev)LRR-RLPs\_854

CGTTCTTTGTCTCTTCAAAGTTGCAACCTTAGAGGGCCTATTCCTGAATCTATTTCTAATCTCATTTCGTATA  
GATTATTTGCACCTTCAAGATAACTCCCTGAATGGAACAATACCATCA

>PGSC0003DMG400018865-(rev)LRR-RLPs\_915

TCATTTCGTATAGATTATTTGCACCTTCAAGATAACTCCCTGAATGGAACAATACCATCAGGGGTGTTCTCC  
CTTCATCACTAAGATATTTACTCTTGGGTAAGAACCCTTTTCTGGTC

>PGSC0003DMG400018866-(rev)LRR-RLPs\_1116

CAGTTGCTGCAACTAGGAAGTGAGGAGCTTGCAAAAAGGATTACGGAGGGGGAGAAACCTTATTTTAT  
ATTAGATTGGTGATGGAGTTAAGTTGTCTCTGTTTCGAATTGAATTCTAAAG

>PGSC0003DMG400018866-(rev)LRR-RLPs\_1364

TTATATAACCAGTTTTTAAATCAGAAAGAGGGACTCTGTACTTTTCTTTCAATACCATATATAGAAAAACAA  
TCCCCCTCCCTACATGTGCATTAACCTCATACTGCCTGCTGCTGGTTGA

>PGSC0003DMG400018866-(rev)LRR-RLPs\_1674

CTATTCATAATTCCATACTTCCTTTTTTTCCATATCATGTTTCACTTTAAAGGTTGTGGTGCACCTCAGCCA  
CTTATAATCTTCATAAACTTGATTCATCATTGGAGTAATTGTACGAGT

>PGSC0003DMG400018866-(rev)LRR-RLPs\_1736

CACTCAGCCACTTATAATCTTCATAAACTTGATTCATCATTGGAGTAATTGTACGAGTATTACTTAAAATT  
AAAATACAATGTTATATTCAAGGAAAATTTATGTGTCTGCCTTCATACA

>PGSC0003DMG400018866-(rev)LRR-RLPs\_1798

CTTAAAATTTAAAATACAATGTTATATTCAAGGAAAATTTATGTGTCTGCCTTCATACATATGTACTTCTCC

ATGTTATACTCATAATCTAAACTGCATCTTTAAAAACTATTCGTGTGAA

>PGSC0003DMG400018866-(rev)LRR-RLPs\_1860

TACTTCTCCATGTTATACTCATAATCTAAACTGCATCTTTAAAAACTATTCGTGTGAACATAACACATCCCT

ATATACAAGAAAACGTTAAGCTAGGAAAAGCAGTACGGCCAAGTTAAT

>PGSC0003DMG400018866-(rev)LRR-RLPs\_2232

CCATGACCCTCTCTTGCTCAAACAGATAGTCATCTTGACATTAGCGAGCTAATATGTCAGGGTCTCAAG

GATGTAGCTCTAATTCTCGATAATGTGTTGGATTGATTGTTATCCATGGA

>PGSC0003DMG400018866-(rev)LRR-RLPs\_2294

GTCTCAAGGATGTAGCTCTAATTCTCGATAATGTGTTGGATTGATTGTTATCCATGGACAGTCCATGTGA

TTGTTAAGAGTAAAACAATAACACAGATCGTACATGTGTATCTCACAGT

>PGSC0003DMG400018866-(rev)LRR-RLPs\_2339

TGTTATCCATGGACAGTCCATGTGATTGTTAAGAGTAAAACAATAACACAGATCGTACATGTGTATCTC

ACAGTCTTGGTGAACAATTTGATTCAGTACGACTTCATTCGAGAGAATGA

>PGSC0003DMG400018866-(rev)LRR-RLPs\_372

GCCAAATCTTTAAGAGAATTGGTTCTGCACGATTGTACTCTTATGCCTGTTTCATTATCTTGTGGGGTTGT

GAATCCAATTCTTTGAGAAAGCTTTCTCTATCTAATGTAACATTAGAC

>PGSC0003DMG400018866-(rev)LRR-RLPs\_806

CCTTTGTATATTTAAATGAGATGAGATCAACATGACAGATTTGCAAATGGACCACATAGTTCTAGTGG

AGGGGTGGACGTTTTAAATCTCAATATGCTACTGATGGATGAAATTATAGA

>PGSC0003DMG400018867-(rev)LRR-RLPs\_0

ATGGCTGACTTATTGCCAGAATGTCTCATTCAAAAATACTCGGTTTGCTTAGTCATAAAGAAGCAATCA

AGATGAGCATTCTCTCGAAAACATGGCTGCAAGCGTGGTTAACTCTTCCC

>PGSC0003DMG400018867-(rev)LRR-RLPs\_1040

TTTAATTGATTGTTAATGTATATGAAGCATTGAGTCATTCTACATATTCTTATGGTTGGAATAATCAATT

AAAAGAAATAAAAGCTTTTGATGGAAAAAATCAGTTGCTGCAACTCGG

>PGSC0003DMG400018867-(rev)LRR-RLPs\_1104

AATCAATTTAAAGAAATAAAAGCTTTTGATGGAAAAAATCAGTTGCTGCAACTCGGAAGTGAGGAGCTT

GCAAAAAGGATTACGGAGGGGGAGCAACCTTATTTATATTAGATTGGTGA

>PGSC0003DMG400018867-(rev)LRR-RLPs\_130

TCACTGTTCTTTGTTGGGAAGGCTGGGAAGGCACTACAAAGATAGTGGACACAATCATGGAGAGATAT  
GAGAAGGGGAAAATTCCTATACAAAAGTTTGAATTATCACTGTTTTTTGCTG

>PGSC0003DMG400018867-(rev)LRR-RLPs\_195

TATGAGAAGGGGAAAATTCCTATACAAAAGTTTGAATTATCACTGTTTTTTGCTGATTCTCCCGAACTTTT  
CCATCTGGTTGATAAGTGGCTTCTCATTGCACTTCAGAATGGTGTAATA

>PGSC0003DMG400018867-(rev)LRR-RLPs\_260

ACTTTTCCATCTGGTTGATAAGTGGCTTCTCATTGCACTTCAGAATGGTGTAATAAGAATTGTACTTCACT  
TTACATCATACCGGGTGCCTATTTAACAATCTTGGCAGCAAAATCATT

>PGSC0003DMG400018867-(rev)LRR-RLPs\_325

TTCACTTTACATCATACCGGGTGCCTATTTAACAATCTTGGCAGCAAAATCATTAAAGTGAATTGGTTCTG  
CACGAATGTATACTTATGCCTGTTTCATTATCTAGTGGGGTTGTGAATT

>PGSC0003DMG400018867-(rev)LRR-RLPs\_390

GTTCTGCACGAATGTATACTTATGCCTGTTTCATTATCTAGTGGGGTTGTGAATTACAATTCTTTGAGAAA  
GATTCTCTATCTAATGTAACATTAGACGAAAACATGCTTCAGACTCTA

>PGSC0003DMG400018867-(rev)LRR-RLPs\_520

GTCCCTTGATTGTCTCTTTTCATCCTTGAGAATTGTTCCGGGGATGAAAGTTCTAAAGATCAAGTCGGATTCC  
CTAAAGGTCTTGAAGATTATACAATATTACAAGATATGTGACATTGATG

>PGSC0003DMG400018867-(rev)LRR-RLPs\_585

GATTCCCTAAAGGTCTTGAAGATTATACAATATTACAAGATATGTGACATTGATGCTCCAAATTTGGTAT  
CCCTTGACTATACAGGGAGTGAAATTCCTGAACTTAACATTGCAAGAGAG

>PGSC0003DMG400018867-(rev)LRR-RLPs\_65

AATCAAGATGAGCATTCTCTCGAAAACATGGCTGCAAGCGTGGTAACTCTTCCAAGTTGGTATTCACT  
GTTCTTTGTTGGGAAGGCTGGGAAGGCACTACAAAGATAGTGGACACAAT

>PGSC0003DMG400018867-(rev)LRR-RLPs\_650

GGTATCCCTTGACTATACAGGGAGTGAAATTCCTGAACTTAACATTGCAAGAGAGTCAAGCCAATTGAA  
GAACTCAAAAATCATTCTTCACTGTCTCCCCAGTTTCTCCAGTTTAATTA

>PGSC0003DMG400018867-(rev)LRR-RLPs\_715

TGAAGAACTCAAAAATCATTCTTCACTGTCTCCCCAGTTTCTCCAGTTTAATTAATACGGCATGGTTTTGT  
AAGTTGAGGAAGTTTCTATCAAATCCGTCCTTGTCTGAAGTTAGCC

>PGSC0003DMG400018867-(rev)LRR-RLPs\_780

TTTTGTAAGTTGAGGAAGTTTCTATCAAATCCGTCCTCTTGTCTGAAGTTAGCCTTTGTTTATTCGAATG  
CGATGAGATCAACATGACAGATTTGCAAATGGACCACATAGGTTCTACT

>PGSC0003DMG400018867-(rev)LRR-RLPs\_845

CGAATGCGATGAGATCAACATGACAGATTTGCAAATGGACCACATAGGTTCTACTGGATGGGTGGACGT  
TTTAAATCTCAATATGCTACTGATGAATCAAATTATAGAGTGCCCAACTTT

>PGSC0003DMG400018867-(rev)LRR-RLPs\_910

ACGTTTTAAATCTCAATATGCTACTGATGAATCAAATTATAGAGTGCCCAACTTTTGTGGATGCGTTGCTA  
TGGAGTTGTCATCCTAGGAGACTCAACTTAATCTCATTGATATTGAAA

>PGSC0003DMG400018867-(rev)LRR-RLPs\_975

TTGCTATGGAGTTGTCATCCTAGGAGACTCAACTTAATCTCATTGATATTGAAACAGTTACACGTTTAAAT  
TGATTGTTTAAATGTATATGAAGCATTGAGTCATTCTACATATTCTTAT

>PGSC0003DMG400018900-(rev)LRR-RLPs\_1037

GTCCAACAGAGATTTGTGAGTACACCAAGTCTCGAAAGTGTAATTGTGATGAGGAGATGAAAGTAGA  
TGATCTCAATAAAGCCATGTTTAAATTCTAAGGTTTGTCTTGTGCCTCTAGTT

>PGSC0003DMG400018900-(rev)LRR-RLPs\_1159

ATAACTAATTACTATATATATTTGTGTCATACGTTAATACACCCCTGGTTTACTGCTATCTTTCCATTTTAA  
CTAGCAAATAATGATAGTAATATTAATCTTTTCACATAGCTATAGCAA

>PGSC0003DMG400018900-(rev)LRR-RLPs\_1220

TTCCATTTTAACTAGCAAATAATGATAGTAATATTAATCTTTTCACATAGCTATAGCAAATAAAAGTTTTTT  
TTATCACCCCTCCTCCTCCAGCCCCTTTTCACAAAAAAGAAATAAAG

>PGSC0003DMG400018900-(rev)LRR-RLPs\_1281

AAAAGTTTTTTTTATCACCCCTCCTCCTCCAGCCCCTTTTCACAAAAAAGAAATAAAGAAATTCAGAAAA  
ACTTAATCTTAATTAATAGAAAGCAAAGATATATCGATCATCAGATG

>PGSC0003DMG400018900-(rev)LRR-RLPs\_1342

ATTCAGAAAACTTAATCTTAATTAATAGAAAGCAAAGATATATCGATCATCAGATGAGAAATAAAA  
AAAACGAAACTAATTGACTAGAGGATTTTAAAGGAGGGTAGTGGACAAGGT

>PGSC0003DMG400018900-(rev)LRR-RLPs\_1403

AAATAAAAAAACGAAACTAATTGACTAGAGGATTTTAAAGGAGGGTAGTGGACAAGGTCTTTGTGAA

AGCTAACTAGTCACATGTTTCATGCAATAATAATAATCCATTTTAAAGTAAAT

>PGSC0003DMG400018900-(rev)LRR-RLPs\_1525

TTTAATTTGTTAGGCAGTGCCAAACGTGCACTTTGAATAGGGTTTAGACGCATTTTTTCTAAAAGAAATTT

TCCAAAGATGATTCAATAATTCACATTTTTTTCTTCCTTTAAGACCTAA

>PGSC0003DMG400018900-(rev)LRR-RLPs\_1586

AAAGAAATTTTCCAAAGATGATTCAATAATTCACATTTTTTTCTTCCTTTAAGACCTAACATACCCAAAAAT

CAATCCTAAAAAGGCTAATAATAAAGCAAATAATTGGCAATCAATAA

>PGSC0003DMG400018900-(rev)LRR-RLPs\_1647

TACCCAAAAATCAATCCTAAAAAGGCTAATAATAAAGCAAATAATTGGCAATCAATAATGGAATCCAA

AGACTTATATATTAGAGACCAGGCAAAACAGAATATAATCCTCTATTATCT

>PGSC0003DMG400018900-(rev)LRR-RLPs\_1708

GAATCCAAAGACTTATATATTAGAGACCAGGCAAAACAGAATATAATCCTCTATTATCTTATGGATCTAA

TATTATATATAACATCAAATTTAATTTGTCACCTTTCTAAGGTTGATCAGA

>PGSC0003DMG400018900-(rev)LRR-RLPs\_1769

TGGATCTAATATTATATATAACATCAAATTTAATTTGTCACCTTTCTAAGGTTGATCAGATAAGACTTAACT

ATTATTTGTGGTTTTGTACTAACTTTAATTACCATCCATTTGGAATTTT

>PGSC0003DMG400018900-(rev)LRR-RLPs\_1830

AGACTTAACTATTATTTGTGGTTTTGTACTAACTTTAATTACCATCCATTTGGAATTTTTTCTTTAAAAAAA

AAGAGAGCCAACAAGAGAATATTAAGGAATTTTTTTTTATTTTTTGT

>PGSC0003DMG400018900-(rev)LRR-RLPs\_1891

CTTTAAAAAAAAGAGAGCCAACAAGAGAATATTAAGGAATTTTTTTTTATTTTTTGTACTTGACCTATTT

TAAATGAGTTGAGTACCCAACGCCTTTAAAATGGGTAAATCTGAATAGG

>PGSC0003DMG400018900-(rev)LRR-RLPs\_2013

CCCATATAAATTATCCATTTTGTACCCCTAGGCGAAATTGCAATATTGTAACCCAAGGGTTCACGTGAA

CCAATAGCTTTTGCCTAGAGACTTTAATTTGTATTATTAATATGTAGAG

>PGSC0003DMG400018900-(rev)LRR-RLPs\_2074

TCACGTGAACCCAATAGCTTTTGCCTAGAGACTTTAATTTGTATTATTAATATGTAGAGATACCTTGATTA

TGAACGTGATTGTTATTGGATATTAACCTGAGGTCTTTGGAGATATCTA

>PGSC0003DMG400018900-(rev)LRR-RLPs\_2135

ACCTTGATTATGAACGTGATTGTTATTGGATATTAACCTGAGGTCTTTGGAGATATCTATACATTTCAAAT  
TTTGAATGTGCATCTCATCCTAAATACTTTATATTTTGGCGCCTCAATAG

>PGSC0003DMG400018900-(rev)LRR-RLPs\_2196

CATTTCAAATTTTGAATGTGCATCTCATCCTAAATACTTTATATTTTGGCGCCTCAATAGGATTAATAAGGT  
AAGACATATCCCCTTGCTTGTACTTTTTTCATTTTGAATTTTGTTTTTAT

>PGSC0003DMG400018900-(rev)LRR-RLPs\_3172

TATTTATGTATTATACCCTACTTTAACTATAGAATGAAATGATAAGCTTGGGGAGGGGTATCATGAAACA  
AAAAAATGAACTTATATAGATAAAAAATGGAAGAATACCAAAGAAGTCTT

>PGSC0003DMG400018900-(rev)LRR-RLPs\_3233

CATGAAACAAAAAATGAACTTATATAGATAAAAAATGGAAGAATACCAAAGAAGTCTTAAAGTTTTAA  
ATTAATAGTAAGAATGAGAGTTATGGATACTAAGATTAGCAATATAAAAA

>PGSC0003DMG400018900-(rev)LRR-RLPs\_366

TTTCTCAAGGTAGTGTTAATATATGACTGCCCTGAAATGAAGACGTTTGTCCAGGGAATATCTGTGAGTC  
TTGAAAGTGATGATGAGGTGAAAGTAATGTTCAATTCTAAGGTTTGTCTT

>PGSC0003DMG400018900-(rev)LRR-RLPs\_3660

ATGCCTATATAATATGTGCATTTATTATCTCATGTCATTTTATATTCTATGTTGTTTTACAAGAATGCTTTTC  
AAAATACTTGTTTTATTTGAGTAATTTGACCTTAGATGTTTAAGCAC

>PGSC0003DMG400018900-(rev)LRR-RLPs\_3721

AGAATGCTTTTCAAATACTTGTTTTATTTGAGTAATTTGACCTTAGATGTTTAAGCACTTTTGGCTTCTCA  
GTGTTGGGTGTTAATATGCAACAACTTTGATACTTGGAAAGTTTGCAG

>PGSC0003DMG400018900-(rev)LRR-RLPs\_3782

TTGGCTTCTCAGTGTTGGGTGTTAATATGCAACAACTTTGATACTTGGAAAGTTTGCAGGTTTCTTGTTCC  
AACTTGGAAAGGTTATGTATCGATGGGGCTAACAACATGAGTGCTCTAT

>PGSC0003DMG400018900-(rev)LRR-RLPs\_4148

TGACGGAGTGACTCTTGAATTCCATTTCTCAAGGTAGTCATATATGACTGCCCTGAAATGAAGACGTTT  
GTCCAGCAGGGAATATCTGTGAGTCTTCAAAGTGATGATGAGGTGAAAGT

>PGSC0003DMG400018900-(rev)LRR-RLPs\_4209

AAGACGTTTGTCCAGCAGGGAATATCTGTGAGTCTTCAAAGTGATGATGAGGTGAAAGTAATGTTCAAT  
TCTAAGGTTTGTCTTTATAACTAATTACTGCTCTCTTCCGTTTTAACTAG



>PGSC0003DMG400018900-(rev)LRR-RLPs\_427

CTGTGAGTCTTGAAAGTGATGATGAGGTGAAAGTAATGTTCAATTCTAAGGTTTGTCTTATAACTAATT  
ACTGCTCTCTTTTCACTTTAACTAGTAAATAGTAGTAATAGTTATTTCTG

>PGSC0003DMG400018900-(rev)LRR-RLPs\_4270

TGTTCAATTCTAAGGTTTGTCTTTATAACTAATTACTGCTCTCTTCCGTTTTAACTAGTGAATAGTAGTAA  
TAGTTATTTCTGTTCCACTTCCTGTTACCTTGACGTAAGATGATATAT

>PGSC0003DMG400018900-(rev)LRR-RLPs\_4331

AATAGTAGTAATAGTTATTTCTGTTCCACTTCCTGTTACCTTGACGTAAGATGATATATGGTTCATTTTTTG  
CTATATTTAATTTTCATCCCTCAACATTTGCAGGTTTTTTGTCCCAAC

>PGSC0003DMG400018900-(rev)LRR-RLPs\_4392

TTCATTTTTTGCTATATTTAATTTTCATCCCTCAACATTTGCAGGTTTTTTGTCCCAACTTGAAACAACATA  
TATCTCGGGGGCTAACAACATAAATGCTCTATTCTCTTACCAACTTC

>PGSC0003DMG400018900-(rev)LRR-RLPs\_488

TAACTAATTACTGCTCTCTTTTCACTTTAACTAGTAAATAGTAGTAATAGTTATTTCTGTTCCACTTCCTGTT  
ACCTTGACGTAAGATGATATATGGTTCATTTTTTTATTTATACTTGA

>PGSC0003DMG400018900-(rev)LRR-RLPs\_549

CCACTTCCTGTTACCTTGACGTAAGATGATATATGGTTCATTTTTTTATTTATACTTGAAGCTATATTCAAT  
TTCCATCCATTCAACATTTGCAGGTTTTTTGTCCCAACTTGGAAGAGC

>PGSC0003DMG400018900-(rev)LRR-RLPs\_976

TCTTCAAATTCCATTTCTTAAAAAAGTAAAGATATATGGCTGCCCTGAAATGAAGACATTTGTCCAACAG  
AGATTTGTGAGTACACCAAGTCTCGAAAGTGTAATTGTGATGAGGAGAT

>PGSC0003DMG400018901-(rev)LRR-RLPs\_195

CTTAAAAAAGTGGAGATATATGACTGCCCTAAAATGAAGACGTTTGTCCAACATGGAATATCTGTGAGT  
CTTGAAAGTGATGATGAGGTGAACGTAATGTTCAATTCTAAGGTTTGTCTT

>PGSC0003DMG400018901-(rev)LRR-RLPs\_325

TACTGCTCTCTTCCGTTTTAACTAGTAAATAGTACTATAGTTATTTCTGTTCTACTTCCTGTTACCTTGACG  
TGAGATGATATATGGTTCATTTTTTTATTTTAAATTGAAACTATATT

>PGSC0003DMG400018901-(rev)LRR-RLPs\_390

CCTTGACGTGAGATGATATATGGTTCATTTTTTTATTTTAAATTGAAACTATATTCAGTTTTAATCCCTTCA

ACATTTGCAGGTTTTTTGTCCCAATTTGGAAAAGCTACATATCTCAAT

>PGSC0003DMG400018901-(rev)LRR-RLPs\_520

ATAAGTGATCTATGTTCTTATCAACTTCCAACCTTATTTTCAGCAAACCTGTTCGCATTAAGTAGATAA  
TTGCAGTAAATTGAGAACTTCAATCAGTGGCTAGAGGTCTTCTGAATC

>PGSC0003DMG400018901-(rev)LRR-RLPs\_585

AGATAATTGCAGTAAATTGAGAACTTCAATCAGTGGCTAGAGGTCTTCTGAATCTCCGGAGCCTAGAG  
ATTAAGACTGCCATTCAATGGAAAAGTGATCAGAGAAGAGGAACAACAA

>PGSC0003DMG400018994-(rev)LRR-RLPs\_0

ATTTCTTGAAGAAGACGAGCTGGGTTTTCAAATTTTCGTAAGTATTGATTAATAATTTCTTTATGAGCTTTGT  
TCTAAGTGCTTAGAGAGTATTGATTCACCTTCATTATCAACAAAGTTTT

>PGSC0003DMG400018994-(rev)LRR-RLPs\_122

GATGGAGAAGAAGAAAACACAAAGATTTGGCTAAACATGTTGTAGTAGGTTGTGTACTTGATTTTCCGG  
GTAACAAGTTTCAGTTAAAGTGACCTAATTATGTAAAAGCTCTTTTTAAAA

>PGSC0003DMG400018994-(rev)LRR-RLPs\_1342

CCTCCTTCACTTGGAAATCTATCAAATTTGCAGTATCTAAGCTTCCGTGCGTGTTCCCTATCCTTACGATAAT  
GTTGAAAGAAGTTGGGTCAAAGATTTGAATTGGGTTTCCGGTCTGTCT

>PGSC0003DMG400018994-(rev)LRR-RLPs\_1708

ATGGTATACAGCAACATCCAAGGCCCAATATCAAATGTTGAATGGGGTAAACTCTGTAATTTGCAGAAG  
TTGTATCTAGAGCAGAACAACTTAATGGAGACCTAAGTCGAGTGGTGGAA

>PGSC0003DMG400018994-(rev)LRR-RLPs\_1769

TGCAGAAGTTGTATCTAGAGCAGAACAACTTAATGGAGACCTAAGTCGAGTGGTGGAAAGGATTGTCC  
AACTGCAGCAACCCTACGATAGAGGAATTATCTCTAGGCGAAAATGTGTTGA

>PGSC0003DMG400018994-(rev)LRR-RLPs\_183

TTTTCCGGGTAACAAGTTTCAGTTAAAGTGACCTAATTATGTAAAAGCTCTTTTTAAAAGTTAAAAGAG  
TGCTTTAGGTGAAAAATAACATTGATGGAGGTATTCCAGAAAATCATT

>PGSC0003DMG400018994-(rev)LRR-RLPs\_1891

GGGGAATTGTCAAATTCATTAGGACATCTGAAGAACTTAAGGATTCTTAGTATTTCTTTAATATGATCTC  
TCAGCTTTCACGGTTGGAAATTTGTACTTGGGAGAGAATCAACTGAAG

>PGSC0003DMG400018994-(rev)LRR-RLPs\_1952

ATATGATCTCTCAGCTTTCACGGTTGGAAATTTTGTACTTGGGAGAGAATCAACTGAAGGGAGCCTTGCC  
TGAGAGTATTTTTAATTTTTCAGAATTAAGTGGAGTTGCGGCTGACAACAA

>PGSC0003DMG400018994-(rev)LRR-RLPs\_2074

GCTTTGGAAGGCAATCTTTCACAAAATCACTTTGAAAACTCCATCAACTGGAAGTTTTATCCCTATCTTG  
TGGAAGAAGTTTTTCAGTCAACTTGAGCAATGAATGGGTTCTCCATTT

>PGSC0003DMG400018994-(rev)LRR-RLPs\_2318

CTTGGCTTTGGATGATGTGCTCACAAATTCATTGGCTCGATCTATCAGATAATCAAATTGGTGGAAAGTCT  
ACTGAGGATAGTAAATTTTCCATCAACATAACCAAATCTGGACGGTGGGTT

>PGSC0003DMG400018994-(rev)LRR-RLPs\_2379

TGGAAGTCTACTGAGGATAGTAAATTTTCCATCAACATAACCAAATCTGGACGGTGGGTTTCTATTTTAGT  
TACTATTATGGTGTGTCGTGGACTTGAGTTCCAATCACTTCCATGGTTC

>PGSC0003DMG400018994-(rev)LRR-RLPs\_244

TAAAAGAGTGCTTTAGGTGAAAAATAAACATTGATGGAGGTATTCCAGAAAATCATTTCATGGAGGATA  
CTTAAGTACTATGCATGCTCAATCACATCAATAATTTTATGATATGTAA

>PGSC0003DMG400018994-(rev)LRR-RLPs\_305

GGAGGATACTTAACTGACTATGCATGCTCAATCACATCAATAATTTTATGATATGTAACAGAGGCGAAA  
ATTTTCATGAGATTTTAGGATAAAAATTGTTTAGCTTTAATTTCAATCAT

>PGSC0003DMG400018994-(rev)LRR-RLPs\_3172

GAATTGGTTGAGAAAGGAACAAAGCAGACTTACACTTTTACCTTAGATCAAGTGAATCTTATTGATCTTT  
CCTGCAACAATCTTCAGGGTGAAATCCCGAAAGAGATAACAGCTCTGTCA

>PGSC0003DMG400018994-(rev)LRR-RLPs\_3233

TTGATCTTTCCTGCAACAATCTTCAGGGTGAAATCCCGAAAGAGATAACAGCTCTGTCAGCCTTGAGCAC  
TCTGAATTTATCTGGGAACCAATTATCAGGAAGAATTCCAGAGGACATAG

>PGSC0003DMG400018994-(rev)LRR-RLPs\_3294

CTTGAGCACTCTGAATTTATCTGGGAACCAATTATCAGGAAGAATTCCAGAGGACATAGGGAGCATGCA  
ACAATTGGAGACTAGACCTTTCATCTAACCATCTCTCAGGTCCTATCCC

>PGSC0003DMG400018994-(rev)LRR-RLPs\_366

GAGGCGAAAATTTTCATGAGATTTTAGGATAAAAATTGTTTAGCTTTAATTTCAATCATGAATACTTCATG  
ATAGTTGAAAAATCATTCTGTTTTATTACGACATTTTGAGATAATAAC

>PGSC0003DMG400018994-(rev)LRR-RLPs\_427

ATACTTCATGATAGTTGAAAAATCATTCTGTTTTATTACGACATTTTGAGATAATAACTATTAGTTGAGT  
GAACATATTGAGAAATCAAAGTCGTGATTGTCTCTAGGTTCTCCAACCTC

>PGSC0003DMG400018994-(rev)LRR-RLPs\_488

TTAGTTGAGTGAACATATTGAGAAATCAAAGTCGTGATTGTCTCTAGGTTCTCCAACCTCTAAGGTATGCA  
GGGGACCTCAATTAACGCTAATTTTTGCCTTCCATTTTCGGCTACTTAAT

>PGSC0003DMG400018994-(rev)LRR-RLPs\_549

AGGTATGCAGGGGACCTCAATTAACGCTAATTTTTGCCTTCCATTTTCGGCTACTTAATTAGCACTATTAT  
TCCACAGGACTTGACTTGACCTTCAAATATTTGTCCTCATTTC AATTA

>PGSC0003DMG400018994-(rev)LRR-RLPs\_61

TGAGCTTTGTTCTAAGTGCTTAGAGAGTATTGATTCACCTTCATTATCAACAAAGTTTTTTGATGGAGAAG  
AAGAAAACACAAAGATTTGGCTAAACATGTTGTAGTAGGTTGTGTA CTT

>PGSC0003DMG400018994-(rev)LRR-RLPs\_732

CTCTGTTATGGGTTGTCTTTCTATATAAACAGGCCCAAATAACTAATGCTAGTAATATACAGTGCTTTAAA  
CTATACCCATCTCTATTAGTATACGATCAACTAAAATGGCATGTTGGAA

>PGSC0003DMG400019051-(rev)LRR-RLKs\_0

ATGATCGGTCTTACATCCCTAAGCCTTGACAGAAACAACCTTGACAGGGAGTATTTCTTCTGAGATTGGTA  
AGCTTAAACAACCTCCAAGGGTTGTATCTAGATAACAATAAATTGCAGGGA

>PGSC0003DMG400019051-(rev)LRR-RLKs\_1008

AGTGGCCATTAAGGTTCTATATTTGGAAAATGAGCAAGTATGCAAGAGGTTTGATACTGAATGTGAAGT  
GATGAGAAATGTTAGACACAGAAATCATGTTCCAGTGATTACTACATGTT C

>PGSC0003DMG400019051-(rev)LRR-RLKs\_1071

TGAAGTGATGAGAAATGTTAGACACAGAAATCATGTTCCAGTGATTACTACATGTTCTAGTGACTTTATA  
AGAGCCTTTGTTCTGCAATTTATGCCCAATGGAAGTCTAGAAAATTGGCT

>PGSC0003DMG400019051-(rev)LRR-RLKs\_126

ACAGAGGCCGTATGCCATTTATCTAATTTGGTTCAATTATATCTGAATGATAATGACCTCTTTGGATCAAT  
TCTAGAATGCTTAGGAAATCTAAGCATTCTACTACATCTTTATTTGGAT

>PGSC0003DMG400019051-(rev)LRR-RLKs\_1369

TCTAAAATTTTAGCCATAAGCAAGTTCATGGCTTATACCGAGACATTGGGCACTCTTGGATACATTGCAC

CAGATATAAAAAAATCTACTCTCTTTGATTTTCTCTTATATCATAATTAA

>PGSC0003DMG400019051-(rev)LRR-RLKs\_189

GGATCAATTCTAGAATGCTTAGGAAATCTAAGCATTCTACTACATCTTTATTTGGATTCTAATAAATTTTC

ATCAAAATTTCCGCTGAGCCTTGGGAAGATGAGTCGTCTTATCTATCTA

>PGSC0003DMG400019051-(rev)LRR-RLKs\_252

AAATTTTCATCAAAATTTCCGCTGAGCCTTGGGAAGATGAGTCGTCTTATCTATCTAGACGTGTCACAGA

ATTCAACAGAGGGGAGAACTTCCATCAGATATTGGAGGACTAAAAGCCATT

>PGSC0003DMG400019051-(rev)LRR-RLKs\_315

TCACAGAATTCAACAGAGGGGAGAACTTCCATCAGATATTGGAGGACTAAAAGCCATTGTAGAACTATAT

CTTTACAATAACCACTTTTCAGGTGTGATACCAACCAGATTCGGGGAACTC

>PGSC0003DMG400019051-(rev)LRR-RLKs\_504

TTGATAAGCTTGGAAATTCTGAATTTGTCTTTAAATGCATTGTCAGGTAGTATTCCTATGTCTTTGGAAAA

ACACTCTTAAAAGCATTAAATGTTTCATTTAATAATTTAGAAGGTAAAAT

>PGSC0003DMG400019051-(rev)LRR-RLKs\_567

TTGGAAAAACACTCTTAAAAGCATTAAATGTTTCATTTAATAATTTAGAAGGTAAAATACCGAGTGGTGGC

GTGTTTGCAAATTCCACTTTGCAATCATTCTAGGGAACAAAGGTCTTTG

>PGSC0003DMG400019051-(rev)LRR-RLKs\_63

ATTGGTAAGCTTAAACAACCTCAAGGGTTGTATCTAGATAACAATAAATTGCAGGGACTTATTACAGAG

GCCGTATGCCATTTATCTAATTTGGTTCAATTATATCTGAATGATAATGAC

>PGSC0003DMG400019051-(rev)LRR-RLKs\_693

GCACATATTGGAGATTCTTCTTGTGCTATCACTAATCCTGGAAAACAATCAAAGTATAAGGAGGTTGTG

CTCAAATTTGTTACTCCAGTGGTTATTGCATCCTTTCTTATATTCTTGTT

>PGSC0003DMG400019051-(rev)LRR-RLKs\_756

GGTTGTGCTCAAATTTGTTACTCCAGTGGTTATTGCATCCTTTCTTATATTCTTGTTGGTTTCAATTTGGAT

AATGAAACGACAGAAGAAAGGAAAGTCTAAAGATGTTGAAAAGGTACC

>PGSC0003DMG400019051-(rev)LRR-RLKs\_819

AATTTGGATAATGAAACGACAGAAGAAAGGAAAGTCTAAAGATGTTGAAAAGGTACCAGAGATCGGGA

CTCATCAATTAGTTTCTTATCACGAGATTCAACGAGCAACAAATAATTTTGA

>PGSC0003DMG400019062G-LecRK\_1024

TGGAAGAAGATAGATATATACACACCTAATGTATTGGTTTACACAACTAGATGCTAAAATAACCTATT  
CTGGAACACTAAAAACAGTGGCTATATGTCTCCGGAATATGCATTGGAGG

>PGSC0003DMG400019062G-LecRK\_1216

ACATGGAATTTTTCGAAGATGTAAACCTCATTGGTCATGTAAGTACCAAATTTCCCTCATTAAATATACAT  
CTCATTCTACTTAAAGCTTTCATTGACTCAAATTAGCATTTCACAGGT

>PGSC0003DMG400019062G-LecRK\_1280

TATACATCTCATTCTACTTAAAGCTTTCATTGACTCAAATTAGCATTTCACAGGTATGGAGACTGTGGAT  
GAAAGACAGTGCATTAGACATGATGGATCAAACCATAGTTGAGTCGTGC

>PGSC0003DMG400019062G-LecRK\_640

TGGATACGTTTCTATTCGGTTAGTATACTTCCCTCCCTACCATGAAACTCGTTGTAGTAATAGTTTTATGA  
TTGATTCTCTCTGAAGTTATCTTACAAACCTTGAAATTAGATCATGCAT

>PGSC0003DMG400019062G-LecRK\_768

TTACTGGACTGGAGGATTCGTTTTGAAATTATATTGGGTATTGCTCGAGGGTTACTTTATCTTCACCAAG  
ACTCAAGGCTAAGGATCATTATAGAGATCTAAAGACGAGCAACATATTG

>PGSC0003DMG400019062G-LecRK\_832

ACCAAGACTCAAGGCTAAGGATCATTATAGAGATCTAAAGACGAGCAACATATTGTTAGATGAAGAAA  
TGAATGCCAAAATATCAGATTTTGGCTTGGCAAGGATTGTTGAAGGCAAAA

>PGSC0003DMG400019062G-LecRK\_960

GCCAATACTAACAAAGTCGTTGGAACATAGTAAGTCTCTTAGTTCTGCTTCACCTTTGATTTGGTGGGAA  
GAAGATAGATATATACACACCTAATGTATTGGTTTACACAACTAGATGC

>PGSC0003DMG400019071-(rev)LRR-RLPs\_0

ACATATTGCTTGGCCTAGTGAAAAATATACGCAAACAACCTACCACACACAAAAAATACTTTTCACTTGCT  
AGTCTAAAACATTGCACACCATGAAAGTGTTAGCAATAACACTATGGGTT

>PGSC0003DMG400019071-(rev)LRR-RLPs\_1008

AATATGCTTTCGGAAAGTTACCGAATGTAATTGGAAAGTTAGGGAAATAGGAGTAATTTCTTTTCAGT  
GGGATTGCGAAATACTTCTTCTTTATCTAGTTTGAGACTAGACAATAATAA

>PGSC0003DMG400019071-(rev)LRR-RLPs\_1071

TTCAGTGGGATTGCGAAATACTTCTTCTTTATCTAGTTTGAGACTAGACAATAATAAACTCACAGGTGCTC  
TTCCGAAAAGTGTTGGCCAGCTTCAATAGAACATTTTTCCATCTTTAA

>PGSC0003DMG400019071-(rev)LRR-RLPs\_1134

AGGTGCTCTTCCGAAAAGTGTTGGCCAGCTTCAATAGAACATTTTTCCATCTTTAATAATAGGTAGGAA  
GGTGTGTAACAGAAAGTCATTTCTCTAAATTAACACTTTTACAAACCTT

>PGSC0003DMG400019071-(rev)LRR-RLPs\_126

TTTTTATTTTGACAAATACCAAGTTTGTGTTTGTATAGGGATTTGCAGAGACAATGAGCAACGAGCGT  
TGGAGATCTTGAAGAAAGAAGTCTATGATCCCTCGGAAATTCTCTCTTCT

>PGSC0003DMG400019071-(rev)LRR-RLPs\_1260

ATCTAGAAATAATCTGACTTTAAAAGTGAGTCGGACTTGGATTCCACCTTTTCAAGCCACAGACATTGTA  
TTACGCGGCTTGAATATAGGTCCTTCGTTTCCCATGTGGCTCCAAACTCA

>PGSC0003DMG400019071-(rev)LRR-RLPs\_1386

GATAATGTATGTCGACATATCAGATTGTGGAATACAAGGTGAGGTTCCAACCTTGGTTTTGGAACCTTCTCT  
TCTCAAATTCGATTACTCAATCTTCTCACAACCAATTTGTTGGTGAGGT

>PGSC0003DMG400019071-(rev)LRR-RLPs\_1449

CTTCTCTTCTCAAATTCGATTACTCAATCTTCTCACAACCAATTTGTTGGTGAGGTTTCAATCATTTCGAT  
AGATGTGCAGAGTGGTTCTTCGCTAATGTACTTGGCTTCCAACAATTT

>PGSC0003DMG400019071-(rev)LRR-RLPs\_1512

CATTTGATAGATGTGCAGAGTGGTTCTTCGCTAATGTACTTGGCTTCCAACAATTTTAGTGGACCAATA  
CCATTGATTTCAACCAGTGTAACTGAGCTAGATATCTCAAACAATTCCTT

>PGSC0003DMG400019071-(rev)LRR-RLPs\_1575

ACCAATACCATTGATTTCAACCAGTGTAACTGAGCTAGATATCTCAAACAATTCCTTTTCCAAAGGTTTAT  
CTAACTTTTTGTGTGAACCAAAGAATGGATCTGACAAATTGAAAATCTT

>PGSC0003DMG400019071-(rev)LRR-RLPs\_1638

AGGTTTATCTAACTTTTTGTGTGAACCAAAGAATGGATCTGACAAATTGAAAATCTTAAACCTCGGGGGA  
AATGATTTATCAGAAGAAATTCCTGATTGTTGGATGAATTGGCCGGAGTT

>PGSC0003DMG400019071-(rev)LRR-RLPs\_1764

TTTAATCTTGAGGGACAACAATTTGATTGGAAGCTTACCAAGATCTATGGCGATTTAAGTAATTTGCAA  
TCCTTAGACTTACGAAGAAATAGACTTAACGGTCTGTTTCCTTCATCCTT

>PGSC0003DMG400019071-(rev)LRR-RLPs\_1890

CTGCACAAAACCTGCATAAAATAGATTTAACTGAGAATGAGTTTATTGGAAAATTACCACCTTGGTTGGGA

ATGAGGTTTCCAACCTTGATAGTCCTTATCCTTCGGTCCAATAGATTCGA

>PGSC0003DMG400019071-(rev)LRR-RLPs\_1953

GTTGGGAATGAGGTTTCCAACCTTGATAGTCCTTATCCTTCGGTCCAATAGATTTCGATGGTGAATTGCCT  
CAAGAACTTTGTCACCTCAAAGATCTTTAAACCTTAGACCTTGCAAACAA

>PGSC0003DMG400019071-(rev)LRR-RLPs\_2016

ATTGCCTCAAGAACTTTGTCACCTCAAAGATCTTTAAACCTTAGACCTTGCAAACAATACATTTGTTGGAA  
TCATACCAAGGTGTATTGGCAATTCAGTGCAATGGTCAAAGGAAAAAA

>PGSC0003DMG400019071-(rev)LRR-RLPs\_2079

TGTTGGAATCATAACCAAGGTGTATTGGCAATTCAGTGCAATGGTCAAAGGAAAAAAGAAAGTGGGAG  
ACGATTATGAGTTAAATTATCCTTTTATAATGGAACCTTGATAGAGAGTGC

>PGSC0003DMG400019071-(rev)LRR-RLPs\_252

GTCGGAAAAGATTGTTGTGAATGGGAAGGGTTCGTGTGCAACAATCTCACTCGTCATGTGATTGATCTA  
AGCATTCTATTGATAGGTTTGATTTCGAGATATCTAAGGATCAATAACCTA

>PGSC0003DMG400019071-(rev)LRR-RLPs\_315

GATCTAAGCATTCTATTGATAGGTTTGATTTCGAGATATCTAAGGATCAATAACCTAGAGTGGTTGACAA  
GTCTTCGAGTCTTGAGAACCTGGAGATAGAAAGTGTGATCTTAGCAAA

>PGSC0003DMG400019071-(rev)LRR-RLPs\_378

TTGACAAGTCTTCGAGTCTTGAGAACCTGGAGATAGAAAGTGTGATCTTAGCAAAGCTAATGAATTG  
CTACAGGTTATTAACATGCTTCCTTCTTGTGATCTTCGTTTATACAAC

>PGSC0003DMG400019071-(rev)LRR-RLPs\_504

CTTCATCATATAACACCTCTACTTGATCATAAAAAAATTCTTCACTCAAATCTCTCAATCTTTCTGGGAAT  
TACAACCTTAATTCATCTGTCCCTAAATGGGTTTTCAACCTCCCCAAT

>PGSC0003DMG400019071-(rev)LRR-RLPs\_567

TCTGGGAATTACAACCTTAATTCATCTGTCCCTAAATGGGTTTTCAACCTCCCCAATCTGTTTCTCTTGAC  
CTGAGTGGCTGTAATTTTACTGGCCCTTTTCCTGACGGTCCAGTTAAT

>PGSC0003DMG400019071-(rev)LRR-RLPs\_756

GATTTGAATAATCTTGAACATCTTGTGCTCTATCGTAGTGGCATTGAAGGTGCGATACAGAGTAAGAGC  
GGAAACATAACAAAACCTTAAATATCTTGATCTTTCTTTCAATAACATCAAC

>PGSC0003DMG400019071-(rev)LRR-RLPs\_819



AAGAGCGGAAACATAACAAAACCTTAAATATCTTGATCTTTCTTTCAATAACATCAACTCCACTATACCAA  
TTGGCTCTATGGATGCAAAGATCTAGAATCACTTTTCCTTGGATCAAAT

>PGSC0003DMG400019071-(rev)LRR-RLPs\_882

ATACCAAATTGGCTCTATGGATGCAAAGATCTAGAATCACTTTTCCTTGGATCAAATCGTCTTGAGGGAA  
CAGTTTCAAGTCTGATTTCAAATTTGAGCTCAATAATTAATATTACCTT

>PGSC0003DMG400019071-(rev)LRR-RLPs\_945

GAGGGAACAGTTTCAAGTCTGATTTCAAATTTGAGCTCAATAATTAATATTACCTTTTTGATAATATGCT  
TTCCGAAAGTTACCGAATGTAATTGGAAAGTTAGGGAAATAGGAGTAA

>PGSC0003DMG400019072-(rev)LRR-RLPs\_0

ATGAAAGTGTTAACAATAACACTATGGGTTCTCTGTTTTTTATTTTGACAAATACCAAGTTTGTTGTTTG  
TGTAGGGATTTGCAGAGAAAATGAGCAACGAGCGTTGGAGATCTTGAAG

>PGSC0003DMG400019072-(rev)LRR-RLPs\_1037

TTTCTTTTCAGTGGGATTGGGAAATACTTCTTTAACATTTTTGAGACTAGATGATAATAAACTCACAGGA  
GCTCTCCGAAAGTGTTGGCCAACTTTCAATGCTAGAAGTCTTTCCAT

>PGSC0003DMG400019072-(rev)LRR-RLPs\_1098

CTCACAGGAGCTCTCCGAAAGTGTTGGCCAACTTTCAATGCTAGAAGTCTTTCCATCTCTAACAATA  
GGTTGGAAGGTGTTGTAACAGAAAGTCATTTCTCTAAATTAACACATTTA

>PGSC0003DMG400019072-(rev)LRR-RLPs\_122

AGAAGTATATGATCCCTCGAATATTCTCTCTTCTGGGTTGTCGGAAAAGATTGTTGTGAATGGGAAGG  
GGTGGTGTGCAACAATCTCACTCGTCATGTGATTGAGCTAAGCATTTATGT

>PGSC0003DMG400019072-(rev)LRR-RLPs\_1220

AACCTTCTATGCATCTAGAAATAATCTGACTTTAAAAGTGAGTCGGAATTGGATTCCACCTTTTCAAGTCA  
TAGATATTGAAATAGGCGGCTGGAATATAGGCCCGTTGTTTCCAATGTG

>PGSC0003DMG400019072-(rev)LRR-RLPs\_1281

TTTCAAGTCATAGATATTGAAATAGGCGGCTGGAATATAGGCCCGTTGTTTCCAATGTGGCTCCGAACTC  
AAAAGCAGATAGCAAATGTTGACATATCAGATGGTGAATACAAGGTGAG

>PGSC0003DMG400019072-(rev)LRR-RLPs\_1342

TCCGAACTCAAAGCAGATAGCAAATGTTGACATATCAGATGGTGAATACAAGGTGAGGTTCCAACCT  
GGTTTTGGAATTGTCTTCTCAAATTGAATTTCTCAATATTCTCACAACC

>PGSC0003DMG400019072-(rev)LRR-RLPs\_1403

TCCAACCTGGTTTTGGAAATTGTCTTCTCAAATTGAATTTCTCAATATTTCTCACAAACCAATTTGTTGGTGA  
GGTCCAATCATCTCGACACCTTCGTGGACGGATGGACATGGAGGTCC

>PGSC0003DMG400019072-(rev)LRR-RLPs\_1464

TTTGTTGGTGAGGTTCCAATCATCTCGACACCTTCGTGGACGGATGGACATGGAGGTCCTTGGACAATG  
TGCTTTGGTTCCAACAATTTTAGTGGACCATTGCCCTTGATTTCACCATT

>PGSC0003DMG400019072-(rev)LRR-RLPs\_1525

GGACAATGTGCTTTGGTTCCAACAATTTTAGTGGACCATTGCCCTTGATTTCACCATTGTAAGTGAAGCTA  
GATCTCTCAAACAATTTCTTTTCCAAGGTTTATCGAATTTTTTGTGTG

>PGSC0003DMG400019072-(rev)LRR-RLPs\_1586

AACTGAGCTAGATCTCTCAAACAATTTCTTTTCCAAGGTTTATCGAATTTTTTGTGTGAAGCAAAGAATG  
GATCTTACAAATTGGAGATCTTAAATCTCGGGGGAAATGATTTATCAGA

>PGSC0003DMG400019072-(rev)LRR-RLPs\_1647

GCAAAGAATGGATCTTACAAATTGGAGATCTTAAATCTCGGGGGAAATGATTTATCAGAAGAAATTCCT  
GATTGTTGGATGAATTGGCCAGAGTTGAAAGTTTTAATCTTGAGGGACAAT

>PGSC0003DMG400019072-(rev)LRR-RLPs\_1708

AAATTCCTGATTGTTGGATGAATTGGCCAGAGTTGAAAGTTTTAATCTTGAGGGACAATAATTTGATTGG  
AAGCTTACCAAGATCTATCGAGGTTTTGAGTAATTTGTTATGCTTAGACT

>PGSC0003DMG400019072-(rev)LRR-RLPs\_1769

TTTGATTGGAAGCTTACCAAGATCTATCGAGGTTTTGAGTAATTTGTTATGCTTAGACTTCCGAAGAAAT  
AGACTTAACGGTCCGTTTCCTTCATCCTTGAAAAGTCTCAAAAAGTCA

>PGSC0003DMG400019072-(rev)LRR-RLPs\_183

TGGGAAGGGGTGGTGTGCAACAATCTCACTCGTCATGTGATTGAGCTAAGCATTATGTTGATATGTTTG  
ATTCGAGATATCTAAGGATCAATAACCTAGAGTGGTTAACAAGTCTTTTCG

>PGSC0003DMG400019072-(rev)LRR-RLPs\_1891

AAATAGATTTAGCTGAGAATGAGTTTTTTGGAAAATTACCATCTTGGTTGGGAATGAGGTTTACAACCTT  
GATAGTTCTTATCCTTCGGTCCAATAAATTCGATGGTGAATTGCCTAAAG

>PGSC0003DMG400019072-(rev)LRR-RLPs\_1952

TACAACCTTGATAGTTCTTATCCTTCGGTCCAATAAATTCGATGGTGAATTGCCTAAAGAAGTATGTCACC

TCAAAGATCTTCAGATCTTAGACCTTGCAAACAATACATTTGTTGGAAT

>PGSC0003DMG400019072-(rev)LRR-RLPs\_2013

CTATGTCACCTCAAAGATCTTCAGATCTTAGACCTTGCAAACAATACATTTGTTGGAATCATACCAAGGT

GTATTGGCAATTTCAAGTGAATGATCAAAGGAAAAAAGAAAGTACTGGAA

>PGSC0003DMG400019072-(rev)LRR-RLPs\_2074

TACCAAGGTGTATTGGCAATTTCAAGTGAATGATCAAAGGAAAAAAGAAAGTACTGGAAGATGATTTTG

AGTTAAATTATTCCTTTTATTATGGAAGTGGATAGAGAGTGCAATGGTGA

>PGSC0003DMG400019072-(rev)LRR-RLPs\_2135

TGATTTTGAGTTAAATTATTCCTTTTATTATGGAAGTGGATAGAGAGTGCAATGGTGACAATAAGGC

AATATGTACCAGTATGACACAATTTGGCGTTGTTTACAAGTATGGATAT

>PGSC0003DMG400019072-(rev)LRR-RLPs\_2318

ATTTAATCTTTCCAAAATAACCTAACTGGAAGGATCCAAATGACATTGGTGACATGAAAGTCTTGAA

TCTGTTGATCTTTAGAAAACCAACTTTACGGTCAAATCCCACAAAGTTT

>PGSC0003DMG400019072-(rev)LRR-RLPs\_2379

GTCTTGGAATCTGTTGATCTTTAGAAAACCAACTTTACGGTCAAATCCCACAAAGTTTTTCGAGTTTGC

TACTTTGAGCTACTTGAATCTATCTGATAACAATTTGTCAGGTATGATA

>PGSC0003DMG400019072-(rev)LRR-RLPs\_2440

CGAGTTTGTCTACTTTGAGCTACTTGAATCTATCTGATAACAATTTGTCAGGTATGATACCATTGAGTACT

CAACTTCAAAGCTTTGATCCCACGAGTTTTCAAGGAAACAAGCTCTGTG

>PGSC0003DMG400019072-(rev)LRR-RLPs\_2501

ATTGAGTACTCAACTTCAAAGCTTTGATCCCACGAGTTTTCAAGGAAACAAGCTCTGTGGGCTCCCGCTC

TTGGTGAAGTGCAGTTCAGATGGCAATATTCCAAATCACAAGTATGAAGA

>PGSC0003DMG400019072-(rev)LRR-RLPs\_2562

CTCCCGCTCTTGGTGAAGTGCAGTTCAGATGGCAATATTCCAAATCACAAGTATGAAGATGATGAGAGT

GACAAAGATGAAGTGGATTGGTTTTACATTTCAATGGCTATTGGATTGCA

>PGSC0003DMG400019072-(rev)LRR-RLPs\_305

TCTTGAGAACCTGGAGATAGAAAGTGTGATCTTAGCAAAGCTAATGAATGGCTACAGGTTATTAACAT

GCTTCCTTCTCTGTTTATCTTCATTTATACAATTGTAGTCTTCATCATAT

>PGSC0003DMG400019072-(rev)LRR-RLPs\_549

CTGAGTGGCTGTAATTTACTGGCCCGTTTCTGATGGTCCAGTTAACTTGACTTCTTTCACAACCTTCGA  
GGCTTCTGGAAATCGTTTCAACTGTCGTTTACCTAAATGGTTGTTTAT

>PGSC0003DMG400019072-(rev)LRR-RLPs\_61

TTGTTGTTTGTGTAGGGATTTGCAGAGAAAATGAGCAACGAGCGTTGGAGATCTTGAAGAAAGAAGTA  
TATGATCCCTCGAATATTCTCTCTTCTTGGGTTGTCGGAAAAGATTGTTGTG

>PGSC0003DMG400019072-(rev)LRR-RLPs\_610

CAACCTTCGAGGCTTCTGGAAATCGTTTCAACTGTCGTTTACCTAAATGGTTGTTTGAATAATCTT  
GAACATGTTGTGCTCTATGGTAGTGGCATTGAAGGTGCGATACAGAGTA

>PGSC0003DMG400019072-(rev)LRR-RLPs\_732

AGCGGAAACATAACAAAACCTTAAATATCTTGATCTTCTTTCAATAACCTCAACTCCACTATACCAAATTG  
GCTCTATGGATGCAAAGATCTAGAATCACTTTTCCTTGGTGGAAATCAT

>PGSC0003DMG400019072-(rev)LRR-RLPs\_854

TGAGGGAACAGTTTCAAGTCTGATTTCAAATTTGAGCTCAATAACTATTATTGACCTTTCTGGTAATATGC  
TTTCTGGAAAGTTACCGAATGTAATTGGAAAGTTAGGGAAATTAGAACA

>PGSC0003DMG400019072-(rev)LRR-RLPs\_915

GGTAATATGCTTTCTGGAAAGTTACCGAATGTAATTGGAAAGTTAGGGAAATTAGAACAACCTTGATCTC  
ACAGGAAATCAATTTGAGGGAGATATATCTGAATTATTCAATGTTAAGAGT

>PGSC0003DMG400019072-(rev)LRR-RLPs\_976

TTGATCTCACAGGAAATCAATTTGAGGGAGATATATCTGAATTATTCAATGTTAAGAGTAATTTCTTTCA  
GTGGGATTGGGAAATACTTCTTTAACATTTTTGAGACTAGATGATAATA

>PGSC0003DMG400019167-(rev)RLKWAX-EGF\_0

ATGAGTTTGCTTCTTACCTCATTGCTTGTGCATGTGCTAATACTAACATTAGCCACTGCCAAAACAGTAC  
CACTAATAGCACCAGCATCACTATAACAAAACCAGGATGCCCTAAGCAG

>PGSC0003DMG400019167-(rev)RLKWAX-EGF\_1054

AAGTTACAATTGTTCTTGTCCCAAGGATATACTGGTGACGGCAAAAAGGATGGTCGTGGTTGTATAGC  
TCCCTACCATGATGAGTTCCCATGGATCAAGTACTCCGCAGGTAAATATCT

>PGSC0003DMG400019167-(rev)RLKWAX-EGF\_1116

GTATAGCTCCCTACCATGATGAGTTCCCATGGATCAAGTACTCCGCAGGTAAATATCTCACTATACGTGG  
GCGACTCAATAAAATTAGTGGCCTAAAACCTTTAACGGGAGGCCTTA

>PGSC0003DMG400019167-(rev)RLKWAX-EGF\_1178

ATACGTGGGCGACTCAATAAAATTAGTGGCCTAAACTTAAACGGGAGGCCTTATTTCCATATCA  
ATATTTTTCAAAGCCAGCTTTAAGTGGCTACTGGCTTGGTAGTTGGTCCT

>PGSC0003DMG400019167-(rev)RLKWAX-EGF\_124

GGAACGTAACAGTTCCGTACCCATTTGGTATTGGCTCAGGTTGCGCTTTTGATTCAGGGTTCGAGCTCAA  
CTGTAGCACATCGGATGATGGTTCTCAGAACTTCTCATAGGAAGTAACA

>PGSC0003DMG400019167-(rev)RLKWAX-EGF\_1240

CCATATCAATATTTTTCAAAGCCAGCTTTAAGTGGCTACTGGCTTGGTAGTTGGTCCTTCTGGCCGAACCT  
GCTTTCATAACCACAAATACTATTTCTTCTTTCCAGAAGTATTGATAG

>PGSC0003DMG400019167-(rev)RLKWAX-EGF\_1302

GCCGAACCTGCTTTCATAACCACAAATACTATTTCTTCTTTCCAGAAGTATTGATAGATTTCTATATTTAA  
AAACAATTAACCTTTACACTTCTCATTTGATCCTTAATGAGAAGCTTTT

>PGSC0003DMG400019167-(rev)RLKWAX-EGF\_1364

CTATATTAATAACAATTAACCTTTACACTTCTCATTTGATCCTTAATGAGAAGCTTTTATGGTCACACACAT  
GCTATGAATACACACAATTTAGTTTATTTGTAAATTTAGGTTGGTG

>PGSC0003DMG400019167-(rev)RLKWAX-EGF\_1426

TCACACACATGCTATGAATACACACAATTTAGTTTATTTGTAAATTTAGGTTGGTGACCCTGTCTTTGT  
CCATTCAACTAATGGTAATTACAGAAAGATAAACAATTCTTTTATCTGT

>PGSC0003DMG400019167-(rev)RLKWAX-EGF\_1488

TGTCTTTGTCCATTCAACTAATGGTAATTACAGAAAGATAAACAATTCTTTTATCTGTGTTTGAAACAGCA  
ACTTGAATACAACTCGTTAGCAGATATGTGTACAATTAATCCTGTAC

>PGSC0003DMG400019167-(rev)RLKWAX-EGF\_1550

GAAACAGCAACTTGGAATACAACTCGTTAGCAGATATGTGTACAATTAATCCTGTACTTTTGATCTAGT  
TGAAATAGAGAATAAAAGTTCAATTCCACTAATTACACAGGTATAGGAGC

>PGSC0003DMG400019167-(rev)RLKWAX-EGF\_1612

GATCTAGTTGAAATAGAGAATAAAAGTTCAATTCCACTAATTACACAGGTATAGGAGCTGGTGCCTTTAT  
ATTCTACTGGTTGGAATAATTTGGTTCTGTTTCAGAATCAGGGAAAGGA

>PGSC0003DMG400019167-(rev)RLKWAX-EGF\_1674

GCCTTTATATCCTACTGGTTGGAATAATTTGGTTCTGTTTCAGAATCAGGGAAAGGAAATTGATTGAAG

TTAGGGAGAAATTCTTCCAACAAAATGGTGGCTTATTATTGAAACACAGA

>PGSC0003DMG400019167-(rev)RLKWAX-EGF\_1736

GATTGAAGTTAGGGAGAAATTCTTCCAACAAAATGGTGGCTTATTATTGAAACACAGAATCTCCACTAAC

GACCGTGGTGTAAAGCAACAAAAGTATTCACAGCGGAGGAGCTCAAGAA

>PGSC0003DMG400019167-(rev)RLKWAX-EGF\_1798

CCACTAACGACCGTGGTGTAAAGCAACAAAAGTATTCACAGCGGAGGAGCTCAAGAAAGCTACAAAC

AATTATGCCAATGACAAAATTCTTGGTCGCGGTGGCCATGCGATTGTATATA

>PGSC0003DMG400019167-(rev)RLKWAX-EGF\_186

GAGCTCAACTGTAGCACATCGGATGATGGTTCTCAGAACTTCTCATAGGAAGTAACATTGTGGTGTAC

AACATCTCCGATGCTGAATTCCGCATCTCCAATTCAATCGGTTGGGGATGT

>PGSC0003DMG400019167-(rev)RLKWAX-EGF\_1860

ACAAACAATTATGCCAATGACAAAATTCTTGGTCGCGGTGGCCATGCGATTGTATATAGAGGTGTGCTA

AGTGATAACCACATAGTCGCAATTAATAAATACAGAATTGTGGATGAGAGT

>PGSC0003DMG400019167-(rev)RLKWAX-EGF\_1984

TTGAGCAGTTTATCAATGAGGTGCTTATTCTCACTCAAATCAACCATCGAAACGTGGTGAGACTGTTTGG

GTGTTGTTTGGGAAGATGAAGTTCCTTTATTGGTTTATGAGTATGTCTCTG

>PGSC0003DMG400019167-(rev)RLKWAX-EGF\_2418

GATGTTTACAGCTTTGGAGTAGTTCTGGCAGAACTTCTAACAGGGTTAAAGCCAGTTTCTGGAGATAGA

AATGACGAGCAAAGAATTTGGCTGATTACTTTGTTTCGTCTGTGGATAAC

>PGSC0003DMG400019167-(rev)RLKWAX-EGF\_2480

AGATAGAAATGACGAGCAAAGAATTTGGCTGATTACTTTGTTTCGTCTGTGGATAACAATAGCTTATTT

CAAATTCTTGATCGTCGTGTTTTGCGAGAAGGGAATCTTGAGCAACTTCA

>PGSC0003DMG400019167-(rev)RLKWAX-EGF\_2542

GCTTATTTCAAATTCTTGATCGTCGTGTTTTGCGAGAAGGGAATCTTGAGCAACTTCAACAGATGGCTGA

GCTAGTGAAGAAGTCTTCAGTTGCACGGAGAAGATAGGCCTACAATGA

>PGSC0003DMG400019167-(rev)RLKWAX-EGF\_2604

ATGGCTGAGCTAGTGAAGAAGTCTTCAGTTGCACGGAGAAGATAGGCCTACAATGAAGGAAGTGAC

TATTCAACTTGAGGGTTTGAGGAAGGTAAGTGGAGTCTCTTGGTCTAATCAA

>PGSC0003DMG400019167-(rev)RLKWAX-EGF\_2666

AGTGACTATTCAACTTGAGGGTTTGAGGAAGGTAAGTGGAGTCTCTTGGTCTAATCAACACCTACACGA  
AGAGAATGATTTATCAGATCTTTACACAGTTCCAATAGACGCCTATGGAAA

>PGSC0003DMG400019167-(rev)RLKWAX-EGF\_2721

CAACACCTACACGAAGAGAATGATTTATCAGATCTTTACACAGTTCCAATAGACGCCTATGGAAAAAACC  
CCAATTCAGATAGTTCTCGTATCATGCATCCTGCATACAATCCAAGTTGA

>PGSC0003DMG400019167-(rev)RLKWAX-EGF\_310

ACTCCAGTGGAGCTGTGCTAGACGAATCACTCGCTTGACCACATTTTTAGAAACAACGCCGTATAGTTT  
CTCTGCGCGGAACAGGTTTACTTTAGTTGGTTGCGATGACTATGCTTCCA

>PGSC0003DMG400019167-(rev)RLKWAX-EGF\_372

TATAGTTTCTCTGCGCGGAACAGGTTTACTTTAGTTGGTTGCGATGACTATGCTTCCATCACAGGGCCTA  
ATAACTTTGAGTATGGCTGCAATGTGAGCTGTACAAGCAGAGGGGATGTG

>PGSC0003DMG400019167-(rev)RLKWAX-EGF\_496

AAGGAGAGTGTATGGGAAAAGGCTGCTGCCAGAAACAGATACCCAAGGGCTTGAAATACTATAACACA  
ACCATGTCTAGCACACAAAACCATACCGACGTTTGGTCCTTTAATTCATGTG

>PGSC0003DMG400019167-(rev)RLKWAX-EGF\_558

AACACAACCATGTCTAGCACACAAAACCATACCGACGTTTGGTCCTTTAATTCATGTGGGTATGCATTTCT  
GGGTGAGGCAGATCACTTTCGTTTCCAGGGCTTGCCAGATCTCGGTGAT

>PGSC0003DMG400019167-(rev)RLKWAX-EGF\_62

AAACAGTACCACTAATAGCACCAGCATCACTATAACAAAACAGGATGCCCTAAGCAGTGTGGGAACGT  
AACAGTCCGTACCCATTTGGTATTGGCTCAGGTTGCGCTTTTGATTCAGG

>PGSC0003DMG400019167-(rev)RLKWAX-EGF\_620

TGCATTTCTGGGTGAGGCAGATCACTTTCGTTTCCAGGGCTTGCCAGATCTCGGTGATGATCTAAATGTT  
AATTATTTTTATGAGAGGATTAAGGCTAGTGTCCCATTGTACTGGATTG

>PGSC0003DMG400019167-(rev)RLKWAX-EGF\_682

TAAATGTTAATTATTTTTATGAGAGGATTAAGGCTAGTGTCCCATTGTACTGGATTGGGCCATCGGGAG  
TCTTACTTGACACAAGCTCTGAAAATCGAGAATTATGCTTGCAGTGCAA

>PGSC0003DMG400019167-(rev)RLKWAX-EGF\_744

ATCGGGAGTCTTACTTGACACAAGCTCTGAAAATCGAGAATTATGCTTGCAGTGCAAATAGCTACTGCA  
TTGATTCAGATACTGGTCTTGGTGGATACCGCTGCAGCTGTAATACAGGT

>PGSC0003DMG400019167-(rev)RLKWAX-EGF\_868

AGGGCAATCCTTATCTCAATCAAGGCTGCAAAGGTATAAGTAATGTTTCAATTCTTTGTGAAGAACTTAA  
CTTTCATGCATTAATTTGATGGTGTATATTGATTTGATCTTTTTTCAGA

>PGSC0003DMG400019167-(rev)RLKWAX-EGF\_930

GAACTTAACTTTTCATGCATTAATTTGATGGTGTATATTGATTTGATCTTTTTTCAGATGTTGATGAATGT  
GCTGATCACCCAAATAACAGTTTGTGTGAAAAGATGTGCATAAATACCC

>PGSC0003DMG400019167-(rev)RLKWAX-EGF\_992

GATGAATGTGCTGATCACCCAAATAACAGTTTGTGTGAAAAGATGTGCATAAATACCCCAGGAAGTTAC  
AATTGTTCTTGTCCCAAGGATATACTGGTGACGGCAAAAAGGATGGTCGT

>PGSC0003DMG400019170-(rev)RLKWAX-EGF\_0

ATGGACCTAAAACACATGAATTTGCTTCCTTACCAAATTACTTGCTTTTACGGTTGTGTGCTGCTGCTACT  
ACTACTACTGACATTAGCCCCAGCCCAAACACGACTAGTAGCACCAGC

>PGSC0003DMG400019170-(rev)RLKWAX-EGF\_1037

AATTGAAATGCTTTGATATAAGTTATAACCAGCGTTCTACTTATTTGGTTTTTCCAGATGTTGATGAATGTT  
CTGATCCAAGCGCCAATACGTGTGAAAAGAACTGCACAAACACCCCAGG

>PGSC0003DMG400019170-(rev)RLKWAX-EGF\_1159

GTTTCTATTGTTCTTGCCCCGATGGATATACCGATGATGGCAAAAAGGATGGTCGTAGTTGTATTCTCC  
CTACACTGATCATCAGTCGCTATGGACCAAGTTCTCTCTAGGTAAATATC

>PGSC0003DMG400019170-(rev)RLKWAX-EGF\_122

CAAAGCTGCCAATACAACAAAACCAGGATGCCGTAAGAGGTGCGGGAACGTAACAGTTCCATACCCATT  
TGGTATTGGCTCAGATTGCGCCATTAECTCAGGGTTCGAGGTCATCTGCAA

>PGSC0003DMG400019170-(rev)RLKWAX-EGF\_1220

TATTCCTCCCTACACTGATCATCAGTCGCTATGGACCAAGTTCTCTCTAGGTAAATATCTTGAAAATTTT  
CATAACCGCAATACTCCCTCCCTCCATTTTATCTCATGTTGTTTGACC

>PGSC0003DMG400019170-(rev)RLKWAX-EGF\_1281

GGAAAATTTTCATAACCGCAATACTCCCTCCCTCCATTTTATCTCATGTTGTTTGACCAGGCACAAAGTTT  
TGAAAGAGACAATGTCTGGGAAGCTTGGAAGTCTATTTCAAATATT

>PGSC0003DMG400019170-(rev)RLKWAX-EGF\_1647

TGAATAATACAGAACTTGCTTTTCATATGTTTGAAACAGCCTCTAGGAACACCAATATGTTAGCATGTAA



ATTCAACAGTAAAATGAAAGTGTACAATCCTGAACTTTTGTTTTAGCTCA

>PGSC0003DMG400019170-(rev)RLKWAX-EGF\_1708

AGCATGTAAATTCAACAGTAAAATGAAAGTGTACAATCCTGAACTTTTGTTTTAGCTCAGTTGAAATAGG

CAATAAAAGTTCAACTCTACTACTTACACAGGTAAGTGGAGTTGGGTCAAT

>PGSC0003DMG400019170-(rev)RLKWAX-EGF\_1769

TGAAATAGGCAATAAAAGTTCAACTCTACTACTTACACAGGTAAGTGGAGTTGGGTCAATCTCCCTAGTGG

TTGTGATAACATTGCTCTACTTTTGCATCAAGAAAAGAAAGTTGATTCAA

>PGSC0003DMG400019170-(rev)RLKWAX-EGF\_183

TACCCATTTGGTATTGGCTCAGATTGCGCCATTAAGTCAAGGTTTCGAGGTCATCTGCAACGTTTCGACTG

ATGGTACTCAGAAACCTTTAATAGGAAGCATTGAGGTGTACGACATCTCT

>PGSC0003DMG400019170-(rev)RLKWAX-EGF\_2013

ATTATGCCAATGACAGAATTCTTGGTCATGGTGGAATGGGATTGTATATAGAGGTGTGCTACGTGATA

CTCGCATAGTTGCCATTAAGAAATCTAGAAGTGGATGAGAGTCAAATTG

>PGSC0003DMG400019170-(rev)RLKWAX-EGF\_2379

TCATTCATAGAGACGTCAAGTCTGCCAACATATTGTTGGATAATGTTTACACAGCTAAAGTGGCAGATTT

TGGAGCATCAAGGTTAATTCCTCTGGATCAAACACATGTGGCTACATTGG

>PGSC0003DMG400019170-(rev)RLKWAX-EGF\_244

TTTCGACTGATGGTACTCAGAAACCTTTAATAGGAAGCATTGAGGTGTACGACATCTCTGATGCTGAATT

GCGCGTCAAAAATGCCATCGCTTGGAGATGTTACAACGAAAATGGATCTA

>PGSC0003DMG400019170-(rev)RLKWAX-EGF\_2745

AAAAGATGGCTGAGCTGGTGAAGAACTGCCTTCAGCCGCATGGAGAAGATAGGCCTACAATGAAGGAT

GTGTCTATTGAACTTGAAGGTTTGGAGGAAGGTAAGTGGAAATCTCTTCGTCTA

>PGSC0003DMG400019170-(rev)RLKWAX-EGF\_2806

GAAGGATGTGTCTATTGAACTTGAAGGTTTGGAGGAAGGTAAGTGGAAATCTCTTCGTCTAGTCAACATGA

ACAGGAAGAATATGATCAGGATGAAATATCAGATCTTTACACAGTTCCCAT

>PGSC0003DMG400019170-(rev)RLKWAX-EGF\_2928

ACTCCTATGAAAATACCCCAATTCAGATAGTTCTCGTATAATGCATCCTACATACAGAGGAGCTCAAGA

AAGCTACAAACAATTATGCCAATGACAGAATTCTTGGTCATGGTGGAAAT

>PGSC0003DMG400019170-(rev)RLKWAX-EGF\_305

TGCTGAATTGCGCGTCAAAAATGCCATCGCTTGGAGATGTTACAACGAAAATGGATCTATGTACAGTGA  
AAATCTCAATTGGATGTATTTGGGGGGCTCAATTTATCCCTATAGTTTCTC

>PGSC0003DMG400019170-(rev)RLKWAX-EGF\_3172

ATCGAAACGTGGTGAAGCTCTTGGGTGTTGTTTGAAGATGAAGTTCCTTATTGGTTTATGAGTATGT  
CTCTGAAGGAAATCTGTACGAGCACATTCACAACCAACGTGGAGTGGGTT

>PGSC0003DMG400019170-(rev)RLKWAX-EGF\_366

TACAGTGAAAATCTCAATTGGATGTATTTGGGGGGCTCAATTTATCCCTATAGTTTCTCTGCAAGGAACA  
TGTTTATCTTGGTCGGTTGTGATGACAATGCCCTCATCACGGGCCCAAAC

>PGSC0003DMG400019170-(rev)RLKWAX-EGF\_427

CAAGGAACATGTTTATCTTGGTCGGTTGTGATGACAATGCCCTCATCACGGGCCCAAACCTTGGGTATAA  
CTGCTCCACCAGCTGTACCAGCTCGAACGACGTGATTGAAGGAAAATGCA

>PGSC0003DMG400019170-(rev)RLKWAX-EGF\_488

TGGGTATAACTGCTCCACCAGCTGTACCAGCTCGAACGACGTGATTGAAGGAAAATGCATGGGTAATGG  
CTGCTATCAGGTGCATTTACCCAGGGGCTTTAAAACTTTACACCAACTAT

>PGSC0003DMG400019170-(rev)RLKWAX-EGF\_549

GGTAATGGCTGCTATCAGGTGCATTTACCCAGGGGCTTTAAAACTTTACACCAACTATTTCTAGCACAC  
GAAACCACACGGATGTTTGGGATTTAATCAATGTGGGTCTGCATTTCTA

>PGSC0003DMG400019170-(rev)RLKWAX-EGF\_61

TGCTGCTACTACTACTACTGACATTAGCCCCAGCCAAAACACGACTAGTAGCACCAGCATCAAAGCTGC  
CAATACAACAAAACCAGGATGCCGTAAGAGGTGCGGGAACGTAACAGTTC

>PGSC0003DMG400019170-(rev)RLKWAX-EGF\_610

CTAGCACACGAAACCACACGGATGTTTGGGATTTAATCAATGTGGGTCTGCATTTCTAGGCGAGGTAG  
ATCGATTCCATTTACAGGGGCCTAGAGGATGTAAGTAATGTTACTACCTTTT

>PGSC0003DMG400019170-(rev)RLKWAX-EGF\_671

CGAGGTAGATCGATTCCATTTACAGGGGCCTAGAGGATGTAAGTAATGTTACTACCTTTTATAAGAGTATT  
ATGGCTAGTGTGCCATTGTGCTCGACTGGGCCATCGGGGATTTACATG

>PGSC0003DMG400019170-(rev)RLKWAX-EGF\_732

AAGAGTATTATGGCTAGTGTGCCATTGTGCTCGACTGGGCCATCGGGGATTTACATGCACACAAGCG  
CAAGATGGCAAGGATTATGCTTGCAAGGAAAATAGCGAGTGTGTTGATTCA

>PGSC0003DMG400019170-(rev)RLKWAX-EGF\_793

CACAAGCGCAAGATGGCAAGGATTATGCTTGCAAGGAAAATAGCGAGTGTGTTGATTCAGATGCTGGT  
TTTGGTGGCTACCGCTGCAGCTGTAAACCAGGTTTTTCAGGGCAATCCATATC

>PGSC0003DMG400019170-(rev)RLKWAX-EGF\_854

TGCTGGTTTTGGTGGCTACCGCTGCAGCTGTAAACCAGGTTTTTCAGGGCAATCCATATCTCACTGCAGGC  
TGCCAAGGTAGGACGATTAACACAGTTTTTCAGGGCAATTCATATTTTCAT

>PGSC0003DMG400019170-(rev)RLKWAX-EGF\_915

ACTGCAGGCTGCCAAGGTAGGACGATTAACACAGTTTTTCAGGGCAATTCATATTTTCATACATGGAAAA  
GATCAAGGCAAACCTTTTACACCAATGAAGTCTGCTTAATTCTCCATTTGA

>PGSC0003DMG400019170-(rev)RLKWAX-EGF\_976

ATGGAAAAGATCAAGGCAAACCTTTTACACCAATGAAGTCTGCTTAATTCTCCATTTGATCAATTGAAAT  
GCTTTGATATAAGTTATACCAGCGTTCTACTTATTTGGTTTTTCCAGATG

>PGSC0003DMG400019171-(rev)RLKWAX-EGF\_0

ATGATGCACCCAAAACAAATGGTTTTGCTTGCTTGCTTTTATATCTGTGTGGTAATATTGACATTAACCAT  
GGCCCAAACCATCACTAATAAACTTCCACCATCACTAAAGGTGCCAAT

>PGSC0003DMG400019171-(rev)RLKWAX-EGF\_1178

TCCTCCAATAATCAGTTCATGGATCAAGTTCTCTCTAGGTAATATCTTGAAAACCTTTCATAACCACA  
AATATCCATTTTACGTGATGTTGTTTGACGACCAAAAAAATCGTGGTCC

>PGSC0003DMG400019171-(rev)RLKWAX-EGF\_124

CAAACCAGGATGCCCTAAGCAGTGTGGGAATGTAACGGTTCCTTACCATTCCGGTATTGGCTCAGGTT  
GTGCTTATAATTCGGAGTTTGAAATCGACTGCGACATTTATATTAATGGTT

>PGSC0003DMG400019171-(rev)RLKWAX-EGF\_1426

GAATTATTGTTTTCTGTGCTAGAAATGACTTGAGTGGGGGAGCTTGGAGTTATATTTCAAACCTATTTTTG  
CAAACCTATTTCTTTATTTAACCAAACCTTCGTGGGGTAATAGGATCTTAG

>PGSC0003DMG400019171-(rev)RLKWAX-EGF\_1488

TATTTTTGCAAACCTATTTCTTTATTTAACCAAACCTTCGTGGGGTAATAGGATCTTAGTATAGTATAAGTG  
TGTCTAAGTTGGGGGTACTTATGCATTTTCTCTTAATTAAGAAGTCC

>PGSC0003DMG400019171-(rev)RLKWAX-EGF\_1550

GTATAAGTGTGTCTAAGTTGGGGGTACTTATGCATTTTCTCTTAATTAAGAAGTCCAAATTTTGGTATT

TATATGGATGATTATGGTATAAGACCAAGATCAAACCTCAACTCCTTTTC

>PGSC0003DMG400019171-(rev)RLKWAX-EGF\_1612

TTTGGTATTTATATGGATGATTATGGTATAAGACCAAGATCAAACCTCAACTCCTTTTCTTCTGAAATCCGA  
ACTACGTTTGAATATTACATAATGTGTTTGTGACTATAAAAAGTGTTACT

>PGSC0003DMG400019171-(rev)RLKWAX-EGF\_1674

GAAATCCGAACTACGTTTGAATATTACATAATGTGTTTGTGACTATAAAAAGTGTTACTCCACTGATAACT  
GATTATTCAGGTATCGGAATCGGCTTTATCTGCCTAGTGGTTGGGGTAAC

>PGSC0003DMG400019171-(rev)RLKWAX-EGF\_1736

TGATAACTGATTATTCAGGTATCGGAATCGGCTTTATCTGCCTAGTGGTTGGGGTAACCTGGCTCTATTT  
CATCATCAATAAAAAGAAAATTGGTTAAAGGCAGAGAGAAGTTCTTCCAAC

>PGSC0003DMG400019171-(rev)RLKWAX-EGF\_186

TCAGGTTGTGCTTATAATTCGGAGTTTGAATCGACTGCGACATTTATATTAATGGTTCTCAGAAAGCCTT  
CATAAGAAAAGACAATATTGTTGTGTACGGCATCTCGGATGCTGAATTG

>PGSC0003DMG400019171-(rev)RLKWAX-EGF\_1860

TGGTGGTTTATTATTGAAACACAGAATGTCTTCTAAAGAAAGCGGTGTGGAAGAAACAAAAATTTTAC  
AGCTGAGGAGCTCAAGAAAGCTACAAACAATTATGCCGATGATAGAATTCT

>PGSC0003DMG400019171-(rev)RLKWAX-EGF\_1922

TTTTTACAGCTGAGGAGCTCAAGAAAGCTACAAACAATTATGCCGATGATAGAATTCTTGGTCTGGCG  
GCAATGGGATTGTGTATAAAGGTGTGTTAGATGATACTCGCATAGTTGCCA

>PGSC0003DMG400019171-(rev)RLKWAX-EGF\_1984

CGTGCGGCAATGGGATTGTGTATAAAGGTGTGTTAGATGATACTCGCATAGTTGCCATTAATAAATCT  
AGAATTGTGGACGAGAGTCAAATAGACCAATTTATCAATGAGGTAGTCATT

>PGSC0003DMG400019171-(rev)RLKWAX-EGF\_2294

CTTATCTTCATTCATTTGCGTCCATGCCTATAATTCATAGGGATGTCAAGTCCGCCAATATATTGATAGAT  
AATGTTTACACAGCTAAAGTGGCAGATTTTGGAGCTTCAAGATTAATTC

>PGSC0003DMG400019171-(rev)RLKWAX-EGF\_248

GAAAGCCTTCATAAGAAAAGACAATATTGTTGTGTACGGCATCTCGGATGCTGAATTGCGCGTCTCCTGT  
GACTACGGTTGGAGATGTTACAACCTCCACTGAACCCAATGAGGCAATGGT

>PGSC0003DMG400019171-(rev)RLKWAX-EGF\_2542

CTTTTGACAGGGTTGAAATCTATATTTAAAGACAGAAACAATGTGCAAAAGAATTTGGCTGATTATTTTG  
TTTCATCTGTGAATAACAATTGCTTATTTCAAATTCCTGATCGTGTTTTG

>PGSC0003DMG400019171-(rev)RLKWAX-EGF\_310

TCTCCTGTGACTACGGTTGGAGATGTTACAACCTCCACTGAACCCAATGAGGCAATGGTTTCCATCGAATT  
TTCAGAATCAAGTCCGTATAGTTTCTCTGCACTGAACAAGTTTACTGTAG

>PGSC0003DMG400019171-(rev)RLKWAX-EGF\_496

GTACAAGCAAAGAGGATGTGATGAATGGAGGAGAGTGTATGGGAAAAGGCTGTTGCCAGAAACAGAT  
ACCCAAGGGCTTGAATACTATAGCACACCATGTCTAGCACAAAGAAACCATA

>PGSC0003DMG400019171-(rev)RLKWAX-EGF\_62

ATTAACCATGGCCCAAACCATCACTAATAAACTTCCACCATCACTAAAGGTGCCAATGTCACAAAACCA  
GGATGCCCTAAGCAGTGTGGGAATGTAACGGTTCCTTACCATTCCGGTAT

>PGSC0003DMG400019171-(rev)RLKWAX-EGF\_682

GGGGCTTGCCAGATCTAGGTGATGATTATACTGTTGATATTTTTTATGAGAGGTTAAAAGCCACTGTTCC  
CATTGTGCTGGACTGGGCTATCGGGAATCTTACTTGCACACAAGCTCTGA

>PGSC0003DMG400019171-(rev)RLKWAX-EGF\_744

ACTGTTCCATTGTGCTGGACTGGGCTATCGGGAATCTTACTTGCACACAAGCTCTGAAAAGAGAGGAT  
TATGCTTGCAGTAAAATAGCGAGTGTGTTGATTCCGGATACTGGTCTTGGT

>PGSC0003DMG400019171-(rev)RLKWAX-EGF\_868

ACCGCTGCAGCTGTAATACAGGTTATCATGGCAATCCTTATCTCAATCAAGGCTGCCAAGGTATATATAT  
ATATATATAAAGGACCATTTCCAATGAAAGCTATTTTATGCTCCATTTG

>PGSC0003DMG400019171-(rev)RLKWAX-EGF\_992

ACTTATCACAAGCTTTGATATAACGGTGTTCTATTTTTTTTTTTTTTTTTTTTTCAGATATTGATGAATGTGCT  
GATCCAAGCACCAATACGTGTGAAAAGATCTGCACAAACACCCCAGG

>PGSC0003DMG400019172-(rev)RLKWAX-EGF\_0

ATGGCCCAAACCAACGCTAATAACAATTACACCATCACTAAAGGTACCAATGTCACAAAACCAGGATGCC  
CTAAGCAGTGTGGGAATGTAACAGTTCCGTATCCATTCCGGTATTGGTTCA

>PGSC0003DMG400019172-(rev)RLKWAX-EGF\_1037

CTGATGGATATACCGATGATGGCAAAAAGGATGGTCGTGGCTGTATTGCTCCCTACTGTGAATCCCCTG  
GATCAACTTCTCTCTAGGTAAATATATCTTGGAAAACCTTGGTGTGTGTA

>PGSC0003DMG400019172-(rev)RLKWAX-EGF\_122

TTGCGCATTGATTTCGGGGTTTGAGATCCACTGCAACAATTCTGAGAAACCCCTCACAGAAAACAATCTG  
ACGGTGTATGACATCTCGGATGCTGAATTGCGCATCTCCAATGTCTTCGG

>PGSC0003DMG400019172-(rev)RLKWAX-EGF\_1220

TTTACAAAATTAAAAAATTATTATCCCAAAGAATATTGTTTATAAAATAAAATGTAAAATATTTTTTTA  
ACTTACTCCTTCACTTCTTAACCCGGCCCCCATTTTTTTTAGTTT

>PGSC0003DMG400019172-(rev)RLKWAX-EGF\_1281

TATTTTTTTAACTTACTCCTTCACTTCTTAACCCGGCCCCCATTTTTTTTAGTTTTTTTGGTTTAAATTT  
CTTTTATAAAAGTATTTAACTTTTTTTACTTCATCTCTCCTCCCC

>PGSC0003DMG400019172-(rev)RLKWAX-EGF\_1647

TAAAATAAAAATAAATTAGAAGTGGATGGTTAAATAGGATGAGGTAGAATTTTTGGTTTGAGGGGGGG  
AGGGGGGCTAGGGTGAAGTATGAATTTTTTTTAAATATTTTATAAAAGAAAT

>PGSC0003DMG400019172-(rev)RLKWAX-EGF\_1708

GGGGGGGAGGGGGGCTAGGGTGAAGTATGAATTTTTTTTAAATATTTTATAAAAGAAATCTTTTTTTAA  
AAATAGGACGGGGAATTATTTATTTTTTTTTGGGGGGGGGGAGGGAGAGGG

>PGSC0003DMG400019172-(rev)RLKWAX-EGF\_2074

TAATTTAAGTATGGAATTTACTCTCATTAGTTTAGATATGAAACTCAAATAAAATTTAGGTGTGTTTT  
TTGACACTTTAATCTTTTTATTTAAACCACTTTGAGATTTACATGTTT

>PGSC0003DMG400019172-(rev)RLKWAX-EGF\_2135

GGTGTGTTTTTTGACACTTTAATCTTTTTATTTAAACCACTTTGAGATTTACATGTTTCTTATATGATA  
GTTTCATCATAAGGTACCACATATGGCAAACCGCAAAGTATTACTTT

>PGSC0003DMG400019172-(rev)RLKWAX-EGF\_2196

CTTATATGATAGTTCATCATAAGGTACCACATATGGCAAACCGCAAAGTATTACTTTTTGTTTTCCATA  
TTCTTTTGATTTCTTACTACGAATTAAGAAGTCCACATTTGCTATT

>PGSC0003DMG400019172-(rev)RLKWAX-EGF\_2257

TTTTCCCATATTCTTTGTATTCTTACTACGAATTAAGAAGTCCACATTTGCTATTTATGATGATTATG  
ATATAAGACCAAGATCAACTCAATTATTTTTCTGAAATTCGGACTATG

>PGSC0003DMG400019172-(rev)RLKWAX-EGF\_2318

TGATGATTATGATATAAGACCAAGATCAACTCAATTATTTTTCTGAAATTCGGACTATGTTTGAATAATAC

AGAATGTGTTTGAAACAATAAAAGTTAAATTTTATGAATTATTCAGGTA

>PGSC0003DMG400019172-(rev)RLKWAX-EGF\_2379

TGAATAATACAGAATGTGTTTGAAACAATAAAAGTTAAATTTTATGAATTATTCAGGTATCGGAATCGGC

TTTATCTCCCTAGTGGTTGGGATATCCTGGCTCTATTTAGCATCAAGAA

>PGSC0003DMG400019172-(rev)RLKWAX-EGF\_244

GGAGATGTTACAACCTCCACTGGAGCTGTGATCAGTGAGGATATGGTATCCAAAATTTTATTGGAATCAA

GTCCGTATAGTTTCTCTGCGCTGAACAGGTTTATTGTAGTTGGTTGCGATG

>PGSC0003DMG400019172-(rev)RLKWAX-EGF\_2440

GGAATCGGCTTTATCTCCCTAGTGGTTGGGATATCCTGGCTCTATTTAGCATCAAGAAAAGAAAATTGA

TTAAAGTCAGAGAGAAGTTCTTCCAACAAAAATGGTGGTTTATTATTGAA

>PGSC0003DMG400019172-(rev)RLKWAX-EGF\_2501

GAAAATTGATTAAAGTCAGAGAGAAGTTCTTCCAACAAAAATGGTGGTTTATTATTGAAACAGAGAATC

TCCACTAAAGAGGGTGGTGGTGAAGCAACAAGAATTTTACAGCTGAGGAG

>PGSC0003DMG400019172-(rev)RLKWAX-EGF\_2623

CAAGAAAGCTACAAACAATTATGCCAATGATAGAATTCTTGGTCGTGGTGGCAATGGGATTGTATATAG

AGGTGTGCTACGTGATACTCGCATAGTTACCATTAATAAATCTAGAATTGT

>PGSC0003DMG400019172-(rev)RLKWAX-EGF\_2684

GTATATAGAGGTGTGCTACGTGATACTCGCATAGTTACCATTAATAAATCTAGAATTGTGGATGAGAGT

CAAATTGAGCAGTTCATCAATGAGGTGGTCATTCTAACTCAAATCAACCAT

>PGSC0003DMG400019172-(rev)RLKWAX-EGF\_2745

ATGAGAGTCAAATTGAGCAGTTCATCAATGAGGTGGTCATTCTAACTCAAATCAACCATCGAAACGTGG

TAAGACTATTTGGATGTTGTTTGGGAAGATGAAGTTCCTTCATTGGTTTATG

>PGSC0003DMG400019172-(rev)RLKWAX-EGF\_2806

AAACGTGGTAAGACTATTTGGATGTTGTTTGGGAAGATGAAGTTCCTTCATTGGTTTATGAGTATGTCTCT

GAAGGAAATCTTACGAGCACATTCACAACCAACGTGGAGGGAGTTGGTT

>PGSC0003DMG400019172-(rev)RLKWAX-EGF\_2928

CTTGGCAAACCGTTTCAGAATTGCAGCCGAGATAGCCACTACACTTGCTTACCTTCATTCAATTTGCGTC

CATGCCTATAATTCATAGGGATGTTAAGTCTGCCAACATATTGTTAGAT

>PGSC0003DMG400019172-(rev)RLKWAX-EGF\_2989

ATTTTGCGTCCATGCCTATAATTCATAGGGATGTTAAGTCTGCCAACATATTGTTAGATAATGCTTACACA  
GCTAAAGTGGCAGATTTTTGGAGCTTCAAAGTTAATTCCTCTGGATCAA

>PGSC0003DMG400019172-(rev)RLKWAX-EGF\_305

GGAATCAAGTCCGTATAGTTTCTCTGCGCTGAACAGGTTTATTGTAGTTGGTTGCGATGACTACGGTGCA  
ATCTCGGGGCCTAACAACTTTGAGTATGGCTGCACTGTCAGCTGTACAAG

>PGSC0003DMG400019172-(rev)RLKWAX-EGF\_3050

TGCTTACACAGCTAAAGTGGCAGATTTTTGGAGCTTCAAAGTTAATTCCTCTGGATCAAACACATTGGTT  
TTAGGAACATCAGGGTACTTGGATCCTGAATATTTTCAGACAATTCAACT

>PGSC0003DMG400019172-(rev)RLKWAX-EGF\_3111

ACATTGGTTTTAGGAACATCAGGGTACTTGGATCCTGAATATTTTCAGACAATTCAACTGACGGAGAAAA  
GTGATGTTTATAGCTTTGGAGTAGTTCTGGCAGAACTTTTGACAGGGTTG

>PGSC0003DMG400019172-(rev)RLKWAX-EGF\_3172

CGGAGAAAAGTGATGTTTATAGCTTTGGAGTAGTTCTGGCAGAACTTTTGACAGGGTTGAAACCTATAA  
TTAGAGATAGAAACGATGAGCAAAAAGAATTTGGCTGATTATTTTGTTCAT

>PGSC0003DMG400019172-(rev)RLKWAX-EGF\_3233

ACCTATAATTAGAGATAGAAACGATGAGCAAAAAGAATTTGGCTGATTATTTTGTTCATCCGTGAATAAC  
AACCCTTATTTCAAATTCCTGATCATCATGTTTTGCAAGAAGGGAATCT

>PGSC0003DMG400019172-(rev)RLKWAX-EGF\_3355

AGCAACTCCAAAAGACAGCTGGTGAATAACTGTCTTAAATTACATAGAGAAGATAGGCCTACAATGAAG  
GAAGTGGCTATTGAACTTGAAGGTTTGGAGGAAGTAACTGGAATCTCTTCG

>PGSC0003DMG400019172-(rev)RLKWAX-EGF\_3416

CAATGAAGGAAGTGGCTATTGAACTTGAAGGTTTGGAGGAAGTAACTGGAATCTCTTCGTCTAATCAA  
ATGGACAGGGTGATAATGATCATGATGAATTTTCCAATTTTACACAGTTC

>PGSC0003DMG400019172-(rev)RLKWAX-EGF\_3477

TAATCAAAATGGACAGGGTGATAATGATCATGATGAATTTTCCAATTTTACACAGTTCAGTTGACTCG  
TACAAGAATACCCCAATTCAGATAGTTCTTGTATATTGCATCCGACATA

>PGSC0003DMG400019172-(rev)RLKWAX-EGF\_3538

GTTGACTCGTACAAGAATACCCCAATTCAGATAGTTCTTGTATATTGCATCCGACATACAGTCCAAGTT  
GATCTAATGTATTCTTTCTTTTCTCTCAATTTAGATTTTCTTTTA



>PGSC0003DMG400019172-(rev)RLKWAX-EGF\_3599

GTCCAAGTTGATCTAATGTATTCCTTTCTTTTCTCTCAATTTAGATTTTTCTTTAAGATGCAGTGTTG  
GAGATCTTGCAGATTATATATAGTCGACCTTTAATGATAAGAGTTT

>PGSC0003DMG400019172-(rev)RLKWAX-EGF\_3660

ATGCAGTGTTGGAGATCTTGCAGATTATATATAGTCGACCTTTAATGATAAGAGTTTTTTTTCTTTG  
TTGCATATTGCATTTTGACAAAATAAATAAATCCAATAGTCAAATCA

>PGSC0003DMG400019172-(rev)RLKWAX-EGF\_3721

TTTTCTTTGTTGCATATTGCATTTTGACAAAATAAATAAATCCAATAGTCAAATCATTGAAACAAATT  
TTGTTTCAAGCCAACCTTACCTCAAATGTGAAGAGTAGAGAGTTAGA

>PGSC0003DMG400019172-(rev)RLKWAX-EGF\_3782

TGAAACAAATTTGTTTCAAGCCAACCTTACCTCAAATGTGAAGAGTAGAGAGTTAGATAACAGAGAA  
AAGCTGCAATGTAAACAGAGAATCATTGCTTATTTATCTTTCAGTTTCCA

>PGSC0003DMG400019172-(rev)RLKWAX-EGF\_3843

ACAGAGAAAAGCTGCAATGTAAACAGAGAATCATTGCTTATTTATCTTTCAGTTTCCACTCTCATTAGAC  
CAAAGTCCAAACCCAACAAAGATGACTTAAAACGCAACTAATAACATCT

>PGSC0003DMG400019172-(rev)RLKWAX-EGF\_3904

CTCATTAGACCAAAGTCCAAACCCAACAAAGATGACTTAAAACGCAACTAATAACATCTTAAGGATTTGG  
GAATCAGAACCTAAAATTTGAATCAGGTTCTTCGGATGTCAGGATTATG

>PGSC0003DMG400019172-(rev)RLKWAX-EGF\_3965

AGGATTTGGAATCAGAACCTAAAATTTGAATCAGGTTCTTCGGATGTCAGGATTATGTTAGCATTATT  
TTCCTCCATAATCATAGTAGTTGTTGACATAGATTTCTTCTTGATTA

>PGSC0003DMG400019172-(rev)RLKWAX-EGF\_4026

AGCATTATTTCACTCCATAATCATAGTAGTTGTTGACATAGATTTCTTCTTGATTATATCTGGTTTTCA  
TTGCTGCTAAAGTTACAGCCTTTAACGGCAACTGTTTAGCCAATTGAA

>PGSC0003DMG400019172-(rev)RLKWAX-EGF\_4087

TCTGGTTTTATTGCTGCTAAAGTTACAGCCTTTAACGGCAACTGTTTAGCCAATTGAAAATGCATTCACA  
AAATGGCTAATTTTACCTTTGGCATCCATTTTCGGTTGTCGATAAATC

>PGSC0003DMG400019172-(rev)RLKWAX-EGF\_4148

TGCATTCACAAAATGGCTAATTTTACCTTTGGCATCCATTTTCGGTTGTCGATAAATCCAATTAATTAC

CACTAAAAATCGCAAGCTTTAACAGTAATTGTTTAGCTGCTAAATCCAA

>PGSC0003DMG400019172-(rev)RLKWAX-EGF\_4209

ATTAAATTACCACTAAAAATCGCAAGCTTTAACAGTAATTGTTTAGCTGCTAAATCCAATCCGAAAATGTC

TAAATATGCACTTTTAACATCCATTTTTATTGCTGGTAAATCCAATTAA

>PGSC0003DMG400019172-(rev)RLKWAX-EGF\_4270

CGAAAATGTCTAAATATGCACTTTTAACATCCATTTTTATTGCTGGTAAATCCAATTAAATTGTTGGAATC

ATCCTCTTAACAACAAATTTAAGGTGCATTCTATTCTAAGACATTGAAG

>PGSC0003DMG400019172-(rev)RLKWAX-EGF\_4331

TGTTGGAATCATCCTCTTAACAACAAATTTAAGGTGCATTCTATTCTAAGACATTGAAGTTTTTAGCGGCA

GTTGCAATGGAAATCAACACTATATAGAAAATAGTCTTAAAAATGCACT

>PGSC0003DMG400019172-(rev)RLKWAX-EGF\_4392

TTTAGCGGCAGTTGCAATGGAAATCAACACTATATAGAAAATAGTCTTAAAAATGCACTACTTAGGGACT

AGGAGAATACTCGCTTCAAGAGACCTCATACTACAAATGCCCTCTACTTC

>PGSC0003DMG400019172-(rev)RLKWAX-EGF\_4453

TTAGGGACTAGGAGAATACTCGCTTCAAGAGACCTCATACTACAAATGCCCTCTACTTCTTGACAAAGTA

ATCTGATCCGTTGCTACTATTTGCAGCTGTTGAGCGAGTTACCAAGGGTA

>PGSC0003DMG400019172-(rev)RLKWAX-EGF\_4514

GACAAAGTAATCTGATCCGTTGCTACTATTTGCAGCTGTTGAGCGAGTTACCAAGGGTACGGTGGAAGA

GTCTCATGTTTGGCAACGTAACCAAGCTAGACCAAAAACCTGTTTCATCAT

>PGSC0003DMG400019172-(rev)RLKWAX-EGF\_488

CAAGGGCTTGAAATACTATAACACAACCATGTCTAGCACACAAAACCATACCGACGTTTGGTCCTTTAAT

TCATGTGGCTATGCATTTCTGGGCGAGGCAGATCGCTTTCATTTCCAGGG

>PGSC0003DMG400019172-(rev)RLKWAX-EGF\_549

TCCTTTAATTCATGTGGCTATGCATTTCTGGGCGAGGCAGATCGCTTTCATTTCCAGGGCTTGCCAGATCT

AGGTGATGATCTAACTGTTGATTATTTTTATGAGAGGTTAAAGGCCACT

>PGSC0003DMG400019172-(rev)RLKWAX-EGF\_61

CAGGATGCCCTAAGCAGTGTGGGAATGTAACAGTTCGGTATCCATTCGGTATTGGTTCAGGTTGCGCATT

TGATTCGGGGTTTGAGATCCACTGCAACAATTCTGAGAAACCCCTCACAG

>PGSC0003DMG400019172-(rev)RLKWAX-EGF\_610

TGCCAGATCTAGGTGATGATCTAACTGTTGATTATTTTTATGAGAGGTTAAAGGCCACTGTTCCCATTGTC  
CTGGAATGGGCCATCGGGAATCTTAGTTGTGCGCAAGCTCTGGAAAGAC

>PGSC0003DMG400019172-(rev)RLKWAX-EGF\_671

TCCCATTGTCCTGGAATGGGCCATCGGGAATCTTAGTTGTGCGCAAGCTCTGGAAAGACTAGAGGATTA  
TGTTTGTAGAGAAAATAGCCACTGTGTTGATTCAGATACTGGTCTTGGTGG

>PGSC0003DMG400019172-(rev)RLKWAX-EGF\_793

ACCGCTGCAGCTGTAATACAGGCTATCATGGCAATCCTTATCTTAATCAAGGCTGCCAAGGTATATATAG  
GAACAAATTTGACACTTTTAAACCTTTATTCAAAGTAAAAACTGTTTTGT

>PGSC0003DMG400019172-(rev)RLKWAX-EGF\_854

TATATATAGGAACAAATTTGACACTTTTAAACCTTTATTCAAAGTAAAAACTGTTTTGTGGTTTGATATAA  
CAGTATTCTATTTATTTGGTTTTGCCAGATATTGATGAATGTGCTGATC

>PGSC0003DMG400019172-(rev)RLKWAX-EGF\_915

TTTGATATAACAGTATTCTATTTATTTGGTTTTGCCAGATATTGATGAATGTGCTGATCCAAACACCAATT  
CGTGTGAAAGTATATGCATAAACATCCCAGGGAGTTATAATTGCTCTTG

>PGSC0003DMG400019172-(rev)RLKWAX-EGF\_976

AACACCAATTCGTGTGAAAGTATATGCATAAACATCCCAGGGAGTTATAATTGCTCTTGTCTGCTGATGGAT  
ATACCGATGATGGCAAAAAGGATGGTCGTGGCTGTATTGCTCCCTACTGT

>PGSC0003DMG400019173-(rev)RLKWAX-EGF\_0

ATGCACCCAAAACAAATGGTTTTGCTTGCTTTTTATATCTGTATGTTAATATTGAAATTAACCATGGCCCA  
AACCATCACTAGAGGTACCAATGTCACAAAACCAGGATGCCCTAAGCAG

>PGSC0003DMG400019173-(rev)RLKWAX-EGF\_1054

ATATGCATAAACATTCCGGGGAGTTATAATTGCTCTTGTCTGCTGATGGATATACCGATGATGGCAAAAATG  
ATGGTCGTGGTTGTATTCCCTACTCTGTATTTCCATGGATCAAGTTC

>PGSC0003DMG400019173-(rev)RLKWAX-EGF\_1116

CAAAAATGATGGTCGTGGTTGTATTCCCTACTCTGTATTTCCATGGATCAAGTTCTCTTTAGGTAAAT  
ATCTTGGAGAACTTTCATAACTACAAATTTTGGTATCTACGATGATTAT

>PGSC0003DMG400019173-(rev)RLKWAX-EGF\_1178

TAGGTAAATATCTTGGAGAACTTTCATAACTACAAATTTTGGTATCTACGATGATTATGATCTAAGACAA  
AGATCAACTCAATCTTTTTCTTTTTGAAATCCAGACTATGTTTGAATAA

>PGSC0003DMG400019173-(rev)RLKWAX-EGF\_1240

TAAGACAAAGATCAACTCAATCTTTTTCTTTTTGAAATCCAGACTATGTTTGAATAATACAGAATGTTTT  
GGAACAATAAAAGTTGAATTCCACCTAATTATTCAGGTATCGGAATCA

>PGSC0003DMG400019173-(rev)RLKWAX-EGF\_1302

GAATGTTTTTGAACAATAAAAGTTGAATTCCACCTAATTATTCAGGTATCGGAATCAGCTTTATCTCCCT  
AGTGGTTGGGATAACCTGGCTCTATTTACGCATCAAGAAAAGAAAATTG

>PGSC0003DMG400019173-(rev)RLKWAX-EGF\_1364

TATCTCCCTAGTGGTTGGGATAACCTGGCTCTATTTACGCATCAAGAAAAGAAAATTGCTTAAAGTCAAA  
GAGAAGTTCTTCCAACAAAATGGTGGTTTATTATTGAAACAAACGATCTC

>PGSC0003DMG400019173-(rev)RLKWAX-EGF\_1426

AAGTCAAAGAGAAGTTCTTCCAACAAAATGGTGGTTTATTATTGAAACAAACGATCTCCACTAAAGAGG  
GTGGTGTGGAAGCAACAAGAATATTTACAGCTGAGGAGCTCAAGAAAGCTA

>PGSC0003DMG400019173-(rev)RLKWAX-EGF\_1550

CAATTATGCCAATGACAGAATTCTTGGTCGTGGCGGCAATGGGATTGTATATAGAGGTGTGCTACGTGA  
TGCTCGCATAGTTGCCATTAATAAATCTAGAATTGTGGACGAGAGTCAAAT

>PGSC0003DMG400019173-(rev)RLKWAX-EGF\_1612

TACGTGATGCTCGCATAGTTGCCATTAATAAATCTAGAATTGTGGACGAGAGTCAAATTGAGCAATTTAT  
CAATGAGGTGGTCATTCTAACTCAAATCAATCATCGGAACGTGGTAAGAC

>PGSC0003DMG400019173-(rev)RLKWAX-EGF\_1674

CAATTTATCAATGAGGTGGTCATTCTAACTCAAATCAATCATCGGAACGTGGTAAGACTCTTTGGATGTT  
GTTTGAAGATGAAGTTCCTTTATTGGTTTATGAGTGTGTCTCTGAAGGA

>PGSC0003DMG400019173-(rev)RLKWAX-EGF\_186

GAAATTGACTGCAACATTTATATTAATGGTTCTCAGAAAGCCCTTATAGCAAAGTACAATATTGAAGTGT  
ACGACATTTCCGATGCTGAATTGCGCATCTCCTGTGACTTTGGTTGGAGA

>PGSC0003DMG400019173-(rev)RLKWAX-EGF\_1860

ATTGCAGCAGAGACAGCAACTGCACTTGCTTACCTTCATTCAATTCATCCATGCCTATAATTCATAGGGA  
TGTTAAGTCTGCCAACATATTGTTAGATAATGTTTTACACAGCTAAAGT

>PGSC0003DMG400019173-(rev)RLKWAX-EGF\_1922

TCATAGGGATGTTAAGTCTGCCAACATATTGTTAGATAATGTTTTACACAGCTAAAGTGCCAGATTTTGG

AGCATCAAGGTTAATTCCTCTGGATCAAACACATGTGGCTACATTGGTTC

>PGSC0003DMG400019173-(rev)RLKWAX-EGF\_2108

TTTACAGCTTTGGAGTAGTTCTGGCAGAACTTTTGACAGGGTTGAAACCTGTAATTAGAGATATAAACAA

TGAGCAAAGAATTTGGCTGATTATTTGTTTCGTCCTTGAATAACAATC

>PGSC0003DMG400019173-(rev)RLKWAX-EGF\_2170

ATAACAATGAGCAAAGAATTTGGCTGATTATTTGTTTCGTCCTTGAATAACAATCTCTTATTTCAAAT

TATTAATCGTCGTGTTCTGCAAGAAGGGAATCTTGAGCAATTTCAAAG

>PGSC0003DMG400019173-(rev)RLKWAX-EGF\_2294

CTGAGCTGGTGAAGAACTGTCTTAACTTGCAAGGAGAAGATAGGCCTACAATGAAGGAAGTGGCTATT

GAACTTGAATGTTTGAGGAAGTAACTGGAGTTTCTTTGTCTAATCAACATG

>PGSC0003DMG400019173-(rev)RLKWAX-EGF\_2356

GCTATTGAACTTGAATGTTTGAGGAAGTAACTGGAGTTTCTTTGTCTAATCAACATGGACAGGGAGATA

ATGATCAGGATGACTTATCAGATCTTTACACAGTTCCAATAGACCCCTAT

>PGSC0003DMG400019173-(rev)RLKWAX-EGF\_2416

CAGGGAGATAATGATCAGGATGACTTATCAGATCTTTACACAGTTCCAATAGACCCCTATGGAAATACCC

CCAATTCAGATAGTTCTCACATAATGCATCCTACATACATTCCAAGTTGA

>PGSC0003DMG400019173-(rev)RLKWAX-EGF\_248

TGAAGTGTACGACATTTCCGGATGCTGAATTGCGCATCTCCTGTGACTTTGGTTGGAGATGTTACGACTCC

ACCGGAGCTCTGCTTGATCAGGATATGGTTTCCATCAACTTTTTAGAATC

>PGSC0003DMG400019173-(rev)RLKWAX-EGF\_310

ACGACTCCACCGGAGCTCTGCTTGATCAGGATATGGTTTCCATCAACTTTTTAGAATCAAGTCCGTATAG

TTTCTCTGCTCTGAACAGGTTTACTGTAGTTGGTTGCGATGACTATGGTT

>PGSC0003DMG400019173-(rev)RLKWAX-EGF\_372

CCGTATAGTTTCTCTGCTCTGAACAGGTTTACTGTAGTTGGTTGCGATGACTATGGTTCCATCTTGGGGC

CTAACAACTTTGAGTATGGCTGCAATGTCAGCTGTACAAGCAAAGAGGAT

>PGSC0003DMG400019173-(rev)RLKWAX-EGF\_496

TGAACGGAGGAGAGTGTATGGGAAAAGGCTGCTGCCAGAAACAGATTCCTAAGGGCTTGAATACTAT

AACACAACCATGTCTAGCACCGGAAACCATACCGACGTTTGGTCATTTAATT

>PGSC0003DMG400019173-(rev)RLKWAX-EGF\_558

TACTATAACACAACCATGTCTAGCACCGGAAACCATACCGACGTTTGGTCATTTAATTCATGTGGCTATG  
CATTCTGGGCGAGGCTGATCGCTTCCATTTCCGGGGCTTGCCAGATCTA

>PGSC0003DMG400019173-(rev)RLKWAX-EGF\_62

CATGGCCCAAACCATCACTAGAGGTACCAATGTCACAAAACCAGGATGCCCTAAGCAGTGTGGGAATGT  
AACGGTCCGTACCCATTCGGTATTGGCTCAGGCTGTGCTTTTGATTCGGG

>PGSC0003DMG400019173-(rev)RLKWAX-EGF\_682

ATGATCTAACTGTTGATTATTTTTATGAGAGGTTAAAGGCCACTGTGCCATTGTGCTGGACTGGGCAAT  
CGGGGGTCTTACTTGCGCGCAAGCTCTGAAAAGAGAGGATTATGCTTGTA

>PGSC0003DMG400019173-(rev)RLKWAX-EGF\_744

TGGGCAATCGGGGGTCTTACTTGCGCGCAAGCTCTGAAAAGAGAGGATTATGCTTGTAGAGAAAATAG  
CCACTGTGTTGATTCGGATACTGGTCTTGGTGGCTACCGCTGCAGCTGTAAT

>PGSC0003DMG400019173-(rev)RLKWAX-EGF\_868

GTTATCACGGCAATCCTTATCTCAATCAAGGCTGCCAAGGTATATATAGGAACAAGTTTGACTACCTTTA  
AACCTTATGCTGCATATTTGATCAACTCATGTGGTTTGATATAACAGTAT

>PGSC0003DMG400019173-(rev)RLKWAX-EGF\_930

TACCTTTAAACCTTATGCTGCATATTTGATCAACTCATGTGGTTTGATATAACAGTATTCTATTTATTTGGT  
TTTGCCAGATATTGATGAATGTGCTGATCCAAGCACCAATTCGTGTGA

>PGSC0003DMG400019173-(rev)RLKWAX-EGF\_992

TTTATTTGGTTTTGCCAGATATTGATGAATGTGCTGATCCAAGCACCAATTCGTGTGAAAGGATATGCAT  
AAACATTCCGGGGAGTTATAATTGCTCTTGTCTGATGGATATACCGATG

>PGSC0003DMG400019237G-LecRK\_1116

TTTTGAGTGATCCTGTGTGTCATTGTTTAGATAAATTCGAGCCAAAGCATCAGGATGATTGGAATAGGGC  
AGATTGGACTAGTGGTTGTGTCCGGAAAACCCATTGAATTGTACTGGAG

>PGSC0003DMG400019237G-LecRK\_124

TTATCACATCACCAACACCCTTTAATATTTTTAAAATTTTTTTGCCTATTTTGTGTAACCAAGAAATGA  
AAAAGGGCTAGTAGCTATGGAGAAATTTCTACCCTTTTTGCTTCTTTG

>PGSC0003DMG400019237G-LecRK\_1488

TGCAATTTACTGAGGTTTTCTTATTACACAATGCTTGTTATTAAGAATGATGTATTGGATAGTTCAATTC  
TGTAAGGCTGATTAACGAACGAAGAGTAGTGCATTTACAGGGAAATTAG

>PGSC0003DMG400019237G-LecRK\_186

CAAGAAATGAAAAGGGCTAGTAGCTATGGAGAAATTTCTACCCTTTTTGCTTCTTTGCCTTTTAATTTTT  
CTTCGAAAAGTTAATGGACAAGGAGATATGATAACTACCACTAAGTTTA

>PGSC0003DMG400019237G-LecRK\_1860

TTGGCCTGATTCTTTATAAACGGAGAAGGAGAGAGGATCCAGTGGTTATGACAAGGGGTAAAGTGAACA  
TAACAAGTTTTTATCTGTTGAAAAGCCGGAAGTAATTAATGGTTATTAGTTC

>PGSC0003DMG400019237G-LecRK\_2604

TAAGTTGAAAACATTTGGCAGATGAAGAAAGGAGCGCATTACTTGACTGGCCAAAGCGCTTCAACATTA  
TCAATGGAATTGCTCGTGGACTGATGTACCTCCATCAAGATTCAAGACTTA

>PGSC0003DMG400019237G-LecRK\_2666

AACATTATCAATGGAATTGCTCGTGGACTGATGTACCTCCATCAAGATTCAAGACTTAGAATCATCCACA  
GAGACTTGAAAGCGAGCAATGTCTTACTTGATACTGAAATGAACCCGAAG

>PGSC0003DMG400019237G-LecRK\_2728

CATCCACAGAGACTTGAAAGCGAGCAATGTCTTACTTGATACTGAAATGAACCCGAAGATATCAGATTTT  
GGGATGGCTAGAAGTTTTGGAGGAGATGAGACTGGAGCCAATACACGCCG

>PGSC0003DMG400019237G-LecRK\_2790

CAGATTTTGGGATGGCTAGAAGTTTTGGAGGAGATGAGACTGGAGCCAATACACGCCGTGTTGTTGGA  
ACATAGTAAGATTTAATCTTTAATTTTACATGTAGTTGTTACATTACATGT

>PGSC0003DMG400019237G-LecRK\_2852

GTTGGAACATAGTAAGATTTAATCTTTAATTTTACATGTAGTTGTTACATTACATGTGCATTTCTGCATT  
ATATTGTTACTTGTCCGCGTAGCTTGGGATTTTCAAAGCAAAAAGA

>PGSC0003DMG400019237G-LecRK\_2914

TTCCTGCATTATATTGTTACTTGTCCGCGTAGCTTGGGATTTTCAAAGCAAAAAGAAGATATTTAACTT  
GCCTTGTTCTACCCCGCTCTGTCTGCATAAGAGCTCCTCTACCCTGCC

>PGSC0003DMG400019237G-LecRK\_2976

ATTTAACTTGCCTTGTTCTACCCCGCTCTGTCTGCATAAGAGCTCCTCTACCCTGCCCTATATAAGATTAA  
ACCCACCCTATCCATTGCCATCTCTAATTATATAGTCCTTTGTTATC

>PGSC0003DMG400019237G-LecRK\_3038

ATAAGATTAAACCCACCCTATCCATTGCCATCTCTAATTATATAGTCCTTTGTTATCGTTGTTGCAGTGGT

TACATGTCCCCGGAATATGCAGTCGATGGGATATTCTCAGTGAAATCA

>PGSC0003DMG400019237G-LecRK\_3162

TCTTTAGCTTTGGAGTATTAGTACTAGAGATTGTGAGCGGAAAGAAGAACAGACGATTTCGTTTCATCCAG  
ACCACCACCTCAACCTTCTTGGACATGTAAATACTATGTCCCAACTCCTAT

>PGSC0003DMG400019237G-LecRK\_3224

CATCCAGACCACCACCTCAACCTTCTTGGACATGTAAATACTATGTCCCAACTCCTATGTGTAAAAGGACT  
TACTCAAAGTATCTGTTAATGAGTTCAAGAGTAGTATATAAACTATTG

>PGSC0003DMG400019237G-LecRK\_3286

AAAAGGACTTTACTCAAAGTATCTGTTAATGAGTTCAAGAGTAGTATATAAACTATTGACATTGTCAATG  
TATATAACTTAAATCGTTTGTAAACGGATGAGTCATTATATGCAGACATA

>PGSC0003DMG400019237G-LecRK\_3348

TGTCAATGTATATAACTTAAATCGTTTGTAAACGGATGAGTCATTATATGCAGACATATATGCTACATAAA  
GAAGGAAGATCATTGGAGCTAGTTGATCCAAAACGGTGGACTCATGTA

>PGSC0003DMG400019237G-LecRK\_3410

CTACATAAAGAAGGAAGATCATTGGAGCTAGTTGATCCAAAACGGTGGACTCATGTAATATATCAGAA  
GTACTAAGATCAATCCATGTAGGTTTATTATGTGTTCAACAAAATCCAGAG

>PGSC0003DMG400019237G-LecRK\_3472

ATCAGAAGTACTAAGATCAATCCATGTAGGTTTATTATGTGTTCAACAAAATCCAGAGGACAGGCCAAG  
TATGTCAACTGTGATTATGATGCTGAGCAATGAAGGCATTTTGCCATCAGC

>PGSC0003DMG400019237G-LecRK\_3534

GGCCAAGTATGTCAACTGTGATTATGATGCTGAGCAATGAAGGCATTTTGCCATCAGCTAAACATCCTG  
GCTTCTTACTGAAAGGAAAATTGGTGTGTTGATCAATTTTCTTGGAGTA

>PGSC0003DMG400019237G-LecRK\_3596

CATCCTGGCTTCTTACTGAAAGGAAAATTGGTGTGTTGATCAATTTTCTTGGAGTACACAAACACCTA  
GTTCTATAAATGAAGTTACCATCACATTGTTGGATGCTCGATAGGAAGAA

>PGSC0003DMG400019237G-LecRK\_3658

AACACCTAGTTCTATAAATGAAGTTACCATCACATTGTTGGATGCTCGATAGGAAGAATGTCGAGTGATT  
TCTGAGATGATCACTCAACTAATAGTTACTATATCAGAAAGTCACTTTCT

>PGSC0003DMG400019237G-LecRK\_3720



GAGTGATTTCTGAGATGATCACTCAACTAATAGTTACTATATCAGAAAGTCACTTTCTTTGTTAAAAGATC  
ATTGGAATGTGATTTTCTGAGATAATTACTACTACTTAAGTAACCATCT

>PGSC0003DMG400019237G-LecRK\_3782

TAAAAGATCATTGGAATGTGATTTTCTGAGATAATTACTACTACTTAAGTAACCATCTGAGAACTCAACC  
AGAATTGTATTAATAATCTTCTCCTCTTTTCTATTTTATTTATTTAGTTAG

>PGSC0003DMG400019237G-LecRK\_3844

ACTCAACCAGAATTGTATTAATAATCTTCTCCTCTTTTCTATTTTATTTATTTAGTTAGAAATTTTGTATTTT  
AACACATACACAGTGTGATCCACTTGTATTCTTTTGTAGTAACAT

>PGSC0003DMG400019237G-LecRK\_496

GGGCGGTGTTGCTCTTCAAATGTTACAAATTCAACAATTTGGTCGACAAATTCATCGAGATTCGTGCAA  
AACCTGTTGCCAGTTGCTGGACACGGGGAATTTTGTGTTGAGGGATGC

>PGSC0003DMG400019237G-LecRK\_558

TCGTGCAAACCTGTTGCCAGTTGCTGGACACGGGGAATTTTGTGTTGAGGGATGCTAATGATCCGA  
ACCCAGAGAATTTCTTTGGCAGAGTTTTGATTACCCTACTGATACGCTGA

>PGSC0003DMG400019237G-LecRK\_62

AGCCCCACTTTGTCTTCCAAGTAATTCAGTCACAAAAATGAAGTCTTGGTCATATTGACATGTTATCACAT  
CACCAACACCCTTTTAATATTTTTAAAATTTTTTTGCCTTATTTTGTG

>PGSC0003DMG400019237G-LecRK\_620

GATCCGAACCCAGAGAATTTCTTTGGCAGAGTTTTGATTACCCTACTGATACGCTGATTGCGAATATGA  
AACTTGGAAGAGATTTGATTACTGGGTTTCAAAGGTATCTTAGTTCATGG

>PGSC0003DMG400019237G-LecRK\_682

GAATATGAACTTGGAAGAGATTTGATTACTGGGTTTCAAAGGTATCTTAGTTCATGGAAAAGCAGTGA  
TGATCCTGCTCCAGGGGATTATACTTATCATTGTGATCCAACGGGTTATCC

>PGSC0003DMG400019238G-LecRK\_1037

TGTATTTTTGAAGTATTCGCATATTAATTGCCAGACACACGGAATTCCTGGTCCAATGTGACTATGACA  
CTAGAAGAATGCAAGACTATATGCTCTAGAAATTGCTCATGTATGGCTTA

>PGSC0003DMG400019238G-LecRK\_1098

ACTATGACACTAGAAGAATGCAAGACTATATGCTCTAGAAATTGCTCATGTATGGCTTACTCAAATATTG  
ACATACGCAATGGAGGAAGTGGATGCTTATTGTGGTTCAAGGATCTGCTT

>PGSC0003DMG400019238G-LecRK\_1159

CAAATATTGACATACGCAATGGAGGAAGTGGATGCTTATTGTGGTTCAAGGATCTGCTTGACATTCGAC  
AGCTATCTAAAGAGGGACAAGATATCTATATAAGAATAGCTGCCTCTGAAT

>PGSC0003DMG400019238G-LecRK\_122

TAAAATTGCTTCACATAGTGAAGCTTTGAAATGGGGTTCTTCAGTCCAGGTGATTCAGAGAATCGCTAT  
GTGGGTATATGGTACAAGAACATATCTGTTAGGACTGTGGTGTGGGTAGC

>PGSC0003DMG400019238G-LecRK\_1220

CATTCGACAGCTATCTAAAGAGGGACAAGATATCTATATAAGAATAGCTGCCTCTGAATTAGGTATGTTT  
GTTACTGAAACAGTTAACAATGATTTGTCATTTGTAACCTGAAAATAAAA

>PGSC0003DMG400019238G-LecRK\_1281

GGTATGTTTGTACTGAAACAGTTAACAATGATTTGTCATTTGTAACCTGAAAATAAAAACCTAAATTTAT  
GGTTGCTGATACTTGGGGTTAAGCAGAGGTAACTTAAATTTCAACTGT

>PGSC0003DMG400019238G-LecRK\_1342

CTAAATTTATGGTTGCTGATACTTGGGGTTAAGCAGAGGTAACTTAAATTTCAACTGTGCTTATGCTTAT  
AAGTATCTAGTACTAGAACGAAATTTCAAAGTCTTGCGTGCTGTATATA

>PGSC0003DMG400019238G-LecRK\_1403

TTATGCTTATAAGTATCTAGTACTAGAACGAAATTTCAAAGTCTTGCGTGCTGTATATATATACTAGTT  
TCTGAGCACATGCTTCGCACGTGTGTTTCATGTGAATTTTTATAGATAC

>PGSC0003DMG400019238G-LecRK\_183

AATCGCTATGTGGGTATATGGTACAAGAACATATCTGTTAGGACTGTGGTGTGGGTAGCTAACAGAGAA  
GCTCCTTTGACCGGTGAATCAGGTATCTTGAAAGTCATTGAACAAGGAATT

>PGSC0003DMG400019238G-LecRK\_2074

AAATTAAGTTAGCAAACCATGTAGAAAGAACAACCTAAAAGTTCTTATCATGTAATTAAGCATCAATGAA  
TTTAAATTTGTGAAGCTAGAGTCATTCTTTAATAATAATCAAGAGGACAT

>PGSC0003DMG400019238G-LecRK\_2135

ATCAATGAATTTAAATTTGTGAAGCTAGAGTCATTCTTTAATAATAATCAAGAGGACATTATCAATGTGT  
GCGTCTCCATTTTGCAGATTTGCACCCTTCAAATTATTAATTTTCGTTAG

>PGSC0003DMG400019238G-LecRK\_2196

TCAATGTGTGCGTCTCCATTTTGCAGATTTGCACCCTTCAAATTATTAATTTTCGTTAGTTATCATAAAGG

ATAATACTTTATCCACATAAATTATATTAAGGAAAAAGTTATGAGAAG

>PGSC0003DMG400019238G-LecRK\_2257

ATCATAAAGGATAAATACTTTATCCACATAAATTATATTAAGGAAAAAGTTATGAGAAGAGGAAAAGTA  
TAGCAATTTAGGTATAGACTTTTTTAATTTTTCTTTTATATATATAGAT

>PGSC0003DMG400019238G-LecRK\_244

ACAGAGAAGCTCCTTTGACCGGTGAATCAGGTATCTTGAAAGTCATTGAACAAGGAATTCTTGTCTTCT  
CAATGGTACTAACAATGTTGTGTGGTCAACTAATACCTCTAGATCTGTGC

>PGSC0003DMG400019238G-LecRK\_2806

TTATTGCATCTGTCAGCTAAAAATCTAAGACGAAATAAAGAGGAATTTAGTTGGAAAACTCATTGAG  
AACTAAAAATATGATTTGCAGAATACCTCTACTAAATGTCAACAAATTA

>PGSC0003DMG400019238G-LecRK\_2867

TCATTGAGAACTAAAAATATGATTTGCAGAATACCTCTACTAAATGTCAACAAATTAATAATGACGTACC  
GTACTTCAAAGTCCAGCAGAATGTTGTAECTCAATATCAGTTATCAACTC

>PGSC0003DMG400019238G-LecRK\_305

TGTCCTTCTCAATGGTACTAACAATGTTGTGTGGTCAACTAATACCTCTAGATCTGTGCAGAATCCTGTTG  
CACAGTTGCTGGATTCGGGAATCTTGTTTTAAACAAGCTGATGATGA

>PGSC0003DMG400019238G-LecRK\_3172

AAGGCTTTAAAGCTTACAACGAAAGGTAAGCTGGATAGGTCACTTTTTGCCTGATCGTTGAGCAAAT  
AGAGGAAGTGAAATTCATTAGAAGTGAAGACGGTCTTTGCTGCTTTAACA

>PGSC0003DMG400019238G-LecRK\_3233

AGCAAATAGAGGAAGTGAAATTCATTAGAAGTGAAGACGGTCTTTGCTGCTTTAACACAATTCATC  
AATTCCTTTTAGCTGCAGAAAAATCGAGATACAGCGGAAGTATCAAGCAG

>PGSC0003DMG400019238G-LecRK\_366

AATCCTGTTGCACAGTTGCTGGATTCGGGAATCTTGTTTTAAACAAGCTGATGATGATAACTCGGGA  
AATTCCTCTGGCAGAGTTTTGATCACCCAAGTGATACACTATTACCAAGC

>PGSC0003DMG400019238G-LecRK\_4026

AACTTCAGCATAGAAATCTTGTAAGATTCTTGATGTTGCATTGAAGGAGAAGAAAAATGCTGATAT  
ATGAATACTTGTCAAACGGAAGTCTTGATTCATTTATATTTGGTAACAAAT

>PGSC0003DMG400019238G-LecRK\_4087

GCTGATATATGAATACTTGTCAAACGGAAGTCTTGATTCATTTATATTTGGTAACAAATCCCATACCAAT  
ATTGTGTATTCTGAATTATCTTCTCCAGTTTCGAATCTCCCATCAAAT

>PGSC0003DMG400019238G-LecRK\_4148

CCATACCAATATTGTGTATTCTGAATTATCTTCTCCAGTTTCGAATCTCCCATCAAATAAGAAAAAAAAA  
AACATGTAAGGAGTGAACATAAACCTCAGCTTTATTAGAGCCTAATAAT

>PGSC0003DMG400019238G-LecRK\_427

ACTCGGGAAATTCCTCTGGCAGAGTTTTGATCACCCAAGTGATACACTATTACCAAGCATGAAGCTCGG  
TTGGAACCTTTGTAAGTGGCCGAGAGGTGTACTTGTTCATCATGGAAGAACG

>PGSC0003DMG400019238G-LecRK\_4819

ACGATTCGCTCCTTCAAACCTTAACCGTAGTCTAATCGGGCATGTAAGATTTTTATGTATTTTTCTTATTTA  
TACATTGGTGTTAGCAACTAACAAGTATCTTGCAAGGCTAGTGATGCT

>PGSC0003DMG400019238G-LecRK\_488

GAAGCTCGGTTGGAACCTTTGTAAGTGGCCGAGAGGTGTACTTGTTCATCATGGAAGAACGAGGAGGATC  
CAGCTCCCGGTGATTATACATATCATTGTGATCCTTCTGGATATCCACAGAA

>PGSC0003DMG400019238G-LecRK\_4880

TTTCTTATTTATACATTGGTGTTAGCAACTAACAAGTATCTTGCAAGGCTAGTGATGCTTATAAGCTTGTA  
AAATCTACAGGCATGGGAACTCAACAAGGAAGGTAGGTCAATAGAACTA

>PGSC0003DMG400019238G-LecRK\_4941

TAAGCTTGTAATAATCTACAGGCATGGGAACTCAACAAGGAAGGTAGGTCAATAGAACTACTTGATGAAC  
GCGTAGGTGATTCTTGTCTACACCTCAAGAAGTGGTACGATCAATTGGTG

>PGSC0003DMG400019238G-LecRK\_5124

TGTTAAACAATGAAGGTACGCTGCCTCAGGCTAACTACTAGCTTTTTACATGGAAGGAGATGCATCAG  
ATACTGAATTACTTTCTACCCAATCACATATTACAACGGATGACACCCCGT

>PGSC0003DMG400019238G-LecRK\_549

GAGGATCCAGCTCCCGGTGATTATACATATCATTGTGATCCTTCTGGATATCCACAGAACATCCTGAAGA  
AGGGTTCAGATGTTGTGTATCGGTCTGGACCGTGGAATGGTCTTCATTTT

>PGSC0003DMG400019238G-LecRK\_61

ACCATACTTTTGGTGCTACAGATAGTACTATAACAGCTACTCAGTTTCTGAAAGATGGCGATAAAATTGC  
TTCACATAGTGGAAGCTTTGAAATGGGGTTCTTCAGTCCAGGTGATTGATCAG

>PGSC0003DMG400019238G-LecRK\_610

TCCTGAAGAAGGGTTCAGATGTTGTGTATCGGTCTGGACCGTGGAATGGTCTTCATTTAGTGGTGCATT  
AAGCTCAAGAGACAGTCCTTTGTATACATTTGGGATATTCTCAAGTAAGA

>PGSC0003DMG400019238G-LecRK\_671

TGGTGCATTAAGCTCAAGAGACAGTCCTTTGTATACATTTGGGATATTCTCAAGTAAGACGGAGGTGTAT  
TTTGGATTTTATCTCACATCTTCGGTTATCACAAGGTTGACACTAAGTCA

>PGSC0003DMG400019238G-LecRK\_732

GAGGTGTATTTTGGATTTTATCTCACATCTTCGGTTATCACAAGGTTGACACTAAGTCAGAATGGTGCAT  
TACAGCGTTGGACTTGGGGTGACCGTGACAGGATTGGATCCCTTACCTC

>PGSC0003DMG400019238G-LecRK\_793

ATGGTGCATTACAGCGTTGGACTTGGGGTGACCGTGACAGGATTGGATCCCTTACCTCTCAATACCCAC  
AGACAACTGCGATGTTTACAACTGTGTGGCGCATATGGTAGCTGCAACA

>PGSC0003DMG400019238G-LecRK\_854

AATACCCACAGACAACTGCGATGTTTACAACTGTGTGGCGCATATGGTAGCTGCAACAGTCAAAATTCT  
CCTGTATGTGGATGCTTAGACAAATTTGTGCCAAAACATAATGAAGATTG

>PGSC0003DMG400019238G-LecRK\_915

CAAAATTCTCCTGTATGTGGATGCTTAGACAAATTTGTGCCAAAACATAATGAAGATTGGCAAAGGCA  
GACTGGTCAACTGGCTGTGTTAGGAGGACTGAACTAACTGCCTCCAGGGA

>PGSC0003DMG400019238G-LecRK\_976

AAAAGGCAGACTGGTCAACTGGCTGTGTTAGGAGGACTGAACTAACTGCCTCCAGGGAGATGTATTTT  
TGAAGTATTCGCATATTAATTGCCAGACACACGGAATTCCTGGTCCAATG

>PGSC0003DMG400019241G-LecRK\_1281

ACTTGATCAAGATCTCTATGTAAGGATGGCTGCATCAGAATTAGGCAAGTCTCCTTATGCTAAGATGAAT  
CATACCACAGGGAATCTTAGTAACTCAATTGATTGATTGACTATTTGAAC

>PGSC0003DMG400019241G-LecRK\_1342

AAGATGAATCATACCACAGGGAATCTTAGTAACTCAATTGATTGATTGACTATTTGAACTTCCACCTTGT  
AACGAGGGTTGGGTTCCCAACCTCGTAATCCCCTTTCCATTTCCATT

>PGSC0003DMG400019241G-LecRK\_1403

CCACCTTGTTAACGAGGGTTGGGTTCCCAACCTCGTAATCCCCTTTCCATTTCCATTTAGCCTTCACCTA

CCCCAACCCCATTTCAAAAATAAGAATCATACCGGAAGGTTTTCACA

>PGSC0003DMG400019241G-LecRK\_1464

GCCTTCACCTACCCCAACCCCATTTCAAAAATAAGAATCATACCGGAAGGTTTTCACAAGTAATAATGA  
ATTTTCACAGGTTGAGGCTATATGGGAAACACAAGAACATCAGTCATTGC

>PGSC0003DMG400019241G-LecRK\_1525

TAATAATGAATTTTCACAGGTTGAGGCTATATGGGAAACACAAGAACATCAGTCATTGCAATTATATTAA  
CAGTTTCAGCAATCATCCTTGTTGGTTTTCTATTTTGGTTTGCTATGCAG

>PGSC0003DMG400019241G-LecRK\_1647

AAAGAAAGGGGAAAGAGGTTAGAAAATTTGTCCGTCGCGTTGAAAGTATAGTTATTTTCATTCACCTCAA  
TCTCTTTACAAAATAAAGTTCAATTTTACAGGAGTAGGAGAAGGAGAAGGA

>PGSC0003DMG400019241G-LecRK\_1708

CACCTCAATCTCTTTACAAAATAAAGTTCAATTTTACAGGAGTAGGAGAAGGAGAAGGAAAGGAAGATA  
TGGAATCACCTTTGTTTGATGTGATGACTGTTTCTGCTGCAACTAATAATT

>PGSC0003DMG400019241G-LecRK\_2989

GGACATGTAAGCAAGTTACAAATCCAGACATTTGCTTTTGTTCATTTCATACTACATTTGTATTTCTACAT  
GTCATTGAAAACACTATACTTGATTTTGTATAGGCTTGGTTATTATGGAA

>PGSC0003DMG400019241G-LecRK\_305

ATGAAACTTCTGGCATATTAACAGTCAGTAGCAAAGGGATTGTACTACTCAATGGAAACCAAGATGTGA  
TTTGGTCATCAAATTCATCGAAAAGTTTGATAAAACCAGTGGCTCAACTTT

>PGSC0003DMG400019241G-LecRK\_3050

TTTCTACATGTCATTGAAAACACTATACTTGATTTTGTATAGGCTTGGTTATTATGGAACGAAGGAAAGG  
CTTTGGAACATAATCGATGATTGTTTAAAAGAATCGTTTGTGGAATCCCAA

>PGSC0003DMG400019241G-LecRK\_3111

AAGGAAAGGCTTTGGAACATAATCGATGATTGTTTAAAAGAATCGTTTGTGGAATCCCAAGTACTAAGAT  
GTGTTTCATGTGGCACTGTTATGTGTTCAACGACTAACAGATGAACGACCAA

>PGSC0003DMG400019241G-LecRK\_3172

ACTAAGATGTGTTTCATGTGGCACTGTTATGTGTTCAACGACTAACAGATGAACGACCAACAATGTCATCA  
GTGGTTTTTCATGTTGAGCCATGAAGAAGTGGCATTACCTCAACCAAAGGA

>PGSC0003DMG400019241G-LecRK\_3294

CTGGTTTCTTCATAGAGAGAAGTATAGCTGAAACAGATCATTCAAATGAGAAAAGATGCATCAGTGACA  
ATGTTTTGACATTAACAATTCTTCAACCAAGATAGCAATGGCGGAACCAGA

>PGSC0003DMG400019241G-LecRK\_3538

CTAGACCATGCAGCTCCGCCCTGATTGTTATTGGACGAGCATTTACTAACATGCTTACATAGAACAATT  
GCGTATATCTTTCTGATATTTGATTAAGACTCACGAGCCATCGGGACCAT

>PGSC0003DMG400019241G-LecRK\_3599

AGAACAATTGCGTATATCTTTCTGATATTTGATTAAGACTCACGAGCCATCGGGACCATTGTGTCAAGTT  
GTGCAAATTGTCAGAACATGATGGAAATGGACATGAAAGTTGTTACACAG

>PGSC0003DMG400019241G-LecRK\_366

AGATGTGATTTGGTCATCAAATTCATCGAAAAGTTTGATAAAACCAGTGGCTCAACTTTTGGACGCTGGA  
AATCTTGTCTTAAAAGATGACAGTTTGGTAAATCAAAAAGACTATGCTTG

>PGSC0003DMG400019241G-LecRK\_3660

TGTCAAGTTGTGCAAATTGTCAGAACATGATGGAAATGGACATGAAAGTTGTTACACAGTATAATGACT  
TATAGTAGATCTGAATGGCTAAATGATAGCCACTGACTTTGTTGAGCAATT

>PGSC0003DMG400019241G-LecRK\_3721

TAATGACTTATAGTAGATCTGAATGGCTAAATGATAGCCACTGACTTTGTTGAGCAATTATTTTTCCTCAT  
GACTACAAATCAATATCATGTCCTGGGGGAGTGTTTCTTTGCAATCACA

>PGSC0003DMG400019241G-LecRK\_3782

TTTTCTCATGACTACAAATCAATATCATGTCCTGGGGGAGTGTTTCTTTGCAATCACATTCATCATATCTT  
TTCCACATCTCTATCACCAAACCTCGAGTTTTGTGCAACTTTTTCTG

>PGSC0003DMG400019241G-LecRK\_3843

CATCATATCTTTTTCCACATCTCTATCACCAAACCTCGAGTTTTGTGCAACTTTTTCTGGTTTTCTACCCAG  
TGTTCAAGTACCAGCTTTGGGGGCTTTTTTTGAAAAATGCTAAACAGG

>PGSC0003DMG400019241G-LecRK\_3904

TTTTCTACCCAGTGTTCAAGTACCAGCTTTGGGGGCTTTTTTTGAAAAATGCTAAACAGGGTAGAGCAAGG  
TGGGTCGATATCTTAGCAGGTCAAGGCTTGCTCACCTTAACCCGCCCTA

>PGSC0003DMG400019241G-LecRK\_3965

AGAGCAAGGTGGGTCGATATCTTAGCAGGTCAAGGCTTGCTCACCTTAACCCGCCCTATTGACATCCCT  
ACCTACTTCAAGGTAAGCCAGCTTCAACAAGACGCCATAAATCCCAGAA

>PGSC0003DMG400019241G-LecRK\_4026

GACATCCCTACCTACTTCAAGGTAAGCCAGCTTCAACAAGACGCCATAAATCCCAGAATGCCTACCTTC  
CTAGTTCCTGGAAGTATGTAAATCTTTGCATTTGATTCTCATTTGAACAG

>PGSC0003DMG400019241G-LecRK\_4087

CCTACCTTCCTAGTTCCTGGAAGTATGTAAATCTTTGCATTTGATTCTCATTTGAACAGCATAACAGATTTAT  
ATTCAGAGGTAGTTACAATAAGTAGAACAAGGAAATGTTCTCGAAAAC

>PGSC0003DMG400019241G-LecRK\_4148

TACAGATTTATATTCAGAGGTAGTTACAATAAGTAGAACAAGGAAATGTTCTCGAAAACACTCACAAAAT  
AAATAATTCAAAAAAATGAAGTCATAGCCAACAGAAAAAAGGCCGTTCA

>PGSC0003DMG400019241G-LecRK\_4209

TCACAAAATAAATAATTCAAAAAAATGAAGTCATAGCCAACAGAAAAAAGGCCGTTCAATCAAGCCAA  
AAAACAAATCCCTTGATGGTTTATACTCCTAAGGCATAAAGCAGTGCAATG

>PGSC0003DMG400019241G-LecRK\_4270

CAAGCCAAAAAACAATCCCTTGATGGTTTATACTCCTAAGGCATAAAGCAGTGCAATGGAAGCTCCTAC  
AGTGATTGTCCAGAGATATATGGTTTGAGACAAAGAATTAGCACCCTGC

>PGSC0003DMG400019241G-LecRK\_4331

AGCTCCTACAGTGATTGTCCAGAGATATATGGTTTGAGACAAAGAATTAGCACCCTGCATTGGTCATTA  
GAACCACTGAAGCATCCAGGTCTACTCACCTTAGGTTCTACTCCCCCTGT

>PGSC0003DMG400019241G-LecRK\_4392

TGGTCATTAGAACCACTGAAGCATCCAGGTCTACTCACCTTAGGTTCTACTCCCCCTGTGGAAAAGCTAC  
TCTTTGGTTTGCCATTGCTGAAGAGTACACACCAGAAATAGGGGCCACCA

>PGSC0003DMG400019241G-LecRK\_4453

AAAAGCTACTCTTTGGTTTGCCATTGCTGAAGAGTACACACCAGAAATAGGGGCCACCACCACCGGAGC  
CACTCACAGCAGCACCAACCTCAGTGTGATTCTTGCTATAGAGAATATCCA

>PGSC0003DMG400019241G-LecRK\_4514

ACCGGAGCCACTCACAGCAGCACCAACCTCAGTGTGATTCTTGCTATAGAGAATATCCAAACTCTTGTA  
TTTCTTATAAGAATATCATTGAATGCTTCAGAAGGTTTCGGCATACTTGGA

>PGSC0003DMG400019241G-LecRK\_4575

CTCTTGGTATTTCTTATAAGAATATCATTGAATGCTTCAGAAGGTTTCGGCATACTTGATTGACATGCCA



GAAATCTCCAGTTATTTGAGCAAGCGATGACGCCTGCACACCACAGTTA

>PGSC0003DMG400019241G-LecRK\_4636

GACATGCGAGAAATCTCCAGTTATTTGAGCAAGCGATGACGCCTGCACACCACAGTTAGGGGCAAATT  
CTTGGGCGAATTCAGATTCAGCAGGTTTCTTTCCATCTGGCCCTCCAATA

>PGSC0003DMG400019241G-LecRK\_4697

GGCAAATCTTGGGCGAATTCAGATTCAGCAGGTTTCTTTCCATCTGGCCCTCCAATACTTTACAATCAC  
CTCCATATGCTTTTATATATTGCAGAGCCAAGCATGCCAAGCCAGGGTT

>PGSC0003DMG400019241G-LecRK\_4758

TTACAATCACCTCCATATGCTTTTATATATTGCAGAGCCAAGCATGCCAAGCCAGGGTTACTGTATAAGG  
AGGATAATTTATTCGCAGTTCTATTACTATTAAGGGCAGATACCAGCTCA

>PGSC0003DMG400019241G-LecRK\_4819

TGTATAAGGAGGATAATTTATTCGCAGTTCTATTACTATTAAGGGCAGATACCAGCTCATCAGCAGGATT  
ATCAGTTACCTTGGCTGCAGTTTATCAAGCCAATATATGTGTTAGAGGTT

>PGSC0003DMG400019241G-LecRK\_4880

AGCAGGATTATCAGTTACCTTGGCTGCAGTTTATCAAGCCAATATATGTGTTAGAGGTTGATCATAAAGG  
CAATAATAGTGAATCAAGATCGAGAAGCTATCTGCTTGAAGGAATACACA

>PGSC0003DMG400019241G-LecRK\_4941

TCATAAAGGCAATAATAGTGAATCAAGATCGAGAAGCTATCTGCTTGAAGGAATACACATTGGGAATGA  
CAAGCGTAAATTACATCTAAACCCAAGAGGCTTGAGCACATGTCAGTATGC

>PGSC0003DMG400019241G-LecRK\_5002

GGGAATGACAAGCGTAAATTACATCTAAACCCAAGAGGCTTGAGCACATGTCAGTATGCTTTCGGTAAT  
TGGAAGTACACGCAATTATCTAAGACTGACTAAAGGAAGAAGAGCCAGAGA

>PGSC0003DMG400019241G-LecRK\_5063

TCGGTAATTGGAAGTACACGCAATTATCTAAGACTGACTAAAGGAAGAAGAGCCAGAGAAGGAGAGTA  
AACATCATTTTCGGCTGTGACTATAATTCTAGCACACTCATGGAAAGATTATC

>PGSC0003DMG400019241G-LecRK\_5124

GAGAGTAAACATCATTTTCGGCTGTGACTATAATTCTAGCACACTCATGGAAAGATTATCAACAACCAACC  
TATTATCAAGAGATCTCTAACAAGAAAGATACAAAATTAGGGCTCCAACA

>PGSC0003DMG400019241G-LecRK\_5185

CAACCACCCTATTATCAAGAGATCTCTAACAAGAAAGATACAAAATTAGGGCTCCAACATAGTATTTGAA  
GGCATAAACTAAAGCATCTTGAGCACTGTCCTTCCATTAGTGGGCTAGAG

>PGSC0003DMG400019241G-LecRK\_5429

TGTTGGAATGGGTTAGAGTCCTCATTGGTCTCCTTATATGGACTTAGACAACCCTTTCCTCATGAGATGCC  
TTTTGTGGCAAGGGGTGTTGGAATGGGTTAGAGTCCACATTGGTCTCCT

>PGSC0003DMG400019241G-LecRK\_5612

CATATCTTTACGGGTATCTTCTCATGTTACCACAAATTACAAAGACCGAAAAACCAATTTGAGCAGCTTCC  
CCTAACTATTCACACTATTCACAAAATCAGAATTTGCAGATTGACTAAA

>PGSC0003DMG400019241G-LecRK\_5673

AGCAGCTTCCCCTAACTATTCACACTATTCACAAAATCAGAATTTGCAGATTGACTAAATAGTTTCTAGTC  
AGTGCTATAAATGCAACATGCCAACAAAATCAGAATTTGCAGATTAAT

>PGSC0003DMG400019241G-LecRK\_5704

CAAAATCAGAATTTGCAGATTGACTAAATAGTTTCTAGTCAGTGCTATAAATGCAACATGCCAACAAAAT  
CAGAATTTGCAGATTAATTAAGAGTTTCTTGTCAATGCCATAAATGCAG

>PGSC0003DMG400019241G-LecRK\_854

TCTTATGGATCGAACGGAACCAGAACTGGTTCCTTTACTCCACTGGACAGATGGATAATTGTGACCGTTA  
TGCCTTGTGTGGTCAATTTGCGCAGTGCAACATCAATGACTCACCTCCAT

>PGSC0003DMG400019275-(rev)G-LecRK\_0

CTTTTTGATGTAAAAATCATGAAGGCATTACTTAGGGAAAGTTTCTACTTATTCTTGTTCCTGTGTTTGTA  
TTCAATCCATCAAAGCTTTGGTGCTACAGATACAATAACTACAACATCAT

>PGSC0003DMG400019275-(rev)G-LecRK\_1037

TTGCCTTCATAGAGATGTATTTTTGAAGTATTCGCATATTAAATTGCCAGACACACGGAATTCCTGGTCCA  
ATGTGACTATGACACTAGAAGAATGCAAGGATATCTGCTCAAAAAATTG

>PGSC0003DMG400019275-(rev)G-LecRK\_1098

TCCTGGTCCAATGTGACTATGACACTAGAAGAATGCAAGGATATCTGCTCAAAAAATTGCTCTTGTATGG  
CTTACTCAAATCCTGACATACGAGGAAGTGGATGCTTATTGTGGTTCGGG

>PGSC0003DMG400019275-(rev)G-LecRK\_1159

CTTGATGGCTTACTCAAATCCTGACATACGAGGAAGTGGATGCTTATTGTGGTTCGGGGATCTGCTTGA  
CATTGGAAGGGAACCAATGGACTGCAAGAGATCTACATAAGAATGGCTT

>PGSC0003DMG400019275-(rev)G-LecRK\_122

TCTAAAAGATGGTGTATGATGATATTACTTCACCTGGTGGGAATATTTGAAATGGGGTTCTTCAGTCCAGAT  
AATTCGGAAAATCGCTATGTCGGTATGTGGTACAAGAACGTATCTGATAG

>PGSC0003DMG400019275-(rev)G-LecRK\_1220

TCTGCTTGACATTCGGAAGGGAACCAATGGACTGCAAGAGATCTACATAAGAATGGCTTCTTCTGAATC  
AGGTAGGCTTGTTGCTACTTAAAGATTTTTGATAGATTACCTAAAGATAGT

>PGSC0003DMG400019275-(rev)G-LecRK\_1281

TCTGAATCAGGTAGGCTTGTTGCTACTTAAAGATTTTTGATAGATTACCTAAAGATAGTAAAGGAATTTG  
GGGTTGCAAGCACTTTGAATAAAGCAGACTGTATTTTTGTGCCTATGCTT

>PGSC0003DMG400019275-(rev)G-LecRK\_1342

AGGAATTTGGGGTTGCAAGCACTTTGAATAAAGCAGACTGTATTTTTGTGCCTATGCTTGTAACATCTA  
GTAGTGTCAACTGCCAGCTCCTACCATATATAACCAGGAACTAACAATT

>PGSC0003DMG400019275-(rev)G-LecRK\_1403

AAACATCTAGTAGTGTCAACTGCCAGCTCCTACCATATATAACCAGGAACTAACAATTATAGTAGAACG  
GAAAGCGACTCCTTTAGAGTGAAGTTGGTCTGAACTAATAAGCTGAATCT

>PGSC0003DMG400019275-(rev)G-LecRK\_1464

AGTAGAACGGAAAGCGACTCCTTTAGAGTGAAGTTGGTCTGAACTAATAAGCTGAATCTACAAGCATAT  
GACTGGTTAGACCCTGTTCAATTTTTTAGAACTAATTGGTAAGCACTTAGT

>PGSC0003DMG400019275-(rev)G-LecRK\_1525

AAGCATATGACTGGTTAGACCCTGTTCAATTTTTTAGAACTAATTGGTAAGCACTTAGTTTTCTATAGAAC  
AAGCACTTGATATGCAGTACTCCAAAGGCTTGCAGAACCCTTAATAACT

>PGSC0003DMG400019275-(rev)G-LecRK\_1586

TCTATAGAACAAGCACTTGATATGCAGTACTCCAAAGGCTTGCAGAACCCTTAATAACTCAGAATAAGAA  
ATCATCTCTCCCATCCGCTTGCAGAACCCTTAATAACTCAGAATAAGAAA

>PGSC0003DMG400019275-(rev)G-LecRK\_1647

GAATAAGAAATCATCTCTCCCATCCGCTTGCAGAACCCTTAATAACTCAGAATAAGAAATCATCTCTCGA  
ATGGATTGGAGAAAGATTGAAATTCATTATTTGTCTCAGTTTAAATGGTT

>PGSC0003DMG400019275-(rev)G-LecRK\_1708

ATCTCTCGAATGGATTGGAGAAAGATTGAAATTCATTATTTGTCTCAGTTTAAATGGTTACTTGCAGATG

ATCAGGAGGAATCGGATGGAAAGAAAGGAAGAGTACTTTTCTGGATTCTG

>PGSC0003DMG400019275-(rev)G-LecRK\_1769

TTGCAGATGATCAGGAGGAATCGGATGGAAAGAAAGGAAGAGTACTTTTCTGGATTCTGCCATTATCAG

TTGGTCTGATTCTGGTATTCCTTAGTCTGCTAATCTACCATAGAAGAAGGA

>PGSC0003DMG400019275-(rev)G-LecRK\_183

AGTCCAGATAATTCGGAAAATCGCTATGTCGGTATGTGGTACAAGAACGTATCTGATAGGACTGTGGTG

TGGGTTGCCAATAGAGAAGCTCCTTTGAGGAGTGGATCAGGTATCTTGAAA

>PGSC0003DMG400019275-(rev)G-LecRK\_1830

ATTATCAGTTGGTCTGATTCTGGTATTCCTTAGTCTGCTAATCTACCATAGAAGAAGGAAGAAGGCTTTA

GAGCTAAAAACAAAGGTAAGCTGGATCCCCTTTTATTTTTCTTGACGTC

>PGSC0003DMG400019275-(rev)G-LecRK\_1891

AAGGCTTTAGAGCTAAAAACAAAGGTAAGCTGGATCCCCTTTTATTTTTCTTGACGTCTAAGCAAATA

GAGGAATAGACATTTAAATATTAGTGAAAAGAACTTCATAGTTGTCTGAT

>PGSC0003DMG400019275-(rev)G-LecRK\_1952

AGCAAATAGAGGAATAGACATTTAAATATTAGTGAAAAGAACTTCATAGTTGTCTGATATTCACAACCT

AAACAACATTCATTCATTTTCTATTTCTTAGAAGCAAATTACATCATT

>PGSC0003DMG400019275-(rev)G-LecRK\_2013

TCACAACCTAAACAACATTCATTCATTTTCTATTTCTTAGAAGCAAATTACATCATTGTTTGGCAGG

AAGGACAGGATGTGGGGGCAATTGCGCTGAAGAATTTGAAATACCACT

>PGSC0003DMG400019275-(rev)G-LecRK\_2074

GTTTTGGCAGGAAGGACAGGATGTGGGGGCAATTGCGCTGAAGAATTTGAAATACCACTGTTTGACTTA

TCTACCATAGCAAACGCTACCAATAACTTTTCAATTGACAGACAGATTGGA

>PGSC0003DMG400019275-(rev)G-LecRK\_2135

TTGACTTATCTACCATAGCAAACGCTACCAATAACTTTTCAATTGACAGACAGATTGGAGAGGGAGGCTA

TGGACCTGTTTACAAGGTATACACACTTAAACCCTTGTCTTCAGAGT

>PGSC0003DMG400019275-(rev)G-LecRK\_2196

GGGAGGCTATGGACCTGTTTACAAGGTATACACACTTAAACCCTTGTCTTCAGAGTAAAGCTTAATC

TTCAGACACAATTTAGGAGTTGTATGATCAAAGGTGTAATGACAAAAACC

>PGSC0003DMG400019275-(rev)G-LecRK\_2257

AGCTTAATCTTCAGACACAATTTAGGAGTTGTATGATCAAAGGTGTAATGACAAAAACCTTTGCTTTGTG  
AAACTAAAAGGAGACAGATACAATAGCTAAGGGAAGAAAGGTGGGGATAT

>PGSC0003DMG400019275-(rev)G-LecRK\_2318

TGCTTTGTGAACTAAAAGGAGACAGATACAATAGCTAAGGGAAGAAAGGTGGGGATATGGGGGATG  
TCCTTCTCAGAATGTGTCCTAGAACCACTATCTTAGCTTTTCCAATAAGTGTT

>PGSC0003DMG400019275-(rev)G-LecRK\_2379

GGGATGTCCTTCTCAGAATGTGTCCTAGAACCACTATCTTAGCTTTTCCAATAAGTGTTGTCGACAATTAG  
CTCAAGTTAGTCAGTCTAGAGTCTTAGAGGGGATATCCTTCTGGTGCG

>PGSC0003DMG400019275-(rev)G-LecRK\_244

CTGTGGTGTGGGTTGCCAATAGAGAAGCTCCTTTGAGGAGTGGATCAGGTATCTTGAAAATAATTAAGT  
CTCGACTTGTCTTGTGATGGAACATAACAATGTTGTGTGGTCAACTAATA

>PGSC0003DMG400019275-(rev)G-LecRK\_2440

CGACAATTAGCTCAAGTTAGTCAGTCTAGAGTCTTAGAGGGGATATCCTTCTGGTGCCTGAACTTGAC  
ATTTCTAAACATTCTCCGGATGTATTTTTATGAGTTAAATTATCTTTCTC

>PGSC0003DMG400019275-(rev)G-LecRK\_2501

AACTTGACATTTCTAAACATTCTCCGGATGTATTTTTATGAGTTAAATTATCTTTCTTCTGCATCTCAA  
GCCTTTATAGTGAGCCGACATTTTGATCAACTTAGATATTTAAAATAT

>PGSC0003DMG400019275-(rev)G-LecRK\_2562

CTGCATCTCAAGCCTTATAGTGAGCCGACATTTTGATCAACTTAGATATTTAAAATATTAACATGCAGAT  
ATTGTGATGTTTAGGGCATACTTGAAGGAGGGGAAGTAGCTGTCAAGCG

>PGSC0003DMG400019275-(rev)G-LecRK\_2623

ACATGCAGATATTGTGATGTTTAGGGCATACTTGAAGGAGGGGAAGTAGCTGTCAAGCGGTTATCTAGA  
ACTTCCACACAAGGAGAAAATGAGTTCAAAAATGAAGTTGTATATATTGCC

>PGSC0003DMG400019275-(rev)G-LecRK\_2684

TATCTAGAACTTCCACACAAGGAGAAAATGAGTTCAAAAATGAAGTTGTATATATTGCCAACTTCAGCA  
CAGAAATCTGGTGAAGATTCTGGCTGCTGCATTGAAGGGGAAGAAAAAA

>PGSC0003DMG400019275-(rev)G-LecRK\_2745

ACTTCAGCACAGAAATCTGGTGAAGATTCTGGCTGCTGCATTGAAGGGGAAGAAAAAATGTTGATCTA  
TGAGTATTTGCCGAATGGGAGTCTTGATTCATTTATTTGGTACAACCTC

>PGSC0003DMG400019275-(rev)G-LecRK\_2806

TTGATCTATGAGTATTTGCCGAATGGGAGTCTTGATTCATTTATATTTGGTACAACCTTCTCAATCCAATAT  
TAAGAATTTGAATAATAATTGTACTCTCGTATTATTTTTCCATCGACAA

>PGSC0003DMG400019275-(rev)G-LecRK\_2867

AATCCAATATTAAGAATTTGAATAATAATTGTACTCTCGTATTATTTTTCCATCGACAAAGAACTGATTTT  
GCTTTAGGCTTTAATAGTACCTTCCACTATACCTACTTAGAATGTTAAT

>PGSC0003DMG400019275-(rev)G-LecRK\_2928

AACTGATTTTGCTTTAGGCTTTAATAGTACCTTCCACTATACCTACTTAGAATGTTAATAACCCAACATTAT  
TTGGCAGATGACGCACAAAGCAAGGTATTAGACTGGCCTAAGCGATTT

>PGSC0003DMG400019275-(rev)G-LecRK\_305

AATTAAGTCTCGACTTGTCTTGTGATGGAACATAACAATGTTGTGTGGTCAACTAATACCTCTAGATTG  
GTTTCAAGATCCTGTCGCGCAGTTGCTAGATTCTGGAAATCTTGTGTTAA

>PGSC0003DMG400019275-(rev)G-LecRK\_3050

CATTATCAATGGTATAGCTCGGGGACTTATGTATCTGCATCAAGATTCTCAATTGAGAATAATCCACAGA  
GACCTGAAAGCTAACAATATTTTGTAGACAAAGACATGAATCCAAAGAT

>PGSC0003DMG400019275-(rev)G-LecRK\_3111

ATCCACAGAGACCTGAAAGCTAACAATATTTTGTAGACAAAGACATGAATCCAAAGATATCAGATTTTCG  
GGATAGCAAAAATATGTGAAGAGAATGACATTGGAGCCAAGACAAACCGA

>PGSC0003DMG400019275-(rev)G-LecRK\_3172

CAGATTTGGGATAGCAAAAATATGTGAAGAGAATGACATTGGAGCCAAGACAAACCGAGTTGTTGGA  
ACATAGTAAGAACCTTCAACTGGGTAGTTAGGAATTTGAACCTAAGACGAGT

>PGSC0003DMG400019275-(rev)G-LecRK\_3233

TGTTGGAACATAGTAAGAACCTTCAACTGGGTAGTTAGGAATTTGAACCTAAGACGAGTTTTGAGATAT  
TAAGCATGTTTTCCAGCACTAGTAATTCTACATTTTGTTTACATTTTATG

>PGSC0003DMG400019275-(rev)G-LecRK\_3294

TGAGATATTAAGCATGTTTTCCAGCACTAGTAATTCTACATTTTGTTTACATTTTATGCAGTGGGTACCT  
CTCACCGGAATATGCATTGCACGGAAGATACTCAGTAAAATCAGATGTA

>PGSC0003DMG400019275-(rev)G-LecRK\_3416

TAGCTTTGGTATCTTAATATTGGAAATTGTGAGTGGGAAAAGCAACAGAAGATTCTCTCATCCAGATCAC

AACCTTAATCTACTTGGACATGTAAGATTTGATTAGTTTTATTTACTTA

>PGSC0003DMG400019275-(rev)G-LecRK\_3477

CCAGATCACAACTTAATCTACTTGGACATGTAAGATTTGATTAGTTTTATTTACTTATCCTTTGGTGTTA  
TGTTATCTCCTAGTAACAGAGATCTGCAAATCTAGTCAAATGCTAATA

>PGSC0003DMG400019275-(rev)G-LecRK\_3538

CTTTGGTGTTATGTTATCTCCTAGTAACAGAGATCTGCAAATCTAGTCAAATGCTAATAAATCTTGTAATC  
TACAGGCATGGAACTCTATAAAGAAGGTAGGTCAACAGAACTACTTGA

>PGSC0003DMG400019275-(rev)G-LecRK\_3599

TCTTGTAATCTACAGGCATGGAACTCTATAAAGAAGGTAGGTCAACAGAACTACTTGATGAATACCTA  
GGTGATTCTTGTTCAACAACCGAAGTGGAACGATCAATCTGTGTTGGTCTA

>PGSC0003DMG400019275-(rev)G-LecRK\_366

TCTAGATTGGTTCAGAATCCTGTGCGCAGTTGCTAGATTCTGGAAATCTTGTTGTTAAAGAGGCTGGTG  
ATGATAGCTCGGGGAATTTGATATGGCAGAGTTTTGATCACCCAACGGAT

>PGSC0003DMG400019275-(rev)G-LecRK\_3660

AATACCTAGGTGATTCTTGTTCAACAACCGAAGTGGAACGATCAATCTGTGTTGGTCTATTATGTGTCCA  
ACAAAGTCCAGAAGACCGTCCAAATATGTCTTCTGCAGTTATGATGTTAA

>PGSC0003DMG400019275-(rev)G-LecRK\_3721

ATGTGTCCAACAAAGTCCAGAAGACCGTCCAAATATGTCTTCTGCAGTTATGATGTTAAGCAATGAAGGT  
GAATTGCCACAGGCTAAACGGCCAGGATTTTACATAGAAAGAGATGCACC

>PGSC0003DMG400019275-(rev)G-LecRK\_3782

AATGAAGGTGAATTGCCACAGGCTAAACGGCCAGGATTTTACATAGAAAGAGATGCACCAGATGGTGA  
ATTATATGCACAGAATACAGTGAGTGAGACCCCATCACAATATTAGCTGCC

>PGSC0003DMG400019275-(rev)G-LecRK\_3843

ATGGTGAATTATATGCACAGAATACAGTGAGTGAGACCCCATCACAATATTAGCTGCCCGATAAGAAA  
ATATTTGTCCACTCGCTTCCACAACAAGCTTGCAGTTTTAATAACCTTTTC

>PGSC0003DMG400019275-(rev)G-LecRK\_3904

ATAAGAAAATATTTGTCCACTCGCTTCCACAACAAGCTTGCAGTTTTAATAACCTTTTCTTTAATTCTTTGT  
AGAAATGTGGTGAAAATTTGTGTATGGCTTTGCCTTATTGGTGTATT

>PGSC0003DMG400019275-(rev)G-LecRK\_3965

TAATTCCTTTGTAGAAATGTGGTGAAAATTTTGTGTATGGCTTTGCCTTATTGGTGTATTAECTATGTCAAA  
CTGACTCAAACATATGTAAAGTGCTGATTCGCTGTTGCTTCTCAATACA

>PGSC0003DMG400019275-(rev)G-LecRK\_4026

CTATGTCAAECTGACTCAAACATATGTAAAGTGCTGATTCGCTGTTGCTTCTCAATACAAGGAAGAGGTT  
AGCCAACAAATCAAGTTCAAGAACATTAGCCTCAAACCCAAACACAAGCT

>PGSC0003DMG400019275-(rev)G-LecRK\_4087

GAAGAGGTTAGCCAACAAATCAAGTTCAAGAACATTAGCCTCAAACCCAAACACAAGCTCCATAGAAAA  
AGATGGTGTACATCAGTCCATAAACTGTTCTTAACCTGGCGATATGATC

>PGSC0003DMG400019275-(rev)G-LecRK\_4148

ATAGAAAAAGATGGTGTACATCAGTCCATAAACTGTTCTTAACCTGGCGATATGATCTACGGATTTTA  
ATCTATCGCAAACTGTTTTAGTTTTAGTACTTTACTAATGGATTTTGTC

>PGSC0003DMG400019275-(rev)G-LecRK\_4209

CGGATTTTAATCTATCGCAAACTGTTTTAGTTTTAGTACTTTACTAATGGATTTTGTCACAACCTTTCAATA  
AATCAAATTCAGGTTTTAACTTTGATGAGACATTTCTCAATCAAAC

>PGSC0003DMG400019275-(rev)G-LecRK\_4270

AACTTTCAATAAATCAAATTCAGGTTTTAACTTTGATGAGACATTTCTCAATCAAECTAGTATCATTTTA  
GTCATTACTTGTACTTAATTTCTTTCTACTGTCATTACTATAATAAC

>PGSC0003DMG400019275-(rev)G-LecRK\_4453

TTGCTTCTGATAGACCTTGTCTCAAGGATAAACAAAATAACGACACTGAAGGAGCCATGGACTGTCAT  
AGTATAATCTATAGCAAATCACAATTACTCCATGTCCAATCATTTAGAAGG

>PGSC0003DMG400019275-(rev)G-LecRK\_4514

ACTGTCATAGTATAATCTATAGCAAATCACAATTACTCCATGTCCAATCATTTAGAAGGGGAACGAGGAA  
GCAATAAGTTTCGGTACTTAACCCCTGTTCTCCAATGTGCACAGATTATA

>PGSC0003DMG400019275-(rev)G-LecRK\_4575

AACGAGGAAGCAATAAGTTTCGGTACTTAACCCCTGTTCTCCAATGTGCACAGATTATATATAACGTTAA  
TTGGAACAATAGCATTTTCGTAATTGATGAAAGAAAAATATTCGTACCACG

>PGSC0003DMG400019275-(rev)G-LecRK\_4636

TAACGTTAATTGGAACAATAGCATTTTCGTAATTGATGAAAGAAAAATATTCGTACCACGAGTTAGCCGCC  
GGTAGCGTTGGCCGATTCGGAGCACTGAATTTTGATTGGATTGCCTGAT



>PGSC0003DMG400019275-(rev)G-LecRK\_4697

TTAGCCGCCGGTAGCGTTGGCCGATTTCGGAGCACTGAATTTTGATTGGATTGCCTGATTACCGAGCACT  
GAAAAAGGAAATGAAGGTACAACCTCAATTATACAACCTTTACACCAATTT

>PGSC0003DMG400019275-(rev)G-LecRK\_4758

CCGAGCACTGAAAAAGGAAATGAAGGTACAACCTCAATTATACAACCTTTACACCAATTTATGAATCAAAG  
ATGAACTTCCTCATAGATACAGATGAATGCATATCGGCAGTAGAATTAGA

>PGSC0003DMG400019275-(rev)G-LecRK\_4819

GAATCAAAGATGAACTTCCTCATAGATACAGATGAATGCATATCGGCAGTAGAATTAGATGAAAATGAG  
AGAGGATTTGACAAAGCATATCATCCTAAAATACACTATAATTATACAATC

>PGSC0003DMG400019275-(rev)G-LecRK\_488

GCTATTAGCAGGCATGAAGCTTGGGAGGAATTTTGTAACCGGAAGAGAGGTGTACTTGTCATCATGGA  
AGAATGAGGAGGATCCAGCTCCCGGTGATTATACATTCCATTGTGATCCTAC

>PGSC0003DMG400019275-(rev)G-LecRK\_4880

AAAATGAGAGAGGATTTGACAAAGCATATCATCCTAAAATACACTATAATTATACAATCTTAACACAACA  
CATGAATAATTAATGATAGAAAAATTAATAATTTCAATTTTTTTGTGATA

>PGSC0003DMG400019275-(rev)G-LecRK\_4941

AACACAACACATGAATAATTAATGATAGAAAAATTAATAATTTCAATTTTTTTGTGATATTCTCAAGCAAA  
GGGATCACAGTGCACATTTCAAGTAATTAAGTTTAAATATGCGTAGTT

>PGSC0003DMG400019275-(rev)G-LecRK\_5002

CTCAAGCAAAGGGATCACAGTGCACATTTCAAGTAATTAAGTTTAAATATGCGTAGTTTAAATATCACA  
AACTTGCTTGGACATAAAATTATTACGATTTCTAACAAGATATTAATAAATA

>PGSC0003DMG400019275-(rev)G-LecRK\_5063

AATATCACAACTTGCTTGGACATAAAATTATTACGATTTCTAACAAGATATTAATAATATTATCTAATTTTT  
TCATGCTCAAAGTCAAGAACTATTGACCTCCTATAATATTTCTTAAT

>PGSC0003DMG400019275-(rev)G-LecRK\_5124

ATCTAATTTTTTCATGCTCAAAGTCAAGAACTATTGACCTCCTATAATATTTCTTAATTCCACATCAGCCG  
CCGTTTAGTCTTAGTTATCCAGTCAAATCTATGAAGACCCCATATAT

>PGSC0003DMG400019275-(rev)G-LecRK\_5185

CACATCAGCCGCCGTTTAGTCTTAGTTATCCAGTCAAATCTATGAAGACCCCATATATTCGAACTGCAGC

AACATTTTCCTCATGTTTGATACTGCTCAGAACATATATGCCTTTTACT

>PGSC0003DMG400019275-(rev)G-LecRK\_5246

GAAGTGCAGCAACATTTTCCTCATGTTTGATACTGCTCAGAACATATATGCCTTTTACTAAATTATTCGTA

AAATATACTATTCAAAAAGTCCACCAAAAAGCAGCCATTAACCTTTTTTAAA

>PGSC0003DMG400019275-(rev)G-LecRK\_5307

ATTATTCGTAAAATATACTATTCAAAAAGTCCACCAAAAAGCAGCCATTAACCTTTTTTAAAAGCAGCAGGAC

TTGAAGCAGCCTCAACTCTCATTA AAAAGCTAAGACTTTTCATAGTCATA

>PGSC0003DMG400019275-(rev)G-LecRK\_5368

CAGCAGGACTTGAAGCAGCCTCAACTCTCATTA AAAAGCTAAGACTTTTCATAGTCATAGACCTTTCACT

CCTTTCAAATAATACTCTTTTCATATGTTAGAAAAGCTCAAGTGATGGCTTT

>PGSC0003DMG400019275-(rev)G-LecRK\_5429

CCTTTCACTCCTTTCAAATAATACTCTTTTCATATGTTAGAAAAGCTCAAGTGATGGCTTTTTTAACTAGTT

TGTTCAGTTTCTTCTGTAAAGATTCACCGTCTGCAAACAAGTCAAAGT

>PGSC0003DMG400019275-(rev)G-LecRK\_549

TCATGGAAGAATGAGGAGGATCCAGCTCCCGTGATTATACATTCCATTGTGATCCTACTGGTTACCCAC

AGACTATCGTGAAGAAGGGCTCAGATGTTGTGTATAGCTCTGGACCGTGG

>PGSC0003DMG400019275-(rev)G-LecRK\_5490

TAACACTAGTTTGTTCAGTTTCTTCTGTAAAGATTCACCGTCTGCAAACAAGTCAAAGTGTCACTACTG

CTACATTTGACATTGAAAAAATTGGATCTCAAAGCATGAAGGCATTAC

>PGSC0003DMG400019275-(rev)G-LecRK\_5551

CATCACTATGCTACATTTGACATTGAAAAAATTGGATCTCAAAGCATGAAGGCATTACTAAGGGAAAG

TTTTACTTATCTTTGCTCCTGTGTTTGTGTTTCATCCACCGAAGCTTTGG

>PGSC0003DMG400019275-(rev)G-LecRK\_5612

AGGGAAAGTTTTTACTTATCTTTGCTCCTGTGTTTGTGTTTCATCCACCGAAGCTTTGGCGCTACAGATAC

AATAACTACAACCTCATTTTCTGAAAGATGGTGATGATAATGTTGCTTCA

>PGSC0003DMG400019275-(rev)G-LecRK\_61

TGTGTTTGTATTCAATCCATCAAAGCTTTGGTGCTACAGATACAATAACTACAACCTCATTTTCTAAAAGAT

GGTGATGATGATATTACTTCACCTGGTGAATATTTGAAATGGGGTTCT

>PGSC0003DMG400019275-(rev)G-LecRK\_610

GTTACCCACAGACTATCGTGAAGAAGGGCTCAGATGTTGTGTATAGCTCTGGACCGTGAATGGTCGAT  
ATTTAGTGGAAACACAAAACCTCGAGACTAGGTACTTTCTATACATATGGAG

>PGSC0003DMG400019275-(rev)G-LecRK\_671

TGGTCGATATTTAGTGGAAACACAAAACCTCGAGACTAGGTACTTTCTATACATATGGAGTATATTCAAGT  
AAGACAGAGGTGTATTTTTGTATAAGCTCACATCTTCAGTTCTTGTGAG

>PGSC0003DMG400019275-(rev)G-LecRK\_6710

GAGTGCAGGAATACCTGCTCTAAAATTGTTCTTGTATGGCTTACTCCAATTCTGACATACTCAATGAAG  
GAAGTGGATGCTTACTGTGGTTCAAGGATCTGCTTGACATTCGGCAGGGA

>PGSC0003DMG400019275-(rev)G-LecRK\_6771

TCAATGAAGGAAGTGGATGCTTACTGTGGTTCAAGGATCTGCTTGACATTCGGCAGGGACCCAACGGA  
GGGCAAGATATCTACATTAGAATGGCTTCTTCTGAATCAGGTTGGCTTGTG

>PGSC0003DMG400019275-(rev)G-LecRK\_6832

CAACGGAGGGCAAGATATCTACATTAGAATGGCTTCTTCTGAATCAGGTTGGCTTGTGCAACTTAATAT  
TTTTGATAGATTGCCTGAGGATAGTAAAGGAGTTTAAGGTTGCAGGCAC

>PGSC0003DMG400019275-(rev)G-LecRK\_6893

ACTTAATATTTTTGATAGATTGCCTGAGGATAGTAAAGGAGTTTAAGGTTGCAGGCACTTAATAAAGC  
AGACTGTAGTTTAGTGCCTATGCTTACTATGATACTATCTACTGCCAATT

>PGSC0003DMG400019275-(rev)G-LecRK\_6954

TAATAAAGCAGACTGTAGTTAGTGCCTATGCTTACTATGATACTATCTACTGCCAATTCCTACCATATTT  
AGCCCGTAACTACCAAATAATAGCAGTACAGAAAGCTACTATTTTTTAG

>PGSC0003DMG400019275-(rev)G-LecRK\_7015

TACCATATTTAGCCCGTAACTACCAAATAATAGCAGTACAGAAAGCTACTATTTTTTAGTGAAGTTGGGA  
TGAATTTATAAGCCAAATCTGCAAGCATGATGACTATAGAACAAGCATTT

>PGSC0003DMG400019275-(rev)G-LecRK\_7198

AGGATGTGCTGTACTCAAAGGCTTGCAAGAGCCTTTATAACTCAAATAAAAATCATCTCCAATGGATA  
GGATAATTGCAATTTATTATTTATGTTTGTGAATTGATACTTGCAAGATA

>PGSC0003DMG400019275-(rev)G-LecRK\_732

TATTCAAGTAAGACAGAGGTGTATTTTTGTATAAGCTCACATCTTCAGTTCTTGTGAGGTTGACAGTAA  
GTCATAATGGAATTCTACAGATTTGGACTTTGGATGACAGAGAACAGGGT

>PGSC0003DMG400019275-(rev)G-LecRK\_793

TGACAGTAAGTCATAATGGAATTCTACAGATTTGGACTTTGGATGACAGAGAACAGGGTTGGGTGCCTT  
TGATCTTAGTACCAGCAGATAAATGTGAGGTTTATAATTCATGTGGCGCAT

>PGSC0003DMG400019275-(rev)G-LecRK\_8052

GATTAAAGTGTTGAGGATATAGTTTGTTTAAGAAGAGAGTCATTTGTTCTTTGTAGTCATTTATTTGTTCA  
TCTTTCCATGGTGACAAGTGGCAACTTGTTCCTCCGCATCAAAGGGCGAA

>PGSC0003DMG400019275-(rev)G-LecRK\_8113

TATTTGTTTCATCTTTCCATGGTGACAAGTGGCAACTTGTTCCTCCGCATCAAAGGGCGAATATTTCTTATAG  
ACTTTAGTTTTAATTTTAAAGAAGATTATCATAGGGCTAAACTGAAAAT

>PGSC0003DMG400019275-(rev)G-LecRK\_854

GGTGCCTTTGATCTTAGTACCAGCAGATAAATGTGAGGTTTATAATTCATGTGGCGCATATGGTAGCTGC  
AACAGTCAAGATTCTCCAGTATGTAGATGCTTAGATAAATTTGTGCCCAA

>PGSC0003DMG400019275-(rev)G-LecRK\_8540

TTTATATTTGGTACAACCTTCTCAATCCAATATTATGCATTTGAATAATAGTTGCATTTTCAGTGACTTGATGC  
CTATAGGCATACACTGATTTTCTTCCAACCTTCAAATCCCCATAAAGC

>PGSC0003DMG400019275-(rev)G-LecRK\_8601

TGACTTGATGCCTATAGGCATACACTGATTTTCTTCCAACCTTCAAATCCCCATAAAGCAGGAAAAAAAAA  
TGTAAGGAGAGAACTAAGACCCCAGTTGTTAAGAGCCTAATAATTACAT

>PGSC0003DMG400019275-(rev)G-LecRK\_976

ATAGTGATGCTTGGAAGAGGGGAAGATTGGTCAGGTGGCTGTGTTTCGGAAAACCTAACTAAATTGCCTTC  
ATAGAGATGTATTTTTGAAGTATTCGCATATTAATTGCCAGACACACGGA

>PGSC0003DMG400019276-(rev)G-LecRK\_1054

TTTTGTCAATGTTTAGATAATTCGAGCCAAAACATCCTGATAATTGGGAAAGGTCTGACTGGTCTAGTGG  
TTGTGTCCGGAAGATCCCCTGAATTGCACAGGAGATGGATTTATTAAGT

>PGSC0003DMG400019276-(rev)G-LecRK\_1736

TTTGTAACGAAAAAGGAGAAAGGATCCGGTGGTTACAACAACAGGTAAGTGGAAGTACCAATTCTGT  
CTATCGTAAAACCAGAAGCAACTAGTGGTCATTAGTTCTGTATACCACTAGT

>PGSC0003DMG400019276-(rev)G-LecRK\_1798

TTCTGTCTATCGTAAAACCAGAAGCAACTAGTGGTCATTAGTTCTGTATACCACTAGTATTTCAATTC

CTCCTTATTTGAGCAAGGTCTACTTGTATGTTCAAATTGCAGGGAGATT

>PGSC0003DMG400019276-(rev)G-LecRK\_2232

AATGTTTTATAAAATAAAGGTTTCATATTCAAAGAAAAGGAACATCAGCTGGAAAAGATTACCAACCAT

GAGATAAGCTGTGGAATGAAATGTGCAAGTAGATGCTGCCTGAACAAGAAC

>PGSC0003DMG400019276-(rev)G-LecRK\_2294

CAACCATGAGATAAGCTGTGGAATGAAATGTGCAAGTAGATGCTGCCTGAACAAGAACTTGATTGCACT

AGTAAGGAAAAAATGACGATTCACTCCATCAAATTTCTAACGGGACTGCT

>PGSC0003DMG400019276-(rev)G-LecRK\_2356

TTGCACTAGTAAGGAAAAAATGACGATTCACTCCATCAAATTTCTAACGGGACTGCTACTTTTACAGGG

TGTATTAGAAGGTGGACAAGAAGTAGCAGTGAAGCGGCTTTCAGAAACAT

>PGSC0003DMG400019276-(rev)G-LecRK\_2542

TTGTAAAGCTTCTAGGATGCTGCATTCAAGGAGAAGAGAAGATGCTGGTGTATGAGTACTTGCCAAACA

AAAGCCTGGAATTATATATATTTGGTTAGTCTTTCACATCTACTGAACGGC

>PGSC0003DMG400019276-(rev)G-LecRK\_2604

CCAAACAAAAGCCTGGAATTATATATATTTGGTTAGTCTTTCACATCTACTGAACGGCCATTTCTTTCAAT

GCAATCAATTGTGATTTACGAAGGTTGGTTTCATTGTTATAGAAACCT

>PGSC0003DMG400019276-(rev)G-LecRK\_2666

TCTTTCAATGCAATCAATTGTGATTTACGAAGGTTGGTTTCATTGTTATAGAAACCTTTAGTAATAAGTT

GAAAACATTTGACAGATGAAGAAAGGAGTGCATTACTTGATTGGCCTAA

>PGSC0003DMG400019276-(rev)G-LecRK\_310

CACTATGTTGGAATATGGTACAAGAAAACCTCTGCTACTACTCCTGTTTGGGTTGCCAATAGACTAGCTC

CTGTTGCTAATAAGTATGGGGTGTGAAAGTTATTCAGCCAGGTCTGATT

>PGSC0003DMG400019276-(rev)G-LecRK\_3224

TACAGTAACTCCTAACGGTAAAAAGACTCAGAAAAAGTGTTTGTTAATGCATTTAAGTTTTATGTGCCGA

CAGTAAATTACATGTAAATCTCTATTATAAGAGCTTGTTAACTAACATAC

>PGSC0003DMG400019276-(rev)G-LecRK\_3286

TGTGCCGACAGTAAATTACATGTAAATCTCTATTATAAGAGCTTGTTAACTAACATACTATCACAAGTTAA

ACTACAATGCTAGAGTATAAAGTCTTTGTACTGTTAGTGTGTATAAGTT

>PGSC0003DMG400019276-(rev)G-LecRK\_3348

ACAAGTTAAACTACAATGCTAGAGTATAAAGTCTTTGTTACTGTTAGTGTGTATAAGTTAAATCCTTTGTTG  
ATGGAGGGATCGTTTTATGCAGGCATGGATGCTTCATAATGAAGAACGG

>PGSC0003DMG400019276-(rev)G-LecRK\_3410

CCTTTGTTGATGGAGGGATCGTTTTATGCAGGCATGGATGCTTCATAATGAAGAACGGACGTTGGAAC  
AGTAGATCCATATCTCGTAAATTCATACTATATATCAGAAGTACTAAGATC

>PGSC0003DMG400019276-(rev)G-LecRK\_3534

CATGTGGGATTGTTATGTGTTCAACAGAATCCAGAGGACAGGCCAAGCATGTCAACTGTGATTATGATG  
CTGAGCAATGAAGGCATTTTACCACTGCCTAAACATCCCGGTTTCTTCACT

>PGSC0003DMG400019276-(rev)G-LecRK\_3596

TATGATGCTGAGCAATGAAGGCATTTTACCACTGCCTAAACATCCCGGTTTCTTCACTGAAAGGAAAGTT  
GAAGGTCATGATCAATTATCTTGGAGTACACAAACACCAAGTTCTATAAA

>PGSC0003DMG400019276-(rev)G-LecRK\_3658

GGAAAGTTGAAGGTCATGATCAATTATCTTGGAGTACACAAACACCAAGTTCTATAAACGAAGTTACCAT  
CACGCTGTTGAATGCTCGATAGAAGCATATCATGGCCATAGTCAGTGGCA

>PGSC0003DMG400019276-(rev)G-LecRK\_372

ACTAGCTCCTGTTGCTAATAAGTATGGGGTGTTGAAAGTTATTCAGCCAGGTCTGATTGTACTTCTGAAT  
GATACTAATGCAACTGTTTGGTCCACAACTCATCGAAATCTGTACAGAA

>PGSC0003DMG400019276-(rev)G-LecRK\_434

TTCTGAATGATACTAATGCAACTGTTTGGTCCACAACTCATCGAAATCTGTACAGAATCCTGTTGCTCAG  
TTGTTGGACACAGGGAATTTTGTGGTGAGGGATGCTAATGATCCGAATC

>PGSC0003DMG400019276-(rev)G-LecRK\_744

AGGGGCTAATGTGACGTTTAGAGCAGGGCCGTGGAATGGTATCAGGTGGAGTGGTGCACCAAATCTGG  
TAAACAACTCTATCATTTCTTTTGGCATGGTTATGAATAGTAGGGAAATTTA

>PGSC0003DMG400019276-(rev)G-LecRK\_806

ATCTGGTAAACAACTCTATCATTTCTTTTGGCATGGTTATGAATAGTAGGGAAATTTACTACAAGTATGA  
GATGGTGAACAAATCCGTTATTTCAACATTTGTTTTAGAGCCTTATGGGA

>PGSC0003DMG400019276-(rev)G-LecRK\_992

ATGACTGTGACACCTACAAATTATGTGGTGCATATGGGACTTGCAACATTTTGAAGTATCCTTTTTGTCA  
ATGTTTAGATAATTCGAGCCAAAACATCCTGATAATTGGGAAAGGTCTGA

>PGSC0003DMG400019278-(rev)G-LecRK\_0

ATGAAAGGGAAACATTTTTATCTTCTTGCTCCATTTTTCTTCCATCTTGCTAATTTCCACAGCATTAGAC  
ACAATCACAACAGAAAAACCAATTAGAGATGGTGACACAATTGTTTCA

>PGSC0003DMG400019278-(rev)G-LecRK\_122

TGGAGGGGTTTACGAGCTTGATTTTTAGCCCTGGAAATTCGAAGAATCGCTACGTTGGCATATGGTT  
CAAGAAGATAGCAACTAGAACTGTTGTCTGGGTTGCCAACAGAAACATTCC

>PGSC0003DMG400019278-(rev)G-LecRK\_1342

TTAGGTAATGACCCTACTCTATACCATTTTTGTGTTCTTTTGCACAATATAAGCATGACACCTTAGAGTTTA  
AGGAACTTTACTATCTGATGTCACTGATAGTAACATATGATAGTCGCG

>PGSC0003DMG400019278-(rev)G-LecRK\_1403

CTTAGAGTTTAAGGAACTTTACTATCTGATGTCACTGATAGTAACATATGATAGTCGCGGAAGCAATTCA  
TATGTCAATTGAAGACTGCTTATGGACTTTTTATTAACAGATTCAGTCA

>PGSC0003DMG400019278-(rev)G-LecRK\_183

ATATGGTTCAAGAAGATAGCAACTAGAACTGTTGTCTGGGTTGCCAACAGAAACATTCCACTGAATGAC  
AATTCAGGAGTGTTATTACTCAATCCCAATGGAATTCTTGTACTTGTTGAC

>PGSC0003DMG400019278-(rev)G-LecRK\_1830

CTGTTACTACTGCCACTGAAAATTTCTTCTGCGAATGTGATTGGTGAGGGTGGCTTTGGACAGGTTTA  
CAAGGTAAATCAACTTTGATCTTCAACTAAAAGCTACAAGCATATTTGAC

>PGSC0003DMG400019278-(rev)G-LecRK\_1891

ACAGGTTTACAAGGTAAATCAACTTTGATCTTCAACTAAAAGCTACAAGCATATTTGACCCTAGAGAGAA  
AATCGCAGGGTATTCTACCAGATGGACTAGAGATAGCAGTAAAGAAGCTA

>PGSC0003DMG400019278-(rev)G-LecRK\_2135

TCTATGAGTTTATGCCCAACTCTAGCTTGGACTGTTTCATTTTTGGTCTGCTTTTCGTGATTCATTAATAA  
ATATTACTACTTGATAAGTCCTCAATATCTCTGTTATCACTCAAGAAT

>PGSC0003DMG400019278-(rev)G-LecRK\_2196

TCATTAATAAATATTACTACTTGATAAGTCCTCAATATCTCTGTTATCACTCAAGAATTGGTTTTACATTG  
TGCAGATCCAAGCAGAAAAGCTTCACTTGCATGGAAGAATCGCTTTGA

>PGSC0003DMG400019278-(rev)G-LecRK\_2379

TCATAGAGACCTCAAGACCAGCAACATTTTACTAGATGGAGACATGAATGCCAAAATTGCTGATTTTGGC

CTTGCCAAAATTTTTGGCGGAGAACAAGTGGAAGGAAATACTAAGAGAGT

>PGSC0003DMG400019278-(rev)G-LecRK\_244

TGAATGACAATTCAGGAGTGTTACTCAATCCCAATGGAATTCTTGTACTTGTTGACAATCCAATGCC

TCAATTTGGTCATCAAACATCAAGATTGTTAATGAATCCAAAAGCAC

>PGSC0003DMG400019278-(rev)G-LecRK\_2440

GATTTTGGCCTTGCCAAAATTTTTGGCGGAGAACAAGTGGAAGGAAATACTAAGAGAGTGATAGGGAC

ATAGTAAGTTCTACAAATCTTTATGATAGACATTCAATCAGTACTTGAACCT

>PGSC0003DMG400019278-(rev)G-LecRK\_2501

TAGGGACATAGTAAGTTCTACAAATCTTTATGATAGACATTCAATCAGTACTTGAACCTAAATTTGATGA

GTTGATGCAGTGGATATATGTCACCTGAGTATGCTGTTGATGGGAAATAT

>PGSC0003DMG400019278-(rev)G-LecRK\_2623

AGTAAAATCCGATGTATTTAGTATCGGCGTTATCATTCTAGAGCTAGTCAGTGGCAGAAGGAACAGGAA

ATTTTCATCATTTGGAACATTATCACAATCTTTTGGGACATGTAAGCACATA

>PGSC0003DMG400019278-(rev)G-LecRK\_2684

AACAGGAAATTTTCATCATTTGGAACATTATCACAATCTTTTGGGACATGTAAGCACATAACAACACTAAAC

TTCGTTCCCTTAACTCACTTTTTCTATAGTGAATGCATTTGTATAAATGT

>PGSC0003DMG400019278-(rev)G-LecRK\_2745

ACACTAAACTTCGTTCCCTTAACTCACTTTTTCTATAGTGAATGCATTTGTATAAATGTGTTCTGTTTGTA

TTTAGGCATGGTACTTTGGACTGAAGACAAAGCGTTGGAACCTGATGG

>PGSC0003DMG400019278-(rev)G-LecRK\_2867

GAATGTTTGAAAGAATCATTTTCAGAATCTCAAGTGTTGAGATGCATCCAGGTTGGCTTGTTGTGCGCCC

AAAAACACCCTGAGCATAGGCCTACAATGGCATCAGTAGTTTTCTGGTTG

>PGSC0003DMG400019278-(rev)G-LecRK\_2989

AAATGAAGGCCTGGTTCTTCCTCAACCAAAGCAGCCTGGATTTTTATAGAAAGGAATTCAATGGATTCA

ACAGAATCAGCTCAATTTATCAGTTAGCTCGTTGTAATCGGATAAGGGCA

>PGSC0003DMG400019278-(rev)G-LecRK\_305

TTCCAATGCCTCAATTTGGTCATCAAACATCAAGATTGTTAATGAATCCAAAAGCACGGCTCCTGGATT

CCGTAACCTTGTTGTCGGTGATGGAAATAATAGTGAACGAGAAGTTAA

>PGSC0003DMG400019278-(rev)G-LecRK\_3050



ATGGATTCAACAGAATCAGCTCAATTTATCAGTTAGCTCGTTGTAATCGGATAAGGGCATTGTGAATTCA  
AGTTCAATCAACACATATAATATCTAATTAATGAGAAGAAAATCTGAAAG

>PGSC0003DMG400019278-(rev)G-LecRK\_3111

GTGAATTCAAGTTCAATCAACACATATAATATCTAATTAATGAGAAGAAAATCTGAAAGTGTGTACACAC  
ATTTACAGCACACGCTTTGTAGCACAATTAATCCGGATTCACAGGGGAAAG

>PGSC0003DMG400019278-(rev)G-LecRK\_3172

TGTACACACATTTACAGCACACGCTTTGTAGCACAATTAATCCGGATTCACAGGGGAAAGTTCGACTTTTT  
GGGAGAAACTAAAGTCTCCTCATCAAAGTGACTCCATTCAAGAAGTTGA

>PGSC0003DMG400019278-(rev)G-LecRK\_3233

CGACTTTTTGGGAGAAACTAAAGTCTCCTCATCAAAGTGACTCCATTCAAGAAGTTGAAGATTCTTCTT  
GTTTTTCTCTCAGTTGAATATTAGATGGTGACTTTACAACTTTTTAAAA

>PGSC0003DMG400019278-(rev)G-LecRK\_3294

ATTCTTCTTGTTTTTCTCTCAGTTGAATATTAGATGGTGACTTTACAACTTTTTAAAATAAATGCATTAAT  
ATTAATAGAAAATAAAAAAGACATCAGTTCCTTTTTTCTTAGTTCTGC

>PGSC0003DMG400019278-(rev)G-LecRK\_3355

AATGCATTAATATTAATAGAAAATAAAAAAGACATCAGTTCCTTTTTTCTTAGTTCTGCCATTACTAGTCC  
AAGATGTCACATCGTCATTAACACTAAATCATTTTAGGAAGACTTTAGG

>PGSC0003DMG400019278-(rev)G-LecRK\_3416

TTACTAGTCCAAGATGTCACATCGTCATTAACACTAAATCATTTTAGGAAGACTTTAGGCAATTTACTCCA  
ATACATTTTATGTGTTTACACCAAGAAAATAGATGCATGCCATATGTTT

>PGSC0003DMG400019278-(rev)G-LecRK\_3477

ATTTACTCCAATACATTTTATGTGTTTACACCAAGAAAATAGATGCATGCCATATGTTTGTATGAATAGTT  
CTATAGCGTGCAATTGCAAACACCAGGTTAATGGTGGAAATGGAAAGTC

>PGSC0003DMG400019278-(rev)G-LecRK\_3599

AGGCATACAACTTTTGACAAGTTCAAACCTTTGACATCTAATTCTTGGCAGCAGTTGTGATTGGCCTTTTATC  
TCAAAAAGTTCTTTTTTTCATTTTATAGTTGTGATTGGCCTTTTATTC

>PGSC0003DMG400019278-(rev)G-LecRK\_366

CTCCTGGATTCCGGTAACCTTGTTGTCGGTGATGGAAATAATAGTGAACGAGAAGTTAATTTTCGTGTGG  
CAGAGTTTTGATTATCCAGGAGATACTTTATTACCTGGGATGAAGCTTGGA

>PGSC0003DMG400019278-(rev)G-LecRK\_3660

GGCCTTTCATTCAAAAAAGTTCTTTTTTTCATTTTATAGTTGTGATTGGCCTTTCATTCAAAAAAGTTCTTT  
TTTTCATTTTATTTATATAAAACATTTTTGGACATGGTTGTTAATTCT

>PGSC0003DMG400019278-(rev)G-LecRK\_3721

AAAAGTTCTTTTTTTCATTTTATTTATATAAAACATTTTTGGACATGGTTGTTAATTCTAAACTGAGAAAAA  
AAAAGTTATCAGTATCTTTTCTGTGTCAAGGCTTTTTTGAAGTTGTCA

>PGSC0003DMG400019278-(rev)G-LecRK\_3782

ACTGAGAAAAAAAAGTTATCAGTATCTTTTCTGTGTCAAGGCTTTTTTGAAGTTGTCAATCAAAAACAT  
GAGTCAGAGTCTATCAAAGGGCTACTGTTTTTATTCCTTTGCTCACATT

>PGSC0003DMG400019278-(rev)G-LecRK\_3843

CAAAAACATGAGTCAGAGTCTATCAAAGGGCTACTGTTTTTATTCCTTTGCTCACATTTTTTCTTCATCTT  
ACTAATTTCCGCGGCATTAGACACGATCACAACAGATGAATCCATTAG

>PGSC0003DMG400019278-(rev)G-LecRK\_4209

ATTAAGGATCCAAAAGCACGGATTCTGGATTCCGGGAACCTTGTTGTCAATGATGGAAATGAAAGAGA  
CCTGAAAATTAATTTCCGCGTGGCAGAGTTTTGATTATCCAGGAAATACTTT

>PGSC0003DMG400019278-(rev)G-LecRK\_427

TCGTGTGGCAGAGTTTTGATTATCCAGGAGATACTTTATTACCTGGGATGAAGCTTGGACGTAATCTGGT  
CACGGGCATGGATTGGTACATAGAGTCATGGAAGAGCACTGATGATCCTG

>PGSC0003DMG400019278-(rev)G-LecRK\_4636

GTGCTTAACCCGGAAGGGCTGATAGAACACATAACATGGATTGAGAGCAGTCAAAGCTGGTTTCTGTAC  
TCAACAGTACAGATTGATAGCTGTGGTCGATTTGCTTTATGCGGTCCTTAT

>PGSC0003DMG400019278-(rev)G-LecRK\_4697

TTCTGTACTCAACAGTACAGATTGATAGCTGTGGTCGATTTGCTTTATGCGGTCCTTATGCAAGTTGCAG  
CATCAATAACTCCCCTCCATGTGACTGCTTGCAAGGTTTCAATCCTAGGT

>PGSC0003DMG400019278-(rev)G-LecRK\_488

TAATCTGGTCACGGGCATGGATTGGTACATAGAGTCATGGAAGAGCACTGATGATCCTGCTGCGGGTG  
AATATATAGAACGTCTTGATTCTCATGGATACCCTCAATTTTTCTGTGTGGAA

>PGSC0003DMG400019278-(rev)G-LecRK\_4941

ATATTATATTGATTACTTAATTATGACTTCACAGGGTTCCTCAACAGTCTGCAGCAGATTGGGCTACTGGT

TGTGTTAGGAGAACTTCTTTGGATTGTAAACAAGACGGTTTTCTTAAAT

>PGSC0003DMG400019278-(rev)G-LecRK\_5185

AAATGGCGGAAGTGGATGCTTACTATGGTTCGGAGATCTCATTGATATTCGAGAGTTGAGCCAAAATGA  
ACAAAATCTGTTTGTGAGAGTTGCTGCTTCAGAAATAGGTAATGACCCTAC

>PGSC0003DMG400019278-(rev)G-LecRK\_5246

CAAAATGAACAAAATCTGTTTGTGAGAGTTGCTGCTTCAGAAATAGGTAATGACCCTACTCTGCACCATT  
TTCATTTTGTGTTCAATATAAATACACAGATCTTTGAAACTGACGAATC

>PGSC0003DMG400019278-(rev)G-LecRK\_5307

TGCACCATTTTCATTTTGTGTTCAATATAAATACACAGATCTTTGAAACTGACGAATCCCTGGTCAACAA  
ATTACTGATAACCAAGTTTGCAGGCTTCATAACAAAATAAGACGTATAT

>PGSC0003DMG400019278-(rev)G-LecRK\_5368

TGGTCAACAAATTACTGATAACCAAGTTTGCAGGCTTCATAACAAAATAAGACGTATATGTAAATTGAAG  
ACTGCTTATGAACTAATTATTGAACATATTCAGACAGGAAGCGGAGGAGA

>PGSC0003DMG400019278-(rev)G-LecRK\_549

GCGGGTGAATATATAGAACGTCTTGATTCTCATGGATACCCTCAATTTTTCGTGTGGAAAAATTCGTCTA  
TAGTATATAGCACAGGGCCATGGAATGGTATCGCATTTAGTAGTAGTCCT

>PGSC0003DMG400019278-(rev)G-LecRK\_5673

ATCTAGCTGACATTGTTTGCCTTACCAAATTCTCATTGATATCATGTTTGTGGTGGGCGAATGTATATTG  
ACAGGTCCAGCTGTTGAAAATGAGGACATGGAGCTTCCATTGTTTGATT

>PGSC0003DMG400019278-(rev)G-LecRK\_61

CAGCATTAGACACAATCACAACAGAAAAACCAATTAGAGATGGTGACACAATTGTTTCAGCTGGAGGGG  
TTTACGAGCTTGGATTTTTTCAGCCCTGGAAATTCGAAGAATCGCTACGTTG

>PGSC0003DMG400019278-(rev)G-LecRK\_610

ATTCGTCTATAGTATATAGCACAGGGCCATGGAATGGTATCGCATTTAGTAGTAGTCCTAAAAATCAACC  
AGCTATATATTATGCTTTCGAGTTTGTATTAAACAGAAGGAGATTTACT

>PGSC0003DMG400019278-(rev)G-LecRK\_671

AAATCAACCAGCTATATATTATGCTTTCGAGTTTGTATTAAACAGAAGGAGATTTACTTTAAATACGAG  
CTTAATGAGTCCCTGCCACCAGGGTGGTGATCAATCAGGCTGGAATGGT

>PGSC0003DMG400019278-(rev)G-LecRK\_7259

GATAATTGAGCAATCAATGGACTAATTATTGGCAAATTTGTAAGCACAAGTAGTTAGAGGTATCTATAT  
CATGCATTACTTTTTTTGGGGACAATGAATATATTCATCAAACATAGTTG

>PGSC0003DMG400019278-(rev)G-LecRK\_732

AAATACGAGCTTAATGAGTCCCTGCCACCAGGGTGGTGATCAATCAGGCTGGAATGGTAGAACACCTA  
ACATGGATCGAGCGTAATCACAGATGGATAGTCTACGTATCAGCACAATCT

>PGSC0003DMG400019278-(rev)G-LecRK\_7371

CATAGTTGCTATACATGATACATAAGCCCTATTCTATATGAAGTATCTTTTTTTGTTTCCCACTCGGTGTCT  
GGATCCCACATTGGAGCTCTGGCTAAATTTGGATTGCGTATAGCAGGA

>PGSC0003DMG400019278-(rev)G-LecRK\_793

AACACCTAACATGGATCGAGCGTAATCACAGATGGATAGTCTACGTATCAGCACAATCTGATAATTGTG  
ATCGTTTTGCTTTATGTGGTCCTTATGCAAGTTGCAACATCAATAACTCTC

>PGSC0003DMG400019278-(rev)G-LecRK\_854

TAATTGTGATCGTTTTGCTTTATGTGGTCCTTATGCAAGTTGCAACATCAATAACTCTCCTCCATGTGACT  
GCTTGCGAGGTTTCGAGCCTAGGTATTGTTAAAAATATGCCTTCACACG

>PGSC0003DMG400019278-(rev)G-LecRK\_915

CCATGTGACTGCTTGCGAGGTTTCGAGCCTAGGTATTGTTAAAAATATGCCTTCACACGACTCCTCTGTCT  
GTTCCAATACCATGTTAATTCATTAATTATGTCTTCACAGGTATCCTGA

>PGSC0003DMG400019278-(rev)G-LecRK\_976

TCCTCTGTCTGTTCCAATACCATGTTAATTCATTAATTATGTCTTCACAGGTATCCTGAACAATGGTATGCA  
GTGGACTGGTCTAATGGTTGTATAAGGAAAACCTCTTTGTCTTGTAAC

>PGSC0003DMG400019415-(rev)LRR-RLKs\_1037

TGGAGGGACATTTTCATGAGTTTTTCAGCAACCTTTCAAGTAATCTGGCGTTTGTAGACTAGTCAAGCAAT  
CAGTTTTCAGGAAATATCCCGATAGACATTGGGAAATTCAACAACCTTGGA

>PGSC0003DMG400019415-(rev)LRR-RLKs\_1342

CTTCAAGTGTTGCAAATGTCAAAGTTTGTGTATCTTAACCTGAACCAAACAATTTAATCGGTTTCGATA  
CCTAAAGAAATTTGTCTCATATCTTCCTTAGTTGTTCTAAACCTTTCTA

>PGSC0003DMG400019415-(rev)LRR-RLKs\_1403

CGGTTTCGATACCTAAAGAAATTTGTCTCATATCTTCCTTAGTTGTTCTAAACCTTTCTAGTAACAACCTTGAC  
TGCGCCCTTCCCAAAGAAATCGAAAGCCTGAAAAATCTCTTATCATT

>PGSC0003DMG400019415-(rev)LRR-RLKs\_1586

TGTTAACTTAACAATGAAAAGGAATTTATTCCGCGGGATTATTCCTTCCACTTTCAGTTCACTAAAGAGTC  
TTCAAGTTTTAGATCTTTCTCAGAATAAGCTATCAGGTATGGTTCCAAA

>PGSC0003DMG400019415-(rev)LRR-RLKs\_1647

CTAAAGAGTCTTCAAGTTTTAGATCTTTCTCAGAATAAGCTATCAGGTATGGTTCCAAAAGTACTTGGAAG  
GATTGGCCTTACATTTCTTAACTTATCGTTTAATGATTTTGAAGGTGGC

>PGSC0003DMG400019415-(rev)LRR-RLKs\_1708

ACTTGGAAGGATTGGCCTTACATTTCTTAACTTATCGTTTAATGATTTTGAAGGTGGCCTTCCACAACGA  
GGCATCTTTGAGAACGCGAGTGTAGATTCTTTCGTTGGAAATTCTAGAA

>PGSC0003DMG400019415-(rev)LRR-RLKs\_2074

GCAACTTGATTGGTGTGGGAGTTATGGATATGTTTATAAGGGAATTTAGAAACGGATGGTAAGCACG  
TTGCTATAAAAGTATTGAATCTTTTACAATATGGAGCTATCAAAGTTTCA

>PGSC0003DMG400019415-(rev)LRR-RLKs\_2318

TGGAAGTTTGGAGGACTGGTTGCATCCAGATAATTCAAGACCAAATGTTCAACCAAGAAGATTAGGATT  
TCTACAAAGGATGATTATTGCTATTGATGTTGCTAGTGCAATTCATTATCT

>PGSC0003DMG400019415-(rev)LRR-RLKs\_244

GTGTGTTATCACCTTTGTTGGAAATTTGAGCTTCCTTATACGACTAGACGTCGGAAACAACACCATTTCT  
GGCAATATCCCTCCTGAATTAGGCCGTTTGACAAGATTACGCCATCTAT

>PGSC0003DMG400019415-(rev)LRR-RLKs\_2745

AATGCAAGGTGATGTGTATAGTTTTGGTATCGTCTTACTTGAAATGTTAACCGGGAAAAGACCAACAGA  
TGACATGTTTGGCGGCGATTTAAGCCTTCATGATTTTGTAGGAATGCCAT

>PGSC0003DMG400019415-(rev)LRR-RLKs\_2806

CCAACAGATGACATGTTTGGCGGCGATTTAAGCCTTCATGATTTTGTAGGAATGCCATGCCTGATGGAG  
CACTTGAGATAGTAGATCCACTTCTATTTTGAAGAGGAAGAGATAAGC

>PGSC0003DMG400019415-(rev)LRR-RLKs\_2867

CTGATGGAGCACTTGAGATAGTAGATCCACTTCTATTTTGAAGAGGAAGAGATAAGCAGAGAGAGG  
TCTCAAATCCAAGATTCATCAGAAGGCCAAAAAATGGTGGAGGGTATAATCT

>PGSC0003DMG400019415-(rev)LRR-RLKs\_2928

AGAGAGGTCTCAAATCCAAGATTCATCAGAAGGCCAAAAAATGGTGGAGGGTATAATCTCCTTATTTGG

AGTTGGAATTGTTTGTTC AATGTATGATTCAAGTAAAAGAAAAACATGAA

>PGSC0003DMG400019415-(rev)LRR-RLKs\_2986

TCCTTATTTGGAGTTGGAATTGTTTGTTC AATGTATGATTCAAGTAAAAGAAAAACATGAAGGAGGTTG  
TTAGAGAGTTGTGTTCTATAAGAGATTCTCTAGTTGGTTGTACAATATGA

>PGSC0003DMG400019415-(rev)LRR-RLKs\_427

TTGAGTTATGGGCGTACAAGAACAATCTTGTAGGTGTTCTTCCAAGGGAGCTTGGTTACTTACCAA  
CAATATTTTGATTTTCAGTTACAACAAGCTCATTGGTGAAATCCCGAAAT

>PGSC0003DMG400019415-(rev)LRR-RLKs\_488

TACCAAACCTCAAATATTTTGATTTTCAGTTACAACAAGCTCATTGGTGAAATCCCGAAATCTTATGGTA  
ATTTCAAGTCTATTGGAAATGTACCTTTTGGATAATGATCTCGAGGGTAA

>PGSC0003DMG400019698LRR-RLKs\_1403

TATTCATCTGGGATTTGCAAAGATCCTATGAATAACTTAAAAGTGTGTACCTTCAGAATAACTTGT  
TTGAAGGCCCTATACCTGACAGTCTAAGCAACTGTTCCACAGCTGGTGCTCACT

>PGSC0003DMG400019698LRR-RLKs\_1464

AACTTGTTTGAAGGCCCTATACCTGACAGTCTAAGCAACTGTTCCACAGCTGGTGCTCACTT  
GATCTTAGCTTAACTTACTTGACTAGGAGAATACCATCTAGTTTGGGGTCATTGTCAAAG

>PGSC0003DMG400019698LRR-RLKs\_1830

ATCTCAGGGAATATACCTGCTGAGTTGGGTAATTGCCAGAGCTTGATATGGTTGGATCTCAACTA  
AATTTCCTGAGTGGCTCCATTCCACCGCCTTTGTTCAAGCAATCTGGAAATATT

>PGSC0003DMG400019698LRR-RLKs\_1891

ATACTAATTTCTGAGTGGCTCCATTCCACCGCCTTTGTTCAAGCAATCTGGAAATATTGCAGT  
GGCATTGCTGACCGGAAAACGATATGTGTATATTAAGAATGATGGGAGTAAGGAGT

>PGSC0003DMG400019698LRR-RLKs\_1952

AGTGGCATTGCTGACCGGAAAACGATATGTGTATATTAAGAATGATGGGAGTAAGGAGTGCCAT  
GGAGCAGGGAATTTGCTGGAGTTTGGAGGGATTAGACAAGAACAGCTGGGTAGAAT

>PGSC0003DMG400019698LRR-RLKs\_244

CTCCAGCTTACCAGCTTCTGTTAATGGTCTTTTTAAAGACTCCCAACAGCTTCTTTCTTTAAAG  
CTGCAC TTCCACCAACCCCTACTCTGCTTCAGAACTGGTTGCCATCTACTGACC

>PGSC0003DMG400019698LRR-RLKs\_3721

TAGAAATGGGGATAAATGAAAGTATAAAAGAAGGCAATGAGCTAAGCAAACACCTTTGAATGCAGCAG  
CACTAAATCAAGAGTTTGTGAAAGCTCACAAATTTCCAAAATCATATGCA

>PGSC0003DMG400019720RLKWAX-EGF\_1008

GTATTAGAAATGCTTGAAGGTGAAGTTGAAGTGCTAGAAGTACCTCCTCAGCCTCTTCAATCTCAACGGA  
TTGTTTCATCAGTTGATGGGAAGTTCTATGACATTTTCGTCCGATTCAATG

>PGSC0003DMG400019720RLKWAX-EGF\_1071

CAACGGATTGTTTCATCAGTTGATGGGAAGTTCTATGACATTTTCGTCCGATTCAATGGCTTTGTTAGAAA  
ATTCTGCTGATAATTCTGTCAAAGTAGACATTTGTTCTGATTGATTATAG

>PGSC0003DMG400019720RLKWAX-EGF\_1134

TTAGAAAATTCTGCTGATAATTCTGTCAAAGTAGACATTTGTTCTGATTGATTATAGTTGTGTATTGTTCA  
TTTAAAATGACATATATGTGAGAAGGGCTTCACATTATACCAAGGGTTCG

>PGSC0003DMG400019720RLKWAX-EGF\_1187

ATAGTTGTGTATTGTTTCATTTAAAATGACATATATGTGAGAAGGGCTTCACATTATACCAAGGGTCGGGT  
CTGAATTGGTCCGTCTCATTCTGTTGTTTCGCACTGACCAAATACACATG

>PGSC0003DMG400019720RLKWAX-EGF\_126

GATACGATTGAAGGCTTTCTGCAAACACAAAATAATTTTCATGCCAATCAGATATAATTACTCTCACATAA  
AGAGAATGACCAGAGGATTCAAAGAGAAATTAGGTGAGGGAGGTTACGGC

>PGSC0003DMG400019720RLKWAX-EGF\_756

TACAAAGCTGATGTGTACAGCTTTGGAATGCTGCTAATGGAAATGTTAGACTTAAATAGACATGAAGTT  
GCAAATGAAGAGAATTCCAGCCAATATTTTCCTTATTATATTTACGATAAG

>PGSC0003DMG400019720RLKWAX-EGF\_819

GAAGTTGCAAATGAAGAGAATTCCAGCCAATATTTTCCTTATTATATTTACGATAAGTTCAACGAGGGGA  
AGGAGATCCCGGTGGATGAAGAAGCAAATGACGGTGAAAATAAGATGGCT

>PGSC0003DMG400019720RLKWAX-EGF\_882

GAGGGGAAGGAGATCCCGGTGGATGAAGAAGCAAATGACGGTGAAAATAAGATGGCTAGAAAGCTGA  
GTTTAGTTGCATTATGGTGCATTCAAACGAATCCAATACAACGCCCTTCAATG

>PGSC0003DMG400019721OtherRLKsTM\_0

ATGCAAGTAAGAGTTTTAGAAATGTCCATCTTACTTTTCTGTTATTTTCCCATTGCTTAGCTTAGGACAC  
AGACTAGAGGCGGGTTGTGAGGATTCTTCGTGCAAGAATGATGGTCTC

>PGSC0003DMG400019721OtherRLKsTM\_1008

TGTGATCAGCAAATCCTACATTTTCGATATCAAACCACAAAACATCCTTTTAGACCACAACCTGAATCCCAA  
AATATGTGATTTTGGCCTAGCCAAACTGTGTTATAAAGAAAAAAGTGTG

>PGSC0003DMG400019721OtherRLKsTM\_126

CATTTCCATTTCAGACTCAGTCATCAACCAAAACATTGTGGCAATCCTGGCTTTGAACTACACTGTAACAC  
TAAAAAGACACCATCCTTGAGCTCCTCGTCTGTTCACTTAGTTGTTGA

>PGSC0003DMG400019721OtherRLKsTM\_1260

AGGATAAAGATGGATTCTAAGACGAATAATCACAGCAAAGTGAATTCTTTGGAATGGATATATGGATAT  
TTGGAGAAAGGGGAAGAATTAAGATTCGGATAGAGGAAGAAGGAGATGGT

>PGSC0003DMG400019721OtherRLKsTM\_1323

GGATATTTGGAGAAAGGGGAAGAATTAAGATTCGGATAGAGGAAGAAGGAGATGGTACAATTGTGA  
GAAAGTTAGCTATTGTTGAACTTTGGTGCATACTGTGGCATCCAATTGATAGG

>PGSC0003DMG400019721OtherRLKsTM\_1386

GTGAGAAAGTTAGCTATTGTTGAACTTTGGTGCATACTGTGGCATCCAATTGATAGGCCTTCAATAAAAG  
AAGTTACTCAGATGCTGGAAGGAGATGGGAGCCATCTCAACTTGTACCCA

>PGSC0003DMG400019721OtherRLKsTM\_1440

AGGCCTTCAATAAAAGAAGTTACTCAGATGCTGGAAGGAGATGGGAGCCATCTCAACTTGTACCCAAAT  
CCTTTTATGGCTAATAATACGCCTAAGTTAAACGCAAGTCCTCTCAGTTAG

>PGSC0003DMG400019721OtherRLKsTM\_189

TGTAACACTAAAAAGACACCATCCTTGAGCTCCTCGTCTGTTCACTTAGTTGTTGAAGAAATTGATTATG  
TCTCACAGAAAATTAACCTTTACGATCCTGACGAATGCATAGCAGCCAA

>PGSC0003DMG400019721OtherRLKsTM\_252

TGATTATGTCTCACAGAAAATTAACCTTTACGATCCTGACGAATGCATAGCAGCCAAGCTACCAAAACTG  
AATTTGTCACAATCTAATTTTCAGAAATGCTGACGATCCCACAGTCCTATT

>PGSC0003DMG400019721OtherRLKsTM\_315

AAAAGTGAATTTGTCACAATCTAATTTTCAGAAATGCTGACGATCCCACAGTCCTATTCAATTGTTTTGCAC  
CATTGGCATACTATTATGATATTCATTTTGTTCCTTGTCTTGGTTCTTC

>PGSC0003DMG400019721OtherRLKsTM\_378

TTTTGCACCATTGGCATACTATTATGATATTCATTTTGTTCCTTGTCTTGGTTCTTCTGGTTACAAAGTTTAT



GCTGTTTCGTACGACTCAATTATTGTAGGTGTAATTTTAGGTACAGCG

>PGSC0003DMG400019721OtherRLKsTM\_441

CAAAGTTTATGCTGTTTCGTACGACTCAATTATTGTAGGTGTAATTTTAGGTACAGCGCTTGTTTGCATTAT  
TGTCTTCTCACTTTATCAGCTATATTTGACAAGTAGAAATGGAAGAGAG

>PGSC0003DMG400019721OtherRLKsTM\_504

TGCATTATTGTCTTCTCACTTTATCAGCTATATTTGACAAGTAGAAATGGAAGAGAGAGTCGAGTTAGAC  
TTGAAAAGTTTTTGGATGACTACAAGGCCATCAGACCAACACGATATTCA

>PGSC0003DMG400019721OtherRLKsTM\_567

GTTAGACTTGAAAAGTTTTTGGATGACTACAAGGCCATCAGACCAACACGATATTCATATGCTGATATTA  
AGAAGATAACAGATGATTTTAATGAAAAGTTAGGAGAAGGGAGTTATGGA

>PGSC0003DMG400019721OtherRLKsTM\_63

TTAGGACACAGACTAGAGGCGGGTTGTGAGGATTCTTCGTGCAAGAATGATGGTCTCATCATTCAATTC  
CATTGACTCAGTCATCAACCAAAACATTGTGGCAATCCTGGCTTTGAA

>PGSC0003DMG400019721OtherRLKsTM\_819

CGCTTAGTTGGGTTTTGTGCTGATGAATTCAGACGAGCTCTGATCTACGAATACCTACCAAATGATTCAC  
TTGAAAGGTTTATTTTACCAGTGAGCTCAAGCCCGGGTAGTGTCTCACTC

>PGSC0003DMG400019801LRR-RLKs\_186

ATATCTTGCAGTATAAGGCATCAAAGAGTGACATCACTAGACCTCAACGGCCTCAGACTAAGAGGTTCA  
ATTGCCACAGAAATTGGGAACCTCTCATTTCTTAGTTTCCTGGACATTGGC

>PGSC0003DMG400019801LRR-RLKs\_2046

GGTAAACATTGGGAGACAATAAGCTTATAGGATCTATTCCTCCAGATTTGGGGAACCTGAGGAATTTGA  
AAAGATTTAGCCTGGAGAAAAACAATTTAGATGGTATTATACCAACTAGCT

>PGSC0003DMG400019801LRR-RLKs\_2170

TAACATGGAAAACCTGTACCAAATTATCTTGGGGAAAATCACTTTCTGGTGAATTACCAAGTTGTTTT  
GGGAATCTTTCTTTAAGAGAATTCTACTTAGATTCCAATACACTAAT

>PGSC0003DMG400019801LRR-RLKs\_248

AGTTCAATTGCCACAGAAATTGGGAACCTCTCATTTCTTAGTTTCCTGGACATTGGCAACAACAGCATC  
CACAGCAAATCCCTGATGAACTCGGCTATTTGAGGAGGCTAAAGTACTT

>PGSC0003DMG400019801LRR-RLKs\_2604

ATCTTGAACATCTCATTTATTTCAATGTCTCGTTCAATGGGCTCATGGGTGAAATTCCAGATGAGGCCATT  
CGTAAATTTTACAGCTGAATCATTTCATCGGTAACCCTGCATTATGTGGA

>PGSC0003DMG400019801LRR-RLKs\_2666

GAGGCCATTCGTAAATTTTACAGCTGAATCATTTCATCGGTAACCCTGCATTATGTGGATCATCACGCTTCC  
ATGTGATGCAATGCAGAGCCACAAGTCTTGAAAGAAAAAGAAAGAGTAG

>PGSC0003DMG400019801LRR-RLKs\_3038

AATAAAGGTATTCAATACAGAACTGCAACACGCATTTAGGAGTTTTGAAGTGGAGTGTCAAGTTTTACG  
TAGCATTTCGACACAGAAACCTTGTTAAGGTGATAAGTAGTTGTGCCAATTT

>PGSC0003DMG400019801LRR-RLKs\_310

ACAGCATCCACAGCAAAATCCCTGATGAACTCGGCTATTTGAGGAGGCTAAAGTACTTGTCTTGTCAAT  
GAATAATCTCACAGGTCAAATCCAGCAAGTCTAGGATTACTGAGAAGGC

>PGSC0003DMG400019801LRR-RLKs\_3286

AGTATTTACATGGAGGTCATTTGTTTGTAGCCGTCATTGTGATTTGAAACCAAGTAACATACTTTTGGAT  
GGAGATATGGTGGCAAAGTGAGTGACTTTGGGATATCCAACTTCTAA

>PGSC0003DMG400019801LRR-RLKs\_3534

GATTTTTTTGCAGAGTATGGATCAGAAGGCAAAGTATCAACCATGGGAGATGTTTATAGCTTTGGTATTT  
TGTTAATAGAGACTTTTACAAGAAAGAGCCCCGTGGATGATCTATTCGTT

>PGSC0003DMG400019801LRR-RLKs\_496

CTTCTTTGAAGGTCATCAATTTGATTTATAATGCACTGTCTGGGACTTTGCCGAATGACATTTGCCATAAT  
CTTCCGCGGCTGGAGGGATTACAAATAGCAAGAAATCAACTCTCTGGCC

>PGSC0003DMG400019801LRR-RLKs\_744

TTGCAACAATTTTTAGTGAAAACAATGATAAGCTGTTGAGAGGTATAACTTATTGTAACGTCTATTACAG  
GAAACTTGCCTAGAGACATGTGGAAGTGGACAAAAGTCAACATCTATTT

>PGSC0003DMG400019801LRR-RLKs\_930

TTTATTGCTGGACTTCTCACCTCGTAGCACTAGAGATCTTTGACATTTCTAACTTGCTCTTCAAGTCATTT  
ATATGAAATTAGTATTTGCATTTCAAAGGGTAGTAGCAGAAAATGTTA

>PGSC0003DMG400019900-(rev)LRR-RLPs\_0

GAGAATTTAGCCGCCATTTGGCAGAAAAGTCTTTGGCATCTGCAGATTTTCATGAAATATAAAATTCCCAC  
ACTGCTCAAGTGCTCAAAGTATCAAGTCTTAGCATCTGCAGAGTGGTGCT

>PGSC0003DMG400019900-(rev)LRR-RLPs\_1054

TGAATTTTTGTGGCACTAAACAATGCTAGGGGTCTGGATTCATTTGCATTAACATTTGTCTAGATGATTT  
TCTGTATCGAATTTACGGTCTAAAAAAAAGAAATTTCAAATTTGTGAGT

>PGSC0003DMG400019900-(rev)LRR-RLPs\_1116

AGATGATTTTCTGTATCGAATTTACGGTCTAAAAAAAAGAAATTTCAAATTTGTGAGTTATGAATCTTAA  
GTCTAAATTGTAAAACAATTGTTATGGAAATAGGAGGAAACAGTTCTGTT

>PGSC0003DMG400019900-(rev)LRR-RLPs\_1178

AATCTTAAGTCTAAATTGTAAAACAATTGTTATGGAAATAGGAGGAAACAGTTCTGTTGGGAAGGATTT  
CGATACAAATGGATTGTATCTAGCATTTTATTTAATAAAGGGTAAATGGCC

>PGSC0003DMG400019900-(rev)LRR-RLPs\_124

ATAGAATTCTATAAATGGTGGACGCTTTCCTTCAAGTTCTTCTAGAAAATCTGGCTTCTTTCATCGGAGAT  
AAATTTGTATTGCTTTTCGGTTTTGAAAAGGAATTTGTAAAGCTGTCGA

>PGSC0003DMG400019900-(rev)LRR-RLPs\_186

ATCGGAGATAAATTTGTATTGCTTTTCGGTTTTGAAAAGGAATTTGTAAAGCTGTCGAGTGTGTTTTCCA  
CAATTCAAGTTGTGCTTCAAGATGCTCAGGATAAGCAATTGAAGGACAAG

>PGSC0003DMG400019900-(rev)LRR-RLPs\_2108

ATAAAACATAGCAAATTATGCGTGTTGAGGTGGAACAAGTTGAAAACAACAACTTTGCAAGGTGGCTG  
GTTGAAATCTTTGCGGGTTTGTGTGTGTTTGCCTGCACCACCCCATCTGC

>PGSC0003DMG400019900-(rev)LRR-RLPs\_2170

GTGGCTGGTTGAAATCTTTGCGGGTTTGTGTGTGTTTGCCTGCACCACCCCATCTGCCATCCCTGTCTAC  
CTGATTGTTTTGTCTCTTTAGTTTGCAAAGTGTTCTATATTTCTTGCT

>PGSC0003DMG400019900-(rev)LRR-RLPs\_2232

CCTGTCTACCTGATTGTTTTGTCTCTTTAGTTTGCAAAGTGTTCTATATTTCTTGCTGACTCATTCTACTG  
AGCTCAATTGTAACAAATCTTTTATGTCCACACTACTTGGAACAGGTT

>PGSC0003DMG400019900-(rev)LRR-RLPs\_2294

CATTCTACTGAGCTCAATTGTAACAAATCTTTTATGTCCACACTACTTGGAACAGGTTTTGTTTTAACTGA  
ACCAAAGTGATGGAAGGGACAAAGAGGAGGATGAGATAGTGAAAATC

>PGSC0003DMG400019900-(rev)LRR-RLPs\_2356

TTTAACTGAACCAAAGTGATGGAAGGGACAAAGAGGAGGATGAGATAGTGAAAATCCTGATAAACA

ATGTTAATGTTGTCCAAGAACTTTTCGATTTTTCTATAATTGGTATGGGGGA

>PGSC0003DMG400019900-(rev)LRR-RLPs\_2418

TAAACAATGTTAATGTTGTCCAAGAACTTTTCGATTTTTCTATAATTGGTATGGGGGACTAGGAAAGACA  
ACACTAGCCCAAATGATCTTCAATGATGAGAGAGTGACTAAGCATTTC

>PGSC0003DMG400019900-(rev)LRR-RLPs\_248

GTTTTCCACAATTCAAGTTGTGCTTCAAGATGCTCAGGATAAGCAATTGAAGGACAAGGCAATTGAGAA  
TTGGTTGCAGAACTCAATTCTGTAGCCTATGAAGTTGATGACATATTGGG

>PGSC0003DMG400019900-(rev)LRR-RLPs\_2480

GAAAGACAACACTAGCCCAAATGATCTTCAATGATGAGAGAGTGACTAAGCATTTCATCCCAAATAT  
GGGTTTGTGTCTCAGATGATTTTGATGAGAAAAGGTTGATTAAGACAATTA

>PGSC0003DMG400019900-(rev)LRR-RLPs\_2542

AAAATATGGGTTTGTGTCTCAGATGATTTTGATGAGAAAAGGTTGATTAAGACAATTATAGGAAGTATT  
GAAAGAAGTTCTCCTGATGTCGAGGACTTGGCTACATTCCAGAAGAAGGTT

>PGSC0003DMG400019900-(rev)LRR-RLPs\_2604

AAGTATTGAAAGAAGTTCTCCTGATGTCGAGGACTTGGCTACATTCCAGAAGAAGGTTCCAGGAGTATT  
GAATGGAAAAAGATACTTGCTTGTCTTAGATGATGTTTGGAATGATGATCT

>PGSC0003DMG400019900-(rev)LRR-RLPs\_2666

AGTTATTGAATGGAAAAAGATACTTGCTTGTCTTAGATGATGTTTGGAATGATGATCTAGAAAAGTGGG  
CTAAGTTAAGAGCAGTCTTAAAGGTTGGATCAAGAGGTGCTTCCATTCTAG

>PGSC0003DMG400019900-(rev)LRR-RLPs\_2728

AAGTGGGCTAAGTTAAGAGCAGTCTTAAAGGTTGGATCAAGAGGTGCTTCCATTCTAGCTACTACTCGT  
CTTGAAAAGGTTGGATCAATTATGGGAACGTCGCAATCATATCATTATCA

>PGSC0003DMG400019900-(rev)LRR-RLPs\_2790

TACTCGTCTTGAAAAGGTTGGATCAATTATGGGAACGTCGCAATCATATCATTATCAAATTTGTCTCCAC  
ATGATGGTTTACTGTTGTTTATGCAACGTGCATTTGGGCAACAAAGAGA

>PGSC0003DMG400019900-(rev)LRR-RLPs\_2852

TGTCTCCACATGATGGTTTACTGTTGTTTATGCAACGTGCATTTGGGCAACAAAGAGAAGCAAATCCTAA  
TCTAGTGGCCATTGGAAAGGAGATTGTGAAGAAATGTGGTGGTGTACCTT

>PGSC0003DMG400019900-(rev)LRR-RLPs\_2914

AATCCTAATCTAGTGGCCATTGGAAAGGAGATTGTGAAGAAATGTGGTGGTGTACCTTTAGTAGCTAAA  
ACTCTTGGTGGTCTTTTACACTTCAAGAGAGAAGAAAGTGAATGGGAACAT

>PGSC0003DMG400019900-(rev)LRR-RLPs\_2976

AGCTAAACTCTTGGTGGTCTTTTACACTTCAAGAGAGAAGAAAGTGAATGGGAACATGTGAGAGACAA  
TGAGATTTGGAGTCTGCCACAAGATGAAAGTTCTATTTTGCCTGCTTTGAG

>PGSC0003DMG400019900-(rev)LRR-RLPs\_310

TTGAGAATTGGTTGCAGAACTCAATTCTGTAGCCTATGAAGTTGATGACATATTGGGCGAATGTAAAA  
ATGAGGCAACAAAATTCAAGCAATCTCGATTTGGGTTTTATCATCCAGGGA

>PGSC0003DMG400019900-(rev)LRR-RLPs\_3100

AGTTGTCATCACCTTCCACTTGATTTGAGACAATGATTTGCATATTGTGTAGTATTCCCAAAGGACACCAA  
AATGATAAAGGAAAATCTCATCACTCTCTGGATGGCACATGGTTTTCTT

>PGSC0003DMG400019900-(rev)LRR-RLPs\_3162

GGACACCAAATGATAAAGGAAAATCTCATCACTCTCTGGATGGCACATGGTTTTCTTTTATCAAAGGA  
AACTTGGAGTTAGAGGATGTGGGTAATGAAGTATGGAGCGAATTATACTT

>PGSC0003DMG400019900-(rev)LRR-RLPs\_3224

CAAAGGAACTTGGAGTTAGAGGATGTGGGTAATGAAGTATGGAGCGAATTATACTTGAGGTCTTTCT  
TCCAAGAGATTGAAGTAAAATCCGGTAAAACGTATTTCAAGATGCATGATC

>PGSC0003DMG400019900-(rev)LRR-RLPs\_3286

TCTTTCTTCAAGAGATTGAAGTAAAATCCGGTAAAACGTATTTCAAGATGCATGATCTCATTGATTT  
GGCTACATCTCTGTTTTAGAAAAGCGTATCAAGCAGCAATATCCGTGAA

>PGSC0003DMG400019900-(rev)LRR-RLPs\_3348

TCATGATTTGGCTACATCTCTGTTTTAGAAAAGCGTATCAAGCAGCAATATCCGTGAAACAAATGTAAAA  
AGTTACACACATATGATGTCCATTAGTTTCGCTGAAGTGGTGTCTTCTTA

>PGSC0003DMG400019900-(rev)LRR-RLPs\_3410

ATGTAAAAAGTTACACACATATGATGTCCATTAGTTTCGCTGAAGTGGTGTCTTCTTACTCTCCTTCGCTC  
TTGAAAAAGTTTGTCTCATTAAAGGGTGCTTAATCTAAGTTACTCAAAC

>PGSC0003DMG400019900-(rev)LRR-RLPs\_372

TGTAAAAATGAGGCAACAAAATTCAAGCAATCTCGATTTGGGTTTTATCATCCAGGGATTATAAATTTCC  
GTCATAAAATTGTCAAAAAGATGAAAGATATAATGGAGAACTAGATGCA

>PGSC0003DMG400019900-(rev)LRR-RLPs\_3720

TGTA CTTGATGGTTGCCATTGACTTCTACTCCACCAAGGATAGGATTGTTGACATGCCTTAAGACTCTAG  
GTTGCTTTATTGTGGGAAGCAAGAAGGGTTATCAACCTGGTGA ACTAAA

>PGSC0003DMG400019900-(rev)LRR-RLPs\_3782

AGACTCTAGGTTGCTTTATTGTGGGAAGCAAGAAGGGTTATCAACCTGGTGA ACTAAAAATCTAAATC  
TCTATGGCCCAATTTCAATCACACATCTTGAGAGAGTGAAGAATGATAAGG

>PGSC0003DMG400019900-(rev)LRR-RLPs\_3906

AAAAGAAGCCAATTTATCTACAAAAGCAAATCTGCATTCTTTAACCATGAGTTGGGACATCGACGGGCC  
ACATAGTTATGAATCAGAAGAAGTTAAAGTGCTTGAAGCCCTCAAACCACA

>PGSC0003DMG400019900-(rev)LRR-RLPs\_3968

ACGGGCCACATAGTTATGAATCAGAAGAAGTTAAAGTGCTTGAAGCCCTCAAACCACACCCCAATCTGA  
AAAATTTAGAAATCATTGCCTTTGGAGGATTCCGTTTTCCAAGCTGGATAA

>PGSC0003DMG400019900-(rev)LRR-RLPs\_4030

AATCTGAAAAATTTAGAAATCATTGCCTTTGGAGGATTCCGTTTTCCAAGCTGGATAAATCGTTCAGTTTT  
GGAGAAGGTCTTCTCTATTAGAATTACAAGCTGCAAAA ACTGCTTGTGT

>PGSC0003DMG400019900-(rev)LRR-RLPs\_4092

TTCAGTTTTGGAGAAGGTCTTCTCTATTAGAATTACAAGCTGCAAAA ACTGCTTGTGTTTGCCACCCTTG  
GGAGCTGCCTTGTTTAGAAAGTCTAGAGTTACAATACGGGTATGCGGA

>PGSC0003DMG400019900-(rev)LRR-RLPs\_4154

CACCCTTTGGGGAGCTGCCTTGTTTAGAAAGTCTAGAGTTACAATACGGGTATGCGGAGGTTGAGTATG  
TTGAGGAGGAGGATGCTCATTCTAGATTCCCCACAAGAAGAAGATTTCCAT

>PGSC0003DMG400019900-(rev)LRR-RLPs\_4216

GAGTATGTTGAGGAGGAGGATGCTCATTCTAGATTCCCCACAAGAAGAAGATTTCCATCCCTGAAAAGA  
CTTTGTATTTGGTTCTTTCATAATTTGAAAGGATTGGTGAAAGAGGAAGGA

>PGSC0003DMG400019900-(rev)LRR-RLPs\_4340

AGAAATCCCCATGCTTGAAGAGATGGAGATTCTATATTGCCCTATGTTTGT TTTTCCAACCCTTTCATCTT  
TCAAGAAATTAGAAGTTCATGGCAGCAGAAATGCAACAGGTTTGAGCA

>PGSC0003DMG400019900-(rev)LRR-RLPs\_4402

CTTTCATCTTTC AAGAAATTAGAAGTTCATGGCAGCAGAAATGCAACAGGTTTGAGCACCATATCTAATC

TTAGCAGTCTTACTTCCCTCCGCCTTGGTGCTAACAACCAAGTGACTTCA

>PGSC0003DMG400019900-(rev)LRR-RLPs\_4464

ATCTAATCTTAGCAGTCTTACTTCCCTCCGCCTTGGTGCTAACAACCAAGTGACTTCACTCCCAGAAGAGA

TGTTCAAAGCCTTACAAATCTCAAATACTTGACTATCTCTTACTACAA

>PGSC0003DMG400019900-(rev)LRR-RLPs\_4526

CAGAAGAGATGTTCAAAGCCTTACAAATCTCAAATACTTGACTATCTCTTACTACAAGAATCTCAAAGA

GCTGCCTACCAGCCTGGCTAGTCTCAATGCTTTACAGAGTTTGACAATTG

>PGSC0003DMG400019900-(rev)LRR-RLPs\_4588

CTCAAAGAGCTGCCTACCAGCCTGGCTAGTCTCAATGCTTTACAGAGTTTGACAATTGACTATTGTGAAG

CCCTAGAGAGTCTTCTGAGGAAGGGGTGAAAGGTTTAACTTCACTCACA

>PGSC0003DMG400019900-(rev)LRR-RLPs\_4712

TATTTGTTGAACAATGTAAGATGCTAAAATGTTTACCTGAGGGATTGCAGCACCTAACAACCCTCACAAA

TTTAGGAGTTACTGGTTGTCCAGAAGTGGGAACGCGCTGTGATACAAAAA

>PGSC0003DMG400019900-(rev)LRR-RLPs\_4774

CTCACAAATTTAGGAGTTACTGGTTGTCCAGAAGTGGGAACGCGCTGTGATACAAAAATAGGAGAAGA

CTGGCACAAAATTGCTCACATTCCAAATCTGGATATTCGTTAGTCTTATTGT

>PGSC0003DMG400019900-(rev)LRR-RLPs\_4820

GTGATACAAAAATAGGAGAAGACTGGCACAAAATTGCTCACATTCCAAATCTGGATATTCGTTAGTCTTA

TTGTATTTGTATTATTACTTATATAATGTGAAATCTATTTTCTGTACTTG

>PGSC0003DMG400019900-(rev)LRR-RLPs\_496

CTGAGGAAAGAAGCAAGTTTCATCTCCTTAAAATATTATAGAGAGACAAGCCACCTCCACGCGTGAAA

CAGGTGTCACTACTAATTAATAGCGTAATTTAGATTCAATTTGTTAACACA

>PGSC0003DMG400019900-(rev)LRR-RLPs\_558

CGTGAAACAGGTGTCACTACTAATTAATAGCGTAATTTAGATTCAATTTGTTAACACATCGTGGGTTAAC

CGTGATCTCTGGCAATGGGGCGGGAGCCGTTCTTAAAAAATATTTTTTT

>PGSC0003DMG400019900-(rev)LRR-RLPs\_62

ATTCCCACACTGCTCAAGTGCTCAAAGTATCAAGTCTTAGCATCTGCAGAGTGGTGCTTCATATAGAATT

CTATAAATGGTGGACGCTTTCCTTCAAGTCTTCTAGAAAATCTGGCTTC

>PGSC0003DMG400019970-(rev)LRR-RLPs\_1008

CATATCCATACAAAAAAGTTGAGTCTTTTCATATCCCCACCTACATCAGTATTAATTTCTGAGAGGGAGA  
ATCACTTACAAACGTTAACCGGATTGATGCCCTCATCTTGTAACGATGAG

>PGSC0003DMG400019970-(rev)LRR-RLPs\_1071

AGGGAGAATCACTTACAAACGTTAACCGGATTGATGCCCTCATCTTGTAACGATGAGGTGTTTCTACGAA  
TTCCAAATTTGAAGAAGTTGGGAATTTAATTGTTGATGAATCAGACACT

>PGSC0003DMG400019970-(rev)LRR-RLPs\_1197

AAGTGTTATTGTCTTGATAATCTTGACATTTAACTCAGCTTGAGAAGCTCAAAGTTGAGGTCAGCGAGA  
GTTATCTGCTAATTTTTATGCGGATTAGCGAAGGTTGGGTGGACATTCCA

>PGSC0003DMG400019970-(rev)LRR-RLPs\_1323

GACAATTTCCACCAAACCTTAAGAAGTTAACATTGTGCAGAACGCACCTACAATGGGAAGACATGAAC  
ATTCTCAGTAAGTTACCTAATCTTGAGGTGCTCAAACCTAAACATCATGCC

>PGSC0003DMG400019970-(rev)LRR-RLPs\_1386

ATGAACATTCTCAGTAAGTTACCTAATCTTGAGGTGCTCAAACCTAAACATCATGCCTTTCACGGACTAAT  
TTGGAAACTAAGCCATGAAGACGAAGATGGATTCTTGAAGCTAAAGTTT

>PGSC0003DMG400019970-(rev)LRR-RLPs\_1449

GGACTAATTTGGAAACTAAGCCATGAAGACGAAGATGGATTCTTGAAGCTAAAGTTTTACTCTTGAGCG  
CATGAGTCTGAAGCAATGGGAAGCAACAAGTTATCATTTTTCCAAGCCTTGA

>PGSC0003DMG400019970-(rev)LRR-RLPs\_1575

AGTCCTAACAAATTGCCGGTACTTGAAAAAATTCCTTTCGACTTTCGCGGAGATTCAGACACTACAGCTG  
ATTGAACTACACGAATGTAAGCGTTCTGTTCTGTTTCAGCAGAGCAAATA

>PGSC0003DMG400019970-(rev)LRR-RLPs\_1638

ACAGCTGATTGAACTACACGAATGTAAGCGTTCTGTTCTGTTTCAGCAGAGCAAATACAAGAGGAGCAA  
CAAAGCTTGGGAAATGATGACCTCGTTATTCATGCGAACTCTATACGTGAG

>PGSC0003DMG400019970-(rev)LRR-RLPs\_1701

GAGCAACAAAGCTTGGGAAATGATGACCTCGTTATTCATGCGAACTCTATACGTGAGTAAACATTAATC  
AAAAAGGTATACATTTCTTAAAAGCATAAAGATTTTTGATTAGTTAGATTC

>PGSC0003DMG400019970-(rev)LRR-RLPs\_1764

TTAATCAAAAAGGTATACATTTCTTAAAAGCATAAAGATTTTTGATTAGTTAGATTCCTTCGAAAATCTGA  
AAATGATTTTTATATTCATCATTTTCACTTATTATACTATAAAAAGGTG



>PGSC0003DMG400019970-(rev)LRR-RLPs\_1827

AAATCTGAAAATGATTTTTATATTCATCATTTTCACTTATTTATACTATAAAAAGGTGCTAATTACAATTGGT  
TTGTGCATTGCAGACGTAACGACTAGCTGATGGAGAGTACCATAAGGT

>PGSC0003DMG400019970-(rev)LRR-RLPs\_189

GGTGGACTACTTTCCAAGATGAGCAAGGAAACAAGTTCTTGGGAGAATGTTGCAGAAAAGGTAGGATC  
ACTTATGACCAGCGACACTATGGATTGCTTGAACATACTTTTCGTTGAGCTAC

>PGSC0003DMG400019970-(rev)LRR-RLPs\_1890

ACAATTGGTTTGTGCATTGCAGACGTAACGACTAGCTGATGGAGAGTACCATAAGGTATATATACTCAA  
GCAAATTTGCAGAAGTTCATGATATTTCTGTCTGTGTATTTGACTTGTT

>PGSC0003DMG400019970-(rev)LRR-RLPs\_1953

ACTCAAGCAAATTTGCAGAAGTTCATGATATTTCTGTCTGTGTATTTGACTTGTTTAGGACTGAGACGT  
AGTTTAGTGAATCTGATATCTATATACATTCATCAGAAAGAATGCATCA

>PGSC0003DMG400019970-(rev)LRR-RLPs\_2016

TGAGACGTAGTTTAGTGAATCTGATATCTATATACATTCATCAGAAAGAATGCATCACCTTTGGAATGTG  
TGTATAGTTGAATAACTTCTCTTTTTATTGAAATTGATTCTATAAATCAG

>PGSC0003DMG400019970-(rev)LRR-RLPs\_504

GGGAAGCATACTTCCCTAGGAAAAATCAAGACTTGTAAGATGCATGATCTCGTTGAGATATGTGTTTG  
AGAGAAGTCCAATATGAGAATTTTATACACTTCAAACGAGGTATGACTAT

>PGSC0003DMG400019970-(rev)LRR-RLPs\_567

TGTTTGAGAGAAGTCCAATATGAGAATTTTATACACTTCAAACGAGGTATGACTATGATGATCTTCTAG  
AAAACATTAGTTGTCTACGTCGTGTAGCTGATTTCCATAAGTATACACAC

>PGSC0003DMG400019970-(rev)LRR-RLPs\_693

CTTTCTAAACTTATGCCACTCACACGTTCTGTTTTCTTCAAATATCCATACTTTTTTTGTTACCTCTCACAGT  
CGAGCTTTAGATTACTGAGGATATTAGATGTTTGCTTTACATGTTTT

>PGSC0003DMG400019970-(rev)LRR-RLPs\_756

CTCTCACAGTCGAGCTTTAGATTACTGAGGATATTAGATGTTTGCTTTACATGTTTTTCTCCTGTAGTCA  
GTCCGTATCAGAACTTGTTCAATTTGAGGTATATTGCTTGTCCTGTCCTTC

>PGSC0003DMG400019970-(rev)LRR-RLPs\_819

TGTAGTCAGTCCGTATCAGAACTTGTTCAATTTGAGGTATATTGCTTGTCCTGTCCTTCAATGGTCTTGTGCA

ATCACTATGCAAGCTACGGAATATACAGAACTTAGTTATTCATGATTCA

>PGSC0003DMG400019970-(rev)LRR-RLPs\_882

CTTGTGCAATCACTATGCAAGCTACGGAATATACAGAACTTAGTTATTCATGATTACATCCATTTGGTTC

AAGTATGAGAACCCAGTCCCTACCATGGGAAGTTGTGAATATGCCTCAA

>PGSC0003DMG400019970-(rev)LRR-RLPs\_945

TTTGGTTCAAGTATGAGAACCCAGTCCCTACCATGGGAAGTTGTGAATATGCCTCAACTAAAACATATCC

ATACAAAAAAGTTGAGTCTTTTCATATCCCCACCTACATCAGTATTAATT

>PGSC0003DMG400020016-(rev)OtherRLKsTM\_0

GAAAAAATCAAAACATTAATGAAAGAGAACTCCCACTGAGAGTAATCACATATCTAGAGCTTCAATT

GATAAAAACAAATTAGCTGCTGCCTCACCAGGTTTGGGGAGTAATAAACTT

>PGSC0003DMG400020016-(rev)OtherRLKsTM\_1612

AAAATATTCTGTTAGACCATAACTTGAACCCAAAGATCTCTGATTTTGGTCTTGCCAAGTTATGCTCTAAA

GAGAAAAGTGTGTCACTATGACTGAAGCTAGAGGAACCATGGGTTATA

>PGSC0003DMG400020016-(rev)OtherRLKsTM\_1922

GATTGAGGAAGATGATGATGTTATAATTGTAAGGAAATTGGCTGTTATAGGACTTTGGTGCATCCAATG

GAATGCGACAGATCGGCCATCCATCAAAATTGTAACCTCAAATGCTAGAAGG

>PGSC0003DMG400020016-(rev)OtherRLKsTM\_2108

TACGCAAGAGTTGACGGTAATATCAGAACTAGAATGAATGGAAGCCTTAATTATGGATAAACTCCTGCA

TCTAAAGTTGTAATGTCAAGAGTCAGTACAAGTGGTGAAGCTTGATGTTAG

>PGSC0003DMG400020016-(rev)OtherRLKsTM\_2170

TCCTGCATCTAAAGTTGTAATGTCAAGAGTCAGTACAAGTGGTGAAGCTTGATGTTAGTATTTTCATTAG

ATATGTGTTAAGTCATTATGTTTAGCTGCTACTTTTCGCAACTCTTTTCCG

>PGSC0003DMG400020016-(rev)OtherRLKsTM\_2232

TTCATTAGATATGTGTTAAGTCATTATGTTTAGCTGCTACTTTTCGCAACTCTTTTCCGTGTCCAAAATATTT

ATTGTCAATCTGTCATGATTCTAATATCAACACTCTCACAAAAGTTAT

>PGSC0003DMG400020016-(rev)OtherRLKsTM\_2282

CTTTTCCGTGTCCAAAATATTTATTGTCAATCTGTCATGATTCTAATATCAACACTCTCACAAAAGTTATTA

CATATGCAACACCCTCTAGTATAATATAATACAATGTTTGATTTGCCG

>PGSC0003DMG400020016-(rev)OtherRLKsTM\_248

TTGCAGTGTCTCCAGGTGTGGAAGACATGGCCCTATAATTCATTTCCCTTCAGGCTTCACCACCAGCCA  
GAATATTGTGGCTATCCAGGCTTTGAGTTATCTTGTGACCTCAAAAACCG

>PGSC0003DMG400020016-(rev)OtherRLKsTM\_310

ACCAGCCAGAATATTGTGGCTATCCAGGCTTTGAGTTATCTTGTGACCTCAAAAACCGAACCATACTCAT  
ACTTCCCAATTCACCTTACACTAATTGTTGAAGAAATTGATTATATGTCTC

>PGSC0003DMG400020016-(rev)OtherRLKsTM\_496

AATCTCCTTTCTCCTTCACTGTTGATGACCCTTTTTATACACCACATGACATTTTCAGTCTTCAATTGTTCTG  
GTATGCCAGCATATTATCGGAACCTATATCCATATTGTGCCTCTGACA

>PGSC0003DMG400020016-(rev)OtherRLKsTM\_558

AATTGTTCTGGTATGCCAGCATATTATCGGAACCTATATCCATATTGTGCCTCTGACAAAGCAATATTTGC  
TGTTTACTATTCTTTGGATTCACTCCCCCTGCAACTTGCAAAAAGATT

>PGSC0003DMG400020016-(rev)OtherRLKsTM\_620

AATATTTGCTGTTTACTATTCTTTGGATTCACTCCCCCTGCAACTTGCAAAAAGATTCATGAAATTCCGTC  
ATTTCTCTACGATAACAATTTACAGTTCGATAAGACTCAGTTGGGGTAA

>PGSC0003DMG400020016-(rev)OtherRLKsTM\_682

AAATCCGTCATTTCTCTACGATAACAATTTACAGTTCGATAAGACTCAGTTGGGGTAATCCAAACTGTAG  
CTATTGTGAAGGTCTTGAAAAGGATTGTGGCTTCAAGAACTATACTAAAC

>PGSC0003DMG400020016-(rev)OtherRLKsTM\_744

AACTGTAGCTATTGTGAAGGTCTTGAAAAGGATTGTGGCTTCAAGAACTATACTAAACAAGTACTACTC  
AGTGTTTCGATCGACCGTTCACAACAAAAGGTATTAACCTATTAAAAAAT

>PGSC0003DMG400020016-(rev)OtherRLKsTM\_806

GACTACTCAGTGTTCGATCGACCGTTCACAACAAAAGGTATTAACCTATTAAAAAATTTACCTTTGTTTG  
ATGCCATGATCATGTACTTCTCTATTCCATAACAAAAAATTGATTTAA

>PGSC0003DMG400020016-(rev)OtherRLKsTM\_992

TTTTCTCCCTTACATACTTTTGATTGCCTTCTGATAATTTGTGAGATCATATGTTCCAGGTGGAGTTATAG  
GTCTCGTTCTTTGGGAATTATTATGATGGCATTCTATGAGTGTTACAG

>PGSC0003DMG400020023RLKWAX-EGF\_0

ATGGCTCCTAATTATGTGATGATAGTTGCTCTGATAACATTTATTTGCTTTTCACTATGTTTTGGTGATGAT  
GCTATGTTACCAACACACAACAATCTCATAACCAAATCTAACTGCAAT

>PGSC0003DMG400020023RLKWAX-EGF\_1116

ATTTTCAGTGGTGATGGTTATACTGAATGCAATCGTGACAATCCTCAGAGAAAAATTCAGAATATTTATCT  
TATTATAGGTACTTTTCTTAACTTCTTTGCAATTCTGCAGGTAGTTCTTT

>PGSC0003DMG400020023RLKWAX-EGF\_1178

ATTTATCTTATTATAGGTACTTTTCTTAACTTCTTTGCAATTCTGCAGGTAGTTCTTTGATAAGCCCGTCAA  
ATATTACTACTCGTTTGATTATTTTCATTCACAACCTGAACCGAAAAAGG

>PGSC0003DMG400020023RLKWAX-EGF\_124

GTTGTGGCAATGTCAACATCCCTTTCCCATTTGGTATGTCCCGAGATTGCACTCTACGCGATCAGTTCCTT  
GTCACTTGTGATTACTCCTTAAATCCTCCCCAGCCTTTTTTAGAAAAACA

>PGSC0003DMG400020023RLKWAX-EGF\_1240

AGCCCGTCAAATATTACTACTCGTTTGATTATTTTCATTCACAACCTGAACCGAAAAAGGAAAACACAGAT  
TTTCATGTATATTTGTTAATCACATACTTTTATTACAGGCATTACAGCAG

>PGSC0003DMG400020023RLKWAX-EGF\_1302

CCACAGATTTTCATGTATATTTGTTAATCACATACTTTTATTACAGGCATTACAGCAGGGGTTGCTTTAAT  
GGTTTTTATAATATTTGGCTGGTCATATACTGCATTCCAAAGGAGAAAA

>PGSC0003DMG400020023RLKWAX-EGF\_1364

TGCTTTAATGGTTTTTATAATATTTGGCTGGTCATATACTGCATTCCAAAGGAGAAAAATGTCAATGATG  
AAAGAGAAGTTTTTCCAAGAAAATGGTGGATTAGTTCTACAACAGCGACT

>PGSC0003DMG400020023RLKWAX-EGF\_1426

CAATGATGAAAGAGAAGTTTTTCCAAGAAAATGGTGGATTAGTTCTACAACAGCGACTCAGAAGGGAA  
GAGGGATCAAGTCATAATAATACAATAAAGATTTTACATCGGACGAGCTTG

>PGSC0003DMG400020023RLKWAX-EGF\_1488

AGGGAAGAGGGATCAAGTCATAATAATACAATAAAGATTTTACATCGGACGAGCTTGAAAAGGCAAC  
TAATGGCTTTGACAAAGATAGAGTTGTTGGTCAAGGAGGTTTTGGAAGTGTG

>PGSC0003DMG400020023RLKWAX-EGF\_1674

CAAATTGAACAATTCATAAATGAAGTCCTTGTCTTTCCCAAATCAACCATAGAAATGTGGTTAAGCTTTT  
AGGTTGTTGCCTCCAGACGGAAGTTCCACTACTGGTATATGAATTTATC

>PGSC0003DMG400020023RLKWAX-EGF\_1736

TAAGCTTTTAGGTTGTTGCCTCCAGACGGAAGTTCCACTACTGGTATATGAATTTATCAGCAATGGAACA

CTTTCTGAACACTTACATGATAAATTTGTTAGGATTTGAAACTTTTAGAG

>PGSC0003DMG400020023RLKWAX-EGF\_1798

ATGGAACACTTTCTGAACACTTACATGATAAATTTGTTAGGATTTGAAACTTTTAGAGAAGAAAATAAGG

TTCAGCAGCAGAACTTTCATTCATATTCAACTTTTGAAAGCATAACACAC

>PGSC0003DMG400020023RLKWAX-EGF\_186

CAGTTCCTTGTCACCTTGATTACTCCTTAAATCCTCCCCAGCCTTTTTTAGAAAACAGCAGTATTGAAATC

ACAAGCATATCTCTCGCTGGGCAACTTAACGTCTTACAGTTCATATCC

>PGSC0003DMG400020023RLKWAX-EGF\_248

TATTGAAATCACAAGCATATCTCTCGCTGGGCAACTTAACGTCTTACAGTTCATATCCACAGATTGTTATG

GTGCTGGGATAAGCACGAATAAGATTAAGTCATTCATAGCATTACCGTC

>PGSC0003DMG400020023RLKWAX-EGF\_310

ATTGTTATGGTGCTGGGATAAGCACGAATAAGATTAAGTCATTCATAGCATTACCGTCGTTGCTAACTGT

GAACGACACCTCCAATAGGTTTCATTGCGGTTGGCTGTGACACATATGCTA

>PGSC0003DMG400020023RLKWAX-EGF\_372

CTAACTGTGAACGACACCTCCAATAGGTTTCATTGCGGTTGGCTGTGACACATATGCTATTGTTTCAGGGTT

ATTATACCAAGTTTGGAGCTAAAATCGAGTATCCCTCCTACATAACAGGA

>PGSC0003DMG400020023RLKWAX-EGF\_434

TCAGGGTTATTATACCAAGTTTGGAGCTAAAATCGAGTATCCCTCCTACATAACAGGATGCATGTCCATG

TGCAATAGTATTGATGATGCTGTTAATGGTGATAAAAACTCATGTTCTGG

>PGSC0003DMG400020023RLKWAX-EGF\_496

TGTCCATGTGCAATAGTATTGATGATGCTGTTAATGGTGATAAAAACTCATGTTCTGGGGTTGGTTGTTG

CCAGACATCCATCCCTAAGGGAGCATGGAATGTCACCATAACACTAAGCA

>PGSC0003DMG400020023RLKWAX-EGF\_558

GGTTGTTGCCAGACATCCATCCCTAAGGGAGCATGGAATGTCACCATAACACTAAGCAGCTATTATAATT

ATAATGAACTGATATGAAAAATGACCTTAGTTGCAGCTATGCTTTTGTG

>PGSC0003DMG400020023RLKWAX-EGF\_6054

TCTAGAAATATCTCATTTTCTAACAAAATTGAAGGCGTCGTCTCTTTCTTTGGATATTCGTCTGAAAGTTG

CTGCAGAACTGCTGGAGTACTTTCTTACTTGCACTCAGCAGCTTACCC

>PGSC0003DMG400020023RLKWAX-EGF\_6118

AAAGTTGCTGCAGAACTGCTGGAGTACTTTCTTACTTGCACTCAGCAGCTTACCCTCCTATTATTCATAG  
AGATATTAATCAGTCAACATTCTTCTAGACAAAAGCTACACAGCCAAA

>PGSC0003DMG400020023RLKWAX-EGF\_6182

TTCATAGAGATATTAATCAGTCAACATTCTTCTAGACAAAAGCTACACAGCCAAAGTGTCCGATTTCCGG  
AGCATCCAAGTTGGTTCCTGCTAATCAAAAAGAGATATCTACATTGGTTC

>PGSC0003DMG400020023RLKWAX-EGF\_62

TGGTGATGATGCTATGTTACCAACACACAACAATCTCATAACCAAATCTAACTGCAATGAAAGTTGTGGC  
AATGTCAACATCCCTTTCCATTGGTATGTCCCGAGATTGCACTCTACG

>PGSC0003DMG400020023RLKWAX-EGF\_620

TTATAATTATAATGAAACTGATATGAAAAATGACCTTAGTTGCAGCTATGCTTTTGTGGTTCGATCAAGCT  
ACTTTGACTTTTCTAAGAGTTACCTCAGCAGTTTGCAGAACACGAAGAA

>PGSC0003DMG400020023RLKWAX-EGF\_6246

TTTCGGAGCATCCAAGTTGGTTCCTGCTAATCAAAAAGAGATATCTACATTGGTTCAAGGAACTCTAGGA  
TATTTAGATCCTGAATACTTGCAAACAAATCAACTCACTGAAAAAAGTGA

>PGSC0003DMG400020023RLKWAX-EGF\_6374

GTTTCGGAGTAGTGCTTGTAGAGCTCCTAACCGGTAGAAAGGCTCTATGTTTTCAAAGACCTGAAGAAG  
AGAGAAGTCTAGCTCAATATTTTATATCTTCAGTGGAAAAGGGTCATTTGT

>PGSC0003DMG400020023RLKWAX-EGF\_6438

AGAAGAGAGAAGTCTAGCTCAATATTTTATATCTTCAGTGGAAAAGGGTCATTTGTTCAATATTCTAGAC  
GATAATATAGTCTGTGATGAGGGAAATGCAGGGCAATTGGAAAATATTGC

>PGSC0003DMG400020023RLKWAX-EGF\_6566

CACAAAGGTGCTTAAATGTTAAAGGGGATGATCGACCTACAATGAAGGAAGTTGCTGCAGAACTGGAA  
GCTGGATCGAGATTGAAGCACTCGTGGGATCAAAGTCAACATTCAGAGG

>PGSC0003DMG400020023RLKWAX-EGF\_6630

GGAAGCTGGATCGAGATTGAAGCACTCGTGGGATCAAAGTCAACATTCAGAGGAGATAAAGTCCT  
TCTTGACGACACTCAACCGTTGGGATTTGGATACGAATATAGTGAACAAAG

>PGSC0003DMG400020023RLKWAX-EGF\_6688

ATAAAGTCCTTCTTGACGACACTCAACCGTTGGGATTTGGATACGAATATAGTGAACAAAGTGTCCATA  
TTGATAGTATAACGAGCCACGTAACCTTACCATTTCTGGAGGAAGGTGA

>PGSC0003DMG400020023RLKWAX-EGF\_682

ATCAAGCTACTTTTCGACTTTTCTAAGAGTTACCTCAGCAGTTTGCAGAACACGAAGAAGCTTCCTCTTGTG  
CTAGATTGGGCAGTTGGTGAAGAAAAATGTGAAATAGCTAAGAGAACT

>PGSC0003DMG400020023RLKWAX-EGF\_806

TGCATATGCATGTAAGAGTAACAACAGCTATTGCCATGATGATTCAAATGGTTATCGATGTTCCCGCATG  
CAAGGATATGATGGGAATCCATACCTGATAGATGGTTGTCAAGGTATGTA

>PGSC0003DMG400020023RLKWAX-EGF\_868

CCCGCATGCAAGGATATGATGGGAATCCATACCTGATAGATGGTTGTCAAGGTATGTATATGTTTGTGA  
GTCTCCTAATATGATTTTAATTATATCAAATCTATCATTTTCGCAAATGAAT

>PGSC0003DMG400020023RLKWAX-EGF\_930

TTTGTGAGTCTCCTAATATGATTTTAATTATATCAAATCTATCATTTTCGCAAATGAATGTTTACGGTTGTGC  
TCTACGAGTCTGCAGATATCAATGAATGTGCAGATCCGCAACCAGATT

>PGSC0003DMG400020023RLKWAX-EGF\_992

ACGGTTGTGCTCTACGAGTCTGCAGATATCAATGAATGTGCAGATCCGCAACCAGATTATAGGTGTGTC  
AAAAATGCCATTTGCAACAATACAGTTGGGAGTTATACATGCACATGCCGT

>PGSC0003DMG400020178LRR-RLPs\_1488

CAATAATAATATTACTACTATTATGGCTTAATTTTTCTAGATTCTTTCATTGATTAATCCATTTTCATTTTCT  
TCCTGATTATGATGGACTAAGTAATACTAGTAAAAAAGAGTAAATGT

>PGSC0003DMG400020178LRR-RLPs\_1550

TTCATTTTCTTCTGATTATGATGGACTAAGTAATACTAGTAAAAAAGAGTAAATGTGCATAATAAAGG  
AGAGAAAAATAGAGTAAAAGGGTGTACGAGTCATGGCCATCCATCCTATT

>PGSC0003DMG400020178LRR-RLPs\_1612

AATAAAGGAGAGAAAAATAGAGTAAAAGGGTGTACGAGTCATGGCCATCCATCCTATTGTTTTTCTTTT  
GTATTAAGCCAAAACAATTTTGGCATTCTTTTTGTAATTAGGTATGTACT

>PGSC0003DMG400020178LRR-RLPs\_1657

CATCCATCCTATTGTTTTTCTTTTGTATTAAGCCAAAACAATTTTGGCATTCTTTTTGTAATTAGGTATGT  
ACTATAATAATATATTCAATTACTTGGATTTACGGATCTCAAGTTGAA

>PGSC0003DMG400020178LRR-RLPs\_186

GATGACCTGTTGCTTCTCACGGAAAAGAAAACCAAAAAAGTTCCATTTTTTTTACCTTATATAAGCCTGCA

CTGCCTTTTCTATCATTCTTCTCTTCAGCTATACGGTAATTATGATACC

>PGSC0003DMG400020178LRR-RLPs\_310

TTTGTATTCTTTTTTCTTCTTCTGCAGAATAGTTTCGCCATTTTAGACCCAATTGATTTCTTAGCTTTACAAG  
CGATTTCGAAAAGGCTTGGATGATTTGCCCGGTTCCAACCTATTTTGCT

>PGSC0003DMG400020326L-LecRK\_124

ACAATGGATTCAAATCAAGTAATATTAGCTTAGATGGCATTGCTAATATTACATCCAATGGTCTTTTGTTG  
TTAACCGATTCCAAAACACAAGATCAAGGCCATGCTTTCTATCCAAATC

>PGSC0003DMG400020326L-LecRK\_1612

ATGTATTTTCTTTGGGGCTTTTCTGCTTGAAGTTGCCTGTGGTAGGAGGCCGATAGAACCAAGACAAGC  
CGGTGATGATCTGATTTTAGTCGATTGGGTGTTTTCTGTGCTGGAATAGAG

>PGSC0003DMG400020326L-LecRK\_1984

CTTCTGTTAATGCACATTCCCCGCTTCATCTGTAGCAGAATCACTCCTTTCTGATCCCCGATGATTCATGG  
TGAGTTGGACATAACTTCTTTGGTGGGAATATTGATATACTGATCCTGG

>PGSC0003DMG400020326L-LecRK\_2046

TGATTCATGGTGAGTTGGACATAACTTCTTTGGTGGGAATATTGATATACTGATCCTGGTAAATATAACAT  
GATTTTAGTGATTATGTACTTCTGATAAATTATTGTAATTCATACACCTG

>PGSC0003DMG400020326L-LecRK\_2108

TATAACATGATTTTAGTGATTATGTACTTCTGATAAATTATTGTAATTCATACACCTGAAACATATTGTGA  
CATGTCTTAAGATATCAGCCATGGTATCCTGATCTTATTGTTTACTTCC

>PGSC0003DMG400020326L-LecRK\_2146

TATTGTAATTCATACACCTGAAACATATTGTGACATGTCTTAAGATATCAGCCATGGTATCCTGATCTTAT  
TGTTTACTTCCAATGCTAAATAAATACTAATCAGAGATTCAGCAATGGC

>PGSC0003DMG400020326L-LecRK\_248

TCATTTCAAGAATTCACCTAATGGTAATGCATTTTCATTCTCTACAACCTTTGTGTTTCGCGATAACGTCTGA  
TTATCCACCATTGGATGGTCATGGACTAGTTTTTGTATCGCGCCACA

>PGSC0003DMG400020326L-LecRK\_310

TAACGTCTGATTATCCACCATTGGATGGTCATGGACTAGTTTTTGTATCGCGCCACAGAGAGGAATTCA  
GAAGGCTTTGGCAAACCACTATCTTGGCCTTTTAACTCAAGTAATAATG

>PGSC0003DMG400020326L-LecRK\_434



TAAATCAAACCATGTTGTTGGAGTTGAGTTTGATAACAATATATAGCGCGGATTTTGGTGATATGAATGAC  
AATCATGTTGGAATTGATATAAATGGATTGAGGTCTGTAGCAAATCACAC

>PGSC0003DMG400020326L-LecRK\_496

TGAATGACAATCATGTTGGAATTGATATAAATGGATTGAGGTCTGTAGCAAATCACACAGCAGGTTATTT  
TGATGATACTGGTTTGTCAACAACCTTACTCTGATTAGTGGCAAGGCAA

>PGSC0003DMG400020326L-LecRK\_558

GGTATTTTGTGATACTGGTTTGTCAACAACCTTACTCTGATTAGTGGCAAGGCAATGCAAGTTTGGG  
TGGATTATGATGGCAGAACTAAGCTAATCAATGTGACAGTAGCTCCTTTA

>PGSC0003DMG400020327L-LecRK\_126

TTCAATCTTGTCATACTAGTAGCTCTCTTCTTAGTTGGTATTGCACCAGCTTCTTGTGAAGTTGATGCATTC  
ATTTACAATGGATTCCAATCAAGGAATCTTAGCTTGGATGGCATAGCA

>PGSC0003DMG400020327L-LecRK\_189

GATGCATTCATTTACAATGGATTCCAATCAAGGAATCTTAGCTTGGATGGCATAGCAGAGTTTACGCCCC  
ATGGCCTTTTGCTGTTAACAGATTCTGAAACACAAGATCAGGGCCATGCT

>PGSC0003DMG400020327L-LecRK\_252

ACGCCCCGATGGCCTTTTGCTGTTAACAGATTCTGAAACACAAGATCAGGGCCATGCTTTCTATCCAAATC  
CAATTCATTTCAAGAATTCAACTAATGGTACTGCAGTTTCATTCTCCACA

>PGSC0003DMG400020327L-LecRK\_315

CCAAATCCAATTCATTTCAAGAATTCAACTAATGGTACTGCAGTTTCATTCTCCACAACATTTGTGTTTGCC  
ATAAGGTCTGATTATGGAATTTGAGTGGTCATGGACTGGTTTTTTGTT

>PGSC0003DMG400020327L-LecRK\_63

TTAGCTTTATATGGTCACAAATCACAATATTATCTCTCAATCAAGAAAATATTGGCAATGTTGTTCAATCT  
TGTCACTACTAGTAGCTCTCTTCTTAGTTGGTATTGCACCAGCTTCTTGT

>PGSC0003DMG400020328L-LecRK\_126

GCATAGCACAAATTTACATCAAATGGCTTATTAGAGTTAACAATACTTCTAGGCTACAAAAGGGGCATGC  
TTTTTATCCTACACCAATTAATTTCAAGAACTTACAAAATGGTTCAAATT

>PGSC0003DMG400020328L-LecRK\_1386

AAGTTGTAATACACAGAGATGTGAAGGCTAGTAATGTGTTGTTAGACAGTGAATTGAACGCGAAATTAG  
GAGATTTTGGACTAGCAAGATTGTATGATCACGGGACCGATCCACTCACTA

>PGSC0003DMG400020328L-LecRK\_1449

AATTAGGAGATTTTGGACTAGCAAGATTGTATGATCACGGGACCGATCCACTCACTACACATGTAGTTG  
GAACTGTAGGTTACCTTGCCCCTGAGCAGACAAGAACAGGCCAAAGCCACAA

>PGSC0003DMG400020328L-LecRK\_1575

GTGATGTATATGCTTTTGGTGCATTTTTGCTTGAAGTGGCTTGTGGGAGAAGGCCAATAGATCCACGAG  
TATCGGATGAGGACATCGTGTTGGTTGATTACGTATTTTCTTGTTGGAGTA

>PGSC0003DMG400020328L-LecRK\_189

GGCATGCTTTTTATCCTACACCAATTAATTTCAAGAACTTACAAAATGGTTCAAATTTCTCTTTTCTACCA  
CTTTTGTCTTTGCTATTGTGCCTTCTGTTTTACCTGGTCATGGTATGG

>PGSC0003DMG400020328L-LecRK\_1953

CAGAGAAAGTACTTTCATATCCCTCCACCGATTGGAAGTCTCTTCCATTCACTGGTCCATGATTAGAAGTC  
TTTCTGTATTGCCTTGATGAATTGTGATTCCAATCCCAACAGCAACAAC

>PGSC0003DMG400020328L-LecRK\_252

TTCTACCACTTTTGTCTTTGCTATTGTGCCTTCTGTTTTACCTGGTCATGGTATGGCTTTTGTAAATTGCAC  
CTGTTGGTGGCCTAGTAGATGCACTTCCAAGCCATTTTTAGGCCTGT

>PGSC0003DMG400020328L-LecRK\_441

GAGAATTCAATGATATTGATGGTAACCATGTTGGAATTGATATCAATGGATTGAAATCCGTTGAATCAAA  
GACAGCAGGTTATTATTATGGTGTAAATTCAATAACATGACTCTTGCTA

>PGSC0003DMG400020328L-LecRK\_504

AATCAAAGACAGCAGGTTATTATTATGGTGTAAATTCAATAACATGACTCTTGCTAGTGGTCAGCCAAT  
GCAGGGTTGGGTGGACTATGATGGTGTGGCTAAGCAAATTAATGTAAGTC

>PGSC0003DMG400020328L-LecRK\_630

CAATGAATGTAGCAAACCAAATGTACCACTTTTGTCAATTGTTGTATGATCTTTCACCAATCTTGAATGAA  
ACCATGCATATCGGTTTCTCTGGATCGACTGGCTCGGTTGTTTCAACAC

>PGSC0003DMG400020328L-LecRK\_693

TGAATGAAACCATGCATATCGGTTTCTCTGGATCGACTGGCTCGGTTGTTTCAACACAATATGTTCTAGG  
ATGGAGCTTTGAAATGAATGGAATAGCTCAAGGTCTTGATCTTGCTAGAC

>PGSC0003DMG400020330LRR-RLPs\_0

ATGAGAAGTCTACACTTTCTCCGTCTTTTCTTGATTCTTTTGTTCAAATCTTATCAGGAAATGATATTTTCT

TTGTTTCCTCTAAATGTCTTGATGATCAAAAGTCATTGTTGCTGCAA

>PGSC0003DMG400020330LRR-RLPs\_1054

ACTTAGGTTTCTCCTTGAACAACCTTACTGGTCTATCCCATATTTCCAACGGTCCAAGAACTCACCTACT  
TAGACGTGTCGTATAATAGTCTAACTGGTCTCCTCTCTCCAGCTCATT

>PGSC0003DMG400020330LRR-RLPs\_1116

CTCACCTACTTAGACGTGTCGTATAATAGTCTAACTGGTCTCCTCTCTCCAGCTCATTTTGAAGGACTCTC  
AGAGCTTGTGTACATGAATTTAGGCAACAACCTTACTCAACGGGATCCTT

>PGSC0003DMG400020330LRR-RLPs\_1178

AGGACTCTCAGAGCTTGTGTACATGAATTTAGGCAACAACCTTACTCAACGGGATCCTTCTGCATATATC  
TTTGAGCTACCCTCGTTGCAGAAGCTTTTTCTTTGCAGCAATGAATTTGT

>PGSC0003DMG400020330LRR-RLPs\_124

AAGACAGCCTCCAATATGATTCTAGTTTGTCAACCAAGTTGGCGCGTTGGAACGACAACACAAGTGAAT  
GTTGTAATTGGGATGGGGTGAATGTGATCTCTATGGTCATGTGATTGCCT

>PGSC0003DMG400020330LRR-RLPs\_1240

CATATATCTTTGAGCTACCCTCGTTGCAGAAGCTTTTTCTTTGCAGCAATGAATTTGTTGGCCAACTCAAC  
GAATTCGCAATGCATCCTTCTCTCTACTGAAAATACTTGATGTGAGCA

>PGSC0003DMG400020330LRR-RLPs\_1302

CAACTCAACGAATTCGCAATGCATCCTTCTCTCTACTGAAAATACTTGATGTGAGCAATAACCATCTGAA  
TGGATCAATTCCTCAAGTCCATATTTGGAATTGAGAGGCTTAAGGTCCTC

>PGSC0003DMG400020330LRR-RLPs\_1364

CCATCTGAATGGATCAATTCCTCAAGTCCATATTTGGAATTGAGAGGCTTAAGGTCCTCTCACTTTCTTCCA  
ACTTGTTTAGTGAGACATTACCATTTGAGATGATTGGGATGCTCAGTTA

>PGSC0003DMG400020330LRR-RLPs\_1426

TTTCTTCCAACCTTGTTTAGTGAGACATTACCATTTGAGATGATTGGGATGCTCAGTTACCTTACTAACTTA  
GATCTTTCATACAATAACTTGACAATTGATACAAGTAGCAGCAATTCAA

>PGSC0003DMG400020330LRR-RLPs\_1488

ACTAACTTAGATCTTTCATACAATAACTTGACAATTGATACAAGTAGCAGCAATTCAACAACATTCATTT  
TCCACATTTGAGAATATTGAAACTAGCTTCTTGTCGGTTGCAAGTGTTT

>PGSC0003DMG400020330LRR-RLPs\_1550

ATTCACITTTCCACATTTGAGAATATTGAAACTAGCTTCTTGTCGGTTGCAAGTGTTTCCTCGTCTTAAACT  
CCTTTCAGAAATTAGGATCTTAGACCTTTAATTCATGGGCCAATACCA

>PGSC0003DMG400020330LRR-RLPs\_1612

GTCTTAAACTCCTTTCAGAAATTAGGATCTTAGACCTTTAATTCATGGGCCAATACCAAATTGGATTTGGG  
AAATTGGTTATGGATTTCCCTCTCAACTGAATCTTTCCTGCAATCTGCT

>PGSC0003DMG400020330LRR-RLPs\_1674

GGATTTGGGAAATTGGTTATGGATTTCCCTCTCAACTGAATCTTTCCTGCAATCTGCTGGAGTACATGAA  
GCAGCCTTATAATATTCCCGACAATCTTACGATGTTGGACTTGCACCTCCA

>PGSC0003DMG400020330LRR-RLPs\_1736

TACATGAAGCAGCCTTATAATATTCCCGACAATCTTACGATGTTGGACTTGCACCTCCAACAGGCTAAAGG  
GTGACCTTCCAATGCCTCCTTCTTCTTCTTCTATGTGGACTACTCGAGC

>PGSC0003DMG400020330LRR-RLPs\_1798

GCTAAAGGGTGACCTTCCAATGCCTCCTTCTTCTTCTTCTATGTGGACTACTCGAGCAATAGTTTCAGCA  
ATTCCATCCCCTAGATATTGGTGATTCTTGTTAATGCACGCGTTTT

>PGSC0003DMG400020330LRR-RLPs\_186

AGTGAATGTTGTAATTGGGATGGGGTGAAATGTGATCTCTATGGTCATGTGATTGCCTTGGAAGTAGAT  
AATGAGTTGATTTCTAGTGGAGTTGAGAATTCAAGTGCTCTTTTAAGTTTT

>PGSC0003DMG400020330LRR-RLPs\_1860

GTTTCAGCAATTCCATCCCCTAGATATTGGTGATTCTTGTTAATGCACGCGTTTTCTCAGTTGGAAAT  
AATAGCCTCACTGGAAGAATCCTGAATCCATATGCAATGCCCTCTTCC

>PGSC0003DMG400020330LRR-RLPs\_1922

GTTGGAATAATAGCCTCACTGGAAGAATCCTGAATCCATATGCAATGCCCTCTTCCCTCAAGTTCTTAC  
TTTCTCTCAAATGCATTGAGTGGAAACAATACCAATGTGTCTACTGGAA

>PGSC0003DMG400020330LRR-RLPs\_1984

AGTTCTTACTTTCTCTCAAATGCATTGAGTGGAAACAATACCAATGTGTCTACTGGAAAATAGTGCAACT  
CTTGGGGTGCTAGATCTAGGGAACAATAGACTGAAAGGTGTTATACCAGA

>PGSC0003DMG400020330LRR-RLPs\_2046

GTGCAACTCTTGGGGTGCTAGATCTAGGGAACAATAGACTGAAAGGTGTTATACCAGATTCATTTCCAA  
TCGGCTGTGCTCTAAGATCTTACACCTCAATGAGAATACCTTACAGGGGA

>PGSC0003DMG400020330LRR-RLPs\_2108

TTTCCAATCGGCTGTGCTCTAAGATCTTTACACCTCAATGAGAATACCTTACAGGGGAAGCTCCCAAGGT  
CACTGGTGAAGTGTGACTTCTTGGAGGTCCTAAATGTTCGGAAATAACAAA

>PGSC0003DMG400020330LRR-RLPs\_2170

CCCAAGGTCACTGGTGAAGTGTGACTTCTTGGAGGTCCTAAATGTTCGGAAATAACAACTTTTTGATAGT  
TCCCCTTTCATGTTGAAGAATTCATCCAGGCTTAGAGTCCTAGTATTGCG

>PGSC0003DMG400020330LRR-RLPs\_2232

TTGATAGTTCCTTTCATGTTGAAGAATTCATCCAGGCTTAGAGTCCTAGTATTGCGCTCCAACGGATT  
TATGGAAATTTTCAGTGTTCATAGCTGGCAAAATCTCCAGATCATAGATA

>PGSC0003DMG400020330LRR-RLPs\_2294

AACGGATTTTATGGAAATTTTCAGTGTTCATAGCTGGCAAAATCTCCAGATCATAGATATAGCCTCCAACA  
ATTTTACTGGTGAATTGATTGCAGAATGCTTATGGAATTGGAAAGGAATG

>PGSC0003DMG400020330LRR-RLPs\_2356

CTCCAACAATTTTACTGGTGAATTGATTGCAGAATGCTTATGGAATTGGAAAGGAATGATGGTTGGAGA  
TGATTACATTGATTGAGGAATTAATCGCATTCAATTTGGATACTGTCAGGA

>PGSC0003DMG400020330LRR-RLPs\_2418

TTGGAGATGATTACATTGATTGAGGAATTAATCGCATTCAATTTGGATACTGTCAGGAAACAGTGACACT  
AACCATCAAAGGAATGGAAATGAAGCTTGTGAAAATCTTTAGAGCCTACA

>PGSC0003DMG400020330LRR-RLPs\_248

ACTAGATAATGAGTTGATTTCTAGTGGAGTTGAGAATTCAAGTGCTCTTTTAAGTTTTGAGTATCTTGAG  
AAGCTAAATTTGGCTTACAACAGTTTTGACGTTGGTATAACAGTTGGTAT

>PGSC0003DMG400020330LRR-RLPs\_2480

GTGACACTAACCATCAAAGGAATGGAAATGAAGCTTGTGAAAATCTTTAGAGCCTACACATCTATTGATT  
TCTCTTCAAACAATTTTCATGGAGTGATCCAGATATTGTTCGGAAATCTT

>PGSC0003DMG400020330LRR-RLPs\_2542

TATTGATTTCTCTTCAAACAATTTTCATGGAGTGATCCAGATATTGTTCGGAAATCTTAGCGCCCTCTATG  
TTCTCAACCTGTCACACAATGCTCTTGAGGGTCAAATTCAAAATCAAT

>PGSC0003DMG400020330LRR-RLPs\_2604

CCCTCTATGTTCTCAACCTGTCACACAATGCTCTTGAGGGTCAAATTCAAAATCAATTGGGAAGCTAAA

AATGCTTGAATCACTAGACCTGTCCTGGAACAAGCTATCTGGAGAAATCC

>PGSC0003DMG400020330LRR-RLPs\_2666

AAGCTAAAATGCTTGAATCACTAGACCTGTCCTGGAACAAGCTATCTGGAGAAATCCCTGCAGAACTT

GCATATCTTACATTCCTATCATATTGCTTGGAAAAATCCCATCGAGTAATC

>PGSC0003DMG400020330LRR-RLPs\_2728

AGAACTTGCATATCTTACATTCCTATCATATTGCTTGGAAAAATCCCATCGAGTAATCAGTTTCAAACATT

CTCTGCAGATTCTTTGAAGGAAACAAAGGCCTATGTGGATTACCTCTT

>PGSC0003DMG400020330LRR-RLPs\_2790

TCAAACATTCTCTGCAGATTCTTTGAAGGAAACAAAGGCCTATGTGGATTACCTCTTGAAGATCGCAGA

AACAATGACTCTGAGCTGCCGCCAACTCAGCCTCTACCAGACTCAGATGA

>PGSC0003DMG400020330LRR-RLPs\_2828

GCCTATGTGGATTACCTCTTGAAGATCGCAGAAACAATGACTCTGAGCTGCCGCCAACTCAGCCTCTACC

AGACTCAGATGATGATTGGAAGTTCATTTTTTTGGCTTCAGGATACATAG

>PGSC0003DMG400020330LRR-RLPs\_310

ATCTTGAGAAGCTAAATTTGGCTTACAACAGTTTGACGTTGGTATACCAGTTGGTATATACAATTTAGT

CAACTTGAAGTACCTGAATTTATCAAATGCTGGTTTTTTTCGGGCAAATTC

>PGSC0003DMG400020330LRR-RLPs\_372

AATTTAGTCAACTTGAAGTACCTGAATTTATCAAATGCTGGTTTTTTTCGGGCAAATTCCTATGACGTTATC

AAGATTAACCAGGCTAGTTACTCTTGATCTCTCAACTCTTCTCCATCCA

>PGSC0003DMG400020330LRR-RLPs\_434

GACGTTATCAAGATTAACCAGGCTAGTTACTCTTGATCTCTCAACTCTTCTCCATCCACTTAAAATTTGAG

AGTCTTGATTTTATTGAGAACTTAACAGAACTTAGAGAGCTTTACCTTG

>PGSC0003DMG400020330LRR-RLPs\_496

AAATTTGAGAGTCTTGATTTTATTGAGAACTTAACAGAACTTAGAGAGCTTTACCTTGATGGTGTGACC

TTTCAGCTCAGAGGAACGAGTGGTGTGAGTCTTTATCGTCATATTTGCCT

>PGSC0003DMG400020330LRR-RLPs\_558

TGTTGACCTTTACGCTCAGAGGAACGAGTGGTGTGAGTCTTTATCGTCATATTTGCCTAACTTGATGGTCT

TGAGCTTGCGTGGTTGTGAGTTTCAGGCCCTATTGATGATTCACCTTC

>PGSC0003DMG400020330LRR-RLPs\_62

TGATATTTTCTTTGTTTCCTCTAAATGCTTGATGATCAAAAGTCATTGTTGCTGCAATTGAAAGACAGCC  
TCCAATATGATTCTAGTTTGTCAACCAAGTTGGCGCGTTGGAACGACAA

>PGSC0003DMG400020330LRR-RLPs\_620

TGATGGTCTTGAGCTTGCGTGGTTGTCGAGTTTCAGGCCCTATTGATGATTCACCTTCCAACCTTCAATTT  
CTTTCAGTCATCTATCTAGACCAGAACAATCTACCACAGTTCCTCAATA

>PGSC0003DMG400020330LRR-RLPs\_682

CTTCAATTTCTTTCAGTCATCTATCTAGACCAGAACAATCTACCACAGTTCCTCAATATTTTGCCAAATTCT  
CCAACCTGACTAGCTTGCCCTCAGCTCTTGTAATCTACATGGAGCAT

>PGSC0003DMG400020330LRR-RLPs\_744

GCCAAATTCTCCAACCTTGACTAGCTTGCCCTCAGCTCTTGTAATCTACATGGAGCATTTCTGAAACAAT  
CTTTCGAGTACAATCTCTAGAGATGTTGGATTTGTCAAACAATAAGATG

>PGSC0003DMG400020330LRR-RLPs\_806

TGAAACAATCTTTCGAGTACAATCTCTAGAGATGTTGGATTTGTCAAACAATAAGATGCTTAGTGTCAGA  
ATCCCAAACCTTCTAAAAACGGATCTTTCGAGGACGATATCACTAAGCAA

>PGSC0003DMG400020330LRR-RLPs\_868

GTGTCAGAATCCCAAACCTTCTAAAAACGGATCTTTCGAGGACGATATCACTAAGCAACACCAAATTTTC  
TGGTTTATTACCAGAGTCCATTTCCAACCTTCAGAACTTGCCAAGTTAG

>PGSC0003DMG400020330LRR-RLPs\_930

AAATTTTCTGGTTTATTACCAGAGTCCATTTCCAACCTTCAGAACTTGCCAAGTTAGAGCTCTCCAATTG  
CAATATCAGTGGACCAATACCATCCACAATGGAAAACCTTACAAATCTT

>PGSC0003DMG400020330LRR-RLPs\_992

CTCCAATTGCAATATCAGTGGACCAATACCATCCACAATGGAAAACCTTACAAATCTTGTTTACTTAGGTT  
TCTCCTTGAACAACCTTCACTGGTTCTATCCCATATTTCCAACGGTCCAA

>PGSC0003DMG400020370RLKANKrepeat\_0

GGCGGGTGTATATGTTTTTCAAGATTTGGGATTTCTGAGTTTTTCAATCATGTGTTAATTTCTGGGGGAT  
TTCTAATTTGTATTGAGATATACATATCTGCTACAGTAGAATTGAATTG

>PGSC0003DMG400020370RLKANKrepeat\_122

CAAATATTCTCTATCAAATGTATAAGTCTATCCTATCTGTGGTGTAAACAATAGATTTTTGTTTGCTGGAG  
ATAAGTGTGAAATGGAGCAGTTAAAGAGAGGAATATCAAGGCAATTCT

>PGSC0003DMG400020370RLKANKrepeat\_183

TTTGCTGGAGATAAGTGTTGAAATGGAGCAGTTAAAGAGAGGAATATCAAGGCAATTCTCAACAGAGC  
TGTTTAGGAAGAGTGGAAAATTCAGTTTCAAGAGGCAGAGTTCATTGGATCC

>PGSC0003DMG400020370RLKANKrepeat\_244

ACAGAGCTGTTTAGGAAGAGTGGAAAATTCAGTTTCAAGAGGCAGAGTTCATTGGATCCAAGGAGGAA  
CAATTTGAGGTTTCAGTTTTGGGAGGCAGTCATCGCTTGACCCGCTTCAAAGG

>PGSC0003DMG400020370RLKANKrepeat\_2867

TGGGTATGTTGTTGTTGTAAGATCTCTACCTCCCAAAGTAGGGGTATAAAAATAACATTTGATGATAGCT  
CAAGCATGAAACTCAAAAAATCGGAATACTTTATGTGTGTATTTGACCCT

>PGSC0003DMG400020370RLKANKrepeat\_305

GGAGGAACAATTTGAGGTTTCAGTTTTGGGAGGCAGTCATCGCTTGACCCGCTTCAAAGGAGCCCTTCGA  
TTGAAAATGCTGGGAGAACTGTGCCAGAGAATCTTGATTTCGACGATGCAGC

>PGSC0003DMG400020370RLKANKrepeat\_366

CCCTTCGATTGAAAATGCTGGGAGAACTGTGCCAGAGAATCTTGATTTCGACGATGCAGCTGTTATTCATG  
GCGTGTAAGGGGATGTGAAGGGAGTTCAGGACTTGTTGGATGAAGGTAT

>PGSC0003DMG400020370RLKANKrepeat\_427

TTATTCATGGCGTGTAAGGGGATGTGAAGGGAGTTCAGGACTTGTTGGATGAAGGTATTGATGTGAA  
TAACATCGATTTGGATGGAAGGACTGCTCTTCATATTGCTGCCTGTGAAGGC

>PGSC0003DMG400020370RLKANKrepeat\_488

ATGTGAATAACATCGATTTGGATGGAAGGACTGCTCTTCATATTGCTGCCTGTGAAGGCCATGTGGAAG  
TTGCCAAGCTATTGTTAAGTAGGAAGGCTAATATGAATTCCCGTGATCGGT

>PGSC0003DMG400020370RLKANKrepeat\_549

TGTGGAAGTTGCCAAGCTATTGTTAAGTAGGAAGGCTAATATGAATTCCCGTGATCGGTGGGGTAGCAC  
GGTATAAATCTTATTATTTTGATTCTTTGGTAATTATTTTGAAAGCAGCA

>PGSC0003DMG400020370RLKANKrepeat\_61

TCTGGGGGATTTCTAATTTGTATTGAGATATACATATCTGCTACAGTAGAATTGAATTGGTCAAATATTCT  
CTATCAAATGTATAAGTCTATCCTATCTGTGGTGTAAACAAATAGATTTT

>PGSC0003DMG400020370RLKANKrepeat\_610

GGTAGCACGGTATAAATCTTATTATTTTGATTCTTTGGTAATTATTTTGAAAGCAGCATCTTTTCTTTT



GTTCTTTGGTAACATGTTGTAGGATGTGTGTAATGAAACTGTTGTTTT

>PGSC0003DMG400020370RLKANKrepeat\_7564

ACCTTTTGCCACTTGAGCTAGGCCTTGGGGGCATTTCTAGTACCCTTTTTGTCAGATCCTTCTAGACCTTG

AGCATTAAATGCTCGTCTTTTGATGTCCATCTCTAAAGGCAGCCTGGTG

>PGSC0003DMG400020370RLKANKrepeat\_7625

CTAGACCTTGAGCATTTAATGCTCGTCTTTTGATGTCCATCTCTAAAGGCAGCCTGGTGCATAAAGCATCT

CGTGTTAGCAGGGTCTGGGGAAGGGCGGCCGCACCCGCACCCCAAGGGT

>PGSC0003DMG400020370RLKANKrepeat\_7747

GACGTAGACAAGCTACCTAAATGCAAGCATTAGTGGCTGCTTCCACGGCTCGAATCCATGATCTACAGG

CCACACAGAGACTTTGTTGTGTGCATGACCTCATTTATGCTCAACTTAAGA

>PGSC0003DMG400020370RLKANKrepeat\_7808

TCTACAGGCCACACAGAGACTTTGTTGTGTGCATGACCTCATTTATGCTCAACTTAAGAGTTCTGTAATAA

GCTTTTGATAATTGATATTCGGTAATTGGAGTATACTCCAGATGAGTGT

>PGSC0003DMG400020370RLKANKrepeat\_7869

TCTGTAATAAGCTTTTGATAATTGATATTCGGTAATTGGAGTATACTCCAGATGAGTGTACCACCTCCAG

GCCCCTCAGGCAGGACTAGATGGCTCTCCTAGTGCACCATTACCTTATTA

>PGSC0003DMG400020370RLKANKrepeat\_7930

CACCTCCAGGCCCTCAGGCAGGACTAGATGGCTCTCCTAGTGCACCATTACCTTATTAGGTTTGCATTC

AATATCAATACTTGTGTTCCCTCTTGACTTCTGCTCAATGTATTGTATTT

>PGSC0003DMG400020370RLKANKrepeat\_7991

TTTGCAATCAATATCAATACTTGTGTTCCCTCTTGACTTCTGCTCAATGTATTGTATTTCTAGGTTGATTGA

AGAATGTTGGGATCCAGAAGCTTTTGTACGGCCAACATTTTCTGAGGT

>PGSC0003DMG400020370RLKANKrepeat\_8052

AGGTTGATTGAAGAATGTTGGGATCCAGAAGCTTTTGTACGGCCAACATTTTCTGAGGTCATTGTGCGG

ATGAATAAAATATTTGCTAACTCCTCGAAACAAGGATGGTTGAAAGATACT

>PGSC0003DMG400020370RLKANKrepeat\_8113

TTGTGCGGATGAATAAAATATTTGCTAACTCCTCGAAACAAGGATGGTTGAAAGATACTTTAACTTCC

TTGGTAATGATTCTACTGCACTATTCATCGTCTATTTTAGAAATTCAACA

>PGSC0003DMG400020370RLKANKrepeat\_8174

TAAACTTCCTTGGAATGATTCTACTGCACTATTCATCGTCTATTTTAGAAATTCAACATTTGTTTATTTATT  
ATGAATAAGAGCCTTGAACCTAAGGGGAAAAATTGTCTTCTCCTTAGC

>PGSC0003DMG400020370RLKANKrepeat\_8235

TGTTTATTTATTATGAATAAGAGCCTTGAACCTAAGGGGAAAAATTGTCTTCTCCTTAGCACAATATCAACT  
ACGTTTGATGGGCCAGTAAACATATTTTACAAGATTGGTTTGCCATTGC

>PGSC0003DMG400020370RLKANKrepeat\_8296

AATATCAACTACGTTTGATGGGCCAGTAAACATATTTTACAAGATTGGTTTGCCATTGCTGGGATCATT  
GCAAGATGAATTTATAAGTTTATCAAGTTGGTCTATGTCTGCTAATGCAA

>PGSC0003DMG400020370RLKANKrepeat\_8357

GGATCATTTGCAAGATGAATTTATAAGTTTATCAAGTTGGTCTATGTCTGCTAATGCAACAGATCTTTGGT  
GCAGGTTGTAAGTGTGCATGAAAGTGTCAAGAACATGGACAATAATTGG

>PGSC0003DMG400020370RLKANKrepeat\_8418

GATCTTTGGTGCAGGTTGTAAGTGTGCATGAAAGTGTCAAGAACATGGACAATAATTGGAGTCAACGG  
AGTTTATCAGCGGAAGATTCTTGTGGAGCTTCCATTTATGATAAACCTAAT

>PGSC0003DMG400020370RLKANKrepeat\_8479

TCAACGGAGTTTATCAGCGGAAGATTCTTGTGGAGCTTCCATTTATGATAAACCTAATAGGCAAACCTTG  
TATTTACAAGATTCTTGAAAGCTTTATATTGTTGTTAACCAAATAAAAG

>PGSC0003DMG400020370RLKANKrepeat\_8540

GCAAACCTGTATTTACAAGATTCTTGAAAGCTTTATATTGTTGTTAACCAAATAAAAGGCAGATTTGCTG  
GGTGAATAAGATGGGATTACAATTAATGTCGGCTTTATAGTAAGTTTG

>PGSC0003DMG400020370RLKANKrepeat\_8601

AGATTTGCTGGGTGAATAAGATGGGATTACAATTAATGTCGGCTTTATAGTAAGTTTGAACCTCACTAT  
ATGTCATGTGAAGTGTGTTTATTAGATCCATAGTATTTGAACCTAAATGTA

>PGSC0003DMG400020370RLKANKrepeat\_8651

GTAAGTTTGAACCTCACTATATGTCATGTGAAGTGTGTTTATTAGATCCATAGTATTTGAACCTAAATGTAT  
TTTGTTTTACAAGGGGGAAAAACAAAAGGGTTATATAAGAAAGGACTGGA

>PGSC0003DMG400020520-(rev)LRR-RLPs\_0

GGCAACTCCAATCACAAAACCCCATCACCTGCATGTACAAAATTCATAGAAGAAATCACAGAATTTAC  
AAATCACTCCCACCAAGACCATCCATTTTAGAAATTGAAGCTTCAATTC

>PGSC0003DMG400020520-(rev)LRR-RLPs\_1281

TCTTTTTCCTTTTATAGTGATGGCGCTAGCTTGCTATGTACGTCAACTAATCTACTAGGTTTCCAGCATTTCGT  
TCAGTATGTGTGGCAGTGGCAAAGCTATTGATATCCCTTCATCGGAAA

>PGSC0003DMG400020520-(rev)LRR-RLPs\_1342

CCAGCATTTCAGTATGTGTGGCAGTGGCAAAGCTATTGATATCCCTTCATCGGAAAATTATAATGTG  
CAAATAGGTCAATTTCTTTTTTATGTATAAATACTATATATGTTGTTTGG

>PGSC0003DMG400020520-(rev)LRR-RLPs\_3111

CATCCTGCAAAAAACATTTGAAAACATATACATATTATAGGATCTCACTCATTCTGAATCCACTGACTCTA  
GATCCTGGATTACCTTAGTGAGAGGTGTCGGATACCTTCAGAATCCAT

>PGSC0003DMG400020520-(rev)LRR-RLPs\_3162

TTCTGAATCCACTGACTCTAGATCCTGGATTACCTTAGTGAGAGGTGTCGGATACCTTCAGAATCCATC  
AAAGCAATTATATATATATATATATATATATGAAAAGTTACTCCAAAC

>PGSC0003DMG400020520-(rev)LRR-RLPs\_793

TAGTACTAGTAGTCCTAGGATTGCTTATCTGGTTTCTGTCCTTCTGTTACTATGTGTTGTTGTAGTATAT  
AGTTTGATTATCGCATTATTTTATTGGAAATCTTAGAATAAAAAATGT

>PGSC0003DMG400020546LRR-RLPs\_1159

AAAATAGAATTGTTTGGTCTTTTCTTTTCTTCCAATTCATTTTTTAATTTTATATCTAATGCATTTTCTG  
GCTCGAGTAGGTGAGATAGCCAAGCTATTTTCGTTCTCTTTTCGTATA

>PGSC0003DMG400020546LRR-RLPs\_2806

CTCTATATATCATTTTGTGCATGTACATATTATGTATCCAGTATGAGAGTATACTATGGTCAAATGGTAAA  
TTCATCTTAGCCAAGTAGTAGGACCAAGTTTGATTCCTTCTATCGCCCA

>PGSC0003DMG400020546LRR-RLPs\_3294

GATAATTCCTTAAGCTGGGAAGAGCTAGCTTCTCTAAAGAGTCTTATGGTTATCTCACTGAACCAAACC  
AGTAAGCCCCCTTCATCAGCATATTACTCTCCAAGCTGAATGAGATTCA

>PGSC0003DMG400020546LRR-RLPs\_3355

ACCAAACCAGTAAGCCCCCTTCATCAGCATATTACTCTCCAAGCTGAATGAGATTCACCAATATATTGC  
ATCGTCTCTATTTAATTGAAGTAGAAAAGTATTCTTTTCTGCACCATTA

>PGSC0003DMG400020546LRR-RLPs\_4514

AGGTCTCCCATCTGAGATAGGTCTGCTGACCAGCCTTGAGGTTCTGAAAGTTAACAACAACAGGTAATTT

GAAGTACTGAAACAAAAAAGATATTTCAATGATATGGAATCAGCGTGAA

>PGSC0003DMG400020546LRR-RLPs\_5185

AAATACCACTTCAGTTTACAGCTTTTTATATGCAATATAAAAAAAAATCTTGTTTTTTTTTATAAATGCC  
GTACAGAAAAGAACTTGCAAACGTTTTACGAGATTAGCTATATATGCT

>PGSC0003DMG400020546LRR-RLPs\_5307

AGTACTGGTTGTTAGACATTGGTAAAGAATGTAACATAGTTTTCTAAGATAGAGCATAGCCTGGATGGA  
CATTTATATATCAGCTCTAGAATATTCAGCTATGACATTTTAAACCAA

>PGSC0003DMG400020546LRR-RLPs\_5368

TGGATGGACATTTATATATCAGCTCTAGAATATTCAGCTATGACATTTTAAACCAA

>PGSC0003DMG400020546LRR-RLPs\_5551

GTTTATACTGCACATTATAGGGGATGTCACGAGTTTAAATGTTGCCACAGAAATATTCAAGTGGAGAA  
GGATAGATGGTAGCCCATTATCACATAGTGTCAA

>PGSC0003DMG400020546LRR-RLPs\_5612

GTGGAGAAGGATAGATGGTAGCCCATTATCACATAGTGTCAA

>PGSC0003DMG400020546LRR-RLPs\_5673

ACAGGGATCTCTCAGTTATCAAAGGGAAAAAATGTTGTTTTCTTGCAAGGCACGACACAAATTTCTTA  
AGTCAACAATGTTTTCTGAAACATCTAGCATCATGTGATGGCCTCTTTA

>PGSC0003DMG400020546LRR-RLPs\_5917

ACTCTCTACACTAGATCTCCATGGA

>PGSC0003DMG400020546LRR-RLPs\_5978

AATCATTTACTACTATAAAGTAATAACAGTAACATGCCCTATCTAGTTTGCCTCTTACGATTTTCAAACGA  
TCACAGATTGAAGGATGGGAGAATTTGATGAGAGAAGACGCTCGAAGC

>PGSC0003DMG400020546LRR-RLPs\_6161

GCTGATAAGGCCTGATACAAATTA

>PGSC0003DMG400020546LRR-RLPs\_6222

TGCATAGTGATCCCTAGCAAACCTTTACAGAAGAATATTGTAGTACCTGTTAAGATACATCAAGAAATTAT  
AATGAGCATACTTGCTCCTCTGTGCACTCCCTAAAGATGATTAATTTTC

>PGSC0003DMG400020594LRR-RLKs\_0

CCCCAACACCCCCACCCACATCTCCATTCTTCCTTATTTATGCACCCACCACCCTAACATCTCCACCACAG  
CCCCTTACAATCAATGGCTTTCCACCACCACCACTACCTCCTCCTCCA

>PGSC0003DMG400020594LRR-RLKs\_1178

ATGTAGCTGTTGTTACCTTAGGTAAGAGGGGATTTTCGGGTACTATTTACCTGCTTTTGCGAATTTGACT  
TCATTGAGGAGCTGTTTTTGAATGATAATAATCTTACTGGTACGATCC

>PGSC0003DMG400020594LRR-RLKs\_1240

AATTTGACTTCATTGAGGAGCTTGTTTTTGAATGATAATAATCTTACTGGTACGATCCCGGAGAGGTTGA  
CAACTTTCCTAGTTTACAAGTTCTTGATGTGTCTAATAATAATTTGTCT

>PGSC0003DMG400020594LRR-RLKs\_1612

AAGAGACACCATAAGAGATTTGGAAGGGTTGAGACTCCAGAGAAAAGCAATGAAATGGTTAAGCCTAG  
TCTCCAAGTGTCGTGGGTGGTTCGAATGGATATACTGGTGGCACCAGTGAG

>PGSC0003DMG400020594LRR-RLKs\_1674

GCCTAGTCTCCAAGTGTCGTGGGTGGTTCGAATGGATATACTGGTGGCACCAGTGAGTTACAGAGTCA  
GAGCAGTGGCGATCATAGTGAGATACCAGTTTTTGGAAATGGAAACGTGGC

>PGSC0003DMG400020594LRR-RLKs\_1736

AGAGTCAGAGCAGTGGCGATCATAGTGAGATACCAGTTTTTGGAAATGGAAACGTGGCCATTTCCATCC  
AGGTCCTTCGACAAGTGACGAACAACCTTCAGTGAAGAAAATATCTTGGGGA

>PGSC0003DMG400020594LRR-RLKs\_2108

AATTAGGCTACAAACCTCTTACTTGAAGCAAAGGGTAACGATAGCATTGGATGTGGCAAGAGGGGTC  
GAATACCTTCATAGCTTGGCACAACAAAGTTTCATTCATAGAGATTTAAAAC

>PGSC0003DMG400020594LRR-RLKs\_2170

GGGGTCGAATACCTTCATAGCTTGGCACAACAAAGTTTCATTCATAGAGATTTAAAACCGTTAAACATCC  
TTCTCGGAGACGACATGAGAGCCAAGGTTGCAGATTTTGGTTTGGTTAGA

>PGSC0003DMG400020594LRR-RLKs\_2356

GAATACGCGGGTAAGCATTCTACTCCTTGTATCATTACGTCTTTCTTTAACTGAGAAGTATTGTATGC  
CCCTAGCTGTAACTTCAGATTTTAGCAAATTTGAAATTATTCGATCA

>PGSC0003DMG400020594LRR-RLKs\_2418

TTTGATGCCCTAGCTGTAACTTCAGATTTTAGCAAATTTGAAATTATTCGATCATCTGCATTGCTAG  
GCATTGTTGTCTTCATTACATTTAAAGACATTTGGCATATAATGTAGAG

>PGSC0003DMG400020594LRR-RLKs\_2480

CATTGCTAGGCATTGTTGTCTTCATTACATTTAAAGACATTTGGCATATAATGTAGAGGCAATCTCCATGC  
GTAAATGCTGCTTTGCAATTTTTATCGAACTCATGAACTATATACTACT

>PGSC0003DMG400020594LRR-RLKs\_2542

TCTCCATGCGTAAATGCTGCTTTGCAATTTTTATCGAACTCATGAACTATATACTACTATTATAAAAGATA  
AGTTTCCATTTTCGTGTGGATCAGCATCTGAATAATTATCCTATTACATC

>PGSC0003DMG400020594LRR-RLKs\_2604

TAAAAGATAAGTTTCCATTTTCGTGTGGATCAGCATCTGAATAATTATCCTATTACATCTCCTCTTTGTTACA  
GCTACTGGACGAGTCACAACCAAAGTAGATGTTTACGCCTTTGGCGTT

>PGSC0003DMG400020594LRR-RLKs\_2790

TTGGTTACATGGTTCCGCAGAGTCCTTATCAACAAAGAAAACCTCCGAAAGGCTATTGACTCGACACTTG  
ATCCTGATGATGAAACATATGAAAGCATCTCCAAGGTTTCCGAGTTAGCT

>PGSC0003DMG400020594LRR-RLKs\_2852

GACACTTGATCCTGATGATGAAACATATGAAAGCATCTCCAAGGTTTCCGAGTTAGCTGGCCATTGCACT  
GCTCGGGAACCTTTTCAGCGACCTGATATGGGACATGCTGTTAATGTCCT

>PGSC0003DMG400020594LRR-RLKs\_3100

TGTTTCGATGACTTCTCAATCAGTCACTCGCAGTCGAGCATACCCTCAAACCTTCCGGATTTCGAGATACT  
TTCAGTTCAACAGATTGCAGATGATATGCAAAAAATTTGACAACAGTTC

>PGSC0003DMG400020594LRR-RLKs\_3162

GCAGATACTTTTCAGTTCAACAGATTGCAGATGATATGCAAAAAATTTGACAACAGTTCAAGCCATGCCAT  
GCCACACCTCGCGCGGTTTTAATCCTTTGTGGATCAACATAGAGTATGCC

>PGSC0003DMG400020594LRR-RLKs\_3224

CATGCCATGCCACACCTCGCGCGGTTTTAATCCTTTGTGGATCAACATAGAGTATGCCAATATTCATTGTA  
TTAATTGGTTTCTTATTGTCAATGTCATTAATTTTTATGTGATTACATA

>PGSC0003DMG400020594LRR-RLKs\_3286

TTCATTTGATTAATTGGTTTCTTATTGTCAATGTCATTAATTTTTATGTGATTACATATTAAGTTAATATAGT

CTTGATGTAAGGTGTGTGATAACAGTTGTAAAGTCAGGTGAATGTCA

>PGSC0003DMG400020594LRR-RLKs\_3348

GTTAATATAGTCTTGATGTAAGGTGTGTGATAACAGTTGTAAAGTCAGGTGAATGTCACATTTTTCTTTT

GCCTTTTTGGAGACAACAGAAAATTGTAACAAATTCTTTCATATTACATT

>PGSC0003DMG400020594LRR-RLKs\_3382

AGTTGTAAAGTCAGGTGAATGTCACATTTTTCTTTTGCCTTTTTGGAGACAACAGAAAATTGTAACAAATT

CTTTCATATTACATTGTTAATGTAAATCAAATTTGAGCTTCCCCCTCC

>PGSC0003DMG400020594LRR-RLKs\_434

TCTTGGACAATAACCAATTCACCTTCTGTTCCCTCAAGATTTCTTTTGGGGTTCCCAATTTGGTAACTTTAA

GCATTAGTGA AAAATGGGAGACTCTCTCCTTGGCAAATCCCTATTTATT

>PGSC0003DMG400020594LRR-RLKs\_496

GTAAC TTTAAGCATTAGTGA AAAATGGGAGACTCTCTCCTTGGCAAATCCCTATTTATTTAACTGAAAGTA

CAAATTTGGGATCTTTATATGCTAGTAATGCTAGTATTGTTGGTGTCAAT

>PGSC0003DMG400020594LRR-RLKs\_992

TTGAGGTTAAACTTGAACTACTAATAGTTTCTGTAAGGACACTCCGGGACCGTGTGATCCACAGGTCAC

TACACTTCTTGATGTGGCTGGTGGTTTTGGATATCCATTGTCTTTGGCTG

>PGSC0003DMG400020641LRR-RLPs\_1302

AAAATTAGTATTATTTTTTACCAAATCTTAGTATAACTTATCCCATATAGAAGGTGGATTAATTATAATC

TTGAGATATCATGGTTTGAACCAAATGACCTACCCCTTAGGAGAGGTTT

>PGSC0003DMG400020641LRR-RLPs\_1364

ATTATAATCTTGAGATATCATGGTTTGAACCAAATGACCTACCCCTTAGGAGAGGTTTTTGTACAAGCTA

TTATCAAGCGTGTCTGCAGAATAGCTAGTGCTTTTGAAGCTCATCTTCCA

>PGSC0003DMG400020641LRR-RLPs\_1426

ACAAGCTATTATCAAGCGTGTCTGCAGAATAGCTAGTGCTTTTGAAGCTCATCTTCCAAGATGAATTGTA

CATCTATTCTTGTGATACCATATACATATGTTTATGCCTGTGGATTATA

>PGSC0003DMG400020641LRR-RLPs\_1736

CTTGATATTGCCAAGTTGGCCTTGATATTACAATGAAATACTTTAACTGAGAAAAAAAATTCCAAGTAA

CACTACTATCTCAGTTGGGATATTTCAAGACTTCACCAAATGTAGGATA

>PGSC0003DMG400020641LRR-RLPs\_186

CTTATCTTCGCCTCTCTCAGGTACGGCCTTCGGATTTTGATTTTTTTTTTTCTAAGTCTGGAAACACCTTAT  
CTTCCCGAATTTGATAAATTTGGTGGATTTTTTTTGTGAGATTTTGAT

>PGSC0003DMG400020641LRR-RLPs\_2108

TGAGTGTACCTAGTATGCATTAATAGTACTGCAGAAATTTGAGATTATGTATTCATATTGAAGTGGACAT  
ATGCATGCACAAAGCATCTTATAATATATTGATGAGGTTACTTTTATCAA

>PGSC0003DMG400020641LRR-RLPs\_2170

GTGGACATATGCATGCACAAAGCATCTTATAATATATTGATGAGGTTACTTTTATCAAAAAAATATATTG  
ATGAGGTTACAATTTACCTTTATTAATTTTGTAAATGCTTGAAAACATTAA

>PGSC0003DMG400020641LRR-RLPs\_2356

GTGGGATTACACTGGGTATGTTGTTGTAGAGAAAATTTAATTATAAACAAAAGACAAGATATTCATGTAT  
GGTATGCTCAATGCTGTATAATGTCAACTAATATGCAGTTTTTCTTATTC

>PGSC0003DMG400020641LRR-RLPs\_248

AACACCTTATCTTCCCGAATTTGATAAATTTGGTGGATTTTTTTTGTGAGATTTTGATGAAATTGTAGTTTT  
ATAGAACCCAGATTTGTTAGCTGTAGCATGTCTACAAAGAGTTCAATT

>PGSC0003DMG400020641LRR-RLPs\_3100

TATAGGCTTCTGAACCGTTTCCAGAACCTAGAATCATTGTCCCTGTCCGGATGCACCGAGCTTCCAGATT  
CGGGTTTGTCTTTGTTACCACGTCATGGATCGAAACTGCAAAGTCTTCAT

>PGSC0003DMG400020641LRR-RLPs\_3534

GCTTGAACCTAATGGAATACGGAGTATCCTAAGTGGAGGTGGTATTGAATACTTGAGTGTGTCTAACTT  
GACCTGGTGCACCTCGTGTGAATGGTCTGGTAGTTATTAGCGTCGGATTTGC

>PGSC0003DMG400020641LRR-RLPs\_3658

AAGTTAAGAGTGTTGAATTTCCGTTCCAGCAGAACGATTGGCGATGATTGTATCATGACAATAGCAAAG  
GGTTGCCCATCGCTTCAGGAATGGAACCTAGCAATATGTCATGAGGTCAAG

>PGSC0003DMG400020641LRR-RLPs\_3720

AGCAAAGGGTTGCCCATCGCTTCAGGAATGGAACCTAGCAATATGTCATGAGGTCAAGATAGCAGGTTG  
GGAATCTATTGCATCACATTGTCATAACTTGAAAACACTACATGTGAATCG

>PGSC0003DMG400020641LRR-RLPs\_4154

GTTACTACCCGTCCACCACTGGAAACATTGTTTCTGTCCAACCTTGATGGAAATGCACGACAGTTGTGC  
CCCACTGCACACTAGTATCAAGCTGCGTATAATTTCTTGTAAATGTTTTCT



>PGSC0003DMG400020641LRR-RLPs\_930

CATAGGTCTGCATACATTCTTGCAATTTTTTTGTATACCCTTGTTAGAATCCCTTGCTCTGCCTCCGGTCGT  
TCAAGCGTTGTTAAATCTTTCTCTTAGAATATCTAAACCCAAAATGCT

>PGSC0003DMG400020641LRR-RLPs\_992

CTCCGGTCGTTCAAGCGTTGTTAAATCTTTCTCTTAGAATATCTAAACCCAAAATGCTGACTTATTGGAGC  
AAGGGGGACCTTAGAGCTATCTGTAGTTTACAAAATATTTCAAGTTAGA

>PGSC0003DMG400020697-(rev)LRR-RLKs\_0

ATAATGGAGAAAGTCTTCACATATTTTTACTTAATAGCACTCATGTTGCTTTACTTGGGTGTGGCTAGTTT  
AGCCATGACTCAAACCAACATTACAACCTGATCAATCCGCTCTTCTTTCC

>PGSC0003DMG400020697-(rev)LRR-RLKs\_1054

ACCATATTTCTGGTCATTTCCCAATCTCCACATTCAATATCTCCTCATTACAGGTTTTGGTACTGAATCACA  
ACAATCTGATTGGATCCTTGCCAAGGGAGGTTAGCAATTTGACAGAAT

>PGSC0003DMG400020697-(rev)LRR-RLKs\_1116

CTGAATCACAACAATCTGATTGGATCCTTGCCAAGGGAGGTTAGCAATTTGACAGAATTGCAAATTCTAG  
ATCTTGCCGATAATAATCTTACAGGTATATATGTATTCAAATCATTACTA

>PGSC0003DMG400020697-(rev)LRR-RLKs\_1178

AATTCTAGATCTTGCCGATAATAATCTTACAGGTATATATGTATTCAAATCATTACTAGCTAGCAACATAA  
TTTCTTAAATCTTAGTAATTACTAACTATACATATACATACATTGGCAG

>PGSC0003DMG400020697-(rev)LRR-RLKs\_124

AATTCAAATCATTTTCGGATCCCTTTCACTTGTTGGATGAAAGTTGGTCTCCAGCTATTTCTGTTTGCATT  
GGGTTGGAGTCACTTGTGGTTCTCACCACAAAAGAGTGACGTCATTGA

>PGSC0003DMG400020697-(rev)LRR-RLKs\_1240

GCAACATAATTTCTTAAATCTTAGTAATTACTAACTATACATATACATACATTGGCAGGTGAGATACCGAA  
AAAGTTTAGCAATCACATTGAGCGGTTTGATCTTAGTTTCAACAAGTTT

>PGSC0003DMG400020697-(rev)LRR-RLKs\_1302

GATACCGAAAAAGTTTAGCAATCACATTGAGCGGTTTGATCTTAGTTTCAACAAGTTTACTGGTTCACTA  
CCAATGGAGATTTTCAACATATCGGGTATGAGAGAGATTCAAGTTATTTT

>PGSC0003DMG400020697-(rev)LRR-RLKs\_1488

TCTGGGCAACTTAAATCTTTATGGGACTATACCTCATTCTCTCTCCAATTGTTCCAAACTCACTAGTCTAGA

CCTTCCCTCAATAGACTAACCGGTATGATTCCCAACTCTCTCGGAAG

>PGSC0003DMG400020697-(rev)LRR-RLKs\_1550

CTAGTCTAGACCTTCCCTCAATAGACTAACCGGTATGATTCCCAACTCTCTCGGAAGTTGACTCATCTA

CAGTCCCTAAGCTTGGCAATAACAATTTAATGGGCGATAGTAGGTAA

>PGSC0003DMG400020697-(rev)LRR-RLKs\_186

GTTTGTCAATTGGGTTGGAGTCACTTGTGGTTCTCACCACAAAAGAGTGACGTCATTGAATATTTCCA

TGGATCTTATAGGCAAATTCCTTCTGATTTTGGGAATCTCACATCACTT

>PGSC0003DMG400020697-(rev)LRR-RLKs\_2418

GCTTCTATATCTCAAGTATTTCAACATCTCATTCAACAAGTTGATTGGTGAAATCCCCTCGAATGGTCCTT

TCGAGAACCTCTCCGGTGAGTCTTTCATGTCTAATGAAGCATTGTGTGG

>PGSC0003DMG400020697-(rev)LRR-RLKs\_248

TTCCAACCTGGATCTTATAGGCAAATTCCTTCTGATTTTGGGAATCTCACATCACTTGTTTCTTGACTT

GAGTAGCAATAATTTCTACGGAAAATTGCCTCAAGAAATGGCACATCT

>PGSC0003DMG400020697-(rev)LRR-RLKs\_2604

AGTGATTGTTCTTGTCTACCGGGTGCCTTGTATTAGTCTCCATCGCCTTTGCCCTTTATGGATAAGGA

ATACAAGAGGTAAAAGAACCGATCCTCAGCAAGCAGTTGATTCATCCTT

>PGSC0003DMG400020697-(rev)LRR-RLKs\_2666

GGATAAGGAATACAAGAGGTAAAAGAACCGATCCTCAGCAAGCAGTTGATTCATCCTTTGTCGTCTCAA

CAAAGGAAGAATTTCACTATGAAGTCTCGAGCAACTGATTCACTCA

>PGSC0003DMG400020697-(rev)LRR-RLKs\_3038

TGTATTCACACAACACTACTTCTTAGACATCAATCATAGGCTAAGTATAATGATAGATGTAGCATGTGCATT

GGAATATCTCCATCATGGTTGCCATTGCCGTGATTCATTGTGATTTGA

>PGSC0003DMG400020697-(rev)LRR-RLKs\_3100

TGTGCATTGGAATATCTCCATCATGGTTGCCATTGCCGTGATTCATTGTGATTTGAAGCCTAGTAACGT

CTTGTTGGATGAGGACATGGTTGCCACCTAAGTGAAGTTGGAATTTCA

>PGSC0003DMG400020697-(rev)LRR-RLKs\_3596

TAGATTGTGTGGTATCCATCATGAAAGTGGCAATAGATTGTTGTGTTGAATCTCCTAAAGGAAGGATTG

ACATGAAAGACGTTGTGGGAAGGTAAAGATGATCAAGATTCAACTTCTTG

>PGSC0003DMG400020697-(rev)LRR-RLKs\_3658

AGGATTGACATGAAAGACGTTGTGGGAAGGTAAAGATGATCAAGATTCAACTTCTTGC GTGTTGAGGA  
AGATCTTATTAGAACTTTTCTTCCAAATCATCTCATGTGTAACAAACATT

>PGSC0003DMG400020697-(rev)LRR-RLKs\_3782

ATAATAGTTAGCTTCAAATAAGTTATAGCGTTATGTCTTTCATAACATAGAGAATTGATGGGCATGTATA  
CCTCTTTGGTCTTGAATTTGTACAGTGGTTTTGGCCTAATACCTTTACTT

>PGSC0003DMG400020697-(rev)LRR-RLKs\_3844

CATGTATACCTCTTTGGTCTTGAATTTGTACAGTGGTTTTGGCCTAATACCTTTACTTTTTCCATCTTTTAA  
ACTTTAACAATGTAAATAGAACTCTCAATATTGAATAACGGAATTC

>PGSC0003DMG400020697-(rev)LRR-RLKs\_62

GGCTAGTTTAGCCATGACTCAAACCAACATTACAACCTGATCAATCCGCTCTTCTTTCCTTGAAATTCCAAA  
TCATTTGGATCCCTTTCACTTGTGGATGAAAGTTGGTCTCCAGCTAT

>PGSC0003DMG400020697-(rev)LRR-RLKs\_744

CTTTTGTCAATAGAATCCAATCAACTTACAGTTCTATACCATTCTCGATCTTCAACATTTCTGGAATTGA  
GATCATTGCATTTACAAATAATACCTTATCAGGAAATCTTCCTTATGAT

>PGSC0003DMG400020729LRR-RLPs\_0

ATGAACGGTCTTGAGGAGATTGCCAACACTTGTAAGGAACTTCAAGAGCTTAGGGTGTTTCCTTCTGATC  
CATTTGCTCCAGGACCTAATGTATCCTTGACAGAGCAAGGCCTTGATGCT

>PGSC0003DMG400020729LRR-RLPs\_126

ATGGGCTGCCTTAAGCTTCAGTCAGTTTTATACTTCTGCCGCCAAATGACAAATGACGCCTTAGTTACTAT  
TGCAAGGAACCGTCCTAACATGATCCGATTTGTTTGTGTATTATCGAG

>PGSC0003DMG400020729LRR-RLPs\_189

GTTACTATTGCAAGGAACCGTCCTAACATGATCCGATTTGTTTGTGTATTATCGAGCCTCGAACTCCTGA  
TTACTTAACCCTGAACCACTTGATGCTGGTTTTGGGGCCATTGTGCAA

>PGSC0003DMG400020729LRR-RLPs\_315

AAGGAATTGCGGCGACTTTCTCTTCTGGCCTCCTTACAGATCGTGTGTTTGAGTACATCGGGGTCCATG  
TTAAGAAGTTAGAGATGATTTCTTAGCTTTTGCAGGGGATAGCGATCTA

>PGSC0003DMG400020729LRR-RLPs\_378

GTCCATGTAAAGAAGTTAGAGATGATTTCTTAGCTTTTGCAGGGGATAGCGATCTAGGCCTCCACTATA  
TTCTCTCTGGTTGTGAGAGCCTCCGTAAGTTGGAGATTAGAGACTGCCCT

>PGSC0003DMG400020729LRR-RLPs\_63

TCTGATCCATTTGCTCCAGGACCTAATGTATCCTTGACAGAGCAAGGCCTTGCTAGCTGTCTCAATGGGCT  
GCCTTAAGCTTCAGTCAGTTTTATACTTCTGCCGCCAAATGACAAATGAC

>PGSC0003DMG400020729LRR-RLPs\_690

TACATATACAGGACAGTGTGTCAGGAAGGAGGTTTGACTCTGGTTTTGTTTGGGAATATTGATGAAGAT  
GCAGCATTGACTCCATATAGCAACGGGAATTGCTCTCTGGTTTCTTCTTAG

>PGSC0003DMG400020744-(rev)LRR-RLKs\_1152

TTGCAAGAGCTGGCTTTACTTGAAATCAGTTCTCTGGCCAAATCCAATCTCATTGGGAAATTTAGCTTA  
TTTAGCCAAACTCAGTTTAAGAGAAAACAATATCCAGGGGAGAATTCCT

>PGSC0003DMG400020744-(rev)LRR-RLKs\_1216

TAGCTTATTTAGCCAAACTCAGTTTAAGAGAAAACAATATCCAGGGGAGAATTCCTTCCAGTTTAGGCAA  
ATGCCACAATTTGAACTGTTGGATCTTGGTTCAAATAACCTTAGTGGTT

>PGSC0003DMG400020744-(rev)LRR-RLKs\_1461

TCTGATAACAAGTTGCAGGGCCAGATTCTACCACTATAGGTACTTGTGTGAAACTTGAAGCACTAGACA  
TAAGCAACAACAACCTTTCAGGGTAGTATTCTTCAACCATGAATAGTTTG

>PGSC0003DMG400020744-(rev)LRR-RLKs\_1992

GGGCTTATAGGATTGACATTCATAGTTTGTTCCTTGGCATAACGGCAATTTAGTAGTATCTTATCAGTGTCT  
ACTTAGGGAAACTGATAGATTTTCTGCATCAAATTTGCTTGGAGTGGGT

>PGSC0003DMG400020744-(rev)LRR-RLKs\_2550

GGTGATTTTGGTTTGGCAAGATTTGTTCCACCAGCAATTCGAACTCATCAGCAAATTCAAAAAGTTCTA  
CAGGCGTAGGGGGAACCTATTGGTTATACACCTCCAGGTAATAATAAATCA

>PGSC0003DMG400020744-(rev)LRR-RLKs\_2612

AAGTTCTACAGGCGTAGGGGGAACCTATTGGTTATACACCTCCAGGTAATAATAAATCAAGGTTTCTGCT  
GGCTGTCATAAATATGTCATTTGATAAGAATATCTCTAATTCTGTAGTATT

>PGSC0003DMG400020744-(rev)LRR-RLKs\_2798

TTCTGCTCTTGGAAATGTTTACCGGGAGGAAACCAACTGATGAAATGTTCAAAGACAATTTAAACCTTCA  
TAACTATGCCAATGCTGCTTTGCCTGACAGAGTGATGCATATTGCAGATC

>PGSC0003DMG400020744-(rev)LRR-RLKs\_2860

AACCTTCATAACTATGCCAATGCTGCTTTGCCTGACAGAGTGATGCATATTGCAGATCCCATTCTTCTCCA

GGAAAGAGATGAACTTGAATGAAATACAAAGTTGATGACAATACAAGC

>PGSC0003DMG400020744-(rev)LRR-RLKs\_2984

CTGTGACATATTTCTGTCATTCTTAGTTAAGGTGATTCAAGTCGGAGTTTCCTGCTCCGTTGAATCTCCA  
AAAGAAAGAAAGCAGATCAGTGATGTTGTTGGAGAACTCAATTCATTAA

>PGSC0003DMG400020832-(rev)LRR-RLKs\_0

ATGGACACAAGTTATACTCTCTCTTTGCTCAACTTTCAATTTTCATTCTGCTTCTTAACCATACTTCACTTG  
CTAATATTAGCACTGATGGAGCTGCTCTTCTTGCACTTAAATCACAC

>PGSC0003DMG400020832-(rev)LRR-RLKs\_1037

TGACTATCCTAGATCTGCAATTTAATCAACTTAGTGGCTCTATACCACCATCAATCTTCAACATTACCACA  
ATGCAAGTAATTGCTCTTACGGGCAACAATCTTACTGGAAAGCTTCCAA

>PGSC0003DMG400020832-(rev)LRR-RLKs\_1098

CATTACCACAATGCAAGTAATTGCTCTTACGGGCAACAATCTTACTGGAAAGCTTCCAAAACTATATGT  
GACCATCTTCCAACTTGCAAAGGCTTACCTCTCAAAGAACTCCTTAGA

>PGSC0003DMG400020832-(rev)LRR-RLKs\_1159

ACTATATGTGACCATCTTCCAACTTGCAAAGGCTTACCTCTCAAAGAACTCCTTAGATGGAGTTATTCC  
ACCAAGCCTTGAGAAATGCCGAAACTTCAAATATTGTCATTGTCTTAC

>PGSC0003DMG400020832-(rev)LRR-RLKs\_1281

TGAGTTTATTGGAATTGTACCAAGAGAGCTGGCCAACCTAACAGCTCTTACAGAATTATATCTCAGAGCC  
CTGCATTTGGAAGGTAGTATGATATTTCTTACAAGATAAATGAAAATTT

>PGSC0003DMG400020832-(rev)LRR-RLKs\_1342

CTCAGAGCCCTGCATTTGGAAGGTAGTATGATATTTCTTACAAGATAAATGAAAATTTTCTTCTTTTCT  
CTCTCCGCTAAACTGGTAACTCATATACTTCTGAAATTGACAGGAGA

>PGSC0003DMG400020832-(rev)LRR-RLKs\_2074

TAGCCAACCTAACAGTTCTTACAGAATTATATCTCAAAGCTCTGCATTTGGAAGGTAGTATGATATTTCT  
TACAAGAAAAATGAAAATTTTCTTCTTTTCTCTTCCGCTAAACTGG

>PGSC0003DMG400020832-(rev)LRR-RLKs\_244

TGCAACTTCATGGTACCATTACTCCACACCTTGAAACCTCTCATTTCTGTTTCCCTCAACATCAGTAATA  
ACGCTTTTCATGGAGATTTGCCACAAGAGTTGGCTCGTTTGCAGAGGT

>PGSC0003DMG400020832-(rev)LRR-RLKs\_2806

CAATGAGTTTATAGGAACTATACCAAGAGAGATAGCCAACTTAACAGTTCTTACAGAATTATATCTCAA  
GCTCTGCATTTGGAAGGTAGTATGATATTTCTTACAAGAAAAATGAAAT

>PGSC0003DMG400020832-(rev)LRR-RLKs\_305

CATCAGTAATAACGCTTTTCATGGAGATTTGCCACAAGAGTTGGCTCGTTTGCAGAGGTTGAAAGTGATT  
GATGTCACAAGCAATAACTTCACCGGAGAATTTCCGTCATTTTTAAGTTT

>PGSC0003DMG400020832-(rev)LRR-RLKs\_366

AAAGTGATTGATGTCACAAGCAATAACTTCACCGGAGAATTTCCGTCATTTTTAAGTTTGTTACCAAATTT  
ACACATTATGTACCTCTGGAGAAACCAATTTTCAGGTAAAATTCCATCC

>PGSC0003DMG400020832-(rev)LRR-RLKs\_3843

TCAACATTACCACAATGCAAATCATTGATTTTACTGGCAATAATCTTACTGGTAAGCTTCCAACA  
ACTATA TGTGACCATCTTCCAACTTGAAGGGCTTACCTCACAAGCAACTCCC

>PGSC0003DMG400020832-(rev)LRR-RLKs\_427

TACCAAATTTACACATTATGTACCTCTGGAGAAACCAATTTTCAGGTAAAATTCCATCCTCCCTTTCCAATC  
TGACAAA  
ACTGCAAGTGTTGTCAATACAGAACAATTTTCTCCAAGGAG

>PGSC0003DMG400020832-(rev)LRR-RLKs\_4270

AACTTAGTGGCTCTATACCACCATCAATCTTCAACATTACCACAATGCAAATCATTACTCTTACTGACAAT  
AATCTTACTGGTAAGCTTCCACCAAGCCTCGAGAAATGCAGAAAGCTTC

>PGSC0003DMG400020832-(rev)LRR-RLKs\_4392

GTCTTGGCATTGTCGCTCAATGAGTTTATAGGAACTATACCAAGAGAGATAGCCAACTTAACAGCTCTTA  
CAGAATTATATCTCGAAACTCTGCATTTGGAAGGTAGTATGATATTTCTT

>PGSC0003DMG400020832-(rev)LRR-RLKs\_4453

CAGCTCTTACAGAATTATATCTCGAAACTCTGCATTTGGAAGGTAGTATGATATTTCTTACAAGAAAAAT  
GAAAATTTTCTTCTTTTCGGAGCTCTGCATAAGGTAAGTGTA  
ACTCATA

>PGSC0003DMG400020832-(rev)LRR-RLKs\_4514

CAAGAAAAATGAAAATTTTCTTCTTTTCGGAGCTCTGCATAAGGTAAGTGTA  
ACTCATATATTTCCCAA  
ATTGACAGGAGAGATACCAATGGAGCTAGGTAATCTTAAGAACTTCAGG

>PGSC0003DMG400020832-(rev)LRR-RLKs\_4575

TTTCCAAAATTGACAGGAGAGATACCAATGGAGCTAGGTAATCTTAAGAACTTCAGG  
TACTGCAGTT  
AGCAGAAAATGAGCTTACTGGCTCTGTTCTGACAGCATTTTCAACATGTC

>PGSC0003DMG400020832-(rev)LRR-RLKs\_4636

CTGCAGTTAGCAGAAAATGAGCTTACTGGCTCTGTTCTGACAGCATTTC AACATGTCAGCACTGAAGA  
TTATAGATTTTGGACAAAACAAGCTTTCAGGTA CTCTACCTTCAGATTTA

>PGSC0003DMG400020832-(rev)LRR-RLKs\_4697

CACTGAAGATTATAGATTTTGGACAAAACAAGCTTTCAGGTA CTCTACCTTCAGATTTAGGTCGTAGAAT  
TCCCAACCTAGAAGTATTTCTTTGTGGAGGAAATAATCTGAGTGGTTTTA

>PGSC0003DMG400020832-(rev)LRR-RLKs\_4758

TCGTAGAATTCCCAACCTAGAAGTATTTCTTTGTGGAGGAAATAATCTGAGTGGTTTTATCTCTGATTCAA  
TCACAAATTCTTCAAGACTCAGAATGTTTGACATCTCATTCAACAGTTT

>PGSC0003DMG400020832-(rev)LRR-RLKs\_4819

TCTGATTCAATCACAAATTCTTCAAGACTCAGAATGTTTGACATCTCATTCAACAGTTTCACAGGTCCAAT  
TCCTAAATCATTGGTAACTTAGAATACCTTGAGATTCTTAACTTAGAG

>PGSC0003DMG400020832-(rev)LRR-RLKs\_488

CCTTTCCAATCTGACAAAAGTCAAGTGTGTC AATACAGAACAATTTTCTCCAAGGAGAGATCCCTCGG  
GAACTCGGTCATCTTCGTTACCTGAGTATCCTAGACCTGCAATATAATGG

>PGSC0003DMG400020832-(rev)LRR-RLKs\_4880

CAGGTCCAATTCCTAAATCATTGGTAACTTAGAATACCTTGAGATTCTTAACTTAGAGATGAATAATTTT  
ATCAGTGATTCATCATTGAGCTTCCTTACATCATTAACTGTAAGGA

>PGSC0003DMG400020832-(rev)LRR-RLKs\_4941

GAATAATTTTATCAGTGATTCATCATTGAGCTTCCTTACATCATTAACTGTAAGGAACTAAGAGCA  
CTCCGATTTAATGAGAATGCATTGGATGGGGCATTACCAGCGTCTGTTGG

>PGSC0003DMG400020832-(rev)LRR-RLKs\_5063

ATTTCTCAAACCTCGATGCAAAATTTTCAAGGAAATGGCTGTAAGCTAAAGGGCGTCATTCTCGAGAAAT  
CGGTAATCTTACTGGAGTGATACATATGAGTCTGTTTAACTAAGTTGG

>PGSC0003DMG400020832-(rev)LRR-RLKs\_5124

TCGAGAAATCGGTAATCTTACTGGAGTGATACATATGAGTCTGTTTAACTAAGTTGGCTGGACATATT  
CCAAATACTGTCCAAGACATGTTGAACCTCCAAGAATTTTATCTACATAG

>PGSC0003DMG400020832-(rev)LRR-RLKs\_5246

ATGAGATTAAGGTACCATAACCAATGTTATATGCAGTTTAAAGAATCTTGGTGCATTAGACTTGTGAGG

AAATCATTTTTCTGGTTCAGTGCCCTCATGCTTAGGGAATGTAAGT

>PGSC0003DMG400020832-(rev)LRR-RLKs\_5307

CTTGTCAGGAAATCATTTTTCTGGTTCAGTGCCCTCATGCTTAGGGAATGTAAGTATCTTA

ATCTAGCTTACAACAGGCTGAATTCAAGATTACCTGCAAACCTGGGGAG

>PGSC0003DMG400020832-(rev)LRR-RLKs\_5368

AGGTATCTTAATCTAGCTTACAACAGGCTGAATTCAAGATTACCTGCAAACCTGGGGAGCCTTCAAGATC

TCATTGAATTAAGTGTTCATCCAATTCATTAAGTGGTCATATTCCTCTG

>PGSC0003DMG400020832-(rev)LRR-RLKs\_5429

TTCAAGATCTCATTGAATTAAGTGTTCATCCAATTCATTAAGTGGTCATATTCCTCTGGAGTTGGGAAAT

TTAAAGGCAGTAACACTAATTGATTTGTCAAAAAATGATTTTTCTGGTA

>PGSC0003DMG400020832-(rev)LRR-RLKs\_549

ATCCCTCGGGAACTCGGTCATCTTCGTTACCTGAGTATCCTAGACCTGCAATATAATGGACTTACAGGCT

CTATACCATCATCAATCTTTAACATTACTACAATGCAAGTAATTGCTCTT

>PGSC0003DMG400020832-(rev)LRR-RLKs\_5612

TAGAGGGGCCTATTCCAGATTCATTTGGCAAATTGTTGGCATTGGAATTCTTGGATTTGTCTTATAACAAT

CTTAGTGGTGAAATTCCAAAGTCATTAGAAGCTCTAGTGTATCTCAAAT

>PGSC0003DMG400020832-(rev)LRR-RLKs\_5734

ATGAATTTCTCATTCAATAAACTCAGTGGAGAAATCCCATTGGTGGTCCTTTTGTAATGTCACTAGTCA

ATCCTTCTTGCCAATGATGCACTTTGTGGTGACTCCCGGTTTAAACATA

>PGSC0003DMG400020832-(rev)LRR-RLKs\_5795

TCACTAGTCAATCCTTCTTGCCAATGATGCACTTTGTGGTGACTCCCGGTTTAAACATAAAACCATGTCAA

ACTAAATCTACAAAGAAGTCAAGAAGAAAAAGAGTGCTTATAGGTTTAT

>PGSC0003DMG400020832-(rev)LRR-RLKs\_5856

ACCATGTCAAATAAATCTACAAAGAAGTCAAGAAGAAAAAGAGTGCTTATAGGTTTATATACGCTGTT

AGGGATTGGGTCGCTCTTTGTGTTGGTAGTTGGATATGTGGTGTTAAGATT

>PGSC0003DMG400020832-(rev)LRR-RLKs\_5917

ACGCTGTTAGGGATTGGGTCGCTCTTTGTGTTGGTAGTTGGATATGTGGTGTTAAGATTGAGAAAGACA

AAGAAGAATGCAAGTCAAGCAGATGTGTCTCTGGTAAAAGAACATGAAAGA

>PGSC0003DMG400020832-(rev)LRR-RLKs\_61



ATACTTCACTTGCTAATATTAGCACTGATGGAGCTGCTCTTCTTGCCTTAAATCACACATTTCTTCTCATC  
CTAACAAACATCTTAGCAAGCAACTGGTCTTCTTCAACCTCGGTTTGCA

>PGSC0003DMG400020832-(rev)LRR-RLKs\_610

TTACAGGCTCTATAACCATCATCAATCTTTAACATTACTACAATGCAAGTAATTGCTCTTACAGGCAACAAT  
CTTACTGGAAAGCTTCCAAAACTATATGTGACCATCTTCCAAACTTGG

>PGSC0003DMG400020832-(rev)LRR-RLKs\_6100

GGGAGTTTTAGTGTGGTCTACAAAGGGATACTTAAGGATGGTACTCTTTTGGCAGCAAAGGTATTCAAT  
GTGCAATTGGAGGGTGCAATTTAAAAGTTTTGATACGGAATGTGAGATACTC

>PGSC0003DMG400020832-(rev)LRR-RLKs\_6405

TCTCCACAATGGCTATAACAACGCCTGTGGTTCATTGTGACTTGAAGCCAAGTAATGTCTTGCTTGATCAG  
GAAATGGTTGGTCATGTCAGTGATTTTGGCATTGCGAAATTGCTAGGTGA

>PGSC0003DMG400020832-(rev)LRR-RLKs\_6649

GAAGCTTTTATGATAATTTTTTAAAAATAATCGTAGAGTATGGACAAGATGGCATAGTATCCACGAGTTG  
TGATGTTTATAGTTTTGGCATCCTGATGATGGAGGCATTACACAAGAAGAA

>PGSC0003DMG400020832-(rev)LRR-RLKs\_6710

CACGAGTTGTGATGTTTATAGTTTTGGCATCCTGATGATGGAGGCATTACACAAGAAGAAGACCAAGTGA  
TGAAACATTTACCGGTGAATTGAGCATAACAGCGTTGGGTTAGTGATTCCTT

>PGSC0003DMG400020832-(rev)LRR-RLKs\_6771

CCAAGTGATGAAACATTTACCGGTGAATTGAGCATAACAGCGTTGGGTTAGTGATTCCTTTCCGGGTGAA  
ATTCATAAGGTGGTGGATTGCAATTTGGTACAGCCAGGGGATGAACAAATT

>PGSC0003DMG400020832-(rev)LRR-RLKs\_6832

CGGGTGAAATTCATAAGGTGGTGGATTGCAATTTGGTACAGCCAGGGGATGAACAAATTGATGCAAAG  
ATGCGATGTTTGTATCTATCATGGAATTATCTTTGAACTGCACTTTAGTGA

>PGSC0003DMG400020832-(rev)LRR-RLKs\_6893

TGCAAAGATGCGATGTTTGTATCTATCATGGAATTATCTTTGAACTGCACTTTAGTGAAACCTGATGCA  
AGAATTAGCATGAAAGATGCTCTTTCAACACTCAAAAAGATCAGGCTACA

>PGSC0003DMG400020832-(rev)LRR-RLKs\_732

GGGCTTACCTCACAAGCAACTCCCTAGATGGAGTTATTCCACCAAACCTTGAGAAATGCCGAAAACCTC  
AAATATTGTCATTGTCTTACAATGAGTTTATTGGAATTGTACCAAGAGAG

>PGSC0003DMG400020832-(rev)LRR-RLKs\_793

GAAAACTTCAAATATTGTCATTGTCTTACAATGAGTTTATTGGAATTGTACCAAGAGAGCTGGCCAACTT  
AACAGCTCTTACAGAATTATATCTCGGAGATCTGCATTTGGAAGGTAGTA

>PGSC0003DMG400020832-(rev)LRR-RLKs\_854

GGCCAACTTAACAGCTCTTACAGAATTATATCTCGGAGATCTGCATTTGGAAGGTAGTATGATATTTCTT  
TACAAGAAAAATGAAAATTTTCTTCTTTCTCTCTTCCGCTAAACTGGT

>PGSC0003DMG400020848LRR-RLKs\_0

ATGGGAAGAAGTTGCAATCTTCTTTGCTCTTGCAGTTCTCATTCTACTCCATCACCATACTTTACTTGCT  
ACTCTTCCTAATATTAGCACTGACGAAGCTGCTCTTCTTGCACCTAAA

>PGSC0003DMG400020848LRR-RLKs\_1037

AACTACAGCTGCTGATGTTAGACCAGAATGAGTTTACTGGTTCTATCCCTGAAAGCATTTTCAATATATCA  
GCAATGCAGATCCTAGATTTTTCAATGAACAAGCTTTCAGGTACTCTAC

>PGSC0003DMG400020848LRR-RLKs\_1098

CAATATATCAGCAATGCAGATCCTAGATTTTTCAATGAACAAGCTTTCAGGTACTCTACCTTCGGATTTAG  
GTCGTGGAATGCCCAATTTAGAAGAACTTTATTGTGGAGGAAATAATCT

>PGSC0003DMG400020848LRR-RLKs\_1159

TCGGATTTAGGTCGTGGAATGCCCAATTTAGAAGAACTTTATTGTGGAGGAAATAATCTGAGTGGTTTTA  
TATCTGATTCAATCTCAAATCTTCAAGACTCAGAATGGCTGATCTCTCA

>PGSC0003DMG400020848LRR-RLKs\_1220

GTGGTTTTATATCTGATTCAATCTCAAATCTTCAAGACTCAGAATGGCTGATCTCTCAGACAATAGTTTC  
ACAGGTGTAATCCCGAATCACTAGGTAACCTTAGAGTACCTTGAGGTTT

>PGSC0003DMG400020848LRR-RLKs\_1525

GGCGTCATTCTCGAGAAATTGGTAATCTTACTGGAGTGATATATATGAGTTTGTATAAAAATGAGTTGA  
CTGGACATATTCAAATACTGTCCAAGACATGTTGAACCTTCAAGAATTT

>PGSC0003DMG400020848LRR-RLKs\_1708

GGTGCATTAGACTTGTGAGGAAATCATATTTCTGGTTTGGTGCCATGCTTAGGGAATGTTACTAGTTTGA  
GGAAACTTAATCTAGCTTACAACAGGCTGAATTCTAGATTACCTGCAAAC

>PGSC0003DMG400020848LRR-RLKs\_1891

CCTCTGGAGTTGGGAAATTTAAAGGCAGTGACACTCATTGATTTATCAAAAATGATTTTTCTGGTAAAA

TTCCTAGCACTTTAGGGGGTCTAGCTGAATTGACGGATCTTTTTCTAACA

>PGSC0003DMG400020848LRR-RLKs\_1952

CTGGTAAAATTCTAGCACTTTAGGGGGTCTAGCTGAATTGACGGATCTTTTTCTAACACATAATAGATT  
AGATGGGGCTATTCCAGATTCATTTGGCAAATGTTGCTACTGGAATACT

>PGSC0003DMG400020848LRR-RLKs\_2074

GATTTGTCCTATAACAATATTAGTGGTGAAATTCCAAAGTCATTAGAAGCTCTTGTGTATCTCAAATACAT  
GAATTTCTCATTCAATAAACTCAGTGGAGAAATCCCACTGGCGGTCCT

>PGSC0003DMG400020848LRR-RLKs\_2196

TAAAAATGTCACCAGTCAATCTTCTATCCAATGATGCACTCTGTGGTGACTCCTGGATTAATGTAAAAC  
CATGTCAAAGCAAGTCAACAGAGAAGCCAAGAGGAAAGAGAGTGCTTAT

>PGSC0003DMG400020848LRR-RLKs\_2257

AATGTA AAACCATGTCAAAGCAAGTCAACAGAGAAGCCAAGAGGAAAGAGAGTGCTTATCAGTTTATAT  
ACATTGTTAGGGATTGGATCACTCCTTGTGTTGGCCGTTGGATATGTGGTG

>PGSC0003DMG400020848LRR-RLKs\_2562

AGTAAAGGTATTCAATGTGCAATTGGATGATGCATTCAAAGTTTTGACACGGAGTGTGGGATACTCCG  
GAACCTTCGCCACAGAAATCTGACCAAAGTCATCACCAGCTGCTCCAATCT

>PGSC0003DMG400020848LRR-RLKs\_2684

ATTTCAAGGCCCTGGTGTGGAATACATGCCCAACGGGACACTTGATAAATGGTTATACTCTCACAACCT  
GTTCTTGAACCTTATTGCAGAGATTAGATATAATGATAGATGTTGCATCTG

>PGSC0003DMG400020848LRR-RLKs\_2745

TCACAACCTGTTCTTGAACCTTATTGCAGAGATTAGATATAATGATAGATGTTGCATCTGCAATGTAATC  
TCCACAATGGCTATTCAACGCCTGTTGTGCATTGTGACTTGAAGCCAAG

>PGSC0003DMG400020848LRR-RLKs\_2928

AGATGCAGGGGAGGCTTTCGTTCAAACAAGAACAATTTCAACCATTGGATATATTGCTCCAGGTATATTA  
GTTAAGCAATTCTTCCCTAGATATGGATTGATGCTTTCAGTTTTGGCA

>PGSC0003DMG400020848LRR-RLKs\_427

GTTTGTACCAAACCTACGCTTTCGCTACCTCTCGAGCAACCAATTTTCGGGGAAAATTCATCATCTATT  
TCCAATCTGACAAAGCTGGAATTGTTGACAATACACAAAATTTCTCG

>PGSC0003DMG400020848LRR-RLKs\_488

ATCATCTATTTCCAATCTGACAAAGCTGGAATTGTTGACAATACACACAAATTTTCTCGAAGGAGAGATT  
CCTAAAGAAATCGGTGATCTTCGTTACTTGATTGTCCTAAACATGCAAGA

>PGSC0003DMG400020848LRR-RLKs\_61

CTTTACTTGCTACTCTTCCTAATATTAGCACTGACGAAGCTGCTCTTCTTGCACTTAAATCACACATTTCTT  
CTTATCCTAACATCATCTTAGCAAGCAACTGGTCTTCTTCCAGCCCGG

>PGSC0003DMG400020848LRR-RLKs\_671

TCTTACTGACAACAATCTGACCGGAAATCTTCCACGAACTATATGTGACCGTCTTCCAAACTTGGAAGGG  
CTTACCTCTCAAGCAACTACCTAGGTGGAGTTATTCCACCAAACCTGGA

>PGSC0003DMG400020848LRR-RLKs\_732

TTGGAAGGGCTTCACCTCTCAAGCAACTACCTAGGTGGAGTTATTCCACCAAACCTGGAGAAATGCCGA  
AAACTTCAAATACTGTCTCTGTCTTACAATGAATTTACTGGAAGTGTACCA

>PGSC0003DMG400020848LRR-RLKs\_793

AATGCCGAAAACCTTCAAATACTGTCTCTGTCTTACAATGAATTTACTGGAAGTGTACCAAGAGAGCTATC  
CAACTTAACAGCTCTTACAGAATTATATCTTGAATACAACACTTGGAAG

>PGSC0003DMG400020848LRR-RLKs\_854

AGAGCTATCCAACCTAACAGCTCTTACAGAATTATATCTTGAATACAACACTTGGAAGGTAGTATGCTA  
TTTCTCACAAGATATTTGAAATTTTCTTCTTCTCTCTTCCACCAAAT

>PGSC0003DMG400020848LRR-RLKs\_915

AGTATGCTATTTCTCACAAGATATTTGAAATTTTCTTCTTCTCTTCCACCAAATTTGTACTCATATAT  
TTCCCAAATTGACAGGAGAGATACCAGCAGAGCTAGGTAATCTTAA

>PGSC0003DMG400020848LRR-RLKs\_976

GTAATCATATATTTCCCAAATTGACAGGAGAGATACCAGCAGAGCTAGGTAATCTTAAAGAACTACAG  
CTGCTGATGTTAGACCAGAATGAGTTTACTGGTTCTATCCCTGAAAGCATT

>PGSC0003DMG400020898RLKWAX-EGF\_1024

GAATGCTGCTAATGGAAATGTTGGACTTGAAGAGAAATGAAGTTGCAAATGAAGAGAATTCCAGTCAAT  
ACTTTCTTATTATATTTACGATAAGTTCAATAAGGGGAAAGAGATTGTGG

>PGSC0003DMG400020898RLKWAX-EGF\_1088

TCAATACTTCTTATTATATTTACGATAAGTTCAATAAGGGGAAAGAGATTGTGGTGGATGAAGGAGC  
GAACGATGATGAAAAGAAGATTGCTAGGAAGCTGAGTTTGATTGCATTATG

>PGSC0003DMG400020898RLKWAX-EGF\_1152

GGAGCGAACGATGATGAAAAGAAGATTGCTAGGAAGCTGAGTTTGATTGCATTATGGTGTATACAAAC  
AAATCCGATACAACGCCCTTCAATGAGTAAAGTAGTAGAAATGCTTGAAGGC

>PGSC0003DMG400020898RLKWAX-EGF\_1276

TCGAAGTGCTACAAGTACCTCCTCAGCCTCTTTAATCTCAACCGATTGTCCATCAGATCATGGGAAGTTCT  
ATGACATTTTCATCTGATTCAATAGCTTTGTTGGATAATTCCATTGAGG

>PGSC0003DMG400020898RLKWAX-EGF\_448

CAAGAGGGTTCAAAGAGAAATTAGGTGAGGGGGGTTACGGAAGTGTGTACAAAGGAAAGCTTCAAAG  
TGGAAGAGATGCAGCAGTGAAGATGTTGAGCAAGCCTAAAGCCGGTGGGCAAG

>PGSC0003DMG400020899RLKWAX-EGF\_0

ATATATAAAGTCACGACTGTTCAACACAAATACACAATTTGAGCAAAGGTGTGTTTGGCATATGGGGG  
AAACATGACATTTCCATCTCCCTACTAATAAATTGGTAAACCGTCAAAGT

>PGSC0003DMG400020899RLKWAX-EGF\_1054

CAATGGATTCACTCACTACAATTTGATTTCTTCATGTCTTTGTAGGTGTTGCTTTAATGATTCTCTGTGAGT  
ACTCAAACTTTTCTCTACATATGCTTTTAATTCTCCATTGATCTCTCA

>PGSC0003DMG400020899RLKWAX-EGF\_1116

CTCTGTGAGTACTCAAACTTTTCTCTACATATGCTTTTAATTCTCCATTGATCTCTCATTCTAAATATTTTGC  
ACTTTAATCAAACCAGGGAGCAGTCAGTTGCTACTTCTGCTTTTCT

>PGSC0003DMG400020899RLKWAX-EGF\_1178

AAATATTTTGCACTTTAATCAAACCAGGGAGCAGTCAGTTGCTACTTCTGCTTTTCTGAGTAAGCTCTTA  
TTACTTATATATCCCTTCATTAAGCTGTATGTTATTTGGCTGCACAAAA

>PGSC0003DMG400020899RLKWAX-EGF\_124

CTCTTGAGGGACCTTCATCAAATTGCAACTTCCCCATCAAGGACCAAACACAAGTCTTCCATTGGCTTGG  
GACCCAAAGGAGTAATATTGGTAATGAAAAGTCCACAAAGCTTCAACTTG

>PGSC0003DMG400020899RLKWAX-EGF\_1240

AAGCTCTTACTTATATATCCCTTCATTAAGCTGTATGTTATTTGGCTGCACAAAACCTTATCATTCCATT  
GATCATGTGTTTAAATGGCCTCACTGGCATAAAAAGTGAGCACGACACA

>PGSC0003DMG400020899RLKWAX-EGF\_1302

TCATTCCATTGATCATGTGTTTAAATGGCCTCACTGGCATAAAAAGTGAGCACGACACAAAAATTTCGAAAA

CTAATTTCTTCGAATCCTTTATACGTCATGATGATATAAGTAAAGCTTGT

>PGSC0003DMG400020899RLKWAX-EGF\_1364

TTCGAAAAC TAATTTCTTCGAATCCTTTATACGTCATGATGATATAAGTAAAGCTTGTGTACCTTATAGTG

TTAAGTATAGAAAGCTGTTAATAGCAATATTTCTGAAAACATAGCCTTC

>PGSC0003DMG400020899RLKWAX-EGF\_1426

CTTATAGTGTTAAGTATAGAAAGCTGTTAATAGCAATATTTCTGAAAACATAGCCTTCTATCTCCTTATCA

TTTCTATGTTTTGTTGGCCTAAGGGGAAGTTACTTTCTATGATTTCTCA

>PGSC0003DMG400020899RLKWAX-EGF\_1488

TCCTTATCATTCTATGTTTTGTTGGCCTAAGGGGAAGTTACTTTCTATGATTTCTCAAACGTGCAGTGCA

TTTGGTAGCAAAATTTGTGATCGGCCTCCGTTGGTAATTGCATTTCTC

>PGSC0003DMG400020899RLKWAX-EGF\_1550

TGCAGTGCATTTGGTAGCAAAATTTGTGATCGGCCTCCGTTGGTAATTGCATTTCTCGTGTACAAATTCA

AAAGGAGGCATTTGTCAATGTACGATACGATTGAAGGCTTTCTGCAAAC

>PGSC0003DMG400020899RLKWAX-EGF\_1674

AATAATTCATGCCAATCAGATATAATTA CTCCAACATAAAGAGAATGACAAGAGGATTCAAAGAGAAA

TTAGGCGAGGGAGGTTACGGA ACTGTGTACAAAGGAAAGCTTCAAAGTGGA

>PGSC0003DMG400020899RLKWAX-EGF\_1736

AGAGAAATTAGGCGAGGGAGGTTACGGA ACTGTGTACAAAGGAAAGCTTCAAAGTGGAAGAGATGCA

GCAGTGAAGATGTTGAGCAAGCCTAAAGCTGATGGGCAAGATTT CATGAATGA

>PGSC0003DMG400020899RLKWAX-EGF\_186

TGGCTTGGGACCCAAAGGAGTAATATTGGTAATGAAAAGTCCACAAAGCTTCAACTTGCTAGATGGTTT

AATTGCATTTTTACTCTTATATATGATAACAGCAATTATTGTGAAGTCTCA

>PGSC0003DMG400020899RLKWAX-EGF\_2356

ATTCCAGCCAATACTTTCTTATAATATTTACGATAAGTTCAACAAAGGGAAAGAGATTGTGGTGGATGA

AGAAGCGAATGATGATGAAAAGAAGATTGCTAGGAAGCTGAGTTTGGTTG

>PGSC0003DMG400020899RLKWAX-EGF\_2418

GTGGATGAAGAAGCGAATGATGATGAAAAGAAGATTGCTAGGAAGCTGAGTTTGGTTGCATTATGGTG

TATACAAACAAATCCGATACAACGCCCTTCAATGAGTAAAGTGGTAGAAATG

>PGSC0003DMG400020899RLKWAX-EGF\_248

ATGGTTTAATTGCATTTTTACTCTTATATATGATAACAGCAATTATTGTGAAGTCTCAGCTGAACCTGAGT  
AATACACAAATGTCTAAAGGAACTGTCAGCTTAAATACTTTACATTAA

>PGSC0003DMG400020899RLKWAX-EGF\_2542

AAGGCGAAGTTGAAGTGCTAGAAGTACCTCCTCTGCCTCTTCAATCACAACCGATTGTCCATCAGATCAT  
GGGAGGTTCTACGACATTTTCGTCTGATTCAATAGCTTTGTTAGATAATC

>PGSC0003DMG400020899RLKWAX-EGF\_2666

TGAGGTAGACATTTATGCTGATTGATTATAGTTGATGTAATGTTTATGTGAAATAAACATAGCCAACCAA  
ACAATGTTTGGGACAAAGAATCGTATTGTTATTGTTGCACTAGTTATATT

>PGSC0003DMG400020899RLKWAX-EGF\_310

AACCTGAGTAATACACAAATGTCTAAAGGAACTGTCAGCTTAAATACTTTACATTAATCCTTCAAATCAT  
CTTTCTGCAAACATGCCATGCTCGGAAGAGCAAACACTACTGTCCTCCT

>PGSC0003DMG400020899RLKWAX-EGF\_434

CTTGTGGCGATATCCGTAACATAAGCTACCCTTTTCGTTTAAACACCGATCCAGAATATTGCGGAGATGA  
TAAAAAAATTGAATTAGCTTGTGAAGGTAACCAAACAGTTATATGGCTAT

>PGSC0003DMG400020899RLKWAX-EGF\_496

GGAGATGATAAAAAAATTGAATTAGCTTGTGAAGGTAACCAAACAGTTATATGGCTATTCTCCAAAAG  
TTGCACGTTCAAGGCATCGGCTATGATAATCGGACAATTCACCTGGTTGAT

>PGSC0003DMG400020899RLKWAX-EGF\_62

ATGGGGGAAACATGACATTTCCATCTCCCTCACTAATAAATTGGTAAACCGTCAAAGTCTTCCTCTTGAG  
GGACCTTCATCAAATTGCAACTTCCCCATCAAGGACCAAACACAAGTCTT

>PGSC0003DMG400020899RLKWAX-EGF\_620

CTTTACAAACACAAGAACAAGATGATCTATGTTCTTTCAGACCTCAGCTTAATTTCAACCAATACAATAGA  
ATCTTTCAATCATATACGTATACTAATGAATATTATAAAACAATAGCTG

>PGSC0003DMG400020899RLKWAX-EGF\_682

TACAATAGAATCTTTCAATCATATACGTATACTAATGAATATTATAAAACAATAGCTGAGCCCATCTTCAT  
GTTCAACTGTCCGTTTGCTGTTAATAATTCTTCGACATTTGTGGAAATT

>PGSC0003DMG400020899RLKWAX-EGF\_744

CATCTTCATGTTCAACTGTCCGTTTGCTGTTAATAATTCTTCGACATTTGTGGAAATTAGTGGCTGCAAT  
TAAGCAGATACACTTATTTAAAGATTGGAGAAATGAATGTCTCTGAAGT

>PGSC0003DMG400020899RLKWAX-EGF\_806

GCTGCAAATTAAGCAGATACTTATTTAAAGATTGGAGAAATGAATGTCTCTGAAGTGAGTGATGGAT  
GCAGAGCGGAGTTTATAGGCTTAACCTCATGGCCTAATATTAAGATGCAG

>PGSC0003DMG400020899RLKWAX-EGF\_930

CAACATTTCCCTTTCTGATTTTCATCAAGCAATCCTTTATGGCTTTGAGCTCTATTATCCGCGTTTCGGAAA  
AAGGATAAGTAACGACTTCAACTATATATGATTTTCTCCTTTATTAGG

>PGSC0003DMG400020899RLKWAX-EGF\_992

GTTTCGGAAAAAGGATAAGTAACGACTTCAACTATATATGATTTTCTCCTTTATTAGGAAAACAATGGAT  
TCACTCACTACAATTTGATTTCTTCATGTCTTTGTAGGTGTTGCTTTAAT

>PGSC0003DMG400020918-(rev)LRR-RLPs\_122

CTATTTTTTACGGCAGCGTCTACAATTCGGCAGACCATTACGACAACGTTTACTAGTTTCCTTCATTCCA  
AATGGGCCAATCTTCCTCAGCTCACGGCTTCTCCCCACCGATTCCAAT

>PGSC0003DMG400020918-(rev)LRR-RLPs\_1647

GCATAGAGTTTCCGCCGATTGCAAGAACTGTCCCATCCTTGGTGCTGGTGGTGTGCTTGATATTGATAC  
CCCATCGACCGTAATTTGGTCGATCATCATCTACTTCAAGGATTG

>PGSC0003DMG400020918-(rev)LRR-RLPs\_1708

TATTGATACCCCATCGACCGTAATTTGGTCGATCATCATCTACTTCAAGGATTGGCTTTCTTGGAG  
GAAGGGGCTTCGTTGCTTGCACTTCCGTAGGTGGTCAAATGGTAACGC

>PGSC0003DMG400020918-(rev)LRR-RLPs\_2135

AAATGTCATCAAGGACAGTGATCATTATGCATGTTTCATTGTCATTTTGCTTCAAGAATGGAGTAATACAT  
GTCGAAGCACCTTTCTATATTACCAGGAATGCACATATTACTTCGACTGC

>PGSC0003DMG400021008-(rev)LRR-RLKs\_0

TTCCTTTCAATATGCTATCTGTCATGGTATTTGTAGTGGTTGTAATCAAGGTGTACTGGTATTGATTTCTT  
GTTCTAAGTGAACCCCATTTTACCTTGTGGTGTTAGAATGAAGTTTATC

>PGSC0003DMG400021008-(rev)LRR-RLKs\_1159

GAAACAACCTCACTGGTAAATACATGAAACCCTTTGGTAAATAAAGTTATCTGTTTGCTAACAACTCTTTT  
CGCTGTTTTTCTCAATCTCTTCATTTTGTAGGTTCAATAAGCATGATAA

>PGSC0003DMG400021008-(rev)LRR-RLKs\_122

GTTCTTGATGATTTTTGTTCTTTATTTTGGCTCTGTCATTGGGCAGCTTCCCTCTCCGGACATATTGGCTTT



GCTTGAGTTTAAGAAAGGTGTCGAACATGATCCAACGGGGTTTCTTCT

>PGSC0003DMG400021008-(rev)LRR-RLKs\_1220

CAACTCTTTTCGCTGTTTTCTCAATCTCTTCATTTTGTAGGTTCAATAAGCATGATAACATCCACAACATT

GCGAATGCTTAACTTATCCTCCAATGCTCTTTCTGGTGAACCTCCCTT

>PGSC0003DMG400021008-(rev)LRR-RLKs\_1952

CTTCTCTGGTGTGCGTGCCTGAGAATTTGAGAAAGTTTCCTTTATCATCTTTCTACCCGGGAAACTCTCAAC

TTCAATTTCCAAATCCTCCCTCAGGATCTGGTCAAGCTTCAACAGAAAA

>PGSC0003DMG400021008-(rev)LRR-RLKs\_2013

AACTCTCAACTTCAATTTCCAAATCCTCCCTCAGGATCTGGTCAAGCTTCAACAGAAAAGCATAAGAGCA

GGCAACTTAAACTATTATCAAAGTGGTGATCATTGTTGCTTGTGTGGTT

>PGSC0003DMG400021008-(rev)LRR-RLKs\_244

AATCTTGAATGAGGAGTCTATTGATTTCAATGGATGCCCTTCATCTTGAATGGGATAATGTGTAATGG

TGGTAATGTTGCAGGAGTTGTTCTTGACAACCTGGGTTTAGTTGCTCATG

>PGSC0003DMG400021008-(rev)LRR-RLKs\_2684

TTACTACTGGGGTCCCACACAACATGAGAAGCTTATTCTTTCAGATTACATATCTCCCGGAAGTCTATCAA

ATTTTCTATATGGTAAACTTTATCTTCTTGATCAACCTTGCAGTTCTT

>PGSC0003DMG400021008-(rev)LRR-RLKs\_2806

TATGCATATCGTTTGCTATAAACAACCTTTGAACTCATAAAACAACCTTATAATCTTTCCTTCTTTTGATATTTTTTA

GTATTTTCATGGCAAACAATTTGTCAGTTTGATATCTTGACAGTTCTT

>PGSC0003DMG400021008-(rev)LRR-RLKs\_2867

TGATATTTTTTAGTATTTTCATGGCAAACAATTTGTCAGTTTGATATCTTGACAGTTCTTGTGGTGCATGTA

TTTTCTCAGTCTGTGATACACGAATTAAGGATAAGAAGCCATTTCCATT

>PGSC0003DMG400021008-(rev)LRR-RLKs\_3233

ACTTAAACTGCTGAAGTCTAGCTTCTGATTTATTGTTGGAAAACCTTTAAACTTGTCCAAGGCCCTATACAC

TACGTCGGACCGGACGTGTAAGCAGGCCTTTACTTTCTTAATATCTCTG

>PGSC0003DMG400021008-(rev)LRR-RLKs\_3294

CCCTATACTACGTCCGACCGGACGTGTAAGCAGGCCTTTACTTTCTTAATATCTCTGCACTGGCAGTAA

GGTTCAGCAATTGTGGTACTTTGCTCATAAAAAGGTCACAATGAACTGC

>PGSC0003DMG400021008-(rev)LRR-RLKs\_3355

CTGGCAGTAAGGTTCAAGCAATTGTGGTACTTTGCTCATAAAAAGGTCACAATGAACTGCAAATACTTCAA  
TGCTCAAATACCTTATTTTCGATTGGTGATTCTACCTGCTCAACTTCTCT

>PGSC0003DMG400021008-(rev)LRR-RLKs\_4087

TGAGAGGCCAGGTATCAAGACTGTATATGAGGACCTTTCATCTATTTAGTTTTCTCATTGCTTTTGGCTTTTGG  
CTTGGGAATCAAATAGCTCATTGGCTTCCCTTGAGTTGTAGAATTAGCC

>PGSC0003DMG400021008-(rev)LRR-RLKs\_4148

TGGCTTTTGGCTTGGGAATCAAATAGCTCATTGGCTTCCCTTGAGTTGTAGAATTAGCCAGTTTAGTGTGT  
GAATGGGCTAGTTTTATTAACCATTGTTTGTGTAATTGGGGCATATT

>PGSC0003DMG400021008-(rev)LRR-RLKs\_488

AGGTAATCTATTCAACTCTTCTTTACCCCCAGAGGTTGGACAGTTAGGGAGGTTAAGAATTTGTCATTA  
GCTGGTAATAACTTCTCCGGTATGATACCGGAGACAATTCAGGGCTTGT

>PGSC0003DMG400021008-(rev)LRR-RLKs\_549

TTGTCATTAGCTGGTAATAACTTCTCCGGTATGATACCGGAGACAATTCAGGGCTTGTGTCTGTGCAAT  
CTTTGGACTTGAGTCGCAATCTTTTTCTGGGGGTCTACCTTCATCTTTG

>PGSC0003DMG400021008-(rev)LRR-RLKs\_61

TTGATTTCTTGTCTAAGTGAACCCATTTTACCTTGTGGTGTTAGAATGAAGTTTATCAAGTTCTTGATG  
ATTTTTGTTCTTTATTTTGGCTCTGTCATTGGGCAGCTTCCCTCTCCGG

>PGSC0003DMG400021008-(rev)LRR-RLKs\_610

CTGTGCAATCTTTGGACTTGAGTCGCAATCTTTTTCTGGGGGTCTACCTTCATCTTTGATGAAGTTGGCT  
GGTTTGGTATACCTGAATCTATCTGTTAATGGATTCACAAAGGAAATTC

>PGSC0003DMG400021008-(rev)LRR-RLKs\_671

GAAGTTGGCTGGTTTGGTATACCTGAATCTATCTGTTAATGGATTCACAAAGGAAATTCCTAAAGGATTT  
GAGCTGATGGAAAATCTTGAAGTGCTTGATTTGCACGGAAATATGTTTGA

>PGSC0003DMG400021017-(rev)LRR-RLKs\_0

ATGGAGGAGTACATTTTCTTATTGATTCTTCTTTCTACTTCAATTTTCTGTATCATTGCAACCTCAAAT  
GAGACAGACCAACAAGCTCTACTAGCTTTCCAAAATCTTATTACAAGT

>PGSC0003DMG400021017-(rev)LRR-RLKs\_1037

GGGGAAAATCCCCAAGAATTAGGGAAGCTATCAAATTTGAGGCAATTAACCTTGCCTCTAATTATAAT  
CTTATTGGTCAAATTCCAGAGGCTATTTTTAACATATCTTCTTTGGAAAT

>PGSC0003DMG400021017-(rev)LRR-RLKs\_1098

AATTATAATCTTATTGGTCAAATCCAGAGGCTATTTTAAACATATCTTCTTTGGAAATCATTGATTTCAAT  
TTCAATAGCCTCTCAGGTAGAATTCCAGTCACTACAGGTCTTCATCTT

>PGSC0003DMG400021017-(rev)LRR-RLKs\_1159

TTGATTTCAATTTCAATAGCCTCTCAGGTAGAATTCCAGTCACTACAGGTCTTCATCTTCCAAACCTTAAA  
GTACTTGAGTTGGGAGCCAATCAGATCAACGGGGAAATTCCATTGTTCA

>PGSC0003DMG400021017-(rev)LRR-RLKs\_122

TAGTCATTTTTTTGGCCAACAATTGGACCAACAATACTTATTTTTGCTCTTGGTTTGGTGTCACTTGCACTTC  
AAAAACCCAAAGGTTTTGGGGCCTTGACTCTTCCTAATTTGCAACTTCA

>PGSC0003DMG400021017-(rev)LRR-RLKs\_1220

AAACCTTAAAGTACTTGAGTTGGGAGCCAATCAGATCAACGGGGAAATTCCATTGTTCATAACAAATGC  
TTCCAAGATTGAGAACTGGTACTAGCACGGAACCTTCTCACGGGGCGCTAT

>PGSC0003DMG400021017-(rev)LRR-RLKs\_1281

ACAAATGCTTCCAAGATTGAGAACTGGTACTAGCACGGAACCTTCTCACGGGGCGCTATTCCTAATAATT  
TAGGAAATCTTCGTGAGTTGCGATTACTGTTCTTGCATACTAATCAACTT

>PGSC0003DMG400021017-(rev)LRR-RLKs\_1342

CTAATAATTTAGGAAATCTTCGTGAGTTGCGATTACTGTTCTTGCATACTAATCAACTTACCAATGAACCA  
AGAGAGCATGAATTGTGATTTTTCAATTCTTTGGCGGATTGTAGAATGT

>PGSC0003DMG400021017-(rev)LRR-RLKs\_1403

CAATGAACCAAGAGAGCATGAATTGTGATTTTTCAATTCTTTGGCGGATTGTAGAATGTTGAAATATCTA  
GAAGTAGGTTCCAATCCGTTGATTGGCATTCTTCCCAATTCTATTGGGAA

>PGSC0003DMG400021017-(rev)LRR-RLKs\_1464

AAATATCTAGAAGTAGGTTCCAATCCGTTGATTGGCATTCTTCCCAATTCTATTGGGAATCTTTCATCTAC  
TGTTGAATACTTTGAAATAGGATATGCACACATCAACGGCCTCATCCCC

>PGSC0003DMG400021017-(rev)LRR-RLKs\_1525

TTTCATCTACTGTTGAATACTTTGAAATAGGATATGCACACATCAACGGCCTCATCCCCATAAGTATAGGC  
AACATTAGCGGCCTTACAGCCTTGACTTTGAAGACAACAACCTTGGCAG

>PGSC0003DMG400021017-(rev)LRR-RLKs\_1586

AAGTATAGGCAACATTAGCGGCCTTACAGCCTTGACTTTGAAGACAACAACCTTGGCAGGGGAATATTCCT

TCTGAGATTGGTAAGCTTAAACAACCTCCAAGGGTTGTACCTATCTAAAAA

>PGSC0003DMG400021017-(rev)LRR-RLKs\_1647

AATATTCCTTCTGAGATTGGTAAGCTTAAACAACCTCCAAGGGTTGTACCTATCTAAAAATAAATTGGAGG

AACATAAGAGGCGGTATGCCATTTATCTAATTTGGTTGAATTAGGTTTGG

>PGSC0003DMG400021017-(rev)LRR-RLKs\_1708

AATTGGAGGAACATAAGAGGCGGTATGCCATTTATCTAATTTGGTTGAATTAGGTTTGGTTGATAATGA

GCTACCTAGATTAATTCAGAATGCTTAGGTAATCTTAGCATGCTTCAAAA

>PGSC0003DMG400021017-(rev)LRR-RLKs\_1769

GATAATGAGCTACCTAGATTAATTCAGAATGCTTAGGTAATCTTAGCATGCTTCAAAGCTTTATTGG

GTTCTAATAAATTTTTATCAAAAATTCCTTGAGCCTTTGGAAGATGAGT

>PGSC0003DMG400021017-(rev)LRR-RLKs\_183

ACTTGCACTTCAAAAACCCAAAGGTTTGGGGCCTTGA CTCTTCTAATTTGCAACTTCAAGGCACAATATC

CCCGTTTTTGGCCAATTTGTCCTCCTCGATGTTCTCAATCTTGGAAC

>PGSC0003DMG400021017-(rev)LRR-RLKs\_1830

TTTATTTGGGTTCTAATAAATTTTTATCAAAAATTCCTTGAGCCTTTGGAAGATGAGTAGCCTTCTCTATC

TTGACGTGTCACATAATTC AATAGAGGGAAAAGTTCTCGAGGATATTG

>PGSC0003DMG400021017-(rev)LRR-RLKs\_1891

CCTTCTCTATCTTGACGTGTCACATAATTC AATAGAGGGAAAAGTTCTCGAGGATATTGGAGGACTGAA

GGCCATTGTAGAACTACATCTTTCCGGTAACCACTTTTCAGGCATGATACC

>PGSC0003DMG400021017-(rev)LRR-RLKs\_2013

GCAGATTCGGGGA ACTCCAAAACCTGCAGTCTCTTGACCTGTGCAACAATTCATTTTTGGACAAATTCC

ATCTTCCTTTTCCA ACTTGATAAGCTTGGAATTCTGAATTTGTCTTTAA

>PGSC0003DMG400021017-(rev)LRR-RLKs\_2074

ACAAATTCATCTTCCTTTTCCA ACTTGATAAGCTTGGAATTCTGAATTTGTCTTTAAATGCATTCTCAAG

TACTATTTCTATGTCTTTGGAAAACTTTCATCCCTTAAAAGCATTAA

>PGSC0003DMG400021017-(rev)LRR-RLKs\_2196

TTTCATTTAATGATTTAAAAGGTGAAATACCTAGTGGCGGTGTGTTTGCAAATTCACACTACAATCATT

CTCGGGAACAAAGGTCTATGTGGAGTGCACATATTGGAGATTCCTGCTT

>PGSC0003DMG400021017-(rev)LRR-RLKs\_2318

GCTATCACTAATCCTGGACAACAATCAAAGCTTAAGGAGGTTGTGCTAAAAATTGTTTCTCCGATGGTTA  
TTTCATCCTTTCTCATATTCTTGTGGTTTCAATTTGGATAATGAAACGA

>PGSC0003DMG400021017-(rev)LRR-RLKs\_2379

CGATGGTTATTTTCATCCTTTCTCATATTCTTGTGGTTTCAATTTGGATAATGAAACGACAAAAGAAAGGA  
AAGTCCAAAGATGTGGAGAAGGCTTAGAGATCAAACCTCATCAATTGA

>PGSC0003DMG400021017-(rev)LRR-RLKs\_244

GCACAATATCCCCGTTTTTGGCCAATTTGTCCTCCTCGATGTTCTCAATCTTGGGAACAACAACCTCCAT  
GGTGGGATCCCTTATGGACTTGGCCACTTGCCTTGCTTGCAGTGATTG

>PGSC0003DMG400021017-(rev)LRR-RLKs\_2562

GAAGTTTTGGCTCTGTGTACAAAGGCACATTATCTGGGGGGAAGTGTAGTGGCAATAAAGGTTCTAGAC  
TTGGAAAATGAGCAAGTATGCAAGAGGTTTGATACTGAATGCGAAGTGATG

>PGSC0003DMG400021017-(rev)LRR-RLKs\_2623

TTCTAGACTTGGAAAATGAGCAAGTATGCAAGAGGTTTGATACTGAATGCGAAGTGATGAGAAATGTTA  
GACATAGAAATCTTGTCCAATGATTACTACATTTTCTAGTACTATATAA

>PGSC0003DMG400021017-(rev)LRR-RLKs\_2684

AAATGTTAGACATAGAAATCTTGTCCAATGATTACTACATTTTCTAGTACTATATAAGAGCCTTTGTTG  
TGCAATTTATGCCCAATGAAAGTCTTGAGAATTGGTTGTACAAAGAAGA

>PGSC0003DMG400021017-(rev)LRR-RLKs\_2745

GCCTTTGTTCTGCAATTTATGCCCAATGAAAGTCTTGAGAATTGGTTGTACAAAGAAGATTGTCACCTGA  
ATCTTCATCAAAGAGTCACTATAATGCTTGATGTAGCTATGGCAATTGAA

>PGSC0003DMG400021017-(rev)LRR-RLKs\_2806

GTCACCTGAATCTTCATCAAAGAGTCACTATAATGCTTGATGTAGCTATGGCAATTGAATATCTACATTAT  
AGTCATGTCAATTAGATAGTTCATTGTGACCTAAAGCCAGCCAACGTTG

>PGSC0003DMG400021017-(rev)LRR-RLKs\_2989

GCAAGTTCATGGCTTATACCGAGACATTAGGCACTCTTGGATACATTGCACCAGGTATAAAGAATCTACT  
CCTTTGATTTTCTCTTATTATAATTATGACTCTCCAAATTCTAATGGTAA

>PGSC0003DMG400021017-(rev)LRR-RLKs\_305

CAACTCCATGGTGGGATCCCTTATGGACTTGGCCACTTGCCTTGCTTGCAGTGATTGATGTTCAAAC  
AATCAGCTAGAAGGAAGTATTCCAACAAGTCTATTTCAACACCAGAAAGT

>PGSC0003DMG400021017-(rev)LRR-RLKs\_3050

GAATCTACTCCTTTGATTTTCTCTTATTATAATTATGACTCTCCAAATTCTAATGGTAAAAAAGGTAAGTCT  
TTATTTATGCAGAATTATTGTTTTATTCAATTGAGTAACTTTTCTTC

>PGSC0003DMG400021017-(rev)LRR-RLKs\_427

AAGTTATTTCAATTGGGCTTCAATAAACTCGGTGGTCAAATGTGGAAAGGGCCATGGTGTGTACCGAAAC  
TCAGAGTCTTAAATCTCAAGAACAATAGCCTCACGGGTATAATCCCTCCTT

>PGSC0003DMG400021017-(rev)LRR-RLKs\_549

ATTTGAAATGCCACAAAGTTGCTTAACTTCAGTTTGTATGGAAATAGAGTTGGTGGCAACATTCCAAAGG  
AAATTGGTAATCTGAGACAACCTGAATTTTTGTCCTTGGTCGATAATCAA

>PGSC0003DMG400021017-(rev)LRR-RLKs\_61

CAACCTCAAATGAGACAGACCAACAAGCTCTACTAGCTTTCCAAAATCTTATTACAAGTCCTAGTCATTTT  
TTGGCCAACAATTGGACCAACAATACTTATTTTTGCTCTTGGTTTGGTG

>PGSC0003DMG400021017-(rev)LRR-RLKs\_610

TTCCAAAGGAAATTGGTAATCTGAGACAACCTGAATTTTTGTCCTTGGTCGATAATCAATTAACAGGTTTC  
GTAACCTGCAACATTGTTTAATATCTCATCACTTCGTGTCCTATCTCTTG

>PGSC0003DMG400021017-(rev)LRR-RLKs\_671

AACAGGTTTCGTAACCTGCAACATTGTTTAATATCTCATCACTTCGTGTCCTATCTCTTGGAAATCAAAGAC  
TTTCTGGTCCTCTCTTGCTTGATGAAAGGAATATTGTGTCAAATATAGA

>PGSC0003DMG400021017-(rev)LRR-RLKs\_732

ATCAAAGACTTTCTGGTCCTCTCTTGCTTGATGAAAGGAATATTGTGTCAAATATAGAGTTTCTAAGTAT  
ATCTAACAAACCAATTTCTGGCTGCATTCCTTCCAACATATGCCAACTC

>PGSC0003DMG400021017-(rev)LRR-RLKs\_793

TTCTAAGTATATCTAACAAACCAATTTCTGGCTGCATTCCTTCCAACATATGCCAACTCACAAAGCTCAAA  
GTCTTGTCCAGAGCTTTCAACAACATAACTGGAGAAATACCCAGAAATA

>PGSC0003DMG400021017-(rev)LRR-RLKs\_854

AAAGCTCAAAGTCTTGTCCAGAGCTTTCAACAACATAACTGGAGAAATACCCAGAAATATTGATTGTTTA  
TCCAAACTTGAACAGTTTCTTATTGGTGATAATCCAATAGAAGGGACTAT

>PGSC0003DMG400021017-(rev)LRR-RLKs\_915

GATTGTTTATCCAAACTTGAACAGTTTCTTATTGGTGATAATCCAATAGAAGGGACTATCCCCACTTCATT

GGGAAATATATCCACTCTTCAATATATTTATTGTGGAAACAATCGCATA

>PGSC0003DMG400021017-(rev)LRR-RLKs\_976

CCACTTCATTGGGAAATATATCCACTCTTCAATATATTTATTGTGGAAACAATCGCATAGTGGGGAAAAT

TCCCCAAGAATTAGGGAAGCTATCAAATTTGAGGCAATTAACTTTGCCT

>PGSC0003DMG400021018-(rev)LRR-RLKs\_0

ATGAGTGGTCTTCTCTATCTAGACGTGTCACAGAATTCAATAGAGGGAGAAGTTCCATCAGATATTGCTG

GACTGAAAGCCATTGTAGAACTACATCTTTCCTATAACCACTTTTCAGGC

>PGSC0003DMG400021018-(rev)LRR-RLKs\_1116

GCACATACCGAGACATTGGGCACTCTTGATATATTGCACCAGGTAAACGAGTCTCTTCTATTTTCAGA

AAAATCACAATTGAGCCCTTCAAATTCTAGAACTAAATAAAAGCAAGTG

>PGSC0003DMG400021018-(rev)LRR-RLKs\_1178

TTTTCAGAAAATCACAATTGAGCCCTTCAAATTCTAGAACTAAATAAAAGCAAGTGTCTGTTAATACAT

AATTATTGTTATATTCAAATGAGTAATTCTTTTTCATTTTTCTTCTTTT

>PGSC0003DMG400021018-(rev)LRR-RLKs\_124

TACCAAGCCAATTGGGGGACCTCCAAAACCTGAAGTCTCTTGACTTGTGCAACAATTCGTTTTTCAGGCTC

AATTCCATTATCCTTTGCCAACTTGATAAGCTTGGAATTCTTGAATTTGT

>PGSC0003DMG400021018-(rev)LRR-RLKs\_1364

TGGAGGTTTTGACCAAAGAAGGCCAACAGATGAAGTGATATGCAATGAAAATCTTGACATGAGGAAG

TGGATCACACAATCATTTTCAGGGACTATGATGGACGTTGTGGATGCCAATA

>PGSC0003DMG400021018-(rev)LRR-RLKs\_186

TCAGGCTCAATTCCATTATCCTTTGCCAACTTGATAAGCTTGGAATTCTTGAATTTGTCTTTAAATGACTTG

TCAGGTACTATCCCTATGTCTTTGGAAAACTCTCATCCCTTAAAAGC

>PGSC0003DMG400021018-(rev)LRR-RLKs\_248

AAATGACTTGTGAGGTAATCCCTATGTCTTTGGAAAACTCTCATCCCTTAAAAGCATTAAATGTTTCAT

TAAATGGTTTGGAAAGGTGTAATACCCATTGGTGGTGTGTTTTCAAATTC

>PGSC0003DMG400021018-(rev)LRR-RLKs\_310

ATGTTTCATTTAATGGTTTGGAAAGGTGTAATACCCATTGGTGGTGTGTTTTCAAATTCCTACTACAATCA

TTTCTCGGGAACAAAGGTCTATGTGGAATGCACATATTGGAGATTCCTG

>PGSC0003DMG400021018-(rev)LRR-RLKs\_372

CTACAATCATTCTCGGGAACAAAGGTCTATGTGGAATGCACATATTGGAGATTCTGCTTGCACTATCA  
CTAATCCAGGAAAACAATCAAAGCTTAAGGAGGTTGTGCTAAAAATTGTT

>PGSC0003DMG400021018-(rev)LRR-RLKs\_62

TATTGCTGGACTGAAAGCCATTGTAGAACTACATCTTTCCTATAACCACTTTTCAGGCATGATACCAAGCC  
AATTGGGGGACCTCCAAAACCTGAAGTCTCTTGACTTGTGCAACAATTC

>PGSC0003DMG400021018-(rev)LRR-RLKs\_744

GATTTGGAAAATGAGCAAGTATGCAAGAGGTTTGATACTGAATGTGAAGTGATGAGAAATGTTAGACA  
CAGAAATCTTGTCCCTGTGATTACTACTTGTCTAGTGACTATATAAGAGCC

>PGSC0003DMG400021018-(rev)LRR-RLKs\_806

TAGACACAGAAATCTTGTCCCTGTGATTACTACTTGTCTAGTGACTATATAAGAGCCTTCTTCTGAAAT  
ATATGTCCAACGGGAGCCTTGAGAATTGGTTGTACAGAGAAGAGTCCCA

>PGSC0003DMG400021018-(rev)LRR-RLKs\_868

TTCTGAAATATATGTCCAACGGGAGCCTTGAGAATTGGTTGTACAGAGAAGAGTCCCCTTGAACCTACT  
CCAAAGAATCACTATAACGCTTGATGTGGCTGTGGCAATCGAATATCTAC

>PGSC0003DMG400021018-(rev)LRR-RLKs\_930

AACCTACTCCAAAGAATCACTATAACGCTTGATGTGGCTGTGGCAATCGAATATCTACACCATGGTCATA  
ACACTCTGATAGTTCATTGCGACCTAAAGCCAGCCAACGTTCTTTTGGAT

>PGSC0003DMG400021051LRR-RLPs\_0

ATTTTGGAAAATGGTTTGGTCAAGGTCTATGCTATGTGCTATATAAACCTCATAAAAATTATTGAATAGA  
GACACAAAGCAAGAATTGAAGAAATTAGTAATTTTGATATATATTTTGGAG

>PGSC0003DMG400021051LRR-RLPs\_1054

TGGTTATAACCATCTTGAAGGACCAATTTCCGATTTCTTTAGATTTGGAAAGCTTACAGAGTTATATCTTG  
GAAATAACAACCTTTGATGGCCAACCTGAGTTCTTATTCTTTAATGGATG

>PGSC0003DMG400021051LRR-RLPs\_1178

CAACTTGAACAGCTAGATTTTTTCAATTCCTAACAGGTCCAATTCCTTCTAATTTAAGTGGTCTGCA  
AAACCTTCAAGTTCTTCTTGTGCATCAAACCACTTGAATGGGACTATA

>PGSC0003DMG400021051LRR-RLPs\_124

GAAAATGGGCATTGGAAAACCTTGCAATTGTTTCTGCTATACGCGTTTCTCTGTCAACTGTTTTCTCCTCAT  
CCTTACCTCATTTGTGCCCAATGATCAAGCCATTGCTCTTCTTCAATT



>PGSC0003DMG400021051LRR-RLPs\_1240

TGGTCTGCAAAACCTTCAAGTTCTCTTCTTGTGCATCAAACCACTTGAATGGGACTATACCTTCATCGGTAT  
TCTCCCTCCCTTCACTAACTAATTTAGGCTTGAGTGATAACCATTTAAG

>PGSC0003DMG400021051LRR-RLPs\_1302

CATCGGTATTCTCCCTCCCTTCACTAACTAATTTAGGCTTGAGTGATAACCATTTAAGTGGAAAAATTCAG  
GAGTTCGAGTCCCAAACATTGTCTGAAGTTGATTTAAAACAAAATCAGT

>PGSC0003DMG400021051LRR-RLPs\_1364

AAAATTCAGGAGTTCGAGTCCCAAACATTGTCTGAAGTTGATTTAAAACAAAATCAGTTGCAAGGTCCTA  
TTCCAAAGTCACTCCTAGACCAGATGTCCCTACAACATCTTCTCCTTTTCG

>PGSC0003DMG400021051LRR-RLPs\_1426

AGGTCCTATTCCAAAGTCACTCCTAGACCAGATGTCCCTACAACATCTTCTCCTTTCGTACAATAATCTAA  
GTGGAAAGATTGCTTCAATCATCTGCAATGTGAACATGCTACAAGTGCT

>PGSC0003DMG400021051LRR-RLPs\_1488

ATAATCTAAGTGGAAAGATTGCTTCAATCATCTGCAATGTGAACATGCTACAAGTCTAGATTTAGGCAG  
CAATAATTTGGAGGGAGCAATCCACAATGTTTGGGTGAGATAAGTAGAC

>PGSC0003DMG400021051LRR-RLPs\_1550

TTAGGCAGCAATAATTTGGAGGGAGCAATCCACAATGTTTGGGTGAGATAAGTAGACTTGTGATTTTG  
GATTTAAGCAACAATAGTCTTAGCGGGACAATTAATACAAATTTTAGTATT

>PGSC0003DMG400021051LRR-RLPs\_1612

GATTTTGGATTTAAGCAACAATAGTCTTAGCGGGACAATTAATACAAATTTTAGTATTGGAAACCAACTC  
AAGGTCATTAATTCATGGGAATAAGCTAGAGGGGAAAATCCCACGATC

>PGSC0003DMG400021051LRR-RLPs\_1736

ATCAATTGCACGTATTTGGAAGTTCTTGATTTAGGTAACAATGAGTTGCATGATACATTTCCAAAATGGT  
TAGGAACTCTATCGAATTTAAAGATTTTAAGCTTGAGATCAAATATGTTG

>PGSC0003DMG400021051LRR-RLPs\_1798

AAAATGGTTAGGAACTCTATCGAATTTAAAGATTTTAAGCTTGAGATCAAATATGTTGCATGGTCCCCTC  
AAAGTTTCAAAGAACCAAAACTTGTTTGACCGACTTCAAATTATAGATGC

>PGSC0003DMG400021051LRR-RLPs\_186

TCTCCTCATCCTTACCTCATTGTGCCCCAATGATCAAGCCATTGCTCTTCTTCAATTCAGCCAAACGTTTA

CTATAAATCTTGGTACTTCTTCTAGTGGATCCGATTCTAAAACTCTTA

>PGSC0003DMG400021051LRR-RLPs\_1860

GTCCCCTCAAAGTTTCAAAGAACCAAACTTGTTTGACCGACTTCAAATTATAGATGCCTCATCCAATGG

ATTTAGTGGGAGCTTACCAGCAAGTCTTTTTGAGAATTTCCAAGCCATGA

>PGSC0003DMG400021051LRR-RLPs\_1922

TCCAATGGATTTAGTGGGAGCTTACCAGCAAGTCTTTTTGAGAATTTCCAAGCCATGAGGATAATTGATC

AGAACGTGACAACCTCCAGGGTATTTAGGAGATGTAGAGTTAATTTATGTG

>PGSC0003DMG400021051LRR-RLPs\_1984

AATTGATCAGAACGTGACAACCTCCAGGGTATTTAGGAGATGTAGAGTTAATTTATGTGTCTCATCTGAGA

ACCCAGTGTATGTAGGTGATCTTTTTCTGTTTATAAGTATGTGAGTGA

>PGSC0003DMG400021051LRR-RLPs\_2046

ATCTGAGAACCCAGTGTATGTAGGTGATCTTTTTCTGTTTATAAGTATGTGAGTGAACCTACAACAAA

GGGACGAAATCTGAATCGGTTTCGAGTCTTCCAAAAACATATTTATTG

>PGSC0003DMG400021051LRR-RLPs\_2108

ACAACAAAGGGACGAAATCTTGAATCGGTTTCGAGTCTTCCAAAAACATATTTATTGATCTTTCTAACA

ACAGATTTGAAGGTCAGATACCAAGCATTATTGGAGATCTCATTGGACTT

>PGSC0003DMG400021051LRR-RLPs\_2170

TTCTAACAACAGATTTGAAGGTCAGATACCAAGCATTATTGGAGATCTCATTGGACTTCGTACTTTGAAC

TTATCTCATAATGTCTTGAAGGTCATATACCAGTGTGATTGCAAAATTT

>PGSC0003DMG400021051LRR-RLPs\_2232

CTTTGAACTTATCTCATAATGTCTTGAAGGTCATATACCAGTGTGATTGCAAAATTTATTGGTACTTGAA

TCATTGGATCTCTCATCCAACAAAATCAGCGGAGAAATCCACAACAGC

>PGSC0003DMG400021051LRR-RLPs\_2294

GTAATTGAATCATTGGATCTCTCATCCAACAAAATCAGCGGAGAAATCCACAACAGCTTGTATCCCTCA

CATTTCTTGAGTCTTAAATCTTCTCACAATCATCTTGTTGGATGCATC

>PGSC0003DMG400021051LRR-RLPs\_2356

ATCCCTCACATTTCTTGAGTCTTAAATCTTCTCACAATCATCTTGTTGGATGCATCCCCAGAGGAAAAC

AATTTGATACGTTTGGGAATAGTTCATACCAAGGGAATGATGCGTTACG

>PGSC0003DMG400021051LRR-RLPs\_248

CAAACGTTTACTATAAATCTTGGTACTTCTTCTAGTGGATCCGATTCTAAACTCTTACATGGAACAAGAG  
CACAGATTGTTGCTCTTGGGATGGAGTTTATTGTGATGAGACGACGGGA

>PGSC0003DMG400021051LRR-RLPs\_2480

TTGCCACTCTCAAAGATTGTGGGGGTGATGAAGGGGTACCACAAGCAACAACCTCCAATTGGGCTAGAT  
CAAGAAGAAGAAGAAGAAGGAGATTCAGCAATTATAAGTTGGAAGGCAGTT

>PGSC0003DMG400021051LRR-RLPs\_2728

AAAGCACAAAAGATATTAGTTTGTACCTCCAGGTATTCAATTTGATCTTTAATTATCAATGAATTTGCTC  
ACCTCCTTCATCCTTAAACTCTTAACTTTGAATTCTTTTTTAAAAAAA

>PGSC0003DMG400021051LRR-RLPs\_2790

AATTTGCTCACCTCCTTCATCCTTAAACTCTTAACTTTGAATTCTTTTTTAAAAAAAATAATTGCAGGATT  
CAAGTCTAATATGTTGTTGGTGATGCAAATAAAAGCTTTTAGTTTACT

>PGSC0003DMG400021051LRR-RLPs\_2852

TTGCAGGATTCAAGTCTAATATGTTGTTGGTGATGCAAATAAAAGCTTTTAGTTTACTAGTTTGTGATGTA  
TTTGAAGTGTACATTTCCCTATGTATAAAAGCATTAAATTTTCGTTTATC

>PGSC0003DMG400021051LRR-RLPs\_2901

TAGTTTACTAGTTTGTGATGTATTTGAAGTGTACATTTCCCTATGTATAAAAGCATTAAATTTTCGTTTATCA  
ATATTTTGTGACGCGTAATTATTAGTTAGGTAATTGGATTGACTGCAA

>PGSC0003DMG400021051LRR-RLPs\_310

GAACAAGAGCACAGATTGTTGCTCTTGGGATGGAGTTTATTGTGATGAGACGACGGGACAAGTGACGG  
AGCTTAACCTCGCTGACTGCGAACTTCAAGGCAAGTTTCACTCCAACAGTAG

>PGSC0003DMG400021051LRR-RLPs\_372

TGACGGAGCTTAACCTCGCTGACTGCGAACTTCAAGGCAAGTTTCACTCCAACAGTAGCCTCTTTCAACT  
CTCCAATCTCAAAGGCTTGATTTGTCTAATAATGATTTCTCTGGATCGC

>PGSC0003DMG400021051LRR-RLPs\_434

TTTCAACTCTCCAATCTCAAAGGCTTGATTTGTCTAATAATGATTTCTCTGGATCGCTCATTTACCTAAA  
TTTGGTGAACCTTCTAGTTTGACGCATCTTGATTTGTGCGAATTCAGGA

>PGSC0003DMG400021051LRR-RLPs\_496

TTCACCTAAATTTGGTGAACCTTCTAGTTTGACGCATCTTGATTTGTGCGAATTCAGGATTTCTGGTCTAAT  
TCCAACAGAAATCTCTCGTCTTTCTAAATTACAAGTTCTTAGTATCCA

>PGSC0003DMG400021051LRR-RLPs\_558

CTGGTCTAATTCCAACAGAAATCTCTCGTCTTTCTAAATTACAAGTTCTTAGTATCCAGAGTAGTCTATTA  
AGTTTTAAACCTAACAAATTTGAACTGCTCCTTAAGAACTTGACCCAAT

>PGSC0003DMG400021051LRR-RLPs\_62

TGAATAGAGACACAAAGCAAGAATTGAAGAAATTAGTAATTTTGATATATATTTTGAGGCACGAAAATG  
GGCATTGGAAAACCTGCATTGTTTCTGCTATACGCGTTTCTCTGTCAACTT

>PGSC0003DMG400021051LRR-RLPs\_682

AGAGGTTGAATTTTACGATGTGAACATCTCTCCACCATTCTCTTAATTTCTCTTCTTATTTAACTACTTT  
GTTCTTCAGAACACACAGTTATACGGGGTACTGCCTGAAAGAGTTTT

>PGSC0003DMG400021051LRR-RLPs\_744

TAACTACTTTGTTCTTCAGAACACACAGTTATACGGGGTACTGCCTGAAAGAGTTTTCCACCTTTCCAAC  
TTAAAATCTCTTGATTTATTAGACAATCCCCAGCTCACTGTTAGGTTTC

>PGSC0003DMG400021051LRR-RLPs\_868

AACCAAATGGAATAGCAGCGCATCACTCATGGAGTTAAATCTCTATAGTGTGAATGCTACTGGCAGGAT  
ACCTGAATCATTGGTTCATCTAACTTCACTAGATAGATTGACAATAGCTTC

>PGSC0003DMG400021051LRR-RLPs\_930

GCAGGATACCTGAATCATTGGTTCATCTAACTTCACTAGATAGATTGACAATAGCTTCTTGTAACTGTCA  
GGGTCTATTCTAAACCTCTATGGAATCTACCAACATATATCATTGG

>PGSC0003DMG400021051LRR-RLPs\_992

AATCTGTCAGGGTCTATTCTAAACCTCTATGGAATCTACCAACATATATCATTGGACCTGGTTATAA  
CCATCTTGAAGGACCAATTTCCGATTTCTTTAGATTTGGAAAGCTTACA

>PGSC0003DMG400021184-(rev)LRR-RLKs\_0

TTTTTTTTTAGAGAGAGAAGCTGAGAGTTGTAAGAGAGAGAAAATATGTCTGCAAGAAGACAAATGTTG  
AGTGTCACTGCCATTTCTGGGAGCTGTGAGTTTCTTTTCATTCATATAC

>PGSC0003DMG400021184-(rev)LRR-RLKs\_122

AACAAGACTAGGGTTTTACCATTGTGGTTTGGTTTTTACTGAGCTCATAGAAATCTTGAACCTTCATTTAT  
CAAGATTTCTAAAGGGCTAAATACTTTGCTGGCCATTTCATTTTCTTG

>PGSC0003DMG400021184-(rev)LRR-RLKs\_3477

CAAGTTTCTCTATGGTAAGCTTCATGTATTCTAACTCTCATATTATGTTTTGCTAATAAAGGTAAAGGC

CTTGTGTACCTGTTCTTTAATCTAGTCATTTTCCTCTGACTGTGTGATA

>PGSC0003DMG400021184-(rev)LRR-RLKs\_3538

AGGTAAAGGCCTTGTGTACCTGTTCTTTAATCTAGTCATTTTCCTCTGACTGTGTGATATATCTTACAGTTC

ATATGGTTTTCCCATGCACATTATATATGAGCACTTTAATCATTGCTG

>PGSC0003DMG400021184-(rev)LRR-RLKs\_3599

TCTTACAGTTCATATGGTTTTCCCATGCACATTATATATGAGCACTTTAATCATTGCTGTGTGATCCTGTA

GTGGGAATTTGTGTGAACGACAGTATTTAGTCCTTGGTTTGATGTGGTA

>PGSC0003DMG400021184-(rev)LRR-RLKs\_3721

ACTTTAGTACATCTAGAGCCCAATATATTATGCATGTCTTTTGTATGTAACCTTTCACACCAAGTAGTAAT

ACAACAATCACCATGTGCTCTTCGTGATGGTCACTACATAGGCTGTGA

>PGSC0003DMG400021184-(rev)LRR-RLKs\_3782

CAAGTAGTAATAACAACAATCACCATGTGCTCTTCGTGATGGTCACTACATAGGCTGTGAGGGATTTGCAA

TATGGTACTTATTATTTCCAGTAGCTAAAATTCTGTATGATTGAGTTCTT

>PGSC0003DMG400021184-(rev)LRR-RLKs\_427

TTGTTTTACTATCTTGAATCTTTGAAAGTTCAGTCTGTACTTTGTTTTTGTCACTCATTTCAGCTTGTATACC

TAGAAAAGTTTCTATTTTGAAAAGACTGGTGATTTTGGGTTGAAGT

>PGSC0003DMG400021184-(rev)LRR-RLKs\_4636

GTTCTATATCTGAGAGACCTGGTATCAAGACTATATACGAGGACCTTTCTTCTATATAGTTTGTACCAAAC

TCTACTTTGGGAATCAAATAGCTCATTGACTTCCCTTTTGAGTAGTAGA

>PGSC0003DMG400021184-(rev)LRR-RLKs\_4697

TGTACCAAACCTACTTTGGGAATCAAATAGCTCATTGACTTCCCTTTTGAGTAGTAGAATTAGCACAGTT

AGTGTGTGAATGGGGCTAGTTTTATTGACCATTGTTTGTGTAATTGG

>PGSC0003DMG400021184-(rev)LRR-RLKs\_488

AGCTTGATACCTAGAAAAGTTTCTATTTTGAAAAGACTGGTGATTTTGGGTTGAAGTTGTGTACTTTTC

CCCCCTGTTGTTTTACTGCTTTGAACTGTGATGGTTGTTGTGAAAGATG

>PGSC0003DMG400021184-(rev)LRR-RLKs\_5002

AAAAAGGTGTTCAAGAGAAAGTGCCAGGTTATGAACAAATGCTACTGGTTTTTCTTGTCCACTATTCAAT

AAAAGTTCAAATGCAACATCATTATAAGACACCTAAGGTGGAAAAAGGAA

>PGSC0003DMG400021184-(rev)LRR-RLKs\_5063

CTATTCAATAAAAGTTCAAATGCAACATCATTATAAGACACCTAAGGTGGAAAAAGGAAAAGTTACAAG  
AACCTAGTTATGCCACTAGTTACTATGCAAGTGAGGAGAGGGGTGGGATAA

>PGSC0003DMG400021184-(rev)LRR-RLKs\_5124

GTTACAAGAACCTAGTTATGCCACTAGTTACTATGCAAGTGAGGAGAGGGGTGGGATAAAGGTATGAA  
TTTAAACAACAGGAACTCTAAATTACATGAAAATACATCATAAGATGCAACA

>PGSC0003DMG400021184-(rev)LRR-RLKs\_61

AAATGTTGAGTGTCACTGCCATTTCTGGGAGCTGTGAGGTTTCTCTTTCATTCATATACAAAACAAGACT  
AGGGTTTTACCATTGTGGTTTGGTTTTTACTGAGCTCATAGAAATCTTG

>PGSC0003DMG400021184-(rev)LRR-RLKs\_6283

AGGTCTGAATCTTGTAAGGAAGGGGCAGAGGTAGAGGCCTCTCTATCCAATTTCCAGGCTTCTGAGG  
GATCCTCCCTTTAAAAGAGATGAAATTGCTTCCATCTCATCCGACTCCCA

>PGSC0003DMG400021184-(rev)LRR-RLKs\_6344

TTCTGAGGGATCCTCCCTTTAAAAGAGATGAAATTGCTTCCATCTCATCCGACTCCCATATAATTCCCC  
ATCATCATCACATCCTTCTTTTTCTACTTCCAGCTCCAATTCTTCA

>PGSC0003DMG400021184-(rev)LRR-RLKs\_6771

TGAGCATTGGTTCGAGCAGGTGGTCGGCACAAATTTATAACAAAGGAATATGAGAGACCTTATAGTGT  
GACGGAGTATAAAACCAACTGTTAAATGAAAGTTGAGCAGTATTTTTGACA

>PGSC0003DMG400021184-(rev)LRR-RLKs\_732

TAAAGCTTTTTCTGGTGTGCAATGAACCTATTTAGGTTTTGATGCTTGCTTTGTTTTGGTTCTGCAAT  
GGGGCAGCTTCTTCCAGGACATTTTGGCCCTGCTTGAATTTAGGAA

>PGSC0003DMG400021186-(rev)RLKmalectin\_122

TTTTTGTACCATTGTCTCCAAGATTGGAGCTTTTGACCATTTTATTGGTCTCAGATCTGTTTGCTGATT  
TGCGGTTTTCTGCACTGAAAGTGTTCAATTTTTGAAGATATAATTTT

>PGSC0003DMG400021186-(rev)RLKmalectin\_1281

TCAAGATTCAGGGTTCAGGAGGAAGTGGGAGGCAGATTCAGCTATATGATCATCGCAGATGCAGGTT  
CAGAAGCCAAAACCATTTCCAACATTACTTATGCTTCCCGAATGACACCTC

>PGSC0003DMG400021186-(rev)RLKmalectin\_183

GTTTGCTGATTTGCGGTTTTCTGCACTGAAAGTGTTCAATTTTTGAAGATATAATTTTGTGGGTTTTGGT  
TAAAACCCATGTTGTTGAAGCTTTATGAGTTGCCTATGAGAGATTTGT

>PGSC0003DMG400021186-(rev)RLKmalectin\_1891

CTTGCAGGATTAGTCATGGTTATTATATGGCTGTGTAGAAAGGCAGAGTAGCAAAGATGACACAAAGAA  
AACCTCACCTGGATGGAGGCCTTTATTCCTTCATGCAGCTGCTGTGACCAAT

>PGSC0003DMG400021186-(rev)RLKmalectin\_244

GGGTTTTGGTTAAAAACCCATGTTGTTGAAGCTTTATGAGTTGCCTATGAGAGATTTGTGAAGGTATTCT  
TTAATGTTTATGCTTCACTTTTGATGTGTCTTGAGATATATAGATTGTT

>PGSC0003DMG400021186-(rev)RLKmalectin\_305

AGGTATTCTTTAATGTTTATGCTTCACTTTTGATGTGTCTTGAGATATATAGATTGTTTTGGTTTTGGG  
TAGAAAGTGAGTGTGAGTTAAGGGTTTTCTTATTTGAAAATTTGTC

>PGSC0003DMG400021186-(rev)RLKmalectin\_3172

AAACAACAGACAGTTGATTGTAATGTCTGGACCGTTATAGGCCTAAATTCTTCCATTTTTGTCACATGCA  
TCTGTGAGGACTTCACGATAACCTCAATCAGCTTCGACAGTGCTCATT

>PGSC0003DMG400021186-(rev)RLKmalectin\_3233

GTCACATGCATCTGTGAGGACTTCACGATAACCTCAATCAGCTTCGACAGTGCTCATTAAAGCAGAAAGA  
GCTTAGAATGGAGAATGTGAAGATCTTGTAATACCTTCATGCTTGTATTC

>PGSC0003DMG400021186-(rev)RLKmalectin\_3355

TTACTCAGATTAGATTAAATCTTTTCTGCTGAATCCTTGTTGCTCAGGATTTAATGATTCTTTTATTATT  
GTATGTACTTCATGTTTGAGAGAATGCCACTAAGTTGATGAATTGGAA

>PGSC0003DMG400021186-(rev)RLKmalectin\_3404

GATTTAATGATTCTTTTATTATTGTATGTACTTCATGTTTGAGAGAATGCCACTAAGTTGATGAATTGGAA  
TGTAATATATATTTCACTTCTATTTCAATGGAAAAATGAAATCTTGTTT

>PGSC0003DMG400021186-(rev)RLKmalectin\_366

TGGTTTTGGGTAGAAAGTGAGTGTGAGTTAAGGGTTTTCTTATTTGAAAATTTGTCTAGTTTTGAAA  
CAATACTGGTGGGGTTTTGGGGTTTTGAGTTTTGTAATTGAATTGGAA

>PGSC0003DMG400021279-(rev)LRR-RLPs\_0

TGATTCTTTTCTCACTCAAGATCATGTCCCCACTCTCCCCACCCATCGTATCAGTCACATCTCTAAGCCTA  
CCCCCCCCCTCCACCACCTAAACCCTCCAAATAGTTCTTGCAT

>PGSC0003DMG400021279-(rev)LRR-RLPs\_128

ATTCTTTTCTTAAAATATCAAATAGAACTCCAACAATTGATCAGAACTTTTACAACAATACAATGTATC

CATTCAAACCTTTTTATTTCTCTACTACTCATGTTTTTCCTATCTAC

>PGSC0003DMG400021279-(rev)LRR-RLPs\_1408

TTTATGTTGGAGTTAATGTGTGTGGGAGTAGTAGTAATACTATAACTATGCCATTGAAGAAGAATAGAT  
CATGTGAAGCTTCATGTGGAGTTGTTAGATCATTGTTTCTTGTTTGTGTTT

>PGSC0003DMG400021279-(rev)LRR-RLPs\_64

TAAGCCTACCCCCCCCCCTCCACCACCACTAAACCCTCCAAATAGTTCTTGCATAAAAATTGATTCTTTT  
CTTAAAATATCAAATAGAACTCCAACAATTGATCAGAACTTTTACAA

>PGSC0003DMG400021279-(rev)LRR-RLPs\_832

TCAATCTTATAGGCTTAGACTTTAGCTACAATTCATTAACAAATCCAATCCCATCCACAATTGGCCTTCTCA  
AATCTCTTCAAAAACCTTGACTTAAGCTCAAACCTCATTAACAGGCAAAA

>PGSC0003DMG400021353LRR-RLKs\_1426

TTCTAGGCTTGTTGAATCATGGTCTGGAAACAACCCTTGCGATGGACGTTGGTGGGGAATAAGCTGTGA  
CGATAACCAAAAAGTTAGTGCATAAACTTGCCTAAGTCTAATCTTTCCGG

>PGSC0003DMG400021353LRR-RLKs\_1674

ATAACAATATTTCTCCACCTCTACCTAAATTTACCACCCCTTTGAAACTTGTTCTAAATGGAAATCCAAAG  
CTGACTTCTAGTCCTCTGGAGCAAATCCTTCACCAAACAACAACACAA

>PGSC0003DMG400021353LRR-RLKs\_1736

AATCCAAAGCTGACTTCTAGTCCTCTGGAGCAAATCCTTCACCAAACAACAACACAACGCCTGCAGCAT  
CACCTGCGTCTGTACCATCTTCACGACCCAACAGTTCAAGCTCTGTG

>PGSC0003DMG400021353LRR-RLKs\_1922

GTTCTATTGCTGGTTTTCTACTTTTGATTTTTCTTGCTATTCCACTGTACATTTATGTCTGTAAGAGGAGT  
AAAGATAACCATCAAGCTCCAACCTGCTCTTGTGGTTCATCCTAGAGAT

>PGSC0003DMG400021353LRR-RLKs\_2294

GTCAAAGAATGGAGGCTGGTATTGTTAGCAACAAAGCTTTGGATGAATTTTCGATCTGAAATTGATGTT  
CTCTCAAAGTACGGCATCGACATTTAGTGTCTCTACTGGGATACTCTGTT

>PGSC0003DMG400021353LRR-RLKs\_248

CAAGATTTGACATGGGGTCTTCAAGAATCAACCTCATTAGGTGGCAAAGATTGTAGCTTTCTTGATTTT  
TGTTGTAGTGGGGTTTTTCTTGTGGAATGTTAATGCAAATGCTCAAATG

>PGSC0003DMG400021353LRR-RLKs\_310



TTGATTTTTGTTGTAGTGGGGTTTTCTTTGTTGAATGTTAATGCAAATGCTCAAATGTTGTTGCTTTGTG  
GATCATCTATGGAGGTTTTTTTTACCACATATGGTTTGTGTAGCTCT

>PGSC0003DMG400021353LRR-RLKs\_3596

AGATACAAAATAGTGATGAAGGAGAACTATACATCGGTTAACTCCTCGCTCAGTCACTATTTTCATCTT  
CTATATACTATTGTGAGATTTAAGAGCATTCTTACAACCTTGCTTATTT

>PGSC0003DMG400021353LRR-RLKs\_3658

TTCATCTTCTATACTATTGTGAGATTTAAGAGCATTCTTACAACCTTGCTTATTTTCGTCGTCTAGTTT  
GCTGCTTCAGAAGTTCTGTGTTGAGAAACATACTGATGTTGAGATAGC

>PGSC0003DMG400021394-(rev)LRR-RLKs\_122

TCAAGTAGTTTTCTTTTTATCTAAAATTGATCATCGTTTTGTTGGGGACATTTTGTGATGCCGATCCTCG  
GATTCAGAAGCAGGGCAGGTGTGTGGCACTAACATGACATTGCCGTCC

>PGSC0003DMG400021394-(rev)LRR-RLKs\_1281

CTCACCAGCAACCAAACAACCTAAGGGTGTGTTTGTATGGAAGAAAACATTTTCGCTACAAAAAACATT  
TTCAAGCTGTTAAGGATTATAATTTGTAAGTAGCCAACAATGACGAGAAT

>PGSC0003DMG400021394-(rev)LRR-RLKs\_1342

AAAAACATTTTCAAGCTGTTAAGGATTATAATTTGTAAGTAGCCAACAATGACGAGAATTGCTAAGAAA  
AGAAAACACTAAAAAATTTCTTCAAGGGATTCAATAATACAGAGAAAGAAA

>PGSC0003DMG400021394-(rev)LRR-RLKs\_1403

CTAAGAAAAGAAAACACTAAAAAATTTCTTCAAGGGATTCAATAATACAGAGAAAGAAAGATGAAAGA  
ATGATAAACAACTTCAGATTAAGTTGTGGTACCTTTTTTTTTGTTTTTTGTT

>PGSC0003DMG400021394-(rev)LRR-RLKs\_1464

TGAAAGAATGATAAACAACTTCAGATTAAGTTGTGGTACCTTTTTTTTTGTTTTTTGTTTGAGTATTTAG  
ATTGGCTTAATGAAAATAAAGAAGTATGAAAGGGAAGTGATGGATACGT

>PGSC0003DMG400021394-(rev)LRR-RLKs\_1525

AGTATTTTAGATTGGCTTAATGAAAATAAAGAAGTATGAAAGGGAAGTGATGGATACGTACGTTCCGGTG  
CTTTGCTGTAAACATTATTTTCAATATAGATCTAGCAGATCATAAATCT

>PGSC0003DMG400021394-(rev)LRR-RLKs\_1586

GTTCCGGTGCTTTGCTGTAAACATTATTTTCAATATAGATCTAGCAGATCATAAATCTTATTTTAGCCAA  
AGAAATTCCTATTCTTTGGGTTAATACTTCATTAAATGGTGTCTCAA

>PGSC0003DMG400021394-(rev)LRR-RLKs\_1647

TTTTAGCCAAAGAAATTCCTATTCTTTGGGTTAATACTTCATTAATGGTGTCTCAACATGTAATGTTTT  
GAAAATAATCCCCGCATCAACTCCTAGTTTTCTATTTTGGAACACCTC

>PGSC0003DMG400021394-(rev)LRR-RLKs\_1708

TGTAATGTTTTGAAAATAATCCCCGCATCAACTCCTAGTTTTCTATTTTGGAACACCTCTAGTTATGGGAA  
TTACATGTTTAATGATTGATTGGAAAAACCTTCATTGAAAAATTGATT

>PGSC0003DMG400021394-(rev)LRR-RLKs\_1769

GTTATGGGAATTACATGTTTAATGATTGATTGGAAAAACCTTCATTGAAAAATTGATTTCAATCTCAAAA  
AATTCATCTTCAGAACTCATTGCATCTCATGAAAATGTCTTGAACCTAT

>PGSC0003DMG400021394-(rev)LRR-RLKs\_183

CCGATCCTCGGATTTGAGAAGCAGGGCAGGTGTGTGGCACTAACATGACATTGCCGTCCATTATCATCCC  
ACAGTATACTAAAGAAATGCAAGTGATTACCCAGCTTGTGAGTGAACATG

>PGSC0003DMG400021394-(rev)LRR-RLKs\_1830

ATCTCAAAAAATTCATCTTCAGAACTCATTGCATCTCATGAAAATGTCTTGAACCTATTATTTTCAATACA  
AGGAAAAATGTCCAAACAAGATCTTAGAACGATATATATCCTGTTTGC

>PGSC0003DMG400021394-(rev)LRR-RLKs\_1891

TTTTCAATACAAGGAAAAATGTCCAAACAAGATCTTAGAACGATATATATCCTGTTTGCTAGCTTTACTAA  
AGGCATTTTATGAACGTGTTTCCCCAAAAGAATTTGATATTCTCCTACC

>PGSC0003DMG400021394-(rev)LRR-RLKs\_1952

GCTTTACTAAAGGCATTTTATGAACGTGTTTCCCCAAAAGAATTTGATATTCTCCTACCAAACACTCAAAA  
TTATTTTTTTAAAGTATTTATTTCAAAATATAAAATCATATATAATTTT

>PGSC0003DMG400021394-(rev)LRR-RLKs\_2013

ACACTCAAATTATTTTTTTAAAGTATTTATTTCAAAATATAAAATCATATATAATTTCCGTCCTGTTTGAT  
TATCTCAAGGAAAATAAAAAATGATATTATAGGAATATCTTGACTATG

>PGSC0003DMG400021394-(rev)LRR-RLKs\_2074

TCCTGTTTGATTATCTCAAGGAAAATAAAAAATGATATTATAGGAATATCTTGACTATGTGGGATGGTCA  
AACTAACGCCATATTTGCTTTAAAAACAAGAATGGTCCAAAGTCCGAAC

>PGSC0003DMG400021394-(rev)LRR-RLKs\_2135

GGATGGTCAAACCTAACGCCATATTTGCTTTAAAAACAAGAATGGTCCAAAGTCCGAACCTTATATGAGTT

CTCTAACATCCTTCCTTTTGTCTTATTCCCCTAATCCAACATAAATTCAC

>PGSC0003DMG400021394-(rev)LRR-RLKs\_2196

ATATGAGTTCTCTAACATCCTTCCTTTTGTCTTATTCCCCTAATCCAACATAAATTCACATTGTACAAAAAA

AAACAGCATAAATCATTATTTTAAACGGATAGCAAATTAATAATT

>PGSC0003DMG400021394-(rev)LRR-RLKs\_2257

TGTACAAAAAAAACAGCATAAATCATTATTTTAAACGGATAGCAAATTAATAATTCATAACACATT

AGCACCTAAGATTAATTAATTGTTAAAAAAGCTCAACTGTGGAAATAA

>PGSC0003DMG400021394-(rev)LRR-RLKs\_2318

TAACACATTAGCACCTAAGATTAATTAATTGTTAAAAAAGCTCAACTGTGGAAATAATTCTTATTTGAT

TTACTAAACAACGCAAGTTAGACTCTATGTTTTTTTCAAGTACTAAAGC

>PGSC0003DMG400021394-(rev)LRR-RLKs\_2379

CTTATTTGATTTACTAAACAACGCAAGTTAGACTCTATGTTTTTTTCAAGTACTAAAGCCAAATATATGCA

AATTGGAAGGCAGAAAATTTCAAACGTATCGATAATGACATCCATATGA

>PGSC0003DMG400021394-(rev)LRR-RLKs\_244

TATCATCCCACAGTATACTAAAGAAATGCAAGTGATTACCCAGCTTGTGAGTGAACATGGATGGGGCAG

CAGCTATGCTGTTAATTCAACAGATATTTTCGATATACGCTTTAGCAAATTG

>PGSC0003DMG400021394-(rev)LRR-RLKs\_2440

AATATATGCAAATTGGAAGGCAGAAAATTTCAAACGTATCGATAATGACATCCATATGACCTACTCCTAC

AAAGATGTATTATAAATATTTCTGTTGGGTCAAGTCTATACGGATCGACA

>PGSC0003DMG400021394-(rev)LRR-RLKs\_2501

TACTCCTACAAAGATGTATTATAAATATTTCTGTTGGGTCAAGTCTATACGGATCGACAGAGACATTTTA

ATGGTATGTAAAATAATTATTTTCTTTGTTGTTATATTTTGATTTTGGT

>PGSC0003DMG400021394-(rev)LRR-RLKs\_2562

GACATTTAATGGTATGTAAAATAATTATTTTCTTTGTTGTTATATTTTGATTTTGGTGAAAAAGATTGG

AAGTATATATTTATATATATACTAGCTGAATTAATAAATGTAGAAA

>PGSC0003DMG400021394-(rev)LRR-RLKs\_2623

AAAAGATTGGAAGTATATATTTATATATATACTAGCTGAATTAATAAATGTAGAAAAGTATAAAATAT

AAAACATCAATTGTGCTATTGTGGAATTGACTTGTCTTATAAGTTGAAGT

>PGSC0003DMG400021394-(rev)LRR-RLKs\_2684

ATAAAATATAAAACATCAATTGTGCTATTGTGGAATTGACTTGTCTTATAAGTTGAAGTAGAACCAGCTC  
CTCTCCTCTCGGACTCAGGTGTAGTTCAGTTCCAATACTAAACATTTTCT

>PGSC0003DMG400021394-(rev)LRR-RLKs\_2745

AACCAGCTCCTCTCCTCTCGGACTCAGGTGTAGTTCAGTTCCAATACTAAACATTTTCTTAAAAGAAAAAT  
AGAAAATAAATATTCAAGAAAATAATACTCCCTCAGTCCCTTTTTATTT

>PGSC0003DMG400021394-(rev)LRR-RLKs\_305

TGGGGCAGCAGCTATGCTGTTAATTCAACAGATATTTTCGATATACGCTTTAGCAAATTGTTACCAAGATC  
TTCCACCTAACGACTGTGTTCAATGCTTCCTTATAAGTTGTTCTACACTC

>PGSC0003DMG400021394-(rev)LRR-RLKs\_3050

ATGTATCAAATAAAAAGAGTATTATTGAACAAACAAAGTTTTTACTGATATACTAGACTATAAGGGATTG  
GGTTGTGAGAGTCTATAAAAACAATCTCAGAACTGACAAATTAATCTG

>PGSC0003DMG400021394-(rev)LRR-RLKs\_3111

AAGGGATTGGGTTGTGAGAGTCTATAAAAACAATCTCAGAACTGACAAATTAATCTGCTACCTTATAC  
TCTCAAGACCCCATTTTGTGAGATTACATCAATCAATATTCTGTTGTTA

>PGSC0003DMG400021394-(rev)LRR-RLKs\_3172

ACCTTATACTCTCAAGACCCCATTTTGTGAGATTACATCAATCAATATTCTGTTGTTATTGTTGTAGTATA  
CTATAAACTTTATCTGGCTCCTCTTTGACTGCTAACTTGAAAGCTT

>PGSC0003DMG400021394-(rev)LRR-RLKs\_3233

GTTGTAGTATACTATAAACTTTATCTGGCTCCTCTTTGACTGCTAACTTGAAAGCTTGTCTTTAGAGA  
CTTTCAACTCTGTTTTTTTTCTTTCTCTCAAGGACAATAATACTTG

>PGSC0003DMG400021394-(rev)LRR-RLKs\_3294

TCTTTAGAGACTTTCAACTCTGTTTTTTTTCTTTCTCTCAAGGACAATAATACTTGCTTTTGACTAATTT  
GTAAATAAATGCTCTTGTTTTGAGGCTTAAGCAAAGGTGTGATAATA

>PGSC0003DMG400021394-(rev)LRR-RLKs\_3355

TTTGACTAATTTGTAAATAAATGCTCTTGTTTTGAGGCTTAAGCAAAGGTGTGATAATAGTTATCGTTTTT  
GCAATGATAGCTTTCTCCATGCTGTTTCTTTGTTGCGTACGTAGCTC

>PGSC0003DMG400021394-(rev)LRR-RLKs\_3416

TATCGTTTTTGCAATGATAGCTTTCTCCATGCTGTTTCTTTGTTGCGTACGTAGCTCGTAAAAAATCGTT  
AAAGCGAAAACAAGGTATCATAAAAGAACTAACCTTAATTTGTCAAT

>PGSC0003DMG400021394-(rev)LRR-RLKs\_3477

AAAAAATCGTTAAAGCGAAAACAAGGTATCATAAAAGAACTAACCTTAATTTGTCAATTTAGACAATCG  
ATCAGTCGTATATGTTATAAAATAATTACATAAATGTTTGCAATTTTTCT

>PGSC0003DMG400021394-(rev)LRR-RLKs\_3538

AGACAATCGATCAGTCGTATATGTTATAAAATAATTACATAAATGTTTGCAATTTTTCTTGGCCACAGAAT  
TCATTAATCTTGGCAAGATATCGAATTCATACAAGAGGTCCAGCTTGAA

>PGSC0003DMG400021394-(rev)LRR-RLKs\_3599

GCCACAGAATTCATTAATCTTGGCAAGATATCGAATTCATACAAGAGGTCCAGCTTGAACTTTAAATATG  
AATATCTTGAAAAGGCAACACACTACTTTGATCCATCAACAATAGTAGGC

>PGSC0003DMG400021394-(rev)LRR-RLKs\_366

ACCAAGATCTTCCACCTAACGACTGTGTTCAATGCTTCCTTATAAGTTGTTCTACACTCCCTACTTGTCTCC  
CTGCTGTCTCTGGTCGTGTATATCTTGATGGTTGTTTCATCCGTTATG

>PGSC0003DMG400021394-(rev)LRR-RLKs\_3660

TTAAATATGAATATCTTGGAAAAGGCAACACACTACTTTGATCCATCAACAATAGTAGGCCAAGGAGGAA  
ATGTTCTGTATAACAAGGGGACTCTTCCTAATGGGAAGGTTGTTGCAGTTA

>PGSC0003DMG400021394-(rev)LRR-RLKs\_3721

AGGAGGAAATGGTTCTGTATAACAAGGGGACTCTTCCTAATGGGAAGGTTGTTGCAGTTAAGAGACTGTT  
TTTCAATACAAGGCACTGGGTTGATGAGTTCTTCAATGAGGTTAACCTTAT

>PGSC0003DMG400021394-(rev)LRR-RLKs\_3782

AGACTGTTTTTCAATACAAGGCACTGGGTTGATGAGTTCTTCAATGAGGTTAACCTTATCCATGGGATTG  
AGCACAAAATCTTGTGAAGTTGTTGGGTTGCAGCATTGAAGGCCCCGAG

>PGSC0003DMG400021394-(rev)LRR-RLKs\_3843

ATGGGATTGAGCACAAAATCTTGTGAAGTTGTTGGGTTGCAGCATTGAAGGCCCCGAGAGCCTCCTTG  
TCTATGAGTTTGTGCCTAATAAGAGCCTAGATCAATACCTTAATGGTACGT

>PGSC0003DMG400021394-(rev)LRR-RLKs\_3904

CCTCCTTGTCTATGAGTTTGTGCCTAATAAGAGCCTAGATCAATACCTTAATGGTACGTTAATATCGATGA  
ATTTATATCTATAAATGCAGTGACAATTAGGGACGACTTCTAATTGAGT

>PGSC0003DMG400021394-(rev)LRR-RLKs\_3965

ATATCGATGAATTTATATCTATAAATGCAGTGACAATTAGGGACGACTTCTAATTGAGTTGTTCAAATTTT

TGTTGTGTAGATAAGAATAAGATAAAAAGTTCTAAGTTGGAAAGAACGAT

>PGSC0003DMG400021394-(rev)LRR-RLKs\_4026

TTCAAATTTTTGTTGTGTAGATAAGAATAAGATAAAAAGTTCTAAGTTGGAAAGAACGATTACACATCATA

GTCGGAACAGCAGAAGGCCTTGCCTCCATGGAGGTTTCAGATATGAA

>PGSC0003DMG400021394-(rev)LRR-RLKs\_4087

CACATCATAGTCGGAACAGCAGAAGGCCTTGCCTCCATGGAGGTTTCAGATATGAAAATCATCCAC

AGGGACATCAAGAGCTCCAATGTACTTTTGGATGAAAATTTTGGAGGCGAAA

>PGSC0003DMG400021394-(rev)LRR-RLKs\_4148

TCATCCACAGGGACATCAAGAGCTCCAATGTACTTTTGGATGAAAATTTTGGAGGCGAAAATTGCTGATTT

TGGACTAGCTCGGTGTCTTGCAGCTGATAAACTCATCTTAGCACTGGAA

>PGSC0003DMG400021394-(rev)LRR-RLKs\_4209

TGCTGATTTTGGACTAGCTCGGTGTCTTGCAGCTGATAAACTCATCTTAGCACTGGAATTGCTGGGACA

TTGTAAGAATGATAAAACAGCATTACAGCCTTCTTTAACTACTTAATT

>PGSC0003DMG400021394-(rev)LRR-RLKs\_427

TACTTGTCTCCCTGCTGTCTCTGGTGTATATCTTGATGGTTGTTTCATCCGTTATGATTATTACAACCTT

CTTCGGGGAACTACTGATTCTTTCAAAGATAAAGTGAAGTGTAGCAG

>PGSC0003DMG400021394-(rev)LRR-RLKs\_4270

GCTGGGACATTGTAAGAATGATAAAACAGCATTACAGCCTTCTTTAACTACTTAATTATAACTAGTGA

TTTTATTTGTTGCGTAGAGGATATATGGCGCCTGAATATCTCGTAAAAGG

>PGSC0003DMG400021394-(rev)LRR-RLKs\_4331

AACTAGTGATTTTATTTGTTGCGTAGAGGATATATGGCGCCTGAATATCTCGTAAAAGGACAACCTCACAG

AGATGGCTGATGTCTATAGCTATGGAGTGCTTGTCTTCAAATTGTTTGT

>PGSC0003DMG400021394-(rev)LRR-RLKs\_4392

AACTCACAGAGATGGCTGATGTCTATAGCTATGGAGTGCTTGTCTTCAAATTGTTTGTGGAAGAAAAA

ACATTTCTTTGGCAGAGGATGACTCTGGATATCTACTGCAAACCTGTAAGAA

>PGSC0003DMG400021394-(rev)LRR-RLKs\_4453

AAGAAAAACATTTCTTTGGCAGAGGATGACTCTGGATATCTACTGCAAACCTGTAAGAATTAATGTTGTA

CATTTCTTAAAAGTTTGTGGTAACAAATTGAACCTGTCATTTTTTAT

>PGSC0003DMG400021394-(rev)LRR-RLKs\_4514

AATGTTGTACATTTCTCTTAAAAGTTTGGTTGGTAACAAATTGAACCTGTCATTTTTTATTTTCAGGTGTGGA  
AACTGTATACAACAAATCAAGTGAACAAAGCATTAGACCCCATCTTGAA

>PGSC0003DMG400021394-(rev)LRR-RLKs\_4575

CAGGTGTGGAAACTGTATACAACAAATCAAGTGAACAAAGCATTAGACCCCATCTTGAAAGATGATTTTT  
CACCAGAAGAGGTATCAAAGTCCTCAAAGTAGGGCTTTTGTGCACTCAA

>PGSC0003DMG400021394-(rev)LRR-RLKs\_4636

ATGATTTTTACACCAGAAGAGGTATCAAAGTCCTCAAAGTAGGGCTTTTGTGCACTCAAGCTTCTGTTAC  
ATTAAGACCATCAATGTCTGATGTTGTCCAAATGCTAACAACATTTGGAC

>PGSC0003DMG400021394-(rev)LRR-RLKs\_4697

TTCTGTTACATTAAGACCATCAATGTCTGATGTTGTCCAAATGCTAACAACATTTGGACAACCGATTCCGG  
AACCATGCCAACCATTTCTTACGTTCAAGCAGTAGCATAAAAAGATT

>PGSC0003DMG400021394-(rev)LRR-RLKs\_4758

CCGATTCCGGAACCATGCCAACCATTTCTTACGTTCAAGCAGTAGCATAAAAAGATTTCGTCTCCGATA  
CACTATCCAACTTGATGAATCTTGATCTCCTCTGCCATGCATAGCTCA

>PGSC0003DMG400021394-(rev)LRR-RLKs\_4819

TCTCCGATACACTATCCAACTTGATGAATCTTGATCTCCTCTGCCATGCATAGCTCATCAGATGGACCA  
CACATTAAGTATCAAGAATTCTTTTCAAACCGTCTCTACTGGAAACA

>PGSC0003DMG400021394-(rev)LRR-RLKs\_488

TATTACAACTTCTTCGGGAAACTACTGATTCTTTCAAAGATAAAGTGAAGTACTGATGAGTTCGTTTGGAA  
GGGCTGTTACTGATTAGATCAATTGGCTTTGGCTGCTGCAGCTGGAAAT

>PGSC0003DMG400021394-(rev)LRR-RLKs\_4880

AGATGGACCACACATTAAGTATCAAGAATTCTTTTCAAACCGTCTCTACTGGAAACATATATAACAATT  
AAAAGAAGTCAAATTTTCAATGATGTATGTAAGTGAAGTGAAGTGAAGTGAAGTGAAGTGAAGT

>PGSC0003DMG400021394-(rev)LRR-RLKs\_4941

TATACAAATTAAGAAGTCAAATTTTCAATGATGTATGTAAGTGAAGTGAAGTGAAGTGAAGTGAAGT  
GTACCGTTTGAAGTCTAGTATGATTACATGTTGCATTTTTACGATTTGATT

>PGSC0003DMG400021394-(rev)LRR-RLKs\_549

CGTTTGAAGGGCTGTTACTGATTAGATCAATTGGCTTTGGCTGCTGCAGCTGGAAATTTGATTGAAAA  
CGTGACGAAAAAAGCAATTAATGAGAATGATGGATATGCAAAGGGGAAAT

>PGSC0003DMG400021394-(rev)LRR-RLKs\_610

GATTGAAAACGTGACGAAAAAAGCAATTAATGAGAATGATGGATATGCAAAGGGGAAATTGAATGGA  
GTTTATGGATTGGCACAGTGTTGGAGAACAGTGAGTAAACAAGGTTGCAGAGA

>PGSC0003DMG400021394-(rev)LRR-RLKs\_671

AATGGAGTTTATGGATTGGCACAGTGTTGGAGAACAGTGAGTAAACAAGGTTGCAGAGAATGTTTGA  
CAAGGCAAGTGAAGCTATAAAGGGATGTTTGCCTAATAGGGATGCTAGAGCT

>PGSC0003DMG400021394-(rev)LRR-RLKs\_732

GTTTGGACAAGGCAAGTGAAGCTATAAAGGGATGTTTGCCTAATAGGGATGCTAGAGCTTTAATGGCTG  
GTTGTTATTTGAGGTATTCCACTCACAATTCCTCAGTCATCATTCTCAGG

>PGSC0003DMG400021394-(rev)LRR-RLKs\_793

AATGGCTGGTTGTTATTTGAGGTATTCCACTCACAATTCCTCAGTCATCATTCTCAGGCTACTAATAAAG  
GTATCTATATCACTTCTCTTTTCACCATACCAACTCTATTCTTCGGTTA

>PGSC0003DMG400021394-(rev)LRR-RLKs\_854

ACTAATAAAGGTATCTATATCACTTCTCTTTTCACCATACCAACTCTATTCTTCGGTTAATCCATAGACTTT  
TGAAAATTTACTTCTCATCAACATATCTCTTTTTATTTCTTCTTTAT

>PGSC0003DMG400021415LRR-RLPs\_0

AAATGGCAGGCTCTTAATAAGAGGGGTGCATTTGGCGGCAACAAAATGAACCAATTTGGGGAGGTCTC  
AATTCTCATCTCAAATTAATTTTGGGTTCTAGGGTTTCAAATTCGATTATTC

>PGSC0003DMG400021415LRR-RLPs\_1037

TACCTGACGCTCTTATTGTACAAATCTTTCTCAAATGCCATACAGGATGCCTTCAAACATCTATTCTCT  
CTAAACGTTGGCAATACCCCTGGACTTCTATAGACAACCTTATTTTTG

>PGSC0003DMG400021415LRR-RLPs\_1098

ATCTATTCTCTCTAAACGTTGGCAATACCCCTGGACTTCTATAGACAACCTTATTTTTGATAACAGGAATA  
CCAATTGGTCCGATAGAGAGAATGTGATTAATAAGTTCATTTCTTCAC

>PGSC0003DMG400021415LRR-RLPs\_1159

AACAGGAATACCAATTGGTCCGATAGAGAGAATGTGATTAATAAGTTCATTTCTTCACAGACAATGTAC  
TACCTCTCCTTTGCTGCTCTAAAATTA AAAAGTTCTGTCTATATTTCCGA

>PGSC0003DMG400021415LRR-RLPs\_122

CATTGTCGACGAAACACGATGGGTTAACTTCTGTTGAGAGGCGATTTATTTGTTCTTCTGGTACGACTC



CGTTCATTCTTTACCCATATCATTTTATGTAAATAAATATCACTGTACTA

>PGSC0003DMG400021415LRR-RLPs\_1220

ACAATGTACTACCTCTCCTTTGCTGCTCTAAAATTA AAAAGTTCTGTCTATATTTCCGATTTTGCCTTGTTG  
CTTCTTATAGTTCCAAAATTGACAAGTGGCTTGAAATTGCTTTAAAGA

>PGSC0003DMG400021415LRR-RLPs\_1281

TTGCCTTGTTGCTTCTTATAGTTCCAAAATTGACAAGTGGCTTGAAATTGCTTTAAAGAAAAAAGTGGAG  
GATCTTGACCTGGAAATATGGTATTATGATCAAAACCCCTATGTCTTGCC

>PGSC0003DMG400021415LRR-RLPs\_1342

AAAGTGGAGGATCTTGACCTGGAAATATGGTATTATGATCAAAACCCCTATGTCTTGCCACAAGTTCTCT  
GCAACAACCTCATCCATTGTAAAGTTTAATTGCGAGTTTTGCAGAATACCA

>PGSC0003DMG400021415LRR-RLPs\_1403

AAGTTCTCTGCAACAACCTCATCCATTGTAAAGTTTAATTGCGAGTTTTGCAGAATACCAGAAGAATGTGT  
ACTAAATTGGACATCCCTGAAGAGTTTGACACTAACCTATTTGTTTCTTC

>PGSC0003DMG400021415LRR-RLPs\_1525

GATGAACATGTTGAACAAATAGTAACAAATTGTCCTCAGTTGGAATCGTTGAAGCTATGTGAGTTTTGTG  
GTTTTCATCGCTTACATATAACTTCTCCAAAATGTAGGAGTCTGCAATTG

>PGSC0003DMG400021415LRR-RLPs\_1586

AGTTTTGTGGTTTTTCATCGCTTACATATAACTTCTCCAAAATGTAGGAGTCTGCAATTGATTGATCAAGCC  
CATCCTGATGGAGATTGGGGTCCATTTGGAGGTGATTGTTCTTCGAAA

>PGSC0003DMG400021415LRR-RLPs\_1647

TGATCAAGCCCATCCTGATGGAGATTGGGGTCCATTTGGAGGTGATTGTTCTTCGAAATAGTTGCCCCA  
TATATTCAACATTTAAAGATTTTCGGGGCATTTTGATAACGTGGAAATTAG

>PGSC0003DMG400021415LRR-RLPs\_1708

GTTGCCCCATATATTCAACATTTAAAGATTTTCGGGGCATTTTGATAACGTGGAAATTAGACTTGGGGACC  
TTTCATCTTTAGTCCACGCTGATCTTACTTTCTCTGTTGATGTTGTATTT

>PGSC0003DMG400021415LRR-RLPs\_1769

TTGGGGACCTTTCATCTTTAGTCCACGCTGATCTTACTTTCTCTGTTGATGTTGTATTTGACAAAACCGTG  
GCACTTCTCTTGGCAAGTGTACGTTGTGCTAATGAGCTAATGATCCCAT

>PGSC0003DMG400021415LRR-RLPs\_183

GTACGACTCCGTTTCATTCTTTACCCATATCATTTTATGTAAATAAATATCACTGTACTAGTATCTAGGCTTC  
TGCTACTTTTAAGTTTGAGTTAACTTCTTAGTTGACAGATTTGTGATC

>PGSC0003DMG400021415LRR-RLPs\_1830

CAAAACCGTGGCACTTCTCTTGGCAAGTGACGTTGTGCTAATGAGCTAATGATCCCATGCTGGTTTATC  
GAGGTCAGTTTTAGCCCAAAAATCTCCAGTCTTTTTTTATGCTGAATA

>PGSC0003DMG400021415LRR-RLPs\_1891

TGGTTTATCGAGGTCAGTTTTAGCCCAAAAATCTCCAGTCTTTTTTTATGCTGAATATGAATATAAAAT  
GTGCCTGCATTTAAAGTCAAATTATAATTAAGATAGACTGAACAAAGTC

>PGSC0003DMG400021415LRR-RLPs\_1952

AATATAAAATGTGCCTGCATTTAAAGTCAAATTATAATTAAGATAGACTGAACAAAGTCAGAATACCAAG  
GGGGAAAAAAGACTGACACAGTAATAAAAAGAAAAAGGATCAATCTAGA

>PGSC0003DMG400021415LRR-RLPs\_2013

AATACCAAGGGGGAAAAAAGACTGACACAGTAATAAAAAGAAAAAGGATCAATCTAGACAGCTCTGA  
ATCTGCAGAAGAACTTAAACAATATAGAGAAAATTGAGAGCACGATGATGCA

>PGSC0003DMG400021415LRR-RLPs\_2135

TGTAAAACCTGTCTCTGTAAGATGTATTGCTCTACAGTAAACAGACATAAAAAGGTAAAATTGAAATAA  
GATAGAGCGTCTCCCTAATCTTGGAGCTGGATACCAAGGAAACACTTCTC

>PGSC0003DMG400021415LRR-RLPs\_2196

TTGAAATAAGATAGAGCGTCTCCCTAATCTTGGAGCTGGATACCAAGGAAACACTTCTCTAGGCTAAAA  
GGCAAGTAATGGTAATAATCACTACATTAAGTAAAGCATAGAGTGACTAGT

>PGSC0003DMG400021415LRR-RLPs\_244

ATCTAGGCTTCTGCTACTTTTAAGTTTGAGTTAACTTCTTAGTTGACAGATTTGTGATCAATTCAGTCTTA  
GGCATTCCATAGAGAAGAAAAATAGAATGGGTCAGTTAGATGTCCTG

>PGSC0003DMG400021415LRR-RLPs\_2440

ATAGGTACTCTTTTGGTGCATAAATGAGTAATCACTCGTCGTTGGTGTCAAATCCTCTGTTGTCATTGGCA  
TAGGCCCCCACTACTCAAATAAGTCCCTGATTTGCTTCGACTGAAAA

>PGSC0003DMG400021415LRR-RLPs\_2806

ACTGTGTTTGCTTTCCACAAAAGAGATTCAGCTCTAGAAGATAAAGGGGGGCAGCTATGCAGCTTATTT  
AGAAGTGAGGACACGGTTAAATTCACAATCATTTTTGCTGCACCAGAGACC

>PGSC0003DMG400021415LRR-RLPs\_2928

AAACACAGGCCTGTTTCAGACCACATTTCTGAATTGTAGCATCTTGTGTTTGTGCAATACTGTAAATATATG  
GATACTGTATCTTCGGTGGTGTGGACTAGCCAAACATCCTCCCAGAA

>PGSC0003DMG400021415LRR-RLPs\_2989

TAAATATATGGATACTGTATCTTCGGTGGTGTGGACTAGCCAAACATCCTCCCAGAACTTGTCTCCTTC  
CCATTTCCAACCTGAAGAGGTGATGGCAAAAATAATTTTAGTGGACTC

>PGSC0003DMG400021415LRR-RLPs\_305

TTCAGTCTTAGGGCATTCCATAGAGAAGAAAAATAGAATGGGTTCAGTTAGATGTCACTGAAAACTTAA  
AAAGAGCTCAAATTTAGAGTAGTTGATTTGTAAAACCGAGATGCGAATCT

>PGSC0003DMG400021415LRR-RLPs\_3050

TGTCTCCTCCCATTTCCAACCTGAAGAGGTGATGGCAAAAATAATTTTAGTGGACTCTAATATGCCTCC  
ATATACCATAGGGACTGTTGCTGAACCTGTTTAGTTATCCAAGGGATCA

>PGSC0003DMG400021415LRR-RLPs\_3355

CTCTTGATAAGCAATTCCTATGTAGTTTGTGGTCCAACTTTTTGTCCTGAAAACATGCAGTGGAGCA  
AACAGATAGGGTATATTGGATATTATTCTGAACTTAAAACAGCTTTGGT

>PGSC0003DMG400021415LRR-RLPs\_3538

ATATATTATAGAAGCTATTGGGAAGTTCTGATGCTAGAAAAAGATCAAATTAAGACCATAGTTTCAAACA  
TTCTCTTGTCGGGTGAAGGGGTGTGAAGGGTGAACTTTAACCCATGAGT

>PGSC0003DMG400021415LRR-RLPs\_3599

TTTCAAACATTCTCTTGTCGGGTGAAGGGGTGTGAAGGGTGAACTTTAACCCATGAGTTTGGGATGTTT  
TTAAGCCCTATAAAAATTTGATATTGTGATACTTAATGTACTTACCTTCTA

>PGSC0003DMG400021415LRR-RLPs\_366

AAACTTAAAAGAGCTCAAATTTAGAGTAGTTGATTTGTAAAACCGAGATGCGAATCTAGTATTTTCGAG  
AACATAGCGCACCCTAAAAAAAATGAATTAAGTGGTAATTGATGGATTC

>PGSC0003DMG400021415LRR-RLPs\_3904

GAAGAGGTATGTTTTCAATTGATTCTTGCTTTGAGATACCTTTTATATTCTTTTTCACTCTTTAATTTTTCC  
CTTGTTTGTTCATTATCCTTTACATTTTCAGTATCACATTTTGA

>PGSC0003DMG400021415LRR-RLPs\_3965

TTAATTTTTTCCCTTGTTTGTTCATTATCCTTTACATTTTCAGTATCACATTTTGAGGCATAATATAGCC

TTGGATGTCAAGCTGTTTTATGTATAGCGCCATTTATTACTGAAATT

>PGSC0003DMG400021415LRR-RLPs\_427

TATTTTCGAGAACATAGCGCACCCTAAAAAAAATGAATTAAGTGGTAATTGATGGATTCCTAGTACTCTA  
GGTAAATAACTCAACGTGAACCATTTAGGCTTCCCGTAGCATGGGTGTCA

>PGSC0003DMG400021415LRR-RLPs\_4331

ATTTTCATCTGTTTGTCTATTGTTTGACTACTATGTTGCTTATATCTCGCTTCAGATTCTTTTGTGTTGTTCA  
GCAATTCAGTACCATAAAATTCCATTCTAAAATCCAAACATTTACT

>PGSC0003DMG400021415LRR-RLPs\_4575

TTCCCTCTCCTTGCATGAAAACATATTCAAAGGCTCCTTACAGAATTTGAAGCATGTGGAAGTTACTTCAA  
ACTGTTGTAGTTGTCAACACAAAGCTGACGCAACAGAGCGCCTTTCAGA

>PGSC0003DMG400021415LRR-RLPs\_4697

TTTTGAAGTCTTTGCTTGAGCATGCAAAAAATCTTGAGAACTGGTAATAGCGCCATGGCACAATGGAT  
GCAATATCTCTCAGCCAATATCTCAAAGTGTTTAAGAACTTGCTAGCTT

>PGSC0003DMG400021415LRR-RLPs\_488

AGTACTCTAGGTAAATAACTCAACGTGAACCATTTAGGCTTCCCGTAGCATGGGTGTCATCCGATAATAT  
TATACCAATTTTAAAAATATATATACATACCACGGGTTACGGGCCCCAT

>PGSC0003DMG400021415LRR-RLPs\_4941

ACTCTTATATTTTTGTATGTCAGTGTAAAAAAATGTTGACCATCAAGTTATTGTGTAAGTAAAGAGGAG  
ATGTAATCTGCTATAATTGATTAATAACTACTGTGGTAGTATTCAAAGTTG

>PGSC0003DMG400021415LRR-RLPs\_549

CGATAATATTATACCAATTTTAAAAATATATATACATACCACGGGTTACGGGCCCCATTTTAAGGCTATA  
AATTTGCCACTGGTCAAACCAATATAGATAGATAAATGATAAATGCACA

>PGSC0003DMG400021415LRR-RLPs\_61

AGGTCTCAATTCTCATCTCAAATTAATTTTGGGTTCTAGGGTTTCAAATTCGATTATTCACCATTGTCGAC  
GAAACACGATGGGTTAACTTCTGTTGAGAGGCGATTTATTTGTTCTTCC

>PGSC0003DMG400021415LRR-RLPs\_610

TAAGGCTATAAATTTGCCACTGGTCAAACCAATATAGATAGATAAATGATAAATGCACAGAGTAGGTAC  
ATGAGTAGTTTAGTATATAGGTCTCTCATTCTTGAGTGAACCTTGAAGG

>PGSC0003DMG400021415LRR-RLPs\_671

GTAGGTACATGAGTAGTTTAGTATATAGGTCTCTCATTCTGTAGTGAACCTTGAAAGGTTTAATATGTG  
CTATTTTTCAGAGCAGGAATCAAGGAGTGTCAGACTTTTCGGCTAAGATCA

>PGSC0003DMG400021415LRR-RLPs\_732

TAATATGTGCTATTTTTCAGAGCAGGAATCAAGGAGTGTCAGACTTTTCGGCTAAGATCAAAAGTTATTAA  
TATGTGCTCTTTTCTCAGCGCAGGTACAGTAGTTGTTTAGCATATAGGTC

>PGSC0003DMG400021415LRR-RLPs\_793

AGTTATTAATATGTGCTCTTTTCTCAGCGCAGGTACAGTAGTTGTTTAGCATATAGGTCTCTCATTCTTGC  
AATGAACTTGAAAGGAAATGTAGTGTGACAACCATGGGCGATCAAGAC

>PGSC0003DMG400021415LRR-RLPs\_854

TCATTCTTGCAATGAACTTGAAAGGAAATGTAGTGTGACAACCATGGGCGATCAAGACCAATCCCCTG  
GCAGTTCTGGTGATGATGGACATTCTAAAGGCCAGATTCTTGAAAACCTAC

>PGSC0003DMG400021415LRR-RLPs\_915

ATCCCCTGGCAGTTCTGGTGATGATGGACATTCTAAAGGCCAGATTCTTGAAAACCTACCTCAGGAAAA  
AGTGAACATTGAGACGGAATGTGAAGAACTGGCATTGATTGGATCAGTGA

>PGSC0003DMG400021415LRR-RLPs\_976

CAGGAAAAAGTGAACATTGAGACGGAATGTGAAGAACTGGCATTGATTGGATCAGTGAGCTACCTGA  
CGCTCTTATTGTACAAATCTTTCTCAAATGCCCATACAGGATGCCTTCAA

>PGSC0003DMG400021609LRR-RLKs\_1037

CAAGGGAATCATTTTCAGTGGAGATTTACCAGCTGATATTGGTTTCTGTCCACATTTGAATAGATTAGATT  
TGAGTAATAATCAATTCACAGGACAAATCCAATGTCACTTCAAAGGGTG

>PGSC0003DMG400021609LRR-RLKs\_1098

GATTAGATTTGAGTAATAATCAATTCACAGGACAAATCCAATGTCACTTCAAAGGGTGAATGTTCTTTC  
TTTTCTCAGTTTATCAAACAATATGATAAATGGAGATTTCCCTCAATGGA

>PGSC0003DMG400021609LRR-RLKs\_1159

TGTTCTTTCTTTTCTCAGTTTATCAAACAATATGATAAATGGAGATTTCCCTCAATGGATAAGTAACATGA  
GCAGCTTGGAGTACTTGGATCTTTCAGGCAATAGTTTAGAAGGAGCATT

>PGSC0003DMG400021609LRR-RLKs\_1220

AGTAACATGAGCAGCTTGGAGTACTTGGATCTTTCAGGCAATAGTTTAGAAGGAGCATTGCCTGATTCA  
ATAGGAGATTTGAAAATGTTGAAGTACTTGAGTTTATCTGGTAATAAATTG

>PGSC0003DMG400021609LRR-RLKs\_1464

TTTCAAGAAATGAGTAACTGGTTCAATCCCTCCTGGTTCTGGTAAATTCTTTGAATCACTTCAAGTTCTT  
GATCTATCAGGAAACAATCTTACTGGGAATATCCCAGCTGAAGTGGGAC

>PGSC0003DMG400021609LRR-RLKs\_1525

TCAAGTTCTTGATCTATCAGGAAACAATCTTACTGGGAATATCCCAGCTGAAGTGGGACTTTTCTCCAAG  
TTGAGATACTTGAATCTTTCTTGGAAACAATTTTCAATCTAGATTGCCTCC

>PGSC0003DMG400021609LRR-RLKs\_1769

TTCACTGGACCTATTCCTGATGAGATTGGAAATTGTTTCATCCCTCTACTTGTTGTAAGTATATTTATTCTGA  
TTTATCTCATTATAGTATGGTACAGCCTCTCTATAACAGTCATTTTAC

>PGSC0003DMG400021609LRR-RLKs\_183

TTTCCCTTTTTTCAATTTCCATTCCTTCTCTAACTACTCTGAAAAAACATTTGTTTGCTTCTTATTGTAGG  
AACTAAAAACACCATCATAAAAATGAGATCTTTTAGTCCCTTTTTAG

>PGSC0003DMG400021609LRR-RLKs\_1830

ATTTATTCTGATTTATCTCATTATAGTATGGTACAGCCTCTCTATAACAGTCATTTCACTATGAGAACCATG  
TTTTTTGTGGAACCAATCTCTCATGTTATGTTATCTATTACAACATGT

>PGSC0003DMG400021609LRR-RLKs\_1891

TGAGAACCATGTTTTTTGTGGAACCAATCTCTCATGTTATGTTATCTATTACAACATGTTGCTATAGCAGC  
AAAAATAATATCGGAACAAACAATGTTGTTATAGAGAGGTAGCAAGGGA

>PGSC0003DMG400021609LRR-RLKs\_1952

CTATAGCAGCAAAAATAATATCGGAACAAACAATGTTGTTATAGAGAGGTAGCAAGGGATATGTTTATT  
TGAAAATGAGGTTCTGTATCACTTTTGCTTTGTCTATTTTCCCTGTAGTTC

>PGSC0003DMG400021609LRR-RLKs\_244

TCTTATTGTAGGAACTAAAAACACCATCATAAAAATGAGATCTTTTAGTCCCTTTTTAGTTCTAATACTTTA  
TTTTGGCTTATTGTATGGATCTTTATTAGCTGATGATACTACTATGCA

>PGSC0003DMG400021609LRR-RLKs\_2562

ACTCAATGCTTCTGTTTGAAGGAGGATCACATTCGTTGACAATGCCTTGAAAGTATGTGCTCAAGTTCT  
TCTAAGTCAGGGAGCCTTGCCACTGGAAAGCTTGTGTTATTGGACACCAA

>PGSC0003DMG400021609LRR-RLKs\_2623

TCAAGTTCTTCTAAGTCAGGGAGCCTTGCCACTGGAAAGCTTGTGTTATTGGACACCAAATTGTCCCCGG

ATTGGACTAATAGCAGTCTTGAATCAATCCTAAACAAGGCATCTCAAATC

>PGSC0003DMG400021609LRR-RLKs\_2989

GAAAGGCCTTCGTCTTCAACTTCCCTTCCCCTGTCTTGGTCCACTCGATTCAACATTGTGCTCGGAACAGC  
CAAGGGACTAGCACATTTGCACCATGCGTTTAGGCCAGCAATCATAAC

>PGSC0003DMG400021609LRR-RLKs\_366

TTAATGATGATGTTTTAGGCCTCATTGTGTTCAAATCAGCTCTTCTTGATCCTTACTCAAAACTCTTGTCAT  
GGAGTGAAGATGATAACTCTCCTTGTGCATGGGAATACATCAAATGCA

>PGSC0003DMG400021609LRR-RLKs\_427

ACTCTTGTCATGGAGTGAAGATGATAACTCTCCTTGTGCATGGGAATACATCAAATGCAATCCAATGAAT  
GGTAGAGTCACTGAGCTCAACTTAAATGGCTTAAGTTTATCAGGAAAGAT

>PGSC0003DMG400021622-(rev)OtherRLKsTM\_0

ATGGAGTACTGAAGGCCCTACGAAATCTCTTGTCTGGAAAGGGATGTTATTCCCAGTTGGTTTGATA  
CAAAGGCTACTCCATGCAATTGGACCGGCATAAAGTGTGAAGGTGAACGT

>PGSC0003DMG400021622-(rev)OtherRLKsTM\_1037

TATGTGGATTTCCAAGTGGACGCAAGTAGAGTCTATAATGGTGTCAAAGAATTTCTAACTGGACCTCTC  
CCACCACTGTATCTCCCTTTGCTATCTGTTCTTGATGTCAGTGCTAACAG

>PGSC0003DMG400021622-(rev)OtherRLKsTM\_122

CATCCAGATTGACTTTCCATGTACAGGATCACCGCTAAATGTACCATTTCTGGAAATATTGGAAAATTTA  
GGTCCCTCAAGCACCTGAACCTCAGCCATTGCGCCTTCACTGGTACTAT

>PGSC0003DMG400021622-(rev)OtherRLKsTM\_183

GGAAAATTTAGGTCCCTCAAGCACCTGAACCTCAGCCATTGCGCCTTCACTGGTACTATACCTACAGATG  
TTTGGAGTCTGGAGAATATGGAGACACTAGACTTGACTGACAACAGGTTA

>PGSC0003DMG400021622-(rev)OtherRLKsTM\_2135

TGGCTCATTGCCGCTTCTGCATTTAGGCTCAAAGTTTGACTTACCTGGACATCAGCATGAATTCCTTCT  
CAGGCTCGCTGTCTTTAACATTGGAAGCTCCAGCTCTTTGTTGGTCTT

>PGSC0003DMG400021622-(rev)OtherRLKsTM\_2196

AATTCTTTCTCAGGCTCGCTGTCTTTAACATTGGAAGCTCCAGCTCTTTGTTGGTCTTAAATGCTAGCAA  
CAACCAACTCTCTGGTGTCTTGATGATTCTCTCTAATCTCACATCC

>PGSC0003DMG400021622-(rev)OtherRLKsTM\_2440

GTATTTGTGACATTGAAGGCCTTGTTTTTCCAATTTCTCTGGCAACAAATTCATTGACCTAGCCCCTGAT  
GTGTGCACTAAGGCTAGGAAATGCATACCAAGTGAGCCTGTTTTACCTC

>PGSC0003DMG400021622-(rev)OtherRLKsTM\_2806

AGCAGTCTTTGTTACGGATCAACCCTACAGCTATTCTCTCAGCCACTGAGAACTTCAGCAAGAGCTACAT  
CATTGGTGATGGTGGCTTTGGTACTGTATACAAAGCCAAACTGCCTGAAG

>PGSC0003DMG400021622-(rev)OtherRLKsTM\_2867

GAGCTACATCATTGGTGATGGTGGCTTTGGTACTGTATACAAAGCCAAACTGCCTGAAGGCCAGACCAT  
TGCTGTCAAGAGGCTGAACGGAGGCCACATGCATGGTGATCGCGAGTTCTT

>PGSC0003DMG400021622-(rev)OtherRLKsTM\_2928

CAGACCATTGCTGTCAAGAGGCTGAACGGAGGCCACATGCATGGTGATCGCGAGTTCTTTGCTGAAATG  
GAAACAATTGGGAAAGTAAAGCATGAAAATCTGGTGCCATTGCTTGGTTAT

>PGSC0003DMG400021622-(rev)OtherRLKsTM\_3050

TGTCTTTGCAGATGAGAGGTTCTTGATATATGAATACATGGAGAATGGAAGCCTTGATTTCTGGTTGAG  
AAACCAAGCAGATGCAGTAGAAGCACTTGACTGGCCAACTCGTTTCAAGAT

>PGSC0003DMG400021622-(rev)OtherRLKsTM\_61

GGTTTGATACAAAGGCTACTCCATGCAATTGGACCGGCATAAAGTGTGAAGGTGAACGTGTCATCCAGA  
TTGACTTTCCATGTACAGGATCACCGCTAAATGTACCATTTCTGGAAATA

>PGSC0003DMG400021789LRR-RLKs\_1464

GATGATTTCTTGCTTCTTAGATCCATGACTAAAATTTTTGGGATGATTTCTTGTTTTCTGCTTCTAACCTA  
GCTGACTATGTCGCATACACTCCCTGCAGGTCCTTGCAAGGAAATCGT

>PGSC0003DMG400021789LRR-RLKs\_1525

CTTCTAACCTAGCTGACTATGTCGCATACACTCCCTGCAGGTCCTTGCAAGGAAATCGTATAACTGGTGA  
AATTCCCAAAGAGATTGGAAATTTAACAAGCTTGACAATGTTGGATTTAG

>PGSC0003DMG400021789LRR-RLKs\_1708

TGTAAGTCATATTATTTCAATTAATCATTTGAGATATAACTTAGTTTACTTGGTGACTGGAATAGGTGTGA  
ACTCTATTATTCCATTGAGCAGGTTTTTGGAGTCGAAACAATATCACGGG

>PGSC0003DMG400021789LRR-RLKs\_2257

GTGAATCTGCTAATGGAGGTAAGTTCTACCAGCAAATATGTGAATTTTTGAACTGTATATGCTTCATGCT  
TCTCTGATTCTGGAAGAATGAAAGTAATGTAGCTAAATTTTTTGAATTT



>PGSC0003DMG400021789LRR-RLKs\_2318

CTTCATGCTTCTCTGTATTCTGGAAGAATGAAAGTAATGTAGCTAAATTTTTGAATTTACTGCCATTATC  
TTGATTTTATTTGTTATTATCTTTTAGCTAGAAAGGAGGCTTTATCTT

>PGSC0003DMG400021789LRR-RLKs\_2379

CTGCCATTATCTTGATTTTATTTGTTATTATCTTTAGCTAGAAAGGAGGCTTTATCTTTAGTTACTTTAT  
TAGAGAAAAAACTTTAGTATTTTCAAGATGTCTAGCTTGTTAGGGGT

>PGSC0003DMG400021789LRR-RLKs\_2684

CCCTTCTCCCTTTTCTTGGTGCTATTTCTCCTTGACTCAAGACATGGAACAAGATTAAGTTCTTAGTGT  
TATTTAGAGTTATACTTGCCATTGGCTGTGGGATATGTTTGTGTGTG

>PGSC0003DMG400021789LRR-RLKs\_2806

ATACTGGTATCTAATTTAATGGATGGAAGAATCAAGCACCTCATGGTGCTGCCTGCACTAAAAAGTATG  
AGTTTCTTTCCATTAGTACATTTAATCTTGGAGAGGTGTAACCTGTAACAC

>PGSC0003DMG400021789LRR-RLKs\_2867

AAAGTATGAGTTTCTTTCCATTAGTACATTTAATCTTGGAGAGGTGTAACCTGTAACACTGACTTACTTGT  
AGGTGCCAAGCATTCTTAACGGAGGGATAATGATGTAGCTGAAAAATAT

>PGSC0003DMG400021789LRR-RLKs\_3111

GAGTTGTAATGCTTAAAAAAAAGAATTTAGTAATTCTAAGAGTTGTAATGATTCTAAAAGAAAAATTATT  
TTAACTCTAAGAGTTGTAATGATTAAAAAATAGAATTTTAAACAATTCTAA

>PGSC0003DMG400021789LRR-RLKs\_3355

TCTCTCCCTTAATCATCATGCTCATTCTCTCTCTTTTGGTGCTACATCTCAGAAAGTTTCTGAAGTTGATT  
ACCTATCCGATGTATTACTATTCGTTTAGCAAGGAAATCGTCATTTAA

>PGSC0003DMG400021789LRR-RLKs\_3416

TGAAGTTGATTACCTATCCGATGTATTACTATTCGTTTAGCAAGGAAATCGTCATTTAACATATGCACCTT  
GTTGAACTTTCTGGACAAACCAAATTCTAAAGTTGAATTTCTTGCAGGT

>PGSC0003DMG400021789LRR-RLKs\_3660

TCTTTGTTGACGTTGTAGGTTTGTGTACACATATTTTGACAATAATTCATCAGTTTAAATGTACTTGTTATT  
CTTCGTAAGGGAAGAAGATATTCTGGCCATGCATTGTTGTATCTTGTA

>PGSC0003DMG400021789LRR-RLKs\_4331

TTTCATCTAATTTATTTTATCCCAATCAATAGATCCTTCATTTCATTAGTCTTACATTTCTGTGGCGCATAT

TTTGATTTTGTTCAGCTTGGTTGTAAACGATCACGAGTCATTTCCCCG

>PGSC0003DMG400021789LRR-RLKs\_4392

TGTGGCGCATATTTTGTTCAGCTTGGTTGTAAACGATCACGAGTCATTTCCCCGTTTCGATCTGCGA  
AGAAAGCGTGCATTTGTCATTGTACGGTCTAAATTGACTATTAAAGTAC

>PGSC0003DMG400021789LRR-RLKs\_4453

CGATCTGCGAAGAAAGCGTGCATTTGTCATTGTACGGTCTAAATTGACTATTAAAGTACTGTAGAACTGC  
TGATCCGGTAAAAGAACTTGTACATGGCATCAAGCTCGAGGGGCATGTTT

>PGSC0003DMG400021789LRR-RLKs\_4819

TATTTTCTGATATTCATTGAAGGGTTGAGTGTTTCGGAGATTGCAATTTTCTTTGGTCAAATCAAGAGCA  
ATACTCAAATCATACCTCATTAAATCATTAAATAGATGTATTTCAGTTTTTTTT

>PGSC0003DMG400021789LRR-RLKs\_488

GGTGTAAAGTACTATTGTTAGAGCCATTAGAATCACTGTGTGCATATACTATGATGTTACTGTTTTTATGCA  
CTAGAAAGGTTAATCTTTGGTTGGTCAACTTCCTTTACTGGATGTAATT

>PGSC0003DMG400021789LRR-RLKs\_4880

TCAAGAGCAATACTCAAATCATACCTCATTAAATCATTAAATAGATGTATTTCAGTTTTTTTTTAAAATCATTAA  
AAGATGTATGTGCGTTAAGTTGGTATCACAGATCGTGATATGAAAGAG

>PGSC0003DMG400021789LRR-RLKs\_5063

AGTTAGTGCAGCTTAAGATTTTCAGCAGTTTTCTGCTAGAGTTGATGTGTCTGTTATTAGTTTTTCAGTGGTG  
TCTAATTAATTTTTAATCACTTACAGAACTTAAACCTGGGGAGCCTGT

>PGSC0003DMG400021789LRR-RLKs\_5612

GCATCAAACCTTTTCATATATCTTATCTCTACTGACCAATCTTTGTTTCTCTCCATATTCTATTGGGACGACT  
CATTGCATGAGAGCCTCTTGGATGGATATACATTTCGTTTATCTTTCTC

>PGSC0003DMG400021789LRR-RLKs\_5673

TTGGGACGACTCATTGCATGAGAGCCTCTTGGATGGATATACATTTCGTTTATCTTTCTCCTATTGGTGAAA  
CTGCTGCAATTTTTCTATGATAATTGAAATGGTGTAAACAATTATTATT

>PGSC0003DMG400021789LRR-RLKs\_5856

AGGCACAAGAAATATGATGACTATATATATTTGATGCTAATTTTTCTCTCTTTCAAAGTGTGGATATGT  
GGACCCTGAGCCTCTCTTATAACTTTACATGATTATTCTTTAAGCTTCA

>PGSC0003DMG400021789LRR-RLKs\_6344

AGTAATAACTTTGAACCACAAAAATGTTTCTTGATATATAGATGCCTGGTTGCTAAATGTTTTTTTTAAAA  
TTATTTATGGAAAACCCCTTGTTCTAACTAGGCAGATCAACAGTGGACC

>PGSC0003DMG400021789LRR-RLKs\_6405

TTTTTAAAATTATTTATGGAAAACCCCTTGTTCTAACTAGGCAGATCAACAGTGGACCTGTATTTATGTA  
AGTTTTAGTCATTATTTTCATGTTCCATTAATACTACTCCTGGGAGTGGGA

>PGSC0003DMG400021789LRR-RLKs\_6462

CCTGTATTTATGTAAGTTTTAGTCATTATTTTCATGTTCCATTAATACTACTCCTGGGAGTGGGAATTTGATTC  
CTCAAATTGTTACATATTTTCTCACTAAACTATTTTTCATTTCATA

>PGSC0003DMG400021789LRR-RLKs\_793

ATTGCTATTTTAAAATGTTTATTTAAATTTTGTCTGAACATACAAGTTTGATGTCATGGCATTGCACTAG  
AACAAAAATCCCTTCAAATCATCAGATGTTAACTAAAAGTTGAGAACA

>PGSC0003DMG400021789LRR-RLKs\_854

CATTGCACTAGAACAAAAATCCCTTCAAATCATCAGATGTTAACTAAAAGTTGAGAACACGATGATTAAT  
ATTTTCAAGGGAGCTTCACTTAGCGGAAGGGGGAAAAAGAAAAAGGAAAG

>PGSC0003DMG400021789LRR-RLKs\_915

ATGATTAATATTTTCAAGGGAGCTTCACTTAGCGGAAGGGGGAAAAAGAAAAAGGAAAGTACCTACAT  
ATTGTGGTGTATAAATGAACAAGGAGAAATATTTGGCCATTTACAAAGGC

>PGSC0003DMG400021804G-LecRK\_0

TGAATGTCTGCGACTCCCTGTTGATGACCCATTTGGCCGTCTCCATTACCAAATACTAGTCTTTGATT  
GTGTTGCAAAGAGCTCCAAAAATGGAAGAAATTCGCTAATAAATAAGCT

>PGSC0003DMG400021804G-LecRK\_1037

GTGGAGGATATGGTAGTTGTAGTAGTTTGAATTCTCCGGTATGTGGATGTTTAGAAAAGTTGAGCCTA  
AACATGTTGAAGATTGGGGGAAGGCAGATTGGTCAAGTGGTTGTGTTAGGA

>PGSC0003DMG400021804G-LecRK\_1098

CGAGCCTAACATGTTGAAGATTGGGGGAAGGCAGATTGGTCAAGTGGTTGTGTTAGGAGGATTGAAC  
TGAATTGCATCAAGGGAGATGGATTTTTGAAGTATTCGAACTTAAATTACC

>PGSC0003DMG400021804G-LecRK\_1159

ATTGAACTGAATTGCATCAAGGGAGATGGATTTTTGAAGTATTCGAACTTAAATTACCAGACACGCGG  
AATTCATGGTTTAAATGTGACTATGAACCTTGAAGAATGCCGGAAGTTTGC

>PGSC0003DMG400021804G-LecRK\_122

ATTTTATTTTTCCAACCATGAAGCTGCTACAAACAACACTATTCATTTCTTGTCGTTTTCTACTTATTTTCCAT  
TTTCAAATTCATTAGGTGATACCATAACAACAACACTCAATTTCTCA

>PGSC0003DMG400021804G-LecRK\_1220

ACACGCGGAATTCATGGTTTAATGTGACTATGAACCTTGAAGAATGCCGGAAGTTTGCTTGAGAAATT  
GCTCTTGATGGCATACTCAAATCTTGACATACGCAATGGAGGAACCGGTT

>PGSC0003DMG400021804G-LecRK\_1281

GAGAAATTGCTCTTGATGGCATACTCAAATCTTGACATACGCAATGGAGGAACCGGTTGCTTACTGTG  
GTCTGAAGATCTGCTTGATATTCGACAGCTAGCCAACGAAGGACAAGATAT

>PGSC0003DMG400021804G-LecRK\_1342

TTACTGTGGTCTGAAGATCTGCTTGATATTCGACAGCTAGCCAACGAAGGACAAGATATCTACATTAGAA  
TGGCTGCCTCTGAATTAGGTAAGTTTATTGCTGAAAATATAAAATAAATA

>PGSC0003DMG400021804G-LecRK\_1403

ACATTAGAATGGCTGCCTCTGAATTAGGTAAGTTTATTGCTGAAAATATAAAATAAATAGTTTTGAGATT  
GATTCGTAAAGACGGTAAATTTATGAGTTGCAGGAGCCTGGGATTAATA

>PGSC0003DMG400021804G-LecRK\_1464

TTTGAGATTGATTCGTAAAGACGGTAAATTTATGAGTTGCAGGAGCCTGGGATTAATAAAAAAAAAAGTGA  
ATTTTCTTGATGACTGCTGACTACTATGAAATCCATAAATGAAAGT

>PGSC0003DMG400021804G-LecRK\_1769

AGCAGTTGACAATTGAATCCGATTTTGACCATTATTTTACATCAAACATGTTGTACTATAACGACAAAAGT  
AAAACACAGATTTAACAGAACAAAATACTATGAAATTAGTACAGCTA

>PGSC0003DMG400021804G-LecRK\_183

CTTATTTTCCATTTTCAAATTTTATTAGGTGATACCATAACAACAACACTCAATTTCTCAAAGATGGTGAAC  
CCAGTATCACTTCATCCGGTGGAAAGTTTTTTCAGATGGGGTTTTTTCAGTCC

>PGSC0003DMG400021804G-LecRK\_1830

ACGACAAAGTAAACTCACAGATTTAACAGAACAAAATACTATGAAATTAGTACAGCTACGTCTCTAGAT  
TAAGAAAAAAAAATGAGTTAGAGTTGAGCTATGCTGAACTGGTGACCACTG

>PGSC0003DMG400021804G-LecRK\_1891

TCTCTAGATTAAGAAAAAAAAATGAGTTAGAGTTGAGCTATGCTGAACTGGTGACCACTGACCATGATGT

CTAGACAAATAAAAGAGCTTTAATGTAGTCATGTCTAATAAGCTGACGGAG

>PGSC0003DMG400021804G-LecRK\_1952

CATGATGTCTAGACAAATAAAAGAGCTTTAATGTAGTCATGTCTAATAAGCTGACGGAGAAAGTCGAAC  
TGATTACCTATATTTGGGTTACATACTTGCAGCTAGTCAGGTGAAATCAA

>PGSC0003DMG400021804G-LecRK\_2013

AGTCGAACTGATTACCTATATTTGGGTTACATACTTGCAGCTAGTCAGGTGAAATCAAATGGACACAAAC  
GAAAATTACTCTCCTGGATTATCCCGTTATCGGCTGGAGTGATTTTGGTA

>PGSC0003DMG400021804G-LecRK\_2074

GACACAAACGAAAATTACTCTCCTGGATTATCCCGTTATCGGCTGGAGTGATTTTGGTAATCCTAAGCCT  
AGTGATCTGGATTAGAAGAAGGAAGATAGCTTCAGAGAAAAAGAAAGGTA

>PGSC0003DMG400021804G-LecRK\_2135

CCTAAGCCTAGTGATCTGGATTAGAAGAAGGAAGATAGCTTCAGAGAAAAAGAAAGGTAACCTCGACA  
AGTCATTATGTTTCGGAATATAATTAGTAGATGAATTCAAATTCAAAGGAAAA

>PGSC0003DMG400021804G-LecRK\_2196

CTCGACAAGTCATTATGTTTCGGAATATAATTAGTAGATGAATTCAAATTCAAAGGAAAATCTTTCTTGTCT  
AGTATTTGCCAAACTGAATTTGGTATATCGGTCTTTTGACAGGATGCTG

>PGSC0003DMG400021804G-LecRK\_2257

TTTCTTGTCTAGTATTTGCCAAACTGAATTTGGTATATCGGTCTTTTGACAGGATGCTGGGGGAACAATG  
GCAATTACAAGATGGATTACCTCAACGGAAACCTCAGTGAAGAATATGAG

>PGSC0003DMG400021804G-LecRK\_244

GATGGTGAACCCAGTATCACTTCATCCGGTGGAAGTTTTTCAGATGGGGTTTTTCAGTCCAGGTAATTCCA  
AAAATCGTTATATAGGTATATGGTATAGCAACATATCTGTAACAACCGTT

>PGSC0003DMG400021804G-LecRK\_2562

CAGTAAGGAATGATTTATCGACTTTATAGTTTTGGAAGAGTTTTATAAACATTAGCTAAACTTGATTGAA  
TTTATAATAGTTGCTCAATTCCTCATAATTTGAGCTTCTACCTTTTGGTG

>PGSC0003DMG400021804G-LecRK\_2623

TTGATTGAATTTATAATAGTTGCTCAATTCCTCATAATTTGAGCTTCTACCTTTTGGTGGAAGTATAATTTG  
ATTTTCATGTTTCAGTGTTGAAAAACTTAACATGTAGATATATGATGT

>PGSC0003DMG400021804G-LecRK\_2928

CAAATGGAAGTCTTGATTCATTTATATTTGGTAAGGATTTCTCAAAAAAAAAAGAAAAAATTGTGCTTAA  
TAGTTACATACATCTCAGTTGATAGATGCCCTGTAGGAGTACCCAAATAA

>PGSC0003DMG400021804G-LecRK\_2989

TGTGCTTAATAGTTACATACATCTCAGTTGATAGATGCCCTGTAGGAGTACCCAAATAATCCTCTTAGCCC  
AAAGTTATGTTTTATTGTTACTTTTCCGATTTATTTTCGATGTTTAAATC

>PGSC0003DMG400021804G-LecRK\_305

GTAATTCCAAAAATCGTTATATAGGTATATGGTATAGCAACATATCTGTAACAACCGTTGTTTGGGTTGC  
CAATAGAGAAGCTCCTCTAGGAACTAATTCAGGTACCCTAAAAGTTATCA

>PGSC0003DMG400021804G-LecRK\_3050

CTCTTAGCCCAAAGTTATGTTTTATTGTTACTTTTCCGATTTATTTTCGATGTTTAAATCCCACTCTCAGTTTT  
ATCTGATTTGTGTGAATTAATGTTCCAACCTATGAACTTTTAAACAGA

>PGSC0003DMG400021804G-LecRK\_3111

ACTCTCAGTTTTATCTGATTTGTGTGAATTAATGTTCCAACCTATGAACTTTTAAACAGATGACACACGAAG  
CACGGTATTAGACTGGTCTAAGCGCTTTCACATAATCAATGGGATAGCT

>PGSC0003DMG400021804G-LecRK\_3416

TCAAGATGATATTTTACTGAATCATTCAAACTGGAATAGCAGAAGAGCCTTGACATTATCATAGTATGT  
TAAAATCAAAAAATAAAATCAAAAAATTATCATAGTATGTTTACCCAGTA

>PGSC0003DMG400021804G-LecRK\_3477

ATAGTATGTTAAAATCAAAAAATAAAATCAAAAAATTATCATAGTATGTTTACCCAGTATTAGTAACGCT  
AATTTCTGTTTACGTTTTATGCAGTGGCTACCTCTCACCGGAATATGCTG

>PGSC0003DMG400021804G-LecRK\_366

TTGGGTTGCCAATAGAGAAGCTCCTCTAGGAACTAATTCAGGTACCCTAAAAGTTATCAAACCAGGACT  
ACTTGTTATAGTGAATGATAGTAACCACATCATATGGTCTACCAATACCTC

>PGSC0003DMG400021804G-LecRK\_3843

CGGGGATTTCCCATTGATGTTCACTTACACCTGAAGTTATACGATCAATCCATGTTGGTCTATTGTGTG  
TTCATCATCGTCCAGAAGATCGTCCAAGTATGTCTTCAGTGGTTATGAT

>PGSC0003DMG400021804G-LecRK\_4087

ACAACATTAGAAGCCAGATAGTAAATCTTCATTGCAAATAGCAATCTATTATACCCTTCATTCTTTTCTTC  
TTTGTAACAACGTAGCAATCTTATCGTAATAGTGTACCCATCATATCA

>PGSC0003DMG400021804G-LecRK\_4148

TTCTTTTCTTCTTTGTAACAACGTAGCAATCTTATCGTAATAGTGTACCCATCATATCAAAATCTTGGATAT  
GCCTCTGCACGCGATCCTTCTCTGCCAGCCATAAACAGCTAATCATAG

>PGSC0003DMG400021804G-LecRK\_4209

ATCTTGGATATGCCTCTGCACGCGATCCTTCTCTGCCAGCCATAAACAGCTAATCATAGCAATGCAGGGG  
GTTAAATAGGGAAAAGATGTAAAAATCACAAAACAACCTTTCAGGATCGGT

>PGSC0003DMG400021804G-LecRK\_427

CCAGGACTACTTGTATAGTGAATGATAGTAACCACATCATATGGTCTACCAATACCTCGAGATCTGTGC  
AAAACCCTGTTGCAAAGTTGCTTGATTCTGGAAATCTTGTTGTTATTGAT

>PGSC0003DMG400021804G-LecRK\_4270

ATGCAGGGGGTTAAATAGGGAAAAGATGTAAAAATCACAAAACAACCTTTCAGGATCGGTATATATTCTC  
TCTCTTGATGTGTTATTTTGCTTTTGTTTCATATATAGTTTAGTATTGATT

>PGSC0003DMG400021804G-LecRK\_4331

ATATTCTCTCTCTGTATGTGTTATTTTGCTTTTGTTTCATATATAGTTTAGTATTGATTTATATGTATGTGT  
TATCTATTAATTAAGAAGATGGAAGAATGTGTAGATCCAACACTAAA

>PGSC0003DMG400021804G-LecRK\_4370

TATATAGTTTAGTATTGATTTATATGTATGTGTTTATCTATTAATTAAGAAGATGGAAGAATGTGTAGATC  
CAACACTAAAAGGATCATTTTGTAAGATATATAGACATGTTATTCAAAG

>PGSC0003DMG400021804G-LecRK\_488

GATCTGTGCAAAACCCTGTTGCAAAGTTGCTTGATTCTGGAAATCTTGTTGTTATTGATGCTGGTCATGG  
TGTTGGTGATGATATTAATAATTGGGGATTTTCTCTGGCAGAGTTTTGATT

>PGSC0003DMG400021804G-LecRK\_549

TGGTCATGGTGTGGTGTATATTAATAATTGGGGATTTTCTCTGGCAGAGTTTTGATTACCCAAGTAT  
ACCCTTTTGCCCGGATGAAAATTGGGTGGAATTTTGTAAGTGGGAAGGA

>PGSC0003DMG400021804G-LecRK\_61

GTCTTTGATTGTGTTGCAAAGAGCTCCAAAATGGAAGAAATTCGCTAATAAATAAGCTGCATTTTATTT  
TTCCAACCATGAAGCTGCTACAAACAACACTATTCATTTCTTGTTTCGTTTTT

>PGSC0003DMG400021804G-LecRK\_610

CCAAGTATACCTTTTGCCCGGATGAAAATTGGGTGGAATTTTGTAAGTGGGAAGGAAGTATTGTT

CGTCGTGGAAGAACGAGGAGGATCCAGCTCCGGGTGATTATACGTACCAT

>PGSC0003DMG400021804G-LecRK\_671

TGTATTTGTCGTGTCGTGGAAGAACGAGGAGGATCCAGCTCCGGGTGATTATACGTACCATTGTGATCCTTC

TGGTACTTGCAGAACATTTTGAAGAAAGGTTCAAAGGAGGTATACAGAT

>PGSC0003DMG400021804G-LecRK\_732

TGATCCTTCTGGTACTTGCAGAACATTTTGAAGAAAGGTTCAAAGGAGGTATACAGATCTGGGCCATG

GAATGGCTTAAGGTTTAGCGGAGCAACAAGTTCAAGACAAAGTCCATTTTA

>PGSC0003DMG400021804G-LecRK\_793

GGGCCATGGAATGGCTTAAGGTTTAGCGGAGCAACAAGTTCAAGACAAAGTCCATTTTATACATTTGGT

GTGATTTCAACTAAACTGAGGTGTATTTAGTTATCACCTTCTAGCTTCG

>PGSC0003DMG400021804G-LecRK\_854

CATTTGGTGTGATTTCAACTAAACTGAGGTGTATTTAGTTATCACCTTCTAGCTTCGGTTATTACAAGG

TTTTGTTTGAATCCAAATGGTTCGTTACAACGATGGACTTGGGGCGATA

>PGSC0003DMG400021804G-LecRK\_915

TATTACAAGGTTTTGTTTGAATCCAAATGGTTCGTTACAACGATGGACTTGGGGCGATAGGAATAAAGG

TTGGGCACTTTACCTTTCATTACCAACAGATAATTGTGATACTTATAAGTT

>PGSC0003DMG400021804G-LecRK\_976

AATAAAGGTTGGGCACTTTACCTTTCATTACCAACAGATAATTGTGATACTTATAAGTTGTGTGGAGGAT

ATGGTAGTTGTAGTAGTTTGAATTCTCCGGTATGTGGATGTTTAGAAAAG

>PGSC0003DMG400021842-(rev)RLKmalectin\_124

AAGGTATATTCATTAACAAATGTTACAAATTCTTATTCCTTTGTTTTGTCTTGTGGAGCTACAAGTAATGC

CACAGATGCAGATGGAAGGATTTGGAGTCCAGATTCTACATATTTCCCT

>PGSC0003DMG400021842-(rev)RLKmalectin\_1240

TTAGAGATTTTTAAGATCAACGACACAACGGGGAATTTGGCAGGGCCTAATCCTGTGCCATCACCACCCC

TAGCAGCTACAGACTGATTCTCAGTCAAACCAGCATTTCATCAAAT

>PGSC0003DMG400021842-(rev)RLKmalectin\_1302

ACCACCCCTAGCAGCTACAGACTGATTCTCAGTCAAACCAGCATTTCATCAAATAAAACTAGTAAG

AAAGGCATAATAGTTGGTTCGGTGGCAGGAATGACAGCTGGACTTAGTAT

>PGSC0003DMG400021842-(rev)RLKmalectin\_1364



CTAGTAAGAAAGGCATAATAGTTGGTTCGGTGGCAGGAATGACAGCTGGACTTAGTATTGTTGTTGTTG  
TACTTACTTTTGTCAAGCGAAGGAAGAATATAAACAATGGAGGGAATAAGT

>PGSC0003DMG400021842-(rev)RLKmalectin\_1426

GTTGTTGTACTIONACTTTTGTCAAGCGAAGGAAGAATATAAACAATGGAGGGAATAAGTCTAGCAGAGGT  
GGTTGGTTACCTATTTATAGTTCTAGGAGTACAGAACTAGAACAACCTATC

>PGSC0003DMG400021842-(rev)RLKmalectin\_186

AAGTAATGCCACAGATGCAGATGGAAGGATTTGGAGTCCAGATTCTACATATTTCCCTTCTTCTTCTGGT  
AATTCAATCACATCTAAAGCTAAATATCAAGACCTTCATTGATATCTGA

>PGSC0003DMG400021842-(rev)RLKmalectin\_2666

TGTTTAGATTTTTACTGTCAGGGTTAGCAATTATGAAGAGAGTTTATAATTGACAATGAGGCTTGCTTAG  
TTTGTAGAGAACCTCCATCTCCCACCAGTAGGTTGAGTGTTCAAGTCATG

>PGSC0003DMG400021842-(rev)RLKmalectin\_2728

TTGCTTAGTTTGTAGAGAACCTCCATCTCCCACCAGTAGGTTGAGTGTTCAAGTCATGTGGATGGTACAT  
GGAAGTACTAATAATCCTGCTAGGCTGGGGGTGAAAAACAAATACACTTG

>PGSC0003DMG400021842-(rev)RLKmalectin\_62

AATCAACAATGAAATTTTACACATTTTTGGTTATCATAACCACATTTTGTCCCTTCTAAGCAAGGTATATT  
CATTAAACAATGTTACAAATTCTTATTCTTTGTTTTGTCTTGTGGAG

>PGSC0003DMG400021842-(rev)RLKmalectin\_868

CCTTCTAATTTACCTAATTACATTGCTCCGGAGGATGTTTATAGGACAGCACGATCGATGGGGCCAAATC  
CAGATGTTAATAGGAATTATAATCTTACTTGGATCTTCCAAGTTGATACG

>PGSC0003DMG400021842-(rev)RLKmalectin\_930

GCCAAATCCAGATGTTAATAGGAATTATAATCTTACTTGGATCTTCCAAGTTGATACGAATTTCACTTATC  
TTGTGAGGTTACATTTTTGTGATTTTCAAATGAAAAGGATGAATCAGAG

>PGSC0003DMG400021962LRR-RLPs\_124

CCGGATGAACTTCTGATCAAAATTCTGTCTTGTTTCGGCGACAAAGGATGCATACACAACATGTATTCTCT  
CTAAAAGGTGGCTTTATCTCTGGACTTCCATTCGTAACCTCAGTTTTGCT

>PGSC0003DMG400021962LRR-RLPs\_1302

GGTGCGGTATATTACCATGGCTGGTGAATATGAGTTGAGACTTGCATAAAACCACACCGAGATGATGAT  
CCAATCCAATAAGTTTTGCTTGAGGGCTTGAGGCTCATATAACTCATCCA

>PGSC0003DMG400021962LRR-RLPs\_1364

TGATGATCCAATCCAAATAAGTTTTGCTTGAGGGCTTGAGGCTCATATAACTCATCCAATGCTTTGAGCT  
CCTTTGCAGGAGATGAACTGGTTAGCTCATAGATTTGAAGCAAATTGTT

>PGSC0003DMG400021962LRR-RLPs\_186

TATTCTCTCTAAAAGGTGGCTTTATCTCTGGACTTCCATTGTAACCTCAGTTTTGCTAATAACAAATTACCG  
AGAAAATTTACATCTTTTGTTAACTATATATTATCTCGTTCTGTTTC

>PGSC0003DMG400021962LRR-RLPs\_1922

TCCTCTCTTTTAAATCCATTCATTTTATGAGTTAATCACCCCTCCTTAGAATTTTTCTTTTGTCACGAC  
AAAGCTTAACATTAGTTGGTTGGTGTGTTGCTTTCTTTGAGGCAAA

>PGSC0003DMG400021962LRR-RLPs\_1984

TTTGTACGACAAAGCTTAACATTAGTTGGTTGGTGTGTTGCTTTCTTTGAGGCAAATGAGGTCTGAAA  
CGGAAAGGGTTTGGTGCCATCCACTCTTTGCTTGGGTTACGTAGGCCATG

>PGSC0003DMG400021962LRR-RLPs\_2046

GTCTGAAACGGAAAGGGTTTGGTGCCATCCACTCTTTGCTTGGGTTACGTAGGCCATGAATCTTTAAGAT  
AGGAACAATCATCATAATCTGTTTAAAAAGTACCAATAAGATTTGTTGGT

>PGSC0003DMG400021962LRR-RLPs\_2728

TATCTTGTGGCATAACCAAATGTTATGATGTCTTAGTTTCTCATTCTTGAAGCTTTCAGTTCTGATGAATCAT  
TATATTCAAATCATATAAGAATGTATGGTTAGATCTCTTTGTTTGATT

>PGSC0003DMG400021962LRR-RLPs\_2790

GATGAATCATTATATTCAAATCATATAAGAATGTATGGTTAGATCTCTTTGTTTGATTCATCTGAAATATC  
CATTCTTCAGGCAAAATTTAGATGACGATAAGGGGTTTCGAGAAATAGT

>PGSC0003DMG400021962LRR-RLPs\_434

TAATCACTCCCCTTTCCATTGCCTCAATCTTTCTGCGAATGTTTCGTCATTGATAACATTAGCAATAGTTG  
TGGGTCGTTTTAACTTTGATGACACAGTCATAGCCTGGAAGTCTTTAA

>PGSC0003DMG400021962LRR-RLPs\_868

ATTATGTGTATCAAAGACATCAACTATGATTATGGTCTACATGTTGATCCTGAGGAAGACAGTTGTAGTG  
GCTATCATCAATTCTTTAGGTCGCTCGCCCACTGTTACCTTCTAATGTTTC

>PGSC0003DMG400021962LRR-RLPs\_930

TTGTAGTGGCTATCATCAATTCTTTAGGTCGCTCGCCCACTGTTACCTTCTAATGTTCCATAATGTAAAGG

AGTTAACCATTGGAACCTGGTTCACAGAGGTCTGTTTTATCTCAGAGT

>PGSC0003DMG400021993-(rev)G-LecRK\_1178

GAGTCGTTGAAATGTTGGAAGGTCGTGGGCCAGTAGAAGCGCCTAGACAAACGACAATGTTGATCCTT  
GATCTATTAGACGAGGGTGTGGATCATCATCCTGGGATACCTAGGGTTGCTG

>PGSC0003DMG400021993-(rev)G-LecRK\_124

GAGACATTTTTCTCATTTTTCGGAGCTGATGTTGCGTTGATAGTTGGTGTTTTTGCTGGTGTGTTTATCCG  
AAGGAAGTTCAACAACAGGAGGTTATTGCTAGAAAATCAGTTAGACTCA

>PGSC0003DMG400021993-(rev)G-LecRK\_1240

ATCCTTGATCTATTAGACGAGGGTGTGGATCATCATCCTGGGATACCTAGGGTTGCTGCAGCCATGGCA  
AGATCTAGTGATACTAATTCGCTTCGCTCTTATACAATGTCTATTCTCTCA

>PGSC0003DMG400021993-(rev)G-LecRK\_1302

CATGGCAAGATCTAGTGATACTAATTCGCTTCGCTCTTATACAATGTCTATTCTCTCAGGGAGGTAGTACC  
TACATAATGCATAAGGGATTTTCGTCTGCTTTCTGTCAAATTTTTCAATA

>PGSC0003DMG400021993-(rev)G-LecRK\_1364

GGTAGTACCTACATAATGCATAAGGGATTTTCGTCTGCTTTCTGTCAAATTTTTCAATATCAATAGGTTGAT  
TGTTTCTCGAGTGTTGTATCCTGAATCCGAAAGAGTGTAATTGAATTCT

>PGSC0003DMG400021993-(rev)G-LecRK\_1416

TCAATATCAATAGGTTGATTGTTTCTCGAGTGTTGTATCCTGAATCCGAAAGAGTGTAATTGAATTCTCCC  
CCTAACAAAAAAGTGATGAATTTGCTTTTGTTACGCCAAAATATA

>PGSC0003DMG400021993-(rev)G-LecRK\_310

AAGCTGAAAGAGCTCGAAGAAGCAACCGATAACTTTGGATCGTTGGTAGGACGTGGATCATCAGCTTGT  
GTTTTCAAAGGTGTGCTTAGTGATGGTACATCAGTAGCTGTAAAAGGATA

>PGSC0003DMG400021993-(rev)G-LecRK\_372

AGCTTGTGTTTTCAAAGGTGTGCTTAGTGATGGTACATCAGTAGCTGTTAAAAGGATAGATGGAGAGGA  
GCGTGGCGATAAGGAATTCAAATCAGAAGTTGCAGCTATTGCTAGTGTTCA

>PGSC0003DMG400021993-(rev)G-LecRK\_434

GAGAGGAGCGTGGCGATAAGGAATTCAAATCAGAAGTTGCAGCTATTGCTAGTGTTCAACATGTTAATC  
TTGTACGTTTACTTGGATATTGTAGTGTTCCCTCCTTCAGGACCTCGATTTT

>PGSC0003DMG400021993-(rev)G-LecRK\_496

GTTAATCTTGTACGTTTACTTGGATATTGTAGTGTTCCCTCCTTCAGGACCTCGATTTTTGGTTTATGAGTAT  
ATTGTTAATGGATCACTTGATAATTGGATTTTTCGAAAAAGGGGAATT

>PGSC0003DMG400021993-(rev)G-LecRK\_558

TTATGAGTATATTGTTAATGGATCACTTGATAATTGGATTTTTCGAAAAAGGGGAATTCGAGGGTGTGTTG  
TCGTTGGATTTGAGGTGTAGAGTTGGTCTAGATGTGGCTAAGGCACTTTC

>PGSC0003DMG400021993-(rev)G-LecRK\_62

TTTTACTTGTGATTTTATTGATCACACTCATCGTTATCGCACGTATAACGTTGAAATATTCGGAGACATTTT  
TCCTCATTTTCGGAGCTGATGTTGCGTTGATAGTTGGTGTGTTTTGCTG

>PGSC0003DMG400021996LRR-RLPs\_0

CCCCTCTCTACAAGTCTTCAAACCCACCTACCCCAATTCAACCCACCCACCCCATCTCCTCTTCTTCAG  
CTCCACACACTCCCTCTTAGTCTCCACAGATCTGAACTTTCATTAC

>PGSC0003DMG400021996LRR-RLPs\_1037

TGAGTACTTTATTTGTTAATGGTGAAAAGAAGTCTTACTCTTTCATCTGGGGTTAGCTGTTCTTGTGTTGT  
AACTGAGGGGTTGAGGGAAGTTTAATCTTTCATCTGGGGTTAACTGT

>PGSC0003DMG400021996LRR-RLPs\_1098

TCTTGTGTTGTAAGTGAAGGGGTTGAGGGAAGTTTAATCTTTCATCTGGGGTTAACTGTATTTGTAATTG  
AGGGGCTGAGGAGATGGTATGATTTGTAGAGCATGTTGTCTGAGTACTTT

>PGSC0003DMG400021996LRR-RLPs\_1159

TTGTAATTGAGGGGCTGAGGAGATGGTATGATTTGTAGAGCATGTTGTCTGAGTACTTTAGTTGTTAAT  
GGTGAAAAGAAGTCTTAATATTTGCACCTGGGGTTAACTGTACTCGTTTGT

>PGSC0003DMG400021996LRR-RLPs\_1220

TTGTTAATGGTGAAAAGAAGTCTTAATATTTGCACCTGGGGTTAACTGTACTCGTTTGTGATTGCGGGGT  
TGAGGACATGGTATGTTTTGTAGAACATTGTTGTCTGAGTACTTTAGTCC

>PGSC0003DMG400021996LRR-RLPs\_1281

TTGCGGGGTTGAGGACATGGTATGTTTTGTAGAACATTGTTGTCTGAGTACTTTAGTCCTTGTGTTGGTGA  
AAAAGTCTTAATCTTTCATCTGGGGTTTACTGTACTTGTGTTGTAATTTA

>PGSC0003DMG400021996LRR-RLPs\_1403

GGTTGATGAAAGTTTAATCTTTCATCTGGGGTTAAGTATTTGTTTGTAAATTGAGGGGTTGAGAAATTT  
AGACTTAAGAGAATGGTTTTTTTTGTCATGAGTCATTGAAGCTGATCTCAA

>PGSC0003DMG400021996LRR-RLPs\_1464

GAGAAATTTAGACTTAAGAGAATGGTTTTTTGTCATGAGTCATTGAAGCTGATCTCAAAGTCATTTAAG  
AATTTCGAAGTCTTGGTTTTACAGTCTTGTGAAGGACTTACTACCTATGG

>PGSC0003DMG400021996LRR-RLPs\_1525

TCATTTAAGAATTTTGAAGTCTTGGTTTTACAGTCTTGTGAAGGACTTACTACCTATGGACTTGCTGCCAT  
TGCTGCTAACTGCAGGTTTATCTGGCACTTTTTAGCTGTGTTTTCTTT

>PGSC0003DMG400021996LRR-RLPs\_1586

TTGCTGCCATTGCTGCTAACTGCAGGTTTATCTGGCACTTTTTAGCTGTGTTTTCTTTGTAAATTACCCTT  
TTCTGGTAATAGTGAAAAAGCTTTGACCTTTGCATCTGGGGTTAGCT

>PGSC0003DMG400021996LRR-RLPs\_1647

AAATTACCCTTTTCTGGTAATAGTGAAAAAGCTTTGACCTTTGCATCTGGGGTTAGCTGTACTTGTTTGA  
AACTGGGGTGAGGAAAGTTTTAATCTTTGCATCTGGGGTTGACTGTATT

>PGSC0003DMG400021996LRR-RLPs\_1708

ACTTGTGTTGAACTGGGGTGAGGAAAGTTTTAATCTTTGCATCTGGGGTTGACTGTATTTGTTTGTAAAGT  
GTGGGGTTGAGGAAATGGTATGTTTTTTGTAGAGCATTGCTGTCTGAGT

>PGSC0003DMG400021996LRR-RLPs\_1769

TTTGTAAGTGTGGGGTTGAGGAAATGGTATGTTTTTTGTAGAGCATTGCTGTCTGAGTACTTTAGTTGT  
TAATGGTGAAAAGAAGTCTTAATCTTTGCATCTGGGGTTAACTGTACTTG

>PGSC0003DMG400021996LRR-RLPs\_1830

TTTAGTTGTTAATGGTGAAAAGAAGTCTTAATCTTTGCATCTGGGGTTAACTGTACTTGTTTGTATTTGAG  
GGGTTGAGGAAAGTTGTAATCTTTGCATCTGGGGTTAATAACTGTATTT

>PGSC0003DMG400021996LRR-RLPs\_1891

TGTATTTGAGGGGTTGAGGAAAGTTGTAATCTTTGCATCTGGGGTTAATAACTGTATTTGCTTGTAATTT  
AGGGGTGGAGGAAATAGTAGTTTTGTAGAGCATTGTTGTTTGTAGTACTT

>PGSC0003DMG400021996LRR-RLPs\_1952

TTGTAATTTAGGGGTGGAGGAAATAGTAGTTTTGTAGAGCATTGTTGTTTGTAGTACTTTAGTCTTTACT  
GGTGAAAAGAGTTCAAATCTTTGCATCTGTGGGGTAACTGTTTCGAGGA

>PGSC0003DMG400021996LRR-RLPs\_2074

TACTAGAAGGTTTTGTTGAGCACTGTTGTCTGAGTACTTCAGCCCTTACCGGTGACTTCATTCAATTAGTT

TTAATCTGGGGTAACTGATTTGAGGAAATAGTAGGTTTTGTGGAACAT

>PGSC0003DMG400021996LRR-RLPs\_2135

TCAATTAGTTTTAATCTGGGGTAACTGATTTGAGGAAATAGTAGGTTTTGTGGAACATTGTTGTCCGAG

TACTTTAGCCCTTACTGATTAGGATAACTTTTAATCTATGCATCTGAGAG

>PGSC0003DMG400021996LRR-RLPs\_2196

TTGTCCGAGTACTTTAGCCCTTACTGATTAGGATAACTTTTAATCTATGCATCTGAGAGTACTGTTTTTGT

TGTAATTGATGCATTGGGGAAGCAGTGGGTTTTGTGGAGCATTGTTGT

>PGSC0003DMG400021996LRR-RLPs\_2257

CTGTTTTTGTGTTGTAATTGATGCATTGGGGAAGCAGTGGGTTTTGTGGAGCATTGTTGTCCGAGTACGT

AGTGTACTGGTGAGAAAAGTTCTAATCTTTGCATCTGGGGTTGAATGTT

>PGSC0003DMG400021996LRR-RLPs\_2318

GAGTACGTTAGTGTTACTGGTGAGAAAAGTTCTAATCTTTGCATCTGGGGTTGAATGTTTCTGTTTGTA

ATTGAGGGTTTGTGGAAGCAGTAGGTTTTGTGAAGCATTCTCGTCTGAGT

>PGSC0003DMG400021996LRR-RLPs\_2562

CTAATATAAAAGTTGGGGTTGTTATAACCAAAAAATTAGGGTAAAATTTGAAAATAAACTATAATTCCAA

CATTTGAAAGCGAGTTGGAAAACATATTATAAGTTGTTTTCCAAATTTGA

>PGSC0003DMG400021996LRR-RLPs\_2623

TAATTC AACATTTGAAAGCGAGTTGGAAAACATATTATAAGTTGTTTTCCAAATTTGATTTACAACCTCA

AGTCGGCTTTGAACTTTTCATGACCAAACACTGGTTTTCAAATAAAGTG

>PGSC0003DMG400021996LRR-RLPs\_2684

TACAAC TTCAAGTCGGCTTTGAACTTTTCATGACCAAACACTGGTTTTCAAATAAAGTGAAACATTATTCC

GGAAAAAAGTAAATAATAATTATGGCCAAATGGGTCCTTAGTTACGTCT

>PGSC0003DMG400021996LRR-RLPs\_2745

ACATTATTCCGGAAAAAAGTAAATAATAATTATGGCCAAATGGGTCCTTAGTTACGTCTTTTCAGTTCATTC

CTTTGTTTTGCTTGATTGCTTGGTATTTACGGTAGTTGGTGGAAAGAG

>PGSC0003DMG400021996LRR-RLPs\_2806

CAGTTCATTCTTTGTTTTGCTTGATTGCTTGGTATTTACGGTAGTTGGTGGAAAGAGTAGCAAGAATG

CCCTAGCGAAGAAATGCCTTAGTACTTTGATCCGCTTACTGGGCAAAGAA

>PGSC0003DMG400021996LRR-RLPs\_2867

GCAAGAATGCCCTAGCGAAGAAATGCCTTAGTACTTTGATCCGCTTACTGGGCAAAGAAGCAAGAGCAT  
ATACTTGTATGACTTGGCTTCAACAAACAAAAGGGACGTAAGAGGGGCACAA

>PGSC0003DMG400021996LRR-RLPs\_2928

AAGAGCATATACTTGTATGACTTGGCTTCAACAAACAAAAGGGACGTAAGAGGGGCACAATTCGTCCAC  
CTTTAGAACTAACAGGAACTGAATCTAATTAACCTTTCTTTTGATATG

>PGSC0003DMG400021996LRR-RLPs\_2989

TCGTCCACCTTTAGAACTAACAGGAACTGAATCTAATTAACCTTTCTTTTGATATGTGCATTTTATTA  
GCAATGGTGCACGGAAAGTGTAACACTACTGGTTCAATATTATAAGTAGT

>PGSC0003DMG400021996LRR-RLPs\_3050

CATTTTATTAGCAATGGTGCACGGAAAGTGTAACACTACTGGTTCAATATTATAAGTAGTTCAATGAATTT  
GAATTATTGAAAGGGTTGAACATCTTGTAACATGGTTATCAAATAAATGT

>PGSC0003DMG400021996LRR-RLPs\_3111

AATGAATTTGAATTATTGAAAGGGTTGAACATCTTGTAACATGGTTATCAAATAAATGTTGCATTTTTATC  
TCTTTCTTATGGATTTATGACAATTCCTTATATTTGGACCTTCTTTT

>PGSC0003DMG400021996LRR-RLPs\_3172

CATTTTTATCTCTTTCTTATGGATTTATGACAATTCCTTATATTTGGACCTTCTTTTGCTGCTATTCTTGT  
TAGCGCTGGGAATAAAAACTATAGAAGCAATGTAACCTCGTGATTTG

>PGSC0003DMG400021996LRR-RLPs\_3233

TGCTATTCTTGTTTAGCGCTGGGAATAAAAACTATAGAAGCAATGTAACCTCGTGATTTGCTGCAGGAACC  
TGAGAGAACTGGACCTAGGAGAAAGTGAAGTAGAAGACCTGAGTGGCCAT

>PGSC0003DMG400021996LRR-RLPs\_3294

GCAGGAACCTGAGAGAACTGGACCTAGGAGAAAGTGAAGTAGAAGACCTGAGTGGCCATTGGCTTAGT  
CATTTTCCTGATAGCTGCACATCACTTGTGTCACTTAACATTGCTTGTTTGG

>PGSC0003DMG400021996LRR-RLPs\_3355

GCTTAGTCATTTTCCTGATAGCTGCACATCACTTGTGTCACTTAACATTGCTTGTTTGGCTTCTGAGGTCA  
GCTTCTCAGCTTTGGAGCGTCTAGTTGCTCGTTCTCCTCATTTGAGGAC

>PGSC0003DMG400021996LRR-RLPs\_3416

TCTGAGGTCAGCTTCTCAGCTTTGGAGCGTCTAGTTGCTCGTTCTCCTCATTTGAGGACTCTTCGGCTCAA  
TCGTGCTGTTTCCATTGAGAACTTCAAAGCTACTTCGTCATGCTTCG

>PGSC0003DMG400021996LRR-RLPs\_3477

TTCGGCTCAATCGTGCTGTTCCATTGAGAACTTCCAAAGCTACTTCGTCATGCTTCGAAGTTGGTTGAA  
TTTGGTACAGGATCCTACTCTGCTGACATGCAGGCTGATGTTTCTGAAG

>PGSC0003DMG400021996LRR-RLPs\_3538

GTTGGTTGAATTTGGTACAGGATCCTACTCTGCTGACATGCAGGCTGATGTTTCTGAAGTTTTTGAAAT  
GTATCTCAAGCTTTTTTCAGGCTGTAATCAACTCAAAGGCTTGAGTGGGTT

>PGSC0003DMG400021996LRR-RLPs\_3660

GGGATGCTGTGCCAGCCTACTTCCAACATTTATCCAGTCCACTCCAAACTCACCTCTTTGAATTTAAGC  
TATGCTACCATTCAAATACCTGATCTTGGCAAGCTCATTGGCAACTGTC

>PGSC0003DMG400021996LRR-RLPs\_3721

GAATTTAAGCTATGCTACCATTCAAATACCTGATCTTGGCAAGCTCATTGGCAACTGTCTCAATTTGCAAC  
GGTTGTGGGTAGGTTCTAGCTTGTGTTTTACTTTTGTATACTTATTGCG

>PGSC0003DMG400021996LRR-RLPs\_3782

AATTTGCAACGGTTGTGGGTAGGTTCTAGCTTGTGTTTTACTTTTGTATACTTATTGCGTGTTTTCAATAG  
TCATGGCTCGATACATAAACTTTTTTTTTTTTTTGAGAAGGGATATATGA

>PGSC0003DMG400021996LRR-RLPs\_3843

TTTTCAATAGTCATGGCTCGATACATAAACTTTTTTTTTTTTTTGAGAAGGGATATATGAATGTGTTTGTGA  
TAAAATAGATAAATTGATTGTTAGTTGTAAACACAGAAGTTTCCAAGAG

>PGSC0003DMG400021996LRR-RLPs\_3904

GTGTTTGTGATAAAATAGATAAATTGATTGTTAGTTGTAAACACAGAAGTTTCCAAGAGAAGAACAATA  
ATCCTAACTTATTAATTGTCTTGCTGATTCTGATTACTGCCAGGGATATAT

>PGSC0003DMG400021996LRR-RLPs\_3965

GAACAATAATCCTAACTTATTAATTGTCTTGCTGATTCTGATTACTGCCAGGGATATATAAACAGCGTAAT  
AACTTCAGTGTATACTGAGATAACATAGCTAAACAATTAATGTGCGAGT

>PGSC0003DMG400021996LRR-RLPs\_4026

ACAGCGTAATAAACTTCAGTGTATACTGAGATAACATAGCTAAACAATTAATGTGCGAGTAACTCATTGA  
ATAGTTTGTGGTCTGCCATATGAAGAATAACTTAATGTTGAAGCTTAGT

>PGSC0003DMG400021996LRR-RLPs\_4087

ACTCATTGAATAGTTTGCTGGTCTGCCATATGAAGAATAACTTAATGTTGAAGCTTAGTGTTGCACGAAT



CCTACACTTTGACAATTCATGTTTATCTTTCCGAGTTAGATGCTTCCATT

>PGSC0003DMG400021996LRR-RLPs\_4148

TGCACGAATCCTACACTTTGACAATTCATGTTTATCTTTCCGAGTTAGATGCTTCCATTAGTTTTTAAGCTC  
TTCTTGCCATTGGCTCTGTTGCATAATTGGTTATCCCGCTTATGCTT

>PGSC0003DMG400021996LRR-RLPs\_4209

TTTTAAGCTCTTCTTGCCATTGGCTCTGTTGCATAATTGGTTATCCCGCTTATGCTTAAGGCACTTAGAA  
TGGATGTGATTGCAATTTGCAGGTGCTAGATTACATTGAAGATAGCGG

>PGSC0003DMG400021996LRR-RLPs\_4270

GGCACTTAGAATGGATGTGATTGCAATTTGCAGGTGCTAGATTACATTGAAGATAGCGGTCTTGAGGAG  
ATTGCCAACACTTGTAAGGAACTTCAAGAGCTTAGGGTGTTTCCTTCTGAT

>PGSC0003DMG400021996LRR-RLPs\_4392

ATTTGCTCCAGGACCGAATGTATCCTTGACAGAGCAAGGCCTTGTAGCTGTCTCGATGGGCTGCCCTAA  
GCTTCAGTCAGTTTTATACTTCTGCCGCCAAATGACAAATGAGGCCTTAGT

>PGSC0003DMG400021996LRR-RLPs\_4453

TGCCCTAAGCTTCAGTCAGTTTTATACTTCTGCCGCCAAATGACAAATGAGGCCTTAGTTATTATTGCAAG  
GAATCGTCCTAACATGATCCGATTCGTTTGTGTATTATTGAGCCTCGA

>PGSC0003DMG400021996LRR-RLPs\_4514

TTATTGCAAGGAATCGTCCTAACATGATCCGATTCGTTTGTGTATTATTGAGCCTCGAACTCCTGATTAC  
GTGACCCTTGAACCACTTGATGCTGGTTTTGGGGCCATTGTGCAACACT

>PGSC0003DMG400021996LRR-RLPs\_4636

AAGGAATTGCGGCGACTTTCTCTTTCTGGCCTTCTTACAGATCGTGTGTTTGAGTACATCGGGGTCCATG  
CTAAGAAGTTAGAGATGCTTTCCTTAGCTTTTGCGGGGGATAGCGATCTA

>PGSC0003DMG400021996LRR-RLPs\_4697

GGGTCCATGCTAAGAAGTTAGAGATGCTTTCCTTAGCTTTTGCGGGGGATAGCGATCTAGGCCTCCACT  
ATGTTCTCTCTGGTTGTGAGAGCCTTCGTAAGTTGGAGATTAGAGACTGCC

>PGSC0003DMG400021996LRR-RLPs\_5002

GAGAACTTTATATACAGGACAGTGTGAGGAAGGAGGTTGACACTCCTGGTTTTGTTGGATTATTG  
ATGAAGATGCAGCATTGACTCAATATAGCAACGGGAATTGCTCTCTGGCT

>PGSC0003DMG400021996LRR-RLPs\_5063

GGATTATTGATGAAGATGCAGCATTGACTCAATATAGCAACGGGAATTGCTCTCTGGCTTCTTCTTAGGA  
AGACTTCAGGTATAAGTTCTATGTTAATCTTTCACCCGCGTTTACTTGCT

>PGSC0003DMG400021996LRR-RLPs\_5185

AGCCTTGTGTAGTTGCAGTGCTGGTTATGGTGGGAGTGAAGCTCGTGTCCATCGATTTGATCCTTTGTT  
GAGTGACTTGGCAGCAATTAATTACAAATAATGAGAGTTTAAACTGTCGT

>PGSC0003DMG400021996LRR-RLPs\_5246

TCCTTTGTTGAGTGACTTGGCAGCAATTAATTACAAATAATGAGAGTTTAAACTGTCGTTGTTGTGCTATA  
TCAGCAAGGACAACACTATTGTATTTTTGGTTGGGAGGGGGCATGTTCAAC

>PGSC0003DMG400021996LRR-RLPs\_5307

TTGTGCTATATCAGCAAGGACAACACTATTGTATTTTTGGTTGGGAGGGGGCATGTTCAACTGTTTATCCTA  
TTTTGTATCATTATGTATCAGTTTAACTTTCTCTAGTGACTTTTTCTTCT

>PGSC0003DMG400021996LRR-RLPs\_5368

TTTATCCTATTTTGTATCATTATGTATCAGTTTAACTTTCTCTAGTGACTTTTTCTTCTGGTGAAATGGTGCT  
ATCATGTACTTCTCTGGTCATGTATTGTTGTAATTCTCTTTGAAGAT

>PGSC0003DMG400021996LRR-RLPs\_5416

CTTTTTCTTCTGGTGAAATGGTGCTATCATGTACTTCTCTGGTCATGTATTGTTGTAATTCTCTTTGAAGAT  
TAATGCGAACCTTTCATTCATTATGAGTGCTGGAAATCCCATTTGTTG

>PGSC0003DMG400021996LRR-RLPs\_549

ATTTGGAAGTCGTTCAAGAATTTTAGAGTCTTGGTTTTACAGTCTTGTGAAGGATTTACTACTGATGGACT  
TGCTGCCATTGCTGCTAACTGCAGGTTTATCTAGCATTTTTTTAGCTGTT

>PGSC0003DMG400021996LRR-RLPs\_610

CTGATGGACTTGCTGCCATTGCTGCTAACTGCAGGTTTATCTAGCATTTTTTAGCTGTTTTTTTTTTGGTAG  
ATGACCCTTTTCTGAGTGATGGTGAAAAAAGTCTTAATCTTTACATCT

>PGSC0003DMG400021996LRR-RLPs\_732

GGTTAACTGTGCTTGTGTTGTAAGTGAAGGGGTTGAGGAAAGTTTTAATCTTTCATCTGGGGTTGACTGTA  
TTTGTGTTGTAAGTGAAGGGTGGTTGAGGAAATGGTATGTTTTTTTTTAGAGC

>PGSC0003DMG400021996LRR-RLPs\_793

TTGACTGTATTTGTTGTAAGTGAAGGGTGGTTGAGGAAATGGTATGTTTTTTTTTAGAGCATTGTTGTCTG  
AGTACTCTAGTTGTTAATGGTGAAAAGAAGTCTTAACCTTTGCATCTGGG

>PGSC0003DMG400021996LRR-RLPs\_854

TGTTGTCTGAGTACTCTAGTTGTTAATGGTGAAAAGAAGTCTTAACCTTTGCATCTGGGGTAACTATACT  
TGTTTGTAACTGAGGGGCTGAGGAAGGTTTTAATCTTTGCATCTGGGGT

>PGSC0003DMG400021996LRR-RLPs\_915

TAACTATACTTGTGGTAACTGAGGGGCTGAGGAAGGTTTTAATCTTTGCATCTGGGGTAACTGTATTT  
GTTTGGTATTGTGGGGTTGAAGAAATAGTATGTTTTGTAGAGTATTGTTG

>PGSC0003DMG400021996LRR-RLPs\_976

ACTGTATTTGTTTGGTATTGTGGGGTTGAAGAAATAGTATGTTTTGTAGAGTATTGTTGTCTGAGTACTTT  
ATTTGTTAATGGTGAAAAGAAGTCTTACTCTTTGCATCTGGGGTTAGCT

>PGSC0003DMG400022000LRR-RLKs\_1426

ATGTCTCATCTCAAGTGAATCACATATCCATCTTAATATAGATAATTGACTGACGATCAAATAGTTTAAGC  
TTCCTTTCTTCAGTTACCATATAAGAAGAGAGGAAAAGAGAATAGCAGA

>PGSC0003DMG400022000LRR-RLKs\_1550

AATGAATAGTTCTCATGTTGCCAATATTTAAAATTTAAATGCCCTAATTAACAGAAAACCTTTCCTAGGCT  
TGTTATTGTTCTGCTTCAAGAGGACGTTGAAACAGAATACAAGGATTGC

>PGSC0003DMG400022000LRR-RLKs\_1984

CTATGTACAACATTTCTGGATTAGCAATGATTTTCAATTTGTAGGAAATGGGCTCTCAGGAACACTTCCCTCA  
AACATAGGCCATACCCTTCCAAATCTTGTCGGCCTCTATCTTGGGAACA

>PGSC0003DMG400022000LRR-RLKs\_2170

GTCGCAATCTGTTTAGTGGACCTGTACCTATGAATCTTGAAAAGCTACAACAGCTTCAATTCATCAGCTT  
GCAATTTAATCAATTGACGAATGATCCATCTACGGACAAGTTAAGTTTTTC

>PGSC0003DMG400022000LRR-RLKs\_2232

ATCAGCTTGCAATTTAATCAATTGACGAATGATCCATCTACGGACAAGTTAAGTTTTCTTACATCATTATC  
TAATTGCAAGTATTTGAAGACAGTTCAAATAGGAGGTAACCAATTTAAT

>PGSC0003DMG400022000LRR-RLKs\_2356

GTCTTCCAAAGTCCTTGGGATCAGGCAACTGGTCCTTTTCCCTTGAATATTTTATTGCCACCAATAGTGGT  
ATCACAGGAAAAATACCAACTAACATCAGTAACTTTAGGAACCTGGAGT

>PGSC0003DMG400022000LRR-RLKs\_2542

TGCAAAAGTTTTACCTGCAGATAAACAATTTAGATGGAATTATACCAACTAGCTTGTGTAACATGGAAAG

CTTGTACCAAGTTATCTTGGGCAAAAATCAACTTTCTGGGGAATTACCAA

>PGSC0003DMG400022000LRR-RLKs\_2852

CAATCAGTTCTCAGGTCAGATTCTAGCACGATTGGCCAACACTACAAAGCTTGGTTAGCCTTTCATTGTCA

AAGAATATGTTAGATGGTCCTATACCTGAACTATTTGAAGATTTGGTTTC

>PGSC0003DMG400022000LRR-RLKs\_3100

GGCATTATAAATTTTACAGCTGAATCATTATGGGTAACCCTGCATTATGTGGATCATCACGCTTCCAT

GTGATGCAATGCAGAGTCACAAGTCTTGAAAGCAAAAGAAAGAGTAGAG

>PGSC0003DMG400022000LRR-RLKs\_3658

ACAAATTTTTGGATATAACTCAAAGACTAAAGGTGATGATTGATGTGGCTTCTGCTGTGGAGTATTTACA

TGGAGGTCATTTTTTTGTAGTCATCCATTGTGATTTGAAACCAAGTAACA

>PGSC0003DMG400022000LRR-RLKs\_620

CCCAAGTGGGCTGAATCAATGCACACAACCTATTTACCTTTCCTTGTGCATATAATCAGCTCACAGGTAATT

AGTAATGTTAATTCAATTCTTGACTATATATACTTGATTCAGAATCAT

>PGSC0003DMG400022067-(rev)LRR-RLPs\_0

ATGGCCTCATTGCTTAAATTGAAGCATGAACTTACATTTGATTCTTCTATAACCAAAGAAAATAGTTAGGT

GGAATAGAAACATAGATTGCTGCTTGTGGTCGGGTGTAAGTTGTGACGAA

>PGSC0003DMG400022067-(rev)LRR-RLPs\_1037

GGCTAACAAGCTCAATTACATTGACATTTCTAATAACAACGGTCAACTTTCTTCTGCTCAAACCTCAATTAG

CCGTTCTCCTTCCCTCCCCTCATTGCAGTACCTTTATCTTTATAATAG

>PGSC0003DMG400022067-(rev)LRR-RLPs\_1098

ACTCAATTAGCCGTTCTCCTTCCCTCCCCTCATTGCAGTACCTTTATCTTTATAATAGTCATTTAAGTGGA

GAAATCCATGAATTTCAAATGCATCCTCCTCTGTTCTGGAAACACTT

>PGSC0003DMG400022067-(rev)LRR-RLPs\_122

AGGTCATGTGCTTGTGCTGGAGTTGGACAACGAAGCCATTTCTGGCGGAGTTGACAACCTCAAGCAGTCT

CTTCGATCTTCAACATCTTGAGAAGCTCAATCTGGCTTATAACGACCTACG

>PGSC0003DMG400022067-(rev)LRR-RLPs\_1220

TTTGAGCAATAACCATCTAAATGGATTGATCCCCGGTCTATCTTTAAACTCAATAGGCTTTCACAACCTCT

CACTTTCTTCCAACCTCCTTCAGTGGGACCATTAATATCGAAGCGGTAAA

>PGSC0003DMG400022067-(rev)LRR-RLPs\_1342

GACTTCCTAGGCTAACCACCCTTGACCTTTCAGACAACAAAATTGAAGGGAAAATACCAAATTGGGTTTG  
GACAGTTGCAAAACTGAATCTTTCTCACAATCTCTTTGAGTCACTGGAAA

>PGSC0003DMG400022067-(rev)LRR-RLPs\_1403

TTGGGTTTGGACAGTTGCAAAACTGAATCTTTCTCACAATCTCTTTGAGTCACTGGAAAAACCTTATTATA  
TATCTACTACTTCTATTGTCATTGACTTGAGTTTCAACAGGATCAAGGG

>PGSC0003DMG400022067-(rev)LRR-RLPs\_1647

TTCCTTGATATGTTGAATAACTCCATAAGCGGAAAAATACCTCCCTGTCTAATCCAAATGCTGGCTATGA  
GTCTCGTAGTGTTGAATATAGGGAGAAACAATCTAAGTGGCATTGTTCCCT

>PGSC0003DMG400022067-(rev)LRR-RLPs\_1708

TGGCTATGAGTCTCGTAGTGTTGAATATAGGGAGAAACAATCTAAGTGGCATTGTTCCCTGATACATTTCC  
GCTGAATTGCAGTTTGGAACTTTAGATCTCAGTAGGAATATGTTAGAAG

>PGSC0003DMG400022067-(rev)LRR-RLPs\_1769

TACATTTCCGCTGAATTGCAGTTTGGAACTTTAGATCTCAGTAGGAATATGTTAGAAGGAAAAGTTCCA  
AGCTCCTTGCAAAGATGTGAACCTTTGCAAGTTTTGAACATTGGAAACAA

>PGSC0003DMG400022067-(rev)LRR-RLPs\_1891

AGATCAAAGATACATTCCCGTGCATGTTGAAGAAATTATACAGTTTTCATGTCCTAGTCATAAGGTGCGAA  
CAAGTTCTACGGGAATCTCCAGTGTTCTGTTGCTAATCAAACCTTGGTCAA

>PGSC0003DMG400022067-(rev)LRR-RLPs\_2013

CTTCAAATTGTGGATCTTGCTTACAATAATTTCAAGTGGTGATCTGCTACCGCATTACTTCTCCAGCTGGGA  
AGGCATGATGCAGGGCAACAATCCATACCCATGGGAGCAGTACTTAAGT

>PGSC0003DMG400022067-(rev)LRR-RLPs\_2074

CCAGCTGGGAAGGCATGATGCAGGGCAACAATCCATACCCATGGGAGCAGTACTTAAGTGCTGATAAT  
CTGTATCAAGACAAGGTGACTTTAACTATCAAAGGTTTAAACAGTGGGAATATG

>PGSC0003DMG400022067-(rev)LRR-RLPs\_2196

AAAATTCTTGTGGTTTTAACTTCCATTGATTTCTCTTGCAACAACCTTCAAGGGGAGATACCGGAGACATT  
GGGAGATCTCAAATCACTAATCCATCTTAACTTCTCGCACAATGCTTTG

>PGSC0003DMG400022067-(rev)LRR-RLPs\_2684

TTTGCATAGTCAAAGATGCAATGAGCTCCTTGATAGACTTCTTTTCAGAATGTTGGATCGACACAAAAAA  
AGGCGCATGAATAAAAATCTTTGAAGGTGGTCAAGTATAGCTTTGATGTT

>PGSC0003DMG400022067-(rev)LRR-RLPs\_2745

CACAAAAAAGGCGCATGAATAAAAATCTTTGAAGGTGGTCAAGTATAGCTTTGATGTTTGATCTTTTAC  
ATTCTGTTTAAAGGAGTTCATAATACTATTGTTCACTTTGTTTTTCTTT

>PGSC0003DMG400022067-(rev)LRR-RLPs\_2806

ATCTTTTACATTCTGTTTAAAGGAGTTCATAATACTATTGTTCACTTTGTTTTTCTTTGTTTTCTGTATGGT  
AAAGAGTGGTGTGTTGAATTTAATGCAAGGAATAATTTTCATGATGA

>PGSC0003DMG400022067-(rev)LRR-RLPs\_2867

TTTCTGTATGGTAAAGAGTGGTGTGTTGAATTTAATGCAAGGAATAATTTTCATGATGATCTGTTTATCAT  
TTTTCAACTATTTGGCTCTTTTACTTTTATACAAACAATACTGCTAGAT

>PGSC0003DMG400022067-(rev)LRR-RLPs\_2928

TGTTTATCATTTTTCAACTATTTGGCTCTTTTACTTTTATACAAACAATACTGCTAGATCCTTATTTCTCTCT  
CTATTATTTTCAATCGTTTTTCCAACATCAATACTCAAAACATCAA

>PGSC0003DMG400022067-(rev)LRR-RLPs\_2989

TTATTTCTCTCTATTATTTTCAATCGTTTTTCCAACATCAATACTCAAAACATCAAAATAAAGATATGC  
TACTCCTAGGTCAGTTGAACAAGTTCATTGTCTTGGAGATCCTTGAGA

>PGSC0003DMG400022067-(rev)LRR-RLPs\_3050

TAAAGATATGCTACTCCTAGGTCAGTTGAACAAGTTCATTGTCTTGGAGATCCTTGAGATACTGATTAGA  
TATATTGTTAGGTTGCCTGTTCAATTTTATCGGATTTACATGCCTAAAAA

>PGSC0003DMG400022067-(rev)LRR-RLPs\_3111

CTGATTAGATATATTGTTAGGTTGCCTGTTCAATTTTATCGGATTTACATGCCTAAAAATCTGCTATTTACA  
CCACAAAAGATATGCTACTCCTAGCTGCAATGTTCTGAAAAATATTG

>PGSC0003DMG400022067-(rev)LRR-RLPs\_3172

TGCTATTTACACCACAAAAGATATGCTACTCCTAGCTGCAATGTTCTGAAAAATATTGTTATATTAATCC  
CTGGATAACTCCTATCTATGGGAGGCAATTAACATCATAATTATACAAA

>PGSC0003DMG400022067-(rev)LRR-RLPs\_3233

ATATTAATCCCTGGATAACTCCTATCTATGGGAGGCAATTAACATCATAATTATACAAATATATATAGCTA  
TTACATAGATAAAGTAAAGCTATTCTAATCTGTCCATCATGTTAACAAA

>PGSC0003DMG400022067-(rev)LRR-RLPs\_3294

TATATAGCTATTACATAGATAAAGTAAAGCTATTCTAATCTGTCCATCATGTTAACAAAGATTGGTCTTAT

TTTCTGCAAATTCTTAAGATGACTATATATTAGTGATCTCTATTCGTTT

>PGSC0003DMG400022067-(rev)LRR-RLPs\_3355

TTGGTCTTATTTTCTGCAAATTCTTAAGATGACTATATATTAGTGATCTCTATTCGTTTCGGTGATTTTTTA

GTTAGTCTTTGTGTTAAGAAAATATTTTACCTGATGCTAATCGCGAGA

>PGSC0003DMG400022067-(rev)LRR-RLPs\_3416

GTGATTTTTTAGTTAGTCTTTGTGTTAAGAAAATATTTTACCTGATGCTAATCGCGAGATGAAATTTATGC

AATTCTGACTAATGAAGCCATTAATATTTGTCACCTTCAGACAACCATC

>PGSC0003DMG400022067-(rev)LRR-RLPs\_3477

AAATTTATGCAATTCTGACTAATGAAGCCATTAATATTTGTCACCTTCAGACAACCATCATAGATTAAGTT

TTGTTCTTTAGACGGAGTCCTGATGAACTGGTAAACAATAAACATATAG

>PGSC0003DMG400022067-(rev)LRR-RLPs\_3538

AGATTAAGTTTTGTTCTTTAGACGGAGTCCTGATGAACTGGTAAACAATAAACATATAGGTCTAAGGAA

GTGTTGGCAGGGTTAAACACATTTAAATATTTGTTCTTTTGGTTGTAACCC

>PGSC0003DMG400022067-(rev)LRR-RLPs\_3599

CTAAGGAAGTGTGGCAGGGTTAAACACATTTAAATATTTGTTCTTTTGGTTGTAACCCCTCACCTAGCTT

ACTCTTATCGTTGGGGTCACTCAATAATCATACTCTACTTATATATCTA

>PGSC0003DMG400022067-(rev)LRR-RLPs\_3660

CACCTAGCTTACTCTTATCGTTGGGGTCACTCAATAATCATACTCTACTTATATATCTAGGCGCGTCCTAA

AACCAAATGTCAAAGTTTCCATCTTATTGTATTTGAGAAACAACAAAG

>PGSC0003DMG400022067-(rev)LRR-RLPs\_3721

CGCGTCCTAAAACCAAATGTCAAAGTTTCCATCTTATTGTATTTGAGAAACAACAAAGCATTGCAAGGC

ATCAACTTATGCTCTTGTAAGTTGAATGTGTCATTGTCAATTACAAGC

>PGSC0003DMG400022067-(rev)LRR-RLPs\_3782

TTGCAAGGCATCAACTTATGCTCTTGTAAGTTGAATGTGTCATTGTCAATTACAAGCTTAAGTTGTGTA

AATTTATACCTTATGTTAATGATATTAGGTTTACTTGCATATGCACAAC

>PGSC0003DMG400022067-(rev)LRR-RLPs\_3843

AAGTTGTGTAATTTATACCTTATGTTAATGATATTAGGTTTACTTGCATATGCACAACCCAAGTCAACAT

AAAACATAAGCGAAATTATACCAAATTGGAATTAGTCTAGTCGTTTC

>PGSC0003DMG400022067-(rev)LRR-RLPs\_3904

AAGTCAACATAAAACTACAAAGCGAAATTATACCAAATTGGAATTAGTCTAGTCGTTTCATGTGTAAAAG  
AAAAGACAGAAACATCAACTTTGTTTAGATTTTAAAACATCTGATGTAAG

>PGSC0003DMG400022067-(rev)LRR-RLPs\_3965

GTGTAAAAGAAAAGACAGAAACATCAACTTTGTTTAGATTTTAAAACATCTGATGTAAGACCTCATTAGA  
CAAAACAATGAAGCTGTCTTGACTTTTCCAAAAAAATTCTTGTCTTTGCG

>PGSC0003DMG400022067-(rev)LRR-RLPs\_4026

CTCATTAGACAAAACAATGAAGCTGTCTTGACTTTTCCAAAAAAATTCTTGTCTTTGCGAGTGCCGGCCA  
AGATTATTTGTATATATATATAGAATTCATCATCATTTCAATACTTCAC

>PGSC0003DMG400022067-(rev)LRR-RLPs\_4087

TGCCGGCCAAGATTATTTGTATATATATATAGAATTCATCATCATTTCAATACTTCACTTCATAATATTGC  
CTCACTATGAAAATATCACTCCTGCTACAACCTTTCTTACATTACTGTG

>PGSC0003DMG400022067-(rev)LRR-RLPs\_4148

CATAATATTGCCTCACTATGAAAATATCACTCCTGCTACAACCTTTCTTACATTACTGTGCTAGTGGTGTTC  
TGATTAGTTCTAATATTTCTCCAGTGTATGGCCAATGTTTGGGCGATG

>PGSC0003DMG400022067-(rev)LRR-RLPs\_4209

AGTGGTGTTCCTGATTAGTTCTAATATTTCTCCAGTGTATGGCCAATGTTTGGGCGATGAAAAGGCATTG  
TTGCTTAAACTCAAGAAAAGCCTCACTTTGATTCTTCTAAATCAACCAA

>PGSC0003DMG400022067-(rev)LRR-RLPs\_4270

AAGGCATTGTGCTTAAACTCAAGAAAAGCCTCACTTTGATTCTTCTAAATCAACCAAAGTGGTAGAT  
GGGATCTAAACACAGACTGTTGCCTGTGGCCAGGTGTAAGTTGTGATCAA

>PGSC0003DMG400022067-(rev)LRR-RLPs\_4331

TGGGTAGATGGGATCTAAACACAGACTGTTGCCTGTGGCCAGGTGTAAGTTGTGATCAAGAAGGTCAT  
GTGCTTGTCTGGATCTGGACGACGAAGTAATCACTAGTGGAGTTCCAGAAT

>PGSC0003DMG400022067-(rev)LRR-RLPs\_4392

AGGTCATGTGCTTGTCTGGATCTGGACGACGAAGTAATCACTAGTGGAGTTCCAGAATTTATAGCAAA  
TTTTACAAAATTGACTACCTTGAGTCTCCGGAAGTCAAGTTGCGTGGTTC

>PGSC0003DMG400022067-(rev)LRR-RLPs\_4453

ATAGCAAATTTTACAAAATTGACTACCTTGAGTCTCCGGAAGTCAAGTTGCGTGGTTCATTTCTAGTA  
AAATCATTGAGGTACAACTCTTCAGGAGCTTTATTTATCATTTAATGTA



>PGSC0003DMG400022067-(rev)LRR-RLPs\_4514

TTCCTAGTAAAATCATTACAGGTACAAACTCTTCAGGAGCTTTATTTATCATTTAATGTAAACCTTACTGGC  
ACTTTACCTGAATTTTCACAAAAGAGTGCATTAAGGGAAGTAGTGCTTA

>PGSC0003DMG400022067-(rev)LRR-RLPs\_4575

CCTTACTGGCACTTTACCTGAATTTTCACAAAAGAGTGCATTAAGGGAAGTAGTGCTTAGTTACACGGGA  
TTCACCGGTTCCCTTTCAGATTCAATTGCTAACCTTCAGAATTTGACCCG

>PGSC0003DMG400022067-(rev)LRR-RLPs\_4636

TACACGGGATTCACCGGTTCCCTTTCAGATTCAATTGCTAACCTTCAGAATTTGACCCGGCTTGATTTAGC  
AGGTTGCAATTTACAGTGGAGATATTCCATCAAAAATGGGAAATCTCACA

>PGSC0003DMG400022067-(rev)LRR-RLPs\_4697

TTGATTTAGCAGGTTGCAATTTACAGTGGAGATATTCCATCAAAAATGGGAAATCTCACAGACCTGGTTCA  
TCTAGACTTGTCAATTCAACAGTTTTACTGGCTCGATCCCATTCTTTCACA

>PGSC0003DMG400022067-(rev)LRR-RLPs\_4758

CCTGGTTCATCTAGACTTGTCAATTCAACAGTTTTACTGGCTCGATCCCATTCTTTCACAAGGCAAAGAAGC  
TCAATTACATTGACCTTTCTAATAACAATGGTCCATTTTCTTCCACTCA

>PGSC0003DMG400022067-(rev)LRR-RLPs\_4819

GCAAAGAAGCTCAATTACATTGACCTTTCTAATAACAATGGTCCATTTTCTTCCACTCAAACCTCAATTAGC  
AGTTCTCCTTCCCTCCCGTCCTTGCAGTTTCTTAGTGTTTCAGAACAGT

>PGSC0003DMG400022067-(rev)LRR-RLPs\_4880

CTCAATTAGCAGTTCTCCTTCCCTCCCGTCCTTGCAGTTTCTTAGTGTTTCAGAACAGTCGTTTAAGTGGA  
GTAATCCATGAATTTTCAAATGCATCCTCTTCTGTTCTTGATACACTTG

>PGSC0003DMG400022067-(rev)LRR-RLPs\_4941

TTTAAGTGGAGTAATCCATGAATTTTCAAATGCATCCTCTTCTGTTCTTGATACACTTGATTTGAGTAATA  
ATCATCTGAATGGATCCATTCCGCGGTCTATCTTTCAACTCAAAGTCT

>PGSC0003DMG400022067-(rev)LRR-RLPs\_5002

TTGAGTAATAATCATCTGAATGGATCCATTCCGCGGTCTATCTTTCAACTCAAAGTCTTTCAGAAGTACTAGT  
ACTTTCTTCCAACTCGTTCAATGGGACCATTAATCTTGAAGCGATTAGC

>PGSC0003DMG400022067-(rev)LRR-RLPs\_5063

CAGAAGTACTTTCTTCCAACTCGTTCAATGGGACCATTAATCTTGAAGCGATTAGCCGACTTCCTAG

GCTAAACATCCTCGACCTTTCTTACAACAACCTTGAGAGTTGTAAGTAATT

>PGSC0003DMG400022067-(rev)LRR-RLPs\_5124

ACTTCCTAGGCTAAACATCCTCGACCTTTCTTACAACAACCTTGAGAGTTGTAAGTAATTCAACCTCATTTC

CCTCTCCGGCTGGGATGCACTCCCTGAGGTTGGCTTCATGCCAGTTGCA

>PGSC0003DMG400022067-(rev)LRR-RLPs\_5185

ACCTCATTTCCTCTCCGGCTGGGATGCACTCCCTGAGGTTGGCTTCATGCCAGTTGCAAAGTTTCCTG

ATCTCAAAAACCTATCATTCTTATTAGAATTAGACCTTTCGAACAACAAA

>PGSC0003DMG400022067-(rev)LRR-RLPs\_5246

AGTTTCCTGATCTCAAAAACCTATCATTCTTATTAGAATTAGACCTTTCGAACAACAAAATTAGAGGGGG

AATACCAAATTGGGTTTGGAAAGTTACAAATCTGAATCTTTCTCACAAATC

>PGSC0003DMG400022067-(rev)LRR-RLPs\_5307

TAGAGGGGGAATACCAAATTGGGTTTGGAAAGTTACAAATCTGAATCTTTCTCACAAATCTCCTGGAGTCT

CTAGAAAAACCTTACTATATGTTTACCAGTCCTCTTTCCATTGATTTGAG

>PGSC0003DMG400022067-(rev)LRR-RLPs\_5368

CTGGAGTCTCTAGAAAAACCTTACTATATGTTTACCAGTCCTCTTTCCATTGATTTGAGTAGCAACAGGAT

CAAGGGCAATCCACCCTTTCTACCACCTGACAGGGATGATACATATTAC

>PGSC0003DMG400022067-(rev)LRR-RLPs\_5429

GCAACAGGATCAAGGGCAATCCACCCTTTCTACCACCTGACAGGGATGATACATATTACCGTACAAGTC

GGGGAGGTAGTGTTACTTTCATATCACTTGCCAATAATGAATTTACGGGAT

>PGSC0003DMG400022067-(rev)LRR-RLPs\_549

AGAGTTTTGTCAATGAGATACTGTGAAATTTAGGCCCAATTGATCCTGTCCTGGTAAATCTTCCTTTCTCCT

TTCAGTTATTCGTCTCGATATGAATAACTTGCCACTATGGTTCCAGAT

>PGSC0003DMG400022067-(rev)LRR-RLPs\_5490

TACAAGTCGGGGAGGTAGTGTTACTTTCATATCACTTGCCAATAATGAATTTACGGGATCAATACCCTCT

TTCATATACAATCTAGATCATCTTAAATTTCTTGATATGTCAAACAACAC

>PGSC0003DMG400022067-(rev)LRR-RLPs\_5551

ATACCCTCTTTCATATACAATCTAGATCATCTTAAATTTCTTGATATGTCAAACAACACCTTTAACAACAAA

ATACCTTCATGTCTATTCCAAAAGGCTGACCGTTTTGTAGTACTGAAT

>PGSC0003DMG400022067-(rev)LRR-RLPs\_5612

TTAACAAACAAAATACCTTCATGTCTATTCCAAAAGGCTGACCGTTTTGTAGTACTGAATCTTGGGAGAAA  
CAAATAAGTGGCACTATTCCAGACACATTTCCACTAAATTGTAGTTTGA

>PGSC0003DMG400022067-(rev)LRR-RLPs\_5673

TGGGAGAAACAACTAAGTGGCACTATTCCAGACACATTTCCACTAAATTGTAGTTTGAGAACTTTAGAC  
CTCAGCAGCAATATCTTAGAAGGAAAAGTTCCAAGATCCCTGCTAAGATG

>PGSC0003DMG400022067-(rev)LRR-RLPs\_5734

ACTTTAGACCTCAGCAGCAATATCTTAGAAGGAAAAGTTCCAAGATCCCTGCTAAGATGTGAACCTTTGG  
AGTTTTTGAACATTGGAAACAACAAGATTGAAGATACATTCCCATGCATG

>PGSC0003DMG400022067-(rev)LRR-RLPs\_5795

AACCTTTGGAGTTTTTGAACATTGGAAACAACAAGATTGAAGATACATTCCCATGCATGTAAATTATTT  
TTCCAATTTGCATGTACTAGTCTTGAGGTCTGAACAAGTTCCATGGGAATC

>PGSC0003DMG400022067-(rev)LRR-RLPs\_5856

AAATTATTTTTCCAATTTGCATGTACTAGTCTTGAGGTCTGAACAAGTTCCATGGGAATCTCCAGTGCCTA  
TTGCGAATCAAACCTGGTCAAGTATTCAAATTATTGATCTTGCTTACAA

>PGSC0003DMG400022067-(rev)LRR-RLPs\_5917

CAGTGCCTATTGCGAATCAAACCTGGTCAAGTATTCAAATTATTGATCTTGCTTACAATAATTTAGCGG  
TGCTATGCTACCACAATACTTCTCAAACCTGAAAGGCATGATGCAAAGC

>PGSC0003DMG400022067-(rev)LRR-RLPs\_5978

ATTTAGCGGTGCTATGCTACCACAATACTTCTCAAACCTGAAAGGCATGATGCAAAGCAGAAATATAGA  
CCCGGGGGAGCATTATTTGCATGTTGATAGTCTGTATCAAGACAAGGTGA

>PGSC0003DMG400022067-(rev)LRR-RLPs\_6039

AAATATAGACCCGGGGGAGCATTATTTGCATGTTGATAGTCTGTATCAAGACAAGGTGACTTTAACTATT  
AAAGGTCTAACATTGGAATATGTGAAAATTCTGTAGTTTTAACATCCAT

>PGSC0003DMG400022067-(rev)LRR-RLPs\_61

TAGTTAGGTGGAATAGAAACATAGATTGCTGCTTGTGGTCTGGGTGTAAGTTGTGACGAAGAAGGTCAT  
GTGCTTGTGCTGGAGTTGGACAACGAAGCCATTTCTGGCGGAGTTGACAACT

>PGSC0003DMG400022067-(rev)LRR-RLPs\_610

TTCTTTCTTTTCAAGTATTCGTCTCGATATGAATAACTGTCCACTATGGTTCCAGATTTTTTGGCAGATT  
TTACGAAATTGACAACCTTAAGTGTTAGATGGTGCAATTTGTTTGTT

>PGSC0003DMG400022067-(rev)LRR-RLPs\_6100

TTAACTATTAAGGTCTAACATTGGAATATGTGAAAATTCTTGTAGTTTAAACATCCATTGATTCTCTTGC  
AATAACTTTCAAGGGGAGATACCTGAGACATTGGGAGATCTCAAATCA

>PGSC0003DMG400022067-(rev)LRR-RLPs\_6161

ATTTCTCTTGCAATAACTTTCAAGGGGAGATACCTGAGACATTGGGAGATCTCAAATCACTTATCCATGT  
TAACTTCTCACACAATGCTTTGACTGGAAGAATACCAAAGGCTCTTGAA

>PGSC0003DMG400022067-(rev)LRR-RLPs\_6222

TATCCATGTAACTTCTCACACAATGCTTTGACTGGAAGAATACCAAAGGCTCTTGAAAGTTGACTCAG  
CTTGAATCCTTAGATTTCTCAGTTAACCATTTAAGCGGGAGAATTCCAGA

>PGSC0003DMG400022067-(rev)LRR-RLPs\_6283

TTGACTCAGCTTGAATCCTTAGATTTCTCAGTTAACCATTTAAGCGGGAGAATTCCAGACGAGCTCGTGA  
GTCTCACATTTCTTGCTTTCTTGAACCTATCTTTAATCAACTTTCTGGT

>PGSC0003DMG400022067-(rev)LRR-RLPs\_6344

AGCTCGTGAGTCTCACATTTCTTGCTTTCTTGAACCTATCTTTAATCAACTTTCTGGTAGGATTCCAAGTG  
GCAACCAATTTAGACATTCTCAGCAGATTCCTTTGAAGGGAACATTG

>PGSC0003DMG400022067-(rev)LRR-RLPs\_6405

GATTCCAAGTGGCAACCAATTTAGACATTCTCAGCAGATTCCTTTGAAGGGAACATTGGGTTGTGCAAC  
TTTCCTTTAAATACAACGTGCAGTGAAACCAAAGTGAATGGATCGTCACA

>PGSC0003DMG400022067-(rev)LRR-RLPs\_6466

TTGTGCAACTTTCTTTAAATACAACGTGCAGTGAAACCAAAGTGAATGGATCGTCACAACCTAACAACC  
ATTCTGAACATGAAATTGATGGGAAATATATAAGTTTTTCTTGGGATCT

>PGSC0003DMG400022067-(rev)LRR-RLPs\_6527

CTAACAACCATTCTGAACATGAAATTGATGGGAAATATATAAGTTTTTCTTGGGATCTTCTATGGCTTTT  
GGTATCGTAACCTGGCTTCTTTTGCATAGCCAAAGATACAATGAGCTCG

>PGSC0003DMG400022067-(rev)LRR-RLPs\_6588

TATGGCTTTTGGTATCGTAACCTGGCTTCTTTTGCATAGCCAAAGATACAATGAGCTCGTTGATGGACTTC  
TTTTAAGAATTTTGGGTCAGCCAAAAGGAGGAGAAAGAATAAAAACCA

>PGSC0003DMG400022067-(rev)LRR-RLPs\_732

TTTCCCAGTAAAATCTTTTCAAGGTACCAACTCTACAACAACCTGATCTGTTAGGCAACGTAAACCTTACCGG

CACTTTACCTGAATTTCCACAGAAAAATGCATTAAGGGAGTTGAGTCTT

>PGSC0003DMG400022067-(rev)LRR-RLPs\_793

ACCTTACCGGCACTTTACCTGAATTTCCACAGAAAAATGCATTAAGGGAGTTGAGTCTTAGGGAGACGA

GTTTCACCGGTTTGCTTCCAAATTCAATTGCTAACCTTCGAAGTTTGATTA

>PGSC0003DMG400022068-(rev)LRR-RLPs\_0

ATGAAAATATCACTCCTGCTACAGCTTCTTTTCATCACCATGCTGGTGGTGCTTTTTTTGATTAATTCTCCA

GTGTATGGTCATTGTTTGGGCGATCAAAGGCGTTGTTGCTTAAACTC

>PGSC0003DMG400022068-(rev)LRR-RLPs\_1054

TTTATTTAGACTTTACATCCAATAGCTTTACTGGCTCAATCCCTCTCTTTCATAAGGCCAAAGAAGCTCAATT

ACATTGACCTTTCTCATAACAATCTAACAGGTCCACTTTCTTCTACTC

>PGSC0003DMG400022068-(rev)LRR-RLPs\_124

ATGGTCTTACATTGATTCTTCTAGGTCAACCAAAGTGGTCAGATGGAATCAAACACTGACTGTTGCCA

GTGGCCAGGTGTAAGTTGTGATCAGAAAGGTCATGTGCTTGTTTTGGAAC

>PGSC0003DMG400022068-(rev)LRR-RLPs\_1240

CGACAGTTGTGTTTTCCATTCCATCATTGCAGGTGCTTGAACCTCAGAATAATCACTTCAGTGGAGAAGT

CCATGAATTTGCTAACGCGTCCTCCTCTTTTTGTATGAACTTGACTTGA

>PGSC0003DMG400022068-(rev)LRR-RLPs\_1364

TAACTATCTAAATGGATCAATCCCCGGTCTATCTTTAACTCAATAGGCTTTCACAACCTCACTTTCTTC

CAACTCCTTCAGTGGGACCATTAATATCGAAGCGATAAAGGGACTTCC

>PGSC0003DMG400022068-(rev)LRR-RLPs\_1426

CACTTTCTTCCAACCTCCTTCAGTGGGACCATTAATATCGAAGCGATAAAGGGACTTCCCTAGGCTAAAAAC

ACTTGACCTTTCTTACAACAATTTGAGAATTGATGTACAGGGTAATAATT

>PGSC0003DMG400022068-(rev)LRR-RLPs\_1488

CTAAAAACACTTGACCTTTCTTACAACAATTTGAGAATTGATGTACAGGGTAATAATTCAACCTCATTTC

CTTTCCCAAATGAGTGAAGTGAAGTGGCATCATGCCAGTTGCAAAG

>PGSC0003DMG400022068-(rev)LRR-RLPs\_1674

CAAGTACCCAGCTGGATTTGGAGTAATAGTTAAGTTATCTTAATCTTCTTGCAATTTCTCGAGGCTTT

GGAAGAACCTTACGACACATCTTCAGAATTATGGAGTGTCATTGACTTG

>PGSC0003DMG400022068-(rev)LRR-RLPs\_1736

CGAGGCTTTGGAAGAACCTTACGACACATCTTCAGAATTATGGAGTGTTCATTGACTTGCATAACAACAG  
GATCCACGGCAATATACCCATTGTACCTACTTCTTATCTACCTTTCAAT

>PGSC0003DMG400022068-(rev)LRR-RLPs\_2294

TATTGCTTCCAACAATTCAGGGGAGCACTGCTACCACATTACTTCTCGAACTTGGAAAGGCATGATGAAG  
AGCAGAAATCCAGAGCCACGACTACCTACTTGGAAAGTTGAATTCATCAA

>PGSC0003DMG400022068-(rev)LRR-RLPs\_248

CAATGAAGCAATCTTCAGCGGACTTGAGAATCCAACCAGTCTATTCGATCTTCAGTATCTTGAGAAGCTG  
AATTTGGCTTATAATCATTTAACTCTATTCAAATAGCAACAGAAGTTTA

>PGSC0003DMG400022068-(rev)LRR-RLPs\_2728

CTTTAATCAACTTTCCGGTAGGATTCCAAGAGGCAACCAACTGCAGACATTCTCAGCAGAATCCTTTGA  
AGGGAGCACAGGGCTGTGTGATTTCCGCTGAAGAACTGTGCAGTGACA

>PGSC0003DMG400022068-(rev)LRR-RLPs\_2914

TAAGTTTTGCATTGGGATCTTCATTGTGTTTTGGCATCGTTACCTGGCTGCTTTTGCATAGCACAAAGATAC  
AATGGGCTCGTTGACAGACTTCTTTTCAGAATATTTGGTGAGCACAAAA

>PGSC0003DMG400022068-(rev)LRR-RLPs\_2952

GTTACCTGGCTGCTTTTGCATAGCACAAAGATACAATGGGCTCGTTGACAGACTTCTTTTCAGAATATTTG  
GTGAGCACAAAAAGGCGGGCAGAAATAGAAACAGAAGGAGGTCAAGGTAA

>PGSC0003DMG400022068-(rev)LRR-RLPs\_310

AGAAGCTGAATTTGGCTTATAATCATTTAACTCTATTCAAATAGCAACAGAAGTTTATAAGCTCACAAA  
CTTAACATACCTGAATTTGTCATTTGCTGGTTTTGGTGGAAGATTCCAA

>PGSC0003DMG400022068-(rev)LRR-RLPs\_434

ATTGTCAAGATTGACGAAGTTAACGTTTCTTGACCTTTCTAATGTGCGATTAAAGCTTGAGAGCGGAGAT  
CTGAAGACTGTTGGAAACCTGGCAAATCTTAGAGAACTTTATCTTGA

>PGSC0003DMG400022068-(rev)LRR-RLPs\_496

GCGGAGATCTGAAGACTGTTGGAAACCTGGCAAATCTTAGAGAACTTTATCTTGATGAAGTGCACA  
TATCATGGAAGGGGATTGAGTGGTGCTCAACCTTATCTTCATCTCTGCCTC

>PGSC0003DMG400022068-(rev)LRR-RLPs\_558

GTGCACATATCATGGAAGGGGATTGAGTGGTGCTCAACCTTATCTTCATCTCTGCCTCAGTTAAGAGTGT  
TAAGCATGACAAATTGTGGCATTTCAGCCCTTTTGATCCCATCCTCTTA

>PGSC0003DMG400022068-(rev)LRR-RLPs\_62

TAATTCTCCAGTGTATGGTCATTGTTGGGCGATCAAAAGGCGTTGTTGCTTAAACTCAAGAATGGTCTT  
ACATTTCGATTCTTCTAGGTCAACCAAAGTGGTCAGATGGAATCAAACAC

>PGSC0003DMG400022068-(rev)LRR-RLPs\_682

TTCATTTCTTTTCAGTCATTTCGTCTCGATGGCAATAACTTGCCAGTATAGTTCCTGAATTTCTAGCAAATT  
TTACAAAATTGACAACCCTTAGTCTCAGTAACTGCAACTTGAGAGGTG

>PGSC0003DMG400022068-(rev)LRR-RLPs\_806

TCCGAATAGATCTTTTCAGGTACCAACTCTACAGGAGCTTGATTTATATGGCAATGAAAAACTCACTGGCA  
CTTTACCTGACTTTTCACAGAATGGTTCATTAAGGGAGTTAGGGCTTGGC

>PGSC0003DMG400022068-(rev)LRR-RLPs\_930

CAAATTTACAGGTTTACTTCCGGATTCAATTGCTAACCTCACAACCTTAACCGAGATTGACTTAAGTTCA  
TGCAATTTCTTTGGACCTATCTCATCAAAAAATGGAAAATCTAAGAGAT

>PGSC0003DMG400022068-(rev)LRR-RLPs\_992

TTAAGTTCATGCAATTTCTTTGGACCTATCTCATCAAAAAATGGAAAATCTAAGAGATTTAGTTTATTTAG  
ACTTTACATCCAATAGCTTTACTGGCTCAATCCCTCTCTTTCATAAGGC

>PGSC0003DMG400022139LRR-RLks\_0

GTTTTCTTGAAGATTTGGAGATTGTAGGATGGAGGAGTGTTCTTAAATAGTTGAAAGAATTGATTTTTAT  
GCAGTTGGTTGGTGGTGGACTGGTGGTGTGTTTTGTTTTTCAGCAAGATGAGCT

>PGSC0003DMG400022139LRR-RLks\_1098

TGAAGCGATTGGTGCTAGCCACAATCAGTTTTTTGATAAAAATCCATCAGAATTGGGGCAGAGTTGCA  
GCACACTTGAGGAGTTGATCTTTCTGGAAACCGGCTTACTGGTGAAGTTC

>PGSC0003DMG400022139LRR-RLks\_1647

TCACAGGTGAAATTCCTGAGGGCATTTCATCAATGGAGGAAACCTTCAAACACTCATTCTCAATAACAA  
TTTCATCTCAGGGGCACTTCCACAGTCCATTTCCAATTGTACCAACTTGG

>PGSC0003DMG400022139LRR-RLks\_2379

CGTTAGGAGGCCTTTCAATTTCTTAGTGATCTTGATGTTTCAAACAACAACCTTATCGGGAACGATTCTTCT  
GGTGGACAGCTGACTACATTTCCAGCTTCAAGATACGAAAACAATTCAG

>PGSC0003DMG400022139LRR-RLks\_3477

ACAATCTTGTTGGATGGGCAAAGCAACTTCATAACGAGAAACGAAGTCATGAGATTCTTGATCCTGAGC

TGATAACAAACCTATCTGGTGATGCTGAACTCTATCATTACTTGAAAGTTG

>PGSC0003DMG400022139LRR-RLKs\_488

ACTGATCTCATGGCCTTGCCCTCTTTGCTCAGAGTTAATTTCAATGGCAACCATTCTATGGTAATCTTTCC

TCAATAGCTAGTTCCTGTAGCTTTGAGTTTCTTGATTTATCAGCTAAT

>PGSC0003DMG400022139LRR-RLKs\_61

GATTTTTATGCAGTTGGTTGGTGGTGGACTGGTGGTGGTTTGTTCAGCAAGATGAGCTATTAAGATTC

TAAAGAATTGATTTTTATGCAGTTAGTGGTGGTTTTTACAGCAATATGAG

>PGSC0003DMG400022189LRR-RLKs\_1240

GAGGTTTCGCGTACATATACAGAAGTTCAAAGAAAGGCAATGTCATTCCTCATGGCAACATTAAGCCAT

CAAACATTCTATTAAGCGATAACGGGGAGCCATTGATAAGTGAGTATGGCT

>PGSC0003DMG400022189LRR-RLKs\_1302

AAGCCATCAAACATTCTATTAAGCGATAACGGGGAGCCATTGATAAGTGAGTATGGCTATTACAAATTCT

TAGACCCTGACAAAAGTTGCCTCTATAAAGACAATGGTTATACAGCCCCCT

>PGSC0003DMG400022189LRR-RLKs\_558

GACGATAAGAAGACAAATAATCATCATGTGAGTCTGATGGTTTGGTACTCATATCTCTTGGAAGTGTG

ATTGTGTTAGTAGTTTTAGTATTCTTGTATATGAGATGTGTTGGGACAGTT

>PGSC0003DMG400022189LRR-RLKs\_620

AACTGTGATTGTGTTAGTAGTTTTAGTATTCTTGTATATGAGATGTGTTGGGACAGTTAAGGATAAGGAG

GTTATAAAGGAAGTAGTTGATTATCCGTCTCCTCGAAAACTCCCTCAGA

>PGSC0003DMG400022189LRR-RLKs\_682

ATAAGGAGGTTATAAAGGAAGTAGTTGATTATCCGTCTCCTCGAAAACTCCCTCAGATGAAGTTGTGG

ATGGAGTGTGTAACACTGAAGAGAAAAGCTCAGAACTTTACTTCTTCATGG

>PGSC0003DMG400022264-(rev)LRR-RLKs\_1488

TGGAAACTGCACAAATTTGTATAGACTTAGAGTGAATAGGAATAGGCTAGGGGGTACTGTTCCATCAGA

AATAGGAAAGTTGAAGAATTTGAATTTCTTGACATGAGTGGCAATCACTT

>PGSC0003DMG400022264-(rev)LRR-RLKs\_1550

CATCAGAAATAGGAAAGTTGAAGAATTTGAATTTCTTGACATGAGTGGCAATCACTTTATGGGAGAAA

TTCCTTCAGCAATATCAGGATGTCAAATCTTGAGTTTCTTGATCTCCATT

>PGSC0003DMG400022264-(rev)LRR-RLKs\_1612



GGAGAAATTCCTTCAGCAATATCAGGATGTCAAATCTTGAGTTTCTTGATCTCCATTCGAACGCGTTTAC  
TGGTTCTTACCAGAGAACTGCCAGGGAGTCTACAGTATGTGGATATT

>PGSC0003DMG400022264-(rev)LRR-RLKs\_2108

ATGGAAAACCTCCCAATGCTCCATTCTTTCATAATCTTCCTTTGAGTGATCTTACTGGAAACCAAGCTCTA  
TACATTTCTGGAGGGGACGTGATCCAAACGGGGCCTGCTGGACATGCTA

>PGSC0003DMG400022264-(rev)LRR-RLKs\_2294

TCTACACATTGATCAGGATGCAAATGGCGGCAAAGTATGGACCAGAAGTTGATACTTGGGAAATGACTC  
TTTACCAGAAGTTGGACTTTTCAATAGATGACATTGTTTCATAATCTAACAT

>PGSC0003DMG400022264-(rev)LRR-RLKs\_2356

ATGACTCTTACCAGAAGTTGGACTTTTCAATAGATGACATTGTTTCATAATCTAACATCAGCTAATGTCAT  
TGGCACTGGGAGCTCTGGGGTTGTCTACAGGATAATGACCGAAAATGGG

>PGSC0003DMG400022264-(rev)LRR-RLKs\_2418

TAATGTCATTGGCACTGGGAGCTCTGGGGTTGTCTACAGGATAATGACCGAAAATGGGGTGACTTTAGC  
AGTCAAGAAAATGTGGTCATCAGAGGGATCAGGAGCATTGGTTTCAGAAAT

>PGSC0003DMG400022264-(rev)LRR-RLKs\_248

AAACATTAACATAACTTCCAATGATGTTTTAACATCATGGGATTCTTTAGATAAAAGTCCTTGTAATTGG  
TTTGGCATAAACTGCAATTCCAATGGTCATGTTGTTAGTATAAGTCTTA

>PGSC0003DMG400022264-(rev)LRR-RLKs\_2542

ACACTTGTTCAATCCGGCACAAGAACATAGTACGCCTTCTCGGCTGGGCTTCAAACCAGAACATGAAA  
CTTCTGTTCTATGACTACCTTCCAATGGGAGTTTGAGCTCATTGCTCCAT

>PGSC0003DMG400022264-(rev)LRR-RLKs\_2666

TTGGCAAAGGAGCAGCAGAATGGGAGAACAGATTTGATGTGGTCCTTGGAGTAGCTCATGCACTTGCA  
TACTTGCATCATGACTGTGTACCCCTATAATGCATGGAGATGTCAAAGCAA

>PGSC0003DMG400022264-(rev)LRR-RLKs\_310

TGTAATTGGTTTGGCATAAACTGCAATTCCAATGGTCATGTTGTTAGTATAAGTCTTAAATCAGTTGATTT  
ACAAGGTCCATTGCCTTCAAATTTTCAGTCACTTAAATTCTTGAACACT

>PGSC0003DMG400022264-(rev)LRR-RLKs\_3534

TTCTCAAATGTCTTGTAGCTGCTCTTTTGTATTTCTGATAACTCTATCTCAAATAAGTCATCAACACAGT  
GAACAAATTTGTGAATATAGCATGTTTTATTAGCAGTATGAGTTAGAG

>PGSC0003DMG400022264-(rev)LRR-RLKs\_3596

TCAACACAGTGAACAAATTTGTGAATATAGCATGTTTTATTAGCAGTATGAGTTAGAGCAGATTATAGAT  
TTTAAAAGGAATATCATGTATCCAATTAATTTAGCATAAGCATTATAGAG

>PGSC0003DMG400022264-(rev)LRR-RLKs\_372

AGTTGATTTACAAGGTCCATTGCCTTCAAATTTTCAGTCACTTAAATTCTTGAACACTCTTGTTCTTTTCATC  
TGTTAATCTTAGTGGTCCAATCCCAAAGAGTTTGGAGATTATCTTGA

>PGSC0003DMG400022264-(rev)LRR-RLKs\_62

TTCTATAAACAAAACATGGGGTCCCCATTTACAATCCCAAAGTCCTCAACTTTCTCTCTTCCCTCTTAGC  
AGCAGCAAACAATGCCTGCTCCTTCAAGAAATCCCTTTCTTCTTCTC

>PGSC0003DMG400022391G-LecRK\_1037

TTCTTGTTTAGAGGGATTTAGGCCGACAAGTGAAGAGGAATGGGGAAAAGGAACTGGACTCGTGGAT  
GCAACAGAAAGTCCATGTTAGAGAGCGAAAGAAACAGTTCTAACCTTGAGCA

>PGSC0003DMG400022391G-LecRK\_1159

GGAAGCAAGATTGGTTTCTGAAGCTGCAGTCAATGAAAGTGCCGGATTCTGCTATTTGGGTACCTTTTGC  
AGATGAAGATTGTGTTAACGGTTGCTTGAGGAATACTTCATGCATAGCTT

>PGSC0003DMG400022391G-LecRK\_122

AAGAAAACTTCATAAGCAATGAAATTAAGCACAAAGAGAGATACTTCTGTTTCTTTCTATATCAACTGCTT  
CAGGTATCATTAGCACCAATAAATCCTGCGAGATTCAGAACTTTAGT

>PGSC0003DMG400022391G-LecRK\_1220

ACCTTTTGCAGATGAAGATTGTGTTAACGGTTGCTTGAGGAATACTTCATGCATAGCTTATTCATACTACA  
CAGGCATAGGATGCATGCATTGGGAAGGAAGCTTACTTGATGTTTCAGAA

>PGSC0003DMG400022391G-LecRK\_1281

TCATACTACACAGGCATAGGATGCATGCATTGGGAAGGAAGCTTACTTGATGTTTCAGAAATTCATCCATCG  
GTGGGGCAGATTTATTCCTCCGCCTTTCATACTCTGAGCGTGGTAAGACC

>PGSC0003DMG400022391G-LecRK\_1342

TCTCCATCGGTGGGGCAGATTTATTCCTCCGCCTTTCATACTCTGAGCGTGGTAAGACCTGCATTTCAGA  
ACTATAATATAAGCTATAAACTCTGCTTGCCAATGACATATGTATAATG

>PGSC0003DMG400022391G-LecRK\_1586

CAGAGGTAACAAGCTTATCTGAAACATTAGAAAATCCATAGTAGCTTTAATCATACGAATCACTTTATCTC

TAATGTCCTCTTGAATCAGGATGGAAGAGAATGAGTAAGATCTTATCAA

>PGSC0003DMG400022391G-LecRK\_1647

ACTTTATCTCTAATGTCCTCTTGAATCAGGATGGAAGAGAATGAGTAAGATCTTATCAAGTGAATCATCG  
CCAAACTATTACAAGGAAGACAAGATTACAGAGGACATCAATCAAGCTAA

>PGSC0003DMG400022391G-LecRK\_1830

GTCCAGCAAGCTTGGACAGGGAGGTTTTGGTCCAGTTTACAAAGTAAGGATTTGTTTGATTGAGTGTCTT  
ACAATTGTTTTAAGAAAACATAACCAAGTATATGATATAATTGCAGGGG

>PGSC0003DMG400022391G-LecRK\_1891

GAGTGTCTTACAATTGTTTTAAGAAAACATAACCAAGTATATGATATAATTGCAGGGGAAATTGCCAGA  
TGGACAAGAGATTGCTGTGAAAAGGCTTTCACAGTCTTCTGGTCAGGGGC

>PGSC0003DMG400022391G-LecRK\_2135

AAGCTTGGATGCCTATCTCTTTGGTTCGTTATGATTAGTTTTCTTTATTTTCCATAGTCTAACTAAAACAA  
ACTTTTCTTTAATTTAACTTGTCAAATTCGCGATGTATTTTCAGGGT

>PGSC0003DMG400022391G-LecRK\_2196

AACTAAAACAACTTTTCTTTAATTTAACTTGTCAAATTCGCGATGTATTTTCAGGGTCACAACAACAAG  
AGGAAGAGTTCCTGGATTGGAGTAAACGTGTGATCATTATTGAGGGAAT

>PGSC0003DMG400022391G-LecRK\_2257

CAACAACAAGAGGAAGAGTTCCTGGATTGGAGTAAACGTGTGATCATTATTGAGGGAATTGGTCGAGG  
CCTTCTTTACCTTCACAGGGATTCAAGACTAAGGATTATTCATAGGGATTTA

>PGSC0003DMG400022391G-LecRK\_2318

GTCGAGGCCTTCTTTACCTTCACAGGGATTCAAGACTAAGGATTATTCATAGGGATTTAAAGGCCAGCAA  
CATTTTGTGGATGAATACCTGAACCCCAAATTTTCAGATTTTGGGATGG

>PGSC0003DMG400022391G-LecRK\_2379

GGCCAGCAACATTTTGTGGATGAATACCTGAACCCCAAATTTTCAGATTTTGGGATGGCAAGGATTTT  
GCAGGCAACCAAGATCAGGCCAACACAAGCAGAGTAGTTGGAACCTAGTA

>PGSC0003DMG400022391G-LecRK\_2623

AGAAAAATCAGATGTTTATAGCTTTGGAGTATTGTTATTGGAAATTATAAGTGGAAGGAGGAACACTAG  
CTTTCACCAAGATGATGGTGCATTAAGCCTGCTAGCATTGGTAAGTTCTTA

>PGSC0003DMG400022391G-LecRK\_2928

ATTATTATGTGTACAAGAATATGCAGAAGACAGACCAAATGTCTCCACAATTTTGTCTATGCTCACCAAG  
ATGTTTATAGCTTTGGAGTATTGTTATTGGAAATTATAAGTGGAAGGAGG

>PGSC0003DMG400022391G-LecRK\_2989

CTCACCAAGATGTTTATAGCTTTGGAGTATTGTTATTGGAAATTATAAGTGGAAGGAGGAACACTAGCTT  
TCACCAAGATGATGGTGCATTAAGCCTGCTAGCATTGGTAAGTTCTTATG

>PGSC0003DMG400022391G-LecRK\_3294

TATTATGTGTACAAGAATATGCAGAAGACAGACCAAATGTCTCCACAGTTTTGTCTATGCTCACCAGGGA  
AATTGATGATTTACCAAGTCCTAAACAACCTGCATTTACAACAAGACCGA

>PGSC0003DMG400022391G-LecRK\_3355

CACCAGGGAAATTGATGATTTACCAAGTCCTAAACAACCTGCATTTACAACAAGACCGAGCTTTTCCAAA  
AAATGCACTTCTAAATCTCAAGGCTCCATTAACAATGTTACCGTTACTAT

>PGSC0003DMG400022391G-LecRK\_3416

TTTTCCAAAAATGCACTTCTAAATCTCAAGGCTCCATTAACAATGTTACCGTTACTATTATGGAAGGACG  
ATAAGGCATATACGATTTTTATTTAGGCATGATAGTATTCTTTTCTCTG

>PGSC0003DMG400022391G-LecRK\_3477

TGGAAGGACGATAAGGCATATACGATTTTTATTTAGGCATGATAGTATTCTTTTCTCTGTAATTACTG  
TTTCTGGTTCTTATTATAATGGTTCCACTCAATATTACCTCAGTACATT

>PGSC0003DMG400022391G-LecRK\_3538

ATTATTACTGTTTCTGGTTCTTATTATAATGGTTCCACTCAATATTACCTCAGTACATTAAGAATCCAAGAG  
AAAAGTGTTAACCTGCAAGTCACTTATGCTTGATAACAGAACCCATA

>PGSC0003DMG400022391G-LecRK\_3599

GAATCCAAGAGAAAAGTGTTAACCTGCAAGTCACTTATGCTTGATAACAGAACCCATATCCAAGCAAG  
AAGAAGCAAAGCTAGACTTCAAACCTCAGAGTTGTCAACAAGTAGCCTAAAC

>PGSC0003DMG400022391G-LecRK\_3660

CAAGCAAGAAGAAGCAAAGCTAGACTTCAAACCTCAGAGTTGTCAACAAGTAGCCTAAACAGGTGTTTGC  
AGAAATTTAGAGAATCCTATCCACGGATTGAGATCATTTAGAGTTAGCTTT

>PGSC0003DMG400022391G-LecRK\_3721

GTGTTTGCAGAAATTTAGAGAATCCTATCCACGGATTGAGATCATTTAGAGTTAGCTTTGTATTACAGCT  
GACTCTGAAGATGAACAACCTTTCTAGACAAAGGCATTCTTACAGCGTGG

>PGSC0003DMG400022391G-LecRK\_3782

ATTACAGCTGACTCTGAAGATGAACAACCTTTTCTAGACAAAGGCATTCTTACAGCGTGGTTGGAGGGTC  
ACCAAATCAACAGGGAAGCCTGTAGGAAAGGGGAACATGCATCCAATTCAC

>PGSC0003DMG400022391G-LecRK\_3843

GGAGGGTCACCAAATCAACAGGGAAGCCTGTAGGAAAGGGGAACATGCATCCAATTCACATCAGAAAT  
TGCTGAAATGATGTGAAATCTTGCACTTTTGTCTTGGAAGTCAAGTCA

>PGSC0003DMG400022391G-LecRK\_3904

CAGAAATTGCTGAAATGATGTGAAATCTTGCACTTTTGTCTTGGAAGTCAAGTCATGTCAGCCCAA  
GAATATTTGCAGTATCACAGGTAACAAAGGACAAGAAACCTTCTGAGATA

>PGSC0003DMG400022391G-LecRK\_3965

TCAGCCCAAGAATATTTGCAGTATCACAGGTAACAAAGGACAAGAAACCTTCTGAGATAGCATGTAAT  
TTTTCAAATTCAGACAAAGACTCCTTTTCTTAGAATTGTTAATAAAC

>PGSC0003DMG400022391G-LecRK\_427

CACAGAATAGGAGTATATGGTCATCAAATATTTACCAGCTGTGAGAAATTCACAGCGCAGATCTTGG  
ATACTGGAACTTAGTTTTGAACGATAGCTTCAATGGGAGGGTTCTCTGGG

>PGSC0003DMG400022391G-LecRK\_488

GATCTTGGATACTGGAACTTAGTTTTGAACGATAGCTTCAATGGGAGGGTTCTCTGGGAAAGTTTTCG  
GGATCCTTCAGATTGCTTCTTGCAAGCATGAAAATTGGCGTTGATGTAAG

>PGSC0003DMG400022391G-LecRK\_61

TGCAGCTATAGGTATTCTCCATTTTAGTTTTATACAGAACTAATTCACATGCAAATTGGCAGAAGAAAAAC  
TTCATAAGCAATGAAATTAAGCACAAGAGAGATACTTCTGTTTCTTTCTA

>PGSC0003DMG400022404LRR-RLPs\_1178

AGATATGGGTGTTGTTTTGATTGGATAAAAAATCTATCTTTTTTTCAAGAAATAGTTTTTATTTGATTGTA  
ACTGGTATATCTAGCATCTGACTTCAAGATCTTAGTTTTCTGTTATGGT

>PGSC0003DMG400022404LRR-RLPs\_1240

TTGATTGTAAGTGGTATATCTAGCATCTGACTTCAAGATCTTAGTTTTCTGTTATGGTGGATTAGAATTC  
TTCAAGGCAGATTGAGGAAAAACAGTACTGTTTACAAGGTGGTCCATG

>PGSC0003DMG400022404LRR-RLPs\_1798

CGATGTATGGAGCTTCAACTAGTATATCACTATGTATATGTTGTCAAATTGTCGTCTAGTTTTGTAGCACC

ACTAGGTTATTATGGTTCATGAGGCTTTCAGGTTGATTGTTGTCTTGGC

>PGSC0003DMG400022404LRR-RLPs\_248

GCATGGTTTTCTGGGTCATTTTTTTTTATCTGCTTTTTCAGTAGCATTTTCAGAAATTTCTCAGCCTTTTCTC  
TCTTTAGAGTTTTAGAGTTTAGACCCATATCTCTTGCTCTGTTTTCT

>PGSC0003DMG400022404LRR-RLPs\_310

AGCCTTTTCTCTCTTTAGAGTTTTAGAGTTTAGACCCATATCTCTTGCTCTGTTTTCTGAAGCTCTAAAAT  
GGAGTGTAGTACAACACTGATTGCAGATGATGTTGTCTTTTTGAAATTCA

>PGSC0003DMG400022404LRR-RLPs\_372

GCTCTAAAATGGAGTGTAGTACAACACTGATTGCAGATGATGTTGTCTTTTTGAAATTCAGGTGACTCAAGA  
TGGTTTTTTGTTTGTTTACAAATCTTGAAAGCTAGTATTTTTTTTTTATA

>PGSC0003DMG400022404LRR-RLPs\_434

ACTCAAGATGGTTTTTTGTTTGTTTACAAATCTTGAAAGCTAGTATTTTTTTTTTATAACCAGAAGAGTTGT  
TGACTGTTGAAAATTTGTCAGCATGTCGAAAAATAGGATAAAGATTT

>PGSC0003DMG400022404LRR-RLPs\_4520

AAGTTATTTGGCCAAACTGGAAATGCAAAAGAAAAAAGAAACCATGGTATTCTTTTTTTAAAATGTGC  
ATGATTGCTGTGCTTCATCAAATAATTTAGTGTGACATTTACTATGTTG

>PGSC0003DMG400022425LRR-RLKs\_1464

TCACTTAGTACCTTGTATGTATTTCTCCTTGTTGGTATGATAATTAGGGAAATATTAGGAAATGAAACTAC  
TTTTCTGGCTATGAGGAATGAGTGCTTTCCTCTCTCTAGACACTGAATA

>PGSC0003DMG400022425LRR-RLKs\_2379

CATTGGTCACTGTGGTAATGGGACAATGTGACTTAAAAATTTAAACAAAAGGGAGTTGTCTCTTGGG  
CTAGAGATTGCACTATTTAGATCTAATTTAATTGCCAATTGTGCTTGCAAT

>PGSC0003DMG400022425LRR-RLKs\_244

GTTTACTGATCCTCGTGATGGTATTAATAAATCTCTCTGTGGTTTGAAATTTGTGTATTATACAGTATAGA  
ATGTCTCAATAGTTTGAATTTGTTATCTTTTCTATTAGCTTTATTGAAA

>PGSC0003DMG400022425LRR-RLKs\_2440

CTCTTGGGCTAGAGATTGCACTATTTAGATCTAATTTAATTGCCAATTGTGCTTGCAATGAATATTTATGG  
GAAGCCAGTATAACTGTTGTTTCTAATAAACTTGACACCATTCCATGAG

>PGSC0003DMG400022425LRR-RLKs\_2623

ATAAATAAATCAGTACACTGGCTGATAAATGGGTAAAGTAGCAAACCTGAAGATATGGCATGTAATGAT  
ATTACTAAATAGTATGGTCTTTTTGATGAAGACTGCATAGTACACCTTATG

>PGSC0003DMG400022425LRR-RLKs\_2867

AAATTCTATTTTGTGCAAGATTGATAATAGATATTTAGTTGGTGTTTGTGTGAAAGCTCTTTTGGAGTTC  
TTTTAAAGACCTTATTAACCATGTTTGCTTTAGTTCTTATAAGACAT

>PGSC0003DMG400022425LRR-RLKs\_2928

TTTGGAGTTCTTTAAAGACCTTATTAACCATGTTTGCTTTAGTTCTTATAAGACATTTTTCATTTTCATC  
AATGAAGAAGGGGGTTTGAGGGATTTTCATTAACCAATTCCTTCTT

>PGSC0003DMG400022426G-LecRK\_0

GAAATATCGTAACTAATAGAGTAGCATTACATATAATCTTAGTCCAGGTAGGGGTGAATAGGATGGAA  
TGCACTTATGGAACCTGTTTTTTGAAAGTCATTTTCCTGATTTTCCGAG

>PGSC0003DMG400022426G-LecRK\_1054

TCATCTGTGCCAGACTTTAATTACACAAGGCTACTACTGAATTCCTCAGGGGAAATACAATTATATGGCT  
GGAGTAACGAGAGTACAGGGTGGTTACAAATATGGTCAGAACCACAAGAT

>PGSC0003DMG400022426G-LecRK\_1116

ATATGGCTGGAGTAACGAGAGTACAGGGTGGTTACAAATATGGTCAGAACCACAAGATCCATGCGATG  
TGAATGAAAGTTGTGGGAAATTTGGAATTTGCAACAGTGGGTTTATGTCTCG

>PGSC0003DMG400022426G-LecRK\_1178

GCGATGTGAATGAAAGTTGTGGGAAATTTGGAATTTGCAACAGTGGGTTTATGTCTCGGTGCAAGTGT  
TGCCAGGATTTGACCCTGATTCTCCAGATGAATGGACGGTTGGGACTTGTA

>PGSC0003DMG400022426G-LecRK\_124

TTGTTATCCTAGTCAATTGAAAACAAAAGAGCTGGAATCATATTGAATAATTGGTCCCAGTTTGAGGAAA  
ATCCTTACGGTAGTCTATCTAAGCACACAGATTATTCTGAAGACTTGTA

>PGSC0003DMG400022426G-LecRK\_1240

AAGTGTGGCCAGGATTTGACCCTGATTCTCCAGATGAATGGACGGTTGGGACTTGTACTGATGGTTGTT  
CAAGAAAGTCAGTTCGTGGTTGCAACAAGAAGTCAGAATTTGACACATTC

>PGSC0003DMG400022426G-LecRK\_1302

TGGTTGTTCAAGAAAGTCAGTTCGTGGTTGCAACAAGAAGTCAGAATTTGACACATTCTAAACTTTTCA  
ACTATCAATGGGAAACTTTGTTTGCATACCTAACAAGGTGTGGATCACCA

>PGSC0003DMG400022426G-LecRK\_1364

ACTTTTCAACTATCAATGGGAACTTTGTTTGCATACCTAACAAGGTGTGGATCACCACCGACAAATCCTT  
TTAGTTGTATCCTCCATTTTATTCACCTACGCAAGTTTCAATTTGTTTT

>PGSC0003DMG400022426G-LecRK\_1426

CAAATCCTTTTAGTTGTATCCTCCATTTTATTCACCTACGCAAGTTTCAATTTGTTTTGGTTTCAGAGCATGT  
AGGACAAAGAGGATGGAGTGGAGAGAAGGCAACATCCTTGAATCTCAA

>PGSC0003DMG400022426G-LecRK\_1488

CAGAGCATGTAGGACAAAGAGGATGGAGTGGAGAGAAGGCAACATCCTTGAATCTCAAAGTCCTGATT  
ATTTCTGTCAGTGTAGCTGCTGCTGGAECTATAACCATAACCATTTGCTATG

>PGSC0003DMG400022426G-LecRK\_1550

CTGATTATTTCTGTCAGTGTAGCTGCTGCTGGAECTATAACCATAACCATTTGCTATGTAATCTACCATAG  
AAAAAAGGTGGCAAGAAGGAAAGGTAACAAATAGCACAAGCTTTTATAT

>PGSC0003DMG400022426G-LecRK\_1612

CTACCATAGAAAAAAGGTGGCAAGAAGGAAAGGTAACAAATAGCACAAGCTTTTATATAAATGATATAT  
GTATTGTGAATTTGGTGCTAATTTTGAECTCACTTTATGTAATGAGAAGCC

>PGSC0003DMG400022426G-LecRK\_1674

GATATATGTATTGTGAATTTGGTGCTAATTTTGAECTCACTTTATGTAATGAGAAGCCAAGAAAATAAGT  
TTGGGGAATGGGATAGAGTACTTGTCCGAGTGTGGAGGTTTCATCTAAATA

>PGSC0003DMG400022426G-LecRK\_1736

AAATAAGTTTGGGGAATGGGATAGAGTACTTGTCCGAGTGTGGAGGTTTCATCTAAATATTTGGTAACCG  
AAGATGATAAGAAACGGATCGATATCCCATTTTTCACTTGGAAAGCATAAC

>PGSC0003DMG400022426G-LecRK\_1798

GTAACCGAAGATGATAAGAAACGGATCGATATCCCATTTTTCACTTGGAAAGCATACTAGTCGCTACG  
GACAATTCTCAGATGCAAACAGGCTTGGTCAAGGTGGATTTGGCCCTGTT

>PGSC0003DMG400022426G-LecRK\_186

TGAGGAAAATCCTTACGGTAGTCTATCTAAGCACACAGATTATTCTGAAGACTTGTAAATTCAAATCTG  
AATACCAATATTCATAGCCATTGTTTTATGAGCTAGCAACATGAAGTC

>PGSC0003DMG400022426G-LecRK\_1860

CGCTACGGACAATTCTCAGATGCAAACAGGCTTGGTCAAGGTGGATTTGGCCCTGTTTACAAGGTGGT



GGTGATTCTCACATGTACCATTTTTAAAATCATTTTTCTAACTACAGCTAA

>PGSC0003DMG400022426G-LecRK\_1922

AGGTGGTGGTGATTCTCACATGTACCATTTTTAAAATCATTTTTCTAACTACAGCTAATATTGTACGTACA

GGGTAAGTTCCTCAAGGACAAGAAATGGCAATTAAGAGGTTGTCAAGT

>PGSC0003DMG400022426G-LecRK\_1984

GTACGTACAGGGTAAGTTCCTCAAGGACAAGAAATGGCAATTAAGAGGTTGTCAAGTCATTCTAGTCA

AGGTGCAGAAGAATTTAAAACGAAGTAATGTTAATTGCCAACTCCAACA

>PGSC0003DMG400022426G-LecRK\_2046

CTAGTCAAGGTGCAGAAGAATTTAAAACGAAGTAATGTTAATTGCCAACTCCAACACAGAAATCTAG

TCAGACTTTTGGGCTACTGCATCGAGGAGAACGAAAAGATCTTATTATATG

>PGSC0003DMG400022426G-LecRK\_2108

AATCTAGTCAGACTTTTGGGCTACTGCATCGAGGAGAACGAAAAGATCTTATTATATGAATATATGCCCA

ACAAAAGCTTAGACACCCATATATTTAGTGAGTCTACTTACTTTTCTTCT

>PGSC0003DMG400022426G-LecRK\_2170

TATGCCCAACAAAAGCTTAGACACCCATATATTTAGTGAGTCTACTTACTTTTCTTCTCAGAACTCCATTAT

AGAATCTCTCCCGTTGGTTCAGTGAACCTCTAAATTTCAATTATACATA

>PGSC0003DMG400022426G-LecRK\_2232

ACTCCATTATAGAATCTCTCCCGTTGGTTCAGTGAACCTCTAAATTTCAATTATACATACAGATAGATACAA

GGGTCAATATTTATTTAACTAAACCATTGTTCAACTAAAACTTTGCTTT

>PGSC0003DMG400022426G-LecRK\_2294

TAGATACAAGGGTCAATATTTATTTAACTAAACCATTGTTCAACTAAAACTTTGCTTTGTTGGGGTCATTA

TTGTTACATTGGAAAACAGAAAACAAGGGAATTTCAATTTGGTGTGGAA

>PGSC0003DMG400022426G-LecRK\_2356

GGGTCATTATTGTTACATTGGAAAACAGAAAACAAGGGAATTTCAATTTGGTGTGGAAAGATCTTTGTAT

TAGCAAAGCTTAGGAATTAGAATGCTTAATTTCTGTAATTGGTGAAAAG

>PGSC0003DMG400022426G-LecRK\_2418

CTTTGTATTAGCAAAGCTTAGGAATTAGAATGCTTAATTTCTGTAATTGGTGAAAAGTAAGATCTAACT

GTGATTTAGTTGTTCTTTGAGTTCACTCTACACAAATACCTCGGGTACTA

>PGSC0003DMG400022426G-LecRK\_248

CAAATCTGAATACCAATATTCCATAGCCATTGTTTTATGAGCTAGCAACATGAAGTCTACTAGTGTCTTC  
TTGTTTGTATTCTTGCTGTATTTGAGTCACTTCAAATGTGATTCTAGGG

>PGSC0003DMG400022426G-LecRK\_310

AGTGTCTTCTTGTGTTGATTCTTGCTGTATTTGAGTCACTTCAAATGTGATTCTAGGGACATCATAACTTCA  
AGGAACATATTAACAAACAAAAGGAAAACCTTTGTGTCAGCTGGACAG

>PGSC0003DMG400022426G-LecRK\_372

CATAACTTCAAGGAACATATTAACAAACAAAAGGAAAACCTTTGTGTCAGCTGGACAGATATTCGAGCT  
GGGACTCTTCAACACACGATCTAAAGACGGAAAACCTTAGAAATTATGTTGG

>PGSC0003DMG400022426G-LecRK\_434

TCGAGCTGGGACTCTTCAACACACGATCTAAAGACGGAAAACCTTAGAAATTATGTTGGCATATGGTACC  
GGGTGAGTCCCAAACTATTGTGTGGGTTGCCAATAGGGACAGACCAATTC

>PGSC0003DMG400022426G-LecRK\_4534

AACACACCCATTGTAAGTAAACATATTTGATTTCTAAAAACTGCTATATATGTAATGTCCCTTCAATTGT  
TCTTTTGATCATCAATTGGTTTCGTTTTGCTAATGTTGTGATTTTCTA

>PGSC0003DMG400022426G-LecRK\_4595

CTTCAATTGTTCTTTTGATCATCAATTGGTTTCGTTTTGCTAATGTTGTGATTTTCTACTTGTCTGCAAGA  
TCATAGTGTACGCCATTGTTGAATTGGAATATCCGCTTTGAAATCA

>PGSC0003DMG400022426G-LecRK\_4778

GAGATCTAAAACGAGCAATATTCTATTAGACGAAGAGATGAATGCCAAAATATCAGATTTTCGGCTTGG  
CCAGGAATGTTGAAGGCAAAGTATTGATGCTAAGACGCAAAAAGTTGCCG

>PGSC0003DMG400022426G-LecRK\_4839

CGGCTTGCCAGGAATGTTGAAGGCAAAGTATTGATGCTAAGACGCAAAAAGTTGCCGGAACCTAGT  
AAGTATATATATATATATATGCTTTCAGTTTAGTTTTCTGCATAATATAATC

>PGSC0003DMG400022426G-LecRK\_4900

ACTTAGTAAGTATATATATATATATATGCTTTCAGTTTAGTTTTCTGCATAATATAATCGCCAAAAACTTA  
TGAAATTACAAGTATATCGGAAATTGTGCAATCACCTGTTTATAGAGA

>PGSC0003DMG400022426G-LecRK\_496

TGGTACCGGGTGAGTCCCAAACTATTGTGTGGGTTGCCAATAGGGACAGACCAATCCCGTATCAGAT  
GAAATTTTGGCTATTGGCATTGATGTGGATGGTAATCTCAAAGTGTGGAC

>PGSC0003DMG400022426G-LecRK\_4961

CAAAAACTTATGAAATTACAAGTATATCGGAAATTGTGCAATCACCTGTTTATAGAGAGCAGCCTTGTT  
TCATGAACTAGCCCCTCTCAAATCCCCACTTGATCAGGAATTCTTCATTG

>PGSC0003DMG400022426G-LecRK\_5205

TACTTTAGTACTTTTAGCTTTATAAATAATCATTACTTCTAAATCTCATTTCAGTGAATTAATCCACC  
CAAAAAGCTAACGTCGCAAATAAAAAAAGAAAAGGCTAGTGAAAAC

>PGSC0003DMG400022426G-LecRK\_558

ATCAGATGAAATTTGGCTATTGGCATTGATGTGGATGGTAATCTCAAAGTGTGGACTCAAAGAAGAA  
CTCTTACTTTTCAACAGGACTCGTTAGTGCATCTTCTTAAGCGTACAGC

>PGSC0003DMG400022426G-LecRK\_5632

CTTTTTTTCTTTCCAACCAATAAGGTTTCATCTTCCTCACACCCCACCACCCCACCACCTTTCTCCACCATA  
ACCCACCCCTTACGCCTCGAACCCCCACCCGCACCTCTCTTTCCCC

>PGSC0003DMG400022426G-LecRK\_5693

TTCTCCACCATAACCCACCCCTTACGCCTCGAACCCCCACCCGCACCTCTCTTTCCCCTATTTCGAACCCCT  
GCCGCCACCCACACTTGCCTCACCCCTTTCTTCTTCTTCTTCGAGGTC

>PGSC0003DMG400022426G-LecRK\_5754

TTTCGAACCCTGCCGCCACCCACACTTGCCTCACCCCTTTCTTCTTCTTCTTCGAGGTCCCGTCCCTGCCAC  
GTTCTTTCTTCTTTTTCAAAACACTCCACACATTCCTTCATTTCAAAT

>PGSC0003DMG400022426G-LecRK\_62

GATGGAATGTCACTTATGGAACCTGTTTTTTGAAAGTCATTTTCTGATTTTCCGAGAACTTGTTATCC  
TAGTCAATTGAAAACAAAAGAGCTGGAATCATATTGAATAATTGGTCCC

>PGSC0003DMG400022426G-LecRK\_620

AGAAGAACTCTTACTTTTCAACAGGACTCGTTAGTGCATCTTCTTCTAAGCGTACAGCAAATCTCTATGAC  
TCAGGAAATTTGGTTTTAATTGATGAATTGTCAGGCAAGAGATTGTGGC

>PGSC0003DMG400022426G-LecRK\_682

CTCTATGACTCAGGAAATTTGGTTTTAATTGATGAATTGTCAGGCAAGAGATTGTGGCAAAGTTTTGACA  
ACCCCACTGACACCTTCCTCCTGGTATGAACATGGACAGTGCATTGAAG

>PGSC0003DMG400022426G-LecRK\_6852

GATTACTTCAATATCAGATTGACCCAAATATTTATTGATCTAAATACAATTTGACTTTGAAAAAGGTAAAG

GTAATTAAGCTTCAGCTTATTTCTGTTATTAATGAGAAAAAGAGCTGA

>PGSC0003DMG400022426G-LecRK\_7401

TTGTATATTATTCACCTAACTAAAAAGAAAATTTGCAAATCCTCGCCACAGGCGTTTACTGATCATGTACT  
CATTCTACTCAAGGCCGTTTTTATCTCATATACATGGTGGTATACG

>PGSC0003DMG400022426G-LecRK\_744

TTTTGACAACCCCACTGACACCTTCTTCTGGTATGAACATGGACAGTGCATTGAAGTTGACTGCTTGG  
AGGGTTACCCAAGAGGATCCCAGCACTGGAGATTACACGTTTCGGCAAAA

>PGSC0003DMG400022426G-LecRK\_7706

ATCATTAGTGGAAACAAAACTTGGATGTTCTTGAAGACACAAACCTTGGGTCATGTAAGTACCTCTC  
TATTTAGAACATGTAATCTTAAGACATAAACGAAATGTGAAGATTGACAT

>PGSC0003DMG400022426G-LecRK\_806

CTGCTTGAGGGTTACCCAAGAGGATCCCAGCACTGGAGATTACACGTTTCGGCAAAATACAGCAACCA  
AATTTGAGTACAACATACTATCCCAAAAAGGGGCCTTCACTGGAAAGCCT

>PGSC0003DMG400022426G-LecRK\_8499

ATAAATATAGGGCTAATAGGTTAGGATTAGCAGTACTATTCTTGTATGGAGCACACAATTGAAGCAG  
ACATGTTGATGCTCAGCTTTGTGCTTATAGTAATTCTTGGATAATACTAAT

>PGSC0003DMG400022426G-LecRK\_8553

ACACAATTGAAGCAGACATGTTGATGCTCAGCTTTGTGCTTATAGTAATTCTTGGATAATACTAATATTTG  
TACTGGTAATAAAAATCCTTGTTAATCCTCTAAATGTTGCATTAGTTTTTC

>PGSC0003DMG400022426G-LecRK\_868

GCAACCAAATTTGAGTACAACATACTATCCCAAAAAGGGGCCTTCACTGGAAAGCCTCTGTTTCTGCTA  
AGCCCTTTAGTTCCAGGGAAGTGCCTCTCTTGTGGGATCAATGTTAACC

>PGSC0003DMG400022426G-LecRK\_930

TTCTGCTAAGCCCTTTAGTTCCAGGGAAGTGCCTCTCTTGTGGGATCAATGTTAACCAATTTAGTTTCA  
ATACAGAACAACAATATACCCCGAAATTGAACAAGTCACCGACTGATGA

>PGSC0003DMG400022426G-LecRK\_992

TCAGTTTCAATACAGAACAACAATATACCCCGAAATTGAACAAGTCACCGACTGATGATGTTTCATCTGT  
GCCAGACTTTAATTACACAAGGCTACTACTGAATTCCTCAGGGGAAATAC

>PGSC0003DMG400022452-(rev)LRR-RLPs\_0

CAAAGTCTTTGTGATGGTTTGAACTGTATATAAATGATAGCTTGTCTTTCCATAGTCACATTTGGTATTA  
GACATAGAAGATAAATTAAGACAGAGAGATGGAGAGAATAATATTGTC

>PGSC0003DMG400022452-(rev)LRR-RLPs\_1037

AACTACATCTTTCAGACAACTATTTGGAGGGTGAAATTCCTGATTTTTTTTCCAACCTTGCAAAAGCTTACA  
TCCTTATCACTGGAGAACAACAACCTTCACTGGCCGGTCCCATCTTCTC

>PGSC0003DMG400022452-(rev)LRR-RLPs\_1098

AAAGCTTACATCCTTATCACTGGAGAACAACAACCTTCACTGGCCGGTCCCATCTTCTTGTGAATTTGA  
CAAAGCTTGAAGATTTGAGTTTGAGAAACAATTCCTCAGTGGTACACT

>PGSC0003DMG400022452-(rev)LRR-RLPs\_1159

GTGAATTTGACAAAGCTTGAAGATTTGAGTTTGAGAAACAATTCCTCAGTGGTACACTTCCTCCTTTTAC  
TGCTAGCAGGCTTCAAATCTAATTTACCTTGATTTGTCTGAAAACCTCA

>PGSC0003DMG400022452-(rev)LRR-RLPs\_122

TTATAATTCTATTTGTGTATGCAGTTGAAGTGGTTTCATTTTCATTTGGTAATCCACTTTGCTCTTCCCATG  
ATTCCATTGCACTTTTACAGTTTAAGCATTCACTTAATTTGACAGACG

>PGSC0003DMG400022452-(rev)LRR-RLPs\_1220

CTCCTTTTACTGCTAGCAGGCTTCAAATCTAATTTACCTTGATTTGTCTGAAAACCTCACTCAACGGATCA  
ATCCCGTCTTGGATGACTAGTCTTCTTCATTGGTACAGTTATTGCTGG

>PGSC0003DMG400022452-(rev)LRR-RLPs\_1281

CAACGGATCAATCCCGTCTTGGATGACTAGTCTTCTTCATTGGTACAGTTATTGCTGGGGAGGAATCGT  
TTCAGTGAACCACTTCCCGAGTTTAAGACCAATTCTCTAGAAGAGCTTTA

>PGSC0003DMG400022452-(rev)LRR-RLPs\_1342

AGGAATCGTTTCAGTGAACCACTTCCCGAGTTTAAGACCAATTCTCTAGAAGAGCTTTATTTGTCTCATAA  
TCAATTCTCTGGTCCCATACCTCAATCGCTTGGAGATCTTCTGAACCTA

>PGSC0003DMG400022452-(rev)LRR-RLPs\_1403

TGTCTCATAATCAATTCTCTGGTCCCATACCTCAATCGCTTGGAGATCTTCTGAACCTAACTGCTGTCTATC  
TTGAACAAAATAAGTTGAGTGGGGAGATTGGAGCAGATATGTTTTCAA

>PGSC0003DMG400022452-(rev)LRR-RLPs\_1464

TGCTGTCTATCTTGAACAAAATAAGTTGAGTGGGGAGATTGGAGCAGATATGTTTTCAAGTATGACAAA  
CCTTCAATATCTTGATCTTTCTCATAGTGGTTTATCATGGAGTAGCAATAT

>PGSC0003DMG400022452-(rev)LRR-RLPs\_1525

ATGACAAACCTTCAATATCTTGATCTTTCTCATAGTGGTTTATCATGGAGTAGCAATATCAACACCACTTT  
TCCCCTTCTTCTTTCTTACGTTTAGGCTCTTGTCGTGTGAAAGATTTT

>PGSC0003DMG400022452-(rev)LRR-RLPs\_1586

ACACCACTTTTCCCCTTCTTCTTTCTTACGTTTAGGCTCTTGTCGTGTGAAAGATTTCCCAGATTCTTATT  
GAACTCTAAGGAATTATGGGTTTTGGATCTCTCGGAGAATGAAATTC

>PGSC0003DMG400022452-(rev)LRR-RLPs\_1647

AGATTTCTTATTGAACTCTAAGGAATTATGGGTTTTGGATCTCTCGGAGAATGAAATTCATGGTCAGTTC  
CCTAAATGGTTTGGGGTTTTGAGTGCATTGCAATTCCTAATGTCTCTCA

>PGSC0003DMG400022452-(rev)LRR-RLPs\_1708

GGTCAGTTCCCTAAATGGTTTGGGGTTTTGAGTGCATTGCAATTCCTAATGTCTCTCACAACCTTCTTAC  
AAGCTTAGACCATCTACCATGGGAGACAATAAGGGTACTTGATCTTCAA

>PGSC0003DMG400022452-(rev)LRR-RLPs\_1769

ACTTCCTTACAAGCTTAGACCATCTACCATGGGAGACAATAAGGGTACTTGATCTTCAATCAAATTCACTC  
AGAGGACCTTTGCCATTTCCATTTGCACCATAACTGAACTTTATCTTA

>PGSC0003DMG400022452-(rev)LRR-RLPs\_183

CTCTTCCCATGATTCCATTGCACTTTTACAGTTTAAGCATTCACTTAATTTGACAGACGATGGTTATTGTGA  
ATCTTCTTATCCTAAGATGACGTCGTGGAATATGAGTAGTATGGATTG

>PGSC0003DMG400022452-(rev)LRR-RLPs\_1830

AAATTCACTCAGAGGACCTTTGCCATTTCCATTTGCACCATAACTGAACTTTATCTTATAAATCTGTCTTA  
CAATAATTTGAGTGCTGAAATTCCTAATTGCTTGTTTACTTCTTCCTT

>PGSC0003DMG400022452-(rev)LRR-RLPs\_1891

AATCTGTCTTACAATAATTTGAGTGCTGAAATTCCTAATTGCTTGTTTACTTCTTCCTTGCTCAAGGTCTTA  
GACTTACGAGCAAATAACTTCCATGGACCCATCCCAAACAAATTCCTA

>PGSC0003DMG400022452-(rev)LRR-RLPs\_1952

TCAAGGTCTTAGACTTACGAGCAAATAACTTCCATGGACCCATCCCAAACAAATTCCTAAGAATAGTGC  
ACTAGTTCATATTAGTTTGGAGCAAAAATCAATTGGAAGGTTCTATCCCAA

>PGSC0003DMG400022452-(rev)LRR-RLPs\_2013

GAATAGTGCACTAGTTCATATTAGTTTGGAGCAAAAATCAATTGGAAGGTTCTATCCCAACATCCCTAGTC

AACTGTACATCCTTAAAAGTCCTTGATTTGGGAAACAATAAAATCCAATC

>PGSC0003DMG400022452-(rev)LRR-RLPs\_2135

CATTTCCACCTGGCTGGAAACATTGCAAGAGTTAGAGGCTCTCATACTGAAATCTAATAGATTTTACGG

ACCCATTGGTGGTTACCAAACGAAATCACCATTTCCAAATTTGAGGATCT

>PGSC0003DMG400022452-(rev)LRR-RLPs\_2196

ATTTTACGGACCCATTGGTGGTTACCAAACGAAATCACCATTTCCAAATTTGAGGATCTTTGATCTCTCAG

ACAATTCATTTACTGGCTCTTTACCTACAAAGGTACTAAAAAGTTTCAA

>PGSC0003DMG400022452-(rev)LRR-RLPs\_2257

GATCTCTCAGACAATTCATTTACTGGCTCTTTACCTACAAAGGTACTAAAAAGTTTCAAAGCTATGATAAA

CATGGATTCACACAAATCAGGATTGGAGTATCTTGAGGAACTTTATAT

>PGSC0003DMG400022452-(rev)LRR-RLPs\_2318

CTATGATAAACATGGATTCACACAAATCAGGATTGGAGTATCTTGAGGAACTTTATATTTCAAAGTCC

TAACACTTGGTATGGGGTTTATCATAAAGATCACTATGCGGAATCGATGA

>PGSC0003DMG400022452-(rev)LRR-RLPs\_2379

CAAAGTCCTAACACTTGGTATGGGGTTTATCATAAAGATCACTATGCGGAATCGATGATATTAGTGATG

AAAAATCAAGAGATTGAATTCAACAAGATGTTGAAGATTTTCACAACAAT

>PGSC0003DMG400022452-(rev)LRR-RLPs\_244

GGTATTGTGAATCTTCTTATCCTAAGATGACGTCGTGGAATATGAGTAGTATGGATTGTTGTAGGTGG

GATGGAGTTACCTGCAATCTCTTAAGTGGCCATGTCATTGGTTTGGACCTC

>PGSC0003DMG400022452-(rev)LRR-RLPs\_2440

TTAGTGATGAAAAATCAAGAGATTGAATTCAACAAGATGTTGAAGATTTTCACAACAATCGATTTGTCAA

GGAACAAGTTTGAAGGAGAAATCCCTAAATTCATTGGGAACTTGAATTCA

>PGSC0003DMG400022452-(rev)LRR-RLPs\_2501

ATTTGTCAAGGAACAAGTTTGAAGGAGAAATCCCTAAATTCATTGGGAACTTGAATTCATTCTGCTGCT

GAATTTATCTCATAACAACCTCACAGGACACATTCCTATTGAAATGAAGA

>PGSC0003DMG400022452-(rev)LRR-RLPs\_2562

TCTGCTGCTGAATTTATCTCATAACAACCTCACAGGACACATTCCTATTGAAATGAAGAACATGAGCACT

CTTGAAGCTCTGGACCTTTCATTTAACCAGCTTACCGGCAAATTCAGT

>PGSC0003DMG400022452-(rev)LRR-RLPs\_2684

AATTGGCGAGTCTCACATTTCTGGCGGTCTAAATCTGTCACACAACCATCTTGTTGGACCTATTCCTCAG  
AGTAATCAGTTCAATACGTTTTCAAATGATTCCTATTTAGGAAACTCTG

>PGSC0003DMG400022452-(rev)LRR-RLPs\_2745

TATTCCTCAGAGTAATCAGTTCAATACGTTTTCAAATGATTCCTATTTAGGAAACTCTGAATTATGTGGAT  
TTCCACTGTCAAATGAATGTGGGAAGCATAAGAGTGCATCAGTACCGGT

>PGSC0003DMG400022452-(rev)LRR-RLPs\_2806

TTATGTGGATTTCCACTGTCAAATGAATGTGGGAAGCATAAGAGTGCATCAGTACCGGTTGAACAAGAA  
GAAGATGAGCCAAGTTTTCTTAGCGAAATGACTTGGCAATCTGTCCTAATC

>PGSC0003DMG400022452-(rev)LRR-RLPs\_2867

AACAAGAAGAAGATGAGCCAAGTTTTCTTAGCGAAATGACTTGGCAATCTGTCCTAATCGGGTATGGTT  
GTGGCTTGACATTTGGATTTGGCATAGTGTATCTCATATACCGCTTTGAAA

>PGSC0003DMG400022452-(rev)LRR-RLPs\_2928

GTATGGTTGTGGCTTGACATTTGGATTTGGCATAGTGTATCTCATATACCGCTTTGAAAGGCCAAGATGG  
TTCATAGACTCTTTTGAAACTATCATTAATGAAATGATATACATACTACA

>PGSC0003DMG400022452-(rev)LRR-RLPs\_2989

CCAAGATGGTTCATAGACTCTTTTGAAACTATCATTAATGAAATGATATACATACTACAGAGGGGACATA  
AAAGGCGCAGGAGGAATTTTCACAGAAGAAAACACTGAAAATCTATGCAG

>PGSC0003DMG400022452-(rev)LRR-RLPs\_305

GTAGGTGGGATGGAGTTACCTGCAATCTCTTAAGTGGCCATGTCATTGGTTTGGACCTCAGTTGTAGCA  
GACTTGGAGGAACTCTACATCCCAATAGTAGCCTTTTCCAGCTTCGTCATC

>PGSC0003DMG400022452-(rev)LRR-RLPs\_3050

GGGGACATAAAAGGCGCAGGAGGAATTTTCACAGAAGAAAACACTGAAAATCTATGCAGCAAGGGAG  
AGATCAGAGAGCCACTACAGTGTCTGTTTGGGAATGCAGATTATCATTATCAT

>PGSC0003DMG400022452-(rev)LRR-RLPs\_366

TTGTAGCAGACTTGGAGGAACTCTACATCCCAATAGTAGCCTTTTCCAGCTTCGTCATCTTCAAACACTCA  
ATCTTTCCCTTAATGGCTTTTGGGGTTCTCAATTTCCACAGGAGATTAG

>PGSC0003DMG400022452-(rev)LRR-RLPs\_427

CAAACACTCAATCTTTCCCTTAATGGCTTTTGGGGTTCTCAATTTCCACAGGAGATTAGTCAGTTGGTCAG  
CTTAACACATCTCAACCTCTTATTGTTGGTTCAAAGGAAGGATTCCA



>PGSC0003DMG400022452-(rev)LRR-RLPs\_488

AGTTGGTCAGCTTAACACATCTCAACCTCTCTTATTGTTGGTTCAAAGGAAGGATTCCATTAGAAATCTCA  
CACTTGTCAGTTTAGTATCCCTTGATCTCTCTAATAATTTTCGATGTCA

>PGSC0003DMG400022452-(rev)LRR-RLPs\_549

AGAAATCTCACACTTGTCAGTTTAGTATCCCTTGATCTCTCTAATAATTTTCGATGTCAAGTTCAGTCAGG  
AAGGATTCAATATGCTCTTTCAAACCTTAACCAAGTTAGAGATACTTTC

>PGSC0003DMG400022452-(rev)LRR-RLPs\_61

TTTGGTATTAGACATAGAAGATAAATTAAGACAGAGAGATGGAGAGAATAATATTGTCTCTTATAATTC  
TATTTGTGTATGCAGTTGAAGTGGTTTCATTTTCATTTGGTAATCCACTT

>PGSC0003DMG400022452-(rev)LRR-RLPs\_610

TTCAGTCAGGAAGGATTCAATATGCTCTTTCAAACCTTAACCAAGTTAGAGATACTTCTCTTTATAAGGT  
AAACATCTCATCCAGCATACCCATGAATCTATTATTCTCTTCTTCTTTG

>PGSC0003DMG400022452-(rev)LRR-RLPs\_671

TTTATAAGGTAAACATCTCATCCAGCATACCCATGAATCTATTATTCTCTTCTTCTTTGAGATATCTTGATC  
TTGCAAGCACTAAGTTGCAAGGAGACTTGCCAAAAGCATTTCCTCC

>PGSC0003DMG400022452-(rev)LRR-RLPs\_732

ATATCTTGATCTTGCAAGCACTAAGTTGCAAGGAGACTTGCCAAAAGCATTTCCTCCTATCCAATCTG  
GAAACTCTCAGATTGCCAGGAAATTATCTAACTGTTTCCTTACCCAAGTA

>PGSC0003DMG400022452-(rev)LRR-RLPs\_793

TCCAATCTGGAACTCTCAGATTGCCAGGAAATTATCTAACTGTTTCCTTACCCAAGTACTTTAACTGGAG  
CAGCAGTACTCATTCACTAAGGGAGTTAGATCTCTCTTTAATAATGTT

>PGSC0003DMG400022452-(rev)LRR-RLPs\_854

TAACTGGAGCAGCAGTACTCATTCACTAAGGGAGTTAGATCTCTCTTTAATAATGTTTATGGAGGGAT  
ACCCAATCACTCGGAACTACTCTCAAAGCCTTAAAGATTCTACAAC

>PGSC0003DMG400022452-(rev)LRR-RLPs\_915

TGGAGGGATACCCAATCACTCGGAACTACTCTCAAAGCCTTAAAGATTCTACAACCTTCTGGGTGC  
AACCTTGCCGGACCATTTCAGAAATTCATCGGGAACCTTTCACAAATCAC

>PGSC0003DMG400022452-(rev)LRR-RLPs\_976

TCTGGGTGCAACCTTGCCGGACCATTTCAGAAATTCATCGGGAACCTTTCACAAATCACCCAACACTACATCT

TTCAGACA ACTATTTGGAGGGTGAAATTCCTGATTTTTTTTCCA ACTTG

>PGSC0003DMG400022565-(rev)LRR-RLKs\_2562

GCTGAAACAATCGAAGCAACTAGGGAATTTGATGAGGAAAATGTTCTTAGCAGAACACGCCACGGAGT  
CCTATTCAAGGCATGTTACAGTGATGGAATGTTGCTCTCGATCTGTAGACTA

>PGSC0003DMG400022565-(rev)LRR-RLKs\_2623

ACGGAGTCCTATTCAAGGCATGTTACAGTGATGGAATGTTGCTCTCGATCTGTAGACTACCAGATGGATC  
ACTAGATGAAAACACATTCAGAAAAGAGGCTGAATCGCTTGGCAGAGTGA

>PGSC0003DMG400022565-(rev)LRR-RLKs\_2684

AGATGGATCACTAGATGAAAACACATTCAGAAAAGAGGCTGAATCGCTTGGCAGAGTGAAGCACAGAA  
ACCTAACTGTTCTACGCGGGTACTATGCTGGCCCTCCAGACCTTAGACTACT

>PGSC0003DMG400022565-(rev)LRR-RLKs\_2745

CACAGAAACCTAACTGTTCTACGCGGGTACTATGCTGGCCCTCCAGACCTTAGACTACTTGCATATGATT  
ACATGCCAAACGGGAACCTTGCAACTCCTTCAAGAAGCATCTCATCAA

>PGSC0003DMG400022565-(rev)LRR-RLKs\_2806

CATATGATTACATGCCAAACGGGAACCTTGCAACTCCTTCAAGAAGCATCTCATCAAGATGGTGGTCA  
TGTTCTCAATTGGCCAATGCGACACCTCGTTGCACTTGGCATTGCCCGTG

>PGSC0003DMG400022565-(rev)LRR-RLKs\_2928

CTTGCTTTCTCCACGCAGCCTCTATTATTCACGGAGATGTTAAACCACAAAATGTA CTGTTTGATGCAGA  
CTTTGAAGCCCATCTTTCAGACTTCGGCTTAGACAAGCTTACTGTAGCC

>PGSC0003DMG400022565-(rev)LRR-RLKs\_2989

TTGATGCAGACTTTGAAGCCCATCTTTCAGACTTCGGCTTAGACAAGCTTACTGTAGCCACACCAGTCGA  
ACCTTCCTCTTCAACATCAGTTGGGACTATAGGCTATGTGGCGCCAGAAG

>PGSC0003DMG400022565-(rev)LRR-RLKs\_3050

ACCAGTCGAACCTTCCTCTTCAACATCAGTTGGGACTATAGGCTATGTGGCGCCAGAAGCAACATTAACA  
GGAGAAGCCACAAGGCAATCAGATATTTATAGCTTTGGCATTGTATTACT

>PGSC0003DMG400022565-(rev)LRR-RLKs\_3477

CCAAGGTCTCATCCTAATTCTTTGCCCTTCCTATTGACTCTTTGATTTTTTGAGGAGTTGCATTGCAATGCA  
ACAATTGCTAGCACTAGAACTTAAGTTTTTTGTTTAAGGAAAAGAACA

>PGSC0003DMG400022565-(rev)LRR-RLKs\_549

GAAATACCCAGTGAGTTGCCGGTGAATCTGAGGTATTTTGATGTCTCGGAGAATTTGTTTTCCGGTGGTA  
TACCGGAGAAAATATCGGACCTTTCTCAGGTTATTCTGCTTAATCTGTCG

>PGSC0003DMG400022599-(rev)LRR-RLPs\_1426

TAGACGGCAGTGTGAATGCAGTTTTCCAGATAAAGAGCAGGTTTGCAGAAGGATCATTGACATATCTTG  
ATCTGTCTGATAACAATTTCTCAAGTGGTGTCTGAACAGATTGGCATGGGAG

>PGSC0003DMG400022599-(rev)LRR-RLPs\_1488

TATCTTGATCTGTCTGATAACAATTTCTCAAGTGGTGTCTGAACAGATTGGCATGGGAGGACAACAACATA  
TCCAACACTTAAATTTATCGCATAACTTTCTCAAAGGTAGATTACCAACC

>PGSC0003DMG400022599-(rev)LRR-RLPs\_310

AAGTTATCAATATAGGTGATCTTCTTGGTATAACGGGGAAAATCCCCTCATCGATTGGTTTACATCTACC  
AAATCTCAGAAACTCAACTTTGTTAGAAACAGGTTTACTGGTGCATTAC

>PGSC0003DMG400022599-(rev)LRR-RLPs\_930

GGTTCTATTCCTTCGAGTATAGGTAATTTGAAGTTATTGGAAATGTTATATCTCAGTTGCAACCAATTATC  
TGGTCAGTTGCCAAGATCAATAGGCGGGATTTCTGAGCTTATTTACCTG

>PGSC0003DMG400022599-(rev)LRR-RLPs\_992

CCAATTATCTGGTCAGTTGCCAAGATCAATAGGCGGGATTTCTGAGCTTATTTACCTGAGTATATCTCATA  
ACATGATTGAAGGACCGCTGCCTCGTGAAATTTCTCCCTTTCAAATCT

>PGSC0003DMG400022632LRR-RLKs\_1302

TCTTAGTACTGGTATTAGAAATGATAGTTCTGAGCTTGGTTGGTTAGCAAGGGTTAGGGTTGCTGCTGG  
TGCAGCTAGAGGACTAGCTTGGCTTCATCATGGGTGTCAACCGCCATACGT

>PGSC0003DMG400022632LRR-RLKs\_62

TGTTCTTCTTCTTCTTCTTAACCCCTTCTCACTTCACTTCTCCACACTCAACCCACCCACCATGACAGCAA  
ATCAACTAACCCCATCTTCTTCTTCACTCTTTTCTCCTCATTTTCA

>PGSC0003DMG400022785-(rev)LRR-RLPs\_0

ATGGCGGCGTATGCTGCTGTGAATTCATTTTTGCATACGCTGGATAATCTATCTCAAACCTACATACACA  
TTCTCTTCTTTACAAAAAAGCAAACCTGAAGTCCTCAGTGACAAGTAC

>PGSC0003DMG400022785-(rev)LRR-RLPs\_1043

AAGGTCTTTGGGAATGGTAGTTACCCTCCGGACAAAATCTCACATTCAAGAGATACTTCTCACTGCTCC  
CTTTGTATCAAAAAGATATAATCGTTGGACTGGATGAAGACTTGCTGAAG

>PGSC0003DMG400022785-(rev)LRR-RLPs\_1108

GCTCCCTTTGTATCAAAAAGATATAATCGTTGGACTGGATGAAGACTTGCTGAAGATAAAAGAACGACT  
CACCGTGCAATCGTCAAGACTCGAAGTTGTCCCCATTATAGGGATGGGTGG

>PGSC0003DMG400022785-(rev)LRR-RLPs\_124

TCCTTAAACCTTTCTTGAGGATTTTACTAATATTTTCCATGAAGATGTAAAGATGAAGCATCTCGAAAG  
GATAATCCAAGAAGCTGCTAATGGAGTGGAAGATACTATTGACTCACATG

>PGSC0003DMG400022785-(rev)LRR-RLPs\_1436

GTCAACGATGAAGTAGAAAGAAACAGTACTAATGAGCAATTGGCTGAAAGAGTTTATCGAAGTTTAAAA  
GGGATGAAGTATCTTATTGTCCTAGATGATATGTGGTCCATCAAGGCTTGG

>PGSC0003DMG400022785-(rev)LRR-RLPs\_186

CTCGAAAGGATAATCCAAGAAGCTGCTAATGGAGTGGAAGATACTATTGACTCACATGTATATGATAGC  
TCTGCCTTAGTACAAAGCAAGCGAGTACGAAGAAAGGCTTATACGATCTTT

>PGSC0003DMG400022785-(rev)LRR-RLPs\_2056

TCATAAAAATCTAGAAGATGTGGCAGAGGAAAATTTGAGGGAGTTGGTTGATAGAAGTTTGGTTTGGT  
GGGAAGCATACTTCACTAGGAAAAATCAAGACTTGTAAGATGCATGATCTCG

>PGSC0003DMG400022785-(rev)LRR-RLPs\_2118

TTTGGTGGGAAGCATACTTCACTAGGAAAAATCAAGACTTGTAAGATGCATGATCTCGTTTCGAGATATG  
TGTTTGAGAGAAGCCCAATATGAGAATTTTATACACTTCGAAACAAGGTAT

>PGSC0003DMG400022785-(rev)LRR-RLPs\_3048

GATCATGCCTTTTCGCGGACATATTTGGAACTAAGCGATGAAGACGCAGATGGATTCTTGAAGCTAAAG  
TTTTACTTCTTGAGCACATGCATCTGGAGCAATGGGAAGCAACAAGTTAT

>PGSC0003DMG400022785-(rev)LRR-RLPs\_310

AAAACCTTGAATATGCAATTGAGGAAATTGGTTTGATACAAAAGAGGTTATGAAAAGATAAAGGTC  
AACAAAGTTCAACAGCAAAATCTCTCATTCAAGAGATACTTCATCTCAGATCC

>PGSC0003DMG400022785-(rev)LRR-RLPs\_3110

GCTAAAGTTTTTACTTCTTGAGCACATGCATCTGGAGCAATGGGAAGCAACAAGTTATCATTCCCAAGC  
CTTGAGCACTTAGTCCTAACACATTGCCATTCGTTGGAGCAAATTCCTTT

>PGSC0003DMG400022785-(rev)LRR-RLPs\_3172

TCCCAAGCCTTGAGCACTTAGTCCTAACACATTGCCATTCGTTGGAGCAAATTCCTTTGACTTTGCGGAG

ATTCAGACACTACAGCTGATTGAACTACACAATTGTATGCGTTCTGTTC

>PGSC0003DMG400022785-(rev)LRR-RLPs\_372

AAGGTCAACAAGTTCAACAGCAAATCTCTCATTCAAGAGATACTTCATCTCAGATCCCTATGGATCAAA

AAGATGTAATCATTGGACTGGATGAAGACTTGCTAAAGATAAAAGATCGA

>PGSC0003DMG400022785-(rev)LRR-RLPs\_434

GGATCAAAAAGATGTAATCATTGGACTGGATGAAGACTTGCTAAAGATAAAAGATCGACTCATCGTGCA

ATCATCAAGACTCGAAGTTGTCCCATTATAGGGATGGGTGGTATTGGCAA

>PGSC0003DMG400022785-(rev)LRR-RLPs\_62

TACATCACATTCTTCTTTACAAAAAAGCAAAGTGAAGTCTCAGTGACAAGTACACCTTCCTTAAAA

CCTTTCTTGAGGATTTTACTAATATTTTCCATGAAGATGTAAAGATGAA

>PGSC0003DMG400022787G-LecRK\_1054

ATTGGACTAGTGGTTGTGTGAGGAGGAAAAGTTTGAATGTGATCAAGAAAACAACAAAACAAGTACA

AGAGATGGATTTTTGAAGATGGGATACATGAAAGTGCCTGATTTGCTGAAT

>PGSC0003DMG400022787G-LecRK\_1116

AGTACAAGAGATGGATTTTTGAAGATGGGATACATGAAAGTGCCTGATTTGCTGAATGGTTACCTCT

AAGCTTGAAGATGAATGCAGAAGCCAATGCTTGAGTAATTGTTCTTGCTTA

>PGSC0003DMG400022787G-LecRK\_1178

ACCTCCTAAGCTTGAAGATGAATGCAGAAGCCAATGCTTGAGTAATTGTTCTTGCTTAGCTTATGCTTTC

GACACAGGAATAGGCTACATGTCGTGGAGCGGATACTTGATTGACATTCA

>PGSC0003DMG400022787G-LecRK\_1240

ATGCTTTCGACACAGGAATAGGCTACATGTCGTGGAGCGGATACTTGATTGACATTCAACAGTTTCAAG

CCTCTGGCACGACACTTCACATCCGTGTGGCACATTCTGAACTCGGTATTG

>PGSC0003DMG400022787G-LecRK\_1302

TTTCAAGCCTCTGGCACGACACTTCACATCCGTGTGGCACATTCTGAACTCGGTATTGATTGTTTCT

TGATTTGCCACTGTTCCATTAATGTTTCCAGTAGTCTTACATGATTTGG

>PGSC0003DMG400022787G-LecRK\_1364

ATTGTTTCTTGATTGCCACTGTTCCATTAATGTTTCCAGTAGTCTTACATGATTTGGTTTTCGTCTGCAGAT

CATCACGGAGAGATTAGACTAATCGCAACTCTAGTGATTGTATCGTCT

>PGSC0003DMG400022787G-LecRK\_1426

GTCTGCAGATCATCACGGAGAGATTAGACTAATCGCAACTCTAGTGATTGTATCGTCTTTTGTGTTTGC  
GTTGGTGTGTATCTTATATGGTTTTGGATGTCAAGGCAAAGAGGTAAAAT

>PGSC0003DMG400022787G-LecRK\_1488

TTGTTTGC GTTGGTGTGTATCTTATATGGTTTTGGATGTCAAGGCAAAGAGGTAAAATATGGTTTCACTT  
TAAAAGGAACAATCATTTAGATGGAAAGAAGATCTGTTTGGGAGAAATTA

>PGSC0003DMG400022787G-LecRK\_1550

TTTCACTTTAAAAGGAACAATCATTTAGATGGAAAGAAGATCTGTTTGGGAGAAATTATTAGTAATGTTG  
GTTTGGATGAGTTGCCAATTTTCAAGTTTGAAGTGCTTGCAATGTCAACA

>PGSC0003DMG400022787G-LecRK\_1612

TAATGTTGGTTTGGATGAGTTGCCAATTTTCAAGTTTGAAGTGCTTGCAATGTCAACAAATCAGTTTCAT  
GACAACAATAAGCTTGGACAAGGTGGTTTTGGTCCGGTATACAAGGTAAA

>PGSC0003DMG400022787G-LecRK\_1674

AGTTTCATGACAACAATAAGCTTGGACAAGGTGGTTTTGGTCCGGTATACAAGGTAAACCTGTTTTTTTC  
TTCGCGTGAACCAATATGTTCCAACCTCCGTTCTTGTAATGCAACTGTC

>PGSC0003DMG400022787G-LecRK\_1736

TTTTTTTCTTCGCGTGAACCAATATGTTCCAACCTCCGTTCTTGTAATGCAACTGTCACGTAGTATCGTTT  
ACCTGTTTATTGTTTCGTAGGGAGTATTAGCAGACGGGGTGGAAATAGC

>PGSC0003DMG400022787G-LecRK\_1798

AGTATCGTTTACCTGTTTATTGTTTCGTAGGGAGTATTAGCAGACGGGGTGGAAATAGCTGTCAAGAGGC  
TTTCGACTGTCTCAGGACAAGGGATGGAAGAGTTCATGAATGAAGTGTTGT

>PGSC0003DMG400022787G-LecRK\_1860

AAGAGGCTTTCGACTGTCTCAGGACAAGGGATGGAAGAGTTCATGAATGAAGTGTTGTTGATATCTAGA  
GTCCAACATAGAAACCTTGTTAGATTATTGGGATGTTGCATAGAAAAAGAA

>PGSC0003DMG400022787G-LecRK\_1922

ATCTAGAGTCCAACATAGAAACCTTGTTAGATTATTGGGATGTTGCATAGAAAAAGAAGAGAAGATGTT  
GATCTATGAGTATTTGCCAATAAAAAGCTTGGATGTTTTTCTCTTTGGTTA

>PGSC0003DMG400022787G-LecRK\_1984

AGATGTTGATCTATGAGTATTTGCCAATAAAAAGCTTGGATGTTTTTCTCTTTGGTTAGTCCTAAAAGAAA  
CTCTTACTCTGCGATATATAGTCAGACCTTTTTATAACAGTCATTCTCT

>PGSC0003DMG400022787G-LecRK\_2046

TAAAAGAAACTCTTACTCTGCGATATATAGTCAGACCTTTTTATAACAGTCATTCTCTATAATAACATTCC  
ACTATAACAACCAAGTTTCCTTTGGAACCGATTTTAATGTTATGTTTT

>PGSC0003DMG400022787G-LecRK\_2108

TAACATTCCACTATAACAACCAAGTTTCCTTTGGAACCGATTTTAATGTTATGTTTTTATAATAGCATTCA  
CTATAGCAAGCCAAAAAATCATCCAGACAAACGACATTGTTATAGAGA

>PGSC0003DMG400022787G-LecRK\_2170

ATAGCATTCACTATAGCAAGCCAAAAAATCATCCAGACAAACGACATTGTTATAGAGAGGTCTGACTGT  
ATGTTTCATTATAGCTTTCTCTTTTATCTCATGCAAAAGCTTAAGTTGTTA

>PGSC0003DMG400022787G-LecRK\_2232

TGACTGTATGTTTCATTATAGCTTTCTCTTTTATCTCATGCAAAAGCTTAAGTTGTTATAGAAAGAAATTG  
TCTTTTCGATGAATGTTTAGATCAAACGCATAAAGGGATGTTGGATTTGA

>PGSC0003DMG400022787G-LecRK\_2294

AAGAAATTGTCTTTTCGATGAATGTTTAGATCAAACGCATAAAGGGATGTTGGATTTGAGCAAACGATTG  
CACATTATCGAAGGGATAGGGCGAGGACTACTATATCTACATAGAGATTCA

>PGSC0003DMG400022787G-LecRK\_2356

ACGATTGCACATTATCGAAGGGATAGGGCGAGGACTACTATATCTACATAGAGATTCAAGAATAAAGAT  
AATCCATAGAGATCTAAAGCCAAGTAATATCTTGTTAGATAATGATTTCAA

>PGSC0003DMG400022787G-LecRK\_2418

TAAAGATAATCCATAGAGATCTAAAGCCAAGTAATATCTTGTTAGATAATGATTTCAATCCAAAGATTTT  
AGACTTTGGCATGGCTAGGATTTTAAATGCAATCAAGATCAAGCAGAGA

>PGSC0003DMG400022787G-LecRK\_248

GAATCGTTACGTTGCTATTTGGTACAACCTCTCAGAAACAACTGTTGTTTGGGTAGCAAATAGAGATAAA  
GTACCATTGAAAGATTCATTTGGTGTTCCTCAAGATTTCTGAGGATGGAAA

>PGSC0003DMG400022787G-LecRK\_2480

AAGATTTTCAGACTTTGGCATGGCTAGGATTTTAAATGCAATCAAGATCAAGCAGAGACAAGGAAAGTT  
GCAGGAACATAGTAAGTATATATATAGCCATTCAATATGCTAAGTTTTCTT

>PGSC0003DMG400022787G-LecRK\_2542

GAAAGTTGCAGGAACATAGTAAGTATATATATAGCCATTCAATATGCTAAGTTTTCTTCTTGTCTAAAAG

TTCCACATTAAGCTAATTCGTTGATTTATCGTTGAATTTGCAATGCCTT

>PGSC0003DMG400022787G-LecRK\_2604

TCTAAAAGTTCCACATTAAGCTAATTCGTTGATTTATCGTTGAATTTGCAATGCCTTAGTGGCTATATGG

CTCCAGAGTACGCGATCAAAGGGATGTTTTCTGAGAAATCGGATGTTTT

>PGSC0003DMG400022787G-LecRK\_2666

GCTATATGGCTCCAGAGTACGCGATCAAAGGGATGTTTTCTGAGAAATCGGATGTTTTAGCTTTGGAGT

AGTGTGTTGGAAATAATGAGTGGGCAAAGGTTGCAAGTTTTTGGAAATG

>PGSC0003DMG400022787G-LecRK\_2728

TTTGGAGTAGTGTGTTGTTGGAAATAATGAGTGGGCAAAGGTTGCAAGTTTTTGGAAATGAGGAGATCTCA

TTAAGCCTTCTTGATATGTAAGTTCCTTTAAACTCTCTTGTACTTAATT

>PGSC0003DMG400022787G-LecRK\_2790

GATCTCATTAAGCCTTCTTGATATGTAAGTTCCTTTAAACTCTCTTGTACTTAATTGTGAGAAGCAAAA

ATATATTGATAAAGAAGTTCATTAGAATCTAACTTTAGAACTTGATATT

>PGSC0003DMG400022787G-LecRK\_2852

GAAGCAAAAATATATTGATAAAGAAGTTCATTAGAATCTAACTTTAGAACTTGATATTGAGTGTATAGC

CTTGTGAAATAAGGACATTTTGATAGATCGAATTGAATGTTATTAACGCT

>PGSC0003DMG400022787G-LecRK\_2914

GTTATAGCCTTGTGAAATAAGGACATTTTGATAGATCGAATTGAATGTTATTAACGCTCAAACTTTAGT

ACAACCTTTCTGATCCCATTGATGGGAAGACCCATATTATACCAACATC

>PGSC0003DMG400022787G-LecRK\_2976

ACTTTAGTACAACCTTTCTGATCCCATTGATGGGAAGACCCATATTATACCAACATCTCTTTAGGTTCTTC

GATCATCTAGAGGTGTATATTTCCATTCTGCTTGGATCCAGTATCATT

>PGSC0003DMG400022787G-LecRK\_3038

TAGGTTCTTCGATCATCTAGAGGTGTATATTTCCATTCTGCTTGGATCCAGTATCATTAAAGCTTCAAATCC

TGAGTGCGTCTCATTGTTAATTATTTAATAAATCTAAATACCACTAAAA

>PGSC0003DMG400022787G-LecRK\_3100

TTCAAATCCTGAGTGCCTCATTGTTAATTATTTAATAAATCTAAATACCACTAAAACAATTTATTTATTT

TTCAGGCATGGGAATGAAAAGAGAATGATTTATCAAATTTTATTG

>PGSC0003DMG400022787G-LecRK\_3162



TTATTTATTTTCAGGCATGGGAACTATGAAAAGAGAATGATTTATCAAATTTTATTGATCAAGTGATATG  
GGATCCCAACTTTGAAATTGTGTTGACAAAATGCATACAAATAGGTTTG

>PGSC0003DMG400022787G-LecRK\_3224

AGTGATATGGGATCCCAACTTTGAAATTGTGTTGACAAAATGCATACAAATAGGTTTGTTGTGTGTTCAA  
GAATTTGCTAGAGATAGGCCAACAGTTTCAAATGTTCTTTCCATGTTTTC

>PGSC0003DMG400022787G-LecRK\_3286

GTGTTCAAGAAATTTGCTAGAGATAGGCCAACAGTTTCAAATGTTCTTTCCATGTTTTCAAGTGAAGTTATA  
AGTCTTCCAACACCATTGAAGCCTGCTTTTGCTAATTTTTATGATGATA

>PGSC0003DMG400022787G-LecRK\_3348

GAAGTTATAAGTCTTCCAACACCATTGAAGCCTGCTTTTGCTAATTTTTATGATGATAATGGAGTTGGTTC  
TGTAATTATGTCACCTTTGACAAACCTTGATGCTAGATAATTAATATGA

>PGSC0003DMG400022787G-LecRK\_558

ATACCTATTAACTCTGTTACAACAGGGGAGAAAACAGGGGCTAAGATCTTGAAAAGTCCTTTGGATCCA  
AGTTTTGGTGATTTTTCGACTAGCATTACCGCGATTCTTCCTCAGCTTTTG

>PGSC0003DMG400022787G-LecRK\_620

GGATCCAAGTTTTGGTGATTTTTCGACTAGCATTACCGCGATTCTTCCTCAGCTTTTGATTTGAAAAGGG  
AAGAATCTATACTGGCGAAGTGGTCAATGGAATGGTCAGGTTTTTATTGG

>PGSC0003DMG400022787G-LecRK\_682

GGAAAGGGAAGAATCTATACTGGCGAAGTGGTCAATGGAATGGTCAGGTTTTTATTGGAATAAAGGGT  
ATGCATAGAGTGCACACTGGTGGATAACAATGTTGTTGATGATGAAGAGGGCA

>PGSC0003DMG400022787G-LecRK\_744

AAGGGTATGCATAGAGTGCACACTGGTGGATAACAATGTTGTTGATGATGAAGAGGGCACTGTCTATCTT  
ACGGGTTTTGTTGAACGAAAAAACCTACAAGGTTTGTCTTGGACTCGAGT

>PGSC0003DMG400022787G-LecRK\_806

CTATCTTACGGGTTTTGTTGAACGAAAAAACCTACAAGGTTTGTCTTGGACTCGAGTGGGAACTTGGTA  
CAATCATACTGGGATGGGATTGAGAGGATTTGGAAGTTTCCGTGGTCAGC

>PGSC0003DMG400022787G-LecRK\_868

ACTTGGTACAATCATACTGGGATGGGATTGAGAGGATTTGGAAGTTTCCGTGGTCAGCTATCGAAAATG  
ATTGTGATGTTTATGGAACCTGTGGTCCATTTGGGAGCTGCAATTCATTGT

>PGSC0003DMG400022787G-LecRK\_930

GAAAATGATTGTGATGTTTATGGAACCTGTGGTCCATTTGGGAGCTGCAATTCATTGTATTGCGCAATTT  
GTTTCGTGTTAAGAGGGTTCGAGCCAAAGAATATCGATGAATGGGAAAAG

>PGSC0003DMG400022787G-LecRK\_992

GCCAATTTGTTTCGTGTTAAGAGGGTTCGAGCCAAAGAATATCGATGAATGGGAAAAGGAGAATTGGA  
CTAGTGGTTGTGTGAGGAGGAAAAGTTTGCAATGTGATCAAGAAAACAACAA

>PGSC0003DMG400022900-(rev)LRR-RLKs\_0

AAAAATTATACTAATTCTACCTAACAAAAAACAAGTAAATTTTTCTTGAGATAACAAATGAAAAATCCA  
GAAATTTACTTCATAACGGGGACGAATATAGTAATTTTGAAGAAATAACA

>PGSC0003DMG400022900-(rev)LRR-RLKs\_1403

TTTGTGTATGAGTACATTCCTAAAGGAAGCTTGCTGTACATATTGCACGGTAAAGTACCTACCTCTAATTT  
TATCAAGTCATACTAGAAATGCATGGTAAGACTGTGTACAATAAACTCA

>PGSC0003DMG400022900-(rev)LRR-RLKs\_1464

CCTCTAATTTTATCAAGTCATACTAGAAATGCATGGTAAGACTGTGTACAATAAACTCATTTTTGTTAATT  
TTGTGCATGTGCTTAGAATAGGAGACCAAAAGCCAAAACTTCTACAAG

>PGSC0003DMG400022900-(rev)LRR-RLKs\_1525

TTTGTTAATTTTGTGCATGTGCTTAGAATAGGAGACCAAAAGCCAAAACTTCTACAAGTAAGTAAGTTT  
ACATTGTATTAGTAGTCTAGTTGTCAAGTGTTCATATTAGTTGAGGGAA

>PGSC0003DMG400022900-(rev)LRR-RLKs\_1586

AGTAAGTTTACATTGTATTAGTAGTCTAGTTGTCAAGTGTTCATATTAGTTGAGGGAACGGAAAGTAGT  
CTCCTTGTATGATCTTGGCAAACCTATACGTCTATATCCATGAACTAGCCT

>PGSC0003DMG400022900-(rev)LRR-RLKs\_1647

GAAAGTAGTCTCCTTGTATGATCTTGGCAAACCTATACGTCTATATCCATGAACTAGCCTTGAAGTTGAGT  
GAGGTCTAAAGGTCCATTTGATTCACAAGTTATCAAAGCCAGACTCGTAT

>PGSC0003DMG400022900-(rev)LRR-RLKs\_1708

AAGTTGAGTGAGGTCTAAAGGTCCATTTGATTCACAAGTTATCAAAGCCAGACTCGTATGTACTCTTGAT  
ATCCCGATGTAGAGTTCCCATCTTACATTGGGATTATTCGCACCTTGTGG

>PGSC0003DMG400022900-(rev)LRR-RLKs\_1769

ACTCTTGATATCCCGATGTAGAGTTCCCATCTTACATTGGGATTATTCGCACCTTGTGGTTTTTTTCAAGA

CCACTTTTTGAATTATGTTCCCGTTAGCCCAGTGGGTAAAGGGGAACAT

>PGSC0003DMG400022900-(rev)LRR-RLKs\_1891

GTTAAATAGAGACCTCAAGAAAGGTCATTTCTACAGTTGCCTGTTATTTTCTCCATGTTAATTAGTTGAG  
GAGTTGAGGGACGGATTTGAGCTATGCTTAACTTATGAACTAGTTTTCG

>PGSC0003DMG400022900-(rev)LRR-RLKs\_1952

ATTAGTTGAGGAGTTGAGGGACGGATTTGAGCTATGCTTAACTTATGAACTAGTTTTCGAGGTTTAATTA  
GGCATAATATTCATTTTCTTCGCGCTAATTAGTCTGTGCATGATTACTTA

>PGSC0003DMG400022900-(rev)LRR-RLKs\_2013

GTTTAATTAGGCATAATATTCATTTTCTTCGCGCTAATTAGTCTGTGCATGATTACTTATAAAGATTGCTG  
CTGCTTTATATGAATGATCACAGGTGAAAGAGGGCTGCCCCATGCTGAG

>PGSC0003DMG400022900-(rev)LRR-RLKs\_2074

AAGATTGCTGCTGCTTTATATGAATGATCACAGGTGAAAGAGGGCTGCCCCATGCTGAGCTCACCTGGC  
CAGTGCGTCTAAATATTATAACAAGGAGTAGCTGAAGGACTAAATTATCTTC

>PGSC0003DMG400022900-(rev)LRR-RLKs\_2806

GAACAGCAAATCATTAGGAATTTTAGCAGACTCCGGTAATCAAGGCGTGGTTAATATTGCAGCTTCTCC  
TATGGTCATCAGACTAATGATAGTGTTTTTTTTTCTTCATTTTTTAAGGT

>PGSC0003DMG400022900-(rev)LRR-RLKs\_2928

GTTAACTAGGGATAGTACATATATTACTGACTAAGTTTTAGTTTCATTTTGTAGTCTGATGACCATTATCT  
CCCCTTGTAGAACAAGAAATGAGAGGAGAAGCTGTATCCTGTGTAGAGA

>PGSC0003DMG400022900-(rev)LRR-RLKs\_2989

ACCATTATCTCCCCTGTAGAACAAGAAATGAGAGGAGAAGCTGTATCCTGTGTAGAGATGAAAGAGCT  
TACTGCTTGCTTTAGAATTGTATATGCAATACAATTTCTGTTTCTACTAC

>PGSC0003DMG400022900-(rev)LRR-RLKs\_3050

AAAGAGCTTACTGCTTGCTTTAGAATTGTATATGCAATACAATTTCTGTTTCTACTACGTTGAGTACCAA  
CTATTGTAGACTAAAAATTCGTAGCGTACTTTGACCAACTCCAAGGGAT

>PGSC0003DMG400022900-(rev)LRR-RLKs\_915

TCTCAATGTGGATTATGATATCATCAGTTGTTCTTTTATTGATCATGATCATAGTAATATATCTCATATGTC  
GCTACCAACAAAATCGCCGTGCTTCAATTGAAAGTTTTGATGAGCCAT

>PGSC0003DMG400022900-(rev)LRR-RLKs\_976

TTCATATGTCGCTACCAACAAAATCGCCGTGCTTCAATTGAAAGTTTTGATGAGCCATCACTTGGGAGG  
CGAATTCGAGTGATAGCAAGAAGTCATTTGAACTAAGTAGACGTGGCAG

>PGSC0003DMG400022977-(rev)LRR-RLPs\_0

CTTGAACATCTTAATCTTGCTAATAACTTTAAGATTAAGGTGGGGTCCAGTTCTTTGAGAATTTGA  
CCTGTTTACGTCATCTGGACATGTCTAATACTTAGACAGACCAATGGCT

>PGSC0003DMG400022977-(rev)LRR-RLPs\_1116

TAACAATTTCTCTGGAGAAATTCCACATTCATTGGGTTCTTGACAAATTTGAAGGCGTTATACATACGCC  
AAAACAGTTTTAGTGGAATGTTGCCTTCTTTTTACAATGTCAGCAGTT

>PGSC0003DMG400022977-(rev)LRR-RLPs\_1178

ACATACGCCAAAACAGTTTTAGTGGAATGTTGCCTTCTTTTTACAATGTCAGCAGTTGCAAATCTTGGAT  
CTTGGAGGGAATACGTTGACAGGAAGTGTCCCGGCATGGATAGGGACTG

>PGSC0003DMG400022977-(rev)LRR-RLPs\_124

GAGTTGTTTCTCAGGTTATCAGGCAGTAGGAAATCACTTGAGGTTTTGGGGTTGAACGACAACTCATTGT  
TTGGTTCAATTGTTAATATGACAAGATTTTCATCCTTGAAGAAATTATAC

>PGSC0003DMG400022977-(rev)LRR-RLPs\_1240

ATCTTGGATCTTGGAGGGAATACGTTGACAGGAAGTGTCCCGGCATGGATAGGGACTGATCTACTCAAT  
TCGCGCATTCTAAGCATGCGGTTCAACAGATTGCATGGCAGCATAACCGTCC

>PGSC0003DMG400022977-(rev)LRR-RLPs\_1302

ACTCAATTCGCGCATTCTAAGCATGCGGTTCAACAGATTGCATGGCAGCATAACCGTCCATAATCTGTCAG  
CTTCAATTTCTTCAGATACTGGACCTTTTAACAAATGGATTATCAGGGAA

>PGSC0003DMG400022977-(rev)LRR-RLPs\_1364

TCTGTCAGCTTCAATTTCTTCAGATACTGGACCTTTTAACAAATGGATTATCAGGGAAAATTCCACATTGC  
TTCAACAATTTTACCTTATTGTATCAAGATAATAATTCTGGTAAGCCAA

>PGSC0003DMG400022977-(rev)LRR-RLPs\_1488

ATTTATAGTTCAAGGTTTCTATCGTAAATTTCTCGTCGTTACTTGTATATTGGTGACCTATTGGTTCAATG  
GAAAATCAGGAGGCTGAGTACAAAAATCCTTTATTATATCTGAAGAC

>PGSC0003DMG400022977-(rev)LRR-RLPs\_1550

TGGTTCAATGGAAAATCAGGAGGCTGAGTACAAAAATCCTTTATTATATCTGAAGACTATTGATCTTTC  
AAGTAATGAATTGGTTGGAGGTGTTCTGAAGAAATAGCTGAGATGAGAG

>PGSC0003DMG400022977-(rev)LRR-RLPs\_1612

GATCTTTCAAGTAATGAATTGGTTGGAGGTGTTCTGAAGAAATAGCTGAGATGAGAGGATTGAAATCT  
TTGAATCTATCAAGAAATGATCTGAATGGAAGTGTCTGTTGAAAGAATAGGT

>PGSC0003DMG400022977-(rev)LRR-RLPs\_1674

GAAATCTTTGAATCTATCAAGAAATGATCTGAATGGAAGTGTCTGTTGAAAGAATAGGTCAAATGAAGAT  
GTTGGAGTCTCTTGACATGTCAAGAAACCAGCTTTCTGGTGTGATCCCCCA

>PGSC0003DMG400022977-(rev)LRR-RLPs\_1736

TGAAGATGTTGGAGTCTCTTGACATGTCAAGAAACCAGCTTTCTGGTGTGATCCCCCAGGGTCTTGCGAA  
TTTGACTTTTCTTAGTGTGTTGGACTTGTCTGAACAACCACTTATCCGGGA

>PGSC0003DMG400022977-(rev)LRR-RLPs\_186

CTCATTGTTTGGTTCAATTGTTAATATGACAAGATTTTCATCCTTGAAGAAATTATACCTGCAGAAGAATG  
TGCTGAATGGTTCTTTCATGGAAAGTGCGGGACAAGTTTCTACCCTCGA

>PGSC0003DMG400022977-(rev)LRR-RLPs\_1860

TCCATCAAGCACTCAACTGCAAAGTTTTGATAGATCATCCTACAGTGATAATGTTCAACTCTGTGGTCCTC  
CTCTTCAAGAGTGTCCCGGATATGCTCCTCCTAGCCCTTATCGATTA

>PGSC0003DMG400022977-(rev)LRR-RLPs\_1922

GTGGTCCTCCTCTTCAAGAGTGTCCCGGATATGCTCCTCCTAGCCCTTATCGATTATGGTAGCAACAAC  
AATCCATAAGAACATGATGACGATGAAGAGGAGTCCCATCGCTGGAGT

>PGSC0003DMG400022977-(rev)LRR-RLPs\_1984

AGCAACAACAATCCATAAGAACATGATGACGATGAAGAGGAGTCCCATCGCTGGAGTTTTATATATCA  
ATGGTGCTAGGCTTTTTTGTTCATTTTGGGGAATTTTGGGCTGTTTAATT

>PGSC0003DMG400022977-(rev)LRR-RLPs\_2046

TATATCAATGGTGCTAGGCTTTTTTGTTCATTTTGGGGAATTTTGGGCTGTTTAATTGTCAATAGTTCTT  
GGAGGAATGCCTACTTCACATTCTTAACGGACACGACAAGTTGGCTCAA

>PGSC0003DMG400022977-(rev)LRR-RLPs\_2108

ATAGTTCTTGGAGGAATGCCTACTTCACATTCTTAACGGACACGACAAGTTGGCTCAATATGATATGAAG  
AGTCTGGTTTGCAAGACTCAAGAAAAACAGAGGAGGGCCTGATAAATGT

>PGSC0003DMG400022977-(rev)LRR-RLPs\_2170

ATATGAAGAGTCTGGTTTGAAGACTCAAGAAAAACAGAGGAGGGCCTGATAAATGTCAAGTTTCTGT

GTA CTTGTTACTTTTTAAGAGTTAGCTTGTTTTCTTGTTCTTCTTCCTAC

>PGSC0003DMG400022977-(rev)LRR-RLPs\_2207

AGAGGAGGGCCTGATAAATGTCAAGTTTCTGTGTACTTGTTACTTTTTAAGAGTTAGCTTGTTTTCTTGT  
TCTTCTTCTACCTGATAGTTGCTTTCCTCTTGTTGTGATTTCTATCTG

>PGSC0003DMG400022977-(rev)LRR-RLPs\_248

AGAAGAATGTGCTGAATGGTTCTTTCATGGAAAGTGCGGGACAAGTTTCTACCCTCGAGTATCTGGATT  
GTCTGATAACCAAATGAGAGGGGCATTACCAAATTTAACATTGTTCCAT

>PGSC0003DMG400022977-(rev)LRR-RLPs\_310

CTGGATTTGTCTGATAACCAAATGAGAGGGGCATTACCAAATTTAACATTGTTCCATCATTGAGAGAGT  
TGCATCTTGGCTCTAATCAATTTTCAAGGGAGGATACCACAAGGTATCAG

>PGSC0003DMG400022977-(rev)LRR-RLPs\_372

GAGAGAGTTGCATCTTGGCTCTAATCAATTTTCAAGGGAGGATACCACAAGGTATCAGACAACTTTTACA  
GCTTAGAATTTTGGATGTCTCGTCCAATAGACTGGAAGGATTACCAGAAA

>PGSC0003DMG400022977-(rev)LRR-RLPs\_558

CTGAGTCCCACCTTTCAAACCTCTCCAGTTTAGTGGATTTGGACTTGTCATTCAACTCATTGGCTCTGAAG  
ACGAGCTTCGATTAGCTTCTCCTTTCCAGCTACAAGTTATAAGCCTGC

>PGSC0003DMG400022977-(rev)LRR-RLPs\_620

GCTCTGAAGACGAGCTTCGATTAGCTTCTCCTTTCCAGCTACAAGTTATAAGCCTGCCGTCTTGCAATTT  
GGGACCTTCTTCTCAAATGGCTTCAAATCAACATAACTATACTGTT

>PGSC0003DMG400022977-(rev)LRR-RLPs\_682

TTGCAATTTGGGACCTTCTTCTCAAATGGCTTCAAATCAACATAACTATACTGTTCTTGATATCTCTCT  
TGCAAGTATTTAGACACGCTTCCAAGTTGGTTCTCTGGCATTCTCTCC

>PGSC0003DMG400022977-(rev)LRR-RLPs\_744

ATATCTCTCTTGCAAGTATTTAGACACGCTTCCAAGTTGGTTCTCTGGCATTCTCCCGATCTAAAGATTT  
TGAATCTCTCAAACAACCAAATCAGTGGAAAGAGTGGAAAGAGTGTCTAA

>PGSC0003DMG400022977-(rev)LRR-RLPs\_806

CTAAAGATTTTGAATCTCTCAAACAACCAAATCAGTGGAAAGAGTGGAAAGAGTGTCTAACTTAATAGAGA  
ATACATATGGTTACAAGGTTATAGATTTAAGCTCTAACAACTTTTCAGGGC

>PGSC0003DMG400022977-(rev)LRR-RLPs\_868

ATAGAGAATACATATGGTTACAAGGTTATAGATTTAAGCTCTAACAACTTTTCAGGGCCTTTGCCAATAG  
TCCCTACCAATGTCCAAATATTTTACCTGCATAAAAATCAGTTTTTTTGGGA

>PGSC0003DMG400022977-(rev)LRR-RLPs\_930

GCCAATAGTCCCTACCAATGTCCAAATATTTTACCTGCATAAAAATCAGTTTTTTGGATCCATCTCTGCAA  
TTTGTCAAAGTAAAACATCCCCCACTTCTCTCGACTTGGCACACAACCA

>PGSC0003DMG400022977-(rev)LRR-RLPs\_992

TCTCTGCAATTTGTCAAAGTAAAACATCCCCCACTTCTCTCGACTTGGCACACAACCAATTCTCAGGAGAA  
CTTCCAGATTGTTGGATGAACATGACAAGTCTAGCTGTTCTTAATCTAG

>PGSC0003DMG400022978-(rev)LRR-RLPs\_0

ATGTTAAGAGTGGATCATGCAAACATTTTGTGCATAACAAAGGAGAGGGAAGCTCTTCTCGAGTTCAA  
CGAGGTCTCATAGACGAACATAATATGCTTTCTTCATGGAAAAATGAGGAA

>PGSC0003DMG400022978-(rev)LRR-RLPs\_1054

TTAGACAAATCTCCTGTCTTGAGTATCTTGATTTGTCTAATAACCAATGACAGGGTCATTACCAGACTTG  
GAATTCTTCCATCACTGAGAGAGTTGAAATTACGGTCCAATCACTTTT

>PGSC0003DMG400022978-(rev)LRR-RLPs\_1116

CCAGACTTGGAATTCTTCCATCACTGAGAGAGTTGAAATTACGGTCCAATCACTTTTATGGAATGATAC  
CACAAGGTTTAGGGAAACTTTCCGAGCTTAAAATCTTGGATGTGTCTTTC

>PGSC0003DMG400022978-(rev)LRR-RLPs\_1178

AATGATACCACAAGGTTTAGGGAAACTTTCCGAGCTTAAAATCTTGGATGTGTCTTTCACATATTGCAA  
GGCTTACCAGATAGTTTGGGGCAACTTTCCAAGCTGAAAATCTTGGATGT

>PGSC0003DMG400022978-(rev)LRR-RLPs\_124

GTTCTTGGAGTGGTGTGAAATGCAGTAACAGAACAGGCCATATACAAGTGCTGAATCTTCGTGGTAACT  
TCGACACGTCTTTGACAGGTAATATTAGTCCATCATTGGTTAAGTTGCAGT

>PGSC0003DMG400022978-(rev)LRR-RLPs\_1302

TTCAATAGACTGAAAGGCTTACCGGAAAGTTTAGGGCAACTTTTCGACCTTGAAAGTTTTGATGCTCCTT  
ATAATTTGTTAGAAGGTACAGTCTCTGAATCCCATCTTCCAACCTTTGC

>PGSC0003DMG400022978-(rev)LRR-RLPs\_1364

TGCTCCTTATAATTTGTTAGAAGGTACAGTCTCTGAATCCCATCTTCCAACCTTTGCAAATTGAAAAGCT  
TAAACTTGCTTCCAACCTTGAAGTGGTATGATTGGAT

>PGSC0003DMG400022978-(rev)LRR-RLPs\_1426

TGAAAAGCTTAAACTTGTCTTCCAACCTCTTGACTTGGAATGTTAGCGTTGATTGGATTCCGTGTTTTCAA  
CTACAAGTTATCAGTCTTTCGTCTTGTAACTTTGGACCAAACCTTCCAA

>PGSC0003DMG400022978-(rev)LRR-RLPs\_1488

TGTTTTCAACTACAAGTTATCAGTCTTTCGTCTTGTAACTTTGGACCAAACCTTCCAAAATGGCTTCAAAC  
CAAAATGACTACTCAATTCTGGATCTATCTCTTAATAGTCTCTCAGAC

>PGSC0003DMG400022978-(rev)LRR-RLPs\_1550

GCTTCAAACCTCAAATGACTACTCAATTCTGGATCTATCTCTTAATAGTCTCTCAGACACAATGCCTAGTT  
GGTTCTCAAAGTTGCCTCCCATGTTAACATACTTGAATCTCTCTTACAA

>PGSC0003DMG400022978-(rev)LRR-RLPs\_1612

TGCCTAGTTGGTTCTCAAAGTTGCCTCCCATGTTAACATACTTGAATCTCTCTTACAACCAAATCATCGGA  
AAGATACAAGATTTATCAGCCAATAATATCGGTTCCATTGTTATAGATC

>PGSC0003DMG400022978-(rev)LRR-RLPs\_1674

ATCATCGGAAAGATACAAGATTTATCAGCCAATAATATCGGTTCCATTGTTATAGATCTTGGTTATAACA  
ATTTTTCAGGACCCTTACCAACATTTCTCAATTGGTTAGTGCATTGCGT

>PGSC0003DMG400022978-(rev)LRR-RLPs\_1736

TTATAACAATTTTTCAGGACCCTTACCAACATTTCTCAATTGGTTAGTGCATTGCGTATTGACAACAATC  
AGATTTCTGGATCACTTAACTCCATATGCAAATTCGTTTCAGCTGTAAC

>PGSC0003DMG400022978-(rev)LRR-RLPs\_1798

ACAACAATCAGATTTCTGGATCACTTAACTCCATATGCAAATTCGTTTCAGCTGTAACACTTGACTTGTCC  
GATAATCTCTTGTCCGAGAGATTCCTGATTGTTGGACCCTCATGTCTG

>PGSC0003DMG400022978-(rev)LRR-RLPs\_186

GGTAACTTCGACACGTCTTTGACAGGTAATATTAGTCCATCATTGGTTAAGTTGCAGTATTTGAAGTACTT  
GGACCTTAGTTTCAATAATTTTGGTGGACAAATACCAAATTTATCGGC

>PGSC0003DMG400022978-(rev)LRR-RLPs\_1860

GACTTGTCCGATAATCTCTTGTCCGAGAGATTCCTGATTGTTGGACCCTCATGTCTGTTCCAATGGTCCT  
TAACTTAGCCAATAACCATATATCTGGAAGCATTCCGTAATCTCTGTGT

>PGSC0003DMG400022978-(rev)LRR-RLPs\_1922

AATGGTCCTTAACTTAGCCAATAACCATATATCTGGAAGCATTCCGTAATCTCTGTGTTCTTCGACATCCT



TGAGCTCTCTATACGTGCGTAACAACAATTTAAGCGGACAGTTTCCAGC

>PGSC0003DMG400022978-(rev)LRR-RLPs\_1984

CGACATCCTTGAGCTCTCTATACGTGCGTAACAACAATTTAAGCGGACAGTTTCCAGCCTCTTTGAAGAA

TTGCCAAGGTTTGAAAGTCTTGGATTTGGGAAGAAATACATTTAGTGGAA

>PGSC0003DMG400022978-(rev)LRR-RLPs\_2046

TTGAAGAATTGCCAAGGTTTGAAAGTCTTGGATTTGGGAAGAAATACATTTAGTGGAAAAATCCCAGAA

TGGATAGGGACTGAGTTAGCTTATTTGGGGATTCTGAGCCTTCGATTCAAC

>PGSC0003DMG400022978-(rev)LRR-RLPs\_2108

CCCAGAATGGATAGGGACTGAGTTAGCTTATTTGGGGATTCTGAGCCTTCGATTCAACGAATTCTCTGG

GAGCATTCTTTAAGTATATGTCAGCTTCAATCTATTCAGATACTGGACCT

>PGSC0003DMG400022978-(rev)LRR-RLPs\_2170

TCTCTGGGAGCATTCTTTAAGTATATGTCAGCTTCAATCTATTCAGATACTGGACCTTTCTGGCAACCAT

TTATCAGGAAGAATTCCGAAATGCTTCAGCAATTTTCAGCACAAATGCAAC

>PGSC0003DMG400022978-(rev)LRR-RLPs\_2232

GGCAACCATTTATCAGGAAGAATTCCGAAATGCTTCAGCAATTTTCAGCACAAATGCAACTTTTGCAAGATG

GTTCAAGTGTGAGCTATGACTTCGATCCTTACACCCCTCGAGTAGGTACA

>PGSC0003DMG400022978-(rev)LRR-RLPs\_2294

GCAAGATGGTTCAAGTGTGAGCTATGACTTCGATCCTTACACCCCTCGAGTAGGTACATTGTACCATGGC

AATGCACTAGTCCAATGGAAAAACAAAGAGTCAGAGTATCGTAACATCTT

>PGSC0003DMG400022978-(rev)LRR-RLPs\_2418

CTTCTGAAAACCATCGATCTTTCTAGCAACGATCTAGTCGGTGACATCCCTAAAGATTTTAGCAAAATGA

ATGCATTGCTGTCATTGAACCTATCAAGGAACAATTTGACTGGAAATATC

>PGSC0003DMG400022978-(rev)LRR-RLPs\_248

GAAGTACTTGGACCTTAGTTTCAATAATTTTGGTGGACAAATACCAAATTTATCGGCTACTTCGAAAGA

CTAGAGTACCTAAATCTCTCATTTAGTTACAATCCTTTCACTGGTCTTAT

>PGSC0003DMG400022978-(rev)LRR-RLPs\_2480

CAAAATGAATGCATTGCTGTCATTGAACCTATCAAGGAACAATTTGACTGGAAATATCGTTGAAGGAATT

GGTTTAATGAAGATGTTAGAGTCTCTTACTTGTCGAGGAACCATCTCTC

>PGSC0003DMG400022978-(rev)LRR-RLPs\_2542

AAGGAATTGGTTAATGAAGATGTTAGAGTCTCTTGACTTGTCGAGGAACCATCTCTCGGGGAAGATCC  
CAGTAGGGCTTGCTAACCTGACATTTCTTAGCGTGTGGATTTGTCAAACA

>PGSC0003DMG400022978-(rev)LRR-RLPs\_2604

AAGATCCCAGTAGGGCTTGCTAACCTGACATTTCTTAGCGTGTGGATTTGTCAAACAACAACTTGTCAG  
GGAGAATACCATCGAGCACTCAATTGCAAGGCTTCGACTCCTCAACCTAT

>PGSC0003DMG400022978-(rev)LRR-RLPs\_2666

CTTGTCAGGGAGAATACCATCGAGCACTCAATTGCAAGGCTTCGACTCCTCAACCTATGGTGGGAATGTT  
CAGCTATGTGGCCCTCCTCTCCAGAGTGTCTTCATTTGCTCCTCCAAA

>PGSC0003DMG400022978-(rev)LRR-RLPs\_2728

GGAATGTTCACTATGTGGCCCTCCTCTCCAGAGTGTCTTCATTTGCTCCTCCAAATCTTCATGTTGGT  
CAAGACAGTAATTTCCAAGAAAATGATGATGATGATGAGTTTCCATCAA

>PGSC0003DMG400022978-(rev)LRR-RLPs\_2790

CATGTTGGTCAAGACAGTAATTTCCAAGAAAATGATGATGATGATGAGTTTCCATCAAAAGAGTTTTATA  
TATCGATGGCGTTAGGGTTCATTGTTGCATTTGGGGGGGTGTTAGGATCT

>PGSC0003DMG400022978-(rev)LRR-RLPs\_2852

GTTTTATATATCGATGGCGTTAGGGTTCATTGTTGCATTTGGGGGGGTGTTAGGATCTTGTTCCTCAAC  
AGTTCATGGAGGAATGCCTATATTAAGTGGCTCCATCTTTAGCTCAAGGC

>PGSC0003DMG400022978-(rev)LRR-RLPs\_2914

TCCTCAACAGTTCATGGAGGAATGCCTATATTAAGTGGCTCCATCTTTAGCTCAAGGCCTGATTTATGTTA  
TATGTAAATATCCTATGAATGGCTTGTAATCAAGAGAACTTCTTTTATA

>PGSC0003DMG400022978-(rev)LRR-RLPs\_310

TCGAAAGACTAGAGTACCTAAATCTCTCATTTAGTTACAATCCTTTCACTGGTCTTATTCCTCTTCAGTTCC  
AAAATCTAACACACTTAAAGACTCTTGATCTTGGTCAAAATTCTTTAA

>PGSC0003DMG400022978-(rev)LRR-RLPs\_372

CTTCAGTTCCAAAATCTAACACACTTAAAGACTCTTGATCTTGGTCAAAATTCTTTAACAGTGAAAAGCCT  
TGAGTGGCTTTCTAATCTAGTGTATTTGGAGTACTTAGATCTTCATTTT

>PGSC0003DMG400022978-(rev)LRR-RLPs\_434

GAAAAGCCTTGAGTGGCTTTCTAATCTAGTGTATTTGGAGTACTTAGATCTTCATTTTTCCAATGTGCAAG  
TGAAAACTGGTTACAAGAGATGATTAAGCTTCTAATTTGAGGGAATT

>PGSC0003DMG400022978-(rev)LRR-RLPs\_558

TTATCAGCCTGTCAACTCCCTGTAATCATTCTTCATCACTTGTATCAGCCAATATTTCTCGTCTCATCTTT  
CGATCCTTGACATCTCCTATAATAGATATTCGTCCCCTGCAATAAAT

>PGSC0003DMG400022978-(rev)LRR-RLPs\_62

GTTCAAACGAGGTCTCATAGACGAACATAATATGCTTTCTTCATGGAAAAATGAGGAATGTTGTTCTTGG  
AGTGGTGTGAAATGCAGTAACAGAACAGGCCATATACAAGTGCTGAATCT

>PGSC0003DMG400022978-(rev)LRR-RLPs\_620

GTCTCATCTTTCGATCCTTGACATCTCCTATAATAGATATTCGTCCCCTGCAATAAATAGTTGGTTATTTAA  
CTTCACTAGTCTTACTAGCCTAGATCTTTCGGGTAACGACTTAGGCCA

>PGSC0003DMG400022978-(rev)LRR-RLPs\_682

GGTTATTTAACTTCACTAGTCTTACTAGCCTAGATCTTTCGGGTAACGACTTAGGCCAAATGTCTAGTGGC  
TTTGGTACTTGAAGTCTTTGGAACATGTTAAGCTATTTGGAAGTGGTA

>PGSC0003DMG400022978-(rev)LRR-RLPs\_744

TCTAGTGGCTTTGGGTACTTGAAGTCTTTGGAACATGTTAAGCTATTTGGAAGTGGTATTCAAGGTGGG  
ATACCAAGGTCTTTTGGGAGTTTAAGTCGTTTACGCTCTATTGATGCAGAT

>PGSC0003DMG400022978-(rev)LRR-RLPs\_868

ATAACTTGTTAAGTCAACCATTTTCTGAGTTGCTTGATAACTTAGCTGGGAGTAATCAATCGCTTGAATAT  
CTGTCGTTTGAGGGAAATGCACTCACTGGTTCATTGATTAATCTTACTA

>PGSC0003DMG400022978-(rev)LRR-RLPs\_930

CTTGAATATCTGTCGTTTGAGGGAAATGCACTCACTGGTTCATTGATTAATCTTACTAGATTTTCATCCTT  
GAGGGAGTTGAGGCTACGAGAGAATTCGCTGAATGGCATTTCATGAT

>PGSC0003DMG400022978-(rev)LRR-RLPs\_992

TTCATCCTTGAGGGAGTTGAGGCTACGAGAGAATTCGCTGAATGGCATTTCATGATAGCTTTAGACAA  
ATCTCCTGTCTTGAGTATCTTGATTTGTCTAATAACCAAATGACAGGGTC

>PGSC0003DMG400022988LRR-RLPs\_0

AGCAAAAAAAAAAATGGATACCAAAGAACACTACAAACCAATTCATTTCTTTTGATTTGTCTATCAATGTT  
GATCATGCATCAAAGCTTAGCTTTTGGATCAACGTTAAGAGTGGATCAT

>PGSC0003DMG400022988LRR-RLPs\_1054

AAAATGCACTCACTGGCTCATTGATTAATATTACTAGATTTTCATCCTTGAAGGAATTGAGGCTACAAGA

AAACTCGCTGAATGGCATTTCATGAAAGCTTTAGACAAATCTCCAGTC

>PGSC0003DMG400022988LRR-RLPs\_1116

CTACAAGAAAACCTCGCTGAATGGCATTTCATGAAAGCTTTAGACAAATCTCCAGTCTTGAGTATCTTG  
ATTTGTCTTATAACCAAATGACAGGGTCAATACCAGACTTGGCATTCTTT

>PGSC0003DMG400022988LRR-RLPs\_1178

GTATCTTGATTTGTCTTATAACCAAATGACAGGGTCAATACCAGACTTGGCATTCTTTCCATCATTTAGAG  
AGTTGCACTTACAGTCCAATCACTTTTATGGAATGATACCACAAGGATT

>PGSC0003DMG400022988LRR-RLPs\_1240

CATTTAGAGAGTTGCACTTACAGTCCAATCACTTTTATGGAATGATACCACAAGGATTAGGGAAACTTTC  
CGAGCTTAAAATCTTGATGTGTCTTTCAATAGATTGCAAGGCTTACCGG

>PGSC0003DMG400022988LRR-RLPs\_1302

AAACTTTCCGAGCTTAAAATCTTGATGTGTCTTTCAATAGATTGCAAGGCTTACCGGATAGTTTGGGGC  
AACTTTCCAACTGAAAATATTGGATGTGTCTTTCAATAGACTGAAAGGC

>PGSC0003DMG400022988LRR-RLPs\_1364

TTTGGGGCAACTTTCCAACTGAAAATATTGGATGTGTCTTTCAATAGACTGAAAGGCTTACCGGAAAGT  
TTAGGGCAACTTTTCGACCTTCAAAGTTTTGATGCTTCTAATAATTTGTT

>PGSC0003DMG400022988LRR-RLPs\_1488

GTACAATCTCTGAATCCCATCTTTCCAACCTTTGCAACTTGAAGAGTTTAGAATTGTCTTCCAACCTCGTT  
GACTTGGAACGTTAGTGTTGATTGGATTCCATGTTTTCAACTACAAGTT

>PGSC0003DMG400022988LRR-RLPs\_1550

CAACTCGTTGACTTGAACGTTAGTGTTGATTGGATTCCATGTTTTCAACTACAAGTTATCAGTCTTTTCGT  
CTTGTAATCTTGACCATACTTTCCAAAATGGCTTCAAACCTCAAATGA

>PGSC0003DMG400022988LRR-RLPs\_1612

GTCTTTTCGTCTTGTAATCTTGACCATACTTTCCAAAATGGCTTCAAACCTCAAATGACTACGCATTTCTT  
GATATCTCTCTTAATAGTATCTCAGACACAATGCCTAGTTGGTTTACAA

>PGSC0003DMG400022988LRR-RLPs\_1674

GCATTTCTTGATATCTCTCTTAATAGTATCTCAGACACAATGCCTAGTTGGTTTACAAAGTTGCCTCCCAT  
GTTATATTTTTTGAATCTCTCTTACAACCAAATCAGCGGAAAGATACAA

>PGSC0003DMG400022988LRR-RLPs\_1736

GCCTCCCATGTTATATTTTTGAATCTCTCTTACAACCAAATCAGCGGAAAGATACAAGATTTATCAGCCA  
ATAATATCGGTTCCATTGTTATAGATCTTGGTTATAACAATTTTTTCAGG

>PGSC0003DMG400022988LRR-RLPs\_1798

TATCAGCCAATAATATCGGTTCCATTGTTATAGATCTTGGTTATAACAATTTTTTCAGGACCCTTACCAACA  
TTTCCTTATTTGGTTAGTGAATTGCGTGTTGACAACAATAAGTTTTCTG

>PGSC0003DMG400022988LRR-RLPs\_1860

TTACCAACATTTCTTATTTGGTTAGTGAATTGCGTGTTGACAACAATAAGTTTTCTGGATCACTTAACTC  
CATATGTAAAATTCGTTACCTGTAACACTTGACTTGCCGATAATCTC

>PGSC0003DMG400022988LRR-RLPs\_1922

ACTTAACTCCATATGTAAAATTCGTTACCTGTAACACTTGACTTGCCGATAATCTCTTGCCGGAGAGA  
TTCCTGATTGTTGGGCTCTCATGTATACTCTAATGGTCCTTAACTTAGC

>PGSC0003DMG400022988LRR-RLPs\_1984

CCGGAGAGATTCCTGATTGTTGGGCTCTCATGTATACTCTAATGGTCCTTAACTTAGCCAATAACCATATA  
TCTGGAAGCATTCCGATTCTCTGTGTTCTTCGACATCCTTGGGCTCTC

>PGSC0003DMG400022988LRR-RLPs\_2108

CGTGCGTAACAACAATTTAAGTGGACAGTTTCCTGCCTCTTTGAAGAATTGCCAAAGTTTGAAAGTCTTG  
GATTTGGGAAGAAATATATTGAGTGGAAATATCCCAGAATGGATAGGGAC

>PGSC0003DMG400022988LRR-RLPs\_2170

AAGTCTTGGATTTGGGAAGAAATATATTGAGTGGAAATATCCCAGAATGGATAGGGACTAAGCTGTCTG  
GTTTGGGCATTCTGAGCCTACGATTCAACGAATTTTCTGGTAGCATTCTC

>PGSC0003DMG400022988LRR-RLPs\_2294

TATATGCCAGCTTCAATCTATTCAGATTCTGGATCTTTCTGGCAACCGTTTATCAGGAAGAATTCCGGAAT  
GCTTCAGCAATTTACCACAATGCAACTTTTGCAAGATGGCTCAAGTAT

>PGSC0003DMG400022988LRR-RLPs\_2356

TTCCGGAATGCTTCAGCAATTTACCACAATGCAACTTTTGCAAGATGGCTCAAGTATGAGCTATGACTT  
CGATCCTTACTTCCCTCATAAAGGTACATTGTACCATGGCAATGCATTAG

>PGSC0003DMG400022988LRR-RLPs\_2418

TATGACTTCGATCCTTACTTCCCTCATAAAGGTACATTGTACCATGGCAATGCATTAGTCCAATGGAAAA  
AAAAAGAGTCAGAGTACCGTAACATCTTGTGGCTTCTGAAAACCATCGAT

>PGSC0003DMG400022988LRR-RLPs\_248

CAGTAACAGAACAGGCCATATACTAGTCTGAATCTTCGTGGTAACTCCGACATGTCTTTGACAGGTAAT  
ATTAGTTCATCATTGGTTAAGTTGCAGTATTTGAAGTACTTGGACCTTAG

>PGSC0003DMG400022988LRR-RLPs\_2480

ATGGAAAAAAAAAAGAGTCAGAGTACCGTAACATCTTGTGGCTTCTGAAAACCATCGATCTTTCTAGCAAC  
GAACTAGTCGGTGACATCCCAAATGATTTTAGCAGAATGAATGCATTGCT

>PGSC0003DMG400022988LRR-RLPs\_2542

CTAGCAACGAACTAGTCGGTGACATCCCAAATGATTTTAGCAGAATGAATGCATTGCTGTCATTGAACCT  
ATCAAGGAACAATTTGACAGGAAATATCATTGAAGGAATTGGTTTAATGA

>PGSC0003DMG400022988LRR-RLPs\_2604

TTGAACCTATCAAGGAACAATTTGACAGGAAATATCATTGAAGGAATTGGTTTAATGAAGATGTTGGAG  
GTTCTTGACTTGTCTGGGGAATCATATCTCGGGGAAGATCCCAGTTGGACTG

>PGSC0003DMG400022988LRR-RLPs\_2666

GTTGGAGGTTCTTGACTTGTCTGGGGAATCATATCTCGGGGAAGATCCCAGTTGGACTGGCTAACTTGAC  
ATTTCTTAGTGTGTTGGATTTGTGCGAAAAACAACCTTGTCAGGGAGAATACC

>PGSC0003DMG400022988LRR-RLPs\_2728

ACTTGACATTTCTTAGTGTGTTGGATTTGTGCGAAAAACAACCTTGTCAGGGAGAATACCATCGAGCACTCA  
ATTGCAAGGCTTTGATCCTTCAACCTATGGTGGGAATATTCAGCTATGTG

>PGSC0003DMG400022988LRR-RLPs\_2790

AGCACTCAATTGCAAGGCTTTGATCCTTCAACCTATGGTGGGAATATTCAGCTATGTGGACCTCCTCTTCC  
AGTATGTCCTACATTTTCTCCTCCAAATCCTCATGTTGGCTTTGACAGT

>PGSC0003DMG400022988LRR-RLPs\_2914

GTCAAGAAAATGATGATGATGATGAGTTTCCTTCTAAAGAGTTTTATGTATCGATGGCATTGGGCTTCAT  
TGTCGCATTTTGGGGAATTTTGGGCTCTTTGTACTTCAATGATTCATGGA

>PGSC0003DMG400022988LRR-RLPs\_2976

GGCTTCATTGTCGCATTTTGGGGAATTTTGGGCTCTTTGTACTTCAATGATTCATGGAGGAATGCCTACTT  
CAAGTGGTTAAATGGATGTCAGAATTGGCGCTTCATCTTTACTCAGCAG

>PGSC0003DMG400022988LRR-RLPs\_3038

TGCCTACTTCAAGTGGTTAAATGGATGTCAGAATTGGCGCTTCATCTTTACTCAGCAGTCTGCTTTGCAA

GGTTGAAGGCAAACTGAGGGCCTGATGACTAAATTTATATTCTAATCAT

>PGSC0003DMG400022988LRR-RLPs\_3079

TCATCTTTACTCAGCAGTCTGCTTTGCAAGGTTGAAGGCAAACTGAGGGCCTGATGACTAAATTTATAT

TCTAATCATGAAAAATGCATCTATTTTGTATGTCATTTGTCTATAGGTG

>PGSC0003DMG400022988LRR-RLPs\_310

CAGGTAATATTAGTTCATCATTGGTTAAGTTGCAGTATTTGAAGTACTTGGACCTTAGTTTCAATGATTTT

GGTGGACAAATCCAAAATTTATCGGTTACTTCGAAAGACTAGAGTACC

>PGSC0003DMG400022988LRR-RLPs\_372

AATGATTTTGGTGGACAAATCCAAAATTTATCGGTTACTTCGAAAGACTAGAGTACCTAAATCTCTCATT

TAGTTACAATCATTTCACTGGTCTTATTCCTCTTCAGTTCCAAAATCTA

>PGSC0003DMG400022988LRR-RLPs\_434

TCTCTCATTTAGTTACAATCATTTCACTGGTCTTATTCCTCTTCAGTTCCAAAATCTAACAACTTAAAGAC

TCTTGATCTTGGTCAAATTCATTAACAGTGAAAAGCCTTGAGTGGCT

>PGSC0003DMG400022988LRR-RLPs\_496

ACTTAAAGACTCTTGATCTTGGTCAAATTCATTAACAGTGAAAAGCCTTGAGTGGCTTTCTAATTTAGTG

TATTTGGAGTACGTAGATCTTCATTTTTCCAATGTGCAAGCGAAAACT

>PGSC0003DMG400022988LRR-RLPs\_558

AATTTAGTGTATTTGGAGTACGTAGATCTTCATTTTTCCAATGTGCAAGCGAAAACTGGTTACAAGAGA

TGATTAAGCTTCCTAATTTGAGGGAATTGCATTTATCAGCCTGTCAACTC

>PGSC0003DMG400022988LRR-RLPs\_62

ATCAATGTTGATCATGCATCAAAGCTTAGCTTTTGGATCAACGTTAAGAGTGGATCATGCAAACATTTTG

TGCATAACAAAGGAGAGGGAAGCTCTTCTCGAGTTCAAACGAGGTCTCAT

>PGSC0003DMG400022988LRR-RLPs\_620

ACAAGAGATGATTAAGCTTCCTAATTTGAGGGAATTGCATTTATCAGCCTGTCAACTCCCTGTAATCATT

CTTCATCACTTGTATCAGTCAATATTTCTCGTCTCATCTTTGATCCT

>PGSC0003DMG400022988LRR-RLPs\_806

TACTAGCCTAGATCTTTGGGTAACGACTTAGGCCAAATGTCTAGTGGCTTTGGGTACTTGAAGTCTTTG

GAACATCTTAAGCTATTTGGTAATAGTATTCAAGGAGGGATACCAAGGTC

>PGSC0003DMG400022988LRR-RLPs\_868

AGTCTTTGGAACATCTTAAGCTATTTGGTAATAGTATTCAAGGAGGGATACCAAGGTCTTTAAGGAATTT  
AAGTCGTTTACGCTCTCTTGATGTTAGTAACAATTACTTATTAAGTCAAC

>PGSC0003DMG400022988LRR-RLPs\_930

AGGAATTTAAGTCGTTTACGCTCTCTTGATGTTAGTAACAATTACTTATTAAGTCAACCGTTTTCTGAATT  
GCTTGATATCTTATCAGGGAGTAATAGATCACTTGAATTTTTGTCCTTT

>PGSC0003DMG400022988LRR-RLPs\_992

TTCTGAATTGCTTGATATCTTATCAGGGAGTAATAGATCACTTGAATTTTTGTCCTTTGAGGAAAATGCAC  
TCACTGGCTCATTGATTAATATTACTAGATTTTCATCCTTGAAGGAATT

>PGSC0003DMG400022989LRR-RLPs\_992

ATAATAAATAATACAAAACATAACGAAATTTGGCATTGCAAACAGTTAGAAAGTAGTCATATTGGCATG  
CAAATTTTATACAGATATTTGAAGTTATACTTTGTAACTAATGAACCTTT

>PGSC0003DMG400022990LRR-RLPs\_0

ATTCACAACAACAAAAAATGTATACCAAAGAACACTACAAACCAATTAATTTGCTTCTAATCTGTCTATC  
GATACTGATCATGCATCAAAGCTTTGCTTTTGGATTAATGTCAAGAGGG

>PGSC0003DMG400022990LRR-RLPs\_1054

TGCTTGATATCTTAGCTGGGAGTAATCAATCGCTTGAGTATTTGTCGTTTGAGGGAAATGCATTCCTGG  
TTCATTGATTAATCTTACTAGATTTTCATCCTTGAGGGAATTGAGGCTAC

>PGSC0003DMG400022990LRR-RLPs\_1116

TTCCTGGTTCATTGATTAATCTTACTAGATTTTCATCCTTGAGGGAATTGAGGCTACGAGAAAATCTCT  
GAACGGCATTTCATGAAAGCTTTAGAAAAATCTCCAATCTTGAGTAT

>PGSC0003DMG400022990LRR-RLPs\_1178

AAACTCTCTGAACGGCATTTCATGAAAGCTTTAGAAAAATCTCCAATCTTGAGTATCTTGATTTGTCTA  
ATAACCAAATGACAGGGTCATTACCAGACTTGGCATTCTTTCCATCATT

>PGSC0003DMG400022990LRR-RLPs\_124

ATACGAAAATTTGTGCATAACAAAGGAGAGGGGAAGCTCTTCTCGAGTTCAAACGAAGTCTCATAGATG  
AATATAATCTGCTTTCTTCATGGGGAAATGAAGAAAATAATGAGGAATGTT

>PGSC0003DMG400022990LRR-RLPs\_1240

ATTTGTCTAATAACCAAATGACAGGGTCATTACCAGACTTGGCATTCTTTCCATCATTGAGAGAGTTGCA  
CTTACAGTCCAATCACTTTTATGGAATGATACCACAAGGTTTAGGGAAAC



>PGSC0003DMG400022990LRR-RLPs\_1488

TTAGGGCAACTTTTCGACCTTGAAAGTTTTGATGCTTCTAATAATTTATTAGAAGGTACAATCTCTGAATC  
CCATCTTTCCAACCTTTGCAACTTGAAGAGTTTAAAATTGTCTTCCAAC

>PGSC0003DMG400022990LRR-RLPs\_1550

CTCTGAATCCCATCTTTCCAACCTTTGCAACTTGAAGAGTTTAAAATTGTCTTCCAACCTCGTTGACTTGGA  
ATGTTAGTGTTGATTGGATTCCATGTTTTCAACTCCAAGATATCAGTCT

>PGSC0003DMG400022990LRR-RLPs\_1612

TGACTTGGAATGTTAGTGTTGATTGGATTCCATGTTTTCAACTCCAAGATATCAGTCTTTCGTCTTGTAAAT  
CTTGGGCCTCTTTTTCCGAAATGGCTTCAAACCTCAAATAGCTACTCAT

>PGSC0003DMG400022990LRR-RLPs\_1674

TCTTGTAATCTTGGGCCTCTTTTTCCGAAATGGCTTCAAACCTCAAATAGCTACTCATTCTTAATATCTCT  
CTTGCTAGTATCTCAGACACAATGCCTATTTGGTTTACAAAGTTGCCT

>PGSC0003DMG400022990LRR-RLPs\_1736

TAATATCTCTCTTGCTAGTATCTCAGACACAATGCCTATTTGGTTTACAAAGTTGCCTCCCATGTTATACTT  
TTTGAATCTCTCTTACAACCAAATCAGCGGGAAGATACAAGATTTATC

>PGSC0003DMG400022990LRR-RLPs\_186

ATAGATGAATATAATCTGCTTTCTTCATGGGGAAATGAAGAAAATAATGAGGAATGTTGTTCTTGGAGG  
GGTGTGGAATGCAGTAATATAACTGGCCATATACTCGTCCTTAATCTTCGT

>PGSC0003DMG400022990LRR-RLPs\_1922

ATTTCTCATTGGTTAGTGAATTGCGTGTTGACAACAATAAGTTTTCTGGATCACTTAACCTCCATATGTA  
AAATTCATTGCGCTGTAACACTTGACTTGTCCGATATTCTCTTGTCCGG

>PGSC0003DMG400022990LRR-RLPs\_1984

CCATATGTAAAATTCATTGCGCTGTAACACTTGACTTGTCCGATATTCTCTTGTCCGGAGAGATTCCTGAT  
TGTTGGACCCTCATGTCTGTTCCAACGGTCCTTAATGTAGCCAATAACC

>PGSC0003DMG400022990LRR-RLPs\_2046

ATTCCTGATTGTTGGACCCTCATGTCTGTTCCAACGGTCCTTAATGTAGCCAATAACCGTATATCTGGAAG  
CATTCCATACTCTTGTGTTCTTCAACATCCTTGAACCTCTCTATACGTG

>PGSC0003DMG400022990LRR-RLPs\_2108

ATCTGGAAGCATTCCATACTCTTGTGTTCTTCAACATCCTTGAACCTCTCTATACGTGCGTAACAACAATTT

AAGTGGACAGTTTCCTGCCTCTTTGAAGAATTGCCAAGGTTTGAAAGT

>PGSC0003DMG400022990LRR-RLPs\_2294

TTTGGGCATTCTGAGCCTACGATTCAACGAATTTTCTGGTAGCATTCTCCAAGTATATGCCAGCTTCAAT  
CTATTCAGATACTGGACCTTTCTGGCAACCATTATCCGGAAGAATTCC

>PGSC0003DMG400022990LRR-RLPs\_2356

AGCTTCAATCTATTCAGATACTGGACCTTTCTGGCAACCATTATCCGGAAGAATTCAAAATGCTTCAGC  
AATTCACCACAATGCAACTTTTGCAAGATGGTTCAAGTGTGAGCTATG

>PGSC0003DMG400022990LRR-RLPs\_2418

TGCTTCAGCAATTTACCACAATGCAACTTTTGCAAGATGGTTCAAGTGTGAGCTATGACTTCAATCCACT  
TGCCGGTAGAGGAATTTAGTGTACAAAGGCAATGCATTTGTTCAATGG

>PGSC0003DMG400022990LRR-RLPs\_248

TTGGAGGGGTGTGGAATGCAGTAATAACTGGCCATATACTCGTCCTTAATCTTCGTATAGGTACAATT  
GAATCCAATCCTGATGGTCCTGATAAGGATCTCATATTGACAGGCAACAT

>PGSC0003DMG400022990LRR-RLPs\_2480

CAATCCACTTGCCGGTAGAGGAATTTAGTGTACAAAGGCAATGCATTTGTTCAATGGAAAAACAAGGA  
ATCAGAATACCGTAACACCTTGTGGCTTCTGAAAACCATTGATCTTTCTAG

>PGSC0003DMG400022990LRR-RLPs\_2542

ACAAGGAATCAGAATACCGTAACACCTTGTGGCTTCTGAAAACCATTGATCTTTCTAGCAACGAACTAGT  
TGGTGACATCCCTAAAGATTTTAGCAGAATGAACGCATTGCTGTCATTGA

>PGSC0003DMG400022990LRR-RLPs\_2604

GAACTAGTTGGTGACATCCCTAAAGATTTTAGCAGAATGAACGCATTGCTGTCATTGAACATATCAAGAA  
ACAATTTGACAGGAAGTATCATTGAAGGAATTGGTTTAATGAAGATGTTG

>PGSC0003DMG400022990LRR-RLPs\_2666

ATCAAGAAACAATTTGACAGGAAGTATCATTGAAGGAATTGGTTTAATGAAGATGTTGGAGGCTCTTGA  
CTTGTCGGGAATCATCTCTCGGGGAAGATCCCAGTAGGACTGGCTAACTT

>PGSC0003DMG400022990LRR-RLPs\_2914

CAGCATGTCCTACATTTTCTCCTCCAAATCCTCATGTTGGCTTTGACAGTACTCGTCAAGAAAATGATGAT  
GATGATGAGTTTCTTCTAAAGAGTTTTATGTATCGATGGCATTGGGCT

>PGSC0003DMG400022990LRR-RLPs\_3038

TGTCGCATTTTGGGGAATTTTGGGCTCTTTGTACTTCAATGATTCATGGAGGAATGCATACTTCAAGTGG  
TTAAATGCCTGCTTTGCAAGGTTGAAGGCAAAACTGAGGGCCTGATGACT

>PGSC0003DMG400022990LRR-RLPs\_310

GTACAATTGAATCCAATCCTGATGGTCCTGATAAGGATCTCATATTGACAGGCAACATCACTTCTTCATTG  
GTTAAGTTGCAGTATTTGAAGTACTTAGACCTTAGTTCCAATAATTTTG

>PGSC0003DMG400022990LRR-RLPs\_372

TCTTCATTGGTTAAGTTGCAGTATTTGAAGTACTTAGACCTTAGTTCCAATAATTTTGGTGGCGACGGACC  
AATACCCAAATTTATTGGATATTTCAAAGATTAGAGTACTTAAATCTC

>PGSC0003DMG400022990LRR-RLPs\_434

CGACGGACCAATACCCAAATTTATTGGATATTTCAAAGATTAGAGTACTTAAATCTCACATCTAGATAC  
AGAGTTTTTACTGGTCTAGTTCCTCTCCAGCTCCAAAATCTTACCTCCAT

>PGSC0003DMG400022990LRR-RLPs\_496

CTAGATACAGAGTTTTTACTGGTCTAGTTCCTCTCCAGCTCCAAAATCTTACCTCCATAAGGACACTTGAT  
CTTCGAGGCAATTATTTAACGGTCAATAGCCTTGAGTGGATTCTCATC

>PGSC0003DMG400022990LRR-RLPs\_558

ACACTTGATCTTCGAGGCAATTATTTAACGGTCAATAGCCTTGAGTGGATTCTCATCTAGTGCATTTGGA  
GTACTTAGATCTAAGTTTATCCAATGTGCAAGCGAAAAACTGGTTGCAA

>PGSC0003DMG400022990LRR-RLPs\_62

CTGTCTATCGATACTGATCATGCATCAAAGCTTTGCTTTTGGATTAATGTCAAGAGGGAATAATACGAAA  
ATTTTGTGCATAACAAAGGAGAGGGAAGCTCTTCTCGAGTTCAAACGAAG

>PGSC0003DMG400022990LRR-RLPs\_620

GCATTTGGAGTACTTAGATCTAAGTTTATCCAATGTGCAAGCGAAAAACTGGTTGCAAGAGATAAGTAA  
GCTCCCAAATTTGAGGGAATTGCATTTGTTTGGTTGTCAACTCCCCAAAAT

>PGSC0003DMG400022990LRR-RLPs\_682

TAAGTAAGCTCCCAAATTTGAGGGAATTGCATTTGTTTGGTTGTCAACTCCCCAAAATCATTCTTCATCA  
CTTATCTTAGCTAATATTTCTCATCTCGTCTTCCATCCTCGACATCT

>PGSC0003DMG400022990LRR-RLPs\_744

CCTTCATCACTTATCTTAGCTAATATTTCTCATCTCGTCTTCCATCCTCGACATCTCCTCTAATAGATATT  
CGTCCCCTGCAATAAATAGTTGGTTATTTAACTTCACTAGTCTTACT

>PGSC0003DMG400022990LRR-RLPs\_868

TAGATCTTTCGAGCAACGACTTAGGCCAAATGTCTAGTGGCTTTGGGTAAGTTTGGAACATGT  
TAAGCTATTTGGAAGTGGTATTCAAGGTGGGATACCAAGGTCTTTGGGA

>PGSC0003DMG400022990LRR-RLPs\_992

AAGTCGTTTACGCTCTATTGATGCAGATTCCAATAACTTGTTAAGTCAACCGTTTTCTGAGTTGCTTGATA  
TCTTAGCTGGGAGTAATCAATCGCTTGAGTATTTGTCGTTTGAGGGAAA

>PGSC0003DMG400023004-(rev)LRR-RLKs\_0

CTACTGCCAAAAGAAAAAAGAAACCAACTGAGTCAGTATAGTACTTCATCTCTGAAACAAAGCAAGA  
ACCTCACTCTCTACCATTTCCAGTCAAAGGTAGGTAACAATAACATGGG

>PGSC0003DMG400023004-(rev)LRR-RLKs\_1159

TGGGTATGTTGTCGTTGTTGTAGTTCATCCCCGTATGTTCTAAAGGTGGCTTTAAGTTTTGTTTTGGGTG  
TTTATTTACAACCTCATTTTGATAATGGAGTCTGTCTCACTTTAGTTTA

>PGSC0003DMG400023004-(rev)LRR-RLKs\_122

TTCTCCATTATTCCTCTGTTTTCTTTCATACTCTTTTCACTCTCTGTAAGTGGAATGCTGAGTTACAACC  
TCTAATGGACTTAAAAGCCAGTCTTGACCCTGAAAATGCTTTACTCA

>PGSC0003DMG400023004-(rev)LRR-RLKs\_1525

TATCCGAAACAACAAGATTTCTGGCAATGTGCCTCTTGGTAATGAATTTCTCGCCCTACATTGACTCTC  
TCCGTTGGAGTTTCAAGAGTCAATCAAGTTTTTTTTTAGTGGCATTTC

>PGSC0003DMG400023004-(rev)LRR-RLKs\_1586

TTGTAAGTCTCTCCGTTGGAGTTTCAAGAGTCAATCAAGTTTTTTTTTAGTGGCATTTCATATATGCCTTT  
AGATAATTTAGTTGTTAATTATTGTGTTTCATAGTACTTATTACGTA

>PGSC0003DMG400023004-(rev)LRR-RLKs\_1647

ATATGCCTTTTAGATAATTTAGTTGTTAATTATTGTGTTTCATAGTACTTATTACGTAGTTTTCAAATATG  
AGTTTTTTTCAAAAACCTTGAAGCTTCTATGTCCGATTCATGGTCAA

>PGSC0003DMG400023004-(rev)LRR-RLKs\_1708

TTTCAAATATGAGTTTTTTTCAAAAACCTTGAAGCTTCTATGTCCGATTCATGGTCAAAGTTTAGACGTT  
GAATCTTGAAATTTCAACCGTGCCACATAAGTTGAGGCAGAAGGAGTTA

>PGSC0003DMG400023004-(rev)LRR-RLKs\_1769

TTAGACGTTTGAATCTTGAAATTTCAACCGTGCCACATAAGTTGAGGCAGAAGGAGTTATGTATATGTA

GCCCCATAAGAGTCGTACGTATAGTTTCTTGGTAAATTATATCTTATCTAG

>PGSC0003DMG400023004-(rev)LRR-RLKs\_183

TGAGTTACAACCTCTAATGGACTTAAAAGCCAGTCTTGACCCTGAAAATGCTTTACTCACTTCATGGACT

GTTTCTGGTAATCCATGTGATGGTTCTTTTGAAGGTATTGCTTGTAATGA

>PGSC0003DMG400023004-(rev)LRR-RLKs\_2318

TAGTCAGTCTTGAGTACTCGATTGGTTGGGATCCGTTGGCTGAGGGCCGGCGTTATGGTGGAGTTTCCC

AAGAGATTCTGCAGAGATACAGATTCAATTTGGAAGAGGTGGAGTCAGCTA

>PGSC0003DMG400023004-(rev)LRR-RLKs\_244

TCATGGACTGTTTCTGGTAATCCATGTGATGGTTCTTTTGAAGGTATTGCTTGTAATGAAAAGGGTCAAG

TTGCTAACATTTCTCTACAAGGTAAAGGCCTTAAAGGGAAGTTGTCACCA

>PGSC0003DMG400023004-(rev)LRR-RLKs\_2745

ATGGTCCACGAGGGTATCTATCATTAGTGGCACTGCAAAGGTCAGTTTTTGAATCAACTCTATCTTATA

AGATCTAAAGTACAGTAGTTTGACATTATATTACTTTTTTTGAGCTTACT

>PGSC0003DMG400023004-(rev)LRR-RLKs\_2806

TATCTTATAAGATCTAAAGTACAGTAGTTTGACATTATATTACTTTTTTTGAGCTTACTGTCAACAATTCAA

TAATGCCTTTTTATCTATCTTGAGCAGGCGTTGAGTATTTGCACGGGT

>PGSC0003DMG400023004-(rev)LRR-RLKs\_305

AGGGTCAAGTTGCTAACATTTCTCTACAAGGTAAAGGCCTTAAAGGGAAGTTGTCACCAGCCATTGCTG

GGCTAACTCACTTGACTGGACTCTACTTGCATTATAACTCATTGTATGGAG

>PGSC0003DMG400023004-(rev)LRR-RLKs\_3355

GAGAAATTGGTAATTTAGCTAGTCCCTCCTAATGCTAATGATCTTCTTCCATCTACTATTGCCTGTGGCAA

ATTTTCAATCCTCCTACTTATTAGCTGGAGATAGATTCGTAACCTC

>PGSC0003DMG400023004-(rev)LRR-RLKs\_3477

ACGAGTATTGGAGCTTCAAATATTTAGTCAGTCTGAGAACTTCTTCGACTGAGGACTTGACCATTTTGTG

AATGTATCTTGATGCCATTTAACCTTAGGATTTCTCATGTTGGAGGATT

>PGSC0003DMG400023004-(rev)LRR-RLKs\_3538

CATTTTGTGAATGTATCTTGATGCCATTTAACCTTAGGATTTCTCATGTTGGAGGATTTTCTCCGTTTAT

CTCATGGATTCTAATTAATCTGTTTGTAAAAAGATGAATGTTCTTCTA

>PGSC0003DMG400023004-(rev)LRR-RLKs\_3577

ATTTCTCATGTTGGAGGATTTTCCTCCGTTTATCTCATGGATTCTAATTAATCTGTTTGTAAAAAGATGAA  
TGTTCTTCTATTTACCTACGATCATTGCTTCGTTTTGTTTTGTGCCTA

>PGSC0003DMG400023004-(rev)LRR-RLKs\_366

CATTGCTGGGCTAACTCACTTGACTGGACTCTACTTGCATTATAACTCATTGTATGGAGAGATACCAAGA  
GAAATTTCTAATTTGGTTGAACTCACTGATTTGTATTTGAATGTTAATGA

>PGSC0003DMG400023004-(rev)LRR-RLKs\_427

ATACCAAGAGAAATTTCTAATTTGGTTGAACTCACTGATTTGTATTTGAATGTTAATGATCTCTCTGGTGA  
GATCCCTCAAGAACTTGAACCATGTCAAAATTGCAAGGTCAGTGA

>PGSC0003DMG400023004-(rev)LRR-RLKs\_488

TCTCTGGTGAGATCCCTCAAGAACTTGAACCATGTCAAAATTGCAAGGTCAGTGAAGAACTAAC  
TTCTCTGTTTTGTGCGTTATGCTTTGCTTGGTTTTTGGGCTATTTTAGATT

>PGSC0003DMG400023004-(rev)LRR-RLKs\_61

AAGCAAGAACCTCACTCTCTCACCATTTCCAGTCAAAGGTAGGTAACAACATGGGTTTTCTCCATT  
ATTCTCTGTTTTCTCTCATACTCTTTTCACTCTCTGTAAGTGAAAT

>PGSC0003DMG400023004-(rev)LRR-RLKs\_671

TTTTACATTTCTTTGTTCTTTCTGAATATTTTGTCCAAATGTGTTGAGCTCTAGTTGGAAAAAGTAGGGG  
CTTCTGCTGTTAATCATTATGTCTCACTGAAAAAATTGAAGTCACAAA

>PGSC0003DMG400023004-(rev)LRR-RLKs\_732

AAAGTAGGGGCTTCTGCTGTTAATCATTATGTCTCACTGAAAAAATTGAAGTCACAACTGGA

>PGSC0003DMG400023004-(rev)LRR-RLKs\_793

GAACTTGTTCCATTTGGGAAATCATAAAGATTGTTTTTTCCCCCAAATTGTTTTAGAGTTCAATTCAG  
TCTAGTAGTTCCATCCCTTGATTCTTTTCACTACTAGTTTCTTGTT

>PGSC0003DMG400023018LRR-RLPs\_1071

CCATGGTTAATACTAATTAAGCTTACGTTGACATTACATATATCAAAGACATGTAACATGCGGTATAAT  
ATTGGATGTCTTTGATGGATGTAATATCGAACATAAGCTTAGTATTAACC

>PGSC0003DMG400023018LRR-RLPs\_1134

GTATAATATTGGATGTCTTTGATGGATGTAATATCGAACATAAGCTTAGTATTAACCACATATGATATGG  
CTACAAGCCTACACTTACAAAATGATGACTTCCTGAAATCTCTGAATAA

>PGSC0003DMG400023018LRR-RLPs\_1197

GATATGGCTACAAGCCTACACTTACAAAATGATGACTTCCTGAAATCTCTGAATAATGAATGTACTGTA  
GGAGACAACAATTTCCACAAAATGATCAATTTCTTCATCATCATTATATG

>PGSC0003DMG400023018LRR-RLPs\_126

TTCTACTTGTGTCAGTTCAATGAGGGAGAGTATGTATAAGTTGGAGTGTGCAGAGTCACAAAATCTAAAAC  
ATGCCAAGTAAATCCAAAATATTGTGTATTATACTTTCTATTAATACTAA

>PGSC0003DMG400023018LRR-RLPs\_1449

TCCACTTCAATTTTATACTATACGGAGATTTTCAAATTATATCCACATGCACATCAAAATCTCAAATTAGT  
ATTTTCAAGCGAATGTGTATAAACATTCCTGCAATGCACAAATCTCTT

>PGSC0003DMG400023018LRR-RLPs\_1512

AAAATTAGTATTTTCAAGCGAATGTGTATAAACATTCCTGCAATGCACAAATCTCTTTTTTGAACTGACT  
TGAGTTTCACATTTTCTTTGATCAAAGTTGTAAGTTGAATTTTTTTAA

>PGSC0003DMG400023018LRR-RLPs\_189

TAAAACATGCCAAGTAAATCCAAAATATTGTGTATTATACTTTCTATTAATACTAAGTAAAAGAAATTA  
AGAGAGAGAGCAGTGATAAATGACAAATGGAAGAAATGAAAATGAATGA

>PGSC0003DMG400023018LRR-RLPs\_2016

TTGGTCGATCCAGCAACTGACCGGTCGATCCGACAACCTGATTGGTCGATCTACATCTGTTGTTGCCGGA  
ATCCAGAAATGCTTAGAAGGTATCACCCCCCTTTCCGTTTCAGTTTTAAC

>PGSC0003DMG400023018LRR-RLPs\_2062

GATCTACATCTGTTGTTTGCCGGAATCCAGAAATGCTTAGAAGGTATCACCCCCCTTTCCGTTTCAGTTTT  
AACTTAGGCACAAAATGAGCAAATTGAGTAATATATTGGCATAAATTTG

>PGSC0003DMG400023018LRR-RLPs\_315

ACGTAAGACTTTGACGATTTGGGCACTTAAAAGAGTAAAACGCGGTATAATTAATGTGAACTCCAAGA  
GCTCTTTTGGTCGTCCACAAGACCTAAAGCTGTAGACCAAATCAGTCAATT

>PGSC0003DMG400023018LRR-RLPs\_378

CCAAGAGCTCTTTTGGTCGTCCACAAGACCTAAAGCTGTAGACCAAATCAGTCAATTGCCGGATGCTCTT  
CTCCTTTGCTCTCTTATATCGACTGATCAAACACTCGTAACAACCGCTCT

>PGSC0003DMG400023018LRR-RLPs\_567

GCATTATGTATCCTATGTTTCATTATGTATTAGGTTATTCTATTTCTTCCAAAATAAAAAATCCAACCTTGAT

AGCCTTGAGCCGGATGCACACAGGTGGAAAATATGAAACTCCGGTTAG

>PGSC0003DMG400023018LRR-RLPs\_630

CAACTTGATAGCCTTGAGCCGGATGCACACAGGTGGAAAATATGAAACTCCGGTTAGTTTCTGAAGAAG

AGGTTTGTGCATTGTCTTTATGTTTATGCACTTGTTTCATCGTTTATAACAC

>PGSC0003DMG400023018LRR-RLPs\_693

AAGAAGAGGTTTGTGCATTGTCTTTATGTTTATGCACTTGTTTCATCGTTTATAACACTAATTTTGGGATTT

TGATGCTAATGTGTCCATAGCATGAAAGTCTCTAAAAACATAAAATTGA

>PGSC0003DMG400023018LRR-RLPs\_756

TGGGATTTTGTATGCTAATGTGTCCATAGCATGAAAGTCTCTAAAAACATAAAATTGAAGTGGATAGTGTT

ATCCAATGACCATATTGTGAACTTATTGTTGGGTTGTCCTGCATTAGAAA

>PGSC0003DMG400023018LRR-RLPs\_819

TAGTGTTATCCAATGACCATATTGTGAACTTATTGTTGGGTTGTCCTGCATTAGAAACTATGAAATTATCT

TGTTTTAAAGGTTTTAGTCGCATGGAAATTAGGTCTTCAAATTAAGA

>PGSC0003DMG400023057LRR-RLKs\_1054

AGATTCCTGTGGAGTTGAAAGAATGCATTTCACTAAAGCAGCTTGATTTGTCTAACACACGCTTAATGG

TTCGATACCAGTAGAGCTGTATGAGTTGGTTGAGTTAACTGATCTCCTAC

>PGSC0003DMG400023057LRR-RLKs\_1116

CTTAATGGTTTCGATACCAGTAGAGCTGTATGAGTTGGTTGAGTTAACTGATCTCCTACTTAACAACAACA

CATTGGTTGGTTTCAGTTTCTCCGTTGATTGCAAACCTAACCAATCTGCAA

>PGSC0003DMG400023057LRR-RLKs\_1178

CAACAACACATTGGTTGGTTTCAGTTTCTCCGTTGATTGCAAACCTAACCAATCTGCAAACATTGGCATTGT

CGCATAATAATTTTCATGGCAATATACCGAAAGAGATTGGGATGGTCGA

>PGSC0003DMG400023057LRR-RLKs\_2108

AGAAGAGAATTCTCTCAATGGAACCTCTGCCCTTGAAATTGGTGAACCTCAAGTCCCTAAATATCTTAAAT

TTCAACAAAAACCAACTCTCTGGTCCCATTCCATCTACCATTGGCAACTT

>PGSC0003DMG400023057LRR-RLKs\_2294

AGAACTCAAGAATCTTCAAAGCATACTGGATTTGAGTTTCAACAACATCATTGGTCAAATTCCTCCTTCTG

TTGGGACACTTACTAAGCTTGAAACACTTGATCTATCTCATAACCATCT

>PGSC0003DMG400023057LRR-RLKs\_2356



CTCCTTCTGTTGGGACACTTACTAAGCTTGAAACACTTGATCTATCTCATAACCATCTCACCGGAGAAGTT  
CCTCCTCAAGTCGGTGAAATGAGCAGTTTGGGAAAGCTTAACCTCTCCT

>PGSC0003DMG400023057LRR-RLKs\_2976

GCAAGAGAAATCAAGACACTTTGGAGGATAAGGCACAGACACTTGGTGAGGCTACTTGGATACTGTAA  
CAACAGCGGAGAAGGTTCCAACGTATTGATTTATGAGTACATGGAGAACGGA

>PGSC0003DMG400023057LRR-RLKs\_3348

ACTGAATCAAACCTTGTGGCTTGCTGGTTCATTTGGTTATATTGCTCCAGGTATATATCATTCTGAATTCT  
CGAGTATTAGCATTGAAAATAGTTTTTTATTTTTTTATACTAAGTTG

>PGSC0003DMG400023057LRR-RLKs\_3410

CTGAATTCTCGAGTATTAGCATTGAAAATAGTTTTTTATTTTTTTATACTAAGTTGCTTATTTGTTGCGA  
GAGTATGCTTATTCTTGAAGGCAACAGAGAAGAGTGATGTTTATAGC

>PGSC0003DMG400023057LRR-RLKs\_3534

GGATTGTACTGATGGAGCTAGTGAGTGGAAGGATGCCAACTGATGGGAGTTTCGGAGAAGACATGGAC  
ATGGTGAGGTGGGTTGAATCGTGCATCGAAATGTCTGGGACAGTTAGGGAAG

>PGSC0003DMG400023057LRR-RLKs\_620

TGCTGAGATTGGTAACTGCTCTAGTCTTGTTGCGTTCAGCGTTGCAGTTAACAATCTCAATGGATCAATC  
CCGGAGGAGTTATCTATGCTTAAAACCTTCAAGTTATGAATTTAGCGAA

>PGSC0003DMG400023057LRR-RLKs\_682

GATCAATCCCGGAGGAGTTATCTATGCTTAAAACCTTCAAGTTATGAATTTAGCGAATAATAGTCTTTC  
AGGACAGATTCTACTCAGCTTGGAGAAATGAATGAGCTGCAGTATCTCA

>PGSC0003DMG400023057LRR-RLKs\_868

ATTTAGACTTGTCTGGTAATAGACTTACTGGTGAAATTCCTGGAGAATTTGGGAATATGGATCAGCTACA  
GTTCTTGGTTCTGACTAGTAATAATCTTTCGGGTAGCATACCGAAAACAA

>PGSC0003DMG400023057LRR-RLKs\_992

TAGTTCTAATCGAAACAGTAGTTTGGAACACATGATGCTATCTGAAAACCAACTTCTGGTGAGATTCTC  
GTGGAGTTGAAAGAATGCATTTCACTAAAGCAGCTTGATTTGTCTAACAA

>PGSC0003DMG400023192LRR-RLKs\_1054

CACTTAGCGGGGCTATTCCAATGCAGTTGAGTAACTGTAGCAGCTTAACAGCTCTTCAGTTGGATAAGA  
ACCTATTATCCGGCACGATTCTGAGCAAGTTGGTGAGTTGAAGTACTTGC

>PGSC0003DMG400023192LRR-RLKs\_1922

GTTGAGTGGAAGAATCACAACCTAAGCCTCTTGACCAGTCTCGCTACTCTAAACGTATCGTATAATAAT  
TTCTCAGGACCTATTCTGTAAACACCCTCCTTTAGAACTCTAACATCAAA

>PGSC0003DMG400023192LRR-RLKs\_1984

ATAATAATTTCTCAGGACCTATTCTGTAAACACCCTCCTTTAGAACTCTAACATCAAACCTTTTTCTTGAGA  
ATTCACCTTTTTGTGAATCAACTGATGGCTTCACTTGTCTGCACATA

>PGSC0003DMG400023192LRR-RLKs\_2046

TTTTCTTGAGAATTCACCTTTTTGTGAATCAACTGATGGCTTCACTTGTCTGCACATATAACTAGAAAGGAA  
CGGATTGAAGTCTGCAAAAACCATAGCTTTGGCTGCTGTGATTGTGACT

>PGSC0003DMG400023192LRR-RLKs\_2480

TGAAATTCAGATTCTTGGTCACATTAGGCATCGAAACATAGTGAAGCTCCTCGGATATTGTTCAAACAGG  
AGTGTTAAGCTTCTTCTCTACAACCTACATTTCAAATGGTAATCTTCAACA

>PGSC0003DMG400023192LRR-RLKs\_2852

TCCAGGCAAGTATCTTCAACTTTTTATTTCTCATCTTAACCTAAATGTTGTGCAGCTATATGATGCTTTAAA  
TCCTTGTTGAATCGTGTGATCATCGCATCTCTAAAAGCTTAAGTTA

>PGSC0003DMG400023192LRR-RLKs\_2914

ATGCTTTAAATCCTTGTGTTGAATCGTGTGATCATCGCATCTCTAAAAGCTTAAGTTATTAGAAAGGATAC  
ACTTTTCTCTACTAAATCATATCTTCAACACATGCGGCTCTGATTCTTG

>PGSC0003DMG400023192LRR-RLKs\_2976

AAAGGATACACTTTTCTCTACTAAATCATATCTTCAACACATGCGGCTCTGATTCTTGCCAAGCACGTGGA  
TAATGGGTGACGCTTAGACTTCAACCTAGGATACCATGTTGAAATGTGT

>PGSC0003DMG400023192LRR-RLKs\_434

TGGACTTACCTCACTTCAGTTCCTTTTCTTGAATCAAACAGATTGAGTGGTAGAATCCCATATCAACTTG  
CTAATCTTTCTTCATTAGAAATACTCTGTCTCCAAGATAATCTCCTTAA

>PGSC0003DMG400023192LRR-RLKs\_496

ATCAACTTGCTAATCTTTCTTCATTAGAAATACTCTGTCTCCAAGATAATCTCCTTAACGGGTTCGATTCCG  
AAATATTTAGGCTCATTGGTATCACTCCAACAGTTCAGGATTGGAGGGA

>PGSC0003DMG400023192LRR-RLKs\_744

ACTCTGGCAGTATATGATACTGAAGTGTTTGGTTCAATACCTCCTGAACTTGGGATGTGTTTCAGAGCTCA

GGAACCTGTATTTGCACATGAATAAGCTTACTGGTCCAATCCCTCGTCAG

>PGSC0003DMG400023198-(rev)LRR-RLPs\_0

GCTAATAATACATCAACCTACCATTTCTAGCAACAACAGGCAACAGCTGTGGAGATTTTTTTTTTTGTATA  
AATAAATTGTAACCCCTTCGATGTATTTATGGTTGGATTTTCCATCAA

>PGSC0003DMG400023198-(rev)LRR-RLPs\_186

AAAAATGTCAGTGAATAGTATAACTGAGTTCTGTTCTGAATCCTAAGTGGGGTTTGCTTTTCTCATCTTT  
TTTTTATGCTGCCCTGTTTCCATCATAAACACTCGTTTTTCACTGTAT

>PGSC0003DMG400023198-(rev)LRR-RLPs\_2356

TTTTAGTTTTGATATATGACTCATGAACGTTTATTTTACTCATCAGGCTGTTGTGCAGCATATGGCTGATC  
TTGTTGAAAAGAGGGATGCGAAGCCACAGCCAGTTAAGCAGAAGAAATC

>PGSC0003DMG400023198-(rev)LRR-RLPs\_248

CTCATCTTTTTTTTTATGCTGCCCTGTTTCCATCATAAACACTCGTTTTTCACTGTATAAAACACGAAAAAC  
AAGTAAAGTTTTGTTTCTTAECTACTATTATTTTGATTTGATTTGATT

>PGSC0003DMG400023198-(rev)LRR-RLPs\_3038

TTGGTTCTATTTATCATCCTCTTTGTAATATTTGCTTGTAATTTTATGATGTATGTTTTAAAATCAGTTGTTA  
AAAATCGATATCACACGGCTATGAAGAGGGAGGAAATATCTGTTGTT

>PGSC0003DMG400023198-(rev)LRR-RLPs\_3084

TGATGTATGTTTTAAAATCAGTTGTTAAAATCGATATCACACGGCTATGAAGAGGGAGGAAATATCTG  
TTGTTGTCAAATCCCTCAATGTTAATGAATTATTATGAGTTGACTTCAGA

>PGSC0003DMG400023198-(rev)LRR-RLPs\_310

CACGAAAAACAAGTAAAGTTTTGTTTCTTAECTACTATTATTTGATTTGATTTGATTTGATTGGATTAAC  
ATTTGATTCTTGCAATATTGATTGGCGCTTCTAGAAAGTTGTAAAGA

>PGSC0003DMG400023198-(rev)LRR-RLPs\_372

TGGATTAACATTTGTATTCTTGCAATATTGATTGGCGCTTCTAGAAAGTTGTAAAGAGGAAGAACTCAA  
TTATGGCTTCTCAATATTTTCGTTTTTTTTTATCTAGGACTCTTGAAA

>PGSC0003DMG400023198-(rev)LRR-RLPs\_434

GAACTCAATTATGGCTTCTCAATATTTTCGTTTTTTTTTATCTAGGACTCTTGAAACTAAACCCCCAAAA  
AAGTGTATTCGAATCTGGATACTGTGGGTGGTTTCTGTGTGTAGCTGT

>PGSC0003DMG400023198-(rev)LRR-RLPs\_558

GTGTGTGTGTGTGTTTTTTTTTTGACGAAATTGAGAGTGAAATGGGATCCTCTGCAATGTCTGTTGACGA  
GATTGTGGAAGAGATGATGAGGCTTAACAAATCTCTACCAATAAGGCCAG

>PGSC0003DMG400023274LRR-RLPs\_114

CTCTTCATACAGTCTTTCCTCAGAGATGCAGAACTAAAGCAAAGTAGAGATCAAAGAGTTCAACAATGG  
GTGTTTCAAATCAACTCTATTGCTAATGATGTTGTTGCTATACTCGAGACT

>PGSC0003DMG400023274LRR-RLPs\_1283

CTGATAAGACGAAGCTTGGTTCAAGTGGTAGATACATTTTGGGAAAGAGTTACTGAATGTAGGGTTCAT  
GATTACTCCATGATCTTGCATACAAAAGGCATTGGAAGTAACTTCTTT

>PGSC0003DMG400023274LRR-RLPs\_1346

GTTTCATGATTTACTCCATGATCTTGCATACAAAAGGCATTGGAAGTAACTTCTTTGACATTTATGATCC  
AAGAAGCCACTCCATATCCTCTTTATGTATCAGACATGTGATTCATAGT

>PGSC0003DMG400023274LRR-RLPs\_1472

AAAAGGTACTTCTCACTTGATCTTTCTAACTTGAAGTTGAGGTCAATTATGTTCTTCGATCCAGATTTTGG  
TAATGTGTTCCAACATATAGATGTGTTCCGACATATATATGTGCTGCAC

>PGSC0003DMG400023274LRR-RLPs\_1535

GATTTTTGTAATGTGTTCCAACATATAGATGTGTTCCGACATATATATGTGCTGCACTTGAATATTAAGA  
AGTTGGTTATATACCTTATGCCATAGGGAGTTTGTACCAACTCAAGTTC

>PGSC0003DMG400023274LRR-RLPs\_1598

ATTAAGAAGTTGGTTATATACCTTATGCCATAGGGAGTTTGTACCAACTCAAGTTCCTAAGATTTAGAG  
GTATCCATGATCTTCCCTCGTCCATTGGCAATCTCAAGAATCTACAGACA

>PGSC0003DMG400023274LRR-RLPs\_1661

TTTAGAGGTATCCATGATCTTCCCTCGTCCATTGGCAATCTCAAGAATCTACAGACACTTGTCTTCGATCC  
GGTCAGATACACTTTCCAACACTACCAAGCGAGACAGTTGACCTGATAAAT

>PGSC0003DMG400023274LRR-RLPs\_1724

TTCGATCCGGTCAGATACACTTTCCAACACTACCAAGCGAGACAGTTGACCTGATAAATTTAAGACATTTAG  
TTGCTCGGTATTCAGAACCTCTGGCACATATAAGCAAACACTCACTAGTCTT

>PGSC0003DMG400023274LRR-RLPs\_1850

CTTGAAAGAGTTTGTGTTGATCAATGGAAAGATGTTGACCCTGTTGATTTAGTCAATCTTCGAGAATTAA  
GCATGCTTGATATTAGGAAATCTTACTCCCTAAACAACATTAGCAGCTTG

>PGSC0003DMG400023274LRR-RLPs\_1913

GAATTAAGCATGCTTGATATTAGGAAATCTTACTCCCTAAACAACATTAGCAGCTTGAAAACCTTAGCA  
CTCTCACATTGTTTTGTAGAGGTGATGAATCATTCCCATCCCTTGAATTT

>PGSC0003DMG400023274LRR-RLPs\_1976

CTTAGCACTCTCACATTGTTTTGTAGAGGTGATGAATCATTCCCATCCCTTGAATTTGTTAATTGTTGTGA  
AAAGCTACAAAAATTGTGGTTAAGAGGTAGAATAGAGAACTGCCTCAT

>PGSC0003DMG400023274LRR-RLPs\_2039

TGTTGTGAAAAGCTACAAAAATTGTGGTTAAGAGGTAGAATAGAGAACTGCCTCATCTGTTTCAAATT  
CCATCACAATAATGGTTCTTCAGAACTCAGGACTGACAGAAGATCCGATG

>PGSC0003DMG400023274LRR-RLPs\_2102

CCAAATTCATCACAATAATGGTTCTTCAGAACTCAGGACTGACAGAAGATCCGATGCCTATATTGGGAA  
TGTTGCCAAACCTAAGGAATCTCGATTTGTTTAGAGCTTATGAAGGAAAA

>PGSC0003DMG400023274LRR-RLPs\_2165

TTGGGAATGTTGCCAAACCTAAGGAATCTCGATTTGTTTAGAGCTTATGAAGGAAAAGAAATAATGTGC  
AGTGATAGCAGCTTCAATCAACTAGAGTTCCTTATTCTTTATGGTCTTGAG

>PGSC0003DMG400023274LRR-RLPs\_2228

ATGTGCAGTGATAGCAGCTTCAATCAACTAGAGTTCCTTATTCTTTATGGTCTTGAGAACCTAGAAAGAT  
GGGATTTGGTCACAAGTGCCATGCCTCTGATTAAAGGTCTTGGTGTGCGAT

>PGSC0003DMG400023274LRR-RLPs\_2354

CCAAATTTAAAGGAGATTCCAGAGAGAATGAAAGACGTGGAGCTGTTGAAGAGGAATTATAATAAGTG  
GTGAAGGTTTTCAAGCTATATATATATATATATATCATGTCTTCATAATCGTAG

>PGSC0003DMG400023274LRR-RLPs\_2417

AAGTGGTGAAGGTTTTCAAGCTATATATATATATATATATCATGTCTTCATAATCGTAGAGGTATTGATGGG  
GGCATTCTGCCAAGCACTTGAAGACACTGGTTATTAATTTAGGGCTGT

>PGSC0003DMG400023274LRR-RLPs\_2480

TGATGGGGGCATTTCTGCCAAGCACTTGAAGACACTGGTTATTAATTTAGGGCTGTGAGTGAAGTGG  
TTTTAGTGTAATTGGTTTGAACATAATTGTTTTTGCCAAAAATGATTTTGT

>PGSC0003DMG400023274LRR-RLPs\_2543

GAGTGGTTTTAGTGTAATTGGTTTGAACATAATTGTTTTTGCCAAAAATGATTTTGTGATGCTTTAATTAA

TTGGTCGACTGTATGTTCTCTTGCTTATCCACATTTAAGACGATGCTTT

>PGSC0003DMG400023274LRR-RLPs\_2586

AAAAATGATTTTGTGATGCTTTAATTAATTGGTCGACTGTATGTTCTCTTGCTTATCCACATTTAAGACGA  
TGCTTTATATGTTAAAATGAAATTAATAATAGCATATGGTACTCTCTCG

>PGSC0003DMG400023274LRR-RLPs\_57

CAAGTTCCCTGCGTAAAAATCTGAGAAAGGAAATTGAGTGGCTGAAAAATGAGCTACTCTTCATACAG  
TCTTTCCTCAGAGATGCAGAACTAAAGCAAAGTAGAGATCAAAGAGTTCAA

>PGSC0003DMG400023282LRR-RLKs\_0

AATGAACCATCCCTCTTTCTTCATTTTCCTTCACTCCACAATAACACTCTCTTCTTTTAACAAAATTTTTTT  
CTTCTCATTAGATTTCTGAATTCTGCTGCTCAAACATGAGACTAAT

>PGSC0003DMG400023282LRR-RLKs\_1054

ACAAATTGACATGTAAACACATCAGCCAATCACCCAACATCCTTTGTCTGTGTATATCTGTTTAACATCT  
TTCATATGTGCTTTACTCAATTCATAAGCTATCTTATTCTTTTTAAGTG

>PGSC0003DMG400023282LRR-RLKs\_1116

TTAACATCTTTCATATGTGCTTTACTCAATTCATAAGCTATCTTATTCTTTTTAAGTGATATTTTTAATTTCT  
TATTATAACAACAACATTTGATTAGGTATACATTGCTTTTTAAAGTAA

>PGSC0003DMG400023282LRR-RLKs\_1178

TTTTAATTTCTTATTATAACAACAACATTTGATTAGGTATACATTGCTTTTTAAAGTAAAAGGGGTTTGTTAT  
ATGTTTATTCTGTTTCTATACTTTATTGTTTGGTTACTGATTGCTAC

>PGSC0003DMG400023282LRR-RLKs\_124

GCACACATTGTTACTATTATATTTTAGGTAAGTAACTCTGTTTCCTCTTAACTCTTCTTCATTATTTTTGTA  
ATATTATGTATGCAACAACATTTGAGTTATAGTATAACATGTTCTT

>PGSC0003DMG400023282LRR-RLKs\_1302

CTTCTTTCAGTTACTCATTAAAGAATGGGCATCCATCATATCTGTTATGGAGTTTGTGCATCCCCTTGTGAAA  
TGACTCTTAGCCCTTCCCATATTCAATCATGTCTAGAATTCAAACCTCT

>PGSC0003DMG400023282LRR-RLKs\_1364

CTTGGAATGACTCTTLAGCCCTTCCCATATTCAATCATGTCTAGAATTCAAACCTCTCCATTCCCTCCAAA  
TCCTTGTTATTTTCTGAAGTTTCTTGTTTTCTCTAATTCATTGTCTG

>PGSC0003DMG400023282LRR-RLKs\_1612

GTCACTGAAATTTCACTTGACAATAAGTCCCTTTATGGAATTATTTCCCCTTCAATATCTGTCCTCCAAAGC  
CTTACTTCTCTAGTGCTTCCTTCAAATTACCTGTCTGGAAATCTTCCA

>PGSC0003DMG400023282LRR-RLKs\_186

TTATTTTTGTAATATTATGTATGCAACAAATTCTTGAGTTATAGTATAACATGTTCTTTAATAGCAAAAGA  
TGCATTCTACTTTTTGTTGTACTTAATGTCTCTGTTTCTGTTAAATTTA

>PGSC0003DMG400023282LRR-RLKs\_248

AGCAAAAGATGCATTCTACTTTTTGTTGTACTTAATGTCTCTGTTTCTGTTAAATTTAAGAGTTAAATGATT  
TTAGGCACAAAAATATATGATTTTGGTTGTTAGGACTCAATTATGAAA

>PGSC0003DMG400023282LRR-RLKs\_2976

CTCGTTGAACTCTCTGAATCTTTCGAGTAACAACTCAGTGGCTCAATCCAACAAGCTTGGATAACCTG  
AAGTTATCTTCATTGGACCTCTCTAACAATCAGCTAACTGGAAGAGTTCC

>PGSC0003DMG400023282LRR-RLKs\_3038

ATAACCTGAAGTTATCTTCATTGGACCTCTCTAACAATCAGCTAACTGGAAGAGTTCCTACAGATCTTTTG  
ACGGTGGGAGGAGAAACGGCATTATAGGAAACAAGGGGCTTTGTGTTG

>PGSC0003DMG400023282LRR-RLKs\_310

TTAAATGATTTTAGGCACAAAAATATATGATTTTGGTTGTTAGGACTCAATTATGAAAGTTATATGTTTTT  
TTTTGTCTGTCACCACTCACCCTTTCTTTTTCTCTCCTGTATGTA

>PGSC0003DMG400023282LRR-RLKs\_3100

GATCTTTTGACGGTGGGAGGAGAAACGGCATTATAGGAAACAAGGGGCTTTGTGTTGATCAAAGCAT  
CAGGAATGTCCGAAGGAACTCAAGCATCGGCGCTTGTAGTGGAAGGCTGCT

>PGSC0003DMG400023282LRR-RLKs\_3162

AAGCATCAGGAATGTCCGAAGGAACTCAAGCATCGGCGCTTGTAGTGGAAGGCTGCTCAGGAAGTGT  
TCATGAAGAGCAAAGTGTGTTTTGCATTGTATTACTTTCTTTGGCTGT

>PGSC0003DMG400023282LRR-RLKs\_3286

ATGGGTGTTTTCATGCTTGTGAGTTACTGGAAGTACAAGTGCAATGCTGAAGCTGATTCAGAAAAGTGT  
CTGGGACATTCAAATGGAATGAATCCAAAATGGAAGCTTGAAAGCTTCCAA

>PGSC0003DMG400023282LRR-RLKs\_372

TATGTTTTTTTTGTCTGTCACCACTCACCCTTTCTTTTTCTCTCCTGTATGTATATGCCATACTCATT  
CCTCTTCTTTTTTTTTTTTTGATGATTTGTCATATTAGAATCTCCC

>PGSC0003DMG400023282LRR-RLKs\_3968

AAAGAGGATAAACCAAATACTATGTTTCCACTTCTTTCTATTTTCACTCTTGCTAGTTTCCTAACATCACAT  
TTAAATTTGTTTTATTGACAGAGATAGCATATACTTCCAGAGTGACAG

>PGSC0003DMG400023282LRR-RLKs\_4030

AACATCACATTTAAATTTGTTTTATTGACAGAGATAGCATATACTTCCAGAGTGACAGAAAAGAGCGATG  
TATACAGTTTTGGAGTTGTTCTATTAGAATTAGTAACCGGAAGGAAACCA

>PGSC0003DMG400023282LRR-RLKs\_4092

GAGCGATGTATACAGTTTTGGAGTTGTTCTATTAGAATTAGTAACCGGAAGGAAACCAATAGAGGAAAC  
CTACGGAGAAGGCAAAGACCTGGTTTATTGGGCATCAACTCATCTTAATGA

>PGSC0003DMG400023282LRR-RLKs\_4154

AGGAAACCTACGGAGAAGGCAAAGACCTGGTTTATTGGGCATCAACTCATCTTAATGACAAAGGAAGT  
GTTCTGAATATTCTTGATCAAAAGGTGGTTTCCGAGCTTATCCAAGATGACA

>PGSC0003DMG400023282LRR-RLKs\_4216

GGAAGTGTCTGAATATTCTTGATCAAAAGGTGGTTTCCGAGCTTATCCAAGATGACATGATCAAAGTTC  
TGAGGATTTCTGCCCTATGTACGACTAAGCTTCCTAATTTACGCCCCAGC

>PGSC0003DMG400023282LRR-RLKs\_434

CCATACTCATTTCTCTCTTTTTTTTTTTTTGATGATTTGTCATATTAGAATCTCCAATTTGTTCAATCAAT  
AATAAGTGTGTGGGTCAATTTAAGCGCATCTTGATTAATTTTATGA

>PGSC0003DMG400023282LRR-RLKs\_4402

AGAAAAATGAGAAGGATCCTTTGTAGTTTTCTCTTTTCCCTCTTACCATATAGTTTAAATTCCAACTTCA  
GTATAGTTTTAGTTTTCTCATTATGGATATGCCATGTAAAATTGTATC

>PGSC0003DMG400023282LRR-RLKs\_4464

CCAACTTCAGTATAGTTTTAGTTTTCTCATTATGGATATGCCATGTAAAATTGTATCCAATTTGTCTGTA  
CAAGTTCATTTTGTTAAATGGAATGCATATTTCTGGTTGAGCTTATAA

>PGSC0003DMG400023282LRR-RLKs\_496

TGTTCAATCAATAATAAGTGTGTGGGTCAATTTAAGCGCATCTTGATTAATTTTATGACATATTTGCCATC  
TGTTATTCATGCATTCAGATTAGCAAATCAGAAACAATTAAGATGAAAA

>PGSC0003DMG400023282LRR-RLKs\_558

TTTGCCATCTGTTATTCATGCATTCAGATTAGCAAATCAGAAACAATTAAGATGAAAAGAAAAAGAATTT



TCTATTCACACCTTTAAAACCCAACATCATCTCACATCAATAATAAATAG

>PGSC0003DMG400023282LRR-RLKs\_62

CAAAATTTTTTCTTCTCATTAGATTTCTGAATTCTGCTGCTCAAACATGAGACTAATTAAAGCACACATTG

TTACTATTATATTTTAGGTAAGTAACTCTGTTTCCTCTTAACTCTTTC

>PGSC0003DMG400023282LRR-RLKs\_806

TGTAATAAGTTTAGAACTATTCGGTTCAAGATTTTAATCTTTTCTGGTGCTATGTTCTATCCCACTCTAGTC

AGATCCTTCCCCGGATATGAAGAATTTGATTGTAGGAAAGATGAAAAA

>PGSC0003DMG400023282LRR-RLKs\_868

CACTCTAGTCAGATCCTTCCCCGGATATGAAGAATTTGATTGTAGGAAAGATGAAAAAACAAGGCCGC

TCTTTAGTATCTTTCCTTATAACAAAAGACTATAAAGTCAAGCGAAACATT

>PGSC0003DMG400023282LRR-RLKs\_930

AGGCCGCTCTTTAGTATCTTTCCTTATAACAAAAGACTATAAAGTCAAGCGAAACATTATATACTTGAGTC

ACTTCAAAGAAAGATGTAAATTCATTTGCAATATAGTAAACCCACAACCT

>PGSC0003DMG400023282LRR-RLKs\_992

ACTTGAGTCACTTCAAAGAAAGATGTAAATTCATTTGCAATATAGTAAACCCACAACCTAAATACAAATTG

ACATGTAAACACATCAGCCAATCACCCAACATCCTTTGTCTGTGTATAT

>PGSC0003DMG400023283-(rev)LRR-RLKs\_1736

GGTATTGGAGGATTATTGGCAGCAACCACAGTGGCCCTTCTTATTTTCTTGTGTGCTAGAAGAAAAAAG

AAGTCCACTTCATCGGAGAATTCATCGTTGGACGTGATCCCAAGAGTGAC

>PGSC0003DMG400023283-(rev)LRR-RLKs\_2542

TGTGCAGAATATGCTACATGCAATACGTTTTCGACCTATGGAGATGTCTATAGTTATGGAATTCTACTGTT

GGAAACATTTACTGGACGAAGTCCAACCTGATGAGATTTCCAAGGATGGT

>PGSC0003DMG400023283-(rev)LRR-RLKs\_2604

TCTACTGTTGGAAACATTTACTGGACGAAGTCCAACCTGATGAGATTTCCAAGGATGGTCTAAACCTTCAT

GATTTTGTTAAGAGAGCCATACCTGAGCAAGTGAAAGATGTTTCTGATCC

>PGSC0003DMG400023283-(rev)LRR-RLKs\_2852

ATGTTGTTAATGAACTGAATGTAATCAAAGATGCCTTCCTGAGGAACTAGCAATATTGGCTATGAAGTTT

TTGAGTTTCATTATAAAGATACTACTTATATAAGTTATATACTCTTTATC

>PGSC0003DMG400023283-(rev)LRR-RLKs\_2899

TAGCAATATTGGCTATGAAGTTTTTGAGTTTCATTATAAAGATACTACTTATATAAGTTATATACTCTTTAT  
CCACTTTTCCCTCCCCTTTTCCTGCTTCTCCTTATGTAATGGAAATT

>PGSC0003DMG400023283-(rev)LRR-RLKs\_434

TCTTGATTTTGCTTTGAATTATCTGTCTGGAGAGATTCTATGTCAATTTTCAACTTGTCATCATTGCATAC  
ACTTCAGATAACTTTTAATAAACTTGAAGGGGCTCTCCATCAGATAT

>PGSC0003DMG400023329LRR-RLKs\_0

CAAAATTGTTCTATTCTACTTTCTTGAATGCTTTGTGTGTCCCACTTTACACATTACACTAAACCCCAAT  
TGCCATTTGAATCTCACCTATTCATCATGTCATCAATTATCTACTATT

>PGSC0003DMG400023329LRR-RLKs\_1037

TACAAGGCCTATTTCTTTGACATCATATTCTCCGACCTAGACTTGTTTGAGATTGAGGCGTAATTATTGTT  
GTTGTTGTTATATAGAGTATTGGAAACAAGGAGAAGGATCAATTAGAAG

>PGSC0003DMG400023329LRR-RLKs\_1098

AATTATTGTTGTTGTTGTTATATAGAGTATTGGAAACAAGGAGAAGGATCAATTAGAAGCTCTCCTCTGG  
TTGATAGAGAAAATTCAATGCCTACAGCCTTTTCGTTCCGGAATTTTCAC

>PGSC0003DMG400023329LRR-RLKs\_1708

ATTTTTGGTTAGCTTGTAAGTATACTGCACTTTGTATTAATAATTAGAGTTACTGGTCAAAAACACACCTAA  
AGTATCCCTTTTTTCGAGTTCCCTATCACCAACTATTTATCAAAAACAC

>PGSC0003DMG400023329LRR-RLKs\_1830

CTCAACTATTAGTTGCTCCCTTTTTCTACCTGAGATATCACCATCGTTCAGGCAGGAAAAATGAAATGTT  
GCTAATACTTGATGTCTCGCGAACCTAGGAAAGTTTTGTGAAGTGTTGC

>PGSC0003DMG400023329LRR-RLKs\_1891

ATGAAATGTTGCTAATACTTGATGTCTCGCGAACCTAGGAAAGTTTTGTGAAGTGTTGCTAAAATGTTAA  
TGGAAGTGTGCAGGGATTTACAGAACAATGATCTATCTGGTGCCTTACCT

>PGSC0003DMG400023329LRR-RLKs\_2257

GAGTGTGACAACAGTTTTGGAGAGTCCTCTCTGACCTTAACATAGCTCTTATTAATAGTTCTTGTAACAA  
AGTCTTTCTATGATATGTCCTTTTGTCTGCATCAGGGTCATGAGGGGA

>PGSC0003DMG400023329LRR-RLKs\_2379

TCACATAACTGGAAGTGTCCAAATTCACCTACAAATATCACAGGCTTAAAGAAGTGTAAAGAACTATGT  
TTACCTTACGGGCATAATTTACTCTTTGTTTGAAATTTTCGGTTGGATTG

>PGSC0003DMG400023329LRR-RLKs\_244

CCTCATATAGTCGACCTCAACTTGTTAGGGACTGAGGCGTAATAGTTGTTATACATGTTGTGAAGCTTAT  
ATAGTTGACCTCAACTTGTCAGGGACTGAGGCGTAGTAGTTGTTATACAT

>PGSC0003DMG400023329LRR-RLKs\_2440

GAACTATGTTTACCTTACGGGCATAATTTACTCTTTGTTTGAAATTTTCGGTTGGATTGAGGCCTATGTTG  
CTCAGACTCTTCAAACTACTATAGTATGTGTGTGCGAACCCCTTCAAAG

>PGSC0003DMG400023329LRR-RLKs\_2928

CAAGGCTCCCTTCAACTGATAAAAAAATGAAAATTTGTTACTCATGACTGCATTATTCAACTGAAGCTAT  
TATTATTGACTTAGTTGCTTAACTATGTTGTTTTAACAATCATTCTATA

>PGSC0003DMG400023329LRR-RLKs\_3355

TGTGGAAGGTATATGCTTTACTCCTATTTCTTCAACAGAAAGAGTATATGGTTTTTCTGTAAGCAAAAT  
TTCCTTAATAACTTCAAATGCCATCTACTTGTATGGCATTITTAGGTGAC

>PGSC0003DMG400023329LRR-RLKs\_3416

CTGAACAAATTTCTTAATAACTTCAAATGCCATCTACTTGTATGGCATTITTAGGTGACGTTGAGCGCAAC  
ATTTCAATAGGCCAACTAAGAAGGTTCTCATGGCGCGAACTTCAGATTG

>PGSC0003DMG400023329LRR-RLKs\_3477

TGAGCGCAACATTTCAATAGGCCAACTAAGAAGGTTCTCATGGCGCGAACTTCAGATTGCAACGGACAA  
TTTCAGTGAAAGCAACGTTATAGGACAAGGAGTTTTGGTAAAGTTTACAA

>PGSC0003DMG400023329LRR-RLKs\_366

TGTAAAGCTTATATAGTCGACCTCAACTGTCTAGGGACTAGTAGTTGTTATACATGTTGTGAAGCGTATA  
TAGTCGACCTCAACTTGTTATGGATTGAGGCATGGTAGTTGTTATACATG

>PGSC0003DMG400023329LRR-RLKs\_4148

CCACATTGCTCCAGAATACTTGTCTACTGGAAAATCATCTGAGAAAACAGATGTATTCGGATATGGTATT  
ACACTTTTAGAACTTGTAACAGGGCAACGTGCAATTGACTTTTCGCGTCT

>PGSC0003DMG400023329LRR-RLKs\_4209

TATGGTATTACACTTTTAGAACTTGTAACAGGGCAACGTGCAATTGACTTTTCGCGTCTTGAAGAAGAGG  
AAGATGTGTTGCTACTGGATCATGTAAGTCCCTACTTCCACACACTTTTC

>PGSC0003DMG400023329LRR-RLKs\_427

AAGCGTATATAGTCGACCTCAACTGTTATGGATTGAGGCATGGTAGTTGTTATACATGTTGTGAAGCTT

ATATAGTCGACCTCTAACTTGTTAGGGACTGAAGCATGGTAGTTGTTATA

>PGSC0003DMG400023329LRR-RLKs\_4270

AAGAAGAGGAAGATGTGTTGCTACTGGATCATGTAAGTCCCTACTCCACACACTTTTCAATTTTGAAG

AGTTAGAGCAACATAATGGATACCTTTTACTTCTACAGATCAAGAACT

>PGSC0003DMG400023329LRR-RLKs\_4758

CTTCTGCTGCAGCTAGCTAGTTATGTAACATGTAAGAGTAATTTTATCATACATCTAGCTAGTTATGTATC

ATGTAAGAGTAAATTTATCATACGTATATAAGGCGCTAAGGAGTCTTTT

>PGSC0003DMG400023329LRR-RLKs\_4819

GTTATGTATCATGTAAGAGTAAATTTATCATACGTATATAAGGCGCTAAGGAGTCTTTTTTAAATTTTACG

ATGTATATATATAGAGAGAGAGACCATCTATTACTGAATTCACCTCAATT

>PGSC0003DMG400023329LRR-RLKs\_4870

AGTCTTTTTTAAATTTTACGATGTATATATATAGAGAGAGAGACCATCTATTACTGAATTCACCTCAATTCCT

AGCTCGTTGTAATAAGTTCCTGCTCGATACTAATACTAAAGTTCCAT

>PGSC0003DMG400023329LRR-RLKs\_488

GTGAAGCTTATATAGTCGACCTCTAACTTGTTAGGGACTGAAGCATGGTAGTTGTTATACATGTTGTGAA

GCTTATATAGTCGACCTCAACTTGTTAGGGACTGAGGCGTAATAGTTGTT

>PGSC0003DMG400023329LRR-RLKs\_61

AAACCCCAATTGCCATTTGAATCTCACCTATTCATCATGTCATCAATTATCTACTATTACTCTTCCTTGAT

AACTTAATCATTCAACTCTCAAATCCATGGCTATTAGTCCA

>PGSC0003DMG400023329LRR-RLKs\_610

ACATGCTATTATATAATTTTCTTGATATTTTTTGGGTATATTGAACTAAGTTAATTTTGCCTTAGCTTTTA

AATGAACCTATGTTAAGGGGATTCAACAATCTAATATATATATATGTGCC

>PGSC0003DMG400023329LRR-RLKs\_671

CTTAGCTTTTAAATGAACCTATGTTAAGGGGATTCAACAATCTAATATATATATGTGCCTATCATTTAACA

TACGTATGTCATTTAGTTTTTGTACCTTTGTCATCCCTCAACCCCTCTC

>PGSC0003DMG400023329LRR-RLKs\_732

TCATTTAACATACGTATGTCATTTAGTTTTTGTACCTTTGTCATCCCTCAACCCCTCTCCAATCTTTTCTATC

TATCATTAGAAGTAGGACGGGTAATATTCCGGTGAAGTGGATAAAAA

>PGSC0003DMG400023329LRR-RLKs\_793

ATCTTTTCTATCTATCATTAGAAAGTAGGACGGGTAATATTCCGGTGAAGTGGATAAAAAATTAGTTTAAAG  
GCTTTATGTTTTGATGATCATTGAGAAATTAACCTTAGGAAGACTAGT

>PGSC0003DMG400023329LRR-RLKs\_854

AGTTTAAAGGCTTTATGTTTTGATGATCATTGAGAAATTAACCTTAGGAAGACTAGTCGCTCAGAAAT  
AGTCATTTGATTCTTTTATTCTTACTCAGTATGAGCATTAAATTCTTATT

>PGSC0003DMG400023329LRR-RLKs\_915

CTCAGAAATAGTCATTTTGATTCTTTTATTCTTACTCAGTATGAGCATTAAATTCTTATTGGTAGCACAAAAA  
GAAGTGGATACTTCTTGAACCTAATTGGTAATATTTTCATTGTGTTGCA

>PGSC0003DMG400023396LRR-RLPs\_0

ATGTGGTTAAAGAAAGATTTTATTATATTTTCTGCTCTATTTTACCATTTTTCGATCATTATAGCTGTCAT  
GAAACAGAAAGAGCAGCTCTGTTAAGCTTCAAATCCTTGCTGACTGAT

>PGSC0003DMG400023396LRR-RLPs\_1054

TAGTGGAATGATTCCCTCCTTCTTAAAGCAACTCAACTTCATTGTCCTTTTTCCGAGCTGATGGATGCTCG  
ATTCAAGGGTCGATACCTTCTTCTGTCACAAAACCTTAAGAAATTAAGTG

>PGSC0003DMG400023396LRR-RLPs\_1116

GGATGCTCGATTCAAGGGTCGATACCTTCTTCTGTCACAAAACCTTAAGAAATTAAGTGACTGATGCTGA  
ATGACAACGATATCACAGGCCAACTTCTGTATCCATGTCCAGTTTAGTA

>PGSC0003DMG400023396LRR-RLPs\_124

CTAACCGTTATCTTCATGGCAAGACAGAAATTGTTGCAATTGGAAAGGAATCAAGTGCTCGAGTTCAG  
GTCATGTTGTAGTTGTCAACCTTCGGAATCCTAATCCCGTTGAAGTCATGA

>PGSC0003DMG400023396LRR-RLPs\_1302

ATCGCCTCCCTCAAGTACCTGAATTTAGAATGGAACGATCTAACAGGACATCTCCGTTGTGCATACTTC  
AGCTTCCTAAGCTTTTCATCTCTTTATATTAGAGGAATAGACTGAATGGT

>PGSC0003DMG400023396LRR-RLPs\_186

AGTTCAGGTCATGTTGTAGTTGTCAACCTTCGGAATCCTAATCCCGTTGAAGTCATGATCAATATCAATA  
AGGAAGTTGTTACAAATTCTAAAAACACGTCGATTTTTCTCTTAAAGGT

>PGSC0003DMG400023396LRR-RLPs\_2108

AAGTCTTCGTTACCTTGACCTGAATGGAAATCAGCTAGAAGGATCTTTTCCAAAAATGATTGAAAACCTT  
CAAGATTTGGAGATTCTGAACTTGGCAGGCAATAGATTTGAAGGACCGAT

>PGSC0003DMG400023396LRR-RLPs\_2170

AAAAC TTTCAAGATTTGGAGATTCTGAACTTGGCAGGCAATAGATTTGAAGGACCGATACCAAAGTTCA  
TCGGTGAGCTACACAGCCTCCGTATACTCGTTCTTTTCATCGAACATTTTCA

>PGSC0003DMG400023396LRR-RLPs\_372

ATG TACTCAAAGTTACCTGTTGAGATATCGAACTTAACAAAGTTGACTTATCTCAATCTGTCTGAATGCCAT  
GTTTCAAGATTTTCATCACCATGCAATTCACAAACCTTACATATCTAAGG

>PGSC0003DMG400023396LRR-RLPs\_434

GAATGCCATGTTTCAAGATTTTCATCACCATGCAATTCACAAACCTTACATATCTAAGGTCTCTTGATCTTTC  
GTGTGCTAATTTAGTACCTGATTTTTCTTCTGTTTCTGTTAGCTTGAC

>PGSC0003DMG400023396LRR-RLPs\_496

TTGATCTTTCGTGTGCTAATTTAGTACCTGATTTTTCTTCTGTTTCTGTTAGCTTGACATTTCCACTGAAGTT  
GGAGTTTGGCTCATTGTTATCTTTTATAAGCTACGGTTATTTATCTA

>PGSC0003DMG400023396LRR-RLPs\_558

CCACTGAAGTTGGAGTTTGGCTCATTGTTATCTTTTATAAGCTACGGTTATTTATCTAGTCCAAATCTTAG  
GTGGTTACAAGGACTCCGACGTCTCAGATATCTAGTATTGACTGGTGTT

>PGSC0003DMG400023396LRR-RLPs\_62

TAGCTGTCATGAAACAGAAAGAGCAGCTCTGTTAAGCTTCAAATCCTTGCTGACTGATCCTTCTAACCGG  
TTATCTTCATGGCAAGACAGAAATTGTTGCAATTGGAAAGGAATCAAGTG

>PGSC0003DMG400023396LRR-RLPs\_682

TATCAAAGGCGTCCGAATCATTTTCATTGGGCTAAACCAATATCAAGCCTCTCAAATCTCATGTCACTTCAT  
TTGTCCAGCTGCAACATTTTCAGGAAGAATTCTGATAGGGCAATTACTTA

>PGSC0003DMG400023396LRR-RLPs\_744

TCACTTCATTTGTCCAGCTGCAACATTTTCAGGAAGAATTCTGATAGGGCAATTACTTAACCTTACTAATCT  
TGCTACTCTAGATATGAGTTCTAACGTTCTAACATCCTCGATACCTGAT

>PGSC0003DMG400023396LRR-RLPs\_930

TCTTACATTCCTCAACTCAAAGAACTTTCTGTTTCTGGCAATCCTGCTATGACCATAGATCTTGTTTCAATG  
TTTTCTGCTCCATGGCCACAGTTGACATTTCTTGACATAAGCTTCGTT

>PGSC0003DMG400023396LRR-RLPs\_992

TGTTTCAATGTTTTCTGCTCCATGGCCACAGTTGACATTTCTTGACATAAGCTTCGTTTCATGTAGCTGGAA

TGATTCCTCCTTCTTTAAGCAACTCAACTTCATTGTCCTTTTTCCGAGC

>PGSC0003DMG400023419RLKmalectin\_244

TTGAGTAAAAATGTGTTCTTGATAAAGGGTTGTTCTGTTTTCTGCTAGCATTGTGTGTGATTTCTCAGTT

TTTGGTCATTGGATTTTGTTCCTTTGTCCTGTTTTCTGAGCTGTATTT

>PGSC0003DMG400023419RLKmalectin\_2989

GGAGTGTTCTCTCAGATAATGAATCCAAAAGGAAGGTAAAGAAGAAGCTTGTGTTTGTGAAGAAAAAA

AAAATTTGAAATTGTGGTTATAGTATTTTTTTTTTTTCATACTATAAGTAGAT

>PGSC0003DMG400023419RLKmalectin\_3042

TTTGTGAAGAAAAAAAATTTGAAATTGTGGTTATAGTATTTTTTTTTTTTCATACTATAAGTAGATTTAT

ACCTTATATTATCAATCTTAGGATGAAAATCCCTTGATGCATTTTTATG

>PGSC0003DMG400023419RLKmalectin\_305

TTTCTCAGTTTTTGGTCATTGGATTTGTTTCTTTTGTCTGTTTTCTGAGCTGTATTTTTGTGTA AAAATGT

GTTCTTGAAAAGGGTTGTTCTGTTTTCTGCTAGCTTTGTGTGATC

>PGSC0003DMG400023498-(rev)LRR-RLPs\_0

ATGTATTCAAAGTTACCAGTTGAGATATCAAACCTTAACAAAGTTGACTTATCTCAATCTGTCAAATGCTAT

GTTTCAAGATACCATCACTACACAATTCTCAAATCTTACATCTCTAAGG

>PGSC0003DMG400023498-(rev)LRR-RLPs\_1054

TGCCACTGTCATTGCTCCAGAAGTCTAGATTGGACTTTATCAGTTTTCGGAGTTAGTGGATTGTCCGTGGA

ACTCGATGATCAAGATCAATCCTTTGTGCAAACCTTCCAGCCCATAATTT

>PGSC0003DMG400023498-(rev)LRR-RLPs\_124

TTGATCTTTCGTGTGCTAATTTAGTACTCGATTTATCTACTGTTACTATTAGCTTGACATTACCACCAAAGT

TGGATTTTGGCTCATTGTTATCTTTTATAAGCTATGGTTATTTGTCTA

>PGSC0003DMG400023498-(rev)LRR-RLPs\_1364

TCAGATGAAATCTTCTCGTTTTCCAACGCTAGTAAATTTAGCCAGAAACAACTTGAAGGTCCTATTCCTA

CTCAGCTCGAGAATGTTAATGTCATCGATTTGTCATTTAACAATTTTCGT

>PGSC0003DMG400023498-(rev)LRR-RLPs\_1550

AATCCATGGTCCAATACCTGGATCATTTTGCCAAGCGACTAACGTTCTCCAGGTTCTTGATCTCACTAATA

ACAGCTTGTGAGGCACCATTCGACGTAATTTGGGGAACTGCAAATCTCT

>PGSC0003DMG400023498-(rev)LRR-RLPs\_1612

TCACTAATAACAGCTTGTGTCAGGCACCATTTCGACGTAATTTGGGGAAGTGC AAATCTCTCATTTACCTTGGT  
CTTGAAAAACAAGCTCAGTGGAAGTGTTCGAAAGAACTTGAATGCG

>PGSC0003DMG400023498-(rev)LRR-RLPs\_1674

TACCTTGGTCTTGAAAAACAAGCTCAGTGGAAGTGTTCGAAAGAACTTGAATGCGTTACAAGCCTT  
CGTTACCTTGGCCTGAATGGAAATGAGTTTGAAGGTTCTTTTCCAACAGTG

>PGSC0003DMG400023498-(rev)LRR-RLPs\_1736

AAGCCTTCGTTACCTTGGCCTGAATGGAAATGAGTTTGAAGGTTCTTTTCCAACAGTGATTGAAAAGTTT  
AAAGATTTGGAGATTCTGAACTTGGCAGGTAATAGATTGAAGGAAGGAT

>PGSC0003DMG400023498-(rev)LRR-RLPs\_1798

AAAAGTTTAAAGATTTGGAGATTCTGAACTTGGCAGGTAATAGATTGAAGGAAGGATACCAAAGTTCA  
TCGGTGAGCTACACAGCCTCCGTATACTCATGCTTGCATCAAACCTTTCA

>PGSC0003DMG400023498-(rev)LRR-RLPs\_1984

ATCTGTCCGGTCCCATTTCCCGAGAATCTTGATGGCTTGAAAATGATGATGAAAACACAAAATCAAACAAC  
CATCTTAGGCTATTTTTACTCCCTCAAGTTCACTGGTGCTCAGCTAGAAA

>PGSC0003DMG400023498-(rev)LRR-RLPs\_2046

CAAACAACCATCTTAGGCTATTTTTACTCCCTCAAGTTCACTGGTGCTCAGCTAGAAATTGTCACCAAAGG  
ACAGATACATTGGCTTGAACAGTGTATTCTACAACACTGGATTTCGAC

>PGSC0003DMG400023498-(rev)LRR-RLPs\_2232

CTGAATCTCTCACATAATAATCTAACCGGGGTGATCCCAACGACTATTGGCGAAATGATTTCCCTCGAGT  
CGTTGGATCTCAGCTATAACCAATTAACAGGTGAAATTCCAGTAACATTG

>PGSC0003DMG400023498-(rev)LRR-RLPs\_372

TCACTTGAATTGTCTAGCTGCAACATTTAGGAAGAATTCCAATAGAGCAATTGATTAACCTTACTAGTCT  
TTCTACTCTAGATATGCGTTCTAATGTTCTAACATCCACGATACCTGAT

>PGSC0003DMG400023498-(rev)LRR-RLPs\_434

TACTAGTCTTCTACTCTAGATATGCGTTCTAATGTTCTAACATCCACGATACCTGATATGATATCGAATCT  
CACAACCCTCTCAGCTCTTAATTTTCATGGCAACGATTTAGATGGTCA

>PGSC0003DMG400023498-(rev)LRR-RLPs\_62

AAATGCTATGTTTCAAGATACCATCACTACACAATTCTCAAATCTTACATCTCTAAGGTATCTTGATCTTTC  
GTGTGCTAATTTAGTACTCGATTTATCTACTGTTACTATTAGCTTGAC



>PGSC0003DMG400023498-(rev)LRR-RLPs\_992

CATACTTCAGCTTCCTAAGCTTTCATTTCTTTATGTTTCAGATGAATAACCTTAATGGTAATATGCCACTGTC  
ATTGCTCCAGAAGTCTAGATTGGACTTTATCAGTTTCGGAGTTAGTGG

>PGSC0003DMG400023508-(rev)RLKmalectin\_0

CAAATTGAACGTAGAACCATTTTTCTCCATTCTTAAATTAGACTTCAAATTCTTGAATGCTAAGTGCAAC  
ACAATTACACAAAGTTGACAACTTTTTTTTTTTCTTGAAAGTTTAGTCC

>PGSC0003DMG400023508-(rev)RLKmalectin\_1159

CGTGGTTGTTTGATGTTGATCCTGGCTTCGATTATTTATCAGGTTCCACTTTTGTGACATAGTAACTGGC  
TACAATGATCCAAACAGAGTAGGTGGCGACCATGAACTATTATTCAATG

>PGSC0003DMG400023508-(rev)RLKmalectin\_1220

AGTAACTGGCTACAATGATCCAAACAGAGTAGGTGGCGACCATGAACTATTATTCAATGTTTACATTAAT  
TCCCAATTTGCTTCGAGGGACCTTGATCTTAAAAACAAGACATCAAATGT

>PGSC0003DMG400023508-(rev)RLKmalectin\_1525

CGGTGCCTACTTCAAAGAAGACTAAAACATGGTTGATCATTGGATCAACTATTGGAGGATCGACTATTTG  
CATCGTTTTGGTTGTGGTGTCTATTCTTTTTGCAGAAGTAGAATACAGA

>PGSC0003DMG400023508-(rev)RLKmalectin\_1586

GACTATTTGCATCGTTTTGGTTGTGGTGTCTATTCTTTTTGCAGAAGTAGAATACAGACAGCTGTTGAT  
GACTCAACAGAGGAAAATCATAACAGCAGTTGGAGCTAAAGAAGCATCTAT

>PGSC0003DMG400023508-(rev)RLKmalectin\_1647

GCTGTTGATGACTCAACAGAGGAAAATCATAACAGCAGTTGGAGCTAAAGAAGCATCTATCATTCCAAG  
TCGAATATGGGGTACCTGTTCCCTCTTGTAGCAGTTCAGGAAGCAACCGAT

>PGSC0003DMG400023508-(rev)RLKmalectin\_1769

CTTCAGTGAAAGCATGATCATAGGCTTTGGTGGTTTTGGAAAAGTTTACAAGGGAATTTTGAAGGATAA  
CACAAAGGTGGCAGTGAAGAGAGGATTTTCATCAATCACAACAAGGTCTTGC

>PGSC0003DMG400023508-(rev)RLKmalectin\_2379

CCCTCTTCCCAGAGAATCAGTAAACTTGGTTGAATATGTGATGAAATGTTTAAGTACAGGAGAAGCG  
GAGGCAATCATTGATCCTAGGATTGCACATGAGATTACACCAGAATCCCTG

>PGSC0003DMG400023508-(rev)RLKmalectin\_2440

GAGAAGCGGAGGCAATCATTGATCCTAGGATTGCACATGAGATTACACCAGAATCCCTGATGAAGTTTG

TAGAGACTGCTGAGAAATGCTTGGCTGAATATGGTGCAGACCGGCCAACTA

>PGSC0003DMG400023508-(rev)RLKmalectin\_2562

GGAGAAGTTTTGTGGAACCTGGAATATGCATTGAACTTCAAGGAAAGACGAAAAACAACACAAGA

GAACGAGATATCGGATAATCAGTTAGATAACAGTGTCTTAAGTACAGAATAC

>PGSC0003DMG400023508-(rev)RLKmalectin\_2623

CACAAGAGAACGAGATATCGGATAATCAGTTAGATAACAGTGTCTTAAGTACAGAATACAGCATGGGG

AGTATGGCTGATCTTGCTGGTGTTCATGAGCAAAGTTTTTGGCCAAATGG

>PGSC0003DMG400023508-(rev)RLKmalectin\_2745

AAATCTGAAAACAAAACACTCATGTGATATATGTTAGGATAAAATGCAGGTCCATCTAATGAACTCTGCCT

TTGGATTGTATATTTGTATTCTTTTTCTTTAGATTTCTATGTTATAACA

>PGSC0003DMG400023508-(rev)RLKmalectin\_2851

TCTATGTTATAACAGATACTTGTGTTGTTTCAATTGATTTGAAGCCGCGTTATACTATACATACATAAGT

TTTCATTAGGTTTTTTTTACCGAGTTGTTTCATAAGCACGATAGAGCAAT

>PGSC0003DMG400023508-(rev)RLKmalectin\_61

TAAGTGCAACACAATTACACAAAGTTGACAACCTTTTTTTTTCTTGAAAGTTTAGTCCATTTGGTGTGTT

GGGGTTGTTGATATCACATATTAAGTTCATTTCAAGATTTCAAAGTTTT

>PGSC0003DMG400023549-(rev)LRR-RLPs\_504

TTAAATCTCAGGAACAATAGCCTCACAGGTATAATCCCTCCTTCTGTTGGAAATGCCACAAAATTGTTGA

ACATCAATTTGTCTGGGAATAGAATCAATGGTAACATTCCAATGGAGATC

>PGSC0003DMG400023549-(rev)LRR-RLPs\_567

TTGTTGAACATCAATTTGTCTGGGAATAGAATCAATGGTAACATTCCAATGGAGATCAGTAATCTTAGCC

AACTTGCATTTTTGTTCTTGTAGATAATCAATTAACAGGTTCCATTCCT

>PGSC0003DMG400023549-(rev)LRR-RLPs\_630

CTTAGCCAACCTTGCATTTTTGTTCTTGTAGATAATCAATTAACAGGTTCCATTCTCCAACACTGTTTAAT

ATCTCGTCGCTACTTGGCATATCTCTGTCATTCAATGGCCTTTCTGGT

>PGSC0003DMG400023549-(rev)LRR-RLPs\_693

CTGTTTAATATCTCGTCGCTACTTGGCATATCTCTGTCATTCAATGGCCTTTCTGGTCCTCTCTTGCTAGAT

GAAGGAAATATTGTGTCAAATCTGAAGCATTAAAGTATGTCTTTCAAC

>PGSC0003DMG400023550-(rev)LRR-RLKs\_0

ATGTTGAGATATCTAGAAGTGGGTAACAATCCGTTGAGCGGCGTTCTACCAAATTCTATTGGGAATCTCT  
CATCTACTATTGAAAAAATCATTTAGTAGATGCACACATCAATGGCCTC

>PGSC0003DMG400023550-(rev)LRR-RLKs\_126

ACAAGTATAGGCAACATGAGCGGTCTTACATCCATAGACATTCAAGACAACAACCTTGGCAGGGAATATT  
CCTTCTGAGATTGGTAAGCTTAAACAACCTCAAGGGTTGTATCTAAGTAAC

>PGSC0003DMG400023550-(rev)LRR-RLKs\_189

AATATTCCTTCTGAGATTGGTAAGCTTAAACAACCTCAAGGGTTGTATCTAAGTAACAATAAATTTTCAGG  
GACATATCCAGAAGCGGTATGCCATTTATCTAATTTGGTTAAATTAAC

>PGSC0003DMG400023550-(rev)LRR-RLKs\_252

TTTCAGGGACATATTCCAGAAGCGGTATGCCATTTATCTAATTTGGTTAAATTAACCTCTGCAAGTTAATGA  
GCTCTCTGGATTAATTCAGAATACTTTGGAAATCTTAGCATGCTACAA

>PGSC0003DMG400023550-(rev)LRR-RLKs\_315

GTTAATGAGCTCTCTGGATTAATTCAGAATACTTTGGAAATCTTAGCATGCTACAAAAGCTTTATTTGGC  
TTCTAATAAATTTTCATCAAAATTTCCGTTGAGCCTTTGGAAGATTTAG

>PGSC0003DMG400023550-(rev)LRR-RLKs\_3238

TTGTTACTCCAGTGGTTATTGCATCCTTTCTGATATTCTTGTTGTTCAATTTGGATAATGAAACGACAG  
AAGAAAGGGAAGTCCAAAGAGGTGGAGAAGATACCGGAGATGGGGACTC

>PGSC0003DMG400023550-(rev)LRR-RLKs\_3303

CGACAGAAGAAAGGGAAGTCCAAAGAGGTGGAGAAGATACCGGAGATGGGGACTCATCAATTAGTTT  
CCTATCACGAGATTCAACGAGCAACAAATAATTTTGATGAATCCAATTTAATT

>PGSC0003DMG400023550-(rev)LRR-RLKs\_3563

CAGAAATCTTGTTCAAGTGATTACTGCATGTTCTAGTGACTATATAAGAGCCTTTATTCTGCAATTTATGC  
CCAATGGAAAGTCTTGAGAATTGTCTGTACAAAGAAGATCGCCACTTGA

>PGSC0003DMG400023550-(rev)LRR-RLKs\_3628

TTATGCCCAATGGAAAGTCTTGAGAATTGTCTGTACAAAGAAGATCGCCACTTGAACCTTCATCAAAGAG  
TTTCTGTAATGCTTGATGCAGCTATGGCAGTTGAATATCTACATCATGGT

>PGSC0003DMG400023550-(rev)LRR-RLKs\_378

TATTTGGCTTCTAATAAATTTTCATCAAAATTTCCGTTGAGCCTTTGGAAGATTTAGTGGTCTTCTCTATCT  
AAGTGTGTCACAAAATTCAATAGAGGGAGAAGTCCATCAGATATTGG

>PGSC0003DMG400023550-(rev)LRR-RLKs\_3823

TGGTGATTTTGGCATCTCTAAAATTTTAGCCATAAGCAAGTCCATAGCTTATACCGAAACATTGGGCACT  
CTTGGATACATTGCACCAGGTATAAAAAATAATCTCTCTTTGATTTTCTC

>PGSC0003DMG400023550-(rev)LRR-RLKs\_3888

GCACTCTTGGATACATTGCACCAGGTATAAAAAATAATCTCTCTTTGATTTTCTCTTATCATAGTTAAGCA  
TTCTAAAAGTAAAAAAGCAAGTCTTCATTTATGCAGAATTATTGTTGT

>PGSC0003DMG400023550-(rev)LRR-RLKs\_4213

GTTGTGCGATGCCAATCTTTTTTACGAGGAAGAACAATCACTAGTAAAAGTGAAATCTGCATAGCGTCCA  
TGATAGAATTGGGTTTAGATTGCACAAAGGAAATGCCAGAATCAAGAGTG

>PGSC0003DMG400023550-(rev)LRR-RLKs\_441

TCTCTATCTAAGTGTGTCACAAAATTCAATAGAGGGAGAACTTCCATCAGATATTGGAGAACTGAAAGC  
CATTGTAGGACTATATCTTTACAGTAACCACTTTTCAGGTGTGATACCAAC

>PGSC0003DMG400023550-(rev)LRR-RLKs\_504

GAAAGCCATTGTAGGACTATATCTTTACAGTAACCACTTTTCAGGTGTGATACCAACCAGATTCGGGGAA  
CTTCAAACCTGCAATATCTTGACCTATCGAACAATTCATTTTTTGGCAA

>PGSC0003DMG400023550-(rev)LRR-RLKs\_567

CGGGGAACTTCAAACCTGCAATATCTTGACCTATCGAACAATTCATTTTTTGGCAAAGTCCATTATCCT  
TTGCCAACTTGATAAGCTTGGTATTCTTGAATTTGTCTTTAATGCCTT

>PGSC0003DMG400023550-(rev)LRR-RLKs\_630

ATTATCCTTTGCCAACTTGATAAGCTTGGTATTCTTGAATTTGTCTTTAATGCCTTGTCTGGTACTATTCC  
TATGTCATTGGAAAAGCTCTCCTACCTTAAAAGCATTAAATGTTTCATT

>PGSC0003DMG400023550-(rev)LRR-RLKs\_693

TACTATTCCTATGTCATTGGAAAAGCTCTCCTACCTTAAAAGCATTAAATGTTTCATTTAATGATTTAGAAG  
GTGAAATACCGAGTGGTGGCGTGTGCAAATTCCACTTTGCAATCATT

>PGSC0003DMG400023550-(rev)LRR-RLKs\_819

GAACAAAGGTCTTTGCGGAGTGCACATATTGGATATTCCTGCTTGTGATATCACTAATCCTGGAAAACAA  
TCAAAGCTTAAGGGGGTTGTGCTAAAAATTGTTACTCCACTGGTTATTTTC

>PGSC0003DMG400023551-(rev)LRR-RLPs\_0

ATGAAGAAGAACATTCTTATTGATTCTTCTCTTTCTAATTCAAATTTCTGTATCATTGCTTCTCCTCAAAT

GAGACTGATCAACAAGCTCTACTAGCTTTCCAAAATCTTATTATTACA

>PGSC0003DMG400023551-(rev)LRR-RLPs\_1024

TGATTGTGTCGACAATTGGTTGAAGGGGAAAATTCCTCAAGAATTAGGGAAGCTATCAAATTTGGGGGA  
ATTAAGCATTGCCAATAATTCTAATCTTATTGGTCAAATTCAGAGGCTAT

>PGSC0003DMG400023551-(rev)LRR-RLPs\_1088

GGGGAATTAAGCATTGCCAATAATTCTAATCTTATTGGTCAAATTCAGAGGCTATGTTCAACATAACCT  
CTCGGGGAGAATTCCAACCACTACAGGTCATCATCTTCCGAACCTTGAAG

>PGSC0003DMG400023551-(rev)LRR-RLPs\_128

TCATTTTTTGGCCAATAATTGGACCAAAAATACTTCTTTTTGTTCTTGGTATGGTGTCACCTGCACTGAAA  
AAAGGCAAAGGGTTGTGGCCTTGGCTCTCCTAGTTTGCAACTTCAAGT

>PGSC0003DMG400023551-(rev)LRR-RLPs\_384

CTCAACGGAAGTATACCAACAAGTCTATTTCAAGTTTTCAACACCGGAGAATTCAAGTAATTTTCATTGGC  
TTTCAATCAACTCAGTGGTGAAACGTTGAGAGGGCCATGGTATGTACCTG

>PGSC0003DMG400023551-(rev)LRR-RLPs\_448

ATTGGCTTTCAATCAACTCAGTGGTGAAACGTTGAGAGGGCCATGGTATGTACCTGAACTCAGAGTCTT  
AAATCTCAGGAACAATAGCCTCACCAGTATAATCCCTCCTTCTGTTGGAAA

>PGSC0003DMG400023551-(rev)LRR-RLPs\_512

GTCTTAAATCTCAGGAACAATAGCCTCACCAGTATAATCCCTCCTTCTGTTGGAAATGCCACAAAATTGAT  
GAACTTCGATTTGTCTGGGAATAGAGTCAGTGGCAACATTCCAAAGGAG

>PGSC0003DMG400023551-(rev)LRR-RLPs\_576

AATTGATGAACTTCGATTTGTCTGGGAATAGAGTCAGTGGCAACATTCCAAAGGAGGTCGGTAATCTGA  
GCCAGCTTACAGACTTGTATTTGTACAACAATCAATTAACAGGTTTCATTC

>PGSC0003DMG400023551-(rev)LRR-RLPs\_64

CCTCAAATGAGACTGATCAACAAGCTCTACTAGCTTTCCAAAATCTTATTATTACAAGTCATAATCATTTTT  
TGCCAATAATTGGACCAAAAATACTTCTTTTTGTTCTTGGTATGGTG

>PGSC0003DMG400023551-(rev)LRR-RLPs\_640

TCTGAGCCAGCTTACAGACTTGTATTTGTACAACAATCAATTAACAGGTTTCATTCCCGCAACATTGTTTA  
ATATTTTCATCACTTCTTGCCCTATCTTGGGAATCAATAGCCTTTCCGG

>PGSC0003DMG400023551-(rev)LRR-RLPs\_704

TTGTTTAATATTTTCATCACTTCTTGCCCTATCTCTTGAATCAATAGCCTTTCCGGTCCTCTCTTGCTTGATG  
AAGGAAATATTGTCTCAAATCTCAACTTTTTAAGTACATATCACAAAC

>PGSC0003DMG400023551-(rev)LRR-RLPs\_832

TGGTTGCATTCTTCCAACATATGCCAACTCACAGAGCTCAATTTTTGTCAATATCTATCAACAACATAA  
CTGGAGATATAACTAGAAATATTGGTTGTTTATCCAAACTCGAAAGGTT

>PGSC0003DMG400023551-(rev)LRR-RLPs\_896

AACATAACTGGAGATATAACTAGAAATATTGGTTGTTTATCCAAACTCGAAAGGTTTTATATTGGTGAAA  
ATCCAATGGAAGGGACTGTTCCCACTTCATTGGGAAATATTTCTACTCTG

>PGSC0003DMG400023551-(rev)LRR-RLPs\_960

GTGAAAATCCAATGGAAGGGACTGTTCCCACTTCATTGGGAAATATTTCTACTCTGCAATATCTTGATTG  
TGTCGACAATTGGTTGAAGGGGAAAATTCCTCAAGAATTAGGGAAGCTAT

>PGSC0003DMG400023554-(rev)LRR-RLKs\_1008

GAAGGACTTTACTTGGGAGTAAATCAGTTCAAAGGAGAAATTCATTGTTTATAACAAATGCTTCCAAGC  
TTCAGCTACTGGACCTAAGTTATAACTTTCTGACAGGAACTATTCCTACT

>PGSC0003DMG400023554-(rev)LRR-RLKs\_1071

TCCAAGCTTCAGCTACTGGACCTAAGTTATAACTTTCTGACAGGAACTATTCCTACTAATTTGGGAAATCT  
TCGTGAGCTGCAAATACTGCTCCTATATAATAATCAACTTACCAATGAA

>PGSC0003DMG400023554-(rev)LRR-RLKs\_126

AATAGAGTCAGCGGCAACATTCCAAAGGAGGTCGGTAATATGAGCCAACCTGCAGACTTGCCTTGACT  
GATAATCAATTAACAGGTTCCATCAGTGGCGAATTTAGAGCCAAAAAAAAG

>PGSC0003DMG400023554-(rev)LRR-RLKs\_1260

GGTCCAATCCGTTAAATGGCGTTCTGCCAATTCAATTGGGAATCTTTCATCTACTATTCATAACTTTAAT  
ATAGAAGATGCACACATCAATGGCCTCATCCCCAAAAGTATAGGCAAC

>PGSC0003DMG400023554-(rev)LRR-RLKs\_1386

GGTCTTACAATCCTAAGCCTTAGAGGAAACAACCTTAGCGGGAAGCATTCTTCTGAGATTGGTAAGCTTA  
AACAACTCCAAGGGCTGTATCTAAGTAACAATAAATTGCAGGGACATATT

>PGSC0003DMG400023554-(rev)LRR-RLKs\_1449

AAGCTTAAACAACCTCCAAGGGCTGTATCTAAGTAACAATAAATTGCAGGGACATATTCCAGAGGCGGTA  
TATCATTTATCTAATTTGGTTGAATTAACCTCTGCAAGTTAATGAGCTCTCT

>PGSC0003DMG400023554-(rev)LRR-RLKs\_1512

GCGGTATATCATTTATCTAATTTGGTTGAATTAAGTCTGCAAGTTAATGAGCTCTCTGGATTAATTCCAGA  
ATGCTTAGGAAATCTAAGCATGCTACAACATCTTTTTTTGGATTTAAT

>PGSC0003DMG400023554-(rev)LRR-RLKs\_1575

ATTCCAGAATGCTTAGGAAATCTAAGCATGCTACAACATCTTTTTTTGGATTTAATAAATTTTCTTCAA  
ATTTCCGTTGAGCCTTTGGAAGATGAGTGGTCTTCTCTATCTAAGTGTG

>PGSC0003DMG400023554-(rev)LRR-RLKs\_1701

AATTCAATAGAGGGAGAAGTTCCATCAGATATTGGAGGACTGAAAGCCATTGTAGAAGTATATCTTTAC  
AATAACCACTTTTCAGGAAGGATACCAAGCACATTCCGGGAACTCCAAAAC

>PGSC0003DMG400023554-(rev)LRR-RLKs\_1764

CTTTACAATAACCACTTTTCAGGAAGGATACCAAGCACATTCCGGGAACTCCAAAACCTGCAGTATATTG  
ACTTGTGCAACAATTCATTTTTTTGGCAAATTCATTATCCTTTGCCAAC

>PGSC0003DMG400023554-(rev)LRR-RLKs\_1827

TATATTGACTTGTGCAACAATTCATTTTTTTGGCAAATTCATTATCCTTTGCCAACTTGATAAGCTTAGAA  
TGCTTGGATTTGTCTTCAAATGCGTTGTCAGGTACTATTCCTAAGTCT

>PGSC0003DMG400023554-(rev)LRR-RLKs\_1953

AAACTCTCATACTTAAAAGAATTAATGTTTCATTTAATGATTTAGAAGGGGAAATACCAAGTGGTGGCG  
TGTTTGCAAATTCACCTTTGCAATCATTCTTGGGAACAAAGGTCTTTGC

>PGSC0003DMG400023554-(rev)LRR-RLKs\_2079

CACATACTGGAGATTCCTGCTTGTGCTATCACTAATCCTGGAAAACAATCAAAGCTTAAGGAGATTCTGC  
TAAAAATTGTTACTCCAGTGATTATTGCATCCTTTCTGATATTCTTGTTG

>PGSC0003DMG400023554-(rev)LRR-RLKs\_2142

ATTCTGCTAAAAATTGTTACTCCAGTGATTATTGCATCCTTTCTGATATTCTTGTTGGTTTCAATTTGGATA  
ATGAAACGACATAAGAAAGGGAAAGTCCAAAGATGTAGAGAAGGTACCA

>PGSC0003DMG400023554-(rev)LRR-RLKs\_2877

CCAGGTATAAAAAATCTACTCTCATTGATTTTCTTATCATAATTAAGCCTCTCCAAGTTGTAGAAGTAA  
AAAGAGAACTATTGTTATATTTCAATTGAGCAACTTTTGGTCAATCATT

>PGSC0003DMG400023554-(rev)LRR-RLKs\_441

CCTAGATTGCGCTCTGGGTTTCATTCCCAGAACTGTTTAATATCTCGTCGCTACTTGCCGTATCTCTGGC

AAACAATAGCCTTTCTGGTCCTCTCTTGCTAGATGAAGGCAATATTGTG

>PGSC0003DMG400023554-(rev)LRR-RLKs\_504

TCTCTGGCAAACAATAGCCTTTCTGGTCCTCTCTTGCTAGATGAAGGCAATATTGTGACGAATCTGTACTT

TTAAGTATATCTGACAACCAAATTTCTTGTTGCATTCCCTTCCAACATA

>PGSC0003DMG400023554-(rev)LRR-RLKs\_567

CTGTACTTTTTAAGTATATCTGACAACCAAATTTCTTGTTGCATTCCCTTCCAACATATGCCAACTCACAGAG

CTCAAAGTTTTGTCCGTATCTTTCAACAATATAACTGGAGACATACCC

>PGSC0003DMG400023554-(rev)LRR-RLKs\_630

CTCACAGAGCTCAAAGTTTTGTCCGTATCTTTCAACAATATAACTGGAGACATACCCAAAAATATTGGTT

GTTTATCCGAGCTCCATGAGTTTTATATTGGTGATAATCTAATAAAAGGG

>PGSC0003DMG400023554-(rev)LRR-RLKs\_693

ATTGGTTGTTTATCCGAGCTCCATGAGTTTTATATTGGTGATAATCTAATAAAAGGGACTATTCCGACTTC

ATTGGGAAATATTTCCACTATGCATAATCTTAATTGTGGAAACTATCGC

>PGSC0003DMG400023554-(rev)LRR-RLKs\_756

CGCACTTCATTGGGAAATATTTCCACTATGCATAATCTTAATTGTGGAAACTATCGCATAGTGGGGCAA

TTCCTCTGGAATTAGGGAAGCTATCAAATTTGAGGAAATTAAGTTTTGCC

>PGSC0003DMG400023554-(rev)LRR-RLKs\_819

GGGCAAATTCCTCTGGAATTAGGGAAGCTATCAAATTTGAGGAAATTAAGTTTTGCCATAATTCTAATC

TAATTGGTGAAATCCAGAGGCTATTTTCAACATCTCTTCTTTGGAAGGG

>PGSC0003DMG400023554-(rev)LRR-RLKs\_882

TCTAATCTAATTGGTGAAATCCAGAGGCTATTTTCAACATCTCTTCTTTGGAAGGGATCGATTTCAAGTTT

CAACAACCTCTCAGGGAGAATTCCAACCACTACAGGTCTTCATCTCCCC

>PGSC0003DMG400023554-(rev)LRR-RLKs\_945

TTCAGTTTCAACAACCTCTCAGGGAGAATTCCAACCACTACAGGTCTTCATCTCCCCAACCTTGAAGGACT

TACTTGGGAGTAAATCAGTTCAAAGGAGAAATTCATTGTTTATAACA

>PGSC0003DMG400023587-(rev)LRR-RLKs\_0

ATGGAGAAGCACATTTTCTTACTGATTCTTCTACTTGTAATTCAATATTACTCTGTTGCTTCTCAAATGAA

ACTGATCAACAAGCTCTACTAGCTTTCAAAAATCTTATTACAAGTCCT

>PGSC0003DMG400023587-(rev)LRR-RLKs\_1054



GGAAGCTATCAAAGTTGAGGGTATTAGTCATTGAGGACAATTCTAATCTTATTGGTCAAATCCAGAGG  
CTATTTTCAACATATCTTCTTTGGAAGTGATTGCTTTCAGTTTCAATAACC

>PGSC0003DMG400023587-(rev)LRR-RLKs\_1116

CCAGAGGCTATTTTCAACATATCTTCTTTGGAAGTGATTGCTTTCAGTTTCAATAACCTCTTGGGGAGAAT  
TCCAACCACTACAGGTCTTCATCTTCCGAACCTTAAAGAACTCTACTTG

>PGSC0003DMG400023587-(rev)LRR-RLKs\_1240

ACAATCAGCTTGAAGGGGAAATTCCATTGTTTCATAACAAATGCTTCCAAGCTTGAGAAATTGGAGCTAA  
ATGATAACTTTCTGTCAGGAACTATTCCTACTAATTTGGGAAATCTTCATG

>PGSC0003DMG400023587-(rev)LRR-RLKs\_1302

GAGCTAAATGATAACTTTCTGTCAGGAACTATTCCTACTAATTTGGGAAATCTTCATGAGCTGCGATATCT  
CTTCTACATCATAATCAACTAACCAATGAACCAAGAGAGTGTGAGTTG

>PGSC0003DMG400023587-(rev)LRR-RLKs\_1364

GCGATATCTTCTTCTACATCATAATCAACTAACCAATGAACCAAGAGAGTGTGAGTTGTTATTCTTCAATT  
CATTGGCGGACTGTAAGATGTTGAAATATCTACAAGTGGGTTTCAATCT

>PGSC0003DMG400023587-(rev)LRR-RLKs\_1426

TCTTCAATTCATTGGCGGACTGTAAGATGTTGAAATATCTACAAGTGGGTTTCAATCTGTTGAATGGCGC  
TCTGCCAAATTCTATTGGGAATCTTTCATCTACTATTCAAACCTTTCATA

>PGSC0003DMG400023587-(rev)LRR-RLKs\_1488

AATGGCGCTCTGCCAAATTCTATTGGGAATCTTTCATCTACTATTCAAACCTTTCATATAGGACATGCACA  
CATCAACGGCCTCATCCCCACAGGTATAAGCAACATGAGCGGTCTAATG

>PGSC0003DMG400023587-(rev)LRR-RLKs\_1736

TTTATCTAATTTGGTTCAATTATATCTGGAACATAATGAGCTCACTGGAGTGATCCCAGAATGTATAGGA  
GATCTAAGCTTGCTACAACATCTTTATTTGGATTCTAATAAATTTTCATC

>PGSC0003DMG400023587-(rev)LRR-RLKs\_1860

TTCCGTTGAGTCTTTGGAAGATGAGTGGTCTTCTCTATCTAAGTGTGTCACGAAATCTTTAGAGGGAG  
AAGTCCATCAGATATTGGGAACTGAAAGCCATTGTAGGACTATATCTT

>PGSC0003DMG400023587-(rev)LRR-RLKs\_1984

GTAACCACTTTTCAGGCGTGATACCAACCAGATTCGGGGAACTCCAAAACCTGCAGTATCTTGACCTATC  
CAACAATTCATTTTTTGGCCAAATTCCATTATCCTTTGCCAACTTGATAA

>PGSC0003DMG400023587-(rev)LRR-RLKs\_2170

TTCATACCTTAAAAGCATTAAATGTTTCATTTAATTATTTAGAAAGGTGAAATACCGAGTGGTGGCGTGTT  
GCAAATCCACTCTTCAATCATTCTCAGGAACAAAGGTCTATGTGGAA

>PGSC0003DMG400023587-(rev)LRR-RLKs\_2232

GGCGTGTTTGCAAATCCACTCTTCAATCATTCTCAGGAACAAAGGTCTATGTGGAATGCACATATTGG  
AGATTCCTGCTTGCCTATCAATAATCCTGGAAAACAATCAAAGCTTAAG

>PGSC0003DMG400023587-(rev)LRR-RLKs\_2294

CATATTGGAGATTCCTGCTTGCCTATCAATAATCCTGGAAAACAATCAAAGCTTAAGGAGGTTCTGCTG  
AAAATTGTTACTCCAGTGGTTATATCATCCTTGTTGATATTCTTGTTGGT

>PGSC0003DMG400023587-(rev)LRR-RLKs\_2480

TGGGACTCATCAGTTAGTTTCTTATCATGAGATTCAACTAGCAACAAATAATTTTGATGAATCCAATTTAA  
TTGGTGAGGGAAGCTCTGTTCTGTTTACAAAGGCACATTATCTAGTGG

>PGSC0003DMG400023587-(rev)LRR-RLKs\_2666

ATGCGAAGTGATGAGAAATGTTAGACACAGAAATATTGTTCCAGTTATTACTACTTGTCTAGTGACTAT  
ATAAGAGCCTTTGTTCTGCGATATATGCCCAACGGGAGTCTTGAGAATTG

>PGSC0003DMG400023587-(rev)LRR-RLKs\_2728

GTGACTATATAAGAGCCTTTGTTCTGCGATATATGCCCAACGGGAGTCTTGAGAATTGGTTGTACAGAG  
AAGATTGCCACTTGAATCTTCATCAAAGAGTCACCATAATGCTTGACGTGG

>PGSC0003DMG400023587-(rev)LRR-RLKs\_2790

TACAGAGAAGATTGCCACTTGAATCTTCATCAAAGAGTCACCATAATGCTTGACGTGGCAATGGCAATT  
GAATATCTACATCATGGTCATGTCACTCCAATAGTTCATTGCGACTTAAAG

>PGSC0003DMG400023587-(rev)LRR-RLKs\_2914

CCAACGTTCTTTTGGATGAAGATATGGTGGCTCAAGTTGGTGATTTTGGCATCTCTAAAATTTTAGCCAT  
AAGTAAGTCCATGGCACATACCGAGACATTGGGAACTCTTGATACATTG

>PGSC0003DMG400023587-(rev)LRR-RLKs\_2976

TTAGCCATAAGTAAGTCCATGGCACATACCGAGACATTGGGAACTCTTGATACATTGCACCAGGTAGA  
CTACTTTCTTTCTTTCTCACTTATATAATAACCTTTCTATTTGATTTTTTT

>PGSC0003DMG400023587-(rev)LRR-RLKs\_3038

AGGTAGACTACTTTCTTTCTTTCTCACTTATATAATAACCTTTCTATTTGATTTTTTTCTTATCTAAATCAAG

CCCTTGCAAATACTAGAACTAAATAAAAAGCATGTCTTTGTTAGTAC

>PGSC0003DMG400023587-(rev)LRR-RLKs\_3100

TCTAAATCAAGCCCTTGCAAATACTAGAACTAAATAAAAAGCATGTCTTTGTTAGTACGCGCACTATTGTT  
ATATTCAAATGAGTAATTCTTTTTTCATTTTCATTTGTTTAAGAATATGG

>PGSC0003DMG400023587-(rev)LRR-RLKs\_558

AAAATGATGAACTTCAGTTTGTCTGGAATAGATTCAGCGGCAACATTCCTAAGGAGGTCTGGTAATCTG  
AGCCAACTTGCAGACATGTCCTTGACTGATAATCAGTTAACAGGTTCCATT

>PGSC0003DMG400023587-(rev)LRR-RLKs\_62

CTCAAATGAAACTGATCAACAAGCTCTACTAGCTTTCAAAAATCTTATTACAAGTCCTAATCATTTTTTGG  
CCAATAATTGGACCAAATACTCTTTTGCTCTTGGTTTGGTGTCACTTG

>PGSC0003DMG400023587-(rev)LRR-RLKs\_620

TAATCTGAGCCAACTTGCAGACATGTCCTTGACTGATAATCAGTTAACAGGTTCCATTCCCGTAGAACTG  
TTAATATCTCGTCACTACTGTCCATAAATCTGCGACACAATAGCCTTTC

>PGSC0003DMG400023587-(rev)LRR-RLKs\_992

CACTCTACAATATCTTTATTGTGGAGAAAATCACATAGTAGGGAAAATTCCTCAAGAATTAGGGAAGCTA  
TCAAAGTTGAGGGTATTAGTCATTGAGGACAATTCTAATCTTATTGGTCA

>PGSC0003DMG400023599-(rev)LRR-RLPs\_0

CCACTCCTTACATATCCATTTCTTAATCTTCCAACTTTTCTTGTTTCATCATTTTTGAGTATTAATTTGATGG  
CAGCTTATAGTGCTGTAATTTCTTCTTCAAACCTTGTGTTGATCAA

>PGSC0003DMG400023599-(rev)LRR-RLPs\_1054

AACCATGATCATCCTCCTGAGTTAGAAGGAATTGGAAAGGAAATAGTAGAAAAATGCCAAGGACTACCC  
TTGACAATCTCAGTGATTGCGGGACATCTCTCTAAAGTGGCCAGGACATTA

>PGSC0003DMG400023599-(rev)LRR-RLPs\_1116

ACTACCCTTGACAATCTCAGTGATTGCGGGACATCTCTCTAAAGTGGCCAGGACATTAGAAAGTTGGAA  
GGATGTGCGCCAAACCTTAAGTGAATAATTGCCAGTCAGTCAGATAAATA

>PGSC0003DMG400023599-(rev)LRR-RLPs\_1178

GTTGGAAGGATGTCGCCCAAACCTTAAGTGAATAATTGCCAGTCAGTCAGATAAATACTTAGGAGTGC  
TCGTTTTGAGTTACCACCACTTGCCTAGTCGCCTTAAACCTTGCTTTCTTT

>PGSC0003DMG400023599-(rev)LRR-RLPs\_124

ATATTCGAGAACTCTTTCATGATCACACTGCCAAAACGCTCGATTCTCTTCATGCTACTGCTCAATATTTTC  
AACATGTCCTTGAAAATATTAAGCAAGAATAGAAGATTTGACCATGAA

>PGSC0003DMG400023599-(rev)LRR-RLPs\_1302

GAGTAGTTTCCCAGAGGATTTTCAGGTTGATACTCGGAGACTGATCCAATTATGGATCGCAGAAGGTTTT  
TGTAAGGATTTCCAAAAAATGGTAAAAGTTTGGAGGAAGTGGCAATTGAT

>PGSC0003DMG400023599-(rev)LRR-RLPs\_1364

AAGGTTTTTGTAAAGATTTCCAAAAAATGGTAAAAGTTTGGAGGAAGTGGCAATTGATTATTTGGAGGA  
CCTTATTAGCAGGAACTTGATACAAGCTAGAAAAAGGGGATTCAATGGTGA

>PGSC0003DMG400023599-(rev)LRR-RLPs\_1426

TGGAGGACCTTATTAGCAGGAACTTGATACAAGCTAGAAAAAGGGGATTCAATGGTGATATAAAAGCA  
TGTGGAATACATGATATACTGCGTGAGTTCTGTTTGATAGAAGCTGAAATGA

>PGSC0003DMG400023599-(rev)LRR-RLPs\_1488

AAAGCATGTGGAATACATGATATACTGCGTGAGTTCTGTTTGATAGAAGCTGAAATGACAAAGCATATG  
CATGTTGAGAGAACTTACCCTACTCTCCAACACAAAAGCATAATGTTTCGT

>PGSC0003DMG400023599-(rev)LRR-RLPs\_1550

GCATATGCATGTTGAGAGAACTTACCCTACTCTCCAACACAAAAGCATAATGTTTCGTCGCTTCAGTTTTC  
AGACCAAATCTTGTTTCAGTTGAGGATTTTTATAAGTTATTGACCCCTGT

>PGSC0003DMG400023599-(rev)LRR-RLPs\_1612

TCAGTTTTTCAGACCAAATCTTGTTTCAGTTGAGGATTTTTATAAGTTATTGACCCCTGTTGCCAGATCTATC  
TATTTATATTCTCTATGGAATCTACCTCTTGATCCCCGTATTAAGATTT

>PGSC0003DMG400023599-(rev)LRR-RLPs\_1674

AGATCTATCTATTTATATTCTCTATGGAATCTACCTCTTGATCCCCGTATTAAGATTTTCTGGAGAATTCCC  
AGCTACCGCTGTGATCCTAATAATAACCTGAATTTTTCTCTCGTTTC

>PGSC0003DMG400023599-(rev)LRR-RLPs\_1736

GAGAATCCCAGCTACCGCTGTGATCCTAATAATAACCTGAATTTTTCTCTCGTTTCAACCTTCTCAGGG  
TATTGGTCATTTTCAATAAAGTTTTAATGCTCTCATCATTTCCAGTTGT

>PGSC0003DMG400023599-(rev)LRR-RLPs\_1798

TTCTCAGGGTATTGGTCATTTTCAATAAAGTTTTAATGCTCTCATCATTTCCAGTTGTGATTACAAAGTTGT  
TTCATTTGAGATATCTCCAAGTTCCATTTACCAGAATATTCCTGAAT

>PGSC0003DMG400023599-(rev)LRR-RLPs\_186

CAATATTTTCAACATGTCCTTGAAAATATTAAGCAAGAATAGAAGATTTGACCATGAAAAGATCAAATCT  
TTGGAGGAAAAATAAGAGTTGCTGTTAGTTATGCAGAAGATGTTGTTGA

>PGSC0003DMG400023599-(rev)LRR-RLPs\_1860

ACAAAGTTGTTTCATTTGAGATATCTCCAAGTTCCATTTACCAGAATATTCCTGAATCAATCTCAGAGCT  
TCAGAATTTGCAAACCTAATTTGTAGTGGTTATTCTCTCGAGTCTGTA

>PGSC0003DMG400023599-(rev)LRR-RLPs\_1922

CTCAGAGCTTCAGAATTTGCAAACCTAATTTGTAGTGGTTATTCTCTCGAGTCTGTAAGTTTACCTGTGG  
AGATATGGACGATGCAGTACTTGAGGTATATACATCTACGGGCAGCCAC

>PGSC0003DMG400023599-(rev)LRR-RLPs\_1984

TACCTGTGGAGATATGGACGATGCAGTACTTGAGGTATATACATCTACGGGCAGCCACTTCTTTACCCAG  
CCCTAGAAGAGAAAGTATTCTAAATAAGCATCTTGTGACAAGGATGCCAA

>PGSC0003DMG400023599-(rev)LRR-RLPs\_2046

TTACCCAGCCCTAGAAGAGAAAGTATTCTAAATAAGCATCTTGTGACAAGGATGCCAAATCTAGAGGAA  
TTTTCTGGTCTTTCTTGCAACAGTTGTACAAATGAAGTCTTTTCTGGCATT

>PGSC0003DMG400023599-(rev)LRR-RLPs\_2108

AGAGGAATTTTCTGGTCTTTCTTGCAACAGTTGTACAAATGAAGTCTTTTCTGGCATTCCCGATCTAAGGA  
GATTGATCATTCAAGCACCTTTATTCTTTGATGACTCTTTACCCAATGG

>PGSC0003DMG400023599-(rev)LRR-RLPs\_2170

ATCTAAGGAGATTGATCATTCAAGCACCTTTATTCTTTGATGACTCTTTACCCAATGGACTCATGGATATG  
TCCATCTTGAGAAAACCTCGAAACATTCAAGTGTATTACTGGCAACATA

>PGSC0003DMG400023599-(rev)LRR-RLPs\_2232

ATGGATATGTCCATCTTGAGAAAACCTCGAAACATTCAAGTGTATTACTGGCAACATAGTTGGATCTCGT  
GTA ACTCCATCAAGAGTTTTGTTTTTCCAACATCACTTAAGAGGTTGACT

>PGSC0003DMG400023599-(rev)LRR-RLPs\_2294

GATCTCGTGTA ACTCCATCAAGAGTTTTGTTTTTCCAACATCACTTAAGAGGTTGACTTTAACTAGGTGTT  
ATCTTTTTCTTGGAAGACATATCATCAACTCTCATCATGTTGCCAAA

>PGSC0003DMG400023599-(rev)LRR-RLPs\_2356

CTAGGTGTTATCTTTTTCTTGGAAGACATATCATCAACTCTCATCATGTTGCCAAATCTTGAAGAGTTC

AAACTTAAAGATTCTAAAGCTACAGATGATATATGGAGATTGAGTGATG

>PGSC0003DMG400023599-(rev)LRR-RLPs\_2418

GAAGAGTTCAAACCTAAAGATTCTAAAGCTACAGATGATATATGGAGATTGAGTGATGAAGATAAGTTC

AAAAGCTTGAAGTTGTTGTTACTAGATGTCCTAAATCTTAAGCATTGGGAA

>PGSC0003DMG400023599-(rev)LRR-RLPs\_248

TCAAATCTTTGGAGGAAAAATAAGAGTTGCTGTTAGTTATGCAGAAGATGTTGTTGAGATGAAAATTT

CTCAAATCATCAAAGGCTCAAGCTGGACATTTGGAATTTTACAACACCATG

>PGSC0003DMG400023599-(rev)LRR-RLPs\_2480

TAAGTTCAAAGCTTGAAGTTGTTGTTACTAGATGTCCTAAATCTTAAGCATTGGGAATCTAGTAGTGAT

AACTTCCCAAATCTAAAACGCCTTGTCTGAAGAATTGCACCGACCTGCA

>PGSC0003DMG400023599-(rev)LRR-RLPs\_2542

GTAGTGATAACTTCCCAAATCTAAAACGCCTTGTCTGAAGAATTGCACCGACCTGCAAGAAATTCCAGG

AGATTCGGGGAAATTGGTACTTTGGAATCAATTGAGTTACATGATTGCA

>PGSC0003DMG400023599-(rev)LRR-RLPs\_2604

ATTCCAGGAGATTCGGGGAAATTGGTACTTTGGAATCAATTGAGTTACATGATTGCAGCACTACCACTG

AGGATTCTGCAAGAGAGATTGTACAAGAACAAGAGGACATGGGAAATAAT

>PGSC0003DMG400023599-(rev)LRR-RLPs\_2666

TACCACTGAGGATTCTGCAAGAGAGATTGTACAAGAACAAGAGGACATGGGAAATAATATTCTTAAGGT

CTACATCCATAATAATTGCAGTAAGTTTTAAATCTCTCCAAAAAGTTCTTC

>PGSC0003DMG400023599-(rev)LRR-RLPs\_2728

TTAAGGTCTACATCCATAATAATTGCAGTAAGTTTTAAATCTCTCCAAAAAGTTCTTCGATTCTCTAATCTT

TGTTAAATATTACTTCCTTGAAATTAAGATGATGACTTGTACTTTTTA

>PGSC0003DMG400023599-(rev)LRR-RLPs\_2790

CTCTAATCTTTGTAAATATTACTTCCTTGAAATTAAGATGATGACTTGTACTTTTTATCTTGCATATGCAG

GGGAATGAAGCTTATTTTAAGGCACCATCTAATGTCATCTTCCAAATA

>PGSC0003DMG400023599-(rev)LRR-RLPs\_2852

GCATATGCAGGGGAATGAAGCTTATTTTAAGGCACCATCTAATGTCATCTTCCAAATACAAAACCTTTTA

GTTCATACTTCGAAAAGTAAAATCTTTCGTTGTTTCTATGTTCTGATCAT

>PGSC0003DMG400023599-(rev)LRR-RLPs\_2914

ACCTTTTAGTTCATACTTCGAAAAGTAAAATCTTTCGTTGTTTCTATGTTCTGATCATTAAATTTGGTTAAAT  
TCATGTTTTAGGAATAAACATGTTTAATTCAATTTACCTTCAGCCTG

>PGSC0003DMG400023599-(rev)LRR-RLPs\_2976

TTGGTTAAATTCATGTTTTAGGAATAAACATGTTTAATTCAATTTACCTTCAGCCTGAGAGGTATGTTCT  
GTATCATATGACGGAGTGTTCAGCAACGGAGAGTTAAGGTCTTGAGCA

>PGSC0003DMG400023599-(rev)LRR-RLPs\_3038

GTATGTTCTGTATCATATGACGGAGTGTTCAGCAACGGAGAGTTAAGGTCTTGAGCAATCCTTAACTCT  
TAAACTAGCTCAATGTCCATTTCTTATCATGTATCAGAGCCAAACTCTTC

>PGSC0003DMG400023599-(rev)LRR-RLPs\_310

AAAATTTCTCAAATCATCAAAGGCTCAAGCTGGACATTTGGAATTTTACAACACCATGATTTGATACCACT  
TGTTGAAAAAATGGATAACAACAAGAAACAAGTGATGGACATTCTTTCT

>PGSC0003DMG400023599-(rev)LRR-RLPs\_3100

TAACTCTTAAACTAGCTCAATGTCCATTTCTTATCATGTATCAGAGCCAAACTCTTCTTAAATCATTGTTT  
ACCTGATGATTTGGGCCCATCTTATATTATCCACACTCCAGATGTCC

>PGSC0003DMG400023599-(rev)LRR-RLPs\_3136

ATGTATCAGAGCCAAACTCTTCTTAAATCATTGTTTACCTGATGATTTGGGCCCATCTTATATTATCCACA  
CTCCAGATGTCCAATCCTAGGCATGCCGAGGTGTTGAGTCCACACCAT

>PGSC0003DMG400023599-(rev)LRR-RLPs\_372

GATACCACTTGTTGAAAAAATGGATAACAACAAGAAACAAGTGATGGACATTCTTTCTCATGATGCTGAT  
CAAGTTCTGGAATTATCCGGCGATTCCCTTGATTGCCACTTCTTCTACAAG

>PGSC0003DMG400023599-(rev)LRR-RLPs\_434

ATGCTGATCAAGTTCTGGAATTATCCGGCGATTCCCTTGATTGCCACTTCTTCTACAAGTTATCCAATGATG  
AAAGATGATATTGTTTACGGACTTGATGATGACTTGGAGATCATAATTA

>PGSC0003DMG400023599-(rev)LRR-RLPs\_496

CCAATGATGAAAGATGATATTGTTTACGGACTTGATGATGACTTGGAGATCATAATTAATAGGTTGAAA  
GGATGAGTACGGGATCTAGACGTTGTCACAATATCAGGCATGGGTGGCATT

>PGSC0003DMG400023599-(rev)LRR-RLPs\_558

GTTGAAAGGATGAGTACGGGATCTAGACGTTGTCACAATATCAGGCATGGGTGGCATTGGTAAAACAA  
CACTAGCTAAAACAGCTTATGATCATCTTACAATCAGGTATCATTTTGACAT

>PGSC0003DMG400023599-(rev)LRR-RLPs\_62

TAATTTGATGGCAGCTTATAGTGCTGTAATTTCTCTTCTTCAAACCTTGTTGATCAATGAAATATTCGAG  
AACTCTTTCATGATCACACTGCCAAAACGCTCGATTCTCTTCATGCTAC

>PGSC0003DMG400023599-(rev)LRR-RLPs\_620

AAACAACACTAGCTAAAACAGCTTATGATCATCTTACAATCAGGTATCATTTTGACATTCTTGCTTGGGTT  
ACAATATCTCAAGAATTTAGCCATAGAAGTGTATTGTTAGAAGCTTTAC

>PGSC0003DMG400023599-(rev)LRR-RLPs\_682

GCTTGGGTTACAATATCTCAAGAATTTAGCCATAGAAGTGTATTGTTAGAAGCTTTACATTGCATCTCAA  
AGTCAACAGTTAGTTTTACACAAAAGATTATGATAAGATGGATGACAAT

>PGSC0003DMG400023599-(rev)LRR-RLPs\_744

CATCTCAAAGTCAACAGTTAGTTTTACACAAAAGATTATGATAAGATGGATGACAATGAGTTAGCTGAC  
CTGGTGCAAAGAACCTAAAGGGTCGAAGATACCTTATTGTTGTTGACGA

>PGSC0003DMG400023599-(rev)LRR-RLPs\_806

TAGCTGACCTGGTGCAAAGAACCTAAAGGGTCGAAGATACCTTATTGTTGTTGACGATATTTGGAGTA  
CAGATGTTTGGGATAGTATAATAGGAATATTTCTAATTACAACAATGGAA

>PGSC0003DMG400023599-(rev)LRR-RLPs\_868

TGGAGTACAGATGTTTGGGATAGTATAATAGGAATATTTCTAATTACAACAATGGAAATCGAATCTTAT  
TGACTACTAGGAAAACGAGGTAGCAATGTATGCAAATACTTGTAGCCCT

>PGSC0003DMG400023599-(rev)LRR-RLPs\_930

AATCTTATTGACTACTAGGAAAACGAGGTAGCAATGTATGCAAATACTTGTAGCCCTCATGAGATGAA  
GCTTTTGAGTTTAGAAAACGGTTGGAGGTTACTTTGTGATAAGGTGTTTGG

>PGSC0003DMG400023599-(rev)LRR-RLPs\_992

AGATGAAGCTTTTGAGTTTAGAAAACGGTTGGAGGTTACTTTGTGATAAGGTGTTTGGACCAAACCATG  
ATCATCCTCCTGAGTTAGAAGGAATTGGAAAGGAAATAGTAGAAAAATGCC

>PGSC0003DMG400023612LRR-RLKs\_0

ATGGAGGGGCAAATTCCTCCGGAATTAGGGAAGCTATCAAATTTGAGGAAATTAAGCTTTTCAGAGAAT  
TATAATTTTATTGGTCAAATTCAGAGGCTATTTTCAACATATCTTCTTTG

>PGSC0003DMG400023612LRR-RLKs\_1116

AGTATTCCTATGTCTTTGGAAAACTCTCATACCTTAAAAGCATTAAATGTTTCATTTAATGATTTAGAAGG



TGTAATACCAAGTGGTGGTGTGTTTGCACATTCCACTGTGCAATCATT

>PGSC0003DMG400023612LRR-RLKs\_1488

CAAGCAACCAATAATTTTGTATGAATTCAATTTAATTGGTGTGGGAAGTTCTAGCACTGTGTTCAAAGGCA  
CATTATCTAGTGGAACTGCAGTGGCCATTAAGGTTCTGGATTGGAAAAT

>PGSC0003DMG400023612LRR-RLKs\_1674

GTTCCAGTGATTACTACTTGTCTAGTGACTATATAAGAGCCTTTGTTCTGAAATTTATGCCCAATGGAAG  
TCTTGAGAATTGGTTGTACAAAGAAGATCGCCACTTGAACCTTCATCAA

>PGSC0003DMG400023612LRR-RLKs\_186

CCTAACCTTAAAGTACTTGGAGTTGGGAGTCAATCAGCTGGAAGGGGAAATTCATTGTTTCATAACAAATT  
CTTCCAAGCTTCAGATACTATCGCTAATTGATAACTTTCTCACAGGAACT

>PGSC0003DMG400023612LRR-RLKs\_1984

TGGTACTCTTGGATACATTGCACCAGGTATAAAAAATCTACTCACTTTGATTTTCTTTTATCATAATAAA  
GCCTCTCCAAATTCTACAATAAAAAACAAGCTTTTATTTATGCAGAA

>PGSC0003DMG400023612LRR-RLKs\_2046

CATAATAAAGCCTCTCCAAATTCTACAATAAAAAACAAGCTTTTATTTATGCAGAATTATTGTTGTATT  
CAATTGAATTAACTTTTTCAATCCTTTTAAAGAATATGGCTCGGATG

>PGSC0003DMG400023612LRR-RLKs\_2108

TGTTGTATTTCAATTGAATTAACTTTTTCAATCCTTTTAAAGAATATGGCTCGGATGGAATAGTGTCTGC  
TAGTGGCGATGTTTATAGTTACGGCATCATGTTGATGGAGTTTTGACG

>PGSC0003DMG400023612LRR-RLKs\_248

AACAAATTCTTCCAAGCTTCAGATACTATCGCTAATTGATAACTTTCTCACAGGAACTATTCCTACTAATTT  
AGGAAATCTTCGTGAGCTGCAAGAACTGTTCTACATACTAATCAACT

>PGSC0003DMG400023612LRR-RLKs\_310

CTACTAATTTAGGAAATCTTCGTGAGCTGCAAGAACTGTTCTACATACTAATCAACTTACCAATGAACCA  
AGAGAGTATGAGTTGCGATTTTTCAATTCTTTGGCGGACTGTAGGATGT

>PGSC0003DMG400023612LRR-RLKs\_372

AATGAACCAAGAGAGTATGAGTTGCGATTTTTCAATTCTTTGGCGGACTGTAGGATGTTGAAATATCTAC  
AAGTAGGTTCCAATCTGTTGTATGGCATTCTGCCCAATTCTATTGGCAGT

>PGSC0003DMG400023612LRR-RLKs\_434

ATATCTACAAGTAGGTTCCAATCTGTTGTATGGCATTCTGCCAATTCTATTGGCAGTCTTTCATCTACTAT  
TCAAAAATTTGAAATAGGAGATGCACACATCAATGGAATCATCCCCAC

>PGSC0003DMG400023612LRR-RLKs\_496

CATCTACTATTCAAAAATTTGAAATAGGAGATGCACACATCAATGGAATCATCCCCACAAGTATAGGCAA  
CATGACCGGTCTTACATCCTTAAGCCTTGGCGGAAACAACCTTGACAGGGA

>PGSC0003DMG400023612LRR-RLKs\_62

AGAGAATTATAATTTTATTGGTCAAATTCAGAGGCTATTTTCAACATATCTTCTTTGGAAATGATTGATT  
TCAGTAACAATAACCTCTCGGGTAGAATTCCAACCACTACAGGTCTTCA

>PGSC0003DMG400023612LRR-RLKs\_620

TCCTTCTGAGATTGGTAAGCTTAAACAACCTCCAAGGGTTGTATCTAGATAACAATAAATTGCAGGGACAT  
ATTCCAGAGGCAGTATGCCATTTATCTAATTTGGTTCATTCTTATCTAGA

>PGSC0003DMG400023612LRR-RLKs\_682

AGGGACATATTCCAGAGGCAGTATGCCATTTATCTAATTTGGTTCATTCTTATCTAGATAATAATGAGCTC  
TCTGGACTAATTCCAGAATGCTTAGGTAATCTTAGCATGCTACAAAAGC

>PGSC0003DMG400023612LRR-RLKs\_744

AATGAGCTCTCTGGACTAATTCCAGAATGCTTAGGTAATCTTAGCATGCTACAAAAGCTTTTTTTGAGTTC  
CAATAAATTATCAAAAATTCCAGGGAACCTTTGGAAAATGAGTGGTCTT

>PGSC0003DMG400023612LRR-RLKs\_806

TTTGAGTCCAATAAATTATCAAAAATTCCAGGGAACCTTTGGAAAATGAGTGGTCTTCTCTATCTAAGT  
GTGTCACAAAATTCTATAGAGGGAAAAATTCCATTAGATATTGGAGAACT

>PGSC0003DMG400023612LRR-RLKs\_930

GCCATTGTAGAAATACATCTTTCTGGTAACCACTTTTCAGGCATGATACCAAGCACATTCGGGGCACTCC  
AAAACCTGCAGTCTTTGACCTATCAAACAATTCATTCTTTGGCCAAATT

>PGSC0003DMG400023612LRR-RLKs\_992

GGCACTCCAAAACCTGCAGTCTCTTGACCTATCAAACAATTCATTCTTTGGCCAAATTCCATTATCCCTTG  
CCAACCTGATAAGCTTGAATTCTTGAATTTGTCTTTAAATGCATTGTC

>PGSC0003DMG400023613LRR-RLPs\_0

ATGCTTCTCTTTCTAATTCAATTTTCTGTATCATTTTCTCCTCAAATGAGACTGATCAACAAGCTCTACTA  
GCTTTCCAAAATCTTGTTACAAGTCCCACTCATTTTTTTGGCCAATAAT

>PGSC0003DMG400023613LRR-RLPs\_1054

TGCAATTAGGCTTTGACCAAAATTATTATCTTATTGGTCAAATTCAGAGGCTATTTTCAACATATCTTCTT  
TGAAATAATTGATTTCAAGTTTCAACAATCTCTGGGGGAGAATTCCAA

>PGSC0003DMG400023613LRR-RLPs\_1116

ATATCTTCTTTGGAAATAATTGATTTCAAGTTTCAACAATCTCTGGGGGAGAATTCCAACCACTATAGGTCT  
TCATCTTCCAAACATTAAGGATCTTATCTTGGGAGGTAATCAGTTGGAA

>PGSC0003DMG400023613LRR-RLPs\_1178

TATAGGTCTTCATCTTCCAAACATTAAGGATCTTATCTTGGGAGGTAATCAGTTGGAAGGGGAAATTCCA  
TTGTACATAACAAATGCTTCCAAACTTGAGATACTGGAGCTAAGTAAGAA

>PGSC0003DMG400023613LRR-RLPs\_1240

AAATTCCATTGTACATAACAAATGCTTCCAAACTTGAGATACTGGAGCTAAGTAAGAACTTCCTCACAAG  
AACTATTCCTACTAATTTGGGAAATCTTCGTGAACTGCGATCACTACTCC

>PGSC0003DMG400023613LRR-RLPs\_1302

CTCACAAGAACTATTCCTACTAATTTGGGAAATCTTCGTGAACTGCGATCACTACTCCTAGATAATAATCA  
ACTTACCAATGAACCACGAGGGCATGAGTTGCGATTCTTAAATTCTTTG

>PGSC0003DMG400023613LRR-RLPs\_1364

TAATAATCAACTTACCAATGAACCACGAGGGCATGAGTTGCGATTCTTAAATTCTTTGGCGGACGGTAG  
GATGTTGCGATATCTATCAGTGAGTTCCAATCCGTTGAATAACGTTCTGCC

>PGSC0003DMG400023613LRR-RLPs\_1426

ACGGTAGGATGTTGCGATATCTATCAGTGAGTTCCAATCCGTTGAATAACGTTCTGCCAATTTTATTGG  
GAATCTTTCATCTACTTTTGAATCTTTCATATAGAAGATGCACACATCA

>PGSC0003DMG400023613LRR-RLPs\_1488

TTTATTGGGAATCTTTCATCTACTTTTGAATCTTTCATATAGAAGATGCACACATCAATGGGCTCATCCC  
CACAAGTATAGGCAACATGAGTGGACTTACAACCCTAATTTTTGACGAA

>PGSC0003DMG400023613LRR-RLPs\_1550

GCTCATCCCCACAAGTATAGGCAACATGAGTGGACTTACAACCCTAATTTTTGACGAAAACAACCTTGACA  
GGAAATATTCCTCCTGAGTTTGGTATGGTTAAACAACCTCCAAGGGCTGTA

>PGSC0003DMG400023613LRR-RLPs\_1612

ACTTGACAGGAAATATTCCTCCTGAGTTTGGTATGGTTAAACAACCTCCAAGGGCTGTATCTAGATAACAA

TCAATTGAACGGACATATTCCAGAGGCGGTATGTCATTTATCTAATTTGG

>PGSC0003DMG400023613LRR-RLPs\_1674

GATAACAATCAATTGAACGGACATATTCCAGAGGCGGTATGTCATTTATCTAATTTGGATCTATTAATTCT

GGAAGGTAATGAGCTCACTGGAGTGATCCCAGAATGTATAGGAAATCTT

>PGSC0003DMG400023613LRR-RLPs\_1736

ATTAATTCTGGAAGGTAATGAGCTCACTGGAGTGATCCCAGAATGTATAGGAAATCTTAGCATGCTACA

ACATCTTTATTTGGGTTCTAATAAATTTTCATCAACGTTTCCATTGAATCT

>PGSC0003DMG400023613LRR-RLPs\_1798

TGCTACAACATCTTTATTTGGGTTCTAATAAATTTTCATCAACGTTTCCATTGAATCTTTGGAAAATGAGT

GGTCTTCTCTCTAAGTGTGTCACGAAATTC AATTGAGGGAGAAGTTC

>PGSC0003DMG400023613LRR-RLPs\_186

GTGGCCTTGTCTCTTCTAATTTGCAACTTCAAGGCACAATTTCCCATCGTTGGCTAATTTATCCTTCCTT

AGTGTCTCAATCTCAAGAACAACA ACTTCCAAGGTGGCATCCCTTAT

>PGSC0003DMG400023613LRR-RLPs\_1860

AAAATGAGTGGTCTTCTCTCTAAGTGTGTCACGAAATTC AATTGAGGGAGAAGTTCATTAGATATTG

GAGGACTGAAAGCCATTGTAGCTCTAGATCTTTCCAGTAACCACTTTTCA

>PGSC0003DMG400023613LRR-RLPs\_1922

AGATATTGGAGGACTGAAAGCCATTGTAGCTCTAGATCTTTCCAGTAACCACTTTTCAGGAATGATACCA

ACTAGATTGGGGGAACTCCAAAACGTGCAGTATTTTGACTTATCGAACAA

>PGSC0003DMG400023613LRR-RLPs\_1977

TCAGGAATGATACCAACTAGATTGGGGGAACTCCAAAACGTGCAGTATTTTGACTTATCGAACAAATTCAT

TTTTTGCCAAATTCATTATCCTTTGCCAACTTGATAAGCTTAGAATGA

>PGSC0003DMG400023613LRR-RLPs\_310

TTGGCCACTTGCCTCGCTTGCAGTCATTGATATTC AAAACAATCATCTCAACGGAAGTATAACCATCAAG

TCTATTTCAACACCAAGGAGTTCAAGCAATTTTGTTGGCTTTCAATGAAC

>PGSC0003DMG400023613LRR-RLPs\_434

TGGTGAAATGTGGAGAGGGCCATGGTATGTACCCAAACTGAGTGTCTTAAATCTCAGGAACAATAGTCT

CACGGGTATAATCCCTCCTTATGTTGGGAATGCCACAAAATTGATGAACTT

>PGSC0003DMG400023613LRR-RLPs\_496

ATAGTCTCACGGGTATAATCCCTCCTTATGTTGGGAATGCCACAAAATTGATGAACTTCGATTTGTCTGG  
GAATAGAATCAATGGTAACATTCCAACAGAGATCGGTTATCTTAGCCAAC

>PGSC0003DMG400023613LRR-RLPs\_558

TTGTCTGGGAATAGAATCAATGGTAACATTCCAACAGAGATCGGTTATCTTAGCCAACCTACAGAGTTGT  
ATTTGTACAACAATCAATTAACAGGTTTCATTCCCGCAACATTGTTTAAT

>PGSC0003DMG400023613LRR-RLPs\_62

AGCTCTACTAGCTTTCCAAAATCTTGTTACAAGTCCCACTCATTTTTTGGCCAATAATTGGATAAAAAAAA  
CTACTTTTTGCCCTTGGTTTGGTGTCACTTGCAGTCCAAAAGGCAAAG

>PGSC0003DMG400023613LRR-RLPs\_682

CGTCACTTCTTGTCTATCTCTTGGAAATCAATAGCCTTTCCGGTCCTCTCTTGCTTTATGAAGGAAATATTG  
TCTCAAATCTCAAATTTTTAAGTATATATGAGAACCAAATTTCTGGTT

>PGSC0003DMG400023613LRR-RLPs\_744

GGAAATATTGTCTCAAATCTCAAATTTTTAAGTATATATGAGAACCAAATTTCTGGTTGCATTCCTTCCAA  
CATATGCCAACTCACAGAGCTCAAATTTGTGACCATATCTTTCAACAAC

>PGSC0003DMG400023613LRR-RLPs\_806

TCCTTCCAACATATGCCAACTCACAGAGCTCAAATTTGTGACCATATCTTTCAACAACATAACTGGAGAC  
ATACCCAGGAATATTGGTTGTTTATTCAAACCTAGAGGAGTTTTATATTGG

>PGSC0003DMG400023613LRR-RLPs\_868

CTGGAGACATACCCAGGAATATTGGTTGTTTATTCAAACCTAGAGGAGTTTTATATTGGCAATAATCCGAT  
AAATGGGACTATTCCATTTTCATTGGGAAATATTTCCAACCTCTGCGTAATC

>PGSC0003DMG400023613LRR-RLPs\_930

AATCCGATAAATGGGACTATTCCATTTTCATTGGGAAATATTTCCAACCTCTGCGTAATCTTTACTGTGGAAA  
CAATCGCATAGTGGGGAAAATTCTTTTCGAAATTAGGGAAGCTATCAAAT

>PGSC0003DMG400023613LRR-RLPs\_992

CTGTGGAAACAATCGCATAGTGGGGAAAATTCTTTTCGAAATTAGGGAAGCTATCAAATTTGATGCAATT  
AGGCTTTGACCAAATTATTATCTTATTGGTCAAATTCCAGAGGCTATTTT

>PGSC0003DMG400023614LRR-RLKs\_0

ATGCCTAGAAATATTGGTTGTTTATCCAAGCTCGAGAAGTTCTTGATTGGCAATAACCCAATAAAAGGGA  
CTATTCCCACTTCATTGGGAAATATTTCCAACCTCTGCAATATATTTATTGT

>PGSC0003DMG400023614LRR-RLKs\_1134

ATTCATTTTTGGCCAAATTCCATTATCCTTTGCCAACTTGATAAACTTGGAAATTCTTGAATTTGTCTTTAA  
ATGCATTGTCAGGTAGTATTCTTAAGTCTTTGGAAAACTCTACTACC

>PGSC0003DMG400023614LRR-RLKs\_126

AGTCGCATAGTGGGGCGAATTCCTCCGGAATTAGGGAAGCTATCAAATTTGAGGCAATTAAGCTTTGAC  
AACAAATTCTAATCTTATTGGTCAAATTCAGAGGCTATTTTCAACATTTCT

>PGSC0003DMG400023614LRR-RLKs\_1386

CTTGCCTATCAATAATCCTGGAAAACAATCAAAGCTAAAGGAGGTTCTGCTAAAAATTGTTACTCCGGT  
GGTTATATCATCCTTTCTGATATTCTTGTGGTTTCAATTTGGATAATGA

>PGSC0003DMG400023614LRR-RLKs\_1449

CTCCGGTGGTTATATCATCCTTTCTGATATTCTTGTGGTTTCAATTTGGATAATGAAACGACAAAAGAAA  
GGGAGGTCCAAAGATGTGGAGAAGGACTGGAGATCGGGACTCATCAAT

>PGSC0003DMG400023614LRR-RLKs\_1701

ATTTGGAAAATGAGCAAGTATCCAAAAGTTTTGATACCGAATGCGAAGTGATGAGAAATGTTAGACACA  
GAAATCTTGTTCAGTGATTACTACGTGTTCTAGTGACTATATAAGAGCCT

>PGSC0003DMG400023614LRR-RLKs\_1764

GACACAGAAATCTTGTTCAGTGATTACTACGTGTTCTAGTGACTATATAAGAGCCTTTGTTCTGCGATAT  
ATGCCCAATGGAAGTCTTGAGAATTGGCTGTACGAAGAAGATCGCCACT

>PGSC0003DMG400023614LRR-RLKs\_189

TTTGACAACAATTCTAATCTTATTGGTCAAATTCAGAGGCTATTTTCAACATTTCTTCTTTGGAACTGATT  
GGATTTGCTTTCAACAACCTCTCCGGGAGAATTCAAGCTACTACAGCT

>PGSC0003DMG400023614LRR-RLKs\_2016

TGGTTCATGTTGGTGATTTTGGAAATCTCTAAAATTTTAGCCATAAGCAAGTCCATAGCTTATACGGAGAC  
ATTGGGCACTCTTGATAACATAGCACCAGGTATAAGAAAACACTCTCTCTT

>PGSC0003DMG400023614LRR-RLKs\_2079

CGGAGACATTGGGCACTCTTGATAACATAGCACCAGGTATAAGAAAACACTCTCTTTGATATTCTATTA  
TCATAATTAAGCCTCTCCAAATTCTAGAAGTAAGAAAAAAGCAAGTCTT

>PGSC0003DMG400023614LRR-RLKs\_2142

TCTATTATCATAATTAAGCCTCTCCAAATTCTAGAAGTAAGAAAAAAGCAAGTCTTATTTATGCAGAAT

TATTGTTGTATTTCAATTAACCTTTTGTGGAATCGGCCTTTTCTAAGAAT

>PGSC0003DMG400023614LRR-RLKs\_252

GAACTGATTGGATTTGCTTTCAACAACCTCTCCGGGAGAATTCAAGCTACTACAGCTATTCATCTTCCGAA  
CCTTAAAGAACTTTTCTTGGGAGTCAATCAGCTGGAAGGGGAAATTCCA

>PGSC0003DMG400023614LRR-RLKs\_315

CTTCCGAACCTTAAAGAACTTTTCTTGGGAGTCAATCAGCTGGAAGGGGAAATTCCATTGTTCATAACAA  
ATGCTTCCAAGCTTGAGACACTGTCGCTAGCACGGAGCTTTCTGACAGGA

>PGSC0003DMG400023614LRR-RLKs\_378

ATAACAAATGCTTCCAAGCTTGAGACACTGTCGCTAGCACGGAGCTTTCTGACAGGAACTATTCCCCTA  
ATTTGGGAAATCTTCGTGAGCTACGAAATCTGTTCCCTATATGATAATCAA

>PGSC0003DMG400023614LRR-RLKs\_441

CCCCTAATTTGGGAAATCTTCGTGAGCTACGAAATCTGTTCCCTATATGATAATCAACTTACCAATGAACC  
AACAGAGCGTGAGTTGAGATTCTTCAATTCTTTGGCGGACTGTTGGATG

>PGSC0003DMG400023614LRR-RLKs\_504

AATGAACCAACAGAGCGTGAGTTGAGATTCTTCAATTCTTTGGCGGACTGTTGGATGTTGCGATATATAT  
CAGTGGGTTCCAATCCGTTGAATAGCGTTCTGCCCAATTCTATTGGGAAT

>PGSC0003DMG400023614LRR-RLKs\_567

TATATATCAGTGGGTTCCAATCCGTTGAATAGCGTTCTGCCCAATTCTATTGGGAATCTTTCATCTACTAT  
TGAATACATTTATATAGGAGATGCACACATCAACGGCCCCATCCCCACA

>PGSC0003DMG400023614LRR-RLKs\_693

GGCAACATGAGCGGTCTTACATCCCTAGTCTTTAATGAAAACAACCTTGATGGGGAGTATTCCTCTGAGA  
TTGGTAAGCTTAACTACTCCAAGGGCTGTATCTATTAACAATAAATTG

>PGSC0003DMG400023614LRR-RLKs\_756

CCTGAGATTGGTAAGCTTAACTACTCCAAGGGCTGTATCTATTAACAATAAATTGCAGGGACATATTC  
CAGAGACGGTATGCCATTTATCTAATTTGGTTCAATTATATCTGGACGGT

>PGSC0003DMG400023614LRR-RLKs\_819

CATATTCCAGAGACGGTATGCCATTTATCTAATTTGGTTCAATTATATCTGGACGGTAATGAACTCTCTGG  
ATTAATTCCAGAATGCTTTGGAAATCTTAGCATGCTACAACATCTTTAT

>PGSC0003DMG400023614LRR-RLKs\_882

CTCTCTGGATTAATTCCAGAATGCTTTGGAAATCTTAGCATGCTACAACATCTTTATTTGGATTCTAATAA  
ATTTTCATCAAAATTTTCGTTGAGCCTTTGGCACGAAATCTTTAGAGG

>PGSC0003DMG400023614LRR-RLKs\_945

TCTAATAAATTTTCATCAAAATTTTCGTTGAGCCTTTGGCACGAAATCTTTAGAGGGAGAAGTTCCATCA  
GATATTGGAGGACTGAAAGCCATTGTAGAACTACATCTTTCCAATAACC

>PGSC0003DMG400023638LRR-RLKs\_2232

AGTGGAGGTGTGTTTTCAAATCCACTTTGCAATCATTTCTTGGGAACAAAGGTCTATGTGGAGTACACA  
TATTGGAGATTCTGCTTGTGCTATCACTAATCCTAGAAAACAATCAAAA

>PGSC0003DMG400023638LRR-RLKs\_3440

ATAGCCTCCATGATGGAATTGGCTTTGGATTGCACAAAGGAAATGTCAGAGACAAGGATAACTATGAGA  
GACGTAGTCAAGAGGCTTAGCAAAATCAAAAACACATTTTTAGGAACATAG

>PGSC0003DMG400023639LRR-RLKs\_1364

TTCTTTGGCGGACTGTAGGATGTTGCGATATCTACAAGTGGGTTCCAATCCGTTGAATGGCATTCTGCC  
AATTCTATTGGGAATCTTTCATCTACTATTGAAAACCTTTCATATAGAAGA

>PGSC0003DMG400023639LRR-RLKs\_1426

TTCTGCCCAATTCTATTGGGAATCTTTCATCTACTATTGAAAACCTTTCATATAGAAGATGCACACATCAAT  
GGCCCCATCCCCAGGGGCTTACTCAACATGAGCGGTCTAATAGCCCTAA

>PGSC0003DMG400023639LRR-RLKs\_1488

CACATCAATGGCCCCATCCCCAGGGGCTTACTCAACATGAGCGGTCTAATAGCCCTAAACCTTGGAGAA  
AACAACTTGGCGGGAAGTATTCCTTCTGATGTTGTTAAGCTTGAACAACCTC

>PGSC0003DMG400023639LRR-RLKs\_1550

TGGAGAAAACAACCTTGGCGGGAAGTATTCCTTCTGATGTTGTTAAGCTTGAACAACCTCCAAGGTCTGTAT  
CTAAATAACAATAAATTGCAGGGACATATTCCAGAGGCAGTATGCCATTT

>PGSC0003DMG400023639LRR-RLKs\_1612

GTCTGTATCTAAATAACAATAAATTGCAGGGACATATTCCAGAGGCAGTATGCCATTTATCTAATTTGGT  
TCAATTAAGTCTGGGTGGTAATGAGCTCTTTGGATTAATTCCAGAATGTT

>PGSC0003DMG400023639LRR-RLKs\_1674

AATTTGGTTCAATTAAGTCTGGGTGGTAATGAGCTCTTTGGATTAATTCCAGAATGTTTAGGAAATCTTA  
GCATGCTACAAGCCATTATGTTGAGTTCTAACAAATTTTCATCCAAGATT



>PGSC0003DMG400023639LRR-RLKs\_1736

AAATCTTAGCATGCTACAAGCCATTATGTTGAGTTCTAACAAATTTTCATCCAAGATTCCTTTGAGCATT  
GGAAGATGAGTAGTCTTCTCTATCTAATCATGTCACAAAATTCTATAGA

>PGSC0003DMG400023639LRR-RLKs\_1798

TGAGCATTGGGAAGATGAGTAGTCTTCTCTATCTAATCATGTCACAAAATTCTATAGAGGGAGAAGTTCC  
ACAGGATATTGGAGGACTGAATGCCATTGTAGGACTAGATCTTTCTGGTA

>PGSC0003DMG400023639LRR-RLKs\_1860

GAAGTTCCACAGGATATTGGAGGACTGAATGCCATTGTAGGACTAGATCTTTCTGGTAACCACTTTTCAG  
GCATGATACCAAGCCAATTGGGGGACCTCCAAAACATGAATACTCTTGAC

>PGSC0003DMG400023639LRR-RLKs\_1984

CAAACAATTCATTTTCAGGCTCAATTCCATTATCCTTTGCCAACTTGATAAGCTTAGAATACTTGGATTTGT  
CTTTAAATGTGTTGTCAGGTAATCCCAAGTCTTTGGAAAAGCTAT

>PGSC0003DMG400023639LRR-RLKs\_2108

CCTTAAAAGCATTAAATGTTTCATTTAATGATTTAGAAGGTGTAATACCCAGTGGTGGTGTGTTTGCGAAT  
TCCACTCTGCAATCATTTATTGGGAACAAAGGTCTATGTGGAATGCACAT

>PGSC0003DMG400023639LRR-RLKs\_2170

TTGCGAATCCACTCTGCAATCATTTATTGGGAACAAAGGTCTATGTGGAATGCACATAATGGAGATTCC  
TGCTTGTGCTATCACTACAACCTGGACAACAATCAAAGTCTAAGAAGCTTG

>PGSC0003DMG400023639LRR-RLKs\_248

AATATCCCCGTCTTTGGCCAATTTGTCCTTTCTCAGAGAGCTCAATCTCGAGAATAACTTATTCCATGGTG  
GCGTACCATACAGACTTGGCCACTTGCCTCGCTTGCAGAGTGATTATTGT

>PGSC0003DMG400023639LRR-RLKs\_2480

AATTGGTGTGGGAGGTTCTGGGCTCTGTGTACAAAGGTATATTATCTAGTGGAAGTGTGGTGGCAATAAA  
GGTTCTCGATTTGCAAAATGAGGAAGTATGCAAGAGGTTTGATACTGAATG

>PGSC0003DMG400023639LRR-RLKs\_2604

GTGATGAGAAATGTTAGGCACAGAAATCTTATTCCAGTGATTACTACTTGTCTAGTGAATACATAAGAG  
CCTTTCTTCTACAGTATATGCCAATGGAAGTCTTGAGCGTTGGTTGTAC

>PGSC0003DMG400023639LRR-RLKs\_310

TCCATGGTGGCGTACCATACAGACTTGGCCACTTGCCTCGCTTGCAGAGTGATTATTGTTGAAACAATCA

GCTAGAAGGAAGTATTCCGACAAGTCTATTTCAACACCAGAGAGTTCAAA

>PGSC0003DMG400023639LRR-RLKs\_62

TTCCTCAAATGATACGGACCAAGAAGCTCTACTAGCTTTTCAAATCTTATTACAAATCCGAATCATTTTT

TGGCCAATAATTGGACCAAAAATACTTCTCTTTGCTCTTGGTTTGGTGT

>PGSC0003DMG400023639LRR-RLKs\_992

TATTTCCAATCTGCGGAATCTTTATTGTGGAAACAGTCGCATAGTAGGGCAAATCCAAAGGCTATTTTT

AACCTATCTTCTCGGAAATGATTGATTGCAGTTACAGTAACCTCTCGGG

>PGSC0003DMG400023641LRR-RLPs\_1403

GATAATCAACTTACCAGTGAACATGAGTTGCCATTCTTCCAATCTTTGGCAGACTGTAGGATGTTGCAAT

ATCTAGATGTGGGTTACAATCCGTTGAATAGTGTCTGCCCAATTCAATA

>PGSC0003DMG400023641LRR-RLPs\_2196

TTAATGTTTCATTTAATGAATTAGAAGGTGAAATACCCAATGGTGGTGTGTTTGTAATTCTACTTTGCAA

TCATTTCTCGGAAACAAAGGTCTATGTGGAATGCGCAAATTGGAGGTTT

>PGSC0003DMG400023641LRR-RLPs\_2257

TACTTTGCAATCATTTCTCGGAAACAAAGGTCTATGTGGAATGCGCAAATTGGAGGTTCTGCTTGCCCT

ATCAGTAGTCATGGAAAACAATCAAAGTCTAAGGAGCTTGTGCTGAAAAT

>PGSC0003DMG400023641LRR-RLPs\_2318

GCTTGCCCTATCAGTAGTCATGGAAAACAATCAAAGTCTAAGGAGCTTGTGCTGAAAATTGTTATTCCAG

TGGTTGTTTCATCCTTTCTGATACTCTTGTGGTGTGCTGAGCTTGGATAATG

>PGSC0003DMG400023641LRR-RLPs\_2562

GTGTGGGAGGTTCTGGCTCTGTATACAAAGGCACATTATCTAGTGGAATTTTGGTGGCTATAAAGGTTCT

GGATTTGCAAAGTGAGGAAGTATGCAAAGGTTTGATAACCGAATGCGAAG

>PGSC0003DMG400023641LRR-RLPs\_2623

AAAGGTTCTGGATTTGCAAAGTGAGGAAGTATGCAAAGGTTTGATAACCGAATGCGAAGTGATGAGAA

ATATCAGGCACAGAAATCTTGTCCGGTGATTACTACTTGTCTAGTGACTA

>PGSC0003DMG400023641LRR-RLPs\_2989

TACAAGCAAATTCATGGCACATACCGAGACATTAGGCACTCTTGGATATATTGCACCAGGTATAATAGTC

TCTTTCTATCTCACTTATATTGACTGTTTCTTTTCTATTTTCACAAATCA

>PGSC0003DMG400023641LRR-RLPs\_305

AATCTCGAGAATAACTCATTCTATGGTGGCATCCCTTATGGACTTGGCCACTTGCCTCGCTTGCAAGTGA  
TTGATTTTCAAACAATGAGCTCCAAGGAAGTATACCAACAAGTCTATTT

>PGSC0003DMG400023641LRR-RLPs\_3050

ATAATAGTCTCTTTCTATCTCACTTATATTGACTGTTTCTTTTCTATTTTCACAAATCATAATTTAGCCCTTC  
CAAAATCTAGAACTCAATAAAAGCAAGTGTCTGTTAGTACATAATTA

>PGSC0003DMG400023641LRR-RLPs\_3477

TTAGACTGCACAAATGAAAAGCCAGAATTAAGGATAACCATGAAAGAAGTAGTCAAGCGGCTTGACAA  
AATGAAGAACACATTTCTGAACACATAGAAGTTAGCATCTCTCCGGCGGTG

>PGSC0003DMG400023641LRR-RLPs\_366

TGCAAGTGATTGATTTTCAAACAATGAGCTCCAAGGAAGTATACCAACAAGTCTATTTCAACACCCGAG  
AGTTCAAATCATTTATTGGCCTTCAATAAACTCGGTGGTGAAATGTGGA

>PGSC0003DMG400023641LRR-RLPs\_427

ACACCCGAGAGTTCAAATCATTTATTGGCCTTCAATAAACTCGGTGGTGAAATGTGGAAAGGGCCATG  
GTATGTACCTGAACTTAGAGTCTTAAATCTCAGGAACAATAGCCTCACAGG

>PGSC0003DMG400023641LRR-RLPs\_488

GGGCCATGGTATGTACCTGAACTTAGAGTCTTAAATCTCAGGAACAATAGCCTCACAGGTATAATCCCTC  
CTTCTGTTGGAAATGCCACAAAGTTGATGAACTTTAGCTTGTCTTATAAT

>PGSC0003DMG400023641LRR-RLPs\_671

GTTGATAATCAAGTAACAGGTTCCATTCTACATCACTTTTTAATATCTCGTCATTACGTTCCCTAACTCTG  
GGAAGGAATAGCCTTTCTGGTCCTCTCTTGCTTGATGAAGGAATATTT

>PGSC0003DMG400023641LRR-RLPs\_732

CCCTAACTCTGGGAAGGAATAGCCTTTCTGGTCCTCTCTTGCTTGATGAAGGAATATTTTTATCAAATTTG  
GAGCGTTTAAGTTAACTCGCAACCAAATTTCTGGTCGCATTCTTCTA

>PGSC0003DMG400023641LRR-RLPs\_793

ATCAAATTTGGAGCGTTTAAGTTAACTCGCAACCAAATTTCTGGTCGCATTCTTCTAACATCTGCCAAC  
TCATACAGCTTAAAATACTGTCAATATCTTCCAACAACATAACTGGAGA

>PGSC0003DMG400023643LRR-RLKs\_1612

TAGTCTTTAATGAAAACAACCTTGACAGGATATATTCCTCCAGAGATTGGTAAGCTTAAACAACCTCCAAGG  
TCTGTACCTATTTAAACAACAAATTGCAGGGACATATTCCAGAGGCGGTAT

>PGSC0003DMG400023643LRR-RLKs\_1674

CTCCAAGGTCTGTACCTATTTAACAACAAATTGCAGGGACATATTCCAGAGGCGGTATGCCATTTATCTA  
ATTTGGTCTGAATTAGAAATGGATGGTAATGAACTCTCTGGATCAATTCCA

>PGSC0003DMG400023643LRR-RLKs\_1736

TTTATCTAATTTGGTCTGAATTAGAAATGGATGGTAATGAACTCTCTGGATCAATTCCAGAATGTTTAGGA  
AATCTTGGGATGCTACTATATCTTTCGTTGGGTTCAAATGAATTTTCACC

>PGSC0003DMG400023643LRR-RLKs\_186

TGCAGTGCAAGAAGGCTAAGGCTTGTGGCCTTGGCTCTTCTAATTTGCAACTTCAAGGCACAATTACCG  
GGATTAGGGCATTGCTTGTCTGAGAGCTCAATCTCGAGAACAACCTTATTC

>PGSC0003DMG400023643LRR-RLKs\_2356

TTGTGCTAAAAATTGTTACTCCAGTGGTTATTTTCATTCTTCTGATATTCTTGTGGTTTCAATTTGGATAA  
TGAAACGAAAGAAGAAAGGGAAGTCCAAAGATGTTGAAAAGGTTCTGG

>PGSC0003DMG400023643LRR-RLKs\_248

AATTACCGGGATTAGGGCATTGCTTGTCTGAGAGCTCAATCTCGAGAACAACCTTATTCAATGGGGGCAT  
CCCTTACGGACTTGGCAAGTTGCCTCGCTTGTGAGAGTCATTGATTTTCAAAA

>PGSC0003DMG400023643LRR-RLKs\_2728

GTGACTATATAAGAGCCTTTGTTCTGAAATATATGTCAAATGGGAGTCTTGAGAATTGGTTGTACAGAG  
AAGCTCGCCACTTGAACCTTCTTCAAAGAGTCACTGTAATGCTTGATGCGG

>PGSC0003DMG400023643LRR-RLKs\_2852

GGCAATTGAATATCTACATCATGGCAATGACTGCGATAGTTCATTGTGACATAAAGCCAGCCAACGTT  
CTTTTGGATGAAGATATGGTGGCGCATGTTGGTGATTTTGAATCTCTAA

>PGSC0003DMG400023643LRR-RLKs\_2914

CCAACGTTCTTTTGGATGAAGATATGGTGGCGCATGTTGGTGATTTTGAATCTCTAAGATTTTAGCCGT  
AAGCAAGTCCATGACACAAACCGAGACATTGGGCACTCTTGGATACATTG

>PGSC0003DMG400023643LRR-RLKs\_3348

GGAGTATGATGGACGTTGTGGATGCCAATCTTTTTTCCGAGGAAGAACAATCACTTGTA AAAAGTGAAA  
TCTGCATAGGGTCCATGATAGAATTGGGTTTACTGACACAAAGGAAATGG

>PGSC0003DMG400023643LRR-RLKs\_744

CCTCTCTTGCTTGATGAAGGGAATATTGAGTCAAATCTGAAGATACTAAGTATATCTTTCAATCAAATTC

TGGTCGCATTCTTCTAACATATGCCAACTCACACAGCTCAAATTTTG

>PGSC0003DMG400023643LRR-RLKs\_868

TATCTTTCAATAACATAACTGGAGACATACCCAAAAATATTGATTGTCTAGCCAAGCTCGAGATGTTCTTA  
ATTAGTGAGAATGCAATAAGTGGAACCTATTCCTACTTCATTGGGCAATA

>PGSC0003DMG400023671-(rev)L-LecRK\_124

TCAGCTACCAAAAATTCACCAAGCAAACGAAAAGATTCATTACTACTAACGATTTCGTACATAGCCGT  
TGATGCTATCCAAGTAACTCGCGATGTTTCGTGGTGCTTCCATCAGTAATT

>PGSC0003DMG400023671-(rev)L-LecRK\_1302

AATGGGAGCTTAGACAAGTTGATATTTTGCGAAGAAAACGGAAAAGTTTGAGTCTGAATTGGGAAAT  
AAGGTATGGTATCATCTGTGGGACTGCTCAAGCACTTGATTATCTGCACAAT

>PGSC0003DMG400023671-(rev)L-LecRK\_1612

GAGCCACAGTTGAAACAGACGTCTTTGCATTTGGAGTGCTAGTTCTTGAAGTTGCTTGTGGTTCGAAAACC  
TGAAATCGATATGAGGAGAATAATTATACTAATAAAGTCATTGAATATG

>PGSC0003DMG400023671-(rev)L-LecRK\_1674

CGAAAACCTGGAAATCGATATGAGGAGAATAATTATACTAATAAAGTCATTGAATATGTATGGGACTTG  
TACAAGATTGGAAGGATCATTGATGCCATAGATGTCAGATTGGATAGAGAC

>PGSC0003DMG400023671-(rev)L-LecRK\_1922

CCCAACTGAGAAACCTGCATTTGTATGGCCAGCCAGAGCTCCATCGTCCAACGAAGCTGCTAGTGGCTCT  
CTCCTGGATGGCCAACTTACACAGATTACAGTACTCAGTGGCAGATGACT

>PGSC0003DMG400023671-(rev)L-LecRK\_1984

GTGGCTCTCTCCTGGATGGCCAACTTACACAGATTACAGTACTCAGTGGCAGATGACTGCAGAGTATGA  
GGAACCTCAGCAAGGTTAGGTAACCTTTAGGAGGCAAAGATACTGTAA

>PGSC0003DMG400023671-(rev)L-LecRK\_2170

GGAGATATCTTCTCCGAGTGTTTCGTTTTTCTGCATTATAAATAATTTGTATTTAGTCAATGTCATAATCA  
ACTTTCCAAGTAAAACTGAAAACAAAAGCAGCAAGCATTGTAACAAA

>PGSC0003DMG400023671-(rev)L-LecRK\_2232

GTCATAATCAACTTTCCAAGTAAAACTGAAAACAAAAGCAGCAAGCATTGTAACAAAGGCAGCTAGCT  
ACATGAGTTACTCCTACAGAACATAAATGTTGTACCAAACCACAAAGAAG

>PGSC0003DMG400023671-(rev)L-LecRK\_2294

GCTAGCTACATGAGTTACTCCTACAGAACATAAATGTTGTACCAAACCACAAAGAAGTTGTGAAAATG  
AAAATTCACGATCCATCATCATCTTCATGTTCTATCTCGAAGAACTCTT

>PGSC0003DMG400023671-(rev)L-LecRK\_2351

GTTGTGAAAATGAAAATTCACGATCCATCATCATCTTCATGTTCTATCTCGAAGAACTCTTTCGTA  
CATCAATAACAGTTTCTCTGGATTGTTTCATGTCTGCTATGTCCATCGTT

>PGSC0003DMG400023671-(rev)L-LecRK\_62

TAACTTTGTTTCATCTTTTGATCATATTCATATTTTTGGTTCTTAGAGTGGATTGTATGAGTTTCAGCTACCA  
AAAATTCACCAAGCAAACGAAAAAGATTCATTACTACTAACGATTC

>PGSC0003DMG400023814-(rev)RLKantifungi(GNK)\_1769

ATGTGTGGAAGGAAGGTCCTTGATTTCTTTCAGGATCACCTCGTGCTTTTCTGATCACAGATTGGGCTT  
GGTCGAAGGTAAAGGCTGGAAAGATAAATGAAGTTTTGGATACCATCCTA

>PGSC0003DMG400023814-(rev)RLKantifungi(GNK)\_1830

ATTGGGCTTGGTCGAAGGTAAAGGCTGGAAAGATAAATGAAGTTTTGGATACCATCCTAGTAAAGACTG  
AGGATTCAGTAAGTGCAAATCCAAGGGCTATAATGGTGAGATTTCTCCTTG

>PGSC0003DMG400023814-(rev)RLKantifungi(GNK)\_1891

AAAGACTGAGGATTCAGTAAGTGCAAATCCAAGGGCTATAATGGTGAGATTTCTCCTTGTTGGAATATT  
GTGTGCTCACGTGATGGTGGCCTTGAGGCCAACTATATTGGATGCACTGAA

>PGSC0003DMG400023814-(rev)RLKantifungi(GNK)\_2135

CTGCCTGCTGGAGACATGCTCAGGTGACAATATGAGGTTTTCTCATATTACATCCTTTTCTTGCTTATTGA  
GATTAGGAGAAAGCTAATGAAATTTCTGCTAGAGTTGAACCTGGGATCC

>PGSC0003DMG400023814-(rev)RLKantifungi(GNK)\_2196

TGCTTATTGAGATTAGGAGAAAGCTAATGAAATTTCTGCTAGAGTTGAACCTGGGATCCGAGTGCCTTG  
GGATTTTTTGTGATAAAATAATATTAGCTCGGAGAGTTCTGTTGTTTTCAA

>PGSC0003DMG400023814-(rev)RLKantifungi(GNK)\_2257

GTGCCTTGGGATTTTTTGTGATAAAATAATATTAGCTCGGAGAGTTCTGTTGTTTTCAATTTCTGTCAAT  
AGGGACATACTTAGAAATCCTAAGTGTAGAATAAAAACAGAAACACCAT

>PGSC0003DMG400023814-(rev)RLKantifungi(GNK)\_2318

TCCTGTCAATAGGGACATACTTAGAAATCCTAAGTGTAGAATAAAAACAGAAACACCATCTACTTGCCGT  
CCAGCTAAACAAACCAAGAGGACATGGATTCCAATTAGATTGTCAATTCC

>PGSC0003DMG400023814-(rev)RLKantifungi(GNK)\_2379

ACTTGCCGTCCAGCTAAACAAACCAAGAGGACATGGATTCCAATTAGATTGTCAATTCCTTGGAAGACC  
GAGAGTTTCTTTGGCAGATGTAAGAGTTTCTTCTTTCTTTTCATTCTTTCCG

>PGSC0003DMG400023814-(rev)RLKantifungi(GNK)\_2440

GGAAGACCGAGAGTTTCTTTGGCAGATGTAAGAGTTTCTTCTTTCTTTTCATTCTTTCCGACAGCCTAGAAC  
TTTTGACAATCTTTTGTAGGCAAACCTGCAGATTTTGTGTTTGCTTTCCG

>PGSC0003DMG400023814-(rev)RLKantifungi(GNK)\_2610

CCTCTGTAATATATCTAGCTTGCTTCATTCAAGGCCATGGTTGCCTGTGATGTATGTTGCAGTCTGTAAAT  
TCATATATCTATATTATTTATGTTTCAAAGTTCTCGAGACAATATTTCC

>PGSC0003DMG400023863-(rev)LRR-RLPs\_1638

CATAATGGATTACAAGGTCATATACCGTCATCACTTGGAAGTTTATCTTCAGTTGAATCATTGGATCTGTC  
AAGTAACCATCTTGTAGGAGAGATAACCAGCACGATTTGCTTCTGTTACA

>PGSC0003DMG400023863-(rev)LRR-RLPs\_2055

GGAAATCCAAGATGGCTTGCAAGAATAATTGTAGAACTGGAACACAAAATAATGATGGGAAGGAGAAA  
GAAGCAGCAAAGGCAAAGGAGTTACAGAAGAAGAAATAATAGCTTAACTTGA

>PGSC0003DMG400023864-(rev)LRR-RLPs\_0

ATGATGATGGTTTCTAGCAAAACATTCTCTTCACTTCAGCTTTTCACTCTATTCTACCTCTTTACGGTTGCA  
TTTGCTTCCACTGAGGAAACAACCTGCCCTCTTAAAATGGAAAGCAACT

>PGSC0003DMG400023864-(rev)LRR-RLPs\_124

AGAACCAGAACAACCTCCTTATTCGCTTCATGGACACCAAGTTCTAACTCATGCAGGGATTGGTATGGAGT  
TATATGCTTTAACGGTAGAGTAAACATGTTGAATATTACAAATACTAGTG

>PGSC0003DMG400023864-(rev)LRR-RLPs\_1302

CTGCTTCATTGGGGAATTTGAGAACTTGCAAGTTCTGTCTCTCCAACAAAACAATCTGATAGAGGAAAT  
TCCTTCATCTATTTGCAATTTATCATTGCTGACAATCCTGTATTTGTCGA

>PGSC0003DMG400023864-(rev)LRR-RLPs\_1364

GAGGAAATTCCTTCATCTATTTGCAATTTATCATTGCTGACAATCCTGTATTTGTCGAGAAACAACCTTGAA  
AGGAAAAAATCTGCAATGCATGGGTAATATCAGTGCCTCCAGTATGTG

>PGSC0003DMG400023864-(rev)LRR-RLPs\_1426

CAACTTGAAAGGAAAAAATCTGCAATGCATGGGTAATATCAGTGCCTCCAGTATGTGATAATGTCAGA

TAATAATCTCAGTGGAGAGCTCCATCCGTCTATTTGCAATTTAACATCACT

>PGSC0003DMG400023864-(rev)LRR-RLPs\_1488

TGTCAGATAATAATCTCAGTGGAGAGCTCCATCCGTCTATTTGCAATTTAACATCACTGCAAATTCTAGAT

TTGGGTAGAAACAATCTAAAGGGAGAAATTCCGCAATGTTTTGGCAACA

>PGSC0003DMG400023864-(rev)LRR-RLPs\_1612

TGGTCATCTTGAGGTTCTGGATATGCAACACAACAATCTTTCTGGAECTATTCCAACAATCCTGTATTTGT

CGAGAAACAACCTGAAAGGAAAAAATCTGCAATGCATGGGTAATATCAG

>PGSC0003DMG400023864-(rev)LRR-RLPs\_2728

TAATGATTCAGAATCAGAGAAAACCTGATACCGGATCTGAGCTTGATGAAGAAAGCAACTCTGAATTTCT

GAATGATTTTTGGAAAGCTGCTCTTATGGGGTATGGAAGTGGACTCTGTAT

>PGSC0003DMG400023864-(rev)LRR-RLPs\_310

TGAACTATTTCTCTGACACCATTCCACCTGACATTGGTAAACTCACTAATCTTATTTGTCTTGATTTGTCAA

GTAATCAGATTTTCAGGTACAGTACCACCACAAATCGGCTCACTAGCCA

>PGSC0003DMG400023864-(rev)LRR-RLPs\_372

GATTTGTCAAGTAATCAGATTTTCAGGTACAGTACCACCACAAATCGGCTCACTAGCCAAGCTTCAAAGCC

TCCATATGTTTGACAACCATTTAAATGGTTTCATTCCTGAAGAAATAGGT

>PGSC0003DMG400023864-(rev)LRR-RLPs\_434

TCAAAGCCTCCATATGTTTGACAACCATTTAAATGGTTTCATTCCTGAAGAAATAGGTCATCTAAAGTTTC

TTACTGAGCTAGATTTGAGTACCTAAGGTCTTACTGAGATAGATTTG

>PGSC0003DMG400023867-(rev)LRR-RLPs\_1116

AATGCACCAAGTGATGAAGGGAATCGATATTACCAAGACTCGGTAGCTCTCGTAACAAAGGGATTGGA

GCTTGAAGTTGTGAGAATCTTGTCTGTACACTACTGTTGATCTTTCAAAC

>PGSC0003DMG400023867-(rev)LRR-RLPs\_1550

AAAAGGGTGTGGTAATGATGGTAATGATTCAGAGACAAATGATACCACATCTGGACTAGACGATGAAG

AAAATGACTCTGAATTTCTGAATGATTTTTGGAAATCTGCCTTTATGGGGTA

>PGSC0003DMG400023867-(rev)LRR-RLPs\_682

TGAAGGGAGCAATTCCGCAATGTTTGGGTAATATCAGTAGCCTCGAGGTTCTGGATATGCACCACAACA

GTCTTTCAAGGACTCTTCCAACAACCTCTAGAATTGGAAGTGCCTCAAAA

>PGSC0003DMG400023867-(rev)LRR-RLPs\_744



CACAACAGTCTTTTCAGGGACTCTTCCAACAACCTCTAGAATTGGAAGTGCCTCAAAGCTTCAACTTTC  
ATGGGAATAAGCTGGAGGGGAAAATCCCACAATCCTTGACCAATTGCAAG

>PGSC0003DMG400023867-(rev)LRR-RLPs\_930

CTGCCAAAGCTGAAAGTTCTTAGTTTGAGATCCAATAAATTGCATGGGTCCATTGGAACTCTAACGACTG  
AAAACATGTTTCCTCAGCTTAGAATATTAGATCTCTCCTCCAATGCCTTC

>PGSC0003DMG400023868-(rev)LRR-RLPs\_0

ATGACTGGCTGTGTGATTGAACTTAATCTCAGTTGCAGTGGTCTTGTAGGAAAGATTGATTCCAATAGCA  
GCCTCTTCAACTCTCACATCTTCAAAGGCTCGACCTTCTTCTAATAAC

>PGSC0003DMG400023868-(rev)LRR-RLPs\_122

CTCTAATTCTCACATCTCGCCTGAATTTGGAAGGTTCTCGACCTTGACACTTCTTGATCTTCTGACTCCTA  
TTTCTCAGGTCATATTCCTTCTGAAATCTCTCATCTTTGTCAATTACA

>PGSC0003DMG400023868-(rev)LRR-RLPs\_183

TCTGACTCCTATTTCTCAGGTCATATTCCTTCTGAAATCTCTCATCTTTGTCAATTACAGTCTCTTAGCCTCT  
CCCCATCATTGAAACTATTCTAAGACTCACCGCCCATGATTTGAAA

>PGSC0003DMG400023868-(rev)LRR-RLPs\_244

CTCTTAGCCTCTCCCCATCATTGAAACTATTCTAAGACTCACCGCCCATGATTTGAAATTGCTCCTTCAGA  
ATTTGACTCAATTAAGTGAGCTTGATCTTACTTCCATAAATATCTCTT

>PGSC0003DMG400023868-(rev)LRR-RLPs\_61

CCAATAGCAGCCTCTTCAACTCTCACATCTTCAAAGGCTCGACCTTCTTCTAATAACTTCTCTAATTCTC  
ACATCTCGCCTGAATTTGGAAGGTTCTCGACCTTGACACTTCTTGATC

>PGSC0003DMG400023869-(rev)LRR-RLPs\_0

TGCAATGCTTGGGTAATATCAGTGCCCTCCAGTATATGATGATGTCACATAATAATCTCAATGGAGAGCT  
CCCTTCGTCTATTTGCAATTTAACATCACTACAAATTCTAGATTTAGGTA

>PGSC0003DMG400023869-(rev)LRR-RLPs\_1183

ATGGCTTGCAAGAATTATTGTGGAGCTGGAGCATAAAATTATGATGGGAAGAAGAAAGAAGCAGCGAA  
AGCAAAGGAGTTACAGAAGAAGCAAATAATCGCATGTAGAAGAGTTAAAAAT

>PGSC0003DMG400023869-(rev)LRR-RLPs\_126

ATCTAAAGGGAGCGATTCCACAATGTTTTGGCAACATGAGTGGTCATCTTGAGGTTCTGGATATGCAAC  
ACAACAATCTTCTGGAECTTCCAACGACTTTTAGAGCTGGAACATTTA

>PGSC0003DMG400023869-(rev)LRR-RLPs\_189

TGCAACACAACAATCTTTCTGGAACCTCTCCAACGACTTTTAGAGCTGGAACATTTAGAAGCTTCAACTTG  
CATGGCAATAAAATAAAGGGGAAAATTCCCAATCTTTGGCCAATTGTA

>PGSC0003DMG400023869-(rev)LRR-RLPs\_378

TTCCTAAGTTAAGAGTTTTAAGCCTGAGATCGAATAAGTTGCATGGACCGATCAGAAATTTAAGAAGTG  
AAAACATTTTTCTTGAGCTTCGAATGTTGGATATCTCTTCCAATGCCTTCA

>PGSC0003DMG400023869-(rev)LRR-RLPs\_441

GAAGTGAAAACATTTTTCTTGAGCTTCGAATGTTGGATATCTCTTCCAATGCCTTCACGGAAAACCTACCG  
ATCAGTCTGTTTCAACATTTAAAAGGAATGAGGACAATTGATCAAACGA

>PGSC0003DMG400023869-(rev)LRR-RLPs\_504

ACTTACCGATCAGTCTGTTTCAACATTTAAAAGGAATGAGGACAATTGATCAAACGATGAATGCACCAA  
GTGATGAAGGAGATGAATATTACCAAGACTCAGTAGCTGTCGTAACAAAGG

>PGSC0003DMG400023869-(rev)LRR-RLPs\_63

GAGAGCTCCCTTCGTCTATTTGCAATTTAACATCACTACAAATTCTAGATTTAGGTAGAAACAATCTAAAG  
GGAGCGATTCCACAATGTTTTGGCAACATGAGTGGTCATCTTGAGGTTT

>PGSC0003DMG400023869-(rev)LRR-RLPs\_945

TTGAGAACAATTCATATATAGGTAATGATGGATTACGTGGATTTCCACTTTCAAAGGCTGTGTTAGTGA  
TGATAATGATTCAGAATCAGAGAAAAATGATACCAGATCTGAGCTTGATG

>PGSC0003DMG400023953LRR-RLKs\_2728

GGTGCCACAATTCCTTCATTCTGAATTAGGTTGATTAAGAGAGTGATTTTTGTTCTTCTACTGTCTGTAG  
ATACCCACCCAAGTGTGCTATTTTTGTTCTGTTATTTGAGCAGCAATGG

>PGSC0003DMG400023953LRR-RLKs\_2790

TGTCTGTAGATACCCACCCAAGTGTGCTATTTTTGTTCTGTTATTTGAGCAGCAATGGAATCCTCTTAATT  
TCTGGCCCTAGAGACAGAAAATACACTAAAACTCCACACACATGTCTA

>PGSC0003DMG400024033LRR-RLPs\_0

CATCCTCTTCTTCTCCTCTTCCAGATCTGAACAACAATGTCGTCGTCATTCCCTGAACAAGTGTTGAAGC  
ACCTCTTCTCCTTGTTAACCTCACACAAGGACCGTAACAGTATATCCTT

>PGSC0003DMG400024033LRR-RLPs\_1054

CTCATAAGTCTGTGTCATAATTTGCAGAGATTGTGGGTATGTTCCAGTGCTTTGCTTTACTTTACTTTACTT

TACTTGCCTATGTTTTAGTCACAACATTCTGATAACTTAAGAGCATG

>PGSC0003DMG400024033LRR-RLPs\_1364

TGAAGTAGGATCTAGAAGATACATTCTTTGGTTGTATAATTCTCATACGCAATGGTCATATGACATATTTA

TCAATCTTAATGCTGAAGACTTTTTTACGAAACAGGTAACCTAACTTTT

>PGSC0003DMG400024033LRR-RLPs\_2232

CTGTAAGCTGCTAAGTCAGAAGATGCCTAGGCTTAATATTGAAGTTATAGATGAGATGGGTCCTCTGGA

CACGCAGCCAAGAAGCTGCCCTGTTGATAAACTTTACATATAACCGAACAGT

>PGSC0003DMG400024033LRR-RLPs\_2480

ATGTCGAAGACCTCACATGCCATCAACTATTACCTCTTGGCTAAGCTAATTTACTGCATCAGCTTATAAAG

AGTAAAACCTTTGTGAGGTTTGAATGACAGACCCAAGTTCTATACTT

>PGSC0003DMG400024033LRR-RLPs\_2542

CTTATAAAGAGTTAAAACCTTTGTGAGGTTTGAATGACAGACCCAAGTTCTATACTTATATTAGTATCCT

AATCCCAGTAACCGACCCCTATGTGTTGTTATGTATCATTGGGAATAAG

>PGSC0003DMG400024033LRR-RLPs\_2728

TGAAGACTTTGTGCATCGTTATGCAGCTAATTTCAATTATCTTTTCTATTGACTTGTTTTTCTGATGAGATTA

TGCCATCGTGTACTCATAAGTCAATAAAATTCATTGCATCCATGTACT

>PGSC0003DMG400024033LRR-RLPs\_2790

GATGAGATTATGCCATCGTGTACTCATAAGTCAATAAAATTCATTGCATCCATGTACTAAGAATCTCTTCA

GGAATTTTTTTTTGTCAAAATTTGAACTCATAATCAAGTGATGAGTTCA

>PGSC0003DMG400024033LRR-RLPs\_2852

ATCTCTTCAGGAATTTTTTTTTGTCAAAATTTGAACTCATAATCAAGTGATGAGTTCAATGGAAGGATTAA

TTCTGAATTCACCTTTACAAGACAATGAGAATTCAAGACTTTAAATACT

>PGSC0003DMG400024033LRR-RLPs\_2914

AAGGATTAATTCTGAATTCACCTTTACAAGACAATGAGAATTCAAGACTTTAAATACTAGTGACCTACCA

TAGAAGAGCATCACTGGTACTCCTATCTAAGAAAGCAAATGATGGAAGTT

>PGSC0003DMG400024033LRR-RLPs\_2976

ACCTACCATAGAAGAGCATCACTGGTACTCCTATCTAAGAAAGCAAATGATGGAAGTTCAAATGTGCAC

GAACGACTAAAGAGAGAGGCTTAATGAAAATATTAATTGGACAAGAACAGT

>PGSC0003DMG400024033LRR-RLPs\_3038

TGTGCACGAACGACTAAAGAGAGAGGCTTAATGAAAATATTAATTGGACAAGAACAGTTTTATTCTTTA  
AACTTTTACATCCATACACACTTGTGTCTTTTGCAACTGCTTCTTTGATGT

>PGSC0003DMG400024033LRR-RLPs\_434

TGTTGTCTTGTGAAGGCTTACTACCGATGGACTTGCTGCCATTGCCGCTAACTGCAGGTCCCTTTTATTG  
CCTTACTTATTTAATTGCTGCTCATAATAATGGGCATCTCCCATACAC

>PGSC0003DMG400024033LRR-RLPs\_496

CTTTTATTGCCTTACTTATTTAATTGCTGCTCATAATAATGGGCATCTCCCATACACTTACAGAAAGAATT  
GAAATTGTTATTTGCACTTGCAGAAATCTCACTGAACTAGACTTGGGA

>PGSC0003DMG400024033LRR-RLPs\_558

AGAAAGAATTGAAATTGTTATTTGCACTTGCAGAAATCTCACTGAACTAGACTTGGGAGAAAGTGAAGT  
GGAGGACCTAAGTAGTGATTGGCTCAGTCATTTTCTGATGGTTGTACGTC

>PGSC0003DMG400024033LRR-RLPs\_992

GCTCCAGACTCACCTCATTGAATTTAAGCTATGCTACTATTCAAACCCCTCATCTTAACAAGCTCATAAGT  
CTGTGTCATAATTTGCAGAGATTGTGGGTATGTTCCAGTGCTTTGCTTT

>PGSC0003DMG400024206-(rev)LRR-RLPs\_0

TTTCACTCAAATCTATTTTATTTTATTCACCCGTTAATTTCTTCAAGAACATCAAACCTAATCGACAATTT  
CAATTGTAAATCGAAGAACTGCTAAAGATTTCTTCGATTTTATAGT

>PGSC0003DMG400024206-(rev)LRR-RLPs\_1037

AATTCTAGTAAATAAGAGATAATTGTGGAGAAAATCTAAAACGAAAATGTTTTGCGCGCAACTGAATT  
GTACAAGGTACCCCAAACATCTTCTCCTCCTCTATACTTTAGACTTGTAT

>PGSC0003DMG400024206-(rev)LRR-RLPs\_1098

ACTGAATTGTACAAGGTACCCCAAACATCTTCTCCTCCTCTATACTTTAGACTTGTATTGTTGTTTCATGGT  
CTTCTATATTGTAGTGAAGTTTGTGGAGGGGATGCCCTTTGAAAGAAT

>PGSC0003DMG400024206-(rev)LRR-RLPs\_122

TTTTGAGTCATCTTACCAGTGTTAATCGTTAATCAAGGTTTTACTGTCATATTGGGAGAAATTTGATGGT  
TATAATTGAGTTCATCATTTGGTGGAAAGAAAATCGGCGGTTACTAGGGT

>PGSC0003DMG400024206-(rev)LRR-RLPs\_1647

GGCTGTCGCAAATTGAAGTATTGTATTGGTCTTACTTGAGTTGCGTGACATTATTGATACAACATAAACA  
TTTGCTTTACTTGGATGATCGACCACGTAAGCTATTCACCCATTTCACTT

>PGSC0003DMG400024206-(rev)LRR-RLPs\_183

ATTTGATGGTTATAATTGAGTTCATCATTTGGTGGAAAGAAAATCGGCGGTTACTAGGGTTTGGTGAAGC  
ATTTATTGTGTCGTCATCTCCATTTCTAAAAGGTCAGCCACACATCTCATT

>PGSC0003DMG400024206-(rev)LRR-RLPs\_1952

TTATCTTGTTATATATATATAAAAAAAAAAAGGTATTGAGCCATTTCTAACAGTAACAAAGGATAATTCTTA  
TAAATTTTACTACTCAATGTCATTGTTAGGTAGATAATATTGTGATTGC

>PGSC0003DMG400024206-(rev)LRR-RLPs\_2013

ATAATTCTTATAAATTTTACTACTCAATGTCATTGTTAGGTAGATAATATTGTGATTGCTTCTTCAAGAGTT  
TTGATTTATGTACTTAGTCCCTTCTATCATAATTATGAACTCTACTAG

>PGSC0003DMG400024206-(rev)LRR-RLPs\_2074

CTTCAAGAGTTTTGATTTATGTACTTAGTCCCTTCTATCATAATTATGAACTCTACTAGGTGAAGTACTATT  
GACTCTTTTATCTGCATATATCAGCAATATTCTTATTTTTTTGGTATCA

>PGSC0003DMG400024206-(rev)LRR-RLPs\_2135

GAAGTACTATTGACTCTTTTATCTGCATATATCAGCAATATTCTTATTTTTTTGGTATCAATAATGTCACTCA  
AGTAACACCAAACCACTAACATACAAAAAAAAAATTAATAATAATAA

>PGSC0003DMG400024206-(rev)LRR-RLPs\_2196

AATGTCACTCAAGTAACACCAAACCACTAACATACAAAAAAAAAATTAATAATAATAAAGAGACACAT  
TTTGTTGGACTCTATTCTTTCTTTTTCAATTATAATTACAGTTGTTGTTGA

>PGSC0003DMG400024206-(rev)LRR-RLPs\_2257

AGACACATTTTGTGGACTCTATTCTTTCTTTTTCAATTATAATTACAGTTGTTGTTGATTCTTCATTTCCAA  
AACAAAATGATTCAAGTAGGACCCCTACTGTTTTTGAAGTCTAGTAG

>PGSC0003DMG400024206-(rev)LRR-RLPs\_2318

CTTCATTTCCAAAACAAAATGATTCAAGTAGGACCCCTACTGTTTTTGAAGTCTAGTAGTATGCTTTTGGT  
GACCAAGAAAGCCATTGACATATTTACAATAATTCTTATGACAAGTGA

>PGSC0003DMG400024206-(rev)LRR-RLPs\_2379

TGCTTTTGGTGACCAAGAAAGCCATTGACATATTTACAATAATTCTTATGACAAGTGAAGTAGAGCTTT  
ATGAAACTTCTTAATTCACAAAACATTCATCTTTCATTTTGTTCATT

>PGSC0003DMG400024206-(rev)LRR-RLPs\_244

GGTGAAGCATTTATTGTGTCGTCATCTCCATTTCTAAAAGGTCAGCCACACATCTCATTATTTCTATTTTTCT

ATACGATTTAGCCTAGGATTTTTTTGTCTTTAATATTTTGTCAAGTTT

>PGSC0003DMG400024206-(rev)LRR-RLPs\_305

TTCTATTTTTCATACGATTTAGCCTAGGATTTTTTTGTCTTTAATATTTTGTCAAGTTTGCAATATTTTCATCC

ATATTGATGATTCCCCTTTAGAGTTGTATGTATTTTGTAGTGGTTGA

>PGSC0003DMG400024206-(rev)LRR-RLPs\_3111

AAACGAATAATTTCTATTCAAATTTGGATGCTTTTGTGAATCCTAGATATATTCTACTATAGAGCAAAGAA

TCTATACCTCCAAAAGGTGAATTAATTAACAGAATCAACACTTAATTA

>PGSC0003DMG400024206-(rev)LRR-RLPs\_3172

GAGCAAAGAATCTATACCTCCAAAAGGTGAATTAATTAACAGAATCAACACTTAATTAATTTGTCATATTT

ACCAAATTTAAAAGGTGGAAATTAGATCAACATATTTTTGAGCTAAGAA

>PGSC0003DMG400024206-(rev)LRR-RLPs\_3233

TGTCATATTTACCAAATTTAAAAGGTGGAAATTAGATCAACATATTTTTGAGCTAAGAATACTGAATGCA

CTGTCTTATTTTCATTGATTATCATTTAGACATAAGAAATGTATTTATATT

>PGSC0003DMG400024206-(rev)LRR-RLPs\_3294

CTGAATGCACTGTCTTATTTTCATTGATTATCATTTAGACATAAGAAATGTATTTATATTTTTTTCCGGTAAA

GAGAATGATGGTAGATTATATATGTTTATATCAGTAAGAAAGCATAGT

>PGSC0003DMG400024206-(rev)LRR-RLPs\_3355

TTTCCGGTAAAGAGAATGATGGTAGATTATATATGTTTATATCAGTAAGAAAGCATAGTCCTATCAATTT

AATTAGAGAGAACACCTAAAAATCCTCCTAAACAATTCGAGTTTTGCAAC

>PGSC0003DMG400024206-(rev)LRR-RLPs\_3416

TATCAATTTAATTAGAGAGAACACCTAAAAATCCTCCTAAACAATTCGAGTTTTGCAACTTTCATACTTTA

CTAATAGAGTAATCGTATTTATTTTCCACTATCAATCTTTTTATTTATG

>PGSC0003DMG400024206-(rev)LRR-RLPs\_366

AATATTTTCATCCATATTGATGATTCCCCTTTAGAGTTGTATGTATTTTGTAGTGGTTGAGGGTCAACTGTG

ATTGAAAAAATTAATTTGTAAACATCGCGTTTTGATATATTAACCTTTGT

>PGSC0003DMG400024206-(rev)LRR-RLPs\_427

GTCAACTGTGATTGAAAAAATTAATTTGTAAACATCGCGTTTTGATATATTAACCTTTGTTGAAACAAGATA

AATCTGCCTCGATACATTGCTCAACATTCCGATATATCATGTCTAGATA

>PGSC0003DMG400024206-(rev)LRR-RLPs\_4697

ATTCCAATCATTATTTCTCTTGCTTCCCATTCTCATATGTGAGTCATTTTAATAGTTTTTGTGGAAGATGC  
AAAGTAATAATTATTGTCTAACACAATAATTCATCAAGGAGCCAGTT

>PGSC0003DMG400024206-(rev)LRR-RLPs\_4758

GTGGAAGATGCAAAGTAATAATTATTGTCTAACACAATAATTCATCAAGGAGCCAGTTTGATTAATGTT  
GCCTAATTCATTTTCTTAAGTTATTAAGCTATGAAGTAGTCTAGTATCAC

>PGSC0003DMG400024206-(rev)LRR-RLPs\_4819

ATTAATGTTGCCTAATTCATTTTCTTAAGTTATTAAGCTATGAAGTAGTCTAGTATCACTTAAACTGTTTAA  
TCCAATTTCATTTTTGGATAACATGAAATTTGTATGACATTTTATAC

>PGSC0003DMG400024206-(rev)LRR-RLPs\_488

AAACAAGATAAATCTGCCTCGATACATTGCTCAACATTCCGATATATCATGTCTAGATACATCTTTGTTGA  
TATAAACACACACGTCCCGATACATTGCGTAAGCGTGATGTATCCGAG

>PGSC0003DMG400024206-(rev)LRR-RLPs\_5246

GGAACAAAGGTACAATAGTTAAATTCTTGTTTATTTAATTATTCTCATATCTATTAGAGTGAATGGTGAC  
AAATGCAAGAAGTGTCTAGTTTTTGCRACTTTTCATATCTAAACTATCAG

>PGSC0003DMG400024206-(rev)LRR-RLPs\_5307

GAATGGTGACAAATGCAAGAAGTGTCTAGTTTTTGCRACTTTTCATATCTAAACTATCAGGTGTGCGAGTT  
TCCTACCTGAACAATCACCAAACGTTTATCAAAAAACATCCTAATTCAAA

>PGSC0003DMG400024206-(rev)LRR-RLPs\_5368

GTGCGAGTTTCTACCTGAACAATCACCAAACGTTTATCAAAAAACATCCTAATTCAAATGGCGTTACTCA  
CTTTTTGTGTAAGGGAGTAAATTAACACAATGGTCATTTGATACATAG

>PGSC0003DMG400024206-(rev)LRR-RLPs\_5429

GCGTTACTCACTTTTTGTGTAAGGGAGTAAATTAACACAATGGTCATTTGATACATAGATAGCCCAGTA  
GCCAAATCTAAATCACGAGCAGCACCTAATTCTCATGCTTTTTGTGTTT

>PGSC0003DMG400024206-(rev)LRR-RLPs\_61

AATCGACAATTTCAATTGTAAATCGAAGAACTGCTAAAGATTTCTTCGATTTTATAGTGTTTTTGAGTCA  
TCTTACCAGTGTTAATCGTTAATCAAGGTTTTACTGTCATATTGGGAG

>PGSC0003DMG400024206-(rev)LRR-RLPs\_610

TAAGAGAGAGTGGGAATTCTTGTAATTTTATTAAGTATAGAAAATTTTAAAGAATATGGTAAAATAAAT  
TTTGTATTTAAGTAATTTTTTCAATTTTTTATATTAATACGGTAGAAAA

>PGSC0003DMG400024206-(rev)LRR-RLPs\_671

AAAATAAATTTTGTATTTAAGTAATTTTTCAATTTTTTATATTAATACGGTAGAAAATAATTTTTTGGT  
ACTTTTTTTTATTACAATGTATCGTCTATATTTACCTTTAATAGCTAA

>PGSC0003DMG400024206-(rev)LRR-RLPs\_6893

TAAAGATGAGCCTGGGCTTGTGGCCTTGAATCGATATGATAATAGTGAACGCCATGACTTCGTGACTAA  
TGAAGCCAGCTGTTCCCTCTTCAGAACTTTGCAGCTCTTTCCACAAGTCC

>PGSC0003DMG400024206-(rev)LRR-RLPs\_6954

GTGACTAATGAAGCCAGCTGTTCCCTCTTCAGAACTTTGCAGCTCTTTCCACAAGTCCAGGATTTAGCT  
TAAATATAGGTATTCTATGACATCTTGCAGCTTTTCATCATATCTTAGTG

>PGSC0003DMG400024206-(rev)LRR-RLPs\_7015

GATTTTAGCTTAAATATAGGTATTCTATGACATCTTGCAGCTTTTCATCATATCTTAGTGCTCCATTTGTATT  
CATTTACTATGCAAGCCATTATTCTGCTTTTTTAAAAACCAAGTATCA

>PGSC0003DMG400024206-(rev)LRR-RLPs\_7076

CCATTTGTATTCAATTTACTATGCAAGCCATTATTCTGCTTTTTTAAAAACCAAGTATCAGATATTGTCTTTG  
TTGTATGGTTTTCATGTGCGAAAGATGTATGGTGTTAAGATTGTAATTC

>PGSC0003DMG400024206-(rev)LRR-RLPs\_7137

TATTGTCTTTGTTGTATGGTTTTCATGTGCGAAAGATGTATGGTGTTAAGATTGTAATTCAGTATTAATTA  
TATTTGTTCCCCTGATCATGTCATCCTGCTGATGAAGATTCATTTGTAC

>PGSC0003DMG400024206-(rev)LRR-RLPs\_7198

GTATTAATTATATTTGTTCCCCTGATCATGTCATCCTGCTGATGAAGATTCATTTGTAATTCCTCTCATTAA  
GTCCAGAGAAGAAAAGGCAAATGTTTGTAGTCCCAAAGTAGCCGCTG

>PGSC0003DMG400024206-(rev)LRR-RLPs\_7259

CTTCTCATTAAAGTCCAGAGAAGAAAAGGCAAATGTTTGTAGTCCCAAAGTAGCCGCTGATCCATGGCTA  
CAAACTTACTAATAGTTCCATTTTGTATGCTCTTTAATTGTTACATTTG

>PGSC0003DMG400024206-(rev)LRR-RLPs\_732

AATTTTTTGGTACTTTTTTTTATTACAATGTATCGTCTATATTTACCTTTAATAGCTAAAATCACCCCATTAC  
TCTTCTCCCTTCTCTAGCCAACCTCGCGTCGCCGGAGATGACTTCTC

>PGSC0003DMG400024206-(rev)LRR-RLPs\_7320

CCATGGCTACAAAACCTTACTAATAGTTCCATTTTGTATGCTCTTTAATTGTTACATTTGGAGGTATCCCTGT



CTTAACTTTTAAAAATAAAAATATCTCTCTTGTATGGTAGGGATCGG

>PGSC0003DMG400024206-(rev)LRR-RLPs\_7381

GGTATCCCTGTCTTAACTTTTAAAAATAAAAATATCTCTCTTGTATGGTAGGGATCGGAGTTGGACGTG

GAGGAGGCTGGAGTACAAGGCGAAGTTCGTGAAGGTGGAAAATGAGTAAC

>PGSC0003DMG400024206-(rev)LRR-RLPs\_7442

TTGGACGTGGAGGAGGCTGGAGTACAAGGCGAAGTTCGTGAAGGTGGAAAATGAGTAACAAAGTTTTT

GTGTCAATTTGCCTCTTACATCAGATAATAGCAGAAGTCCTACATTATTATA

>PGSC0003DMG400024206-(rev)LRR-RLPs\_7503

AGTTTTTGTGTCAATTTGCCTCTTACATCAGATAATAGCAGAAGTCCTACATTATTATAACCAAATGTTACTT

ACAAGTCCTTTCTCTGAAAAGTGTGGCACTAATTCATGGTTAGATG

>PGSC0003DMG400024206-(rev)LRR-RLPs\_7564

AAATGTTACTTACAAGTCCTTTCTCTGAAAAGTGTGGCACTAATTCATGGTTAGATGTGATGTGATCGT

TTCAAATTAGGAATGTGCTATCGTTTTTATCTGCTGCTACTTTTTGTAG

>PGSC0003DMG400024206-(rev)LRR-RLPs\_7625

ATGTGATCGTTTTCAAATTAGGAATGTGCTATCGTTTTTATCTGCTGCTACTTTTTGTAGAAATTGATCTTG

ATAAGGTAATACTAACATCTATATCTTGATTACTTATTATAAGTGGTTC

>PGSC0003DMG400024206-(rev)LRR-RLPs\_7686

ATTGATCTTGATAAGGTAATACTAACATCTATATCTTGATTACTTATTATAAGTGGTCCAATCTTTTGGAT

TTGGATTATTTTGAATGCATAATGTAGATACATTATTTGAGAACAA

>PGSC0003DMG400024206-(rev)LRR-RLPs\_7747

ATCTTTTGGATTTGGATTATTTTGAATGCATAATGTAGATACATTATTTGAGAACAAAATTACATATGG

TACTTCCCCTGTTTGTAGCTAGATTCTTGTGGTGAGAAAGAGATTCGCG

>PGSC0003DMG400024206-(rev)LRR-RLPs\_7808

TTACATATGGTACTTCCCCTGTTTGTAGCTAGATTCTTGTGGTGAGAAAGAGATTCGCGAAAGAAGCTTTG

GGTGGGATCTCTCATCTTTGTAGAGGTGACGGGACAGCTCTTTTAGACCT

>PGSC0003DMG400024206-(rev)LRR-RLPs\_7869

AGAACTTTGGGTGGGATCTCTCATCTTTGTAGAGGTGACGGGACAGCTCTTTTAGACCTGAATACCTAGT

TTCATTTTGAATATCCACCTTATCTCGCATACCAAATGACCCATAGTA

>PGSC0003DMG400024206-(rev)LRR-RLPs\_793

TCACCCATTACTCTTCTCCCTTCTCTAGCCAACCTCGCGTCGCCGGAGATGACTTCTCCAAGGATGCTTA  
TGTTTTAGTTGGTTCACATATACAAAGATCTGGCCAATATATTTCACTT

>PGSC0003DMG400024206-(rev)LRR-RLPs\_7930

ATACCTAGTTTCATTTTAAAATATCCACCTTATCTCGCATACCAAATGACCCATAGTATTTTGAAGTCAA  
CTCGTCTGCTTTAGGTGACGAAGAAAGCCATTATTAAGATATCTTACAA

>PGSC0003DMG400024206-(rev)LRR-RLPs\_7991

TTGAAGTCAACTCGTCTGCTTTAGGTGACGAAGAAAGCCATTATTAAGATATCTTACAATTTCAAAGATA  
TCTTAAGTAGAAGGCCATCTAATCACTTTCCATTTGTCCAAGAAAAATA

>PGSC0003DMG400024206-(rev)LRR-RLPs\_8052

TCAAAGATATCTTAAGTAGAAGGCCATCTAATCACTTTCCATTTGTCCAAGAAAAATAGGACCCATAGT  
GCTGCTTTAATGCTTTTGGTGGGTCAGCTACCCATATAATTGATGTGGGA

>PGSC0003DMG400024206-(rev)LRR-RLPs\_8113

ACCCATAGTGCTGCTTTAATGCTTTTGGTGGGTCAGCTACCCATATAATTGATGTGGGACTTGTCTCATT  
GTATCATCATTTTTATTTCTTACTTATCACAACCCCATCTATCCACACG

>PGSC0003DMG400024206-(rev)LRR-RLPs\_854

AGGATGCTTATGTTTTAGTTGGTTCACATATACAAAGATCTGGCCAATATATTTCACTTTGCCCGCTAAGT  
TTTGGTATTTCCCTTATGAAATATTAGCAAAGTGAAGTTCGATGCCAC

>PGSC0003DMG400024206-(rev)LRR-RLPs\_8967

TTGGTAAGAAATGTTATGAAAAACATGAAATTGGGGAATATTTGTATTGTGCATGACGAATAAAAGT  
GATAGTTCTGTCCTTGTATATGTTTGAGCTTATAATCCAAGTCCAATTGAA

>PGSC0003DMG400024206-(rev)LRR-RLPs\_9028

ATAAAAGTGATAGTTCTGTCCTTGTATATGTTTGAGCTTATAATCCAAGTCCAATTGAAAAAGAAGGATA  
ATTTAGTTCTGCTTCAGCAATTTTTGATGAGCAATTCATTTTTCTCAATA

>PGSC0003DMG400024206-(rev)LRR-RLPs\_9089

AGAAGGATAATTTAGTTCTGCTTCAGCAATTTTTGATGAGCAATTCATTTTTCTCAATACAAACATATAAG  
CTGCTTTGTTGGGTATTTAAACCACATAAATAATGAACATTATCCTC

>PGSC0003DMG400024206-(rev)LRR-RLPs\_915

GCCGCTAAGTTTTGGTATTTCCCTTATGAAATATTAGCAAAGTGAAGTTCGATGCCACGTTTCAGATCTGA  
TCAGAAAATCTCCATTTACGTTTCAGATATTACTCTAATATGACTTCAAT

>PGSC0003DMG400024206-(rev)LRR-RLPs\_9150

AACATATAAGCTGCTTTGTTGGGTATTTTAAACCACATAAATAATGAACATTATCCTCGGGTTTGATGTC  
ATAGATTAAGCCTGGATCACCTGTTCTTAACGGATTGACATGTCCTGCA

>PGSC0003DMG400024206-(rev)LRR-RLPs\_9211

GTTTGATGTCATAGATTAAGCCTGGATCACCTGTTCTTAACGGATTGACATGTCCTGCACCAGTGGCGAA  
CAAGTCACTCTTTTCATCAAGATCAGCAGTCGTCATGATTGCTGATTTGA

>PGSC0003DMG400024206-(rev)LRR-RLPs\_9272

AGTGGCGAACAAGTCACTCTTTTCATCAAGATCAGCAGTCGTCATGATTGCTGATTTGATAGCAGCTGGA  
GACCAGTCAGGGTTTGTACATTTTACTAATGTTGCAATTCCAGATACATG

>PGSC0003DMG400024206-(rev)LRR-RLPs\_9333

GCAGCTGGAGACCAGTCAGGGTTTGTACATTTTACTAATGTTGCAATTCCAGATACATGAGGGCAAGAC  
ATTGACGTGCCAGACGCGATGTTAAAAGTAGACTTAGTTGGCCAAGCAGCA

>PGSC0003DMG400024206-(rev)LRR-RLPs\_976

TCAGATCTGATCAGAAAATCTCCATTTACGTTTCAGATATTACTCTAATATGACTTCAATAAAAATTCTAGTA  
AATAAGAGATAATTGTGGAGAAAATCTAAAACGAAAATGTTTTGCGCG

>PGSC0003DMG400024258-(rev)G-LecRK\_441

GATAGTGAATTCGAGCCCAAGATTGCAGATTTTGGACTTGCAAAGCTGTCCCAAAGAGGCGGCCCTGGT  
TCAGATTTCTCCAAGATTCGCGGTACTAAAGGCTATATGGCTCCTGAATGG

>PGSC0003DMG400024258-(rev)G-LecRK\_756

GAGAACTTGTGATCCACGACTAGAAGGCAAATTTGGCAAGAACCAGGCAGTGACACTGATTGAAAT  
AGGCCTTTCTTGTGTAGAGCAAGACAGAAACAAAAGGCCTACAATGGCCTCA

>PGSC0003DMG400024258-(rev)G-LecRK\_807

GTGACACTGATTGAAATAGGCCTTTCTTGTGTAGAGCAAGACAGAAACAAAAGGCCTACAATGGCCTCA  
GTAGTCCAAACATTGCTGGATTGTGAAGATGAAACAACACAAATAACATAG

>PGSC0003DMG400024259-(rev)G-LecRK\_0

ATGAAAAGTTTGAACTTTACTATCTTTTTCCATTTTAGTTTTTTCATTTCTTGTCTTCTTTCCCTTTGAT  
AACATCATCAAGAATTTTGCTTAAAGGTGATTCTTTTTTCAGTTAAA

>PGSC0003DMG400024259-(rev)G-LecRK\_1008

TCTAAACAACATGTAAAGTTTGTGGAGATTCCTAATGCTGATTATTGGGGTTTTGATCTCAATGCCACTAC

TCCTTTGTCATTTGAATCTTGTAGGGCATTGTGCTTGGACGATCCACGT

>PGSC0003DMG400024259-(rev)G-LecRK\_1071

GCCACTACTCCTTTGTCATTTGAATCTTGTAGGGCATTGTGCTTGGACGATCCACGTTGTCGTGCATTTGT

TTATAGGTTAACTGGTGTGGGATCATGCTATACTAAAGGCATCCTTTTT

>PGSC0003DMG400024259-(rev)G-LecRK\_1134

GCATTTGTTTATAGGTTAACTGGTGTGGGATCATGCTATACTAAAGGCATCCTTTTTAATGGATACAGGT

CTCCTAGTTTCCCTGGAAGTGATTCTTGAACTCCCTATGAATCTAAGT

>PGSC0003DMG400024259-(rev)G-LecRK\_1260

GAATCAGGTCATTTGATGCTTGAAGGTACTGATGCAAAATGTGGATTGAGTCCTGAAAACCTCTCTTTTTG

GTTCTCTTTCTATGTATGTATTGGATTTAAGAAGGTGAAGTGGATTTAT

>PGSC0003DMG400024259-(rev)G-LecRK\_567

AATGATAATGTATTGAGAATGATTATAATGGTCCTTTAGTTTCGAGTATATACTGGCCTAATCGCGAAA

GGAGTGCGCCCCAGAATGGTAGAACTAGTCAGGTGGATACTGTAGTTGCA

>PGSC0003DMG400024259-(rev)G-LecRK\_630

CGCGAAAGGAGTGCGCCCCAGAATGGTAGAACTAGTCAGGTGGATACTGTAGTTGCACATTTTGATGG

AATGGGTAGATTTTTCTCAAGTGATATGTTGCAATCAATGTTTCTGATATG

>PGSC0003DMG400024259-(rev)G-LecRK\_756

GGGATATTGAGAAGATTGACTATAGATACTGATGGTAATTTGAGGATGTATAGTTTGGATAACTTGACA

GGGTTGTGGAAGATGTCGTGGCAAGCTATTGCACAACCTTGTGCTGTGCAT

>PGSC0003DMG400024259-(rev)G-LecRK\_819

TTGACAGGGTTGTGGAAGATGTCGTGGCAAGCTATTGCACAACCTTGTGCTGTGCATGGAATGTGTGGA

AGATTTTCGATATGTACTTATGTATCGAAGCCTAAATGTACATGTCCTCCT

>PGSC0003DMG400024259-(rev)G-LecRK\_945

GAGATTGTTAATGGAAGTGATTGGAGTAGAGGTTGTAGGCCAATGTTTAGATCAAGTTTGGAGTCTAAA

CAACATGTAAAGTTTGTGGAGATTCCTAATGCTGATTATTGGGGTTTTGAT

>PGSC0003DMG400024260-(rev)G-LecRK\_1098

TGTAGGGAATTGTGCTTGGGTGATCCACGTTGTCGTGCATTTGTCTATAGGCGTACTGGGGAGGGATCA

TGCTATACTAAAGGCATCCTTTTCAATGGATACAGGTCTCCTGGTTTTCCCT

>PGSC0003DMG400024260-(rev)G-LecRK\_1159

AGGGATCATGCTATACTAAAGGCATCCTTTTCAATGGATACAGGTCTCCTGGTTTCCCTGGAAGTGTGTT  
TTTGAAACTCCCTATGAATCTAAGTGCATCAGAATCAGGTCATTTGATGC

>PGSC0003DMG400024260-(rev)G-LecRK\_1220

AAGTGTGTTTTTGAAACTCCCTATGAATCTAAGTGCATCAGAATCAGGTCATTTGATGCTTGAAGGTACT  
GATGTAAAATGTGGATTGAGTCCCCAAAACGTTCTTTTTGGTTCTCCTTC

>PGSC0003DMG400024260-(rev)G-LecRK\_1281

GAAGGTACTGATGTAAAATGTGGATTGAGTCCCCAAAACGTTCTTTTTGGTTCTCCTTCTATGTATGTATT  
CGATTTTAAGAAGGTGAAGTGGATTTATCTTTACCTGTTTTGTTCCACC

>PGSC0003DMG400024263-(rev)LRR-RLPs\_0

AGATGTTATCTATAATTATATTTGAAGTGTGGATTTTAAACCTAGCACTGAAAATATGTTATCTCGTCTCT  
GGTTAAAGTATAAAAAAGACATACATTTGCTAGCTAAAGATTACGAGTG

>PGSC0003DMG400024263-(rev)LRR-RLPs\_310

GAATGCGCTTTCAGGATTGAAGCTTCTCACTTTATGCCTGTAGCTTATTTGTACATTATGACAGACTGTG  
TCTACTATAGTTTTATTACAAAAGAGTATCACTGCAGGGATCTACGATC

>PGSC0003DMG400024263-(rev)LRR-RLPs\_372

CAGACTGTGTCTACTATAGTTTTATTACAAAAGAGTATCACTGCAGGGATCTACGATCATTGTCCACCATT  
TAGTCATGATGGTTGAAATCATCGGAGGTCATTAAGCCAATGGTTTTTC

>PGSC0003DMG400024263-(rev)LRR-RLPs\_558

AGGATGGAACTAAGGGTGAGAAGAAATTTAAATGATTGGGTGTTAACTGCACTAACTGATCTTCTTTT  
GTTTCATGCAGGGTCATCAAGGTAACACGGATGAAAGAGATAGAGTATGGTG

>PGSC0003DMG400024263-(rev)LRR-RLPs\_62

TCTCGTCTGGTTAAAGTATAAAAAAGACATACATTTGCTAGCTAAAGATTACGAGTGTTATCATGTCAA  
CAGTAAATATTTGATCATCTTTGTCTGGTTGTTACGTATGAGGATGTGAG

>PGSC0003DMG400024263-(rev)LRR-RLPs\_620

TTCTTTTGTTTCATGCAGGGTCATCAAGGTAACACGGATGAAAGAGATAGAGTATGGTGGATTCCTAGCA  
GTGATGGTGAATTATCTGTGAGTTTGTA AAAAGACTATTCATATGGAAGGT

>PGSC0003DMG400024263-(rev)LRR-RLPs\_682

CCTAGCAGTGATGGTGAATTATCTGTGAGTTTGTA AAAAGACTATTCATATGGAAGGTGAAATTGTTGG  
AGAATAGCTAGAAAAACAAATCTAGGACACTAAGGTGGCCTGTTTCACGTG

>PGSC0003DMG400024406LRR-RLPs\_0

TAAACTCAAATATGATGATGGTTTCTAGCAAACATTCTCTCCCTTCAGTTTTTCACTCTTTTGTACCTC  
TTTACAGTTACTTTTGCTTCCACTGATGAAGCAACTGCCCTCTTGAAA

>PGSC0003DMG400024406LRR-RLPs\_1040

AATAACAACTTTCTGGGACTCTTCCAACAAATTTTAGCATTGGAAGTTCACCTATGAGTCTCAACTTGCA  
TGGCAATGAACTCGAGGGAGAAATCCCTCGATCTTTGGCCAATTGCAAA

>PGSC0003DMG400024406LRR-RLPs\_130

CTTTCAAGAACCAGAATAATTTTGTATTGGCTTCATGGACGCCAAGTTTTAATGCATGCACGGACTGGTA  
TGGAGTTATATGCTTTAATGGGAGGGTAAACACGTTGAATATTACAGATT

>PGSC0003DMG400024406LRR-RLPs\_260

TGGTACACTCTATGCTTTCCGTTTTTCATCCCTCCCTTTTCTTGAAAATCTTGATCTTAGCATGAACAATTTCT  
CGGGCACCATTCCACCTGAGATTGGTAATCTCACTAATCTCGTCTTT

>PGSC0003DMG400024406LRR-RLPs\_845

GTTCCGCAATGTTTGGGTAATATAAGTGGCCTCCAGTTCTAGTGATGTCACATAATAATCTTAGTGGAG  
GGATGCCTCCATCTATTTCCAATTTAACATCACTACAAATTCTAGAATTG

>PGSC0003DMG400024426-(rev)G-LecRK\_122

ATTCTTCATCATCTTCTTCGAATTCTCCACCGTCTGGCTCATCCTCAAATTCTTCGCCATCCCAAGACAATT  
CATCTTCATCCAATGATTCAAATCCCAATCTCCTCCTCAAAGTAATT

>PGSC0003DMG400024426-(rev)G-LecRK\_1525

GTCGGTTATTGCATTGCTGGATCTCAAAGTTGTTGGTATATGAGTTTGTTCTAATGGCACTCTTGAGT  
ATCACCTTCATGGTATTAACTTAATTTCTTTTTTTATATCTAAATACT

>PGSC0003DMG400024426-(rev)G-LecRK\_1586

CTCTTGAGTATCACCTTCATGGTATTAACTTAATTTCTTTTTTTATATCTAAATACTCATTCTACATATGT  
CGTATTTAACTCATCGATCCCTTATTTAATTAGGAACTGGTCGCCCT

>PGSC0003DMG400024426-(rev)G-LecRK\_1708

TATGGACTTCCTACTAGGCTTAAAATTGCATTAGGATCTGCCAAAGGCTTCGCGTACCTTCATGAAGAT  
TGTAAGTTCATATATACTATTCTCATTAAAGCACTTGTCTATATATTCTC

>PGSC0003DMG400024426-(rev)G-LecRK\_1769

CATGAAGATTGTAAGTTCATATATACTATTCTCATTAAAGCACTTGTCTATATATTCTCATAAAAAATTTAAA

CTTCTATTTTCATATATAAAATTACAGGCCACCCTCGTATTATTCACAGA

>PGSC0003DMG400024426-(rev)G-LecRK\_1891

CATTAAAGCTGCTAATATTTTACTGGACCATAACTGTGAAGCTAAGGTATTTGGTAAAAATAGTTGAAAC  
ATTGATTCCTCATTAGATTCTAACAATTTTATTACTCCCTTTGT

>PGSC0003DMG400024426-(rev)G-LecRK\_1952

AGTTGAAACATTGATTCCTCATTAGATTCTAACAATTTTATTACTCCCTTTGTAAGGTTGCTGATT  
TTGGATTAGCTAACTTTCCAACGACACTAATACACATGTTTCTACGC

>PGSC0003DMG400024426-(rev)G-LecRK\_2013

GGTTGCTGATTTTGGATTAGCTAACTTTCCAACGACACTAATACACATGTTTCTACGCGTATCATGGGC  
ACTTTTGGGTGAGTTTAGTTTGATAATTCTTCAAATATCCAATGGATTTG

>PGSC0003DMG400024426-(rev)G-LecRK\_2257

GGCGTCGTCCTATAGACATCAGCAGTGATGATGATACTTTAGTGGAAATGGGTATACCATGATGATTACTT  
TACATCTTCAAATTAATTCAGTAGGACATCGATCAGATTATATGTATAT

>PGSC0003DMG400024426-(rev)G-LecRK\_2318

TGATTACTTTACATCTTCAAATTAATTCAGTAGGACATCGATCAGATTATATGTATATATATGTGCAGGC  
TAGGCCAATTCTGATTCGTGCAACAGAGGGTGGAACTACGATGAATTA

>PGSC0003DMG400024426-(rev)G-LecRK\_2562

TAATATTCGTCAAAGCTTTTCCTAATTCACAATTTTAAAAAGTATAGTGGTCCAGCGATTGACATATATA  
TATGTTGTAGATTGTACGTGCTTTAGAAGGTGATGTGTCTCTGGATGAT

>PGSC0003DMG400024426-(rev)G-LecRK\_3050

GAATGCGGGTTGTAAAGAGTATCACATCCTCCTAACCATTCTGTGGTTGGCTTTGGTTGTCAGTTGAATC  
ATTTAGTTTTGTTGACTTTGGAAGTTGGGATATATACTAATTCTGAATT

>PGSC0003DMG400024426-(rev)G-LecRK\_3105

GTTGTCAGTTGAATCATTAGTTTTGTTGACTTTGGAAGTTGGGATATATACTAATTCTGAATTGTTTTC  
AATATATTCGTCAATGTATCTGCTAATTAATCTTTTCTTTGTTTA

>PGSC0003DMG400024426-(rev)G-LecRK\_61

GACTTTATAAAAATGTCTTCATCATCTAAGGATGATCAATCATCCAATACACCATCATCGGATTCTTCATC  
ATCTTCTTGAATTCTCCACCGTCTGGCTCATCCTCAAATTCTTCGCCA

>PGSC0003DMG400024426-(rev)G-LecRK\_610

CCACCACCTCCTCCTTCTCCTTTTTCTCCAACTCCGGGTTTCTTTCTCCTCCAAAGCATAAGCCACCACCA  
AGCAAGTCCTTAGATAATAATAACAACAAGCCTAATGATAACGGG

>PGSC0003DMG400024426-(rev)G-LecRK\_671

AGCCACCACCAAGCAAGTCCTTAGATAATAATAACAACAAGCCTAATGATAACGGGACAGCCATCA  
TTGTAGGAGTTGCTGCTGCAGGAGGTCTATTACTTCTTGTCATGTTAGTTT

>PGSC0003DMG400024437-(rev)LRR-RLPs\_0

GAGAGAACATTTGAAACAATGCTTCAAACCTTCAGTAATCTAGAGGTACTTTCTCTCTTTCATGTCAACAT  
CTCATCTCCGATACCTGTGAATATTTCTTCTCCTTAAGGTACCTGGAT

>PGSC0003DMG400024437-(rev)LRR-RLPs\_1008

TCCATTTGTAACATGAGCTCGCTTGAATTTCTTGATTTATCACGCAACAACCTTCAGTGAAGTCAAGTTTCACA  
TTGCTTGAAGCATGGCTAGTCTAACGGTGCTAGAACTTAAGAAGGAAC

>PGSC0003DMG400024437-(rev)LRR-RLPs\_1071

GTTTCACATTGCTTGAAGCATGGCTAGTCTAACGGTGCTAGAACTTAAGAAGGAACAATTCACAGGGA  
GTCTTCCCCCATTATGTGCACACAGCACTTCGTTGAGCACCATTGTCATAA

>PGSC0003DMG400024437-(rev)LRR-RLPs\_1134

CAGGGAGTCTTCCCCCATTATGTGCACACAGCACTTCGTTGAGCACCATTGTCATAAATGGTAAATCAAT  
TTGAAGGACCTGTACCTGTGTCGTTGCTCAAGTGTAGTGGTCTAGAAGTA

>PGSC0003DMG400024437-(rev)LRR-RLPs\_1197

AATCAATTTGAAGGACCTGTACCTGTGTCGTTGCTCAAGTGTAGTGGTCTAGAAGTACTTGATGTGGGG  
AACAAATGCTATAAATGACAAGTTTCCTTCTTGGCTTGGAACTCTTGAATAC

>PGSC0003DMG400024437-(rev)LRR-RLPs\_1260

GTGGGGAACAATGCTATAAATGACAAGTTTCCTTCTTGGCTTGGAACTCTTGAATACCTGTAGGTCCTTA  
TATTAAGTCGAACAAGTTCCATGGACCTATAAGTACGTGTCTGACTAAG

>PGSC0003DMG400024437-(rev)LRR-RLPs\_1449

GTTTTTGAAACTTCAAGGCAATGATCAAATTAGATGGTGAAGACACAGGAAATATCATGTACATGGAA  
TCTCTGTGCAATTCGCCATTTGTCACATCCTATGAGGATTCAGTGAGTTTG

>PGSC0003DMG400024437-(rev)LRR-RLPs\_1512

ATGGAATCTCTGTGCAATTCGCCATTTGTCACATCCTATGAGGATTCAGTGAGTTTGGAAATCAAAGGGC  
ACGATATTGAGCTACAAAGAATAAGCACAATTATGACAACCATAGATCTC



>PGSC0003DMG400024437-(rev)LRR-RLPs\_1638

AATCATTTTGAAGGTGTGATTCCGAAAACACTAAAGGATCTCAGCTCACTTTGGCTACTCAATTTATCCCG  
TAACAATCTCAGAGGTGATATTCCAATGAAACTAGGACAATTGAGTATG

>PGSC0003DMG400024437-(rev)LRR-RLPs\_1827

TTTTTGGCCTTCTTAAACCTCTCTCAAATCATCTCGTCGGACCAATCCTCAAGGTCGACCATTCAACAC  
ATTTGAAAATGACTCATATGGTGGCTACCTTGATTTATGTGGTCTTCCT

>PGSC0003DMG400024437-(rev)LRR-RLPs\_2016

GAGTCATATTTTTTTAGTGGATTTACTTGGGAATCAGTAATCATAGGCTACAGTTTTGGACTAGTTGTTG  
GAACTTTCATGTGGAGTCTCATGTTTAAATATCGTAAGCCAAAATGGTTT

>PGSC0003DMG400024437-(rev)LRR-RLPs\_2142

TTTTTTGATGGACTCATGCCTCACAAAAGAGGAAGGCAAAGAAGAGAGCTCAGAGATGAAGGACTTA  
ATGGAAGATTGAGAGGGCTAAATTGTCTTTGTTTGGTTTTGTGGACTAATTA

>PGSC0003DMG400024437-(rev)LRR-RLPs\_2184

AAGAGAGCTCAGAGATGAAGGACTTAATGGAAGATTGAGAGGGCTAAATTGTCTTTGTTTGGTTTTGTG  
GACTAATTAGTGAAGTCTGTTTTGTCTTTTTTAATTTCTATTTGTT

>PGSC0003DMG400024437-(rev)LRR-RLPs\_252

TTGTTAATGGAGTTGGATATTTTCATCCACAGGCATCTCTGGTGAGCTGCCTCATTCAATTGGCACCTTTAG  
TTCCTTGAATATCTCTAACCTCCAAGAGCTACGTTCCATATATCTTTAC

>PGSC0003DMG400024437-(rev)LRR-RLPs\_315

ACCTTTAGTTCCTTGAATATCTCTAACCTCCAAGAGCTACGTTCCATATATCTTTACCATAACAACCTTCATC  
GGTCCATTTCCCGCTTCAATTTAACTTGACACATCTTGAATTCTTA

>PGSC0003DMG400024437-(rev)LRR-RLPs\_441

TCGACTAATTCCCTATCTGGCCCACTGCCTAGCAAGGAACCAAGCTGGATTTGTCATACAACCTCACTGAA  
TGGTACCATAACCATCTTGGCCTGTTTAGCCTACCTTTGCTATCTTCAGTG

>PGSC0003DMG400024437-(rev)LRR-RLPs\_504

CACTGAATGGTACCATAACCATCTTGGCCTGTTTAGCCTACCTTTGCTATCTTCAGTGTCGCTCCAACCTAGC  
CGATGAAGTGATCAAAACAAACCCAACATTAGAAGAACTGAATTTAAAC

>PGSC0003DMG400024437-(rev)LRR-RLPs\_567

CAACTAGCCGATGAAGTGATCAAAACAAACCCAACATTAGAAGAACTGAATTTAAACAATAATCAACTC

AGTGGTTCTTTTCCTCAATCACTTGTGAATCTCACAAACCTTTTACCCTT

>PGSC0003DMG400024437-(rev)LRR-RLPs\_63

GTC AACATCTCATCTCCGATACCTGTGAATATTTCTTCCTCCTTAAGGTACCTGGATCTTAGTTATACTAAT  
CTGCGAGGTGTTCTCATAGAGAGCTTTTTCCTTCCGTCAAACAGCTTG

>PGSC0003DMG400024437-(rev)LRR-RLPs\_630

CAACTCAGTGGTTCTTTTCCTCAATCACTTGTGAATCTCACAAACCTTTTACCCTTAATATTTTCATCAAAT  
AACATCACCATTGATGAGGGAATGAATATCACCTTTCCTAGACTATCA

>PGSC0003DMG400024437-(rev)LRR-RLPs\_693

TCATCAAATAACATCACCATTGATGAGGGAATGAATATCACCTTTCCTAGACTATCATCTTTATTCTTATC  
ATCTTGTGAACTGAAGGATTTTCCACACTAGTTGAGAAATTTAAAGACA

>PGSC0003DMG400024437-(rev)LRR-RLPs\_756

TTCTTATCATCTTGTGAACTGAAGGATTTTCCACACTAGTTGAGAAATTTAAAGACACTTGTGTACTTGGA  
TAATTCTAACAATAAGATTTGTGGTCAAATCCCTAACTGGTTTAGCGGC

>PGSC0003DMG400024438-(rev)LRR-RLPs\_0

ATGGAGTTGGATATTTCAATTCACAGGCATCTCTGGTGAGCTGCCTCATTTAATTGGCAACTTGAAATCCTT  
GAATATCTTGGACCTCGGAGGATGTCAATTCTCTGGTTCATTCCCGAT

>PGSC0003DMG400024438-(rev)LRR-RLPs\_1037

TCCACTACCTTCATCCATTTGTAACATGAGGAACTTATCTTATTAGATTTATCACACAACACTTTCAGTG  
GCTCAGTTCCACATTGCTTGGGAAGCATGGCTTTACTAACGGTGCTGGA

>PGSC0003DMG400024438-(rev)LRR-RLPs\_122

CATTGGCAACCTAACACAAATTACAGAGTTGATTTTATCTTATAATCATTTCACTGGCCACATTCCTGATT  
CCATAGGCAACCTAACACAAATTACGGAGTTGGTTTTATCTTATAATCA

>PGSC0003DMG400024438-(rev)LRR-RLPs\_1220

TACCATTGTCATAAATGGTAATCGATTTGAAGGACCTGTTCTGTGTCATTGCTCAACTGTGATAGTCTAG  
AAGTCTTTGATTTGGGGAACAATGCTATAAATGACACGTTTCCATCTTG

>PGSC0003DMG400024438-(rev)LRR-RLPs\_1281

GATAGTCTAGAAGTCTTTGATTTGGGGAACAATGCTATAAATGACACGTTTCCATCTTGGCTCGGAATTC  
TTGAATACCTGCAGGTCCTTATATTAAGTCGAACAAGTTCCATGGACCT

>PGSC0003DMG400024438-(rev)LRR-RLPs\_1342

TCGGAATTCTTGAATACCTGCAGGTCCTTATATTAAGTCGAACAAGTTCCATGGACCTATAACTACGTG  
TCAGACTAAGTTTTGCTTTCCCAAGTTGCGAATTTTTGATCTTTCTCGTA

>PGSC0003DMG400024438-(rev)LRR-RLPs\_1464

GATTTTCAGTGGCTCACTTCCTGCAAAAATTTTTGGAACTTCAAGGCAATGATTAAATTAGATGGTGAAG  
ACACAGAATTTAGTGGCCTAGTTTCTGCAAAGGGATCACGTACATGGCA

>PGSC0003DMG400024438-(rev)LRR-RLPs\_1525

ATGGTGAAGACACAGAATTTAGTGGCCTAGTTTCTGCAAAGGGATCACGTACATGGCACCATATATAG  
CGAGCGAGTTATCTGGTAGGTCGTATGAGGATTCAGTGAGTTTGGTAATCA

>PGSC0003DMG400024438-(rev)LRR-RLPs\_1586

ATATATAGCGAGCGAGTTATCTGGTAGGTCGTATGAGGATTCAGTGAGTTTGGTAATCAAAGGGCAGG  
CTATTGAGCTAGAAAGAATCAGCACAATTATGACAACCATAGACTACAAC

>PGSC0003DMG400024438-(rev)LRR-RLPs\_244

TCACTGGCCATATTCCTTCTACAATCTCTAAATTGAAGCACCTCACAAGTTTACAACCTTCTGACAACCTCCT  
TTTCAGGTGAAATTCCTGATGTTTTCTAACCTCCAAGAGCTACGTA

>PGSC0003DMG400024438-(rev)LRR-RLPs\_2806

GTGAAATTTATGTAAGTTTTCCATTAATAATGACTAATATGTGAAGTTCTAAATTTCAATTAATTCCGGTA  
AGAAATCACAATCTCATCTTATAATGAATGATTGAAATGTGTGAACTAT

>PGSC0003DMG400024438-(rev)LRR-RLPs\_2989

CTGACTTATCATCAAGATATTATTCAACAATGTTCTTCAGAAATATTCGCCACCTGATTCAAGAGATCGAA  
TCAAATTTTCTCTTTTGTATTTCATTCTTTGATTTTATTAATTGTT

>PGSC0003DMG400024438-(rev)LRR-RLPs\_305

TGACAACTCCTTTTCAGGTGAAATTCCTGATGTTTTCTAACCTCCAAGAGCTACGTACTTTACCACTTTC  
TTATAACGGCTTCATCGGTTTCGTTTCCCGCTTCAATTTTAAGTTTGAC

>PGSC0003DMG400024438-(rev)LRR-RLPs\_3782

AAAGAAAATAACAAATTTTACTTTCAATTAATTTTTCCCTCCACTTTCAATGTGTAAATTCCCCCTCACACC  
ATTTCCATTTTCCATCCAGTAAACCACGCATAACGGCACAAGGAACT

>PGSC0003DMG400024438-(rev)LRR-RLPs\_3843

CCCCTCACACCATTTCCATTTTCCATCCAGTAAACCACGCATAACGGCACAAGGAACTGCCCACTAACTT  
TCTTTTCATTTTATTTTTTTTAAAATAATCAAATTTGCCCACTCTCTT

>PGSC0003DMG400024438-(rev)LRR-RLPs\_4453

CATACTTTTATCTTTTTTAAATTTATCATTGTTCCCGTACCTCATCTAGGTCTTTTTTTTGAGTGATTCCCTT  
GATTTACTCAATGAATTTGACTCAAATGTTATCCCTGAATAATTA

>PGSC0003DMG400024438-(rev)LRR-RLPs\_4575

AATGTAATTACTATATAGTTTCGTATGGATTTTTGGTATTATGTTCTCTTTTTTTTTTTTTGATTTATTTATT  
TACAAAAGCTATGACTTTTAAAATTGAAGTATACATGTAATTAA

>PGSC0003DMG400024438-(rev)LRR-RLPs\_5002

AATTTATTCGTCAGTAATACCATATAGAGAGACAAATTATTCATCACTAATACCATAAAGAGAGACAAAC  
TATTCGTCATTAATATCGTATTTAGTATATCACAACTAATTTTCAGCCAC

>PGSC0003DMG400024438-(rev)LRR-RLPs\_5551

TTTTGAAGGTGTGATTCCAAAAACACTAAAGGATCTCAGCTCACTTTGGCTACTCAATTTATCTCATAACA  
ATCTCATAGGTGCTATTCCAATGGAATTGGGGCAATTGAATACGATTGA

>PGSC0003DMG400024438-(rev)LRR-RLPs\_5734

CTTTTTGGCAGTTTTTAACTCTCTCAAATCATCTCATCGGACCAATTCCTCATGGTCTACAATTCAACAC  
ATTTGAAAATGATTCTTATGGTGGCAACCTTGATTTATGTGGTCCTCC

>PGSC0003DMG400024438-(rev)LRR-RLPs\_5795

CAATTC AACACATTTGAAAATGATTCTTATGGTGGCAACCTTGATTTATGTGGTCCTCCTTTATCAAACA  
ATGTGGTACGAGTGATTCATCACATGTTCTCAACCATTGGAGTCTGAA

>PGSC0003DMG400024438-(rev)LRR-RLPs\_61

TGAAATCCTTGAATATCTTGACCTCGGAGGATGTCAATTCTCTGGTTCCATTCCCGATTCCATTGGCAAC  
CTAACACAAATTACAGAGTTGATTTTATCTTATAATCATTTCACTGGCC

>PGSC0003DMG400024438-(rev)LRR-RLPs\_915

GGCATGAGGTGGGACTCGTTGCAGTTCCTAAACCTTTCTCATAATTCATTAACAGGCAACCTACCACAAT  
TTCGTTACTATAACCTACAGTTTCTTGATCTGAGATTTAACTTCCTTCAG

>PGSC0003DMG400024438-(rev)LRR-RLPs\_976

TACCACAATTTGTTACTATAACCTACAGTTTCTTGATCTGAGATTTAACTTCCTTCAGGGTCCACTACCTT  
CATCCATTTGTAACATGAGGAACTTATCTTATTAGATTTATCACACA

>PGSC0003DMG400024485LRR-RLKs\_1220

CAAGCATCTCCATAGTAAGTTTTATTAGTGCAAACCTAATTATTCTCACTTGAATTTCAAGCCATAGAATG

ATACATGAGTAATAGGCCTTCCTGTAAGAACTATCAAGAATTGATATCA

>PGSC0003DMG400024485LRR-RLKs\_1281

CCATAGAATGATACATGAGTAATAGGCCTTCCTGTAAGAACTATCAAGAATTGATATCAGTAAAGGAAT

ATGTTAGATAGAACTATAGTTCAATTTCCAGATCCAGGGTCTAGCTAAGTC

>PGSC0003DMG400024485LRR-RLKs\_1342

AAAGGAATATGTTAGATAGAACTATAGTTCAATTTCCAGATCCAGGGTCTAGCTAAGTCAAATCTTTTT

AAGTATTTTGTCTGGTCTACGTTGCTTTGACTCCAAAATGTTGCCACACCT

>PGSC0003DMG400024485LRR-RLKs\_1525

TGAAAAGTCCGAGCAACATTGTTGTCTGGTTGATTAAGTAAGAAAGAACTTTACTAATTAGTATTATTAG

TTTGGGCAGCAAGATATAGTCATGTTTTATTGGAATCTAACTTCTGATT

>PGSC0003DMG400024485LRR-RLKs\_1586

TATTATTAGTTTGGGCAGCAAGATATAGTCATGTTTTATTGGAATCTAACTTCTGATTCTGAACCTAGTT

CAAAGATAATGTCAACATATCAGCTTATAGGATTTTAGGTATTTACAT

>PGSC0003DMG400024485LRR-RLKs\_1647

GAACCTAGTTCAAAGATAATGTCAACATATCAGCTTATAGGATTTTAGGTATTTACATTGGCAATACAA

AGCTAACCTATAATAGCAAGTCAATTACCTATAATTAGTTACCATACAAG

>PGSC0003DMG400024485LRR-RLKs\_1708

GCAATACAAAGCTAACCTATAATAGCAAGTCAATTACCTATAATTAGTTACCATACAAGTGATCTAATCG

TATAAGTATCTTTTACGCAGTCAGTGAATAGACCTTAAACTCTTAAAAAT

>PGSC0003DMG400024485LRR-RLKs\_1769

ATCTAATCGTATAAGTATCTTTTACGCAGTCAGTGAATAGACCTTAAACTCTTAAAAATAATCAAGTAGTA

ACTAGTTTGTCTATTATTCTTTGAGAATGAACATGGAAAGGTAAAGTTA

>PGSC0003DMG400024485LRR-RLKs\_1830

TCAAGTAGTAACTAGTTTGTCTATTATTCTTTGAGAATGAACATGGAAAGGTAAAGTTACTGCATAACTG

TTCATTTACAGCATCTCAGGGCAGTAAAGTTTTCGAGTGGGCGAGCAGATT

>PGSC0003DMG400024485LRR-RLKs\_1891

GCATAACTGTTTCAATTTACGCATCTCAGGGCAGTAAAGTTTTCGAGTGGGCGAGCAGATTAGCTATTGCA

GCCAGTGTCTGCAGAGGCCTTAGCATTATGCATGAAGGCCTTCAGAATGAC

>PGSC0003DMG400024485LRR-RLKs\_1952

CTATTGCAGCCAGTGTCTCGCAGAGGCCTTAGCATTTCATGCATGAAGGCCTTCAGAATGACAATATTCCTCA  
TGGAAACATGAAATCCACCAACATTATGCTGAACGATGACATGGAAGCCT

>PGSC0003DMG400024485LRR-RLKs\_2013

TATTCCTCATGGAAACATGAAATCCACCAACATTATGCTGAACGATGACATGGAAGCCTGTATCAGCGA  
GTATGGTCTAATGCCCAACAATCAAGACCAGTCATTTGTTGCTCAAAGTGA

>PGSC0003DMG400024485LRR-RLKs\_2074

ATCAGCGAGTATGGTCTAATGCCCAACAATCAAGACCAGTCATTTGTTGCTCAAAGTGATCATAGCATCA  
GAGAAGATGATTCAGTTGCAATTACTACACGTAACACCTTCAAGATGGAT

>PGSC0003DMG400024485LRR-RLKs\_2135

ATAGCATCAGAGAAGATGATTCAGTTGCAATTACTACACGTAACACCTTCAAGATGGATGTTTATAGTTT  
TGGAGTGATTCTTCTTGAATTGCTCACAGGGAAGCCTGTTGAGGCTAGTG

>PGSC0003DMG400024485LRR-RLKs\_2196

TTATAGTTTTGGAGTGATTCTTCTTGAATTGCTCACAGGGAAGCCTGTTGAGGCTAGTGGATATGATTTG  
TCTAGGTGGGTAAATTCAGTAGTTAGAGCGGAATGGACTGGTGAAGTTTT

>PGSC0003DMG400024485LRR-RLKs\_2257

TATGATTTGTCTAGGTGGGTAAATTCAGTAGTTAGAGCGGAATGGACTGGTGAAGTTTTCGACAAGTCC  
CTTATTACAGATGGTACAAATGAAGAAAGAATGATCAATCTGTTGCATGTA

>PGSC0003DMG400024485LRR-RLKs\_2318

ACAAGTCCCTTATTACAGATGGTACAAATGAAGAAAGAATGATCAATCTGTTGCATGTAGCTCTCAAATG  
CATAAATACATCACCAGATGCAAGGCCTAACATGAAGGAAGTTGCGTTCA

>PGSC0003DMG400024485LRR-RLKs\_2371

CATGTAGCTCTCAAATGCATAAATACATCACCAGATGCAAGGCCTAACATGAAGGAAGTTGCGTTCATCA  
TCAATTCTATTAAGGAAGATGAAGAGAAATCCGTGTCTGCGTTCAGCTAA

>PGSC0003DMG400024485LRR-RLKs\_305

AATATCAAATGCAGACGTCTCACACATTTTTATCTGCGTGGCAACAAATTATCAAGCAACTTACCAAGCT  
CTCTTTGCGGTTGAGCAATTTGAAAAGGTTTGTAAATTCAGACAATGC

>PGSC0003DMG400024485LRR-RLKs\_549

TCATACAATAATTTAACTGGTCCAATACCTGATGTCAAGGACCAGTTTAGTTCCAGCAGTTTTTTGGGTAA  
TCCTGGATTATGTGGAGTGCCATTGCCAAGCATATGTCCACCCTCGCCA

>PGSC0003DMG400024485LRR-RLKs\_854

AAAGACTCCTAAAAATAGGTCAGAATATTCAATAACATCTAGTCCCGAAAACCTCTATGCTCTCAGCATCA  
TTTGAAATCCTTTCAAGTCCTCTGGCTAATAAATTGAGATTCGAGGACTT

>PGSC0003DMG400024485LRR-RLKs\_915

TCAGCATCATTGAAATCCTTTCAAGTCCTCTGGCTAATAAATTGAGATTCGAGGACTTGCTTCGAGCTCC  
AGCTGAATTGATTGAGAAAGGAAAACATGGAAGTGTTTTCAAGGTCAAT

>PGSC0003DMG400024485LRR-RLKs\_976

TTCGAGCTCCAGCTGAATTGATTGAGAAAGGAAAACATGGAAGTGTTTTCAAGGTCAATGTTGATGGAG  
TGACATTGGTAGTAAAGAGGATCAGTGGTTGGAATATTTGAAATACGATT

>PGSC0003DMG400024661-(rev)LRR-RLKs\_0

TTTGTATTA AAAAGTTTGGTTTGGTCCATTTTGCAGGCCCTCCCTTTCTGAAATTCAACTCCATTTTCCCAT  
GTTTATTCCTTGCACAGAGATATTGTTTCTGAACTACCAAACCCCT

>PGSC0003DMG400024661-(rev)LRR-RLKs\_1054

AAAAACAAGTGTAATGGCTCTCTGCCTTCGTCAATTTTCACTCAAACCTGCACCTTGCAGGTGTTGGATT  
ATCAGAAAATGGATTGTTGGAGGAGTGCCTAAAGAGATATCGAATTGT

>PGSC0003DMG400024661-(rev)LRR-RLKs\_124

TAAACATAGTAAAATACCATTTCTTTCTTGTGTTTGCACAAATTTCTATAACAACAACAACTCATCTGTCACA  
CAACAAAAAATAAATAAAAAAATAGAACAATAGTACTGGAAGAAATC

>PGSC0003DMG400024661-(rev)LRR-RLKs\_1612

ACACTTCAGGCCCTTGATCTTTCATCTAATAAGTTAACTGGCTCAATACCACCAAGTTTAGGGAAGCTAA  
GCTCACTTTTGTGGTTGATGCTTGCTAACAATTCCTGACCGGTGGAATC

>PGSC0003DMG400024661-(rev)LRR-RLKs\_1674

GAAGCTAAGCTCACTTTTGTGGTTGATGCTTGCTAACAATTCCTGACCGGTGGAATCCCACCCGAGTTG  
GGAAATTGCAGTAGCTTATTGTGGTTGAATCTTGCAACAATCAGCTTTC

>PGSC0003DMG400024661-(rev)LRR-RLKs\_186

ATCTGTCACACAACAAAAAATAAATAAAAAAATAGAACAATAGTACTGGAAGAAATCAAGATTCAAGA  
TTGAGTTATGTCAGAAGAGGAATCTGATATTCTTCTCCTGTTGTATTATT

>PGSC0003DMG400024661-(rev)LRR-RLKs\_310

TTCTTGCTTCTAATCACTACTGGTAAGTCTGAGTTTTTTTTTTTCGATTTTCAAGATTGTAICTCAGAATTCT

GATTGTTGTTTTATGAGGTTTTAGCTGATTTGTAATACTAAAGTTT

>PGSC0003DMG400024661-(rev)LRR-RLKs\_62

ATTTTCCCATGTTTATTCCTTGCACAGAGATATTGTTTCTGAACTACCAAACCCCCTTCTTAAACATAGT

AAAATACCATTTCTTTCTTGTGTTTGCACAAATTTCTATAACAACAACA

>PGSC0003DMG400024661-(rev)LRR-RLKs\_992

ACAATAACTTGACTGGAGGATTGTCATTTGGTTTTGATAAGCTTAAGGAGTTTTCGGTGTCTAAAAACAA

GTGTAATGGCTCTCTGCCTTCGTCATTTTTCACTCAAACACTGCACCTTGC

>PGSC0003DMG400024768-(rev)LRR-RLPs\_0

GATCACTTATCAATGAAAATGCATCTCCAGCACCATTCCACTTATCTTCCAATATCAACAATCCTTTCTTT

CTCTCTCTCACACACACTACTTGTCTTCTTTAACCTATGTCACACC

>PGSC0003DMG400024768-(rev)LRR-RLPs\_1159

ACATTTTCATATTTAAAGGTTTGTGTTTACTTACTATCCTTCTTTTTGATCGTAGCATATAAGGTATCTGTGTT

TGTGAAAATGTGGATTTGGTGTGTTTTCAGGTTACTAGTGTGTCACTG

>PGSC0003DMG400024768-(rev)LRR-RLPs\_122

TCGTCATAGCACCTCGGAATTTCCGATACCCACCTGAAAACATCGCCGGAGAATTAGGCATCTACCATG

ATCATCTTTGTCTGCATGACCCGGTTTGGTCTTTCTTGTACTCTTTCTTT

>PGSC0003DMG400024768-(rev)LRR-RLPs\_1342

GATGAAGGACTACATTATCTTGAAAAGGGTGCCTTCGCTTCAGGTGATTAACACGTTTGTCAAATTAT

TGTGATCAATTGTAGAAAAATATGAGATCATAGCTGCTTTTTGGAGTTTT

>PGSC0003DMG400024768-(rev)LRR-RLPs\_1403

TCAAATTATTGTGATCAATTGTAGAAAAATATGAGATCATAGCTGCTTTTTGGAGTTTTGTTCTCCTCTCT

TAAGGTGGCCTTACCATGTTGCTATCTGGTTTTTGCCGATTTTAAGAC

>PGSC0003DMG400024768-(rev)LRR-RLPs\_1464

TCTCCTCTCTTAAGGTGGCCTTACCATGTTGCTATCTGGTTTTTGCCGATTTTAAGACTGAAAATAAACC

TTGTATGCAAACACAATTGCTTCATAAATAAGCACATGTAGTTTCATTT

>PGSC0003DMG400024768-(rev)LRR-RLPs\_1525

AAAATAAACCTTGATGCAAACACAATTGCTTCATAAATAAGCACATGTAGTTTCATTTCTTATAGCTTG

TGGAATTATATTTATTTATCATAGAGTGAAGATGGGCTTAAATTTGTTT

>PGSC0003DMG400024768-(rev)LRR-RLPs\_1769



TAAAAATTTTGGAAGTTGTTATCATAAACATGCCATAACATCTATGTGGCTATAAAAAGCTTCTTGTTGAGT  
GTAGAATGAGAAGTTTTACGTTAAAGTTAGTTCAATTGGCAAAGGTTGA

>PGSC0003DMG400024768-(rev)LRR-RLPs\_1952

GCTCCATATGGATTTCTCAGTCACTAAAAAATTATATCCAAATATAGATATGTGCCATTCTTTTTGGAAT  
AGACACATACGAAAGTATTGTCACATAAAAGGAATAGAGTGAATGACTC

>PGSC0003DMG400024768-(rev)LRR-RLPs\_2013

TTTTTGGAATAGACACATACGAAAGTATTGTCACATAAAAGGAATAGAGTGAATGACTCGTTTCAGGTG  
TCATGGTTGGAATTTGAGACAGTTAGTGCATATGACATTTTCCTGATGACC

>PGSC0003DMG400024768-(rev)LRR-RLPs\_2074

TTCAGGTGTCATGGTTGGAATTTGAGACAGTTAGTGCATATGACATTTTCCTGATGACCAAATTATGCAG  
TAAGCACATGAATCTGGAATACAGGAAATACTTAATGGAAAATATGATTT

>PGSC0003DMG400024768-(rev)LRR-RLPs\_2135

ATTATGCAGTAAGCACATGAATCTGGAATACAGGAAATACTTAATGGAAAATATGATTTATGGCTGGTG  
ATATTTCTGGTATTCTGACTGTAGGCGAACAAAGGCATCACTTGATGCTG

>PGSC0003DMG400024768-(rev)LRR-RLPs\_2196

GGCTGGTGATATTTCTGGTATTCTGACTGTAGGCGAACAAAGGCATCACTTGATGCTGCATGATCTAGT  
TCTGATCCTTCTTATCTATCTATCTATTTGTACTTTTTATGAATCCCAC

>PGSC0003DMG400024768-(rev)LRR-RLPs\_2379

TATATTTATAGTGAAAACAATTTTCTATCCATGAATATCTGAAATTAGTATTCTAAAGCTCAAGCTTTAG  
CATTTTATGTGGCGTACATAAGTTTCTTGGGTTGCCATAACTATTCAGA

>PGSC0003DMG400024768-(rev)LRR-RLPs\_2440

CAAGCTTTAGCATTTTATGTGGCGTACATAAGTTTCTTGGGTTGCCATAACTATTCAGAACTTGTATGTT  
TACAGGCACTGGATGTATCAAGGTGTGACAGACTAAGCTCATCTGCCTT

>PGSC0003DMG400024768-(rev)LRR-RLPs\_3233

CCCTCGTCTCATCTGGATTCTATTTCCATTTTTATATTCTTCAAGTTTTGGGCTTTTGAGTTGGCTTCCCATT  
TCTCAAGAGCAAGACATCTAATTTTCTTCTTTAATGACATGTGAAG

>PGSC0003DMG400024768-(rev)LRR-RLPs\_3294

TGGCTTCCCATTCTCAAGAGCAAGACATCTAATTTTCTTCTTTAATGACATGTGAAGCTTTGTGCATTCA  
TGTCTCAAAGCTCCTCGTGTCAAGTCTTCGATGATATGGTTACTCCAA

>PGSC0003DMG400024768-(rev)LRR-RLPs\_3355

TTGTGCATTCATGTCTCAAAGCTCCTCGTGTCAAGTCTTCGATGATATGGTACTCCAAAACCTGTGCAGT  
TGGTGACATACCTTTAAATTAAGCATTTCAGCTAGGAATTCAGCTATG

>PGSC0003DMG400024768-(rev)LRR-RLPs\_3416

CTTGTGCAGTTGGTGACATACCTTTAAATTAAGCATTTCAGCTAGGAATTCAGCTATGCTTTAGGTCTGC  
GCTAATATGTGTTGCATCTCATCTCTTCTGCAGGACTTTATTACCTGTC

>PGSC0003DMG400024768-(rev)LRR-RLPs\_3477

TTAGGTCTGCGCTAATATGTGTTGCATCTCATCTCTTCTGCAGGACTTTATTACCTGTCTAAATGTACAAA  
GCTTATATGCCTAAAGTTGGGATTATGTACTAACATTACTGACAAGGGA

>PGSC0003DMG400024768-(rev)LRR-RLPs\_366

TTGACTAGTTGAGTTTTTTTTTTGTTTTTTACAGAGTATTCAAGATTTGTATGTCAGCGTATTGAATGTTA  
AACGGATTCAAATGGGCTTAAAGGAGTAGTTAGAATTCATTTAATTTA

>PGSC0003DMG400024768-(rev)LRR-RLPs\_4087

GCTTGGCATGTACTTTCTGCATTACCAGTTGATTGTAATGGTTAAATAACTATACACCTTTGATCAGTTT  
TTATCATTTCTCGAAATCCTGAGAACAGTAATTGAGTTGTAATCCTTTT

>PGSC0003DMG400024768-(rev)LRR-RLPs\_4209

AAAATTTTGTTCGATACAACATAACTCTCTTCTTGGTCCACAATTACATTTATATAAGTGCCAGGAATTT  
ATTTTTGTAGAAGTTATCAGCAACTCTGTAACCTCTGATTTAGTTGCT

>PGSC0003DMG400024768-(rev)LRR-RLPs\_4270

GCCAGGAATTTATTTTTGTAGAAGTTATCAGCAACTCTGTAACCTCTGATTTAGTTGCTACAAGAGTCCGT  
GCTCCTTTTATGTTATCAGCTCACTTTTGAGAGTCTAACAAAACCTTTCC

>PGSC0003DMG400024768-(rev)LRR-RLPs\_4331

AAGAGTCCGTGCTCCTTTTATGTTATCAGCTCACTTTTGAGAGTCTAACAAAACCTTTCCGTGATAAATTAG  
GTTTTAAATACTTCAACAGATTTTTGGCCTCAAGTCTTTCATAAACTG

>PGSC0003DMG400024768-(rev)LRR-RLPs\_4392

GATAAATTAGGTTTTAAATACTTCAACAGATTTTTGGCCTCAAGTCTTTCATAAACTGAATCAGTTTTTA  
TAAAAGACTGTTTGTGGGATCAAGCAGTCCTGGTTTTCTTTTTGTTT

>PGSC0003DMG400024768-(rev)LRR-RLPs\_4453

TCAGTTTTTATAAAAAGACTGTTTGTGGGATCAAGCAGTCCTGGTTTTCTTTTTGTTCAAAGTTCAAAT

AGCATAGTAATCTTGGCGGTGCATAATGGTTCAAGTTTCACTAGTAGAT

>PGSC0003DMG400024768-(rev)LRR-RLPs\_4514

AGTTCAAATAGCATAGTAATCTTGGCGGTGCATAATGGTTCAAGTTTCACTAGTAGATTTTCTAGATTA

CTCTTTTTGTATAATTTTCTGGACCCATGATAAGATATGTTAGAATTATG

>PGSC0003DMG400024768-(rev)LRR-RLPs\_4575

TCTAGATTACTCTTTTTGTATAATTTTCTGGACCCATGATAAGATATGTTAGAATTATGTTTCTCGCAACTA

TATCCACTTTGTTGCCTTTGGACTTAGTAGGCCATTCATCAGGATTGA

>PGSC0003DMG400024768-(rev)LRR-RLPs\_4636

TCTCGCAACTATATCCACTTTGTTGCCTTTGGACTTAGTAGGCCATTCATCAGGATTGAGAATTATCATT

CACTATATGCACCACACTGAAAGGACTCTGAATGTTGCATTAACCCTAA

>PGSC0003DMG400024768-(rev)LRR-RLPs\_4697

ATTATCATTTCACTATATGCACCACACTGAAAGGACTCTGAATGTTGCATTAACCCTAATCAACTGGTCAA

TTCTTGTTTGTAAATGCTTAAAAAGTTCAGAATACCCCTACTTTTTGGAT

>PGSC0003DMG400024768-(rev)LRR-RLPs\_4758

AACTGGTCAATTCTTGTGTTGTAATGCTTAAAAAGTTCAGAATACCCCTACTTTTTGGATATCAATCACAGT

TTTTGCAAATTATCGACAACGTTTTGACTGATCAAACCTTGATATTGAG

>PGSC0003DMG400024768-(rev)LRR-RLPs\_4819

CAATCACAGTTTTTGCAAATTATCGACAACGTTTTGACTGATCAAACCTTGATATTGAGTTTACCAACTCA

AATAATCGACATATACTTACTCCATTTCCCCTTAAAGGTTTATTAGC

>PGSC0003DMG400024768-(rev)LRR-RLPs\_4880

TACCAACTCAAATAATCGACATATACTTACTCCATTTCCCCTTAAAGGTTTATTAGCGTCAGATATGTC

AGGTCACTTAATATTCTTACCAGCAACAGTGTGTACTGTGTATGAACAG

>PGSC0003DMG400024768-(rev)LRR-RLPs\_4941

CAGATATGTCAGGTCACTTAATATTCTTACCAGCAACAGTGTGTACTGTGTATGAACAGGTAGTGATCGT

ACTTGAACTTTTGAGTTGATTTTTTTTTCTGCATACTCATGAGGTGTCAA

>PGSC0003DMG400024768-(rev)LRR-RLPs\_5002

AGTGATCGTACTTGAACTTTTGAGTTGATTTTTTTTTCTGCATACTCATGAGGTGTCAAATTGAGACCATC

TGAGGATTAACTATATTTTTTCAATATCAATTAAAGGACAAAAGGAATC

>PGSC0003DMG400024768-(rev)LRR-RLPs\_5246

TTTTACCATTTTAGTCTTGTTAGTAGGTTGACTTTGAACCTAGTGCTTTTCTGGAGTATTTTGATCTTACCA  
TAAATTTATATGTCAGTCAAAATATAGAGAACTTTCAATATTAGTGTT

>PGSC0003DMG400024768-(rev)LRR-RLPs\_5307

TGATCTTACCATAAATTTATATGTCAGTCAAAATATAGAGAACTTTCAATATTAGTGTTACTATTATTATA  
TATTTAACTCATTTTCAAAAAAATATTATTTGGTATGATGATGACATG

>PGSC0003DMG400024768-(rev)LRR-RLPs\_5490

GAATTGAGGCATAGTTGTTGATGTTGTTGTAATAAAAGGACAAGTTTCAACCATGACGTCTGTTTTAAC  
ACCTTTCTCACAGGCATCTGTATGATGGTTACTACACTTTTCAATCAGAT

>PGSC0003DMG400024768-(rev)LRR-RLPs\_5551

TGTTTTAACACCTTTCTCACAGGCATCTGTATGATGGTTACTACACTTTTCAATCAGATCATCAGTTAGAA  
TCATGTCACTGTTTCTTGACAAAAGCTGTGGCATAATTATTTTTTTTAA

>PGSC0003DMG400024768-(rev)LRR-RLPs\_5612

TCAGTTAGAATCATGTCACTGTTTCTTGACAAAAGCTGTGGCATAATTATTTTTTTTAAAATTTTGATTCCA  
CACTCGACTTGAAAGTTGTAACATGCTTGGTTGAATTTTATAATTGTT

>PGSC0003DMG400024768-(rev)LRR-RLPs\_5673

TTTTGATTCCACACTCGACTTGAAAGTTGTAACATGCTTGGTTGAATTTTATAATTGTTGTCTGTTCAAGA  
ATCAGATGTACTTGACAGTGCATTTGTTTAGTAGATCTCTGAAATGAGC

>PGSC0003DMG400024768-(rev)LRR-RLPs\_5734

CTGTTCAAGAATCAGATGTACTTGACAGTGCATTTGTTTAGTAGATCTCTGAAATGAGCATTTCATCAGAT  
CTATTGATTGCCTTGCTATTGCTCTATGCTTTTACGGTTTAATGAACAAT

>PGSC0003DMG400024768-(rev)LRR-RLPs\_5795

TCATCAGATCTATTGATTGCCTTGCTATTGCTCTATGCTTTTACGGTTTAATGAACAATCTCTTATGAGTTT  
AACTGGGTTATATACTTGTTTAAGTTGGTCAAGTTGACTGAGTTCAAA

>PGSC0003DMG400024768-(rev)LRR-RLPs\_5856

CTTATGAGTTTAACTGGGTTATATACTTGTTTAAGTTGGTCAAGTTGACTGAGTTCAAAATGAAGGTCAT  
AACTCATAATCATTAAAGTGAATACAAACATTTTGCCGTATAAAAAAAAAA

>PGSC0003DMG400024768-(rev)LRR-RLPs\_5917

GAAGGTCATAACTCATAATCATTAAAGTGAATACAAACATTTTGCCGTATAAAAAAAAAAATACAGACATT  
TTCATGTCAATTTCACTAAGTTCTACTAGCCGGAATTGACTCAGTTTGTG

>PGSC0003DMG400024768-(rev)LRR-RLPs\_5978

ACAGACATTTTCATGTCAATTTCACTAAGTTCTACTAGCCGGAATTGACTCAGTTTGTGCAAGTATGGTTA  
AATTCATTTGTGAGTAGATGCATGTAGCTGTTGTTGGCACCCCTTGATGC

>PGSC0003DMG400024768-(rev)LRR-RLPs\_6039

AGTATGGTTAAATTCATTTGTGAGTAGATGCATGTAGCTGTTGTTGGCACCCCTTGATGCTTGCTATGCAT  
TGAGACTTGGTTATGTTATGCATGCAGTAGTATAAGCAGCAGATTTTCTT

>PGSC0003DMG400024768-(rev)LRR-RLPs\_61

ATCCTTTCTTTCTCTCTCTCACACACACTACTTGTCTTCTTTAACCTATGTCACACCTGTCGTCATAGCAC  
CTCGGAATTTCCGATACCCACCTGAAAAACATCGCCGGAGAATTAGG

>PGSC0003DMG400024768-(rev)LRR-RLPs\_6100

GCTATGCATTGAGACTTGGTTATGTTATGCATGCAGTAGTATAAGCAGCAGATTTTCTTCTAGATTTTTGT  
TGTTATTCCTCATGTATTCTAAATAAAGTACATTTTGTGCGATTTCATG

>PGSC0003DMG400024768-(rev)LRR-RLPs\_6161

AGATTTTTGTTGTTATTCTCATGTATTCTAAATAAAGTACATTTTGTGCGATTTCATGCCATTCTTGTGTC  
CTTGAATACCTAAATGGGAATAGAGAGGCTTATGAATTTGTCTACAAC

>PGSC0003DMG400024768-(rev)LRR-RLPs\_6222

ATTCTTGTGTCCTTGAATACCTAAATGGGAATAGAGAGGCTTATGAATTTGTCTACAACCTGCTGAAATAA  
GTCCTTTGATGGCAGATTAATCTGAGTCATTGTGCAATCTCGGATGTGGGC

>PGSC0003DMG400024768-(rev)LRR-RLPs\_6283

CTGAAATAAGTCTTTGATGGCAGATTAATCTGAGTCATTGTGCAATCTCGGATGTGGGCCTGTGCATGGT  
GATGGGGAACTTGACACGGTTGCAGGATGCCAAGCTCGTAAACCTTTACA

>PGSC0003DMG400024768-(rev)LRR-RLPs\_6344

GTGCATGGTGATGGGGAACCTTGACACGGTTGCAGGATGCCAAGCTCGTAAACCTTTACAACGTGTCAAC  
CAATGGCTTTGAGGTTGCTCTTCGGGCTTCCCGTGTTCCGGCTGAAAAAAGT

>PGSC0003DMG400024768-(rev)LRR-RLPs\_6405

GTGTCAACCAATGGCTTTGAGGTTGCTCTTCGGGCTTCCCGTGTTCCGGCTGAAAAAAGTTAAGTTGATTG  
CCTCCCTGAGACTACATCTTACGCCGGACGTAGTTAAGACATTGAAGGCA

>PGSC0003DMG400024768-(rev)LRR-RLPs\_6466

AGTTGATTGCCTCCCTGAGACTACATCTTACGCCGGACGTAGTTAAGACATTGAAGGCAAGAGGTTGCA

GGATTAGGTGGGATTA AAAAGGTACAATATCCCAACAGTACATGCCAATGTG

>PGSC0003DMG400024768-(rev)LRR-RLPs\_6527

AGGTTGCAGGATTAGGTGGGATTA AAAAGGTACAATATCCCAACAGTACATGCCAATGTGTGTTACCATA  
CCCCCCCCTTACATGAATGGGGTACTACCAATACATTTGAGCTGTTGAAC

>PGSC0003DMG400024768-(rev)LRR-RLPs\_6588

TTACCATACCCCCCTTACATGAATGGGGTACTACCAATACATTTGAGCTGTTGAACCTAAACTTCTC  
CCATTACATCAGTAAGCAGAAATTTCCATCATGTTGTTTTTGTAAGTC

>PGSC0003DMG400024768-(rev)LRR-RLPs\_6649

AAAACTTCTCCATTACATCAGTAAGCAGAAATTTCCATCATGTTGTTTTTGTAAGTCCACCGAAGAGAT  
TTTGC GCGACTCTTCACTTGTGTGGACTCATTGTATAAACTTCTTATGT

>PGSC0003DMG400024768-(rev)LRR-RLPs\_6710

CCGAAGAGATTTTGC GCGACTCTTCACTTGTGTGGACTCATTGTATAAACTTCTTATGTACCTTTGCAGTC  
TGGAGATCAACTATATGAATGATAAAACATCATATCAGAGGATCTCTAA

>PGSC0003DMG400024768-(rev)LRR-RLPs\_6771

CTTTGCAGTCTGGAGATCAACTATATGAATGATAAAACATCATATCAGAGGATCTCTAAAGTTAATGGCA  
GAGAATATCTTCTTATTAATCCCTTTGCCATTTTGC GCGCTGCTTCTTGAG

>PGSC0003DMG400024768-(rev)LRR-RLPs\_793

TTTCCATGCTGGTGGGTTATGGGTTGCCGATTGGAGTAGGAGGTTGAGGAGGTTGGTGTCTGAGTCGA  
ACCACTGGGTTGAAATCAGCCGGGTTAGAGATTCTTATGAAGTCTTGTCTCTG

>PGSC0003DMG400024795LRR-RLKs\_122

TTACATAAAATTCTGCAAGAATTTAACTGTTGTGCATTTCCAACACCAGCAAACCATGATAAAGAAATCA  
TTGCAGATAACCTCTTATGACTACATTTGGTGCAAAAAAGAAAAGTAAA

>PGSC0003DMG400024795LRR-RLKs\_183

AAGAAATCATTGCAGATAACCTCTTATGACTACATTTGGTGCAAAAAAGAAAAGTAAAAGTACA  
GTAGATCAGAGAGTACATACACACCCTCATTGTCATCATAATCATAATCAT

>PGSC0003DMG400024795LRR-RLKs\_244

GAAGTACAGTAGATCAGAGAGTACATACACACCCTCATTGTCATCATAATCATAATCATGTCAGGCAAAC  
TAACAGTCATCTTATTCTTCTTGTCTCAACATATCTTTTTTATTCCCA

>PGSC0003DMG400024795LRR-RLKs\_61

TGAAGACAGATATATTTGGAGGAAAATCAAGATTTCTGAAAATTCCATTTGTTTCTTTCTTTTACATAAAA  
TTCTGCAAGAATTTAACTGTTGTGCATTTCCAACACCAGCAAACCATGA

>PGSC0003DMG400024795LRR-RLKs\_671

GGATTTTGGATCTCAGTTTCAACGCTCTAACAGGAAGTATTCCGCCTGAAATAGGAAGATTATCACAGCT  
AAAGCAACTTTTGTGAGTTCTAATTTCTTTGAAGGTCAGATACCAAAGG

>PGSC0003DMG400024795LRR-RLKs\_732

ATCACAGCTAAAGCAACTTTTGTGAGTTCTAATTTCTTTGAAGGTCAGATACCAAAGGAGATAGGAAG  
ATGTTCTGAATTGCAGCAGCTTGAGCTCTTTGACAATCAGTTTTCTGGAAA

>PGSC0003DMG400024857-(rev)LRR-RLPs\_0

GTTACTTTCCCTCCCAATGAAACAAAACCTCCCTTTTCCCCTAGAAATACTGATCAATACATACTACTAT  
ACATTCAAGTCTATCTCTTTTTTTTCTACTCACCTCTCTGTATTTTT

>PGSC0003DMG400024857-(rev)LRR-RLPs\_1037

GAGTGCCAAGACTTGGATGAGCAAAGCTAAGTTGAAAAGCTTGCCTTGCCTGGCATCAAGGGATTG  
GGGGAAATGAGGAGATTAGAGAGATTAGGATAGTGATTCAACAGCCTTAATC

>PGSC0003DMG400024857-(rev)LRR-RLPs\_1098

GGATTTGGGGGAAATGAGGAGATTAGAGAGATTAGGATAGTGATTCAACAGCCTTAATCCCATAGGTC  
TTATCACATGTGTTTGTATCTGAGATGCCCTAAATATGAAATATGGTCATAG

>PGSC0003DMG400024857-(rev)LRR-RLPs\_1159

ATAGGTCTTATCACATGTGTTTGTATCTGAGATGCCCTAAATATGAAATATGGTCATAGCATAATGGTTA  
TTGTTCTGCTTTGTGGCTAAATTTACCCTTTTTTCTATGTGCTTCATCC

>PGSC0003DMG400024857-(rev)LRR-RLPs\_122

TTGAAACAGCAACAAGAAGATACCCTTTTTGGGCTTTTCTTCTTTGTTTTGTGTATATATAGAGGTAGGA  
GTTTGTGGGGGTGTAAAAAGATTACAACCTTTGAGTAGTGCCAAATGTTA

>PGSC0003DMG400024857-(rev)LRR-RLPs\_1220

TAATGGTTATTGTTCTGCTTTGTGGCTAAATTTACCCTTTTTTCTATGTGCTTCATCCTGGACATCTGGAA  
GTTAATATCTATGTTTTAGTGCTCAGAAGCATTGGACCTGAGAAGATA

>PGSC0003DMG400024857-(rev)LRR-RLPs\_1281

GACATCTGGAAGTTAATATCTATGTTTTAGTGCTCAGAAGCATTGGACCTGAGAAGATATAACTTGCATA  
TGATTGTGCATTTGCCTTTATTTTATATTTTCTTTACTTTTTGAGGAC

>PGSC0003DMG400024857-(rev)LRR-RLPs\_1342

ACTTGCATATGATTGTGCATTTGCCTTTATTTTATATTTTTCTTTACTTTTTGAGGACTTATTCACATGTTG  
GTTCTTGCTTGCATTTTCTGGATTTGTAGTGTGGTTTTTCACCCTC

>PGSC0003DMG400024857-(rev)LRR-RLPs\_1403

ATTCACATGTTGGTTCTTGCTTGCATTTTCTGGATTTGTAGTGTGGTTTTTCACCCTCTCCTGCTATTAGA  
ATTTGATTGTATTTCCCTATCTTGCTGGTATTAGTAATCTGAGAGTTG

>PGSC0003DMG400024857-(rev)LRR-RLPs\_1464

CTGCTATTAGAATTTGATTGTATTTCCCTATCTTGCTGGTATTAGTAATCTGAGAGTTGATATTCTATGGA  
ATTGAGTACATAGATATTTGTGAGTTATCTTTCCCTTGTTGATTTGTGG

>PGSC0003DMG400024857-(rev)LRR-RLPs\_1525

ATTCTATGGAATTGAGTACATAGATATTTGTGAGTTATCTTTCCCTTGTTGATTTGTGGTGTATATCGGT  
TTCTAAGCTTTTTTGTCCCCTCAGGTGCAAGAGGAATATGAACAATTTA

>PGSC0003DMG400024857-(rev)LRR-RLPs\_1586

TTATATCGGTTTCTAAGCTTTTTTGTCCCCTCAGGTGCAAGAGGAATATGAACAATTTAGTGCTGACACTT  
GCCCCAAGTTCACGAAGCTGCAGGTTCTAACTCTTAGACAAGATTTAC

>PGSC0003DMG400024857-(rev)LRR-RLPs\_1647

GCTGACACTTGCCCCAAGTTCACGAAGCTGCAGGTTCTAACTCTTAGACAAGATTTACCACAACCTTGAG  
GATGTTGGTGTGAGACAATTGCCAATCACTGTCATGAATTGCAAGACCT

>PGSC0003DMG400024857-(rev)LRR-RLPs\_1708

CAACTTGAGGATGTTGGTGTGAGACAATTGCCAATCACTGTCATGAATTGCAAGACCTTGATCTTAGCA  
AGAGTTTTAAGCTAACTGATCGTTCCCTTTATGCTTTAGCTCACGGCTGT

>PGSC0003DMG400024857-(rev)LRR-RLPs\_1769

ATCTTAGCAAGAGTTTTAAGCTAACTGATCGTTCCCTTTATGCTTTAGCTCACGGCTGTCCAAACCTCACA  
AAGCTGAATATCAGTGGGTGTTCTGCTTTAGTGATAGCGCTGTTGCAT

>PGSC0003DMG400024857-(rev)LRR-RLPs\_183

AGAGGTAGGAGTTTGTGGGGGTGTA AAAAGATTACA ACTTTGAGTAGTGCCAAATGTTAGGGGTAGAA  
GATTTGAGCTTGACAAGCTGTTTGTGAACAATAGTAGCAGAGGTGGGGTTT

>PGSC0003DMG400024857-(rev)LRR-RLPs\_1830

AAACCTCACAAGCTGAATATCAGTGGGTGTTCTGCTTTAGTGATAGCGCTGTTGCATACCTAGCTGAG



CATTGCCGAAACCTAAGAGTCTTAAACCTTTGTGGTTGTGTTAAAGCTGC

>PGSC0003DMG400024857-(rev)LRR-RLPs\_1891

CTAGCTGAGCATTGCCGAAACCTAAGAGTCTTAAACCTTTGTGGTTGTGTTAAAGCTGCAACTGATAAGG

CATTGAAGGTATATGTCTTGTCTCTCAAATGACCTGTAGGAGTACTAAA

>PGSC0003DMG400024857-(rev)LRR-RLPs\_1952

CTGATAAGGCATTGAAGGTATATGTCTTGTCTCTCAAATGACCTGTAGGAGTACTAAACCGTTGTTTCTT

CGAACTTATATGACTCATATTACTCCTTGCAGGCTATTGGTTACTACTG

>PGSC0003DMG400024857-(rev)LRR-RLPs\_2013

GTTGTTTCTTCGAACTTATATGACTCATATTACTCCTTGCAGGCTATTGGTTACTACTGTAACCGACTGCA

GACTGTAAATCTTGGTTGGTGTGATAAAGTTGGTGATGAAGGTGTAATG

>PGSC0003DMG400024857-(rev)LRR-RLPs\_2074

ACCGACTGCAGACTGTAAATCTTGGTTGGTGTGATAAAGTTGGTGATGAAGGTGTAATGAGTTTGGCTT

ATGGGTGTCCTGATCTCAGAGCCCTCGATCTGTGTGGCTGTGTCCTTATAA

>PGSC0003DMG400024857-(rev)LRR-RLPs\_2135

TTTGGCTTATGGGTGTCCTGATCTCAGAGCCCTCGATCTGTGTGGCTGTGTCCTTATAACAGGTAAAACA

TGTATCTGGTTAGGTTTTGTATTTAATGTCTTCCCTTAGCAGTGGTATGT

>PGSC0003DMG400024857-(rev)LRR-RLPs\_2196

GGTAAAACATGTATCTGGTTAGGTTTTGTATTTAATGTCTTCCCTTAGCAGTGGTATGTTTACTACCAAAG

AGTCTTAAAAGTACTCGGATTTGCCATGCTTATTAGGGCATAAGTTGT

>PGSC0003DMG400024857-(rev)LRR-RLPs\_2257

ACTACCAAAGAGTCTTAAAAGTACTCGGATTTGCCATGCTTATTAGGGCATAAGTTGTATTCTAGAAAT

TTTATGCAAAAAAATCTTACCAAAGAAGACGAACTTATTTATTTCTAT

>PGSC0003DMG400024857-(rev)LRR-RLPs\_2318

TCTAGAAATTTTATGCAAAAAAATCTTACCAAAGAAGACGAACTTATTTATTTCTATTAGTAACTAACT

AGAAGGAGATATTCATGCAAGATATTTTCTTCTAGGAAATGAAAAGTGG

>PGSC0003DMG400024857-(rev)LRR-RLPs\_2379

GTAACAACTAGAAGGAGATATTCATGCAAGATATTTTCTTCTAGGAAATGAAAAGTGGAAACATGATTTT

GATGTATACGAGGGATATGAAGGACCTTACTTTAGATTTTATATCAAATA

>PGSC0003DMG400024857-(rev)LRR-RLPs\_244

GGTAGAAGATTTGAGCTTGGACAAGCTGTTTGTGAACAATAGTAGCAGAGGTGGGGTTTGTAAAATGG  
GGGGTGGGGTGATGATGATGGGAGAGTGAAGGATATACCTATGGAGTTGTT

>PGSC0003DMG400024857-(rev)LRR-RLPs\_2440

CATGATTTTGATGTATACGAGGGATATGAAGGACCTTACTTTAGATTTTATATCAAATAAACTCCTATGG  
CTATTTGTGGTGTCTGAAATGAATGATGAAATGCATATTAGACGGTAGAA

>PGSC0003DMG400024857-(rev)LRR-RLPs\_2501

CTCCTATGGCTATTTGTGGTGTCTGAAATGAATGATGAAATGCATATTAGACGGTAGAACTGAGCTTTTT  
TTCTTTGGGGGAGTGTCCAAATTTATGAAGTCTGCCTCAGCCGACTGATT

>PGSC0003DMG400024857-(rev)LRR-RLPs\_2562

GAGCTTTTTTTCTTTGGGGGAGTGTCCAAATTTATGAAGTCTGCCTCAGCCGACTGATTATTAGATGTCTC  
CTATATTTCTCTGTGTGGATGCTTTTGTATGAAATTTTATGATCATTG

>PGSC0003DMG400024857-(rev)LRR-RLPs\_2623

TAGATGTCTCTATATTTCTCTGTGTGGATGCTTTTGTATGAAATTTTATGATCATTGCTCTCGACCTGTT  
AGAGCAATGGCTACAAGATAGCAGTGTCTAAGTAGTTTAGAGGTCTG

>PGSC0003DMG400024857-(rev)LRR-RLPs\_2684

CTCGACCTGTTAGAGCAATGGCTACAAGATAGCAGTGTCTAAGTAGTTTAGAGGTCTGTGTTTCCTCTC  
GTTGGCTTGTGAGTGTACTCACACCTATGTTCTACTGCCTACTTCTTGA

>PGSC0003DMG400024857-(rev)LRR-RLPs\_2745

TTTCCTCTCGTTGGCTTGTGAGTGTACTCACACCTATGTTCTACTGCCTACTTCTTGATGGGCTATTAGTG  
TTTCCTTTTTCTACTGAAGTTTGAGATAAAGTTGCTGATGTCTCCAAC

>PGSC0003DMG400024857-(rev)LRR-RLPs\_2806

GGCTATTAGTGTTCCTTTTTCTACTGAAGTTTGAGATAAAGTTGCTGATGTCTCCAACCTGGATTCATTTT  
CTTGGTTTAGTCATCCATTTAACATAGCTATTATCTAATGCCTGCAGA

>PGSC0003DMG400024857-(rev)LRR-RLPs\_2867

GATTCATTTTTCTTGTTTAGTCATCCATTTAACATAGCTATTATCTAATGCCTGCAGATGAGACTGTGAT  
TGCTTTGGCAAACAATTGCACTCACTTGAGATCCCTCGGCCTATACTTC

>PGSC0003DMG400024857-(rev)LRR-RLPs\_2928

AGACTGTGATTGCTTTGGCAAACAATTGCACTCACTTGAGATCCCTCGGCCTATACTTCTGTGAGTACATC  
ACAGATAGGGCAATGTACTCTAGCTCAGAGTCGGGTCAAGAACAAGC

>PGSC0003DMG400024857-(rev)LRR-RLPs\_2989

TCAGTACATCACAGATAGGGCAATGTACTCTCTAGCTCAGAGTCGGGTCAAGAACAAGCACGAGATGTG  
GGCATCTATGAAGAAGCACAGGTACGAGGACGAAGGGCTTATGAATCTAAA

>PGSC0003DMG400024857-(rev)LRR-RLPs\_305

AAAATGGGGGGTGGGGTGATGATGATGGGAGAGTGGAAGGATATACCTATGGAGTTGTTGTTGAGGA  
TTGCTTCACTTGTGGATGATCGGACGGTGATTGTGGCTTCTGGTGTGTTGTAGT

>PGSC0003DMG400024857-(rev)LRR-RLPs\_3050

GAGATGTGGGCATCTATGAAGAAGCACAGGTACGAGGACGAAGGGCTTATGAATCTAAACATCAGCCA  
ATGCACTGCTCTCACACCTCCCGCCGTTCAAGCAGTATGCGAAGCATTTCCT

>PGSC0003DMG400024857-(rev)LRR-RLPs\_3111

TCAGCCAATGCACTGCTCTCACACCTCCCGCCGTTCAAGCAGTATGCGAAGCATTTCCTGCTCTGCACAC  
ATGCCCTGAGCGACATTCCCTCATCATTAGCGGATGCCTGAACTTAACAT

>PGSC0003DMG400024857-(rev)LRR-RLPs\_3172

TCTGCACACATGCCCTGAGCGACATTCCCTCATCATTAGCGGATGCCTGAACTTAACATCAGTGCACTGC  
GCCTGCTCTGTCCAAGCTCACCGTGCGCGTGTCTCCATCCAGCTCACTG

>PGSC0003DMG400024857-(rev)LRR-RLPs\_3233

GTGCACTGCGCCTGCTCTGTCCAAGCTCACCGTGCGCGTGTCTCCATCCAGCTCACTGAGTGTCTATG  
GAGGAGAAGTTGCCAAGTTTTTTTTTTTTGAGAATGGTAAAGAGAAAAGT

>PGSC0003DMG400024857-(rev)LRR-RLPs\_3294

TGTTCTATGGAGGAGAAGTTGCCAAGTTTTTTTTTTTTGAGAATGGTAAAGAGAAAAGTTGCCAAGTTTC  
GAAGCCGTCATAGAGGGAGAGAAGAAAAATAGGGTGAGAAGGTTGAAACG

>PGSC0003DMG400024857-(rev)LRR-RLPs\_3355

CCAAGTTTCGAAGCCGTCATAGAGGGAGAGAAGAAAAATAGGGTGAGAAGGTTGAAACGCCCTTGAC  
ATATTTGTTTGTGAAAAAACTATGCTGGACAATCTAGGCTGTTTAAGCCAAA

>PGSC0003DMG400024857-(rev)LRR-RLPs\_3416

CTTGACATATTTGTTTGTGAAAAAACTATGCTGGACAATCTAGGCTGTTTAAGCCAAACAGGTTCTGTTT  
GTTTAATCTGTTGGACTGAGAACTTGTTGGTTTATGTCAAAACTCTTAA

>PGSC0003DMG400024857-(rev)LRR-RLPs\_3477

GGTTCTGTTTGTGTTAATCTGTTGGACTGAGAACTTGTTGGTTTATGTCAAAACTCTTAAAGACTCCTTTCA

TGTGTTTTGACTATTTGGTGAAAGACATTTAATTTCTGTTTCATATTT

>PGSC0003DMG400024857-(rev)LRR-RLPs\_3518

TTATGTCAAACCTCTTAAAGACTCCTTTTCATGTGTTTTGACTATTTGGTGAAAGACATTTAATTTCTGTTT

CATATTTCACTCCTAAAATATGGAGAAATAACTTTTTAAGTGGAGAAA

>PGSC0003DMG400024857-(rev)LRR-RLPs\_366

TGAGGATTGCTTCACTTGTGGATGATCGGACGGTGATTGTGGCTTCTGGTGTGTAGTGGATGGAGAG

ATGCAATTTCTGGGGACTCACTCGTCTTTCCCTTTCTTGGTATGACTGAC

>PGSC0003DMG400024857-(rev)LRR-RLPs\_427

ATGGAGAGATGCAATTTCTTGGGGACTCACTCGTCTTTCCCTTTCTTGGTATGACTGACTTTTCTTGTTCCT

TGATTTTGATAAAATTTAAGGTTTATTTGATTGTGTGGTTTTGCTT

>PGSC0003DMG400024857-(rev)LRR-RLPs\_488

TTCTTGTTCCTTGATTTTGATAAAATTTAAGGTTTATTTGATTGTGTGGTTTTGCTTGATGTGATTGATG

AAGGGTAGTTCTTGTTCCTCATTTGTTTGATTGTAAATGGTCAGGGGA

>PGSC0003DMG400024857-(rev)LRR-RLPs\_549

TGTGATTGATGAAGGGTAGTTCTTGTTCCTCATTTGTTTGATTGTAAATGGTCAGGGGAGTCAAGTCAGC

AAAAGACTGAATTTTGTGTTCTAGAATAGTTGAAGGAAATAGGAAAAAT

>PGSC0003DMG400024857-(rev)LRR-RLPs\_61

TACACTACTATACATTCAAGTCTATCTCTTTTTTTTCTACTCACCTCTCTGTATTTTTGTTTGAAACAGCAA

CAAGAAGATACCCTTTTTGGGCTTTTCTTCTTTGTTTTGTGTATAT

>PGSC0003DMG400024857-(rev)LRR-RLPs\_610

CAAGTCAGCAAAGACTGAATTTTGTGTTCTAGAATAGTTGAAGGAAATAGGAAAAATCTACAAGTTTT

TATGTGTTGGACTATTTTGGTCCTATTTACCTTGATTAATCTATTTGAGA

>PGSC0003DMG400024857-(rev)LRR-RLPs\_671

ACAAGTTTTTATGTGTTGGACTATTTTGGTCCTATTTACCTTGATTAATCTATTTGAGATGTCATGTATGAT

TGATCAACTGGAGGAACACACATGAGGTTTTTATTGTTTACTTTCTTG

>PGSC0003DMG400024857-(rev)LRR-RLPs\_732

TCATGTATGATTGATCAACTGGAGGAACACACATGAGGTTTTTATTGTTTACTTTCTTGGAGGAAGGGTT

TGTAAATGTTGTTGAATAAAGCTTTGAGTTTGGAACTAAGGTTAGATGTT

>PGSC0003DMG400024857-(rev)LRR-RLPs\_793

GGAAGGGTTTGTAATGTTGTTGAATAAAGCTTTGAGTTTGGAACCTAAGGTTAGATGTTAAAAGGGGAA  
TCATAGTAGCTCAGTGGATTGACTACCTGAACTTTTTATCTCGTTGGTGA

>PGSC0003DMG400024857-(rev)LRR-RLPs\_854

AAGGGGAATCATAGTAGCTCAGTGGATTGACTACCTGAACTTTTTATCTCGTTGGTGAGGGTATGAGTC  
CCCACCTGTAAACCCCTTCTCCTTACCCTACCCCGGTTTTGTTCTTTTG

>PGSC0003DMG400024857-(rev)LRR-RLPs\_915

GTATGAGTCCCCACCTGTAAACCCCTTCTCCTTACCCTACCCCGGTTTTGTTCTTTTGAAAAGGTTAGAT  
TTTTTATGTTAAAAGGGGTTGACTGAAGATTTTTTCCAATTTGGATTT

>PGSC0003DMG400024857-(rev)LRR-RLPs\_976

AAAGGTTAGATTTTTTATGTTAAAAGGGGTTGACTGAAGATTTTTTCCAATTTGGATTTGTGAGTGCCAA  
GACTTGGATGAGCAAAGCTAAGTTGAAAAGCTTGCCTTGCCTGGCATCA

>PGSC0003DMG400024890LRR-RLKs\_1830

GTCAAAATTTTCTTCTGGTGAAATCCCCCTGAAATAGGCAATTGTGTCCACTTGACTTATCTAGACTTG  
AGCCAGAACAACCTTCTCTGGCTCAATCCACCTCGAGTATCCGAAATTC

>PGSC0003DMG400024890LRR-RLKs\_2806

AAAATTCTTGGTAGATGGTGGTGCCTCAGAATGCATGTCTGCTGTTGCTGGCTCCTATGGTTACATTGCC  
CCTGGTACACTTTTAACTTTTACTCACACATTCTCAATAATCAATCG

>PGSC0003DMG400024890LRR-RLKs\_2867

TACATTGCCCTGGTACACTTTTAACTTTTACTCACACATTCTCAATAATCAATCGTTCATATTAAGTG  
AAATTAATAACCTCGAAAGATAAAAATACAACCTGGTACAACATGTCAA

>PGSC0003DMG400024890LRR-RLKs\_2928

CATATTAAGTGAAATTAATAACCTCGAAAGATAAAAATACAACCTGGTACAACATGTCAAAATACACATTG  
TATAGAGGGGACAATTATTGTGTA AAAATCATATATGTACGTTGGTTAGT

>PGSC0003DMG400024890LRR-RLKs\_2989

TACACATTGTATAGAGGGGACAATTATTGTGTA AAAATCATATATGTACGTTGGTTAGTTAATTTAGTTA  
GGTATGTAGACATTACCTGACAAAGTGATTTTTGCCTGGTCGTACATACA

>PGSC0003DMG400024890LRR-RLKs\_3111

AACAATTAGTCTTATCAATTGGTCATAAAAATCAAACCTTTAAGATAAAAATATTATATTGCATTTTGTCTT  
TTAGTTTGGAGTTTGTGTAATTCGATAGAAATTTTGGGCTAAAGTGAA

>PGSC0003DMG400024890LRR-RLKs\_3172

TTTTGTTTCTTTTAGTTTGGAGTTTGTGAATTCGATAGAAATTTTGGGCTAAAGTGAAGAGGCCCAAGA  
TCACCCGTGATTGAAGGCATAGAGTTTAGGGCTTTGTTGGAATTTTCTGG

>PGSC0003DMG400024890LRR-RLKs\_3416

TGACTGACACACAAAGATAATTGGGCCCCCTCGATTGTCGTGCTTGCCAACTCAACATGCACTTGTTCAA  
AAGGAATTCAACTAAATGGAATAGAGTATATAATATATAGTCACAATATT

>PGSC0003DMG400024890LRR-RLKs\_3477

CTTGTTCAAAGGAATTCAACTAAATGGAATAGAGTATATAATATATAGTCACAATATTACATATTTTACT  
GTATAACTCTTTAAAGTAGTCAACTTTTTTAAAATTAAGGAGGGAGAG

>PGSC0003DMG400024890LRR-RLKs\_3538

ATATTTTACTGTATAACTCTTTAAAGTAGTCAACTTTTTTAAAATTAAGGAGGGAGAGAAAGCAATAGT  
GTGAATAGCGATGAAGTCAAGATATTCTATTTGTCACATATATTTGAGGG

>PGSC0003DMG400024890LRR-RLKs\_3599

AGCAATAGTGTGAATAGCGATGAAGTCAAGATATTCTATTTGTCACATATATTTGAGGGGTGTTAACTGA  
TCTCAAATATTGTTTAAATGCATTTATATTAATTTGTATATACATTGTCA

>PGSC0003DMG400024890LRR-RLKs\_3660

GTTAACTGATCTCAAATATTGTTTAAATGCATTTATATTAATTTGTATATACATTGTCATAAATGTTAACCT  
ATTTTTTTAAAAAATTGTTGCAGAATATGCATATACTTTGAGAGTAG

>PGSC0003DMG400024890LRR-RLKs\_3721

AATGTTAACCTATTTTTTTAAAAAATTGTTGCAGAATATGCATATACTTTGAGAGTAGATGAAAAGAGC  
GATGTATATAGTTTTGGTGTGGTTCTATTGGAGCTGATCACCGGGCGTCG

>PGSC0003DMG400024890LRR-RLKs\_3843

CGGTGGGTGAATTCGGAGACGGAGTGGACATAGTACAATGGAGCAAGAAAGTGACAAATTGTAAAAG  
GGAACAAGTAACACACATTGTTGATCCAAGGTTAACCACTGTGCCTGAAGATG

>PGSC0003DMG400024890LRR-RLKs\_4270

GGTTTTGTGACAAAGAGAAGTAGGAATATAATTAGTACTATGTATTACTAAGTAGTTAATTAGTTGCTTT  
TGATTAGTTGTTAGGGTACTTGGGGGTGTTTTAAGTTCTTGGCAAAGGCA

>PGSC0003DMG400024890LRR-RLKs\_4331

AGTTGCTTTTGATTAGTTGTTAGGGTACTTGGGGGTGTTTTAAGTTCTTGGCAAAGGCAGACCAGGCC

AATTAAGTTGGTTCTGAATGCTTTTTGTATCATATGGTTATATACAGGTAT

>PGSC0003DMG400024890LRR-RLKs\_4423

TTTGTATCATATGGTTATATACAGGTATATATTCTTCCTTTAACGGGTGAATTGATTCTCGATCCAATAAT

GTTTAATTGTTTATTGTTGGTCATGTTGTTATGGATGAATTGGTTCTCG

>PGSC0003DMG400024954LRR-RLKs\_1302

GCATCATCAGAAGAATACAACCTGGTTAAGGTCATGGACTTGCTTGAAAAACAAAGGCACGGAGATGA

CGACGAATTATCAGAAGCTTCCCATTCAGAAAGTGAAAATCCCAATTGGGT

>PGSC0003DMG400024954LRR-RLKs\_1736

CGATTCGTTCCCTAATGGTAGCCTTGCCAATGCACGTAACAGTAAGTCCACTTTTTCCCATATACATTATG

TTTTACATCAAATAACGTTACAATTATTGAGTAGAATCGCGTCTTTTGT

>PGSC0003DMG400024954LRR-RLKs\_1798

TACATTATGTTTTACATCAAATAACGTTACAATTATTGAGTAGAATCGCGTCTTTTGTATTTGTTTTACTA

TTTTGCTCCTGTTTTACAGTGGAGAATAAATTGAAACAAAATTGACTA

>PGSC0003DMG400024954LRR-RLKs\_2294

ATAAATACCGCCAAACGCCCTCTTCTACTGTCACTTACATGGAAAATGACTACCTTTTTAAAAAAAAAAT

ATTACTCTGTAGGCCATAAGTATGCTCTTTTGTATGTCAAATTCATGC

>PGSC0003DMG400024954LRR-RLKs\_2356

AAAAAAAAATTTACTCTGTAGGCCATAAGTATGCTCTTTTGTATGTCAAATTCATGCATTTCTTTTGCCCA

CAACACCAATAATGTTAAAAGAATCTTCACCTTATTTACCATTTATAG

>PGSC0003DMG400024954LRR-RLKs\_2418

CTTTTGCCACAACACCAATAATGTTAAAAGAATCTTCACCTTATTTACCATTTATAGTATGTTGTTTATTT

TATAGATATTATTGTGAGAATCTTAGCGCTCAGTTGATTGACTACCTG

>PGSC0003DMG400024954LRR-RLKs\_2480

TTGTTTATTTTATAGATATTATTGTGAGAATCTTAGCGCTCAGTTGATTGACTACCTGATGTAATTATAAC

GTGTGCATTTTCATGGTTTCAGGAAAGGCTGGTTCTTCGCCATGTCACG

>PGSC0003DMG400024954LRR-RLKs\_3286

TGGACACAATTGTAGAGACAAGAGACTTTGTATGTAATGAGACTGACATCTTTGTTATTTTATTTTTTTTC

AATTTTTTTGGTTTGTGTCTTAATATAGTATTAGCCATTGGTTTTCTTT

>PGSC0003DMG400024954LRR-RLKs\_3348

TTTTTTTCAATTTTTTGGTTTGTGTCTTAATATAGTATTAGCCATTGGTTTTCTTTTTAACAGTGATTAG  
TGTAATTGTCCGTGCTTTGTTGTGTTGTAGTTTTCTAAACCTTATG

>PGSC0003DMG400024954LRR-RLKs\_3389

AGCCATTGGTTTTCTTTTTAACAGTGATTAGTGAATTGTCCGTGCTTTGTTGTGTTGTAGTTTTCTAAA  
CCTTATGGTGACTTTGGATTACCAATATATATGACAACCTATTATGTG

>PGSC0003DMG400024954LRR-RLKs\_558

AGAATATCCGGCCAGTTGCCTGAGCTTGTCCGACATTTAAATAATCTTCAGTTTCTAACCTCTCCGGTAA  
TGCTTTGACGGGAAGATTACCGGCAAATCTGGTAATCTAACTGTTGTT

>PGSC0003DMG400024954LRR-RLKs\_62

CACATGGTCCCCTTTTTATCATAAATCTACATTTATTCTTCTAACTTTTTTTCTATTCAATTCCTAAAAAA  
AACAGAGATGTGGGAACATTTAGAGACACCATGAAATTCCAAACCTT

>PGSC0003DMG400024954LRR-RLKs\_620

CTCCGGTAATGCTTTGACGGGAAGATTACCGGCAAATCTGGTAATCTAACTGTTGTTTCTTTGAAAGAT  
AATTATTTTTTGGTGCTGTTCCTTTTGGGTTTGATTCAGTTCAAGTTTT

>PGSC0003DMG400024958LRR-RLPs\_0

CGGCCATGGACGATATTGACGAGGACGCGCACATTTCTCTTCTCCTTCCTTTGATATTCCACCTTTTAA  
CCGGTCAAATCTCTAACTCTCCTCCTTCTCTTAATAAATTCTTCTCATT

>PGSC0003DMG400024958LRR-RLPs\_1323

TTGGCAATAGCTTCTAATTGTA AAAAGTTAGAAAGATTGGCTCTTTGTGGTAGTGACACTATTGGAGATC  
CTGAAGTATCTTGATTGCCACAAAATGTATGGCCTTGAAGAAGCTGTGT

>PGSC0003DMG400024958LRR-RLPs\_1953

GTCTTGAATACATTGTGCAGATATACATCTCACTTCCCAATTTTGATGAGCTTTTGTTAGATTTTTGTCTGT  
ACAAGATTTGTTATAGCAATAACCTTGTTTCATGTTGGTTCTTGGATGA

>PGSC0003DMG400024958LRR-RLPs\_2007

TGTTAGATTTTTGTCTGTACAAGATTTGTTATAGCAATAACCTTGTTTCATGTTGGTTCTTGGATGATAAAA  
GTGTATCTTGCAAAGCAAATTCTCCCTCAACATGCATGCATACTTGTCT

>PGSC0003DMG400024958LRR-RLPs\_63

CCTTTAACCGGTCAAATCTCTAACTCTCCTCCTTCTCTTAATAAATTCTTCTCATTCTTTCTTTCTTTCCATA  
ATCTCCATTTTTTCCCATTCCAACCTCTAGATCTCTATAACCCTAA



>PGSC0003DMG400024998G-LecRK\_0

GAAGAATTAGCATCAAAAATTTGAATCCATGAAATTTCTAGCTTTTTTATTCATTTACTTCAATTTTCTTTC  
AATTGTACTAGCATTAGACACCATAACTATTGATCAACCTATTAAGA

>PGSC0003DMG400024998G-LecRK\_1159

ACAGGCCTGGATTGGTACTCGTCGTCGTGGAAGAGTCCTGATGATCCTGCTATAGGTGAATTTGTTGAA  
AGGATGGATGTTCAAGGGTATCCACAGTTATTTGTATGGAAAGGTTCAATCA

>PGSC0003DMG400024998G-LecRK\_122

GTGACACAATTGTTTCATCAGGTGGTGTATGAACCTGGATTTTTTCAGGCCTGGAAATTCGACGAATCG  
ATATGTTGGTATATGGTACAAGAAAATATCAACTGGAAGTGTGTTTGGG

>PGSC0003DMG400024998G-LecRK\_1708

ATTAAAGTGCCTGATACGCAGAAATCATGGTTTAACGAGAGCATTGGACTTGAGGAATGCGGAAAGTT  
GTGCTTGGCTGATTGTAAGTGTACAGCCTACTCAAATATGGATGTTTCGAGAT

>PGSC0003DMG400024998G-LecRK\_2135

TGTTTCTTATGGCCTACAATTTTTGTTGGGAACTCATGAATGTGAATCATATTGTTATGACAATGTTGGAA  
TTTTCTGATTGATTATGTACGAACTTATCGACAGACAAGAAACGAAAGA

>PGSC0003DMG400024998G-LecRK\_2196

AATGTTGGAATTTTCTGATTGATTATGTACGAACTTATCGACAGACAAGAAACGAAAGAAAAAGAAGTC  
AAGGCTGATTGCAATCGTATCAGCAGTAGCCGCGACTTGTATCCTCAGCCT

>PGSC0003DMG400024998G-LecRK\_244

GCTAATAGAAATAATCCGTTGAGTGATAGTTCAGGTGTGTTGATGATCAATCCTGATGGAATCTTAGTAC  
TTGTTAATAGTACTAATGTGACGATTTGGTCAACGAATTCATCAACAATC

>PGSC0003DMG400024998G-LecRK\_2867

CATTTTTGGTCCGTTCTCTCGACTAGTCACCTTTATACTATGTTGCTCGTATCCTCCAAAAAATGATGTTG  
CACCAGTGTCCGATCCTCAAAGATGCACTACTTCTGGAGGATCCAAC

>PGSC0003DMG400024998G-LecRK\_2928

AAATGATGTTGCACCAGTGTCCGATCCTCAAAGATGCACTACTTCTGGAGGATCCAACATGGGCGCGG  
AGGCATTTTTGGAGGACTTGAGCAACCTACTAATAAATGAATGGATGAGGA

>PGSC0003DMG400024998G-LecRK\_2989

GGGCGCGGAGGCATTTTTGGAGGACTTGAGCAACCTACTAATAAATGAATGGATGAGGATTCCTGAC

ATTTTACATATTGCAGATCCAAGCAGAAAAGAATCACTTTCTTGGAGAAATC

>PGSC0003DMG400024998G-LecRK\_305

TCTTAGTACTTGTTAATAGTACTAATGTGACGATTTGGTCAACGAATTCATCAACAATCTTGAAGAATCCA  
ATAGCAAGATTGTTAGATTCAGGTAATACTTGTTATGTTTCGTTTCTGG

>PGSC0003DMG400024998G-LecRK\_3294

CGAGTAATCGGAACATAGTAAGTCTTATAAACAACTCTATGATAGATGTTTTTGTGTTACAATCAACA  
AGTTGATCAACTTAAATTTGATGCATTGTGTAGCGGATACATGTCTCCG

>PGSC0003DMG400024998G-LecRK\_3355

ACAATCAACAAGTTGATCAACTTAAATTTGATGCATTGTGTAGCGGATACATGTCTCCGGAGTATGCTGT  
CGATGGGAAATATTCAGTGAAATCTGATGTCTTCAGCCTTGGCGTGCTTT

>PGSC0003DMG400024998G-LecRK\_3599

AACACTCGACCCCGTCTGAGCTTACTCACATCACCAGTCCCAAGCTCCCATAAAGGAAGAGGGTTGCAG  
CCAGTATAAACTAGTCAGTTCATGTGCAATCCTCACAATACAGTCGGAAC

>PGSC0003DMG400024998G-LecRK\_3721

AGGCATTGTAGTAGTTGTTATAGCCTGTTTTCCATTAAAAAAAGTTGACCTGCCTGAGTTTACTCATATTA  
CCGGTCCCAAACCCCCATAAAGGAAGAGGATCGCAGTAGGCTAGAAGCC

>PGSC0003DMG400024998G-LecRK\_3782

ACTCATATTACCGGTCCCAAACCCCCATAAAGGAAGAGGATCGCAGTAGGCTAGAAGCCATTATAAAAC  
TAGTCAATTCATGACGAATCCTCATAATACAGTTGGGGCCGAGGTGTTGTA

>PGSC0003DMG400024998G-LecRK\_4087

ATGACTGAGGCATTGTAGTAGTCACCGTTGTAGCTTCTTTTTACTAAATGCATTTGTATAACTGTGTTATC  
ATAAAAAATATTTAGGCATGGTACTATTGAATGAAGGCAAAGCATTG

>PGSC0003DMG400024998G-LecRK\_4148

CTGTGTTATCATAAAAAATATTTAGGCATGGTACTATTGAATGAAGGCAAAGCATTGGAACATAATGG  
ATGAATGTTTAAAAGACTCATATGTTGAATCACAAGTGTTGAGATGCATTC

>PGSC0003DMG400024998G-LecRK\_4270

GTAAGTTTATTGTGTGTACAAAACTCCCTGAAGACAGGCCTACAATGGCTTCAGTAGTTTTCTGGTTAA  
GCAATGATGGTGTGGAATTGCCTCAACCAAAGCAGCCTGGTTTCTTTATA

>PGSC0003DMG400024998G-LecRK\_549

AATGTAATCTAATCTGATTCGTAATCTTTTCATCAAGGAAGGAAATGAAAATAGAATTGAGATTTTCAC  
CTGGGAGAGTTTTGATTATCCAGGGGATACTCTGTTGCCTGGAATGAAGC

>PGSC0003DMG400024998G-LecRK\_61

AATTTTCTTTCAATTGTACTAGCATTAGACACCATAACTATTGATCAACCTATTAAGATGGTGACACAAT  
TGTTTCATCAGGTGGTGTATGAACCTGGATTTTTCAGGCCTGGAAAT

>PGSC0003DMG400024998G-LecRK\_793

TTCGTATAATTTTTACTACTGTTGTTTCTTTACTTTGGTTATCCTTTATATTTGTACTGTAACTACTTTTCTT  
TCTTCAATATTTTCATCTTGAAGTTCAATTATTGCTTTTCTTTCAA

>PGSC0003DMG400024998G-LecRK\_854

AACTACTTTTCTTTCTTCAATATTTTCATCTTGAAGTTCAATTATTGCTTTTCTTTCAAAGACGAGGGTTTAT  
CAGAAACAAACTCTGTGTATGTTGTTGTCGTAGTAGTAGTACTTTTA

>PGSC0003DMG400025030-(rev)RLKmalectin\_0

AGCTAGCTGTGGAGTAGCCACTGAAAAAGCTCTTGTTGTGATTGTGTTTAGAATTGGGTATTTCTTGTTT  
CTTTCTTCTTTTGGTTCACACCCATGTCAAAGATTCAATGTTTCATAT

>PGSC0003DMG400025030-(rev)RLKmalectin\_1464

ATCTGGGAAATCAGACTTAGCTTATTCAGCTACTTTGATATCGAGATTGAGGCATAGTTATTGTTGTTGTT  
GTTGTAACCTGGAGGGGTCGTCTGAAAGAAGACAAAAAGTTGTCTTAAGA

>PGSC0003DMG400025030-(rev)RLKmalectin\_1525

TGTTGTTGTTGTTGTTGTAACCTGGAGGGGTCGTCTGAAAGAAGACAAAAAGTTGTCTTAAGAGTTTAAATTTT  
TGTGGAGAATTGGAGTCCAGTATTTAGCAATAGGCTCTTAGGACGATGG

>PGSC0003DMG400025030-(rev)RLKmalectin\_2013

ACAGTGGTCACAGAAAATTTTGTCTGTTGAACAATTTCAAGTTTCAAGAGCTATAATGGATCATACCTTTT  
TAAGGAATACGCGATCAATGTCAATTCAGATAGTTTGATTCTTGCTTTG

>PGSC0003DMG400025030-(rev)RLKmalectin\_2562

TGTGATATTGTGAGCGAATCTTTGAATAGTCTTCTGTTCAACCTATATGTTAATAATGATGCTGCTCTACT  
GGACCTAGACTTGTCAAACCTAGCTGGAAATTTGGATGTACCGTTATAC

>PGSC0003DMG400025030-(rev)RLKmalectin\_2806

AAGCTAGAAGCTTGAGTGGGGTTCAATCTGTTGAGACTCTTTTGTGTTGCCTCACAAAAAGAAAAAGA  
TAGGTATCATTCTTGGTTCTGCCTTAGGAGCATCTGCTGTTTTGGCGCTTA

>PGSC0003DMG400025030-(rev)RLKmalectin\_2867

GAAAAAGATAGGTATCATTCTTGTTCTGCCTTAGGAGCATCTGCTGTTTTGGCGCTTATTGCGTTGTGT  
TGTTGCTTTTTTATAGCTCGAAGATCAAAGACTTCCAACCAAGGACACTC

>PGSC0003DMG400025030-(rev)RLKmalectin\_3538

TTGTGGCTAAAGTTGCTGACTTTGGTCTTCCAAAGCCGGACCAGCTCTTGATCAAACACATGTAAGTAC  
TGCCGTTAAGGGTAGCTTTGGGTACCTTGATCCTGAATACTTCCGGAGGC

>PGSC0003DMG400025030-(rev)RLKmalectin\_3599

TGTAAGTACTGCCGTTAAGGGTAGCTTTGGGTACCTTGATCCTGAATACTTCCGGAGGCAGCAGCTGAC  
AGAGAAATCAGATGTCTACTCATTGGTGTGTCCTAATGGAAGTTCTCTG

>PGSC0003DMG400025030-(rev)RLKmalectin\_366

CCTTTTCAAAGATCCAATTTTTCATGGTGGAGTTGCACTAAAAGCTGTTCTTGATTGTGTTTTCATGGT  
GGCATTGAGGTAACCTGACTTGGGACTTGTTCCTTCTTTTTGGTT

>PGSC0003DMG400025030-(rev)RLKmalectin\_3721

CCAGACCAGCATTGAATCCGGTCTTCTCGTGAGCAAGTTAATATAGCCGAGTGGGCTATGATTTGGC  
AAAAGAAAGGCATGTTGGATCGGATAATGGACCAGAATCTCAAGGGGCAAG

>PGSC0003DMG400025030-(rev)RLKmalectin\_4148

GCGGGGAAGATGAGAAGAGATACTCCCTCATATACGTGCTTGAGTATAGTATTGAATCAAATTTCCCTA  
CTAAAATGTTTGAGTGTGTATTGTATATGATTGATGTACCTAGCACATAC

>PGSC0003DMG400025030-(rev)RLKmalectin\_427

TTTTCATGGTGGCATTGAGGTAACCTGACTTGGGACTTGTTCCTTCTTTTTGGTTCATACCCTTTTCA  
AAAGATTCAATTTTTCATAGTGTAGTTGCACTAAAAGCTGTTCTTGA

>PGSC0003DMG400025030-(rev)RLKmalectin\_4270

TGAAATTCATCGTTCAAATACTGCAAGTTGTAGTATTATTTCCATTGTTAGGTGATACATTGCCCTCTTTAT  
CTGATAGATAGTCATGAATATGTATTTGTAAAAGCACTATAATTGTAT

>PGSC0003DMG400025030-(rev)RLKmalectin\_4305

TTATTTCCATTGTTAGGTGATACATTGCCCTCTTATCTGATAGATAGTCATGAATATGTATTTGTAAAAG  
CACTATAATTGTATCCATTCATAGATAATAAATATTAAGCATATGTTGC

>PGSC0003DMG400025030-(rev)RLKmalectin\_610

TCATACCCTTTTCAAAGATTCAATTTTTCATAGTGTAGTTGCACTAAAAGCTGTTCTTGATTGTGTTTTC

ATGGTGGCATTGAGGTAAGTGAATTGGGTCCTCTTATTTCTTCCTTT

>PGSC0003DMG400025076-(rev)LRR-RLKs\_0

TAATCTCTTTGCTATTTAAATGTATAGTTTCATTTGTTTGCTCTTTAGTTTCTCAAGAACTGTCACTCTCACT  
CAAATCCTCTCCGCCACCGTCAACCGCCGTCAACCACCGTCCGCCG

>PGSC0003DMG400025076-(rev)LRR-RLKs\_1159

TAGGCCTGCTCACCAATCTTACCATGTTTGGTGTGCGGGCGACTGGTCTTTCGGGTGTTATTCCACCTAC  
GTTTGGGAACTTGATCAATCTTCAAACACTGGCAATTTATGATACTGAAG

>PGSC0003DMG400025076-(rev)LRR-RLKs\_122

GTCATGAAAAAATGCAAAATGACAAATGTGTTTGGTTCATGCTAGTGACCATTTATCTTCACCACCATCA  
TTAGTAAGCTACTAGCTAGCGCCGCCGTGTACGGAGGAGCAAGGAGCAAG

>PGSC0003DMG400025076-(rev)LRR-RLKs\_1220

TCCACCTACGTTTGGGAACTTGATCAATCTTCAAACACTGGCAATTTATGATACTGAAGTATTTGGTTCGA  
TACCGCCTGAACTCGGGATGATTTCCGGAGCTTAGGTACTTGTATCTGCA

>PGSC0003DMG400025076-(rev)LRR-RLKs\_1281

TTTGGTTCGATACCGCCTGAACTCGGGATGATTTCCGGAGCTTAGGTACTTGTATCTGCATATGAATAAGC  
TCACTGGTTCGATACCTCCTCAGTTGGGTAAGTTGCAAAGCTTACTAGC

>PGSC0003DMG400025076-(rev)LRR-RLKs\_183

CCACCATCATTAGTAAGCTACTAGCTAGCGCCGCCGTGTACGGAGGAGCAAGGAGCAAGGAGGAGCTG  
TTTTCTCCAGTAAGAGAACTTTAATAGTAGCAGTTTAGTAAATGTTTCATTA

>PGSC0003DMG400025076-(rev)LRR-RLKs\_1830

AAATTGTTGCTCCTTGGGAACTCGTAACTGGGCGATTGCCTCGAAGTGTGCGAGATGCCAGTCTCTG  
GTGAGGTTGAGGCTTGGTGAGAATCAGCTTTCAGGACAGATTCCTAAAGAG

>PGSC0003DMG400025076-(rev)LRR-RLKs\_3416

AAATCGATCATAACATCTTTTGAATATTTACTTTATGAGTCATAGTTCGTTGAGTGTGACACAAATATTTG  
TCAACGGTTGCAGAATATGGATATACAGCGAATATAACAGAAAAGAGCG

>PGSC0003DMG400025076-(rev)LRR-RLKs\_3477

CAAATATTTGTCAACGGTTGCAGAATATGGATATACAGCGAATATAACAGAAAAGAGCGATGTCTATAG  
TTATGGAGTGGTGTGCTGCTGGAAATACTTAGTGGGCGTAGCGCTGTTGATTC

>PGSC0003DMG400025076-(rev)LRR-RLKs\_3965

TGATCAACTCATTGTTCCAAGCATTGGATAATGTCTTGGGGTCCATTGTGTACATATTTTCAGAAACATTTA  
TGTAGTTTATTTGCTTCTTCATTCTTCCTATCCATCTCTCCATCTCTG

>PGSC0003DMG400025076-(rev)LRR-RLKs\_4026

GAAACATTTATGTAGTTTATTTGCTTCTTCATTCTTCCTATCCATCTCTCCATCTCTGTGCTGAGATTTTAG  
CTTTCAAAATGCTTGCAGTTGCACCATATAATATTTTAGTTTACCAT

>PGSC0003DMG400025076-(rev)LRR-RLKs\_4209

TGTGGTTTCAAACCTTCCGGTGATGCTAAAAGTAGTTTCAGAAAAGAGAAATATAGAAGAAGAAATCAA  
AGAAGGGGAATCTTGGAGCAACGGTAAAATTATCTCATGGGTTCAAACCTGT

>PGSC0003DMG400025076-(rev)LRR-RLKs\_4270

GAAATCAAAGAAGGGGAATCTTGGAGCAACGGTAAAATTATCTCATGGGTTCAAACCTGTGGAAGCAGG  
CATTAAATGCATTAGGTAAATTGTCTACATCATATCCTTTGAAGTGTGGCCT

>PGSC0003DMG400025076-(rev)LRR-RLKs\_915

CTTTTAGGTTCTATTCCATCAGAAGTTGGTAGGCTTAGTTCACCTCAGTTCTTGTTCTTGAATTCAAATAGA  
TTGACTGGTAAGATTCCACCAGAGTTGGCTAATCTTTCTTCACTAGAA

>PGSC0003DMG400025076-(rev)LRR-RLKs\_976

ATTCAAATAGATTGACTGGTAAGATTCCACCAGAGTTGGCTAATCTTTCTTCACTAGAAATCTTTTGTCTT  
CAAGATAATCTCCTCAATGGGTCAATCCATCACAGTTAGGGTCCTTAG

>PGSC0003DMG400025222-(rev)RLKANKrepeat\_0

GATGTTTGTACCTGAAAAAATTTTCAGTTCAAATCCATTCCCTCTTCCCTCCATTGTAACGCACTTCTATCTAT  
CGCTCTGAGAATTTCAATTCTCAATTATCGATTACAGTTTCAGTTCTT

>PGSC0003DMG400025222-(rev)RLKANKrepeat\_1037

TGTAATTCTAATTTACAGAGGGAAAATAGGCCAGGTGGGAGCTGGAAGTAAAGTTTCAATTCTGAAGA  
AACTTTAGCTAAGTTTTTGGATAGACTGTGAAAATATTGTGAGTGAAAGTG

>PGSC0003DMG400025222-(rev)RLKANKrepeat\_1098

TCTGAAGAACTTTAGCTAAGTTTTTGGATAGACTGTGAAAATATTGTGAGTGAAAGTGTTTTATATGGA  
AAAGAATTCTGCTACGAATTTCTTCTGTAATTTGTGAAAAATCATGCAAA

>PGSC0003DMG400025222-(rev)RLKANKrepeat\_1159

TTATATGGAAAAGAATTCTGCTACGAATTTCTTCTGTAATTTGTGAAAATCATGCAAAGGACTACAGAA  
AGAAGAAAATATTAGTGACAGAAGATGAGAAAGAGCTTATGTAGGTCTCA

>PGSC0003DMG400025222-(rev)RLKANKrepeat\_122

GCAACAAAATTATCAAAATATATCTCTCAGCATTCTTCTAATTGTGATGAAATTATTCTAGTTTTGATTCT  
GAAAGTTTATCTGTGTTAAAGTTGATTTTTTATGATGAACGATAAAATGG

>PGSC0003DMG400025222-(rev)RLKANKrepeat\_1220

ACTACAGAAAGAAGAAAATATTAGTGACAGAAGATGAGAAAGAGCTTATGTAGGTCTCATAGAATAAA  
AAAATTGTTCAAATGGCTTCGGCGAGTTTTACTTCCCATAGTATTTATGAGG

>PGSC0003DMG400025222-(rev)RLKANKrepeat\_1281

GAATAAAAAAATTGTTCAAATGGCTTCGGCGAGTTTTACTTCCCATAGTATTTATGAGGGCCCAAGTGCA  
TCCTTGAACCTCCTTATTATTATGGCAGGCAGCAGCTGACGCGAAATACT

>PGSC0003DMG400025222-(rev)RLKANKrepeat\_183

GTTTTGATTCTGAAAGTTTATCTGTGTTAAAGTTGATTTTTTATGATGAACGATAAAATGGATATGAAAAAG  
CGATTAACACGAGGAATATCTAGGCAATTTTCAACAGGTTTCATTGAGAAT

>PGSC0003DMG400025222-(rev)RLKANKrepeat\_244

ATGAAAAAGCGATTAACACGAGGAATATCTAGGCAATTTTCAACAGGTTTCATTGAGAATGAGTGGAAAA  
TTCAGTTTTCAAAGGCAAATTTCAATGGATCCAAGGAATAACAATATGCGG

>PGSC0003DMG400025222-(rev)RLKANKrepeat\_2989

AATTCAGCCTTCTAGGTAAAATTACTCTTTATATTCACATGTTTCCAAGATATTGGCAGATTGAGTTGACG  
ATGATCTGGATCTTTGATTTGTAGTAATATGGAATAAGTTGAGGATCAC

>PGSC0003DMG400025222-(rev)RLKANKrepeat\_305

GTGGAAAATTCAGTTTCAAAGGCAAATTTCAATGGATCCAAGGAATAACAATATGCGGTTTAGTTTTG  
GTAGGCAATCGTCTCTCGATCCGATACGTAGGTGTCCGTCGTTTGAGAATG

>PGSC0003DMG400025222-(rev)RLKANKrepeat\_3416

AGCTCTATCCTTTTTCTGGTGACTTTCTAAATCAAGAAAACTTATAATCTGCACTCTTGTGTGATCGCCA  
CAAATTTTCACTCAGACATTGAAGTGATTCCGGGGAGATGCTTTATTTT

>PGSC0003DMG400025222-(rev)RLKANKrepeat\_3599

AATTATCTTCTGAAAGTGATCTTGGTCAAATGATAGATCCAGTTTTTGTATTATGGTCTTTTAGTTTCT  
CATTTGAACAAATCATTTTCAAGTTGTTATTTAGGATTGTCAAATCTT

>PGSC0003DMG400025222-(rev)RLKANKrepeat\_366

TAGTTTTGGTAGGCAATCGTCTCTCGATCCGATACGTAGGTGTCCGTCGTTTGAGAATGAGACGATTGCT

GTACCGGATAATTTGGATTTCGACGATGCAGCTGTTGTTTATGGCGTGTA

>PGSC0003DMG400025222-(rev)RLKANKrepeat\_3660

TTTTAGTTTCTCATTGAACAAATCATTTCAAGTTGTTATTTAGGATTGTCAAATCTTATTGTTTGGTTAA

CTGTTTTTATTCTTGATGTTAAGGTCACCTAATTCCATTTCTTCACA

>PGSC0003DMG400025222-(rev)RLKANKrepeat\_3721

TGTTTGGTAACTGTTTTTATTCTTGATGTTAAGGTCACCTAATTCCATTTCTTCACATGCAGAAATGCTT

TTAAGCATGAATTAACCTTGTGGAAAGAGTACGGCATCCTAATGTGG

>PGSC0003DMG400025222-(rev)RLKANKrepeat\_3843

CAATTTGTTGGAGCTGTTACACAAAATATACCAATGATGATAGTAATAGAGTATCATCCGAGGGTAAGA

TCTCTAAATTTCTCTATCTCACACTGCTCCCCACAAAATCCTTTCTTCACT

>PGSC0003DMG400025222-(rev)RLKANKrepeat\_3904

GGGTAAGATCTCTAAATTTCTCTATCTCACACTGCTCCCCACAAAATCCTTTCTTCACTCTATCCACCTACA

TTGTGAATATTGTTTATTATTATGCATACATTAATATTGAGAAATAAT

>PGSC0003DMG400025222-(rev)RLKANKrepeat\_3965

ATCCACCTACATTGTGAATATTGTTTATTATTATGCATACATTAATATTGAGAAATAATCAATCAGCTCTTA

CATCAAATGTGCATTCAATTTTGTGCTGTGATTTCTCTCCTGGTATAT

>PGSC0003DMG400025222-(rev)RLKANKrepeat\_4026

ATCAGCTCTTACATCAAATGTGCATTCAATTTTGTGCTGTGATTTCTCTCCTGGTATATTTTCATTCTTATT

GATTTTATGTGCTGTACTTCTGTTCTTGGCTTAGTTTTCCAATGGGT

>PGSC0003DMG400025222-(rev)RLKANKrepeat\_427

ACGATTGCTGTACCGGATAATTTGGATTTCGACGATGCAGCTGTTGTTTATGGCGTGTAAGGTGATGTG

AATGGAGTGAAGGATTTGTTGGATGAAGATGTTGATGTTAATAGTATTGAT

>PGSC0003DMG400025222-(rev)RLKANKrepeat\_4453

AAGAAAATAAATGCTTTATGATTCTCATATTTAAATGACAATTTTCAGTGTACTCATGTCACGTATCTA

CTTCTTTTAAATGTTTGAATTTTGTAAAGGTGCCAGAAATATTTTGCAG

>PGSC0003DMG400025222-(rev)RLKANKrepeat\_4758

TACTAGTGTCCACTTTAAAACTTCAGGGGATGGACTTAAATGTATTCTAATTTTCATCACAGGAGGAATT

GTAATAAATAAATGCACTATCTTTCTTGTACTTGTAGGTACCTATAT

>PGSC0003DMG400025222-(rev)RLKANKrepeat\_4819



GGAGGAATTGTA ACTACAATAACTGCACTATCTTTCTTGTTACTTGTAGGTACCTATATAGCACCTGAGAT  
TTATAAAGATGAAATATTCGATAGAAGCGTGGATGTATATGCTTTTGGGA

>PGSC0003DMG400025222-(rev)RLKANKrepeat\_488

GTGATGTGAATGGAGTGAAGGATTTGTTGGATGAAGATGTTGATGTTAATAGTATTGATTTAGATGGAA  
GGACTGCTTTGCATATTGCTGCTTGTGAAGGACATGTAGAGGTTTCTAAGC

>PGSC0003DMG400025222-(rev)RLKANKrepeat\_5246

TCTTGAATCAGTCTTCTCAAATGTTCTTGAGCTCTTATCTTGTTCAATTTTGGCTAACTTTGTTGGGTTTA  
GATGATGGAGGGATCACCACCTTTTCATCCCAAGTCACCTGAAGAGGC

>PGSC0003DMG400025222-(rev)RLKANKrepeat\_549

AGATGGAAGGACTGCTTTGCATATTGCTGCTTGTGAAGGACATGTAGAGGTTTCTAAGCTTTTGTGAGT  
AGGAAGGCTAATATTGATGCTCGTGATCGATGGGGAAGCACGGTAAATTT

>PGSC0003DMG400025222-(rev)RLKANKrepeat\_61

CTTCTATCTATCGCTCTGAGAATTTCACTCTCAATTATCGATTACAGTTTCAGTTCTTTCGCAACAAAATT  
ATCAAAATATATCTCTCAGCATTCTTCTAATTGTGATGAAATTATTC

>PGSC0003DMG400025222-(rev)RLKANKrepeat\_610

TTGTTGAGTAGGAAGGCTAATATTGATGCTCGTGATCGATGGGGAAGCACGGTAAATTTTTTATTTTTTT  
TGCAATTTTTTGGCTCATAAAGTTGTATATGTATGAGATATTGTGTTTGG

>PGSC0003DMG400025222-(rev)RLKANKrepeat\_671

TATTTTTTTTTGCAATTTTTTGGCTCATAAAGTTGTATATGTATGAGATATTGTGTTTGGTATGATGAAAAG  
CGTTATTGAATCTTACCTTGAATTACGTAAAATGTTTTGTGAAAATAGA

>PGSC0003DMG400025222-(rev)RLKANKrepeat\_6771

AAAAAATTTATGTCTCCAACACGCCAGTCATGTTCTATCCTAATTCTTCTTCATGGGGCAAGTTTGTAGA  
ATTTTTTTTTGTAATAATGGATGACGGTAAAACCTCGAACCCAAGACCTT

>PGSC0003DMG400025222-(rev)RLKANKrepeat\_6832

AGTTTGTAGAATTTTTTTTTGTAATAATGGATGACGGTAAAACCTCGAACCCAAGACCTTGTCTGCTCTTGA  
TACTGTGCTGAAAGCTAGCTTCAAATACTCCCAAAGAGTTCAACAAGA

>PGSC0003DMG400025222-(rev)RLKANKrepeat\_6893

CTGCTCTTGATACTGTGCTGAAAGCTAGCTTCAAATACTCCCAAAGAGTTCAACAAGATATACCATGTT  
GAAAGCTCTAAGCTGTAAGTAAAGAATAACTTAGGTCCATGTGGAAGATT

>PGSC0003DMG400025222-(rev)RLKANKrepeat\_6954

TACCATGTTGAAAGCTCTAAGCTGTAAGTAAAGAATAACTTAGGTCCATGTGGAAGATTCAGCAATAGT  
TGTATGGAAGAAATCTAGTTAACTAGAGAGAGTATATACTCCGTCTTGTGA

>PGSC0003DMG400025222-(rev)RLKANKrepeat\_7015

GCAATAGTTGTATGGAAGAAATCTAGTTAACTAGAGAGAGTATATACTCCGTCTTGTGACGAGACAATA  
AAAGTAGATTACAGGATTTGTTTCTCATAGGGACCATACCTTAGATGAATT

>PGSC0003DMG400025222-(rev)RLKANKrepeat\_7076

AGACAATAAAAGTAGATTACAGGATTTGTTTCTCATAGGGACCATACCTTAGATGAATTTCTTGATGCAG  
GTTATAGAGTGAAGCAAACACTACATTGACCATGGACAAAGCTTAAGATCTG

>PGSC0003DMG400025222-(rev)RLKANKrepeat\_7137

TTGATGCAGGTTATAGAGTGAAGCAAACACTACATTGACCATGGACAAAGCTTAAGATCTGGAGAAGAATA  
TTGACACAAGATTCTTGTGACTATTCGATATAATTATGTGGATGTGTGGCA

>PGSC0003DMG400025222-(rev)RLKANKrepeat\_7198

GAAGAATATTGACACAAGATTCTTGTGACTATTCGATATAATTATGTGGATGTGTGGCAGATTATGATAT  
CATACTAAGCCTTATGCTGTCTTTGCAAGAATCGTCGTCATCGTGTTGT

>PGSC0003DMG400025222-(rev)RLKANKrepeat\_7259

TTATGATATCATACTAAGCCTTATGCTGTCTTTGCAAGAATCGTCGTCATCGTGTTGTTGGACCAAATAA  
AGGAAGAAAGAAGGGTGTGAGTGATTGGGATGAGAATTGAACTTCATG

>PGSC0003DMG400025222-(rev)RLKANKrepeat\_7320

GACCAAATAAAGGAAGAAAGAAGGGTGTGAGTGATTGGGATGAGAATTGAACTTCATGCACTGTGCT  
TCTCTAGTTTTGAGTAAAGCTAGAACTAGAGAAGTTCCTTTGTTGTCTGTTT

>PGSC0003DMG400025222-(rev)RLKANKrepeat\_7381

CTGTGCTTCTCTAGTTTTGAGTAAAGCTAGAACTAGAGAAGTTCCTTTGTTGTCTGTTTATAGGCTTTTAC  
TAGAAACAACCTTGATCTTGTGTATAAGGAAAAGAGGAAGAATAATAT

>PGSC0003DMG400025222-(rev)RLKANKrepeat\_7442

AGGCTTTCCTAGAAACAACCTTGATCTTGTGTATAAGGAAAAGAGGAAGAATAATACTTTTATTTT  
TCTTGTGTTGATATGTTGACAACTATCGAGAATTCATTCTGCAACTATTG

>PGSC0003DMG400025222-(rev)RLKANKrepeat\_7498

TATACTTTTATTTTCTTGTGTTGATATGTTGACAACTATCGAGAATTCATTCTGCAACTATTGTATAAATG

CATCCCTTATCGCCTTTTCTGTAAACCATCCGTAGTAACGAACTTGCA

>PGSC0003DMG400025222-(rev)RLKANKrepeat\_854

AACAATCTATTGTAGAAATTCATGTGACTAGGAGGTCAGGGGTTCGAACTGTGAAAACAACCTATTGTA  
GAAATGTAGGGGAAATCCTTGAGATATCTTATTATGAGAATATTTTCTTAT

>PGSC0003DMG400025222-(rev)RLKANKrepeat\_915

CTATTGTAGAAATGTAGGGGAAATCCTTGAGATATCTTATTATGAGAATATTTTCTTATTGTTTCGTTTGCT  
ATTATTCTCTTTGATATGTGAATAAATGAAATCAAGTAAATGTGGTGAG

>PGSC0003DMG400025222-(rev)RLKANKrepeat\_976

TTCGTTTGCTATTATTCTCTTTGATATGTGAATAAATGAAATCAAGTAAATGTGGTGAGATTGTAATTCTA  
ATTTACAGAGGGAAAATAGGCCAGGTGGGAGCTGGAACTAAAGTTTCA

>PGSC0003DMG400025295LRR-RLPs\_0

GTGATGAATAACAAGAAAAACCCAATCTTTCTCTTTTTCAATTTTTTATCATAAACTATACATACATAC  
ACCTTTTGTCTTCCAAAGTCAAGATTATTTTTTTTTCAAACCCC

>PGSC0003DMG400025295LRR-RLPs\_126

CAAAATGCATTTTCTGATGTTGGTTTTCAAGATTTTGTTCAATTCATCATTCTTTCATCTGTTCTCACTAGCC  
CAACAACCCCAAATTTGTGTTGAACTGACAGACTTGCTCTTCTTGG

>PGSC0003DMG400025295LRR-RLPs\_1323

AAAGGGGAAGATATCAAACAACCAGTTGAAATCTGATGTTGCTGTGATCAAACCTGCCTGATGGGATTTTC  
ATCTCTTGATCTTCATTCAAACCAGCTATTCGGGTCTCTTTCGAGGATGTT

>PGSC0003DMG400025295LRR-RLPs\_1386

GATTTTCATCTCTTGATCTTCATTCAAACCAGCTATTCGGGTCTCTTTCGAGGATGTTAAGCAACAAGACTA  
GCAAATTCTTGGAAGCAATCGACGTCTCAAACAACCAACTCTCTGGGAG

>PGSC0003DMG400025295LRR-RLPs\_1939

GTTTGTTAACAACAAACAGTTTACTTTTCTTTTTCTTTTTTTGAATTCTAGTACTACTTGTACAACCTCTATC  
ATCTCACATTGTTAGTCAGTGTTTACTTCACATAAATTCAATATGAA

>PGSC0003DMG400025295LRR-RLPs\_63

CATACATACACCCTTTTGTCTTCCAAAGTCAAGATTATTTTTTTTTCAAACCCCCTTACCAAATGCA  
TTTTCTGATGTTGGTTTTCAAGATTTTGTTCAATTCATCATTCTTCA

>PGSC0003DMG400025295LRR-RLPs\_630

GACAGGACATGTACCTTCTGTATTAGGAAATTTCAAGAATCTGCAGCAGCTGAGTTTAACAGACAATTTG  
CTAACTGGGGTTATCCCAATTGGTTTCAAGAATCTTATTA ACTTGCAGTC

>PGSC0003DMG400025295LRR-RLPs\_693

CAATTTGCTAACTGGGGTTATCCCAATTGGTTTCAAGAATCTTATTA ACTTGCAGTCCTTGGATCTGAGCC  
ACAATTCATATCCGGGGTTGTTCCGAATTTTCTTGGACAGCTTCAAAA

>PGSC0003DMG400025295LRR-RLPs\_756

TCTGAGCCACAATTCATATCCGGGGTTGTTCCGAATTTTCTTGGACAGCTTCAAAAATTTGACATATATTG  
ATCTTTCAAGTAATGAATTGTCAGGGGAGGTTCTGTTTCCTTGTGTAG

>PGSC0003DMG400025295LRR-RLPs\_819

ATATATTGATCTTTCAAGTAATGAATTGTCAGGGGAGGTTCTGTTTCCTTGTGTAGTTTGCTCAAGCTGT  
CGTTTTTATCGATGGATCATAATCGAATAACAGGGAGAATTCCA ACTCA

>PGSC0003DMG400025330LRR-RLKs\_0

TTTTGAATTCTCCACTGGTGTCTGGACAACGGTTCTTCTCTTTTTTTTTTTCTTTCTTTCTATTATACACAA  
CTTTCTAGACTACTTTCAAAGTAAAGTCTTCTCTTTTTTCAAATACA

>PGSC0003DMG400025330LRR-RLKs\_1037

GTTTCATATATAACTGAGTGATAACATGTTTTCTTGGAGATTCCACATGTTTCTTGATGAATTTGTCACAA  
GCTAGGTGTTATTTATGCGTACAGATACCTCAGGGCAAATTTTCTTCAA

>PGSC0003DMG400025330LRR-RLKs\_1098

TTTGTACACAAGCTAGGTGTTATTTATGCGTACAGATACCTCAGGGCAAATTTTCTTCAAGGAGGCATACC  
ATCAGATATTGGAAATCTTTCAATACTGACCATATTGTGAGATATATATA

>PGSC0003DMG400025330LRR-RLKs\_1159

AGGCATACCATCAGATATTGGAAATCTTTCAATACTGACCATATTGTGAGATATATATATTTTAATTCACC  
ATCTTATTATATAGTTAATGAGGTTGTTGTTTTAATGATTGGTACCTTT

>PGSC0003DMG400025330LRR-RLKs\_122

CACCCCCCTCCCCTCTTCTCTTTTTCTCACTTCGTGCTTGAAATTTTATTATTATGGATTTTCCATCTGTAA  
GAACTGTAATCATACCCATTGTTTCTATCAAAAACCCACCATTTTAG

>PGSC0003DMG400025330LRR-RLKs\_1525

TAAGTTCTCCTCCATTGGAATATAATCCACATTTGATTTTGCCTCTGTGTTTCATCATTTTCTATATACTCT  
AAATAAATTTAGACAGATGGTTCAAACTCAGAAAATACAATTTATC

>PGSC0003DMG400025330LRR-RLKs\_1586

TCTATATACTCTAAATAAATTTAGACAGATGGTTCAAACCTCAGAAAATACAATTTATCGTGAATAATGCT  
TCACATTATTATATGTATAGAAGTGCAGCAAAATATTCACATTCCATTT

>PGSC0003DMG400025330LRR-RLKs\_183

TTCCATCTGTAAGAACTGTAATCATACCCATTGTTTCTATCAAACCCCACCATTTTAGCTTTACTCTTTTTT  
TTTTCAAGATCTGTATTGATTAGTGAACCTGCTACTACTCCACATTG

>PGSC0003DMG400025330LRR-RLKs\_2135

GGTGATTGGCTGCTACATAGTTGAAACTAGGAATCTAGTCCTGTATCATGATCAGTTTTACTTGTGTACCT  
TGCAAAAATTATTCTTCCCCATCATCTCAAAGGGGAAGCTTGATGCTCT

>PGSC0003DMG400025330LRR-RLKs\_2196

TTGTGTACCTTGCAAAAATTATTCTTCCCCATCATCTCAAAGGGGAAGCTTGATGCTCTCAAAGTCTCAAA  
TAGTTAAGCTTATAAAGTATTTTCAAATGTCACAAGGGCAAGAATGTAT

>PGSC0003DMG400025330LRR-RLKs\_244

TTACTCTTTTTTTTTTCAAGATCTGTATTGATTAGTGAACCTGCTACTACTCCACATTGCACTTGATATTTAT  
AGTCCAAAGTGAAGAAGTAAAGCTCAAATCTGCATTTTTTCATCAAGA

>PGSC0003DMG400025330LRR-RLKs\_305

CTTGATATTTATAGTCCAAAGTGAAGAAGTAAAGCTCAAATCTGCATTTTTTCATCAAGAAATCGAAATGG  
GTGTCTCGGATTTGATCTTTTTGGGACTATTTACGATGACCATTTTCAGT

>PGSC0003DMG400025330LRR-RLKs\_366

TCGAAATGGGTGTCTCGGATTTGATCTTTTTGGGACTATTTACGATGACCATTTTCAGTAGAAGCTGTTTT  
TCACTAACCCAGATGGTAAAGTTTACTTCTTTGTGGGTTTTATCTAGT

>PGSC0003DMG400025330LRR-RLKs\_4026

TTTTATAATCATCTATATGTAGGTTTGACTTGCTTAACCTCTATAAATTGAAATTCCAAACCTCACCTCATCT  
TCTAATGAAATGTCTGACCAACGATTTCTTGTTGTATATTGTAATAT

>PGSC0003DMG400025330LRR-RLKs\_427

AAGCTGTTTTTCACTAACCCAGATGGTAAAGTTTACTTCTTTGTGGGTTTTATCTAGTTTTTTCAGCATTG  
TATGTTGTTCTTGAGCTAAAAAGATTGTACTTTTTTAGGTTCTGCTTT

>PGSC0003DMG400025330LRR-RLKs\_4270

AAATGTGGTTGGCTGGGTATGCATGCTCCCTTGAAACTCACCAAATTTTTGAACTTCATGAAGACTCATT

AATTTTTTAAACTTCCCTTTTCTGTATTTAGCTGTACAATATCCACATA

>PGSC0003DMG400025330LRR-RLKs\_4331

AAGACTCATTAAATTTTTTAAACTTCCCTTTTCTGTATTTAGCTGTACAATATCCACATATTGATAGTGTAC

AATTTGAAAAATGAACAGATGAATACCTTGCTGAAGGAGAATAGACTG

>PGSC0003DMG400025330LRR-RLKs\_4880

AATCTATTTATCACTAGTGAATTTTTCCTTCACCTATAATAGAGTTTAGGTTCTCCTAAGAAAGTTCTTTA

AGAAAATTTGATGAAATATGTGAGGACACTCAACTACTGGTGGATGTC

>PGSC0003DMG400025330LRR-RLKs\_610

TGAGTCGCCTTGTAGGTGGACAGGCATTTCTTGCTATCCTAATGACCAAAGAGTTCAATCTATGTATGTT

CAATTCACTTTTTTTTGTTTTCACTATCAGTGCTTTATTCACTTTGTTA

>PGSC0003DMG400025330LRR-RLKs\_671

ATGTATGTTCAATTCACTTTTTTTTGTTTTCACTATCAGTGCTTTATTCACTTTGTTAGTTCTGTTTGCTTG

GATTCATTTTCTGCATTTTGTTTCTGAATTTTCAGCAACTTACCTTA

>PGSC0003DMG400025330LRR-RLKs\_732

TCTGTTTGCTTGGATTCATTTTCTGCATTTTGTTTCTGAATTTTCAGCAACTTACCTTATATGGAACCTGGA

GGAATTATATCTCCTAGCGTTGGTAAACTCACCAGATTGCAGAGATTG

>PGSC0003DMG400025383-(rev)LRR-RLPs\_1098

AGAGAATAAGAATATCTGGTTGTGGGAAACTAAATTTGGAGGCGTCCATGAATGCTATGTTTCTCGAGG

AACTGTCTTTAAAAGGATGTGATTCACCTCAGTTTGTTCCCAAGAGCACCT

>PGSC0003DMG400025383-(rev)LRR-RLPs\_1159

TCTCGAGGAACTGTCTTTAAAAGGATGTGATTCACCTCAGTTTGTTCCCAAGAGCACCTATTTGAATGTA

AGTAGTTGCCACAACCTTAATAGGCTTTTGGTTCTATTGCCACTGAAAG

>PGSC0003DMG400025383-(rev)LRR-RLPs\_122

CTTTATAAGCTACCTCTGCTTATGGAAAAATTGATCAACTTGCGTCACCTTGACATTAGCGAAGCTCATT

GAGGAGACCCTACATCTGAACAAGTTGAAAAGTCTCCATGTGCTAGTG

>PGSC0003DMG400025383-(rev)LRR-RLPs\_1220

TTGAATGTAAGTAGTTGCCACAACCTTAATAGGCTTTTGGTTCTATTGCCACTGAAAGACTCAGTATTA

GAGGTTGTGATAATCTTGAGATACTTTCAGTGGCATGTGGGACTCAGATG

>PGSC0003DMG400025383-(rev)LRR-RLPs\_1281

TCAGTATTAGAGGTTGTGATAATCTTGAGATACTTTCAGTGGCATGTGGGACTCAGATGACATCATTGCA  
TATTCACGACTGCAAGATTTTGAAGTCGTTGCCAGAGCATATGCAGGAAC

>PGSC0003DMG400025383-(rev)LRR-RLPs\_1403

CTTCCATCTCTTAAGGAACTGCAACTATGGCGTTGTCCAGAAATAGATTCTTTCTGAAGGAGGATTGC  
CCTTCAATTTACAAGTCCTTTGGATCAACAAGTCAAGAACTGGTGAAT

>PGSC0003DMG400025383-(rev)LRR-RLPs\_183

AAGCTCATTTGAGGAGACCCCTACATCTGAACAAGTTGAAAAGTCTCCATGTGCTAGTGGGAGCCAAGT  
TTCTTCTAAGTGGTCGCAGTGGTCCAGAATGGAAGATTTGGGTGAACTAC

>PGSC0003DMG400025383-(rev)LRR-RLPs\_1952

CCTGAATCGGGGATGCCCTCCTCTCTCTCAGCTGTACATTTTGAATTGTCCTAATCTCCGATCTCTTCCA  
CTAAAAGAGATGCCCCCTTCCATCTCTAAACTATCTATTTACAAATGC

>PGSC0003DMG400025383-(rev)LRR-RLPs\_244

AGCCAAGTTTCTTCTAAGTGGTCGCAGTGGTCCAGAATGGAAGATTTGGGTGAACTACATAACTTGTAT  
GGATCTCTATCAATTCTAGAGTTGCAAATGTGATTGATAGAAGGGAATC

>PGSC0003DMG400025383-(rev)LRR-RLPs\_488

ATAAAAGTACTCCAAATTACCGGATATAGAGGGACAAAATTTCCAAATTGGCTAGCTGATAATTCATTT  
ATAAGCTAATAGAAGTGTCTCTTAGCTACTGCAAGGACTGTGATTCCTTG

>PGSC0003DMG400025383-(rev)LRR-RLPs\_61

GCCAGATTCAATTTGTGTACTGTACAACCTAGAGACACTTCTCTTGTACATTGTAGTAATCTTTATAAGC  
TACCTCTGCTTATGGAAAAATTGATCAACTTGCGTCACCTTGACATTAG

>PGSC0003DMG400025383-(rev)LRR-RLPs\_671

GAGGTGACTGAAGAGTTCTATGGTAGTTTGTCTCTAAAAAGCCATTTAACTCCCTTGAGAAGCTTGACT  
TTGCAGAAATGCCGATTGGAAGCAGTGGCATGTACTGGGGAAGGGAGAA

>PGSC0003DMG400025383-(rev)LRR-RLPs\_732

AGCTTGACTTTGCAGAAATGCCGATTGGAAGCAGTGGCATGTACTGGGGAAGGGAGAATTCCTATA  
CTCGAGGAACTTTGATTAAAGATTGCCCAAAGTTTATAGGAAAATTGCCTG

>PGSC0003DMG400025383-(rev)LRR-RLPs\_793

CCCTATACTCGAGGAACTTTGATTAAAGATTGCCCAAAGTTTATAGGAAAATTGCCTGAAAATCTTTCTT  
CTCTGACAGGATTGAGAATTTGAACTGCCCTGAACTCAGTTTGGAGAC

>PGSC0003DMG400025383-(rev)LRR-RLPs\_854

AATCTTTCTTCTCTGACAGGATTGAGAATTCGAACTGCCCTGAACTCAGTTTGGAGACACCTATCCGACT  
TTCAAATTTAAAAGAGTTAAAAGTTGTTGGTTGTCCTAAGGTTGGAGTT

>PGSC0003DMG400025383-(rev)LRR-RLPs\_915

CTATCCGACTTTCAAATTTAAAAGAGTTAAAAGTTGTTGGTTGTCCTAAGGTTGGAGTTCTTTTTGAGGAT  
GCTCAACTGTTTACATCTCAACTTGAAGGAATGAAACAGATTGTTGAAT

>PGSC0003DMG400025383-(rev)LRR-RLPs\_976

TTTTGAGGATGCTCAACTGTTTACATCTCAACTTGAAGGAATGAAACAGATTGTTGAATTAGTAATTACT  
GATTGTAAGTCTTACCTCCTACCAATTAGCATTCTGCCGAGTACCTT

>PGSC0003DMG400025480LRR-RLPs\_290

ATGCGAAACTTTCTTTTTACAAAAGAGAAATTGCCGGGACATGAAATCACTAAGCTATGTACCTTGTAAG  
ATTCATGACTTCTTCTAGGAATAGTTCTTCAGGTCGAGCTCATAACCAC

>PGSC0003DMG400025480LRR-RLPs\_348

GTACCTTGTAAGATTCATGACTTCTTCTTAGGAATAGTTCTTCAGGTCGAGCTCATAACCACGGCGATG  
CAAGGACTCGTTCGACTACTTATGCTGCCCTCAAGAAACCTCACCCTGA

>PGSC0003DMG400025546LRR-RLPs\_0

ATGTTAACTACCTAGTACAGTTTGGGATATGGTTAAATTGAGATATCTGTATATTCCTAACTTTAGCCC  
TGAAAATAAAAAAGCATTACTCGAGAACTCTCCAAAACCTCTATGATTTG

>PGSC0003DMG400025546LRR-RLPs\_124

CCCTTTCCAATCCATATTTCACTCGTGTTGAGGATGCAGAATTGATGCTGAGAAAAACACCTAATCTTCG  
AAAACCTGAAATGTGAAGTCCAGTGCTTAAAATACCCCATCAGTGCCATA

>PGSC0003DMG400025546LRR-RLPs\_248

GAACTTTCCAATACGGCTTGAAATACTAAAGCTTCATTTATCAAAGCCTTTGAAACCGTCCCCTTTTGCA  
TCTCTGCATCAAATCTCAAATACCTGAAATTCTCTGGCTTTTACCTGAA

>PGSC0003DMG400025546LRR-RLPs\_310

CCTTTTGCATCTCTGCATCAAATCTCAAATACCTGAAATTCTCTGGCTTTTACCTGAATTCTCAGTACTTAT  
CAGAACTGCTAATCATCTCAAGCACATTGAGGTA CTCAAACCTGTACC

>PGSC0003DMG400025546LRR-RLPs\_372

CAGTACTTATCAGAACTGCTAATCATCTCAAGCACATTGAGGTA CTCAAACCTGTACCACGTTGAATTTG



GTGATCATGGGGAATGGAAAGTGAGCAGTGGCAAGTCCCTAAACTCAA

>PGSC0003DMG400025546LRR-RLPs\_496

TGAAACTAGAATATTTGTCCTTGATGAAATGGATTGTAGCTGATGATGCCTTTCCTAACCTTGAACAATT  
GGATTTTCTCTAGTATTTTCATGCAGAAAATGGTGTGAAATTCGATACAT

>PGSC0003DMG400025546LRR-RLPs\_558

GAACAATTGGATTTTCTCTAGTATTTTCATGCAGAAAATGGTGTGAAATTCGATACATCTAATGAAAAAG  
AGATAAGTAAGGCATTTGATAGATTAGTCTCTCTTCAAGGTACTGATTAT

>PGSC0003DMG400025546LRR-RLPs\_62

CTTTAGCCCTGAAAATAAAAAAGCATTACTCGAGAACTCTCCAAAACCTATGATTTGGAAACCCTTTCCA  
ATCCATATTTCACTCGTGTGAGGATGCAGAATTGATGCTGAGAAAAAC

>PGSC0003DMG400025546LRR-RLPs\_620

TGAAAAAGAGATAAGTAAGGCATTTGATAGATTAGTCTCTCTTCAAGGTACTGATTATTTTTTCTTTCTTT  
CCTATTTTTTTTTCGTACACCAAATGAATTGATTCATATTTTTTGCCTT

>PGSC0003DMG400025546LRR-RLPs\_682

TCTTTCTTCTCTATTTTTTTTTCGTACACCAAATGAATTGATTCATATTTTTTGCCTTTTTGATATGAAAGGG  
ATACAATCAATTGCAGTTGATAGGAATGAGAAGAAATTTATTGTGAT

>PGSC0003DMG400025546LRR-RLPs\_737

CTTTTTGATATGAAAGGGATACAATCAATTGCAGTTGATAGGAATGAGAAGAAATTTATTGTGATCGGA  
GATATGGATGCTGATGAAGTTCGATTAGTTGTGGGGAAACTGATGCTGTAA

>PGSC0003DMG400025558G-LecRK\_0

AAAAAAAACCTCAAATCTATGGCTGTTTTGCTATGGTTATTAATCTTATCTGCATTTTCATGCAGTAACACTA  
GCACAACAAAGGCAGTTTAATAACTCTTGGCTCTTCTAACACCTA

>PGSC0003DMG400025558G-LecRK\_1098

CAAGGGAGATTGTGAACAAGCCTGTCTACAGGATTGTAAGTGTGAGGCTGCTTCGTTCAAAGACAAAGT  
GTGTAGAAAGCAAAGGCTGCCTCTGAGGTATGGAAGAAAAGACCTGGGTAA

>PGSC0003DMG400025558G-LecRK\_1159

GACAAAGTGTGTAGAAAGCAAAGGCTGCCTCTGAGGTATGGAAGAAAAGACCTGGGTAATTCTAATCT  
TGCATTGGTCAAGGTGGGCATTAATGTGTTAGACAACAAAGAGTTGCCTGAT

>PGSC0003DMG400025558G-LecRK\_1220

CTAATCTTGCAATTGGTCAAGGTGGGCATTAATGTGTTAGACAACAAAGAGTTGCCTGATCAGAAGATTG  
AAGAAACAAAAGGC AAAAGCTAAGGATAGACATCCTAATTGCCAGCATT

>PGSC0003DMG400025558G-LecRK\_2257

TCACAGAATTCATGTCTGGAGTCTGGACTTACAGAAAAATCCAGGAGAGTAGAAGTGTTGAGTTGAGCG  
AGGATGTTGCTCCACGAGCATTTCCTATGCAGAACTAGAGCAGGCAACCA

>PGSC0003DMG400025558G-LecRK\_244

AAATAGGAACAGTCCTGTTGCCGAGTAACACTGTCTTGCTCTTAATAATGATGGAAGGCTCATTGTA  
CAAGTAGGAAGCCAGGAAAACCTGTGCATCAATTCCTCTCGAGCCATTGC

>PGSC0003DMG400025558G-LecRK\_2501

CCAAACTGAAATAAAAATCATTGGAAGGAAACATCACCGAAATCTAGTCCGCCTCATTGGTTATTGCCTG  
GACGGATCAAGAAGGCTTCTGGTGTATGAGTATATGACAAATGGGTCCT

>PGSC0003DMG400025558G-LecRK\_2865

AGAGGCTATATTTTGTGCTAAGTGACTAGCAACCGTCGTTGTAGTATTTGAATTGTAAATACTAATTTAG  
GAGAGTTACAATTTTCTCCATAGTGAAGCGAATCTGCAACAACCAAC

>PGSC0003DMG400025558G-LecRK\_305

CTCATTGTACAAGTAGGAAGCCAGGAAAACCTGTGCATCAATTCCTCTCGAGCCATTGCTTCAGCTTCCCT  
GATGGACACGGGAACTTTGTGCTCTATGATTCTGATCGCAATGTCATT

>PGSC0003DMG400025558G-LecRK\_366

CAGCTTCCCTGATGGACACGGGAACTTTGTGCTCTATGATTCTGATCGCAATGTCATTTGGCAAAGTTT  
TGACAATCCAACAAACACACTTTTACCTGGTCAGCATATATCAGCTGGAC

>PGSC0003DMG400025558G-LecRK\_488

GAGCTGTTCTCGAGTGCCTCGGAAGCAGATGACTCATTAGGGATTTCCGTCTTCCGTCTCATAATGCA  
AGTTGATGGGTACCTTGTTGAGTATCCTGTCAATACACCAGATACTGCCC

>PGSC0003DMG400025558G-LecRK\_549

CATAATGCAAGTTGATGGGTACCTTGTTGAGTATCCTGTCAATACACCAGATACTGCCCCATATGCTTACT  
ACGCATCCTACATCCGTGGAGTAAGGAATAATTTTCACTGAATCTTGA

>PGSC0003DMG400025558G-LecRK\_854

GGTGTGATCCAAAAGGCCTTTGTGGGCTTAATGGATTTTGCACCAATATAGATGCTCAAGCTAAATGTAT  
GTGTCTTCCCTGGATTTAATTTTGAATGCCAGGAAATTGGAGCGCTGGCT

>PGSC0003DMG400025558G-LecRK\_915

TAAATGTATGTGTCTTCCTGGATTTAATTTTGTAAATGCCAGGAAATTGGAGCGCTGGCTGTGAAAGGAAT  
TTCACCACAGAAACCTGTCAGTTAAAGGAGAACAACCTTCCAAATACTATGA

>PGSC0003DMG400025563-(rev)LRR-RLPs\_0

ATGGACAAAACCTTCAGCAGAGTTACCAACAGAAATCCTTCATCAAATACTCTCTCTCTCCCAACTAAAAC  
TGCTGCTCGAACTGCATTGTTGTCCAAATCATGGCTTAAAGCATGCTCT

>PGSC0003DMG400025563-(rev)LRR-RLPs\_1098

TCCATAAGGATTGACATTTTATGGGACGTTACGACCTCATGAACTTACGGAGATTTCTAGTTGAGTTGG  
GTGATCAAGTTGTAGATTTGACGTTGTCTACATTCTCTAAAAGTTTGATC

>PGSC0003DMG400025563-(rev)LRR-RLPs\_1159

TTGAGTTGGGTGATCAAGTTGTAGATTTGACGTTGTCTACATTCTCTAAAAGTTTGATCATACCAAGAGG  
AATTTATCATCTTCCCACACTTGAAGTTGAGCATTGGGAATTATCTTATA

>PGSC0003DMG400025563-(rev)LRR-RLPs\_122

GAAACCCCATCTCTGTTTCGATATATCTGATCCCGTAGAATATCGAGCTCATGAATTCCTGAGAATTGTA  
GATAATACTTTGGAAAGGTATCACCGCGATAATAATCTACCTATTTTCATC

>PGSC0003DMG400025563-(rev)LRR-RLPs\_1220

ACCAAGAGGAATTTATCATCTTCCCACACTTGAAGTTGAGCATTGGGAATTATCTTATAGTGATATTACAA  
CCGCGACATATTCATCTTATAACTATGATGTCATCTTCGCAATTTGTTT

>PGSC0003DMG400025563-(rev)LRR-RLPs\_1342

CCAAGATTTTAACGTTACAGTGTGACAAGAACTAAGAAAGTTTCTACGTCAACAATGGTTGAAGAAGA  
GAGAAAACAGATTTATCAAATGTACTTGGAAAAAGTATCTCATAAATGCTG

>PGSC0003DMG400025563-(rev)LRR-RLPs\_1403

GAAGAAGAGAGAAAACAGATTTATCAAATGTACTTGGAAAAAGTATCTCATAAATGCTGAGATAGAGTA  
CAAGAAAAGGAACGGAGAGGATTGGATGACCCTTGATAGGAAGATATTGGT

>PGSC0003DMG400025563-(rev)LRR-RLPs\_1464

ATAGAGTACAAGAAAAGGAACGGAGAGGATTGGATGACCCTTGATAGGAAGATATTGGTAGCTGATCC  
GCATATTATTGAAGAGATCTATAACAATCCGCTTCAAGCAAATTCAAAGAAAT

>PGSC0003DMG400025563-(rev)LRR-RLPs\_1525

CTGATCCGCATATTATTGAAGAGATCTATAACAATCCGCTTCAAGCAAATTCAAAGAAATGAAAAAATAA

GTATTCGTATATTCCAAGGTACGTAACAATTTGTTATGCACAATGTATGG

>PGSC0003DMG400025563-(rev)LRR-RLPs\_1586

AAAAAATAAGTATTCGTATATTCCAAGGTACGTAACAATTTGTTATGCACAATGTATGGATTATGATATC

AATACTTTTCATCTCTTTCCATTTCCAAACAATTAACCTTCGCTTGTTATT

>PGSC0003DMG400025563-(rev)LRR-RLPs\_1647

TATGATATCAATACTTTTCATCTCTTTCCATTTCCAAACAATTAACCTTCGCTTGTTATTTCTGCAGATGTATT

CCGAGATGGATAGTTCATTGATTGGAGTGATCGCGATATGTGATAGC

>PGSC0003DMG400025563-(rev)LRR-RLPs\_1769

GTTCTTCTTGGCTTCTATTTACATAGTCTGCAATACCAAACAGCGTAATGCAAATCTTTGCTCGGATTTGA

ATTGAATTAGGAAATGTTGTTTGATTGAATTAGGATTTGAATTTTATGC

>PGSC0003DMG400025563-(rev)LRR-RLPs\_183

AGAATTGTAGATAATACTTTGGAAAGGTATCACCGCGATAATAATCTACCTATTTTCATCTTTTGAGCTTTG

CATCTCCTTTTATGATCACATTTATTGTGATGGTCTAGTTGATAAATGG

>PGSC0003DMG400025563-(rev)LRR-RLPs\_1830

TCGGATTTGAATTGAATTAGGAAATGTTGTTTGATTGAATTAGGATTTGAATTTTATGCTTCTACGTGGTA

GAATATTGATATTAACCTGGGTTGTGAATTTTATGTTTTATATACGTATT

>PGSC0003DMG400025563-(rev)LRR-RLPs\_1891

CTACGTGGTAGAATATTGATATTAACCTGGGTTGTGAATTTTATGTTTTATATACGTATTTCTCGTATCTTAT

TCATGTAAATAAATAAGCAGAAAGATGTAATGTAAAGTAATACTTTA

>PGSC0003DMG400025563-(rev)LRR-RLPs\_1952

TCGTATCTTATTCATGTAAATAAATAAGCAGAAAGATGTAATGTAAAGTAATACTTTATTTTTATACTAT

ATATATTATGATTAGTCCATTTTCTTCACTTTCTTGTCTGAGCAAACT

>PGSC0003DMG400025563-(rev)LRR-RLPs\_2013

TTTATACTATATATATTATGATTAGTCCATTTTCTTCACTTTCTTGTCTGAGCAAACTCCATATGCTCTTCC

ATGGATAGAATTTACAGTTACCAACTAAAATCCTTCACCAAATACT

>PGSC0003DMG400025563-(rev)LRR-RLPs\_2074

ATATGCTCTTCCATGGATAGAATTTACAGTTACCAACTAAAATCCTTCACCAAATACTATCTCTTCTCCCT

ACTAAAACCTGCTGCTCGAACCGCGGTGTTGTCGAAGCAATGGCTTAAA

>PGSC0003DMG400025563-(rev)LRR-RLPs\_2196

ATGCTATACAACTCCAATCTCTGTTTTGACGAATCTGATTTTGGCGAAGAACAACAGAATAATGGTAGG  
TTTGTAGACTTTTCATGGTGAATTCTCGAGGTTAGTAGATTATACTTTGG

>PGSC0003DMG400025563-(rev)LRR-RLPs\_2257

AATGGTAGGTTTGTAGACTTTTCATGGTGAATTCTCGAGGTTAGTAGATTATACTTTGGAAAGATATCGC  
CGTGAAAATCTACCTATTTCCGGGTTTTAAGCTTCACATCTCTTTTTCCGA

>PGSC0003DMG400025563-(rev)LRR-RLPs\_2318

AGATATCGCCGTGAAAATCTACCTATTTCCGGGTTTTAAGCTTCACATCTCTTTTTCCGATCAAAGTATTG  
TGAAGGTCTAGTCGATAAATGGTTAGAAATTATAGCAGAGAGAAGGGCT

>PGSC0003DMG400025563-(rev)LRR-RLPs\_2379

AAACTGATTGTGAAGGTCTAGTCGATAAATGGTTAGAAATTATAGCAGAGAGAAGGGCTTCACAGGTT  
GCACTTTTGGTGAAAAGCGAATTTGGAGTTTATTCGAAAAGATATAGTTTGT

>PGSC0003DMG400025563-(rev)LRR-RLPs\_244

TTGAGCTTTCATCTCCTTTTATGATCACATTTATTGTGATGGTCTAGTTGATAAATGGTTAGATATTATA  
ACAGATAAAAGAGCTTCAAAGATTTCACTTTTTGTGAAAAGCAAAGCTA

>PGSC0003DMG400025563-(rev)LRR-RLPs\_2440

ACAGGTTGCACTTTTGGTGAAAAGCGAATTTGGAGTTTATTCGAAAAGATATAGTTTGTAGCTGATTCC  
ATATTTGCGATAGGATCGTTGCAGGAGTTGGAGATAAATTGCTGCAGAAT

>PGSC0003DMG400025563-(rev)LRR-RLPs\_2501

GCTGATTCCATATTTGCGATAGGATCGTTGCAGGAGTTGGAGATAAATTGCTGCAGAATACTGAAGCAA  
AAAGCATTACTTTCCGAAGATAAAATTAAGTGTAGTAACCTAAAAAATCTA

>PGSC0003DMG400025563-(rev)LRR-RLPs\_2562

TGAAGCAAAAAGCATTACTTTCCGAAGATAAAATTAAGTGTAGTAACCTAAAAAATCTAACCTTGTGCTA  
TGTTACTGTTACTGAATCAGCACTTGATAGTCTAATTTTCATGTTGCTCTC

>PGSC0003DMG400025563-(rev)LRR-RLPs\_2623

CTTGTGCTATGTTACTGTTACTGAATCAGCACTTGATAGTCTAATTTTCATGTTGCTCTCAGATCCAGAAGA  
TATCATTCCAACACTGTTTGGGGTTCAATTGCATTTGTGTTACGAAAAA

>PGSC0003DMG400025563-(rev)LRR-RLPs\_2684

ATCCAGAAGATATCATTCCAACACTGTTTGGGGTTCAATTGCATTTGTGTTACGAAAAATCTTCCTAATCT  
TTTGTCTCTTCATATCTTAAAGTGCCCAATTATGGAAGTTCATATTGGT

>PGSC0003DMG400025563-(rev)LRR-RLPs\_2745

TTCCTAATCTTTTGTCTCTTCATATCTTAAAGTGCCCAATTATGGAAGTTCATATTGGTGATGCACCAAAA  
CTGCTATCTTTCGAATATGTGAACAAAGGTGATTCCGAGCGTTTATATC

>PGSC0003DMG400025563-(rev)LRR-RLPs\_2806

TGCACCAAAACTGCTATCTTTCGAATATGTGAACAAAGGTGATTCCGAGCGTTTATATCGTCATAATCAT  
GACATATGTTTGCGGACGTTAGAGATTGGTTCTTGTATAATCTCAGAAG

>PGSC0003DMG400025563-(rev)LRR-RLPs\_2928

TAGAATTTGTGAAAGCTGAGATTGATGATGTGGTTCTTTTCGAGCTTATACCAAAACTACACTTCATCAA  
GGAGTTGATCTTACACTACTGTAAGTACTTGAAGAACATAAGAATCTCAA

>PGSC0003DMG400025563-(rev)LRR-RLPs\_2989

CTTCATCAAGGAGTTGATCTTACACTACTGTAAGTACTTGAAGAACATAAGAATCTCAAGTGCAACACTC  
GAGGTTTGTAGCATAGAAAGTTGTGTGTGCTTAGTGCAAGCCACTTTTGA

>PGSC0003DMG400025563-(rev)LRR-RLPs\_305

AGATATTATAACAGATAAAAGAGCTTCAAAGATTTCACTTTTTGTGAAAAGCAAAGCTAAAGAATATTGT  
GAAAGATATAATTTGTTTGTTCATAACATATTTAAGATGAAATTCATACA

>PGSC0003DMG400025563-(rev)LRR-RLPs\_3050

GCAACACTCGAGGTTTGTAGCATAGAAAGTTGTGTGTGCTTAGTGCAAGCCACTTTTGTATGTGCCCAAGT  
TACTCTTCTTAGTCGTCAAGCCAATGCAGGATTTTGGTGAACGTATAACA

>PGSC0003DMG400025563-(rev)LRR-RLPs\_3172

ACCTTGTTTATCTTTTCAAAGTGCTTCAAGCCAATGCAGAATTTACATAAAGTATGGCGATCTACCATCTG  
ATGCCGAGCATATCATTGACTTACGGAGATCTCTGGTTGAGTTGAATGA

>PGSC0003DMG400025563-(rev)LRR-RLPs\_3233

CTACCATCTGATGCCGAGCATATCATTGACTTACGGAGATCTCTGGTTGAGTTGAATGATAAAGTTGCAG  
ACTTGACATTGGTTAGTATCAGTAAAGGGTTGAGAGCAACAAGTGGAGTT

>PGSC0003DMG400025563-(rev)LRR-RLPs\_3294

AAGTTGCAGACTTGACATTGGTTAGTATCAGTAAAGGGTTGAGAGCAACAAGTGGAGTTGATCATTTTC  
CCTCAACTGAAGTTGAGAATTTGATATTAACCTATTGTGACTGGTCAATTA

>PGSC0003DMG400025563-(rev)LRR-RLPs\_3355

TCATTTTCCCTCAACTGAAGTTGAGAATTTGATATTAACCTATTGTGACTGGTCAATTACGACATATTCAT

CTTACTTAAATGACGTCTTCTGGATTTGTTGGCCCAAGAATTTAACTGT

>PGSC0003DMG400025563-(rev)LRR-RLPs\_3416

ACATATTCATCTTACTTAAATGACGTCTTCTGGATTTGTTGGCCCAAGAATTTAACTGTACATTGTGGCAA

CAAATTTAGAAAGTTCGTATGTCAACAATTGTTGAAGAAATGCTGGTGG

>PGSC0003DMG400025563-(rev)LRR-RLPs\_3477

ATTGTGGCAACAAATTTAGAAAGTTCGTATGTCAACAATTGTTGAAGAAATGCTGGTGGAGGAGACCTT

CTAAATGTTCTTGAAAGAATATTTTCATAAATGCTCAGATAGATTGCATGA

>PGSC0003DMG400025563-(rev)LRR-RLPs\_3599

CGGGGAGGAGACGACTGGATGACTCTTGATTGGAAAATGTTGGCATCTAACCCCTCGTATTATTGAAGAA

ATCCGTATAATTCGCTTCAACCATACTCAAAGAAAAGAGATAAAGAAAGAA

>PGSC0003DMG400025563-(rev)LRR-RLPs\_366

GAATATTGTGAAAGATATAATTTGTTTGTTCATAACATATTTAAGATGAAATTCATACAACATTTGGAGTT

AAATCATTGCCAAATATTACTGGCGAAACAAAATGCACTCTTTTATGAT

>PGSC0003DMG400025563-(rev)LRR-RLPs\_3660

TTGAAGAAATCCGTATAATTCGCTTCAACCATACTCAAAGAAAAGAGATAAAGAAAGAATCATATATTCT

AAGGTAACGTTTCGTTATGTAAAATTGTTCTATGAATTACAATATTATTT

>PGSC0003DMG400025563-(rev)LRR-RLPs\_3721

ATATATTCTAAGGTAACGTTTCGTTATGTAAAATTGTTCTATGAATTACAATATTATTTGTGCCATCCCCTT

TCCCTTTCTTAACAATTAACAGAGTATATTATTTGTGCAGATGCATTC

>PGSC0003DMG400025563-(rev)LRR-RLPs\_3782

GCCATCCCCTTTCCCTTTCTTAACAATTAACAGAGTATATTATTTGTGCAGATGCATTCCGAAATGAATAG

CTCATCAATCGGAGTGATCCATATGGCTTGGGATTATTTTGAGTTGTTT

>PGSC0003DMG400025563-(rev)LRR-RLPs\_3843

AAATGAATAGCTCATCAATCGGAGTGATCCATATGGCTTGGGATTATTTTGAGTTGTTTCTTTCAATTTG

GTTGTAGACTTGCTTTGAGGTTAGCTGTTTATGTCCATTTAAGCTTATT

>PGSC0003DMG400025563-(rev)LRR-RLPs\_3965

CATTTTCTCCATTGGACCTCCAATGTTATGCTGTTGGTATGGTCTCGAATTGATTGGATTTGATATTTTGT

CGACTTACAACAAAAGTACTACTTAGATAGTTCTTTATATCTGTCAA

>PGSC0003DMG400025563-(rev)LRR-RLPs\_4026

GATATTTTTGTCGACTTACAACAAAAGTACTACTTAGATAGTTCTTTATATCTGTCAAAGTCTTGGTGCG  
CAGATTTACCTGTTAACAAATACGTGATAGAAATGCGAGCTCTCTGAAA

>PGSC0003DMG400025563-(rev)LRR-RLPs\_4087

TCTTGGTGCGCAGATTTACCTGTTAACAAATACGTGATAGAAATGCGAGCTCTCTGAAACACCATCATAA  
GTCGATACTTGCATAAACAATTATCATTTTTTCATATACATTACTGCAGG

>PGSC0003DMG400025563-(rev)LRR-RLPs\_4148

CCATCATAAGTCGATACTTGCATAAACAATTATCATTTTTTCATATACATTACTGCAGGATTAATGCTAAC  
CAATCCACTCAGTGCTGCAGAACAGGAATTTGAGAACTATACTACTCCA

>PGSC0003DMG400025563-(rev)LRR-RLPs\_4209

TAATGCTAACCAATCCACTCAGTGCTGCAGAACAGGAATTTGAGAACTATACTACTCCATCTGTTTCAATT  
TGTTTGCCTGATTTTGACTCGACACAAAGTTTAAGAACGTAAAGAAGAT

>PGSC0003DMG400025563-(rev)LRR-RLPs\_427

ATTTGGAGTTAAATCATTGCCAAATATTACTGGCGAAACAAAATGCACTCTTTTATGATGATAAAATTA  
GTGTGATAACCTGAAAAACATAACCTTGTGTTATGTTACTATTTCTCAAT

>PGSC0003DMG400025563-(rev)LRR-RLPs\_4331

TTAAATCTTATGATTTTAACTAAATATATGTAGAATATCCAAAATGTCATTTAATTTTGTGGTATTAAAC  
ATTTCCCGTGAAAAATGCATTTTAACTTCCTGAAGAGTGTAATGT

>PGSC0003DMG400025563-(rev)LRR-RLPs\_4392

TGGTATTAACATTTCCCGTGAAAAATGCATTTTAACTTCCTGAAGAGTGTAATGTGTCAGTTCTATTTT  
TTCTGAGGTTTAGCTAATAAAAACTTTAATCTAATTGGTCTGCCGTGT

>PGSC0003DMG400025563-(rev)LRR-RLPs\_4575

ATTAAATAGTGGGATAAATAATTACAGAACAGCCTAATACCTCCAAACAAACACAGAATAAAAGTCGTG  
CATTTTATCCTGGTTATACACCTCACAACCTCTCAACAAGCTCTGCTACTGC

>PGSC0003DMG400025563-(rev)LRR-RLPs\_4636

AAGTCGTGCATTTTATCCTGGTTATACACCTCACAACCTCTCAACAAGCTCTGCTACTGCCATGGATAGAAT  
TTCAGATTTACCAACTGAAATCCTTCACCAAATACTCTCTCTTCTCCCC

>PGSC0003DMG400025563-(rev)LRR-RLPs\_4697

TGGATAGAATTTAGATTTACCAACTGAAATCCTTCACCAAATACTCTCTCTTCTCCCCATTAATAACTGCT  
GCTCGAACTGCCGTGTTGTGGAAGCCATGGCTATACAAATCCCTATCTC



>PGSC0003DMG400025563-(rev)LRR-RLPs\_4758

TAAAACTGCTGCTCGAACTGCCGTGTTGTCGAAGCCATGGCTATACAAATCCCTATCTCTGTTTTGATCAA  
TATGATTCTAAACCACCTGCGGCTGCATAACGGTATGTTTCATAGACTTT

>PGSC0003DMG400025563-(rev)LRR-RLPs\_4819

TTTTGATCAATATGATTCTAAACCACCTGCGGCTGCATAACGGTATGTTTCATAGACTTTCATAATCAATTC  
GTGACGATTGTAGACAATACTTTGGAGAGATATCGCCGTGAAAATCTAC

>PGSC0003DMG400025563-(rev)LRR-RLPs\_488

TAAAATTAAGTGTGATAACCTGAAAAACATAACCTTGTGTTATGTTACTATTTCTCAATTAACACTTCAAA  
GCCTGATTTTCATGTTACCCTCAGATTGAGAAGGTATCAATACAATACTG

>PGSC0003DMG400025563-(rev)LRR-RLPs\_4880

TAATCAATTCGTGACGATTGTAGACAATACTTTGGAGAGATATCGCCGTGAAAATCTACCGATTTTCAGTT  
TTAACCTTCGCATCTATTTTTCCGATCAAACCTGATTGTGACGGTCTAATC

>PGSC0003DMG400025563-(rev)LRR-RLPs\_4941

ATTTTCAGTTTTAACCTTCGCATCTATTTTTCCGATCAAACCTGATTGTGACGGTCTAATCGATAAATGGTTA  
GCTATCATAGCACAGAAAAGTGTTTTACAGGTTTCACTTTTGGTGAATT

>PGSC0003DMG400025563-(rev)LRR-RLPs\_5002

TAAATGGTTAGCTATCATAGCACAGAAAAGTGTTTTACAGGTTTCACTTTTGGTGAATTGCAGATCTGAA  
AATTATTTTAAAAAATATAGTTTGTAGCTGATTCCATATTTGCGATAGA

>PGSC0003DMG400025563-(rev)LRR-RLPs\_5063

AGATCTGAAAATTATTTTAAAAAATATAGTTTGTAGCTGATTCCATATTTGCGATAGAATCGTTGCAGCA  
GTTGAAGATGAATCACTGCAGAATACTGAAACAAAAAGCACTACTTTCC

>PGSC0003DMG400025563-(rev)LRR-RLPs\_5124

CGTTGCAGCAGTTGAAGATGAATCACTGCAGAATACTGAAACAAAAAGCACTACTTTCCGAAGATAAAA  
TTAAGTGCAGTAACCTAAAAAACTAACTTTGTGCTCTGTTACTGTTACTG

>PGSC0003DMG400025563-(rev)LRR-RLPs\_5185

AGATAAAATTAAGTGCAGTAACCTAAAAAACTAACTTTGTGCTCTGTTACTGTTACTGAATCAGCACTT  
GATAGTCTAATTTTCGTGTTGCTCTCAGATCGTGACGATATCATTTCATA

>PGSC0003DMG400025563-(rev)LRR-RLPs\_5246

TCAGCACTTGATAGTCTAATTTTCGTGTTGCTCTCAGATCGTGACGATATCATTTCATACTGTATAGGGTT

CATTTTCTCTACTTTACAATCGATATACATAGGTTGGATAAACATACCA

>PGSC0003DMG400025563-(rev)LRR-RLPs\_5307

GTATAGGGTTCATTTTCTCTACTTTACAATCGATATACATAGGTTGGATAAACATACCAGACTACCTTGTT

TATCTTTTCGAAAGTCCTTCAAGCAAATGCAGGATTTCTATATATTATGG

>PGSC0003DMG400025563-(rev)LRR-RLPs\_5368

CTACCTTGTTTATCTTTTCGAAAGTCCTTCAAGCAAATGCAGGATTTCTATATATTATGGTGATCTATGGGA

TGAAGAGAAGTACATTGACTTACGGAGATCTCTAATTGAATTGCGTGAT

>PGSC0003DMG400025563-(rev)LRR-RLPs\_5429

ATCTATGGGATGAAGAGAAGTACATTGACTTACGGAGATCTCTAATTGAATTGCGTGATCAAGTTGTAG

AGTTGAGATTGTTTTGTATCTATATAGGCTTGAGAGGAGCTAGTGGAATTG

>PGSC0003DMG400025563-(rev)LRR-RLPs\_549

ACACTTCAAAGCCTGATTTTCATGTTACCCTCAGATTGAGAAGGTATCAATACAATACTGTATCGGGTTCA

ATAGCATTTCGTGTTTCAAAAACCTTCTCTAACTTTTGTGATTTAGTATC

>PGSC0003DMG400025563-(rev)LRR-RLPs\_5490

AGTTGTAGAGTTGAGATTGTTTTGTATCTATATAGGCTTGAGAGGAGCTAGTGGAATTGATCATATTCCG

ATACCTGAAGTTGTGAATTTGATACTTACTCCTTACTATTCAACTACTTA

>PGSC0003DMG400025563-(rev)LRR-RLPs\_5551

CATATTCCGATACCTGAAGTTGTGAATTTGATACTTACTCCTTACTATTCAACTACTTACTTTGATATCATC

TTCTCGATTTGTTGGCCCAAGAGTTTAAACATTTTCAGGAAGGTGACAAA

>PGSC0003DMG400025563-(rev)LRR-RLPs\_5612

TTGATATCATCTTCTCGATTTGTTGGCCCAAGAGTTTAAACATTTTCAGGAAGGTGACAAAAGATTTAGAAA

GTATCTACGACAACAATTGTTGAAGAAGAGACAATGGAGTTTTACGAGAT

>PGSC0003DMG400025563-(rev)LRR-RLPs\_5673

ATTTAGAAAGTATCTACGACAACAATTGTTGAAGAAGAGACAATGGAGTTTTACGAGATGTACTTGGAA

GGAGTATATGATGAATGCTTAGATAGAGTACAAGAAAAGGACACAAGACGA

>PGSC0003DMG400025563-(rev)LRR-RLPs\_5734

ACTTGAAGGAGTATATGATGAATGCTTAGATAGAGTACAAGAAAAGGACACAAGACGATTGGATTAC

TCTTGATAGGAAAATAGTGGCAGCCGACACTCGTATTATTGAAGAGATGAAT

>PGSC0003DMG400025563-(rev)LRR-RLPs\_5795

GGATTACTCTTGATAGGAAAATAGTGGCAGCCGACACTCGTATTATTGAAGAGATGAATACAATCCGCC  
TTACTGTACAATGTATGAATTATGATATTGATCACGTCTCCAGTTTCC

>PGSC0003DMG400025563-(rev)LRR-RLPs\_5856

AATCCGCCTTACTGTACAATGTATGAATTATGATATTGATCACGTCTCCAGTTTCCATCCCCTTTCCCT  
TTCCTAACAATTAATGGAGTTTGTATTCTGCTGATGCCGTCCGAGA

>PGSC0003DMG400025563-(rev)LRR-RLPs\_5917

CCCCTTTCCCTTTCCTAACAATTAATGGAGTTTGTATTCTGCTGATGCCGTCCGAGATGGATACCTCAT  
CATGGAGGGATCGATAACTCATTTTTTCAGCTATCTTCTTTGCTTTATC

>PGSC0003DMG400025563-(rev)LRR-RLPs\_5978

GATACCTCATCATGGAGGGATCGATAACTCATTTTTTCAGCTATCTTCTTTGCTTTATCTTTTCTTATTTCT  
TTAATTTACCAATAATTTGATGGAGTTTGAGTATTAGGGTAGAAGG

>PGSC0003DMG400025563-(rev)LRR-RLPs\_6039

TTCTTATTTTCTTTAATTTACCAATAATTTGATGGAGTTTGAGTATTAGGGTAGAAGGTCAGTAGGTAGC  
TCATAGCTGAGTGTTGTCTCACTTTGTGTGTGAGAGAGACACGGGCGGA

>PGSC0003DMG400025563-(rev)LRR-RLPs\_61

CAACTAAACTGCTGCTCGAACTGCATTGTTGTCCAAATCATGGCTTAAAGCATGCTCTACGAAACCCCA  
TCTCTGTTTCGATATATCTGATCCCGTAGAATATCGAGCTCATGAATTCC

>PGSC0003DMG400025563-(rev)LRR-RLPs\_610

TCGGGTTCAATAGCATTTCGTGTTTCAAAAACCTTCTCTAACTTTTGTGATTTAGTATCTTTTACTGCCCAA  
TTGTGGAAGTTGAAATTGTTGATGCACCAAACTGCTATCTTTTGAAT

>PGSC0003DMG400025563-(rev)LRR-RLPs\_6100

AGTAGGTAGCTCATAGCTGAGTGTTGTCTCACTTTGTGTGTGAGAGAGACACGGGCGGACTACCTTGAT  
ATTTTATTGTTTTAGTTTATTTAATCCTGTATTGGATACATTCCTTTTGA

>PGSC0003DMG400025563-(rev)LRR-RLPs\_6283

TATTTAGTGGATCTCTTACTACAAGTACATGGTTTGAACCTTGAACACTACTGATCTCAGCTGAACC  
TGTATGTAACCTGCTAGCTCCGACACTGTAAGAACCCTGTAGACATCAA

>PGSC0003DMG400025563-(rev)LRR-RLPs\_6344

CAGCTGAACCTGTATGTAACCTGCTAGCTCCGACACTGTAAGAACCCTGTAGACATCAAATGTCTTGACT  
GATTCTTTCACCTTGTATCTTGGTTCAGATATTCGAAAGATAGCAATTT

>PGSC0003DMG400025563-(rev)LRR-RLPs\_6394

AGACATCAAATGTCTTGACTGATTCTTTCACCTTGTTATCTTGGTTCAGATATTCGAAAGATAGCAATTTT  
GGTGCATCAACAACATGAACTTCCTCAACTCGGAAACATAAGACATTAA

>PGSC0003DMG400025563-(rev)LRR-RLPs\_732

GTGAACAAAGGTGATTCCGCGCCTTATTTATCTAGTGATAATCTTCACATATGTTTGCGAACAATAGAGA  
TTGGTACTTGTCAAATCTCAAAGGGTAGAATTTGTGAAGGTCACAGTT

>PGSC0003DMG400025563-(rev)LRR-RLPs\_793

CAATAGAGATTGGTACTTGTCAAATCTCAAAGGGTAGAATTTGTGAAGGTCACAGTTGAGTATTGGG  
ATCTCTTCAAGATTATACAAAAATTACACTCTGTGAAAGAGTTGATTTTAC

>PGSC0003DMG400025563-(rev)LRR-RLPs\_854

GTATTGGGATCTCTTCAAGATTATACAAAAATTACACTCTGTGAAAGAGTTGATTTTACTACTGTAGG  
TACTTGAGAAAAATAAAAATCTCAAGTTCAACCCTCGAGGTTTGTAGCAT

>PGSC0003DMG400025563-(rev)LRR-RLPs\_915

TACTGTAGGTACTTGAGAAAAATAAAAATCTCAAGTTCAACCCTCGAGGTTTGTAGCATAGTTCAGTGTG  
ATTTAGTAGAAGAAGCCATTTTTGATACGCCCAAATTACTCTCCTTAGCC

>PGSC0003DMG400025563-(rev)LRR-RLPs\_976

TTCAGTGTGATTTAGTAGAAGAAGCCATTTTTGATACGCCCAAATTACTCTCCTTAGCCTTCTCCGATCAA  
GATAGACTACCTTCTTTATCTTTTGAAAGGGCTCCGAGCCAATGCAGAG

>PGSC0003DMG400025598-(rev)RLKWAX-EGF\_0

CAAAGTGCAGCGTATTTGGTTACAAAATTTGTGATCGGCCTCCGCTTGTCTTGTATTTCTGGTGATCA  
AATTCAAAGGAGGCATTTGTCGATGTATGATGCGATTGAAGGCTTTTT

>PGSC0003DMG400025598-(rev)RLKWAX-EGF\_1054

GTTTATCAGATGATGGGAAGTTCTATGATATTTTCGTCTGATTCAATGGCTTTGTTAGAAAATTCTGCTGA  
TAATTCTGTCAAAGTAGACATTTGTTCTGATTGATTTGTATTGTTTCATT

>PGSC0003DMG400025598-(rev)RLKWAX-EGF\_1116

TTCTGCTGATAATTCTGTCAAAGTAGACATTTGTTCTGATTGATTTGTATTGTTTCATTTAAAATGACATATA  
TGCGAGAAGGGCTTCACATTTTACGAAGGGTCCGGTCTGAGTTGGTCC

>PGSC0003DMG400025598-(rev)RLKWAX-EGF\_1178

ATGACATATATGCGAGAAGGGCTTCACATTTTACGAAGGGTCCGGTCTGAGTTGGTCCGTCTCGAGACA

CTGCATTGTGTTCTCGCTGAACAAATACACATGGACATAATTTAAAAGTCTA

>PGSC0003DMG400025598-(rev)RLKWAX-EGF\_1233

TCCGTCTCGAGACACTGCATTGTGTTCTCGCTGAACAAATACACATGGACATAATTTAAAAGTCTATTTTCA

ACCTTAAGACTTTAGCACTCGATTATGGGGCTTGGGATTATAGTTTGGG

>PGSC0003DMG400025598-(rev)RLKWAX-EGF\_124

ACACAAAACAATTTTCATGCCAATCAGATATAAATACTCCCACGTAAAGAGAATGACCAGAGGATTCAAA

GAGAAATTAGGTGAGGGAGGTTACGGCAGTGTATACAAGGGAAACCTTCGT

>PGSC0003DMG400025598-(rev)RLKWAX-EGF\_186

ATTCAAAGAGAAATTAGGTGAGGGAGGTTACGGCAGTGTATACAAGGGAAACCTTCGTAGTGGAAGAG

ATGTAGCAGTGAAGATGTTGAACAAGCCTAAAGCTGGTGGGCAAGATTTTCAT

>PGSC0003DMG400025598-(rev)RLKWAX-EGF\_372

TGAGGGAACAATACGTGCTCTTGTATACGACTTCATGTCCAATGGATCACTCGACAAGTACATCAACACC

AGTCAAGAAGGAAGTCCTCTGTTAAGTTGGCAGAGTAAGTATGACATTGT

>PGSC0003DMG400025598-(rev)RLKWAX-EGF\_620

TTGCAAAATTATATCCAACAGATAATAGCATTGTGACTCTCACAGCTGCTCGTGGAACCTATTGGATATGT

AGCTCCAGAATTGATCAGCAAAAGCATTGGAGCAATCTCTTACAAAGTTG

>PGSC0003DMG400025598-(rev)RLKWAX-EGF\_992

TGCTTGAAGGTGAAGTTGAAGTGCTAGAAGTACCTCCTCAGCCTCTTCAATCTCAACCGATTGTTTATCA

GATGATGGGAAGTTCTATGATATTTTCGTCTGATTCAATGGCTTTGTTAG

>PGSC0003DMG400025635LRR-RLKs\_0

ATGCGTCTTATATCACGTATTGGTGCTCCAATACCAACAACGACATTTCTGAGAGGTATCATCTTTTGCTT

CTTGACATTTTCCAGAATGGAAATTTTCACAGCGAGTTTTAACTTCCAC

>PGSC0003DMG400025635LRR-RLKs\_1054

ACTTGGGAGGTCTCAACTTGGGTAACAGTCTCTTGACAGGGGTCACCCCTTCTTCAATAGGAAACCTCAC

TGAACTCATCTATCTTTATTTGGGACTAAACAGGTTAGAGGGTAACATAC

>PGSC0003DMG400025635LRR-RLKs\_1178

AACATTGGGAAACTGTAGCCAACCTGCTAAAATTGGGTATTTCTGAAAACAACCTAACAGGCACTATACCA

CAACAACCTTTTGGCTCTCTCATCCCTCACAAATATTTATGCATCTTATAA

>PGSC0003DMG400025635LRR-RLKs\_124

TTCTGGCTATACATGCTGTGTTTCTTGTGTTCTTATTCTCATTCTCTCCAACATATTGTATCAGCTGCTTT  
TCTTGGAATGAAACTGACAACTTGCCTTACTTGGATTCAAGTCCC

>PGSC0003DMG400025635LRR-RLKs\_1364

TCACAACAATTTTTCGGGGATGATTCCACGAACTCTTGAAAATGCTTGGCCTTGGGGGATCTATTTGAA  
GGGAACTCCCTCCAAGGGACCATTCCAATTTAGAAGATCTGCCGGATC

>PGSC0003DMG400025635LRR-RLKs\_1612

ATATTTTCAAATTTGAGTGCAGATGTATTAAGTGGAACTCCGAGCATTGGTGGGATTCAAGAGCTGC  
ATTTACGACCTTGTGTTTATCAAAAGACACAGAAGAAGCATGTACTTCCC

>PGSC0003DMG400025635LRR-RLKs\_186

TCAGCTGCTTTTCTTGGCAATGAAACTGACAACTTGCCTTACTTGGATTCAAGTCCCAAATAACTGAGG  
ATCCAGCAAGAGTTTTCGCCTCTTGAACGATTCTGTTCAATTTCTGTCAG

>PGSC0003DMG400025635LRR-RLKs\_1860

TCTCACAGCTCATTGGATGATTTGGTTTGGTGAGACTCATTCTTGATGAAGATCTCACAGCTCAGTTTA  
GCTCACTTGGAGTTATGGGAACCATTGGCTATGCAGCTCCAGGTGGTGT

>PGSC0003DMG400025635LRR-RLKs\_2108

TTGGGATTCTCATATTGGAGATATCACTGGAAGAAGACCCACAGACACTTTGTTCCAAGCAAGCTCTAG  
TCCTCACCCTTTGTCGAAACAGCGTTGCCAGAGAAAGTTATGGAGATTC

>PGSC0003DMG400025635LRR-RLKs\_2728

ACACAGATGAGGTATTCTGTCCCAAAGTTGGAGCATCATGATCAATACTTGGAGGGTTAGTGAGAACA  
CTGTTGATCTTTGCGTTGCTTTCTTAGCTTTGCTTGTGTTTTGCCTTGTGTC

>PGSC0003DMG400025635LRR-RLKs\_2790

GAGAACACTGTTGATCTTTGCGTTGCTTTCTTAGCTTTGCTTGTGTTTTGCCTTGTCTTTATTTGAATAC  
CAATGCCATGCCACATGACATTGTTAGCCTTCATCTTGTCAAGTCC

>PGSC0003DMG400025635LRR-RLKs\_310

CTGGAGTAAAATGTGGCCTGAGACACGGAAGAGTCATCCGTTTGAATCTCAAAGGGCGAGGCTGGCAG  
GTATGATCTCAGGTAATCTTGGAAACCTCTTTTTCTTAATTCTCTTGACCT

>PGSC0003DMG400025635LRR-RLKs\_372

TGGCAGGTATGATCTCAGGTAATCTTGGAAACCTCTTTTTCTTAATTCTCTTGACCTTGCAGAAAATGCC  
TTCCATAACAAAATTGAGGCTTCTTGGATTGTCAGTAAATAGCTTATCC

>PGSC0003DMG400025635LRR-RLKs\_434

GAAAATGCCTTCCATAACAAAATTGAGGCTTCTTGGATTGTCAGTAAATAGCTTATCCGGGGAGTCCCT  
CCTCCGTTGTACAATTTGTCTTCCCTGGAACATAATCACTTTCTTTAA

>PGSC0003DMG400025635LRR-RLKs\_62

CTTTTGCTTCTTGACATTTTCCAGAATGGAAATTTTACAGCGAGTTTTAACTTCCACACCTTTCTGGCTAT  
ACATGCTGTGTTTCTTGTGTTCTATTCTCATTTTCTCTCCAACATAT

>PGSC0003DMG400025635LRR-RLKs\_744

ATTTTCTTGTGGCTCAACGTTTGGAGTAACCAACTTGGATACAGTAAGCATGATGACCTTGACTTTGTAA  
TTTTTCTTACCAACTACCAGCAGTCTACAAATGCTCCATTTTGGAGACAA

>PGSC0003DMG400025635LRR-RLKs\_868

TTTGTAGGTACATTACCTCATTCAACAGTCAACCTTCTAGTCAGTTACAACGCCTACTCTACTAGGAAAC  
AGAATTACTGGAAGCATACCCAGAGATATCTCAAACCTGGTGAATATGC

>PGSC0003DMG400025635LRR-RLKs\_930

CTAGGAAACAGAATTACTGGAAGCATACCCAGAGATATCTCAAACCTGGTGAATATGCATCTACTCGAG  
ATGAGTAACAACAATCTTACAGGTAGCACTCCAGGTTCTATTGGAAGACTG

>PGSC0003DMG400025635LRR-RLKs\_992

ACTCGAGATGAGTAACAACAATCTTACAGGTAGCACTCCAGGTTCTATTGGAAGACTGACAACTTGGG  
AGGTCTCAACTTGGGTAACAGTCTCTTGACAGGGGTCACCCCTTCTTCAAT

>PGSC0003DMG400025668RLKWAX-EGF\_0

TCTACACCATGCAGCATAATCAAGTTGCTCTGTTTTCTTTCCCACTCCTCTGTTTTATGCTAATCTTAACAC  
TAACCACCGCCCAAATTATCCCCTCTAACACCACTTCTCCTCCTCCTT

>PGSC0003DMG400025668RLKWAX-EGF\_1037

TTGAAGCACGGGAAAGTAACGATTATGCTTGCCTCGATAATAGCCAGTGTGTTGATTCTGACTGGCA  
TTGGTGGCTATCGGTGTAGCTGCAACTCGGGATATGAAGGCAATCCATATA

>PGSC0003DMG400025668RLKWAX-EGF\_1098

CACTGGCATTGGTGGCTATCGGTGTAGCTGCAACTCGGGATATGAAGGCAATCCATATATAGGCTATGG  
CTGCCAAGGTAATTTGATTTTTGTACTCTCACATCATCTACAGGTTTTA

>PGSC0003DMG400025668RLKWAX-EGF\_1159

GGCTATGGCTGCCAAGGTAATTTGATTTTTGTACTCTCACATCATCTACAGGTTTTATGCTGAACGCAA

TCGTATATCATATAGGCAATTACAAGTATTTATGTTATTCCATCTGTCT

>PGSC0003DMG400025668RLKWAX-EGF\_122

AAGCCCACGAACGCCACTTCTCCGCCAACCAATGCCAACGCCACCACCTACACAATAACCAAACCTGCTA  
ACATAACAAAACCAGGATGTCCAAAACAATGTGGGAACCTTACCGTTCCA

>PGSC0003DMG400025668RLKWAX-EGF\_1220

CTGAACGCAATCGTATATCATATAGGCAATTACAAGTATTTATGTTATTCCATCTGTCTCATTGTTTGTG  
TACTTCTCGTTTTTACTCTATTTGAAAAAGAATATTACAATTCCAAC

>PGSC0003DMG400025668RLKWAX-EGF\_1403

AATTTAACATGACAAGATTCAATCGACAAAATTTCCGACACTACATCAAAAATGTTCTCTAACGACAATTA  
ATTAATGACAACAACCTAATTGCTGCTAAATATGTTCTTTTAGAGGCAA

>PGSC0003DMG400025668RLKWAX-EGF\_1586

GATTTTAACACTCTTTGTCAATGTGCATACTTATTGCTGCTAAAAGTTGTTTTGTTATATTGAGGGATTA  
ATACTATCTGTTTTGCATTCCAGATATTGATGAATGTGCAGATCCAAAT

>PGSC0003DMG400025668RLKWAX-EGF\_1647

TGAGGGATTAATACTATCTGTTTTGCATTCCAGATATTGATGAATGTGCAGATCCAAATACCAATTCATGT  
GAACAAATTTGCACAAACACGCCAGGGAGTTACAATTGTTCTTGTCCAG

>PGSC0003DMG400025668RLKWAX-EGF\_1708

CAATTCATGTGAACAAATTTGCACAAACACGCCAGGGAGTTACAATTGTTCTTGTCCAGAAGGATTCTCT  
GGTGATGGCAGAAAGAATGGTCGTGGCTGTATTGCACCAAACCTCGAACTC

>PGSC0003DMG400025668RLKWAX-EGF\_1769

GGATTCTCTGGTGATGGCAGAAAGAATGGTCGTGGCTGTATTGCACCAAACCTCGAACTCCGAGTTCCCA  
TGGATCAAGTTTTCTGTTGGTAAGTTTCTCAGAATTCAAATTTTATTTGTC

>PGSC0003DMG400025668RLKWAX-EGF\_183

AACCTGCTAACATAACAAAACCAGGATGTCCAAAACAATGTGGGAACCTTACCGTTCCATATCCATTTGG  
AATTGGAATAGGTTCTGGTTGTGGATTAACCCGAATTTTGAAATCAATT

>PGSC0003DMG400025668RLKWAX-EGF\_1830

AGTTCATGGATCAAGTTTTCTGTTGGTAAGTTTCTCAGAATTCAAATTTTATTTGTCACTACTCGCATAT  
AGATAAACGTCTTGCTTACATTCTATCAAAAAGTCATGGTTTATACAT

>PGSC0003DMG400025668RLKWAX-EGF\_1891



TACTCGCATATAGATAAACGTCTTGCTTACATTCTATCAAAAAGTCATGGTTTATACATGGTAGTGACAA  
ATCATGAATCATTTCTTGAAGTGAAAAAATAAAATTACATGCATGTTTCGT

>PGSC0003DMG400025668RLKWAX-EGF\_1952

TAGTGACAAATCATGAATCATTTCTTGAAGTGAAAAAATAAAATTACATGCATGTTTCGTTTCGATCTATTG  
AATTTCTAATTCCAACATTTGTTTCGATAAATACAGGTATGAGTGTTGGTT

>PGSC0003DMG400025668RLKWAX-EGF\_2013

GATCTATTGAATTTCTAATTCCAACATTTGTTTCGATAAATACAGGTATGAGTGTTGGTTTTGTATCCCTAG  
TGGTTGGGACAACATGGCTCTATTTTCAGCATCAAGAAAAGAAAACATCAT

>PGSC0003DMG400025668RLKWAX-EGF\_2074

GTATCCCTAGTGGTTGGGACAACATGGCTCTATTTTCAGCATCAAGAAAAGAAAACATTAACCTTCGCG  
AGAAATTCTTCCAACAAAATGGTGGTTTGCTCTTGAAACAGCGTATCTCT

>PGSC0003DMG400025668RLKWAX-EGF\_2135

AACTTCGCGAGAAATTCTTCCAACAAAATGGTGGTTTGCTCTTGAAACAGCGTATCTCTTCAAACGAGGG  
TGGTGTGGAAGCAACCAAATCTTTACAGCTGCGGAGCTGAAGAAGGCTA

>PGSC0003DMG400025668RLKWAX-EGF\_2257

AACAATGATGCCACTGATCGAATTCTTGGTCGTGGTGGAAATGGAATTGTCTACAAAGGTATTCTACCTG  
ATAATCGCATAGTTGCTATTAAGAAATCAAAGTTTATGGAAGAGGAACAG

>PGSC0003DMG400025668RLKWAX-EGF\_2318

TTCTACCTGATAATCGCATAGTTGCTATTAAGAAATCAAAGTTTATGGAAGAGGAACAGATTGAACAGTT  
CATCAATGAGGTACTTATTCTTACTCAAGTCAACCATCGAAATGTGGTGA

>PGSC0003DMG400025668RLKWAX-EGF\_2379

TGAACAGTTCATCAATGAGGTACTTATTCTTACTCAAGTCAACCATCGAAATGTGGTGAGACTCTTTGGA  
TGTTGTTTGGAAAGCTGAAGTTCCTTACTTGTCTATGAATACATTTCTCA

>PGSC0003DMG400025668RLKWAX-EGF\_244

TCCATTTGGAATTGGAATAGGTTCTGGTTGTGGATTAACCCGAATTTTGAAATCAATTGTGATACTACT  
ACAACAGATTCTCCAACACCCCTCATATGGAACATGCAAGTCTACGACAT

>PGSC0003DMG400025668RLKWAX-EGF\_2562

GTTAAGAGTTGCTAGTGAGACAGCAAGTCACTTGCTTACCTTCATTCATCTGCACAAATGCCAATAATC  
CATAGAGATGTCAAGTCAGCCAATTTATTATTGGATGATGTTTACACCGC

>PGSC0003DMG400025668RLKWAX-EGF\_2623

CCAATAATCCATAGAGATGTCAAGTCAGCCAATTTATTATTGGATGATGTTTACACCGCGAAAGTGGCAG  
ATTTTGGTGCTTCAAGGTTAATCCCTATTGATCAAACACATCTTGCTACA

>PGSC0003DMG400025668RLKWAX-EGF\_2806

AAAAGTGATGTTTATAGTTTTGGAGTAGTTCTTGCCGAACTTTTGACAGGGATGAAACCTATTTTCGAGGG  
ATAGAAATGACGTGGACAAGAATTTGGCAGAGTATTTTGTTCATG

>PGSC0003DMG400025668RLKWAX-EGF\_2867

TTTCGAGGGATAGAAATGACGTGGACAAGAATTTGGCAGAGTATTTTGTTCATGAGAAAGAATC  
AATTGTTTCAAATTCTTGATCGCAGAGTGGTAAGAGAAGGAAGCCTTGAGC

>PGSC0003DMG400025668RLKWAX-EGF\_2989

CTCCAAAAGGTGGCTGAGCTAGTGAAGAGTTGCCTTAGTTTGCACGGTGAAGATAGGCCTACGATGAA  
AGAAGTATCGATGGAACCTGAAATTTTAAGAAAGTTCACAAAAATAACCCT

>PGSC0003DMG400025668RLKWAX-EGF\_305

GATACTACTACAACAGATTCTCCAACACCCCTCATATGGAACATGCAAGTCTACGACATCTCGGATGCAG  
AAATGCGGATATCAAATACCATAAATATAAAGTGTTACTCACAAACAGGA

>PGSC0003DMG400025668RLKWAX-EGF\_3172

ATTGACTCTAATGCAGGCATCGACAATTTCTCTGGACAATATAGTTCCAATTCCAATACAAATAGCAGCA  
ACTTTTCTGGACAGTATAGTTTCGGGTAGTACTTCTAACACAAATAGCCCA

>PGSC0003DMG400025668RLKWAX-EGF\_3233

ATAGCAGCAACTTTTCTGGACAGTATAGTTTCGGGTAGTACTTCTAACACAAATAGCCCATTGATCCAAAA  
CAGAAGGGTAATTTGATAATGCATTTTGAATTTTCTGATGTAATTTTCTT

>PGSC0003DMG400025668RLKWAX-EGF\_3294

GATCCAAAACAGAAGGGTAATTTGATAATGCATTTTGAATTTTCTGATGTAATTTTCTTCTTGATTTCG  
TACTTTCTTCTTTAAATTTTGTTCATTGGAGTCAACTCCCCTTAT

>PGSC0003DMG400025668RLKWAX-EGF\_3344

AATTTTCTTCTTGATTTCGTACTTTCTTCTTTAAATTTTGTTCATTGGAGTCAACTCCCCTTATGTG  
ATAAATTTGGTGTTTAGACTATTTTCGTACATTTTATATAAATTGGT

>PGSC0003DMG400025668RLKWAX-EGF\_427

TTTGGTTCAAATGAACCTGCTTGGATGGGTTTAGGAAGATCAAGTCCTTACAGTTTTTCTTCCCTAAACA

GGTACGAGGCGTATTCGCAATTAGTTTACATAATTCTTAAATTAATTTTC

>PGSC0003DMG400025668RLKWAX-EGF\_488

TCCCTAACAGGTACGAGGCGTATTCGCAATTAGTTTACATAATTCTTAAATTAATTTTCATAGTAGTTAAA

ACAGTGTAATCTCACTACTCTATTCGTTTTGATCCAATAACATGATGGA

>PGSC0003DMG400025668RLKWAX-EGF\_549

AGTAGTTAAACAGTGTAATCTCACTACTCTATTCGTTTTGATCCAATAACATGATGGACGAGTCATAACT

CAACTTGAGCTGATCTCGCGGTCTCTTTACATACTGATTCTAAATTATA

>PGSC0003DMG400025668RLKWAX-EGF\_61

AATCTTAACACTAACCACCGCCCAAATTATCCCCTCTAACACCACTTCTCCTCCTCCTTCTAAGCCCACGAA

CGCCACTTCTCCGCCAACCAATGCCAACGCCACCACCTACACAATAAC

>PGSC0003DMG400025668RLKWAX-EGF\_610

AGTCATAACTCAACTTGAGCTGATCTCGCGGTCTCTTTACATACTGATTCTAAATTATAAATTCACCTCTG

CAGATTCACGGTGGTTGGTTGTGATGATGGTGCTCTAATGACCGCACTT

>PGSC0003DMG400025668RLKWAX-EGF\_671

TTCACCTCTGCAGATTCACGGTGGTTGGTTGTGATGATGGTGCTCTAATGACCGCACTTAACTTCGCTAA

TGGTTGCCCACTGCCTGCAGAAGTACAAGTGATGTAATAAAGGAAGAT

>PGSC0003DMG400025668RLKWAX-EGF\_732

CTTCGCTAATGGTTGCCCACTGCCTGCAGAAGTACAAGTGATGTAATAAAGGAAGATGTATGAGTTC

CGGTTGTTGCCAAATGATAATACAAAAGGCTTGAAATATTACAATACAAC

>PGSC0003DMG400025668RLKWAX-EGF\_793

ATGAGTTCCGGTTGTTGCCAAATGATAATACAAAAGGCTTGAAATATTACAATACAATACTATGATCACCA

CGAGAAATCATAGTTTATCTTGGTCGTTTAATCCATGTGGATATTCGTTT

>PGSC0003DMG400025668RLKWAX-EGF\_854

TGATCACCACGAGAAATCATAGTTTATCTTGGTCGTTTAATCCATGTGGATATTCGTTTCTTGGTGAAGCT

AGTCGATTCCGAGTTCCAAGGTGTAGAGGATCTCAGTGATGTTAATTTTG

>PGSC0003DMG400025668RLKWAX-EGF\_915

TGGTGAAGCTAGTCGATTCCGAGTTCCAAGGTGTAGAGGATCTCAGTGATGTTAATTTTGCAAAGAAGAT

TATGGATAATGTCCCTATTGTGCTAGATTGGGCCATTGGAAATCTTACTTG

>PGSC0003DMG400025668RLKWAX-EGF\_976

AAGAAGATTATGGATAATGTCCCTATTGTGCTAGATTGGGCCATTGGAAATCTTACTTGTGTTGAAGCAC  
GGGAAAGTAACGATTATGCTTGCCTCGATAATAGCCAGTGTGTTGATTCT

>PGSC0003DMG400025769-(rev)LRR-RLPs\_1037

AATCTATTCTGACCAACTTGTTTAACTTTTGAGTAATTTAAGAGAGTGAGCACACTGTAAGGGATTAAC  
GGAAGCTTTTATAAGCACAAAGGCTTATTTAGAAAATAATCACAATTATA

>PGSC0003DMG400025769-(rev)LRR-RLPs\_1098

GGGATTAACGGAAGCTTTTATAAGCACAAAGGCTTATTTAGAAAATAATCACAATTATAGAAGGAATAA  
TTATGTATAACTAATTCTTGGCATTAAAGAAAAATAAATTATATCAAAAAGTA

>PGSC0003DMG400025769-(rev)LRR-RLPs\_1159

AGGAATAATTATGTATAACTAATTCTTGGCATTAAAGAAAAATAAATTATATCAAAAAGTAAAAGCACTTTT  
CACCTTTAAGTCTCCTTTATTTCCATTTGTTCTAAGAAAAAATTACTTTG

>PGSC0003DMG400025769-(rev)LRR-RLPs\_1220

AGCACTTTTCACCTTTAAGTCTCCTTTATTTCCATTTGTTCTAAGAAAAAATTACTTTGCATTCCAAGAACC  
TTTTTAGTTTGTCTAGACCTATCGCAGAAAACCTCTAGTATTAGGGAA

>PGSC0003DMG400025769-(rev)LRR-RLPs\_1281

TTCCAAGAACCTTTTTAGTTTGTCTAGACCTATCGCAGAAAACCTCTAGTATTAGGGAACTAGTAATTTGT  
CTAACAGATGAACAATTGAAAATTGGATCCAATGGCATAGAAATGGAT

>PGSC0003DMG400025769-(rev)LRR-RLPs\_1586

TCATAAATTTGCTAGATTTTCTAAAATAAAGTAATTAATTTGATGGGAAAAAAACAAAAAAACTCATA  
AGGTAACCTTTGAAAAGAAGGTAGCATGGGAAAGGAGAAAATGGAGTGGGG

>PGSC0003DMG400025769-(rev)LRR-RLPs\_1708

AAAAGTCAATAGGAGGTGGACTATAATTACACCTCTCTTTTTTGCTAACGTCCGCTACCAAAAACACAGA  
TTCCCTCACTCCCTTATTTTTCTAAAATATTAACAAAATATGAATACCTA

>PGSC0003DMG400025769-(rev)LRR-RLPs\_1769

AAACACAGATTCCCTCACTCCCTTATTTTTCTAAAATATTAACAAAATATGAATACCTAACTTTTGAGTCA  
GGAATTATCGAAAACGATCTTTCTATTTTATAAAGATAAAGATAAAATC

>PGSC0003DMG400025769-(rev)LRR-RLPs\_183

AAAAGGAAAAACGAGCTGCAGTACTTAGGTGCTCAAAGTAACTAGATTAGAGTACAAATACTAGG  
AGACAAGCATAATAGAGATTCTAAATCAATAGCAAAAAGAGAACTTCTAGAGT

>PGSC0003DMG400025769-(rev)LRR-RLPs\_1830

TTTTGAGTCAGGAATTATCGAAAACGATCTTTCTATTTTATAAAGATAAAGATAAAAATCTATGTATTTTT  
ATTCTTCTTCAATTTCACTTATAAAATTATATTAATATTATAATTCTG

>PGSC0003DMG400025769-(rev)LRR-RLPs\_2074

GATCAGTATAATTTTAACTTGTGTGAAAGGTTATTTGCTAGAGTTTTTTTGAACCTCAGATAATCCGCA  
GCCGTTACAACCTCTGCCGAAGTCTTCGCTCTTCGAGTGAGCACTTTGT

>PGSC0003DMG400025769-(rev)LRR-RLPs\_2318

ACAGAAACAAAGTACTTCAATATTAGCCATTCACTTTGTTTTCTATACTTACTCAAGTACCCTTTTACTAC  
TACTACTATATATCAATATCAGATTATCAATATTATCATCTATGTAGC

>PGSC0003DMG400025769-(rev)LRR-RLPs\_2379

CCTTTTACTACTACTATATATCAATATCAGATTATCAATATTATCATCTATGTAGCAGAGTGAACCAG  
AACACTATTCTTTTTTTTTGCCCAATACTTCTACATCCCTTGCTGCCTT

>PGSC0003DMG400025769-(rev)LRR-RLPs\_244

TACTAGGAGACAAGCATAATAGAGATTCTAAATCAATAGCAAAAGAGAACTTCTAGAGTATGCACTGGC  
TCCATTGAAATGCTTGTGGATTACTAATCAAATGACCATGCCACTATTC

>PGSC0003DMG400025769-(rev)LRR-RLPs\_2440

AGTGAACCAGAACACTATTCTTTTTTTTTGCCCAATACTTCTACATCCCTTGCTGCCTTTTTGGTCACCAAA  
GCAACTTCTCTAGTAGTTGGTTTACCTTTTCTCTTTCTTCTTATGTA

>PGSC0003DMG400025769-(rev)LRR-RLPs\_2501

TGGTCACCAAAGCAACTTCTCTAGTAGTTGGTTTACCTTTTCTCTTTCTTCTTATGTATATAGGAGTATTA  
TGCTGTAATCATGAATAATCAGTTCAAGAAATGATGACAAACTCAGAT

>PGSC0003DMG400025769-(rev)LRR-RLPs\_2562

TAGGAGTATTATGCTGTAATCATGAATAATCAGTTCAAGAAATGATGACAAACTCAGATCAGTACTATTC  
TTTCTGGTCATTTGGGGTCTTTTTCTTTCTTTCTTTGTGTCCTTCATTTG

>PGSC0003DMG400025769-(rev)LRR-RLPs\_2623

GTAATTCTTTCTGGTCATTTGGGGTCTTTTTCTTTCTTTCTTTGTGTCCTTCATTTGGTCTCAACATAGAT  
GGAACTCTTGTGTCTTTCAAATACTCTGTTCTTGAAGACCCTT

>PGSC0003DMG400025769-(rev)LRR-RLPs\_2745

CATTTCTTGATAATTGGGACTATAATGATGCAACCCCATGTTTATGGACTGGTGTAACCTGTGCACCAGA

CATGTTTAGAGTCATTAGTTTAGTACTCCCAAATTCTAAGCTTATTGGTT

>PGSC0003DMG400025769-(rev)LRR-RLPs\_2806

TGCACCAGACATGTTTAGAGTCATTAGTTTAGTACTCCCAAATTCTAAGCTTATTGGTTCTATTCTAGAAG  
AATTAGGATTTATTCAACATCTTCATACTATTGATCTTTCAAATAATTT

>PGSC0003DMG400025769-(rev)LRR-RLPs\_2867

ATTCTAGAAGAATTAGGATTTATTCAACATCTTCATACTATTGATCTTTCAAATAATTTCTGAATGGAAC  
GCTACCTGTTTCACTTCTCAATGCTTCTGAACTTCAAGTTCTTTCACTG

>PGSC0003DMG400025769-(rev)LRR-RLPs\_3050

CTAAATCTTTCTGTCAATGCATTTGTAGGAAATCTCCACAAAAGCTAAGTTTTTGCAGAATATAAAAGT  
TGTTTCTTTGAGTAAAACCTATTTTCTGGTGGATTTTCAAGTTTGTGAG

>PGSC0003DMG400025769-(rev)LRR-RLPs\_3111

ATATAAAAGTTGTTTCTTTGAGTAAAACCTATTTTCTGGTGGATTTTCAAGTTTGTGAGGTGTTGGATCTT  
TCTTCTAACTTGTGAATGGAGCATTGCCTGATAATTTTGTGAGGGGATA

>PGSC0003DMG400025769-(rev)LRR-RLPs\_3172

GTTGGATCTTTCTTCTAACTTGTGAATGGAGCATTGCCTGATAATTTTGTGAGGGGATAGTTTCAAATACT  
TGAACCTTTCTTCAAACAAGTTATCTGGTTTGTGTCACCACAATTTGC

>PGSC0003DMG400025769-(rev)LRR-RLPs\_3233

TTGAAATACTTGAACCTTTCTTCAAACAAGTTATCTGGTTTGTGTCACCACAATTTGCAAAGAAAATACC  
AGCAAATGCTGCAATTGATCTTTCTTTCAACAGCCTTACAGGTGAAATC

>PGSC0003DMG400025769-(rev)LRR-RLPs\_3294

AGAAAATACCAGCAAATGCTGCAATTGATCTTTCTTTCAACAGCCTTACAGGTGAAATCCCAGAGTCAAT  
AGACTTATCAAACCAGAAAACAGAGTTTTTTGCAGGAAATACAGATCTTT

>PGSC0003DMG400025769-(rev)LRR-RLPs\_3355

AGAGTCAATAGACTTATCAAACCAGAAAACAGAGTTTTTTGCAGGAAATACAGATCTTTGTGGAAAACC  
ACTCAAGAACTCTGTACAATCCCTTCAACGCCTTCATCTCCACCTAATAT

>PGSC0003DMG400025769-(rev)LRR-RLPs\_3416

GGAAAACCACTCAAGAACTCTGTACAATCCCTTCAACGCCTTCATCTCCACCTAATATAACCACTAATCC  
TCCAGCAATTGCAGCCATTCAAAGTAAATTAACCTCAACCCCACTTCTCT

>PGSC0003DMG400025769-(rev)LRR-RLPs\_3477

CCACTAATCCTCCAGCAATTGCAGCCATTCCAAAGTAAATTAECTCAACCCCACTTCTGAACAAAAAACT  
GTTGTTGGCAAAGTGTGATCTAACATAAGTTTGTACCAACTGATTGCCT

>PGSC0003DMG400025769-(rev)LRR-RLPs\_3538

ACAAAAAACTGTTGTTGGCAAAGTGTGATCTAACATAAGTTTGTACCAACTGATTGCCTCTTCATCACATT  
ATAGAATGAACATGTGATAATTAGAGACTTACAAATAAAACATGGAGAT

>PGSC0003DMG400025769-(rev)LRR-RLPs\_3599

TCATCACATTATAGAATGAACATGTGATAATTAGAGACTTACAAATAAAACATGGAGATATACTTGACAT  
TTTAGCAAATAACCCCTCTTCAGGAAATACCAGAGAAGTTGGATGAGTAG

>PGSC0003DMG400025769-(rev)LRR-RLPs\_3660

ACTTGACATTTTAGCAAATAACCCCTCTTCAGGAAATACCAGAGAAGTTGGATGAGTAGATCTGGAAAG  
CTATTTTTGCCCTTTTCCCTATGTTTCAAATTTCTCCCAAATTAAGCAT

>PGSC0003DMG400025769-(rev)LRR-RLPs\_3721

CTGGAAAGCTATTTTTGCCCTTTTCCCTATGTTTCAAATTTCTCCCAAATTAAGCATCTAGAGTACAATA  
TGTTGTTTCGCTTAAAAAATCTGTCTACAATGGACAGAGGACTATCAAC

>PGSC0003DMG400025769-(rev)LRR-RLPs\_3782

AGAGTACAATATGTTGTTTCGCTTAAAAAATCTGTCTACAATGGACAGAGGACTATCAACGTGCCCATAAA  
AGGGAAAGGTCTTTAACGAGGGCAATCATACTGGTGATCAGGGTATAG

>PGSC0003DMG400025769-(rev)LRR-RLPs\_3843

GCCCATAAAAGGGAAAGGTCTTTAACGAGGGCAATCATACTGGTGATCAGGGTATAGCTGCATTATT  
AAAAGTCTTCAGGAACCTCACGATCCAATTATTCTTCTACTTAAACAAGAA

>PGSC0003DMG400025769-(rev)LRR-RLPs\_3904

GCATTATAAAAGTCTTCAGGAACCTCACGATCCAATTATTCTTCTACTTAAACAAGAAAAAAAAAAGGAA  
AATTCATCCCAAACAAGTCAAGCAGCAATAAAATAACTCTTGTTAGTGC

>PGSC0003DMG400025769-(rev)LRR-RLPs\_3965

AAAAAGGAAAATTCATCCCAAACAAGTCAAGCAGCAATAAAATAACTCTTGTTAGTGCCCTTGTATTA  
GGATATCAAGAACTTATAGCAGAACAATGTATTTTGCTTACAGATCAAA

>PGSC0003DMG400025769-(rev)LRR-RLPs\_4026

CTTGATTAGGATATCAAGAACTTATAGCAGAACAATGTATTTTGCTTACAGATCAAAGGGCATGACAT  
AAAGGATTCAGAGCAGAAGAACATAAAGTATTTGATAAGCAAATGTTTA

>PGSC0003DMG400025769-(rev)LRR-RLPs\_4087

GCATGACATAAAGGATTCAGAGCAGAAGAACATAAAGTATTTTCGATAAGCAAATGTTTAATTCTATATTC  
ATTTCAACAAGTTAACAGAACCCAGACATCCTGTGAAGATATGCATAGGAC

>PGSC0003DMG400025769-(rev)LRR-RLPs\_4148

TCTATATTCATTTCAACAAGTTAACAGAACCCAGACATCCTGTGAAGATATGCATAGGACAGAAAGAGAA  
AACTGCATGTATATCTTTATATCTGAGAGAAAGAGAAAGTAAGAGAAAGGG

>PGSC0003DMG400025769-(rev)LRR-RLPs\_4209

AAAGAGAAAACACTGCATGTATATCTTTATATCTGAGAGAAAGAGAAAGTAAGAGAAAGGGATGAGGCAA  
GACATTACAGTTTACTGAGTCTTCTTTTCCTTATTTGAAGACCTTGAAATCT

>PGSC0003DMG400025769-(rev)LRR-RLPs\_4270

GAGGCAAGACATTACAGTTTACTGAGTCTTCTTTTCCTTATTTGAAGACCTTGAAATCTTCTCAGTACAT  
TATCATCAATTTTCTGTACTGTGTCTGAATGACCTTTTGTGCTATAAT

>PGSC0003DMG400025769-(rev)LRR-RLPs\_4331

CTCAGTACATTATCATCAATTTTCTTGTACTGTGTCTGAATGACCTTTTGTGCTATAATAAGCTTGTCAATCA  
ATTTGATTTTGATACTTGTCTGACAGCAGAGGCACAGACAAACTAAAA

>PGSC0003DMG400025769-(rev)LRR-RLPs\_4392

GCTTGTCAATTTGATTTTGATACTTGTCTGACAGCAGAGGCACAGACAAACTAAAAAGAATTCTCTGT  
AGGAAAGATACACAATTCAGTCAACTATAAATCCCCAACACAATTTATA

>PGSC0003DMG400025769-(rev)LRR-RLPs\_4453

AATTCCTGTAGGAAAGATACACAATTCAGTCAACTATAAATCCCCAACACAATTTATATCACCTGAAAA  
GAACCCGACTCACCCATGTAGATGAAAGTGAGGAGGTTGAAGAAACTACC

>PGSC0003DMG400025769-(rev)LRR-RLPs\_4514

ACCTGAAAAGAACCCGACTCACCCATGTAGATGAAAGTGAGGAGGTTGAAGAAACTACCAACATAAGA  
TATCAGCCACAAGACAAGAGAAACCTGATAAACCAATCCATATTAATAAGAT

>PGSC0003DMG400025769-(rev)LRR-RLPs\_4575

CATAAGATATCAGCCACAAGACAAGAGAAACCTGATAAACCAATCCATATTAATAAGATGTAAATGTGA  
AGAAAATATGGCGCCAATAGCGTGACAAACATGATGCCTGAAATGGAAGGG

>PGSC0003DMG400025769-(rev)LRR-RLPs\_4636

AAATGTGAAGAAAATATGGCGCCAATAGCGTGACAAACATGATGCCTGAAATGGAAGGGGTCCTATAA



GAACAGACCTTAACAAAAAGTTTTAAATTCCCACCAATAGCAATATCATGGG

>PGSC0003DMG400025769-(rev)LRR-RLPs\_4697

CCTATAAGAACAGACCTTAACAAAAAGTTTTAAATTCCCACCAATAGCAATATCATGGGCAATCATCAGG  
ACATGATTGATCCAAACACGCATCATGTCAGCAGCCTTTACGACAGATTC

>PGSC0003DMG400025769-(rev)LRR-RLPs\_4758

ATCATCAGGACATGATTGATCCAAACACGCATCATGTCAGCAGCCTTTACGACAGATTCCTCGTGAACCT  
CCAAATCAGGGATAGGAGGTAAAGGCCTGGAATTGTACAGACATAATTGA

>PGSC0003DMG400025769-(rev)LRR-RLPs\_4819

CGTGAACCTCCAAATCAGGGATAGGAGGTAAAGGCCTGGAATTGTACAGACATAATTGATTGATTTTC  
CACAAAAAGTCTTACTACAGCATAATCATTAAAGGATCTCAATTGCTCAAC

>PGSC0003DMG400025769-(rev)LRR-RLPs\_4880

CAGTTTTCCACAAAAAGTCTTACTACAGCATAATCATTAAAGGATCTCAATTGCTCAACACAATCAGAACC  
ATAATTGAAATGCACGCCCCAGTAGAAAAGGCAGAGAAATGCAACAGCC

>PGSC0003DMG400025769-(rev)LRR-RLPs\_4941

AATCAGAACCATAATTGAAATGCACGCCCCAGTAGAAAAGGCAGAGAAATGCAACAGCCAGAGGCAGA  
TCTACTTCAGGTGCACCCCTGCCTCAGTGCCAAATTAGCCTGACAGTAGGCT

>PGSC0003DMG400025769-(rev)LRR-RLPs\_5002

AGGCAGATCTACTTCAGGTGCACCCCTGCCTCAGTGCCAAATTAGCCTGACAGTAGGCTTCAATTTTCAA  
AAACTAAAGACAAAATCAATGATCCACCAATCTTATTCAGAGAGCAACCA

>PGSC0003DMG400025769-(rev)LRR-RLPs\_5063

AATTTTCAAAAATAAGACAAAATCAATGATCCACCAATCTTATTCAGAGAGCAACCAGAAATTATCTC  
GAAAAAAGTTGGATAGCGTGACATGCACTTATTACATTACCTGTTAAGAA

>PGSC0003DMG400025769-(rev)LRR-RLPs\_5124

AATTATCTCGAAAAAAGTTGGATAGCGTGACATGCACTTATTACATTACCTGTTAAGAAGTGAGGCAGA  
TTTAGCCCAGAAGAAGAGAATCACAACCTAGAAGCAACATAACATTGGCAAC

>PGSC0003DMG400025769-(rev)LRR-RLPs\_5185

GAGGCAGATTTAGCCCAGAAGAAGAGAATCACAACCTAGAAGCAACATAACATTGGCAACAAAGGAAAG  
GACATTATATCCAGCTCGCTCAAACAAAATCCAAAGCGCAGTGGAAGTACT

>PGSC0003DMG400025769-(rev)LRR-RLPs\_5246

AGGAAAGGACATTATATCCAGCTCGCTCAAACAAAATCCAAAGCGCAGTGGAAGTACTGACTAGCAGAGTA  
AACTAGCACACCATCTCCTCCACAACAGCACATCCGCCACTGCAATTCAA

>PGSC0003DMG400025769-(rev)LRR-RLPs\_5307

CAGAGTAACACTAGCACACCATCTCCTCCACAACAGCACATCCGCCACTGCAATTCAAATTTAACCGCCTC  
AACAAAACATTTCTATCGAATAGTATTATTTTCTAGAGAAGCCGAAG

>PGSC0003DMG400025769-(rev)LRR-RLPs\_5368

TAACCGCCTCAACAAAACATTTCTATCGAATAGTATTATTTTCTAGAGAAGCCGAAGTTGATTATCATC  
GTGATCAAGTGTTACTTCAAATCCATAGTGAATTGATGCGTTAATTGA

>PGSC0003DMG400025769-(rev)LRR-RLPs\_5429

GATTATCATCGTGATCAAGTGTTACTTCAAATCCATAGTGAATTGATGCGTTAATTGATAATTGCAATA  
AGGTCAATATCAAATCTGAATTTCTGTAAATGCATGAATTGGGCTATGGA

>PGSC0003DMG400025769-(rev)LRR-RLPs\_5490

ATTGCAATAAGGTCAATATCAAATCTGAATTTCTGTAAATGCATGAATTGGGCTATGGATGCAAATATAG  
AGAAAGACAAGAATATACAGAAGGCCAAAACGCAGACGTAGGATGAGGAAG

>PGSC0003DMG400025769-(rev)LRR-RLPs\_5551

CAAATATAGAGAAAGACAAGAATATACAGAAGGCCAAAACGCAGACGTAGGATGAGGAAGAAACCTGA  
GCCACCACCAAGAGCATGATGTACAAAAGACTGACGATTATCTCCCATGGCGA

>PGSC0003DMG400025769-(rev)LRR-RLPs\_5612

ACCTGAGCCACCACCAAGAGCATGATGTACAAAAGACTGACGATTATCTCCCATGGCGATTAGGGTTTC  
TGCCTAGTCTGCAACCGAAGAAGGAGGGCAGTGATGAAATCGCAGGGAGGG

>PGSC0003DMG400025769-(rev)LRR-RLPs\_5673

AGGGTTTCTGCCTAGTCTGCAACCGAAGAAGGAGGGCAGTGATGAAATCGCAGGGAGGGCGACGACG  
GTAATTTTTGGTAAATCAGTTCAACTTCAAATATGCCAGGCGCACTAATGGAT

>PGSC0003DMG400025769-(rev)LRR-RLPs\_5734

ACGACGGTAATTTTTGGTAAATCAGTTCAACTTCAAATATGCCAGGCGCACTAATGGATTAAACAATACT  
TAACATAATAAATCTGAAGGACGAGGAAATAAAATACTCCCGATCAGAAA

>PGSC0003DMG400025769-(rev)LRR-RLPs\_5770

ATATGCCAGGCGCACTAATGGATTAAACAATACTTAACATAATAAATCTGAAGGACGAGGAAATAAAAT  
ACTCCCGATCAGAAAGAAAGACGTTATGCTAAAGGTAAGGTAAGTCTC

>PGSC0003DMG400025769-(rev)LRR-RLPs\_61

CATTTCTCCACCATCACCCAGCCAGCCAAAAGGGAAACCTTTTTTCAAAGTTACATTAAGAAATTTGT  
GTGAAAGAGCTGACCATCAACTACAAAGGTGAGATATCAACCCAAAAAA

>PGSC0003DMG400025769-(rev)LRR-RLPs\_671

TGGAAGAAAAACAGTTGTGCAATCAAGAAAAGGAGCAAAGGGGACATATCCCTCTCATAGTTAGCAG  
AAGATCGAAGGTGAGGGTGGAAGCAAAAAGACCTGTACTTCTACAAGCTGCC

>PGSC0003DMG400025769-(rev)LRR-RLPs\_732

TTAGCAGAAGATCGAAGGTGAGGGTGGAAGCAAAAAGACCTGTACTTCTACAAGCTGCCTTTGGATGTT  
GAGTGAAGGAATATTTCAAGAACTTAATTCTCTATCTGGTTCATGTAAATC

>PGSC0003DMG400025769-(rev)LRR-RLPs\_976

TATCAGCAATTATGAAGTAATCTAAAGATTCAAAAAATCCCAAATTAGTGTATCCGGTTAAATCTATTCT  
GACCAACTTGTTTAACTTTTGAGTAATTTAAGAGAGTGAGCACACTGT

>PGSC0003DMG400025771LRR-RLKs\_1798

TTTTCTTTCATCTTCATTATCTTATCATAGTTATAGTTTTGATAAATCTTTTCTGTCCTTATCATAATTACCC  
CAAATATTCTGATTAGTCAAGTGTACTTGACATTTAATGTCACTGG

>PGSC0003DMG400025771LRR-RLKs\_2232

TAAGTACACTGTCTGTCATTAGAAAACTAGTTTAGTTTTAGTGTACATATACTACTCATAGGCATGGATT  
TTCGTTACTAAATTTTGCAGATACTATACTTCATATGTGGTTGTGTTTG

>PGSC0003DMG400025771LRR-RLKs\_2418

ACATATAATACGTCAAATACATGTGCACCCCTTCTCCTCCATATTGTAGTACCACAAACGTTCCCGAGAC  
TTGATTTTTTCAAACCTCCACGTTTGATCAGATTATACTGAGTATAATAT

>PGSC0003DMG400025771LRR-RLKs\_2480

TCCCGAGACTTGATTTTTTCAAACCTCCACGTTTGATCAGATTATACTGAGTATAATATTATTGTTTAAATTT  
TTCAGAAAAAGTTGGTTCCTCTCCTTACCATTTATCATATGAAGTCCG

>PGSC0003DMG400025771LRR-RLKs\_2542

GTTTAAATTTTTTCAGAAAAAGTTGGTTCCTCTCCTTACCATTTATCATATGAAGTCCGGCTCAAGATAGCA  
AAAGGAATTGCAAGAGGATTGACCTACATCCACGAAAAGAGACAAGTAC

>PGSC0003DMG400025771LRR-RLKs\_2604

AAGATAGCAAAAAGGAATTGCAAGAGGATTGACCTACATCCACGAAAAGAGACAAGTACATGGCAATAT

TAAACCTAGTAACATTCTCTTAACACCAGATATGGAGCCCATAATAAGTGAC

>PGSC0003DMG400025771LRR-RLKs\_2666

CAATATTAACCTAGTAACATTCTCTTAACACCAGATATGGAGCCCATAATAAGTGACATTGGGCTTCAT  
GGGCTAATGCATGGTAAAAACACCTCTAAACCGGATAATTCGGGCCGGCA

>PGSC0003DMG400025771LRR-RLKs\_2728

GGCTTCATGGGCTAATGCATGGTAAAAACACCTCTAAACCGGATAATTCGGGCCGGCATTTCGGTAGCA  
AGCGGTCCACATCCTCCTCCCGGGACGGTTTAAATGATCAACCGGTTTCATG

>PGSC0003DMG400025771LRR-RLKs\_2790

GGTAGCAAGCGGTCCACATCCTCCTCCCGGGACGGTTTAAATGATCAACCGGTTTCATGGAAGTCCTTAC  
ATTGCCCCAGCCGGGTTTCGTGGTAGGGTGCACGTCCCCCTACCACGCCCCG

>PGSC0003DMG400025771LRR-RLKs\_2852

TCCTTACATTGCCCCAGCCGGGTTTCGTGGTAGGGTGCACGTCCCCCTACCACGCCCCGGAGTCGTTGGA  
GAGTCTCAAACCTAGTCCTAAATGGGATGTTTACTCATTGGGATTGTGTT

>PGSC0003DMG400025771LRR-RLKs\_2914

CGTTGGAGAGTCTCAAACCTAGTCCTAAATGGGATGTTTACTCATTGGGATTGTGTTGCTTGAGCTTTT  
AACCGGGAAAGTATTCTCGGACCGGGAGTTGAGCCAGTGGACCACCGGTT

>PGSC0003DMG400025771LRR-RLKs\_2976

GAGCTTTTAACCGGGAAAGTATTCTCGGACCGGGAGTTGAGCCAGTGGACCACCGGTTTCAGTATCGGAT  
GACGTGGACCTGGTTTTAAGGATGGCTGATGTGGCGATTAGAGCTGACGTG

>PGSC0003DMG400025771LRR-RLKs\_3038

ATCGGATGACGTGGACCTGGTTTTAAGGATGGCTGATGTGGCGATTAGAGCTGACGTGGAGAGCAGGG  
AAGAGACCACGGTGTTCATTGTTTAAAGTTAGGTTTTAGTTGTGCATCATTGAA

>PGSC0003DMG400025771LRR-RLKs\_310

ATGATGCAACCCCATGTTTATGGAATGGGGTAACTTGTGCACCAGACATGTTTAGAGTCATTAGTTTACT  
ACTCCCAAATTCTAAGCTTATTGGTTCTATTCCAGAAGAATTAGGATTTA

>PGSC0003DMG400025771LRR-RLKs\_3100

GCAGGGAAGAGACCACGGTGTTCATTGTTTAAAGTTAGGTTTTAGTTGTGCATCATTGAATCCACAAAAA  
GGCCTACAATGAAAGATGCCCTTCATGTGCTTGATAAAGTACCAGGTTATT

>PGSC0003DMG400025771LRR-RLKs\_3162

CAAAAAGGCCTACAATGAAAGATGCCCTTCATGTGCTTGATAAAGTACCAGGTTATTCACATTACTAAT  
CATTATGTTGGGACCAAGAAAAGCTATAAAAAGCTGTTTAGTTCCTTTA

>PGSC0003DMG400025771LRR-RLks\_3224

TTACTAATCATTATGTTGGGACCAAGAAAAGCTATAAAAAGCTGTTTAGTTCCTTTAATTTGTTCTTCTTT  
TGACTTGGAAGATTTTTGCTCCATAAAGATGAGAAGAACCGTTGTGT

>PGSC0003DMG400025771LRR-RLks\_3286

GTTCTTCTTTTGACTTGGAAGATTTTTGCTCCATAAAGATGAGAAGAACCGTTGTGTTGTAATTGGTGA  
AAGTGTGTAAGTTTGACAAATTGATCAACAGTGATTTTATTTGAGTTT

>PGSC0003DMG400025771LRR-RLks\_3317

CCATAAAGATGAGAAGAACCGTTGTGTTGTAATTGGTGAAAGTGTTTGTAAGTTTGACAAATTGATCAA  
CAGTGTATTTATTTGAGTTTTTAATAATAGTAGTTTTTTTTTTCACCCGC

>PGSC0003DMG400025784OtherRLksTM\_1037

TTCTTAAAATTGGAGATATTCAGGTTGATACCCCTCCCAAACACCCACACGTAAATAGCTTTGAGCTCTT  
GCTTCCACAAAAGTACTGAGCTTATACAAAATACAGGTACTTTTAAACATGT

>PGSC0003DMG400025784OtherRLksTM\_244

AGCCATCTTCTGGGTTTCTTGATCTTCTTGAAATGCACCTTTTATCAACAACAAGTCTGCTTCAGGTAT  
TACATCTTTGTGCCTTCAATTACATCTTGTGTTTGGGAGCTTCCCATT

>PGSC0003DMG400025784OtherRLksTM\_2440

CTTACACTCGGAGCAAAGTCTGTTATGACCCTCATTTTGCAACTTTTTCTGGTCCCGTGTCTTTCTCTGGT  
ATGTTTACTAATGGTAATTTCTTAGGCAGGGAGTTGGTGTGTTGTTTTT

>PGSC0003DMG400025784OtherRLksTM\_2501

CTTCTCTGGTATGTTTACTAATGGTAATTTCTTAGGCAGGGAGTTGGTGTGTTGTTTTGTACTTCTGCAC  
ATAAAAATATTTCCATGGATCATTTTAGTGATGTAATGCACTTTCAGC

>PGSC0003DMG400025784OtherRLksTM\_305

GCTTCAGGTATTACATCTTTGTGCCTTCAATTACATCTTGTGTTTGGGAGCTTCCCATTTTGTGTTCAACA  
GTTTTGAGTTATATTCTATCTTGAGTTTGGAGTAAAGGAGAAAAAGAT

>PGSC0003DMG400025784OtherRLksTM\_3721

GCTGGCGTACTAGAATTCAAATAGCTATTGATGTTGCAAACGCTCTGGTACAATTTTTATTTACTCTGT  
CCAATTGTATAATTTATAAGCTGCTTAACATTCAGTGCGCTTATTC

>PGSC0003DMG400025784OtherRLKsTM\_427

CATTTTTAAAATTGTAATTTGGGCTTATTTATGAGTGTTTGATGATAGAAGTTATAGTGAGCTTGAAAAG  
CTGAAGCTGCTTTTATTTTCTTGAAAATCTTATGGGTGTTTGTCTTGAC

>PGSC0003DMG400025784OtherRLKsTM\_4758

AAGTACATCGAGGTCCTATTGTAGCAGGAGCTTTCTAATTGAAACCAGCCCTCCCAGTCTCCACTCTAA  
TGTACCAGTTATTTGAGACCATTGCTTTGACTGTGAACTTTTTTTTTTTTT

>PGSC0003DMG400025784OtherRLKsTM\_4819

CCACTCTAATGTACCAGTTATTTGAGACCATTGCTTTGACTGTGAACTTTTTTTTTTTTTTATATCTGAGG  
AATTCCCGTGGGCCAGCTGATGCATGGTTCAAACCTCGGTGGGTAATGG

>PGSC0003DMG400025784OtherRLKsTM\_488

CTTGAAAAGCTGAAGCTGCTTTTATTTTCTTGAAAATCTTATGGGTGTTTGTCTTGTACTTGGTTTTGATG  
TGTTTGGGGTTCATGAGAATTTAAGAGGGAAGTGGAAGAAGAAAGGTAT

>PGSC0003DMG400025784OtherRLKsTM\_4880

TATATCTGAGGAATCCCGTGGGCCAGCTGATGCATGGTTCAAACCTCGGTGGGTAATGGACCCACCCCT  
CCACCCTTTTGACTGTAACTATCTCTTGAGCAGATTTTAACTGTAAAGCC

>PGSC0003DMG400025784OtherRLKsTM\_4941

CCACCCCTCCACCCTTTTGACTGTAACTATCTCTTGAGCAGATTTTAACTGTAAAGCCATTACATATCAG  
AGTTTAAAGGTTACTGACTTCACCATCCTGACATTGATAAGTAGCGTGC

>PGSC0003DMG400025784OtherRLKsTM\_5185

TTGGAGAGGTAGTAACATAACAACCTTTAGTTTTCCCGTTCTCTTTGGTTTGGTTTGTGTTTAAACATTCTT  
TAGTACTTTCCAGGGCTGTTATTTCTTGTAAGTTATTGGATTGTGAAT

>PGSC0003DMG400025784OtherRLKsTM\_5246

TTAACATTCTTTAGTACTTTCCAGGGCTGTTATTTCTTGTAAGTTATTGGATTGTGAATTTGACTTGTGCTC  
TCTTTACCTGTATGTTTCCAACATTAGAAGAACTTGCTGCTTTTGCCT

>PGSC0003DMG400025784OtherRLKsTM\_549

GGTTTTGATGTGTTTGGGGTTCATGAGAATTTAAGAGGGAAGTGGAAGAAGAAAGGTATTTATGGAAA  
TGTGATTAATGTGCCTGCGTGACTATAAAGACCTGCCAATTTTCAGTGACAA

>PGSC0003DMG400025784OtherRLKsTM\_732

GCTCATACTAATCCAATTTATGTTTGCTTGTAAGTTTCATAACATTCAAATTC AATACGACAGCTATTCATA

G TTCAGTTTTAATATTGCTATAAGCATTACTTCATTTAACGATGGTGT

>PGSC0003DMG400025784OtherRLKsTM\_793

AGCTATTCATAGTTCAGTTTTAATATTGCTATAAGCATTACTTCATTTAACGATGGTGTTACTGCACGATG

TATTGATGTTTCTTTGGAGTTTCCGCTATAACAATAACAGTGTAATAA

>PGSC0003DMG400025784OtherRLKsTM\_854

CTGCACGATGTATTGATGTTTCTTTGGAGTTTCCGCTATAACAATAACAGTGTAATAAATTTATATTTATC

AGTGCAATTGATGGAAAGTACAATCAAACCTGTCCTGTCTGAAGTCTAA

>PGSC0003DMG400025784OtherRLKsTM\_915

TATATTTATCAGTGCAATTGATGGAAAGTACAATCAAACCTGTCCTGTCTGAAGTCTAATGGTCCAAGTTT

TCATCTGTAGTCTAGGTGTACAAGATCAATGTCCGTACAATTCGCTGTT

>PGSC0003DMG400025784OtherRLKsTM\_976

GTCCAAGTTTTCATCTGTAGTCTAGGTGTACAAGATCAATGTCCGTACAATTCGCTGTTAATTCTTAAAT

TGGAGATATTCAGGTTGATACCCCTCCCAAACACCCACACGTAATAG

>PGSC0003DMG400025799RLKmalectin\_122

TTCATGCCGCCATTAATGTTAATCAACCTCAAGGTAAATTAATTAACATTGCTCGCGTGC GTTCTGTGAAT

TCAACTGAACCTATTAATGTATAACATAATAAGATGGCGCTCATT

>PGSC0003DMG400025799RLKmalectin\_2013

AAGCAATGAACTGACAGGTCAAATACCTGATTTAAGCTCATTGCAGAATTTAGAACTCTGTAAGTTCCC

ATTTGTTGTTTTCTCCTACTCTTTTTCTAATGACCAAGAAATCTCA

>PGSC0003DMG400025799RLKmalectin\_2074

TAAGTCCCATTGTTGTTTTCTCCTACTCTTTTTCTAATGACCAAGAAATCTCAGAGAGTCAACTAG

CTCATTGTTCCGGTAGATAATGAGCCTGCCTCTCTACCCTTCTCCACTT

>PGSC0003DMG400025799RLKmalectin\_2135

GAGTCAACTAGCTCATTGTTCCGGTAGATAATGAGCCTGCCTCTCTACCCTTCTCCACTTAATAATCAATTT

TTTTCTCGAAAAGGAAAAAACACGAGATTTTTCTCCTCCTACTTTAC

>PGSC0003DMG400025799RLKmalectin\_2257

TAATTCTTATCCTAATTTGTATTTCTAACAAATATATTCATCTCCCCTGAAATGGAAAAGGCACTTGGAGA

ACAACCAGTTGGAAGGATCAATCCCTGAATCGTTAGGAAAACCTACCTAA

>PGSC0003DMG400025799RLKmalectin\_2318

CACTTGGAGAACAACCAGTTGGAAGGATCAATCCCTGAATCGTTAGGAAAACCTACCTAAACTTCGAGAA  
GTGTATGCTGCTTTGTTTTTTTTATCTACTTAACTCAGTTTTTGATTTTGT

>PGSC0003DMG400025799RLKmalectin\_2379

TTCGAGAAGTGTATGCTGCTTTGTTTTTTTTATCTACTTAACTCAGTTTTTGATTTTGTATATTTGATGATTA  
ATGTTCAATTTCTGTAAGTCCATAACTGAAATTTCTGGTTTTATAGGT

>PGSC0003DMG400025799RLKmalectin\_2440

ATTTGATGATTAATGTTCAATTTCTGTAAGTCCATAACTGAAATTTCTGGTTTTATAGGTTTCTCCAAAACAA  
CCGTCTCAAAGGGAGTGTCCAGGAAGCCTAAGAAACAAGAATGGCAT

>PGSC0003DMG400025799RLKmalectin\_2623

ACTTCTGATCCTATTGATATTATACAAATATATGTTGTTTAGGGTGTCAAGTTAGGGACTGGAGTAACAA  
GAGAATTAATGAAGAACTACCAGAACTTGCTACATACTTCTGAAAGTGG

>PGSC0003DMG400025799RLKmalectin\_2684

GAGTAACAAGAGAATTAATGAAGAACTACCAGAACTTGCTACATACTTCTGAAAGTGGACAGAGTTAT  
TCGGGACCTTATATGAGAAACACAAGTTATAAGATGGAATGAAGGGATTTCG

>PGSC0003DMG400025799RLKmalectin\_2745

AGAGTTATTCGGGACCTTATATGAGAAACACAAGTTATAAGATGGAATGAAGGGATTTCGGAAGAAGAG  
CTTTTTAGTCTTGGTGTACTTTGGTCTTTGTGTATAGCATATCAACATTAT

>PGSC0003DMG400025799RLKmalectin\_2867

CATCTAATACTTAAAAAACAAAATAATTAGCAAAGTAAAGGTGATTTGTACATCAGTCATGACTAGTAA  
TCATTTAATAGAAGATAGATGTAACCACGTTTTTTTTTATTATTCAAATG

>PGSC0003DMG400025799RLKmalectin\_2928

GACTAGTAATCATTTAATAGAAGATAGATGTAACCACGTTTTTTTTTATTATTCAAATGAAAGATATGTAT  
AAGCAATTCACAAAACAGTGTACATGCATGCAAGATTTGATTAACAACT

>PGSC0003DMG400025799RLKmalectin\_3599

CTCATGGTCTTGATCTCGGGGATTGATATCCTCTGTGCGCAATGCAAAAATAAAGCATGATGAAAGAAA  
GAAACCTCACATAAGAGAAATTTCTAACAAAAGTCATTGAACTCCAGAAC

>PGSC0003DMG400025799RLKmalectin\_3660

GAAAGAAAGAAACCTCACATAAGAGAAATTTCTAACAAAAGTCATTGAACTCCAGAACACTTGAGTAT  
AAGATTTTTCTAACCAAGTCAGGATTGAAGTTCAAATAGTTATGAGCAATG



>PGSC0003DMG400025799RLKmalectin\_732

TTTGGGAAATATGCATTGGTTACTCTTGCTCGTCATAGCTTTGGATCTCATGATAAACTAACGTATGTATG  
CCTTTTTTTTTTTTACCTCTTCTATCTATTTCTTTGGTATGAGTAAAAT

>PGSC0003DMG400025848-(rev)LRR-RLPs\_0

ATGGATTTGGGTTGTTTTGATATGGGTTGTATTGAAAAGAAGCCGGCGAACGACAATTTTTCTAATTCAG  
AGAACAGTCCCACCGCCGCTTCCAGAGTCGGAAGGTACCCATTACCCAT

>PGSC0003DMG400025848-(rev)LRR-RLPs\_1037

CATCGCAAACTTCGCCTCTGAATTGGTGTTCCTCAATTTGAGTTGTCTTGTTTTCAATTAGTGCTGAAC  
AAGGCAATCAAAGTTGAATCTAGTTGCTTTGAAGTATTATTTAATTGGT

>PGSC0003DMG400025848-(rev)LRR-RLPs\_1098

AGTGCTGAACAAGGCAATCAAAGTTGAATCTAGTTGCTTTGAAGTATTATTTAATTGGTGTTCCTCAATTT  
TGGGTTTTCATTTTGTGTTTTGGAATAGTGCAGACTAAGGCAACGAAA

>PGSC0003DMG400025848-(rev)LRR-RLPs\_1159

TTTCCAATTTGGGTTTTCATTTTGTGTTTTGGAATAGTGCAGACTAAGGCAACGAAAGAAAGTGGCCA  
GTCAAGTTTAGTTTTCTTTAAACAAATCTGGATCACAAATTAGAAAGCCTC

>PGSC0003DMG400025848-(rev)LRR-RLPs\_122

TTTTTTGATATCTGAGGAAGAACTCTGTTTAGTTTTGAATTTATTTTCTTGATTTTGCTTATGTTTCTTGG  
TTGGGGTTCTTTTGATTTTGGGGTTTTCCAAAACCCTTGTTTCGTAAT

>PGSC0003DMG400025848-(rev)LRR-RLPs\_1342

GGAAAATAAAAATGCTCCAGGTATATTTATATGCTTGAGCATTCTCTTTTTTATTGTCAATAAATAGTGGA  
AGAAGTACTGATAGTGTTCCTGCTGAAATCTCAGGAAGTGGA

>PGSC0003DMG400025848-(rev)LRR-RLPs\_1464

GTATGAACTCCACTCTTGATGAGACTCTGGGGGATGCAAATCCCCACTATTGTAGAGTTTTGAGAGAATA  
AATTGCAGTAAGAGAAGCTGCTCAAAGAGTTGTGAAAGCTCGGAAGGCTG

>PGSC0003DMG400025848-(rev)LRR-RLPs\_1647

TTATCTGATTTGTTGTTACATGCATTAGATCCGGTATTTGTCTGGAGTTGTTTTTTCTGCTTAGAAATTC  
ATACAGGAATTCATTTGCTAATTATGTGATATTGGATACATTAATTT

>PGSC0003DMG400025848-(rev)LRR-RLPs\_1830

GTATAGGCTTGGTATATCTTAGTATAAATATACATATAATACTCACAGCTGAGAACATGCTTTTATATA

TAGGAAGTTATGGAGGTGGAGAAATAGGGTAGAAGGTACTAGGTAGTCG

>PGSC0003DMG400025848-(rev)LRR-RLPs\_1891

CTTTTATATATAGGAAGTTATGGAGGTGGAGAAATAGGGTAGAAGGTACTAGGTAGTCGAGTGTTGTT  
GTGCTGTAGTATGATTTAGGTATCGTTAGTTTCTCTAATGTATATTAATTTA

>PGSC0003DMG400025848-(rev)LRR-RLPs\_244

GGAAGAAAGATTTAATTTGATCCCCAATGTTAATCTTGATTGTTATCTATTGTTAGCTTAAAGATTTTGT  
GAGTGGATGTAACGGTAATGACCAAATAAACTTCATTATCATTGAGT

>PGSC0003DMG400025848-(rev)LRR-RLPs\_2623

TTAAGGCTGCCCTTCTTAAGCTTGCTAATTGCCCTTCTATGAACAAAGATGAAGTTAAGGAACTGCTGCA  
CAGAATAAGCCAGAACCCTGAAACAGATGATAATCAACAAGAAGTGTCTG

>PGSC0003DMG400025848-(rev)LRR-RLPs\_2684

ACTGCTGCACAGAATAAGCCAGAACCCTGAAACAGATGATAATCAACAAGAAGTGTCTGAGTTCTCTTC  
AGAATGCGAATCAGATACTGCTTCCGAAGCCACAGAGTTAGAAAAAGAAAA

>PGSC0003DMG400025848-(rev)LRR-RLPs\_2928

GCAACGTGTGGGTTGAACGCTGCTCTAGCTGAAGCGGAAAACAACAAAGTGCATGTTTCAGGGTCTGCT  
GCTGATGACAGATCAGAATTATCTGTAGGAGACGGAACAGTTAAGGGCACT

>PGSC0003DMG400025848-(rev)LRR-RLPs\_2989

GGTCTGCTGCTGATGACAGATCAGAATTATCTGTAGGAGACGGAACAGTTAAGGGCACTGAGGAACTT  
CCAAGCCTGGATAAGTTTCTAGTTAAGCGGTTAACAAGACTTGAAAGGGAGG

>PGSC0003DMG400025848-(rev)LRR-RLPs\_305

AAGATTTTGTGAGTGGATGTAACGGTAATGACCAAATAAACTTCATTATCATTGAGTATGAGTGTTTA  
AAGAAGTCGGTGGCTAATTAGGCTTTATGAAAAATGTAAGTTTCTCTAGA

>PGSC0003DMG400025848-(rev)LRR-RLPs\_366

GAGTGTTTAAAGAAGTCGGTGGCTAATTAGGCTTTATGAAAAATGTAAGTTTCTCTAGAGTGTTATTTGC  
ATTAGGGGTGTGGTTTGGTATGTAAGTAAGAGAATATTATCCCAAGAGCA

>PGSC0003DMG400025848-(rev)LRR-RLPs\_3904

CTGAGACTACCTCATTGGTAGGAAAAGAAAATGTTGACCACAATGTAAATTCTTGTAATGGAGAACAAC  
CATCAAAGCCAGCAGACACATTATCATTGAGGTTGAAAACAAGAAGATG

>PGSC0003DMG400025848-(rev)LRR-RLPs\_3965

AGAACAACCATCAAAGCCAGCAGACACATTATCATTTGAGGTTGAAAACAAAGAAGATGTGGATAGTCT  
GGACAAGATTCTAGTAAAGCCAGTTCATCGTCTGCAAAGACTTAAAATGCA

>PGSC0003DMG400025848-(rev)LRR-RLPs\_427

GTTATTTGCATTAGGGGTGTGGTTTGGTATGTAAGTAAGAGAATATTATCCCAAGAGCATTTTTATGTTA  
TCTAGCAAACGATATGGAGGTGAGTAGGGATGAGGAGTAGGGGGTTCAG

>PGSC0003DMG400025848-(rev)LRR-RLPs\_4575

TTGTTTTCTTGTAGGCTGCCTGGCTTAAAGCTGAAGAAGAGGAGAGGAAGGGAACCGTGAAATTATG  
AGAACTATTAGATTCAAATATCATAAATTCTTTGTTTTTCCCTCCCATGC

>PGSC0003DMG400025848-(rev)LRR-RLPs\_4819

CTATTTTTTTTCATTTCAAATGTGTAAGTGAAGGTTGCAATGTAAAGAAGAGTGCTGCAAATTTGTACAT  
ATTGCTTGTCTATATTCCTTCTGTGTATATGAGTGAGCAACTAAATGTA

>PGSC0003DMG400025848-(rev)LRR-RLPs\_488

TTTATGTTATCTAGCAAACGATATGGAGGTGAGTAGGGATGAGGAGTAGGGGGTTCAGGGGTGGCG  
GGATTGGGATGATCAAGGGGGGGTGGGGTGGGTGGGGAGGAGATGATAAAC

>PGSC0003DMG400025848-(rev)LRR-RLPs\_4880

ATTTGTACATATTGCTTGTCTATATTCCTTCTGTGTATATGAGTGAGCAACTAAATGTATCTGCAATATTA  
GAAAGAACTACATATTGTACAAATTAATATATAAATTAACAAAGTA

>PGSC0003DMG400025848-(rev)LRR-RLPs\_4941

TGCAATATTAGAAAGAACTACATATTGTACAAATTAATATATAAATTAACAAAGTACTTGAAGTAAT  
GTAAGGATAAGATGAGAGAAAATAGCGAAGATAATTTGGCCATATTTTA

>PGSC0003DMG400025848-(rev)LRR-RLPs\_5185

CTGGATTTATCCAAGAAAATATATTCAAATTACATGATAAAGCCGTTAAATCCAAAAAAAAAAAAACAATC  
CACACCCCTCCCAACCCCAATTTTGTCTTAATATAAAATTAATGC

>PGSC0003DMG400025848-(rev)LRR-RLPs\_5246

AAAACAATCCACACCCCTCCCAACCCCAATTTTGTCTTAATATAAAATTAATGCTTACATAAATTCG  
AATGTAATTATTGAGAGTATAGTAAATGGTTGAGATGACATTCAATC

>PGSC0003DMG400025848-(rev)LRR-RLPs\_5551

GGTCTCATTTACTCACTTAATAGTAATAACTTGACAAAGTACTCAACAGTTGTACAAACTCAACACT  
CAACAGTATTTTACAGCTTCAAATTTGACTTGACCTCTCTCTCTCTCT

>PGSC0003DMG400025848-(rev)LRR-RLPs\_5673

CTCTCTCTCTCTCTTATATAACACTCCTATTGGTTTAACTACTACTACATGTACTTTCTTCTTTGGCCTAA  
AATTTCTTGACTCATCACTTCCATTGTTTCTCCATTTTCTCAATGGC

>PGSC0003DMG400025848-(rev)LRR-RLPs\_5734

TCTTTGGCCTAAAATTTCTTGACTCATCACTTCCATTGTTTCTCCATTTTCTCAATGGCTTCTCCTTCTACT  
TTTTCTTCTTCTTCAAATCATTCTTTGTATTCCCCCTGCCTTCTCC

>PGSC0003DMG400025848-(rev)LRR-RLPs\_5795

CTCCTTCTACTTTTTCTTCTTCTTCAAATCATTCTTTGTATTCCCCCTGCCTTCTCCACAAATTCTGAAGG  
TAATTCCTGCTAATTCAAGTTTCCCATGTTTTCTTAGGGTTTAAAGA

>PGSC0003DMG400025848-(rev)LRR-RLPs\_5856

AAATTCTGAAGGTAATTCCTGCTAATTCAAGTTTCCCATGTTTTCTTAGGGTTTAAAGATTTTCTGCTTTGTT  
TTTTCTTCTTTTTAGTTTCATGGGGTTTGTAGTTAAAATCTTGGAAATG

>PGSC0003DMG400025848-(rev)LRR-RLPs\_5917

TCAGCTTTGTTTTTTCTTCTTTTAGTTTCATGGGGTTTGTAGTTAAAATCTTGGAAATGGAAATATTTGTAT  
AAAAGAAAGAAAAGGTGTACCCTTCTACTCAATTTTTTTTTTTTGTAT

>PGSC0003DMG400025848-(rev)LRR-RLPs\_5978

AATATTTGTATAAAAGAAAGAAAAGGTGTACCCTTCTACTCAATTTTTTTTTTTTGTATTTGCAGGGACTG  
CTTTGCATTCTTTGAGAACCAAATTTCTGACCCAAAAAATGTTCTACA

>PGSC0003DMG400025848-(rev)LRR-RLPs\_6039

GCAGGGACTGCTTTGCATTCTTTGAGAACCAAATTTCTGACCCAAAAAATGTTCTACAAAGCTGGGACC  
CTACACTTGTAATCCTTGTACATGGTTTCATGTTACCTGTGACTCAGAT

>PGSC0003DMG400025848-(rev)LRR-RLPs\_61

CTAATTCAGAGAACAGTCCCACCGCCGCTTCCAGAGTCGGAAAGGTACCCATTACCCATTCTTTTTTGTAT  
ATCTGAGGAAGAACTCTGTTTAGTTTTGAATTTATTTTCTTGATTTTG

>PGSC0003DMG400025848-(rev)LRR-RLPs\_610

GGAATTTCACTTGTACAAAACATTTTGTATCAACCAAACATTTCTCCATACCAAACACACCCTAGATCTTC  
GCTTAAAAAGGTGTATATTTCTATTGTTTTTTCATGTTCTTGTTTTCTA

>PGSC0003DMG400025848-(rev)LRR-RLPs\_6100

GCTGGGACCCTACACTTGTAATCCTTGTACATGGTTTCATGTTACCTGTGACTCAGATAATAATGTTATT

CGCCTGTAAGAGAGTCTTGATTTTTCTTTTTCTTCTTGATTTGAATGT

>PGSC0003DMG400025848-(rev)LRR-RLPs\_6161

TAATGTTATTCGCCTGTAAGAGAGTCTTGATTTTTCTTTTTCTTCTTGATTTGAATGTAGCCTTAATTTTTT

TTGGAATTTGCAGGGATTTGGGCAATTCTAATATTTCTGGAACTTTA

>PGSC0003DMG400025848-(rev)LRR-RLPs\_6222

CCTTAATTTTTTTTTGGAATTTGCAGGGATTTGGGCAATTCTAATATTTCTGGAACTTTAGGACCAGAGCTT

GGTGAACTCAAGAATCTACAGTACCTGTATATTTCTTTGTTTATCTCTT

>PGSC0003DMG400025848-(rev)LRR-RLPs\_6283

ACCAGAGCTTGGTGAACTCAAGAATCTACAGTACCTGTATATTTCTTTGTTTATCTCTTTTTCTTGACTTTT

GTTTCTTGCTCAGTTTAGTATCTCTTGTTGGCTGTAAGAAACCGTG

>PGSC0003DMG400025848-(rev)LRR-RLPs\_6344

CTTGACTTTTTGTTTCTTGCTCAGTTTAGTATCTCTTGTTGGCTGTAAGAAACCGTGGATAAAGTAACG

GAAACATAATAGAAAAAGGGGCGTTTTTTAGACAAAGAAATAACTATGT

>PGSC0003DMG400025848-(rev)LRR-RLPs\_6405

TAAAGTAACGGAAACATAATAGAAAAAGGGGCGTTTTTTAGACAAAGAAATAACTATGTATCACATGAT

TAATGTTGTTTCTGTGATTAACAGTTCAATCTTTTGTGTGTTTTCTTTGCT

>PGSC0003DMG400025848-(rev)LRR-RLPs\_6466

CACATGATTAATGTTGTTTCTGTGATTAACAGTTCAATCTTTTGTGTGTTTTCTTTGCTTGCAAGTCTATCT

ATCTGTCTTTAAGATGATGGACAACTTTATCTATCCTGAATTGCAGG

>PGSC0003DMG400025848-(rev)LRR-RLPs\_6527

CAAGTCTATCTATCTGTCTTTAAGATGATGGACAACTTTATCTATCCTGAATTGCAGGGAACTTTATAGT

AATAACATAGAAGGGGAAATCCCAAAGGAATTTGGTGATTTGGAAAATC

>PGSC0003DMG400025848-(rev)LRR-RLPs\_6588

ACTTTATAGTAATAACATAGAAGGGGAAATCCCAAAGGAATTTGGTGATTTGGAAAATCTTATTAGCAT

GGACCTATATGGCAATAGATTTGAAGGCAACATTCCCAAATCTTTTGCTAA

>PGSC0003DMG400025848-(rev)LRR-RLPs\_6649

ATTAGCATGGACCTATATGGCAATAGATTTGAAGGCAACATTCCCAAATCTTTTGCTAAATTGAAGTCTC

TTAGATTTTTGTAAGTATTCTCATTGAATAATTCATCAGTATGACATTTT

>PGSC0003DMG400025848-(rev)LRR-RLPs\_671

CTAGATCTTCGCTTAAAAAGGTGTATATTTCTATTGTTTTTTCATGTTCTTGTGTTTTCTAGGATTGCACAACA  
AGGAAATGAAGAAGGTTGACAATCAGATTTTGTTACTTTTAAGCAAAT

>PGSC0003DMG400025848-(rev)LRR-RLPs\_6710

TGAAGTCTCTTAGATTTTTGTAAGTATTCTCATTGAATAATTCATCAGTATGACATTTTTAGTAGATATTTG  
ATGTGATGTTATAAAGATTGAATCTTTTTCATGCTATGACTACAGACG

>PGSC0003DMG400025848-(rev)LRR-RLPs\_6771

GTAGATATTTGATGTGATGTTATAAAGATTGAATCTTTTTCATGCTATGACTACAGACGGTTAAATGACA  
ACAACTAACTGGTTCGATTCCAAGGGAACCTACGACACTCCCCAACCTT

>PGSC0003DMG400025848-(rev)LRR-RLPs\_6832

TAAATGACAACAACTAACTGGTTCGATTCCAAGGGAACCTACGACACTCCCCAACCTTAAAGTATTGTA  
AGTTCTCAAATTCATATCTGCTGTTATTACCTTCGTATTTACACCATGAA

>PGSC0003DMG400025848-(rev)LRR-RLPs\_6893

AGTATTGTAAGTTCTCAAATTCATATCTGCTGTTATTACCTTCGTATTTACACCATGAAACAGAAAAGGAC  
AATCAAACAATATGGTGTGATTCTGCTTGAGTGTATTTGTTTATTGC

>PGSC0003DMG400025848-(rev)LRR-RLPs\_6954

AGAAAAGGACAATCAAACAATATGGTGTGATTCTGCTTGAGTGTATTTGTTTATTGCATTGCTGCAGT  
GATGTTTCTAACAACAATCTTTGTGGAACAATCCCTGCTGATGGACCCTT

>PGSC0003DMG400025848-(rev)LRR-RLPs\_7015

TGCTGCAGTGATGTTTCTAACAACAATCTTTGTGGAACAATCCCTGCTGATGGACCCTTTGGAAGCTTTCC  
TATGGAAGGGTAATCATTTTTTCTTCTTTCTTGAAAATATGCTTACATT

>PGSC0003DMG400025848-(rev)LRR-RLPs\_7076

GAAGCTTTCCTATGGAAGGGTAATCATTTTTTCTTCTTTCTTGAAAATATGCTTACATTTTCACTGATCCCC  
TTAACTATCCCTTGATATGGTACTGGTTCATTAAGTCCCAATTTTATTG

>PGSC0003DMG400025848-(rev)LRR-RLPs\_7137

CACTGATCCCCTTAACTATCCCTTGATATGGTACTGGTTCATTAAGTCCCAATTTTATTGGTGAAGATTGTTT  
TGAGCTTCATTCTGTTAAGCTGTGTTACTGGGGGAGAAAGAAATCTAT

>PGSC0003DMG400025848-(rev)LRR-RLPs\_7198

GAAGATTGTTTTGAGCTTCATTCTGTTAAGCTGTGTTACTGGGGGAGAAAGAAATCTATTGAATGACTG  
GTTGCATCATGCTAAAAATGTGCTTTAAGGTTTCATAGACACAGGTTCTGAG

>PGSC0003DMG400025848-(rev)LRR-RLPs\_7259

AATGACTGGTTGCATCATGCTAAAAATGTGCTTTAAGGTTTCATAGACACAGGTTCTGAGCTTAATCCACC  
AACCCATTGCAAAAAATTAACCTTATGGTAAGTCATTAGTTAGTAGTTGGT

>PGSC0003DMG400025848-(rev)LRR-RLPs\_7320

TAATCCACCAACCCATTGCAAAAAATTAACCTTATGGTAAGTCATTAGTTAGTAGTTGGTGGCTTTGGGTG  
ATAGCTAGTGATTAATGCTTGTGTTGCAAGTGCAATTACTATATGCCC

>PGSC0003DMG400025848-(rev)LRR-RLPs\_7381

CTTTGGGTGATAGCTAGTGATTAATGCTTGTGTTGCAAGTGCAATTACTATATGCCCTCAAATTGTTAT  
CGGATGCTGATGTTTCATACGACTCTAGTATGAGTCTTAGAAACCATTCA

>PGSC0003DMG400025848-(rev)LRR-RLPs\_7442

AAATTGTTATCGGATGCTGATGTTTCATACGACTCTAGTATGAGTCTTAGAAACCATTTCATTGACCTTGTGT  
TATTGAATTCGGATGACACATACAAGTTACAACCCCAAATGTTTCGAGTT

>PGSC0003DMG400025848-(rev)LRR-RLPs\_7503

GACCTTGTGTTATTGAATTCGGATGACACATACAAGTTACAACCCCAAATGTTTCGAGTTCATCAGATCTCT  
CATTCTTGACTAGGATATGTCATATTTATAGGTAAAGCTGTGATATTT

>PGSC0003DMG400025848-(rev)LRR-RLPs\_7564

TCAGATCTCTCATTCTTGACTAGGATATGTCATATTTATAGGTAAAGCTGTGATATTTGAGCTAGAACC  
AGTATCACAACATCAAACCTCAAAGGAGCTGTCCTGACTCGTGAGTTACG

>PGSC0003DMG400025848-(rev)LRR-RLPs\_7625

GCTAGAACCAGTATCACAACATCAAACCTCAAAGGAGCTGTCCTGACTCGTGAGTTACGCATATGTTGG  
GACCTTTACTATATAGTGCAATTCAATGGTAGATTCAGATTTTTTCTTCCT

>PGSC0003DMG400025848-(rev)LRR-RLPs\_7686

TATGTTGGGACCTTTACTATATAGTGCAATTCAATGGTAGATTCAGATTTTTTCTTCCTCAATGTTGTGTAT  
TGTTATTAGTTCTACTTGTAGTAAAATGAGCAATCAATGCAACTCTTG

>PGSC0003DMG400025848-(rev)LRR-RLPs\_7747

ATGTTGTGTATTGTTATTAGTTCTACTTGTAGTAAAATGAGCAATCAATGCAACTCTTGATGACATTCCTT  
TTGTTTCAGTTTTGCACACAACAGACTCAATGGACCTGAACTGAAAGGA

>PGSC0003DMG400025848-(rev)LRR-RLPs\_7808

GACATTCCTTTTGTTCAGTTTTGCACACAACAGACTCAATGGACCTGAACTGAAAGGACTAGTGCCATA

TGACTTTGGATGCAAAGAAGTTGAAGTATAGTTTGACAACAGCCTTCACA

>PGSC0003DMG400025848-(rev)LRR-RLPs\_7869

AGTGCCATATGACTTTGGATGCAAAGAAGTTGAAGTATAGTTTGACAACAGCCTTCACAAGGTTGCTATT  
ATATCTTTATGTATTGTATATGTAGTTTGACAGTGTTACTGAAATTA AAA

>PGSC0003DMG400025848-(rev)LRR-RLPs\_793

ACATAAATGTTCACTTTGATTGGTGTGTTGTCAAAGTTGGTAGTTGTCTTGT TTTCAATTAGTGCTGAAC  
AAGGCAATCAAAGTTGAATCTAGTTGCTTTGAAGTATTATTTAATTGGT

>PGSC0003DMG400025848-(rev)LRR-RLPs\_7930

GTTGCTATTATATCTTTATGTATTGTATATGTAGTTTGACAGTGTTACTGAAATTA AAAAATCTCAAGTCGA  
ATGCACTTCATGAGACATAAGGTTCTTTAAATTCATCACTAAAGCTCAC

>PGSC0003DMG400025848-(rev)LRR-RLPs\_7991

CTCAAGTCGAATGCACTTCATGAGACATAAGGTTCTTTAAATTCATCACTAAAGCTCACCTTCACTGATAA  
CTTGGCAGCAGAAAATGTATTGTCTTGCTGAATTTTGAATTAAGTGCT

>PGSC0003DMG400025848-(rev)LRR-RLPs\_8052

TCACTGATAACTTGGCAGCAGAAAATGTATTGTCTTGCTGAATTTTGAATTAAGTGCTTGATGGTTTTG  
GAGTGAATTTCTTCTTCAAGAACAATCTATTTTTATGTTGGTGTATCAA

>PGSC0003DMG400025864-(rev)LRR-RLPs\_330

GGAACGCTACCTGTTTCACTTCTCAATGCTTCTGAACTTCAAGTTCTTTCCTGTCAAACAATGCTATTTCT  
GGTGAGCTTACTGAGTCTATTGGAGGGTTGAAGAGCTTAAAGGTTCTA

>PGSC0003DMG400025864-(rev)LRR-RLPs\_396

ATTTCTGGTGAGCTTACTGAGTCTATTGGAGGGTTGAAGAGCTTAAAGGTTCTAAATCTTTCTGTCAATG  
CATTTGTAGGAAATCTCCACAAAAGCTAAGTTTTTTGCAGAATATAAAA

>PGSC0003DMG400025921-(rev)LRR-RLPs\_1098

AAGATGGTTAATTTGACAAACAAC TTTTTTCAAGGGCCTACGCCAACTTTCCATCTTCAGTGCTAGTGG  
ATATGTTGGATAATACCAATAGTTTTTGT TTTGTCACAGCCGGGTCCTTGT

>PGSC0003DMG400025921-(rev)LRR-RLPs\_1220

CTCACAAGTTAATACGCTGTTGGGTGTGGCTAAGGCTGTGGGGTATCCACGGGGTTTGCTGAGAATTG  
GAAGGGGAATGATCCTTGTTCTTGGATTGGTATTACCTGTGATGGTGG

>PGSC0003DMG400025921-(rev)LRR-RLPs\_1281



GAGAATTGGAAGGGGAATGATCCTTGTCGCTTGGATTGGTATTACCTGTGATGGTGGGAACATTACA  
GTGCTGAATTTTCAGAAAATGGGACTTACTGGGACAATCTCTCCCAACTAC

>PGSC0003DMG400025921-(rev)LRR-RLPs\_1525

GAAAAATCCCACCATTTAAGAGCAATGTATTGGTTAAATATGATGGCAATGTCAATATTGGGAAAGATA  
GTCCACCTCCAGTTGCACCTTCCGGGAGTACTCCTAGTTCACCCGATGGGG

>PGSC0003DMG400025921-(rev)LRR-RLPs\_1708

CAGTGATAGGTGGTGTGGTGGTGCAGTTGCTGGATTATTTGTGTTTTGTCTTTACAGGACTAA  
GCGCATGCAGTCCGGTAGAGTTCAGAGTCCACACGCAGTGGTTATTCATC

>PGSC0003DMG400025921-(rev)LRR-RLPs\_1769

CAGGACTAAGCGCATGCAGTCCGGTAGAGTTCAGAGTCCACACGCAGTGGTTATTCATCCTCATCATTCA  
GGATCTGACCAAGATGCTGTTAAGATCACAGTTGCTGGTTCAAGTGCAA

>PGSC0003DMG400025921-(rev)LRR-RLPs\_244

TGAAGAAACCTCATCTGGGTTTTGTGTGTTTTCTTGATATTATTGTCGTTTGTGTCTCTGTATACTCTCAGG  
GTAGTGCAGCAACAGATGCTGCAGTGATGCAAGAGTTGAAGAAGGGAA

>PGSC0003DMG400025921-(rev)LRR-RLPs\_2684

TCTCTGTTTAGTTGTTGGGTCTGCATCTACAGACCATCAGGGAAGCCTATTCTAGCTGGATCTTTTGGGA  
ACGTTGAAATCACGGATGTTTTGAATGGGTCTCAACTTTGAATCACTCC

>PGSC0003DMG400025921-(rev)LRR-RLPs\_2745

ATCTTTTGAACGTTGAAATCACGGATGTTTTGAATGGGTCTCAACTTTGAATCACTCCCTAAAATTCAGT  
ACCTAGTTATTTGTTTAGCTGGATTTTGCCTTTAAATAGTGTTGACAC

>PGSC0003DMG400025921-(rev)LRR-RLPs\_2806

AAAATTCAGTACCTAGTTATTTGTTTAGCTGGATTTTGCCTTTAAATAGTGTTGACACTTTTTTTGGATTT  
TGTAAGCTCTTTGATTTTAGCTAGGTTCTTGACTGGAGCTAACTCTC

>PGSC0003DMG400025921-(rev)LRR-RLPs\_2867

TTTTTGGATTTTGTAAAGCTCTTTGATTTTAGCTAGGTTCTTGACTGGAGCTAACTCTCTTGACACTTTTG  
CTAATATCATCACCTGATACAGTGGAAGTAAAACCAATAGAGAGTTG

>PGSC0003DMG400025921-(rev)LRR-RLPs\_2928

GTACACTTTTGCTAATATCATCACCTGATACAGTGGAAGTAAAACCAATAGAGAGTTGGGAACACTACC  
TTTATCAAAAAAATGAATAAATTCCTATAGAGAGTTAGAGAAGTTTCTAT

>PGSC0003DMG400025921-(rev)LRR-RLPs\_2989

AACACTACCTTTATCAAAAAAATGAATAAATTCCTATAGAGAGTTAGAGAAGTTTCTATGGTAGGATTGC  
AGTAGATGAACTTTTGCTGTACCTTATATCTTCGAATGGTGGAGTGCAAG

>PGSC0003DMG400025921-(rev)LRR-RLPs\_305

ATACTCTCAGGGTAGTGCAGCAACAGATGCTGCAGTGATGCAAGAGTTGAAGAAGGGAATCAGCCCAC  
CGAGTTCACTCAACTGGGACGATCCAGACCCCTGTAAATGGGGTAAAGTTAC

>PGSC0003DMG400025921-(rev)LRR-RLPs\_3050

TAGGATTGCAGTAGATGAACTTTTGCTGTACCTTATATCTTCGAATGGTGGAGTGCAAGTCTGAGAACAT  
AAAAATAAGCAATATGCCTCTAATCAAGGCAAATTTAAATACTTCTGAGA

>PGSC0003DMG400025921-(rev)LRR-RLPs\_3111

TGAGAACATAAAAAATAAGCAATATGCCTCTAATCAAGGCAAATTTAAATACTTCTGAGAAATGCTTGACT  
TTTTGCTTGACAGTCAAACTTAAATCTACTTCTTCAGTAAGATGTGGGA

>PGSC0003DMG400025921-(rev)LRR-RLPs\_3172

TGCTTGACTTTTTGCTTGACAGTCAAACTTAAATCTACTTCTTCAGTAAGATGTGGGAATTCCTGGTAAC  
CTTTCTTTATTTCCACATGTTAGTTATGTTACCGCCATTTAGGTGTTG

>PGSC0003DMG400025921-(rev)LRR-RLPs\_3233

TCCTGGTAACCTTTCTTTATTTCCACATGTTAGTTATGTTACCGCCATTTAGGTGTTGTGCTCGTGTTGAA  
TGATGACTTTTTCGTATTACGGGAAAACACTTGCCTTTCTGATTTTGT

>PGSC0003DMG400025921-(rev)LRR-RLPs\_3294

CTCGTGTTGAATGATGACTTTTTCGTATTACGGGAAAACACTTGCCTTTCTGATTTTGTATTTTCTTCCTCG  
ATGATAAAGCTGTGTTGCTATTGTTCAATTCCTTTAGGCTCAGATCAA

>PGSC0003DMG400025921-(rev)LRR-RLPs\_3355

TTTCTTCCTCGATGATAAAGCTGTGTTGCTATTGTTCAATTCCTTTAGGCTCAGATCAAGTGTAGTTTATCT  
CCTTTAGGCATTGATCGGGTTCTTTCAATTTGTTTCTTGTTTACATTT

>PGSC0003DMG400025921-(rev)LRR-RLPs\_3416

GTAGTTTATCTCCTTTAGGCATTGATCGGGTTCTTTCAATTTGGTTTCTTGTTTACATTTTATTCTCCCTATCC  
AACTTGAATTCAATTTAATAGCTCTCATCTTGAATTGCATCATTAGT

>PGSC0003DMG400025921-(rev)LRR-RLPs\_3477

TTCTCCCTATCCAACCTTGAATTCAATTTAATAGCTCTCATCTTGAATTGCATCATTAGTATGAAAGAACT

GTAAACACTTGACTATTTTATTTAATTGGACAGTTACGGGCCGAGTAAC

>PGSC0003DMG400025921-(rev)LRR-RLPs\_3538

GAAAGAAACTGTAAACACTTGACTATTTTATTTAATTGGACAGTTACGGGCCGAGTAACCACAAAGATTG  
ATGTGTTTAGCTTTGGTGTAAATTTGATGGAGCTAATTACTGGAAGAAGA

>PGSC0003DMG400025921-(rev)LRR-RLPs\_3599

CAAAGATTGATGTGTTTAGCTTTGGTGTAAATTTGATGGAGCTAATTACTGGAAGAAGAGCTCTGGATG  
AATCTCAGCCCGAGGAAAGCATGCATCTGGTCCCATGGTTCCGCAGAATGC

>PGSC0003DMG400025921-(rev)LRR-RLPs\_366

AGCCCACCGAGTTCACTCAACTGGGACGATCCAGACCCCTGTAAATGGGGTAAAGTTACGTGTAATAA  
GATGGTCGTGTAAGTCAAGTAGGGAATCAAGGGCTAAAAGGTTCT

>PGSC0003DMG400025921-(rev)LRR-RLPs\_3660

TCTGGATGAATCTCAGCCCGAGGAAAGCATGCATCTGGTCCCATGGTTCCGCAGAATGCATATAAATAA  
GGAGACATTCCGTAAGGCCATTGACCACACAATCGATCTTGATGAAGAAAC

>PGSC0003DMG400025921-(rev)LRR-RLPs\_3721

ATAAATAAGGAGACATTCCGTAAGGCCATTGACCACACAATCGATCTTGATGAAGAACTCTGGCCAGT  
GTCAGCACAGTTGCTGAGTTGGCTGGTCACTGCTGTGCTAGGGAACCCCAT

>PGSC0003DMG400025921-(rev)LRR-RLPs\_3782

TGGCCAGTGTGACGACAGTTGCTGAGTTGGCTGGTCACTGCTGTGCTAGGGAACCCCATCAGAGACCAG  
ACATGGGTCATGCTGTCAACGTGCTTTCCTCCCTGGCTGAGCTCTGGAAAC

>PGSC0003DMG400025921-(rev)LRR-RLPs\_3843

GAGACCAGACATGGGTCATGCTGTCAACGTGCTTTCCTCCCTGGCTGAGCTCTGGAAACCAGCAGAAGT  
AGACGAGGATGAAATATATGGAATCGATTATGACATGACGCTACCTCAAGC

>PGSC0003DMG400025921-(rev)LRR-RLPs\_3904

GCAGAAGTAGACGAGGATGAAATATATGGAATCGATTATGACATGACGCTACCTCAAGCAGTTAAGAA  
GTGGCAGGCTCTCGAGGGAATGAGTGGCATTGACGGCTCTTCTTCATACATT

>PGSC0003DMG400025921-(rev)LRR-RLPs\_3965

TTAAGAAGTGGCAGGCTCTCGAGGGAATGAGTGGCATTGACGGCTCTTCTTCATACATTGGCAGCAGTG  
AAAATACACAAACAAGTATACCCACTCGGCCATCTGGATTTGCCGATTCAT

>PGSC0003DMG400025921-(rev)LRR-RLPs\_4026

CAGCAGTGAAAATACACAAACAAGTATACCCACTCGGCCATCTGGATTGCCGATTCATTTACGTCAGTG  
GATGGACGATAATTTGATTGTCCAATACTACTGGTGGGGCTTTGGCCTAT

>PGSC0003DMG400025921-(rev)LRR-RLPs\_4087

ACGTCAGTGGATGGACGATAATTTGATTGTCCAATACTACTGGTGGGGCTTTGGCCTATTGTATTGCCCT  
TTAGAGGGTTGGTTTGTTTCATTCTTGCTCATCCCTTATATCTATCTT

>PGSC0003DMG400025921-(rev)LRR-RLPs\_4148

TATTGCCCTTAGAGGGTTGGTTTGTTTCATTCTTGCTCATCCCTTATATCTATCTTTGCCTTCTTTTTCT  
CCCTGTCTTGGTTCTCCAGGTTTGTTAAGATCCTAGTGTGACAATA

>PGSC0003DMG400025921-(rev)LRR-RLPs\_4209

CCTTCTTTTTCTCCCTGTCTTGGTTCTCCAGGTTTGTTAAGATCCTAGTGTGACAATATGGAGTTGCTTTC  
ATCTGATTCTTCTGAACCTTTACTACCCTGCCTGTGCCTTCTTTCTA

>PGSC0003DMG400025921-(rev)LRR-RLPs\_4270

GAGTTGCTTTCATCTGATTCTTCTGAACCTTTACTACCCTGCCTGTGCCTTCTTTCTAGGAGTTGTCCAAT  
ATGCAAATATTATGAGGCAATGTCTGATTTTCATATTAATTAGTTTGGGA

>PGSC0003DMG400025921-(rev)LRR-RLPs\_4331

AGTTGTCCAATATGCAAATATTATGAGGCAATGTCTGATTTTCATATTAATTAGTTTGGATTTCATCATATT  
TTCTGATCTGATTTGAAAGTCTTTTCTAGGGTGTCTAGATTATAAGTCA

>PGSC0003DMG400025921-(rev)LRR-RLPs\_4392

CATTCATATTTTCTGATCTGATTTGAAAGTCTTTTCTAGGGTGTCTAGATTATAAGTCATCAAGATTCTAAT  
ATGGGAATATCAACACTTTGCCTTGCAGATATAGATTCTCTTGTAACC

>PGSC0003DMG400025921-(rev)LRR-RLPs\_4453

AAGATTCTAATATGGGAATATCAACACTTTGCCTTGCAGATATAGATTCTCTTGTAACCTTTTTGTAATGA  
AATATGTTATCTTAATGGCTGAGAGAAATGATGATATGGATCAATGCTT

>PGSC0003DMG400025921-(rev)LRR-RLPs\_4514

TTTGTAATGAAATATGTTATCTTAATGGCTGAGAGAAATGATGATATGGATCAATGCTTTGTGGCCACGT  
TGGGCTACAAAACAAAATAGAGTGGGGCTGCAGATTTTGTGTCATGAT

>PGSC0003DMG400025921-(rev)LRR-RLPs\_4575

TGCCACGTTGGGCTACAAAACAAAATAGAGTGGGGCTGCAGATTTTGTGTCATGATTTAAGTCAAC  
CACATCCATTAATAAATGCTGTGGAAAGAGACGTGGAAGAATTACTTGT

>PGSC0003DMG400025921-(rev)LRR-RLPs\_4636

AAGTCAACCACATCCATTA AAAATGCTGTGGAAAGAGACGTGGAAGAATTACTTGTTAATTAGTGTC  
ATGTGATATAAATAATAAACTAATGTAAAGTTCCATTTTGCCTATTTCTT

>PGSC0003DMG400025921-(rev)LRR-RLPs\_4697

ATTAGTGTCATGTGATATAAATAATAAACTAATGTAAAGTTCCATTTTGCCTATTTCTTTAAGATTGGGGT  
AACTAATGGATATTATTACCCTTTTTCCATTTGTCTATTTGTAATGAAA

>PGSC0003DMG400025921-(rev)LRR-RLPs\_4758

AGATTGGGGTAACTAATGGATATTATTACCCTTTTTCCATTTGTCTATTTGTAATGAAACACTGAATCTCC  
TGTCAGATCAGCCTTGTCGAGGTAAAAATTCCATGTGCTGTACCAAAT

>PGSC0003DMG400025921-(rev)LRR-RLPs\_4819

CTGAATCTCCTGTCAGATCAGCCTTGTCGAGGTAAAAATTCCATGTGCTGTACCAAATGCCAAGTGCA  
AGACCATAGATCTAGTTGAGCAGAATAGAGAATTAACATTCAAGCCTTT

>PGSC0003DMG400025922-(rev)LRR-RLPs\_0

ATGAATTTGAAAAACCCCATTTGAGTTTTGTGTGTTGTTGATACTCTTGCCAATGTTGTCTCTGTATA  
CTCTCAGCCTCAGGGCAGTGCTGCTACAGATGCTGCAGTGATGCAAGAA

>PGSC0003DMG400025922-(rev)LRR-RLPs\_1040

GGAGTTCGCTGAGAATTGGACGGGGAATGATCCTTGTTTGC GTTGGCTGGGCATAACTTGTGATGGTGA  
AAACATTACAGTACTGAATTTTGAGAAAAGTGGACTTACTGGGACAATCTC

>PGSC0003DMG400025922-(rev)LRR-RLPs\_195

TGTACTAAGGATGGTCGCGTAATTAGGATCAAGTTGGGGATCAAGGCCTAAAAGGTTCTCTCCCATCA  
AACATTAATACCCTTACTGAATTGCAAGTTTTTGAAGTTCAAAGAAATGCA

>PGSC0003DMG400025922-(rev)LRR-RLPs\_520

ATTATGCTAATATTACTGGTAAAATCCCTGATTTCTTTGGTGGAAATACTTTTTCTAGTTTAACTTTGC  
ATTTGTCGTTTAAATAATTTGGAGGGTCCTTTGCCCTCGAGTTTTGCGG

>PGSC0003DMG400025922-(rev)LRR-RLPs\_585

ACTTTGCATTTGTCGTTTAAATAATTTGGAGGGTCCTTTGCCCTCGAGTTTTGCGGGTTCTTCTATCCAATC  
GTTGTGGTTAAATGGTATTAAGGTAAGTTGAATGGCTCAATAGATGTG

>PGSC0003DMG400025922-(rev)LRR-RLPs\_65

TGTATACTCTCAGCCTCAGGGCAGTGCTGCTACAGATGCTGCAGTGATGCAAGAATTGAAGAAACAAAT

AATAAATCCGAATTCACCTAACTGGAACGATCCAGATCCCTGTAAATGGGA

>PGSC0003DMG400025922-(rev)LRR-RLPs\_650

CCAATCGTTGTGGTTAAATGGTATTAAGGTAAGTTGAATGGCTCAATAGATGTGATACAGAACATGAC

CAGAGTAACCCAACTCTGGTTTTACAGGTAATGAGTTTACAGGCCCTTTGCC

>PGSC0003DMG400025922-(rev)LRR-RLPs\_715

TGACCAGAGTAACCCAACTCTGGTTTTACAGGTAATGAGTTTACAGGCCCTTTGCCTGATTTTTCGGGCTTA

ACTCAGTTGCAAGATTGTAATTTGAGAGATAATAGATTCACTGGTCCAG

>PGSC0003DMG400025926-(rev)LRR-RLPs\_0

CCATTTTGCTTTGAAGAATATATTACAATAAGCAGCCTTGGGCCTTACCCACAGGTGGACTTACAAACAT

GGTGGCCTTGGGTTGCTTTCTCTTTTCTTGTATCTTTCTGTTCTTTTT

>PGSC0003DMG400025926-(rev)LRR-RLPs\_1240

TTCAAGGGAAGGGCAGAGTCCAAAAGATCCACCTAAAACCCTGACTCCTTCAAACCAGCAACACCAAC

CACTCCAAAACCAAAGCCATCTCCACCACCAGTAGCCTCACCTCCTCC

>PGSC0003DMG400025926-(rev)LRR-RLPs\_1302

CACCAACCACTCCAAAACCAAAGCCATCTCCACCACCAGTAGCCTCACCTCCTCCACCACCAGTG

GCCTCACCTTACCTCCATCCACTCACCACCACCTCCAGTCCATTAC

>PGSC0003DMG400025926-(rev)LRR-RLPs\_1860

CACCACCGCCACCGGTAGCCTCACCTCCACCACCAGTCGCCTCACCACCGCCACCTGTAGCTTACCTCCA

CCTGCTCCAGTATTCTCCTCCACCGCCAGTCCACTCACCACCACCAC

>PGSC0003DMG400025926-(rev)LRR-RLPs\_1984

AGCTCCGGTAATGTCTCCACCTCCACCCACTTTTGAGGATGTCGCTTCCCCCAACATTGGGCTCGCTAT

ACGCCTCACCACCACCAATTTTCCAAGGTTATTAAGAAGTTCGCCA

>PGSC0003DMG400025926-(rev)LRR-RLPs\_2046

GCTCGCTATACGCCTCACCACCACCACCAATTTTCCAAGGTTATTAAGAAGTTCGCCATTAGGACTACTTA

AAACAATGTGTACCAATCAATCTGTAAACACATATCAATTGAAAAAAAAA

>PGSC0003DMG400025926-(rev)LRR-RLPs\_2108

GACTACTTAAAACAATGTGTACCAATCAATCTGTAAACACATATCAATTGAAAAAAAAAACGTTTACATTA

TCAATTGTACTGAAAAATTGGAAATTTGCTATTAGATGGTGCTGATTG

>PGSC0003DMG400025926-(rev)LRR-RLPs\_2169

TTTACATTATCAATTGTACTGAAAAATTGGAAATTTGCTATTAGATGGTGCTGATTGAATAAATCATT  
TGCAGTTTCAACATATTTTCAGTATTTAAATCCTATCAATTATCTTCATT

>PGSC0003DMG400025926-(rev)LRR-RLPs\_62

ACAAACATGGTGGCCTTGGGTTGCTTTCTCTTTTTCTTGTATCTTTCTGTTCTTTTTCTCCATCATATTTTG  
CATTATCTGATATTGAAGCTGCTTCTATTGCCCGTCGCCAACTTTTA

>PGSC0003DMG400025939LRR-RLPs\_1171

AGACATTTGATTTCACTACTGCTTTGTCAAACATACAAAATTGTATTAATGAAACCTTTGTTTTAGTGTC  
TTCTTGATTTTTCTTTCTTTTTTTCTATGTTTTCTACCTGGTGTCCG

>PGSC0003DMG400025939LRR-RLPs\_186

TCCTTTTGGTGTACAAAACTTGGACAGGCCCTGATATTTGCAATTATAAAGGCTTTTATTGTGATAATC  
CACCTAATAATTCCTCAGCAATTTCTCTTGCTTCTATAGATTTCAATGG

>PGSC0003DMG400026004-(rev)LRR-RLKs\_1891

TGATACCTCCGATAGGCGACTCAGTACTGATGAGGTGAAGGAGATCTCTAGAAGAAGCGCGTCGCCCT  
CATCAGCCTGGAATATTCCAATGGCTGGGATCCTCTAGGCAAAGGCCGAGG

>PGSC0003DMG400026004-(rev)LRR-RLKs\_2318

GATTTTCGTTCCAAATGGAAATTTGTTGCAGTATCTTGACGTGAAGGATGGAAAAGGAAAGATCCTTGAT  
TGGTCTACCAGATTTTCTATAATCAAAGGCATTGCCAGAGGTGAGCTACTG

>PGSC0003DMG400026004-(rev)LRR-RLKs\_2379

TCCTTGATTGGTCTACCAGATTTTCTATAATCAAAGGCATTGCCAGAGGTGAGCTACTGTTTGATTAGTCC  
CATGTTTGATGTTTTCTTTATAGCTCTTTGACGACCAGATTTGAATAAC

>PGSC0003DMG400026004-(rev)LRR-RLKs\_2440

TGATTAGTCCCATGTTTGATGTTTTCTTTATAGCTCTTTGACGACCAGATTTGAATAACAACATTTGTTATC  
TATTGTTTAAACAGGTATTCATTACTTGCATAGAAACAAGGGAGGCAAA

>PGSC0003DMG400026004-(rev)LRR-RLKs\_2501

CATTTGTTATCTATTGTTTAAACAGGTATTCATTACTTGCATAGAAACAAGGGAGGCAAACCTGCTCTAGTC  
CATCGAAATATATCAGCTGAAAAAGTACTTGTGATCAACACTACAACC

>PGSC0003DMG400026004-(rev)LRR-RLKs\_2623

TTGCTCTCGGATTCTGGTCTGCATAAACTACTAGCAGATGACATTGTCTTCTCAACACTCAAGGAAAGTG  
CTGCAATGGGATACCTAGCTCCTGAGTATAACAACACTGGACGGTTCACC

>PGSC0003DMG400026004-(rev)LRR-RLKs\_2989

TTAACCTCCAGCAAGTCGTAAAACTATTGCAAACAACATCCAAGTTCTCCAATGACCATTAGGAGCCTG  
ATATTAACATCTTACTGATGCCAGGAGTAGGCACCATTTTCCCATCCTTT

>PGSC0003DMG400026004-(rev)LRR-RLKs\_3050

AGGAGCCTGATATTAACATCTTACTGATGCCAGGAGTAGGCACCATTTTCCCATCCTTTTGATCCTGCATG  
ACTTGTGCCTGAGGACGACACATGAATGCCAGGTGCCTGTTCCACATAG

>PGSC0003DMG400026004-(rev)LRR-RLKs\_3111

ATCCTGCATGACTTGTGCCTGAGGACGACACATGAATGCCAGGTGCCTGTTCCACATAGTTTATTAGTAC  
TAATGCACCTCGACGTAGGTAGGCCTCAAGTGATCAGTTCTCTTGTATTA

>PGSC0003DMG400026004-(rev)LRR-RLKs\_3172

TATTAGTACTAATGCACCTCGACGTAGGTAGGCCTCAAGTGATCAGTTCTCTTGTATTATGTAACCTAACC  
ATAATTCTAAGCAAGTCTTCTCCACTTGCAAAGTGTACCAGAAGTG

>PGSC0003DMG400026004-(rev)LRR-RLKs\_3211

TGATCAGTTCTCTTGTATTATGTAACCTAACCATAATTCTAAGCAAGTCTTCTCCACTTGCAAAGTGTGTA  
CCAGAAGTGCAATTTCTATTTAGTATCATATGAGTTATGACCTCTTGC

>PGSC0003DMG400026004-(rev)LRR-RLKs\_488

GTATCTTAATGTGAATAATCTCTCTGGTGTATTCTCTGAGGTTGGCAACATGTCTAGTCTTCAAGGTA  
GGTTCTTTTTTGCTTTGTTGTCTTGACTAGTTATGGTAAAAAGCCTCAG

>PGSC0003DMG400026004-(rev)LRR-RLKs\_549

CTTCAAGGTAGGTTCTTTTTGCTTTGTTGTCTTGACTAGTTATGGTAAAAAGCCTCAGTCTTGATGCTTA  
GTTTTGACTTAATTTGAATGAATGTTTGAACCTTGCCAAATAGATCTAT

>PGSC0003DMG400026004-(rev)LRR-RLKs\_61

AACTTTTCCTCCATTTTCTTGCAAAAACCAATATGGGTTTTCTCTCTGTTCTCTCTCCATTTTCCTTTTC  
ATCCTAATATTAACATTCCCACAACAAGGGTTTCTTCTGAAGCCA

>PGSC0003DMG400026064LRR-RLPs\_1159

ATACCATTGTATTCTTCACTGCAGGTTGGAGACATTAACCAGTATAGCCTATTTGAGGCATCTATCAATG  
GGTGCATTGTGAGACAGTGGGGAGTTCATTTGATCTATCAGGATGAATGA

>PGSC0003DMG400026064LRR-RLPs\_1220

CTATCAATGGGTGCATTGTGAGACAGTGGGGAGTTCATTTGATCTATCAGGATGAATGAATATCTTTGA



AGCGCAGACTCAGATAGATTGCTTCAAGTACACCTACGCTGAAAAAAGAT

>PGSC0003DMG400026064LRR-RLPs\_1281

ATCTTTGAAGCGCAGACTCAGATAGATTGCTTCAAGTACACCTACGCTGAAAAAAGATTAAATTATGCT  
GGGATATTAAGGGGATTACCAAGAAATAGATTAAGGTAACCTCGAAATACC

>PGSC0003DMG400026064LRR-RLPs\_1586

ATAAATGAATCTCTTTTATTTAATAATTATTACCACTTTTAAATAAACTTTTATTTTATTACTATTTTTGTCA  
ACTTTTAAACAATACTTAAACAATTCTTGAACAATTTTGTTCTTTTA

>PGSC0003DMG400026064LRR-RLPs\_1647

CTATTTTTGTCAACTTTTAAACAATACTTAAACAATTCTTGAACAATTTTGTTCTTTTATATATAATTAAGA  
ATTTTCAACTTAGCAAAAAGTGTTGTACCTGATTGGGAACATCACTC

>PGSC0003DMG400026064LRR-RLPs\_1830

TCTTCTTCAGTTTTCAACACAGAATTCTAATGGAAGAAGGTAAACGAAAATCGCCTAGAAGAAGTCCGC  
GGATACTTAATGATGTTGATACTTTGAATAAAAATTTTTATAGAAGGTGTC

>PGSC0003DMG400026064LRR-RLPs\_1891

AAGTCCGCGGATACTTAATGATGTTGATACTTTGAATAAAAATTTTTATAGAAGGTGTCCGATGAGGGG  
TCAAATTCAGCTACTACTGCTACCGACAAAGTTAAGGACGATCCCAATTT

>PGSC0003DMG400026064LRR-RLPs\_2013

ATTTGGGAATTTCAACAAGTATCGAGTAAGCAGAACAAGGAGGAGAGAAATGCATGTTCAATTGTAAAGG  
TAAAAAAAAGAGTTAAAGAGGTGAACAATGTGAAAAAATAAAAAAATGGCG

>PGSC0003DMG400026064LRR-RLPs\_2074

GTAAAGGTAAAAAAGAGTTAAAGAGGTGAACAATGTGAAAAAATAAAAAAATGGCGTTGATTTTG  
CATCTACATCGAAGAAAATTGCAGACAACGATGACAATTTTGAGGATTACC

>PGSC0003DMG400026064LRR-RLPs\_2135

GATTTTGCATCTACATCGAAGAAAATTGCAGACAACGATGACAATTTTGAGGATTTACCTCCTCAATTC  
AGTCAAAAAAATGAAAAATAAGTTGTTTCAGAGAAGAAGCCAGTGAAGG

>PGSC0003DMG400026064LRR-RLPs\_2196

CTCAATTTTCAGTCAAAAAAATGAAAAATAAGTTGTTTCAGAGAAGAAGCCAGTGAAGGATGCAAAAAC  
ACTGAACTGATTGCCCAAAAATGTCATTCTACCGGAGAGTAGAGATTCGGT

>PGSC0003DMG400026064LRR-RLPs\_366

AAAGCATCAATCTGCTCGCAGTTTGATATTACCCTGGGAGTTTCATGCTTTGAGGGAATTGAAAAGCTTA  
GATCTCAGTGGATGTAATTTATGTGATAGCCAAGCTGCTGCTCTAATGAG

>PGSC0003DMG400026064LRR-RLPs\_427

AAAAGCTTAGATCTCAGTGGATGTAATTTATGTGATAGCCAAGCTGCTGCTCTAATGAGCTTAACTTCTTT  
ATTGGAACTGAACCTGAGCAGAAATAAGTTTATTTATTTCCCTGATGTC

>PGSC0003DMG400026064LRR-RLPs\_549

CAGCCGACTTTCTCACCTTCGATATCTCAATATAGCCCACTGTCAGGAACCTAAGGAACCTCCTCAGAATA  
TAGAGGAATTATATGTAGAAGATTTTTTGGCAAAGAAAGTATTGCAA

>PGSC0003DMG400026064LRR-RLPs\_610

CCTCAGAATATAGAGGAATTATATGTAGAAGATTTTTTGGCAAAGAAAGTATTGCAAAGCTATGGATG  
TACCCAAGGTTGAATTTGGTATCATTACCAATTATAGTTTTGATCAACAA

>PGSC0003DMG400026064LRR-RLPs\_793

AACAATATGGATGATGTGATCCTCCCACTCTTAACTCTGATCATAGGGTAACCTGCTCCATTGTCTTTCC  
TGAACGTGCAATCCACATGGTTTATACATCGGAGTGTTGAGGAAAAG

>PGSC0003DMG400026064LRR-RLPs\_854

TTGTCTTTCTGAACGTGCAATCCACATGGTTTATACATCGGAGTGTTGAGGAAAAGATCTTGTTCAA  
ACTGCCATTAATTGGTATAATGATAAGTTCAAGGGCTTTGCTATATGCT

>PGSC0003DMG400026072LRR-RLKs\_183

CTTACTGCCTCTTTATGTGTGAATAAATAAGAGAAACAGAAAATCATCTTACTATTTTCAGGTATAACTCAT  
GTTTTCTTTAAGCCTTATTCATTTGTTAGTCTTTTAATTACATAAAAAT

>PGSC0003DMG400026072LRR-RLKs\_1891

ATTGGCTTTACCTGGCAGGTTCAAATTTGACAGGAGAAATCCCGGAATCCATTTTTGAAATGGGGGCAC  
TAGGTACATTGGATATTTCAAGAAATCAGATTATTGGGAATTTCTCTAAGT

>PGSC0003DMG400026072LRR-RLKs\_1952

GGGGGCACTAGGTACATTGGATATTTCAAGAAATCAGATTATTGGGAATTTCTCTAAGTCAGTAAACAA  
GCTGAAAAATTTATGGAAAATTGAGCTGTTTCAGAATAAGTTGACAGGGGA

>PGSC0003DMG400026072LRR-RLKs\_244

TATAACTCATGTTTTCTTTAAGCCTTATTCATTTGTTAGTCTTTTAATTACATAAAAATCCAACTTTATGTG  
TTATATGAGTTATCAGATGATTCTTAACAATAAGCTATCATTTAGC

>PGSC0003DMG400026072LRR-RLKs\_427

TTTTTGGAGTTTTGGGACTTCCCTCTTAAAACTTCAAATCTATAGCCAAACAGGACCTAAAGGATGCAT  
GTTACTTATGATTTCTTAAGAAAGTTTACTTTTTTGTCTATGGATAT

>PGSC0003DMG400026072LRR-RLKs\_4575

GTCCACATCGGCAAAAATACATTAGATATGTTGAGTATATAAATAAGCAGGCCTTACACTCAAATAACA  
TGTCTTAAAGCCGCATAGGTGTAGACTCAAAGCTAACAATATTGCCTTAC

>PGSC0003DMG400026072LRR-RLKs\_4636

CAAATAACATGTCTTAAAGCCGCATAGGTGTAGACTCAAAGCTAACAATATTGCCTTACACAAAAACTTG  
TTTTGTTGTAACTTTGAATCTGATTCAATGAATATCCACATAGATAGTT

>PGSC0003DMG400026072LRR-RLKs\_4758

AAGCAAACTGATATACATAAACATTTACATATTTGTATAAGAGGGATGGCAACCAACAATGTTACTCT  
TTTATCTTTTGTGATCCTCCTCAGTATTACATGGTACATTCTGCAGATTT

>PGSC0003DMG400026072LRR-RLKs\_488

AAGGATGCATGTTACTTATGATTTCTTAAAGAAAGTTTACTTTTTTGTCTATGGATATCTCTGTTTCTGTA  
AAATTATGGAAGCTGTTTGTCTGTCAATTAGTTGATTTCCATGTT

>PGSC0003DMG400026072LRR-RLKs\_4941

ATGCAGCATCAATTTGAGCAAATACCTCCTCTTTGGAAACGCTCCCGTCCACCTGAAATTAATAAGGTC  
AGAGAAGATAGAAGTTTTAACACTGAGAAATGATAAGAACACGTTTCATGC

>PGSC0003DMG400026072LRR-RLKs\_5002

AAATAGGTCAGAGAAGATAGAAGTTTTAACACTGAGAAATGATAAGAACACGTTTCATGCACGCGTATTG  
AAAGAAAGAACATACAGTATCCTTGTTTCAGTGAAGAAAAAGAGAAGGGTAA

>PGSC0003DMG400026072LRR-RLKs\_5063

GCGTATTGAAAGAAAGAACATACAGTATCCTTGTTTCAGTGAAGAAAAAGAGAAGGGTAAGCAAAAGGG  
GAGTCCTTGATTAAGTATATTTCCCCCAGATTGTTTGGTATGAATGTAAAA

>PGSC0003DMG400026072LRR-RLKs\_5124

AAAAGGGGAGTCCTTGATTAAGTATATTTCCCCCAGATTGTTTGGTATGAATGTAAACTCAAAGGATT  
TGCTCTTCTTTATCTAATTGAGGAGAGATGAATAATTTAAGATAAAAAG

>PGSC0003DMG400026072LRR-RLKs\_5185

CAAAGGATTTGCTCTTCTTTATCTAATTGAGGAGAGATGAATAATTTAAGATAAAAAGTGGATGTATAG

CCCTTTTGCTTTGGCTTCCCTTGTTGTTTTAACAACTGTGTGAGTATGGA

>PGSC0003DMG400026072LRR-RLKs\_5246

GATGTATAGCCCTTTTGCTTTGGCTTCCCTTGTTGTTTTAACAACTGTGTGAGTATGGATCAGTCTGGATG  
AACTGGAACATAATTTAAATTGAACATTTTGTAACCTACATGTCAAACA

>PGSC0003DMG400026072LRR-RLKs\_5307

AGTCTGGATGAACTGGAACATAATTTAAATTGAACATTTTGTAACCTACATGTCAAACAACATAATCTTAT  
AACCATATCATTATTCTTTGCGCAATTAGAAAACCAAACCTACTTTTTCT

>PGSC0003DMG400026072LRR-RLKs\_5368

ATAATCTTATAACCATATCATTATTCTTTGCGCAATTAGAAAACCAAACCTACTTTTTCTCAAACCATTTCC  
AACCAACCCCTCCACATTGTCTTTTTTATGGACTATATTCCTGTAA

>PGSC0003DMG400026072LRR-RLKs\_5429

AAACCATTTCCAACCAACCCCTCCACATTGTCTTTTTTATGGACTATATTCCTGTAAACCAAGACCTTGGA  
AACCATCAAACAACCAACAACCTATGAATCAAGCATATAAGAATGATT

>PGSC0003DMG400026072LRR-RLKs\_549

CTGTTTCTGTAAAATTATGGAAGCTGTTGTTTTCTGTCAATTAGTTGATTTCCATGTTCCCTGTTTGCCTA  
TTGTAGTTTGCTACAACCTTTCTGGGAAAAAAGTTGTTTTGTTATTGT

>PGSC0003DMG400026072LRR-RLKs\_5490

AAGACCTTGGAACCATCAAACAACCAACAACCTATGAATCAAGCATATAAGAATGATTCCACGTTTTGA  
AGGTGAGTGTTCAATCTGCATTCCCGAGTGAAGCAACTGCACCACATCTG

>PGSC0003DMG400026072LRR-RLKs\_5551

ACGTTTTGAAGGTGAGTGTTCAATCTGCATTCCCGAGTGAAGCAACTGCACCACATCTGTGGCAAAAAG  
AATACCTGGAATATAGTATCTTTGTACATTGAGAGAACTGATTCCACATTT

>PGSC0003DMG400026072LRR-RLKs\_5612

GCAAAAAGAATACCTGGAATATAGTATCTTTGTACATTGAGAGAACTGATTCCACATTTTGATGGTGAGT  
GTGCAGACGCAGCTTACCTGTAAATGGTAAACTGAAAAAGAAATAAGAC

>PGSC0003DMG400026072LRR-RLKs\_5673

ATGGTGAGTGTGCAGACGCAGCTTACCTGTAAATGGTAAACTGAAAAAGAAATAAGACAAAAATGAA  
GCTGATCACAACATAAATTTATGGTGTTTTAGAAACCTATACTTAAGTCAAT

>PGSC0003DMG400026072LRR-RLKs\_5727

AAGACAAAATGAAGCTGATCACAAATAAATTTATGGTGTTTTAGAAACCTATACTTAAGTCAATTATC  
TACAAGGGGACTTGAGTAAGCAAGGGAAAAGAACATCAAGAATGATAAAG

>PGSC0003DMG400026154G-LecRK\_0

GTCTCACTGAAATGAAATAGAGGGCAAGAGCTACCTATTTGAATTTATGTTCTTCATTCAAATCATCAAC  
AATTCCATAAAACAATGCAATTAAGTAATTTTCTGTTGTTGTTGTTGTCT

>PGSC0003DMG400026154G-LecRK\_1054

ACAATGTAGAAGTGCTCGACACGTTCTTGGATTTGAGGTCGATGAAATTCAAGAGTCCAGACAGGATAT  
TCAGTAATAATAGTACCCGTGAGGACTGCAGGAGAATTTGTCTAGGCAACT

>PGSC0003DMG400026154G-LecRK\_1116

AGGATATTCAGTAATAATAGTACCCGTGAGGACTGCAGGAGAATTTGTCTAGGCAACTGTAAGTGCCAG  
GCCTATACTTACCATGATTCTGTATGCCGGATTTGGGTCACTAGTCTCATG

>PGSC0003DMG400026154G-LecRK\_1178

GTGCCAGGCCTATACTTACCATGATTCTGTATGCCGGATTTGGGTCACTAGTCTCATGTATCTCCAGGAG  
AACTATGCTGGTGGCTTCAACATCTCTGTTTCGTGTCAGCATTTCCGATAT

>PGSC0003DMG400026154G-LecRK\_124

CATTGATGATTTTACATCGATGTGATGCAAGGAGGAGCACCATTGATGGAAGCAGTAAATTAGTTGACA  
ATGGCGAAACCCTCGTATCTGCTGGAGAAAATTTGAAATGGGATTCTTTT

>PGSC0003DMG400026154G-LecRK\_1426

ATAAACCTAATACCCTATCCATTAAGCAGTGAACCAAATTGTGGTGACCCTTTGTATTATAGTTTCTCATG  
TGATGATTTAGTTGGTCAGGTAAGCTTCTCACATCGAATGGCAAGTAT

>PGSC0003DMG400026154G-LecRK\_1674

TAAGGTGATAAACTGGTGTTACAATCCCACAGAGAATCTTAATTCAGGACCTTTTAGTCGAGGGAAAGA  
TTTAATATTGATTAGTTGAAACCACCATTGGAGCCATTTTGCAAGACTTC

>PGSC0003DMG400026154G-LecRK\_186

GTTGACAATGGCGAAACCCTCGTATCTGCTGGAGAAAATTTGAAATGGGATTCTTTTCTGATGATGCCG  
GGTTAAACAAATATGTAGGCATATGGTATTACAAATTAAGTCCTAGAACT

>PGSC0003DMG400026154G-LecRK\_372

GTTGTCGTTGAAGATGGTAATCTCAAAGTTATAAGTAATGGGTATACTTATTTCTCCACACAATTAGGTA  
GTGGTTCTAACAGGAAAGTAGAGTTGTTGGATACAGGGAATTTAGTTTTA

>PGSC0003DMG400026154G-LecRK\_434

ATTAGGTAGTGGTTCTAACAGGAAAGTAGAGTTGTTGGATACAGGGAATTTAGTTTTAGTTGATGAAGG  
AGCTGAAATGTGGCAGAGTTTTCGCAATCCAACCGATACATTCCTACCAGG

>PGSC0003DMG400026154G-LecRK\_496

ATGAAGGAGCTGAAATGTGGCAGAGTTTTCGCAATCCAACCGATACATTCCTACCAGGTATGAAAATGG  
ATAGCAGTTTGAATTTGACTGATTCAAATATGAGAACTACATATTCCGAT

>PGSC0003DMG400026154G-LecRK\_558

AAAATGGATAGCAGTTTGAATTTGACTGATTCAAATATGAGAACTACATATTCCGATTAGATCAAGCAA  
GTGACAAGGAATATGTTATAGTACTTCAAAGCAGGGCAAATTTCTCTGG

>PGSC0003DMG400026154G-LecRK\_620

TCAAGCAAGTGACAAGGAATATGTTATAGTACTTCAAAGCAGGGCAAATTTCTCTGGAAAGGGTCTGC  
GGAATCAGGAAAGTTAAGTTTCAGTGAGATGCCTGGTTATGTTGCCTACTT

>PGSC0003DMG400026154G-LecRK\_682

GGTCTGCGGAATCAGGAAAGTTAAGTTTCAGTGAGATGCCTGGTTATGTTGCCTACTTGTATCCAACCTC  
CACTAATAATTCATTGGAATCGATAGGAACATTTAACAAGTATAGGCTCT

>PGSC0003DMG400026154G-LecRK\_744

TCCAACCTCACTAATAATTCATTGGAATCGATAGGAACATTTAACAAGTATAGGCTCTTAATGAACTCCTC  
GGGGGAAATACAATTCTACGGTTGGGATAAAGGAGATCAGTGGATGGTCT

>PGSC0003DMG400026154G-LecRK\_806

GAACTCCTCGGGGGAAATACAATTCTACGGTTGGGATAAAGGAGATCAGTGGATGGTCTTTGAGGTGGT  
CAGCGCCAAATGATAAGTGTGATTGGTATAAGTATTGTGGGAAATTTAGCAT

>PGSC0003DMG400026154G-LecRK\_868

GGTGGTCAGCGCCAAATGATAAGTGTGATTGGTATAAGTATTGTGGGAAATTTAGCATTGTAAACAGCA  
AACGTGAGCCAGTATGCAAATGTTTGCCCGGGTATAAGCTCAATCCTCCAG

>PGSC0003DMG400026154G-LecRK\_930

AACAGCAAACGTGAGCCAGTATGCAAATGTTTGCCCGGGTATAAGCTCAATCCTCCAGATAATTCAAAA  
GCAGGAGAATTTTCAGGTGGTTGTTCAAGTATGTCAGTTAGCTCTTGCAAT

>PGSC0003DMG400026155G-LecRK\_0

ATCTGATTGAACGAAAAAACCAAGTCTTACCATGACTATCAACATGATCTTAATTGATGCTGTGCATCTTC

TGTTATCAAATTTGGTGCAACCATGCAACTGCAACATTATTCGATTCGT

>PGSC0003DMG400026155G-LecRK\_1054

CACCTAGATCTGATACAGAATGGGACTTGAATGATCATTCTGGTGGCTGTGTTAGGAAGGAAAGCTTGC

AGTGTGGTGATGGTAAAATGAAGGGCGGTTTTTCGGAGAATCCCAAAGTGA

>PGSC0003DMG400026155G-LecRK\_1116

AGCTTGCAGTGTGGTGAATGAAGGGCGGTTTTTCGGAGAATCCCAAAGTGACATTGCCCGGT

TATTCTCTAACTGTGCCGGCTGCTAGTTCTGAGGAATGCCAGTCGACTTGC

>PGSC0003DMG400026155G-LecRK\_124

TTTTGTGATCCTAACATGTTTATCTATCAATATTCATCAGTCTCTTGGAGTTGAAATGATCTCAGTAAATC

ACTCTGTTTCTGGAAACCAAAGTATAGTCTCTTCGGGCGAAAACCTTG

>PGSC0003DMG400026155G-LecRK\_1364

TGCTGTCTCTGATGAAGCACGCGGTGAAGGTAAGTTTAAAGTTAGGAGTTGTATTTGATAGTGTGGCC

ATTTCTATGTATGCAATGCTCATCTCCAAATAGCTACCGATAGAGCTTTCT

>PGSC0003DMG400026155G-LecRK\_2170

AAAATTTCTCCTTCCATTTTTTTTTTCCGAATCAGATCAAGAGAGATATCTCAAAGGCTGCTCTTTTTTTT

ATTTTTTATTTTTTATCTTAGCAAGCCAACAAAGCACAGGAGGCAAT

>PGSC0003DMG400026155G-LecRK\_2232

TCTTTTTTTATTTTTTTATTTTTTATCTTAGCAAGCCAACAAAGCACAGGAGGCAATCCAGTCCACATTG

GTAAACAGAGAAAGAGAAGCACAAAACCTGATTAACGAAAATGATAA

>PGSC0003DMG400026155G-LecRK\_2728

TCAAACAAAAGTCTAGACACCTTCATATTCGGTTAGTATATATATCTGAACTTATCTTATTTCTTAATCTCT

CTATTTACTTGATCAATATTGTTAAATTTTCTCGTTGTTTACCAAAT

>PGSC0003DMG400026155G-LecRK\_2790

CTTAATCTCTCTATTTACTTGATCAATATTGTTAAATTTTCTCGTTGTTTACCAAATAAGATCCAACACTT

AGCAAGTCATTGAAATGGAGAAAGCGATTTGAGATCATATTAGGAATT

>PGSC0003DMG400026155G-LecRK\_2852

TCCAACACTTAGCAAGTCATTGAAATGGAGAAAGCGATTTGAGATCATATTAGGAATTTCTCGAGGGCT

TCTCTATCTTCATGAAGACTCAAGGCTCAGAATCATTTCATAGGGATCTGAA

>PGSC0003DMG400026155G-LecRK\_3100

AAACATGACAATGTTATGAACTTTGCTTAATTCCATCTCACATCTGACTCATGATAATTCCATCATTAAATTT  
AGCGGATATATGTCTCCTGAATATGCATTGGAAGGAGTATTCTCAATT

>PGSC0003DMG400026155G-LecRK\_3162

TCATTAATTTAGCGGATATATGTCTCCTGAATATGCATTGGAAGGAGTATTCTCAATTAAGTCAGACGTA  
TTCAGCTTAGGAGTAGTTATACTGGAGATAGTAACCGGAAGGAGAAATAC

>PGSC0003DMG400026155G-LecRK\_3286

TTTTATCAATCTAAAGAAGCATCTAACCTTTTGGTCCATGTGAGTGCCTAGAGTACATGTTAATTTTTTCC  
AATATGTATGTTGGACTTCATATTCATTATTCTAAATCATGATATCACA

>PGSC0003DMG400026155G-LecRK\_3348

ATTTTTTCCAATATGTATGTTGGACTTCATATTCATTATTCTAAATCATGATATCACAGGCATGGAATTACT  
GGAAAGAAAAAAGAGCACTACATTTGCTGGATCATTATTGCTCGAAT

>PGSC0003DMG400026155G-LecRK\_3472

CAACCCGAAAGAAGCAATGACGTGCATAAACGTTGGGCTCTTATGTGTGCAAGAAGATCCAGGTGATC  
GTCCTTCCATGTCAAATGTTGTAATGATGCTTCGTAGTGATAGTACGTCTCT

>PGSC0003DMG400026155G-LecRK\_3658

TGGTACACCACCTAGCTTCACCAAATTGAGTTGACAATCACAGTTGAAGAAGGCCGATGATGTGATGA  
ATTCATTAGTTTTTCAAATGAATTTAAACGCGAAGTTTATTTATTTTTTCA

>PGSC0003DMG400026155G-LecRK\_3720

GTGATGAATTCATTAGTTTTTCAAATGAATTTAAACGCGAAGTTTATTTATTTTTTTCACCTTAGATTA  
ACAAAATTACAGGAATACATCATCTTTTTCTTTTTCTCAATTTTTTTG

>PGSC0003DMG400026155G-LecRK\_3782

AGATTAACAAAACAAAATTACAGGAATACATCATCTTTTTCTTTTTCTCAATTTTTTTGTTGTTTAGGCAGTA  
GAAGACTTAGGACCAGTACTGCTGATATTTATAGTGAAAACCTGAAAGG

>PGSC0003DMG400026155G-LecRK\_3906

TATGCTTAATATTGTGTACAACATAGAATATATTGTGTTGATAAAAAAAGTTCATTTTCTGTTTCATTTTG  
GTCTCTTCTACCTTCTTAACTTGTCTTAAAAGGCCATTTCAGTAAGAAT

>PGSC0003DMG400026155G-LecRK\_62

TGCATCTTCTGTTATCAAATTTGGTGCAACCATGCAACTGCAACATTATTCGATTCGTCTACTTTTTGTGAT  
CCTAACATGTTTATCTATCAATATTCATCAGTCTCTTGGAGTTGAAAT



>PGSC0003DMG400026156G-LecRK\_0

TTTAAACAGGAGCAAATTACAAGGAGGTGTACTAGGAAAAATAATGGAGTTGGATTGTGTTGTAGCTAT  
TTAATTGTATTTTGTGTTCTTTTCGTTACGCTTGTGGCGAGTGAAGAAAG

>PGSC0003DMG400026156G-LecRK\_1037

GTTGTGATGGCGGAGACATATTCTTGAAACATGAAGAGGGTATGAAGTTCCGGATCATTCTATCTCCTT  
AGGACATATGAGCATTAAAGGACTGTGAAACGCGGTGCATTAGGAACTGTT

>PGSC0003DMG400026156G-LecRK\_1098

TATCTCCTTAGGACATATGAGCATTAAAGGACTGTGAAACGCGGTGCATTAGGAACTGTTCTTGTTTCAGCT  
TATGCTTATTCGAATAGCACTTGTTTAATTTGGTTTGGAGATTTACTGGA

>PGSC0003DMG400026156G-LecRK\_1159

TGTTTCAGCTTATGCTTATTCGAATAGCACTTGTTTAATTTGGTTTGGAGATTTACTGGACCTTTCCACAA  
CTTTTCTGGTGGCAGAGTTCTCAATGTTTCGAGTTCGTGGCTCCGAGCCA

>PGSC0003DMG400026156G-LecRK\_122

TCAAGATGGGCAAATCAATCACTGGTAATCAGAAAATGATTTTCAGGTGGTGAAGTTTTGCCTTAGGCT  
TCTTCACTCCGCGTAATTCTACATTTACCTATCTTGGCATATGGTACAACA

>PGSC0003DMG400026156G-LecRK\_1830

TTTGAGAGAGACGTCAACGTCTCATTTTCGTTTCATGACTATGGTGGATGTGGATTTACATATTCTGTTTC  
AGGGATTTTTAACTGAATTCGGAGACGTAGCCATCAAAGGCTAAGCAA

>PGSC0003DMG400026156G-LecRK\_2257

TAGAAGGAATTGCTCAAGGAATGCTTTACCTGCATAAGTACTCGAGATTAAGTCATCCACAGGGACT  
TAAAAGCAAGCAACATTCTTCTAGATCAAGAGATGATCCCAAAAATATCAG

>PGSC0003DMG400026156G-LecRK\_2318

CAGGGACTTAAAAGCAAGCAACATTCTTCTAGATCAAGAGATGATCCCAAAAATATCAGACTTTGGAAT  
GGCAAGGATTTTCGGGACTGATCAAACACAGGCCAATACAAATCGAGTCGT

>PGSC0003DMG400026156G-LecRK\_2379

TTTGGAATGGCAAGGATTTTCGGGACTGATCAAACACAGGCCAATACAAATCGAGTCGTTGGTACATAG  
TAAGTAATAACCCCTTATGATTTGTGGTTTCCAAGCTTTTATGTCATTTGT

>PGSC0003DMG400026156G-LecRK\_2440

GTACATAGTAAGTAATAACCCCTTATGATTTGTGGTTTCCAAGCTTTTATGTCATTTGTGCATATCTAATG

GATACATATTTATACAAATATGGCATAGTGGCTATATGTCTCCAGAATA

>PGSC0003DMG400026156G-LecRK\_2684

GGATGGGTAAGAACACTCAAGACTTTAATTAATTCTGCTTTCTTTCACTTTGTTTTTCATGTTTTTATTTAT

GGTGCAACTCATTGAACTTTTTTAAGGCATGGAATAAGTGGAAAGAA

>PGSC0003DMG400026156G-LecRK\_2867

AGATGTATTATAGTTGCCCTTCTTTGTGTTCAAGAAATCCCTGTTGATCGACCAACAATGTCTGATGTATC

TTTCATGTTAAGCAACGAAACAACCTCCTATCCCTGAACCAAAGAACCT

>PGSC0003DMG400026156G-LecRK\_2989

TTTTCGTAGCAGCTGGCAATCTCAGCAGTTAAGTGATGTATCCATAAATGAGATGACGATTACCTTGCCA

GCACCGCGATGAAATGATTTAAGTTCTCCTACTTCTTGTGGTAAATTTTT

>PGSC0003DMG400026156G-LecRK\_3050

ACCTTGCCAGCACCGCGATGAAATGATTTAAGTTCTCCTACTTCTTGTGGTAAATTTTTCTTGTTAGCATA

GAGCTGTCATAATTTTTTTTTGTAGAACTTGCATAAGTGTAGCTCTGGA

>PGSC0003DMG400026156G-LecRK\_3111

TGTTAGCATAGAGCTGTCATAATTTTTTTTTGTAGAACTTGCATAAGTGTAGCTCTGGAAGAAATATAGA

CTAAATTTCTCTGTTAATTGATGTTTTTCATGTTTTGTTTTTTTTCTGTT

>PGSC0003DMG400026156G-LecRK\_3163

CTCTGGAAGAAATATAGACTAAATTTCTCTGTTAATTGATGTTTTTCATGTTTTGTTTTTTTTCTGTTCTAC

AGTGTATCAAGTTTGTGAAAATGTTGTTTTGAACATTCACCTTGGCTT

>PGSC0003DMG400026156G-LecRK\_61

GTAGCTATTTTAATTGATTTTTGTTGTTCTTTTCGTTACGCTTGTGGCGAGTGAAGAAAGTATCAAGATGG

GCAAATCAATCACTGGTAATCAGAAAATGATTTTCAGGTGGTGGAAAGTTTT

>PGSC0003DMG400026156G-LecRK\_610

AATCCTGAAGGGCGGACGCGCTTTTATATATTGAAGCAGAACAGTATTTATTTTAGGTTTGATGATAGTA

CTGAATACAGTGGAGGGAATATCGGAGGAATTGCTTGGTATATTTCTGTT

>PGSC0003DMG400026156G-LecRK\_793

ATTGTTTTGCATCCTAATGGTTACATTCAGTTGCTGGTATGGCGTCAAATGCTAATAAGTGGATAGTTA

AACTTCAGGCACCAGAATCTCTTTGTGAACGTTACGCGGAGTGTGGTCCA

>PGSC0003DMG400026156G-LecRK\_976

TTTTCGACAGATTGGGAGAACGGGAAATGGAATGATGGTTGTGTTAGAAAAGTAGCATTGAGTTGTGA  
TGGCGGAGACATATTCTTGAAACATGAAGAGGGTATGAAGTTTCCGGATCAT

>PGSC0003DMG400026160LRR-RLPs\_1054

ATTCATTAGTTCTTGAAAATCAAAGTGTTGAGGTATATTTTTGATTCATTTACCAAGTTCTATGTTTTATTT  
GATGTGTGACATTTGATTTTGGCCTCTTCTATTGATCTATGTGTTATA

>PGSC0003DMG400026160LRR-RLPs\_1116

TGTTTTATTTGATGTGTGACATTTGATTTTGGCCTCTTCTATTGATCTATGTGTTATATTTAATTCTGTCTGA  
TAACTTGGTGTGGTCAACTTCCACCAGTATAGGTATTGAGTTACT

>PGSC0003DMG400026160LRR-RLPs\_1178

ATTCTGTCTGATAACTTGGTGTGGTCAACTTCCACCAGTATAGGTATTGAGTTACTCGGCCCATCAAGA  
CTAAAGCTATTAAGATTTGAGTTTTGATTTTTCATTTTTTTTTAGTTCA

>PGSC0003DMG400026160LRR-RLPs\_1240

CCATCAAGACTAAAGCTATTAAGATTTGAGTTTTGATTTTTCATTTTTTTTTAGTTCAGTTCATTGACCACT  
AGACATTCTCTTGTAATATATATATTGATTATTGGACCAAGTTGTTG

>PGSC0003DMG400026160LRR-RLPs\_1302

ATTGACCACTAGACATTCTCTTGTAATATATATATTGATTATTGGACCAAGTTGTTGTTGTTACATTTACA  
TTAGGCCTCGTTTTGCTCTCTACCATGATTTGAATTTTGATCTTCCAT

>PGSC0003DMG400026160LRR-RLPs\_1364

TACATTTACATTAGGCCTCGTTTTGCTCTCTACCATGATTTGAATTTTGATCTTCCATGACCTCCTTATTTTG  
TTAGCCATAATCCAATAAATATTTATTGATTATTCGACCAAATTGTT

>PGSC0003DMG400026160LRR-RLPs\_1426

TCCTTATTTTGTTAGCCATAATCCAATAAATATTTATTGATTATTCGACCAAATTGTTGTTGTTACATTTAC  
ATTAGGACACATTTTTCTCTCTACCATGATTTGAATTTTGATCTCCTC

>PGSC0003DMG400026160LRR-RLPs\_1488

TTACATTTACATTAGGACACATTTTTCTCTCTACCATGATTTGAATTTTGATCTCCTCGATATTTTATTAGCC  
ATTTATCCTATAAATATTTATTGATTATTGGACCAAATTATTGTTAC

>PGSC0003DMG400026160LRR-RLPs\_1550

TTTTATTAGCCATTTATCCTATAAATATTTATTGATTATTGGACCAAATTATTGTTACATTTACGTTATGCCT  
CGTTTTGCTTCTATCATGATTTGAATTCTGATCTCTCATGATTTTC

>PGSC0003DMG400026160LRR-RLPs\_1612

ACGTTATGCCTCGTTTTGCTTCTATCATGATTTGAATTCTGATCTCTCATGATTTTCCCATTATTATATCAT  
TGTAGACTTCAAATTGATTTCTATTTTTTGTTCAGATTCTATCGA

>PGSC0003DMG400026160LRR-RLPs\_1674

TATTATATCATTGTAGACTTCAAATTGATTTCTATTTTTTGTTCAGATTCTATCGAAGAATAATCACTTG  
GCAGGAATTTCTCTGCGTCCTTTTAGTAACTAAGATCGTTAGAGTTG

>PGSC0003DMG400026160LRR-RLPs\_1736

TAATCACTTGGCAGGAATTTCTCTGCGTCCTTTTAGTAACTAAGATCGTTAGAGTTGCACACAGGGTTC  
CACAAACACAACATTCCAGGATTAGCAAATCTGTTTAGGAGTTCTCCAGC

>PGSC0003DMG400026160LRR-RLPs\_1798

CAGGGTTCACAAACACAACATTCCAGGATTAGCAAATCTGTTTAGGAGTTCTCCAGCAACAAATACACT  
AATTCTCAAGATTACAAATGAACACAACATCCAAAGAAGGGTAAGAATTT

>PGSC0003DMG400026160LRR-RLPs\_1860

AATACACTAATTCTCAAGATTACAAATGAACACAACATCCAAAGAAGGGTAAGAATTTTTTCATTACAGCAA  
AATATCCATCTTAATTATGAATATTAATTGTTATACGATACAAGTAACGA

>PGSC0003DMG400026160LRR-RLPs\_1922

TTCAGCAAATATCCATCTTAATTATGAATATTAATTGTTATACGATACAAGTAACGAGGTACATAAACCT  
ATAAATCACACGAAGAAAATTATCTCAATAAAATATATATGATCTAATG

>PGSC0003DMG400026160LRR-RLPs\_1984

CATAAACCTATAAATCACACGAAGAAAATTATCTCAATAAAATATATATGATCTAATGCAATTTATAACCT  
ACATTGTTAAGAACATAAAACACACTTTTAGAAATAGTAGAAGTTTTTT

>PGSC0003DMG400026160LRR-RLPs\_2046

TTATAACCTACATTGTTAAGAACATAAAACACACTTTTAGAAATAGTAGAAGTTTTTTTCCAATCACGAAT  
CAATAGAAAATTTTTGTTCCACCTCATTTTCACCAAATAACTCACTG

>PGSC0003DMG400026160LRR-RLPs\_2108

ATCACGAATCAATAGAAAATTTTTGTTCCACCTCATTTTCACCAAATAACTCACTGGAAAAATGTATGA  
CAGAAAAAGATTCTCATTGAAATACTTGAATAAACACTGAATATTTT

>PGSC0003DMG400026160LRR-RLPs\_2170

AATGTATGACAGAAAAAGATTCTCATTGAAATACTTGAATAAACACTGAATATTTTTATTTTTTCATC

GATTCAATCAAAATTATGACAAATTAAGTTCATCGATAGTGTGAAAAA

>PGSC0003DMG400026160LRR-RLPs\_2232

TTTTTCATCGATTCAATCAAAATTATGACAAATTAAGTTCATCGATAGTGTGAAAAAATTATGACTCCAT

TTGTGTATATAAGTTAACTTATTTCTCTTTGGACTGATTGATTAAGTA

>PGSC0003DMG400026160LRR-RLPs\_2294

TGACTCCATTTGTGTATATAAGTTAACTTATTTCTCTTTGGACTGATTGATTAAGTAAATGTGTGTCAA

TTCTTAGATTGGAGATCACTAGTGCATGCTCGAACTATAGGTAAAT

>PGSC0003DMG400026160LRR-RLPs\_2356

TGTGTCAAATTCTTAGATTGGAGATCACTAGTGCATGCTCGAACTATAGGTAAATTTACCGATAGT

GTTAAAAATCTTTACACTGTCAATATATATTTCTCATTACATTGATGTTT

>PGSC0003DMG400026160LRR-RLPs\_2418

CCGATAGTGTTAAAAATCTTTACACTGTCAATATATATTTCTCATTACATTGATGTTTCTTTAGCCTCATGA

CACATTTTTCTTGTCTTTAAATTTTCAGAAATGGAATAGGGACCTATG

>PGSC0003DMG400026160LRR-RLPs\_2480

AGCCTCATGACACATTTTTCTTGTCTTTAAATTTTCAGAAATGGAATAGGGACCTATGGCAATTGTCAAAC

TCTGGTGAAGAAAGATTTTGGGAGTCACAAAGTAATGCTATGAATTCTT

>PGSC0003DMG400026160LRR-RLPs\_2542

TTGTCAAACCTCTGGTGAAGAAAGATTTTGGGAGTCACAAAGTAATGCTATGAATTCTTTCCTTCAACATC

TTAAAGTAGTGAAGATTCATGGATTCTCAGAGTGTGAAAGTGATGTTAGT

>PGSC0003DMG400026160LRR-RLPs\_2604

TCAACATCTTAAAGTAGTGAAGATTCATGGATTCTCAGAGTGTGAAAGTGATGTTAGTTTAGTGAAGTTT

TTGTTGAAGCATGGAAAAGTATTGCAAGAAATGTTCTTGTGTGTAGCTGA

>PGSC0003DMG400026160LRR-RLPs\_2666

TGAAGTTTTTGTGGAAGCATGGAAAAGTATTGCAAGAAATGTTCTTGTGTGTAGCTGAGCTTTCAAATC

AAGAGACTCACTTCATAGAGAAAAAATCAAATCACAAATAATGGGGTTTT

>PGSC0003DMG400026160LRR-RLPs\_2704

ATGTTCTTGTGTGTAGCTGAGCTTTCAAATCAAGAGACTCACTTCATAGAGAAAAAATCAAATCACAAA

TAATGGGGTTTTCAAAGCATCTTGTAAATGCTAAGATTGTGTTCAAGTAA

>PGSC0003DMG400026160LRR-RLPs\_620

TTCGTGTCTTATTATGTACGAACAACCTTCGTTACATGATTTATTCACGGAGACATCTTTCCCGTTGCTTAA  
GAAATTGAGTCTTGATGGTTGTACGGGGTTAACTTACTTACATGTAAG

>PGSC0003DMG400026183-(rev)G-LecRK\_1240

GAGTTCACGTGTTAGAGCTAGGTATGTTTACTTGTATCATTGCTGGTTCTGTTAACAACAAGTGAAAGAC  
TAGTATAATTTTCGTGTTGTGGATGCAGTACTGATAATCTATCTGGGAA

>PGSC0003DMG400026183-(rev)G-LecRK\_1302

TGAAAGACTAGTATAATTTTCGTGTTGTGGATGCAGTACTGATAATCTATCTGGGAATTCAGCTCGAAG  
ATACAAAATTCTCACTGTGAAAATTGTTTCTGCAATTTTTCGCAATCTTGC

>PGSC0003DMG400026183-(rev)G-LecRK\_2046

CGAGAATCATAACTTTGTTTTCTCATTCTGTTGGCTAATTGGATATTCATTTTTTCTTTTAGACCCTTCG  
TTGAAGGTTACACTCGATTGGGATACACGTTTTGGGATAATAGAAGG

>PGSC0003DMG400026183-(rev)G-LecRK\_2356

TAGTAGCCGCTTCTGTAACCAGTTTTATGTTACTACCCCTTGTGTATAGCTACTTAAGACTGATTTACGC  
CAATATGGCATAGTGGCTATATGTCTCCAGAATACGTAGTATATGGCCA

>PGSC0003DMG400026183-(rev)G-LecRK\_2542

AAACTCAGACTTCTTCATGACTGAAGTTTGTGTGTCTCTATTAGGATGGGTAAGTACATTCGCGCATTG  
AAAATAAGTCCAAGTTTGTGTCAATTTCTTTAACATTTACATCATT

>PGSC0003DMG400026183-(rev)G-LecRK\_2604

CGCATTGAAAATAAGTCCAAGTTTGTGTCAATTTCTTTAACATTTACATCATTGTCATGTTAGGCA  
TGAAAATGTGGAAAGAAGGAAGAATGTTGGAGCTAATAGATCCATCAA

>PGSC0003DMG400026183-(rev)G-LecRK\_2914

TGTTCCATAAATGAGTTGACATTTACTTTGCCAGTACCTAGATGAGAGGATTTAGCTTTCCATATTTCTT  
ATGGAATTAATCTTATTTTAAAAGAACCATCTCAAAAATGTTTAGCAC

>PGSC0003DMG400026183-(rev)G-LecRK\_2969

GCTTCCATATTTCTTATGGAATTAATCTTATTTTAAAAGAACCATCTCAAAAATGTTTAGCACTGTAAA  
TAAAAAATCAAAAACCAATTAATAACTCCCTCTGTCCCAGTTTATATC

>PGSC0003DMG400026183-(rev)G-LecRK\_496

ATATGAGATTTGGTTTCAATAAAATTAGTGGCTTACGAAATGTGATCACTTCATGGACAAGTAATGACGA  
TGCTCGCCCTGGAAATTTCTTTTTGGAATAGACCCTACTGAAGGGGTTA

>PGSC0003DMG400026183-(rev)G-LecRK\_558

AATGACGATGCTCGCCCTGGAAATTTCTCTTTTGGAAATAGACCCTACTGAAGGGGTTATGCGTTTTGTCA  
TTTGGAAACCGAAACGGTATTTATTATAGATTTGACGATAGTTGCAGAGCG

>PGSC0003DMG400026183-(rev)G-LecRK\_620

TTTTGTCATTTGGAACCGAAACGGTATTTATTATAGATTTGACGATAGTTGCAGAGCGTATATACTAGCA  
ACAGTGTGGTGTTCCTACTGTTGTTACTGAAAATGATAATGTATATCTTAA

>PGSC0003DMG400026183-(rev)G-LecRK\_930

TGCAGTTGTTTAGACGGATTTGAACCTAAATTTTCGACAGATTGGGCAAATGAGAAATGGATTGGAGGT  
TGTGTGAGAAAAATAGCGTTGGGGTGTGATGGTGGAGATGGATTTTTTAAG

>PGSC0003DMG400026183-(rev)G-LecRK\_992

TGGAGTTGTGTGAGAAAAATAGCGTTGGGGTGTGATGGTGGAGATGGATTTTTTAAGCACGAGAATA  
TGAAATTGCCAGATCATGCTGTCTCTTTAGGAAATATGAGCACCGAAGAGTG

>PGSC0003DMG400026184-(rev)G-LecRK\_0

ATGGCGAAGAAAACAGGTTTGTGTTGCTATTACAGCCGTTGCAATTCTACTTCTTTTTTTGCTCTATGAA  
TCAGATAAAGAGAGATATCTCAAAGGCTGCTCTTGTTTTCTGATCTTA

>PGSC0003DMG400026184-(rev)G-LecRK\_558

CAGATTCTACTTTACAAGTATATGTCAAACAAAAGTCTAGACTCCTTCATATTCGGTTAGTATATATATCT  
GAACATATCTTATTTCTAATCTCTCTATTTACTTGATCAATGTTGTTA

>PGSC0003DMG400026184-(rev)G-LecRK\_62

CTCTATGAATCAGATAAAGAGAGATATCTCAAAGGCTGCTCTTGTTTTCTGATCTTAGCAAGCCAACAA  
AGCACAGGAGGCAATCCAGTGCCACATTGGTTCAACAGAGAAAAAGACGC

>PGSC0003DMG400026184-(rev)G-LecRK\_620

TATATATCTGAACATATCTTATTTCTAATCTCTCTATTTACTTGATCAATGTTGTTAAATTTTCTCATTGTT  
TACCAAACAAGATCCAACACTTAGCAAGTCATTGAAATGGAAAAAG

>PGSC0003DMG400026184-(rev)G-LecRK\_806

ATCATTATAGAGATCTGAAAACAAGTAACATTCTTTTGGATCAACAAATGAACCCAAAAATATCAGACT  
TTGGCTTGGCAAGGATAGTTGAAGAGCAAACGACAGAACTAGTAATTAA

>PGSC0003DMG400026185-(rev)G-LecRK\_1426

ACCTTACGTTTTAAACAAACATCAGATAGTCACTGACTAAATATAAGTTTACGCAACACCCTCTATGTTAT

AAACACACATAAGATAGTCACTGACCGAATGCATGGTTTTTCATGTTTTC

>PGSC0003DMG400026185-(rev)G-LecRK\_2046

GTAGCTTTAGCTACATTTATTGTAGTAGAATGATGGCGAAGAAAACAGGTTTGTGTTGCTATTACAGCCG

TTGCAATTCTACTTCTTTTTTTTTGCTCTATGAATCAGATAAAGAGAGATA

>PGSC0003DMG400026185-(rev)G-LecRK\_2232

CACATTGGTTCAACAGAGAAAAAGAAGCACAAAACCTGATGAACGAAAATGATAAGCAAACTTCGCC

GTTCCATTCTTTTGTTCGAAAACATATTAGCAGCCACAGATGATTTCTCAG

>PGSC0003DMG400026185-(rev)G-LecRK\_2294

TTCGCCGTTCCATTCTTTTGTTCGAAAACATATTAGCAGCCACAGATGATTTCTCAGATGTAAATAAGCT

TGGGCATGGAGGTTTTGGTACTGTTTATAAGGTTAGCACTATTTATTCA

>PGSC0003DMG400026185-(rev)G-LecRK\_2356

AAATAAGCTTGGGCATGGAGGTTTTGGTACTGTTTATAAGGTTAGCACTATTTATTCACTTCAATAGTTCC

GCTTTATGTAGTCATTTATAGCATCCTAGTTTACACATCGAAAATCTT

>PGSC0003DMG400026185-(rev)G-LecRK\_2418

AATAGTTCCGCTTTATGTAGTCATTTATAGCATCCTAGTTTACACATCGAAAATCTTTTAGGGTATATTTT

CAGATGGACAGAAATTGCTGTGAAAAGGACTAATCAACCCAATCTAGA

>PGSC0003DMG400026185-(rev)G-LecRK\_248

CTTGTTTTGGTCAACAAATATCAGCAACACAATTAGTTCAAATACACTAGTGGCAATTCTTTCTGATGATG

GTAATTTGATGTTGAGTGATGGATCAAATCAACTACCACTTTGGCA

>PGSC0003DMG400026185-(rev)G-LecRK\_2480

GGTATATTTTCAGATGGACAGAAATTGCTGTGAAAAGGACTAATCAACCCAATCTAGACAGGGCATTGA

AGAATTCAGGAACGAAGTCATACTGATCTCAAACCTTACTAACATAGAAAT

>PGSC0003DMG400026185-(rev)G-LecRK\_2542

GCATTGAAGAATTCAGGAACGAAGTCATACTGATCTCAAACCTTACTAACATAGAAATACTAGTCAGACT

TTTAGGCTACTGTATCACACGGGTATGAACAGATTCTAACTTTACGAGTA

>PGSC0003DMG400026185-(rev)G-LecRK\_2604

GTCAGACTTTTAGGCTACTGTATCACACGGGTATGAACAGATTCTAACTTTACGAGTATATGTCAAACAA

AAGTACTAGACACCTTCATATTCGGTTAGTATATATATCTGAATTTCTTA

>PGSC0003DMG400026185-(rev)G-LecRK\_2666



TCAAACAAAAGTACTAGACACCTTCATATTCGGTTAGTATATATATCTGAATTTCTTAATCACTCTATTTAC  
TTGATCAATGTTGCTAAATTTTCTCCATGGTCACCAAACAAGATCCA

>PGSC0003DMG400026185-(rev)G-LecRK\_2728

CTCTATTTACTTGATCAATGTTGCTAAATTTTCTCCATGGTCACCAAACAAGATCCAACACTTAGCAAGT  
CATTGAAATGGAAAAAGCGATTAGAGATCATATTAGGAATTTCTCGAGG

>PGSC0003DMG400026185-(rev)G-LecRK\_2976

AACAAACAACAGAAGCAAATACCAATAAAGTGGTTGGAAGTCTAGTAAGTAATACAAACATGTTAATGTT  
ATGAACTTTGCTTAATTGCATCGCACATCTGACTCGTGATTATTCCATCAT

>PGSC0003DMG400026185-(rev)G-LecRK\_3038

TAATGTTATGAACTTTGCTTAATTGCATCGCACATCTGACTCGTGATTATTCCATCATTATTTGGTTGATT  
AGCGGATATATGTCTCCTGAATATGCATTGGAAGGAGTATTCTCGATT

>PGSC0003DMG400026185-(rev)G-LecRK\_3286

ATTTTTTCCAATATATATGTACGTTGAACTTCATATTCATTATTCTAAATCATGATATCACAGGCATGGAAT  
TACTGGAAAGAAAAAGAGCACTACATTTGCTGGATCATTATTGCTC

>PGSC0003DMG400026185-(rev)G-LecRK\_3472

CCAGGTGATCGTCCTACAATGTCAAATGTTGTGATGATGCTTCATAGTGAAAGTACGTCTCTTCCAAAGC  
CTAATCAACCGGCTTTTGTGTCAAGGAGAAATGTTTCTAATTCATCTTCA

>PGSC0003DMG400026185-(rev)G-LecRK\_3534

TCCAAAGCCTAATCAACCGGCTTTTGTGTCAAGGAGAAATGTTTCTAATTCATCTTCAGTTTCATCTGGTA  
AACCACTAGCTTCACCAAATTGAGTTGACAATCACAGTGGAAGAAGG

>PGSC0003DMG400026185-(rev)G-LecRK\_434

TACAACGAAGATACTTACTTCTTGAAGAAGTCAAGAGGATCCTTCTCCGGGGATTTTTTCCGTGGAGATG  
GATCAGAGTAATAAGCAGTTCTTGATAAAGTGGAACAGGACTGAGCTGTA

>PGSC0003DMG400026231LRR-RLPs\_2318

GCAAAAATCATTTTAAAGTTGGAGCATAAACTTATGATGAGATGGAAAAAGATACAGCGAAGGCGAAG  
GAATGACAGAAGAAATGATCGCTTCTAAGATAAGTTAAGGTATTCAAGTTAA

>PGSC0003DMG400026231LRR-RLPs\_2379

GGCGAAGGAATGACAGAAGAAATGATCGCTTCTAAGATAAGTTAAGGTATTCAAGTTAAACTCTGCAC  
TAAACTTCTAATTTTTATACTTTGTTATAAGAATTACTAATCAATATGCT

>PGSC0003DMG400026231LRR-RLPs\_2440

CTCTGCACTAAACTTCTAATTTTTATACTTTCGTTATAAGAATTACTAATCAATATGCTCTCTATCCTAAGC  
ATATTTGATTTTGAATGGTTATGCGTTTGTGATGTCTCAAGCTTGA

>PGSC0003DMG400026231LRR-RLPs\_2562

TTCATTTTTCAATTTCAAGTTCATATCTTAAACTTGAAAGGTGTAGCATGTATGCAACAAAAGGACGAAAG  
AGAAGTAAACAATTATGAACATACATAGACCCATTACGCCAAATACAACA

>PGSC0003DMG400026231LRR-RLPs\_2623

GGACGAAAGAGAAGTAAACAATTATGAACATACATAGACCCATTACGCCAAATACAACAAATGCTGTTA  
CAACACCATTCTATAAACTCTGCCACAAAATCCAACAAACCAACATCACATG

>PGSC0003DMG400026231LRR-RLPs\_2684

TGCTGTTACAACACCATTCTATAAACTCTGCCACAAAATCCAACAAACCAACATCACATGACTTACTCCC  
AACACAGAAGAACTAAGAGAAAAAGACAAAGTAGAATTGAAAAAGGTAC

>PGSC0003DMG400026231LRR-RLPs\_2745

TTACTCTCCAACACAGAAGAACTAAGAGAAAAAGACAAAGTAGAATTGAAAAAGGTACAAGTTGCAT  
GCAACAAGCAGCAGCATTCTTCTCCTTGAACAACTTTGATGATGTTAAAGA

>PGSC0003DMG400026231LRR-RLPs\_2806

GTTGCATGCAACAAGCAGCAGCATTCTTCTCCTTGAACAACTTTGATGATGTTAAAGACTCTTTCAAGTA  
GTAGTCTTAACCTGTTGCTGGGCTTGATGTCCCAATTGCTCTGCTTTCT

>PGSC0003DMG400026231LRR-RLPs\_2867

CTTTCAAGTAGTAGTCTTAACCTGTTGCTGGGCTTGATGTCCCAATTGCTCTGCTTTCTCCTTAATATCATG  
GGCCGCATGGGCTAGTCTATCTCTTGCATAATCTAGCTTATCCGCCCC

>PGSC0003DMG400026231LRR-RLPs\_2928

TTAATATCATGGGCCGCATGGGCTAGTCTATCTCTTGCATAATCTAGCTTATCCGCCCCAATTGGATGCTT  
CCCAGTGGTGTACCTGCAACCATAACACACCGATTCCGAATTTAAATTT

>PGSC0003DMG400026231LRR-RLPs\_2989

TTGGATGCTTCCCAGTGGTGTACCTGCAACCATAACACACCGATTCCGAATTTAAATTTGAAGGTACATT  
CATACCACTACCTGCAACCATAACACCGATTCCGAATTTAAATTTGAAGG

>PGSC0003DMG400026231LRR-RLPs\_3050

AGGTACATTCATACCACTACCTGCAACCATAACACCGATTCCGAATTTAAATTTGAAGGTACATTCATTCG

AACGTGGGTCATCTTGAACCTTTTGACCTCCAACCTTCATAGGGAGGATCA

>PGSC0003DMG400026231LRR-RLPs\_3111

CATTCATTCGAACGTGGGTCATCTTGAACCTTTTGACCTCCAACCTTCATAGGGAGGATCAAAGATTCAAAA

TGGTCAGTGTAATTTTCCTATAATTTATGTGCCACTGTCTGATCAATGTA

>PGSC0003DMG400026231LRR-RLPs\_3172

GATTCAAAATGGTCAGTGTAATTTTCCTATAATTTATGTGCCACTGTCTGATCAATGTATCACATAATTTTT

TTTTGAATAATTTACCATTTTGCCCTTTTAGACAAGCTTTAGTTAGA

>PGSC0003DMG400026231LRR-RLPs\_3233

ACATAATTTTTTTTTGAATAATTTACCATTTTGCCCTTTTAGACAAGCTTTAGTTAGAGCTATAGAAATGT

TATGGCACCGCTTAAAATTACAAAGCTCCGAAAAATCAAATCTTAAAT

>PGSC0003DMG400026231LRR-RLPs\_3270

TTTTAGACAAGCTTTAGTTAGAGCTATAGAAATGTTATGGCACCGCTTAAAATTACAAAGCTCCGAAAAA

TCAAATCTTAAATCCCGTATCAAATCAAACATAGAAATTAAGTACTCC

>PGSC0003DMG400026231LRR-RLPs\_488

TTTTCTCTGTCAAATCTCACTCGCATAGAGTCCTTATACCTTAGAGGTAACCTCCCTGAATGGTACAATACC

ATCCGGTATGTTCTCCCTCCATCACTAATTGAATTAGACTTGAGTAAT

>PGSC0003DMG400026231LRR-RLPs\_549

GTACAATACCATCCGGTATGTTCTCCCTCCATCACTAATTGAATTAGACTTGAGTAATAACCATTTTTCTG

GTCATCTTGAGGATTTCAAGTCCAATCACTAAGATCTATTGATTTAA

>PGSC0003DMG400026231LRR-RLPs\_671

AATAATCAGCTGCAAGGTCGTCTTCCCAAGTCAATTCAAACCTTGTGAACCTAACGTGGCTTGATCTTTC

ATCAAATAATTTTAGTGGCAATGTGGATGTCAGCTTATTTTCAAACATC

>PGSC0003DMG400026325RLKmalectin\_122

AATAACAGAGTACAATAATTCTCTCATTCTTCTCCCATGAGAAGTTGTAAAGTTGTTGTTGGGTTTTTCAT

CCCTTGTTTCTGTATCATCTATTTATCAGGTGCTTTCTCCCCACAAGAT

>PGSC0003DMG400026325RLKmalectin\_1464

AAAAGCTAAAATCAAAGCCCTCAGAAAGTGCTGGATGGACGCCTTACGTCGATATGGAAGTAGTTCCC

ATGGTACATTGTCTGATGGGACTTCACCTGGACCAAATGGATATCTAGGCC

>PGSC0003DMG400026325RLKmalectin\_2562

ATATATCGACAAGCAAGGTATTTTCACAATTGATGACTAATGAAGGAAGATAACTAGTCTACAGTATAGT  
GCACCATCAAATCATTGTTCAACAGTTTACAGGTATCAATGTTGATTTTG

>PGSC0003DMG400026325RLKmalectin\_2623

CAGTATAGTGCACCATCAAATCATTGTTCAACAGTTTACAGGTATCAATGTTGATTTTGGTTCACTTTAAC  
ATTTTCTTTTTACGTTTTTCTTAATTGGCAGAGCCATCATATACTCTTT

>PGSC0003DMG400026325RLKmalectin\_2928

TGCCATCAAATAAGGGTCTACCGATCAATGACCATGGTGTCTAAGGTGTGATCTTGTACCCATAGTGC  
AGTACACTGAACAGCAATCCAAACAACCTGCCCTCAGAAAAAATAAGTG

>PGSC0003DMG400026325RLKmalectin\_2989

CCATAGTGCAGTACACTGAACAGCAATCCAAACAACCTGCCCTCAGAAAAAATAAGTGACCCCCTTTGT  
ATGATATTAGTCGGTTTCTATGTTTTTGGATGGTTTAGGACAAAGATATC

>PGSC0003DMG400026325RLKmalectin\_61

CTTGACATTCACATTTTGTCTTGCTTGAAAAGAATTCACTCACATCTTATTGTTAAAAAAAATAACAGAG  
TACAATAATTCTCTCATTCTTCTCCCATGAGAAGTTGTAAAGTTGTTGT

>PGSC0003DMG400026383RLKWAX-EGF\_671

TGCCGGTGCTAATGAATTTAGGTGTTTGTGCCCTGATGATCAATCTTCTTCTTCTCGTCGTCGTCATCGT  
CCAATAATGCGTGCATCAATGGACTTCCTTTCTCTGGAAGTGAAGAG

>PGSC0003DMG400026384RLKWAX-EGF\_0

TCTCAATTTGGTGTCTCTTCCAAACCTCCTTTCTCTGTCCCTTAAATCCTCATCTCCTTTCAGCTTAGCTCC  
TGAATAAAGCTCTTTGCCACTATTACCAGTTAGCGCCTCTCTTTCT

>PGSC0003DMG400026384RLKWAX-EGF\_1037

ATACGCTAACTTAGTAAAGATTCTTTCGCAATCAGTATAGTATCAATTTTATATGAATTCTTGCTTATGTG  
AAAAAATCAGGATAACTTTAAAGGAAAAACCCCAATTAATACCTTGTTA

>PGSC0003DMG400026384RLKWAX-EGF\_1098

TGCTTATGTGAAAAAATCAGGATAACTTTAAAGGAAAAACCCCAATTAATACCTTGTTAATTATCTTGAA  
AAAATATTTATTTTTGGACTAACTAAAAAATATCGTATAATATGGACCAA

>PGSC0003DMG400026384RLKWAX-EGF\_1159

TATCTTGAAAAAATATTTATTTTTGGACTAACTAAAAAATATCGTATAATATGGACCAACGGAAGTACTTC  
TTTTGCATTGCTTACCTAGAAATTAACCTCTCTATAAAAATTTGTACGTG

>PGSC0003DMG400026384RLKWAX-EGF\_1220

GAAGTACTTCTTTTGCATTGCTTACCTAGAATTTAACTCTCTATAAAAATTTTGTACGTGTTAATTTTGTCC  
AAATTCATATGAAACTCTGAATACTACAACCTCTAGCCCTCTATCTA

>PGSC0003DMG400026384RLKWAX-EGF\_1281

TAATTTTGTCCAAATTCATATGAAACTCTGAATACTACAACCTCTAGCCCTCTATCTACGTTGGTCCAGCT  
CCAATTCCTGAGCGTGTTAGTATAGCTCCTTTTTTTTTTTTTTATATA

>PGSC0003DMG400026384RLKWAX-EGF\_1342

TTGGTCCAGCTCCAATTCCTGAGCGTGTTAGTATAGCTCCTTTTTTTTTTTTTTATATATCAGCGTAAATAA  
TCGTTTATATTATATGCAAATAATATTCGTATACGAACTTCCTTAAAA

>PGSC0003DMG400026384RLKWAX-EGF\_1403

AGCGTAAATAATCGTTTATATTATATGCAAATAATATTCGTATACGAACTTCCTTAAAATGTGAAATTGAA  
ATCTTGAAAAATAAGATATGTTATTGCTACAACAAAATAAAAAACTCGG

>PGSC0003DMG400026384RLKWAX-EGF\_1464

TGAAATTGAAATCTTGAAAAATAAGATATGTTATTGCTACAACAAAATAAAAAACTCGGGACCTAATTTT  
AGACTTAGTACTGTGTCTGTGTTTCTGCCATTGTTGTATTGTTTACTTCT

>PGSC0003DMG400026384RLKWAX-EGF\_1708

ACCAGAAAAAATACATATATTTTATTGAACCTTTTTATTGACAAAGTAAACAAGGATACAGTTCTTTATT  
TGTAGTTCTTGACTTTTTAAGTTAGTTCTGTGTTATAATTCAAACCTTGG

>PGSC0003DMG400026384RLKWAX-EGF\_1769

GTTCTTTATTTGTAGTTCTTGACTTTTTAAGTTAGTTCTGTGTTATAATTCAAACCTGGTTGGCGCTTGAAT  
AAAACGAGGGAAACTGAAACGACTTTTTTACTGTGATATTATTATATA

>PGSC0003DMG400026384RLKWAX-EGF\_183

AATATTTATCTTGATCTATATACCCGGGTCTTTCTGTCAAGATGACGAGCGATACAGGAGTTGTGGTGAG  
GAGTTTCGCTGCGGCAGCATGGATATAATTTACCCTTTTTGGGGAGGGAG

>PGSC0003DMG400026384RLKWAX-EGF\_1830

GGCGCTTGAATAAAACGAGGGAAACTGAAACGACTTTTTTACTGTGATATTATTATATAATATATAGACG  
CTCTACCTGCCTCTTTTAAAAACACAATTTGATTTTCAGATAATTCTATT

>PGSC0003DMG400026384RLKWAX-EGF\_1891

ATATAGACGCTCTACCTGCCTCTTTTAAAAACACAATTTGATTTTCAGATAATTCTATTTCATTGATCAATGC

ATTAAACATATATAAAAAATTACAGTTGGTATTTTTTTTTCTTGTTTC

>PGSC0003DMG400026384RLKWAX-EGF\_1952

TTGATCAATGCATTAAACATATATAAAAAATTACAGTTGGTATTTTTTTTTCTTGTTTCTAGTGGAATTCAC

ACTAAACCTTTTATGATTCAATTTTATTGAGGTTTGACCACACCAAGT

>PGSC0003DMG400026384RLKWAX-EGF\_2074

GGTGCTACTCCCCGATTTCATTTTACTTTAATTCATATCTACTTGACATAATATTAAGACAGTTTTGGTTA

AGAATATTTTTTATTGAATTAATTTTTATTAATAATATATTGAAACCT

>PGSC0003DMG400026384RLKWAX-EGF\_2135

AGTTTTGGTTAAGAATATTTTTTATTGAATTAATTTTTATTAATAATATATTGAAACCTTAACTTAATTATT

GCTAGTTTATGTAGTTATTTAATATTAAGATAGTAATATGGGCAAA

>PGSC0003DMG400026384RLKWAX-EGF\_2196

ACTTTAATTATTGCTAGTTTATGTAGTTATTTAATATTAAGATAGTAATATGGGCAAAATATAATTAATA

AAAATAATTTATTAATAAATGAATAAATAAAAAATATAAAGACCAAGTAAAA

>PGSC0003DMG400026384RLKWAX-EGF\_2257

ATAATTAATAAAAAATAATTTATTAATAAATGAATAAATAAAAAATATAAAGACCAAGTAAAATGAAACAGAG

GGAGTAATTACTCTTTTGGTCTTGGTTTATAAATTATATAGATCCTTAACA

>PGSC0003DMG400026384RLKWAX-EGF\_244

TGTGGTGAGGAGTTTCGCTGCGGCAGCATGGATATAATTTACCCTTTTTGGGGAGGGAGACAACCAGA

GTATTGTGGTCATCCAAGTTTTGAGATCAAGTGCGAAAGTAACATACCCAAA

>PGSC0003DMG400026384RLKWAX-EGF\_2562

TTCATAATTTATCGTTTATCATTAAATTATAGTTATTTCTCTATTATATTTTTATCATTAAATATATTCAAAGG

ATGATAAACTTACCCTACTATTTATAATAAGTAGTTACTTAAATTTA

>PGSC0003DMG400026384RLKWAX-EGF\_2623

TATATTCAAAGGATGATAAACTTACCCTACTATTTATAATAAGTAGTTACTTAAATTTATATAGAATTGAA

CATATAGATATAAACATCTTATATGTTAATTCGTGACACGTATGTCTAC

>PGSC0003DMG400026384RLKWAX-EGF\_2684

TAGAATTGAACATATAGATATAAACATCTTATATGTTAATTCGTGACACGTATGTCTACTTATTTTTATTTTT

GTACAAATTTAAATATATATTTGTGTATATTCAAATTAATGAAATA

>PGSC0003DMG400026384RLKWAX-EGF\_2745

ATTTTATTTTTGTACAAATTTAAATATATATTTGTGTATATTCAAATTAATGAAATAAATGTATATTAGA  
CCAAGTGAAAAGGTATATTTATGTTTCATTTATTAAGTTAGGCGTCTA

>PGSC0003DMG400026384RLKWAX-EGF\_2806

TGTATATTAGACCAAGTGAAAAGGTATATTTATGTTTCATTTATTAAGTTAGGCGTCTATCAACCTTCTTT  
CTTTTCTATTCAACGTGCAGTAATAATATTCAACTTTCAGTCAAATCC

>PGSC0003DMG400026384RLKWAX-EGF\_2867

AACCTTCTTTCTTTTCTATTCAACGTGCAGTAATAATATTCAACTTTCAGTCAAATCCTTTTTGTCTCTCTC  
TTTCAAATGTAATCTCAGATTCTCACCATCTTCCAAATCCCTGTCA

>PGSC0003DMG400026384RLKWAX-EGF\_2928

TTTGTCTCTCTTTCAAATGTAATCTCAGATTCTCACCATCTTCCAAATCCCTGTCAACAATAAATATAC  
AGATATGAATCTACAGACTACAAATAATTCCAGATATGACTCTCACTC

>PGSC0003DMG400026384RLKWAX-EGF\_2989

AATAAATATACAGATATGAATCTACAGACTACAAATAATTCCAGATATGACTCTCACTCACTCATTCTCTT  
TTCGTATTCCAAATGACTCTCTCCTACCCTTCCACCACTACCAATGGCC

>PGSC0003DMG400026384RLKWAX-EGF\_305

AACCAGAGTATTGTGGTCATCCAAGTTTTGAGATCAAGTGCGAAAGTAACATACCCAAAATTGCAATTG  
AATCAACAAGCTACGAAGTGATAAATATCAACGCTCCTAATCGAATTGTAA

>PGSC0003DMG400026384RLKWAX-EGF\_3050

TCATTCTTTTTCGTATTCCAAATGACTCTCTCCTACCCTTCCACCACTACCAATGGCCGCCGCGGCCAC  
CACCACA ACTACTCTCTTCTTCGCCACCTTTATTCTCACAACATCCTT

>PGSC0003DMG400026384RLKWAX-EGF\_3294

CCGGATTTCAA ACTCCGATGTGTTGACGACAAACACACCGAGTTTACTACCAATCACTTACTTACCGTGT  
TCTTTCTATTAATCAGTCATCAACGACCATGACTGTATCGAGAATCGAC

>PGSC0003DMG400026384RLKWAX-EGF\_3355

CTTACCGTGTCTTTCTATTAATCAGTCATCAACGACCATGACTGTATCGAGAATCGACCTCTGGAAAAAT  
TCCTGCCCTTCGCAATTCATCAACACTACTTTTAATTCTTCTCTTTTCA

>PGSC0003DMG400026384RLKWAX-EGF\_3416

CTGGAAAAATTCCTGCCCTTCGCAATTCATCAACACTACTTTTAATTCTTCTCTTTTCAACATTGACCGTAA  
CGAAGACGAAGAACTTTCGTTGAGCTACGGCTGCGATGTCTCTGCATT

>PGSC0003DMG400026384RLKWAX-EGF\_3477

ATTGACCGTAACGAAGACGAAGAAGCTTCGTTGAGCTACGGCTGCGATGTCTCTGCATTGGTTATCACGC  
CTCAGAATTTGTTCAACTGTAGTGTAGATGGTTTGAATTCACCGGCGCA

>PGSC0003DMG400026384RLKWAX-EGF\_366

TGCAATTGAATCAACAAGCTACGAAGTGATAAATATCAACGCTCCTAATCGAATTGTAACCCTGGCTCGG  
GATGATTTACTGAGTAGTATTTGTTTGGATAATCCTAAGAATGCCTCCTT

>PGSC0003DMG400026384RLKWAX-EGF\_3904

GTACTGACAAGTGAAGAACTTTATCCTTTAATTTTACTACTAATCAGGAGTTCTTATTATTAACATAGAAA  
TCTATAGTTTGAATTCAGGACTGAATGGATTTAGCTTAACAGTAACCC

>PGSC0003DMG400026384RLKWAX-EGF\_3965

AACATAGAAATCTATAGTTTGAATTCAGGACTGAATGGATTTAGCTTAACAGTAACCCAGTTAGAGAAT  
CGGTACATATAGGTGTCGATTGTTCTAGTTGATGAATCCTGAGTTCATGG

>PGSC0003DMG400026384RLKWAX-EGF\_427

CTGGCTCGGGATGATTTACTGAGTAGTATTTGTTTGGATAATCCTAAGAATGCCTCCTTTGATTTAAACAC  
TTTCAGCTATGTTTCTAGTGACCTGAATATTACTCTGTATTTCCACTGC

>PGSC0003DMG400026384RLKWAX-EGF\_4270

GTTATGACTGTATGAGTAGTTGTTATCTTATAGCACCTATTATATAGGTCTTTGATTAAGGGATACCTAAA  
AAACACTATGCGACTTGCTAACACAAAAGTGAAGTGAACGAAGCGTA

>PGSC0003DMG400026384RLKWAX-EGF\_4331

GATACCTAAAAAACAATGCGACTTGCTAACACAAAAGTGAAGTGAACGAAGCGTAATCCAATATG  
ATTTACTAGAATCTTCATGTTAGTTTTAGATTTCCATGGTATGTTCTCTT

>PGSC0003DMG400026384RLKWAX-EGF\_4392

CCAATATGATTTACTAGAATCTTCATGTTAGTTTTAGATTTCCATGGTATGTTCTCTTCAGGTATCCCTAG  
GAATCTTGTTACAGTATGCTTCTTTCTTATAGTTTATACTTCTCAGA

>PGSC0003DMG400026384RLKWAX-EGF\_4453

GGTATCCCTAGGAATTCTTGTTACAGTATGCTTCTTTCTTATAGTTTATACTTCTCAGATCTATTATTAGCG  
AATACACCCATTTGCCACATGAGTTTTGTTTGTTCCTAATTCCA

>PGSC0003DMG400026384RLKWAX-EGF\_4636

GACTGTTTTGCAGATAACCGAAAGAAAAATCAGATGCCACTTGCAGTAGGTATTGTCTTTGTTCTAACAT



TATACTGGTACAACCTCAATAGACACGGTCAATGCCTTGAGAAGATTGTAA

>PGSC0003DMG400026384RLKWAX-EGF\_4697

TTCTAACATTATACTGGTACAACCTCAATAGACACGGTCAATGCCTTGAGAAGATTGTAACTTTCTTCTTT  
CGATTGCAGGCATTAGTGTAGGAGGTGCTGTACTTGCCAGCATTGGTGT

>PGSC0003DMG400026384RLKWAX-EGF\_4758

TTTCTTCTTTTCGATTGCAGGCATTAGTGTAGGAGGTGCTGTACTTGCCAGCATTGGTGTGGGTGGCTAG  
TCTTCTTCTGCAGACAAAAGAGAAAGCGGATTGCATCACAGGCTTCACTT

>PGSC0003DMG400026384RLKWAX-EGF\_4819

GGTGGCTAGTCTTCTTCTGCAGACAAAAGAGAAAGCGGATTGCATCACAGGCTTCACTTGCCCAAACCG  
AAAGGAAGGATCTTCCAATTTTAAGTTCAAGCAACGGCCTGAGTTCCTCTT

>PGSC0003DMG400026384RLKWAX-EGF\_488

ATTTAAACACTTTTCAGCTATGTTTCTAGTGACCTGAATATACTCTGTATTTCCACTGCACCGTCCGCCCTG  
GTTTGCAATTACCACCTTCGCCTCCAATAGGTTCAATTGCGATAGCA

>PGSC0003DMG400026384RLKWAX-EGF\_5307

AGCTCCGCCACAAGAACCTAGTGATGTTGTATGGGTGTACATCTAAACGAAGCCGAGAGTTACTGCTTG  
TTTATGAGTATATACCAAACGGGACTGTGGCAGATCATCTGCATGGTAAAC

>PGSC0003DMG400026384RLKWAX-EGF\_5368

ACTGCTTGTTTATGAGTATATACCAAACGGGACTGTGGCAGATCATCTGCATGGTAAACGGGCCAAATC  
TGGCTTACTCTTGGCCTATCCGAATGAACATAGCCATTGAGACTGCTGA

>PGSC0003DMG400026384RLKWAX-EGF\_549

CGTCCGCCCTGGTTTGCAATTACCACCTTCGCCTCCAATAGGTTCAATTGCGATAGCAACATGTTTGGTA  
TATACACGCTGATCAACGTTCCCTTCGACCTTAGTCTGGTAAACATGCGA

>PGSC0003DMG400026384RLKWAX-EGF\_5795

AATATGGCTGTCAACAAGATCCAAGGCCATTCAATACATGAGTTAGTTGATCCAAGTCTTGGATTCTCAA  
CAAACAGCTCCGTGAGGAGGATGACTACATTAGTCGCTGAGTTAGCTTTC

>PGSC0003DMG400026384RLKWAX-EGF\_5978

GGCATCCAGAATGGAGAGTCGAAAGCACACAATGCTGAGGTAAGTGGATATTGTGGTAGATGATGTTGG  
GCTCCTAAAGGAGGGCCCCTTTTCTTCTCCAGATTCAGTTGCCGCTGACAAA

>PGSC0003DMG400026384RLKWAX-EGF\_6039

ATGTTGGGCTCCTAAAGGAGGGCCCCTTTTCTTCTCCAGATTCAGTTGCCGCTGACAAATGAGTTGACAG  
CTCCACACCACATTCTAGTGGATGAAATATCTTTATCAGGTTGGTTGAAT

>PGSC0003DMG400026384RLKWAX-EGF\_610

ATGTTTGGTATATACACGCTGATCAACGTTCCCTTCGACCTTAGTCTGGTAACATGCGAGGAAGAAATAA  
TAGCTAGGGTCAATCAAACGAGTGCTGTGGCATTAGCCAGTCCTACAGCT

>PGSC0003DMG400026384RLKWAX-EGF\_6100

AGTTGACAGCTCCACACCACATTCTAGTGGATGAAATATCTTTATCAGGTTGGTTGAATTCAATGCTAGG  
TGTGGAAGCAACTACTATTTTGGCACTTGTGATCAGTGTCATGTTTGGGC

>PGSC0003DMG400026384RLKWAX-EGF\_6344

TAAATAGTGAATAGGGCTGCCAACATTCTAGTATACATATGCATCTTTTGCTCTTTGTACATCAGGTTTTG  
TTTCTTTACCGACCTTATGGTCCTTCTGTTACCTTAAAGTTCATTTATG

>PGSC0003DMG400026384RLKWAX-EGF\_6405

TCAGGTTTTGTTTCTTTACCGACCTTATGGTCCTTCTGTTACCTTAAAGTTCATTTATGTTGAGGACATGAA  
AATCATATGTAACAACAATAATGCACTGCAGCAGAACATATTCTAAGC

>PGSC0003DMG400026384RLKWAX-EGF\_6466

GAGGACATGAAAATCATATGTAACAACAATAATGCACTGCAGCAGAACATATTCTAAGCCTATTCGTAG  
CTTGAGTGCTAGGTTTTGCCTAAGGAACATGCTCTGATATTAAATTGTAA

>PGSC0003DMG400026384RLKWAX-EGF\_793

GACTCTAAGTGCCAACAATGCCGCACGTCAGGTGGAAGATGTGGATCCAATCCAGATTCTGGAGACTTT  
GCTTGCCATTGTGTAAATGGTACTCATTCAAACGACTGCTACGACGGACAA

>PGSC0003DMG400026384RLKWAX-EGF\_976

AGATAAATACATGTCCGATCCAAACCATCATTCCAGTCCTTTCCAAGAGATTTGAATTACATACGCTAAC  
TTAGTAAAGATTCTTTTCGCAATCAGTATAGTATCAATTTTATATGAATT

>PGSC0003DMG400026388RLKWAX-EGF\_0

TGGATAAGCAGTTTTAAAAGGCAAATTTAAAAAGAAAGATTGGACTGAATTTGCTCCAAAAAGATGCTC  
TCAGATCTCCACTCAACTGTCATTCTGTTTATCATTCTATGCTTTCTCCAT

>PGSC0003DMG400026388RLKWAX-EGF\_1054

TTCATATCAATTACTAGCATATGAACTACGAAAATTGGTAGATGATAAATCTAGCTTATATCCAACATCC  
CCTTTTAAACTATATTCATCACTTCAAGAGACAGTATGGAAGAATTCGA

>PGSC0003DMG400026388RLKWAX-EGF\_1116

CCAACATCCCCTTTTAAACTATATTCATCACTTCAAGAGACAGTATGGAAGAATTCGATCTTCAAGGTCTT  
TTGAAGGTATCCAAAACCTTGATCTTGCGACTTTCATGGAACCTTCTCTA

>PGSC0003DMG400026388RLKWAX-EGF\_1178

CAAGGTCTTTTGAAGGTATCCAAAACCTTGATCTTGCGACTTTCATGGAACCTTCTCTACCTAATTTATGTC  
GAGTGCATCTTTGATGAGAGCCACCTGTTTCATCATTCTTCTTGAGAA

>PGSC0003DMG400026388RLKWAX-EGF\_124

CCATATCCCTCGGTCAAGATGACGAGCGATACAGGAGTTGTGGTGAGCCGTTTCAGTGCGGCAGCATGA  
ATATAATTTACCCTTTTTGGGGAGGGAGAAAACCAGAGTATTGTGGTCATC

>PGSC0003DMG400026388RLKWAX-EGF\_1240

ATTTATGTCGAGTGCATCTTTGATGAGAGCCACCTGTTTCATCATTCTTCTTGAGAAAACTCTGCTTGA  
AAAGCATATACAACATAATTCTTGTTTTGGTTAGTCTTCTTCATGGAC

>PGSC0003DMG400026388RLKWAX-EGF\_1302

TCTGCTTGAAAAGCATATACAACATAATTCTTGTTTTGGTTAGTCTTCTTCATGGACTTGCAAAAATCAA  
GTTCATTAAATGGTCGTGATGTTCAAGTCCTTGCACTCTTCTGGATTGAC

>PGSC0003DMG400026388RLKWAX-EGF\_1364

AAAAATCAAGTTCATTAATGGTCGTGATGTTCAAGTCCTTGCACTCTTCTGGATTGACTAGTCATTCATCA  
ATTCACCTTCTTTTTTTTTCTAAATTCTCTCGATCTATAGCTTTTCCTT

>PGSC0003DMG400026388RLKWAX-EGF\_1426

CATTCATCAATTCACCTTCTTTTTTTTTCTAAATTCTCTCGATCTATAGCTTTTCCTTCATTTTCCTTTTGTA  
GTCTCTGTGAAAGAGACATTTTGAAACTGTGACACGGTTCGCTTGA

>PGSC0003DMG400026388RLKWAX-EGF\_1488

TTTCCTTTTGTAGTCTCTGTGAAAGAGACATTTTGAAACTGTGACACGGTTCGCTTGAGTTGTTCAATTCAT  
GATAGTCCTTTGTAGTTGCGCTCAGATAAAATCCTGAAATGAATGATAA

>PGSC0003DMG400026388RLKWAX-EGF\_1550

TTCATTCATGATAGTCCTTTGTAGTTGCGCTCAGATAAAATCCTGAAATGAATGATAAGTTATTGGCACAT  
ATTGCAGGTTTCAGTAATGATTCCGACAGCTGTAATAGGTAAAGCATCCC

>PGSC0003DMG400026388RLKWAX-EGF\_1612

TTGGCACATATTGCAGGTTTCAGTAATGATTCCGACAGCTGTAATAGGTAAAGCATCCCTGTGTCATTCCC

TCAATCTGCTTTTCTGCATTTGACTTGATCTATTAACAATATCTATATG

>PGSC0003DMG400026388RLKWAX-EGF\_186

AGCATGAATATAATTTACCCTTTTTGGGGAGGGAGAAAACCAGAGTATTGTGGTCATCCTAGTTTTGAG

ATCAAGTGCGAAAGTAGCATACCCAAAATTGCAATTGAATCAACAAGATAC

>PGSC0003DMG400026388RLKWAX-EGF\_1922

GAAAATAACAAGCTCATTAGCCATAAAATAGGACAGGGAGGATTTGGTCAGGTATACAAAGGAAATC

TACCTGATGGTCACGCAGTAGCTGTAAAGGTCCTGACAGAACTAATGGTGA

>PGSC0003DMG400026388RLKWAX-EGF\_1984

GAAATCTACCTGATGGTCACGCAGTAGCTGTAAAGGTCCTGACAGAACTAATGGTGACGGAGAAGAA

TATATAAATGAGGTAGCCAGTATAAGTAGAACTTCCCATGTTAACATAGTAG

>PGSC0003DMG400026388RLKWAX-EGF\_2046

GAAGAATATATAAATGAGGTAGCCAGTATAAGTAGAACTTCCCATGTTAACATAGTAGGGCTTTTGGGA

TTTTGTTACCAAGGAAATAGGAGAGCCTTAATCTATGAGTATGTGTCCAAT

>PGSC0003DMG400026388RLKWAX-EGF\_2108

TTTGGGATTTTGTACCAAGGAAATAGGAGAGCCTTAATCTATGAGTATGTGTCCAATGGTTCACTGGAC

AAATTTCTTAACAGTGGACCATCTAGCACAACCTTGTACCTTGAATGGAC

>PGSC0003DMG400026388RLKWAX-EGF\_2170

CACTGGACAAATTTCTTAACAGTGGACCATCTAGCACAACCTTGTACCTTGAATGGACGACATTGTACAG

TATCGCAGTTGGGACTGCTCGAGGGTTGGAATATTTGCACCGAGGTTGTA

>PGSC0003DMG400026388RLKWAX-EGF\_2232

TTGTACAGTATCGCAGTTGGGACTGCTCGAGGGTTGGAATATTTGCACCGAGGTTGTAACACAAGAATA

GTGCACTTTGACATAAAACCTCACAACATTCTCTTGGACGAGGATTTCTGC

>PGSC0003DMG400026388RLKWAX-EGF\_2604

GAGCTGGGGAAGGACCTAAGTCTACAAGGTATCATGAACGAAGAAGATGAAGAATTAGCAAGGAAGA

TGATTTTAGTGGGCTTGTGGTGCATTAGACCAAGCCGTCAGATCGACCAGCA

>PGSC0003DMG400026388RLKWAX-EGF\_2666

GAAGATGATTTTAGTGGGCTTGTGGTGCATTAGACCAAGCCGTCAGATCGACCAGCAATAGAAAAGG

CAGTTGAAATGCTGGAGGGAAGCCTTCACTCCCTACAAGTTCCACCAAACC

>PGSC0003DMG400026388RLKWAX-EGF\_2728

AAAAGGCAGTTGAAATGCTGGAGGGAAGCCTTCACTCCCTACAAGTTCCACCAAACCTGTCTTGTTC  
TCCAACAAGATCCATCCTAGAGTCATTTACATCAACATCCACATCGACCT

>PGSC0003DMG400026388RLKWAX-EGF\_2790

TTGTTTTCTCCAACAAGATCCATCCTAGAGTCATTTACATCAACATCCACATCGACCTCGGAAAGGAGGT  
CGTTTCTGGAGCCAATATCGCTTCCGAGTAAAAACAATTGATGCAAAT

>PGSC0003DMG400026388RLKWAX-EGF\_2852

AAGGAGGTTCTTTCTGGAGCCAATATCGCTTCCGAGTAAAAACAATTGATGCAAATTTGTAAGTATAT  
TCAAACGAAAGTGTGATTAATTTAGTGGGAGTACTATCCCGAGTTTGAT

>PGSC0003DMG400026388RLKWAX-EGF\_2914

AAGTATATTCAAACGAAAGTGTGATTAATTTAGTGGGAGTACTATCCCGAGTTTGATCACCCTGATTA  
AGTTTCGGAGCCGTTAGTGTGTTGATAAAATTATTGCCAATTGGTAACAA

>PGSC0003DMG400026388RLKWAX-EGF\_2976

ACTGATTAAGTTTCGGAGCCGTTAGTGTGTTGATAAAATTATTGCCAATTGGTAACAAGCAGAGAGAGA  
ACATAAATTTCTCATTTATGGTGGCCTCACCAAACATTCTAACTCATTTGG

>PGSC0003DMG400026388RLKWAX-EGF\_3038

AGAGAGAACATAAATTTCTCATTTATGGTGGCCTCACCAAACATTCTAACTCATTTGGTTAATCTAGCTAT  
GTCATACAATGCTTGTGCCAACGTAAAATACCCAAGGCTGTCATCCAAA

>PGSC0003DMG400026388RLKWAX-EGF\_3100

TCTAGCTATGTCATACAATGCTTGTGCCAACGTAAAATACCCAAGGCTGTCATCCAAATTATATATGTATC  
GTCTCCTGCTGTAAATGAGCAGCCACAACCTGACCACACTTGTTTTGAT

>PGSC0003DMG400026388RLKWAX-EGF\_3286

TCTGGATTGATGATCACTAAATAACAATGAATCCTCCTGGTAACACCCATCTCATCCTGCATCACAACCAT  
CTTTTACTGCAGTGTGGATTTGCCACTCCTCGATTAAGAAGTAAATTT

>PGSC0003DMG400026388RLKWAX-EGF\_3348

CACAACCATCTTTTACTGCAGTGTGGATTTGCCACTCCTCGATTAAGAAGTAAATTTTAAAGTCAATGT  
GTGGTAAGAACAGGTCCTTGTAAATGCAATCTTCCATTGAGTGGTATAAAA

>PGSC0003DMG400026388RLKWAX-EGF\_3410

AGTCAATGTGTGGTAAGAACAGGTCCTTGTAAATGCAATCTTCCATTGAGTGGTATAAAACATTTCTGCAG  
TAGTTCAAACCTAGAATTGGCACAATATCACAAAGTTGCTGCAAGAGAGG

>PGSC0003DMG400026388RLKWAX-EGF\_434

TGACCTGAATATTACTCTGTATTTTCGGCTGCACCGTCCGCCCTGGTTTGCAGTTACCACCTTCGTCTCCAA  
ATAGGTTCAATTGCAATAGCAGCATATTTGGTATATACACTCTGATCAA

>PGSC0003DMG400026388RLKWAX-EGF\_496

CGTCTCCAAATAGGTTCAATTGCAATAGCAGCATATTTGGTATATACACTCTGATCAACGTTCCCTTCAAC  
CTTAGTCTGGTAACATGCCAGGAAGAAATAATAGCTAGGGTCAATCAA

>PGSC0003DMG400026388RLKWAX-EGF\_62

GATGCTCTCAGATCTCCACTCAACTGTCATTCTGTTTATCATTCTATGCTTTCTCCATATGCCCATATCCCTC  
GGTCAAGATGACGAGCGATACAGGAGTTGTGGTGAGCCGTTTCAGTG

>PGSC0003DMG400026388RLKWAX-EGF\_744

GGAAGATGTGGATCCAATCCAGATTCTGGAGACTTTGCATGCCATTGTCTAAATGGTACTCATTCAA  
ACTGCAACGATGGACCAAACCACTTACCCGGTAATCTTTCCTCTACTAAT

>PGSC0003DMG400026388RLKWAX-EGF\_806

TTCAAACACTGCAACGATGGACCAAACCACTTACCCGGTAATCTTTCCTCTACTAATCCTCATAATTTACT  
ACTACTAGAATCACTTGAAGACAAGTTGTAGGAGAAAGTATCTTGTC

>PGSC0003DMG400026388RLKWAX-EGF\_868

ATAATTTACTACTACTAGAATCACTTGAAGACAAGTTGTAGGAGAAAGTATCTTGTCCCAATTTAGACTTT  
GAATAAAACAGCTATAATTCCTAGGAATTTCTACATATTCAAACGTATA

>PGSC0003DMG400026388RLKWAX-EGF\_930

TTAGACTTTGAATAAAACAGCTATAATTCCTAGGAATTTCTACATATTCAAACGTATAACCTTATGTATCTT  
AATTTAGTTACTATCACTCTTTTCCTTAGTTCAGGTATAAACCATACAT

>PGSC0003DMG400026388RLKWAX-EGF\_992

ATGTATCTTAATTTAGTTACTATCACTCTTTTCCTTAGTTCAGGTATAAACCATACATGAATTCTCATATCA  
ATTACTAGCATATGAACTACGAAAATTGGTAGATGATAAATCTAGCTT

>PGSC0003DMG400026646-(rev)L-LecRK\_0

GCACAAAAAACTTAACAATTTGTACTTCCAACAACCTCCATGGACAATCCCTATAGCCTAGTTATTCTTGC  
ATTGATCTTTTTCCCTATTCTTGTGAGAGCTCAATCTTTTGATTTTGCT

>PGSC0003DMG400026646-(rev)L-LecRK\_1054

AGGCAACTAAGGGATTCAAGGAAAGTGAACCTAATTGGAGTTGGAGGATTTGGTGCTGTTTACAAGGGT

GTTTTGCCTACTAATGGAGCCGAGGTTGCAGTAAAGAAGATATCGAGCAATT

>PGSC0003DMG400026646-(rev)L-LecRK\_186

CTTAAGCTCACTAATAGATCACAAAATGTTATAGGTCATGCGTTCCACCCCAATCCTGTACCAATTTTCAA

CTCCAGTACTAAAAATGTTACTTCATTTAGTACATACTTTGTCTTCGCC

>PGSC0003DMG400026646-(rev)L-LecRK\_1860

ATGAGACAAATAATGAAGTATCTCACTGGAGATGAATCACTTCCAGTTTTTGGAGCAGCAGTTGAGCTGT

GTTGGATCTGATAGGGTTGATGAAATCACAGCCAAGTTCTTGGAAGTGTTT

>PGSC0003DMG400026646-(rev)L-LecRK\_248

AATTTTCAACTCCAGTACTAAAAATGTTACTTCATTTAGTACATACTTTGTCTTCGCCATTGTCCCTCTGA

GAAAACCTCTGGTGGCTTTGGCTTTGCTTTCACCTTATCTCCATCCCC

>PGSC0003DMG400026646-(rev)L-LecRK\_310

TCCCTCTTGAGAAAACCTCTGGTGGCTTTGGCTTTGCTTTCACCTTATCTCCATCCCCGGGTTTTCCAGGT

GCTCAGGGTGATCACTTCTTGAGTCTCAACAACACGAACAATAGAA

>PGSC0003DMG400026646-(rev)L-LecRK\_372

TTCCAGGTGCTCAGGGTGATCACTTCTTGAGTCTCAACAACACGAACAATAGAAAGGATACTAACC

ACATCTTTATGGTTGAATTCGACACTGTGGATGGTCATGATGAAGGTGTG

>PGSC0003DMG400026646-(rev)L-LecRK\_434

TACTAACCACATCTTTATGGTTGAATTCGACACTGTGGATGGTCATGATGAAGGTGTGGATACAGATGG

AAATCACATTGGGATTAACATCAATAGCATGATATCTATCGCGTCACAACC

>PGSC0003DMG400026646-(rev)L-LecRK\_496

CAGATGGAAATCACATTGGGATTAACATCAATAGCATGATATCTATCGCGTCACAACCAGCCAATTA

TGTTAATGGTACTTCTAGAACAGAGGAGGTACATCTACAAAACGGAGAAT

>PGSC0003DMG400026646-(rev)L-LecRK\_558

AATACTATGTTAATGGTACTTCTAGAACAGAGGAGGTACATCTACAAAACGGAGAATCAATTCAGGCTT

GGATCGATTATGATGGAATGAGCAAAGTGGTAAATGTA ACTATATCTCCC

>PGSC0003DMG400026646-(rev)L-LecRK\_620

TCAGGCTTGGATCGATTATGATGGAATGAGCAAAGTGGTAAATGTA ACTATATCTCCCAGAACAGTTCC

AAAGCCAATTCGACCTCTGATCAGTGAGGTCGTAGATTTATCTCCTGTGTT

>PGSC0003DMG400026646-(rev)L-LecRK\_682

CAGTTCCAAAGCCAATTTCGACCTCTGATCAGTGAGGTCGTAGATTTATCTCCTGTGTTGAACCAAACCTAT  
GTATGCTGGTTTCTCAGCAGCCACGGGAGATAAAGCGAGCTCTCATTACA

>PGSC0003DMG400026646-(rev)L-LecRK\_744

CAAACCTATGTATGCTGGTTTCTCAGCAGCCACGGGAGATAAAGCGAGCTCTCATTACATCTTGGGGTTGG  
AGTTTTCGGTTGAATGGAGCTGCTGATCCTTTAGATCTTGATAACCTACCT

>PGSC0003DMG400026646-(rev)L-LecRK\_868

CCCCACCTGAAGTGGTAAGACCCTCCAAGAATCCCATCTCAAAGGGCCTTGATAGGAACATTCTGCTC  
CGTCGTTATCCTGCTCCTTGGGGCATTATATCTATAGAAGGATGAGGC

>PGSC0003DMG400026646-(rev)L-LecRK\_930

TTCTGCTCCGTCGTTATCCTGCTCCTTGGGGCATTATATCTATAGAAGGATGAGGCAGCATGAAGTTC  
TAGAGGACTGGGAGCTGGATTGTCCTCACAGGTTCCGATTTAGAGATCTT

>PGSC0003DMG400026647-(rev)L-LecRK\_1197

AGCAATTCTCTCCAAGGAATAAGAGAATTTGCAGCGGAGATCGAAAGCTTAGGCAGGTTAAGGCACAA  
ACACTTGATCAACCTACAAGGCTGGTGCAAGAACAAGAATGATCTTCTCCTA

>PGSC0003DMG400026647-(rev)L-LecRK\_126

AGAGCTCAATCTTTTGATTTTGCTTACAATGGATTCAATAACTCAAATATCATTAGAGATGGAATTGCAAT  
TATCAATCCAAATGGTGCACCTTAAGCTCACTAATAGATCACAAAATGTT

>PGSC0003DMG400026647-(rev)L-LecRK\_1890

ATGAGACAAGTAATGAAGTACCTCAATGGAGATGAATCACTTCCAGTTTTTGAGCAGCAGTTGAGCTGT  
ATTGGATCTGGTAGGGTTGATGAAATCACAGCCAAGTTCTTGGGAAGTATTT

>PGSC0003DMG400026647-(rev)L-LecRK\_1953

AGCTGTATTGGATCTGGTAGGGTTGATGAAATCACAGCCAAGTTCTTGGGAAGTATTTTCTACTGATACAA  
TCAATATATCACATCGTTCGCTATCCGTCGGACAGACATCATCTAGTTCA

>PGSC0003DMG400026647-(rev)L-LecRK\_2016

GATACAATCAATATATCACATCGTTCGCTATCCGTCGGACAGACATCATCTAGTTCACTCCATTCTGGTAG  
ATGAAAACCTCAGTAAAAAGGACATACACTCTTCTTTTGTGTTTGTGTTAAC

>PGSC0003DMG400026647-(rev)L-LecRK\_2079

TCTGGTAGATGAAAACCTCAGTAAAAAGGACATACACTCTTCTTTTGTGTTTGTGTTAACCACTTTGTTGGGAT  
TAATTAAGTAGCTTAGAATAATATATAACTAGGAAAAAGGTAAGTCTCA



>PGSC0003DMG400026647-(rev)L-LecRK\_2205

CATTTTCACTTAGCTGGAGTGCAAAAACCATGTAATTTAGAGAAGAAAAGTTATAAAAATTAGTCTAGAAA  
GTAAATTTGTAATTATAAAAAAAAAAAAAAAAAATCTATGTAGAATATTCGTTA

>PGSC0003DMG400026647-(rev)L-LecRK\_2244

GAGAAGAAAAGTTATAAAAATTAGTCTAGAAAAGTAAATTTGTAATTATAAAAAAAAAAAAAAAAAATCTATGTA  
GAATATTCGTTATAAAAATCTATTTGTAATAAAAATGGTGACATGATTCAGA

>PGSC0003DMG400026647-(rev)L-LecRK\_252

CATGCTTCCACCCCAATCCTGTACCAATTTTCAACTCCAGTACTAAAAATGTTACTTCATTTAGTACATAC  
TTCGTCTTCGCCATTGTCTCTCTAGAGAAAACCTCTGGTGGCTTTGGA

>PGSC0003DMG400026647-(rev)L-LecRK\_378

TTCACCTTATCTCCATCCCCGGGTTTTCCGGGTGCTAAGGGAGCTCATTTTCTTGGAGTCGTCAACAGTA  
GTAACGATGGCAATGATACTAACCACATCTTTATGGTTGAATTTGACACT

>PGSC0003DMG400026647-(rev)L-LecRK\_441

AACAGTAGTAACGATGGCAATGATACTAACCACATCTTTATGGTTGAATTTGACACTGTGGATGGTCATG  
ACGAAGGTGTGGACACAGGTGGAAATCAAATTGGGATTAACAGAAATGGC

>PGSC0003DMG400026647-(rev)L-LecRK\_504

GGTCATGACGAAGGTGTGGACACAGGTGGAAATCAAATTGGGATTAACAGAAATGGCATGAGGCATAT  
CACGTCAGAATCAGCTGATTACTATAATAATGCTACTTCTGAAACAAAACCA

>PGSC0003DMG400026647-(rev)L-LecRK\_567

CATATCACGTCAGAATCAGCTGATTACTATAATAATGCTACTTCTGAAACAAAACAGTAGATCTACAAA  
ACAGAGAATCAATTCAGGCTTGGATCGATTATGATGGAATGAGCAAAGTG

>PGSC0003DMG400026647-(rev)L-LecRK\_630

CTACAAAACAGAGAATCAATTCAGGCTTGGATCGATTATGATGGAATGAGCAAAGTGGTAAATGTA  
ACTATCTCCATAAAAAGTTCCAAAGCCAATTATACCTCTGATCAGTCGGGAT

>PGSC0003DMG400026647-(rev)L-LecRK\_693

GTA  
ACTATATCTCCATAAAAAGTTCCAAAGCCAATTATACCTCTGATCAGTCGGGATGTAGATTTATCTCC  
TGTGTTGAAAGAGACTACGTATGCTGGTTTCTCAGCAGCCACGGGAGAT

>PGSC0003DMG400026647-(rev)L-LecRK\_882

GAAAAGCTACCAGTTGCCCCACCTGAAGTGGTAACATCCTCCAAGAATTCCCATCTCAAAGGGCCTTGA

TCGGAACATTTTGCTCCGTGGTTATCCTGCTCCTTGGAGCATTTTATATC

>PGSC0003DMG400026743OtherRLKsTM\_0

TTTTTCTCCATTCCATTGGATTTTATTTCTCCCAACACAAAAACACATCCTCTAATCCGAGCTAATTTTCCCC

AATGATTAGCCAGGGGAAATCACTAGGCGAATACATGATGATTCGCC

>PGSC0003DMG400026743OtherRLKsTM\_1054

ACCTCGTAGTGATTTGATATTGTGGATGATTCGGATGCAGAGTGTTCTTCAGGACACAAAGAACAGAA

TTCATCAGCAATAATGAAGCCTACTTTTTTTGAATGCTTTTCGATATCATTTTC

>PGSC0003DMG400026743OtherRLKsTM\_1116

AACAGAATTCATCAGCAATAATGAAGCCTACTTTTTTTGAATGCTTTTCGATATCATTTTCTCTTTCTCCTGGTT

TTGATCTCTCTAGCTTGTTCGAGAAAGATAAGAGTCATAGGTTGGATG

>PGSC0003DMG400026743OtherRLKsTM\_1178

TCTCCTGGTTTTGATCTCTCTAGCTTGTTCGAGAAAGATAAGAGTCATAGGTTGGATGCTAGATTCACAA

CACAGAAGTCCACGCCCACTATTGTCTCGAGGCTAGAGGAAGTAGCTTCA

>PGSC0003DMG400026743OtherRLKsTM\_124

ATTTCAATTTCTTCACGCGCTTGAATGCATCATCTATCCTCTTGCAGGATGATGAGCATGAAGAGAGCGA

AAACGGAGAAAAAAGGGACAATTTTGATGCATAAATATGAGATTGGTAAA

>PGSC0003DMG400026743OtherRLKsTM\_1240

ATTCACAACACAGAAGTCCACGCCCACTATTGTCTCGAGGCTAGAGGAAGTAGCTTCAATGGAGAGTTT

TAAGGTACGTATGATAGTATAATATCGGTGAAAGATGTTTCATCTGACCACC

>PGSC0003DMG400026743OtherRLKsTM\_1302

AGAGTTTTAAGGTACGTATGATAGTATAATATCGGTGAAAGATGTTTCATCTGACCACCCTTGAGCCTATA

TGTGACTTTGCCTGTAGGTTTCATCTCATCTAAAAGTTTAATCTGATCACC

>PGSC0003DMG400026743OtherRLKsTM\_1426

GCTTATGACCATCTTAGCTAAAAGTTTAGTATTATAGAATGAACAACTTTATTTACTTTATTATGTCTTCA

ACAGGTGAAGAAAAAAGACGGGACGGTGAAAATGCAAGGAAGCAAAGA

>PGSC0003DMG400026743OtherRLKsTM\_1488

TATGTCTTCAACAGGTGAAGAAAAAAGACGGGACGGTGAAAATGCAAGGAAGCAAAGAAGGGAGAAA

AAGGGCAATTAGCAATTCATGCAGAGATATTTGGGATTACTCCAGCTTTCCAT

>PGSC0003DMG400026743OtherRLKsTM\_1550

AGAAAAAGGGCAATTAGCAATTCATGCAGAGATATTTGGGATTACTCCAGCTTCCATGTTGTACAAGT  
GACAAAAAATCAGGAGATACTGCAGAATACAGCCTTCATTAAGATATA

>PGSC0003DMG400026743OtherRLKsTM\_1674

GGACATGGCTGGGCAATGAGCAACAACAAGTGGAAAATCAAGAAATCAACACTTGAGAGGTAAAGATA  
TGAAAAAAAAAAAAACAAGTTGTGGGGGTAAAGTTGCCTCTGTGGGACCTAT

>PGSC0003DMG400026743OtherRLKsTM\_1860

GATTTACAACCCTTGGATGAGAGCCTTCTCCATATCTCATGCATCGAGTTGTTTCTGTTTTTTTAAATCAT  
AGAGGCATTATGAATTTCTGTTTTTTTAAATCATGTAGGCATTATAA

>PGSC0003DMG400026743OtherRLKsTM\_1922

TTTAAATCATAGAGGCATTATGAATTTCTGTTTTTTTAAATCATGTAGGCATTATAATCATAGCATTTTTT  
GTCATTGCTCTTTTTGTTTGTCTTGATGTTATATGTCCTCTTGGT

>PGSC0003DMG400026743OtherRLKsTM\_248

TAGCCAAGGTACATTTGCCAAAGTCTATCATGCAAGGAACCTAAAAACAGGACAAATTGAGCTGTAA  
GGTAATTGACAAAGAAAAAGTCATGAAAGTTGGCTTAATTGACCAAATCAA

>PGSC0003DMG400026743OtherRLKsTM\_310

CTGTTAAGGTAATTGACAAAGAAAAAGTCATGAAAGTTGGCTTAATTGACCAAATCAAACGTGAATTTCT  
GTTATGAGATTAATTAGGCATCCAAATGTTGTTGAACTTTATGAAGTAAT

>PGSC0003DMG400026743OtherRLKsTM\_496

TGCTAAAGGGAGGCTTAGGGAATCAGCAGCGCAAAAATACTTTCAACAATTAATTGTGTCTGTTGATTTCT  
CATCATAGTCGAGGGGTATATCATAGGGACTTGAAGCCCGAAAATATACT

>PGSC0003DMG400026743OtherRLKsTM\_558

TTGATTTCCATCATAGTCGAGGGGTATATCATAGGGACTTGAAGCCCGAAAATATACTCCTTGATGAAAC  
TGAAACCTAAAGGTTTCTGATTTTGGGTTGAGTACTTTTTCGATACGA

>PGSC0003DMG400026743OtherRLKsTM\_62

TAATTTTCCCAATGATTAGCCAGGGGAAATCACTAGGCGAATACATGATGATTCGCCATAATTTCAAT  
TTCTTACGCGCTTGAATGCATCATCTATCCTCTTGCAGGATGATGAGCA

>PGSC0003DMG400026743OtherRLKsTM\_868

TAAAGGGATATTTAAATGCCCTGAATATTTTCTTATGAAGTGAAAAACTACTTTCAAGAATTCTTGATC  
CAAATCCGTTTTCAAGAATTACATTAGCTAAGCTAATGGACAATAATTG

>PGSC0003DMG400026748-(rev)LRR-RLPs\_1037

ATTATTTTTTCGAACTGAACCTTGACTTTGGCACTCCTGCAACAATAGTGTATGTGAAGGACATTAGTTGT  
GCAACAATAGAGAGAAATGCAAAAAGGCATAGAGGAAAATAGCACATTT

>PGSC0003DMG400026748-(rev)LRR-RLPs\_1098

CATTAGTTGTGCAACAATAGAGAGAAATGCAAAAAGGCATAGAGGAAAATAGCACATTTGACTGTAGC  
ACAAGAGACTCAATGTCTACGATAGGCAGGATCGATTCTGTCAAGTATTAGC

>PGSC0003DMG400026748-(rev)LRR-RLPs\_1159

CTGTAGCACAAAGAGACTCAATGTCTACGATAGGCAGGATCGATTCTGTCAAGTATTAGCTCAGTGCTATA  
CCAGTAGTCAGTGACGGAATCAAGATTTTCATCAGCCTTTGTGCCTAAGG

>PGSC0003DMG400026748-(rev)LRR-RLPs\_122

TAAGGGTAGTAGCATTGCCTATGTTTCATCTCCATTACATTGGGGGCGACAATTGATTTTAGCAGGTTCT  
AATGTTCAAAAAGTTTATGTCAGTGACAAGGAGCTTATTGATGCATTGTG

>PGSC0003DMG400026748-(rev)LRR-RLPs\_1281

AGTAGCATTGCCTATGTTTCATCTCCATTACATCGGGGGTGACAATTGATTTTAGCAGGTTCTAATGTTCA  
AAAAGTATATGTCAGTGACAAGGAGCTTATTGATGCATTGGGGGGGTTCT

>PGSC0003DMG400026748-(rev)LRR-RLPs\_1342

CTAATGTTCAAAAAGTATATGTCAGTGACAAGGAGCTTATTGATGCATTGGGGGGGTTCTGATGTTGAA  
AGGTTGGTTTCTTTACACCTATTAACACTAACAACAACACTACAAGTTGGT

>PGSC0003DMG400026748-(rev)LRR-RLPs\_1403

ATGTTGAAAGGTTGGTTTCTTTACACCTATTAACACTAACAACAACACTACAAGTTGGTGGTAGTAGTAC  
TTTCTCCCCAAATCAGTTTGCTAACCTACAAGATGAGGAAAGTGATGAAG

>PGSC0003DMG400026748-(rev)LRR-RLPs\_1464

TAGTAGTACTTTCTCCCCAAATCAGTTTGCTAACCTACAAGATGAGGAAAGTGATGAAGAGGATTGGTT  
GGATCAATGTTTTAAGAATGTAGCTAGGGATGCAGATATTTCTCCTAGGCA

>PGSC0003DMG400026748-(rev)LRR-RLPs\_1525

GATTGGTTGGATCAATGTTTTAAGAATGTAGCTAGGGATGCAGATATTTCTCCTAGGCAACAACACAATA  
TATAACAAAAGAAGCATGGAGGAAAGAATAAATGGAATGACAAGGTGCC

>PGSC0003DMG400026748-(rev)LRR-RLPs\_183

GCAGGTTCTAATGTTCAAAAAGTTTATGTCAGTGACAAGGAGCTTATTGATGCATTGTGGGGTTCTAATG

TTGAAAGGTTGGTTTCTCTTACAAGTTACACCTATTAACACTAACAACA

>PGSC0003DMG400026748-(rev)LRR-RLPs\_244

GTTCTAATGTTGAAAGGTTGGTTTCTCTTACAAGTTACACCTATTAACACTAACAACAACACTGCAAGTTGA

TGGTAGTCAGTTTGCTAACCTACAAGATGAGGAAAGTGATGAAGAGGAT

>PGSC0003DMG400026748-(rev)LRR-RLPs\_2562

CACATTTATGTATTATCCCTAAAAAAGTGTGATTACGTGTTCCGGATAAAAGTATTGAAATTTATAATAA

AGATTTATGTATTTGGTAAGATGTTGTATTGGTAAGTTGTTCTTTTATTA

>PGSC0003DMG400026748-(rev)LRR-RLPs\_2623

TTATAATAAAGATTTATGTATTTGGTAAGATGTTGTATTGGTAAGTTGTTCTTTTATTAATAAATAACTAATCT

AAAATAATCTTGATTTGTCTTTTTTTAGAAAGTGTAATCTAAATGTA

>PGSC0003DMG400026748-(rev)LRR-RLPs\_2684

ATAACTAATCTAAAATAATCTTGATTTGTCTTTTTTTAGAAAGTGTAATCTAAATGTAACCTTGTAAGA

AAAAGAGGAACACTATATATCTTAGTGAAGAGGAAGTTACGAGACTTAT

>PGSC0003DMG400026748-(rev)LRR-RLPs\_2806

TGGAAAAGTATTTTTGAGAATTTAAAAAAAATAAGGACAAAATAGTAAGAGACCGGGTCAAATCAA

GAGTGTTCCATAACCCAAAAATTAATAAGTTCCGGAATAATCAACTTATGACTT

>PGSC0003DMG400026748-(rev)LRR-RLPs\_2867

AAATCAAGAGTGTTCCATAACCCAAAAATTAATAAGTTCCGGAATAATCAACTTATGACTTTTGATTGGTCTT

AGTGGTTTATAAGTACTTTGAATGTTTACTAATTAATACGAACGTAAGA

>PGSC0003DMG400026748-(rev)LRR-RLPs\_2928

GATTGGTCTTAGTGTTTATAAGTACTTTGAATGTTTACTAATTAATACGAACGTAAGATAAAAATTGTTT

ATAAGTTAGTTAACGAGCCTACAAGCTTAGTCAAATACCTTCTAAATA

>PGSC0003DMG400026748-(rev)LRR-RLPs\_3050

TCATTTAATTTTGTACTTTTTATCTCTCAAGTGAGAAGCGATAATGATCAAGAACTCACAAGTGTTTTTTTT

TTTTTTGTAAGATTCATACATAAATTATCAAGTGTTTGTGTTTTCTAT

>PGSC0003DMG400026748-(rev)LRR-RLPs\_3111

GTGTTTTTTTTTTTTTTGTAAGATTCATACATAAATTATCAAGTGTTTGTGTTTTCTATCTGAATTATCACTA

TTTATAATTAACCTCTCTTTCTTTAAAGGGAAAAGACCCAACTATGC

>PGSC0003DMG400026748-(rev)LRR-RLPs\_3294

TGACATTTTCATTTGAGAAAATGTTTCATCCATATCATTGTTAGTTAATTAATAAGTTTAAATTTTGCTTA  
GTTATACAACGTTTACTAGCTAGCTATTCATGTCTGAAATTAATACAC

>PGSC0003DMG400026748-(rev)LRR-RLPs\_3355

AATTTTGCTTAGTTATACAACGTTTACTAGCTAGCTATTCATGTCTGAAATTAATACACAATTTGTTTTACA  
ATTTAAAAACAACGTAACATAACTTGTATAAGTTAGGAGGGAATTT

>PGSC0003DMG400026748-(rev)LRR-RLPs\_3416

TTTGTTTTACAATTTAAAAACAACGTAACATAACTTGTATAAGTTAGGAGGGAATTTGTACATAATGTT  
ATCTCAAATGGACTGTCAATGCTTATAGAAAATATAATAACAAAAGGAT

>PGSC0003DMG400026748-(rev)LRR-RLPs\_3477

ACATAATGTTATCTCAAATGGACTGTCAATGCTTATAGAAAATATAATAACAAAAGGATAATGACAATTG  
AGAAAAAGGTAATTAAGAAATGATGCATAAATCAGAGGTCAAATATATGA

>PGSC0003DMG400026748-(rev)LRR-RLPs\_366

GTTGGATCAATGTTTTGAGAATGTAGCTAGGGATGCAGATATTTCTCCTAGGCAACAACGCAATACACTA  
CAAAAAAGGGGCTAATTCGCAGGAGTAAAAATTACGAATAGTGGGGGTTT

>PGSC0003DMG400026748-(rev)LRR-RLPs\_3721

AAAGAATTACGCACACAATAAATAAGCAAACCTTGGTTTACTTGCCATGTCTTAATTGGCTGATTAGAG  
GAATTTTTTTGCCACCATATTTGACCATTCTGATTGAGATGTGAAATACT

>PGSC0003DMG400026748-(rev)LRR-RLPs\_3782

TGATTAGAGGAATTTTTTTGCCACCATATTTGACCATTCTGATTGAGATGTGAAATACTTGATTGAATGG  
AAAAATCTCCTAAAAAGAGATCTTATTGCTTTTTCAAAGTCTCAAACCAC

>PGSC0003DMG400026748-(rev)LRR-RLPs\_3843

ATTGAATGGAAAAATCTCCTAAAAAGAGATCTTATTGCTTTTTCAAAGTCTCAAACCACAGGTTACTAGT  
ACTAATATTTGCACTAATGGAGAAAGCCTTCACATTTTTCTCTTAACAA

>PGSC0003DMG400026748-(rev)LRR-RLPs\_3904

GTTACTAGTACTAATATTTGCACTAATGGAGAAAGCCTTCACATTTTTCTCTTAACAATACTCTTGTTGCC  
TCACTATGTTATGGCCCAAACCAACATTACAACACTGATCAATTAGCTCT

>PGSC0003DMG400026748-(rev)LRR-RLPs\_4148

TCGTTGAAGCTTTCCAACCTTGCTTTACAGGAAGAATCCCCGTGATTTTGAAATCTCACATTTCTTGT  
TTCTCTTGACTTGGGAAACAACCATTTCCACGGAAATTTGCCTCAAGAA

>PGSC0003DMG400026748-(rev)LRR-RLPs\_4209

CATTTCTTGTCTTCTTGACTTGGGAAACAACCATTTCCACGGAAATTTGCCTCAAGAAATGGCACATTTG  
CGTCGGCTTAAGTTTCTTGATTTAAGTTTAAACAGCTTCAGAGGGGAAA

>PGSC0003DMG400026748-(rev)LRR-RLPs\_427

AATACACTACAAAAAAGGGGCTAATTCGCAGGAGTAAAAATTACGAATAGTGGGGGTTTAGAACCCCC  
ACAATTTGTCGTTACAGGGGTTTCCACAACCCCCATAGTTAGGTTTGTCAACA

>PGSC0003DMG400026748-(rev)LRR-RLPs\_4453

CAATTTACTTGAAGGAAACATCCCGGAAGAGATTGGCAATCTTCACAACCTGAAATCGTTGTCCATAGAA  
CAAATCAGCTTACGGGTTCTATACCATTACATTATTCAATATTTCTAG

>PGSC0003DMG400026748-(rev)LRR-RLPs\_4636

TGATCTCCCAATACTCAAAGAGCTTTTATCTATCCAGAAACAAGCTTGATGGTCATATGCCTACAAGCTTG  
TCAAATTGTTACGACTTCAAATATTGTCTCTATCTGGAAATTAATTTT

>PGSC0003DMG400026748-(rev)LRR-RLPs\_4697

TACAAGCTTGTCAAATTGTTACGACTTCAAATATTGTCTCTATCTGGAAATTAATTTTGTATGGACCAATA  
CATAATGAAATTGGAAAATTGACTAACTTGCAGAAATTGTATCTCGGAT

>PGSC0003DMG400026748-(rev)LRR-RLPs\_4758

TGGACCAATACATAATGAAATTGGAAAATTGACTAACTTGCAGAAATTGTATCTCGGATACAACCATTTCC  
ACAGGTATATATGTTTTATCTTATGAATGCTACTACTATATATTGAATCT

>PGSC0003DMG400026748-(rev)LRR-RLPs\_4819

AACCATTTACAGGTATATATGTTTTATCTTATGAATGCTACTACTATATATTGAATCTAATTACCTCACAT  
CTTTCTTTATTACACATTGAATGCAGGTATAGTTCCAGAAGAAATTGG

>PGSC0003DMG400026748-(rev)LRR-RLPs\_488

AACCCCCACAATTTGTCGTTACAGGGGTTTCCACAACCCCCATAGTTAGGTTTGTCAACAATTAAGTTGCA  
GCAGTTTTTAAGCAACCCCCACAATCGACAATTAGCGGGGTTCTAACTTC

>PGSC0003DMG400026748-(rev)LRR-RLPs\_4880

TTACCTCACATCTTTCTTTATTACACATTGAATGCAGGTATAGTTCCAGAAGAAATTGGAAATCTTGTTAA  
TTTGGTGGACTTAAGCGTGGAGAATAACCAGATTACCGGATCTATCCCA

>PGSC0003DMG400026748-(rev)LRR-RLPs\_4941

ATCTTGTTAATTTGGTGGACTTAAGCGTGGAGAATAACCAGATTACCGGATCTATCCCAATCTCCATATTC

AATATCTCATCGCTGCAATCATTGTTACTGTGGGGCAACAATCTTAGTG

>PGSC0003DMG400026748-(rev)LRR-RLPs\_5063

TTCTTACCACGGGAGATTGGCAACTTAACCAAGATGCAATTCTTAAATCTCAAGGAAAATAGGTTTACTG  
GTACGTATTCAAAGTTATAGCGATCTGTATTGAGCTAGCTAGACTCATTC

>PGSC0003DMG400026748-(rev)LRR-RLPs\_5124

GGTTTACTGGTACGTATTCAAAGTTATAGCGATCTGTATTGAGCTAGCTAGACTCATTCTTTCTTCACGTG  
TTGACAGGTGAAATACCCAAAGATATAAGAAATCTCGTTGAGTTGGAGG

>PGSC0003DMG400026748-(rev)LRR-RLPs\_5246

TTTGATGTTGGGTTTAATAGTTTTAGTGGTTCACCTTCCAATGGAGATCTTCAACATATCACAACCTGAGAAC  
AATTCAACTTTCAGACAACAATCTATCAGGAACTCTACCACCAAACATA

>PGSC0003DMG400026748-(rev)LRR-RLPs\_5307

AACTGAGAACAATTCAACTTTCAGACAACAATCTATCAGGAACTCTACCACCAAACATAGGTTCTACCTT  
ACCCAACATTGAAATACTTTATCTGCATACCTTAACCAATCTTGTTGGGA

>PGSC0003DMG400026748-(rev)LRR-RLPs\_5368

TTCTACCTTACCCAACATTGAAATACTTTATCTGCATACCTTAACCAATCTTGTTGGGACTATTCCTCATTC  
TATCTCCAATTGTTCAAAGCTTACTGATCTAGAGCTTTCACAAAACAA

>PGSC0003DMG400026748-(rev)LRR-RLPs\_549

TAAGTTGCAGCAGTTTTTAAGCAACCCCAACAATCGACAATTAGCGGGGTTCTAACTTCTGTAATTTATTT  
TCCAGGAAATAATTTTATCCATTTTGTGGGGGTTTTATAACCCTCCAC

>PGSC0003DMG400026748-(rev)LRR-RLPs\_5490

TCAGTGGCTTAATACCCAATTCTCTTGATATTTGACTCATCTAAACTTCCTAAACTTGTGGGGAAACAAT  
TTAACCAGTGATTCATTTTTAAGCTTCTTGACTTCCTTAACCAATTGCA

>PGSC0003DMG400026748-(rev)LRR-RLPs\_5551

GGGAAACAATTTAACCAGTGATTCATTTTTAAGCTTCTTGACTTCCTTAACCAATTGCAGAAATTTAACAT  
TCTATCTTTC AACCTCTAAATGGCATGCTTCCGGTCTCCGTAGGGAAT

>PGSC0003DMG400026748-(rev)LRR-RLPs\_5673

CTCCAAATCTCTTGTAAGTTTTATGCCGCTGCTTGCAAGATTAACGGTCAGATTCCAAATGAAGTTGGC  
AACTTAAGCAGCTTATTAGACCTTGATCATTCTAATAATAACTTCATTGG

>PGSC0003DMG400026748-(rev)LRR-RLPs\_5734



GAAGTTGGCAACTTAAGCAGCTTATTAGACCTTGATCATTCTAATAATAACTTCATTGGATCAATTCCTAC  
CTCAACTCGTAACTTGAGAAACCTTCAGCGCCTGTACTTGAACAACAAC

>PGSC0003DMG400026748-(rev)LRR-RLPs\_5795

CAATTCCTACCTCAACTCGTAACTTGAGAAACCTTCAGCGCCTGTACTTGAACAACAACAAGCTTACGGG  
ATTTATTGGAGATAATTTATGTAAATTGCAGCATTGGGTGCTATTTACT

>PGSC0003DMG400026748-(rev)LRR-RLPs\_5917

GGACAAAATCAACTTTCAGGATCTCTCCTAATTGTTTAGGGAACGTCACTTCCCTTAGAGAGATACATA  
TGTATTCCAATAAATTGAGTTCCAATATACCAACAAGCTTAGGAAATCTC

>PGSC0003DMG400026748-(rev)LRR-RLPs\_5978

AGATACATATGTATTCCAATAAATTGAGTTCCAATATACCAACAAGCTTAGGAAATCTCAAAAATCTAAT  
GGTTCTTAACTTGTCATCAAACAACATGGTTGGTTCTTTACCTCCGGAAA

>PGSC0003DMG400026748-(rev)LRR-RLPs\_6039

AAATCTAATGGTTCTTAACTTGTCATCAAACAACATGGTTGGTTCTTTACCTCCGGAAATTGGAAATCTAA  
AAGCTGTGATACAGATGGATCTGTGGTTCTTTACCTCCGGAAATTGGAA

>PGSC0003DMG400026748-(rev)LRR-RLPs\_610

TAATTTATTTTCCAGGAAATAATTTTATTCCATTTTGTGGGGGTTTTATAACCCTCCACAAATAAATTTAG  
TATGTTGGGGCTATAACCTCCGCAACACTTTTGATGGAATTTTATAT

>PGSC0003DMG400026748-(rev)LRR-RLPs\_6100

GGAAATCTAAAAGCTGTGATACAGATGGATCTGTGGTTCTTTACCTCCGGAAATTGGAAATCTAAAGGC  
TGTGAATTATATGGATCTGTCAATGAATCAATTTTTTTCGACACAACAAGT

>PGSC0003DMG400026748-(rev)LRR-RLPs\_6161

CTAAAGGCTGTGAATTATATGGATCTGTCAATGAATCAATTTTTTTCGACACAACAAGTTGCAAGGATCT  
ATACCTGACTCAATGAGAAACATGGTAGGCTTGGAAATCCTAGACCTTTC

>PGSC0003DMG400026748-(rev)LRR-RLPs\_6222

CAAGGATCTATACCTGACTCAATGAGAAACATGGTAGGCTTGGAAATCCTAGACCTTTCTCATAATAATA  
TAACAGGAATCATTCCCATGTCTTTGGAGAACTTCAATACCTCAAGTAT

>PGSC0003DMG400026748-(rev)LRR-RLPs\_6283

ATAATAATATAACAGGAATCATTCCCATGTCTTTGGAGAACTTCAATACCTCAAGTATTTCAATGTTTCT  
GACAACAATTGTATGGTGAAATACCCTCGGGGGTCTTTCAAGAACC

>PGSC0003DMG400026748-(rev)LRR-RLPs\_6466

GATGCCCCACTTCATCAAAGCACAGATCAAATAGGAAACAAATGTTTGCTCTATTTCTTATGCTGGGAAT  
TGCACTTGTATTTGTTCTATTGCCTTTGTGTTTCGTATGGATTAGGTATA

>PGSC0003DMG400026748-(rev)LRR-RLPs\_6527

GCTGGGAATTGCACTTGTATTTGTTCTATTGCCTTTGTGTTTCGTATGGATTAGGTATAGAAGAGGTAAA  
AGAGTTCCTCAACGAGCTGATTCATTGTCTATCGCAACAACGGAAAGAAT

>PGSC0003DMG400026748-(rev)LRR-RLPs\_6588

AGAGGTAAAAGAGTTCCTCAACGAGCTGATTCATTGTCTATCGCAACAACGGAAAGAATTTCACTACTAT  
GAACTACTCCAAGCAACTGATTCACTTAGCGAGAGTACTAATCTGATTGGT

>PGSC0003DMG400026748-(rev)LRR-RLPs\_671

ATAAATTTTAGTATGTTGGGGCTATAACCTCCGCAACACTTTTGATGGAATTTTTATATTCAATTTTCGTAG  
AGGTAATAATGTATATAAAATTAAGCTACAATAAATAAATAAATATT

>PGSC0003DMG400026748-(rev)LRR-RLPs\_6832

GAAGTCTTGACAAGTATTTGTATTCGCACAACACTTCTAGACATCAGGCAGAGACTAAGCATTATGAT  
AGATGTAGCATGCACGTTAGAATATCTCCATCATGGGTGCTCGTTACCCG

>PGSC0003DMG400026748-(rev)LRR-RLPs\_6893

CATTATGATAGATGTAGCATGCACGTTAGAATATCTCCATCATGGGTGCTCGTTACCCGTGATTCACTGT  
GATCTGAAGCCTAGTAACGTCTTGCTGGACGAGGATGTGGTTGCCACCT

>PGSC0003DMG400026748-(rev)LRR-RLPs\_7076

AGCAACATTTGGTTATATTGCACCGGGTGCCTCTCTTTGTTTTTGCTAATTTGAACATTGATTTTTCGTCTT  
TTTTTTTTTTCCAATCAAGAAAGTATATTGCCTATTTAAATTAATTGT

>PGSC0003DMG400026748-(rev)LRR-RLPs\_7137

TTTTTCGTCTTTTTTTTTTTTCCAATCAAGAAAGTATATTGCCTATTTAAATTAATTGTTTCCCTGTAGAGTA  
TGGAATGGATGGACTGGTGTCAATAAAATGTGATGTCTATTGTTACG

>PGSC0003DMG400026748-(rev)LRR-RLPs\_7198

CCCTGTAGAGTATGGAATGGATGGACTGGTGTCAATAAAATGTGATGTCTATTGTTACGGGATTATGTTG  
CTGGAAACATTTACTAGGAGAAAGCCTAGTGATTTTGAGGGAGATCTTAG

>PGSC0003DMG400026748-(rev)LRR-RLPs\_732

AATTTTCGTAGAGGTAATAATGTATATAAAATTAAGCTACAATAAATAAATAAATAAATTTTCATGGAATAA

AAAACACAAAGATCTAACTAAATCATGAAGTTAACATAAATTAGTGTTAA

>PGSC0003DMG400026748-(rev)LRR-RLPs\_7381

GATAACAGTACCAATGGATAATTGCTTACAGAAGGAGCTAGATGTTGTGGCATCAATCATGAAAGTGCC  
ATTAGATTGTTGTGCTGAATCTCCGGCAAGAAGGACAAACATGAAAGATGT

>PGSC0003DMG400026748-(rev)LRR-RLPs\_793

ATGGAATAAAAAACACAAAGATCTAACTAAATCATGAAGTTAACATAAATTAGTGTTAAAGTTCATCAAA  
TTTACAATAGACTTTCTTTAAATCAAAGAACATAAAAAACAAAAAATTG

>PGSC0003DMG400026748-(rev)LRR-RLPs\_854

TTCATCAAATTTACAATAGACTTTCTTTAAATCAAAGAACATAAAAAACAAAAAATTGATACGGTGTTG  
TCTCTATGTACACAATGTCTACTCAACTCAACTTCTCTAAAAAATATAAT

>PGSC0003DMG400026748-(rev)LRR-RLPs\_915

ACGGTGTTGTCTCTATGTACACAATGTCTACTCAACTCAACTTCTCTAAAAAATATAATACGTAAATCTGG  
CTTTTGAAGAACAACACTTCAATTCCTTCCAAGTATTTATTGATCTTTTAG

>PGSC0003DMG400026748-(rev)LRR-RLPs\_976

GTAAATCTGGCTTTTGAAGAACAACACTTCAATTCCTTCCAAGTATTTATTGATCTTTTAGACATTATTTTTTC  
GAACTGAACCTTGACTTTGGCACTCCTGCAACAATAGTGTATGTGAAG

>PGSC0003DMG400026749-(rev)LRR-RLKs\_0

CTCAAACACAGGTTACTAGTACTAATATTTGCACTAATGGAGAAAGCCTTCACTATTTTTCTCTTAACA  
ATACTCTTGTTGCTTCACTATGTTATGACCCAAACCAACATTACTACTG

>PGSC0003DMG400026749-(rev)LRR-RLKs\_1054

ATTGTATCTCGGATCTAACCATTTACAGGTACGATCCTAGCTACAACATTATTAATTCTTTTATGAATACT  
TGTAATATTGAACTTGAAGTGCAGGAATAATTCCACAAGAGTTAGGAA

>PGSC0003DMG400026749-(rev)LRR-RLKs\_124

ATTAGCTCTTCTTTCTTTAAAATCTCAAATCATTTCCGGATCCCTTCACTTCTTGAATGAAAGCTGGTCTCC  
CGCTATTTCTGTTTGTGATTGGGTAGGAGTCACTTGTGGTTCTCATCA

>PGSC0003DMG400026749-(rev)LRR-RLKs\_1302

CCACGAGAGATTGGCAACTTAACCAAGATACAGATTCTAGATCTTAGAGAAAATACATTTATTGGTACGT  
ATTTGAAGTGATAGCAAATTATAAACTTGTACTAGCTTGAACACTCA

>PGSC0003DMG400026749-(rev)LRR-RLKs\_1364

TGGTACGTATTTGAAGTGATAGCAAATTATAAACTTGTACTAGCTTGAACCTAATTCTTAATTTCTT  
TAGGTGAAATACCCAAAGAGATGAGCAATATGATGGAGTTGGAGGTACT

>PGSC0003DMG400026749-(rev)LRR-RLKs\_2046

CCCACATCAATTGGCAACTTGAGAAACCTTCAACGCTTCAACTTGAGTTACAACAACTTACAGGATTTAT  
TGGAGATTTAATTTGTAAATTGCAGCATTGGGTGCTATTTACTTGGGA

>PGSC0003DMG400026749-(rev)LRR-RLKs\_248

CGAGTGAAGTCCTTGAATCTTCCAACATGGCTCTTACAGGCAGGATTCCCCGTGATTTTGGAAACCTCA  
CATTTCTTGGTTCTCTTGACTTGGGAAGCAACAATTTCCAGGGATATATG

>PGSC0003DMG400026749-(rev)LRR-RLKs\_2604

AAGTTGCACGGTGAATACCCTCAGAGGGTCTTTCAAGAACCTCTCGAGTAAGTTTTTCATCGACAATG  
AAGCATTGTGTGGTTCTTCAAGTTTTAGTGTCCCACCATGCGCCACATCA

>PGSC0003DMG400026749-(rev)LRR-RLKs\_2728

AGCATAGATCAAATAGGAAAAAATGCTTGTCTATTTCTTGTGCTGGGAATTGCACTTCTTATGCTGGG  
AATTGCACTTGTATTTGTTCTATTACCTTTGTGTTTGTATGGATAAAGT

>PGSC0003DMG400026749-(rev)LRR-RLKs\_2790

ATGCTGGGAATTGCACTTGTATTTGTTCTATTACCTTTGTGTTTGTATGGATAAAGTATAGAAGAGGTA  
AAGGTGATCCTCAACAAGCTGACTCATTGTCTACCGTAACAAGAGAAAGA

>PGSC0003DMG400026749-(rev)LRR-RLKs\_310

AAACCTCACATTTCTTGGTTCTTGTACTTGGGAAGCAACAATTTCCAGGGATATATGCCTCAAGAAATG  
GCATATTTGCATCGGCTTAAGTTTCTTGATTTAAGCTTCAACAACCTTTAG

>PGSC0003DMG400026749-(rev)LRR-RLKs\_3224

AGATATCAGCCAGAGACTAAGCATTATGATAGATGTGGCATGTGCGTTGGAATATCTCCATCATGGATG  
CTCCTCACCCGTGATTCATTGTGATATAAAGCCTAGCAACGTCTTGCTGGA

>PGSC0003DMG400026749-(rev)LRR-RLKs\_372

AAGAAATGGCATATTTGCATCGGCTTAAGTTTCTTGATTTAAGCTTCAACAACCTTTAGAGGGGAAAATCC  
TTCTTGGTTTGGGTTTTTACACCAACTTCAAGATCTAAATCTTGGAATA

>PGSC0003DMG400026749-(rev)LRR-RLKs\_3906

TCTGAATCTCTTGTCCGAATCGATCACTTTTTTGTGTTTGTGTTTAGCACTTGATTTGTGCATGATTCTGTT  
TCAGAAATGCTAGTTGGTTGCAATAAATGTCACTGTTTCCTCTTAAA

>PGSC0003DMG400026749-(rev)LRR-RLKs\_434

GAAAATCCTTCTTGGTTGGGTTTTTACACCAACTTCAAGATCTAAATCTTGGAATAATAGTTTCATTGG  
TTCCATCCCTTCTTCATTTTCTAATATTTCCACACTTGAAACTTTGAAT

>PGSC0003DMG400026749-(rev)LRR-RLKs\_496

TTTCATTGGTTCATCCCTTCTTCATTTTCTAATATTTCCACACTTGAAACTTTGAATCTGAATTTCAATTCC  
ATAGAGGGTGAAATCCCAGAAGTGATTGGAAGTCTTATAAACCTTAG

>PGSC0003DMG400026749-(rev)LRR-RLKs\_558

ATTTCAATTCATAGAGGGTGAAATCCCAGAAGTGATTGGAAGTCTTATAAACCTTAGAGTTTTAAGCTT  
GTATGGAATAATCTCATAGTTCTATTCCTCCGTCACTCTCGAATGCCT

>PGSC0003DMG400026749-(rev)LRR-RLKs\_62

CTCTTAACAATACTCTTGTTGCTTCACTATGTTATGACCCAAACCAACATTACTACTGATCAATTAGCTCTT  
CTTTCTTTAAAATCTCAAATCATTTTCGGATCCCTTTCACTTCTTGAAT

>PGSC0003DMG400026749-(rev)LRR-RLKs\_620

TTAAGCTTGTATGGAATAATCTCATAGTTCTATTCCTCCGTCACTCTCGAATGCCTCAAGGTTGGAGG  
CATTAGATTTATCTCGTAATTTACTTCAAGGGAACATTCCAGAAGGGATT

>PGSC0003DMG400026749-(rev)LRR-RLKs\_930

AACTTGGTGGTCATATGCCTACAAGCTTGTCAAATTGTTCACAACTTCAAATATTGAATTTATCAGGTAAT  
GAGTTTGACGGACGAATACATAGTGAAATTGGAAGATTGAGTAACTTGC

>PGSC0003DMG400026749-(rev)LRR-RLKs\_992

TCAGGTAATGAGTTTGACGGACGAATACATAGTGAAATTGGAAGATTGAGTAACTTGCAGATATTGTAT  
CTCGGATCTAACCATTTACAGGTACGATCCTAGCTACAACATTATTAATT

>PGSC0003DMG400026750-(rev)LRR-RLPs\_0

GTCTCTTTTTCACTATCTTCTGTACACAACAGACTTCAATACACCTCTGCTCTGTAATTGCAACCATTTTCC  
ATCTTTCTTCAACCAAAAACAACAACAATGGCCTCTTCTTCTCCAGAT

>PGSC0003DMG400026750-(rev)LRR-RLPs\_1736

CATTTGTTGATTGACAATTTGAAACATTCCTTTATTTTTCATGTGTTGGTTACGAGTCATGACAATGGATG  
AGATAATCTATGTCGTGTGGATCCTTCATTTGTCTTGATGTACCCCGTG

>PGSC0003DMG400026750-(rev)LRR-RLPs\_1798

CAATGGATGAGATAATCTATGTCGTGTGGATCCTTCATTTGTCTTGATGTACCCCGTGTCCAGTGGGAAT

GTGGCAAGGGTTAGGATACTTTGCTGGAAAAGGTTGACATACCCATATCT

>PGSC0003DMG400026750-(rev)LRR-RLPs\_1860

GTGGGAATGTGGCAAGGGTTAGGATACTTTGCTGGAAAAGGTTGACATACCCATATCTGGTGCTTCCAA

AGAAACTGTACAGAACACATACCCGTAAAAGAGTCCAAGCAACATAATGAC

>PGSC0003DMG400026750-(rev)LRR-RLPs\_1922

CTTCAAAGAAACTGTACAGAACACATACCCGTAAAAGAGTCCAAGCAACATAATGACAATATGAAGTA

TCTACCAAATTAGCTCCAATAGTCTATTGTCTCAGTTTGAAGTCAAAGAT

>PGSC0003DMG400026750-(rev)LRR-RLPs\_1984

TGAAGTATCTACCAAATTAGCTCCAATAGTCTATTGTCTCAGTTTGAAGTCAAAGATCACCGTTTTCGTT

CTTACTTGTATGATTTTTCGTAGTAAGTTCTTTTGCTTTCTTTGTGCTC

>PGSC0003DMG400026750-(rev)LRR-RLPs\_2046

GTTTTCGTTCTTACTTGTATGATTTTTCGTAGTAAGTTCTTTTGCTTTCTTTGTGCTCTACCGGACTTTCCAG

TATTCCTCGTATGTCCTGTGATGCCAGTGTTTTTATGAGATCTAACA

>PGSC0003DMG400026750-(rev)LRR-RLPs\_2108

GGACTTCCAGTATTCCTCGTATGTCCTGTGATGCCAGTGTTTTTATGAGATCTAACATAATGCTGTGAAA

ACAGTATTCCATTGTGGACACAAAAGTTCATTATCTGGCACTTCATTTTC

>PGSC0003DMG400026750-(rev)LRR-RLPs\_2170

GCTGTGAAAACAGTATTCCATTGTGGACACAAAAGTTCATTATCTGGCACTTCATTTCAATTTGACAGAAG

AAGCTCAACTAGTCCTCTCCTTAGTTGTGTTGCTCGGATTCTTCATAATA

>PGSC0003DMG400026750-(rev)LRR-RLPs\_2232

GACAGAAGAAGCTCAACTAGTCCTCTCCTTAGTTGTGTTGCTCGGATTCTTCATAATATGTTTGGGTATGT

GTTGGATCCTCAAAGCTATGCATTTTTGGAGGATCTGACACGGGTGGG

>PGSC0003DMG400026750-(rev)LRR-RLPs\_2356

CACTTTTGGAGGATTCGAGTAACAAAGCTCCTTAGTCCCACTATGGTACCTGATCACCACAAAGGATTA

CTAGGGGGTGCTGCCACTATGGTTTTTCTTTTCATTGTTAAATGCTTATT

>PGSC0003DMG400026750-(rev)LRR-RLPs\_2418

AAGGATTACTAGGGGGTGCTGCCACTATGGTTTTTCTTTTCATTGTTAAATGCTTATTGTGATAATAGACC

GGAGAATTCATATAGTCGATTCTAACTTGCTTGGGACAGAGGCACGAGT

>PGSC0003DMG400026750-(rev)LRR-RLPs\_868

GTGATTTGTCTTCATTGCAAAATGTGTCTTTGTCTTCGAATTCGTTGTCTGGATCTGTTCCGGATTTCGTTTG  
CTGCTATTCCGAGATTAGTTCATCTTGATTTGGGGTCTAACCAACTCA

>PGSC0003DMG400026750-(rev)LRR-RLPs\_930

GATTCGTTTGCTGCTATTCCGAGATTAGTTCATCTTGATTTGGGGTCTAACCAACTCAATGGGACTATTCC  
TAAGTTCATTTCTGATATGAAGGGATTGAAGTATTTGAATCTTGAGAGG

>PGSC0003DMG400026760-(rev)LRR-RLKs\_0

CCAAATTTCAAGAAAAATAGAAAAATAAATAAAAAATTTTGTTTTTGTTTTTAGAATTGTTTGGTTGGTG  
GTGGGTATTGGATCCAATGTCACCAAGTAAATGTTTTAGTTATCCAATG

>PGSC0003DMG400026760-(rev)LRR-RLKs\_1037

CTGCATTAGATCCCTTTAGTGTTAAGACTCCATTTTTAGCTCTGCAGTAGATCCCTTTAGAGTCAAGACTC  
CATTTTTATCTCTGTAAGTTGAGTATTTTAGTGTCAAGACTCCATTTTT

>PGSC0003DMG400026760-(rev)LRR-RLKs\_1098

GTCAAGACTCCATTTTTATCTCTGTAAGTTGAGTATTTAGTGTCAAGACTCCATTTTTAGCTCTGTATTGA  
GCATTTCAAGTCTCAAAAATTGTCAAGTTCAATGAAAATCAAAAACCC

>PGSC0003DMG400026760-(rev)LRR-RLKs\_1159

CTCTGTATTGAGCATTTCAGTGCTCAAAAATTGTCAAGTTCAATGAAAATCAAAAACCCCTTTTTCTCTA  
GAATTGAACAACCTAATGCTCAATCATTCAACAATGGAAATGTCAATTT

>PGSC0003DMG400026760-(rev)LRR-RLKs\_122

TTTTCTTTTTAAAATTCAGCAAAAAAAAAAAGTGTATTTATTAGACACACAAATCATTGTTTTTAGAAGC  
ATTTTTGGGTGTCTCTGCAATCTCTGAGGTCTGTCATGTGAAGTGTAGG

>PGSC0003DMG400026760-(rev)LRR-RLKs\_1220

TTTTCTCTAGAATTGAACAACCTAATGCTCAATCATTCAACAATGGAAATGTCAATTTCAATGGAAATCA  
AGAACCCAGTTTTGTTCTTAAGGTACTGTTCTAGTCACAAATTCTTGTT

>PGSC0003DMG400026760-(rev)LRR-RLKs\_183

TTTTAGAAGCATTTTGGGTGTCTCTGCAATCTCTGAGGTCTGTCATGTGAAGTGTAGGGAAAAATAATT  
CAAGAAACCAAACCCCAAGTTTTGAATTTCTTTATTTTATTATATGGTA

>PGSC0003DMG400026760-(rev)LRR-RLKs\_1891

TTTCTGGTGAAATCCCGAATACTCCGGCGTTATCTCGGTTCAATGAATCATCTTCGCCGGAAATGTCAA  
ATTGTGCGGAGTACAACCTGCATAATAACTGTCCTTCAACTAGTCCATCGT

>PGSC0003DMG400026760-(rev)LRR-RLKs\_2623

ATGGCAGCCTCTTCTCCCTCGTTCATGGTATGTATTCCGTCATTCATTTATTTATTTATAGTATATTTTGCTT  
TTATCCGTTTTTGTGTACTIONCTCGTGAAGGAGGAAAAACAGG

>PGSC0003DMG400026760-(rev)LRR-RLKs\_2684

TATATTTTGCTTTTATCCGTTTTTGTGTACTIONCTCGTGAAGGAGGAAAAACAGGTATAGTTGAACT  
CATGAATAGTGAAAGGAAGTTAAAAAGGGATAGATTTGGCGGAGTGAAC

>PGSC0003DMG400026760-(rev)LRR-RLKs\_2745

TAGTTGAACTCATGAATAGTGAAAGGAAGTTAAAAAGGGATAGATTTGGCGGAGTGAACCTGCACTTG  
AGTGGTATAAGGTGGAATAAGATAAGGGTGAGGTAACCTATTTACGTCTAGT

>PGSC0003DMG400026760-(rev)LRR-RLKs\_2806

GCACTTGAGTGGTATAAGGTGGAATAAGATAAGGGTGAGGTAACCTATTTACGTCTAGTATATGCATCG  
ATTC AATAGATGCATTACATGTGTTTTTTACTAAATTAGTTATCGAATAG

>PGSC0003DMG400026760-(rev)LRR-RLKs\_305

TTTTTGTAAATTTTTTTGGGTTTTGGGTTTTATGAAAAGTGAAAGTAGTAGTAAAGAGTGAAAAAAGG  
GTAGTGATGGTGATGAGGAAGTTCAATAAATTGAGTTTGTGGAGTTG

>PGSC0003DMG400026760-(rev)LRR-RLKs\_3416

AATATGTAAATTTGTAAAGGAAGTTCCAACTTGCTTTGGTATACTGATGTGAAGATTATAGAAAAATAT  
TGTTTAAATAATTAAGTTAAAAAATGAATAATCAAATAAGTAACTCT

>PGSC0003DMG400026760-(rev)LRR-RLKs\_3477

GAAAAATATTGTTTAAATAATTAAGTTAAAAAATGAATAATCAAATAAGTAACTCTTCTCATCTTGTT  
CTCTACGACTACGGATGCTATACGAAAAGAAGATAAGGAACAAAAGGGG

>PGSC0003DMG400026760-(rev)LRR-RLKs\_3538

TCATCTTGTCTCTACGACTACGGATGCTATACGAAAAGAAGATAAGGAACAAAAGGGGAGTATAGTTA  
TATATTGGCCTTTTGAATCTTACAAAGGATGATATTTGTTCAAATGAAT

>PGSC0003DMG400026760-(rev)LRR-RLKs\_366

AAAAAAGGGTAGTGATGGTGATGAGGAAGTTCAATAAATTGAGTTTGTGGAGTTGTTGATTTTAT  
AGTTTTGTGGTCAAAGTTTTTGTGTCAATTGATGATAATGACACTAATT

>PGSC0003DMG400026760-(rev)LRR-RLKs\_4026

TTGTCCACCATATATGGAGATAAGGCATGATACTTTGAAATTAGAAAGACCCTGCATATTGCTCAAATTT



GCATACGTAAGAGCTTCTTTGCCTTGTGCTGATTTCACTACTTCTCTGGT

>PGSC0003DMG400026760-(rev)LRR-RLKs\_4087

CTCAAATTTGCATACGTAAGAGCTTCTTTGCCTTGTGCTGATTTCACTACTTCTCTGGTAAGGTGTTAATC

GTTAAATTGACCAGTGAGCTTCCAAAGATACCTGGAAAAATCAACATTT

>PGSC0003DMG400026760-(rev)LRR-RLKs\_427

GATTTTATAGTTTTGTGGTCAAAGTTTTTGTGGTCAATTGATGATAATGACACTAATTGGTAGATCTGAA

GATTCTTGTGTTGATAGTATCTTGTAAAACTTTTATAGACAGAAAGG

>PGSC0003DMG400026760-(rev)LRR-RLKs\_4270

GGGGAGGGTGGTGTGTACGCAGAAAAACAGAATTTTTCTGACACTAGTCACTAGCGATTAGAAGTTCCA

TTGCTATTTATAAAGTTTCATAATTGTCTGTACTATTTAGCTTTTAAACATC

>PGSC0003DMG400026760-(rev)LRR-RLKs\_4331

AAGTTCCATTGCTATTTATAAAGTTTCATAATTGTCTGTACTATTTAGCTTTTAAACATCTGCTCAACATCTC

TTGTTCTCTCCACATTATATCTTGTGATATAGTTTGAGATGTTCTAAA

>PGSC0003DMG400026760-(rev)LRR-RLKs\_4392

CTCAACATCTCTTGTCTCTCCACATTATATCTTGTGATATAGTTTGAGATGTTCTAAATTTGATTTGTTCC

AGTAAACTGAAGTTGCACCTACGTTGTATTCCAGAGTGTGTTCAATA

>PGSC0003DMG400026760-(rev)LRR-RLKs\_4453

TGATTTGTTCTTAGTAAACTGAAGTTGCACCTACGTTGTATTCCAGAGTGTGTTCAATATGATATTTACTT

TTCTTCTATTTAGGGAACTAGAATGCAATACACCATTGACAAGAACAA

>PGSC0003DMG400026760-(rev)LRR-RLKs\_4514

ATATTTACTTTTCTTCTATTTAGGGAACTAGAATGCAATACACCATTGACAAGAACAAAAAAGTTCAATA

TCATATAAACTATTGTCAACCGACATGTTGAACTCCGAGATCCCTACA

>PGSC0003DMG400026760-(rev)LRR-RLKs\_4575

AAGTTCAATATCATATAAACTATTGTCAACCGACATGTTGAACTCCGAGATCCCTACATGTAAGTATAG

CAAATTGGGTAATAATCAAGAATAAGGTAGTCTAGATGCTAGTCTTTTCT

>PGSC0003DMG400026760-(rev)LRR-RLKs\_4636

TAAGTATAGCAAATTGGGTAATAATCAAGAATAAGGTAGTCTAGATGCTAGTCTTTTCTTCCAAGTAAAG

TTGTGGTGTGATGCAGTGAAAGGCATTGAAAATGAGTTGCTTTGTTAGGCCA

>PGSC0003DMG400026760-(rev)LRR-RLKs\_4697

CAAGTAAAGTTGTGGTGATGCAGTGAAAGGCATTGAAAATGAGTTGCTTTGTTAGGCCATTAGACCATT  
TCAGGCACTAAATCACCTATGGCGGAATCACAGAGCAAAGGCACACCGAA

>PGSC0003DMG400026760-(rev)LRR-RLKs\_4758

AGACCATTTAGGCACTAAATCACCTATGGCGGAATCACAGAGCAAAGGCACACCGAAGTTTATTTTT  
GGAATAAGGACAACGTGGAAGGTGCTATGCAACAACAACAACATACTCGGT

>PGSC0003DMG400026760-(rev)LRR-RLKs\_488

TAGATCTGAAGATTCTTGTTGATAGTGATCTTGTTAAACTTTTTATAGACAGAAAGGAAAATGTCTTTT  
GGATCTTTTACATTTCAAGATTTAATCATCAAATAAGAAAATACTCTAC

>PGSC0003DMG400026760-(rev)LRR-RLKs\_4880

AATCACACAAAGTGGGGTAAAGAGGTGGTTACAATAGACCCTCGGTTTCGAGGAAAAAAATTCAAAGC  
AGTTCGGATGGAAGGTGATTTATGCGTCTAGCAATTGTATACGCCGTATGCA

>PGSC0003DMG400026760-(rev)LRR-RLKs\_4941

TCAAAGCAGTTCGGATGGAAGGTGATTTATGCGTCTAGCAATTGTATACGCCGTATGCAAGTACCACCTC  
AAATAGTGTGTTACCTTTCATGTGGTCTTATCTTGTTACTAGTCATTGTA

>PGSC0003DMG400026760-(rev)LRR-RLKs\_5002

TACCACCTCAAATAGTGTGTTACCTTTCATGTGGTCTTATCTTGTTACTAGTCATTGTAAGACCACATCTG  
ATGTTTAATACATGGGGGTGCCAATCGAATATTTGAAGAGAACATATTC

>PGSC0003DMG400026760-(rev)LRR-RLKs\_5063

ACCACATCTGATGTTAATACATGGGGGTGCCAATCGAATATTTGAAGAGAACATATTCAAAGTTAGCC  
GGGACTCTTATTTTCATGTATCTGGACAACCAATATGTTTTGTTATTCA

>PGSC0003DMG400026760-(rev)LRR-RLKs\_5124

AGTTAGCCGGGACTCTTATTTTCATGTATCTGGACAACCAATATGTTTTGTTATTCAAAAAATATTCCA  
GATGATAACTAAGCTATATTTTACAATTTGCTAACTTTTTTCAGGGACA

>PGSC0003DMG400026760-(rev)LRR-RLKs\_5185

AAATATTCCAGATGATAACTAAGCTATATTTTACAATTTGCTAACTTTTTTCAGGGACAAGGGCTAATAGT  
GGTCAAAGCCTCTTCACTGGACTTCCTGTCTCAAAATTGCAGAGGATG

>PGSC0003DMG400026760-(rev)LRR-RLKs\_5246

GGCTAATAGTGGTTCAAAGCCTCTTCACTGGACTTCCTGTCTCAAAATTGCAGAGGATGTGGCTACTGGA  
TTGCTTCATATCCATCAGAACCCTGGTCTGACTCATGGAACTTGAAATC

>PGSC0003DMG400026760-(rev)LRR-RLKs\_5307

GCTACTGGATTGCTTCATATCCATCAGAACCCTGGTCTGACTCATGGAACTTGAAATCATCAAATGTAC  
TCTTGGGGGCCGACTTTGAGTCGTGTCTTACAGATTATGGCCTCATGCCA

>PGSC0003DMG400026760-(rev)LRR-RLKs\_5368

CAAATGTACTCTTGGGGGCCGACTTTGAGTCGTGTCTTACAGATTATGGCCTCATGCCATTTAGGAATCT  
AGATTCTCCTGAGGAATCAGGTGCTTCTCCCTCTTCTATAGAGCTCCTG

>PGSC0003DMG400026760-(rev)LRR-RLKs\_5429

TAGGAATCTAGATTCTCCTGAGGAATCAGGTGCTTCTCCCTCTTCTATAGAGCTCCTGAGTGTCTGTGAC  
ATTGAAGGCCACTTACCCATCAGGCCGATGTCTATAGCTTTGGTGTCT

>PGSC0003DMG400026760-(rev)LRR-RLKs\_549

AATGTCTTTTGGATCTTTTACATTTCAAGATTTAATCATCAAATAAGAAAATACTCTACTTTTGTATATGA  
AAATCCAAAAAAAAAAAAAAAAACTTCATTTTAAATGAACTTTCTTGTTT

>PGSC0003DMG400026760-(rev)LRR-RLKs\_5490

TGTCGTGACATTGGAAGGCCACTTACCCATCAGGCCGATGTCTATAGCTTTGGTGTCTCCTATTGGAGC  
TCCTCACGGGAAAGACTCCATTTCAAGATCTTGTTCAAGAACACGGATCA

>PGSC0003DMG400026760-(rev)LRR-RLKs\_5551

TATTGGAGCTCCTCACGGGAAAGACTCCATTTCAAGATCTTGTTCAAGAACACGGATCAGACATAACCGA  
GGTGGGTGAAATCTGTTTCGAGAAGAAGAACTGAATCAGGTGATGAACCTG

>PGSC0003DMG400026760-(rev)LRR-RLKs\_5612

CATACCGAGGTGGGTGAAATCTGTTTCGAGAAGAAGAACTGAATCAGGTGATGAACCTGTTTCTAGTAA  
TGAAGCCTCGGAAGAGAACTCGGTGCTCTCTTAAACGTAGCTATGGCTTG

>PGSC0003DMG400026760-(rev)LRR-RLKs\_5673

TCTAGTAATGAAGCCTCGGAAGAGAACTCGGTGCTCTCTTAAACGTAGCTATGGCTTGTGTTTCACTTG  
TACCCGAGAATCGACCCACAATGAAGGATGTTTTGAGGATGATCCGGGAT

>PGSC0003DMG400026760-(rev)LRR-RLKs\_5734

TTTCACTTGTACCCGAGAATCGACCCACAATGAAGGATGTTTTGAGGATGATCCGGGATGCTAGAGCAG  
AAGCTCAAGGGTCTCCAATAGCAGTGACCATTACCAGGAAGATGGTCAG

>PGSC0003DMG400026760-(rev)LRR-RLKs\_5795

TAGAGCAGAAGCTCAAGGGTCTCCAATAGCAGTGACCATTACCAGGAAGATGGTCAGATACTGTCCA

AAGCTTGCCAAGAGATGAACATTTGAGCATATGAGTTTGTACTATACTTAT

>PGSC0003DMG400026760-(rev)LRR-RLKs\_5856

ACTGTCCAAAGCTTGCCAAGAGATGAACATTTGAGCATATGAGTTTGTACTATACTTATGGAGGCCCCGA

ATAACGTGTCTTGATTCTTTTGAAGGCAGAAGTTACTTCGTAAGTTAAG

>PGSC0003DMG400026760-(rev)LRR-RLKs\_5917

AGGCCCCGAATAACGTGTCTTGATTCTTTTGAAGGCAGAAGTTACTTCGTAAGTTAAGCATCATCGATG

TATCTGAGTTCTCAGAGATTTGTTGATTCAGTTCTTGTAAGTCTCAAGG

>PGSC0003DMG400026760-(rev)LRR-RLKs\_5978

TCATCGATGTATCTGAGTTCTCAGAGATTTGTTGATTCAGTTCTTGTAAGTCTCAAGGGCTTTCTACTTT

TCTTGTTTTCTAGGTTTAGTTGTTGTATGTAGGAGATTTGCTTTTAT

>PGSC0003DMG400026760-(rev)LRR-RLKs\_6039

TTTCTACTTTTCTTGTTTTCTAGGTTTAGTTGTTGTATGTAGGAGATTTGCTTTTATACCACTTGGATTG

ACATTCAGTGTGATGATACATTCCTGATTCAAAAGTTGTCATTGTG

>PGSC0003DMG400026760-(rev)LRR-RLKs\_61

TGGTTGGTGGTGGGTATTGGATCCAATGTCACCAAGTAAATGTTTTAGTTATCCAATGTGTTTTCTTTT

TAAAATTCAGCAAAAAAAAAAAGTGTATTTTATTAGACACACAAATCATT

>PGSC0003DMG400026760-(rev)LRR-RLKs\_610

TTGTCATATGAAAATCCAAAAAAAAAAAAAAAAACTTCATTTTTAATGAACTTTCTTGTTCCATTCATCAAT

GGTGACACCCCAACCAATCAAGAATCCATTTTTTTCTAGGTTTCTAG

>PGSC0003DMG400026760-(rev)LRR-RLKs\_6100

CACTTGGATTGACATTCAGTGTGATGATACATTCCTGATTCAAAAGTTGTCATTGTGTTTTGTGAGAGA

TGTAATTGTAATTGAGGTTCCAACACTTCTTTAACATAGTTTCTTATTC

>PGSC0003DMG400026760-(rev)LRR-RLKs\_6161

TTGTGAGAGATGTAATTGTAATTGAGGTTCCAACACTTCTTTAACATAGTTTCTTATTCTAGTGGTAAGAG

TGTATCACGTGATGTGTGGATTAGGAGTACGACAACCATTCAAACCTTG

>PGSC0003DMG400026760-(rev)LRR-RLKs\_6214

TTATTCTAGTGGTAAGAGTGTATCACGTGATGTGTGGATTAGGAGTACGACAACCATTCAAACCTTGCCC

TAGACAAAATATGATTGCTACTTTCTTGACTTGGGGCATTACATTTCCG

>PGSC0003DMG400026760-(rev)LRR-RLKs\_671

ATTCATCAATGGTGACACCCCAACCAAATCAAGAATCCATTTTTTTCTAGGTTTCTAGTAGATCCCTTTA  
GTGGCAAGACTCCATTTTTAATTCTGCATATTAACTTTGTAGTTTGGT

>PGSC0003DMG400026760-(rev)LRR-RLKs\_732

GATCCCTTTAGTGGCAAGACTCCATTTTTAATTCTGCATATTAACTTTGTAGTTTGGTGACACCCAAACCA  
AATCAAGACTCCATTTTTAGCTCTGCATTTTGAACCTTCTAGTTTCCCA

>PGSC0003DMG400026760-(rev)LRR-RLKs\_793

CACCCAACCAAATCAAGACTCCATTTTTAGCTCTGCATTTTGAACCTTCTAGTTTCCCATTTCATCAATGGTG  
ACACCCAACCAAATCAAGAATCCATTTTTGCAGACCCCTTTAGTCTCA

>PGSC0003DMG400026760-(rev)LRR-RLKs\_915

ACTCCATTTTTAACTCTGCACTTTGGACTTTCTTGCTTCCCATTTCATCCATGGTGACACCCAACCAAATCAA  
GAATCCATTTTTGCAGAGACCCCTTTAGTCTCAAGACTCCATTTTTAG

>PGSC0003DMG400026792LRR-RLKs\_0

CGGCGTTACTCTCTCTTCACTCCAAAACCTGTCTAATTTTACTATACAAAATCATTGGAATCCACCTCC  
TCAACAAAGAACCAGCCTTGATGAACCTTTCTCTCTCACTACTCACTG

>PGSC0003DMG400026792LRR-RLKs\_1037

ATTAATTTACATAAAAACAAGTTTACTGGTTGGCTGCCTGAAAATATTGGAACTGTGTGCAGCTCAAGT  
CAATTGATCTCAGTGACAATTTGTTGAATGGGGAACCTCCTGAGTCTATG

>PGSC0003DMG400026792LRR-RLKs\_1098

AGCTCAAGTCAATTGATCTCAGTGACAATTTGTTGAATGGGGAACCTCCTGAGTCTATGAGAAGATTGG  
GTTTTGTACCAATATGGAGTTAAGATCAAATTTGCTTAATGGGCAGATTC

>PGSC0003DMG400026792LRR-RLKs\_1159

AAGATTGGGTTTTGTACCAATATGGAGTTAAGATCAAATTTGCTTAATGGGCAGATTCCAGATTGGATA  
GCAGAGATGAAAAGCCTCAAGGTTTTGGATCTTTCTGCGAATAATCTTTC

>PGSC0003DMG400026792LRR-RLKs\_122

TTTCGTCACTCTCTTCTTCTAAAACCTGCCTCCCCCTTTTAAGTTTCTCTCTTTCTTGATTCCAACCTGTCTGC  
TTAAACACCCTTTTTCTTCTCTCCATCACACACACATTCTTGAG

>PGSC0003DMG400026792LRR-RLKs\_1220

GATTGGATAGCAGAGATGAAAAGCCTCAAGGTTTTGGATCTTTCTGCGAATAATCTTTCTGGTAGGATTC  
CAACCTCTATGGGAGATGTTTCATTGCTAAAGGAACTCAATTTGTCAAAC

>PGSC0003DMG400026792LRR-RLKs\_1281

GTAGGATTCCAACCTCTATGGGAGATGTTTCATTGCTAAAGGAACTCAATTTGTCAAACAATTACTTCGTT  
GGAAGCTTGCCTCGGTCCTTGATGAAATGCAATGACCTTGTAATCTTGG

>PGSC0003DMG400026792LRR-RLKs\_1342

TTACTTCGTTGGAAGCTTGCCTCGGTCCTTGATGAAATGCAATGACCTTGTAATCTTGGACATAGGCAAC  
AACTTCTTGACTGGTAACCTTCCTTCTTGGACCTTTGAATTGGGTGTAGA

>PGSC0003DMG400026792LRR-RLKs\_1403

ATAGGCAACAACCTTCTTGACTGGTAACCTTCCTTCTTGGACCTTTGAATTGGGTGTAGAGAGTATTTCTCT  
TTCGGGGAATAGGTTTACCGGGCATATAGATTATCCGTCCATATCCATG

>PGSC0003DMG400026792LRR-RLKs\_1464

GTATTTCTCTTTTCGGGGAATAGGTTTACCGGGCATATAGATTATCCGTCCATATCCATGGATGCTTCTTAT  
CGAAGCCTTCAAGTTTTGGATTTGTCTTCCAATGCATTATCTGGTGAAA

>PGSC0003DMG400026792LRR-RLKs\_1525

TGCTTCTTATCGAAGCCTTCAAGTTTTGGATTTGTCTTCCAATGCATTATCTGGTGAAATACCAGCTGCCA  
TTTGAATATCAGTAGCTTGCAGGTCTTGAATATTTCCAGGAACTTTTT

>PGSC0003DMG400026792LRR-RLKs\_1586

CCAGCTGCCATTTGGAATATCAGTAGCTTGCAGGTCTTGAATATTTCCAGGAACTTTTTGTCTGGTACTAT  
TCCAGAAGCTGTAGGTAACTAAACGCAACTCGAATTCTTGATTTAAGT

>PGSC0003DMG400026792LRR-RLKs\_1647

CTGGTACTATTCCAGAAGCTGTAGGTAACTAAACGCAACTCGAATTCTTGATTTAAGTCACAATCAACT  
AAACGGAAGTATTCCCAGTGAAATTGGGAGTGCTGTTTCATTGCTGGAAC

>PGSC0003DMG400026792LRR-RLKs\_1708

CAATCAACTAAACGGAAGTATTCCCAGTGAAATTGGGAGTGCTGTTTCATTGCTGGAAGCTGAG  
AGAAAATCATTTGAGTGGTACAATTCCTGCAGATATAGCGAATTGCTCTGC

>PGSC0003DMG400026792LRR-RLKs\_1769

AAGCTGAGAGAAAATCATTTGAGTGGTACAATTCCTGCAGATATAGCGAATTGCTCTGCTCTAAGTTCAT  
TGTAAGTTTCTGCCACTTCCATCTCATTTTTATTCAATGTGTTGAAAAC

>PGSC0003DMG400026792LRR-RLKs\_183

CCAACCTGTCTGCTTAAACACCCTTTTTCTTCTCTCCATCACACACACATTCTTGCAGAATACCCTTTTTCT

TCTACTCTATCTTCAACCACTGACAATGTTTCTTTTATTCACTCAAT

>PGSC0003DMG400026792LRR-RLKs\_1830

TAAGTTCATTGTAAGTTTCTGCCACTTCCATCTCATTTTTATTCAATGTGTTGAAAACCTTTTGTATTTAGC

TTTTCGATCATGTTATCTTCGTTTAAATTGCAGTTATGTGCATCATGA

>PGSC0003DMG400026792LRR-RLKs\_1891

TTGTATTTAGCTTTTTCGATCATGTTATCTTCGTTTAAATTGCAGTTATGTGCATCATGATGTTTGCATTTGT

TATGTCTGTGTGATTCTAAGAGTCATTTGTTCTGCATTTTTCGATTGTG

>PGSC0003DMG400026792LRR-RLKs\_1952

TTTGCATTTGTTATGTCTGTGTGATTCTAAGAGTCATTTGTTCTGCATTTTTCGATTGTGTAGGGACTTGTC

ACACAACAACCTCACTGGCCCTATCCCTCCAGAGATTGCTAAGTTGACC

>PGSC0003DMG400026792LRR-RLKs\_2013

GGGACTTGTCACACAACAACCTCACTGGCCCTATCCCTCCAGAGATTGCTAAGTTGACCATTCTTGAAGT

GGTAGATTTCTCCTTTAACCAATTTTCTGGAAGCTTACCTAAAGAATAA

>PGSC0003DMG400026792LRR-RLKs\_2074

TCTTGAAGTGGTAGATTTCTCCTTTAACCAATTTTCTGGAAGCTTACCTAAAGAATAAACCAATCTTTTCGC

ACCTTGCCACATTTAATGTCTCCCACAACCATCTCAAAGGTGAACTTCC

>PGSC0003DMG400026792LRR-RLKs\_2135

AATCTTTTCGCACCTTGCCACATTTAATGTCTCCCACAACCATCTCAAAGGTGAACTTCCAGTAGGTGGCTT

TTTCAACACCATTTCTCCATCATCTGTTGTTGGTAATCCATCCCTATGT

>PGSC0003DMG400026792LRR-RLKs\_2196

TAGGTGGCTTTTTCAACACCATTTCTCCATCATCTGTTGTTGGTAATCCATCCCTATGTGGTTCTGTTCTCA

ACCACTCCTGCCCTGCTGTCCATCCAAAGCCTCTTGTACTAAACCCCA

>PGSC0003DMG400026792LRR-RLKs\_2257

TTCTGTTCTCAACCACTCCTGCCCTGCTGTCCATCCAAAGCCTCTTGTACTAAACCCCAATTCATCTGACCC

GAATCATGCTTCTGTTACTTCGCTTGGTCATAAGAGAATCATGCTCAG

>PGSC0003DMG400026792LRR-RLKs\_2318

TCATCTGACCCGAATCATGCTTCTGTTACTTCGCTTGGTCATAAGAGAATCATGCTCAGTATATCATCTCT

CATTGCCATTGGAGCAGCAGTTTTCATAGCACTTGGAGTAGTGGTCGTT

>PGSC0003DMG400026792LRR-RLKs\_2379

TATCATCTCTCATTGCCATTGGAGCAGCAGTTTTCATAGCACTTGGAGTAGTGGTCGTTTCTATTCTCAAT  
TTGCATGTGCGCTCTTCTATGGCACTCTCTGCTGCAACTTTCACCTTAT

>PGSC0003DMG400026792LRR-RLKs\_244

TACCCTTTTTCTTCTACTCTATCTTCAACCACTGACAATGTTTCTTTTATTCACTCAATCTATTCTTTAACCTT  
TATGTTTTGTTTTCTTATATATGCAATTTACATATCTCTTCACCAT

>PGSC0003DMG400026792LRR-RLKs\_2440

TATTCTCAATTTGCATGTGCGCTCTTCTATGGCACTCTCTGCTGCAACTTTCACCTTATCTGGTGGCGATG  
ACTTTAGCCATTCACATGGTACAGAAGCCAATCTAGGCAAGCTTGTTAT

>PGSC0003DMG400026792LRR-RLKs\_2501

GGTGGCGATGACTTTAGCCATTCACATGGTACAGAAGCCAATCTAGGCAAGCTTGTTATGTTTTCTGGTG  
ATGCAGATTTTGTGTTGGAAGTCAAGCGCTGCTCAACAAGGATAATGAA

>PGSC0003DMG400026792LRR-RLKs\_2562

TTTCTGGTGATGCAGATTTTGTGTTGGAAGTCAAGCGCTGCTCAACAAGGATAATGAACTTGGACGTG  
GTGGTTTTGGATCTGTATAACAAGACAGAAGTCCGGAGATGGACGTTCTGTTG

>PGSC0003DMG400026792LRR-RLKs\_2623

TGGACGTGGTGGTTTTGGATCTGTATAACAAGACAGAAGTCCGGAGATGGACGTTCTGTTGCCATTAAGAA  
GCTCAACATTACAAGTTTGATCAAGTCCCAAGAAGATTTTGAGAGGGAAAT

>PGSC0003DMG400026792LRR-RLKs\_2684

ATTAAGAAGCTCAACATTACAAGTTTGATCAAGTCCCAAGAAGATTTTGAGAGGGAAATGAAAAGTCTC  
GGAAGCATCAGGCACGAGAACCTTGTGGCACTTGAAGGTTATTATTGGACA

>PGSC0003DMG400026792LRR-RLKs\_2745

AAAGTCTCGGAAGCATCAGGCACGAGAACCTTGTGGCACTTGAAGGTTATTATTGGACACCTTCTCTCCA  
GCTCCTGATTAATGAATATGTATCTGGAGGCAGCTTGTACAAATTACTCC

>PGSC0003DMG400026792LRR-RLKs\_2806

TTCTCTCCAGCTCCTGATTAATGAATATGTATCTGGAGGCAGCTTGTACAAATTACTCCATGAGGAAAGT  
TCCAAAAGGAGTCTCTCTTGGCAGCAAAGGTTCAACATTATTCTTGATAC

>PGSC0003DMG400026792LRR-RLKs\_2867

GAGGAAAGTTCCAAAAGGAGTCTCTCTTGGCAGCAAAGGTTCAACATTATTCTTGATACTGCGAAAGGC  
TTAGCCTATCTGCACCAGCTGAACATAATTCATTACAATATGAAGTCAACC



>PGSC0003DMG400026792LRR-RLKs\_2928

CGAAAGGCTTAGCCTATCTGCACCAGCTGAACATAATTCATTACAATATGAAGTCAACCAACGTCCTCAT  
AGATGATGGTTCTGCCAGCACAAAAGTTGGAGATTTTGGTTTGGCTCGTT

>PGSC0003DMG400026792LRR-RLKs\_2989

CGTCCTCATAGATGATGGTTCTGCCAGCACAAAAGTTGGAGATTTTGGTTTGGCTCGTTTATTACCAGTC  
TTGGATCGTTACATATTGAGCAGCAAGATTCAGAGTGCACCTGGATACAT

>PGSC0003DMG400026792LRR-RLKs\_305

ATTCTTTAACCTTTATGTTTTGTTTTCTTATATATGCAATTTACATATCTCTTCACCATATATTTTCATTTTGT  
TGGAGACAAAATGTTGTGGCATATAATAACTGTTTTATCTTTAGCT

>PGSC0003DMG400026792LRR-RLKs\_3050

TTACCAGTCTTGGATCGTTACATATTGAGCAGCAAGATTCAGAGTGCACCTGGATACATGGCTCCTGAAT  
TTGCATGCCAGACGGTGAAGATAACTGAGAAATGTGATGTCTATGGATTT

>PGSC0003DMG400026792LRR-RLKs\_3111

CTCCTGAATTTGCATGCCAGACGGTGAAGATAACTGAGAAATGTGATGTCTATGGATTTGGCATCTTGAT  
TCTTGAGGTGGTGACAGGGAAAAGACCCATGGAGTACATGGAAGATGACG

>PGSC0003DMG400026792LRR-RLKs\_3172

CATCTTGATTCTTGAGGTGGTGACAGGGAAAAGACCCATGGAGTACATGGAAGATGACGTGATTGTATT  
ATGTGACATGGTGCGGGGAGCACTAGAAGAAGGCAGGATAGAAGAATGCAT

>PGSC0003DMG400026792LRR-RLKs\_3233

ATTGTATTATGTGACATGGTGCGGGGAGCACTAGAAGAAGGCAGGATAGAAGAATGCATTGACGGACG  
GCTCCAAGGTAACCTCCCTGTGCGAAGAGGCAATTCCAGTTGTGAAACTTGGT

>PGSC0003DMG400026792LRR-RLKs\_3294

ACGGACGGCTCCAAGGTAACCTCCCTGTGCGAAGAGGCAATTCCAGTTGTGAAACTTGGTTTAATATGTG  
CATCTCAAGTTCCATCCAATCGACCAGACATGGAAGAGGTGATCAAAATTT

>PGSC0003DMG400026792LRR-RLKs\_3355

AATATGTGCATCTCAAGTTCCATCCAATCGACCAGACATGGAAGAGGTGATCAAAATTTTGGAGCTAATT  
CGATGTCCGTCAGAAAGTCCAGAGGAAATAGAGTAATGTTATAAGGTGTT

>PGSC0003DMG400026792LRR-RLKs\_3416

GAGCTAATTCGATGTCCGTCAGAAAGTCCAGAGGAAATAGAGTAATGTTATAAGGTGTTTGTGGAAAAC

CAGATTATAGAGAATGAGTCATGTGGTGAACAGGAATTCAGTTTTGTTTGT

>PGSC0003DMG400026792LRR-RLKs\_3477

TGGAAAACCCAGATTATAGAGAATGAGTCATGTGGTGAACAGGAATTCAGTTTTGTTTGTACATTTGGA  
GAAGGTCACTATCCTCTTGTTATTTTGTTCATATCCATACATGTTAAATCTT

>PGSC0003DMG400026792LRR-RLKs\_3538

CATTTGGAGAAGGTCACTATCCTCTTGTTATTTTGTTCATATCCATACATGTTAAATCTTTATATGTTATTTA  
AATAACTGGATTCCCTCTTCACCAGCTCCAGTTTGGGACCCTTGTTAGA

>PGSC0003DMG400026792LRR-RLKs\_3599

TATGTTATTTAAATAACTGGATTCCCTCTTCACCAGCTCCAGTTTGGGACCCTTGTTAGATTTGGATAGACT  
GGCATTGTCTTTATATAGTATTCAGACATCCAACCTTGTTGTCTTGCT

>PGSC0003DMG400026792LRR-RLKs\_366

ATTTCATTTTTGTGGAGACAAAATGTTGTGGCATATAATAACTGTTTTATCTTTAGCTCCATTTCTGGTAC  
ACTCTTTAGACCCAGCATTCAATGATGATGTAATGGGTTTAATTGTTT

>PGSC0003DMG400026792LRR-RLKs\_3660

TGGATAGACTGGCATTGTCTTTATATAGTATTCAGACATCCAACCTTGTTGTCTTGCTTGTTGATGTTG  
TTGTCCATACAAAGCTGAAAAAATACATCAGTTGTATTCTTATAGAAG

>PGSC0003DMG400026792LRR-RLKs\_3714

GTGCTTGTGGATGTTGTTGTCCATACAAAGCTGAAAAAATACATCAGTTGTATTCTTATAGAAGAAGA  
CCCACATGGATTCCCTAATGAAATGAAAACATCAAAGTAGCCCACCACTCA

>PGSC0003DMG400026792LRR-RLKs\_427

ATTTCTGGTACACTCTTTAGACCCAGCATTCAATGATGATGTAATGGGTTTAATTGTTTTGAAAGCTGGAT  
TCACTGACCCTAAATCTAAACTTGCATCTTGGACAGAAGATGATCCTAC

>PGSC0003DMG400026792LRR-RLKs\_488

AAAGCTGGATTCACTGACCCTAAATCTAAACTTGCATCTTGGACAGAAGATGATCCTACTCCTTGTAATT  
GGGTTGGTATAAATTGTTATCCTCAATCCAATAGAGTTTCTGAGATTTTA

>PGSC0003DMG400026792LRR-RLKs\_549

CTTGTAATTGGGTTGGTATAAATTGTTATCCTCAATCCAATAGAGTTTCTGAGATTTTACTTGATAATTTCT  
CTCTTTCTGGACATATTGGGAGAAGTCTCTTGAGGTTACAATTCTTAA

>PGSC0003DMG400026792LRR-RLKs\_61

AATCCACCTCCTCAACAAAGAACCAGCCTTGATGAACTTTTCTCTCTCACTACTCACTGTCTTTTCGTCACCTC  
TCTTCTTCTAAAAGTGTCTCTCCCTTTTAAGTTTCTCTCTTTCTTGA

>PGSC0003DMG400026792LRR-RLKs\_610

TGATAATTTCTCTCTTTCTGGACATATTGGGAGAAGTCTCTTGAGGTTACAATTCTTAAAGGTTTTGTCTT  
TGTCTAACAATAACTTTACTGGCAATATCAATCCCATTTTATCCCAAAT

>PGSC0003DMG400026792LRR-RLKs\_671

GTTTTGTCTTTGTCTAACAATAACTTTACTGGCAATATCAATCCCATTTTATCCCAAATACCTAGCTTGAGG  
GTTATTGATTTGAGTCACAACACTTTGTCAGGTTCAATCCCTGATGAA

>PGSC0003DMG400026792LRR-RLKs\_732

CTAGCTTGAGGGTTATTGATTTGAGTCACAACACTTTGTCAGGTTCAATCCCTGATGAATTTTTTCAACAA  
TGTAGCTCTTACAATCTGTTTCTTTGCAAACAACAATCTTACTGGTG

>PGSC0003DMG400026792LRR-RLKs\_793

TTTTCAACAATGTAGCTCTTACAATCTGTTTCTTTGCAAACAACAATCTTACTGGTGAATCCCTCAATC  
TTAACATCTTGTTCAACGCTCCAAAGGGTTAACTTTTCATCCAACCG

>PGSC0003DMG400026792LRR-RLKs\_854

ATCCCTCAATCTTTAACATCTTGTTCAACGCTCCAAAGGGTTAACTTTTCATCCAACCGCCTTTCGGGTCC  
GTTGCCTTCAGCTTTATGGTCCTTAACCTCTCTTCAATCTCTTGATGTT

>PGSC0003DMG400026792LRR-RLKs\_915

TTTCGGGTCCGTTGCCTTCAGCTTTATGGTCCTTAACCTCTCTTCAATCTCTTGATGTTTCTGATAATTTAA  
TGGAGGGTGAGATTCCTAAAGCAATTGAAGGTTTATATTCTTTGAGGT

>PGSC0003DMG400026792LRR-RLKs\_976

TGATAATTTAATGGAGGGTGAGATTCCTAAAGCAATTGAAGGTTTATATTCTTTGAGGTCAATTAATTTA  
CATAAAAACAAGTTTACTGGTTGGCTGCCTGAAAATATTGGAAACTGTGT

>PGSC0003DMG400026810G-LecRK\_0

CAAATTGGAAGAGACATTTTTCAAAGTGTCTGAAACCTTTTTTCAGACCACTCCCTTTTACTCCCAGAAAAA  
AATTGCTTTGTTGATTTTCCGTCAGTCCCTTCTCTTGCTTTCCAGGGAA

>PGSC0003DMG400026810G-LecRK\_1098

CTTGAATCAATTGGTAGTTTGAGAGTTTTACCTTATAGTTGATAGTGATATTTCAATTCCTTTACAAAAGA  
ACAGTTTCTTGTTCAATTGTAAATCAGTGGAATGACTGAACATATTTTTT

>PGSC0003DMG400026810G-LecRK\_1159

TTACAAAAGAACAGTTTCTTGTTTCATTGTAAATCAGTGGAATGACTGAACATATTTTTTGTGATATGCAG  
AAGCTGGAACCAGCTTTCTGTCTTTTCATCTGCTTCCGCAAGTAGTGAC

>PGSC0003DMG400026810G-LecRK\_122

ATAAAGAGTTGAAAATCTACAATGTGAGGCACTTAAATTTGCCTCTTTACTTTACTGGTGAGTCATATCT  
CTTGTTAATTTAAGCTCACCACTCAAACCTCCCCAAGATACTAACTTT

>PGSC0003DMG400026810G-LecRK\_3416

GATGAACGTATGAGGCCATCAATGGGAGAGGTAATCAAGGTACTGGAGGGAACCTCTGACTGTTCGATCC  
TCCACCACCTCCTTTTGCTCATAATCAACAGTGGCCACCTGATGATGAATCA

>PGSC0003DMG400026810G-LecRK\_3477

TCGATCCTCCACCACCTCCTTTTGCTCATAATCAACAGTGGCCACCTGATGATGAATCACCATCTGAATCA  
TATTCAGCACTGTAGAAGTTCTAATTCGTATATTTTCATTCCCATTAAGT

>PGSC0003DMG400026810G-LecRK\_3538

ATCTGAATCATATTCAGCACTGTAGAAGTTCTAATTCGTATATTTTCATTCCCATTAAGTCATCTGTTTCTGT  
ACAGAACTTACCAGGCACCTTCGACTTGGCATGATGTAGAATGCCTAG

>PGSC0003DMG400026810G-LecRK\_366

ACCGAGTACTTTTGCTCTACATTATCCTTAAAATTGGGACGTAATTGTAAAGATCCATTCTCTCTTGCATG  
TGCACTTAGATTTGTTCTTATCTTTCCCTTAAAATATTTTTTTCTCT

>PGSC0003DMG400026810G-LecRK\_3721

AACTGTAACCTTGGTATGTAACCTCCAAGTACAGTTTTGTGTTAGAAAATCCTGATTCAGAAATTCAGG  
TTTTTTTTTAAGTTTTTTATTCTGTTCATGTTAATTATCACTGCTTATC

>PGSC0003DMG400026810G-LecRK\_3782

AAATTCAGGTTTCTTTTTTAAGTTTTTTATTCTGTTCATGTTAATTATCACTGCTTATCACATGTGTTTACAT  
TTGATATTTTCTTGAGGTGACTAACTTCCTTAACTCTGCCCAAAA

>PGSC0003DMG400026810G-LecRK\_4241

GTTTTGATTTTGGCTTGCTGCACCTTTGTTGCCTGGTAAGTAGGGTCATTTTCGGTGAACATCCATGATCA  
GTATTTTCAGCAATGAACACAATTCATTATTTTTATTAGTGAAAGAGTTG

>PGSC0003DMG400026810G-LecRK\_427

CTCTTGCATGTGCACTTAGATTTGTTCTTATCTTTCCCTTAAAATATTTTTTTCTCTTACCTAAATTGCTC

TTTTTTGCTTAGAAAAATTGAGATATATATGTGTGTATGTGGACTC

>PGSC0003DMG400026810G-LecRK\_488

CCTAAATTGCTCTTTTTTCTTAGAAAAATTGAGATATATATGTGTGTATGTGGACTCATGGTTTCTTTG

CAACGCGTATTTTGTCAAAGGCATGTTTGTTCCTCAAGTCTATGCGTCTA

>PGSC0003DMG400026810G-LecRK\_61

CCCAGAAAAAATTGCTTTGTTGATTTTCCGTCAGTCCCTTCTCTTGCTTTCCAGGGAAAGATAAAGAGTT

GAAAATCTACAATGTGAGGCACCTAAATTTTGCCTCTTACTTTACTGG

>PGSC0003DMG400026810G-LecRK\_732

ATAAGGACCTAAATAGGGTCCCATTTGTAGTTTTGAACCAGGATTTCAAACAAAAGCTGTTTTCTTAAGC

CATTTTAAATTAATTTTCTTTGTGTACTGTTTATTTTATGGTCCATCTGT

>PGSC0003DMG400026810G-LecRK\_915

TCTTATAGGGAAGCATTGCTGTTTCAAGAAAGTGTCTGCAGGCAATATTCTTCCAATTGATGTGGTTTC

ATTCTCAAAAAAATATTCTTCCAATTGATGTGGTTTGGATGTCGTTTCT

>PGSC0003DMG400026810G-LecRK\_976

TGTGGTTTCATTCTCAAAAAAATATTCTTCCAATTGATGTGGTTTGGATGTCGTTTCTGAGGTTCAATGC

TTCCCTTCTTTCAATCATTTTCCCACCTTTTGTGGATCTTGGTGTA

>PGSC0003DMG400026840LRR-RLPs\_0

CAAAAATTCATGAAAAATCATATACGTTTAAGGGAAGCCGGTATTTACCAAGTCCTAGAATAGATAACA

ATCTTGTGACAGGGATGGCAAATCTAGAGGAATTTACAATCTTTGTTAC

>PGSC0003DMG400026840LRR-RLPs\_1054

CATGTTCTAAGTTGCTGCCAGTGGTATTACGGCAGCAAAGGACAGGTTGGTTTTGCTTTTCAATTCTTG

TTAAAGTCATTATATGCATCAGTTCCTAGATCTGATGGTCCAATTTTCATT

>PGSC0003DMG400026840LRR-RLPs\_1116

AATTCTTGTTAAAGTCATTATATGCATCAGTTCCTAGATCTGATGGTCCAATTTTCATTCTTCTCCAGAGTG

CCCAACGTCAAATTTAATGTTGCAAAGGTGTTGCAGTCCCTTATCCCT

>PGSC0003DMG400026840LRR-RLPs\_1178

CTCCAGAGTGCCCAACGTCAAATTTAATGTTGCAAAGGTGTTGCAGTCCCTTATCCCTGTTGTTGACCAAT

CAGTGAGAACTCTCATCTACCTTCTTTTCTTGGATTGGTTACTTGGTTT

>PGSC0003DMG400026840LRR-RLPs\_1302

GAAATAACGATTGAGCTTACTTACGTTGTTGTTTGTGAAGAAAGTTTACACTTGCATATCCTCGCTATAC  
CTTAATGTCGACTTTCTAGTTTAGTAGAGCTAGCTGAGGACCCTGATGT

>PGSC0003DMG400026840LRR-RLPs\_1364

TCGCTATACCTTAATGTCGACTTTCTAGTTTAGTAGAGCTAGCTGAGGACCCTGATGTCGATGTCCGTTTT  
TATGCAAGTCAAGCACTTCAGCCAATTGATGATGTCATGATGTTAAGCT

>PGSC0003DMG400026840LRR-RLPs\_1426

GTCCGTTTTTATGCAAGTCAAGCACTTCAGCCAATTGATGATGTCATGATGTTAAGCTAGAGATACTTAT  
CTGTATTTCTGTTGGGGTTCCTACCAGAAATCTGTTGTCAAATCCTCT

>PGSC0003DMG400026840LRR-RLPs\_1550

ACGTCTGGGATTATGCCGTCACACCAGGAAACAGTAAAGAGAAGGCAGAAAGTGAAATATATCTGTCT  
GAGATTTGGGGTTCGTATTAATACTAATATATATTTTAGGATGTCAAATATG

>PGSC0003DMG400026840LRR-RLPs\_1612

CTGTCTGAGATTTGGGGTTCGTATTAATACTAATATATATTTTAGGATGTCAAATATGAAATGCTTCCTAC  
AGTAAGCTCAAGTATTTACATGTAAATTGGCTGTTTAGACTAACTAATT

>PGSC0003DMG400026840LRR-RLPs\_1674

GCTTCCTACAGTAAGCTCAAGTATTTACATGTAAATTGGCTGTTTAGACTAACTAATTAGTATCTTCGAAT  
GAATGGTTTTTCTTATTAGATTCTTTCTAGTTACTAAAGGCTGTTATAT

>PGSC0003DMG400026840LRR-RLPs\_1736

TCTTCGAATGAATGGTTTTTCTTATTAGATTCTTTCTAGTTACTAAAGGCTGTTATATTTGGTGCTTTGTAT  
AGTAGACCATTTAGTTGGGTCATGGCCATTCTGTTGTATGATCATAGT

>PGSC0003DMG400026840LRR-RLPs\_1798

TGCTTTGTATAGTAGACCATTTAGTTGGGTCATGGCCATTCTGTTGTATGATCATAGTCCAGTGATAGT  
AGTTGAAGGTTCTTATTGAAATTTTGATTTCAATACTAGTAGTTTTTGA

>PGSC0003DMG400026840LRR-RLPs\_1844

TATGATCATAGTCCAGTGATAGATGAGTTGAAGGTTCTTATTGAAATTTTGATTTCAATACTAGTAGTTTT  
TGAGAAGATTCTTATCATTGTGCATTTTAATAAAGAAGGCATAATACAT

>PGSC0003DMG400026840LRR-RLPs\_682

AAGAGGACATGGGAAATAATATCCTTAAGGTCTACATCCATAACAGCGACAGTAAGTTTAATTCTCTCTG  
TAAAGTTCTTCGATTCTTCACATTATTTAAAACCTCGTTTTTATTAATC

>PGSC0003DMG400026840LRR-RLPs\_930

TTTATATTCTGATGGCTTGTTAATTTTCATGTTTTAGGAATAAGCATGTTTAATTCATGTATCGGCCAATTGT  
GTTTTTTTTATTTATTTTGTAAACGGTAACTAGTGATTTATTTTCTGAG

>PGSC0003DMG400027071-(rev)LRR-RLKs\_0

CAACCATTTTTGATTCATATAAACCACCAATACACACTTATAAAAAAATCCATCAACCACCACAGCCTGGT  
TGCCTCATTACCTCTCTCTTCCCTCCGTCCGGCCTACCGGAAAAACAA

>PGSC0003DMG400027071-(rev)LRR-RLKs\_1674

ATATTGCACCAGAATATTATCAGACACTGAAGTTTACAGACAAGTGTGATATATACAGCTTCGGTGTGGT  
GCTAGCTGTGTTGTTATCGGAAAGGGTCCATCGGATGAATATTTCCAAC

>PGSC0003DMG400027071-(rev)LRR-RLKs\_1736

GGTGTGGTGCTAGCTGTGTTGTTATCGGAAAGGGTCCATCGGATGAATATTTCCAACATACTTCTGAG  
ATGAGTTTAGTTAAGTGGCTGAGAAATGTAATGACTTCTGATGATCCTAAA

>PGSC0003DMG400027071-(rev)LRR-RLKs\_186

AAGCAAGACTGAATCTTTATCCACAAGATCATGCTGCACTTTTGCTTGTTCAAAAAGACTTAGGCATCATT  
GCTCTTAACAACCCCTGTACGCTCGCAGGAATATCCTGCGAGCGTAGAC

>PGSC0003DMG400027071-(rev)LRR-RLKs\_1984

GTTAACTCAGATCAAGCATTAGCTAAGTCATACGGGGTATACGTTGGTTATGTAACATAAGAATGTGTTCT  
GTATTTTCAGTTTTTGTGTAATTGTGTTATACATGTCAAATCTTGTATGT

>PGSC0003DMG400027071-(rev)LRR-RLKs\_2041

AAGAATGTGTTCTGTATTTTCAGTTTTTGTGTAATTGTGTTATACATGTCAAATCTTGTATGTTTACTGCAG  
TGTTAATAATATTATTTCCACTTCGCTACTTAAATACTAAACTCTA

>PGSC0003DMG400027071-(rev)LRR-RLKs\_434

CTATCTGAACAAATCCCAATTCAGATTCTTGATTGTCGGAAATTAGAGATTCTTGAACCTCAAAGAAACA  
GATTTTCTGGAAAGATTCCGTATGAATTGTCATCTTTAAACCGTTTAAGG

>PGSC0003DMG400027071-(rev)LRR-RLKs\_496

AAGAAACAGATTTTCTGGAAAGATTCCGTATGAATTGTCATCTTTAAACCGTTTAAGGGTAGTTGACTTT  
TCATCGAATGAGTTTTCTGGGAATCTTGATTTCTTGAATACTTTCTCTAA

>PGSC0003DMG400027071-(rev)LRR-RLKs\_62

CAGCCTGGTTGCCTCATTACCTCTCTCTTCCCTCCGTCCGGCCTACCGGAAAAACAAGAATCTCAATGGC

TTCAAATTTCCACTTTTTTCTTATACCTTGTGACCCTTTTCCTTTT

>PGSC0003DMG400027115LRR-RLKs\_0

TTCTTGTGGTGTGTGTAAAAAAACACTGTCCCTATCCCATTTTTATACTTATCAAAAAGCAAAAAAACA  
GGGATGTCAACTGAAAAATCCCATTTTTCTAACAAAAAATGGAAAAT

>PGSC0003DMG400027115LRR-RLKs\_1178

GTTGCAAAGTTGTTCGTTTCTTAACCTGAGGAATAACCGGTTTAGAGGTGATATTCCAGCTGCTATCGGG  
GACATTTCTGGTCTAGTCATGATAGATTTGTCTCGTAACAATCTAACCGG

>PGSC0003DMG400027115LRR-RLKs\_124

ACCAAGTTCAAGACTTTACCTGTTTTACCAGCACCCATTAGGGGTTTTTCATGTTTTAATCCAAGAAAGA  
AATGTGGGGTGTGTTAAAAAGAAGGAAAAATGGATACCATTTATCCAAA

>PGSC0003DMG400027115LRR-RLKs\_1550

GTTTCTACTCTGTTGCATTCTTCTCTGCTGTTTGATCAAGAAAAGAGGTGTGGCCAAAAAAGCAAAGAT  
GTAAAGGATGTTCCCTCCAACCTGCCGGAGAAGTTGAGGCGGCTGGGGATAA

>PGSC0003DMG400027115LRR-RLKs\_2418

CTTTCACGCCTTGCTAGCTGCTGCTGCAAATTCAAATGTTATGGCCACAGCAGGGGCACTTGTTATCGTG  
CACCTGAGCTTAATAAGCTCAAGAAAGCCAACGTGAAGACGGATGTCTAC

>PGSC0003DMG400027115LRR-RLKs\_248

GTTGTTTTTGCAGCTGATGATTTGTGGAGCTCAGTTAGCTTTAGGTCAAGTTTGGGATGGTGTAGTTATC  
ACTGAGGCAAATTATCAAGCACTTGAGGCGCTTAAACATGAGTTAGTTGA

>PGSC0003DMG400027115LRR-RLKs\_2480

TTATCGTGACCTGAGCTTAATAAGCTCAAGAAAGCCAACGTGAAGACGGATGTCTACAGCCTCGGAGT  
CATCATACTTGAACCTCCTAACTGGAAAGTCTCCAGGTGAGGCAGTGAATGG

>PGSC0003DMG400027115LRR-RLKs\_2900

TACTAGATCTGTTTCAAGTGTCTTTAAATAAAAGTGTGCAACATTGTGAAAAGTGGTTGAGCTTAATGGA  
TTCCTAAATACCATCCCCTTTTGGCCTAAAGAACATAACTTGAGATTGAG

>PGSC0003DMG400027115LRR-RLKs\_310

TAGTTATCACTGAGGCAAATTATCAAGCACTTGAGGCGCTTAAACATGAGTTAGTTGATCCCAGAGGGT  
ATTTAAGTAGCTGGAATGATAGTGGTTATGGAGCTTGTCTGGTACTTGGG

>PGSC0003DMG400027115LRR-RLKs\_558



ATTGGTGGTTCAGTGCCTTCATCTTTGGGTTTTTACCCAATCTAAGAGGTGTTCAATTGTACAATAACAG  
GTTTTCTGGTTCATTCTGTTCACTTGGTTTATGTCCAGCTTTACAA

>PGSC0003DMG400027115LRR-RLks\_62

AAAAAACAGGGATGTCAACTGAAAAATCCCATTTTTCTAACAAAAAATGGAAAATCAAGACCAAGT  
TCAAGACTTTACCTGTTTTACCAGCACCCATTAGGGTTTTTCATGTTTT

>PGSC0003DMG400027115LRR-RLks\_620

CAATAACAGTTTTCTGGTTCATTCTGTTCACTTGGTTTATGTCCAGCTTTACAAACACTTGAACCTA  
GTAACAATTCTTTATCTGGTGCAATCCCTGATAGTCTTGTGAATTCATC

>PGSC0003DMG400027115LRR-RLks\_744

CTTTATAGACTTAATCTTAGTTACAATTTATTGTCTGGTTCATTCTGTTAGTATAACTCAATCGCGCTCT  
CTAGTCTTTATTGACTTGAAATATAACAACTTGACAGGGTCTATTCCG

>PGSC0003DMG400027115LRR-RLks\_806

ATCGCGCTCTTAGTCTTTATTGACTTGAAATATAACAACTTGACAGGGTCTATTCCGGATTCTTGGGGTG  
GAAATGGAGATAGACAGTTTAAATTAGAGTCGTTGACGCTTGATCATAA

>PGSC0003DMG400027124OtherRLksTM\_0

CTTAGCTACTGTTACACATATACAGTATAATCCACCATTGCTCCAACTTTTAGCTTACATCATAGCCTTT  
TTCCTTCTACAAATGACAGAAAATTTCTGATGACATTACCCATCTCCG

>PGSC0003DMG400027124OtherRLksTM\_122

GCCGGCGCCGTCATCGTTGCCGCCGTTATCTCACTGATAACTTCTGTTTTACTACCATTTTCTCATGCCCTC  
GGTAGTTCGCCACCACTTTGGCCGTTGCTTACGGCGCCAACATCACT

>PGSC0003DMG400027124OtherRLksTM\_183

CTCATGCCCTCGGTAGTTCGCCACCACTTTGGCCGTTGCTTACGGCGCCAACATCACTATCTGCGGCAT  
AGTAGCTTCTCAACCAATCCAAAGAATCCAATGCTGGTCAGAAAATCAAT

>PGSC0003DMG400027124OtherRLksTM\_2196

AAACTAGTGAAAACGGGGACATGCCAATGAGTGTGTCGACTTGCAGTACCAGCAATTATGGTTGGAG  
AATTGAACAAGATTTTGGATCCCAGAGTTGGGCTGCCCCGAGTTGAGGGAAG

>PGSC0003DMG400027124OtherRLksTM\_2257

GGTTGGAGAATTGAACAAGATTTTGGATCCCAGAGTTGGGCTGCCCCGAGTTGAGGGAAGCTGAGGGAG  
TAGAATTGGTGGCATATACTGCAATGCATTGTGTTCAATTTGGAAGGAAAACA

>PGSC0003DMG400027124OtherRLKsTM\_244

CTGCGGCATAGTAGCTTCTCAACCAATCCAAAGAATCCAATGCTGGTCAGAAAATCAATTAGCACCCATC  
CCCATATCTCCTAACGCCTCCTTTAACTCCATCGCCGGCGGAGTTAACGG

>PGSC0003DMG400027124OtherRLKsTM\_2501

TCCGCGAAAGACTCCTACCAGTATCACTAGACGATAAGTTTTGGTGGTTAGAATAGTACGATTCGTGTAA  
CAATTGTTGTTAGTGTAAACTGTAAATTATCGATAGCTGGAATGAAATTC

>PGSC0003DMG400027124OtherRLKsTM\_2562

TTCGTGTAACAATTGTTGTTAGTGTAAACTGTAAATTATCGATAGCTGGAATGAAATTCTTTTTCTTCCTA  
GAAGGATACAATCTTCACTATGTTGTGTTTAGCATCTTCTTGATAGGAC

>PGSC0003DMG400027124OtherRLKsTM\_2684

ATTGACTTGTGCCATTGTTCTTTTGTGTGTTTTTTTTTTGTAAAGGTGCTTAATGCACAAAAGTCCAATTG  
TTGAAATGACAATTCAAGAGTAATAGCAGCAAGCCACAAGGCAAGTTG

>PGSC0003DMG400027124OtherRLKsTM\_305

GCACCCATCCCCATATCTCCTAACGCCTCCTTTAACTCCATCGCCGGCGGAGTTAACGGCTTCACCGGCGT  
TGAAACCGGTGGGTTTTCCCTTCTCTTCTGGAECTCAAGTTTTCAACCC

>PGSC0003DMG400027124OtherRLKsTM\_427

AAGACTTTTCTTCAGTTACTCAACTTTGTTAACAAGTGTACAATGGGAGATACTCAAATTTGCGGCTTAA  
CAAACGGTACCCAAAATGTTAAATGTTGGAGAGATGACTCGAATTTGGC

>PGSC0003DMG400027124OtherRLKsTM\_61

TCATAGCCTTTTTCTTCTACAAATGACAGAAAATTTCTGATGACATTACCCATCTCCGGCGCCGGCGCCG  
TCATCGTTGCCGCCGTTATCTCACTGATAACTTCTGTTTTACTACCATT

>PGSC0003DMG400027124OtherRLKsTM\_610

AATTTTGAAAAGTTCAAATAGGGTTATATGCTGGGGAAACAATAGGGATATTGCTTCAGCTATTCAATCT  
GGTTTTGGTAATATTACAGTAGTGAATATATTTGCCGGTGGAAAACATGC

>PGSC0003DMG400027124OtherRLKsTM\_793

TATTCCATCTAATTTTGCTTATGAGTATAACGGATTAGCTTTAGGGGTTAATCATACTTGTGGAATTCTTA  
GAATGAATTATACAGTTGTTTGTGGGGTGGGAATGGTGAATTTTCGAT

>PGSC0003DMG400027140L-LecRK\_0

CTTTAAACCCCACTCTTTCACCTTCCCAACTCTTCTTCATTCTTTGTAATCACACAGACAAATCACATGTG

GCAAATCAAAGTAGAACTCTACAAAAGAATGTCTAGATTCAGCTAT

>PGSC0003DMG400027140L-LecRK\_1054

ACGATATCGGCTGTTGTGTTTCTTGTATTCGGACTCGTTTTAGCCTTGTATGTCATTTGGAAAATCAAGAA  
CATAGATGTGATTGAACCTTGGGAACTTGAAATAGGTCCACATAGGTTT

>PGSC0003DMG400027140L-LecRK\_1674

TCCTAGTACAACAAGAGTAGTCGGTACGTTGGGTTACTTAGCTCCAGAATTAACCAAGATCGGAAAGCC  
TACACCAAGTTCAGATGTTTTTGCCTTTGGTGCATTGCTGCTAGAAGTTGC

>PGSC0003DMG400027140L-LecRK\_1922

ATGAGATGGAGGCCATAATGGTGCTTAAATTAGGACTCATGTGTTCAAATAATACACCATCTAAGAGAC  
CTAGCACGAGACTAGTGGTGAGATACTTGGAGGGGGAGGTGACACTCCCAG

>PGSC0003DMG400027140L-LecRK\_1984

AAGAGACCTAGCACGAGACTAGTGGTGAGATACTTGGAGGGGGAGGTGACACTCCCAGAGACGCTGG  
CAGTCCCGATGAATATGATGGAAAGAAGGGTGGTACTAGCGGTATGGAGTTA

>PGSC0003DMG400027140L-LecRK\_2046

GCTGGCAGCTCCCGATGAATATGATGGAAAGAAGGGTGGTACTAGCGGTATGGAGTTAGAGGACTTAA  
TAGATTCCTATCCGTCTTCGTCTTATTTTGAGAAAGTAAGTACATGGTCATC

>PGSC0003DMG400027140L-LecRK\_2232

CAGAGAGGACAACAGATAGCCATGCAAAATGGAGGGACCATTCTACTTGCCCTCCCAAACCTCCCTCCAT  
ATTTTAGTACTTTTTATGGTTTGATTTTTGAACTTAAATGTAAATTATGGC

>PGSC0003DMG400027140L-LecRK\_2294

CCTCCATATTTTAGTACTTTTTATGGTTTGATTTTTGAACTTAAATGTAAATTATGGCTTTTGAAAAGAAAA  
TGATATTAGTATCAACCATTCTATGGTTTTGAGAATATTGGTGTTAG

>PGSC0003DMG400027140L-LecRK\_2349

GGCTTTTGAAAAGAAAATGATATTAGTATCAACCATTCTATGGTTTTGAGAATATTGGTGTTAGTAAAA  
TGGAATATATTTTGAATCAAGTCAATTTGAATCTTGATGAAGCTTG

>PGSC0003DMG400027140L-LecRK\_248

ATGAATTTGTGTATAATGGCTTTAATGGGGTTGAAGCTAGTAATCTTACTGTAAATGGGATTGCTCAGAT  
TTTAAAGAGTGGCGCTTTAAAGCTTACAAATGAAACATCTAGAGTTGTTG

>PGSC0003DMG400027140L-LecRK\_62

AATCACATGTGGCAAATCAAAGTAGAACTCTACAAAAAGAATGTCTAGATTAGCTATAAATCATCACCC  
CACACAATTCTTCAACTCTACAAACAAATTTCAATCTAACTATGCCATGG

>PGSC0003DMG400027140L-LecRK\_744

TCTTCAGAGTGGAAAGACAATTCAGGCTTGGATTGACTATGATTCAAGTAGAAATGTGTTGAATGTTAC  
ACTTTCACTTTCTTCAACAAAACCAGCCTTTTCAATTTTGTCTTCCCTTT

>PGSC0003DMG400027233-(rev)G-LecRK\_1098

GTCGATGGCCTTGCTCTTTTTGATGATTAGGTCACACCGTTTGGTCTGCGAAGCGTAGTAGTACTAGTA  
GTTCTGTTACTTCAATGCAGCTTCTTGAATCAGGAACTTGGTGTGGTT

>PGSC0003DMG400027233-(rev)G-LecRK\_122

AGCAGAGTAGATTGCTACCGCGATCAACTGAAATTCAGCTCTCTATTGCTCCAAAGAAAACATTTTGACA  
TGTGTAGTCTTGCTGTCAGGATCCACATAGAGATATCTTGGTTATCGTGA

>PGSC0003DMG400027233-(rev)G-LecRK\_1220

TGCTTTTAATAACTGTGTGGGAAAGTTTTGATTCCCCGACAGATACAATCGTTGTAGGCCAACGATTG  
CCTGTTGGGAAATCGTTGGTTAGTTCAGTGAACGAAGATGAAATTGCTAA

>PGSC0003DMG400027233-(rev)G-LecRK\_1525

TTATTTGGATGAGGTGAAAGATCCTGACTTTAGGATTGCGAAATTGGAAGAGAATGGACATTTGCGTG  
TCAAACGATTAGTAACGGAAATTGGATGTCTGAATTTGATAGTCCTATTG

>PGSC0003DMG400027233-(rev)G-LecRK\_1586

TTTCGGTGTCAAACGATTCAGTAACGGAAATTGGATGTCTGAATTTGATAGTCCTATTGATAGTTGTCGT  
GTTGCTTTCACCTGCAAGAAGCTTGGAGTTTGTGATGAGGGGAGCTGTTT

>PGSC0003DMG400027233-(rev)G-LecRK\_183

ATTTTGACATGTGTAGTCTTGCTGTCAGGATCCACATAGAGATATCTTGGTTATCGTGACCAATTGAGAT  
TCAAACACTTTGTTGCTCCAGTGAACAAAAAACATTTTCATAGAGTAAT

>PGSC0003DMG400027233-(rev)G-LecRK\_2257

GGACGGATTCTTCTTTGTTGCTGAGCTTGATAACATTTCCATACTGGGGTTGCCTGTGAAATTTGATCAT  
GAGGAGATTCGGGTAGCTACGGAGTGTTTTAGAAATCAAATTGGTACTG

>PGSC0003DMG400027233-(rev)G-LecRK\_2318

ATTTGATCATGAGGAGATTCGGGTAGCTACGGAGTGTTTTAGAAATCAAATTGGTACTGGTGGATTTGG  
AACAGTATATAAAGGTACACTTTCTGATGGAGCTGTTGTTGCTGTCAAGAA

>PGSC0003DMG400027233-(rev)G-LecRK\_244

AATTGAGATTCAAACACTTTGTTGCTCCAGTGAACAAAAAACATTTTCATAGAGTAATCTTGCTGTCAG  
AATCTACTGAGATATCTTGGTTATCGTGACCAATTGATATTCAAACACTTT

>PGSC0003DMG400027233-(rev)G-LecRK\_2989

GTAGTGAAAGGAACAGGCTTTCTCCATCGTCTCTTGCCCTCAGCAAATCAGCCAATCTACTTCCCATTATTC  
GCGTTGGAAATGCATGAACAGAAAAAGTACCTGGAGCTAGTGGATCCTC

>PGSC0003DMG400027233-(rev)G-LecRK\_305

TGCTGTCAGAATCTACTGAGATATCTTGGTTATCGTGACCAATTGATATTCAAACACTTTTTTGCTCCTGTT  
CATTTTCATATAGTAAGTCTTGCTACCAAGATCAGCTGAGATTTAGCTT

>PGSC0003DMG400027233-(rev)G-LecRK\_3050

CCCATTATTCGCGTTGGAAATGCATGAACAGAAAAAGTACCTGGAGCTAGTGGATCCTCGTGTCTGGG  
GAGTGTCAAAGTGAGGAAGTCGAGAAGCTAGTACGTGTGGCTTTGTGTTG

>PGSC0003DMG400027233-(rev)G-LecRK\_3294

TTCCTGAAGCATCAACTATCGATGGGGATCAAGAGGTTAATGTGTTGAGTTACATCAACAAAGCAGG  
AACCGTAGCAGTACTACTAGTAGCTCTTACAATTCCTTCTTATATGTCT

>PGSC0003DMG400027233-(rev)G-LecRK\_3355

AAAGCAGGAACCGTAGCAGTACTACTAGTAGCTCTTACAATTCCTTCTTATATGTCTTCACAGCAAGTC  
TCAGGTCCAAGATAGCACTAGTAAATCAAACGTTGCTCAAACACTACAA

>PGSC0003DMG400027233-(rev)G-LecRK\_3416

ACAGCAAGTCTCAGGTCCAAGATAGCACTAGTAAATCAAACGTTGCTCAAACACTACAAAAATGTTGTTA  
CATTCGTGTCTGGTCCTCCAAAAGTGCATAGCTTTGGGAAGATCCAACCT

>PGSC0003DMG400027233-(rev)G-LecRK\_3477

ATGTTGTTACATTCGTGTCTGGTCCTCCAAAAGTGCATAGCTTTGGGAAGATCCAACCTACTTTTGACATT  
ATTTTTGGAGAGTCTAAACAACACGGAGTAAATCTGCTTTTTTTAGTTCA

>PGSC0003DMG400027233-(rev)G-LecRK\_3538

TTTTGACATTATTTTTGGAGAGTCTAAACAACACGGAGTAAATCTGCTTTTTTTAGTTCAATATGTTATGCT  
ACTGTTTGAAAACCTTTAGTTGTAATATGATGTTTGTACCTCTTCTGTGA

>PGSC0003DMG400027233-(rev)G-LecRK\_3583

GCTTTTTTAGTTCAATATGTTATGCTACTGTTTGAAAACCTTTAGTTGTAATATGATGTTTGTACCTCTTCTG

TGAGGCAGTAGAAAGAGTATAAATATAAGTTGTAATTTATTCAATTC

>PGSC0003DMG400027233-(rev)G-LecRK\_366

TGCTCCTGTTCCATTTTCATATAGTAAGTCTTGCTACCAAGATCAGCTGAGATTTAGCTTTTTGTTGCTCCG  
ATTCATTTTCTTGTTTCTATTAACAAAAAATATTTTGATAGAGTAATC

>PGSC0003DMG400027233-(rev)G-LecRK\_427

TGTTGCTCCGATTCATTTTCTTGTTTCTATTAACAAAAAATATTTTGATAGAGTAATCTTGTTGTCAGGAT  
CCACTGAGATATCTTGTTATTGTGACCAATTGATATTC AACACTTTG

>PGSC0003DMG400027233-(rev)G-LecRK\_610

TTTGTTGCTCCGATTCGTTTTCTGTTCTCTTTTTCAAGTAAGTAAAGTAGGTTGACTCGCTACTTTACCTT  
CTGTGTATAATGAGACGGAACAGAGTAAAAAATGCAACTTATAAGTAT

>PGSC0003DMG400027233-(rev)G-LecRK\_671

TACTTTACCTTCTGTGTATAATGAGACGGAACAGAGTAAAAAATGCAACTTATAAGTATGGTATGCAAAA  
AGATTCTTGATTTCAAGAACTGATTTTTTTTTTCAAGTTTTCATTGTTGT

>PGSC0003DMG400027233-(rev)G-LecRK\_732

TATGCAAAAAGATTCTTGATTTCAAGAACTGATTTTTTTTTTCAAGTTTTCATTGTTGTTAAGAGCATGGG  
ATCATCTTTTTTGTATTTCATTGTTACCCTTTTGTATCTTGTTTTCTT

>PGSC0003DMG400027233-(rev)G-LecRK\_793

AGAGCATGGGATCATCTTTTTTGTATTTCATTGTTACCCTTTTGTATCTTGTTTTCTTGTA CACTCTGGAC  
CTCTTTCTCTTCAACCATTA ACTCCAAATTTCACTGCTTCAAATTTCA

>PGSC0003DMG400027233-(rev)G-LecRK\_976

CAAACACAAAATCTCAAGAAAGATCCTATTACTTTGTCAATTGTTCACTCGGAATCACATGTAGTTGTTTGG  
TCAGCAAATCGCGATATGCCTGTATCTGATT CAGGTGAGTTGCACCTTT

>PGSC0003DMG400027391-(rev)RLKWAX-EGF\_1240

CTTCAACTCTCACTCGGTACGTCTACTCTGTGTGTCCAATCAAACACCTTCATATAAAATGAGAAAGTTA  
AGAGTATACTAAAGTTGCACTTTCATTGCAGGTTTGTGCTTTGGTTTTTC

>PGSC0003DMG400027391-(rev)RLKWAX-EGF\_1302

GAAAGGTTAAGAGTATACTAAAGTTGCACTTTCATTGCAGGTTTGTGCTTTGGTTTTCTGGCTTTGGTCAT  
CAGTGCAACTTGGATATACTTAGGCATCAA AAGAAGACGACTCATAAGA

>PGSC0003DMG400027391-(rev)RLKWAX-EGF\_1488

GGTGGTATACAGTATGCAGCTAAGATCTTTACAGCAGCAGAACTCGAGAAATCAACCAACAACTATGCT  
GAGGATCGTATCCTAGGCCGAGGTGGTTATGGTACCGTTTACAAAGGTGTC

>PGSC0003DMG400027391-(rev)RLKWAX-EGF\_1550

CTATGCTGAGGATCGTATCCTAGGCCGAGGTGGTTATGGTACCGTTTACAAAGGTGTCCTTCCGGACAA  
ACGTGTAGTTGCAATTA AAAAGTCTAGAACAATGGACGTCAGCCAAATAGA

>PGSC0003DMG400027391-(rev)RLKWAX-EGF\_1860

ATAGCGTCTGAAGCTGCTGGTGCCTCGCGTATCTACATTCTGCAGCTTCTACACCTGTAATTCATCGAG  
ATGTGAAGTCTACAAACATTCTACTAGATGAGAATTACACCGCAAAGATA

>PGSC0003DMG400027391-(rev)RLKWAX-EGF\_1922

TCATCGAGATGTGAAGTCTACAAACATTCTACTAGATGAGAATTACACCGCAAAGATATCAGATTTCCG  
GGCTTCTAGATTAGTGTCAATTGGATCAAACCTCAAGTACTACATTGGTTCA

>PGSC0003DMG400027391-(rev)RLKWAX-EGF\_2170

CATCCGAACAAGAGAGAAATCTAGCTGCATTTTTCGTTAGGTCTATTAAGGAAAATCGATTGTTTCAAGT  
ACTTGAGTCACGTGTGGTTTCGAGAAGGAAGTTTTGAGCAATGTCAAGGTG

>PGSC0003DMG400027391-(rev)RLKWAX-EGF\_2232

TTTCAAGTACTTGAGTCACGTGTGGTTTCGAGAAGGAAGTTTTGAGCAATGTCAAGGTGTTGCTGAGCTC  
GCGAAGAGATGTTTAAGGTTAACGAGTGAAGAAAGGCCTACGATGAAAGAA

>PGSC0003DMG400027391-(rev)RLKWAX-EGF\_434

CTTAGCTATCATTGCGGCTATGAAGGGAGGAACCTTACTAGTGGATGCATTTCACTATGCGCGAAAAA  
AGAGGATATAGTTGATGGATATTGCTCAGGAATCGGATGTTGCCAGACTTC

>PGSC0003DMG400027391-(rev)RLKWAX-EGF\_868

GATACCAGGGTAACCCTTATATCAGTCCAGGTTGCATAGGTAAGACTGAATGCATATTTGAACTTTTTG  
TGTTGAGTTTAAAATTGTTGTGCTTGTGTTAGTAAAGTTTGAAGCAAAGT

>PGSC0003DMG400027391-(rev)RLKWAX-EGF\_930

ACTTTTTGTGTTTCGAGTTTAAAATTGTTGTGCTTGTGTTAGTAAAGTTTGAAGCAAAGTATTGTGTTGAA  
TGATGTTATATGTGTTGGTTAGTGTGCTTTCGATTTGAGCCGAGGGTCTATCA

>PGSC0003DMG400027392-(rev)RLKWAX-EGF\_0

AAAAATGTTTACCACTTCAGCATGATCCCTCGTTGTTAGATGAAGGAATGGTTCAATCTTCCATCATTCA  
TAGCCAACCCCCCGCCCCCTTTCTTCCCTCGCCCCATATACACCCC

>PGSC0003DMG400027392-(rev)RLKWAX-EGF\_1037

ACGAAATATTCTTAGTGAAATTCTTAACTTTGACATTGAATCTTGAACGTTATTAGAGAAAAATTTGACCT  
TCCCATTAAACACTAATGCTCTTAATAAAAATTCCTGAGTTTGTATTGA

>PGSC0003DMG400027392-(rev)RLKWAX-EGF\_1098

AATTTGACCTTCCCATTAAACACTAATGCTCTTAATAAAAATTCCTGAGTTTGTATTGATTATAGGAACC  
AAGTTTTGGAGTATCAAAGTGGGTTAAACCACTTGCTAAAAAATTGCT

>PGSC0003DMG400027392-(rev)RLKWAX-EGF\_1159

TATAGGAACCAAGTTTTGGAGTATCAAAGTGGGTTAAACCACTTGCTAAAAAATTGCTTGAGGTGCTA  
TTGAAGGGTCTCAATGTCAATGAAATTGACGAATCTTTAGAACTTCTCTTG

>PGSC0003DMG400027392-(rev)RLKWAX-EGF\_122

TCAAACCCACCATTAAACAACCTCCAAATTTCTTCTCCCAGTAGTACACACTCATCAAGATTCAATACAA  
ATGTCTTCTTCAAATTTGAACCAAATGATGACATACTTGATTTTGTAA

>PGSC0003DMG400027392-(rev)RLKWAX-EGF\_1220

AGGTGCTATTGAAGGGTCTCAATGTCAATGAAATTGACGAATCTTTAGAACTTCTCTTGATGGGAACTAT  
GTCTATAAACATCAACTACTATCCACCATGCCCAAATCCAAGTATCGCCA

>PGSC0003DMG400027392-(rev)RLKWAX-EGF\_1342

GGTTTTCGTAGACTGCGACATGGGCTGCATAACTTTGCTCCTCCAGGACGACACAGGAGGCCTATAT  
GTCCGAGGGACTAAAGGCAACTGGATTCACGTAAATCCTATCAAAGGTGCC

>PGSC0003DMG400027392-(rev)RLKWAX-EGF\_1525

CATTGTGTAGCAGTTGATTTCGAGCAGGACTCGAATATCTGTACCGCTATGCGTGAATCCTAGTTTTGATA  
GTGTCATTGGTTCATTCCCACAAATGCTAAAAGATGGAGAAAAACCAAGTG

>PGSC0003DMG400027392-(rev)RLKWAX-EGF\_1708

GCATCACTAGATTTTGCAAAAAATTGATGCTTTAATTTCAAATTTCTTGTATGTTAATGTTTTTGTATTAT  
AAATCTGTTATTGTAATGACGATAACTGTTATTTTATGTAACCTTGCAA

>PGSC0003DMG400027392-(rev)RLKWAX-EGF\_183

TTCAATACAAATGTCTTCTTCAAATTTGAACCAAATGATGACATACTTGATTTTGTAAATCAAGAAAGCAA  
ATGGACTAAAAGGCCTAGTAGACACAAACCTTGAAATTATCCCAAATCA

>PGSC0003DMG400027392-(rev)RLKWAX-EGF\_1891

AACAATGTTGGGAGTAGGTGTTATGATCAAGCAGGGGTCTTGATCAATGATGACTCGATAAACTTTAGC



TTGGGATTGACGTCTTTCTCCTTCTCTGATCTCAATAGTTTGATGGTAGTT

>PGSC0003DMG400027392-(rev)RLKWAX-EGF\_1952

ACTTTAGCTTGGGATTGACGTCTTTCTCCTTCTCTGATCTCAATAGTTTGATGGTAGTTGGCTGCGATGAC

TTAGCTCTCATTCTCGGCTATGAAGGGAGGAACTTTACTAGTGGATGCA

>PGSC0003DMG400027392-(rev)RLKWAX-EGF\_2013

CTGCGATGACTTAGCTCTCATTCTCGGCTATGAAGGGAGGAACTTTACTAGTGGATGCATTTCACTATGC

GCGAAAAAAGAGGATATAATTGAAGGATATTGCTCAGGAATTGGATGTTG

>PGSC0003DMG400027392-(rev)RLKWAX-EGF\_2806

AAAAAGGACGGCCACGGTTGCATCCCTAAGAACTCTAAATCACCCATCCTTCAACTCTCAATCAGTACGT

CTACTCTACTCTGTGTGTCCAGTCAAACACCTTCATATAAAGTGAAAACG

>PGSC0003DMG400027392-(rev)RLKWAX-EGF\_2867

TCAGTACGTCTACTCTACTCTGTGTGTCCAGTCAAACACCTTCATATAAAGTGAAAACGGTTAAGAGTAA

ACTAAAGTTGCACTTTCATTGCAGGTTTGTGCTTTGGTTTTCTGGCTTTG

>PGSC0003DMG400027392-(rev)RLKWAX-EGF\_2989

CATCAGTGTAACCTTGATATACTTAGGCATCAAAGATGACGACTCATAAGACTCAGGGAAACGTTTTTTT

CAGAAAAATGGTGGATTGATGCTCACGCAGAACTCCGATCAAATGAGGG

>PGSC0003DMG400027392-(rev)RLKWAX-EGF\_3477

GAATAGCATCTGAAGCTGCTGGTGCCTCGCATATCTACATTCTGCAGCTTCTACACCTGTAATTCATTGA

GATGTGAAGTCTACAAACATTCTACTCGATGAGAGTTACTGCAAAAA

>PGSC0003DMG400027392-(rev)RLKWAX-EGF\_4026

CTCAACAATGTCAAGATGAGGAGAGTCTTGGATTAATTACAGAACAAACATTGGACCTTTACGCGATCA

ATATGAACACGAACTTCATGTCTAACGGAGAATTCTCAGGACAACAGAGCT

>PGSC0003DMG400027392-(rev)RLKWAX-EGF\_4148

GATAGTCGGATGATGTTACAAATTCATAGTCCTCGGTGATCAATTACTTGTGTATGGCCTGCATTTGTGT

CCTAACTTGTATGTTACATTCATGAAAATATGATTCGTCAAATCCGTCCA

>PGSC0003DMG400027392-(rev)RLKWAX-EGF\_4209

CATTTGTGTCCTAACTTGTATGTTACATTCATGAAAATATGATTCGTCAAATCCGTCCAAGTTTGGCCTAG

TCATTGGTTCTAGTAATACGATTCGTCAAATCCGTCCAAGTTTGGCCTA

>PGSC0003DMG400027392-(rev)RLKWAX-EGF\_4270

TTTGGCCTAGTCATTGGTTCTAGTAATACGATTCGTCAAATCCGTCCAAGTTTGGCCTAGTCATTGGTTCG  
TCTATTTACTCATTTCAACTCATTAAAAGACTAGGCTGATATGTTGCAG

>PGSC0003DMG400027392-(rev)RLKWAX-EGF\_4331

CATTGGTTCGTCTATTTACTCATTTCAACTCATTAAAAGACTAGGCTGATATGTTGCAGAATGTAATTCCC  
CTTATTATTTTGTCTTTACAATTTAACTTGTATAAATTAGTGTATAAT

>PGSC0003DMG400027392-(rev)RLKWAX-EGF\_4392

TGTAATCCCCTTATTATTTTGTCTTTACAATTTAACTTGTATAAATTAGTGTATAATCCATATTTCTTGA  
ATTTTGAGCATTGGCATAGTTGATTTTTTTTTGTACATTTTAACTT

>PGSC0003DMG400027392-(rev)RLKWAX-EGF\_4453

CATATTTCTTGAATTTTGAGCATTGGCATAGTTGATTTTTTTTTGTACATTTTAACTTTTGACATTATCAA  
CACATTTATTTAGAGAGAGGCAAATAGGTGCATTTTCTAGCAAATGA

>PGSC0003DMG400027392-(rev)RLKWAX-EGF\_4941

AACCAATTCAAGAATTTTGTAGGTCATTAATATATCATCCACATATCCCATCCCTACTACCTTCAAATA  
TAGATTAATCATTGATATTTGATATTCATATTGAGTCTAACTAAAAT

>PGSC0003DMG400027392-(rev)RLKWAX-EGF\_5002

CCTTCAAATAATAGATTAATCATTGATATTTGATATTCATATTGAGTCTAACTAAAATTGAATTTGCACC  
GAAAAGTCTTATATTGAAAAGTAAAACAATCTCTAATAAGAACAATATT

>PGSC0003DMG400027392-(rev)RLKWAX-EGF\_5246

CTTTTGCCCCACCCTCCCTTGAAATAATAGAAGAAGGAATAATATTTATTTTTTTATCATCGGAGGTTTGA  
TATTCATATTGAGTCCAATGAAATTTGAATTCGCACCAAAAAGTCTCAT

>PGSC0003DMG400027392-(rev)RLKWAX-EGF\_5307

GGAGGTTTGATATTCATATTGAGTCCAATGAAATTTGAATTCGCACCAAAAAGTCTCATATTAAGAGGAT  
GTTTTTTAAATAAGTCAATTTTGTATTCAGGAAATTTGAATCTAAAACAT

>PGSC0003DMG400027392-(rev)RLKWAX-EGF\_5490

CAATCTTTCATCATTTTCATAGTCCACTCCCCTTCTTCTCTCCCCCATACACACCCCTCTCAAACCCACAG  
CTAAAAAAAACCCCAAATTTCTTTCTTTCATTAGTACACACTCATCA

>PGSC0003DMG400027392-(rev)RLKWAX-EGF\_5551

TCAAACCCACAGCTAAAAAAAACCCCAAATTTCTTCTTTCATTAGTACACACTCATCAAGATTCAACACA  
AATGCCTTCATCAAAAATTTGAACCAAATGATGACATACTTAATTTTGTA

>PGSC0003DMG400027392-(rev)RLKWAX-EGF\_5978

AAGAGAGCTATAATGCTAGTGAATCTGTGTTGATGTTTTGGAGTGCTATTGGTGAGAAAGATGAAAAAG  
TTTTAGAGTGGAGGGATGGTATAAGACATAGTTGTAATCCACAAAATGATA

>PGSC0003DMG400027392-(rev)RLKWAX-EGF\_6039

TGAAAAAGTTTTAGAGTGGAGGGATGGTATAAGACATAGTTGTAATCCACAAAATGATAGCAATCTTTG  
GCCTCCTCAAACAAGGTAACTTTTGGGGTTTTCTGCTCCATGTAATTTAT

>PGSC0003DMG400027392-(rev)RLKWAX-EGF\_61

CATCATTTTCATAGCCAACCCCCCGCCCCCTTCTCCCTCGCCCCATATACACCCTCTCAAACCCACC  
ATTAATACAACCTCAAATTTCTTCTCCAGTAGTACACACTCATCAA

>PGSC0003DMG400027392-(rev)RLKWAX-EGF\_610

GAGAAAGTTTTGGAGTGGAGGGATAGTATAAAACATGGTTGTAATCCACAAAATGATAGCAATCTTTG  
GCCTCCTCAAACAAGGTAACTTTTGGGGTTTTCTACTCTGTGTAATCAAT

>PGSC0003DMG400027392-(rev)RLKWAX-EGF\_6344

TTGATGATAGTCCATATAGGAAAGAAAACCTCGTGAAAACGTGATACTTCAGATGTGTTTTTATCATTAT  
CTCAAGACTTTTTTATAACGGTGTACATATATCTTTTTTACAATTACAT

>PGSC0003DMG400027392-(rev)RLKWAX-EGF\_6588

CTTTGACATTGAATCTTGAACATTATTAGCAAAATTCTTGATCTTACCATTAAATTTGAACACTCTTAGTG  
AAATTTCTGACTTTGATACTGTTTTACAGGAATCAAGTCTTGGAGTAT

>PGSC0003DMG400027392-(rev)RLKWAX-EGF\_6832

ACTATCCACCTTGTCCAAATCCAAGTATCGCCATTGGTTTTCGTAGACACTGCGACATGTCCTGCATAACT  
CTGCTCCTCCAGGACGACACGGGAGGCCTATATGTCCAAGGGACTAAAG

>PGSC0003DMG400027392-(rev)RLKWAX-EGF\_7137

TTCCACAAATACTCAAAGATGGAGAAAAATCAATGTACAAACATGTTTTGTTCTCTGATTATTGGGATC  
ATTACTTCAGTAAGAGGCCCTCTGGTAAAGCATCACTAGATTTTGCTAAA

>PGSC0003DMG400027392-(rev)RLKWAX-EGF\_732

GTCACGGGTTTTCAAGTAGTATTACTTTTTGGGAGGTGCTTGACGTTTCTGAACTATCACCAACTATTTAT  
CAAAAGATATTTAAAACTAACTAGATTAAGTGGTTGAATACAAAATTA

>PGSC0003DMG400027392-(rev)RLKWAX-EGF\_793

AACTATTTATCAAAGATATTTAAAACTAACTAGATTAAGTGGTTGAATACAAAATTATATCAAGATTTT

ATAATGGTTTTATAACTTAAATCAAAGTATATCGTATATGTAGGAGA

>PGSC0003DMG400027392-(rev)RLKWAX-EGF\_854

TCAAGATTTTATAATGGTTTTATAACTTAAATCAAAGTATATCGTATATGTAGGAGAAAAGTTATCTTT

TATACGATTACATATCTAGTATAATCTCACAAAGTAGAGTATGGAGAGGG

>PGSC0003DMG400027392-(rev)RLKWAX-EGF\_915

AGTTATCTTTTATACGATTACATATCTAGTATAATCTCACAAAGTAGAGTATGGAGAGGGTAGAATATACG

CATATTTTACCTCTGTCTTAGCAGCATAAGGAGGTTGTGATTTTATAGAC

>PGSC0003DMG400027392-(rev)RLKWAX-EGF\_976

GAATATACGCATATTTTACCTCTGTCTTAGCAGCATAAGGAGGTTGTGATTTTATAGACTTACGAAATATT

CTTAGTGAAATTCTTAACTTTGACATTGAATCTTGAACGTTATTAGAGA

>PGSC0003DMG400027407LRR-RLPs\_1342

GGTTGCAAAAAGATGAAACAATTGAAGACTTAGGCAAACCTATACTTTCTCGAGTTGAGATCAAGATCAC

TTTTTGAAAGGGTCCAGGAGTCTTCTAAAAGGAATGAAGAGGAATTCTTAA

>PGSC0003DMG400027407LRR-RLPs\_1647

AATATCCAGCGTGGGTACTCATTTCCTTTAAGCAAGAGGGTGTGTATAACATATTGCCAAGACTAACAT

CCTTAAGGGCTTTATCATTGTCTCATTATCGGATTAAGGAGTTGCCGAAT

>PGSC0003DMG400027407LRR-RLPs\_1830

TTACCAGATTCCATATGTGCATTGTATAACTTGGAGATACTTCTCTTGTCTTCTTGTATATATCTTGAGGA

ATTACCGCCGCATATGGAAAAGTTGATCAGCTTGCCTCACCTTGACACT

>PGSC0003DMG400027407LRR-RLPs\_1891

ATCTTGAGGAATTACCGCCGCATATGGAAAAGTTGATCAGCTTGCCTCACCTTGACACTACTGGCACTTC

TCTCTTGAAGATGCCACTACATCCAAGCAAGTTGAAAAACCTCCATGTGC

>PGSC0003DMG400027407LRR-RLPs\_1952

TGGCACTTCTCTTGAAGATGCCACTACATCCAAGCAAGTTGAAAAACCTCCATGTGCTAGTAGGATTT

AAGTTTATTCTAGGTGGCTGCAATGATTTGAGAATGGTAGATTTAGGTGA

>PGSC0003DMG400027407LRR-RLPs\_2135

AGCTCTGAACGCAAACATGATGAAAAAGGAACATGTTGAGATGTTGTCGTTGGAGTGGAGTGAGAGTA

TTGCTGACAGTTCACAACTGAAGGAGACGTAACAATAAACTACAACCAA

>PGSC0003DMG400027407LRR-RLPs\_2196

GAGAGTATTGCTGACAGTTCACAACTGAAGGAGACGTA CTCAATAAACTACAACCAAATACAAACATA  
AAGGAACTGGAATCGCTGGATATAGAGGGACAAAATTTCCGAATTGGATG

>PGSC0003DMG400027407LRR-RLPs\_2318

TGATCATTCAATTTCTTAAGCTGGTGGGAGTGTCTCTTAGCAATTGCAACA ACTGTGCTTCCTTGCCAGCAC  
TAGGACA ACTTCCTTCTTTGAAATTCCTTACCGTTAGAGGGATGCATCG

>PGSC0003DMG400027407LRR-RLPs\_244

ATGGTGCTGAAAACATAATAGAAGAAGTCAACTATGAAGCTCTGAGACTTAAGGTGGAAGGTCAGCAT  
CAAAATCTCGCAGAAACAATCAACAAGCAAGTAATTAGCATAAAGGAGAAGT

>PGSC0003DMG400027407LRR-RLPs\_2684

GACACCTATCCA ACTTTCAAATTTGAAAGAGTTTAAAGTTGTTGCTTCTCCTAAAGTTGGAGTTCTTTTTG  
ATGATGCTCAACTGTTTACATCTCAACTTCAGGGAATGAAACAGATTGT

>PGSC0003DMG400027407LRR-RLPs\_305

TCAGCATCAA AATCTCGCAGAAACAATCAACAAGCAAGTAATTAGCATAAAGGAGAAGTTGGAAGACA  
CCATTGAAACATTGGAGGAGTTGCAA AAGCAAATTTGGTTTCCTTGATCTAAC

>PGSC0003DMG400027407LRR-RLPs\_3355

AGAGACTCCCCTGTCTCAGAGAGTTA ACCATCTTACATGATGGCAGTGACCTTAACCATCTTACATGATG  
GCAGTGACCTTGCTGGTGAAA ACTGGGAGTTGCCTTGCTCTATT CGAAGG

>PGSC0003DMG400027407LRR-RLPs\_3599

CTCTTTCTCATCTAACTTTATTTGGCAATCATGAGCTCCATTCCCTACCGATTGAAGGTCTACGACAACTCA  
CTTCACTTCGGGATCTATTCAATTTCTTCATGTGATCAACTCCAATCTA

>PGSC0003DMG400027407LRR-RLPs\_3660

ACGACA ACTCACTTCACTTCGGGATCTATTCAATTTCTTCATGTGATCAACTCCAATCTATTCCAGAATCAG  
CACTGCCCTCCTCCCTCTCTGAGCTGACCATCCAGAATTGCCATAAACT

>PGSC0003DMG400027407LRR-RLPs\_3721

CCAGAATCAGCACTGCCCTCCTCCCTCTCTGAGCTGACCATCCAGAATTGCCATAAACTCCAATACCTTCC  
GGTAAAAGGGATGCCCACTTCAATCTCTACACTATCTATTTACGACTGT

>PGSC0003DMG400027407LRR-RLPs\_671

GTTTTGTGTATCTGAACCATATGACGCTCTCAGAATAACAAAAGGATTACTTCAAGAAATTGGCTCATT  
GACTCGAAGGCTGAAAGCAATCTTAATCAGCTACAGGTCAAATTGAAGGA

>PGSC0003DMG400027410LRR-RLPs\_0

ATGCGTCGAATAATAGAGGTGACTGAAGAATTCTATGGTAGTTTGTCTTCCAAAAGCCATTTAACTCTC  
TTGAGAAGCTTGAATTTGCAGAGATGCCAGAGTGGAAGCGGTGGCATGTA

>PGSC0003DMG400027410LRR-RLPs\_1071

AAAAGCCTCACCTCTCTTGCATATCTAGATACTTATTATTTACCTCAAATTCAGTCACTGCTGGAAGAAGG  
GCTTCCCTCATCTCTTTATGAGCTACGTTTAGATGACCATCATGAGCTT

>PGSC0003DMG400027410LRR-RLPs\_1134

GAAGAAGGGCTTCCCTCATCTCTTATGAGCTACGTTTAGATGACCATCATGAGCTTCATTCACTACCGAC  
CGAAGGTTTTCGACACCTCACTTCGCTTCGACGTCTAGAGATCAGGCAC

>PGSC0003DMG400027410LRR-RLPs\_1197

CTACCGACCGAAGGTTTTCGACACCTCACTTCGCTTCGACGTCTAGAGATCAGGCACTGCAATCAACTCC  
AATCTCTTTCAGAATCAACTCTGCCCTCCTCCTCTCTGAGCTGACCATC

>PGSC0003DMG400027410LRR-RLPs\_126

AATGGAGAGTTCCTGCACTTAAGATCCTTTTCAGTTGAAGATTGCCCAAGTTGATTGAGAAGTTCCCCG  
AAAATCTTCTCTCTGACAGGATTGAGAATTTCAAATGCCATGAACTC

>PGSC0003DMG400027410LRR-RLPs\_1323

TGCCCTAATCTCCAGTCCCTTCCAGTAAAAGGGATGCCCTCTTCCCTCTCTAAACTACATATTTACAAGT  
CCCGTTGCTCAAACCACTACTAGAATGTGACAAGGGGGAGTACTGGCAA

>PGSC0003DMG400027410LRR-RLPs\_189

TTCCCCGAAAATCTTCTCTCTGACAGGATTGAGAATTTCAAATGCCATGAACTCAGCTTGGAGACAC  
CTATCCAAGTTTCAACTTTAAAATATTTGAAGTTATTAGTTCTCGTAAG

>PGSC0003DMG400027410LRR-RLPs\_252

GAGACACCTATCCAAGTTTCAACTTTAAAATATTTGAAGTTATTAGTTCTCGTAAGTTGGAGTTCTTTT  
TGATGACACTGAACTGTTTACATCCCAACTTCAGGAAATGAAACATATT

>PGSC0003DMG400027410LRR-RLPs\_315

GTTCTTTTTGATGACACTGAACTGTTTACATCCCAACTTCAGGAAATGAAACATATTGTTGAATTGTTTTT  
ACTGATTGTAAGTTCGCTTACCTCCTTACCTATTAGCATTCTGCCAAGT

>PGSC0003DMG400027410LRR-RLPs\_441

AAGAGAATACACATATATCAGTGCGAGAACTGAAATTGGAGACGCCAGTTGGTGAGATGATTACTAAT

AACATGTTTCTCGAGGAGTTGAAACTGGATGGATGTGATTCCATAGATGAT

>PGSC0003DMG400027410LRR-RLPs\_504

ACTAATAACATGTTTCTCGAGGAGTTGAAACTGGATGGATGTGATTCCATAGATGATATATCACCTGAGT

TGGTCCCAAGAGTAGGCACTTTGATAGTTGGGCGTTGCCACAGCCTTACT

>PGSC0003DMG400027410LRR-RLPs\_567

CCTGAGTTGGTCCCAAGAGTAGGCACTTTGATAGTTGGGCGTTGCCACAGCCTTACTAGACTTTTGATTC

CTACTGAGACTAAAAGCCTCACTATTTGGTCTTGTGAGAATCTTGAAATA

>PGSC0003DMG400027410LRR-RLPs\_63

AACTCTCTTGAGAAGCTTGAATTTGCAGAGATGCCAGAGTGGAAGCGGTGGCATGTACTAGGGAATGG

AGAGTTCCCTGCACTTAAGATCCTTTCAGTTGAAGATTGCCCAAGTTGATT

>PGSC0003DMG400027410LRR-RLPs\_630

TTGATTCCACTGAGACTAAAAGCCTCACTATTTGGTCTTGTGAGAATCTTGAAATACTTTCAGTAGCATG

TGGGGCTCGGATGACGTCGTTGCGTTTTTTGAATATTGAAAACCTGTGAG

>PGSC0003DMG400027410LRR-RLPs\_693

GTAGCATGTGGGGCTCGGATGACGTCGTTGCGTTTTTTGAATATTGAAAACCTGTGAGAAGCTGAAGTGG

CTGCCTGAATGCATGCAGGAACTCCTTCCATCTCTTAATACGCTGGAACCTC

>PGSC0003DMG400027410LRR-RLPs\_756

AAGTGGCTGCCTGAATGCATGCAGGAACTCCTTCCATCTCTTAATACGCTGGAACCTTTAATTGTCCAG

AAATGATGTCCTTTCCTGAAGGAGGATTGCCCTTCAATTTACAAGTCCTT

>PGSC0003DMG400027410LRR-RLPs\_819

TGTCCAGAAATGATGTCCTTTCCTGAAGGAGGATTGCCCTTCAATTTACAAGTCCTTTAATCTGGAATTG

CAAGAACTGGTGAATGGCCGAAAGAATTGGCGTTTACAGAGGCTCCCC

>PGSC0003DMG400027410LRR-RLPs\_882

TGGAATTGCAAGAACTGGTGAATGGCCGAAAGAATTGGCGTTTACAGAGGCTCCCCTGTCTTAGAGA

GTTAAGGATCGAACACGATGGCAGTGATGATGAGATTCTTCTGGTGAGAAT

>PGSC0003DMG400027410LRR-RLPs\_945

AGAGAGTTAAGGATCGAACACGATGGCAGTGATGATGAGATTCTTCTGGTGAGAATTGGGAGTTGCC

TTGCTCTATTCAACGTCTTACATATCTAATCTGAAAACCTTAAGCAGCCAA

>PGSC0003DMG400027467LRR-RLKs\_0

ATGGGACTAATAGGTGAGTTTCCGCGAGGCATACAAAATTGCACTTCTTTAACTTCTCTGAATCTTTCAA  
ACAACGAGCTATATGGAACCATCCCTTCCGATATATCAAACTAATCGTA

>PGSC0003DMG400027467LRR-RLKs\_1024

ATTGTACAAAGCACTAGTCCCAAATGGATGGACTGTTGCCATAAAGAGGCTCTAAAGTTCCGAGGATTT  
GGAGGAAGAGTTTGTTCGGAGATCACAACCTCTAGGTATTTTGAGGCATCC

>PGSC0003DMG400027467LRR-RLKs\_1088

GATTTGGAGGAAGAGTTTGTTCGGAGATCACAACCTCTAGGTATTTTGAGGCATCCGAATTTAGTGCCCC  
TAATCGGATTTTGTATGAGAGGGACAAGCGACTTCTGGTTTACAAATAC

>PGSC0003DMG400027467LRR-RLKs\_1152

TGCCCCTAATCGGATTTTGTATGAGAGGGACAAGCGACTTCTGGTTTACAAATACATGCCTAATGGAAA  
CTTACATGAGTGGCTGCATTCAACTGACGACAAGGCAAGACTCTTGGACT

>PGSC0003DMG400027467LRR-RLKs\_1280

AGGGTTAAAATTGTTGTTGGTGTGCGGAAAGCCCTGGCTTGGCTTCATGATGGTGGAAATTTGATCCC  
AAGTTATCCAATTTTGGGAGGCAACATTTGTAGAACCAAATGACATAGGT

>PGSC0003DMG400027467LRR-RLKs\_1640

TGCATGAAATTCATCCCGGATCAAAGACCAACGATGCAACAAGTGTATCAGATTGTTGCTGCGATTGCTC  
GAGTCCATGACCAAACAGGGGACTCTGAAATACAATTGCACTTGGACTAG

>PGSC0003DMG400027467LRR-RLKs\_256

TGTTACAGCGACTCAAGACGTTAATGTTGCAAATAATATGTTGACAGGGCCAGTGCCAAATTTGTCAA  
TGCTACTTTTCCAGATGAAAGTTATGCAAATAATCCAGGACTTTGTGGTA

>PGSC0003DMG400027467LRR-RLKs\_320

TGTCAATGCTACTTTTCCAGATGAAAGTTATGCAAATAATCCAGGACTTTGTGGTAGTCCTCTGGAATTAT  
GTGTTACAGAACGCGTAGTAAGCCGTCATATTCTGTTTCTTGTGGTTT

>PGSC0003DMG400027467LRR-RLKs\_448

GTTGGTCGCTTTCTACACTTGGTGTATATCTTTTTTCTTTGGTGTAAAGAAGATGCTTCTATTGATCA  
ACAAGAGAACAAAGGTAATGGTGATTGATGGAAATGAAGTAAACAATG

>PGSC0003DMG400027467LRR-RLKs\_64

TTTCAAACAACGAGCTATATGGAACCATCCCTTCCGATATATCAAACTAATCGTATATGCTGTAATCGTT  
GATCTCTCGAGCAACCTATTCTCAGGCGCGATCCCAAGTGACATTTCAA



>PGSC0003DMG400027467LRR-RLKs\_832

ACGAAAGGGGAACTACTTAATAAAAAAACTGTTGTTGTAGAGGAGAAATAAAATGTGGTAATGGTAAA  
TATGTTTTTTTTCTCAGATTTTAAAGCTGGAGAAGATTGTTACAAGAATGAG

>PGSC0003DMG400027467LRR-RLKs\_896

TAAATATGTTTTTTTTCTCAGATTTTAAAGCTGGAGAAGATTGTTACAAGAATGAGTTTTATGGAACATC  
AAAAGCGACTTTGAATTTAGCCAAGACAATGAAATCGGGAACGGAATG

>PGSC0003DMG400027468LRR-RLKs\_1116

AATCAAAAATTTTTATTGTAGAGGAGAAATAAAATGTGGTAATGGTAGATATGTTATTTTCTCAGATTT  
TAAAGCTGGAGAAGATTGTTACAAGAATGAGTTTTATGGAACATCAAAA

>PGSC0003DMG400027468LRR-RLKs\_124

TTCGTTGATAGACCCTTTAAACATCTTGAATTCTACATGGAAGTTCGATAATCAGACAGAAGGTTTTATAT  
GCAAATTTACAGGAATACAATGCTGGAATGCCGATGAGAACATAGTTGT

>PGSC0003DMG400027468LRR-RLKs\_1302

CTGGTCCCAAATGGATGGACTGTTGCCATAAAGAGGCTCCAAAGTTCGAAGATTTGGAGGAAGAGTTT  
GTTTCGGAGATCACAACCTAGGTATCTTGAGGCATCCGAATTTAGTGCCC

>PGSC0003DMG400027468LRR-RLKs\_1426

TCGGATTTTGTATGAGAGGGACGAGCGACTTCTGGTTTACAAATACATGCCTAATGGAAACTTACATGA  
GTGGCTGCATTCAACTGACGACAAGGCACAATTCTTGACTTCCCTCTAA

>PGSC0003DMG400027468LRR-RLKs\_1550

AAAAATTGTTGTTAGTGTCGCGAAAGCCCTGGCTTGCTTCATGATAGTGGAATTTCCATGTCGTGCAT  
AGTAACATTAGCACACAATGTATCTTGCTCGATGAAATCTTACATATTGA

>PGSC0003DMG400027468LRR-RLKs\_1612

TCGTGCATAGTAACATTAGCACACAATGTATCTTGCTCGATGAAATCTTACATATTGAGTTGCTCGAGTCT  
AAATTTGTGCGAGCAGCTTTTTGCCAGTCTCTTGATGTGGATAAACTA

>PGSC0003DMG400027468LRR-RLKs\_186

GTTTTATATGCAAATTTACAGGAATACAATGCTGGAATGCCGATGAGAACATAGTTGTATCCATTAGTCT  
TCCAGACATGGGACTAATAGGTGAGTTTCCGCGAGGCATACAAAATTGCA

>PGSC0003DMG400027468LRR-RLKs\_1922

GCCACCAAAGGGACGTGTAGCTTTGGCTCAAACCATGTATTTGTGATGAAGAACCATTTTCATATGTATAA

ATAATCCATCTAGACTCATGTGCTACAAATTCTGGCTCCGCCTCATACTA

>PGSC0003DMG400027468LRR-RLKs\_1984

ATGTATAAATAATCCATCTAGACTCATGTGCTACAAATTCTGGCTCCGCCTCATACTAGAATCACCAGCTT  
TTGGAACCGTGTTTCCTATGGTTTCTTTGTTTAGCAAGAATGTATGTCT

>PGSC0003DMG400027468LRR-RLKs\_2040

TAGAATCACCAGCTTTTGGAACCGTGTTTCCTATGGTTTCTTTGTTTAGCAAGAATGTATGTCTTCCTGAA  
TTGTTGTTTTCAATATTGCAATAACTATGCTTCAGAATGATCATCATT

>PGSC0003DMG400027468LRR-RLKs\_310

TTTAACTTCTCTGAATCTTTCAAACAACGAGCTATATGGAACCATCCCTTCCGATATATCAAACTAATCG  
CATTTGCTGTAGACATTGATCTCTCGAGCAACCTATTCTCAGGCGCTAT

>PGSC0003DMG400027468LRR-RLKs\_372

AACTAATCGCATTTGCTGTAGACATTGATCTCTCGAGCAACCTATTCTCAGGCGCTATCCCAAGTGACATT  
TCAAATTTCTCTTTTCTCAATTCCTCAAATTAGAAAACAATAAACTAG

>PGSC0003DMG400027468LRR-RLKs\_434

AGTGACATTTCAAATTTCTCTTTTCTCAATTCCTCAAATTAGAAAACAATAAACTAGAAGGACTGATCCC  
ACCTGAAATTTGCTGGTTACAGCGACTCAGGATGTTTAATGTTGCAGAT

>PGSC0003DMG400027468LRR-RLKs\_496

ACTGATCCCACCTGAAATTTGCTGGTTACAGCGACTCAGGATGTTTAATGTTGCAGATAATATGTTGACA  
GGGCCAGTGCCAAATTTGTCAATGCTGCTTTTCCAGCTGAAAGTTATGC

>PGSC0003DMG400027468LRR-RLKs\_620

AATCCAGGACTTTGTGGTAGTCCTCTGGAATTATGTGTTACAGAACGCGTAGTAAGCCGTCATATTCTGT  
TTGCTTGTGGTTTTGTGACGGGTTGGTCGCTTTCTACATTACTTGGTGTA

>PGSC0003DMG400027468LRR-RLKs\_682

TATTCTGTTTGCTTGTGGTTTTGTGACGGGTTGGTCGCTTTCTACATTACTTGGTGTATATTTTTTTTTGG  
TGAAAGAAGATGTTTCTCTTGATCAACAAGAGAACAAAGGTAATGGT

>PGSC0003DMG400027468LRR-RLKs\_744

TTTTTTTTGGTGTAAGAAGATGTTTCTCTTGATCAACAAGAGAACAAAGGTAATGGTGATTGATGGAAA  
TGAAGTAAACAGTGACCCAAAGGTAATTATGTCTATCTGTTCAATTATAT

>PGSC0003DMG400027469LRR-RLPs\_0

GGATACTCTAAAACAAAAAATCCATTTCCATAATGTGCAACTGCAACATTATTCTTTACTTAGTACTAC  
CATTTTTCTACTACTTTCCAGCTTTTCTCTAGATTGTTTGATGTCGAT

>PGSC0003DMG400027469LRR-RLPs\_1054

TTTTGTCCAATCAAACATATGTCAGATATATTGAGACGAAAGGGTACTACTTAATCAAACATTTGCTAAA  
TATGGTAGCTATGTTCTCTCCTCAGATTTTAAAGATGGAGAAGATTGTT

>PGSC0003DMG400027469LRR-RLPs\_124

GATTCGTTGGAAGACCCTTTAATTTCTTGAATACTACGTGGAAGTTCGATAAACAGACAGAAGGTTTCA  
TATGCAGATTTGCAGGAATACAATGCTGGCATGATGATGAGAGCAGAGTT

>PGSC0003DMG400027469LRR-RLPs\_1302

GAGGTTCCATGTATCAGAGGATTTGGAGGAAGAGTTTGTTCGAGATCACAACCTCTAGGTAGTCTGAG  
GCATCCGAATTTGGTGCCTTTAATCGGCTTTTGTCTGAGAGGGACGAGCG

>PGSC0003DMG400027469LRR-RLPs\_1426

CTGGTTTACAAATACATGCCTAATGGAACTTACATGAGTGGTTGCATTCAACCGACGACAAGGCAAGA  
CTCTTGGACTTTAATCTAAGGGTTAAAATTGTTTTAGGTGTCGCAAAAAGCC

>PGSC0003DMG400027469LRR-RLPs\_1550

CTTGGCTTCATGATGGTGGAAATTTCCATGTTGTGCATAGTAACATAAGCACACAATGTATCTTGCTCAA  
TGAAAATTTTGATCCTAAGTTATCCAATTTTGGGAGGCAACACTTGCAA

>PGSC0003DMG400027469LRR-RLPs\_186

AGGTTTCATATGCAGATTTGCAGGAATACAATGCTGGCATGATGATGAGAGCAGAGTTTTATCCATTAG  
TCTTTCAGACATGAGACTAAAAGGTGAGTTTCCGCGAGGCATAAAAAATTG

>PGSC0003DMG400027469LRR-RLPs\_310

TCTATAACTTCTCTAGATCTTTCAAGCAACGAGATATATGGAACCATCCCTTCGGATATATCAAATTAAT  
TGAATTTATTATAATGGTTGATCTCTCAAGCAACCTATTGTCAGGCGCG

>PGSC0003DMG400027469LRR-RLPs\_372

AAAATTAATTGAATTTATTATAATGGTTGATCTCTCAAGCAACCTATTGTCAGGCGCGATCCCAAGTAAC  
ATTGCAAATTGCTCTTTTCTTAATTCGTCAGATTAGACAGCAATAAACT

>PGSC0003DMG400027469LRR-RLPs\_434

CAAGTAACATTGCAAATTGCTCTTTTCTTAATTCGTCAGATTAGACAGCAATAAACTAGACGGTCCGAT  
CCCAGCTGAAATTGGCTCGTTAAATCGACTCAAGAACCTTAATGTTGCCA

>PGSC0003DMG400027469LRR-RLPs\_496

GGTCCGATCCCAGCTGAAATTGGCTCGTTAAATCGACTCAAGAACTTTAATGTTGCCAACACATGTTGA  
CAGGGCCAGTGCGAAGGTTTATCAATGCCACTTTTCCACCTGAAAGTTAT

>PGSC0003DMG400027469LRR-RLPs\_558

CATGTTGACAGGGCCAGTGCGAAGGTTTATCAATGCCACTTTTCCACCTGAAAGTTATGCAAATAATGCA  
GGACTTTGTGGTAGTCCTCTGAAAGCATGTGTTACAAAACGCATCGGGTT

>PGSC0003DMG400027469LRR-RLPs\_62

TAGTACTACCATTTTTCTACTACTTTCCAGCTTTTCTCTAGATTGTTTGATGTCGATAAAAGATTTCGTTGG  
AAGACCCTTTTAATTTCTTGAATACTACGTGGAAGTTCGATAAACAGA

>PGSC0003DMG400027469LRR-RLPs\_806

AGATGCTTCTATTCATCAACAAGAGAACAAAGGTAATGGTGATTGATGGAAATGAATCGCCTCAACGAG  
AAGAAGTAAACAACGATCCAAAGGTAACATTACGCTTTGAAAAATATTTA

>PGSC0003DMG400027469LRR-RLPs\_868

CAACGAGAAGAAGTAAACAACGATCCAAAGGTAACATTACGCTTTGAAAAATATTTAGAAATCTATGGC  
CAAACGCCTCCTTAAAGTTATCATTTTACTCTTAGTCACAAGTTTTTATAG

>PGSC0003DMG400027469LRR-RLPs\_930

CTATGGCCAAACGCCTCCTTAAAGTTATCATTTTACTCTTAGTCACAAGTTTTTATAGGCATACAAGTGT  
ATGGGATGTTTAAGACTACAAGTTTAAAAAAAATTCTTCTTTTGTCTTA

>PGSC0003DMG400027469LRR-RLPs\_992

ACAAGTGTTATGGGATGTTTAAGACTACAAGTTTAAAAAAAATTCTTCTTTTGTCTTAAAATTTTTGTCCA  
ATCAAATATGTCAGATATATTGAGACGAAAGGGTACTACTTAATCAA

>PGSC0003DMG400027470LRR-RLPs\_0

ATGGGACTAAAAGGTGAGTTTCCACGAGGCATAGAAAATTGCACTTCTATAACTTCTCTAGATCTTTCAA  
GCAACGAGCTATATGGTACCATCCCTTCGGATATATCAAATAATCAGA

>PGSC0003DMG400027470LRR-RLPs\_122

TACTATAACCCTTGATCTCTCAAGCAACCAATTTTCAGGCGCGATCCCAAGTGACATTGCAAATTGCTCTT  
TTCTTAATTCCTCAGATTAGACAACAATAAACTACAAGGTCCAATCCC

>PGSC0003DMG400027470LRR-RLPs\_183

AATTGCTCTTTTCTTAATTCCTCAGATTAGACAACAATAAACTACAAGGTCCAATCCCACCAGAAATTGC

CCTTTTAGGTCGACTCAAGAACTTTAATGTTGCCAACAACATGTTGGTA

>PGSC0003DMG400027470LRR-RLPs\_244

CAGAAATTGCCCTTTTAGGTCGACTCAAGAACTTTAATGTTGCCAACAACATGTTGGTAGGGCCAGTGCC

AAGGTTTATTAATTCAACTTTTCCAGCTGAAAGCTATGCAAATAATCCAG

>PGSC0003DMG400027470LRR-RLPs\_305

GCCAGTGCCAAGGTTTATTAATTCAACTTTTCCAGCTGAAAGCTATGCAAATAATCCAGGACTTTGTGGT

CCTCCTCTGGAATTATGTGGTACAAAACACGTCGGGTTTCATGTTAAGTAC

>PGSC0003DMG400027470LRR-RLPs\_366

CTTTGTGGTCTCCTCTGGAATTATGTGGTACAAAACACGTCGGGTTTCATGTTAAGTACTGTATTGAACC

GTCGTGTACAGTTTGCCTGTGGTTTTGTGACTGGTTGGTCACTTTTTACT

>PGSC0003DMG400027470LRR-RLPs\_546

ATCAACAAGAGAACAAGGTAATGGTGATTGATGGAAATGAATCGCCTCGAGGAGAAGAAGTAAACAA

CGATCCAAAGGTAAACATTACGCTTGCTTTCAACCGTCTTTTTTCCCAATAA

>PGSC0003DMG400027470LRR-RLPs\_61

ATCTTTCAAGCAACGAGCTATATGGTACCATCCCTTCGGATATATCAAAATTAATCAGATTTACTATAACC

CTTGATCTCTCAAGCAACCAATTTTCAGGCGCGATCCCAAGTGACATTG

>PGSC0003DMG400027482LRR-RLKs\_0

ATTTGGTGCCTTTAATCGGCTTTTGTCTGAGAGGGACGAGCGAATTCTGGTTTACAAATACATGCCTAA

TGGAACTTACATGAGTGGTTGCATTCAACCGACGACAAGGCAAGACTCT

>PGSC0003DMG400027482LRR-RLKs\_488

GTAAGTGGTGGCAAGGATTTGATAATATGGTAATGCAACTACTTGAAGTGGCAAGTATTGCATGAAA

TTTATTCCGGATCAAAGGCCAACGATGCAACAAGTGTATCAGACTGTTGCT

>PGSC0003DMG400027499-(rev)LRR-RLKs\_0

GTGACTGTATTCTTTAAAATGCATGCAGCTTCTTCAACCCCATCATTTTCTTGAAGTTTACAGCTTTAATT

CCTCAAAGAAATCAGCAAAAAAATTGCATTTGCCATGGGAATTGCAA

>PGSC0003DMG400027499-(rev)LRR-RLKs\_1054

ACATGTAGTCAAGACCTTTCTTTGTGAATTTATCATCAAATTACTTGACAGGGGAGTTGCCTGATTGCTT

GCACCCTAGTTCTGGTTCCAAGATTGTATTGTTTTCTGGGAATTGTCTG

>PGSC0003DMG400027499-(rev)LRR-RLKs\_1302

AGGAGGTTTTGTTGGAGTAGTAGCGATTGTCGGTTTTGGCTTTCGTGGTTGTTAGAAGAGAGTATGCCAA  
GCAGAAAGCTAGCAAAGCCCCTCAAACAAGATTGATACTTGAAAAGGTCTC

>PGSC0003DMG400027499-(rev)LRR-RLKs\_1426

GCTCACACTCTTAAGCTGCTTAATGATGCAAGTAAGCTCTCTCTTTCTCTCACACAAACACATTTTGTTAAT  
GATTTCAACTTGTGAAAGTTTTTAGATCCTGATAATTGTAAATCTAAT

>PGSC0003DMG400027499-(rev)LRR-RLKs\_1612

TGTTGTTGTTATTGTTGTCATTGTAAGTAAGCTATAAACATTTGAATTTAAGCATTATTCCACAAAA  
GGAGTTTCTTTATATATAGATTGAAAATATCAATTTGCTTCAGGAAATT

>PGSC0003DMG400027499-(rev)LRR-RLKs\_1674

TCCACAAAAGGAGTTTCTTTATATATAGATTGAAAATATCAATTTGCTTCAGGAAATTGTCCAATACTGTG  
TTATTGGAATAAACTCTGTTCTTGCCTAAATTTCAAGATGTATCTTGAT

>PGSC0003DMG400027499-(rev)LRR-RLKs\_1736

AATACTGTGTTATTGGAATAAACTCTGTTCTTGCCTAAATTTCAAGATGTATCTTGATCTTTGATTCTTGAT  
AGGGTATATTTCTGAAACGAGGAAGTTGGGATTGCTTGGGGCCCCCTCC

>PGSC0003DMG400027499-(rev)LRR-RLKs\_1860

CGAACGTTTGTCTTGGATGAGCTTCGAGAGGCCACTAATAACTTTGATATATCAAATCTAATTGGCGCAA  
GCTCCAGTGGACAGGTATGGATTTCTTACTAAATACTGTAAGACTGTTT

>PGSC0003DMG400027499-(rev)LRR-RLKs\_1922

TGGCGCAAGCTCCAGTGGACAGGTATGGATTTCTTACTAAATACTGTAAGACTGTTTGAACAATGTTAG  
TCCACATGGACTGTTTTGTAGTTCATTCTCAATTCTCTTGCATCTATGG

>PGSC0003DMG400027499-(rev)LRR-RLKs\_1984

AATGTTAGTCCACATGGACTGTTTTGTAGTTCATTCTCAATTCTCTTGCATCTATGGTGAATGCTGATTG  
TGCTTTTCTATACTCTGAACAATAGATTTACAAAGGGCGTCTCACAGAT

>PGSC0003DMG400027499-(rev)LRR-RLKs\_2356

TTATCATTTGGCACAACAAGTCAACAGTTTATAATTGAGCATTTAGTTTACTTATTTGACTATTTCTACAA  
TATTACATAAATTATACTAAGTCTAAGTAAATGACTTCTTGGTATGTA

>PGSC0003DMG400027499-(rev)LRR-RLKs\_3038

TCTTAGGATACTGGACCGTCTTCTAGTGGATCAAAGGGAAATGATGGGCAAAGGTAATGATCTCATCA  
TTCTCAGCTGCTACTGCTGCATTTTCGCTCTTCACTACTCCACTTTTATGG

>PGSC0003DMG400027499-(rev)LRR-RLKs\_3100

CTCATCATTCTCAGCTGCTACTGCTGCATTTTCGCTCTTCATTACTCCACTTTTATGGTTCGATTTTCAGAAG  
CACCTATTGGAAACTAATCTTGTATACTTCTAAATGCAAATTGGTCT

>PGSC0003DMG400027499-(rev)LRR-RLKs\_3224

AGGTTTTAGAGAATCTTAAGTGTATCTCGACCAATTCTAGACAACACCTCTCCAGCCACTGCTATTTATTG  
GTTATGATTCTTGAAGACAATATATAGAGCCATAGACTTGGACCGTCTT

>PGSC0003DMG400027499-(rev)LRR-RLKs\_3286

TATTTATTGGTTATGATTCTTGAAGACAATATATAGAGCCATAGACTTGGACCGTCTTAGGAGATTCCAA  
GATAGTGCTCTACCGTTTAGTAGACTACTAATGAATTCCTTCTTTTGTTA

>PGSC0003DMG400027499-(rev)LRR-RLKs\_3348

GATTCCAAGATAGTGCTCTACCGTTTAGTAGACTACTAATGAATTCCTTCTTTTGTTAATATCTTCTTGAAT  
GCAGGTTAAAATACGAGGAGAAAGATGATGTGTATGACTTTGGAGTAA

>PGSC0003DMG400027499-(rev)LRR-RLKs\_3534

TTGTAAGAGTCACTTATGACATTTATGAGAAATTCCTTCATGTCATCAAGTTGAAGAACTATTTTGTTAAA  
ACCTTTTCTTGTGTTCTTATTGCAGCTAATAGTTAGCTTAACAGCTGA

>PGSC0003DMG400027499-(rev)LRR-RLKs\_3782

AAGACTTGATATGGAACCTTGCAGTTTGCAGCTCAGGTCCAAGACCCTTGAATAGAGACACTTATGGCA  
ACCAAGAGTCCCCTGGTCATGTGTAAGAACTTCCAATGATCAATGGACCTT

>PGSC0003DMG400027499-(rev)LRR-RLKs\_3844

TATGGCAACCAAGAGTCCCCTGGTCATGTGTAAGAACTTCCAATGATCAATGGACCTTTTCTTGTACAAA  
ATGTAACATTATAACCACTAGGATAGTAGTTCCAATTATTTAGTAGTCTCT

>PGSC0003DMG400027499-(rev)LRR-RLKs\_3906

TGTACAAAATGTAACATTATAACCACTAGGATAGTAGTTCCAATTATTTAGTAGTCTCTATTGCAACACTTT  
TGGCTATATGAGGTTTCAGTACTCTTTGGAGGTTAAACTCTACATTTGA

>PGSC0003DMG400027499-(rev)LRR-RLKs\_3968

CAACACTTTTGGCTATATGAGGTTTCAGTACTCTTTGGAGGTTAAACTCTACATTTGAGCCAAAATTTGTG  
AGCAAATGGCTATTTCTTGCACTTTTTTTTTTAACGAACCTAAAATTTAA

>PGSC0003DMG400027499-(rev)LRR-RLKs\_4030

AAATTTGTGAGCAAATGGCTATTTCTTGCACTTTTTTTTTTAACGAACCTAAAATTTAAAAGGTGGGCCTTT

CACCGACCATCCAATGGACCATGGACTAAACGGCACCCAAAAATGTATG

>PGSC0003DMG400027499-(rev)LRR-RLKs\_62

AGCTTTAATTCCTCAAAGAAATCAGCAAAAAATTGCATTTGCCATGGGAATTGCAAAAACAGTGCAGG

GCTCATGTTGGCTTCTTGTATTCATGTTGTTTTTCTGTTTAATTTATCAG

>PGSC0003DMG400027499-(rev)LRR-RLKs\_930

GAAACTGGATATTTCTTCTAATGAGCTTGTGGACCCTTTTCACCAACAATTTTATCATTGCCATCACTAA

GCTATTTGGATATTTCTGGAAATAAACTAACTGGGAAGCTTCTAAAGAA

>PGSC0003DMG400027536LRR-RLKs\_0

CTCTGCGCACACACAACCTCAGTAGAGAGAGAAAGAGAAGCAGTACAAAAATGTGAAAAGTTGCAGCAG

ATAAAAAAAAAAAGGGGGTTCATCAGAAGAAGGAGAAGAACTAACTGAAC

>PGSC0003DMG400027536LRR-RLKs\_122

AGAAATACAAAAAAGGGTTGTTTCAGTGAAGAGTAAAGGGGTAGCAAAATCTTGGTAAACAAGTGTA

AAATTTGATCTTTTTTTGTTGGGTTATGAGATGAGATCGATTCTTGGGTTTT

>PGSC0003DMG400027536LRR-RLKs\_1708

TTGCTTGTGAAAACATTGTAGTTGAACTTAAATTTCTGTCATACACTCCCCTATCCAAAGTAAGCATAGAT

TCTAAATACCATTACTAATGCCAGTACCCTAAGCACTCTTTATTCTTTT

>PGSC0003DMG400027536LRR-RLKs\_2013

GTACCCTAAGCACTCTTAAACAAACTTCCAACCTCATATCAAATCCTTTATTCCCTCTTTCCTTGTCCCAGGT

AGCGTCTAATCATGATTTAGGATGATGGAATAGGATAAAGCAAACAAG

>PGSC0003DMG400027536LRR-RLKs\_2257

TCTGGTTTTACCCACGAGTTTGAATCATGATTCAATTAAGCATAGATTTTGTACCTGTGTTAGCTTAGTTT

GGAGTTTGATAATATACCGTTCACTTAAATTGTCAACGTGCTATAGGCA

>PGSC0003DMG400027536LRR-RLKs\_2684

TATAAAAAGAACATCAAGAATGCTGATGGATTTTAAACGATCACTGGGCATACACACTGTTTAGATGAAG

TTCGAAATAAACATAATGACAGACGTTAATTTTTTATTGATGAGCTATAAA

>PGSC0003DMG400027536LRR-RLKs\_2745

AGATGAAGTTCGAAATAAACATAATGACAGACGTTAATTTTTTATTGATGAGCTATAAAGATTGTATAAA

ATGTTTGACGAGCTGATCCTTTCAGCACATGGGATGACAGGTTTTTATC

>PGSC0003DMG400027536LRR-RLKs\_2989



ATGCCAGTTTTGATGAATGTGTGAACTTGGCTTCATTATCTTGGTTGTCCCATTATCCTAGGGATGTCATT  
GGTATGATCTGTGGAATTAATTCATTCTCTGGTTTTCTTGTCACAGGGA

>PGSC0003DMG400027536LRR-RLKs\_3050

GGATGTCATTGGTATGATCTGTGGAATTAATTCATTCTCTGGTTTTCTTGTCACAGGGAGCTTTACAGTAA  
TAACATAAGTGGTCTAATACCGAGTGATCTTGGGAATTTGACTAATTTG

>PGSC0003DMG400027536LRR-RLKs\_3599

TAGTAATTGGTGTATTTATTTTTCTCCATTGTTGGGATCCTTTCTAGAAGAGAAAAGAAGTTTAGAATCC  
CATGCTTCATCTTACATTTTTCACTGCTGAAGTTTCTCTTGCTTAATGC

>PGSC0003DMG400027536LRR-RLKs\_3660

TTTAGAATCCCATGCTTCATCTTACATTTTTCACTGCTGAAGTTTCTCTTGCTTAATGCTCCACAACTTCTT  
TCTTTTGGCTTGACTGTCTAAGAAGTGTACCAAATAAGTTCTATTAT

>PGSC0003DMG400027536LRR-RLKs\_4636

GCTCCAGGTGGTCTCTAAATTGGTGTGGATAGGTTGTTTTCCCTTTTTTTTTTTTTGCTTGTTTGAGTTTG  
GTGATTTTTGTTGGTCCATCCATCTTGCCTCTCTTAGTTTTTCCTAAC

>PGSC0003DMG400027536LRR-RLKs\_4941

TTTGGTCCCCTTGTAATTATTATCTGTGGTATTTGAAGTCGAGTATGTCTGAATGAAATTAATCATATTT  
AAGCCAGAACTTGTGAAGATTTTCTTTGCTTTGTAAAATCTATCCTGGA

>PGSC0003DMG400027536LRR-RLKs\_5002

AATCATATTTAAGCCAGAACTTGTGAAGATTTTCTTTGCTTTGTAAAATCTATCCTGGAAATTAGATCTGA  
ATGATAGATACATATTTGTGTTCTTTCTTTTGAAGTGATTTAAATAAT

>PGSC0003DMG400027536LRR-RLKs\_5063

TTAGATCTGAATGATAGATACATATTTGTGTTCTTTCTTTTGAAGTGATTTAAATAATGAAGGGCCAAAA  
TTGTGTGTTAAATATAGTCTGGATCATATGAAGGAAATTAATCAAATTT

>PGSC0003DMG400027536LRR-RLKs\_5246

GCTCTACTATTTGCTGCTCCTGCCATTGCATTTGCCTGGTGGCGCCGTAGAAAGCCACAAGAATATTTCTT  
TGATGTACCAGGTTAGCAGTATTCACAATACCCAACCATAAGTCCATAA

>PGSC0003DMG400027536LRR-RLKs\_5307

AATATTTCTTTGATGTACCAGGTTAGCAGTATTCACAATACCCAACCATAAGTCCATAACTCCTACTTGCT  
CCCTCGCGTGTGTTGTGGTTTCTCTTGCATGTTTATTTTTGGCTCCATA

>PGSC0003DMG400027536LRR-RLKs\_61

GCAGCAGATAAAAAAAAAAAGGGGGTTCATCAGAAGAAGGAGAAGAAGAACTAACTGAACTGAGAAAT  
ACAAAAAAGGGTTGTTTCAGTGAAGAGTAAAAGGGGTAGCAAAATCTTGGTAAA

>PGSC0003DMG400027536LRR-RLKs\_6405

CATGTTGCTTGACTGGGTATGTTGTCATGCCTGCTTTACATGTAACATGACACGAGTACCATAATGTGCT  
CATTTTTTAATCTGTACAATCATAACACTAGCTGATTAATAAGTGTCTTCT

>PGSC0003DMG400027536LRR-RLKs\_6466

TAATGTGCTCATTTTTTAATCTGTACAATCATAACACTAGCTGATTAATAAGTGTCTTCTGCCTTTAGCAGG  
AATCTTTACATCTATGTCTGAACTTGTTGAGGTTCTTGTTCAGGTGAA

>PGSC0003DMG400027536LRR-RLKs\_7015

AAGTGTGTCTGTTACATTGTGCATACAAATTTGACTGACAGGAAATCCAAATCCATGCCCTGACAAGT  
TGGCACATAGGCGTAGTAGTTAAGTGCTTTAAAATTGTCCAACACAGTAC

>PGSC0003DMG400027536LRR-RLKs\_7320

GTTTTGCCACTCTATGCCCAAATTTTGGGCTCTTTCTGACAATTCAGATTAGTACCAGACGCTCTGATATA  
AGTACAAGATCTGCTCAGTGATACTTTTCGATCATTTCTGTCAATTTT

>PGSC0003DMG400027536LRR-RLKs\_8845

AGAAAAATCAGAAACAAGAAACAGTTCCTCTTTCTCGTTTAGCTATGGCATAAAGGAGAAGTAAGGTAA  
CCTGGCGATTGACTCCGCATTCTGGCATGAGCTCTGTAGCAGCAGCAATGA

>PGSC0003DMG400027555LRR-RLKs\_1464

TAAAGAAAATCAAATCATTAGGAACTTTTTATTTTTGTTGACCTTGTGAAAGTTTTTCTTTGTGAAATTTAA  
TGAAAATCTCCAGTTGTAAGCCCATGAAGTGTGTCTGTTACATTGTGC

>PGSC0003DMG400027555LRR-RLKs\_1525

GTGAAATTTAATGAAAATCTCCAGTTGTAAGCCCATGAAGTGTGTCTGTTACATTGTGCATACAAATTTG  
TACTGACAGGAAATCCAAATCCATGCCCTGACAAGTTGGCACATAGGCG

>PGSC0003DMG400027555LRR-RLKs\_1647

GTAGTTAAGTGCTTTAAAATTGTCCAACACAGTACACTACTGTCAAGCAGACTCTTGTTCAGTGACATT  
GAAAATGCTATCAATTTGACAAGGTTATTTACAAGATTTTGGATTTTAC

>PGSC0003DMG400027555LRR-RLKs\_1769

TCAAAGAATAGTGCTTCACATTCTTTACGGTTTTTATCATAATCTCGTGCTACAAGATAATGGCAGATAT

TTCATCAATAGGGCACTTGCAGAGTTTGTGTTTGCCACTCTATGCCCAA

>PGSC0003DMG400027555LRR-RLKs\_1830

TGGCAGATATTTTCATCAATAGGGCACTTGCAGAGTTTGTGTTTGCCACTCTATGCCCAAATTTTGGGCTCTT

TCTGACAATTCAGATTAGTACCAGACGCTCTGATATAAGTACAAGATCT

>PGSC0003DMG400027555LRR-RLKs\_2806

ACTATCAGCTGATCCAAAATCTTTTGAACTACCTTCTCTTGCAAAAAGTTCATCTCGCTCCACATCTTGTTT

GTGAGATTTGAGCTCACCGTCTTCAGAAGACTTAGCTACCTCCTCATC

>PGSC0003DMG400027555LRR-RLKs\_4026

CGGATACATGCACATACTTCCATTTAATTGACCTACAACCTAGACATTTCAAAGTTGGTAACTTTTTTTTCA

GAATGCATGAAATTTAGCAAATTAAGGACTGTGATTCATTAATTGAAC

>PGSC0003DMG400027555LRR-RLKs\_4087

CTTTTTTTCAGAATGCATGAAATTTAGCAAATTAAGGACTGTGATTCATTAATTGAACTAGAGTCGCTCC

ATGAAAAGTATCCATATCTAGGGCAGATAATTCTCGCAAACAACAGCT

>PGSC0003DMG400027555LRR-RLKs\_4941

ACCCTAGCTTGGTATCCTATACTATTTTTATTAGGAAAAAAATGCCAAAGAACCCCCCCCCCACCACC

CCACCCCGACTTGTAGCTTTTTAGTTAGTGAGCACCTAACTATCACT

>PGSC0003DMG400027555LRR-RLKs\_5002

CCACCCACCCACCCCGACTTGTAGCTTTTTAGTTAGTGAGCACCTAACTATCACTCGTATTAATAAC

CCCTGGAATTTGTTTTTCAACCGTAGCGTACACCTACGACGTTTAGAT

>PGSC0003DMG400027555LRR-RLKs\_5063

TATTAATACCCCTGGAATTTGTTTTTCAACCGTAGCGTACACCTACGACGTTTAGATCCCTCAACCGTG

TATACACGCACGTGACACGGTGAAAATATGACAAATGTGGATGTCCATG

>PGSC0003DMG400027555LRR-RLKs\_5124

CTCAACCGTGTATACACGCACGTGACACGGTGAAAATATGACAAATGTGGATGTCCATGTAGATAAATA

ATGCCCCACCCTCTCTAATATTTACCCTTTTTCAAAGCTTTTTATATAA

>PGSC0003DMG400027555LRR-RLKs\_5185

GATAAATAATGCCCCACCCTCTCTAATATTTACCCTTTTTCAAAGCTTTTTATATAATCCCCAATTCAC

ACAAATCAACCCTAATTACCCGATCTTCTTTTACACAAATACTCTC

>PGSC0003DMG400027555LRR-RLKs\_5246

CCCCAATTCACACAAATCAACCCTAATTACCCGATCTTCTCTTTACACAAATACTCTCTAAATAATCAAAT  
CCTAAGAAGTTTAACAGTCGGAGTTAAGGGTAGATTTTGAACATTTCT

>PGSC0003DMG400027555LRR-RLKs\_5307

AATAATCAAATCCTAAGAAGTTTAACAGTCGGAGTTAAGGGTAGATTTTGAACATTTCTGGCTCTGCTAT  
TTGAATGTTTTCTCCTCAAATAGTACAGTCCATTTGGGTGAAGCTTTTTA

>PGSC0003DMG400027555LRR-RLKs\_5368

CTCTGCTATTTGAATGTTTTCTCCTCAAATAGTACAGTCCATTTGGGTGAAGCTTTTTATTTGAGTGGATT  
TTCTCCGATCTGTCTGAAATTCTTATCAAGTAAGTGATTATCCATTC

>PGSC0003DMG400027555LRR-RLKs\_5429

TGAGTGGATTTTTCTCCGATCTGTCTGAAATTCTTATCAAGTAAGTGATTATCCATTCTTAAAATGTATT  
TTGTTTGTTCCTCGAATAGCCTTGGTCAGTTACAATCCAATTACG

>PGSC0003DMG400027555LRR-RLKs\_5490

AAAATGTATTTTTGTTTGTTCCTCGAATAGCCTTGGTCAGTTACAATCCAATTACGTCCGGGGTAGTC  
ATATGACCATGAAATTCTCACAATCGGAGGACACCCACATGCACAAACA

>PGSC0003DMG400027555LRR-RLKs\_5551

CGGGGTAGTCATATGACCATGAAATTCTCACAATCGGAGGACACCCACATGCACAAACAAGCATCCTAT  
TATAATTCATGGATTCATCAATTGCAACTTTAGAAAGACGGAGGAGAGATA

>PGSC0003DMG400027555LRR-RLKs\_5612

CATCCTATTATAATTCATGGATTCATCAATTGCAACTTTAGAAAGACGGAGGAGAGATAAATTATAGGCA  
AAGAAAGAAAATGATGGCAAAGATAGGTATTTAGAAAATTGAAAGTGAT

>PGSC0003DMG400027555LRR-RLKs\_5673

TTATAGGCAAAGAAAGAAAATGATGGCAAAGATAGGTATTTAGAAAATTGAAAGTGATGGAGAAGAA  
GGGTTTAGGGAGAATAAATAGGAAGAGAATGAAGAGAGATGCTGTGCAAAAA

>PGSC0003DMG400027555LRR-RLKs\_5734

AGAAGAAGGGTTTAGGGAGAATAAATAGGAAGAGAATGAAGAGAGATGCTGTGCAAAAAAGGAAAA  
AAATAAAGAGAAACAAGAATTTTTAATGTTTTTCACCATTGAAGTAATATGATG

>PGSC0003DMG400027555LRR-RLKs\_5795

GAAAAAATAAAGAGAAACAAGAATTTTTAATGTTTTTCACCATTGAAGTAATATGATGCGGCAAAAA  
TTACTCCCTCACGCACCTAGCTGAGCTTGTGTCAGTTTCTATGCCAGGT

>PGSC0003DMG400027555LRR-RLKs\_5917

ACGTTGTAGGTGTATGCGACGGTTGAAAAACAAGTCCGGGGGTATTCATATGAGTGATAGTTTAGG  
TATCACTGAATAAAAAGCTACAAGGTCGGGGGTCTCTAGCATTCTGCC

>PGSC0003DMG400027555LRR-RLKs\_5978

AGTTTAGGTATTCCTGAATAAAAAGCTACAAGGTCGGGGGTCTCTAGCATTCTGCCTTTTTATTATTA  
TTAAACTGGTGTATGCGACGGTTAAAAACAAGTCCAGGGATATTTCA

>PGSC0003DMG400027555LRR-RLKs\_6039

TTTATTATTATAAACTGGTGTATGCGACGGTTAAAAACAAGTCCAGGGATATTCATATGAGTGATA  
GTTTAGGTATTCCTAAATATAAAGCTACAAGATCGGGAGGTCTCTAGCA

>PGSC0003DMG400027555LRR-RLKs\_6100

TGAGTGATAGTTTAGGTATTCCTAAATATAAAGCTACAAGATCGGGAGGTCTCTAGCATTCTGCCTTT  
TTATAATTATAAACCTCATTAGCTGACTATCCTAGTCTATATCAGGTG

>PGSC0003DMG400027555LRR-RLKs\_6161

TCTGCCTTTTTATAATTATAAACCTCATTAGCTGACTATCCTAGTCTATATCAGGTGTAACCCAGTTTAT  
TGACTTATTGCAGCTAGAGTAAAGTTAAATGGAGCTATTGTTTTAGAG

>PGSC0003DMG400027555LRR-RLKs\_6222

ACCCAGTTTATTGACTTATTGCAGCTAGAGTAAAGTTAAATGGAGCTATTGTTTTAGAGCACAATACAGC  
TATAAAGATACATATGACCAGCATAACTACACAAGATGACAATATACTTT

>PGSC0003DMG400027555LRR-RLKs\_6283

CAATACAGCTATAAAGATACATATGACCAGCATAACTACACAAGATGACAATATACTTTACTTATGAAAA  
CGGAAGAAGAAAAATAAGCTAAAAGGCAATTCTACAAGTAGGCCAACCTT

>PGSC0003DMG400027555LRR-RLKs\_6344

TTATGAAAACGGAAGAAGAAAAATAAGCTAAAAGGCAATTCTACAAGTAGGCCAACCTTACAGCTGGG  
ATTTACATCTGCCAACGGTGTCAAAAAAATCATATAACCACGAAAACCAAAA

>PGSC0003DMG400027555LRR-RLKs\_6405

AGCTGGGATTTACATCTGCCAACGGTGTCAAAAAAATCATATAACCACGAAAACCAAAAACCTTGCTGTT  
TATAGGCACTTCGCCAAAACATCATAGGTGATCATCTAATGCATCATAAA

>PGSC0003DMG400027555LRR-RLKs\_6466

TTGCTGTTCTATAGGCACTTCGCCAAAACATCATAGGTGATCATCTAATGCATCATAAAGGAACCCTTTTA

TATTCTTTGCCATTGCCCCATACATTCTTTATCCTAAGAGCAACTAAA

>PGSC0003DMG400027555LRR-RLKs\_6527

AACCCTTTTATATTCTTTGCCATTGCCCCATACATTCTTTATCCTAAGAGCAACTAAAAGCATATTCAGTT  
GCTCATCAATAAACTGAAGAACCATCTTAGGATACTGTAAATGTTCCAC

>PGSC0003DMG400027555LRR-RLKs\_6588

CATATTCAGTTGCTCATCAATAAACTGAAGAACCATCTTAGGATACTGTAAATGTTCCACACCATATAGAAT  
ATCAAGAACATTAACACAACAGATAACTCATTACCTTTGTGCTTCAATA

>PGSC0003DMG400027555LRR-RLKs\_6649

CATATAGAATATCAAGAACATTAACACAACAGATAACTCATTACCTTTGTGCTTCAATAATTGGAAGACG  
AACCGATATAAGCTCGCAGAATAGCTCAACAATCTCCTGCGCTGCCATCA

>PGSC0003DMG400027555LRR-RLKs\_6710

TGGAAGACGAACCGATATAAGCTCGCAGAATAGCTCAACAATCTCCTGCGCTGCCATCATTTTCTCTTCT  
CTTATGATATGCTCTACCTAAACAAGCAAACATCACAGTCAAGCTCATTA

>PGSC0003DMG400027555LRR-RLKs\_6771

TTCTCTTCTTTATGATATGCTCTACCTAAACAAGCAAACATCACAGTCAAGCTCATTACTCTGTAAAACC  
ATCTATCAAATACATAATAACCTTTTCAGTATTCAAATGCGAAGAACAC

>PGSC0003DMG400027555LRR-RLKs\_6832

CTGTAAAACCATCTATCAAATACATAATAACCTTTTCAGTATTCAAATGCGAAGAACACACAGCCTAGCA  
CAAATTATATCAGCATGAATCGATGAATTTAAGCAAATAAGAGTCAGTT

>PGSC0003DMG400027555LRR-RLKs\_6893

AGCCTAGCACAAATTATATCAGCATGAATCGATGAATTTAAGCAAATAAGAGTCAGTTTATACCCGAAT  
TCGAGCAGTAGCTTCTGACCAGTCTCTAGTAGCTTAGCTATTTCTTTCC

>PGSC0003DMG400027555LRR-RLKs\_6954

TACCCGAATTCGAGCAGTAGCTTCTGACCAGTCTCTAGTAGCTTAGCTATTTCTTCTCATCTGCTTCA  
GCTGAAACTCCCTACGATTCTCAGTAGTTTGATCCGAGGAATTGTCAA

>PGSC0003DMG400027555LRR-RLKs\_7015

ATCTGCTTCAGCTGAAACTCCCTACGATTCTCAGTAGTTTGATCCGAGGAATTGTCAATTTCAACATGGT  
TTTACTGCAAATTGATAGGTACCATCAGCAAATTTCCATATAAAAAAGA

>PGSC0003DMG400027555LRR-RLKs\_7076

TCAACATGGTTTTACTGCAAATTGATAGGTACCATCAGCAAATTCCCATATAAAAAAGACAACATTTTTCT  
CAAAAATTTGAAAAATTCGAAACCCCATGATTTCAACAATACAAAATTT

>PGSC0003DMG400027555LRR-RLKs\_7137

ACATTTTTCTCAAAAATTTGAAAAATTCGAAACCCCATGATTTCAACAATACAAAATTTCAAATCTGCATC  
ATAAGAACCCTTAATAAAAAGATCCAAATCATAAAATCTGACAAGAAC

>PGSC0003DMG400027555LRR-RLKs\_7198

AATCTGCATCATAAGAACCCTTAATAAAAAGATCCAAATCATAAAATCTGACAAGAACCCTTCAATAAAA  
GACAGGAAAGTGGGAAATTGAGGATTACCATTTGGCAGCTTTGAAACCTT

>PGSC0003DMG400027555LRR-RLKs\_7259

TCAATAAAAGACAGGAAAGTGGGAAATTGAGGATTACCATTTGGCAGCTTTGAAACCTTTGCTGAAGAA  
AGAATCCATTATAGACTTGATTGAGATCTTCAATATCCGTGTACCCTTTAA

>PGSC0003DMG400027555LRR-RLKs\_7320

CTGAAGAAAGAATCCATTATAGACTTGATTGAGATCTTCAATATCCGTGTACCCTTTAAAATTCTTGCAGT  
AAAACCTTATGAATTATCACTTACCTAAAACCACAAAATAATTAATCAA

>PGSC0003DMG400027555LRR-RLKs\_7381

TTCTTGCAGTAAAACCTTATGAATTATCACTTACCTAAAACCACAAAATAATTAATCAAACCTTGGTAGTAT  
TTCAGATTAAAGCAAAGAATACCTTTTTATTTTTCAAAAAAAGAAAAGA

>PGSC0003DMG400027555LRR-RLKs\_7442

TTGGTAGTATTTTTCAGATTAAAGCAAAGAATACCTTTTTATTTTTCAAAAAAAGAAAAGAAAAGAGATCA  
AAGATCAAACCTGATGACGAAGTAGTTAAGAAAATATGTGTTTTTTGTGGA

>PGSC0003DMG400027555LRR-RLKs\_7503

AAGAGATCAAAGATCAAACCTGATGACGAAGTAGTTAAGAAAATATGTGTTTTTTGTGGAAAGCACAGA  
AAGTGAACCTGCTCCGCTATGCATATAAAGACAAATGGAACGCGGACAAAGC

>PGSC0003DMG400027555LRR-RLKs\_7564

GCACAGAAAGTGAACCTGCTCCGCTATGCATATAAAGACAAATGGAACGCGGACAAAGCTTTCAATGTC  
TACGACAACAAGCAGCTTCCTTAAGCTCTAAGCATTATTGGATTTCAACTT

>PGSC0003DMG400027581-(rev)LRR-RLKs\_1054

AGGAAGTAAGGGTTGTTAAAAAGGAGTTTGAACAGCATATGGATATTGTTGGAAAGATTACAAGGCAC  
CCAAATATAGTGCCATTTCTTGCTTGTATTACTCAAAGGATGAGAACTTC

>PGSC0003DMG400027581-(rev)LRR-RLKs\_1116

AGGCACCCAAATATAGTGCCATTTCTTGCTTGTTACTCAAAAGGATGAGAACTTCTTGTTTGTGAATA  
CATCCCTTATGGTAGCTTGTCATCCGCCTTATATGGTATAAGCTCCTTG

>PGSC0003DMG400027581-(rev)LRR-RLKs\_1178

TTGTGAATACATCCCTTATGGTAGCTTGTCATCCGCCTTATATGGTATAAGCTCCTTGACTCTTCTTATATA  
AAACTACTTCTTAGAACAGATCATGCTTGCTGCACATTATGCTGTAA

>PGSC0003DMG400027581-(rev)LRR-RLKs\_124

CACATCTTAGAAACTCAACTGGAAGCTGCTTTGTCAATCTGCAATTCTTGGATTGGGATCACTTGCAAC  
AAAGATGGAACGCGAGTAGTTGCAATTCATCTGCCTGGTGTGGACTTA

>PGSC0003DMG400027581-(rev)LRR-RLKs\_1240

TTCTTATATAAACTACTTCTTAGAACAGATCATGCTTGCTGCACATTATGCTGTTAATAGCTATTCCAATT  
CCGGCTTTATGCTTACATGGTCTTAGCTTAAATAGAGCGACATGATTA

>PGSC0003DMG400027581-(rev)LRR-RLKs\_1302

TATTCCAATTCCGGCTTTATGCTTACATGGTCTTAGCTTAAATAGAGCGACATGATTATTGGTGGTGATT  
ATATAGCCGAGTAGTAGTTGTTGTTTCGTAAGTTACATGATCTTGTTT

>PGSC0003DMG400027581-(rev)LRR-RLKs\_1364

TGGTGATTCATATAGCCGAGTAGTAGTTGTTGTTTCGTAAGTTACATGATCTTGTTTATAACTAGCTATA  
TGCCTACTGTTAGCTTGCAACAGCCTTGCATGGTATACAAAATTACAC

>PGSC0003DMG400027581-(rev)LRR-RLKs\_1612

TCTGATTGAACTGCAGTGTATCGATCACTTGCTACAGATTATTAATGATTCCTGTTTTGGGCTTTATTTT  
TACATGATATTGGTTATAGCAGGTAATGGAAGAACTCGACTAGACTGG

>PGSC0003DMG400027581-(rev)LRR-RLKs\_1674

GCTTTATTTTACATGATATTGGTTATAGCAGGTAATGGAAGAACTCGACTAGACTGGGATACCAGATTG  
AAGGTCTCTCTTGGAGCAGCAAAGGAATAGCACATATCCATTCTGAAGG

>PGSC0003DMG400027581-(rev)LRR-RLKs\_1736

CCAGATTGAAGGTCTCTCTTGGAGCAGCAAAGGAATAGCACATATCCATTCTGAAGGTGGAGTGAAAT  
TACTCATGGAAACATCAAAGCATCCAACATACTTCTTACAAGGGATCTAG

>PGSC0003DMG400027581-(rev)LRR-RLKs\_1798

GTGAAATTTACTCATGGAAACATCAAAGCATCCAACATACTTCTTACAAGGGATCTAGATGGTTGCATTT



CTGATTTTGGCTTAAGCCCTTAATGAATTACACAGCCATCAAGAATAAG

>PGSC0003DMG400027581-(rev)LRR-RLKs\_186

ACTTGCAACAAAGATGGAACGCGAGTAGTTGCAATTCATCTGCCTGGTGTGGACTTACTGGCCATATCC

CAGCAAACAGCATTGGCAAAGTAGATGCTCTCCAAGTCCTTAGCCTAAGA

>PGSC0003DMG400027581-(rev)LRR-RLKs\_1860

TTGCATTTCTGATTTTGGCTTAAGCCCTTAATGAATTACACAGCCATCAAGAATAAGGCTGCTGGTTACC

ATGCTCCAGAAGTGATTGAAACGCGAAAAGGCACACAAAAATCAGATGT

>PGSC0003DMG400027581-(rev)LRR-RLKs\_1922

CTGGTTACCATGCTCCAGAAGTGATTGAAACGCGAAAAGGCACACAAAAATCAGATGTTTATAGCTTTG

GAGTGTGGTACTTGAGTTGCTCACTGGCAAATCTCCTCTGCCATTGCCAA

>PGSC0003DMG400027581-(rev)LRR-RLKs\_1984

AGCTTTGGAGTGTTGGTACTTGAGTTGCTCACTGGCAAATCTCCTCTGCCATTGCCAAGGCACGAGGAC

GTAGTCAATTTGCCTAGATGGGTACGAGCTGTTGTTAAAGAGGAATGGACA

>PGSC0003DMG400027581-(rev)LRR-RLKs\_2046

CGAGGACGTAGTCAATTTGCCTAGATGGGTACGAGCTGTTGTTAAAGAGGAATGGACAGCTGAAGTTTT

TGATGCAGAGCTGATGAAGTACCATAATATTCAAGAAGAGATGGTGCATAT

>PGSC0003DMG400027581-(rev)LRR-RLKs\_2108

AAGTTTTTGATGCAGAGCTGATGAAGTACCATAATATTCAAGAAGAGATGGTGCATATGCTTCAAATTG

CACTTTTATGTGTAGCAAAGGTGCCTGACATGAGGCCTTCAATGGATGAAG

>PGSC0003DMG400027581-(rev)LRR-RLKs\_2143

ATTCAAGAAGAGATGGTGCATATGCTTCAAATTGCACTTTTATGTGTAGCAAAGGTGCCTGACATGAGG

CCTTCAATGGATGAAGTGATTAATAATGATTGAGCAAATTAACATCTATAA

>PGSC0003DMG400027586-(rev)LRR-RLKs\_0

GCTCAACAAGGTATATAATTAAGAAACCTTGTTGACATATATAGTTATGGGCAGAAGTTGCATTGTCC

TCTTTGGTCTTGACAGCTGTTTTCATTCTGCTTCATAACCAAACCTTCACTT

>PGSC0003DMG400027586-(rev)LRR-RLKs\_2318

GTCATCCAAACACCCAAGAGGAAAAGGCTAACTTAGTTTTGTACATCAGTTTGGGAGTGGGTATGTTA

CTTCTTGATTAGCCCTTGCATATGTATTTGTAAGATTCCGAAACACAAAA

>PGSC0003DMG400027586-(rev)LRR-RLKs\_2379

GTATGTTACTTCTTGTATTAGCCCTTGCATATGTATTTGTAAGATTCCGAAACACAAAAAGAATACAGG  
TCAAACAAATGTGTCTCCATTAAGAGCATGAAAGAATTCCTATTATG

>PGSC0003DMG400027586-(rev)LRR-RLKs\_549

TTCAATCTAACAAAGCTGCAAGTGTGAGTTTGCAGAGTAATTTTCTTGTAGGAGAGATCCCTCGAGAAA  
TTGGTGATCTTCGTTACTTGACTGTCCTAGACCTGCAATACAATCAGCTT

>PGSC0003DMG400027586-(rev)LRR-RLKs\_61

GCATTGTCCTCTTTGGTCTTGCAGCTGTTTTATTCTGCTTCATAACCAAACCTTCACTTGCTACTGTTCTTA  
ATATTGGCACTGATGAAGCTGCTTTTTTGCCTGAAATCACACATTT

>PGSC0003DMG400027586-(rev)LRR-RLKs\_732

AACAATCTTACTGGAAAGCTTCCAACAATATATGTGACCATCTTCCAAACTTGGAAAGGGCTTTATCTGTC  
AAGCAACTCCTTAGATGGAGTTATTCCATCAAACCTTGAGAAATGCAGA

>PGSC0003DMG400027586-(rev)LRR-RLKs\_793

TTTATCTGTCAAGCAACTCCTTAGATGGAGTTATTCCATCAAACCTTGAGAAATGCAGAAAGCTTCAAAG  
ATTGTCATTGTCGTCCAATGAGTTTATTGGAAGTGTACCAAGAGAGCTAG

>PGSC0003DMG400027683-(rev)LRR-RLKs\_0

GTCGTCGCCTGTCCCCGTTTAACTCTTTTTCTTTTTTCAATTTCTTTGCAAGTTTTAGTTTTAGTTCTC  
ACTGTTAGCCTTCTTTCTTTGACCAAAGAAAACTGTATCATCAAAA

>PGSC0003DMG400027683-(rev)LRR-RLKs\_1037

GACTTGCTTGTTGGGATTCCCTGTATATCAAGTAAGGGGGCTTTTATCAGCTTCCCTTCTTGGAGGTGTGA  
AGTTTGTGCTTGTGGCTTTGTAAGTTCAGATAAAACCAACTTCCATCGTG

>PGSC0003DMG400027683-(rev)LRR-RLKs\_1098

GAGGTGTGAAGTTTGTGCTTGTGGCTTTGTAAGTTCAGATAAAACCAACTTCCATCGTGTGTTTTGTTTAT  
ATCAAGTAGGGGTGTTCTTTTTTTCAACTTCCACGTAAAAGGCGTGAA

>PGSC0003DMG400027683-(rev)LRR-RLKs\_1159

TTTTGTTTATATCAAGTAGGGGTGTTCTTTTTTTCAACTTCCACGTAAAAGGCGTGAACTTTTATGGTTG  
TCAATGTAGATGATAAGGTGAAATCATCTTTTGAATGAAGTTTTACTTT

>PGSC0003DMG400027683-(rev)LRR-RLKs\_122

ATACTCTTTTTTTGCCCTTTTCTTTTGTAAATTGACCATCAAGATCCAGCATTTGATATCCTCAACTGG  
GCTGTAAGTATCTTGCATCTATAATTTCTTGGTCTTCTTTTGGTATT

>PGSC0003DMG400027683-(rev)LRR-RLKs\_1220

TTTATGGTTGTCAATGTAGATGATAAGGTGAAATCATCTTTTGAATGAAGTTTACTTTTGTTGACGATAG  
TTTTATGGAAGTGCATCTCTTGGATTGCTGTTATTGTGCTTTTTTCTCT

>PGSC0003DMG400027683-(rev)LRR-RLKs\_1281

TTGACGATAGTTTTATGGAAGTGCATCTCTTGGATTGCTGTTATTGTGCTTTTTTCTCTCCCAAGTCTCTT  
TTGCTTCCTTGTTTGCCGTTTTTCCATTAAAATCTGTGAGGAACAGT

>PGSC0003DMG400027683-(rev)LRR-RLKs\_1342

CCAAGTCTCTTTTGCTTCCTTGTTTGCCGTTTTTCCATTAAAATCTGTGAGGAACAGTTTTCTGCTTGAT  
CTGACTTGCCTTCAATCTTTATTTTGGTTGCCTGTAAGTGTGGGAT

>PGSC0003DMG400027683-(rev)LRR-RLKs\_1403

TCTGCTTGATCTGACTTGCCTTCAATCTTTATTTTGGTTGCCTGTAAGTGTGGGATTTGAGTACCTCTA  
CTTCTGGAGAATCACTAGTTCGCTTAAGAAGAAAAGTTATCTAATGTT

>PGSC0003DMG400027683-(rev)LRR-RLKs\_1464

GAGTACCTCTACTTCTGGAGAATCACTAGTTCGCTTAAGAAGAAAAGTTATCTAATGTTGATATGAAATG  
AGTCCGAATAGAGCGGATGAAACGTAGATTCATATAGTTTTTTTTTTACT

>PGSC0003DMG400027683-(rev)LRR-RLKs\_1525

TATGAAATGAGTCCGAATAGAGCGGATGAAACGTAGATTCATATAGTTTTTTTTTTACTAGTTTGGAAAGT  
GAGGCAGCATTGACTGATTGATAAACTGATTCATCATCTTATTTTTTTC

>PGSC0003DMG400027683-(rev)LRR-RLKs\_1586

TTTGGAAGTGAGGCAGCATTGACTGATTGATAAACTGATTCATCATCTTATTTTTTCTTGCAGCCTTAC  
ATTTTGCTTCTTAACTCGGGAGAAATTGGATTTGTTCTTGCAATGGATT

>PGSC0003DMG400027683-(rev)LRR-RLKs\_1647

GCAGCCTTACATTTTGCTTCTTAACTCGGGAGAAATTGGATTTGTTCTTGCAATGGATTTTTCGGGGTTGC  
AAACTAGTCTATAGAGATCTTAAATGTTTCAGTCAACTACTTAATTAGG

>PGSC0003DMG400027683-(rev)LRR-RLKs\_183

ATCCTCAACTGGGCTGTAAGTATCTTGCATCTATAATTTCTTGGTCTTCTTTTGGTATTTTTTATGCTCAAT  
TTGTTTATTGGTAGAATTTCTTATTAATAAATTGTTTCTTATTATGTT

>PGSC0003DMG400027683-(rev)LRR-RLKs\_2074

AAGGGCAAGTTTCCACGTGGTCTTAAAGAATTGCACCTCTATTACATCATTAGATCTTTCGAGCAACAAAC

TCCATGGAAGTATTCCAAATGATATCTCCAAAATTATAGGTTTTATGGTA

>PGSC0003DMG400027683-(rev)LRR-RLKs\_2135

GCAACAAACTCCATGGAAGTATTCCAAATGATATCTCCAAAATTATAGGTTTTATGGTAACGCTGGATCT

CTCATCCAACAATCTATCAGGGGATATCCCAGTTAATCTTGCAAAGTCTGCT

>PGSC0003DMG400027683-(rev)LRR-RLKs\_2257

TTTTGAATAGCCTTAGACTTGACAACAACCAGTTTACGGGTCAAATTCCTCCAGAAATTGCCCTGCTTGG

TCGGCTCAAGAATTTTAATGTAGCAAACAATCGATTGACTGGACCAGTT

>PGSC0003DMG400027683-(rev)LRR-RLKs\_2318

CCCTGCTTGGTCGGCTCAAGAATTTTAATGTAGCAAACAATCGATTGACTGGACCAGTTCCACGTTTCAT

AAATTCAACTTTTTCCCCAGAGAGCTATGCCAATAATGCCGGACTGTGTG

>PGSC0003DMG400027683-(rev)LRR-RLKs\_2379

ACGTTTCATAAATTCAACTTTTTCCCCAGAGAGCTATGCCAATAATGCCGGACTGTGTGGACCACCATTA

GCTCTTTGTGAGGGTTATGCTAAGAAATCCCCTACTGGAATCATTGTCTGG

>PGSC0003DMG400027683-(rev)LRR-RLKs\_2440

CCACCATTAGCTCTTTGTGAGGGTTATGCTAAGAAATCCCCTACTGGAATCATTGTCTGGTGCTGCTGTTG

GTGGGGTGACTTTAGGCGCTGTATTATTGACCATCGGTATGTTCTTCTAT

>PGSC0003DMG400027683-(rev)LRR-RLKs\_2562

GAGAAAGATATCCAGGAAGAGGAAAAAGGAAGATGATCCTGAAGGGAATAAATGGGCGAAGAGTATC

AAGGGTTCCAAGGCAATCCAGGTGAGAATTCTGTTCGTGCTTTGTTGATAGGT

>PGSC0003DMG400027683-(rev)LRR-RLKs\_2623

AGTATCAAGGGTTCCAAGGCAATCCAGGTGAGAATTCTGTTCGTGCTTTGTTGATAGGTCATAAATCAAT

TCTAGTGGGTTGTGGTTTGTGTTTACGGGTTCTACTGTGGCATTGCGATC

>PGSC0003DMG400027683-(rev)LRR-RLKs\_2684

TAAATCAATTCTAGTGGGTTGTGGTTTGTGTTTACGGGTTCTACTGTGGCATTGCGATCATATTTAGAAC

CATAAATTCGTGTTTTAATAAGCATTAACTAATGAATTTTTCCACCAT

>PGSC0003DMG400027683-(rev)LRR-RLKs\_2745

ATTTAGAACCATAAATTCGTGTTTTAATAAGCATTAACTAATGAATTTTTCCACCATAAGCTCGTGTGA

GTTTTCTTGTCTCAAGCATTCTAATTGACTTAAAGTGCCTTATTTTC

>PGSC0003DMG400027683-(rev)LRR-RLKs\_305

TGCTTGCCTTTGACTAAGGACTTGGTAATTTGTTGAATTTTGAAAGTTGTGTAGAAAGGGTCTGGACTTA  
ATTTATGGAAATTGAAGTTTTTTTTGGTATTTTTGCCTAGTTGCTATAAAA

>PGSC0003DMG400027683-(rev)LRR-RLKs\_3050

GAGTTTACATCCGAGATGGCTACGTTGGGAAATGTAAAGCACCGTAACCTGGTGCCTCTTTTAGGTTTCT  
GCATGGCGAAAAAAGAAAGGCTGTTGGTCTACAAAGATATGCCAAATGGC

>PGSC0003DMG400027683-(rev)LRR-RLKs\_3111

TAGGTTTCTGCATGGCGAAAAAAGAAAGGCTGTTGGTCTACAAAGATATGCCAAATGGCACCTTGCATG  
ATAGTTGCATTCGGTGAGTGAAGGGGAAAAAACTCTTGAGTGGCCTATGA

>PGSC0003DMG400027683-(rev)LRR-RLKs\_3172

CTTGCATGATAGTTGCATTCGGTGAGTGAAGGGGAAAAAACTCTTGAGTGGCCTATGAGAATGAAAA  
TCGCTATTGGAGCAGCCAAAGGATTTGCATGGCTTCACCACAACCTGCAATCC

>PGSC0003DMG400027683-(rev)LRR-RLKs\_3355

AATATCGGATTTTGGACTTGCTAGGCTCATGAATCCAGTTGACACTCATTTGAGTACCTTTGTAAATGGG  
GAATTCGGGGACTTTGGTTATGTTGCACCTGAGTACGCGCGAACTCTCAT

>PGSC0003DMG400027683-(rev)LRR-RLKs\_3416

GTAAATGGGGAATTCGGGGACTTTGGTTATGTTGCACCTGAGTACGCGCGAACTCTCATGGCTACACCA  
AAAGGTGATGTGTACAGTTTCGGTGTGACTTCTCGAGTTAGTTACAGGT

>PGSC0003DMG400027683-(rev)LRR-RLKs\_366

CTGGACTTAATTTATGGAAATTGAAGTTTTTTTTGGTATTTTTGCCTAGTTGCTATAAAAAGATTGATTTTTT  
TTTAATTGTGTTGGTAGCTGCTTTGAATATGGACTTTGTAAATTTGTT

>PGSC0003DMG400027683-(rev)LRR-RLKs\_3782

TATCATTTCACAACTGATGATGACATTATGATGCCTGAGAGTGATAGCGGATTCCAAATGGACGAGCTC  
ATTGTTGCTCAATAAGTAAATGAAGCCCTTCGATAATGGTCGAGTAAGATA

>PGSC0003DMG400027683-(rev)LRR-RLKs\_3843

ACGAGCTCATTGTTGCTCAATAAGTAAATGAAGCCCTTCGATAATGGTCGAGTAAGATAACAATAACT  
AGATCATTTTCTATCCTGTACAAATACCACGGTTCACTATCTATATAATA

>PGSC0003DMG400027683-(rev)LRR-RLKs\_3904

ATAATACTAGATCATTTTCTATCCTGTACAAATACCACGGTTCACTATCTATATAATATCATTCTATTTCT  
ACTGTAAGTCCCTTATTCATAGCTACCCAACCTATGTAATTTGTGCTTC

>PGSC0003DMG400027683-(rev)LRR-RLKs\_3965

ATTCTATTTCTACTGTAAGTCCCTTATTCATAGCTACCCAATGTAATTTGTGCTTCTTTTTCTGTATTTT  
TAATGGTGAAGAGATTTCTACAGATTGGTGTTAGTCAGTATTTTTCC

>PGSC0003DMG400027683-(rev)LRR-RLKs\_4026

TTTCTGTATTTTAAATGGTGAAGAGATTTCTACAGATTGGTGTTAGTCAGTATTTTTCTCTTTTCAGATTT  
ACTGCTTGAACAGTGTAGTCTCATCTCCAGTAATTATAAAAATGCAAA

>PGSC0003DMG400027683-(rev)LRR-RLKs\_427

ATTGATTTTTTTTTAATTGTGTTGGTAGCTGCTTTGAATATGGACTTTGTAAATTTGTTAATTTTGAAAGT  
TGCATAGAAAAGCTCTGGACTTGTATTTCTGGAAATTGAAGTTGAATT

>PGSC0003DMG400027683-(rev)LRR-RLKs\_549

GCCTTTTGTGTTTGATCTTAAGAACCCTTTTTGGGTTTTGTGGATTGTGTGAGATGGGGTTTGTGTCTTA  
TATCAAGTAGAGGTCTTTTTCTTTTTGAACTTTCTTTTGAAGGTCT

>PGSC0003DMG400027683-(rev)LRR-RLKs\_610

TTGTGTCTTATATCAAGTAGAGGTCTTTTTCTTTTTGAACTTTCTTTTGAAGGTCTGAACTTTTGTGCTT  
GTGGATGTGGAAGATCAAGTAAATTCTGTATCTCGGAAACAATCTCT

>PGSC0003DMG400027683-(rev)LRR-RLKs\_854

TACTAACCATTTCTTAATACATTGGCTGCCTTCTTGAGTACTTTGAACAAGGACAGTGGTTTATTATTTG  
TTGAAAATTTGAAGGTCATGGTCAAAAAGCTCTCAACTTCAATTAATTT

>PGSC0003DMG400027683-(rev)LRR-RLKs\_915

TTATTATTTGTTGAAAATTTGAAGGTCATGGTCAAAAAGCTCTCAACTTCAATTAATTTTTTTTTGGGATAG  
GAATTTGCTCTCTTGTGTTTGTATTTTCAGAACCTTTCTGGGTTCTAT

>PGSC0003DMG400027683-(rev)LRR-RLKs\_976

TTTGGGATAGGAATTTGCTCTCTTGTGTTTGTATTTTCAGAACCTTTCTGGGTTCTATTAGACTTGCTTGT  
TGGATTCCCTGTATATCAAGTAAGGGGCTTTTATCAGCTTCCTTCT

>PGSC0003DMG400027703-(rev)LRR-RLKs\_1054

GGATCACCTCTGTTGGCGTTCCAACCTTAATTACCAAGTTTATTACTCCAAATCTACCACCACTAGGCCAC  
CTTTCTATGTTCCCTTAAGCAAATAGTAGCAGTATCTTTGAACTGGTACA

>PGSC0003DMG400027703-(rev)LRR-RLKs\_1116

CTAGGCCACCTTTCTATGTTCCCTTAAGCAAATAGTAGCAGTATCTTTGAACTGGTACAGTAGACTGGTAA

TATATGCTCTTAAACATTGTTTTTTAAGTCTATAGATGGAGATCAGATGT

>PGSC0003DMG400027703-(rev)LRR-RLKs\_1178

ACTGGTAATATATGCTCTTAAACATTGTTTTTTAAGTCTATAGATGGAGATCAGATGTCAAGAAGCAAAC

TTTGATCTAATAACTGTATGTCTATATGGATATCACCTAATCTAGATTAT

>PGSC0003DMG400027703-(rev)LRR-RLKs\_124

ATACCAAAGTCTCCTATCAAGGAAACGGCTATGTAAGTTATCTCATTTTGGTTATAAGCTACCTTTACTTC

ATAAGAATATGTTTCTTTCAATTCTCCCGCAAATGACTAGCATAAA

>PGSC0003DMG400027703-(rev)LRR-RLKs\_1612

ATTCTTTACCTCCATACAGAAGCTCATCCACCAATATTCCATAGGGACATCAAAGCCAGCAATATTCTTCT

TGACTCAAAAATGGCAGCTAAAGTTGCTGATTTCCGATTATCTAGGCTT

>PGSC0003DMG400027703-(rev)LRR-RLKs\_1674

TATTCTTCTTGACTCAAAAATGGCAGCTAAAGTTGCTGATTTCCGATTATCTAGGCTTGACCTGTTCCAGG

ATGATGAAGGTGTACTACCTAACCATGTTTCAACTATTGTGAAGGGAAC

>PGSC0003DMG400027703-(rev)LRR-RLKs\_1736

CTGTTCCAGGATGATGAAGGTGTACTACCTAACCATGTTTCAACTATTGTGAAGGGAACACCTGTAAGTCC

TTCACTACATCATTATGTTCTATTTGACCTCACTCGTATCATTTAAATTT

>PGSC0003DMG400027703-(rev)LRR-RLKs\_1798

GTAAGTCCTTCACTACATCATTATGTTCTATTTGACCTCACTCGTATCATTTAAATTTGATGCATTGAGACT

CTACTTGTATATGCAGGGTTATCTAGATCCCGAATACTTCTTGACCCG

>PGSC0003DMG400027703-(rev)LRR-RLKs\_1860

CATTGAGACTCTACTTGTATATGCAGGGTTATCTAGATCCCGAATACTTCTTGACCCGTAAATTGACAGAT

AAAAGTGATGTTTATAGCCTTGGGGTTGTGTTTCTAGAAATCTTAACCG

>PGSC0003DMG400027703-(rev)LRR-RLKs\_1984

GCGTCCCATCTCACATGGAAAAACATTGTCCGCGAGGTATTACTCTCATTGTTAACTTCCCGATTTCAT

GTCTTATCGTGTGCATATGTTTGATAGATGATTTATCCGCACACAAAGT

>PGSC0003DMG400027703-(rev)LRR-RLKs\_2046

GATTTCCATGTCTTATCGTGTGCATATGTTTGATAGATGATTTATCCGCACACAAAGTGAATACTGCTGA

CTGATGCAAGGGTAGGAATAGAGGCAGATTCATGAATTAACCTTGTAAAT

>PGSC0003DMG400027703-(rev)LRR-RLKs\_2108

TACTGCTGACTGATGCAAGGGTAGGAATAGAGGCAGATTCATGAATTAACCTGTAATGCTCTTAGTTCT  
TACCATTGAACACACTACATGTCGCACAAAATGACGCTTTTAGAATTTAT

>PGSC0003DMG400027703-(rev)LRR-RLKs\_2170

TTAGTTCTTACCATTGAACACACTACATGTCGCACAAAATGACGCTTTTAGAATTTATATTTTATGGATAC  
ATTTTAGTGATTTTACATATGTATGTTATTTTATGGTGCATCCTCCTC

>PGSC0003DMG400027703-(rev)LRR-RLKs\_2232

TATGGATACATTTTAGTGATTTTACATATGTATGTTATTTTATGGTGCATCCTCCTCTGGGCTGAGAAGG  
GCTAGGGGAAATGTGAACATAATTTTACGCAATCTTTCCTTGCATTTTC

>PGSC0003DMG400027703-(rev)LRR-RLKs\_2294

CTGAGAAGGGCTAGGGGAAATGTGAACATAATTTTACGCAATCTTTCCTTGCATTTCTGCTATGAAGCT  
TCACACCTCGAATCTAGCTCCACCGTGTTAATAGTCCCTTGTACCATCA

>PGSC0003DMG400027703-(rev)LRR-RLKs\_2542

CAGAAGACAGACCTTCAATGTTGGATGTGGTCAGGGAGCTGGAAACTATTCAGTCTATCCTCAATCTGA  
TGCCAGATATTGACACTGATTCAGTAGATTCTAAAGCAAAATTTAACGAAC

>PGSC0003DMG400027703-(rev)LRR-RLKs\_2728

CGGGAGCTTACAGTATCAGTGGTGTGAGTCTTACTATGCCTCGCTAACAGAATAGACAATAGTTGCTCAT  
GTTTTGTACTAGAAAAAATAGCATGTAGAATAGAGAGTTGTACCATTTAG

>PGSC0003DMG400027703-(rev)LRR-RLKs\_2790

TTGCTCATGTTTTGTACTAGAAAAAATAGCATGTAGAATAGAGAGTTGTACCATTTAGCTTCTGTTTTATA  
TATGTATATTTCAAGGATTTGTTAACAAAAACCTCTTTATCATAGCCTT

>PGSC0003DMG400027703-(rev)LRR-RLKs\_2852

TGTTTTATATATGTATATTTCAAGGATTTGTTAACAAAAACCTCTTTATCATAGCCTTCTGAGTTCTGACAG  
TATGTGTATGCTATCAAAATCCAAAACCTTGTACAAAATGGACTCTG

>PGSC0003DMG400027703-(rev)LRR-RLKs\_2914

GTTCTGACAGTATGTGTATGCTATCAAAATCCAAAACCTTGTACAAAATGGACTCTGAGATAGGTAAGT  
CTATTTGTTTGAAGGAGTTGCACCAACCAATTCCTCAAAACAACCTGACA

>PGSC0003DMG400027703-(rev)LRR-RLKs\_2976

AGGTAAGTCTATTTGTTTGAAGGAGTTGCACCAACCAATTCCTCAAAACAACCTGACAACAAACAGACAA  
TGCCAGAGCTAAAGGGGCGGAAGGGGGTTCATCGCCAGAAAATCACACTG



>PGSC0003DMG400027703-(rev)LRR-RLKs\_3038

ACAGACAATGGCAGAGCTAAAGGGGGCGGAAGGGGGTTCATCGCCAGAAAATCACACTGTATATATAAA  
AGGTCGATCTTTTTATCTATATAAATGATGAACCCTCTTGTAATCCAACATC

>PGSC0003DMG400027703-(rev)LRR-RLKs\_3100

TATAAAAGGTCGATCTTTTTATCTATATAAATGATGAACCCTCTTGTAATCCAACATCATTACCAGAAATA  
GAAATATTATCTAAGCTATGGCTACAATGAGAGTCGTACAACAAAACAG

>PGSC0003DMG400027703-(rev)LRR-RLKs\_3162

CCAGAAATAGAAATATTATCTAAGCTATGGCTACAATGAGAGTCGTACAACAAAACAGGCAAAACTCGT  
AGTTTTGAAGTAATGTTAGCTTTAGATCACATAACATGTCATCGTAAACCA

>PGSC0003DMG400027703-(rev)LRR-RLKs\_3224

AACTCGTAGTTTTGAAGTAATGTTAGCTTTAGATCACATAACATGTCATCGTAAACCACACAAAGGAACA  
GAAAACAAATCCTCAAATCAATATGAGGAAACTCATGTTTTGTTCTATGG

>PGSC0003DMG400027703-(rev)LRR-RLKs\_3286

AAGGAACAGAAAACAAATCCTCAAATCAATATGAGGAAACTCATGTTTTGTTCTATGGAACCAAAGTTA  
GACATGGTTGACACACTCCAAGCTCCTACAAGAAGTCAGAAGACTATTTCT

>PGSC0003DMG400027703-(rev)LRR-RLKs\_3472

GGCTCTACCGGGAGGGAGGGAGGGAGCCGGTTTTGGATTGGTGTGTATTTGAAACAAATATTGATAAT  
CACTTTGAAGCAGCATCAGCAGTATGCATACTGTCATTCTGGTCCAGCAACC

>PGSC0003DMG400027703-(rev)LRR-RLKs\_4464

TACCTCAGGTGATCCACTTGTTTAGACACAATATACCCAGTTTTCAAAGGGTTAAAACAAACCCTATTATC  
ACAAAATCTGGCTGAAACACCAGAAAGATCACGACTTTGATTATGATTC

>PGSC0003DMG400027703-(rev)LRR-RLKs\_4650

TAATAAAATGAGAAAATAGAAAGTAATGGCTATATTATTCATCCCATCAACAAACAAAGATTGATTCA  
CTAAAAGATCAAGAAAGACTCTTTCTTTGACACAAATAATATATATAAAT

>PGSC0003DMG400027703-(rev)LRR-RLKs\_4712

CAGATTCACTAAAAGATCAAGAAAGACTCTTTCTTTGACACAAATAATATATATAAATACATACACACAC  
AACAAAAAAGATGCAACAGAGTTAACAATAAATCAAGAAAAGGAAAAGGG

>PGSC0003DMG400027703-(rev)LRR-RLKs\_496

CATCACCGGAATCTAGTTTCATTGCTAGGGTATTGTGATGAAGAAGGAGAACAGGTATGATAAACCTCA

AAACTTCAAATTCCAAATCTTTTTGAATCCACTCATTAACATGGAATTCA

>PGSC0003DMG400027703-(rev)LRR-RLKs\_62

GGTGTTTTGCTGCATTTGTTTCAGCAATTTAACTGTGTTAATAAAAAACGACATGCCAAATACCAA

GTCTCCTATCAAGGAAACGGCTATGTAAGTTATCTCATTTTGTTATAAG

>PGSC0003DMG400027703-(rev)LRR-RLKs\_868

TCTTCTCTGCTTTATTTTTGGTTAGGGAAGCTATTGAGCCAGGAGAGGAATTTGATATTTATCATTATTC

TGATAATTGTGTTGTGTAAGCTGGCTTGCTTGCCTTTGACTAATCTAT

>PGSC0003DMG400027703-(rev)LRR-RLKs\_930

TCATTATTCTGATAATTGTGTTGTGTAAGCTGGCTTGCTTGCCTTTGACTAATCTATTAATACGTGCTA

CCTCCCACTAGCACAAATATCAGATAACTCCATCCTTCAAGGTTTAGGA

>PGSC0003DMG400027710-(rev)LRR-RLKs\_1159

AACGAAATTTGATCCGTTTTTTTTGGTCCCATCTTCTTGATTTTGCAGTCACCCTACATGTTTCCCGAAT

GCTTTGAACCCTGAACTATCTCATCTAGGAGATCTAGATAATCATTG

>PGSC0003DMG400027710-(rev)LRR-RLKs\_1525

CATTTTTTTTCTTGAATTTCTTATGAAAATTGTGCTTAATGTAAGATTGTTTCAAGAAGAAGTAAACCTA

ATATGCTTGAAAGATCATGACTATGTCGATTGGTTAATCCCTTCGGA

>PGSC0003DMG400027710-(rev)LRR-RLKs\_1769

AAATCCTTCTCCAATTTAAACAGTGTCCAACATATGTAAGTGCAACTCATTTGATTGTTTTAAACAGTGGA

ACAAGTCTAAGGTTCTACCTTTGTAATCTTATGTGATATATCATGTGTC

>PGSC0003DMG400027710-(rev)LRR-RLKs\_2013

AGAAGTTAGAGCGAAGCAAGTTTTTTGTAACTTCTAAAATGACCTTTATCTCTGCTTATGTCTGTAACTAA

CGGAGTAATGTTTTGTGATGATACTTTCTTTTTGTCAACAGGCTTATG

>PGSC0003DMG400027710-(rev)LRR-RLKs\_2196

ATGTATGTCCCTACTCACACACACATATATGATATGCATATATTGAACCTCATATGCAACTTTCATTAGCT

GTATTTTGCTCAAGAGGTATAACTAACTGTTACAAAAACAATGGTTA

>PGSC0003DMG400027710-(rev)LRR-RLKs\_2440

CAGATGATCGAACAACCTGAAGCTGAGAACATTTTCGTTACAGATCTATCTCAGAACCCTCTAATTATCATC

TTCAGATCTTCTGTTGATTATAAAATTCATCGATAATCTTTGCTTGTA

>PGSC0003DMG400027710-(rev)LRR-RLKs\_2806

ATTCTTCCCCTATTCTCTATGACTCAGCATTATAAGTTATACATTTGAAGGACAACAATAGTAAATAATAT  
GTACAAACATAAGCATATATTCATTGTGCACAATGTATATGAAAGAGAG

>PGSC0003DMG400027710-(rev)LRR-RLKs\_2867

TAAATAATATGTACAAACATAAGCATATATTCATTGTGCACAATGTATATGAAAGAGAGAATGTTTCAGGA  
CATCTTATTATGACGGTTCGGGTAGATAGAATAAGATGTAATAGTTGAAT

>PGSC0003DMG400027710-(rev)LRR-RLKs\_2928

TGTTTCAGGACATCTTATTATGACGGTTCGGGTAGATAGAATAAGATGTAATAGTTGAATCGTACTGTCAC  
CTAATCAAATGGAGATTCAATGCTTCTGATAATATTGCAGTAGTCTCAGA

>PGSC0003DMG400027710-(rev)LRR-RLKs\_3233

CAGCTGGAATCAACTGTCTGGATCTCTACCAAATAAGCTTTCCAACAATATGACTTCTATGTATGCTTTCT  
ATTTTCATGCTACAGATTTCTTCATATATCTAGCATCTTAGTTCAGCCAT

>PGSC0003DMG400027710-(rev)LRR-RLKs\_3294

TATGCTTTCTATTTTCATGCTACAGATTTCTTCATATATCTAGCATCTTAGTTCAGCCATATTTTGTGTTAGTT  
CATTATCTCATGTTGTGAAGAGTTCTACATCAGCCCTTTAAGAAACA

>PGSC0003DMG400027710-(rev)LRR-RLKs\_3599

AGTTTTTCATCTCTTCCTTTGTTGCAGAACTGTGAGGATCTTCACTGTGTCTTGTAATACATTCTCTTTAG  
TACTGTTTCTTTAACATTTCAAAGCTCAATTTTCGTATATAACAAATTG

>PGSC0003DMG400027710-(rev)LRR-RLKs\_4026

ACGACAAAACCTAAGAGAAGCCATTGAATTACTAATTTTATGATCTGACTATCACTTCATATCCACATTTT  
CAATAATAAAAGACATTATTTTCAGGTTGCAGGGCAATCCTGTCTGCAG

>PGSC0003DMG400027710-(rev)LRR-RLKs\_4087

TCCACATTTTCAATAATAAAAGACATTATTTTCAGGTTGCAGGGCAATCCTGTCTGCAGAAATGAGAATG  
TAAGAAACATCGTCAAGTTCTGCGGCTCTGAAGCCGGAGCAGAACATAAG

>PGSC0003DMG400027710-(rev)LRR-RLKs\_4148

ATGAGAATGTAAGAAACATCGTCAAGTTCTGCGGCTCTGAAGCCGGAGCAGAACATAAGACGAATAAC  
TCAGTGATTGTAAGTGGTCTTGTCTTATTGTTGCATGCCCAAAGGATAACT

>PGSC0003DMG400027710-(rev)LRR-RLKs\_4209

GAATAACTCAGTGATTGTAAGTGGTCTTGTCTTATTGTTGCATGCCCAAAGGATAACTATTATGAATAT  
GTTCCAAACTCACCTGTTCCCTGCACTTGTGCCTCACCTCTCATAGTTGG

>PGSC0003DMG400027710-(rev)LRR-RLKs\_4270

TATGAATATGTTCCAAACTCACCTGTTCCCTGCACTTGTGCCTCACCTCTCATAGTTGGCTGGCGGCTGAA  
AAGTCCAAGTTTTTCTTACTTTGATCCATATGTGCATCAATTTGAGCAG

>PGSC0003DMG400027710-(rev)LRR-RLKs\_4331

GGCGGCTGAAAAGTCCAAGTTTTTCTTACTTTGATCCATATGTGCATCAATTTGAGCAGTATATGACTAG  
AGATCTTCATTTGGACCTTACCAAATGTTGATTGAGTCAAATTCTTGGG

>PGSC0003DMG400027710-(rev)LRR-RLKs\_4392

TATGACTAGAGATCTTCATTTGGACCTTACCAAATGTTGATTGAGTCAAATTCTTGGGAAGAAGGACCT  
CGTCTACGAATGCAATTGAAGCTTTTCCCAGTAGTTGGGGTCAGTACATT

>PGSC0003DMG400027710-(rev)LRR-RLKs\_4453

GAAGGACCTCGTCTACGAATGCAATTGAAGCTTTTCCCAGTAGTTGGGGTCAGTACATTTAATAAAAGT  
GAGGTCATTCGTATCAGCGACATTCTGCAATATTGGGAAATATCTGTAGTT

>PGSC0003DMG400027710-(rev)LRR-RLKs\_4514

ATAAAAGTGAGGTCATTCGTATCAGCGACATTCTGCAATATTGGGAAATATCTGTAGTTGACCTTTTTGG  
ACCTTATGAGCTCCTTAGTTTCACTCTGGAGGGACCTTATTCCTACTGTA

>PGSC0003DMG400027710-(rev)LRR-RLKs\_4575

CCTTTTTGGACCTTATGAGCTCCTTAGTTTCACTCTGGAGGGACCTTATTCCTACTGTAAGTTCTCAGCGC  
TTCATTGTGCTTCATGGTTGATCTTTGTTATCATGATTAGTATCTTCCT

>PGSC0003DMG400027710-(rev)LRR-RLKs\_4636

TTCTCAGCGCTTCATTGTGCTTCATGGTTGATCTTTGTTATCATGATTAGTATCTTCCTTCCTCAGAATTTT  
GGTTTATCATATGATGCATGTTTTTCTGCAGTGAATCCTGATATTCAA

>PGSC0003DMG400027710-(rev)LRR-RLKs\_4697

CTCAGAATTTTGGTTTATCATATGATGCATGTTTTTCTGCAGTGAATCCTGATATTCAAGCTAAACATAAA  
AACAAAGGTGCTATCATAGCTATCGTTGTATCAGGTGTTTTTGTGTCAT

>PGSC0003DMG400027710-(rev)LRR-RLKs\_7076

CTTTCCTTGCAATTTCTGCTATGAAGCTTCACACCTCGAATCTAGCTCCACCGTGTTAATAGTCCCTTGAC  
CATCAATGGCAGGTAAATTTGGCTCATGGCTCTGAGAAGATGTTCTCA

>PGSC0003DMG400027710-(rev)LRR-RLKs\_7320

TGGAAACTATTCAGTCTATCCTCAATCTGATGCCAGATATTGACACTGATTCAGTAGATTCTAAAGCAAA

ATTTAACGAACCAAAGACATCGTCTTCATTTTCTGATTGCACTAGCAAGG

>PGSC0003DMG400027710-(rev)LRR-RLKs\_915

AAGTTTAACACCTGAGCTTGACAACACTATCTCATCTTCAGTTTCTGTGAGTTGTTACACATATTACTACGT  
TGTACAAATATTTTGATTTTAAGATATAGTAGGGTTTATTAATTTTTCT

>PGSC0003DMG400027710-(rev)LRR-RLKs\_976

ATTACTACGTTGTACAAATATTTTGATTTTAAGATATAGTAGGGTTTATTAATTTTTCTATCTGTTTTACTT  
ATTTTTATCTTTATAATTCACCTTTCTGAAAGGAATTCATGTGGAATG

>PGSC0003DMG400027966LRR-RLPs\_0

ATGGTTCCCAAATATTTTATTTCTGATGTTTTTCACTCTCTTCACTGTTACTTTTGCTTCCGTTGAGGAA  
GCAACTGCTCTCTCAAATGGAACGCTAATGTCCTAAGCCAAAATAAT

>PGSC0003DMG400027966LRR-RLPs\_1116

GTTCTGTTTCCTTTGGCAATTTGAGAACTTGCAGACACTAAATCTCGCTGCGAACGAACTTTCCGGTTCC  
TATTCCAAAAGAATTTGCATATTTGGATAACTTGGTTTTGTTATCAATG

>PGSC0003DMG400027966LRR-RLPs\_124

TACTGGCTTCATGGACACTAAGTACTGATGCATGCAGGGGTTGGTATGGAGTTATATGTTTTAATGGTCG  
GGTAACAAGATCAATATTACAAATGCTGGTGTGTTGGTACACTCCATGA

>PGSC0003DMG400027966LRR-RLPs\_1364

CAAAGGGTTCGCTTCAATAACAACAGCTTTACTGGGGATTTATCTGAACTTTTGGTATCTATCCAGAG  
CTTCTGTTCAATTGATTTGAGCGACAACGATTTTCATGGTGAACCTCAGCAG

>PGSC0003DMG400027966LRR-RLPs\_1736

TCTATCGTACAACAGATTGAATGGATCAATCCCGAAGTGTATAGGAGATTTTCATGCACTTGTTTCAGTTG  
AACCTGAGCAACAAAGATTTTCGTGCACTTGTTTCAGTTGAACCTGAGCAA

>PGSC0003DMG400027966LRR-RLPs\_186

AATGGTCCGGTAACAAGATCAATATTACAAATGCTGGTGTGTTGGTACACTCCATGATTTTCCATTTTCA  
TCTCTTTGTTTCTTGAATATGTTGATCTTAGCATGAACCAGTTCTCTG

>PGSC0003DMG400027966LRR-RLPs\_2294

TATGTGTAATAAAAGAAGGAGAGTTAGAGACGTTGAAAGAAGGGATGGTGTGTTGGCTTTTCGATA  
TCCATGTTAGATGGGAAGGCATTGTACAGAGACATCTTAAACGCCACAGAAG

>PGSC0003DMG400027966LRR-RLPs\_2418

TGATGCAAATTTTGCATCGGGCAAGGAGGTCACGGAAGTGTTCACAAGGTGAACCTTCCATCATTAGG  
GAATATAGCTGTGAAAAGACTTCATTCTTCATTTTCAAGAACTCATCCCAA

>PGSC0003DMG400027966LRR-RLPs\_248

CCATTTTCATCTCTCTTGTTCCTTGAATATGTTGATCTTAGCATGAACCAGTTCTCTGGTATCATACTCTGG  
TCCAATTCCAATAACTCTTGGTGACTTAACTGAGCTTAATGTTTTGTA

>PGSC0003DMG400027966LRR-RLPs\_2666

CTAGTATTTTGAGCAATGAAGTTGAGTCCAAGAAATTGGATTGGCTTAAAAGGGTGAATATCATCAAGG  
GTGTAGCCTTTGCTTTATCTTACATGCACAGAGACTGTTTCATCACCGATTG

>PGSC0003DMG400027966LRR-RLPs\_2728

ATCAAGGGTGTAGCCTTTGCTTTATCTTACATGCACAGAGACTGTTTCATCACCGATTGTTTCATCGAGACAT  
ATCAAGCAGTAATGTGTTGCTTGATTCTGAGTATGAAGCTCGTATTGCA

>PGSC0003DMG400027966LRR-RLPs\_2914

GGTTATGTCGCACCTGGTAAGTTTTAAATAGTTTATGAACTATATCCAAACACTATCTCATTTACATGTTT  
AAATTCTTAATATTGTTCTGGAAATTGTGTTGTTTCAGAGCTTGCATATA

>PGSC0003DMG400027966LRR-RLPs\_3038

GAAGGTTACGCAAATGTGTGATGTGTATAGCTTTGGAGTATTATCCTTGGAGATAGTCAAAGGAAAGCA  
TCTTGGAGATTACATTTCTGTGCTAGCAAATTCATCGACTATAGATCCTGA

>PGSC0003DMG400027966LRR-RLPs\_3100

GAAAGCATCTTGGAGATTACATTTCTGTGCTAGCAAATTCATCGACTATAGATCCTGAGCAGCTTAGCGA  
TTTGCTGGATGAACGCCTTCCATATCCTGATGATAGAGTAAAAGATGTTT

>PGSC0003DMG400027966LRR-RLPs\_3224

TTTTATCATCAATCTAGCATGCTCTTGTTCCTTGAAGTCCAAAATCAAGGCCAACAAATGCCCTTCATCTC  
TCATAAGTTATCATCAATGGATGCACGCCTACCTATTCATCAGAAAAC

>PGSC0003DMG400027966LRR-RLPs\_3286

CCTTCATCTCATAAGTTATCATCAATGGATGCACGCCTACCTATTCATCAGAAAACCCCATATAAGGC  
AAGCTATATAATCCCTAACATATATGGAGATGAATAACCTTTGTCGCTG

>PGSC0003DMG400027966LRR-RLPs\_372

TATTCAAACCAACTTTCTGGTCCCATTCTGCAGAAATAGGAAAGATGAAGTCACTCGAGTATTTATCCTT  
ATGGAGTAATAATCTTTCTGGTCCAATTCCAATAACTCTGGGTGACTTA

>PGSC0003DMG400027966LRR-RLPs\_62

CGTTGAGGAAGCAACTGCTCTCCTCAAATGGAACGCTAATGTCCTAAGCCAAAATAATTCCTTACTGGCT  
TCATGGACACTAAGTACTGATGCATGCAGGGGTTGGTATGGAGTTATATG

>PGSC0003DMG400027966LRR-RLPs\_682

CCATTCTTGCAGAAATAGGAAAGATGAAGTCACTCAAGTATTTATCCTTATGGGGTAATAAACTTTCTGG  
TCCAATTCCAGTAACTCTTGGTGACTTAACTGAGCTCAAACCTTTGTACC

>PGSC0003DMG400027966LRR-RLPs\_930

CTCAATATTTTGTACCTTTATTCAAACCAACTTTCTGGTCCCCTTCTGCAGAAATAGGAAAGATGAAGTC  
ACTTGAGTATTTATCCTTATGGAGTAATAATCTTTCCGGTCCAATTCCT

>PGSC0003DMG400027967LRR-RLks\_0

ATGGATCCCAAATACTTTATTTCTTCTCTGGTATATCTCTTCACAATTACTTTTGCTTCCACAGAGGAA  
GCAACAACCTTTCTTAAATGGAAATCAACTTTCAAAAACCAGAATAAT

>PGSC0003DMG400027967LRR-RLks\_124

TATTGGCTTCTTGGACACTACGTCATCCTGCTGCTGCCAAGAATTTTTCGAGCCATGATCCATGCAGGGA  
CTGGTATGGAGTTAAATGCTTTAATGGTCGAATAAACAGGTTGAATATTA

>PGSC0003DMG400027967LRR-RLks\_1426

CACCGGAGATTGGAAACCTCAAAGGGCTTCAAGGACTTATTCTTTTCATCCAATCATTGGTTGGACAGAT  
ACCTAGGGAATTAGGAAAATTAACCTCTCTGGTTAATCGTCTTTTTCGAA

>PGSC0003DMG400027967LRR-RLks\_1488

GGACAGATACCTAGGGAATTAGGAAAATTAACCTCTCTGGTTAATCGTCTTTTTCGAAACAACCAAATTT  
CTGGCAATATTCCTATGGAACCTGGATTATTGACAAAGTTAGATTACCTT

>PGSC0003DMG400027967LRR-RLks\_1736

TCATCTTAATGTACTGGATTTGAGCCGTAATCATCTTGTTGGAGAGATCCCCCTCAGTTAGCCAATTTAA  
AGGTGTTGGTAAACTTAAATCTTTACACAATGGCCTATCTGGGCGCAT

>PGSC0003DMG400027967LRR-RLks\_2046

GCGAAGGGACGTAAACTCATCCTCATCATTGTACTTCTGTTATGGGAGCACTTGTTTTACTCTGTGTTTT  
CATTGGTGTCTCTTTATGTGTGATAAAAGAAGAGCTGGAGATGTTGAA

>PGSC0003DMG400027967LRR-RLks\_2095

CACTTGTTTTACTCTGTGTTTTTATTGGTGTCTCTTTATGTGTGATAAAAGAAGAGCTGGAGATGTTGAA

AGAAGGGATGGTGATGGTTGGCTTTCGATATCCATGTTAGATGGGAAGG

>PGSC0003DMG400027967LRR-RLKs\_248

TTCTGGCGTCATTGGTACTCCATGATTTCCATTTTCATCTCTACCTTTTCTTGAATATATTGATTTTAGC  
ATGAACAACCTTTCTGGTCCCATTCTGCAGAAATAGGGAACTTAC

>PGSC0003DMG400027967LRR-RLKs\_2748

CAGATTCATCGAATTGCACTGCACTTGCAGGCACATATGGCTATGTTGCACCTGGTAAGTTTTAAATATTT  
CATGAAAGCCAAACTATTGTTTTTATCTTATTACAAGTTTAAATTG

>PGSC0003DMG400027967LRR-RLKs\_3068

ATATCCTGAAGATAGAGTAAAAGAGGCTTTGGTTTTTATCATCAAGCTAGCATGCTCTTGTTTGCTTGAA  
AACTCCAAAATTCAAGGCCAACAAATGCACTTCATCTCTCATAAGTTATC

>PGSC0003DMG400027967LRR-RLKs\_310

TTGATTTTAGCATGAACAACCTTTCTGGTCCCATTCTGCAGAAATAGGGAACTTACCAACCTTGTCGA  
AATTGATCTTGATACAAACCAGTTAACAGGTCATATTCCTCCGGAAATAG

>PGSC0003DMG400027967LRR-RLKs\_372

CTTGTCGAAATTGATCTTGATACAAACCAGTTAACAGGTCATATTCCTCCGGAAATAGGCAACTTGATCA  
ATGCAAAATTGTTCTATGCTTACTCCAATGAATTGTCTGGTTCCATTCTCT

>PGSC0003DMG400027967LRR-RLKs\_434

CTTGATCAATGCAAAATTGTTCTATGCTTACTCCAATGAATTGTCTGGTTCCATTCTCTATTGAAATAGGGA  
AGATGAAGTCACTTGAAAGTTAAGCTTACAGAAAAACAATCTTTCTGG

>PGSC0003DMG400027967LRR-RLKs\_62

CACAGAGGAAGCAACAACCTCTTCTAAATGGAAATCAACTTTCAAAAACCAGAATAATTCCTTATTGGCT  
TCTTGACTACTACGTCATCCTGCTGCTGCCAAGAATTTTTCGAGCCATGA

>PGSC0003DMG400027967LRR-RLKs\_992

TCCTGGTTCATTTGGCAATTTGAGAACTTGCAATTTTTGTATCTCCACACCAACAACTTTCTGGTCCTAT  
TCCGAAAGAACTTGCAATTTTGGATAACTTGGTAGAGCTGATAATAAG

>PGSC0003DMG400027968LRR-RLPs\_122

GGTTGAGAACCTCTTCATCTTTAATAACCATTTAAATGGTTTCATTCTGTTGAAATAGGGAGCATGAAAT  
CACTTGAGATTTTAGCCTTACAGAATAACAATCTTTCTGGTCCAATTCC

>PGSC0003DMG400027968LRR-RLPs\_1708



ATCAACTTTCTGGTCTCATTCTAGTGAAATAGGGAAGATGAAGTCACTTGAGGTTTTAGCCTTACAGAG  
TAACAATCTTCCGGTCCAATTCCAATAACTCTAGGTGACTTAACTGAGC

>PGSC0003DMG400027968LRR-RLPs\_1891

TGAGAAAGTTACAATTTTTGTATCTCCGTGCCAACAACTTTCTGGTTCTATTCCAAAAGAACTTGCATAT  
TTGGATAACTTGGTAGAGCTGGTACTGAGTGAAAATCAACTTACTGATC

>PGSC0003DMG400027968LRR-RLPs\_1952

ACTTGCATATTTGGATAACTTGGTAGAGCTGGTACTGAGTGAAAATCAACTTACTGATCCAATTCCTGCT  
TCCTTTGGCAATTTGAGAAAGTTACAATTTTTGTATCTCCGTGCCAACAA

>PGSC0003DMG400027968LRR-RLPs\_2074

TTTCTGGTTCTATTCCAAAAGAACTTGCATATTTGGATAACTTAGTAGAGCTGATACTAAGTGAAAATCA  
GTTTTCAGGCCATTTGCCTGAGCATCTTTGCCAAGATGGGAACTTGAGA

>PGSC0003DMG400027968LRR-RLPs\_2135

TGAAAATCAGTTTTCAGGCCATTTGCCTGAGCATCTTTGCCAAGATGGGAACTTGAGAACTTCACGGTG  
GCCAGTAACAAGTTAACAGGACCAATACCAAGAAGCTTGAGCAAGTGCTC

>PGSC0003DMG400027968LRR-RLPs\_2257

GTTTTAAATGGGTCCGCTTTAACAAACAACAGTTTCACTGGGGATTTATCTGAAAATTTTGGTATCTATCCA  
GAGCTTCTGTTTATTGATTTGAGCGACAATGATTTTCATGGTGAECTCA

>PGSC0003DMG400027968LRR-RLPs\_2379

AGTAACTGGGGAAAATGCAAAAATTTAATTGATCTGCGTGTAGCCAGAAATAACATTAGTGGTAGCATA  
CCACCAGAGATTGGAAATGTCAAAGGACTTCTAGGACTTGATCTTTCATCG

>PGSC0003DMG400027968LRR-RLPs\_2440

GTAGCATACCACCAGAGATTGGAAATGTCAAAGGACTTCTAGGACTTGATCTTTCATCGAATCATTTAAT  
TGGGCAGATTCCAAAGGAATTTGGAAAATTAACCGCTCTAGTTAATCTTT

>PGSC0003DMG400027968LRR-RLPs\_2562

CTGCAAAACAACCGAATTTCTGGCAATATACCTGAGGATTTTGAGTCACTAACAAAGTTAGAGACCCTAG  
ATCTGTCAAACAATAGATTGAATGGGTCAATCCCGATGTGTATAGTAGAT

>PGSC0003DMG400027968LRR-RLPs\_2623

AGACCCTAGATCTGTCAAACAATAGATTGAATGGGTCAATCCCGATGTGTATAGTAGATTTTCGTGCACTT  
GTTTCAGTTGAACCTGAGCAACAACAAGTTTGGCCAGAATATTCCAAAGG

>PGSC0003DMG400027968LRR-RLPs\_2745

ATAGGAAGGATAACTCAGCTTAATGTACTTGATTTGAGCTATAATCTTCTGGTTGGAGATATAACCCCTC  
AGTTAGCCAATTTGAAGGTGTTGGTAACTTAAATTCCAAAGGAGATAGG

>PGSC0003DMG400027968LRR-RLPs\_2806

TAACCCCTCAGTTAGCCAATTTGAAGGTGTTGGTAACTTAAATTCCAAAGGAGATAGGGAGGATAACA  
CAGCTTAATGTACTTGATTTGAGCTATAATCTTCTGGTTGGAGGTATACCC

>PGSC0003DMG400027968LRR-RLPs\_2928

TCAGTTAGCCAATTTGAAGGTGTTGGTAACTTAAATCTTTCCACAATGGCCTATCTGGGCGCATTCCCTC  
AAGAACTTGAAAGTTTGACTGGTTTGCAGGACGTCGTATTGTCATACAA

>PGSC0003DMG400027968LRR-RLPs\_2989

CGCATTCCCTCAAGAACTTGAAAGTTTGACTGGTTTGCAGGACGTCGTATTGTCATACAATGAGTTGGAAG  
GTCCAATCCCTAATAATAAGGCTTTTATCAATGCCTCATTGGAGGGTAAT

>PGSC0003DMG400027968LRR-RLPs\_3172

AAGCACTCAATGGCGAAGGCATGTAACTCACCTCATCACTGTACTTCCTGTTATGGGAGCACTGGTAC  
TGCTCTGTGTTTTATTGGTGTCTCTTTATGTGTAATAAAAGGAGGAGA

>PGSC0003DMG400027968LRR-RLPs\_3233

CACTGGTACTGCTCTGTGTTTTATTGGTGTCTCTTTATGTGTAATAAAAGGAGGAGAGTTAAAGAAGT  
TGAAAGAAGGGATGGTGATGGTTGGCTTTTCGATATCCATGTTAGATGGGA

>PGSC0003DMG400027968LRR-RLPs\_3355

GAATTGTACAGGGACATCTTAAACGCCACAGAAGAGTTTGATGCAAATTTTGCATTGGGCGAGGAGGT  
CACGGAAGTGTTTACAAGGTAAACCTTCATCATTAGGGAATATTGCTGTGA

>PGSC0003DMG400027968LRR-RLPs\_3416

GAGGAGGTCACGGAAGTGTTTACAAGGTAAACCTTCATCATTAGGGAATATTGCTGTGAAGAGACTTCA  
TTCTTCATTTTACAATAACATCCCAAAGCTTCATCAATGAAGTAAGGGC

>PGSC0003DMG400027968LRR-RLPs\_3538

TGACTGGGATTAACACCGAAACATTGTGAACCTCTACGGCTATTGTTCAAACGAATACACATCCCAA  
AGCTTCATCAATGAAATAAGGGCATTGACTGGGATTAAGCACCGAAACAT

>PGSC0003DMG400027968LRR-RLPs\_61

TTGACTTGTCGTCTAATCAGTTTTAGGCAAATCCCATCACAGATTGGCTCACTGTCAAAGGTTGAGAA

CCTCTTCATCTTTAATAACCATTTAAATGGTTTCATTCTGTTGAAATAG

>PGSC0003DMG400027971LRR-RLKs\_1054

CTGGTCTCATTCTAGTGAGTTGGGGACAGGGCCAATACCAAGAAGCTTTAGCAAGTGCTCGAGTTTCA

AAAGAGTTCGGTTGGATAACAACAGTTTTACTGGAAATTTATCTGATGCTT

>PGSC0003DMG400027971LRR-RLKs\_1116

AGTTTCAAAGAGTTCGGTTGGATAACAACAGTTTTACTGGAAATTTATCTGATGCTTTTGGCATCCATCC

ACACCTTTACTTCATTAATTTGAGCGAAAATGATTTTTATGGTGAATC

>PGSC0003DMG400027971LRR-RLKs\_1922

CTCAATGGCGAAGGGACGTAACTCATCCTCATCATTGTACTTCCTGTTATGGGAGCACTTGTCATCCTC

ATCACTGTACTTCCTGTTATGGGAGCACTTGTTCTACTCTGTGTTTTTCAT

>PGSC0003DMG400028001LRR-RLPs\_1220

GCAATTCTTGATGGCAGCTCCCTTGTTGCATCTGAAGATAGCATTAAAGAATATCCTAAAACCTCAGTTATG

ATTATCTACCATCTCCACATCTGAAGAAATGGTTTAGTTACTTTGCAATG

>PGSC0003DMG400028001LRR-RLPs\_1281

TCAGTTATGATTATCTACCATCTCCACATCTGAAGAAATGGTTTAGTTACTTTGCAATGTTTCCAAAAGAT

TTTGAGTTTGAAAAGGACCAACTAATCCAACCTCTGGATGGCAGAAGGGT

>PGSC0003DMG400028001LRR-RLPs\_1403

CTTCGTCTATGTCAAGAGACCACTGTGATGGAAGACGTCGGGAACAAGTTTTTCCAACCTCTGTTACAAT

ATTCCTTGCTGCAGGATGTTAAGCTAGATGAGTACAACAATATAACACAC

>PGSC0003DMG400028001LRR-RLPs\_1464

TGTTACAATATTCCTTGCTGCAGGATGTTAAGCTAGATGAGTACAACAATATAACACACTGTAAGATGCA

TGATCTTGTCATGATTTGGCAGGAGATATTTTAAAGTCTAAACTATTTG

>PGSC0003DMG400028001LRR-RLPs\_1769

GGCATCAAGGAGTTGTCAGCCTCAATCGTCAAGCTAATACTTGAGATATCTTGATCTCTCCAATACTG

AGATGAAAAACCTTCCAACCTCCATATGCAAGCTCTACAATTTGCAAACCT

>PGSC0003DMG400028001LRR-RLPs\_1830

CCAATACTGAGATGAAAAACCTTCCAACCTCCATATGCAAGCTCTACAATTTGCAAACCTTTGAGATTCTAT

AGCTGCTGGTGTCCACTCGGGAACTTCCAGAAGAAATGGCAAATATGA

>PGSC0003DMG400028001LRR-RLPs\_1891

GAGATTCTATAGCTGCTGGTGTCCACTCGGGAAACTTCCAGAAGAAATGGCAAATATGATAAGTTTGAG  
ACACATATGTTGCTACCATTGTTTCGAATCAGATTCTCAGATGCCACTTAA

>PGSC0003DMG400028001LRR-RLPs\_1952

AGTTTGAGACACATATGTTGCTACCATTGTTTCGAATCAGATTCTCAGATGCCACTTAATATGGGGCAAT  
TGACTAGTCTTCAGACGCTACAGTTTTTCTATGTAGGTTTAAAGAAAGGT

>PGSC0003DMG400028001LRR-RLPs\_2074

TCGAATAGAAGAACTGGGTTGTTGAAAAATCTTAGAGGTGAATTGACGATCGAACGTCTACAATTAGT  
CGGAAATAAAGAAGAGGCTCGAACACATATTTACAGGAGAAACCAAATAT

>PGSC0003DMG400028001LRR-RLPs\_2135

CAATTAGTCGGAAATAAAGAAGAGGCTCGAACACATATTTACAGGAGAAACCAAATATCTACAAACTG  
GTGTATTCGTGGTCCCATGATGAATCAGAAGGCTGTGAGATCAATCATGAG

>PGSC0003DMG400028001LRR-RLPs\_2196

ACAAACTGGTGTATTCGTGGTCCCATGATGAATCAGAAGGCTGTGAGATCAATCATGAGCATGTGTTGG  
ATGGTCTTCAACCACATCTGAACCTGAAAACCTTAGAAGTTGTGGACTATT

>PGSC0003DMG400028001LRR-RLPs\_2318

GGGACTAAATTTGCTTCATGGTTCAGTGAAAAAATGCTACCAAATTTGGTCATGTTGAGATTAAGTGGTT  
GCAAAGGTGCAAAGAAATTCATCACTTGCCAACTGAAATTCCTTCGG

>PGSC0003DMG400028001LRR-RLPs\_2501

ATTAGCAATATTGGATCAAGCAGCATTATCCAAGTGTTCCTCGTCATTGAAAACACTAGTATTGGAGGATA  
TGCGTAGCCTTATTGAGTGGAAGGGAGATGAAGTTGGAGTAAGAATGTTT

>PGSC0003DMG400028001LRR-RLPs\_2562

TGGAGGATATGCGTAGCCTTATTGAGTGGAAGGGAGATGAAGTTGGAGTAAGAATGTTTCCTAGGCTT  
GAGAAGTTGAGGATTAGGAACTGTCCATTGTTAAAAGGTACTCCGAATCAAT

>PGSC0003DMG400028001LRR-RLPs\_2623

TAGGCTTGAGAAGTTGAGGATTAGGAACTGTCCATTGTTAAAAGGTACTCCGAATCAATTTGAAATCCTC  
CGTGAATTAGTAATTGTCAGAGTTGACAGTGAAATGCCATTGTTGAACTT

>PGSC0003DMG400028001LRR-RLPs\_2806

GCCAGATGAGATGCTACGCAACAATGTTTCTCTTCAACACATATCGGTTTCCGACTGCAGAGAGTTTCAT  
GAATTGCCACAAAGCTTGTACAATCTCCATTCTCTTAAGCTCTTAACGAT

>PGSC0003DMG400028001LRR-RLPs\_2867

GAGTTTCATGAATTGCCACAAAGCTTGACAATCTCCATTCTCTTAAGCTCTTAACGATTGATAACTGCAC  
GAATTCAGTTCTTTTCCTGTTCCGAGTGAAGAGAATTATTTGACTTCC

>PGSC0003DMG400028001LRR-RLPs\_2928

ATAACTGCACGAATTCAGTTCTTTTCCTGTTCCGAGTGAAGAGAATTATTTGACTTCCCTCCAAGATCTT  
CGTTATTGGATTGTGATGGATTGAGCAGTTTACCAAGTGAATGCTAG

>PGSC0003DMG400028001LRR-RLPs\_3050

CATTGTCGGTCTCTGGAACTTTGAGTGTGAGCCGCTGTGACAATTTAGTTTCATTCCCTTTACATGTGGG  
GGAAATGCCTTCACTTTCCTATTTGTATATATCACAATGTCCCAAATTG

>PGSC0003DMG400028001LRR-RLPs\_3294

TGTCCCTTCGTACATTGTGGGTGTATGGACATGGTCACTGGGATTCTCTGCCCTATCAGTTTATGCAACTC  
TCTGACTTAACAAAGATTCAAATATATGGATTCCGAATCGAGGCTCTTC

>PGSC0003DMG400028001LRR-RLPs\_3355

TATGCAACTCTCTGACTTAACAAAGATTCAAATATATGGATTCCGAATCGAGGCTCTTCCTCATAGATTTT  
GCAACCTTACTTCTCTTGGAACGTTAAGGTTAGTGAGGTGCAAACGGCT

>PGSC0003DMG400028001LRR-RLPs\_3416

CATAGATTTTGCAACCTTACTTCTCTTGGAACGTTAAGGTTAGTGAGGTGCAAACGGCTACAGAACCTGG  
ACTTCTCATATGTCATGCCCAAATTACAATATCTGTGTGTAGAGGAATGT

>PGSC0003DMG400028001LRR-RLPs\_3477

AGAACCTGGACTTCTCATATGTCATGCCCAAATTACAATATCTGTGTGTAGAGGAATGTCCATTGTTAGA  
AGCTCTGTCCGATGGGCTTGGCAACCTTGTTTTTTTTGGGACATTTACATT

>PGSC0003DMG400028001LRR-RLPs\_3538

ATTGTTAGAAGCTCTGTCCGATGGGCTTGGCAACCTTGTTTTTTTTGGGACATTTACATTTAGTAAACTGT  
GAGAACTAGAGCATTTGCCATCGAGAGATGCCATGCAACGCCTCACCAA

>PGSC0003DMG400028001LRR-RLPs\_3599

GTAAACTGTGAGAACTAGAGCATTTGCCATCGAGAGATGCCATGCAACGCCTCACCAAATTATGGAAC  
CTGGGAATTAAGGCTGCCCAAAGTTAGAAGAAAGTTGCACCAATCGGAGT

>PGSC0003DMG400028001LRR-RLPs\_3721

CCCAAACCTCCAGTGGTCCAACATTTCCCATATTCAAAAAATTGAAGTTGGTGAAGCACAATTCAGGAC

TTGCGTAAGTCTCTGTTTCTTTCAATTTCCGAGTCGCATTTTAAATTA

>PGSC0003DMG400028001LRR-RLPs\_4026

CATGGGCAGCAATTACACTAGGTGAAATTCATTTAGAATTCTGTAACAATTTTGCAAGTTTTCTTTGC

ACTCCTTTTTTTTTTTTTCTTTTCTCATGACACAATTTTATTGTTTAAACA

>PGSC0003DMG400028001LRR-RLPs\_4087

TTTTCTTTGCACTCCTTTTTTTTTTTTTCTTTTCTCATGACACAATTTTATTGTTTAAACAGGGTTAGTTATGTTT

GATAGAGAGGAACCAACACGTTTGTGTTTGTGAAGAACAGAATCTT

>PGSC0003DMG400028001LRR-RLPs\_427

TCGAAAAATCAATAAGATCAATGAAGAGTTGAGGGATATCAATCAGTTAGCTAACAACTCGGTTTCCA

ATCACTGACGGTTCCTTCTCGGAAAATACTACTAATCCGAGAAACAGATTC

>PGSC0003DMG400028001LRR-RLPs\_4575

TTGGTCAGGTAGTAAAGGGTATCCGTGGACCGAGCCATTGAATTCTGTTTCATGAACTATTCATAAGATG

AAGTTAGGAGGTTGCTGTGCTACTAAACTGACTTTTTACCGTCTCCTATG

>PGSC0003DMG400028001LRR-RLPs\_4758

CTCTTAGATGTGTTTAAAGTGTCGTGATTAGCCAGGGAAATTACATTAGGCGGAAACTGGAGAGGAGATA

CTATTTACTTGTATGACTAAGATTTGACAGCAGAGGCCTTTCTTGACACAGT

>PGSC0003DMG400028001LRR-RLPs\_4819

AGGAGATACTATTTACTTGTATGACTAAGATTTGACAGCAGAGGCCTTTCTTGACACAGTGTTTCATGCCTTT

TTGTACAAAGAGTTTTTTGTTTCCAGCAAACATTTTGAACCTAATACTT

>PGSC0003DMG400028001LRR-RLPs\_4856

GCAGAGGCCTTTCTTGACACAGTGTTTCATGCCTTTTTGTACAAAGAGTTTTTTGTTTCCAGCAAACATTTTG

AACTTAATACTTAGCTGCTGCATCATTGCCTAGTTTCATATACATCTTCT

>PGSC0003DMG400028001LRR-RLPs\_488

GGTTTCCAATCACTGACGGTTCCTTCTCGGAAAATACTACTAATCCGAGAAACAGATTCTGCACTAGTTC

CTTCAGATGTTGTTGGTAGAGACAAAGATGTTGCTGTAATAAAGGAGAAG

>PGSC0003DMG400028001LRR-RLPs\_854

CGAGATGCATTGGGAGAAAAACAGTATTTGCTTGTCTGGATGATTTGTGGCGTGTTGACTCTACTTCGT

GGCACGAGTTCTTGACACCTTGAGGGGAATAAATACATCCAGAGGAAAC

>PGSC0003DMG400028001LRR-RLPs\_915

CTACTTCGTGGCACGAGTTCTTGGACACCTTGAGGGGAATAAATACATCCAGAGGAAACTGCATTCTCG  
TGACTIONCGTTTCGAAGCAAGTGGCATCCATAGTAGCAGCAGATCTTCATA

>PGSC0003DMG400028001LRR-RLPs\_976

CATTCTCGTGACTACTCGTTTCGAAGCAAGTGGCATCCATAGTAGCAGCAGATCTTCATAAGTTGGGGAA  
ATTAACAGATGATCATTGTTGGTCCATTTTCAAACAACGAGCATTGTTGA

>PGSC0003DMG400028073-(rev)OtherRLKsTM\_0

CGGCTTACCGCCGTTCCGCTCCGGTGGATTTTCTCTCTTTTCTGGAACACGAGTTTCGTCCCCAAACGAC  
TGTATTTACAGCAACTCAAACCTGTTAACAACCGTTACAATGGGTGGCGA

>PGSC0003DMG400028073-(rev)OtherRLKsTM\_1008

TACTATTACTGCTACTTCTAATGGTGGGCAATTATCCAGTAGTGGTCCTATTTCAAGATCATCAACTCTTA  
GGCGTCAAGGGTCGCGGTTGATGAGGCGTCAAAGGAGTGGAACCTTCTC

>PGSC0003DMG400028073-(rev)OtherRLKsTM\_1071

AACTCTTAGGCGTCAAGGGTCGCGGTTGATGAGGCGTCAAAGGAGTGGAACCTTCTTCTAAACACGCAG  
ACAGGGCAGAGGAATTTCTGTTTACAGACCTTGCTGCAGCTACTAACAATTT

>PGSC0003DMG400028073-(rev)OtherRLKsTM\_1134

CGCAGACAGGGCAGAGGAATTTCTGTTTACAGACCTTGCTGCAGCTACTAACAATTTTCTCTAGAGAAC  
AAGATTGGTGCTGGTAGTTTTGGGGTGGTTTACAAGGGCAAACCTACCGGA

>PGSC0003DMG400028073-(rev)OtherRLKsTM\_1197

AGAGAACAAGATTGGTGCTGGTAGTTTTGGGGTGGTTTACAAGGGCAAACCTACCGGATGGTCGTGAGG  
TTGCCATCAAACGTGGAGAAACAGGTACAAGAACAAGAAATTTACAGGAGAA

>PGSC0003DMG400028073-(rev)OtherRLKsTM\_126

TTGTGGCATAACCAACAGTACAAAAATGTTACCTGCTGGAGAGGCGATTTGAGTGAACAGCCAAATGG  
GTCATCACAATTTATATCAATCTCATCTGGGTCTGAATTTTCTTGCGGAGT

>PGSC0003DMG400028073-(rev)OtherRLKsTM\_1260

TGAGGTTGCCATCAAACGTGGAGAAACAGGTACAAGAACAAGAAATTTACAGGAGAAAGAAATTGCAT  
TTGACTCAGAATTAGCTTTCTTGCTCGGCTACATCACAACATTTAGTTAG

>PGSC0003DMG400028073-(rev)OtherRLKsTM\_1323

TGCATTTGACTCAGAATTAGCTTTCTTGCTCGGCTACATCACAACATTTAGTTAGACTTGTTGGTTATT  
GCGAAGAAAGGGATGAAAGGCTTTTGGTTTACGAGTACATGAAGAATGG

>PGSC0003DMG400028073-(rev)OtherRLKsTM\_1386

TGGTTATTGCGAAGAAAGGGATGAAAGGCTTTTGGTTTACGAGTACATGAAGAATGGAGCACTTTTTGA  
TCATTTACATGATAAGAACAATGTGGAGAAGAGCAGTAGTATAATTAATTC

>PGSC0003DMG400028073-(rev)OtherRLKsTM\_1449

TTTTGATCATTTACATGATAAGAACAATGTGGAGAAGAGCAGTAGTATAATTAATTCTTGGAAAATGAG  
GATCAAGATTGCTTTAGACGCTGCACGAGGCATTGAATACCTTCACAATTA

>PGSC0003DMG400028073-(rev)OtherRLKsTM\_1512

AATGAGGATCAAGATTGCTTTAGACGCTGCACGAGGCATTGAATACCTTCACAATTATGCAGTTCCGCCT  
ATAATTCATAGGGACATCAAGTCATCCAACATCTTGATTGATGCAAACCTG

>PGSC0003DMG400028073-(rev)OtherRLKsTM\_1575

TCCGCCTATAATTCATAGGGACATCAAGTCATCCAACATCTTGATTGATGCAAACCTGGATTGCAAGAGTG  
TCTGATTTTGGATTATCGTTAATGGGGCCAGAGAGTAATCGCGATTACAG

>PGSC0003DMG400028073-(rev)OtherRLKsTM\_1638

AAGAGTGTCTGATTTTGGATTATCGTTAATGGGGCCAGAGAGTAATCGCGATTACAGCAGCATGCCAAT  
GAAGGCTGCTGGGACAGTTGGGTACATTGATCCCGAGTACTATGGTCTAAA

>PGSC0003DMG400028073-(rev)OtherRLKsTM\_1701

GCCAATGAAGGCTGCTGGGACAGTTGGGTACATTGATCCCGAGTACTATGGTCTAAATGTGTTGACAGC  
AAAGAGCGATGTATATGGACTTGGAGTGGTATTGCTAGAACTTTTGACAGG

>PGSC0003DMG400028073-(rev)OtherRLKsTM\_1764

GACAGCAAAGAGCGATGTATATGGACTTGGAGTGGTATTGCTAGAACTTTTGACAGGAAAGAGAGCGA  
TATTCAAGAGCGAAGAGAACGGAGGTGCACCAATGAGTGTGGTGGACTATGG

>PGSC0003DMG400028073-(rev)OtherRLKsTM\_1827

AGCGATATTCAAGAGCGAAGAGAACGGAGGTGCACCAATGAGTGTGGTGGACTATGGAGTACCAGCA  
ATTATGGCTGGAGAATTGAACAAGATTTTGGATAAGAGAGTAGGGACAGCAGA

>PGSC0003DMG400028073-(rev)OtherRLKsTM\_189

AAATGGGTTCATCACAATTTATATCAATCTCATCTGGGTCTGAATTTTCTTGC GGAGTTTTGGAAAGTTCAA  
ACAGGGTTGTCTGTTGGGGAAATAGTGATATCGCTTCAACTATCCAATC

>PGSC0003DMG400028073-(rev)OtherRLKsTM\_1890

AGCAATTATGGCTGGAGAATTGAACAAGATTTTGGATAAGAGAGTAGGGACAGCAGAGGCAAGTGAA



GAAGTAGAAGCAGTGGGAATTGGTGGCGTATACTGCAATGCATTGTGTACATTT

>PGSC0003DMG400028073-(rev)OtherRLKsTM\_1953

TGAAGAAGTAGAAGCAGTGGGAATTGGTGGCGTATACTGCAATGCATTGTGTACATTTGGAAGGGAGAG  
ACAGACCAACCATATCTGATATTGTTTCTAATTTAGAGAGAGCTTTGGCTGC

>PGSC0003DMG400028073-(rev)OtherRLKsTM\_2016

GAGAGACAGACCAACCATATCTGATATTGTTTCTAATTTAGAGAGAGCTTTGGCTGCATTTGATGATAGC  
CATGGCAGCATCTCTAGTGGTCCAATTTCTTTGTTTCTGATTGATAATT

>PGSC0003DMG400028073-(rev)OtherRLKsTM\_2079

TGATAGCCATGGCAGCATCTCTAGTGGTCCAATTTCTTTGTTTCTGATTGATAATTCCACTCTCTCATTCT  
TTGTTTATGGCTAATTAATAAAGTGTGATTATTTTGTTAATAGTGTAATA

>PGSC0003DMG400028073-(rev)OtherRLKsTM\_2142

TCTCATTCTTTGTTTATGGCTAATTAATAAAGTGTGATTATTTTGTTAATAGTGTAATAAGAGTAGATTCTTCA  
TTCTAACATCATGTCTAAGGAAATCTGTAAGCTGCCAATTGCTGAAAAA

>PGSC0003DMG400028073-(rev)OtherRLKsTM\_2205

ATTCTTCATTCTAACATCATGTCTAAGGAAATCTGTAAGCTGCCAATTGCTGAAAAAGTTGTACAAGAAA  
TTCTTTCTTCCCACAAGATTGCTACTGTTGCTAACCAGAAGGAATCAAGG

>PGSC0003DMG400028073-(rev)OtherRLKsTM\_252

AAGTTCAAACAGGGTTGTCTGTTGGGGAAATAGTGATATCGCTTCAACTATCCAATCTGAGTTCCGTAAT  
GAAACGATGATGAATATATATGCCGGCGGAAGGCACGCTTGTGGGGTGAA

>PGSC0003DMG400028073-(rev)OtherRLKsTM\_315

CCGTAATGAAACGATGATGAATATATATGCCGGCGGAAGGCACGCTTGTGGGGTGAACGCTACCGGAT  
TTTTAATTTGCAGAGGTGATAACACAAACGGTCAGCTTGATGTTCTTCTAA

>PGSC0003DMG400028073-(rev)OtherRLKsTM\_378

CGGATTTTAAATTTGCAGAGGTGATAACACAAACGGTCAGCTTGATGTTCTTCTAATTTGTCTTACGAGT  
ATTTTGGATTAGCTTTGGGGATTAATCATACTTGTGGAATTCGTAGGGT

>PGSC0003DMG400028073-(rev)OtherRLKsTM\_441

TTACGAGTATTTTGGATTAGCTTTGGGGATTAATCATACTTGTGGAATTCGTAGGGTGAATCGCACGGTA  
GTTTGTGGGGCGGAAATGGTGTATTTCAAGTAATGTAACAGAAGGATA

>PGSC0003DMG400028073-(rev)OtherRLKsTM\_504

CACGGTAGTTTGTGGGGCGGAAATGGTGTATTTCAAGTAATGTAACAGAAGGATATTTTTTTGAATCA  
GTTTCAGCTGGGTAGATTTTACGTGTGGATTAACCACAAACAATTTTTC

>PGSC0003DMG400028073-(rev)OtherRLKsTM\_567

TGAATCAGTTTCAGCTGGGTAGATTTTACGTGTGGATTAACCACAAACAATTTTTCAGTGGTGTGTTGG  
GGGCCAGGTTGGACTAGTAAGATGGTTCCTCAAGGGGCAGCCCTTCCTTT

>PGSC0003DMG400028073-(rev)OtherRLKsTM\_63

CAAACGACTGTATTTCACTCAACTCAAACCTGTTAACAACCGTTACAATGGGTGGCGACAAAATTTGTGGC  
ATAACCAACAGTACAAAAAATGTTACCTGCTGGAGAGGCGATTTGAGTGA

>PGSC0003DMG400028073-(rev)OtherRLKsTM\_630

GTGTTGGGGGCCAGGTTGGACTAGTAAGATGGTTCCTCAAGGGGCAGCCCTTCCTTTACCGATGATTCT  
TCCAGGTCCGTGTGTACGAAGTAATTGTAGTTGTGGTATATATCCGCAGTC

>PGSC0003DMG400028073-(rev)OtherRLKsTM\_693

GATTCTCCAGGTCCGTGTGTACGAAGTAATTGTAGTTGTGGTATATATCCGCAGTCTCAAAGTCTCTGT  
TTTGCAATGGTAATATTTGTAGGCCTTGTGATTTCTCAATTTTAGCACC

>PGSC0003DMG400028073-(rev)OtherRLKsTM\_882

TAGAGGTTTATTAGCTTTTGCTATTGTTGGATCAGTGGGCACTTTGGCAGGGATTTGCAGTATAATTTAT  
TTTCTTTGGGCTGGTGGTTGTTTTGGAAAGAAGAAAGTACATAATTCAGT

>PGSC0003DMG400028073-(rev)OtherRLKsTM\_945

AATTTATTTTCTTTGGGCTGGTGGTTGTTTTGGAAAGAAGAAAGTACATAATTCAGTTCAACCTACTATTA  
CTGCTACTTCTAATGGTGGGCAATTATCCAGTAGTGGTCCTATTTCAAG

>PGSC0003DMG400028081-(rev)LRR-RLPs\_1870

TAATTGTGATTTAGTGACACATTTATTGAAGACAACACATGAAGTAATCAAGTTCCCAATTTATATCAGT  
TGCTGCTTGATCTCTGCCTTGCTGACTCACATTTGCAGTGACAATGT

>PGSC0003DMG400028081-(rev)LRR-RLPs\_1994

CGCATTGAGTTCCCTCAGTTACGGAAAATGTACTTCTATAGGTTACGTGAGTTCCAAAGGTTCTTTCCTAC  
AGCCATCAATGACTCAGATCCTCTTTTTGATGAAAAGGTTAGCTTCTTA

>PGSC0003DMG400028081-(rev)LRR-RLPs\_2056

CTTCTACAGCCATCAATGACTCAGATCCTCTTTTTGATGAAAAGGTTAGCTTCTTATCACAAAAATATT  
GCTTACAAAGTCTATTGCTTTGATATATCCTTTTTGTCTAACAAGTGAA

>PGSC0003DMG400028081-(rev)LRR-RLPs\_2118

AAAAATATTGCTTACAAAGTCTATTGCTTTGATATATCCTTTTTGTCTAACAAGTGAAAAATAATTTTAA  
ATTAGTTTTTTAATTTGTTATTTAAAAAATCCATATAAGGCTATATTTG

>PGSC0003DMG400028081-(rev)LRR-RLPs\_2180

TAATTTTAAATTAGTTTTTTAATTTGTTATTTAAAAAATCCATATAAGGCTATATTTGATGTGAATTTTTTAT  
TCAACGGTTAATTTAAGTTTTAAATATCTCCCTTAAAAATATATTAA

>PGSC0003DMG400028081-(rev)LRR-RLPs\_2242

GAATTTTTTATTCAACGGTTAATTTAAGTTTTAAATATCTCCCTTAAAAATATATTAACCTATAATTATTTG  
AGTTTCATATTCTTATTTCAATTTTTTTAGTTGTGAAAATAAATAGATA

>PGSC0003DMG400028081-(rev)LRR-RLPs\_2304

TAATTATTTGAGTTTCATATTCTTATTTCAATTTTTTTAGTTGTGAAAATAAATAGATATGGAAAAGAAGAA  
AAAGGAAGAACAATTTTAAGACTTTTTTTTTTTGTAGCTATATTGTGA

>PGSC0003DMG400028081-(rev)LRR-RLPs\_2366

AAAGAAGAAAAAGGAAGAACAATTTTAAGACTTTTTTTTTTTGTAGCTATATTGTGATTTATTTTTTGAA  
AAAAGGTCAATAATGCCTCACTTACCTAAAATGATCAAAAATGCCCTCA

>PGSC0003DMG400028081-(rev)LRR-RLPs\_2428

TTTTTTGAAAAAAGGTCAATAATGCCTCACTTACCTAAAATGATCAAAAATGCCCTCAATTTATAGTTTAG  
TCCAAAATATTCTTGCCCTCACTACTTTAGTAAGAAAATGTTCTTGCC

>PGSC0003DMG400028081-(rev)LRR-RLPs\_2490

ATAGTTTAGTCCAAAATATTCTTGCCCTCACTACTTTAGTAAGAAAATGTTCTTGCCGTTGATAGTTTGT  
TCTGGAAATGTTCTTATTGTTACTACTTGAGTCAAAAATATTTCTTTCC

>PGSC0003DMG400028081-(rev)LRR-RLPs\_2552

ATAGTTTGTCTGGAAATGTTCTTATTGTTACTACTTGAGTCAAAAATATTTCTTTCCGCACAAATCTTATT  
CCTATTAAGATATTACTGTTAAAGTACTCTATTATTGTTTTCTTTA

>PGSC0003DMG400028081-(rev)LRR-RLPs\_256

ATGATGTTTGGGAGTCTCTTCATGATCTAGACAAACATGGAATCCCAGCGGTAGCAACCACAACCATCA  
GTGCAAAGTGCTATTGACGACACGTTTCCGAAATGTTTGTGCAGAAATGG

>PGSC0003DMG400028081-(rev)LRR-RLPs\_2614

AAATCTTATTCCTATTAAGATATTACTGTTAAAGTACTCTATTATTGTTTTCTTATTTTAAAATTACTTT

AACTATTA AAAAATGTACCCTTTATACTGATAATATATATCTTATAT

>PGSC0003DMG400028081-(rev)LRR-RLPs\_2676

AAAATTACTTTAACTATTA AAAAATGTACCCTTTATACTGATAATATATATCTTATATATAAGATCATAGTA

AATCAACCATTAATTTTTATTTGGATATTTATAATAAAAATAAGAAATG

>PGSC0003DMG400028081-(rev)LRR-RLPs\_2738

GATCATAGTAAATCAACCATTAATTTTTATTTGGATATTTATAATAAAAATAAGAAATGTTTTTAGTATTATT

ATTTTCCAATTGAAGTAGGATTAACATTTGTCCACTTATGACCTAGTG

>PGSC0003DMG400028081-(rev)LRR-RLPs\_2800

TAGTATTATTATTTTCCAATTGAAGTAGGATTAACATTTGTCCACTTATGACCTAGTGTTTTGTTCCAATAG

CTCCAAGTGTATCTGCAACAAAGTTTGATACTTCAAAGTTCGCAGGTT

>PGSC0003DMG400028081-(rev)LRR-RLPs\_2862

GTTCCAATAGCTCCAAGTGTATCTGCAACAAAGTTTGATACTTCAAAGTTCGCAGGTTTCTTGTTCCAACC

TAGAATACCTAGATATTAGTGGGCCTAACAGCATAAGTGCTCTATGCTC

>PGSC0003DMG400028081-(rev)LRR-RLPs\_3172

ACCTTATTTCCCCTCTTGGACGAACTGAAGCTTAGCGGGCTGCCTAAGTTGGAGCATTTCTTTTTGACAAA

CCATGCCCTTGAATTTCCATTTTAAAGAAATGTGGATATTGATGACTGC

>PGSC0003DMG400028081-(rev)LRR-RLPs\_320

CCATCAGTGCAAAGTGCTATTGACGACACGTTTCCGAAATGTTTGTGCAGAAATGGAAGCTCAGAAGAT

CATGGAAGTTGGAACGTTATCCGAAGAGGAAGCATGGTTCCTTTTCAGTCA

>PGSC0003DMG400028081-(rev)LRR-RLPs\_3358

GAGGTGAAAGTAGATGATCTCAATAAATGGATACAGCAGGAGTTCAATAACAAGGTATGTCTTATTCCG

CTAGCTATATAAGTAATTGCTACAGATGACGACGAAGCTGAACCTAGTCAT

>PGSC0003DMG400028081-(rev)LRR-RLPs\_3420

TATTCCGCTAGCTATATAAGTAATTGCTACAGATGACGACGAAGCTGAACCTAGTCATGCCAGAAGTTA

GGAAGCTGGTAGGAAAACTCAATGAAATAATGCAAGTAAAACCTCGAACA

>PGSC0003DMG400028081-(rev)LRR-RLPs\_3606

CTATCGGTTTCATGTCAACCTACTAGCTATTGGCTATAGATCTAGTATATGTATTAGTAATATCTAAAAAAT

AGTTGATTGTGATATAAACTTGAGGTCCTGCAGAATTCTGTAAACTAT

>PGSC0003DMG400028081-(rev)LRR-RLPs\_3649

GTATATGTATTAGTAATATCTAAAAATAGTTGATTGTGATATAAACTTGAGGTCCTGCAGAATTCTGT  
AAACTATAAATTTGGATCCGCCTGTGATTCTAAGTTCATCTTTCATTATA

>PGSC0003DMG400028081-(rev)LRR-RLPs\_4295

AGCAAGCATAGTAGATTCTGGATAAATTATTTATACATATTAAGTGAATTTTTAAACACAAATACATGAC  
AAAACCCGTAGACAGGGTTGTAGCTCCGCCCTGATGCCAGTGAACAAC

>PGSC0003DMG400028081-(rev)LRR-RLPs\_448

GTGATTTTGGCAACGATCCTTCTATGATTGACATAGCAAAGAAGTTGCCAAAGAATTCAGGGGGCTGC  
CGCTTGCAATTATTATACTTGCAGGAGCACTTAAGGGTAAAGACAAGCCTT

>PGSC0003DMG400028081-(rev)LRR-RLPs\_4481

CCCTATTCTACATAAAACAGAAATCATTCCCAGTTATATTATGATTTCCGATAAATAAAAAGACCTCCAGA  
ACTCAATAAAAAAGCACGACGACATGCAGCAACCACCACTATTCCCACC

>PGSC0003DMG400028081-(rev)LRR-RLPs\_4605

TCCGAGTCCTGTCCAGGAACAATGATCCTGGTCCCTTTAAAGATTGTGACTTCCCATAATCAGCTCCCG  
GAGCTGCAATAAGCATGTTCTTGCCAATGATTTTATAAATTTCTATTTAAA

>PGSC0003DMG400028081-(rev)LRR-RLPs\_4667

AGCTCCCGGAGCTGCAATAAGCATGTTCTTGCCAATGATTTTATAAATTTCTATTA AAACTTATAAATTC  
TATTA AAACTGTCATGAATGCACCCTAGACGTTTGTGGATTGAAGAGCT

>PGSC0003DMG400028081-(rev)LRR-RLPs\_4729

ATAAATTTCTATTA AAACTGTCATGAATGCACCCTAGACGTTTGTGGATTGAAGAGCTGATGTTCCATA  
AAGAAAAGATTCTCCCTTTCTGCAAATTCTTGAGCATCTTCAACTGGTAC

>PGSC0003DMG400028081-(rev)LRR-RLPs\_4791

TTTCCATAAAGAAAAGATTCTCCCTTTCTGCAAATTCTTGAGCATCTTCAACTGGTACAGCTTGAAGACTT  
CCTAGATCACATTTGTTTCGCGATGAGCATTATAACTATGTTCTTGTCCG

>PGSC0003DMG400028081-(rev)LRR-RLPs\_4915

ACCTCTTAGTTCCTCCAGCCATCTAGCCATATGATCGAATGATTGGCATTGTTGTTATGTCGTAGACTAGCA  
TCGCGCCAACTGCACCTCGAGAATATGCACTTGACTGCGCTATACCTGA

>PGSC0003DMG400028081-(rev)LRR-RLPs\_4977

AGACTAGCATCGCGCCAACTGCACCTCGAGAATATGCACTTGACTGCGCTATACCTGAGAGAGATATGA  
GAGATGATTCATTGAGTTGCAACAATTACCAATTGGTAATGTTGCTCTGAC

>PGSC0003DMG400028081-(rev)LRR-RLPs\_5101

CAAAAGAGGATCCTTTGAAAGTAGAGCATTTTGGAGGATCCGACATGGATGCGGCATTATTTTTCTCGA  
GAGTCCAAGAAACATAGCTTAACAAAAGGAAAATATTAATATGTATGCAGA

>PGSC0003DMG400028081-(rev)LRR-RLPs\_512

GCTGCCGCTTGCAATTATTATACTTGCAGGAGCACTTAAGGGTAAAGACAAGCCTTCATGGAAGTATAC  
CCTTAAACAATTACGTCGTGCAGAAACAATAAATATCCCTGGAGTGGACGA

>PGSC0003DMG400028081-(rev)LRR-RLPs\_5163

TTCTCGAGAGTCCAAGAAACATAGCTTAACAAAAGGAAAATATTAATATGTATGCAGACCTTACCTCTAC  
CTTTGCCGGGTAGAGTCGTAGAGAGGTTGTTTCGATAGGCACTCGACTCA

>PGSC0003DMG400028081-(rev)LRR-RLPs\_5225

ACCTCTACCTTTGCCGGGTAGAGTCGTAGAGAGGTTGTTTCGATAGGCACTCGACTCAAATGAGATGAA  
TTGTAAGACAGGGAGATACCTTGTACAATGATAGAAATGAAAACCTCGAGAA

>PGSC0003DMG400028081-(rev)LRR-RLPs\_5287

AGATGAATTGTAAGACAGGGAGATACCTTGTACAATGATAGAAATGAAAACCTCGAGAAGAAACATACA  
TATGAAAGTCTGAATCGCGATATAAATTAACACTCTTTAAGGAGATTAAT

>PGSC0003DMG400028081-(rev)LRR-RLPs\_5349

CATACATATGAAAGTCTGAATCGCGATATAAATTAACACTCTTTAAGGAGATTAATCACAAATACAAG  
AACGTCTCAAATATCTCAATTAAGTTGGGATCAGCAATATGAATTCTAAC

>PGSC0003DMG400028081-(rev)LRR-RLPs\_5411

AATACAAGAACGTCTCAAATATCTCAATTAAGTTGGGATCAGCAATATGAATTCTAACTAATAACCATGT  
CGCTATATTTTTATACCTCTGACAGAACTAGACGACTCCAAGAACACAT

>PGSC0003DMG400028081-(rev)LRR-RLPs\_5473

AACCATGTCGCTATATTTTTATACCTCTGACAGAACTAGACGACTCCAAGAACACATAGGACCTAAAGT  
AAAACATTTAACTCCTAGAACAAATAAATTAGTGATCAGACATTTGGTT

>PGSC0003DMG400028081-(rev)LRR-RLPs\_5535

CCTAAAGTAAAACATTTAACTCCTAGAACAAATAAATTAGTGATCAGACATTTGGTTTTTTTTTTTTTTT  
TTCAATTTGCTTAGCCTATTTTGATTTGGCCAGAGGTGCTCTGAATCT

>PGSC0003DMG400028081-(rev)LRR-RLPs\_5597

TTTTTTTTTTTTCAATTTGCTTAGCCTATTTTGATTTGGCCAGAGGTGCTCTGAATCTCAAGAGACTATGGA

TAACAGATTGCCAATAAATGGAAGAAGTGATCAGAAAAGGAGAAGGAA

>PGSC0003DMG400028081-(rev)LRR-RLPs\_576

TATACCCTTAAACAATTACGTTCGTGCAGAAACAATAAATATCCCTGGAGTGGACGACAAGGTGTATAAA

CCTCTGAGGCTAAGCTATGATTACTTGGGAAGTGATGAAGTCAAGCATCTG

>PGSC0003DMG400028081-(rev)LRR-RLPs\_64

AGGAGAAACAACAAGGGTTCTTCAAAGATGTCGTCATGGTAACTGTCAGTCAACAACCAGACTGGAAAA

AACTTCAGGGTGATATCGCAGAAGAACTCAAGCTGAAATTTGAAGGGGATA

>PGSC0003DMG400028081-(rev)LRR-RLPs\_640

ATAAACCTCTGAGGCTAAGCTATGATTACTTGGGAAGTGATGAAGTCAAGCATCTGTTTTTGCTTTGTTC

TTTGTTCAGGAAGATAGTGATATTTGGATTGAAGAATTGCTTATATATG

>PGSC0003DMG400028081-(rev)LRR-RLPs\_704

TTGTTCTTTGTTCCAGGAAGATAGTGATATTTGGATTGAAGAATTGCTTATATATGGAATGGGACTTCGC

ATCTTTTCGGGAATCGAAAATTTGAAGATGCAAGAAATAGGGTGTGCTT

>PGSC0003DMG400028081-(rev)LRR-RLPs\_768

CTTCGCATCTTTTCGGGAATCGAAAATTTGAAGATGCAAGAAATAGGGTGTGCTTTCTGTAAACATAT

TGAAAGATTGTTTCTTGTATCCCAACGTTTCAGACAAAAATCATGTGAAA

>PGSC0003DMG400028081-(rev)LRR-RLPs\_832

ACATATTGAAAGATTGTTTCTTGTATCCCAACGTTTCAGACAAAAATCATGTGAAAATGCATGATGTGGT

CCGTGATGTGGCTAAATATATTGCGACCGAGAGAGAGCATATATTTATGG

>PGSC0003DMG400028081-(rev)LRR-RLPs\_884

GAAAATGCATGATGTGGTCCGTGATGTGGCTAAATATATTGCGACCGAGAGAGAGCATATATTTATGGT

AAGTCATGATGTGAACTCAGAAGAGTTCCCAAGAAAAGACTCTTACGAGCA

>PGSC0003DMG400028112-(rev)LRR-RLPs\_1037

ACAATGATCTATGTGTTAAAGATGGAGAAGTGTGATTCATTAATGATCTTTGTCATTGTTATGTTTCTAAT

CGCACGTGGTTGCATCTTTTATAAACTTTTAGGAGATTTTGTCTGATTT

>PGSC0003DMG400028112-(rev)LRR-RLPs\_1098

TGTTTCTAATCGCACGTGGTTGCATCTTTTATAAACTTTTAGGAGATTTTGTCTGATTTAAAGTGTGGCAA

AGCCTTGTACTTTAAAATTAGTTGGTGGTGACCCAAGATGAAGAGGGCG

>PGSC0003DMG400028112-(rev)LRR-RLPs\_1159

AGTGTGGCAAAGCCTTGACTTTAAAATTAGTTGGTGGTGACCCAAGATGAAGAGGGCGTGTGCATTAC  
TTTTGTTAACTTACTCGAAGTTCCTGTCGTGATGTGTATCGATGATCTAT

>PGSC0003DMG400028112-(rev)LRR-RLPs\_122

CATCAAATTCTAAGCAAACCCATCAATTTTCTTTGCTTTCTGAGTATTATTAACCATGGCAGCTGTGTTC  
AAAACCCAGAGTTCGCTCTTGAAGTTATGGGGTTTGTGGCAGTTGTTC

>PGSC0003DMG400028112-(rev)LRR-RLPs\_1220

TGCATTACTTTTGTTTAACTTACTCGAAGTTCCTGTCGTGATGTGTATCGATGATCTATGTGCTAAAGATA  
GAGACGTGTGATTCATTAATGATCTTTGTCCTTGTTATGTTTCTGATCT

>PGSC0003DMG400028112-(rev)LRR-RLPs\_1281

GCTAAAGATAGAGACGTGTGATTCATTAATGATCTTTGTCCTTGTTATGTTTCTGATCTCACGTGGTTGCA  
CCTTTAAGTCTGTATTACTTTTGACTTACTCGAAGCTCCTGTCGTGATG

>PGSC0003DMG400028112-(rev)LRR-RLPs\_1342

CGTGGTTGCACCTTTAAGTCTGTATTACTTTTGACTTACTCGAAGCTCCTGTCGTGATGTGTATCAATGAT  
CTATGTGCTAAAGATGGAGACGTGTGATTCATTAATGATCTTTGTCCTT

>PGSC0003DMG400028112-(rev)LRR-RLPs\_1403

TATCAATGATCTATGTGCTAAAGATGGAGACGTGTGATTCATTAATGATCTTTGTCCTTGTTATGTTTCTG  
ATCTTACGTGGCTGCACCTTTATGTCCGTTTTAAAGCATGGCAAAGCGC

>PGSC0003DMG400028112-(rev)LRR-RLPs\_1464

TATGTTTCTGATCTTACGTGGCTGCACCTTTATGTCCGTTTTAAAGCATGGCAAAGCGCCAAAGTCTTGTA  
CGTCAAATTAGTTGGTGGTGACAATGTTTGTGTACGGCTTTTTTGTA

>PGSC0003DMG400028112-(rev)LRR-RLPs\_1525

AAGTCTTGACGTCAAATTAGTTGGTGGTGACAATGTTTGTGTACGGCTTTTTTGTAATGTTGGAGCAA  
GCATGGTCATTTGCTAATGTTTTTTTTTTTTATAAAATCAAATTATCAT

>PGSC0003DMG400028112-(rev)LRR-RLPs\_1586

TTGGAGCAAGCATGGTCATTTGCTAATGTTTTTTTTTTTTATAAAATCAAATTATCATTTCACTGGCAAAA  
AATTGGATGTTTGTGACAGTTTGTGTGTCTTAGAGTTCCATTTCTGT

>PGSC0003DMG400028112-(rev)LRR-RLPs\_1647

CACTGGCAAAAAATTGGATGTTTGTGACAGTTTGTGTGTCTTAGAGTTCCATTTCTGTATCTTATATGAT  
CTTGAACACCTGATGACTGATGTTACTGGGTGGATTTTTATGTTGATT



>PGSC0003DMG400028112-(rev)LRR-RLPs\_1708

CTTATATGATCTTGGAACACCTGATGACTGATGTTACTGGGTGGATTTTTATGTTGATTGATTGATAGTTG  
ATACATAACAGATGATTTGTGAAATTTGAATGAGTCACAACTTATTTA

>PGSC0003DMG400028112-(rev)LRR-RLPs\_1769

TTGATAGTTGATACATAACAGATGATTTGTGAAATTTGAATGAGTCACAACTTATTTATTGAAATGCAA  
GAAATCTTGCTATTAGTGTTACCAAAAGCAAAAAAAGCTCTATGATCTG

>PGSC0003DMG400028112-(rev)LRR-RLPs\_2196

CACTTTAAGCGCACCTTTGACAACACTCCTTGCTATATCTTCGCAACTGTGTCTCACATATTTAAAAACAT  
GAGGTACTTGGCCGGACATTCCACGTGTACGAAGAATCACATCAATGTC

>PGSC0003DMG400028112-(rev)LRR-RLPs\_2257

TTAAAAACATGAGGTAAGTGGCCGGACATTCCACGTGTACGAAGAATCACATCAATGTCCAAACCGGAA  
ATTGTTATATACTTGCATCTATCCTGAAAGGAACAGTAACTATAACCAACA

>PGSC0003DMG400028112-(rev)LRR-RLPs\_2318

AACCGGAAATTGTTATATACTTGCATCTATCCTGAAAGGAACAGTAACTATAACCAACAAACATGTTTTTC  
TGAAACGAACTTGTTTCGCCTAAGAATAAATTTTCATGTTTCCTGATATG

>PGSC0003DMG400028112-(rev)LRR-RLPs\_2379

CATGTTTTCTGAAACGAACTTGTTTCGCCTAAGAATAAATTTTCATGTTTCCTGATATGAACTTATTCTCTA  
CTGATTCATACATAAACTGCCCCCTGATGAATTCTCCCAAAAAGTGG

>PGSC0003DMG400028112-(rev)LRR-RLPs\_244

GCTGTAGCTGTGGCTGTGAAGGGGAATTCAGAAGGGGATGCTTTGTACGCCCTCCGCCGGAGCTTATCC  
GACCCGGGTAACGTGCTTCAGAGCTGGGATCCGAATCTTGTTAACCCCTGT

>PGSC0003DMG400028112-(rev)LRR-RLPs\_2440

CTTATTCTCTACTGATTCATACATAAACTGCCCCCTGATGAATTCTCCCAAAAAGTGGTGCAACTCAGAA  
AAGATAATGACAAGTCTGAAATATCTCTGGGTTTTAATGTTTCTCCAGG

>PGSC0003DMG400028112-(rev)LRR-RLPs\_2501

CAACTCAGAAAAGATAATGACAAGTCTGAAATATCTCTGGGTTTTAATGTTTCTCCAGGGACCTTGGCAA  
CTCAAAGTTATCTGGTCATTTGGTACCTGAGCTTGAAAGCTTGAACATC

>PGSC0003DMG400028112-(rev)LRR-RLPs\_2562

CCTTGGCAACTCAAAGTTATCTGGTCATTTGGTACCTGAGCTTGAAAGCTTGAACATCTACAGTATCTG

TGAGTAATTATTTGAAATCTTGAATTGACTTGCCATTTCTAGTCAATAAC

>PGSC0003DMG400028112-(rev)LRR-RLPs\_2623

CAGTATCTGTGAGTAATTATTTGAAATCTTGAATTGACTTGCCATTTCTAGTCAATAACTCTTTTTGTTTAT

AAGGAGTCATATCCATGAGGTAATTGTTTGTGCTTCAGGGAGCTTTA

>PGSC0003DMG400028112-(rev)LRR-RLPs\_2684

TTTTTGTATAAGGAGTCATATCCATGAGGTAATTGTTTGTGCTTCAGGGAGCTTTACAAAATAATAT

TCAGGGAACCATCCCTAAAGAGCTCGGTAACCTGAAGAGCCTTATTAGT

>PGSC0003DMG400028112-(rev)LRR-RLPs\_2745

AAAATAATATTCAGGGAACCATCCCTAAAGAGCTCGGTAACCTGAAGAGCCTTATTAGTCTGGATCTGTA

CAACAACAATATTTGCGGGACAATTCCTACTTCACTTGGAAGCTGAAAA

>PGSC0003DMG400028112-(rev)LRR-RLPs\_2806

GGATCTGTACAACAACAATATTTGCGGGACAATTCCTACTTCACTTGGAAGCTGAAAAACCTTGTTTTTC

TTGTAAGTTCTCCTTTGTGATGTTCCCAATTTGGTTCCAGTCATGTGTA

>PGSC0003DMG400028112-(rev)LRR-RLPs\_2867

CTTGTTTTCTTGTAAGTTCTCCTTTGTGATGTTCCCAATTTGGTTCCAGTCATGTGTACGTTTTACATATG

AGGGGGAAGAAAAATAAAGCAAATATTCTGTTACTTGCACTACTCACA

>PGSC0003DMG400028112-(rev)LRR-RLPs\_2928

TTTTACATATGAGGGGGAAGAAAAATAAAGCAAATATTCTGTTACTTGCACTACTCACAGAGTTCCCTTT

TCTTCTTTGACCTTAATATTCACTTGCTTGAGTGAATGGGTTA

>PGSC0003DMG400028112-(rev)LRR-RLPs\_2989

GTTCCCTTTTCTTCTTTGACCTTAATATTCACTTGCTTGAGTGAATGGGTTAAAGCACATTCCCTC

TTATGTTGATTGAAAGTTTCTTATCTGATCTATCAGGCGTCTAAATGA

>PGSC0003DMG400028112-(rev)LRR-RLPs\_305

GCTTATCCGACCCGGGTAACGTGCTTCAGAGCTGGGATCCGAATCTTGTTAACCTTGACCTGGTTTCA

TGCACTTGCAACGGAGATAATCAAGTTACTCGTGTGTAAGTCTTCAAAG

>PGSC0003DMG400028112-(rev)LRR-RLPs\_3050

GCACATTCCTTATGTTGATTGAAAGTTTCTTATCTGATCTATCAGGCGTCTAAATGATAACAAGCTAAC

CGGACCAATCCCAAGAGAACTTACTAGCGTTTCTAGCGTGAAAGTCGTG

>PGSC0003DMG400028112-(rev)LRR-RLPs\_3111

ACAAGCTAACCGGACCAATCCCAAGAGAACTTACTAGCGTTTCTAGCGTGAAAGTCGTGTAAGTATAAT  
TTCTTTGCTTGTGTTATTATTGTTAATTCTTCTGCGAAATAGATTTTAAAT

>PGSC0003DMG400028112-(rev)LRR-RLPs\_3172

AGTATAATTTCTTTGCTTGTGTTATTATTGTTAATTCTTCTGCGAAATAGATTTTAAATTATGCACTCTTTCT  
TCCAGGGATGTCTCGAATAATGATTTGTGTGGAACAATTCCCCTTC

>PGSC0003DMG400028112-(rev)LRR-RLPs\_3233

TGCACTCTTTCTTCCAGGGATGTCTCGAATAATGATTTGTGTGGAACAATTCCCCTTCTGGTCCATTTGA  
GCATATTCCTCTGAACAAGTAAGATTTCTTGTATATCCTTCAAGTATT

>PGSC0003DMG400028112-(rev)LRR-RLPs\_3294

GTCCATTTGAGCATATTCCTCTGAACAAGTAAGATTTCTTGTATATCCTTCAAGTATTGTTGTCAGAGTT  
GAACTGTAGGAGTATTATGCAATGGTGCAAAGAGTAATCATGTCTCTGT

>PGSC0003DMG400028112-(rev)LRR-RLPs\_3355

TGTCAGAGTTGAACTGTAGGAGTATTATGCAATGGTGCAAAGAGTAATCATGTCTCTGTATGCTTTATTC  
TATCGTTCACCTTTAAAAAAGACTACCAATCAAAAAAGGTATTCCTTTT

>PGSC0003DMG400028112-(rev)LRR-RLPs\_3416

GCTTTATTCTATCGTTCACCTTTAAAAAAGACTACCAATCAAAAAAGGTATTCCTTTTAAAAAATATAT  
TTTCTTGATTTGCCCTTATCTAAGTTAAATTTGGGCTTCATAATAGGCA

>PGSC0003DMG400028112-(rev)LRR-RLPs\_3477

AAAAATATATTTTCTTGATTTGCCCTTATCTAAGTTAAATTTGGGCTTCATAATAGGCAAATTATACCGGA  
AGCAATGACTTCCAACCTTTTGTGTTTGAAGAAGAAAATTATTTGGAAAA

>PGSC0003DMG400028112-(rev)LRR-RLPs\_3538

TTATACCGGAAGCAATGACTTCCAACCTTTTGTGTTTGAAGAAGAAAATTATTTGGAAAAGATTTGAATTT  
CTGCAATGACTTCTAAATTTTGTGTTTGAATAAGACAACCTATTTGGGAAG

>PGSC0003DMG400028112-(rev)LRR-RLPs\_3599

TTTGAATTTCTGCAATGACTTCTAAATTTTGTGTTTGAATAAGACAACCTATTTGGGAAGGACTTGGATATG  
TGACCTTTTATTTAGACTACACGTCATTGATTAGTTGAGAAGCCTTAA

>PGSC0003DMG400028112-(rev)LRR-RLPs\_366

CTGGTTTCATGTCACTTGCAACGGAGATAATCAAGTTACTCGTGTGTAAGTCTTCAAAGTTTCTTCTTTT  
TGTGTTTTTTGAGTTAAATACTTGTGTTGGGTGTGCTGATAGTTATCGGA

>PGSC0003DMG400028112-(rev)LRR-RLPs\_3660

CTTGGATATGTGACCTTTTATTTTCAGACTACACGTCATTGATTAGTTGAGAAGCCTTAAATAACACCTTAA  
AGAGAGTGATATACTAACAACAATGAGTTCTAGATTTCCGGTTATTTCA

>PGSC0003DMG400028112-(rev)LRR-RLPs\_3721

AACACCTTAAAGAGAGTGATATACTAACAACAATGAGTTCTAGATTTCCGGTTATTTCAATTAGAATTGT  
GGGTGGCATTAAATTCAAGCTATACACGAGATACCATTGTCTCCATTTACT

>PGSC0003DMG400028112-(rev)LRR-RLPs\_3782

TAGAATTGTGGGTGGCATTAAATTCAAGCTATACACGAGATACCATTGTCTCCATTTACTTCAAACCGAAA  
GGAAGCCCAACTGTATTTTTATTTTGTTCCTCTGGATATGCTAATTATAT

>PGSC0003DMG400028112-(rev)LRR-RLPs\_3843

AAACCGAAAGGAAGCCCAACTGTATTTTTATTTTGTTCCTCTGGATATGCTAATTATATGTGCAACGCAA  
ATCAATTAAGACGCGTCATGGTTACCTTTTCACTTTTTGTTTATTCTTTT

>PGSC0003DMG400028112-(rev)LRR-RLPs\_3904

GCAACGCAAATCAATTAAGACGCGTCATGGTTACCTTTTCACTTTTTGTTTATTCTTTAGCTCCTTAATTC  
CCTTGTTTCGACATGTATTTATATTAGATTTTGTGTTATTTGGGAAA

>PGSC0003DMG400028112-(rev)LRR-RLPs\_3965

CTCCTTAATTCCCTTGTTTCGACATGTATTTATATTAGATTTTGTGTTATTTGGGAAAGGGTGTGTGTAA  
GTAAAAAAAAAAGAAGTAGAATATATAAAAATAAAGCCAGACAAGCAG

>PGSC0003DMG400028112-(rev)LRR-RLPs\_4026

GTGTGTGTTAAGTAAAAAAAAAAGAAGTAGAATATATAAAAATAAAGCCAGACAAGCAGATAAATACA  
TCCAGTATATGTCTCAGAAAGCAATTGTGCTTTTGAATATAGTCAAAGAGCC

>PGSC0003DMG400028112-(rev)LRR-RLPs\_4087

AAATACATCCAGTATATGTCTCAGAAAGCAATTGTGCTTTTGAATATAGTCAAAGAGCCTTCGTGTTCTT  
GGTGGTATCCATGTGTCATATGTGGGTCTTACCTGCTTAGCTTTTGCCT

>PGSC0003DMG400028112-(rev)LRR-RLPs\_4148

CGTGTTCTGGTGGTATCCATGTGTCATATGTGGGTCTTACCTGCTTAGCTTTTGCCTATGACCAAGAA  
ATTCACCTGGGGCTAACTATTAGGACCAACCGCCTCTTACCATTCTCCA

>PGSC0003DMG400028112-(rev)LRR-RLPs\_4209

GACCAAGAAATTCACCTGGGGCTAACTATTAGGACCAACCGCCTCTTACCATTCTCCACGTAAGTACCA

GATTTAGTTTGCATGGTTCTGAGATTGAGCTTTTGACACAAGTCCATCAA

>PGSC0003DMG400028112-(rev)LRR-RLPs\_427

TCCTTCTTTTTGTGTTTTTTGAGTTAAATACTTGTGGGGTGTGCTGATAGTTATCGGAAATTGGTCGATTT  
GTATGTTTGTGTTTGTGTTATGTATGTGTTACTCACAGGTATATATAT

>PGSC0003DMG400028112-(rev)LRR-RLPs\_4270

TAAGTACCAGATTTAGTTTGCATGGTTCTGAGATTGAGCTTTTGACACAAGTCCATCAACCTTTGCCACTT  
GAACCAAGTCCCGGGGGCTTGTGCTATGTATAGTCTTACACCATGTCAT

>PGSC0003DMG400028112-(rev)LRR-RLPs\_4331

TTTGCCACTTGAACCAAGTCCCGGGGGCTTGTGCTATGTATAGTCTTACACCATGTCATTCTTCTTGATTT  
CTCAACTCTGCGGTCATCTCCTACTGATTCCTTTAAGAAGATACAGTAT

>PGSC0003DMG400028112-(rev)LRR-RLPs\_4392

TTCTTGATTTCTCAACTCTGCGGTCATCTCCTACTGATTCCTTTAAGAAGATACAGTATCCTAGTTGGATG  
TTTCTAATGAGTTTCTGAACTTCTAATTTGCAGTTTCGAGCACAATCC

>PGSC0003DMG400028112-(rev)LRR-RLPs\_4453

TAGTTGGATGTTTCTAATGAGTTTCTGAACTTCTAATTTGCAGTTTCGAGCACAATCCTCGACTTGAAGG  
TCCGGAGTTGTTGGGACTCGCTACCTACGACACCAACTGCTCTTAGAAG

>PGSC0003DMG400028112-(rev)LRR-RLPs\_4514

GACTTGAAGGTCCGGAGTTGTTGGGACTCGCTACCTACGACACCAACTGCTCTTAGAAGCTTGATGAAT  
AGCTTCAGAAGAAGCACCACCTTTGTGGAAGTTTAACAAATCCCCTCCCC

>PGSC0003DMG400028112-(rev)LRR-RLPs\_4575

TGATGAATAGCTTCAGAAGAAGCACCACCTTTGTGGAAGTTTAACAAATCCCCTCCCCTGAACCTTGTTT  
ATTGTTGTACTIONTACAGTGTGTCCAAAGTTGTAAGCTAAGCAAAGGTAT

>PGSC0003DMG400028112-(rev)LRR-RLPs\_4636

AACCTTGTTTATTGTTGTACTIONTACAGTGTGTCCAAAGTTGTAAGCTAAGCAAAGGTATGGTGTATGTAG  
GTTATTACTAAGTTAAGGAATGTGTGTAAAACAATCTCTATACTIONTACTGCTACC

>PGSC0003DMG400028112-(rev)LRR-RLPs\_4697

TGTATGTAGTTTATTACTAAGTTAAGGAATGTGTGTAAAACAATCTCTATACTIONTACTGCTACCAACTGTTGATG  
TATTTTCATATTTCAAAGTCTAGTGAAATGGTTTCAAGTGGGGTTAGAAATGC

>PGSC0003DMG400028112-(rev)LRR-RLPs\_4728

TGTGTAACAATCTCTATACTGCTACCAACTGTTGATGTATTTTCATATTTCAAAGTCTAGTGAAATGGTT  
CAGTGGGGTTAGAAATGCCTATTTTTACTTCTGTTACACTGCTATAAAT

>PGSC0003DMG400028112-(rev)LRR-RLPs\_488

TTGGTCGATTTGTATGTTTGTGTTTGTGTTATGTATGTGTTACTCACAGGTATATATATGGTCTAAACCTA  
AAGCGGAGGATTTGATTGAATCTGCTATGTGAGGCTGGATTTATATGAC

>PGSC0003DMG400028112-(rev)LRR-RLPs\_549

TCTAAACCTAAAGCGGAGGATTTGATTGAATCTGCTATGTGAGGCTGGATTTATATGACAGGAAAAAAG  
AAAAATTGCTGAGTTGTGGAAGGAAATGGGTGTAGAGTAGAATTTAGCTAG

>PGSC0003DMG400028112-(rev)LRR-RLPs\_732

TCATATAGATGGTAAAAAGTTAAGCTTTCACTTGACTTGCTTGCTAACAAAGTCTTTGTTTGGAGATTAGTA  
GCAAAGTGATTCCTGTTTCCAGGGTGAAGAGCATGTCTGTATTACTTTT

>PGSC0003DMG400028112-(rev)LRR-RLPs\_793

GAGATTAGTAGCAAAGTGATTCCTGTTTCCAGGGTGAAGAGCATGTCTGTATTACTTTTGTGACTTAC  
TCAAAGTTCCTGTCGTGATGTGTACTGATGATCTATGTGCTAAATATGGA

>PGSC0003DMG400028112-(rev)LRR-RLPs\_854

TTGACTTACTCAAAGTTCCTGTCGTGATGTGTACTGATGATCTATGTGCTAAATATGGAGGTGTGTGGTT  
CATTAAATGATCTTTGTCGTTGTTATGTTTTTGTCTCACGTGGTTTCACC

>PGSC0003DMG400028112-(rev)LRR-RLPs\_915

TGTGTGGTTCATTAAATGATCTTTGTCGTTGTTATGTTTTTGTCTCACGTGGTTTCACCCTTTGTGTCTGTA  
TTACTTTTGTAACTTACTCGAAGTTCCTGTCGTGATGTGTATCGATG

>PGSC0003DMG400028112-(rev)LRR-RLPs\_976

TTGTGTCTGTATTACTTTTGTAACTTACTCGAAGTTCCTGTCGTGATGTGTATCGATGAGACAATGATCT  
ATGTGTTAAAGATGGAGAAGTGTGATTCATTAAATGATCTTTGTCATTGT

>PGSC0003DMG400028123LRR-RLKs\_1037

ACTAAGATTTCTAACTCGGACAACCTCTCAATGTAAACCAACAGAAAAGGAAAGTACAGTCAGTTCTCT  
TTCTACATGGAGTCCTGATTTTCTGATTTTCAAGTTGTTGATAGTTTAT

>PGSC0003DMG400028123LRR-RLKs\_1098

CAGTTCTCTTCTACATGGAGTCCTGATTTTCTGATTTTCAAGTTGTTGATAGTTTATCGAACTGAAGTCC  
ACCACTACTAATTCAAATGAAGTATAATCATCTCTGCCGTGGAGTCGA

>PGSC0003DMG400028123LRR-RLKs\_1159

AACTGAAGTCCACCACTACTAATTCAAATGAAGTATAATCATCTCTGCCGTGGAGTCGATTACACACTGT  
AACTCTTTAATCTTTTGTAGCTTCTACGGATAACATCCAATTCAAAAGAA

>PGSC0003DMG400028123LRR-RLKs\_1342

ACTATCATCATAGAAGTCTTAATATAGTCATTAATATTAATATATATCACACCATAATGGGGAGTTTATGC  
ATAGACGTAAAGAAACATCCTCAAAGGTGTGCACATCAGACTATCCTC

>PGSC0003DMG400028123LRR-RLKs\_1403

GAGTTTATGCATAGACGTAAAGAAACATCCTCAAAGGTGTGCACATCAGACTATCCTCCTATGCATAGC  
CCATGTTATAGGAGATACTAATGAATATGGAAGGTTAGATTGAAGGTA

>PGSC0003DMG400028123LRR-RLKs\_183

GCTCAAGTTGAGGATTCATGGAGAAAAGACTCTTCAAGTAGTGATGCCTCTCCAATTCACATCTCTACA  
GCTTCAAACCCAACTTGTGCGCAATAGCAATAGCAATAACAATAGCAAT

>PGSC0003DMG400028123LRR-RLKs\_2928

AGAACTCCACTGAGCATGGTCATCTTTTTTGGTCTGTTGAATTTCTCCGCAGTAGAACTTGTGGTACTT  
CTGCATCCGACTGATCCAGAGGAATATAAGGTGGAGGTGAATAATTCTT

>PGSC0003DMG400028123LRR-RLKs\_3294

TAGAGTCCGAGCAACATAGCTTGTGTGGGGGGGGGGGGGGGGGGGGGGGATTTTAAAAATCCTTAGGG  
GTACATGCCCCCTCCCCCTTAAATTCATCTCTGAATGTCTAACACTTACTA

>PGSC0003DMG400028123LRR-RLKs\_3355

TTAGGGGTACATGCCCCCTCCCCCTTAAATTCATCTCTGAATGTCTAACACTTACTAGATTCCCTTTGCT  
AAACTCTACAGAGTTCTTGTGGACATTGGAACCTAGATAGTTTGTCT

>PGSC0003DMG400028123LRR-RLKs\_3416

TTCCCTTTGCTAAACTCTACAGAGTTCTTGTGGACATTGGAACCTAGATAGTTTGTCTATACTGTACGGG  
TTCAACAAATATATTTCAATATCTTTGTCAAATTACTCCAAATTGATGT

>PGSC0003DMG400028123LRR-RLKs\_3477

ACTGTACGGGTTCAACAAATATATTTCAATATCTTTGTCAAATTACTCCAAATTGATGTAGTTAATAAAT  
ATAAACGGCATCTATAATATTCTCTATTGGTAATTTATAAATACATCG

>PGSC0003DMG400028123LRR-RLKs\_3538

TTAATAAATATAAACGGCATCTATAATATTCTCTATTGGTAATTTATAAATACATCGTAGATTTATTCTT

TTTAGTTCTTCTATATGTGTATACTCCAAATTAACACTTTCCTCTAAC

>PGSC0003DMG400028123LRR-RLKs\_3599

GATTTATTCTTTTTAGTTCTTCTATATGTGTATACTCCAAATTAACACTTTCCTCTAACCGTGCTTATAAATG

TCTGGTACTCATTTCACAACCTATAGTGTCTTATCACAGGTGAAATC

>PGSC0003DMG400028123LRR-RLKs\_3660

TGCTTATAAATGTCTGGTACTCATTTCACAACCTATAGTGTCTTATCACAGGTGAAATCTCGAATACACCC

GTGTTAGTTCTGCATTAAATTGTA AACCTTAACGTATATAAGAGAGTT

>PGSC0003DMG400028123LRR-RLKs\_3721

GAATACACCCGTGTTAGTTCTGCATTAAATTGTA AACCTTAACGTATATAAGAGAGTTATCCTTCGTATT

ACTTATCAACTAAGTTGCTCGGACTCTCCAAAATGTTGCCGCACCCGT

>PGSC0003DMG400028123LRR-RLKs\_3904

AGAGTCCGAGCAACATAGCTTTTTGATGAAGTTATAAATCATCTGCCATCGTTTCAAAGAAAAGAAACA

CACACACAGATATTGACAGGAAAGAGAAAAGAAAGATGCTTAACATTAC

>PGSC0003DMG400028123LRR-RLKs\_3965

AAAGAAACACACACACAGATATTGACAGGAAAGAGAAAAGAAAGATGCTTAACATTACAAAATCGAT

TCTAAGTTGTCAA ACTGAAAATGTTTACCAACAAAAAATTAGCACTGTGTA

>PGSC0003DMG400028123LRR-RLKs\_4026

AATCGATTCTAAGTTGTCAA ACTGAAAATGTTTACCAACAAAAAATTAGCACTGTGTAGATTGACCACA

TTGCAGATTGGCTCCACTAGGACTGACGATTATTTTATCATGTAATGCTT

>PGSC0003DMG400028123LRR-RLKs\_4087

TTGACCACATTGCAGATTGGCTCCACTAGGACTGACGATTATTTTATCATGTAATGCTTACGATTAAGTAT

TTCCA ACTTTCAATTATGGGTGTTCTTAGAAAGGATTGCACCCAATTT

>PGSC0003DMG400028123LRR-RLKs\_4148

GATTAAGTATTTCCA ACTTTCAATTATGGGTGTTCTTAGAAAGGATTGCACCCAATTTGTGCACTTCCTT

TATTTTTTGACCTTGTAATCACAAAAGGAAGCTTTCCTAGTGCTTGCT

>PGSC0003DMG400028123LRR-RLKs\_4453

TTAGCCACAGCCTCAC AACCTTGGTGCAACTATTCAGAATTTTTTATCAATAACTATTAACCATAGCCAT

TTCTGATTTAAAAAATTAGACTAGATGCACCTGATACCTGTTGCTACTT

>PGSC0003DMG400028123LRR-RLKs\_4636



ACACGACACGATTATCAAAGAAATTGTAATGTGGTGTAAACGGTAATTAGAAGGATTTGACAAATGATT  
AGCAATTCATGACAGTATGTTTCGATTCATCTATCGGCCTTAATTTTTTTT

>PGSC0003DMG400028123LRR-RLKs\_4697

AAATGATTAGCAATTCATGACAGTATGTTTCGATTCATCTATCGGCCTTAATTTTTTTTCATTTTCTTCAA  
CAATTGATAAGCAATACTTCAATGCAATTATTACTCAGATCTCAACTA

>PGSC0003DMG400028123LRR-RLKs\_4758

TTTTCTTCAAACAATTGATAAGCAATACTTCAATGCAATTATTACTCAGATCTCAACTATAGAGCCATGAC  
AAATAACGACATAGTATCGAAATTCAAGCTTTATTCATGCAGTGTAAC

>PGSC0003DMG400028123LRR-RLKs\_4819

GAGCCATGACAAATAACGACATAGTATCGAAATTCAAGCTTTATTCATGCAGTGTAACGAATTTAAAGC  
ATTGAATCCAAATATCAAAAACAATATCGTCTATTTTACCGCTAAGAATC

>PGSC0003DMG400028123LRR-RLKs\_488

GTATATACCAACCCAACCTTAATAGTACCTAGATATTACAAGAGCAACATATAGTGCAGAAACCTATAAT  
AGACATGGATGATAAAAAACAAAAACAAAAGAATGCAAAGAGGGACTAGT

>PGSC0003DMG400028123LRR-RLKs\_4880

ATTTAAAGCATTGAATCCAAATATCAAAAACAATATCGTCTATTTTACCGCTAAGAATCATTTGGGATGA  
GGTTTTCGTTTTTTTTTTGCTCGTAAGAGAAAATAAAAAGGCAAAATCTG

>PGSC0003DMG400028123LRR-RLKs\_4941

TTGGGATGAGGTTTTCGTTTTTTTTTTGCTCGTAAGAGAAAATAAAAAGGCAAAATCTGGAGAAGAAAG  
AGACAGACCGGAACCTTACAGCTCGATGTCGCCGAGAGAAGGATATTGCTG

>PGSC0003DMG400028123LRR-RLKs\_5002

GAAGAAAGAGACAGACCGGAACCTTACAGCTCGATGTCGCCGAGAGAAGGATATTGCTGAGGATTTTCG  
CCGAGAAAGAGATCGCCGGGCAATGAACTTCGCCGAAAAACAAAACAAGGA

>PGSC0003DMG400028123LRR-RLKs\_5036

GTCGCCGAGAGAAGGATATTGCTGAGGATTTGCCGAGAAAGAGATCGCCGGGCAATGAACTTCGC  
CGAAAAACAAAACAAGGAGTAGTTCCAGAGGACAAAAAGTGCCGTTTTGTT

>PGSC0003DMG400028123LRR-RLKs\_549

ACCTATAATAGACATGGATGATAAAAAACAAAACAAAAGAATGCAAAGAGGGACTAGTTAATGGAAA  
AGGGAAGCATTACAAATCGATTTTTTAGACAGTAGAAACAGAATATCTATTC

>PGSC0003DMG400028123LRR-RLKs\_610

ATGGAAGGGAAGCATTACAAATCGATTTTTAGACAGTAGAAACAGAATATCTATTCGTTTGCAGGA  
GGAGTTTCCATTTTCTGAACTTGAGGGGCTGCTACTGCCACTAAGCTAAGA

>PGSC0003DMG400028123LRR-RLKs\_915

ATGGAACCATAGTATTTTCGTAGAACAGAAAAGGGGGCGGGAGCTAATGGGAAGAGAGGAAGGTGAA  
GAATTCAGGGTAACTGGTTATAGATGCTGCAGACTCATCTGATAATAAACTCA

>PGSC0003DMG400028123LRR-RLKs\_976

GGTGAAGAATTCAGGGTAACTGGTTATAGATGCTGCAGACTCATCTGATAATAAACTCAAACTAAGAT  
TTCTAACTCGGACAACCTTCTCAATGTAAACCAAACAGAAAAGGAAAGTACA

>PGSC0003DMG400028147-(rev)LRR-RLKs\_0

TCTCACTCCAATTATAACACTGTATATTACTATCTCTCCATTATTCTTGCTTTGTAGTGATCTGAATCAAC  
CCATGTTTCCCACCTCTCCTTGTCTAAATTCTAACATGGGTTTGTACA

>PGSC0003DMG400028147-(rev)LRR-RLKs\_1116

TTATGGGGCCAATACCAAATTTCAAAGCTATAAATGTTAGTTATCAATCTAACTCTTTTTGTCAAGCCAAA  
ATTTGTGCACCTGAGGTTATGGCACTTTTAGAATTCCTTGATGAGTTGA

>PGSC0003DMG400028147-(rev)LRR-RLKs\_1612

CACTTCTGTTTACCCTCTTTGCCGACCAATAAGTCAAGCTCTTCCAAGTCTAACTTAGTCATTTTTGTGGT  
TCCTATTGCAAGTTTTGCACTTTTAGTTTCTTTTGTATGCTACTATA

>PGSC0003DMG400028147-(rev)LRR-RLKs\_2170

TGTTGAAGGCAATGAACGGATTCTGGTTTATGAACACATGCCACAAGGTGCTCTTAGCACGCATCTTTTC  
AACTGGAAAAGCTTGAACCTTAGAGCCTCTTTCGTGGAAGAGGAGGCTGAA

>PGSC0003DMG400028147-(rev)LRR-RLKs\_2232

ATCTTTTCAACTGGAAAAGCTTGAACCTTAGAGCCTCTTTCGTGGAAGAGGAGGCTGAATATTGCATTAGA  
TGTTGCTAGAGGAATGGAATATCTACATACATTGGCTCATCAGTGCTTCA

>PGSC0003DMG400028147-(rev)LRR-RLKs\_2294

GCATTAGATGTTGCTAGAGGAATGGAATATCTACATACATTGGCTCATCAGTGCTTCATACACAGAGATC  
TCAAGCCCTCAAATATCTTGCTGACTGATGATTTCCGAGCAAAAAGTATCA

>PGSC0003DMG400028147-(rev)LRR-RLKs\_248

CTTACTCTTCATTTCACTTTTTTCAGTTGTTTACAGCGTTACAGACCCTAATGACCTTGCCATTATCAAT

GAGTTCAAGAAAGGGTTAGAAAATTCTGAGCTTTTGGGAATGGCCAGTT

>PGSC0003DMG400028147-(rev)LRR-RLKs\_2604

TTTGGTATGAGTACAGTTACATAAACTCAAATAGTTTAGTTACTGTTGTCTGTTTTGGGGTGGATAAGT

TAAGGACTATAATAAATCTGTTACCGATAAGATGATATTGAATATCAAC

>PGSC0003DMG400028147-(rev)LRR-RLKs\_2666

GGATAAGTTAAGGACTATAATAAATCTGTTACCGATAAGATGATATTGAATATCAACTTTAGTACTAA

TTCTTGTAGACACCTAGGATTTCTTTAGATGATTCTGTCTTTTCCGTCT

>PGSC0003DMG400028147-(rev)LRR-RLKs\_3162

ATTCAGACGACGATTGTGGTATCGATTACAGTCTTCCACTCAATCAAATGGTCAAGGGCTGGCAAGAAT

CAGAAGGAAAAGACTTGAGTTGCGTCGACCTTGAAGACACTAAGGGTAGTA

>PGSC0003DMG400028147-(rev)LRR-RLKs\_3224

CAAGAATCAGAAGGAAAAGACTTGAGTTGCGTCGACCTTGAAGACACTAAGGGTAGTATCCCCTCAAG

GCCTACTGGATTTGCTGAGTCCTTTACATCAGTTGATGGTAGATGAGAAAAA

>PGSC0003DMG400028147-(rev)LRR-RLKs\_3286

CTCAAGGCCTACTGGATTTGCTGAGTCCTTTACATCAGTTGATGGTAGATGAGAAAAAAGGTACTGCACT

ACTTCTAGTGTAGTTGATCTGATATTCTTATTCAGTAAATGTGGATAGCA

>PGSC0003DMG400028156-(rev)LRR-RLPs\_1302

AGTTAATACTATATTGTTATGGATTTCTCAAAGTTGCTTCTTTTTGCTAATACAGGGGCTAGTTATACCA

AAAGACGTGAGAGAACACTTGTTTCTCCCCTTTATGGAACATAATCACG

>PGSC0003DMG400028156-(rev)LRR-RLPs\_1364

GTTATACCAAAGACGTGAGAGAACACTTGTTTCTCCCCTTTATGGAACATAATCACGTGAAAGTACACA

TTCATAATCCATTGATAAGTTATTCAGTTGTAGATATTCTTGATGGTATT

>PGSC0003DMG400028156-(rev)LRR-RLPs\_1612

TGATGATGATGATGATTGAAAATTATGCTTCGTAATCACTCAAACCTGAACTTCTGTTGATCTGTTCCAGC

ACGCATATACTGTTGCTATCGAGCATTAAATTAACCCTCTCTAATATT

>PGSC0003DMG400028156-(rev)LRR-RLPs\_1922

AAGGAAGAAAAACAGAAGTTGAAAAACTATTTTTCCACAAACACAGATATCTTGGAGATAATTGAGGTT

CCCCCGGCACACATTGACCTAGAATCCCCTGGGAACAAGTACATACCTAAA

>PGSC0003DMG400028156-(rev)LRR-RLPs\_1984

TGAGGTTCCCCGGCACACATTGACCTAGAAATCCCCTGGGAACAAGTACATACCTAAATGTCCATGTCCC  
AATTGTTCTCAGATTAATTTTGTAGAATTACATGCTTGGTTTGTATAGG

>PGSC0003DMG400028156-(rev)LRR-RLPs\_744

GATTTGTTGATATTAGATCACCTAATATTGAAGATCTTGACGTCTATGGCTCCAACCTCTGCTCCGACTAC  
TTAAGAGTGAGAGTGATCTAAATGTAGTTATTATTACTAACTGTTGCA

>PGSC0003DMG400028156-(rev)LRR-RLPs\_806

TCCGACTACTTTAAGAGTGAGAGTGATCTAAATGTAGTTATTATTACTAACTGTTGCAAAGCCCTTAAGA  
GTTTGCAGCTCAATGGCCTCAATGGTGTGGCCATGACCCAAAAATGGTTT

>PGSC0003DMG400028156-(rev)LRR-RLPs\_868

CCTTAAGAGTTTGCAGCTCAATGGCCTCAATGGTGTGGCCATGACCCAAAAATGGTTTGCAGAAATTTTT  
ACCTGCCTTCAGAATATAGAGAAGTTGGATTTAGGTGATTGCAACATGTT

>PGSC0003DMG400028156-(rev)LRR-RLPs\_930

AAATTTTTACCTGCCTTCAGAATATAGAGAAGTTGGATTTAGGTGATTGCAACATGTTAAAGACTGTGAA  
AATCTCAGGCGTCTTCTCAAACAGCTGAGAGTATATCGTTGTGATAATG

>PGSC0003DMG400028156-(rev)LRR-RLPs\_992

ACTGTGAAAATCTCAGGCGTCTTCTCAAACAGCTGAGAGTATATCGTTGTGATAATGTGATTACTATTG  
AATTAGACTCCTAATTTGATAGAGTTCTCGTATGATTGTTCTTCATTG

>PGSC0003DMG400028212LRR-RLPs\_0

ATGAAGTATGGTCTCTCTTCACTGTCATTTGTTCTAGTGTTTATTAAGTACATCTTGCAGGTATGTAT  
TCAAGATTCAGATTTTTTTTTTTTTCATAAAAGACTACAAATATTTCTA

>PGSC0003DMG400028212LRR-RLPs\_120

CTAATACTATACTCTTGAGGAAAATGTAAAATTTTTTTTTGTCTTTTTGGCAATTGTTAGAAGAAGAATAT  
TTGGTGAAGTTTGTGTTTGAAGTTATCTTTAATAAAAGAAGAAGAACA

>PGSC0003DMG400028212LRR-RLPs\_180

AAGAAGAATATTTGGTGAAGTTTGTGTTTGAAGTTATCTTTAATAAAAGAAGAAGAACATTTGGTGTGTT  
TAATTAATTCAATTTGAAGGTCTTCAATTTCTTTTTTAAACAGGTACTT

>PGSC0003DMG400028212LRR-RLPs\_2043

GAAACAGAGGAAAGTACATTTCTTGAATTGTTGTTATTCTAATAACTATGGATACAGAGTTTGATGTTT  
GCTTACTGAAATTTCAATTCAGCTGAAGTAGTGAAGAAGTGGCAACTAGA

>PGSC0003DMG400028212LRR-RLPs\_240

TTTGGTGTTTTAATTACTTCAATTTGAAGGTCTTCAATTTCTTTTTTAAACAGGTACTTCTCAAGATTCTT  
GTTTACTTTTGTTCCTATTGGTTAAACTTTTCGTTTGGTCATAGATTT

>PGSC0003DMG400028212LRR-RLPs\_300

CTCAAGATTCTTGTTTACTTTTGTTCCTATTGGTTAAACTTTTCGTTTGGTCATAGATTTTGAAGTTGTGTT  
CGAACATGTATTTTAGTTGAAGTTGTGTTAAAATTTAGTTATTTGGAA

>PGSC0003DMG400028212LRR-RLPs\_3221

TTGCCTAGTTGCCTTCTGACTGGTCCTAAGGACAGGATCGTGCGTTACTCTAACAATTGTTTAGCAACTG  
GAGGCGGAACTCAACATCCATTTTCTTCTGTCCGAATGAGGCGTTGGCT

>PGSC0003DMG400028212LRR-RLPs\_3593

TGAAGTTTGAAGCATAGTACAATAATTTTGGCTTACCTGTGCACGAAATACACAATAGGAAGGCGAAAA  
AAGCCTAAACATACGAAGTTTCTTCTATTCTAATTACTACTAATTTTCC

>PGSC0003DMG400028212LRR-RLPs\_360

TGAAGTTGTGTTTGAACATGTATTTTAGTTGAAGTTGTGTTAAAATTTAGTTATTTGGAAAATTTGATCAA  
ATTTTATTGCCAAACAGATATTTGAAGACAAATTTTTCGAAATCTGATC

>PGSC0003DMG400028212LRR-RLPs\_3655

GCGAAAAAAGCCTAAACATACGAAGTTTCTTCTATTCTAATTACTACTAATTTTCCATCTTGTGTGTTTC  
TTCTCCGTTTACAAGACTATGTTACTCGAACAATGAAGCTGGGATCAC

>PGSC0003DMG400028212LRR-RLPs\_3841

CAGCAACTTTTATAGGCAACAGTTCTGATGATCAGGTGCATTTCAAGAATCACTATGTACCTTACTTTTCT  
TTCTTAACGTCATAATTGAGATCCTTAAACGTTTCGTTTAAGAACATTTT

>PGSC0003DMG400028212LRR-RLPs\_420

AATTTGATCAAATTTTATTGCCAAACAGATATTTGAAGACAAATTTTTCGAAATCTGATCCAAAATCTATG  
GCTAAACGCTAGCTAAATGTCTGCATTAATACTTCATGAAGCTTTTCTTT

>PGSC0003DMG400028212LRR-RLPs\_4213

CATACACTTATGTGATACTCACGTCTGAGCGAATGTAACAACATAAAGAGTAAACTGCATATATTATATG  
ACAGAATTAGTGAGTATGGAGGTTAACTTACTGTTTTTTTTGGATTCAGC

>PGSC0003DMG400028212LRR-RLPs\_4275

ATTATATGACAGAATTAGTGAGTATGGAGGTTAACTTACTGTTTTTTTTGGATTCAGCTGTACAGAGGTC

AGCTGAAAGATGGTTCATACATAACCATAAGATGCCTGCAAACGAAACGA

>PGSC0003DMG400028212LRR-RLPs\_4399

ATAGCAGTCAAATTTTATGTATCATATAGAATTGATGTCAAACCTCAGACATAATCATCTGGTCAGTAC

TCTTGGACACTGCTTCAAGTGTTACTTGGATGATTTCGATTGTTAGCAGGA

>PGSC0003DMG400028212LRR-RLPs\_4461

GTCAGTACTCTTGGACACTGCTTCAAGTGTTACTTGGATGATTTCGATTGTTAGCAGGATATTTCTGGTCTT

TGAGTATGTATCAAATGGTACCCTAAGAAGCTGGATCTCTGGTAATTAT

>PGSC0003DMG400028212LRR-RLPs\_4771

GATAACAGATATCTTGTGGATCAGAACTTTGTAGCCAAAATTTGCAGCTATAATTTGCCTATTCTGGAT

GAGTATGTAAAGGAGCAGAAGAGTACAAGGTATGCCTAACTGTTCCGAAT

>PGSC0003DMG400028212LRR-RLPs\_480

CAAATCTATGGCTAAACGCTAGCTAAATGTCTGCATTAATACTTCATGAAGCTTTCTTTTTTCTTCTAA

TTGTGCTGCTTACTTCATTATGTGAAAAGATAAGAGGATGTTGATATA

>PGSC0003DMG400028212LRR-RLPs\_5205

CCAAGAATGAAGTGAGAGTTATACAAAATCAGGTATGATTTAACTCTTTTTTCACTCTTCACAACAACCTA

TGTCCAAGTCAAATGTAAGTTAGGATCAGCTATATGAATTCTGACCGAC

>PGSC0003DMG400028212LRR-RLPs\_5267

CAACAACTATGTCCAAGTCAAATGTAAGTTAGGATCAGCTATATGAATTCTGACCGACTCTTTTACTCTTC

ATATTTTCTGCAGTTACAAGAGAGCATAATGTCTAATGCAATGTCAAGA

>PGSC0003DMG400028212LRR-RLPs\_540

TTTTCTTCTAATTGTGCTGCTTACTTCATTATGTGAAAAGATAAGAGGATGTTGATATATTGCAATATGT

GTCCTGTATTTTCAAGATTCATCTTTTCTTGGATTGGATTTGGTGGT

>PGSC0003DMG400028212LRR-RLPs\_5639

AACAATAGCAATGGCACGTCTGTGTGACAAGCTATTTCTAACGTGGATAACTAATCTCGATACTATTATT

CCATCCTGTGACAAGAATAACTAACTAACAATTTATGTAATAATTTTCT

>PGSC0003DMG400028212LRR-RLPs\_60

GCAGGTATGTATTCAAGATTCAGATTTTTTTTTTTCATAAAAGACTACAAATATTTCTACTAATACTATAC

TCTTGAGGAAAATGTAAAATTTTTTTTTGTCTTTTTGGCAATTGTTAG

>PGSC0003DMG400028212LRR-RLPs\_6011

CTATTCGTTTGCAGGAGGAGTTTCCATTTTCTGAACTTGAGGGGCTGTCACTGCCACTAAGCTAAGATCA  
GATGAGTTTGAATCTCCAGATCTTTCATGGATCTCTCGGTACTCCTGGCA

>PGSC0003DMG400028212LRR-RLPs\_6197

CAGGACACACAAAATTGTTAAATGCAGAAATACTGATGTAAGCAGTTTGCATCTTTCTATTCAGGCATGG  
AACCATAGTATTTTCGTAGAACAGAAAAGGGGGGCGGGAGCTAATGGGAAG

>PGSC0003DMG400028312LRR-RLPs\_1008

TTCCAGGTTTAGACTCTTTGAATCACTTAAATTTAAGGTCTATTTTCTAAAACATGGTGCAAAGCGACTTG  
AGATCAACTTTCTAGGAACCTCAAGAAGTTGACCTTGTCATCATTTCG

>PGSC0003DMG400028312LRR-RLPs\_1071

GCGACTTGAGATCAACTTTCTAGGAACCTCAAGAAGTTGACCTTGTCATCATTTCGATTACAACATATAG  
GAAGATTAGAAAATTGGAGGTGCTCAAGTTGGAGTCCAATGCTTTTCGAG

>PGSC0003DMG400028312LRR-RLPs\_126

CAGCTTTGGATCGCGGAAGAATTTGCAGTAGAAGATGTAGCAAAGGACTATGTGAAGGAATTAATAGA  
TAGTAATCTTGTAATGGTTGTTGCGAAGGAATTTCTTTGGTGAGGTGAAAGCA

>PGSC0003DMG400028312LRR-RLPs\_1260

AATATTCCACAATGGAACCTTTCTGATATGTTCTTTCCTAACCTTCAACATTTGATATTCAGAAATAGTCGA  
CTTAAAACAATTCCTCGCGACTTTGAAAACCTTACTTTTGCAGCAGATG

>PGSC0003DMG400028312LRR-RLPs\_1323

AATAGTCGACTTAAAACAATTCCTCGCGACTTTGAAAACCTTACTTTTGCAGCAGATGATTGAGGTGTCTT  
GGTGTAATGCAGCCGAGATGCCTTAAACACTGCTGAAGAGATTAAGAAA

>PGSC0003DMG400028312LRR-RLPs\_252

ATGCATGATCTGTTGCGTGAGTTCTGCTTGACTCGAGGTAATATCTCATTGTAACCATCGATCACAACTT  
TGTTACTTCCAGACTCTTTTAACTGGTTCTTACTATTTTATTTTCTTCC

>PGSC0003DMG400028312LRR-RLPs\_315

ACAAACTTTGTTACTTCCAGACTCTTTTAACTGGTTCTTACTATTTTATTTTCTTCTTTTGGTATTTTGT  
CTTTGCAGATCAAGTAATTCAACAGCTGCTGAACACGAACGTGGCA

>PGSC0003DMG400028312LRR-RLPs\_378

TATTTTGTCTTTCTTTGCAGATCAAGTAATTCAACAGCTGCTGAACACGAACGTGGCATTTCACCTTGATTC  
CGTTAAAATTATAAAGAAGCTGAATATTTGTATCCCCATTCTGCTATCT

>PGSC0003DMG400028312LRR-RLPs\_441

TTGATTTCCGTTAAAATTATAAAGAAGCTGAATATTTGTATCCCCATTCTGCTATCTCCCGAATACCCTATT  
CTGTTGACGATATACTTGACCAGAACAACCTTTCTCATATTTGACTGCA

>PGSC0003DMG400028312LRR-RLPs\_504

TACCCTATTCTGTTGACGATATACTTGACCAGAACAACCTTTCTCATATTTGACTGCAAAAGTTTGTGTTTC  
AAACCCAGAATCACATCACTGAGAGTGTTGGATTTGGTGTGTGTGCACAT

>PGSC0003DMG400028312LRR-RLPs\_567

TGTGTTTCAAACCCAGAATCACATCACTGAGAGTGTTGGATTTGGTGTGTGTGCACATCGAGCAATGCACC  
TTATATTCAATTCTTGGTTAATTTAAGATACTTGTCCATGAAGGGGAATT

>PGSC0003DMG400028312LRR-RLPs\_63

ACGAATGGCTTTCTTTACTTTGGAAAACATTTTGAGGATGAGATTTTGGTTGAGAGTTGATTCAGCTTT  
GGATCGCGGAAGAATTTGCAGTAGAAGATGTAGCAAAGGACTATGTGAAG

>PGSC0003DMG400028312LRR-RLPs\_630

ATGCACCTTATATTCAATTCTTGGTTAATTTAAGATACTTGTCCATGAAGGGGAATTTTGAGGAAGATCC  
ATCATGGTTATCCAACCTCAAGTACTTAAAAACATTGATACTCAGAGAAT

>PGSC0003DMG400028312LRR-RLPs\_693

AAGATCCATCATGGTTATCCAACCTCAAGTACTTAAAAACATTGATACTCAGAGAATCGCGCAGATTAGA  
TCTATCTTATGCAATATGGGGTATGGTGAGCTTAAAAACATTTGGAAGTGA

>PGSC0003DMG400028312LRR-RLPs\_756

GATTAGATCTATCTTATGCAATATGGGGTATGGTGAGCTTAAAAACATTTGGAAGTACTGGTAAACCAG  
CTGTCATCAGGTGCCATGTCCCAGAGTTCATGATGAACCGTCGTTTAAACAA

>PGSC0003DMG400028312LRR-RLPs\_819

AACCAGCTGTCATCAGGTGCCATGTCCCAGAGTTCATGATGAACCGTCGTTTAAACAAAATTACAATGTCT  
TTCTTTTGTACACTTACCTGAAGGCGAAGAGTTCATGTCAAAGTACCCA

>PGSC0003DMG400028312LRR-RLPs\_882

AATGTCTTTCTTTTGTACACTTACCTGAAGGCGAAGAGTTCATGTCAAAGTACCCAATTTAGTAAAGAT  
GAGGTGTTTGGTTGATGAGGCTGAGCCACAAGGTGATCAGACAATATGCA

>PGSC0003DMG400028312LRR-RLPs\_945

TAAAGATGAGGTGTTTGGTTGATGAGGCTGAGCCACAAGGTGATCAGACAATATGCATTAGGCTTCCAG



GTTTAGACTCTTTGAATCACTTAAATTTAAGGTCTATTTTCTAAAACATGG

>PGSC0003DMG400028346RLKANKrepeat\_0

GAGGAAGAGAGAGACTCAAACTAACTGTGTACACACATTCAAAGAAACGGAACACACGAGTCAAT  
TGATCCATTATCAATCCAAATGAGTACAAGTGAAGGGAGCTCCGGCTCATCG

>PGSC0003DMG400028346RLKANKrepeat\_1281

TATTAGGCTTCTAGATTGATGGCATGATTAGGAGATCATTTACCTGAGTTGGGCAAAAATCTTTACTTTT  
AGCAAATAACTGATTGGAGCTATCGCCTTAATAATGAGCCAAGAGCTAA

>PGSC0003DMG400028346RLKANKrepeat\_1342

TTTTACTTTTAGCAAATAACTGATTGGAGCTATCGCCTTAATAATGAGCCAAGAGCTAATGGTTGCTGGT  
ACTATAACAAGAAAATAATCTAACAGCGTTGGAAGCAGGATGTTCAATTC

>PGSC0003DMG400028346RLKANKrepeat\_2867

TTCTATTTGTTAAGAATCTTTACTCTGCTAATATTGTACGAGGACCTGGAATTTAAGTGGATCAAGAAGCT  
TCACATGTTACCCAAGGCTGTCAGCATTCTCAATTCACAATTGTCTCTT

>PGSC0003DMG400028346RLKANKrepeat\_2989

AGCTTGATGCAGATTTATATAATTATAAAAAGTATGCTGTTAGTTAGACCCTGCTGCAGTAATTAATTTTTG  
ATATTTAATATGATACTGATCTCTCTTTTTTTTTGGGATAACTGAGA

>PGSC0003DMG400028346RLKANKrepeat\_3050

TTAATTTTTGATATTTAATATGATACTGATCTCTCTTTTTTTTTGGGATAACTGAGAAATTTGTCTGTGA  
CCCGCCCTTTGGAATATGATACTGATCTGCCTAATTTAATTCCTCTCA

>PGSC0003DMG400028346RLKANKrepeat\_4880

TCTTCTCTTGCAACCTTAGGTTTTATATATGCACTGCGAAGTTTATTTCTTTGACTATTAGCCAACGCAA  
GAAGATGGTGGGCAGTGTTTTGTTTTATGCTTTTCTAAAGACAAATCA

>PGSC0003DMG400028407RLKmalectin\_0

ATATATGTAGGCCATACACAAAAGATAAATGTGACCATTATTGCCATAATAATCTAAAATGTAAGTTATT  
TTTTACCAAGCTGTAGTATTCGTAATGTTTTCTTGGCTTCTGCTTATTTG

>PGSC0003DMG400028407RLKmalectin\_1037

GAAAATAATTTCTGAAAATGCTTTTTGAAAAAAAAGAAAGAAATTATATACAAAATGATTGAAAC  
AGTAACAAATGGGAGAGTGTTTTGATGAAAATTCGAGTACTAAAGATTA

>PGSC0003DMG400028407RLKmalectin\_122

AAAATTTAAATGGCAAATCAATATTTTTTGTGTAGAACAAATGATTAAGGAACAAACGTGTGTTGCACG  
TTCTCAGAACTAGTATATATATAAACACAAGTATCTCGTATCAAAAGTT

>PGSC0003DMG400028407RLKmalectin\_1342

CTACAACCAAACACCATAAACTATTTTTCCAGAAAAATATTTGTCATGGAGAACGACTTCTGTTATACCA  
AATAGAATTGTAAAGGTATCATCTTTGTAGTTCTTCTTTGAAAAGCTGT

>PGSC0003DMG400028407RLKmalectin\_1403

TGTTATACCAAATAGAATTGTAAAGGTATCATCTTTGTAGTTCTTCTTTGAAAAGCTGTCATTGTAGGGG  
GAGAATGTACGGAAGAAGTACAATATAGAAGCAGAAAAAGAGAATGATGA

>PGSC0003DMG400028407RLKmalectin\_1464

TTGTAGGGGGAGAATGTACGGAAGAAGTACAATATAGAAGCAGAAAAAGAGAATGATGATGGGGATA  
AAATGGTGGCACATAATACTTCTATAAAATCCTATCTTGAAATCACTTGAC

>PGSC0003DMG400028407RLKmalectin\_1586

GTCTGGTAATGGCTCGGCCAACTACGGTCCCCTATTTTCAGCTATTTCTGTAACCAAAGGTATGCTTTCTT  
TATCTGGTGTACTGTTAGTCATATTCTTCAGTGCCTTTCTAAGACAAC

>PGSC0003DMG400028407RLKmalectin\_1647

ATGCTTTCTTTATCTGGTGTACTGTTAGTCATATTCTTCAGTGCCTTTCTAAGACAACAATACTTTGATGG  
TAGTTCGTGTACAACCTACCACCAAGACACCATCCGAAACTGACTCCTG

>PGSC0003DMG400028407RLKmalectin\_1708

TACTTTGATGGTAGTTCGTGTACAACCTACCACCAAGACACCATCCGAAACTGACTCCTGCGCTTAAGGCT  
GTGATAGCAGTATCATCACTGTTTTTTCTTGCTCTACTTTTGCTTTTACT

>PGSC0003DMG400028407RLKmalectin\_1769

CTTAAGGCTGTGATAGCAGTATCATCACTGTTTTTTCTTGCTCTACTTTTGCTTTTACTAAGGAAATTGGG  
TTATCTTGGTGGAAAAAGATCATCAAAGGAAGGTTAGACGCAGTTATAT

>PGSC0003DMG400028407RLKmalectin\_183

TGTTGCACGTTCTCAGAACTAGTATATATATAAACACAAGTATCTCGTATCAAAAGTTGTCTCAATTAA  
AGGAATGACAGTACTTTTCTCTCACACAGATGATGAATTGTTTATCAAC

>PGSC0003DMG400028407RLKmalectin\_1830

GGAAATTGGGTTATCTTGGTGGAAAAAGATCATCAAAGGAAGGTTAGACGCAGTTATATATGGAGTTTG  
GTTTGGTTATTATTACAATATAAATTTGTATAACTCACTAAAATAAAATTC

>PGSC0003DMG400028407RLKmalectin\_2196

TATAGTTACGGCCTTGGTGCTTTTTTCTGAAGGGATTTTATGTACTTTATCTGTCACTGCTGCACATATA  
ACATATGAAGTGCCCTTATCATGTTACGTTTTCGCGCCAATTCTAA

>PGSC0003DMG400028407RLKmalectin\_244

CTCAATTAAGGAATGACAGTACTTTCTCTCACACAGATGATGAATTGTTTATCAACTGTGGTGGCAA  
GGAAGTTACTGTAAATGGCAATCACTACTCTGCTGATCAGAACCCCAATG

>PGSC0003DMG400028407RLKmalectin\_2440

TTCAGCTCTGCAACATCCGAATCTTGTGAAGTTAATGGGATGTTGTGCAGAAGACAACGAGCTCCTACTC  
ATTTACGAATACATGGAAAATAATTCTCTTGACCATGCATTATTCGGTAA

>PGSC0003DMG400028407RLKmalectin\_2562

ATAGCAAGGCTCATATGTTTTGACAAAAAATTCTGAAGTAGTTAATAAAATAGTATGAAATTGCTTTTGC  
AGTCCAGAGGAAATTAATCGAGACTAAATTGGTCGACGAGGGTCAAAA

>PGSC0003DMG400028407RLKmalectin\_2867

ACAACGTAATTTGATAATCCTGCTAATCCTCCTCCACCCTGTTACCTTAAAGCTTATGCTATACATATATTT  
TCTTTCCGATAAGTGTATTTTTCTCTCATTGGAAGTTCTTTTATAGG

>PGSC0003DMG400028407RLKmalectin\_2928

TACATATATTTTCTTTCCGATAAGTGTATTTTTCTCTCATTGGAAGTTCTTTTATAGGGGATATATGGCAC  
CAGAATATGCAATGCGCGGCTACTTAACATCAAAGCAGACGTTTACA

>PGSC0003DMG400028407RLKmalectin\_305

TGGTGGCAAGGAAGTTACTGTAAATGGCAATCACTACTCTGCTGATCAGAACCCCAATGGATCATCAAC  
GTTTTCTCGCAATGAAACAGGAGGTTGGGGTTATAGTAGCATGGGTCTTAC

>PGSC0003DMG400028407RLKmalectin\_3172

ATTGATGCACATGCCTAATAAACAGTTGCCATTGTCAATTTACTTGAATAATGAGTTTGCTAATTTGATCG  
ACGTCTGCTGGTTCGATTGCAGGCTTACGTGTTGCAAGAGCAGGGAAAT

>PGSC0003DMG400028407RLKmalectin\_3477

AACAGACGAGATTGCATTGACTAAGGCCATGGCTGCACTCTCTCAGCCTTCTCCATCTGAAAGCTATTCT  
ACAGCCGGGCCATCAGAAGCTACTCCTCCCTTATCTGACAGCAATAATAT

>PGSC0003DMG400028407RLKmalectin\_3538

AGCTATTCTACAGCCGGGCCATCAGAAGCTACTCCTCCCTTATCTGACAGCAATAATATTACCAATGAAA

TTTGAATCCAACATCTCCCATTTCTGAGATGATTACTCTACTTAGACAAT

>PGSC0003DMG400028407RLKmalectin\_3599

CCAATGAAATTTGAATCCAACATCTCCCATTTCTGAGATGATTACTCTACTTAGACAATGAAAATCAAGG  
AGGCAATAATGCTTCGGTAGTATGAGTTTTCTTGTGTTTTGAAACTATTG

>PGSC0003DMG400028407RLKmalectin\_366

TCATCAACGTTTTCTCGCAATGAAACAGGAGGTTGGGGTTATAGTAGCATGGGTCTTACCAAGAGTTTG  
GATAATCGACCTGAATCATTATAATCAAGGATACATGTAATCTTTCCAAT

>PGSC0003DMG400028407RLKmalectin\_3660

AAATCAAGGAGGCAATAATGCTTCGGTAGTATGAGTTTTCTTGTGTTTTGAAACTATTGGTCTGGCATAT  
ATATCAGTATAAGATTTTCATTTTAGTAACCGTGACATTGTCGATGATT

>PGSC0003DMG400028407RLKmalectin\_3699

CTCTTGTGTTTTGAAACTATTGGTCTGGCATATATATCAGTATAAGATTTTCATTTTAGTAACCGTGACATT  
GTCGATGATTGTTTTCTGTTCTACCACTGAATTCATTGAGGCTTTGGAC

>PGSC0003DMG400028407RLKmalectin\_427

AGAGTTTGGATAATCGACCTGAATCATTATAATCAAGGATACATGTAATCTTTCCAATACTGCAGCACT  
TCTGGTTGAAACAGCCCGTGAGCCCTGATCTCTCTCAAGTACTATGGAT

>PGSC0003DMG400028407RLKmalectin\_61

TAAGTATTTTTTACCAAGCTGTAGTATTCGTAATGTTTTCTTGGCTTCTGCTTATTTGCCAAAATTTAAAT  
GGCAAATCAATATTTTTGTTGTAGAACAATGATTAAGGAACAAACG

>PGSC0003DMG400028407RLKmalectin\_610

AACAAGCCTATCCCATCACACCTAAACGAGTTTTTGATATTGACATCCAGGTATTATCTAGGAATGACGC  
AAGTCATTTTCTATATATTAAGTTTTCCATGAGGAAGTCATATCTAGAAA

>PGSC0003DMG400028407RLKmalectin\_671

GAATGACGCAAGTCATTTTCTATATATTAAGTTTTCCATGAGGAAGTCATATCTAGAAAAATTTTTCCGA  
GATCAATTTATGGTGTTAGGTTAAATAACCAAATGAAAAATTTATGGA

>PGSC0003DMG400028407RLKmalectin\_732

TATTTTCCGAGATCAATTTATGGTGTTAGGTTAAATAACCAAATGAAAAATTTATGGAGTTTGGTACT  
AAAAAGGGCTTAGTTATCAAGAAAAACAAACATTTTCCATCAAAGATAG

>PGSC0003DMG400028407RLKmalectin\_793

TTGGTTACTAAAAGGGCTTAGTTATCAAGAAAAACAAACATTTTCCATCAAAGATAGAAAAAGACTTC  
CTTCACTTGTGGATGGAAATCATTTTCCTTATATAACTTTCTCAATTTTT

>PGSC0003DMG400028407RLKmalectin\_854

AAAGACTTCCTTCACTTGTGGATGGAAATCATTTTCCTTATATAACTTTCTCAATTTTTACTTGCTTCAAGT  
AACACTTAGATATCATTATTAATAAAAAAAAAATTTACTCAAAGTTGCGTC

>PGSC0003DMG400028407RLKmalectin\_915

TTGCTTCAAGTAACACTTAGATATCATTATTAATAAAAAAAAAATTTACTCAAAGTTGCGTCAAACACTCCCC  
TATATATTATCATTGATCTATAAAGAGTGTTTCGGTGTGGCAATTTTCCA

>PGSC0003DMG400028407RLKmalectin\_976

AACACTCCCCTATATATTATCATTGATCTATAAAGAGTGTTTCGGTGTGGCAATTTTCCATTGAAAATAATT  
TCCTGAAAAATGCTTTTTGAAAAAAAAAAGAAAGAAATTATATACAAAAA

>PGSC0003DMG400028429LRR-RLKs\_1098

GGGTGCGCTGATTTATTTAAATTACCTGTGAGTGTAGGCTAAACTCTTGATTTTGTTCTCTCTTTATTATTC  
ATATGTTACAGTTCCCCTTGTGGCTGTGTATGTAATCCTCTGGTGTG

>PGSC0003DMG400028429LRR-RLKs\_1159

CTTTATTATTCATATGTTACAGTTCCCCTTGTGGCTGTGTATGTAATCCTCTGGTGTGTCAAATTCTCAGG  
AGGCTTAGCAGGAACAGATTGTCTGGACAAATTCCTAAACCTGTGGCA

>PGSC0003DMG400028429LRR-RLKs\_1952

AAGTATTATCTTCTTACCTGGTCTAATGGAACCTCCATGATGTTTGTTTGATATAATTCCTATATTTCTAAT  
CTGCTAATGTCAAGCAGAATATTTGCTTGAGATAATGTCTGATGTTAT

>PGSC0003DMG400028429LRR-RLKs\_2013

ATATTTCTAATCTGCTAATGTCAAGCAGAATATTTGCTTGAGATAATGTCTGATGTTATAGAGGTTTTCTA  
TCCTACTTGCAATGCTTGTGATTATCTTCCCCCTGGCATCATACTAGC

>PGSC0003DMG400028429LRR-RLKs\_2074

AGGTTTTCTATCCTACTTGCAATGCTTGTGATTATCTTCCCCCTGGCATCATACTAGCAACCCTTCGGGTT  
CTTTTTTATTCTATTTTCACTTATATTTTGGTTGTTGCCGCCTTAGTA

>PGSC0003DMG400028429LRR-RLKs\_2135

CCCTTCGGGTTCTTTTTTATTCTATTTTCACTTATATTTTGGTTGTTGCCGCCTTAGTATTGCAGGAAACAG  
ATTTCTTTGCTCTGCATTGACCACACAAATTTGTGGGGGTGTGCCAAA

>PGSC0003DMG400028429LRR-RLKs\_2318

AATCAAACCTCTATTTTTACCATGCAGAAACATCTTCAGACAAGAGGATTAGCAATCATCATCGATGGGTT  
GTTTCTGTTAGCATTGGGGTCAGTTGCACATTCATAGTTGCAGTCACGCT

>PGSC0003DMG400028429LRR-RLKs\_2379

CGATGGGTTGTTTCTGTTAGCATTGGGGTCAGTTGCACATTCATAGTTGCAGTCACGCTTCTTGTTTGTG  
GGTGCATTGGTACAGATCTCGTGTCTCACAGGATATGGTAATTACAAA

>PGSC0003DMG400028429LRR-RLKs\_244

TTTATTGCTTAGCACTTGTTTATTTTTGTTTTCATAGTTTAGAGTGGTAAAGATGAAAACCTTACTACAATC  
CAAACATTTGTTGTTGTTTTTTTTCCAGTGAAAAATCCAAACTTTGTT

>PGSC0003DMG400028429LRR-RLKs\_305

TTACTACAATCCAAACATTTGTTGTTGTTTTTTTTCCAGTGAAAAATCCAAACTTTGTTGTTTAGCACTGTT  
TATAAGCATTATTTGTTTATGTTTTCATAGTTTAGAGTGGTAACTTT

>PGSC0003DMG400028429LRR-RLKs\_3233

TCAACAATGCATCAAACCCAAACTAGTTGGGGTTGACTATATGAATATTTTGTATCCATTGCAATTAAGA  
CTCCTGATGTAGTGCATTACCTAAGACTCTAGCAATCTATTGCGACCTTA

>PGSC0003DMG400028429LRR-RLKs\_3294

CAATTAAGACTCCTGATGTAGTGCATTACCTAAGACTCTAGCAATCTATTGCGACCTTACGTGCTATTAAG  
CTTAATTTTTATGTGACAAAGTTTCTATCCATCTTCTGAAACTCTAATG

>PGSC0003DMG400028429LRR-RLKs\_3538

CACAAAATCAAGTTGGAATTATTGGAATGTTAACGCATTAGCTTGATGTAGTGACTGTGTCATCTTTTGC  
TCTGTTCTCACATAATCTTTTGTATCTACCAGACAATGGCCGGGATAAA

>PGSC0003DMG400028429LRR-RLKs\_4209

GTCTAACGCAGAAGTTGCTCCACATCTTATGAGAGAAGTACAGTTCCAAAATTCTGAATCATTGCTCGAA  
AACTTGTTCTTTTTACTGACTGCATAATCTGTAGGAATTATGGACAACAT

>PGSC0003DMG400028429LRR-RLKs\_4270

TTGCTCGAAAACCTGTTCTTTTTACTGACTGCATAATCTGTAGGAATTATGGACAACATATTCAAGGTTTT  
TGAATCACTTACTGATCAGTGAATAAAATTATTGCTGTGTATTACCTT

>PGSC0003DMG400028429LRR-RLKs\_4392

TGTTGCATACTTAAGCCCTTAAATATAAATTATTTGGTTGATTTTTTATCACATATAATGTTACTCTTGCAT

ACTTTAAGCCCTTGATTAACCTATTTGGTTGATAATTATTACATTATC

>PGSC0003DMG400028429LRR-RLKs\_4453

TACTCTTGCATACTTTAAGCCCTTGATTAACCTATTTGGTTGATAATTATTACATTATCATGCAAGTCTGAA  
CAACCATGTATTATGCTAGAATAGTTGTGTGAAAAAAGGTACCCGTTT

>PGSC0003DMG400028429LRR-RLKs\_4514

GCAAGTCTGAACAACCATGTATTATGCTAGAATAGTTGTGTGAAAAAAGGTACCCGTTCTATGCTTCTTC  
AATTATGATTTTTCTCCCTCTCAGGCTGTTTTATGTGGAGTAAAGATTT

>PGSC0003DMG400028429LRR-RLKs\_5002

TGAACCAATTGAGCTTTCAGGACCCAGATAACAAAAGTAGCCTGCACTGGCCTTGCATAATAAGTGTG  
CAATCTTGATATATCTAGTTCAGCCATACATACGAGTATGTTGTTGCTTTA

>PGSC0003DMG400028429LRR-RLKs\_5063

TAAGTGTGCAATCTTGATATATCTAGTTCAGCCATACATACGAGTATGTTGTTGCTTTAAGTCAATGTCCT  
AGTACTCTGTAAGTTACTGTAATTTGTAATTTTTGTTGCAAAAGCATTC

>PGSC0003DMG400028429LRR-RLKs\_793

TATTCTTATTTTGATGTGATGCTGCTCATATATATCTTGGAGATACTTGAAGTTGAAATCACATAGTACTT  
GTTAATAATTACTAATATTAGTAAGAGTAACATTAAGTGCTTTAATTGC

>PGSC0003DMG400028429LRR-RLKs\_854

CATAGTACTTGTTAATAATTACTAATATTAGTAAGAGTAACATTAAGTGCTTTAATTGCAAGATATGTTGA  
AAAATATCTTTAATATGATCTGTTAAAGTCATTTTTGCATTGGTTTTT

>PGSC0003DMG400028435LRR-RLKs\_0

ATGTTCCAACCTCAAGCCGAATCTTTTCTGCAACAACACCAGCCAGGATTTTCATATATACATTGAAATTGG  
AAGGGCAACTCAAGGGTTCGACCAATGCAACTTGCTAGGCTCTGGAGGT

>PGSC0003DMG400028435LRR-RLKs\_122

TGGCTCTGTTTACAAGGGCATGTTTAAAATGGGATGACTTTGGCAATCAAAGTGTTCAATTTACGGATT  
GAAGGTGCATTCAAGAGTTTTGATATTGAATGTGAAGTTCTACACAACCT

>PGSC0003DMG400028435LRR-RLKs\_1464

CCCAACAATTTCAACCTGAAGAGATTGATTTTGAGAAAAAGTTGTGTTTTGTGTCCTCTATTTTGGACTTG  
GCATTGAATTGCACAGTTGAATCTCCTAATGAGAGGCCGAACATGAAAG

>PGSC0003DMG400028435LRR-RLKs\_1525

TTTGGACTTGGCATTGAATTGCACAGTTGAATCTCCTAATGAGAGGCCGAACATGAAAGATGTCCTGGC  
AAATATCAATAAGATCAAGCATGAATTTCTTCACAGATGATGCACCAAGGT

>PGSC0003DMG400028435LRR-RLKs\_1586

GTCCTGGCAAATATCAATAAGATCAAGCATGAATTTCTTCACAGATGATGCACCAAGGTTTATGCAAACG  
GTAGGCATCCAACATAGCTCCTAGATTTAACTTTTCTTGTTTCTTGTGC

>PGSC0003DMG400028435LRR-RLKs\_1647

ATGCAAACGGTAGGCATCCAACATAGCTCCTAGATTTAACTTTTCTTGTTTCTTGTGCTTTCCTCTCGTGT  
ATATTTCAAGTTTGAGTGAGTGTGTCAAATAACTTAAGTACATAACAT

>PGSC0003DMG400028435LRR-RLKs\_1708

TCCTCTCGTGTATATTTCAAGTTTGAGTGAGTGTGTCAAATAACTTAAGTACATAACATGTTTACTACAAT  
TGAAAGGAAGAATGCCCTGTATAATATGATTAATGAGGTTATTATGTT

>PGSC0003DMG400028435LRR-RLKs\_1769

TTACTACAATTGGAAAGGAAGAATGCCCTGTATAATATGATTAATGAGGTTATTATGTTAATTTCAACTA  
CAATAGTACACAAAGAGTGGTGTATAATGTTGAACTAAAATTGAACTTTT

>PGSC0003DMG400028435LRR-RLKs\_183

TTACGGATTGAAGGTGCATTCAAGAGTTTTGATATTGAATGTGAAGTTCTACACAACCTTCGCCATAGAA  
ATCTTGCCAAAGTTATCAGCAGTTGTACTAACATGGATTTTAAAGCATT

>PGSC0003DMG400028435LRR-RLKs\_1830

TTTCAACTACAATAGTACACAAAGAGTGGTGTATAATGTTGAACTAAAATTGAACTTTTCTTTGTTTATTG  
CTTTCCTCTTGTTATGTACCAATTTGAGTGTCTCTCAAATATAAGT

>PGSC0003DMG400028435LRR-RLKs\_1891

TTGTTTATTGCTTTCCTCTTGTTATGTACCAATTTGAGTGTCTCTCAAATATAAGTGTAATATAGGACA  
AGTATATATAAGATGTGTACTAAAGTTGTTATAGAAGAATGCCCTGTA

>PGSC0003DMG400028435LRR-RLKs\_1952

AATATAGGACAAGTATATATAAGATGTGTACTAAAGTTGTTATAGAAGAATGCCCTGTACAATATTAATG  
ATCGTTATTGTTTTGATGTATCTACTTTGCAGATGTGAATCCCTCCGCTT

>PGSC0003DMG400028435LRR-RLKs\_2013

ATATTAATGATCGTTATTGTTTTGATGTATCTACTTTGCAGATGTGAATCCCTCCGCTTAAGCTTTTTAGAT  
GATATAGTCAGACACTTCAATACTCCTTTATGTTACACCACGCTGCTC



>PGSC0003DMG400028435LRR-RLKs\_2074

GCTTTTTAGATGATATAGTCAGACACTTCAATACTCCTTTATGTTACACCACGCTGCTCCTTTCTCAAATAA  
CTTGATAGAACATTCAAAAAAGACGTAATCTAACACCCTTTTTTGGGA

>PGSC0003DMG400028435LRR-RLKs\_2135

TTCTCAAATAACTTGATAGAACATTCAAAAAAGACGTAATCTAACACCCTTTTTTGGGACAGACTTTAGTA  
AAGTCAAGTCGACCAACTGTGGAAAATTTATAACTAGGGGTGTACAAA

>PGSC0003DMG400028435LRR-RLKs\_244

GCCATAGAAATCTTGCCAAAGTTATCAGCAGTTGTACTAACATGGATTTTAAAGCATTACTTCTAGAGTA  
CATGCCCAATGGGAGCCTGGAGAAATGGTTACATTCTGATGATCACTTCT

>PGSC0003DMG400028435LRR-RLKs\_305

TCTAGAGTACATGCCCAATGGGAGCCTGGAGAAATGGTTACATTCTGATGATCACTTCTTGGACATAATC  
CAAAGATTAGACATTAATGGTTGATGTTGCATCAGCTTTGGAGTATCTCC

>PGSC0003DMG400028435LRR-RLKs\_3111

ATGTACACCCTTATTTACAACCCCTTATCTACGGCATTGCTTGGCCCTCTTTCCTTGATAATAATTAATAA  
CAAGGAAAAAGGTTTGCATAACATTAGAAAGGTATGCTGTACTGTCCA

>PGSC0003DMG400028435LRR-RLKs\_3172

TAATTAATAATCAAGGAAAAAGGTTTGCATAACATTAGAAAGGTATGCTGTACTGTCCATATGGTTTAAA  
CAGGAAATAATAAGAAAACCTTTCATCATAATAAGAGCTCAGGTAAAGAT

>PGSC0003DMG400028435LRR-RLKs\_3233

TGGTTTAAACAGGAAATAATAAGAAAACCTTTCATCATAATAAGAGCTCAGGTAAAGATCGGATATTAC  
CGTTGACAATATAATTAATAATATAAAAGTTTGTCTCTCTAATCGCTTA

>PGSC0003DMG400028435LRR-RLKs\_3355

TTTTTAGATGAGATGGTCACACAATTCAACAATTATTAGTGGAAACTAATTTTTCTAGTACTGTTCGAACT  
AGATAAGTATTAGGTAAATTATATAAATTTGTATTTTCTGCTTATTTAA

>PGSC0003DMG400028435LRR-RLKs\_3416

TGTTCGAACTAGATAAGTATTAGGTAAATTATATAAATTTGTATTTTCTGCTTATTTAAAATACAAGAAAA  
TATACTAAAAAATATTTTTCTCCGACCCTACTCAATCACTGAATT

>PGSC0003DMG400028435LRR-RLKs\_3477

TACAAGAAAATATACTAAAAAATATTTTTCTCCGACCCTACTCAATCACTGAATTTAATGCCTATTT

GGAAGGAGAAAAAACTCTCTAAGAAGACCTAGTAAATCCAATAATT

>PGSC0003DMG400028435LRR-RLKs\_3538

ATGCCTATTTGGAAGGAGAAAAAACTCTCTAAGAAGACCTAGTAAATCCAATAATTTTCCATATACT

GCTCTTTGATATAGCACATGAAGTCAAGTCACTCTGGAAAATTTATAGCC

>PGSC0003DMG400028435LRR-RLKs\_3599

CCATATACTGCTCTTTGATATAGCACATGAAGTCAAGTCACTCTGGAAAATTTATAGCCCCTTATCTACGA

CATTGCTTGGCCCTCTTTTATCCCTATTTAATGACTAGCTTGGTTTGAT

>PGSC0003DMG400028435LRR-RLKs\_366

GACATAATCCAAGATTAGACATTAATGGTTGATGTTGCATCAGCTTTGGAGTATCTCCATCATGGTTAT

TCAACAGTCGTTGTACATAGTGACTTGAAGCCTAGTAATGTCTTGCTAGA

>PGSC0003DMG400028435LRR-RLKs\_3660

TTATCTACGACATTGCTTGGCCCTCTTTTATCCCTATTTAATGACTAGCTTGGTTTGATTTTTTCATTTAAAA

ATAACTAAATGAATTATATTGATGTATTAATCTATAAATCAACCCAA

>PGSC0003DMG400028435LRR-RLKs\_3721

TTCATTTAAAAATAACTAAATGAATTATATTGATGTATTAATCTATAAATCAACCCAAATTAACAAAAAG

TGTTTTCAATTTTTTGGTTTTTTTTATAATTATAACAATAATTGAAAAA

>PGSC0003DMG400028435LRR-RLKs\_3843

GATCAAATATATTTTCACTTACATATGTGATAGGCTAAAACCTAAAGAGATCAATTTTACTTTATATTACG

AAAGAATTTTAGAAAGAAAAAAGACAAAAAAGAGAGAATTTTGCT

>PGSC0003DMG400028435LRR-RLKs\_3904

TTATATTACGAAAGAATTTTAGAAAGAAAAAAGACAAAAAAGAGAGAATTTTGCTTTAAACAAT

TGACAAATAATAAGAAGAGAGAAAATAGGAACAATAAAATAATGAACTTTT

>PGSC0003DMG400028435LRR-RLKs\_3965

AAAACAATTGACAAATAATAAGAAGAGAGAAAATAGGAACAATAAAATAATGAACTTTTTATTTTCAA

ATATATATGATAGATTAATATAGTCAAGAACAATGATAAAAAAATGATTA

>PGSC0003DMG400028435LRR-RLKs\_427

CATGGTTATTCAACAGTCGTTGTACATAGTGACTTGAAGCCTAGTAATGTCTTGCTAGACGAAAGATTGG

TTGGACACGTGAGTGACTTTGGCCTGGCCAAGTTATTCGGAGAAGGGGAA

>PGSC0003DMG400028435LRR-RLKs\_4453

ATGATGTGCCATTTTTCTTTTAATATAGTGTACAATTATTATTGGATGAAGGGATTACCATAGTAAAGA  
AAAGTTCTAAAGAAATTTGGATGTCTGATGAAATAATATATTATCTCAA

>PGSC0003DMG400028435LRR-RLKs\_4514

ATAGTAAAGAAAAGTTCTAAAGAAATTTGGATGTCTGATGAAATAATATATTATCTCAAAACAAAGACTT  
GGGGACAAAATTTAATAAAGTCAAGCCAACCACTGTGGAAAATGTACAA

>PGSC0003DMG400028435LRR-RLKs\_4575

CAAAGACTTGGGGACAAAATTTAATAAAGTCAAGCCAACCACTGTGGAAAATGTACAAATTACAACCC  
CTTTATCTACGGCATTGCTTTTGTTCCTTTTTTTTATACAAATAAGGGACC

>PGSC0003DMG400028435LRR-RLKs\_4636

TACAACCCCTTTATCTACGGCATTGCTTTTGTTCCTTTTTTTTATACAAATAAGGGACCCAGTCCTTAGCAA  
CCTTTTGTCCCTATTTAGCTCAACACTTGTTTCCTTATCTTATGTGCA

>PGSC0003DMG400028435LRR-RLKs\_4697

GTCCTTAGCAACCTTTTGTCCCTATTTAGCTCAACACTTGTTTCCTTATCTTATGTGCAATCACATGGAGAA  
AGCATACTCTTTCTTTCTTTCACTACTACTCTTGACCTATACTTGTT

>PGSC0003DMG400028435LRR-RLKs\_4758

CACATGGAGAAAGCATACTCTTTCTTTCTTTCACTACTACTCTTGACCTATACTTGTTAGAGACATGCATT  
AGCAAAAACATAGTAATTAACACAGATCAATCAACTCTACTTTTCATTG

>PGSC0003DMG400028435LRR-RLKs\_4819

AGACATGCATTAGCAAAAACATAGTAATTAACACAGATCAATCAACTCTACTTTTCATTGAAAGCTAGTTTT  
ACTCTAAACTCTTCTCATCCCTTAACTCAAATTGGTCTTCTCAAGCTT

>PGSC0003DMG400028435LRR-RLKs\_488

AAAGATTGGTTGGACACGTGAGTGACTTTGGCCTGGCCAAGTTATTCGGAGAAGGGGAATCAGTTGCTC  
ATACTAAAACACTTGCTACAATGGGGTACATTGCACCAGGTAAATTTCTTT

>PGSC0003DMG400028435LRR-RLKs\_4880

AGCTAGTTTTACTCTAAACTCTTCTCATCCCTTAACTCAAATTGGTCTTCTCAAGCTTCAGTTTGTGATTG  
GATTGGAGTCACTTGCGGCTCTCGCCACCATAGGGTGAGAGCACTAAA

>PGSC0003DMG400028435LRR-RLKs\_4941

GTTTGTGATTGGATTGGAGTCACTTGCGGCTCTCGCCACCATAGGGTGAGAGCACTAAATGTATCCAAC  
TGAACATTCTTGAAACATTCCACCACAATTGGGAAACCTCTCATTCTC

>PGSC0003DMG400028435LRR-RLKs\_5002

TATCCAACCTGAACATTCTTGGAACATTCCACCACAATTGGGAAACCTCTCATTCTCGTTTCGCTTGAT  
CTTAGTAGTAATAATTTCCAAGGAGACCTCCCTCAAGATTTGTCTCGTT

>PGSC0003DMG400028435LRR-RLKs\_5063

TTCGCTTGATCTTAGTAGTAATAATTTCCAAGGAGACCTCCCTCAAGATTTGTCTCGTTTACGTAGATTGA  
AGGTGATGAATCTAGCAAACAATAACTTCACTGGCCAGATTCCCAAAGA

>PGSC0003DMG400028435LRR-RLKs\_5124

CGTAGATTGAAGGTGATGAATCTAGCAAACAATAACTTCACTGGCCAGATTCCCAAAGATTTTGGTAACC  
TTATGAGGTTAGAGAAGTTGGTTCTAGTCAGTAATAAACTTAGTGGCTCA

>PGSC0003DMG400028435LRR-RLKs\_5185

TTGGTAACCTTATGAGGTTAGAGAAGTTGGTTCTAGTCAGTAATAAACTTAGTGGCTCAATTCCATTCTC  
CATTTTCAACATTTCTCGTTGGAAATTTAGCTCTCACATATAATCAAT

>PGSC0003DMG400028435LRR-RLKs\_5246

TCCATTCTCCATTTTCAACATTTCTCGTTGGAAATTTAGCTCTCACATATAATCAATTATCAGGGAGTCT  
ACCTGTAGATATATGTCGTCGTCTTCAAAAATAAAGAGTATTTCAAT

>PGSC0003DMG400028435LRR-RLKs\_5307

TCAGGGAGTCTACCTGTAGATATATGTCGTCGTCTTCAAAAATAAAGAGTATTTCAATCATTTCACACC  
ACTTGAGTGGTCAAATTCCAACAGGTTTGTCTAACTGCACAGAATTGTAT

>PGSC0003DMG400028435LRR-RLKs\_5429

ATTGTCATTGTCATACAATAACTTCAGTGGAAACCATTCCACCAGAAATTGTAACTTGGAGAGGCTTCAG  
TTCTTAAACCTTGGGGGAAACAACCTTGCAAGGTACATTCTGCATACTTTA

>PGSC0003DMG400028435LRR-RLKs\_549

AGTTGCTCATACTAAAACACTTGCTACAATGGGGTACATTGCACCAGGTAAATTTCTTTTAGTCCTTTTGT  
TACCACATATAAAGTGTTATTTTACATCACATTAGAACTTGGTGAAAGC

>PGSC0003DMG400028435LRR-RLKs\_5490

AGGCTTCAGTTCTTAAACCTTGGGGGAAACAACCTTGCAAGGTACATTCTGCATACTTTAATTTCTCAATGT  
GAATATATAACATCCTACTTTGCATATATATGTAAGCCCACAATATTTA

>PGSC0003DMG400028435LRR-RLKs\_5551

TTCTCAATGTGAATATATAACATCCTACTTTGCATATATATGTAAGCCCACAATATTTAGGGTGTGTTTGG

TACCAAGGAAATTTTCCTACTTTCTATTTTTTATGTTTGGTGCTTAG

>PGSC0003DMG400028435LRR-RLKs\_5612

GTGTGTTTGGTACCAAGGAAATTTTCCTACTTTCTATTTTTTATGTTTGGTGCTTAGCATGAGGCTAAG

CACCAAAGTTTGTTAATTGAGAATTAACACCTTGAGCAACATCATAAAA

>PGSC0003DMG400028435LRR-RLKs\_5673

TGAGGCTAAGCACCAAAGTTTGTTAATTGAGAATTAACACCTTGAGCAACATCATAAAAATTTGCAAATT

TGTTTGCCGTTTGTTGAAATTTGCAGGCACAATTCCAGCAAAGATTGGTA

>PGSC0003DMG400028435LRR-RLKs\_5734

TTGCAAATTTGTTTGCCGTTTGTTGAAATTTGCAGGCACAATTCCAGCAAAGATTGGTAATTTAGGAAAG

ATGCAGCAATTACAATTGGAGAACAATCGCATCGTGGGTTCAATACCACG

>PGSC0003DMG400028435LRR-RLKs\_610

GTCCTTTTGTACCACATATAAAGTGTTATTTTACATCACATTAGAACTTGGTGAAAGCATAATCAAAATG

GCCAAGTTAGCTCATAGATTGAATCTGTATATTATTACCTTTAATCTGC

>PGSC0003DMG400028435LRR-RLKs\_6161

CCTTTCGGGTAGTCTTCCATCTGCTTCAGGCTACTGGCAAACAAATCTACAGCTTTTGAATCTTGGTCAAA

ACAACATTGGTGGAGTAATACCCACTTCAATCTCCAATTCATCAAATCT

>PGSC0003DMG400028435LRR-RLKs\_6222

CTTGGTCAAACAACATTGGTGGAGTAATACCCACTTCAATCTCCAATTCATCAAATCTAGAGATTATAG

ATCTTAGTATAAACAATTCAGTGGCCAAATTCCTAACTCGTTGGGGGAT

>PGSC0003DMG400028435LRR-RLKs\_6344

GAGGGATCTTGAATATCTGGACTTGTTGTTAATAACTTATCGTCTCCGCACCTAAGTATCTTAACTTCAT

TGGTGAAGTGCAGATATTTGAAAGAAGTAATATTAGGGGAGAATCCTCT

>PGSC0003DMG400028435LRR-RLKs\_6405

TAACTTCATTGGTGAAGTGCAGATATTTGAAAGAAGTAATATTAGGGGAGAATCCTCTGTATGGTGTTT

TTCCAGATCCATTGGCAATCTCTCCATTTCTATCATGGAAGTGGAGTTA

>PGSC0003DMG400028435LRR-RLKs\_6466

ATGGTGTCTTCCAGATCCATTGGCAATCTCTCCATTTCTATCATGGAAGTGGAGTTATATAGTTCTGAA

ATTAGAGGCCAGATACCATTAGGAATTGGGAATTTAAGTAACTTAAACA

>PGSC0003DMG400028435LRR-RLKs\_6527

TAGTTCTGAAATTAGAGGCCAGATACCATTAGGAATTGGGAATTTAAGTAACTTAAACACTTTGTCCCTA  
TCCGGCAATGACTTGACTGGATCAGTGCCAACAACCTTATGTGATTTACA

>PGSC0003DMG400028435LRR-RLKs\_6588

TTGTCCCTATCCGGCAATGACTTGACTGGATCAGTGCCAACAACCTTATGTGATTTACACATTCTTCAAAG  
GCTAGGACTTGGTCTTAATAGGTTGAGTGGATCCTTGCCAGAGTGCCTT

>PGSC0003DMG400028435LRR-RLKs\_671

AATCAAAATGGCCAAGTTAGCTCATAGATTGAATCTGTATATTATTACCTTTAATCTGCCAGAAGTCATAT  
TGTTTCAATTGATTACCTTACTCTTGTTTTATTCCCATTATACCTTTAA

>PGSC0003DMG400028435LRR-RLKs\_6893

TTTGATTGGTTCTATACCTCCAGAATTAGGGAACTTGAAAGCCATAACATCCATAAATCTGTCCAGGAAT  
CACCTTTCAGGAAGTATCCCTCCACAATTGGAGACTTGCAGAGCCTAGT

>PGSC0003DMG400028435LRR-RLKs\_6954

TCCAGGAATCACCTTTCAGGAAGTATCCCTCCACAATTGGAGACTTGCAGAGCCTAGTTTATCTTTCCTT  
GGCTTATAATGAGTTACAAGTTCTATTCCAGAGTCACTTGGGAAAATG

>PGSC0003DMG400028435LRR-RLKs\_7015

ATCTTTCCTTGGCTTATAATGAGTTACAAGTTCTATTCCAGAGTCACTTGGGAAAATGATAAGTTTAGA  
ATCGGCGAATCTATCCAATAACATTCTTTCAGGTACCATTCCAAAATCAT

>PGSC0003DMG400028435LRR-RLKs\_7259

CGGCGGTTTTAGTTTTCCAACCTTGATGACTAGGTCTTTTCATCATTCAAGGAGAGGCAAACCTGCTTCTG  
ATTATACTTGTCTCACTGGGAGCTGCGGTAATGGTACTTGGCTCAATCGT

>PGSC0003DMG400028435LRR-RLKs\_732

GAAGTCATATTGTTTCAATTGATTACCTTACTCTTGTTTTATTCCCATTATACCTTTAATTTCTTATTTGGCT  
CGTCAAGAAACTAATTACTCTGGTAACATTGGATCAGAGTATGGATC

>PGSC0003DMG400028435LRR-RLKs\_7320

CTGCTTCTGATTATACTTGCTCACTGGGAGCTGCGGTAATGGTACTTGGCTCAATCGTTGTGTTTATGTT  
AAGGAGACGTTGGAATAGAAATATTCCAACCTGAAGCTGAATCCTTTGCT

>PGSC0003DMG400028435LRR-RLKs\_7381

TGTTTATGTTAAGGAGACGTTGGAATAGAAATATTCCAACCTGAAGCTGAATCCTTTGCTGCAACAACACT  
AGCCAGGATTCATACATTGAAATTGAAAGGGCAACTCAAGGGTTTGACC

>PGSC0003DMG400028435LRR-RLKs\_7503

TGCAACTTGCTAGGCTCTGGAGGTTTTGGCTCTGTTTACAAGGGCATGTTTGCAAACGGGATGACTTTG  
GCAATCAAAGTGTTTAATTTACAGGTTGAAGGAGCGTTAAAGAGCTTTGAT

>PGSC0003DMG400028435LRR-RLKs\_7564

TGACTTTGGCAATCAAAGTGTTTAATTTACAGGTTGAAGGAGCGTTAAAGAGCTTTGATGCTGAATGTG  
AAGTTTTACGCAACCTTCGTCATAGAAATCTTACCAAAGTTGTCAGCAGTT

>PGSC0003DMG400028435LRR-RLKs\_7625

TGAATGTGAAGTTTTACGCAACCTTCGTCATAGAAATCTTACCAAAGTTGTCAGCAGTTGTACTAACTTG  
GATTTTAAAGCATTACTTCTTGAGTATATGCCTAATGGAAGCCTAGAGCT

>PGSC0003DMG400028435LRR-RLKs\_7747

GGTTACATTCTGATGATCGCTTCTTGAATATGATCCAAAGATTAGACATAATGATTGATGTTGCATTTGCT  
TTGGAATATCTCCATCATGGTTATGAAACAGTTGTTGTACATAGTGATT

>PGSC0003DMG400028435LRR-RLKs\_7808

TGCATTTGCTTTGGAATATCTCCATCATGGTTATGAAACAGTTGTTGTACATAGTGATTGAAGCCTAGCA  
ATGTCTTGCTAGACGAAAAGTTGGTTGGACATGTGAGTGACTTTGGCCT

>PGSC0003DMG400028435LRR-RLKs\_7930

CCAAGTTATTAGGAGAAGGGGAATCAATTGCTCATACTAATACACTTGCTACAATGGGCTACATTGCACC  
AGGTAACCTTTCTGTAAGTCCTTTTATCATCGCCTATGATGTGTTATTTTA

>PGSC0003DMG400028435LRR-RLKs\_8296

CAGTAGGATTAGTTTCTACAAGATGTGATGTGTACAGCTACGGCATTATGCTCATGGAAACTTTTACAAG  
AAATAGGCCATATGATGAAATGTTTGACGGAAATTTAAGCATGAGGAGTT

>PGSC0003DMG400028435LRR-RLKs\_8357

TTTACAAGAAATAGGCCATATGATGAAATGTTTGACGGAAATTTAAGCATGAGGAGTTGGGTCTGCAA  
TTCAGTACCTGCAATGCCAGAGGATATTATTGATGTCACGTTAATGGAACC

>PGSC0003DMG400028435LRR-RLKs\_8418

GTCTGCAATTCAGTACCTGCAATGCCAGAGGATATTATTGATGTCACGTTAATGGAACCAGAAAAGACT  
CACTTTCAGGAAAAGTTGTGTTGTGTGTCTTCTATTTTGGAGGTGGCGTTG

>PGSC0003DMG400028435LRR-RLKs\_8479

AAAAGACTCACTTTCAGGAAAAGTTGTGTTGTGTGTCTTCTATTTTGGAGGTGGCGTTGCATTGCACAAC

TGAATCTCCAATGAAAGGTTGAACATGATAGAAGTCCTTGCAAATATCA

>PGSC0003DMG400028435LRR-RLKs\_854

TAGGATTAGTTTCTACAAGATGTGATGTGTACAGCTACGGCATTATGCTCATGGAACTTTCACAAGAAA  
AAGGCCATATGATGAAATGTTTCAAGAAAATTTGAACATGAGGAGTTGGG

>PGSC0003DMG400028435LRR-RLKs\_8540

TTGCACAACCTGAATCTCCAATGAAAGGTTGAACATGATAGAAGTCCTTGCAAATATCAAGAAGATAAA  
GCAGGAATTTCTTCGCAAATGATGTACGTAGCAGTGGTAAATATCCAACCTT

>PGSC0003DMG400028435LRR-RLKs\_8601

AAGATAAAGCAGGAATTTCTTCGCAAATGATGTACGTAGCAGTGGTAAATATCCAACCTTTTTAAAAGTAT  
TCTGATGTCATCTAGATATATTATTTCTTATTCAAGAATAGAAATGATT

>PGSC0003DMG400028435LRR-RLKs\_8662

TAAAAGTATTCTGATGTCATCTAGATATATTATTTCTTATTCAAGAATAGAAATGATTATTGCTTGTGA  
GCTTGTCTATATCGTACAAATATATTGAATTGGATATTCTGGTTTTCCA

>PGSC0003DMG400028435LRR-RLKs\_8723

TGTCTTGTGAGCTTGTCTATATCGTACAAATATATTGAATTGGATATTCTGGTTTTCCATACAAATATATCC  
CCTTGTATAAGAAAAACAAGAACTAATTGAAGCATAACTTAATTCAT

>PGSC0003DMG400028435LRR-RLKs\_8784

CAAATATATCCCCTTGTATAAGAAAAACAAGAACTAATTGAAGCATAACTTAATTCATGATTATAAGTA  
GAAGAACCCAACATTTTTGCCTATGGAAATTTGAATTGTGATGAATGTTG

>PGSC0003DMG400028435LRR-RLKs\_8845

TTATAAGTAGAAGAACCCAACATTTTTGCCTATGGAAATTTGAATTGTGATGAATGTTGAAAACCTGAAGT  
AAACAACCTCAAGTCTGTGTTACTATTAGTTTATTTTTGTATGTGCTGTGC

>PGSC0003DMG400028435LRR-RLKs\_8906

AACTGAAGTAAACAACCTCAAGTCTGTGTTACTATTAGTTTATTTTTGTATGTGCTGTGCCAGCTCAAGTTT  
AATCCTAATTGAAAATTTGTGCAGGTTGTACGTGCTGCCTTTTCTCCTG

>PGSC0003DMG400028435LRR-RLKs\_8967

GCTCAAGTTTAATCCTAATTGAAAATTTGTGCAGGTTGTACGTGCTGCCTTTTCTCCTGGTTTAGCAAATT  
TGGGTGATACCAATTGAGATGAAAATCAACATTTGGTCCGAGATTTGA

>PGSC0003DMG400028435LRR-RLKs\_9028



TTAGCAAATTTGGGTGATACCAATTGAGATGAAAAATCAACATTTGGTCCGAGATTTGAACTTTTCTTGT  
TTCTGTTCTTGTGAATATTTTCGACATTTGGTAAAATAAGTCTAATGTATA

>PGSC0003DMG400028435LRR-RLKs\_9089

TTTTCTTGTTTCTGTTCTTGTGAATATTTTCGACATTTGGTAAAATAAGTCTAATGTATAAGATGTGTACTAC  
AGTTGGAATAGAAGAATGCCCTGTATAATATTGGATTGTTAATGTATA

>PGSC0003DMG400028435LRR-RLKs\_915

CACAAGAAAAAGGCCATATGATGAAATGTTTCAAGAAAATTTGAACATGAGGAGTTGGGTCTGTAATTC  
ACTACCTGTCGCACCAGATGATATTATTGATGACACCTAATTTCTGTTAGG

>PGSC0003DMG400028436LRR-RLKs\_0

CCTAAATATTTATTTCTTGAAAATTATATATACCTCTCACTTTCTTATTTGTCCCTACCTGAAACTTAATTT  
GTTCCCAATCACTTGGAGAGATCATACTCTTTCTTGCTTTCACTAC

>PGSC0003DMG400028436LRR-RLKs\_122

TTATTGACACTTTACTTGTTTCGAGGCCATCGACATAAAAACAGATCAATCAGCTCTACTTGCCTTAAAAGT  
TAGCTTTACTCTAAACTCTTCTCATCCCTCAACTCAAATTTGGTCTTCT

>PGSC0003DMG400028436LRR-RLKs\_1342

AATTTGAACACAAACTATTTATCAGGTAGCATACGTGGTCTTGTTTGGTTATCCGGAGGCAATAAAATAA  
ATTAATCGAGATATATGTACTCTTTCATGTGTCAGGTGTTATACCCAGAG

>PGSC0003DMG400028436LRR-RLKs\_1464

ATTGGGAATCTTCACAAATTGGAGACACTTTATTTGCAATTTAATCAATTAAGTGGTAATATACCAGAAG  
AGCTCTTCAATATCTCTACACTTACAAGGGTTTCTCTCCTCTCTAACCAC

>PGSC0003DMG400028436LRR-RLKs\_1525

TACCAGAAGAGCTCTTCAATATCTCTACACTTACAAGGGTTTCTCTCCTCTCTAACCACCTTTCGGGTAGT  
CTTCAATATGCTTCAAACACTACTGGCCAACAAATCTAGAGATTTTGAATC

>PGSC0003DMG400028436LRR-RLKs\_1586

TTCGGGTAGTCTTCAATATGCTTCAAACACTACTGGCCAACAAATCTAGAGATTTTGAATCTTGGTGTAAC  
AACATTGGTGGAGTTTTACCCACCTCAATCTCCAATTCCTCATATCTAAT

>PGSC0003DMG400028436LRR-RLKs\_1769

GCATCTTGAACATCTGGACTTGTCCAATAATAACTTATTATCTCTGCACCTAAGTATCTTAACTTCATTGAC  
AAACTGCAGATCATTGAAAGAAGTTTACTTAGACCATAATCTTCTCGA

>PGSC0003DMG400028436LRR-RLKs\_183

CCTTAAAAGTTAGCTTTACTCTAAACTCTTCTCATCCCTCAACTCAAATTGGTCTTCTCAATCCTCCGTTT  
GTGATTGGATTGGAGTCACTTGCAGATCTCGTCACCATAGGGTGAGTG

>PGSC0003DMG400028436LRR-RLKs\_1830

ACTTCATTGACAAACTGCAGATCATTGAAAGAAGTTTACTTAGACCATAATCTTCTCGATGGTGTTATTCC  
AGATTCCATTGGCAATCTCTCCACTACCATTATGGAATTTTATTTAGAC

>PGSC0003DMG400028436LRR-RLKs\_1952

TTGTGAAATAAGGAGTCAGATACCATTAGGAATTGGGAATTTAAGTAACTTAAACACTTTGTCCCTAACC  
CACAATGACTTGACTGGATCAGTGCCAACAGCATTATGTAATTTACATAT

>PGSC0003DMG400028436LRR-RLKs\_244

ATCCTCCGTTTGTGATTGGATTGGAGTCACTTGCAGATCTCGTCACCATAGGGTGAGTGCCTAAATATA  
TCCAACATGAACATTCTTGAAACATTCCTTCAAACCTGGGAAACCTCTC

>PGSC0003DMG400028436LRR-RLKs\_2440

TTTCGTTGGCTTATAATGAGTTACAAGGATCTATTCCGGAGTCACTCGAGAATACGATAAGTTTGGAAATC  
AGCAAATCCATCCAATAATTTTCTTTCAGGTATGATTCCAAAATCATTAG

>PGSC0003DMG400028436LRR-RLKs\_2623

GTAAAGGACCTTTTCTCAATTTACCTCTCAATCTTTTATGGGAAATGAAGGGTTATGCGGCGGTTTAGTT  
TTCCAACCTTGTATGACTAGGTCTTTTCATCATTCAAGGAAAAGCAAAC

>PGSC0003DMG400028436LRR-RLKs\_2745

CTTTTGATTATACTTGTCTTCTGGGAGCTGCAGTAGTGGTACTTGGCTCAATCGTTGTGTTTATGTTAAG  
GAGACGTTGGAATAGAAATATTCCAACCTCAAGCTGAATCCTTTACTGCA

>PGSC0003DMG400028436LRR-RLKs\_2928

AACTTGCTAGGCACTGGAGGTTTTAGCTCTGTTTATAAGGGCATGTTTGCAAATGGGATGACTATGGCA  
ATCAAAGTGTTTAATTTACAGATTGAAGGTGCGTTAAAGAGTTTCGATGCT

>PGSC0003DMG400028436LRR-RLKs\_305

CTAAATATATCCAACATGAACATTCTTGAAACATTCCTTCAAACCTGGGAAACCTCTCCTCCTCGTTTCT  
CTTGATGTGAGCCAAAACAATTTACATGGAGACCTCCCTCAAGATTTG

>PGSC0003DMG400028436LRR-RLKs\_3233

ATTTGCTTTGGAATATCTCCATCACGGTTATGAAACAGTTGTTGTACATAGTGACCTGAAGCCTAGCAAC

GTCTTGCTAGATGAAAAGTTGGTTATGTGAGTGACTTTGGCCTGACCAAG

>PGSC0003DMG400028436LRR-RLKs\_3294

CCTAGCAACGTCTTGCTAGATGAAAAGTTGGTTATGTGAGTGACTTTGGCCTGACCAAGTTATTAGGAG

AAGGGGAATCAATTGCTCATACTAAAACACTTGCCACAATGGGCTACATTG

>PGSC0003DMG400028436LRR-RLKs\_3416

CCAGGTAACCTTTCTTTTAGTCCTTGAATATCGCATATGATGTGTTATTTACATAATAATTAGTTTACTATTA

CATCACATTA AAACTCGGTGAAAGCCTGAGTGGATAGCTTAATTAAG

>PGSC0003DMG400028436LRR-RLKs\_3477

GTTTACTATTACATCACATTA AAACTCGGTGAAAGCCTGAGTGGATAGCTTAATTAAGAAATGTAATAT

ATCACAGATTAAGCGTGAACAAAATGGTATAGAAAACATTGAAATATGA

>PGSC0003DMG400028436LRR-RLKs\_3538

ATGTAATATATCACAGATTAAGCGTGAACAAAATGGTATAGAAAACATTGAAATATGACTGTCAAACCT

CTATATGCATGCATCTACGAATTTCTTTTATCAAAAAGTTCCCTCAAAGGA

>PGSC0003DMG400028436LRR-RLKs\_3599

GTCAAACTCTATATGCATGCATCTACGAATTTCTTTTATCAAAAAGTTCCCTCAAAGGATATTAATAGAT

GAGCCAAAGGGGCATAGAGGGGGACTACGCCTGACCTCATCAATACAAA

>PGSC0003DMG400028436LRR-RLKs\_366

TCCTCGTTTCTCTTGATGTGAGCCAAAACAATTTACATGGAGACCTCCCTCAAGATTTGTCTCGTTTGCCT

AGACTGAAGGTGATGGATCTTGCGTTCAATAATTTAGCGGAGAGATCC

>PGSC0003DMG400028436LRR-RLKs\_3660

TTAAATAGATGAGCCAAAGGGGCATAGAGGGGGACTACGCCTGACCTCATCAATACAAATTTACGATAC

TAGGAGTGAGGAAAAGAAGAAATGTGGGGGGGGGGTTAAGGGTTGCCCA

>PGSC0003DMG400028436LRR-RLKs\_3721

TACGATACTAGGAGTGAGGAAAAGAAGAAATGTGGGGGGGGGGTTAAGGGTTGCCCCACATCAATT

AAGCATACAAAAGATAAATTCTAGGATTTTAGAGCAAGCAGAGAAGACTCAG

>PGSC0003DMG400028436LRR-RLKs\_3843

AGGATCAAAAAGAAAGCTGTTCTTAACTTAGATTCTAATGTTAGGCTTGCCAACTACATCATTCTTAAA

CGGAAGATTTATAGGCCTAGTCTCAGTGAAGAAGGTAGTCATTTTGCAC

>PGSC0003DMG400028436LRR-RLKs\_4087

AGTCCATATCGTTTCGATTGACTGCCTTATACTTGTTTCATTCCAATTATACTTTCAGTTTTTAAAGTCCTTA  
TCTACTCAAGGTAAATTCAACTATTTTCAATATCTAGTAAATATATA

>PGSC0003DMG400028436LRR-RLKs\_427

TCGTTTGCGTAGACTGAAGGTGATGGATCTTGC GTTCAATAATTT CAGCGGAGAGATCCCAGTCATGTG  
GTTTCGGTTTCATTTCAAAGTTAGAACTTTGAGTGTGAGAAACAATCGTCT

>PGSC0003DMG400028436LRR-RLKs\_4270

TCGGGCTCATCAAGAACTAATTACTCCAAATATTGGATCTCAGAGTATGGATCAGTTGTATTAGTTTCT  
AGAAGATGTGATGTGTACAGCTATGGCATTATGCTCATGGAACTTTCAC

>PGSC0003DMG400028436LRR-RLKs\_488

GTCATGTGGTTCGGTTTCATTTCAAAGTTAGAACTTTGAGTGTGAGAAACAATCGTCTTCAAGGCAATA  
TCCCTAAGGAGATTGGGAATCTTGAGTATCTAAAGGAGTTGATTTTATTT

>PGSC0003DMG400028436LRR-RLKs\_5063

TTATCTGCAATGACTGCCAACTCAAGTTTGATGCCATTTAAATTTTTGTACAGGTAGTGCCGCCTTTTATG  
CCTGTCGTTGGCAAATTTGGGTGACACCAATTGAGTTGCCAACAAAGAT

>PGSC0003DMG400028436LRR-RLKs\_5124

GCCTTTTATGCCTGTCGTTGGCAAATTTGGGTGACACCAATTGAGTTGCCAACAAAGATTTGGTCTGAGA  
TTCGGACTTCTCTTATTTCTTGTGCCTTCCTCTTGTGCATGTTTCAAGTT

>PGSC0003DMG400028436LRR-RLKs\_5185

GGTCTGAGATTCGGACTTCTCTTATTTCTTGTGCCTTCCTCTTGTGCATGTTTCAAGTTTGAGTATGTTTAT  
GTAACAAATCTAATATATAAGATGTGTACTAAAGTATAATACCGGTGA

>PGSC0003DMG400028436LRR-RLKs\_5229

TGCATGTTTCAAGTTTGAGTATGTTTATGTAACAAATCTAATATATAAGATGTGTACTAAAGTATAATACC  
GGTGATCATGAATTATTATTGAGATAGCAGCTTGAATAGTCTATGAAGA

>PGSC0003DMG400028436LRR-RLKs\_61

AAAACCTAATTTGTTCCCAATCACTTGGAGAGATCATACTCTTCTTGCTTTCACTACAATTATTGACACT  
TTACTTGTTTCGAGGCCATCGACATAAAAACAGATCAATCAGCTCTACT

>PGSC0003DMG400028436LRR-RLKs\_610

AAACCAATTTACTGGCTCTATCCCGCTCTCCATTTTCAATATGTCGTTGTTGGAAATTTTAGGTCTATCACA  
TAATCAATGAACTGGGAGTCTTCCTGTAGATATATGTCGTCGTCTTGC

>PGSC0003DMG400028437LRR-RLKs\_1008

AAACCTTAGCAACATTCGGCTACATTGCACCAGGTAAATCAAATCTCTTATACTTCTTTTTTCAGTATTCTA  
TCTTTGTTTGCCTTTTATTTTCGATTATATGATATTATGATAAACCGTA

>PGSC0003DMG400028437LRR-RLKs\_1071

AGTATTCTATCTTTGTTTGCCTTTTATTTTCGATTATATGATATTATGATAAACCGTAAGTGTGCTTTTATTG  
TAGAGTATGGAAGGGAAGGATTGGTGTGCGCCAAAATGTGATGTTTATA

>PGSC0003DMG400028437LRR-RLKs\_1260

TTAGTTTAAAGAAATGGGTGAGTGATTCACTCCCAGAGGCAACAATCAAAGTTGTAGATGCGAATTTGC  
TAACGCCAGAAGATGAAAAATTCATGGACAAGATAGATTGTGTAGCATCCA

>PGSC0003DMG400028437LRR-RLKs\_1323

ATTTGCTAACGCCAGAAGATGAAAAATTCATGGACAAGATAGATTGTGTAGCATCCATCATGAAAGTGG  
CACTGGATTGCTCTGCAGAATCTCCTGAAGAAAGGATCAACATGAAAGATG

>PGSC0003DMG400028437LRR-RLKs\_1449

GAATACTACAAAAGATCAAGATTCAACTTCTTTTCATGTTCTGCAAGTACATAAAAAACATTTGATTCATGTC  
ACTTGAGGGTATAGAAAGTGTGTTGTTAACTTTTTAGCTGCATACCTAGA

>PGSC0003DMG400028437LRR-RLKs\_1505

CATTTGATTCATGTCACTTGAGGGTATAGAAAGTGTGTTGTTAACTTTTTAGCTGCATACCTAGACTGTTTT  
CCTTTCTTGCTGCATAAGATTCTTTTCTGTAACACTAATGTAATATCGG

>PGSC0003DMG400028437LRR-RLKs\_315

TCCTCCCGTGCCCCACTTCTTCAAACCATAGATCAAAGAAGAAGAAGTTACTTCTGATAGTCTTTCCTCTA  
CTGGGAGCAGCTGTGATAATTGTTTTGTAACATTGGCGTTTGTGTGGA

>PGSC0003DMG400028437LRR-RLKs\_378

TTCTCTACTGGGAGCAGCTGTGATAATTGTTTTGTAACATTGGCGTTTGTGTGGATGAGGTACAGAAG  
AGAAGGAAATGTTCCAATTGAAGCTGATTTGTTAGCTACAATGGAAAGAA

>PGSC0003DMG400028437LRR-RLKs\_693

ATAGGAATCTCACCAAAGTCATTAGCAGTTGCTCCAACCTTGATTTCAAGGCTTTAGTGCTCGAGTACAT  
GCCTAATGGGAGCCTTGAAAAGTGGTTGTATTACACAACACTACTTCTTAG

>PGSC0003DMG400028437LRR-RLKs\_756

AGTACATGCCTAATGGGAGCCTTGAAAAGTGGTTGTATTACACAACACTACTTCTTAGACATCCTGCATAG

ACTAAGCATAATGATAGATGTGGCATGTGCATTGGAATATCTCCACAATG

>PGSC0003DMG400028437LRR-RLKs\_882

CAGCACCTGTGATTCATTGTGATCTGAAGCCTAGCAATGTCTTGCTAGATGAAAACATGGTCGCTCATGT

AAGTGACTTTGGCATTCTAACTACTCAGTGAAGATGAGAGTGATTTAC

>PGSC0003DMG400028437LRR-RLKs\_945

CTCATGTAAGTGACTTTGGCATTCTAACTACTCAGTGAAGATGAGAGTGATTTACACTAAAACCTT

AGCAACATTCGGCTACATTGCACCAGGTAATCAAATCTCTTATACTTCT

>PGSC0003DMG400028438LRR-RLKs\_1159

CAATCACTCAATCTTTATGGCAATAATCTCTCTGGCACATTGCCCCGGTATATATGTTTGAACATGCCTGA

TCTCAGAGCATTGATCTTGGGAATAATTTATTCAGTGGAAACATTCCA

>PGSC0003DMG400028438LRR-RLKs\_1220

ACATGCCTGATCTCAGAGCATTGATCTTGGGAATAATTTATTCAGTGGAAACATTCCAAAAGAATTTGG

AAACTGCACTTCACTTACTGACCTCTTCTTAAGAGAAAACAACCTAACAG

>PGSC0003DMG400028438LRR-RLKs\_1281

AGAATTTGGAAACTGCACTTCACTTACTGACCTCTTCTTAAGAGAAAACAACCTAACAGGTATCATCTTGT

CATTTTATTTTTCCAAGATTTGGTGTATGTTCTATGCTTTTCATATCC

>PGSC0003DMG400028438LRR-RLKs\_1342

ATCATCTTGTCATTTTATTTTTCCAAGATTTGGTGTATGTTCTATGCTTTTCATATCCTAATGAGTCGCTC

AAATGTCATCAGGTGAGTTACCAAGGGAGATTGGTAATCTTTTCAATT

>PGSC0003DMG400028438LRR-RLKs\_2440

CTTTTGCAGAAAATAGACTAGAAGGACCAATTCCAGAGTCAATGGGGAACATGATCGCCTTGGAATCGT

TAGACTTGTCTCATAACAAGCTCTCTGGTGGCATTCCCAAATCATTGGTAG

>PGSC0003DMG400028438LRR-RLKs\_366

TTGCATAGATTGGAGTTTATAAATGTCACTTCTAATAAGTTCACAGGAGATATCCCTCATGGTTCTCTCT

TTTGCCAGAACTCCAGCACTTGCATCTAGCTTTTAAACAGTTTCACAGGT

>PGSC0003DMG400028438LRR-RLKs\_3660

AGTGGATAAGACAATCATGGCCACACGGAATGGACGAGATAATAGACCCCGAGCTTATGATACCAGGG

GAGAAGAACAAAACAGGAAAGGTGCAGTTCTTATCATCCATCATGGAATTAG

>PGSC0003DMG400028443-(rev)RLKANKrepeat\_0

CTTTAAATAGCCCCATTGATAGCTAAGTCTCATTTTTTTTTTTGAAGTAGGTTATCTTTGAACTGTCTTGTT  
CAACTGTAAATTTTCCAAAAAAGAAGAAGAAAAATCTATTCTTTT

>PGSC0003DMG400028443-(rev)RLKANKrepeat\_1159

ACCTGAGCATTGCAGCTCCCAGTTGTTTTACTTCCAACCCCTCTTTGCATTGAGGGAAGAGTAAGAAATG  
ACAATAACATTGTCATGCATTACCAAGCATTATTGACACAATGTTACCTT

>PGSC0003DMG400028443-(rev)RLKANKrepeat\_1403

GGAACATGGTGCCAAGCCTCTGTAAAGTTTTATTTTCTGTTCTATTTTACTCATCAAGTGATTAAAAACT  
GTAAGAAAGCAAACCTTTTGTTCGTTGCACAAAAGATTGCTTGGCTTT

>PGSC0003DMG400028443-(rev)RLKANKrepeat\_1647

GCATTGAATTGGCCAAGGTAATTTTCATATATAAAATGTGAACATTTACATAAACTTGATTGGTAATTAGC  
TATTTTCAGTGGGCTAGGTGTGCTGATTTTACTTTCAAAGTACTTCCTTT

>PGSC0003DMG400028443-(rev)RLKANKrepeat\_1708

GTAATTAGCTATTTTCAGTGGGCTAGGTGTGCTGATTTTACTTTCAAAGTACTTCCTTTAACCTATTATCT  
TGGGAGGTTATAGTGAAAAGTTGACACAATAAATTGAGTGGGATGCT

>PGSC0003DMG400028443-(rev)RLKANKrepeat\_1830

GTTGGTAAGGATAAGTTGATCTTCTTTGGTGTTTCTGTCATAAGAAGTCCTTATATTAGGGTGGTATGTTT  
GGGAAAAGCTGGGAAATATTCACCTGCTCCTTTTCCTATTCCGCTAATA

>PGSC0003DMG400028443-(rev)RLKANKrepeat\_1891

TGGTATGTTTGGGAAAAGCTGGGAAATATTCACCTGCTCCTTTTCCTATTCCGCTAATATATTGCTCCAAT  
CTACAAACTTTTGCTTCTGTATCTTTCTGATGATTCCTGAACTATTATA

>PGSC0003DMG400028443-(rev)RLKANKrepeat\_2013

GAACCTTTCATATTGCCTCATGGCGTGGAATACAAGTTGCTGTGAAAAAGTTTGGAGATGATGAGATTG  
CTGATGAGGATAAAGTGTGAGTATAAGAAGATACCAATACTGATTCTGTGG

>PGSC0003DMG400028443-(rev)RLKANKrepeat\_2074

TGAGATTGCTGATGAGGATAAAGTGTGAGTATAAGAAGATACCAATACTGATTCTGTGGAATCTTCTAA  
TAAAAACAGAAAAAACCATAAGAGCTTTTTCTTCACATTGTTTAGCTCTCC

>PGSC0003DMG400028443-(rev)RLKANKrepeat\_2135

TCTTCTAATAAAAACAGAAAAAACCATAAGAGCTTTTTCTTCACATTGTTTAGCTCTCCTCATATCTCACTT  
ATTTATTATATATTCTTAATTTATGGATATTTGCAGGACGGCATTGAG

>PGSC0003DMG400028443-(rev)RLKANKrepeat\_2623

ATCAGATTTGCAATAGACATCGCAAGGTTCTCGAGCCACTCTACCCTATTAGCTAATGTTATAAACTCACT  
ACGTAATAACAAGACCAACACTTGTATAAATGTCTGGAACCCGGGGAAC

>PGSC0003DMG400028443-(rev)RLKANKrepeat\_2684

TAAACTCACTACGTAATAACAAGACCAACACTTGTATAAATGTCTGGAACCCGGGGAAC TTTTGTGGAGT  
AACATTTAAGTCCACACA ACTTGCATATCTCTTGG AATTCTAAAAATTAG

>PGSC0003DMG400028443-(rev)RLKANKrepeat\_2745

TTGTGGAGTAACATTTAAGTCCACACA ACTTGCATATCTCTTGG AATTCTAAAAATTAGCATCTGTGGGA  
GGCAGCAGAGCAAGTAATCACTCAGCTGTTGACTATACTTCTGAGAATAT

>PGSC0003DMG400028443-(rev)RLKANKrepeat\_2928

AAAGATCCCATCTGGTGT TTTGCATATCCACTGGTAATATTAATAGAAAGAAGAAAAGAAAATAGAAGAT  
CATACTTGTTAATGGACATGCCACTTTTTCTCAATCGCGTGGTTATCTGC

>PGSC0003DMG400028443-(rev)RLKANKrepeat\_2989

TAGAAGATCATACTTGTTAATGGACATGCCACTTTTTCTCAATCGCGTGGTTATCTGCTGACCTAGTATT  
GTAATGTCCTGCATATCACTTTAAGCTGACCCTAGGAATATCAAATAGG

>PGSC0003DMG400028443-(rev)RLKANKrepeat\_3355

AATCATTCTCTTGAGCTCTGAGATAGTCAACACAGCTCAAACAAATTGGATTGGAGCATTAAACGATCTCT  
TCAAAAGTTATTTTTTAATTCTATCAAATTTTCATTTCAAATTTCACT

>PGSC0003DMG400028443-(rev)RLKANKrepeat\_3477

AATTTCCACAGCTGCTTGGCATGTGAGACATTTGATTATATTTATTTTCTTCGAATCAGCTCGTGCTTGT  
AATTACTAAAATAATCTATCAAACATACTGTTACATTCATATGAAGTT

>PGSC0003DMG400028443-(rev)RLKANKrepeat\_3538

CGTGCTTGTTAATTACTAAAATAATCTATCAAACATACTGTTACATTCATATGAAGTTGAAGCCTTATAT  
GACTCATGTTAGCCTGAAGCATAATGTGCATAAGTAGAATTTTAACCAC

>PGSC0003DMG400028443-(rev)RLKANKrepeat\_3599

AGCCTTATATGACTCATGTTAGCCTGAAGCATAATGTGCATAAGTAGAATTTTAACCACTCTTGTGTTTTA  
TATTGTTGCAGAGGACTGAACTATCTACATGAAATTAACCTGAAGCGA

>PGSC0003DMG400028443-(rev)RLKANKrepeat\_3782

TTTGTGTAAGCAAATCCCATCCAAGGTTTGGTTGACAAGCCTCAATCTTTGAAGTTCCCCTCTTTCAAAA



TTGAGTTTCTTCATCCTATTGTTTTAATATTTTAACGTGACATAACAGA

>PGSC0003DMG400028443-(rev)RLKANKrepeat\_4209

ATTTCTGTTGATTAATAATTGAAATCTCTTAACCTGTTTCCTTTTTGCCTTGTTTTGTTGGAAATAAAT

AGGCCGATATGTAGCTCCAGAGGTTTTCAAAAATGAGGAATACGATAC

>PGSC0003DMG400028443-(rev)RLKANKrepeat\_4270

TGGAAATAAATAGGCCGATATGTAGCTCCAGAGGTTTTCAAAAATGAGGAATACGATACCAAAGTTGAT

GTCTTTTCCTTTGCTTTAATTTTGCAAGAGGTAAAAATATATATGTTTCATA

>PGSC0003DMG400028443-(rev)RLKANKrepeat\_4331

AAGTTGATGTCTTTTCCTTTGCTTTAATTTTGCAAGAGGTAAAAATATATATGTTTCATATATTCTTTTCACG

ATTAATACTATTTTCTGAATGGAGTTACATTATTGAAATAACATGTGG

>PGSC0003DMG400028443-(rev)RLKANKrepeat\_4392

TTCTTTTCACGATTAATACTATTTTCTGAATGGAGTTACATTATTGAAATAACATGTGGGAGAAGAGGTTT

ATAGTTGATGGTCACTATGGGGTCTCTTTTGTGAAGAGTTGCCGTAGGT

>PGSC0003DMG400028443-(rev)RLKANKrepeat\_4453

GAAGAGGTTTATAGTTGATGGTCACTATGGGGTCTCTTTTGTGAAGAGTTGCCGTAGGTTTTGCATGTAC

TTCTGATAAATGAAGATCCTATCTTTTCTCCGCACAAGTCCACGAAAGTG

>PGSC0003DMG400028443-(rev)RLKANKrepeat\_4514

TGCATGTA CTCTGATAAATGAAGATCCTATCTTTTCTCCGCACAAGTCCACGAAAGTGAAAATAAATCCT

TGCACATCATTGAGTTGCCACATATCTAGTCCTTTTCTGACTTTGAAC

>PGSC0003DMG400028443-(rev)RLKANKrepeat\_4575

AATAAATCCTTGACATCATTGAGTTGCCACATATCTAGTCCTTTTCTGACTTTGAACTTGATTTCTTCAT

ACCCACAAATATGTATGTATCTATCTGCTTTATGGTTGTGACTCAG

>PGSC0003DMG400028443-(rev)RLKANKrepeat\_4636

GATTTCTTCATACCCACAAATATGTATGTATCTATCTGCTTTATGGTTGTGACTCAGATGATTGATCTA

GCTACATGACTTCGAACTTGAGAATCCTTAATATAGTTTCTTTATAAC

>PGSC0003DMG400028443-(rev)RLKANKrepeat\_4697

GATTGATCTAGCTACATGACTTCGAACTTGAGAATCCTTAATATAGTTTCTTTATAACATGCCTTTCATGC

AATACAATCAAGAGAGGATTTGTTGTGATGCAATAACAAGCAATATCT

>PGSC0003DMG400028443-(rev)RLKANKrepeat\_4758

GCCTTTCATGCAATAACAATCAAGAGAGGATTTGTTGTGATGCAATAACAAGCAATATCTTTAGTTTTCTT  
TTATAAAACAATCTCTTTATATGCATGGCATTATGCAGTTTGTGTTAT

>PGSC0003DMG400028443-(rev)RLKANKrepeat\_4819

AGTTTTCTTTTATAAAACAATCTCTTTATATGCATGGCATTATGCAGTTTGTGTTATTTGTAGACAGTGT  
TAACTTTCTGCCGAGGGAAGTACAGCAGAGTGGTTGCCTTGTGCAGT

>PGSC0003DMG400028443-(rev)RLKANKrepeat\_4880

GTAGACAGTGTAACTTTCTGCCGAGGGAAGTACAGCAGAGTGGTTGCCTTGTGCAGTGGAGACTGCA  
AGTTTTATTTTCTACCATCTAGATAAATCAGTACTGCAATACATATTGATT

>PGSC0003DMG400028443-(rev)RLKANKrepeat\_4941

AGACTGCAAGTTTTATTTTCTACCATCTAGATAAATCAGTACTGCAATACATATTGATTATACTATACTAG  
TGTTGATCTGCTCTATGATGCTAGAAATCAGCTAAAAGTCTAATTGTG

>PGSC0003DMG400028443-(rev)RLKANKrepeat\_5002

ACTATACTAGTGTGATCTGCTCTATGATGCTAGAAATCAGCTAAAAGTCTAATTGTGCTTTATGAACTT  
CCATAAGTCAAGGATGTGCATATTTTCTATTTTTGTTCCACATATGGG

>PGSC0003DMG400028443-(rev)RLKANKrepeat\_5063

TTATGAACTTCCATAAGTCAAGGATGTGCATATTTTCTATTTTTGTTCCACATATGGGTTGGGATTTTGA  
TAATTGTGCTGTCGTGTACTTTAGATGATTGAAGGCTGCCCCCTTTCA

>PGSC0003DMG400028443-(rev)RLKANKrepeat\_5124

GGGATTTTGATAATTGTGCTGTCGTGTACTTTAGATGATTGAAGGCTGCCCCCTTTCAAAGCAAAGAAT  
GAAAATGAAGTACCTAAACACTATGCTGCTAAGGAGCGCCCTCCTTTTAA

>PGSC0003DMG400028443-(rev)RLKANKrepeat\_5185

GCAAAGAATGAAAATGAAGTACCTAAACACTATGCTGCTAAGGAGCGCCCTCCTTTTAAAGCTCCAGCA  
AAGGTTTATGCCCATGGACTGAGGGAGTAAGTTCTCTATCAATTTATTTGT

>PGSC0003DMG400028443-(rev)RLKANKrepeat\_5246

CTCCAGCAAAGGTTTATGCCCATGGACTGAGGGAGTAAGTTCTCTATCAATTTATTTGTGGAAGTCCATA  
GTCTAATACTTGTGCAATGCATTGGAAACTCTGTTCTCATTGAAATTTAA

>PGSC0003DMG400028443-(rev)RLKANKrepeat\_5307

AACTCCATAGTCTAATACTTGTGCAATGCATTGGAAACTCTGTTCTCATTGAAATTTAAGAAAATGATGA  
CGATTAAGATATCAAGTAAAATTCAAGAACATTTGTTTATGACTGGTCTA

>PGSC0003DMG400028443-(rev)RLKANKrepeat\_5368

AAATGATGACGATTAAGATATCAAGTAAAATTCAAGAACATTTGTTTATGACTGGTCTAAGTTTAAGTAC  
TGTCTACATTTTTCTAACTATCACAATTTACATGTGTGAAAAGAGTAAGA

>PGSC0003DMG400028443-(rev)RLKANKrepeat\_5429

TTTAAGTACTGTCTACATTTTTCTAACTATCACAATTTACATGTGTGAAAAGAGTAAGAATAACTAGGAA  
AGTACACTTCGTGGACATGCTTCTTTATTTAACCATACATATGCATACGG

>PGSC0003DMG400028443-(rev)RLKANKrepeat\_5490

AACTAGGAAAGTACACTTCGTGGACATGCTTCTTTATTTAACCATACATATGCATACGGAAGAAAGAACA  
AGAAATTAACGGAGATAGGTAGAGACGAAAAGTAAAATGGGAGAAAGAG

>PGSC0003DMG400028443-(rev)RLKANKrepeat\_5551

GAAAGAACAAGAAATTAACGGAGATAGGTAGAGACGAAAAGTAAAATGGGAGAAAGAGATGGATAT  
ATGTGGGGTTTATATCAGCAGGGTTCTGCCCGAAGGACCAAACCTTACTTCTT

>PGSC0003DMG400028443-(rev)RLKANKrepeat\_5612

GGATATATGTGGGGTTTATATCAGCAGGGTTCTGCCCGAAGGACCAAACCTTACTTCTTGGACAAGTTTG  
GTATATTGTTTTCCCTTTGTTGGCAGATGTTATAGTCGTATTGCACTTAT

>PGSC0003DMG400028443-(rev)RLKANKrepeat\_5673

ACAAGTTTGGTATATTGTTTTCCCTTTGTTGGCAGATGTTATAGTCGTATTGCACTTATCCCACCAATACG  
GCATCAAAGCCCCTCCTGGCTCATCCTTAGACACTCTAAGATCCTTTC

>PGSC0003DMG400028443-(rev)RLKANKrepeat\_5734

CACCAATACGGCATCAAAGCCCCTCCTGGCTCATCCTTAGACACTCTAAGATCCTTCTCGAACCTGCTC  
CCTACTCTGAATCAATCTATTTCTTATTCTAAGGGCCTCAAAGACAGCAT

>PGSC0003DMG400028443-(rev)RLKANKrepeat\_5795

GAACCTGCTCCCACTCTGAATCAATCTATTTCTTATTCTAAGGGCCTCAAAGACAGCATATAGAAAACAG  
AGCTTGACCTATGAGATTGCCTTGTATTCCACTTGGTCGCATACCCAGA

>PGSC0003DMG400028443-(rev)RLKANKrepeat\_5978

ATTACTTCTTTTAAGGACCATTAAGGAAAGTGTATGTTAAATGACACCTACCTATGTGCCCTGTGTTCTGA  
CAAATAAGTTATAGACCTTCATTTGTTAAAATTTCTTTTTTTAAGTGCC

>PGSC0003DMG400028443-(rev)RLKANKrepeat\_6039

TGTGTTCTGACAAATAAGTTATAGACCTTCATTTGTTAAAATTTCTTTTTTTAAGTGCCCATGGCAGCATT

TATGTGATAATAAGAAAAGTTATTGCAGCTAAGTTCCGTTTATCGAAG

>PGSC0003DMG400028443-(rev)RLKANKrepeat\_61

ACTGTCTTGTTCAACTGTTAAATTTTCCAAAAAAGAAGAAGAAAAATCTATTCTTTTTCAAGTTTATTC

ACCTCTGATCCTAAATTTGGTTGAAATAATAAGTTTCAAGAATACCCTT

>PGSC0003DMG400028443-(rev)RLKANKrepeat\_6100

TGGCAGCATTTTATGTGATAATAAGAAAAGTTATTGCAGCTAAGTTCCGTTTATCGAAGTTCTAGAGTTC

CATAACCATCCTTTCCCTGTGTGCAACTTTATAGAGGATCTATAAATCAT

>PGSC0003DMG400028443-(rev)RLKANKrepeat\_6161

CTAGAGTTCCATAACCATCCTTTCCCTGTGTGCAACTTTATAGAGGATCTATAAATCATGATAGGCATTCC

CATGCAATTTATGCAGTTTAGGTTTAAACTAAACAAAAGGAAGTCGAT

>PGSC0003DMG400028443-(rev)RLKANKrepeat\_6222

TAGGCATTCCCATGCAATTTATGCAGTTTAGGTTTAAACTAAACAAAAGGAAGTCGATCCAGAAGTCAA

TTTGTAACCTCTTTGATTCTACTTATTCTACAGTTGTCTAGGTTTATAAT

>PGSC0003DMG400028443-(rev)RLKANKrepeat\_6283

AGAAGTCAATTTGTAACCTCTTTGATTCTACTTATTCTACAGTTGTCTAGGTTTATAAATTGTGGTTCTATAT

TTGATACTTTTTGAGATATTCAATAATGAACTGGTTTACTGTGAATCA

>PGSC0003DMG400028443-(rev)RLKANKrepeat\_6344

TGGTTCTATATTTGATACTTTTTGAGATATTCAATAATGAACTGGTTTACTGTGAATCAACTTTTTTTCCCC

ACAGTATAGGTTTAACTTTTTATGGTTACAAAATCATCACCGCATTG

>PGSC0003DMG400028443-(rev)RLKANKrepeat\_6405

TTTTTTCCCCACAGTATAGGTTTAACTTTTTATGGTTACAAAATCATCACCGCATTGTTGTTATTACTGC

TGATTTAATCAGAGTTGATTTTGGTTTTCCAGGCTGATTGAAGAGTGT

>PGSC0003DMG400028443-(rev)RLKANKrepeat\_6466

GTTATTACTGCTGATTTAATCAGAGTTGATTTTGGTTTTCCAGGCTGATTGAAGAGTGTGGAATGAGAA

TCCGTCCATGCGTCCAACCTTTCAAGAAAATAATCCCAAGGCTCGAGGCCA

>PGSC0003DMG400028443-(rev)RLKANKrepeat\_6527

GAATGAGAATCCGTCCATGCGTCCAACCTTTCAAGAAAATAATCCCAAGGCTCGAGGCCATTTACAACAA

ATTTGGCCACAAAAGGCGTTGGAAGGTAAACCTTTTCGGTCATTTAGCTCCT

>PGSC0003DMG400028443-(rev)RLKANKrepeat\_6588

TACAACAAATTTGGCCACAAAAGGCGTTGGAAGGTAAACCTTTTCGGTCATTTAGCTCCTTTCCACCATCT  
STATGCACTTATAAATAGTGTGTGGTGCATCTGTATTTTGAACCTTCTCAT

>PGSC0003DMG400028443-(rev)RLKANKrepeat\_6649

CCACCATCTCTATGCACTTATAAATAGTGTGTGGTGCATCTGTATTTTGAACCTTCTCATAATGGAGATCAA  
TGAGTTCAAACCTATTTTCCAAGCCTAGTCAAGTAGAAATGTATTACCTA

>PGSC0003DMG400028443-(rev)RLKANKrepeat\_6710

TGGAGATCAATGAGTTCAAACCTATTTTCCAAGCCTAGTCAAGTAGAAATGTATTACCTAAATCACTTGAG  
CATCTGTGATTGCATAAGTAGTTCTTATACATCCCATTACCTTTCCACG

>PGSC0003DMG400028443-(rev)RLKANKrepeat\_6771

TCACTTGAGCATCTGTGATTGCATAAGTAGTTCTTATACATCCCATTACCTTTCCACGCTTCAACAAGTG  
CATAGCAACTAGCAAATAATACATAATTGCATAAACTTGACAGAAAAAG

>PGSC0003DMG400028443-(rev)RLKANKrepeat\_6832

TCAACAAGTGCATAGCAACTAGCAAATAATACATAATTGCATAAACTTGACAGAAAAAGAAAAAAGAA  
AACATGCTCATGTTCTGATTGATAAGAGTCTCTCTCTGCTTTTCTGCTGAT

>PGSC0003DMG400028443-(rev)RLKANKrepeat\_6893

AAAAAGAAAACATGCTCATGTTCTGATTGATAAGAGTCTCTCTGCTTTTCTGCTGATTTTCATACCTAG  
TACTAGAGGACAAGCCAGTGTTCGAAAATGTTCTGTTTCTTTTTTCT

>PGSC0003DMG400028443-(rev)RLKANKrepeat\_6954

TCATACCTAGTACTAGAGGACAAGCCAGTGTTCGAAAATGTTCTGTTTCTTTTTTCTTCTTTTCCTTCATA  
CTTGCTCATTGACATAGTCAAAGGTGGTCTACAATTTTGTCCAAGGC

>PGSC0003DMG400028443-(rev)RLKANKrepeat\_7015

TTTCTTCATACTTGTCTCATTGACATAGTCAAAGGTGGTCTACAATTTTGTCCAAGGCTTAACGATGCCC  
GAGTCTCAGCGATGGCCTGTATTGTGTTTTAGGAGATATAGTTTTGTTG

>PGSC0003DMG400028443-(rev)RLKANKrepeat\_7076

AACGATGCCCGAGTCTCAGCGATGGCCTGTATTGTGTTTTAGGAGATATAGTTTTGTTGCTACTTCAATG  
CTCCTATATATATGATCATTCTGAGTTAAGCATAGATCTCTCATTTCATC

>PGSC0003DMG400028443-(rev)RLKANKrepeat\_7137

ACTTCAATGCTCCTATATATATGATCATTCTGAGTTAAGCATAGATCTCTCATTTCATCTTGTATATGTTTC  
CCTATGCAGGTTAGACCATTGAAATGTTTCCAGAATTTTCGAGGCCATG

>PGSC0003DMG400028443-(rev)RLKANKrepeat\_7198

GTATATGTTTCCCTATGCAGGTTAGACCATTGAAATGTTTCCAGAATTTGAGGCCATGTGGAAGAAAGA  
AAACTCAAGTTCAAGTAGGAATGGATCATCGCGGTCAAACAGCAGTATCT

>PGSC0003DMG400028443-(rev)RLKANKrepeat\_7259

GAAGAAAGAAAACACTCAAGTTCAAGTAGGAATGGATCATCGCGGTCAAACAGCAGTATCTAGCAAATTGT  
GGATATTTCTTTGTTCAAGTGTGCATATGTTCTTCACAGATTTCTGCCA

>PGSC0003DMG400028443-(rev)RLKANKrepeat\_732

TCGCTGGGGAAGCACGGTATATCTCATGAACTAGTTTTATTATCATATAGTTTTTGTCTCCCATATGATT  
GGTAAATTGGTATAAGTTAGATAAGGCTTGATTATGATTATGATTATGA

>PGSC0003DMG400028443-(rev)RLKANKrepeat\_7320

CAAATTGTGGATATTTCTTTGTTCAAGTGTGCATATGTTCTTCACAGATTTCTGCCAAAGATTTAGTA  
GTAGGAAGTTGTATCACTTTTTCTAGCTTTAAATCTCTAGATGTCCAAA

>PGSC0003DMG400028443-(rev)RLKANKrepeat\_7381

GATTTAGTAGTAGGAAGTTGTATCACTTTTTCTAGCTTTAAATCTCTAGATGTCCAAAACAAATGGTCAT  
CCTTTTTTTTTCTTTGCCTCTTTCTATTGAGATCTATATTGTTTATGTA

>PGSC0003DMG400028443-(rev)RLKANKrepeat\_7442

AAATGGTCATCCTTTTTTTTTCTTTGCCTCTTTCTATTGAGATCTATATTGTTTATGTACATTACAGTAGATA  
AAATATTCATGGTGCAAATGCTATGTTTTCTTCTCTTTGCTTTGT

>PGSC0003DMG400028443-(rev)RLKANKrepeat\_7476

TATTGAGATCTATATTGTTTATGTACATTACAGTAGATAAAATATTCATGGTGCAAATGCTATGTTTTCTT  
CTCTCTTTGCTTTGTGGAAGCATCCAATTAAGTACTGAGACAAAAGAGAAA

>PGSC0003DMG400028443-(rev)RLKANKrepeat\_793

CCATATGATTGGTAAATTGGTATAAGTTAGATAAGGCTTGATTATGATTATGATTATGATTTTATATTGCT  
AGTATCTTCACTTTTGGGTAGTTAGTTGGTATTGGAGAAAAAGGTATAG

>PGSC0003DMG400028443-(rev)RLKANKrepeat\_915

CCTTGCATTCTGTTTTATTTATATATGTTAATCTTAATCAAATCCGAAGTTGATTCAGTTGGGTTAATGAG  
TTCATTTGTTAAAAAGTGTCTAAGAGGATTCTGTGGGACAAAATTCTA

>PGSC0003DMG400028454-(rev)RLKmalectin\_0

CTCTTTATTCTATCCATTGAAATGTTTTAAACCAGGAATCTCGAGGCGAACCAGTTTTTCAGGCAGTGTCC

TTCTGAACTAGGGAAATTGATCTACTTGCAAACCCTGTAAGACCTCTCA

>PGSC0003DMG400028454-(rev)RLKmalectin\_1037

TAGAGAGAGAGAGAGCTATTACATGATTTTCTGCCTTCTCTCTGTCCGTGACCTTTGGATTCTCTGAAG

TCACACTATTTACTGTCCTCTATTGGCGCCTCTTTCAGTTAATACTGCC

>PGSC0003DMG400028454-(rev)RLKmalectin\_1098

TTCTCTGAAGTCACACTATTTACTGTCCTCTATTGGCGCCTCTTTCAGTTAATACTGCCTTCCCCAGTCAAA

AACAGTTGAGAAATCATTCTTCTCTACCAAGAACTCCTGTAGAAATT

>PGSC0003DMG400028454-(rev)RLKmalectin\_122

TCTCTTCCACTTTGTTATCTTCTCTAAAGCAAACCTTGAAGAATACTTGGCATTGGCACCTGAATGACTG

ATGCATAGATGAGTGGGTGATTAATCTTTTTCTACTTTCAGGATTTTA

>PGSC0003DMG400028454-(rev)RLKmalectin\_1281

GACTGTAAATTTTTAGCATTCCAGTTTTAAAAGATAATTGAGGCTGTTCAAGAAACAATGCACTTGTTCC

TTAATTAGTATATGACACCTCAATATCAAAAGGTTTCATGCTGCTCTTT

>PGSC0003DMG400028454-(rev)RLKmalectin\_1342

GCACTTGTTCTTAATTAGTATATGACACCTCAATATCAAAAGGTTTCATGCTGCTCTTTGCTTTTCACTAAA

CTTCTCATCCTTCTATGTTTGTATCTCTCCAGTACATTATTTAGTCT

>PGSC0003DMG400028454-(rev)RLKmalectin\_1403

TTTTCACTAACTTCTCATCCTTCTATGTTTGTATCTCTCCAGTACATTATTTAGTCTAACATATAGAGTTG

GCTCTTATACATTTTTCTTCTACAATATACATGTGGCGGTTGTAAGA

>PGSC0003DMG400028454-(rev)RLKmalectin\_1647

ATTAGTGCTAGAAGTATGCTGAAGTTTGTGTAAGTTGAATTGCAAAAAGTGGATTCTCTCAAATGTGATG

TCCTTTTTATTTTGTATTAGCAAGTTACATCAGTCTTCTCAATCTTC

>PGSC0003DMG400028454-(rev)RLKmalectin\_1708

AATGTGATGTCCTTTTTATTTTGTATTAGCAAGTTACATCAGTCTTCTCAATCTTCTTTTGCTCATACCC

CCAACATCTTCAAGTATGAAGTGTATAACATGTGCTTGCACTTCCAG

>PGSC0003DMG400028454-(rev)RLKmalectin\_1769

TTGCTCATACCCCAACATCTTCAAGTATGAAGTGTATAACATGTGCTTGCACTTCCAGATTTGCTGTTGC

CTAATTGCTTTATGTTCTCTACATAGGTTTCTTACTGGCAACATGCTCA

>PGSC0003DMG400028454-(rev)RLKmalectin\_1830

TTGCTGTTGCCTAATTGCTTTATGTTCTCTACATAGGTTTCTTACTGGCAACATGCTCAGTGGAGATATAC  
CAGACTCTCTTTTGAAGAGTGGAATAAATGTGTAAGTGTATATTTATTA

>PGSC0003DMG400028454-(rev)RLKmalectin\_1891

GGAGATATAACCAGACTCTCTTTTGAAGAGTGGAATAAATGTGTAAGTGTATATTTATTAATATTCTAATTT  
CATAAACAATTTCTGCTGGTGTAAAGATGGACTCGGTCTTTGCGGAACAT

>PGSC0003DMG400028454-(rev)RLKmalectin\_1952

ATTCTAATTTTCATAAACAATTTCTGCTGGTGTAAAGATGGACTCGGTCTTTGCGGAACATGTCATAATTTTT  
ATTCATAAACATAATGGTTGTTTCAGTGGCATGCCAAAGCAATTTTGATT

>PGSC0003DMG400028454-(rev)RLKmalectin\_2013

CATAATTTTTATTTCATAAACATAATGGTTGTTTCAGTGGCATGCCAAAGCAATTTTGATTCATTCACGTTGG  
CATTATTTTTTCCATATTTTGTCTTCATGTGGATCTCACAACGCTTGG

>PGSC0003DMG400028454-(rev)RLKmalectin\_2074

TTCACGTTGGCATTATTTTTTCCATATTTTGTCTTCATGTGGATCTCACAACGCTTGGTTCATAATCGGAA  
AGATGACATCTAACAGCGTCCTTTGCGCGCAGTGATCTTTCCTACAAT

>PGSC0003DMG400028454-(rev)RLKmalectin\_2135

CATAATCGGAAAGATGACATCTAACAGCGTCCTTTGCGCGCAGTGATCTTTCCTACAATAATTTTACATG  
GCAAGGACCTGACCAACATGCTTGTGTCAGCAGAACATGTAAGGATAGGTCC

>PGSC0003DMG400028454-(rev)RLKmalectin\_2196

TTTTACATGGCAAGGACCTGACCAACATGCTTGTGTCAGCAGAACATGTAAGGATAGGTCCATTTTTGTTAA  
TTCATGCTTTTACATTGTTTATTGGATAAGCATATATGGTTCTGATAATT

>PGSC0003DMG400028454-(rev)RLKmalectin\_2318

TCCTTCTACAGGAATCTGTATTTAACTTGTACAAGAGCTCTGCAGCAGTAAGCCCCTTGTAAGATGATT  
CTTATTATCCTGAAACATTAAAATTCTGATTTATGATGAAACTGAGAGAA

>PGSC0003DMG400028454-(rev)RLKmalectin\_2379

AAGATGATTCTTATTATCCTGAAACATTAAAATTCTGATTTATGATGAAACTGAGAGAAAAAGGAAGTGC  
AAAGCAGAAGTGATTGCTTCTATCTAATTCGGATTTGGTTCTAACTGCTT

>PGSC0003DMG400028454-(rev)RLKmalectin\_2440

AGGAAGTGCAAAGCAGAAGTGATTGCTTCTATCTAATTCGGATTTGGTTCTAACTGCTTTTGTGCTTTAA  
CTCCTACAGAATGAGAATTCATCCATGTACGAAGGATTTTACTTGTCGTC



>PGSC0003DMG400028454-(rev)RLKmalectin\_2562

TGTAAGTATGTTCTTTTCTTCTCTGGAAAGTTATAACAATTTTCATATGGAATATGAATCACATCCGTAGCA  
AGAATCTGAAACTATATCTTTAGCCGCTTTGCCATCTTCTCCTTCACTC

>PGSC0003DMG400028454-(rev)RLKmalectin\_2623

ATCCGTAGCAAGAATCTGAAACTATATCTTTAGCCGCTTTGCCATCTTCTCCTTCACTCAAATAGCAGATT  
GCTCAACTATGCAAGAACTGTAGCAAGTTAGTTTCATTTTTGATATTT

>PGSC0003DMG400028454-(rev)RLKmalectin\_2684

ATAGCAGATTGCTCAACTATGCAAGAACTGTAGCAAGTTAGTTTCATTTTTGATATTTAACACAGAGAC  
ATTCTAAGGGTGTATTCAGTCTTAATGTCCGTTTGGATTGGCTTATTTTA

>PGSC0003DMG400028454-(rev)RLKmalectin\_2989

AAACTCATGTATATAACAAGTATTTAGATGATTTGAGGATTCACTACCTAATCGTTGGAAATATTTTTCTGCT  
TGATCATTTTTCCCAACTTATGAAATATATTTTTGAGCATTGACTTCTATT

>PGSC0003DMG400028454-(rev)RLKmalectin\_3050

ATTTTTCTGCTTGATCATTTTTCCCAACTTATGAAATATATTTTTGAGCATTGACTTCTATTATTTTTATTGGCA  
GATGGGTGTTTATTACATGTTAATAGTGGTGGAAATGATTTTACTGTA

>PGSC0003DMG400028454-(rev)RLKmalectin\_3233

TATTTTCTGAGTAGCACCAATTATTGGGGATTGAGTAGCACTGGGGACTTTATGGATGATAATAATGAC  
CAAAATGCACGTTTTATTGAAAGTACACAATCAAAAAGCCTCTCTGAATTG

>PGSC0003DMG400028454-(rev)RLKmalectin\_3294

ATAATGACCAAAATGCACGTTTTATTGAAAGTACACAATCAAAAAGCCTCTCTGAATTGTACAATAATGC  
ACGGATGTCTCCCCTCTCACTCACTTACTTCCGTTATTGCTTGAGGAATG

>PGSC0003DMG400028454-(rev)RLKmalectin\_3355

CAATAATGCACGGATGTCTCCCCTCTCACTCACTTACTTCCGTTATTGCTTGAGGAATGGGAGTTACAATG  
TCAGCTTGCACTTTGCTGAGATAAGTTTTACAAATGACAGCACCTATAC

>PGSC0003DMG400028454-(rev)RLKmalectin\_3416

AGTTACAATGTCAGCTTGCACTTTGCTGAGATAAGTTTTACAAATGACAGCACCTATACCAGTCTTGAA  
GGCGAGTATTTGATATATACATCCAGGTTGGTATGCCATTAGAAAACT

>PGSC0003DMG400028454-(rev)RLKmalectin\_3477

GTCTTGGAAGGCGAGTATTTGATATATACATCCAGGTTGGTATGCCATTAGAAAACTTTCTATACGCT

TAAACTATGTTAGATGTGTGAAAATATGAGGAAAAAAGAGAGAACTTGT

>PGSC0003DMG400028454-(rev)RLKmalectin\_3538

CTATACGCTTAAACTATGTTAGATGTGTGAAAATATGAGGAAAAAAGAGAGAACTTGTATTGTATTG

GTTGTAGATGATATACAAGATGCCTCCACATATAGAAGTTCAGGCAATTAC

>PGSC0003DMG400028454-(rev)RLKmalectin\_3599

TGTATTTGGTTGTAGATGATATACAAGATGCCTCCACATATAGAAGTTCAGGCAATTACAATTATGGTAA

GCTCTAACCTAAATGAAATAAGAGAACTTATTAAATTTGGGAATTTACCC

>PGSC0003DMG400028454-(rev)RLKmalectin\_366

TATCTCACAGTATAATTTTACTATACAGTAGGATAAGTGACAACAATTTTCAGTGGACAGATTCCAGATTT

CATACAGAACTGGAAACAACCTACCAAACCTGTAAGATCTTTCGAAATACC

>PGSC0003DMG400028454-(rev)RLKmalectin\_3660

TTATGGTAAGCTCTAACCTAAATGAAATAAGAGAACTTATTAAATTTGGGAATTTACCCATCCAGAATTA

GAAAAAATGCTCTCTACTACTAACCTAGAATATATTTTAACACATCACTG

>PGSC0003DMG400028454-(rev)RLKmalectin\_3782

TTAATTCTCCACAACGCGCCTTCCAAACTCAAGGTGATACAGCAACTTGTGTTTGCAAATCGAAAGTGA

AAAGTGACATGATACTACCTGGACAAAATAGAGTAGGAGTTATGATTGAA

>PGSC0003DMG400028454-(rev)RLKmalectin\_3843

CGAAAGTGAAAAGTGACATGATACTACCTGGACAAAATAGAGTAGGAGTTATGATTGAATTTGAGGAC

ATTCATGTTGCGAGCGTATCTAGATGGCTACAGAGAAGCAAGCACTGTGCCA

>PGSC0003DMG400028454-(rev)RLKmalectin\_3904

TGAGGACATTCATGTTGCGAGCGTATCTAGATGGCTACAGAGAAGCAAGCACTGTGCCAGATTGATTGG

ATAGATGATCATTACGGTGTTTAACTTGGTGACGGTATAGTAACCATGCG

>PGSC0003DMG400028454-(rev)RLKmalectin\_4087

TGACACATCAGCTAGCTGGACAGCTATAGACTGTTTGACTTGACAGGTTAACAGGTATAGAGTGATGAT

ATCAACCCAACGCGGACTGTGATACGTGGCACATGTTGCCAAAAGATGC

>PGSC0003DMG400028454-(rev)RLKmalectin\_4148

GTGATGATATCAACCCAACGCGGACTGTGATACGTGGCACATGTTGCCAAAAGATGCTGGAGCCTGG

AAGAGAGTAAAAGAGTGATGCTGCTTTATCTGGAAAGAGACGAGCCTTATT

>PGSC0003DMG400028454-(rev)RLKmalectin\_4209

GAGCCTGGAAGAGAGTAAAAGAGTGATGCTGCTTTATCTGGAAAGAGACGAGCCTTATTATGAAAAAA  
ATGAAAAACTGTGTGGCAGGCAGCTTTAGATGGAAGCTATTAGATCTATAAC

>PGSC0003DMG400028454-(rev)RLKmalectin\_427

TCCAGATTTTCATACAGAACTGGAAACAACCTACCAAAGCTGTAAGATCTTTTCGAAATACCTTCCAAACTTCA  
AAATAATATTTTGGCAAGAGTTTCTAAACTTTTTCTTGACGATATCTGA

>PGSC0003DMG400028454-(rev)RLKmalectin\_4270

GAAAAAATGAAAAACTGTGTGGCAGGCAGCTTTAGATGGAAGCTATTAGATCTATAACAAGAAAGTA  
GTCTTTATATAGGAGTTTAGACAACCTAGGATACAAAATTTTATCTTTTCCTTT

>PGSC0003DMG400028454-(rev)RLKmalectin\_4392

ACTGAGATTTTTGAATAGGAAGAATTTTCGTATACTATTAATCTAGACATATTCTAACATCTCACTGAATAA  
GTTCTGTGACTTTCCACAAGATACCTACACAATATTCTTTGTACTTCA

>PGSC0003DMG400028454-(rev)RLKmalectin\_4453

CACTGAATAAGTTCCTGTGACTTTCCACAAGATACCTACACAATATTCTTTGTACTTCAGGAAAAATTAGT  
TTGGAAAGACTTCAATATTGTGAATGAGGCTGGTGGAGTTCAAACGCCT

>PGSC0003DMG400028454-(rev)RLKmalectin\_4514

AAAAATTAGTTTGAAAGACTTCAATATTGTGAATGAGGCTGGTGGAGTTCAAACGCCTCTGGTTAGGC  
ATTTTAAAACCAGTGTGACAGATAATTTTTTGGAGATTTCGATTTTACTGGG

>PGSC0003DMG400028454-(rev)RLKmalectin\_4575

GGTTAGGCATTTTAAAACCAGTGTGACAGATAATTTTTTGGAGATTTCGATTTTACTGGGCTGGCAAAGG  
AACTATCAGAATCCCAGTTAGAGGGCATTACGGTCCCCTAATATCTGCAAT

>PGSC0003DMG400028454-(rev)RLKmalectin\_4636

GGCAAAGGAACCTATCAGAATCCCAGTTAGAGGGCATTACGGTCCCCTAATATCTGCAATCTCACTCAAAC  
CAAGTAAGTTTCTTCAATATTCATCATTTTAAGGGGAATATCATAGTATA

>PGSC0003DMG400028454-(rev)RLKmalectin\_4697

CACTCAAACCAAGTAAGTTTCTTCAATATTCATCATTTTAAGGGGAATATCATAGTATATCTGCTTTTACA  
CTTCTCACTTTGGTTTCCTTCAAGTATATTGTGTATTTAAGCATGTCTC

>PGSC0003DMG400028454-(rev)RLKmalectin\_4758

TGCTTTTACACTTCTCACTTTGGTTTCCTTCAAGTATATTGTGTATTTAAGCATGTCTCAGTGAGAACTAAC  
ACAAAAAGGCATGTATCAGTGTAACCTTTAAAGTCCCAAGAGATATTC

>PGSC0003DMG400028454-(rev)RLKmalectin\_4819

TGAGAACTAACACAAAAAGGCATGTATCAGTGAAACTTTAAAGTCCCAAGAGATATTCTAGAGATCGT  
ACATATCATATGAGCAGGTTTCATACATGATAAATTTAATTGTTTTAGAAAG

>PGSC0003DMG400028454-(rev)RLKmalectin\_4880

GAGATCGTACATATCATATGAGCAGGTTTCATACATGATAAATTTAATTGTTTTAGAAAGAAATACTGCAA  
TTGAATGCATGATTACATGCTCTGTTTGCTTATTTGTGGGGTTGACATTG

>PGSC0003DMG400028454-(rev)RLKmalectin\_4941

ATACTGCAATTGAATGCATGATTACATGCTCTGTTTGCTTATTTGTGGGGTTGACATTGTTTATCAACTTC  
CGTTGTATAAGATAAAAATTGCTGCTATCTAACATGATCCATGTTAATAT

>PGSC0003DMG400028454-(rev)RLKmalectin\_5002

TATCAACTCCGTTGTATAAGATAAAAATTGCTGCTATCTAACATGATCCATGTTAATATTGTTGAAGTGTG  
TGACCATCTCATCTGGTCTGATACCATATTGAAGTGTGTGATCATCTCA

>PGSC0003DMG400028454-(rev)RLKmalectin\_5124

TAAAAGCTTAAGCTACTAGAGAGAGCACACTTTAACAGTTAATTATATTCTCAACAAATATGTGGAAAAT  
TCTGATATTTTTTTTGGCATTTCACCGTGCTATTTGAACACCAGTTGGC

>PGSC0003DMG400028454-(rev)RLKmalectin\_5185

GTGGAAAATTCTGATATTTTTTTTGGCATTTCACCGTGCTATTTGAACACCAGTTGGCGTCTGAAATTGC  
AAAAGATAAATGGTTGGCTATCTCTCTCAACCATTGATTTGCTTTGGTC

>PGSC0003DMG400028454-(rev)RLKmalectin\_5246

CTGAAATTGCAAAAGATAAATGGTTGGCTATCTCTCTCAACCATTGATTTGCTTTGGTCTCTTAGAGTTG  
CAACTTGCAACATTTATCTAGAGATCAAGTAAACTATTATCAGCACCAA

>PGSC0003DMG400028454-(rev)RLKmalectin\_5307

TTTAGAGTTGCAACTTGCAACATTTATCTAGAGATCAAGTAAACTATTATCAGCACCAAAGCCAATCTG  
CGGCTTTAACTTAGCCTGCTCCGAATGATTGAAAGAGTAATTTTTCAATA

>PGSC0003DMG400028454-(rev)RLKmalectin\_5368

GCCAATCTGCGGCTTTAACTTAGCCTGCTCCGAATGATTGAAAGAGTAATTTTTCAATAGCTTTCTAATT  
TTTTACTGGGCAAAGTATTTTTTTGAAACTAAGCTATTAAAGTTCATA

>PGSC0003DMG400028454-(rev)RLKmalectin\_549

GGAGATGCATGCCACCGGACTAGAGGGTCCCATTCCAACAAACATATCTCTTCTGAATAAGTTAACAGA

TTTGTGAGTAGAGAACCTTACAACATTATCTTAACTAATTTTTATTAGATT

>PGSC0003DMG400028454-(rev)RLKmalectin\_5551

TATAAACTTCGATGTTTACCAGGTGATAGAATATTTGTATTGTGGTTATTCAACCAGGCTCTTCTTTTCG

GCCTTCCAATAGATAGTTTTAAGCTCTAAATACCTTTCCTATTCCCTATT

>PGSC0003DMG400028454-(rev)RLKmalectin\_5612

CTTCTTTTCGGCCTTCCAATAGATAGTTTTAAGCTCTAAATACCTTTCCTATTCCCTATTGCTATTTTCTTTTC

ATCTAAAAAATAAGTAGGAGTTAAATCTCTTCTGGTATGTCCGATG

>PGSC0003DMG400028454-(rev)RLKmalectin\_5673

TATTTTCTTTTCATCTAAAAAATAAGTAGGAGTTAAATCTCTTCTGGTATGTCCGATGTAGGCATACATT

TTATAACTGTTTTCTCTCCTTTTTGGTTATTGATTCAAAGGGTCATTCT

>PGSC0003DMG400028454-(rev)RLKmalectin\_5734

GGCATACATTTTATAACTGTTTTCTCTCCTTTTTGGTTATTGATTCAAAGGGTCATTCTATATGGCCAAGG

AAATCCATTTTCGTAATTTTGGTTGAATTAACAGACAGAAATTCTCAGC

>PGSC0003DMG400028454-(rev)RLKmalectin\_5795

ATGGCCAAGGAAATCCATTTTCGTAATTTTGGTTGAATTAACAGACAGAAATTCTCAGCTTGAAGGAGTG

TTGGATGAGTGCCCATGTATTTTCTTTGCTATTATTTTCCCATGAATAA

>PGSC0003DMG400028454-(rev)RLKmalectin\_5856

GAAGGAGTGTTGGATGAGTGCCCATGTATTTTCTTTGCTATTATTTTCCCATGAATAATATGCATGTTGA

TATTCATATTCTATGTAATCAACTGGAAGAATCTTATTTTCTATTGCC

>PGSC0003DMG400028454-(rev)RLKmalectin\_5917

TGCATGTTGATATTCATATTCTATGTAATCAACTGGAAGAATCTTATTTTCTATTGCCCTGCTGTTGCATA

CACTTAACAATCTAGTCTTCATTTCTGTGCAGCTTTTGGATCTTGTC

>PGSC0003DMG400028454-(rev)RLKmalectin\_5978

GCTGTTGCATACACTTAACAATCTAGTCTTCATTTCTGTGCAGCTTTTGGATCTTGTTTCAGAGGAAGATAA

AAAGAATAAAAAGAGTGCGACTGTTTATGTTATTGTTGGAGTAGTGGCT

>PGSC0003DMG400028454-(rev)RLKmalectin\_6039

AGGAAGATAAAAAGAATAAAAAGAGTGCGACTGTTTATGTTATTGTTGGAGTAGTGGCTACATGCATT

TCCTGTTGTTAATAAGCACGCTTTGGTGGAAAGGATATCTTCAATGCAAAA

>PGSC0003DMG400028454-(rev)RLKmalectin\_61

GCAGTGTTCTTCTGAACTAGGGAAATTGATCTACTTGCAAACCCTGTAAGACCTCTCATTCTCTTCCAC  
TTTGTTATCTTCTCCTAAAGCAAACCTGAAGAATACTTGGCATTGGCA

>PGSC0003DMG400028454-(rev)RLKmalectin\_6100

ATGCATTTTCCTGTTGTTAATAAGCACGCTTTGGTGGAAAGGATATCTTCAATGCAAAAAGAAACAGAG  
AAAAGGTAATCACTGAACAGATGTTAGAATGAAGTAATTTTAACTAGCAAA

>PGSC0003DMG400028454-(rev)RLKmalectin\_6161

AAACAGAGAAAAGGTAATCACTGAACAGATGTTAGAATGAAGTAATTTTAACTAGCAAATTTTGTGACT  
AGGCAGCTAGCTGATCCATGCATTACTGATTTGAAAGAGCACAATCTACTG

>PGSC0003DMG400028454-(rev)RLKmalectin\_6222

TTGTGACTAGGCAGCTAGCTGATCCATGCATTACTGATTTGAAAGAGCACAATCTACTGAAATGATAATC  
AAAGAAAACCTCCATATCCAGAAGTTGTGAGTTATAAATAGATGACTAACC

>PGSC0003DMG400028454-(rev)RLKmalectin\_6283

ATGATAATCAAAGAAAACCTCCATATCCAGAAGTTGTGAGTTATAAATAGATGACTAACCAGTAAAGTTTC  
TCTATTTCCATGACAGATTTAGAGGGCATGGAGCTGCAGACCATTTCTTT

>PGSC0003DMG400028454-(rev)RLKmalectin\_6527

ATCATTATTGGTTGTGAACTCTGACCAAATATTTTATGTAGGGCCGGTTATCTGATGGTACTTTAGTTGCA  
GTGAAGCAGCTCTCGCGTCAATCAAGACAGGGGAACCGTGAATTTTGA

>PGSC0003DMG400028454-(rev)RLKmalectin\_6771

ATTATTTTCGTAAGTTATTCAATCTCTTTTAAAAAAGTTCCTAAACTATTACTAACTCTCTATGAAAATGTCC  
ATTAAAATTTTAGCATGTTGGATAACTTTAGATTAGAGAAAAGTCAG

>PGSC0003DMG400028454-(rev)RLKmalectin\_6832

TGAAAATGTCCATTAAAATTTTAGCATGTTGGATAACTTTAGATTAGAGAAAAGTCAGTTGATGCTTGA  
TTGGCCGACAAGGTTCAAGATTTGTGTTGGGATCGCTAAAGGTCTGGCTT

>PGSC0003DMG400028454-(rev)RLKmalectin\_732

ACATAGGTGGACCAGTTCAGGCATTTCTTCACTGGGTGATATAATGGGATTCCATAACTTGTATGTCAA  
ATTATACCGATATGTGGAAACCGTTGCACAGTTATAGTGTGCTATTAAGT

>PGSC0003DMG400028454-(rev)RLKmalectin\_7381

CTTTTCCTTTTGTAAATGCACTTCAACAAAGCCTGACTCGTCTACCATTTATAAGATTGAGAATCCTTGAA  
CATTTTAAACCATGAACCTCCCGCACTCCCTTTGAAGTTGCTAGCTTA

>PGSC0003DMG400028454-(rev)RLKmalectin\_7442

GAATCCTTGAACATTTTTAACCATGAACCTCCCGCACTCCCTTGAAGTTGCTAGCTTATAAACTCTATT  
GCAGGCCTGTCACTTGCTGCAAAATGGAAAAATAGAGGAGCTGATTGAT

>PGSC0003DMG400028454-(rev)RLKmalectin\_7503

AAACTCTATTGCAGGCCTGTCACTTGCTGCAAAATGGAAAAATAGAGGAGCTGATTGATGATAAATTGG  
GTTCTCAGTTTAGCAAAGCAGAAGCCGAAAGGACAATAAAAGTAGCACTAT

>PGSC0003DMG400028454-(rev)RLKmalectin\_7564

TAAATTGGGTTCTCAGTTTAGCAAAGCAGAAGCCGAAAGGACAATAAAAGTAGCACTATTATGCACTAG  
TGCGACGCCATCACTCAGGCCTGTAATGTCTGAGGCTGTAGGCATGCTTGA

>PGSC0003DMG400028454-(rev)RLKmalectin\_7686

GAAAAATAGATGCCCTGATAGTATCCCAGAAGCAAGTATGTATACTGACGATTTGAGATTTCAAGCCTT  
GAAAGATTTCCAACAAGAGAGGCTAAATCAAAGTGCATCAAGTAATCAAG

>PGSC0003DMG400028454-(rev)RLKmalectin\_793

GTATGTCAAATTATACCGATATGTGGAAACCGTTGCACAGTTATAGTGTGCTATTAAGTATTCTAGCTTTC  
CTTAAGCTAATTAATATGGATACAGGGTATTAAGAAACTGCAGCCTTT

>PGSC0003DMG400028454-(rev)RLKmalectin\_7930

GGCTCATGAGGGATTGCATTGGTTCAAAGCCATTCATCGAGGTATGATTGTTGTAAGTTGTAAGTATTG  
TTCAATTTTTGTGAGTAAGATTTCTAAATGTACATAAATTAATTAATCCCTA

>PGSC0003DMG400028454-(rev)RLKmalectin\_7991

AACTATTTGTTCAATTTTTGTGAGTAAGATTTCTAAATGTACATAAATTAATTAATCCCTAGAAAAAGTGTGA  
GGAGTTATATTTCTCCAGCTCTGCATTTTTGCACCTCCTAGCTAGATTT

>PGSC0003DMG400028454-(rev)RLKmalectin\_8091

TGCACCTCCTAGCTAGATTTCAAAGTTGTATAAAATTCTGCCCCATTGTGATATACTGAAATGTAGACTA  
TATGGTCCTTCTGTAAACAAAAAGGATTCATTGTTCAATTTGTGTCAG

>PGSC0003DMG400028454-(rev)RLKmalectin\_976

TATTCCTTTGCACCTAATGTTCAAACCTTCTCAGCTGCATTCAAATACATGGTATTAAATAGAGAGAGA  
GAGAGCTATTACATGATTTTCTGCCTTCCTCCTCTGTCCGTGACCTTTG

>PGSC0003DMG400028461-(rev)G-LecRK\_0

AAATACAACATCAGCTTCAAATCATCTTTACCCTATCCAGACAAGTAGTTAAGCAGATGGGAATAGATAC

ATTTGATGATCGTCAAGTCATTGATATAAATTAGAGATTTACAGATGA

>PGSC0003DMG400028461-(rev)G-LecRK\_124

TTCGTATGTATAAGAATTCTTTCCCTTGAAATATGTTTTTGGTCAATGAACATTTTAGTTTTTTGTCTA  
AACAGAATCATGGCTTTACCCTCTGTCAAACATTTGTTGAAGCTTTTG

>PGSC0003DMG400028461-(rev)G-LecRK\_186

TTTTGTCTAACAGAATCATGGCTTTACCCTCTGTCAAACATTTGTTGAAGCTTTTGATCATTGTGCTCCT  
TGAGAACCTTACTTTGGCTCAATTTCTGATTATCACACAGTGAAAAT

>PGSC0003DMG400028461-(rev)G-LecRK\_248

TTGTGCTCCTTGAGAACCTTACTTTGGCTCAATTTCTGATTATCACACAGTGAAAATACCCACAACGTGG  
ATAACAATAATGTATCGTCTATCAATGTTACAAAGCCCTTGACATGGC

>PGSC0003DMG400028461-(rev)G-LecRK\_2728

AGTCAATAGAGAAAAGAAAATCCCCCTCCTTATCTTATTTCTGTCTGATCCCATGATCATCATTGTTGT  
ATAGCTATTTATTGGTTTCATTTGTGTTGTTTTCTGTGACTCAGTAA

>PGSC0003DMG400028461-(rev)G-LecRK\_496

ATTGGAATTATACGTCTTCGTCAGGACTTTCTAGGAGCTCAGCGCTGGACTGACCTTGAGCTGGTCTGGT  
TTGCAAACAGAAACCATCCAATTCATGAAAATGGAACGCTGCAATTGTTG

>PGSC0003DMG400028461-(rev)G-LecRK\_558

GGTCTGGTTTGCAAACAGAAACCATCCAATTCATGAAAATGGAACGCTGCAATTGTTGCAAGATGGAGA  
TTTAGTGTTAAAGATGTGGATGGAACCTTGTATGGTCTACAGGCACCGC

>PGSC0003DMG400028461-(rev)G-LecRK\_62

ATAGATACATTTGATGATCGTCAAGTCATTGATATAAATTAGAGATTTACAGATGAACTATTCGTATG  
TATAAGAATTCTTTCCCTTGAAATATGTTTTTGGTCAATGAACATTTT

>PGSC0003DMG400028461-(rev)G-LecRK\_744

TCAGACTGTCTGGCAGTCTTTTGATCATCCAACAGATGCATTGCTTCCAGGCCAGAAATTAAGGTCTGGT  
CAAAGACTTGCGGCTAGAGTTTCTTCGTCCAATTGGAGTGAAGGTAECTA

>PGSC0003DMG400028461-(rev)G-LecRK\_806

GGTCTGGTCAAAGACTTGCGGCTAGAGTTTCTTCGTCCAATTGGAGTGAAGGTAECTACTATATCTCTGT  
AACCAATCAAGGCTTGTTCATTTACATATCAGACAAGCCGCAGATGT

>PGSC0003DMG400028473-(rev)LRR-RLKs\_1098



TGAATGATAACAAGCTTGAAGGACCTTTACCAAGACAGGTTGGAAATTTTACTATGCTTGCCTGGTTTGA  
TCTTTCCAATAATTACCTGGCAGGTACGGGGAAAAAATCTAATTCAAGTC

>PGSC0003DMG400028473-(rev)LRR-RLKs\_1159

CTGGTTTGATCTTTCCAATAATTACCTGGCAGGTACGGGGAAAAAATCTAATTCAAGTCATGTTAGAATT  
TTTTGTTTTTTGGGATACGTCTTCTGATCATAATTATACTGAATTTTTCA

>PGSC0003DMG400028473-(rev)LRR-RLKs\_1220

GTTAGAATTTTTGTTTTTTGGGATACGTCTTCTGATCATAATTATACTGAATTTTTCAGGTGTAATTCCAC  
ATGAAGTTGGTAACCTTCAAGAGTTGACAGACCTTCCATTGTTTTACA

>PGSC0003DMG400028473-(rev)LRR-RLKs\_1647

ATTGAGCTTCATTACTCCTTTGGCCAATTGTAAACACTTGAGAATATTGATATTGTCTTTCAATCCTCTAAA  
TTCAATGCTCCCGAGATCCATTGGCAACATCTCTTCTCTTCAATCATT

>PGSC0003DMG400028473-(rev)LRR-RLKs\_183

GGTACTATCCCGCCACAACCTTGGCAACCTCTCCTTTCTTGTTCCTTACTTGATCTAAGCAAAAATGATTTCTGT  
GGTGAACCTCCATCAGAATTTTCTCATTTACGGAGATTGAGAGTCATT

>PGSC0003DMG400028473-(rev)LRR-RLKs\_1891

TTGAAAAACCTGCAACGGCTTTTTCTTGATGCAAACAGAATAACTGGTCCTTTCCCAATTGTTTTATGTGA  
GCTACCCCACTTGGGGATACTAAGCCTTTCACAAAATAAAATTTGGGGA

>PGSC0003DMG400028473-(rev)LRR-RLKs\_1952

TTTTATGTGAGCTACCCCACTTGGGGATACTAAGCCTTTCACAAAATAAAATTTGGGGAGATATTCCTAG  
TTGCTTGGGGAACATGACATCCCTAAGGGAGGTTTATCTTGATTCCAATA

>PGSC0003DMG400028473-(rev)LRR-RLKs\_2013

TATTCCTAGTTGCTTGGGGAACATGACATCCCTAAGGGAGGTTTATCTTGATTCCAATAACCTCACTGCTA  
GCATACCTTCAAGTCTATGGAACCTCAAAGACATTTTGAAGATGAACTT

>PGSC0003DMG400028473-(rev)LRR-RLKs\_2074

CTCACTGCTAGCATACCTTCAAGTCTATGGAACCTCAAAGACATTTTGAAGATGAACTTGTCTTCTAATTC  
CTTCATTGGATCTCTACCACTAGAAGTTTGAAACCTCAAAGCTGCACTA

>PGSC0003DMG400028473-(rev)LRR-RLKs\_2196

TCTGGATCTTTCCAGGAACCAAATATCAGGCAACCTTCCAAGTACATTGGGAGGTCTACAGAAATTGATT  
CAACTATCTTTGGCTCATAACGGAATTGAAGGATCTATTCCTGAGACATT

>PGSC0003DMG400028473-(rev)LRR-RLKs\_2318

GGGAACTCCTAAGTTTGGAAACATTAGATCTTTCATATAACAAAATGTCTGGTGTGATTCCAAAGTTATT  
AGAGGCACTTAAGCAGCTAAACTCCTTTAATGTCTCATTCAATAGGTTAG

>PGSC0003DMG400028473-(rev)LRR-RLKs\_2379

AAAGTTATTAGAGGCACTTAAGCAGCTAAACTCCTTTAATGTCTCATTCAATAGGTTAGATGGGGAAATT  
CCGAGTGGGGGACCTTTTCTTAATCTCCCTTACCAGTCTTTCATGTGCGAA

>PGSC0003DMG400028473-(rev)LRR-RLKs\_244

ATGATTTCTGTGGTGAACCTCCATCAGAATTTTCTCATTTACGGAGATTGAGAGTCATTAAACTTAGTTAC  
ATCAACTTCACCGGAGAAATTTCAATTGGAATAGCCCCTCTTCCGAGTT

>PGSC0003DMG400028473-(rev)LRR-RLKs\_2562

GTCTAAGTCGAAGAAAAGAAATCTGATATGGATTATAGTTGCCTCTTCAGTTATCTCTGTAATAGGGCTT  
GCTTCAGCAATAGTTTTTCATGTTGATGAGACGCGGGGGTAAAACGATCAA

>PGSC0003DMG400028473-(rev)LRR-RLKs\_2623

ATAGGGCTTGCTTCAGCAATAGTTTTTCATGTTGATGAGACGCGGGGGTAAAACGATCAATGTTGAAGTT  
GAGTGGTCTCCTGAGGTAGCACCACAAAGATTTTCTTACTATGAACTTCAA

>PGSC0003DMG400028473-(rev)LRR-RLKs\_2867

GAACATTTCAAACCTTTGATAGAGAGTGTGAAATCTTGCGGAATCTTCGTCACAGAAATCTCACAAAGAT  
CATTAGCAGCTGTTTTAACTTGGATTGCTCCAGGTGAATTCTTTATTTAA

>PGSC0003DMG400028473-(rev)LRR-RLKs\_2928

CACAAAGATCATTAGCAGCTGTTTTAACTTGGATTGCTCCAGGTGAATTCTTTATTTAACTAGTAACAATG  
TTATGGTTTAATGCATTAATAAATGCTGACTTATTTCTTTTTTCTTTTT

>PGSC0003DMG400028473-(rev)LRR-RLKs\_2989

AGTAACAATGTTATGGTTTAATGCATTAATAAATGCTGACTTATTTCTTTTTTCTTTTTAGAGTATGGTCTG  
GAAGGCCTTATATCCAAGAGGTCTGACGTTTATAGTTTTGGCATCATG

>PGSC0003DMG400028473-(rev)LRR-RLKs\_305

ACTTAGTTACATCAACTTCACCGGAGAAATTTCAATTGGAATAGCCCCTCTCCGAGTTTGATACGGTTTT  
CCATGGGATAACAATAAATTAATCAATGGCTCCAATGTGCTCTCTAAATT

>PGSC0003DMG400028473-(rev)LRR-RLKs\_3050

AGTATGGTCTGGAAGGCCTTATATCCAAGAGGTCTGACGTTTATAGTTTTGGCATCATGCTGTTGGAAAC

TTTTACCAAGAAGAAACCCAGTGATGAAAAGTTCGCAGGAGATTTGAATT

>PGSC0003DMG400028473-(rev)LRR-RLKs\_3111

GTTGAAACTTTTTACCAAGAAGAAACCCAGTGATGAAAAGTTCGCAGGAGATTTGAATTTGAGATGCTG

GGTGCATAATTCCTTCTGATGAGTTGGATCAAATCATAGATGCTGACTT

>PGSC0003DMG400028473-(rev)LRR-RLKs\_3172

AGATGCTGGGTGCATAATTCCTTCTGATGAGTTGGATCAAATCATAGATGCTGACTTACTAACAGTCA

ATGAACAAAACCTTAAGTCAAAAGCTGCAATGTGTGTCATCCATTATGGAG

>PGSC0003DMG400028473-(rev)LRR-RLKs\_3233

TAACAGTCAATGAACAAAACCTTAAGTCAAAAGCTGCAATGTGTGTCATCCATTATGGAGTTAGCCATGAA

TTGCACAACTAGTATTCCAGTTGAAAGGATGAACATGACTGATGTTGTAG

>PGSC0003DMG400028473-(rev)LRR-RLKs\_3294

AGCCATGAATTGCACAACTAGTATTCCAGTTGAAAGGATGAACATGACTGATGTTGTAGAAACATTGAA

CAAGATCAAACAAAAGCTTTCTTACTGTTATTGAACTACCTAACAACATGA

>PGSC0003DMG400028473-(rev)LRR-RLKs\_3355

ACATTGAACAAGATCAAACAAAAGCTTTCTTACTGTTATTGAACTACCTAACAACATGACATCAGGTGCT

TTTCATATCCCTTCTGAAAAGAACGAGGTTATAAGTTCAGTAGCATTGA

>PGSC0003DMG400028473-(rev)LRR-RLKs\_3416

TCAGGTGCTTTTCATATCCCTTCTGAAAAGAACGAGGTTATAAGTTCAGTAGCATTGACCATCAGTAAG

TGTTCTTGTATTGTCAGGAGATTATGTGGCTATTGGAAGTTAAAAGGAT

>PGSC0003DMG400028473-(rev)LRR-RLKs\_3477

ATCAGTAAGTGTTCCTTGTATTGTCAGGAGATTATGTGGCTATTGGAAGTTAAAAGGATTGAAGTTCATA

TACTTCTTACGTCAAGAAGTTGCTATGATTTTGGGACTACGTACTATTAT

>PGSC0003DMG400028473-(rev)LRR-RLKs\_3538

AAGTTCATATACTTCTTACGTCAAGAAGTTGCTATGATTTTGGGACTACGTACTATTATAAAAAGCCGAT

GATAGCTTGTGTAATCTTCTTTCTTGTGTAAACCAAGAGGGCCTTT

>PGSC0003DMG400028473-(rev)LRR-RLKs\_3599

AAAGCCGATGATAGCTTGTGTAATCTTCTTTCTTGTGTAAACCAAGAGGGCCTTTCCATAACCTGAT

GTTCTAAGCACCTTCCAATTTGATGATACAAGGAATGTAAGCCATTTA

>PGSC0003DMG400028473-(rev)LRR-RLKs\_3660

ATAACCTGATGTTCTAAGCACCTTCCAATTTGATGATACAAGGAATGTAAGCCATTTAAATAAACTATG  
TTGAATCCATTGTATATATCTCAAGTTCTCCCAAGTATTCAACTGACTTA

>PGSC0003DMG400028473-(rev)LRR-RLKs\_3721

TAAACTATGTTGAATCCATTGTATATATCTCAAGTTCTCCCAAGTATTCAACTGACTTAAAAAATTTCTCC  
AAAGAATAGAGCAGCAAGATATGCATATTCCTTGATAGTTTTCACTAG

>PGSC0003DMG400028473-(rev)LRR-RLKs\_3782

AAAATTTCTCCAAAGAATAGAGCAGCAAGATATGCATATTCCTTGATAGTTTTCACTAGTTACTTTGACAT  
CGGAGTTCCTTTCTGTTACTGATCTATCCATATATATATAGTCAACTAG

>PGSC0003DMG400028473-(rev)LRR-RLKs\_3843

ACTTTGACATCGGAGTTCCTTTCTGTTACTGATCTATCCATATATATATAGTCAACTAGTCAAGGTTTTACC  
TTGTTATGGCATTGAACATGCATGAAGGAGAAGTTTCATACAGCCACA

>PGSC0003DMG400028473-(rev)LRR-RLKs\_3904

AAGGTTTTACCTTGTTATGGCATTGAACATGCATGAAGGAGAAGTTTCATACAGCCACAGATAAATGAA  
GGGTAAACAAGAAAATATCTTAGGCAGAAAGGGAGTTGAATTTGAAGTTCT

>PGSC0003DMG400028473-(rev)LRR-RLKs\_3965

TAAATGAAGGGTAAACAAGAAAATATCTTAGGCAGAAAGGGAGTTGAATTTGAAGTTCTTGATTTGTAC  
AGTCAAGGGTGTATGAACTGGGTGCCAAAGAGGGCAACTAGTGGGGCAAAT

>PGSC0003DMG400028473-(rev)LRR-RLKs\_4026

ATTTGTACAGTCAAGGGTGTATGAACTGGGTGCCAAAGAGGGCAACTAGTGGGGCAAATAGTGAGTCG  
AAAAAGGGTTGTAAATTTCCAGAGTCAACTCAAATAGTTTATTTATTAATG

>PGSC0003DMG400028473-(rev)LRR-RLKs\_4087

TGAGTCGAAAAAGGGTTGTAAATTTCCAGAGTCAACTCAAATAGTTTATTTATTAATGACTGCATGAAG  
CCTGGAATAAATTCATTAATTCAAATAGTTTAGGGTATTGATGCAAAGAT

>PGSC0003DMG400028473-(rev)LRR-RLKs\_4148

TGCATGAAGCCTGGAATAAATTCATTAATTCAAATAGTTTAGGGTATTGATGCAAAGATCCAACCTAGGA  
AAGTTAACGACCTAGCTAGAGAGTCAACTCTTATTCCACTCTTTTGTATG

>PGSC0003DMG400028473-(rev)LRR-RLKs\_4209

AACCTAGGAAAGTTAACGACCTAGCTAGAGAGTCAACTCTTATTCCACTCTTTTGTATGTCTGTATACTGA  
TAACCACAAACAAATTTCTATGCCAAAATCTAGATAGCTGTGTTTAGC

>PGSC0003DMG400028473-(rev)LRR-RLKs\_4270

TGTATACTGATAACCACAAACAAATTTTCTATGCCAAAATCTAGATAGCTGTGTTTAGCAACATCTCACCA  
TTAGCAAAGTTTCCTTCTCTTTAAGTAACAGATTAATTTAGTTCAATAT

>PGSC0003DMG400028473-(rev)LRR-RLKs\_4331

CATCTCACCATTAGCAAAGTTTCCTTCTCTTTAAGTAACAGATTAATTTAGTTCAATATATGGTGCAAAGT  
CAACTTCCTTAGTGGAGTAATATATTACTTAGGCCATAAACTTATATTT

>PGSC0003DMG400028473-(rev)LRR-RLKs\_4392

GGTGCAAAGTCAACTTCCTTAGTGGAGTAATATATTACTTAGGCCATAAACTTATATTTTAATGTATTAGC  
ATTTATTAGCTAGCTACCAGATCTTGAATAAATTTACTTGCACAATTA

>PGSC0003DMG400028473-(rev)LRR-RLKs\_4453

ATGTATTAGCATTTATTAGCTAGCTACCAGATCTTGAATAAATTTACTTGCACAATTAACGGACTAAATAG  
TTGCTAGAAGCATTTTACAATTCCAAGTATTATGTTGGTTTCAATAATA

>PGSC0003DMG400028473-(rev)LRR-RLKs\_4514

GACTAAATAGTTGCTAGAAGCATTTTACAATTCCAAGTATTATGTTGGTTTCAATAATATAGAACTATGTA  
CTAGCATTATATTTTCGATTATAAATCTAATCAGTTTCAATAGGTATAG

>PGSC0003DMG400028473-(rev)LRR-RLKs\_4575

GAACTATGTACTAGCATTATATTTTCGATTATAAATCTAATCAGTTTCAATAGGTATAGATCATTATATTG  
CTGCAATGATCAAACCAGAAAACATCAATGGAGAAAACATCCTCCTC

>PGSC0003DMG400028473-(rev)LRR-RLKs\_4636

CATTATATTGCTGCAATGATCAAACCAGAAAACATCAATGGAGAAAACATCCTCCTCCTCTTTCCGCT  
TCTAGAAATTTTATTAATATCTTTTCATGTTATAACGACATGCTTAGCC

>PGSC0003DMG400028473-(rev)LRR-RLKs\_4697

CCTTTCCGCTTCTAGAAATTTTATTAATATCTTTTCATGTTATAACGACATGCTTAGCCATGAATATCACTA  
TATCAGCACAGATCAATCTTCTTCTAGCCTTGAGAGAACACATCAC

>PGSC0003DMG400028473-(rev)LRR-RLKs\_4758

GAATATCACTATATCAGCACAGATCAATCTTCTTCTAGCCTTGAGAGAACACATCACTTCAGATACTAA  
TCACATTCTTGTGACAACTGGTCTTTTTCTAACTCAGTTTGTAAGTGG

>PGSC0003DMG400028473-(rev)LRR-RLKs\_4819

CAGATACTAATCACATTCTTGTGACAACTGGTCTTTTTCTAACTCAGTTTGTAAGTGGATTGGAATCACT

TGTAGCTCTCGTCATCACAGAGTTATTGAACTGAATATATCAGGTATGG

>PGSC0003DMG400028473-(rev)LRR-RLKs\_4880

TGGAATCACTTGTAGCTCTCGTCATCACAGAGTTATTGAACTGAATATATCAGGTATGGATATTACTGGT

ACCATCCCACCGGAACTTGGCAACCTCTCTTTTCTTGTTTCACTTGATCT

>PGSC0003DMG400028473-(rev)LRR-RLKs\_4941

ATTACTGGTACCATCCCACCGGAACTTGGCAACCTCTCTTTTCTTGTTTCACTTGATCTAAGCAAAAACAA

TTTCCATGGTGAACCTCCACCAGAGTTGCTTCGCGGAAGTTGAGAGACA

>PGSC0003DMG400028473-(rev)LRR-RLKs\_5002

GCAAAAACAATTTCCATGGTGAACCTCCACCAGAGTTGCTTCGCGGAAGTTGAGAGACATTGATCTTAGT

TACAACAACCTCCACCGGAGAAATACCAAAGGAATAGCCACTCTTCCAAA

>PGSC0003DMG400028473-(rev)LRR-RLKs\_5063

GATCTTAGTTACAACAACCTCCACCGGAGAAATACCAAAGGAATAGCCACTCTTCAAATTTGAAATGGT

TCATCTTGAGATGCAACAATTACTCAATATCTCATCTCTTGATTTCTG

>PGSC0003DMG400028473-(rev)LRR-RLKs\_5124

TGAAATGGTTCATCTTGAGATGCAACAATTACTCAATATCTCATCTCTTGATTTCTGGGAATCTTAGGA

AACCACATTTCCGGTAGTATTCCTTCCACTATAGGCAATGGCTTACCTA

>PGSC0003DMG400028473-(rev)LRR-RLKs\_5185

AATCTTAGGAAACCACATTTCCGGTAGTATTCCTTCCACTATAGGCAATGGCTTACCTAATATCGAAGGA

ATTTATCTAGTTGGAAATAACATCAATGGTGCTTTACCTAGTTCCATCTC

>PGSC0003DMG400028473-(rev)LRR-RLKs\_5246

ATCGAAGGAATTTATCTAGTTGGAAATAACATCAATGGTGCTTTACCTAGTTCCATCTCAAATTTGTCTAA

GCTTGAATTTCTCGAACTAGGTGGAAATGAACTTACGGGTTCAATTCCC

>PGSC0003DMG400028473-(rev)LRR-RLKs\_5307

ATTTGTCTAAGCTTGAATTTCTCGAACTAGGTGGAAATGAACTTACGGGTTCAATCCCCGAATCTCTAGG

AAATTTAAGACTACTTAGAAATCTCAACTTGTACGGTAACTCCTTCACAA

>PGSC0003DMG400028473-(rev)LRR-RLKs\_5368

ATCTCTAGGAAATTTAAGACTACTTAGAAATCTCAACTTGTACGGTAACTCCTTCACAAGTGAATTGAGC

TTCATTACTCCTTTGGCCAATTGTGAAAACATGACAAGATTGTTATTGCC

>PGSC0003DMG400028473-(rev)LRR-RLKs\_5429

GAATTGAGCTTCATTACTCCTTTGGCCAATTGTGAAAACATGACAAGATTGTTATTGCCTTTCAATCCCCT  
AAATGCAATGCTTCCAAAATCTGTTGGCAATCTTTCTTCTCTTAATTAT

>PGSC0003DMG400028473-(rev)LRR-RLKs\_5490

TCAATCCCCTAAATGCAATGCTTCCAAAATCTGTTGGCAATCTTTCTTCTCTTAATTATTTTTTCGGCAATAA  
GCTGTAACCTCAAGGGACAAATTCCAGATGAAATTGGAAATATGAGAA

>PGSC0003DMG400028473-(rev)LRR-RLKs\_5551

TTCGGCAATAAGCTGTAACCTCAAGGGACAAATTCCAGATGAAATTGGAAATATGAGAAAGTTATCTAC  
TTTGGAGTTGGATGACAATGACTTAACTGGAATTATCCCGACAACGATAAA

>PGSC0003DMG400028473-(rev)LRR-RLKs\_5612

TTATCTACTTTGGAGTTGGATGACAATGACTTAACTGGAATTATCCCGACAACGATAAATTCTTTGAAAA  
ACCTTCAACGGCTTTCACTTGGTGCAAACAGAATAAGTGGTCCTTTCCAA

>PGSC0003DMG400028473-(rev)LRR-RLKs\_5673

CTTTGAAAAACCTTCAACGGCTTTCACTTGGTGCAAACAGAATAAGTGGTCCTTTCCAAATTGTTTTATGT  
GAGTACCCAACCTGGGCATGCTAAACCTTTACAAAATCAAATGTGGG

>PGSC0003DMG400028473-(rev)LRR-RLKs\_5795

AATATTCCTAGTTGCTTAGGGGATGTGACTTCTCTAAGGGAGATTTATCTTGATTCCAATAACTTCTCTGC  
TAGCATACCTTCAAGTCTATGGAACCTCAAAGACATTTTAAAGTTGAAC

>PGSC0003DMG400028473-(rev)LRR-RLKs\_5856

ACTTCTCTGCTAGCATACCTTCAAGTCTATGGAACCTCAAAGACATTTTAAAGTTGAACTTGTCATCTAAT  
TTCTTCAATGGTTCTCTTCCACTAGAAGTTGGAACTTCGAGGCTGCAA

>PGSC0003DMG400028473-(rev)LRR-RLKs\_5917

GTCATCTAATTTCTTCAATGGTTCTCTTCCACTAGAAGTTGGAACTTCGAGGCTGCAACTCTTCTGGATC  
TTTCGAGAAACCATATCTCAGGCAACATTCCAAGTACATTGGGAGATCT

>PGSC0003DMG400028473-(rev)LRR-RLKs\_5978

CTTCTGGATCTTTTCGAGAAACCATATCTCAGGCAACATTCCAAGTACATTGGGAGATCTACAGAAATTGA  
CTCAACTATCTTTGGCTCATAACAGAATTGAAGGATCTATTCCTGACACA

>PGSC0003DMG400028473-(rev)LRR-RLKs\_6039

AGAAATTGACTCAACTATCTTTGGCTCATAACAGAATTGAAGGATCTATTCCTGACACATTTGGGGA  
CATAAATTTGGAAGCGATGGATCTCTCGTATAACAAAATGTCTGGTGTGA

>PGSC0003DMG400028473-(rev)LRR-RLKs\_610

ATAACTTTGTTGGAACAATTCCAAGAGATATAGGTAACCTGCATCAGCTGCAACATTTAGATCTTGCAGA  
TAACACGTAAAAGGTATGGCTTTACCATTTTTCTCGGGACATTAGATTTA

>PGSC0003DMG400028473-(rev)LRR-RLKs\_6100

TGGGGAACTCATAAATTTGGAAGCGATGGATCTCTCGTATAACAAAATGTCTGGTGTGATTCCAAAGTC  
ATTAGAAGAACTTAAGCAACTACGCTCCCTTAATGTCTCATTCAACAGGTT

>PGSC0003DMG400028473-(rev)LRR-RLKs\_6161

CCAAAGTCATTAGAAGAACTTAAGCAACTACGCTCCCTTAATGTCTCATTCAACAGGTTACATGGAGAAA  
TTCCGAGTGGAGGGCCATTTGTTAATCTCACTTACCAATCTTTCATGTCTG

>PGSC0003DMG400028473-(rev)LRR-RLKs\_6222

ATGGAGAAATCCGAGTGGAGGGCCATTTGTTAATCTCACTTACCAATCTTTCATGTCTGAATGAAGGATT  
GTGTGGTAACTCTCAAGAGCATTTCAGCTTGTCTTCTAATTCAAAGA

>PGSC0003DMG400028473-(rev)LRR-RLKs\_6283

TGAAGGATTGTGTGGTAACTCTCAAGAGCATTTCAGCTTGTCTTCTAATTCAAAGAATCATTCTGAGT  
CAAAGAAAAGAAGAATGATATGGATTGTAGTTGCCTTTTCAGTTATCTC

>PGSC0003DMG400028473-(rev)LRR-RLKs\_6344

CATTCTGAGTCAAAGAAAAGAAGAATGATATGGATTGTAGTTGCCTTTTCAGTTATCTCTGTGATAGTGC  
TAACTTCAGCAATAGTTTTCTGTGTTGATGAGACATCGGGGCATAACAGTC

>PGSC0003DMG400028473-(rev)LRR-RLKs\_6405

TGATAGTGCTAACTTCAGCAATAGTTTTCTGTGTTGATGAGACATCGGGGCATAACAGTCACTGCAGAAG  
ACGAGGGATTGCCTGAGGTAGTACCACAAAGAATATCTTACTATGAACTTC

>PGSC0003DMG400028473-(rev)LRR-RLKs\_6466

TGCAGAAGACGAGGGATTGCCTGAGGTAGTACCACAAAGAATATCTTACTATGAACTTCAAAGAGTGAC  
TCAGGGCTTTGATGAAATTAACCTGCTAGGTAGTGGAAGTTTTGGTTCTGT

>PGSC0003DMG400028473-(rev)LRR-RLKs\_6527

AGAGTGACTCAGGGCTTTGATGAAATTAACCTGCTAGGTAGTGGAAGTTTTGGTTCTGTTTACAAAGGG  
ACATTGGCAGATGGGATGATTGTAGCTGTTAAAGTTTTCAATGTGCAGATG

>PGSC0003DMG400028473-(rev)LRR-RLKs\_6588

ACAAAGGGACATTGGCAGATGGGATGATTGTAGCTGTTAAAGTTTTCAATGTGCAGATGGAAGGTACAT



TTCAAACCTTTGATAGAGAATGTGAACTCTTAAGGAATCTTCGTCACAGAA

>PGSC0003DMG400028473-(rev)LRR-RLKs\_6649

AGGTACATTTCAAACCTTTGATAGAGAATGTGAACTCTTAAGGAATCTTCGTCACAGAAATCTCACAAG

ATCGTTAGCAGCTGTAGTAACTTGGATTTCAAGGCATTGATACTTGAGTA

>PGSC0003DMG400028473-(rev)LRR-RLKs\_671

TCTTGCAGATAACACGTAAAAGGTATGGCTTTACCATTTTTCTCGGGACATTAGATTTAACTTATTTAAAA

GAAAATGTATTTTAGAGAGTTGAAGTGTTGGACAATCTTTAAAAAAT

>PGSC0003DMG400028473-(rev)LRR-RLKs\_6710

CTCACAAGATCGTTAGCAGCTGTAGTAACTTGGATTTCAAGGCATTGATACTTGAGTACATGCCAAATG

AGAGCTTAGACAAGTTGCTATATTCTAGAGATTTCTGTTCAAGTATGATG

>PGSC0003DMG400028473-(rev)LRR-RLKs\_6771

TGCCAAATGAGAGCTTAGACAAGTTGCTATATTCTAGAGATTTCTGTTCAAGTATGATGCAAAGATTGAA

TATCATGGTTGATATTGCATCTGCTCTGGAATATCTCCATCATGGTTACT

>PGSC0003DMG400028473-(rev)LRR-RLKs\_6832

AAGATTGAATATCATGGTTGATATTGCATCTGCTCTGGAATATCTCCATCATGGTTACTCAGTAGGAGTT

ATTCATTGTGATCTGAAGCCTAGCAACGTGTTACTTGACAACGACATGGT

>PGSC0003DMG400028473-(rev)LRR-RLKs\_6893

GTAGGAGTTATTCATTGTGATCTGAAGCCTAGCAACGTGTTACTTGACAACGACATGGTGGGACACCTG

ACTGACTTTGGCATTGCGAAACTTTTAACCAAAGAAGAATCTATTGCTCAC

>PGSC0003DMG400028473-(rev)LRR-RLKs\_6954

GACACCTGACTGACTTTGGCATTGCGAAACTTTTAACCAAAGAAGAATCTATTGCTCACACTAGTTACAT

TGATCCAGGTGAATGCTTTATTTAACTAGTATAACAGTGTTATGGTTTAA

>PGSC0003DMG400028473-(rev)LRR-RLKs\_7015

TAGTTACATTGATCCAGGTGAATGCTTTATTTAACTAGTATAACAGTGTTATGGTTTAAATGTGTTAAAAAT

GCTGACATAATTTATTTTTTATTTTCTAGAGTATGGTCTGGAAGGCCTT

>PGSC0003DMG400028473-(rev)LRR-RLKs\_7076

TGTTAAAAATGCTGACATAATTTATTTTTTATTTTCTAGAGTATGGTCTGGAAGGCCTTATATCCAAGAGG

TCTGATGTTTATAGTTTTGGTATCATGCTGTTGGAAACTTTTACCAAGA

>PGSC0003DMG400028473-(rev)LRR-RLKs\_7126

GAAGGCCTTATATCCAAGAGGTCTGATGTTTATAGTTTTGGTATCATGCTGTTGGAAACTTTTACCAAGA  
AGAAACCCAGTGATGAAATGTTTCGCGGGAGATTTGAATTTGAGAAGCTAG

>PGSC0003DMG400028473-(rev)LRR-RLKs\_793

GAGTATTTTTTAATAGTAGCATAAGAAGATTTGTTTGTTCCTACTAATTGCTCCGTCACCTTCTCCTCTCGC  
TTTGTATACTTGTAGCCGGTTTGACCAATCTCCGGCATAACCCATTTG

>PGSC0003DMG400028473-(rev)LRR-RLKs\_854

TCTCCTCTCGCTTTGTATACTTGTAGCCGGTTTGACCAATCTCCGGCATAACCCATTTGGAAGTTAAGCTC  
TTGTTAAATATATGATTTTTATGTGATATTTCTGTTTAAACAATATGACA

>PGSC0003DMG400028474-(rev)LRR-RLKs\_1037

ACTTTAATTTTCAGTTTCGACAAGAGGTTAAGTGTTCAATTTTCCTCTCTTAAACAAGCATATGTATGGTTT  
TGACCTGGTGTGAGAATTTGTTACATCACCTTTGCTTATACCTGTCTG

>PGSC0003DMG400028474-(rev)LRR-RLKs\_1098

ATGTATGGTTTTGACCTGGTGTGAGAATTTGTTACATCACCTTTGCTTATACCTGTCTGTTAAATTATTTAA  
TGAGGTATTGAGATTGGTTCAACTTAATTCCTTAAGACTTTCATTCTGA

>PGSC0003DMG400028474-(rev)LRR-RLKs\_1159

AAATTATTTAATGAGGTATTGAGATTGGTTCAACTTAATTCCTTAAGACTTTCATTCTGATAATTTTGCATA  
ACAATTTGACAGGCACAATTCCCAATGAAATTGGTCATCTTCATAACTT

>PGSC0003DMG400028474-(rev)LRR-RLKs\_1342

TTCATCACTTCAAGTTTTATCAATGTGGGACAACAAGCTTGAAGGGCCTCTACCAAGAGAGGTTGGAAA  
TTTACTATGGTTAACGTACTTGATCTTGAATGAATAGCTTGACGGGTAT

>PGSC0003DMG400028474-(rev)LRR-RLKs\_183

TTATCAAATTCTTTCAACAAACTGGTCTTCTTCTGCCTCTGTTTGTAAGTGGATTGGTGTCACTTGTGGCTC  
TCGTCATCAACGAGTTACTTTACTCAATATTTAGACATGGGATTTTC

>PGSC0003DMG400028474-(rev)LRR-RLKs\_2074

CAAATGAAATTGGAAATTTGAGAAATTTATCTTATTTGAAGCTGGATGAAAATGACTTTACTGGAATTGT  
CCCTTCGACAATAAGTTCTTTGGAAAACTTCAACAGTTTTCACTTAGTG

>PGSC0003DMG400028474-(rev)LRR-RLKs\_2135

TGGAATTGTCCCTTCGACAATAAGTTCTTTGGAAAACTTCAACAGTTTTCACTTAGTGCAAACAGAATA  
AGTGGTCCTTTCCCAATTGTTTTATGTGAGCTACCCAACCTGGGCATGCT

>PGSC0003DMG400028474-(rev)LRR-RLKs\_2196

AACAGAATAAGTGGTCCTTTCCCAATTGTTTTATGTGAGCTACCCAACCTGGGCATGCTAAACCTTTCACA  
AAACCAAATGTGGGGAAGTATTCTAGTTGCTTAGGAGATGTGACTTCT

>PGSC0003DMG400028474-(rev)LRR-RLKs\_2257

ACCTTTCACAAAACCAAATGTGGGGAAGTATTCTAGTTGCTTAGGAGATGTGACTTCTCTAAGGGAGA  
TTTATCTTGATTCCAATAACTTTACTGCTAGCATACCATCAAGTCTATGGA

>PGSC0003DMG400028474-(rev)LRR-RLKs\_244

ACTTGTGGCTCTCGTCATCAACGAGTTACTTTACTCAATATTTTCAGACATGGGATTTTCGGGCACCATACC  
GTCACAACCTGGCAACCTCTCTTTTCTTGTTTCACTTGATCTAAGCTAC

>PGSC0003DMG400028474-(rev)LRR-RLKs\_2440

AAGTTGGAAATCTCAAGGCTACAATACTTCTGGATCTTTCAGGAACCAAATCTCAGGCAACATTCTCTGG  
TACATTGGGAGGTTTACAGAAATTGATCCAGCTATCTTTGGCTCATAACA

>PGSC0003DMG400028474-(rev)LRR-RLKs\_2501

CATTCTGGTACATTGGGAGGTTTACAGAAATTGATCCAGCTATCTTTGGCTCATAACAGAATTGAAGGA  
TCTATTCTGAGACATTTGGGGAACCTCATAAGTTTGGGAAGCATTGGATCT

>PGSC0003DMG400028474-(rev)LRR-RLKs\_2562

ATTGAAGGATCTATTCTGAGACATTTGGGGAACCTCATAAGTTTGGGAAGCATTGGATCTTCAAATAACA  
ATATTTCCGGTGTAATTCCAAAGTCATTAGAGGCACTCAAGCAACTACAG

>PGSC0003DMG400028474-(rev)LRR-RLKs\_2623

CAAATAACAATATTTCCGGTGTAATTCCAAAGTCATTAGAGGCACTCAAGCAACTACAGTCCTTTAATGT  
CTCATTCAACAGGTTACACGGGGAATTTCCGAGTGGTGGACCTTTTCTTA

>PGSC0003DMG400028474-(rev)LRR-RLKs\_2806

CAGCTTGTCAATTCAAATTCAAAGAATCATTCTAATTCAAAGAAAAGAAGAATGATATGGATTGTAGTTGT  
CTCTTCAGTTATCTCTATAATAGGGCTTGCTTCAGCAATAATTTTCGTGT

>PGSC0003DMG400028474-(rev)LRR-RLKs\_2867

TGTAGTTGTCTCTTCAGTTATCTCTATAATAGGGCTTGCTTCAGCAATAATTTTCGTGTTGATGCGACATC  
GGGGTAAAGTAATCAAAGGTGAAGATGAGTGGTCGCCTGAGGTAACACC

>PGSC0003DMG400028474-(rev)LRR-RLKs\_2928

ATGCGACATCGGGGTAAAGTAATCAAAGGTGAAGATGAGTGGTCGCCTGAGGTAACACCACAGAGATT

TTCTTATTATGAACTTCAAAGAGCAACTCAGGGGTTTGATGGAAATAACTTG

>PGSC0003DMG400028474-(rev)LRR-RLKs\_2989

AGAGATTTTCTTATTATGAACTTCAAAGAGCAACTCAGGGGTTTGATGGAAATAACTTGCTAGGTAGTG

GAAGTTTTGGTTCTGTTTTTAAAGGGACATTGGCAGATGGGATGATACTAG

>PGSC0003DMG400028474-(rev)LRR-RLKs\_3233

TTTTAAAGCATTGGTACTTGAGTACATGCCAAATGGGAGCTTAGACAAGTTGCTATATTCTCAAGATTAT

TCTCTAAATATAATGCAGCGATTGAATATCATGGTCGATGTTGCATCTGC

>PGSC0003DMG400028474-(rev)LRR-RLKs\_3294

CAAGATTATTCTCTAAATATAATGCAGCGATTGAATATCATGGTCGATGTTGCATCTGCTCTGGAATATCT

CCATCATGGTTACTCTGTACCTGTTATTCATTGTGATCTGAAGCCTAGC

>PGSC0003DMG400028474-(rev)LRR-RLKs\_3538

GTGAATCATTTATTTAACTTGTAACAAAGTTTTTGATTAACAGTTAATCAGATTTACGCCTTTTAAGTTCA

GTTGCTGACGTATTTAATTTTTCTTTTCTAGAATATGGATTGGAAGGC

>PGSC0003DMG400028474-(rev)LRR-RLKs\_3599

TTTAAGTTCAGTTGCTGACGTATTTAATTTTTCTTTTCTAGAATATGGATTGGAAGGCCTTATATCCAAG

AGGTCTGATGTTTATAGTTATGGTATCATGTTGCTGGAAACTTTTACAA

>PGSC0003DMG400028474-(rev)LRR-RLKs\_3904

AAATCTCCGGCTGAAAGGATGAACATGACTGATGTTGTAGCTGCATTGGAAAAGATCAAGCAGCAGCTT

TCTTCATGTTACTGATCGAATGGCTTAATGACATGACATCAGGTACTTTTT

>PGSC0003DMG400028474-(rev)LRR-RLKs\_3965

AGCAGCTTTCTTCATGTTACTGATCGAATGGCTTAATGACATGACATCAGGTACTTTTTCCATATCACTTTT

GGGAAGTAAAAGGAAATATGTAAATTTCATTAGCATTTTAATCAGTA

>PGSC0003DMG400028474-(rev)LRR-RLKs\_4026

ATATCACTTTTGGGAAGTAAAAGGAAATATGTAAATTTCATTAGCATTTTAATCAGTAATTGCTCTTCAA

ATGCTTTTGCAAGAGACTATGTGGCTATTGTAAGTGCCTTTGTTGAGA

>PGSC0003DMG400028474-(rev)LRR-RLKs\_4087

TGCTCTTCAAATGCTTTTGCAAGAGACTATGTGGCTATTGTAAGTGCCTTTGTTGAGATGAGTCTTCTGT

ACAATGTATTGCTAATTAAGGATCAATAAAATGCAGTGCTTCTTAATTT

>PGSC0003DMG400028474-(rev)LRR-RLKs\_4148

AGTCTTCTGTACAATGTATTGCTAATTAAGGATCAATAAAATGCAGTGCTTCTTAATTTTAAGTGAAGTG  
ATCCCCATCTGGCCTTATAAATATCATCCAAAAGAGTCATTTGCCCTTGC

>PGSC0003DMG400028474-(rev)LRR-RLKs\_854

TCTTACTGTTGATGGAAAATAACTTGATTGGAACAATTCCAGGAGAACTTGGGAAATTACAACTGCTGCA  
ACAATTAGCTCTCGGAAATAACAAGTTAGAAGGTATGCAGCTTCCAATCT

>PGSC0003DMG400028474-(rev)LRR-RLKs\_915

ACTGCTGCAACAATTAGCTCTCGGAAATAACAAGTTAGAAGGTATGCAGCTTCCAATCTTAACAATATCT  
ACATATATAGTAATAAATCGAAGATATTGTTTTGTGCTGAGCACATGCAT

>PGSC0003DMG400028478-(rev)LRR-RLKs\_1054

AACCATAGCTATTTCTCTGCTTCAGCATTCTAATCTTGGCCATGGGGTTAGTCATTTTGTGTCTATACA  
AGAGGAGAAAAACATTGGCTAGGAAGAACAATGGCTAATTTCAAAGCC

>PGSC0003DMG400028478-(rev)LRR-RLKs\_1116

GTCTATACAAGAGGAGAAAAACATTGGCTAGGAAGAACAATGGCTAATTTCAAAGCCAATACAAATAC  
CATTTAGAATGGACAAATCAGGGCCATTTTCATTTGAAACAGAGTCAGGGA

>PGSC0003DMG400028478-(rev)LRR-RLKs\_1426

CAAGGTCTTGGACATGCTAGGGAAGTCCCATGATGATGCTATTATCTTGTGTTGAACAACTCTCCAGG  
CTTAAGCATCCTAATCTGTTGCCTATTTCTGGTACTGCATTGCAGGTAC

>PGSC0003DMG400028478-(rev)LRR-RLKs\_1488

TCTCCAGGCTTAAGCATCCTAATCTGTTGCCTATTTCTGGTACTGCATTGCAGGTAATCTTCTTTTAC  
TTATTACAGCATCTTCTGTTAATAAGTACAATTTATGTGATAACAATTC

>PGSC0003DMG400028478-(rev)LRR-RLKs\_1550

CTTCTTTCACTTATTACAGCATCTTCTGTTAATAAGTACAATTTATGTGATAACAATTCGAATTCTAGCAGTA  
AAAAATATCTAGAGGTGAGCATATTGAATGCATTCACGTGGGAGGATG

>PGSC0003DMG400028478-(rev)LRR-RLKs\_1612

TCTAGCAGTAAAAAATATCTAGAGGTGAGCATATTGAATGCATTCACGTGGGAGGATGGGATGAGAAA  
TAGGACAGACAGTAGTAAATGAGACAGAAATCTTTGCAACCATAGAAACGTA

>PGSC0003DMG400028478-(rev)LRR-RLKs\_1984

ATATTTACGACATTTATTTATCGTGAAATTAATGGTAGAATAAAAAAAATTTGTGATTAATTAATATC  
TCAAATAACATGGAAAAAATTAATTTTAAATTTTATTTTCGAGATTAT

>PGSC0003DMG400028478-(rev)LRR-RLKs\_2170

ACGATAAGGTCAAATCTTTAAAAATCTTACCAGATTGGGAGTTCTACTGTTACGCCTTGATTTATGATTTT  
TGGAAGAATGTTGCACAAATATTATCCATAAAGTATTATTTTATGGAGG

>PGSC0003DMG400028478-(rev)LRR-RLKs\_2232

TATGATTTTTGGAAGAATGTTGCACAAATATTATCCATAAAGTATTATTTTATGGAGGCGTTATTGAATTA  
AAAAGATAAGAGGATATTTTAAAAGCATTAAATGGTTCAGAAGAATGTCA

>PGSC0003DMG400028478-(rev)LRR-RLKs\_2542

TACTTCCCTTTGATGCAGGGAAAGAGAAGCTAGTCTTATACGAATTCATATCCAATGGTGACCTCCACCG  
ATGGCTACACGAGCTTCCAAGTCTACCACCAACGTGGAAGATTGGACAA

>PGSC0003DMG400028478-(rev)LRR-RLKs\_2666

CACGTGGGAGTTACAAAACGGTCTCAAATTACGTCACCCGGGAAAATGGAATGGCACACGCGCCACCG  
TATTGCCGTTGGCGTAGCGCGTGGACTAGCCTACCTCCACCACGCGCAGTC

>PGSC0003DMG400028478-(rev)LRR-RLKs\_744

ACCATATGGATGGTAAATTTCTAATGATTTTCTCTCTGTCTAGTCTCAATTTCTTGAATATCTCATTCA  
ATAACTTCACTGGGGAAATACCCAAAGACCAGTTTGCTAAATTTGGGA

>PGSC0003DMG400028561-(rev)OtherRLKsTM\_0

ATGCCATCCAATGATATCCTTGACTGGAATACTGAAATCACAAGCACGTTTATTCTAACCGAATCCAGAG  
TTAACGTTCCCTTTCGTTGTGATTGCCTTAATAATGGTGAGTTTTTGGGA

>PGSC0003DMG400028561-(rev)OtherRLKsTM\_124

TATTTTCTATATTGTTAGTGCCAATGACACTTATGATCTCATCGCCACAAGGCTCTATTCAAGTTTGACG  
AATAAAGAGTTGTTGATGAGGGATAATAGTTATCCGGAAAACAATATAC

>PGSC0003DMG400028561-(rev)OtherRLKsTM\_186

AGTTTGACGAATAAAGAGTTGTTGATGAGGGATAATAGTTATCCGGAAAACAATATACCCGTTTCATGTG  
ACCTTGAACGTGACTGTGAATTGCTCCTGTGGGAATAAAGATGTGTCAAAG

>PGSC0003DMG400028561-(rev)OtherRLKsTM\_2666

ATATGATGGAATAGTTCATTCTTTATGGTTTTCTTCTATTTGTATTTGTGATGTTTATATGCTTACAGATT  
AATTGTTTGGTAAATCTATTTACAGGGAAAGACGTATTGACATGGTCA

>PGSC0003DMG400028561-(rev)OtherRLKsTM\_2728

CTTACAGATTAATTGTTTGGTAAATCTATTTACAGGGAAAGACGTATTGACATGGTCAACAAGGGTGCA

AATTGCAATGGATTCAGCCAGAGGTCTTGAGTATATACACGAGCACACCAT

>PGSC0003DMG400028561-(rev)OtherRLKsTM\_2852

TTTTACATCCATCGTGATGTTAAATCAGCAAATATTCTGATAAACGAGAACTTTCATGCAAAGGTATCTTT

AACGTCCTCTATTAATTCTCTGTGTTCAACAATTCTCTAGTCTTGTA

>PGSC0003DMG400028561-(rev)OtherRLKsTM\_3472

ATCGTGATTGTTCTGTGGTAATTGTAGTTTGATGAAGCTTATAGTCATTCAAATCAAATTGAAGCCATTTCC

CAGATTGATAGACCCTAAACTCCACGATGACTACCCCTCGATTTCAGTC

>PGSC0003DMG400028561-(rev)OtherRLKsTM\_3534

AGCCATTTCCAGATTGATAGACCCTAAACTCCACGATGACTACCCCTCGATTTCAGTCTACAAGGTCCAA

TTATATCTCTTTAATTATTGCACTAGCTAGTTACCCCTTTTCTTTCTCT

>PGSC0003DMG400028561-(rev)OtherRLKsTM\_62

ATCCAGAGTTAACGTTCCCTTTTCGTTGTGATTGCCTTAATAATGGTGAGTTTTTGGGACATGTATTTTCTT

ATATTGTTAGTGCCAATGACTTATGATCTCATCGCCACAAGGCTCTA

>PGSC0003DMG400028561-(rev)OtherRLKsTM\_620

GCAAGCATAGAAAATCCTGTTTTTAATGATTTGTGTCTTTTGTACAATGTTGCTGTTGTTGTGATGGATAT

TATATTTGATTGTAAATCCAATTTTATCTATGTATATACTTGTTTTATG

>PGSC0003DMG400028561-(rev)OtherRLKsTM\_682

GATGGATATTATATTTGATTGTAAATCCAATTTTATCTATGTATATACTTGTTTTATGCAGATAAACTGGG

GAATTATCCACCTATACCAACCAGGTACAATTTTCAGATTTGAAGTAGT

>PGSC0003DMG400028561-(rev)OtherRLKsTM\_868

TCCCCTGGCTTGCAGAAAAGGTGGACTACCCTTTCCTTCTCTTTATTTTGTGTTGATTCCTCCATTATTGCT

TCTTGCTCCCAAATCAAGTTGTTGATGGAAGTGTTGTACAATGTAAGC

>PGSC0003DMG400028561-(rev)OtherRLKsTM\_930

CATTATTGCTTCTTGCTCCCAAATCAAGTTGTTGATGGAAGTGTTGTACAATGTAAGCATATTGATTATTC

TGTATGAGTGTCTCATCAGGCTCATCAGGTAAAACAATAGCTGCATTAG

>PGSC0003DMG400028575-(rev)LRR-RLPs\_1116

TTCCAACAAATTGGAAGGGCCAATACCTGAGTTTTTATTTGAGCTGCATGATCTTTATGGTCTGTCACTTT

CATTCAACAAGTTAACGGTACTGTGCAGTTGAAGAAGTACACAAAGAT

>PGSC0003DMG400028575-(rev)LRR-RLPs\_1178

TGTCACITTCATTCAACAAGTTTAAACGGTACTGTGCAGTTGAAGAAGTACACAAAGATCAATAAACTTGT  
AGATCTTGATCTGTCCCACAACAGTTTATCAGTTGACACCAATATAAGTG

>PGSC0003DMG400028575-(rev)LRR-RLPs\_1240

AAACTTGTAGATCTTGATCTGTCCCACAACAGTTTATCAGTTGACACCAATATAAGTGAATCGGACCTTG  
CCTTGCTACCCAGCTAAATAGTTTCATGTTAGCGTCATGCAATCTGCAG

>PGSC0003DMG400028575-(rev)LRR-RLPs\_1736

CCAGCTATCTTGAAGTACTTGAGTTATCAAACAACAGTTTGAATGGCATAATACCACCATGTTTAGCAGA  
AAAGAGCAGCACACTGAAAGTACTGAACCTGGGAAAGAACAATCTCATAG

>PGSC0003DMG400028575-(rev)LRR-RLPs\_186

ATTACTCTCCATCTGCTGTAAAATGAGTGATGTAGTGGCAGCTAATTCCAGTAAATGTCTTGAGGATCAG  
AAGAAGTTACTGCTGCAGCTGAGAAATAAGCTTACTTATGATTCTGAAAT

>PGSC0003DMG400028575-(rev)LRR-RLPs\_1860

TATACCTGAAAAGTTTTCTTATAATTGTGAGTTGCAGAGCCTTGACCTCAGTCAGAATCACTTAACAGGT  
CTGCTTCCTCGTTCTTTGTCCAACCTGCACAAAGTTAAAGGTAATAAATAT

>PGSC0003DMG400028575-(rev)LRR-RLPs\_1922

TAACAGGTCTGCTTCCTCGTTCTTTGTCCAACCTGCACAAAGTTAAAGGTAATAAATATTGGAAACAACAA  
GATCAAGGATACTTTCCCTGCTGGTTGAGGAACATGTCAGATCTTCGTG

>PGSC0003DMG400028575-(rev)LRR-RLPs\_1984

AACAACAAGATCAAGGATACTTTCCCTGCTGGTTGAGGAACATGTCAGATCTTCGTGTACTTGTATTAC  
GCTTCAATGGTTTCCATGGGAACATTGATTGCTCACGTGTGAATTCCAAC

>PGSC0003DMG400028575-(rev)LRR-RLPs\_2046

TGTATTACGCTTCAATGGTTTCCATGGGAACATTGATTGCTCACGTGTGAATTCCAACCTGGACTGCACTTC  
AAATCATGGACCTAGCTTCCAACAATTTAGGGGGTGTCTTCCCCGAGG

>PGSC0003DMG400028575-(rev)LRR-RLPs\_2170

TTCTTGGAGCTAAAAGCAATGATGGCTGACCCATCTTTAACACATTCACGCTCTGATATCTTGCATTTTGA  
GTCTTCTATTAGGCCAATATATTATCAGGACAGAGTCACTCTTTCTCTT

>PGSC0003DMG400028575-(rev)LRR-RLPs\_2232

GCATTTTGAAGTCTTCTATTAGGCCAATATATTATCAGGACAGAGTCACTCTTTCTCTTAAAGGACAAGATG  
TTACACAGACAAAGATCTTTATCTTCTTACCTCCATTGACTTTTCAAG



>PGSC0003DMG400028575-(rev)LRR-RLPs\_2294

GACAAGATGTTACACAGACAAAGATCTTTATCTTCTTCACCTCCATTGACTTTTCAAGTAACAATTTTGTG  
GGGAACATACCAGAGATAGTTGGAGATCTCAGATCACTTAATCTTCTCA

>PGSC0003DMG400028575-(rev)LRR-RLPs\_248

AGGATCAGAAGAAGTTACTGCTGCAGCTGAGAAATAAGCTTACTTATGATTCTGAAATATCTACCAAGCT  
AGTGAAGTGGAACCAGCGGATTGACTGCTGTCAATGGGAGGGTGTCACTT

>PGSC0003DMG400028575-(rev)LRR-RLPs\_2666

ACAGAACTTGCAAGAATAATTCAGCAGATGCACCTTCTGAACCAGAAGTTGAAGAGGAAGAATTCATTT  
CAATGACGGAGATTTATGTAAGTGCTATGTTGGGATTTATTGTTGGTATTG

>PGSC0003DMG400028575-(rev)LRR-RLPs\_2728

TTCATTTCAATGACGGAGATTTATGTAAGTGCTATGTTGGGATTTATTGTTGGTATTGGGATCATCTTCCT  
ACCACTTCTGTTCTCAAAAAGATGGAACCAGTCGTACAACAGAATAATT

>PGSC0003DMG400028575-(rev)LRR-RLPs\_2790

CATCTTCCTACCACTTCTGTTCTCAAAAAGATGGAACCAGTCGTACAACAGAATAATTAACAGATTAATTT  
TAAGGATATTTTCAGCAGCAAAATCAAGAAAAGAAAAGTAGTAGCAGTAG

>PGSC0003DMG400028575-(rev)LRR-RLPs\_2852

GATTAATTTTAAGGATATTTTCAGCAGCAAAATCAAGAAAAGAAAAGTAGTAGCAGTAGTGTAGCATCTT  
GGAAAAGGCAGCAGGGAAATCAAGAGGCAGACATTAATTTACAGGATGT

>PGSC0003DMG400028575-(rev)LRR-RLPs\_2914

GCATCTTGAAAAAGGCAGCAGGGAAATCAAGAGGCAGACATTAATTTACAGGATGTAACACTTCCTT  
GCAGCATGCTGCTCACTATTAGTACTTCTAATTGTTTCCACTATGAGTTAT

>PGSC0003DMG400028575-(rev)LRR-RLPs\_2976

CTTCCTTGCAGCATGCTGCTCACTATTAGTACTTCTAATTGTTTCCACTATGAGTTATCTGTGTTTGTTC  
CTTTCATGATTCATTTTAGTTGCTTCTTATTACATAGAAGAACACAAA

>PGSC0003DMG400028575-(rev)LRR-RLPs\_3028

AGTTATCTGTGTTTGTTCACCTTTCATGATTCATTTAGTTGCTTCTTATTACATAGAAGAACACAAAGCAA  
TCTTGCATTCTGTTTTAGGTAACGGTCAGTGAATAGCCATAACTAAAC

>PGSC0003DMG400028575-(rev)LRR-RLPs\_806

TAACCCAGCTTGTTCTTCTGGATTTCAATTTGAATAGCTTCACGGGTTCAATTCATCTTTAAGCTGTCCA

AAAATCTCACTGATATATACTCTGCTAGAAATCGTTTGATAGGAATAT

>PGSC0003DMG400028575-(rev)LRR-RLPs\_868

AAGCTGTCCAAAAATCTCACTGATATATACTCTGCTAGAAATCGTTTGATAGGAATATCATCAGACTGGG

AAGGCTTTGAGAATCTTGAGTATCTTGACTTGAGTAGCAATTCAATTTCT

>PGSC0003DMG400028575-(rev)LRR-RLPs\_930

AGACTGGGAAGGCTTTGAGAATCTTGAGTATCTTGACTTGAGTAGCAATTCAATTTCTGGGATCATTCCA

GAATCATTGTTTTACCTACCCTCACTTTCAGCTTTAGTTCTGTCCAACAA

>PGSC0003DMG400028576-(rev)LRR-RLPs\_0

AAAATAGGCCAAAAAATGGATCTGTTAGCCCAAAAAATAATTATTCAAACAAATCCTGCTGTTTATTTGC

GAGGATTTTGCTATTTTATACGTTTCAGATCTGAAGAACTTGGAACTTC

>PGSC0003DMG400028576-(rev)LRR-RLPs\_1037

AACAACAAGTTTTCTGGCCAAATAACTGAATTACAAAATGTGATTTCTCCACTAACAAGTCTTGACTTGA

GTTCCAACAATTGGAAGGGCCAATACCTGAGTTTTTATTTGACCTGCAT

>PGSC0003DMG400028576-(rev)LRR-RLPs\_1098

TTGACTTGAGTTCCAACAAATTGGAAGGGCCAATACCTGAGTTTTTATTTGACCTGCATGATCTTTACGGT

CTTTCATTTTCATTCAACAAGTTTAACGGTACTGTACAGTTGAAGAAGT

>PGSC0003DMG400028576-(rev)LRR-RLPs\_1159

TCTTTACGGTCTTTCATTTTCATTCAACAAGTTTAACGGTACTGTACAGTTGAAGAAGTTCACAAACATCA

ATAAATTGTAGATCTTGATCTGTCCCAACAGTATATCAGTTGACAC

>PGSC0003DMG400028576-(rev)LRR-RLPs\_122

TTTCTGTTGAGAGTCCAAATGAGAAGTGAAATGTTTTCCAGCTTTTCTTGATCCTTCTACTCTCCATCTGC

TGTAAAACGAGTGATGTAGTGGCAGCTAATCCAGTAAATGTCTTGAG

>PGSC0003DMG400028576-(rev)LRR-RLPs\_1220

ACAAACATCAATAAACTTGTAGATCTTGATCTGTCCCAACAGTATATCAGTTGACACAAATATAAGTG

AGTCGGACCTTGCCCTGCTACCCAGCTGAACAGTTTCATGTTAGCGTCA

>PGSC0003DMG400028576-(rev)LRR-RLPs\_1342

CAATCTGCAGAATATTTCTTCTCAAGAACCAATCAAAGTTGTCGATGTTAGATCTCTCAAACAGCCAAC

TTACGGGTGAAATACCAAACCTGGCTGGTGGAAATCAATGATGGACTTCT

>PGSC0003DMG400028576-(rev)LRR-RLPs\_1403

AACAGCCAACTTACGGGTGAAATACCAAAGTGGCTGGTGGAAATCAATGATGGACTTCTCCGTTTTCTG  
AATCTTTCTTTCAATCAATTCACACATCTTCAAGAACCTTATACATTTGGC

>PGSC0003DMG400028576-(rev)LRR-RLPs\_1464

GTTTTCTGAATCTTTCTTTCAATCAATTCACACATCTTCAAGAACCTTATACATTTGGCTTCTGAATTCCT  
TGATCTGCATTCAAATCTGCTCACTGGGGTTATTCCAGTACCACCAC

>PGSC0003DMG400028576-(rev)LRR-RLPs\_1525

CCTGAATTCCTTGATCTGCATTCAAATCTGCTCACTGGGGTTATTCCAGTACCACCACGTGCAGCTGCTT  
ATATTGACTTCTCCAACAATAACTTTTCTACTTTTCCACCTGACTTTGG

>PGSC0003DMG400028576-(rev)LRR-RLPs\_1586

GCAGCTGCTTATATTGACTTCTCCAACAATAACTTTTCTACTTTTCCACCTGACTTTGGCAATTATCTAGTA  
ACTGCTCGGTTCTCTCAATTGCAAACAACAAAGTTATCGGTAGTATC

>PGSC0003DMG400028576-(rev)LRR-RLPs\_183

TCTCCATCTGCTGTAAAACGAGTGATGTAGTGGCAGCTAATTCCAGTAAATGTCTTGAGGATCAGAAGA  
TGTTGCTGCTGCAGCTGAGAAATAAGCTTACTTATGATTATGAAATATCTA

>PGSC0003DMG400028576-(rev)LRR-RLPs\_2074

CTCACGAGTGAGTTCCAAGTGGACCGCTCTTCAAATCATGGACCTAGCTTCCAACAATTTAGGGGGTGT  
CTTCCACGAGGTTCAATTCTTGAGCTAAAAGGAATGATGGCGGACCCATC

>PGSC0003DMG400028576-(rev)LRR-RLPs\_2196

TAACACATTCACGGTCTGATATCTTGCATTTTGAGTCTCAATCTGTTAGGTCAGTATACTATCAGGACAGA  
GTCACTCTTTCTCTTAAAGGACAAGATGCTACACAGACAAAGATCTTTC

>PGSC0003DMG400028576-(rev)LRR-RLPs\_2257

TCAGGACAGAGTCACTCTTTCTCTTAAAGGACAAGATGCTACACAGACAAAGATCTTTCTTCTTCCACT  
CCATTGACTTTTCAAGCAACAATTTTGTGGGGAACATACCAGAGATAGT

>PGSC0003DMG400028576-(rev)LRR-RLPs\_2379

GAGATCTCAGATCACTTAATCTTCTCAATATTTACACAACAATCTCACGGGTCAAATCCCTCCATCAATT  
GGAAAATTGAAGCAATTGGAATCACTGGACCTCTCATTCAACAAATTAG

>PGSC0003DMG400028576-(rev)LRR-RLPs\_244

TCAGAAGATGTTGCTGCTGCAGCTGAGAAATAAGCTTACTTATGATTATGAAATATCTACCAAGCTAGTG  
AAGTGGAGCCAGATGATTGACTGCTGTCAATGGGAGGGTGTCACTTGCAA

>PGSC0003DMG400028576-(rev)LRR-RLPs\_2440

TCCATCAATTGGAAAATTGAAGCAATTGGAATCACTGGACCTCTCATTCAACAAATTAGGTGGCAATATC  
CCAGAAAATCTTGCTAGCCTCACATTTCTTTCCCTCATAAATTTATCATA

>PGSC0003DMG400028576-(rev)LRR-RLPs\_2501

GGCAATATCCCAGAAAATCTTGCTAGCCTCACATTTCTTTCCCTCATAAATTTATCATATAATGAATTGGTT  
GGAATGATTCCACGAGGCAACCAATTCAAACATTTGGAGAAAGTTCT

>PGSC0003DMG400028576-(rev)LRR-RLPs\_2684

GATGCACCTTCAGAGCCAGAAGTTGAAGAGGACGAATTCATTTCAAGGACGGAGATTTATGTAAGTGCT  
ATATTGGGATTTGTTGTAGGTGTTGGGATCATCTTTCTACCACTTCTGTTC

>PGSC0003DMG400028576-(rev)LRR-RLPs\_2745

TAAGTGCTATATTGGGATTTGTTGTAGGTGTTGGGATCATCTTTCTACCACTTCTGTTCTCAAAAAGATGG  
AACCAGTTGTACAACAGAACAATTGACAGATTAATTGTAAGGATATTTTC

>PGSC0003DMG400028576-(rev)LRR-RLPs\_2806

AAAAAGATGGAACCAGTTGTACAACAGAACAATTGACAGATTAATTGTAAGGATATTTTCAGCAGCAAAA  
TCAAGAAAGGAGAACTAGTAGCTGTAGTGTAGCATCTTGGAAAAAGGCAGT

>PGSC0003DMG400028576-(rev)LRR-RLPs\_2867

CAGCAAAATCAAGAAAGGAGAACTAGTAGCTGTAGTGTAGCATCTTGGAAAAAGGCAGTAGGGAAAGC  
AAGAGGCAGATATTAATTTACAGGATGTAACACTTCCTTGCAGCATGCTGC

>PGSC0003DMG400028576-(rev)LRR-RLPs\_2928

GGAAAGCAAGAGGCAGATATTAATTTACAGGATGTAACACTTCCTTGCAGCATGCTGCTCACTATTAGC  
ACTTCTAATTGTTTCCACTATGAGTTATCGGTGTTTGTACCTTTTCATG

>PGSC0003DMG400028576-(rev)LRR-RLPs\_2989

ACTATTAGCACTTCTAATTGTTTCCACTATGAGTTATCGGTGTTTGTACCTTTTCATGATTCATTTTAGTG  
GTTTCTTATTAGATAGAAGAACAATGCAATCTTGCATTCTGTTTTA

>PGSC0003DMG400028576-(rev)LRR-RLPs\_3050

TCATTTTAGTGGTTTCTTATTAGATAGAAGAACAATGCAATCTTGCATTCTGTTTTAGGCAACGGTCAG  
TGAATAGCCATAACAAACCTGATAACAACCTCTCTCTTTTTTTAAGAAA

>PGSC0003DMG400028576-(rev)LRR-RLPs\_3111

CAACGGTCAGTGAATAGCCATAACAAACCTGATAACAACCTCTCTCTTTTTTTAAGAAACAGAAGCCAGC

TTTGCCATTTTCTAAGTACAAAATAGTTTATACAAGTTCTCCCTTATTCT

>PGSC0003DMG400028576-(rev)LRR-RLPs\_3172

GAAGCCAGCTTTGCCATTTTCTAAGTACAAAATAGTTTATACAAGTTCTCCCTTATTCTTCGAAGTCAAGA

GTCGTTCTGCGAAGACAAAATACTTCTTCAAGTTCCTTACTGAAGTCTT

>PGSC0003DMG400028576-(rev)LRR-RLPs\_3216

GTTCTCCCTTATTCTTCGAAGTCAAGAGTCGTTCTGCGAAGACAAAATACTTCTTCAAGTTCCTTACTGAA

GTCTTTATCGACATCCTGCTCTTCAGCCACTTCTTGTTGGGAGAACTTA

>PGSC0003DMG400028576-(rev)LRR-RLPs\_366

GTGAAGGCCAAGTTATTGGTCTTGACCTTAGTGCTGAATCATTCTCGGGCAGCATCAATCCGTTAGCTAA

TCTCAAGTATCTCTGTTATCCGTCTTGATGGGAACAATTTATCTGCAC

>PGSC0003DMG400028576-(rev)LRR-RLPs\_427

GTTAGCTAATCTCAAGTATCTCTGTTATCCGTCTTGATGGGAACAATTTATCTGCACCATTTCCAGAGT

TCTTCGCGGAATTCACCAATCTAACTGTCTTGAGTCTAAGTTCCTGCAA

>PGSC0003DMG400028576-(rev)LRR-RLPs\_488

TTTCCAGAGTTCTTCGCGGAATTCACCAATCTAACTGTCTTGAGTCTAAGTTCCTGCAACTTGATAGGAGA

AGCACCTCAGAAGATATTCCAGGTACCAACTCTACAGACAATTGACTTA

>PGSC0003DMG400028576-(rev)LRR-RLPs\_549

TGATAGGAGAAGCACCTCAGAAGATATTCCAGGTACCAACTCTACAGACAATTGACTTATCAGTAAACG

ATATGCTTGGGGGTTCTTTACCTGAATTCCTTCAAAGGATCTTTACAAT

>PGSC0003DMG400028576-(rev)LRR-RLPs\_61

TTTATTTGCGAGGATTTTGCTATTTTATACGTTTCAGATCTGAAGAACTTGGAACCTCTTTTTCTGTTGAG

AGTCCAAATGAGAAGTGAAATGTTTTCCAGCTTTTCTTGATCCTTCT

>PGSC0003DMG400028576-(rev)LRR-RLPs\_610

AGTAAACGATATGCTTGGGGGTTCTTTACCTGAATTCCTTCAAAGGATCTTTACAATCACTGGTGCTTA

CTGCTACAAAATTTTCAGGAATTTACCCGAGTCCATAGGGAACCTTAG

>PGSC0003DMG400028576-(rev)LRR-RLPs\_671

CTGGTGCTTACTGCTACAAAATTTTCAGGAATTTACCCGAGTCCATAGGGAACCTTAGGAAGTTGTCGC

GTGTTGAACTTAGAGCTTGTAATTTATAGGTTCAATTCCATCTTCTATG

>PGSC0003DMG400028576-(rev)LRR-RLPs\_732

AGTTGTCGCGTGTTGAACTTAGAGCTTGAATTTTATAGGTTCAATCCATCTTCTATGGAAAATCTAACC  
CAGCTTGTCTTCTGGATTTGAGTTGAATAGCTTCACGAGTTCATTTTC

>PGSC0003DMG400028576-(rev)LRR-RLPs\_793

AAATCTAACCCAGCTTGTCTTCTGGATTTGAGTTGAATAGCTTCACGAGTTCATTTCCATCTTTTAAGCT  
GTCCACAAATCTCACTCGTATATACTCTGCTGGAAATAGATTGACAGG

>PGSC0003DMG400028576-(rev)LRR-RLPs\_854

TCTTTTAAGCTGTCCACAAATCTCACTCGTATATACTCTGCTGGAAATAGATTGACAGGTATATCATCCGA  
CTGGCAAGGCCTTGAGAATCTTGAGTATCTTGACTTGAGTAACAATTCA

>PGSC0003DMG400028576-(rev)LRR-RLPs\_915

TATCATCCGACTGGCAAGGCCTTGAGAATCTTGAGTATCTTGACTTGAGTAACAATTCAATTTCTGGTCTC  
ATTCCAGCATCATTGTTTTACCTACCCTCACTTTCAGATTTAGTTCTGT

>PGSC0003DMG400028576-(rev)LRR-RLPs\_976

TTCTGGTCTCATTCCAGCATCATTGTTTTACCTACCCTCACTTTCAGATTTAGTTCTGTCCAACAACAAGTT  
TTCTGGCCAAATAACTGAATTACAAAATGTGATTTCTCCACTAACAAG

>PGSC0003DMG400028591LRR-RLPs\_0

GAGAAGAGAATTAGAGGAGAGAGATATGGAGAGAATAATATTGTCTCTTATAATTCTTTTTGTGTATGC  
AGTTGAAGTGGTATGTTTTTCATTTGGTGATCCACTTTGCTCTTCTCATGA

>PGSC0003DMG400028591LRR-RLPs\_1054

CTGAAGAACAACAACCTTCACTGGCCCTTTCCCATCCTCTCTTGGAATTTGACAAACCTTCAAGTTTTAAG  
GTTGAGAAACAATCACTCAGTGGTACCCTTCCCGAGTTTAAGACTAAT

>PGSC0003DMG400028591LRR-RLPs\_124

CTTGCACTTTTACAGTTTAAGCATTCACTTAACGCGACAGGTGACCATCAATATGATTGCCCAAATTATTT  
TTATGCTAAGACGACGTCTTGAATACGAGTAGTATGGATTGTTGTAGG

>PGSC0003DMG400028591LRR-RLPs\_1240

CTTCTCAACCTAACTGTTGTCTTTCTTGACAAAATAAGTTGAGTGGCGAGATTGGAGCAGAAATGTTTT  
CAAGCATGACAAACCTTCAATATCTTGATCTTTCTAATAGTGGTTTATCA

>PGSC0003DMG400028591LRR-RLPs\_1302

AATGTTTTCAAGCATGACAAACCTTCAATATCTTGATCTTTCTAATAGTGGTTTATCATGGAGTGGCAATA  
TCAACACCACTTTTCACTTCTTTATTATTTAGGTTTAGGATCTTGTGCG

>PGSC0003DMG400028591LRR-RLPs\_1364

GTGGCAATATCAACACCACTTTTCCACTTCTTTATTATTTAGGTTTAGGATCTTGTCGTGTGAAAGATTC  
CCAGATTCATATTCAACTCTAAGAAGTTATGGATTTTGGATCTCTCGG

>PGSC0003DMG400028591LRR-RLPs\_1426

AAAGATTTCCAGATTCATATTCAACTCTAAGAAGTTATGGATTTTGGATCTCTCGGAGAATGAAATTC  
ACGGGCAGTTTCCAAAATGGTTTGGGAGTTTCGGTGATTTGGTAAACCTT

>PGSC0003DMG400028591LRR-RLPs\_1488

TGAAATTCACGGGCAGTTTCCAAAATGGTTTGGGAGTTTCGGTGATTTGGTAAACCTTAACCTCTCTCAC  
AACTACCTTACAAGCTTAGACCATCTACCTTGGGCGACAATGATGATACT

>PGSC0003DMG400028591LRR-RLPs\_1550

TCTCTCACAACCTTACAAGCTTAGACCATCTACCTTGGGCGACAATGATGATACTTGATCTTCAATCA  
AATTCACCTCACAGGACCTTTGCCATCCCCATTTGCACATCAACTTCAC

>PGSC0003DMG400028591LRR-RLPs\_1674

TATAATAAATTTGTCTTACAATAATTTGAGTGCCGAAATCCCAATTGCTTGTTACTTTTTCTAGGCTCGT  
GGTCTTAGACTTACGAGCTAATAACTTCCATGGACCCATCCCAAACAA

>PGSC0003DMG400028591LRR-RLPs\_1736

CTAGGCTCGTGGTCTTAGACTTACGAGCTAATAACTTCCATGGACCCATCCCAAACAAATCCCAAAGAA  
TAGTGGACTAGTTCATATTAGTTTGGAGCAAAAATCAATTGGAAGGTTCCA

>PGSC0003DMG400028591LRR-RLPs\_186

AAATTATTTTTATGCTAAGACGACGTCTTGAATACGAGTAGTATGGATTGTTGTAGGTGGGATGGAGT  
AATCTGTGATAGCTTCACTGGTCATGTCATTGGTTTGGACTTGAGTTGCAG

>PGSC0003DMG400028591LRR-RLPs\_1922

CTACATTTCCACCCTGGCTGGAAACATTGCAAGAGTTAGAGGCTCTCATACTGAAATCTAATAGATTTTA  
CGGACCCATCGTTGCTTTTAAAACAAAATCGCCATTTCCAAATATGAGGA

>PGSC0003DMG400028591LRR-RLPs\_1984

AGATTTTACGGACCCATCGTTGCTTTTAAAACAAAATCGCCATTTCCAAATATGAGGATCTTTGACCTCTC  
CGACAATTCATTTAGCGGCTCTTTACCTATGGAGGTTCTAAAAGGTTTC

>PGSC0003DMG400028591LRR-RLPs\_2046

TGACCTCTCCGACAATTCATTTAGCGGCTCTTTACCTATGGAGGTTCTAAAAGGTTTCAAAGCTATGATGT

ACATGGATGCACACAAATCAGGATTGGAGTACTATGTTCGAGGAAACTAT

>PGSC0003DMG400028591LRR-RLPs\_2108

CTATGATGTACATGGATGCACACAAATCAGGATTGGAGTACTATGTTCGAGGAAACTATAAATTTTCGGTA

TTAGTTCATATGACGTTTTGTATCGTGGATTGTATGTGGAATCGATGATAT

>PGSC0003DMG400028591LRR-RLPs\_2170

TTCGGTATTAGTTCATATGACGTTTTGTATCGTGGATTGTATGTGGAATCGATGATATTGGTGATGAAAA

ATCAAGAGACTAAATCAACAAGATATTGAAGATTTTCACAACAATTGAT

>PGSC0003DMG400028591LRR-RLPs\_2232

GATGAAAAATCAAGAGACTAAATCAACAAGATATTGAAGATTTTCACAACAATTGATTTGTCAAGGAA

CAAGTTTGAAGGAGAAATCCCTAAATTCATTGGGAATTTGAACTCACTTCT

>PGSC0003DMG400028591LRR-RLPs\_2294

CAAGGAACAAGTTTGAAGGAGAAATCCCTAAATTCATTGGGAATTTGAACTCACTTCTGCTGCTGAATTT

ATCCACAACAACCTCACAGGACAAATTCCTGTCGAAATGAGGAACATGA

>PGSC0003DMG400028591LRR-RLPs\_2356

CTGAATTTATCCACAACAACCTCACAGGACAAATTCCTGTCGAAATGAGGAACATGAGCACTCTTGAAG

CTTTGGACCTTTCATTTAACCATCTAACCGGCAAATTCAGTGGAGTTG

>PGSC0003DMG400028591LRR-RLPs\_2418

TCTTGAAGCTTTGGACCTTTCATTTAACCATCTAACCGGCAAATTCAGTGGAGTTGGCAAGTCTCACAT

TTCTCGCGGTCCTAAATCTGTCATACAACCATCTTGTGGACCTATTCC

>PGSC0003DMG400028591LRR-RLPs\_248

ATGGAGTAATCTGTGATAGCTTCACTGGTCATGTCATTGGTTTGGACTTGAGTTGCAGCAGACTTGAAG

GAACTATACATCCTAATAGTAGCCTTTTCCAGCTTCGTCATCTTCAAACAC

>PGSC0003DMG400028591LRR-RLPs\_2480

GTCTCACATTTCTCGCGGTCCTAAATCTGTCATACAACCATCTTGTGGACCTATTCCTCAGAGTAATCAG

TTCAATACGTTTCAAATGATTCCTATTTTGGAACTCTGATTTGTGTG

>PGSC0003DMG400028591LRR-RLPs\_2542

AGTAATCAGTTCAATACGTTTCAAATGATTCCTATTTTGGAACTCTGATTTGTGTGGATTACCACTGTC

AAATGAATGTGGGCATCATAAGAGTTCATCAGTACCAGTTGAACAGGAA

>PGSC0003DMG400028591LRR-RLPs\_2604



ACCACTGTCAAATGAATGTGGGCATCATAAGAGTTCATCAGTACCAGTTGAACAGGAAGAAGATGAACC  
AAGTTTTCTTAGCGAAATGACTTGGCAGTCTGTGCTAATTGGTTATGGCAG

>PGSC0003DMG400028591LRR-RLPs\_2666

ATGAACCAAGTTTTCTTAGCGAAATGACTTGGCAGTCTGTGCTAATTGGTTATGGCAGTGGCCTGACTTT  
TGGTTTTGGCATAGCGTATCTCATATACCTCTTTGAAAGGCCAAGATGGT

>PGSC0003DMG400028591LRR-RLPs\_2728

CTGACTTTTGGTTTTGGCATAGCGTATCTCATATACCTCTTTGAAAGGCCAAGATGGTTCATAGACTCTTT  
TGAAACTATCACTCATGAAATGATATACATAGTACAGAGGGCACGTAAA

>PGSC0003DMG400028591LRR-RLPs\_2790

AGACTCTTTTGAAACTATCACTCATGAAATGATATACATAGTACAGAGGGCACGTAAAAGGCGCAGGAG  
GAATTTTCACAGAAGAAGACACTGAAAATCTGTGAGGTAATAATTAATTCA

>PGSC0003DMG400028591LRR-RLPs\_2852

GCAGGAGGAATTTTCACAGAAGAAGACACTGAAAATCTGTGAGGTAATAATTAATTCATTATTTTCTTGT  
CTGCATAATCAAGTATACTTTTTATTAGCAATACGTAAGGTCATGTAAAC

>PGSC0003DMG400028591LRR-RLPs\_2914

TTTCTTGTCTGCATAATCAAGTATACTTTTTATTAGCAATACGTAAGGTCATGTAACTACAACATAATCC  
ATTGATATTAATGGGAATTGGAACTTTGTTTTTTGTACAAGCTCTAGT

>PGSC0003DMG400028591LRR-RLPs\_2976

ACATAATCCATTGATATTAATGGGAATTGGAACTTTGTTTTTTGTACAAGCTCTAGTCCCAAAGAGTTT  
CTTAGATATTCAATACTTTCAAACCTTTTTTTTTAAAAAAAATAAAAAAT

>PGSC0003DMG400028591LRR-RLPs\_3038

AAAGAGTTTCTTAGATATTCAATACTTTCAAACCTTTTTTTTTAAAAAAAATAAAAAATCAAGGAAGTGCAC  
ATAATATCCTAATGTAACTCATTGTTTATCATTGCTATTCAGATGACA

>PGSC0003DMG400028591LRR-RLPs\_310

CTTGAAGGAACATAACCTAATAGTAGCCTTTTCCAGCTTCGTCATCTTCAAACACTCGATCTTTCCTCT  
AATAACTTTTCAGTTCTCAATTTCCACAGGGGATTGGTCAGTTGGTC

>PGSC0003DMG400028591LRR-RLPs\_372

TCTTTCCTCTAATAACTTTTCAGTTCTCAATTTCCACAGGGGATTGGTCAGTTGGTCAGCTTAACGCATC  
TCAATCTTCTTACTGTTGGTTCAAAGGGAGGATTCCATTAGGCATGTC

>PGSC0003DMG400028591LRR-RLPs\_434

TAACGCATCTCAATCTTTCTTACTGTTGGTTCAAAGGGAGGATTCCATTAGGCATGTCACACTTGTCCAAT  
TTGGTTTCCCTTGATCTATCTGATAACTATTATCCCTTTGTACACTTAA

>PGSC0003DMG400028591LRR-RLPs\_496

TTGTCCAATTTGGTTTCCCTTGATCTATCTGATAACTATTATCCCTTTGTACACTTAAGTCAGGACGTATTC  
AATATGCTCTTTCAAAACCTAACCAAGTTAGAGTTACTTTCTCTTTCT

>PGSC0003DMG400028591LRR-RLPs\_558

GGACGTATTCAATATGCTCTTTCAAAACCTAACCAAGTTAGAGTTACTTTCTCTTTCTCATCTAAACATCTC  
ATCCAGCATACCCATGAATCTATCATTCTTCTTCTTTGAGATATCT

>PGSC0003DMG400028591LRR-RLPs\_62

TGTATGCAGTTGAAGTGGTATGTTTTTCATTTGGTGATCCACTTTGCTCTTCTCATGATTCCCTTGCACTTT  
TACAGTTTAAGCATTCACTTAACGCGACAGGTGACCATCAATATGATT

>PGSC0003DMG400028591LRR-RLPs\_620

TAAACATCTCATCCAGCATACCCATGAATCTATCATTCTTCTTCTTTGAGATATCTAAATCTTGACAACA  
CTTACTTGCAAGGAGACTTGCCAAAAACATTTTCCTCCTGCCCAATC

>PGSC0003DMG400028591LRR-RLPs\_682

CTTGACAACACTTACTTGCAAGGAGACTTGCCAAAAACATTTTCCTCCTGCCCAATCTGGAAACTCTCA  
GACTCTCAGGAAATTATCTAACTGTTTCTTTACCCGAGTTCAACTGGAGC

>PGSC0003DMG400028591LRR-RLPs\_744

AACTCTCAGACTCTCAGGAAATTATCTAACTGTTTCTTTACCCGAGTTCAACTGGAGCAGTAGTACTCATT  
CACTAAGGGAGTTAGATCTCTCTTTAATAATGTTTCTGGAGGGATACT

>PGSC0003DMG400028591LRR-RLPs\_930

CGGACCATTTCCAGAATTCATTGGGAACCTTTCACAGATCACCCAAGTAGATCTTTCAGACAACACTATTTGG  
ATGGCAAATTCAGACGTTTTTTCCAACCTTGCAAATGCTTACATCCTT

>PGSC0003DMG400028591LRR-RLPs\_992

ACTATTTGGATGGCAAATTCAGACGTTTTTTCCAACCTTGCAAATGCTTACATCCTTGTCACTGAAGAAC  
AACAACTTCACTGGCCCTTCCCATCCTCTCTTGTGAATTTGACAAACC

>PGSC0003DMG400028617G-LecRK\_0

GTCACAGTAAAAGTTCTACAAACAATATCATCGAAACTTGGGAACAGATACTGGAATGTCAACCGAGCC

TCTTGTACGCAGGAGAGGGATTTAACATGACGGATCCTAATTATGATGAA

>PGSC0003DMG400028617G-LecRK\_1037

TGTAAGACATAGATTCAACGTCTAATATCTACTTATTGTTACATCTATTCCAAATTATTTGGCACTTTTCAA  
TTCCCAGTTGTCAAATAAATTGCATTTCTTTCACCGTTTTTATTGG

>PGSC0003DMG400028617G-LecRK\_1342

GAAATAGATTTATTTATAGCCATAGAAGTACTGTTTCTGACAGTTTGCAACCTTCCAGAATACCTTAAGA  
GAAGTACTATTTTCGGAAAGTTTCTTAAGATTGTTGTTTATTGTAAATAA

>PGSC0003DMG400028617G-LecRK\_1403

ACCTTAAGAGAAGTACTATTTTCGGAAAGTTTCTTAAGATTGTTGTTTATTGTAAATAATAGGATACTTAG  
AACAACTTTGCAGAACTTCGTAAGAAACATCACTTCATATTCCCTTC

>PGSC0003DMG400028617G-LecRK\_1464

GGATACTTAGAACAATACTTTGCAGAACTTCGTAAGAAACATCACTTCATATTCCCTTCATTTCTCATTAT  
TATTATTATTATTATACCCAACACTTTTAATATGAAGAAAGAGTTAAT

>PGSC0003DMG400028617G-LecRK\_1525

TTCTCATTTATTATTATTATTATACCCAACACTTTTAATATGAAGAAAGAGTTAATCGAGTCTAATTTA  
GCTCCAAAAGTTGGTCAAATTGTATCAAACATAAGCAAAAAGTGTCGA

>PGSC0003DMG400028617G-LecRK\_1708

GTTGCTTTCTGCCAATAATCTCAATGGAECTATACCTGAGAECTTCAGCAACCTTAAGAACATGAGAGAT  
TTGTAAGCAAGAAAATGTTATAAGAACATTTGACTTTTGTGCTTCAATCT

>PGSC0003DMG400028617G-LecRK\_1769

ATGAGAGATTTGTAAGCAAGAAAATGTTATAAGAACATTTGACTTTTGTGCTTCAATCTCTTAACTCTTTC  
GTCTGTTTGCAGTAGGATCGATGGGACTAGCATATCTGGAACCATACCA

>PGSC0003DMG400028617G-LecRK\_2135

CACACGTCTCTCGTACTACCTGCTATAGCGGAAGTTCTCATGTGCATTGTTGTTTTTCAGGACAATATCTGA  
TTTGAGAGGAAAACAAATGCAATTTCCAAATCTTCAAGGCTTGAGGAAT

>PGSC0003DMG400028617G-LecRK\_2196

CAATATCTGATTTGAGAGGAAAACAAATGCAATTTCCAAATCTTCAAGGCTTGAGGAATATGACAAGGC  
TGTGAGTAGTTGGAAATTTAGCTATTACATCTCTTCATTTTAATTTTCGTAT

>PGSC0003DMG400028617G-LecRK\_2379

AGATATGTAGGTGACATGCCTTTGAACTTTTGTAAGTTTGCATCTCCTCTTTTCGATTTTTTTTTTTTTGTCT  
ATAATACAAACCTGGAATTACCCTATATTGTATAAAAAGGAAAATCTT

>PGSC0003DMG400028617G-LecRK\_2501

ACATACCAATGCATTCGTCGTATTTGCATGATGGAGCAAAGATTTTCACTAATTGTTTGGATACCACAGT  
GGTTTGCTTTGCTGTCTAGTTTGATGCTAAACCTGCCTGCTTCTGATAAC

>PGSC0003DMG400028617G-LecRK\_2562

TACCACAGTGGTTTGCTTTGCTGTCTAGTTTGATGCTAAACCTGCCTGCTTCTGATAACAGTTATTTAATT  
ACTTGCAGGGACCTGAGTAACAATATGTTGAATGATACAATCCCAGATA

>PGSC0003DMG400028617G-LecRK\_2806

ACAAGCAAAAGTTTTATCTGCAATGTAGGTTGCTTGGTAACAACACATTAAGCGGAGCAATCCCAGCT  
GGATGTTTAGTAAAAGAGAGAACATGTTGGTATTTGCTCAATTTATTCCGT

>PGSC0003DMG400028617G-LecRK\_2867

TCCCAGCTGGATGTTTAGTAAAAGAGAGAACATGTTGGTATTTGCTCAATTTATTCCGTTTTCTCATCTT  
AGTAGTAAACTTTGGTTATTATTATAGTTAGCCACACTTCAAAGTTAAC

>PGSC0003DMG400028617G-LecRK\_3050

ACAACTACAATTTTTGCAGTGATTTATCATAACAATTTCACCCATACAACACTACTCCAGGATGCCAGTC  
CTCTACCATGTGAGCATTCAATTTATTATTGCTTTTTTTATTAGTGAGAA

>PGSC0003DMG400028617G-LecRK\_3111

GATGCCAGTCTCTACCATGTGAGCATTCAATTTATTATTGCTTTTTTTATTAGTGAGAATTTCCGGTCCTTTA  
ACTACATAACTTACTAACATTCTTTCTTTAATAGAACTTAGCCGCCA

>PGSC0003DMG400028617G-LecRK\_3172

TCGGTCCTTTAACTACATAACTTACTAACATTCTTTCTTTAATAGAACTTAGCCGCCAGCTATTCAGATAC  
AATGAACACGTTCAAAAACATGTAAGTCCTCCTAAATGTTGTCTTATG

>PGSC0003DMG400028617G-LecRK\_3233

TATTCAGATACAATGAACACGTTCAAAAACATGTAAGTCCTCCTAAATGTTGTCTTATGCATCAGGTGCT  
AGTTTGTTGATGCCTTCTATCTATTGTCGGCTTTATCTATTGCAAATTG

>PGSC0003DMG400028617G-LecRK\_3294

TCAGGTGCTAGTTTGTTGATGCCTTCTATCTATTGTCGGCTTTATCTATTGCAAATTGTAGGGATGCCTG  
GTGTTCCATGAAACCCCTCATTTGTCCCACAGAAGCGAAATGTAAGAGT

>PGSC0003DMG400028617G-LecRK\_3660

AGAACTACATTTGAGGGAAATGATTATGAGGAGGACAAGATCAGTTCGGGTCCATCATATTTTTCTTCGT  
CCTCCGATAAATGGGCATTCAGCACTTCAGGAGTGTACGTGGGTCGAGTA

>PGSC0003DMG400028617G-LecRK\_3721

TTTCTTCGTCCTCCGATAAATGGGCATTCAGCACTTCAGGAGTGTACGTGGGTCGAGTAAATGCTAGCTA  
TATTGCAACAATAACATTTTCACTAGATGTGTCCGGTCCTGACTTTTACA

>PGSC0003DMG400028617G-LecRK\_3782

TGCTAGCTATATTGCAACAATAACATTTTCACTAGATGTGTCCGGTCCTGACTTTTACAACACAGCACGCC  
TTGCCCAAATTCTCTCAAATATTATGGGCTTTGTCTACGAGGAGGTAG

>PGSC0003DMG400028617G-LecRK\_3965

TGGAAGGCGGATATTTGATGTAGCAATACAAGTAAGTTTGAGGCCTAACTTCTTTTGAAATAATAAATA  
TGTAATCTAAAATGTTGATTTATTCAGTTCAGATATGATTTGGTCACTTG

>PGSC0003DMG400028617G-LecRK\_4026

TAATAAATATGTAATCTAAAATGTTGATTTATTCAGTTCAGATATGATTTGGTCACTTGATGTAGATATAC  
TGAGTTCTGATATGATTGGCAACTTTCTGATTTAATATTGAATGTTGGA

>PGSC0003DMG400028617G-LecRK\_4758

AGATAGTTAGCACACAATAAATGCTCATGACTGCTTAACTATATATCTTCGTCATACAGATGTTTTAGA  
AGATCTATATACTGACGTTTGAATATTCTTCTCGTTTACAGAACTC

>PGSC0003DMG400028617G-LecRK\_4941

TTTGATCCTGCCAACAAAATTGGTGAAGGAGGGTTTGGACCAGTTTACAAGGTATCAAATCTCTATCTCT  
CTCTACCCATACTGATTTTGCGCAAGGATAGCTTGTGGTTCTGTGGTGAT

>PGSC0003DMG400028617G-LecRK\_5002

TCTATCTCTCTACCCATACTGATTTTGCGCAAGGATAGCTTGTGGTTCTGTGGTGATATTCCTACTGT  
GCGTAACGTTTATAGGAAAATAGCTGATATAATCCATATCCTACGTTCT

>PGSC0003DMG400028617G-LecRK\_6039

CTCTGTACGGAGGTATCTTGCATATTTAGTTTTTCTTTCTCTAGCTAATTTGATGTTTGCTATGTATGTG  
AATGTTTGTGTTTAGGCTTACGTCCTACAAGAACAGGGAAATCTGTTAG

>PGSC0003DMG400028617G-LecRK\_61

ACCGAGCCTCTTGTACGCAGGAGAGGGATTTTAAACATGACGGATCCTAATTATGATGAAGTTTTTCAGCA

ATGTAAAATGTAATTGTTCAATAATGGCTCAGTTTGCCATGTTGTAA

>PGSC0003DMG400028617G-LecRK\_732

AAGCTATGGCCAGCTTCGCGTCACTAATTTGTAAGTTCTTTTCTGTTTAATCTTTTCAATGAAGAATTTTTG  
ACATTTTGTTCAAACTCAGGTCCTTGGGTAACCGTATCAGTGGGC

>PGSC0003DMG400028617G-LecRK\_976

AATAATCTACTTGAAGGACCTCTTCTCCGAACCTTGGTAGCTTGAACCGCCTCAGAAGAATGTAAGACA  
TAGATTCAACGTCTAATATCTACTTATTGTTACATCTATTCCAAATTATT

>PGSC0003DMG400028688LRR-RLKs\_0

TTTTGCTTCTCTATACAAACTCTCTCATTCTTAGCTTTCCAGTTTTCTGTGGGCCCTTTTTCTCATGTGCTT  
CCTTCTTCTTCTACTCTCAACTCTGCAAAAAACCCTACCACATTGC

>PGSC0003DMG400028688LRR-RLKs\_1037

AACTTACTGAACCTGAACGTTTAGAGCTTCAAGGGAACAATATTTCTGGGCCTTGCCTAGTTTGAAAGG  
TTTGAGTTCATTGCAAGTGTACTGCTTGGTGAAAATCAGTTTAGTTCAA

>PGSC0003DMG400028688LRR-RLKs\_1098

TTTGAAAGGTTTGAGTTCATTGCAAGTGTACTGCTTGGTGAAAATCAGTTTAGTTCAATTCCTGCTGATT  
TCTTTACTGATATGTCTTCATTAATCTGTTGATATGGATAAGAACCC

>PGSC0003DMG400028688LRR-RLKs\_1159

CCTGCTGATTTCTTACTGATATGTCTTCATTAATCTGTTGATATGGATAAGAACCCTTTTGTTGGTTGG  
GAGATCCCTGAAAGCCTTAGAAATGCTTCTTCACTTAAAACTTTTCA

>PGSC0003DMG400028688LRR-RLKs\_122

AATGTTTCTCTTCTAATCTTGAAAAAGATTGAATTTTTGCTATAAAGAACAATTGGTTTCTTGTTTTTCTT  
CATTGTCTTGCAAAAAGTTTCAATCTTTGCAAAAAGAAATGAACACCC

>PGSC0003DMG400028688LRR-RLKs\_1891

AAAATGGGGCTTTCAGGAACAATTTCTCTGAATTTGCTTCACTGAAGTCGCTACAAAAAATAGTTCTTG  
CAGATAATAATCTGACTGGTACAATTCCAGAAGAGCTAACCACATTGACA

>PGSC0003DMG400028688LRR-RLKs\_305

AAAAAGTTTCAATCTTTACAAAAGAAATGAGCACCTTCTTGTGTTAAAGCTTGTATCTTACTTGTCTG  
TAAAGAACACTTGGGTTCTTGTTTTTTATTTCAATTGTGTTGTCAAAAAG

>PGSC0003DMG400028688LRR-RLKs\_3233

ACTGATGAGAGTCAGATGATACTAACTGTACTCCAAGAACTTAGCCTGTTTTACATTAATCAACTTTTGC  
CCTATAATAGGTCTGTAACAGTATATATTAATGTTTTGTCTTTTTCTC

>PGSC0003DMG400028688LRR-RLKs\_3294

CAACTTTTGGCCTATAATAGGTCTGTAACAGTATATATTAATGTTTTGTCTTTTTCTCAGTCAATTATACT  
TGTGCTCATGGTTAAGAACCTGCCATTCATACATTGTCATATATCAAA

>PGSC0003DMG400028688LRR-RLKs\_3416

TCCTTATTGATTCTGTCATCCCTTTAATGCTATGATTACTTAGTTTCTAAAAGTGGATACCCATCCTACTG  
GAAACACTTTTTCTGATGCATTTGCTTAATGCCACCGTTTTCTACTT

>PGSC0003DMG400028688LRR-RLKs\_3477

CCATCCTACTGGAAACACTTTTTCTGATGCATTTGCTTAATGCCACCGTTTTCTACTTTGGCCTCATCACA  
CACTTTAAACATGTTATTATTCCTATGACAGAAGATCCTCTTGTTTTC

>PGSC0003DMG400028688LRR-RLKs\_3538

GCCTCATCACACACTTTAAACATGTTATTATTCCTATGACAGAAGATCCTCTTGTTTTCTTTCCCCTTAGT  
GGAATTTAAGGATAGCCAAATTTGTTATTTGCTCACTTCCTGATTGT

>PGSC0003DMG400028688LRR-RLKs\_3599

TTCCCCTTAGTGGAATTTAAGGATAGCCAAATTTGTTATTTGCTCACTTCCTGATTGTGATTTGTGCATA  
GGAGTTCTTGGAATGTAGATACATCATTATCTAAACTTGTATTTTATCT

>PGSC0003DMG400028688LRR-RLKs\_366

ACTTGTTCTGTAAAGAACACTTGGGTTCTGTTTTTATTTCAATTGTGTTGTCAAAAAGTTTCAATCTTTAC  
AAAAGAAAACACCCATCTTGTTTAAAGCTTGTAGCTTTACTTGTCT

>PGSC0003DMG400028688LRR-RLKs\_3660

TTTGTGCATAGGAGTTCTTGGAATGTAGATACATCATTATCTAAACTTGTATTTTATCTTGTTTCGTCTGCC  
AGTAACTGGGAGAGTGACAACCAAGGTGGATGTGTTTCAGTTTTGGTGT

>PGSC0003DMG400028688LRR-RLKs\_3721

TTTCGTCTGCCAGTAACTGGGAGAGTGACAACCAAGGTGGATGTGTTTCAGTTTTGGTGTGATTTTGATG  
GAGCTCATCACAGGAAGAAAGGCTCTTGATGAAAGCCAGCCTGAGGAGAGT

>PGSC0003DMG400028688LRR-RLKs\_427

TCAATCTTTACAAAAGAAAACACCCATCTTGTTTAAAGCTTGTAGCTTTACTTGTCTATAAAGAACACT  
TGGGTTCTTGTTTTTTTTCATTGTCTTATCAAAAAGTTTCAATCTTTA

>PGSC0003DMG400028688LRR-RLKs\_4270

GACACTCTTTGATCTAGGTTTGGTTGTTCACTCTCTGTTTTCTCCTCATCGCGAGTCACACATCATTTTT  
TTCTTCTTTTTTTTTGCTTTAACTCTGATGCTTTTACCTTAACTCA

>PGSC0003DMG400028688LRR-RLKs\_4331

CACATCATTTTTTCTTCTTTTTTTTTGCTTTAACTCTGATGCTTTTACCTTAACTCATTGTTAGTTTTGGCA  
CTGTGGTGAATAGGGATTCTTTTTAAGATTTTTGATGTCTTTTGAC

>PGSC0003DMG400028688LRR-RLKs\_549

AAAGAAATGAACACCCTTCTTGGTTTAAAGCTTGTAGCTTTACTTGTCTATAAAGAATACTTGGGTTTCGT  
GTGTTTTTTTTCATTGTCTTGTCAAAAAGTTTCAATCTTTACAAAAGAAA

>PGSC0003DMG400028688LRR-RLKs\_61

TCTCATGTGCTTCCTTCTTCTTCTACTCTCAACTCTGCAAAAAACCCTACCACATTGCACAATGTTTCTCT  
CTAATCTTGAAAAAGATTGAATTTTTGCTATAAAGAACAATTGGTT

>PGSC0003DMG400028688LRR-RLKs\_610

TTGGGTTTCGTGTGTTTTTTTTCATTGTCTTGTCAAAAAGTTTCAATCTTTACAAAAGAAAACACCCATCTTG  
GTTTAAAGCTTGTAGCTTTACTTGTCTATAAAGAATACTTGGGTTTCGT

>PGSC0003DMG400028688LRR-RLKs\_854

CTCAAGATGATGATGTTTCAGTGATGTTAGCTTTGAAAAAGAGCTTAAATCCACCTCAAGAAGTTGGATG  
GTCAGACTCGGATCCATGCAAATGGAACCATGTGGGTTGTTTCAGATAAAC

>PGSC0003DMG400028801-(rev)LRR-RLKs\_0

AACACATCCTAGAACTACTAAGTACACACTTTTTCATCACTCCTACAAAGAACACCATTCTTTCTTCTTACTT  
CTGCTACTACATTTCTCTCTGCTATGAATTTCTAGCAGTTCTTGGTTC

>PGSC0003DMG400028801-(rev)LRR-RLKs\_1464

ATTATTTTCAGCAGGGAGGAAAACTTCTTGTCTTTGACTATATGCCAATGGGAAGCTTGTCTGCTCTTCTT  
CATGGTAAGTTTTAGTACACTCTTTTACTGTCAATTCATGTTGTTTCGGA

>PGSC0003DMG400028801-(rev)LRR-RLKs\_1525

TGCTCTTCTTCATGGTAAGTTTTAGTACACTCTTTTACTGTCAATTCATGTTGTTTCGGACTCTCTAAAAATG  
TTACCACATCTGTGCGAAATCATCAAAAAATGCACTACTTTGGAGGAT

>PGSC0003DMG400028801-(rev)LRR-RLKs\_1586

CTCTAAAAATGTTACCACATCTGTGCGAAATCATCAAAAAATGCACTACTTTGGAGGATTCGACACACAC



TCAGTGGTATGGATCCTCTAACAATACTACCTTTTTGGAGGATCTCAC

>PGSC0003DMG400028801-(rev)LRR-RLKs\_1647

GACACACTCAGTGGTATGGATCCTCTAACAATACTACCTTTTTGGAGGATCTCACATGCACTTAGC

AGCATGGGTCCTCAAATATGCACTACCTTTGGAGGATCCAACACTCAGT

>PGSC0003DMG400028801-(rev)LRR-RLKs\_1708

GCACTTAGCAGCATGGGTCCTCAAATATGCACTACCTTTGGAGGATCCAACACTCAGTGGCATGGATTC

TCAAAAAAAAAATTCACTATTTTTGGAGGGTCCGACATGTATTGGTCGATA

>PGSC0003DMG400028801-(rev)LRR-RLKs\_1769

CATGGATTCTCAAAAAAAAAATTCACTATTTTTGGAGGGTCCGACATGTATTGGTCGATATTTTAATGAG

TTCAAGCAACATAGCTACCAATATCTGGTGTTTTACTTGCTTTTCCCTTA

>PGSC0003DMG400028801-(rev)LRR-RLKs\_1830

TTAATGAGTTCAAGCAACATAGCTACCAATATCTGGTGTTTTACTTGCTTTTCCCTTATTCAGTAGATGC

ACTATATTTGTTCCAGATTTTGACATTTTGTTAGAGTAATTAGTTTGAC

>PGSC0003DMG400028801-(rev)LRR-RLKs\_549

TCCAGGGTAACTTTTTTACCGGAGCTGTTTCTTCTCCTTCTCTGGGCTTCACTCTTAGTTCGGTTAAATC

TCGCCGAAAACAATTTTTCTGGAGAAATCCATCTGGGTTAACAGTT

>PGSC0003DMG400028801-(rev)LRR-RLKs\_610

TCGGTTAAATCTCGCCGAAAACAATTTTTCTGGAGAAATCCATCTGGGTTAACAGTTTGATCCGATTG

AGAACATTTCTACTTGAGAAAACCAGTTTTCTGGGTTTATGCCTGAGCT

>PGSC0003DMG400028845-(rev)LRR-RLKs\_1037

ACACCAATGAGTTTGAAGTTGATCAAACCTTAATAAAGCTATATAATTTACTTTTGGACTCCTGATGATC

CAAAGAGTTTCACAGTAATGGTTTGGTTAAGTTGCTCGCTACTTTGTAC

>PGSC0003DMG400028845-(rev)LRR-RLKs\_3050

ATGCCACATGTGTAGATATTATGTCTTATGTCTACATCTCCTTCAGTTTCAGTTAAATCCATTGGTTGAAA

ACCATGTTCACTTCTATTATTTAGGAATGTTGAAAACAACCAATTTA

>PGSC0003DMG400028845-(rev)LRR-RLKs\_3111

TTGGTTGAAAACCATGTTCACTTCTATTATTTAGGAATGTTGAAAACAACCAATTTACTGGCTGGATTC

CAGATCAGCTTAAAGGGATAGTGCAGTGAGTGTCTTAGATTGCAATAAT

>PGSC0003DMG400028845-(rev)LRR-RLKs\_366

ATGAACAAACCCAACTGAAAAAACTTGTTTCTTTGAAGCCCCATGATATTGAAAAGAAAATAGCATTGGA  
AAACTAGGTCTAGGCTTGGTAGATAGAGTTATGTGGTACATGTTGTTG

>PGSC0003DMG400028845-(rev)LRR-RLKs\_3721

TATGGAAAATGATGTCTAAGCCTCTATCCTTACCTTGCTAATGATTGGTCATAAACCATGCAAGTAGTATC  
AAAATTTTGCAAGGGGTTGTCATTGATACAGAAGGAAGCAGCAAAGCTG

>PGSC0003DMG400028845-(rev)LRR-RLKs\_4026

TTAACATCAGCTACCCTTGATGGTTTAACTTCCTGGGAGACAAAACTCTTGAGAATATAGTTGACCCGA  
AGAACTCTTGCTTCAGACTGTAAGTGCAGCACAGTGAAGGAGTCATCTT

>PGSC0003DMG400028845-(rev)LRR-RLKs\_4087

TTGACCCGAAGAACTCTTGCTTCAGACTGTAAGTGCAGCACAGTGAAGGAGTCATCTTCAGGTTTCATAT  
TTGGGAAGTTGCTTCTCCTTTTACTCCATCAAAAGCCCACAAAACAAA

>PGSC0003DMG400028845-(rev)LRR-RLKs\_427

AGCATTGAAAACACTAGGTCTAGGCTTGGTAGATAGAGTTATGTGGTACATGTTGTTGGTATATATCCT  
TGGAATTAGTTAGTTGCACACAAGCTGGCTCGGACACTGTGGTTATCATA

>PGSC0003DMG400028845-(rev)LRR-RLKs\_4270

TTATAACTTTCATGCCTCATTTTCATTATTGACTTCAATGATGTCATGGAATCCGAGTTGGAGCTTGATTT  
GCTTATGTCTAACTTTTTTCATTGCTGTGTTGCTGTTTTTTTAAAAAGGT

>PGSC0003DMG400028845-(rev)LRR-RLKs\_4331

GCTTGATTTGCTTATGTCTAACTTTTTTCATTGCTGTGTTGCTGTTTTTTTAAAAAGGTAACGTCACTGTTA  
TATTTTGTGTTGCTTCTGGAATTCCTACTCATTGTCTGTTTTTGGTTGC

>PGSC0003DMG400028845-(rev)LRR-RLKs\_488

ATATATCCTTGGAATTAGTTAGTTGCACACAAGCTGGCTCGGACACTGTGGTTATCATAAAAAAGAAATC  
TTTGAAAATGATGGATATAATAAGTCTTGCTTGGGCTGCATCAATGGTAG

>PGSC0003DMG400028845-(rev)LRR-RLKs\_549

AAAGAAATCTTTGAAAATGATGGATATAATAAGTCTTGCTTGGGCTGCATCAATGGTAGTCTTCACTTTC  
GAGTATGGGAAATACTCATTACTTATGGCTGAACAACCCCTTAGTCTTGT

>PGSC0003DMG400028845-(rev)LRR-RLKs\_5551

TGGCTAATTACTAGTAGTTTACATGAATCTTCTGCTTATCTATATCGGAGATTCATAGAATAGATCTTCTG  
GGTAGAAGAAAAGGGGATTCTGTGAAAGTCAATACCAAGCACTTAGTCG

>PGSC0003DMG400028845-(rev)LRR-RLKs\_61

GACCCTTTTCTTCTTTTAGTGTCTTTTTCTCACTCTAAAAAGAGTCTTTCTGTGTTGTTGGTGTGGGAGAG  
ATGAGGTTGTTGTTGCTACTGGCAGTAGTACTGTTGGTGGCCATTTTGG

>PGSC0003DMG400028845-(rev)LRR-RLKs\_6710

TAACTCATTTAATGAACTAGTCTTTCTATGGTCCCTGTTGCTTTATCTCCTGCTCTTCTCTACTTACTCAAT  
TGGTAAAATTGTAGCTGTTTCTTCTTAAAAGATTCACTTCATTA

>PGSC0003DMG400028845-(rev)LRR-RLKs\_6771

TACTTACTCAATTGGTAAAATTGTAGCTGTTTCTTCTTAAAAGATTCACTTCATTATCATCTTCTCAAG  
ATATTTGGAAGTGATCATCTTGCAGGCACTAAACCATAATACAGGGT

>PGSC0003DMG400028845-(rev)LRR-RLKs\_6954

GCTTTGGAGTTGTTATGTTGGAACCTTACCGGACGGACACCTTTTGATAGGTAAAGTTGCTTAGGCAT  
CATGATATTGTGTCAAATTACTTAGAGACAAACAGGAAGAAATTCAGAAA

>PGSC0003DMG400028845-(rev)LRR-RLKs\_7259

CTTTGTGTCCAGGTAATATTTTGTATAGACGGTGTGCCTAATTCATAAATCTGCTGTGTTTATCAAGAACT  
TGATTCTGTTAGTTCAGTCAACACTATCTCATTGTCATGTATACTATTG

>PGSC0003DMG400028845-(rev)LRR-RLKs\_7320

ATCAAGAACTTGATTCTGTTAGTTCAGTCAACACTATCTCATTGTCATGTATACTATTGTGGCAGTCTGAG  
CCTGAGTTCCGGCCACCTATGTCAGAAGTGGTTGAAGCCTTAGTTCGGC

>PGSC0003DMG400029146LRR-RLKs\_1281

CTTCATGGCGAAATCCCTGTAAGCTTGAGTCATTGCAAAGCTTACAAAGGGTCCGCCTTCAAACAACC  
ACCTCACCGGTGAATTGTCCCAGAATTCACAAAACCTCCCACTTGTTTAC

>PGSC0003DMG400029146LRR-RLKs\_1342

AAAACAACCACCTCACCGGTGAATTGTCCCAGAATTCACAAAACCTCCCACTTGTTACTTCCTTGATATC  
TCGGGCAACAATCTATTTGGCTCCATTAGCGAAAGACGATGGGATATGC

>PGSC0003DMG400029146LRR-RLKs\_1464

TCACTTCAAATGCTAAATTTGGCTAAGAACAAGTTTTTTGGTACCTTGCCTGATTCTTTTGGTAGCAAGAA  
ACTCGAAAACCTGGACTTATCCGAAAATGATTTTAACGGTACTATTCT

>PGSC0003DMG400029146LRR-RLKs\_1525

GTAGCAAGAACTCGAAAACCTGGACTTATCCGAAAATGATTTTAACGGTACTATTCTAAGAATTTTCGG

AGAGTTATCAGAGTTAATGGAGCTCAAACCTACGAAGCAACAAGCTTTCAG

>PGSC0003DMG400029146LRR-RLKs\_1830

TTGGTTAACATCTCTCACACCATTTCAGTGGATATTTACCGTCCACCGGAGCTTTCCTAGCCATAAATTC

AAGTGCGGTGGTTGGAAACCAACTATGTGCCCGTGGGGACGACATTACA

>PGSC0003DMG400029146LRR-RLKs\_1891

CCATAAATTCAAGTGCGGTGGTTGGAAACCAACTATGTGCCCGTGGGGACGACATTACAAGCGGCTTAA

CGCCTTGTAATCACTCAAGAAAAGCTCAATTTGGTGGTTCTTCTTGACAT

>PGSC0003DMG400029146LRR-RLKs\_2074

GAAGAGAATTGAAGCTAAAGAAAGTGGAGAGTACTACTCAAGATGGTAATAATTGGGAAATTCAATTCT

TTGATTCAAAAGCCTCAAATCCATCACCTAGATGACATCTTAGGGATTG

>PGSC0003DMG400029146LRR-RLKs\_2623

CATCTACGGTACTTCTCTTGTGTTTTGACATTTTTTAAGAGTTTAAGTAATATACAATCGTAAGCTAAAACAT

CATATATTCTATCAGGTAACATGTCTTATTTGCAAGATTATAAGCTTA

>PGSC0003DMG400029146LRR-RLKs\_2684

AGCTAAAACATCATATATTCTATCAGGTAACATGTCTTATTTGCAAGATTATAAGCTTACTTACATACATC

TTTCAACTGACTAGATCATGTAAATTAATTTATACTGATAATGCATATA

>PGSC0003DMG400029146LRR-RLKs\_2745

TACATACATCTTCAACTGACTAGATCATGTAAATTAATTTATACTGATAATGCATATAACTTAATTAACTC

GTTAGTTTAATAGTTAAACAACCTTTGTTATAACTTAAACAAACCACAT

>PGSC0003DMG400029146LRR-RLKs\_305

TGACTTGTACATGTTGCAAAAATTGAGCTATCAGGGAAGAACTTATCTGGAAAATTATCCGAGACTATT

TTCAACTTTCCATACGTTGAATCGATTGATCTCTCGAATAATCAACTCTA

>PGSC0003DMG400029146LRR-RLKs\_3111

ATTAAGCAAACAAATGTCATGGAGGCAATCATGAATGTTTTTTCTCTTAAAATAAATGTAGAGACATAA

ATCTTATCATTCTTTCTTTACGTAGAAAACAATAAATCTAGTCTAGTGT

>PGSC0003DMG400029146LRR-RLKs\_3172

GAGACATAAATCTTATCATTCTTTCTTTACGTAGAAAACAATAAATCTAGTCTAGTGTAAACAAAAGTCAT

GACCTTTTATGCCATGCACGTACAATACTGTTACTTAATTACGAGTTAC

>PGSC0003DMG400029146LRR-RLKs\_3294

CTTTTCTCATAAATTGTAGAATACAATGGAATATCGGAGAGGAGCGATATATATGGATTTGGGCTTGTTT  
TGATCGAGTTATTGACTGGAAAAAATCGCGGTGATGCTGAATTTGGGAAG

>PGSC0003DMG400029146LRR-RLKs\_3355

GGCTTGTTTTGATCGAGTTATTGACTGGAAAAAATCGCGGTGATGCTGAATTTGGGAAGCGTGAGAGTA  
TAGTTGATTGGGCGCGATATTGTTACTCAGAATGTCATTTGGATAACATGGA

>PGSC0003DMG400029146LRR-RLKs\_366

GAGACTATTTTCAACTTTCCATACGTTGAATCGATTGATCTCTCGAATAATCAACTCTATGGAGAAATTCC  
AAGCAATATCTCAACTTGTGGGCGCTGAGATTTCTCAATCTGAGTAAC

>PGSC0003DMG400029146LRR-RLKs\_427

GAGAAATCCAAGCAATATCTCAACTTGTGGGCGCTGAGATTTCTCAATCTGAGTAACAATAACTTCAC  
AAGTCTACTTCCTCAAGGCTCGAGAATCCCACTTCTCGAGACATTGGATC

>PGSC0003DMG400029146LRR-RLKs\_488

TAATTCACAAGTCTACTTCCTCAAGGCTCGAGAATCCCACTTCTCGAGACATTGGATCTCTCAAACAACA  
TGATTTGGGGAAAATCCCCGAAAATATTGGTTTATTCTCAATGCTCAA

>PGSC0003DMG400029168-(rev)LRR-RLPs\_0

ATCATCAATAGAGAAGAAAAAGAAGTTGAGCATTTGTCAAATCCGGTGAAGGAGCAATGGCGGCAGA  
AACTATTTGGAACAGAGAAACAGTGCCAAAAGTGATGAAAATAGTGAGCACG

>PGSC0003DMG400029168-(rev)LRR-RLPs\_1159

TTTTTTATTTTTTTTTGGGTTGTTTTCTCAACCAATAGAAGGTCTAGTAGTACTACCTTGTTCTAAAATTA  
CTACTAGAGAGAAGACCAATATTTAAGTTGGACATAAACCATGTATTA

>PGSC0003DMG400029168-(rev)LRR-RLPs\_122

GCTTCAACAAAGAGACCTCATCACTCTTCTACTTGCCAGCCCTTCGATTCACCGTACTCTCCTTTCTCACCC  
CTCCCTCTGGCTGGTTAGTTCACTTTCCCACTCGATACGACTTGCTTA

>PGSC0003DMG400029168-(rev)LRR-RLPs\_1220

TTCTAAAATTACTACTAGAGAGAAGACCAATATTTAAGTTGGACATAAACCATGTATTAACAGGATAAGA  
ACTGGATTACTTGGTCTCAACACCTTCATCTTAAATACTCACCACTGGC

>PGSC0003DMG400029168-(rev)LRR-RLPs\_1281

AGGATAAGAACTGGATTACTTGGTCTCAACACCTTCATCTTAAATACTCACCACTGGCCAGACTAAATTT  
TTTTGATAGATAACCGCTAAGACAGGCTTCATTGGCTTCTTTGTTTGT

>PGSC0003DMG400029168-(rev)LRR-RLPs\_1342

GACTAAATTTTTTGATAGATAACCGCTAAGACAGGCTTCATTGGCTTCTTTGTTGTTTTGTTTTGTCA  
AGCAACAGGAACACTAGTAAGGAACTAGTGCCCTTTGTCGTAGCCTCC

>PGSC0003DMG400029168-(rev)LRR-RLPs\_1403

GTTTTTTGTCAAGCAACAGGAACACTAGTAAGGAACTAGTGCCCTTTGTCGTAGCCTCCTCCATATTA  
GATAACCACTAGGCCACACTTCTTTGGATCTTGTGCTTTTCTATTGTGT

>PGSC0003DMG400029168-(rev)LRR-RLPs\_1464

CATATTAAGTATAACCACTAGGCCACACTTCTTTGGATCTTGTGCTTTTCTATTGTGTAGGTGATGAAA  
GAAGCAGTATAGAAGAATGAGTTTCTTTAACTTAGGGATGCAGGTTGTT

>PGSC0003DMG400029168-(rev)LRR-RLPs\_1525

GTGATGAAAAGAAGCAGTATAGAAGAATGAGTTTCTTTAACTTAGGGATGCAGGTTGTTGTCTTATGA  
TTTCTTCTTGCAGCCGAGATATCGCAATGTGAAGCATATCAACCTTGAGTT

>PGSC0003DMG400029168-(rev)LRR-RLPs\_1586

TCTTATGATTTCTTCTTGCAGCCGAGATATCGCAATGTGAAGCATATCAACCTTGAGTTGCGCAGGATA  
TTGAAGACAAGCAACTGGAAAATGTTAAAAGCAAGGTGGGATTTAGAAAA

>PGSC0003DMG400029168-(rev)LRR-RLPs\_1647

CGCAGGATATTGAAGACAAGCAACTGGAAAATGTTAAAAGCAAGGTGGGATTTAGAAAATTGGGAAGT  
CACAGAAATTAGAATGTTTCAGATTATTTTTTTTAAAAAATCTGTGGAGGCT

>PGSC0003DMG400029168-(rev)LRR-RLPs\_1708

GGGAAGTCACAGAAATTAGAATGTTTCAGATTATTTTTTTTAAAAAATCTGTGGAGGCTGCCTTTGTTG  
ATAAGCACCTCTGGCTTATTTTTGTGACTTAGTATCAAAATCTACTTGGGA

>PGSC0003DMG400029168-(rev)LRR-RLPs\_1769

CTTTGTTTGATAAGCACCTCTGGCTTATTTTTGTGACTTAGTATCAAAATCTACTTGGAGCCATTTTATAAT  
CCTCAGAAACGTTAGAAGTGATTTTTTCTTGTGTGCAACAACCTTG

>PGSC0003DMG400029168-(rev)LRR-RLPs\_183

CTTTCTCACCCCTCCCTCTGGCTGGTTAGTTCACTTTCCCACTCGATACGACTTGCTTAGTGCGGTTTACAT  
TACTGTGTGTGGCCTGCTATTTATTGCACAACCTGGGTACCTTTTCTT

>PGSC0003DMG400029168-(rev)LRR-RLPs\_1830

CATTTTATAATCCTCAGAAACGTTAGAAGTGATTTTTTCTTGTGTGCAACAACCTGGGTGACCTGTAT

ATAGGGGTGTCAAAAATGAGGAACTATTCATATCTTACCATCTAATG

>PGSC0003DMG400029168-(rev)LRR-RLPs\_1891

TGACCTGTATATAGGGGTGTCAAAAATGAGGAACTATTCATATCTTACCATCTAATGAAGATAAAGA

AAAGTTTGCTAATTCTTGTAATTTGAGGTAACAAATTACTTTTAATGTGTC

>PGSC0003DMG400029168-(rev)LRR-RLPs\_1952

GATAAAGAAAAGTTTGCTAATTCTTGTAATTTGAGGTAACAAATTACTTTTAATGTGTCCTGCATGGTACT

ATTTTTGTCACAGAAATTTGATGTTCCCGTGGTGTAAAAAATATGCAGT

>PGSC0003DMG400029168-(rev)LRR-RLPs\_2013

GCATGGTACTATTTTTGTCACAGAAATTTGATGTTCCCGTGGTGTAAAAAATATGCAGTGTGGGGATTCC

CTTTTAGATTTAGAGATTCTAAATCTAAATGGCTGTCAAAGGATCTCTGA

>PGSC0003DMG400029168-(rev)LRR-RLPs\_2074

GGGGATTCCCTTTTAGATTTAGAGATTCTAAATCTAAATGGCTGTCAAAGGATCTCTGACAAGGGAATCG

AAGTAGTGACAAATACTTGTCTAAACTGAAGTTTTTTCCATTTATTGG

>PGSC0003DMG400029168-(rev)LRR-RLPs\_2135

AGGGAATCGAAGTAGTGACAAATACTTGTCTAAACTGAAGTTTTTTCCATTTATTGGAATGTAAGGTA

TCGCAAGCTTCATCTAATGCTCTTTCCCAATTATTATATAGCTGTTGCAT

>PGSC0003DMG400029168-(rev)LRR-RLPs\_2196

TGTAAGGTATCGCAAGCTTCATCTAATGCTCTTTCCCAATTATTATATAGCTGTTGCATGACCGAATAAAT

GTAACCTTTGTCACCTGCAATTTTTGGATAAATGTTTAGGGTAACAGATG

>PGSC0003DMG400029168-(rev)LRR-RLPs\_2257

CCGAATAAATGTAACCTTTGTCACCTGCAATTTTTGGATAAATGTTTAGGGTAACAGATGTTGGCATTACT

CATCTGGTGAAGAATTGCAGATTTGTGGTAGATTTGAACTTAAGTGGATG

>PGSC0003DMG400029168-(rev)LRR-RLPs\_2318

GGCATTACTCATCTGGTGAAGAATTGCAGATTTGTGGTAGATTTGAACTTAAGTGGATGCAAGGTACAT

GAACCTCTAATGTTCTATACGCATGTTTCAGTGATTACTTGATGAGCTTGT

>PGSC0003DMG400029168-(rev)LRR-RLPs\_2684

AGGAGCTTTTTGTTTTGTCTGATATTTGTATGATAGAGAAAACATAGAGGACTTCTACTGATAGAGACC

TAACTTTTTATGTTTGATTGAGACCAGTCTAAGTGGAGCGACATGGATA

>PGSC0003DMG400029168-(rev)LRR-RLPs\_2745

ATAGAGACCTAAACTTTTTATGTTTGATTGAGACCAGTCTAAGTGGAGCGACATGGATAGCAATGATTCA  
TATAGTTGATCCCAACTAGGCCAGGTTTGAGACATAGTATATTGCTATTG

>PGSC0003DMG400029168-(rev)LRR-RLPs\_2806

AATGATTCATATAGTTGATCCCAACTAGGCCAGGTTTGAGACATAGTATATTGCTATTGTTGTTGTATAA  
ATAGACTTTATCATCCTTCATAAATTATTATTCTTGTCTACAGTTTTTCA

>PGSC0003DMG400029168-(rev)LRR-RLPs\_2867

GTTGTATAAATAGACTTTATCATCCTTCATAAATTATTATTCTTGTCTACAGTTTTTCAACATTCATATAGA  
TGTCAGGAGAAAAGAGACCCTGTATACAAGCAGTATCCAAAAAAGTGA

>PGSC0003DMG400029168-(rev)LRR-RLPs\_2928

ATTCATATAGATGTCAGGAGAAAAGAGACCCTGTATACAAGCAGTATCCAAAAAAGTGAAGAACCTAAA  
CCGGAAATTTTTCTCTAACAAAAGCCACCAATCATCTACACAAGTAGGGGT

>PGSC0003DMG400029168-(rev)LRR-RLPs\_2989

AACCTAAACCGGAAATTTTTCTCTAACAAAAGCCACCAATCATCTACACAAGTAGGGGTATGGTGGATCT  
ACCAAAAAGAACTAAGAACACGAGGCTATTCCTCGAGTATGCAGTGTCA

>PGSC0003DMG400029168-(rev)LRR-RLPs\_305

TTTTTTTTTACTTGTTTTAATTTTTGGTGGTTTCTTTATAGGTTCTTGATTTTCATGAGATGAGTAATGCTG  
GTGATCGCCTTGCTCAGCTCTTTCTTTGGTTTGTTTCCTTTCTTT

>PGSC0003DMG400029168-(rev)LRR-RLPs\_3050

GGTGGATCTACCAAAAAGAACTAAGAACACGAGGCTATTCCTCGAGTATGCAGTGTCAATTCTCGGCGG  
TTTCAGATGTCCACTCTCTATCAAAGAACCCACATAGTGGCTGAAGAAGCA

>PGSC0003DMG400029168-(rev)LRR-RLPs\_3111

CTCGGCGGTTTCAGATGTCCACTCTCTATCAAAGAACCCACATAGTGGCTGAAGAAGCAACATCCCACGC  
TAAGAGTCCTCTCTTCTTTATCTAAAAGCCTAACTGTAAAACACTTCCT

>PGSC0003DMG400029168-(rev)LRR-RLPs\_3172

ATCCCACGCTAAGAGTCCTCTCTTCTTTATCTAAAAGCCTAACTGTAAAACACTTCCTTCACTCTGCTTTG  
CATAACCCATTGTACTAAAAATTAGTTCAGGACCGTTCACCACGAAAC

>PGSC0003DMG400029168-(rev)LRR-RLPs\_3233

ACTCTGCTTTGCATAACCCATTGTACTAAAAATTAGTTCAGGACCGTTCACCACGAAACCGTAGCCACAT  
GACAACGCAGAAGGATGTGATATGTCTTCTCCTGAAAGTTGCCGTCAAGG



>PGSC0003DMG400029168-(rev)LRR-RLPs\_3294

TAGCCACATGACAACGCAGAAGGATGTGATATGTCTTCTCCTGAAAGTTGCCGTCAAGGGAAATGCAGA  
CTTCCAGTAGACGTCCTTCTGGTTCGATTGTTGGAGTTTGTGTTTTAGAACAA

>PGSC0003DMG400029168-(rev)LRR-RLPs\_3416

GATTCTGGACAAAGGTTCTGATATTCTGCATTGTACAGTTTGTGGTCAAAACCTAGCAGATGTTGTGAGT  
TTTAGGGTGTGAAAGAAAGGAGAGGAAGAGAACATTTACGGGCAAAAAAT

>PGSC0003DMG400029168-(rev)LRR-RLPs\_3477

GTTGTGAGTTTTAGGGTGTGAAAGAAAGGAGAGGAAGAGAACATTTACGGGCAAAAAATATTCTTCAT  
ACAAAGCCAACCGGGAACCCTTTTTCAAACCTCGCTCAACACAAAAGAAAAG

>PGSC0003DMG400029168-(rev)LRR-RLPs\_366

TGAGTAATGCTGGTGATCGCCTTGTCTCAGCTCTTCTTTGGTTTGTTCCTTTCTTTCTGTATTTTATTG  
GGTATTTGTTAAGCTGATGGATTTTTCTGAGTAATCAGTTTTGGTTC

>PGSC0003DMG400029168-(rev)LRR-RLPs\_3660

ATCGTTGCCTTGCACAAGACGATGCCCTTCACTTCAAGGCGTCGGCTCTGAAATGATGGAAGATTGAAT  
CATTCTTCATTCTATTACAACCTAGTGATGGCCGGCTTTCATTTTTCCGG

>PGSC0003DMG400029168-(rev)LRR-RLPs\_3721

AGATTGAATCATTCTTCATTCTATTACAACCTAGTGATGGCCGGCTTTCATTTTTCCGGTAGGCCATGACT  
AAATTCAGATTTCTCTGTTTATTCTAAAATATGGAGAAGACACGATA

>PGSC0003DMG400029168-(rev)LRR-RLPs\_3782

GGCCATGACTAAATTCAAGATTTCTCTGTTTATTCTAAAATATGGAGAAGACACGATAATTGCTTCTTCT  
TTGTTGAGATCCGCCCCCAGCCTTTTCTTCTTCTTTCAGGTCCCTCCC

>PGSC0003DMG400029168-(rev)LRR-RLPs\_3843

TGCTTCTTCTTTGTTGAGATCCGCCCCCAGCCTTTTCTTCTTCTTTCAGGTCCCTCCCCTCGTATTCATTTT  
AAATCCCATGCCTCCAACCTCTTTTTCATTTTTCACAGTTACTTCTA

>PGSC0003DMG400029168-(rev)LRR-RLPs\_3904

CGTATTCATTTTAAATCCCATGCCTCCAACCTCTTTTTCATTTTTCACAGTTACTTCTAGTTTTTTGCCATGT  
CAGCACTTAACTTAAGCTTATATGGTGTGGTCTTCAAGTTCTTTCAT

>PGSC0003DMG400029168-(rev)LRR-RLPs\_427

TGTATTTTATTGGGTATTTGTTAAGCTGATGGATTTTTCTGAGTAATCAGTTTTGGTTCAGGAAAAATGT

AAGAAGGAAAAGTTAATTGCTTTAGTTTGTCTTTTGGGAATCTGGGAGA

>PGSC0003DMG400029168-(rev)LRR-RLPs\_488

GGAAAAATGTAAGAAGGAAAAGTTAATTGCTTTAGTTTGTCTTTTGGGAATCTGGGAGAATAATGTGAA  
TGGAGAAAGACTGGAATTTGGAGGCTCAAAGATAAACTAGTCATATTTTG

>PGSC0003DMG400029168-(rev)LRR-RLPs\_5856

TTTACCTTATTGCAACTTTAATAGGAGCCTCACCATGAGATACATCAAGCTAGTCGAATATGCTCTTCAGA  
TATACATGCCAAATATGCTGAGGTGTCGTTTGTGACGTTCCACTCAAAA

>PGSC0003DMG400029168-(rev)LRR-RLPs\_6039

CTATCCAATTCGTATTTTCGCCCTTTCAGCAGTTTAAAGTTGGCACTATGTACATAAGTTGCACTTGCTTCTCA  
TTATGCAAATCCTCTTAGCTTCATTTGATCCATACTCGTTCTGCTGAA

>PGSC0003DMG400029168-(rev)LRR-RLPs\_61

CGGCAGAACTATTTGGAACAGAGAAACAGTGCCAAAAGTGATGAAAATAGTGAGCACGAGGCTTCAA  
CAAAGAGACCTCATCACTCTTCTACTTGCCAGCCCTTCGATTCACCGTACTC

>PGSC0003DMG400029168-(rev)LRR-RLPs\_6283

TGCATGAGATTAGTTAAAGGAAGAGTTGTTTTCAAATGTTCTGGATAACGCATAGCATCTCTTGGACATA  
AGGATGCCCTTTCTTGGCTGAGGCCTTTGTCTGTTGTAGGGGTGATGATA

>PGSC0003DMG400029168-(rev)LRR-RLPs\_7198

TAAGGTGAGTGTGGACCTAGAATTATCACTAAAATAGGAAGACCAAATGACCTATGCTGCATTACTTC  
AGCACCTCCACAAAGTCGACAAATATTCTATCTTGTGAACTAACTAGATAG

>PGSC0003DMG400029168-(rev)LRR-RLPs\_7381

ATAAAATATAAAGTATAACCACTTCCTATTGACTGCAGATTTATTTGCAATTTTTTTTTTTTCAATTAAGCG  
AGCTCAGGGCTCATTTATTCAACACCAAAAATATTTACATTGGCCCAA

>PGSC0003DMG400029168-(rev)LRR-RLPs\_7442

TCAATTAAGCGAGCTCAGGGCTCATTTATTCAACACCAAAAATATTTACATTGGCCCAACGAGCCCAAAA  
GTGAAAAAGAAGCAAATGGAAAAGATCACCTGGCCGTCCAAATAAGACCA

>PGSC0003DMG400029168-(rev)LRR-RLPs\_7503

AGCCCAAAAGTGAAAAAGAAGCAAATGGAAAAGATCACCTGGCCGTCCAAATAAGACCAACCAAGTTG  
TCTTAAATGTCCTACTCTGTAATTATTGTTTATTTGCTGCCTCTGCACGC

>PGSC0003DMG400029168-(rev)LRR-RLPs\_7564

CAAGTTGTCTTAAAATGTCCTACTCTGTAATTATTGTTTCATTTTGCTGCCTCTGCACGCTGATCCTTCTTGT  
CTTAATCCTCAATGTTGGCATGCCTATTTTATCCATGTTTATTATTCT

>PGSC0003DMG400029168-(rev)LRR-RLPs\_7625

ATCCTTCTTGTCTTAATCCTCAATGTTGGCATGCCTATTTTATCCATGTTTATTATTCTCTTGCAGTCAACTG  
TTAGTTGATTAATAATTGTTCCACTGAATCCCTCCTGCTGCATGAAT

>PGSC0003DMG400029168-(rev)LRR-RLPs\_7686

TGCAGTCAACTGTTAGTTGATTAATAATTGTTCCACTGAATCCCTCCTGCTGCATGAATGCTTCATTTGCC  
ATTGTGTCTGCTAGTTGATTTACTTCTCTGTATCCATGTACTATAATTG

>PGSC0003DMG400029168-(rev)LRR-RLPs\_7747

TTCATTTGCCATTGTGTCTGCTAGTTGATTTACTTCTCTGTATCCATGTACTATAATTGCATGTGTTGTTCC  
CTGAAGTATATGTATCTCCTCTATTTTATTAATGAGCTGGACTATTTT

>PGSC0003DMG400029168-(rev)LRR-RLPs\_7808

TGTGTTGTTCCCTGAAGTATATGTATCTCCTCTATTTTATTAATGAGCTGGACTATTTTTGTAATGACTAAA  
TTCGTGACCTCCAGTGAAGTACTGCTATATTTATTTAATTTCTTTT

>PGSC0003DMG400029168-(rev)LRR-RLPs\_7869

TAATGACTAAATTCGTGACCTCCAGTGAAGTACTGCTATATTTATTTAATTTCTTTTTATGTTGCTACTG  
CAGTTTGTGGGATACTTGGGGTCTCTGACAGGTGCTTAGAGGTGCT

>PGSC0003DMG400029168-(rev)LRR-RLPs\_793

GATTGGGTGGGTGGAGAGGAGAAAATAAAATTGGAGACTTCTGTCTGGGAAGTCATTTGCCTCATTTTT  
AAGGAATTTGTTTTCTACTCCCAAGGGAAGTCATTTGCCTCGTTTTTAA

>PGSC0003DMG400029168-(rev)LRR-RLPs\_7930

TGTTGCTACTGCAGTTTGTGGGATACTTGGGGTCTCTGACAGGTGCTTAGAGGTGCTTTCTAGCTTCT  
GCTCCAATACACTTACAACCCTTGATGTAAATGGGTGCATCAATATAAAG

>PGSC0003DMG400029168-(rev)LRR-RLPs\_7991

CTAGCTTCTGCTCCAATACACTTACAACCCTTGATGTAAATGGGTGCATCAATATAAAGGTACATAATAT  
ATCTTTAGAATCTCCAGCCATGTTGTCACTTCTGTTTCTAGAATACGAC

>PGSC0003DMG400029168-(rev)LRR-RLPs\_8052

ACATAATATATCTTTAGAATCTCCAGCCATGTTGTCACTTCTGTTTCTAGAATACGACGACAACAACATA  
ACCAATATAATCCAACAAGTGGTGACACATTTAAGTTTTGTGTGACACA

>PGSC0003DMG400029168-(rev)LRR-RLPs\_8235

GCAACATCATTGTTGATCTCCCTGTCTTTTTGTGAGGTTAAAATACAAGAGAAATAAGCAGTTTCCTTTGT  
TTCCTAGAATATTGGCTCATAAAATCACATGTGATAAAGTTGGAAAACA

>PGSC0003DMG400029168-(rev)LRR-RLPs\_8296

TTTCCTTTGTTTCCTAGAATATTGGCTCATAAAATCACATGTGATAAAGTTGGAAAACAACTGGATCATGC  
TATTTAGCAATTAAGCTAAGCCTTTCAATATGGTTTTCCAGTAGGT

>PGSC0003DMG400029168-(rev)LRR-RLPs\_8357

TGGATCATGCTATTTAGCAATTAAGCTAAGCCTTTCAATATGGTTTTCCAGTAGGTTTTCTAAGTTCA  
TACTTGGTCAGCTGGAAGTCCCTGCTCTCCCATATGCCCTTGACAT

>PGSC0003DMG400029168-(rev)LRR-RLPs\_8418

TCTAAGTTCATTACTTGGTCAGCTGGAAGTCCCTGCTCTCCCATATGCCCTTGACATTTTCTCATATTC  
CCCATGATTCATATGATTTTCTTACTGTTGGTACATTACTTTGTAGAA

>PGSC0003DMG400029168-(rev)LRR-RLPs\_8479

TCTCATATTTCCCATGATTCATATGATTTTCTTACTGTTGGTACATTACTTTGTAGAATCGCAGCCGTGAT  
CAACTGCTCAAGTTATTCCCGAACCTGATGTGCTTCAAAGTGCATAGC

>PGSC0003DMG400029168-(rev)LRR-RLPs\_854

TCATTTTTAAGGAATTTGTTTTCTACTCCCAAGGGAAGTCATTTGCCTCGTTTTTAAGAACTTGTTTT  
CCTACTCCATCAGGGAAGTCATTGCCTCATTTTTAAGAACTTGTTT

>PGSC0003DMG400029168-(rev)LRR-RLPs\_8540

GCAGCCGTGATCAACTGCTCAAGTTATTCCCGAACCTGATGTGCTTCAAAGTGCATAGCTAAGTTGTGAC  
TTGTCAAGGATTTTCTGTTCTTCTTAGTGAGTATCTCAGCTAGCACA

>PGSC0003DMG400029168-(rev)LRR-RLPs\_8601

AGTTGTGACTTGTCAAGGATTTTCTGTTCTTCTTAGTGAGTATCTCAGCTAGCACAGAGTTATTGAAA  
GAAACTGATCCCAAATTTCTAATGGATTACGACGAGCCCTTGATTTATT

>PGSC0003DMG400029168-(rev)LRR-RLPs\_8662

GTTATTGAAAGAACTGATCCCAAATTTCTAATGGATTACGACGAGCCCTTGATTTATTGTCAACATGAG  
AAAAAGAATGGAAGGGGGAATTAGCTTACCTGCTTCTACGAAAGATCAAA

>PGSC0003DMG400029168-(rev)LRR-RLPs\_8723

CAACATGAGAAAAAGAATGGAAGGGGGAATTAGCTTACCTGCTTCTACGAAAGATCAAACAGGGCAAC

TTAGCATACTTATGTGCCACTTAGTTTTTCATCTTTTACTGGCAAAGCTTTAT

>PGSC0003DMG400029168-(rev)LRR-RLPs\_8784

GGGCAACTTAGCATACTTATGTGCCACTTAGTTTTTCATCTTTTACTGGCAAAGCTTTATTTATTCCTTATAC

GCTTATCGTTATGGTCATCTCTTATGCGATCCAGGTTCTGTATGTTCT

>PGSC0003DMG400029168-(rev)LRR-RLPs\_8845

ATTCCTTATACGCTTATCGTTATGGTCATCTCTTATGCGATCCAGGTTCTGTATGTTCTACAAATATGTTTG

CTTAGCATGGTCTTTGGTTTTACTAATTCCTAAACTTTAAGCGCTTCA

>PGSC0003DMG400029168-(rev)LRR-RLPs\_8906

AAATATGTTTGCTTAGCATGGTCTTTGGTTTTACTAATTCCTAAACTTTAAGCGCTTCATGTAGCTACACA

CCACATGTTTTATGTAGATTCATGTAAATCTTTATTGGAGAGAATGTAT

>PGSC0003DMG400029168-(rev)LRR-RLPs\_8939

CTAATTCCTAAACTTTAAGCGCTTCATGTAGCTACACACCACATGTTTTATGTAGATTCATGTAAATCTTTA

TTGGAGAGAATGTATTATTGTCAATCCCTTCTTTATTGATTTGTTAC

>PGSC0003DMG400029415-(rev)LRR-RLPs\_124

GGGTTTCGAGTCCCCCAAGTACAAAGTTCTTTTATTAGAAAGATGTGTACACTATGTAAGACTTCCTGACA

CGAATTTAGATTTAGTCAGGTCCCAATGCGGATACCAGATAACGCATGGA

>PGSC0003DMG400029415-(rev)LRR-RLPs\_186

TCCTGACACGAATTTAGATTTAGTCAGGTCCCAATGCGGATACCAGATAACGCATGGAAAACCCTAAGG

CAATAAAGATACTACAATAAGGTCTTTAAGTTGTAAACATGTAATGACTT

>PGSC0003DMG400029415-(rev)LRR-RLPs\_248

CCTAAGGCAATAAAGATACTACAATAAGGTCTTTAAGTTGTAAACATGTAATGACTTTTAGTTTTTGGTC

AATAACAAAGTTATAAGTCTTCTAATAAGGAAGATGATAAGAAGTTTAC

>PGSC0003DMG400029415-(rev)LRR-RLPs\_2728

GGCTTGTTGAACTTTGGCCAATACCAAAGGTATAGTGATTTCTTTCTCTCCAAAACAATAGCTCCAGTTTA

TCACGCGCTATGGTTCAAATGCTATACCAAATAAATGCTTTTGTATAAG

>PGSC0003DMG400029415-(rev)LRR-RLPs\_310

TTTTTGGTCAATAACAAAGTTATAAGTCTTCTAATAAGGAAGATGATAAGAAGTTTACCATAAAAGACTA

TGAATTGTGAAAAATGTTAAAGTCTTGCTCTTTATTATGTGTGTTTCTTG

>PGSC0003DMG400029415-(rev)LRR-RLPs\_3224

AAAAGATTTCCAAAAATCTGTGGAGATATGCGGCGCTTATCAATACTGTATGTAGAATCCCCCTGGATAA  
GAAGCTTACCCCCGTCTCTCAGCGGCCTTAGTCGTTTGAAACTGAAAGGT

>PGSC0003DMG400029415-(rev)LRR-RLPs\_372

AAAGACTATGAATTGTGAAAAATGTTAAAGTCTTGCTCTTTATTATGTGTGTTTCTTGTTGTTGTTGTTGT  
TGTTGTTGTAGTCTTTAGCAATATTTTTCGACAATGTCTCATGCTTCTT

>PGSC0003DMG400029415-(rev)LRR-RLPs\_3906

AATAAGTGTCTTAAGCTGCGTATCTTGTCATATCATGGCGTGGTCATGAGAAATCCGAATGCCAAACTG  
TCTCAAGTGAACAAGTTAATGTGTTGAAGTTGCTACGACATTTTCTCCAG

>PGSC0003DMG400029415-(rev)LRR-RLPs\_3968

CCAAACTGTCTCAAGTGAACAAGTTAATGTGTTGAAGTTGCTACGACATTTTCTCCAGACATGCATCCAG  
GTTTTTTAGCTATCCATACACATATGAATGTTGAATATTCTCGTCAAATT

>PGSC0003DMG400029415-(rev)LRR-RLPs\_4030

GCATCCAGGTTTTTTAGCTATCCATACACATATGAATGTTGAATATTCTCGTCAAATTGATTTGTACTAAT  
AGTAGTTTCTATTGCAGTGTGACTTCCGCCAAAGGATTTCTTTTCTCAT

>PGSC0003DMG400029415-(rev)LRR-RLPs\_4092

TGTAATAATAGTAGTTTCTATTGCAGTGTGACTTCCGCCAAAGGATTTCTTTTCTCATTTGTTTTCTGAAG  
TCAGAATTCCAGAGTTGTTTCGATTATCAGTTCATAAATCAAAAAGTGA

>PGSC0003DMG400029415-(rev)LRR-RLPs\_4154

TTTCTGAAGTCAGAATCCAGAGTTGTTTCGATTATCAGTTCATAAATCAAAAAGTGATCTCAATTGATCT  
GAAACCATCTTGGTATACCGATAAGTTCATGGGGTTTTTCACTGTGTTAT

>PGSC0003DMG400029415-(rev)LRR-RLPs\_4216

AATTGATCTGAAACCATCTTGGTATACCGATAAGTTCATGGGGTTTTTCACTGTGTTATTGTCCTGTACTTG  
AAGCAAATGTGAGTTTAATAGCTACGTTGGTCTGAAAATCGGACCCTGA

>PGSC0003DMG400029415-(rev)LRR-RLPs\_4278

CTGTACTTGAAGCAAATGTGAGTTTAATAGCTACGTTGGTCTGAAAATCGGACCCTGAAAGAAAACATT  
CCTTGAAGTATGTCATCCGTGAATATTGTCCTAAGCTTCTTCTTCCATGT

>PGSC0003DMG400029415-(rev)LRR-RLPs\_4340

AAACATTCCTTGAAGTATGTCATCCGTGAATATTGTCCTAAGCTTCTTCTTCCATGTACTTCATCTACATA  
CCATTTGAAACATTGTGGCGCGCATTTGACAATAAAGAAGGGAAGAAC

>PGSC0003DMG400029415-(rev)LRR-RLPs\_4402

CATCTACATACCATTTGAAACATTGTGGCGCGCATTGACAATAAAGAAGGGAAGAACCCAAATGATTA  
TTACCTTTTGAAGGTATCTTCATTTTACAGGGAAGTATGTTGGGGAATTTCG

>PGSC0003DMG400029415-(rev)LRR-RLPs\_4464

ATGATTATTACCTTTTGAAGGTATCTTCATTTTACAGGGAAGTATGTTGGGGAATTTCGATTGGAGTATGA  
GAATAAAGTTGGGAGATCGATCAAGAAGGATTTACGAGTTATGTAAAGT

>PGSC0003DMG400029415-(rev)LRR-RLPs\_4526

GAGTATGAGAATAAAGTTGGGAGATCGATCAAGAAGGATTTACGAGTTATGTAAAGTCTTTCTGGTAA  
AGCAAAGTGTACTGAAAAGTAAAGTTTTTCATACGAATTTCCCAAATGATTC

>PGSC0003DMG400029415-(rev)LRR-RLPs\_4588

CTGGTAAAGCAAAGTGTACTGAAAAGTAAAGTTTTTCATACGAATTTCCCAAATGATTCGTAGGTGGGAA  
AACCTTTGTTTCCAAGTAGTGTGTGCAACAATTTTTCGACTATCTCTGT

>PGSC0003DMG400029415-(rev)LRR-RLPs\_4650

GTGGGAAAACCTTTGTTTCCAAGTAGTGTGTGCAACAATTTTTCGACTATCTCTGTTTCATGTTGAATA  
TACATTTAGTTCTTAGTGTAAGTGTAACATCATGGTTTCAAGGGGAATG

>PGSC0003DMG400029415-(rev)LRR-RLPs\_4707

TTTCATGTTGAATATACATTTAGTTCTTAGTGTAAGTGTAACATCATGGTTTCAAGGGGAATGTTGTAATA  
TATTTTGATTGACATTTGAGTTTCTTGTAATAATACATTATGTATTTG

>PGSC0003DMG400029415-(rev)LRR-RLPs\_62

TTGAAAAACGAAATGTGTACATAAATTGGGACAGAGGGAGTACTTCGTACTIONAACCAGGACCGGGTTCCG  
AGTCCCCAAGTACAAAGTTCTTTTATTAGAAAGATGTGTACACTATGTAA

>PGSC0003DMG400029415-(rev)LRR-RLPs\_806

TCTGATGTAAGCCATCAAAGTCAACATTCGCTGAGTCGTTTTCAAATACAAAGATGATGAGTTGGAGA  
AGTTCAAAGATGGAGAGAAGCTTGTAAGGAAGCTGGGAAAATATCAGGT

>PGSC0003DMG400029442LRR-RLKs\_122

GTCTTGTTTTTTTCTTGATTCTTGATCCGTAACGCGGTATCTTCTCCATCAAAGTCAACTGATGCTGAATCA  
CTCTTGCTATTCAAGAACATGATACAAAAGACCCTTCTGGTGTTTTA

>PGSC0003DMG400029442LRR-RLKs\_1647

GTAGCAATAGTTAACCAGGGGAGATCCCACCGCGACTTGGTAGGCAGCAAGGGGCAAAGCATTGAGT

GGGATTCTATCAGGTAACACTTTGGTGTTTGTTCGAAATGTAGGAAATTCGT

>PGSC0003DMG400029442LRR-RLKs\_2989

AATGGACGCCAGGGTGTCTGATTTTGGGATGGCAAGGCTGATAAGCGCGCTGGACACACACCTCAGTG

TGTCCACACTAGCAGGAACACCAGGTTATGTGCCACCTGAGTACTATCAGAG

>PGSC0003DMG400029442LRR-RLKs\_3050

CTCAGTGTGTCCACACTAGCAGGAACACCAGGTTATGTGCCACCTGAGTACTATCAGAGTTTTAGGTGCA

CAGCAAAGGGAGACGTGTACTCGTTTGGAGTTGTGCTTCTTGAACCTTG

>PGSC0003DMG400029442LRR-RLKs\_3111

TTAGGTGCACAGCAAAGGGAGACGTGTACTCGTTTGGAGTTGTGCTTCTTGAACCTTGACAGGGAAAA

GGCCAACAGATAAGGAAGATTTTGGTGACACAACTTGGTAGGATGGGTGA

>PGSC0003DMG400029442LRR-RLKs\_3233

ATGAAAGTAAGAGAAGGAAAATCAATGGAAGTAATTGATCAAGAATTGTTATCAGTGACTAAAGGGAA

TGATGAAGCAGAAGTAGTAGAAGTTAAAGAGATGGTAAGGTAAGGTAAGGACTTAGAGATA

>PGSC0003DMG400029442LRR-RLKs\_3477

AAAAAAAAAGGAAAAAAAAAAAAACCAAAGAATGTAAAATTCTTTCTTGTTTTGTTTGTGCAAGTATTCATC

TGCATTTGATTTAGTCAACAACCTTCTTATTTTTTTGCAATATTATTC

>PGSC0003DMG400029442LRR-RLKs\_61

TCTATTTTCTCTATTCATCATGGACAACATGAACACCAACTCTGCTATAACATTGCTCATTGTCTTGTTTTT

TTCCTTGATTCTTGCATCCGTAAACGCGGTATCTTCCTCCATCAAAAAC

>PGSC0003DMG400029520-(rev)G-LecRK\_0

CCCCACCCACCCCTCCTTTGAATTTTCTGAAAATCCACATAAACACGGTTCCTTAATGTAACAAAGAA

CCTTAAAATTTGTAAGGACAAGTTATAATTTTCTATTGTTTTATACTTT

>PGSC0003DMG400029520-(rev)G-LecRK\_1037

CTCTTTAGTAAGTTTTATTACTACTAGTTTTTATCTTCTTAGCTCTACTAGATTTTGTATGTGCTTTTAAAAT

GAAATGAAATGACATTCATTGAGAGCGTAGCCAGGATTTTTAGTTT

>PGSC0003DMG400029520-(rev)G-LecRK\_1281

TAGACACCTGTGGCTCCGCCCTTGTCTTCACTATCCAAAGATTAACAAATTGAACTGCAGATGGATGC

TCTTGTCACTTTTTAGGAGTGAGATACTGGAAATAGCCTTGGGATAAG

>PGSC0003DMG400029520-(rev)G-LecRK\_1342



GATGGATGCTCTTGTTCAGTCTTTTTAGGAGTGAGATACTGGAAATAGCCTTGGGATAAGCATTTCATTT  
TGCTATTGGGTCCAGAAATTTGTTCTTTCAGTTACGTTGTCAGTAATCTA

>PGSC0003DMG400029520-(rev)G-LecRK\_1403

TTTTCAATTTGCTATTGGGTCCAGAAATTTGTTCTTTCAGTTACGTTGTCAGTAATCTAGTTCAATGATCTC  
TGTGTCAGTCCGTGAAACTACTAGAGACCGTCATATTGTTCTGTATCC

>PGSC0003DMG400029520-(rev)G-LecRK\_1464

TCAATGATCTCTGTGTCAGTCCGTGAAACTACTAGAGACCGTCATATTGTTCTGTATCCGTGTGTTTTACT  
TGCTTAACAAACTCTAAGCTCAAATGTTCTTGAACTCCAGTGATGGAC

>PGSC0003DMG400029520-(rev)G-LecRK\_1525

GTGTTTTACTTGCTTAACAAACTCTAAGCTCAAATGTTCTTGAACTCCAGTGATGGACCATAATGTTAAA  
ATTAAATTTTCTCTTGACATCCAGCAGCTAACTTGTGGCTGTTCTTCT

>PGSC0003DMG400029520-(rev)G-LecRK\_2013

TCTCAAGAATTCTGTAACCCTGAAACATCATTGACGACATTTGAGGACCTTAACTTCCTCGTGTA AAACT  
TATCAGTAGAAGCAATTTGTGATTCCAAGCCCGAATATAATATAATTCT

>PGSC0003DMG400029520-(rev)G-LecRK\_2074

GTGTAAAACCTTATCAGTAGAAGCAATTTGTGATTCCAAGCCCGAATATAATATAATTCTTCAAGCAAGAA  
ATTTTTCTCATAGTGGTCTTAGTAAAACCAGACTCTTTACTTTATGAATC

>PGSC0003DMG400029520-(rev)G-LecRK\_2135

AAGCAAGAAATTTTTCTCATAGTGGTCTTAGTAAAACCAGACTCTTTACTTTATGAATCTTTTTAACCTTTC  
CGAGTTTTGAGCAAGAAGAAAGATGTTTAGTAGTTTTAGAAGCTAGTA

>PGSC0003DMG400029520-(rev)G-LecRK\_2196

TTTAACCTTCCGAGTTTTGAGCAAGAAGAAAGATGTTTAGTAGTTTTAGAAGCTAGTACTGACTCTTAT  
ATTCTTGTATTAGAATCTGCTAACAGAGATGCACTCAGCTGGAAGCAACG

>PGSC0003DMG400029520-(rev)G-LecRK\_2318

ATGACATAATTGTTGGCATTGCTAGAGGGTGTCTATATCTTCATGAAGGTTACATACTTGCATTATCCAC  
CGTGACATAAAAGCTAGCAACATCCTACTTGATGACAAATGGGTGCCCA

>PGSC0003DMG400029520-(rev)G-LecRK\_244

AAAATTCTTGTGAGGGTACCCTTAATCTTGATTTTTTTTTTTTGTGTTCTAATGGTGATTTTGGGTTTTTTTC  
TTGTTGTGAATTGACTAATCAAAAAAAGGGAAGAATGACGACTTAGA

>PGSC0003DMG400029520-(rev)G-LecRK\_2440

ATTGCTGATTTTGAATGGCTAGACTCTACCCTGAAGATAAAACACATATTAATACCCGTGTAGCTGGTA  
CCAAGTATGATTCTATCGAACCTTATAAACTGTGTTTAGTAATGACTATG

>PGSC0003DMG400029520-(rev)G-LecRK\_2501

TAGCTGGTACCAAGTATGATTCTATCGAACCTTATAAACTGTGTTTAGTAATGACTATGTAGAAATTCAT  
TGAATAATATATTGCACAAGTACACTCACTTGATATTGCTAACAACCTCT

>PGSC0003DMG400029520-(rev)G-LecRK\_2562

GAAATTCATTGAATAATATATTGCACAAGTACACTCACTTGATATTGCTAACAACCTCTCTTTGATAATTT  
AACTTGGAAGCCAGTGGCTATATGGCGCCAGAGTACGTTATGTATGGAC

>PGSC0003DMG400029520-(rev)G-LecRK\_2623

TTGATAATTTAACTTGAAGCCAGTGGCTATATGGCGCCAGAGTACGTTATGTATGGACATCTATCTGTT  
AAGGCTGATGTATTCAGTTTCGGAGTTGTAGTTCTGGAGCTCATAAGTGG

>PGSC0003DMG400029520-(rev)G-LecRK\_2684

CTATCTGTAAAGGCTGATGTATTCAGTTTCGGAGTTGTAGTTCTGGAGCTCATAAGTGGCCAGAAGAATT  
CAACCTTTAACAGAGATCCTGATTCTCGAAGCCTTCTTGAATGGGTAAGA

>PGSC0003DMG400029520-(rev)G-LecRK\_2806

TTGATTTCTCTGCGCTTTTCAGTCTTGATATTCCTTGAAATTTCTGAATTACAAAATAAGCACCGGTCAAT  
GCCTTCGTTCCCTGTTGAGTATAATAGGAGAGTCCTCGGAATCAATTTCG

>PGSC0003DMG400029520-(rev)G-LecRK\_2867

CACCGGTCAATGCCTTCGTTCTGTTGAGTATAATAGGAGAGTCCTCGGAATCAATTTCGAGCTTCCTATA  
ATCATGTAACAGAAAAACAATATAGCCATATGGTAGAATTTTTTAACTA

>PGSC0003DMG400029520-(rev)G-LecRK\_2928

CTTCCTATAATCATGTAACAGAAAAACAATATAGCCATATGGTAGAATTTTTTAACTACTTGAAAAGTA  
AGATCGAACTACTTTTGTCTATGTTATAGTGCAAAACATAATCAAATCGG

>PGSC0003DMG400029520-(rev)G-LecRK\_2989

TGAAAAGTAAGATCGAACTACTTTTGTCTATGTTATAGTGCAAAACATAATCAAATCGGTAGGTGGAGG  
GAGAAGGACTTTACATTTAAGGTATAGGGATACTCTTGATGGTGTGAGGCC

>PGSC0003DMG400029520-(rev)G-LecRK\_305

TGGGTTTTTTTCTTGTTGTGAATTGACTAATCAAAAAAAGGGAAGAATGACGACTTAGAGAAAATTGCA

GCACAAGAACAGAAGCAATTCTCTTTTGGAGTTCTTGTTTCTGCTACCAA

>PGSC0003DMG400029520-(rev)G-LecRK\_3050

GGTGGAGGGAGAAGGACTTTACATTTAAGGTATAGGGATACTCTTGATGGTGTGAGGCCTTTTGGAGA

AAACTTTTGTGGCTGTGACCCTAAGTGGATAGTAGCACACCATGTAAAGGTA

>PGSC0003DMG400029520-(rev)G-LecRK\_3111

TTGGAGAAAACCTTTTGTGGCTGTGACCCTAAGTGGATAGTAGCACACCATGTAAAGGTATTTTCTAGGCC

GACTIONAGCTATAAGCAGATAGTAGAGCCAATTATTTGACGGGTTGAGTA

>PGSC0003DMG400029520-(rev)G-LecRK\_3172

TTCTAGGCCGACTTAGCCTATAAGCAGATAGTAGAGCCAATTATTTGACGGGTTGAGTATGGAGATGAA

GGCATTGAGTGAGTTTGTCTGCTAGTCGTGGTAAATGCACAAGAAAAACACT

>PGSC0003DMG400029520-(rev)G-LecRK\_3233

GAGATGAAGGCATTGAGTGAGTTTGTCTGCTAGTCGTGGTAAATGCACAAGAAAAACACTATCAGTCTTG

GTGATTGACCACACGGTACTAGGTCCGGGGAGTGTGTCGTTCTCGGGTGAA

>PGSC0003DMG400029520-(rev)G-LecRK\_3294

CAGTCTTGGTGATTGACCACACGGTACTAGGTCCGGGGAGTGTGTCGTTCTCGGGTGAATCGTGATTCCG

AGAGAATATTTGTGGAGATGCGAACAAAGTCTCATATTGGTAGTCGAAGTA

>PGSC0003DMG400029520-(rev)G-LecRK\_3355

GTGATTGAGAGAATATTTGTGGAGATGCGAACAAAGTCTCATATTGGTAGTCGAAGTAGAAAAATAGC

TATATATAAGGTGTTGGGATGGTCTTACGGTGTGTGGGGTAAAAACGTGCA

>PGSC0003DMG400029520-(rev)G-LecRK\_3416

AAAATAGCTATATATAAGGTGTTGGGATGGTCTTACGGTGTGTGGGGTAAAAACGTGCATGCTTGGCCC

GAAACAACAGTATTAACCATGTTTAAAGTGTCTTTGAGCGGGGTTAGCCT

>PGSC0003DMG400029520-(rev)G-LecRK\_3477

CTTGGCCCGAAACAACAGTATTAACCATGTTTAAAGTGTCTTTGAGCGGGGTTAGCCTAACTTTGTACC

AGATGGTGATCATGATTAATGTTGTTATGGTTGTAGGCGTACAGGCTTT

>PGSC0003DMG400029520-(rev)G-LecRK\_3538

CTTTGTACCAGATGGTGATCATGATTAATGTTGTTATGGTTGTAGGCGTACAGGCTTTACAAGAAGGGT

CGGAGCTGGGAGATTATGGACCCTGCACTGGCACAATCGGCTATCCCCGA

>PGSC0003DMG400029520-(rev)G-LecRK\_3599

AAGAAGGGTCGGAGCTGGGAGATTATGGACCCTGCACTGGCACAATCGGCTATCCCCGATGAGATAGC  
AATGTACATACAAATTGGCTTATTATGCATTCAAGCGGATCCACCACTACGT

>PGSC0003DMG400029520-(rev)G-LecRK\_3660

AGATAGCAATGTACATACAAATTGGCTTATTATGCATTCAAGCGGATCCACCACTACGTCCAACCATGCA  
ACAGGTCGTGGTGATGCTATCAAAGAATCCTGGATCTCTTGATAGAGAAC

>PGSC0003DMG400029520-(rev)G-LecRK\_3721

AACCATGCAACAGGTCGTGGTGATGCTATCAAAGAATCCTGGATCTCTTGATAGAGAACCAACTAGACC  
TGGATATCCCGGTTCAAGAATTAGATCTCACAGACCAGGTGGTGGTACGTC

>PGSC0003DMG400029520-(rev)G-LecRK\_3782

ACTAGACCTGGATATCCCGGTTCAAGAATTAGATCTCACAGACCAGGTGGTGGTACGTCTCATAACAGCT  
GGAACCTCGGGTGCATCCAATCCTTCTACATTCAGCTCCTCGTCTATTAGC

>PGSC0003DMG400029520-(rev)G-LecRK\_3843

ATACAGCTGGAACCTCGGGTGCATCCAATCCTTCTACATTCAGCTCCTCGTCTATTAGCAACACTGTTAGT  
GCAACTGCAAGTTCATCCACACCTACAAGACGGAGATCGGACCCTCATG

>PGSC0003DMG400029520-(rev)G-LecRK\_3904

CACTGTTAGTGCAACTGCAAGTTCATCCACACCTACAAGACGGAGATCGGACCCTCATGGAAAACGTCC  
TGTGAGAGATTAGGCGCGTTGTTGTTGGGAGATTTTTCTTATTCTTTTTG

>PGSC0003DMG400029520-(rev)G-LecRK\_3965

AAACGTCCTGTGAGAGATTAGGCGCGTTGTTGTTGGGAGATTTTTCTTATTCTTTTTGTGTATACATTCA  
ATTTTTGTAGCATGTAAATTGGTTACAAATAGAGATCAATGAGTATGAT

>PGSC0003DMG400029520-(rev)G-LecRK\_4026

TATACATTCAATTTTTGTAGCATGTAAATTGGTTACAAATAGAGATCAATGAGTATGATGAATCTTAGTG  
ACAGTTAACATGTAAAAGAAGTGTATGCAGTTACTCTCAGGATATAAAAC

>PGSC0003DMG400029520-(rev)G-LecRK\_427

TTTTACCCAGATAACAAGCTTGGTGAAGGTGGATTTGGGCCTGTATTCAAGGTAAAAAATAAAAAACAA  
ACTGAAAATCAACAAAATTGAGTCTTCTTGTGATTTGGGTGTTAACAAAA

>PGSC0003DMG400029520-(rev)G-LecRK\_61

TAACAAAGAACCTTAAAATTTGTAAGGACAAGTTATAATTTCTATTGTTTTATACTTTGTACAAAGTCCT  
CTTGAGTTTTGTAATGGACTAATTATTTTTGTGTACCCGCTATGACCAA

>PGSC0003DMG400029520-(rev)G-LecRK\_610

TTCTTGAAAAAATTGAGTCTTTTTGTGATTCTTGAAGAAAATGAATCTTTTTGTGATTGGGTATGAACAG  
AAACTCAAGCTTTCTTGCAAAAATTGAGTCTTTTTGTGATTGGGTATG

>PGSC0003DMG400029520-(rev)G-LecRK\_671

GTATGAACAGAACTCAAGCTTTCTTGCAAAAATTGAGTCTTTTTGTGATTGGGTATGAACTGAAACTA  
AGGCTTTCTTGAAAAAATTGAGTCTTTTTTTGATTTAGGTATTGAACAGA

>PGSC0003DMG400029520-(rev)G-LecRK\_732

CTGAAACTAAGGCTTTCTTGAAAAAATTGAGTCTTTTTTTGATTTAGGTATTGAACAGAACTCAAGATT  
CTTGAAAAATTGTGTCTTCGTTCTTTATAGGGGAAATTGAGTGATGGGA

>PGSC0003DMG400029520-(rev)G-LecRK\_793

CTCAAGATTTCTTGAAAAATTGTGTCTTCGTTCTTTATAGGGGAAATTGAGTGATGGGAGGCAAATAGCT  
GTGAAGAAGCTTTCACATAGTTCAAGGCAAGGGATGAAGGAATTCAAGAA

>PGSC0003DMG400029520-(rev)G-LecRK\_976

ACATGGGGTAGAGAAGTTGCTTGTCTATGAGTATGTTGCTAATGAGAGCCTTGACAAAATCCTCTTTAGT  
AAGTTTTATTACTACTAGTTTTTATCTTCTTAGCTCTACTAGATTTTGTA

>PGSC0003DMG400029555LRR-RLPs\_0

ATGATAACTTCGTCTTACGGTCAAGAGTCTGAACCAACTCTCCTCTTTAAATTCAAATCTTCGCTCGAAAA  
CGCCACGTCATCATCATCACTCGGAACTGGAATTCATCGGTGCCGCTT

>PGSC0003DMG400029555LRR-RLPs\_189

GAATCGATGGGATTATCGGGGAATCTTGACGTCGATACGCTTCTCAGTTGACTAATTTGCTTACTATAA  
GTATTATGAATAATAATTTTGAAGGTCCGTTTCCGAACGTGAAGAAAATC

>PGSC0003DMG400029555LRR-RLPs\_252

ACTATAAGTATTATGAATAATAATTTTGAAGGTCCGTTTCCGAACGTGAAGAAAATCGGAGGTGATTG  
AGAGGTGTGTTTTGTGCGAATAATCGATTTTCCGGTGAGTTGCCGGACGAT

>PGSC0003DMG400029555LRR-RLPs\_315

CGATTGAGAGGTGTGTTTTGTGCGAATAATCGATTTTCCGGTGAGTTGCCGGACGATGCTTTCGCCGGG  
ATGAAGTCGATAAGGAGAATTTAATGGCGAATAATGAGTTTACAGGGAAG

>PGSC0003DMG400029555LRR-RLPs\_378

GCCGGGATGAAGTCGATAAGGAGAATTTAATGGCGAATAATGAGTTTACAGGGAAGATTCCGACGTC

GTTATTGGGAATTCCGAAGCTTGTTGAGCTGCAGATACAAAATAACAAATTC

>PGSC0003DMG400029555LRR-RLPs\_441

ACGTCGTTATTGGGAATTCCGAAGCTTGTTGAGCTGCAGATACAAAATAACAAATTC AATGGAACAATA

CCGGCGTTTAGTCAGAAGGATTTCAAATAAATGCTGCAAATAATAGACTT

>PGSC0003DMG400029555LRR-RLPs\_498

AATGGAACAATACCGGCGTTTAGTCAGAAGGATTTCAAATAAATGCTGCAAATAATAGACTTGAAGGT

CCAATACCATCTCAGCTTAGCAGCCAAAGTGCAAGCTCGTTTGCAGGTTAG

>PGSC0003DMG400029555LRR-RLPs\_63

CTCGAAAACGCCACGTCATCATCATCACTCGGAAACTGGAATTCATCGGTGCCGCTTTGCACCGGCAACA

ATTCAAATTGGAACGGATTGCTTTGCTTCAACGGAAAATTCTACGGTCTC

>PGSC0003DMG400029556LRR-RLPs\_1098

AAAACAAAACGGAAACGAGAAAGTAAATATTTAACTGACTACTCACTATAGTAGGCTCTTACTTTATTTTC

TTCCGATTACTATTTTGGGCTTTATATAATTAATAACCTATCATTGTTG

>PGSC0003DMG400029556LRR-RLPs\_1159

CTTTATTTCTTCCGATTACTATTTTGGGCTTTATATAATTAATAACCTATCATTGTTGGTGAATTTAGGT

GTTAAAAA ACTTACACTAAGTTTTATGTATCGATGTACATTATCAGAT

>PGSC0003DMG400029556LRR-RLPs\_1220

GAATTTTAGGTGTTAAAAA ACTTACACTAAGTTTTATGTATCGATGTACATTATCAGATCACTTATTAGTA

GCAATACGAGTAAATCTCTTAATAAATATTAATAATTAATAATTCGGTA

>PGSC0003DMG400029556LRR-RLPs\_1281

CTTATTAGTAGCAATACGAGTAAATCTCTTAATAAATATTAATAATTAATAATTCGGTAAAAATGGTAATA

GTA CTATTTTAAAAAATGATACTAGCATTATTTTTTTGAGTTTAAGTT

>PGSC0003DMG400029556LRR-RLPs\_1342

AATGGTAATAGTACTATTTTAAAAAATGATACTAGCATTATTTTTTTGAGTTTAAGTTATGCACACTCTC

AATATAAGATTGATATAATTTTGTTTTAATAACTCTTTGTTAAGAAGTC

>PGSC0003DMG400029556LRR-RLPs\_1403

GCACACTCTCAATATAAGATTGATATAATTTTGTTTTAATAACTCTTTGTTAAGAAGTCAATTAATAAAGA

TAGCGTTAAATATTGAAAGACTTGATCAATTCGAATTGGAATGGTAGAA

>PGSC0003DMG400029556LRR-RLPs\_1464

TTAATAAAGATAGCGTTAAATATTGAAAGACTTGATCAATTCGAATTGGAATGGTAGAAAGTGATGAAG  
CAAAATTTTACTATCATGTTAACTTTATTATTATTACAAAAAGAAGTTTA

>PGSC0003DMG400029556LRR-RLPs\_1525

TGATGAAGCAAATTTTACTATCATGTTAACTTTATTATTATTACAAAAAGAAGTTTACTAGAAATCGCT  
TTCAAATAAATTACTGAATAACTTACGCCTATTAATATGCATACTAAAA

>PGSC0003DMG400029556LRR-RLPs\_1830

AATTATATGTAGTGCCGTTGGTGGGATGATGGCTAACAAATGATAATTGTAAATGTTGATCGGAAATGGT  
GTTGGCTAATTGTAGTGATTAATGGTGGTAAGTTCATAGATGAGGCTGATA

>PGSC0003DMG400029556LRR-RLPs\_1891

GAAATGGTGTGGCTAATTGTAGTGATTAATGGTGGTAAGTTCATAGATGAGGCTGATAGCTGTGATGA  
ATGATAGTGATAGCTAATAATGATAGTTGACAATATATAGTGGTAACTGAT

>PGSC0003DMG400029556LRR-RLPs\_1952

TGTGATGAATGATAGTGATAGCTAATAATGATAGTTGACAATATATAGTGGTAACTGATGATAATAATTA  
TCGATAGTGATTGATGATACATGTGTCTTGATTATCAATGGGGAGAATCG

>PGSC0003DMG400029556LRR-RLPs\_2013

TAATAATTATCGATAGTGATTGATGATACATGTGTCTTGATTATCAATGGGGAGAATCGAGAGACCTAAC  
TCGTCCGAACTATTAATAATACGTATCGTGCAATTAGACATTATAGAAAT

>PGSC0003DMG400029556LRR-RLPs\_2074

AGACCTAACTCGTCCGAACTATTAATAATACGTATCGTGCAATTAGACATTATAGAAATGAAGATAGCAT  
GTCAATTAGAGTGATCTTATATAAGATCCCAAGAGATTGATATTATCACT

>PGSC0003DMG400029556LRR-RLPs\_2135

AGATAGCATGTCAATTAGAGTGATCTTATATAAGATCCCAAGAGATTGATATTATCACTACGTGGGCGCA  
CGTCCTAATTAGATGAAGTTAATTATTGATACCCTCTTGATCCCTTTAGC

>PGSC0003DMG400029556LRR-RLPs\_2318

ATCTTTTAAATAGACGTACGTGGCAATTTTGTTTATCCCCTACACTTCTGCACCTTCTGTCTTTCCAAATTCA  
GGAAAAAAAAGTTAAAAAGTTTTATATATCATAAATCATAGTACTAAT

>PGSC0003DMG400029556LRR-RLPs\_2379

TTCAAATTCAGGAAAAAAAAGTTAAAAAGTTTTATATATCATAAATCATAGTACTAATATATAGTAAGT  
GTTAAAGAACTTATTGAAAATACTGTATACGTCATTGATTTTTGAGCAT

>PGSC0003DMG400029556LRR-RLPs\_2440

ATAGTAAGTGTTAAAGAACTTATTGAAAATACTGTATACGTCATTGATTTTTGAGCATATAATTTTGTGT  
ACATTATATATATATAGTCAGTGAATTAGAACTTATTAATAATTCTGT

>PGSC0003DMG400029556LRR-RLPs\_2501

AATTTTGTGTACATTATATATATATAGTCAGTGAATTAGAACTTATTAATAATTCTGTGTACGCCACTGA  
TCTTGAGCATATAATTCTTTATACACTACTGATCTTGAACATATAATAA

>PGSC0003DMG400029556LRR-RLPs\_2562

ACGCCACTGATCTTGAGCATATAATTCTTTATACACTACTGATCTTGAACATATAATAATTTTAATATTTTG  
TGAATGAAACAGGAAATTTGGAGATATGTGGTAAGCCAATGGCAGCAT

>PGSC0003DMG400029556LRR-RLPs\_2623

TTAATATTTTGTGAATGAAACAGGAAATTTGGAGATATGTGGTAAGCCAATGGCAGCATGTGCAACATC  
AAAGAAGAAAAAGAAAATCCCAATAGTGGCCATAATCCTTGCATCTATTGG

>PGSC0003DMG400029556LRR-RLPs\_2684

GCAACATCAAAGAAGAAAAAGAAAATCCCAATAGTGGCCATAATCCTTGCATCTATTGGAGGATTAATC  
ATATTAGCCATTATATTATTTGCTCTCTCCTTGTCTATAAACAAAGGAAA

>PGSC0003DMG400029556LRR-RLPs\_2745

GATTAATCATATTAGCCATTATATTATTTGCTCTCTCCTTGTCTATAAACAAAGGAAAAAACCAACTCAA  
TATGAAAAATCATCAGTAAAAAATCTCAACAAAAAACCCCTCAGTACTGA

>PGSC0003DMG400029556LRR-RLPs\_2806

ACCAACTCAATATGAAAAATCATCAGTAAAAAATCTCAACAAAAAACCCCTCAGTACTGAGAGAAGAAAA  
GTACACAAAAAGTCATCATGACAAGGCTAGTAAATTGTACTTTGTAAGAAG

>PGSC0003DMG400029556LRR-RLPs\_2867

GAAGAAAAGTACACAAAAAGTCATCATGACAAGGCTAGTAAATTGTACTTTGTAAGAAGGGATAGAGA  
AAAGTTTGATTTAGAAGATCTTCTTAGAGCACCAGCTGAAGTTTTGGGAAGT

>PGSC0003DMG400029556LRR-RLPs\_2928

ATAGAGAAAAGTTTGATTTAGAAGATCTTCTTAGAGCACCAGCTGAAGTTTTGGGAAGTGGAAGTTTTG  
GTTCTTCTTATAAAGCTGATCTTCTATTGGAAAACCAATTGTTGTGAGGA

>PGSC0003DMG400029556LRR-RLPs\_2989

AAGTTTTGGTTCTTCTTATAAAGCTGATCTTCTATTGGAAAACCAATTGTTGTGAGGAGATTTAGGCAA



ATGAGTAATATGGGCAAAGAAGATTTTCATGAACATATGAGAAGCCTTGG

>PGSC0003DMG400029556LRR-RLPs\_3050

TTTAGGCAAATGAGTAATATGGGCAAAGAAGATTTTCATGAACATATGAGAAGCCTTGGCAAGTTGTCA  
CATCCTAATGTTCTTCCTCTTGTGGCTTTCTATTATAGGAGGGAAGAAAAG

>PGSC0003DMG400029556LRR-RLPs\_3111

AGTTGTCACATCCTAATGTTCTTCCTCTTGTGGCTTTCTATTATAGGAGGGAAGAAAAGCTTTTGGTACT  
GATTTTGTGATAATGGAAGCTTGGCAAGTCATTTACATGGTAAGTACT

>PGSC0003DMG400029556LRR-RLPs\_3172

TTTGGTACTGATTTTGTGATAATGGAAGCTTGGCAAGTCATTTACATGGTAAGTACTTTCACAGCATT  
AAAACTTACTCAGAACTACTTTTTAATAGTGCTCAATTCTCAAGAAAC

>PGSC0003DMG400029556LRR-RLPs\_3233

CACAGCATTTAAAACTTACTCAGAACTACTTTTTAATAGTGCTCAATTCTCAAGAAACATCTAATAAATA  
AGTATAATTTAGTAACATATGTCTTGTAGTATTGTTATTTTTTCATAATA

>PGSC0003DMG400029556LRR-RLPs\_3294

CTAATAAATAAGTATAATTTAGTAACATATGTCTTGTAGTATTGTTATTTTTTCATAATAGGTCTGAAATGA  
GCTAAATCAACAATTATTTGGAACAGTGAGGGTAAAACTTAAAGTGATA

>PGSC0003DMG400029556LRR-RLPs\_3355

TCTGAAATGAGCTAAATCAACAATTATTTGGAACAGTGAGGGTAAAACTTAAAGTGATAGTAATACATG  
TCACTTAATTATAGTTAGGTGGTAGATATGTGTATAAAAATACATGGTATA

>PGSC0003DMG400029556LRR-RLPs\_3416

AATACATGTCACTTAATTATAGTTAGGTGGTAGATATGTGTATAAAAATACATGGTATATATTTATTAATT  
TAACATAAACATTGAATGCAAATAAATTTAACCCTCAAGTCAAGCAT

>PGSC0003DMG400029556LRR-RLPs\_3477

TTTATTAATTTAACATAAACATTGAATGCAAATAAATTTAACCCTCAAGTCAAGCATGATATCTGTCAC  
AATTTGTATGAAGCAATGAGATTATTTAAAGTATTAAATTATAAAAAAG

>PGSC0003DMG400029556LRR-RLPs\_3538

TATCTGTCACAATTTGTATGAAGCAATGAGATTATTTAAAGTATTAAATTATAAAAAAGTTTCAACTTTTT  
AAACAGATTAAGATGCTTTACAATAATTATAGATAGTTGTACATAAAA

>PGSC0003DMG400029556LRR-RLPs\_3599

TCAACTTTTTAAACAGATTAAAGATGCTTTACAATAATTATAGATAGTTGTACATAAAAATTGAGTTAGCT  
AGTTATCTCAAATGAAGGCAATAGTGAAAATTGTTTGTATTGCCAAT

>PGSC0003DMG400029556LRR-RLPs\_3660

TGAGTTAGCTAGTTATCTCAAATGAAGGCAATAGTGAAAATTGTTTGTATTGCCAATGTATTAATTA  
AATTCCTATTGAATTTAACTTATATATATTGATCATATAAAGAAATGTTA

>PGSC0003DMG400029556LRR-RLPs\_3721

ATTAATAATTCCTATTGAATTTAACTTATATATATTGATCATATAAAGAAATGTTACACTATTTTTATA  
TTTTAACATATATAGTAATTTTTTTAGAAAGATTTATTAGTGTA AAAAC

>PGSC0003DMG400029556LRR-RLPs\_3965

TCAAAGCAAGACTCATCTCAAATCTCATTACGATATTGGGCCTCACCCATGCTCCAGATATATATCCAGC  
CCGCCTCTTGAAGTAGTTTTTGAGGTTGACTTTGCAATTCTCTTCATAT

>PGSC0003DMG400029556LRR-RLPs\_4026

TATATCCAGCCCGCCTCTTGAAGTAGTTTTTGAGGTTGACTTTGCAATTCTCTTCATATGAACTAATTTTGG  
TATTTGTTGATCAGGCAAAGAAGTCCTAACCAACCAAGTCTTGATTG

>PGSC0003DMG400029556LRR-RLPs\_4087

ACTAATTTTGGTATTTGTTGATCAGGCAAAGAAGTCCTAACCAACCAAGTCTTGATTGGCCAAGTCGTT  
TGAAAATCATAAAGGAGTTACAAGGGGATTGGCTTATCTTTACAAGGAA

>PGSC0003DMG400029556LRR-RLPs\_4148

CAAGTCGTTTGAAAATCATAAAGGAGTTACAAGGGGATTGGCTTATCTTTACAAGGAACTTCCAACACT  
GACTCCACATGGACATCTTAAATCCTCAAATGTTCTTCTAGACCACA

>PGSC0003DMG400029556LRR-RLPs\_4209

TCCAACACTGACTCCACATGGACATCTTAAATCCTCAAATGTTCTTCTAGACCACAAATTTGAGCCAC  
TTGTAGCAGACTATGCTCTTGTGCCAGTAATCAACAAAGACCATGCCAA

>PGSC0003DMG400029556LRR-RLPs\_4270

TTTGAGCCACTTGTAGCAGACTATGCTCTTGTGCCAGTAATCAACAAAGACCATGCCAAACAGTTCATGG  
TGGCTTACAAATCACCAGAGTACATGCAAAATGAACGTCTCACAAGAAAA

>PGSC0003DMG400029556LRR-RLPs\_4331

AGTTCATGGTGGCTTACAAATCACCAGAGTACATGCAAAATGAACGTCTCACAAGAAAACTGATGTAT  
GGAGCCTTGGCATCCTCATCCTTGAGCTACTAACCGGCAGGTAATAACT

>PGSC0003DMG400029556LRR-RLPs\_4392

TGATGTATGGAGCCTTGGCATCCTCATCCTTGAGCTACTAACCGGCAGGTAATAATACTTCATCCCCATCC  
TTTATTTATTATCTGAAAGACAGTCTGGTGCATAAAGTATCTGACATTC

>PGSC0003DMG400029556LRR-RLPs\_4453

ATCCCCATCCTTTATTTATTATCTGAAAGACAGTCTGGTGCATAAAGTATCTGACATTCACATCCTTTATTT  
ATTATCTGAAAGACAGTCTGGTGCATAAAGTATGTGACATTCACCTAG

>PGSC0003DMG400029556LRR-RLPs\_4514

ATCCTTTATTTATTATCTGAAAGACAGTCTGGTGCATAAAGTATGTGACATTCACCTAGAGACAGTAAAA  
GTACTAGTAATACTTTCTCCATCGCAAATTATTTGTTGCTTTTTTACTTT

>PGSC0003DMG400029556LRR-RLPs\_4575

ACAGTAAAAGTACTAGTAATACTTTCTCCATCGCAAATTATTTGTTGCTTTTTTACTTTACAAGTCCTTTAA  
AAAGTAGTATTAATTACAATTTTTTTAGTACTTTAACCTTATATATCA

>PGSC0003DMG400029556LRR-RLPs\_4636

AAGTCCTTTAAAAAGTAGTATTAATTACAATTTTTTTAGTACTTTAACCTTATATATCAAAGTTATACATCT  
TAGTATGCAATTATCAAGATCATTTTGTGCATATACCAACACAAATTA

>PGSC0003DMG400029556LRR-RLPs\_4697

GTTATACATCTTAGTATGCAATTATCAAGATCATTTTGTGCATATACCAACACAAATTACTTCATTTTGAGT  
TTCATTTAGTGACAAGGAACCAAATATTTACATTTTAGGCTCACAAAT

>PGSC0003DMG400029556LRR-RLPs\_4758

TCATTTTGAGTTTCATTTAGTGACAAGGAACCAAATATTTACATTTTAGGCTCACAAATTTTGATCCACTA  
ACTTGTGAAATAAAAAGAAACCTCATATCACTAATGTTAGTTGTGCACG

>PGSC0003DMG400029556LRR-RLPs\_4819

TGATCCACTAACTTGTGAAATAAAAAGAAACCTCATATCACTAATGTTAGTTGTGCACGACTTTTTTGATC  
GCTTCATTCGGGTTAAGATGTGGCTAAAGTCTCTCTGAGGGTAGGAATG

>PGSC0003DMG400029556LRR-RLPs\_4880

TTTTTTGATCGCTTCATTCGGGTTAAGATGTGGCTAAAGTCTCTCTGAGGGTAGGAATGTTTGACTGGAT  
AGGTAATTTAAGAAAAAGGAAGACTTTTAAGTATACATGACATTTATATT

>PGSC0003DMG400029556LRR-RLPs\_4941

TGACTGGATAGGTAATTTAAGAAAAAGGAAGACTTTTAAGTATACATGACATTTATATTACTATAAAA

AGCATGTTATTAATATTAAGCTTAATTAACACAGGTTTCCAGCTAATTA

>PGSC0003DMG400029556LRR-RLPs\_5002

TACTATAAAAGCATGTTATTAATATTAAGCTTAATTAACACAGGTTTCCAGCTAATTATCTAAAGCAAGG

CAAAGGTGCAAATGCAGACTTAGCAATGTGGGTGAATTCAGTAGTAAGA

>PGSC0003DMG400029556LRR-RLPs\_5063

TAAAGCAAGGCAAAGGTGCAAATGCAGACTTAGCAATGTGGGTGAATTCAGTAGTAAGAGAAGAATGG

ACAGGTGAGGTTTTTGGATAAAGACATGAACACAACAAAACATAATTGTGAAG

>PGSC0003DMG400029556LRR-RLPs\_5124

AGAATGGACAGGTGAGGTTTTTGGATAAAGACATGAACACAACAAAACATAATTGTGAAGGTGAAATGC

TTAAGCTATTGAAAATTGGAATGTCTTGTGTGAAATGGATGTTGGAAAGAG

>PGSC0003DMG400029556LRR-RLPs\_5185

GAAATGCTTAAGCTATTGAAAATTGGAATGTCTTGTGTGAAATGGATGTTGGAAAGAGATGTGATTTA

ATGGAAGCTTTACACAAAATTGAAGAATTGAAAGAAAATGATGAAGAAGAT

>PGSC0003DMG400029556LRR-RLPs\_5246

GTGATTTAATGGAAGCTTTACACAAAATTGAAGAATTGAAAGAAAATGATGAAGAAGATTATTCTTCTA

ATTCTTATAATAATTATGCAAGTGATCAAGGAGAAATGTATTCTTCTAAAG

>PGSC0003DMG400029556LRR-RLPs\_5287

GAAAATGATGAAGAAGATTATTCTTCTAATTCTTATAATAATTATGCAAGTGATCAAGGAGAAATGTATT

CTTCTAAAGCCATCACTGATGATGATTTCTCCTTTTCTAAGAATGCTTAG

>PGSC0003DMG400029556LRR-RLPs\_549

AATAATAGACTTGAAGGTCCAATACCATCTCAGCTTAGCAGCCAAAGTGCAAGCTCGTTTGCAGGTTAG

AGTTTATCTTAAGGAAAGTTATACTCGTTTTAATTCGGTGGTTTCGTTGTG

>PGSC0003DMG400029556LRR-RLPs\_732

ATTTTGAATTAATACTCTCTGTCACGATTTATGTGATATTTTTCGTTTATAGAGAGTCAAACCGTTTAAGTT

TGACCGGGTTCAAATGAAATTTTATATTATAAAAAACTACGTAAAAA

>PGSC0003DMG400029556LRR-RLPs\_915

CAAAGATAGATTTGTTTAAATCTCAAATTTGAACAATGCCAATAAATTGAGATAAAGGAAGTAATATGT

CAAGTATACCAAATATCGTATAATCTTATGATTTAATTAACGAAAAGTT

>PGSC0003DMG400029556LRR-RLPs\_976

GTAATATGTCAAGTATACCAAATATCGTATAATCTTATGATTTAATTAACGAAAAGTTAAAATTTAAAAG  
GTTTTAAAAAATAAAAAATATATAGTACATGTTTTTAAACAACACTAAAAAA

>PGSC0003DMG400029572LRR-RLPs\_122

TCTGTGCCCCGCGATGAAGCTTTTTATTTGCTTCAATTTAGCAAGGCCTCACAGTTGATCTTAGTGGTTAT  
GACTGTGACTATGAGGCCCGAGCTAAGACTTTGTCTTGGAATGTTACAG

>PGSC0003DMG400029572LRR-RLPs\_1342

GTGAATTTAGAGTTGCAAAACAATTTACTAACTGGTTCACTTCCCTCTAATATAAGCGGATTTCAACAAC  
ACAAGCACTTGATTTGTCCTTCAATTATTTCACTGGCACAACACCCCCT

>PGSC0003DMG400029572LRR-RLPs\_1403

TTCAACAACATAAGCACTTGATTTGTCCTTCAATTATTTCACTGGCACAACACCCCCTTCGTTATTCCTTC  
TTCCAAGATTGGTTTCTTTACATGTTCAACGCAATCAATTAACCGGGA

>PGSC0003DMG400029572LRR-RLPs\_1769

TGTATAGTCTTGAATTCCTCATTCTAGCTCGGAACAATTTAGTGGTTCAATCCCGGGATGTTTGGGTAAC  
TCCAGTATCTCCATTTCTGCTTTAGACTTGCGAATGAACAATTTGCATG

>PGSC0003DMG400029572LRR-RLPs\_183

TAGTGGTTATGACTGTGACTATGAGGCCCGAGCTAAGACTTTGTCTTGGAATGTTACAGGAGATTGTTGT  
CAATGGGATGGTGTACTTGTGATGGATTTACTGGTCACGTTATAGGACT

>PGSC0003DMG400029572LRR-RLPs\_1830

TTTGGGTAACCTCCAGTATCTCATTCTGCTTTAGACTTGCGAATGAACAATTTGCATGGAGAGATACCA  
AGATTCTTATCTACAGGGTTACAATATCTTGGTTTATATGGCAATCAATT

>PGSC0003DMG400029572LRR-RLPs\_2013

CAACAAGATAAATGACACGTTTCCGATATGGCTGCAGAACTACCAAACCTACAAGTTCTGATTCTGAAA  
TCGAATCTCTTTCACGGTCCAATTGGTGATTTGGAGTCCGAGTTTCCATT

>PGSC0003DMG400029572LRR-RLPs\_2501

CAAAGTTGCAACAGCTCGAAGCATTAGATCTCTCATGGAACAACTCATTGGAGATATTCCTGATCCATT  
GTCAAGTTTGACATTTCTTGAGGTCTTAAACCTTCTACAATCATCTGG

>PGSC0003DMG400029572LRR-RLPs\_2623

GGACGCATTCTTGGGAAACAGTTCAATACATTTCAAATGATTCGTATTGTGGAAATCCTGATTTAT  
GTGGATTTCCACTATCAAAGGAATGTGGAAACAGTAATGACTCACCCTT

>PGSC0003DMG400029572LRR-RLPs\_2684

CTGATTTATGTGGATTTCCACTATCAAAGGAATGTGGAAACAGTAATGACTCACCCTTAAACACGATGA  
TGATGATGATTCATTTTTTTCGAGTGGGTTACATGGCAAGCTGTGGTAA

>PGSC0003DMG400029572LRR-RLPs\_305

ATCTTTCTTGCAGCTTTCTTAACGGAACCATTAATACTAACAGCAGCCTCACAAACTTAGTCATCTGCAA  
AGACTCAACCTTGCTTTCAACAAGTTGAGTAACTTTCCACTTGGGGATA

>PGSC0003DMG400029572LRR-RLPs\_3050

TATGTCAACTGTTTTATTTTTCTAAATATTCAAACCTTAATCTGTCTCTGCAGAGGTTGCTGGAGAGTT  
GGACAAGTTTATTAGCAAGTTAGTGCTGATGTTCTGGCAAATAGCAAT

>PGSC0003DMG400029572LRR-RLPs\_3270

TATTATATTGTATTGTATTGTATTGTTAGTACAACAATATGAATCCTGTATTATCTACTAGATGAGTCAAG  
CCCGTGCTTAGCACGAGCTCAACATTAAGGTGATTGAAATCTCTTTTCT

>PGSC0003DMG400029572LRR-RLPs\_549

GTATTACACTGAACTCAAAGTTGATCGAAAAACCTTCAGAAGTTTGCTTCAAGACTTGACCAATTTGGAG  
GTACTGTTGCTTGACAACACGGATGCACCATTTGAGTTACCTAAGAATCT

>PGSC0003DMG400029572LRR-RLPs\_610

AATTTGGAGGTACTGTTGCTTGACAACACGGATGCACCATTTGAGTTACCTAAGAATCTTTCTTCTCCCT  
TAGGTACTTAAGTCTTGAAGGAACCGGCATGTTTGGGAACATAAGTGAG

>PGSC0003DMG400029572LRR-RLPs\_671

CTTCTTCCCTTAGGTACTTAAGTCTTGAAGGAACCGGCATGTTTGGGAACATAAGTGAGTTTCAGATATT  
TCATTTACCAAACCTTGCAAGTGCTGAGATTGGGACAGAATCCTTTACTAA

>PGSC0003DMG400029572LRR-RLPs\_732

TCAGATATTTCAATTTACCAAACCTTGCAAGTGCTGAGATTGGGACAGAATCCTTTACTAACAGGCACTTTG  
CCAAATTTAATCGGAGTTCCAATGGAAGAAGTGTCTTAGAGTTGGACTT

>PGSC0003DMG400029572LRR-RLPs\_793

GGCACTTTGCCAAATTTAATCGGAGTTCCAATGGAAGAAGTGTCTTAGAGTTGGACTTTTTTTCCACTG  
GTATTTCTGGGAAGGTACCCGATTCAATTGGTAATCTCCATTCTCTTTGG

>PGSC0003DMG400029572LRR-RLPs\_854

TTTCCACTGGTATTTCTGGGAAGGTACCCGATTCAATTGGTAATCTCCATTCTCTTTGGTATTTGAACCTC

CAGAATTGTCATTTATCCGGCTCGATTCCAGAATCCATTGGCAATCTCA

>PGSC0003DMG400029572LRR-RLPs\_915

TTTGAACCTCCAGAATTGTCATTTATCCGGCTCGATTCCAGAATCCATTGGCAATCTCACTGCAATCAGAG  
AGTTGATACTTTCAGAAAACGACTTCACTGGTAATGTTCCCTCAACTGT

>PGSC0003DMG400029572LRR-RLPs\_976

GCAATCAGAGAGTTGATACTTTCAGAAAACGACTTCACTGGTAATGTTCCCTCAACTGTCTCAAAGTTAA  
ACAAACTCGTTCGTTTAGATCTCTCTTCAAACATTTTCGAGGCTCAATT

>PGSC0003DMG400029597-(rev)LRR-RLPs\_1098

CTGACAACATAAAATGAAAAATAAAATACCACATGAATTACTGTCATATGACATGTGCACTACTACTCTTTT  
GGAAATGTAGATTTCAAATATTATCTGTAGAATCATTATTAGGTATTA

>PGSC0003DMG400029597-(rev)LRR-RLPs\_1159

CTACTCTTTTGGAAATGTAGATTTCAAATATTATCTGTAGAATCATTATTAGGTATTAATAAATTTATTGC  
AACATTACATGTGCCATTTAATATGATATACAGAGAACTTGTGGTGTT

>PGSC0003DMG400029597-(rev)LRR-RLPs\_122

CCCCGTCATTTACTAGTTTTTCTCCTTTTCAGAGCTACATTTTTTTAGTTACATTTTTGCTATTCTTATAA  
AAGGTTATTGTTACTAGAAATTAGAGTAAGTAAAAGCAATATTTGA

>PGSC0003DMG400029597-(rev)LRR-RLPs\_1220

AAATTTATTGCAACATTACATGTGCCATTTAATATGATATACAGAGAACTTGTGGTGTTAGCACTATAAAT  
AGAGCTGAAATCAAGCCATTTGATTCACATCTACTTCTACAAGTAAATC

>PGSC0003DMG400029597-(rev)LRR-RLPs\_1281

CACTATAAATAGAGCTGAAATCAAGCCATTTGATTCACATCTACTTCTACAAGTAAATCAAACCTTTGG  
AAAAAATAACGTTTGAGGAATTCTTTTGATACCAATATGGGGTGTAGC

>PGSC0003DMG400029597-(rev)LRR-RLPs\_1342

AACTCTTTGGAAAAAATAACGTTTGAGGAATTCTTTTGATACCAATATGGGGTGTAGCTTGTGCAAGAT  
GGCAACCTTTCTAGTATTAACCTTTGAATATTGCTCGGCTTCGAAGATGGA

>PGSC0003DMG400029597-(rev)LRR-RLPs\_1403

GTGCAAGATGGCAACCTTTCTAGTATTAACCTTTGAATATTGCTCGGCTTCGAAGATGGACTAAACATCAA  
TATCCCATACTTGAAAGCGTTACACAGTTTCAAAGTTTGCTAATGTTGA

>PGSC0003DMG400029597-(rev)LRR-RLPs\_1464

AAACATCAATATCCCCATACTTGAAAGCGTTACACAGTTTCAAAGTTTGCTAATGTTGATGTACAGTTCAT  
CTTCGGCGCCAAGCGATATTATTGAAAGTTAATAGTAGAAAGGTTGTCG

>PGSC0003DMG400029597-(rev)LRR-RLPs\_1525

TACAGTTCATCTTCGGCGCCAAGCGATATTATTGAAAGTTAATAGTAGAAAGGTTGTCGTCCTGCACAAT  
TAATGAACCCTTGATTAAAGAAAAAAATTGTACTTTTGTTCGTGGATAT

>PGSC0003DMG400029597-(rev)LRR-RLPs\_1586

CTGCACAATTAATGAACCCTTGATTAAAGAAAAAAATTGTACTTTTGTTCGTGGATATGTAACCGTATA  
TATCATTATATTAAGTTTTGGGTAATATTATTTCACTACATTTACGAATG

>PGSC0003DMG400029597-(rev)LRR-RLPs\_1647

AACCGTATATATCATTATATTAAGTTTTGGGTAATATTATTTCACTACATTTACGAATGTGATTTACATAAC  
CAGTGTTCGGAAGGCGTGGGATGATAAAAAACAACAGGTCCACTCC

>PGSC0003DMG400029597-(rev)LRR-RLPs\_183

GCTATTCTATAAAAGGTTATTGTTACTAGAAATTAGAGTAAGTAAAAGCAATATTTGATAAGTAAAACC  
TAAATTTGCTTGATCAGCTAGAAATTCACAACATAAAGTGATTATACAAT

>PGSC0003DMG400029597-(rev)LRR-RLPs\_1891

CATGCAACTAAACTGAGGGAAAAAAACTAAGCAAAAAATGCAAGAACAGCTTTACTTATGAAAT  
TGCAGATTTGGTTTGAGAAAAAAATTTGGACCATTTCTCAATTTGTGCGTG

>PGSC0003DMG400029597-(rev)LRR-RLPs\_2074

GAAGGGACAAATATATATCTTAATGTTTCGCAATATAAATCCCCAAACAAATTTTCTGCAGACGATGAG  
GGAGAATTAGCTTGCTAGTTTTTGTGTTTTCCCTGGCACGGGCCTGGGCT

>PGSC0003DMG400029597-(rev)LRR-RLPs\_2135

GACGATGAGGGAGAATTAGCTTGCTAGTTTTTGTGTTTTCCCTGGCACGGGCCTGGGCTTCTTTTTTGT  
GTTTTAGTTGGATCTGAACAAAGCCATTTTTGTGCCTGGATTAAGTGT

>PGSC0003DMG400029597-(rev)LRR-RLPs\_2196

TTTTTTGTTGTTTTAGTTGGATCTGAACAAAGCCATTTTTGTGCCTGGATTAAGTGAATGGGCCGGCC  
TTTTTTGTTCTTCTTTATAGAGAAATTTTCATAAATAGTGTTATTA

>PGSC0003DMG400029597-(rev)LRR-RLPs\_2257

TGGGCCGGCCTTTTTTGTTCCTTCTTTATAGAGAAATTTTCATAAATAGTGTTATTAGCGTTCGTTTTTG  
TAAAATGTGATGGTTTTTTAAGGGAAAATTGTATAAATAGCAAATT



>PGSC0003DMG400029597-(rev)LRR-RLPs\_244

AGTAAACCTAAATTTGCTTGATCAGCTAGAAATTCACAACATAAAGTGATTATACAATACAACATCATT  
TGCCTTGATCTACCTAAGTTATATGGCCTATGGGGTTCAATCTTTAAG

>PGSC0003DMG400029597-(rev)LRR-RLPs\_2928

TACTAATATGATTTTTATATTTGCTAAACCCAAAATTTACTTTTTTTGAAACTAAGCAAATACATTCTATT  
TACATATATCTAAAAAAATCTAATCCTAATTGAAATCCACGAATACA

>PGSC0003DMG400029597-(rev)LRR-RLPs\_305

AACATCATTTTGCCTTGATCTACCTAAGTTATATGGCCTATGGGGTTCAATCTTTAAGATTTTATAGTATC  
GAAACGAGAAGGCAAGCTTGTTGGCTTACATTCTTAAACAACTGTCTC

>PGSC0003DMG400029597-(rev)LRR-RLPs\_3233

CACAAATATCTTATTTGCAAATATAGTGTGTTTTTCGAAACGTAGCAAATACATTGTATCTACATACA  
TAAATAAAATAATTTAATCCAAATTGAAATCCCCGAATACAATGTCTCA

>PGSC0003DMG400029597-(rev)LRR-RLPs\_3294

TCTACATACATAAATAAAATAATTTAATCCAAATTGAAATCCCCGAATACAATGTCTCATTATGCTCCTTC  
AGAACAAGTTATTTTCAAGAAAATAGGGGTTCCGAACGGGAGAAGAATA

>PGSC0003DMG400029597-(rev)LRR-RLPs\_3355

ATGCTCCTTCAGAACAAGTTATTTTCAAGAAAATAGGGGTTCCGAACGGGAGAAGAATAAGATAGACTT  
TCCTTTTATTAGTTTGTGACCGAATGACTCTATAAAATTAGGTGATACT

>PGSC0003DMG400029597-(rev)LRR-RLPs\_3477

CACATATCACGAATAAGGTAAGTGACTTCTCTATTTTTTTGATACCCTTTCTTTTTAGCCCGTTTAAAAAA  
AAAGTTACTTTAATATAATTAGAAATTAGAAATAATTTAGTTTTAAAA

>PGSC0003DMG400029597-(rev)LRR-RLPs\_3538

CGTTTAAAAAAAAGTTACTTTAATATAATTAGAAATTAGAAATAATTTAGTTTTAAAATTCTCCTTTTAC  
AACCACACAAATATTTTATTTTAGATCACTAAAATAATTATCCTACAA

>PGSC0003DMG400029597-(rev)LRR-RLPs\_3599

CTCCTTTTACAACCACACAAATATTTTATTTTAGATCACTAAAATAATTATCCTACAATACTTCTATTTATC  
ATCTAGCAGATTTTCGTGCCCTTGATTGAACGTTTTTCGTGCATTAA

>PGSC0003DMG400029597-(rev)LRR-RLPs\_366

TTTTAGTATCGAAACGAGAAGGCAAGCTTGTTGGCTTACATTCTTAAACAACTGTCTCAAATTTATTAGT

TTTGTTGATCTTGATCTTGTGGTGGATATGATGATGTATCATTGCTT

>PGSC0003DMG400029597-(rev)LRR-RLPs\_3660

CTTCTATTTATCATCTAGCAGATTTTCGTGCCCTTGTATTGAACGTTTTTCGTGCATTAAGGGAGGAGATAA

ACACCAAACGTGAAACGTCGCCAACTTCCATTAAAACCGGCAGTTTTGA

>PGSC0003DMG400029597-(rev)LRR-RLPs\_3721

GAGGAGATAAACACCAAACGTGAAACGTCGCCAACTTCCATTAAAACCGGCAGTTTTGATCTCTCTCCG

GTGGACTCTTCATCTAAAGGTAAGTCTATAGTTTCAATCAACTTCTCGTTT

>PGSC0003DMG400029597-(rev)LRR-RLPs\_3782

TCTCTCCGGTGGACTCTTCATCTAAAGGTAAGTCTATAGTTTCAATCAACTTCTCGTTTTATGTTACATCTC

TTTGAGTTTTCTACTTCAATTACAAACCCTTTAAACCCTTCTACTTTT

>PGSC0003DMG400029597-(rev)LRR-RLPs\_3843

TGTTACATCTCTTTCAGTTTTCTACTTCAATTACAAACCCTTTAAACCCTTCTACTTTTTGGGGGAATTTGTG

TAGCAATAGGAAGTCTCTGTTTCTGCTTACAATGGATTTGTGATTAA

>PGSC0003DMG400029597-(rev)LRR-RLPs\_3904

GGGAATTTGTGTAGCAATAGGAAGTCTCTGTTTCTGCTTACAATGGATTTGTGATTAATTCATATTGAAA

TTGGTCATATTTGTTGTCATTCTTCTAATTTGCCCTATTTAGAAAAC

>PGSC0003DMG400029597-(rev)LRR-RLPs\_3965

CATATTGAAATTGGTCATATTTGTTGTCATTCTTCTAATTTGCCCTATTTAGAAAAGTATCACTTTACTT

ACTTGATTCATAAACTTCTCATCACTATTTTGAGAAATTTAAACGGAG

>PGSC0003DMG400029597-(rev)LRR-RLPs\_4026

TCACTTTACTTACTTGATTCATAAACTTCTCATCACTATTTTGAGAAATTTAAACGGAGGAACACTGGCTA

ATGAGAGGAAGAAAGTCCTTATATAAAATTTAGTTAGTTAGATGGACT

>PGSC0003DMG400029597-(rev)LRR-RLPs\_4087

ACACTGGCTAATGAGAGGAAGAAAGTCCTTATATAAAATTTAGTTAGTTAGATGGACTTTTTTTTTTTTTT

TGGTTTCCCACCCGTGTCTGGAGCTCGACTAAATCTGGATCGTGCCTG

>PGSC0003DMG400029597-(rev)LRR-RLPs\_4209

GGACCCATTTAGGGGTGACGGTCTCAACAGGATTTTCATCGTCTGGTTAACGGTGAAGCAGTCCTACAC

TGCACCATAACCCATGTTGGTTAGATGGACTTAATTTTTGGGTGACTGTTG

>PGSC0003DMG400029597-(rev)LRR-RLPs\_427

ATTTATTAGTTTTGTTGATCTTGATCTGTTTGGTGGATATGATGATGTATCATTGCTTTAATTAGTAAAG  
GAGCCATTTTTAGATTATGTTCAAATTTATAAAATCTATACGTATATG

>PGSC0003DMG400029597-(rev)LRR-RLPs\_4270

TCCTACACTGCACCATAACCCATGTTGGTTAGATGGACTTAATTTTTGGGTGACTGTTGGGCTTCTTTTT  
TTTTGTAGACACTAACAATGTTCTCTCAACTTGAAGTTTGTGGTCCTCC

>PGSC0003DMG400029597-(rev)LRR-RLPs\_4331

CTTCTTTTTTTTTGTAGACACTAACAATGTTCTCTCAACTTGAAGTTTGTGGTCCTCCAACAATCTCCAA  
TTTCTTATACCATTACGAAAATTGTTGAAAAATTGTATGTAGATGAAA

>PGSC0003DMG400029597-(rev)LRR-RLPs\_4392

CAATCTCCAATTTCTTATACCATTACGAAAATTGTTGAAAAATTGTATGTAGATGAAAAACATTGAATTA  
TTAGTCATATGCAAAGGCTATGCATACGTTGTTGAAATATGTATTTTTG

>PGSC0003DMG400029597-(rev)LRR-RLPs\_4453

CATTGAATTATTAGTCATATGCAAAGGCTATGCATACGTTGTTGAAATATGTATTTTTGTATATTTGCATG  
TGTTATCTTGATGTTGAAATTCTGTTGAGAATATTGATTACTTTGAAAG

>PGSC0003DMG400029597-(rev)LRR-RLPs\_4514

TATTTGCATGTGTTATCTTGATGTTGAAATTCTGTTGAGAATATTGATTACTTTGAAAGTCGAAAAGTGCA  
TTTGCTTGATACTATTGGTTTAACTCCCTGATCTTAACTTTCAGAAGT

>PGSC0003DMG400029597-(rev)LRR-RLPs\_4575

GAAAAGTGCATTTGCTTGATACTATTGGTTTAACTCCCTGATCTTAACTTTCAGAAGTGTATGCAACTTG  
TAAGTATTCGATCATGAGGACTGCTACGAGATCTAGTGTAGATACAATT

>PGSC0003DMG400029597-(rev)LRR-RLPs\_4636

ATGCAACTTGTAAGTATTCGATCATGAGGACTGCTACGAGATCTAGTGTAGATACAATTAGTGATTTGCC  
TTGTAACGTTCTGGATGGAATATTAGGGTGCTTGCCTCTGAAAGATGCAG

>PGSC0003DMG400029597-(rev)LRR-RLPs\_4697

TGATTTGCCTTGTAACGTTCTGGATGGAATATTAGGGTGCTTGCCTCTGAAAGATGCAGTGAAGACTAGT  
ATCTTGCAAGAGACTGGAGGTATAAATGGGTTACACGTCAAGAGCTTGA

>PGSC0003DMG400029597-(rev)LRR-RLPs\_4758

AAGACTAGTATCTTGCAAGAGACTGGAGGTATAAATGGGTTACACGTCAAGAGCTTGAGTTTGATTAT  
CAATTTTTGTGACGTATGCATGTAATCAAGCTACGGCAATCATTTACCAA

>PGSC0003DMG400029597-(rev)LRR-RLPs\_4819

TTGATTATCAATTTTTGTGACGTATGCATGTAATCAAGCTACGGCAATCATTTACCAAGTCCTATTACTC  
CATAAAGGACCAATACTTAAGTTTAGTCTTGGGGGCTCTAACTTGACAA

>PGSC0003DMG400029597-(rev)LRR-RLPs\_4880

CCTATTACTCCATAAAGGACCAATACTTAAGTTTAGTCTTGGGGGCTCTAACTTGACAATATATCCTGATA  
TTGATCACTGGATACTTTTCTTGTCAAAGAAAAATGTTCAAGAATTCAC

>PGSC0003DMG400029597-(rev)LRR-RLPs\_4941

TATCCTGATATTGATCACTGGATACTTTTCTTGTCAAAGAAAAATGTTCAAGAATTCACCCTTTGCGGAAA  
CAGCTTAAACAACAGATATCATTTACCTTCTCACTTTTTTACGTTCCAT

>PGSC0003DMG400029597-(rev)LRR-RLPs\_5002

TTTGCGGAAACAGCTTAAACAACAGATATCATTTACCTTCTCACTTTTTTACGTTCCATCACCTAAGGCAT  
CTGAAAGTTGATCGATGCTCGTTCCATCCTCCACCCGGTTTCAAAGGGT

>PGSC0003DMG400029597-(rev)LRR-RLPs\_5063

CCTAAGGCATCTGAAAGTTGATCGATGCTCGTTCCATCCTCCACCCGGTTTCAAAGGGTTTGAGAAGCTT  
ATTAATCTTGACCTTCATTTTGCCACTTTTGATCCAGCAATACTTGGGAA

>PGSC0003DMG400029597-(rev)LRR-RLPs\_5124

GAGAAGCTTATTAATCTTGACCTTCATTTTGCCACTTTTGATCCAGCAATACTTGGGAATCTATTTTCAG  
ATGCCATTGCTTGAAAGATTGACGTTGAGATGGTGCACAAATTTTGAC

>PGSC0003DMG400029597-(rev)LRR-RLPs\_5185

TTATTTTCAGATGCCATTGCTTGAAAGATTGACGTTGAGATGGTGCACAAATTTTGACACCCTTGAAATT  
GATGCACCTAATCTCAAATGCTTTGACTTTAGAGGAAATTCAAAGTCCA

>PGSC0003DMG400029597-(rev)LRR-RLPs\_5246

CCTTGAAATTGATGCACCTAATCTCAAATGCTTTGACTTTAGAGGAAATTCAAAGTCCATTTGCTTCAAGA  
ACGCCCTATGCTCGAGAACTTATTGTGCATCTCAATTCACGAGTTTC

>PGSC0003DMG400029597-(rev)LRR-RLPs\_5307

TGCTTCAAGAACGCCCTATGCTCGAGAACTTATTGTGCATCTCAATTCACGAGTTTCGATGGTTGCATC  
TCCTGTTTGTCCAATATTACAAAGTTCTTCTGTACATGCCATGCCTA

>PGSC0003DMG400029597-(rev)LRR-RLPs\_5368

TGGTTGCATCTCCTGTTTGTCCAATATTACAAAGTTCTTCTGTACATGCCATGCCTAATGCAACTGGAT

ATAAGTGGTCATTTATTGGAGGTAAAGGACATTTGTGATATAATTAGTT

>PGSC0003DMG400029597-(rev)LRR-RLPs\_5429

GCAACTGGATATAAGTGGTCATTTATTGGAGGTAAAGGACATTTGTGATATAATTAGTTATAGTCTAGTG

AAGTTTGATGCTTATCTACATAACTAAATGATGCATCTGCGTTATATCTT

>PGSC0003DMG400029597-(rev)LRR-RLPs\_5490

AGTCTAGTGAAGTTTGATGCTTATCTACATAACTAAATGATGCATCTGCGTTATATCTTTAACTAATTTTT

GATATTTTCCTAGTACTTAACAATGGGAGGTCTGCCGGAAGAATCATCTG

>PGSC0003DMG400029597-(rev)LRR-RLPs\_5551

ACTAATTTTTGATATTTTCCTAGTACTTAACAATGGGAGGTCTGCCGGAAGAATCATCTGACTGCTCTGAAC

AATGTCAAATCTTTCAGTGTTCCGGCAATGTTCTTCAGAAGCATTAAAC

>PGSC0003DMG400029597-(rev)LRR-RLPs\_5612

TGCTCTGAACAATGTCAAATCTTTCAGTGTTCCGGCAATGTTCTTCAGAAGCATTAAACATGTTTCGGGT

GTTATTTACTTGATTACAAGCTTCCCAAATTACAAAATTTGACTATTGA

>PGSC0003DMG400029597-(rev)LRR-RLPs\_5673

GTTTCGGGTGTTATTTACTTGATTACAAGCTTCCCAAATTACAAAATTTGACTATTGAATGTGTAATCAC

TCTTTCCTATTTCTGATTAAGGTCATTTTATACAGTGTTTCGTCATCTG

>PGSC0003DMG400029597-(rev)LRR-RLPs\_5734

GTGTAATCACTCTTTCCTATTTCTGATTAAGGTCATTTTATACAGTGTTTCGTCATCTGACCACTTTCTGAT

AATCTTTTAGGGAATGAAAAGTGAAGCTGTGGAACCTGTTGTACAATA

>PGSC0003DMG400029597-(rev)LRR-RLPs\_5795

CACTTTCTGATAATCTTTTAGGGAATGAAAAGTGAAGCTGTGGAACCTGTTGTACAATACTTACAAAACC

AATCAAGCTTGTGTGGTGCTGTGAAGCTGCTTCAAAAAGTACATATGAGT

>PGSC0003DMG400029597-(rev)LRR-RLPs\_5856

TACAAAACCAATCAAGCTTGTGTGGTGCTGTGAAGCTGCTTCAAAAAGTACATATGAGTATGTTTAGTG

GTCGTGAGGTGGAAATGGAATTTCTGAGGCTTATATTAGTGTCTGCTCCTG

>PGSC0003DMG400029597-(rev)LRR-RLPs\_5917

GTTTAGTGGTCGTGAGGTGGAAATGGAATTTCTGAGGCTTATATTAGTGTCTGCTCCTGTACTTGAGGA

AATTTCCGCTTGGAAATTATGAACATCTCCTTTGTCTGTCCGGGTAGAGAAAT

>PGSC0003DMG400029597-(rev)LRR-RLPs\_5978

CTTGAGGAAATTTCCGCTTGAATTATGAACATCTCCTTTGTCTGTCTGGGTAGAGAAATTATGGATAATA  
TGAAACAATACCAACGAGCATCACCCAATGTAAATTCATAGTTGATGAA

>PGSC0003DMG400029597-(rev)LRR-RLPs\_6039

TGGATAATATGAAACAATACCAACGAGCATCACCCAATGTAAATTCATAGTTGATGAAATTGTGGTAGA  
AGATGCTTTACTATGAGTTGAGCATCACACACCTTGAATGTGGTTTGGGA

>PGSC0003DMG400029597-(rev)LRR-RLPs\_610

CGCTACTCTCTAAATCCGTCTCTGGATGGTGATGTTTAGTCATGAAGCTAAGCTCATTGACTGCAAT  
AGTGGTTGATTTTATCACATGGATTTACAAAGAAGTACAAGCCCCATAT

>PGSC0003DMG400029597-(rev)LRR-RLPs\_6100

TGTGGTAGAAGATGCTTTACTATGAGTTGAGCATCACACACCTTGAATGTGGTTTGGATTGGGGCTCG  
GGTGGTACATCTGAGGACCAGATGAGGAGCAGGTTCTAGGGCGAGTGGCGG

>PGSC0003DMG400029597-(rev)LRR-RLPs\_6161

GGGGCTCGGGTGGTACATCTGAGGACCAGATGAGGAGCAGGTTCTAGGGCGAGTGGCGGAAGTTGAA  
CCTCAACTTTGGATTCAAGTTGTATACTACATCAGTACTCAGTAGTGATAGATA

>PGSC0003DMG400029597-(rev)LRR-RLPs\_6222

GTTGAACCTCAACTTTGGATTCAAGTTGTATACTACATCAGTACTCAGTAGTGATAGATAACATTTATATTA  
TAGTGAGCTATTAGTATTAATATATATACTCCATCCGCCTCAAATATT

>PGSC0003DMG400029597-(rev)LRR-RLPs\_6283

ATTTATATTATAGTGAGCTATTAGTATTAATATATACTCCATCCGCCTCAAATATTTGTCGTTCTTAAT  
AGAAGTAAGTATTTGTTATGTTACTATGTCATAAAAGTTGTGTGTTTC

>PGSC0003DMG400029597-(rev)LRR-RLPs\_6344

TCGTTCTTAATAGAAGTAAGTATTTGTTATGTTACTATGTCATAAAAGTTGTGTGTTTCCACCTTATGCATT  
CACTTTTGACTTCCTAGCTGGTTAATAGACACAACATCAGCTCAAACA

>PGSC0003DMG400029597-(rev)LRR-RLPs\_6405

CCTTATGCATTCACTTTTGACTTCCTAGCTGGTTAATAGACACAACATCAGCTCAAACAGATCAATTGAAA  
AGTTGCCCTCTGAATCCTGAAGTACATGGCAAGTTTACCACCTGATTGT

>PGSC0003DMG400029597-(rev)LRR-RLPs\_6466

TCAATTGAAAAGTTGCCCTCTGAATCCTGAAGTACATGGCAAGTTTACCACCTGATTGTGGCAACATCAG  
AAATGAAGCAAGCAAGTGAAGACAAAACACTACATCTTAGGCACTCTTGAT

>PGSC0003DMG400029597-(rev)LRR-RLPs\_6527

CAACATCAGAAATGAAGCAAGCAAGTGAAAGACAAAACACTACATCTTAGGCACTCTTGATAACTACATCTT  
CTTCATAGTTTACTGCATCCCCGCCTCTAAGATCTGCTGCTGTTTCTTCA

>PGSC0003DMG400029597-(rev)LRR-RLPs\_6588

CTACATCTTCTTCATAGTTTACTGCATCCCCGCCTCTAAGATCTGCTGCTGTTTCTTCAAAGTAATCGTCCC  
GAGCATTATTAGATATCATCAAGCAAACCAACCAGAAAAGCGCAGAAT

>PGSC0003DMG400029597-(rev)LRR-RLPs\_6649

GTAATCGTCCCGAGCATTATTAGATATCATCAAGCAAACCAACCAGAAAAGCGCAGAATCAAGAGACAA  
GAAGGCACCGCCACCAAGAAGACCAGTCTTGGCAGTTGGACACCCCGTTTG

>PGSC0003DMG400029597-(rev)LRR-RLPs\_671

TGACTGCAATAGTGGTTGATTTTATCACATGGATTTACAAAGAAGTACAAGCCCCATATAGTGTGTCAG  
ATCCATTTAACATATTGTATTGTCACATAATTATGATTTAAATAATTAAA

>PGSC0003DMG400029597-(rev)LRR-RLPs\_6710

AGAGACAAGAAGGCACCGCCACCAAGAAGACCAGTCTTGGCAGTTGGACACCCCGTTTGCAAGTTGTG  
GTGGTGTATGTTCCGCATGCTATGAAGTTGCTCACTGATGATAGGCCACAAC

>PGSC0003DMG400029597-(rev)LRR-RLPs\_6757

ACACCCCGTTTGCAAGTTGTGGTGGTGTATGTTCCGCATGCTATGAAGTTGCTCACTGATGATAGGCCAC  
AACACAGCACTGCTGCTAAACCAGTTGTACCCCTTTATTTTACCAGCAG

>PGSC0003DMG400029597-(rev)LRR-RLPs\_732

TGTTGTCAGATCCATTTAACATATTGTATTGTCACATAATTATGATTTAAATAATTAAATAATAGAAACCA  
GAAGTAATTTAATCTTGATTTTTTTTTAGAAATATAAATTTATATAATAA

>PGSC0003DMG400029644-(rev)LRR-RLKs\_1426

AAATTGGATATTGTAGCTCATTAGTGAGGCTAAGACTTGGAACAACAGGATTGCTGGTGGAAATTCCGA  
AAGAAATTGGAGGTCTTAAGAGCTTAACTTTCTTGATTTGTCCGGTAATC

>PGSC0003DMG400029644-(rev)LRR-RLKs\_1488

ATTCCGAAAGAAATTGGAGGTCTTAAGAGCTTAACTTTCTTGATTTGTCCGGTAATCGCCTTTCTGGAC  
CAGTTCCTGATGAGATAAATAGCTGTAAGTACTGAGCTACAAATGGTAGACCTC

>PGSC0003DMG400029644-(rev)LRR-RLKs\_1674

GACGTTTCAATAACCGGTTTGGAGGGCCTATATCGGCTAGTTTTGGGCGTCTTGTGTCCTTGAACAAGC

TGATTCTCAGTAAGA AACTCGTTCTCAGGGTCGATACCTCCATCTATCGGC

>PGSC0003DMG400029644-(rev)LRR-RLKs\_2604

ATTGTTTCGATTCTTGGGGTGTGTTGTTGGAACAGAAGCACAAGATTGCTCATGTATGATTACATGCCAAATG  
GGAGCTTAGGAAGTCTTCTCCATGAGAGAGGTGGTAACCCTTTGGAATGG

>PGSC0003DMG400029644-(rev)LRR-RLKs\_2914

ATACAGTTGCTGGTTCTTATGGCTACATTGCTCCAGGTAAACATGTTTTTTTATTTTCATGTCAAGTTACAA  
TTCGTCATCATTTTCTAATTCCTAGCATATTATTCCGAGTATACATTTT

>PGSC0003DMG400029644-(rev)LRR-RLKs\_2976

AAGTTACAATTCGTCATCATTTTCTAATTCCTAGCATATTATTCCGAGTATACATTTTGCTTAGTTATAGTA  
TAAGCATTGATTGCACATTGCAACAACAACAATATACCCAGCGTAGTC

>PGSC0003DMG400029644-(rev)LRR-RLKs\_3162

GTTGTTTCCAATAGACCCTCGCTTCATGGAAAAACAAAAACAAGGCAATCTAGAAAAAGAAGTAACAGA  
TGCGACAACGATTACACATTGCATTTATCACAATTTTTTCAAAGAATATCA

>PGSC0003DMG400029644-(rev)LRR-RLKs\_3224

TAACAGATGCGACAACGATTACACATTGCATTTATCACAATTTTTTCAAAGAATATCAGTAGTTCTTGATG  
ATCATTGATCCAAGTGCTCCAATGTTGTTTCATTTTTCATTACAGAATAT

>PGSC0003DMG400029644-(rev)LRR-RLKs\_3286

TTCTTGATGATCATTGATCCAAGTGCTCCAATGTTGTTTCATTTTTCATTACAGAATATGGCTATATGATGA  
AGATAACTGCAAAGAGCGATGTCTACAGCTACGGAGTGGTTGTATTAGA

>PGSC0003DMG400029644-(rev)LRR-RLKs\_3782

AGAAGTATGTATACAATGAGCAATAACACAAGCTTCTCTGCTTCATCATTGCTTTATTATTCATCATCATC  
ATCAAATGCCAAAAGTCGATTCTTGGGGTGTGTTGTTGGAACAGAAGCACA

>PGSC0003DMG400029644-(rev)LRR-RLKs\_3844

ATCATCATCATCAAATGCCAAAAGTCGATTCTTGGGGTGTGTTGTTGGAACAGAAGCACAAGATTGCTCAT  
GTATGATTACATGCCAAATGGGAGTTTAGGAAGTCTTCTTCATGAGAGGGA

>PGSC0003DMG400029644-(rev)LRR-RLKs\_3906

TGCTCATGTATGATTACATGCCAAATGGGAGTTTAGGAAGTCTTCTTCATGAGAGGGAAGAATACGCCA  
AAGTCGATGTTTTACTCAAAGGCTCTCCAACAACAACA ACTACTACTGATC

>PGSC0003DMG400029644-(rev)LRR-RLKs\_4092



GAAGTATGTATACAATGAGCAATAACACAAGCTTCTCTGCTTCATCATTGCTTTATTATTCATCATCATCA  
TCAAATGCCAAAAGTGGTGTTTAAGTGATTCAACAAAACCTTATTACATT

>PGSC0003DMG400029644-(rev)LRR-RLKs\_4154

TCATCATCATCAAATGCCAAAAGTGGTGTTTAAGTGATTCAACAAAACCTTATTACATTTGCATTGAATAG  
AAGTTTGCATATTAGTTACTATTAGTTTTAAGTTTCAATAATCCTTTGT

>PGSC0003DMG400029644-(rev)LRR-RLKs\_4216

TTGAATAGAAGTTTGCATATTAGTTACTATTAGTTTTAAGTTTCAATAATCCTTTGTTTGTGGAA  
TTTTCTGTAAAGAGAATTAGAAAGGTAGATATGTGTGACAAGTTGAAA

>PGSC0003DMG400029644-(rev)LRR-RLKs\_4278

TTGTTTGAATTTTCTGTAAAGAGAATTAGAAAGGTAGATATGTGTGACAAGTTGAAACAAAACAAGCC  
AACTTATGCTAATTTGGCTTTTTGAGCATTTTTAAGCTTTCATGTAGCTAC

>PGSC0003DMG400029644-(rev)LRR-RLKs\_4340

ACAAGCCAACCTTATGCTAATTTGGCTTTTTGAGCATTTTTAAGCTTTCATGTAGCTACTAAAGTCAACTTT  
ATTCCTCCTGGTTTTAAGGTTCAATTTTTGAAGCTTCAAACAAATATTT

>PGSC0003DMG400029712-(rev)RLKmalectin\_3111

TGTATGTTTGTGTGGTCGGACATATGGTATATCCATGGGCATATTCAAAAATCACTTGCATACACCATGT  
ACTTGTAATCTTCAGTCAAGCTCCCCACCTCAATATAGGTTTTGGTTGAT

>PGSC0003DMG400029712-(rev)RLKmalectin\_3172

ACACCATGTACTTGTAACTTCAGTCAAGCTCCCCACCTCAATATAGGTTTTGGTTGATAAGTTTCTGGAC  
AACTGGCCTCCACTGTGTGTGAATTTCTGATCAATCATGAATCAACC

>PGSC0003DMG400029712-(rev)RLKmalectin\_4270

CATATCTGTCGCAGTAAATCCTGTTATTAGAATAGCAAACATGGTGTCTCCATTTCTTCTGTTCTATAAT  
GCATAGCTTCTATAAGCTTGATTGGTTCATAGCAATTGTATTTTTTCT

>PGSC0003DMG400029712-(rev)RLKmalectin\_4331

GTTCTATAATGCATAGCTTCTATAAGCTTGATTGGTTCATAGCAATTGTATTTTTTCTGAAAATGTGAAT  
TATTGTTGATGCTATTTGCTATATAACATGTTACCTCTTGTGATGTAAC

>PGSC0003DMG400029712-(rev)RLKmalectin\_4392

AAATGTGAATTATTGTTGATGCTATTTGCTATATAACATGTTACCTCTTGTGATGTAAGTCTTCTGTCTGT  
TAATGTCCCCTTTTGTCTTTACATTCTTCAGTGCTGGTTTTTTGACCA

>PGSC0003DMG400029712-(rev)RLKmalectin\_4514

TTTTATCATTTTCCTAAGGTCTATATTGCTTTTCTTGACTGCGGTCTGCAGGAATGCTTTGAATTCGTTTG  
CATAATCATCTTTAACTCTTTTTCTTTTTCCAAATGGTTTACCTGTA

>PGSC0003DMG400029712-(rev)RLKmalectin\_4575

AATTTGTTTTGCATAATCATCTTTAACTCTTTTTCTTTTTCCAAATGGTTTACCTGTAAGGTCAGTGGCTT  
GGACAACCAAGGTTTAAGAGGCTTCTTACCAAATGAAATTTCTCGATT

>PGSC0003DMG400029712-(rev)RLKmalectin\_6832

TAGATTCCTGACTAATTCAACTGCTACCCTTGCTTATGGTACTCTTCTTAAACCACTGTCTATTTTTTTGTC  
CAGCGAGAGATGCTCCATATGCAAAGTCGAGAACTCAATTCAATCGA

>PGSC0003DMG400029735-(rev)L-LecRK\_124

ATTTTCTTGTAATCAATCAGTTGCAGAACTGATTTTGTCTCAATGGCTTTACACAATCAGATGTGTCAT  
TTTTGGGAATGTTACAATCGAATCTAGAGTTCTTACTCTTTCAAATGA

>PGSC0003DMG400029735-(rev)L-LecRK\_1798

GCTGTGGGAACTAATGAGACGAGGCGAATTGATTAACGCCTTTGATAGTCGATTAAGGATTAATCAAGA  
TTTCAATGAAGAGGAAGCTTTAAGGGTGTGCAACTAGGCATGATATGCGC

>PGSC0003DMG400029735-(rev)L-LecRK\_2232

CTAGCTTTGATTGAATTTGCATTTGGCAATGCTGCTTCATGTACAAATTTATATGATGGAGTAGGAAAAA  
GGATTTGGTTATGACTTGTGAGATATATACATGTATTCATTTCTTTTTTT

>PGSC0003DMG400029735-(rev)L-LecRK\_434

CAGAATTTAGGTTTCTTGAATTTACAAATAATGGGAATCCTGATAATCATGTTTTTGGGGTTGAGTTTG  
ATGTTTTCAAGAATCAAGAATTCAATGACATAAATGAGAATCATGTTGGA

>PGSC0003DMG400029735-(rev)L-LecRK\_992

ACAGTGTCACTCTTGTTTCTTGTTGTGGTCATTGCTGTAGCTTCATGGCTTTTGATTAAGAGAAATAGGA  
GAATGAAAAAGGAAAGAGAGGATATGGAAGATTGGGAATTGGAATATTGG

>PGSC0003DMG400029885RLKmalectin\_0

AATTAGTAGAGTTTTAATATCAAGCTACAAGCAACTACCATCTTCCTTCAATTTCACTTCTCCATTGCTC  
TCTCTCTAAAACCTCAAACCCTATTCTCTCTCTTTTCATCTTCAGCT

>PGSC0003DMG400029885RLKmalectin\_1281

TGGGATTGAGATTATTTACACCCTGATATCTATAATACAGAAGATGGAAATACCTTCATTGTGGGTCAG

AAATCCTCTTTCATCATTGGCAATTCTACTGCCTTGGAAAATGTTTATCG

>PGSC0003DMG400029885RLKmalectin\_1586

AGACAGCTAGGTTAATGGGTCCAACCTTTTCAAATTAACGAGCAATTCAATTTGAGTTGGGTTTTCTCAGT  
TGATTCAGGGTTCTCGTATCTTGTTAGGCTCCATTTCTGTGAAATCACTA

>PGSC0003DMG400029885RLKmalectin\_305

AGCTGGATCTTGATACTCTGGTTTCTTTATTTTGGACTGAGCGCTTTCAGCCTTTCATCATTTAGCTCCAAA  
GTTCTATTTTTATGCAATTTGCTGCTACTTCTGCTGGGTTTTCTTTAT

>PGSC0003DMG400029885RLKmalectin\_366

TTAGCTCCAAAGTTCTATTTTTATGCAATTTGCTGCTACTTCTGCTGGGTTTTCTTTATATTGGACTGAGTG  
CCTTTCATTTAGCTGTAAAACTTTTATCTGTCTACTTTATTCTATC

>PGSC0003DMG400029885RLKmalectin\_427

TGGACTGAGTGCCTTTCATTTAGCTGTAAAACTTTTATCTGTCTACTTTATTCTATCCCCTGCTTCTTATA  
CTGCATCGTGATGCTGAGTTTTATTTTTGGACTTAGTGTTTTTTGG

>PGSC0003DMG400029885RLKmalectin\_488

CTGCTTCTTATACTGCATCGTGATGCTGAGTTTTATTTTTGGACTTAGTGTTTTTTGGTCTTGTAGATTTA  
TTTATAAAAAGAGGTTCCGGAGTTCATGCGATTATGAGATTTTCTTGT

>PGSC0003DMG400029885RLKmalectin\_549

TTGTAGATTTATTTATAAAAAGAGGTTCCGGAGTTCATGCGATTATGAGATTTTCTTGTCTTGTGTGGTT  
AAAATTGAGGGGAGGTCAACAGATGGAACTGATCTTTCTTTTTGCAAT

>PGSC0003DMG400029885RLKmalectin\_61

CTCCATTGCTCTCTCTCTAAAACCTCAAACCCTATTCTCTCTCTTTCATCTTCAGCTCACTGCTGCATTCA  
ATTTACTTCTTTTGGTGTGGTCAACTCAGCAATGGCCTGAAGTTTG

>PGSC0003DMG400029885RLKmalectin\_610

TTGTGTGGTTAAAATTGAGGGGAGGTCAACAGATGGAACTGATCTTTCTTTTTGCAATTCTGTTTTTTTT  
TTGTTCCAGTGATTTCTGCGGATTACTATAGGCTTGTGCAGCATCAATG

>PGSC0003DMG400029885RLKmalectin\_671

TGTTTTTTTTTTGTTCCAGTGATTTCTGCGGATTACTATAGGCTTGTGCAGCATCAATGGCAGACGACAGT  
AAATTCTGTTTTTTCTTGGTTTCAACATTTTTGTTGTTGGCTGTTGTGG

>PGSC0003DMG400029885RLKmalectin\_854

CTGACAATCTCCAGATGCTGATGGTTCGGAAATGGGGCACAGATATTGGGTCAAATATATGTTGGGTA  
GTAAGTCATCAACCTCTGATGCTGCTGATCAAAAGCCCTCTGTCCCTCAAG

>PGSC0003DMG400030072LRR-RLPs\_0

TGATAAACTCAGCAATTGCCAGACAAGCATATGTTGATGAAACACACAGGTGAAAGCTGCTAACTGTGG  
CTTCTACATTCAGAGAAATACACCCCTATCTGTCCTGGATTCGGGTAAAA

>PGSC0003DMG400030072LRR-RLPs\_1037

ACGTTGAACCACTAGTTATTTTCTATACATTACTGAAATGTATTTGGATATTGCCTTCATCCCTGATTTTAA  
TTTTCAGAATTGCTGACAACTTGTTTTGTTAGACCATGAGGAATGCT

>PGSC0003DMG400030072LRR-RLPs\_1098

CCTGATTTTAATTTTCAGAATTGCTGACAACTTGTTTTGTTAGACCATGAGGAATGCTTGGACATCTGAT  
GTAGATAAATTAGCAATTTGCCTTGTAAATGTTCTCGATGGAATACTTG

>PGSC0003DMG400030072LRR-RLPs\_1159

GACATCTGATGTAGATAAATTAGCAATTTGCCTTGTAAATGTTCTCGATGGAATACTTGGGTGCTTGCCTT  
GGAAAGATGCAGTGAAGACCAGTATCTTGTCAAAGACTGGAGGTACAA

>PGSC0003DMG400030072LRR-RLPs\_122

TTACTGCCTCCGGCTTTTCGATCTCTCTGAGACTCTCAGTACTGGTAAACATCTTGTATAATCTTTGATTATT  
TGCTCTCAAATTGTAATTCTTTGTTGAATAATCAACTTATCATCAACC

>PGSC0003DMG400030072LRR-RLPs\_1342

AGAAGCCAAGAGAATCATTACCAAGTCCTATTAGTCCATCAAGGACCAATACTGAAGTTTAGACTCTGT  
AGGATTACGAGTTGTCCTGATATTGATCATTGGATGCACTTCTTGTCAAA

>PGSC0003DMG400030072LRR-RLPs\_1403

AGACTCTGTAGGATTACGAGTTGTCCTGATATTGATCATTGGATGCACTTCTTGTCAAAGAAAAATGTCC  
AGGAATTCACCTTCATGTAAGCTTAGGAAACAAATATCATTACCTCAT

>PGSC0003DMG400030072LRR-RLPs\_1586

CTCGGTTTCAAAGGGTTTGAGAAGCTTATTAATCTCGATCTTGTGCGTGTCACTTTTGATCCATCAATATT  
TACTAATCTCATCTCTAAAAGCCCGTTGCTTGAACGATTGAGGTTGCGT

>PGSC0003DMG400030072LRR-RLPs\_1647

CATCAATATTTACTAATCTCATCTCTAAAAGCCCGTTGCTTGAACGATTGAGGTTGCGTTGCTGCACAAAC  
CTTGACATCCTTGAAATTGATGCCGCTAATCTCAAATTCTATGAGTTTA

>PGSC0003DMG400030072LRR-RLPs\_1769

GGAAAAACAAAATCCATTTCTTCAGGAACGCTCCTATGCTTGAAAAAGTTACTGTGGCGATCCTTGGAC  
GGCGACTTTTGACTGATACATCTCCTGTTTGCTCTAATTTCCCAAAGTTC

>PGSC0003DMG400030072LRR-RLPs\_183

CTTTGATTATTTGCTCTCAAATTGTACTTCTTTGTTGAATAATCAACTTATCATCAACCCATCAGGTTAGGT  
TTTCTTTGGGATTTAACCGACTAATTCATAATACCATAAGTTGTCCA

>PGSC0003DMG400030072LRR-RLPs\_1891

CTATTACATGCCTTCACTGCTGGAAGTGGAAATATGCGGTACAATATTAGAGGTAAGGTACATTTGTGAT  
ATTACTATCATAACTAAATGATGAATCTGATTGGTGTTTTAAAGTAATTT

>PGSC0003DMG400030072LRR-RLPs\_2074

AATATCAAATCTCTCACTATTTCTGTCATGTCTTTAAGAAACGCCAGGTGGTTTCAAGTGCAGTTTACTT  
GATTTCAAGCTGTCCTAAATTACAAGATCTTACACTTGAATTTGTAAGC

>PGSC0003DMG400030072LRR-RLPs\_2135

CAGTTTACTTGATTTCAAGCTGTCCTAAATTACAAGATCTTACACTTGAATTTGTAAGCACTCTCTTGTTT  
TTTTTTCATTAAGGGGATTGAATATGGTTTCTTATTCATCTGAACTCG

>PGSC0003DMG400030072LRR-RLPs\_2196

TCTCTTGGTTTTTTTTTTCATTAAGGGGATTGAATATGGTTTCTTATTCATCTGAACTCGCCTAACTAACCGG  
TCCTCAAATATTCTTTAGTACCAAGTGTGGGCGGGGGATATTGTTGAA

>PGSC0003DMG400030072LRR-RLPs\_2318

TGTTGTACAGTTGCTACGAGCCCAATCATCTCAAGCGGTGTTGTGAAGCTTCAAAGGTCCAAGTGAA  
CATGTTTACTGGTCTTGAGATGGAAATGGAGTTTATGAAGTTTATATTGGC

>PGSC0003DMG400030072LRR-RLPs\_2379

CAAGTGAACATGTTTACTGGTCTTGAGATGGAAATGGAGTTTATGAAGTTTATATTGGCATCTGCACCTG  
TACTTGAGGAGATCTTCATTTGGAATTGTACGCGTTGCCTTTTTCGTTTCG

>PGSC0003DMG400030072LRR-RLPs\_244

TCAGGTTAGGTTTTCTTTGGGATTTAACCGACTAATTCATAATACCATAAGTTGTCCAAATCATCTTGTG  
TTTTGACGCCTCTGGAATTTGAACCTTAGATATCGTGATTTTCAACCCA

>PGSC0003DMG400030072LRR-RLPs\_2440

CTGCACCTGTACTTGAGGAGATCTTCATTTGGAATTGTACGCGTTGCCTTTTTCGTTTCGTGTAAACAAATG

ATCGATGAGATGAAAGAATTCCGCAGAGCATCACCCAATGTTGAATTCA

>PGSC0003DMG400030072LRR-RLPs\_2562

TTTGAAGAAATCGATATGGAAGGTGGATATGAACATGAAGAAGTCATGGAAGTGCCATGATTTTGCTAA  
CATATTTTGTGGTAGCGCTTAGTTTGCCTGTTATGCCCTGTCTTGTCTG

>PGSC0003DMG400030072LRR-RLPs\_2623

TTTGCTAACATATTTTGTGGTAGCGCTTAGTTTGCCTGTTATGCCCTGTCTTGTCTGTCTAATATTATGC  
AGTATGTATATATGTGCTGGCTAAGTAAGTTTAAACAGTTTGATGAA

>PGSC0003DMG400030072LRR-RLPs\_2684

TAATATTATGCAGTATGTATATATGTGCTGGCTAAGTAAGTTTAAACAGTTTGATGAACTATGACTCTAC  
TTGTAATGGTCACTGTATTACCATGTTATTTTATTTTGGCCCCCGTGT

>PGSC0003DMG400030072LRR-RLPs\_2745

ATGACTCTACTTGAATGGTCACTGTATTACCATGTTATTTTATTTTGGCCCCCGTGTATACAATTATGC  
ATATTTAATCTTTAATTAACCTAAATGTGTAGTTTTTGTCTATAAAAC

>PGSC0003DMG400030072LRR-RLPs\_2806

TACAATTATGCATATTTAATCTTTAATTAACCTAAATGTGTAGTTTTTGTCTATAAAACTGAATAAATGGG  
GTAACCTTTTGTCTAAATAAGGAGTAATAAAAAAACGTTTTCAAAGTGG

>PGSC0003DMG400030072LRR-RLPs\_2867

AATAAATGGGGTAACCTTTTGTCTAAATAAGGAGTAATAAAAAAACGTTTTCAAAGTGGATAACATGAAA  
CTTGGAGGTTTCGAATAGGGATAATCGGATCAGTTTGCTAACATCAAGGACA

>PGSC0003DMG400030072LRR-RLPs\_305

TCATCTTGTGTTTTGACGCCTCTGGAATTTGAACCTTAGATATCGTGATTTTCAACCCATCAACTAGCCAG  
AAATGGTGTGGTAATATCACCGGAAGATTAATTCGTGATTCTTTTTTA

>PGSC0003DMG400030072LRR-RLPs\_3050

TTGTTTCATTTCAATAGTTCAGGATTCTTTTTGGCCATTGTTTTTTTTTTTTTTTGGATTATGATAATTTT  
GTTTAGCACTTAACTTCAAGTATACACATAAAGTTAAAGGCATAATA

>PGSC0003DMG400030072LRR-RLPs\_3355

TTCAGCCCAATTGCACACAAAGGAAAATGGTTAACATTCGTGATTTGTCTTATATATGCCTTTCCTCAAT  
TGACGCACCCAACGTTATCTTTTATCTTAAGTATACCCCTAAACTATTT

>PGSC0003DMG400030072LRR-RLPs\_3416

TTTCCTCAATTGACGCACCCAACGTTATCTTTTATCTTAAGTATACCCCTAAACTATTTAAAAGTTCGTTTC  
TATTGAATAAATATTTCTTTTGCAAGTACACGTTCTTTTGAAGAAAC

>PGSC0003DMG400030072LRR-RLPs\_3477

AAGTTCGTTTCTATTGAATAAATATTTCTTTTGCAAGTACACGTTCTTTTGAAGAAACACTTCAATTCTTT  
ATCAAAAATTAAGAATGTGAAACCTTCTTGTTATATTGTTTGATCTT

>PGSC0003DMG400030072LRR-RLPs\_3538

TTCAATTCTTTATCAAAAATTAAGAATGTGAAACCTTCTTGTTATATTGTTTGATCTTAAACATGTAATAG  
AAGTGCTTTTCATACATTTTGCCATAAGGTTATATTTATATTTGAAAA

>PGSC0003DMG400030072LRR-RLPs\_3599

ACATGTAATAGAAGTGCTTTTCATACATTTTGCCATAAGGTTATATTTATATTTGAAAAATGTTATAAAAT  
ACTACATACATGTTAGAATATTTAGTTCGGTTCGGATTTTTTTTGATTT

>PGSC0003DMG400030072LRR-RLPs\_366

AACTAGCCAGAAATGGTGTGGTAATATCACCGGAAGATTAATTCGTGATTCTTTTTTAACCGGAGAAAT  
CACTTGGTGGATAATGGATTCATGATTCTCCACTTAAATATTAGGTTAGG

>PGSC0003DMG400030072LRR-RLPs\_3660

GTTATAAAATACTACATACATGTTAGAATATTTAGTTCGGTTCGGATTTTTTTTGATTTTCTTTTATAAATT  
AAAAGGGCCATTCCAATTGTTTCAGGATGGTTACACACTTAAATAAAAA

>PGSC0003DMG400030072LRR-RLPs\_3843

CAGTTTTTCATATTCTTTTGACACCCTACATGAGTTATAAACTCAAATGCCTAATTAACACTAGATAGAAT  
TAGTCCGTGCAAGCACGGCCTAGGGGTGTGCAAAAATTGAACCGAAAA

>PGSC0003DMG400030072LRR-RLPs\_427

CGGAGAAATCACTTGGTGGATAATGGATTCATGATTCTCCACTTAAATATTAGGTTAGGGTTCGAACCTA  
TTGCATGTAAGAACTAGGGATGGATATTGGTAAAAGGACTGCAAGTAACT

>PGSC0003DMG400030072LRR-RLPs\_4270

AACCTAAAGAACTAAAAACAACGTTGGGCTAGCGTTTGCAACGACAACGGCGACAAGGATTAGGCAAC  
GACTAGGGTGGTGAATTGCGAGTATTTTGCTATAGTACTTTTACTACACTAA

>PGSC0003DMG400030072LRR-RLPs\_4575

AATTA AAAAATCAAAAATTAATAAATCGAATCGATAATACTTAAAACTGAACCGAATCGACCGATACATA  
CACCCCTACACGGGCCAACTTGACGGGCCAACACATGTTGTTCTAGCGA

>PGSC0003DMG400030072LRR-RLPs\_4636

CGATACATACACCCCTACACGGGCCAACTTGCACGGGCCAACACATGTTGTTCTAGCGAAATTCGTTTCA  
ACAGATGTAATGACATTCTATTGTAGTGAAATTTGTTTCAAAGACACAA

>PGSC0003DMG400030072LRR-RLPs\_488

TCGAACCTATTGCATGTAAGAACTAGGGATGGATATTGGTAAAAGGACTGCAAGTAACTAATTAGGACA  
TGCTACAAAAGAATTGGATTGGTAATATTTGGTTATATAACGTTTAACGAA

>PGSC0003DMG400030072LRR-RLPs\_5002

TCTTAAACACTTTTCTTCTTCTCCTTGTTGTTCCACCATTATTCCAACCTTCCATACTTCTTTCTTCTTCTT  
CACTATTCAACAATTTTTAAGTCACTTTAAAGAAGAAAATTCCT

>PGSC0003DMG400030072LRR-RLPs\_5368

CGTCAATAAAATGACATTGGTGTGAATTTTACGAATTAATAAAAGACTAGTGAAATGAAAATAGTGGA  
TAGAGGTGGGGATGAAGATGGAGGAGGAGATGTTTCAATGGAGAAAGATGT

>PGSC0003DMG400030072LRR-RLPs\_549

TTAGGACATGCTACAAAAGAATTGGATTGGTAATATTTGGTTATATAACGTTTAACGAAGTCAATCAGAA  
AACAAATTTAAACATTTGGTTTCCACATGTATTAATTGTTAATGACATGGA

>PGSC0003DMG400030072LRR-RLPs\_5612

AAGCTATTTAAATAATTTGTTATATATAGGCCAATAAAAAAGGCCATGTGTAGGGCTTTAAAAATTCAGC  
TTTTTTTCTATGTTTTACGCACTTTCAGGAGAGTGCACTCACTCTCTCT

>PGSC0003DMG400030072LRR-RLPs\_5856

TTTCCCAAATAAAAAATGATAAGTTAAAGAGTTTTTCATAAAACATGGGCCATAATCTTGATTAATTTCTTC  
ACATAAACTGCAAGCATTGTTTATCCTATCAGATTTATAAAATTTGTAA

>PGSC0003DMG400030072LRR-RLPs\_5917

TAATTTCTTACATAAACTGCAAGCATTGTTTATCCTATCAGATTTATAAAATTTGTAAACAAAACGATAA  
TGAAAAAAAATAAGAAGATTTTTCTAAATTTGAAAGAATTGCAAACCT

>PGSC0003DMG400030072LRR-RLPs\_5978

AAAACGATAATGAAAAAAAATAAGAAGATTTTTCTAAATTTGAAAGAATTGCAAACCTCAAAATTTATG  
AGATCAAACCTGAGAAAGAGCGTGTGAAACAAAAAAAATATTACTAGAAAA

>PGSC0003DMG400030072LRR-RLPs\_6039

AAATTTATGAGATCAAACCTGAGAAAGAGCGTGTGAAACAAAAAAAATATTACTAGAAAAATAAGAGA



AAAGAAAAAGGCATCTAATATGAGTAGAGGTGTGCACTATTTGGATTAAACC

>PGSC0003DMG400030072LRR-RLPs\_61

AACTGTGGCTTCTACATTCAGAGAAATACACCCCTATCTGTCCTGGATTTCGGGTAAAATCTTACTGCCTC  
CGGCTTTCGATCTCTCTGAGACTCTCAGTACTGGTAAACATCTTGTATA

>PGSC0003DMG400030072LRR-RLPs\_610

CAATCAGAAAACAATTTAAACATTTGGTTTCCACATGTATTAATTGTTAATGACATGGATGAGCCTTTTTT  
CAAACATAAATGTCATAGATGATCCTTTTCTCAAAGCTAGATGGTATAT

>PGSC0003DMG400030072LRR-RLPs\_6344

CATATAATATTTAGGTTTACTATGTAGGCCGTAGGGTACTAATAATTCAGTATTGTTGTAATATTTAGGCC  
CATATCAAATTACTGCCATCCTATTTCACTAAATTTTAGGCATTAGGTT

>PGSC0003DMG400030072LRR-RLPs\_6405

TATTTAGGCCCATATCAAATTACTGCCATCCTATTTCACTAAATTTTAGGCATTAGGTTTTACATTATAACT  
ATAAATATCACATATTACTTGCACTTTCATGACAAAAAAATTAGCAGA

>PGSC0003DMG400030072LRR-RLPs\_6466

ACATTATAACTATAAATATCACATATTACTTGCACTTTCATGACAAAAAAATTAGCAGAACTAGAATTAGT  
ACTTTTCCTTATATGATTTTTTTTTTTTTTAAGCATGCAAATATAACTT

>PGSC0003DMG400030072LRR-RLPs\_671

AGCCTTTTTTCAAACATAAATGTCATAGATGATCCTTTTCTCAAAGCTAGATGGTATATTTGAGCCTTTTTTC  
CCTTTATTTAAAAATATATAAATGGGCAAGTTAGGCATACTTCAAGAG

>PGSC0003DMG400030072LRR-RLPs\_6771

TATGAGGACTGAGGTGGCTATAGTCAATAAAGCCACGTAGTTAAATGTATTGGCAATTGAAGGAAAAAC  
ACACGTAATATTAAGAAGCTTAGAACTTAAATGACAAATATACCCACAATT

>PGSC0003DMG400030072LRR-RLPs\_6832

GGAAAAACACACGTAATATTAAGAAGCTTAGAACTTAAATGACAAATATACCCACAATTTGAAATTTAAT  
GACAAAAAACAAACATTAGGGTTATTTTTGTACAAATGAGAAAATATAAA

>PGSC0003DMG400030072LRR-RLPs\_6893

AAATTTAATGACAAAAACAAACATTAGGGTTATTTTTGTACAAATGAGAAAATATAAATGAATTTCAAC  
CTCTCTGTCCTGCATTTTCGGGTAAAATTTACTGTCTCCGGCATTTCGATCT

>PGSC0003DMG400030072LRR-RLPs\_6954

AATTTCAACCTCTCTGTCCTGCATTTCTGGGTAAAATTTACTGTCTCCGGCATTTCGATCTCTCTGAGACTCTC  
ACTACTGGTAAGTAAGCATCTTCTATAATCTTTGATTATTTGCTCACA

>PGSC0003DMG400030072LRR-RLPs\_7015

CTGAGACTCTCACTACTGGTAAGTAAGCATCTTCTATAATCTTTGATTATTTGCTCACAAATTTTAGTTATT  
TGTTGAATAATCAAACCTCATTATGAACCCATCAAGCTAGGTTTTTTTT

>PGSC0003DMG400030072LRR-RLPs\_7076

TTTTAGTTATTTGTTGAATAATCAAACCTCATTATGAACCCATCAAGCTAGGTTTTTTTTTTTGTTTTTTTTTTAT  
CGATAATCATAACTGACTAATTCACCAGTACCATGGGTTGTCCAAAT

>PGSC0003DMG400030072LRR-RLPs\_7137

GTTTTTTTTTATCGATAATCATAACTGACTAATTCACCAGTACCATGGGTTGTCCAAATCATCTTGTGTTTT  
GACGCCGCTGGAATTTGAATCTTATATGTCGTGATTTCAACCCACTT

>PGSC0003DMG400030072LRR-RLPs\_7198

TCTTGTGTTTTGACGCCGCTGGAATTTGAATCTTATATGTCGTGATTTCAACCCACTTTATTGAAATGGT  
GTGGTAATATCACCAGAAGATTAATTCCTGAACCGGAGAAATCACGAGT

>PGSC0003DMG400030072LRR-RLPs\_7259

TTGAAATGGTGTGGTAATATCACCAGAAGATTAATTCCTGAACCGGAGAAATCACGAGTACTTGGTGGAA  
TAATGGACTCCGTTTCAGTTCGCGAATTTTCGATCCGATTTTCAGCAAAAATGAA

>PGSC0003DMG400030072LRR-RLPs\_732

GAGCCTTTTTCCCTTTATTTAAAAATATATAAATGGGCAAGTTAGGCATACTTCAAGAGCTTAAAGTAAG  
ATGAGAGGAGGAAACATTACTTTGTGAATCTTAATCTCACACTACTTCGG

>PGSC0003DMG400030072LRR-RLPs\_7320

TTGGTGGATAATGGACTCCGTTTCAGTTCGCGAATTTTCGATCCGATTTTCAGCAAAAATGAAATTTACTTAGA  
GGTCAACTGTGAGTTCTCTATGCTATGTCTGTTTTATCTACTAAAACCTGC

>PGSC0003DMG400030072LRR-RLPs\_7381

TACTTAGAGGTCAACTGTGAGTTCTCTATGCTATGTCTGTTTTATCTACTAAAACCTGCATCATTGGATAG  
AGTATATAATTACTATCTTGGGAAGTTATAACTATGGGACTTATTT

>PGSC0003DMG400030072LRR-RLPs\_7442

CATTGGATAGAGTATATAATTACTATCTTGGGAAGTTATAACTATGGGACTTATTTGTGAACTGTGA  
GTTCAATTGGAAAGAAAAGTAAAGTGACCGCTTTTAAATCAAGCTCAAAT

>PGSC0003DMG400030072LRR-RLPs\_7503

GAAGTGTGAGTTCAATTGGAAAGAAAAGTAAAGTGACCGCTTTTAAATCAAGCTCAAATATTGAGGAAC  
CTTGGCTAATGCGAGGAGGAAAATCCATATATAAGTTTTCAATAGATTAGA

>PGSC0003DMG400030072LRR-RLPs\_7564

TGAGGAACCTTGGCTAATGCGAGGAGGAAAATCCATATATAAGTTTTCAATAGATTAGATGGGCGGAAT  
ATCCTGAAGAGTAATGAAACCTTTGTAGGAGCTTTATTGATACTAGTTGTG

>PGSC0003DMG400030072LRR-RLPs\_7686

TTATTTGCTGTCATCCCATGTTTATTGAAGGGGATTCAACTAAATACCATTTTGCCAAAAGATTGTATTG  
TGTATGTAGGTTAAATATTATTTTATGTGTACATATATACTTGTGAAT

>PGSC0003DMG400030072LRR-RLPs\_7747

GATTGTATTGTGTATGTAGGTTAAATATTATTTTATGTGTACATATATACTTGTGAATCCTCTGCATACA  
AGAGAACATTTTTTTGAATCCCTTGATGAAAATCTTGCTTTTACCACTG

>PGSC0003DMG400030072LRR-RLPs\_7808

TCTGCATACAAGAGAACATTTTTTTGAATCCCTTGATGAAAATCTTGCTTTTACCACTGGTCTTCAAATAA  
TTATTTTCTTTCTATGATATTGATAAATGATAAAATTTGATGCAGTTGC

>PGSC0003DMG400030072LRR-RLPs\_7869

CTTCAAATAATTATTTTCTTTCTATGATATTGATAAATGATAAAATTTGATGCAGTTGCAGACGTTGAACC  
ACTAGTTATTTTCAATACATTACTGAAATGTATTTGGATATTGCCTTTA

>PGSC0003DMG400030072LRR-RLPs\_793

TAAAGTAAGATGAGAGGAGGAAACATTACTTTGTGAATCTTAATCTCACACTACTTCGGTGCCTGGATG  
TTCTCTTTTGACATGCTCCTGTTTTTATGTCTTAAGGAGTTATAACTCA

>PGSC0003DMG400030072LRR-RLPs\_7930

ACGTTGAACCACTAGTTATTTTCAATACATTACTGAAATGTATTTGGATATTGCCTTTATCGCTGATTTTAA  
TTTTCAGAGTTGTTGACAACTTGTGGTTAGACCATGAGGAATGCT

>PGSC0003DMG400030072LRR-RLPs\_7991

GCTGATTTTAATTTTTCAGAGTTGTTGACAACTTGTGGTTAGACCATGAGGAATGCTTCGACATCTGG  
TGTAGATACAATTAGCAATTTGCCTTGTAATGTTCTCGATGGAATACTTG

>PGSC0003DMG400030072LRR-RLPs\_8235

AGAAGCCAAGAGAATCATTTACCAAGTCCTATTAGTCCATAAAGGACCAATACTGAAGTTTAGACTCTGT

AGGATTACGAGTTGTAAGTACTGATATTGATCATTGGATGCACTTCTTATCGAA

>PGSC0003DMG400030072LRR-RLPs\_8296

AGACTCTGTAGGATTACGAGTTGTAAGTACTGATATTGATCATTGGATGCACTTCTTATCGAAGAAAAATGTTCC

AGGAATTCACCCCTTCATGTAAGCTTAGGAAACAAATATCATTACCTCAT

>PGSC0003DMG400030072LRR-RLPs\_8357

AAAATGTTCAAGGAATTCACCCCTTCATGTAAGCTTAGGAAACAAATATCATTACCTCATCATCCTTTTACA

TTCCAGCAACTAAGGTTTTTGGAACTTCAAGATTGCTTGTCCACCCTC

>PGSC0003DMG400030072LRR-RLPs\_8479

CTCGGTTTCAAAGGGTTTTGAGAAGCTTATTAATCTCGATCTTATGGATGTCACCTTTTGATCCATCAATATT

AACAAATCTCATCTCTAAAAGCCCGTTGCTTGAACGGTTGCGGTTGCGT

>PGSC0003DMG400030072LRR-RLPs\_854

CCCTGGATGTTCTCTCTTTGACATGCTCCTGTTTTTATGTCTTAAGGAGTTATAACTCATTGTGGTTGCTCT

TCTGAGTCTCTTTTATCTACTAAAACCTCCATCATTGGATAGAGTATAT

>PGSC0003DMG400030072LRR-RLPs\_8640

GCTAATCTCAAATTCCTTTGAGTTTATTGGAAAAACAAATCCATTTCTTCAAGAACGCACCTATGCTTGA

AAAAGTTACCGTGGGTTTCCTTGGACGACGACTTTTGACTGATACATCT

>PGSC0003DMG400030072LRR-RLPs\_8764

TTTGCTCTAATTTCCCAAAGTTCTTCCATTACATGCCTTCACTACTAGAACTGGATATATGCGGTACAACA

TTAGAGGTAATGTACATTTGTGATATTACTATCATAACTAAATGATGAA

>PGSC0003DMG400030072LRR-RLPs\_9012

ACGCCGAGGTGGTTTTCAAGTGCCATTTACTTGATTACAAGCTGTCCTAAATTACAAGATCTTACAATTGA

CTTTGTAAGCACTCTCTTAATTTTTTTTCATTAAGGTGATTGAATATGGTT

>PGSC0003DMG400030072LRR-RLPs\_9074

ACAATTGACTTTGTAAGCACTCTCTTAATTTTTTTTCATTAAGGTGATTGAATATGGTTTCTTATTCATCTGA

ACTCGCCTAATTAACCGTTCCTCAAAAATCTTTAGTACCCTGTGGGG

>PGSC0003DMG400030072LRR-RLPs\_9136

ATTCATCTGAACTCGCCTAATTAACCGTTCCTCAAAAATCTTTAGTACCCTGTGGGGGATATTGTTGAAC

CTGTTGTACAGTTGCTACGAGCCCAATCATCCTCATATGGTGTGTGAA

>PGSC0003DMG400030072LRR-RLPs\_915

GTGGTTGCTCTTCTGAGTCTCTTTTATCTACTAAACTCCATCATTGGATAGAGTATATAATTACACTATTG  
TCTTCAATCTATGTTCTTTCCCGTGCTCAATCATGTATCATTCTCTAA

>PGSC0003DMG400030072LRR-RLPs\_9260

CAAAGAGTTCGAGTGAACATGTTTACTGGTCTCGAGATGGAAATGGAGTTTATGAAGTTTATATTGGCA  
TCTGCACTTGACTTGAGGAGATCTTCATTTGGAATTGTACGTGTTTCCTT

>PGSC0003DMG400030072LRR-RLPs\_9322

ATTGGCATCTGCACTTGACTTGAGGAGATCTTCATTTGGAATTGTACGTGTTTCCTTTTCGTTTCATGTA  
AACAAATGATCGATGAGATGAAAGAATTCCGCAGAGCATCACCCAATGT

>PGSC0003DMG400030072LRR-RLPs\_9446

TTCACATTTGAAGAAATCGGTATGGAAGGTGGATCATATGAACGTGAAGAAGTCATGGAAGTGCCATG  
ATTTTGCCAACATATTAGTTTGCCTGTTATGCCCTGTCTGTCTAATATTATG

>PGSC0003DMG400030072LRR-RLPs\_9508

GCCATGATTTTGCCAACATATTAGTTTGCCTGTTATGCCCTGTCTGTCTAATATTATGCAGTATGTATATAT  
TTGCTTGCCTAAGTAAGTTTTAACAGTTTCATGAACTATGAGTCTGCT

>PGSC0003DMG400030072LRR-RLPs\_9568

GTATGTATATATTTGCTTGCCTAAGTAAGTTTTAACAGTTTCATGAACTATGAGTCTGCTTGTAATGGTCA  
CTGTATTATTATGTTATTCCATTTTGGCCCCTGTGTTATACAATTATG

>PGSC0003DMG400030072LRR-RLPs\_976

TTACTACTATTGTCTTCAATCTATGTTCTTTCCCGTGCTCAATCATGTATCATTCTCTAATGACGTTGAACCA  
CTAGTTATTTTCTATACACTGAAATGTATTTGGATATTGCCTTCA

>PGSC0003DMG400030113LRR-RLKs\_0

CTTCAGTCTTCATTACCATATGAAAAGAAACACAAGGGAAGCATCATTTTTAATATGCTCCAATCAAGAT  
CTAACCGTTTTTTGCTTAATTTGCAAATCTTCTTCTAATTAGCCTGTTT

>PGSC0003DMG400030113LRR-RLKs\_1037

ACTTTTGAGATCACAACTTGATTATTCCTATTGTAGGAGTGGGGTTGGCTATACAGTTATCATGGATC  
TTTTACAGAACAAGAAAGCATTGGTGGAAAACAAAGAAGCAGAATGTCAA

>PGSC0003DMG400030113LRR-RLKs\_1098

TCATGGATCTTTTACAGAACAAGAAAGCATTGGTGGAAAACAAAGAAGCAGAATGTCAAAGATGACAT  
GAAGTTCATTTTCATTTTCAGAAGTTGAAGGTGACTACAGAAGACATTTTGTCT

>PGSC0003DMG400030113LRR-RLKs\_1159

ATGACATGAAGTTCATTTCAATTCAGAAAGTTGAAGGTGACTACAGAAGACATTTTGTCTAGCTTGAAAGA  
CAAAAACATAATAGGAAATGGAGGATCAGGGAAGGTCTATCGAGTTGTGA

>PGSC0003DMG400030113LRR-RLKs\_122

CCAAGAAACCTTACAATTTTCGGTCAGGGAACAGTCCATATTACTAAGCTTGAAACGACACTGGAGGGA  
TTCCGAGTTCCTCCAGTCATGGGACTTGAATTCTTCAGCATGCACTTGGTC

>PGSC0003DMG400030113LRR-RLKs\_1220

CTTGAAAGACAAAAACATAATAGGAAATGGAGGATCAGGGAAGGTCTATCGAGTTGTGATAGACCAAA  
CAGGCAATACTTATGCTGTTAAAAGCATAGGGCATGGAGAAAAATCAGGTGG

>PGSC0003DMG400030113LRR-RLKs\_1342

GACCCCAAAGGAGTTCCTGGTAGAAGTTAGAACCCTTGGTAGCATTTCGACACAACAACATTGTCAAGC  
TCATCTGTTGCATCTCAAGTTTAGACAGAAAGCTTCTAGTCTATGAATACT

>PGSC0003DMG400030113LRR-RLKs\_1403

TGTCAAGCTCATCTGTTGCATCTCAAGTTTAGACAGAAAGCTTCTAGTCTATGAATACTTTGAGAAACAA  
AGCCTCGACAAATGGCTTCACAGAAAGAAAAGTGTAGTATCATCGGGTCA

>PGSC0003DMG400030113LRR-RLKs\_1464

GAGAAACAAAGCCTCGACAAATGGCTTCACAGAAAGAAAAGTGTAGTATCATCGGGTCAAAGTAGTAC  
CCCGGCCCTGGATTGGCAAAAGAGATTAATAATAGCCACTGGTGCAGCGCAA

>PGSC0003DMG400030113LRR-RLKs\_1586

ACTCTGCTATATGCACCACGACTGTACTCGATCCATCATTTCATAGAGACATTAAGTCCAGCAATATCCTTC  
TGGACTCAGAATTCAATGCAAAAATAGCAGATTTTGGACTAGCAAAAAT

>PGSC0003DMG400030113LRR-RLKs\_1647

AATATCCTTCTGGACTCAGAATTCAATGCAAAAATAGCAGATTTTGGACTAGCAAAAATACTATCCAGGA  
GGGATGATAATCCTGAGACAGTTTCTGCTATTGCTGGAACATTTGGTTAC

>PGSC0003DMG400030113LRR-RLKs\_1708

TATCCAGGAGGGATGATAATCCTGAGACAGTTTCTGCTATTGCTGGAACATTTGGTTACATTGCACCAGG  
TATATTACAGTTTAAATATCTATTGTACCTCGAGAATTTACAAAAGAAT

>PGSC0003DMG400030113LRR-RLKs\_1769

TGCACCAGGTATATTACAGTTTAAATATCTATTGTACCTCGAGAATTTACAAAAGAATTATACTCCAATA

TTAAATTTAATGTTTGGTCCTCACAGAGTATGCCTCGACATTTAGAGT

>PGSC0003DMG400030113LRR-RLKs\_183

TGGAGGGATTCCGAGTTCCTCCAGTCATGGGACTTGAATTCTTCAGCATGCACTTGGTCAGGAGTTTTGT  
GCATCGATGACCGGGTAGTGACTIONAACTAAATCTTGGAGAAAAGAACATT

>PGSC0003DMG400030113LRR-RLKs\_1830

TACTCCAATATTAATTTAATGTTTGGTCCTCACAGAGTATGCCTCGACATTTAGAGTGAATATAAAGAC  
AGATATCTATAGCTTCGGAGTGGTGCTATTGGAATTAACAACAGGGAGG

>PGSC0003DMG400030113LRR-RLKs\_1891

ATATAAAGACAGATATCTATAGCTTCGGAGTGGTGCTATTGGAATTAACAACAGGGAGGCAACCCATTC  
TCAGAGAGGACCAAATGAATCTAGCACAATGGGCTCAACAGCGTTACAGAG

>PGSC0003DMG400030113LRR-RLKs\_1952

ACCCATTCTCAGAGAGGACCAAATGAATCTAGCACAATGGGCTCAACAGCGTTACAGAGATGGGAATTT  
CATTGTTGCCCTTGATGAAGAAATCATGGAAACAAGTAATGTGGAACAAAT

>PGSC0003DMG400030113LRR-RLKs\_2013

GGGAATTTTATTGTTGCCCTTGATGAAGAAATCATGGAAACAAGTAATGTGGAACAAATGAGAGGTGTT  
TTTAACTAGGACTAATGTGTACCGGAGCATCACCATCTAGTAGGCCGTCA

>PGSC0003DMG400030113LRR-RLKs\_2074

GAGGTGTTTTTAACTAGGACTAATGTGTACCGGAGCATCACCATCTAGTAGGCCGTCAATGAAGGAGG  
TCTGCAACATTCTCAAAGTCTCAGAGACCCCATATTTTGAGAGAATAGAA

>PGSC0003DMG400030113LRR-RLKs\_2135

GAAGGAGGTCTGCAACATTCTCAAAGTCTCAGAGACCCCATATTTTGAGAGAATAGAATGTTTCGCCTT  
ACATAGATAAATGTAGTTGTATTTTTTTAACAGAATGAGAAAGTCGTGT

>PGSC0003DMG400030113LRR-RLKs\_2196

TTTCGCCTTACATAGATAAATGTAGTTGTATTTTTTTAACAGAATGAGAAAGTCGTGTTGATAACGATTT  
CTTCAGCAATGTATACTTTAGTAATACTGTCAGAGGACATTTTTTATC

>PGSC0003DMG400030113LRR-RLKs\_2257

ATAACGATTTCTCCAGCAATGTATACTTTAGTAATACTGTCAGAGGACATTTTTTATCCTCAGACAGATC  
AATAGCCTCATCTGGTTAAGTGGTGTCAAACACAAGGGCTTGTAAGCT

>PGSC0003DMG400030113LRR-RLKs\_2379

ACCTTAGAATGTGATTCCCTTGTTTCATACTTGAGATGTCGCGAGGCAAGAGCTAAGTGTCGTGGCAATTAC  
AGTGTATATATATATATATATCTTTTTTTAATTCTTCAGAACTCTCCAA

>PGSC0003DMG400030113LRR-RLKs\_244

GAGTTTTGTGCATCGATGACCGGGTAGTGACTCAACTAAATCTTGGAGAAAAGAACATTACTGGAAAA  
TTCCATCAACAATAATATGTCAGCTCAAGAACCTTAACTTCATTGATCTCT

>PGSC0003DMG400030113LRR-RLKs\_2440

GGCAATTACAGTGTATATATATATATATCTTTTTTTAATTCTTCAGAACTCTCCAAGGAAGCTTTTGG  
ACATACAGGTTTGATGAACTGCAAATGCCTTCTTCAAACATAAATCC

>PGSC0003DMG400030113LRR-RLKs\_2501

AAGCTTTTGGAACATACAGGTTTGATGAACTGCAAATGCCTTCTTCAAACATAAATCCTTCTCATGATA  
TCTTGTAGGAAGTCTAGTTCTTGTGGCAGAGGTTGTAGCGGCTGGGGAT

>PGSC0003DMG400030113LRR-RLKs\_2562

CTCATGATAATCTTGTAGGAAGTCTAGTTCTTGTGGCAGAGGTTGTAGCGGCTGGGGATTATCCTGGGG  
TTCCAAAAAATAAAAAATAAAAAATTCTAACAGTTTTACACAATTGATAAA

>PGSC0003DMG400030113LRR-RLKs\_2623

TCCTGGGGTTCCCAAAAAATAAAAAATAAAAAATTCTAACAGTTTTACACAATTGATAAAAGCTAAAACCA  
TTGATTAGATATTCATTAATGGTCTAGGCTAACTTATATGATTGGAAAAA

>PGSC0003DMG400030113LRR-RLKs\_2684

CTAAACCATTGATTAGATATTCATTAATGGTCTAGGCTAACTTATATGATTGGAAAAATGAAATGTTCT  
ATAAGCGATCAAGTTTTTCTACTCGTTAATTCTTTTGGTACTTGTTTTA

>PGSC0003DMG400030113LRR-RLKs\_2745

AAATGTTCTATAAGCGATCAAGTTTTTCTACTCGTTAATTCTTTTGGTACTTGTTTTAATTAGTTTGTTAG  
AATTGTTCTGACCCTCAGTGATACTCCTGATGGAGCAGGGTCAAGTAG

>PGSC0003DMG400030113LRR-RLKs\_2803

AATTAGTTTGTTAGAATTGTTCTGACCCTCAGTGATACTCCTGATGGAGCAGGGTCAAGTAGGACTAACA  
GACTTCTAGGTTTACAAGCTTCAGAAGATGAGGTGAACATGACATCTTAG

>PGSC0003DMG400030113LRR-RLKs\_305

TGGAAAAATTCATCAACAATAATATGTCAGCTCAAGAACCTTAACTTCATTGATCTCTCCAACAACAACA  
TTTCAGGAACTATTCCAGTAGGCCTGAAAGATTGCTCAATGTTACAACA



>PGSC0003DMG400030113LRR-RLKs\_366

AACAACAACATTTTCAGGAACATTCCAGTAGGCCTGAAAGATTGCTCAATGTTACAACATTTGGACTTGT  
CCAATAATTCTTTGATCGACCGGATTCCAGGTGAGTTGTTTGGGATGAAA

>PGSC0003DMG400030113LRR-RLKs\_427

TGGACTTGTCCAATAATTCTTTGATCGACCGGATTCCAGGTGAGTTGTTTGGGATGAAACAGTTACTCAG  
TTTGTATCTTAATGGTAACATGTTGTCTGGTGAGATGCCAAAACAAATAT

>PGSC0003DMG400030113LRR-RLKs\_488

GTTACTCAGTTTGTATCTTAATGGTAACATGTTGTCTGGTGAGATGCCAAAACAAATATCATCTCAACTG  
GAAAATCTTGATCTTTCTGAGAATCACTTGAACGGTTCGATACCAGAAGA

>PGSC0003DMG400030113LRR-RLKs\_549

TCTCAACTGGAAAATCTTGATCTTTCTGAGAATCACTTGAACGGTTCGATACCAGAAGATATTGGAAACT  
TCAAAAATCTTTTGAAATTGGATCTGTCACATAATTCTCTCAGTGGTTCA

>PGSC0003DMG400030113LRR-RLKs\_61

AATCAAGATCTAACCGTTTTTTGCTTAATTTGCAAATCTTCTTCTAATTAGCCTGTTTTTCCAAGAAACCT  
TACAATTTTCGGTCAGGGAACAGTCCATATTACTAAGCTTGAAACGAC

>PGSC0003DMG400030113LRR-RLKs\_610

TTGGAAACTTCAAAAATCTTTTGAAATTGGATCTGTCACATAATTCTCTCAGTGGTTCAATTACAAGCAAG  
TTGTTTCAGTTGCATGATTTGCGTCACCTGTCGCTAAGTTCCAACTACT

>PGSC0003DMG400030113LRR-RLKs\_732

TCCGGTGTGATACCTGATGAAATGGACTTGTTTAGTTTATACGATATGGATCTTTCACATAACCAATTGAC  
TGGTTCTATACCAAAGGGATTTTCAGTATTTACCTGGACTGCATGCCCTG

>PGSC0003DMG400030113LRR-RLKs\_793

ACCAATTGACTGGTTCTATACCAAAGGGATTTTCAGTATTTACCTGGACTGCATGCCCTGGATTTGTCTTAT  
AATCAGTTATCAGGAGACATTTCAAAAAGTATAGAATATCTTAGGCCTA

>PGSC0003DMG400030113LRR-RLKs\_854

TTTGTCTTATAATCAGTTATCAGGAGACATTTCAAAAAGTATAGAATATCTTAGGCCTAGAAATACTTTAA  
GGCTTTGTTCCAACAAATTCTCAGGAAGAATTTCTTCTGAATTTGTAA

>PGSC0003DMG400030113LRR-RLKs\_915

AATACTTTAAGGCTTTGTTCCAACAAATTCTCAGGAAGAATTTCTTCTGAATTTGTTAAGCTAACATATGA

AGTGAATTGCTTTGATGAGTCCAATCTTTGTTCTACATCCAACAACCGA

>PGSC0003DMG400030113LRR-RLKs\_976

TAACATATGAAGTGAATTGCTTTGATGAGTCCAATCTTTGTTCTACATCCAACAACCGAAAACCTTTTGAGA  
TCACAACACTTGATTATTCCTATTGTAGGAGTGGGGTTGGCTATACAGT

>PGSC0003DMG400030117-(rev)LRR-RLKs\_0

ATGTTCTTCCGCATTTTTTTTCGTCTAATTAGTCCGTCATTGCAAGAAAGTTTACAATTGGAACAGTCCGT  
GTTGTTAAAATTGAAACAACACTGGAGCGATTCCGGAGTTCCTTCAGTCA

>PGSC0003DMG400030117-(rev)LRR-RLKs\_1054

AGTTAACATGGATACTTTACATGGTCAGAAAGCATTGGTGGAAAACAAAGAAGCAGAATGTCAAAGAT  
GACATGAAATTCATTTCAATTTCAAAGTTGAAGGTGACTACAGAAGACATTT

>PGSC0003DMG400030117-(rev)LRR-RLKs\_1116

AAAGATGACATGAAATTCATTTCAATTTCAAAGTTGAAGGTGACTACAGAAGACATTTTGTCTAGCTTGA  
AAGACGAAAACATAATAGGAAAAGGAGGATCAGGGAAGGTCTATCGAGTT

>PGSC0003DMG400030117-(rev)LRR-RLKs\_1178

TAGCTTGAAAGACGAAAACATAATAGGAAAAGGAGGATCAGGGAAGGTCTATCGAGTTGTGATCGACC  
AAACAGGCAATACTTATGCTGTAAAAGCATAGGGCATGGAGAAAATTCAGG

>PGSC0003DMG400030117-(rev)LRR-RLKs\_124

ATTTGAATTCTTCAGAATGCACTTGGTCAGGAGTTTCGTGCATCGATGGCAGGGTAGTGACAGAACTAC  
ATCTTGGAGGAAAAGACATTACTGGAACAATTTTCATCGACAATATGTGAGC

>PGSC0003DMG400030117-(rev)LRR-RLKs\_1364

TGTCAAGCTCATGTGTTGCATCTCAAGTTTAGACAGAAAGCTTCTAGTCTATGAATACTTTGAGAAACAA  
AGCCTCGACAAGTGGCTTCACGGAAGAAAAGAGCAGCATCACTAGGTCA

>PGSC0003DMG400030117-(rev)LRR-RLKs\_1426

AGAAACAAAGCCTCGACAAGTGGCTTCACGGAAGAAAAGAGCAGCATCACTAGGTCAAAGTAGTACC  
CCGGCCCTGGATTGGCGAAAGAGACTAAATATAGCCATTGGTGCAGCTCAAG

>PGSC0003DMG400030117-(rev)LRR-RLKs\_1488

AGTACCCCGGCCCTGGATTGGCGAAAGAGACTAAATATAGCCATTGGTGCAGCTCAAGGACTATGCTAT  
ATGCACCATCATTGCACTCGACCAATCATTATAGAGACATTAAGTCCAGC

>PGSC0003DMG400030117-(rev)LRR-RLKs\_1550

ATGCTATATGCACCATCATTGCACTCGACCAATCATTATAGAGACATTAAGTCCAGCAATATCCTTCTGG  
ACTCAGAATTCAATGCAAAAATAGCAGATTTTGGACTAGCAAAAATACT

>PGSC0003DMG400030117-(rev)LRR-RLKs\_1612

TCCTTCTGGACTCAGAATTCAATGCAAAAATAGCAGATTTTGGACTAGCAAAAATACTATCCAGGCGGG  
ATGATGATCCTGAGACAGCTTCAGCTATTGCTGGAACATTTGGTTACATTG

>PGSC0003DMG400030117-(rev)LRR-RLKs\_1736

AGGTACATAACAGTTCAAACATGTATGAATATTCAATCTTTCAAATCCAATTCTACTATATCAAATTTTA  
ATATTTGGTCCTGACAGAGTATGCCTCGACATTCAAAGTGAACGTAAAG

>PGSC0003DMG400030117-(rev)LRR-RLKs\_1798

CAAATTTTAATATTTGGTCCTGACAGAGTATGCCTCGACATTCAAAGTGAACGTAAAGACTGATATCTAT  
AGCTATGGAGTGGTGCTATTAGAATTGACAACAGGGAGAGAACCCATTCT

>PGSC0003DMG400030117-(rev)LRR-RLKs\_186

GAACTACATCTTGGAGGAAAAGACATTACTGGAACAATTTTCATCGACAATATGTGAGCTCAAGAACCTT  
ACCTTCATTGATCTCTCCAACAACAATATTTTCAGGAATCATACCAGTAAGC

>PGSC0003DMG400030117-(rev)LRR-RLKs\_1860

ATATCTATAGCTATGGAGTGGTGCTATTAGAATTGACAACAGGGAGAGAACCCATTCTCAGGGATGAGC  
AAATGAATCTAGCACAATGGGCGCTACAGCGTTACAGAGAGGGGAATTCCA

>PGSC0003DMG400030117-(rev)LRR-RLKs\_1922

GATGAGCAAATGAATCTAGCACAATGGGCGCTACAGCGTTACAGAGAGGGGAATTCCATTCTCGAGGC  
CCTGGATGAAGAAGTGATGGAAACAAGTAATTTGGAACAAATGAGAAGTGTT

>PGSC0003DMG400030117-(rev)LRR-RLKs\_1984

CGAGGCCCTGGATGAAGAAGTGATGGAAACAAGTAATTTGGAACAAATGAGAAGTGTTTTAACTAG  
GAGTGATGTGTACAGGAGCATCACCATCTGGTAGGCCATCAATGAAGGAGGT

>PGSC0003DMG400030117-(rev)LRR-RLKs\_2024

GAACAAATGAGAAGTGTTTTAACTAGGAGTGATGTGTACAGGAGCATCACCATCTGGTAGGCCATCA  
ATGAAGGAGGTTTGCTATGTTCTCAAAGCTGCAGAGAGTCTAATATTTGA

>PGSC0003DMG400030117-(rev)LRR-RLKs\_248

GAACCTTACCTTCATTGATCTCTCCAACAACAATATTTTCAGGAATCATACCAGTAAGCCTGAACGATTGCT  
CAATGTTACAACATTTGGACTTGTCCAATAATTCTTTGAATGATCGGAT

>PGSC0003DMG400030117-(rev)LRR-RLKs\_310

ACGATTGCTCAATGTTACAACATTTGGACTTGTCCAATAATTCTTTGAATGATCGGATTCCAGGTGAGTT  
GTTTGGGATGAAACAAATACTCAATTTATATCTTAATGGTAATATGTTGT

>PGSC0003DMG400030117-(rev)LRR-RLKs\_372

GGTGAGTTGTTTGGGATGAAACAAATACTCAATTTATATCTTAATGGTAATATGTTGTCTGGTGAGATGC  
CAAAGAAATATCATCATCCCAGCTGAAAAATCTTAATCTCTCTGAGAAC

>PGSC0003DMG400030117-(rev)LRR-RLKs\_434

TGAGATGCCAAAAGAAATATCATCATCCCAGCTGAAAAATCTTAATCTCTCTGAGAACTACCTGAACGGT  
TCGATACCAGAAGATATTGGTAACTTGAAAAATATTGTGAAGTTGGACAT

>PGSC0003DMG400030117-(rev)LRR-RLKs\_496

TGAACGGTTCGATACCAGAAGATATTGGTAACTTGAAAAATATTGTGAAGTTGGACATGTCACATAATTC  
TTAAGTGGTTCAATTACAAATCAGTTGTTTCAGTTGCATCATTGCGTC

>PGSC0003DMG400030117-(rev)LRR-RLKs\_558

CATAATCTTTAAGTGGTTCAATTACAAATCAGTTGTTTCAGTTGCATCATTGCGTCACCTGTCGCTAAG  
TTCCAATATTTGTCCAGTGTGATACCTGATGAAATGGACTTGTTTAGT

>PGSC0003DMG400030117-(rev)LRR-RLKs\_62

ACAGTCCGTGTTGTTAAAATTGAAACAACACTGGAGCGATTCCGGAGTTCCTTCAGTCATGGGATTTGAAT  
TCTTCAGAATGCACTTGGTCAGGAGTTTCGTGCATCGATGGCAGGGTAGT

>PGSC0003DMG400030117-(rev)LRR-RLKs\_620

GTCGCTAAGTTCCAATATTTGTCCAGTGTGATACCTGATGAAATGGACTTGTTTAGTTTGTATGCTATG  
GATCTTTCTCATAATCAATTGACTGGTTCTATACCAAAGGGATTTCCGGTA

>PGSC0003DMG400030117-(rev)LRR-RLKs\_682

ATGCTATGGATCTTTCTCATAATCAATTGACTGGTTCTATACCAAAGGGATTTCCGGTATTTACCTGGATTA  
CATGCTCTGGATTTGTCGTATAATCAGTTATCAGGAGATATTTCTCAA

>PGSC0003DMG400030117-(rev)LRR-RLKs\_744

CCTGGATTACATGCTCTGGATTTGTCGTATAATCAGTTATCAGGAGATATTTCTCAAAGTATAGAACATCT  
TAGGCCTAGAAATACTTTAAGGCTTTGTTCCAACAAATTCTCAGGAAGA

>PGSC0003DMG400030117-(rev)LRR-RLKs\_806

AGAACATCTTAGGCCTAGAAATACTTTAAGGCTTTGTTCCAACAAATTCTCAGGAAGAATTTCTGCTGAA

TTTGTGAAGTTAACATACGAAGAGAATTGCTTTGACGAATCAAATCTTTG

>PGSC0003DMG400030117-(rev)LRR-RLKs\_868

CTGCTGAATTTGTGAAGTTAACATACGAAGAGAATTGCTTTGACGAATCAAATCTTTGTTCTACATCCAA  
GAACTTATCCGTCCTGTCCTACCAAGCTGTTCTCTGATGATGAGGTTT

>PGSC0003DMG400030117-(rev)LRR-RLKs\_930

ACATCCAAGAACTTATCCGTCCTGTCCTACCAAGCTGTTCTCTGATGATGAGGTTGAAAATCTTCGA  
GACCAAAACACTTGATTATCATTATTTCTGTTGTAGGAGTTGGGGTAGCT

>PGSC0003DMG400030117-(rev)LRR-RLKs\_992

ATCTTCGAGACCAAAACACTTGATTATCATTATTTCTGTTGTAGGAGTTGGGGTAGCTATACAGTTAACA  
TGGATACTTTACATGGTCAGAAAGCATTGGTGGAAAACAAAGAAGCAGAA

>PGSC0003DMG400030119-(rev)LRR-RLKs\_0

CTTTGCTGTTTTTCTTGCCACAGTCCACAGACGTCAGTGAAGTCAATTTTTGTTTCTTATCTTTTTAAAA  
TTAACAAGTCAAACCTTTGTTAGCATTATACAAATTTTCGTCCATGTT

>PGSC0003DMG400030119-(rev)LRR-RLKs\_1054

GTTTAACCAATTTTCCGGTAGGTTACCAATGTTGGATGCAAATATGGAATTGATGGGGAGAACTCAAGA  
AATGTTTTCTAATCTTTCTGGTCTCCAAGTCTTAGATCTCTCAGGAAATCA

>PGSC0003DMG400030119-(rev)LRR-RLKs\_1116

CTCAAGAAATGTTTTCTAATCTTTCTGGTCTCCAAGTCTTAGATCTCTCAGGAAATCACCTAAATGGTTCA  
ATTCCAAGCTACTTATTTTATTGGAAGAATTTAACATCTCTTCTTTTGG

>PGSC0003DMG400030119-(rev)LRR-RLKs\_1178

AATGGTTCAATTCCAAGCTACTTATTTTATTGGAAGAATTTAACATCTCTTCTTTTGGGGGATAACCAATT  
TTCTGGGAATTTACCTAGTATAACTGGAAATTTGAGATTAAGAACATTG

>PGSC0003DMG400030119-(rev)LRR-RLKs\_124

GACTTGTGTTGTATAATACACGGTTTCTCAAAGCTAATTCATGATCCACAAAATAAAGAGGACAATCAA  
ACCAAAGGAGCCATGAAAATCAACCATATTCATGTTGTAAAATCTACATT

>PGSC0003DMG400030119-(rev)LRR-RLKs\_1240

TAACCAATTTTCTGGGAATTTACCTAGTATAACTGGAAATTTGAGATTAAGAACATTGGATCTTTCATCGA  
ATCAGCTTTCTGGACATATTCCACAAGAGTATGACAAGAATGAATACTA

>PGSC0003DMG400030119-(rev)LRR-RLKs\_1302

TTTCATCGAATCAGCTTTCTGGACATATTCCACAAGAGTATGACAAGAATGAATACTACTTTAGAAATAA  
TCTGAATCTATGTAGCAAATATACCAACCATTACATCCAAGTTCCACGTT

>PGSC0003DMG400030119-(rev)LRR-RLKs\_1364

AGAAATAATCTGAATCTATGTAGCAAATATACCAACCATTACATCCAAGTTCCACGTTGAAGTGGAAAAA  
CAAGAGTTGTAATTGCCGTTGTGGCCCCTGTTGCATTTTTAGTCATGATA

>PGSC0003DMG400030119-(rev)LRR-RLKs\_1426

TGGAAAAACAAGAGTTGTAATTGCCGTTGTGGCCCCTGTTGCATTTTTAGTCATGATAACATTATTATGTT  
ACACATTTAAAAAGAATTGGACTTTCTCCACAGACCAACTCATGTGGAG

>PGSC0003DMG400030119-(rev)LRR-RLKs\_1488

TATTATGTTACACATTTAAAAAGAATTGGACTTTCTCCACAGACCAACTCATGTGGAGGAAGAGGCATGA  
GAACCAAGATCCTGAGTGGATGTTCAATTTCTTCCAGCAGTTAGGATTCA

>PGSC0003DMG400030119-(rev)LRR-RLKs\_1550

AGGCATGAGAACCAAGATCCTGAGTGGATGTTCAATTTCTTCCAGCAGTTAGGATTCACAGAATTTGAAA  
TTCAGGTGAATATGACAGAAGAAAATTTGATTTGAAGTGGAGGATATGGG

>PGSC0003DMG400030119-(rev)LRR-RLKs\_1612

ATTTGAAATTCAGGTGAATATGACAGAAGAAAATTTGATTTGAAGTGGAGGATATGGGAAGGTCTATCG  
AGTTGGTGTCAATCCTAATGGGAACCTTTGTGGCAGTTAAGAGAATATGGAA

>PGSC0003DMG400030119-(rev)LRR-RLKs\_1674

TCTATCGAGTTGGTGTCAATCCTAATGGGAACCTTTGTGGCAGTTAAGAGAATATGGAACAAGAGGAATT  
TAGACCACGGGCTTGAGAAACAGTTCCTTGCAGAAGTTGAAGTATTGGGTA

>PGSC0003DMG400030119-(rev)LRR-RLKs\_1736

AGGAATTTAGACCACGGGCTTGAGAAACAGTTCCTTGCAGAAGTTGAAGTATTGGGTAGCATTTCGACAT  
TCTAATATTGTGAAGTTGTTATGTTGCATTTCTAGAGGAACTCAAAGGTT

>PGSC0003DMG400030119-(rev)LRR-RLKs\_1798

TCGACATTCTAATATTGTGAAGTTGTTATGTTGCATTTCTAGAGGAACTCAAAGGTTTTGGTGTACGAG  
TACATGGAAAATCAAAGCTTAGACAAGTGGTTGCATCACAAGAGAAGAAG

>PGSC0003DMG400030119-(rev)LRR-RLKs\_186

ACAATCAAACCAAAGGAGCCATGAAAATCAACCATATTCATGTTGTAAAATCTACATTCTCAATCCCAG  
GAAACAAGTTTACCTTTTCATTGTCTCCTTACTTGCCTTTATGCATTTCC

>PGSC0003DMG400030119-(rev)LRR-RLKs\_1860

TGTACGAGTACATGGAAAATCAAAGCTTAGACAAGTGGTTGCATCACAAGAGAAGAAGTGAAAAAGAT  
ATTACTGCCTCAGCACATTGTGTATTGGAATGGCATACTAGACTGCAAATTG

>PGSC0003DMG400030119-(rev)LRR-RLKs\_1984

TGGTGCTGCCCCGAGGTCTATGTTACATGCATCACGAGTGCTCTACGCCAATCATTTCATCGTGACATTAAG  
TGCAGTAATATCCTTTTAGACCATGAACTGAATGCCAAAATTGCAGATTT

>PGSC0003DMG400030119-(rev)LRR-RLKs\_2046

ACATTAAGTGCAGTAATATCCTTTTAGACCATGAACTGAATGCCAAAATTGCAGATTTTGGACTAGCTAA  
GATTTTGGCCAAGTGGGGAGAGACAGAGACTGCTTCTGCTATCGCTGGCA

>PGSC0003DMG400030119-(rev)LRR-RLKs\_2108

CTAGCTAAGATTTTGGCCAAGTGGGGAGAGACAGAGACTGCTTCTGCTATCGCTGGCACGTTTGGCTAC  
CTAGCTCCAGGTATATTTCACTGTTCTCATAATGAAATAAACAAAAACACA

>PGSC0003DMG400030119-(rev)LRR-RLKs\_2170

TGGCTACCTAGCTCCAGGTATATTTCACTGTTCTCATAATGAAATAAACAAAAACACACCAGAGTGTACG  
TATGTATCGTGTTTCTCATTGATTTTATCCTAATACCTTGTTATTCTAAT

>PGSC0003DMG400030119-(rev)LRR-RLKs\_2232

AGTGTACGTATGTATCGTGTTTCTCATTGATTTTATCCTAATACCTTGTTATTCTAATTGGAATTTCAAGT  
ATGCATACACGTCGAAAGTGAATGCCAAGATTGATGTCTACAGTTTTG

>PGSC0003DMG400030119-(rev)LRR-RLKs\_2294

ATTTCAAGTATGCATACACGTCGAAAGTGAATGCCAAGATTGATGTCTACAGTTTTGGTGTGGTGTAT  
TGGAGCTGGTTACCGGGAGAGAACCAATTAACGGAGACGAGCATATAAAC

>PGSC0003DMG400030119-(rev)LRR-RLKs\_2356

GGTGTTATTGGAGCTGGTTACCGGGAGAGAACCAATTAACGGAGACGAGCATATAAACCTTGCACAAA  
GGGCATGGAACCACCATGAAGAAGGCAATCCAGTGGTTGATGCTATTGATGA

>PGSC0003DMG400030119-(rev)LRR-RLKs\_248

ATTCCCAGGAAACAAGTTTACCTTTTCATTGTCTCCTTACTTGCCTTTATGCATTTCCAGGGCGGTTTACA  
GAGTGACGTCTACGAAAAGGAGAAGAACATTTTGTGGAGCTGAAGCAA

>PGSC0003DMG400030119-(rev)LRR-RLKs\_2480

ATCAAGGAAGCATGTTTCTTGAACGAAATGAGTTCCATGTTCAAGTTGGGGATTATTTGCACCAGTACTG

TACCTTCTGCTAGACCTTCCATGAAGGAAGTTCTGCAAATTCTATTACTT

>PGSC0003DMG400030119-(rev)LRR-RLKs\_2542

CAGTACTGTACCTTCTGCTAGACCTTCCATGAAGGAAGTTCTGCAAATTCTATTACTTAGCCTTAATACTT  
CTTCCTAGCAATTGGCTGCGAATCCAGGATTATCGTTGCTTCTTTATTT

>PGSC0003DMG400030119-(rev)LRR-RLKs\_310

CGGTTTACAGAGTGACGTCTACGAAAAGGAGAAGAACATTTTGTGGAGCTGAAGCAACTATGGGGAT  
TGCATCAATTATGGGATTCCGATTCCGATTCTCACACTGCAGTTGGTATGG

>PGSC0003DMG400030119-(rev)LRR-RLKs\_372

GGGGATTGCATCAATTATGGGATTCCGATTCCGATTCTCACACTGCAGTTGGTATGGTATAGGCTGCAG  
AAATGGTTCTGTTACAAGCATCTCGATTCATGAAGGGAATCTACTTTCCG

>PGSC0003DMG400030119-(rev)LRR-RLKs\_434

GGCTGCAGAAATGGTTCTGTTACAAGCATCTCGATTCATGAAGGGAATCTACTTTCCGGAACAATTTAC  
TAATCATATGTGAACTCAAAGCCTGCAATTGATAGACCTGAGTAGCAAC

>PGSC0003DMG400030119-(rev)LRR-RLKs\_496

AATTTCACTAATCATATGTGAACTCAAAGCCTGCAATTGATAGACCTGAGTAGCAACTATATCAGAGGA  
GAATTTCTACCTCCTTGTTACAATTGCTCAAAGCTGGAATATCTTGATAT

>PGSC0003DMG400030119-(rev)LRR-RLKs\_558

TCAGAGGAGAATTTCTACCTCCTTGTTACAATTGCTCAAAGCTGGAATATCTTGATATTTCTTGGAATCAA  
TTCCATGGACCACTGCCTAGTGACCTTCATCGTTTGTGCGAGGCTAATCC

>PGSC0003DMG400030119-(rev)LRR-RLKs\_62

CTTTTTAAAATTTAACAAGTCAAACCTTTGTTAGCATTATACAAATTTTCGTCCATGTTGACTGACTTGTGTT  
GTATAATACACGGTTTCTTCAAAGCTAATTCATGATCCACAAAATAAA

>PGSC0003DMG400030119-(rev)LRR-RLKs\_620

TGGAATCAATTCCATGGACCACTGCCTAGTGACCTTCATCGTTTGTGCGAGGCTAATCCATTTAGATATTGC  
TGAAATAACTTCAGTAATATCCCAGAAGCCATAGGTCAGCTTTCTGAA

>PGSC0003DMG400030119-(rev)LRR-RLKs\_682

AGATATTGCTGGAATAACTTCAGTAATATCCCAGAAGCCATAGGTCAGCTTTCTGAATTGCAATATCTA  
TCTCTTAAGTTCAATAATTTCAACACTTGGATATCCCGAGAAATTGGAAA

>PGSC0003DMG400030119-(rev)LRR-RLKs\_744



AATATCTATCTCTTAAGTTCAATAATTTCAACACTTGGATATCCCGAGAAATTGGAAATTTATCAAAGCTT  
GAGACCTTGGATATATCCTATATTGACAGCTTTAAGCAGGCAACAATCC

>PGSC0003DMG400030119-(rev)LRR-RLKs\_806

TCAAAGCTTGAGACCTTGGATATATCCTATATTGACAGCTTTAAGCAGGCAACAATCCCAGAGGAATTAA  
GAAGACTGAAGAAGTTGACAGCCCTTTTCATTGTACGGTCAAATTTGAAA

>PGSC0003DMG400030119-(rev)LRR-RLKs\_868

GGAATTAAGAAGACTGAAGAAGTTGACAGCCCTTTTCATTGTACGGTCAAATTTGAAAGGGGAGATTCC  
AGAAACATTTTCCGCTCTTTCAGGTCTCGAAGTCTTGGATCTCTCAATGAA

>PGSC0003DMG400030119-(rev)LRR-RLKs\_930

AGATTCCAGAAACATTTTCCGCTCTTTCAGGTCTCGAAGTCTTGGATCTCTCAATGAATTACTTAAAGGG  
GTCTATCCCAAGTTACTTGTGTTGAATGGAAGAAGTTGACGAATCTTCATT

>PGSC0003DMG400030119-(rev)LRR-RLKs\_992

TTAAAGGGGTCTATCCCAAGTTACTTGTGTTGAATGGAAGAAGTTGACGAATCTTCATTTGGAGTTTAACC  
AATTTTCCGGTAGGTTACCAATGTTGGATGCAAATATGGAATTGATGGGG

>PGSC0003DMG400030144-(rev)L-LecRK\_0

GTATATATAAAATTTATTTTTTAGCAAAGCACTAACAGAGTGTTTGGTGTGTTATTGTATATATATGCAGT  
TGCATGTCTAACAATGTGATTAACATATTGTCCAACATATGGTTGTTTTT

>PGSC0003DMG400030144-(rev)L-LecRK\_1364

CCATCAAAAAGAGAACTTCTACTTGTCTATGAGTTTATGCCTAATGGAAGCTTAGATCACCATATTTTTTA  
GTGGAAAAGCCATTTGGCATGGCCACTAAGATTCAAGATTGCTCAAGG

>PGSC0003DMG400030144-(rev)L-LecRK\_1426

ATATTTTTAGTGGAAAAGCCATTTGGCATGGCCACTAAGATTCAAGATTGCTCAAGGCTTGGCCTCGGC  
GTTGCTATATCTACACGAAGAATGGGAACAATGTGTGGTGCATAGGGATA

>PGSC0003DMG400030144-(rev)L-LecRK\_1984

TTGAAGCTCCATTACCCACGCTCCCTCGGAGCATGCCTGTGCCACATATTGCAGCTTCTCACGCCATTTA  
TCAACTATTTAGTTTCATCAACACATGAAACCAGCGGTACAGAGATCG

>PGSC0003DMG400030144-(rev)L-LecRK\_2046

CGCCATTTATCAACTATTTAGTTTCATCAACACATGAAACCAGCGGTACAGAGATCGCCCTTGCCCAA  
TCCAGCATTAGTAAACGGAAACACCACTGATGCTTCAATAAAGAGAACA

>PGSC0003DMG400030144-(rev)L-LecRK\_558

TTTGACACCTATCAGAACCCCTATGACCCAAAGGGTGATCATGTAGGTGTCGATATTAACCTATGCAAT  
CTGTTGTTAATGTGACTTGGTTTAGTAGCATTCCAAATGGTACGAAAAC

>PGSC0003DMG400030144-(rev)L-LecRK\_62

ATATGCAGTTGCATGTCTAACAATGTGATTAACATATTGTCCAACATATGGTTGTTTTGTCTCTTTATCTTC  
TCTCAAATACTTGCTTCTTATCATAATTATCCCTTTAGTCACTTCACT

>PGSC0003DMG400030144-(rev)L-LecRK\_868

AAAGAATCTATTCTTGAAATTTACTTCTTCTTTAGATAATATGACAGATACAGGGGTAACCTTATCAAAC  
ACCTTGCCAAAGGATGCACCAACAAAACAACTAAGTTAGGACTTGTGGTTG

>PGSC0003DMG400030149LRR-RLPs\_0

AAAAAACTACTATAATTCTGCCCTATATAGTTCCTATATAAACATTCATTCCGTTAGGTAGCAAATTAG  
ATTGCCAGAAAAGAAAATAGAGTAATAATGGGGATGGGGAACATTAAGC

>PGSC0003DMG400030149LRR-RLPs\_1037

TCTACCATCTTTTCATCACTGAAGTTTTTCCATCTCTCAAGCAGTTGGAACCTGTGCGACAATAAAATAAA  
TGAAATATCAAATGAATGGTTTGTACGCATATTTTGCTCCACTAAG

>PGSC0003DMG400030149LRR-RLPs\_1098

ATAAAATAAATGGAAATATCAAATGAATGGTTTGTACGCATATTTTGCTCCACTAAGATATTAATGAT  
GCATCTAAATATCTCAATTTTATTTCTTCGCATATCAAATTATAGTTTGA

>PGSC0003DMG400030149LRR-RLPs\_1159

ATTAATGATGCATCTAAATATCTCAATTTTATTTCTTCGCATATCAAATTATAGTTTGATTTTTTATTTTTTA  
TTTATCTGTCTAGACATAATTGCTTTGAGCAACTTGAAACATCTGGA

>PGSC0003DMG400030149LRR-RLPs\_122

TTGTTGTTAGCGTTTTTTCTAATAGTAATTGTGGCGAATGGTTGTTGGGAGGAAGAGAGAAATGCTCTCT  
TGGAGCTGCAGGCAACATAATGAGTTCTAATGGCGAATTGTTGGTTGAT

>PGSC0003DMG400030149LRR-RLPs\_1220

TTTTATTTTTTATTTATCTGTCTAGACATAATTGCTTTGAGCAACTTGAAACATCTGGATCTCAGGGGAAA  
CAATATAGAGAGATTTGTGACTACCAAAGGTACACAAATCAATGCAGTT

>PGSC0003DMG400030149LRR-RLPs\_1281

TCAGGGGAAACAATATAGAGAGATTTGTGACTACCAAAGGTACACAAATCAATGCAGTTGCTCTAATAT

TGAATGTTTTATTTAAACCTTAAGAACAAAATGCAAATTTGATCAGATAAA

>PGSC0003DMG400030149LRR-RLPs\_1342

TCTAATATTGAATGTTTTATTTAAACCTTAAGAACAAAATGCAAATTTGATCAGATAAAGATTAATAATGA  
AATGTGGACTAGGATTACACATCTTTACAACTTATGAATAAGATCAAT

>PGSC0003DMG400030149LRR-RLPs\_1403

TTAATAATGAAATGTGGACTAGGATTACACATCTTTACAACTTATGAATAAGATCAATCTATTCATTCTT  
ATGTAAAAACATATATGATTTATTTAACAGGTAACAAAAGAATAAGTTC

>PGSC0003DMG400030149LRR-RLPs\_1464

ATTCATTCTTATGTAAAAACATATATGATTTATTTAACAGGTAACAAAAGAATAAGTTCTCTATGGAAATT  
ACTATTGGGAAGTCCTTGTTAGGATATACTATTAACCATGCGTTTTGAT

>PGSC0003DMG400030149LRR-RLPs\_1586

AGTATTATTATTGAACAATTGTTTATTCATTTATTCAATTCAATAAAGTGTTACATTAATAGATCAATTTT  
CATATATGTGTCCTTAACCTTATATAGTAGATGATTTAGTGTATAGAGT

>PGSC0003DMG400030149LRR-RLPs\_183

ATGCTCTCTTGGAGCTGCAGGCAAACATAATGAGTTCTAATGGCGAATTGTTGGTTGATTGGGAAGGTT  
ATAATGCCAATGGATTTATAGATTGTTGTTTTGGGAAAGTGAAAATGCA

>PGSC0003DMG400030149LRR-RLPs\_244

GGAAGGTTATAATGCCAATGGATTTATAGATTGTTGTTTTGGGAAAGTGAAAATGCAGCTTAGAAAC  
AGGTTCGAGTGATCAAACCTCAGTCTCGGAAGTGAAAGGTTTGGATCAGGGGA

>PGSC0003DMG400030149LRR-RLPs\_305

TTAGAAACAGGTTCGAGTGATCAAACCTCAGTCTCGGAAGTGAAAGGTTTGGATCAGGGGATGATTGGAG  
ATTTAATGCCTCTCTATTTCTTCCATTCAAGTCCCTCCAATTTCTTTTATTG

>PGSC0003DMG400030149LRR-RLPs\_366

ATTGGAGATTTAATGCCTCTCTATTTCTTCCATTCAAGTCCCTCCAATTTCTTTTATTGTCTAACAGAAATA  
TTATAGGGTGGACAAAAAATGAAGGTATGACTTGTGAATACGTACGGA

>PGSC0003DMG400030149LRR-RLPs\_427

TAACAGAAATATTATAGGGTGGACAAAAAATGAAGGTATGACTTGTGAATACGTACGGAACTATATAT  
TACTATATACTAACATGTTATTTTGTATCCGATCCAGGGTTCAGTAACT

>PGSC0003DMG400030149LRR-RLPs\_488

CTATATATACTATATACTAACATGTTATTTTGTATCCGATCCAGGGTTCAGTAACTAAGTCAGCTTCCT  
AACCTGATAGAAGTCGATTTGCAATTCAATCCGATCCATCCTAAAGTT

>PGSC0003DMG400030149LRR-RLPs\_549

GTCAGCTTCCTAACCTGATAGAAGTCGATTTGCAATTCAATCCGATCCATCCTAAAGTTTTACTATCATCT  
TTATGTTTCGATTTTCATCTCTTGAGGTTCTAAAACCTGGTGCAGATGCTG

>PGSC0003DMG400030149LRR-RLPs\_61

AGCAAATTAGATTGCCAGAAAAGAAAATAGAGTAATAATGGGGATGGGGAACATTAAGCTTTTGTGTT  
AGCGTTTTTTCTAATAGTAATTGTGGCGAATGGTTGTTGGGAGGAAGAGAG

>PGSC0003DMG400030149LRR-RLPs\_610

ACTATCATCTTTATGTTTCGATTTTCATCTCTTGAGGTTCTAAAACCTGGTGCAGATGCTGATACCTCATTCA  
GCATACCGACGACATATAATAGCAGTATATCCTCCAACATAAACTCTAC

>PGSC0003DMG400030149LRR-RLPs\_671

ACCTCATTGAGCATACCGACGACATATAATAGCAGTATATCCTCCAACATAAACTCTACATATGAAATTGT  
GGCCATTTTTGCAATATAATACTTAGTATAGTTGTAATTTTTGGATGAA

>PGSC0003DMG400030149LRR-RLPs\_732

ATGAAATTGTGGCCATTTTTGCAATATAATACTTAGTATAGTTGTAATTTTTGGATGAAGGGATGAGTAA  
GAAATGTGGAGGGCTAACCAATTTAAGACAACCTCTGGTTCGAAGGCTATG

>PGSC0003DMG400030149LRR-RLPs\_793

GATGAGTAAGAAATGTGGAGGGCTAACCAATTTAAGACAACCTCTGGTTCGAAGGCTATGGAATCAGTG  
ACATCAATACCCTTTTTGCATTGGGTAAGCTCTCTTTACCATAAGAGAAAAA

>PGSC0003DMG400030149LRR-RLPs\_854

ATCAGTGACATCAATACCCTTTTTGCATTGGGTAAGCTCTCTTTACCATAAGAGAAAAAGCAATTAACAA  
AATAACACTAAGCCTAAGTACAGTTTTTTTTTCATAAATCAAATGCAGGT

>PGSC0003DMG400030149LRR-RLPs\_915

AATTAACAAAATAACACTAAGCCTAAGTACAGTTTTTTTTTCATAAATCAAATGCAGGTGGTGGTGCAA  
TAGTGGACTGAGGAATTTAGAGAACTCAATTTGAATTATAATAACTTCA

>PGSC0003DMG400030149LRR-RLPs\_976

TGGTGCAAATAGTGGACTGAGGAATTTAGAGAACTCAATTTGAATTATAATAACTTCAATTCTACCATC  
TTTTCATCACTGAAGGTTTTTCCATCTCTCAAGCAGTTGGAACCTGTCTGA

>PGSC0003DMG400030159LRR-RLPs\_0

GGGGATATGGGGAACATTAAGCTTTTGTGTTGGTGTTTTTTATGATGGTAATTATGGTGAATGGTTATT  
GGGAGGAAGAGAGAAATGCTCTCTTGGAGCTCCAGGCAAACATAATGAAT

>PGSC0003DMG400030159LRR-RLPs\_132

TTGTTGGTTGATTGGGCAGGATATAATGCGAATGGTTTTATAAATTGTTGTTTTTGGGAAAAAGTTAAAT  
GCAGCTTAGCAACAAGTCGAGTGATTGAACTCGATCTTGCAGCAAGGCTT

>PGSC0003DMG400030159LRR-RLPs\_198

AAATGCAGCTTAGCAACAAGTCGAGTGATTGAACTCGATCTTGCAGCAAGGCTTGGATCAGGGGATGAT  
TGGAGATTTAATGCCTCTCTTTTTCTCCATTCAAGTCCCTCAAACCTTCTT

>PGSC0003DMG400030159LRR-RLPs\_264

GATTGGAGATTTAATGCCTCTCTTTTTCTCCATTCAAGTCCCTCAAACCTTCTTTTATTGTCTAACAGAAAT  
ATTAATATGACCTGAACTCATTGCAATAATACAAATTTTAATTATCAA

>PGSC0003DMG400030159LRR-RLPs\_330

AGAAATATTAATATGACCTGAACTCATTGCAATAATACAAATTTTAATTATCAATTTAGATAAAACAACCTT  
ATGTATTAGCTAATACCTAAAACCTATTTAAATAATTTTTTCCATGCTTT

>PGSC0003DMG400030159LRR-RLPs\_396

ACTTTATGTATTAGCTAATACCTAAAACCTATTTAAATAATTTTTTCCATGCTTTGATTCACAAATAAGTCTA  
TTAAAATAAATAAAAAGAAATTGAATACGAACTTGTGTGATAAAAATA

>PGSC0003DMG400030159LRR-RLPs\_462

AGTCTATTAATAAATAAATAAAAAGAAATTGAATACGAACTTGTGTGATAAAAATAGGAGCAAGAACGTCA  
TTGCCGATACTCGACATAGAGACCAAACCCAAGTTTCAACCCATAAATC

>PGSC0003DMG400030159LRR-RLPs\_524

AACGTCATTGCCGATACTCGACATAGAGACCAAACCCAAGTTTCAACCCATAAATCTTCACAAAATA  
TATTTTGTGTTGTTGGATATTGCTTTTCCTTTTTGCGTGAGTCTTGGCG

>PGSC0003DMG400030159LRR-RLPs\_66

TATTGGGAGGAAGAGAGAAATGCTCTCTTGGAGCTCCAGGCAAACATAATGAATTCGAATGGTGAATT  
GTTGGTTGATTGGGCAGGATATAATGCGAATGGTTTTATAAATTGTTGTTTT

>PGSC0003DMG400030169-(rev)LRR-RLKs\_0

CTTTTCTTCTTCAAGAATTTAGGGTTTCTTCTCTCCACCGACGGGAGGCGTTATTTTCTCCTCTTCTCAC

AATTCTTCTCGAATTTCTTCTATATATAAGTGGGGTTCTCGTTCTTGA

>PGSC0003DMG400030169-(rev)LRR-RLKs\_122

CTTTTGATTTCTTATTCAAGCTGCTCGTATGGGTGAAAACGATTCAGAAAGCTCTGAAAGTGCCAAACCC

AAGAATGTATCTGAAAATTCCGACGGAGGTGATGAATTGACGGGTTTAGA

>PGSC0003DMG400030169-(rev)LRR-RLKs\_1403

CCAAAAGATATGCACAAAATTTGTAAAGTTGTTTATCGGGAGTTTAGACTTTAGCATTCTTCAAAGGGTA

TCAGGTTCTACTCTAGGACCATACTAAGTTCAACCAGGATATGATACGAT

>PGSC0003DMG400030169-(rev)LRR-RLKs\_1464

CAAAGGGTATCAGGTTCTACTCTAGGACCATACTAAGTTCAACCAGGATATGATACGATATTAGGATTA

GTCGATAGTACATAGCATAACTATCCCTTGTTAAGGGTCGTAAAGAGTGT

>PGSC0003DMG400030169-(rev)LRR-RLKs\_183

GCCAAACCCAAGAATGTATCTGAAAATTCCGACGGAGGTGATGAATTGACGGGTTTAGAGGAAGATTC

GAGCAAGATGGTTTCTGGGTTTGATTCAAGTTTTGATATTTTCGGGGAAAAGT

>PGSC0003DMG400030169-(rev)LRR-RLKs\_2074

GGAAAAAAGAAAAGGGAAAGTATATGAAGTGACTTTGTTTCGCTTGGAGTATGGAATATAGAATATGCT

GCCTCAAGGAGTTTGAGGTGCAAAGGTGTCCACACACTTCACACTTCAGAA

>PGSC0003DMG400030169-(rev)LRR-RLKs\_2135

ATATGCTGCCTCAAGGAGTTTGAGGTGCAAAGGTGTCCACACACTTCACACTTCAGAATTGCGAGCCT

GTTGCTGTCACATCTTTCCATCACAGTAGTATGTCCTATAGCTAATAGCAG

>PGSC0003DMG400030169-(rev)LRR-RLKs\_2196

GCGAGCCTGTTGCTGTCACATCTTTCCATCACAGTAGTATGTCCTATAGCTAATAGCAGATTAAGTGAAC

TTTTGCTTAGCATGTGTAATTTATCAGTTGTATATCATTGCTTAATGTTG

>PGSC0003DMG400030169-(rev)LRR-RLKs\_244

AAGATTGAGCAAGATGGTTTCTGGGTTTGATTCAAGTTTTGATATTTTCGGGGAAAAGTTTGGATTTTCC

ATTGTTGGAAGGTGTAGAAGGTGGGGTTGAAGGTTTGTATATGTATAAGA

>PGSC0003DMG400030169-(rev)LRR-RLKs\_2928

ATCCTTGGAGAATCTTGATCTCCTTTCAATGTATAATCTGCAGAGTCTCAATCTTCAGGTATGTGTTACTG

AAATTACAGTTTCTTTCTAGTCTTGTTGCTTTTAGGCTTTTTCTCTAGT

>PGSC0003DMG400030169-(rev)LRR-RLKs\_305

GGATTTCCATTGTTGGAAGGTGTAGAAGGTGGGGTTGAAGGTTTGTATATGTATAAGAATGTATTTAA  
TTTGATTCTAAGGCAATTGGTGCACCTGGGAAGGTTAAGATACTTAAATT

>PGSC0003DMG400030169-(rev)LRR-RLKs\_366

GTATTTAATTTGATTCTAAGGCAATTGGTGCACCTGGGAAGGTTAAGATACTTAAATTTTTGGGAATG  
AGGTTAATTTGTTTCCAACCTGGAGAGTTAAGGAATTTGGTTGAATTAGAG

>PGSC0003DMG400030169-(rev)LRR-RLKs\_427

TTGGGAATGAGGTTAATTTGTTTCCAACCTGGAGAGTTAAGGAATTTGGTTGAATTAGAGAGTTTGCAAG  
TGAAGGTATCATTTCCTGGGATGAGTGGATTGGATTGCAGAAGTTAAAGA

>PGSC0003DMG400030169-(rev)LRR-RLKs\_4575

GAACTATAGCAAGCCTTTTGTCTGCACATGCCCTACTGGAAATGATGACACTACCAGCATGGTCACAAAA  
GAGAGTCCTAGCATCTCAGAAGATATACTTTTCTTAATCTTTGTGAGAA

>PGSC0003DMG400030169-(rev)LRR-RLKs\_488

TTTGCAAGTGAAGGTATCATTTCCTGGGATGAGTGGATTGGATTGCAGAAGTTAAAGAATTTGAAAGA  
ATTGGAGCTATGTAAAGTTCCCTCTAGACCTTCAGCTTCCCACTTTTAAG

>PGSC0003DMG400030169-(rev)LRR-RLKs\_5246

AGTTTACCTGAGTTATGTCGGAATGAAAATGGCCAGATCACTGAGCTTGCTGTTTCTTTCAGGTATATTC  
CACTGAACCGGATAAATGTTCCCTGTTGTGCCAGATGCTAGTCCTGGTCAA

>PGSC0003DMG400030169-(rev)LRR-RLKs\_5368

TAGTTCTTTTCTTCTCTAACCGGTGCTGATAAAATTCATAAAGCTCCCTCCTCAACCCTCGTCCCGTGTA  
ATTGGGATCCCTTGAGACTCTGGCAAAGGTGTGGTTCCTGATTGCCTT

>PGSC0003DMG400030169-(rev)LRR-RLKs\_549

TTGAAAGAATTGGAGCTATGTAAAGTTCCCTCTAGACCTTCAGCTTCCCACTTTAAGAGATATTGCTGG  
TCTTAAGCGCCTGACTAAGCTCTCTGTCTGTCATTTTTCTATCAGGTTA

>PGSC0003DMG400030169-(rev)LRR-RLKs\_5734

CCTTTTGGACTTATTCTGCTATTCAGCTGGAATCCATTATATTGCAGGCTTATGCTTTTCATTTTGCAAATT  
TTTCATTTATCTGCTGATAAACTTGATTAATTAGTGACACGTATTAT

>PGSC0003DMG400030169-(rev)LRR-RLKs\_5795

TTTTGCAAATTTTTCATTTATCTGCTGATAAACTTGATTAATTAGTGACACGTATTATACCACTAGAATGT  
GGGAATTTTCTCGGCTAGCATCTTATTGACGAGGCATAGTTGATTT

>PGSC0003DMG400030169-(rev)LRR-RLKs\_5856

CACTAGAATGTGGGAATTTTTCTCGGCTAGCATCTTTATTGACGAGGCATAGTTGATTTTTTTTTAAATTT  
ATTCTGCTCAATTAACCTGAATTGAGCGGAATGAATATAAAAGAGTCAT

>PGSC0003DMG400030169-(rev)LRR-RLKs\_61

CTCTTCTTCACAATTCTTCTCGAATTTCTTCTATATATAAGTGGGGTTCTCGTTCTTGATCCTTTTGATTCT  
TATTCAAGCTGCTCGTATGGGTGAAAACGATTCAGAAAGCTCTGAAA

>PGSC0003DMG400030169-(rev)LRR-RLKs\_610

ATATTGCTGGTCTTAAGCGCCTGACTAAGCTCTCTGTCTGTCATTTTTCTATCAGGTTAGATCTGTTTCTC  
TTGCAATAATTCTATCTAAGTTTATTTACGCTAAACTCATGTTTACTA

>PGSC0003DMG400030169-(rev)LRR-RLKs\_6283

TAGAACTCTTCTCGTACCTGACTTTCCTCTCCTTTATTTCCCTTTGAGGTTGGAAGGGTATAAATA  
ACACCTGATTGCCTTTTGTATTCAGCTCATTACTTTCTTGTCCTTA

>PGSC0003DMG400030169-(rev)LRR-RLKs\_671

TCTGTTTCTTCTTGCAATAATTCTATCTAAGTTTATTTACGCTAAACTCATGTTTACTATAGACAAATTACCT  
GTAGTTGGCTGTCAGTTAACTTGATAACATAAAAATTTCTGACTTTGT

>PGSC0003DMG400030169-(rev)LRR-RLKs\_7076

ATATTTTGTCTGCTCTATTGCTGCACTGCTACTGATTAAAGAACAATAATATGTAATCATTGACAAATTCA  
AATTTTCACCTTACTTTCTTGGAATTTGTTTGTAAATTTCTCATT

>PGSC0003DMG400030169-(rev)LRR-RLKs\_7259

CGGCTAATCTCAGAGGATGTATCCTGTGGCAAAGGGGTTGGGGAATATTATCTTACTTCTTTGAAGT  
TGAAAAGGTCTCTAGGTTATAGATGAGTTGCTTCAAGGTAAAAGGTTTT

>PGSC0003DMG400030169-(rev)LRR-RLKs\_732

GACAAATTACCTGTAGTTGGCTGTCAGTTAACTTGATAACATAAAAATTTCTGACTTTGTCAATGTATAAAT  
ATTAACCAATTTCGATGATGTTTCTCTGTGAACTTGTCTATATTGTTGC

>PGSC0003DMG400030169-(rev)LRR-RLKs\_7320

CTTTGAAGTTGAAAAGGTCTCTAGGTTATAGATGAGTTGCTTCAAGGTAAAAGGTTTTTCTTGCTTTGA  
CTTTGCAGGTTCCCCGTTTCAATAGGTAGATGAAAGCTAAATAGGACCTA

>PGSC0003DMG400030169-(rev)LRR-RLKs\_7381

TTGCTTTGACTTTGCAGGTTCCCCGTTTCAATAGGTAGATGAAAGCTAAATAGGACCTAAAATAAGTCCA



CTATGGCCAAAAAATATCAGGAGGGGCGGGTGGATTATTTACCCCTTAAC

>PGSC0003DMG400030169-(rev)LRR-RLKs\_7442

ATAAGTCCACTATGGCCAAAAAATATCAGGAGGGGCGGGTGGATTATTTACCCCTTAACCCAAATTCAA

TAGATGGGTAAATTGGCTAGAATGGGTTATTGAACAACAAAAAAGTATTTA

>PGSC0003DMG400030169-(rev)LRR-RLKs\_793

ATGTATAAATATTAACCAATTCGATGATGTTTCTCTGTGAACCTGTCTATATTGTTGCACTAAATTCATGT

GCAGGTTGCAGCTCAATGTGCTTTTGGTGTATTGGAAGATTAGGTTG

>PGSC0003DMG400030169-(rev)LRR-RLKs\_7930

GGACTTCAGAAGTTCCAAAGTCCCCTGTTGGACAATCTTTATTATGGCTGCCCTTGTTGCTCAAAGGC

TAATGGTTCTAGCATCTTGGTTGTTGGATATTTCCGGAGCTCTCATGGTTT

>PGSC0003DMG400030169-(rev)LRR-RLKs\_8052

TTCTTATATTGCTTTCGTTCATAAGAACTGCCTGCAGAAGTACACTTGTCGCATGCACATTTAAAAAAA

ACAAGTTTTTGTGTTGAATTGCTTTAAATGGTAGAAAACAATGTAATTCA

>PGSC0003DMG400030169-(rev)LRR-RLKs\_8113

TTAAAAAAAACAAGTTTTTGTGTTGAATTGCTTTAAATGGTAGAAAACAATGTAATTCATGTTTAACACAT

GCAGGCGGGTAAACGGCCACAATTAACCGAAAAATTAGAGGCAATGGCT

>PGSC0003DMG400030169-(rev)LRR-RLKs\_854

TAAATTCATGTGCAGGTTGCAGCTCAATGTGCTTTTGGTGTATTGGAAGATTAGGTTGCATCTGCACTT

TTTCGCTTTTGTCTGCATTCCTTAAAGTAATTTGAATTTAATAGAACAAGT

>PGSC0003DMG400030169-(rev)LRR-RLKs\_8662

TTCTTTAGTCCTTTTCCAGCTTGTAGTTGTATACATTTGTACCCATCTAATGTATTCATCTTCACTAATTCCA

ATTGATGTTAATTATGAATGTATTCTGAGTTTCTAAGACTTGTTGGA

>PGSC0003DMG400030169-(rev)LRR-RLKs\_915

TCTGCACTTTTTCGCTTTTGTCTGCATTCCTTAAAGTAATTTGAATTTAATAGAACAAGTTTATTGCTAAACT

ATTGTTTTTACAAGTGCTAGCTGCTGCAACTATAAGCCCCAAGTTAAA

>PGSC0003DMG400030169-(rev)LRR-RLKs\_976

ATTGCTAAACTATTGTTTTTACAAGTGCTAGCTGCTGCAACTATAAGCCCCAAGTTAAATAGTATTAAGCA

GGGTACATGATCACACAACTTCCATTAATACAGGGGAAACTAGGTAGG

>PGSC0003DMG400030209-(rev)G-LecRK\_0

TTTTGATATTTTCTTTCAATTCAAATTAATAAACCAAACGCCCAATTCTTGGCCAAAAATGAAAATTCAA  
CTCAGAAGGAGGCCAAAGTAGAAAAGTAAAGTCAAAGTCGACACTTCTT

>PGSC0003DMG400030209-(rev)G-LecRK\_2013

CACATACCTTCACGAGGAATGCCGAGATTGTATAGTTCATTGTGACATAAAGCCTGAGAACATACTATTG  
GATGAGAACTACGTTGCCAAAGTATCAGATTTTGGCCTCGCCAAGCTCAT

>PGSC0003DMG400030209-(rev)G-LecRK\_2379

GGACAAAAAGCTTTCCAATCAGGAGATGGATATGGAACAAGTTATGCGAGCAATTCAGGTGAGCTTCTG  
GTGCATTCAAGAGCAACCATCTCAAAGGCCAACGATGGGCAAGGTGGTTCA

>PGSC0003DMG400030209-(rev)G-LecRK\_2501

TGTTAGAAGGCGTTTTTGAGATTGATCGGCCACCAGCACCTAAGGCTACTGAAGGGTCTTTGCTGGAA  
CCAGCTTAAACACCAGTAGCACAAGCGGTCTCTCCACCTTTGCAGCCTCGG

>PGSC0003DMG400030209-(rev)G-LecRK\_2562

TGCTGGAACCAGCTTAAACACCAGTAGCACAAGCGGTCTCTCCACCTTTGCAGCCTCGGCCCCAGCTCCC  
TCTTCATCATCATCATTCCAAACGGCAGGATTCCAGTCTTCAGCTTCTGC

>PGSC0003DMG400030209-(rev)G-LecRK\_2623

CCAGCTCCCTCTTCATCATCATCATTCCAAACGGCAGGATTCCAGTCTTCAGCTTCTGCAAAGAATGTCSA  
TAGGCAATCATCATCACTTCTACACTCCGAAATTAAGTGAGTCTAAACC

>PGSC0003DMG400030209-(rev)G-LecRK\_2684

AGAATGTCGATAGGCAATCATCATCACTTCTACACTCCGAAATTAAGTGAGTCTAAACCATACTTTAG  
ATTCCCTACAAGAACTGATGGGAGGTTTAGTATCTCAAAGATCATTGTTT

>PGSC0003DMG400030209-(rev)G-LecRK\_2745

ACACTTTAGATTCCCTACAAGAACTGATGGGAGGTTTAGTATCTCAAAGATCATTGTTTGACTTGTGTCTT  
ACAATTCATATTGTATAATAGATAGGGTTTGCATATATATTGATATGTT

>PGSC0003DMG400030209-(rev)G-LecRK\_2806

CTTGTGTCTTACAATTCATATTGTATAATAGATAGGGTTTGCATATATATTGATATGTTTCATATTAGAAA  
ATACCACTCACTTATTTTCCATATCCTATTATTCACCAGAATTCGACGA

>PGSC0003DMG400030209-(rev)G-LecRK\_2867

ATATTAGAAAATACCACTCACTTATTTTCCATATCCTATTATTCACCAGAATTCGACGACTCTGTCCTGTCC  
TGTTTGTGGTGCTTGTCCATTTCTTTTGATAATGAAGCTAGGGGTGT

>PGSC0003DMG400030209-(rev)G-LecRK\_2928

CTGTCCTGTCCTGTTTGTGGTGCTTGTCCCATTTCTTTTGATAATGAAGCTAGGGGTGTGCATCAGTCTGG  
TTCGATTTTATGTATTATTAGTTTCGATTTATCGATTTTCGGGTTGGGGA

>PGSC0003DMG400030209-(rev)G-LecRK\_2978

TAGGGGTGTGCATCAGTCTGGTTCGATTTTATGTATTATTAGTTTCGATTTATCGATTTTCGGGTTGGGGA  
TGATTTGGTCAGGGGGTTGATGTGAACTAGAAACATGGCTATAAAATAAT

>PGSC0003DMG400030209-(rev)G-LecRK\_61

GAAAATTCAACTCAGAAGGAGGCCAAAGTAGAAAAGTAAAGTCAAAGTCGACACTTCTTCTCCACCT  
TCCCCTGTTTTCTCCACCTCCACAACAATGGCACACAACCTCATAAATCCAC

>PGSC0003DMG400030209-(rev)G-LecRK\_671

GACAGAATTTCACTAATAATCATGTTTTGAGATCTGGGTTGTATTCTTTTAGCCTTATGAATAATGGGAAC  
TTGTCACTTTTGTGGAATGGTTCTATAGTGTATTATAATTCTGGGTTGA

>PGSC0003DMG400030209-(rev)G-LecRK\_732

TAATGGGAACTTGTCACTTTTGTGGAATGGTTCTATAGTGTATTATAATTCTGGGTTGAATTCTTCTGTAA  
ATGTTAACTTGCTTCGCCTAGTTTGGGAATGCAGCCTATTGGGATTCT

>PGSC0003DMG400030209-(rev)G-LecRK\_793

TCTTCTGTAAATGTTAACTTGTCTTCGCCTAGTTTGGGAATGCAGCCTATTGGGATTCTTTCACTTTCTGAT  
CCTAGTCTTTTGAACCCTGTGAATGTTGTTTATAGTAGTGATTATGCT

>PGSC0003DMG400030209-(rev)G-LecRK\_854

CACTTTCTGATCCTAGTCTTTTGAACCCTGTGAATGTTGTTTATAGTAGTGATTATGCTGATGAAGGGAAC  
ATTTTAAGGTTTTTCAAGCTGGATAATGATGGAAATCTTAGGATTATA

>PGSC0003DMG400030225G-LecRK\_1178

AATCTGAAAACCTAGTTTTTCATCGTTCCCTTTCATCATGGAAGAGCACAAATGATCCTTCCATAGGTGAGTT  
TACCTGGACATTCGATACTGGTGGATTCTGCAAACATTCATTATGAAT

>PGSC0003DMG400030225G-LecRK\_1240

AGGTGAGTTTACCTGGACATTCGATACTGGTGGATTCTGCAAACATTCATTATGAATGGTTTCATTGAA  
CTCTACAGAGTTAGACCATGGAATGTCCGAGTCTTTCCTAATGCACCATC

>PGSC0003DMG400030225G-LecRK\_1302

TCATTGAACTCTACAGAGTTAGACCATGGAATGTCCGAGTCTTTCCTAATGCACCATCTCATGACATATCT

TGGAATGGTTATAACTATACATACTTATCTAATCCTAATGAAATATTAT

>PGSC0003DMG400030225G-LecRK\_1364

GACATATCTTGGGAATGGTTATAACTATACATACTTATCTAATCCTAATGAAATATTATTAATGTATGAACT

GACATGTAGCTCTATCATTGCAAGGGTAGTGATGCAACTAAATAGATAA

>PGSC0003DMG400030225G-LecRK\_186

TATTCTGACTATTTGGCCTCTGCTGGTAAATACCTCAAGTGTCTTCTGGTTCTGTTTCTCCGAATGAGCTT

CTCTCATTCTCTAAGTCTCATGTAGAAATTTAACTTTGATAGAGTGC

>PGSC0003DMG400030225G-LecRK\_248

GAATGAGCTTCTCTCATTCTCTAAGTCTCATGTAGAAATTTAACTTTGATAGAGTGCTACAAGCCTGTAT

TATGACGATTCATCATAAATTAAGCATGGAACTAGCAATGTGTTCTTG

>PGSC0003DMG400030225G-LecRK\_434

ACAAGTTACATGGTGGGATATGGAAACAATAACCCAAGACAGGTACACCACAGAGCCTCCTCCATTGTC

TCGTTTAAGGTTAATCCTAGTTTTGTTATCTTTTCGGGCAGGCTATCCTACC

>PGSC0003DMG400030225G-LecRK\_496

CATTGTCTCGTTTAAGGTTAATCCTAGTTTTGTTATCTTTTCGGGCAGGCTATCCTACCTGTTATAGTAGAA

AGGCGAGTGATCCTAATCTCCTTACTGGTGCTCTTATTGGTGGACCTGA

>PGSC0003DMG400030225G-LecRK\_558

ATAGTAGAAAGGCGAGTGATCCTAATCTCCTTACTGGTGCTCTTATTGGTGGACCTGATGCCTATGACAA

CTTTACTGATCAAAGAGATAACTATGAGCAAACCTGAGCCTGCCACTTACA

>PGSC0003DMG400030225G-LecRK\_62

CTTTATGTGTTTCATGTCTTGCAAAGGGTGACAGAAATACCCAGAAAACCTCCTGGAGGTCTCATCTATAGG

CAAAGATGGAACAATATGTATTTGTTACTAGTGCTGCATTCCTTGGCAC

>PGSC0003DMG400030225G-LecRK\_682

TGCTCCGTTGATCGGTGTGTTGACAAGACTTCATGCTGGTCACAACGGTTACAATCATCTCCTCCCAGGT

ACATTTTAGTGAATTAACATCTTTATATGAGTATTTTGAGGATTCATCAT

>PGSC0003DMG400030225G-LecRK\_744

TCCCAGGTACATTTTAGTGAATTAACATCTTTATATGAGTATTTTGAGGATTCATCATAAAATGACTAGTT

TTAGCTAGCCATCCACCTACTACAACCTTGCTTGGGATTGAGACGTAGTA

>PGSC0003DMG400030225G-LecRK\_806

TGACTAGTTTTAGCTAGCCATCCACCTACTACAACCTTGCTTGGGATTGAGACGTAGTAGTTGTTGTAGTA  
CTAAATTATTCGTATAACTCATTAGTCTCAAGTTCTAACCTGTAATGGA

>PGSC0003DMG400030225G-LecRK\_868

TTGTAGTACTAAATTATTCGTATAACTCATTAGTCTCAAGTTCTAACCTGTAATGGAGAAAATCCACTCA  
ATGACACATCCAGTGCGCTAAATTTACCAGACAAGGAATTCTTACTCT

>PGSC0003DMG400030239-(rev)LRR-RLPs\_122

AATTAGTAGTGGACTGAACATTTTAAGAGAACTAAAATATAAATAAACATAAAAATTAGGCAAATAAG  
TTCAACCTGTAATGTAGTCATAAATAAAAATTATATTTATAAAAATGCAATT

>PGSC0003DMG400030239-(rev)LRR-RLPs\_1281

GAGAATAAGCAAACATCAAATCCATACGTGAGCCAGTGGCTTAATGAGCTTCGAGATGCTGTGGACAGT  
GCTGAGAACTTAATTGAAGAAGTCAATTATGAAGTTTTGAGACTAAAGGTA

>PGSC0003DMG400030239-(rev)LRR-RLPs\_1342

TGGACAGTGCTGAGAACTTAATTGAAGAAGTCAATTATGAAGTTTTGAGACTAAAGGTAGAAGGTCAGT  
GTCAAAATCTTGGAGAAACAAGCAACCCACAGGTAAGTCACCTCAGCTTGT

>PGSC0003DMG400030239-(rev)LRR-RLPs\_1403

AGGTCAGTGTCAAATCTTGGAGAAACAAGCAACCCACAGGTAAGTCACCTCAGCTTGTCTTGAGTGA  
TGAATTTTTCTTAACATAAAGGATAAGTTGGAAGAAAATATTGAAACATT

>PGSC0003DMG400030239-(rev)LRR-RLPs\_1464

TTGAGTGATGAATTTTTCTTAACATAAAGGATAAGTTGGAAGAAAATATTGAAACATTGGAGGAGTTG  
CAAAGCAAATTGGTTGTCTTGACCTGAAATCGTGTCTTGATTTCGGGTAAA

>PGSC0003DMG400030239-(rev)LRR-RLPs\_2196

ATTGCAGAGAAATGCAAAGGATTGCCTTTAGCTATAAAGACCCTTGCTGGGATGTTACGCTCAAATCA  
ACAATTGAAGAGCGGAAACGCATTTTGAGAAGTGAATATGGGAGCTTCCA

>PGSC0003DMG400030239-(rev)LRR-RLPs\_2318

CAATGGAATCTTACCAGCATTGATGTTAAGCTACAATGAGCTTCCCCACATTTGAAGCGATGCTTTTCCT  
ATTGCGCAATTTTTCAAAGATTATCAATTTTACAGAGAACAAATCAT

>PGSC0003DMG400030239-(rev)LRR-RLPs\_2379

TGCTTTTCCTATTGCGCAATTTTTCAAAGATTATCAATTTTACAGAGAACAAATCATTCAACTGTGGAT  
TGCTAATGGTCTAGTTCAGAAGTTGCAAAAAGATGAAACGGTTGAAGAA

>PGSC0003DMG400030239-(rev)LRR-RLPs\_2440

AACTGTGGATTGCTAATGGTCTAGTTCAGAAGTTGCAAAAAGATGAAACGGTTGAAGAACTAGGCAACT  
AGTACATTCTCGAGTTGAGATCAAGATCATTGTTAGACAGGGTCCCTGATT

>PGSC0003DMG400030239-(rev)LRR-RLPs\_2623

CTTCAAAACACTGTACCAGGTTGGAAGACATCGAAGGATCTCATATGTTGGAACGAACTCGACACTTGT  
CATATATCACGGGTGATAGTAACCTTTTGTCAATTTTCAGGAGGAGATGGTG

>PGSC0003DMG400030239-(rev)LRR-RLPs\_2684

ACACTTGTCATATATCACGGGTGATAGTAACCTTTTGTCAATTTTCAGGAGGAGATGGTGATTTTGGTAAA  
TTGAAAACCCTCCACAAATTGGAGCAATTAAGGACATTGCTTCCGATAAA

>PGSC0003DMG400030239-(rev)LRR-RLPs\_2745

TTTGGTAAATTGAAAACCCTCCACAAATTGGAGCAATTAAGGACATTGCTTCCGATAAATTTCCAGCACC  
ATTGGTGTTTCAGTTAATCTAAGCAAGAGGGTGCTGCATAACATACTTCCA

>PGSC0003DMG400030239-(rev)LRR-RLPs\_2806

TCCAGCACCATTGGTGTTTCAGTTAATCTAAGCAAGAGGGTGCTGCATAACATACTTCCAAGACTAACATT  
CTTAAGGGCATTGTCATTTTCTGGTTATTACATCAAGGATGTACCGAATG

>PGSC0003DMG400030239-(rev)LRR-RLPs\_2867

ACTAACATTCTTAAGGGCATTGTCATTTTCTGGTTATTACATCAAGGATGTACCGAATGACTTATTTATCA  
AATTAAAACTCCTAAGATTTTTGGACCTTTCTTGGACACATATAAAACA

>PGSC0003DMG400030239-(rev)LRR-RLPs\_3111

CACTGTTCTCGGTTGAAGATGCCGCTACATCCTAGCAAGTTGAAAAGCCTCCAGGTGCTATTAGGAGTTA  
CATGTCTTCCAAGTGTTTGAAGACTCAAAGATTTGGGTGAACAATGCAAC

>PGSC0003DMG400030239-(rev)LRR-RLPs\_3172

TAGGAGTTACATGTCTTCCAAGTGGTTTGAAGACTCAAAGATTTGGGTGAACAATGCAACTTGTATGGATC  
TCTATCAATTGTAGAGTTGCGAAATGTGGTTGATAGAAGGGAAGCTCTGA

>PGSC0003DMG400030239-(rev)LRR-RLPs\_3355

CTGAGAATTCACAACTGAAAGAGACATACTCGATGAACTACAACCAAACACAAACATACAAGACCTGG  
AAATCTCTGGATATAGAGGGACAAAATTTTCGAACTGGCTGGCTGATTATT

>PGSC0003DMG400030239-(rev)LRR-RLPs\_3416

AGACCTGGAAATCTCTGGATATAGAGGGACAAAATTTTCGAACTGGCTGGCTGATTATTCCTATCTTAAG

CTGGAGACGTTGTCTCTTAGCCACTGCAACAACCTGTGATTCCCTTGCCAGC

>PGSC0003DMG400030239-(rev)LRR-RLPs\_3477

TATCTTAAGCTGGAGACGTTGTCTCTTAGCCACTGCAACAACCTGTGATTCCCTTGCCAGCACTAGGACAAC

TTCCATCTTTGAAAGTCCTCACCATTGGGTATATAGATCGAATAACAGAG

>PGSC0003DMG400030239-(rev)LRR-RLPs\_3538

TAGGACAACCTCCATCTTTGAAAGTCCTCACCATTGGGTATATAGATCGAATAACAGAGGTGACCGAAG

AATTCTATGGTAGCCCATCTTCAATAAAGCCATTTAACTCTCTGGAATTGC

>PGSC0003DMG400030239-(rev)LRR-RLPs\_3599

GACCGAAGAATTCTATGGTAGCCCATCTTCAATAAAGCCATTTAACTCTCTGGAATTGCTTGGATTTAATC

GGATGAACGGGTGGAAGCAATGGCATGTACTAGGAAGAGGAGAGTTCCC

>PGSC0003DMG400030239-(rev)LRR-RLPs\_3721

CACTTCAGAACCTTTCAATTGAAGGCTGTCCAAGTTGATGGGGAAGTTGCCTGGAAATCTTTGTTCTTT

GACCGGATTGTCAATTTAGATTGTCCGAAATTCATTTTGGAGACACCTA

>PGSC0003DMG400030239-(rev)LRR-RLPs\_3782

TTGTTCTTTGACCGGATTGTCAATTTAGATTGTCCGAAATTCATTTTGGAGACACCTATCCAACCTTCAA

ATCTAAAAGGTTTAAAGTTGCTGGTTCTTTAAAGGTTGGAGTTCTTTT

>PGSC0003DMG400030239-(rev)LRR-RLPs\_3843

CAACTTTCAAATCTAAAAGGTTTAAAGTTGCTGGTTCTTTAAAGGTTGGAGTTCTTTTTGATCATGCTGA

GCTATTTGCATCCCAACTTCAAGGAATGATGCAGCTAGAGTCATTAATT

>PGSC0003DMG400030239-(rev)LRR-RLPs\_3904

ATCATGCTGAGCTATTTGCATCCCAACTTCAAGGAATGATGCAGCTAGAGTCATTAATTATCAGTTGGTG

TTACGGTCTTACCTCCTTGCATATTAGCAGTCTGTCGAAAACCTTGAAGA

>PGSC0003DMG400030239-(rev)LRR-RLPs\_3965

CAGTTGGTGTTACGGTCTTACCTCCTTGCATATTAGCAGTCTGTCGAAAACCTTGAAGAAAATAAAAATA

GATTATTGTCAGAAATTGAAATTGGAGCCGTCAGCTAGTGAGATGTTTCT

>PGSC0003DMG400030239-(rev)LRR-RLPs\_4026

ATAAAAATAGATTATTGTCAGAAATTGAAATTGGAGCCGTCAGCTAGTGAGATGTTTCTCGAGAGACTG

GAACTAAGTGGATGTAATTCTATAAATGATATATCACCTGAGTTGGTCCCA

>PGSC0003DMG400030239-(rev)LRR-RLPs\_4148

AGCACACTATTTGAGTGTAATAGGTGCCATAGCCTCACTAGGCTTTTGATTCTACTGGGACTGAAGAT  
CTCCGTATTTCTGAATGTGAAAGTCTTGAAATACTTTTGGTGGCATCCAG

>PGSC0003DMG400030239-(rev)LRR-RLPs\_4209

ACTGAAGATCTCCGTATTTCTGAATGTGAAAGTCTTGAAATACTTTTGGTGGCATCCAGGACTCCAACGT  
TGTTGCGAAAAATGAAAATTCACCGCTGTGAGAAGCTGAAGTCGCTGCCA

>PGSC0003DMG400030239-(rev)LRR-RLPs\_4270

CTCCAACGTTGTTGCGAAAAATGAAAATTCACCGCTGTGAGAAGCTGAAGTCGCTGCCAGAACATATGC  
AAAAACTTCTCCATCTCTTAGTCATCTCTTCCTGCAATCTTGCCAGAAA

>PGSC0003DMG400030239-(rev)LRR-RLPs\_4331

ACATATGCAAAAACCTTCTCCATCTCTTAGTCATCTCTTCCTGCAATCTTGCCAGAAATAAAGTCCTTCCC  
TGAAGGAGGGTTGCCCTTCAGTCTAGAATTCCTTGAGATCGAATTTTG

>PGSC0003DMG400030239-(rev)LRR-RLPs\_4453

ATAAACTGGAGAATGATCGAAAGGAGTGGCATTACAGAGACTCCCTTGTCTCAGAAAACCTCACATCC  
TCCATGATGGTTCTGATGAAGGGATTCAATGGGAGTTGCCTTGCTCTATTC

>PGSC0003DMG400030239-(rev)LRR-RLPs\_4514

TCACATCCTCCATGATGGTTCTGATGAAGGGATTCAATGGGAGTTGCCTTGCTCTATTCGAAAGCTGTTG  
GTTAGATTTATGACAGCTAGGATTAGAGCAGTTCACAAGATAATTATTCT

>PGSC0003DMG400030239-(rev)LRR-RLPs\_4575

AAGCTGTTGGTTAGATTTATGACAGCTAGGATTAGAGCAGTTCACAAGATAATTATTCTAGAATCAGTTA  
GAAGGTTAGAAAGTTGTTAGAGTTAGTTAGCACAGTAACTTTTCTTTATA

>PGSC0003DMG400030239-(rev)LRR-RLPs\_4636

AATCAGTTAGAAGGTTAGAAAGTTGTTAGAGTTAGTTAGCACAGTAACTTTTCTTTATATAGACATAGCA  
TTGTAAAGATATTTTTAAGATGCTTTTCTAGCTTAATGAGAATTAGTTCTCT

>PGSC0003DMG400030239-(rev)LRR-RLPs\_4697

GACATAGCATTGTAAAGATATTTTTAAGATGCTTTTCTAGCTTAATGAGAATTAGTTCTCTTTCTTCTATAATT  
CTCTCTGTATCTTCTTACTTCTGATCCTTTTTGCATCTTCTAGATGG

>PGSC0003DMG400030239-(rev)LRR-RLPs\_4758

CTTCTATAATTCTCTCTGTATCTTCTTACTTCTGATCCTTTTTGCATCTTCTAGATGGTGATTACTCCATAA  
GTTTACATGGTATCAGAGCCTGAGTGTTTCGAGCAGGAGTTCATCATC



>PGSC0003DMG400030239-(rev)LRR-RLPs\_4819

ATTACTCCATAAGTTTACATGGTATCAGAGCCTGAGTGTTTCGAGCAGGAGTTCATCATCAATTTGTGGTT  
TTATCAACTTGTAGTTGTTTCATCTTTGTAGTGATTTTTTGTGATTTGCT

>PGSC0003DMG400030239-(rev)LRR-RLPs\_4880

TTTGTGGTTTTATCAACTTGTAGTTGTTTCATCTTTGTAGTGATTTTTTGTGATTTGCTTATTACTGTTCCCT  
TTAGAGCTTCGATCTATAATCCATGGCGATTGATGAGTCCAATGATG

>PGSC0003DMG400030239-(rev)LRR-RLPs\_5673

AGTCCAAAACCTTGATATTAATGAAGGAGCTGTTTTCTATACAAGCAAAGGAAATTTTAAGCCTAATCTC  
GGAGGAGGAGGAGTCCAATTTAGGCCAACTTCTAGTCAAGGTCATACTGG

>PGSC0003DMG400030239-(rev)LRR-RLPs\_61

ATAGGCTTGCTCCTAAGGGTGAGCTGTTCAAGGTGTTTCGGAAGCATAATTAATAATATGTAATTAGTA  
GTGGACTGAACATTTTAAGAGAACTAAAATATAAATAAACATAAAAATTA

>PGSC0003DMG400030239-(rev)LRR-RLPs\_732

AAAATAATCCTCAATTAAGTATTTTATCCATCACAGCAAACGACCCCTTTCTTATCCTCTCTTGCTTCAAT  
TATTCAAGGCATTGAGAGAGTAATGAATAGTCTTTGTCATCTTGTTGG

>PGSC0003DMG400030239-(rev)LRR-RLPs\_854

GAAAAGTCATACTTTCGGAAAAGAGAAAAAAGGGACAATAGTTAATAGTAGCAGACATAGTTGTACCA  
GTTACAAGTAAAACCACTAGCAAGAGAGAGAGAGAGAGAAATCAGTGATCAT

>PGSC0003DMG400030239-(rev)LRR-RLPs\_915

TGTACCAGTTACAAGTAAAACCACTAGCAAGAGAGAGAGAGAGAGAGAAATCAGTGATCATTATAGTTGC  
AAATTACTCTTTATCATTCAACAGGTAAAATAAAGCTCTTAGCAAAGAAAC

>PGSC0003DMG400030239-(rev)LRR-RLPs\_976

ATAGTTGCAAATTACTCTTTATCATTCAACAGGTAAAATAAAGCTCTTAGCAAAGAAACAGTAATCTTCTC  
CAAATTCTTATAATCATTTTGTGGTTTCCTGTTTTTGTCTTGCAGATTT

>PGSC0003DMG400030240-(rev)LRR-RLPs\_0

ATGTTGTCTCTTAGCCACTGCAACAACACTGTGATTCCTTGCCAGCACTAGGACAACCTCCTTCTTTGAAATC  
CCTCACCATTGAGTATATGGATCGAATAACAGAGGTGACCGAAGAATTC

>PGSC0003DMG400030240-(rev)LRR-RLPs\_1054

ATTGGGAGTTGCCTTGCTCAATTAATCGCTTTGCATATCCAATATGAAAACATTAAGCAGCCAACCTTCTC

AAAAGCCTCACCTCTCTTGAATCTCTATCCATTGCTAATTTACCTCAA

>PGSC0003DMG400030240-(rev)LRR-RLPs\_1178

GTCACTGATCGAAGAAGGGCTTCCCTTGTCTCTTTCTTCACTAAAATTAAGACACCATGATGAGCTCCATT

CACTGTCAACTGAAGGTCTTCAGGGCCTCACTTCTCTTAGGCGTCTAGA

>PGSC0003DMG400030240-(rev)LRR-RLPs\_124

GTAGCCCATCTTCAATAAAGCCATTTAACTCTCTGGAATGGCTTGAATTTAATTGGATGAACGGGTGGAA

GCAATGGCAGTACTAGGAAGTGGAGAGTTCCTGCACCTCAGATCCTTT

>PGSC0003DMG400030240-(rev)LRR-RLPs\_1240

AGCTCCATTCACTGTCAACTGAAGGTCTTCAGGGCCTCACTTCTCTTAGGCGTCTAGAGATTAGCTCCTGC

GTTCAACTCCAATCTCTTCCAGAATCAGCGCTTCCCTCCTCCCTCTCTA

>PGSC0003DMG400030240-(rev)LRR-RLPs\_1302

AGTCCTGCGTTCAACTCCAATCTCTTCCAGAATCAGCGCTTCCCTCCTCCCTCTCTAAGCTGACCATCCAT

TCTTGTCTAAACTCCAACACCTTCCAGAAAAAGGGATGCCCTCTGCC

>PGSC0003DMG400030240-(rev)LRR-RLPs\_1364

GACCATCCATTCTTGTCTAAACTCCAACACCTTCCAGAAAAAGGGATGCCCTCTGCCCTCTCTAAACTAT

CTATTACACACTGCCATTGCTCAGTCCATGTCTAGAATTTATGAAGGG

>PGSC0003DMG400030240-(rev)LRR-RLPs\_1425

TCTAAACTATCTATTACACACTGCCATTGCTCAGTCCATGTCTAGAATTTATGAAGGGGAATACTGGC

CAATATTGCTCATATTTCCACTATAGAGATCAATGGGGAATGCCTGTGA

>PGSC0003DMG400030240-(rev)LRR-RLPs\_248

TAACAACTGTCCCAAGTTGATGGGGAAATTGCCTGGAAATCTTTGTTCTTTGACAGGATTGACAATTTCA

AATTGTCCGGAATTTATTTTGGAGACACCTATCCAACCTTCAAGTCTAAA

>PGSC0003DMG400030240-(rev)LRR-RLPs\_310

CAATTTCAAATTGTCCGGAATTTATTTTGGAGACACCTATCCAACCTTCAAGTCTAAAATGGTTAAAGTT

TTCGGTCTTTAAAGGTTGGGGTCTTTTTGATCACGCTGAGCTATTTG

>PGSC0003DMG400030240-(rev)LRR-RLPs\_434

CCAACCTCAAGGAATGACGCAGCTAGAGTCATTAATTATCAGAAGTTGTCACCTCTTACCTCCTTTCATA

TTAGCAGTCTGCCGAAAACCTTGAAGAAAATAGAGATATCTGATTGTGA

>PGSC0003DMG400030240-(rev)LRR-RLPs\_496

CCTTTCATATTAGCAGTCTGCCGAAAACCTTGAAGAAAATAGAGATATCTGATTGTGATCAATTGAAATT  
GGAGCCGTCAGCTAGTGAGATGTTTCTCAAGAGTCTGGTACTAACTGAAT

>PGSC0003DMG400030240-(rev)LRR-RLPs\_558

TTGAAATTGGAGCCGTCAGCTAGTGAGATGTTTCTCAAGAGTCTGGTACTAACTGAATGTAATTCTATGA  
ATGAGATATCACCTGAGCTGGTCCCAAGAGCACACTATTTGAGTGTAAT

>PGSC0003DMG400030240-(rev)LRR-RLPs\_682

GCCACAGCCTTACTAGGCTTTTGATTCTACTGGGACTGAAGATCTCCATATTTCTGGATGTGAAAATCTT  
GAAATGCTTTTGGTGGCATCCAGGACTCCAACGTTGCGAAATTTGCATA

>PGSC0003DMG400030240-(rev)LRR-RLPs\_744

GAAAATCTTGAAATGCTTTTGGTGGCATCCAGGACTCCAACGTTGCGAAATTTGCATATTCACAGCTGCA  
AGAAGCTGAAGTCGCTGCCAAAACATATGCAGGAACTTCTTCATCTCTT

>PGSC0003DMG400030240-(rev)LRR-RLPs\_806

CAGCTGCAAGAAGCTGAAGTCGCTGCCAAAACATATGCAGGAACTTCTTCATCTCTTAATTATCTCAAC  
CTGTATGATTGTCCAGAAATAAAGTCCTTCCCTGAAGGAGGCTTGCCTTT

>PGSC0003DMG400030240-(rev)LRR-RLPs\_930

CTAGAAGTCCTTCAGATCTGGAATTGTGAGAACTGGAGAATGATCGAAAGGAGTGGCATTACAGAG  
ACTCCCTTGCCTCAGAGAACTTAAAATCTTCATCATTCTACTGACGAAGAG

>PGSC0003DMG400030240-(rev)LRR-RLPs\_992

ACAGAGACTCCCTTGCCTCAGAGAACTTAAAATCTTCATCATTCTACTGACGAAGAGATTGATTGGGAG  
TTGCCTTGCTCAATTAATCGCTTTGCATATCCAATATGAAAACATTAAG

>PGSC0003DMG400030291RLKWAX-EGF\_1054

CATTCTAATGTCGAAATGATGGAGCAGACGTTGGTGGTTGAATTTTTAGTTAAACCATTACAAAATTTTTC  
TTGCTTATATGTGATGGTTGTACACAGGGCTTATCATTGTGCCAAGAGT

>PGSC0003DMG400030291RLKWAX-EGF\_1116

AAATTTTTCTTGCTTATATGTGATGGTTGTACACAGGGCTTATCATTGTGCCAAGAGTCATTCTATTCCA  
TGCATACTTGATTTCTAATGATTGAGTTACGAAGAAGGCATTTGTCGA

>PGSC0003DMG400030291RLKWAX-EGF\_1178

CTATTTCCATGCATACTTGTATTTCTAATGATTGAGTTACGAAGAAGGCATTTGTCGATTTATGATGCAAT  
TGAAAGTTTCTGCACGGTGAGAACATTTTCGCCCCATTAGATATTCC

>PGSC0003DMG400030291RLKWAX-EGF\_124

AAAATTATGAATTGATCTGTAAAGGAGATCACACCATATTAACAATACCGCCATATGATTGGCACGGAAC  
ACTGAACTACTATGTTCAAGCCATCAATTACGATAACTCCACTATCCGCC

>PGSC0003DMG400030291RLKWAX-EGF\_1240

TGATGCAATTGAAAGTTTCTGCACGGTGAGAACATTTTCGCCCCATTAGATATCCAACTCCAACATTA  
GAAAGATGACTAGGAACTTTAAAGAGAACTAGGCCAAGGAGGTTATGG

>PGSC0003DMG400030291RLKWAX-EGF\_248

TGATCCTGGTATAAGAGAACAAGTTATTTGCTCTCTCCTCAGAATTCGATTTTCAGTTTACACTTCCCTTTT  
TTATTTTGTTTCTTTTATAGAATTAATGCCTGGTTTTGTTAAGTTAAT

>PGSC0003DMG400030291RLKWAX-EGF\_3046

AATTTAGTTGTATTAAGGTGAAGAAAACATGATATGACACAACCCAAAATTAATTAACATAGAAAAGTT  
TTCTTCATGACTCATTAAATATCAAGAAAAATTGGTTTGTAAGTTGTCTT

>PGSC0003DMG400030291RLKWAX-EGF\_310

CTTCCCTTTTTTATTTTGTTTCTTTTATAGAATTAATGCCTGGTTTTGTTAAGTTAATCACTCTCTTCAGCTG  
TCCATTTGCCATAAATTCTCCAGTCTTTGTGGAAATCACTAATTGTC

>PGSC0003DMG400030291RLKWAX-EGF\_3108

GAAAAGTTTTCTTCATGACTCATTAAATATCAAGAAAAATTGGTTTGTAAGTTGTCTTCTTTATTATTATTA  
TTATATTAGCAAATTTCCAATATTGTGTTGAATATGCTAATATTACGA

>PGSC0003DMG400030291RLKWAX-EGF\_3170

ATTATTATTATTATATTAGCAAATTTCCAATATTGTGTTGAATATGCTAATATTACGAACCCCCCCCCCCT  
TTATTTTTTCCACATGTTATTGTTCCAATATTTTTTATATCAATCTTT

>PGSC0003DMG400030291RLKWAX-EGF\_3232

CCCCCCCCCTTTATTTTTTCCACATGTTATTGTTCCAATATTTTTTATATCAATCTTTAATTTGGTATCATATT  
ATTTTTTGGCCAATTAATGACAAAGAAGACTTTAAGTCAACTAATG

>PGSC0003DMG400030291RLKWAX-EGF\_3294

TGGTATCATATTATTTTTTGGCCAATTAATGACAAAGAAGACTTTAAGTCAACTAATGGCATAGAATTCTT  
TATCTTGAAAGTGTTGCCACTACTTAGTCAAGGAGTCCAAATAAAGAAG

>PGSC0003DMG400030291RLKWAX-EGF\_3356

AGAATTCTTTATCTTGAAAGTGTTGCCACTACTTAGTCAAGGAGTCCAAATAAAGAAGTGATTTTAACTT

ACATTAAAAAAATAAAATCATGTGGTGTCTAATTTTGTGTCCCATTT

>PGSC0003DMG400030291RLKWAX-EGF\_3418

TTTAACCTTACATTAATAAAATAAAATCATGTGGTGTCTAATTTTGTGTCCCATTTAAGTAACATTTGTT

ATAAAAATTACACGAATATTTAGTCATGGCTGAAATTTTAACGAATTT

>PGSC0003DMG400030291RLKWAX-EGF\_3480

AACATTTGTTATAAAAATTACACGAATATTTAGTCATGGCTGAAATTTTAACGAATTTTAATTTGTGTTTT

AGATATGTATAATTGAGCATAGATTTATATATATTTTTTAAATAATCA

>PGSC0003DMG400030291RLKWAX-EGF\_3542

TTGTGTTTTAGATATGTATAATTGAGCATAGATTTATATATATTTTTTAAATAATCAAAAGGGTGGTACA

TGGAATAGGGTTAGGAGTTGAGTCCTAGATCGAAGTCTGGATCGGGAGT

>PGSC0003DMG400030291RLKWAX-EGF\_3604

GGTGGTACATGGAATAGGGTTAGGAGTTGAGTCCTAGATCGAAGTCTGGATCGGGAGTCGAGGCTCCG

ATCAAAGTTGGGGTGGATCGGGAGGGTTCGAGATCGTAGTCCGGATCCGGAT

>PGSC0003DMG400030291RLKWAX-EGF\_3728

AGTTGGGCTCTTGTTAGGGTCAAGAGTCGAATTCTCGGTCAAGATTGGATAATGAGGTTGAAAAAGATT

TTTGATATGATTTATTTACTAGTACCCATTAATAACCAAGAAAATTGATTTG

>PGSC0003DMG400030291RLKWAX-EGF\_3790

AAAGATTTTTGATATGATTTATTTACTAGTACCCATTAATAACCAAGAAAATTGATTTGTGAAGTTGTCTTC

ATTATTAATAGCAAATTTCCAATACTGTGTTGAATATTCTAATAGTGGG

>PGSC0003DMG400030291RLKWAX-EGF\_3852

GTTGTCTTCATTATTAATAGCAAATTTCCAATACTGTGTTGAATATTCTAATAGTGGGCCCTTTTTTTTTTC

CACACGTTATTTTCTCAATTGTGTTATATCAATCTTTAATTTGGTATC

>PGSC0003DMG400030291RLKWAX-EGF\_3914

TTTTTTTTCCACACGTTATTTTCTCAATTGTGTTATATCAATCTTTAATTTGGTATCATATATTTTTTGGCC

AATTAATGACAAAGAAGACTTTAAGTCAACTAATGGCATAGAATTCT

>PGSC0003DMG400030291RLKWAX-EGF\_496

CTGAATTATCACCATCCGATTTGAAAGTCGGGTGTAGTGTAGACCTCATGTCAATAACTTCATGGCGTAT

TCAGGATGCAAATGCCAACATTTCTATTTAAGTTTGCATAATGCTTTGG

>PGSC0003DMG400030291RLKWAX-EGF\_558

TGGCGTATTCAGGATGCAAATGCCAACATTTCTATTTTAAGTTTGCATAATGCTTTGGCATATGGATTTGA  
GCTTTCATGGTTTATTTACGTTTATTGTGGCAAGTGCGCCTATCCATAT

>PGSC0003DMG400030291RLKWAX-EGF\_62

GCATCTTCATAACATCAGTTATCCCTTTGATTGAAAAGTGATCCAAAGCACTGTGGCCTTGAAAATTAT  
GAATTGATCTGTAAAGGAGATCACACCATATTAACAATACCGCCATATGA

>PGSC0003DMG400030291RLKWAX-EGF\_620

TGGATTTGAGCTTTCATGGTTTATTTACGTTTATTGTGGCAAGTGCGCCTATCCATATCTATGTGAAGGG  
AAAAATTCAAGTGATGTTGTTGTGTGGATTACAGCTGCAAAACTTACCA

>PGSC0003DMG400030291RLKWAX-EGF\_682

GTGAAGGGAAAAATTCAAGTGATGTTGTTGTGTGGATTACAGCTGCAAAACTTACCATTTTAGATTCTT  
CAAATCGTCGTGTGGTAAGAACATTCTAATGTCATGCTTAGACACTTTT

>PGSC0003DMG400030291RLKWAX-EGF\_744

AGATTCTTCAAATCGTCGTGTGGTAAGAACATTCTAATGTCATGCTTAGACACTTTTTTTAGCATTTTTTT  
CTGTGCATGTTTTAATGTATTTTTTCTTTGGATGACCACAATCAAGCT

>PGSC0003DMG400030291RLKWAX-EGF\_806

GCATTTTTTTCTGTGCATGTTTTAATGTATTTTTTCTTTGGATGACCACAATCAAGCTTACTATTCCCACGT  
TCTTGATAGTAAGCAGTCGTACTTCTATTGTCAATTCTGTTTTATATA

>PGSC0003DMG400030291RLKWAX-EGF\_868

ATTCCCACGTTCTTGATAGTAAGCAGTCGTACTTCTATTGTCAATTCTGTTTTATATAACGGAACTAGTT  
GCAAGTTAGATTAATAAATTATTGATTGTTGGTGTTTCTGCAGCAATC

>PGSC0003DMG400030291RLKWAX-EGF\_930

AAACTAGTTGCAAGTTAGATTAATAAATTATTGATTGTTGGTGTTTCTGCAGCAATCATCCTATGGATAC  
TTCCCATAGCTGGTAAGTCACATCTTTGCTCTTTCAAATTTATTACTAG

>PGSC0003DMG400030291RLKWAX-EGF\_992

TATGGATACTTCCCATAGCTGGTAAGTCACATCTTTGCTCTTTCAAATTTATTACTAGAAATCATTCTAATG  
TCGAAATGATGGAGCAGACGTTGGTGGTTGAATTTTTAGTTTAACCAT

>PGSC0003DMG400030292RLKWAX-EGF\_0

CTGTTAGCAGTTATTCTGTGTAATCTTAACTGTTTTCTTTCTTTTTCCGGTTCGGTATTTTTTCTTTGGATG  
ATCACAATCAAGATAATCGAATACATTATTACCACGTTCTTGATAGT

>PGSC0003DMG400030292RLKWAX-EGF\_1426

GCGGGAACCATGTTCAATTGGAATTCAATCTAATTAGTTCTTCAATTAACTCAACTGAGTCTGTGAAGTTG  
CTTGAGAGTTGTTCTGATTATGCAAAAATAGATGTAATTGTTGCTTGACA

>PGSC0003DMG400030292RLKWAX-EGF\_248

AGCCACATCTTTCGTCTTTCAAATATATTACTAGAAATCATTTTAATGTCAAATGATGGAGGAGAA  
GTATTGTAATAACCTCTGCTTATATGTGATGGTTGTACACAGGGCCTAGC

>PGSC0003DMG400030292RLKWAX-EGF\_310

GAGGAGAAGTATTGTAATAACCTCTGCTTATATGTGATGGTTGTACACAGGGCCTAGCATTGTGGCAAG  
AATCGTTCTATTTCCATGCATAGTTGTATTTCTAATGATTAAGTTACAAAG

>PGSC0003DMG400030292RLKWAX-EGF\_372

TGGCAAGAATCGTTCTATTTCCATGCATAGTTGTATTTCTAATGATTAAGTTACAAAGAAGGCATTTGTCC  
ATTTATGATGCAATTGAAAGTTTCCTGCACGGTGAGAACAATTCGCGC

>PGSC0003DMG400030292RLKWAX-EGF\_62

TTCTTTGGATGATCACAATCAAGATAATCGAATACATTATTACCACGTTCTTGATAGTAAGCAGTCGTACT  
TCTATTGTCAATTCTGTTTTATATAACAGTAGCTAGTTGCAAGTTAGAT

>PGSC0003DMG400030292RLKWAX-EGF\_682

TCATCATGTTAACATAGTACAACCTTATTGGCTATTGTGCTGAGAGATGTAAGCGTGCTCTCGTGTATGAC  
TTCGGCTATTGAGCTGAGCGATGGAAGCGAGCATTTCGGGTATGACTTCAT

>PGSC0003DMG400030292RLKWAX-EGF\_744

TGTATGACTTCGGCTATTGAGCTGAGCGATGGAAGCGAGCATTTCGGGTATGACTTCATGCCTAACGGAT  
CACTTGAAAAGTACATCACACCTCGAGAAGGAGGAGCTGAACTATTAAGTT

>PGSC0003DMG400030298LRR-RLKs\_0

ATGTGGAGAGGGCCATGGTATGTACCCCAACTGAGCGTCTTAAATCTCAGGAATAATAGCCTCACGGGT  
ATAATTCCTCCTTCTGTTGGAAATGCCACACAAATGATGAACTTCAGTTTG

>PGSC0003DMG400030298LRR-RLKs\_2057

TATTGGAGATTCTGCTTGTGCTATCACTAATCTTGGAAAACAATCAAAGCCTAAGGAGGTTGTGCTAAA  
AATTGTTACTCCAGTGGCTATTGCATCCTTTATGATATTCTTGTTTCGTTT

>PGSC0003DMG400030298LRR-RLKs\_2118

TGTGCTAAAAATTGTTACTCCAGTGGCTATTGCATCCTTTATGATATTCTTGTTTCGTTTCAATTTGGATAAT

GAAACAACACAAGAAAGGAAAGTCTAAAGATGTTGAAAAGGTACCGGA

>PGSC0003DMG400030298LRR-RLKs\_2362

ACTGCAATGGCCATAAAGGTTCTGGATTTGAAAATGAGCAAGTATGCAAGAGGTTTGACACCGAATGT

GAAGTGATGAGAAATGTTAGACACTGAAATCTTGTTTCAGTGATTACTACA

>PGSC0003DMG400030298LRR-RLKs\_2423

CCGAATGTGAAGTGATGAGAAATGTTAGACACTGAAATCTTGTTTCAGTGATTACTACATGTTCTAGTGA

CTATATAAGAGCCTTTGTTCTGCAATTTATGCCCAATGGTAGTCTTGAGA

>PGSC0003DMG400030298LRR-RLKs\_2728

TCTAAAATTTTAGCCATAAGCATGTCCATGGCTTATACCGAGACATTGGGCACTCTTGGATACATTGCAC

CAAGTATAAAAGAATCTATTCTCTTTGATTTTCTCTTATCATAATTAAGC

>PGSC0003DMG400030298LRR-RLKs\_2789

ACATTGCACCAAGTATAAAAGAATCTATTCTCTTTGATTTTCTCTTATCATAATTAAGCCTCTCCAAATTCT

ACAAGTAAAAAGAGCAAGTCTTTATTTTTGCAGAATGATTGTTGTATT

>PGSC0003DMG400030298LRR-RLKs\_2850

CTCCAAATTCTACAAGTAAAAAGAGCAAGTCTTTATTTTTGCAGAATGATTGTTGTATTCAATTGAGTAA

CTTTTCTTCAATCCTTTTCTAAGAATATGGCTCGGAGGGAATAGTGTCT

>PGSC0003DMG400030298LRR-RLKs\_3704

GGCCCCAAAAGGCCAATGCCTAAAATTTTATAGGCAAGAGCCGCCCTGGCAGGGAGTATGATGGAC

GTTGTGGATGTTAGTCTTTTTTCTGAGGATGAACAAATCACCAATAAAAGTG

>PGSC0003DMG400030298LRR-RLKs\_3948

ATAGAAGTTGAGCAGCATCTTTTTGATATGATGCTTTTTGTTTCTTCAATAAAGTTGTTGTATAGTACTA

CTTGAAGTCATGTATTGTTGGTAATGTAACATCCGACAATTTGAAGTG

>PGSC0003DMG400030298LRR-RLKs\_4619

TGTGAGACATGATTGGGTTGTGATTTAAGTTGAAACCTATTGTATGTTGAGGGAATTATGATTCTAAGA

GTTATGACCCTTTTGAAGTTGATTCATCATCAATTCTCAGCAAATTTTGG

>PGSC0003DMG400030298LRR-RLKs\_6510

AACAACGTCTCAATGTCAAACAAGTTTGGACATATTTTTGTTGATAGTTTACTTAAAATATTGACTACTAT

TTCATGACGAATTAATAAAACCTCTTAACAAGAATTCTTGTATCTAT

>PGSC0003DMG400030298LRR-RLKs\_6571



TGACTACTATTTTCATGACGAATTAATAAAACCTCTTAACAAGAATTCTTGTATCTATTATGAGTTAGTC  
GACTTTTATTCCATTTTGTGAAACACAACCGAAGTAGTGTCAACTGTCA

>PGSC0003DMG400030298LRR-RLKs\_6632

TGAGTTAGTCGACTTTTATTCCATTTTGTGAAACACAACCGAAGTAGTGTCAACTGTCAAGGAATAAATG  
GATAAATTCCTTTTCTTATTTTCCTCATCCATATTAATCTGTTTTACAT

>PGSC0003DMG400030298LRR-RLKs\_6693

GAATAAATGGATAAATTCCTTTTCTTATTTTCCTCATCCATATTAATCTGTTTTACATTTTGGAAATTTGA  
GACTATTTATTTAAATTAATGAAGGTATTTAGCTGCAACTGTTTTGCT

>PGSC0003DMG400030298LRR-RLKs\_6754

TGGAAATTTGAGACTATTTATTTAAATTAATGAAGGTATTTAGCTGCAACTGTTTTGCTTTTTTTTTTGCAA  
ACTCGGAAATCTCTTTTTCGCCTCTCTCCTTCATTTGTATTTGCCTC

>PGSC0003DMG400030298LRR-RLKs\_6815

TTTTTTGCAAACCTCGGAAATCTCTTTTTCGCCTCTCTCCTTCATTTGTATTTGCCTCAGAAGTTTTACACA  
GTCAATGTGTAGAGCCTAAACTCTAATGTGATTAATAAACATGAATAG

>PGSC0003DMG400030298LRR-RLKs\_6876

AAGTTTTACACAGTCAATGTGTAGAGCCTAAACTCTAATGTGATTAATAAACATGAATAGATTAAGCACCT  
TATCCATTTTTTTAATCTCTTCCGCCCCGACTTGGTTTAAAAAAGTTT

>PGSC0003DMG400030298LRR-RLKs\_6937

TAAGCACCTTATCCATTTTTTTAATCTCTTCCGCCCCGACTTGGTTTAAAAAAGTTTTCATATGACAATT  
TCCATTCATAAAAATAATTTTGTATTTTGTACTTTGCTTATTATTG

>PGSC0003DMG400030298LRR-RLKs\_6998

ATATGACAATTTCCATTCATAAAAATAATTTTGTATTTTGTACTTTGCTTATTATTGACGAGTGTAATTC  
ATGTATTAGAGTATGTTAATAGAACCAATTTAAATCAGGATAAGATGT

>PGSC0003DMG400030298LRR-RLKs\_7059

GAGTGTAATTCATGTATTAGAGTATGTTAATAGAACCAATTTAAATCAGGATAAGATGTTTAGATCGTCA  
TAAGCAAAGTTAAGGTTACAATACGATATAGTATTATGAAACAATACG

>PGSC0003DMG400030298LRR-RLKs\_7120

AGATCGTCATAAGCAAAGTTAAGGTTACAATACGATATAGTATTATGAAACAATACGTAACAACAAT  
AGTGAAATCAAGGTCTATTCTAGATTTTTTAAAAAAGAGGAAGAGAA

>PGSC0003DMG400030298LRR-RLKs\_7181

ACAACAATAGTGAAATCAAGGTCTATTCTAGATTTTTTAAAAAAAAAAGAGGAAGAGAAAATACAGGTA  
AAAATAAGATTTTCGTGTAICTCAAATGATTTTGAGATACATAATTCTCTA

>PGSC0003DMG400030298LRR-RLKs\_7242

TACAGGTAAAAATAAGATTTTCGTGTAICTCAAATGATTTTGAGATACATAATTCTCTACATAAGATACTT  
GTGTTTAAGAGACATTATATTAAGTTAATGTATTTAGATGATCACTGGA

>PGSC0003DMG400030298LRR-RLKs\_7303

TAAGATACTTGTGTTTAAGAGACATTATATTAAGTTAATGTATTTAGATGATCACTGGATACATAATTTTA  
GTATCAAACGGATAATCAAGTTAAAGTTTAAGTATCTATCGATGTATTT

>PGSC0003DMG400030298LRR-RLKs\_7364

CATAATTTTAGTATCAAACGGATAATCAAGTTAAAGTTTAAGTATCTATCGATGTATTTTAGCAAAAATAA  
TGGCATTAAACAATGAATGTTGCCCTTTTCATTTGAATTTGATTGAAT

>PGSC0003DMG400030298LRR-RLKs\_7425

GCAAAAATAATGGCATTAAACAATGAATGTTGCCCTTTTCATTTGAATTTGATTGAATATATTATTTTT  
GGAATAAAAAGATGAAAAATTTAAATAACATTTGGTACAAGATTTGTGT

>PGSC0003DMG400030298LRR-RLKs\_7486

ATTATATTTTGAATAAAAAGATGAAAAATTTAAATAACATTTGGTACAAGATTTGTGTATCTTTGATTGT  
TGTAGCAAATGAAATTCACGAGCTGAATGATTTGCTCCAGATTTTTCT

>PGSC0003DMG400030298LRR-RLKs\_7547

CTTTGATTGTTGTAGCAAATGAAATTCACGAGCTGAATGATTTGCTCCAGATTTTTCTTTGTATCACTAG  
GAAACAAAGATAGTGCTTCACAACTAAATGCCCTTTTTGTTGGGTGTC

>PGSC0003DMG400030298LRR-RLKs\_7608

GTATCACTAGGAAACAAAGATAGTGCTTCACAACTAAATGCCCTTTTTGTTGGGTGTCTTTAATCTAAG  
AAGAAGATGTTACCCTTTCTTTGAGTTTTTTTATTTTTGTACTTCTGT

>PGSC0003DMG400030298LRR-RLKs\_7669

TAATCTAAGAAGAAGATGTTACCCTTTCTTTGAGTTTTTTTATTTTTGTACTTCTGTCTTTGTTAAGAGC  
GTAAATCATCTATTTAAAAAAGGGATTGTTTACGTTGGAATAGTTACA

>PGSC0003DMG400030298LRR-RLKs\_7730

TTGTTAAGAGCGTAAATCATCTATTTAAAAAAGGGATTGTTTACGTTGGAATAGTTACAAAATTGTTCC

CTCCCTTATTTTAAATTAGCATTTATCCCTTTTACAGATAGCATTGCACC

>PGSC0003DMG400030298LRR-RLKs\_7791

AATTGTTCCCTCCCTTATTTTAAATTAGCATTTATCCCTTTTACAGATAGCATTGCACCAGGTATAAAAGAT

CTTCTCTCTTTTATTTTCTCTTATCATAGTAAAGCATTCTAGAAGTAA

>PGSC0003DMG400030298LRR-RLKs\_7852

GTATAAAAGATCTTCTCTCTTTTATTTTCTCTTATCATAGTAAAGCATTCTAGAAGTAAAAAAGCAAGTC

TTCATTTATGCAGAATTATTGTTGATTTCAATTGAATAACTTTTCTTC

>PGSC0003DMG400030443-(rev)LRR-RLKs\_1037

AATTATAATTGCATATGATTTGTTTATTTAATTTCTAATACACCAATGTTTTGTTTTATTTGTTAACAAACGC

AACTCTAAACTTGAGTGCCGCAGGAGGAAGTTGATTTTCTTATGAAGT

>PGSC0003DMG400030443-(rev)LRR-RLKs\_1159

TTTTTAGAGCTGATAGGCTCACAAAGAAACTTGGATGAGTGGACAAGGTATTCTATATATGTGATAAAT

AAAAATATCTTGTGTGATCAGCTATCCGACTATCTATATAAGAGATCGTTA

>PGSC0003DMG400030443-(rev)LRR-RLKs\_122

CACACTACAACATGCTATCCCTGGGATTCTCACTTCCTCCTCCTTCCAATAATAAACTAATTGTTACCAACA

AAAACCAATATAATTTTCGTACCAATTTAGCCAAGGTTTGTCTAATA

>PGSC0003DMG400030443-(rev)LRR-RLKs\_1220

TGATAAATAAAAATATCTTGTGTGATCAGCTATCCGACTATCTATATAAGAGATCGTTAATTCCACCATT

TAATGCCAAAATGGTTCCCGAAATTAATTCCCCATGGTTTAGTAAAAAAA

>PGSC0003DMG400030443-(rev)LRR-RLKs\_1281

TCCACCATTTAATGCAAAATGGTTCCCGAAATTAATTCCCCATGGTTTAGTAAAAAAAAGGTGGTATT

TGATATTCATTTTGAATTCAACTTATTCGAATTAATTATATTATGTGA

>PGSC0003DMG400030443-(rev)LRR-RLKs\_1403

GGGATGGTAGACGAGTATCATTTATTGGGGATAAATCAATCCTTTCCAAGTCTTTACAGAAAGCTCTTAC

TGTAATGGAGGAGAGAACAAAATGTAATTCTGGACTACATGTTATAATGG

>PGSC0003DMG400030443-(rev)LRR-RLKs\_1464

AGCTCTTACTGTAATGGAGGAGAGAACAAAATGTAATTCTGGACTACATGTTATAATGGCAATCAATTAC

AGTGGACGACATGATATATTACAAGCAACCAAAGCATTGCCAGTAAAGT

>PGSC0003DMG400030443-(rev)LRR-RLKs\_1586

AAAATGGACATTTAACTGTAAAAGACATTGATCAGAGCCTATTTGAACAAGAACTGGAAACTCATTGCG  
CCGAATTCCTGAACCAGATTTGTTAATTAGAACAAGTGGAGAGAAAAGAG

>PGSC0003DMG400030443-(rev)LRR-RLKs\_1769

CTGACATGGAAGAAGCTGATTTTATGGAGGCTTTAATGTCGTTAAGTCGAGACAGAGACGTTATGGTG  
GACAAAATATCTAGTAATATTTTCAAGAACTTCCATTACTGAGAATTAAC

>PGSC0003DMG400030443-(rev)LRR-RLKs\_1830

TTATGGTGGACAAAATATCTAGTAATATTTTCAAGAACTTCCATTACTGAGAATTAACCTAGCTCGAAA  
TATGAAGAATTATTGATTAGATCTCTTGAATTTCTCTTGCTATTAGTAC

>PGSC0003DMG400030443-(rev)LRR-RLKs\_1952

TTAAATAATTTTATGGTGGTCGATTGTATCTATACCAGCACTATATAAGCATGAAATATCATCATGCTAGT  
TATGTGGTTTGTGCTGAGTTTTTCTTTTCTTTTCCCATCGCCCCATTA

>PGSC0003DMG400030443-(rev)LRR-RLKs\_2013

TCATGCTAGTTATGTGGTTTGTGCTGAGTTTTTCTTTTCTTTTCCCATCGCCCCATTAATTTGTATCACA  
CACCGAAGGACTCGTGGCACTCCAACAGGATATTCATATTTTCATAAA

>PGSC0003DMG400030443-(rev)LRR-RLKs\_2074

TTTGTATCACACACCGAAGGACTCGTGGCACTCCAACAGGATATTCATATTTTCATAAAAAAAGAAGAAA  
AAAAAAGGAGGGGGACGGGGTGGGGACAACGCCGGAAAATGAGACTATAA

>PGSC0003DMG400030443-(rev)LRR-RLKs\_2135

AAGAAGAAAAAAAAGGAGGGGGACGGGGTGGGGACAACGCCGGAAAATGAGACTATAAAAAGTAC  
TCAAAGTCATATGCTTCCAAGATGTCAATCACATCACCATCATTTCATCATTTTG

>PGSC0003DMG400030443-(rev)LRR-RLKs\_2196

AGTACTCAAAGTCATATGCTTCCAAGATGTCAATCACATCACCATCATTTCATCATTTTTGTTGGTTCTAAGT  
GATGAGTGGATATAAAATTTTCATTTTTTACATCACATTTGATTTTTGC

>PGSC0003DMG400030443-(rev)LRR-RLKs\_2318

GACTATAATATAGTAAATTAATTATAAAATTGAGGCGAAAAATATAGTATATTAATTAACTATCAATAA  
TAATATCATATATTAATTGAATTAGTATTAATCGTAACTTGTCTTTTTA

>PGSC0003DMG400030443-(rev)LRR-RLKs\_2379

TATCAATAATAATATCATATATTAATTGAATTAGTATTAATCGTAACTTGTCTTTTTAGCAAATCCTTAAA  
TTATTTTTAGATGAGGGAAGTTCACTTTCTTAAGTCAAATGTCAACTC

>PGSC0003DMG400030443-(rev)LRR-RLKs\_2440

AAATCCTTAAATTTATTTTAGATGAGGGAAGTTCACCTTCTTAAGTCAAATGTCAACTCACTAGTCATTAA  
TCATCTTATTATTCAAAGATCCAGTGAATTCATTACAATTCCATGGAA

>PGSC0003DMG400030443-(rev)LRR-RLKs\_2501

TAGTCATTAATCATCTTATTATTCAAAGATCCAGTGAATTCATTACAATTCCATGGAAAATAAAAAGATT  
TGACAAACAAATAAGAAATTATTTGGTGTTCCTTTCTCTTAAAGGGA

>PGSC0003DMG400030443-(rev)LRR-RLKs\_2562

TAAAAAGATTTGACAAACAAATAAGAAATTATTTGGTGTTCCTTTCTCTTAAAGGGAGAGCCGTTTAC  
CTATACAAGTCTATATTTGTCGCACTCTTAAAGTCATTGGCCATACTTTG

>PGSC0003DMG400030443-(rev)LRR-RLKs\_2623

GCCGTTTACCTATAACAAGTCTATATTTGTCGCACTCTTAAAGTCATTGGCCATACTTTGACTCAAGGGGTG  
GTATCCTGTTTGATTGGTAAATCTAGAACCCTTTTTATTATTATTATAGT

>PGSC0003DMG400030443-(rev)LRR-RLKs\_2684

TCAAGGGGTGGTATCCTGTTTGATTGGTAAATCTAGAACCCTTTTTATTATTATTATAGTCGTGGTATTCAG  
ATCACCTTATAAGCACCTTGTTAATTTACAAGATATGTTACCTTCCAT

>PGSC0003DMG400030443-(rev)LRR-RLKs\_2745

TGGTATTCAGATCACCTTATAAGCACCTTGTTAATTTACAAGATATGTTACCTTCCATCAACACAAGTAC  
CGAGTAAGATTTGCTAAGAAAGTATCCTTTCCCTTCACATGATCTTCTT

>PGSC0003DMG400030443-(rev)LRR-RLKs\_2806

ACACAAGTACCGAGTAAGATTTGCTAAGAAAGTATCCTTTCCCTTCACATGATCTTCTTTTTTCAGTACAA  
GTTATATGCACTAATTGAGTCAAATAACTACACAACCATGTCGCTTGT

>PGSC0003DMG400030443-(rev)LRR-RLKs\_2867

TTCAGTACAAGTTATATGCACTAATTGAGTCAAATAACTACACAACCATGTCGCTTGTAATAAATTCAT  
GTAAATATGACAGTATATATTATTGATAACCCGAGAAAAATAATATCTA

>PGSC0003DMG400030443-(rev)LRR-RLKs\_2928

AATAATTCATGTAAATATGACAGTATATATTATTGATAACCCGAGAAAAATAATATCTAATCTGATATAAT  
AGGTTAAATTACACTGAAAATGGTTGTAAAAAATTTGTACACTACCATT

>PGSC0003DMG400030443-(rev)LRR-RLKs\_3050

GTATAACTTTAAGCCCTTTTTCTCAAACACTTTGGTACCCACATAAGGAATAATGAACCCATTATAATTA

GCAGAATCAATTGTGACTCAGTATTATCCTCTTTGTCCACATATCACCT

>PGSC0003DMG400030443-(rev)LRR-RLKs\_3111

ATTATAATTAGCAGAATCAATTGTGACTCAGTATTATCCTCTTTGTCCACATATCACCTAACCTTCCAATC

CCCAAATGGAGCTTCAAACACTTTTTGTTCAATCAAGCTCTCTTTTTT

>PGSC0003DMG400030443-(rev)LRR-RLKs\_3172

CCTTCCAATCCCAAATGGAGCTTCAAACACTTTTTGTTCAATCAAGCTCTCTTTTTTTCTGTCATTCCAT

GCTATTCTTTCATGTTCTATACTTATCTTTTCCAGAGTGTGCTTC

>PGSC0003DMG400030443-(rev)LRR-RLKs\_3538

GGATAACTCCTTTCATGGTGTAATCCCTCCAGAGCTTGGCCAATTGATCAGACTTCAAACCATGAACTTA

AGCTTCAACTTCTTGAGAGGTGAAATCCCGCTTACCCTATCTCGTTGCGT

>PGSC0003DMG400030443-(rev)LRR-RLKs\_3599

ATGAACTTAAGCTTCAACTTCTTGAGAGGTGAAATCCCGCTTACCCTATCTCGTTGCGTTAACGTTGTAA

CCTTATTCTAGACCATAATATCCTTGAAGGACACATTCTACTGAACTT

>PGSC0003DMG400030443-(rev)LRR-RLKs\_4087

TTGTTCAAGATCTTCTGCGGCTTGATATTCCTCTAAACAATTTACAGGAAATATACCATTGAGTTTTGGAA

ACCTCAAGAATCTTATGGCTTAATGTTAACGATAACCAGCTTGGAGT

>PGSC0003DMG400030443-(rev)LRR-RLKs\_4148

AGTTTTGGAAACCTCAAGAATCTTATGGCTTAATGTTAACGATAACCAGCTTGGAGTTGGTGCACCTG

ATGATCTAAATTTATAAATTCTTTAACCAATTGCAAATGCTTGAGTTC

>PGSC0003DMG400030443-(rev)LRR-RLKs\_4209

GTGCACCTGATGATCTAAATTTATAAATTCTTTAACCAATTGCAAATGCTTGAGTTCCTGGACATTGCA

AACAACAATTTGGAGGTATGTTGCCTTACTCTATAACTAATCTCTCGA

>PGSC0003DMG400030443-(rev)LRR-RLKs\_4270

GGACATTGCAAACAACAATTTGGAGGTATGTTGCCTTACTCTATAACTAATCTCTCGACAACCTTTGACA

AAGCTACTGATTGGATACAACAGGATAAGTGGAAACCATACCTAGAGAGAT

>PGSC0003DMG400030443-(rev)LRR-RLKs\_4819

CTCACTGGAGAGTTGTTTCATCCCTTGAATACTCTACCTGCAAGAAAACATCTTTGAAGGAACGATTCTT

CCTCTGGATGATTTGAAAAACATTCAGTATCTTGATCTTTCACGTAATAC

>PGSC0003DMG400030443-(rev)LRR-RLKs\_5246

AAGCATAGGCCTAGCACAGCATCTTCATTCAGGAAAGGATACACCCAAGTTTCCTATGAAGAACTCTTAA  
ATGCAACTGGTGGGTTCTCTTCAAATAACTTGATAGGATCAGGAAGTTTT

>PGSC0003DMG400030443-(rev)LRR-RLKs\_5856

TTAAAGGCACAGTAGGTTATGCTGCTCCAGGTAAATATTATAGTGGGGATCTTAGTCTAAATATTGTCTG  
AACTCTGAAATCCATTTTTTTTTCTCCATAAGACCATAACATAATAACAAT

>PGSC0003DMG400030443-(rev)LRR-RLKs\_5917

TATTGTCTGAACTCTGAAATCCATTTTTTTTTCTCCATAAGACCATAACATAATAACAATTTAAGCAATTACA  
TACTTCCTTGAGAGACTCCGGATGCTCCTTGTCTAAGCCCCAGGCAT

>PGSC0003DMG400030443-(rev)LRR-RLKs\_6039

GTTACCTTTGCAGATCACTACCTCATGATTTTGTGCTATTGATTCTTATAACCAGAGGCAGAGGCAGCTTT  
AGTTTAATGGATTCAACCAAATCTAGTATTTTCGACACTGAATATGGAT

>PGSC0003DMG400030443-(rev)LRR-RLKs\_61

AATTAATTTGGGCGAACAAGAGAGTACTAATTCAAATCGGCGAGCTTTGAAACCAGAACGCACACTAC  
AACATGCTATCCCTGGGATTCTCACTTCCTCCTCCTCCAATAATAAACTA

>PGSC0003DMG400030443-(rev)LRR-RLKs\_6100

AGGCAGCTTTAGTTAATGGATTCAACCAAATCTAGTATTTTCGACACTGAATATGGATATATAAGTTTA  
AAAACTACTTAAATTACAATAAATATCATATTTTGAACCCATAATTTCA

>PGSC0003DMG400030443-(rev)LRR-RLKs\_6161

ATAAGTTTAAAAAACTACTTAAATTACAATAAATATCATATTTTGAACCCATAATTTCAGAAGTACAATGA  
GTTTCAGTTCTAAGAATCTTAGACGTTGAACCCATCAAATTTAAATCCTG

>PGSC0003DMG400030443-(rev)LRR-RLKs\_6222

AGTACAATGAGTTCAGTTCTAAGAATCTTAGACGTTGAACCCATCAAATTTAAATCCTGGATGTCTCTTCT  
CTCAAATATAATTCCTGACTAGTCATAGTTTTTCTAAGGACCTTAATAA

>PGSC0003DMG400030443-(rev)LRR-RLKs\_6283

TGTCTCTTCTCTCAAATATAATTCCTGACTAGTCATAGTTTTTCTAAGGACCTTAATAAGAGGTTTCAGCTT  
TCTAGGGCATTTTACATAACATTCTCTATTGGAAAATCGATACAAGTA

>PGSC0003DMG400030443-(rev)LRR-RLKs\_671

TAAAGATTTATTTGAATCTCGAAATTTGAAATTAGGTGCACCATAAATTGGGGAATGAGGGAATAACTTT  
AATGACGATCTATCAAGCATGTAAAATAAATCATCAAGAAAATAAATTA

>PGSC0003DMG400030443-(rev)LRR-RLKs\_6795

CCACACGCCAGAATAAGCATGGGTCAAGTTATTTTGGATCTCATTTCATCAGAAACAAATTGAGCAGAA  
TTTTAGTTCATTCAGAGAAAGTGAAAATCTCAAGAAAAGGTGAATCATAA

>PGSC0003DMG400030443-(rev)LRR-RLKs\_793

TAAAGAATAACAATAACATATTCAGTGTAATTTTATAGGTGAGGATCTGAAAATGATATAATGTACGCTG  
AACTTACCCCCACCTCGAAAAGATAATAAAAGTTGTTTTTAAAGATCATT

>PGSC0003DMG400030443-(rev)LRR-RLKs\_854

TGTACGCTGAACTTACCCCCACCTCGAAAAGATAATAAAAGTTGTTTTTAAAGATCATTGACCCAAGTAA  
CCTGTACAAAATCAACGAATATATATATATCAGAGAAAGTGACTTTCTTT

>PGSC0003DMG400030443-(rev)LRR-RLKs\_915

CCCAAGTAACCTGTACAAAATCAACGAATATATATATATCAGAGAAAGTGACTTTCTTTTCTAACAATGA  
AATTAATTATACAAGAAATGAATCATATGTCTGATTATATTTAACTATAT

>PGSC0003DMG400030474-(rev)LRR-RLKs\_1037

ATAATAAAAATCCCATGATCTGGTAGATTTTTTGTAGTGTCTTCTTCATCAACTGTTTCAAGCTCCAACC  
TTGAATAAGAATTATCATGACATCAGGATTGAAAACTTGTAATTA

>PGSC0003DMG400030474-(rev)LRR-RLKs\_1098

AAGCTCCAACCTTGAATAAGAATTATCATGACATCAGGATTGAAAACTTGTAATTAATGGGTTAGTCT  
AGTCCCGGGTTGACTTGATGGAGTGGTTATTTTCTTCCCGTTGCTTATT

>PGSC0003DMG400030474-(rev)LRR-RLKs\_1220

ATACTATCATGTTAGAATACTTAAGTGCTAGCTATTTGTATGTTTTTTTTTTTTCTCAAACATCTCTTGT  
TATTAATAATATAATTACAAAAGAGGGTGACCTAAGGCCTAACACCA

>PGSC0003DMG400030474-(rev)LRR-RLKs\_1281

ACATCTCTGTTTATTAATAATATAATTACAAAAGAGGGTGACCTAAGGCCTAACACCATTTCTCACACGT  
AACACCAAAAAAAGAGTTTCCATCCCGGAAGTTTCTTCTTCAGTTA

>PGSC0003DMG400030474-(rev)LRR-RLKs\_1342

TCTCACACGTAACACCAAAAAAAGAGTTTCCATCCCGGAAGTTTCTTCTTCAGTTAGAGTTTTTACCA  
AAACCGAGGGTGGCTCATAATGCCAACCAGAATGGTTTTCTTTTTTGA

>PGSC0003DMG400030474-(rev)LRR-RLKs\_2074

TTGGCATTACATAAGAAATTGTATAAGTCTAGTTCATTGCTAAGTGCTTTTGGAACGAATGTGCAAAGAGA



AACATTAGTTGGACACATAATAATTGTTAATTGGAATCCATAAAAAGTTA

>PGSC0003DMG400030474-(rev)LRR-RLKs\_2135

GCAAAGAGAAACATTAGTTGGACACATAATAATTGTTAATTGGAATCCATAAAAAGTTATCCAGTTTTAG  
TTCATGAAAATTTAGTGCAGATTCCAAACATATTTCTTGAGGATATTCTT

>PGSC0003DMG400030474-(rev)LRR-RLKs\_2196

CAGTTTTAGTTCATGAAAATTTAGTGCAGATTCCAAACATATTTCTTGAGGATATTCTTATATCTTTGACT  
GCATAGATGCTTGCTATGTCAAATGTCTTTGTTTATCCTTCCTCTCTC

>PGSC0003DMG400030474-(rev)LRR-RLKs\_2257

ATCTTTGACTGCATAGATGCTTGCTATGTCAAATGTCTTTGTTTATCCTTCCTCTCTCACCTTTGGTGTTT  
GTTTGGTTCTCAAATGTTTATCTACTGAATTATCCAGGACGACCAC

>PGSC0003DMG400030474-(rev)LRR-RLKs\_3721

CATATGCTCTCATCGTCATTTCTTTTTCTATTTCTAGCGTTTGGTGGAGTAACTTGATTCACTCTTTGTGA  
TTGAATGCCTGATAGTAAGCTTCTAACACAATACAAAATGCACTCAAG

>PGSC0003DMG400030474-(rev)LRR-RLKs\_3843

ATGTCCTAAACGAATCTAAACAATGTGAGTTTGAACCTTTAACTTGTGAACTGGTGTGAAAAGAAGCAT  
TCTTTCTTGAGCTTATTGTAAAGTTAGAGAAGAAAAAGTCTTCTTTAGA

>PGSC0003DMG400030474-(rev)LRR-RLKs\_3965

ATATGCATCAGTTTGATCTTTATAGGTCTATTATATGAGTATAAACAGCTCTTATGTTATTCTGTATCTATT  
GTTTCTGTAGCAACATATTGACTTGGCTTTCTTTTTCTTATCA

>PGSC0003DMG400030474-(rev)LRR-RLKs\_4026

CTGTATCTATTGTTTCTGTAGCAACATATTGACTTGGCTTTCTTTTTCTTATCACTGGTAGTTTATT  
GCTCGCACTATCTTGCTGTTTGTCTAACTGGAAAGCTGCTAGTGCTGA

>PGSC0003DMG400030474-(rev)LRR-RLKs\_4087

GGTAGTTTATTGCTCGCACTATCTTGCTGTTTGTCTAACTGGAAAGCTGCTAGTGCTGAAGAATTCATGT  
ATGATACCTATTATCTATCCTGGAAGACTACACCAGAAGTGAATTCA

>PGSC0003DMG400030474-(rev)LRR-RLKs\_4148

AATTCATGTATGATATACCTATTATCTATCCTGGAAGACTACACCAGAAGTGAATTCATCTTCATTCCT  
AACCTGCATAAACTTATCAATGTTAAGTATACTGCCAATGATGTTACGT

>PGSC0003DMG400030474-(rev)LRR-RLKs\_4209

TTCATTCACCTAACCTGCATAAACTTATCAATGTTAAGTATACTGCCAATGATGTTACGTACTGCTGATATT  
TCTGTTCTCTAACCTATCAAACCCCACTATCATTTAGGAAACAGGACT

>PGSC0003DMG400030474-(rev)LRR-RLKs\_427

ATTGAACAGTCAATTTTTATTTATTTTGAATATGATTTTTGAAGGTTTTCTGATAGTATTTTTTTTTTTTGT  
AGCTTTAAATTTGATTTTTAAAAATTAATTAGGAAATCCGTGATGAA

>PGSC0003DMG400030474-(rev)LRR-RLKs\_4270

TGCTGATATTTCTGTTCTCTAACCTATCAAACCCCACTATCATTTAGGAAACAGGACTCCGGGAAGGAC  
TCCATTGGACTGGGAGTCGAGAGTTAAAATATCTCTTGCAGCAGCAAAGG

>PGSC0003DMG400030474-(rev)LRR-RLKs\_4331

GGGAAGGACTCCATTGGACTGGGAGTCGAGAGTTAAAATATCTCTTGCAGCAGCAAAGGGTATTGCC  
ACATCCATTCAATGGGTGGTCCAAAATTTACTCATGGAAATATAAAGTCCTC

>PGSC0003DMG400030474-(rev)LRR-RLKs\_4392

ATTGCCACATCCATTCAATGGGTGGTCCAAAATTTACTCATGGAAATATAAAGTCCTCAAACGTCCTACT  
CAAGCAAGATATGGAAGCTTGCATCTCAGATTTTGGTTTAGCCCCTATA

>PGSC0003DMG400030474-(rev)LRR-RLKs\_4453

ACGTCCTACTCAAGCAAGATATGGAAGCTTGCATCTCAGATTTTGGTTTAGCCCCTATAATGAACTCCCT  
GCAGCCCCATCTCGATATCCAGGGTACCGTGCTCCTGAGGTGATAGAAA

>PGSC0003DMG400030474-(rev)LRR-RLKs\_4514

GAACTCCCTGCAGCCCCATCTCGATATCCAGGGTACCGTGCTCCTGAGGTGATAGAAAGCCGAAAGCA  
TAGTCATAAATCAGATGTCTACAGCTTCGGTGTCTTACTACTCGAGATGCT

>PGSC0003DMG400030474-(rev)LRR-RLKs\_4575

CGAAAGCATAGTCATAAATCAGATGTCTACAGCTTCGGTGTCTTACTACTCGAGATGCTTACTGGTAAGC  
AGCCTATGCAATCACCAGGGCGTGATGACATGGTTGACCTTCTAGGTGG

>PGSC0003DMG400030474-(rev)LRR-RLKs\_4636

CTGGTAAGCAGCCTATGCAATCACCAGGGCGTGATGACATGGTTGACCTTCTAGGTGGGTCCAATCAG  
TTGTCAGGGAGGAATGGACGTCAGAGGTTTTTGACGTCGATTTGATGAGAT

>PGSC0003DMG400030474-(rev)LRR-RLKs\_4697

CCAATCAGTTGTCAGGGAGGAATGGACGTCAGAGGTTTTTGACGTCGATTTGATGAGATTTCAAACAT  
TGAAGAAGAGATGGTACAAATGCTGCAAATTGCTATGGCATGTGTTGTAAA

>PGSC0003DMG400030474-(rev)LRR-RLKs\_4758

CAAAACATTGAAGAAGAGATGGTACAAATGCTGCAAATTGCTATGGCATGTGTTGTAAAGGTCCCGGAC  
ATGCGACCCAACATGGAGGAAGTTGTTAGAATGATTGAAGACGTCAGGCAA

>PGSC0003DMG400030474-(rev)LRR-RLKs\_4819

TCCCGGACATGCGACCCAACATGGAGGAAGTTGTTAGAATGATTGAAGACGTCAGGCAATCTAACTCCG  
AAAACAGGCATTCTTCAGAAAGAGAATAGATCCTATGATTCAAATGTGCAT

>PGSC0003DMG400030474-(rev)LRR-RLKs\_4880

TAACTCCGAAAACAGGCATTCTTCAGAAAGAGAATAGATCCTATGATTCAAATGTGCATATTCCTTGGAT  
TTCTGACTTGCAATTTGTAAGTCCTGTGAAATTCATTCGATTTCGATTACC

>PGSC0003DMG400030474-(rev)LRR-RLKs\_4941

TCCTTGGATTTCTGACTTGCAATTTGTAAGTCCTGTGAAATTCATTCGATTTCGATTACCCAGTGCAACAAC  
ATACATGTTTTCTTCCCTAAATTTCTGATTCAATCCTATTGACAAGT

>PGSC0003DMG400030474-(rev)LRR-RLKs\_5002

GTGCAACAACATACATGTTTTCTTCCCTAAATTTCTGATTCAATCCTATTGACAAGTGTATCTAGGAAA  
GTGTGGATTTGTTTTCTTAGGAGATATAGTAGACAAGTTAATCATCTT

>PGSC0003DMG400030474-(rev)LRR-RLKs\_5063

ATCTAGGAAAGTGTGGATTTGTTTTCTTAGGAGATATAGTAGACAAGTTAATCATCTTCTTTTTCTTTT  
CGTTTAAGAACTCTTGTCATTTGTTGTAAGATTCAATCTGCACTGCACT

>PGSC0003DMG400030474-(rev)LRR-RLKs\_5124

TTTTTCTTTTCGTTTAAGAACTCTTGTCATTTGTTGTAAGATTCAATCTGCACTGCACTTATTAACATCTGA  
TTTATGCAACATGTGCAAGCAATTCATTTGCTGTGTGTTTGGATTTTG

>PGSC0003DMG400030474-(rev)LRR-RLKs\_5164

ATTCATCTGCACTGCACTTATTAACATCTGATTTATGCAACATGTGCAAGCAATTCATTTGCTGTGTGTT  
TGGATTTTGGTGTGAAATCATTTTTATGGCATTCAAACACCAAGTAATT

>PGSC0003DMG400030474-(rev)LRR-RLKs\_61

TTCATTTTGTACTTGGCACTAAACACTCCTCCTTCTTCTCCATTAACACAGATCCAAATCTCTTACTACTTCA  
GCTCAAGCTAAACGGGTCGGGTCGGGCTTATTCTGCGCAAAATGTG

>PGSC0003DMG400030474-(rev)LRR-RLKs\_610

CACTAAAGTGATTGAAAAATAAAGAAAGAAATATAATGATAAACTATGTATGATTTTTTTCTATTTCTTTT

TTTTGAACTTGTATATATGGTATGATTTTCCAGCTTTCACCCCTGGCT

>PGSC0003DMG400030474-(rev)LRR-RLKs\_915

CTCATATGAGTTGGGGTTGTTCAATAGTCTTAATTAACCCAACCTCTCTTTGACATTTACTTGAAGAAGAAT

TATGAATGTGGTAATAGGTAATCCCCAACCCCAAATAGTAATAATAA

>PGSC0003DMG400030474-(rev)LRR-RLKs\_976

GAAGAAGAATTATGAATGTGGTAATAGGTAATCCCCAACCCCAAATAGTAATAATAATAATAATAA

AATCCCATGATCTGGTAGATTTTTTGGATGTAGTTCTTCTTCATCAACTGTT

>PGSC0003DMG400030496-(rev)LRR-RLPs\_0

GTTACAAGAAAAAGAAAGCAAGGAAACACAAAACCTCTAGAGAGAAAAAATGGCTTATGCTTGTATTCC

TCACTTATGCAGACACTGCAGCAACTCTTGCAATCTAAATCATCTTTGATT

>PGSC0003DMG400030496-(rev)LRR-RLPs\_1116

AGATAGGTGTGACATGATAATTGGAAGAAAATTGAGGAAAATTTGAAGTCATTTTCATGGTTCGGTTTTA

GAACAATGTCAAGCAATTCTTTCTTTGAGCTACAATTAAGTTGCCCCATAC

>PGSC0003DMG400030496-(rev)LRR-RLPs\_124

AAAGTCCCATACAACAAAACATGTTGAATCTTCTTATCAAAGTCTATGTGCTCTTCAAGTTTTTCTTGAG

GATACCACAAATGAAGCCAATGATATTGAAAATCTCAAGATTTTAGAAA

>PGSC0003DMG400030496-(rev)LRR-RLPs\_1426

CTAATGGAAGATTCAAACCTTGCAAATTCATGATCTTCTTAGGCAGTTGTGCATAAGAGAAGCTCAAAT

TCAAATGTTGTGCATTTCCCTTACAGTGATCATGTTTCTACTTACTCAG

>PGSC0003DMG400030496-(rev)LRR-RLPs\_1488

GCTCAAATTCAAAATGTTGTGCATTTCCCTTACAGTGATCATGTTTCTACTTACTCAGATGACATAAATGA

TCGTAGGCGTGTGATGATTCCTTTCTGATTGAGGATTATTTTTGCGAT

>PGSC0003DMG400030496-(rev)LRR-RLPs\_1674

TATCTAGTACCTGAAATAAATCACTGGCCTGATAGTATTTTCAGATTTCAAGCTACTTAAGGTGTTGGATG

CACGTGAAATTGGCTACGATTTCTCTCATATTATACCTCAACTTGTTTCAT

>PGSC0003DMG400030496-(rev)LRR-RLPs\_1736

GTTGGATGCACGTGAAATTGGCTACGATTTCTCTCATATTATACCTCAACTTGTTTCATTTGAGGTATGTTG

ATGCAAGAATTCAGGATCCTTCTTCACTAGCCAAGTTGTGCAATCTACA

>PGSC0003DMG400030496-(rev)LRR-RLPs\_1798

GGTATGTTGATGCAAGAATTCAGGATCCTTCTTCACTAGCCAAGTTGTGCAATCTACAGACCATAATTAT  
TTATTCAAGGATAAATATTGTGCAGCTCCCGGTGGAGATTTGGACAATGT

>PGSC0003DMG400030496-(rev)LRR-RLPs\_1860

ATAATTATTTATTCAAGGATAAATATTGTGCAGCTCCCGGTGGAGATTTGGACAATGTCAGAGATAAAAC  
ATGTGATTATTGAACAAATGGATATGCCTAATCCTCTTAGTATTGAAGAG

>PGSC0003DMG400030496-(rev)LRR-RLPs\_1922

GATAAAACATGTGATTATTGAACAAATGGATATGCCTAATCCTCTTAGTATTGAAGAGCAACAACCTTTG  
TTTCTGAATAACTTGCAAACACTTGCTCTCGATTCTCGCCTTTTTTGGC

>PGSC0003DMG400030496-(rev)LRR-RLPs\_2170

CAACAGAAGACAACAGTCCGCGCATTCTGTCTAGTGCTTTTTGCGCGCCTAATCTAAAGCATTTGAGATT  
AGCTGAAACTTCATTGCCTTGGGAAGATATGGCTGTGCTGGCTAATTTAC

>PGSC0003DMG400030496-(rev)LRR-RLPs\_2232

TTGAGATTAGCTGAAACTTCATTGCCTTGGGAAGATATGGCTGTGCTGGCTAATTTACCAATCTTGAGG  
TGCTCAAAGCAGATCATGCATTCACGGGAACAGATTGGGATCTAAATGAA

>PGSC0003DMG400030496-(rev)LRR-RLPs\_2294

TCTTGAGGTGCTCAAAGCAGATCATGCATTCACGGGAACAGATTGGGATCTAAATGAAGATGTTGTGTT  
TCAAAAATAAAATATCTACGAATTAAGAGGGCAGATGATCTGGAAATGTG

>PGSC0003DMG400030496-(rev)LRR-RLPs\_2418

GCAGCTAGTGATAGTTTCCCGATGCTTGAGCAACTAGTCCCTCAGCATCTCGAAGAACTAGAGGATATTC  
CACAAAGTTTTGGAGAAATAATGACACTAAAATTAGTCCAAGTGAAATAT

>PGSC0003DMG400030496-(rev)LRR-RLPs\_2480

GGATATTCCACAAAGTTTTGGAGAAATAATGACACTAAAATTAGTCCAAGTGAAATATTGCAGTCCTACA  
GTCGATGATAGTGCAAGGAATATTCTAGAAGATCAACAAAGCTGGGGAAA

>PGSC0003DMG400030496-(rev)LRR-RLPs\_2542

GTCCTACAGTCGATGATAGTGCAAGGAATATTCTAGAAGATCAACAAAGCTGGGGAAATTATGAGCTTC  
AAATTATAATTGTACCATCTTTACAATACATGTAATGTTTTCTGTTTTCTT

>PGSC0003DMG400030496-(rev)LRR-RLPs\_2604

GAGCTTCAAATTATAATTGTACCATCTTTACAATACATGTAATGTTTTCTGTTTTCTTTCATTCTTGTTTTC  
ACCTATTTGTGAACTCTTATCTATCTATACTATTCTAAAGGTA

>PGSC0003DMG400030496-(rev)LRR-RLPs\_310

TAGCTGATAATGAAGACGACCGAGGAAAAGCTTGTAATTCTTCAATGAAGAATTACAACAAGTTGAAA  
CAGAATTTGATTCTCTCAGGAAAGAGGTGATGGTGATCGAGTTCAACAAGC

>PGSC0003DMG400030496-(rev)LRR-RLPs\_62

TATTTCTCACTTATGCAGACACTGCAGCAACTCTTGCAATCTAAATCATCTTTGATTTGTGAAAGTCCCA  
TACAACAAAACATGTTGAATCTTCTTATCAAAGTCTATGTGCTCTTCA

>PGSC0003DMG400030496-(rev)LRR-RLPs\_744

AAATGAGCAATGATGAATTGATGGTTATTGTGTATAGGAGTCTCAAGGGTAGGAGATTTCTAATCGTCA  
TAGATGATCTTTGGAGTACCGATGCTTGGGACCAAATGCGAAGAATATTTTC

>PGSC0003DMG400030496-(rev)LRR-RLPs\_868

TGATAACAATAAAAAGCCGAATTATATTAACCACTCGTCTCAAACATGTTGCTGATTATGCAAGTCCCCTG  
AATTTCTCCTCATGATGTGTCTTTTCTAAGTTTTAAAGATAGTTGGAA

>PGSC0003DMG400030497-(rev)LRR-RLPs\_1364

ATTCATAAAGGCAACAAGCGATAAAAAGGTTAGAAGTTGTGGCAGAGGAGTATGTGCAAGAGTTGATGG  
ATAGGAGTCTAATTTTGGGTAAAACACGAAAGCCTAATGGAAGATTCAAAAC

>PGSC0003DMG400030497-(rev)LRR-RLPs\_1488

AAAATCCATGATCTTCTTAGGCAGTTGTGCATAAGAGAAGCTCAAAGTGAAAATGTTGTGCATTTTCCTT  
ACAGTGATCTTGTTCCTGCTTACTCAGATGACATAAATGATCGTAGGCGT

>PGSC0003DMG400030497-(rev)LRR-RLPs\_1550

TTTTCTTACAGTGATCTTGTTCCTGCTTACTCAGATGACATAAATGATCGTAGGCGTGTGATGATTCCTT  
TTCTCATTGAGGATTATTTTTGCAATCATCCAAGTCAAATGAGTGGTAA

>PGSC0003DMG400030497-(rev)LRR-RLPs\_1736

CTGGCCTGATAGTATTTCAAGCTACTTAAGGTGTTGGATGCACGTGAAATTGGCTACGATTTTC  
TCACATATAATACCTCAACTTGTACATTTGAGGTATATTGATGCAAGAAT

>PGSC0003DMG400030497-(rev)LRR-RLPs\_1798

ACGATTTCTCACATATAATACCTCAACTTGTACATTTGAGGTATATTGATGCAAGAATTGAGAATCCTTCT  
TCACTAGCCAAATTGTTCAATCTACAAACCATAATTGTCTATTCAAGGA

>PGSC0003DMG400030497-(rev)LRR-RLPs\_186

GTTGAATCTTCTTATCAAAGTCTATGTTCTCTTCAGGTTTTTCTAGAGGATACCACAAATGAAGCCAATGA

TATTGAAAATCTCAAGATTTTAGAGAAAAAGATCAAAGATGTAGTCTAC

>PGSC0003DMG400030497-(rev)LRR-RLPs\_1922

TGTGCAGCTCCCCGCGGAGATTGGACAATGTCACAGATAAAACACCTCGATATTGAACAAATGGATAT

GCCTAATCCCCTTAGTATTGGAGATCAACAGCCTGAATTTTTGTACCTGAA

>PGSC0003DMG400030497-(rev)LRR-RLPs\_1984

TGGATATGCCTAATCCCCTTAGTATTGGAGATCAACAGCCTGAATTTTTGTACCTGAATAACTTGCAAAC

ACTTGCTCTTGATTCTCGCCTTTTTGGCAGAAATCCTAGAGAGAACAC

>PGSC0003DMG400030497-(rev)LRR-RLPs\_2046

TTGCAAACACTTGCTCTTGATTCTCGCCTTTTTGGCAGAAATCCTAGAGAGAACACCCAATGTAGAAA

AGCTAAAGATTAGAGCTGCTAATACACATAATGAGTGGTCTGATTTTGT

>PGSC0003DMG400030497-(rev)LRR-RLPs\_2232

CGCATTCTGTCTAGTGCTTTTTGTGCGCCTAATCTAAACATTTGAGATTAGCTTATACTTCATTGCCTTG

GGAAGAAATGGATGTGCTTGCTAATTTACCCAATCTTGAGGTGCTCAA

>PGSC0003DMG400030497-(rev)LRR-RLPs\_248

AGCCAATGATATTGAAAATCTCAAGATTTTAGAGAAAAAGATCAAAGATGTAGTCTACAAAGCAGAAGA

TAGAGTTGATTCATGCTTAACAAGCATACTTCTAGCAGATAATGAAGACGA

>PGSC0003DMG400030497-(rev)LRR-RLPs\_2480

AATGCTTGAGAACTAGTCCTTCAGCATCTCGAAGAACTAGAGGAGATTCCACAAAGTGTTGGAGAAAT

AATGACATTAATAATTAGTCCAAGTGGAAAATTGCAATCCTGCAGTCGACAC

>PGSC0003DMG400030497-(rev)LRR-RLPs\_2542

GAGAAATAATGACATTAATAATTAGTCCAAGTGGAAAATTGCAATCCTGCAGTCGACACAAGTGAAGGA

ATATTCTACAAGAGCAGCAAGGCTGGGGAAATTGTGAGCTTCAAATTGAAA

>PGSC0003DMG400030497-(rev)LRR-RLPs\_2604

GCAAGGAATATTCTACAAGAGCAGCAAGGCTGGGGAAATTGTGAGCTTCAAATTGAAATTGTACCTTCA

TTACAATACGATCTTTGATTATTTCCAATTCTTAGTTAATAAATTCATATG

>PGSC0003DMG400030497-(rev)LRR-RLPs\_310

CAGAAGATAGAGTTGATTCATGCTTAACAAGCATACTTCTAGCAGATAATGAAGACGACCGAGAAAAAG

CTTGTAATTCTTCAATGAAGAATTACAACAAGTTGAAACAGAATTTGATT

>PGSC0003DMG400030497-(rev)LRR-RLPs\_992

TGTGTCTTTTCTAAGTTTTAAAGATAGTTGGAACTATTTACCAAAGACTATTCAAAAAGATCGTTGTC  
CTCCACAACACTACGAAAAATAGGTAAGCATATCATAACAATGTCAAGG

>PGSC0003DMG400030533-(rev)RLKWAX-EGF\_0

TCTAGAGTCACAATTCACAAAGCTTTAGCTAGCTTTCCTCTTATTGCAGTTAGATTCAGTATGGATTTGTC  
TTCTTCTTTTATTTGTTTCCTTCTGTCTCTACTTGTGATGTTAGTTCAG

>PGSC0003DMG400030533-(rev)RLKWAX-EGF\_1054

AGCTCAAATCCTTTCTCTAGCAATAAAGGAACAGAAAGAAGAGACTTAAACACAAAATGTATGGATGTG  
GAGTTGAGGGAGAATTCCTTCTAGATGCTATTCGTTTTGCTTTTCCAAAG

>PGSC0003DMG400030533-(rev)RLKWAX-EGF\_1116

GGATGTGGAGTTGAGGGAGAATTCCTTCTAGATGCTATTCGTTTTGCTTTTCCAAAGACATTGATTACT  
AACTTCTCTCCAGTCTTTGGCGGAGTAGGATCGGTGATGATAACTTCTT

>PGSC0003DMG400030533-(rev)RLKWAX-EGF\_1178

TGATTACTAACTTCTCTCCAGTCTTTGGCGGAGTAGGATCGGTGATGATAACTTCTTTAGCTGTATACGT  
TATCTGGCGTTACAAGAAGAGGAAATTTAGTTCATCCCACTTCTTCTCG

>PGSC0003DMG400030533-(rev)RLKWAX-EGF\_124

AGGGCAGAAATGTTTCAACTTGCCAAAGTCCTTTTCATGTGGAAATTTACTGACCTGACATTTCTTAC  
TCTCTTCCACACAACCCGATTGTGGAATAATGTCCATGTCTGGTTGTG

>PGSC0003DMG400030533-(rev)RLKWAX-EGF\_1240

TGTATACGTTATCTGGCGTTACAAGAAGAGGAAATTTAGTTCATCCCACTTCTTCTCGACAAGGAAATTG  
TCAAATATCTTTAATCATGATGCTGAGGGAGGCAGTATATACTTTGGTGT

>PGSC0003DMG400030533-(rev)RLKWAX-EGF\_1302

GGAAATTGTCAAATATCTTTAATCATGATGCTGAGGGAGGCAGTATATACTTTGGTGTTCAGTCTTCTCT  
TATTCAGAACTTGAAGAAGCCACAGATGATTTCAATTCCTCTAGAGTAC

>PGSC0003DMG400030533-(rev)RLKWAX-EGF\_1364

GTCTTCTTATTTCAGAACTTGAAGAAGCCACAGATGATTTCAATTCCTCTAGAGTACTTGGAGATGGAG  
GTTATGGAAGTGTACTATGGTGAGAACTTCTTAACCTGGATATGTAT

>PGSC0003DMG400030533-(rev)RLKWAX-EGF\_1426

AGATGGAGGTTATGGAAGTGTACTATGGTGAGAACTTCTTAACCTGGATATGTATCAACTGTTTCTT  
CTTCTGGCTAATTCTTTCCCATCGATGAACAGGAAAACCTTAAAGATGGAC



>PGSC0003DMG400030533-(rev)RLKWAX-EGF\_186

TTTCCTTACTCTCTTCCCACACAACCCGATTGTGGAATAATGTCCATGTCTGGTTGTGATGCTAAACCATA  
TCCAAGAATCCAAATAGTTCCTGGAGGAGAATGGTACTATGCTTTAGAG

>PGSC0003DMG400030533-(rev)RLKWAX-EGF\_1922

CTTCCCAAATGATGTCTCTCATATTTGACTACACCCCGGGGTACCCCAGGCTATATTGATCCAAAGTATC  
ACGAATGTTACCAGCTGACCATTAAGTGATGTCTATAGCTTCGGGGT

>PGSC0003DMG400030533-(rev)RLKWAX-EGF\_2232

TTTCTGTGCTTGCAGACAGATAGGGACGTGAGGCCTACTATGGTTGAAGTTTTGGATACTCTAAACGAG  
ATTCAGACTAATCTCAATGCCAATGAAGCTAAAATAGTAGCAGCTCCTCCT

>PGSC0003DMG400030533-(rev)RLKWAX-EGF\_2294

AAACGAGATTCAGACTAATCTCAATGCCAATGAAGCTAAAATAGTAGCAGCTCCTCCTTCCCTGAATCA  
GAAGATATTGTTTTGTTGAAGAAAGTTAAATCACTACCTTCTCCAAATTC

>PGSC0003DMG400030533-(rev)RLKWAX-EGF\_2356

CTGAATCAGAAGATATTGTTTTGTTGAAGAAAGTTAAATCACTACCTTCTCCAAATTCTGTGACTGACAA  
ATGGACTACTTGCTCTGATATAACTTGTACAAAGTAGTTAAGATTTCTAT

>PGSC0003DMG400030533-(rev)RLKWAX-EGF\_2418

ACTGACAAATGGACTACTTGCTCTGATATAACTTGTACAAAGTAGTTAAGATTTCTATACTTCGTTTCTTT  
GTTACTTCTATGTAAATTTTGGGAGACTGCATATGTACTACTGTGAGAA

>PGSC0003DMG400030533-(rev)RLKWAX-EGF\_248

TAAACCATATCCAAGAATCCAAATAGTTCCTGGAGGAGAATGGTACTATGCTTTAGAGATGCATAATTCA  
TCAGTTTGGATTGGGGACCCTAAGCTTCAAACGACACTGAGACAACACAA

>PGSC0003DMG400030533-(rev)RLKWAX-EGF\_310

ATAATTCATCAGTTTGGATTGGGGACCCTAAGCTTCAAACGACACTGAGACAACACAAGTGCCAGGCTT  
TCAACAAAAATTTCTCCCTTCCAAACTCTCCTTTTATGTCTTTCCATATGA

>PGSC0003DMG400030533-(rev)RLKWAX-EGF\_372

CAGGCTTTCAACAAAAATTTCTCCCTTCCAAACTCTCCTTTTATGTCTTTCCATATGATTAATATTAATAAG  
TTCTTCAAATGCATCAGTAGCAGTAATAATGCCCATAACATTATGCAG

>PGSC0003DMG400030533-(rev)RLKWAX-EGF\_434

TATTAATAAGTTCTTCAAATGCATCAGTAGCAGTAATAATGCCCATAACATTATGCAGAAGAAGAACAAT

CATTTTGTGGATTATAATATGTACAGTGGCTGTGAAGGCCTTAGCATATA

>PGSC0003DMG400030533-(rev)RLKWAX-EGF\_496

AGAACAATCATTTTGTGGATTATAATATGTACAGTGGCTGTGAAGGCCTTAGCATATACTACAAGTTTTTC

TGAAGTTGATGAATACATAAGAGCAGACAATCTTCCTACCAACTGTTTAC

>PGSC0003DMG400030533-(rev)RLKWAX-EGF\_558

AAGTTTTCTGAAGTTGATGAATACATAAGAGCAGACAATCTTCCTACCAACTGTTCACTTATCAGATTGCC

AATTCAATCAAGTCATGGTGATTTGTTTCGACATATTAGGTCCCGAAATT

>PGSC0003DMG400030533-(rev)RLKWAX-EGF\_62

GGATTTGTCTTCTTCTTTTATTTGTTTCCTTCTGTCTCTACTTGTGATGTTAGTTCAGGCAAAGGGCAGAAA

TGTTTCAACTTGTTCCAAAGTCCTTTTCATGTGGAAATTTTACTGACCT

>PGSC0003DMG400030533-(rev)RLKWAX-EGF\_620

CAGATTGCCAATTCAATCAAGTCATGGTGATTTGTTTCGACATATTAGGTCCCGAAATTCTAGTAGAATGG

AAACTGTCTGAGGAATGTAACGAATGTCATTATAGTGGAGGTCAATGCCA

>PGSC0003DMG400030533-(rev)RLKWAX-EGF\_682

TAGAATGGAACTGTCTGAGGAATGTAACGAATGTCATTATAGTGGAGGTCAATGCCAGACTGATAAAA

CCAACAAATTTTCTTGTACAAAGGTAGACATCTCCAAAATAATCTATAAT

>PGSC0003DMG400030533-(rev)RLKWAX-EGF\_744

GATAAAACCAACAAATTTTCTTGTACAAAGGTAGACATCTCCAAAATAATCTATAATTTCAAGGTCAAG

TTCATGCTTCTTAAGTCCCTTTTTTGTTCATGCCACATAAATAATATAT

>PGSC0003DMG400030533-(rev)RLKWAX-EGF\_806

AGGTCAAGTTCATGCTTCTTAAGTCCCTTTTTTGTTCATGCCACATAAATAATATATTTTCGTATTATTGCC

ACCTTCTGTAGATGCAAACACCTACAGGTAGTACCGATCAAAGAAA

>PGSC0003DMG400030533-(rev)RLKWAX-EGF\_868

TATTATTGCCACCTTCTGTAGATGCAAACACCTACAGGTAGTACCGATCAAAGAAAAGAAACAACTG

GAAGAAATATGGTGGGGCAGATTCTGGGAACAGGTAGTAAATATGTTTAA

>PGSC0003DMG400030533-(rev)RLKWAX-EGF\_930

ACAACTGGAAGAAATATGGTGGGGCAGATTCTGGGAACAGGTAGTAAATATGTTTAAATTGCTGCCATG

TATTCTTATTACAGAATATTCAAGCATATCATTTAAAATTCCATCATTTTG

>PGSC0003DMG400030535-(rev)RLKWAX-EGF\_1054

AGTGCTTACTTGTTAGCTGAGGCTAATACTATGCCATAACTTTTATTTGCAACTCTATGTTGCTCGGACTC  
TTCAAAAATGTTGTCAGGTTTCATGGCGGATCCTCGAAAAGTAGTGAATT

>PGSC0003DMG400030535-(rev)RLKWAX-EGF\_124

GGCTATGGGTTGATGGTATCGATCTTTCGGACTCGATTCTTGAAGGTTATTTATCTAATAGAAGTTGCAA  
ATCCTTTGAAAGGAACTTATCTTTTCCTAATACACCTTCTGTTTCATTTG

>PGSC0003DMG400030535-(rev)RLKWAX-EGF\_1488

TCGGGGATGGAGGATATGGAACAGTGTACTATGGTAAGAACTTTTGACAATGCAGATGTCTAGCCATC  
ACTTTCTTCATTTTCGTTTATTCTAATTCTTGTATGCTACAACTAGGGAA

>PGSC0003DMG400030535-(rev)RLKWAX-EGF\_1550

AGCCATCACTTTCTTCATTTTCGTTTATTCTAATTCTTGTATGCTACAACTAGGGAACTTCAGGATGGA  
AGAGAAGTTGCAGTAAAACGCCTCTACGACCACAATGCTAGGAGAAAGG

>PGSC0003DMG400030535-(rev)RLKWAX-EGF\_186

AGTTGCAAATCCTTTGAAAGGAACTTATCTTTTCCTAATACACCTTCTGTTTCATTTGGTGTATTCAACAAT  
ATCACTTTGTTCAAATGTATGAATGGTAGTAGTAGTACTAGTAGTAAT

>PGSC0003DMG400030535-(rev)RLKWAX-EGF\_2356

GTACTAGAAACATTGCAAGAAATTCAGCATGGTGAGTTTACACATGATAAGAAAATCGATTGTGACGGA  
AACTAAAGAGAGTGTCCAAGTCCCTCTTTCACCTGAATCAGAAGTAGAT

>PGSC0003DMG400030535-(rev)RLKWAX-EGF\_2418

TGACGGAAACACTAAAGAGAGTGTCCAAGTCCCTCTTTCACCTGAATCAGAAGTAGATGTATTATTGAA  
GAACTCAACAAGTTTCCAACCTCACCAATTTTCAGTAACTCAAGTGTGGAT

>PGSC0003DMG400030535-(rev)RLKWAX-EGF\_2452

CTTTCACCTGAATCAGAAGTAGATGTATTATTGAAGAACTCAACAAGTTTCCAACCTCACCAATTTTCAGT  
AACTCAAGTGTGGATTAGTGACTCTAGCACAAGCACCCTAGTACATAA

>PGSC0003DMG400030535-(rev)RLKWAX-EGF\_248

ATTCAACAATATCACTTTGTTCAAATGTATGAATGGTAGTAGTAGTACTAGTAGTAATGAGGAGATAGAT  
GGTATTTTCGACGTTATGAGAAGTACTTGAATTGTGATGGATTAACTT

>PGSC0003DMG400030535-(rev)RLKWAX-EGF\_62

CAACACTTTTCAATATCCAAAAGTTGAGATTGAAGGAGTAACATACAATGCTTACAAGAAGTGGCTATG  
GGTTGATGGTATCGATCTTTCGGACTCGATTCTTGAAGGTTATTTATCTAA

>PGSC0003DMG400030535-(rev)RLKWAX-EGF\_682

TATTGTGACTGATTGAACTGTCATTTGTGTGTTTTGCAGCAGCAAAAAAGAATTTGGGATTGATTCTAGG  
CTCAGGTAAGTACTGACTATAATCAATAACTTTTAGCATAATGCAGGAATAGA

>PGSC0003DMG400030535-(rev)RLKWAX-EGF\_744

ATTCTAGGCTCAGGTAAGTACTGACTATAATCAATAACTTTTAGCATAATGCAGGAATAGACTCGAACTT  
GATCTCAACCGGCAAGTAAACATTCCAACTTTGAGTATTTTTGCACATCT

>PGSC0003DMG400030536-(rev)RLKWAX-EGF\_1098

GATATAAAGAATCTAAAATATTTAACTTTAGTCCATGTTTTGTCCGTTGATCGGTTGTTATTGTTTTTTGTT  
TCAGTTTCAGTATTTATCGGTTCTGTTGTTGGACTTTGTGCAATTGCC

>PGSC0003DMG400030536-(rev)RLKWAX-EGF\_1159

TGTTTTTTGTTTCAGTTTCAGTATTTATCGGTTCTGTTGTTGGACTTTGTGCAATTGCCTGTGTTCTATGGT  
TTTACATGAGGAGGAGAAATGGTTCTTCACCATTTATTTCAAGAAATA

>PGSC0003DMG400030536-(rev)RLKWAX-EGF\_1708

ATCCACAAAAGTCTTTTTGTTGTTTTGCTTTTCGAGGGGAAATGTACGTAGTAAGCATCTTGATCTAAC  
AGCTATTTCTGTATGTTCTAAAATCAGGAAAACCTTAAAGATGGAAAAGA

>PGSC0003DMG400030536-(rev)RLKWAX-EGF\_1769

TTGATCTAACAGCTATTTCTGTATGTTCTAAAATCAGGAAAACCTTAAAGATGGAAAAGAAGTTGCAGTTA  
AGAGACTTTATGAGAACAATCACAGACAAATGGAGCAGTTTATCAACGAA

>PGSC0003DMG400030536-(rev)RLKWAX-EGF\_183

TTGAGTTTTCTTTCTACAAATCCACTGAACTTGATTGTGGATTGTCCAAAGTTGATTGTGATGTTAGTCC  
AAATCCTATTATTGAATTAGAAGGGGTGAAATATCAAGCTCTTTTAAAA

>PGSC0003DMG400030536-(rev)RLKWAX-EGF\_1830

TTGCAGTTAAGAGACTTTATGAGAACAATCACAGACAAATGGAGCAGTTTATCAACGAAATTGAAATTCT  
CACTCGCCTTAGGCATCCGAATCTTGTTACCCTTTATGGATGTGCATCAA

>PGSC0003DMG400030536-(rev)RLKWAX-EGF\_244

ATGTTAGTCCAAATCCTATTATTGAATTAGAAGGGGTGAAATATCAAGCTCTTTTAAAAGCTGATGTTTTT  
ATCAGACTTAAGGACTAGTCTTGAGAACTTTTGAAGAAGAACAGTT

>PGSC0003DMG400030536-(rev)RLKWAX-EGF\_2981

ATCCTCCAAAATGCACTACTTCTAGAAGATCCGCACACACTTGTGAGCATTTTTGAAAATTTTCTCTATG

GATTATCCTGGCTTTAAATATGTCTTTGCTACTTTTGGTGAATTATAAC

>PGSC0003DMG400030536-(rev)RLKWAX-EGF\_366

GAGACTTTTGATAAAAATTTCTCGATCGCTATTTCTCCTTCAATAACATATAGATTTGATCCCTTACTCACT  
TTGTTCAAATGCAACAGAAACCAAAGAGTAGAAATGAAGAATTTTTC

>PGSC0003DMG400030536-(rev)RLKWAX-EGF\_427

CCTTACTCACTTTGTTCAAATGCAACAGAAACCAAAGAGTAGAAATGAAGAATTTTCAACTCCAGCAG  
TTATCAAAGTTACAATGTCTGTGATAGTTTCATATTATACTATAACATCT

>PGSC0003DMG400030536-(rev)RLKWAX-EGF\_488

CTCCAGCAGTTATCAAAGTTACAATGTCTGTGATAGTTTCATATTATACTATAACATCTCCATCCATTATTA  
TCAAGTATCTGAAATTCCTAGTAGCTGTTCAATTTATTCAGTTGCCTTT

>PGSC0003DMG400030536-(rev)RLKWAX-EGF\_549

ATCCATTATTATCAAGTATCTGAAATTCCTAGTAGCTGTTCAATTTATTCAGTTGCCTTTGACATCAAATTCA  
GAAGCAAAAACAAATGGAAGTGGCTTATTTTCATCTGTAACTGATGAA

>PGSC0003DMG400030536-(rev)RLKWAX-EGF\_610

CATCAAATTCAGAAGCAAAAACAAATGGAAGTGGCTTATTTTCATCTGTAACTGATGAAGTTATGCTAGG  
ATGGACTGTGTCTGATGAGTGCAATCAGTGTTATTATAACCGGAGGAAGGT

>PGSC0003DMG400030536-(rev)RLKWAX-EGF\_671

TATGCTAGGATGGACTGTGTCTGATGAGTGCAATCAGTGTTATTATAACCGGAGGAAGGTGTCAAACAGA  
TAATGCTACTAATAGATTTCTTTGTTCTGATACCAATGGTAAAGAGAAGAT

>PGSC0003DMG400030536-(rev)RLKWAX-EGF\_854

TTTTACTGTGATTGCAGGTGGTCATAAATTTGCGAAAGTGATTGTTGCAGGTACCTATCTTTTTAACATT  
TTGTCTGCAATTTTGTGTTTACATTACAAGATTTTAGCCTTTAAAGGT

>PGSC0003DMG400030536-(rev)RLKWAX-EGF\_915

TTTTAACATTTTGTCTGCAATTTTGTGTTTACATTACAAGATTTTAGCCTTTAAAGGTTTATTTCTACAAT  
GAGTATGATATAACAAGAAGTAGCGTTTTCCACCGCTTGAGCCTGTGA

>PGSC0003DMG400030553G-LecRK\_1525

CTTCAATCTCAAACCTTGAAGTACTAGAGACTAGAGACATCTAGTTGAGGATAGATGAATACTTAACAGTTAC  
CACTCCACCACAACCTTTAGTAATACATATCTACAGTTACCATTCCACCA

>PGSC0003DMG400030553G-LecRK\_1586

AACAGTTACCACTCCACCACAACCTTTAGTAATACATATCTACAGTTACCATTCCACCACAACCTTTATACA  
TATATATACTTCAAATTGTTACCTTTGTAGGTAGAGTGGATTTACC

>PGSC0003DMG400030553G-LecRK\_1647

ACCTTTATACATATATATACTTCAAATTGTTACCTTTGTAGGTAGAGTGGATTTACCTAGTTTATAAAG  
TTTCTTTTGAGTCCAAATTTGAATTCATTAATTACTTCTCCTCTTTTT

>PGSC0003DMG400030553G-LecRK\_1708

GTTTATAAAGTTTCTTTTGAGTCCAAATTTGAATTCATTAATTACTTCTCCTCTTTTTTTTCTCTATTATCAA  
GAAAATGAAAACCAAAAACACATATTTTCTTTGTTAACGATCCAG

>PGSC0003DMG400030553G-LecRK\_1769

TCTCTATTATCAAGAAAATGAAAACCAAAAACACATATTTTCTTTGTTAACGATCCAGTATCTGAAATTT  
ACTGGCTTGATTAATTTAGATTTACATCGGGGTAAGCCTAATTAAGGTG

>PGSC0003DMG400030553G-LecRK\_183

TCTTCAAACCAGGTAACAATTCCAATTATTACATAGGTATATGGTATAAAAAAATAAGTAAACAAACTAT  
AATTTGGGTTGCAAATAGAGAAACACCAATTTCCATATATGAAATGGATT

>PGSC0003DMG400030553G-LecRK\_1830

TCTGAAATTTACTGGCTTGATTAATTTAGATTTACATCGGGGTAAGCCTAATTAAGGTGTTAAATCTCTTT  
CTATTAATTCATTATTGAATTCGAGACGTCTGGTTAAAAATGGAGGCCA

>PGSC0003DMG400030553G-LecRK\_1891

AAATCTCTTTCTATTAATTCATTATTGAATTCGAGACGTCTGGTTAAAAATGGAGGCCATCCCCTCACAAT  
TAGTGACACATTAACATAACATTTTTTTTTCTTTCTCTCTTTTGTTAT

>PGSC0003DMG400030553G-LecRK\_1952

CCCTCACAATTAGTGACACATTAACATAACATTTTTTTTTCTTTCTCTCTTTTGTTATTTGTCTATTTATGA  
ACTTGTCATTAATCTTTTCATTTTACTTGGTAATAATGTGTTCTTTG

>PGSC0003DMG400030553G-LecRK\_2257

ATTAATAAAAATATACAAAATTTAGTATTATCAAGACTCTAAACTCATACTTTTTTTAATTTTTAAATATA  
GAGAGTACTACAAAATTTACAGACAGAATACAAAAGGAGAAGGACTA

>PGSC0003DMG400030553G-LecRK\_2318

TTTTAAATATAGAGAGTACTACAAAATTTACAGACAGAATACAAAAGGAGAAGGACTAGAATTGATAG  
ATATTCAAGATGATGATATTGAGGTTCCATTCTTTAGTTTTGAAAGTATAT

>PGSC0003DMG400030553G-LecRK\_2440

GTAGCAACAGATGACTTCTCTGAACAAAATAAGCTTGGTCAAGGGGGATTGGTCCTGTTTACAAGGTA  
TTTATGCAAATATCATTTTGTAAATTTATTTTTATATGTGGCGCACAGTTTG

>PGSC0003DMG400030553G-LecRK\_2501

ACAAGGTATTTATGCAAATATCATTTTGTAAATTTATTTTTATATGTGGCGCACAGTTTGAAATTCGATTG  
TATAGGGATAGAGGTACAAACAGGTTTGACAGAACCCAATAATTTTGGT

>PGSC0003DMG400030553G-LecRK\_2562

ATTCGATTTGTATAGGGATAGAGGTACAAACAGGTTTGACAGAACCCAATAATTTTGGTTCAGACCTTAT  
ATTTTTGTTTAAAAGATCGATGAATTAGTATAAATATTTTATCCAGATCC

>PGSC0003DMG400030553G-LecRK\_2623

AGACCTTATATTTTTGTTTAAAAGATCGATGAATTAGTATAAATATTTTATCCAGATCCCAATAAGCTCTC  
TTTTCAAAAATCTGAAATCTATACACTCAAAATTCTAGTTTGCGGCATG

>PGSC0003DMG400030553G-LecRK\_2684

ATAAGCTCTCTTTTCAAAAATCTGAAATCTATACACTCAAAATTCTAGTTTGCGGCATGTACTACTTTTCTT  
ATTAGTTGTCATGTCTTTTTTACTGCCACATTTCCCTTTTTCAAATA

>PGSC0003DMG400030553G-LecRK\_2745

CTACTTTTCTTATTAGTTGTCATGTCTTTTTTACTGCCACATTTCCCTTTTTCAAATACTTTGAAATGCTTTT  
CTTGAGTCTGAGCGTCTATCAGAAACAATTTCTCTATTTCCATGAG

>PGSC0003DMG400030553G-LecRK\_2806

TTGAAATGCTTTTCTTGAGTCTGAGCGTCTATCAGAAACAATTTCTCTATTTCCATGAGGTAGGAGTAAG  
GTCTATGTACCATCTACCCTCTCTATACTCCACTTATGAAATTACACTAC

>PGSC0003DMG400030553G-LecRK\_2867

AGGAGTAAGGTCTATGTACCATCTACCCTCTCTATACTCCACTTATGAAATTACACTACTGAATATGTTAG  
TAGTATTATATTGTTTTGCTGTGGTGGCCGAACCTGTGACGTGCACCT

>PGSC0003DMG400030553G-LecRK\_2928

AATATGTTAGTAGTATTATATTGTTTTGCTGTGGTGGCCGAACCTGTGACGTGCACCTAACCAACATAA  
TCACTTTTTAAATAAATATATTGTATCACAGTATTTATTTTTAAAATAA

>PGSC0003DMG400030553G-LecRK\_2989

CCAACATAATCACTTTTTAAATAAATATATTGTATCACAGTATTTATTTTTAAAATAAATAATTTTTTTGT

AGGGAATATTTTCTGGAGGAAGAGAAATTGCATTA AAAAGGTTATCAA

>PGSC0003DMG400030553G-LecRK\_3111

CATTCTGGACAAGGCATAAATGAATTCAAGAATGAAGTAATGTTGATTGCAAGGCTTCAACATAGAAAT

CTTGTTAGACTTTTGGGTTATTGCATTCAATCAAGTGAAAAGATTTTACTC

>PGSC0003DMG400030553G-LecRK\_3294

ACTAATATCTTTATACTGTCGATGTATATAAGTTAAATTTATTTGATTGTTTTTCTTGATAAGATCGAAAA

CGAAGCGTATTATTGGATTGGAGAAAAAGATTTGAGATTATAGAGGGA

>PGSC0003DMG400030553G-LecRK\_3355

AAGATCGAAAACGAAGCGTATTATTGGATTGGAGAAAAAGATTTGAGATTATAGAGGGAATTGCTAAA

GGACTTCTTTATCTACATCATGATTCAAGATTAAGGATCATT CATAGAGATC

>PGSC0003DMG400030553G-LecRK\_3599

AGTACTCATAACTCCCTATTGTGATGTGACCCTTCTCCAGAATCTGCTAATGTAGGATGTTTTGTGCATCC

GAGTTCAGACTGTCCTTTTTAAATAATTTGCCAATTGTGTTGATTTTC

>PGSC0003DMG400030553G-LecRK\_3660

TTGTGCATCCGAGTTCAGACTGTCCTTTTTAAATAATTTGCCAATTGTGTTGATTTTCTTGTTCAATAA

TGTTTTGTTGATACTATTAATGCAGTGGTTATATGGCTCCGGAGTAT

>PGSC0003DMG400030553G-LecRK\_3843

ATCATCAGTGGAGAAGAAATACTGGATTTTTTAATCAAGAAGAAGCGTCAAATCTCTTAGGCCTTGTG

AGTGAATAACTTAAATTCTTGCTTTTTTTTTGCAACACTGTCACGGAG

>PGSC0003DMG400030553G-LecRK\_3904

GCCTTGTGAGTGAATAACTTAAATTCTTGCTTTTTTTTTGCAACACTGTCACGGAGTTTCAAACCTCAT

AGGTAAACTCCAGTACATTGCCATGGAATTTACCTATGAAATTTGA

>PGSC0003DMG400030553G-LecRK\_3965

TCAAACCTCATAGGTTAAACTCCAGTACATTGCCATGGAATTTACCTATGAAATTTGAATCGATCTCCAT

GACATTTATTTTCAATTACATGACTGAAAAGTGACTAGTCCGCGCTAT

>PGSC0003DMG400030553G-LecRK\_4026

CGATCTCCATGACATTTATTTTCAATTACATGACTGAAAAGTGACTAGTCCGCGCTATTTATTACAAAAC

TTTATGTTAACATAAATATGTGAACTATAATTTAGGCATGGAGATTGTG

>PGSC0003DMG400030553G-LecRK\_4087



ATTACAAAACCTTTATGTTAACATAAATATGTGAACTATAATTTAGGCATGGAGATTGTGGACAGAAGATA  
AGTCAATGGACTTAGTGGATCAACTACTACATAAATCATGCAACAAAGAG

>PGSC0003DMG400030553G-LecRK\_4453

TAACGCACTACTAGAAATCAGTCAATTTTTTCATCATGAACATGTTTCATTGAAAAATCTATCGAAAATATTT  
CTGATAGAACGTCTGTTGAAAATTGACTGATTTAAGACTGAGATGCCAA

>PGSC0003DMG400030561LRR-RLPs\_1178

TTAACGAGCATTTTCTGTCGATTGAGTGTGCTTGATTGTCAGACAATGAAATCAGTGGACTGCTTCCAA  
CTTTTATAAGAGATCCATCGAGCTGTCTCGATAATCGTTTGAAGGAGCTA

>PGSC0003DMG400030561LRR-RLPs\_1240

GCTTCCAACCTTTTATAAGAGATCCATCGAGCTGTCTCGATAATCGTTTGAAGGAGCTATACTTAGGAAAT  
ACAAAATTCAGTGACTTCTTTCCTGAAGGATTGACAATGCACAAGAATCT

>PGSC0003DMG400030561LRR-RLPs\_1426

AAATTTGAGGTTTCTAAGGATATCAAACAACAAGTTGAATGGGAGCATTCTTCGAGTATTGGACAGTT  
ATCGAATCTTGAAGAGCTAGATATCTCTGAGAACTTATTCACCAGTATAGT

>PGSC0003DMG400030561LRR-RLPs\_1488

GACAGTTATCGAATCTTGAAGAGCTAGATATCTCTGAGAACTTATTCACCAGTATAGTTTCTGAACTCCA  
CTTTGTAAAATAAGCAAATTGATGAAATTGCACTTGTCTAAAAACGAAA

>PGSC0003DMG400030561LRR-RLPs\_1612

GGTTTTGAATGTGAGTTCCAATTGGTATCCAACCTTCCAAGTCAAAGAGATTGGAATGGCATCAGTAAAA  
GTAGGGCCTAATTTTCTCAATGGCTACAAAACTGTCAATTCTTGATAC

>PGSC0003DMG400030561LRR-RLPs\_1674

CAGTAAAAGTAGGGCCTAATTTTCTCAATGGCTACAAAACTGTCAATTCTTGATACTCTTATTATGTCT  
GATGCTAATATTACTGATATGATCCCGAATTGGTTGAGCAATATAACAT

>PGSC0003DMG400030561LRR-RLPs\_1736

ATTATGTCTGATGCTAATATTACTGATATGATCCCGAATTGGTTGAGCAATATAACATTGTTTCATGACAAC  
TCTGGATCTCTCTGTTAACACATTAGTCGGTGGTATAAGCGTGTTGTGT

>PGSC0003DMG400030561LRR-RLPs\_1798

CATGACAACTCTGGATCTCTCTGTTAACACATTAGTCGGTGGTATAAGCGTGTTGTGTGATGCTCAACTTT  
TGGAATCAATTGATCTTTCCAAGAATCTGTTATCCGGACGAATCCCTTC

>PGSC0003DMG400030561LRR-RLPs\_1860

CTCAACTTTTGGGAATCAATTGATCTTTCCAAGAATCTGTTATCCGGACGAATCCCTTCATGTTTGAGTAAC  
TTGGAAGAGTTGAGATCATTAAATCTGGCTGACAATAGTCTTGAAGGTG

>PGSC0003DMG400030561LRR-RLPs\_1922

TTGAGTAACTTGAAGAGTTGAGATCATTAAATCTGGCTGACAATAGTCTTGAAGGTGAAATCCCAAGT  
TCTTTAGGTGATTTGACACTAAGGTTTTTGCATTTGCAAAGAACAACCTTA

>PGSC0003DMG400030561LRR-RLPs\_1984

CCCAAGTTCTTTAGGTGATTTGACACTAAGGTTTTTGCATTTGCAAAGAACAACCTTACAAGGTAAAATC  
CCTTTGTCTTTTCAAATTTGACATGGTTAGAAAGACTTGACTTAGGAGA

>PGSC0003DMG400030561LRR-RLPs\_2232

GTTGGTTAAATCTTGCTGGTAATAACTTGTATGGAECTATTCCGAGTTGTTTTGGAACTTTTCGTGTGGT  
AGTATTAGTGGACCTGGTGAAGTATTTGGACAAAGAGTTGAAAGTTTTA

>PGSC0003DMG400030561LRR-RLPs\_2294

TCGTGTGGTAGTATTAGTGGACCTGGTGAAGTATTTGGACAAAGAGTTGAAAGTTTTATGAAAGGAATA  
CCACTTGAGTATGTTGGTGAACAAATTTTGTACTTAGAATTTTGGATCTT

>PGSC0003DMG400030561LRR-RLPs\_2976

TTGTCTGGTTGACAGTTGACACACAAGTTATGCAGAGATTAGAGTGTGAGAATTGTAATGCAGAACATT  
ATAATGTAAAGATTGTAACATATATATTATTTTTTTTCGGACATTAGGTTC

>PGSC0003DMG400030561LRR-RLPs\_3038

GAACATTATAATGTAAAGATTGTAACATATATATTATTTTTTTTCGGACATTAGGTTCATTGTAATAAAAA  
CATAAATATTTTTCTGTAATGGCAAGCTTGTGCATGAATGTACACGTG

>PGSC0003DMG400030561LRR-RLPs\_3100

TACTAAAAACATAAATATTTTTTCTGTAATGGCAAGCTTGTGCATGAATGTACACGTGGCTCTCATCGAG  
TTGCTGATCATGATCTCTTAGACTCGAGAAGAGACTCATCATGACCTGA

>PGSC0003DMG400030561LRR-RLPs\_682

TGATCTTTCTCAATTGGTTATTGAAGATACTAAAGATCTTTGGAATTCAATTAACATGTTGCCTTCATTGCT  
TTCATTGAACTTAGAAGGTTGTAATCTCAACATTTTGCCTTCTTTTAC

>PGSC0003DMG400030561LRR-RLPs\_744

CTTCATTGCTTCATTGAACTTAGAAGGTTGTAATCTCAACATTTTGCCTTCTTTTACACAAGTTAATTTCA

CATCTCTTAGTTCACTCAATATCCGTGATAACGCGATTGGAATGAGCT

>PGSC0003DMG400030561LRR-RLPs\_930

GTCAAAACAAGTTTGATGATCCAATAATGTTCTTGAGAAGCTTAGTTCACTAAGAGTATTAGATGTTTC

TAATAATGGATTTGGCGATTGTTGTTGAGTTCATTGAGTAAGTTGAACA

>PGSC0003DMG400030561LRR-RLPs\_992

GATGTTTCTAATAATGGATTTGGCGATTGTTGTTGAGTTCATTGAGTAAGTTGAACAACCTTGGTTTATTT

GGATTTGCTAGGGAATGACATCCACTTCTCTAGTCTCCATTTACTTGA

>PGSC0003DMG400030572LRR-RLKs\_1612

TTATTGGTCTGTGCGACGAGAAGCTACTGATATATGACTTCATTCCAAATGGAAACCTTACCACCGCAATT

CACGGTATGCTTCAAACCTTAGGCTGTTGCATTCTCGTTTATCGTTTTTTC

>PGSC0003DMG400030572LRR-RLKs\_1674

CCGCAATTCACGGTATGCTTCAAACCTTAGGCTGTTGCATTCTCGTTTATCGTTTTTCTTTGATTTCCACAA

CTGTTTTAAGCTTTCGTGATTATTAAGTTATTAACCTTGTCTTTTTGCT

>PGSC0003DMG400030572LRR-RLKs\_1736

ATTTCCACAACCTGTTTTAAGCTTTCGTGATTATTAAGTTATTAACCTTGTCTTTTTGCTTGTGTAATCAACTCT

TAGGAAAACCTGGTATGGTGCATTTACACCGCTTTCGTGGTCCATT

>PGSC0003DMG400030572LRR-RLKs\_2356

TAAAGAAGAGGAAATGATTGCGTTTTGAAGATTGCAATGGCGTGTGTTACAGCAGCCCGGAGAGAA

GACCCTCAATGAGATACATATCTGATGCATTAGAAAGACTGCAAGCTTCCTC

>PGSC0003DMG400030572LRR-RLKs\_2418

AGAGAAGACCCTCAATGAGATACATATCTGATGCATTAGAAAGACTGCAAGCTTCCTCTGAATGAACGA

TCGAAACAGAACCTGAAGGCTACACATTGCAGAGTAAGGATCACAGCATCT

>PGSC0003DMG400030578RLKWAX-EGF\_0

ATGTACAATGGCTGTGAAGGCTTTAACATATACTACAAGCTTCCGAAGATGTTGATGAATACATAGGA

GCAGACAATCTCCACCAACTGTTCACTTATCAGATTGCCAATTCATTCA

>PGSC0003DMG400030578RLKWAX-EGF\_1054

ATTTTGTGTTGAGGGTCACAAAAGAGCTCTTGATATGAGTTCATGCCAAATGGATCTCTTGAAAAGTTT

ATCTATGAGGAAAGATCTAACGGAGTTCGCCAATTAGGCTGGCCAATATT

>PGSC0003DMG400030578RLKWAX-EGF\_1116

AAAAGTTTATCTATGAGGAAAGATCTAACGGAGTTCGCCAATTAGGCTGGCCAATATTATACAAAATTGC  
ATTAGGCATTGCTCGAGGATTAGAGTACTTGCACCGTGGTTGTAACACTC

>PGSC0003DMG400030578RLKWAX-EGF\_1240

TTTGCATTTTGATATAAAGCCTCATAATATCCTGCTTGATGAAGATTTTTGTCCTAAGGTTTCCGACTTTG  
GTCTAGCCAAAATGTGCATGAAACAGGAGAGTGTGTGTCAATGTTAGG

>PGSC0003DMG400030578RLKWAX-EGF\_1488

TTGATGTTGGAGTTGATCGCACGAGTGAAATCTACTTTCCACATTGGCTTTATCAACGACTTGAAGTAGA  
CGAAGAGCTTCAACTAGTCGGGATAATGAATGAAGAGGAGAATGAATGTG

>PGSC0003DMG400030578RLKWAX-EGF\_1550

GAACTAGACGAAGAGCTTCAACTAGTCGGGATAATGAATGAAGAGGAGAATGAATGTGCAAGAAAAAT  
GGTGATAGCGAGTTTATGGTGCATACAGACTGGTCCATCAAATCGACCATCG

>PGSC0003DMG400030578RLKWAX-EGF\_1670

ATGAGCAAGGTTGTTGAAATGTTAGAAGGGAACTAGACTCTTTGCAAATGCCTCCCAATCCTTATCTAT  
TTTCTCCCTCAAATTCAGAGGTAGATTCATCAGTAGTAGAACTGGCCTAG

>PGSC0003DMG400030578RLKWAX-EGF\_496

TATTACAGAATTTTCATGCATAACATTTAAATTCTCATCATTGTGTATAAGCTCAAAAACCTTTCTCTAGTG  
ATATAGAAACAAAAACAAGAGAATTAATAGTTTTTCGGTCACAAAAAG

>PGSC0003DMG400030578RLKWAX-EGF\_558

TTCTCTAGTGATATAGAAACAAAAACAAGAGAATTAATAGTTTTTCGGTCACAAAAAGTATGGATGTGG  
AATTGAGAGAAAAAAAATTCTCTGATGGGGCATGATTTCATTTTTTTCCCA

>PGSC0003DMG400030578RLKWAX-EGF\_620

GATGTGGAATTGAGAGAAAAAAAATTCTCTGATGGGGCATGATTTCATTTTTTTCCACAGGTGCAAGTT  
TATCTACTGTTGGACTGTTGGCTTTACTACTCTTTTGCTTCAGAGAAAAA

>PGSC0003DMG400030578RLKWAX-EGF\_868

CACCGTTCGCTTCAGAAGGAACTAGGACAAGGAGGATTTGGTAATGTGTACAGAGGAAGTTTGGGTA  
ATGGGAGTGAAGTGGCAGTAAAGGTCCTGAATGAACTAAAAGGCAATGGTGA

>PGSC0003DMG400030579RLKWAX-EGF\_1037

TTCACTTGCAATTGGAATCGTGATTTTGCTCTTCTGCTTCAGAGAAAAGATTTTGTGGTACAAGTGCCTCAG  
GTTTTGGGAATCTAATGCTCAGGATCACCAAAGAGTTGAAGAATTCTTA

>PGSC0003DMG400030579RLKWAX-EGF\_1098

AGTGCCTCAGGTTTTGGGAATCTAATGCTCAGGATCACCAAAGAGTTGAAGAATTCTTAAAGAACTACG  
GATCATACGCTCCAAACAGATACAATTATACAGACATCAAAAGAATCACCG

>PGSC0003DMG400030579RLKWAX-EGF\_1159

GAACTACGGATCATACGCTCCAAACAGATACAATTATACAGACATCAAAAGAATCACCGGTGCTTCAG  
AAATAAACTAGGCCAAGGAGGATTTGGTAATGTATACAGAGGAAGTTTGCG

>PGSC0003DMG400030579RLKWAX-EGF\_122

GAGTTATCCTTTTTCAGAATTCAACAAACCATATTGTGGATTATCCAAGATCGATTGTAACACCACTTTTC  
AATATCCAAAAGTTGAGATTGAAGGAGTGACATACAATGCTTACAAGAA

>PGSC0003DMG400030579RLKWAX-EGF\_1830

ATGTTGATGTTGGAGTTGATCGTAGGAGTGAAATCTACTTTCCACATTGGCTCTATCGACGAATTGAACT  
AGACGAAGAACTTCAACTAATCGGGATAATGAATAAAGAGGAGAACGAAT

>PGSC0003DMG400030579RLKWAX-EGF\_1891

AATTGAACTAGACGAAGAACTTCAACTAATCGGGATAATGAATAAAGAGGAGAACGAATGTGCAAGAA  
AGATGGTGATAGCGAGTTTATGGTGTATACAGACTGATCCCGCAAATCGACC

>PGSC0003DMG400030579RLKWAX-EGF\_2072

AAGCCTTATCTATATTCTCCCTCAAGATCAGAGGTAGATTCATCAAATAATAGAAGTACAAACAACA  
ACAACGTACCGAGTATAGTCCCACAAGTGGGGTGTGACTTCATTTCTTAG

>PGSC0003DMG400030579RLKWAX-EGF\_427

GTTATTTTCAACGTTATGAGAAGTACTTGAATTGTGATGGATTTAACTTATACTATCATAAACCAAGAATA  
GATCATAGAACTACAGTATTCCAGTTGATGAGGATGATCTTCCTGCAA

>PGSC0003DMG400030579RLKWAX-EGF\_671

GTGTATCCATAGAGAAGGGCAATGCCAAAGTGACAGCAAAAATGACTTCTTCTGCTCCAAAGCCAAAGG  
TAAATGCATATATGATGCTTTGTCAGTTGCTTGAATTGGTTCATTCATTTTC

>PGSC0003DMG400030579RLKWAX-EGF\_732

GCCAAAGGTAAATGCATATATGATGCTTTGTCAGTTGCTTGAATTGGTTCATTCATTTCAAGATGTTTAAAT  
ATTTCAATGTGAATTGAAGTAAAAATTGCTTTTACTCTTATTGTGACTA

>PGSC0003DMG400030581RLKWAX-EGF\_122

AATGCTTGGTGATGAGGGAAGTAATCGAGATGTTGACTATCTGGGGATTTTGAGAAGGGGGTTTAGAT

TGATATGGACTGCTGCTAATTGCAGTGAATGTGCAGAAAGTGGAGGATATTG

>PGSC0003DMG400030581RLKWAX-EGF\_1647

CTGCTGACAGCCCTCATACATCGAATTGCCACCTTCCGGTAAGCCCCTATCTAGCAGTTAATTTCCAGT  
ATAATTATGCAGAACATTATGCTATGATTACACATACTTTAGGTTCTTT

>PGSC0003DMG400030581RLKWAX-EGF\_1708

ATTTTCCAGTATAATTATGCAGAACATTATGCTATGATTACACATACTTTAGGTTCTTTTCGTGTGATTACC  
AAGTGCACAAAGAAGTATCACTTGATGATCTAGGCATTTGGATTATGC

>PGSC0003DMG400030581RLKWAX-EGF\_1769

GTGTGATTACCAAGTGCACAAAGAAGTATCACTTGATGATCTAGGCATTTGGATTATGCTGTGGATGATT  
AAAAAATGTGTGAACCACAAAATTTGCGCAGCCAAGAAAATATCCTTATA

>PGSC0003DMG400030581RLKWAX-EGF\_183

TTTAGATTGATATGGACTGCTGCTAATTGCAGTGAATGTGCAGAAAGTGGAGGATATTGCGGATTTGAT  
GTCATCAATTATAAATTCGAATGTTTCTGCACTGACAGCCAGGGGCGGACC

>PGSC0003DMG400030581RLKWAX-EGF\_1830

TGGATGATTAATAAATGTGTGAACCACAAAATTTGCGCAGCCAAGAAAATATCCTTATAGCGGCTGATA  
ACCTCTTGTTCTTTAATCCTGTGATACTAATTGAAGACTTGTTTAAATCT

>PGSC0003DMG400030581RLKWAX-EGF\_1891

GGCTGATAACCTCTTGTTCTTTAATCCTGTGATACTAATTGAAGACTTGTTTAAATCTTTTCTCAATCTAA  
TAGGCCACCTAATCTCCTTCTTTTTGACTCAAAGTCCTTTAAAATCAT

>PGSC0003DMG400030581RLKWAX-EGF\_1952

TCTCAATCTAATAGGCCACCTAATCTCCTTCTTTTTGACTCAAAGTCCTTTAAAATCATAACAATTATGATC  
TTCTCTGTTGAGCCTTATCAATCAAGTAGCATTGTGGTTATGGAACAA

>PGSC0003DMG400030581RLKWAX-EGF\_2013

CAATTATGATCTTCTCTGTTGAGCCTTATCAATCAAGTAGCATTGTGGTTATGGAACAACCTAGGACATAG  
CGAAAAGTCAGTTTCTAGTCTTCTGTAGTTACGGAAGTGCCTAACTATT

>PGSC0003DMG400030581RLKWAX-EGF\_2074

AGGACATAGCGAAAAGTCAGTTTCTAGTCTTCTGTAGTTACGGAAGTGCCTAACTATTTGGAAATGACA  
ACTAACAAAATCTAAGTCAAGATTCACACATCTATGAAGATGACCAATCT

>PGSC0003DMG400030581RLKWAX-EGF\_2135

GAAATGACAATAACAAAATCTAAGTCAAGATTCACACATCTATGAAGATGACCAATCTTAATTTCAAGA  
ATCATGAATAGAATCCTTACTTCACTAGAAAAAGCCTAAACTTATTTTC

>PGSC0003DMG400030581RLKWAX-EGF\_2196

ATTTCAAGAATCATGAATAGAATCCTTACTTCACTAGAAAAAGCCTAAACTTATTTTCCTAAAAGATAAG  
TTTGAGTTTTATGATCAGACACTTTGGCGTTTACATTATTTTTATTTTA

>PGSC0003DMG400030581RLKWAX-EGF\_2257

AAAAGATAAGTTTGAGTTTTATGATCAGACACTTTGGCGTTTACATTATTTTTATTTTATAGCTCTTAATAT  
CTGTTTCTTGAATTATAGTAGAAGGTCAGATAGTCCAAACTCAAGTAT

>PGSC0003DMG400030581RLKWAX-EGF\_2318

GCTCTTAATATCTGTTTCTTGAATTATAGTAGAAGGTCAGATAGTCCAAACTCAAGTATAGGAGGATTCA  
GAGGTAGTCAAGAGAACATTAATTTGGGTACTCATATTTGTCTTATATA

>PGSC0003DMG400030581RLKWAX-EGF\_2379

GAGGATTCAGAGGTAGTCAAGAGAACATTAATTTGGGTACTCATATTTGTCTTATATATTTCTGTATGTT  
ACTTGTTAAGTTTAGATTTAGACTAATGACTGCAGCCTCCTTTTCTGC

>PGSC0003DMG400030581RLKWAX-EGF\_2440

TCTGTATGTTACTTGTTAAGTTTAGATTTAGACTAATGACTGCAGCCTCCTTTTCTGCTATGTTCTTTATG  
TTTCATCTGCTTATCTTCAATAGTTCAATTAGAGAGTAAATCTGACTT

>PGSC0003DMG400030581RLKWAX-EGF\_2501

TGTTCTTTATGTTTCATCTGCTTATCTTCAATAGTTCAATTAGAGAGTAAATCTGACTTTGTACATTGTGGA  
AGAACTGGAACCATTAGTTATCTTCTCACACCTCATGTTCTATTTTGA

>PGSC0003DMG400030581RLKWAX-EGF\_2562

TACATTGTGGAAGAACTGGAACCATTAGTTATCTTCTCACACCTCATGTTCTATTTTGAGTCTACAACAAT  
ATAAATTTGTACATTCAAATGAACAAATAATAGTATGCAGATTGATGGT

>PGSC0003DMG400030581RLKWAX-EGF\_2623

CTACAACAATATAAATTTGTACATTCAAATGAACAAATAATAGTATGCAGATTGATGGTTATTTTCAAAGT  
TATAAGAACTACTCGAATTGTGATGCCTTTAGCTTATTCTGTCATAAAC

>PGSC0003DMG400030581RLKWAX-EGF\_2684

TTTTCAAAGTTATAAGAACTACTCGAATTGTGATGCCTTTAGCTTATTCTGTCATAAACTAAGAACAGATC  
AAAGACATAGTATTCCAGCTAGTGATCCCTCGGTTATTCGATTGCCTTT

>PGSC0003DMG400030581RLKWAX-EGF\_2745

AGAACAGATCAAAGACATAGTATTCCAGCTAGTGATCCCTCGGTTATTTCGATTGCCTTTTCAGTATCGTTC  
ACCTTCTGAACCAAATTCTACTGATTTGTTTGATCTATTGACTCCTTGT

>PGSC0003DMG400030581RLKWAX-EGF\_2806

AGTATCGTTCACCTTCTGAACCAAATTCTACTGATTTGTTTGATCTATTGACTCCTTGTTCACATTAGATT  
GGGAATTGTCGTAAATTATTCCAAATGTCTTCATAGAGAAGGGCAAT

>PGSC0003DMG400030581RLKWAX-EGF\_2867

CACATTAGATTGGGAATTGTCGTAAATTATTCCAAATGTCTTCATAGAGAAGGGCAATTCCAAAGTGAC  
ATCGATAACTTCTTTTGCTCAAGAGGTATTGGATATAAGAAGCTTGTCAG

>PGSC0003DMG400030581RLKWAX-EGF\_2928

CAAAGTGACATCGATAACTTCTTTTGCTCAAGAGGTATTGGATATAAGAAGCTTGTCAGTTGCTTGTGTA  
TGTCTGGTTTTCATTTTTGGAAAGGATATAGATGTGTGTTAATTGGTTCA

>PGSC0003DMG400030581RLKWAX-EGF\_2989

GCTTGTGTATGTCTGGTTTTCATTTTTGGAAAGGATATAGATGTGTGTTAATTGGTTCATTCCAAGATGTT  
AGCTATGTCAATGTGATAACTTAATTTCTTTCACTCTTATTGTGACTTA

>PGSC0003DMG400030581RLKWAX-EGF\_3050

CCAAGATGTTAGCTATGTCAATGTGATAACTTAATTTCTTTCACTCTTATTGTGACTTAACTTTTCATTTT  
TGTGTTCTTGCAGCAGCTAAAATAAATTTGGGACTGATTCTAGGCATA

>PGSC0003DMG400030581RLKWAX-EGF\_3111

CTTTTCATTTCTGTGTTCTTGCAGCAGCTAAAATAAATTTGGGACTGATTCTAGGCATAGGTACATATCTA  
TAATCATTAACTTTTGTCTGTAATTAGACTTGCACAAAAATCTTATATT

>PGSC0003DMG400030581RLKWAX-EGF\_3172

TACATATCTATAATCATTAACTTTTGTCTGTAATTAGACTTGCACAAAAATCTTATATTGCCTTGCATAAAC  
TTAGAACTATTTAATATGTTTTGCAAATGTTGTGTTTGCCTAAACATC

>PGSC0003DMG400030581RLKWAX-EGF\_3233

CTTGCATAAACTTAGAACTATTTAATATGTTTTGCAAATGTTGTGTTTGCCTAAACATCAGGCTCTTCCG  
GTACTTTGCTTTTTTCCCCACATTTGCAGTTTTCTCTTGCATCGGAGT

>PGSC0003DMG400030581RLKWAX-EGF\_3355

TGATTTTGCTCTTCTGCTTGAGAAAAAGATTTTCTGGCACAACAATCTCAGGTTTTGGGAATCTAGAGC



TGAGGATCACCGAAATATTGAAGCATTCTGAAGAACTCTGGGTCATATG

>PGSC0003DMG400030581RLKWAX-EGF\_3416

ATCTAGAGCTGAGGATCACCGAAATATTGAAGCATTCTGAAGAACTCTGGGTCATATGCTCCAAAAG

ATACAACTACGCAGACATCAAACGAATTACCAGTCGCTTCAAAAACAACT

>PGSC0003DMG400030581RLKWAX-EGF\_3477

CCAAAAGATACAACTACGCAGACATCAAACGAATTACCAGTCGCTTCAAAAACAACTAGGCCAAGGA

GGATTTGGTAATGTATACAGAGGAAGTTTGCGTAACGAGAGTCAAGTGGCA

>PGSC0003DMG400030581RLKWAX-EGF\_3660

AGCAGGACATCACATGTTAACATAGTGAGCCTTGTGGGATTTTGTGTTTGGAGGGTCACAAAAGAGCTCTC

ATTTATGAATTCATGCCAAATGGATCTCTTGAAAAGTTTATCTATGAGGAA

>PGSC0003DMG400030581RLKWAX-EGF\_3721

GAGCTCTCATTTATGAATTCATGCCAAATGGATCTCTTGAAAAGTTTATCTATGAGGAAAGATCTAACGG

GGTTCGCCAATTAGGCTGGCCAATATTGTACAAAATTGCATTAGGCATTG

>PGSC0003DMG400030581RLKWAX-EGF\_3904

CTCATAATATCCTACTGGATGAGGATTTTGTCCAAAGATCTCCGACTTTGGTCTTGCCAACTATGCATA

AAAAAGGAGAGTATCGTGTCAATGCTAGGCCACGAGGTACAATAGGCT

>PGSC0003DMG400030581RLKWAX-EGF\_4148

TCGTACGAGTGAAATCTACTTTCCACATTGGCTCTATCGACGAATAGAAGTACGAGAGCTTCAACTA

ATTGGGATAATGAATGAAGAGGAGAACGAATGTGCAAGAAAGATGGTGAT

>PGSC0003DMG400030581RLKWAX-EGF\_4209

CTTCAACTAATTGGGATAATGAATGAAGAGGAGAACGAATGTGCAAGAAAGATGGTGATAGCAAGTTT

GTGGTGCATACAGACTGATCCGGCAAATCGGCCATCGATGAGCAAGGTTGTG

>PGSC0003DMG400030581RLKWAX-EGF\_4331

AATGTTAGAAGGGAACTAGACTCTTTGCAAATGCCTCCGAAGCACTTATCTATATTCTCCCTCAAGACC

AGAGGTAGATTCATCAATAATAGAAGTACAAACAACAACGTACCCAA

>PGSC0003DMG400030581RLKWAX-EGF\_61

AGGATGAAAGCTTTGAGTCTGCATTACAAGTGTGTGAAAACATGTGATGGCACCAGTAGAAATGCTTG

GTGATGAGGGAAGTAATCGAGATGTTGACTATCTGGGGATTTTGAGAAGGG

>PGSC0003DMG400030625-(rev)LRR-RLKs\_0

ATTTACTCAAACAAAAGAATATACACCAAACGGATTACCCACCCCCTCCTCACTTTTGCCTTTCTCACTCT  
CACTGAGTGAAACCGCAAACCAACAGTTGGTGGGCATTAGATTAAGG

>PGSC0003DMG400030625-(rev)LRR-RLKs\_122

GGAAAAATGCGTCTTCTTTTTCTTCTTCTTCTTGTATGCATTTTACCGACTTTTCTGCCGGTAAACAACCA  
CGGTTACCGGAATACCAGGCTTTGCTTGCCCTGAAAACCTGCCATTACC

>PGSC0003DMG400030625-(rev)LRR-RLKs\_183

GTAACAACACCGGTTACCGGAATACCAGGCTTTGCTTGCCCTGAAAACCTGCCATTACCGATGACCCACA  
GTTAACACTTGCCTCATGGAACATCTCCACCAGTCACTGTACGTGGAATG

>PGSC0003DMG400030625-(rev)LRR-RLKs\_2806

GTGCCGAAGTTACAACTTACTGATGAACTAAAATTTATCAGCTGAGACTAATTATCAATCTGTAAAAT  
GAAGCTTAGGTGTTCTAAACATCATAAATGTGCTATCCTGTAGTCTTGTA

>PGSC0003DMG400030625-(rev)LRR-RLKs\_2867

TGTTAAAATGAAGCTTAGGTGTTCTAAACATCATAAATGTGCTATCCTGTAGTCTTGTATTTCCACTACTA  
ATAATGTGACGATGAAGGACAGCATTAAAGACATGGATAGTGGGGTCTCT

>PGSC0003DMG400030625-(rev)LRR-RLKs\_305

GTCACGTGCGACACGCATCGTCACGTGACCTCTCTTGATATTTCTGGGTTTAATCTTACCGGTACTCTTCC  
GCCGGAAGTTGGGAATCTTCGTTTCTTACAAAATCTGTCTGTTGCTGTT

>PGSC0003DMG400030625-(rev)LRR-RLKs\_3050

GTGATGGTTAGGTTGGAATTTATAAATGCTTATGTCACCTTGATAAGTAAGGCAACTGTGTTGCATGCTCC  
TGAAGCAAAGCAACATTAAATAAGTGGTACTGGTACTGATGAACTATTTA

>PGSC0003DMG400030625-(rev)LRR-RLKs\_3111

GCATGCTCCTGAAGCAAAGCAACATTAAATAAGTGGTACTGGTACTGATGAACTATTTACTGTTGGA  
ACGGGTAAGGGGATGTAAAACCTCGGTTTCTTGTGTTAGTTATCTAACAAC

>PGSC0003DMG400030625-(rev)LRR-RLKs\_3233

ACTGATTGCTAGCAATTTTGTCTGTTCTATCGTCTACTTCTCATTAGCATCTTATTTTCGTTTTTGCAGA  
ATATGCTTACACGCTTAAGGTTGATGAGAAAAGTGTATATATAGCT

>PGSC0003DMG400030625-(rev)LRR-RLKs\_366

GTA CTCTCCGCCGAAGTTGGGAATCTTCGTTTCTTACAAAATCTGTCTGTTGCTGTTAACCAGTTTACT  
GGACCCATTCTGTTGAAATCTCCTTTATTCCAAATCTCGGTTACCTTA

>PGSC0003DMG400030625-(rev)LRR-RLKs\_3843

AGCTTTGTTCTTTTTTAAAAAAATCGGGTCTTTTAGGCTCAGGGGTTTATTCTAACTCTAAGATGGGT  
TTAATGCTCAGAAGTTTTCCTCTTGTACAGTAAGATTGGTAGGGTTTTTC

>PGSC0003DMG400030626-(rev)LRR-RLKs\_0

TTTTATGCCATATAATATTTTGTAGTCCAAAAACCTTATCATTACTCTCTGCTTCAAGTTACTGCAACTCTTG  
TCTTGTTCTTCGCCATTAGAGTCCAATACTAGCTTTTTTTTTCTTCTAA

>PGSC0003DMG400030626-(rev)LRR-RLKs\_2989

TTTGCCAATAAAAAATGTTGAAAAAATCTAGTGCTAAGGAGACTATTTAAAAGAAAAAAAATATTGAAC  
CAAGATAGGCATAAATGAAGTGGTATGGACAGCAGGAATTCATAATGCTAA

>PGSC0003DMG400030626-(rev)LRR-RLKs\_3050

TATTGAACCAAGATAGGCATAAATGAAGTGGTATGGACAGCAGGAATTCATAATGCTAACCTCTACTTG  
TTTGGGATCAGGGCCTAATTATTGTTGTCGTTCAACTTTTTTGTTAACTTG

>PGSC0003DMG400030626-(rev)LRR-RLKs\_3294

TTTATATGAAGCCAGAGAAGATTTTAGGAGATGATTCAAACCTAGAAAGTAGATTGGAACTTTAATAATA  
TCCATTTAATTGTAGCATCTAGTTTCATTCTCTAACTGGACGTTGTTTC

>PGSC0003DMG400030626-(rev)LRR-RLKs\_3843

GTATTGTTACTTATTTATCTAATTTATCGATATCTTAAATTCTATTTACTCCCATAAGTCCTCTTTGATTGGA  
CATACAGTTTCATCTTTTTGTAAAGCTGACACTATCCGGTCTGTGG

>PGSC0003DMG400030626-(rev)LRR-RLKs\_3904

TCTTTGATTGGACATACAGTTTCATCTTTTTGTAAAGCTGACACTATCCGGTCTGTGGCTCTGCCCATGT  
GCCCTTCCTTTGCAAACTGAGAGAATACAGAAACCAATATCGTTGATG

>PGSC0003DMG400030626-(rev)LRR-RLKs\_3965

CTGCCCATGTGCCCTTCCTTTGCAAACTGAGAGAATACAGAAACCAATATCGTTGATGGATATTTTTTG  
ATGGCCTTTTGATACTAGAAAACATTCCGGTTGCAATGACAAACAGTTTG

>PGSC0003DMG400030626-(rev)LRR-RLKs\_4026

TATTTTTTGATGGCCTTTTGATACTAGAAAACATTCCGGTTGCAATGACAAACAGTTTGTTAAGTTGATCT  
TGGCTACTTAACGATTAGGAAGATGCTAAAGTTTGCTAAATATCTCATG

>PGSC0003DMG400030626-(rev)LRR-RLKs\_4087

AAGTTGATCTTGGCTACTTAACGATTAGGAAGATGCTAAAGTTTGCTAAATATCTCATGGGATGGCACAT

GTGTTATCCAAGGTTTTTCAGCTGCACGTTTAAACTTAACCTCGATTCCCTT

>PGSC0003DMG400030626-(rev)LRR-RLKs\_61

TGCAACTCTTGTCTTGTCTTCGCCATTAGAGTCCAATACTAGCTTTTTTTTTCTTCTAATGTGTGAACACTC

TTCACGCTTTCAGTACTATTTCTTCTCCTTAAACTCTGCTTCCGTTAC

>PGSC0003DMG400030658RLKmalectin\_1159

TTAAGATGCCATAGTAGAAAAGCATTACAGAGAAGTGCATTTATTATCTCTCTATATGTTTCAGTTGACAT

AATGGCGAATGTCAAGAAGGAATTATTGCAACAAAACAAAACAATGAA

>PGSC0003DMG400030658RLKmalectin\_1220

CAGTTGACATAATGGCGAATGTCAAGAAGGAATTATTGCAACAAAACAAAACAATGAAATATGGAAG

AGTTGGTCAGGAGACCCTTGTCTTCCCCTTCCATGGCCGGGTCTAACTTGTG

>PGSC0003DMG400030658RLKmalectin\_1769

ACTCTTTACATCATCCTTTACATACTCTACAAGGTAATCTCCTATGTTGGTTTCCACATAAAATAATTGCA

AAATATGAAGAAGTTAAATAATATCATACAGAGGATTAACCTCTGAAA

>PGSC0003DMG400030658RLKmalectin\_2074

TATGAGACCACTACCCTATCTTCAGAGAAAAAAAACAATTTCTATGATTTTACGCTGTCCACTTTTTCTCC

GGGGGTGGGGGAAAGCAATGGGATATCAGGAGCAGGGAGCTGAGAAATA

>PGSC0003DMG400030658RLKmalectin\_2135

CTTTTTCTCCGGGGGTGGGGGAAAGCAATGGGATATCAGGAGCAGGGAGCTGAGAAATAAAGAAAAA

TAAGCCTAATTTGTTTTCTTTTTTACATTTTCAGCAAAGGGATGGCTAATGTT

>PGSC0003DMG400030658RLKmalectin\_2440

AATAATCCTGCACGCATAATGCATGATAATATATCATGATAATTTAAGAATCTTTTCTTGTGCTTGCAAT

AGCTTAAGATTGGACTCAACAAGCATAAATCATAAAACCTTCATGATTA

>PGSC0003DMG400030658RLKmalectin\_2623

AAATTTGAAACAGAGTTAATATCCTTAACATTTGGTACTTATATTCAATGAAGCAATATGCTCAAAAAAA

ATATTCAAATGCAGATGCAATATATTCAGTACCAAGCACGGATACTACCA

>PGSC0003DMG400030658RLKmalectin\_2989

AAACCAACAAAAGATGTTACCTAAAATGTGAGAAAAGCATCAGCACATGGAGTGAGCAATGAATCTTC

TATTTTCTATTGCTATTTACATAGGGAATACGCTCCACAAAATTAATACT

>PGSC0003DMG400030658RLKmalectin\_3050

GAATCTTCTATTTTCTATTGCTATTTACATAGGGAATACGCTCCACAAAATTAATACTTTCTCACAGATCC  
GTGATTTTCTCTTCATAATTACTTCCGGCGAGGAGTGTTGCCTCTGAA

>PGSC0003DMG400030658RLKmalectin\_3111

CTCACAGATCCGTGATTTTCTCTTCATAATTACTTCCGGCGAGGAGTGTTGCCTCTGAAACGTCTTAGCTC  
TTCAGGAGCCATCTTTATAATAATGCATCTTATCCATGCATATATAGTT

>PGSC0003DMG400030658RLKmalectin\_3477

TTTCTTTCTTGTTCCCTCATCCTGTTTAGGAGCAGCAGCAAAAAGGAAGATTCTAGACTGGCCAGCCAGA  
CTTTCCATTGCGTTAGGAGCAGCGAGAGGCAAGTAACACAAAACACTATGCT

>PGSC0003DMG400030658RLKmalectin\_3538

CCAGCCAGACTTTCCATTGCGTTAGGAGCAGCGAGAGGCAAGTAACACAAAACACTATGCTATTCATGCAA  
CTCTTCAATGAAAAAGCCATATCTATGGACTTAAGCATGCGTAAATAAAA

>PGSC0003DMG400030658RLKmalectin\_3721

AATCAATCATTCCCTGTTACTTATTATGAAGGCACATTTGTAAACAGCAAATACCAAAGTTTGACGTTTTTC  
ATTATGTTATTTCTTTTAATCTTCTTCAGGTTTGCTGCACCTTCACAC

>PGSC0003DMG400030658RLKmalectin\_4453

AATTGCTACTATTACCGAATCCTCAGAACCACACAGTCTCTCCATAATTTATTTGCAGCAAACACTACAGT  
GCCATGAAAAGACTGAAAGAGTTTTTTTTTTTTTTTAAAACACAGAAAAG

>PGSC0003DMG400030658RLKmalectin\_4514

AAACTACAGTGCCATGAAAAGACTGAAAGAGTTTTTTTTTTTTTTTAAAACACAGAAAGAACTTCTGTTGT  
TACTACGACTTACGTGATAATTCACAGCTACTCAAGATGATAAACTGAT

>PGSC0003DMG400030658RLKmalectin\_4575

CTTCTGTTGTTACTACGACTTACGTGATAATTCACAGCTACTCAAGATGATAAACTGATGTTGAGTGCTTA  
ACTACTTTGCAACTATATATACTCTTTTGATTTGCATGTTTACATCTGA

>PGSC0003DMG400030658RLKmalectin\_4636

TGAGTGCTTAACTACTTTGCAACTATATACTCTTTTGATTTGCATGTTTACATCTGATCACAAGCAAGT  
ATCCACTTTGAAATACAGGCGAAACCTCTAATAAGAAGCTCAAGAGTTG

>PGSC0003DMG400030704RLKWAX-EGF\_1037

GTACCAAGAGACTTCAATATGTACATACAAACAATGAACACGGCGGAAACATCTTGGACATCTAGCAAT  
TGCACCTATTACTTAATTGTGGAAAAGGGCAGTTCCGAGTTTGACTTCACT

>PGSC0003DMG400030704RLKWAX-EGF\_1098

CTAGCAATTGCACCTATTACTTAATTGTGGAAAAGGGCAGTCCGAGTTTGACTTCACTCAGTTACGTGG  
TAAGTGCAAAGAAGATGATCATTATGAAGGAAGGATGGCGCTGGACTGGG

>PGSC0003DMG400030704RLKWAX-EGF\_1342

TTATGAAGGCAACCCTTACCTCCTTCATGGATGCCAAGGTACTAATCCCTGGTCAGTTTCTCTTTTTGTTTT  
TGCGATTAACTTGTGTATACGTATCTTATTTTCGTTTTTAGTCTGTT

>PGSC0003DMG400030704RLKWAX-EGF\_1525

TATGCTTGATAAGACTCCCTTATAGGAATGCCATGGAATCTCTAAGATCACAGGATTTAAAGTACTTTTA  
GGGGTCATTCAATACAAAGATTAATAATGCAGAGATTAGTAATCTATAGA

>PGSC0003DMG400030704RLKWAX-EGF\_1586

GTACTTTTAGGGGTCATTCAATACAAAGATTAATAATGCAGAGATTAGTAATCTATAGATTAATAATACA  
GAGATTATTTTTATCTGGTTCATTGCTTCCACCTATTTTTGTGTAAAC

>PGSC0003DMG400030704RLKWAX-EGF\_183

ATCACTATCTCCACTATTCAAATTAAGAATAGGATGTTAGAACTCCACGTAAAAAGACCAGCTCGATCC  
AACAAATGATGAATCGAAAATGCAAATTAATATTAACCGGACCAAAAACAT

>PGSC0003DMG400030704RLKWAX-EGF\_1830

ATTTTCTCACTTGAATTATTTGAGGGTAAATAATTGTCATTCTAATAAAATTTTTTGAGAATAATTGTCATT  
CTAATAAATTGATCACTCACAATCGTTAATTTTTAATTCAAAAAAGA

>PGSC0003DMG400030704RLKWAX-EGF\_244

GCTCGATCCAACAATGATGAATCGAAAATGCAAATTAATATTAACCGGACCAAAAACATTTAAAAATCAT  
AATATGGATCCCACTTGTAAGTTATTACTTTTTTCGTTTGTGCGAGAAGT

>PGSC0003DMG400030704RLKWAX-EGF\_2806

AGCCTAGGATATTTCTTCTTTTTTTCCACTTGTTCGTTATTCTATTTTCCTTGGCCCTGTTTAGCTTTGATT  
ATTTAAATTATATGTTGTTAATTTTTTCTCACAGTGATTAATA

>PGSC0003DMG400030704RLKWAX-EGF\_2867

TTTAGCTTTGATTATTTAAATTATATGTTGTTAATTTTTTCTCACAGTGATTAATAATACATCGCCAA  
ATTGTTTTGTTTCTTAACAATGACTAAAATGTTGTTGAATTTTTCTT

>PGSC0003DMG400030704RLKWAX-EGF\_2928

TACATCGCCAAATTGTTTTGTTTCTTAACAATGACTAAAATGTTGTTGAATTTTTCTTAATAGTGATAAAA

ATATAATGTTGATTAGTTTTCTTAAATCTTATCTGCGATTA AAAATGG

>PGSC0003DMG400030704RLKWAX-EGF\_2989

TAGTGATA AAAATATAATGTTGATTAGTTTTCTTAAATCTTATCTGCGATTA AAAATGGCTAGCCCAACAT  
GAAAATATGGGGGAAAAGTGAGACCAATAGGACAACAATTGTATGTCT

>PGSC0003DMG400030704RLKWAX-EGF\_3050

AGCCCAACATGAAAATATGGGGGAAAAGTGAGACCAATAGGACAACAATTGTATGTCTGTTTTCTAGT  
ATTTAATATGAATTTTTGCTTATATATTTTGTCTATTTATTTTGGTCTTT

>PGSC0003DMG400030704RLKWAX-EGF\_3111

TTTCTAGTATTTTAATATGAATTTTTGCTTATATATTTTGTCTATTTATTTTGGTCTTTTTTTCTTTAAATTG  
TGCTTCACTTCAATGAAGCGAGCGCTTCGCTTCACGCTTCACGCTT

>PGSC0003DMG400030704RLKWAX-EGF\_3233

CGCTTACGCTTCACGCTTCACTTAAAGCATGAAGCAGGGCCTTGTTGCTTTTTACTGCTTGCCTCCCC  
TAAACTGAATATACCAAACGACCCCTTAGTGTGTTATAGGCACCTTT

>PGSC0003DMG400030704RLKWAX-EGF\_3294

TGCACTCCCCTAAACTGAATATACCAAACGACCCCTTAGTGTGTTATAGGCACCTTTTGTCAACACAA  
GATCCAAAAGTATTCTTTAGGTTTTTAAATTTAGTGCAAAAATCAAATA

>PGSC0003DMG400030704RLKWAX-EGF\_3355

TTCAACACAAGATCCAAAAGTATTCTTTAGGTTTTTAAATTTAGTGCAAAAATCAAATAAGACATAAAAAT  
GAAACAAAGAGAGTAACAATATAACAATATCCCACTGTACCCCTTTATTT

>PGSC0003DMG400030704RLKWAX-EGF\_3416

ACATAAAATGAAACAAAGAGAGTAACAATATAACAATATCCCACTGTACCCCTTTATTTAACTTGTTTTT  
AGCATGTAACATGACTTATATATTTTCTAAGTTACTAATGTCAGTTTTT

>PGSC0003DMG400030704RLKWAX-EGF\_3477

ACTTGTTTTTAGCATGTAACATGACTTATATATTTTCTAAGTTACTAATGTCAGTTTTTATAATGACTTCTT  
GTTAATTTTACAGACATCGATGAGTGTGCCAGTCCAAAACGAATCC

>PGSC0003DMG400030704RLKWAX-EGF\_3538

AATGACTTCTTGTTAATTTTACAGACATCGATGAGTGTGCCAGTCCAAAACGAATCCTTGTTCCCAACA  
ATACTCGCTGTGTTAATACTCTTGGCACTTACCATTGTGACTCAAATAAT

>PGSC0003DMG400030704RLKWAX-EGF\_366

GGAAGCCTTAGCAGGGCCTATTTCAAAGTCTAATGATGTTTGCAGAATTTTGTGCCATCATAAGATACG  
ATTCAACCAGAGAATGAGGCAGTAATACATGAAGATGCAGATAACCATGT

>PGSC0003DMG400030704RLKWAX-EGF\_427

TAAGATACGATTCAACCAGAGAATGAGGCAGTAATACATGAAGATGCAGATAACCATGTGGTCATTTTT  
CATTCTTCTGACGGGGCTGCTTTCTAAAGAAACAACACAAGTTTCAGCTAT

>PGSC0003DMG400030704RLKWAX-EGF\_4453

ATTGACGATAGAGAAATTTATAATGCCTAAAGAGGATTGAAGAGCGAACTTATAATATTAGAAAGACT  
CCTATACTCTTACAAAATAACACACTAGACTTGCACAGTGGCGGAGCCAGA

>PGSC0003DMG400030704RLKWAX-EGF\_4575

TTTTATGAAGGGTGTGCAAAATTTTAAAAAGTAACCAACAAAATATTTAGTGAGTTTTGACTAACAAAA  
ATGATGTTAAAACTTAAAGTTAGCAAGAATCGAACCTAGCACTTGATCA

>PGSC0003DMG400030704RLKWAX-EGF\_4636

TAACAAAAAATGATGTTAAAACTTAAAGTTAGCAAGAATCGAACCTAGCACTTGATCACACTTTTAACA  
TTAAGTTTACGGTTTACAACAGGTAAGTTGGTTGTTGCTTAGAACTCAA

>PGSC0003DMG400030704RLKWAX-EGF\_4758

CCCATTATTAGTTTATGAGTACATCTCGAATGGAACCTTGTCATCCCATGTTTCATGGAAACCTCAGTCACA  
GTTCTAACCTTAATAAATTGATCACTCACAAATCGTCAATTTTTAATT

>PGSC0003DMG400030704RLKWAX-EGF\_488

TCATTTTTATTCTTCTGACGGGGCTGCTTTCTAAAGAAACAACACAAGTTTCAGCTATAAGAATATGGTC  
ATCATCAGCAATATTATCTTCACAAAGACCTGGATGCCCAGAACGATGT

>PGSC0003DMG400030704RLKWAX-EGF\_549

GAATATGGTCATCATCAGCAATATTATCTTCACAAAGACCTGGATGCCCAGAACGATGTGGCAACGTAA  
CCATTCTTTTCCATTTGGAATAGGAAAAAAGTGTTACTTCAATGAAGCAT

>PGSC0003DMG400030704RLKWAX-EGF\_5612

CGCTTCTAGGCTTGAAGCGCAATGCGACCAGAAGCGGTGAAGCGAGAAAAGCAACGCTTTTATTTTTTC  
TAAGTAATAAGTGATCGATTTTAAAGAATAAAAATAGGCATGACTTACCTA

>PGSC0003DMG400030704RLKWAX-EGF\_5978

ATTAGTTTTCTTAAATCTTATCCGCGATTAATAATGGCTGGCCCAACATGAAAATATGGGAAAAAAGTGA  
GACCAATAGGACAACAATTGTATGTCTGTTTTCTAGTATTTTAATATGAA



>PGSC0003DMG400030704RLKWAX-EGF\_610

CAACGTAACCATTCCCTTTCCATTTGGAATAGGAAAAAGTGTTACTTCAATGAAGCATTGGAAGTGAGC  
TGCATAACAATACTGCTTTTAGTCATGGTAATGGTTTGCCTGTGCAACA

>PGSC0003DMG400030704RLKWAX-EGF\_6100

TTTGCTTATAAATTTTGTCTATTTATTTTGGTCTTTTTTCTTTTAAATTGTGCTTCACTTCAATGAAGCGAGT  
GCTTCGCTTCACGCTTCGCTTAAAGCATGAAGTGGGGCCTTGTGCGT

>PGSC0003DMG400030704RLKWAX-EGF\_6344

CAAACATAAGACATAAAATGAAACAAAGAGAGTAACAATATAACAATATCCCACTGTACCCCTTTATTTTA  
ACTTGTTTTTAGCATGTAACATGACTTATTTTCTAAGTTACTAATGTCAG

>PGSC0003DMG400030704RLKWAX-EGF\_6405

TTTATTTTAACTTGTTTTTAGCATGTAACATGACTTATTTTCTAAGTTACTAATGTCAGTTTTTATGATGACT  
TCTTGTTAATTTTACAGACATCGATGAGTGTGCCAGTCCAAAAGG

>PGSC0003DMG400030704RLKWAX-EGF\_6649

CTTCTTTTTTCTCCTCTTGTCTTTGTTAGATTAAGCTTTCTATAAATTTTATTTGACACAAATTAC  
TCCTTTTGAAGTGTCCCAACAAATGATTCATAATCCTATTCATGTT

>PGSC0003DMG400030704RLKWAX-EGF\_671

GAAGTGAGCTGCGATAACAATACTGCTTTTAGTCATGGTAATGGTTTGCCTGTGCAACACATATCAATGG  
ACTCCATCACTCTTTATATTACTTTTACTCCTTTCTCTACAACAAATCA

>PGSC0003DMG400030704RLKWAX-EGF\_6771

TTCTAGCTAACTGCTCTTTAGAACTTAGAAGTTCAACTTAATATATGCTTTAAAATTACAAAGGGGCCTG  
GATAAGCATTAAAGCTCTTTCTTTAGATTCTCAAATGAATTTATGC

>PGSC0003DMG400030704RLKWAX-EGF\_7137

GACAATTTCAATGAAATTCGAATTCTTGGTAAAGGAGGGGCTGGGACTGTTTACAAAGGAATGTTATCA  
GATGGAAGCATTGTAGCTGTGAAGAAGTCCAATGCAGTGGATAAAGATCAA

>PGSC0003DMG400030704RLKWAX-EGF\_732

TATCAATGGACTCCATCACTCTTTATATTACTTTTACTCCTTTCTCTACAACAAATCATCTGGAAAGAACA  
TTTACAATGATTATCTTCAAGCAACCAGTAACGAGTATTTCAAGTATTT

>PGSC0003DMG400030704RLKWAX-EGF\_7381

AACACAATTCGACGATAGAGAAATTTATAATGCCTAAAGAGGATTGAAGAGAGAAGTATAATATTAGA

AAGATTCCTATACTCTTACAAAATAACACACTGAACTTATAATATTAGAAA

>PGSC0003DMG400030704RLKWAX-EGF\_7442

ATATTAGAAAGATTCCTATACTCTTACAAAATAACACACTGAACTTATAATATTAGAAAGACTCCTATACT  
CTTACAAAATAACACACTAGACTTACACACACACGCAGTCGCACACACT

>PGSC0003DMG400030704RLKWAX-EGF\_7503

CTCCTATACTCTTACAAAATAACACACTAGACTTACACACACACGCAGTCGCACACACTGAGCTACTACAT  
CAACTCGTGTTCTATTGCTTCAACCATAATAAGCGAACAGTTTAGGA

>PGSC0003DMG400030704RLKWAX-EGF\_7564

GCTACTACATCAACTCGTGTTCTATTGCTTCAACCATAATAAGCGAACAGTTTAGGATAACTCATTAGT  
CACTCATGAACCAAAGATAACTCAAATACAATTGAACCTAGCACTTGA

>PGSC0003DMG400030704RLKWAX-EGF\_7747

AGTCCCATTATTAGTTTATGAGTACATCTCGAATGGAACCTTGTTCATCCCATATTCATGGAAACCTCAGTC  
ACAGTTCTAACCTTCTGTCTCAAAGTCTGAGTTGGATGATCAGATTCT

>PGSC0003DMG400030704RLKWAX-EGF\_793

TGGAAAGAACATTTACAATGATTATCTTCAAGCAACCAGTAACGAGTATTTTCAGTATTTCCAACAAGAAC  
AACTTAGTAGCCATTGGGTGTGACATTTATGCTTATGCCAAAGATTTAGA

>PGSC0003DMG400030704RLKWAX-EGF\_8418

AACAACAAGGAAAAATGAGGCAAGATATGCCTCATACTGAGAGTTTTAAAGATAACATTTACCAAAAA  
GTGAAAGTAGTCATACTTCTGATTGTTCCGAAGAAGATAATCAGAACTCAG

>PGSC0003DMG400030704RLKWAX-EGF\_915

CCGGTAGTGGAGGCAGCATTGTAAGTCAATGTGCTTCTTTCTGTGGCAACTCCACTTATAATGTTTCATC  
ATCTTATTGCACTGGGAATAACGGTTGTTGTCAGTCTGAATTATCAAAAA

>PGSC0003DMG400030704RLKWAX-EGF\_976

TGTTTCATCATCTTATTGCACTGGGAATAACGGTTGTTGTCAGTCTGAATTATCAAAAATAGTACCAAGA  
GACTTCAATATGTACATAACAATGAACACGGCGGAAACATCTTGGAC

>PGSC0003DMG400030705RLKWAX-EGF\_0

ATGTGGTCATTTTTTATTCTTCTGACGGGGCTTCTTTCTAAAGAAAAACACAAGTTTCAGCTATAAGAAT  
AGGGTCATCATCAGCAATATTATCTTCACAAAGGCCTGGCTGTCCAGAA

>PGSC0003DMG400030705RLKWAX-EGF\_128

CAACGTAACCATTCTTTTCCATTTGGAATAGGAAAAGAGTGTTACTTCAATGAAGAATTTGAAGTGAGC  
TGCGATAACAACACTGCTTTGAGTAATGATATGTATGTGCAATACATATC

>PGSC0003DMG400030705RLKWAX-EGF\_192

GTGAGCTGCGATAACAACACTGCTTTGAGTAATGATATGTATGTGCAATACATATCAAAGGACTCCATCA  
CGGTTGATAATGATTTTTTATCGCACCCCTACAACAAATCATCTGGAATG

>PGSC0003DMG400030705RLKWAX-EGF\_256

CCATCACGGTTGATAATGATTTTTTATCGCACCCCTACAACAAATCATCTGGAATGAACATTTACAGTGAT  
GCATTTATTAAGGAAGACTAGCGACGAGTATTTTCAGTTTTTCCAACAAGA

>PGSC0003DMG400030705RLKWAX-EGF\_320

CAGTGATGCATTTATTAAGGAAGACTAGCGACGAGTATTTTCAGTTTTTCCAACAAGAACAAGTTTATAGCC  
ATTGGGTGTGATGTTTATGCTAATGTCAAAGATTCAGACACTGGTAGCAG

>PGSC0003DMG400030705RLKWAX-EGF\_384

ATAGCCATTGGGTGTGATGTTTATGCTAATGTCAAAGATTCAGACACTGGTAGCAGTGTAAGTGGATGT  
GCTTCTTACTGTGACGACTCCACTAATAATGTTTCATCCTCTTCAGCTTCA

>PGSC0003DMG400030705RLKWAX-EGF\_448

GATGTGCTTCTTACTGTGACGACTCCACTAATAATGTTTCATCCTCTTCAGCTTCATCATCATATTGCACTG  
GGAATAACGGTTGTTGTCAGTCTGAATTTTCAAAAACAATACCAAGAG

>PGSC0003DMG400030705RLKWAX-EGF\_512

TTGCACTGGGAATAACGGTTGTTGTCAGTCTGAATTTTCAAAAACAATACCAAGAGAGTTCACCATGTCC  
ACACAAACAATGAACACGGAGGACACATCGTGGAGATCTAGCAATTGCAC

>PGSC0003DMG400030705RLKWAX-EGF\_576

ATGTCCACACAAACAATGAACACGGAGGACACATCGTGGAGATCTAGCAATTGCACCTATTACTTACTTA  
TAGAAAAGGGCAGTTCTGAGTCTGACTTCACTCAGTTACGTGGTAAGTGC

>PGSC0003DMG400030705RLKWAX-EGF\_64

TAAGAATAGGGTCATCATCAGCAATATTATCTTCACAAAGGCCTGGCTGTCCAGAAAGATGTGGCAACG  
TAACCATTCTTTTCCATTTGGAATAGGAAAAGAGTGTTACTTCAATGAAG

>PGSC0003DMG400030705RLKWAX-EGF\_640

TACTTATAGAAAAGGGCAGTTCTGAGTCTGACTTCACTCAGTTACGTGGTAAGTGCAAAGAAAATCATTA  
TTTAAAAGGAAGGATGGTGTGATGGACTGGGTGATTGGAAATGTTAGTTGCG

>PGSC0003DMG400030705RLKWAX-EGF\_704

TCATTATTTAAAAGGAAGGATGGTGATGGACTGGGTGATTGAAATGTTAGTTGCGACAAAGCCATGA  
GCAGGCCAAAAGATTATGCATGTAGAAATAACAGTAGGTGTGTCAATGACAC

>PGSC0003DMG400030705RLKWAX-EGF\_768

ATGAGCAGGCCAAAAGATTATGCATGTAGAAATAACAGTAGGTGTGTCAATGACACTTCTAGACCTGCT  
GGGGGGTACCGATGTGAATGCTCTCGTGGTTATCAAGGCAACCCTTACCTC

>PGSC0003DMG400030705RLKWAX-EGF\_831

CCTGCTGGGGGGTACCGATGTGAATGCTCTCGTGGTTATCAAGGCAACCCTTACCTCCTTCATGGATGCC  
AAGGTACTAATTACCCTGTTCAATTTCTTTTTTTGTTTTTGTGATTTAA

>PGSC0003DMG400030790LRR-RLPs\_0

CGCTGATTGATCTATCGCTCCTTGTCAACAAGTACGCGGCAAGTTCTACCGACCCGACTCACCTGATACC  
ACATCTATATCTTCACTCATCGAATTTCTATTTCTCTTTTTACGTAT

>PGSC0003DMG400030790LRR-RLPs\_122

GAAATCGAGATTCAGCTGCGAATTGTGTATTTATAAGGTCATATAGATCCAGAAGAAGTAGACAAATTC  
AATGAGAGGGCGTGATTGGATCAATCAAATCCTGCCGGATGAGCTGATTCT

>PGSC0003DMG400030790LRR-RLPs\_183

ACAAATTCATGAGAGGGCGTGATTGGATCAATCAAATCCTGCCGGATGAGCTGATTCTCGATATTTCC  
GGCATCTGGAATCAAATCAAGCCGTGACGCTTGTGCACTTGTCTGCAAG

>PGSC0003DMG400030790LRR-RLPs\_244

ATATTTTCCGGCATCTGGAATCAAATCAAGCCGTGACGCTTGTGCACTTGTCTGCAAGCGTTGGCTCCG  
TCTCGAGCGCCTCAGTCGTCTCACTTTACGAATTGGTGCCTCTGGCTGCC

>PGSC0003DMG400030790LRR-RLPs\_305

TTGGCTCCGTCTCGAGCGCCTCAGTCGTCTCACTTTACGAATTGGTGCCTCTGGCTGCCCCGACGTGTTTA  
TTAAACTGCTCGCTCGCCGCTTCGTCAATGTCCGAAATGTGTTTGTGCGA

>PGSC0003DMG400030790LRR-RLPs\_3538

CATTTAAACTTTGGTTTCTCATGGTTATTTTATTGATCTGTTTCTAGCTGTTTTGGAATTGAACTATATG  
ATGTGCATGTTATCTAAGGTCTGAGAAGCTTTAGTTTCTGTACCTCT

>PGSC0003DMG400030790LRR-RLPs\_366

GACGTGTTTATTAAGTCTCGCTCGCCGCTTCGTCAATGTCCGAAATGTGTTTGTGACGAGAGACTAT

CCATATCTCTCCCGGTTCCACTTGTAAGCCTTTGAATTCACTATGCGACG

>PGSC0003DMG400030790LRR-RLPs\_427

AGAGACTATCCATATCTCTCCCGGTTCCACTTGTAAGCCTTTGAATTCACTATGCGACGATTCATATATTT  
ATTGATTAGCTTGTATGCAACGTCTATATTTTGAGTGTCTAGGTCTCA

>PGSC0003DMG400030790LRR-RLPs\_4819

AGGAGAGTATTTAGCATGAGAAGCACTTATGTGAGTATCTAGTAAATGTTTAGAATTACATTTAGAGGTT  
TCAAAAAAAAAATAAGCATTAAAAGAAGCAGCTCAAAATTGGTGCTTATAG

>PGSC0003DMG400030790LRR-RLPs\_488

TTCATATATTTATTGATTAGCTTGTATGCAACGTCTATATTTTGAGTGTCTAGGTCTCAAATTTAAGATTG  
GGATATCTATTGCATTCCAATTGGGAATATTTTGGTCAGAATTCTAATT

>PGSC0003DMG400030790LRR-RLPs\_5063

TTATAGCAGATTATGGAGGGAGTGCTTATATTAGATTTTAAACGTGATTTTCTTTGAACGCATTCTCTAGA  
AAAGTTTTGTACTCCCAAGTTGGACCAAATTGAGTTCTCTGTTATTCCA

>PGSC0003DMG400030790LRR-RLPs\_5124

ATTCTCTAGAAAAGTTTTGTACTCCCAAGTTGGACCAAATTGAGTTCTCTGTTATTCCAAAGCTCATGCGA  
CAATCATGTTATTCTATTTCTGTCAGTATTACCTCATGAAACAAAATGC

>PGSC0003DMG400030790LRR-RLPs\_549

TTTAAGATTGGGATATCTATTGCATTCCAATTGGGAATATTTTGGTCAGAATTCTAATTTTGCACCTAATG  
ATTTGGAATGATTGTTTTTTTTTTTGCCTAACAAAGTTATTCGTTTCTG

>PGSC0003DMG400030790LRR-RLPs\_5551

GTGGGCAGTAAATTTATGTTTGTGTTTCATAGATGATTGGCTGTAATTTTCATTGTCTTTAATGAAATCCTGT  
CTTTTTTCATTGTTTAGTGTCTCCAATTTCTTTCATCTCTTTTTCTTT

>PGSC0003DMG400030790LRR-RLPs\_5612

GAAATCCTGTCTTTTTTCATTGTTTAGTGTCTCCAATTTCTTTCATCTCTTTTTCTTTAAAATGAAGACTG  
AAAACCTAATCTATTAGGACTAGCAAAGTTGAATGGTAGTTGATT

>PGSC0003DMG400030790LRR-RLPs\_5673

AAATGAAGACTGAAAACCTAATCTATTAGGACTAGCAAAGTTGAATGGTAGTTGATTGGTTTCACTGA  
TAGATTGATTACTGCTATTTATGTTATGCTTGGCTCATCTTATTAATAAT

>PGSC0003DMG400030790LRR-RLPs\_5795

TTATGAAATTCATGAATTTTATCCATTGCTTGACCTGATAGTTTGTACCCCTCTAAAATTCTGTCCTGGTCC  
TATCTTGAGTCTTGTCTTCCTTTTTCTAAGAAGTCAAAGGTCCTAA

>PGSC0003DMG400030790LRR-RLPs\_61

CCTGATACCACATCTATATCTTCACTCATCGAATTTCTCATTTCCTCTCTTTTACGTATCTGAAATCGAGATT  
CAGCTGCGAATTGTGTATTTATAAGGTCATATAGATCCAGAAGAAGT

>PGSC0003DMG400030790LRR-RLPs\_610

GCACTTAATGATTTGGAATGATTGTTTTTTTTTTTGCCTAACAAAGTTATTCGTTTCTGTTGCTCTTGTGTA  
TATCTTTTCGAGATATAACTGGTCAAAGACTATGTATTTGTCAATTGAG

>PGSC0003DMG400030790LRR-RLPs\_6466

TCATCTGATATGAATCATTCTCCAAACATAAAACCTCATCCAACATGAATCCAACCTTTACAACAATACGAG  
AGTAAAGACAAATAGTTGTATTTGATTTTGCTAACAGATTCTGCTTTAT

>PGSC0003DMG400030790LRR-RLPs\_6527

ACAATACGAGAGTAAAGACAAATAGTTGTATTTGATTTTGCTAACAGATTCTGCTTTATTCGTGAAGCAC  
CTTAAGTTCCTTCCATGTTGCCCATCTAGTGCACGCTGGTACTG

>PGSC0003DMG400030790LRR-RLPs\_6649

GTTTCGTACGCTTTTCTGTTTCTTATTGATGCCTCTTCCATTCCACTGAGTGGAAGCTCCCTGGTAGTTCTT  
GGCATTCTCCACATAAGCTTAGAGATGTGCAGGAACATTACTATAGTT

>PGSC0003DMG400030790LRR-RLPs\_671

GCTCTTGTGTATATCTTTTCGAGATATAACTGGTCAAAGACTATGTATTTGTCAATTGAGGATAGGAACTC  
TAAAATCTAGATCAGGACTTCAAAGTTTACCATCGAATTAGGAATTGGTG

>PGSC0003DMG400030790LRR-RLPs\_6710

TGGTAGTTCTTGGCATTCTCCACATAAGCTTAGAGATGTGCAGGAACATTACTATAGTTGTGAGAGTAAT  
ATGCAATGTAGAAAAATGTGACAGTTGTCTTCCATCTATTTCTTACAAAG

>PGSC0003DMG400030790LRR-RLPs\_6954

GCCCTTAAAGTCCCTTAAATTGAACACATCACTGTTATGTGCCTTCTCTGTAGACTATATTACCATAGCATT  
CAAGAGACCTGAGTAGTCCATGGGAGGCCTAACAGCACTCCTTGTTTC

>PGSC0003DMG400030790LRR-RLPs\_7015

ACCATAGCATTCAAGAGACCTGAGTAGTCCATGGGAGGCCTAACAGCACTCCTTGTTTCCCCTTTTTTCATT  
CTTCCGATCTATTGTTAGTGAAATCTGATTTGTGCTGTTTCCTTTGCA

>PGSC0003DMG400030790LRR-RLPs\_7259

CCGATTCTGCGATAGGTACATGATTTTCTCTTTCTCAACTAATATTGCCTTCTATTTTTTTTTGTTTCTCAAT  
CATCAAGTCTCGGCTGATAAAATTGTCAGACAGTCTCTTCCTTGCTT

>PGSC0003DMG400030790LRR-RLPs\_732

TAGGAACTCTAAAATCTAGATCAGGACTTCAAAGTTTACCATCGAATTAGGAATTGGTGATCATGATGTT  
TCATGTTAACCCCTCAATTTTTACCTGAAATAAATCAGATTGACATTTAT

>PGSC0003DMG400030790LRR-RLPs\_7442

CTTTGCGTCTCTTTTCTTTTTTGATATGGGAATTGTTGTGCTCCTTGTGGCGCCAGATTTTTGATATGGGA  
ATTGTTGTGCTCCTTGTGGCACCTCTGGTGCTGCAAGAGGTCGCTTGTC

>PGSC0003DMG400030790LRR-RLPs\_7503

TGATATGGGAATTGTTGTGCTCCTTGTGGCACCTCTGGTGCTGCAAGAGGTCGCTTGTCCATTTGAAGAT  
GAAGATTGCCTAGGCACAATTTTCATCTGCTTCTTTAAACTTCCTAGCC

>PGSC0003DMG400030790LRR-RLPs\_7564

TTTGAAGATGAAGATTGCCTAGGCACAATTTTCATCTGCTTCTTTAAACTTCCTAGCCCATAGTCTGACG  
GAAAATGTTCTACACTGCGAGATCAACAAAAAATTGTGTCTAGATGGTT

>PGSC0003DMG400030790LRR-RLPs\_8174

GAATCCACCGGTTAACAAGTGCATTAGGAACCCCATATTATAAAGTCCCATATGCAACACACACACACAC  
GTATTGCTCCCATATAACAAGATGTTTGATAGACCAAAAAATTGTACTTTT

>PGSC0003DMG400030790LRR-RLPs\_8235

CACACACACGTATTGCTCCCATATAACAAGATGTTTGATAGACCAAAAAATTGTACTTTTTATCTCTATTCC  
GCACTGAATACTAGCGCATCAATTTTTGACAGGATTTGGGCGATATGGC

>PGSC0003DMG400030790LRR-RLPs\_8601

ATCCATCATCTCCTATCTCTGTGTTGATCTGTAGATCTCTGTACACGTGTTAGTGTAATCTATTCCTTGCAG  
CCTCCAATCGAAAGCAGCAAGGGTAAAACAGACTATCGTTGTGGATAG

>PGSC0003DMG400030790LRR-RLPs\_8723

AGTTTAGAAAGAGGGGTGTCGTAGCTTGTGTTGCACTTTTCTTTTATCTGCTATGTTCTTTTCAGTGTTTTG  
TTTTTGTCCAAATCTCACAGTAATTTACTAGTAGATCGACTTCATTTT

>PGSC0003DMG400030790LRR-RLPs\_8784

CAGTGTTTTGTTTTTGTCCAAATCTCACAGTAATTTACTAGTAGATCGACTTCATTTTAGAAGGTGGGTG

GGGTGCTTGTAACCCTCCCGATGTGTAGGAATATGCTCGTTGATTGTC

>PGSC0003DMG400030790LRR-RLPs\_8845

AAGGTGGGTGGGGTGTCTTGTAACCCTCCCGATGTGTAGGAATATGCTCGTTGATTGTCTTTATTGGGG

AAAGATAGCAAATAGCCAGTTCTTTACCATCAGTTGAAACTTTAGCCAGC

>PGSC0003DMG400030856LRR-RLPs\_0

CTGAAACTTTCCTTCAAGTTGTGCTAGACAATCTTACTTCTTTCTCAAAGGGGAACTTGTATTGCTTTTTG

GTTTTCAAATGAGTTCCAAAAGCTTCAAGCATCTTTCTACAATCC

>PGSC0003DMG400030856LRR-RLPs\_1037

TACCAAATTCCAAATTTCAAATTCAAATCATGATATGGAGGAGCAACCAAAAAGCATTGGGGGTGAATT

ATTTGATTATGTGCTTGTACGTCTTTCCGTCAAGATTAAGGGAAAATTTG

>PGSC0003DMG400030856LRR-RLPs\_1098

GGTGAATTATTTGATTATGTGCTTGTACGTCTTTCCGTCAAGATTAAGGGAAAATTTGTGCCAAAGAAT

AAAGAGGTGGGATATTTGGACTGAAAGAATAATGGGAGAGATATATTTGG

>PGSC0003DMG400030856LRR-RLPs\_1159

CCAAAGAATAAAGAGGTGGGATATTTGGACTGAAAGAATAATGGGAGAGATATATTTGGACCAAAGT

ATAACAATAGGTATATTTAAAGTATTTCCGATAGTATATTGTGTAAATATAT

>PGSC0003DMG400030856LRR-RLPs\_122

TCCGTCCTTGAAGATGCTCAGGAGAAGCAATTCAACGACAAGCCACTTGAAAATTGGTTGCAAAAACCTC

AACGCTGCTACATATGAAGTCGATGACATCTTGGATGAATATAAAACTAAG

>PGSC0003DMG400030856LRR-RLPs\_1220

CAAAGTATAACAATAGGTATATTTAAAGTATTTCCGATAGTATATTGTGTAAATATATTCTCTATTTTCT

GCTGACTCCTAATGAGAATGAATGTAACAATATTCTCATGTTGATATTG

>PGSC0003DMG400030856LRR-RLPs\_1281

TCTATTTTCTGCTGACTCCTAATGAGAATGAATGTAACAATATTCTCATGTTGATATTGCTTGCACCAGGT

TCTGTATTAATTGAACCACAAGTTTATGGAAGGGACAAAGAGGAAGATG

>PGSC0003DMG400030856LRR-RLPs\_1342

TGCACCAGGTTCTGTATTAATTGAACCACAAGTTTATGGAAGGGACAAAGAGGAAGATGAGATAGTGA

AAATCCTGATAACAATGTTTCGTGATTCCCAAAAATTTTCAGTCCTCCAAT

>PGSC0003DMG400030856LRR-RLPs\_1525



AACTGAGCATTCTATCCCAAATATGGATTTGTGTCTCAGATGATTTTGATGAGAAGAGGTTGATAAAG  
GCAATTGTAGAATCTATTGAAGGAAAGTCACTCAGTGACATGGACTTGA

>PGSC0003DMG400030856LRR-RLPs\_1586

TTGATAAAGGCAATTGTAGAATCTATTGAAGGAAAGTCACTCAGTGACATGGACTTGGATCCACTTCAA  
AAGAAGCTTCAGGAGCTGCTGAATGGAAAACGATACTTGCTTGTCTTAGAT

>PGSC0003DMG400030856LRR-RLPs\_1647

CACTTCAAAGAAGCTTCAGGAGCTGCTGAATGGAAAACGATACTTGCTTGTCTTAGATGACGTTTGA  
ATGATGATCAACAGAAGTGGGATAATTTAAGAGCAGTCTTGAAGGTTGGAG

>PGSC0003DMG400030856LRR-RLPs\_1708

CGTTTGAATGATGATCAACAGAAGTGGGATAATTTAAGAGCAGTCTTGAAGGTTGGAGCAAGTGGCG  
CTTCTGTTCTAATCACTACTCGTCTCGAAAAGGTTGGATCAATTATGGGAAC

>PGSC0003DMG400030856LRR-RLPs\_1769

AGTGGCGCTTCTGTTCTAATCACTACTCGTCTCGAAAAGGTTGGATCAATTATGGGAACATTGCAACCAT  
ATGAATTGTCACATCTGTCTCAAGAAGATTGTTGTTGTTGTTTCATGCAA

>PGSC0003DMG400030856LRR-RLPs\_1830

TGCAACCATATGAATTGTCACATCTGTCTCAAGAAGATTGTTGTTGTTGTTTCATGCAACGTGCATTTGGA  
CACCAAGAAGAAATAAATCCCAACTTCGTGTCTATGGGAAAGGAGATTG

>PGSC0003DMG400030856LRR-RLPs\_1952

AAAAAATGTGGTGGTGTGCCTCTAGCAGCCAAGACTCTTGGAGGTCTTTTGCCTTCGAGAGAAAAGAA  
AGAGAATAGGAACATGTAAGGGATAGTGAGATTTGGAATTTGCCTCAACAT

>PGSC0003DMG400030856LRR-RLPs\_2013

GAAAAGAAAGAGAATAGGAACATGTAAGGGATAGTGAGATTTGGAATTTGCCTCAACATGAAAGTACT  
ATTTTGCCTGTCCTCAGGCTGAGTTATCATCACCTTCCACTTGATTTGAGAC

>PGSC0003DMG400030856LRR-RLPs\_2074

AAGTACTATTTTGCCTGTCCTCAGGCTGAGTTATCATCACCTTCCACTTGATTTGAGACAATGCTTTGCAT  
ATTGTGCAGTATTCCCAAAGGACACCAAATGGAAAAAGAAAAGCTAAT

>PGSC0003DMG400030856LRR-RLPs\_2135

TGCTTTGCATATTGTGCAGTATTCCCAAAGGACACCAAATGGAAAAAGAAAAGCTAATCTCTCTCTGGA  
TGGCACTCGGTTTTCTTTTATCAAAGGAAAGGAGTTAGAGGATGATGGT

>PGSC0003DMG400030856LRR-RLPs\_2196

CTCTCTGGATGGCACTCGGTTTTCTTTTATCAAAAGGAAAGGAGTTAGAGGATGATGGTAATGAAGTAT  
GGAACAAATTATGCTTGAGGTCTGTCTTCCAAGAGATTGAAGTTAAATCTG

>PGSC0003DMG400030856LRR-RLPs\_2257

TGAAGTATGGAACAAATTATGCTTGAGGTCTGTCTTCCAAGAGATTGAAGTTAAATCTGGTAAACTTAT  
TTCAAGATGCATGATCTCACCCATGATTTGGCTACATCTCTGTTTTCTGC

>PGSC0003DMG400030856LRR-RLPs\_2318

AAAACCTATTTCAAGATGCATGATCTCACCCATGATTTGGCTACATCTCTGTTTTCTGCAAGCACATCAAG  
CAGCAATATCCGCGAAATAAATGTAGAAAGTTACTCACATATGATGTCC

>PGSC0003DMG400030856LRR-RLPs\_2379

GCACATCAAGCAGCAATATCCGCGAAATAAATGTAGAAAGTTACTCACATATGATGTCCATTGGTTTCAC  
TGAATTGGTGTCTTCTTACTCTCCTTCTCTTGCAAAAGTTTGTCTCGT

>PGSC0003DMG400030856LRR-RLPs\_244

CACACGATTCTCCAGTCTGCATATGGCCGTTATCATCCTAAGGTTATCCCTTCCGTCACAAAGTCGGGA  
AAAGGATGGACCAAGTGTGCAAAGACTAAATGCAATTGCTGAGGAAAG

>PGSC0003DMG400030856LRR-RLPs\_2440

TGGTTTCACTGAATTGGTGTCTTCTTACTCTCCTTCTCTTGCAAAAGTTTGTCTCGTTGAGGGTGCTTAA  
TCTGAGTGACTTGGGACTCAAGCAGTTACCGTCTTCCATTGGAGATCT

>PGSC0003DMG400030856LRR-RLPs\_2501

AGGGTGCTTAATCTGAGTGACTTGGGACTCAAGCAGTTACCGTCTTCCATTGGAGATCTAGTACATTTAA  
GATACTTGAACCTGTCTGGCAATTGGAATATGCGTAGTCTTCCAAAGGAG

>PGSC0003DMG400030856LRR-RLPs\_2745

TGACTTTTATGCCACCAAGGTTTGGATCTTTGACATGCCTGAAGACTCTAGATTTCTTTGCTGTGGGTGA  
GAAGGAAGGTTCTCAACTAAGTGAAGTACTAGGAAACCTGAATCTCTATGGCT

>PGSC0003DMG400030856LRR-RLPs\_2806

TGTGGGTGAGAAGGAAGGTTCTCAACTAAGTGAAGTACTAGGAAACCTGAATCTCTATGGCTCAATTTCAAT  
CAAACATCTTGAGAGAGTGAAGAATGATAAGGATGCAAACGAAGCCAATTT

>PGSC0003DMG400030856LRR-RLPs\_2867

ATTTCAATCAAACATCTTGAGAGAGTGAAGAATGATAAGGATGCAAACGAAGCCAATTTATCTGCAAAA

GGGAATCTGCACTCTTTAAGCATGATTTGGAAACAACCTGCATAGATATGAA

>PGSC0003DMG400030856LRR-RLPs\_2928

CTGCAAAGGGAATCTGCACTCTTTAAGCATGATTTGGAAACAACCTGCATAGATATGAATCAGAAGAAG

TTAAAGTGCTTGAAGCCCTCAAACACACCCCAATCTAACTTCTTTAACAA

>PGSC0003DMG400030856LRR-RLPs\_2989

AGAAGAAGTTAAAGTGCTTGAAGCCCTCAAACACACCCCAATCTAACTTCTTTAACAAATCATAGGCTTT

AGAGGATTCCGTTTCCCAGACTGGATAAATCAATCAGTTTTGATAAATGT

>PGSC0003DMG400030856LRR-RLPs\_305

AAAGTCGGGAAAAGGATGGACCAAGTGATGCAAAGACTAAATGCAATTGCTGAGGAAAGAAAGAATTT

TCATTTGCACGAAAATATTATAGAGAGACAATCTGTTCCGACGGGAAACAGGT

>PGSC0003DMG400030856LRR-RLPs\_3050

ATAGGCTTTAGAGGATTCCGTTTCCCAGACTGGATAAATCAATCAGTTTTGATAAATGTTGTCTCGATTGT

AATTGAAGGTTGCGAAAACCTGCTCATGCTTACCACCCTTTGGTGAGCTG

>PGSC0003DMG400030856LRR-RLPs\_3172

TTGTCTAGAAAGTCTAGAGTTATGGAAGGGGTCTGCGGAGTACGTTGAAGAGGCTGATGTTTCATTTCAGG

ATCCCCACAAGAAAATGGTTTCCATCCCTGAGAAAACCTTAGTATAGGCAA

>PGSC0003DMG400030856LRR-RLPs\_3355

GATGACGATTTTCAGATTGCCCTATGTTTGTATACGACCCTTTCTTTAGTTGTGGGCGAGAGGAAAGGT

TTTCAACTTGGTGAACCTACGAAACCCGAATCTCTATGGCAAATGAAAT

>PGSC0003DMG400030856LRR-RLPs\_3416

AGGAAAGTTTTCAACTTGGTGAACCTACGAAACCCGAATCTCTATGGCAAATGAAATTACACATCTTG

AGAGAGTGAAGAAGGATACGGAGGCAAAGAAGCCAACCTTATCTGGAAAA

>PGSC0003DMG400030856LRR-RLPs\_3477

CACATCTTGAGAGAGTGAAGAAGGATACGGAGGCAAAGAAGCCAACCTTATCTGGAAAAATGAATCTG

CATTCTTTAAGCATGAGTTGGGATGATGATGAACCACATAGAGATGAATCAG

>PGSC0003DMG400030856LRR-RLPs\_3538

GAATCTGCATTCTTTAAGCATGAGTTGGGATGATGATGAACCACATAGAGATGAATCAGAAGAAGTTAA

AGTGCTTGAAGCCCTCAAACACACCCCAATCTGAAATCTTTAGAAATCAT

>PGSC0003DMG400030856LRR-RLPs\_3599

GAAGTTAAAGTGCTTGAAGCCCTCAAACCACACCCCAATCTGAAATCTTTAGAAATCATTGGCTTCAGAG  
GATTCCGTCTCCAGACTGGATGAATCACTCCGTTTTGAGAAATGTTGTC

>PGSC0003DMG400030856LRR-RLPs\_366

AGAATTTTCATTTGCACGAAAATATTATAGAGAGACAATCTGTTTCGACGGGAAACAGGTAATCATCTTAA  
ATTAGTATTACGACAGCTTAGTTTACATTCATATTTTTGGCAATTATCAA

>PGSC0003DMG400030856LRR-RLPs\_3782

CTAGAAAGTCTAGTGTTACACAAGGGGTCTGCGGAGGTGGAGTATGTTGAAGAAGAGGATATTGATGT  
TGATTCTGGATTCCCCACAAGAATAAGGTTTCCATCTCTGAGAGAACTTTGT

>PGSC0003DMG400030856LRR-RLPs\_3965

CTTGAAGAGATATCGATTTACTGGTGCCCTGTGTTTGTTCCTTCCAAACCTTTCTTCTGTCAAAGGATTGAA  
AGTTAATGGGGACGAGGTAGATGCAGCAAGTTTCATGTCCATATCTAAT

>PGSC0003DMG400030856LRR-RLPs\_4026

AAGGATTGAAAGTTAATGGGGACGAGGTAGATGCAGCAAGTTTCATGTCCATATCTAATCTTAGCACAC  
TTACTTCCCTCCGCATTAGCAGTAACAAATCTACTTCGCTCCCAGAAGAGA

>PGSC0003DMG400030856LRR-RLPs\_4087

TAGCACACTTACTTCCCTCCGCATTAGCAGTAACAAATCTACTTCGCTCCCAGAAGAGATGTTCAAAGC  
CTTGCAAATCTCAAAGACTTGAAATCTCTTTCTTTAAGAATCTCAAAGA

>PGSC0003DMG400030856LRR-RLPs\_4209

TGCCTACCAGCCTGGCTAGTCTCAATGCTTTGAAGAGTCTGAAACTCCCAGAAGAGATGTTCAAAGCCT  
TGCAAATCTCAAGTACTTGACTATCTCTTTCTCTATGAATCTCATAGAGC

>PGSC0003DMG400030856LRR-RLPs\_427

TCATCTTAAATTAGTATTACGACAGCTTAGTTTACATTCATATTTTTGGCAATTATCAAATTTGGAGAAGG  
GTCAAATATACTCATGTACTATTGTAAATAGTTTAAATATACCTCTCTT

>PGSC0003DMG400030856LRR-RLPs\_4270

CAAAGCCTTGCAAATCTCAAGTACTTGACTATCTCTTTCTCTATGAATCTCATAGAGCTGCCTACCAGCC  
TTGGTTGTCTCAGTGCTTTGAAGTGTCTACAAATTCAATGTTGTGACGC

>PGSC0003DMG400030856LRR-RLPs\_4331

CCTACCAGCCTTGGTTGTCTCAGTGCTTTGAAGTGTCTACAAATTCAATGTTGTGACGCACTAGAGAAAT  
TCCCCGAGGAAGGGATGAAAGGTTTAACTTCACTAACAGAGTTATCTGTT

>PGSC0003DMG400030856LRR-RLPs\_4453

TTGCTGTAAGACGCTAAAATGTTTACCAGAGGGATTGCAGCACCTAAAAGCCCTCACAAAGATTGAAAAT  
TAGTGACTGTCCAGAAGTGAAAAGCGGTGTGAGAAGGGTATAGGAGAAGA

>PGSC0003DMG400030856LRR-RLPs\_4514

TTGAAAATTAGTGACTGTCCAGAAGTGAAAAGCGGTGTGAGAAGGGTATAGGAGAAGAATGGCACA  
AAATTGCTCGCATTCCGTATCTGTATATTAGTTAGTCTTATATGTAATCGTAA

>PGSC0003DMG400030856LRR-RLPs\_4575

GGCACAAAATTGCTCGCATTCCGTATCTGTATATTAGTTAGTCTTATATGTAATCGTAAGTATTACTACTT  
GTAATTGTTTCTTGGGTTCTTTGTTTGCAGTTTTCCACACATTTTTAT

>PGSC0003DMG400030856LRR-RLPs\_4758

GCCGGGAAGTCCCACAGCGCTCCCTAACAAAAGCGACCTCGGTACCCAAGGGGCTCCCACACATGTTAC  
ATTCTGCCATTGGATGTAATATTGTGATTTTCTGTCCAAATAGTAAGAAA

>PGSC0003DMG400030856LRR-RLPs\_4819

CATGTTACATTCTGCCATTGGATGTAATATTGTGATTTTCTGTCCAAATAGTAAGAAAAGACAAGTTTTCT  
GTTATATCACTTTGATCACCTTCAAAGTGGGAATTCCATTTCTAACTT

>PGSC0003DMG400030856LRR-RLPs\_4875

AAAGACAAGTTTTCTGTTATATCACTTTGATCACCTTCAAAGTGGGAATTCCATTTCTAACTTGATCAAA  
ACTGTCGTGCACCATGTAGCTTGCATTACACTCGATGTTTATATTAAT

>PGSC0003DMG400030856LRR-RLPs\_488

TTGGAGAAGGGTCAAATATACTCATGTACTATTGTAAATAGTTTAAATATACCTCTCTTATTATACTTTGG  
CACAAATTTGTCAAACCTAGCAAGTAGCAAGTTTTAAATACCCGATTTT

>PGSC0003DMG400030856LRR-RLPs\_549

TATACTTTGGCACAAATTTGTCAAACCTAGCAAGTAGCAAGTTTTAAATACCCGATTTCTTTAGAAATCCA  
CCCGTTTAACTCATCCACTACCCATTCCCTTTGCTTTTTGCTTTGAATT

>PGSC0003DMG400030856LRR-RLPs\_61

ATTGCTTTTTGGTTTTCAAATGAGTTCAAAGCTTTCAAGCATTTTTCTACAATCCAATCCGTCCTTGA  
AGATGCTCAGGAGAAGCAATTCAACGACAAGCCACTTGAAAATTGGTT

>PGSC0003DMG400030856LRR-RLPs\_610

TAGAAATCCACCCGTTTAACTCATCCACTACCCATTCCCTTTGCTTTTTGCTTTGAATTGTTTTCTTTACCTC

TAAACTTAGAAAACGCGATCTGTTTTGTTAATCAAATTAATATTAT

>PGSC0003DMG400030856LRR-RLPs\_671

TTTCTTTACCTCTAAACTTAGAAAACGCGATCTGTTTTGTTAATCAAATTAATATTATGTTCTCAATGACG  
ATAGCCTTTCCAGACAGCTGAATGTAAATTTGTCTAACAAAGAAAAA

>PGSC0003DMG400030856LRR-RLPs\_732

TCTCAATGACGATAGCCTTTCCAGACAGCTGAATGTAAATTTGTCTAACAAAGAAAAAAATGATTAGG  
CATGTTTCTCCTTGTTAGTGATTACGCTGGATTTCTTTCAGAGTGAAATA

>PGSC0003DMG400030856LRR-RLPs\_793

ATGATTAGGCATGTTTCTCCTTGTTAGTGATTACGCTGGATTTCTTTCAGAGTGAAATATAGGGGATAAA  
GTTAGAGCATAGTAATCGATCGTTCATTTCTTTCCTAAAAAGTAAAAAGT

>PGSC0003DMG400030856LRR-RLPs\_854

GGGGATAAAGTTAGAGCATAGTAATCGATCGTTCATTTCTTTCCTAAAAAGTAAAAAGTTCAGCAAATA  
ATATCAAGGTACCATGATGGAAAATGATCAGATATGATAAAACTACAAAT

>PGSC0003DMG400030856LRR-RLPs\_915

AGCAAATAATATCAAGGTACCATGATGGAAAATGATCAGATATGATAAAACTACAAATAGAATAGAAA  
CTTATATATTAAGCTGGAAGAGAGTGAGTGACAATATCATCCTCTAATAAC

>PGSC0003DMG400030856LRR-RLPs\_976

AATAGAACTTATATATTAAGCTGGAAGAGAGTGAGTGACAATATCATCCTCTAATAACACTACCAAATT  
CCAAATTTCAAATTCATGATATGGAGGAGCAACCAAAAAGCATTG

>PGSC0003DMG400030928LRR-RLPs\_1159

CTCTGATATTCGCCATACTAATCTTTCAGCTGCTAATGGGGCTTCAGATGATACAAAAATGGCCTCAGCT  
GATGAAGATCTTGAAGTGGAGTGTGACGGATATCTTACTAGGTGTTTAGA

>PGSC0003DMG400030928LRR-RLPs\_1281

GGAAGAAAGCTACAGACATTAGGCTCTCAGCTATGGCAGTTGGAACCTTAGCCGTGGGGGTCTTGGA  
AAGCTCTCAGTTCGGGGGAGCAACCCCGTTCGGGGTATTACTAATGTTGGTC

>PGSC0003DMG400030928LRR-RLPs\_1891

GGGTTTGCAATCTCTGGCTTCTTGTACTGTCACTTCGTGCATTGGACTGACGAATCCGAGTCTTGAAGCA  
GTGGGAAAGGGCTGCACAAATATTAAGCATGTGCCTTCGCGAGTGTGA

>PGSC0003DMG400030928LRR-RLPs\_2196

CCTTGTTGTCTCCCTGTGATTCTCTCCGATCGTTGTCCATCCGAAGCTGTGCAGGATTCGGTAGCAGAAG  
CTTAGCTATGGTGGGGAAGCTATGTCCCAGCTTCATCATTTGGATCTCA

>PGSC0003DMG400030928LRR-RLPs\_305

GTGATTTAGTTTTATAGAATAGATTCATTTTTAGTGCTTCATGAATCTATTAAGGGTTGTTGATTGTTGA  
TATGAATATGAAGGGTGTAGGAGTAACAAGAAGAAAAAATTGTTGCTT

>PGSC0003DMG400030928LRR-RLPs\_3050

CTCTTACACAACCATGGTATCCTGAGAATACAGTTACCTAAGTCCTGGTGCTAAAGTTTTCACTAGTGTTG  
CTCCTTGTCCTCGGGGATGAACTAATAATGCTTCTCTTAACT

>PGSC0003DMG400030928LRR-RLPs\_3111

ACTAGTGTGCTCCTTGTCCTCGGGGATGAACTAATAATGCTTCTCTTAACTATATAGATATCA  
TGCATTTGCCTTGATAGTACTACACTGCAGAATCAGACAGTTTTTTCTT

>PGSC0003DMG400030928LRR-RLPs\_3233

TTCTAGTATGTAAGTTTTCGTATTAAGAAGTCGTCCTCGTTGTTACTATAAGTGTTTTACTTATCATCTTAG  
TCGTCTGTAGTTGGAATCGAACGATTTCTGTAGCATGGTGTCTGATAA

>PGSC0003DMG400030928LRR-RLPs\_3294

TATCATCTTAGTCGTCTGTAGTTGGAATCGAACGATTTCTGTAGCATGGTGTCTGATAATCTGGGGCTTG  
GTCATGGCAACTAGTCCATCTAGGTTGTTTTCTAGTGTCCAAGTTCTAG

>PGSC0003DMG400030928LRR-RLPs\_488

TTGCCCATTTCCCAATTTGAAAAAGATTAAGTTGTTGCTTTGGCTTTGAAGATGTTAATCTTGC  
TCCTATTTAAAAAAATTATGCTTTAGTAAGTTTTGTGTGTGATTG

>PGSC0003DMG400030928LRR-RLPs\_549

TTAATCTTGCTCCTATTTAAAAAAATTATGCTTTAGTAAGTTTTGTGTGTGATTGTTAGATTGATGT  
TAAAGATTGGCACTTTTTGATAAAAGGTGTGAATAAGAAACATTTTTC

>PGSC0003DMG400030928LRR-RLPs\_61

TAGATAGGGTTTTGTTGAAATCTTGAACTTTTTCATGTGTAATGCAAATCTGGTTGAAGATAAAATTTG  
GGGTTTGTGTTCTTGGTGCAAAGTTTTTTTTTTTTAATTCCTTTGG

>PGSC0003DMG400030928LRR-RLPs\_671

GTCTTTGTAGCTAAGAATTTATTTGTTGTTCAACTTTTGATCTGATTTGGTAGATCTCAGTTTTAAGTTTT  
TATGTAATGAGTTCTCTGACTTGAATGAAGTTAAATATAAGATTTTT

>PGSC0003DMG400030928LRR-RLPs\_732

TTTAAGTTTTTATGTAATGAGTTCTCTGACTTGAAATGAAGTTAAATATAAGATTTTTGTAAGAAAGGGC  
ATGAAATTATAATCTTGGGAATTTAGTATGTTGATTTGGTGGAAAAGA

>PGSC0003DMG400030928LRR-RLPs\_915

TTTGTTCACTGATTTGGGTCTTATGTTGGCTCTTGGTCATGCTGATTTACTGTCCTGTTAGTAAGAGG  
GCACGCATTAGTGGCCCGTTTGTGTTGAAGAGAGGACAAAGAATCCAT

>PGSC0003DMG400031028LRR-RLKs\_1037

GCTCAAGCAGCTAGAGTTATTGTGAGTTATTTAATCACGTTAAATTGATGTCTTCTCATATCTAGTTGATA  
TGGTTATGATGAATTAATTCATATGTGGTACAGGAACCTGAAAAACAAC

>PGSC0003DMG400031028LRR-RLKs\_1525

TGCTCTGCTACAAGTTGTCTATACGGAATGCTGTGTTGTCTGTTTGGTGTATGTTTATTCTAACAATAGA  
AGTTTCATATTATTCAGTGATGTGCGGGCAATAACCTCAGTGGAATA

>PGSC0003DMG400031028LRR-RLKs\_1647

TCCAGATAATATTGGGAATTGTACAAGTTTTGAGATACTGTCAGTGTCTCTCCTCGCTCTTGTAACATTA  
AGCTACGGTTTTTACTCCTACTGCTGCCCAATTATAACAAAGTCTTTTT

>PGSC0003DMG400031028LRR-RLKs\_1952

CTTCAACAGGTCTTTGCAAGGAAATAGGCTAACTGGGAAGATCCCAGAAGTGATTGGTCTAATGCAAG  
CTCTTGCTGTTCTGTGAGTATTCATACTATTACATTTTTTTTTTAACAACT

>PGSC0003DMG400031028LRR-RLKs\_2013

AATGCAAGCTCTTGCTGTTCTGTGAGTATTCATACTATTACATTTTTTTTTTAACAACTCCATTTCTTACTAT  
TTACTACTTGCAAGTTAGAAAGTTTCATGATGTTTGTTCCTCTGTA

>PGSC0003DMG400031028LRR-RLKs\_2318

ACCACCGGAGCTAGGAAATATGTCTAACTTAGTACTTGTAAGAGGGTTAATTCACAATTCAGATGCA  
TTATGCGGTCACCTTTTTTTTTGCTTCATGCATTGAGCTATCTTATTTA

>PGSC0003DMG400031028LRR-RLKs\_244

CCATGCTATTTAACTCTGATAACGAAAAATCCGTGTTATTTAAGATATATTTAGGCTCCAGTTTATGGCAT  
AACTACTGGAATACTAGTTGATGAAAATGAAAATGGTTATGACTGCTT

>PGSC0003DMG400031028LRR-RLKs\_2989

GCGAATCATCAACCTTGATACATTGTGAGTTCTTACTGTCAAGGTCAATAAAATTTATTAGTTCAAGTG



ATTTCTTGTAATAAACTTGTATTCTTTAGGGATCTCTCTGGCAATGAAT

>PGSC0003DMG400031028LRR-RLKs\_305

TTTATGGCATAACTACTGGAATACTAGTTGATGAAAAGTAAAATGGTTATGACTGCTTGCGCAGGCAA  
AGCATTAAATGTCGATCAAGGCATCGTTTAGCAACGTGGCAAACGTGTTGCT

>PGSC0003DMG400031028LRR-RLKs\_3050

GTTCAAGTGATTTCTTGTAATAAACTTGTATTCTTTAGGGATCTCTCTGGCAATGAATTTTCTGGGTCTA  
TCCCTGGTTCTATTGGAGATTTGGAGCATCTCCTCACACTGTAAGATTT

>PGSC0003DMG400031028LRR-RLKs\_3111

TCTGGGTCTATCCCTGGTTCTATTGGAGATTTGGAGCATCTCCTCACACTGTAAGATTTTAAACATTTTGA  
TGTACAAGGAGTTTGTATCATATTGTGACTTGAACATAATCACAATATC

>PGSC0003DMG400031028LRR-RLKs\_3172

AACATTTTGTATGTACAAGGAGTTTGTATCATATTGTGACTTGAACATAATCACAATATCACTGCATATTGT  
AGGAATCTGAGCAGCAATCATCTTGATGGACAAATTCCTGTAGAATTTG

>PGSC0003DMG400031028LRR-RLKs\_3294

AATCTGAAAAGTATACAGACCATGTGAGTTTCTGCTGAGAGCTTTGGTTACTGCCTTCAAATGTGTA  
CTTTTTTTAGTATACTGATTTTCTTGTTCTGAGATTGGTTTCTATTCTT

>PGSC0003DMG400031028LRR-RLKs\_3355

AAATGTGTAATTTTTTTAGTATACTGATTTTCTTGTTCTGAGATTGGTTTCTATTCTTTCAGTGATATGTC  
ATGCAACAAGATTTCTGGTGCCATCCCAAAGAGCTGGGACAGCTGCA

>PGSC0003DMG400031028LRR-RLKs\_3782

TGTTCTCTTTCACGGAATTTCTCGCGGTTTGCACCTGACAGGTATTTCCGTATAGAATGAAGCTTCATC  
ATTATATATGAGCATTAGTACAAGTTAATGATCATCTTACTATGGTCAT

>PGSC0003DMG400031028LRR-RLKs\_3843

AAGCTTCATCATTATATATGAGCATTAGTACAAGTTAATGATCATCTTACTATGGTCATCAGCTTTTTGGG  
GAACCCATTTCTTTGTGGCAACTGGAAGGCTCAATATGTGACCCCTAT

>PGSC0003DMG400031028LRR-RLKs\_4575

TCCTTTGTTACGACTACTTGGAGAATGGTTCACTCTGGGATCTACTTCATGGTTAGTAACCCTCTTTTCCTT  
GTAATCTTTTATAAAGCATCTTCATGTAAGACAGTGTTGACTATTAGT

>PGSC0003DMG400031028LRR-RLKs\_4636

CTCTTTTCCTTGTAATCTTTTATAAAGCATCTTCATGTAAGACAGTGTTGACTATTAGTTGATATTTGTTAC  
TGTTTTCCCTGTCGGAGAATGGTGCTATAAGCCAGGATTGATTTGAAA

>PGSC0003DMG400031028LRR-RLKs\_488

CTCCATTTCCGTCGTTGCCCTGTAGGTTTTCCATCCTTGTCTCCTAACTTTTACTGATACACCAGAACAAG  
AAGTAGCTGGACTCTGATGACCTGCTAGCTATTGTATAGCACTTTGTT

>PGSC0003DMG400031028LRR-RLKs\_4880

AACCCAAGAATCATCCACAGAGATGTGAAATCTTCAAACATTCTTGTTGATGAAAATTTTGAGGCTCATC  
TTTCTGATTTTGGGGTTGCAAATGCATCCCTTCTGCAAAAACACTCATGCA

>PGSC0003DMG400031028LRR-RLKs\_5124

AACCGGTTGATAATGACTTGAACCTGCATCAGCTGGTATTATTCTCCTCTTGTAGTCTACGTTGTTGCTTG  
TAAAAAAGATTTAACTCAGACTGGATATAGAAAAGAACAACCTTATCTCA

>PGSC0003DMG400031028LRR-RLKs\_5185

TTGTTGCTTGTA AAAAAGATTTAACTCAGACTGGATATAGAAAAGAACAACCTTATCTCAAATTTTCCTACC  
TTCTCCAGCATTTGCGATGTTATCATTCCATCAAATGTCTTTTGTCTT

>PGSC0003DMG400031028LRR-RLKs\_5246

TTTTCTACCTTCCTCCAGCATTTGCGATGTTATCATTCCATCAAATGTCTTTTGTCTTTAACTCCTGTATT  
ATATTTGTTGTCTTTATAGAGTACTTTGATTTGTGTTACAGATAATG

>PGSC0003DMG400031028LRR-RLKs\_549

CCAGAACAAGAAGTAGCTGGACTCTGATGACCTGCTAGCTATTGTATAGCACTTTGTTATTTTAGCTAA  
AACTTATACGTCTTTTATTTAAATTTGCCTTCTCTGCTTGCGAAGGAATC

>PGSC0003DMG400031028LRR-RLKs\_5612

AAAGGACTACCGCAAGTTCAGCAGGGTGATGATTCCTCCGAAGCACAGTGGCTTGTTAGATTTCAAGAA  
GCTATATCCAAAACTCCCTTTGACTTGGGTTTCATAGACACACTTCATATC

>PGSC0003DMG400031028LRR-RLKs\_5673

TTCAAGAAGCTATATCCAAAACTCCCTTTGACTTGGGTTTCATAGACACACTTCATATCAAATCAGAAGC  
GAATATGGAACATATATATGTTGGCCAAAGGTTTTTTGATGTTAGAGATT

>PGSC0003DMG400031028LRR-RLKs\_5795

TCCTATAAGATGGTTAGGTACACGGTAATAGCTAGTGTATTTACATTTGTAGATGGAATGTTTTATGGT  
GGATGAGATCCACAATAGGTTAGATCTACAACCAGTGCAGTTCAACTTAA

>PGSC0003DMG400031028LRR-RLKs\_61

TTTTACCGATCGTTTTAGCTCTCACCGAAGAAGGTAAGTATTTTTTTGAACACCTAGAAGCTGTTTTGGTG  
TTTTCTAGCTCCTCTGTTTTATAGCAGAAGGTAGTGCTATGTGTGCTA

>PGSC0003DMG400031028LRR-RLKs\_610

TTTAGCTAAAACCTTATACGTCTTTTATTTAAATTTGCCTTCTCTGCTTGCGAAGGAATCTGTCTAATCTTAA  
CTTGGGCGGGGAAATTTACCAGCCATTGGAGATTTGAAGAATCTAGA

>PGSC0003DMG400031028LRR-RLKs\_732

CATTGTATGGTCCATGTTCTCTTTACTGTTCTTGGTCCATTGACTGTTATTTTTCCGTGCTAATATTATATT  
CCAATTTTAATGACAGAGACCTTCAGGGAAATAAATTAAGTGGTCAA

>PGSC0003DMG400031103-(rev)LRR-RLKs\_122

GCCTTATCAATCAATCAACTTTTTTAGCCAATTTTTTCTCTGTTTTCGCATCCCTTTTTATCCTCTTATTTA  
ATTTTTAGCTAAACCCCATTTCTTGATTTTTAGTCTTTTGCATGTC

>PGSC0003DMG400031103-(rev)LRR-RLKs\_2379

GTTTCGCTGGAAATCTCCCCGATGAACCTGGTAGGCTAGTCAACTTGGAAGTCTTAAGCTATCTGATAAT  
AAGTTTAATGGACAGATACCTGGTGGCTTAGGTGGACTAGCACGACTAAC

>PGSC0003DMG400031103-(rev)LRR-RLKs\_3416

TTGCCTTAGGAGCTGCTGAGGGACTATGCTATTTGCACCATGACTGTAAGCCACATATCATTACAGGGA  
TATAAAATCGAACAACATTTTGTTGGACGAAATGCTTGAGGCACATGTAG

>PGSC0003DMG400031103-(rev)LRR-RLKs\_3599

GTTTCATACGGCTACATTGCCCTGGTAAGACCGGTGTTTAGGCACTTAAAACGATACTCTTTATTAGCATT  
ACTTACATACAGAAGCTAACTAAGTTCTAGTTTTTTCTTTTTTTCAGAA

>PGSC0003DMG400031103-(rev)LRR-RLKs\_3660

TATTAGCATTACTTACATACAGAAGCTAACTAAGTTCTAGTTTTTTCTTTTTTTCAGAATATGCATACACAA  
TGAAAGTGACAGAGAAATGCGACATCTATAGTTATGGCGTTGTTTTGT

>PGSC0003DMG400031103-(rev)LRR-RLKs\_4148

AATATCTCTATAACAGTCATCCTCTATAACAACATTTCACTATAACAAACGGGTTCTCTATGGAACCTAATT  
TTCATGTTATGTTACATTACATGTTCTCTATAACAACATTTCACTATAA

>PGSC0003DMG400031103-(rev)LRR-RLKs\_4209

GGAACCTAATTTTCATGTTATGTTACATTACATGTTCTCTATAACAACATTTCACTATAACAAACGGGTTCTC

TATGGAACTAATTTTCATGTTATGTTACATTACATGTTCTCTATAACA

>PGSC0003DMG400031103-(rev)LRR-RLKs\_4819

TTCATGTTATGTTACATTACATGTTCTCTATAACAACATTTTCGCTATAGGAGCCAAATATTGGAACAAGTA

AAACTGTTATAGAGATGTTTGATTGTATATCATTTAAACACATATCGAA

>PGSC0003DMG400031103-(rev)LRR-RLKs\_4880

GGAACAAGTAAACTGTTATAGAGATGTTTGATTGTATATCATTTAAACACATATCGAATCAATACCTGT

GTTTATAGCAGCCCCAAAAGAAAGGAATTCTCATTTTTTCATGTCCATAAT

>PGSC0003DMG400031103-(rev)LRR-RLKs\_4941

AATACCTGTGTTTATAGCAGCCCCAAAAGAAAGGAATTCTCATTTTTTCATGTCCATAATTCTAAGTTTGTAGT

TAATAATAAAAGGAATTATTCAATACTGAATGGATGTTACAAAGAAAA

>PGSC0003DMG400031103-(rev)LRR-RLKs\_5002

TAAGTTTAGTTAATAATAAAAGGAATTATTCAATACTGAATGGATGTTACAAAGAAAAATCAGCTAAAT

CACATGCATGTCTGTTTACTAACAGCAACCAGTTTCTACATTTTTTTTAGT

>PGSC0003DMG400031103-(rev)LRR-RLKs\_5063

CAGCTAAATCACATGCATGTCTGTTTACTAACAGCAACCAGTTTCTACATTTTTTTTAGTAGCATTTGTGTAT

TCATGCTATACATGTTTGATAATTTTGATTCAGAATGTTGCGCATACT

>PGSC0003DMG400031103-(rev)LRR-RLKs\_5124

CATTTGTGTATTCATGCTATACATGTTTGATAATTTTGATTCAGAATGTTGCGCATACTCTCCAAAAATATC

GTCAGACACTACTTTTGGAGGATCCGACATGCATCCAGCTGATATTTT

>PGSC0003DMG400031103-(rev)LRR-RLKs\_5185

CCAAAAATATCGTCAGACACTACTTTTGGAGGATCCGACATGCATCCAGCTGATATTTTTTTGGAGAGTT

CGAGCAACATAGATTCAGATTATATCATCCACAAAAAACTAAAATGCATC

>PGSC0003DMG400031103-(rev)LRR-RLKs\_5246

TGGAGAGTTTCGAGCAACATAGATTCAGATTATATCATCCACAAAAAACTAAAATGCATCCACTTTATGTT

TCTTGCAGGTTCTAATTAAGCAACCATAGACCAAAAAACAGAAAATTGAA

>PGSC0003DMG400031103-(rev)LRR-RLKs\_5307

CTTTATGTTTCTTGCAGGTTCTAATTAAGCAACCATAGACCAAAAAACAGAAAATTGAAGTTGTGGCTCA

TCTCAAGCTCTGCCAAATTTCTAATAGAGTTAGAAGCATCTTATTATTCA

>PGSC0003DMG400031103-(rev)LRR-RLKs\_5368

TGTGGCTCATCTCAAGCTCTGCCAAATTTCTAATAGAGTTAGAAGCATCTTATTATTCATGTACACACAAC  
TACCTTTGATACCATACTTCCCCTCTAATAATTATTAGTTGGCATTCT

>PGSC0003DMG400031103-(rev)LRR-RLKs\_5426

ATGTACACAACACTACCTTTGATACCATACTTCCCCTCTAATAATTATTAGTTGGCATTCTTATCTATTTAT  
CTTCTAAATTATATCTACTTCTATGATCTGTCTCCACATTAAGTCC

>PGSC0003DMG400031228-(rev)LRR-RLKs\_0

CAAACCTGCAGGAGTCTTAGGAACTGCAACTTGCAAGGAACAGTTCCTGATCTAAGCACAATACCACAC  
CTTCTTTACTTGTAAGCATACTTCATCGAGAAATTCATGCGTCCAGTTAAA

>PGSC0003DMG400031228-(rev)LRR-RLKs\_1037

GCCAAATTTGTATTCTATTTTCAATTTGGTAGCTAGTCAGTCCACATGTAGTTTTGGATATACAAAGAAAG  
TATCCCGGAAAATAATAGTACAATCAAGGAATAGTGTGTCCATTGTCAA

>PGSC0003DMG400031228-(rev)LRR-RLKs\_1098

ACAAAGAAAGTATCCCGGAAAATAATAGTACAATCAAGGAATAGTGTGTCCATTGTCAACAAGGGTTTC  
CTATCTCTATACAGTTAATATATAACAAGGAATAATATGTCTGGTGTTTTG

>PGSC0003DMG400031228-(rev)LRR-RLKs\_1159

AGGGTTTCCTATCTCTATACAGTTAATATATAACAAGGAATAATATGTCTGGTGTTTTGTTTCGTTTCGAGG  
TAATGTAGCATGTATTCTTTCTCTACTAAACCAGGCCATGTGACTAG

>PGSC0003DMG400031228-(rev)LRR-RLKs\_1220

TCGTTTCGAGGTAATGTAGCATGTATTCTTTCTCTACTAAACCAGGCCATGTGACTAGAAAAGGCCCT  
CAGATGTTAACATATCAGATAGCCAGGCTGATCCAGTTGTTCTCCTTTGT

>PGSC0003DMG400031228-(rev)LRR-RLKs\_1281

AAGGCCCTCAGATGTTAACATATCAGATAGCCAGGCTGATCCAGTTGTTCTCCTTTGTGCAGGAACTTT  
CAACGTAATTTCTCTCAGATATTTCCGGTATTCTTGATCCTCCTCCAAA

>PGSC0003DMG400031228-(rev)LRR-RLKs\_1342

AGGAACTTTCAACGTAATTTCTCTCAGATATTTCCGGTATTCTTGATCCTCCTCCAAATGTCGATATTATG  
TAAGACCTTGTTCCGGTAGTCTTGACATACATATTTGCGGACTTAC

>PGSC0003DMG400031228-(rev)LRR-RLKs\_1403

TCGATATTATGTAAGACCTTGTTCCGGTAGTCTTGACATACATATTTGCGGACTTACTTTTCAGTTCTCG  
GCTTTTATAATTATATGTGGCGAATCAAGCTCCCCTAATTCAATTGCTA

>PGSC0003DMG400031228-(rev)LRR-RLKs\_1464

TCAGTTCTCGGCTTTTATAATTATATGTGGCGAATCAAGCTCCCCTAATTCAATTGCTATCTAACTTTCATT  
ATCCTATTTTTTATAAGCTTCAAATTACAAAGTAATTCTGTGGAGTCT

>PGSC0003DMG400031228-(rev)LRR-RLKs\_1525

TAACTTTCATTATCCTATTTTTTATAAGCTTCAAATTACAAAGTAATTCTGTGGAGTCTTAGTTTCTATTTTC  
AGATTTCTGTGATTCAACAGAACTACTATCATGAAGAAGGCAGAAAAA

>PGSC0003DMG400031228-(rev)LRR-RLKs\_1586

GTTTCTATTTTCAGATTTCTGTGATTCAACAGAACTACTATCATGAAGAAGGCAGAAAAACTTGCTATAGC  
ATATCCCCATGACAACATTTGGGATAGTTGCATAAACTGCCTTCATTTG

>PGSC0003DMG400031228-(rev)LRR-RLKs\_1647

TGCTATAGCATATCCCCATGACAACATTTGGGATAGTTGCATAAACTGCCTTCATTTGCTGTTTTCTGC  
TAAACTCTTCTATCAGTATAGAGATTTACTTCGAATATCCATTGATGA

>PGSC0003DMG400031228-(rev)LRR-RLKs\_1708

GTTTTCTGCTAAACTCTTCTATCAGTATAGAGATTTACTTCGAATATCCATTGATGAAGATAGAGTAGT  
GAACCAACACAGTTTCAACTTCTTTATTTTGTTCATCGTTCAAACTTC

>PGSC0003DMG400031228-(rev)LRR-RLKs\_1769

ATAGAGTAGTGAACCAACACAGTTTCAACTTCTTTATTTTGTTCATCGTTCAAACTTCATTTCTTGTCAGA  
AGATGGGTAGTTTTCTTGCTAGCAGTGCACTTTATATGGAGCTCGAAA

>PGSC0003DMG400031228-(rev)LRR-RLKs\_1830

TTCTTGTCAGAAGATGGGTAGTTTTCTTGCTAGCAGTGCACTTTATATGGAGCTCGAAAACAATGGGGTC  
AAATTCATATATGTGAATTTCTTCCATATGATATGGTAATATGACAAAG

>PGSC0003DMG400031228-(rev)LRR-RLKs\_2440

AAAAATGGCAGCTTTCGAATGCTTGATGATGATCCCTGCATTATAATCTTTTTATTTTTATTACAATTCTG  
GCATAACTTGCCTCTAAACCAGACAATACTGGTTACATACCGAAGT

>PGSC0003DMG400031228-(rev)LRR-RLKs\_2501

TTACAATTCTGGCATAACTTGCCTCTAAACCAGACAATACTGGTTACATACCGAAGTAGTAACAGGCT  
TTCCAATTTGATGGAGAGATCACGCCTCAGCAATACCTTTCAAGCTGTAT

>PGSC0003DMG400031228-(rev)LRR-RLKs\_2562

TAACAGGCTTTCGAATTTGATGGAGAGATCACGCCTCAGCAATACCTTTCAAGCTGTATATATTTAATTCT

AAAAACAAATTGTTCAACTTCTATCATGGTTAAATAAATTCTGGTTCAC

>PGSC0003DMG400031228-(rev)LRR-RLKs\_2623

ATTTAATTCTAAAAACAAATTGTTCAACTTCTATCATGGTTAAATAAATTCTGGTTCACCTACTAACTTTAT

TTTTCTGAAGAGCAGCTTCACCTACTAACCTTATACATGTTTGTGTGC

>PGSC0003DMG400031228-(rev)LRR-RLKs\_2684

ACTAACTTTATTTTTCTGAAGAGCAGCTTCACCTACTAACCTTATACATGTTTGTGTGCAGTTTTGTGTGCC

ATATTTGCTGATTTTCATGAATAACATAAATAATGAGTTTGAGTTTTGT

>PGSC0003DMG400031228-(rev)LRR-RLKs\_2806

TTAACCCATTTACTGGTACTTTAACGTGCAAATATTTTCAATGGCATAGAATCCCTACACACATTTTGCTTT

ATCACTCCTTTATATTTCTGATTAAGTATTCATTAGGTGTGACAAAGA

>PGSC0003DMG400031228-(rev)LRR-RLKs\_2867

CATTTTGCTTTATCACTCCTTTATATTTCTGATTAAGTATTCATTAGGTGTGACAAAGAACTGTAACCTTCA

GGCTTTATGGAAATCCTGTTTGTGGAAATGCAAATGAGCGCCAGATTA

>PGSC0003DMG400031228-(rev)LRR-RLKs\_305

AAATTTCTCATGTCACAGAGACCTTAGCAGAAACCAACTCACGGGAAATATACCTTCCAATAAGCTGTCT

GATAATATCACAACCATGTAAGTTTCTGGAAGTGTTAACTGCTGATATC

>PGSC0003DMG400031228-(rev)LRR-RLKs\_3172

TTTCCACCACATTATAGTGACTTTGAACAGTGGATAACAAAAAGCGTTAATTTGAATGATTATCAACTGC

AAATTGATTCGGTTTCATGGCAAAGCGGTCCTAGGCTTAGGTTCTTTTTG

>PGSC0003DMG400031228-(rev)LRR-RLKs\_3538

GTTCTGTAATGATTTCTGAGGAATTTAAAGTAAAACCAATGTGAACAATAATAGAAACAAACGTCAATC

TCGTTTGTTTTTTACAACCTTAGATCATGCACGGAGAGTGGCAAAAACCTCA

>PGSC0003DMG400031228-(rev)LRR-RLKs\_3599

ACGTCAATCTCGTTTGTTTTTTACAACCTTAGATCATGCACGGAGAGTGGCAAAAACCTCAATTTTTTTAGTT

TAAATTTCTCTAGGGAGGCACAAGAACCCAAGGTTGAGATTAGCATGCA

>PGSC0003DMG400031228-(rev)LRR-RLKs\_366

AAGCTGTCTGATAATATCACAACCATGTAAGTTTCTGGAAGTGTTAACTGCTGATATCTTCTCTGGTTTG

ATTCACCCATCTTTAATCACACTTCTTCCCCCCCCCCCCCAACTCTCT

>PGSC0003DMG400031228-(rev)LRR-RLKs\_3782

AAATATTGGATACTTTTCAACTGGACTGGAAGTCTGGAACCTTGTGCACCCGCATGACTAATTTTTCTTT  
TGTTCTTGCTGAATCTTGAATATAATTATTATGATTATTATATTTCTTT

>PGSC0003DMG400031228-(rev)LRR-RLKs\_3904

TCTTTACTGGTCATGCTCGGATAAAAAATTCCCTTTCCATTGTGCTCCATTTGTTTTCTGAAAATGTCTAT  
TTATATCGTTTACCCTGTGATATAGAACATAGTTTTTTCTTCTTGTCA

>PGSC0003DMG400031228-(rev)LRR-RLKs\_3965

AAAATGTCTATTTATATCGTTTACCCTGTGATATAGAACATAGTTTTTTCTTCTTGTGCATAGAAGTATGCG  
AGTATGAAAATTCAATGAAATGGTTTAGATATCATGCATGCTTTGAAGC

>PGSC0003DMG400031228-(rev)LRR-RLKs\_4026

GAAGTATGCGAGTATGAAAATTCAATGAAATGGTTTAGATATCATGCATGCTTTGAAGCTTAACATCCTC  
ATGAACATGGTAACCTGACAGAGATGCTAGTAATCTCTTAGATACTCAGT

>PGSC0003DMG400031228-(rev)LRR-RLKs\_4087

AACATCCTCATGAACATGGTAACCTGACAGAGATGCTAGTAATCTCTTAGATACTCAGTAAGGGTCAAG  
AGACTAAATTGACTACCTTAGTACAAGTTCTTGATTAAGTAAAATCTTAGG

>PGSC0003DMG400031228-(rev)LRR-RLKs\_4148

GGGTCAAGAGACTAAATTGACTACCTTAGTACAAGTTCTTGATTAAGTAAAATCTTAGGTGAACCATATG  
GTACTGTCAAACATGTGAATATCCCCATTCAGAACTCAAGATGAATTG

>PGSC0003DMG400031228-(rev)LRR-RLKs\_4209

AACCATATGGTACTGTCAAACATGTGAATATCCCCATTCAGAACTCAAGATGAATTGGCTACTTTTGT  
TTATTTTTGGTGTATGAAGAATTTGTTAATGACGCAGAATCTGTGTGAA

>PGSC0003DMG400031228-(rev)LRR-RLKs\_427

TCCTGGTTTGATTACCCATCTTTAATCACACTTCCTTCCCCCCCCCCCCCAACTCTCTATCGATATCTGTGA  
ATAGGTGGTTGAATGGACATTAGTGTTTTAACATGCACTCTTTTCTT

>PGSC0003DMG400031228-(rev)LRR-RLKs\_4270

TACTTTTGTTTTATTTTTGGTGTATGAAGAATTTGTTAATGACGCAGAATCTGTGTGAAGAAGCCTTATAG  
AATCTTTGTAAGCAGAACAAGGATTTACTTTTCTTTTTTTTTCTATTTG

>PGSC0003DMG400031228-(rev)LRR-RLKs\_4331

AGCCTTATAGAATCTTTGTAAGCAGAACAAGGATTTACTTTTCTTTTTTTTTCTATTTGAGATGTCTCGCAA  
CACAGCCTTTGTCCTGAATATAAATATATCATTGTAAATATATGCTA



>PGSC0003DMG400031228-(rev)LRR-RLKs\_4392

ATGTCTCGCAACACAGCCTTTGTCCTGAATATAAATATATCATTGTTAAATATATGCTATCATATAAGAGA  
GCCACTCTGTTCTTGTCTTTCTTTCTGCTTTCTCAAGATCAAATAACGA

>PGSC0003DMG400031228-(rev)LRR-RLKs\_4453

ATATAAGAGAGCCACTCTGTTCTTGTCTTTCTTTCTGCTTTCTCAAGATCAAATAACGAATGTTTTTCCTTC  
TTGCAGTCCTTTTTCTCCGTTGGGAGGAGAGAGAAGCAGAAAAAACA

>PGSC0003DMG400031228-(rev)LRR-RLKs\_4514

GTTTTTCCTTCTTGCAGTCCTTTTTCTCCGTTGGGAGGAGAGAGAAGCAGAAAAAACAGAGGCACTGT  
GGTTGGAATTGTCTTAGGGTCCATATTTGCTGCAGCTGTGCTACTTATGGC

>PGSC0003DMG400031228-(rev)LRR-RLKs\_4697

GTTAATCTTCAGTAATTTTATGTGACTTTTCTCAGCTATGGGGAGTTTCTTCTCCATTTCTTTCATTCACCC  
CATTAGGACCTGTTGGTTAAGTAGTCAATACGTTTAACTTTTTCTTGG

>PGSC0003DMG400031228-(rev)LRR-RLKs\_4758

TTTCATTCACCCATTAGGACCTGTTGGTTAAGTAGTCAATACGTTTAACTTTTTCTTGGGTATTCTGTTGA  
ATCGCCAAAAAGAGGACATGAAACCACATTCTTTGAGTGCTTCATGCA

>PGSC0003DMG400031228-(rev)LRR-RLKs\_488

CGATATCTGTGAATAGGTGGTTGAATGGACATTAGTGTTTAAACATGCACTCTTTTCTTCTTGATGTTTGA  
GTA ACTTGGTCTTGGTATCAGACCCTCAATAGTGA ACTAACTACTTTGA

>PGSC0003DMG400031228-(rev)LRR-RLKs\_4880

TAATGCAA ACTTTGCACCTGATAATTTCCAATTTCCATCTTCTGAAAAACAAAAAGATGCCAAAAACCATA  
AAATCTGTCTTCTTACTGTTATTTTCTTGTTTAAGTTCTCTATTTAAT

>PGSC0003DMG400031228-(rev)LRR-RLKs\_4941

AAAAACCATAAAATCTGTCTTCTTACTGTTATTTTCTTGTTTAAGTTCTCTATTTAATCAAGAAATAACAC  
AGAATTGCCAGTGTCAACCATCTTTTTCAATGTGGCAAATTATTTTTTCT

>PGSC0003DMG400031228-(rev)LRR-RLKs\_5002

AGAAATAACACAGAATTGCCAGTGTCAACCATCTTTTTCAATGTGGCAAATTATTTTTCTTAGTATGTATA  
CTTGTAATTTAGCTATGATACTGCTTGATGTTAGTTTTTTTTAAGGAGAG

>PGSC0003DMG400031228-(rev)LRR-RLKs\_5063

AGTATGTATACTTGTAATTTAGCTATGATACTGCTTGATGTTAGTTTTTTTTAAGGAGAGAGTATGGTGCTT

TAATTCCTCACATGGACAGATAACTTTACGGTTTTATGGGAAGTTTGTG

>PGSC0003DMG400031228-(rev)LRR-RLKs\_5124

TATGGTGCTTTAATTCCTCACATGGACAGATAACTTTACGGTTTTATGGGAAGTTTGTGCGTATTTATGAT

GAGTAAACTCTCCGGCAATGCCCCATCACCCCTTAGAACAAAAAGTGGAA

>PGSC0003DMG400031228-(rev)LRR-RLKs\_5185

TATTTATGATGAGTAAACTCTCCGGCAATGCCCCATCACCCCTTAGAACAAAAAGTGGGAATAGAAATAAAT

AGGAAGTGTGTGCTGGACAATTGGCATGTATATCTAAGTAATACTCTTGT

>PGSC0003DMG400031228-(rev)LRR-RLKs\_5246

GAAATAAATAGGAAGTGTGTGCTGGACAATTGGCATGTATATCTAAGTAATACTCTTGTGTAGTGCTTC

TGTTATTTGTACATCAATTAGACGATTATTTATGTTCTTTTCTTAGTCAG

>PGSC0003DMG400031228-(rev)LRR-RLKs\_5307

TAGTGCTTCTGTTATTTGTACATCAATTAGACGATTATTTATGTTCTTTTCTTAGTCAGATTAATTGATATT

CTTAAAGTGAACAAAGTTAGCTGAAGCCAATATTGTATCAAAGGTTT

>PGSC0003DMG400031228-(rev)LRR-RLKs\_5429

TTGCATTAAAGTTATGCTACCATCACCTAAGCTTTTTCGTTTTATTCTTTTTATGTCAACTTTTTATGCTTA

AGTTTTCAATGAATATCTGATTTTTAATAAATTGAATCTTGTGGCAA

>PGSC0003DMG400031228-(rev)LRR-RLKs\_5490

TTTTTATGCTTAAGTTTTCAATGAATATCTGATTTTTAATAAATTGAATCTTGTGGCAATGATGTATTTCTT

GCTTAAACAAACTTACCCAGGACCACATGGCACTCATAGTGATATTCC

>PGSC0003DMG400031228-(rev)LRR-RLKs\_5551

ATGTATTTCTTGCTTAAACAACTTACCCAGGACCACATGGCACTCATAGTGATATTCCTTTCATTTCTTTT

GTAGTACCAAATTTCCAATGCGAATAGAAGGTGTTAAGGCAATGGGT

>PGSC0003DMG400031228-(rev)LRR-RLKs\_5673

TAAGGAATTAGAGGCAGCACTAACAATTTTAGCAGTACTACTGAAATTGGCCAAGGAGGCTATGGAAA

GGTCTACAAAGGCACTTTGGCAGAGGGAACAATAGTGGCAATTAACGTGC

>PGSC0003DMG400031228-(rev)LRR-RLKs\_5856

GCATCATCGAAATCTGGTTTCTTGGTGGGATACTGTAATGAAGGAAGTGAACAAGTAAGATTCTCCAA

ACTGGAAATGTAATAGACACACACACACACACAGAGCCAAGTCCATG

>PGSC0003DMG400031228-(rev)LRR-RLKs\_6039

TCAGTTCAGCCACTTGTTGAATTCTGATTGCCAGTTCTGGTTGAATACCTAGGTCAAAATTGAATTTTT  
TGCATATCCTTGATCATTGGATGCCTCATTGCCGTTGTGCAGAACCA

>PGSC0003DMG400031228-(rev)LRR-RLKs\_61

TACCACACCTTCTTACTTGTAAGCATACTTCATCGAGAAATTCATGCGTCCAGTTAAACCACATGTTGAG  
GCTTATGTTCTTGTTGTTCTAACCTCTGGTAATGTTGATATCTGCTTA

>PGSC0003DMG400031228-(rev)LRR-RLKs\_6100

TGAATTTTTTGCATATCCTTGATCATTGGATGCCTCATTGCCGTTGTGCAGAACCAATCAACCATAAT  
ATCAATTACCTTCTACAACCTTGAGAAATCCATTTGATATCACTCTAGA

>PGSC0003DMG400031228-(rev)LRR-RLKs\_6161

CAACCATAATATCAATTACCTTCTACAACCTTGAGAAATCCATTTGATATCACTCTAGATGCAAATGAAAT  
TACAAGAATCACAAATGATAGTTAAATTGCAGGGCAAAGTTCAGACTTA

>PGSC0003DMG400031228-(rev)LRR-RLKs\_6222

CAATGAAATTACAAGAATCACAATGATAGTTAAATTGCAGGGCAAAGTTCAGACTTAGCTGATTCATC  
TGTTAAAGTAACTCGAGCAAAGTCTTCTGAGATAGTATTTTCATCATA

>PGSC0003DMG400031228-(rev)LRR-RLKs\_6344

TCTTTTTTGTACCAATTATTATCACACGTTAAGTGATTCAATTTGTGAGCATATCCAGTGTACAGTACT  
AGATCACCTAATATTAAGTTCAACCAAATTTCCATCTATGAGTAGCTC

>PGSC0003DMG400031228-(rev)LRR-RLKs\_6405

GTACAGTACTTAGATCACCTAATATTAAGTTCAACCAAATTTCCATCTATGAGTAGCTCATCAGTTACATC  
CCTCTTATACTTGCGTAGTCTGGGCACATTAGTGAAATGCATGTCTTCT

>PGSC0003DMG400031228-(rev)LRR-RLKs\_6466

CAGTTACATCCCTCTTATACTTGCGTAGTCTGGGCACATTAGTGAAATGCATGTCTTCTGAAAAAGTAATC  
AAATAATCAAGCAGATGGAAGGATAAGAACGGATATTATGTTTTATGTT

>PGSC0003DMG400031228-(rev)LRR-RLKs\_6527

AAAAGTAATCAAATAATCAAGCAGATGGAAGGATAAGAACGGATATTATGTTTTATGTTTTTTTATTCTA  
CTTTTGTAATAGTTGGTTACATGTGCATGCAGATGTTGGTGTATGAGTTC

>PGSC0003DMG400031228-(rev)LRR-RLKs\_6710

TTGTCATTTGATTTCTTTTGTGTTAGAATCAAGCACATCTATTCTCCTTATCACTTATTTTTTCTGGTGTA  
GTACTTCTTATACGAAAAAGAGGGTGAAAGATATGTCCCTCTAGTAA

>PGSC0003DMG400031228-(rev)LRR-RLKs\_6771

TTTCCTGGTGTAGTACTTCTTATACGAAAAAGAGGGTGAAAGATATGTCCCTCTAGTAAAGAATATTGTA  
TAGATGAAAGTAAATCAAATTATCTAGTCACTCAGATTTTCTTTTCTGA

>PGSC0003DMG400031228-(rev)LRR-RLKs\_6832

AATATTGTATAGATGAAAGTAAATCAAATTATCTAGTCACTCAGATTTTCTTTTCTGAAGTTTTTACTTCA  
TTTTGACTCCTGAAAGTCACTGTTAGTTTTCTACTTTCTTCACTTGG

>PGSC0003DMG400031228-(rev)LRR-RLKs\_6893

TTTTTACTTCATTTTGACTCCTGAAAGTCACTGTTAGTTTTCTACTTTCTTCACTTGGGTGGTCATCAACA  
AGTTTATCACATGGAACTTTATATTCTTAATTTTAGTCATGTGTCAGT

>PGSC0003DMG400031228-(rev)LRR-RLKs\_6954

GGTCATCAACAAGTTTATCACATGGAACTTTATATTCTTAATTTTAGTCATGTGTCAGTTCCAATATGCAT  
ATCAAACAGGTATCTCAAAGTACAATTATTAAGATTTTTTTTACTTAT

>PGSC0003DMG400031228-(rev)LRR-RLKs\_7015

CAATATGCATATCAAACAGGTATCTCAAAGTACAATTATTAAGATTTTTTTTACTTATTTTTTACAGCTAG  
ATATGGGGAATGTCTGAGTCTTGAACAAGGTTATACATTGCTTTAGGT

>PGSC0003DMG400031228-(rev)LRR-RLKs\_7320

AACTCCTGTAAGGCTTACTCGTCTTATATGTTGAAGCCTGCAATAGAAAAGCTAGAAAATCGCAATGAG  
ATAAGATCTGCAACTTGAGTAATCTAGGTAGCATTGCTACAGACCAGGAA

>PGSC0003DMG400031228-(rev)LRR-RLKs\_915

TACATTTTCTCTTATCAGTAATTTGATTTTCATGTTTCTGTTGTCTGCTGCCCCACAATCTATTGGCCAGTT  
AAAGTTTTTAACTGTAAGATACAGACAAAAGCTTTTTGTAGAGAATC

>PGSC0003DMG400031228-(rev)LRR-RLKs\_976

TATTGGCCAGTTAAAGTTTTTAACTGTAAGATACAGACAAAAGCTTTTTGTAGAGAATCAAGCCAAATTT  
GTATTCCTATTTTATTTTGGTAGCTAGTCAGTCCACATGTAGTTTTGGAT

>PGSC0003DMG400031283LRR-RLPs\_1071

ATGATGGACTATGTGGATTTCCACTCTCAAAAAAATGTGGTGGTGTGATGATGGGGTACCACAAGCGGCAA  
CTCAATTTGGTGTGATCAAGAAGAAGAAGGAGATTCATCAATTGTCAATT

>PGSC0003DMG400031283LRR-RLPs\_1134

CGGCAACTCAATTTGGTGTGATCAAGAAGAAGAAGGAGATTCATCAATTGTCAATTGGCAGGCAGTTC

TTATGGGCTATGGTTGTGGATTAGTCATTGCACTATCTGTAATATACATGC

>PGSC0003DMG400031283LRR-RLPs\_1181

ATTGTCAATTGGCAGGCAGTTCTTATGGGCTATGGTTGTGGATTAGTCATTGCACTATCTGTAATATACA

TGCATAATGTTGGCAACACGATATCCATCATGGTTTTCGAGGTTGTTGA

>PGSC0003DMG400031283LRR-RLPs\_315

TCTTAGTGGGACAGTTAATAACAACTTTTAGTATTGCAAACCAACTTCAAATCATTAACATGGACGGTAAT

AAGCTAGAGGGGAAAGTCCCACCATCTTTGCAAATATTTGGGACAACCTTG

>PGSC0003DMG400031283LRR-RLPs\_378

CGGTAATAAGCTAGAGGGGAAAGTCCCACCATCTTTGCAAATATTTGGGACAACCTTGATTTAGGTAATA

ATGAGTTGAATGACACATTCCCAAATGGTTGGGAGCAATACCTGCTTTGC

>PGSC0003DMG400031283LRR-RLPs\_441

GTAATAATGAGTTGAATGACACATTCCCAAATGGTTGGGAGCAATACCTGCTTTGCGGATTTTAAGTTT

GAGATCAAATAAGTTGCATGGTCCTATAGAAGTTTCAAGGACTTCAAACCT

>PGSC0003DMG400031283LRR-RLPs\_504

TAAGTTTGAGATCAAATAAGTTGCATGGTCCTATAGAAGTTTCAAGGACTTCAAACCTTTTTTCTCAACTG

CGAATTATGGATCTCTCATCCAACGGATTTAGTGGGAAGTTACCGGCAA

>PGSC0003DMG400031283LRR-RLPs\_567

CTCAACTGCGAATTATGGATCTCTCATCCAACGGATTTAGTGGGAAGTTACCGGCAAGTCTTTTTGATAG

TTTTCAAGCCATGAAGATAATTAATGAGAACATTACAACCTCATATCAGG

>PGSC0003DMG400031283LRR-RLPs\_630

TTGATAGTTTTCAAGCCATGAAGATAATTAATGAGAACATTACAACCTCATATCAGGGAGTTCAATATGA

TACTTTGACAATTACAACAAAGGGATTGGATCTTCAATTTGTCAAAGTTT

>PGSC0003DMG400031283LRR-RLPs\_693

AATATGATACTTTGACAATTACAACAAAGGGATTGGATCTTCAATTTGTCAAAGTTTTTGATCAAGCAA

CATAGTTATCGATCTCTCTAACAAATAGATTTGAAGGTTATATTCCACGTA

>PGSC0003DMG400031283LRR-RLPs\_756

AAGCAAACATAGTTATCGATCTCTCTAACAAATAGATTTGAAGGTTATATTCCACGTA

CATTGGGCTTCGTACGTTGAATTTGTCTCATAATAACTTGAAAGGTTATA

>PGSC0003DMG400031283LRR-RLPs\_819

GAGATATCATTGGGCTTCGTACGTTGAATTTGTCTCATAATAACTTGAAAGGTTATATACCAACATCACT  
GCACCAATTATCTGTAGTTGAGTCATTGGATGTCTCATTTAATAAAATCA

>PGSC0003DMG400031284LRR-RLPs\_126

AGGGGAAAGTCCCACCATCTTTGCAAATATTTGGGATAGCTTGATTTAGGTAATAATGAGTTGAATGAC  
ACATTCCCAAATGGTTGGGAGCACTACCTGATTTGCGGATTTTAAGTTTG

>PGSC0003DMG400031284LRR-RLPs\_189

AATGACACATTCCCAAATGGTTGGGAGCACTACCTGATTTGCGGATTTTAAGTTTGACATCAAATAAGT  
TGCATGGTCCCATAGAAGTTTCAAGGACTGAAAACCTTTTTTCTCAACTG

>PGSC0003DMG400031284LRR-RLPs\_315

ATGGATCTCTCATCCAACGGATTTAGTGGGAAGTTACCGGCAAGTCTTTTTGATAGTTTTTATGCCATGA  
AGATAATTAATGAAAACATTACAACCTCATATCTGGGAGTTCAATATGAT

>PGSC0003DMG400031284LRR-RLPs\_378

GCCATGAAGATAATTAATGAAAACATTACAACCTCATATCTGGGAGTTCAATATGATACTTTGACAATTA  
CAACAAAGGGATTGGATCTTCAATTTTTTAAAGTTTTTGATCAAGCAAAC

>PGSC0003DMG400031284LRR-RLPs\_63

TTAATACAACTTTTAGTATTGGAAACCAACTCCAAATCATTAAACATGGATGGGAATAAGCTTGAGGGGA  
AAGTCCCACCATCTTTGCAAATATTTGGGATAGCTTGATTTAGGTAATAAT

>PGSC0003DMG400031284LRR-RLPs\_819

GGATTTCCACTCTCAAAGAATGTGGTGGTGGTGGTGGGTTACCACACGCGGCAACTCAATTTGGTCTT  
GATCAAGAAGAGGAAGGAGATTCATCAATTGTCAATTGGCAGGCAGTTCTT

>PGSC0003DMG400031284LRR-RLPs\_882

GGTCTTGATCAAGAAGAGGAAGGAGATTCATCAATTGTCAATTGGCAGGCAGTTCTTATGGGCCATGGT  
TGTGGATTAGTCATTGTACTGTCTGTAATATACATGCATATTGTTGGCAAC

>PGSC0003DMG400031284LRR-RLPs\_942

GGCCATGGTTGTGGATTAGTCATTGTACTGTCTGTAATATACATGCATATTGTTGGCAACAGGATATCCA  
TCATGGTTTTCGAGGTTGTTTGAAGAATTGGAACACAAAATTATTACGAG

>PGSC0003DMG400031320-(rev)LRR-RLPs\_1054

TATCTGGGAAGTATGACTATGCTTTCATCAATGCCAAATTGATATGCAATGATCATTTGAAAGACCTTAA  
AGTGCTAGAGAAAGAATGTAAAGTGGGCCAGCATCTAGAACTTATGGCC

>PGSC0003DMG400031320-(rev)LRR-RLPs\_1116

GACCTTAAAGTGCTAGAGAAAGAATGTAAAGTGGGCCAGCATCTAGAACTTATGGCCAGTGTGTTTGC  
TTTGCGTACATACCGTTGTATGCTTCACTGCAGGTGTCTGGCACTGATGTT

>PGSC0003DMG400031320-(rev)LRR-RLPs\_1176

TGTGTTTGCTTTGCGTACATACCGTTGTATGCTTCACTGCAGGTGTCTGGCACTGATGTTGGAGACATTA  
ACCAGTACAGCCTATTTGAGGCATCTATCTGTGGGTGCATTGTGAAATAG

>PGSC0003DMG400031320-(rev)LRR-RLPs\_372

CTATCATTAAGAAATGGGCGGAAGGTTAAGCATCAATATGCTCGCAGTTTGATATTACCCAGTCTGTTTC  
ATGCTTTGAGGCAACTGAAAAGCTTAGATCTCAGTGGATGTAATTTATGT

>PGSC0003DMG400031320-(rev)LRR-RLPs\_434

TCTGTTTCATGCTTTGAGGCAACTGAAAAGCTTAGATCTCAGTGGATGTAATTTATGTGATGACCAAGCT  
TCTGCTCTTAAGAACTTGACTTCTTTATTAATGGAAGTGAACCTGAGCAG

>PGSC0003DMG400031320-(rev)LRR-RLPs\_496

ACCAAGCTTCTGCTCTTAAGAACTTGACTTCTTTATTAATGGAAGTGAACCTGAGCAGAAATAAGTTTATT  
TATTTGCCTGATGTCTTCAGCCGACTTTCTCACCTTCGATATCTCAATA

>PGSC0003DMG400031320-(rev)LRR-RLPs\_558

AAGTTTATTTATTTGCCTGATGTCTTCAGCCGACTTTCTCACCTTCGATATCTCAATATAGCCCACTGTCAG  
GAACTTCCCCTACTTCTCGGAATATAGAGGAATTATATGTAGAAGAT

>PGSC0003DMG400031320-(rev)LRR-RLPs\_620

CCACTGTCAGGAACTTCCCCTACTTCTCGGAATATAGAGGAATTATATGTAGAAGATTTTTTGGAAAAA  
GAAAGTATTGCAAAGCTACTGATGTACCCAAGGTTGAAATTGCTCTCATT

>PGSC0003DMG400031320-(rev)LRR-RLPs\_682

TGGAAAAAGAAAGTATTGCAAAGCTACTGATGTACCCAAGGTTGAAATTGCTCTCATTACCAATTATAG  
TTTTGATCAACAATCTTATACAGAGGAGAGCAATGATAGCTCAATTTCCGG

>PGSC0003DMG400031320-(rev)LRR-RLPs\_744

AATTATAGTTTTGATCAACAATCTTATACAGAGGAGAGCAATGATAGCTCAATTTCCGGATGAGATTCTCA  
GTCTGTTTCTATCTAACAATATGGATGATGTGATCCTTCCCTCTCTTAAC

>PGSC0003DMG400031320-(rev)LRR-RLPs\_806

GATTCTCAGTCTGTTTCTATCTAACAATATGGATGATGTGATCCTTCCCTCTCTTAACCTGATCATAGGG

TAACTTGTTCCATTGTCTTTCTGAACGTGCAATCCCAAATGGTTTAT

>PGSC0003DMG400031320-(rev)LRR-RLPs\_868

ATCATAGGGTAACTTGTTCCATTGTCTTTCTGAACGTGCAATCCCAAATGGTTTATGCATCAGAGTGCT  
GAGAAAAAGATCTCGTTCAAACCTGCCATTAATTGGTATAATGATAAGT

>PGSC0003DMG400031320-(rev)LRR-RLPs\_930

CAGAGTGCTGAGAAAAAGATCTCGTTCAAACCTGCCATTAATTGGTATAATGATAAGTTCAAGGACTTTG  
CTATATGTTGCGTGACTCGCATGGGGGCAGGTGTTTGCAGTCTTGATTCA

>PGSC0003DMG400031320-(rev)LRR-RLPs\_992

GGACTTTGCTATATGTTGCGTGACTCGCATGGGGGCAGGTGTTTGCAGTCTTGATTCATGGCTATCTGG  
GAAGTATGACTATGCTTTTCATCAATGCCAAATTGATATGCAATGATCATT

>PGSC0003DMG400031446-(rev)LRR-RLPs\_0

ATGCCTTCTAAAGACTTACCAACGAGTCTGTTTCAACATTTGAAAGGCATGAGGACTATTGATCAAATAA  
TGAAGTCACCAAGTTATAAAGGAGGTGGAGTAACTACCAAGACTCGGTA

>PGSC0003DMG400031446-(rev)LRR-RLPs\_126

GTAACAAAGGGATTGAAGCTTGAAGTTGTGAAAAATTTGCCTTTGTACACAGTTATTGATCTTTCAAACA  
ACAAATTTGAAGGACATATTACTAGTGTCTAGGAGATCTTATTGCGATT

>PGSC0003DMG400031446-(rev)LRR-RLPs\_504

ATTTCAAAGGTTGTGGCAATGATCCTGTGTCGGAGACAAATTTTACAGTATCTGCGCTAGCTGATCAAG  
AAAGGAATTCTGAATTTCTCAATGATTTTTGGAAAGCTGTTCTGATGGGC

>PGSC0003DMG400031446-(rev)LRR-RLPs\_63

CAAATAATGAAGTCACCAAGTTATAAAGGAGGTGGAGTAACTACCAAGACTCGGTAGTCATTGTAACA  
AAGGGATTGAAGCTTGAAGTTGTGAAAAATTTGCCTTTGTACACAGTTATT

>PGSC0003DMG400031446-(rev)LRR-RLPs\_693

CTTGCAAGAATCATTGAAGAACTGGAACACAAAATTATCATGCGAAAGAGAAAAAAGCGGCAAGGTCA  
AAGGAATTACAGAAGAAGAGATAATCAATCTAGGCAAGTTATCAATAAAGAT

>PGSC0003DMG400031446-(rev)LRR-RLPs\_750

CGGCAAGGTCAAAGGAATTACAGAAGAAGAGATAATCAATCTAGGCAAGTTATCAATAAAGATGGATT  
TGATTTCAGAACTTCAGGTATTCAAGCTAAGATCTACGCTCATCTTTTTTAG

>PGSC0003DMG400031451-(rev)LRR-RLPs\_1071



GAATAACAAACTTTCTGGGACTCTTCCAACAAATTTTAGCATTGGAAGTTCACCTATAAGTCTCAACTTGC  
CTGGCAATGAATTAGAGGGGAGAATCCCTCGGTCGTTGTCCAATTGCAA

>PGSC0003DMG400031451-(rev)LRR-RLPs\_1449

ACCAAGTTATAGAGGACATGGAGTATACTTCCAAGACTCTGTAGTTGTTGTAACAAAGGGATTGAAGCT  
TGAAGTTGTGAAAATTTTGTCTTTGTACACAATTATTGACCTTTCAAACAA

>PGSC0003DMG400031451-(rev)LRR-RLPs\_1512

GAAGCTTGAAGTTGTGAAAATTTTGTCTTTGTACACAATTATTGACCTTTCAAACAATAAATTTGAAGGAT  
GTATTCCTAGTGTCTAGGAGATCTCATAGCTCTTCGGGTATTGAATAT

>PGSC0003DMG400031451-(rev)LRR-RLPs\_1827

CTTCGAGAGCAATTCATATGAAGGTAATGATGGATTACGTGGATTCCCTGTTTCAAAGGTTGTGGCAAT  
GATCCTGTGTCTGCGCTAGAAGATCAAGAAAGAAATTCTGAATTTTTCAA

>PGSC0003DMG400031451-(rev)LRR-RLPs\_2049

AAGAATCATTGAAGAACTGGAACACAAAATTATCATGCGAAGGAGAAAGAAGCAGCGAGGTCAAGGG  
AATTACAGAAGAAGAAATAATCGCTTCTAGACAAGTTACCAATACAGAAGGAT

>PGSC0003DMG400031451-(rev)LRR-RLPs\_693

AAATCTGAAAATGATTCTCAATGATAACAATCTCATTGGGGAAATTCCTTCATTTGTGTGCAATTTGA  
CATCACTGGAAGTGTGTGTATGCCGAGAACCAATTTGAAGGGAAAAGT

>PGSC0003DMG400031451-(rev)LRR-RLPs\_756

CAATTTGACATCACTGGAAGTGTGTGTATGCCGAGAACCAATTTGAAGGGAAAAGTTCGCAATGTTT  
GGGTAATATCGGCAGCCTCCAGGTTTTGATAATGTCACATAATAATCTCAG

>PGSC0003DMG400031451-(rev)LRR-RLPs\_819

ATGTTTGGGTAATATCGGCAGCCTCCAGGTTTTGATAATGTCACATAATAATCTCAGTGGAGAGATCCCT  
TCATCTATTTCAAATTTAACATCACTAAAAATTCTAGATTTGGGCAGAAA

>PGSC0003DMG400031451-(rev)LRR-RLPs\_882

GATCCCTCATCTATTTCAAATTTAACATCACTAAAAATTCTAGATTTGGGCAGAAACAATCTGGAGGGA  
GCAATTCACAATGTTTTGGCAATATTAGTAGCCTCCAGGCTCTTGATAT

>PGSC0003DMG400031485RLKWAX-EGF\_0

CCTAATAAAAATATAATGTCTGTAGTAACCAAGTTTCTTCTTACAATCCTCATCTTCATGTACCTCTCAGAA  
ACCCATTAGCAGAACAAAGACAGCAGTGTGTCCCTTCTAGTTGTGGG

>PGSC0003DMG400031485RLKWAX-EGF\_1054

CATTAGATATTCCAACCTCCAACATAAGAAAGATGACTAGGAATTTTAAAGAGAAACTAGGCCAGGGAGG  
TTATGGTTCAGTATATAAAGGCAAGCTTCAAAGTGGTCCTAATGTAGCAGT

>PGSC0003DMG400031485RLKWAX-EGF\_1798

ACATGATGACGTAAAGAAGCTGACTTTAGTTCCTCCCAGGCCCTCTGAATCGCGGGAACCATGTTTCATTG  
GAATCAATCTAATTAGTTCTTCAATAAACTCAACTGAGTCTGTGAAGTT

>PGSC0003DMG400031485RLKWAX-EGF\_310

CTGGTATAAGAGAACAAGTTATTTGCTCTCTTCCCTCAGAATTCGATTACGGTTGGAACCTACCCTTCTTGGT  
TTTGATCCTTATATGTATAAAATGCTTCATTTTGTGATTAAACAGTAC

>PGSC0003DMG400031485RLKWAX-EGF\_372

CTTCTTGGTTTTGATCCTTATATGTATAAAATGCTTCATTTTGTGATTAAACAGTACCAATCACTCTCTTC  
AGCTGTCCATTTGCCATAAATTCTCCAGTCTTTGTGGAAATCACTAAT

>PGSC0003DMG400031485RLKWAX-EGF\_496

TCAACAGGAGTTATGCTTCCAATGTTTCTTCTGATTCATTTAAGGGACACACATATGCAACCATGACTGA  
ATTATCACCATCCGATTTGAAAGTCGGGTGTACTGTAGACGTCATGTCAA

>PGSC0003DMG400031485RLKWAX-EGF\_558

ATGACTGAATTATCACCATCCGATTTGAAAGTCGGGTGTACTGTAGACGTCATGTCAATGACTTCATGGC  
GTATTCAGGATGCAAATGCCAACATTTCTATTTTAAGTTTGCATTATGCT

>PGSC0003DMG400031485RLKWAX-EGF\_620

TTCATGGCGTATTCAGGATGCAAATGCCAACATTTCTATTTTAAGTTTGCATTATGCTTTGGCATATGGAT  
TTGAGCTTGGTGTCTTGCAGCAATCATCCCATGGATACTTCCCATAGC

>PGSC0003DMG400031485RLKWAX-EGF\_682

CATATGGATTTGAGCTTGGTGTCTTGCAGCAATCATCCCATGGATACTTCCCATAGCTGGTAAGCCACA  
TCTTTCGTCTTTCAAATATATTACTAGATATCATTTTAATGTCAAATGA

>PGSC0003DMG400031485RLKWAX-EGF\_744

AAGCCACATCTTTCGTCTTCAAATATATTACTAGATATCATTTTAATGTCAAATGATGGAGGTGAAGTA  
TTGTAATAACCTCTACTGAACATAACACATTGGTGATTGAATTTTTAGT

>PGSC0003DMG400031485RLKWAX-EGF\_806

GGTGAAGTATTGTAATAACCTCTACTGAACATAACACATTGGTGATTGAATTTTTAGTTAAACCATTCA

ATTTTTCTTGCTTATATGTGATGGTTGTACACAGGGTACACAGGGCTT

>PGSC0003DMG400031485RLKWAX-EGF\_868

CCATTCACAATTTTTCTTGCTTATATGTGATGGTTGTACACAGGGTACACAGGGCTTAGCATTGTGGCA

AGAATCGTTCTATTTCCATGCATAGTTGTATTTCTAATGATTAAGTTACG

>PGSC0003DMG400031485RLKWAX-EGF\_992

AGGCATTTGTCAATTTATGATGCAATTGAAAGTTTCCTGCACGGTGAGAACAATTCGCGCCCATTAGAT

ATTCCAACCTCAACATAAGAAAGATGACTAGGAATTTTAAAGAGAAACTA

>PGSC0003DMG400031486-(rev)OtherRLKsTM\_1575

CAATTTGCGAAAAGCGTCTCATAAATCTGATGTCTATAGCTTTGGAATGATGCTACTTGAAATGGTTGGA

GGGAGGAAGAATTTTGATGCAAAAGCGGATACTAGCCAAATGAACTTTCC

>PGSC0003DMG400031486-(rev)OtherRLKsTM\_1890

TCCTTTTACAACAAGAAACACCACCCATGTAGGTCCTTCTACGCAAGAGTTGACGGTAATCTCAGAACTA

GAATGAATGGAAGCCTTAATTACAGATCAACTCCTTCATCTAAAGTTGTA

>PGSC0003DMG400031486-(rev)OtherRLKsTM\_1953

AGAACTAGAATGAATGGAAGCCTTAATTACAGATCAACTCCTTCATCTAAAGTTGTAATGTCAGAGTCAA

TACAAGTGGAAAGTCTGAATTTTGGTATTTTCATTAGATATGTGTTAAGTC

>PGSC0003DMG400031486-(rev)OtherRLKsTM\_2016

GAGTCAATACAAGTGGAAAGTCTGAATTTTGGTATTTTCATTAGATATGTGTTAAGTCATTATGTTTTGCTG

CTACTTTCACAGCTCTTTTCCGTGTCCAAAATATTTATTGTCAATCTGT

>PGSC0003DMG400031486-(rev)OtherRLKsTM\_2066

TTAAGTCATTATGTTTTGCTGCTACTTTCACAGCTCTTTTCCGTGTCCAAAATATTTATTGTCAATCTGTCA

TGATTCTAATATCAACACTCACAAAAGTTATTACATATGCAACACCAT

>PGSC0003DMG400031486-(rev)OtherRLKsTM\_252

TCCAGGCTTTGAGTTATCTTGTGACCTCAAACCGAACCATACTCATACTTCCCAATTCACTTACACTAATT

GTTTCGAGAAATTGATTATATGTCTCAACAGATTAGTCTTTCTGATCCT

>PGSC0003DMG400031486-(rev)OtherRLKsTM\_315

ACACTAATTGTTTCGAGAAATTGATTATATGTCTCAACAGATTAGTCTTTCTGATCCTGAACGTTGTCTCAT

TCTTAATATATTGCACCTTAATTTATCAGCATCTCCTTTCTCCTTCACT

>PGSC0003DMG400031486-(rev)OtherRLKsTM\_378

TGTCTCATTCTTAATATATTGCACCTTAATTTATCAGCATCTCCTTTCTCCTTCACTGTTGACGAGCGTTATC  
TTACTAGATAACATTTCAATTTTCAAATGTTCTGGTATGCCAGCA

>PGSC0003DMG400031486-(rev)OtherRLsTM\_441

GAGCGTTATCTTACTAGATAACATTTCAATTTTCAAATGTTCTGGTATGCCAGCATATTATCGGAACCT  
ATATCCAGATTGTGCCTCTGACAAATCAATATTTGCTGTTTCCTACTCT

>PGSC0003DMG400031486-(rev)OtherRLsTM\_504

CGGAACCTATATCCAGATTGTGCCTCTGACAAATCAATATTTGCTGTTTCCTACTCTTTAGATTTACTCCCC  
CAGGCAACTTGCAAAAAGATTCATGAAATCCATCATTTCTCTACGAT

>PGSC0003DMG400031486-(rev)OtherRLsTM\_630

TACAGTAGTTTGATAAGACTCAGTTGGCTTAATCCAACTGTAGCTACTGTGAAGGTCTTGAAAAGGATT  
GTGGCTTCAAGAACTATACTAAACAAGTACTACTCAGTGTTTCGATCGA

>PGSC0003DMG400031486-(rev)OtherRLsTM\_693

AAGGATTGTGGCTTCAAGAACTATACTAAACAAGTACTACTCAGTGTTTCGATCGACCATTTACTACAA  
AAGGTATTGACAACTTTTCTTTAATGCCATTATCATGTACTTCTCTTTT

>PGSC0003DMG400031486-(rev)OtherRLsTM\_756

ACTACAAAAGGTATTGACAACTTTTCTTTAATGCCATTATCATGTACTTCTCTTTTCCATAACAAAAAAAT  
TGTGTTAATTCTGGCAGGCACAGTAAAGGAACCACTGATTGCAGGTGG

>PGSC0003DMG400031486-(rev)OtherRLsTM\_882

AGGTCTCATTCTTTTGGGAATAATTATTATGGCACTTTATGAGTGTTATAGCTCAAGCAAATTGAAAGA  
GAGAATCAAGTCAGAGTTGAAAAGTTTTTGGAAAGACTATAGAGCTCACAG

>PGSC0003DMG400031752LRR-RLs\_0

GTCAGCTTTTACTACTCCCTTTTCCAAAAAGAAAATTGCAGTCTTTCTTCTTCTTCTTTGTTCTTTCTT  
GATCCCAGAAAACCAAAAAATGAAATCTTCAATTTCAATAATGTTT

>PGSC0003DMG400031752LRR-RLs\_1054

AGATGTTTGGTGAATTGCCACAAGGCATTGCAACTTCACCAAATTGTATGAGTTGCGCCTTTTTCACAA  
CCGTTTTAATGGGAGTTTACCTAAACATCTTGGAAAAAATTCACCTTTGT

>PGSC0003DMG400031752LRR-RLs\_1116

TTTCAACCGTTTTAATGGGAGTTTACCTAAACATCTTGGAAAAAATTCACCTTTGTTGTGGATTGATGT  
GTCAGAAAACAATTTTTCTGGTGAAATTCGGAAAAATTTGTGTGGGAAA

>PGSC0003DMG400031752LRR-RLKs\_1178

GATTGATGTGTCAGAAAACAATTTTTCTGGTGAAATCCGGAAAATTTGTGTGGGAAAGGGTTGTTGTT  
GGAGCTTTTGATGATAAATAACTTACTTTCCGGTGAAATCCGGCGAGTTT

>PGSC0003DMG400031752LRR-RLKs\_124

AAATCTTGGTTACCCTTTTGCTCCCAACTTTGATTTTCTCACTTAACCAAGAGGGTCTTTATTACATAATG  
TGAAGCTTGGATTTGATGACCCTGATAATGTTCTTTCAAACCTGGAATG

>PGSC0003DMG400031752LRR-RLKs\_1240

TGTTGTTGGAGCTTTTGATGATAAATAACTTACTTTCCGGTGAAATCCGGCGAGTTTGAGTGAATGCCG  
GAGCTTACTGCGCGTGAGATTGGCACACAACCAGTTATCCGGTGATGTTT

>PGSC0003DMG400031752LRR-RLKs\_1302

GAATGCCGGAGCTTACTGCGCGTGAGATTGGCACACAACCAGTTATCCGGTGATGTTCCGGAGGGGTTCC  
TGGGGTCTGCCACACCTTTCTCTGCTTGAGCTCATGGACAATCACTCTCC

>PGSC0003DMG400031752LRR-RLKs\_1364

GGGGTTCTGGGGTCTGCCACACCTTTCTCTGCTTGAGCTCATGGACAATCACTCTCCGGTGATATCGCG  
AAACTATAGCCGGTGCTTCAAATTTATCAGCTTTGATTTTGTCTAAGAA

>PGSC0003DMG400031752LRR-RLKs\_1426

ATATCGCGAAAATATAGCCGGTGCTTCAAATTTATCAGCTTTGATTTTGTCTAAGAACAATTTTCAGGT  
TCCATCCCAGAGGAGATTGGTTCTCTGGAAAATCTTCTTGATTTTGTGG

>PGSC0003DMG400031752LRR-RLKs\_1488

TTTTCAGGTTCCATCCCAGAGGAGATTGGTTCTCTGGAAAATCTTCTTGATTTTGTGGGCAATGATAACC  
AGTTTTCTGGGCCTTTACCTGCAAGCCTGGTGATTCTTGGACAATTGGGA

>PGSC0003DMG400031752LRR-RLKs\_1550

TGATAACCAGTTTTCTGGGCCTTTACCTGCAAGCCTGGTGATTCTTGGACAATTGGGAAGGCTGGATCTT  
CACAACAATGAGTTAACTGGTAAGCTTCCAAGTGGGATTCATTCTTTGAA

>PGSC0003DMG400031752LRR-RLKs\_1612

TGGATCTTACAACAATGAGTTAACTGGTAAGCTTCCAAGTGGGATTCATTCTTTGAAGAAATTGAATGA  
ATTGAACTTGGCAAACAATGATCTTTCTGGAGATATCCCCAAGGAGATTG

>PGSC0003DMG400031752LRR-RLKs\_1674

TTGAATGAATTGAACTTGGCAAACAATGATCTTTCTGGAGATATCCCCAAGGAGATTGGGAGCTTGTCT

GTTTTGAATTATCTTGATCTATCAGGGAACCAGTTTTTCAGGGAAAATCCCA

>PGSC0003DMG400031752LRR-RLKs\_1736

CTTGTCTGTTTTGAATTATCTTGATCTATCAGGGAACCAGTTTTTCAGGGAAAATCCCAGTGGAGTTGCAG

AATTTGAAGCTCAATCAGCTGAACTTGTCGAATAATGACCTTTCGGGTGA

>PGSC0003DMG400031752LRR-RLKs\_1798

AGTTGCAGAATTTGAAGCTCAATCAGCTGAACTTGTCGAATAATGACCTTTCGGGTGATATCCCCCTGT

TTATGCAAAGGAAATGTATAAGAGTAGCTTTTTGGGGAATGCTGGTTTAT

>PGSC0003DMG400031752LRR-RLKs\_186

TTACATAATGTGAAGCTTGGATTTGATGACCCTGATAATGTTCTTTCAAACCTGGAATGAATATGATGATA

CACCATGTAACCTGGTTTGGTGTTCATGTGACCAATTGACTCGCACTGTT

>PGSC0003DMG400031752LRR-RLKs\_1860

CCCCCTGTTTATGCAAAGGAAATGTATAAGAGTAGCTTTTTGGGGAATGCTGGTTTATGTGGAGACATT

GAGGGCTTGTGTGAAGGAACAGCTGAAGGTAAAACCTGCTGGTTATGTTTGG

>PGSC0003DMG400031752LRR-RLKs\_1922

AGACATTGAGGGCTTGTGTGAAGGAACAGCTGAAGGTAAAACCTGCTGGTTATGTTTGGTTATTGAGGTT

ACTCTTCACCCTTGCTGGATTGGTGTGTTTATTGGGGTTGCTTGGTTCTA

>PGSC0003DMG400031752LRR-RLKs\_1984

TGAGGTTACTCTTCACCCTTGCTGGATTGGTGTGTTTATTGGGGTTGCTTGGTTCTACTGGAAGTACAA

GAATTTTAAGGAAGCTAAAAGGGCTATTGATAAGTCTAAATGGACTTTGA

>PGSC0003DMG400031752LRR-RLKs\_2046

AAGTACAAGAATTTTAAGGAAGCTAAAAGGGCTATTGATAAGTCTAAATGGACTTTGATGTCGTTTCATA

AATTGGGTTTCAACGAGTATGAAATCTTGGATGCTCTTGATGAGGACAAC

>PGSC0003DMG400031752LRR-RLKs\_2108

GTTTCATAAATTGGGTTTCAACGAGTATGAAATCTTGGATGCTCTTGATGAGGACAACCTAATTGGCAGT

GGCTCTTCTGGGAAGGTTTACAAGGTGGTTCTGAGCAAGGGTGACACTGT

>PGSC0003DMG400031752LRR-RLKs\_2170

TTGGCAGTGGCTCTTCTGGGAAGGTTTACAAGGTGGTTCTGAGCAAGGGTGACACTGTTGCGGTGAAG

AAGATTTTGAGAAGTGTGAAAATAGTAGATGAGAGTAGTGATATCGAGAAAG

>PGSC0003DMG400031752LRR-RLKs\_2232

GTGAAGAAGATTTTGAGAAGTGTGAAAATAGTAGATGAGAGTAGTGATATCGAGAAAGGTAGCTTTCA  
AGAAGATGGATTTGAAGCAGAGGTTGAGACGTTGGGGAAGATTCGACACAAG

>PGSC0003DMG400031752LRR-RLKs\_2294

CTTTCAAGAAGATGGATTTGAAGCAGAGGTTGAGACGTTGGGGAAGATTCGACACAAGAACATTGTTA  
AGCTATGGTGTGTTGTACAACACTAGGGATTGCAAACCTCTGGTCTATGAGTA

>PGSC0003DMG400031752LRR-RLKs\_2356

TTGTTAAGCTATGGTGTGTTGTACAACACTAGGGATTGCAAACCTCTGGTCTATGAGTATATGCCTAATGG  
AAGTTTGGGTGATTTGCTACACAGCAGCAAAAGTGGCCTTCTAGACTGGC

>PGSC0003DMG400031752LRR-RLKs\_248

TGATGATACACCATGTAACCTGGTTTGGTGTTCATGTGACCAATTGACTCGCACTGTTACATCATTGGACC  
TTTCTAATGCTAATGTTGCTGGTCCTTTCCGACTCTGCTTTGTCGGTT

>PGSC0003DMG400031752LRR-RLKs\_2480

GAGATCTAAGATAGCCATGGATGCAGCTGAGGGACTCTTTACTTGCATCATGACTGTGCTCCACCTATC  
GTTACACAGAGATGTTAAGTCAAATAACATCTTGCTGGATGGTGAGTTTGG

>PGSC0003DMG400031752LRR-RLKs\_2542

CACCTATCGTTCACAGAGATGTTAAGTCAAATAACATCTTGCTGGATGGTGAGTTTGGAGCTCGTGTTGC  
TGACTTCGGTGTGCAAAGGCGGTTCGATGCCAATGCTAAGGCAATCAAGT

>PGSC0003DMG400031752LRR-RLKs\_2666

GTCTGTATTGCAGGGTCTTGTTGTTACATTGCTCCAGGTTAGTGGATTAACCTTTTCACTTTTCAGCTTC  
AGTTTCATGAGTTTGTGTTGAATTTGTTCAATTTGAGTTTTACTAGCAA

>PGSC0003DMG400031752LRR-RLKs\_2728

TTCAGCTTCAGTTTCATGAGTTTGTGTTGAATTTGTTCAATTTGAGTTTTACTAGCAAATTGTTATGCCTGT  
AAGTTTATGGATTACTGTAGCCTTTCAAAAATGAGATCTAGTATTACT

>PGSC0003DMG400031752LRR-RLKs\_2790

TTATGCCTGTAAGTTTATGGATTACTGTAGCCTTTCAAAAATGAGATCTAGTATTACTGTAGCTATGTGGC  
ACCTATTGTGTAGAAGGCTAGATCTATATACTACGATATTTCCCTAGATA

>PGSC0003DMG400031752LRR-RLKs\_2852

CTATGTGGCACCTATTGTGTAGAAGGCTAGATCTATATACTACGATATTTCCCTAGATATTCCACATTTGTT  
AAGTAATTGGCTCATATCTGGAGTACCCCTAATACAGTAACAGTGTAC

>PGSC0003DMG400031752LRR-RLKs\_2914

ACATTTGTTAAGTAATTGGCTCATATCTGGAGTACCCCTAATACAGTAACAGTGACCATTGCTCTAGAT  
CATAGTTTGTGAACAGTTAAGTAGGCTCCACGAGTTTCCGGCTCTTGAG

>PGSC0003DMG400031752LRR-RLKs\_2976

GCTCTAGATCATAGTTTGTGAACAGTTAAGTAGGCTCCACGAGTTTCCGGCTCTTGAGCACAAAAGACTG  
TATTAGGACTGTAGAAAAGATATACTTAGCTTTCCACTTATGATGTTTG

>PGSC0003DMG400031752LRR-RLKs\_3038

AAAGACTGTATTAGGACTGTAGAAAAGATATACTTAGCTTTCCACTTATGATGTTTGAAATCTTAACAG  
CTAGCTATATTGTGGGCGGCTGCTAAGTTTAATAACCACCCACCCATATT

>PGSC0003DMG400031752LRR-RLKs\_310

CATTGGACCTTTCTAATGCTAATGTTGCTGGTCCTTTCCGACTCTGCTTTGTCGGTTGAAGAAGCTTCGT  
TACATTTGTTGTATAACAACCTCTGTGAACAGTACTCTTCTTGACGATT

>PGSC0003DMG400031752LRR-RLKs\_3100

CTTAACAGCTAGCTATATTGTGGGCGGCTGCTAAGTTTAATAACCACCCACCCATATTTTTGGTTTCATGT  
GGTCATTCTTTGTTGTGTTGTTTCCTTGCAACAACCTAGTTGACTGAAT

>PGSC0003DMG400031752LRR-RLKs\_3162

GTTTCATGTGGTCATTCTTTGTTGTGTTGTTTCCTTGCAACAACCTAGTTGACTGAATTCTTTTTGCATTC  
CAGAATATGCATACACACTGCGGGTGAATGAGAAGAGTGATATATACA

>PGSC0003DMG400031752LRR-RLKs\_3224

TTTTGCATTCCAGAATATGCATACACACTGCGGGTGAATGAGAAGAGTGATATATACAGCTTCGGTGTG  
GTCATCCTAGAGCTTGTAACGGGGAAACGCCCTGTGGATCCTGAGTTCGGG

>PGSC0003DMG400031752LRR-RLKs\_3286

CGGTGTGGTCATCCTAGAGCTTGTAACGGGGAAACGCCCTGTGGATCCTGAGTTCGGGGAAAAGGATC  
TGGTGAAATGGGTGTGCAGTACATTGGACCAAAGGGCATAGATCATGTAAT

>PGSC0003DMG400031752LRR-RLKs\_3348

AGGATCTGGTGAAATGGGTGTGCAGTACATTGGACCAAAGGGCATAGATCATGTAATTGACCCTAAAC  
TTGATACTTGTTC AAGGAGGAGATATGCAAGGCCCTAAACATTGGCCTAC

>PGSC0003DMG400031752LRR-RLKs\_3410

CCTAAACTTGATACTTGTTC AAGGAGGAGATATGCAAGGCCCTAAACATTGGCCTACTCTGCACTAGCC



CTCTCCAATTAACCGACCCTCGATGAGACGAGTCGTTAAAATGTTGCAA

>PGSC0003DMG400031752LRR-RLKs\_3472

CACTAGCCCTCTCCAATTAACCGACCCTCGATGAGACGAGTCGTTAAAATGTTGCAAGAAGTGGGTGG

TGGGAACCTGCCCAAGGCTGCCTCAAAGGATGGCAAGTTGACACCCTATTA

>PGSC0003DMG400031752LRR-RLKs\_3534

TGGGTGGTGGGAACCTGCCCAAGGCTGCCTCAAAGGATGGCAAGTTGACACCCTATTACTATGAAGAA

GCATCAGATCAAGGAAGTGTAGCTTAAGAATGTCTCAACAAATTTTGCCTT

>PGSC0003DMG400031752LRR-RLKs\_3596

GAAGAAGCATCAGATCAAGGAAGTGTAGCTTAAGAATGTCTCAACAAATTTTGCCTTAAAAGTGAGA

CTCAATTAACCTTTTGTTCATCTGCTAACTACTCAATTCTTTCCCACTAG

>PGSC0003DMG400031752LRR-RLKs\_3658

AGTGAGACTCAATTAACCTTTTGTTCATCTGCTAACTACTCAATTCTTTCCCACTAGATGTTTGGGTGAA

AGAATTGAAGTTAAATGAAAAAAGGTGAGAACAAAAGAATATTAGGA

>PGSC0003DMG400031752LRR-RLKs\_372

AAGCTTCGTTACATTTTCGTTGTATAACAACCTCTGTGAACAGTACTCTTCTTGACGATTTATCTGGGTGTGA

AGCAGTGGAGCATCTTGATTTGGCGCAGAATTTCTTGGTGGGTACACTT

>PGSC0003DMG400031752LRR-RLKs\_3720

TTGGGTGAAAGAATTGAAGTTAAATGAAAAAAGGTGAGAACAAAAGAATATTAGGAAAAAAAATG

GAGTTGGAAGAATCTTGTTTTTCATTGTAAAAATCCCATCCAACCTACCAAAA

>PGSC0003DMG400031752LRR-RLKs\_3782

AAAATGGAGTTGGAAGAATCTTGTTTTTCATTGTAAAAATCCCATCCAACCTACCAAAAAGTTATTGCAGTA

AGTATTTTACTATCTGGCACTAAAAGATCTTAAATGTGCTACCTATACTC

>PGSC0003DMG400031752LRR-RLKs\_434

TGGGTGTGAAGCAGTGGAGCATCTTGATTTGGCGCAGAATTTCTTGGTGGGTACACTTCCGGCGAGTTT

ATCTGAGCTCCCAAACCTGAAATATCTTGACTTGTGGGTAATAACTTTAC

>PGSC0003DMG400031752LRR-RLKs\_496

CGAGTTTATCTGAGCTCCCAAACCTGAAATATCTTGACTTGTGGGTAATAACTTTACGGGAGATATTCC

GGCGAGTTTTGGTTCTTTTCAGCAGCTTGAAGTTCTTGGGTAGTTGGAA

>PGSC0003DMG400031752LRR-RLKs\_558

GATATTCCGGCGAGTTTTGGTTCTTTTCAGCAGCTTGAAGTTCTTGGGTTAGTTGGAACTTGCTTGACG  
GGAGTATACCGGCGTTTCTCGGGAACGTTACGACGTTGAAGCAGCTGAAT

>PGSC0003DMG400031752LRR-RLks\_62

TGTTCTTTCTTGATCCCCAGAAAACCAAAAAATGAAATCTTCAATTTCAATAATGTTTCTTCAAATCTTGGT  
TACCCTTTTGCTCCCAACTTTGATTTTCTCACTTAACCAAGAGGGTCT

>PGSC0003DMG400031752LRR-RLks\_682

CGTACAACCCGTTTACTACGGGTCGGATCCCGCCGGAGCTGGGGAATCTGACGAATCTTGAGGTTTTGT  
GGCTTCCGACTGTAATTTGATTGGGGAAGTTCCTGACACATTGGGGAGCT

>PGSC0003DMG400031752LRR-RLks\_744

GTTTTGTGGCTTTCCGACTGTAATTTGATTGGGGAAGTTCCTGACACATTGGGGAGCTTGAAGAAGATA  
GTGGATTTGGACCTAGCTGTAACTACTTGGATGGGCCGATTCCGAGTTGG

>PGSC0003DMG400031752LRR-RLks\_806

GAAGATAGTGGATTTGGACCTAGCTGTAACTACTTGGATGGGCCGATTCCGAGTTGGCTCACTGAGCT  
GACTAGTGCTGAACAAATTGAGCTGTATAACAACCTCGTTTACCGGGGAGTT

>PGSC0003DMG400031752LRR-RLks\_868

CTGAGCTGACTAGTGCTGAACAAATTGAGCTGTATAACAACCTCGTTTACCGGGGAGTTTCCGGTGAATG  
GGTGGTTCGAAAATGACGGCGTTGAGGCGAATCGACGTTTCGATGAACCGGG

>PGSC0003DMG400031752LRR-RLks\_930

GTGAATGGGTGGTTCGAAAATGACGGCGTTGAGGCGAATCGACGTTTCGATGAACCGGGTAACTGGTAC  
GATTCCGAGGGAGTTGTGTGAGCTGCCACTTGAGTCACTCAATCTTTATGAG

>PGSC0003DMG400031752LRR-RLks\_992

TGGTACGATTCCGAGGGAGTTGTGTGAGCTGCCACTTGAGTCACTCAATCTTTATGAGAACCAGATGTTT  
GGTGAATTGCCACAAGGCATTGCAACTTACCAAACCTTGTATGAGTTGCG

>PGSC0003DMG400031802RLKmalectin\_0

TTAAGAGTGATATAGTCTACCGTTAATACGTTATCATATTCATAACTCTTTTTCTCTCTTTCAATTTAG  
AAACAAAATTTTAATTATCATTTTTTTAAGAAAAAGAATTAGCTACT

>PGSC0003DMG400031802RLKmalectin\_1403

AACCTTTGAGGCTAAGTTCTTTCTAGTGCTCATTTGGAATAGGTTATGAACTGCAGCAGAATCTATCCTAT  
TCGCGTTTCTCCTAAATTTATTACAAGGAAGATAGAAAAATGGCTAGGC

>PGSC0003DMG400031802RLKmalectin\_1464

TCTATCCTATTCGCGTTTCTCCTAAATTTATTACAAGGAAGATAGAAAAATGGCTAGGCATGAGTTATGC  
TCTTTGACTAACCAGATAACGGCCTTTGTGAGCATATCTTTTTGAGCGT

>PGSC0003DMG400031802RLKmalectin\_1586

TCCTGAAAATTGTTCTCAAGCATATCTAAAGCAAGAAAATCCACCCTTAATATACATAGTTGCTAAGCTG  
TCTGAATGCAAATATACTCTAGTCTATTTGGTTACTAGTTTTATAGTGG

>PGSC0003DMG400031802RLKmalectin\_1647

TGCTAAGCTGTCTGAATGCAAATATACTCTAGTCTATTTGGTTACTAGTTTTATAGTGGTTGTTAGAGAAA  
TTAGTATCTGATTATATCATCCATGTTTAAACAAACGTGTTTCTTTTGG

>PGSC0003DMG400031802RLKmalectin\_183

AACAATGGCATTAAATCCAACCTTTGATTCTTTCCTCTTCACCAACTTCACCTCTCTTCTCCAAATTTTCTATT  
CTTTTCTTCTTAACTCACCCAAACGACTCATTCAACTCCACTCCAC

>PGSC0003DMG400031802RLKmalectin\_2135

GCCTCTGTCTGGTATTACAAAGATAACTTTAACTCCGGTGATTGGATCAAGTGCTGGTCCGTTGATTAAT  
GCAGGAGAGGTTTTTGAAGTGTTGCCCTCGGAGGAAGAACTCATACTCG

>PGSC0003DMG400031802RLKmalectin\_2196

TTGATTAATGCAGGAGAGGTTTTTGAAGTGTTGCCCTCGGAGGAAGAACTCATACTCGAGACGGTAAT  
CTGCTTTTCTGGCTTCTAATATAGCACTTGGATTAGCATGAGCAGTCCTCT

>PGSC0003DMG400031802RLKmalectin\_2257

ACGGTAATCTGCTTTTCTGGCTTCTAATATAGCACTTGGATTAGCATGAGCAGTCCTCTAGGATTACTTTT  
TACCTCATTTTCTGTTGATTAATTACCTCTGCTACATCAATGTGATATA

>PGSC0003DMG400031802RLKmalectin\_2501

GATCACGAATTCGTGTTACTTCTTTGTGAGTTCAGATGTCTCTTACTCCATTAGCCTCAAACCTCTCCCACGT  
CACCCGCCTCATGAATAAGAAAAATGGGAAAAATGAATACCTTACCTT

>PGSC0003DMG400031802RLKmalectin\_2928

TGTTCTTCTTCAAATGCTGTTGCAATAATGATCTTTCTAATTATAGCCCAAGCATTGTGAAAAAGTCG  
GGGAAAAAAAACCTTGTGTAATTAAGTATGTCTATTCTAATACTCTCG

>PGSC0003DMG400031802RLKmalectin\_2989

GAAAAAGTCGGGGAAAAAAAACCTTGTGTAATTAAGTATGTCTATTCTAATACTCTCGTCTTTTATTCA

GACACTTGGAAGACAATCAGCTTAGTGGAGAAATCCACCTTCTCTTGG

>PGSC0003DMG400031802RLKmalectin\_3477

AACTAAGTACCTCAAATAGTGTCTCTTAAGTAGATTTCTCTTGGTATAGAGATCATTTTTCAAAAAGGTTGA  
AGCAGGTTTTAGGAAAGCTTGTGTCAGATACTTAAATTCATGGATGGTA

>PGSC0003DMG400031802RLKmalectin\_3538

AAAAGGTTGAAGCAGGTTTTAGGAAAGCTTGTGTCAGATACTTAAATTCATGGATGGTAGAGCAGCCAT  
TGATCTCTTAAATGTGAGAATCCAAGTCAATTCGAGGTTTTTATCACTT

>PGSC0003DMG400031802RLKmalectin\_366

ATCATTAAACCATGTCTTTCTTCTATTTCTCCTTCTCTCCCTTTTTATCTTCCCTTCTGGTTCTCAATCCTT  
AAGAGGTAAACCCCTTTTCCCATTTCATTAACCCCTTTTCAAAA

>PGSC0003DMG400031802RLKmalectin\_3965

CAAATTATTCTTGTTGCTTCAGCAACAGGATCTCTATCGAGCGAAATCACCATTAAAGCCCACGCGGTA  
ATACTCATTTTGTAGAGCTTCCACTACAAAGCACTCATTTGATCAGAGCT

>PGSC0003DMG400031802RLKmalectin\_4026

CACGCGGTAATACTCATTTTGTAGAGCTTCCACTACAAAGCACTCATTTGATCAGAGCTTATAGAAGCTA  
TTGTGTGAAAACTAATGTTCTAAAGTCATTACCTTGAGCATCCTTGACT

>PGSC0003DMG400031802RLKmalectin\_4087

TAGAAGCTATTGTGTGAAAACTAATGTTCTAAAGTCATTACCTTGAGCATCCTTGACTGCTTTAGACATA  
ACTTTGCTCATAGAATTTCAATTCACAAGCACTCGTTATGTTTTTCTTT

>PGSC0003DMG400031802RLKmalectin\_4148

TTTAGACATAACTTTGCTCATAGAATTTCAATTCACAAGCACTCGTTATGTTTTTCTTTTCTAAGAGACCAT  
AATAGAGATATATTAATGATATCAAATGCCATCGAGGAACTTTCTTGA

>PGSC0003DMG400031802RLKmalectin\_427

GGTTCTCAATCCTTAAGAGGTAACCCCTTTTCCCATTTCATTAACCCCTTTTCAAAAATTTGATCTTTTTT  
TCAAGATTTCAACTTTTCTGTTTTTTTTTCAGGTGTTTTGATTGATT

>PGSC0003DMG400031802RLKmalectin\_4331

CTTGCAACAATAATTTATCTGGCCAGATACCAAGCAGTCTTCTCGGAAAACCAACGCTGAATCTCAGG  
TAATGAATCACTCATTAGTGATAAGCTTTTCGTTGCTTTTGCCTTTTGCT

>PGSC0003DMG400031802RLKmalectin\_4392

AATCTCAGGTAATGAATCACTCATTAGTGATAAGCTTTTCGTTGCTTTTGCCTTTTGCTTTTGTTCGAATA  
TCAATCAAATTGCTCTGTTGCTTTAATTGTAGGACCACTCCTGGGAAT

>PGSC0003DMG400031802RLKmalectin\_4809

ATTCAAGGTAACCTCAAAAAGTTGTGTTTTGATTCATATATACTGAAAACCTCAATTGTATAAACATGTTTG  
TAACTTGTTTATTATTGAAATGATGCAAGAGCTTTTGTATTGATTGTCTG

>PGSC0003DMG400031802RLKmalectin\_549

GGTGCTGTAGTTGATTCTGTAGTTAATGAGCAGAATTGGGTGTCTGGATTCTGGTTATGTATCAGCAGGA  
AAACCCAAGAATCTTACTGTTGATGTTCTTAATTATACACTGTCAACTGTC

>PGSC0003DMG400031802RLKmalectin\_61

TTTCAATTTTAGAAACAAAATTTTAATTATCATTTTTTAAGAAAAAGAATTAGCTACTCTGCAAATGGCA  
GCAAAGTGAAGCAGGCTGACCTGGTTCATTCCCGCGTGTCTTCTCCCAA

>PGSC0003DMG400031802RLKmalectin\_610

CAGCAGGAAAACCCAAGAATCTTACTGTTGATGTTCTTAATTATACACTGTCAACTGTCCGTACATTTCCA  
TTGAAGAACAATGTTTTCAAGAAATTCTGTTATGAGGTTCTGTTTATC

>PGSC0003DMG400031802RLKmalectin\_793

CTCCTGTGTTTGATCAGATTGTTGATGGGACTTTTTGGAGTCCAGTGAATACAACCTGAGGATTATTGGAA  
TGGAATGTCTTCATATTATGAAGGGTTTTTTAAGGCTGTTGGGAAGAATA

>PGSC0003DMG400031802RLKmalectin\_854

TTATTGGAATGGAATGTCTTCATATTATGAAGGGTTTTTTAAGGCTGTTGGGAAGAATATGAGTGTGTGT  
TTGGCTGCAAATAGTTTAACGGATTCTGACCCTTTTATATCTGCTTTGGA

>PGSC0003DMG400031860-(rev)G-LecRK\_1240

GATTGTTATGCCATGGCTGCTTCTCTAATCAATAGGGAATGTCACAAGAGGCGTACTCCTATACTCAACG  
CCCGTAGAATTTCTATGACCACAGGTAGTGTTCCTTCATCAAGGTGCCT

>PGSC0003DMG400031860-(rev)G-LecRK\_1302

ACTCAACGCCCGTAGAATTTCTATGACCACAGGTAGTGTTCCTTCATCAAGGTGCCTATTAAGTCAGTTA  
AAGATGACATATCAACAAAAAAGAAATCCAACACCAGAGCCCATCTCAC

>PGSC0003DMG400031860-(rev)G-LecRK\_1426

GGCCTTATAACTACCAGTTCACTTACTTTCTATTTGGAGCCTGGCTTTTTACTATCATCCTGCTCCTTGG  
AGACTTTTAAAACGAGAGTGGAATCCAAATTCATCAAGAATAGGTATC

>PGSC0003DMG400031860-(rev)G-LecRK\_1612

AAAGGAGCTTCTGCAAAAGTTTACTATGGTAATCTAAAGTTAAAGGATGTTCAAGTAGAGATTGCAGTG  
AAGCTGATGAAAGACGTTGCAGAGCCAAGTGAGAACGTATTCATGACAGAG

>PGSC0003DMG400031860-(rev)G-LecRK\_1674

TGCAGTGAAGCTGATGAAAGACGTTGCAGAGCCAAGTGAGAACGTATTCATGACAGAGCTAAAAATCA  
TAGGCAGAACTCATCACAAGAATTTGGTAAAACCTATTAGGATTTTGCATTGA

>PGSC0003DMG400031860-(rev)G-LecRK\_1736

AAATCATAGGCAGAACTCATCACAAGAATTTGGTAAAACCTATTAGGATTTTGCATTGAGGATAATCATT  
CATTTTGGTTTACGAGTTGATGAAGAACGGAGCTTTATCAGATTTTTTGT

>PGSC0003DMG400031860-(rev)G-LecRK\_2232

TGAAGGTGATGATTTATTGCATGTAAATTGGGTTTCAGGCTGTGTGAGAAGTGGTAGAATTGACAACT  
TGCAAGGAGTGATCCTGAAATATTGAATGATATTAAGAACTTGAACGATT

>PGSC0003DMG400031860-(rev)G-LecRK\_2294

ACAAACTTGCAAGGAGTGATCCTGAAATATTGAATGATATTAAGAACTTGAACGATTCGTCAAGGCCG  
GATTGTGGTGTGTCCATCCTGATCCAACCTGTTAGACCTTCAATGAAAATAG

>PGSC0003DMG400031860-(rev)G-LecRK\_2418

GCAAATGCTTGAAGGCATAACTGAGGTTGGAGTTCCTCCAATGTTTTATCACTAAATGATTGTTTAAATC  
ATCAACAGGGAGGAGCATTGGAACACGACGAAAACTGAAAGGAAAAGGC

>PGSC0003DMG400031860-(rev)G-LecRK\_2480

TTTAAATCATCAACAGGGAGGAGCATTGGAACACGACGAAAACTGAAAGGAAAAGGCCTCCTTGCA  
TTGCAAACCTGGTAGTGAAAAATCCTGGAGTACTTGTGATATTGTAAAATTAG

>PGSC0003DMG400031860-(rev)G-LecRK\_2542

TTGGCATTGCAAACCTGGTAGTGAAAAATCCTGGAGTACTTGTGATATTGTAAAATTAGTCTCTGTCTCAG  
AATTTGATTGTTAAGTTTTTTCTTTTTTGTGTTGAAGTCCTGAATTTAAAT

>PGSC0003DMG400031860-(rev)G-LecRK\_2590

GTAAAATTAGTCTCTGTCTCAGAATTTGATTGTTAAGTTTTTTCTTTTTTGTGTTGAAGTCCTGAATTTAAAT  
TATTACTTTTGCTAGTTTATAATCTGTGCTTCAGTTTCTCCCTTGTC

>PGSC0003DMG400031860-(rev)G-LecRK\_558

GCCAGGACAGACTTTATCATCAGCAGGAAAGCTCTATTCTAATTCTATTTTCAGATGGGAATTCCAAGTAC

TCTAAAGGGAATTCATGCTAGAAATGCAACTTGATGGAAAATTGGTACT

>PGSC0003DMG400031860-(rev)G-LecRK\_620

CCAAGTACTCTAAAGGGAATTCATGCTAGAAATGCAACTTGATGGAAAATTGGTACTATCTGCTTATCA

TTTTGGGGATACAGGATATTGGCTGAGTAGTTTAGATGATGAAGGAAACC

>PGSC0003DMG400031860-(rev)G-LecRK\_682

GCTTATCATTTTGGGGATACAGGATATTGGCTGAGTAGTTTAGATGATGAAGGAAACCGTGAAGTGAAT

TTAGTTTTCGACCAGAGGAATGCATCTTTGTACCTTGTGAAAGATAACAAT

>PGSC0003DMG400031861-(rev)G-LecRK\_0

GAAAAGAATTCCACACATTCCAGTGACCTCATAATCATAGCCTTCTGCATTATATTATGCAAGTCTTTGAA

TCATGGCCTTTTACTAAAAGATTTTAATTCTCCATTTGTATCTAAGTT

>PGSC0003DMG400031861-(rev)G-LecRK\_124

TATCTCAAAAAGAATAAAGTATTTCCATAAGATTCCAACAATGGTTTCTTGAAAATCCTGTTATGGTTT

GTCTCAATTTATCTTGCAATTTATTAGCTCTTTCTGTCAAGAACTACAA

>PGSC0003DMG400031861-(rev)G-LecRK\_1798

GCCTAACACATCACAAAATCTGGTTCATTTGATAGGCTTCTGCAATGAAAAAAGCAACAGGCTTGTGTG

TTATGAATTAATGAAAAATGGGGCCGTGTCAAATATTGTCTTTCGCGATG

>PGSC0003DMG400031861-(rev)G-LecRK\_1860

CTTGTTGTTTATGAATTAATGAAAAATGGGGCCGTGTCAAATATTGTCTTTCGCGATGGACAAAACCAA

GCTGGAAGCTAAGAAGTGACATAGTACTTGACATTGCCAGAGGCCTGTTA

>PGSC0003DMG400031861-(rev)G-LecRK\_1922

AAAACCAAGCTGGAAGCTAAGAAGTGACATAGTACTTGACATTGCCAGAGGCCTGTTATACTTGCATGA

AGAGTGTGAGAACCAGATCATTGCGACATTAAGCCACAGAATATCCT

>PGSC0003DMG400031861-(rev)G-LecRK\_1984

TGCATGAAGAGTGTGAGAACCAGATCATTGCGACATTAAGCCACAGAATATCCTTCTTGACAAGA

ACTACTCTGCAAAAATTGCTGATTTTGGTCTTGCAAAGCTTCTTATGAAAG

>PGSC0003DMG400031861-(rev)G-LecRK\_2046

GACAAGAACTACTCTGCAAAAATTGCTGATTTTGGTCTTGCAAAGCTTCTTATGAAAGACCAGACGCGAA

CAAACACGAATTTTAGAGGAACCATGGGTTATATGGCACCAGAATGGCTA

>PGSC0003DMG400031861-(rev)G-LecRK\_248

TGTCCCTCTGGTTCCAATATCACAGCTGGAAGTGAATCTTCACACTGGCTTTCATCCTCTGGAGATTTTG  
CTTTTGGTTTCTACCATCTTAACAGTACTGGACTATTCCTTGTTGGAAT

>PGSC0003DMG400031861-(rev)G-LecRK\_2480

TATAGAAGTGGTGTTCCTCCTATGGTTGATACAAGTATATGAGCCATTTTCTGTATTATCTTGTAATTTT  
CCAACAATTAAGTGTCACTTCTGTTTTATTAATCATTAGACCTGGTTAA

>PGSC0003DMG400031861-(rev)G-LecRK\_2527

TTTTCTGTATTATCTTGTAATTTTCCAACAATTAAGTGTCACTTCTGTTTTATTAATCATTAGACCTGGTTAA  
ATTTCACTGTTTTTCTCATAGTTCTCTGGTGCAAAAGTTAGTGTTT

>PGSC0003DMG400031861-(rev)G-LecRK\_310

GAGATTTTGCTTTTGGTTTCTACCATCTTAACAGTACTGGACTATTCCTTGTTGGAATATGGTTTGATAAA  
ATCCCCGATAAACTCTCGTTTGGTCAGCCAATCGTGATGATCCAGTTC

>PGSC0003DMG400031861-(rev)G-LecRK\_558

GTCCTGAAAAATTCATCCTCAGGTGTCTTGTGGGAAAGCTTTGATTTCCAACAGATACAATTTTGCCTG  
GTCAATATCTTGATATGGGGCAGGCGCTTTTTCCAGTGCCAATGGGACA

>PGSC0003DMG400031861-(rev)G-LecRK\_62

GTCTTTGAATCATGGCCTTTTACTAAAAGATTTTAATTCTCCATTTGTATCTAAGTTATAATATCTCAAAA  
AGAATAAAGTATTTTCCATAAGATTCCAACAATGGTTTCTTGGAAAAT

>PGSC0003DMG400031861-(rev)G-LecRK\_682

ATTACTCGACGGGGAAGTATAGACTACTGATGCAGACTGATGGGAATGTGGTCTTGTCTGCATATAGAA  
CTGCTGATATTGGCTACTGGAATTCTATAACTGAAAACAATAAGAATGTAA

>PGSC0003DMG400031861-(rev)G-LecRK\_744

TATAGAAGTGTGATATTGGCTACTGGAATTCTATAACTGAAAACAATAAGAATGTAAGACTGGTCTTCG  
ACAACACCAGTGATACTTTGCTCATTACAAATGGAAGCTCTATCATATCC

>PGSC0003DMG400031861-(rev)G-LecRK\_806

GGTCTTCGACAACACCAGTGATACTTTGCTCATTACAAATGGAAGCTCTATCATATCCAACATGACATTG  
ACAGAGAAGTTGCCTGATTCAGTTCGAGATTATTACCACAGAGCTATGAT

>PGSC0003DMG400032130LRR-RLPs\_0

TGAAGATTTTAAGCTTGAGATCAAATAAGTTGCATGGTCCCATCAAATCTTCAGGCAATAAAAAGTTGTT  
TGCGCAGCTTCAAATTATGGATCTATCATCCAATGGATTTAGTGGGAATT



>PGSC0003DMG400032130LRR-RLPs\_126

AAAATATTTTTGGGAAGCTTGAAGCCATGAAGAAAATTGATGAGAGTACAAGAACCCCGAAGTATGTTT  
CTGATCAATATGCTGGTTATTATGATTATTTGACGACAATTACAACAAAGG

>PGSC0003DMG400032130LRR-RLPs\_189

ATGTTTCTGATCAATATGCTGGTTATTATGATTATTTGACGACAATTACAACAAAGGGACATGATTATAAT  
TATGTTTCGGATTTTGGCTCCAACATGATTATCGATCTCTCAAACAACA

>PGSC0003DMG400032130LRR-RLPs\_252

ATTATAATTATGTTTCGGATTTTGGCTCCAACATGATTATCGATCTCTCAAACAACAGATTTGAAGGTCAC  
ATTCCAAGCATTGTTGGAGATCTCATTGGACTTCGTACCTTGAACCTTAT

>PGSC0003DMG400032130LRR-RLPs\_315

AAGGTCACATTCCAAGCATTGTTGGAGATCTCATTGGACTTCGTACCTTGAACCTTATCTCATAATGTCTTG  
GAAGGTCATATACCAGCATCATTGCAAAAATTTATCTGTAICTCAAATCAT

>PGSC0003DMG400032130LRR-RLPs\_378

ATGTCTTGAAGGTCATATACCAGCATCATTGCAAAAATTTATCTGTAICTCAAATCATTGGATTTCTCATCT  
AACAAAATCAGCGGAGGAATTCCACCACAACCTTGCATCCCTCACATTTT

>PGSC0003DMG400032130LRR-RLPs\_567

TTGAGAACAGTTCATACCAAGGAAATGATGGATTACGAGGATTGCCACCCTCAAGAGATTGTGGTTCGTG  
ATGATAGGGTACCACAAGAGACAATTCCAGTTGAGCTTGGTCAAGAAGAAG

>PGSC0003DMG400032130LRR-RLPs\_63

ACTTGTGTTGCGCAGCTTCAAATTATGGATCTATCATCCAATGGATTTAGTGGGAATTTACCAGAAAATATT  
TTTGGGAACCTTGAAGCCATGAAGAAAATTGATGAGAGTACAAGAACCC

>PGSC0003DMG400032130LRR-RLPs\_630

GTCGTGATGATAGGGTACCACAAGAGACAATTCCAGTTGAGCTTGGTCAAGAAGAAGAAGAAGATTCA  
CCAATGATCAGTTGGCAGGCAGTTCTCATGGGTTACGGTTGTGGACTTGTTA

>PGSC0003DMG400032130LRR-RLPs\_693

ATTCACCAATGATCAGTTGGCAGGCAGTTCTCATGGGTTACGGTTGTGGACTTGTTATTGGACTGTCTAT  
AATATACATAATGTTGTCAACTCAATATCCGGCATGGTTTCCGGGGATGG

>PGSC0003DMG400032130LRR-RLPs\_756

TGTCTATAATACATAATGTTGTCAACTCAATATCCGGCATGGTTTCCGGGGATGGTTGTAAAATTGGA

ACACAGAATTACTACGAGAATGAAAAAGCACAAGAAAAGATATTAGTGTG

>PGSC0003DMG400032130LRR-RLPs\_882

CCTCCAGGTATTCAACTTGATCTTTATCCTTCAAAGATTAATTTTATATATATCGATGTATTTTCTACCT  
ACTTCATCATCAAAGCTCTTAACTTTAATTCTTTACTTTTTAAAAATT

>PGSC0003DMG400032130LRR-RLPs\_945

TTTCTACCTACTTCATCATCAAAGCTCTTAACTTTAATTCTTTACTTTTTAAAAATTGCAGGATTTAAGTCTA  
CAGAGTTGCTGAAGATGCAGATAAAAGCCTTTTATCTTTCATAGTTT

>PGSC0003DMG400032130LRR-RLPs\_999

ATTGCAGGATTTAAGTCTACAGAGTTGCTGAAGATGCAGATAAAAGCCTTTTATCTTTCATAGTTTGTGA  
TGTTTTCATAAAGTTTTTGTAACTCTATGAATAAAGACACAACCTTTTATT

>PGSC0003DMG400032286LRR-RLPs\_0

GGTGTTAAAAAAAAGATCAAATTTCCACACTTCTTGAGAAATGTAAAGACACTTGTGTACTTGGATATT  
TCTACCAATAATATTTGTGGTCAAATCCCTAACTGGTTTAGCGGAATGAG

>PGSC0003DMG400032286LRR-RLPs\_124

GACTCGTTGCAGTTCCTAAACCTTTCTCATAATTTATTAACAGGCCACCTACCACAATTCCATTATTATAGT  
CTAGAGTATCTTGATCTGAAATTTAACTCCCTTCAGGGTCCACTACCT

>PGSC0003DMG400032286LRR-RLPs\_1426

TCAGAGATGACGGACTTAATGGAAGATTGAGAGGGCCAATTGGTGAACCTTTCTGGTTCTGTTTTTATCT  
ATTAGAAACATAATTATATGTGTGGTATAATTCAAGTTAAGTTACTCTGC

>PGSC0003DMG400032286LRR-RLPs\_1488

TTTTATCTATTAGAAACATAATTATATGTGTGGTATAATTCAAGTTAAGTTACTCTGCTTGTGTGGAAAA  
TATTATTGAATTTCTTACAAGGATAAGGCATTTCACTTTCTAGTTCTGA

>PGSC0003DMG400032286LRR-RLPs\_1550

TGTGGAAAATATTATTGAATTTCTTACAAGGATAAGGCATTTCACTTTCTAGTTCTGAGTGTTTAAAAGCA  
AATTGAACAAAATTTCAACTCTTTTTAAGTAAATATCGGTTCGATCTGT

>PGSC0003DMG400032286LRR-RLPs\_1612

TTAAAAGCAAATTGAACAAAATTTCAACTCTTTTTAAGTAAATATCGGTTCGATCTGTTCGGTAGCACAAA  
GTTTCTGGCAGTCTTAAACCTCTGTCACAATCTTCTTGCTGGACAGATTC

>PGSC0003DMG400032286LRR-RLPs\_1736

AGGTCTACAATTGATCAACACATTTGAAAATGACTCATATGGTGGCAACCTTGATTTATGTGGTCCTCCTT  
TATCAAAGCAATGTGGATCGAGTGATCCATCACATGTTCTCAACCATT

>PGSC0003DMG400032286LRR-RLPs\_1798

GTCCTCCTTTATCAAAGCAATGTGGATCGAGTGATCCATCACATGTTCTCAACCATTAGAGTACGAAGA  
AGAACATGCAATAGGGCTAGGTTAATTTGGGATCCGGATTGAGTAGTGGC

>PGSC0003DMG400032286LRR-RLPs\_372

CACAGGGAGTCTTCCCCATTATGTGCATAGAGCACTTCATTGAGTACCATTGTCATAAATGGTAATCAA  
TTTGAAGGACCTGTACCTGTGTCGTTGCTCAAGTGTGGTGGTCTAGAAGT

>PGSC0003DMG400032286LRR-RLPs\_558

ACAGGTCCTTATATTAAGTCGAACAAGTTCCATGGACCTATAAGTACGTGTCAGACTAAGTTTTGCTTT  
CCCAAGTTGTCGAATTTTTGTATCTTTCTCGTAATGATTTCAAGTGGCTCA

>PGSC0003DMG400032286LRR-RLPs\_620

TTTGCTTTCCCAAGTTGTCGAATTTTTGTATCTTTCTCGTAATGATTTCAAGTGGCTCACTTCCTGCAAAAGT  
TTTTGGAACTTCAAGGCAATGATTAATTAGAGGGTGAAGACACGGA

>PGSC0003DMG400032286LRR-RLPs\_682

CTGCAAAAGTTTTTGAACTTCAAGGCAATGATTAATTAGAGGGTGAAGACACGGAAGAGATCAAG  
TACATGGAGTTGATTTGTCATTTGACACATCGTATGAGGATTCAGTGAGTT

>PGSC0003DMG400032286LRR-RLPs\_744

ATCAAGTACATGGAGTTGATTTGTCATTTGACACATCGTATGAGGATTCAGTGAGTTTGGTGATCAAAG  
GGAGGGATATTGAGCTAGAAAGAATCAGCACAATTATGACAACCATTGAT

>PGSC0003DMG400032286LRR-RLPs\_930

CTCAATTTATTCCATAACAATCTCAGAGGTCATATACCAATGGAATTGGGGCAATTGATACGCTTGAAGC  
TTTAGATCTCTCCTGGAATCTGCTCACTGGAAAGATTCCACAGGAATTGA

>PGSC0003DMG400032572-(rev)LRR-RLPs\_1159

GCAAGAAGTGAAAGATCAACTTTGGAAGAACATTATTGAAGATAAATTTATTGAAATCTCCTGCATTCTA  
TCCTTAAGCTACAATGATTTTGTCAACTGTGCTCAAGCAGTGTTTTCTGT

>PGSC0003DMG400032572-(rev)LRR-RLPs\_1220

TGCATTCTATCCTTAAGCTACAATGATTTTGTCAACTGTGCTCAAGCAGTGTTTTCTGTACTTTGGTATTTT  
TCCAGAAGATCAAGAGGTCGATGCTGAAAAGATAAATACTGTTGTGGAT

>PGSC0003DMG400032572-(rev)LRR-RLPs\_1281

TTTGGTATTTTTCCAGAAGATCAAGAGGTCGATGCTGAAAAGATAATACTGTTGTGGATGGCCGAGGGT  
TTCATACCAAATGGAGAAGAAAGAATGGAGGATGTGGCTGAAGGCTTCTTG

>PGSC0003DMG400032572-(rev)LRR-RLPs\_1403

TGAGCTGATAAGACGAAGCTTGGTTCAAGTGGCTAATACGTTTTGGGAAAAAGTTACTGAATGTAGGGT  
TCATGATTTACTCCGTGATCTTGCCATACAAAAGGCATCCGACACAAACCT

>PGSC0003DMG400032572-(rev)LRR-RLPs\_1769

CCTTAAGTTCTTAAGCTTGAGAGCTAACCGTGATCTTCCATCTTCCATTGGCAACCTCAAGAATCTACAGA  
CACTTGTTGTCAATGAGGGGGGATACTACTCCTGCAAACCTACCCCGCGA

>PGSC0003DMG400032572-(rev)LRR-RLPs\_1830

AATCTACAGACACTTGTTGTCAATGAGGGGGGATACTACTCCTGCAAACCTACCCCGCGAGACAGCTAAC  
CTGATAAATCTAAGACATTTAGTTGTTTGGTATTCAAACCTCTGGCACAT

>PGSC0003DMG400032572-(rev)LRR-RLPs\_1891

CAGCTAACCTGATAAATCTAAGACATTTAGTTGTTTGGTATTCAAACCTCTGGCACATATAAGCAAACCT  
CACTAGTCTTCAAGTTCTTGAAAGAGTTTGTGTGATCAATGGAAAGATG

>PGSC0003DMG400032572-(rev)LRR-RLPs\_2013

GATCCTGTTGATTTAGTCAATCTTCGAGAATTAAGCATGTTTCATACTAGCAAACCTTACTCCCTAAACAA  
CATTAGCAGCTTGAAAAACCTTAGCACTCTCAAATTGATTTGTGGAGAA

>PGSC0003DMG400032572-(rev)LRR-RLPs\_2074

CCCTAAACAACATTAGCAGCTTGAAAAACCTTAGCACTCTCAAATTGATTTGTGGAGAACTGAATCATT  
CCCATCTCTGAATTTGTTAATTGTTGTGAAAAGCTCCAGAAATTGAGGT

>PGSC0003DMG400032572-(rev)LRR-RLPs\_2135

TGAATCATTCCCATCTCTTGAATTTGTTAATTGTTGTGAAAAGCTCCAGAAATTGAGGTTAGAAGGGAGA  
ATAGGGAAACTGCCTCTGTTTCAAATTCCATCACAATGATGCTTCTTGA

>PGSC0003DMG400032572-(rev)LRR-RLPs\_2196

GAAGGGAGAATAGGGAAACTGCCTCTGTTTCAAATTCCATCACAATGATGCTTCTTGAAGAACTCAAAA  
CTGACGGAAGATCCGATGCCTATTTGGGAATGTTGCCAAACCTAAGGAAT

>PGSC0003DMG400032572-(rev)LRR-RLPs\_2257

ACTCAAACCTGACGGAAGATCCGATGCCTATTTGGGAATGTTGCCAAACCTAAGGAATCTCCATTTGGT

TGGAGCTTATGAAGGAAAAGAAATAATGTGCAGTGATAACAGCTTCAGTC

>PGSC0003DMG400032572-(rev)LRR-RLPs\_2318

CCATTTGGTTGGAGCTTATGAAGGAAAAGAAATAATGTGCAGTGATAACAGCTTCAGTCAACTAGAGTT

CCTTCATCTTTATGATCTTTCAAAGCTAGAAAGATGGGATTTAGGCACAAG

>PGSC0003DMG400032572-(rev)LRR-RLPs\_2440

CAATGCCTCTGATTAAAGGTCTTGGTATCCATGACTGTCCAAATTTAAAGGAGATTCCAGAGAGAATGA

AAGACGTGGAGCTGTTGAAGAGGAATTATATGTGGTGAAGCTTTTCAAGCA

>PGSC0003DMG400032572-(rev)LRR-RLPs\_2501

GAGAATGAAAGACGTGGAGCTGTTGAAGAGGAATTATATGTGGTGAAGCTTTTCAAGCATATATATATA

TATATATATATGATGTCTTCATAATCGTAGAGGTATTGATGGGGGCATGGC

>PGSC0003DMG400032572-(rev)LRR-RLPs\_2562

TATATATATATATATATATGATGTCTTCATAATCGTAGAGGTATTGATGGGGGCATGGCATTCTGCCAA

GCACATTGGTTATTAATTGAGTGGTTTTAGTGTTTCATTTCTTTATTATT

>PGSC0003DMG400032572-(rev)LRR-RLPs\_2623

TTCTGCCAAGCACATTGGTTATTAATTGAGTGGTTTTAGTGTTTCATTTCTTTATTATTGTTTTAAGCTTTG

TAATTGGTTTGAACATAATTGGTCTACTGTATGTTCTCTTGCTTATCC

>PGSC0003DMG400032572-(rev)LRR-RLPs\_2671

TCTTTATTATTGTTTTAAGCTTTGTAATTGGTTTGAACATAATTGGTCTACTGTATGTTCTCTTGCTTATCCA

CATTTAAGACGATGCTTTATTTATATGTTAAAAAATGATATTAATA

>PGSC0003DMG400032572-(rev)LRR-RLPs\_610

TCTTGCAAGAAACCTCTACACCAGTCCTAATAATCTCAAGCTTCCCTACACGCGCTTGGATATGTGTTT

CTCAAGAGTACAACATAATGGATCTTCTTAAGACTATCATAAAATCCAT

>PGSC0003DMG400032785-(rev)LRR-RLPs\_0

CCCCTGTATAGTTCTATATAAACATTCGGTTAGGTAGCTAGCAAATCAGATTGCCAGAAAAGAAAGTA

GAGTAATAGTGGGCCGGGATAATGGGGAACATTAAGTTTTTGCTGTTAGCG

>PGSC0003DMG400032785-(rev)LRR-RLPs\_1037

TCACTCAAGATTTTTCCGTCTCTCAAGCATCTCAATCTCGCCTCAAATGAAATAACTGGAAATATCAAAAT

GAATGGTTTGTACGCCCTCTCCCATCCAAGTCTTCCCTGCTAACAAT

>PGSC0003DMG400032785-(rev)LRR-RLPs\_1098

ATATCAAAATGAATGGTTTGTACGCCCTCTCCCATCCAAGTCTTCCCTGCTAACAATATTTGCTCCACTA  
AGATATCAATGATGCATCTAAGTATCTCGATTTTATATTATTCGCATA

>PGSC0003DMG400032785-(rev)LRR-RLPs\_122

TTTTCTAATAGCAATTGTGGCCAATGGTTGTTGGATGAAGAGAGAAATGCTCTCTTGGATCTGCAAGCA  
AACATAATGAGTTCGAATGGCGAATTGTTGGTTGATTGGGCAGGTTACAA

>PGSC0003DMG400032785-(rev)LRR-RLPs\_1281

TAGATATAATTGCTTTGAGCAACTTGAAATATCTAAATCTCTGGAATAACAATATAAAGAGCTTTAGGAC  
TACCAAAGGTACACAAATCAAGGCAGTTGCTCTAATGTTGAATGATTTAT

>PGSC0003DMG400032785-(rev)LRR-RLPs\_1342

CTTTAGGACTACCAAAGGTACACAAATCAAGGCAGTTGCTCTAATGTTGAATGATTTATTTTAAACCTTAA  
GACATACAAAATGCAAATTTTATCAGATAGAGATTAATGATGAAATGTG

>PGSC0003DMG400032785-(rev)LRR-RLPs\_1403

TTAACCTTAAGACATACAAAATGCAAATTTTATCAGATAGAGATTAATGATGAAATGTGGACTAGGATTA  
CACATTTTACTAACATATGTAATAAGATCAATAAAAAACATATATGATT

>PGSC0003DMG400032785-(rev)LRR-RLPs\_1464

CTAGGATTACACATTTTACTAACATATGTAATAAGATCAATAAAAAACATATATGATTTATTTAACAGGT  
AAAAAAGAATAAGTTCTCTGCGGAATTTACTATTGGGAAGTCGTAACT

>PGSC0003DMG400032785-(rev)LRR-RLPs\_1525

TTAACAGGTAAAAAAGAATAAGTTCTCTGCGGAATTTACTATTGGGAAGTCGTAACTCCAACCTCAAC  
TCGAGCAGCGTCTTACAATCTCTAAAATTATTCTCATCCCTTAAGTCACT

>PGSC0003DMG400032785-(rev)LRR-RLPs\_1586

AACTCCAACCTCGAGCAGCGTCTTACAATCTCTAAAATTATTCTCATCCCTTAAGTCACTTTCTTATAAAGAT  
AGTGATCTCACTGCTCCCACCATAATTTACGGTAAGTTCAAATCAAA

>PGSC0003DMG400032785-(rev)LRR-RLPs\_1647

CTTATAAAGATAGTGATCTCACTGCTCCCACCATAATTTACGGTAAGTTCAAATCAAATTTTATTTAACT  
TACTTCTATTGTGACTTTTTCTTTTGAATATGAAAATTTTGTATTTC

>PGSC0003DMG400032785-(rev)LRR-RLPs\_1708

TTATTTAACTTACTTCTATTGTGACTTTTTCTTTTGAATATGAAAATTTTGTATTCTTTTTTGTGACTCTA  
TCATATAATAAGCATTAAAGAAATCTGAGCACGGTGGAGTACTTATA

>PGSC0003DMG400032785-(rev)LRR-RLPs\_1769

TTTTGTGACTCTATCATATAATAAGCATTAAAGAAATCTGAGCACGGTGGAGTACTTATATTTGGGGAAAT  
CTTCTTTAAATGAGAATTCCTCGCAAATATTGGACAAATGACTTCTCTT

>PGSC0003DMG400032785-(rev)LRR-RLPs\_183

CTGCAAGCAAACATAATGAGTTCGAATGGCGAATTGTTGGTTGATTGGGCAGGTTACAATGAGACTGAT  
CTTATAGATTGTTGTTCTGGAATAGGGTAAAATGTAACCTTAACAACAGGT

>PGSC0003DMG400032785-(rev)LRR-RLPs\_1830

TGGGGAAATCTTCTTTAAATGAGAATTCCTCGCAAATATTGGACAAATGACTTCTCTTAAAGTGTTGAG  
TATGCCTTCTGGTTACAATAATGGCAACCTCCCTAATCAAGGTAACCTAT

>PGSC0003DMG400032785-(rev)LRR-RLPs\_1891

AGTGTTGAGTATGCCTTCTGGTTACAATAATGGCAACCTCCCTAATCAAGGTAACCTATTTCTTCTTTTT  
TCCTAATGCTTGCATTTTCATTAATATAGGTGTGTTCAAGTATGGGGAA

>PGSC0003DMG400032785-(rev)LRR-RLPs\_2074

TATAATATTTTTCTTTAGAACACATCCATAGTCCATAGCTATAATATAATATACAAATTTTTTTTAGCTAAA  
TATCTCTGAATCTTTTTTATAAAAATATATAGGTTGGTGTGAACTCA

>PGSC0003DMG400032785-(rev)LRR-RLPs\_2135

TTTTAGCTAAATATCTCTGAATCTTTTTTATAAAAATATATAGGTTGGTGTGAACTCAAATACATTGAAG  
AGCTGGATTTCTTAGACAATAATTTTGTGGGAACACTGCCTTCGTGTCT

>PGSC0003DMG400032785-(rev)LRR-RLPs\_2196

TACATTGAAGAGCTGGATTTCTTAGACAATAATTTTGTGGGAACACTGCCTTCGTGTCTTGAAACTTGA  
CATCCCTTCGATGGTTGTGTTTGGCTGGGAATTACTTCAGCGGAAATACA

>PGSC0003DMG400032785-(rev)LRR-RLPs\_2257

GAAACTTGACATCCCTTCGATGGTTGTGTTTGGCTGGGAATTACTTCAGCGGAAATACAACCTCACATTC  
TATTTGGAGGAGATTCACATCACTTGAGTACTTGGATATTGCATATAACC

>PGSC0003DMG400032785-(rev)LRR-RLPs\_2318

CTCACATTCTATTTGGAGGAGATTCACATCACTTGAGTACTTGGATATTGCATATAACCAATTTGATGTTC  
CTCTGTCATTCAGGCACTTTTCCAACCATACAAAATTGATCTACTTGGGA

>PGSC0003DMG400032785-(rev)LRR-RLPs\_2379

TTTGATGTTCTCTGTCATTCAGGCACTTTTCCAACCATACAAAATTGATCTACTTGGATGTTGGTTATAAT

ACAATAATTACAGATACCGAATTCCTCAAATTGGATCCCAAATTTCCAG

>PGSC0003DMG400032785-(rev)LRR-RLPs\_244

AGACTGATCTTATAGATTGTTGTTCTGGAATAGGGTAAAATGTAACCTTAACAACAGGTCGAGTGATCG

AACTCAATCTCGCAACAAGGTTTGGATCAGGGGATGGTTGGAGATTTAATG

>PGSC0003DMG400032785-(rev)LRR-RLPs\_2440

TTGGTTATAATAACAATAATTACAGATACCGAATTCCTCAAATTGGATCCCAAATTTCCAGTTGGAGTTTTTT

GCTATCGAGGGATGTATGAACCTTCAAATAATTGCCTTCTTTCTTCACT

>PGSC0003DMG400032785-(rev)LRR-RLPs\_2501

GGAGTTTTTTGCTATCGAGGGATGTATGAACCTTCAAATAATTGCCTTCTTTCTTCACTACCAATATGACT

TGAGGATTCTTGTTATAGATGGAAATCAATTGCAAGGAACTTTCCAAC

>PGSC0003DMG400032785-(rev)LRR-RLPs\_2562

CAATATGACTTGAGGATTCTTGTTATAGATGGAAATCAATTGCAAGGAACTTTCCAACATGGTTGTTAG

AAAATAACACCAGACTTGCAGGGATTTATAGTAGAGATAATGCTTTTCGAT

>PGSC0003DMG400032785-(rev)LRR-RLPs\_2623

GGTTGTTAGAAAATAACACCAGACTTGCAGGGATTTATAGTAGAGATAATGCTTTTCGATGGACCATTCA

AGTTGCCATCGAGTTGTCACCTCCATCTAGAGATGATTGATGTGTCTAATA

>PGSC0003DMG400032785-(rev)LRR-RLPs\_2684

ACCATTCAAGTTGCCATCGAGTTGTCACCTCCATCTAGAGATGATTGATGTGTCTAATAACAACTAAAT

GGACGTATTCCAGAAAATATGAGTTTAGCCTTCCCAAAGCTTACTAGTTT

>PGSC0003DMG400032785-(rev)LRR-RLPs\_2745

AAACTAAATGGACGTATTCCAGAAAATATGAGTTTAGCCTTCCCAAAGCTTACTAGTTTGAACCTGTCAC

AAAATTATCTTGAAGGTCCTATACCTTCCAAGATTTGTGGCGTTCATGTA

>PGSC0003DMG400032785-(rev)LRR-RLPs\_2806

ACCTGTCACAAAATTATCTTGAAGGTCCTATACCTTCCAAGATTTGTGGCGTTCATGTATTTTATCTAGAC

CTATCTCACAATTTCTTGCTGTTGGGGAGTACCTAGTGATGTGGCAATTG

>PGSC0003DMG400032785-(rev)LRR-RLPs\_2867

TTATCTAGACCTATCTCACAATTTCTTGCTGTTGGGGAGTACCTAGTGATGTGGCAATTGGTTCTCCAGCAT

TAGGTTACCTTCGATTGTCACACAACAAGTTAAAAGGGCAAATTTTCC

>PGSC0003DMG400032785-(rev)LRR-RLPs\_2928



TCTCCAGCATTAGGTTACCTTCGATTGTCACACAACAAGTTAAAAGGGCAAATTTTTCCGAAGTATGTCA  
AACAAAGGATGTTATCCTTTTTGTACTTGAATGGAAATAACTTTGAGGGG

>PGSC0003DMG400032785-(rev)LRR-RLPs\_2989

AGTATGTCAAACAAAGGATGTTATCCTTTTTGTACTTGAATGGAAATAACTTTGAGGGGCCACTACCTAG  
CAACATGTTTATCACATCCCTTTTTGTACTGGACGCTAACAAACAATAGTT

>PGSC0003DMG400032785-(rev)LRR-RLPs\_305

AGTGATCGAACTCAATCTCGCAACAAGGTTTGGATCAGGGGATGGTTGGAGATTTAATGCCTCTCTCTT  
CTCCATTCAAGTCACTACAACCTCTTTTATTGTCTTACAGAAATATTAT

>PGSC0003DMG400032785-(rev)LRR-RLPs\_3050

ACTACCTAGCAACATGTTTATCACATCCCTTTTTGTACTGGACGCTAACAAACAATAGTTTCTCTGGGAAGA  
TTCCGAGATGCATTAGGGATAATACAAGATTGTTACAACCTGATTTGTC

>PGSC0003DMG400032785-(rev)LRR-RLPs\_3111

TCTGGGAAGATTCCGAGATGCATTAGGGATAATACAAGATTGTTACAACCTGATTTGTCCAAGAATCATC  
TCGAAGGTTTCGATTCCAGTTGAGATTTGCAATTTAAAGCGCATTTCAGGTT

>PGSC0003DMG400032785-(rev)LRR-RLPs\_3172

AGAATCATCTCGAAGGTTTCGATTCCAGTTGAGATTTGCAATTTAAAGCGCATTTCAGGTTTTATCTTTATCT  
GAAAACAGTCTTTCAGGATTAATTCCTTCTTGTATGAGTTCTTTATCTC

>PGSC0003DMG400032785-(rev)LRR-RLPs\_3233

ATCTTTATCTGAAAACAGTCTTTCAGGATTAATTCCTTCTTGTATGAGTTCTTTATCTCTTCAACACATCCA  
TCTAGAGAGAAACCAATTGGGTGGTACTAGAACATGTACTATTCAA

>PGSC0003DMG400032785-(rev)LRR-RLPs\_3294

CAACACATCCATCTAGAGAGAAACCAATTGGGTGGTACTAGAACATGTACTATTCAACTTCTCTTCTCT  
GATAACTTTGGATCTTCGCAACAACAATTTTAGAGGAAATATCCCACAC

>PGSC0003DMG400032785-(rev)LRR-RLPs\_3355

TCTCTTCTCTGATAACTTTGGATCTTCGCAACAACAATTTTAGAGGAAATATCCCACACACCATAGGCTCG  
CTTAATACTCTAAACTACCTTCTCCTTAGCACTAACCAATTGGAAGGGC

>PGSC0003DMG400032785-(rev)LRR-RLPs\_3416

CATAGGCTCGCTTAATACTCTAAACTACCTTCTCCTTAGCACTAACCAATTGGAAGGGCAGATTCCAAATC  
AGATTTGTATGCTGAATAAGTTATCTATTGTGGATTTATCTTTCAATAA

>PGSC0003DMG400032785-(rev)LRR-RLPs\_3538

TTTATGGTCCACTCCTTCCTTGTGGGTTACTTAACACAAGCCGAAAATGATGTAGAGATAAGTAGTAC  
TAAGTATGCTACGACTTCTACGTATTCATGGTTAAATTTTTTGCCTGGA

>PGSC0003DMG400032785-(rev)LRR-RLPs\_3599

AAGTAGTACTAAGTATGCTACGACTTCTACGTATTCATGGTTAAATTTTTTGCCTGGATACGTTGAAAA  
GGCACTACCACGATAGTCATGGAATTCTAAGTGACATATCTTTGATGGA

>PGSC0003DMG400032785-(rev)LRR-RLPs\_366

TCTCTCTTTCTTCCATTCAAGTCACTACAACCTCTTTTATTGTCTTACAGAAATATTATTGGGTGGACAAAA  
AATGAAGGTCTGATCGATCTTGTATGGAGTGTGTGTGTATATATATTA

>PGSC0003DMG400032785-(rev)LRR-RLPs\_3660

CGTTCGAAAAGGCACTACCACGATAGTCATGGAATTCTAAGTGACATATCTTTGATGGATGTGGAAACT  
CAGGTCCAGTTTTCAACGAAAAGAACTCATACTTATAAGGGAAGCATT

>PGSC0003DMG400032785-(rev)LRR-RLPs\_3782

AAAATATATGTCGGGTATTGATCTCTCAAGTAACAGATTAAGTGGTGAAATCCCGTTGAGCTAGGGAA  
CATGAGCAATTTACCTGCATTGAATCTATCGCACAACCATCTCATCGGAAG

>PGSC0003DMG400032785-(rev)LRR-RLPs\_3843

CTAGGGAACATGAGCAATTTACCTGCATTGAATCTATCGCACAACCATCTCATCGGAAGAATACCATATA  
CCTTCTCCAATCTACAGGAAATTGAGAGTTTAGACCTTTCCTACAATAGA

>PGSC0003DMG400032785-(rev)LRR-RLPs\_3965

GAATGGGAGCATTCTGTTGGTCTACTTGAGCTGAATCTTTGGCAGTATTCAGTGTGCATACAACAAC  
TTATCTGGTGCAGTTCCTGATTTTAAAGCTCAATTTGCAACTTTTGACAA

>PGSC0003DMG400032785-(rev)LRR-RLPs\_4026

TACAACAACCTTATCTGGTGCAGTTCCTGATTTTAAAGCTCAATTTGCAACTTTTGACAAAAGCAGCTACGA  
GGGAAATCCTTTTCTTTGCGGTTATCCATTAGACAACAAGTGTGGCATG

>PGSC0003DMG400032785-(rev)LRR-RLPs\_4087

GCAGCTACGAGGGAAATCCTTTTCTTTGCGGTTATCCATTAGACAACAAGTGTGGCATGAGTCCTAAATT  
GTCAAATACCTCCAAGATTAATGGAGATGAGGAATCATCAGAATTGGAAG

>PGSC0003DMG400032785-(rev)LRR-RLPs\_4148

TCCTAAATTGTCAAATACCTCCAAGATTAATGGAGATGAGGAATCATCAGAATTGGAAGACATTAAGTG

TTTTACATTGGCTTAGTTGTGTCTTATGGAGCGATCTTGTTGGGATTAGC

>PGSC0003DMG400032785-(rev)LRR-RLPs\_427

GGTGGACAAAAAATGAAGGTCTGATCGATCTTGTATGGAGTGTGTGTGTATATATATTATAACTAACAT

GTTTTTTGGTCTGATTTTTTAATCCAGGATTCAGTAACTAAAACAGCTTC

>PGSC0003DMG400032785-(rev)LRR-RLPs\_4270

CAGCGCTCTGCTTCAATCGTCATTGGAAAAGAGCATGGTTTAGGATGATAGAGTCATTGATGTTCTATTG

TAACTATTTTTGTGTTGGACAACATTGTTACACCCATCAAGAGTAGATGGT

>PGSC0003DMG400032785-(rev)LRR-RLPs\_4331

GTTCTATTGTAACATTTTTGTGTTGGACAACATTGTTACACCCATCAAGAGTAGATGGTACAGGAATGTT

GGTTAGGAATTGTTGTATGTCTATTCACTATTATTTTATTGTGATTCTCT

>PGSC0003DMG400032785-(rev)LRR-RLPs\_4392

AGGAATGTTGGTTAGGAATTGTTGTATGTCTATTCACTATTATTTTATTGTGATTCTCTTTTATCAATATAA

AAATCCATTTGGAGCTGTTACAATTTTCATATGTTAGTAATATCCCAAT

>PGSC0003DMG400032785-(rev)LRR-RLPs\_4430

ATTATTTTATTGTGATTCTCTTTTATCAATATAAAAATCCATTTGGAGCTGTTACAATTTTCATATGTTAGTA

ATATCCCAATGGTCTATTTTTGTATATTCATGAGATGCTTCATTGGTG

>PGSC0003DMG400032785-(rev)LRR-RLPs\_488

ACTAACATGTTTTTTGGTCTGATTTTTTAATCCAGGATTCAGTAACTAAAACAGCTTCCCAACCTGAAAG

AAGTCGATTTGCAATATAATCCAATCCATCCTAAAGTTTTACTATCATC

>PGSC0003DMG400032785-(rev)LRR-RLPs\_549

AACCTGAAAGAAGTCGATTTGCAATATAATCCAATCCATCCTAAAGTTTTACTATCATCTTTATGTTGGAT

TTCATCTCTTGAGGTTCTAAAACCTGGTGTACATGTTGGTACCTCTTTC

>PGSC0003DMG400032785-(rev)LRR-RLPs\_61

AGAAAGTAGAGTAATAGTGGGCCGGGATAATGGGGAACATTAAGTTTTTGCTGTTAGCGTTTTTTCTAA

TAGCAATTGTGGCCAATGGTTGTTGGATGAAGAGAGAAATGCTCTCTTGG

>PGSC0003DMG400032785-(rev)LRR-RLPs\_610

TATGTTGGATTTTCATCTCTTGAGGTTCTAAAACCTGGTGTACATGTTGGTACCTCTTTCAGCATACCGACG

GCATATAATACCAGTATATTTTCTTACATATGCATATACCTGTAGCTAT

>PGSC0003DMG400032785-(rev)LRR-RLPs\_671

CATACCGACGGCATATAATACCAGTATATTTTCTTACATATGCATATACCTGTAGCTATTTTTGGACGGTA  
TATTTTTACTTAGTATAGTTGTAATTTTTGGATGAAGGCATGAGTAAGA

>PGSC0003DMG400032785-(rev)LRR-RLPs\_732

TTGGACGGTATATTTTTACTTAGTATAGTTGTAATTTTTGGATGAAGGCATGAGTAAGAAATGTCCGGGG  
CTAAGCAATTTAAGAGAACTCTGGTTTGAAGGTTATGAAATCAATGACAT

>PGSC0003DMG400032785-(rev)LRR-RLPs\_793

TGTCCGGGGCTAAGCAATTTAAGAGAACTCTGGTTTGAAGGTTATGAAATCAATGACATCAATATCCTTT  
CTGCATTGGGTAAGCTCTCTTTTACACAACAAATACATGTACAAAGTAAC

>PGSC0003DMG400032785-(rev)LRR-RLPs\_854

ATATCCTTTCTGCATTGGGTAAGCTCTCTTTTACACAACAAATACATGTACAAAGTAACTCGGAGATTTAC  
AAAATAATACGTTTTTTTTTCCATAAATCAAATGCAGGTGCAAATTCT

>PGSC0003DMG400032785-(rev)LRR-RLPs\_915

GGAGATTTACAAAATAATACGTTTTTTTTTCCATAAATCAAATGCAGGTGCAAATTCTGGACTGAGGAA  
TTTAGAGAAGCTCATTTTGAATGATAAATACTTCAATCCACCATCTTTT

>PGSC0003DMG400032828-(rev)LRR-RLPs\_1216

TTTTTTTTCAAATTTAGTAGCCAATGTGAAAAAGAATAAAGTCAATAGCAACTCTGTAAATATGGTGTG  
TGATTAAGCTTTTCTTATGTTGGTAATTTAACTTTGATGCTGCTATTATG

>PGSC0003DMG400032828-(rev)LRR-RLPs\_1280

GGTGTGTGATTAAGCTTTTCTTATGTTGGTAATTTAACTTTGATGCTGCTATTATGTGTTGTCCCAAACA  
TGATTCTCATTCTTGAAAAATCTTAATCAAGTTCCTACCTACATAGTGA

>PGSC0003DMG400032828-(rev)LRR-RLPs\_704

TTACCACCTAGCATAGCCAACCTTTGCAAACACCTTAGAAGAATTGCTCCTTACTAATACTAGCTTATCAGG  
GTGTTTGCCTCCTGAAGTGGGATTTTTATACAAGTTAAAAGTTCTTGAT

>PGSC0003DMG400033049-(rev)LRR-RLKs\_0

GAGGAAAACAAGATTGTAATTAAGTGACACACTAATTATCATGTCTGAAGTGAATCTCATGTTCTTCTT  
CTCATTGTACTCAATTTCTTCATTCTCATAACAGGTATGTATATATC

>PGSC0003DMG400033049-(rev)LRR-RLKs\_1240

TCAGGTCTAAACAAATTGGTATTTCTGGACCTAAGTAGAAACAACTTTGGAGGAGAAATACAAGAAATT  
TTCGGGAAATTGACACAGGTAAGATTTCTCATGCTGCACGGAACTCATAT

>PGSC0003DMG400033049-(rev)LRR-RLKs\_1302

AGAAATTTTCGGGAAATTGACACAGGTAAGATTTCTCATGCTGCACGGAAACTCATATATTGGAGGCAT  
AGTGTCATCAGGAATTCCAAACTTGGTGAACCTTTCGCGGTTGGACTTGAG

>PGSC0003DMG400033049-(rev)LRR-RLKs\_1550

AGGCTGTTGATCTTTCCTCTAATAGGATCAATGGTTCAATACCACCAAGTTTCGGGAAGCTAAGGCCACT  
ACTGTGGTTGATGCTTGCAAACAATTCATTGAGTGGTGAAATCCCATCAG

>PGSC0003DMG400033049-(rev)LRR-RLKs\_1612

AGGCCACTACTGTGGTTGATGCTTGCAAACAATTCATTGAGTGGTGAAATCCCATCAGAGTTGGGGAAC  
TGCAGCAGCTTGTATGGTTGAATCTCGCGAATAATCAACTTACTGGTCCA

>PGSC0003DMG400033049-(rev)LRR-RLKs\_186

TAAAAAGAATCAATTTTTTAAACAACATTTATTGCAGCAAGACTAATGTTTTTTTTTACTTAGCAAAATCA  
TAGGACCAGTCTTGTGTTGTTACTCCAACACCAAGCATTAAATGTTGT

>PGSC0003DMG400033049-(rev)LRR-RLKs\_2356

TCATCATTTCTTGTAATCCGTTGTTGCGTCTTCCATCCTTCATGCATAACTCTAACAACAACACAGAACG  
AAACAAGAATGACAATCACAAAAGCCCAAAAAGGTGGGTGCACTTTTG

>PGSC0003DMG400033049-(rev)LRR-RLKs\_3782

AAAATGTTCTCAAGGATATCAATTTTTGCTATGAAATTGAAGCACACAAATATTTGACCCACCTACAAAG  
TTACTACTACAGTAGGTGGCAAGATTGTTCCCCTTATCAGGTACATTATTT

>PGSC0003DMG400033049-(rev)LRR-RLKs\_3844

CTACAAAGTTACTACTACAGTAGGTGGCAAGATTGTTCCCCTTATCAGGTACATTATTTGTCTGGTGCAATT  
CAAAGTCTCTATTTCAAACAAGATTCCTCTACCAGGGACTGTGCAATAG

>PGSC0003DMG400033049-(rev)LRR-RLKs\_3968

TACAAACAGGAGTGTCTCAAATTTCAACTTCTGGACCACATCTGATGGAAAATTTAGTATACTTCCACT  
ACATCAACACACCACCAATTGTCAACGCCACAATACTCATTTTCATATC

>PGSC0003DMG400033049-(rev)LRR-RLKs\_4216

CTTGCTATCTGCTTAAGAAAAAGAACTACAGATAACGTTTAGTGAAACTCTTAATGGTGTGAGACCTT  
TTAAGAAAAACATTGCGAGGTTGGATGAAAACCTACCAGTATCCTACCATG

>PGSC0003DMG400033049-(rev)LRR-RLKs\_4278

GAGACCTTTTAAGAAAAACATTGCGAGGTTGGATGAAAACCTACCAGTATCCTACCATGTTAAGAATGTCT

TTGGGCTAAACATAACCATGTATACCCCATTAATCTAGAGGTCACCTAT

>PGSC0003DMG400033049-(rev)LRR-RLKs\_62

TTCTTCTTCTCATTGTATTACTCAATTTCTTCATTCTCATAACAGGTATGTATATATCCTCATGTCATATTTG

ATAGCTTTAATTTGATCAAGTTTAGTATTAGAGTCTCATTTTTGTACA

>PGSC0003DMG400033131-(rev)LRR-RLPs\_1302

GAACGAGAGTTAATCGTGATGTAGTGTACTGCTCACTTCACGATGTAGTGCGTGAGTTCTGCTTGAGAA

AACTCACAGAAGACAATTATATACAGGTTGCAGTGCCATACAATCCGTATC

>PGSC0003DMG400033131-(rev)LRR-RLPs\_1736

CAATTGAAGTGGATATCACACCTACCCATCTCCAACTCTGCACCTCAAACAAGGAAGAGGATATGG

CTAAGGGCTTCTACTTTATGGGAAATGACAAAGATAAGGCATGTGAATATA

>PGSC0003DMG400033131-(rev)LRR-RLPs\_1798

GATATGGCTAAGGGCTTCTACTTTATGGGAAATGACAAAGATAAGGCATGTGAATATAAATAGGTCTTC

CGTGGTATGGGATTTCAATGACGAAGGAAGTTGTGATGAACTTCAACAAC

>PGSC0003DMG400033131-(rev)LRR-RLPs\_1860

GGTCTTCCGTGGTATGGGATTTCAATGACGAAGGAAGTTGTGATGAACTTCAACA ACTATGCTAGAGA

ACATGAAGACTTTTCACACTTGCAATATATGCTTGGATAATATGAATCCAG

>PGSC0003DMG400033131-(rev)LRR-RLPs\_1922

CTAGAGAACATGAAGACTTTTCACACTTGCAATATATGCTTGGATAATATGAATCCAGGGTTTTTGTGGA

GGTTCCAAATCTTGAAGAACTCGGCCTCAAATGAAATATGTACCTGAG

>PGSC0003DMG400033131-(rev)LRR-RLPs\_1984

TTTGTGGAGGTTTCCAAATCTTGAAGAACTCGGCCTCAAATGAAATATGTACCTGAGTTTCCTTTGTTTC

CCATACCGGAAGTTTATACTTGCCTTCATTCTCTTTCTCTGGAGTTAAG

>PGSC0003DMG400033131-(rev)LRR-RLPs\_2046

CTTTGTTTCCCATACCGGAAGTTTATACTTGCCTTCATTCTCTTTCTCTGGAGTTAAGTTCCTTGAAATTCT

GGGATTCAGTTGGATGGAAGAGCAATTTTGTCTTCCCTCCAAATCTTA

>PGSC0003DMG400033131-(rev)LRR-RLPs\_2108

TTGAAATTCTGGGATTCAGTTGGATGGAAGAGCAATTTTGTCTTCCCTCCAAATCTTAGGCATCTGTA

TGCTGGCTGTTTCTTGAGGGAAGGAATGGTTTCAAACATAGCAAGATTG

>PGSC0003DMG400033131-(rev)LRR-RLPs\_2170

TCTGTA CTTTGCTGGCTGTTTCTTGAGGGAAGGAATGGTTTCAAACATAGCAAGATTGCGGAAGCTTGA  
GAGTCTCACATTAGAAGAGGGAGTTCCTTGCAGGATATCTGAGAGTGAGAG

>PGSC0003DMG400033131-(rev)LRR-RLPs\_2294

TATTGCTGGGACATTACAAATGTTGAGTTCCTTGCCTCAAACTTGACATTACTCCGTTGGCATATAGA  
CGAATGGAAAGCATCAGAGGAATCCTTCCCGTTCTTGAGGAGCTATCT

>PGSC0003DMG400033131-(rev)LRR-RLPs\_2356

GCATATAGACGAATGGAAAGCATCAGAGGAATCCTTCCCGTTCTTGAGGAGCTATCTATAGAGGCTAC  
TGGTCAAATTTCAAGGAGATCCCTCCTTGCTTTGCGGATATTTCAACACT

>PGSC0003DMG400033131-(rev)LRR-RLPs\_2418

AGGCTACTGGTCAAATTTCAAGGAGATCCCTCCTTGCTTTGCGGATATTTCAACACTGCGACTTATTAG  
ACTGGCTTACTGCAGCCATTCACTTGGTGTTCAGCCATGAATATCAAAA

>PGSC0003DMG400033131-(rev)LRR-RLPs\_2480

CTTATTAGACTGGCTTACTGCAGCCATTCACTTGGTGTTCAGCCATGAATATCAAAAAGGGACAGAGAAG  
AAAACACAGGATGTGACAGTCTCCAAGTTTTAGGTGTAATAAATAATTAA

>PGSC0003DMG400033131-(rev)LRR-RLPs\_2542

CAGAGAAGAAAACACAGGATGTGACAGTCTCCAAGTTTTAGGTGTAATAAATAATTAAATGATTTAAA  
AGCAATTCAAAGCTGTGAATCCCAGCTCTATTTCCACTTCTTAATTCTAC

>PGSC0003DMG400033131-(rev)LRR-RLPs\_558

GTGCTTTGTCGCAAGTATATAATAGGACGACGTTATTGATTGAGATTTTCAAACAAGCTACAAATGATGA  
GATCGAAATCAAAGAAGAGGATGATGTAGCTGACATGTTGCGCAGGGTTC

>PGSC0003DMG400033131-(rev)LRR-RLPs\_620

AATGATGAGATCGAAATCAAAGAAGAGGATGATGTAGCTGACATGTTGCGCAGGGTTCTAATAGGCAA  
GAGATACCTCATCGTATTAGATGATATTTGGGATGTCGAGGCATGGGAAGAT

>PGSC0003DMG400033132-(rev)LRR-RLPs\_0

GAAGAACCTCTGTTTTAGTAGCAAAGATAGTTGTTGAAGCTACAAATTTATGCAAAGGAAAGAAAAG  
GGGTTGATGGATGTAGCATGCTTGTGGAAATCATGAATGCATTCTGAATAA

>PGSC0003DMG400033132-(rev)LRR-RLPs\_1178

ATTATTGGGGAAAAGGATAGGGAAGCGTCCAGGTTGTGGCTGGAGGTTGCAAATGATTTAAGTTCTTAT  
GTTTTAGGAGAGCAGAGCATGAAGGTGATACAGTCAAGTTATGACCATTTA

>PGSC0003DMG400033132-(rev)LRR-RLPs\_124

GGTGAAGGGAAATAGAGAAATTGTTTCATATGTTTCATCTGAAATGAAGGGAACCTCTTGATATCCATGTT  
GAGCTCATCTCTGGCTTCTCTGGACACTAGGTAATTGCTGAATATATTGT

>PGSC0003DMG400033132-(rev)LRR-RLPs\_1364

TCTAATTTGTTGAAGTTGTAGATGGCTGAAGAGTTTGTACTGAATGTCGACACAGAGAATATGGAGGAA  
GCATCTAGAATTTGCTTGAATGATCTGCTTAACAAAAGCTTAGTTATGGTC

>PGSC0003DMG400033132-(rev)LRR-RLPs\_1426

GGAGGAAGCATCTAGAATTTGCTTGAATGATCTGCTTAACAAAAGCTTAGTTATGGTCTCTAAGAGGAG  
TGCTAATGGTGACACAAAATACTGCATACTTCATGATGTAGTGCGTGAGTT

>PGSC0003DMG400033132-(rev)LRR-RLPs\_1550

TTGAGAAAACCTCACACAAGACAAGTATATGCAGCTCGCAGTGCCATACAATCCATATCAACATTTGCATT  
CCATGGAATCACGGTTATGGATTTATATTCATGATGATCTTGTTGAACAA

>PGSC0003DMG400033132-(rev)LRR-RLPs\_1612

TTTGCAATCCATGGAATCACGGTTATGGATTTATATTCATGATGATCTTGTTGAACAATTAGATCATTCTG  
AATATCAATTGGATATAATTCCAATGCTTGAGTCCACCAACAAAACATA

>PGSC0003DMG400033132-(rev)LRR-RLPs\_1674

ATCATTCTGAATATCAATTGGATATAATTCCAATGCTTGAGTCCACCAACAAAACATACTGTTTTGGTAAA  
TGTCTATGTCGTCTTTGGAGTTCATTGCTCATCCAAAGTTCAACACAT

>PGSC0003DMG400033132-(rev)LRR-RLPs\_1736

TTTGGTAAATGTCCTATGTCGTCTTTGGAGTTCATTGCTCATCCAAAGTTCAACACATGGAACCTATCAAA  
TCCTTTACCTTTACTTGTAATAACTAAGACTTGTTTCGGGTGTTGCATTTT

>PGSC0003DMG400033132-(rev)LRR-RLPs\_1798

CCTATCAAATCCTTTACCTTTACTTGTAATAACTAAGACTTGTTTCGGGTGTTGCATTTTCCGCTTGCAAAGCT  
TCCAAGTTCTTGGCCTAGTGCAATCTCTAACTCACTTGAGGTA

>PGSC0003DMG400033132-(rev)LRR-RLPs\_186

TCCATGTTGAGCTCATCTCTGGCTTCTCTGGACACTAGGTAATTGCTGAATATATTGTTGAATCAAGTGA  
GGTTATTACAAATAAGTCTGCAGTGCGATAGGCTATCAATTACACTTGTT

>PGSC0003DMG400033132-(rev)LRR-RLPs\_1860

TTGCAAAGCTTCCAAGTTCTTGGCCTAGTGCAATCTCTAACTCACTTGAGGTACCTTGAGATTTAT



GTCCAAGAATTTGATTTCAAGTGGATATCTCACCTGCTCGATCTTCAA

>PGSC0003DMG400033132-(rev)LRR-RLPs\_1922

GAGATTTATGTCCAAGAATTTGATTTCAAGTGGATATCTCACCTGCTCGATCTTCAA  
ACTCTAGTGGTTTG  
TTCATCTAATTCTCTAAGGACCTCGCTTGCAGCTATCTGGAAAATGACG

>PGSC0003DMG400033132-(rev)LRR-RLPs\_1984

AGTGGTTTGTTTCATCTAATTCTCTAAGGACCTCGCTTGCAGCTATCTGGAAAATGACGAAGCTAAGGCAC  
TTAGATATATACTTGTCTTTGATATGGGACGACAATGATCGGGCAAC

>PGSC0003DMG400033132-(rev)LRR-RLPs\_2046

TAAGGCACTTAGATATATACTTGTCTTTGATATGGGACGACAATGATCGGGCAACTTTTGAAGAATC  
TTCTACAACCTATGCTAGAGAACTTGAAGACATTCCGCGCTCATGTTATAC

>PGSC0003DMG400033132-(rev)LRR-RLPs\_2170

GGATGATAGGACCCCGAGGTTTTGGAGGAGGTTTCTGAATATTGAAGAACTCAGATGCTTCCACATTAT  
CGATTTACCTAGTTGTTCTTTGTTTCCCGCAGTGGAAGTTCATACTCGGCT

>PGSC0003DMG400033132-(rev)LRR-RLPs\_2232

ACATTATCGATTTACCTAGTTGTTCTTTGTTTCCCGCAGTGGAAGTTCATACTCGGCTTCAATCTCTTTATC  
TGGTCATAAACCTCAGGGATTCTGGGATTGAGTTGGTTGGGAGAGCA

>PGSC0003DMG400033132-(rev)LRR-RLPs\_2356

TGTCTTCCCTTCAAATCTTAAGGAATTGTGCATTGGCGGCTGTTTCATAACAGAAGAAATGGTTTTAAAT  
ATTGCACGATTGAAGAAGCTTGAGAGTCTGACATTAGAGGGAGGATTTCA

>PGSC0003DMG400033132-(rev)LRR-RLPs\_2418

TTTTAAATATTGCACGATTGAAGAAGCTTGAGAGTCTGACATTAGAGGGAGGATTTTATTGGGAGGAAA  
TAGAGTACCATTGTTGGGACGTCACAAATGTGAAGTTCCTGCACTCAAAT

>PGSC0003DMG400033132-(rev)LRR-RLPs\_248

TCAAGTGAGTTATTACAAATAAGTCTGCAGTGCGATAGGCTATCAATTACACTTGTTTCCTCAAATAAG  
ACTTTTTTTTTCTTTCTGTGTGGCATTACTTCATTTTATTTTTTTGTTT

>PGSC0003DMG400033132-(rev)LRR-RLPs\_2542

GGCATTACACTTTATGAGGATGGAAGAATGGAAAGCTTCAGAGGAATCCTTCCCGTGCTTGAGAAGTT  
AGTTATAAGAGAATGTCACTACTTCAAGGAGATCCCTACTAGCTTTGCCGA

>PGSC0003DMG400033132-(rev)LRR-RLPs\_2604

AGAAGTTAGTTATAAGAGAATGTCACTACTTCAAGGAGATCCCTACTAGCTTTGCCGATATTCCAACACT  
GCGACTTATTGAACTGTTTGAGTGCCTGATTCACTTGTGGTTTCAGCTG

>PGSC0003DMG400033132-(rev)LRR-RLPs\_2666

CCAACACTGCGACTTATTGAACTGTTTGAGTGCCTGATTCACTTGTGGTTTCAGCTGTGAACATCAAAA  
ATGAAATAGAAGAAAACACTGGATGTGATAGTCTCCGGGTAAGAAAGTTG

>PGSC0003DMG400033132-(rev)LRR-RLPs\_2728

CATCAAAAATGAAATAGAAGAAAACACTGGATGTGATAGTCTCCGGGTAAGAAAGTTGTATGGAGACG  
GATCTCTAAAGAAAAAAGAAAAGGATGCCACGGGGTTTTTAATAAAGAGAAG

>PGSC0003DMG400033132-(rev)LRR-RLPs\_2771

CGGGTAAGAAAGTTGTATGGAGACGGATCTCTAAAGAAAAAAGAAAAGGATGCCACGGGGTTTTTAAT  
AAAGAGAAGAGAAAAGGATTTTTCCAATTGAAGTGATGTATTGATAAGGGAT

>PGSC0003DMG400033132-(rev)LRR-RLPs\_310

CAAATAAGACTTTTTTTTTCTTTCTGTGTGGCATTACTTCATTTTATATTTTTGTTTTGATTTTTCTCTAGA  
GTATGAATATTGTTAAAAGTTTCGTTTTCTTTATGAAAAGGTGACA

>PGSC0003DMG400033132-(rev)LRR-RLPs\_372

TTTTTCTCTAGAGTATGAATATTGTTAAAAGTTTCGTTTTCTTTATGAAAAGGTGACAGGGCAATAAACT  
CAAGGCAGTTGGATTGTGAAAGACACCAAACCAATTGACATGGATGTTG

>PGSC0003DMG400033132-(rev)LRR-RLPs\_434

AATAAACTTCAAGGCAGTTGGATTGTGAAAGACACCAAACCAATTGACATGGATGTTGTTGAGACTTGT  
GGAAAAGGAACTCTATTGATTCCGGGGAGTTCCATCCAACGTAGTTTTCCA

>PGSC0003DMG400033132-(rev)LRR-RLPs\_496

GACTTGTGGAAAAGGAACTCTATTGATTCCGGGGAGTTCCATCCAACGTAGTTTTCCATCAATTGATGAA  
GAAATTGTGGGCTTTGAAAAAGATGCAGAAAGTATAATGCAGAAATTGAC

>PGSC0003DMG400033132-(rev)LRR-RLPs\_558

TTGATGAAGAAATTGTGGGCTTTGAAAAAGATGCAGAAAGTATAATGCAGAAATTGACACGAGGAACA  
AAGAAGCTGGACGTTATATCAATCTTTGGAATGCCGGGACTCGGCAAAACAA

>PGSC0003DMG400033132-(rev)LRR-RLPs\_62

AGAAAAGGGGTTGATGGATGTAGCATGCTTGTGGAAATCATGAATGCATTCTGAATAATAATGGTGAA  
GGGAAATAGAGAAATTGTTTCATATGTTTCATCTGAAATGAAGGGAACCTTG

>PGSC0003DMG400033132-(rev)LRR-RLPs\_620

GGAACAAAGAAGCTGGACGTTATATCAATCTTTGGAATGCCGGGACTCGGCAAACAACCTTTGGCCAG  
GAAAGTGTACAACATTCCCTCTATTGTTAATCACTTTGATGTTAAAGTATGG

>PGSC0003DMG400033132-(rev)LRR-RLPs\_682

GGCCAGGAAAGTGTACAACATTCCCTCTATTGTTAATCACTTTGATGTTAAAGTATGGTGTCTGTTTCTC  
AAGAATATGATAGGAGAACGTTGTTGGGTGAGATCCTTAAACAAACAAC

>PGSC0003DMG400033132-(rev)LRR-RLPs\_744

CTGTTTCTCAAGAATATGATAGGAGAACGTTGTTGGGTGAGATCCTTAAACAAACAACACGTAAGAGCG  
AATTCATTGAGGCTGATGACAGACCTGAAATATTGTGCAGGAGTCTGATAG

>PGSC0003DMG400033132-(rev)LRR-RLPs\_806

AAGAGCGAATTCATTGAGGCTGATGACAGACCTGAAATATTGTGCAGGAGTCTGATAGGCAGGAGATA  
CCTCATTGTATTAGATGATATATGGGATGTCAAGGCATGGGAAGATTTGGAT

>PGSC0003DMG400033132-(rev)LRR-RLPs\_868

GAGATACCTCATTGTATTAGATGATATATGGGATGTCAAGGCATGGGAAGATTTGGATTTATGTTCCCT  
AAGGGTGAAAATGGAAGCAGGGTAATGGTAACAACCTCGAATTGAACAAGT

>PGSC0003DMG400033152-(rev)LRR-RLPs\_325

ATATTGTTGGGATGTGACAGATGTGGAGTTTGCTGCACTCAAATACTTGGGATTATTCTTTATGCAGATA  
GAAGAATGGAAAGCTTCAGAGGAATCGTTTCCTGTGCTTGAGAAGCTAGT

>PGSC0003DMG400033152-(rev)LRR-RLPs\_390

AGATAGAAGAATGGAAAGCTTCAGAGGAATCGTTTCCTGTGCTTGAGAAGCTAGTTATAAGTGGATGG  
CCCGTTTCAAGGAGATCAAGGAGATCCCCCAAGCTTTGCGGATATTCTAA

>PGSC0003DMG400033152-(rev)LRR-RLPs\_455

TGGCCCGTTTTCAAGGAGATCAAGGAGATCCCCCAAGCTTTGCGGATATTCTAACCTAAGACGTATT  
GAACTGTTTGACTGCATGGAGTCTTTAGGGGTTTCAGCTATGAATATCAAA

>PGSC0003DMG400033152-(rev)LRR-RLPs\_518

CGTATTGAACTGTTTGACTGCATGGAGTCTTTAGGGGTTTCAGCTATGAATATCAAAAGAGAGATTGAA  
GAAAACACAGGATGTGACAGTCTCCAAGTTGTTATAGAAAAGTAAATAAAT

>PGSC0003DMG400033152-(rev)LRR-RLPs\_65

GGCCTCAACGTTAAAGTTGTACCTGAGTTTCCGTTGTTCCCATAGCGGAAGTTCATAGTCACCTTCATT

TCTTACTCTGGAGTTCTCTTTAACAGAATTATTTGATTGAGTTGGATGG

>PGSC0003DMG400033153-(rev)LRR-RLPs\_0

GTGGGCTTTGAGAAAGATGCAGAAATTATAATGAAGAAATTGATACGAGGAACTAAGGAGCGGGATCT

TATCTCCATCTTTGGAATGCCCGGACTCGGTAAAACAACCTTTGACAAGAAAG

>PGSC0003DMG400033153-(rev)LRR-RLPs\_1008

CTCGCAGTGCCATTCAATCCGTATCAACATTTGCATTCCACGGAATCACGATTGTGCATTTATATTCATGA

TGATCTTGTTAAACAATTAGATCATTCCAACCTACCAGCTGGATAAGATT

>PGSC0003DMG400033153-(rev)LRR-RLPs\_1071

ATTCATGATGATCTTGTTAAACAATTAGATCATTCCAACCTACCAGCTGGATAAGATTCCAATGCTCGATT

CAAGGAAACAAATTCTTTGGAGTTCATTGCTCATCCAAAACCTCAATACG

>PGSC0003DMG400033153-(rev)LRR-RLPs\_1197

AACCAATATTCAAATCCTTTGATTTACTTGTTAAATTAAGATTTGTTTCGGGCATTGGATTTGATGGATGT

GGAATTATCAGATTCATGGGCTACTGCAATTCAATCGCTAACTGAGTTA

>PGSC0003DMG400033153-(rev)LRR-RLPs\_126

AACAATCCCTATATTGTTGATCACTTTGATGTTAAAGCATGGTGTGCTGTGTCCACAAGCATATAATAGAA

GGACGTTATTGGTTGAGATTTTCAAACAAGCTACAAATGATAAGATCAAA

>PGSC0003DMG400033153-(rev)LRR-RLPs\_1260

ATGGATGTGGAATTATCAGATTCATGGGCTACTGCAATTCAATCGCTAACTGAGTTAAGATACCTTGAC

TTTGTGTCAAACAATTTGAATTGAAGTGGATATCACACATACACAATCTC

>PGSC0003DMG400033153-(rev)LRR-RLPs\_1323

CTTGCACTTTGTGTCAAACAATTTGAATTGAAGTGGATATCACACATACACAATCTCCAAACTCTTCAGGT

CAAGTCAAGTGAGAAGTTACGCCTAAGGGCAGCTACTTTATCAGAAATG

>PGSC0003DMG400033153-(rev)LRR-RLPs\_1449

CTAAGGCATGTGAAAATAGACTGTTTTTTCATGGTATGGGAAAACAATGAGCAAGAAAGTTCTTCAACC

ACTATGCTAGAGAACATGAAGAGTTTTGGCACTTGCGATATACGCTTGGAT

>PGSC0003DMG400033153-(rev)LRR-RLPs\_1512

TCAACCACTATGCTAGAGAACATGAAGAGTTTTGGCACTTGCGATATACGCTTGGATAATATGAATGCA

AGGTTCTGGTGGAGGTTTCCGAATCTTGAAGAACTCGGCCTCAGCGTTAAA

>PGSC0003DMG400033153-(rev)LRR-RLPs\_1638

CCTGAGTTTCCTTTGTTTCCCATAGCGGAAGTTCATAGTCACCTTCATTTTCTTTCTCTGGAATTCTCTTTG  
ATGGAATTATTTAATTCAGTTGGATGGGAGAGATATTTTGTGTTCCCT

>PGSC0003DMG400033153-(rev)LRR-RLPs\_1701

TTCTCTTTGATGGAATTATTTAATTCAGTTGGATGGGAGAGATATTTTGTGTTCCCTTCAAATCTTAGGCA  
TTTGGACCTTGCCGGCTGTTTTTTGACGGAAGAAATGGTTTTAAACATT

>PGSC0003DMG400033153-(rev)LRR-RLPs\_1827

TTGAAGAAGCTTGAGAGTCTCAAATTAATTGTGGGATTACCTTTTGGGAGATCAGAGAGCTATTGCTGG  
GATGTGACAGATGTGGAGTTTGTCTGCACTCAAATACTTGGGATTATTCTTT

>PGSC0003DMG400033153-(rev)LRR-RLPs\_2079

CTGACTAACTGCATCGACTCTTTAGGGGTTTCAGCTATGAATATCAGAAGAGAAATTGAAGAAAACACA  
GGATGTGACAGTCTCCAAGTTGTTATAGAAAAGTAAATTAATGTATTTAAA

>PGSC0003DMG400033153-(rev)LRR-RLPs\_2394

ATACATGTAGGACACAATTGATAGATAGACGAATGGAAAGCTTCAGAGGAATCCTTTCCGGTGCTTGAG  
AAGCTATCTATACAAGCTACTGAGGAGATCCCTTCTAGCTTTGCAGATATT

>PGSC0003DMG400033153-(rev)LRR-RLPs\_2428

GGAAAGCTTCAGAGGAATCCTTTCCGGTGCTTGAGAAGCTATCTATACAAGCTACTGAGGAGATCCCTT  
CTAGCTTTGCAGATATTCCAACACCCTGACTTATTGAACTGTCCAAATGCA

>PGSC0003DMG400033153-(rev)LRR-RLPs\_378

TGTGGAAGCAGAGTAATGGTCACAACACGAATTGAAGAAGTGACTAAGCATCTTCCGCACCACAGTGAT  
CCTTATTCTTTAGCTTTCTAACGTCCGAAGAGAGTTGGGAATTATTGGAG

>PGSC0003DMG400033153-(rev)LRR-RLPs\_63

GATCTTATCTCCATCTTTGGAATGCCCGGACTCGGTAAAACAACCTTTGACAAGAAAGGTGTACAACAATC  
CCTATATTGTTGATCACTTTGATGTTAAAGCATGGTGTGCTGTGTCACAA

>PGSC0003DMG400033153-(rev)LRR-RLPs\_630

GCGTCCTTGTGGCTCGAGGGTGCAGAAGACTTGAGTTCCTTGCTTTAGGAGAGCAGAGTATGAAGGT  
GATACAATCAAGTTATGACCATTTAGAAGATCACTTAAAGCCTTGCCTTCTT

>PGSC0003DMG400033153-(rev)LRR-RLPs\_819

GAGTTTGTATTGAATGCCGGAACAGAGAACATGGAGAAAGCATGTGCGAGTCTGCATGACTGATTTGCTT  
AACAGAAGCCTAATAATGGTCTCCGGAATGAGATTTTATCGTGATGTACAA

>PGSC0003DMG400033154-(rev)LRR-RLPs\_1054

AGTTCATACTCGGCTTCAATCTCTTAATCTGGTCATAAACCCCTCAGGGATTCTGGGATTCAAGTTGGTTGG  
GAGAGCAATTTTGTCTTCCCTTCAAATCCTAAGGAATTGTGCATTGGCGG

>PGSC0003DMG400033154-(rev)LRR-RLPs\_1240

AGAGGGAGGATTTTATTGGGAGGAAATAGATTACCATTGTTGGGACGTCACAAATGTGACGTTCCCTGC  
ACTCAAATACTTGGCATTACACTTTATGAGGATGGAAGAATGGAAAGCTTC

>PGSC0003DMG400033154-(rev)LRR-RLPs\_248

AGCTTAGTTATGGTCTCTAAGAAGAGTGCTAATGGTGACACAAAATACTGCATACTTCATGATGTAGTGC  
GTGAGTTCTGCTTGAGAAAACCTCACACAAGACAAGTATATGCAGCTCGCA

>PGSC0003DMG400033154-(rev)LRR-RLPs\_868

CAATGATCGGGCAACTTTTGAAGAATCTTCTACAACCTATGCTAGAGAACTTGAAGACATTCCGCGCTCAT  
GTTATACGCGTGGATGATAGGACCCCGAGGTTTTGGAGGAGGTTTTCTGAA

>PGSC0003DMG400033334-(rev)LRR-RLPs\_2684

TTTACTTTATTAATGATAGAAGCAAAAATAACAGTAGTTGCCAAAGGTAGCTAATTCGTCAAGTATCCAT  
TTTTAGTTAACGTTGCCTAATTCGTTTATGTTATGGTTAGTGGATTTTGC

>PGSC0003DMG400033334-(rev)LRR-RLPs\_3355

ATCTCAGTTTTGTGTAAAAAAGTGTGTACACGCATTTTCACACATAAATAATATTGTTTTAAATTTTTAAA  
ACATTTTTCTTGATATTTTCTTAACTTTTGCAAAAATTTAAAAATG

>PGSC0003DMG400033334-(rev)LRR-RLPs\_3416

AAATTTTTAAAACATTTTTCTTGATATTTTCTTAACTTTTGCAAAAATTTAAAAATGTGGGCATCTTCCT  
TCTCTACCATACATATCTCTTTTTAAATCTATTTCTTCTTCTTCT

>PGSC0003DMG400033334-(rev)LRR-RLPs\_3477

GGCATCTTCCTTCTCTCACCATACATATCTCTTTTTAAATCTATTTCTTCTTCTTCTCCATTGTTCATAAAT  
TGAAGGGAAAAATAAAAATTTGAAGAGAAAATAGGAGTCAGTAAGT

>PGSC0003DMG400033334-(rev)LRR-RLPs\_3538

ATTGTTCATAAATTGAAGGGAAAAATAAAAATTTGAAGAGAAAATAGGAGTCAGTAAGTCGATTATGAA  
GTATAGAGATGTTGGCTCCGGTGATAGGCGATGGGCAACACCATTATGGTC

>PGSC0003DMG400033334-(rev)LRR-RLPs\_3599

ATTATGAAGTATAGAGATGTTGGCTCCGGTGATAGGCGATGGGCAACACCATTATGGTCGATGGAACA

AATAAAATTTTCAGATCTGTAAAATTCTTTAAAAATCTTGATAAGTATGTAT

>PGSC0003DMG400033334-(rev)LRR-RLPs\_3660

TGGAACAAATAAAATTTTCAGATCTGTAAAATTCTTTAAAAATCTTGATAAGTATGTATGTAAATCAAACA  
TTTCATTAGTATTTTTTTGTGGGTAATTGATTAATCAAATATGCTATTGA

>PGSC0003DMG400033334-(rev)LRR-RLPs\_3721

AAATCAAACATTTTCATTAGTATTTTTTTGTGGGTAATTGATTAATCAAATATGCTATTGATGATATGAGACA  
TAAAATAACATTGTGGTGGTTGTTGGTAGTTCTCCGACGAAAATAGAG

>PGSC0003DMG400033334-(rev)LRR-RLPs\_3782

ATATGAGACATAAAAATAACATTGTGGTGGTTGTTGGTAGTTCTCCGACGAAAATAGAGAAGACAAAGA  
TTGAGAAATCATTTTCTTCGGTGAGCTTTTGAAAAATTTAGACAATATAAT

>PGSC0003DMG400033334-(rev)LRR-RLPs\_3843

GACAAAGATTGAGAAATCATTTTCTTCGGTGAGCTTTTGAAAAATTTAGACAATATAATCATGAATTTTAT  
GCATAAATGGCATAGAAATTTCAATAGAAATCATTATTTTTTCTCATGAA

>PGSC0003DMG400033334-(rev)LRR-RLPs\_3965

CTTTTTCGGTGATCTTCTCCGGTGAATCCTCCGGCGAGTCCGAATGGAAAAATCTTGAAAATTATTA  
TTCGATGAAAATCATCATCTTCTCCACCCTTTCTATTTTTTAAGAGTTC

>PGSC0003DMG400033334-(rev)LRR-RLPs\_4026

TTATTAACTTTTCGATGAAAATCATCATCTTCTCCACCCTTTCTATTTTTTAAGAGTCTTCTGTATGGCTAG  
AGTGTTGGATGTGCTTCCATTAACAATCAATAGCTACAAATGCTCC

>PGSC0003DMG400033334-(rev)LRR-RLPs\_4087

CTGTATGGCTAGAGTGTTGGATGTGCTTCCATTAACAATCAATAGCTACAAATGCTCCTTAAGAAGAAG  
AACAAATCAAACAAAGAAAAATGTAAAAGCTTTAAAGAAATTGGGGCCA

>PGSC0003DMG400033334-(rev)LRR-RLPs\_4148

AAGAAGAAGAACAATTCAAACAAAGAAAAATGTAAAAGCTTTAAAGAAATTGGGGCCACCAATAAAA  
AGATTAATAAAGAAAGAAATTGAAATAATTAATATATTAATAAAGTTATAATAC

>PGSC0003DMG400033334-(rev)LRR-RLPs\_4209

AATAAAAAGATTAATAAAGAAAGAAATTGAAATAATTAATATATTAATAAAGTTATAATACATAATTATATA  
ATGACCTATAAAATAGTGCCATGTGTTGAAATTCGTCATTTTAACATATA

>PGSC0003DMG400033334-(rev)LRR-RLPs\_4453

GTAAGTACTGACTTTTCGACACAAGCTTAGGGGGGAATTTATAAACTCAAACCTAATGTATTTTACATTATTTTG  
GGTTGTACGTTCTCATATTATTAATCTCTATGAATTGCATTTCCAACCT

>PGSC0003DMG400033334-(rev)LRR-RLPs\_4514

CATTATTTTGGGTTGTACGTTCTCATATTATTAATCTCTATGAATTGCATTTCCAACCTTTGCATCTCATGA  
AGAAACAAAAAGAAATATGTTGGCACAACCTTTCTCATCGGCCATTGT

>PGSC0003DMG400033334-(rev)LRR-RLPs\_4575

GCATCTCATGAAGAAACAAAAAGAAATATGTTGGCACAACCTTTCTCATCGGCCATTGTTTTCTATTTTTC  
ATTACACTCACGCGCCTAAAAAGGTATTTACACTCTTTTCTACATCAA

>PGSC0003DMG400033334-(rev)LRR-RLPs\_4636

TCTATTTTTCATTACACTCACGCGCCTAAAAAGGTATTTACACTCTTTTCTACATCAACGTCTAGGGGGG  
TAAATGAGAATAGATAATCAAGTATATATAGCGGAAATTTAAATGTGCA

>PGSC0003DMG400033334-(rev)LRR-RLPs\_4697

TCTAGGGGGGTAAATGAGAATAGATAATCAAGTATATATAGCGGAAATTTAAATGTGCACTAAATAAAA  
CATGCTAAGATTAAGGTCTTCTTTTAGATATTTTACCTTTTATTTATTATA

>PGSC0003DMG400033334-(rev)LRR-RLPs\_4758

AAATAAACATGCTAAGATTAAGGTCTTCTTTTAGATATTTTACCTTTTATTTATTATAACATGATTTTAT  
TTAGTTTCTGAGCATGTAATTTCCATATAAAGTAAAATAAACAATTTT

>PGSC0003DMG400033334-(rev)LRR-RLPs\_4819

ATGATTTTATTTAGTTTCTGAGCATGTAATTTCCATATAAAGTAAAATAAACAATTTCTCATTTCAAATGT  
TGAGTTATAATATAAACATGTGGTTTACTACTTTTTCATCATTCTTTCT

>PGSC0003DMG400033334-(rev)LRR-RLPs\_6161

TTGTATAAAGATGAAGCTGAGCTTCAATGCGAAAAGGAGGAGCAGAAATGAACATCATGAAGAAGA  
GGCAAGTTGCTCCTCTTCTAAGAAACAAAGGCCACTTTTCCCACAAGCTCG

>PGSC0003DMG400033334-(rev)LRR-RLPs\_6222

AAGAAGAGGCAAGTTGCTCCTCTTCTAAGAAACAAAGGCCACTTTTCCCACAAGCTCGGGATTATAGA  
TTAACTATAGGTAAATACCTCACAGATTTGTGTTCTCTGTTTATATATAAA

>PGSC0003DMG400033334-(rev)LRR-RLPs\_6283

ATTATAGATTAAGTAAATACCTCACAGATTTGTGTTCTCTGTTTATATATAAATTATTTCTTCTCA  
TTCTTTCCCTATTGGCAATCAGCAGTGAGTTTGATTCTCCTCTTAAC



>PGSC0003DMG400033334-(rev)LRR-RLPs\_6344

ATTTCTTCTCATTCTTTCCCCTATTGGCAATCAGCAGTGAGTTTGATTCTCCTCTTAACAACCTTTTTATTTTT  
TATTTTTTGGTAACCAATGTAAAATATTACCATTACCACAAAAACGC

>PGSC0003DMG400033334-(rev)LRR-RLPs\_6405

CTTTTTATTTTTTATTTTTTGGTAACCAATGTAAAATATTACCATTACCACAAAAACGCAATACAAATAAAG  
AGCATCCATTTCTGATATCAGAACTAGGTCTCCAACAAACAAGAAAA

>PGSC0003DMG400033334-(rev)LRR-RLPs\_6453

CACAAAAACGCAATACAAATAAAGAGCATCCATTTCTGATATCAGAACTAGGTCTCCAACAAACAAGA  
AAACTAACTACAAAGTAAGCGATGCGTAAAATGTTTACATTTTTTTGCTTT

>PGSC0003DMG400033563-(rev)LRR-RLPs\_0

GTCCGTAATTACGGGCCTTAAATATCTAGTTACGTATAACCAAAGGAGTAACAAAGGGCTGTTCGCCT  
ATGCCGTTCGAGCCCCAAATCGAAAATCCCTAAAACCTAGAGTTCCACCGT

>PGSC0003DMG400033563-(rev)LRR-RLPs\_1054

TAGCTTGTCTGCACTTGAGAACTTACTTTAGGTCCAATTGCTCTTGAGGTAAGAATCTAACATGTTTTAC  
CTGGTATGGGTTATGTTCCAAATTGTTCTTATTGTTTTGCTCCAAAGC

>PGSC0003DMG400033563-(rev)LRR-RLPs\_1116

ATGTTTTACCTGGTATGGGTTATGTTCCAAATTGTTCTTATTGTTTTGCTCCAAAGCTTTTGAGTACAGGT  
GTAGTTACAAAGGGAATTCCTTTTACTCACTCACTACTTGTGGCATCTA

>PGSC0003DMG400033563-(rev)LRR-RLPs\_1178

GAGTACAGGTGTAGTTACAAAGGGAATTCCTTTTACTCACTCACTACTTGTGGCATCTACAGTTAATTGTA  
GACTTGAGCCAAATAGGCCAGACTTCTTACGCTCTGGAGTTAATTAAGAG

>PGSC0003DMG400033563-(rev)LRR-RLPs\_124

AGTGTCTCTGTCTCAATTGCCGGAACCGGCGCCTTCTTCTCCGTGAATTTCTCAGTCAGCATGACTCA  
AGGTATACGATTCTCTTTTCGTCTTCTTTTTGGATTATAAATTT

>PGSC0003DMG400033563-(rev)LRR-RLPs\_1240

TAATTGTAGACTTGAGCCAAATAGGCCAGACTTCTTACGCTCTGGAGTTAATTAAGAGTTTTCCCAACTT  
GAGCAAACCTCAGATTTGGGTAAGAATAACTGGTACTGCATATATGTCGC

>PGSC0003DMG400033563-(rev)LRR-RLPs\_1302

CCCAACTTGAGCAAACCTCAGATTTGGGTAAGAATAACTGGTACTGCATATATGTCGCTCTATTTTTACTT

CATATGTTATAAACATGAGAACTAAAACATGTATTGCCTTGTATCATT

>PGSC0003DMG400033563-(rev)LRR-RLPs\_1359

CTCTATTTTTACTTCATATGTTATAAACATGAGAACTAAAACATGTATTGCCTTGTATCATTAAATTAGGTC

TATGCTGCTTGTGACAAGGATGAAACGGTTATGAAATATCTGGACAAA

>PGSC0003DMG400033563-(rev)LRR-RLPs\_186

CATGACTCAAGGTATACGATTCTCTCTTTTCGTCTTCTCTTTTGGATTATAAATTTTATGCCTAAGATTA

TTGATCTTCTTTTAGGTAAAAGAGCTGCTGTTGAAGTTGAAAGAGAAG

>PGSC0003DMG400033563-(rev)LRR-RLPs\_248

CCTAAGATTATTGATCTTCTTTTAGGTAAAAGAGCTGCTGTTGAAGTTGAAAGAGAAGTAGAAGATATA

ATCACTGCTCTGCCAGTAAATGTTGTCGATCGTATTCTTAAGTTGTTGCCG

>PGSC0003DMG400033563-(rev)LRR-RLPs\_310

AGATATAATCACTGCTCTGCCAGTAAATGTTGTCGATCGTATTCTTAAGTTGTTGCCGTTACACGACGCA

GCAAAAAGTAGTATTTTGTCTAGAAAATGGAGAGGTATATGGGCTTCACA

>PGSC0003DMG400033563-(rev)LRR-RLPs\_372

ACGACGCAGCAAAAAGTAGTATTTTGTCTAGAAAATGGAGAGGTATATGGGCTTCACATCCATATCTGG

TACTGAATAGCTTATTTTGCAAAAGGCTAATAACAAAATCTGAATCTTTTT

>PGSC0003DMG400033563-(rev)LRR-RLPs\_434

TATCTGGTACTGAATAGCTTATTTTGCAAAAGGCTAATAACAAAATCTGAATCTTTTTTTAGAGAAACAGT

AGATATGATTCTTTACAACATATTGGCGACATTGTGGAGTTTGATCTC

>PGSC0003DMG400033563-(rev)LRR-RLPs\_496

AGAAACAGTAGATATGATTCTTTACAACATATTGGCGACATTGTGGAGTTTGATCTCGATGTTTCAGGA

GTACGATTGTCTTCATTTATAGATATTGATAGATGGATGCTTTTTGTAAC

>PGSC0003DMG400033563-(rev)LRR-RLPs\_558

TTTCAGGAGTACGATTGTCTTCATTTATAGATATTGATAGATGGATGCTTTTTGTAAGTAAATGGTGTCT

AAGAACTAACACTTAAGATGTCAAAGACTATAAATACTACTTATAAAG

>PGSC0003DMG400033563-(rev)LRR-RLPs\_62

TTCGCCTATGCCGTCGCAGCCCCAAATCGAAAATCCCTAAAACCTAGAGTTCCACCGTCGTCAGTGTCTT

CTGTCTCAATTGCCGGCAACCGGCGCCTTCTTCTCCGTGAATTTCTCAG

>PGSC0003DMG400033563-(rev)LRR-RLPs\_620

AATGGTGTCAAGAACTAACACTTAAGATGTCAAAGACTATAAATACTACTTATAAAGTGCCTTCTTATA  
TATTCAATTGTCGAACATTGGAACATTTGACACTTTTCAACTGTATCTTC

>PGSC0003DMG400033563-(rev)LRR-RLPs\_682

TTCTTATATATTCAATTGTCGAACATTGGAACATTTGACACTTTTCAACTGTATCTTCAAACCACCAAATCC  
CTTTCTTGGATTCAACAATCTTATAACCCTCTGTCTACGAAGAATAAC

>PGSC0003DMG400033563-(rev)LRR-RLPs\_744

CACCAAATCCCTTTCTTGGATTCAACAATCTTATAACCCTCTGTCTACGAAGAATAACGTTTGTACCAGCT  
ACGGAGTTTTGTGTTATCAATGCACCCATTCTTATCAATTTGACCTTGA

>PGSC0003DMG400033563-(rev)LRR-RLPs\_806

GTACCAGCTACGGAGTTTTGTGTTATCAATGCACCCATTCTTATCAATTTGACCTTGATAAGGTGTAAGTG  
TACTCAATACTTCAACATTGTTGTCTCAAGTAGGTTGAAGTGCTTGTCT

>PGSC0003DMG400033563-(rev)LRR-RLPs\_868

GTGTAAGTGTACTCAATACTTCAACATTGTTGTCTCAAGTAGGTTGAAGTGCTTGTCTAATTGTGGGGGT  
CACGGCAATCTTGATCTTAATCGCTTTGCGAACTGCAAAGAATTGACAAA

>PGSC0003DMG400033563-(rev)LRR-RLPs\_930

GTGGGGGTCACGGCAATCTTGATCTTAATCGCTTTGCGAACTGCAAAGAATTGACAAATTTAGTGCTTTT  
GGATGATAGTCCAATACACAGTGATGAAATATCAACTTATGAAAAGCTTA

>PGSC0003DMG400033563-(rev)LRR-RLPs\_992

GTGCTTTTGGATGATAGTCCAATACACAGTGATGAAATATCAACTTATGAAAAGCTTATCTTTAGCTTGTC  
TGCACTTGAGAACTTACTTTAGGTCCAATTGCTCTTGAGGTAAGAATC

>PGSC0003DMG400033632LRR-RLPs\_0

TTTGAACTCTTTCATTCAAACATGGACTACAAGCAACTCTCAGTTGTGCTCTTACTTGTCTTTCTCCGTCAC  
AAACTTGTTTTCTTCTTCCATATTACCTCATTGTGTCCCAAACAT

>PGSC0003DMG400033632LRR-RLPs\_1054

ATAACCAATTTTCTGGTCAGCTTGAGGATTTCAAGTCCAATTCACCTGTCTGGATTTACTTACAAGACAAT  
CAGCTGCAAGGCCATCTTCCACGTCAATTCAAAACCTCGTGAACCTAA

>PGSC0003DMG400033632LRR-RLPs\_1116

CAAGACAATCAGCTGCAAGGCCATCTTCCACGTCAATTCAAAACCTCGTGAACCTAACAACTCTTGATC  
TTTCATCGAATAATTTTAGTGGTAGTGTGGATGTTAGCTTCTTTTCGAAG

>PGSC0003DMG400033632LRR-RLPs\_1178

TCTTGATCTTTCATCGAATAATTTAGTGGTAGTGTGGATGTTAGCTTCTTTTCGAAGCTCAAGTATCTTT  
AGATCTTGGTCTTTCATATAATCGTATCACATTGATCAATGAGAATAA

>PGSC0003DMG400033632LRR-RLPs\_124

GTACCACCCTTCTAAAATTCAAGCAGACGTTTACGATAGATACATTTGATATGTGTGGACTTATGCTTGG  
CCAGGAGTCTTATCCAAAGACGATCTCATGGAECTTAAGCAGAGATTGTT

>PGSC0003DMG400033632LRR-RLPs\_1240

AGTATCTTTTAGATCTTGGTCTTTCATATAATCGTATCACATTGATCAATGAGAATAAAGTTAAATCTACT  
TTGCCTGAATCTCTTGAGAAGTTAGGATTGGCCGCGTGTGAAGTGAAAG

>PGSC0003DMG400033632LRR-RLPs\_1302

AAATCTACTTTGCCTGAATCTCTTGAGAAGTTAGGATTGGCCGCGTGTGAAGTGAAAGAATTGGAGTTT  
CTAAGATCCGCGAAGAATCTCAAGGAGTTGGATCTTTCAAATAATAAGATT

>PGSC0003DMG400033632LRR-RLPs\_1364

GGAGTTTCTAAGATCCGCGAAGAATCTCAAGGAGTTGGATCTTTCAAATAATAAGATTCAAGGAAGGAT  
TCCTGATTGGGCATGGTCTAATTGGGAATTTTCAGTGTCAACTCTTAATTT

>PGSC0003DMG400033632LRR-RLPs\_1426

GAAGGATTCCTGATTGGGCATGGTCTAATTGGGAATTTTCAGTGTCAACTCTTAATTTATCTCACAATATG  
TTGACAAGCATGGACTCAATTCCTCTTCTATCTCTAGATACTATTGATT

>PGSC0003DMG400033632LRR-RLPs\_1488

CACAATATGTTGACAAGCATGGACTCAATTCCTCTTCTATCTCTAGATACTATTGATTTGCGTTCCAATTTT  
CTTGAAGGGTCACTACCTATTCCAGCTAATTCCACGAGATACTTCTTC

>PGSC0003DMG400033632LRR-RLPs\_1550

TTCCAATTTTCTTGAAGGGTCACTACCTATTCCAGCTAATTCCACGAGATACTTCTTCATATCGGAAAATA  
ATCTTAGTGGGGAAATTCCTTCGTCTCTTTGCAATTTGATGTCACTAAA

>PGSC0003DMG400033632LRR-RLPs\_1612

CGGAAAATAATCTTAGTGGGGAAATTCCTTCGTCTCTTTGCAATTTGATGTCACTAAAATGCTCGTTTTG  
GGAAAAATAACTTGAGGGGAACAATTCACAATGTGTTGGGTAACATG

>PGSC0003DMG400033632LRR-RLPs\_1674

CTCGTTTTGGGAAAAATAACTTGAGGGGAACAATTCACAATGTGTTGGGTAACATGAGTTACGATCT

TGAGGTTTTGGATATGCACCACAACAATCTTTCGGGGACTCTTCCAACGAC

>PGSC0003DMG400033632LRR-RLPs\_186

ATGCTTGGCCAGGAGTCTTATCCAAAGACGATCTCATGGAACCTAAGCAGAGATTGTTGTTTATGGGAT  
GGAGTGAAGTGTGACGAGATGAGTGGTCATGTCATTGAACTTGACCTCGGT

>PGSC0003DMG400033632LRR-RLPs\_1922

ACACATTCCAATGTGGTTGGGGACTTTGCCTGAGCTTCAAGTTTTAAGCTTGCGATCCAACAAATTACA  
TGGGTCGATTCAACCTTCAAGGTTTAAAAATATGTTTCCCAGCTCCGGA

>PGSC0003DMG400033632LRR-RLPs\_1984

AAATTACATGGGTGATTCAACCTTCAAGTTTTGAAAATATGTTTCCCAGCTCCGGATAATAGATCTCTC  
TTACAATGCCTTCTCAGGAACTTACCTACGAGTCTATTTCAACATCTG

>PGSC0003DMG400033632LRR-RLPs\_2108

CCATGAGGACGATTGATCCATTGACAAAGTCACCAAGTAATGAAAGAGATGGATATTACCAAGACTCGG  
TCGTTGTAGTAACAAAGGGATTGGAACCTGAAGTTGTGAGAATCTTGTTTT

>PGSC0003DMG400033632LRR-RLPs\_2542

GATGGATTGCGTGGATTCCCTGTTTCAGAAGATTGTGGAAGTCGCGAGATGCCAAAGAGAAACAACAC  
AACACAAGTGTGAATCAAGAAAGCAACTCCACATTTCTAAGTGAATTTAGG

>PGSC0003DMG400033632LRR-RLPs\_2604

CAACACAACACAAGTGTGAATCAAGAAAGCAACTCCACATTTCTAAGTGAATTTAGGAAGACAATTCTT  
ATGGGATATGGGAGTGGACTTATCATTGGACTCTTCATAGCATATTTTCAT

>PGSC0003DMG400033632LRR-RLPs\_2666

CAATTCTTATGGGATATGGGAGTGGACTTATCATTGGACTCTTCATAGCATATTTTCATGCTTTTCGAGTCGA  
AATTCCAATTGGCTTTCTAGGATCACTGAAGAACTAGAATACAGAATCG

>PGSC0003DMG400033632LRR-RLPs\_2728

TCGAGTCGAAATCCAATTGGCTTTCTAGGATCACTGAAGAACTAGAATACAGAATCGCTATGAGAAGG  
CGAAAAAAGAAGCAGCAGCAAGGCCGTCAAAGGCAGCACTAAGAATCCAGT

>PGSC0003DMG400033632LRR-RLPs\_2790

GAGAAGGCGAAAAAAGAAGCAGCAGCAAGGCCGTCAAAGGCAGCACTAAGAATCCAGTTGGTGGAAAT  
GCCCCATTGGAGATGCAATATGATGCTTGTGTTTGGTGTGGTGGATTATGAAT

>PGSC0003DMG400033632LRR-RLPs\_2852

GGAATGCCCCATTGGAGATGCAATATGATGCTTGTGTTTGGTGATGGTGGATTATGAATTTCAATGTATTC  
ATTGTAGTTTTTTTTTACATTGCACGAATTCAGATTAGTCAGGTCTCTAAT

>PGSC0003DMG400033632LRR-RLPs\_2914

ATGTATTCATTGTAGTTTTTTTTTACATTGCACGAATTCAGATTAGTCAGGTCTCTAATGTGAATATCAGAA  
ACTAAATGAAAAACCAAAAAAATCATGTCTCCTTCTAAATATCATGTC

>PGSC0003DMG400033632LRR-RLPs\_2946

GAATTCAGATTAGTCAGGTCTCTAATGTGAATATCAGAACTAAATGAAAAACCAAAAAAATCATGTCT  
CCTTCTAAATATCATGTCTAATAAGGTCTATCAACAACTCAATATCTTAT

>PGSC0003DMG400033632LRR-RLPs\_310

GCCTGCTTGTTGGGGTGATTGATTCCAATAGCAGCCTATTCCAACCTCTCTCATCTCCAAGACTCAACCTT  
TCTATGAATAACTTTGATGGTTCTCAAATCTCACCTAAATTTGGCAGGT

>PGSC0003DMG400033632LRR-RLPs\_372

CTCAACCTTTCTATGAATAACTTTGATGGTTCTCAAATCTCACCTAAATTTGGCAGGTTTTCAAGCATGAC  
ACATCTTGATCTTTCCCGGTCATATTTCTCAGGTCAAATTCCTTCTGAA

>PGSC0003DMG400033632LRR-RLPs\_434

AAGCATGACACATCTTGATCTTTCCCGGTCATATTTCTCAGGTCAAATTCCTTCTGAAATCTCTCATCTTTC  
CAAGTTAACTCTCTTCTTCTCTCCACACTTTATCTCAATAAGCTAAG

>PGSC0003DMG400033632LRR-RLPs\_496

CTCATCTTTCCAAGTTAACTCTCTTCTTCTCTCCACACTTTATCTCAATAAGCTAAGACTCGCAAGTCATG  
ATTTTAAACCACTCCTTCGGAATTTGACCCAATTAAGAGAGCTTAATC

>PGSC0003DMG400033632LRR-RLPs\_62

TCTCCGTCACAACTTGTTTTCTTCTTCCATATTACCTCATTTGTGTCCCAAACATCAAAGTACCACCCTT  
CTAAAATTCAAGCAGACGTTTACGATAGATACATTTGATATGTGTGG

>PGSC0003DMG400033632LRR-RLPs\_620

ATCCGTAAACATCTCTTCCACCATTCTCCGATTTTTTTCTTCTCATTTAACAACCTTTGAGGTTGGGATGGAC  
AGGATTGTATGGGATAATACCCGAGAGTATTTTCCACTTGCCCAACTT

>PGSC0003DMG400033632LRR-RLPs\_682

TGGGATGGACAGGATTGTATGGGATAATACCCGAGAGTATTTTCCACTTGCCCAACTTGCAAAGACTTG  
ACTTACATCACAATGATCAGCTCAGTGGTTATTTTCCAAGACCAAATGGA

>PGSC0003DMG400033632LRR-RLPs\_744

AGACTTGACTTACATCACAATGATCAGCTCAGTGGTTATTTTCCAAAGACCAAATGGAATAGTAGCGCAT  
CTCTCATAGAGTTAGATCTTACTGACGTGAATTTTTCTGATACTTTACCC

>PGSC0003DMG400033632LRR-RLPs\_806

TAGCGCATCTCTCATAGAGTTAGATCTTACTGACGTGAATTTTTCTGATACTTTACCCGAGTCTCTTGCT  
ATCTAACTTCGTTGCAGTCTTTGTCTCTTCAAAATTGCAACCTTAGAGG

>PGSC0003DMG400033632LRR-RLPs\_930

ATTCCCGAATCTCTTTCAAATCTCACCCACATAGAGTCTTTGTACCTTGGAGTAACTCCCTGAATGGAAC  
AATTCCGTCATGGATATTCTCCCTTCCATCACTAAGTTTAATATACTTG

>PGSC0003DMG400033632LRR-RLPs\_992

GAATGGAACAATTCCGTCATGGATATTCTCCCTTCCATCACTAAGTTTAATATACTTGAGTAATAACCAAT  
TTTCTGGTCAGCTTGAGGATTTCAAGTCCAATTCATTGTCTGGATTTA

>PGSC0003DMG400033667LRR-RLKs\_0

CAATTTGGCATTCTTTTCCACACCTCCAATGTTGACCAAATTTCCAAAATCAACTCATAATTCTAACCCAC  
CTTTTTTTTTTTCATGGAGTTTTCCATTTTCCGACCGGCATCTTCGCG

>PGSC0003DMG400033667LRR-RLKs\_1860

AATATCCCTGATGCATTTGCTAACCTAGCCTTTGAAAACAGTTTCTTGAACAATCCCAGTCTTTGTACCAC  
CAACTCACTTCCATATCTTCCAAGTTGTAATAATGCGAAAGTCGCCAAT

>PGSC0003DMG400033667LRR-RLKs\_3038

TTGGGCTTATATGCACGAGCAATTTACCTGCAAGCAGGCCTTCCATGAAAGAGATTCTGCAGATACTTCA  
TCGATGCAAGTCCTTTAGGTATTCTGGAGGAAAATCACCAGGTACAGAGT

>PGSC0003DMG400033667LRR-RLKs\_62

CTAACCCACCTTTTTTTTTTTCATGGAGTTTTCCATTTTCCGACCGGCATCTTCGCGGAAAACAGTTCCT  
CTATCTCATTATTCTACTAACTTCATACCCATTTTCGTAACCTCACA

>PGSC0003DMG400033670LRR-RLPs\_5033

GAATAATTTTAAAGACAATCTACACATTATTATATATTACTTTATCAAACAAAGATTCTCTACCTCAAAAAT  
GAGTCAAACAGAATCTTAAATAACTTAATTTTCTGAAAATAGTCTGAT

>PGSC0003DMG400033670LRR-RLPs\_671

CATCCGCCAAGGGTGAGTTAAAAAAAAGTGTAGTTTAGACGTTAGAAATGCTTATTTAAGTCCTTTATT

TTTTATGAAAAAATGTTTATAGACACTTTTTTTTTAAAATTTAATATAT

>PGSC0003DMG400033670LRR-RLPs\_732

TCCTTTATTTTTTATGAAAAAATGTTTATAGACACTTTTTTTTTAAAATTTAATATATAATCACTTTATTTT

CAATTTTAGCACTTCAACTCAAACATCTGAATGGTGCTTATTTATTA

>PGSC0003DMG400033670LRR-RLPs\_793

TCACTTTATTTTCAATTTTAGCACTTCAACTCAAACATCTGAATGGTGCTTATTTATTAACCAGCTCCCCC

ACATGAAAAGTATTTCTCAGCACTAATAGTATGAAATACTTATAATAC

>PGSC0003DMG400033914LRR-RLKs\_0

CTGGCAAGTGAGGCCAAAGTGACCACAATACATGTCCATGTCAGTGGCCACTACCTTCTAACCTGCCCG

GAGAAATTCAACTCTGCGAACTGACACACGCATAGGCATCGGTGTTTCTTT

>PGSC0003DMG400033914LRR-RLKs\_1037

ACTTGCATCTCTACAGTTCTTGATCTTAGCTTCTGTTCAATAACTGGTGCTATTCCTTCAACTATTGGTAA

TTTGAGAAGTTTAGCTGTTTTATACATATCTAATAATGGTCTTAGTGG

>PGSC0003DMG400033914LRR-RLKs\_1098

ACTATTGGTAATTTGAGAAGTTTAGCTGTTTTATACATATCTAATAATGGTCTTAGTGGAAATGGTGCCTC

AAGTTTGAGTCAATTGTTAAGTCTTTCAGTTCTTGATGTTTCACACAAT

>PGSC0003DMG400033914LRR-RLKs\_1159

TGGTGCCTTCAAGTTTGAGTCAATTGTTAAGTCTTTCAGTTCTTGATGTTTCACACAATGCACTTGGTGGG

TCAATTCCTGCATCATTGGGTCTCTGGGAATCTTACTTTGCTTGATA

>PGSC0003DMG400033914LRR-RLKs\_122

TTTGGCACAACCTGGGGGAAAACACCGGGCAAACCACCCCTTTTAATTAATCTTCTGATTACAGAAGTG

GTTTAGGGTTGGGATGGGAATCGTGTGCAGTTCTCAGCTCCACACCCCG

>PGSC0003DMG400033914LRR-RLKs\_1220

ACTTGGTGGGTCAATTCCTGCATCATTGGGTCTCTGGGAATCTTACTTTGCTTGATATGTCTTCAAATG

TTTTGTCTGGGGCTATTCCTCCTGTAATTGGGACTTTATCTCAGTTGAA

>PGSC0003DMG400033914LRR-RLKs\_1281

TCTTCAAATGTTTTGTCTGGGGCTATTCCTCCTGTAATTGGGACTTTATCTCAGTTGAAATCTTGAATCTT

TCTCGGAATATGTTGTATGGGAATCTGCCGCCTGTAATTGGGAGATTC

>PGSC0003DMG400033914LRR-RLKs\_1342



TCTTGAATCTTTCTCGGAATATGTTGTATGGGAATCTGCCGCCTGTAATTGGGAGATTGAGTTTTCTTGAT  
ATATCAAACAACACTATTTTCAAGGCAAAGTTCCTCAGTACTGGCAAAGCA

>PGSC0003DMG400033914LRR-RLKs\_1403

TTTTCTTGATATATCAAACAACACTATTTTCAAGGCAAAGTTCCTCAGTACTGGCAAAGCAATGTGACCCTTA  
ATAGAAATTGCCTACAAAGATTGGAAAGTCAAAGGGATACAAGAGAATG

>PGSC0003DMG400033914LRR-RLKs\_1464

GTGACCCTTAATAGAAATTGCCTACAAAGATTGGAAAGTCAAAGGGATACAAGAGAATGTGCATCTTTC  
TATGATGAGCGGGGCTTGATATTTGACAATTTTGAATGCCTAATGCTATG

>PGSC0003DMG400033914LRR-RLKs\_1525

CATCTTTCTATGATGAGCGGGGCTTGATATTTGACAATTTTGAATGCCTAATGCTATGGAGCTTCCGGT  
TCTTATATCTGAAAAGAAGAGTCCCAAAAATGTGATCATATCAGCTGCTG

>PGSC0003DMG400033914LRR-RLKs\_1586

GCTTCCGGTTCTTATATCTGAAAAGAAGAGTCCCAAAAATGTGATCATATCAGCTGCTGTTCTAGGGGTT  
GTCGGATTTATTGCTACTGTGATGCTCTTTGTAGTGCTGCTGATTTGTTG

>PGSC0003DMG400033914LRR-RLKs\_1647

CTAGGGGTTGTCGGATTTATTGCTACTGTGATGCTCTTTGTAGTGCTGCTGATTTGTTGCTGCAAGAGGG  
GCGTGACGAATCAAAGGGTCACTGGTGTAGGGCCTGTTCTACTACTGCA

>PGSC0003DMG400033914LRR-RLKs\_1708

GCAAGAGGGGCGTGACGAATCAAAGGGTCACTGGTGTAGGGCCTGTTCTACTACTGCAAGTCCTCCCC  
CACCTCCAGGACCATCATTGAAATTTTCAAGTTTAGGAGTAGCATTAACT

>PGSC0003DMG400033914LRR-RLKs\_1769

TCCTCCCCACCTCCAGGACCATCATTGAAATTTTCAAGTTTAGGAGTAGCATTAACTACCAGCAGATCC  
TTCAAACAGCCGGTCATTTCAAGTGTGATAATCTTATTAAGCATGGACA

>PGSC0003DMG400033914LRR-RLKs\_183

ACAGAAGTGGTTTAGGGTTGGGATGGGAATCGTGTGCAGTTCTCAGCTCCACACCCCCGTGTGACAACT  
TAGCTTATGCTTTTGCTTTTAAATCACTATGTTTCCTTTTGAATATCCGAT

>PGSC0003DMG400033914LRR-RLKs\_1830

CAGCAGATCCTTCAAACAGCCGGTCATTTCAAGTGTGATAATCTTATTAAGCATGGACATTCAGGTGATA  
TTTTCCGTGGAATCCTGAAAGGTGGAGTTCATGTAGTAGTAAAAGAATT

>PGSC0003DMG400033914LRR-RLKs\_1891

CAGGTGATATTTTCCGTGGAATCCTGAAAGGTGGAGTTCATGTAGTAGTAAAAGAATTGATTCCAGCTC  
AGTAAAAAGGAAGCATACTTGTTAGAATTGGACTTCTTCAGCAAAGTTT

>PGSC0003DMG400033914LRR-RLKs\_1952

TTCCAGCTCAGTAAAAAGGAAGCATACTTGTTAGAATTGGACTTCTTCAGCAAAGTTTCTCATTCTAGA  
GTAGTCCCTTTTCTGGGACATTGTTTAGAGAGTGAAAATGAAAAGTTTCT

>PGSC0003DMG400033914LRR-RLKs\_2013

CATTCTAGAGTAGTCCCTTTTCTGGGACATTGTTTAGAGAGTGAAAATGAAAAGTTTCTGGTATACAAAT  
ATATGCCAAATGGAGATCTCTCTAGTTCTTTGTTAAGAAAAACAATGCA

>PGSC0003DMG400033914LRR-RLKs\_2074

TATACAAATATATGCCAAATGGAGATCTCTCTAGTTCTTTGTTAAGAAAAACAATGCAGATGATGATAG  
TTTGCAGTCACTTGATTGGATAACGAGACTGAAAATCGCTATTGGAGTTG

>PGSC0003DMG400033914LRR-RLKs\_2135

TGATGATAGTTTGCAGTCACTTGATTGGATAACGAGACTGAAAATCGCTATTGGAGTTGCTGAGGGTTT  
GTCTTATCTGCATCATGAATGTAATCCACCTCTTGTCACAGGTATTTTAG

>PGSC0003DMG400033914LRR-RLKs\_2196

GAGGGTTTGTCTTATCTGCATCATGAATGTAATCCACCTCTTGTCACAGGTATTTTAGAGCTTGTTGTGA  
TGCATTACTTACTTCCACTTATCACGCTTAATCTGACAACTTTTAAA

>PGSC0003DMG400033914LRR-RLKs\_2257

CTTGTTGTGATGCATTACTTACTTCCACTTATCACGCTTAATCTGACAACTTTTAAATTGCAGTAACAAA  
CCAAATCTATTATCTTTATACTGCCTATCTGAATCATAAGTTATCATT

>PGSC0003DMG400033914LRR-RLKs\_2318

GCAGTAACAAACCAAATCTATTATCTTTATACTGCCTATCTGAATCATAAGTTATCATTGTGATGGGACAC  
TTGATCATGAATCTTGGAAGAGTAGTTGCATATTCCTCTACATATGTTT

>PGSC0003DMG400033914LRR-RLKs\_2379

GATGGGACACTTGATCATGAATCTTGGAAGAGTAGTTGCATATTCCTCTACATATGTTTCTTTGGTTGTA  
GACTTTTGGCGAATTAGCATAATAAATGATATGCATGTTTTATTAATACA

>PGSC0003DMG400033914LRR-RLKs\_244

TGACAACTTAGCTTATGCTTTTGTCTTTAAATCACTATGTTTCCTTTTGAATATCCGATGTGGGACAAAGA

GGCCATTAAAGTGATTTTGTATTGCATTATGAAGTGAAGGCTGTATTTT

>PGSC0003DMG400033914LRR-RLKs\_2440

TTGGTTGTAGACTTTTGGCGAATTAGCATAATAAATGATATGCATGTTTTATTAATACATGATATTTTCAGA  
AAATTAATCATCCATTATTCATGAAAGATGAAGTGCTTAAGTTTCCT

>PGSC0003DMG400033914LRR-RLKs\_2501

ATATTTTCAGAAAATTAATCATCCATTATTCATGAAAGATGAAGTGCTTAAGTTTCCTCCATACTAATTG  
GCGTCACTGAAAAGCCTCTTCTTACTGATAAAATTTGGCCAAGTTAAT

>PGSC0003DMG400033914LRR-RLKs\_2562

ATACTAATTGGCGTCACTGAAAAGCCTCTTCTTACTGATAAAATTTGGCCAAGTTAATGCTGGCACCAT  
TTTGTACTTCATGAATTTCAACTGTCTATCAGTGCCAATTAGGTCAATAC

>PGSC0003DMG400033914LRR-RLKs\_2623

TGGCACCATTTTGTACTTCATGAATTTCAACTGTCTATCAGTGCCAATTAGGTCAATACTATAAGAGACAT  
GAGTGAAAGATATAAGCTAGAGCTGGATGGTTTGGCAATTAATATACT

>PGSC0003DMG400033914LRR-RLKs\_2684

TAAGAGACATGAGTGAAAGATATAAGCTAGAGCTGGATGGTTTGGCAATTAATATACTCTGAGGTGTT  
CTTTTTTTGGAECTAAGTGGCCACATGATACAAACCGGAGCTGGATATTTA

>PGSC0003DMG400033914LRR-RLKs\_2745

GAGGTGTTCTTTTTTTGGAECTAAGTGGCCACATGATACAAACCGGAGCTGGATATTTAGCAATTATATA  
CAATCCAAAAGTCTTAGCAGTGATCTAAAAGCTTGCTAGGACACATG

>PGSC0003DMG400033914LRR-RLKs\_2806

AATTATATACAATCCAAAAGTCTTAGCAGTGATCTAAAAGCTTGCTAGGACACATGAATTGGGCAAA  
TCCAATCATAAACTATTTACAGAAAATATGAAACCAAACCTTTGTCTTGAG

>PGSC0003DMG400033914LRR-RLKs\_2867

TTGGGCAATCCAATCATAAACTATTTACAGAAAATATGAAACCAAACCTTTGTCTTGAGATACCCCTGTTA  
CAACTACAAGAGTAAGGGTGAATAGAATAAGTCCTTTACTCTTTTGGC

>PGSC0003DMG400033914LRR-RLKs\_2928

ACCCCTGTTACAACCTACAAGAGTAAGGGTGAATAGAATAAGTCCTTTACTCTTTTGGCCGTGTACTT  
CACAATCTGGGCTAACTACTCCAGACGTACTGAGTGAAACCTAATGAC

>PGSC0003DMG400033914LRR-RLKs\_2989

TGTATTACTTCACAATCTTGGGCTAACTACTCCAGACGTACTGAGTGAAACCTAATGACAAAAAACTCC  
TATTGGCAACTCGGTCTAAATTTTGACAAAACCTCTATCACTGCCATCTT

>PGSC0003DMG400033914LRR-RLKs\_305

GGGACAAAGAGGCCATTAAAGTGATTTTGTATTGCATTATGAAGTGAAGGCTGTATTTTGTCTCTTTGA  
CTGCCTCTGTTTTATCCAACCTCCATCGAAGTGGGAGCTTACACACTGT

>PGSC0003DMG400033914LRR-RLKs\_3050

AAAACTCTATTGGCAACTCGGTCTAAATTTTGACAAAACCTCTATCACTGCCATCTTTCCTGAACAACT  
TGGATCACAGCCCAAATGTTAACCTTCTTCGGAATTGTCCTTTTTAGA

>PGSC0003DMG400033914LRR-RLKs\_3111

CTGAACAACTTGGATCACAGCCCAAATGTTAACCTTCTTCGGAATTGTCCTTTTTAGAAAAGATTTCTAT  
TTAATTTTCTCATATTGTTTCATCAGAAGCTTGTAGAGAATGATAACTC

>PGSC0003DMG400033914LRR-RLKs\_3172

AGATTTCTATTTAATTTTCTCATATTGTTTCATCAGAAGCTTGTAGAGAATGATAACTCAATGAACAACTT  
TGTGGATTTAATAACATGTCTGGTTGTTTGAATTGATCCAGTATGTAG

>PGSC0003DMG400033914LRR-RLKs\_3233

TGAACAACTTTGTGGATTTAATAACATGTCTGGTTGTTTGAATTGATCCAGTATGTAGATAAATAGCAA  
AATATCAGATGACAGCTGCGACAATTAGCTTCATGAAATTTTACAAAGAC

>PGSC0003DMG400033914LRR-RLKs\_3294

AAATAGCAAAATATCAGATGACAGCTGCGACAATTAGCTTCATGAAATTTTACAAAGACAAAGAAAAGG  
AATAGACAAGACTTCATCCTTGTTTTGCTCTTCATTATATGTTCTCTATGT

>PGSC0003DMG400033914LRR-RLKs\_3355

AGAAAAGGAATAGACAAGACTTCATCCTTGTTTTGCTCTTCATTATATGTTCTCTATGTGTTATTCACGTG  
CAATAAATTACAAATTTTCCATAACAAGACGATTTGGCCAATGAGGGGC

>PGSC0003DMG400033914LRR-RLKs\_3416

TATTCACGTGCAATAAATTACAAATTTTCCATAACAAGACGATTTGGCCAATGAGGGGCCATGGTTATGT  
ACACTTGTACTAGCTATTCTCTCTAGTTGCATGCATGTCTATTTCCACTT

>PGSC0003DMG400033914LRR-RLKs\_3477

TGGTTATGTACACTTGTACTAGCTATTCTCTCTAGTTGCATGCATGTCTATTTCCACTTTAGCAAGTTCTGG  
TTTCTTCTAGATTCTATATCTAGTGACATGGCTTAAGGTTCACTGTTA

>PGSC0003DMG400033914LRR-RLKs\_3538

GCAAGTTCTGGTTTCTTCTAGATTCTATATCTAGTGACATGGCTTAAGGTTCACTGTTACTAGATCTCTTA  
CTGCTCTAGCATATTAATAATTTATTTCTGAAACTACGGCGAATTGAGGT

>PGSC0003DMG400033914LRR-RLKs\_3599

AGATCTCTTACTGCTCTAGCATATTAATAATTTATTTCTGAAACTACGGCGAATTGAGGTAGCTTTGCTTAT  
TAATTTTTTGAAGACTTTCTAACATCGAGGTCTTCTTGTGTTTGACATG

>PGSC0003DMG400033914LRR-RLKs\_3660

CTTTGCTTATTAATTTTTTGAAGACTTTCTAACATCGAGGTCTTCTTGTGTTTGACATGGGTGCCGCTTTTG  
ATACTGAGATTTTATGAGATCGCTAAACTTGTTTAGTTGAGTACTAGC

>PGSC0003DMG400033914LRR-RLKs\_3721

TGCCGCTTTTGATACTGAGATTTTATGAGATCGCTAAACTTGTTTAGTTGAGTACTAGCTGGTAAATATGT  
TAGGTAGGTCATTTAGAAATCTCATAATGTAGAAGTGACCTTTTCTTAT

>PGSC0003DMG400033914LRR-RLKs\_3782

GTAAATATGTTAGGTAGGTCATTTAGAAATCTCATAATGTAGAAGTGACCTTTTCTTATTTTTTCATCAA  
GGATTTCTAATAGGATAGCACTTTGACTGACTTTTTTCATTTTAAAACA

>PGSC0003DMG400033914LRR-RLKs\_3843

TTTCATCAAAGGATTTCTAATAGGATAGCACTTTGACTGACTTTTTTCATTTTAAAACATCAGCATAGCTC  
CTTGACATATCACATACTCGTGATAAACTATGTACAGATTGATTGAGCT

>PGSC0003DMG400033914LRR-RLKs\_3904

AGCATAGCTCCTTGACATATCACATACTCGTGATAAACTATGTACAGATTGATTGAGCTGGTATAACCGT  
GACTATCAAATTTATTTCTTGGATTTCTTTGTACTTCAGTAGACCCATC

>PGSC0003DMG400033914LRR-RLKs\_3965

TATAACCGTGACTATCAAATTTATTTCTTGGATTTCTTTGTACTTCAGTAGACCCATCGAGCTTCTTTCTG  
AAGTTAGTTTGAATATTTACTAAACTTGCAAACAGGTTTAGATATCA

>PGSC0003DMG400033914LRR-RLKs\_4026

GCTTCTTTCTGAAGTTAGTTTGAATATTTACTAAACTTGCAAACAGGTTTAGATATCACCATGATTTATG  
TCCATTTCTTCTTCCAATTTAATCATCTTCCAATTTAATCATGAAT

>PGSC0003DMG400033914LRR-RLKs\_4087

ATGATTTATGTCCATTTCTTCTTCCAATTTAATCATCTTCCAATTTAATCATGAATGACTCTATTTTAC

TATAGGTTACTACACTTTTCCTCAAGCTGTTCAACCACATTTTTTCAGT

>PGSC0003DMG400033914LRR-RLKs\_4148

ACTCTATTTCACTATAGGTTACTACACTTTTCCTCAAGCTGTTCAACCACATTTTTTCAGTTAAGTATTATTTTT  
TTTATGTGGCAACTAGAATTTCTTAAGCCAGCATGCATAAATAATTA

>PGSC0003DMG400033914LRR-RLKs\_4209

AGTATTATTTTTTTTATGTGGCAACTAGAATTTCTTAAGCCAGCATGCATAAATAATTATATTCTTATCTTC  
TCTCTGTTTCTTTTCCACCATACCACGTGGTAGACAAAAGATGGTCTA

>PGSC0003DMG400033914LRR-RLKs\_427

AAAAGTAGAAAATGGAGAGGTTTCGCGCTTAACTACTTCTCCCTCCCCTTTTCACTATTTTTAAGTATTTTC  
CTCTGTCACCCATCAACTGAAAGAAAAGAATAACCCAACTATTATAGCA

>PGSC0003DMG400033914LRR-RLKs\_4270

TTCTTATCTTCTCTCTGTTTCTTTTCCACCATACCACGTGGTAGACAAAAGATGGTCTAAGCTGGAACCTCC  
CAAACGCCTCATAATAGACCATACTTAAGGTAGTGCATGAAAAGGAGA

>PGSC0003DMG400033914LRR-RLKs\_4331

CTGGAACCTCCCAAACGCCTCATAATAGACCATACTTAAGGTAGTGCATGAAAAGGAGAAACCAATTGC  
ACAAATTTCTGCATTTTCCCTGAGCTATATCAGTGAACGTAAAAAAGACG

>PGSC0003DMG400033914LRR-RLKs\_4392

CCAATTGCACAAATTTCTGCATTTTCCCTGAGCTATATCAGTGAACGTAAAAAAGACGGATTTTATACTA  
TTCTTAATGGTTACATTGTCTTTCTGCTGCATTGCAGATGAAAATTCAC

>PGSC0003DMG400033914LRR-RLKs\_4453

TTTTATACTATTCTTAATGGTTACATTGTCTTTCTGCTGCATTGCAGATGAAAATTCACATAATCTCGGTTA  
TATAATTTATGCCTTGGGGTACTATGGTGAAACACCTTTTTTGAACCT

>PGSC0003DMG400033914LRR-RLKs\_4514

AATCTCGGTTATATAATTTATGCCTTGGGGTACTATGGTGAAACACCTTTTTTGAACCTTGTCTTGCTATA  
TTTACAGAGATGTCCAAGCAAGCAGCATACTTCTTGATGATAAATATGA

>PGSC0003DMG400033914LRR-RLKs\_4575

TCTTGCTATATTTACAGAGATGTCCAAGCAAGCAGCATACTTCTTGATGATAAATATGAAGTACGGTTAG  
GGAGTTTGAGTGAGGTCTGTGCACAAGAAGGAGACACCCATCAAAACAAG

>PGSC0003DMG400033914LRR-RLKs\_4636

TACGGTTAGGGAGTTTGAGTGAGGTCTGTGCACAAGAAGGAGACACCCATCAAAACAAGATTTCCAGG  
ATGTTGCGGCTGCCACAGTGAGTAGTTGTTGCTTTTCTTTTCATTTTATTTT

>PGSC0003DMG400033914LRR-RLKs\_4673

AGGAGACACCCATCAAAACAAGATTTCCAGGATGTTGCGGCTGCCACAGTGAGTAGTTGTTGCTTTTCT  
TTCATTTTATTTTATATGACAATATCTTTATTTGGGATTGAGGCATAAGT

>PGSC0003DMG400033914LRR-RLKs\_488

TAAGTATTTCTCTGTACCCATCAACTGAAAGAAAAGAATAACCCAACTATTATAGCACTTGTATACTTT  
TCAAGAGGAAGAATCAAACCCAGACCTTCTGATTAGTACAACGCTGA

>PGSC0003DMG400033914LRR-RLKs\_549

TGTATACTTTTCAAGAGGAAGAATCAAACCCAGACCTTCTGATTCAGTACAACGCTGAATGATAAGCAG  
TGGGGTTTTGCCTCACTTGTATTCATATTTGTATACCCCAAACCTTCACA

>PGSC0003DMG400033914LRR-RLKs\_61

CCTGCCCGGAGAAATCAACTCTGCGAACTGACACACGCATAGGCATCGGTGTTTCTTTGTTTGGCACA  
ACTGGGGGAAAACACCGGGCAAACCACCCCTTTTAATTAATCTTCTGA

>PGSC0003DMG400033914LRR-RLKs\_610

GATAAGCAGTGGGGTTTTGCCTCACTTGTATTCATATTTGTATACCCCAAACCTTCACAAGTTTCAATGAA  
GGTTCAGCAAAAATGAGGCACCAACTGGGTTACCTTTCTTTCCTCCTTT

>PGSC0003DMG400033914LRR-RLKs\_671

TTTCAATGAAGGTTTCAGCAAAAATGAGGCACCAACTGGGTTACCTTTCTTTCCTCCTTTTCTTGCTTTTCA  
TTCTACATTCCAGCAGCACGAAGATAGATTGGCTTTACTTCAATTGAG

>PGSC0003DMG400033914LRR-RLKs\_732

TTGCTTTTTCATTCTACATTCCAGCAGCACGAAGATAGATTGGCTTTACTTCAATTGAGATCGTCTTTAGG  
ATTGAGAGCCAGAGAGTGGCCTATTAAGGGTACCCCTTGTTCAAATTGG

>PGSC0003DMG400033914LRR-RLKs\_793

CGTCTTAGGATTGAGAGCCAGAGAGTGGCCTATTAAGGGTACCCCTTGTTCAAATTGGAGAGGTATTT  
CTTGCAACAATGGTAGAGTTACTGGGATTAACATTTCTGGTTTTAAGCGAA

>PGSC0003DMG400033914LRR-RLKs\_854

AGGTATTTCTTGCAACAATGGTAGAGTTACTGGGATTAACATTTCTGGTTTTAAGCGAACACGAACTGGG  
AATCAAAATCCTCAATTCTTGGTTGATTCCCTTCAAATTTGACTCTGTT

>PGSC0003DMG400033914LRR-RLKs\_915

CGAACTGGGAATCAAAATCCTCAATTCTGGTTGATTCCCTTCAAATTTGACTCTGTTGGAGTCATTTAA  
TGCATCTAATTTTGCACCTTCTGGGTTCTATTCCTGATTGGTTTGGCATT

>PGSC0003DMG400033914LRR-RLKs\_976

AGTCATTTAATGCATCTAATTTTGCACCTTCTGGGTTCTATTCCTGATTGGTTTGGCATTGGACTTGCATCTC  
TACAGGTTCTTGATCTTAGCTTCTGTTCAATAACTGGTGCTATTCCTT

>PGSC0003DMG400034859G-LecRK\_1178

ATTTGAAAGGTGAAGTAGTTAATTGTTGTGTAGGTTTGATTATTTACACAGAAACATCAATTAATAGAAT  
TCCCATATTAGTGCTTGATTAAGTGGTTCATCGCAAATTGATGTTTGAAG

>PGSC0003DMG400034859G-LecRK\_124

AAGATATACTGAGAACAACAGTATGGATTTCATAAGCCCAACAGTACAGTTCCTTACTAGTACTGAAGCT  
CCTTGATTCAGGTAATCTTGTGTTTAGAGATTCTAGCAATCTGACGGCTG

>PGSC0003DMG400034859G-LecRK\_1240

AATAGAATTCCCATATTAGTGCTTGATTAAGTGGTTCATCGCAAATTGATGTTTGAAGCATTAGATTGAA  
TGTTGTCACATAATTGCTACACAATCGAGCATAAGATGAAACAACCCTGC

>PGSC0003DMG400034859G-LecRK\_1302

AGATTGAATGTTGTCACATAATTGCTACACAATCGAGCATAAGATGAAACAACCCTGCATGCATCTAGTT  
ATTCTTATTACAAAATCTTTAACATAATGAGCAAATACCTCTAGAATTCC

>PGSC0003DMG400034859G-LecRK\_1364

ATCTAGTTATTCTTATTACAAAATCTTTAACATAATGAGCAAATACCTCTAGAATTCCTATAAAGTTTATGT  
CAAATCTGAAGCCTAATTTTATGAGTAAGAAACAATAACTTAACTTTTAA

>PGSC0003DMG400034859G-LecRK\_1426

AAGTTTATGTCAAATCTGAAGCCTAATTTTATGAGTAAGAAACAATAACTTTTAACTTTCTTATGGAC  
AGATGCACCTGTTTCCGACAGCAGATGCAAAAATAAATGGACAGTTTTT

>PGSC0003DMG400034859G-LecRK\_1488

CTTATGGACAGATGCACCTGTTTCCGACAGCAGATGCAAAAATAAATGGACAGTTTTTGCTTCTTTAATC  
TCAGAGCTGGCACTACTTATTATTTTCTTATAGCTGTTGTGGTTCTATG

>PGSC0003DMG400034859G-LecRK\_186

CTGAAGCTCCTTGATTCAGGTAATCTTGTGTTTAGAGATTCTAGCAATCTGACGGCTGGAGAGTACCTGT



GGCAAAGCTTTGACCACCCAGTTGACACATTGTTACCAAGAATGAAGCTT

>PGSC0003DMG400034859G-LecRK\_1922

AATTTTTCGCTGGCTAATAAGATAGGGCATGGTGGCTTTGGCAATGTTTATAAGGTTATTATTTCTTTTCG

ACAAGCATGAAAATGCATATTTACAGTAACTCAGACAACAAAATTAATA

>PGSC0003DMG400034859G-LecRK\_1984

TTCTTTTCGACAAGCATGAAAATGCATATTTACAGTAACTCAGACAACAAAATTAATACCTAAATGATAC

ATCTGTAGGGTGTACTAGAGAATGGAGTAGAAATAGCAGTGAAGAAGCAG

>PGSC0003DMG400034859G-LecRK\_2232

TGAGTTCATGGCGAATAATAGCCTAGACAAGGTCATATTTGGTATGACATCTTAAATAACATTCTTCTTTT

TTACTATTGTCTGTGTTGTTTTGATATTGGAAAAGCCACAAAAGACAGA

>PGSC0003DMG400034859G-LecRK\_248

GTACCTGTGGCAAAGCTTTGACCACCCAGTTGACACATTGTTACCAAGAATGAAGCTTGGCTGGGACAA

GAAAACCTGGCATCGACCGATCCATAAGGTCCTGGAGGACAGAAGGTGATCC

>PGSC0003DMG400034859G-LecRK\_2666

GTTTATGTATATTTTAGAGTTTTTACAGATGGTTTTATGTTGTGGTTGTAGTGGTAATTATATGCCTCCTG

AGTACATGAAAAATGGACATTATTCAACAAAACAGACGTTTTTATGTTTT

>PGSC0003DMG400034859G-LecRK\_2728

TGCCTCCTGAGTACATGAAAAATGGACATTATTCAACAAAACAGACGTTTTTATGTTTTGGAATCCTGGCA

TTGGAGATGTGAGTGGCCAAAAGAATTATGATTATCGGCACCCAGTCTAT

>PGSC0003DMG400034859G-LecRK\_2790

TCCTGGCATTGGAGATGTGAGTGGCCAAAAGAATTATGATTATCGGCACCCAGTCTATGATATTGGTCTA

GTAGACTATGTAAGTACATCATCGATCCCCTGGTTATCGTCATTACTTCA

>PGSC0003DMG400034859G-LecRK\_2852

TTGGTCTAGTAGACTATGTAAGTACATCATCGATCCCCTGGTTATCGTCATTACTTCACTTAAATTGGTTA

CATAGAAGTTTCACCTTGTGCTAAAACAATTTACATGATTGATGATCGA

>PGSC0003DMG400034859G-LecRK\_372

CCAGGTGATTATTTGTTTCAGGTTAGACTCAGGTGACTCAGGTCAGTTACCCCACTAGTTCTTGAGAAAA

ACCAGCGAATACATTCAAGATGGGGTCCTTGGGATGGACAGAAATTCAGT

>PGSC0003DMG400034859G-LecRK\_496

GTTATGCCCTCATGGATAACCATGCATTGACCAATATTTTCATTCCGATACAGATGCGTTTTTTTTTTCAC  
ATTCGAAGCCAAGAACGATTGGAGTTTCAAATTTTCACTGAATCCAGAC

>PGSC0003DMG400034859G-LecRK\_558

TTTTTTCACATTCGAAGCCAAGAACGATTGGAGTTTCAAATTTTCACTGAATCCAGACGGAAAAATACAG  
TTCTTGAGGTGGAATAATGCCTACCAATTACTGGGAGGAAGTGAATACAC

>PGSC0003DMG400034859G-LecRK\_62

AAGAAATCCAGTTAATTGTGGTGCATTGCTAGGACTAGACACAGAAGGAGACATTTTCTCCAAGATAT  
ACTGAGAACAACAGTATGGATTGATAAGCCCAACAGTACAGTTCCTTACT

>PGSC0003DMG400034859G-LecRK\_620

AAATACAGTTCTTGAGGTGGAATAATGCCTACCAATTACTGGGAGGAAGTGAATACACTGAATAAGGAC  
ACATGTGACCAGTATAGAACTTGTGGGCCTTATGGAGTTTGTAGTGATGGA

>PGSC0003DMG400034859G-LecRK\_868

GAATACTGGACTGAAGTGCCTGATAATGCTACTTACTGGGGAATGTTGTACCACCAGGAGTGTGAACA  
GAAGTGCTTAAATGAAAGATCGTGTATGGCTTATACTAACATCAATATCAA

>PGSC0003DMG400034859G-LecRK\_930

GTGAACAGAAGTGCTTAAATGAAAGATCGTGTATGGCTTATACTAACATCAATATCAACGGAAATGGAA  
GCAAATGTGTCGTTTGGTTGGGAAATTTACTTGATATAAGACATTCACAGA

>PGSC0003DMG400034987LRR-RLPs\_0

ATGGATAGAATTTACAGTTACCACCAGAAATCTTCACCAAATACTCTCTCTCTCCAAACTAAAAGTGC  
TGCTCAAACCGCCGTGCTGTCCAAACTATGGCTTAAAGCATGCTATACC

>PGSC0003DMG400034987LRR-RLPs\_1116

TTGGAATCAAAGTACCTATCATGCCCTTTCTTCATTCTATATGGACCCATATTCCTATGTTCTTCCAATG  
TTTACTGTATTACTGGGATTCTATTTACTGAACCATATCAAAGAAGC

>PGSC0003DMG400034987LRR-RLPs\_124

CCCATCTTAATTTGATCAATTTGATTTCTACTTCTTCTGATGAATCTGATTTGACACTTCTGATGATG  
AATCTGATGACGAAGCTGAAATTGAACCACGGCATAGCGATAGTTTCT

>PGSC0003DMG400034987LRR-RLPs\_1364

AGAGAACAAGATGGGGGGGCTTGCCTCCTCGTTCCTTTTAAACGAGTGGGAAGCTTATTCACCTAATA  
AAATATGTCTGCGTGTGTTGAATATTGGTACTTGTGCGCAGAGGCGAATCT

>PGSC0003DMG400034987LRR-RLPs\_1674

CACGGGTGCGGATGCCCTTTTTTTGGCTCTAGATTCGCCACTGCTTGTCGGAATCTGAGAAGAGTAGA  
GTTTGTGGAAGCTGGAATTGATGATATGTTTCTCTTCGAGCTTATACCAA

>PGSC0003DMG400034987LRR-RLPs\_1736

GAGTAGAGTTTGTGGAAGCTGGAATTGATGATATGTTTCTCTTCGAGCTTATACAAAACACTACATTTTCAT  
CAAGGAGTTGATGTTACAGTTTTGTGAGTACTTGAAAGAAATAAATATCT

>PGSC0003DMG400034987LRR-RLPs\_1798

CATTTTCATCAAGGAGTTGATGTTACAGTTTTGTGAGTACTTGAAAGAAATAAATATCTCAAGTTCAACAC  
TCGAGGTTTGTAGTATAGTTAAGTGTGATTTATTAGTACAAGCCATTTTT

>PGSC0003DMG400034987LRR-RLPs\_186

TCTGATGATGAATCTGATGACGAAGCTGAAATTGAACCACGGCATAGCGATAGTTTCTACGAATCTCAT  
GTTGAATTCTCAAGGATGGTAGACAGTATTTTGAAAGATATCGCCGTGAA

>PGSC0003DMG400034987LRR-RLPs\_1860

TTCAACACTCGAGGTTTGTAGTATAGTTAAGTGTGATTTATTAGTACAAGCCATTTTTGATACGCCCAAGT  
TACTCTCCTTAGCCTTCTCCAAACAATGTAAACTACCCTGTTTATCTTT

>PGSC0003DMG400034987LRR-RLPs\_1922

CGCCCAAGTTACTCTCCTTAGCCTTCTCCAAACAATGTAAACTACCCTGTTTATCTTTTCATAAGTGCTTCAA  
GCCAATGCAGAATTTCCATAAAGTATGACACTATAATGGATACCGAGC

>PGSC0003DMG400034987LRR-RLPs\_1984

AGTGCTTCAAGCCAATGCAGAATTTCCATAAAGTATGACACTATAATGGATACCGAGCAGTTGATGAAC  
TTACGGAGATCTCTAGTTGAGTTGCGTGATCAGGTTGTAGATTTGACATTG

>PGSC0003DMG400034987LRR-RLPs\_2046

GATGAACTTACGGAGATCTCTAGTTGAGTTGCGTGATCAGGTTGTAGATTTGACATTGCCTAGTATTGAT  
AAGGATTTGAGATTAGCAAGTAAAATTGATCATCTTCTCCGCCTGAAGT

>PGSC0003DMG400034987LRR-RLPs\_2108

GTATTGATAAGGATTTGAGATTAGCAAGTAAAATTGATCATCTTCTCCGCCTGAAGTTGAGAATTTATC  
ATCTTATTGTCCGAATTCAGCTTATTCATCTTACTTTGATCTCATCTTCT

>PGSC0003DMG400034987LRR-RLPs\_2170

AATTTATCATCTTATTGTCCGAATTCAGCTTATTCATCTTACTTTGATCTCATCTTCTCAATTTGTTGGCCCA

AGAGTTGGATAATACAGTACTGTGACGAAGATTTTGGAGAGTATCTA

>PGSC0003DMG400034987LRR-RLPs\_2232

TTGTTGGCCCAAGAGTTGGATAATACAGTACTGTGACGAAGATTTTGGAGAGTATCTACGTAAACTGTT  
GTTGAAGGAGAAGGAGAGACGATGGAGATTTATCGAATGTACTTGGAAAGA

>PGSC0003DMG400034987LRR-RLPs\_2294

AACTGTTGTTGAAGGAGAAGGAGAGACGATGGAGATTTATCGAATGTACTTGGAAAGAGTATCTCATG  
AATGCTGAGATAGAGTACAAGAAAAGGACACGAAACGATTGGATGACTCTTG

>PGSC0003DMG400034987LRR-RLPs\_2356

CTCATGAATGCTGAGATAGAGTACAAGAAAAGGACACGAAACGATTGGATGACTCTTGATAGGAAAAT  
GTTGGCAGCTGACTCTCGTATTTTTGATGAGATTAATACAATGTGCTTCAAG

>PGSC0003DMG400034987LRR-RLPs\_2404

ATGACTCTTGATAGGAAAATGTTGGCAGCTGACTCTCGTATTTTTGATGAGATTAATACAATGTGCTTCA  
AGCAAACCTCAAAGAAGAGAGAAGCATAAATATTCTTGCATTTCCAGGTAA

>PGSC0003DMG400034987LRR-RLPs\_248

ATCTCATGTTGAATTCTCAAGGATGGTAGACAGTATTTTGGAAAGATATCGCCGTGAAAATCTACCGATT  
TCAGATTTTAACCTTCGTATCTTTTTCCGATCAAACCTGATTGTGAAGG

>PGSC0003DMG400034987LRR-RLPs\_310

TACCGATTTTCAGATTTTAACCTTCGTATCTTTTTCCGATCAAACCTGATTGTGAAGGTCTAGTCGATAAA  
TGGTTAGATATTATAACAGAGACAAGGGCTTCACAGGTAACACTTTTTGG

>PGSC0003DMG400034987LRR-RLPs\_372

GTCGATAAATGGTTAGATATTATAACAGAGACAAGGGCTTCACAGGTAACACTTTTTGGTGGAAAGCAAA  
ACCGAAGATTATTCCGAAAGATATACTCTGTTAGCTGATTCTATCTTCGCA

>PGSC0003DMG400034987LRR-RLPs\_434

AAGCAAACCGAAGATTATTCCGAAAGATATACTCTGTTAGCTGATTCTATCTTCGCAATAGAATCGTTG  
CAGCAGTTGGAGCTAAATCACTGCAAATACTGAAAAGGAGAACTACT

>PGSC0003DMG400034987LRR-RLPs\_496

AATCGTTGCAGCAGTTGGAGCTAAATCACTGCAAATACTGAAAAGGAGAACTACTTTCCGAAGATG  
AAATTAGGTGCATTCACCTAAAAAATCTCACATTGCAATTTGTTACTGTTT

>PGSC0003DMG400034987LRR-RLPs\_558

GAAGATGAAATTAGGTGCATTCACCTAAAAAATCTCACATTGCAATTTGTTACTGTTTCTGAATCAACACT  
CAACACTCTAATTTTCATGTTGCCCTCGGATTGAGACGATATCACTTCAA

>PGSC0003DMG400034987LRR-RLPs\_62

TAAAACTGCTGCTCAAACCGCCGTGCTGTCCAAACTATGGCTTAAAGCATGCTATACCAATCCCCATCTTA  
ATTTTGATCAATTTGATTTCTACACTTCTTCTGATGAATCTGATTTCGA

>PGSC0003DMG400034987LRR-RLPs\_620

ATCAACACTCAACACTCTAATTTTCATGTTGCCCTCGGATTGAGACGATATCACTTCAATACTGTATCGGGT  
TCAATTGCATTCGTGTTACAAAAAGTCTTCATAACCTTTTGTCTCTTAG

>PGSC0003DMG400034987LRR-RLPs\_682

GTATCGGGTTCAATTGCATTCGTGTTACAAAAAGTCTTCATAACCTTTTGTCTCTTAGTATCTTGTCTCTGTC  
AAATTGAGGAAGTTCATATTTTCGATGCACCAAATGTGTCCTGGTTT

>PGSC0003DMG400035141LRR-RLPs\_1116

TAAAAGCATTAAATGTTTCATTTAATGATTTAGAAGGTGAAATACCGAGTGGTGGAGTGTTTGCAAATTC  
ACTCTGCAATCATTTCTTCGGAACAAAGGTCTTTGCGGAATACACATATT

>PGSC0003DMG400035141LRR-RLPs\_124

AGCTCAACGGAAGTATACCAACAAGTCTATTTCAACACCAAGGAGTTCAAGTAATTTTCATTGGCTTTCAA  
TGAACTCGGTGGTCAAATGTGGAAAGGCCTATGGTATGTACCCGAACTCA

>PGSC0003DMG400035141LRR-RLPs\_1302

AATTGTTACTCCAGTGGTTATTGCATCCTTTTTGATATTCTTGTTGGTTTTAATTTGGATTAATTGAAACTA  
ACAGAAGAAAGGAAAGTCCAAAGTATGTTGAACAGGTACTGGAGATCG

>PGSC0003DMG400035141LRR-RLPs\_1364

ATTGAAACTAACAGAAGAAAGGAAAGTCCAAAGTATGTTGAACAGGTACTGGAGATCGGGACTCGTCA  
TTTAGTTTCTTATCACGAGATTCAACGAGCAACAAATAATTTTGATGAATCC

>PGSC0003DMG400035141LRR-RLPs\_186

GCTTTCATGAACCTCGGTGGTCAAATGTGGAAAGGCCTATGGTATGTACCCGAACTCAGAGTCTTGAT  
CTCACCAACAATAACCTCACGGGTATGATCCCTCCTTCTGTTGGAAATGCC

>PGSC0003DMG400035141LRR-RLPs\_372

AATCTGAGCCAGCTTGCATTTTTGACTTGTTCGATAATCAATTAACAGGTTCCATTCCCGCAACACTGTT  
TAATATGTCGTCACTATTTGTCCTATCTCTGGGAAATAATATCCTTTCT

>PGSC0003DMG400035141LRR-RLPs\_496

CTCTCTTGGTAGATGAAGGGAACATTGTCTCAAATATGAACGTTGTAAGTATATCTCTCAATCAAATTTCT  
GGTTGCATTCTTCCAACATGTGCCAACTCACAGACCTCAAACCTTTTGT

>PGSC0003DMG400035141LRR-RLPs\_558

CAAATTTCTGGTTGCATTCTTCCAACATGTGCCAACTCACAGACCTCAAACCTTTTGTCCATATCATTCAAC  
AACATAACTGGAGACATACCCAGAAATATTGATTGTTTATCCAAACTC

>PGSC0003DMG400035141LRR-RLPs\_62

TGGCATCCCTTATGAACTTGGCTACTTGCCTCGCTTGGGAGTGATTGATATTCAAACAATCAGCTCAAC  
GGAAGTATACCAACAAGTCTATTTCAACACCAAGGAGTTCAAGTAATTTT

>PGSC0003DMG400035141LRR-RLPs\_868

GTAAGGCTATTTTCAACATATCTTCTTTGGAAGTTATTGATTTCAAGTTTCAACAACCTCTCGAGCAGAATT  
CCAACCACTACAGGTCTTCATCTTCCAACATTAAGCAACTTATCTTGG

>PGSC0003DMG400035513-(rev)LRR-RLPs\_0

ATGAGTGTTAACCTTCTAGGGTTTTGTCAAAAAATTTCACTGAATCAAATCTCTAAGCACAAAGAGAAGT  
ACAGTTTAGTGAAAGTAGGTTCCCTAATTAATAAATGTTGCCAAAAGTAAA

>PGSC0003DMG400035816RLKmalectin\_320

CAAACCAGCTTTATACAATGGTTTTCTACAAGTCCAAAGCCATTTTTACTGTCAAACCTGATCAGCATACCC  
TGCTCAGTGACTTCATACCTACCCTTGTGTCAGGTATGAACTATTTCAA

>PGSC0003DMG400035816RLKmalectin\_512

CTTTTCAGAAGACACTTATGCTTTTGTTAATGCAATCGAGATTGTTTCCATACCCTCTGGTCTGTATTTTAC  
ACCTGATGGCGATCAGGGAGTCCCTATTGTTGGACGAAATTACAGATT

>PGSC0003DMG400035841G-LecRK\_0

GGAATTCTTACTCTTCTAAATGGTTCTGGCAGAGTAATTTGGTCCTCCGATTCCACTAGACATGGGCAAA  
ATCCAGTAGCACAACCTCTGGATTGAGGCATTCTTGTGTTGTCGAGATGCA

>PGSC0003DMG400035841G-LecRK\_124

AGGATAAGACTCAGAACTACATGTGGCAAAGTTTTGACAATCCAGGTGACACAACCTTTACCTGGAACGA  
AGGTTGGGATTAATCTAAAACTAGTTTTTCATCGTTCCATTTTCGTCATGGA

>PGSC0003DMG400035841G-LecRK\_186

GGAACGAAGGTTGGGATTAATCTAAAACTAGTTTTTCATCGTTCCATTTTCGTCATGGAAGAGCACAAT

GATCCTTCCAGAGGTGAGTTTACCTGGACATTCGATACTGGTGGATTCTCG

>PGSC0003DMG400035841G-LecRK\_248

CACAAATGATCCTTCCAGAGGTGAGTTTACCTGGACATTCGATACTGGTGGATTCTCGCAAACATTCATT  
ATGAATAGTTCCATTGAACCCTACAGAGCTGGACCATGGAATGTCCGAGT

>PGSC0003DMG400035841G-LecRK\_306

CAAACATTCATTATGAATAGTTCCATTGAACCCTACAGAGCTGGACCATGGAATGTCCGAGTCTTTCCTA  
ATGCACCATCTCGTGACACATCTTGAATGGTTATAACTATACATACTGA

>PGSC0003DMG400035893-(rev)LRR-RLPs\_0

ATGGATTCTGCAGGATTCTCTATGAAGCTGTGGCCCCCAAGTTTAAGTACCAGGCTAATGCTCGTGGAG  
AGAATGACCAAGAATCTTATTACTCCATCCATCCTATCCAGGAAATATGGT

>PGSC0003DMG400035893-(rev)LRR-RLPs\_1054

CTGAAATTTACTTAAGTTATCTGAATTTGGAGGATGAGGGGTCCATAGCTCTTGCTAATGTCCTCAAGGA  
ATCTGCTCCATCCCTTGAGGTTTTGGAGATGGATGGAAATGACATCACAG

>PGSC0003DMG400035893-(rev)LRR-RLPs\_1116

CTCAAGGAATCTGCTCCATCCCTTGAGGTTTTGGAGATGGATGGAAATGACATCACAGCTAAAGCTGCT  
CCTGCTCTGGCAGCCTGTATTGCTGCAAACAATTTCTTACCACGTTGAAG

>PGSC0003DMG400035893-(rev)LRR-RLPs\_1178

AGCTGCTCCTGCTCTGGCAGCCTGTATTGCTGCAAACAATTTCTTACCACGTTGAAGTTGGGAGAGAAT  
GAATTGAAAGATGAGGGTGCTATCTTAATTGCAAAGGCATTGGAGGATGG

>PGSC0003DMG400035893-(rev)LRR-RLPs\_124

TGAGTAAAGAAGAAGCTGAAGAGGATGCCAAACAATAGAAGCTCTGGCTTTTGATTCTGCCAATCAAC  
ATTTTGACAAGGAGCCTGATGGCGATGGAAGTTCTGCTGTGCAACTTTATG

>PGSC0003DMG400035893-(rev)LRR-RLPs\_1240

GAGAGAATGAATTGAAAGATGAGGGTGCTATCTTAATTGCAAAGGCATTGGAGGATGGTCACGGTCAA  
TTAACTGAAGTGGATATGAGTACCAATGCAATAAGAAGAGCTGGTGCGAGGT

>PGSC0003DMG400035893-(rev)LRR-RLPs\_1302

GGTCAATTAAGTGAAGTGGATATGAGTACCAATGCAATAAGAAGAGCTGGTGCGAGGTGCTTGGCACA  
AGCTGTAGTGAACAAATCTGGGTTTAAGGTGCTGAACATCAATGGCAACTTC

>PGSC0003DMG400035893-(rev)LRR-RLPs\_1364

GGCACAAGCTGTAGTGAACAAATCTGGGTTTAAGGTGCTGAACATCAATGGCAACTTCATATCTGATGA  
AGGAATTGATGAGGTAAAAGATATTTTTAAGAATTCACTTCATGTGCTTGG

>PGSC0003DMG400035893-(rev)LRR-RLPs\_1426

CTGATGAAGGAATTGATGAGGTAAAAGATATTTTTAAGAATTCACTTCATGTGCTTGGACCTTTGGATGA  
CAATGATCCTGAAGGAGAAGATTATGACGAAGAGGCTGATGAAGGAGGCG

>PGSC0003DMG400035893-(rev)LRR-RLPs\_1485

CCTTTGGATGACAATGATCCTGAAGGAGAAGATTATGACGAAGAGGCTGATGAAGGAGGCGATAATGA  
GAATGATTTGGAGATCAGGCTCAAGGATCTCGATATCAAGCAGGAAGAATAA

>PGSC0003DMG400035893-(rev)LRR-RLPs\_186

AATCAACATTTTGACAAGGAGCCTGATGGCGATGGAAGTTCTGCTGTGCAACTTTATGCTAAGGAATCT  
AGTAAGCTCATGTTAGAAGTTATTTAAAGAGGCCCTCAGACTAAGGAATCT

>PGSC0003DMG400035893-(rev)LRR-RLPs\_248

GGAATCTAGTAAGCTCATGTTAGAAGTTATTTAAAGAGGCCCTCAGACTAAGGAATCTGCAGAAGGTAT  
TGTATCTGAGAAGGTTAAAGCATCTGATGAACTACTATTTTTGATATATC

>PGSC0003DMG400035893-(rev)LRR-RLPs\_310

AAGGTATTGTATCTGAGAAGGTTAAAGCATCTGATGAACTACTATTTTTGATATATCCAAAGGTAGACG  
GGATTTCATAAGTGCAGAAGAGGCGTCTGAGTTATTGAAACCATTAAGTG

>PGSC0003DMG400035893-(rev)LRR-RLPs\_372

GGTAGACGGGATTTTCATAAGTGCAGAAGAGGCGTCTGAGTTATTGAAACCATTAAGTGAACCAGGGAA  
TAATTATAAAAGGATATGTTTCAGCAATAGAAGCTTTGGCGTGGATGCTGCT

>PGSC0003DMG400035893-(rev)LRR-RLPs\_434

AGGGAATAATTATAAAAGGATATGTTTCAGCAATAGAAGCTTTGGCGTGGATGCTGCTAAAATTGCAGG  
ACCTATTTTGCCTCTCTTAAAGATCAATTGACAGAAGTTGACCTTTCAGA

>PGSC0003DMG400035893-(rev)LRR-RLPs\_496

TTGCAGGACCTATTTTGCCTCTCTTAAAGATCAATTGACAGAAGTTGACCTTTCAGACTTCGTAGCAGGT  
AGACCAGAGGAAGAAGCCCTGGAAGTCATGGAAATCTTTTCTTCTGCTT

>PGSC0003DMG400035893-(rev)LRR-RLPs\_558

GTAGCAGGTAGACCAGAGGAAGAAGCCCTGGAAGTCATGGAAATCTTTTCTTCTGCTTTGGACGCCTGT  
GACCTGAGGTACCTCGATCTTTCTAACAATGCTTTAGGTGAAAAAGGAATA



>PGSC0003DMG400035893-(rev)LRR-RLPs\_62

CGTGGAGAGAATGACCAAGAATCTTATTACTCCATCCATCCTATCCAGGAAATATGGTCTTTTGAGTAAA  
GAAGAAGCTGAAGAGGATGCCAAACAATAGAAGCTCTGGCTTTTGATTC

>PGSC0003DMG400035893-(rev)LRR-RLPs\_620

CGCCTGTGACCTGAGGTACCTCGATCTTTCTAACAATGCTTTAGGTGAAAAAGGAATAAGGGCATTGG  
GGCACTTTTAAAGTCACAGAAGAACTTGAAGAAGCTCTATTTAATGAATGA

>PGSC0003DMG400035893-(rev)LRR-RLPs\_682

CATTTGGGGCACTTTTAAAGTCACAGAAGAACTTGAAGAAGCTCTATTTAATGAATGACGGCATTTCAGA  
GGAAGCAGCACAAGCAGTTTGCGAGCTAATCCCTTCAACTGATAAACTTC

>PGSC0003DMG400035893-(rev)LRR-RLPs\_744

ATTTTCAGAGGAAGCAGCACAAGCAGTTTGCGAGCTAATCCCTTCAACTGATAAACTTCGTATCCTTCATT  
TTCACAATAACATGACAGGGGATGAGGGTGCCTTGGCTATTTCTAACTT

>PGSC0003DMG400035893-(rev)LRR-RLPs\_806

CCTTCATTTTACAATAACATGACAGGGGATGAGGGTGCCTTGGCTATTTCTAACTTGTGAAGCATTCT  
CCTGCATTGGAGGATTTCCGGTGCTCATCTACAAGGGTAGGATCTGAAGG

>PGSC0003DMG400035893-(rev)LRR-RLPs\_868

AGCATTCTCCTGCATTGGAGGATTTCCGGTGCTCATCTACAAGGGTAGGATCTGAAGGTGGGGTTGCTC  
TTTACAAGCACTTGGAGAATGTAGGAATTTAAAGAAGGTTGATTTGCGTG

>PGSC0003DMG400035893-(rev)LRR-RLPs\_930

GTTGCTCTTTCACAAGCACTTGGAGAATGTAGGAATTTAAAGAAGGTTGATTTGCGTGACAACATGTTTG  
GTGTGGAAGCTGGAATTGCCTTGAGCAAAGTACTATCAATCTTTTCCGGC

>PGSC0003DMG400035893-(rev)LRR-RLPs\_992

CATGTTTGGTGTGGAAGCTGGAATTGCCTTGAGCAAAGTACTATCAATCTTTTCCGGCTTAACTGAAATT  
TACTTAAGTTATCTGAATTTGGAGGATGAGGGGTCCATAGCTCTTGCTAA

>PGSC0003DMG400035934LRR-RLPs\_1040

ATTTTTAAGCTTCCTCACTTCCTTAACCAATTGCAGAAATTTAACATCTCTTTATCTATCTTTCAACCCTCT  
AAATGGCATGCTTTCCCGGGTCTCCGTAGGGAAGTCTCCATATCTC

>PGSC0003DMG400035934LRR-RLPs\_1092

TTATCTATCTTTCAACCCTCTAAATGGCATGCTTTCCCGGGTCTCCGTAGGGAAGTCTCCATATCTCTTGT

AAATTTTCATGCCACTGCTTGCAAGATCAACGGCCAGATTCCAAATGA

>PGSC0003DMG400035934LRR-RLPs\_130

TATCACGAAACAAGCTTCATGGTCATATGCCTATAAGCTTGTCAAATTGTTCAAACCTCAAATATTGTCT  
CTATCCGAAAATTATTTTGATGGACGAATACATAGTGAAATTGGAAGAT

>PGSC0003DMG400035934LRR-RLPs\_585

TGCTGGTACGTATTCAAAGTGATAGCAATTTGTATTGAACTAGCTAGTTAGTAAACTCAAATCTTTCTTCA  
TGTATTGACAGGTGAAATACCCAAAGAGATAAGAAATCTCGTTGAGTTG

>PGSC0003DMG400035934LRR-RLPs\_650

TCTTCATGTATTGACAGGTGAAATACCCAAAGAGATAAGAAATCTCGTTGAGTTGGAGAACTTGGTCTT  
CACTTTAATAGTTTTAGTGGTTCACCTTGATATGGAGATGTTCAATATATC

>PGSC0003DMG400035934LRR-RLPs\_715

GTCTTCACTTTAATAGTTTTAGTGGTTCACCTTGATATGGAGATGTTCAATATATCAGGGATGAGATCAATT  
GATCTTTCAGCCAACAATCTATCAGGGACCATCCAACCAAACATAGGTT

>PGSC0003DMG400035934LRR-RLPs\_845

CAACATTGAAGAGCTTTATCTGGATCGCTTAACCAATCTCGTTGGGACTATTCCTTATTCTATCTCCAATT  
GTTCAAAGCTTACTATTCTAGAGCTTTCATACAACAACTCACAGGATT

>PGSC0003DMG400035934LRR-RLPs\_975

TCTATTGGATATTTGACTCATCTACAGTTCCTAACTTGGCGGAAAACAATTTAACAGTGATTCATTTTT  
AAGCTTCTCACTTCTTAACCAATTGCAGAAATTTAACATCTCTTTA

>PGSC0003DMG400036044RLKWAX-EGF\_0

ATGGCTTTTCTTGCCTTTATGCTTCTTGTCTACCTATGTTAGCTATGTCAATAGAGAACACAAACATGAT  
GAGCAACAACATGGCAAAGCCTGGATGCCAAACAAAATGTGGGAACTTG

>PGSC0003DMG400036044RLKWAX-EGF\_1098

TTACAATGGCATGAAGTTTCAATTTATCAAACCATAGACATAAAAAATATAAACATTAGATGATTATAAT  
ATGGTTAGAAATTATAGAACCAAGCTCAAATGATTTAGGTAGTTTTAGT

>PGSC0003DMG400036044RLKWAX-EGF\_122

TGTTCTTATCCATTTGGTATTGGTATAGATGCTGGTTGCTCTATACATCCTATATTTGACATTAGGTGCA  
ACACTTCTCGAACCTCCAATTGCCTATCTCAACACCGGAGCCACGAA

>PGSC0003DMG400036044RLKWAX-EGF\_1220

TTAATTATCTTAGTCAATAAGCATATCACTATAATAGGGAGATTTTACAATTACCAGTACATGTGGAGAG  
GAGACTCTCCAACTTATATATTCAACATAAACTATCTTTAACATGAAAA

>PGSC0003DMG400036044RLKWAX-EGF\_1281

TGTGGAGAGGAGACTCTCCAACTTATATATTCAACATAAACTATCTTTAACATGAAAAAACTCAAATAT  
GTCATCAAACCTTTGAGAAAAGATTCATATATGCCATCGTTAAACGTTTGG

>PGSC0003DMG400036044RLKWAX-EGF\_183

ATTAGGTGCAACACTTCCTCGAACCTCCAATTGCCTATCTCAACACCGGAGCCACGAATGTACTAAACA  
TAACAACTAAACCCATGGAGGTCATCGACATAACAACACTAGCCAAATACCG

>PGSC0003DMG400036044RLKWAX-EGF\_1891

CCATTTGAAAAAATTACAAAAATCCTTACTCCCTCTCCTCGGATATATCACGATGTATCGGTCCGATAACAT  
CACTTTATCCATCGGATAACATCATTTTACACGATCGTATCGATCCGAAA

>PGSC0003DMG400036044RLKWAX-EGF\_1952

TCGGATACATCACTTTATCCATCGGATAACATCATTTTACACGATCGTATCGATCCGAAATCAAGACGCGA  
TGTATTGGAATATTGAGTGATGTATTGAAATTGGGACGTGATGTATATT

>PGSC0003DMG400036044RLKWAX-EGF\_2013

AAGACGCGATGTATTGGAATATTGAGTGATGTATTGAAATTGGGACGTGATGTATATTGGATAACATTTT  
GTAATTTGGAAAAGAGTATGGATATGATGTAATTAGCTCTTAATACTATG

>PGSC0003DMG400036044RLKWAX-EGF\_244

TACTAAACATAACAACCTAAACCCATGGAGGTCATCGACATAACAACACTAGCCAAATACCGTATTAGAAAC  
GTGTTGGCAAGCAAATGTTATGAAGAACATGGTGAACCTATCTGCTCAACAA

>PGSC0003DMG400036044RLKWAX-EGF\_305

TTAGAAACGTGTTGGCAAGCAAATGTTATGAAGAACATGGTGAACCTATCTGCTCAACAACCTTGTGTTTCT  
CAATACAGGAGTGTCGTTTTTACGTTATCTGAGAAAGATAACAAGCCCC

>PGSC0003DMG400036044RLKWAX-EGF\_366

TGTGTTTCTCAATACAGGAGTGTCGTTTTTACGTTATCTGAGAAAGATAACAAGCCCCGAAATAGCCC  
CGGAAACCACTAATGTATGGTCCTTTAACCTTGTAGCTACGCATTCC

>PGSC0003DMG400036044RLKWAX-EGF\_4967

CTATTAACAGCAAATGTCATCCAATTTAAACCAAGTGTTCACGATAGAAGAGCTTGAAAAAGCCACAA  
ACAATTTCTCAGAAGATAAGATTCTTGGAGTAGGCGGAAATGGTGTAGTT

>PGSC0003DMG400036044RLKWAX-EGF\_5021

CTTGAAAAAGCCACAAACAATTTCTCAGAAGATAAGATTCTTGGAGTAGGCCGAAATGGTGTAGTTTAC  
AAAGGTGTTCTACCAGATCAACGCGTAGTTGCAATCAAGAAATCAAATAG

>PGSC0003DMG400036044RLKWAX-EGF\_61

CAAACATGATGAGCAACAACATGGCAAAGCCTGGATGCCAAACAAAATGTGGGAACTTGAGTGTTCCTT  
ATCCATTTGGTATTGGTATAGATGCTGGTTGCTCTATACATCCTATATTTG

>PGSC0003DMG400036044RLKWAX-EGF\_610

TGTGGTTAGAACTCAACAACCTTATTCATGTATGGAACATAGTCTATGTATTGATTCTGAAAGTCGACGT  
GGAGGTTATCGTTGCATTTGTGAGGAAGGATATGACGGAAATCCTTATCT

>PGSC0003DMG400036044RLKWAX-EGF\_732

GTCCAGGCTGTCAAGGTTTGTGTGACCATCTCATCTAAAAGTTAAGCTGTTAGAAAGAGTCAAGCACGT  
GCATGCTTTCAGGATTTTTGTCTGCTCTGATACCATGTTGAACTGTGTGA

>PGSC0003DMG400036109-(rev)LRR-RLPs\_0

ATGAGCCCATGTACTAGAAGCAAGTCAGCTAGAGATCTGAGCAACTCTATTATTTCTGAATCACCGATTG  
TTGCACTACATAGAATACTAGAACTTATGCCCATCAAATATGCTGCAAGA

>PGSC0003DMG400036109-(rev)LRR-RLPs\_1008

GCCTAATAAGGACATTTTTATGTATATACATCTTTGTATATTTATTTGAAATCTTAAGAACTTTCATATTGC  
CGTCAAGATTTATTGTTACACTTTGTATAATTCTGGTAATGTAGGTTG

>PGSC0003DMG400036109-(rev)LRR-RLPs\_1071

TCATATTGCCGTCAAGATTTATTGTTACACTTTGTATAATTCTGGTAATGTAGGTTGACTATCATGAGACT  
TTTTCTTTAGGTTGATGAGACATTGAATCAGAGAACGGAGCTGTTATCT

>PGSC0003DMG400036109-(rev)LRR-RLPs\_1134

ATGAGACTTTTTCTTTAGGTTGATGAGACATTGAATCAGAGAACGGAGCTGTTATCTTACTTATCAATGG  
AAAAAGACCGTGTGAATGAAGCTCTGAGATTGATTCAAACAGTGAGGTTT

>PGSC0003DMG400036109-(rev)LRR-RLPs\_1197

TCAATGGAAAAAGACCGTGTGAATGAAGCTCTGAGATTGATTCAAACAGTGAGGTTTCGGAAACTCAAG  
GGATCAAGTACTGAAATGTACTTAATAAGAGTGATGTTTTCTCATTCTCCA

>PGSC0003DMG400036109-(rev)LRR-RLPs\_1260

CTCAAGGGATCAAGTACTGAAATGTACTTAATAAGAGTGATGTTTTCTCATTCTCCAAAACCTTGAGAGGA

TTATCATTGAACAGTGCGAGAAATCAGGACATGTCACAACTATAGGGAA

>PGSC0003DMG400036109-(rev)LRR-RLPs\_1323

GAGAGGATTATCATTGAACAGTGCGAGAAATCAGGACATGTCACAACTATAGGGAAAATTTGAGGGA  
ACTGCTAAGCTGCATTACTCGAGCATCACCCAAAGCAATAGTTGTCAAGTAT

>PGSC0003DMG400036109-(rev)LRR-RLPs\_1368

AACTATAGGGAAAATTTGAGGGAAGCTGCTAAGCTGCATTACTCGAGCATCACCCAAAGCAATAGTTGTC  
AAGTATTTACAATGTGATTTCCAGTGGCGTGTATGACTTTTTTTGTTTAG

>PGSC0003DMG400036109-(rev)LRR-RLPs\_315

GATGTGAATCAATTCATCATCTTTGCCTCGAATCATGGTATCCAAAAGCTCACTCTAAAAATGGCCAACG  
ATGAAAAATATGTGTTGCCTGATAGCATATTTACTTGTGCAACGTTGACA

>PGSC0003DMG400036109-(rev)LRR-RLPs\_378

GCCAACGATGAAAAATATGTGTTGCCTGATAGCATATTTACTTGTGCAACGTTGACACATTTGAATCTCT  
CAAGGTGTATCTTTATGCTTCCGGATGGTACCCAATTTCCAATCTTATT

>PGSC0003DMG400036109-(rev)LRR-RLPs\_441

AATCTCTCAAGGTGTATCTTTATGCTTCCGGATGGTACCCAATTTCCAATCTTATTACCCTTCAGTTAGAA  
CATTCTAAAATTGCCGGTCATCGAGGATTAGAAAACAATCTTAATTTG

>PGSC0003DMG400036109-(rev)LRR-RLPs\_63

CCGATTGTTGCACTACATAGAATACTAGAACTTATGCCCATCAAATATGCTGCAAGATCTAGCATCTTATC  
AAAATTTGGAGACAGTTATGGTCTACACAACCTAATCTTGTGTTTCGAT

>PGSC0003DMG400036109-(rev)LRR-RLPs\_756

TACTTTGTTTTTCATTCGTAGATGCTCTTACTAACACTCCATAACTTCATTTCTTTGTCATTGGTTGTTTCAG  
AAACTTTGCTTGGCGTATGTGGAAGACAAGCTTTTTCAACCACTAAA

>PGSC0003DMG400036109-(rev)LRR-RLPs\_819

GTTGTTTCAGAACTTTGCTTGGCGTATGTGGAAGACAAGCTTTTTCAACCACTAAAATTGCAAAGCCTG  
AAAATTTGCGACTTTAAGATTTAGTTGAAAGTATTGCTTGTGCAGTTTG

>PGSC0003DMG400036109-(rev)LRR-RLPs\_882

AAGCCTGAAAATTTGCGACTTTAAGATTTAGTTGAAAGTATTGCTTGTGCAGTTTGCCTACTTAGGAGT  
TCTCCTAACCTTTCTGAAATTGAAATAGACGAGGTTGTAAAGGTAAAACA

>PGSC0003DMG400036109-(rev)LRR-RLPs\_945

TAGGAGTTCTCCTAACCTTTCTGAAATTGAAATAGACGAGGTTGTAAAGGTAAAACATATCATGCCTAAT  
AAGGACATTTTTATGTATATACATCTTTGTATATTTATTTGAAATCTTAA

>PGSC0003DMG400036410-(rev)LRR-RLPs\_186

ATACTCTGTTGTCTTTGTTTTAAAGAAGCAACACGGATGAGCATTCTTTCCAAAACATGGTTGCAAGCCT  
GGTCGAATCTTCCAAACTTGGATTCACAGTTGATTATTCTAAATGCAAC

>PGSC0003DMG400036410-(rev)LRR-RLPs\_744

ATTAAGTCGGTTTCCCTGAAGTTCTTGAAGATTCAGCATTGTGGGGGAATATGGGAGATTGATGCTCCA  
AACTGGTATCACTTAAGTACACCTGGGAAGACATTCCTCAAATTAATAAATT

>PGSC0003DMG400036410-(rev)LRR-RLPs\_930

AATGCTGCATGGTTTTGTAAGTTGAGGAAGTTTCTATCAAATTCGATCTCTTGGTCTGACTTTTGGATTGA  
TTCTTACGAATGCAAGAACATCAACATTCAAATTTGCAACTGGACCAT

>PGSC0003DMG400036835-(rev)LRR-RLPs\_0

ATGGGGCTCAAGTCGTTATCACTAGGAAATAACAACCTTTGACGGCCAACCTTGAGTTCTTATCCTTTAACA  
GATGGACGCAACTTGTTGAGCTAGATTTTTTCAATTCATTCCTAACAGGT

>PGSC0003DMG400036835-(rev)LRR-RLPs\_118

GTTCAATTACTTCTAATGTAAGTGGTATGCAAACCTACATTCCTCTTGTGCATCAAACCATTTGAAT  
GGGACTATAACCATCATGGATATTCTCCCTCCCTTCACTAAGTTATTTAG

>PGSC0003DMG400036835-(rev)LRR-RLPs\_177

AACCATTTGAATGGGACTATAACCATCATGGATATTCTCCCTCCCTTCACTAAGTTATTTAGACTTGAGTGA  
TAACCATTTCAAGTGGAAACATTGGGCTAGATCAAGAAGATGGGTTACAT

>PGSC0003DMG400036835-(rev)LRR-RLPs\_59

ATCCTTTAACAGATGGACGCAACTTGTTGAGCTAGATTTTTTCAATTCATTCCTAACAGGTTCAATTACTT  
CTAATGTAAGTGGTATGCAAACCTACATTCCTCTTGTGCATCAAA

>PGSC0003DMG400036882-(rev)RLKWAX-EGF\_0

ATGGCATATCAAAGTTTTGTTGGATTGGATAGTTCATTGCCAATTGAAAAATGGCCACAACCTGGACTTG  
AATTAATGTGGCAAATTCAGATCCACCTATTTGTAAAAAAGAAGTGGAT

>PGSC0003DMG400036882-(rev)RLKWAX-EGF\_1054

AATAATCTGTTCTAGCATTACAAAAATTAAGTTAGGGGATCCTATGGGCATAGAACATGGAGTTTGT  
CTTGATATACCAAGATTGTTGCTGATTCGACGTATATTCCTATTTATTT

>PGSC0003DMG400036882-(rev)RLKWAX-EGF\_1116

GTTTGTTCCTTGATATACCAAGATTGTTGCTGATTCGACGTATATTCCTATTTATTTATTTTTATCTAGAC  
ACACTAATATATATTTAACTTAAAAAACTAATGTAAACATACACCCT

>PGSC0003DMG400036882-(rev)RLKWAX-EGF\_1178

TTATCTAGACACACTAATATATATTTAACTTAAAAAACTAATGTAAACATACACCCTCTATCGCAATATA  
TGTGACATAATTTAATTAGACCAAAAAAATTTAAGAAAAAGTTAGTGA

>PGSC0003DMG400036882-(rev)RLKWAX-EGF\_124

ATGTGTTGAAATATTCTAGGTGTTTGATTGATCCTAAAAATGTTGGAAAGAAGAGGTGTTTTTGCAAGTC  
TGGACACTATTGGGATGCACAAGGATATTGTCAAAGTAAGTATAGTTCAT

>PGSC0003DMG400036882-(rev)RLKWAX-EGF\_1240

CGCAATATATGTGACATAATTTAATTAGACCAAAAAAATTTAAGAAAAAGTTAGTGAACTTGTGATGT  
AAATTAATAAGGTATAGATATTTGTGTGACTATAAATAATCTTATTTA

>PGSC0003DMG400036882-(rev)RLKWAX-EGF\_1302

TGTGATGTAAATTAATAAGGTATAGATATTTGTGTGACTATAAATAATCTTATTTAGGATAAAGAAAG  
CGTGACGTGCCTTTTGAGAATTAAGATAGATTAATAAATAATATGTGCGCA

>PGSC0003DMG400036882-(rev)RLKWAX-EGF\_1364

AAAGAAAGCGTGACGTGCCTTTTGAGAATTAAGATAGATTAATAAATAATATGTGCGCATTAAATGTTGTA  
ATTAGTGATAGGTCCATATATTAATTCTGGACAACGTAGATTAATTAATTA

>PGSC0003DMG400036882-(rev)RLKWAX-EGF\_1426

TGTTGTAATTAGTGATAGGTCCATATATTAATTCTGGACAACGTAGATTAATTAATTAATAATAACTCGA  
AGCAAACAATTTCTCAAGTGGACCACATACAAAATTTTGGATTTCAA

>PGSC0003DMG400036882-(rev)RLKWAX-EGF\_1488

AATACTCGAAGCAAAACAATTTCTCAAGTGGACCACATACAAAATTTTGGATTTCAAAAAGAAGGAATT  
AAATAATTAGTTGTTCAATTTGTTTATGTACTTTAGGTTTTTCTAA

>PGSC0003DMG400036882-(rev)RLKWAX-EGF\_1550

AAGGAATTAATAATTAGTTGTTCAATTTGTTTATGTACTTTAGGTTTTTCTAAAGAAAACTATGT  
AAATTCATTGGCTATTGTTTAGGGATTTGTAGTAGATTTTGTATCCTTG

>PGSC0003DMG400036882-(rev)RLKWAX-EGF\_1612

AAACTATGTAAATTCATTGGCTATTGTTTAGGGATTTGTAGTAGATTTTGTATCCTTGCTTCTGCCCAAT

CAAATTTACATTACATAGTGAAGATTTAAGAATAATAATAAATTTTAAT

>PGSC0003DMG400036882-(rev)RLKWAX-EGF\_1674

CTGCCCAATCAAATTTACATTACATAGTGAAGATTTAAGAATAATAATAAATTTTAATAATAAATGAAATA

ATTATTTTATTATATTATTTTGTAGTTAATTATTCTTAATATAAATCATA

>PGSC0003DMG400036882-(rev)RLKWAX-EGF\_1736

AATGAAATAATTATTTTATTATATTATTTTGTAGTTAATTATTCTTAATATAAATCATATAAATATTGAAAAA

TGATAGTAGTATTTAATAATAAAATAAAATATGTATAAAATGATTAGC

>PGSC0003DMG400036882-(rev)RLKWAX-EGF\_1798

TATTGAAAAATGATAGTAGTATTTAATAATAAAATAAAATATGTATAAAATGATTAGCATATTTACATAG

TTGGATGTGATCAAATTATAATTAATTAATTTGACTCATAAACAGTTTAAGA

>PGSC0003DMG400036882-(rev)RLKWAX-EGF\_186

TGCAAGTCTGGACACTATTGGGATGCACAAGGATATTGTCAAAGTAAGTATAGTTCATCTCATATATACT

TGATATTCTCTATGTTACGTCAACGTGTTTGAATGAATACGAAATTTTGA

>PGSC0003DMG400036882-(rev)RLKWAX-EGF\_1860

TTACATAGTTGGATGTGATCAAATTATAATTAATTAATTTGACTCATAAACAGTTTAAGAAATTATCAATTAT

ATAGATTAATAAAATGTAAAAAATATTTATAAGTTAACTTGACTAATTT

>PGSC0003DMG400036882-(rev)RLKWAX-EGF\_1922

ATCAATTATATAGATTAATAAAATGTAAAAAATATTTATAAGTTAACTTGACTAATTTTTATTCTTAATTT

ACGCAGAATGTCGACATGGCAGCTTGCAAATTCGAAGGAACAAAG

>PGSC0003DMG400036882-(rev)RLKWAX-EGF\_2046

TCTTATTGCAGGTTCTCTTTTTTTATTTTCTTATTTTATCACTTATCCAATTAATCCCTCACTTACTTAATCA

CTATCGGTTGTTTCAATTGATCATCTGAATATAATAATAAAATATT

>PGSC0003DMG400036882-(rev)RLKWAX-EGF\_2108

CTTACTTAATCACTATCGGTTGTTTCAATTGATCATCTGAATATAATAATAAAATATTTTATTAGATACGT

TATATTTAAATTTGAGAAAAAACTTGTGTGTATTCTCAAATACCT

>PGSC0003DMG400036882-(rev)RLKWAX-EGF\_2170

TTAGATACGTTATATTTAAATTTGAGAAAAAACTTGTGTGTATTCTCAAATACCTATTAGGTAGTTAA

TTTGACAACATAAAATATGTCATTTCTTTAATTATATGCATAAGTCTG

>PGSC0003DMG400036882-(rev)RLKWAX-EGF\_2232



GGTAGTTAATTTGACAACATAAAATATGTCATTTCCTTTAATTATATGCATAAGTCTGAACTGAAACACGC  
TAGAGGTTTTATAGCTTGTTGAGGTTAACACATATAATCAAAAGAGATA

>PGSC0003DMG400036882-(rev)RLKWAX-EGF\_2294

GAAACACGCTAGAGGTTTTATAGCTTGTTGAGGTTAACACATATAATCAAAAGAGATAACATATTTTAAC  
TGATTAACCTTATTAATTACCTAATGGACTATCGAGAACACGAGCAAAAGT

>PGSC0003DMG400036882-(rev)RLKWAX-EGF\_2356

ATTTAACTGATTAACCTTATTAATTACCTAATGGACTATCGAGAACACGAGCAAAAGTTTTTTTAAAATTT  
AAATTTAAAGGGTCTATTTAGAAACATTTTACTATGTATTCAGAAGTTC

>PGSC0003DMG400036882-(rev)RLKWAX-EGF\_2418

TTAAAATTTAAATTTAAAGGGTCTATTTAGAAACATTTTACTATGTATTCAGAAGTTCATGAACTAGAACA  
AGCCGTAGTTTCGAGTGTATTATAATAAGTGCTAATTCTATATATATTTT

>PGSC0003DMG400036882-(rev)RLKWAX-EGF\_248

TATATACTTGATATTCTCTATGTTACGTCAACGTGTTGAATGAATACGAAATTTTGAAGTATAAAAATAT  
ACACTTTTGAACTTCTTATCTTTAGTATACATACATTCATATTTGTGC

>PGSC0003DMG400036882-(rev)RLKWAX-EGF\_2480

ACTAGAACAAGCCGTAGTTTCGAGTGTATTATAATAAGTGCTAATTCTATATATATTTTTTTGTTTCATTTTCA  
GTTGCTGTTATATCAGTGCTTCTCATGCTCTTAGGTGGATTTTATAGTC

>PGSC0003DMG400036882-(rev)RLKWAX-EGF\_2914

ACTCGGTTGTTGTGTCGAGCTCGAGTTACCTCTTTAATTTACGAGTACGTACCTAATGGTACGCTTTTTCG  
AACACCTCCACGTGTTCCGTCTCCGCGAGCGGCCCCCACTTACTTGGTT

>PGSC0003DMG400036882-(rev)RLKWAX-EGF\_2976

CGCTTTTCGAACACCTCCACGTGTTCCGTCTCCGCGAGCGGCCCCCACTTACTTGGTTGAGGCGTCTAGT  
GATCGCTCAACAAACCGCGGACGACTCGCGTACCTACACTCGTCGGCCG

>PGSC0003DMG400036882-(rev)RLKWAX-EGF\_310

TAAAATATACACTTTTGAACTTCTTATCTTTAGTATACATACATTCATATTTGTGCATGTAACAGTTCTG  
GTTGGCTGGTTAATTGTTAAGATATTGTCTGATTTATTTTAACCTAA

>PGSC0003DMG400036882-(rev)RLKWAX-EGF\_3100

GCCGATTTATCATCGCGATGTTAAGTCGAGTAATATTTTACTAGACGATAAGCTCGATGCTAAGGTTTTCG  
GACTTTGGACTATCGAGATTAGTCGAGCTAAGTGAAAGTGAGAACACTCA

>PGSC0003DMG400036882-(rev)RLKWAX-EGF\_3162

AGGTTTCGGACTTTGGACTATCGAGATTAGTCGAGCTAAGTGAAAAGTGAGAACACTCATATCAACACAT  
CCGCTCAGGGTACATTGGGGTACCTCGATCCTGAATACTATCTGAATCTTC

>PGSC0003DMG400036882-(rev)RLKWAX-EGF\_3224

AACACATCCGCTCAGGGTACATTGGGGTACCTCGATCCTGAATACTATCTGAATCTTCAACTTACTGATA  
GGAGCGATGTTTATAGTTTTGGAGTTGTGCTTCTAGAACTTTTGACGTCT

>PGSC0003DMG400036882-(rev)RLKWAX-EGF\_3286

TACTGATAGGAGCGATGTTTATAGTTTTGGAGTTGTGCTTCTAGAACTTTTGACGTCTAAAAAGGCAATC  
GACTTCAATCGAGATGAGGAAAATGTGAATTTGGTTGTGTACATGAAGAG

>PGSC0003DMG400036882-(rev)RLKWAX-EGF\_372

AACAGTTCTGGTTGGCTGGTTTAATTGTTAAGATATTGTCTGATTTATTTAACCTAAAAGACGCAACTCA  
TTTTATATAAAGTCCCTAACTTTCTTCTTTTTATTTAATGTGGGTTT

>PGSC0003DMG400036882-(rev)RLKWAX-EGF\_434

CGCAACTCATTTTTATATAAAGTCCCTAACTTTCTTCTTTTTATTTAATGTGGGTTTCGTTTAAGGTGTAA  
TGTGCATTCTTTCCTTCTTGAAAGACTTACCTTCTGGTCTCCACCATG

>PGSC0003DMG400036882-(rev)RLKWAX-EGF\_496

TAAGGTGTAATGTGCATTCTTTCCTTCTTGAAAGACTTACCTTCTGGTCTCCACCATGGGCGTCACAATAT  
AGTTATAATATTATGTTACTAAGGATAAAAATGGAAAATTAAGTCAATT

>PGSC0003DMG400036882-(rev)RLKWAX-EGF\_558

TCACAATATAGTTATAATATTATGTTACTAAGGATAAAAATGGAAAATTAAGTCAATTTATTTATAAGCAT  
AAGAAGGTGTTACTTTTTGAAAGTTAAGTTATGTATACATCATTAAAA

>PGSC0003DMG400036882-(rev)RLKWAX-EGF\_62

TGGACTTGAATTAATGTGGCAAATCCAGATCCACCTATTTGTAAAAAAGAAGTGGATTGCGATGTGTTG  
AAATATTCTAGGTGTTTGATTGATCCTAAAAATGTTGGAAAGAAGAGGTG

>PGSC0003DMG400036882-(rev)RLKWAX-EGF\_620

TATAAGCATAAGAAGGTGTTACTTTTTGAAAGTTAAGTTATGTATACATCATTAAAAATGTAGTATTTGCA  
CCATCAATTCACATTTACATGTAGCAACTAATACAATTTATTTTCATTT

>PGSC0003DMG400036882-(rev)RLKWAX-EGF\_682

GTATTTGCACCATCAATTCACATTTACATGTAGCAACTAATACAATTTATTTTCATTTTGGAGATAACAAA

TCTTACCTTAAAAGAAGATTTATCTGTAGGTATCTTTGAAGTGACTTGA

>PGSC0003DMG400036882-(rev)RLKWAX-EGF\_744

GATAACAAATCTTACCTTAAAAGAAGATTTATCTGTAGGTATCTTTGAAGTGACTTGATAATAATAATAA

ATTTAAAAAATAGCGGTATATATTTAACTTAATACACTTTTTTTTTTAGTT

>PGSC0003DMG400036882-(rev)RLKWAX-EGF\_806

AATAATAAATTTAAAAAATAGCGGTATATATTTAACTTAATACACTTTTTTTTTTAGTTAGTTAAAGTAGAC

TAAAATGGAAATAATGTAGTGTTCATGTTAGCTACTACTATGCTCATTTC

>PGSC0003DMG400036882-(rev)RLKWAX-EGF\_868

AAAGTAGACTAAAATGGAAATAATGTAGTGTTCATGTTAGCTACTACTATGCTCATTTCAGGTGATATGTA

ATTAAATTAATTTTTTTTTTTGTTACGTAATTTCTTTATATATTTTTCT

>PGSC0003DMG400036882-(rev)RLKWAX-EGF\_930

GATATGTAATTAATTAATTTTTTTTTTTGTTACGTAATTTCTTTATATATTTTTCTTCATTTTAGGATAAG

ATAAAAAAATAAAGGAAATGTTCAAAGGCAAAAACCTTAGGCCAAA

>PGSC0003DMG400036882-(rev)RLKWAX-EGF\_992

TTTAGGATAAGATAAAAAAATAAAGGAAATGTTCAAAGGCAAAAACCTTAGGCCAAAAAATAATAATC

TGTTCTAGCATTACAAAAATTAAGTTAGGGGATCCTATGGGCATAGAACA

>PGSC0003DMG400036994LRR-RLPs\_0

ATGGAAAATATTGAAAACTTCCACTAATTGTATTATATGTTTTCTCTTTCAACTTGGTTTCTCTTCATGT

TTGCCTCATTGTGTCCCAAATATCAAGCTCTTGCTCTTCTAGAATTC

>PGSC0003DMG400036994LRR-RLPs\_124

AGACGTTTGTTCATCAACCCTTTGCTTCTACTTTTGAGGAATGTGAAGGTCTTTCTCCTAAGACTGTCA

TGGAATACAAGCACGGATTGTTGCTCGTGGGATGGAGTTCATTGTGATG

>PGSC0003DMG400036994LRR-RLPs\_1240

GTGGACTAGGCACACTTAATCTTTCATATAATAGTTTCTCATGGGATGATAAGGATCAAGTCAAGTCTAA

TTTGCTCAACTCTTTTATGACTTGGATTTGCGCTCCAATTTGCTGCAAG

>PGSC0003DMG400036994LRR-RLPs\_1488

TTGAAGGGAGCAATCCACCTTGTTTTGGTAACATGAGCGCAATTGAGGTTTTAGATTTGCGCCACAATA

ATCTTAGTGGGACAATTCAAATACTTTAGTGTTGGAAATCCAATCAGA

>PGSC0003DMG400036994LRR-RLPs\_186

ACACTGTCATGGAATACAAGCACGGATTGTTGCTCGTGGGATGGAGTTCATTGTGATGAGACGACAAGC  
AAAGTGATTGAGCTTGACCTCAGATGTAGCCAACCTCAAGGCAAGTTCCTT

>PGSC0003DMG400036994LRR-RLPs\_1922

GAAAACCCCAATGTATATTGGAGATTACTATTACAAAGATTCCATAACAATTCATCAAAGGAATGAGC  
ATGGAACCTTGTTAGAATTTTTCTATGTACACAGCCATTGATCTTTCAAG

>PGSC0003DMG400036994LRR-RLPs\_1984

GAATGAGCATGGAACCTTGTTAGAATTTTTCTATGTACACAGCCATTGATCTTTCAAGCAATAGATTTGA  
AGGTTACATTCCAAGTGTATAGGAAATCTCACTTCACTAGTTCTTTTGA

>PGSC0003DMG400036994LRR-RLPs\_2170

CGTTGGATCTCTCATTTAACAACTTGGTGGAGAGATACCAGTGCAACTTGCATCTCTGACATTTCTTGG  
ATTCTTAAGTGTCTCTCACAAATCATCTTGTGGATGCATCCCTAGTGGAA

>PGSC0003DMG400036994LRR-RLPs\_310

ACAGTAGCATCTTCCAACCTCTGCTCTCAAAGGCTCGATTTATCTATGAATGATTTCTCTGACTCAAAC  
ATTTACCTAATTTCCGGTGGGTTTTCTAGCTTGACATATCTTGATCTAT

>PGSC0003DMG400036994LRR-RLPs\_372

GACTCAAACATTTACCTAATTTCCGGTGGGTTTTCTAGCTTGACATATCTTGATCTATCCTATTCGACGTT  
ACAGGTCAAATACCTTCTGAAATTTCTAATCTTTCTAAACTACGTTCT

>PGSC0003DMG400036994LRR-RLPs\_434

TTCGACGTTACAGGTCAAATACCTTCTGAAATTTCTAATCTTTCTAAACTACGTTCTCTTCGTATCTATGG  
TACTCAACTGGTTTAACTTGGACCGCACAACTTGGACAGCTTCT

>PGSC0003DMG400036994LRR-RLPs\_496

GTATCTATGGTTACTCAACTGGTTTAACTTGGACCGCACAACTTGGACAGCTTCTTAAGAACTTGAC  
CCAATTAAGAGAGCTTGAGCTTTCCAATATGGGCATCTCTTCAACCATTC

>PGSC0003DMG400036994LRR-RLPs\_62

CTCTTCATGTTTGCCTCATTTGTGTCCCAAATATCAAGCTCTTGCTCTTCTAGAATTCAAGAAGACGTTTGT  
CATCAACCCTTTTGTCTTACTTTTGGAGGAATGTGAAGGTCTTTCTCC

>PGSC0003DMG400036994LRR-RLPs\_620

AAATTTCTCTTATTATTTAATAACTTTGCGTCTTCCAGGCACACAATTATATGGGATATTACCTGAAAGAG  
TTTTCCACCTTCCAACCTTGAGATTGCTTGATTTATCAAGGAATTCTCA

>PGSC0003DMG400036994LRR-RLPs\_682

CTGAAAGAGTTTTCCACCTTCCAACTTGAGATTGCTTGATTTATCAAGGAATTCTCAACTTTCAGTCAGC  
TTTCCAATAACCAAATGGAATAGCAGTGCATCTCTGAAGGATTTATCCC

>PGSC0003DMG400036994LRR-RLPs\_744

TCAGTCAGCTTTCCAATAACCAAATGGAATAGCAGTGCATCTCTGAAGGATTTATCCCTAAATGGTGTGA  
ATTTTACAAACGTACCTGAACCCATGAGTAACTTTTTTGGACCTGTTCTGA

>PGSC0003DMG400036994LRR-RLPs\_806

TGGTGTGAATTTTACAAACGTACCTGAACCCATGAGTAACTTTTTTGGACCTGTTCTGACTATTCAATGAAA  
ATTGGACACAACCTGGAATCACTAAATCTTCAATCCAATTTCTAACAGG

>PGSC0003DMG400036994LRR-RLPs\_868

TCAATGAAAATTGGACACAACCTGGAATCACTAAATCTTCAATCCAATTTCTAACAGGTCCAATTCCTTCT  
GATGTTAGTGGATTTCAAAGCCTACAGCTACTCTCGATGTCATCAAACA

>PGSC0003DMG400036994LRR-RLPs\_930

ATTCCTTCTGATGTTAGTGGATTTCAAAGCCTACAGCTACTCTCGATGTCATCAAACAGTTTGAATGGAAT  
GATACCATCCTGGATATCCTCACTTCCGTCCTGAAATATTTAGACTTG

>PGSC0003DMG400036994LRR-RLPs\_992

GAATGGAATGATACCATCCTGGATATCCTCACTTCCGTCCTGAAATATTTAGACTTGAGCAATAACAGC  
TTCAGTGGCCAACCTTGAGGAGTTCAAATCCAAAGAACTGTTTTGGATAGA

>PGSC0003DMG400037069-(rev)LRR-RLPs\_1054

GGATCTAAACCAAGTCTCTGGTGTCTTTCTTCTGATTGGAAGTTCTCCCAACTTACACTCACTGGAGATAG  
ATGTAATGTTTTCTCGCTTTCAATAATTTAAAATTGAGTTTAATTTATA

>PGSC0003DMG400037069-(rev)LRR-RLPs\_1116

TGGAGATAGATGTAATGTTTTCTCGCTTTCAATAATTTAAAATTGAGTTTAATTTATATATACACTGATTG  
TAGGTAACCGTTACATGTTGTAGTAGGTAATATATCTTATTTTTAATAT

>PGSC0003DMG400037069-(rev)LRR-RLPs\_1178

CACTGATTGTAGGTAACCGTTACATGTTGTAGTAGGTAATATATCTTATTTTTAATATTACAAGTTTAACT  
TGGTTACCAGTAGATAGTTTTCGGTGAGTTAAGTACTCTACATTTTTAG

>PGSC0003DMG400037069-(rev)LRR-RLPs\_1240

AGTTTAACTTGGTTACCAGTAGATAGTTTTCGGTGAGTTAAGTACTCTACATTTTTAGAGTTTAACTATA

TATGTACCGACAACGTAATGAATTTTATACACTATCAATATTAGGTTAT

>PGSC0003DMG400037069-(rev)LRR-RLPs\_1302

TAACCTATATATGTACCGACAACGTAATGAATTTTATACACTATCAATATTAGGTTATAAAAATTTAAAAA

TATCTACAAGTAATATTTTATGGTTATGGAATTTGTAAAAATACTAAC

>PGSC0003DMG400037069-(rev)LRR-RLPs\_1364

ATTTAAAAATATCTACAAGTAATATTTTATGGTTATGGAATTTGTAAAAATACTAACCTTTTTTTTTGGTC

TTTTTGACCATATGAATTTTATAGGTTGTCAATACCTTGAGTGAAG

>PGSC0003DMG400037069-(rev)LRR-RLPs\_1426

TTTTTTGGTCTTTTTGCACCATATGAATTTTATAGGTTGTCAATACCTTGAGTGAAGGAAACATAGATGA

AGTTACACATTATTTGGAAGATCCAAATTGTGTTGACAAACAATTTGAG

>PGSC0003DMG400037069-(rev)LRR-RLPs\_186

GAGTTCTTTGAAGAGAAAAGTGGTACTATAGGATTGATTGAAAATGGTTTTAGTAATATGATTGACAAC

ATTCTCTTGCAGCATGTTGGATCCCTAGTCAAATTTTTCCTTGATTTGTCA

>PGSC0003DMG400037069-(rev)LRR-RLPs\_248

TGACAACATTCTCTTGCAGCATGTTGGATCCCTAGTCAAATTTTTCCTTGATTTGTCAACTATTGATTGTAA

TGATAGGGACCTTGACCATTGGTTGTTATGTGTAACAAGTAAACGCGT

>PGSC0003DMG400037069-(rev)LRR-RLPs\_310

TTGATTGTAATGATAGGGACCTTGACCATTGGTTGTTATGTGTAACAAGTAAACGCGTCAAAGAACTTAC

CTTAAAAAATCACAAACGCAAACGTTATACGTTGCGTTTTTGTGTATTTG

>PGSC0003DMG400037069-(rev)LRR-RLPs\_372

GAACTTACCTTAAAAAATCACAAACGCAAACGTTATACGTTGCGTTTTTGTGTATTTGATTGTCCAACCTCT

CACATATCTAGATGTCACAAATTTATAGTTAAACCACCTTCTCCCAA

>PGSC0003DMG400037069-(rev)LRR-RLPs\_434

TCCAACCTCACATATCTAGATGTCACAAATTTATAGTTAAACCACCTTCTCCCAAAGCATTAGTCCCAA

ATCTCCTTGAATTGACCTTAAAGTTCATCAAATTTTACCCGGACAAAGC

>PGSC0003DMG400037069-(rev)LRR-RLPs\_496

TAGTCCCAAATCTCCTTGAATTGACCTTAAAGTTCATCAAATTTTACCCGGACAAAGCAAATTATGTCTTG

AATACCCATTACTTTACTCTTTAACGTTTCATTGCTTGCAATGGCGTTC

>PGSC0003DMG400037069-(rev)LRR-RLPs\_868

ATATTTAAATATTCTTTATTATAATATTCTCAATAAGTGTTACTATGCTTATCATATATACTTAACCATTAAT  
GCATTTTGCCTTTTTTTTTCTTTTACCAAGCATTGGGTGCAGAGAT

>PGSC0003DMG400037069-(rev)LRR-RLPs\_930

TAACCATTAATGCATTTTGCCTTTTTTTTTCTTTTACCAAGCATTGGGTGCAGAGATCATTCCGAAAAGG  
TTTCAATCCAAACCCTACCATTGGAGCATGTAACATTGTGTGTGAGAT

>PGSC0003DMG400037098-(rev)LRR-RLPs\_3538

AGAGGTGATAGCGCTTAAGTGTGAGCACCACAAAAATCAGAATATTTAAATAATTTAAATTATTTTAAAA  
AAATAATTTTAAATCAGTTTTAGAGAATAGGAAGTAACTGTGAATATGTA

>PGSC0003DMG400037098-(rev)LRR-RLPs\_3599

ATTTTAAAAAATAATTTTAAATCAGTTTTAGAGAATAGGAAGTAACTGTGAATATGTATTTATTATTAA  
ACAAAAGCTCTACAAAGTAACGTATGTGGTCCTTTTTGTGGAAAGGTA

>PGSC0003DMG400037098-(rev)LRR-RLPs\_3782

AATAATAATAATAACAACAATGATAGCGCTTAAGTGTGAGCACCACAAAAATCAGAATATTTAAATA  
ATTTAAATTTTAAAAAATAATTTTAAATCAGTTTTAGAGAATAGGA

>PGSC0003DMG400037098-(rev)LRR-RLPs\_3843

ATTTAAATAATTTAAATTTTAAAAAATAATTTTAAATCAGTTTTAGAGAATAGGAAGTAACTGTGA  
ATATGTATTTATTATTTAAACAAAAGCTCTACAAAGCACTAATAATAATA

>PGSC0003DMG400037098-(rev)LRR-RLPs\_4026

AGATGGAGATACTTAACTTGACACAAAATCAGTTCTATGGAGAATTGCCTGAACTCGTGTGCAATTTGTG  
GTTGAGTTGCAATTACTTTATTCAAGTTAATTCAGAAAAAGGTTGTTGAT

>PGSC0003DMG400037098-(rev)LRR-RLPs\_4087

CAATTTGTGGTTGAGTTGCAATTACTTTATTCAAGTTAATTCAGAAAAAGGTTGTTGATGTGAGAATGAA  
GTGCCCTTGCCTCATGAATCAATTGGACGTCAACAACCTTACACTGCTTT

>PGSC0003DMG400037098-(rev)LRR-RLPs\_4209

AACCACATTCCTTGTAATAGTATCAGAGATTATAGCAGAATGGCTCACTAATGCATCTATGTTTTGATAC  
CAATTGTTAAGTTTTACTACTTATCTTAATTCATCTATTTTAAAGTTTA

>PGSC0003DMG400037098-(rev)LRR-RLPs\_4270

TTTTTGATACCAATTGTTAAGTTTTACTACTTATCTTAATTCATCTATTTTAAAGTTTAAATAAATCATATGCA  
AACATCGAAAGAAGGATGCATCAAAGGAGTCAATTAACATCACAAT

>PGSC0003DMG400037098-(rev)LRR-RLPs\_4331

AAATCATATGCAAACATCGAAAGAAGGATGCATCAAAGGAGTCAATTAACATCACAATTGGTATGCAT  
TTGTAGTAGTGTCAAATGGAATGATTTAACTCAAATTGACAACTTCAAAT

>PGSC0003DMG400037098-(rev)LRR-RLPs\_4880

ATTAGGGACAACATAAAAAAGAAATTCTAAAATTGTATAAAAAAATGGTATAAACAGTATAACCAATTAC  
AAATAAATTTTATGTAGTTTCTTTTACCAGAAAGCTTAAATTTTAAAAAAA

>PGSC0003DMG400037098-(rev)LRR-RLPs\_4941

CCAATTACAAATAAATTTTATGTAGTTTCTTTTACCAGAAAGCTTAAATTTTAAAAAAAAGTTCATACCAA  
AATCTATTCCAATTTCAAACCTTATATTATGTAATCTCAAAAAAAAAAAG

>PGSC0003DMG400037098-(rev)LRR-RLPs\_5246

GAAGTCATCCATTACAACAAAATGAAGATTATTGAATAGAAACGAATTGGAAGTGTGAGTGACGA  
CAAATTACAAAAAAATTAAGATTATTCTATATAATATGATTATACTTGTG

>PGSC0003DMG400037098-(rev)LRR-RLPs\_5551

TATGAAATTCAAGTTACTTTTATATAATTTTTTACATTTGGAATTTAAATTATATTTGGAAATCATCTCAA  
AAGATTTTAAATTATAAGTTAAATATTTTCAATTAATTAGTTTGTGTTA

>PGSC0003DMG400037098-(rev)LRR-RLPs\_5673

TTATGGTTATAATTTTGTGAGTCAATTAGTTTATTATATTTTATTTTGTAAAGTTAAGATGGTCGTTATTTAA  
TTTGTGTTATTAAAGTTCAAGTTGTTAAAATTCAGGAAACGGAGTCAATT

>PGSC0003DMG400037098-(rev)LRR-RLPs\_5734

TCGTTATTTAATTTGTTGTATTAAAGTTCAAGTTGTTAAAATTCAGGAAACGGAGTCAATTTGACTAAATTGT  
TAATTTATATGGCTATTCCTTAATTACAAATCTCTTGCCTCACCTCCAA

>PGSC0003DMG400037098-(rev)LRR-RLPs\_5795

ACTAAATTGTTAATTTATATGGCTATTCCTTAATTACAAATCTCTTGCCTCACCTCCAACCCATGAAAAGAC  
CAAATTGGGCCAGCCCAATTCCTGTAAAACCCAGCCCAACGTTTACA

>PGSC0003DMG400037098-(rev)LRR-RLPs\_5856

CATGAAAAGACCAAATTTGGGCCAGCCCAATTCCTGTAAAACCCAGCCCAACGTTTACAATACCTACAGC  
AAGCAGCAGGATAATACACAATTCCAAATTTGGGCCGACCCCAATTCGTGTA

>PGSC0003DMG400037098-(rev)LRR-RLPs\_5917

ACCTACAGCAAGCAGCAGGATAATACACAATTCCAAATTTGGGCCGACCCCAATTCGTGTAATCCCAGCC



CACATTCAACTCCAACCTTCACAACGTCTATAATCGATAATTCCAACGTTC

>PGSC0003DMG400037098-(rev)LRR-RLPs\_5978

TCCCAGCCCACATTCAACTCCAACCTTCACAACGTCTATAATCGATAATTCCAACGTTACAGCGTCTGCT

ACACTTCCAACAGTGTAACGTTTCATCAATGGCGTGAATACAACAACGGC

>PGSC0003DMG400037098-(rev)LRR-RLPs\_6039

AGCGTCTGCTACACTTCCAACAGTGTAACGTTTCATCAATGGCGTGAATACAACAACGGCAGCGTGAGAC

ACCAAGAACAGTCGCGTCGTTCTCCTCCTCACCTCGGTAGCAGGTGTCCT

>PGSC0003DMG400037551LRR-RLPs\_0

ATGATGATGGCTACCAAATATTTCTCTACTTCATTTTTTCACTCTTTATATTTCTTCACAATTACTTTTG

CTTCTATTGAGGAAGCAACTTCTCTCCTAAAATGGAAATCATCTTTG

>PGSC0003DMG400037551LRR-RLPs\_1024

ACGATACATCGTCATTGCTAGATCAAGAAATCAATTCTCAATTTCTCATTGAATGGAAGGCGATTCTTTTG

GGCTATGGATGTGGACTATGTATTGGATTTTCCATTGGATATTTTCATGA

>PGSC0003DMG400037551LRR-RLPs\_1149

ACTGAAAACCAAATGGCTTTCAAGATTCATTGAAGAATATGAACACACAATTACTACGCGAAGGAGA

AAAAAGCAACGAGATCAAAGGGACAACAAAAGAAGAAATAATCGCTTCTAA

>PGSC0003DMG400037551LRR-RLPs\_256

ATGATTTTCCATTTTCGACTCTCATTTTTCTTGAATATGTTAATCTTAGTATAAATCATTCTCTGGAATCAT

TCCACTTGAAATTGGTAAACTACTAATCTTGTCCGTCTTGATTTGT

>PGSC0003DMG400037551LRR-RLPs\_320

TGGAATCATTCCACTTGAAATTGGTAAACTACTAATCTTGTCCGTCTTGATTTGTCCAACAATTATATTTT

AGGCACCATCCCACCACAAATCGACTCACTAGCCAAGCTTGAAACCTT

>PGSC0003DMG400037551LRR-RLPs\_384

TATATTTTCAGGCACCATCCCACCACAAATCGACTCACTAGCCAAGCTTGAAACCTTCCACATCTCTAAGAA

CCAGTTAAATGGTTCGATTCCAAGAGAAATAGGTTACCTAAGGTCTCTT

>PGSC0003DMG400037551LRR-RLPs\_640

TCAATCTTATTGAACTTATCTTGATTCAAATCAGTTAGCAGGTCATATTCCTCCAGAAATAGGTAACCTTG

ATCAATGTAAGAGTGTTCTCTGCTTTCTCCAACGGAATTTCTGGTCCCA

>PGSC0003DMG400037551LRR-RLPs\_704

TAACTTGATCAATGTAAGAGTGTCTCTGCTTTCTCCAACGGAATTTCTGGTCCCATTCTGTAGAAATAG  
CAAAGATGCAAACACTTGAGGAATTGGACCTATCAGTCAACTCGCTAGA

>PGSC0003DMG400037551LRR-RLPs\_768

GAAATAGCAAAGATGCAAACACTTGAGGAATTGGACCTATCAGTCAACTCGCTAGAAGGAGAGATACC  
AGAACAACCTCGTTTCTTTCAAATCTTGAAATATTGAATCTCTCCTACAAT

>PGSC0003DMG400037551LRR-RLPs\_832

TACCAGAACAACCTCGTTTCTTTCAAATCTTGAAATATTGAATCTCTCCTACAATCTTCTCACAGGATGCA  
TACCTCAAGGACGTCAATTTGATACCTTTGAGGAAAGTTCGTATGCAT

>PGSC0003DMG400037551LRR-RLPs\_896

AGGATGCATACCTCAAGGACGTCAATTTGATACCTTTGAGGAAAGTTCGTATGCATTCCAAGGTAATATT  
GGATTACGTGGACTCCCAGTTACAAGACGTTGCCATAATAATGGGGTAGA

>PGSC0003DMG400037551LRR-RLPs\_960

AATATTGGATTACGTGGACTCCCAGTTACAAGACGTTGCCATAATAATGGGGTAGAAGAAGGAAACGAT  
ACATCGTCATTGCTAGATCAAGAAATCAATTCTCAATTTCTCATTGAATGG

>PGSC0003DMG400037653LRR-RLPs\_1220

TAGATGGTTAGATTAACAATTATAAAGTACATAAATTTGTCATAGCACTATTTTTTTGTGGATTATTTTTTC  
TCTATCCTTCACTAATTTCTTTGAAATTATTTACCAGGTCGTGTTCA

>PGSC0003DMG400037653LRR-RLPs\_1403

ACGTGACAAAGAATAATTTGTATGGAGCAGCTAGCCTTTTGCAGAACTCGCCTCTTTTGGAGACACTCAA  
CATACCCTTGAGAGCTAGAGCTGTAATTTCTCGCAATTTATTCTTTGCTT

>PGSC0003DMG400037653LRR-RLPs\_1464

GACACTCAACATACCCTTGAGAGCTAGAGCTGTAATTTCTCGCAATTTATTCTTTGCTTTTAAATCTTTGAT  
TTTTAAGTTTTAAGAACTCCCCAGCCCCAACCTCACCAGTTCAAATA

>PGSC0003DMG400037653LRR-RLPs\_1525

AAATCTTTGATTTTTTAAGTTTTAAGAACTCCCCAGCCCCAACCTCACCAGTTCAAATATTTTCTTAAGGA  
GGATGGAAATATTAATTTAATTAACACTAAGAATTTTTTTTGTCACTGT

>PGSC0003DMG400037653LRR-RLPs\_1647

TTGCTTTCTATCTGGTAAATGTACTTAGAAAGCAATGGTGACAACTAAGCCTGTTTACTTTTCATCTAC  
TGCTTGAGCATATCTGGTAGGGATAAGATATTGTAATCAATTGCTGAGA

>PGSC0003DMG400037653LRR-RLPs\_1708

TTTCATCTACTGCTTGAGCATATCTGGTAGGGATAAGATATTGTAATCAATTGCTGAGAACTGTTCCAAG  
GTTTGTGGATTCTGAAAATTATTCTATATTAGACTATTGCAAATGCACTT

>PGSC0003DMG400037653LRR-RLPs\_1769

TGTTCCAAGGTTTGTGGATTCTGAAAATTATTCTATATTAGACTATTGCAAATGCACTTCCTTTTTGTGTTA  
CATGGTATATTCCCATTCTGTTGTGGATCTCCATTTGATTCTGATTA

>PGSC0003DMG400037653LRR-RLPs\_2318

ATTGTAGCTTTTGATTTACTGCAGATGCAAATTATTAAGTGGTGGCATTCTAGTCGTTGCATATATGTGTT  
TGTAATTTTCTTGCAAACTGTGAGATCGGCAAACCTACAAGACATGT

>PGSC0003DMG400037653LRR-RLPs\_2379

TATATGTGTTTGTAAATTTTCTTGCAAACTGTGAGATCGGCAAACCTACAAGACATGTTTATTTACTCAG  
ACATAAGTTGGTATTTTGTCTTTTAACTTCATCAAACCTCTGGCTTGAG

>PGSC0003DMG400037653LRR-RLPs\_2684

GTGTGGTGCGGGTTGAAGCAATTTTTTTGAAAATCATAAGCGGGGTGGGGTGGTATGTGCCTCGTGGG  
TTAGACGAATGTAAGTTTAAGACTCGTTTCTTTGATCGTTTGACTGTCTGTG

>PGSC0003DMG400037653LRR-RLPs\_2745

TCGTGGGTTAGACGAATGTAAGTTTAAGACTCGTTTCTTTGATCGTTTGACTGTCTGTGGTTGTATTCAAT  
GGAGAAATACGGTGAGTGAGTACTCATATAGCTAATTTTAACTTATTTG

>PGSC0003DMG400037653LRR-RLPs\_2806

TGTATTCAATGGAGAAATACGGTGAGTGAGTACTCATATAGCTAATTTTAACTTATTTGAAACTTTGGCA  
AATATCCAGACTTCGGCCTTATTTATTTTCATTAAGATTAATCTTTTCTC

>PGSC0003DMG400037653LRR-RLPs\_2867

ACTTTGGCAAATATCCAGACTTCGGCCTTATTTATTTTCATTAAGATTAATCTTTTCTCAAAGCATATTTAA  
GTGCCTATGGTAAAATATCTACTTTGATTGCTCTTCTTTTCTTACTT

>PGSC0003DMG400037653LRR-RLPs\_2928

AGCATATTTAAGTGCCTATGGTAAAATATCTACTTTGATTGCTCTTCTTTTCTTACTTTATTTGACTAAAG  
TTGTGGACATCTTGTTGATCTTCTTAACTCTATTTTCAAACCTAAAA

>PGSC0003DMG400037653LRR-RLPs\_2989

TTTGACTAAAGTTGTGGACATCTTGTTGATCTTCTTAACTCTATTTTCAAACCTAAAAACTAGCATTGAA

AATGGAGAATACAAAATATTAATTGATTGATTGATAGTTGAAAAAAT

>PGSC0003DMG400037653LRR-RLPs\_3050

TAGCATTGAAAATGGAGAATACAAAATATTAATTGATTGATTGATAGTTGAAAAAATGAGTAAGAAG

GAAGTTGCTCTCAAAAAAAGAAATTAAGCCCGAGTTTGAGAGAGAAATAA

>PGSC0003DMG400037653LRR-RLPs\_3111

GTAAGAAGGAAGTTGCTCTCAAAAAAAGAAATTAAGCCCGAGTTTGAGAGAGAAATAAATGCAGTCT

GAATAGAACTCTTTCATAGATCAGATGTATTCAGACTATTAAGATACTCT

>PGSC0003DMG400037653LRR-RLPs\_3172

GCAGTCTGAATAGAACTCTTTCATAGATCAGATGTATTCAGACTATTAAGATACTCTAAAAAAAACA

ACTATATATTGGACTTAGGTTTAAATGCAAATAATCAGGTCTACAGGCT

>PGSC0003DMG400037653LRR-RLPs\_3233

AAAAAAACAATAATATTGGACTTAGGTTTAAATGCAAATAATCAGGTCTACAGGCTTAAATAGGTTT

AGTAACCGTTCTTCTCAATTTTGAGCCATAACTCAGATCAAAACAATGGA

>PGSC0003DMG400037653LRR-RLPs\_3294

AATAGGTTTAGTAACCGTTCTTCTCAATTTTGAGCCATAACTCAGATCAAAACAATGGATTCCCGCAGTA

ATTGCCCGGCGTCAAAGAAACAAAAGAAGAGTATCGCCGGAGTTGAAGAA

>PGSC0003DMG400037653LRR-RLPs\_3355

CCCGCAGTAATTGCCCGGCGTCAAAGAAACAAAAGAAGAGTATCGCCGGAGTTGAAGAAACCGTCGAC

AGAGTCAATGATTACAAAAGAAGAGTGTCCGGAGTGAAGAAACCGTCG

>PGSC0003DMG400037653LRR-RLPs\_3416

CGTCGACAGAGTCAATGATTTACAAAAGAAGAGTGTCCGGAGTGAAGAAACCGTCGACCGAATCA

GTGATTTGCCAGACTCTTCTTATTAGATTCTCTCTCTTTTGCCAACAAA

>PGSC0003DMG400037653LRR-RLPs\_3477

CGAATCAGTGATTTGCCAGACTCTTCTTATTAGATTCTCTCTCTTTTGCCAACAAAGGATGCCTTCACA

ACCTCTATTCTCTCGAAAAGGTGGCAGTATCTCTGGACTTCAATTGAT

>PGSC0003DMG400037653LRR-RLPs\_3538

ATGCCTTCACAACCTCTATTCTCTCGAAAAGGTGGCAGTATCTCTGGACTTCAATTGATAACTTCATTTTT

AATTGTAGCAATTATGGAGAAAATTCGTACCCTTTGTTGATTATGTAT

>PGSC0003DMG400037653LRR-RLPs\_3599

CTTCATTTTTAATTGTAGCAATTATGGAGAAAATTTTCGTACCCTTTGTTGATTATGTATTAGCTCATTCCGA  
TTCGCCCAAATTAATAAATTTGAACTCGACTACACGAACGAGTTTGT

>PGSC0003DMG400037653LRR-RLPs\_3660

GCTCATTCCGATTCGCCCAAATTAATAAATTTGAACTCGACTACACGAACGAGTTTGTGTACGACTACC  
AATCTCAAATCAGTCAATGGCTTAGTTTTGCTGTTAAAAGAAAAGTGGAA

>PGSC0003DMG400037653LRR-RLPs\_3721

ACGACTACCAATCTCAAATCAGTCAATGGCTTAGTTTTGCTGTTAAAAGAAAAGTGGAACATGTTGTACT  
CTGGTCCACTGATTTAATGGCGGACGAATGCACAATGACTCAATCTTTCT

>PGSC0003DMG400037653LRR-RLPs\_3782

TGTTGTACTCTGGTCCACTGATTTAATGGCGGACGAATGCACAATGACTCAATCTTTCTGTGCATGTTTCGT  
CGTTGATATCATTAGTTTTGGGTCCAATTAAGTTTGATGTTGATGTGGT

>PGSC0003DMG400037653LRR-RLPs\_3843

GCATGTTTCGTCGTTGATATCATTAGTTTTGGGTCCAATTAAGTTTGATGTTGATGTGGTCATAGCCTGGA  
AGTCTCTAACGAGCATAAAGTTGGGGAATTTGTTTTAGACAATGACACA

>PGSC0003DMG400037653LRR-RLPs\_3904

TAGCCTGGAAGTCTCTAACGAGCATAAAGTTGGGGAATTTGTTTTAGACAATGACACAATTGCAAACCT  
ATTGTCAGGATGTCCTGCATTGGAACTATGGAATTATATGATTTAGTTT

>PGSC0003DMG400037653LRR-RLPs\_3965

TGCAAACCTTATTGTCAGGATGTCCTGCATTGGAACTATGGAATTATATGATTTAGTTTTGATTAAGGGT  
CCTTGTCGCATGGAAATTTTCGTCTTCAAATTAAGACATTGAAGCTGAA

>PGSC0003DMG400037653LRR-RLPs\_4026

ATTAAGGGTCCTTGTCGCATGGAAATTTTCGTCTTCAAATTAAGACATTGAAGCTGAAAGGTCATTGGA  
AAGTAGGTCTTCAATTTTATCGTCGTATTTTGGAAATATATGCCCCATAT

>PGSC0003DMG400037653LRR-RLPs\_4087

GTCATTGGAAAGTAGGTCTTCAATTTTATCGTCGTATTTTGGAAATATATGCCCCATATCTTCAGCATTG  
GAAATTTTCAGGAGATCTTTATGATCTCAGGTGTATACTTTTTGATGTGT

>PGSC0003DMG400037653LRR-RLPs\_4148

TCAGCATTTGGAAATTTTCAGGAGATCTTTATGATCTCAGGTGTATACTTTTTGATGTGTCCTCCGTTGTTA  
CTGCTAAGCTTACCTTCAACGTTAGGTGTATCAAAGACATCCTAGATGA

>PGSC0003DMG400037653LRR-RLPs\_4209

TCCGTTGTTACTGCTAAGCTTACCTTCAACGTTAGGTGTATCAAAGACATCCTAGATGATCATTGTCAGG  
AATTTGATCCTCATGAAGACAGTTGTAGTTACTATCATCATTTTCCTCAAG

>PGSC0003DMG400037653LRR-RLPs\_4270

ATTGTCAGGAATTTGATCCTCATGAAGACAGTTGTAGTTACTATCATCATTTTCCTCAAGATCCTCATCCAC  
ACTTATCTTCTAGCGTTCCGTAATGCAAACGAGTTAACAATTGGAGCTT

>PGSC0003DMG400037653LRR-RLPs\_4331

CCTCATCCACACTTATCTTCTAGCGTTCCGTAATGCAAACGAGTTAACAATTGGAGCTTTGTTTCGCAGAG  
GTTTGTCTTCTATCTCAGAGTCCTGTTCTCTGTTTATTAGCAGACAGT

>PGSC0003DMG400037653LRR-RLPs\_4392

TTCGCAGAGGTTTGTCTATCTCAGAGTCCTGTTCTCTGTTTATTAGCAGACAGTTGTTTCTATCACA  
GAGGTCTGTTTGTCAAATACTGGATTATTTGCAGAACTTGTGGCC

>PGSC0003DMG400037653LRR-RLPs\_4453

TTTCTATCACAGAGGTCTGTTTGTCAAATACTGGATTATTTGCAGAACTTGTGGCCTTTTTGTGCTTTT  
TAGTCAACTTTCTGATGTTTGTATTTCTTGTTCATATTGGCAAAGAA

>PGSC0003DMG400037653LRR-RLPs\_4514

TTTGTGCTTTTTAGTCAACTTTCTGATGTTTGTATTTCTTGTTCATATTGGCAAAGAAATATCTGAAAACC  
AGGATTCTTGTGCGTCATGTTGCTTAAAGTGTTTAGATGATTTGATTT

>PGSC0003DMG400037653LRR-RLPs\_4575

ATCTGAAAACCAGGATTCTTGTGCGTCATGTTGCTTAAAGTGTTTAGATGATTTGATTTGTCACATAACTT  
TTCTTGCTGTGGAGTACTTCTTTTTGTTGTTATTGTTTTCTCCATTCT

>PGSC0003DMG400037653LRR-RLPs\_4636

CACATAACTTTTCTTGTGCTGGAGTACTTCTTTTTGTTGTTATTGTTTTCTCCATTCTTTATATTATTAGTTT  
AATTGGAATTGTTGCACCAGGTTCTGTGTATGTTGCAGTTCCAAGG

>PGSC0003DMG400037653LRR-RLPs\_4697

ATATTATTAGTTTAATTGGAATTGTTGCACCAGGTTCTGTGTATGTTGCAGTTCCAAGGGATTCCGCTTCC  
AGAATTGAAATGCAAATATCTGACTCTAGAGTTGCATGAGGAGAAGTTT

>PGSC0003DMG400037653LRR-RLPs\_4758

TTCCGCTTCCAGAATTGAAATGCAAATATCTGACTCTAGAGTTGCATGAGGAGAAGTTTAGTTTGTATGG

AGTTGCTGGCCTTCTGCGAGCATCACCTCATGTAGAGACTCAACATAG

>PGSC0003DMG400037653LRR-RLPs\_4819

TTTGTATGGAGTTGCTGGCCTTCTGCGAGCATCACCTCATGTAGAGACTCAACATAGATATATCAACG  
GTGGCACTCGACACAGATATATCAACAGATCATGTAACCTCCTGGAACCT

>PGSC0003DMG400037653LRR-RLPs\_4859

GTAGAGACTCAACATAGATATATCAACGGTGGCACTCGACACAGATATATCAACAGATCATGTAACCT  
CCTGGAACCTCCTCTCTTTTACATCCATTCATTTTATGAAGTTTAA

>PGSC0003DMG400037653LRR-RLPs\_976

TTAAGTTCAAGTGAACATTGCGGAATGTAACTTGTGAAAGAGAAGAGCCTTCAGAATCTAATAAAATT  
ATGAACTTCTGTATACACGAAAATTTAGTGAGAATATTTTTTGATCGACT

>PGSC0003DMG400037662LRR-RLPs\_1008

ATACCATCTTCGGTGTGGCCTCCCTTTGCTATCTTCATTATTGCTCCAACATAATCAATTTAGTGGACTA  
GATGATGAGCTCAAAACAAACCAACATTAGCACACCTGGGTTTAAGC

>PGSC0003DMG400037662LRR-RLPs\_1071

AGTGGACTAGATGATGAGCTCAAAACAAACCAACATTAGCACACCTGGGTTTAAGCCATAATCAACTC  
AGTGGTTCTTTGCTTCAATCACTTTTGAATCTCACAAACCTTTCTATGCTT

>PGSC0003DMG400037662LRR-RLPs\_1134

CAACTCAGTGGTTCTTTGCTTCAATCACTTTTGAATCTCACAAACCTTTCTATGCTTGACCTTTCATCAAGT  
AACATCACCGTTCATGTGGGAAAACAAATCACTTTTCTGACCTAGAA

>PGSC0003DMG400037662LRR-RLPs\_1197

TCATCAAGTAACATCACCGTTCATGTGGGAAAACAAATCACTTTTCTGACCTAGAAAGTTTTGCGGTTAT  
CATCTTGTGAACTAAAGGATTTCCACACTTCTTGAGAAATGTGAAGACA

>PGSC0003DMG400037662LRR-RLPs\_1257

TTGCGGTTATCATCTTGTGAACTAAAGGATTTTCCACACTTCTTGAGAAATGTGAAGACTTTGGCTCTT  
GGATATTTCTAACATAAGATTCGTGGCCAAATCCCAAACTGGTTTAG

>PGSC0003DMG400037662LRR-RLPs\_126

TATTCTTCTTCAATCCCGCATAACATTGGCCGATTGAGGAATTTGAGGTATCTCAACCTTTCTCAATCTTTC  
TTTGAAGGGGAAATCCCAACAGAAATATCATACCTTTCCAATTTGGTT

>PGSC0003DMG400037662LRR-RLPs\_189

CAATCTTTCTTTGAAGGGGAAATCCCAACAGAAATATCATACCTTTCCAATTTGGTTTCACTTGAACCTTTT  
TGTTACGGATGTGAACTTGATGAGAGAACATTTGAAACAATTCTTCAC

>PGSC0003DMG400037662LRR-RLPs\_315

ACAAATCTGGAGGTAGTTTCTCTCCTTGGTGTCAACATCTCATCTTCAATACCTGTGAATATTTCTTCATCC  
TCCTTACGGTACGTGGATCTTGGACATACTAATCTGCGAGGTGTTATC

>PGSC0003DMG400037662LRR-RLPs\_378

TCTTCATCCTCCTTACGGTACGTGGATCTTGGACATACTAATCTGCGAGGTGTTATCACAGAGAGCTTTTT  
CCTTCTGCCAGAATTGGAAAATCTCAAATTGAATGGAAATGATCTTCTC

>PGSC0003DMG400037662LRR-RLPs\_441

AGCTTTTTCTTCTGCCAGAATTGGAAAATCTCAAATTGAATGGAAATGATCTTCTCAAAGGAGTTTTACC  
AAAGATCCACCCGAGCAACACTCTGTTGGAGTTGGATATTTCTACACA

>PGSC0003DMG400037662LRR-RLPs\_567

TCCGGTGAGCTGCCTGATTCAATTGGCACCTTGAGTTCATTGAATCTCTTGAACATGTATAGATGCCAATT  
CTCTGGTTCATTCTGAATCCATTGGCAATCTTACACAAATGCGGAAA

>PGSC0003DMG400037662LRR-RLPs\_630

TGCCAATTCTCTGGTTCATTCTGAATCCATTGGCAATCTTACACAAATGCGGAAATTGAATTTTGGAAA  
TAATCATTTACCCGCCATATTCCTTCCACAATCTCTAAATTGAAGCAC

>PGSC0003DMG400037662LRR-RLPs\_693

TTTGAAATAATCATTTACCCGCCATATTCCTTCCACAATCTCTAAATTGAAGCACCTCACATTTCTAGG  
TCTTTCGTCCAACCTCTTTTCAGGTGAAGTTCCCGACATTTTTTTCTAAC

>PGSC0003DMG400037662LRR-RLPs\_756

TTTCTAGGTCTTTCGTCCAACCTCTTTTCAGGTGAAGTTCCCGACATTTTTTTCTAACCTCCAAGAGCTACGT  
ACTTTATATCTTCGTAACAACAGCTTCGTTGGTTCGTTTCCTTCTACA

>PGSC0003DMG400037662LRR-RLPs\_882

AGCTTGACACATCTTCAAGACTTAGAATTGTCGAGTAATTCCTATCTGGCCAACCTGCCTATTAATGTGA  
GCATGCTTCAAAGCTAACCATATTGGATCTGTCGTACAACCTCACTGAAT

>PGSC0003DMG400037662LRR-RLPs\_945

AATGTGAGCATGCTTCAAAGCTAACCATATTGGATCTGTCGTACAACCTCACTGAATGGTACCATACCAT  
CTTCGGTGTGGCCTCCCTTTGCTATCTTCATTATTGCTCCAACATAAT



>PGSC0003DMG400037856-(rev)RLKWAX-EGF\_59

ATCCATCCCTAATGGGGCATGGAATGTTACTATAACACTAAGGAGCTATTATAATCATACTTATGTGAAA  
GATAACCCTAGTTGCAGCTATGCTTTTGTAGTTCAAGAAGCTAATTTTAG

>PGSC0003DMG400037968LRR-RLPs\_256

TGTTTGATAAATGGCTTGACATTGCACTTCAGAACAGTGTAACACATATTGTCTTTGGTGTTCTAGCCAT  
ACATCGTACCCCTTGCCTATTTTCAAATCTTTGCATCAAATCTTTAA

>PGSC0003DMG400037968LRR-RLPs\_640

AAGCACCAACTCTTGAACACTTGTCTTATGTTACTCAACCGGAAACATCTCCTAAGTTGGATATTGTTGAT  
GCTCCAAATTTGGTGTCACCTGTGTATAAGGGAAATCTAGTGCCTACGA

>PGSC0003DMG400037968LRR-RLPs\_768

GATGCTAAATTGCCATGGAGTTGTCATCCTAGGAGACTCCTCCTCGAGTCAAATGGTACAACGATTGCAT  
ATGTCATGGATCGTTTAATGTACATGAAGAGTTCAAATCAACTAAAAGAA

>PGSC0003DMG400037968LRR-RLPs\_832

TTGCATATGTCATGGATCGTTTAATGTACATGAAGAGTTCAAATCAACTAAAAGAAGTAAAAGTCTATAG  
ATTTGATTGGGGAGAAGTGAGATGGCATTTTGTGGAACCTCGGAAGGGAAA

>PGSC0003DMG400038191-(rev)LRR-RLKs\_0

ATGGGTTCCCTGCCAATGGAGATTGGAGATATAACAAACCTTGCAAGTTTTGACCTTTCTTACAACAATT  
TCTCCGGCATGATTCCAAGCACCATAGGGAAATGTTTGGCCTTGGAAATTA

>PGSC0003DMG400038191-(rev)LRR-RLKs\_132

CACAATTCATTTGAAGGGTCCATCCCGTACATAGCTGACTTACAAAACCTACGGGAGCTAGACCTTTCAA  
GAAACAACCTTATCAGGAGAAATTCCACCTTGGACTATGAATCTTTCCTCC

>PGSC0003DMG400038191-(rev)LRR-RLKs\_198

TCAAGAAACAACCTTATCAGGAGAAATTCCACCTTGGACTATGAATCTTTCCTCCCTACTGTACCTGAATCT  
TCCAGACAACAATTTAGAGGGTGAGGTTCCCGTCCAAGGAGTATTCTCA

>PGSC0003DMG400038191-(rev)LRR-RLKs\_264

AATCTTCCAGACAACAATTTAGAGGGTGAGGTTCCCGTCCAAGGAGTATTCTCAAATTC AACCGCATTAC  
AAGTTGAGGGGAATCCCAAGCTTTGTGGTGGAATCCAAGAGTTTGATTTA

>PGSC0003DMG400038191-(rev)LRR-RLKs\_396

AAGCAAGAAAACAATAGAACAAGAGGAAGCGTCTTACACCCGTTCTGACTACAATTATCAGTATTGTTT

TATTTGCTGCAATAGCATGTTTTCTGCTTTCTATGTTTTTTATTAAGA

>PGSC0003DMG400038191-(rev)LRR-RLKs\_462

GTTTTATTTGCTGCAATAGCATGTTTTCTGCTTTCTATGTTTTTTATTAAGAATCCAGAAAACGAAGAGA

TGCAACATCTACATCTGGGCATCTCATCTTCCCCATGATTACATATAAG

>PGSC0003DMG400038191-(rev)LRR-RLKs\_594

GTAACATAATGGTTTTTCTTCAGATAGGTTGTTAGGATCAGGCAGTTTCGGCACTGTGTACAAAGGAATTC

TTCATCTCATCGAATGAAAATCCAGTTGCAGTCAAGGTAACCTCCAA

>PGSC0003DMG400038191-(rev)LRR-RLKs\_66

AATTTCTCCGGCATGATTCCAAGCACCATAGGAAATGTTTGGCCTTGAATTACTTTACATGCAACACA

ATTCATTTGAAGGGTCCATCCCGTACATAGCTGACTTACAAAACCTACGG

>PGSC0003DMG400038191-(rev)LRR-RLKs\_660

ATTCTTCACTCATCGAATGAAAATCCAGTTGCAGTCAAGGTAACCTCCAAAGTCACGGTGCATCTA

AAAGCTTCATGACTGAATGCCACGGCTTGAGAAACACCCGGCATAGAAAC

>PGSC0003DMG400038191-(rev)LRR-RLKs\_726

TCTAAAAGCTTCATGACTGAATGCCACGGCTTGAGAAACACCCGGCATAGAAACCTGGTGAAAGTCAGA

ACTGCATGCTCCAGCATTGACATCAAAGGAAATGACTTTAAGGCCATAATG

>PGSC0003DMG400038191-(rev)LRR-RLKs\_792

AGAACTGCATGCTCCAGCATTGACATCAAAGGAAATGACTTTAAGGCCATAATGTATCAGTTCATGGAA

AAGGGAAGCTTGAGAGGAGTGGTTACATCAAGAATACTGCAATGGTTGCTGA

>PGSC0003DMG400038314LysMRLKs\_248

TGTCACGAGGCTTACAGTGTTCGCGCCAGAAAAGGAGGTTATAATTCCAGTGGACTGCTCTTGTTTCAGG

TTCGTATTATCAAAGCCAAAACCATGTACTATATATCACCTCTTATTGAAA

>PGSC0003DMG400038495-(rev)LRR-RLPs\_0

ATGTGGGATGAAAGCAGTATTGACTGTTGCCAGTGGCCAGGTGTAAGTTGTGATGAGGAAGGTCATGT

GCTTGTCTGGAGTTGGACAGCGAAGCCATTTCTGGCGGAATTGAGAAGTCA

>PGSC0003DMG400038495-(rev)LRR-RLPs\_1008

CTTCTTCCCTGCCATCATTGCAGTACCTTAGTGTTTCAGAACAGTCAATTAAGTGGAGAAATCCATGAATT

TCCTAATGCATCCTCCTCTGTTCTGGAAATGCTTGATTTGAGCAATAAC

>PGSC0003DMG400038495-(rev)LRR-RLPs\_1071

CATGAATTCCTAATGCATCCTCCTCTGTTCTGGAAATGCTTGATTTGAGCAATAACCATCTAAGTGGATC  
GATCCCCCGGTCTATCTTTAACTCAATAGGCTTTCAAACCTCTTCCTT

>PGSC0003DMG400038495-(rev)LRR-RLPs\_1134

AGTGGATCGATCCCCCGGTCTATCTTTAACTCAATAGGCTTTCAAACCTCTTCCTTTTCTCCAACCTCCTTC  
AGTGGAACCATTGTTATCGAAGCGGTAAAGGGACTTCCTAGGCTTACC

>PGSC0003DMG400038495-(rev)LRR-RLPs\_1323

AATCTTTCTCACAATCTTTTAGAGTCTCTAGAAAAACCACACAATTTGTATACTACTTCTATTGTCATTGAT  
TTGAGTTCCAATAAGATCAAGGGAGATATACCCATTCTACCTACTTCT

>PGSC0003DMG400038495-(rev)LRR-RLPs\_189

ATACCAAGAGAAATTTATAAGCTGGCAAACCTTGATGTACCTGAATTTGTCACATAGTTTTAACGGGCAGA  
TTCCTATGGAATTGTCAAGATTGATCAAGTTAGAGATTCTTGACCTTTCT

>PGSC0003DMG400038495-(rev)LRR-RLPs\_2079

AACCAACTTCAGACATTCTCAGCAGATTCCTTTGAAGGGAACATTGGGCTGTGCGATTTTCCTTTAAAGA  
AAACGTGCAGTGACACCAAAGAGACTGAACGTGAAATTGATGGGAAATAT

>PGSC0003DMG400038495-(rev)LRR-RLPs\_2205

TTTGCCTTGGGATCTTCTGTCGGTTTTGGCATCATAACCTGGCTGATTTTGCATAGCCGAAAATATAATGA  
GCTCGTTGATATACTTCTTTTCAGAATTTTGGGTCAGCACCAAAGGAGT

>PGSC0003DMG400038495-(rev)LRR-RLPs\_2238

ATAACCTGGCTGATTTTGCATAGCCGAAAATATAATGAGCTCGTTGATATACTTCTTTTCAGAATTTTGGG  
TCAGCACCAAAGGAGTGGCAGGAATAAAAACCAGAGAAGGTCAAGGTAA

>PGSC0003DMG400038495-(rev)LRR-RLPs\_441

TCTCTGCCTCAATTGAGAGTCTTGTCATGAGAGACTGTAAAATTCAGGCCCTCTTGATCCTGTCCCTTTT  
AAATCTTCGTTTTCTTTCCGTCATTCGTCTTGATTATAACTACTTGTCC

>PGSC0003DMG400038495-(rev)LRR-RLPs\_504

GTCCTTTTAAATCTTCGTTTTCTTTCCGTCATTCGTCTTGATTATAACTACTTGTCCACTATGGTTCCAGATT  
TTACAAAATTGACAATCCTAAGCGTCAGATGGTGCTACTTGTGGT

>PGSC0003DMG400038495-(rev)LRR-RLPs\_567

GTTCCAGATTTTACAAAATTGACAATCCTAAGCGTCAGATGGTGCTACTTGTGGTCCATTTCCAGTAA  
AATCTTTTCAGGTACCAACTCTACAGCAACTTGATTTATCTGGCAATGAA

>PGSC0003DMG400038495-(rev)LRR-RLPs\_63

CATGTGCTTGTCTGGAGTTGGACAGCGAAGCCATTTCTGGCGGAATTGAGAAGTCAAGCAGTCTCTTC  
CATCTTCGATATCTTGAGAAGCTCAATCTGGCTTATAATGGCCTATAACCCT

>PGSC0003DMG400038495-(rev)LRR-RLPs\_882

CTAGATTTGTCATTCAACAGTTTTACTGGCTCTATCCCACTCTTTCATAAGGCAAAGAAGCTCAACCACAT  
TGACCTTTCTAATAACAATGGTCCACTATCTTCAGCTCAAACCTCAATTA

>PGSC0003DMG400038495-(rev)LRR-RLPs\_945

AACCACATTGACCTTTCTAATAACAATGGTCCACTATCTTCAGCTCAAACCTCAATTAGCAGTTCTTCTTTCC  
CTGCCATCATTGCAGTACCTTAGTGTTTCAGAACAGTCAATTAAGTGGA

>PGSC0003DMG400038918-(rev)LysMRLKs\_0

ATGAGTTGTAAAGGAACCAATGAAACAGGAACTACTGCTTCTTTTCTCTATTCTTGCAATGGTGAAAAGT  
TCTCCTGTCGATCATTCTGATTTTTAGATCAGATTCTACTTATAATTCT

>PGSC0003DMG400038918-(rev)LysMRLKs\_384

CTGTTTCCAGGTCTAAATTTACGGGTACCACTCAGATGTGCCTGTCCTACAAGGGATCAGTCAAGAAATG  
GTGTGAAATATCTGGTGACTCATTGGTTACATCGGGGGACAACGTTTCT

>PGSC0003DMG400038918-(rev)LysMRLKs\_448

GAAATGGTGTGAAATATCTGGTGACTCATTGGTTACATCGGGGGACAACGTTTCTAGCATTAGCGCGC  
AGTTCAGTGTGAGTAGTCAAAGTACAGCATATGCAAATGGATTATCTGAAA

>PGSC0003DMG400038918-(rev)LysMRLKs\_512

CGCGCAGTTCAGTGTGAGTAGTCAAAGTACAGCATATGCAAATGGATTATCTGAAAATTCAGTTATTTAT  
CCTTGACACAACAATACTGATTCCTCTGCCAAAAGAACCTTTAAGCTCCCA

>PGSC0003DMG400038918-(rev)LysMRLKs\_576

ATTTATCCTTGCACAACAATACTGATTCCTCTGCCAAAAGAACCTTTAAGCTCCCAAACAAGGACTATTAA  
GACTGCACACACTGAAATATTTTACCCTTCTAGGCACAAAATAACATAC

>PGSC0003DMG400038918-(rev)LysMRLKs\_64

AAAAGTTCTCCTGTCGATCATTCTGATTTTTAGATCAGATTCTACTTATAATTCTGTTTCTTCCATCTCAA  
AACTCCTATCTTTGAACCCTGATGATATTGTCCACATCAACAATATCT

>PGSC0003DMG400038918-(rev)LysMRLKs\_640

CTATTAAGACTGCACACACTGAAATATTTTACCCTTCTAGGCACAAAATAACATACCGCAGTCTTTTCATT

GGGGTAGGAACTGGTGTATCCCTTGCAGTCCTCTGTTTTATCTTGTTCA

>PGSC0003DMG400039004LRR-RLPs\_0

ATGCTTTTATCACGTGGTCAAATTGGAATGTAAATTTTCCTTCTATGGAGAGGATTTGTGCCACTACCGC

TTCTCAAATTTTGAGCAGAGGAAATATCCTTCCATTGAAATTCTTCCT

>PGSC0003DMG400039004LRR-RLPs\_1008

TCAGAGTGGGCTTCTTAGAATTACCGACGAGGGGCTCATCCCTCTTGTTCAAATTTGTGCAGCTAATTTG

GTGGCGGTGAATTTAAGCAGGTGTGTCAATATTACAGACATATCAGTTTC

>PGSC0003DMG400039004LRR-RLPs\_1071

TAATTTGGTGGCGGTGAATTTAAGCAGGTGTGTCAATATTACAGACATATCAGTTTCAACCATAGTTAAG

CTGAATGGGGGATCTCTGAAGTCTCTGCTCGTAGATGGTTGCAGACATGT

>PGSC0003DMG400039004LRR-RLPs\_1134

AGTTAAGCTGAATGGGGGATCTCTGAAGTCTCTGCTCGTAGATGGTTGCAGACATGTTACTGATGCAAC

ATTAGTAGAAATTTTGAAGTCTTGCCGGATGCTTAATGTACTAGATGTTTC

>PGSC0003DMG400039004LRR-RLPs\_1197

TGCAACATTAGTAGAAATTTTGAAGTCTTGCCGGATGCTTAATGTACTAGATGTTTCCAAGAGTGGAATC

ACCGATTCAGGGAGTAAACTTTGGCCAATGCTACACAACCTCACCTGCA

>PGSC0003DMG400039004LRR-RLPs\_126

TGCCTCTTTGAGGTATTCAAACGTCTTCCCAGTGGCCAAGAGAGAAGTGTCTATGCTTGTGTTTCCAAGC

GATGGCTTATGCTTTTAAAGCAACATTCACAAGGATGAGATTGCAGAATAT

>PGSC0003DMG400039004LRR-RLPs\_1260

TGGAATCACCGATTCAGGGAGTAAACTTTGGCCAATGCTACACAACCTCACCTGCAGATCCTCTCACTG

TCTGGTTGCCCTTTTGTGTCGGACAATAGCTTACCCTTCTTGCTCGATTT

>PGSC0003DMG400039004LRR-RLPs\_1323

CTCACTGTCTGGTTGCCCTTTTGTGTCGGACAATAGCTTACCCTTCTTGCTCGATTTGGTTCAAACCTTCA

GGGCTTGAACATAACAATTGTCTCGAAATAAGCTCTAGAACTGTTGA

>PGSC0003DMG400039004LRR-RLPs\_1366

TTCTTGCTCGATTTGGTTCAAACCTTCAAGGGCTTGAACATAACAATTGTCTCGAAATAAGCTCTAGAAC

TGTTGATGCACTTGTAGAGATAAATCCAATTTGTGATATCCTTTCCTAA

>PGSC0003DMG400039004LRR-RLPs\_189

TCCAAGCGATGGCTTATGCTTTTAAGCAACATTCACAAGGATGAGATTGCAGAATATAATGGTATAGAA  
GGTGAGGGATATCTTGTGAGGTCCCTTTTTGGCAAGGAAGCCACATATGTC

>PGSC0003DMG400039004LRR-RLPs\_252

ATAGAAGGTGAGGGATATCTTGTGAGGTCCCTTTTTGGCAAGGAAGCCACATATGTCAGACTTGCTGCT  
ATTGCCATTGGAAGTCAAATCATGGAGGCTTAGCAAAGTTATCCATTCAAG

>PGSC0003DMG400039004LRR-RLPs\_315

GCTGCTATTGCCATTGGAAGTCAAATCATGGAGGCTTAGCAAAGTTATCCATTCAAGGAAACAATCCTT  
GTCTTAGTGTGACTGATGCTGGTCTTGTGGCTATTGCTCGAGGTTGCCCT

>PGSC0003DMG400039004LRR-RLPs\_441

AGAGATCTTTCCTTGTGGAATGTGTCTTTTGTGGTGATAAAGGTTTATCTGAAATAGCTCATGGGTGCC  
ATCTATTAGAGAAGCTTGATCTTTTCAAATGCCAATAAATACTGACAAG

>PGSC0003DMG400039004LRR-RLPs\_504

GGGTGCCATCTATTAGAGAAGCTTGATCTTTTCAAATGCCAATAAATACTGACAAGTCTTTGTTGGACA  
TTGCGAAGAACTGTCCCGATATGACCTCTTTAACAATAGATTCTTGTTC

>PGSC0003DMG400039004LRR-RLPs\_567

TTGGACATTGCGAAGAACTGTCCCGATATGACCTCTTTAACAATAGATTCTTGTTCAAACATAGGGAATG  
AGTCGCTCAAAGCTGTGGGTCAATACTGTCCGAACCTGTCCGAACCTGAA

>PGSC0003DMG400039004LRR-RLPs\_63

ACTACCGCTTCTCAAATTTTGGAGCAGAGGAAATATCCTTCCATTGAAATCTTCTGATGAATGCCTCTT  
TGAGGTATTCAAACGTCTTCCAGTGGCCAAGAGAGAAGTGTCTATGCT

>PGSC0003DMG400039004LRR-RLPs\_630

GGGAATGAGTCGCTCAAAGCTGTGGGTCAATACTGTCCGAACCTGTCCGAACCTGAAGATTTTCGTATT  
AAAGAATTCTCCACTCATTGGGGATCATGGATTAGCAGTTCTATTTTATTT

>PGSC0003DMG400039004LRR-RLPs\_693

CGTATTAAGAATTCTCCACTCATTGGGGATCATGGATTAGCAGTTCTATTTTATTTAGCTGGTAAAGTTT  
TAACAGAAGTAAGACTCCAAGGCCTATGCATCAGATTTCTGTCTCTAGG

>PGSC0003DMG400039004LRR-RLPs\_756

TAAAGTTTTAACAGAAGTAAGACTCCAAGGCCTATGCATCAGATTTCTGTCTCTAGGTATACTTTTAACT  
ATTGTACAAAAGTACTAGAGACTCTTTCCTTGGTGAGCTGTATTGATGTGGA

>PGSC0003DMG400039004LRR-RLPs\_819

TTTTAACTATTGTACAAAAGTAGAGACTCTTTCCTTGGTGAGCTGTATTGATGTGGAAGACTATCCATTAA  
CTTTGGTGGCTTCTTGTGCGTAACTCACTAGTATCTTTGGCAATTCACAA

>PGSC0003DMG400039004LRR-RLPs\_882

TCCATTAACCTTGGTGGCTTCTTGTGCGTAACTCACTAGTATCTTTGGCAATTCACAATTGTCCTAGAGTAG  
GCAATACTACAATTGATGTAGTAGGTGGACTGTGTCGCAAAGTACTGACTCA

>PGSC0003DMG400039004LRR-RLPs\_945

TAGAGTAGGCAATACTACAATTGATGTAGTAGGTGGACTGTGTCGCAAAGTACTCATATAGATCAGAG  
TGGGCTTCTTAGAATTACCGACGAGGGGCTCATCCCTCTTGTTCAAAATTG

>PGSC0003DMG400039455-(rev)LRR-RLPs\_1260

GATTTTCGTACATTGATGTTGCTTAAAGTGTGTTAGATGGTTTATTTGTCACAACACTGTATCTGTTGTGGA  
GTACTTTCTATTTGTTGTTTTTTGTTGCTTTCTCCGATTTTTTCATTGG

>PGSC0003DMG400039455-(rev)LRR-RLPs\_1323

GTTGTGGAGTACTTTCTATTTGTTGTTTTTTGTTGCTTTCTCCGATTTTTTCATTGGTACTGCACCAGGTCC  
TGTGCATGTTGCAGTTCAAAGGGGTGCGAATTCCAGAATTGAAATGCA

>PGSC0003DMG400039455-(rev)LRR-RLPs\_1575

TATCTTCTTTTTACATAATTTTTATGAAGCTTTCCTTTTTGCCTTTGTACATCATTTTACACCATAGAAAGA  
GTTAAGTGTGTTAGGAGTTTCCCTCTTCTAAGGCCACCACGGCCAA

>PGSC0003DMG400039455-(rev)LRR-RLPs\_1638

CATAGAAAGAGTTAAGTGTGTTAGGAGTTTCCCTCTTCTAAGGCCACCACGGCCAACCTCTCACTGGGG  
CATTTGCACATCTCTCTACAGTTGCACGAACCATCTCAACACAAATATA

>PGSC0003DMG400039455-(rev)LRR-RLPs\_1827

TGTGTTATCAATTTTTGGCTACCTACATCATGAGTCTCTTTATGAAAAGAATAGCCATTATGATCATTTTCA  
GGTATCATTAAATTTGTTGGCTCTGAAATTTATTTTTACCCGACATT

>PGSC0003DMG400039455-(rev)LRR-RLPs\_1890

TCATTTTCAGGTATCATTAAATTTGTTGGCTCTGAAATTTATTTTTACCCGACATTTCTACTTCAAAGTTTT  
CTTTTGCAACTTTTTTGCAATTTCCATTAGGCTGACATGTATTTGTC

>PGSC0003DMG400039455-(rev)LRR-RLPs\_441

TCTTTTGATGCTAATGTGGCTGTAGCATGGAAGTCTCTAAAGAGCATAAAATTGAAGTGGATGGTGTAT

CTAATGACCATATTGTGAACTTACTGTCGGGATGTCCTGTATTGGAACT

>PGSC0003DMG400039455-(rev)LRR-RLPs\_504

GTGTTATCTAATGACCATATTGTGAACTTACTGTCGGGATGTCCTGTATTGGAACTATGGAATTATCTC

GTTTTAAGGGTTTTAGTCGTTTGGAAATTAGGTCTTCAAATTGAAGAGA

>PGSC0003DMG400039627LRR-RLPs\_122

CAATTTGAGAAATCTGCAAACCTCTGGTTCTCAATGATAACAATCTCATTGGGGAAATTCCTTCATTTGTGT

GCAATTTGACATCACTGGAAGTGTTCATATGCCGAGAAACAATTTGAA

>PGSC0003DMG400039627LRR-RLPs\_1281

GTGTCAGAGACAAATTATACAGAGTCTGCGCTAGACGATCAAGTTCTGAATTTTTTAATGATTTTTGGAA

AGCAGCTCTGATGGGCTATGGCAGTGGGCTGTGTATTGGATTATCCATAA

>PGSC0003DMG400039627LRR-RLPs\_1464

ACAAAATTATCATGCGAAGGAGAAAGAAGCAGCGAGGTCAAAGAATTACAGAAGAAGAAATAATCGC

TTCTAGACAAGTTACCAATAAAGAAGGATTTTTTCAGGTATTCAAGCTAAGT

>PGSC0003DMG400039627LRR-RLPs\_1525

TAATCGCTTCTAGACAAGTTACCAATAAAGAAGGATTTTTTCAGGTATTCAAGCTAAGTTTTACACTAATC

TTTTTAGTTTATTCTAACAACTAATATATTAGGTTTTATGCTTTTTTG

>PGSC0003DMG400039627LRR-RLPs\_1647

ATAAACAAAATACTTATTAACGCTTGATACGAATTGCTAGTAATCAGTTGGAACTGTGATAACAGAGGC

AAAAAATTTATAGTTGTGTGACTCACTTCTTATTTTTTAAGCTATTTCA

>PGSC0003DMG400039627LRR-RLPs\_1708

AACAGAGGCAAAAATTTATAGTTGTGTGACTCACTTCTTATTTTTTAAGCTATTTTCAGATGCCAAGAAT

AAGAAGACATTGGCGTAATGGATTTGGTTCTTCTATGTTGCAGCTTAT

>PGSC0003DMG400039627LRR-RLPs\_1769

TGCCAAGAATAAGAAGACATTGGCGTAATGGATTTGGTTCTTCTATGTTGCAGCTTATGATGTTGGATT

TGATTTTTAGTTTTATAAGCTTTTCTTCAGTTGGGAAAATGTAATATTAT

>PGSC0003DMG400039627LRR-RLPs\_1830

TGTTGGATTTGATTTTTAGTTTTATAAGCTTTTCTTCAGTTGGGAAAATGTAATATTATGAATTTTGATGAT

ATACAATAAATGTTGTGTGTATTTAATGATGTGTATGCATTTCTCGGA

>PGSC0003DMG400039627LRR-RLPs\_1891



ATTTTGATGATATAACAATAAATGTTGTGTGTATTTAATGATGTGTATGCATTTCTCGGATCAATAATACTC  
ACCTCAAAGAATCTTAGAGAGCTGAATGAATGGAGGAAGATATTTAGCG

>PGSC0003DMG400039627LRR-RLPs\_1952

AATAATACTCACCTCAAAGAATCTTAGAGAGCTGAATGAATGGAGGAAGATATTTAGCGCACGATAGAA  
GAGAGAGAATATCTCACACCCCAAAGCTAGTTATTATGGTGGGAGAGACCA

>PGSC0003DMG400039627LRR-RLPs\_2013

CGATAGAAGAGAGAGAATATCTCACACCCCAAAGCTAGTTATTATGGTGGGAGAGACCAAGTTTTAATT  
TTTTGTGATAAGGTTAATGTGGAAACAGTGAGGTAGCATACAATACACCCT

>PGSC0003DMG400039627LRR-RLPs\_2135

TGGTCCGGCCCTTCGCTTAGCCTTTTATTATACAAACAGGCTTACTCAAAGTAAACTGTTTTTTTCATTTGC  
ATTCATCAATGATATTCCTTGCTCGTAGCACTTTGAAACTTTCATT

>PGSC0003DMG400039627LRR-RLPs\_2196

TTTTCATTTGCATTCATCAATGATATTCCTTGCTCGTAGCACTTTGAAACTTTCATTTGCCAATTGCAAT  
AATGTTATTTTGAACATTTGTCTGTTCTATTTACAGATACAGGGGGG

>PGSC0003DMG400039627LRR-RLPs\_2257

CCAATTGCAATAATGTTATTTTGAACATTTGTCTGTTCTATTTACAGATACAGGGGGGTATACTAGATA  
GATCAAAGTTGGATAATCTATATGAAGCAGCACTGGCAAGACAGAATCTT

>PGSC0003DMG400039627LRR-RLPs\_2318

TACTAGATAGATCAAAGTTGGATAATCTATATGAAGCAGCACTGGCAAGACAGAATCTTGTAATAATGAC  
CCTAAAAACAGGGGAAGTTTCATATAATCTATTCGAGGTAGCTGATAATTA

>PGSC0003DMG400039627LRR-RLPs\_2379

AAAATGACCCTAAAAACAGGGGAAGTTTCATATAATCTATTCGAGGTAGCTGATAATTAACAGGATGCA  
CTTAATAGTTCAACCAACTCTGGAACAAATGCTGCACAAAATGGCTCATT

>PGSC0003DMG400039627LRR-RLPs\_244

GAAATATCCGCAATGTTTGGGTAATATCAGCGGCCTCCAGGTTTTGATGATGTCACATAATAATCTCAG  
TGGTGAGATCCCTTCATCTATTTCCAATTTAACATCACTACAAATTCTAG

>PGSC0003DMG400039627LRR-RLPs\_2501

ATGACTATGGTGTACTCATGCAACAACAGGTTGCCAATATGACTCAATCACAACAACCGTTACAACACGA  
AGACCTTGATGATGCAGACAGCAAATGGCTATGTGCCTCTGCAACATCAA

>PGSC0003DMG400039627LRR-RLPs\_2562

ACAACACGAAGACCTTGATGATGCAGACAGCAAATGGCTATGTGCCTCTGCAACATCAAAGCTTCTAT  
GACTCAACATAATGAAGGAGAGATTCAAGAACAGGAAGCACAAAATTAAG

>PGSC0003DMG400039627LRR-RLPs\_2623

TGCTTCTATGACTCAACATAATGAAGGAGAGATTCAAGAACAGGAAGCACAAAATTAAGAAAATATAGC  
TAATGTGCCTCAACTACAACATAAATTCATGTTTGTGTTAGCAGTAAATG

>PGSC0003DMG400039627LRR-RLPs\_2684

AATATAGCTAATGTGCCTCAACTACAACATAAATTCATGTTTGTGTTAGCAGTAAATGTAATCAGGTTAT  
CCATCAAATCAAGATGTTGCTCTCTGTTCCATTCCTAAAGAGCAATTC

>PGSC0003DMG400039627LRR-RLPs\_2745

ATCAGGTTATCCATCAAATCAAGATGTTGCTCTCTGTTCCATTCCTAAAGAGCAATTCCTCCATCAATGG  
AAAAATATTCTTACCAGGTTGAGAGATTCATGCCTAAGATTAATATCAAATGTCTTGAA

>PGSC0003DMG400039627LRR-RLPs\_2806

CCATCAATGGAAAAATATTCTTACCAGGTTGAGAGATTCATGCCTAAGATTAATATCAAATGTCTTGAA  
AATGATTGGATATGGTCCACTACTTTAGAGATAAGAATAGAAAACCAAAC

>PGSC0003DMG400039627LRR-RLPs\_2989

CTTTGACTAAGTCCTTTGCTGAATTAATGTGTAACCTCAAACAAACTCAAATTTTACTTGAGAATGGCC  
ACATTTTCTCTAATAGCAATCAAATTTGCAAATTTGAAGAAAACGCATT

>PGSC0003DMG400039627LRR-RLPs\_305

TAATCTCAGTGGTGAGATCCCTTCATCTATTTCCAATTTAACATCACTACAACCTTAGATTTGGGCAGAA  
ACAATCTGGAGGGAGAGGGAGCAATTCACAATGTTTTGGCAATATTAG

>PGSC0003DMG400039627LRR-RLPs\_3050

GAGAATGGCCACATTTTCTCTAATAGCAATCAAATTTGCAAATTTGAAGAAAACGCATTTACATTCCTAT  
TCTTTTTGGGACCACAGATATGTGTTTAATTACTATTTGCGAAAACAAT

>PGSC0003DMG400039627LRR-RLPs\_3111

CATTCCTATTCTTTTTGGGACCACAGATATGTGTTTAATTACTATTTGCGAAAACAATCATATGAAGATT  
ACTCCCTCTATCTCAATTTATAATGCATAGTCTGGATTTTCAAGAGCCA

>PGSC0003DMG400039627LRR-RLPs\_3172

TATGAAGATTACTCCCTCTATCTCAATTTATAATGCATAGTCTGGATTTTCAAGAGCCAAATAGTTTAATT

TTCACCAAAAATTCAGGCATGAAGTCTTTAAAAAATTTAAAATAAAAATT

>PGSC0003DMG400039627LRR-RLPs\_3294

TATATTTTGAAACTACAGAAAAAGTATTATAAGTCACAATAATTTATCCGCAAACCATCTTCGGAGTGATC

GCGTTTGAAGTGAAAGAATTGGAGTTTTTAATATCCAGAAACCATCCTC

>PGSC0003DMG400039627LRR-RLPs\_3355

CGGAGTGATCGCGTTTGAAGTGAAAGAATTGGAGTTTTTAATATCCAGAAACCATCCTCGGAGGTTGAG

ATATCTTAATCTATCTCTAATAAAAAAACTATTAATATCTAGTTTTCTTGA

>PGSC0003DMG400039627LRR-RLPs\_3416

AGGTTGAGATATCTTAATCTATCTCTAATAAAAAAACTATTAATATCTAGTTTTCTTGAAGGTCATTACCT

ATTCCGACAAATTCCACAAGATACTTCTTGAAGGTCATTTACCTATTCC

>PGSC0003DMG400039627LRR-RLPs\_3477

GTCATTACCTATTCCGACAAATTCCACAAGATACTTCTTGAAGGTCATTTACCTATTCCGACAAATTCCAC

AAGATACTTCATCATATCAAAAAATAATCTCATTTATGAAATTCTTTTA

>PGSC0003DMG400039627LRR-RLPs\_3538

CAAATTCCACAAGATACTTCATCATATCAAAAAATAATCTCATTTATGAAATTCTTTTATTTGGAAAATCG

ATTTGAGAGTCATTGAAATTTAATTTATCAAATATTCGAGCATGAAAA

>PGSC0003DMG400039627LRR-RLPs\_3599

TGGAAAATCGATTTGAGAGTCATTGAAATTTAATTTATCAAATATTCGAGCATGAAAAATTTGGAACTC

TTGGAGGTCTCATAAAAAATAAAATACCCTTTGCAACACGACTTTATTTGG

>PGSC0003DMG400039627LRR-RLPs\_366

TTGGGCAGAAACAATCTGGAGGGAGAGGGAGCAATTCCACAATGTTTTGGCAATATTAGTAGCCTCCAG

GTTTTTGATATGCAGAATAACAACTTTCTGGGAGCCTTCCAACAAATTTT

>PGSC0003DMG400039627LRR-RLPs\_3660

TTGGAECTCTTGGAGGTCTCATAAAAAATAAAATACCCTTTGCAACACGACTTTATTTGGCATATTCAAAA

ATCACCTAATTTTTACACATTTAATTAACAGGCCACCACTTACTATAAAAA

>PGSC0003DMG400039627LRR-RLPs\_3721

TATTCAAAAATCACCTAATTTTTACACATTTAATTAACAGGCCACCACTTACTATAAAAATTACATTAECTCC

TCGAAACCCATAAGTCTCAGTTGTTTGTGAATAATTTGTGTTTCAAAT

>PGSC0003DMG400039627LRR-RLPs\_3782

ACATTA ACTCTCGAA ACCCATAAGTCTCAGTTGTTTGTGAATAATTTGTGTTTCAAATTGAGACGACAAT  
AGTTCAAGTAGGGAAAATAAATAACTTATTATTCGAAAGCACAAACACGC

>PGSC0003DMG400039627LRR-RLPs\_3843

AGACGACAATAGTTCAAGTAGGGAAAATAAATAACTTATTATTCGAAAGCACAAACACGCAAAAAAAGTG  
ACATTCAAATTAATTTTGACCATTATCTCTTAATTTTCTTTGCTCTTCAT

>PGSC0003DMG400039627LRR-RLPs\_3904

AAAAAGTGACATTCAAATTAATTTTGACCATTATCTCTTAATTTTCTTTGCTCTTCATTAATTTGGCTATTC  
ATTTTTCAAAGCTCCACATCATCAGACATCAATATCTAGCAGGTCC

>PGSC0003DMG400039627LRR-RLPs\_3965

ATTTGGCTATTCATTTTTCAAAGCTCCACATCATCAGACATCAATATCTAGCAGGTCCATAAAAATAAA  
ACACCCTTCTCAACACGGCAAAGAAAGATTGAAAAATGACAACATTTAC

>PGSC0003DMG400039627LRR-RLPs\_4026

TAAAAATAAACACCCTTCTCAACACGGCAAAGAAAGATTGAAAAATGACAACATTTACTCAAAGACAA  
AAACAAAACATGTGAGAGAAGACATTACGAATCATCGTAACGTCTAAGACT

>PGSC0003DMG400039627LRR-RLPs\_4087

AAAGACAAAAACAAAACATGTGAGAGAAGACATTACGAATCATCGTAACGTCTAAGACTGAGAATTGTT  
GGATATGGTCCATTACGTAGAGATGAGAATTAAGAACCAGACATGTCTGTA

>PGSC0003DMG400039627LRR-RLPs\_4209

ATACACTAAGGGTGGTCACAAATCAATTTGTGATAACAAAACACTATTTTGGCCACTTTGATTAAGTCCTTG  
GCTGAATTAGACCTTAACACAGAACAATCCAAAATTTGACTTGAGAATG

>PGSC0003DMG400039627LRR-RLPs\_427

GCCTCCAGGTTTTTGATATGCAGAATAACAACTTTCTGGGAGCCTTCCAACAAATTTTAGCATTGGAAG  
TTCACCTAGAAGTCTCAACTTGCATGGCAATGAACTAGAGGGGAAAATCC

>PGSC0003DMG400039627LRR-RLPs\_4270

AAGTCCTTGCTGAATTAGACCTTAACACAGAACAATCCAAAATTTGACTTGAGAATGACAACATTTTT  
TCCCTGATAGCAGTCAAATTAGCAAATTTGGAGAAAACGTGTGTCCAGTT

>PGSC0003DMG400039627LRR-RLPs\_4331

AACATTTTTTCCCTGATAGCAGTCAAATTAGCAAATTTGGAGAAAACGTGTGTCCAGTTGATTTTTTATTA  
GTATAAGTTACGTACAATATCAAATCCTATGAATCTGAAACAATAAACT

>PGSC0003DMG400039627LRR-RLPs\_4392

TTTTTTATTAGTATAAGTTACGTACAATATCAAATCCTATGAATCTGAAACAATAAACTCAAACATGATG  
ATGGTTTCTAGCAAAATATTCTCTTCACTTCAGTTTTTCACACTTTTCT

>PGSC0003DMG400039627LRR-RLPs\_4758

ATCTTAGCAAGAACAATTTCTCTGGCACCATTCCACCTGAGATTGGTAATCTCACTAATCTTGTCTATCTT  
GACTTGAACACCAATCAGATTTTCAGGAACAATCCCACCACAAATCGGAT

>PGSC0003DMG400039627LRR-RLPs\_61

CTCTTACTTATCTATATTTGGGTAATAGCTTTCTAATGGATCTATTCTGCTTCATTTGGCAATTTGAGAA  
ATCTGCAAACCTCTGGTTCTCAATGATAACAATCTCATTGGGGAAATTC

>PGSC0003DMG400039627LRR-RLPs\_610

ACACATTTCCCATGTGGTTGGGAACCTTTGCTAGAGCTGAGAGTTTTAAGGTTGACATTGAATAAATTGCA  
TGGACCTATAAGATCTTTATGGGCTGAAATCATGTTTCCTGATATTCGAA

>PGSC0003DMG400039627LRR-RLPs\_6705

CGTGGATTCCCCATTTCAAAGGTTGTGGCAATGATCCTGTGTCGGAGACAACTATACAGCTGCGCTA  
GAAGATCAAGAAAGAAATTCTGAATTTTTCAATGATTTTTGGAAAGCAGCT

>PGSC0003DMG400039627LRR-RLPs\_671

TAAATTGCATGGACCTATAAGATCTTTATGGGCTGAAATCATGTTTCCTGATATTCGAATCATATATCTCT  
CTAGCAATGCCTTTTCGAAAGACTTACCAACGAGTCTGTTTCAACATTT

>PGSC0003DMG400039627LRR-RLPs\_732

ATATATCTCTCTAGCAATGCCTTTTCGAAAGACTTACCAACGAGTCTGTTTCAACATTTGAAAGGCATGAC  
CACTATTGATCAAACAATGAAGGCACCAAGTTCTAAAGGAAATCAAGTA

>PGSC0003DMG400039627LRR-RLPs\_793

AAGGCATGACCACTATTGATCAAACAATGAAGGCACCAAGTTCTAAAGGAAATCAAGTATACTACCAAG  
ACTCGGTAGTTGTTGTAACAAAGGGATTGAAGCTTGAAGTTGTGAAAATTT

>PGSC0003DMG400039627LRR-RLPs\_854

CTACCAAGACTCGGTAGTTGTTGTAACAAAGGGATTGAAGCTTGAAGTTGTGAAAATTTGTCTTTGTAC  
ACAGTTATTGATCTTTCAAACAATAAATTTGAAGGACATATTCCTAGTGT

>PGSC0003DMG400039627LRR-RLPs\_976

TAGGAGATCTCATTGCTCTTCAGGTATTGAATATGTCTCATAATGGTTTGAAGGTCATATACCACCAGA

ACTTGGAAGTTTGTCTTTAGTGGAATCATTGGACCTTTCATTTAACCATA

>PGSC0003DMG400039637LRR-RLPs\_0

ATGGGCAAAAGAAATAATCCAAGAGGCTTTCTTACTTGGTCTTACTGCTCCTAGAGACAGCTTTTG

GATTAACCTCAAGAGAAGTTAGCAAGACCCTTGTATAGAAAAGGGGAGA

>PGSC0003DMG400039637LRR-RLPs\_1005

TTGTTTCTCAGGTTTTCAAGCAGTAGGAAATCACTTGAGGTTTTGGGATTGAACGACAACCTCGTTGTTTG

GTTCAATTTTCAAACAACCTTATGAGGACCTCTGTAATGAGTTGTGGTAA

>PGSC0003DMG400039637LRR-RLPs\_126

CTTCTTGAGTTTAAAAGAGGCCTTAACGACGATTTTGGTCGTTTATCTACCTGGGGTGATAAAAAAGAAT

GCTACAAATGGAATGGTATTGAATGTGACAAAAGAACAGGTCATGTTATT

>PGSC0003DMG400039637LRR-RLPs\_189

AAAGAATGCTACAAATGGAATGGTATTGAATGTGACAAAAGAACAGGTCATGTTATTGTTCTTGATCTCC

ACAGTGAGGTTACTTGTCCAGGCCATGCTTGTTTTGCTCCAATATTGACA

>PGSC0003DMG400039637LRR-RLPs\_252

GATCTCCACAGTGAGGTTACTTGTCCAGGCCATGCTTGTTTTGCTCCAATATTGACAGGTAAACTTAGTCC

TTGTCTACTTGAGTTAGAGTATTTGAATTTCTTAGACCTCAGTGTAAT

>PGSC0003DMG400039637LRR-RLPs\_315

CTTAGTCCTTGTCTACTTGAGTTAGAGTATTTGAATTTCTTAGACCTCAGTGTAATGGATTTGAAAATAG

TGAGATACCAAGATTCATAAGCTCCCTTAAGAGACTAGAGTACCTGAAC

>PGSC0003DMG400039637LRR-RLPs\_378

GAAAATAGTGAGATACCAAGATTCATAAGCTCCCTTAAGAGACTAGAGTACCTGAACCTTTCATCTTCTG

ATTTTTCTAGTGAAATTCCAGCATAGTTCCAGAATCTAACTTCTTTGAGA

>PGSC0003DMG400039637LRR-RLPs\_441

TCTTCTGATTTTTCTAGTGAAATTCAGCATAGTTCCAGAATCTAACTTCTTTGAGAATTCTTGATCTCGGA

AACAATAAATTATAGTAAAGGACCTTGTGTGGCTTTCTCATCTCTCC

>PGSC0003DMG400039637LRR-RLPs\_504

GATCTCGGAAACAATAAATTATAGTAAAGGACCTTGTGTGGCTTTCTCATCTCTCCTCTCTAGAGTTCTT

GCGTCTTGGTGGTAACTACTTCCAAGCAAGCAATTGGTTTTGAGAGATA

>PGSC0003DMG400039637LRR-RLPs\_567

GAGTTCTTGCCTTGGTGGTAACTACTTCCAAGCAAGCAATTGGTTTCGAGAGATAACTAAGGTCCTT  
TATTGAAAGAATTGGACTTGAGTGTGGACTCTCTAAATTCGTTCTG

>PGSC0003DMG400039637LRR-RLPs\_630

GTCCCTTTATTGAAAGAATTGGACTTGAGTGTGGACTCTCTAAATTCGTTCTGTCTCCAGCTGATCT  
AGCCAATTCATCTTTGATCTCTTTCTATTCTTCATTTATGTTGTAAT

>PGSC0003DMG400039637LRR-RLPs\_693

GCTGATCTAGCCAATTCATCTTTGATCTCTTTCTATTCTTCATTTATGTTGTAATGACTTTTCTACTTCAT  
CTGTATATAACTGGTTATTCAATTTTAGCACAAAGCCTAACTAGCATA

>PGSC0003DMG400039637LRR-RLPs\_819

TCTCATAATCAACTCATTGCTCAAATTGATGATCGCTTTGGGAGCTTGATGTATCTTGAACATCTTAATCT  
TGCTAATAACTTTGAAGTTAAAGATGGGGTCCAAGTCTTTTGGGAGC

>PGSC0003DMG400039637LRR-RLPs\_882

CTTAATCTTGCTAATAACTTTGAAGTTAAAGATGGGGTCCAAGTCTTTTGGGAGCTTGATGTATCTTGA  
ACATCTTAATCTGGACATGTCTAACACTCAAACATACCAATGGCTTCCT

>PGSC0003DMG400039637LRR-RLPs\_945

TATCTTGAACATCTTAATCTGGACATGTCTAACACTCAAACATACCAATGGCTTCCTGAGTTGTTTCTCAG  
GTTTTCAAGCAGTAGGAAATCACTTGAGGTTTTGGGATTGAACGACAAC

>PGSC0003DMG400039680-(rev)LRR-RLKs\_0

ATGGGAATAGGCATTCTTGTTCTTTCTGCTTTTACTGTGTTCTTTAGGCCTTTGCTTTGCCAACAGCC  
AAACTGATGGATTTTTTGTGTCTGATTTTCTCAAAGATGGGGTT

>PGSC0003DMG400039680-(rev)LRR-RLKs\_1054

GTCGCTTGAAAATCCTTGATATATCCAAAACCATCTTAGTAAACGCATTCTCCGCTGAGCAATAGAAA  
TCTCCTGGTTCTTGATGTTTCATACAACAATTTGACTGGTGATATCCCAT

>PGSC0003DMG400039680-(rev)LRR-RLKs\_1116

AATAGAAATCTCCTGGTTCTTGATGTTTCATACAACAATTTGACTGGTGATATCCCATTGCCACTTGTAGA  
GATACTCCAAGGATGGAAAGGTTCAATTTTCTTACAACAATCTAACT

>PGSC0003DMG400039680-(rev)LRR-RLKs\_1178

ACTTGTAGAGATACTTCCAAGGATGGAAAGGTTCAATTTTCTTACAACAATCTAACTCTTTGTGCTACTG  
AATTCTCCCCTAAAACACTCCTTTCGGCGTTTATCGGGTCATCAAATGG

>PGSC0003DMG400039680-(rev)LRR-RLKs\_124

AAGTTCACAACCTTTTCAGCTCACTTTTGTCTTGAAAGGGGTGGGATGTGATTCCAAGGATGAAAATGT  
TGTTAATTTGACAGCTAAAAGTTTTGGTTTATCTGGTGTGATTCTGATA

>PGSC0003DMG400039680-(rev)LRR-RLKs\_1240

GTGCTACTGAATTCTCCCCTAAAACACTCCTTTCGGCGTTTATCGGGTCATCAAATGGATGTCCTATTGCT  
GCCAACCCAGCTCTCTCCACAAGAAAGCTCCGAAACACAGAGGACTTA

>PGSC0003DMG400039680-(rev)LRR-RLKs\_1302

CCTATTGCTGCCAACCCAGCTCTCTCCACAAGAAAGCTCCGAAACACAGAGGACTTAAACTTGCTTTGG  
CATTAACTTTCTCTATGGTTTTTCTGCTTCTTGTTTTACTGTTCTTGGA

>PGSC0003DMG400039680-(rev)LRR-RLKs\_1364

TGCTTTGGCATTAACTTTCTCTATGGTTTTTCTGCTTCTTGTTTTACTGTTCTTGGCATTGGTTGTCGAAG  
GAAAACCACGATATGGGCGGTTAAACAGAAGCTTACAAGGAAGAACA

>PGSC0003DMG400039680-(rev)LRR-RLKs\_1426

GTTGTGCAAGGAAAACCACGATATGGGCGGTTAAACAGAAGCTTACAAGGAAGAACAGACTATTTCTG  
GTCCTTTTTTCATTCCAGACTGATTCAACAAGCTTGGGTTGCTGATGTTAAGC

>PGSC0003DMG400039680-(rev)LRR-RLKs\_1488

ATTTCTGGTCCTTTTTTCATTCCAGACTGATTCAACAAGCTTGGGTTGCTGATGTTAAGCAAGCAAAGCTCAGT  
GCCTGTTGTGATTTTCGAGAAGCCACTGTTGAATTTACATTTGCAGAT

>PGSC0003DMG400039680-(rev)LRR-RLKs\_1550

AAACTCAGTGCCTGTTGTGATTTTCGAGAAGCCACTGTTGAATTTACATTTGCAGATCTCTTATCTGCAA  
CTTCTAATTTTCGATCGAGGCACATTGTTAGCTGAAGGGAGGTTTGGTCC

>PGSC0003DMG400039680-(rev)LRR-RLKs\_1612

TATCTGCAACTTCTAATTTTCGATCGAGGCACATTGTTAGCTGAAGGGAGGTTTGGTCTCTGTTTATAGAGG  
CTTTTTACCAGGTGGCATTGTTGTTGAGTGAAGTTCTTGTTCATGGTT

>PGSC0003DMG400039680-(rev)LRR-RLKs\_1674

TATAGAGGCTTTTTACCAGGTGGCATTGTTGTTGAGTGAAGTTCTTGTTCATGGTTCCACTATGACAG  
ACCATGAAGCTGCAAGAGAGCTCGAGTATCTTGGCCGGATAAAACATCCT

>PGSC0003DMG400039680-(rev)LRR-RLKs\_1736

TATGACAGACCATGAAGCTGCAAGAGAGCTCGAGTATCTTGGCCGGATAAAACATCCTAATCTTGTTC



ATTGACAGGATACTGCTTGGCTGGTGAGCAAAGAATTGCCATTTATGATTA

>PGSC0003DMG400039680-(rev)LRR-RLKs\_1798

TTGTTCCATTGACAGGATACTGCTTGGCTGGTGAGCAAAGAATTGCCATTTATGATTACATGGAGAACG

GGAATTTGCAGAACTTGCTTCATGACTTGCCACTCGGGGTTTCGAACTACTA

>PGSC0003DMG400039680-(rev)LRR-RLKs\_186

GAAAATGTTGTTAATTTGACAGCTAAAAGTTTTGGTTTATCTGGTGTGATTCTGATAACACCATTGGTA

AACTCACAAGCTGAAGTATTTGGATCTGAGCAACAATAAACTCACTGGT

>PGSC0003DMG400039680-(rev)LRR-RLKs\_1860

GAGAACGGGAATTTGCAGAACTTGCTTCATGACTTGCCACTCGGGGTTTCGAACTACTACTGAAGACTGG

AGCACGGACACGTGGGAAGAGGAGGATGATAATAACAGTATTCAGAATGTT

>PGSC0003DMG400039680-(rev)LRR-RLKs\_1922

AGACTGGAGCACGGACACGTGGGAAGAGGAGGATGATAATAACAGTATTCAGAATGTTGGTTCTGAAG

GATTGTTAACCACTTGGAGATTTAGGCACAAAATCGCGCTTGGCACTGCTAG

>PGSC0003DMG400039680-(rev)LRR-RLKs\_1984

CTGAAGGATTGTTAACCACTTGGAGATTTAGGCACAAAATCGCGCTTGGCACTGCTAGAGCACTTGCATT

TCTACACCATGGTTGTTACCTCCCATTATACATAGAGATGTCAAAGCCA

>PGSC0003DMG400039680-(rev)LRR-RLKs\_2046

CTTGCAATTTCTACACCATGGTTGTTACCTCCCATTATACATAGAGATGTCAAAGCCAGCAGTGTTTATCT

TGATATGAACTTGGAGCCTAGACTATCCGATTTTCGGATTGGCCAAAATC

>PGSC0003DMG400039680-(rev)LRR-RLKs\_2108

TGTTTATCTTGATATGAACTTGGAGCCTAGACTATCCGATTTTCGGATTGGCCAAAATCTTTGGCACGGGA

CCCGAGGATGAGATCACTCGCGGTTACCTGGATACATTCCCCCAGAATT

>PGSC0003DMG400039680-(rev)LRR-RLKs\_2170

GCACGGGACCCGAGGATGAGATCACTCGCGGTTACCTGGATACATTCCCCCAGAATTTCTTCATCCAGA

GAGCAGCTCACCTAAATATCCTACACCAAAGTCAGATGTGTATGGATTTG

>PGSC0003DMG400039680-(rev)LRR-RLKs\_2232

CATCCAGAGAGCAGCTCACCTAAATATCCTACACCAAAGTCAGATGTGTATGGATTTGGAGTCATCCTTT

TCGAGCTAATTACCGGGAAAAAACCAGTTGAAGATGATTATCCACAACAC

>PGSC0003DMG400039680-(rev)LRR-RLKs\_2294

CATCCTTTTCGAGCTAATTACCGGGAAAAACCAGTTGAAGATGATTATCCACAACACAATGATGCGAAT  
TTGGTTGGTTGGGTTAGAGGATTAGTAAGGAACAACGAGGGATCAAGAGT

>PGSC0003DMG400039680-(rev)LRR-RLKs\_2356

ATGCGAATTTGGTTGGTTGGGTTAGAGGATTAGTAAGGAACAACGAGGGATCAAGAGTTATCGATCCA  
AAAATTCGTGGAAGTGCATCACAGACACAAATACTAGAAGCCTTGAAAATCG

>PGSC0003DMG400039680-(rev)LRR-RLKs\_2418

GATCCAAAATTCGTGGAAGTGCATCACAGACACAAATACTAGAAGCCTTGAAAATCGGTTATCTATGCA  
CAGCTGAAGTCCCGCGAAACGACCAAGTATGCATCAAGTAGTTGGACTG

>PGSC0003DMG400039680-(rev)LRR-RLKs\_248

CATTGGTAAACTCACAAAGCTGAAGTATTTGGATCTGAGCAACAATAAACTCACTGGTTTGCCTTCTGAT  
ATATGGAGTTTAGGTTCACTAAAGTACCTTAACCTCTCACATAACCATAT

>PGSC0003DMG400039680-(rev)LRR-RLKs\_310

CTTCTGATATATGGAGTTTAGGTTCACTAAAGTACCTTAACCTCTCACATAACCATATCTCTGGTGACCTT  
TCAAGTAACATAGGCAATTTTGGTGGTCTTGAAATCATGGACTTTTCTG

>PGSC0003DMG400039680-(rev)LRR-RLKs\_372

GGTGACCTTTCAAGTAACATAGGCAATTTTGGTGGTCTTGAAATCATGGACTTTTCTGTCAACAATTTCTC  
TGGGAAAATCCCAGATGCCATTAGCTCCCTTTCAAGTTTGCATTCTCTT

>PGSC0003DMG400039680-(rev)LRR-RLKs\_434

CAATTTCTCTGGGAAAATCCCAGATGCCATTAGCTCCCTTTCAAGTTTGCATTCTCTTAATCTTAGTAAGA  
ACTTGTGTTGATTAGAAATCCCTTCTGGAATTTTGGGCTGTCATTCTTT

>PGSC0003DMG400039680-(rev)LRR-RLKs\_496

TTAGTAAGAACTTGTGTTGATTAGAAATCCCTTCTGGAATTTTGGGCTGTCATTCTTTGGAATCCCTTGAT  
CTTTCAGAAAACAGACTCACTGGTTTTCTAATGATTTTGGTTCTACAT

>PGSC0003DMG400039680-(rev)LRR-RLKs\_558

TCCCTTGATCTTTCAGAAAACAGACTCACTGGTTTTCTAATGATTTTGGTTCTACATTTACAAGCTCAA  
GTTCTTGAATCTTGCAGAAAATGAGATTCTTGGTAAAGATTCAGATTTT

>PGSC0003DMG400039680-(rev)LRR-RLKs\_62

CCAACAGCCAAACTGATGGATTTTTGTGTCTGATTTTCTCAAAGATGGGGGTTGCTAAAGTTCCAC  
AACTTTTCAGCTCACTTTTGTCTTGGAAAGGGGTGGGATGTGATTCCAA

>PGSC0003DMG400039680-(rev)LRR-RLKs\_620

CAAGCTCAAGTTCTTGAATCTTGCAGAAAATGAGATTCTTGGTAAAGATTCAGATTTTTCAAGAATGGGT  
TCAATCACTCATATCAATATTTTCAGGCAATCTGTTTAAGGGTTCTGTTGT

>PGSC0003DMG400039680-(rev)LRR-RLKs\_682

GAATGGGTTCAATCACTCATATCAATATTTTCAGGCAATCTGTTTAAGGGTTCTGTTGTTGGTCTTTTTGAG  
GGGCCATTGGAAGTGATTGATTTGAGTAGAAACCAGTTTGATGGTCACA

>PGSC0003DMG400039680-(rev)LRR-RLKs\_744

CTTTTTGAGGGGCCATTGGAAGTGATTGATTTGAGTAGAAACCAGTTTGATGGTCACATTTCTCAGGTAA  
ACTTCAGTTCCAGCTTCAATTGGTCTCATTTGGTTTATCTTGATTTATCT

>PGSC0003DMG400039680-(rev)LRR-RLKs\_806

TCAGGTAAACTTCAGTTCCAGCTTCAATTGGTCTCATTTGGTTTATCTTGATTTATCTGAGAATCACCTTA  
GTGGAGGGATCATTAGAGAATTAAGAATGCTCGAAATCTTCTATACCT

>PGSC0003DMG400039680-(rev)LRR-RLKs\_868

ATCACCTTAGTGGAGGGATCATTAGAGAATTAAGAATGCTCGAAATCTTCTATACCTTAATCTTGCAGA  
TAATAGATTTTCACATCAAGAATTTCCACAAACTGATATGTTATCTAGCT

>PGSC0003DMG400039680-(rev)LRR-RLKs\_930

CTTGCAGATAATAGATTTTCACATCAAGAATTTCCACAAACTGATATGTTATCTAGCTTAGAGTATCTGAA  
TTTGTCTGGAAGTACTGTTGATTGGCCAAATTCCTCAAGAGCTCTCGTCG

>PGSC0003DMG400039680-(rev)LRR-RLKs\_992

GTATCTGAATTTGTCTGGAAGTACTGTTGATTGGCCAAATTCCTCAAGAGCTCTCGTCGTTGAGTCGCTTG  
AAAATCCTTGATATATCCAAAACCATCTTAGTAAACGCATTCTCCGCT

>PGSC0003DMG400040066-(rev)RLKmalectin\_930

TTGAATACTCTACTTTTTAATCTGTACATAAATGATGACTGCTTTACTGGACCTAGATTTGTCTTCAGTT  
GGTAATTTGGACGTGCCGTATTACAAAGATTTTGTCTCCAACCTCCACA

>PGSC0003DMG400040306-(rev)LRR-RLPs\_252

GTTTTCCCTCTGTTTAAACAAGTGGCTTGATATTGCACTTCAGAATGGTGTAAGATCTTGTCTTTTCGAGT  
TCCTAGCCACCTTACGTCATACCCATTGCCTATGCTAACAACTTGGCA

>PGSC0003DMG400040306-(rev)LRR-RLPs\_504

CAGATTCTACTTAATAGTTGTCCCTTTATTGACAGCTTAATTTTAGATTATTGTTCTTGGTTGAAAAAGATT

GAGCTACTGAATAATCTTCCAAAGATCAAGTCGGTTTTTATTCGGAAA

>PGSC0003DMG400040306-(rev)LRR-RLPs\_567

AAAAAGATTGAGCTACTGAATAATCTTCCAAAGATCAAGTCGGTTTTTATTCGGAAATCTGGCACACAGC  
TTGTTAAAATTCAAGCACCATCTCTTGAACATTTATCTTATTTTACTGGT

>PGSC0003DMG400040620LRR-RLPs\_1024

CCTTCAATTTACAAGTACTTGAGATCTGTAATTGCACGAACTAGTGAACGGTTCGAAAGGTGTGGTGTTT  
ACAGAAACTCCCCTGTCTCAGAGAGTTAGTGATCGCACATGATGGCAGTG

>PGSC0003DMG400040620LRR-RLPs\_1088

GTGTTTACAGAAACTCCCCTGTCTCAGAGAGTTAGTGATCGCACATGATGGCAGTGATGAAGAAATGGA  
GCATTCGGAGTTGCCTTCTCTATTCAAAGACTTACCATACGCAATCTGAA

>PGSC0003DMG400040620LRR-RLPs\_1216

GCAGCCAAGTTTTCGAAAGCCTCACCTCTCTTGAATATCTATATATGGCTGATTTACCTCAAATTCAGTCA  
ATGCTGGAACAAGGGCGGCTTCCCTCATCTCTTTATGAGCTACATTTAT

>PGSC0003DMG400040620LRR-RLPs\_1280

TCAGTCAATGCTGGAACAAGGGCGGCTTCCCTCATCTCTTTATGAGCTACATTTATCTCGCCATCATGTGC  
TCCGATCACTTCTGAATCAGCACTGTCCTCCTCCCTCTCTGAGCTGAT

>PGSC0003DMG400040620LRR-RLPs\_1344

CATGTGCTCCGATCACTTCTGAATCAGCACTGTCCTCCTCCCTCTCTGAGCTGATCATCGAGGATTGCCT  
AATTCTCCAATTCCTTCCGGTAAAAGAGATGCCCTCTTCCCTATCTAAG

>PGSC0003DMG400040620LRR-RLPs\_1408

ATTGCCTAATTCTCCAATTCCTTCCGGTAAAAGAGATGCCCTCTTCCCTATCTAAGCTGACCATCAGGGAT  
TGCCCTTATCTCAAATCCCTTCCGGTAAAAGGGATGCCCCCTTCCCTCT

>PGSC0003DMG400040620LRR-RLPs\_320

TGAGGATTTACCGCTGCAGATGGAAAAGCTAATCAACTTACATCATTTTACATAAGCAACACTTATCGG  
TTGAAGATGCCGCTACATCTGAGCAAGTTGAAAAGCCTCCAAGTGCTAGT

>PGSC0003DMG400040620LRR-RLPs\_448

AGTTTCTTCTAGGTGGTGGTGGTGGTTCGAGAATGGAAGATTTGGGTGAAGTACATAACTTGTATGGAT  
CTCTATCAATTCTAGAGTTGCAAATGTGGTTGATAGAAGGGAAGATCGGA

>PGSC0003DMG400040620LRR-RLPs\_576

ATGAGGTGAAAGGAACATGTTGATAAATTATCTATTGTTGATTGTAACCTCTTACCTCCTTACCTTTTAG  
CATTCTGCCAAGTACCTTGAAGACAGTACGGATATCTCGTTGCCAGAAA

>PGSC0003DMG400040620LRR-RLPs\_64

TTCCGACATGTATTGATCTCGATAATTGTTACCCTCTAAGCAAGAGGGTGAACATAACATACTTCCAAG  
TCTAAGATCCTTGAGGATACTGTCATTGTCTCATTACCAGATTGTTGAGT

>PGSC0003DMG400040620LRR-RLPs\_640

CTTTTAGCATTCTGCCAAGTACCTTGAAGACAGTACGGATATCTCGTTGCCAGAAATTGAAATTAGAGCA  
GCCAGTTTGTGATTCTATAGATGATATATCACCTGAGTTGCTCCGGAGAG

>PGSC0003DMG400040620LRR-RLPs\_704

AGAGCAGCCAGTTTGTGATTCTATAGATGATATATCACCTGAGTTGCTCCGGAGAGCACGCAAATTGAG  
GGTACTACATTGCCCAACCTTACTAGCTTTTTGATTCTACTGCCACTGA

>PGSC0003DMG400040620LRR-RLPs\_832

ATATTTGGAATTGTGAGAATCTTGAAATAACTTCGGTGGCATGTTCCGGGACACAGATGGCGTATTTGT  
GTATTTCAACTGTAAGAAGCTGAAGTGGCTGCCAGAACGTATGCAGCAAC

>PGSC0003DMG400040620LRR-RLPs\_896

TTTGTGATTTTCAACTGTAAGAAGCTGAAGTGGCTGCCAGAACGTATGCAGCAACTCCTTCCATCTCTTA  
AAACATTGAATCTGTGGCATTGTCCAGAAATACTGTCATTTCTGAAGG

>PGSC0003DMG400040620LRR-RLPs\_960

TCTCTTAAACATTGAATCTGTGGCATTGTCCAGAAATACTGTCATTTCTGAAGGAGAATTGCCCTTCAA  
TTTACAAGTACTTGAGATCTGTAATTGCACGAAACTAGTGAACGGTCTGA

>PGSC0003DMG400040927-(rev)LRR-RLPs\_0

ATGCCCAAATTTACATCAATTCTGTTTTTGGTGATTCAACAGTTGACACTGGAAATAACAATTATATATT  
TACTTTATTCAAAGGCAATCATATACCTTATGGAAAAGACTATTTTAAC

>PGSC0003DMG400040927-(rev)LRR-RLPs\_1037

ACAAAAAGAAATCATATGAATAGCATTGACATACAACCCTATCGTCTTATCACTCCTTTCTGTAATTTTTT  
GTGAATACTTTACACCATTACATCACATATATATTATAGCAGATAACT

>PGSC0003DMG400040927-(rev)LRR-RLPs\_1098

GTAATTTTTTTGTGAATACTTTACACCATTACATCACATATATATTATAGCAGATAACTTATCTTATTTTCTA  
GACTATATATCTTACTTTTTTTATGATAGTCAAACCTTATATAATTT

>PGSC0003DMG400040927-(rev)LRR-RLPs\_1159

TCTTATTTTCTAGACTATATATCTTACTTTTTTTATGATAGTCAAACCTTATATAATTTTTGTATCTTATTTTA  
TTAGGAACTTTATGAACTTGGATGTCGTAATATTATAGTGAGTGGG

>PGSC0003DMG400040927-(rev)LRR-RLPs\_122

TGTATCAACAGGTAGATTTTCAAATGGAAAAATTGTGCCAGACATATTGGCAAATTTATTAAAATTA  
AAATATGGTGTGCCACCATATTTAAATCCAATTTATTGGAAAATGATTA

>PGSC0003DMG400040927-(rev)LRR-RLPs\_1220

GTATCTTATTTTATTAGGAACTTTATGAACTTGGATGTCGTAATATTATAGTGAGTGGGCTACCTCCAATT  
GGTTGTCTTCCAATTCAAATGACAACAAAATCTCCACTCCATAGAACTT

>PGSC0003DMG400040927-(rev)LRR-RLPs\_1281

ACCTCCAATTGGTTGTCTTCCAATTCAAATGACAACAAAATCTCCACTCCATAGAACTTGCATTGAAAAAG  
AAAATTCAGATTCTCAATCTTATAATAAAAAACTTGAAGAATTATTGCC

>PGSC0003DMG400040927-(rev)LRR-RLPs\_1342

ATTGAAAAAGAAAATTCAGATTCTCAATCTTATAATAAAAAACTTGAAGAATTATTGCCACATTTACAAG  
CACAACCTCAAGGAAGCAAATACTTTATTCTGATATATACACTCCTTTA

>PGSC0003DMG400040927-(rev)LRR-RLPs\_1403

ATTTACAAGCACAACCTCAAGGAAGCAAATACTTTATTCTGATATATACACTCCTTTATCACATCTCGTC  
AATAATCCACATCAATATGGTAAGCTTTAAATTATGTTGTTCAAGTTCT

>PGSC0003DMG400040927-(rev)LRR-RLPs\_1464

ACATCTCGTCAATAATCCACATCAATATGGTAAGCTTTAAATTATGTTGTTCAAGTTCTTCAAATATATTAC  
TGAATACGTATTAATTTCTTTATAAATCATATTTTCTTTAGAAAATTT

>PGSC0003DMG400040927-(rev)LRR-RLPs\_1525

AAATATATTACTGAATACGTATTAATTTCTTTATAAATCATATTTTCTTTAGAAAATTTAGTACAAATATAA  
TATTATTTTTGGAGAGTAAGAGAGATTATATTCTGTGCATTTTTCATA

>PGSC0003DMG400040927-(rev)LRR-RLPs\_1586

TACAAATATAATATTATTTTTGGAGAGTAAGAGAGATTATATTCTGTGCATTTTTCATATTATGATTGACT  
TGATTCTTGTCTTAATTAGAAAAATTTTGTGTGAGTACATCATCAATCT

>PGSC0003DMG400040927-(rev)LRR-RLPs\_1647

ATGATTGACTTGATTCTTGTCTTAATTAGAAAAATTTTGTGTGAGTACATCATCAATCTAGTTTATATTATC

TTTGATTTATGTTATCAATCTAGTTAATGTTATTTTTTTTATAAAAAA

>PGSC0003DMG400040927-(rev)LRR-RLPs\_1708

TTTATATTATCTTTGATTTATGTTATCAATCTAGTTAATGTTATTTTTTTTATAAAAAAAATTGGTACAATG

ATTCTTTTCAAATACATAGTTTTGTCTTAAATACCAAACAAACAATCC

>PGSC0003DMG400040927-(rev)LRR-RLPs\_1769

TTGGTACAATGATTCTTTTCAAATACATAGTTTTGTCTTAAATACCAAACAAACAATCCATTTTGACAAAT

GTGGGAACTATCATATTACAATTTCAACCAGTGCTCATTTCATGAAAA

>PGSC0003DMG400040927-(rev)LRR-RLPs\_183

AAATTAATAAATATGGTGTGCCACCATATTTAAATCCAAATTTATTGGAAAATGATTATAGAAGTGGAG

TTTCTTTTGGATCAGCTGGATCAGGATATGATGATTTAACAAGTTTAATT

>PGSC0003DMG400040927-(rev)LRR-RLPs\_1830

TTTGACAAATGTGGGAACTATCATATTACAATTTCAACCAGTGCTCATTTCATGAAAATAATGTTTCAGAT

CAATTTACACACATTTTATCTATTTTCATTGAGTATTATTTATTATTTTA

>PGSC0003DMG400040927-(rev)LRR-RLPs\_1891

ATGTTTCAGATCAATTTACACACATTTTATCTATTTTCATTGAGTATTATTTATTATTTTATTAATATATTAGT

TTTTTACTCATTAGTAGAGTGGCAACACAAAGTGAGTTGTGGTTAG

>PGSC0003DMG400040927-(rev)LRR-RLPs\_1952

AATATATTAGGTTTTTTTACTCATTAGTAGAGTGGCAACACAAAGTGAGTTGTGGTTAGTTGAATATTTTT

TTGTCAAATCATACTCATGACTATTACCATAGTTAATATTAAGAGTGA

>PGSC0003DMG400040927-(rev)LRR-RLPs\_2013

GAATATTTTTTTGTCAAATCATACTCATGACTATTACCATAGTTAATATTAAGAGTGAAACAAAAA

ATCTCTTAATATACTTTAGTGAACAAGTAAACCTGAAAATATATTTTTT

>PGSC0003DMG400040927-(rev)LRR-RLPs\_2074

CAAAAAAATCTCTTAATATACTTTAGTGAACAAGTAAACCTGAAAATATATTTTTTATTATAATGAAC

AAATAAAAGTAAATGATAAAAGTACTTTACAAACCTCCCCAAAATCACC

>PGSC0003DMG400040927-(rev)LRR-RLPs\_2135

TATAATGAACAAATAAAAGTAAATGATAAAAGTACTTTACAAACCTCCCCAAAATCACCTTTTTGTTCTTC

TTATTAATCTAAATTAATGTCTTTTTATTTTTATTTATCTTTATT

>PGSC0003DMG400040927-(rev)LRR-RLPs\_2196

TTTGTTCTTCTTATTAATCTAAATTAATGTCTTTTTATTTTTATATTTATCTTTATTTTTACATAATTATGAC  
AGGATTTGAAGAAACAAAAAGAGGTTGTTGTGGAAGTGGATTATTA

>PGSC0003DMG400040927-(rev)LRR-RLPs\_244

GAAGTGGAGTTTCTTTGGATCAGCTGGATCAGGATATGATGATTTAACAAGTTTAATTTTCAGGTGTAAT  
TTCAATGAGAAAACAATTAGAACATTTTAAAGAGTATTTGAAGAAATTGA

>PGSC0003DMG400040927-(rev)LRR-RLPs\_2440

AGCTTCTCCCAAATTTCTCAACCATTGACAACTTTTAATTTATTACATTCAAATAAAATTTGTAAAAAAA  
ATTAGGTGTTATTTGGCTTCTGGTTAAGAAGGGAGTTATTCATGTATTA

>PGSC0003DMG400040927-(rev)LRR-RLPs\_2501

GTAAAAAAAATTAGGTGTTATTTGGCTTCTGGTTAAGAAGGGAGTTATTCATGTATTAATTAATGTAG  
GTAAATATCATATGTGGTAACTTTCTAGTTTCTTTGTATAAAAAATTCAG

>PGSC0003DMG400040927-(rev)LRR-RLPs\_2562

TTAATGTAGGTAAATATCATATGTGGTAACTTTCTAGTTTCTTTGTATAAAAAATTCAGCATATCAACTAT  
GATATGTGGTTTGTCAATTTATAATGAGAGAAGTAATCTTGACGCAAAT

>PGSC0003DMG400040927-(rev)LRR-RLPs\_2623

TATCAACTATGATATGTGGTTTGTCAATTTATAATGAGAGAAGTAATCTTGACGCAAATATTAATTTTCGTC  
CCTGAATTATTAGAGTATCATTATCTACGCTTTTTAAGCTTGTTTTCT

>PGSC0003DMG400040927-(rev)LRR-RLPs\_2684

TAATTTTCGTCCTGAATTATTAGAGTATCATTATCTACGCTTTTTAAGCTTGTTTTCTTTTCAAGGATTTT  
ATGATAGTTTGTACTTAAAAAAGAAAATGTAAATGTGTAACACAT

>PGSC0003DMG400040927-(rev)LRR-RLPs\_2806

ATAAAATAAGAAGAGATAAAAAAGAAAAACATAACAACCTAAATTTAACTTGAGAATGACAATTTTCTT  
TGATAAAATATGAACAGACAAATTAGAATAGTTTGAAAAAATGGCACACC

>PGSC0003DMG400040927-(rev)LRR-RLPs\_2867

AATTTTCTTTGATAAAATATGAACAGACAAATTAGAATAGTTTGAAAAAATGGCACACCATGGCATGTTA  
TAGTTAAAATTGGCAATAAATAACCCACTTACAATTTTTAGCAAAAAAA

>PGSC0003DMG400040927-(rev)LRR-RLPs\_2928

GGCATGTTATAGTTAAAATTGGCAATAAATAACCCACTTACAATTTTTAGCAAAAAAAGATTTCTTAAAA  
TCTATTTGTCAATTTATTAGCCATGTTCTTTTTACTCGTTGTTTTTTTT



>PGSC0003DMG400040927-(rev)LRR-RLPs\_2989

TTTCTTAAAATCTATTTGTCATTTATTAGCCATGTTCTCTTTTACTCGTTGTTTTTTTTCTTTGAAAACATTTT  
TTTTCTAACCCTTTTCAAGAAACGTTTTTTCTTTCATTCCTTTATT

>PGSC0003DMG400040927-(rev)LRR-RLPs\_305

AGGTGTAATTTCAATGAGAAAACAATTAGAACATTTTAAAGAGTATTTGAAGAAATTGAAAGATTTTTTT  
GGAGAAAAAGAAAAAAAAGAATTGTGAAAGGTGCTTTGGTTATGGTTAG

>PGSC0003DMG400040927-(rev)LRR-RLPs\_3050

TTGAAAACATTTTTTTCTAACCCTTTTCAAGAAACGTTTTTTCTTTCATTCCTTTATTTATTTGAAAAAAGT  
AAAATTATTTTTAATCATTCTTTCATCTCTCTTCTTATTTTAAACA

>PGSC0003DMG400040927-(rev)LRR-RLPs\_3233

ATTTTTTTCATACATGCATATATTCTTTTTTTTTGCCTAAATTTCTCCTTCGCATCTACATTCAACCTGTGTA  
TGATGATATTAATCATTTTTTTTCATTGTTCTTGACTATATTTAATC

>PGSC0003DMG400040927-(rev)LRR-RLPs\_3538

TCCACGTATTTCAAACCTCAAATAAAAAAGTGAAAGGACCACGAAGAAGAAAGGGGAAGATAATGTAT  
ACCCCATTTCAATGAATTATTTGAGACATTCATATAAGATGTGTATACATAT

>PGSC0003DMG400040927-(rev)LRR-RLPs\_3599

AATGTATACCCCATTTCAATGAATTATTTGAGACATTCATATAAGATGTGTATACATATTAACTTTTAATTT  
GATAGACTATATATATCAAAAGTGTATACATTTCAGAATATAATTTAA

>PGSC0003DMG400040927-(rev)LRR-RLPs\_366

GATTTTTTTGGAGAAAAAGAAAAAAAAGAATTGTGAAAGGTGCTTTGGTTATGGTTAGTTCAGGGAGT  
AATGATTTTATATTTAATTTCTATGATGTTCCAACAAGAAGGCTTGAGTTT

>PGSC0003DMG400040927-(rev)LRR-RLPs\_3660

ACTTTTAATTTGATAGACTATATATATCAAAAGTGTATACATTTCAGAATATAATTTAATGGTGTATACAT  
ATATGAGTGTATACATATTTGAACTATATAAATTACTCCCTCTGTCCCA

>PGSC0003DMG400040927-(rev)LRR-RLPs\_4026

ATTTAGTGGCGTATACATACCAGAAGTGTATACATTTCTGAATTGTACAAAATACAAAGTAATGATGTAT  
ATATATTAGAACTACACAAATACAACCTTAAAGATGGATACATATCAGAAT

>PGSC0003DMG400040927-(rev)LRR-RLPs\_4087

ATGATGTATATATATTAGAACTACACAAATACAACCTTAAAGATGGATACATATCAGAATTATACAAATAT

AATTTAATGATGTATACATGTCAGAATTGTACAAATATAATCTAGTGATG

>PGSC0003DMG400040927-(rev)LRR-RLPs\_4148

TACAAATATAATTTAATGATGTATACATGTCAGAATTGTACAAATATAATCTAGTGATGTAACATATCAG

AATTGTACAAATTTCAAATTAACAGTGTATACATATGAATATGTTTCATA

>PGSC0003DMG400040927-(rev)LRR-RLPs\_4209

ACATATCAGAATTGTACAAATTTCAAATTAACAGTGTATACATATGAATATGTTTCATATTATTATCTACC

ATTTTTCTTTTACATTTCAATGAGATTAACAAAGTGATGTCAATTTTGT

>PGSC0003DMG400040927-(rev)LRR-RLPs\_427

CAGGGAGTAATGATTTTATATTTAATTTCTATGATGTTCCAACAAGAAGGCTTGAGTTTAGTTTGGAGGA

GTATCAAGATTTTCTTCTAGACAAGGTGCAATGTTTTGTCAAGGTAAATT

>PGSC0003DMG400040927-(rev)LRR-RLPs\_4270

ATTATCTACCATTTTTCTTTTACATTTCAATGAGATTAACAAAGTGATGTCAATTTTGTGTTGTATTGTAAG

AGAGAGAAATACGAACAAAATATTTTTTTATGAAAAAGAATATGTGAC

>PGSC0003DMG400040927-(rev)LRR-RLPs\_4331

TGTATTGTAAGAGAGAGAAATACGAACAAAATATTTTTTTATGAAAAAGAATATGTGACTATTCAATACA

CGTTAATAAAGGGATAAAAATATTTTCATTCTGTAAATGTAACCGCATTC

>PGSC0003DMG400040927-(rev)LRR-RLPs\_4392

TTCAATACACGTTAATAAAGGGATAAAAATATTTTCATTCTGTAAATGTAACCGCATTCCTTTTCAATTGAT

TAATTAATTAATGTTGTTTGACAAAAAAATTATTTTCTTAAAAAGAGG

>PGSC0003DMG400040927-(rev)LRR-RLPs\_4453

TTCAATTGATTAATTAATTAATGTTGTTTGACAAAAAAATTATTTTCTTAAAAAGAGGCGCATCTTTTTA

TTAGTGGCTAAGTAGTGCCGATTAATTGAGGCCTTTCAGTTGCTAATTA

>PGSC0003DMG400040927-(rev)LRR-RLPs\_4514

CATCTTTTTATTAGTGGCTAAGTAGTGCCGATTAATTGAGGCCTTTCAGTTGCTAATTATTTTTTGGCTACT

TAGTGCCAATACTATGTGCGGATTGTACCTTTGTGTCAATTCCTACAA

>PGSC0003DMG400040927-(rev)LRR-RLPs\_4575

TTTTGGCTACTTAGTGCCAATACTATGTGCGGATTGTACCTTTGTGTCAATTCCTACAAAATATATAGATG

TGGAACACATGAATAAAAATAATTTTTTTAAAAAGTCTAATCCATCGAT

>PGSC0003DMG400040927-(rev)LRR-RLPs\_488

TTTGGAGGAGTATCAAGATTTTCTTCTAGACAAGGTGCAATGTTTTGTCAAGGTAAATTCTCTATCACATC  
TATATTTCTTTTAATGTTATAGATGGGCAGTCTCGGAATAATTGTAAA

>PGSC0003DMG400040927-(rev)LRR-RLPs\_4880

GTCATATATTTTAAAAAATAATTCTCAACTAATGACTTTTAAGTAGAAAGAAAAATGACCATTGACTTGAT  
GATATGTGGCATTTTAAACTCAAATAATAATTATTTTTAAAAAAGAAAT

>PGSC0003DMG400040927-(rev)LRR-RLPs\_4941

TTGACTTGATGATATGTGGCATTTTAAACTCAAATAATAATTATTTTTAAAAAAGAAATTCACCACTTCTA  
ATTTTCAAGAACTCATCCTCGTCTTCTTACCCACCCAACCCATGCA

>PGSC0003DMG400040927-(rev)LRR-RLPs\_5002

ACCACTTCTAATTTTCAAGAACTCATCCTCGTCTTCTTACCCACCCAACCCATGCATCTTCTCCACCCC  
ACCAGATCGTCTCTTAACCCACCCACCCAACCTCAACCCTTTTT

>PGSC0003DMG400040927-(rev)LRR-RLPs\_5063

TTCTCCACCCACCAGATCGTCTCTTAACCCACCCACCCAACCTCAACCCTTTTTCCACTCCTATCGT  
CTTTTCAAGAACTTTCAAAGAATTTAATTACATCAAAAATAATA

>PGSC0003DMG400040927-(rev)LRR-RLPs\_5124

ACTCCTATCGTCTTTTCAAGAACTTTCAAAGAATTTAATTACATCAAAAATAATAATTTACAATAGC  
ACAATTTTTCTCTTTACTTCTAAAAGCATCAGTTATAACTAACAA

>PGSC0003DMG400040927-(rev)LRR-RLPs\_5185

TTACAATAGCACAATTTTTCTCTTTACTTCTAAAAGCATCAGTTATAACTAACAATGGAAGAATTATT  
ATTTTTGCATTTCTCGTATGTGTAGAAGATTCAAATACGTGAACAAGA

>PGSC0003DMG400040927-(rev)LRR-RLPs\_5246

GAAGAATTATTATTTTTGCATTTCTCGTATGTGTAGAAGATTCAAATACGTGAACAAGAAATAAAGTAAT  
TATTTCTGGCGCTGAAATTTAATTGTCGGATCTAAAAAACAGAATGAG

>PGSC0003DMG400040927-(rev)LRR-RLPs\_5307

TAAAGTAATTATTTCTGGCGCTGAAATTTAATTGTCGGATCTAAAAAACAGAATGAGAAGATGATGT  
GGTTGTGGTGATTTTAGATCTGAAAAAATTAATAATTACTTCGATTGTAA

>PGSC0003DMG400040927-(rev)LRR-RLPs\_5368

GATGATGTGGTTGTGGTGATTTTAGATCTGAAAAAATTAATAATTACTTCGATTGTAATAAGATTAATA  
GCAATGATGCATCGGTGGTGGGTTGATGGTGTGCAGTGGATGAGATAATA

>PGSC0003DMG400040927-(rev)LRR-RLPs\_5429

AGATTAATAGCAATGATGCATCGGTGGTGGGTTGATGGTGTGCAGTGGATGAGATAATAATCACAAAG  
AAAGAGGGAAGAAGATGAACTGTTTTTTTTTAAATAAATTTTTGGCCTGAA

>PGSC0003DMG400040927-(rev)LRR-RLPs\_549

CTATCACATCTATATTTCTTTTAAATGTTATAGATGGGCAGTCTCGGAATAATTGTAAAGCTATCTCTATAT  
AGTAAATTAATTACAAGTTAAGTCATGAAATCAGTCGTTGATACTTGC

>PGSC0003DMG400040927-(rev)LRR-RLPs\_5490

CACAAAGAAAGAGGGAAGAAGATGAACTGTTTTTTTTTAAATAAATTTTTGGCCTGAAAAAAGCCCTT  
TCACACGCTGACTTTGATGTTAGCGAAAAATGTCAAATGATACAATAGG

>PGSC0003DMG400040927-(rev)LRR-RLPs\_5612

TCTACATGAGGTGTTTAAATAAACATCGCTCATTAAAGAAATCTAAATGAACTTTATGCTAATTTTAG  
GAGATCATCGATATATTAAGCCTTAAAAAAGACAAAAATATAACAATC

>PGSC0003DMG400040927-(rev)LRR-RLPs\_5673

TAATTTTAGGAGATCATCGATATATTAAGCCTTAAAAAAGACAAAAATATAACAATCCAAAATTGACT  
TGAGAATGACAATTTTCTCTAATAAAATACAAACAAACAAAAAATGGTT

>PGSC0003DMG400040927-(rev)LRR-RLPs\_5734

AAATTGACTTGAGAATGACAATTTTCTCTAATAAAATACAAACAAACAAAAAATGGTTGAAGCGTGAA  
TTAAAGCGAGCAGCCGAATTTGCACTTAAAGAGGGGCACCGCAACATATAG

>PGSC0003DMG400040927-(rev)LRR-RLPs\_5795

AGCGTGAATTAAGCGAGCAGCCGAATTTGCACTTAAAGAGGGGCACCGCAACATATAGAGAAAACAC  
GTTTCTTCGGGAAAAATAATTTTCTAGTCCTTAAAAAATTATGCACTT

>PGSC0003DMG400040927-(rev)LRR-RLPs\_5856

AAAACACGTTTCTTCGGGAAAAATAATTTTCTAGTCCTTAAAAAATTATGCACTTTTACGAGAGATT  
TTTATTTTTTTTATCGAATCGATGTTTTATTAATAAAAAATTATTTAAT

>PGSC0003DMG400040927-(rev)LRR-RLPs\_5917

ACGAGAGATTTTTATTTTTTTATCGAATCGATGTTTTATTAATAAAAAATTATTTAATATAAGAGATCTTC  
ATTTATTAATTTTTATCGAATACATGTTTTATTAATAAAAAATTGTT

>PGSC0003DMG400040927-(rev)LRR-RLPs\_5978

AAGAGATCTTCATTTATTAATTTTTATCGAATACATGTTTTATTAATAAAAAATTGTTCAATATAAGAGA

CCTTCGATTTACATAGAAGAGATAAAAAATGTCATTTTCTTCTATTCAA

>PGSC0003DMG400040927-(rev)LRR-RLPs\_6039

ATATAAGAGACCTTCGATTTACATAGAAGAGATAAAAAATGTCATTTTCTTCTATTCAAATTGTCCAGATC  
TTATTTCTCAACTTCTCTTTGGTCTTTAATGATAAATAATGTACAATA

>PGSC0003DMG400040927-(rev)LRR-RLPs\_61

ATTATATATTTACTTTATTCAAAGGCAATCATATACCTTATGGAAAAGACTATTTTAACCATGTATCAACA  
GGTAGATTTTCAAATGGAAAAATTGTGCCAGACATATTGGCAAATTTAT

>PGSC0003DMG400040927-(rev)LRR-RLPs\_610

TATCTCTATATAGTAAATTAATTACAAGTTAAGTCATGAAATCAGTCGTTGATACTTGCATCATGATACGC  
TGTATATATTATATGTTCTTGGGGTGTGACTTTTAGTTGGATCCTGTAT

>PGSC0003DMG400040927-(rev)LRR-RLPs\_6100

TGTCCAGATCTTATTTCTCAACTTCTCTTTGGTCTTTAATGATAAATAATGTACAATATTATATTTTATTTT  
TAAAAAATCAATCCCTCTTTTATTCTATCGTCACACTGTGGTCCTCA

>PGSC0003DMG400040927-(rev)LRR-RLPs\_6161

ATATTTTATTTTTAAAAAATCAATCCCTCTTTTATTCTATCGTCACACTGTGGTCCTCATGAAAAGACTTAA  
ATGGTATACTAGCACCATGTGTTTTGTAGCTTTCTTTTGAAATTTTAT

>PGSC0003DMG400040927-(rev)LRR-RLPs\_6222

AAAAGACTTAAATGGTATACTAGCACCATGTGTTTTGTAGCTTTCTTTTGAAATTTTATGGCAAGACTAGT  
CAATACAAACAACAAAATTTCCATTCCGTGAATCCAAAAATTGTTGTTG

>PGSC0003DMG400040927-(rev)LRR-RLPs\_6283

CAAGACTAGTCAATACAAACAACAAAATTTCCATTCCGTGAATCCAAAAATTGTTGTTGAACTAGCACGT  
ATCGAAATCGAGACTTTTGGTTAAAGATAAAGGAGTACAGTAGCGGAACC

>PGSC0003DMG400040927-(rev)LRR-RLPs\_6344

CTAGCACGTATCGAAATCGAGACTTTTGGTTAAAGATAAAGGAGTACAGTAGCGGAACCAAATTTTAA  
TTAAGGCTATCAAGAATAGAACACACAACCTCAAACAACCTTTTGAACCCC

>PGSC0003DMG400040927-(rev)LRR-RLPs\_6588

ACCCCTTGTCCTAGGGTAGCTCCGCTCCCGAAGAATTACTTACCACTCCACCACAACCCTTTCTTTTGTGTT  
CTTTATATTGGGAAGTAAAGTGCTCCCTAACAAAGGCGATTCGTATT

>PGSC0003DMG400040927-(rev)LRR-RLPs\_6649

TCTTTTGTGTTCTTTATATTGGGAAGTAAAGTGCTCCCTAACAAAGGCGATTTTCGTATTGAAGTCGAGAC  
CTTTGGTTAAGGATAAATGAATACTTACCACTCCACCAACCATTTCTTTT

>PGSC0003DMG400040927-(rev)LRR-RLPs\_671

CATGATACGCTGTATATATTATATGTTCTTGGGGTGTGACTTTTAGTTGGATCCTGTATAAATGTGAAAA  
AAATTGTGCATCAGGCTGCAATATTTTATGACTATGTTATTCGAGTTAGA

>PGSC0003DMG400040927-(rev)LRR-RLPs\_6710

AGTCGAGACCTTTGGTTAAGGATAAATGAATACTTACCACTCCACCAACCATTTCTTTTTATGTTACCAC  
AACCTTTCTTTTTTGTTCACCATAACCCTTTCATTTCTGTTCTTTAT

>PGSC0003DMG400040927-(rev)LRR-RLPs\_6771

TGTTACCACAACCCTTTCTTTTTTGTTCACCATAACCCTTTCATTTCTGTTCTTTATATTGGGAGGTAAAA  
TGCTCCCTAACAAAGACAATTCTGTATCGAAGTCGAGACTTTGGTTA

>PGSC0003DMG400040927-(rev)LRR-RLPs\_6832

TGGGAGGTAAAATGCTCCCTAACAAAGACAATTCTGTATCGAAGTCGAGACTTTGGTTAAGAACGAAAA  
AGTACTTACCACTCCACCACAACCCTTTCTTTTTCTGTTTATTATATTGGGA

>PGSC0003DMG400040927-(rev)LRR-RLPs\_6893

AACGAAAAAGTACTTACCACTCCACCACAACCCTTTCTTTTTCTGTTTATTATATTGGGAGGTAAAACACTC  
CCTAACAAAGGTGATTCCGTATCGAAGCCGAGACCTTTAGTTAAGGACG

>PGSC0003DMG400040927-(rev)LRR-RLPs\_7015

GGAGTACTTACCACTCGACACAACCCTTTCTTTTTCTGTTCTTTATATATACATCTTAGATATGAATGATTTT  
TTATCCCTCTTTCATTTAAAAGCTCATAAAAATTGTATTGTTATTGAA

>PGSC0003DMG400040927-(rev)LRR-RLPs\_7076

TGAATGATTTTTATCCCTCTTTCATTTAAAAGCTCATAAAAATTGTATTGTTATTGAAACCAATACTACA  
TTAGACATGACAACCTTCTCATTGTACATTCATTTACATTCTTCTACTT

>PGSC0003DMG400040927-(rev)LRR-RLPs\_732

ATGTGAAAAAATTGTGCATCAGGCTGCAATATTTTATGACTATGTTATTCGAGTTAGATTGTTATAGCG  
TGTAATACCGTTAGTGATATTATTCACTTCATATCAAGATTTACGACTT

>PGSC0003DMG400040927-(rev)LRR-RLPs\_793

GTTATAGCGTGTAATACCGTTAGTGATATTATTCACTTCATATCAAGATTTACGACTTTAAAAGATATCA  
CTAGTGTCTAAGACTTGCACACTTTATACATTCAATATCTTTTTCCGTA

>PGSC0003DMG400040927-(rev)LRR-RLPs\_854

AAAGATATCACTAGTGTCTAAGACTTGCACACTTTATACATTCAATATCTTTTTCCGTATTTAATTTTTCTA  
GGGTGTTACTGTACTTGTGTATATTTTGATTATTTTCATCATATACTTA

>PGSC0003DMG400040927-(rev)LRR-RLPs\_915

TAATTTTTCTAGGGTGTACTTGTGTATATTTTGATTATTTTCATCATATACTTATTTCTTGCCACCAA  
TACAAATGCCATAATAACTTTATTTAGGAAAACCTTAAATTTTTAGAC

>PGSC0003DMG400040927-(rev)LRR-RLPs\_976

TCTTGCCACCAATACAAATGCCATAATAACTTTATTTAGGAAAACCTTAAATTTTTAGACCGACAAAAGA  
AATCACATGAATAGCATTGACATACAACCCTATCGTCTTATCACTCCTTT

>PGSC0003DMG400041062LRR-RLPs\_0

ATGGCAGCTCCAACATGTTTTCTATTTCTTTTATGGTTTTGCTAAGCTTAGCAATATGCTCTGCCAGCCT  
ATTGATGTTCACTAAGCCTATGGAAGTTGATCATCATCACAACCAC

>PGSC0003DMG400041062LRR-RLPs\_441

TCAGGATTATCACTTCACAAACCATACAGATGCAGGCCAGGGCCAAACATGCGCGGAGACAAAGAT  
TTTAACCATGAACTTCTTCTAAACTTTGTTTCTACAATGCAGGACAAACAA

>PGSC0003DMG400041062LRR-RLPs\_504

AAAGATTTTAACCATGAACTTCTTCTAAACTTTGTTTCTACAATGCAGGACAAACAAGAGAACAAACATG  
AACGTCTACACTATGGAGGACACGGTGGAGATGTAGGCCTCCGAGTAGGG

>PGSC0003DMG400041062LRR-RLPs\_63

GCCCAGCCTATTGATGTTCACTAAGCCTATGGAAGTTGATCATCATCACAACCACAAAGCTCACACTT  
TGAGTAATATCGACGTCCAAGGCTTTGGAGGAGGAGGCAGTGATGGCGGA

>PGSC0003DMG400041062LRR-RLPs\_630

AGACGTTTAGGATTTGGTCGTGGTACTGATACCTCTGATCAGTATGCTAATGAGGACCCTGGTTGGAGT  
ATTGAGGGCTGTGGTTATGTATGTCCAGGCAACAGTCCTAGTGGAGGAATC

>PGSC0003DMG400041062LRR-RLPs\_693

TGGAGTATTGAGGGCTGTGGTTATGTATGTCCAGGCAACAGTCCTAGTGGAGGAATCACTGAATTCCAT  
ATATCAGGAATATCACATTTTAGTGAACCTTACAGATGTAGCCCAGATATG

>PGSC0003DMG400041062LRR-RLPs\_756

TTCCATATATCAGGAATATCACATTTTAGTGAACCTTACAGATGTAGCCCAGATATGTGTGACTGAAG

AATGTGGTGAATTTCTTCTACGCTTTGTTTCTCCAATGCATAACAAACAC

>PGSC0003DMG400041062LRR-RLPs\_819

ACTGAAGAATGTGGTGAATTTCTTCTACGCTTTGTTTCTCCAATGCATAACAAACACGAGAACAAACATG  
GTCATCAGTCAGAGAAGCAAGACAAACATGAGAACCAACATGGTCATCAG

>PGSC0003DMG400041062LRR-RLPs\_882

AAACATGGTCATCAGTCAGAGAAGCAAGACAAACATGAGAACCAACATGGTCATCAGTCAGAGCAGCA  
AGAGAAAGAAATCACAAACGATATCCCCGACCCACCCACACCCCAATCCTGA

>PGSC0003DMG400041071RLKmalectin\_1159

GTAAACATGCTAATGCCATCTTAAATGGGATAGAAGTCTTCAAGATAAGCAATCCTGACAACAATCTTGG  
TAGTGTGAGCCCTGTGCATCCTGTTATAAGTTCAACACCAGAAAAATCAG

>PGSC0003DMG400041071RLKmalectin\_1586

CCAGGGGGGGAAAGAGTTTTGGATGGAAATCAATATGTTATCTATGCACCGCCATGAGAACCTTCTCTC  
CCTAATTGGTTACTGCACTGAAGGTCATGAGATGTTATTAGTTTATGGTTA

>PGSC0003DMG400041071RLKmalectin\_1647

CTTCTCTCCCTAATTGGTTACTGCACTGAAGGTCATGAGATGTTATTAGTTTATGGTTATATGCCTCGGGG  
ATCACTTGCTGACAACCTGTACAAAATGGACAGAAATAGCTCATCTCTC

>PGSC0003DMG400041071RLKmalectin\_1708

TGCCTCGGGGATCACTTGCTGACAACCTGTACAAAATGGACAGAAATAGCTCATCTCTCTCTTGGGAACG  
GAGACTCAAGATTGCTATAGGTGCTGCACGTGGACTGGATTTCTTCATA

>PGSC0003DMG400041071RLKmalectin\_1891

GGGAAAGTAAGATTTTCAGATTTTGGGTTGTCCAAAATGGGGCCTGGAAATGAATCAGCTACTCATGTTA  
GTACACAAGTCAAAGGCACATTTGGGTACCTCGATCCTGAGTACTTCCAGA

>PGSC0003DMG400041071RLKmalectin\_1952

TCATGTTAGTACACAAGTCAAAGGCACATTTGGGTACCTCGATCCTGAGTACTTCCAGACTAAAAGATTG  
ACATGGAAAGCTGATGTGTATGCTTTTGGAGTAGTACTATTTGAATTGCT

>PGSC0003DMG400041071RLKmalectin\_2501

AGCTCTACCAACACCGCCACAAGTACTTTACTGCTTCCCCTCAATGAGATGCTAAAGGCTACAAAAGAT  
TTCAATGAGAGCCTGAAAATAGGTTTTCTAGGATCTGACAATGCATACGT

>PGSC0003DMG400041071RLKmalectin\_2623



GCTTCATAAATGGTCGACGTGTTGCCATCAGACGTTACACACTGCAGAGTCAAGACTTCACATGGTTAG  
TGAGTTGCTAGCTAAAAGAGAAATGAGTCCCTTGCTAGCCACATCAACA

>PGSC0003DMG400041071RLKmalectin\_2989

CCAAAGTTTCAGAAGTTAGCTGGTCAAAAACAAAAGGGATCAATACAGCGGGGGTAATTCATGAAGGG  
GGATATTTGGATTTCAGACTACTTACGAGATAAAAAGATTGACAGAATCATACG

>PGSC0003DMG400041071RLKmalectin\_3050

TGAAGGGGGATATTTGGATTTCAGACTACTTACGAGATAAAAAGATTGACAGAATCATACGCATACTCATT  
TGGCTTGGTGTATTTGAGATGCTATGTGCCAATGAAGCATTGGAACATTG

>PGSC0003DMG400041336LRR-RLPs\_1464

GCTTGCACATTCAGAAGGTGGTCGAGCTTTGGTGGGAGTTCCAGTTCCAGAAATAATTAGAAAAAAGG  
AGTTGACTGAGATCAATCTTATGCTCAAACATTCTGCTATTGAAGTTATTT

>PGSC0003DMG400041336LRR-RLPs\_1525

AAAAAAGGAGTTGACTGAGATCAATCTTATGCTCAAACATTCTGCTATTGAAGTTATTTGACTTTTATTAC  
ATTTATATATTCTTGAATTTGCATGCTAGTTAATGCAACTACAGATTCA

>PGSC0003DMG400041336LRR-RLPs\_1830

AAGTTGGTGATTTTGAATGTGTTTACCAGTTTATGTTTTGCTAAGTTTTTCTGTATATATTTACTCCGTAC  
GAAAGATTCAATATCGTTAACACATTCTTCTTGACTCATTAGGCGTTT

>PGSC0003DMG400041336LRR-RLPs\_1952

ATGGAGAAGTGAAGAACCGAAGAACTAGAAGTGTGCATAAATCATACTATTGCTTTCTCTTATACAC  
TAGGATATGCACATTAAGCTAATAGAAAGTCAAATTTTGATTCTATGTT

>PGSC0003DMG400041336LRR-RLPs\_2013

CTTATACACTAGGATATGCACATTAAGCTAATAGAAAGTCAAATTTTGATTCTATGTTCTAATCGTCCGT  
ACCTTTCTCAAACACAAAAAAGTCCAGATTCTGATTCATACCGTTGCC

>PGSC0003DMG400041336LRR-RLPs\_2074

AATCGTCCGTACCTTTCTCAAACACAAAAAAGTCCAGATTCTGATTCATACCGTTGCCTTTCTCAAACAG  
AAAAAAGTCCAGATTTTGATTCACTCCCATGTTATTAATTACAGGATAG

>PGSC0003DMG400041336LRR-RLPs\_2440

AATTAACCTTTGTACATTTTTATATTAATCAGGTGTGTTTGGGACGTGCCCTTATCAGGAATCATTCTTG  
TATTTTTTGGTGAATGTGGGGGGAAGTTAGCAATAGTGTGATTCACCTG

>PGSC0003DMG400041336LRR-RLPs\_2501

ATCATTCTTGATTTTTTGGTGAATGTGGGGGGAAGTTAGCAATAGTGTGATTCACCTGGTAAATGAAGA  
ACATTGGTGAAAAGTCAGGCTTGAATAGTCAAAGCTGCACCCCTAATTGA

>PGSC0003DMG400041336LRR-RLPs\_2562

AAATGAAGAACATTGGTGAAAAGTCAGGCTTGAATAGTCAAAGCTGCACCCCTAATTGAAACAGGAAGT  
GTTTCAAGGCCTTGATATGCTACAGTAAATGTTTAAATGCCATATAAGTCT

>PGSC0003DMG400041336LRR-RLPs\_2623

CAGGAAGTGTTTCAAGGCCTTGATATGCTACAGTAAATGTTTAAATGCCATATAAGTCTAACTGTCTGAA  
TCTTTCTATATCATTCTCTCAATGTGCTTATCTGATTTGGTTATCTAAAA

>PGSC0003DMG400041336LRR-RLPs\_2684

CTGTCTGAATCTTTCTATATCATTCTCTCAATGTGCTTATCTGATTTGGTTATCTAAAAAAAAAATAGTGCT  
TATTTGACTTGTATGACATTTAGGAAACATGTTGAGAACTAGAGCATG

>PGSC0003DMG400041336LRR-RLPs\_2806

TTTGTTTATGCTGAGAGCTAGAGTATAAATTGACTCTCTATTAGATCAAGAGATTGTTGAAGTCAAGGTA  
TCGACCTCTAGATGTTAGGTTAATAAATAGTTACACCAAACCTTTGTTTCAT

>PGSC0003DMG400041336LRR-RLPs\_2867

GTCAAGGTATCGACCTCTAGATGTTAGGTTAATAAATAGTTACACCAAACCTTTGTTTCATTGGTGTTTAGAT  
GTGGATGTA CTCTCCTAGAAGTTCTGCACTTCGCCATAAGACACAACAA

>PGSC0003DMG400041336LRR-RLPs\_2928

GTGTTTAGATGTGGATGTA CTCTCCTAGAAGTTCTGCACTTCGCCATAAGACACAACAACAGAGTTGTAA  
GTTAAAACCTCTGGGTTTGGGGCCACAAATTAGTATTTGTGTGATACCATG

>PGSC0003DMG400041336LRR-RLPs\_3355

CTCTTCTGCATGACTCTGAGGTCTGAACTGCATGCCTGATTTATTGGTTTCATGACCAGCTTATGTCCTTT  
AGTTGGTTTTGTATTAAGTCCTTCAGTTTACTTATGCTTTGCGTCACTT

>PGSC0003DMG400041336LRR-RLPs\_3599

TCAATACAAAGTTGCTCATTTAATTAGATGACGCCTGATGTTTGTGAACTGTATCTTGCTGTTTTCTTCAT  
GCTTTGGTTAGTAGCATGTATTGAATTGTTATCTTAAATTGTACGGTGT

>PGSC0003DMG400041336LRR-RLPs\_3660

TTTTCTTCATGCTTTGGTTAGTAGCATGTATTGAATTGTTATCTTAAATTGTACGGTGTAAATTTGGATTCT

TTACCATAGACAGGCTATAGCAGTAATATTTGCTTCTTTGAGAATGAA

>PGSC0003DMG400041336LRR-RLPs\_3721

TTTTGGATTCTTTACCATAGACAGGCTATAGCAGTAATATTTGCTTCTTTGAGAATGAATCATCAAATTTT

GTTATCATCTTTTGTGGTGAGTTGGTCTAACAAGTAAATCCTAGTTCA

>PGSC0003DMG400041336LRR-RLPs\_3782

ATCAAATTTTGTATCATCTTTTGTGGTGAGTTGGTCTAACAAGTAAATCCTAGTTCATCATTCTATATG

GATCCAGTGGACCGAACAGCCATGTCCTTTAGTTGATTTATGAGTAACA

>PGSC0003DMG400041336LRR-RLPs\_3843

ATTCTATATGGATCCAGTGGACCGAACAGCCATGTCCTTTAGTTGATTTATGAGTAACACACAGTTAGAA

CTTCAGTTATGCTGCATGAACTGGTTATTGTATACACAGTCAGGGTTGTG

>PGSC0003DMG400041336LRR-RLPs\_3904

CAGTTAGAACTTCAGTTATGCTGCATGAACTGGTTATTGTATACACAGTCAGGGTTGTGGCAACTACTAT

AGAATTATCCTTTAGTTACTGAAACATAACAATTACATATGTTTCTCTT

>PGSC0003DMG400041336LRR-RLPs\_3965

AACTACTATAGAATTATCCTTTAGTTACTGAAACATAACAATTACATATGTTTCTCTTTTCTGAATGATGG

GGTTCTGTAGATTTTGTTCACCACCAAATCCCAAACAATGGACACTGG

>PGSC0003DMG400041336LRR-RLPs\_4087

ATACCTGTGAGTTGCCATGATTGATGTTTTATGACTTGGAAAACACTCTTATCAGACACTGGGTTTAAT

TTTTGATTTGGTAGTAAAACACTGACTTTGCTCATTTCCGGTGTGTTGT

>PGSC0003DMG400041336LRR-RLPs\_4148

TGGGTTTAATTTTTGATTTGGTAGTAAAACACTGACTTTGCTCATTTCCGGTGTGTTGTTTTGGAAGGATT

CTTTTGCTTCCTTTCTGTCTTGCTTGATGTAGTGATAATATTGTCGTTT

>PGSC0003DMG400041336LRR-RLPs\_4209

TGGAAGGATTCTTTTGCTTCCTTTCTGTCTTGCTTGATGTAGTGATAATATTGTCGTTTTGGGAATTTTCCT

GTCTTGACCGGTGATCAAATTTCTTCAGTAGTTGTCGATCTTTTTT

>PGSC0003DMG400041336LRR-RLPs\_4331

GGTAATTCTGTTTTCTGGCTATGCATACTTCATCTGGTAAGTGGTGTATGGTGATTGGTTTGTAAGCTT

TTGCTTGCTTGATTGGTTATGTTTAAAGATGTCTCGATTCAAGCTTTGA

>PGSC0003DMG400041336LRR-RLPs\_4575

TTATGTCGATTAGTATTGGATCTGTTGACAATATTTTTGCCTTAAACTGCATCCATTGAGTGTATCAATCT  
AAAATGTAACGCTAGAAGCTCATAGAACTTAACGAGTCTGAACCAAGGG

>PGSC0003DMG400041336LRR-RLPs\_4636

GTATCAATCTAAAATGTAACGCTAGAAGCTCATAGAACTTAACGAGTCTGAACCAAGGGGTACAGTTCCG  
TCTTGCTGATCTGTAAGAATGCTTGTCTAATCCCGCACCTATATGATGTA

>PGSC0003DMG400041336LRR-RLPs\_4880

TTCAGTAAAATAGTTGAGTTGGCATGAATACCACGGTAACTATAATATTCGATATTTAAAACCACTCTGA  
ACAATCAACGTTTTATAACCTTCATATATGTAAACTGTGTGTGTCATTAT

>PGSC0003DMG400041336LRR-RLPs\_4941

CCACTCTGAACAATCAACGTTTTATAACCTTCATATATGTAAACTGTGTGTGTCATTATTACTCCTTAACAA  
CACTATCTCTATTACATTGATTAGTAGCACTTTTCGATCGATTCAACC

>PGSC0003DMG400041336LRR-RLPs\_5002

CTCCTTAACAACACTATCTCTATTACATTGATTAGTAGCACTTTTCGATCGATTCAACCTTAGAAGAATCCC  
TGTTACACAAATTTGATAATCATACTCATTTCTCTATGATTTAGGTA

>PGSC0003DMG400041336LRR-RLPs\_5063

AGAAGAATCCCTGTTACACAAATTTGATAATCATACTCATTTCTCTATGATTTAGGTAGATTGTTCTTCT  
GCTGATTTTGTTCGCTGGGTTCCAACATCACCTGGACAAATAGATAA

>PGSC0003DMG400041336LRR-RLPs\_5124

TTGTTCTTCTGCTGATTTTGTTCGCTGGGTTCCAACATCACCTGGACAAATAGATAAATTTGGTTGCGG  
TGAATATCTTCAACATTTGGTTCTTTAGGCATTTAGAAAACAGGTTT

>PGSC0003DMG400041336LRR-RLPs\_5185

TTGGTTGCGGTGAATATCTTCAACATTTGGTTCTTTAGGCATTTAGAAAACAGGTTCTATGCACAGAG  
AGGGATCGAGAATGAAGAAGGAGGTTTGTCTTGTTCGAGCTCGACTT

>PGSC0003DMG400041336LRR-RLPs\_5246

TGCACAGAGAGGGATCGAGAATGAAGAAGGAGGTTTGTCTTGTTCGAGCTCGACTTGTAGAATTCC  
TCATTCAATCAGCTCAAGACCTTCAAGTTTCTCCGATCGTCAAATACTCAG

>PGSC0003DMG400041336LRR-RLPs\_5307

AGAATTCCTCATTCAATCAGCTCAAGACCTTCAAGTTTCTCCGATCGTCAAATACTCAGCACTGTCACTTT  
TCACCGATCGATTCTACCCAGCTTTACCGGAGAAGGAACTAAGGATGC

>PGSC0003DMG400041336LRR-RLPs\_5429

AGAGCTGGCTCTTACAGCCTCTGAGAGAAAGCAATTTGCAGCTATTTGCGCTTGTTGCAATATGGATCTC  
AAGCAAATAACACGATTCTCCTTCCCAAGTGTGAAATCCTTCAAGTCTC

>PGSC0003DMG400041336LRR-RLPs\_5612

TGTTAATGCAGGTATTGAAATTTGAGATCGGCATGTTAAGCATCCCCTTCCGATTCTTCGAAGATCTACTT  
ACTAAGTTCAGTGAAGTTGCTAGAGTTGGAAAGCAATTAAGCTTGGAAG

>PGSC0003DMG400041679-(rev)LRR-RLPs\_0

ATGAATAAGAACGGTGGAGAAAGCTCTGGTGGAGATAGGATTAGCAGTTTGCCTCGTGATCTTCTTCAG  
AAGATATTAGGATGCTTGCCTTTACATGATGCCGTAAGGACAAGTGTTTTG

>PGSC0003DMG400041679-(rev)LRR-RLPs\_1008

TCCCTTCTCAAGTCGTATGCCTACACATCGTGTGCATGTGAGTGTACACATCCCTTGCATCCCAAGAAAT  
GACAATGACCCATAGTGAATGAAGCGGCTCAAAAGTGTGGATATGACC

>PGSC0003DMG400041679-(rev)LRR-RLPs\_1071

CAAGAAATGACAATGACCCATAGTGCAATGAAGCGGCTCAAAAGTGTGGATATGACCCTCATGTGGGTT  
AATAAACTGAAATGGAATTCTTGAACCATGTATTGGCATATGCAACTGCA

>PGSC0003DMG400041679-(rev)LRR-RLPs\_1134

TGGGTTAATAAACTGAAATGGAATTCTTGAACCATGTATTGGCATATGCAACTGCACTTGAGAAAATAT  
ACATTGCAACTTCGGCAGAAATCCGTCATAGGGGAATGAAAATGATGGAG

>PGSC0003DMG400041679-(rev)LRR-RLPs\_1191

CTTGAGAAAATATACATTGCAACTTCGGCAGAAATCCGTCATAGGGGAATGAAAATGATGGAGGAGAT  
GAAGCGATTCCCTCGAGCATCACCTAATGTAGAATTTATATATCATTATGA

>PGSC0003DMG400041679-(rev)LRR-RLPs\_189

ATCCTCCTGAAAACAAGTATTTATAAAGTCCTATTGATGCATCAAGGAGAAGTACGCAAATTTAGCCTCT  
TGGTCCCTAGCTCCAACCTTTTTTCTGATATTGATACCTGGATTCTGTTT

>PGSC0003DMG400041679-(rev)LRR-RLPs\_252

AGCCTCTTGGTCCCTAGCTCCAACCTTTTTTCTGATATTGATACCTGGATTCTGTTTTTGTCAAGCAAAAAT  
GTCCAGGAATTATCACTTGCATTTCTTACATGCTGTGCGCTCCCTTCT

>PGSC0003DMG400041679-(rev)LRR-RLPs\_315

AGCAAAAATGTCCAGGAATTATCACTTGCATTTCTTACATGCTGTGCGCTCCCTTCTCACCTATTCAAATTT

CAGGATCTAAAGCACCTGGAACCTAATAGTTGTGAATTCAACCCTCCT

>PGSC0003DMG400041679-(rev)LRR-RLPs\_441

TTTAAAGGTTTTCGAAGTCTTGTTACCCCTTAACCTTCAATTTGTAACCTTCGAGCCCATGTCATTTCAAGTC  
CTCCTTTCAAGTAGCCCATTACTTGAGCATGTATCGATGGTTTGCTGT

>PGSC0003DMG400041679-(rev)LRR-RLPs\_504

TTTCAAGTCCTCCTTTCAAGTAGCCCATTACTTGAGCATGTATCGATGGTTTGCTGTAGTGAGTTTGATAG  
CTTCATTATTGAGGCCCCCAATCTAAAAATCTTCAAATTCAGCAGCACACA

>PGSC0003DMG400041679-(rev)LRR-RLPs\_567

TTTGATAGCTTCATTATTGAGGCCCCCAATCTAAAAATCTTCAAATTCAGCAGCACAGCAAATTCCTTTG  
CTTTAGAAGAATCCCTCTGCTTGAGGAAATTGTATTGGGCATGCCTTTT

>PGSC0003DMG400041679-(rev)LRR-RLPs\_63

CTTCAGAAGATATTAGGATGCTTGCCTTTACATGATGCCGTAAGGACAAGTGTTTTGTCAACAAAATGGA  
GGTACAAGTGGGTAGTACGTTCCGAAGTGTGTTGATTATAACATCTAC

>PGSC0003DMG400041679-(rev)LRR-RLPs\_630

TCCCTTTGCTTTAGAAGAATCCCTCTGCTTGAGGAAATTGTATTGGGCATGCCTTTTAAACATGTCAGAGGT  
AATCACTATCATTGAGATGTTTGTGTTGATGCACTACTGGATTTTCCTCG

>PGSC0003DMG400041679-(rev)LRR-RLPs\_693

TCAGAGGTAATCACTATCATTGAGATGTTTGTGTTGATGCACTACTGGATTTTCCTCGTAATTTTAGCTAAT  
TTTTTCACACTTTGTTTTAGTCCTTTACGGTACCAGAGCCTCAGTTAAC

>PGSC0003DMG400041679-(rev)LRR-RLPs\_756

TAGCTAATTTTTTCACACTTTGTTTTAGTCCTTTACGGTACCAGAGCCTCAGTTAACACTACACAACATCAA  
AATTTTGAATTTCAAGAATTTGATCTTTTCTGAGGTTGAGTGGGTTGC

>PGSC0003DMG400041679-(rev)LRR-RLPs\_819

CAACATCAAATTTTTGAATTTCAAGAATTTGATCTTTTCTGAGGTTGAGTGGGTTGCATATGTTCTTGACT  
TGATCAACCGCTGCCCAACATAGAAAGGCTCCTAATTACGGTATGTCT

>PGSC0003DMG400041679-(rev)LRR-RLPs\_882

TCTTGACTTGATCAACCGCTGCCCAACATAGAAAGGCTCCTAATTACGGTATGTCTCATTTTTCATCTTTT  
GATTGTAATATGTTGATTTTTAGCTTCTTTGATCTTATAATTAATCT

>PGSC0003DMG400041679-(rev)LRR-RLPs\_945

TCATCTTTTGATTGTAAATATGTTGATTTTTAGCTTCTTTGATCTTATAATTAATCTTCTTTTTCCCTTCTCAA  
GTCGTATGCCTACACATCGTGTGCATGTGAGTGTACACATCCCTTG

>PGSC0003DMG400041974RLKantifungi(GNK)\_1008

CGAAAATTAGGCGAAGGGGGATTGGAGAAGTTTACAAAGGGTACCTTATCGATCTTGACATAGCGGTT  
GCTGTAAAGAAGATCTCGAGAGGGTCTAAGCAGGGGAAAAAGGAATACATA

>PGSC0003DMG400041974RLKantifungi(GNK)\_1824

CCTAATCTTCCAATGAAGATGCCTGTTCTGTGTACTATTCACCTAGACCATGTGGCGAACCAACAGTTA  
GCTCGGGGGAGCCTACGATGACTTACACAAGCATCGATGTGGGTCGATAA

>PGSC0003DMG400041974RLKantifungi(GNK)\_945

GCAGGGCCAAGAAAGTTTTCGTATAAAGAGTTAGATACTTCAACTAATCATTCTCAGAGGAACGAAAA  
TTAGGCGAAGGGGGATTGGAGAAGTTTACAAAGGGTACCTTATCGATCTT

>PGSC0003DMG400042176LRR-RLPs\_1016

TCTCTGTATTATGTGGCAGGTGTTATACCAAGAGAGATTGGGAATCTTCAGAAATTGAAGGTACTTTATT  
TGCAATTAATCGATTAAGTGTACCAATTTGGGTGCAACAGCCACGTAA

>PGSC0003DMG400042176LRR-RLPs\_128

GATTGGGAACCTTGAGAATCTTAAGGACTTGATTTTATTCGAAAATCAACTTACTGGCTCTATTCCACTCT  
CCATTTTCAACATTTCTCCTTGGAACTTTTAGGTCTCTCAGGTAATCA

>PGSC0003DMG400042176LRR-RLPs\_192

CCACTCTCCATTTTCAACATTTCTCCTTGGAACTTTTAGGTCTCTCAGGTAATCAATTAACAGGGAGTCTT  
CCTGTAGATATATGTCGCCGTCTTGGAAGAATAAAGAGAATATCATT

>PGSC0003DMG400042176LRR-RLPs\_384

GCATACAATAACTTCAGTGGAAACATTCCACCAGAAATTATCAACTTGGAGAGGCTTGAGCTCTTAAGCC  
TTGGGGGAAACAACCTTGCAAGGTATTTATTAAGGGTGTGCTAACTGTTAC

>PGSC0003DMG400042176LRR-RLPs\_448

TAAGCCTTGGGGGAAACAACCTTGCAAGGTATTTATTAAGGGTGTGCTAACTGTTACGTCAATAATGGGC  
AAGTAAAAATGCATGGAGAGGGTACTTCTCTCAATTTGAATAACATTTAAT

>PGSC0003DMG400042176LRR-RLPs\_512

TGGGCAAGTAAAAATGCATGGAGAGGGTACTTCTCTCAATTTGAATAACATTTAATTTTTAGCGCGCTC  
ATAATAATTGACCATGCCCTAGCCTATTCTATTAACAACAATAACTCT

>PGSC0003DMG400042176LRR-RLPs\_576

GCGCTCATAATAATTGACCATGCCCTAGCCTATTCTATTAACAACAATAATACTCTCTCCATCCCATTGG  
CCAAATGCATAAAAAACACCCTTGTTCCGTTTTAACTCTCAAAAATAAT

>PGSC0003DMG400042176LRR-RLPs\_64

TTATTTCAAAGTTAGAACTCTGAGTGTGAGAAACAATCTCCTTCAAGGCGGTATCCCCAAGGAGATTG  
GGAACCTTGAGAATCTTAAGGACTTGATTTTATTCGAAAATCAACTTACTG

>PGSC0003DMG400042176LRR-RLPs\_640

CATTTGGCCAAATGCATAAAAAACACCCTTGTTCCGTTTTAACTCTCAAAAATAATTTGCAGGCACAATTC  
CAGCAAAGATTGGTAATTTACGAAAGTTGCAGCAATTAATTTGGAGAA

>PGSC0003DMG400042176LRR-RLPs\_704

ACAATTCCAGCAAAGATTGGTAATTTACGAAAGTTGCAGCAATTAATTTGGAGAACAATCACATTGTG  
GGTTCAATACCGCGCACTATCTCCAATTATCATCACTATGGTGGCTTAAT

>PGSC0003DMG400042176LRR-RLPs\_768

TTGTGGGTTCAATACCGCGCACTATCTCCAATTATCATCACTATGGTGGCTTAATTTGAATACCAACAGT  
TTATCAGGTAATTTTCAAGCAATGTAGGTTTGTGGTTATCCAGATCA

>PGSC0003DMG400042176LRR-RLPs\_832

CAACAGTTTATCAGGTAATTTTCAAGCAATGTAGGTTTGTGGTTATCCAGATCACTATTACTCCTCCAT  
CATGCGTAGAATTTGGCTGATTAATTTTGGATATATGAACGAATGCAAT

>PGSC0003DMG400042176LRR-RLPs\_896

CCTCCATCATGCGTAGAATTTGGCTGATTAATTTTGGATATATGAACGAATGCAATCAAGCATAATCTTCC  
TGAAAGTTGGAACAAGATTTAAAGAAATAGCATTGATCTGGATGTTTTT

>PGSC0003DMG400042176LRR-RLPs\_960

ATCTTCCTGAAAGTTGGAACAAGATTTAAAGAAATAGCATTGATCTGGATGTTTTTCTCTGTATTATGTG  
GCAGGTGTTATACCAAGAGAGATTGGGAATCTTCAGAAATTGAAGGTAC

>PGSC0003DMG400042190LRR-RLPs\_130

CAACAATAGCCTCACGGGTATGCGGTATGATCCCTCCTTTTGTGGAAATGCCACAAACATGATCAACTT  
CAGTTTGTGGAAATAGAGTTAGCGGCAACATTCCAAAGGAGATCAGTA

>PGSC0003DMG400042190LRR-RLPs\_195

AACTTCAGTTTGTGGAAATAGAGTTAGCGGCAACATTCCAAAGGAGATCAGTAATCTGAGCCAACTA



GAAGACTTGCCTTGAGTGATAATCAATTAACAAGTTCCATTCCCACGACA

>PGSC0003DMG400042190LRR-RLPs\_260

ACTAGAAGACTTGCCTTGAGTGATAATCAATTAACAAGTTCCATTCCCACGACACAGTTTAATATCTCGT  
CACTACTTGCCTTACATCTGCTAAACAATAGCCTTTCTGGTCCTCTCTT

>PGSC0003DMG400042190LRR-RLPs\_325

TCTCGTCACTACTTGCCTTACATCTGCTAAACAATAGCCTTTCTGGTCCTCTCTTGCAAGATGAAGGAAAT  
ATTGTGTCCAATTTAGAGGTATTACGTATATCTCACAACCAAATTTCTG

>PGSC0003DMG400042190LRR-RLPs\_390

GGAAATATTGTGTCCAATTTAGAGGTATTACGTATATCTCACAACCAAATTTCTGGTTGCATTCTTCCAA  
CATTTGTCGGATACTCACAAGCTCAAATGTTGTCTTTATCTTTCAAC

>PGSC0003DMG400042190LRR-RLPs\_455

TTCCAACATTTGTCGGATACTCACAAGCTCAAATGTTGTCTTTATCTTTCAACAACATAACTGGAGAAA  
TACCTAGAAATATTGGTTGTCTAGCCAAGCTTGAGGTGTTGTCTATTGG

>PGSC0003DMG400042190LRR-RLPs\_520

GAGAAATACCTAGAAATATTGGTTGTCTAGCCAAGCTTGAGGTGTTGTCTATTGGACGTAATGCAATGA  
GTGGGACTATTCATGCTTCATTGGGCAATATTTCCACTCTGGAAAATCTTG

>PGSC0003DMG400042190LRR-RLPs\_585

ATGAGTGGGACTATTCATGCTTCATTGGGCAATATTTCCACTCTGGAAAATCTTGTTGTTCTCACTCTCG  
CATAGTGGGGCATTCCATCCACTACAGGTCTTCATCTTTCGAACCTTAA

>PGSC0003DMG400042190LRR-RLPs\_65

AAACTCCATGGTGAAATGTGGAAAGGGCCATGATATGTACCTGAACTCAGAGTCTTGATCTCACCAAC  
AATAGCCTCACGGGTATGCGGTATGATCCCTCCTTTTGTGGAAATGCCAC

>PGSC0003DMG400042529-(rev)LRR-RLPs\_1216

TGCTGTGGAGTTGTCGTCCAAGGAACTCAACCTACAATCAACAAGTGAAATGTTTACATGTTTCATGGG  
TCGTTTGATGCATATGAAGAGTTTGAGACGCACTCTTTCTCATGAAATGG

>PGSC0003DMG400042529-(rev)LRR-RLPs\_1280

CATGGGTCGTTTGATGCATATGAAGAGTTTGAGACGCACTCTTTCTCATGAAATGGGTTGTTTGATGCAT  
ATGAAGAATTGGAGACGCGCTCTTTTTCATGAAAGGCATGGTCAATTA

>PGSC0003DMG400042787LRR-RLPs\_0

ATGACAAATAACACCTTAGTTACTATTGCAAGGAACCGTCCTAACATGATCCAAATTCGTTTGTGTATTAC  
TGAGCCTCAAACCTCATGATTACCTAACCCCTGAACCACTTGATGCTGGT

>PGSC0003DMG400042787LRR-RLPs\_114

GCTGGTTTTGGGGACATTGTACAACACTGCAAGGAATTACGGCGACTTTCTCTTTCCGGACTCCTTACAG  
ATCGTGCGTTTGAGTACATCGGGGTCCTTGCTAAGAAGTTAGAGATGCTT

>PGSC0003DMG400042787LRR-RLPs\_171

GGACTCCTTACAGATCGTGCGTTTGAGTACATCGGGGTCCTTGCTAAGAAGTTAGAGATGCTTTCCTTAG  
CTTTTGTGGGGGATATCAATCTAGGCCTCTACTATGTTCTCTCTGGTTGT

>PGSC0003DMG400042787LRR-RLPs\_228

ATGCTTTCCTTAGCTTTTGTGGGGGATATCAATCTAGGCCTCTACTATGTTCTCTCTGGTTGTGAGAGCCT  
CCGTAAGTTGGAGATTAGAGACTGCCCTTTGGTGATAAGGCTCTGTTG

>PGSC0003DMG400042787LRR-RLPs\_57

CGTTTGTGTATTACTGAGCCTCAAACCTCATGATTACCTAACCCCTGAACCACTTGATGCTGGTTTTGGGGA  
CATTGTACAACACTGCAAGGAATTACGGCGACTTTCTCTTTCCGGACTC

>PGSC0003DMG400042814-(rev)G-LecRK\_124

AAACAATTATCTCTTCAGGTGGAAAATTTAACTTGGTTTCTTCCAACCAGGTAATTCTTCCAACACTACTAC  
ATAGGCATGTGGTACGATAAAGTGGTTGAACAAACTGCTGTTTGGGTTG

>PGSC0003DMG400042814-(rev)G-LecRK\_186

AACTACTACATAGGCATGTGGTACGATAAAGTGGTTGAACAAACTGCTGTTTGGGTTGCAAACAGGGAA  
AAACCAGTTCTTGATAAGAGCACTGCAGAGTTAAAGATCTTAGATGGTAAT

>PGSC0003DMG400042814-(rev)G-LecRK\_744

ACATATCCCTTTATGATGATTCTATCATATCAAGATTCATTATGGATGGCTCTGGACAGATTAAGCAACT  
CACATGGTTGAATACTTCGAATCAGTGGAACTGTTCTGGTCTCAGCCA

>PGSC0003DMG400042814-(rev)G-LecRK\_806

TAAGCAACTCATGTTGAATACTTCGAATCAGTGGAACTGTTCTGGTCTCAGCCAAGACAACAATGT  
GAAGTTTATGCATTTTGCGGGCCATTTGCTACCTGTCAGGAAACCAATCC

>PGSC0003DMG400042814-(rev)G-LecRK\_930

TGTAATTGTTTGGATGGTTTCAAGCATAGTTCAGAGACTGATTGGAATCAAATGATTTTTCTGGAGGAT  
GTGAGAGGCAAACGAAGTCGCAATGTGGCAATGGTAAGGGGGAGAAAGAT

>PGSC0003DMG400042886-(rev)G-LecRK\_0

ATGGACTTTGTAACTCAATAACTCCTTTGAACTAACTCAGTTTTTCATTATTTCCATCTTTTTCTCAATTT  
TTTTTCAAATTAAGTTGAATCTGAGACACCCAACCAAGTTTTTCAA

>PGSC0003DMG400042886-(rev)G-LecRK\_1260

TTTTTCAAATGAGGGAGGGTGTAGGAAAAGATAAGATGGGGGTGGGGTTTGGGGTGAGGGTAGGGT  
TATTATGTGGGGCCATATTGGTATTAGGTGGGGTCATAGGTTTAGGGTATTAT

>PGSC0003DMG400042886-(rev)G-LecRK\_504

AATCAAATTTCACTAGTGCCATGACTTTAGTTTCGTCAAATGGGCTTTATTCCATGAGATTGGGCTTTGA  
TTTTTTCGGGTTGTATTTTAAAGGTGAATCGGGTTCGGATTTCGGGTTCAG

>PGSC0003DMG400042886-(rev)G-LecRK\_567

GGCTTTGATTTTTTCGGGTTGTATTTTAAAGGTGAATCGGGTTCGGATTTCGGGTCAGATCTACTGGAGGC  
ACAAGGCATTAGAAGCTAAAGCTGATGTGATGGAAGATCAAGGACATATT

>PGSC0003DMG400042886-(rev)G-LecRK\_63

TTCTCAATTTTTTTCAAATTAAGTTGAATCTGAGACACCCAACCAAGTTTTTCAAAGGTTTTTAAAGCAA  
CCCAGATCCCCAAATTTTGAATTTTTCAGCCTCTTCTTACTGATTCTACT

>PGSC0003DMG400042886-(rev)G-LecRK\_630

TGGAGGCACAAGGCATTAGAAGCTAAAGCTGATGTGATGGAAGATCAAGGACATATTTATGTTGTATTA  
AAGTCAAATGGATTTTTGGGAATGTACCAAATGAGTCAGTTCCAGTTGAC

>PGSC0003DMG400042886-(rev)G-LecRK\_693

GTATTAAGTCAAATGGATTTTTGGGAATGTACCAAATGAGTCAGTTCCAGTTGACATTGAATCATTTA  
ACAGCTTTCAACAACCCGTATCCGGCGTCCGTCCGGTACGGGTTCGAACCG

>PGSC0003DMG400042886-(rev)G-LecRK\_882

ACATGTGAATTGCCTAGCCCCTGTGGGGCGTACGGGCTCTGTCATCCAGGCAAGAGTTGCTCTTGCCTG  
GATAACAGCACGGACTACAGTATTGGCGGGTGTGCCCCGCCGAATAGTCAG

>PGSC0003DMG400042886-(rev)G-LecRK\_945

TGCCTGGATAACAGCACGGACTACAGTATTGGCGGGTGTGCCCCGCCGAATAGTCAGGAGTCCCCGCGA  
TTTTTTCGGGGCCTCCTATGATCTTGATCACAAGAAGTACAAGGGGTTATCA

>PGSC0003DMG400042991-(rev)LRR-RLPs\_0

ATGGATAGAATTTACAGTTATCAACTGAAATCCTTCACCAAATACTCTCTTCTCCCAACTAAAACCTGC

TGCTCAAACCGCGGTGTTGTGCGAAGCAATTGCTTAAAGCATGCTATACA

>PGSC0003DMG400042991-(rev)LRR-RLPs\_1088

TTGTTTATCTTTTGAAAGTGCTTCAAGCCAATGCAGAATTTCCATAAAGTATGGCAATCTACCATCTGATC

CCGAGCATATCATTGACTTACGGAAATCTCTGGTTGAGTTGAATGATAA

>PGSC0003DMG400042991-(rev)LRR-RLPs\_1152

TCTGATCCCGAGCATATCATTGACTTACGGAAATCTCTGGTTGAGTTGAATGATAAAGATGTAGACTTGA

CATTGGATAGTATCGGTAAAGGGTTGAGAGCAACAAGTGAATTAATCAT

>PGSC0003DMG400042991-(rev)LRR-RLPs\_1200

AATGATAAAGATGTAGACTTGACATTGGATAGTATCGGTAAAGGGTTGAGAGCAACAAGTGAATTA

TCATTTCCCTCAACTAAAGTTGAGAATTTGACATTAACCTATTGTGACTGA

>PGSC0003DMG400042991-(rev)LRR-RLPs\_384

GGAGTTTATTCGAAAAGATATAGTTTGTTAGCTGATTCCATATTCGAGATAGAATCGTTGCAGGTGTTGG

AGATAAATTGCTGCAGAATATTGAAGCAAAAAGCATTACTTTCCGAAGAT

>PGSC0003DMG400042991-(rev)LRR-RLPs\_448

TGTTGGAGATAAATTGCTGCAGAATATTGAAGCAAAAAGCATTACTTTCCGAAGATAAAATTAAGTGCA

GTAACCTAAAAATCTAACTTTGTGCTATGTTACTGTTAGTGAATCAGCAC

>PGSC0003DMG400042991-(rev)LRR-RLPs\_512

GTGCAGTAACCTAAAAATCTAACTTTGTGCTATGTTACTGTTAGTGAATCAGCACTTGATAGTCTAATTT

CGTGTTGCTCTCAGATCCAGAAGATATCATTCCAACACTGTTTGGGGTT

>PGSC0003DMG400042991-(rev)LRR-RLPs\_64

AAACTGCTGCTCAAACCGCGGTGTTGTGCGAAGCAATTGCTTAAAGCATGCTATACAACTCCAATCTCTG

TTTTGACGAATCTGATTTTGGCGAAGAACAACAGAATAATGGTAGGTTTG

>PGSC0003DMG400042991-(rev)LRR-RLPs\_704

AGTTCATATTGGTGATGCACCAAACTGCTATCTTTCGAATATGTGAACAAAGTTGATTCCGAGCGTTTA

TCTCGTCATGATCTTGACATATGTTTGGCGACGTTAGAGATTGGTACTTG

>PGSC0003DMG400042991-(rev)LRR-RLPs\_768

CGTTTATCTCGTCATGATCTTGACATATGTTTGGCGACGTTAGAGATTGGTACTTGTTATAATCTCAGAAG

GGTAGAATTTGTGAAAGCTGAGATTGATGATGTGGTTCTTTTCGAGCTT

>PGSC0003DMG400042991-(rev)LRR-RLPs\_896

ACTACACTTTATCAAGGAGTTGATCTTACTACTGTAAGTACTTGAAGAAAATAAAAATCTCAAGTTCA  
ACACTCGAGGTTTGTAGCATAGAAAGTTGTGTGTGCTTAGTGCAAGCCAC

>PGSC0003DMG400043061-(rev)LRR-RLPs\_504

TTCGACGTATCGAACAATAGATTATCGGGTCCGATACCAGCGTCACTGGGTAACCGGAGCGGAAATTTT  
CCTCGATTCAATGCCAGTTCGTTTGTATGGGAATAAGGATCTTTACGGGTAC

>PGSC0003DMG400043237-(rev)LRR-RLPs\_0

ATGTTTGAAAGAGAGGCTAGAGATGATAGAATATCAGAATTGCCTGTGCATATCATTATCACAGCTTAT  
GCTACTGCACTAACTCAACTTGAAAGAGGCGGCGAGAAGTTGTATCTTG

>PGSC0003DMG400043237-(rev)LRR-RLPs\_128

ATGGTACTATTGTTGGATTTCAAGACCTCATCTGATATTCGATCAATTTGAAGGGAACAAATATATGCCC  
CCAGAAAAGTATGTCAAGTTGGTTGATCAATCCCTGCGATCCCATGTCTGA

>PGSC0003DMG400043237-(rev)LRR-RLPs\_192

ATGCCCCAGAAAAGTATGTCAAGTTGGTTGATCAATCCCTGCGATCCCATGTCTGAACAAAACCTTACGTC  
TTGAACTATTAATCCTTGGATATCGTGATGAAGAATTGGATTCTCACTTA

>PGSC0003DMG400043237-(rev)LRR-RLPs\_256

TACGTCTTGAACATTAATCCTTGGATATCGTGATGAAGAATTGGATTCTCACTTAGATACTTGGATTGAA  
TTGGCGGTTAACTTAACGTCACACTATTGGGGATTTCCCTTCCCCTTT

>PGSC0003DMG400043237-(rev)LRR-RLPs\_320

GATTGAATTGGCGGTTAACTTAACGTCACACTATTGGGGATTTCCCTTCCCCTTTTATATCGTTACCTG  
ATGCTATTTATGCTGCTAAAAAGTTGACGGTATTGTGGTTATGCAGGTG

>PGSC0003DMG400043237-(rev)LRR-RLPs\_384

TTACCTGATGCTATTTATGCTGCTAAAAAGTTGACGGTATTGTGGTTATGCAGGTGCAAGTTTGAATTTG  
ATATTAGCACTACTTGCATAAGATTTTGTGTCTTCGGGATCTTTCTTTG

>PGSC0003DMG400043237-(rev)LRR-RLPs\_448

AATTTGATATTAGCACTACTTGCATAAGATTTTGTGTCTTCGGGATCTTTCTTTGTATGATGTCCATATTT  
CAGATGACCAATTGCAAAGACTTATCGAAAGATCCCCGTATATCAGGA

>PGSC0003DMG400043237-(rev)LRR-RLPs\_512

CCATATTTAGATGACCAATTGCAAAGACTTATCGAAAGATCCCCGTATATCAGGAATCTAATGCTACAG  
AATTGCCAGGGTATAAGCAAATTACATGTTTTTGGCCTAGTCTATCTCGA

>PGSC0003DMG400043237-(rev)LRR-RLPs\_576

CTACAGAATTGCCAGGGTATAAGCAAATTACATGTTTTTGGCCTAGTCTATCTCGAGGATTTGGCTGCAC  
AATATAGCAAATTCGATAGTGTGATAGTCCAAGCCCCAAATCTTCGATGC

>PGSC0003DMG400043237-(rev)LRR-RLPs\_64

GCTTATGCTACTGCACTAACTCAACTTGAAAGAGGCGGCGAGAAGTTGTATCTTGTCCAAGAGATGGT  
ACTATTGTTGGATTTCAAGACCTCATCTGATATTTCGATCAATTTGAAGGGA

>PGSC0003DMG400043237-(rev)LRR-RLPs\_640

CTGCACAATATAGCAAATTCGATAGTGTGATAGTCCAAGCCCCAAATCTTCGATGCTTTACATATGCAGA  
ACATGAGGACAATTTTCTCCTCGTGAAATTGCTATTTTGGATGGTTACA

>PGSC0003DMG400043237-(rev)LRR-RLPs\_704

TGCAGAACATGAGGACAATTTTCTCCTCGTGAAATTGCTATTTTGGATGGTTACAATACTTTACAAACAC  
TCAAGCTCACTGGTGCCAACATCACGGACCAACAGTTTCGAGATTTATC

>PGSC0003DMG400043237-(rev)LRR-RLPs\_768

CAAACACTCAAGCTCACTGGTGCCAACATCACGGACCAACAGTTTCGAGATTTATCCTATAAGTTCCCAA  
ACATTTTCAGAATTGAATCTCACAGAATGTTATAAGCTGAAAAATATAGAG

>PGSC0003DMG400043237-(rev)LRR-RLPs\_832

TCCCAAACATTTTCAGAATTGAATCTCACAGAATGTTATAAGCTGAAAAATATAGAGATTCAGAGTGAAAA  
ACTAAAGATATTCACCTTATTAAGTTGAAGAGTCTGGAAAAAGTCACGG

>PGSC0003DMG400043237-(rev)LRR-RLPs\_896

TGAAAAACTAAAGATATTCACCTTATTAAGTTGAAGAGTCTGGAAAAAGTCACGGTTCAAGCTCCAAAT  
TTATTGGAATTTGATTTTGTGGGTGATAAAATGCCCTTCTCATTTATGGA

>PGSC0003DMG400043237-(rev)LRR-RLPs\_960

CCAAATTTATTGGAATTTGATTTTGTGGGTGATAAAATGCCCTTCTCATTTATGGATCCTTCTTCCCTGGA  
AAGAGCCCAACTCGTTTTCTCCTCGCTGAGCACAACTTGTTGGGTTTA

>PGSC0003DMG400043334LRR-RLPs\_0

ATGGATGAGGTAGCTAGTAAAGGAAGGAAGTCTACCACTATCGGTGACTTACAAGATGGCATATTACAT  
ACAATACTAGAGTTTATGCCCATCCAAGACGCTGCAAGAACTAGCGTCTTA

>PGSC0003DMG400043334LRR-RLPs\_128

ATGGATACCTATATGGTCCACACAGCCACATCTTGTGTTTGGATCCCCTGTTTTTTCAGTATGTATCTAATAT

TGGTGCTTCTGCTGCAACCGTAATTTATAAGATTCTAATGCAACACAC

>PGSC0003DMG400043334LRR-RLPs\_384

ATGTTGCCTAATAGAATATTTACTTGTGCAACATTGACACATTTGAAGCTCTCAAGGTGTTTCTTTAAGCT

TCCGGATGGTACCCAATTTCCCATTCTTGTTAGCCTTCAGTTAGAACAT

>PGSC0003DMG400043334LRR-RLPs\_448

TTAAGCTTCCGGATGGTACCCAATTTCCCATTCTTGTTAGCCTTCAGTTAGAACATTCTAAAATTGCCGGT

CATCTAGGATCAGAAGACGATCTTAATCTGCCAATGCTTGAGACTTTGG

>PGSC0003DMG400043334LRR-RLPs\_512

TGCCGGTCATCTAGGATCAGAAGACGATCTTAATCTGCCAATGCTTGAGACTTTGGAGTTGAGATTTTGT

ATTGGCGTTGATTCTGTAAATTTGGTTTCTCCCAAACCTTGACAATATGTC

>PGSC0003DMG400043334LRR-RLPs\_570

TTGAGATTTTGTATTGGCGTTGATTCTGTAAATTTGGTTTCTCCCAAACCTTGACAATATGTCTATCGTTAGC

AGCTATACAGTTACATTTTACTGTGAACCCAATCTTTGCAATCATTAA

>PGSC0003DMG400043334LRR-RLPs\_64

TACATACAATACTAGAGTTTATGCCCATCCAAGACGCTGCAAGAAGTACTAGCGTCTTATCGAAGAAATGGAT

ACCTATATGGTCCACACAGCCACATCTTGTTTGGATCCCCTGTTTTTTC

>PGSC0003DMG400043603LRR-RLPs\_1056

AAATCAATCCGAATAGTTGATTGCAGCTCTGGTGTTAATACAAGTGAAGGAAAATTCAAGAAGAGCAA

GAAAGCTTGGGAAATTATGAGCTTCAATTTGAAATTGTTTTGGTATGTAA

>PGSC0003DMG400043603LRR-RLPs\_504

CTATATATATCAAACCTTGTTGAAGCAGAACAACTTTATTTCTGAATAACTTGCAAACACTTTATCTCTAT

AATTCTCCTTGTGTTGCGGAAATCATAAGAAGAACTCCCAATCTAAAA

>PGSC0003DMG400043603LRR-RLPs\_567

TATCTCTATAATTCTCCTTGTGTTGCGGAAATCATAAGAAGAACTCCCAATCTAAAAAGCTAAAGATTTT

ATATAGATCTAAGCTTCTGATTCTCTGAGTATTTTACAGGATCTGGAG

>PGSC0003DMG400043603LRR-RLPs\_630

AAGATTTTATATAGATCTAAGCTTCTGATTCTCTGAGTATTTTACAGGATCTGGAGACACTACACATAAA

AGAACAAGAAAACATTGATCCGATGATTATCTCTAGAGATATTTCTCTT

>PGSC0003DMG400043603LRR-RLPs\_693

CACATAAAAGAACAAGAAAACATTGATCCGATGATTATCTCTAGAGATATTTCTCTCCTAATCTCAAGA  
AGTTGAAATTATTTTCGTACTCGTATACCATGGGAAGTTGTGAATTTGCTG

>PGSC0003DMG400043603LRR-RLPs\_756

CTCAAGAAGTTGAAATTATTTTCGTACTCGTATACCATGGGAAGTTGTGAATTTGCTGGCTAATTTAACCA  
ATCTTGAGGTGCTCAATGGGAATCGTGCATTCGTTGGAACAGATTGGAAA

>PGSC0003DMG400043603LRR-RLPs\_819

TTAACCAATCTTGAGGTGCTCAATGGGAATCGTGCATTCGTTGGAACAGATTGGAAAGTAGATGAAGAT  
GTTGTATTTACAAATTAATAATCTACGACTGTATGTGTGCTTTGATCTG

>PGSC0003DMG400043603LRR-RLPs\_882

GAAGATGTTGTATTTACAAATTAATAATCTACGACTGTATGTGTGCTTTGATCTGGAAAGGTGGGAAT  
TAGCAGCTGGTAGTGATAATTTCCGATGCTTGAGCAACTGAACTGTAT

>PGSC0003DMG400043752-(rev)LRR-RLPs\_122

TATGCTAGAGAACATGAAGACTTTTCACACTTGCCATATATTGTTTGATAAAATGAATCCAAGGTTCTGG  
TGGAGGTTTCCGAATCTTGAAGAACTCAGTCTCCGCGTTGATTATGTACC

>PGSC0003DMG400043752-(rev)LRR-RLPs\_183

AGGTTCTGGTGGAGGTTTCCGAATCTTGAAGAACTCAGTCTCCGCGTTGATTATGTACCTCATGAGTTTC  
CTTTGTTTCCCATACCGGAAGTTCATACTCACCTTCATACTCTTTCTGTG

>PGSC0003DMG400043752-(rev)LRR-RLPs\_244

ATGAGTTTCCTTTGTTTCCCATACCGGAAGTTCATACTCACCTTCATACTCTTTCTGTGAATTTATCTGTCA  
TGAATTTCCGGCAATCAGTTGGATGGGAGAGGAATTATGTCTTCCCCT

>PGSC0003DMG400043752-(rev)LRR-RLPs\_305

TTTATCTGTCATGAATTTCCGGCAATCAGTTGGATGGGAGAGGAATTATGTCTTCCCCTCTAATCTTAGGC  
AGCTGCACCTTGCTAGCTATTTCTTGACGGAAGAAATGGTTTTAAGCAT

>PGSC0003DMG400043752-(rev)LRR-RLPs\_366

AATCTTAGGCAGCTGCACCTTGCTAGCTATTTCTTGACGGAAGAAATGGTTTTAAGCATTGCTAGATTGA  
AGAAGCTTGAGATTCTCACATTAAGGGGGGAGTTCGTTTGATGATATTT

>PGSC0003DMG400043752-(rev)LRR-RLPs\_427

CTAGATTGAAGAAGCTTGAGATTCTCACATTAAGGGGGGAGTTCGTTTGATGATATTTCAAAGCTTTTG  
CTGGGACGTCACAAATTTGGAGTTCCTGCACTCAAATACTTGGCATTAC



>PGSC0003DMG400043752-(rev)LRR-RLPs\_549

GGTATGCAGATGGACGAATGGAAAGCATCAGAGGAATCCTTTCCTGTGCTTGAGGAGCTATCTATAGTA  
GATGGTTATACATTCAAGGAGATCCCTCCTAGCTTTGTGGATATTCCAACA

>PGSC0003DMG400043752-(rev)LRR-RLPs\_610

CTATAGTAGATGGTTATACATTCAAGGAGATCCCTCCTAGCTTTGTGGATATTCCAACACTGCGATTTATC  
AAACTGTCTGATTGCGCCAAGTCTCTTAGGGTTTCAGCTTTGAATATCA

>PGSC0003DMG400043752-(rev)LRR-RLPs\_666

ACACTGCGATTTATCAAAGTGTCTGATTGCGCCAAGTCTCTTAGGGTTTCAGCTTTGAATATCAAAAAAG  
AAATAGAAGAAAACACCGGATGTGACCGTCTCCAAGTTGTTACAATATAG

>PGSC0003DMG400043836RLKmalectin\_0

ATGCCAAGAGGATCACCACCACCATCATCGTCTACAATAATGGCTAATATCCTCGTGGCGTTTGTGGCC  
TCATTTTCATCGGCCCTCGAGTGTAATCCAGTTTCTGCACAATCAGAT

>PGSC0003DMG400044242LRR-RLPs\_0

ATGAGGATGTTTCTTTTGTGTTACCTCTTGCTCTTTTGTGAGTGCAGTAGAAACACAAGGTATCAGTGT  
TGTTGATTTATCTGCTCTGCGTGAAATCAAAAACAGCCTCACCGACATT

>PGSC0003DMG400044242LRR-RLPs\_1008

TACGTGGAGAGTGTTCACAGTGGAAACACGAGAACTCTGTATTTGCAACATAATTACATTGCAGAGTTTC  
CGGTGAAAGAAGGATTACCATTGCCGGATTCAGTAGCATTGTGTTTATCG

>PGSC0003DMG400044242LRR-RLPs\_1071

GAGTTTCCGGTGAAAGAAGGATTACCATTGCCGGATTCAGTAGCATTGTGTTTATCGTACAATTGCATGG  
TTCCACCGGTGCCGGTGGGGTTCATGGCTTGCCGGCTAGCGCCGGCGGA

>PGSC0003DMG400044242LRR-RLPs\_1125

TCGTACAATTGCATGGTTCCACCGGTGCCGGTGGGGTTCATGGCTTGCCGGCTAGCGCCGGCGGACAG  
ATATCTAGACCAGTGAACCAGTGCTCTGCTTTTAATACTTCCATGGCATAA

>PGSC0003DMG400044242LRR-RLPs\_126

TCTTCTCAAATGCCTTTTTTACCAGCTGGGACTTCACTGCTCCCGACCCGTGCTCGTCTTTTGCTGGAATT  
ACTTGCTCTCTGTTCAATCCTAAACGTGTTACTACACTCACACTTGGC

>PGSC0003DMG400044242LRR-RLPs\_189

GCTGGAATTACTTGCTCTCTGTTCAATCCTAAACGTGTTACTACACTCACACTTGGCACTGGCCTCTCTGA

TTCACCTGGCCTTGCCGGGATATTATCTCCGGCTATCTCTAACCTCTCC

>PGSC0003DMG400044242LRR-RLPs\_252

CTCTCTGATTCACCTGGCCTTGCCGGGATATTATCTCCGGCTATCTCTAACCTCTCCGAGCTAACTCAACT  
GTTCTTTTCACTGGGATTGTAAGTGGTCCCATCCCTGACCAAATCGGA

>PGSC0003DMG400044242LRR-RLPs\_315

ACTCAACTGTTCTTTTCACTGGGATTGTAAGTGGTCCCATCCCTGACCAAATCGGAACACTCAAAAACT  
CAGCGTCATCTCTCTCACGAACAATCGCCTAACTGGATCCATACCTACT

>PGSC0003DMG400044242LRR-RLPs\_378

AAAAAACTCAGCGTCATCTCTCTCACGAACAATCGCCTAACTGGATCCATACCTACTTCCATTTTCACT  
CCCCAATCTCCATACTCTCGATTTGAGTCACAATCAACTCACTGGTACA

>PGSC0003DMG400044242LRR-RLPs\_441

TTCACACTCCCAATCTCCATACTCTCGATTTGAGTCACAATCAACTCACTGGTACAATCCCTGGTTCGATT  
TCCCAGTTATCTTCGCTGAAGGTAGTAGTTCTGGGATCCAACAAAATC

>PGSC0003DMG400044242LRR-RLPs\_504

GGTTCGATTTCCAGTTATCTTCGCTGAAGGTAGTAGTTCTGGGATCCAACAAAATCTCCGGCGAGATTC  
CAATTCTGCCGACGGAATTACTTCACTTGGATTTGAGTAACAATGAGCTA

>PGSC0003DMG400044242LRR-RLPs\_567

GAGATTCCAATTCTGCCGACGGAATTACTTCACTTGGATTTGAGTAACAATGAGCTATCGGGAATGTTGC  
CGAGGAAAAGCAGAATGCCGTTAACGCTCCGTTATCTGTCAGTATCAGGA

>PGSC0003DMG400044242LRR-RLPs\_63

ATCAGTGTTGTTGATTTATCTGCTCTGCGTGAAATCAAAAACAGCCTCACCGACATTACTTCTCTCTCC  
AAATGCCTTTTTTACCAGCTGGGACTTCACTGCTCCCGACCCGTGCTCG

>PGSC0003DMG400044242LRR-RLPs\_630

ATGTTGCCGAGGAAAAGCAGAATGCCGTTAACGCTCCGTTATCTGTCAGTATCAGGAAATCGGTTGTGG  
GGACCACTGAGCGTCTCGAATCACTCTCAGAGTTAGTGTACCTCGACTTA

>PGSC0003DMG400044242LRR-RLPs\_693

TTGTGGGGACCACTGAGCGTCTCGAATCACTCTCAGAGTTAGTGTACCTCGACTTAAGCATGAACCGTT  
TCAGTGGGACCATCCCTTCATCACTCTCCGATCCACGTTGTCATCAATG

>PGSC0003DMG400044242LRR-RLPs\_756

AACCGTTTCAGTGGGACCATCCCTTCATCACTCTTCCGATCCACGTTGTCATCAATGTACCTCCAACGGAA  
CAATTTAACCGGAAGGGTCCCACAACCACCGCTATCCTCCCCTGCCGCC

>PGSC0003DMG400044242LRR-RLPs\_819

CAACGGAACAATTTAACCGGAAGGGTCCCACAACCACCGCTATCCTCCCCTGCCGCCACCGTATACGGCC  
CTGGATCCACCGTGGATCTAAGTCACAACCTCACTCACTGGGGAACTCACA

>PGSC0003DMG400044242LRR-RLPs\_882

TACGGCCCTGGATCCACCGTGGATCTAAGTCACAACCTCACTCACTGGGGAACTCACAAATACTCTCGCCG  
GAGTAGAAACACTCTTCTTAACAACAATCGGTTACCGGAGCAGTACCG

>PGSC0003DMG400044242LRR-RLPs\_945

CTCGCCGGAGTAGAAACACTCTTCTTAACAACAATCGGTTACCGGAGCAGTACCGAAGGATTACGTG  
GAGAGTGTTTACAGTGGAAACACGAGAACTCTGTATTTGCAACATAATTAC

>PGSC0003DMG400044365-(rev)LRR-RLPs\_1116

TGCAGATGGTTGACAATAAGTTCTTGTATTTCAAACCTTCGTTCCCTCTACTAGACAACCTCTTAAGGTC  
GACTCATAAATTGGAAAATTTGATGATATTTCTGATACGCCGGTATGT

>PGSC0003DMG400044365-(rev)LRR-RLPs\_1178

CTTAAGGTCGACTCATAAATTGGAAAATTTGATGATATTTCTGATACGCCGGTATGTTTTCAATTCACGA  
TACTTTATATCAAATGTATATTGATCCCCTACAGCCTCAACAACCTCAA

>PGSC0003DMG400044365-(rev)LRR-RLPs\_1240

AATTCACGATACTTTATATCAAATGTATATTGATCCCCTACAGCCTCAACAACCTCAATTTCACTACTGTAG  
TTGTTAAGCTTACCACTTAACCTGATTTGTCCTTGTCTGTATTTGTA

>PGSC0003DMG400044365-(rev)LRR-RLPs\_1302

ATTACTGTAGTTGTTAAGCTTACCACTTAACCTGATTTGTCCTTGTCTGTATTTGTAGTACCATCCTTTTTT  
TTGAGGATGAAGAGATAGATTTGTTGGAAGACAAGTACCTCTCCTTT

>PGSC0003DMG400044365-(rev)LRR-RLPs\_1426

AAAACATATTCAAAGTTTCCTTACAGAATTTGAAGAATGTCAAGGTTATGCCATTTTGTAGTCGTACGGG  
TAGATCTGACGAAACAGAGCTCGATCAATTCTTGAAGTTTTTACTTGAGC

>PGSC0003DMG400044365-(rev)LRR-RLPs\_1488

CGTACGGGTAGATCTGACGAAACAGAGCTCGATCAATTCTTGAAGTTTTTACTTGAGCATGCAATAAATC  
TGGAGAAATTGGTTATAGTGCCAGAGCATAAGGAATGCAACAATTGTTCT

>PGSC0003DMG400044365-(rev)LRR-RLPs\_1550

AATAAATCTGGAGAAATTGGTTATAGTGCCAGAGCATAAGGAATGCAACAATTGTTCTACTAATACCTCA  
TACCTGATGAAGTATTTGTTAGCTTTTCCAACAACCTTCTATTCGTGCAGT

>PGSC0003DMG400044365-(rev)LRR-RLPs\_1599

AATTGTTCTACTAATACCTCATACCTGATGAAGTATTTGTTAGCTTTTCCAACAACCTTCTATTCGTGCAGTT  
ATTTCTTAGGAAAAGTTAGTCAGAATGTTTTCTATAGTGATGTTTGA

>PGSC0003DMG400044406LRR-RLPs\_0

ATGCTTTTAAGCAGCATTTCGCAATGATGAGATTGCAGAATCTAATGGTATAGAAGGTGAGGGATATCTT  
GTCAGGTCCGTTTTTGGTAGGGAAACCACAGATTTTCAGAGTTACTGCTATT

>PGSC0003DMG400044406LRR-RLPs\_124

TTGGACCTACAAATGGTGGAGGCTTAGCAAAGCTATCCATTCGGGGAAACAATCATTGTTGTGGTGTGA  
CTGATATTGGTCTTGAGGCTATTGCTCGAGGTTGCCCTACTCTCAGAGATC

>PGSC0003DMG400044406LRR-RLPs\_186

GGTGTGACTGATATTGGTCTTGAGGCTATTGCTCGAGGTTGCCCTACTCTCAGAGATCTTACCTTGTGGA  
ATGTGTCTTTTGGTGGTATAAAGGCTTATCTGAAATATCTCTTGGGTAT

>PGSC0003DMG400044406LRR-RLPs\_248

CTTGTGGAATGTGTCTTTTGGTGGTATAAAGGCTTATCTGAAATATCTCTTGGGTATCATCTGTTAGAG  
AAGCTTGATCTTTTCCAATGCCCAACAATTACGGACAAGTCTTTGTTGGA

>PGSC0003DMG400044406LRR-RLPs\_310

TGTTAGAGAAGCTTGATCTTTTCCAATGCCCAACAATTACGGACAAGTCTTTGTTGGACATTGTAAAGAA  
TTGTCGTGCTGTGACCACTTTAACAATAGATTCTTGTTCAAACATTGGAA

>PGSC0003DMG400044406LRR-RLPs\_372

GTAAAGAATTGTCGTGCTGTGACCACTTTAACAATAGATTCTTGTTCAAACATTGGAAATGATTCCCTTAA  
AGCTGTGGGTCAATACTGTCTGAACCTGAAGATTGTCGTATTAATAAATT

>PGSC0003DMG400044406LRR-RLPs\_434

TTCCCTTAAAGCTGTGGGTCAATACTGTCTGAACCTGAAGATTGTCGTATTAATAAATTTGTCCACTCATT  
GGGATCATGGAATAGCAGTTCTATTTTATTTAGCTAGTAATGTTTTAAC

>PGSC0003DMG400044406LRR-RLPs\_496

CACTCATTAGGGATCATGGAATAGCAGTTCTATTTTATTTAGCTAGTAATGTTTTAACAGAAGTAAGGCT

CCAGGGACTATGCCTCAGCGACCTCTCTCTAGGTATACTTTTTAATTGTT

>PGSC0003DMG400044406LRR-RLPs\_558

GTAAGGCTCCAGGGACTATGCCTCAGCGACCTCTCTCTAGGTATACTTTTTAATTGTTGTACGAACTAG

AGACACTTTCCTTGGTGAGTTTCATTGGTGTGGAAGACTATCCATTAATT

>PGSC0003DMG400044406LRR-RLPs\_618

ACGAACTAGAGACACTTTCCTTGGTGAGTTTCATTGGTGTGGAAGACTATCCATTAATTTGGTGGCTCC

TTGTTGCAAATCACTTGTATCTTTGGCTATTCGCAATTGTCCTGGCGTAG

>PGSC0003DMG400044406LRR-RLPs\_62

ATATCTTGTGAGGTCCGTTTTTGGTAGGGAAACACAGATTTTCAGAGTTACTGCTATTGCCGTTGGACCT

ACAAATGGTGGAGGCTTAGCAAAGCTATCCATTCGGGGAAACAATCATTG

>PGSC0003DMG400044447-(rev)LRR-RLPs\_1008

GATACGCCCAAATTACTCTCCTTAGCCTTCTCCGATCAAGATAGACTACCTTCTTATCTTTTGAAAGGGC

TCCAAGCCAATGCAGAGTTTCCATAAAGATTGACATTTTATGGGACGTT

>PGSC0003DMG400044447-(rev)LRR-RLPs\_1260

CATTTGGAATTATCTTATAGTGATATTACAACCGCGACATATTCATCTTATAACTATGATGTCATCTTCGC

AATTTGTTTGCCCAAGATTTTAACGTTACAGTGTGACAAGAACTAAGA

>PGSC0003DMG400044447-(rev)LRR-RLPs\_1449

CTCATAAATGCTGAGATAGAGTACAAGAAAAGGAACGGAGACGATTGGATGACTCTTGATAGGAAGAT

ATTGGTAGCTGACCCGCATATTATTGAAGAGGTCTATACAATCCGCTTCAAG

>PGSC0003DMG400044447-(rev)LRR-RLPs\_441

CATTGCCAAATATACTAGCGAAACGAAAAGCACTCTTTTATGATGATAAAATTAAGTGTGATAACCTGA

AAAACATAACCTTGTGTTATGTTACTATCTCTCAATTAGCACTTGAAAGC

>PGSC0003DMG400044447-(rev)LRR-RLPs\_504

AACCTGAAAACATAACCTTGTGTTATGTTACTATCTCTCAATTAGCACTTGAAAGCCTGATTCATGTTG

CCCTCAGATTGAGAAGGTATCAATACAATACTGTGTCGGGTTCAATAGC

>PGSC0003DMG400044447-(rev)LRR-RLPs\_567

TCATGTTGCCCTCAGATTGAGAAGGTATCAATACAATACTGTGTCGGGTTCAATAGCATTTCGTGTTTCAA

AAACTCTTCTAACTTGTGTGTTTTAGTATCTTTTGCTGCCCAATTGTG

>PGSC0003DMG400044447-(rev)LRR-RLPs\_693

GAAATTGTTGATGCACCAAACTGCTATCTTTGGAATATGTGAACAAAGGTGATTCCACGCCTTATTTATC  
TAGTGATAATCTTCACATATGTTTGCGAACAAATAGAGATTGGTACTTGT

>PGSC0003DMG400044447-(rev)LRR-RLPs\_819

CTCAGAAGAGTAGAATTTGTGAAGGTCACAGTTGAGTATTGGGATCTCTTCAAGATTATACAAAACTA  
CACTCTGTGAAAGAGTTGATTTTACACTACTGTAGGTACTTAAGAAAAATA

>PGSC0003DMG400044447-(rev)LRR-RLPs\_882

AAACTACTCTGTGAAAGAGTTGATTTTACACTACTGTAGGTACTTAAGAAAAATAAAAATCTCAAGTT  
CAACTCTGAGGTTTGTAGCATAGTTCAGTGTGATTTAGTAGAGGAAGCC

>PGSC0003DMG400044512LRR-RLPs\_0

ATGCCTGTTTCGTTTTCTAGAGATGTGACGAATTACAATCTTTGAGAAAGCTTTCTCTAACCCATGTCAA  
ATTAGATGAAAACATGCTACAACTCTACTTAATTGTTGTCCCTCGATT

>PGSC0003DMG400044512LRR-RLPs\_120

GTCAATTCATCTTTGATTATTGTTGGGGGTTCAAAAACATTGAGTTGTTAAATCTTCAAAGATCAAGTC  
AGTTTCCATTAAGGCAAGAGAACAAAACGAAGTTGTTAAAATCCAAGCA

>PGSC0003DMG400044512LRR-RLPs\_180

AAGATCAAGTCAGTTTCCATTAAGGCAAGAGAACAAAACGAAGTTGTTAAAATCCAAGCACCAACTCTT  
GAACACTTGGCTTATGACGGTATTTGTCTGGGAAAATTGGATATTGTTGAA

>PGSC0003DMG400044512LRR-RLPs\_240

CCAACTCTTGAACACTTGGCTTATGACGGTATTTGTCTGGGAAAATTGGATATTGTTGAATGTCAGAATC  
TAAAATCTTTAGATATATCATATGTGAGAATATCTGATGAATTTCTGCAG

>PGSC0003DMG400044512LRR-RLPs\_360

AACCTTATTTCTGGATCTCAATCCCTGAAGGACTTGAAGATTCGAAATTGTGGGGATATAGAGGAGATT  
GATTTTTCGAATTTGGAGTCACTTGAGTATATGGGATATAAAAATTCCTAGA

>PGSC0003DMG400044512LRR-RLPs\_420

GAGGAGATTGATTTTTCGAATTTGGAGTCACTTGAGTATATGGGATATAAAAATTCCTAGACTAAAAATTA  
CAAGAGAATTGAAGCACTTGAATCAATCTTCAGTGTCTGGCAGTTTAA

>PGSC0003DMG400044512LRR-RLPs\_60

ACCCATGTCAAATTAGATGAAAACATGCTACAACTCTACTTAATTGTTGTCCCTCGATTGTCAATTTTCA  
CTTTGATTATTGTTGGGGGTTCAAAAACATTGAGTTGTTAAATCTTCAA

>PGSC0003DMG400044624-(rev)LRR-RLPs\_0

ATGAGTGAGGTAGCTAGAAATGCGAGGAAGTCTACCACTATCGGTGACTTACCAAATCGCATACTACAT  
ACAATACTAGAGTTTATGCCAATCCAAGATGCTGGAAGAACTAGCGTCTTA

>PGSC0003DMG400044624-(rev)LRR-RLPs\_1134

CTACATTGTACAATATGATATTTTCCTCAGGTTGATGAGACAATACGTCACACAGATGAACTGCTTGATT  
ACTTGTCTGAGGCAGTAAATGAAGTGATTGAAGCACTGAGGATGATTCCGG

>PGSC0003DMG400044624-(rev)LRR-RLPs\_1197

CTTGATTACTTGTCTGAGGCAGTAAATGAAGTGATTGAAGCACTGAGGATGATTCCGGACAGTGAGGTTA  
ACGAAATTCAAAGGAACAACACTACTGAAATGTACTTGATAAAAAGTCATGCTT

>PGSC0003DMG400044624-(rev)LRR-RLPs\_126

AAATGGATGCATATATGGTCCACACTGCCACACCTTGTGTTTGGTCCCCTGTCTTTTAAGTATGTATCAAA  
TATTGGTGCTTCTGCTGCAACCATTATTCATAAGATTCTAATGCAACAC

>PGSC0003DMG400044624-(rev)LRR-RLPs\_1260

AGGTAAACGAAATTCAAAGGAACAACACTACTGAAATGTACTTGATAAAAAGTCATGCTTGCTCATTCTCCAG  
AACTTGAGAGGGTGATTATTGAGAAAAGAAATGCCACATACATTCCACAT

>PGSC0003DMG400044624-(rev)LRR-RLPs\_1320

CATTCTCCAGAACTTGAGAGGGTGATTATTGAGAAAAGAAATGCCACATACATTCCACATTTGAAGGAA  
CTCTTAAGCTACCATCGAGCATCACCAAATGCAGAAATCAAGTACACTTAG

>PGSC0003DMG400044624-(rev)LRR-RLPs\_189

GTATCAAATATTGGTGCTTCTGCTGCAACCATTATTCATAAGATTCTAATGCAACACACTGGAAATAATAT  
GGGATTTTCATCTTATCTCGAGTACGTGCAAACACTAGCACAGTCAGATGTG

>PGSC0003DMG400044624-(rev)LRR-RLPs\_315

TGCATCATATTTGTCTCGAAGCATGGTATACAAAAGCTCACTCTCGATATGGCAAATGATGAAAATTACA  
TGTTGCCTAATAGAATATTTACTTGTGCAACATTGACACATTTGAAGCTC

>PGSC0003DMG400044624-(rev)LRR-RLPs\_63

CTACATACAATACTAGAGTTTATGCCAATCCAAGATGCTGGAAGAACTAGCGTCTTATCGAAGAAATGG  
ATGCATATATGGTCCACACTGCCACACCTTGTGTTTGGTCCCCTGTCTTTT

>PGSC0003DMG400044624-(rev)LRR-RLPs\_882

TTCAAGATTTCTGTAAACGATTTTCTTGTGCACTTTGCCTATTAAGGAATTCACCTAACCTTGTTGAACTT

GGCATAGATGAAGTTGTGAAGGTTAGACATACCTTGACTCGTGTTAAG

>PGSC0003DMG400044624-(rev)LRR-RLPs\_945

GTTGAACTTGGCATAGATGAAGTTGTGAAGGTTAGACATACCTTGACTCGTGTTAAGACTACAACACATT  
GATATGTGGATTAGGTGGAATGTCATGGGTTTGAACCTTGTGCCGCTGGC

>PGSC0003DMG400044936-(rev)LRR-RLPs\_0

ATGGCCTCCATTACTTTTTGCAATTTGCATAGCTACACCAATAGTAGTAGTACTGCATTATTATTACCAGA  
TGATATCCTTCACAAAATCCTCTGTTCTCTTAATCTCAGAAACAGAGCA

>PGSC0003DMG400044936-(rev)LRR-RLPs\_434

TGAAGCATTGATGATATTCAAGAGATGAATCTATTGAAAGAGATTTATTTTGTTCGGTTCAAATCTCTC  
CAACAAATTCGTAAAACCTTATCAACAATTGTCCTTCTATTGCTGATTT

>PGSC0003DMG400044936-(rev)LRR-RLPs\_496

AAATCTCTCCAACAAATTCGTAAAACCTTATCAACAATTGTCCTTCTATTGCTGATTTAACCTTGATCAATT  
GCTACAACGAACTTGGCGTATTTCCAATCTTATTGCCTGATTTGAATC

>PGSC0003DMG400044936-(rev)LRR-RLPs\_558

TTGATCAATTGCTACAACGAACTTGGCGTATTTCCAATCTTATTGCCTGATTTGAATCAACTTAAAAAGGT  
TCATTTGAGTGGTAATGGAATTGGGCCAATTGAAATAAAAGCTCAAAAT

>PGSC0003DMG400044936-(rev)LRR-RLPs\_682

GAGAGTTTCACTTGTTAAGATCATTAGCAGTGAAACTTGATTTAAGTGCTTGTACTAAGCTACATGTTCT  
GAAAATCGATTGTGAGTACATTCCTATCGGATTTCTGAAGATATTTCT

>PGSC0003DMG400044936-(rev)LRR-RLPs\_744

CATGTTCTGAAAATCGATTGTGAGTACATTCCTATCGGATTTCTGAAGATATTTCTCAGCATTCCCCTG  
TCTTAAATCGTTGTTTCTTCGTTTCGTGCAAAGGATTGAAAATTTTCAA

>PGSC0003DMG400044943G-LecRK\_0

ATGGCTTCATGCTTTCTTTGTTTACTATCTGTCATCTTTTTATTTCCATCGCCCTGTATGTATGTTACGCTG  
CTGCTACTGACTCCTTGTTTGCATATCAAATCCTCACCAACTTGAAC

>PGSC0003DMG400044943G-LecRK\_1178

TATCAACGGAAATGGAAGCAAATGTGTGTTTTGGTTGGGCGATTTACTTGATATGAGACGTTACGGAT  
AGCTGGGAACGACATTTTTATAAGGATGGCAAATGGAAAACCAGGTAAAAA

>PGSC0003DMG400044943G-LecRK\_1426



TGGTGCATAAACATCAATAAATAAAATTTCCATATTAGTGCTTGATTAAGTGATTCTGCAGATTTGTCTT  
TTTTTAAACAAAAAGTATCTATAACTTGATTCTTACATGAACCACTC

>PGSC0003DMG400044943G-LecRK\_1488

ATTTGTCTTTTTTTAAACAAAAAGTATCTATAACTTGATTCTTACATGAACCACTCATCCCTCATCTCTAT  
CAGAGGGAAACAGTTCTATAACTTTTCAAATGCATATGTATCTCCG

>PGSC0003DMG400044943G-LecRK\_1612

ATAGAAACGTTAGATGTGTTTCAAGCATTTTACTGAATGTAGTCACATAACTGCTACACAATCTAGCAA  
AATTGACACTAACCTGCATGCATCTAGTTGCTCTCATAGCAAATCTTTA

>PGSC0003DMG400044943G-LecRK\_2108

TGTAATGAAAAACAAAATTTACTTAGAGCACACATGACCCTGTAACCTAGCTCGCGGTTGCTTCCATTA  
TTGTCTGATATATTTGTTTTGAAAAAGAATATTTTCATCTGAGCAGATG

>PGSC0003DMG400044943G-LecRK\_2170

TTCCATTATTGTCTGATATATTTGTTTTGAAAAAGAATATTTTCATCTGAGCAGATGAACCAGAAATCAA  
TCAGCCAGAAAATTCTGTAGGAGCTTTGCTGCAGGGAACAGATGTCATT

>PGSC0003DMG400044943G-LecRK\_2232

AGAAATCAATCAGCCAGAAAATTCTGTAGGAGCTTTGCTGCAGGGAACAGATGTCATTGCATATGATTC  
CAGTGATCTAGCCGCAGCCACTGACAATTTCTCGCTGTCTAATAAGATAGG

>PGSC0003DMG400044943G-LecRK\_2294

ATGATTCCAGTGATCTAGCCGCAGCCACTGACAATTTCTCGCTGTCTAATAAGATAGGGCATGGTGGCTT  
TGGCAATGTTTATAAGGTTAGTATTTCTTTCAACAAGCATGAGCATGCA

>PGSC0003DMG400044943G-LecRK\_2604

ATACTGCATTCATGGAATAGAAAAATTCGTAGTCTATGAGTTCATGGCGAATAAAAGCCTAGACAAGGT  
CATATTTGGTAGGTCATCTTAAATAACAACCTTTGTTTTACTATTATATGTG

>PGSC0003DMG400044943G-LecRK\_2666

ACAAGGTCATATTTGGTAGGTCATCTTAAATAACAACCTTTGTTTTACTATTATATGTGTTAATATGATATT  
GGACAAGCCATAAGAGACAGAAATTTAGGCCTATCGGAGTGAAATTAA

>PGSC0003DMG400044943G-LecRK\_2728

TATGATATTGGACAAGCCATAAGAGACAGAAATTTAGGCCTATCGGAGTGAAATTAATAGGGTAACTG  
TTTTCTCTACATGTCCAGATGCTGCAAGAAGGGCAACAGTAACATGGCCAA

>PGSC0003DMG400044943G-LecRK\_3224

GCCAAAGGAATTCGATTTATCGGCACCCAACCTATGATATTGGTCTAGTAGGCTATGTAAGTATATCGAT  
CATCCCCTGATTAAATATGGTCACTACTTGTACACCTAAGTTTCACCTTG

>PGSC0003DMG400044943G-LecRK\_3286

ATATCGATCATCCCCTGATTAAATATGGTCACTACTTGTACACCTAAGTTTCACCTTGTGCTAAAACAATT  
TACATGCATGATTGATCTTTTGTGGTCAGGCTTGAAAATTTGGAATG

>PGSC0003DMG400044943G-LecRK\_496

AGCTTGGCTGGGACAAGAAAACCTGGCATCGACCGATCCATGAGGTCCTGGAGGACAGAAGGTGATCCA  
GCTCCAGGTGATTATTTGTTAAGGTTAGACTTAGGTGACTCAGGTCAGTTAC

>PGSC0003DMG400044943G-LecRK\_62

ATGTTACGCTGCTGCTACTGACTCCTTGTGGCATATCAAATCCTCACCAACTTGAACCCTTTAGTTTCATC  
CAACCATAATTTGTAATTGGATTTTTTGGTTATTATTCATCGACTCT

>PGSC0003DMG400044943G-LecRK\_620

ACTAGTTCTTGAGAAAAACCAGCGAATACAATCAAGATGGGGTCCTGGGATGGACAGAAATTCAGTG  
GCGGTTATGCCCTCATGGATAACCATGCATTCAGACCAATATTTCAATCCGA

>PGSC0003DMG400044943G-LecRK\_868

AGACACTCAATATGGCCATATGTGACCAGTATAGCACATGTGGGCCTTATGGAGTTTGTACCGATGGAG  
ATTTCCCCTGTGAATGTCCTGATGGATTCACAGCTGCATCACCAGAAGAAT

>PGSC0003DMG400044943G-LecRK\_930

GATGGAGATTTCCCCTGTGAATGTCCTGATGGATTCACAGCTGCATCACCAGAAGAATGGGACAAGATG  
AATTTACGGAAGGATGTAGGAGAAACACCTCACTTAACTATACAGATAAA

>PGSC0003DMG400045303-(rev)LRR-RLPs\_0

ATGAATAATCATTGTACAAAAGTGATCGTTGATGAAAATGAGATAGACAAGATCTTTGATTTACCCATGG  
ATATCCTCGATGAAATAGTCAAGGATATGTCATTTCAAGAATTAGTAAAA

>PGSC0003DMG400045303-(rev)LRR-RLPs\_1024

TTAGAGCATGTAACATTGTGTGTGACATTTATGGATCTAAACCAATTCTCTGGTGTTCTTTCTTGATTG  
AAGTTCTCCCACTTACACTCACTGGAGATAGATGTAATGTTTTCTCAC

>PGSC0003DMG400045303-(rev)LRR-RLPs\_1088

TGATTGGAAGTTCTCCCACTTACACTCACTGGAGATAGATGTAATGTTTTCTCACTTTCAATAATTTAAA

ATTGAGTTTAAGTTATATAAACACTGATTGTAGGTAACCGTTACATGTT

>PGSC0003DMG400045303-(rev)LRR-RLPs\_1216

TAATATATCTTATTTTTAATATTACAAGTTAACTTGGTTACCAGTAGATACTTTAATATATCAGGTTATAA

AAATTAATAAATATCTACAAGTAATATTTTATGGTTATGGAATTTTTA

>PGSC0003DMG400045303-(rev)LRR-RLPs\_128

TTTGTCCAAGAAGTGGGTACATTTTTGGACTATGCATCCAATACTAGTTCTAGATTGGGAGTTCTTTGAA

GAGAAAAGTGGTACTATAGGATTGATTGAAAATGGTTTTAGTAAAATGAT

>PGSC0003DMG400045303-(rev)LRR-RLPs\_1577

GAACCTTCTGATGAACTTGATGTAGCTGAGGTATTGAATTTGTATGAAGAATTGAGGATGTCCTTAAAA

GCATTACTAAGAGCAAAGTCATCATAGCACCTCATGGTCAAGATGTGTAA

>PGSC0003DMG400045303-(rev)LRR-RLPs\_320

TGATAGGGACCTTGACCATTGGTTGTTATGTGAAACAAGTAAATGCGTCAAAGAACTTACCCTAAAAAAT

CACAAACGCAAACGTTATACATTGGCTTTTTGTGTATTTGATTGTCCAAC

>PGSC0003DMG400045303-(rev)LRR-RLPs\_576

TTACTTTACTCTTTAACGTTTCATTGCTTGCAATGGCGTTCATTTCTCACCATATCTGCTCCTAGGATCCAG

TTCTTGACTGTTTCATGATAGTCATGACATTTACGCAATTTTTTTTATG

>PGSC0003DMG400045303-(rev)LRR-RLPs\_64

CCATGGATATCCTCGATGAAATAGTCAAGGATATGTCATTTCAAGAATTAGTAAAAACATGTGTTTTGTC

CAAGAAGTGGGTACATTTTTGGACTATGCATCCAATACTAGTTCTAGATT

>PGSC0003DMG400045303-(rev)LRR-RLPs\_768

AGGTTCAATACATGGTCGCGTCTTCTTTATTTGTGCTCTAACCTAACAAAGGCTTCTTTTGAGTAATTCTTG

CATTCAGGTGATTATAATATGATCAAGACATATTGAAATATTCTTTATT

>PGSC0003DMG400045303-(rev)LRR-RLPs\_832

ATTCTTGCATTCAGGTGATTATAATATGATCAAGACATATTGAAATATTCTTTATTATAATATTCTCAATAA

GTTTTACTATGCTTATCATATATACTTAACCATTAATGTATTTTTCT

>PGSC0003DMG400045303-(rev)LRR-RLPs\_896

CTCAATAAGTTTTACTATGCTTATCATATATACTTAACCATTAATGTATTTTTCTTTTTGTTTTCTTTTACT

AAGCATTTGGGTGCAGAGATCATTCTGTAAAGGTTTCAATCCAAC

>PGSC0003DMG400045303-(rev)LRR-RLPs\_960

TTCTTTTACTAAGCATTGGGTGCAGAGATCATTCTGTAAAGGTTTCAATCCAAACCCTACCATTTAGAGC  
ATGTAACATTGTGTGTGACATTTATGGATCTAAACCAATTCTCTGGTGT

>PGSC0003DMG400045368LRR-RLPs\_0

ATGGTGGATTTTGAGGCGTTCCAATTAATTTTAAATGGTATTCAGCAGTTGTTGTCCCTTCATACATTGGA  
GGTGTGGAGACACTTGCCTGCGACTCTCTGCCCTATCATCATATGCAA

>PGSC0003DMG400045368LRR-RLPs\_114

ATGCAACTTTCTGACCGAACAGAGATCGAAATAGATGGATTCAGAATCGAGGCTCTTCCTCATAGATTTG  
GCAATCTTACTTCTCTTGAAAGATTAACGCTAGTGAGGTGCAAACAGCTA

>PGSC0003DMG400045368LRR-RLPs\_171

CCTCATAGATTTGGCAATCTTACTTCTCTTGAAAGATTAACGCTAGTGAGGTGCAAACAGCTACAACATC  
TGGACTTCTTAGATGCCAGCCCTAAATTACGGTATGCGGAGATCTGTGAC

>PGSC0003DMG400045368LRR-RLPs\_228

CAGCTACAACATCTGGACTTCTTAGATGCCAGCCCTAAATTACGGTATGCGGAGATCTGTGACTGCCCAT  
GGTTAGAAGCTCTGTGCGGATGGGCTCGGCAACCTTGTTTCATTAGAACAG

>PGSC0003DMG400045368LRR-RLPs\_285

TGTGACTGCCCATGGTTAGAAGCTCTGTGCGGATGGGCTCGGCAACCTTGTTTCATTAGAACAGTTAAGAT  
TGTGGAAGCTGCGAAAACTAGAGAATGTGCCATCTAGAGATGCCATGTGA

>PGSC0003DMG400045368LRR-RLPs\_57

CTTCATACATTGGAGGTGTGGAGACACTTGCCTGCGACTCTCTGCCCTATCATCATATGCAACTTTCTGA  
CCGAACAGAGATCGAAATAGATGGATTCAGAATCGAGGCTCTTCCTCAT

>PGSC0003DMG400045411LRR-RLPs\_0

ATGAGCAACCAAGACCAATTCTCTAGCAACTCAGAAAGTCTGCTTATTGAAAACCTCACCTCAAGAAAAAG  
AAAAGATTGAGACAGAATGTGAAGATATTTATAGGATCAGTCAATTACCT

>PGSC0003DMG400045777-(rev)LRR-RLPs\_132

TCGATTTGTAACATGAGCAATCTTAGCCTTCTCACAGACGATATTCCAATGGAAGTGGGACAGTTGAATA  
CGCTTGAAGCATTAGATCTCTTGTAACTGCTCACAGGAAAGATTCTG

>PGSC0003DMG400045777-(rev)LRR-RLPs\_198

AATACGCTTGAAGCATTAGATCTCTTGTAACTGCTCACAGGAAAGATTCTGCAAGAATTGACAAGGC  
TAACCTTTCTGGAAATGTTAACCTCTCTCAGAATCTTCTTGTGGACCA

>PGSC0003DMG400045777-(rev)LRR-RLPs\_66

TTTCATTATTATAGTCTAGAGTCTCTTGATCTTAAATTTAACTTCCTTGAGGAGCCACTACCTTCATCGATT  
TGTAACATGAGCAATCTTAGCCTTCTCACAGACGATATTCCAATGGAA

>PGSC0003DMG400045997G-LecRK\_1364

CAGTTCAGTTTTCATGAATTTGTTCTTAATTCTTTTGGCCCTATTGTACATTTTTAAGTTTATAGGAAAAAA  
ACGAAAGAGGACTGCACCGTATTCAGCTGTTCCAGGAGTGAACCTAAG

>PGSC0003DMG400046138-(rev)LRR-RLPs\_0

ATGACATACACCTCTACCTTAGATCAAGTAAATCTTATTGATCTTTCTTTCAACAATCTTCACGGTGTAATC  
CCGAATGAGATTACAGGTCTGTCAGCCTTGGGCACTCTGAATTTATCT

>PGSC0003DMG400046138-(rev)LRR-RLPs\_177

ACACTAGACCTTTTCATCTAACCATCTCTCTGGTTCTATCCCATTGAGCATGACTTCAATCACTACACTAAGC  
TATCTTAACTTGTCATATAACAACCTTGGTTGCCCTATCCCATCGAAA

>PGSC0003DMG400046324-(rev)G-LecRK\_1054

CCCAATATCATATTCTTATGGAGCTTGAGGACATAGCTTATATCCCCTTTATTTTCAGTACGGTACCAAC  
AAAACAGATTTGGAAAATTGCAAAGGTCCTGCTTAAGTAACTGTTCTT

>PGSC0003DMG400046324-(rev)G-LecRK\_1178

AGCAGCTCAATTTCAATTTAGTGGTCCTGGTAACACAATAGGTGACTGCGCATTGTTGAATGATGTGTTT  
TCGCTCACAGACAATTATGGAGCACCCAATAAGACCACTCTTTTCATCAA

>PGSC0003DMG400046324-(rev)G-LecRK\_1240

ATGTGTTTTCGCTCACAGACAATTATGGAGCACCCAATAAGACCACTCTTTTCATCAAGATGCAGAATC  
TTCTTACCTACAAGCCTCTCCACCACTTATCTCTTCAGAGAAGAAATCAA

>PGSC0003DMG400046324-(rev)G-LecRK\_1302

CAGAACTCTTCTTACCTACAAGCCTCTCCACCACTTATCTCTTCAGAGAAGAAATCAAAGCGTGTCCTAAC  
AATAGTAGGATCCACCATCGGAGCTTCATTTGTTTGCTTCTCATGGTT

>PGSC0003DMG400046324-(rev)G-LecRK\_1488

GATCAAATACCAGGAATGCCTACTAGATTTTCTACGAGGAACTCACTGTGATGACAGAAAATTTTCAGC  
GAGACACTTGGGGAAGGGGGATTTGGTTCTGTATTTGAAGGAACAATGAGT

>PGSC0003DMG400046324-(rev)G-LecRK\_1550

TTTCAGCGAGACACTTGGGGAAGGGGGATTTGGTTCTGTATTTGAAGGAACAATGAGTGATGGCACCA

AAATAGCGGTGAAGCGTATGCAAGGATTCGGTAATGTGAAGAAATCATTCTT

>PGSC0003DMG400046324-(rev)G-LecRK\_1736

TGAGAAATCACACAGACTTCTGGTTTATGAATTCATGGCCAATGTCTCTTTAGATAGGTGGATTTTTCAC

GGAACAGGGGAAAAATCCCTCACATGGGGTGTGAGGAAAAAATCATATC

>PGSC0003DMG400046324-(rev)G-LecRK\_1798

TTTTTCACGGAACAGGGGAAAAATCCCTCACATGGGGTGTGAGGAAAAAATCATATCAGACGTCGCCA

AGGGCCTAGCTTACCTACATGAAGATTGTAACAACAAAATTATTCATTTGG

>PGSC0003DMG400046324-(rev)G-LecRK\_186

AGAGAAGGGAATGAGGCTCTGTTTGTCTGTGGTTTCTTATGTGATTACAATGGCACTGCTTGCGTTTTTG

GCGTCCTTATATTACCAAATACCTATGATTCTTATCTATACTACCCGAGA

>PGSC0003DMG400046324-(rev)G-LecRK\_1984

CAAAGCTTGTGGGGAAAGATGAAAGTAATATAGTTACAGCAATGAGAGGAACACCAGGCTATTTAGCA

CCTGAATGGTTGCATGAGGTCATTACTGAGAAAGTGGATGTTTATAGCTTTG

>PGSC0003DMG400046324-(rev)G-LecRK\_248

CGTTTTTGGCGTCCTTATATTACCAAATACCTATGATTCTTATCTATACTACCCGAGATTAGTATGGTCAG

CAAATCGGAACAATCCAGTTAGAACCAATGCAACCTTGCAACTTAGGCA

>PGSC0003DMG400046324-(rev)G-LecRK\_310

TATGGTCAGCAAATCGGAACAATCCAGTTAGAACCAATGCAACCTTGCAACTTAGGCAAGATGGAGGCT

TGTTGTTGATGGACTCAGATGGCACTTTGATTTGGAATACAAGCACAAGCG

>PGSC0003DMG400046324-(rev)G-LecRK\_372

GGAGGCTTGTGTTGATGGACTCAGATGGCACTTTGATTTGGAATACAAGCACAAGCGGAAAGGTTTCT

GTGGGATTCAACTTGACAGTAATGGGAAATCTTGTCTCTTTGACAAAAGT

>PGSC0003DMG400046324-(rev)G-LecRK\_434

GGTTTCTGTGGGATTCAACTTGACAGTAATGGGAAATCTTGTCTCTTTGACAAAAGTAACGACATCATT

TGGCAGTCTTTTGATCATCCTACAGACACTTTGGTTCCGGGACAAATAAT

>PGSC0003DMG400046324-(rev)G-LecRK\_496

ACATCATTTGGCAGTCTTTTGATCATCCTACAGACACTTTGGTTCCGGGACAAATAATGGTCCCTGGACA

AAAGCTGATATCCAGAATATCAGCAACAGACTGGAATGAAGGTATGCTCA

>PGSC0003DMG400046324-(rev)G-LecRK\_558

CCTGGACAAAAGCTGATATCCAGAATATCAGCAACAGACTGGAATGAAGGTATGCTCACACTTGATTTT  
AAATATTCTGGCCTTTCTGCTTACATTGAGTCAAATCCACGCCAACTCTAT

>PGSC0003DMG400046324-(rev)G-LecRK\_620

TGATTTTAAATATTCTGGCCTTTCTGCTTACATTGAGTCAAATCCACGCCAACTCTATGTCTTGAGACTTG  
GTGTGGAAAAACCTTTCCAGTTTCCTGGACTAGGCTTTTCTTTGAAAGG

>PGSC0003DMG400046324-(rev)G-LecRK\_682

TGAGACTTGGTGTGGAAAAACCTTTCCAGTTTCCTGGACTAGGCTTTTCTTTGAAAGGTTATGGTTCCAG  
AGGGATGTTAACCATAGGTTTCGAATTTTCAAATGCTCGATTCATGAGAT

>PGSC0003DMG400046324-(rev)G-LecRK\_744

GGTTCCAGAGGGATGTTAACCATAGGTTTCGAATTTTCAAATGCTCGATTCATGAGATTAGGGGTTGAT  
GGGCATTTAAGGGTGTATCACTGGAGAGGATCTTGGTCAGAGGAGGCTGAT

>PGSC0003DMG400046324-(rev)G-LecRK\_806

GGTTGATGGGCATTTAAGGGTGTATCACTGGAGAGGATCTTGGTCAGAGGAGGCTGATCTATTTACATA  
CTACATTGGTGAGTGCGGGTATCCAACCATGTGTGGAAATTACTCTGTATG

>PGSC0003DMG400046324-(rev)G-LecRK\_868

TTACATACTACATTGGTGAGTGCGGGTATCCAACCATGTGTGGAAATTACTCTGTATGTGGAAATGGGC  
AATGTACTIONTGTCTCAAACCGCGGTTGGATTTGGTCAGACTAACTTTCTCC

>PGSC0003DMG400046324-(rev)G-LecRK\_930

AATGGGCAATGTACTTGTCTCAAACCGCGGTTGGATTTGGTCAGACTAACTTTCTCCAGCAAATCAATT  
ACAGGCAGCCAAACCAGGGGTGTGTCTTGTACACCTATCTCTTGTGAA

>PGSC0003DMG400046324-(rev)G-LecRK\_992

AATCAATTACAGGCAGCCAAACCAGGGGTGTGTCTTGTACACCTATCTCTTGTGAACATTCCCAATAT  
CATATTCTTATGGAGCTTGAGGACATAGCTTATATCCCCTTTATTTTCA

>PGSC0003DMG400046485LRR-RLPs\_0

ATGAGCAACAAAGAACAATTCTCTGGCAGTTGTGGTGATAATGGAAACTCCGAAAGTCTTCTTATTGAA  
AACTCACCTCTGAAAAAAGCGAAGATTGAGATAGAATGTGAAGATATTGAC

>PGSC0003DMG400046485LRR-RLPs\_1008

CTAATACTCTCATTCTGGTTTATCAAGGTCAGTTATCAGTCACAAATGTGTTTAGTCTTTTTATGTTGATTG  
TGAATAGAGCTCATGTTTTATATTCTGCCTCATTCTTCTGTTTCAGGTA

>PGSC0003DMG400046485LRR-RLPs\_1071

TGTTGATTGTGAATAGAGCTCATGTTTTATATTCTGCCTCATTCTTCTGTTTCAGGTAATTTCCAATTTGATG  
TTGAAAGAGGCAGATGTCTCCTTACCGTTGTTGGAATGCAGATGGTTG

>PGSC0003DMG400046485LRR-RLPs\_1134

AATTTGATGTTGAAAGAGGCAGATGTCTCCTTACCGTTGTTGGAATGCAGATGGTTGACAATAAGTTCTT  
GTATTTCAAACCTTTTCGTTCCCCCTACTAGACAACCTCTTCAGGTGCGACT

>PGSC0003DMG400046485LRR-RLPs\_1197

AGTTCCTGTATTTCAAACCTTTTCGTTCCCCCTACTAGACAACCTCTTCAGGTGCGACTCATAATTTGGAAAA  
TTTGATGATATTTTCTGATACGCCGGTATGTTTTCAATTCACGATATCT

>PGSC0003DMG400046485LRR-RLPs\_1323

CAAATGTATATTGATCCCCTACAGCCTCAACAACCTCAATTTCACTACTACAGTTGTTAAGCTTACCACCTA  
ATCTGATTTGTCCTTGAACGGTATTTGTAGTACCATCCTTTTTTTGAG

>PGSC0003DMG400046485LRR-RLPs\_1386

TACCACCTAATCTGATTTGTCCTTGAACGGTATTTGTAGTACCATCCTTTTTTTGAGGACGAAGAGATAGA  
TTTGTTGGAAGACAAGTACCTCTCCTTTGAAGAAACCATATTCAAAGTT

>PGSC0003DMG400046485LRR-RLPs\_1512

CAGAATTTGAAGAATGTCAAGGCTATGCCGTTTTGTAGTCGTACGCGTAGATCTGACGAAACAGAGCTC  
GATCAATTCTTGAAGTTCTTACTTGAGCATGCAATAAATTTGGAGAAACTG

>PGSC0003DMG400046485LRR-RLPs\_1575

GAGCTCGATCAATTCTTGAAGTTCTTACTTGAGCATGCAATAAATTTGGAGAAACTGGTTATAATGCCAG  
AGCATAAGGAATGGAGCAGTTGTGCTACTAATAACCTCATACTGATGAAG

>PGSC0003DMG400046485LRR-RLPs\_1638

ATGCCAGAGCATAAGGAATGGAGCAGTTGTGCTACTAATAACCTCATACTGATGAAGTATTTGTTAGCTT  
TTCCAACAACCTTCTATTAGTGCAGTTATTTCTTAGGAAAAGTTAGTTAG

>PGSC0003DMG400046485LRR-RLPs\_189

GATGCGTTCAGAACAACCTATTCTCTCTAAATATTGGCAATACTTCTGGACTTGTATCGACAACATTGTTTA  
TGAAGAGGATTATGGGGTTTCATATAGCTCGACAGTGCACAAATTCATT

>PGSC0003DMG400046485LRR-RLPs\_63

ATTGAAAACCTCACCTCTGAAAAAGCGAAGATTGAGATAGAATGTGAAGATATTGACAACATTGATAGG



ATCAGTCAACTACTTGAAGCTCTTATTGTTCAAATTCTATCTCGATTGTCC

>PGSC0003DMG400046485LRR-RLPs\_693

TTGAAGCTACATGAATTTTGTGGTTTTAATCGTTTGCACATGACTTCTCCAATATGTAGGCGACTACATTT  
GATCCATCATGGTCATCCTCGTGGGGATTGGCACTCATTTGAAGGTGAT

>PGSC0003DMG400046485LRR-RLPs\_756

CTACATTTGATCCATCATGGTCATCCTCGTGGGGATTGGCACTCATTTGAAGGTGATATATGTTGCTTTG  
AAATTGTTGCTCCACATGTTGAACATTTAACAATTTCTGGGGTTTTCAAT

>PGSC0003DMG400046550LRR-RLPs\_0

ATGCAGCAACTTCTTCCATCTCTTAAACACTGAATCTGTGGAATTGTCCAGAAATAGTGTCATTTCTGA  
AAGAGAATTGCCCTTCAATTTACAAGTACTTGAGATCTGTAATTGCACG

>PGSC0003DMG400046550LRR-RLPs\_128

GAACGGTCGAAAGGTGTGGCATTACCCTGTCCCAGAGAGTTAGTGATCGCACATGATGGCAGTGACG  
AAGAGATAGAACATTGGGAGTTCCCTTGCTCTATTCTGAAGACTTACCATACG

>PGSC0003DMG400046550LRR-RLPs\_256

AAACATTAAGCAGCCAAGTTCTCCAAAGCCTCACCTCTTGAATATCTATATATGGCTGATTTACCTCAA  
ATTCAGTCAATGCTGGAACAAGGGTGGCTTCCATCATCTCTTTATGAGC

>PGSC0003DMG400046550LRR-RLPs\_320

ACCTCAAATTCAGTCAATGCTGGAACAAGGGTGGCTTCCATCATCTCTTTATGAGCTACATTTATCTCACC  
ATTATGAGCTCCGATCACTTCTGAATCAGCACTACCCTCCTCCCTCTC

>PGSC0003DMG400046550LRR-RLPs\_384

TCTCACCATTATGAGCTCCGATCACTTCTGAATCAGCACTACCCTCCTCCCTCTCTGAGCTGATCATCGA  
GGATTGCCGAATTTCCATTCCCTTCCAGTAAAAGGGATGCGCTCTTCC

>PGSC0003DMG400046550LRR-RLPs\_448

TCATCGAGGATTGCCGAATTTCCATTCCCTTCCAGTAAAAGGGATGCGCTCTTCCCTATCTAAGCTGACC  
ATCAGAGATTGCCCTAATCTCAAATTCCTTCCAGTAAAAGGGATGCCCT

>PGSC0003DMG400046550LRR-RLPs\_576

TCTGAACTATATATTTCTGACTGCCATTGCTCAAACCTCTACTAGAATTTGACAAGGGGAAATATTGGCC  
AGAAATTGCTCATATCTCGAACATAGAGATCGATTGGGAATCCCTTTAA

>PGSC0003DMG400046550LRR-RLPs\_64

TTCCTGAAAGAGAATTGCCCTTCAATTTACAAGTACTTGAGATCTGTAATTGCACGAAACTGGTGAACGG  
TCGAAAGGTGTGGCATTACCTGTCCCAGAGAGTTAGTGATCGCACATG

>PGSC0003DMG400047124LRR-RLPs\_132

CTTAACATGTCAAAGAATATTAGTAGTACTTATAAAGTGCCTTCTTATATATTCGATTGTGGAACCCTGAC  
ACAATTGAAACTCTTCAAATGCATCTTCAAATTACCAAATCTTTTCTT

>PGSC0003DMG400047124LRR-RLPs\_330

CCACTTCTTGTCGAATTAACCTGACACATTGTGAGGGCACTCAATATCTTAACATTGAGTTCTCATCAGG  
ATTGAAGTACTTGTCTGTTTCGTGAGAGTCACTATAATCTTGACCTAAAT

>PGSC0003DMG400047124LRR-RLPs\_396

TCAGGATTGAAGTACTTGTCTGTTTCGTGAGAGTCACTATAATCTTGACCTAAATAGCAATTACTTTAGGA  
ACATCAAAAAATTGACATACTTATACCTTGTGTTTGATAATCCAATACGT

>PGSC0003DMG400047124LRR-RLPs\_66

TGTTTCATATGCAGATATCGATAGATGGATGCTTTATGTCACGAGATATGGTGTCAAGGAATTAACCCCTTA  
ACATGTCAAAGAATATTAGTAGTACTTATAAAGTGCCTTCTTATATATTC

>PGSC0003DMG400047213L-LecRK\_1054

TAGATATGGATGATGAATTTGAAAAGGGTACCGGTCCTAAGAAGTTCTCGTATGGTGAATTAGCTCGTG  
CAACAAACAACCTTGCTGAGGGACAGAAGCTTGGAGAAGGGGGATTGGTG

>PGSC0003DMG400047213L-LecRK\_124

AACAGGGCATAACAAGTTACGCCTAATGAACGTAACATTACATTAAGTAGGAAAACAGGACGCGCCATGT  
ACATTGAGACACTGCAGTTATGGGACAAAGCTACAGGGGAAATGACAGATT

>PGSC0003DMG400047213L-LecRK\_496

CTGTTGCTACAACAATATGGAAAAATGACATTAACTTGGGAAGAAAAATGATGCTTGGATTAGTTACA  
ATGCTAATTCCAAGTTCTTGAAGTTGTTTTACAGGATTTGAGAAAAAAT

>PGSC0003DMG400047213L-LecRK\_62

CAATATCAATCCTTCTTATGTTAATCTCTCTATCAATGTCCTGAGACGCCTACGTAACGAAACAGGGC  
ATACAAGTTACGCCTAATGAACGTAACATTACATTAAGTAGGAAAACAGG

>PGSC0003DMG400047213L-LecRK\_806

AGCTCAAGATCCAAGAAATCATCCTATTCAAGGTCAAATCCAAATGATCCTCCCATTACTCATGTTCAAG  
AACCCAAGGGTCCTCCTCAAGAAGTACTCAGCACCTCGGGAAAAGGAAG

>PGSC0003DMG400047213L-LecRK\_868

ATGTTCAAGAACCCAAGGGTCCTCCTCAAGAAGTACTCAGCACCTCGGGAAAAGGAAGCAAGGGACTA  
CTAGTCGGATCAAGCATAGGTTTACCTATTCTGATTCTTGGTTTGATAACTG

>PGSC0003DMG400047213L-LecRK\_930

GGACTACTAGTCGGATCAAGCATAGGTTTACCTATTCTGATTCTTGGTTTGATAACTGCCAGTTGCTTTTT  
GTGGAAGAAAAAGAAGAAAGGAGATAAAAAATTAGACCATGTCTTCATT

>PGSC0003DMG400047213L-LecRK\_992

TTGCTTTTTGTGGAAGAAAAAGAAGAAAGGAGATAAAAAATTAGACCATGTCTTCATTGATCTAGATAT  
GGATGATGAATTTGAAAAGGGTACCGGTCCTAAGAAGTTCTCGTATGGTGA

>PGSC0003DMG400047346-(rev)LysMRLKs\_0

ATGAATTATTCTCATCTCATCTTTGTTTTTACCATCATTCTTGCTTATTCTCCTCTGTTTCAATTCTTGCACA  
ACAGCCTTACTTTGGAACAGGAACAAATGACTGCAACACCCAAGAT

>PGSC0003DMG400047346-(rev)LysMRLKs\_1008

TTATCCAGCATAGCTCAATCTGTTAAGGTTTACAAGTTTGAAGAGGTTAAAGCAGCTACAGAAAATTTCA  
GTCCTACATGTCTGATAAAGGGGTCTGTTTATCGGGGCACGATCAATGGC

>PGSC0003DMG400047346-(rev)LysMRLKs\_1071

AATTTCAAGTCTACATGTCTGATAAAGGGGTCTGTTTATCGGGGCACGATCAATGGCGATTTTGCTGCTA  
TAAAGAAAATGAGTGGTGATGTATCAAAGGAAATTAATTTGTTGAGCAA

>PGSC0003DMG400047346-(rev)LysMRLKs\_1197

CATTTTAATCTCATTAGTCTATCGGGAATTTGTTTTTATGATGGTCACTGGTATCTTGTATATGAATATGCT  
GCCAATGGACCATTAAGTGATTGGATATGTCACCATAATGGTAATCAG

>PGSC0003DMG400047346-(rev)LysMRLKs\_1260

GAATATGCTGCCAATGGACCATTAAGTGATTGGATATGTCACCATAATGGTAATCAGAAGTCACTAAGTT  
GGGCTCAAAGAGTACAAATTTCTTTTGATGTGGCCACAGGGCTTAACTAT

>PGSC0003DMG400047346-(rev)LysMRLKs\_1323

CTAAGTTGGGCTCAAAGAGTACAAATTTCTTTTGATGTGGCCACAGGGCTTAACTATCTTCATAGCTACA  
CATCCCCTCCTCATGTTTACAAGGATTTAAACGGTGATAATGTTCTTCTT

>PGSC0003DMG400047346-(rev)LysMRLKs\_1386

AGCTACACATCCCCTCCTCATGTTTACAAGGATTTAAACGGTGATAATGTTCTTCTTGTGTTGATTTAAG

AGCCAAGATTGCTAACTTTGGTCTAGCAAGGTCAGCGGATGGACAAGAA

>PGSC0003DMG400047346-(rev)LysMRLKs\_1449

GATTTAAGAGCCAAGATTGCTAACTTTGGTCTAGCAAGGTCAGCGGATGGACAAGAAGGTGAGTTTGC  
GTTGACAAGGCATATAGTTGGGACCCAAGGTTACATGGCACCTGAGTATTTG

>PGSC0003DMG400047346-(rev)LysMRLKs\_882

TTCTTTTTGTTTTTCAGGAAAAAGGAAAAGAAAGCTGATCCACAGTTTGTCTGAAAGCTTTGAAGCTG  
TTGAGAAACCATCGAATAAGAAAGTTGAAGAAGAATCAGAGGAGTTTTTG

>PGSC0003DMG400047346-(rev)LysMRLKs\_945

GAAGCTGTTGAGAAACCATCGAATAAGAAAGTTGAAGAAGAATCAGAGGAGTTTTTGAAAGTTTATCC  
AGCATAGCTCAATCTGTAAAGTTTACAAGTTTGAAGAGGTTAAAGCAGCT

>PGSC0003DMG401000105LRR-RLPs\_1708

AGAGACTTCATAGTCCTTTGCTTATTAATAATTCTGTGTTATTAATCTCTCAGAGAAAAAGGAGGTA  
ACAATGTTGCGATGAGATAAATTACAACAACAACAACCCAACGTAATA

>PGSC0003DMG401000105LRR-RLPs\_183

TTAACCCGGACCCGATTCCCAACATTGACTGTGCGAGAAATGCCTACGTCACCTGAAGAAAACCTAACC  
CTAAGTTATGTGCGCGGCGGCGGCGAAGAAACGGCGGTTCGAGCTTGTCG

>PGSC0003DMG401000105LRR-RLPs\_244

ACCCTAACCTAAGTTATGTGCGCGGCGGCGGCGAAGAAACGGCGGTTCGAGCTTGTCGGATATATGG  
AATAACAAGGATACTCAGGCGTTGAAGCAATTGGTGCTTCAAATGCGAGCTC

>PGSC0003DMG401000105LRR-RLPs\_2806

CTGCAGAACTGGAGGTATGCATAATCTCTGATATAGTATAGTTGATTTCTTTGCTTAGTATATGTGTGT  
GTTCAATACATATCATTAAAGCCTTTCTCTGCTTGCTGTAACAATTTGT

>PGSC0003DMG401000105LRR-RLPs\_3111

TCTGTGAGGTCAATATCAGTTTATAAATAATTTTTTTGGGGGGTGTGGCCCTAGTGGCTAAGTAAGAGA  
GTCCAACACTTCTATATCCTGCTGGCTGCACTCCAGATAAACTTAACT

>PGSC0003DMG401000105LRR-RLPs\_3416

AGTGACTAGTAAACTCCTTTATGGCTTCAATGGGATGTTAACAAAGTTGCTGGAAAATGATTCTTGGGA  
GAATTGCAGTAAAAAAGAAAAAAGAAAGCAGGGAAGTCATTTTCTAG

>PGSC0003DMG401000105LRR-RLPs\_3477

TTCTTGGGAGAATTGCAGTAAAAAAGAAAAAAGAAAGCAGGGAAGTCATTTTCTAGTATTGTTTGA  
AAGAAATTGGAGTTTAAATGAGAAGTGAACAAGACCCTTTTTTCCCCTTA

>PGSC0003DMG401000105LRR-RLPs\_4148

TGAAGTGTGGATGCACTCTGCCAAGAGCGTGCATCCAGGCTTTTCTTGCTCAAACCACACCTTTGGAGA  
TGCTTCAAAGAAGTTGCTTGCTAAGAAGTAATTTTGTGCTCGTTTGTTT

>PGSC0003DMG401000105LRR-RLPs\_4493

TTATGGCTTTTGGCTTTTAAGTCATAAGCCAATCCAAACAGGCCCTAACTTATGTAGATATGCGTATGTAT  
TTTTCAATAAATTTCAACTACTTACAAGGACAAACAGCAGTAATTTCACT

>PGSC0003DMG401000299-(rev)LRR-RLPs\_1178

CATATTTTGAACCCCTTAGTGAAAATAGGATCGGGGTTTAAATTCCTTAATGAAAGAGATTTTCAGTCAA  
AACCATCAGTTTTCTGTTTCTCACAAGTTTATCTTCCCAACATAAATGTA

>PGSC0003DMG401000299-(rev)LRR-RLPs\_1674

AAGTGTTAAGTGAGTTTAAATCAACAAGAAATTTCTACTTACTACACCAATCGATCGAGGTGTTTTGCTA  
TCTATATTTATCTAGTTTTGACAATCTTTTTGCAGGTGGAATTCCTGAAA

>PGSC0003DMG401000299-(rev)LRR-RLPs\_2232

CAATGCACGTGTAAATTACATACATGGTATCAGTTATAGTATATATTACATTCCTAATTCATTTGATACTTT  
GTCAGGGAGATTACCAGCTGATATAGGTAGCATAAATCTGAAGGTACT

>PGSC0003DMG401000299-(rev)LRR-RLPs\_2294

TTGATACTTTGTCAGGGAGATTACCAGCTGATATAGGTAGCATAAATCTGAAGGTACTTAATGTGCGATG  
GAAATCACTTGTGAGGTGTCATTCCATCTGAAGTATTCAACATATCGACGT

>PGSC0003DMG401000299-(rev)LRR-RLPs\_2480

TTCCAAATCTGCAAGAGCTTTATTTAGGTGAGAATGAGCTTACAGGATCAATCCCAAGCTCTATCTCAA  
TGCTTCATCACTGGCTCGATACCCGACCTTGGTAATTTAAGACTTTTGAA

>PGSC0003DMG401000299-(rev)LRR-RLPs\_2542

ATCTCAAATGCTTCATCACTGGCTCGATACCCGACCTTGGTAATTTAAGACTTTTGAAGAGGCTATTTCTA  
GAAGAGAATAACCTTACAGGGGAAACTTCCAAAGGAGAATTTAAATTC

>PGSC0003DMG401000299-(rev)LRR-RLPs\_2976

AAGCTGGGGGATATCTACATTAGTCACAACATGATCCGTGGAGCCATACCAGCATGTTTTGGTGAATC  
AAATCACTACAGAGAGTTTTCTTGGATTCAAACAATTTGACATCTACCATT

>PGSC0003DMG401000299-(rev)LRR-RLPs\_3038

TGAACTCAAATCACTACAGAGAGTTTTCTTGATTCAAACAATTTGACATCTACCATTCCATTGAACTTTT  
GGAACCTGAATGACCTTGTAGGTTTGAACCTTATCCACAAACTCTTTCAA

>PGSC0003DMG401000299-(rev)LRR-RLPs\_3162

TATTTACCATCAGAGATCTCTAATCTGAAGGTTGCAACAGACGTGGACTTATCATGGAATCAATTTTCAG  
GAGATATCCCCAGCATAATAGGCAGGGCGCAATCAATAGTTTACCTTTCT

>PGSC0003DMG401000299-(rev)LRR-RLPs\_3224

ATTTTCAGGAGATATCCCCAGCATAATAGGCAGGGCGCAATCAATAGTTTACCTTTCTTTGGCACATAAT  
AGATTGCAAGTACTATTCTGAATCTTTGAGTAACTTGATAAGCTTAGA

>PGSC0003DMG401000299-(rev)LRR-RLPs\_3286

CACATAATAGATTGCAAGGTACTATTCTGAATCTTTGAGTAACTTGATAAGCTTAGAGACATTAGATTT  
GTCGTCCAACAACCTGTCCGGAATGATTCCAAAGTCTCTCGAGGCATTGA

>PGSC0003DMG401000299-(rev)LRR-RLPs\_372

TTACAAGAGATAAACGTAGGATTCAACAATTTAAGCGGAGACATTCCAAGCTGGTTTGGAAACTTGCCA  
CAGCTCGAGAGCATTTTTATGAACGATAGCACGTTTAGTGGTCCTATTCCA

>PGSC0003DMG401000299-(rev)LRR-RLPs\_62

ATTTACAAACATAGAAACAGATGAATCTGCTCTTATTGCCTTTAGAGCATATATAACTTCAGACCATGATC  
ATATCTTGTCCAAAACTGGACGCCATCCAGTAACAGATCCTCTATCTG

>PGSC0003DMG401000299-(rev)LRR-RLPs\_868

TTGGATATATAACCAAGCTCAAGATATTATATCTGGGGATAAACAATTTTCATAGGTATCATATTATATTTA  
TTCAAGTTATATAGTAGTCAGCACTCTTATAATATTGCTAGTGTAGTTA

>PGSC0003DMG401000299-(rev)LRR-RLPs\_930

TTATATTTATTCAAGTTATATAGTAGTCAGCACTCTTATAATATTGCTAGTGTAGTTAGTGATTAGAAGAG  
AAGTCAAGTTCTATAATTTTTACATAGAAAGATGACTGTTGGAATTGCA

>PGSC0003DMG401000299-(rev)LRR-RLPs\_992

TTAGAAGAGAAGTCAAGTTCTATAATTTTTACATAGAAAGATGACTGTTGGAATTGCATGTTCAAAGAAT  
TATGTTTCTCCGAATAGCTGTGTTTTAACAGATATCTAAGTAGGGGCAGA

>PGSC0003DMG401000674-(rev)LysMRLKs\_195

ACCATCCCAAATCTAAACAGTGTAATCGCCGGAACAAGAATTAACATACCTTTTCGCTGTGATTGCTTGG

AGGACGGCGATTTTTAGGGCATGATTTTCAATATGAGGTTAATTCAGGG

>PGSC0003DMG401000674-(rev)LysMRLKs\_260

CTTGGAGGACGGCGATTTTTAGGGCATGATTTTCAATATGAGGTTAATTCAGGGGATACGTATGGTGG  
AATTGTGTTGAATTACTCTAATTTGTCGAGTGTTGATTTGTTGAGGAGGTT

>PGSC0003DMG401000674-(rev)LysMRLKs\_325

GTGGAATTGTGTTGAATTACTCTAATTTGTCGAGTGTTGATTTGTTGAGGAGGTTAATAGTAGATACCC  
GGAGAATAATATCCGACTGGTGCGAATTTGAGTGTTGTAGTGAATTGTT

>PGSC0003DMG401000674-(rev)LysMRLKs\_585

GCTAAATTCAGTGCTGGAGAAGGGATCATCTATATTCCGGGAAGAGGTTGGTGTTTCATGCTCTTTAGTTA  
TGTGTTTGCTTTATTTCTGCATATAATACATAAGCGTGTTTTTAACTT

>PGSC0003DMG401000674-(rev)LysMRLKs\_650

AGTTATGTGTTTGCTTTATTTCTGCATATAATACATAAGCGTGTTTTTAACTTTGCTTAGCTACTGTTTA  
TATTCTTATTAATTTGAAAGTGCGTAATTAACATATAAATTTGTATG

>PGSC0003DMG401000674-(rev)LysMRLKs\_715

CTGTTTATATTCTTATTAATTTGAAAGTGCGTAATTAACATATAAATTTGTATGAAATTGAATAAGTAAA  
TATACTAATTCTACATGATATAATATGCATCATAACGAACTTATCATT

>PGSC0003DMG401000674-(rev)LysMRLKs\_780

AGTAAATATACTAATTCTACATGATATAATATGCATCATAACGAACTTATCATTTTATTAGATATAGATT  
ATTGCGATTGCTGAGGGCTATGGTCAAATATAGATGCTAAACAAGACTT

>PGSC0003DMG401001040LRR-RLPs\_0

AAAAAATAAACAAAAAATACCAAATAAGGTCCATCCACGTGTAGGAGGAAGGATTTGCCACGTGCCAAT  
ACACGATTTGGGGGTCAGGTGATGAGCACGTGCTTCCCATCATTGCAACTG

>PGSC0003DMG401001040LRR-RLPs\_1037

CACATACTCAAGTCCGAACTGTGGAGCATGGATAACATGGCATAGGATCGCAACAATAGGTAAATTAAG  
AGCAGTGCTGGGTCTAGCTCTGGTATCATGTAAAGAAAATGAACTTTAGGT

>PGSC0003DMG401001040LRR-RLPs\_1098

AAATTAAGAGCAGTGCTGGGTCTAGCTCTGGTATCATGTAAAGAAAATGAACTTTAGGTCTAACTCAAC  
CCTATAATTTTGTTCATTAGTAGACAACAACCCATTTTCTAGATCATTGTG

>PGSC0003DMG401001040LRR-RLPs\_1159

AACTCAACCCTATAATTTTGTTCATTAGTAGACAACAACCCATTTTCTAGATCATTGTGGGACTCTAATGG  
AGCTCTTAATGGTAAATACTAGCAAGTACAAGTTGCACCACTTTTATAG

>PGSC0003DMG401001040LRR-RLPs\_122

AGGACTATTCACTTTTTACACACACCAGTGAAACAAAGAGTCGGGATTGTCGTGCTCAGTACTTCTCCGA  
TGACCAAATTTACCGGTAACGGAGGTTACCGGTCGCCGTGGTTCCATAT

>PGSC0003DMG401001040LRR-RLPs\_1220

ACTCTAATGGAGCTCTTAATGGTAAATACTAGCAAGTACAAGTTGCACCACTTTTATAGAAGCTAATTAA  
TGATATTTACTCTGCTTGGATGTTACATATTGTTTCTATTATCGTACT

>PGSC0003DMG401001040LRR-RLPs\_1281

GCTAATTAATGATATTTACTCTGCTTGGATGTTACATATTGTTTCTATTATCGTACTGTATTATTTAAT  
AAGTACAACGTTTGGATGGATTGTGTCATTTTTCGTCGTTATATAATG

>PGSC0003DMG401001040LRR-RLPs\_1769

GAGCTAAAATAAACTGCATTGAATTGGATTGACAAAAAAGGATAATAAGAGTTGTGGATGTGTTGTGTT  
GGATGTCTCATTACCTACTGTAAAAGTGTGCGATCATTTTATATATATTGTA

>PGSC0003DMG401001040LRR-RLPs\_183

CTTCTCCGATGACCAAATTTACCGGTAACGGAGGTTACCGGTCGCCGTGGTTCCATATTTATTGTCTACT  
TTTGCTACCAAAGCTTCAGTCTCCGAGTTCGCTTTCCTCAAATGGCCA

>PGSC0003DMG401001040LRR-RLPs\_1830

GTTGTGTTGGATGTCTCATTACCTACTGTAAAAGTGTGCGATCATTTTATATATATTGTAGATTTAGAAAAG  
GAAATTTAGCTACCCTGACCATCTTTTTCATTTTCTTCGAGACTTCCTC

>PGSC0003DMG401001040LRR-RLPs\_1891

TTTAGAAAAGGAAATTTAGCTACCCTGACCATCTTTTTCATTTTCTTCGAGACTTCCTCCTTGAGTTTTGTA  
TAAGTGGATCATGTCCACATATTATGGGGATGGTTGATACTTATCGTA

>PGSC0003DMG401001040LRR-RLPs\_2013

AGTAACTGGTTTGTTCCTGTCCCTCACTCCTGGGAAGTTAGTTTCTAACTAGATCCTTTCCTATAAGTT  
TCTTTGGACTTGGTCAAACACAATAACTTTTTCCATGGTAGCTTGGAC

>PGSC0003DMG401001040LRR-RLPs\_2196

CTAATCTAATTGATTCAGACCCGTTTTAAGCTTAACTTGTGCGTTGTGAAGACTCAAATCATTATCTAGTT  
GATAGGCTGACGTAAGGTGTAGAGGTGTTGTTTTCAACTCAGTTGAACT



>PGSC0003DMG401001040LRR-RLPs\_2379

ACTGAAGTCTTGATCGAATAAACTACCCCTAAGCTCTGTGCAACAATGACCAAGTGGGTTTAATTTAAT  
GTCGGTATTATCACATATAAATGATGTTGTTTCCTTCTTCTGTTTGGGGT

>PGSC0003DMG401001040LRR-RLPs\_244

ATTGTCTACTTTTGCTACCAAAAGCTTCAGTCTCCGAGTTCGCTTTCCTCAAATGGCCACTATCGTCTCTAG  
TGAGCTCCTTTTCACTTCTCTTTTAGTGTATCGTAACCTCTTTCGGTT

>PGSC0003DMG401001040LRR-RLPs\_2562

AGGCTGATAATGGATATGTCTCATTCTAGGATTTGGATGGTTTTACGAAGTTTTAAATACTTTGATTGTC  
GCGCTTAGTAATTTATTGATGGTGTACAGATCCTAGTCTTCTTTAGTT

>PGSC0003DMG401001040LRR-RLPs\_2684

ATTTCCACACGTTAACTAACGAGAATCTTATGCTTCAACTTGCATTTGTGTTTGCCATTTACTGCTAAGTT  
CCACCTACTAACTGCTTTTTTCCCTTCCCAGGGAGTAGGTGGCACACA

>PGSC0003DMG401001040LRR-RLPs\_2745

ACTGCTAAGTTCCACCTACTAACTGCTTTTTTCCCTTCCCAGGGAGTAGGTGGCACACAATTAACAGCTTC  
AAACGGCATACTGCTTTGGAAGTGCATAACCCCGAAGGCGGAGAAGATA

>PGSC0003DMG401001040LRR-RLPs\_305

ATCGTCTCTAGTGAGCTCCTTTTCACTTCTCTTTTAGTGTATCGTAACCTCTTTCGGTTTTCCGTTTTGTGGTT  
ATGGCTTCTGATGTTTATGATGTATCAAACGTAGTAAATATTTATCT

>PGSC0003DMG401001040LRR-RLPs\_366

CGTTTTGTGGTTATGGCTTCTGATGTTTATGATGTATCAAACGTAGTAAATATTTATCTTTTGGCATTGTC  
ACTTTATTCGATTTTTTTGGGTGTAAAGTCTCTTTAACTATTATTATC

>PGSC0003DMG401001040LRR-RLPs\_3660

AGAAGAGAAATCAAATTGCTTTTCGTGCTGTTAAGCTCTTTAGAGGGCTACACAAGATTAGTGCTGCCA  
GAATATCTAACAGGGCTATTGAGGTAATTACAAACCAGATGGAAATTAGCT

>PGSC0003DMG401001040LRR-RLPs\_3721

TGCTGCCAGAATATCTAACAGGGCTATTGAGGTAATTACAAACCAGATGGAAATTAGCTACAGAACATC  
ACAGTCTAGAATGTTGAATGTCTAAATATGCAGTACTGATGTTTTTTCTTT

>PGSC0003DMG401001040LRR-RLPs\_3782

AGAACATCACAGTCTAGAATGTTGAATGTCTAAATATGCAGTACTGATGTTTTTTCTTTTTTCCCTTCTGT

GATCCCATCTTGTTGCTTGGCAAAGTCTCTCTTCATCGCAGATATAGA

>PGSC0003DMG401001040LRR-RLPs\_3843

TTCTTTCTGTGATCCCATCTTGTTGCTTGGCAAAGTCTCTCTTCATCGCAGATATAGAGAAAGACCAACT

TCCAATATTTTATAAATTGACGCATTTGGAGTTGAGTATGGAACCTTGAA

>PGSC0003DMG401001040LRR-RLPs\_3965

TCATTCCATTGGACCATTGAAGGAACTGCTCCAATGTCTGCCAAAGTTGCAATCGCTTCATTTTTCTGAGG

TAGATAGATACCTTTGGCATTGTGGACTTGTTTATAAAAAAATTTCAAT

>PGSC0003DMG401001040LRR-RLPs\_4026

TTTTCTGAGGTAGATAGATACCTTTGGCATTGTGGACTTGTTTATAAAAAAATTTCAATTCACATGAGTTC

TTTAATATTTTTCATACCATTGAGGACTTGACCCCTGCATGCACCTTT

>PGSC0003DMG401001040LRR-RLPs\_4209

AATACAGCAATTTTCATGGTAATGATACAGAGATTTCTTTTTTAAGAAATTTGCTGGAAATTGCAATAGTT

TTGGAGAAGCTGAACATAGTTTGTCAAAGAGACCTTTTGGGGATCTAA

>PGSC0003DMG401001040LRR-RLPs\_427

TGGCATTGTCACTTTATTCGATTTTTTTGGGTGTAAAGTCTCTTTAACTATTATTATCCCTAGTTTTTCATTC

GACACTTTTTTATTTGGTTCTCTTTGTGTACATCTAGCATCAGTCG

>PGSC0003DMG401001040LRR-RLPs\_4819

GAAAATCACATTTTGCACATATGCTGTCCAGGTCAAATAAGATCTCTCGTCTATTTCTATTCTTGTGTAT

CTATGGTTCACCGAATGAAAATATGTCTCTTTATGGTATAAAAAGATTT

>PGSC0003DMG401001040LRR-RLPs\_4880

TCTTGTGTATCTATGGTTCACCGAATGAAAATATGTCTCTTTATGGTATAAAAAGATTTGCACGTGCCTGC

ACCAAAAGCTCACCGTGTTAATAAAGCTAATGTTTGACTGGACAATTAT

>PGSC0003DMG401001040LRR-RLPs\_5490

GTTCCATCTTTCGGCAACTTAACTGATATTCTGCACATGAGACTGTGAAATTAGATTACCATTATAAATTG

ATAAATGGGAATCACTTAATGAAATCTGGTTTCTCTAGTTAGGATGTAC

>PGSC0003DMG401001040LRR-RLPs\_5551

TTATAAATTGATAAATGGGAATCACTTAATGAAATCTGGTTTCTCTAGTTAGGATGTACATTACCGAATT

TTTATTCTAAAGAGCTCAGTGTCGTGATGAAATTGTTGAACTAGAACCT

>PGSC0003DMG401001040LRR-RLPs\_5612

TCACCGAATTTTTATTCTAAAGAGCTCAGTGTGCGTGATGAAATTGTTGAACTAGAACCTCTTCGGACCTTT  
ACGAGTGGAACATCACAAGGAGTTTAAAGCACGAGTAACTGCAATATG

>PGSC0003DMG401001040LRR-RLPs\_5673

TCGGACCTTTACGAGTGGAAACATCACAAGGAGTTTAAAGCACGAGTAACTGCAATATGCAAATCTGCT  
TTTGGTGCCTGTGCAAATTTGTTTTTCCAGTCTTTCAGCTAGCCAAGAAG

>PGSC0003DMG401001040LRR-RLPs\_5734

AATCTGCTTTTGGTGCCTGTGCAAATTTGTTTTTCCAGTCTTTCAGCTAGCCAAGAAGCCGTCAATTTAA  
CTATACATATATCATTATACTTGGACTTTGAAGAATTTTCATGTTGCA

>PGSC0003DMG401001040LRR-RLPs\_5795

GTCAATTTAACTATACATATATCATTATACTTGGACTTTGAAGAATTTTCATGTTGCACTTACACTTCTTG  
ATGCAGCAAGTAACTTCACCTAATTCGATATCAAACCTCATGTCTTGCA

>PGSC0003DMG401001040LRR-RLPs\_5856

TACACTTCTTGATGCAGCAAGTAACTTCACCTAATTCGATATCAAACCTCATGTCTTGCCTGCAAGATTAG  
TGTGATTTTCCTTTTCATCTTTCATGTGTCAAAGTATTCTGTTTCGCTT

>PGSC0003DMG401001040LRR-RLPs\_5917

GCAAGATTAGTGTGATTTTCCTTTTCATCTTTCATGTGTCAAAGTATTCTGTTTCGCTTAAAAATGAAATC  
AGTTGACAATTTTTATCTCTAATAGCTTCTACTTTTAGACACTAGGTA

>PGSC0003DMG401001040LRR-RLPs\_5978

AAATGAAATCAGTTGACAATTTTTATCTCTAATAGCTTCTACTTTTAGACACTAGGTAGTGCTGTAGTAT  
TGCATTTTACTAGCCATTGACTGTTAAAAAGCATTTAAGATGGTGTGTA

>PGSC0003DMG401001040LRR-RLPs\_6039

GCTGTAGTATTGCATTTTACTAGCCATTGACTGTTAAAAAGCATTTAAGATGGTGTGTAAACCTAATACT  
GACATTTTTATGCTTATTACCTTCTTATTGTATGTGTATGTAATGCAGTC

>PGSC0003DMG401001040LRR-RLPs\_61

GTGCCAATACACGATTTGGGGGTCAGGTGATGAGCACGTGCTCCCATCATTGCAACTGAAAGGACTAT  
TCACTTTTTACACACACCAGTGAAACAAAGAGTCGGGATTGTCGTGCTCAG

>PGSC0003DMG401001040LRR-RLPs\_6100

CCTAATACTGACATTTTTATGCTTATTACCTTCTTATTGTATGTGTATGTAATGCAGTCTCCAACAAGCAGA  
TATTTTGAAGCATTAGCTGTGGATCCGGCGCTACAATTTTTGGTTCC

>PGSC0003DMG401001040LRR-RLPs\_6222

TTACAAGTGCAACACCATGCTTTAGTACACTTCTTGGATCAGTTATTTTTGGTAATGAATTCTGCAGATTC  
ATGTAAATCAGTTGAAACTTCTTTTTGCATTTAGGTCACAAGTCTTTCT

>PGSC0003DMG401001040LRR-RLPs\_6283

CTGCAGATTCATGTAAATCAGTTGAAACTTCTTTTTGCATTTAGGTCACAAGTCTTTCTGAAGTATTGGAA  
TCTGACTCTAGTGGAACAGGTAAACAGTTAACTTAGCAATGGACCCTTT

>PGSC0003DMG401001040LRR-RLPs\_6405

CCCTTTTTTGTCAATTTATTTTGTGGGGGATAGGCATAGATGCTTGGTAGATGATTTTGTGATTGTTTTTAA  
TTCAAAGGAATCAAGCATTGTAAATCTACTATATGTGATATAGCTGAC

>PGSC0003DMG401001040LRR-RLPs\_6527

AAGTCATATGAAACAACAAGGACAGGGAAAATATTTTATAACAAGTTTGGGTTTTTTTTTGGGAAAGAA  
AGTTACACATGCATTGATCAAGTTCCAATGTCTGTTATTTTGTGTGTTTTA

>PGSC0003DMG401001040LRR-RLPs\_6649

TGTCAAAGTTTTATGCATTATGTCTTGTTTTACAATTGGAGAAATTGAGTTTTATCTTCTTTTTTTTCATA  
CTCTGCTGATAAGTCCTTTATGTAGGCAGTCAGAAAAATTAGAAGTA

>PGSC0003DMG401001040LRR-RLPs\_6710

CTTTTTTTCATACTCTGCTGATAAGTCCTTTATGTAGGCAGTCAGAAAAATTAGAAGTAGAACTATCAGA  
GGGTTTTAACTCTCTTGATAACCATCTCTCGACTTTAGTTTCATAAGTG

>PGSC0003DMG401001040LRR-RLPs\_6771

ACTATCAGAGGGTTTTAACTCTCTTGATAACCATCTCTCGACTTTAGTTTCATAAGTGGACTTTGAAGAA  
CGTAGAATGTATGCAATTTTTATGCTTATTTTTACAGAGTAAAGAGTAA

>PGSC0003DMG401001040LRR-RLPs\_6832

CTTTGAAGAACGTAGAATGTATGCAATTTTTATGCTTATTTTTACAGAGTAAAGAGTAAAGAGACTGTTT  
TCGATAGATTTTCTTCGTATCAAAGGAGGAAAAGCATAAAGAAATGGAAA

>PGSC0003DMG401001040LRR-RLPs\_7137

TCAGATATGCACATTTATTAATGACACAGCATTTAAAATAATCTAACAAGAATATGCCAATTCAGAGAA  
CTTTTTTAAAATAATAATAATGTAGGTCAAAGTGTAGCACTTGATATTC

>PGSC0003DMG401001040LRR-RLPs\_7198

TTCAGAGAACTTTTTTAAAATAATAATAATGTAGGTCAAAGTGTAGCACTTGATATTCTAATAAATTTAT

GTTTCTTTATGTCCTTATCAAACAGCAATTACAATGCACTGAATCCAGT

>PGSC0003DMG401001040LRR-RLPs\_7442

AATTTACTCAACTAAACACATGGTGTGCCCTCACTCTTCAAGAATTGAACTTGTGGGTAAGTTTTGAC

AGTGAGGGGTTATCTTTGTCAAAGGCCCACTTAGAGCAGTACTAAATATA

>PGSC0003DMG401001040LRR-RLPs\_7503

AGTTTTGACAGTGAGGGGTTATCTTTGTCAAAGGCCCACTTAGAGCAGTACTAAATATAAATTCAAAAAA

GATACTTATTTGGACATCGTTATTTAATTTATGTGTTTGAAATTATATAT

>PGSC0003DMG401001040LRR-RLPs\_7564

TTCAAAAAAGATACTTATTTGGACATCGTTATTTAATTTATGTGTTTGAAATTATATATGGTTGAAGTTCA

GATGTTTAGTCTTGACGACTTCATAACTAAGTGTACTTTTTTTTTAAG

>PGSC0003DMG401001040LRR-RLPs\_7625

TTGAAGTTCAGATGTTTAGTCTTGACGACTTCATAACTAAGTGTACTTTTTTTTTAAGTGGTGATGTGCG

TAATGATATTTACTTGTGTTGTGATAAAAGGTACGTTAACATCTTCATGA

>PGSC0003DMG401001040LRR-RLPs\_7686

GTGATGTGCGTAATGATATTTACTTGTGTTGTGATAAAAGGTACGTTAACATCTTCATGAGAATAAAAAAT

AAAAAAGCTCTGAGGATTGGGGCAAACGGCTAGTGATAGACTGCTCGAAT

>PGSC0003DMG401001040LRR-RLPs\_7747

ATAAAAAATAAAAAAGCTCTGAGGATTGGGGCAAACGGCTAGTGATAGACTGCTCGAATTGTTTCCTCA

GGGCAAACGACTAGTGGACAACGTTTCGAGTTGTTTTGAGGTGAAAGTGAG

>PGSC0003DMG401001040LRR-RLPs\_7808

TTTCTCAGGGCAAACGACTAGTGGACAACGTTTCGAGTTGTTTTGAGGTGAAAGTGAGTCATCGTTTAT

CGATCAGGGGATGAACGAGTGTTCATCAGGTCCTCGACGGCTGATTCTG

>PGSC0003DMG401001040LRR-RLPs\_7846

TTGTTTTGAGGTGAAAGTGAGTCATCGTTTATCGATCAGGGGATGAACGAGTGTTCATCAGGTCCTCG

ACGGCTGATTCTGAGGTTAAAGTGAGTCGTTATTTATCAATCAAGGGATGA

>PGSC0003DMG401001040LRR-RLPs\_793

GTTGGCTAAGATGACTACTGATTCAAAAAAAGTTCCTAGGACACCGGGCTTAGTTAGTTGTATTGTGTA

GTCGAATCACATATTAATGATTCCCAAATTTGCGATGATCCACATGGGA

>PGSC0003DMG401001040LRR-RLPs\_854

TATTGTGTAGTCGAATCACATATTAATGATTCCCAAATTTGCGATGATCCACATGGGAAAGACTCTACC  
CGTTGACTAGAAATGGACATTTGGCCTAACTCCAAAATCTAGCTTATAAT

>PGSC0003DMG401001040LRR-RLPs\_915

GACTCTACCCGTTGACTAGAAATGGACATTTGGCCTAACTCCAAAATCTAGCTTATAATGCGAGGATTGT  
TCAAGAAAAAATAATCATTCCCTCGATCATGTGGATTGACTCTAACACC

>PGSC0003DMG401001040LRR-RLPs\_976

GAGGATTGTTCAAGAAAAAATAATCATTCCCTCGATCATGTGGATTGACTCTAACACCAACACATACTC  
AAGTCCGAACTGTGGAGCATGGATAACATGGCATAGGATCGCAACAATAG

>PGSC0003DMG401001828-(rev)LRR-RLPs\_0

ATGGAGTACCAAAAATTGCTAATAGCTTTCTGCTTCTATTCACTTTTTGTCCAACAATCTCAACTTACATAT  
GCTGGGAAACATCTCTGTCCCCGCGATGAAGCTTTTTGTTTGCTTCAA

>PGSC0003DMG401001828-(rev)LRR-RLPs\_1054

CCAGAATCCATTGGCAACCTCACAAATATCATAAAGTTAACGCTTCAATGTAACAACCTTCACTGGTACTGT  
TCCCTCAACTATCTCAAAATTAATAAACTCTATGAATTAGATCTCTCT

>PGSC0003DMG401001828-(rev)LRR-RLPs\_1116

TGGTACTGTTCCCTCAACTATCTCAAAATTAATAAACTCTATGAATTAGATCTCTCTTCCAACAATTTTCT  
AGGCTCGATTCCAGAATCCATTGGTAACCTCACTGCAATTACAAAGTT

>PGSC0003DMG401001828-(rev)LRR-RLPs\_1178

ACAATTTTCTAGGCTCGATTCCAGAATCCATTGGTAACCTCACTGCAATTACAAAGTTGACACTTTTAGGT  
AACAACTTCACTGGTACTGTTCCCTCAACTATCTCAAAATTAATCAAAC

>PGSC0003DMG401001828-(rev)LRR-RLPs\_124

AGCAAGGACTCACAATTGGTCGAAATGTTTCATCACTATTGTGACGAAGACACCCATGCCAAGACTTTTTTC  
CTGGAATGTTACAGGAGATTGCTGTGAATGGGATGGTGTACTTGCAATG

>PGSC0003DMG401001828-(rev)LRR-RLPs\_1240

CTTTTAGGTAACAACCTTCACTGGTACTGTTCCCTCAACTATCTCAAAATTAATCAAACCTCTATGATTTAGAT  
CTCTCTTCCAATCACTTTTCGAGGTTTCGATTCCAGAATCCATTGACAAC

>PGSC0003DMG401001828-(rev)LRR-RLPs\_1302

TGATTTAGATCTCTCTTCCAATCACTTTTCGAGGTTTCGATTCCAGAATCCATTGACAACCTCACTGCAATCA  
CAGAGTTGAGACTTACAGATAACAGCTTCACCGGAAACGTTCCCTCAAC

>PGSC0003DMG401001828-(rev)LRR-RLPs\_1364

CTGCAATCACAGAGTTGAGACTTACAGATAACAGCTTACCGGAAACGTTCCCTCAACTATCGGAAAGCT  
GAACAAACTTAGCTTCATATCTCTCTCTTCCAATAATATTGAAGGCTCGA

>PGSC0003DMG401001828-(rev)LRR-RLPs\_1426

GGAAAGCTGAACAACTTAGCTTCATATCTCTCTTCCAATAATATTGAAGGCTCGATTCCAGACATCTT  
TGGCAACTTTTCAGTGGTAGGTACTTTAAATTTTCAAAGTAACAATTC

>PGSC0003DMG401001828-(rev)LRR-RLPs\_1488

AGACATCTTTGGCAACTTTTCAGTGGTAGGTACTTTAAATTTTCAAAGTAACAATTTCACTGGCCCCATTCC  
CAGATTCAATTGCAACCTTGACTCACCTTACACTCTTAGAGTTGCAAAA

>PGSC0003DMG401001828-(rev)LRR-RLPs\_1550

GCCCATTCCCAGATTCAATTGCAACCTTGACTCACCTTACACTCTTAGAGTTGCAAAAACAATTCATAACT  
GTCCACTTCCCTCTAATATAAGTGGACTTCAAGAGCTACAACAACCTTG

>PGSC0003DMG401001828-(rev)LRR-RLPs\_1736

CTTTATATGTTCAACACAATCAATTAAGTGGGAAATTGCCAAATAAGCTCAAGGGAAGTTCCTCAAATA  
CTTTAGTATTGATCTTTTCGCACAACAATCTGCATGGCAAAAATCCCTGATT

>PGSC0003DMG401001828-(rev)LRR-RLPs\_1798

TCAAAATACTTTAGTATTGATCTTTTCGCACAACAATCTGCATGGCAAAAATCCCTGATTGGATGTTATCATC  
CTTAAGCAAGGGTAGCCTGGATATCTCTCATAACTTCCCTCACAGGCTTT

>PGSC0003DMG401001828-(rev)LRR-RLPs\_186

ACTTTTTCTGGAATGTTACAGGAGATTGCTGTGAATGGGATGGTGTACTTGCAATGGATTTACGGGTC  
ATGTCATAGGACTTGATCTTTCTTCGAGTTGTCTTAGTGGAACCATCCAT

>PGSC0003DMG401001828-(rev)LRR-RLPs\_1860

GTTATCATCCTTAAGCAAGGGTAGCCTGGATATCTCTCATAACTTCCCTCACAGGCTTTGAAAAACAAGTA  
TGGCGTACAATGTATTTGTGGTCGCTTAATTTGGAAAACAATTTTCTTCA

>PGSC0003DMG401001828-(rev)LRR-RLPs\_1922

AACAAGTATGGCGTACAATGTATTTGTGGTCGCTTAATTTGGAAAACAATTTTCTTCAAGGGCCTTTGCA  
TCAATCCATTTGTGACTTGTATAACCTTCAGGTCCTCATTTTGGCTCAGA

>PGSC0003DMG401001828-(rev)LRR-RLPs\_1984

CCTTTGCATCAATCCATTTGTGACTTGTATAACCTTCAGGTCCTCATTTTGGCTCAGAACAATTTCAAGTGG

TTCAATCCCAGGATGTTTGGGCAACTCCAGTAGACGCATTTCTGAGTTA

>PGSC0003DMG401001828-(rev)LRR-RLPs\_2046

TTTCAGTGGTTCAATCCCAGGATGTTTGGGCAACTCCAGTAGACGCATTTCTGAGTTACGGATCTTTGAC  
CTTTCCTGCAATGGGTTCACTGGAACCTTGTCTATCTAATCTTTTCAAAA

>PGSC0003DMG401001828-(rev)LRR-RLPs\_2108

TCTTTGACCTTTCCTGCAATGGGTTCACTGGAACCTTGTCTATCTAATCTTTTCAAAAATTCAGAGGTATG  
ATGAATGTTGATGAAGAAAAACAGGAATTACTCGAAAAAGTACAAGGC

>PGSC0003DMG401001828-(rev)LRR-RLPs\_2170

AGAGGTATGATGAATGTTGATGAAGAAAAACAGGAATTACTCGAAAAAGTACAAGGCATCACACAGA  
TTACCTTTACCATGTAAGTTTGGTTATAAAAGGCAATGAGTTTGATATGAGA

>PGSC0003DMG401001828-(rev)LRR-RLPs\_2232

CACAGATTACCTTTACCATGTAAGTTTGGTTATAAAAGGCAATGAGTTTGATATGAGAATCACATCAATT  
ATGACGAGTGTGATTTATCAAGCAACAGGTTCTGAAGGAGATATTCCAAA

>PGSC0003DMG401001828-(rev)LRR-RLPs\_2294

CATCAATTATGACGAGTGTGATTTATCAAGCAACAGGTTCTGAAGGAGATATTCCAAATTCATTGGAAA  
TCTTAGCTCACTTGTGTTACTCAACCTGTCCCACAACAACCTCCGTGGTC

>PGSC0003DMG401001828-(rev)LRR-RLPs\_2356

ATTGGAAATCTTAGCTCACTTGTGTTACTCAACCTGTCCCACAACAACCTCCGTGGTCCTATTCTGCAGA  
AGTTGCAAAGTTGCATGAGTTCGAAGCATTAGACCTATCATGGAACAGA

>PGSC0003DMG401001828-(rev)LRR-RLPs\_2418

TCCTGCAGAAGTTGCAAAGTTGCATGAGTTCGAAGCATTAGACCTATCATGGAACAGACTTGTTGGTGA  
AATTCCAGGTCCATTGTCGAGTTTGACATTTCTTGAGGTCTTAAACCTTTC

>PGSC0003DMG401001828-(rev)LRR-RLPs\_248

TACGGGTCATGTCATAGGACTTGATCTTTCTTCGAGTTGTCTTAGTGGAACCATCCATGCTAACAAATAGC  
CTCACAAAACCTTGTTCACTCCAAAGACTCAGCCTTGCCCTCAACTACTT

>PGSC0003DMG401001828-(rev)LRR-RLPs\_2666

CACCACTTGAACACGATGATGATGATGATTCATTTTTATGAGCGGATTCACATGGGATGCTGTTGTAAT  
AGGTTATGGTTGTGGTATGATATTTGGATTGTTGATAGGAGGCCTCATGT

>PGSC0003DMG401001828-(rev)LRR-RLPs\_2779



CTCATGTTTCTACTGGAAAAACCAAATGGTATGTGAACTTTGCTGAAGATATTGCTCAACAAATTGCTG  
CTAAGAAGCGAACAAGCCAAAAGAAGAGATGTCAAAGAAGAATGAATTAG

>PGSC0003DMG401001828-(rev)LRR-RLPs\_310

ACAATAGCCTCACAAACTTGTTTCATCTCCAAAGACTCAGCCTTGCCTTCAACTACTTGGATGACTTTCCA  
CTTGAAATAGTATAAGTGAGCTCAATAGTTTGACGCATCTCAATCTTT

>PGSC0003DMG401001828-(rev)LRR-RLPs\_372

GACTTTCCACTTGGAATAGTATAAGTGAGCTCAATAGTTTGACGCATCTCAATCTTTCGGATTCTGGATT  
TCTGAAAGGGAAGATGATTCCACCAGGATTATCCAAGTTGTCTAAGTTG

>PGSC0003DMG401001828-(rev)LRR-RLPs\_434

TTCTGGATTTCTGAAAGGGAAGATGATTCCACCAGGATTATCCAAGTTGTCTAAGTTGATTTCACTTGAC  
CTCACCTGGAATTTTCATCCAAGTTGGCCAAACAACCTTGAGAAGTTTTCT

>PGSC0003DMG401001828-(rev)LRR-RLPs\_496

CACTTGACCTCACCTGGAATTTTCATCCAAGTTGGCCAAACAACCTTGAGAAGTTTTCTGCACAACCTTAACC  
AACTTAGAGGTACTGTTGTTTCGCAATGTGCACGCACCATTTGAGTTAC

>PGSC0003DMG401001828-(rev)LRR-RLPs\_558

AACTTAACCAACTTAGAGGTACTGTTGTTTCGCAATGTGCACGCACCATTTGAGTTACCTAATAATTTTCC  
TTCTTCCCTTAGGAACTAAGTCTTGAGGGCACCGACATGTTTGGAAC

>PGSC0003DMG401001828-(rev)LRR-RLPs\_62

ACTTACATATGCTGGGAAACATCTCTGTCCCCGCGATGAAGCTTTTTGTTTGCTTCAATTTAAGCAAGGAC  
TCACAATTGGTCGAAATGTTTCATCACTATTGTGACGAAGACACCCATGC

>PGSC0003DMG401001828-(rev)LRR-RLPs\_620

TAATTTTCTTCTTCCCTTAGGAACTAAGTCTTGAGGGCACCGACATGTTTGGAACATAACTGATTCTC  
AGCTTTTTCATCTACCAAACCTGCAAGTCCTGAGATTGGGTTGGAATCC

>PGSC0003DMG401001828-(rev)LRR-RLPs\_682

CTGATTCTCAGCTTTTTCATCTACCAAACCTGCAAGTCCTGAGATTGGGTTGGAATCCTTTAATAACAGGC  
ACTTTGCCGAATTTTAATTGGAGTTTCAGTGGAAAGTATTTTAGAGTTGG

>PGSC0003DMG401001828-(rev)LRR-RLPs\_744

ATAACAGGCACTTTGCCGAATTTTAATTGGAGTTTCAGTGGAAAGTATTTTAGAGTTGGACTTTTCCATAC  
TGGTATTTTTGGGAAGGTACCTGATTCAATTGGTAATCTCCATTCTCTT

>PGSC0003DMG401001828-(rev)LRR-RLPs\_806

TTCCATACTGGTATTTTTGGGAAGGTACCTGATTCAATTGGTAATCTCCATTCTCTTTGTTTGCTATTTAG  
ATCTCTCTTCCAACAGTTTATCTGGCTCGATTCCAGAATCCATCGGCA

>PGSC0003DMG401001828-(rev)LRR-RLPs\_868

TGCTATTTAGATCTCTTCCAACAGTTTATCTGGCTCGATTCCAGAATCCATCGGCAACCTCACTGCAAT  
CACTGAGTTAACGCTTCAAGTAACAGCTTCACTGGTAATGTTCTCTCA

>PGSC0003DMG401001828-(rev)LRR-RLPs\_930

CACTGCAATCACTGAGTTAACGCTTCAAGTAACAGCTTCACTGGTAATGTTCTCTCAACTATCTCAAAAT  
TAAACAACTTGTTCAATTTAGATCTCTCAAACAACCATTTTCAAGGCTC

>PGSC0003DMG401001979-(rev)LRR-RLPs\_1008

TCTTCTATGTCCTTGCAGGACAAAGCTCGAGCGTCCTTTCAGGTAGACTCATTACTTGACAAAACCTT  
CTCTCCCGCACTATCCTTTTGTTGCCGAAATGATGAGAAGAAGCTTCCAA

>PGSC0003DMG401001979-(rev)LRR-RLPs\_1071

AAAACCTTCTCTCCCGCACTATCCTTTTGTTGCCGAAATGATGAGAAGAAGCTTCCAATCTAAAAGAGCTA  
AAGATTTTACATAAATCTAAGCATCCTGACTGGCCTGATATTCTCGATT

>PGSC0003DMG401001979-(rev)LRR-RLPs\_1260

GATTTTCTCGGGGGATATTTTCTCCTAGTCTCAAGGAATTGAAATTAGCACGTACTTTTATACCATGGG  
AAGCTATGAATTTGCTGACTAATTTACCCAATCTTGAGGCGTTTATGGG

>PGSC0003DMG401001979-(rev)LRR-RLPs\_630

GCAGCTCTTTTGTAGAGACTAGTGCGACAGAAATTCAAGAAGAGCAAGAAAGAGTAGGAAATTATGAG  
CTTCAAGTTTGAATTTAAAGGTATGTTAAAATTCCATCTTTGATTATTAGCC

>PGSC0003DMG401001979-(rev)LRR-RLPs\_693

ATGAGCTTCAAGTTTGAATTTAAAGGTATGTTAAAATTCCATCTTTGATTATTAGCCAATTCTTAATTAAC  
ATGTTCTTGTGGTCTTTCTATTTTCTTTCATTTTGTGTCACCTGCTA

>PGSC0003DMG401001979-(rev)LRR-RLPs\_945

TGGAACAGAATATAAGTATAAATATTATGATTTTTTTTCTTTTCAACTTGCGATGGCCATAATTCTTCTATG  
TCCTTGCAGGACAAAGCTCGAGCGTCCTTTCAGGTAGACTCATT

>PGSC0003DMG401002428LRR-RLPs\_0

AATTTCCATATAAAGTAAAATAAACAATTTCTAATTTGACACGTTGAGTCATAATCTAAAAAATGTAGTTT

ACTACTTTACTCATATTTTCATCATTCTTTCTTAATGTTTTGAATAGCAG

>PGSC0003DMG401002428LRR-RLPs\_1512

AGATATGAAGAAGAGGCCAGTTGCTCCTCTTCTAAGAAACAAAGGCCATTCTTGCAGCTCTTTCTACAA

GCCCGGGATTATAGATTAATATAGCTAGGTATATAACTCATGAAATTGT

>PGSC0003DMG401002428LRR-RLPs\_1572

TTTCTACAAGCCCGGGATTATAGATTAATATAGCTAGGTATATAACTCATGAAATTGTGTTCTCTGTTT

ATATATAAATTATTTCTTCTTATTCTTTTCCCTATTGGCAATGGGTGAT

>PGSC0003DMG401002542OtherRLKsTM\_0

ATATTTTGCAAGTTGGCTAAAGGTCATCAAACGACGTCGTTTCATTCAACATTTTCTTTTCTGCATCTTC

TTCACTGTTCCACGTTTCTCCGTTATGTCTTGAACCTGTTTGTCTTGG

>PGSC0003DMG401002542OtherRLKsTM\_1037

TCGGTGGATCAGTGACCCAATGGAGCTCCTTGTTTTATTACTTATTACAGTTAGTGTTTTAGTTTTTCAG

CCATGTCCTTGTTATGGTTAGTGATAATGAGATCTTTTGAATTCTGTC

>PGSC0003DMG401002542OtherRLKsTM\_1098

AGTTTTTCAGCCATGTCCTTGTTATGGTTAGTGATAATGAGATCTTTTGAATTCTGTCCTTGTTATCCAA

GGAECTATCAATTAAGTGAAGTAGCTTTGTGTTTTTTTTGTTGAGTTGA

>PGSC0003DMG401002542OtherRLKsTM\_1159

TGTTATCCAAGGAACTATCAATTAAGTGAAGTAGCTTTGTGTTTTTTTTGTTGAGTTGATGACTATTAAGA

ATAGAATGAAGATTCAAGCGTCAGTCCATCAAATTTCTGACTCTTTTGG

>PGSC0003DMG401002542OtherRLKsTM\_122

CTCTTTCAACTGTCCACTCTAGTTCTTCACGCCACTCGAAAAGACCTAGAGAATCTCAAGATCTTGGTTTC

AAACTGCTGAAAAACATTAGTCTTAAAGAAAAAAGTGATCTCCGGTAAT

>PGSC0003DMG401002542OtherRLKsTM\_1220

ACTATTAAGAATAGAATGAAGATTCAAGCGTCAGTCCATCAAATTTCTGACTCTTTTGGGAAAATTAGTA

GTAGTGGTGGTGAGGGGGATATTTGTGTTCCAATGGCCTCAGAAGAAGC

>PGSC0003DMG401002542OtherRLKsTM\_1281

AAATTAGTAGTAGTGGTGGTGAGGGGGATATTTGTGTTCCAATGGCCTCAGAAGAAGCATTAAAGATT

TAAAATTATTGCATTTAGCTATACCATATTATTTGCTGTAAATAGTAC

>PGSC0003DMG401002542OtherRLKsTM\_1342

TTAAGATTTAAAATTATTGCATTTTCAGCTATACCATATTATTTTGCTGTAAATAGTACTCTTTAATGAATT  
AGTATATCCAGAAGTAACAGTGTGGAGGTAAGTAATTGAAGCTAAAAA

>PGSC0003DMG401002542OtherRLKsTM\_1403

TTTAATGAATTAGTATATCCAGAAGTAACAGTGTGGAGGTAAGTAATTGAAGCTAAAAAACTAAAAGTG  
CTAAATTGCTTGGTGGCGTTGTTCCCTTATTTGCAGTATCAATTGCAGTTG

>PGSC0003DMG401002542OtherRLKsTM\_1464

TAAAAGTGCTAAATTGCTTGGTGGCGTTGTTCCCTTATTTGCAGTATCAATTGCAGTTGAAACTGATGTA  
CTTCCTTTGGGGATTGTTTGTGTATAATTGCCTTTTCCTGGGGGAGGAG

>PGSC0003DMG401002542OtherRLKsTM\_1525

ACTGATGTACTTCCTTTGGGGATTGTTTGTGTATAATTGCCTTTTCCTGGGGGAGGAGGAGCCACATTA  
ATTTTTGTTTAAAAATCCATGATATATATGTATATATACACACACACATA

>PGSC0003DMG401002542OtherRLKsTM\_183

TCTTGGTTTCAAACCTGCTGAAAAACATTAGTCTTAAAGAAAAAAGTGATCTCCGGTAATGTCTACTGGGC  
CCCCGGAGTGCCGTTGGGTCCGCCGTTGCCGTTTCCTCCGGCGGATAAT

>PGSC0003DMG401002542OtherRLKsTM\_1952

GCTTGTTTCATGCTCAGATAATTTGTTTGGTGGTCAACATCATCACTGGCAACAAAATGCTCCTCCCTCAG  
CAGAAAACATGGTGAGGATTCCAATAAATCCCTCCCCTCCACCATCCAT

>PGSC0003DMG401002542OtherRLKsTM\_244

CTACTGGGCCCCCGGAGTGCCGTTGGGTCCGCCGTTGCCGTTTCCTCCGGCGGATAATGCAACTACTCC  
AACATCTCCGGTGAACCCAAGTACTACTCCTCCGTCTCCAGATGTTGCTA

>PGSC0003DMG401002542OtherRLKsTM\_2623

TCCTCACCATATGATCTAAATTTAAGCTTAATTAGAAGCACCAATTATTTAGTGTGGTTCAAAGAGAGGG  
ATTTAAAGGTTAAGGGGCTTGGGTGTTTCATATTCAGTATTTTCTTGTCT

>PGSC0003DMG401002542OtherRLKsTM\_2745

TTCAGTATTCAAAGATTTTCTTGCTTTTATTTAGTATTTTAACTTTTTTCTGAAGCAGAAGAGTTGTGTA  
CCACACGATCTAAATTGAACCTTACAAAAAGGACAACCTTTCTCGCAGAT

>PGSC0003DMG401002542OtherRLKsTM\_2806

AGAGTTGTGTACCACACGATCTAAATTGAACCTTACAAAAAGGACAACCTTTCTCGCAGATGTTTCAGGTGTT  
ACAAATGACCAAATTTTGTATGTGTGTAAGAGCACTAATCATTTAGTCT

>PGSC0003DMG401002542OtherRLKsTM\_305

AACTACTCCAACATCTCCGGTGAACCCAAGTACTACTCCTCCGTCTCCAGATGTTGCTAGTCAGCCTTCTT  
CAGCGACCTTGGTAAATCCGCCGCCCTCATCGATTAATGGAAGCTCTCC

>PGSC0003DMG401002542OtherRLKsTM\_3233

ACCAATTCCTTTGAGTTTTAGCCTTTTGTTAAATCTATTTGTTATTTTTAGAATAAGACTTGTGAAGTATA  
TATTCCAAGTCAGTCTGTTTCTTCCCTCCCAAATCCTTGTTTTCTC

>PGSC0003DMG401002542OtherRLKsTM\_3294

TGTGAAGTATATATTCCAAGTCAGTCTGTTTCTTCCCTCCCAAATCCTTGTTTTCTCTATTATGTTTTGGA  
CACAGTTCCTGGAGAGGTATCTCTCATTGTTGAACTTAATTGGCATT

>PGSC0003DMG401002542OtherRLKsTM\_3355

TTATGTTTTGGACACAGTTCCTGGAGAGGTATCTCTCATTGTTGAACTTAATTGGCATTGATCTTTTTAG  
GTATCCCTAGAAAAGTCGGAGAGAACTGCGATTTTTTTGTTCTTTTCA

>PGSC0003DMG401002542OtherRLKsTM\_366

CAGCCTTCTCAGCGACCTTGGTAAATCCGCCGCCCTCATCGATTAATGGAAGCTCTCCAACGAGTGCTC  
CGTCGAAGGGGTCGGCGAATAATACTACTTTAGTAGCACTTGGAGTTGGA

>PGSC0003DMG401002542OtherRLKsTM\_427

CGAGTGCTCCGTCTGAAGGGGTCGGCGAATAATACTACTTTAGTAGCACTTGGAGTTGGAATTGGGATTG  
GAGGAGCACTTGTGCTTATATGCGTGTGCATTTTTGCCCTTTGGTATAAGA

>PGSC0003DMG401002542OtherRLKsTM\_488

TGGGATTGGAGGAGCACTTGTGCTTATATGCGTGTGCATTTTTGCCCTTTGGTATAAGAGGAGAAAAAG  
GCGTCTTGGGTAAATGGTTTTGGTCATGATCCATCTTACAAGGTCCTAA

>PGSC0003DMG401002542OtherRLKsTM\_5307

AAGTGGTGCAATAATCTGGGACAACACTAGATGTGGTTCAGATTTTCATGTGCATGTGCGTAGCATTATTAT  
CATATTCCAATACTCATGAATAAGGAGAGGAAGTTAATACTATGTGG

>PGSC0003DMG401002542OtherRLKsTM\_5429

TCCAAGTTGTGAGTTTATGCATTCTTCTTCTATTATTTGTATGTAATTGCTAAGCTTCTGAGATGATCTAG  
AGCATCCATCTTCTTCTATTTCCCACTCCCCCTCCCCCAGTTAAAT

>PGSC0003DMG401002542OtherRLKsTM\_549

AGAAAAAGGCGTCTTGGGTAAATGGTTTTGGTCATGATCCATCTTACAAGGTCCTAAAGGTGAAATCT

TTGTGACTATTTCTTCTTATATTGGATTTGGTGACCATTTTGGGCTCCGT

>PGSC0003DMG401002542OtherRLKsTM\_5490

AGATGATCTAGAGCATCCATCTTCTTCTATTTCCCACTCCCCCTCCCCCAGTTAAATATAAAAGCAAAA

TAACATATCCCCGAAAAAACTAACACTTCTCTCATGAAATTAGGCGAG

>PGSC0003DMG401002542OtherRLKsTM\_5551

AAAAGCAAATAACATATCCCCGAAAAAACTAACACTTCTCTCATGAAATTAGGCGAGGCCTTTGCTTA

CCCAGGCTCTGGATGATGGCAACTTTGATACTCTGGCTGATCCAAGATTG

>PGSC0003DMG401002542OtherRLKsTM\_5795

TATACATACACTGTAGCTGCATTATTACCTTTAGATTTGCATGTGGAAAGGAACTGTCTGAACTTAGAAA

GTAAGGTTAAATTCCTCGTGTCAAAGGTTGTAATGATTTATATTTGAGT

>PGSC0003DMG401002542OtherRLKsTM\_5856

ACTTAGAAAGTAAGGTTAAATTCCTCGTGTCAAAGGTTGTAATGATTTATATTTGAGTCTTTTTGCTTCT

TTTCTGCCCGAAATAGTTATTAGTTGTACCCCTCTGACACCTAAACTGG

>PGSC0003DMG401002542OtherRLKsTM\_5978

TCTGATACCTGTGCGCTAAAGAACATTTTTTGTCTATTAATGTTTACTCACCAGTTCCTACTACGTGTTT

CAGGTGCCAATATTTGTTTCCTTGACAATTAGCATCTCAAATGTAG

>PGSC0003DMG401002542OtherRLKsTM\_61

TCTGCATCTTCTTCACTGTTCCACGTTTCTCCGTTATGTCTTGAACCTGTTTGTCTTGGTGCTCTTTCAACTG

TCCACTCTAGTTCTTACGCCACTCGAAAAGACCTAGAGAATCTCAA

>PGSC0003DMG401002542OtherRLKsTM\_610

GTGAAATCTTTGTGACTATTTCTTCTTATATTGGATTTGGTGACCATTTTGGGCTCCGTTTATTTTTTTTCTT

TTTATTGCAATTTAATTAGTTGAGTTGGTGTCAAACAAATTTAA

>PGSC0003DMG401002542OtherRLKsTM\_671

ATTTTTTTTCTTTTATTGCAATTTAATTAGTTGAGTTGGTGTCAAACAAATTTAATGAAGTATTCTTG

CATTCTCACTGTTTCTTAATTCTACTTATCATTATTGGGGTCATTTG

>PGSC0003DMG401002542OtherRLKsTM\_732

AAGTATTCTTGCACTTCTCACTGTTTCTTAATTCTACTTATCATTATTGGGGTCATTTGGGTAGGAAGTCAT

ATTGAATAATTTAATTCTAGTCTGATTGTAAGCAAGTATTTTTTTAAT

>PGSC0003DMG401002542OtherRLKsTM\_793

TAGGAAGTCATATTGAATAATTTAATTCTAGTCTGATTGTAAGCAAGTATTTTTTAAATGATTTGTATGCT  
GAATTGAATATAAATTTGGACTTTAGTTGTTGGCACCTTTGAGTATTTT

>PGSC0003DMG401002542OtherRLKsTM\_854

TTTGTATGCTGAATTGAATATAAATTTGGACTTTAGTTGTTGGCACCTTTGAGTATTTTTCCCTAGTGTCT  
ATTTTAAAACAGAGATTTTGTTCATATGATTTTAAAATTTTGAATTT

>PGSC0003DMG401002542OtherRLKsTM\_915

CCCTAGTGTCTATTTTAAAACAGAGATTTTGTTCATATGATTTTAAAATTTTGAATTTGTTGTCGTA  
TAAAACATTATGTTGCTATGCACCTCACTCATATGATATTGTCATGTT

>PGSC0003DMG401002542OtherRLKsTM\_976

TGTCGTA  
CTTATAAAAACATTATGTTGCTATGCACCTCACTCATATGATATTGTCATGTTCTTCGGTGGATC  
AGTGACCCCAATGGAGCTCCTTGT  
TTTATTACTTATTACAGTTAGTGTT

>PGSC0003DMG401002869-(rev)LRR-RLPs\_0

ATGAGTTCATGGAACATGAGCGGAGATTGTTGCTTATGGGATGGAGTCATATGCGATGAGATGACTGG  
CCATGTCATTGAGCTTGACCTCAGCTGCAGCAA  
ACTTGTGGGACCATTGAC

>PGSC0003DMG401002869-(rev)LRR-RLPs\_1054

ATAATATATCATTGATCAATGAGA  
ACAAAGTCAAATCTACTTTGCCCGAATCACTTGAGAAGTTAGGATT  
GGCCAAATGTGATGTGAAAGAAGTGGAGTTTCTAAGATCCGCAAAGAATC

>PGSC0003DMG401002869-(rev)LRR-RLPs\_1116

TTAGGATTGGCCAAATGTGATGTGAAAGAAGTGGAGTTTCTAAGATCCGCAAAGAATCTTGGGGAGTT  
GGATCTTTCAAGTAATAAACTTCAAGGAAGAATTCCTGATTGGGCATGGTCT

>PGSC0003DMG401002869-(rev)LRR-RLPs\_1178

GGAGTTGGATCTTTCAAGTAATAAACTTCAAGGAAGAATTCCTGATTGGGCATGGTCTAACTGGATGTTT  
TCATTGACAAATCTTAATATATCCCACAATATGCTGACGAGTGTGCGATTT

>PGSC0003DMG401002869-(rev)LRR-RLPs\_124

ATAGCAGCCTTTTCCA  
ACTCTCTCATCTCAAAGGCTCAACCTTTCTTCGAATGACTTCTACGGTTCTCATA  
TCTCCCCTGAATTTGGCAGGTTCTCGAGTTT  
GACACATCTTGATCTTT

>PGSC0003DMG401002869-(rev)LRR-RLPs\_1736

GCTAAAAGTTTTAAGTTT  
GAGATCTAATAAATTGCATGGGTCCATTCAACCTCCAAGGATTGAAACTATT  
TTTCCAGAGCTTCGAATCATAGATCTCTCTTACAATGCTTTCTCGGGAAA

>PGSC0003DMG401002869-(rev)LRR-RLPs\_1798

AAACTATTTTCCAGAGCTTCGAATCATAGATCTCTTACAATGCTTTCTCGGGAAACTTACCTTCGAGT  
CTATTTCAACATCTGAAAGCTATGACGAAACCTGATCCATCAATGGAAA

>PGSC0003DMG401002869-(rev)LRR-RLPs\_186

GGTTTCATATCTCCCCTGAATTTGGCAGGTTCTCGAGTTTGACACATCTTGATCTTTTCAGCTCCAATTC  
TCAGGTCAAATTCCTTCTGAAATCTCTCATCTTTCAAAGTTACTCT

>PGSC0003DMG401002869-(rev)LRR-RLPs\_1860

CCTTCGAGTCTATTTCAACATCTGAAAGCTATGACGAAACCTGATCCATCAATGGAAAGAGTAATATATC  
TGGAAGACACATATTATGAAGATTCTATTACAGTTGCAACCAAGGGATT

>PGSC0003DMG401002869-(rev)LRR-RLPs\_2046

GGGCAAATCCAAGTATCATGGGGGATCTCATTGCAGTTCACATATTGAATTTATCACATAATGAATTGC  
GAGGTCATATAACCACCATCATTAGGAGATTTATCTTTAGTTGAATCATTG

>PGSC0003DMG401002869-(rev)LRR-RLPs\_248

CTCCAATTTCTCAGGTCAAATTCCTTCTGAAATCTCTCATCTTTCAAAGTTACTCTCTTCGTCTCAATGG  
ATTTGGTCGTCTAAGAATCGTATCTCACGATTTTAAATTGCTTCTTCA

>PGSC0003DMG401002869-(rev)LRR-RLPs\_310

GTCTCAATGGATTTGGTCGTCTAAGAATCGTATCTCACGATTTTAAATTGCTTCTTCAAACCTGACTCAA  
TTAAGAGAGCTTGATCTTACTTTTGTAAACATCTCTTCCACCATTCCTT

>PGSC0003DMG401002869-(rev)LRR-RLPs\_434

TTTTTCTTCTCATTTAACAACCTCTGAGGATGGGATTTACAAAATTGTACGGGATAATACCTGAGAGTATAT  
TTCACTTACCCAACCTGGAAACACTTGATTTAAGTTACAGCTATCCACT

>PGSC0003DMG401002869-(rev)LRR-RLPs\_62

GACTGGCCATGTCATTGAGCTTGACCTCAGCTGCAGCAAACCTTGTTGGGACCATTGACTCCAATAGCAGC  
CTTTTCAAACCTCTCATCTCCAAAGGCTCAACCTTTCTTGAATGACTT

>PGSC0003DMG401002869-(rev)LRR-RLPs\_806

GCTTCCATCATTAAAGTCGTTAACCTTGAGTAATAACCACTTTTCTGGTCAGCTTGAGGATTTCAAGTCCA  
ATTCACTAGAAGAGATTGATTTAAGTGATAATCAGCTTCAAGGCAATCT

>PGSC0003DMG401002869-(rev)LRR-RLPs\_868

TCAAGTCCAATTCACTAGAAGAGATTGATTTAAGTGATAATCAGCTTCAAGGCAATCTTCCCAACTCAAT



TCAAACCTTGTAACCTAAAAAAATTTTCTTCCTTCAATAATTTTA

>PGSC0003DMG401002869-(rev)LRR-RLPs\_930

AACTCAATTCAAACCTTGTAACCTAAAAAAATTTTCTTCCTTCAATAATTTTAATGGAAATGTGGA

TATTAGCTTATTTCAAACCTCAAACACTTTTGGTTCTTAGTCTTTCA

>PGSC0003DMG401002888LRR-RLPs\_0

GCTATTTGTTGAATACAAACAAACAAATGGGATGTTTCCTTTTCTTTCTTCATTTCTCTGTTTTGTGTTGC

TAATAAGTGGATGTTTTCTTCATCCATTGATCATCATCTTTGCTCTC

>PGSC0003DMG401002888LRR-RLPs\_1037

TTAGTTCTTGAGTCCAATTCCTTTTCAGGTGAAATTCCAGATGTTTTCTCTAACCTCCAAGAGCTACGTTAT

TTACATCTTTATAGTAACAGCTTCATTGGTTCGTTTCCTTCTACAATT

>PGSC0003DMG401002888LRR-RLPs\_1098

AGCTACGTTATTTACATCTTTATAGTAACAGCTTCATTGGTTCGTTTCCTTCTACAATTTTAAACTTGATAC

ATCTTCAATACTTAGACTTGTCGAGTAATCCCTATCTGGCTCACTGC

>PGSC0003DMG401002888LRR-RLPs\_122

ACTGAAGCTTCTGCTTTGCTTCAGTTTAAGCAACCCTTTGAGATTACATCCGAGTACTCTTGTCATTTCCG

AGGACAAGCTTCTTTCCCGAAAACAAAGTCTTGAATGAGAGTAGGGAT

>PGSC0003DMG401002888LRR-RLPs\_1220

AGCAATGCAAGCATGTTTCAAAGCTAACCGAGCTGGATTTGTCATACAACCTCACTGAATGGTACCATAC

CATCTTGGGTGCTTAGCCTCCCTTTGCTAACATCACTGTCGCTCCAAAAT

>PGSC0003DMG401002888LRR-RLPs\_1281

GTACCATACCATCTTGGGTGCTTAGCCTCCCTTTGCTAACATCACTGTCGCTCCAAAATAATCAATTTAGT

GGACTAGCCGATGAGCTCAAAAATAACCCAACATTAGAATACCTGTTTT

>PGSC0003DMG401002888LRR-RLPs\_1342

TCAATTTAGTGGACTAGCCGATGAGCTCAAAAATAACCCAACATTAGAATACCTGTTTTTAAGCAATAAT

CAACTCAGTAGTTCTTTTCTCAATCTCTTGCGAATCTCACAAACCTTTT

>PGSC0003DMG401002888LRR-RLPs\_1403

AGCAATAATCAACTCAGTAGTTCTTTTCTCAATCTCTTGCGAATCTCACAAACCTTTTTACCCTTGACATT

TCATCAAATAACATCACGGGTGATGCGGGAATAAATATCACCTTTCT

>PGSC0003DMG401002888LRR-RLPs\_1464

CCCTTGACATTTTCATCAAATAACATCACGGGTGATGCGGGAATAAATATCACCTTTCCTAGCCTAGAAAA  
AGTGTTCTTATCATCTTGTGAATTGAGGGATTTTCCACACTTCTTGAGAA

>PGSC0003DMG401002888LRR-RLPs\_1525

CCTAGAAAAAGTGTTCTTATCATCTTGTGAATTGAGGGATTTTCCACACTTCTTGAGAAATGTAAACACA  
CTTCAGGTCTTGGATATTTCTAACAATAAGATTCGTGGTCAAATCCCTAA

>PGSC0003DMG401002888LRR-RLPs\_1586

GTAAACACACTTCAGGTCTTGGATATTTCTAACAATAAGATTCGTGGTCAAATCCCTAACTGGTTTAGCA  
GCATGAGGTGGAACCTCGTTGCAGTTCTTAAACCTTCTCATAATTCATTA

>PGSC0003DMG401002888LRR-RLPs\_1647

GGTTTAGCAGCATGAGGTGGAACCTCGTTGCAGTTCTTAAACCTTCTCATAATTCATTAACAGGCCATCT  
ACCACAATTTTATTATTATAGTCTAAAGTATCTTGATCTTAAATTTAACT

>PGSC0003DMG401002888LRR-RLPs\_1708

AGGCCATCTACCACAATTTTATTATTATAGTCTAAAGTATCTTGATCTTAAATTTAACTTCCTTCGGGGGT  
CACTACCTTTATCCATTTGTAACATGAATAGCCTTAGCCTTCTGGATTT

>PGSC0003DMG401002888LRR-RLPs\_1769

CTTCGGGGGTCACTACCTTTATCCATTTGTAACATGAATAGCCTTAGCCTTCTGGATTTATCACACAACAA  
CTTCAGTGGCTCTGTTCCACATTGCTTCGGCAGCATGGTTGAGCTATCT

>PGSC0003DMG401002888LRR-RLPs\_183

GTCATTTCCGAGGACAAGCTTCTTTCCGAAAACAAAGTCTTGAATGAGAGTAGGGATTGTTGTACTTG  
GGACGGAGTCACTTGTGACATGTTAAACGGTCATGTTATTGGGTTGGACC

>PGSC0003DMG401002888LRR-RLPs\_1830

CACACAACAACCTTCAGTGGCTCTGTTCCACATTGCTTCGGCAGCATGGTTGAGCTATCTGTGTTAGACTTT  
AGAAGAAATAACTTCACAGGGAGTCTCCACCATTTTGTGCACAGACCG

>PGSC0003DMG401002888LRR-RLPs\_1891

GTTAGACTTTAGAAGAAATAACTTCACAGGGAGTCTTCACCATTTTGTGCACAGACCGATTCATTGAAA  
ACCATCGTCTTGAATGGTAATCTATTGAAAGGACCTGTCCCTGTGTCGTT

>PGSC0003DMG401002888LRR-RLPs\_1952

TCATTGAAAACCATCGTCTTGAATGGTAATCTATTGAAAGGACCTGTCCCTGTGTCGTTGCTCAACTGTGT  
TGGTTTAGAAGTTCTTGATTTGGGGAATAACGCTATAAATGACATATTT

>PGSC0003DMG401002888LRR-RLPs\_2013

TCAACTGTGTTGGTTTAGAAGTTCTTGATTTGGGAATAACGCTATAAATGACATATTTCCAGCTTGGCT  
AGGAACACTTCAAGAAGTGCAGGTCCTAATATTAAGTTCAATCTGTTCC

>PGSC0003DMG401002888LRR-RLPs\_2074

AGCTTGGCTAGGAACACTTCAAGAAGTGCAGGTCCTAATATTAAGTTCAATCTGTTCCATGGACCTATA  
AGTACTTGTGAGACTGAGTTTTGCTATCCCAAATTGCGAATTTTTGATCT

>PGSC0003DMG401002888LRR-RLPs\_2135

GGACCTATAAGTACTTGTGAGACTGAGTTTTGCTATCCCAAATTGCGAATTTTTGATCTTCTCGTAATGA  
ATTCAGTGGATCACTTCTGCAAAAGCTTTTGGAACTTCAAGGCAATG

>PGSC0003DMG401002888LRR-RLPs\_2196

CTCGTAATGAATTCAGTGGATCACTTCTGCAAAAGCTTTTGGAACTTCAAGGCAATGATCAAATTAGA  
TGGTGAAGATACAAGAGAGATCAAGTACATGGAACCATATGAGAATTTCT

>PGSC0003DMG401002888LRR-RLPs\_2257

CAAATTAGATGGTGAAGATACAAGAGAGATCAAGTACATGGAACCATATGAGAATTTCTCTTACACATC  
GTATGAGAATTCAGTGAAGTTGGTAATCAAAGGGCACGATACTGAGCTAGA

>PGSC0003DMG401002888LRR-RLPs\_2318

TACACATCGTATGAGAATTCAGTGAAGTTGGTAATCAAAGGGCACGATACTGAGCTAGAAAGAATCAGC  
ACAATTATGACAACCATAGATCTCTCAAGCAACCATTTTGAAGGTGTCATT

>PGSC0003DMG401002888LRR-RLPs\_244

TTGTAATGGGACGGAGTCACTTGTGACATGTTAAACGGTCATGTTATTGGGTTGGACCTTAGTTGCAGT  
CTGCTAAAAGGAACTATTCATCCGAAAAGCAGCCTCTTCCAACCTCTTTA

>PGSC0003DMG401002888LRR-RLPs\_2501

GGTCATATTCCAATGGAATTGGGGCAATTGAATATGCTTGAAGCATTAGATCTCTCCTGGAATCGGCTCA  
CTGGAAAGATACCACAGGATTGACAAGAATGAACTTTTTAACAGTCTTA

>PGSC0003DMG401002888LRR-RLPs\_2623

CCTCTCTCAAATCATCTCGTTGGACCAATTCCTCACGGTCCACAATTCAACACATTTGAAAATGGTTCGT  
ATGGTGGCAACCTTGATTTATGTGGTCCTCTCTATCAAAGCAATGCGG

>PGSC0003DMG401002888LRR-RLPs\_2684

AATGGTTCGTATGGTGGCAACCTTGATTTATGTGGTCCTCTCTATCAAAGCAATGCGGAACGAGTGATT

CATCACATGTTCTCAACCATTGGAGTCCGAAGAAGATGAAGACGAGTCA

>PGSC0003DMG401002888LRR-RLPs\_305

AGTTGCAGTCTGCTAAAAGGAACTATTCATCCGAAAAGCAGCCTCTTCCAACCTCTTTATCTTCAAACACT  
AAACCTTGCTTACAATAACTTTTCAACTTCTTCAATCCCACATAACATT

>PGSC0003DMG401002888LRR-RLPs\_3050

GTATATGTTTGATAACAACCTTAATTGTTATGTGTTATTTTAGCATCAATGGTTATTCAAGTAAAGCATT  
TATGCTTAATCCCAAACATACTAGATGGACACCTTCCTGTACATTTAC

>PGSC0003DMG401002888LRR-RLPs\_3111

AAAGCATT  
TTTTATGCTTAATCCCAAACATACTAGATGGACACCTTCCTGTACATTTACTCAAGCAGCTCG  
AAACATCTTGACCTTTTATGATTGTATAGATTCCACGAAAAAATTGCAC

>PGSC0003DMG401002888LRR-RLPs\_3172

AAGCAGCTCGAAACATCTTGACCTTTTATGATTGTATAGATTCCACGAAAAAATTGCACAAAAAATTTATT  
GCATTCGTCCAACCTGGTTTCACTTGATTAAAGTGTTCCCTCTTGTCAC

>PGSC0003DMG401002888LRR-RLPs\_3233

AAAATTTATTGCATTCGTCCAACCTGGTTTCACTTGATTAAAGTGTTCCCTCTTGCTCACTATCTCATCCATG  
GACCACTAATTGGTTCAATGACTTCAAATTATACACTCTATTATCAA

>PGSC0003DMG401002888LRR-RLPs\_3294

TCTCATCCATGGACCACTAATTGGTTCAATGACTTCAAATTATACACTCTATTATCAACTTAAAGCAGCA  
CAACACATCTTGACCTATTATGATCGTATAGATTCCATGAAAAAATTGC

>PGSC0003DMG401002888LRR-RLPs\_366

TTCAAACACTAAACCTTGCTTACAATAACTTTTCAACTTCTTCAATCCCACATAACATTGGCCGATTGACA  
AATTTGAGGAATCTCAACCTTTCTTATTCTTACTTTGATGGGAAAATCC

>PGSC0003DMG401002888LRR-RLPs\_3660

CCCCTTGACCTCTATGTCTCCATCCCTAATCAGAGTGTGGAGAAAGTCAGCCCTTTAACTATATATATAT  
ACCGTGGATTATGATTGATTTTGTAGAACATTTTGTATCTGCTAAAA

>PGSC0003DMG401002888LRR-RLPs\_3843

CTTTTCTTCATCCTTTGTGCAGCATCTTTGCTCTCCAGTGAAGCTTTATCTTTGCTTCAGTTCAAGCAACA  
CTTTCAAATGTCCGACAAGTACTCTAAACATTATAGTACTTCTCTCCC

>PGSC0003DMG401002888LRR-RLPs\_3904

TTCAAGCAACACTTTCAAATGTCCGACAAGTACTCTAAACATTATAGTACTTCTCTCCCAAAGCATCGTC  
TTGGAATGAGAGTACGGATTGCTGCACTTGGGGATGGATCACTTGTGAC

>PGSC0003DMG401002888LRR-RLPs\_4026

GTAACTGGTTATGTAATTGGCCTAGACCTTAGTAATGCAAATCTTAGCGGAACTATTCATCCTAACAGC  
AGCCTCTTCAACTTCATCGTCTTCAGACGCTAAACCTTGCTTACAATAA

>PGSC0003DMG401002888LRR-RLPs\_427

CCGATTGACAAATTTGAGGAATCTCAACCTTTCTTATTCTTACTTTGATGGGAAAATCCCAACAGAAATCT  
CATTGCTTTCCAATTTAGTTTCACTTGATCTTTCTCCTCCTTATAAGTA

>PGSC0003DMG401002888LRR-RLPs\_4270

CTAGATCTTTCGTTTAACTCACTTGGAGGTAAAATCCCGATGTTTTCTAACCTCCGAGAGCTAGTTAC  
ATTGTATCTTCTTATAACAGCTTCATCGGTCCATTTCCCTCTTCGATT

>PGSC0003DMG401002888LRR-RLPs\_4575

TCTATTCAATGGACTATCCGATGAGCTCAAAGTGAATCGAGCAGTAGGGCGTTTGGATTTGAGTTATAAT  
CAACTCAATAGTCCTGTTCTTCGATCACTTCAAAGCTCACAAACCTTGT

>PGSC0003DMG401002888LRR-RLPs\_4636

AGTTATAATCAACTCAATAGTCCTGTTCTTCGATCACTTCAAAGCTCACAAACCTTGAAACCTTGACCT  
TTCATCAAACAACATCACCGTTGATGGGGGGACACACATCACTTTTCCT

>PGSC0003DMG401002888LRR-RLPs\_4697

ACCTTGACCTTTCATCAAACAACATCACCGTTGATGGGGGGACACACATCACTTTTCCTAGACTAGAAAT  
TTTGC GGTTATCATCTTGTGAACTGAAGGATTTTCCACAGTTTCTAAGAA

>PGSC0003DMG401002888LRR-RLPs\_488

ACAGAAATCTCATTGCTTCCAATTTAGTTTCACTTGATCTTTCTCCTCCTTATAAGTATGGATTACAACCT  
GATCAGAGAACATTTGAGGCAATGCTTCACAACCTTGACAAATCTGGAG

>PGSC0003DMG401002888LRR-RLPs\_5612

TGATCAAAGGAAACGATATGGAGCTAGAAAGAATCACTACAATTATGACAGCCATAGATATCTCAAGCA  
ATCATTTTCAAAGTGTGATTCCGAAAACACTAAAGGATCTCAGCTCACTTT

>PGSC0003DMG401002888LRR-RLPs\_61

TTTTGTGTTGCTAATAAGTGGATGTTTTTCTTCATCCATTGATCATCATCTTTGCTCTCCCACTGAAGCTTC  
TGCTTTGCTTCAGTTTAAAGCAACCCTTTGAGATTACATCCGAGTACTC

>PGSC0003DMG401002888LRR-RLPs\_610

ACTATCTCTCTCTTTTGTCAACATCTCATCTCCGATACCTGTGAATATTTCTTCCTCCTTAAGGTACATGGA  
TCTTGAATATACTAATCTGCGAGGTGTTCTCACAGAGAACTTTTTTCT

>PGSC0003DMG401002888LRR-RLPs\_6161

GTAAGCCAAAATGGTTTGTAGAATTTTTCGAAGGCATTATTTCCCACCAAAAAAGAAGGCCAAATAAGA  
GAGCTCAAAGAAGACGGACTTAATTTTTGTTTGGTGTGTGTATATGTTT

>PGSC0003DMG401002888LRR-RLPs\_671

AGGTACATGGATCTTGAATATACTAATCTGCGAGGTGTTCTCACAGAGAACTTTTTTCTTATGCCAAACTT  
GGAAAGGCTTAAATTGGGTTTCAATGCTCTTCTCAAAGGAGTTTTACCA

>PGSC0003DMG401002888LRR-RLPs\_732

TGCCAAACTTGGAAGGCTTAAATTGGGTTTCAATGCTCTTCTCAAAGGAGTTTTACCAAAGATCCACCC  
GAGCAGTACTCTGTTGGAGTTGGATATTTACATACACAGGAATCTCCGGTG

>PGSC0003DMG401002888LRR-RLPs\_854

CTGCCTGATTCAATTGGCACCTTGAGTTCTTTGAATATCTTGTACTTCCGTGGATGTGAATTTTCTGGTCA  
CATTCTGATTCCATTGGCAATCTTACACAAATTCGGGAGTTGATTTTA

>PGSC0003DMG401002888LRR-RLPs\_915

TTTCTGGTCACATTCCTGATTCCATTGGCAATCTTACACAAATTCGGGAGTTGATTTTATCTGATAATCGT  
TTCCTGACTGACATTCCTTCCACAATCTCTAAATTGAAGCACCTCACAC

>PGSC0003DMG401002888LRR-RLPs\_976

TGATAATCGTTTCACTGGCCACATTCCTTCCACAATCTCTAAATTGAAGCACCTCACACATTTAGTTCTTGA  
GTCCAATTCCTTTTCAAGGTGAAATTCCAGATGTTTTCTTAACCTCCA

>PGSC0003DMG401002909-(rev)LRR-RLPs\_0

GGAAAAGTTCAAGGGATAATAACTGAAAATCTGACTCAACTTTAGGGATATACTTAGGGCGGTTCAAAA  
TGGAACCACAACAGATAAGCCAATCGCAAATTTTATAGTTACAGTGCGGG

>PGSC0003DMG401002909-(rev)LRR-RLPs\_1559

TTACTATTGCCATTAAGTCGAAACAAGCATATTTGTCGCTTTTGTCTATTGCCGGCAAAGATAATAATTGT  
AACTCAATTATTGTAACGACTTAAACTAATCATAAATTCCTGTAATT

>PGSC0003DMG401002909-(rev)LRR-RLPs\_1620

TAATAATTGTAACCTCAATTATTGTAACGACTTAAACTAATCATAAATTCCTGTAATTCACATATTTAACC

CTCTTTTGTAATTTCTAAAAGCCCATTAAGTTTTGGCATCTATATTTG

>PGSC0003DMG401002909-(rev)LRR-RLPs\_1681

CATATTTAACCCCTCTTTTGTAATTTCTAAAAGCCCATTAAGTTTTGGCATCTATATTTGGGTCATTCACCAT

GAAGTTAAGGATTCAAAAATTTCTTTCCATATGACATTCATATTTAA

>PGSC0003DMG401002909-(rev)LRR-RLPs\_1742

TCATTCACCATGAAGTTAAGGATTCAAAAATTTCTTTCCATATGACATTCATATTTAAACAAATTTAAATT

ATATATACCAACAATATGAAGTCTACAATCAGTATAATTTAACGTGTT

>PGSC0003DMG401002909-(rev)LRR-RLPs\_1803

AAATTTAAATTATATATACCAACAATATGAAGTCTACAATCAGTATAATTTAACGTGTTGTAGTTAGCATG

TTGTTTACCTTGATTTGCATGTTATTAATTTCACTTATAATGAAGAGTC

>PGSC0003DMG401002909-(rev)LRR-RLPs\_1864

AGTTAGCATGTTGTTTACCTTGATTTGCATGTTATTAATTTCACTTATAATGAAGAGTCATCTATAGTTACT

TTTAGACGAGTTGATAGTAAGAAAATTTCTTTAAAGCTCTAGCATTCA

>PGSC0003DMG401002909-(rev)LRR-RLPs\_1925

CTATAGTTACTTTTAGACGAGTTGATAGTAAGAAAATTTCTTTAAAGCTCTAGCATTCAATTTTTCGAGAA

ACAAAAATAGAACAACGGAGAAAAGCCTAAAATACATTCGAACTATT

>PGSC0003DMG401002909-(rev)LRR-RLPs\_2657

CACTACAAAATATGTGTAACAAGTTGTTAGAAGTGACTTTAATTTGAGTCTTCCTGGAAATTGACTTAAC

ACTTGGGACAATTTTTTTTGTAAACCACAAATTATTACCCCATTTTATTTG

>PGSC0003DMG401002909-(rev)LRR-RLPs\_2840

CAACGTTACTTTATCAAATAGTGTTTAGTTAACTGTTTACTTTATTTAATATGGAGGTCGTTGTAATAATTA

AGAAATAAAATAGTGTTTAGATAATTATAACATTCTTTGTTATGACAA

>PGSC0003DMG401002909-(rev)LRR-RLPs\_3450

TTGAGTAAGATTTGATTATTTTAACTTAATATTATATTTTTTCATTGAAAATTTTTGTTGTTTGTATTCTTAC

TTCATAAAGGTCTTCGTATATCCTATCTTCTTGAAACTTTACTTGTT

>PGSC0003DMG401002909-(rev)LRR-RLPs\_3511

TTGTATTCTTACTTCATAAAGGTCTTCGTATATCCTATCTTCTTGAAACTTTACTTGTTGGATTACGTTATA

GGTATTCAATTTATGTATGACAACTGAACTAGTATATATATATATGTGG

>PGSC0003DMG401002909-(rev)LRR-RLPs\_3572

ATTACGTTATAGGTATTCAATTTATGTATGACAACACTGAACTAGTATATATATATGTGGATAATGCTGATT  
GATTTGTAAGAAGAGAACAAACATCCTGTTATTTGCTGAAAACAAACAA

>PGSC0003DMG401002909-(rev)LRR-RLPs\_3633

AATGCTGATTGATTTGTAAGAAGAGAACAAACATCCTGTTATTTGCTGAAAACAAACAAACAAACAAA  
AATGGGACGTTTCTTTTTCTTTTATTCATTTCTGTGTTTTGTGTTGCTAAT

>PGSC0003DMG401002909-(rev)LRR-RLPs\_3755

GTGAATGCTTTTCTTCTTCTTTGATCATCATCTTTGCTCTCCCACTGAAGCTTCTGCTTTGCTTCAGTTCAA  
ACAATCCTCTCAAATTACGTACTTTAGTTTTCTGGGTGATGGAGCTT

>PGSC0003DMG401002909-(rev)LRR-RLPs\_3938

GTGACTTATTAACGGTCATGTTATCAGGTTAGACCTTAGTTGTAGTCAGCTTTTTGGCACTTTTCATCCC  
AATAGCACCTCTTCCAACCTCCATCATCTCCAAACACTAAACCTTGATA

>PGSC0003DMG401002909-(rev)LRR-RLPs\_3999

TTTTCATCCCAATAGCACCTCTTCCAACCTCCATCATCTCCAAACACTAAACCTTGATAGCAATTACTTTAA  
TCCTTCTTCAATCCCAAATGGCATTGGCCGATTGACGAATTTGAGGCA

>PGSC0003DMG401002909-(rev)LRR-RLPs\_4060

AATTACTTTAATCCTTCTTCAATCCCAAATGGCATTGGCCGATTGACGAATTTGAGGCACAAAACCTCTCTG  
GCTTTGATGGGAAAATCCCAACAGAAATCTCATGCCTTTCCAATTTGGT

>PGSC0003DMG401002909-(rev)LRR-RLPs\_4121

AAACTCTCTGGCTTTGATGGGAAAATCCCAACAGAAATCTCATGCCTTTCCAATTTGGTTTCACTTGATCT  
TTTTGGAATGGATTACAACCTTGACGAGAGAACATTTGAAGCAATGTTTC

>PGSC0003DMG401002909-(rev)LRR-RLPs\_4182

CACTTGATCTTTTTGGAATGGATTACAACCTTGACGAGAGAACATTTGAAGCAATGTTTCAGAACTTCACA  
AATCTGGAGATACTTTCTCTCTTTGAAGTCAACATCTCATCTGCGATACC

>PGSC0003DMG401002909-(rev)LRR-RLPs\_4243

AACTTCACAAATCTGGAGATACTTTCTCTCTTTGAAGTCAACATCTCATCTGCGATACCTGTGAATATTTCT  
TCTTCTCCTTAAGGTATCTGGATCTTGGTTATACTAATCTGCGAGGT

>PGSC0003DMG401002909-(rev)LRR-RLPs\_4487

ATATTTCAAACACAGGCATCTCTGGTGAGCTGCCTCATTCAATTGGCACCTTCAGTTCCTTGAATATCTTG  
AACCTCCATAGATGTCAATTCTCTGGTTCATTCCCTCATTCCATAGGCA



>PGSC0003DMG401002909-(rev)LRR-RLPs\_4548

GAATATCTTGAACCTCCATAGATGTCAATTCTCTGGTTCCATTCTCATTCCATAGGCAACCTAACACAAA  
TTAGGGAGTTGGATTTATCTAATAATCATTTCACTGGCCATATTCTTC

>PGSC0003DMG401002909-(rev)LRR-RLPs\_4609

CTAACACAAATTAGGGAGTTGGATTTATCTAATAATCATTTCACTGGCCATATTCTTCCACAATCTCTAA  
ATTAAAGCACCTCAGAATTTTATATCTTTCTGACAACTCCTTTTCAGGT

>PGSC0003DMG401002909-(rev)LRR-RLPs\_4670

CAATCTCTAAATTAAGCACCTCAGAATTTTATATCTTTCTGACAACTCCTTTTCAGGTGAAATTCCTGATG  
TTTTCTCTAACCTCCAAAAGCTAAGTTATTTAGATCTTTCTTCCAACCT

>PGSC0003DMG401002909-(rev)LRR-RLPs\_4731

AATTCCTGATGTTTTCTCTAACCTCCAAAAGCTAAGTTATTTAGATCTTTCTTCCAACCTCCTTTTCAGGTGA  
AATTCCTGATGTTTTCTCTAACCTCCAAAAGCTAAGTTATTTAGATCT

>PGSC0003DMG401002909-(rev)LRR-RLPs\_4914

TTTAGATCTTTCTTCCAACCTCCTTTTCAGGTGAAATTCCTGATGTTTTCTCTAACCTCAAAGAGCTACGTAC  
TTTACATCTTTCTAATAACAGCTTCATCGGTTTCGTTTCCCTCTTCAAT

>PGSC0003DMG401002909-(rev)LRR-RLPs\_4975

GAGCTACGTACTTTACATCTTTCTAATAACAGCTTCATCGGTTTCGTTTCCCTCTTCAATTTTAAGTTTGACA  
CATCTTGAATACTTAGACATGTGCGAGTAACTCCCTATCTGGCCCACTG

>PGSC0003DMG401002909-(rev)LRR-RLPs\_5036

TAAGTTTGACACATCTTGAATACTTAGACATGTGCGAGTAACTCCCTATCTGGCCCACTGCCTAGCAACCCA  
AGCATGCTTCAAAGCTAACTTCTGTGGATTTGACATACAACCTCACAGA

>PGSC0003DMG401002909-(rev)LRR-RLPs\_5097

TAGCAACCCAAGCATGCTTCAAAGCTAACTTCTGTGGATTTGACATACAACCTCACAGAATGGTACCATA  
CCATCTTCGGTGTTTAGCCTACCTTTGCTATCTTCAGTGTCGCTCCAACA

>PGSC0003DMG401002909-(rev)LRR-RLPs\_5158

GGTACCATAACCATCTTCGGTGTTTAGCCTACCTTTGCTATCTTCAGTGTCGCTCCAACATAACCGATTGAG  
AAGACTAGCCGATGAAGTGATCAAACAAACCCAACATTAAGAAGAACTG

>PGSC0003DMG401002909-(rev)LRR-RLPs\_594

CTTATTGAGGACGAGAGTATTGTTATGAACAAAGTTCAGCCCAATGTGGATAGTCTAGGAGGTCTTACT

GTTGTAAAATTTGTGGTGTGTTTGGTAAGTAAAATTATACCTACTGTCACG

>PGSC0003DMG401002909-(rev)LRR-RLPs\_6057

TGTGTTGAATTCGTCATTTGACACATCATATGAGGATTCAGTGAGTTTGGTAATCAAAGGGCAGAATATT  
GAGCTACAAAGAATCAGCACAATTATGACAACCATAGATCTCTCAAGCAA

>PGSC0003DMG401002909-(rev)LRR-RLPs\_660

ACTGTTGTAAAATTTGTGGTGTGTTTGGTAAGTAAAATTATACCTACTGTCACGTTTATTATGACCCGAGT  
AAATTTTTTTTTGTGGAAAACAGCACAAGAGACAACGCAACTAATCATAT

>PGSC0003DMG401002909-(rev)LRR-RLPs\_6899

CAAATAACATCACTATTGATGAGGGAATGAATATCACCTTTCTTAGCCTACCATCTTTATTCTTATCATCTT  
TGTGAACTGAAGGATTTTCCACACTTCTTGAGAAATGTAACGACACTT

>PGSC0003DMG401002909-(rev)LRR-RLPs\_6963

ATCATCTTTGTGAACTGAAGGATTTTCCACACTTCTTGAGAAATGTAACGACACTTCAGTACTTGGGCATT  
TCTAACATAAGATATGTGGTCAAATCCCTAACTGGTTTAGCGGCATGA

>PGSC0003DMG401002909-(rev)LRR-RLPs\_7091

TCGTTGCAGTTCCTAAACCTTTCTCATAATTCATTAACAGGCCACCTACCACAATTCATTTCCATAGTCTA  
GAGTATCTTGATCTGAAATTTAACTCCCTTCAGGGTCCACTACCTTCA

>PGSC0003DMG401002909-(rev)LRR-RLPs\_7155

ATAGTCTAGAGTATCTTGATCTGAAATTTAACTCCCTTCAGGGTCCACTACCTTCATCCATTTGTAACATG  
AGGAACTTACCTTATTAGATTTATCACGCAACCACTTCAGTAACTCGA

>PGSC0003DMG401002909-(rev)LRR-RLPs\_7219

TAACATGAGGAACTTACCTTATTAGATTTATCACGCAACCACTTCAGTAACTCGATTCCAAGTTGCTTGG  
GAAGCATGTCTAGTCTAACAGTGTTGGACTTAAGAAGGAACAATTTAC

>PGSC0003DMG401002909-(rev)LRR-RLPs\_726

CGAGTAAATTTTTTTTTGTGGAAAACAGCACAAGAGACAACGCAACTAATCATATCAAACAAAATAAAA  
TTCCACACGGTATTATTGTTTTGTTGTTACATACTATAAGTAGATGGAGGA

>PGSC0003DMG401002909-(rev)LRR-RLPs\_7347

TTCCATCGTTATGTGCGCAGAGCACTTCATTGAGTACCATTGTCATAAATGGTAATCGATTTGAAGGATC  
TGTCCCTGTGTCGTTGCTCAAATGCCATAGTTTAGAAGTCCTTGATGTGG

>PGSC0003DMG401002909-(rev)LRR-RLPs\_7411

AGGATCTGTCCCTGTGTCGTTGCTCAAATGCCATAGTTTAGAAGTCCTTGATGTGGGGAACAACGCTATA  
AATGACACGTTTCCAGCATGGCTAGGAACTCTTCAAGTGCTACAGGTCCT

>PGSC0003DMG401002909-(rev)LRR-RLPs\_7475

GCTATAAATGACACGTTTCCAGCATGGCTAGGAACTCTTCAAGTGCTACAGGTCCTTATATTAAAGTCGA  
ACAAGTTCCATGGACCTATAAGTACCTATCAGACTATGTTTTGCTTTCCC

>PGSC0003DMG401002909-(rev)LRR-RLPs\_7539

AGTCGAACAAGTTCCATGGACCTATAAGTACCTATCAGACTATGTTTTGCTTTCCAAGTTGCGAATTTTC  
GATCTTTCTAGTAATGAATTCAGTGGCTCACTTCCAGCAAATTTTTTA

>PGSC0003DMG401002909-(rev)LRR-RLPs\_7603

AATTTTCGATCTTTCTAGTAATGAATTCAGTGGCTCACTTCCAGCAAATTTTTTAGAACTTCAAGGCAA  
TGATCAAATTAGATGGCGAAGAAACAGGAGAGATCAAGTACATGAAACC

>PGSC0003DMG401002909-(rev)LRR-RLPs\_7667

AAGGCAATGATCAAATTAGATGGCGAAGAAACAGGAGAGATCAAGTACATGAAACCATCTGAGAAGTC  
ATACATGTCGTATGAGGATTCAGTGAGTTTGGTAATCAAAGGGCAGGATATT

>PGSC0003DMG401002909-(rev)LRR-RLPs\_792

AAATCCACACGGTATTATTGTTTTGTTGTTACATACTATAAGTAGATGGAGGACTTAAATCATGTCTTCA  
ATTATTGTTCATTTTTTTCTCACTTGACTTAGTCAAGCAATAGTTTCT

>PGSC0003DMG401002909-(rev)LRR-RLPs\_7923

ATATTCCAATGGAATTGGGGCAATTGAATACACTTGAAGCTTTAGATCTCTCCTGGAATCGGCTCACTGG  
AAAGATTCCACAAGAATTGACAAGAATGAACTTTCTGGCGTTCTTGAACG

>PGSC0003DMG401002909-(rev)LRR-RLPs\_7987

CACTGGAAAGATTCCACAAGAATTGACAAGAATGAACTTTCTGGCGTTCTTGAACGTCTCTCAAATCAT  
CTCGTCGGACCAATTCCTCACGGTCTACAATTCAACACATTTGAAAATGA

>PGSC0003DMG401002917-(rev)LRR-RLPs\_1037

TGCAAAACTCGTGGCTTCTGCTGGACGAATTCAAGAGGAGCAAGAATCCCTAGGAAGCAAAGCTGTGG  
ATGTTTCGTTCTACAACGATCCAGGTTAGTACAATAATTGCCTTTGAACTT

>PGSC0003DMG401002917-(rev)LRR-RLPs\_1098

GCTGTGGATGTTTCGTTCTACAACGATCCAGGTTAGTACAATAATTGCCTTTGAACTTAAATTTTTTTTG  
AAGTTATATATTAAGAGTTGATGGTCAAAAACGCACCTAAAGTATCCC

>PGSC0003DMG401002917-(rev)LRR-RLPs\_122

ACCTTCTTTCAGTAACAATTCCAATTTAGAGCTTGGTCATTTGAATTTAATCAGAGTCTTGGACTTGAGTT  
CAATGTTCTTCTCAAGCTTTCCCCTGCAGATACTTAGTCTCTTTTTGTT

>PGSC0003DMG401002917-(rev)LRR-RLPs\_1220

TTTTTCGAGTTTCATATATGAACTATCAGATATGTGAGTTTCCTCCCTGAACTATCAGTTGTTCCATTTTCC  
TATCTGAAACATCCCCATCATTAGGTAGGAAAAGGAAAGCACATGAG

>PGSC0003DMG401002917-(rev)LRR-RLPs\_1281

TTCCATTTTCTATCTGAAACATCCCCATCATTAGGTAGGAAAAGGAAAGCACATGAGAACTTCGTGA  
GAGCTTGCAACGAGTAGCAAAGGACATTGACCGTGTTCAAGAAGAGTCGC

>PGSC0003DMG401002917-(rev)LRR-RLPs\_1342

ACTTCGTGAGAGCTTGCAACGAGTAGCAAAGGACATTGACCGTGTTCAAGAAGAGTCGAAAAGATTCA  
ACAACATAAAGGTAGCCAAGCATCAACGTTGTCCTTGTTACGAGATACAAG

>PGSC0003DMG401002917-(rev)LRR-RLPs\_1403

AAGATTCAACAACATAAAGGTAGCCAAGCATCAACGTTGTCCTTGTTACGAGATACAAGTAGCTCAGAA  
ATATTACCTAATCTGGATGTTTCGAACAATATGGTGGGACGTGACAAGGAA

>PGSC0003DMG401002917-(rev)LRR-RLPs\_1464

GCTCAGAAATATTACCTAATCTGGATGTTTCGAACAATATGGTGGGACGTGACAAGGAAAAGAAAAGG  
ATGCTTGAAGAACTCAGAGGAGGCTCTAAAGATGAACTAAAAGTCATCCCAA

>PGSC0003DMG401002917-(rev)LRR-RLPs\_1586

GTTGGGATGGGTGGCATTGGTAAGACAACCTTTAGCAAACAAGTCTTCAACCATCCTTCGATTAAGTCTC  
GTTTTGATGTTCTGCTTGGGCTACTATATCTAAAGAATACAATGTGAAA

>PGSC0003DMG401002917-(rev)LRR-RLPs\_1647

TTAAGTCTCGTTTTGATGTTCTGCTTGGGCTACTATATCTAAAGAATACAATGTGAAAGAAATCCTGCT  
AAGTCTTCTACAGTCAATAATCAATATCGATGACAAAGTCTACAGCAGAG

>PGSC0003DMG401002917-(rev)LRR-RLPs\_1708

AATCCTGCTAAGTCTTCTACAGTCAATAATCAATATCGATGACAAAGTCTACAGCAGAGATGAGGATGA  
GCTAGCAGACCTACTACAGAAAAAATTGAAATGTAGGAGGTATCTTATTGT

>PGSC0003DMG401002917-(rev)LRR-RLPs\_1769

GAGGATGAGCTAGCAGACCTACTACAGAAAAAATTGAAATGTAGGAGGTATCTTATTGTCATAGATGAC

ATATGGAGCAATAAAGCATGGGATGACACAAAACAATGTTTTCCAATTGAT

>PGSC0003DMG401002917-(rev)LRR-RLPs\_183

GACTTGAGTTCAATGTTCTTCTCAAGCTTCCCTGCAGATACTTAGTCTCTTTTTGTTGAGGTACCTATCC  
TTTTCGACTCGTAATTCTTTGGCATACTGGAGGACTTTGCAGATTA

>PGSC0003DMG401002917-(rev)LRR-RLPs\_1830

TAGATGACATATGGAGCAATAAAGCATGGGATGACACAAAACAATGTTTTCCAATTGATAATAATGGAA  
GTCGAATATTGTTGACTACCCGTCATACTGAGGTAGCTATTAATGCTAGCT

>PGSC0003DMG401002917-(rev)LRR-RLPs\_1891

TAATGGAAGTCGAATATTGTTGACTACCCGTCATACTGAGGTAGCTATTAATGCTAGCTCAAGTAATCTT  
CTTTAAAGATGAATCTCATGAATTCAGATGAGAGTTGGAACCTTTTTAA

>PGSC0003DMG401002917-(rev)LRR-RLPs\_1952

AGTAATCTTCTTTAAAGATGAATCTCATGAATTCAGATGAGAGTTGGAACCTTTTTAAGAGCAAGGCGT  
TTGCAAATGAAAGCTTCCCGCCTGAACTACAGACCATAGGTGAGAAAATT

>PGSC0003DMG401002917-(rev)LRR-RLPs\_2013

GCAAGGCGTTTGCAAATGAAAGCTTCCCGCCTGAACTACAGACCATAGGTGAGAAAATTGCAAGCAAAT  
GTCAAGGGTTACCACTAACGATTGTCGTGGTTGCTGGTCTTCTCTCAAAT

>PGSC0003DMG401002917-(rev)LRR-RLPs\_2135

AAGAGAACAAAAGAAGAATGGGAGAATGTTGCTGAGAATATTAAGTCGTTTGTAACGAAAGATCCTGA  
TGAACAATGTCTACGTGTCTCGGATTGAGTTACA ACTACTTGCCTAATGAC

>PGSC0003DMG401002917-(rev)LRR-RLPs\_2196

ATCCTGATGAACAATGTCTACGTGTCTCGGATTGAGTTACA ACTACTTGCCTAATGACTTAAAAGCATG  
CCTTCTGTATTTTGAATATTTCCAGAAGACAGTGAAATTTTCAGTGAAGA

>PGSC0003DMG401002917-(rev)LRR-RLPs\_2257

AAAAGCATGCCTTCTGTATTTTGAATATTTCCAGAAGACAGTGAAATTTTCAGTGAAGAGATTGGTGAG  
ATTATGGATTGCTGAGGGTTCTGAAGCTGGAGGGTGACTTGAAGAAGA

>PGSC0003DMG401002917-(rev)LRR-RLPs\_244

GGTACCTATCCTTTTCGACTCGTAATTCTTTGGCATACTGGAGGACTTTGCAGATACTGAATCTACAA  
ACATTCATCGTTTCGAGGGCCAGTTATCTCATTTATTAAGTTCCCGGAAC

>PGSC0003DMG401002917-(rev)LRR-RLPs\_2440

AGATGGAAGAAAAATCAAGACATGTAGGATTCATGATCTGGTCCATGAGTTATGCTTGAGAGAAGCACA  
AAGCCAAAACCTTTTTGTTTATCAGAAATGATAAACAGGATCCGTTCCCTCG

>PGSC0003DMG401002917-(rev)LRR-RLPs\_2501

GAAGCACAAAGCCAAAACCTTTTTGTTTATCAGAAATGATAAACAGGATCCGTTCCCTCGTGTGGGATGTC  
AATGGATTAGCATAACAGAAAAGTCAACAACTGATGTTGAGTTTCAGGAT

>PGSC0003DMG401002917-(rev)LRR-RLPs\_2562

TGGGATGTCAATGGATTAGCATAACAGAAAAGTCAACAACTGATGTTGAGTTTCAGGATGAGCATTGGT  
TTAGTCCCTTACACATAAACTTTGCTGGTTGATTAGGACGCCTACCGATG

>PGSC0003DMG401002917-(rev)LRR-RLPs\_2684

GATAAGAGTCCCTTGAGAAGAATTCGATCAATTTTCCTGTTTCTGCACCTTCTTTCAGTAACAATTCCAA  
TTTAGAGCTTGGTCATTTGAATTTAATCAGAGTCTTGGACTTGAGTTCA

>PGSC0003DMG401002917-(rev)LRR-RLPs\_2928

TCATCGTTCGAGGGCCAGTTATCTCATTTATTAAGTTCCCGGAACTAATTTGGGAAACAACACAATTAAG  
GCACCTGAAACTCAGGAATTTTTATTTGCCAGATCCTCCAAGTTCATCCA

>PGSC0003DMG401002917-(rev)LRR-RLPs\_3050

GATGGAGAGAGGAACTTGTTTTGGCCAAACATACAGTCTGTTTCGGGCTTGATTCCTTATTGTTGCACTA  
AGAAGATCCTTTCAAGTTTTCAAACATTAAGAAATTATGTATTCGGGGG

>PGSC0003DMG401002917-(rev)LRR-RLPs\_3111

GTTGCACTAAGAAGATCCTTTCAAGTTTTCAAACATTAAGAAATTATGTATTCGGGGGCACGTGTATGA  
CTATGGAGTGCACGAAGAAGTTATGGACCTCCGTCATCTTGTTGATCTGC

>PGSC0003DMG401002917-(rev)LRR-RLPs\_3233

CAGCTAGAAACATTGAGTGTTAAAGTTGATCGTTATCAGGTAAGTCACGGGAGTTCAAGATTCCATAAA  
TCGCCTGTTTTACATTTTCCAATAAAGTTGAAGAAGTTAAAACCTGGTCGGA

>PGSC0003DMG401002917-(rev)LRR-RLPs\_3416

CTGAAACCAATGCTTGTCATGGCCTAGAATGGCGTCCAATTGAAGGAAGATTTCCACAGTTGAAGTTTT  
TGCTAATTGAAGGTACAAATCTGAAATGTTGGAAAGCCACAAATGATCAT

>PGSC0003DMG401002917-(rev)LRR-RLPs\_3599

TTTGCTGATATTTACTCGCTACAATAATCGAGTTACAGAACTGTACTGCGAAACTCGTGGCTTCTACTGT  
GCTTATTCAAGAAGAGCAAGAATCCCTAGGAAGCAAAGCTGTGGACGTT

>PGSC0003DMG401002917-(rev)LRR-RLPs\_3782

TATATATTAAGAGTTGATGGTCAAAAATGCAGCTAAAGTATCCCGATTTTTCGAGTTTCATATATGAAC  
TATCAGATATGCGAGTTTCCTCCCTGAACTATCAGTTGTTCCATTTTCCT

>PGSC0003DMG401002917-(rev)LRR-RLPs\_3843

TATATGAACTATCAGATATGCGAGTTTCCTCCCTGAACTATCAGTTGTTCCATTTTCCTATCTGAAACATCC  
CCATCACTCAGGTAGGAAAAGGAAATAACTGATAGTTGAGGTGTGTTT

>PGSC0003DMG401002917-(rev)LRR-RLPs\_3965

ATAAATAGTTGATGATAGTTCGGGTAAGAACTCACACACCTGATAGTTCAGATATAAAATTCGAAAAA  
CCAGATATTTAAGGTGTGTTTTTGACCTTCCGTCTATACTAAACATGAAC

>PGSC0003DMG401002917-(rev)LRR-RLPs\_4026

TCGAAAAACCAGATATTTAAGGTGTGTTTTTGACCTTCCGTCTATACTAAACATGAACCAAATCGATTC  
AACTTTCGTATATCAAATGTATAGTTGACCCTTATGTTCTTTTTGCT

>PGSC0003DMG401002917-(rev)LRR-RLPs\_4148

AGCTGAATGTGAACTAAATGGAAGTGATTCTGATTACACTGAGGATTGAAGACTTTCA  
GACTTGATTTGTTAATCATTGCTTATCTTATTCCATAATTGGAGTTTAT

>PGSC0003DMG401002917-(rev)LRR-RLPs\_4209

AGACTTTCAGACTTGATTTGTTAATCATTGCTTATCTTATTCCATAATTGGAGTTTATCTGAATGAACATT  
GGGGCTATTGCAGACCAACATTAAGTGTGCTAAGGCATTATCAGTGA

>PGSC0003DMG401002917-(rev)LRR-RLPs\_671

CGGGAGTTCAAGATTCCATAAATCGCCTGTTTTACATTTTCCAATAAAGTTGAAGAAGTTAAAAGTGGTC  
GGAAGTTGTCTATCATGGGAGGAGTTGAACATCATAGGGCAATGGCCTAA

>PGSC0003DMG401002917-(rev)LRR-RLPs\_854

AAGATTTCCACAGTTGAAGTTTTTGCTAATTGAAGGTACAAATCTGAAATGTTGGAAAGCCACAAATGAT  
CATTTCCCTGCTCTTGAGCATCTAGTGATCAGACATTGCTTTCATTTGGA

>PGSC0003DMG401002917-(rev)LRR-RLPs\_976

AGATCCCTATTGAGTTTGCAGATATTTACTCGCTACAATAATCGAGTTACAGAACTGTAGTGCAAACT  
CGTGGCTTCTGCTGGACGAATTCAAGAGGAGCAAGAATCCCTAGGAAGCA

>PGSC0003DMG401002925-(rev)LRR-RLKs\_3294

TCAAAGTCGAGATTCAAAAAAGTAGATCCTTCTCGTTAGGATCATTTGCACGTCATTGTTTAAAGCAG

TGCAAGGCTTCAAGAAGTAATCCCATTCTTCAAATTGCTTTAAGCGATGG

>PGSC0003DMG401002925-(rev)LRR-RLKs\_3355

TTAAAGCAGTGCAAGGCTTCAAGAAGTAATCCCATTCTTCAAATTGCTTTAAGCGATGGCTTTGAATAAT  
AATGTGGGAGAGATGTTGTGACACATGATGAAATCAATGCCAGTAAGAA

>PGSC0003DMG401002925-(rev)LRR-RLKs\_3416

TTGAATAATAATGTGGGAGAGATGTTGTGACACATGATGAAATCAATGCCAGTAAGAAGAATGATAA  
GAATGCCTTATTTGGTATTAAGTCTTACAACACGTGTTGCTAGACCTGATTT

>PGSC0003DMG401002925-(rev)LRR-RLKs\_3477

ATGATAAGAATGCCTTATTTGGTATTAAGTCTTACAACACGTGTTGCTAGACCTGATTTGACAAATGCCTT  
ATATAAGTTGAAGTAGATCTTTTAGAAACAAAAAGAGCATGAAAACCTC

>PGSC0003DMG401002925-(rev)LRR-RLKs\_3538

CAAATGCCTTATATAAGTTGAAGTAGATCTTTTAGAAACAAAAAGAGCATGAAAACCTCATAATGATCAA  
TCAATTAGTATAACTTGTAAATTACGGAGATCCTACGTCAGGCCGATTA

>PGSC0003DMG401002925-(rev)LRR-RLKs\_3721

CATTACATACATGTTAAAATGGGTGTGTCATGGTTGCGCGTACTCTTCAAATACACAAATAATTTACAA  
AAAAATGCACGTACCTATAATGATACTTACATCTGATAAAATTCATACTC

>PGSC0003DMG401002925-(rev)LRR-RLKs\_3782

AATTTACAAAAAATGCACGTACCTATAATGATACTTACATCTGATAAAATTCATACTCAAGGACGAGTC  
CAGACAAGAAGATTTAGGATTTAAAGTTAATCGGTTCCCAATGATATCAA

>PGSC0003DMG401002925-(rev)LRR-RLKs\_549

ACCCATGGTGTGGTGTATTGTGACTGAATATGCCAGAGGGGGATCAGTGCGTCAGTTCCTCACGAGGCG  
GCAAAACCGAGCTGTGCCATTGAGGTTAGCAGTTATGCAGGCCTTGGATGT

>PGSC0003DMG401002925-(rev)LRR-RLKs\_5551

CAAATGACCCCTTAGAGTCTTATTTAAGAGTTGGTATATTTAGTGACTCTTTTGAGAAAAAATTTCAAAT  
CACGATTTTCCTTAGGATTGTGCTCTTAGAAGTTCAGTTATTTGTGTCT

>PGSC0003DMG401002925-(rev)LRR-RLKs\_5612

AATTTCAAATCACGATTTTCCTTAGGATTGTGCTCTTAGAAGTTCAGTTATTTGTGTCTCAGGCATATATG  
GCAGTTAGAATTTAAACCTTGAATTAGATCATCAATTCAGGTTGGTTTA

>PGSC0003DMG401002925-(rev)LRR-RLKs\_5856



AGTATCACCATCAGTTTCCGTTTGGGTTTGTACCTTACACAATGTTAGAGAGGAAAGCATATTCCCTATA  
AGCTAAGTGAGTTGGAGATTAAGCTTTTGTCTTCTTGAGATAATGTGATA

>PGSC0003DMG401002925-(rev)LRR-RLKs\_5917

TTCCTATAAGCTAAGTGAGTTGGAGATTAAGCTTTTGTCTTCTTGAGATAATGTGATAACTGGAGAAGT  
TTCGATTTCTAATATGACATTTCTTTCAGACTTGATCAAAGATATGTGTT

>PGSC0003DMG401002925-(rev)LRR-RLKs\_5978

TGGAGAAGTTTCGATTTCTAATATGACATTTCTTTCAGACTTGATCAAAGATATGTGTTTCATGTCTGCCTG  
AAATATTTTCGAAATGGTTGCGATCAGAAAGGATTTAGGAGGTTGACCT

>PGSC0003DMG401002925-(rev)LRR-RLKs\_6039

TGTCTGCCTGAAATATTTTCGAAATGGTTGCGATCAGAAAGGATTTAGGAGGTTGACCTGGTGAGTGGT  
GGTAATTTTATAGTCTTCTCTGTGTGATAATAGGCTAGTATGCATGAATGA

>PGSC0003DMG401002925-(rev)LRR-RLKs\_610

ACGAGGCGGCAAACCGAGCTGTGCCATTGAGGTTAGCAGTTATGCAGGCCTTGGATGTGGCAAGGGG  
GATGGAGTATGTGCATGGCCGGAATCTGATTCACCGAGATCTGAAATCCGAC

>PGSC0003DMG401002925-(rev)LRR-RLKs\_6100

TGAGTGGTGGTAATTTTATAGTCTTCTCTGTGTGATAATAGGCTAGTATGCATGAATGACTTTCCTGGG  
GAAATAGACAAAAAATAATATGCTTGCTTTTGTAAATTTGATGTGATAAT

>PGSC0003DMG401002925-(rev)LRR-RLKs\_6161

TTCCTTGGGGAAATAGACAAAAAATAATATGCTTGCTTTTGTAAATTTGATGTGATAATGAAAGATCTTG  
CCAAAACAGGTGTGGATCGAATCTCAATATCTGGTAAAACCTCGAATACGT

>PGSC0003DMG401002925-(rev)LRR-RLKs\_6710

ATTGCTTGCCTGTCTTATCTGATATCATGACCTGCTGCTGGGATTCTGACCCCGATAATCGGCCAACTTTC  
TCTCAGGTGGTCAAGATGCTTGAGGCGGCTGAGACAGAAATCATGACTA

>PGSC0003DMG401002925-(rev)LRR-RLKs\_6832

ATCAGAAGGGCACGTTTCAGGTGCTCCCCTCATCCTACGGCTACAGGGTAAGAGGAAACTGGAGGCAA  
CTGATTTTGAATGGCAAACCTGATTTTGTGAGTCTGCCATGTGTATCTATCAGG

>PGSC0003DMG401002925-(rev)LRR-RLKs\_6893

GAGGCAACTGATTTTGAATGGCAAACCTGATTTTGTGAGTCTGCCATGTGTATCTATCAGGCACAATTTCTT  
TTCAGACAGAAAAAAGGGTTATAGTTGTGAGAAAAAACTAAACATTTCTC

>PGSC0003DMG401002925-(rev)LRR-RLKs\_6954

CAATTTCTTTTCAGACAGAAAAAGGGTTATAGTTGTGAGAAAAACTAAACATTTCTCTGCTGTATTTT  
GTTTCTTTTCTTTAATCCGTGTATTTAAGATGGTGACTAGTTGGTAACAC

>PGSC0003DMG401002925-(rev)LRR-RLKs\_7015

CTGTATTTTGTTCCTTTCTTTAATCCGTGTATTTAAGATGGTGACTAGTTGGTAACACAGGATATCTGAT  
GTGCATCTATGCATGTCAGATTATGGCTGTATTTGCTGAATTTGTTCAA

>PGSC0003DMG401002925-(rev)LRR-RLKs\_793

GTGCTGACTGAAGGAATGACACCAGAACTGGCACTTACCGCTGGATGGCTCCGTAAGCATCTAGACTC  
TTAGCAGCCTTGTCAAATCTGGTGTCTTGATCCAGTTTGAGTTTATTGCC

>PGSC0003DMG401002925-(rev)LRR-RLKs\_915

ACTGTATAATAGAGCTCTTAAGCTTTTTATCCTATTCTTGTGGGCTATTTTTCTCTGTCTGCATTACTTTCT  
GTAATTTTTTTTTCAAATTGCTTTGATATGTGTTTCTTTAGCCAAGC

>PGSC0003DMG401004423LRR-RLPs\_1037

ACTATGGCTCAAGAGGCTTGAGAAAGCTGCTGAAAATGCTGAAAATGTGTTCGACGAATTCAGGTATGA  
ATCTATCAAAGACAAGTGAAGATCCATAAGAACCCAATGTTAAAGGTCAG

>PGSC0003DMG401004423LRR-RLPs\_1098

AGGTATGAATCTATCAAAGACAAGTGAAGATCCATAAGAACCCAATGTTAAAGGTCAGTGATTTCAATT  
CTCATACAACTTTTAAGAGCAAAATGTCTCGAAAAATCAACACCATCAAC

>PGSC0003DMG401004423LRR-RLPs\_1159

ATTTCAATTTCTCATACAACTTTTAAGAGCAAAATGTCTCGAAAAATCAACACCATCAACGAAGAGTTGAG  
GGATATCAATAAGTTATCCAAATACCTCGGTCTCCAATCACTCATGGTTC

>PGSC0003DMG401004423LRR-RLPs\_1220

AGAGTTGAGGGATATCAATAAGTTATCCAAATACCTCGGTCTCCAATCACTCATGGTTCCTCCTCGGCAA  
ATACTACCAATTCGTGAAACAGATTCGCTAGTAGTTGCTTTGGATGTTGT

>PGSC0003DMG401004423LRR-RLPs\_1281

CCTCGGCAAATACTACCAATTCGTGAAACAGATTCGCTAGTAGTTGCTTTGGATGTTGTTGGTAGAGACA  
ATGATGTTGCAGAAATAAAGAGGATGATGTTGAACATCAGAGATGATGTT

>PGSC0003DMG401004423LRR-RLPs\_1403

TCTGTGCACCATTCCCATAGTGGGTATGGGGGGTTTAGGGAAAACAACATGGCTAAGAGTATTTTCAA

CGATGAAAAGATCGAGAAATACTTTGAAAAGAGAGTTTGGTTGTGTCTACC

>PGSC0003DMG401004423LRR-RLPs\_1464

ATTTTCAACGATGAAAAGATCGAGAAATACTTTGAAAAGAGAGTTTGGTTGTGTCTACCTGAAATGTTA

GAAACGAAGAGCTTTCTTCAACTAATCCTCGAATCATTGACAAAGAGGAAA

>PGSC0003DMG401004423LRR-RLPs\_1586

TGAGGTCCAAAGCAGAGACATAATAGTCAAGATGCTACAAGATGAACTGGCAGGAAGAAAGTATTTGC

TTGTCCTGGATGATTTGTGGAATGTAACTCTACATTGTGGGTAGAGTTTGT

>PGSC0003DMG401004423LRR-RLPs\_1647

TATTTGCTTGTCTGGATGATTTGTGGAATGTAACTCTACATTGTGGGTAGAGTTTGTAGATACTTTGCG

AGGAATGAATACATCCCGAGGAACTTCATTCTCGTGACTACTCGTATG

>PGSC0003DMG401004423LRR-RLPs\_1769

ACAGGTGGCGTCCACAGTAGCAACAGTAGGTCCTCATAGGTTGGAAAATTAGCAAAGATCATTGTTG

GTCCATTTTCAAACAAAGAGCATTGTTGATGAGCAAGTTCAGAGGAAAT

>PGSC0003DMG401004423LRR-RLPs\_1830

CATTGTTGGTCCATTTTCAAACAAAGAGCATTGTTGATGAGCAAGTTCAGAGGAAATAGTGATCATG

GAGAACAGGATTGTTGAAATGTGTCAAGGTCTACCATTGGCGGCAAGTGTG

>PGSC0003DMG401004423LRR-RLPs\_2074

ATGATTATCTACCATCTCCACATCTAAAAAATGCTTTGCTTACTTTGCAATGTTTCCAAAAGATTTTGAGT

TTGACAAGGACCAACTAATCCAACCTCTGGATGGCAGAAGGCTTTCTTC

>PGSC0003DMG401004423LRR-RLPs\_2257

GAAATTCCTTGCTGCAAATGTTAAGTTAGATGAGCACACAATATAACACACTATAAGATGCACGATCT

TGTGCATGATTTGGCTGGAGATATCTTAAAATCTAACTATCTGATCCGA

>PGSC0003DMG401004423LRR-RLPs\_2501

GGAAGATATGCTGTTGAGCTTTAAGTTCTTGAGAGTTTTAAATTTGTCCTGTTTCAGGAATCAAGGAGTTG

TCAGCCAAAATTGGGAAGCTAATACACTTGAGATATCTTGATCTCTCGAA

>PGSC0003DMG401004423LRR-RLPs\_2623

CTAAGATCATAGCCTTGCCCAACTCCATTTGCGAGCTCTATAATTTGCAAACATTTAGAGTTGATCGTTGC

TATCCACTTCCATATGAGATGGGAAATATGATAAGTTTGAGACACATAT

>PGSC0003DMG401004423LRR-RLPs\_2745

TGCCATTCTCGGTCTCAGAGTCAGATGCCACTTAACATGGGACAATTGACTTGTCTTCAGACCCTACAAT  
ATTTCAATGTGGGTTTAGAGAAAGGTCGTCGAATAGAAGAATTAGGTCGT

>PGSC0003DMG401004423LRR-RLPs\_2806

CCCTACAATATTTCAATGTGGGTTTAGAGAAAGGTCGTCGAATAGAAGAATTAGGTCGTTTGAAGAACC  
TTAGAGGTGAATTGAGGATCAATCATCTCCAATTGGTCCGTAGTAGAGAAG

>PGSC0003DMG401004423LRR-RLPs\_3111

AGTGAAGAGTCGCTACCAAATTTGGTCAAGTTGACATTAAGTGGTTGCAAAGGTGCAAAGAAATTCCA  
TCGCTTGGCCAACTGAAGTTCCTTCAGCATCTTAAGCTGATAGGACTCCCT

>PGSC0003DMG401004423LRR-RLPs\_4514

CATTTCCCATATTCTAAAAATTGAAGTAGGTGGAAGCATAATTCAGGACTTGCGTAAGTTTCTGTTTCTCT  
TTTTGTTTCTGAGTTGCATTTTTAATTATTATTTTCCACGAGTTATTCT

>PGSC0003DMG401004423LRR-RLPs\_4575

CTGTTTCTCTTTTTGTTTCTGAGTTGCATTTTTAATTATTATTTTCCACGAGTTATTCTCCTCCATTCTCCATT  
ATAGTTTTCAAACATTTTTTTGTTCCACTTGAAACAAATTTATGA

>PGSC0003DMG401004423LRR-RLPs\_4636

TCCATTCTCCATTATAGTTTTCAAACATTTTTTTGTTCCACTTGAAACAAATTTATGAATATCTATTTTTAC  
CTTTATGATATGGATTAATCATGAATATTTATGTGTGCTTTTTCTCA

>PGSC0003DMG401004423LRR-RLPs\_4758

GGTTATTAGTTTAAAGGTCATGCTAGAACGTTGCTGTGGCATTTCAGTCAAATCCATCCACGGCAATT  
ACATTAGGTAAAATTGCAGTTAGAATGTTGTAACAATTTTTTCTTTGCAC

>PGSC0003DMG401004423LRR-RLPs\_4819

ACGGCAATTACATTAGGTAAAATTGCAGTTAGAATGTTGTAACAATTTTTTCTTTGCACTCCTTTTTTTCCC  
ATGACACAATTTTACTGTTTAAACATGAATGGTTATGTACGACAAAGGA

>PGSC0003DMG401004423LRR-RLPs\_4880

CTTTTTTCCCATGACACAATTTTACTGTTTAAACATGAATGGTTATGTACGACAAAGGAACCACCACATTT  
GTTTTGTTGAAGAATAGAATCTTCAGCCGTAGACTGTTTCATGAGCATT

>PGSC0003DMG401004423LRR-RLPs\_4941

CACCACATTTGTTTTGTTGAAGAATAGAATCTTCAGCCGTAGACTGTTTCATGAGCATTGGTAAAGACT  
ATATAATCTCTCAACATTAAGTTGAAGCTAGAAGGTTATTGTAATACAAA

>PGSC0003DMG401004423LRR-RLPs\_5002

GTAAAGACTATATAATCTCTCAACATTAAGTTGAAGCTAGAAGGTTATTGTAATACAAAGACAAAATATA  
TGTCCATTACTAACTACACCTTATTTCTATGCCAGCCAAGACTTAAAAGC

>PGSC0003DMG401004423LRR-RLPs\_5063

CAAAATATATGTCCATTACTAACTACACCTTATTTCTATGCCAGCCAAGACTTAAAAGCTATGAGGAAGT  
ATAAGGCATGCCCAAGAACAATTTCAATTTTACTTTTCAGCTCCTTT

>PGSC0003DMG401004423LRR-RLPs\_5124

TGAGGAAGTATAAGGCATGCCCAAGAACAATTTCAATTTTACTTTTCAGCTCCTTTTTCTCGTTAAAA  
TACTGAAACTTTTAAACAGGTATTATCTTTTCAGCAATATAGTCCTTCTCT

>PGSC0003DMG401004423LRR-RLPs\_5185

CTCGTTAAAATACTGAAACTTTTAAACAGGTATTATCTTTTCAGCAATATAGTCCTTCTCTAAATCCTCAAATA  
TTATTATACTTCATTATATAATATGATTCTGGTAAAGGAAATTGTT

>PGSC0003DMG401004423LRR-RLPs\_5246

ATCCTCAAATATTATTATACACTTCATTATATAATATGATTCTGGTAAAGGAAATTGTTCTTTCTCTTTGAG  
GAAAGTGAAGTATTTGATTGGCATAACATTGGGTTGTCATGATTGGTG

>PGSC0003DMG401004423LRR-RLPs\_5307

TTCTCTTTGAGGAAAGTGAAGTATTTGATTGGCATAACATTGGGTTGTCATGATTGGTGTACACATGATT  
CTTAGATGCAAGACAGATTTTATTTTGGATTCCATTGATAGTAGATGCTT

>PGSC0003DMG401004423LRR-RLPs\_5368

CACATGATTCTTAGATGCAAGACAGATTTTATTTTGGATTCCATTGATAGTAGATGCTTCTCCAAATTATG  
TTCAGTTTTCAACATGATTTTAACTTTTCAGGGAACAGATTGGAAGTTTG

>PGSC0003DMG401004423LRR-RLPs\_5429

CCAAATTATGTTTCAGTTTTCAACATGATTTTAACTTTTCAGGGAACAGATTGGAAGTTTGTGGACATTGGT  
GCCGCGTTGGAGACTCTTCTTGCACAAAGCAAGAAAATTCAAGGTAAGTC

>PGSC0003DMG401004423LRR-RLPs\_5490

GACATTGGTGCCGCGTTGGAGACTCTTCTTGCACAAAGCAAGAAAATTCAAGGTAAGTCAGTTTTTGTTC  
ATAAGAGATTACAAATGGTGCTACAGATCAATTGTAACGAGTTGCTTCTC

>PGSC0003DMG401004423LRR-RLPs\_5551

TTTTTGTTTCATAAGAGATTACAAATGGTGCTACAGATCAATTGTAACGAGTTGCTTCTCCATTTTCGCAAGG

ATCAGACAAAATGTGTGCCAAAAGTACTTTTTACCATTTCTTATGCTT

>PGSC0003DMG401004423LRR-RLPs\_5673

GATTATTGGTTGAAACAACGACATGCATGGACCTTGTTGAGATGGTAGGCTGGAGCAGACTTCTCTTAG

ATGTGTTCAAGTGTCTTGATTGGCAAGTAAAATTGCATTTGGCGGAAACTG

>PGSC0003DMG401004423LRR-RLPs\_5734

TCTCTTAGATGTGTTCAAGTGTCTTGATTGGCAAGTAAAATTGCATTTGGCGGAAACTGGAGTGGAGAT

ATTATGTACTTGTATGACTAAGATTTGATAGCAGAGGCCTTTAATTTCTTG

>PGSC0003DMG401004423LRR-RLPs\_5795

GTGGAGATATTATGTACTTGTATGACTAAGATTTGATAGCAGAGGCCTTTAATTTCTTGCGGACAGAGTA

CATGCCTTTTTTCGACTAATAGAGTTCTTTTGTTCCAGCAAACATTTTG

>PGSC0003DMG401004423LRR-RLPs\_5856

GACAGAGTACATGCCTTTTTTCGACTAATAGAGTTCTTTTGTTCCAGCAAACATTTTGAAGTTAATACTT

ATCTGCTGCATCCTTGCCTAGTTGATAGCTTCTTTAATGTAGCTCTGCT

>PGSC0003DMG401004423LRR-RLPs\_5917

CTTAATACTTATCTGCTGCATCCTTGCCTAGTTGATAGCTTCTTTAATGTAGCTCTGCTTTTTCGTCTTGAAA

TTTATCTATGGAAATTGCACCATTTCAATCCATCTTATTCATTGGTTT

>PGSC0003DMG401004423LRR-RLPs\_6039

TAAAATGGATAAGTATTGTTGGACATTCCAGAATAGTATAGTGTATAAGTAAAGATAGACGAAAGCTAC

TCCAATGTTGGACCATCATTAATTCCTTCTACCGACACATCTAAATAACT

>PGSC0003DMG401004423LRR-RLPs\_6100

AAAGCTACTCCAATGTTGGACCATCATTAATTCCTTCTACCGACACATCTAAATAACTTTAAATAACCAA

CACAAATACACCACATGTACCTAAGTTAACACATAAAGTGGGAGCCTCA

>PGSC0003DMG401004423LRR-RLPs\_732

CAAAAGTGGTCCTTTATTCAAATTATTGTGTATGCATTATTGTTTTTCTTTTAGTGGTCCGCAAAGCAAAA

GAAGGCTTTTTTGAGAAGAAGACTTTGTGCAAGAACTTTCACAACAATG

>PGSC0003DMG401004423LRR-RLPs\_793

CAAAGCAAAGAAGGCTTTTTTGAGAAGAAGACTTTGTGCAAGAACTTTCACAACAATGTCTGACCCTG

TAATTGGTGCCACTGTTCAAGTTTTGCTTCAGAAGCTGCTTTCTCTCACTA

>PGSC0003DMG401004423LRR-RLPs\_854

TGACCCTGTAATTGGTGCCACTGTTCAAGTTTTGCTTCAGAAGCTGCTTTCTCTCACTATTGAGGAACTCA  
GTAGCTCAAGCGACTGCAAGAAAGATCTGGAAATGCTTACACAAAATGT

>PGSC0003DMG401004423LRR-RLPs\_976

CCTTGATCCAAGCTTTCATTCATGATGCCGAAAGACGACAAGTTGACGATCAGGCTGTGAAACTATGGCT  
CAAGAGGCTTGAGAAAGCTGCTGAAAATGCTGAAAATGTGTTCGACGAAT

>PGSC0003DMG401004946G-LecRK\_0

ATGGGATTTTTTCCCCGACTAGTTTCACGAATAATTGGTATGTGCGGAATATGGTACAGGCACAATGTAC  
CTGATAAGTCTGTGGTATGGGTTGCCAATCGAGCAAATCCATTCAACAAC

>PGSC0003DMG401004946G-LecRK\_122

ATCAGGTGTTAGGTTGAAAATCATCGATACAGGACAACCTGCTCTTCTCACTGCTGACAATAAGAGCATA  
TGGTCTACTAATTCGTCAAGGAGTTTGGCTGTGAAGAATACAGTTGCACA

>PGSC0003DMG401004946G-LecRK\_1525

CTGTTTACAAGGTAACATCTTAAGTTTATGAATCATTCTTTCAGTAAACAATATCTACTATTATTGACAGT  
AAACAGATGACACTTACTGAATCACTAAACCAGTTATATGTTGATATTA

>PGSC0003DMG401004946G-LecRK\_1586

TATTGACAGTAAACAGATGACACTTACTGAATCACTAAACCAGTTATATGTTGATATTATAGGGAATCCT  
GGAAGGTGGACACGAAGTAGCTATAAAGAGGCTATCCAAGTCTTCTCGC

>PGSC0003DMG401004946G-LecRK\_183

AAGAGCATATGGTCTACTAATTCGTCAAGGAGTTTGGCTGTGAAGAATACAGTTGCACAGTTGTTGAAC  
TCGGGGAATCTTGTCGTAAGAGATGTAAATGATGCTAGGCCTGAGAACTTC

>PGSC0003DMG401004946G-LecRK\_1830

CAACAGAAGTCTAGATTTCTTCATATTTGGTCTGGTACTCTCTTAACTCGAAGAACCTCTATTAATAC  
AAATAGTAAAGTTGATAGTTTAATCACATTATCAGTGTTCTAACGGAGG

>PGSC0003DMG401004946G-LecRK\_1891

CTATTAATAACAATAGTAAAGTTGATAGTTTAATCACATTATCAGTGTTCTAACGGAGGACATGTTAACA  
GATGAAAAGAGGAGCTTGTTACTCGACTGGCCTAAGCGCTTCGACATCAT

>PGSC0003DMG401004946G-LecRK\_2074

AGACCTCAAAGCTAGTAACATTTTGCTAGATGCTGACATGAACCCCAAGATCTCAGATTTTGGCATAGCT  
AGAAGCGTTGTAGGGAATGAGACTGGTGCTAATACACACCATGTGGTTGG

>PGSC0003DMG401004946G-LecRK\_2135

GGCATAGCTAGAAGCGTTGTAGGGAATGAGACTGGTGCTAATACACACCATGTGGTTGGGACACAGTA  
AGAAATTTAATACTACTCATTTTTTAGCATTTATATTATGTATATAATATCC

>PGSC0003DMG401004946G-LecRK\_2196

CACAGTAAGAAATTTAATACTACTCATTTTTTAGCATTTATATTATGTATATAATATCCTTTACTTAACACT  
ATTTTTGTTTAATGTGTAATGCAGTGGCTACATGTCCCCAGAGTATGT

>PGSC0003DMG401004946G-LecRK\_2257

TACTTAACACTATTTTTGTTTAATGTGTAATGCAGTGGCTACATGTCCCCAGAGTATGTAGTCCATGGTGT  
TTTCTCAGTGAAATCAGATGTATTTAGCTTTGGTGTGTTAGTACTAGAG

>PGSC0003DMG401004946G-LecRK\_2318

TCCATGGTGTTTTCTCAGTGAAATCAGATGTATTTAGCTTTGGTGTGTTAGTACTAGAGATAATCAGTGG  
TCGGAGAAACAGAGGATTTGCCCGTGAAAGTCACAGTATCAACCTACTCG

>PGSC0003DMG401004946G-LecRK\_244

TGTTGAACTCGGGGAATCTTGTCGTAAGAGATGTAAATGATGCTAGGCCTGAGAACTTCCTGTGGCAGA  
GTTTTGATTATCCTACTGATACTGTTACCAGGCATGAAAATGGGTAAGA

>PGSC0003DMG401004946G-LecRK\_2440

CATGTAAGTCTTGTTTGTAATTAAGACGAGTTTAAATTTGTGCACTAACAGAGTAAAATAATCCTTAA  
ACAACGAGGTCACTTATAAGGTAGTTAATTGATAACACCTCATAAAAATG

>PGSC0003DMG401004946G-LecRK\_2501

AATCCTTAAACAACGAGGTCACTTATAAGGTAGTTAATTGATAACACCTCATAAAAATGATAGTTAACT  
GCATTGAACTTAAATCCATCAGGCACATCAACCGCTACATGTTTCTTGAT

>PGSC0003DMG401004946G-LecRK\_2562

AGTTAAACTGCATTGAACTTAAATCCATCAGGCACATCAACCGCTACATGTTTCTTGATTATGTACTGATT  
GTGTTATTTATAGGTATGGAACTTTACAAAGAAGGTAGACCATTGGAG

>PGSC0003DMG401004946G-LecRK\_2623

TGTACTGATTGTGTTATTTATAGGTATGGAACTTTACAAAGAAGGTAGACCATTGGAGCTAATTGATGG  
GGATCTAATGGATTCGAGTTATATTTCTGAATTGCTACGCCTTATCCATG

>PGSC0003DMG401004946G-LecRK\_2684

AATTGATGGGGATCTAATGGATTCGAGTTATATTTCTGAATTGCTACGCCTTATCCATGTCGCTCTGTTAT



GTGTACAACAATGTCCAGAAGACAGGCCAGACATGGCTACAGTAATCTT

>PGSC0003DMG401004946G-LecRK\_2806

TGTTGACTAATGATGCTATTTTGCCTCAAGCTAAGGAACCTGGTTTCTTCACAGAAAGCAAAGTCACTTCT

GGATGTTCTACAAGCATGAGTTCAACAAACGAAATTACCGTCACACAGT

>PGSC0003DMG401004946G-LecRK\_2867

AGTCACTTCTGGATGTTCTACAAGCATGAGTTCAACAAACGAAATTACCGTCACACAGTTAGAACCCCGG

TAAATTACATTACATGTTCAATTCAGATCGTTCAATGTCAACAAGCTTGAA

>PGSC0003DMG401004946G-LecRK\_2928

GAACCCCGGTAAATTACATTACATGTTCAATTCAGATCGTTCAATGTCAACAAGCTTGAATTACAGTGTTTG

TAAAGCCATAATGGCCTATGTTATATGGTATCTGTTATTAGCAAGTCTT

>PGSC0003DMG401004946G-LecRK\_2989

ACAGTGTTTGTAAAGCCATAATGGCCTATGTTATATGGTATCTGTTATTAGCAAGTCTTCAATATGGGTG

TGTATCAGTATTTAGTGTGGATACCTTTAGTTTTTATTAATTCTAATGTA

>PGSC0003DMG401004946G-LecRK\_305

GTGGCAGAGTTTTGATTATCCTACTGATACACTGTTACCAGGCATGAAAATGGGTAAGAACTTTGTGACT

GGACAAGAATTTTACCTGTCCTCATGGAAGAAGGAATCTGATCCAGCTCC

>PGSC0003DMG401004946G-LecRK\_3050

ATATGGGTGTGTATCAGTATTTAGTGTGGATACCTTTAGTTTTTATTAATTCTAATGTATTTTAAAGTATTC

GAACAAAGTACCTATTCAGCATGTGTACATCAAATAAATTAAGATC

>PGSC0003DMG401004946G-LecRK\_3111

TTAAAGTATTCGAACAAAGTACCTATTCAGCATGTGTACATCAAATAAATTAAGATCCATATAAAATA

AATCAACACAATGAGAGTTCACTACTTCACAGTAACAGAAGAAGCTATTG

>PGSC0003DMG401004946G-LecRK\_3172

TATAAAATAAATCAACACAATGAGAGTTCACTACTTCACAGTAACAGAAGAAGCTATTGTTGTTGGTGT

TAGAAGCTCCAGTCCCATAGTACTCCATTATTTACAGAGTATCAGTTATG

>PGSC0003DMG401004946G-LecRK\_3233

GTTGGTGTTTAGAAGCTCCAGTCCCATAGTACTCCATTATTTACAGAGTATCAGTTATGTTGTTCCCATTC

TCCGAGTTTACACGATCAAACATCAGGCAGTCACTGCACCAACAATTAG

>PGSC0003DMG401004946G-LecRK\_3294

GTTCCCATTCTCCGAGTTTACACGATCAAACATCAGGCAGTCACTGCACCAACAATTAGAATGATAGCAG  
AATGGTTTGATTAAAGTAATGAAATTGCCAAGACTAGAGTGATTGGAAGG

>PGSC0003DMG401004946G-LecRK\_3355

TGATAGCAGAATGGTTTGATTAAAGTAATGAAATTGCCAAGACTAGAGTGATTGGAAGGATTGCAATTC  
TAATTTCTTACTTTCTTTCTAGGAAATGTACAAAAGATATTATCACTGCAA

>PGSC0003DMG401004946G-LecRK\_3416

TGCAATTCTAATTTCTTACTTTCTTTCTAGGAAATGTACAAAAGATATTATCACTGCAACTGACTTTATAAA  
TGAAACAACATAAAATTGAAAGACATAAAACGCATTCACTCAATGCGA

>PGSC0003DMG401004946G-LecRK\_366

TTTGTGACTGGACAAGAATTTTACCTGTCCTCATGGAAGAAGGAATCTGATCCAGCTCCAGGAGAATAT  
ACATACCGTTGTGATCCTACTGGATATCCTCAGAATGTCGTGAGGAAAGGT

>PGSC0003DMG401004946G-LecRK\_427

GAGAATATACATACCGTTGTGATCCTACTGGATATCCTCAGAATGTCGTGAGGAAAGGTAAAGTTAAGG  
TGTTCAATACCGGACCATGGAATGGAGTCTTCTGGAGTGGTGTACCAGGAA

>PGSC0003DMG401004946G-LecRK\_488

AGTTAAGGTGTTCAATACCGGACCATGGAATGGAGTCTTCTGGAGTGGTGTACCAGGAAGTATACAAAA  
TACTATTTCCACATCTAAGCTGGATTTTATGATAAAAGAAAGCATTTTACAG

>PGSC0003DMG401004946G-LecRK\_4880

CTTTTATTTAGGTAGATGAGAAGGGTTTATTACCTAGTGCAAAAAGATATTATCACGGCAACTGACTTTCT  
AGCAGATGGAAAGACCATTACTTCATCTGATGGAAGCTGTGAGATGGCTA

>PGSC0003DMG401004946G-LecRK\_4941

TGACTTTCTAGCAGATGGAAAGACCATTACTTCATCTGATGGAAGCTGTGAGATGGCTAGTTTCACGAAT  
AATTGGTATGTTGATGAAAAGAGAGCATTTTACAGCTTCACGCTTTTATT

>PGSC0003DMG401004946G-LecRK\_5002

TTCACGAATAATTGGTATGTTGATGAAAAGAGAGCATTTTACAGCTTCACGCTTTTATTCCCTAACTGTTAG  
ATTAACAGATCCTTGGTTATGACTTATGACTATCACATTAACCAACTTG

>PGSC0003DMG401004946G-LecRK\_5063

TAACTGTTAGATTAACAGATCCTTGGTTATGACTTATGACTATCACATTAACCAACTTGATAAATAGGAGT  
TTTTGTCCACTTGAAACCACAAGTGTGAGACCCGGTCTCAATTTGAGAC

>PGSC0003DMG401004946G-LecRK\_5307

TTATTTTCGTTGAACTTCTAAATTGGTAACAAGTCGAATACTTTATAATTCACTATTATTTTCCATTTATCACT  
ATTTCTATCGTAATGATCTATATTACTTTAACTTTTATGATATTTAT

>PGSC0003DMG401004946G-LecRK\_5368

CCATTTATCACTATTTCTATCGTAATGATCTATATTACTTTAACTTTTATGATATTTATGTTTATCATCTTTTT  
ATTATCATTTTCACTATTTCAAATTATTATTTTTTATCAATGTTA

>PGSC0003DMG401004946G-LecRK\_5429

TTATCATCTTTTTATTATCATTTTCACTATTTCAAATTATTATTTTTTATCAATGTTACTATTAGTACTTTAT  
TGTCGTCTTCTTTAAAATAGATTGTCGTTATTTTATTTTAAGTTTC

>PGSC0003DMG401004946G-LecRK\_549

ATACAAAATACTATTTCCACATCTAAGCTGGATTTTGATGAAAAGAAAGCATTTTACAGCTTCACGCTTCT  
GGCTTCTGTTATGACCAAATTAACCATAAAAAGTAGCGGAGTGCTTCAA

>PGSC0003DMG401004946G-LecRK\_5551

ACTTACTTAACTATTTTACGTAATATATATTATATTAGTTATTAATAAAAAGCTCAAATGATTTAATTTAA  
AGAAGGAAAAATGCCATGAAAGCCTATCCATTTTACGCCCTTTTTACA

>PGSC0003DMG401004946G-LecRK\_5612

ATTTAATTTAAAGAAGGAAAAATGCCATGAAAGCCTATCCATTTTACGCCCTTTTTACAATCTTAAAATAT  
GCAACAATTTGGCTATCCAAAATGCAGCCCAATAGGCCCATACGTTTCA

>PGSC0003DMG401004946G-LecRK\_5673

CTTAAAATATGCAACAATTTGGCTATCCAAAATGCAGCCCAATAGGCCCATACGTTTACGCCAAGTTCAC  
TAAAAAACCCAAATTCGCAGCCCTAATCCAAGACTCACCAGCAGCAGCGC

>PGSC0003DMG401004946G-LecRK\_5734

CAAGTTCATAAAAAACCCAAATTCGCAGCCCTAATCCAAGACTCACCAGCAGCAGCGCTAAGCATCCCT  
TTCTCCTCTTCCCTCTTCTAAGCAAAGTTCCAATATAGTGCAGCCATT

>PGSC0003DMG401004946G-LecRK\_5795

AGCATCCCTTTCTCCTCTTCCCTCTTCTAAGCAAAGTTCCAATATAGTGCAGCCATTGACAGTTTTCATC  
CTTACGTTTTGAGCTTAATTTTGTCTTGTTGAGGCAGCCAACGAATG

>PGSC0003DMG401004946G-LecRK\_5856

CAGTTTTCATCCTTACGTTTTGAGCTTAATTTTGTCTTGTTGAGGCAGCCAACGAATGCTTTCTTGTTTCA

TGCTTCAAACGCAGCAGCTGCTTTTCAAATTTCAAACAAAATCTCA

>PGSC0003DMG401004946G-LecRK\_5917

TTCTTGTTTCATGCTTCAAACGCAGCAGCTGCTTTTCAAATTTCAAACAAAATCTCACTATTTCCGGACG

ATTATATGCAGCAATATCACTGCCATATTTGACCAATTTCAAACGGATA

>PGSC0003DMG401004946G-LecRK\_5978

ATTTCCGGACGATTATATGCAGCAATATCACTGCCATATTTGACCAATTTCAAACGGATACTTTCCCGCTCA

AGCATGCCTTAACCCTAATCTTCACCTATAAATACATCCTTATATATTT

>PGSC0003DMG401004946G-LecRK\_6039

TTCCCGCTCAAGCATGCCTTAACCCTAATCTTCACCTATAAATACATCCTTATATATTTACAAAGAAAAAA

AAAAGGTTTTAGTCACCTTCTTCCCCTCTAACTTTACTAGTCTTTACA

>PGSC0003DMG401004946G-LecRK\_61

ACAATGTACCTGATAAGTCTGTGGTATGGGTTGCCAATCGAGCAAATCCATTCAACAACAAATCAGGTG

TTAGGTTGAAAATCATCGATACAGGACAACCTTGCTCTTCTCACTGCTGACA

>PGSC0003DMG401004946G-LecRK\_610

TCACGCTTCTGGCTTCTGTTATGACCAAATTAACCATAAAAAGTAGCGGAGTGCTTCAAATTTCAACGTG

GGTTGAGAATAGACAGGAATGGCAAGATTATGTTTCTTCATCGGGCGATA

>PGSC0003DMG401004946G-LecRK\_6100

AAAGAAAAAAAAGGTTTTAGTCACCTTCTTCCCCTCTAACTTTACTAGTCTTTACAACCTTTAACAAAA

AGGTTTTAATCTCTCTTTGCTCCTGTTGGACGACAACAAAGGCATTTCA

>PGSC0003DMG401004946G-LecRK\_6161

TTTAACAAAAAGGTTTTAATCTCTCTTTGCTCCTGTTGGACGACAACAAAGGCATTTCAAAGTTGTTTCATT

ACGAGAGTATAGATTCAAGGCCGATAACAATCCCAGTTCACTGCCCCAC

>PGSC0003DMG401004946G-LecRK\_6222

GTTGTTTCATTACGAGAGTATAGATTCAAGGCCGATAACAATCCCAGTTCACTGCCCCACAATCGGTAATC

TCGACCGCTTTACTTTGTTATATTTTACTCTTTTATCCAGCTCGCCAGCG

>PGSC0003DMG401004946G-LecRK\_6283

TCGGTAATCTCGACCGCTTTACTTTGTTATATTTTACTCTTTTATCCAGCTCGCCAGCGTGTGGTATTAG

TTTCTATATGAAAAATGACAAATGATTAAGGCTGGGCACCGAACCGG

>PGSC0003DMG401004946G-LecRK\_671

TTCAACGTGGGTTGAGAATAGACAGGAATGGCAAGATTATGTTTCTTCATCGGGCGATACTTGTAACAA  
CTATGGAACATGTGGTGCATATGGTAGTTGCAACAACGTGCACACTCCTGT

>PGSC0003DMG401004946G-LecRK\_732

TGTAACAACATGGAACATGTGGTGCATATGGTAGTTGCAACAACGTGCACACTCCTGTGTGTAGCTGCT  
TAGACACGTTTGTGCCTAAAGATCCAAGAAATTGGGCAATGAAAAATTGG

>PGSC0003DMG401004946G-LecRK\_793

GTAGCTGCTTAGACACGTTTGTGCCTAAAGATCCAAGAAATTGGGCAATGAAAAATTGGTCCAGCGGGT  
GTGTTAGAAGGAAACCCCTTAATTGCCAGAATGGAGATGGGTTTCTCAAGT

>PGSC0003DMG401004946G-LecRK\_854

CAGCGGGTGTGTTAGAAGGAAACCCCTTAATTGCCAGAATGGAGATGGGTTTCTCAAGTACTCTAGTAT  
AAAGCTACCAGATACACAGTATTCATGGTTTGTGAGTATGACACTCCA

>PGSC0003DMG401004946G-LecRK\_976

AGTGCAAGCAAGCTTGCTTGAGGAATTGCTCGTGTATGGCTTACTCAAATCTTGATATACGCAATGATGG  
GAATGGCTGTTTGTGTTGGTATGGCGACTTAATTGACATTCGAGAATTAC

>PGSC0003DMG401005047G-LecRK\_0

TTAACACCAAAAAACACATTTTTTCATCTATGTTCTTGCTTCTACTTTCTTCTAATTTACAAATCCTCGCAAT  
AGCAGCAACAACAACAGATAATACGATAACGATTACAAATCCCCTTA

>PGSC0003DMG401005047G-LecRK\_1037

TTTTTACATGACAGATTTATCTATGCTCTGATACCATGTTAATTTGTAAAAACGTGTTTTTACTTACTTA  
ATTATGTTTTTGTAGGTGCTTGACAAGAAAATATGTTTCGAGATTGTT

>PGSC0003DMG401005047G-LecRK\_1098

TTACTTACTTAATTATGTTTTTGTAGGTGCTTGACAAGAAAATATGTTTCGAGATTGTTAGTGAAGCATAA  
CGGTTTTTTAGAGAGGTATACTTGGATTCCGACTAGTAACATTTGGAAC

>PGSC0003DMG401005047G-LecRK\_1159

TGAAGCATAACGGTTTTTTAGAGAGGTATACTTGGATTCCGACTAGTAACATTTGGAACAAATTCTGGTA  
CGCCCCGAAGGACCAATGTGATTTATACGAAGAGTGTGGTGTTCGGGAA

>PGSC0003DMG401005047G-LecRK\_122

ATATCGAAAACTTTAGTCTCTCAACAAAAAAATTCGAATTAGGATTTTTCACTCCTGGTGGTCCGAATTC  
AGACAAATGGTACGTCCGAATATGGTACAAAGAAATCAAAGAAACGACG

>PGSC0003DMG401005047G-LecRK\_1220

ATTCTGGTACGCCCCGAAGGACCAATGTGATTTATACGAAGAGTGTGGTGTTCGGGAATTTGTAACGC  
GAATTTATCGCCGGTATGCAAATGTCTAGTAGGGTACAAGCCTAAAAATCA

>PGSC0003DMG401005047G-LecRK\_1281

TGTAACGCGAATTTATCGCCGGTATGCAAATGTCTAGTAGGGTACAAGCCTAAAAATCAAGTGGCATGG  
GATTTAAGAGATGGATCAGATGGATGTATTAGATATCATGATTTGGATTGT

>PGSC0003DMG401005047G-LecRK\_1342

TGGCATGGGATTTAAGAGATGGATCAGATGGATGTATTAGATATCATGATTTGGATTGTGAAACTGATG  
TTTTTAACATATTGAAGAACATGAAATTGCCACAAAGTTCAAGTTCATTTG

>PGSC0003DMG401005047G-LecRK\_1403

AACTGATGTTTTTAACATATTGAAGAACATGAAATTGCCACAAAGTTCAAGTTCATTTGTTGATACTAAG  
ATGAATTTGGAAGAATGTGAAAAAATGTGTAGGTACAAGTTCATGCAC

>PGSC0003DMG401005047G-LecRK\_1464

GATACTAAGATGAATTTGGAAGAATGTGAAAAAATGTGTAGGTACAAGTTCATGCACGGCGTACACC  
ACCGCAAACGTTACGGGTTTCGGGTTTCGGGTTGTGTCATTTGGACAAAGGAA

>PGSC0003DMG401005047G-LecRK\_1525

CGTACACCACCGCAAACGTTACGGGTTTCGGGTTTCGGGTTGTGTCATTTGGACAAAGGAATTAGTCGATA  
TGCGCCAATATTCGGCAGCAGAAGGTGGACAATTTCTCTACGTTAGAGCTG

>PGSC0003DMG401005047G-LecRK\_1586

AGTCGATATGCGCCAATATTCGGCAGCAGAAGGTGGACAATTTCTCTACGTTAGAGCTGCTTCTTCTGAC  
GCAGGTACATTTTTCAATTTCAATCTGATGTTTCGATATCTGTTTGAATTGT

>PGSC0003DMG401005047G-LecRK\_1647

TCTTCTGACGCAGGTACATTTTTCAATTTCAATCTGATGTTTCGATATCTGTTTGAATTGTTATAGAAAATAC  
GTTTTTTGTGGTAAAATAGTACTCCATTTCAAATAATGAAAAGGTAAT

>PGSC0003DMG401005047G-LecRK\_1708

TAGAAAATACGTTTTTTGTGGTAAAATAGTACTCCATTTCAAATAATGAAAAGGTAATTTAATTTGCTTC  
TATAAACTTGAATCTGAAACCTGTGGTTATTATGAAAAGAGTGCTTAA

>PGSC0003DMG401005047G-LecRK\_1769

AATTTGCTTCTATAAACTTGAATCTGAAACCTGTGGTTATTATGAAAAGAGTGCTTAATATCCTAGCGCT

ATTCTTAATTTAGTAGGAGAGAGTTGAGTCGAACTCAATTTAATGGAGT

>PGSC0003DMG401005047G-LecRK\_183

GTCCGAATTCAGACAAATGGTACGTCGGAATATGGTACAAAGAAATCAAAGAAACGACGATAGTTTGG

GTTGCGAACAGAGAAAACCCCGTCACCAATTCATCGTCTCCCCCTGTGTAA

>PGSC0003DMG401005047G-LecRK\_1830

TCCTAGCGCTATTCTTAATTTAGTAGGAGAGAGTTGAGTCGAACTCAATTTAATGGAGTGGTTGAATGTT

GGTAGAGATATATATGAAATTTAATGTATTTGTTGGGTTGAATAATAAT

>PGSC0003DMG401005047G-LecRK\_1891

TTGAATGTTGGTAGAGATATATATGAAATTTAATGTATTTGTTGGGTTGAATAATAATAATAAATG

GTCTCATTTTCATGAAGTTTGAAGTACATATTTTTAAATGATAAAAAAATG

>PGSC0003DMG401005047G-LecRK\_1952

TAATAATTGGTCTCATTTTCATGAAGTTTGAAGTACATATTTTTAAATGATAAAAAAATGGTCGTCTAGGCA

ATTTTTTACCCCTTTATTTTAGAAATTTGAAGTAATATCATGGATTGGA

>PGSC0003DMG401005047G-LecRK\_2013

CGTCTAGGCAATTTTTTACCCCTTTATTTTAGAAATTTGAAGTAATATCATGGATTGGACACGTGGAGATT

CGCCACGTCACACTAGGTTGTTAGCACGCCCTTGTTGAGATTTTACAAA

>PGSC0003DMG401005047G-LecRK\_2074

CGTGGAGATTCGCCACGTCACACTAGGTTGTTAGCACGCCCTTGTTGAGATTTTACAAAACCTCTGAAACG

ATTGTGTAGATGATGAAGTTCAATATTTTTATTTTAGGATATTCTGGAACA

>PGSC0003DMG401005047G-LecRK\_2135

TCTGAAACGATTGTGTAGATGATGAAGTTCAATATTTTTATTTTAGGATATTCTGGAACAATTTTGTAGGT

GATAAAGTTTCGATATTTCTTTTTTAGGAGATTCTAGAACGATTGTATAGA

>PGSC0003DMG401005047G-LecRK\_2196

TTTGTAGGTGATAAAGTTTCGATATTTCTTTTTTAGGAGATTCTAGAACGATTGTATAGATAATGGAGTTC

GGTATTTCATTTTTAGGAGATTCTAAAATGATTGTGTAGATGATAGAGTT

>PGSC0003DMG401005047G-LecRK\_2257

ATGGAGTTCGGTATTTCATTTTTAGGAGATTCTAAAATGATTGTGTAGATGATAGAGTTTCGATATTTTCGT

AATGAAAAAAAATGCTTGTTTAAAATATCTTGTTAGTATATATTTAATG

>PGSC0003DMG401005047G-LecRK\_2318

ATATTTTCGTAATGAAAAAAAAAATGCTTGTTTAAAATATCTTGTTAGTATATATTTAATGAGAGTAATTAAT  
AGAAAAGTAGTTGGTGCTATACTTTGAAAAACAAGAGGTTAGTACATA

>PGSC0003DMG401005047G-LecRK\_2379

AGTAATTAATAGAAAAGTAGTTGGTGCTATACTTTGAAAAACAAGAGGTTAGTACATATTATCATTACA  
ATAAGCAAATTATAATTAATTAAGTCCATTGACTCTTGACAAAGACTTG

>PGSC0003DMG401005047G-LecRK\_2440

ATCATTACAATAAGCAAATTATAATTAATTAAGTCCATTGACTCTTGACAAAGACTTGAAAACAGCCAA  
CTATATATTCGAATATATATTATCTTGCATTATATTTTATTTGATATTGA

>PGSC0003DMG401005047G-LecRK\_2623

TTTTTTGAATTATTATGCATTGAAAATTAAGAAAAAATGTAAACCAAACATATGAAAAATACCCTC  
AAAAGTCCTAAATTAGTTAATTATATGGTTTATCTACTATTAGGTGTTTG

>PGSC0003DMG401005047G-LecRK\_2684

AATACCCTCAAAGTCCTAAATTAGTTAATTATATGGTTTATCTACTATTAGGTGTTTGAATTTTTTTTCC  
TTTTTGATAAGATTGGGATGGTTAATTAGTTAGAAAATAATGCACCTA

>PGSC0003DMG401005047G-LecRK\_2745

TTTTTTTTTCCTTTTGGATAAGATTGGGATGGTTAATTAGTTAGAAAATAATGCACCTACATCTCAAGCTTC  
TAGAATTAATTATTTCCATTCAAAGAAAATTCTACTAATAATACAA

>PGSC0003DMG401005047G-LecRK\_2806

TCTCAAGCTTCTAGAATTAATTATTTCCATTCAAAGAAAATTCTACTAATAATACAAAGTTTTTATTCTC  
CCTTTGGTAAGTTAACTAAAAGTGGAGTTTCCTTTTCTTTGTTATCTT

>PGSC0003DMG401005047G-LecRK\_2867

TTTTTATTCTCCCTTTGGTAAGTTAACTAAAAGTGGAGTTTCCTTTTCTTTGTTATCTTATTCTTTCCATGTA  
TAAGCATGAGATCATATTTCAACTAGAAATTAAGTTAAGTTATATA

>PGSC0003DMG401005047G-LecRK\_2928

TCTTTCCTATGTATAAGCATGAGATCATATTTCAACTAGAAATTAAGTTAAGTTATATATACAAATAATAT  
GGAAAAAAAATGCTAATAGTAACAGACATATGAATTAAGGATAAATAA

>PGSC0003DMG401005047G-LecRK\_2989

CAAATAATATGGAAAAAAAATGCTAATAGTAACAGACATATGAATTAAGGATAAATAAAAACACTCGA  
TAATACACTAATAAAAAAGGTGAGTATAAAAGGTACATTTCTAACTTTATT



>PGSC0003DMG401005047G-LecRK\_305

ATAACACAAGATGGACGTCTTGTTATTGATAATAGAGATGGAAATTATACGTTGTCATTAAATCCGCGA  
ATAATAACTACTACATTTATCGCTAAGTTATTGGATTACAGGTAATTTTCGTC

>PGSC0003DMG401005047G-LecRK\_3050

ACACTCGATAATACTACTAATAAAAAAGGTGAGTATAAAAGGTACATTTCTAACTTTATTAATTAGTTTGAT  
GTGCACTTACAGCCTTACATGTTACGTAACCTTAGTAGTTTTTATCCA

>PGSC0003DMG401005047G-LecRK\_3111

TTAGTTTGATGTGCACTTACAGCCTTACATGTTACGTAACCTTAGTAGTTTTTATCCAGATTCTATAAATA  
TATATATTAATAAATTCACTAAATATTTAGAGGGTCAGTAACCGATTT

>PGSC0003DMG401005047G-LecRK\_3172

TTCTATAAATATATATATTAATAAATTCACTAAATATTTAGAGGGTCAGTAACCGATTTACATGAATTCAG  
TAGCTTTTTATCCAAACCATCGTTTTCTTCGGGTGAAGCTATAATAAGT

>PGSC0003DMG401005047G-LecRK\_3233

ATGAATTCAGTAGCTTTTTATCCAAACCATCGTTTTCTTCGGGTGAAGCTATAATAAGTCTGTAGGCAGG  
TTCGATAGAACTTAGTAGCTTTGACCTATAGTCTATATTTTTGCTTAAAA

>PGSC0003DMG401005047G-LecRK\_3294

GTAGGCAGGTTTCGATAGAACTTAGTAGCTTTGACCTATAGTCTATATTTTTGCTTAAAAATCCACTAATCA  
TGTATAAATTATTTATCAATAACTCAGCAAGCTATTTTTTCTAGAATTT

>PGSC0003DMG401005047G-LecRK\_3355

CCACTAATCATGTATAAATTATTTATCAATAACTCAGCAAGCTATTTTTTCTAGAATTTATAATTCATAAAC  
TTAAAATTTTAGCTCAGATTCTTATTATAAATATTCATAAACTTCAAA

>PGSC0003DMG401005047G-LecRK\_3416

AATTCATAAACTTAAAATTTTAGCTCAGATTCTTATTATAAATATTCATAAACTTCAAATCTTGGATCCGAT  
TCGTTATAAGTTAATGCTTACCTAAAAAAGAAGGTGAGAAACGGGTT

>PGSC0003DMG401005047G-LecRK\_3477

TTGGATCCGATTCGTTATAAGTTAATGCTTACCTAAAAAAGAAGGTGAGAAACGGGTTTAAAATTTAAA  
ACTTGGTCATAAAATGAACAAAGCGTGTGTAACCTTTTTAAATTTTGTATT

>PGSC0003DMG401005047G-LecRK\_3538

AAATTAAACTTGGTCATAAAATGAACAAAGCGTGTGTAACCTTTTTAAATTTTGTATTTTGTATTGCTAA

CGCAAATTGTTGCGTGACATAATGAAAAATACATTAATTTTTTGCTGCT

>PGSC0003DMG401005047G-LecRK\_366

ATTCCGCGAATAATAACTACATTTATCGCTAAGTTATTGGATTCAGGTAATTCGTCGTTCTAACAGAG  
AAAGACGAAATTATGGTGTGGCAGAGTTTTGATTATCCAACGGATACTC

>PGSC0003DMG401005047G-LecRK\_3782

GTTACACAAAAGATTCTTTTTGAAATGGATGAGAAGAAATCATTTTTTTGAACCCACTTTATATTCCAAA  
AATAGTCACTTGGCCGATTATTTTGACTTTGATTAATTTCAAATTTACA

>PGSC0003DMG401005047G-LecRK\_3965

ATGAGTTTTACTTTTAATTTTTCATAACGTTTACTTTTCATATTATAAACATAAAAAATAAATACTTTTTGAC  
AAGGACAGTCTTTGGGTCATTTGAATGGTGTACAAGTTACATTTAAAAT

>PGSC0003DMG401005047G-LecRK\_4026

TACTTTTTGACAAGGACAGTCTTTGGGTCATTTGAATGGTGTACAAGTTACATTTAAAATTATAATATTTAA  
AAATAACTAATGTATAATATTATTTAGTATATATGTATTTGACTTTACA

>PGSC0003DMG401005047G-LecRK\_4087

TAATATTTAAAATAACTAATGTATAATATTATTTAGTATATATGTATTTGACTTTACATTGGATAAATTAG  
TATCAACACTTATTTTCAATTTTAACTTAGATTTTCTAAAGGACCTT

>PGSC0003DMG401005047G-LecRK\_4148

GGATAAATTAGTATCAACACTTATTTTCAATTTTAACTTAGATTTTCTAAAGGACCTTGGAGAAGAGTC  
TCAAGAAAGGGCATTTTGGTCAATTTTCGTATTTTATCTAGAGATTATT

>PGSC0003DMG401005047G-LecRK\_4209

AAGAAGAGTCTCAAGAAAGGGCATTTTGGTCAATTTTCGTATTTTATCTAGAGATTATTATCTGCATTAAA  
GGTTGTATAAAAATAATATCACAATTACGGTGTAAACGACTAACCCCAA

>PGSC0003DMG401005047G-LecRK\_427

TCTAACAGAGAAAGACGAAATTATGGTGTGGCAGAGTTTTGATTATCCAACGGATACTCTGTTACCCGG  
GATGAAACTTGGGTGGGACTCGAAAACGGGGTTTAATCGGAATATAACGTC

>PGSC0003DMG401005047G-LecRK\_4270

CTGCATTAAAGTTGTATAAAAATAATATCACAATTACGGTGTAAACGACTAACCCCAAATCAAATTTTC  
AATCACACGGAATAATATAATCTCACATTTTCATCTCGGGATTGTTATCTA

>PGSC0003DMG401005047G-LecRK\_4392

ATTCCAAATATCAAACGACTATAGGAATTACTAAGTTATGTAATGTGCACTAATGTTTTGGATTTCATGAC  
AAAGGAAACTTGACCTCCGTTTCATTTGTATTTTCGAGCAATTCACAC

>PGSC0003DMG401005047G-LecRK\_4453

GATTCATGACAAAGGAAACTTGACCTCCGTTTCATTTGTATTTTCGAGCAATTCACACCTAGTTCAAGTT  
ACTCAATCGCGATAAAAAATAATTTGTGACTTTACTGTAAAAA

>PGSC0003DMG401005047G-LecRK\_4697

GTTGTTCTTGTCTAATTGGAGTTGTAAGCATTTGCATTTTATCAAAGAGAAAAAATTATTGGAAGGTC  
CAATAAGAAACAAAGCAGAACAAAGAGGTATGTTATTATAAGCCTATAAT

>PGSC0003DMG401005047G-LecRK\_4758

TGGAAGGTCCAATAAGAAACAAAGCAGAACAAAGAGGTATGTTATTATAAGCCTATAATTTGATTCA  
GTATGGTATTCGATATTTACTTAAGGCATAATACATAAAGAATGCACATCT

>PGSC0003DMG401005047G-LecRK\_4819

CGATTTTCAGTATGGTATTCGATATTTACTTAAGGCATAATACATAAAGAATGCACATCTATAGACACCAC  
GACTCCTTACTGTGTCTTATGGACACCTGACGTTGTTGTGACACATAAA

>PGSC0003DMG401005047G-LecRK\_5124

ACTATTTTGAACCAGGCTCTATTGAAAGAAGTCAAGATCTTCTAGTGAACACAGGCATTATTCCAAGTA  
AAAGAGAAATTTCTAGTGAAACAGTCGCGGACGAGTTTGAATTGCCATTA

>PGSC0003DMG401005047G-LecRK\_5185

TTCCAAGTAAAAGAGAAATTTCTAGTGAAACAGTCGCGGACGAGTTTGAATTGCCATTATTTGATCTCAG  
TACCTTAGCTATGGCTACTGAAGATTTTCTGATGCAAACAAGCTAGGCC

>PGSC0003DMG401005047G-LecRK\_5246

TGATCTCAGTACCTTAGCTATGGCTACTGAAGATTTTCTGATGCAAACAAGCTAGGCCAGGGCGGTTTT  
GGTTGTGTTTACAAGGTAAAGCTCATCTTGACGTTAAAAAAGCAAAA

>PGSC0003DMG401005047G-LecRK\_5307

GGCGGTTTTGGTTGTGTTTACAAGGTAAAGCTCATCTTGACGTTAAAAAAGCAAAA

>PGSC0003DMG401005047G-LecRK\_5368

TGTTGCTCGGATTGGTCAAAAATGTCATCATATCCATGTCAGATCCTCAAAAATACATTACTTTGGAAG  
ATGTAACACGGGTGTAGTGACATTTTCGAGGATCATAGCAATACATCAA

>PGSC0003DMG401005047G-LecRK\_5429

CTTTGGAAGATGTAACACGGGTGTAGTGACATTTTTTCGAGGATCATAGCAATACATCAAAGTAGTACTT  
TTTTTCATTTACAAGTTAAAGCTGATCATATATCAGTAAAAAGAATATAT

>PGSC0003DMG401005047G-LecRK\_549

GGAAATCGCCATTTGATCCTTCTCCGGGTAATTATACGTTTAACTTGATGTTAATGGTTTGCCTGAAGCT  
TATTTGACAAACAGAGATAACAATTTTCTATAGAAGTGGACCTTGGAATG

>PGSC0003DMG401005047G-LecRK\_5551

TGCTCAGACAGGACAAAAATGTCGTTGCATGCACTCGTGTGATCCTCCAAAAATGCATCACTTTGGAG  
GATTGATCTAACAAGGGTGCAATGACATTTTTTTGAGTATCTGAGCAATAA

>PGSC0003DMG401005047G-LecRK\_5612

ACTTTGGAGGATTGATCTAACAAGGGTGCAATGACATTTTTTTGAGTATCTGAGCAATAATGAAAACTA  
GTCCTTTTTTTTTTGCATTTACAATGTAAACTCAACTAGATGTGAAAAAA

>PGSC0003DMG401005047G-LecRK\_5673

AAAAACTAGTCCTTTTTTTTTTGCATTTACAATGTAAACTCAACTAGATGTGAAAAAACCTATGTTGTT  
CGGATTCTACAAAAATGTCATTGCACCCCTGATCTGACACGGGTGTTAC

>PGSC0003DMG401005047G-LecRK\_5734

CTATGTTGTTTCGGATTCTACAAAAATGTCATTGCACCCCTGATCTGACACGGGTGTTACAACATTTTTCAA  
GGATATGAGCAACATATGAAAAACTAGTTTTTGCCTTTACAAGGTAGAC

>PGSC0003DMG401005047G-LecRK\_5795

CATTTTTCAAGGATATGAGCAACATATGAAAAACTAGTTTTTGCCTTTACAAGGTAGACGTGAAAACAAC  
CTATGTTGTTTCGTATCCTACAAAAATATCATTACACCCTTGTCGGATCTC

>PGSC0003DMG401005047G-LecRK\_6039

ATCTTCTTTTTTTTTTATTATCAGGGAATAATAGATGAAGGTCAAGAAATAGCAGTGAAAAGGCTGTCAA  
AGAATTCAGGCCAAGGAGTAGAGGAATTCAAGAATGAGCTAAGATTAATT

>PGSC0003DMG401005047G-LecRK\_61

AATCCTCGCAATAGCAGCAACAACAACAGATAATACGATAACGATTACAAATCCCCTTACGATATCGAAA  
ACTTTAGTCTCTCAACAAAAAAAATTCGAATTAGGATTTTTCACTCCTGG

>PGSC0003DMG401005047G-LecRK\_610

GCCTGAAGCTTATTTGACAAACAGAGATAACAATTTTCTATAGAAGTGGACCTTGGAATGGTGTGGATTT

AGTGGTGTACCAGAAATGAAGCCAACAGATATTATAGTTTTCGAGTTTCA

>PGSC0003DMG401005047G-LecRK\_6222

ATGTTGATATACGAATACATGGAAAATAAAAGCTTGGATTCAATCTTATTCAGTAAGTCGTTCTTATGAT  
CAGTAACTATGTTTATGTGTGCTATTGGACTTCAAATAACAAATATAAC

>PGSC0003DMG401005047G-LecRK\_671

GTTGGATTTAGTGGTGTACCAGAAATGAAGCCAACAGATATTATAGTTTTCGAGTTTCAGATGAATAAG  
GATGAAGTTTACTACACTTTTGAGGTATGTTCTGCTCTTCACGTATGAGTC

>PGSC0003DMG401005047G-LecRK\_6832

TAAGTACACCAAAATTATCACAACCTTAGTCATCATTTCTAACTAAGTCGGAACAGAATTTTGAGTTTATGC  
GTTCTGAATTCTAAAAAATATAGCTAATTAGTAGGTTCTCGATAAATT

>PGSC0003DMG401005047G-LecRK\_6893

GAGTTTATGCGTTCTGAATTCTAAAAAATATAGCTAATTAGTAGGTTCTCGATAAATTATTTATGCATGT  
TAAGTAGATTTTATAACATAACTACAAGGTTTTTACTAAAGTTGCTACT

>PGSC0003DMG401005047G-LecRK\_7015

GTTCTGTGGAACCTGTAACCTTCTCTCTAGTTCCGCCCTAAATGTATAATCCGCTCTGCAGGCGTGGAAA  
CTATGGAGAGAAGGAGGAGCCTCAGAACTACTCGATTCATCAGTTGGTG

>PGSC0003DMG401005047G-LecRK\_732

TGAATAAGGATGAAGTTTACTACACTTTTGAGGTATGTTCTGCTCTTCACGTATGAGTCTGATTCTTTTTT  
AGTAATGACAGGTAGCGTTATGTTGAGTCTCATGCTAGTGGTGGGATCG

>PGSC0003DMG401005047G-LecRK\_7381

GGTAGAGTTAAACGTTTCAGACAGATCATAGGCTTGCCCGCTTCTACGTGACAGAATAGAAATAAAGGCA  
AATTCCACTGATGGGAGTGTGAACATAGAGATTTACGACGAATGAATGCA

>PGSC0003DMG401005047G-LecRK\_7442

TAAAGGCAAATCCACTGATGGGAGTGTGAACATAGAGATTTACGACGAATGAATGCAATACATGGAT  
GATGGATCCCTGCTGGCAAAAATGTATAGATAGTACATTAGTGTTTTTTCT

>PGSC0003DMG401005047G-LecRK\_7593

TTTTAACTTACCCTCCTATAGTACATTAGTACTACGAGTGGTTAGCAATTTTCTCTTTGTACACTTACCTTG  
ATTTTTTTTACAAAATAATGTTTTTTTTTGGGTAGTTAATTATAGAA

>PGSC0003DMG401005047G-LecRK\_854

GCAATCTTCACTTCATGAACAAGTGTCTATTTCTTATCATGGTATCAGAGTTAGACTTGTCTGTTCAATTCT  
TCGTTTATATGATGTTAGTGGGGTTAGGGGACTCTTTTGTCTTCTTAT

>PGSC0003DMG401005729RLKWAX-EGF\_0

CAATACCTGTATTAAGAAATCCAACCTCTCAATAACAAATGACAAAATAGTTTGGTGCCTATCCATTAGACT  
ATAAAGCTTTACAACCTCCAAAAATTCAACATTTCATACTTCATGTTGA

>PGSC0003DMG401005729RLKWAX-EGF\_1037

GTACACCCAAAACCTTGCTATTTATCTTTCCTCATTCTTATAGAACATTGTATTTGCCGCTAAATTTTCAT  
AATTTGCTTAAATCTAGCTATAATTATCTTATATTTTTTATATAAGAA

>PGSC0003DMG401005729RLKWAX-EGF\_1098

TAAATTTTCATAATTTGCTTAAATCTAGCTATAATTATCTTATATTTTTTATATAAGAAAAATCGAATCCCT  
TTATTCTTAGAAATTGAACTCAAAAATTTTAATTATAAGTAAAAAAA

>PGSC0003DMG401005729RLKWAX-EGF\_1159

ATCGAATCCCTTTATTCTTAGAAATTGAACTCAAAAATTTTAATTATAAGTAAAAAAAAGTTGTTATTGAA  
TCAAGGTTTCGTAAACTTGCCTTAAAACCTAAAGGTGATAAGTCAAGACG

>PGSC0003DMG401005729RLKWAX-EGF\_122

AAAATATATACTTCTTTTCGTTCTAATTTATGTGGCGATGTTCGAATTTTGAGAGTGTTATTACATTTGAAG  
CTGCAAAAGTTTATACTACTACTATCTCATGTATACCAATCAGCTTTGC

>PGSC0003DMG401005729RLKWAX-EGF\_1220

TGTTATTGAATCAAGGTTTCGTAAACTTGCCTTAAAACCTAAAGGTGATAAGTCAAGACGTGTTCCATAAA  
TTTAGAGGTCATTTGGTTATGGGTTAGGAAGAGAATTATTTATGTATCAA

>PGSC0003DMG401005729RLKWAX-EGF\_1281

TTCCATAAATTTAGAGGTCATTTGGTTATGGGTTAGGAAGAGAATTATTTATGTATCAAATTAGCATAGT  
GAAAACCTTGAAACCATATTTAGTAGCTTGTTAGTTGTTTATACAAAATTT

>PGSC0003DMG401005729RLKWAX-EGF\_1342

TAGCATAGTGAAAACCTTGAAACCATATTTAGTAGCTTGTTAGTTGTTTATACAAAATTTAGCACGTCAAAT  
ATGATGTTTAGTTATCATTTTACAATCTCATATAAATAAATATGTATA

>PGSC0003DMG401005729RLKWAX-EGF\_1403

CACGTCAAATATGATGTTTAGTTATCATTTTACAATCTCATATAAATAAATATGTATAAATTATGAATCA  
ACTTATATCTTATTTTATAGTACAAAATAGAAGATGAAATAATCAATGT

>PGSC0003DMG401005729RLKWAX-EGF\_1464

TTATGAATCAACTTATATCTTATTTTATAGTACAAAATAGAAGATGAAATAATCAATGTAATTAATCTTTG  
CATTATTAACCGAGGACCAATCAATCTCTTATAAAATAAATAATAAATA

>PGSC0003DMG401005729RLKWAX-EGF\_1525

TTAATCTTTGCATTATTAACCGAGGACCAATCAATCTCTTATAAAATAAATAAATAAATAAATAAATAAAGG  
GTCACAGTCTTTCTGTTCAAGAAGATTGATACAAAGGTTTGATCACTT

>PGSC0003DMG401005729RLKWAX-EGF\_1586

ATATAAAAGGGTCACAGTCTTTCTGTTCAAGAAGATTGATACAAAGGTTTGATCACTTATTTTTTCCAAC  
TAATGCTATTTAATTTAATCTAGAAAAAGTCCAATGTTGTGATTCCATA

>PGSC0003DMG401005729RLKWAX-EGF\_1647

TTTTTCCAATAATGCTATTTAATTTAATCTAGAAAAAGTCCAATGTTGTGATTCCATAGTTGGCGTACGT  
GTTTAGTCATTATCATATTATCTTATTTAATACGCGAATCAGCCAATGG

>PGSC0003DMG401005729RLKWAX-EGF\_1708

TGGCGTACGTGTTTAGTCATTATCATATTATCTTATTTAATACGCGAATCAGCCAATGGTAACAAGTTTTT  
TTGAGTATAGCTGATGTTAGTATTTGACTTTAATTCTAATTTTTGCATA

>PGSC0003DMG401005729RLKWAX-EGF\_1769

ACAAGTTTTTTTGAGTATAGCTGATGTTAGTATTTGACTTTAATTCTAATTTTTGCATACTTTGAATTCAAA  
AGAATCAAAATGCATAGTTTATAATTTTAAATTTTTGCTTACTTTGA

>PGSC0003DMG401005729RLKWAX-EGF\_183

ACATTTGAAGCTGCAAAGTTTATACTACTACTATCTCATGTATACCAATCAGCTTTGCAATTTGTTTGAT  
ATCAATTGATCATGTTTCAAATCAATCAATCTGCTTCTTCTACTACTA

>PGSC0003DMG401005729RLKWAX-EGF\_1830

TTGAATTCAAAGAATCAAATGCATAGTTTATAATTTTAAATTTTTGCTTACTTTGAATTCAAATGCAT  
AGTTTATTGCGTCTAAAATCTGAAACAAGATTGAATTTTCCAGAAAGA

>PGSC0003DMG401005729RLKWAX-EGF\_1891

TCAAATGCATAGTTTATTGCGTCTAAAATCTGAAACAAGATTGAATTTTCCAGAAAGAGGCCAAAAAT  
GAAGGGGCTACTGCGAATATACTGAATTGAAAGGCCATTAAAGATTGGG

>PGSC0003DMG401005729RLKWAX-EGF\_1952

GCCAAAAATGAAGGGGCTACTGCGAATATACTGAATTGAAAGGCCATTAAAGATTGGGCTAGTGGCT

AAGGATGCCAAACTAAGCCCAAAAATAAAGGTCCCGCCCAACTTGCGATTTT

>PGSC0003DMG401005729RLKWAX-EGF\_2013

AGTGGCTAAGGATGCCAAACTAAGCCCAAAAATAAAGGTCCCGCCCAACTTGCGATTTTGATTTAGGGA

AGACAGAAAAAAGTGGGTTGAAATTAAGGGTATGTTTGCTACGAAGGAAA

>PGSC0003DMG401005729RLKWAX-EGF\_244

TTTGTGGATATCAATTGATCATGTTTCAAATCAATCAATCTGCTTCTTCTACTACTACTTTTTTGTGTCTC

TGTTTTTCTCCTTCGTCAGATCCAGTGCAAATAATGATACTTCCTTG

>PGSC0003DMG401005729RLKWAX-EGF\_2623

AACTAGGGTAAGCTGAAAATTTTTAAAATGGTGAATAATTGAATGAGTTACAATATAGGAAATCTAC

CTATTTAGACAATCATCCTTACCATAGCTACTAAATTTCACTATACTTTAG

>PGSC0003DMG401005729RLKWAX-EGF\_2684

AAATCTACCTATTTAGACAATCATCCTTACCATAGCTACTAAATTTCACTATACTTTAGAATAATTACATCA

TCTCTCGTCTCTTCTCGGATAGATCAGTGGATATTAATACTCGATACA

>PGSC0003DMG401005729RLKWAX-EGF\_2806

AATACATGAAATTATGAAACACAAATACAAAGAAGTAGAGGAACGAGAGAGGGAGAGAAGTGAGATA

TATTCGTTAGATATAGTATATCTAGAGGAAAATATTCGATATCTAGAGACAAC

>PGSC0003DMG401005729RLKWAX-EGF\_2867

GAGATATATTCGTTAGATATAGTATATCTAGAGGAAAATATTCGATATCTAGAGACAACCTCGGACAAAAT

ACGTAATTATTATTGAAACTATGGATGCGTTGAGTAATTAGCATCTATAC

>PGSC0003DMG401005729RLKWAX-EGF\_2928

GGACAAAATACGTAATTATTATTGAAACTATGGATGCGTTGAGTAATTAGCATCTATACTAGTGTGCTTT

ATAAAAGTTGTTCAATTTACCCATTATTAATTATCTTAAGCTCAATTCA

>PGSC0003DMG401005729RLKWAX-EGF\_2989

GTGTGCTTTATAAAAGTTGTTCAATTTACCCATTATTAATTATCTTAAGCTCAATTCATAAAAATCTAAG

ATGGATTGAGCGGGTCTTTTTTTGGGCTTAGTTTGACACCCCTAGGCT

>PGSC0003DMG401005729RLKWAX-EGF\_305

TTTTTGTGTCTCTGTTTTTCTCCTTCGTCAGATCCAGTGCAAATAATGATACTTCTTGAAGTATGCATTTT

GTCCTAAATCAACCTGCAATGGTGTGAAATTTATATCCATTCTGGA

>PGSC0003DMG401005729RLKWAX-EGF\_3050



AAAATCTAAGATGGATTGAGCGGGTCCTTTTTTTGGGCTTAGTTTGACACCCCTAGGCTAACCCACTTTA  
ACCTATCCAATTTAGGCAACTGCTCATTATACCCCTAGGCTAGCCC

>PGSC0003DMG401005729RLKWAX-EGF\_3111

CCCCTTTAACCTATCCAATTTAGGCAACTGCTCATTATACCCCTAGGCTAGCCCATTGTTTTAGGA  
CAAATCCATGAAAATTAGGGAAGAAAATTAGAAAAGATGACAACAATT

>PGSC0003DMG401005729RLKWAX-EGF\_3172

TTGTTTTAGGACAAATCCATGAAAATTAGGGAAGAAAATTAGAAAAGATGACAACAATTGCGTTAGAAC  
CTTACGCTTATGTGATGCAGTGCGAACACTCAACTCAAGTCGCAGTTTCTCT

>PGSC0003DMG401005729RLKWAX-EGF\_3355

AAGCCTTGTTTGTAGACAAAATTCAGGTTTCTGAGTGTGATGGTCTAAAATAGCCTCTACCCCTTTTTATT  
ACTCCTGTAATATTCTGACTATCAACTTCACAAAATGCCAAAAAATATT

>PGSC0003DMG401005729RLKWAX-EGF\_3416

CCTTTTTATTACTCCTGTAATATTCTGACTATCAACTTCACAAAATGCCAAAAAATTTTTAAAACCTTAAT  
AATATACAAATTGTCAACAGGTGCATATGAATATGATGCGATTTTTGG

>PGSC0003DMG401005729RLKWAX-EGF\_3477

AAAACCTTAATAATATACAAATTGTCAACAGGTGCATATGAATATGATGCGATTTTTGGAATTTTATATTC  
CACTCAAAGAAAGAATTCTCAAACACACATGTCCTTTTCTTGTTCAAGA

>PGSC0003DMG401005729RLKWAX-EGF\_3538

TTTTATATCCACTCAAAGAAAGAATTCTCAAACACACATGTCCTTTTCTTGTTCAAGAGTTTCCGCCTCTT  
TTCCTTTTTTTACTTTGTTTTCTTTCATCTAGACCTGTAATTTTTAGT

>PGSC0003DMG401005729RLKWAX-EGF\_3599

TTCCGCCTCTTTTCTTTTTTTACTTTGTTTTCTTTCATCTAGACCTGTAATTTTTAGTCTGCGGAAAGTTTC  
AGCTTTCAAGGTTATTGAATGGAAGTTACCAATAAGATTGGTGTAAA

>PGSC0003DMG401005729RLKWAX-EGF\_366

GTATGCATTTTGTCTAAATCAACCTGCAATGGTGTGAAATTTTATATCCATTCTGGAGACTTGACAATT  
ACAACGCCAGCGCTCCTCAGTACTGTGGTTATCCGGGATTTGGAATCAA

>PGSC0003DMG401005729RLKWAX-EGF\_427

CTTGACAATTACAACGCCAGCGCTCCTCAGTACTGTGGTTATCCGGGATTTGGAATCAATTGCACAAAAA  
ATCAACCGCTTCCGATTATTTACCTTCCAGGCGATGCTTTCTACGTCAA

>PGSC0003DMG401005729RLKWAX-EGF\_4392

ATGATCCCCTATTACGCTATGGTCCTGACTTTGGGATTCTCATCCTGTTCTATGCTTGCCTTTTGATATAC  
CTTCTGAATGGAAAAATTTACCTTTAGCTGCAATAAACTGGAGAGT

>PGSC0003DMG401005729RLKWAX-EGF\_4514

AGTCATGGTTTCTATCCAGATCAGTCATTTATATCATTCTGGGGACCGCAGTATGGGAGTTGTGAGCGTA  
ATGTCATAGTTCTGTGTTGTTAACGGCATTAAAGCGGTTCCAAGACCAA

>PGSC0003DMG401005729RLKWAX-EGF\_488

GCACAAAAAATCAACCGCTTCCGATTATTTACCTTCCAGGCGATGCTTTCTACGTCAAAGTATAGATTAT  
AAAAGCTATTCTCTCGCTCTAGTGGACGCTGATGTTTTCAACGAGAAAT

>PGSC0003DMG401005729RLKWAX-EGF\_549

TATAGATTATAAAAGCTATTCTCTCGCTCTAGTGGACGCTGATGTTTTCAACGAGAAATGCCCTAGAGCA  
CGTCACAACCTTACATTGGAGAAATTGCCGTTGAAGTTTTCCGATTCCGC

>PGSC0003DMG401005729RLKWAX-EGF\_5551

CTTCTACCAACCTAAGATTTGAATACTTCCCGAATTTCTTTACCTTTCTAGTTCTTCTGTCTAATCCGTGAT  
TGAAATCTCTAATTCTTTTGCCGCATCTAGAGTCTTTTGACTCTTAC

>PGSC0003DMG401005729RLKWAX-EGF\_5612

CTAATCCGTGATTGAAATCTCTAATTCTTTTGCCGCATCTAGAGTCTTTTGACTCTTACCCAGTAGGTGTT  
GAAGGTGGACTTTAGATGTTAATAAGACTTACAAATTATTTTTCACCTA

>PGSC0003DMG401005729RLKWAX-EGF\_61

CCATTAGACTATAAAGCTTTACAACCTCCAAAAATTCAACATTTCATACTTCATGTTGACAAAAATATATA  
CTTCTTTGTTCTAATTTATGTGGCGATGTTTGAATTTGAGAGTGTTA

>PGSC0003DMG401005729RLKWAX-EGF\_610

CCTAGAGCACGTCACAACCTTACATTGGAGAAATTGCCGTTGAAGTTTTCCGATTCCGCTTTGGAACCTA  
CCTTCTATTTCAATTGTACGGAACCTCTACCTGATTCTTCCCGCAGAA

>PGSC0003DMG401005729RLKWAX-EGF\_6161

AGTAAGAAGTTGTATTTATGTCTTTATAACTACTGGAGATATTTGTCGTGGTTCTGTATCATCACTTG  
TTTATGTCTGCATTACAGGTGATAAAAGAGATATCAGAGTGAAGGTTGC

>PGSC0003DMG401005729RLKWAX-EGF\_6222

TCATCACTTGTATGTCTGCATTACAGGTGATAAAAGAGATATCAGAGTGAAGGTTGCCGTAGGTAAC

TTCCTTTGACCATGTTTCATCATATGATATCCTTCTCTTTAAATGATCAAG

>PGSC0003DMG401005729RLKWAX-EGF\_671

TGGAACCTACCTTCTATTTCAATTGTACGGAACCTCTACCTGATTCTCTTCCCGCAGAATGCTTAAAATCA  
AATGGAAACAGGACGCATTTCTACGTTGGGGAAACTGAGCCAGACGATT

>PGSC0003DMG401005729RLKWAX-EGF\_732

CTTAAAATCAAATGGAAACAGGACGCATTTCTACGTTGGGGAAACTGAGCCAGACGATTTGAACTGGTT  
TGGGATTTGTGAAGAGAAAGTGGTGGCGACGGTGACGGAGAGGAGAAGCTT

>PGSC0003DMG401005729RLKWAX-EGF\_793

AACTGGTTTTGGGATTTGTGAAGAGAAAGTGGTGGCGACGGTGACGGAGAGGAGAAGCTTCCAGAACG  
ATGATTGGATTGGAGGATTTGGTGC GGCCATGGAAGACGGTTTCGTGCTGGAC

>PGSC0003DMG401005729RLKWAX-EGF\_854

AGAACGATGATTGGATTGGAGGATTTGGTGC GGCCATGGAAGACGGTTTCGTGCTGGACTGGCGGAGC  
GCGGCGGAGTGC GGCCAGTGTGAGGATTCAGACGGGAGGTGCGGTTATAACA

>PGSC0003DMG401005729RLKWAX-EGF\_915

GCGGAGCGCGGCGGAGTGC GGCCAGTGTGAGGATTCAGACGGGAGGTGCGGTTATAACAATTCAACC  
CATAACCTTTTGTGCTATTGCCAAGATGGTACCGTTAAGTTTAAACATTGCAA

>PGSC0003DMG401005729RLKWAX-EGF\_976

TCAACCCATAACCTTTTGTGCTATTGCCAAGATGGTACCGTTAAGTTTAAACATTGCAAAGGTACACCCA  
AAACTCTTGCTATTTATCTTCTCATTCTTATAGAACATTGTATTTGCC

>PGSC0003DMG401005927-(rev)LRR-RLPs\_0

ATGCATTACCATTTTTAGTTCATAGTTGTTGCTTAAACACATTATTTTATTCTATTATCTTCTTATTCTCTT  
CGATGCTGCATCTACCACAAATCAAATATCTAATTATATTGACCAT

>PGSC0003DMG401005927-(rev)LRR-RLPs\_756

AACTTTGTGGGATGTGTACCTGTTAGTATAGGCAAATGGTTAGATTGAACGAGTTGCTTCTCTTAAATA  
ACAAGTTACATTCATGTTTGCCAAATGATATTGGGATGCTGAAGAATGTG

>PGSC0003DMG401005927-(rev)LRR-RLPs\_819

TTAAATAACAAGTTACATTCATGTTTGCCAAATGATATTGGGATGCTGAAGAATGTGACTGTGTTTGATA  
TAAGTTATAATGAAATGATGGGCACTTTACCTGATAGTATTGGAGGGATG

>PGSC0003DMG401006401LRR-RLKs\_0

GTTAGCCTTCGACATGGTTCAGAGTATTTTATCTCCTGCCTCTCTTATATCACTTCACAATTACTTTTGC  
TTCCATTGAGGAAGCAGCTGCTCTTCTAAAATGGAAAGCAACTTTCCA

>PGSC0003DMG401006401LRR-RLKs\_1098

TGGGAAACTTGAGAGGTTACGGTGACTAGCAACAAGCTGACAGGGCCAATACCAAGAAGCTTGAGCA  
ACTGCTCGAGTTTTAAATGGGTTCGCTTTAATAACAACAGTTTCATTGGAAA

>PGSC0003DMG401006401LRR-RLKs\_1159

TTGAGCAACTGCTCGAGTTTTAAATGGGTTCGCTTTAATAACAACAGTTTCATTGGAACTTATCCGAAG  
CTTTTGAATCTATCCAGAGCTTCAGTTCATTGATTTGAGCGACAATAAT

>PGSC0003DMG401006401LRR-RLKs\_122

ACCAGAATAATTCCTTATTCGCTTCTTGGACACTAAGTCATCCTGCTGCTGCCAAGAATTCTCCAGCCAT  
GATCCATGCAGGGACTGGTATGGAGCTAATTGCTTTAATGGTCGGATAA

>PGSC0003DMG401006401LRR-RLKs\_1220

TATCCGAAGCTTTTGAATCTATCCAGAGCTTCAGTTCATTGATTTGAGCGACAATAATTTTCATGGTGA  
GCTCAGCAGCAACTGGGGGAAATGCGAAAATTTGATTGATCTGCGTGTAG

>PGSC0003DMG401006401LRR-RLKs\_1342

AGAAATAACATTAGTGGTAGCATACCACCAGAGATTGGAAACGTCCAAGGGCTTCTTGGACTTGATCTT  
TCATCGAATCATTGCTTGGGCAGATTCCAAAGGAATTTGGAAGATTAAT

>PGSC0003DMG401006401LRR-RLKs\_1403

TTGATCTTTCATCGAATCATTGCTTGGGCAGATTCCAAAGGAATTTGGAAGATTAATCTCTGGTAAG  
GCTTCTGTGCAAAAACAACAATATTTCTGGCAATATATATGAGGAACTTG

>PGSC0003DMG401006401LRR-RLKs\_1464

TCTGGTAAGGCTTCTGTGCAAAAACAACAATATTTCTGGCAATATATATGAGGAACTTGGGTCACTGACA  
AAGTTAGAGTCCCTTGATTTATCAGACAACAGATTGAATGGATCAATCCC

>PGSC0003DMG401006401LRR-RLKs\_183

TTCCAGCCATGATCCATGCAGGGACTGGTATGGAGCTAATTGCTTTAATGGTCGGATAAACAAGTTGAA  
TATTTCAAATTCTGGTGTGATTGGTACACTCCATGATTTTCCATTTTCATC

>PGSC0003DMG401006401LRR-RLKs\_1891

AATGCTTCGTTAGAAGGTAATAAAGGTCTTTGCGGCAATGTAACAGGATTCCAGCCCTGCAAAAAGCCA  
TCTTCTGTGGTGA AAAAGCACTCAATAGCAAAGGGACGTAAACTCATCCTC

>PGSC0003DMG401006401LRR-RLKs\_2074

ATGTTTAATAAAAAGAAGGAGAGTTAAAGACGTTGAAAGAAGGGATGGTGATGGTTGGCTTTCGATATC  
CATGTTAGATGGAAAGGCATTGTACAGGGATATCTTAAATGCCACTGAGGAG

>PGSC0003DMG401006401LRR-RLKs\_2440

TTGTCGAGTATTCTGAGCAATGAAGTTGAGTCCAAGAAATTGGATTGGCTTAAAAGGGTGAATATCATC  
AAAGGTGTTGCTTTTGCTTTATCTTACATGCACCACGATTGCTCACCGCCA

>PGSC0003DMG401006401LRR-RLKs\_2684

GAACATATGGCTATGTTGCACCTGGTAAGGTCTAAATTTAATTTCTATTTTATTCAGACTTCGTGAACAT  
AGCCAAACACTCTATACTGTTTTATCTCATTTACACATCTAAATTGTT

>PGSC0003DMG401006401LRR-RLKs\_305

TACTTTTTCTTGAATATGTTGATCTTAGCATGAACAACCTTTCTGGTCCCATTCCGGCAGAAATAGGGAAA  
CTTGCAATCTTGTTGAAGTTGCTCTTGATACGAACCAGTTAACAGGTC

>PGSC0003DMG401006401LRR-RLKs\_427

ATTCTCCGGAAATAGGCAACTTGATTAATGCAAAATTGTTCTATGCTTTCTCCAATGAATTGGCTGGCTC  
CATTCTATTGAAATAGGGAAGATGAAGTCACTTGAGAGTTTAAGCTTA

>PGSC0003DMG401006401LRR-RLKs\_488

TGGCTGGCTCCATTCCTATTGAAATAGGGAAGATGAAGTCACTTGAGAGTTTAAGCTTACAGAGAAACA  
ATCTTTCTGGTTCAATTCCAAAACATTTAGGTGAATTAACCAAGCTCAAAA

>PGSC0003DMG401006401LRR-RLKs\_610

TTGTACCTTTATTCTAACCAACTTTCTGGCCCCATTCCAACAGAAATAGGGAAACTTGTCAATCTTGTTGA  
AGTTGATCTTGATACAAACAAGTTAACAGGTCATATTCCTCCGGAAATA

>PGSC0003DMG401006401LRR-RLKs\_671

ATCTTGTTGAAGTTGATCTTGATACAAACAAGTTAACAGGTCATATTCCTCCGGAAATAGGCAACTTGAT  
TAATGCAAAAATATTCTATGCTTTTTCCAATGAATTGTCTGGTCCCATT

>PGSC0003DMG401006401LRR-RLKs\_732

CAACTTGATTAATGCAAAAATATTCTATGCTTTTTCCAATGAATTGTCTGGTCCCATTCTGCAGAAATAG  
GGAAGATGAGGTCCTTGTGGATTTACTGTTCCAGAGAAACAATCTTTC

>PGSC0003DMG401006401LRR-RLKs\_976

CTCCATACCAACAAACTATCTGGTTCCATTCCAAAAGAACTTGCATATTTGGATAACTTGCGAGTTCTAAC

AATGACTAAAAATCAGCTTTCAGGCCATTTGCCTGAGCATCTTTGTCAA

>PGSC0003DMG401006653LRR-RLPs\_0

TTCAAGAATTTACCTGTTGGAAGAACCCACCAGAAGAAAACCTCCAAAAACAGACTAAAAATCCCAAC

TTTGAGTTTTTCTTTCAACAATTATAAGTTTCAGTGAAAATCTCAAGATGT

>PGSC0003DMG401006653LRR-RLPs\_1037

ATATTTGAGTAGTAAAGATTGATAATAATGTTTATATGTTGAGATAATTGTTTGCTCCTTTTTGGTGGAAA

ATGTTTTTCGCAAACATATGTTCTAGCAGCCAAAATCAGAAAAAAGAGA

>PGSC0003DMG401006653LRR-RLPs\_1098

TTGGTGGAAAATGTTTTCGCAAACATATGTTCTAGCAGCCAAAATCAGAAAAAAGAGATTACAAACAC

ACCGTTGATGTCCTTATCTGTTTTTGGAGCACATAGTGACCATATAAGATC

>PGSC0003DMG401006653LRR-RLPs\_1159

ACAAACACACCGTTGATGTCCTTATCTGTTTTTGGAGCACATAGTGACCATATAAGATCATTGAGATTAA

ATTCATGCATTATGGTTCAAATTGTGGTCTTTGGTTGCAAGACTGTCCCT

>PGSC0003DMG401006653LRR-RLPs\_122

TTTTTTTCAAGAATTCATCTTTTAGGAAAACCCATAAGAAGAAAACCTCCAAAAACAGATTCAAAATCTCA

CCTTTTTTTTAGATCTTTTCAACATTTTTCAGTTTATTAGCTTACAAAA

>PGSC0003DMG401006653LRR-RLPs\_1281

ATGGACTTTGTTTAATTTCTATCTAGAATACATCTTGTGATTTAGTTTGTGAGGGCAAAAAATGACCTTT

TGAATTTTCAATTTTGTCTTACAGTTGGCATGGCCAGATGTTGTGAT

>PGSC0003DMG401006653LRR-RLPs\_1342

AATGACCTTTTGAATTTTCAATTTTGTCTTACAGTTGGCATGGCCAGATGTTGTGATTTAGTCAACTAA

AGTTTTTGTTTTTTCTTACTTCAATTTTTTGGATTTTATGTTTTTCC

>PGSC0003DMG401006653LRR-RLPs\_1403

AGTCAACTAAAGTTTTTGTTTTTTCTTACTTCAATTTTTTGGATTTTATGTTTTTCCATTTTTGGGGTTTTC

TGTATTTATGTTGTTTTTGGTTGAATTGTTAAGGCTAGTGGAAT

>PGSC0003DMG401006653LRR-RLPs\_1464

TTTTGGGGTTTTCTGTATTTATGTTGTTTTTGGTTGAATTGTTAAGGCTAGTGGAATTGCTGCATTTGCT

AGAAGGACAGTGGAAGATTCAAGAAAAATCTTCACACCAGAACAATA

>PGSC0003DMG401006653LRR-RLPs\_1525

CTGCATTTGCTAGAAAGGACAGTGGAAGATTCAAGAAAAATCTTCACACCAGAACAATACCCTTCTTGG  
GTTGTTTTCTCAAATCAGCAAAAGATGAAGTCTTTAACTTTTCTTTAGGAT

>PGSC0003DMG401006653LRR-RLPs\_1586

CTTCTTGGGTTGTTTTCTCAAATCAGCAAAAGATGAAGTCTTTAACTTTTCTTTAGGATGTATTTGGTAGG  
ACGTAGTGGCTGAGTCAGAATTTTTAGTTTATATGGGTTCTAGACCATT

>PGSC0003DMG401006653LRR-RLPs\_1647

ATTTGGTAGGACGTAGTGGCTGAGTCAGAATTTTTAGTTTATATGGGTTCTAGACCATTGGTTCTTTTTTG  
CTTTGTTGGGTTTCTGAAAATTATGTTGTTCTGGACTCTCAAAAAATGTT

>PGSC0003DMG401006653LRR-RLPs\_1708

TTCTTTTTGCTTTGTTGGGTTTCTGAAAATTATGTTGTTCTGGACTCTCAAAAAATGTTGTTTGTACCCGTG  
TCGGATTCTCTAAAGTTGCACTAGTTTGGAGTATACGCCAGTAACCCA

>PGSC0003DMG401006653LRR-RLPs\_1769

TTGTACCCGTGTCGGATTCTCTAAAGTTGCACTAGTTTGGAGTATACGCCAGTAACCCATCACCCATCACC  
ATTTTTGAAGAGTCCGAGCAACATTGACTGAAAAGACTATTTATACATC

>PGSC0003DMG401006653LRR-RLPs\_183

CAAAATCTCACCTTTTTTTTAGATCTTTTCAACATTTTTCAGTTTATTAGCTTACAAAAATCACTGAACAAG  
GAAGAAGGGATTCAAGAAAAAGTGAATAAAAAATGTCATTTGTTTTAG

>PGSC0003DMG401006653LRR-RLPs\_1830

ACCCATCACCATTTTTGAAGAGTCCGAGCAACATTGACTGAAAAGACTATTTATACATCTTAACATTAATA  
TAGGGTTAAACCAAAGCTACTGGATTTTGCCGTACTTGTAGCTAAAGCA

>PGSC0003DMG401006653LRR-RLPs\_1891

AACATTAATATAGGGTTAAACCAAAGCTACTGGATTTTGCCGTACTTGTAGCTAAAGCAATGTCATTTAT  
CATAAATCTGTAAAATGACTTATTTTCTGGAAAATGTTTTTCGTGATGGA

>PGSC0003DMG401006653LRR-RLPs\_1952

GTCATTTATCATAAATCTGTAAAATGACTTATTTTCTGGAAAATGTTTTTCGTGATGGATTTTTTTCTGGG  
AAAAGACATTTATTGTAGATTGAATCAGCAAATTGGATAGTGTGTTTGGT

>PGSC0003DMG401006653LRR-RLPs\_2013

TTTTTCTGGGAAAAGACATTTATTGTAGATTGAATCAGCAAATTGGATAGTGTGTTTGGTGAAAAATATGT  
GAGTAGTAAAGATTGATAATAATGTCTATATGTTGAGATAATTGTTGTTT

>PGSC0003DMG401006653LRR-RLPs\_2074

AAAATATGTGAGTAGTAAAGATTGATAATAATGTCTATATGTTGAGATAATTGTTGTTCTTTTTGATGG  
AAAATAAGATTTTACCAAACACACTGTTGATGTCCTTACTGTTTTGAG

>PGSC0003DMG401006653LRR-RLPs\_2135

TTTTGATGGAAAATAAGATTTTACCAAACACACTGTTGATGTCCTTACTGTTTTGAGCACATAGTGACC  
ATATAAGATCATTGAGATTAATTAGTGCATTATGGTTCAAATTGTGGT

>PGSC0003DMG401006653LRR-RLPs\_2196

CATAGTGACCATATAAGATCATTGAGATTAATTAGTGCATTATGGTTCAAATTGTGGTCTTTGGTTGCA  
AGACTGTCCCTTATGGACTTTGTTTAATTTCTATCTAGAATACATCTTG

>PGSC0003DMG401006653LRR-RLPs\_2318

ATTTAGTTTGTGAGGGCAAAAAATGACCTTTTGAATTTTCAATTTTGTCTTACAGTTGGCATGGCTTA  
ATTCTCATCTTGAATAGATCTGGCCATATGTGGATGAGGTTAGGGGTTT

>PGSC0003DMG401006653LRR-RLPs\_2379

GCATGGCTTAATTCTCATCTTGAATAGATCTGGCCATATGTGGATGAGGTTAGGGGTTCAATGTCTATAC  
ATAGTTTAGTTTTCCACTCTATTGCGATTCTGCAATTTTTCATTTCCCC

>PGSC0003DMG401006653LRR-RLPs\_244

CACTGAACAAGGAAGAAGGGATTCAAGAAAAAGTGAATAAAAAATGTCATTTGTTTTAGGGGTTGTGTT  
TGGAATAGCATTGACTTGCTATAATAGTTGCTTTTGTGAAATCTGAAAA

>PGSC0003DMG401006653LRR-RLPs\_2440

TGTCTATACATAGTTTAGTTTTCCACTCTATTGCGATTCTGCAATTTTTCATTTCCCCCTTTTTTGGTTCTA  
ATTTATGATTGTTTGAACCTCTTTGTTGCTAATTGAGTCGGTATGGG

>PGSC0003DMG401006653LRR-RLPs\_2501

TTTTTGGTTCTAATTTATGATTGTTTGAACCTCTTTGTTGCTAATTGAGTCGGTATGGGTATATATGGTAAT  
TCAGGCAGCATCAGAAGTAGTAAAGTCAAGTGTGGAGCCAGTTTTGGA

>PGSC0003DMG401006653LRR-RLPs\_2562

TATATGGTAATTCAGGCAGCATCAGAAGTAGTAAAGTCAAGTGTGGAGCCAGTTTTGGAACAATATAGG  
CCTGTGATTTTGGCGTCGTTAAAATTTTCAAAGTTCACTCTTGATACAGTT

>PGSC0003DMG401006653LRR-RLPs\_2623

AATATAGGCCTGTGATTTTGGCGTCGTTAAAATTTTCAAAGTTCACTCTTGATACAGTTGCTCCACAATTC



ACAGGTTAGTAGATTATGGCTGGTGTAACTGCCTCAAAGCTCTTGAT

>PGSC0003DMG401006653LRR-RLPs\_2684

TCCACAATTCACAGGTTAGTAGATTATGGCTGGTGTAACTGCCTCAAAGCTCTTGATATTGTACTACCT

AAAAGTTTTAGGAGTCACTTATACATATGAACAACTTATCAGTCCTCT

>PGSC0003DMG401006653LRR-RLPs\_2806

GTCTTTATGGCATGCTTATGTCTGGAGTAGCGTAACATTTCCCTGCACGGACACCACCACCATCAAAAAA

AAAAACGGCATAACATTTTCTTGCCATTTATAGCCTCTTGAGATGTCAA

>PGSC0003DMG401006653LRR-RLPs\_2867

ATCAAAAAAAAAAAAAACGGCATAACATTTTCTTGCCATTTATAGCCTCTTGAGATGTCAAATGTGACAAA

TAATTTGAGACAGGCAAGGGTATAAAAGATATTCAAACCTCAAAGAGCAA

>PGSC0003DMG401006653LRR-RLPs\_2928

TGTGACAAATAATTTGAGACAGGCAAGGGTATAAAAGATATTCAAACCTCAAAGAGCAATCCTATCATC

TCGTGTCAGTTAATCCTTAATAAAAGAACTGCTTGTGAGGATGAATCTCA

>PGSC0003DMG401006653LRR-RLPs\_2989

CTATCATCTCGTGTGAGTTAATCCTTAATAAAAGAACTGCTTGTGAGGATGAATCTCACTACATTTAACA

AATGCTTGATCTCATGTATATGCCACTGCAGGGATTTCTATTATTGAAG

>PGSC0003DMG401006653LRR-RLPs\_3050

ACATTTAACAATGCTTGATCTCATGTATATGCCACTGCAGGGATTTCTATTATTGAAGATGGAAGTGAG

GGTATTACTATGGAATTAGAGATGCAATGGGATGGTACCATACCATCTTG

>PGSC0003DMG401006653LRR-RLPs\_3172

TGTTTAGCCTACCTTTGCTATCTTCAGTGTGCTCCAACATAACCGATTCAGAGGTCTAGCTGATGAAGTG

ATCAAAACCGCTCCAACATAACCGATTCGGAGGACTAGCCGATGAAGTG

>PGSC0003DMG401006653LRR-RLPs\_3477

TCAACTGAAGGATTTTCCACACTTCTTGAGAAATGTAAGACACTTGTGTACTTGGATATTTCTAACAATA

TGATTCGTGGTCAAATTTCTGACTGGTTTAGCGGCATGAGGTGGGACAA

>PGSC0003DMG401006653LRR-RLPs\_3538

TCTAACAATATGATTCGTGGTCAAATTTCTGACTGGTTTAGCGGCATGAGGTGGGACAACCTTGTGGTACC

TAAATATTTACATAATCTTTTGACAGGTTACCTACCACAATTGCATTTT

>PGSC0003DMG401006653LRR-RLPs\_3599

TGTGGTACCTAAATATTTACATAATCTTTTGACAGGTTACCTACCACAATTGCATTTCCATAATCTAGGG  
TATCTTGATCTGAAATTTAACTCCCTTCTGGGTCCACTACCCTCATCCA

>PGSC0003DMG401006653LRR-RLPs\_366

CTAGATCCAAACAACGTAAGTACTGATCTGGTTAGTCAACTAAAGTCTTTGTTTTTTTTGGATCTTTATTTTTTTC  
CATTTCTGGGTTTTTTTTTTGTATTTATGTTGTTTTTTTTGGTTGAATT

>PGSC0003DMG401006653LRR-RLPs\_3660

TAATCTAGGGTATCTTGATCTGAAATTTAACTCCCTTCTGGGTCCACTACCCTCATCCATTTGTAACATGA  
GTTTCGCTTATCTTATTAGATTTATCACGCAACAACCTCAGTAACTACAG

>PGSC0003DMG401006653LRR-RLPs\_3721

TGTAACATGAGTTCGCTTATCTTATTAGATTTATCACGCAACAACCTCAGTAACTACAGTTTCGTATGAGG  
ATTCATTGAGTTTGGTAATCAAAGGGCAGGATATTGAGCTACAAAGAAT

>PGSC0003DMG401006653LRR-RLPs\_3904

ACTAAAGGATCTCAGCTCACTTTGGCTACTCAATTTATCCCATAACAATCTCATAGGTCATATTCCAATGG  
AACTAGGGCAATTGAATACGCTTGAAGCTTTAGATCTCTCTTGAATTG

>PGSC0003DMG401006653LRR-RLPs\_3965

ATTCCAATGGAAGTACTAGGGCAATTGAATACGCTTGAAGCTTTAGATCTCTCTTGAATTGGCTCACTGGAA  
ATATTCTGCAGGAACTGACAAGAATGAACCTTCTGGCCTTCTTAAACGTC

>PGSC0003DMG401006653LRR-RLPs\_4026

TCACTGGAAATATTCTGCAGGAACTGACAAGAATGAACCTTCTGGCCTTCTTAAACGTCTCTCAAAATCA  
TCTTGTGCGACCAATTCCTCACGGTCTACAGTTCAACACATTCGAAAATT

>PGSC0003DMG401006653LRR-RLPs\_427

TTATTTTTTCCATTTCTGGGTTTTTTTTTTGTATTTATGTTGTTTTTTTTGGTTGAATTGTAAAGGCTAGTGG  
AATTGCTGCATTTGCTAGAATGACAGTGGAAAGATTCAAGAAAAATCT

>PGSC0003DMG401006653LRR-RLPs\_4392

TCATGCCTCACAAAAGAAGAAGGCCAAAGAAGAGAGCTCAGAGACGAAGGACTTAATGGAAGCTTGAG  
AGGGCTAAATTGTCTTTGTTTGATTTTGTGGACTAGTGAAGTCTGTTTT

>PGSC0003DMG401006653LRR-RLPs\_4575

TTGTAGTATTCAATTTATGTTAGTTTGTCTGTTTCAAATTGACAGAAGTGATCTACACAGCAACTCTAG  
CTATGTTACTTAGATTTTTCAAAAATGTCAACGGGTACGTGTTGGATTC

>PGSC0003DMG401006653LRR-RLPs\_488

AAAGGCTAGTGGAATTGCTGCATTTGCTAGAATGACAGTGGAAGATTCAAGAAAAATCTTTACACCAGA  
ACAATACCCTTCTTGGGTTGTTTTCTCAAATCAACAAAAGGTGAAGTCGTT

>PGSC0003DMG401006653LRR-RLPs\_4941

GGTGCGACATCATCATATTTTAGGAGAGTCCGAGCAACATAGCTCATTAAATACAACAAAATTGGATAAA  
GCAGTGCAGTAAGCATATAGAGTTTGGTTCATGATTGAAATTAGTTGATAT

>PGSC0003DMG401006653LRR-RLPs\_5002

TGGATAAAGCAGTGCAGTAAGCATATAGAGTTTGGTTCATGATTGAAATTAGTTGATATTAGAAAGTTT  
ATATTTGTGAAAATTGATGTAGAAGAATGCTCAAACTACAGAAGTGGCTA

>PGSC0003DMG401006653LRR-RLPs\_5063

GAAAGTTTATATTTGTGAAAATTGATGTAGAAGAATGCTCAAACTACAGAAGTGGCTAATAATTTTGTG  
GTACTTCATCTTTCTAGTCATAAAACATCCTTAAAATGTTCTCTAACTCA

>PGSC0003DMG401006653LRR-RLPs\_5124

AATTTTGTGGTACTTCATCTTTCTAGTCATAAAACATCCTTAAAATGTTCTCTAACTCAGTTTCAACTTCTG  
CAATTTTATTTTGGTAGATTTTACATATATTTATACTTCATGACGA

>PGSC0003DMG401006653LRR-RLPs\_5185

TTCAACTTCTGCAATTTTTATTTTGGTAGATTTTTACATATATTTATACTTCATGACGAGTGTTATGTCTCA  
CGTGATCCAACAATAATTCATACTGCTTGATTATGAATGAGGAAATT

>PGSC0003DMG401006653LRR-RLPs\_5246

GTTATGTCTCACGTGATCCAACAATAATTCATACTGCTTGATTATGAATGAGGAAATTTTTTGTGTTTTG  
GGAAAAATGCTCTCTGGAATCGGCTCACTGGAAAGATTCCAAGGGA

>PGSC0003DMG401006653LRR-RLPs\_5368

CAAGACTAAAATCCTGGCAGTCTAAAACTCTGTCTGAATGTTCTTTTGTAGACCGATTGCATGCTCCTCG  
TCCATTGGAGTCCGAAGAAGAAGAAGAAGAGAGTCGTATTTTGTGCTA

>PGSC0003DMG401006653LRR-RLPs\_5429

ATGCTCCTCGTCCATTGGAGTCCGAAGAAGAAGAAGAAGAGAGTCGTATTTTGTAGTTGTGGATT  
AATTGTTGTAAGTGCATGTGGCACCTCATGTTTAAAGATGGTAAGCTGAA

>PGSC0003DMG401006653LRR-RLPs\_5490

TGTGGATTAATTGTTGTAAGTGCATGTGGCACCTCATGTTTAAAGATGGTAAGCTGAACATGTGATCCT

TCAATACAATTAGTCTCTCAGTTTTTTTTTGCTTGAGTATCATTTTTTTTA

>PGSC0003DMG401006653LRR-RLPs\_5551

TGTGATCCTTCAATACAATTAGTCTCTCAGTTTTTTTTTGCTTGAGTATCATTTTTTTTATCTTCTTAATTTGA

TCACTATACCTTTATCTTGAGTCGAGGGTCTACAGAAACAACATCTC

>PGSC0003DMG401006653LRR-RLPs\_5612

TTCTTAATTTGATCACTATACCTTTATCTTGAGTCGAGGGTCTACAGAAACAACATCTCCACTACTTTGGTT

ATTTTCCATCTTTCATATTTGAACTGTATCATATAGATGGAATTTCC

>PGSC0003DMG401006653LRR-RLPs\_5673

CTACTTTGGTTATTTTCCATCTTTCATATTTGAACTGTATCATATAGATGGAATTTCCCTCATTAACTTAAT

GTTAAAAATCTTTTGGAAAACAGCACAAGAGACAATAATCGGAAAT

>PGSC0003DMG401006653LRR-RLPs\_5734

CATTAECTTAATGTTAAAAATCTTTTGGAAAACAGCACAAGAGACAATAATCGGAAATTTCTCTACAGG

TGGAAGGATCTTCACCAAGTTATTCAGAACATACTAATTAAGCAGGAAAA

>PGSC0003DMG401006653LRR-RLPs\_61

ATCCCACTTTGAGTTTTTCTTTCAACAATTATAAGTTTCAGTGAAAATCTCAAGATGTAATTTTTTTCAAG

AATTCATCTTTTAGGAAAACCCATAAGAAGAAAACCTCCAAAAACAGA

>PGSC0003DMG401006653LRR-RLPs\_610

ACTTTTCTTTAAGATGTATTTGGTAGGACGCAGAGGCGGAGTCAGAATTTTTAGTTTATATGGGTTCTAG

ACCACTGTTCTTTTGTGGTTTCTGAAAGCTATGTTGCTCGGA

>PGSC0003DMG401006653LRR-RLPs\_6161

CACTACAAAATATGAGTATCAAGTTGTTAGAAGTGAGTAGTACTCATCTTGTAATTCAATTGTTTCATCAGT

CCCGATTCATCATAATCTTTTTTTTCTCTAGTCTTTGTGGAAATTGG

>PGSC0003DMG401006653LRR-RLPs\_6222

GTTTCATCAGTCCCGATTCATCATAATCTTTTTTTTCTCTAGTCTTTGTGGAAATTGGCTTAAAGTCTTAC

AAGTCATCGTCCGCTAGTTACAATACTGTATCACTTTTTTCTTAGTT

>PGSC0003DMG401006653LRR-RLPs\_6588

GTTGACATAAAACAGGAGTTCAAATAACTATAAAATATGTATGGATTTTGAAAAACAGAACATTCTGTA

ATATGCTGTAAACAAAAAGTAATCCCGTGACCAGTTCAGTTCAAGGTTG

>PGSC0003DMG401006653LRR-RLPs\_671

GGGTTCTAGACCACTGTTCTTTTTGTTTTGTTGGGTTTCTGAAAGCTATGTTGCTCGGACTCTCAGAAAAT  
GTTGTTTGTACCCATTCTGGATTCTCTAAAGTTGCACTAGTTTGGAGTA

>PGSC0003DMG401006653LRR-RLPs\_6893

TTCCATCTCTTCTATTTGAACTGTATCATATAGATGGAATTTCCCTCATTA ACTTAATGTGAAAAGTCTTC  
AGCACAAGAGACA ACTAATCGGAAATTTCTCATAAAATTTCTCTGCAG

>PGSC0003DMG401006653LRR-RLPs\_6954

GAAAAGTCTTCAGCACAAGAGACA ACTAATCGGAAATTTCTCATAAAATTTCTCTGCAGGTGGAATGATC  
TTCACCAAGTTATTCAAACATACTAAGCAAGCAGGAAATGAAGGACTTA

>PGSC0003DMG401006653LRR-RLPs\_7015

GGAATGATCTTCACCAAGTTATTCAAACATACTAAGCAAGCAGGAAATGAAGGACTTAAATCATGTCTT  
TAATTATTGTTGAGTTTTTTCTCACTTGACTTAGTCAAGCAATAGTTTC

>PGSC0003DMG401006653LRR-RLPs\_732

CTCAGAAAATGTTGTTGTACCCATTCTGGATTCTCTAAAGTTGCACTAGTTTGGAGTATACGACACTAAC  
CATCAACCGTAACCATTTTTGAAGAGTCCGAACAACATTGACTGAAAAG

>PGSC0003DMG401006653LRR-RLPs\_7320

TTGTGGAACACTACAAAATATGAGTAACAAGTTGTTAGAAGTGACTAGTACTCATTTTTGATTCAATTGT  
TCATCAGTCCCGATTCATCATAATCTTTTCCCCCTCTAGTCTTTGAGG

>PGSC0003DMG401006653LRR-RLPs\_7381

TTCAATTGTTTCATCAGTCCCGATTCATCATAATCTTTTCCCCCTCTAGTCTTTGAGGAAATTATCTTAA  
GGCTTACAAGTCATCGTCTGCTAGTTACAGTACCGTATCCCTTTTTTC

>PGSC0003DMG401006653LRR-RLPs\_7442

ATTATCTTAAAGGCTTACAAGTCATCGTCTGCTAGTTACAGTACCGTATCCCTTTTTTCCTTAGGTGGAAT  
GGAATATTGATGGATTGTCCCTTATTA ACTTAATGTGAAAATTATTGTG

>PGSC0003DMG401006653LRR-RLPs\_7625

TATGATTGTATAAATTCATGGAAAAATTGCATAAAAAATTATTGCATTCTTTGTGGAAATTGTCTTATTA  
AAGACTTTGGCTTCAAAGAACAAAATAAAATTCACACGGTATTATTGT

>PGSC0003DMG401006653LRR-RLPs\_7686

TGTCTTATTAAAGACTTTGGCTTCAAAGAACAAAATAAAATTCACACGGTATTATTGTTTTGTTGTTACA  
TACTCTTAAGTTGATGTCTTTAATTATTCTTCATTTTTTTTCTCACTT

>PGSC0003DMG401006653LRR-RLPs\_7869

TTCTACTGTGAGTGTTACGTAACCTTGACCAATTTACATCATCTTGCGTAACACACACCGTAGAGATAGTC  
GATCGATGATCTCGAAATGAACAACAACATCTAGGGAAAATGATGTGTA

>PGSC0003DMG401006653LRR-RLPs\_793

CGACACTAACCATCAACCGTAACCATTTTTGAAGAGTCCGAACAACATTGACTGAAAAGACTATTTTTAC  
ATCTTATAACATTAATATAGGGTTAAACCAAAGCTACTGGATTTTGATGT

>PGSC0003DMG401006653LRR-RLPs\_7930

AGAGATAGTCGATCGATGATCTCGAAATGAACAACAACATCTAGGGAAAATGATGTGTACCAAGTCGTT  
AGAAGTGACTAGTACTCATTTCATGGACCATATGTGACTGAAAATTGACTTT

>PGSC0003DMG401006653LRR-RLPs\_7991

AAGTCGTTAGAAGTGACTAGTACTCATTTCATGGACCATATGTGACTGAAAATTGACTTTACACTTGGGAC  
AACATTTTTTGCAACCACAAATTATTACCCCATTTATTTAATTATCTATG

>PGSC0003DMG401006653LRR-RLPs\_8113

TTTCTTTTCTTTGTTAATTTATACCTCAATAGTCCCATGCATAGACAAGTCAACAACGTTACTTTATGAAA  
TATTGTTTAGTTAATTGTTTACTTTATTTAATGTGGAGGTTGTTGTAA

>PGSC0003DMG401006653LRR-RLPs\_8235

ATTAAGAAATGGAATAGTGTTTAGTTACTTATAGCATCCTTTCTACATGGCTACTTATTTTATTGACTTAT  
TTATATCTTGGCAATTATCATGAATTTTGATAATGCATGTTTTTCATTG

>PGSC0003DMG401006653LRR-RLPs\_8296

TATTGACTTATTTATATCTTGGCAATTATCATGAATTTTGATAATGCATGTTTTTCATTGAACACGGGTGCA  
ACTTAGAAAGTAGTATATATATGTGTGGATAATACTGATTGATTTGTAA

>PGSC0003DMG401006653LRR-RLPs\_8357

CACGGGTGCAACTTAGAAAGTAGTATATATATGTGTGGATAATACTGATTGATTTGTAAGAAGAACACA  
TCCATCCTGTTATTTGCTGAAAACAAACAAACAAAAAATGGTCATGAGTCT

>PGSC0003DMG401006653LRR-RLPs\_8418

AGAACACATCCATCCTGTTATTTGCTGAAAACAAACAAACAAAAAATGGTCATGAGTCTGTTTTTCTTTCA  
TTCATTTCTGTATTTTGTTGCTAATAAGTATGTTTTTCTTCTTCCTT

>PGSC0003DMG401006653LRR-RLPs\_8479

TTTTCTTTCATTCATTTCTGTATTTTGTTGCTAATAAGTATGTTTTTCTTCTTCCTTTGATCATCATCTTTG

CTCTCCCACCGAAGCTTCTGCTTTGCTTCAGTTTAAGCAATCTTTT

>PGSC0003DMG401006653LRR-RLPs\_854

TATTTTTACATCTTATAACATTAATATAGGGTTAAACCAAAGCTACTGGATTTTGATGTACTTGTAGCTAA  
AGCAATGTCATTTATCATAAATCTGTAAACTGACTTATTTTCTAGAAAA

>PGSC0003DMG401006653LRR-RLPs\_8540

ATCATCATCTTTGCTCTCCCACCGAAGCTTCTGCTTTGCTTCAGTTTAAGCAATCTTTTGGAGTTGATTACA  
ACTACTCCAAATGTTTTACTTCTTTCCCAAAAAGAAAGTCTTGGAATG

>PGSC0003DMG401006653LRR-RLPs\_8723

GGTTAGACCTTAGTTGTAGTCTGCTTAGTGGAAGTATTCATCCCAATAGCACCCCTCTTCCAACCTTCATCAT  
CTCCAGGCACTAAACCTTGCTTACAATCACTTCAGCTATTCTTCAATCC

>PGSC0003DMG401006653LRR-RLPs\_8784

ACTTCATCATCTCCAGGCACTAAACCTTGCTTACAATCACTTCAGCTATTCTTCAATCCCACATAACATTGG  
CCGATTGACAAATTTGGTTTCGCTTGATCTTTCTTCTGATTTTTATGG

>PGSC0003DMG401006653LRR-RLPs\_8845

CATAACATTGGCCGATTGACAAATTTGGTTTCGCTTGATCTTTCTTCTGATTTTTATGGACTACAACCTTGAT  
GAGAGAACATTTGAAACAATGCTTCAAACCTTGACAAATCTGGAAGTA

>PGSC0003DMG401006653LRR-RLPs\_8906

TACAACTTGATGAGAGAACATTTGAAACAATGCTTCAAACCTTGACAAATCTGGAAGTACTATCTCTCTT  
TCTTGCAACATCTCATCTCCGATGCCTGTGAATATTTCTTCTCTTTAA

>PGSC0003DMG401006653LRR-RLPs\_8967

ATCTCTCTTTCTTGCAACATCTCATCTCCGATGCCTGTGAATATTTCTTCTCTTTAAGGTACCTGGATCTT  
CGTTATACTAATCTGCGAGGTGTTCTAACAGAGAGCTTTTTCTTCT

>PGSC0003DMG401006653LRR-RLPs\_9028

TACCTGGATCTTCGTTATACTAATCTGCGAGGTGTTCTAACAGAGAGCTTTTTCTTCTGCCAAACAGCTT  
GGAAACGCTCAAACCTGAGTGGGAATGATCTTCTCAAAGGAGTTTTTCCA

>PGSC0003DMG401006653LRR-RLPs\_915

TTGTAGCTAAAGCAATGTCATTTATCATAAATCTGTAAACTGACTTATTTTCTAGAAAATGTTTTTCGTAAT  
GGATTTTTTTTTCTGGGAAAAGACATTTAATCGGATAGTGTTTGGTGA

>PGSC0003DMG401006653LRR-RLPs\_9211

GAGCTGCCTCATTCAATTGGCACCTTTAGTTCATTGAAATACTTAAACCTCCAAGGATGCCAATTCTCTGG  
TTCCATTCTAATTCCATTGACAACCTAACCCAAATTACGGAGTTGATT

>PGSC0003DMG401006653LRR-RLPs\_9272

AATTCTCTGGTTCCATTCTAATTCCATTGACAACCTAACCCAAATTACGGAGTTGATTTTATCTTATAATC  
ATTTCACTGGACATATTCCTTCCACAATCTCTAAATTGAAGTACCTCA

>PGSC0003DMG401006653LRR-RLPs\_9333

ATCTTATAATCATTTCACTGGACATATTCCTTCCACAATCTCTAAATTGAAGTACCTCACAAATTTACATCT  
TTCTGACAACCTCTTTTCAGGTGAAATTCCTGATGTTTTTTCTAATCT

>PGSC0003DMG401006653LRR-RLPs\_9394

AATTTACATCTTTCTGACAACCTCTTTTCAGGTGAAATTCCTGATGTTTTTTCTAATCTCAAAGAGCTACGT  
TATTTAGATCTTTTAATAACAGCTTCATCGGTCCATTTCTGCTTCA

>PGSC0003DMG401006653LRR-RLPs\_9516

TTAAGTTTGACACATCTTGAATACTTAGGATTGTCGAGTAATTCCTATCTGGCCCACTGCCTAGCAAAG  
CAAGCATGCTTCAAAGCTATCCGAACCTGCATTTGTCTTACAACCTCGCT

>PGSC0003DMG401006653LRR-RLPs\_9577

CCTAGCAAAGCAAGCATGCTTCAAAGCTATCCGAACCTGCATTTGTCTTACAACCTCGCTGAATGGTACCA  
TACCATCTGGGTGTTAACCTCCCTTTGCTATCTTCGTCGTGGCTCAAT

>PGSC0003DMG401006653LRR-RLPs\_9638

ATGGTACCATAACCATCTGGGTGTTAACCTCCCTTTGCTATCTTCGTCGTGGCTCAATCATAATCAATTTA  
GTGGACTAGCCGATGAGATCAAACAAACCCAACATTAGAATTCCTGT

>PGSC0003DMG401006653LRR-RLPs\_9699

TAATCAATTTAGTGGACTAGCCGATGAGATCAAACAAACCCAACATTAGAATTCCTGTATTTAAATAAT  
AATCAACTCAGCGGTTCTTTTCCTCAATCACTTGTGAATCTCACAAACCT

>PGSC0003DMG401006653LRR-RLPs\_976

TTTTTCGTAATGGATTTTTTTTTCTGGGAAAGACATTTAATCGGATAGTGTTTGGTGAAAATATTTGAGT  
AGTAAAGATTGATAATAATGTTTATATGTTGAGATAATTGTTTGCTCCT

>PGSC0003DMG401006653LRR-RLPs\_9760

TTAATAATAATCAACTCAGCGGTTCTTTTCCTCAATCACTTGTGAATCTCACAAACCTTTCTACCCTTGAC  
CTTTCATCAAATAACATCACTATTGATGAGGGAATGAATATCACCTTT



>PGSC0003DMG401006653LRR-RLPs\_9821

CTACCCCTTGACCTTTCATCAAATAACATCACTATTGATGAGGGAATGAATATCACCTTTCCTAGCCTTGAA  
ATTTTGCAGTTATCATCTTGTGAACTGAAGGATTTTCCACACTTGTTGA

>PGSC0003DMG401006653LRR-RLPs\_9882

TAGCCTTGAAATTTTGCAGTTATCATCTTGTGAACTGAAGGATTTTCCACACTTGTTGAGAAATGTAAAG  
ACACTTCAGGTCTTGGATATTTCTAACAATAAGATTTGTGGTCAAATCCC

>PGSC0003DMG401006653LRR-RLPs\_9940

AGAAATGTAAAGACACTTCAGGTCTTGGATATTTCTAACAATAAGATTTGTGGTCAAATCCCTAACTGGT  
TTAGCGGCATGAGGATGGGACTCGTTGCAGCTATTAACCTTTCTCATAA

>PGSC0003DMG401008483RLKWAX-EGF\_0

ATGGAGGATCTAAATGATTTGAATTTTGTGAGAGGATTGTCAATAATGTCCCCATTGTATTGGATTGGG  
CTATTGGAAATCTTACTTGTGTTGAAGCACAAAACGCGATGATTATGGT

>PGSC0003DMG401008483RLKWAX-EGF\_1008

AAGCTGAAGTCCCTTACTAGTTTATGAATACGTTTCTAATGGAACCTTTACGAGCATATCCACAATCAA  
AATGGAGCGCCTTGGTTATCTTTGCAAATCGGTTGAGAATTGCTGCAG

>PGSC0003DMG401008483RLKWAX-EGF\_1197

CTGCCAATTTATTGTTGGATGATGTTTACACCGCGAAAGTTGCAGATTTTGGAGCTTCAAGATTAGTCCC  
TCTCGATCAAACACATGTTGCTACGATGGTTCAAGGAACGTTAGGGTACT

>PGSC0003DMG401008483RLKWAX-EGF\_126

GGTAATAGCCAATGTGTTGATTCTGACACTGGCTTAGGTGGATATCGGTGCAGATGTAACCTGGGATAT  
GAAGGAAATCCTTACCTCGGCTGTCAAGGTACAATAACACTAGCCCTGTGT

>PGSC0003DMG401008483RLKWAX-EGF\_1386

TTGCTGAACTTTTGCAGCGTTGAAACCTATTTTGAAGGACGAAAATGAAAAGGACAAATGTTTAGTGG  
ACTATTTTCATCTTGTCCATGAACACGAATAACTTATTTTCAGATTCTTGATC

>PGSC0003DMG401008483RLKWAX-EGF\_1449

TAGTGGACTATTTTCATCTTGTCCATGAACACGAATAACTTATTTTCAGATTCTTGATCGTAGAGTGGTACGA  
GAAGGAAGTCTTGAGCAACTTCAGAAGATTGCTGAGCTTGTTAAGAGTT

>PGSC0003DMG401008483RLKWAX-EGF\_1575

GTTTGCACGGAGAAGATAGGCCTACTATGAAAGAAGTGGCGATGGAACCTGAAAGTTTGAGAAAGTTC

ACAAAAATAATCCTTGGGCTAATGGACATGAACACGAAGAGAATGAAGATG

>PGSC0003DMG401008483RLKWAX-EGF\_189

GGATATGAAGGAAATCCTTACCTCGGCTGTCAAGGTACAATAACACTAGCCCTGTGTATAACTTGAATTC  
ATAAAATGATAAAATGTACTATGGTTTATATATTTTCTCTTGCTTTAATT

>PGSC0003DMG401008483RLKWAX-EGF\_252

TGAATTCATAAAATGATAAAATGTACTATGGTTTATATATTTTCTCTTGCTTTAATTTGTATGCTAGATATT  
GATGAATGTGTGAATCCAAATACTAATTCGTGTGAACAAAATTGTATA

>PGSC0003DMG401008483RLKWAX-EGF\_315

CTAGATATTGATGAATGTGTGAATCCAAATACTAATTCGTGTGAACAAAATTGTATAAACATACCGGGGA  
GTTACAATTGTTCTTGTCCAGAAGGATATACTGGTGATGGAAAAAGAAT

>PGSC0003DMG401008483RLKWAX-EGF\_378

CCGGGGAGTTACAATTGTTCTTGTCCAGAAGGATATACTGGTGATGGAAAAAGAATGGTCGTGGTTGT  
AATGCTAAAACTCAAACCTCGGAGTTTCCATGGATCAAGTTTTCCGTTGGT

>PGSC0003DMG401008483RLKWAX-EGF\_441

GGTTGTAATGCTAAAACTCAAACCTCGGAGTTTCCATGGATCAAGTTTTCCGTTGGTAAGTTCCTCATCAT  
ATAAACTCTAAGAATTCTTCGAGTTTACATTGATATTTGTCATGAAGTT

>PGSC0003DMG401008483RLKWAX-EGF\_504

CTCATCATATAAACTCTAAGAATTCTTCGAGTTTACATTGATATTTGTCATGAAGTTTTTAATATTTTCAGG  
ACGATTTAACATCTGTTCTACTCAGTACAGGTATGGGAGTTGGGTTTA

>PGSC0003DMG401008483RLKWAX-EGF\_567

ATTTTCAGGACGATTTAACATCTGTTCTACTCAGTACAGGTATGGGAGTTGGGTTTATGTCCCTAGTGCTT  
GGAACAACCTGGCTCTATTTTAGCTTCAAGAAACGAAAACCTCATGAAAC

>PGSC0003DMG401008483RLKWAX-EGF\_63

GATTGGGCTATTGGAAATCTTACTTGTGTTGAAGCACAAAACGCGATGATTATGGTTGTCAAGGTAAT  
AGCCAATGTGTTGATTCTGACACTGGCTTAGGTGGATATCGGTGCAGATGT

>PGSC0003DMG401008483RLKWAX-EGF\_945

AGTACTTATTCTTACTCAAGTTAACCATAGAAATGTAGTGAAACTCTTTGGGTGTTGTTTGGGAAGCTGA  
AGTCCCTTACTAGTTTATGAATACGTTTCTAATGGAACCTTTACGAGC

>PGSC0003DMG401009161-(rev)LRR-RLKs\_0

ATCATTTTTCATAGTAGCACAAATTATGAAGATAGCTGTAAAAATTCATCTTTTTTACTGCTGCTGTTT  
CTCTCTGTGGGGTTATGCTGTATATGCTCTCACTTCTGATGGCACCGC

>PGSC0003DMG401009161-(rev)LRR-RLKs\_1037

CGGAAAACCAACTGGAAGGTGAAATTCCTAGTGAAGTACTAGGATCACTCAGCCAGTTGCAGTATCTCTCTCT  
ATATTCCAACAAATTGAGTGGTGAGATTCCTCCGCACTATTTGGAAGATTC

>PGSC0003DMG401009161-(rev)LRR-RLKs\_1098

TCTCTCTATATTCCAACAAATTGAGTGGTGAGATTCCTCCGCACTATTTGGAAGATTCAAAGTCTTCAAC  
ATCTTCTTGTCTATCGGAACAACCTGACTGGGGAGTTACCTCTTGAAAT

>PGSC0003DMG401009161-(rev)LRR-RLKs\_1159

AGTCTTCAACATCTTCTTGTCTATCGGAACAACCTGACTGGGGAGTTACCTCTTGAAATGACTGAGTTAA  
AACAATTAAGAACATATCCTTATTTGAAAACCAGTTTACCGGAGTTATA

>PGSC0003DMG401009161-(rev)LRR-RLKs\_122

TACTTCCCTTTCTAGTCACTGGATTGGTGTACCCTCTTCTTGGAATGCTTCAGATTCCTCCATGTTCTT  
GGGTTGGTGTGAATGTGATAACAACCACTTTGTCACCTCTTTGAACC

>PGSC0003DMG401009161-(rev)LRR-RLKs\_1220

CTGAGTTAAAACAATTAAGAACATATCCTTATTTGAAAACCAGTTTACCGGAGTTATACCTCAAGGTTT  
GGGGATTAACAGCAGTCTAACGCTGCTGGATTTACAAAACAACACCTTCA

>PGSC0003DMG401009161-(rev)LRR-RLKs\_1281

TCAAGTTTTGGGGATTAACAGCAGTCTAACGCTGCTGGATTTACAAAACAACACCTTCACAGGTCCTGTT  
CCACCTAATCTTTGTTTTGGAAAGAACTGGAGAAGCTTATTTTAGGTTA

>PGSC0003DMG401009161-(rev)LRR-RLKs\_1342

GGTCCTGTTCCACCTAATCTTTGTTTTGGAAAGAACTGGAGAAGCTTATTTTAGGTTATAATCATCTCGA  
AGGTGGCATTCTTCTCAATTAGGACAATGTTATACTTTGACGAGAGTA

>PGSC0003DMG401009161-(rev)LRR-RLKs\_1403

ATCATCTCGAAGGTGGCATTCTTCTCAATTAGGACAATGTTATACTTTGACGAGAGTAATTCTCAAAAA  
AAATAATCTGTCAGGTGCCATTCCAGATTTTGTGAAGAATATAAATCCTA

>PGSC0003DMG401009161-(rev)LRR-RLKs\_1464

TCTCAAAAAAATAATCTGTCAGGTGCCATTCCAGATTTTGTGAAGAATATAAATCCTATTTTCTTGGATC  
TCAGTGAGAATGGCTTCAGTGGGAAAATATCCCAAGTTTGGCAAATCT

>PGSC0003DMG401009161-(rev)LRR-RLKs\_1525

TTCTTGGATCTCAGTGAGAATGGCTTCAGTGGGAAAATATCCCCAAGTTTGGCAAATCTTGAAATGCTA  
CATCAATTGACTTATCAGTGAATAAGCTTTCAGGGTTTGTACCACCAGAG

>PGSC0003DMG401009161-(rev)LRR-RLKs\_1586

GAAATGCTACATCAATTGACTTATCAGTGAATAAGCTTTCAGGGTTTGTACCACCAGAGCTGGCAAACCT  
TGTC AACCTCCAGGGTTTGAATCTTTCGTACAATGGTTTGGAAAGGTGTAC

>PGSC0003DMG401009161-(rev)LRR-RLKs\_1647

GGCAAACCTTGTCAACCTCCAGGGTTTGAATCTTTCGTACAATGGTTTGGAAAGGTGTA CTGCCATCTCAG  
CTTTC AA ACTGGCAGAGACTGTTGAAGTTTGTATGCAAGTCATAATTTGTT

>PGSC0003DMG401009161-(rev)LRR-RLKs\_1708

CCATCTCAGCTTTC AA ACTGGCAGAGACTGTTGAAGTTTGTATGCAAGTCATAATTTGTTGAGTGGATCGG  
TCCCATCCATTTTTGGAAGCTTGGAAAGAGCTATCCATTTTGAGTCTGAGT

>PGSC0003DMG401009161-(rev)LRR-RLKs\_1769

GTGGATCGGTCCCATCCATTTTTGGAAGCTTGGAAAGAGCTATCCATTTTGAGTCTGAGTGAGAATAATCT  
TTCAGGAGGTATTCCAACCTCCTTGTTCGACTCAAGAAGCTCTCCAAGC

>PGSC0003DMG401009161-(rev)LRR-RLKs\_183

TCCATGTTCTTGGGTTGGTGTGAATGTGATAACAACCACTTTGTCACCTCTTGAACCTCTCTGGCTATG  
ATATCTCTGGCCAATTGGGACCTGAAATTGCTTATTTGAAGCACTTGCT

>PGSC0003DMG401009161-(rev)LRR-RLKs\_1830

GAATAATCTTTCAGGAGGTATTCCAACCTCCTTGTTCGACTCAAGAAGCTCTCCAAGCTGCAGCTTGGT  
GGAAATGCACTTGGTGGGGAAATTCATTCAGCAATTGCGACTGCATCAAG

>PGSC0003DMG401009161-(rev)LRR-RLKs\_1891

CAGCTTGGTGGAAATGCACTTGGTGGGGAAATTCATTCAGCAATTGCGACTGCATCAAGAGAAACTG  
AGGTGTTTAAATCTGAGTAGTAACAGGTTGACAGGTGAACTTCCTGCGGAG

>PGSC0003DMG401009161-(rev)LRR-RLKs\_1952

AAACTGAGGTGTTTAAATCTGAGTAGTAACAGGTTGACAGGTGAACTTCCTGCGGAGCTAGGAAAAT  
TTACTTTCCTGGAGGAGTTAGATATAGCTGGCAATAACATTTCTGGA ACTT

>PGSC0003DMG401009161-(rev)LRR-RLKs\_2013

AGGAAAATTTACTTTCCTGGAGGAGTTAGATATAGCTGGCAATAACATTTCTGGA ACTTTAAGAGTTCTT

GATGGAATGCGTTCATTGATATTCATCAATGTATCATACAACCTCTTTTC

>PGSC0003DMG401009161-(rev)LRR-RLKs\_2074

AGAGTTCTTGATGGAATGCGTTCATTGATATTCATCAATGTATCATACAACCTCTTTTCTGGTCCAGTACC

TGCACATCTGATGAAGTTCCTCAACTTAACTCCTACCTCTTTCTCGGGA

>PGSC0003DMG401009161-(rev)LRR-RLKs\_2135

GTCCAGTACCTGCACATCTGATGAAGTTCCTCAACTTAACTCCTACCTCTTTCTCGGGAAACTCGGGCCTT

TGCGTGCCTGTGATCCAGAAGAAGGCTCAAATTGCCCTGAGAATATCA

>PGSC0003DMG401009161-(rev)LRR-RLKs\_2196

CTCGGGCCTTTGCGTGCCTGTGATCCAGAAGAAGGCTCAAATTGCCCTGAGAATATCACGTTAAGGCG

CTGTGATCTTCAATCAAACAATGGAAGGCACCTGAGTGTAGCAGAAACGGC

>PGSC0003DMG401009161-(rev)LRR-RLKs\_2257

TTAAGGCGCTGTGATCTTCAATCAAACAATGGAAGGCACCTGAGTGTAGCAGAAACGGCAATGATTGCA

CTTGGGGCACTGATATTTACCATTTCTTACTCCTAGTAATTGCTTACATG

>PGSC0003DMG401009161-(rev)LRR-RLKs\_2318

TGATTGCACTTGGGGCACTGATATTTACCATTTCTTACTCCTAGTAATTGCTTACATGCTTCTGTGGCGC

AAAAGTTCTGGGAAAGGAGTTGCAATCTCTGCTCAAGAAGGTGCATCGT

>PGSC0003DMG401009161-(rev)LRR-RLKs\_2379

TCTGTGGCGCAAAAGTTCTGGGAAAGGAGTTGCAATCTCTGCTCAAGAAGGTGCATCGTCCCTGCTTAA

TAAAGTATTGGAAGCTACTGGGAACCTAAACGATAAGTATGTCATTGGGAG

>PGSC0003DMG401009161-(rev)LRR-RLKs\_244

TCTGGCTATGATATCTCTGGCCAATTGGGACCTGAAATTGCTTATTTGAAGCACTTGCTTACCATTGATT

GAGTTATAATGCTTTCTCTGCCTCCATTCTTCTCAACTCACTAATTGC

>PGSC0003DMG401009161-(rev)LRR-RLKs\_2440

CTGCTTAATAAAGTATTGGAAGCTACTGGGAACCTAAACGATAAGTATGTCATTGGGAGGGGAGCTCAT

GGAGTTGTATATAAGGCCATCTTGGGTCCAGGGAAAGTGTATGCTGTGAAA

>PGSC0003DMG401009161-(rev)LRR-RLKs\_2501

GAGCTCATGGAGTTGTATATAAGGCCATCTTGGGTCCAGGGAAAGTGTATGCTGTGAAAAAGCTGGTGT

TTGTTGGTATAAAGGATGGAAGCAGAAGTATGGTTAGAGAAATTCAGACAA

>PGSC0003DMG401009161-(rev)LRR-RLKs\_2562

GCTGGTGTGGTTGGTATAAAGGATGGAAGCAGAAGTATGGTTAGAGAAATTCAGACAATTGGAAAGG  
TTAGGCACCGCAATCTTGTCAAATTAGAAGACTTCTGGCTGAGAAAGGATTA

>PGSC0003DMG401009161-(rev)LRR-RLKs\_2623

GGAAAGGTTAGGCACCGCAATCTTGTCAAATTAGAAGACTTCTGGCTGAGAAAGGATTATGGGCTGATT  
CTTTATAATTACATGGAGAACGGGAGCCTTCATGATATTCTCCATGAGACT

>PGSC0003DMG401009161-(rev)LRR-RLKs\_2684

GGCTGATTCTTTATAATTACATGGAGAACGGGAGCCTTCATGATATTCTCCATGAGACTAAGCCACCTGT  
AACATTAGAATGGAGCGTTCGGTACCGAATTGCTATTGGAGTTGCTCAAG

>PGSC0003DMG401009161-(rev)LRR-RLKs\_2745

GCCACCTGTAACATTAGAATGGAGCGTTCGGTACCGAATTGCTATTGGAGTTGCTCAAGGGTTGTCATAT  
CTCCATTTGACTGTGATCCTGCCATTGTGCATCGAGACATCAAGCCCAT

>PGSC0003DMG401009161-(rev)LRR-RLKs\_2806

TTGTCATATCTCCATTTGACTGTGATCCTGCCATTGTGCATCGAGACATCAAGCCCATGAATATCTTGTT  
GGACTCTGATCTGGAGCCTCACATATCAGATTTTGGTATTGCCAAGCTT

>PGSC0003DMG401009161-(rev)LRR-RLKs\_2867

ATATCTTGTTGGACTCTGATCTGGAGCCTCACATATCAGATTTTGGTATTGCCAAGCTTCTGGATCAGTCT  
GCAGCAACTTCCGCCTCCAATGCCCTTCAGGGCACTGTTGGATACATGG

>PGSC0003DMG401009161-(rev)LRR-RLKs\_2928

GGATCAGTCTGCAGCAACTTCCGCCTCCAATGCCCTTCAGGGCACTGTTGGATACATGGCTCCAGGTATG  
TAATTTTCATTTTTTTCTCACACTTCCTTTTCAGTTAGCTGTCTCTTTAGA

>PGSC0003DMG401009161-(rev)LRR-RLKs\_2989

CCAGGTATGTAATTTTCATTTTTTTCTCACACTTCCTTTTCAGTTAGCTGTCTCTTTAGAGATCTAGTCATCT  
GTAGAAAAATAATATTGTCTGTGTCTTGTCTGTTTTTGTGACAGAAA

>PGSC0003DMG401009161-(rev)LRR-RLKs\_305

CCATTGATTTGAGTTATAATGCTTTCTCTGCCTCCATTCCTTCTCAACTCACTAATTGCACTCTTCTTCATTA  
CTTGATCTATCCTACAACACCTTTACTGGACATATTCTTCAAACA

>PGSC0003DMG401009161-(rev)LRR-RLKs\_3050

TCTAGTCATCTGTAGAAAAATAATATTGTCTGTGTCTTGTCTGTTTTTGTGACAGAACTGCATTTGCAG  
CTACAAAGAGCAAGGAGTCAGATGTTTATAGTTATGGTATTGTCTCTGTT

>PGSC0003DMG401009161-(rev)LRR-RLKs\_3111

GCATTTGCAGCTACAAAGAGCAAGGAGTCAGATGTTTATAGTTATGGTATTGTCCTGTTAGAACTTATAA  
CTCGAAAGAAGGTGTTGGACCGTTCACTCTATGGGGATACAGATATTATG

>PGSC0003DMG401009161-(rev)LRR-RLKs\_3172

AACTTATAACTCGAAAGAAGGTGTTGGACCGTTCACTCTATGGGGATACAGATATTATGTGTTGGGTTA  
GGTCTGTTTGGACTGAAACTGAAGAAATTGAGAAGATTGTGGATCCAAGAC

>PGSC0003DMG401009161-(rev)LRR-RLKs\_3233

TTGGGTTAGGTCTGTTTGGACTGAAACTGAAGAAATTGAGAAGATTGTGGATCCAAGACTTTTGGACGA  
ATTCATAGACTCAAGTGTCATGGAACAAGTAATTGAAGTGCTTTCCTAGC

>PGSC0003DMG401009161-(rev)LRR-RLKs\_3294

TTGGACGAATTCATAGACTCAAGTGTCATGGAACAAGTAATTGAAGTGCTTTCCTAGCTCTTAGATGTA  
CAGAGAAGAAAGTCAGCAAAGACCCTCAATGAAAGAGGTAGTCAAGCTA

>PGSC0003DMG401009161-(rev)LRR-RLKs\_3355

TTAGATGTACAGAGAAGAAAGTCAGCAAAGACCCTCAATGAAAGAGGTAGTCAAGCTATTAACAAGG  
TCAAGTTCGAGTATACGAAGCAAGTACTAGCTAGCAGGGACATGTAGTATCT

>PGSC0003DMG401009161-(rev)LRR-RLKs\_3416

AACAAGGTCAAGTTCGAGTATACGAAGCAAGTACTAGCTAGCAGGGACATGTAGTATCTAGTGTATCAG  
TCAGAGGGGGTTTCATATAAACGCCTGATGTGTTCTAGGTACTCTATTTTC

>PGSC0003DMG401009161-(rev)LRR-RLKs\_3477

TGTATCAGTCAGAGGGGGTTTCATATAAACGCCTGATGTGTTCTAGGTACTCTATTTTCCAGATTAAGT  
AGTCCTAGCTTCCAGCTTCTGAATCCATGTTACAAAATGCTCCCTGCAG

>PGSC0003DMG401009161-(rev)LRR-RLKs\_3538

GATTAAAGTAGTCCTAGCTTCCAGCTTCTGAATCCATGTTACAAAATGCTCCCTGCAGGTTTCAGTATCTT  
TTTATTGGTAGAGGGTGATAAAAATATATTTACTTCTGTAGTTTAGAAA

>PGSC0003DMG401009161-(rev)LRR-RLKs\_3599

TCAGTATCTTTTTATTGGTAGAGGGTGATAAAAATATATTTACTTCTGTAGTTTAGAAAAGAGAAGGCGTG  
TGCTTTAGCTGTAAATGTTCTTTTCCATCACATGAACATGGATGAAAAC

>PGSC0003DMG401009161-(rev)LRR-RLKs\_366

TCTTCTTCATTACTIONGGATCTATCCTACAACACCTTTACTGGACATATTCCTTCAAACATTGGAAATTTACA

CAAGTTAACCTACATAAGCCTCCTCTCTAATTCATTGACTGGTAATAT

>PGSC0003DMG401009161-(rev)LRR-RLKs\_3660

GAAGGCGTGTGCCTTTAGCTGTAAATGTTCTTTTCCATCACATGAACATGGATGAAAACAAAGATAACT  
TACTGATTTTCATCTTAGTTAATCATATTCTCAGCAAAAAGCAGTTCCTT

>PGSC0003DMG401009161-(rev)LRR-RLKs\_3721

AAGATAACTTACTGATTTTCATCTTAGTTAATCATATTCTCAGCAAAAAGCAGTTCCTTTTGCCATTCCTAG  
CAGGATTTGTTATGGTAAAGCCATATTGTTTTCTCCCTAGCTATTTGC

>PGSC0003DMG401009161-(rev)LRR-RLKs\_3754

ATATTCTCAGCAAAAAGCAGTTCCTTTTGCCATTCCTAGCAGGATTTGTTATGGTAAAGCCATATTGTTTT  
CTCCCTAGCTATTTGCAACTGTACAATACTCCAATAAAATAAGCTTTC

>PGSC0003DMG401009161-(rev)LRR-RLKs\_427

GGAAATTTACACAAGTTAACCTACATAAGCCTCCTCTCTAATTCATTGACTGGTAATATTCCTGATTCCTT  
GTTTTCTATCCCACATTTGAAAACATCTACTTTAACCAAAACAGGTTA

>PGSC0003DMG401009161-(rev)LRR-RLKs\_488

CTGATTCCTTGTTTTCTATCCCACATTTGAAAACATCTACTTTAACCAAAACAGGTAAATGGTTCCATCC  
CATCCAGCATTGGTAACTTGACTCACCTTTTATCTCTCTATCTTTATC

>PGSC0003DMG401009161-(rev)LRR-RLKs\_549

TGGTCCATCCCATCCAGCATTGGTAACTTGACTCACCTTTTATCTCTCTATCTTTATCAGAATGACTTGTC  
CGGTCCAATTCCGTCTTCCATAGGAACTGTACTAACTTGCAAGAATT

>PGSC0003DMG401009161-(rev)LRR-RLKs\_61

TGCTGCTGTTTCTCTCTGTGGGGTTATGCTGTATATGCTCTCACTTCTGATGGCACCGCTTTACTTTCCCTT  
TCTAGTCACTGGATTGGTGTACCCTCTTCTTGAATGCTTCAGATTCC

>PGSC0003DMG401009161-(rev)LRR-RLKs\_610

AATGACTTGTCCGGTCCAATTCCGTCTTCCATAGGAACTGTACTAACTTGCAAGAATTGTATTTGAATG  
ATAATCATTTAGTTGGTAGTTTGCCTGAGAATTTTGATAAGCTACAACAC

>PGSC0003DMG401009161-(rev)LRR-RLKs\_671

ATTTGAATGATAATCATTTAGTTGGTAGTTTGCCTGAGAATTTTGATAAGCTACAACACCTTGTTTATTTG  
GACTTGAGCAATAATAGTCTACAAGGAAGTATCCCTTTCACTTTAGGTA

>PGSC0003DMG401009161-(rev)LRR-RLKs\_732



TGTTTATTTGGACTTGAGCAATAATAGTCTACAAGGAAGTATCCCTTTCACCTTAGGTAAGTACTGCAAACATC  
TTGACACTCTGGTCTTGTGCATCCAACACTTTCAATGGGGAAGTTCCTCC

>PGSC0003DMG401009161-(rev)LRR-RLKs\_793

TGCAAACATCTTGACACTCTGGTCTTGTGCATCCAACACTTTCAATGGGGAAGTTCCTCCAAGTTTGATGAA  
TTGTACTAACCTAAAAGTTCTTGCTGCTTTTTCTTCTGGTTTAAGTGGC

>PGSC0003DMG401009161-(rev)LRR-RLKs\_854

GTTTGATGAATTGTACTAACCTAAAAGTTCTTGCTGCTTTTTCTTCTGGTTTAAGTGGCCCTGTTCTGCTT  
CTCTAGGCCAGCTCACAAAGTTGGAGAAGCTTTACCTTACTGACAACA

>PGSC0003DMG401009161-(rev)LRR-RLKs\_915

TGTTCTGCTTCTCTAGGCCAGCTCACAAAGTTGGAGAAGCTTTACCTTACTGACAACAATTTCTCTGGAA  
AAATACCACCTGAGCTGGGGAAGTGCCAGGCCTTGCAGGAATTACTTCT

>PGSC0003DMG401009161-(rev)LRR-RLKs\_976

TTCTCTGGAAAAATACCACCTGAGCTGGGGAAGTGCCAGGCCTTGCAGGAATTACTTCTACCGGAAAAC  
CAACTGGAAGGTGAAATTCCTAGTGAAGTACTAGGATCACTCAGCCAGTTGCAG

>PGSC0003DMG401009323-(rev)G-LecRK\_0

GCTGCCAAAAATGAAATCTTTAGCCAATTCATCTTCACTTAATATTGACCTTATTCTGCAGCCATACAG  
GTATCATTACCCTTCCATCTGTGGCTGCAATAACCTCAATGAAGCCTGG

>PGSC0003DMG401009323-(rev)G-LecRK\_1037

GCTGGGAGCACTGCAGTTGTGTTGGCTTCATCACCAGCAGCAATGGAATAGGCTGCATAATTTGGAATG  
GAAATGGGGAGTTTCGAGTTGATGAGAGTGGTAGTGCAGTGCAACAATATG

>PGSC0003DMG401009323-(rev)G-LecRK\_1098

TTGGAATGGAAATGGGGAGTTTCGAGTTGATGAGAGTGGTAGTGCAGTGCAACAATATGTTCTGGTTTC  
ATCAAAAGGTAAATCCTTATATTAGGAATACACCTGTTTATGAACTAATC

>PGSC0003DMG401009323-(rev)G-LecRK\_1159

CTGGTTTCATCAAAGGTAAATCCTTATATTAGGAATACACCTGTTTATGAACTAATCTATTTTGAATAG  
ATCAAGAGTCACCTGTATAACACTCAGCAACCTATGTGTGCAGGAAAAC

>PGSC0003DMG401009323-(rev)G-LecRK\_2684

GCTGTTACGAGTTATTCATGTGCGACTATTATGTGTACAAGAAGGAGCAACTGATAGGCCAACAATGTC  
TGATGTTATCTCACTGCTAGGTAATGAAAGTATGCCACTGCCTACGCCAAA

>PGSC0003DMG401009323-(rev)G-LecRK\_2989

GGTATAGATTAGTCAATTTGTAAGTACTGTTAGTACTTGTATAGCTGTCTTTAGCTGTGTTTGTAAACAATACATA  
AATTTCTTTCTACAAAGACCAGAATTATCAATAACTTTTTTTTTTTTTT

>PGSC0003DMG401009323-(rev)G-LecRK\_3050

ACAATACATAAATTTCTTTCTACAAAGACCAGAATTATCAATAACTTTTTTTTTTTTTTTGCATTTTCTCACT  
TAAATGTAGTAACATTTATTAGTATAACAACCTTAAGATTGTAAGAT

>PGSC0003DMG401009323-(rev)G-LecRK\_3477

AAGAAATAACAGAAACAAAATGCAAATTGATTTACATTTCAACAAGAAAATTAAGATTGTCTCTTTCA  
ACAAATTTTCTTACAAGTAAGGTAATATTTCTACTTAGAAAAATCTTCAA

>PGSC0003DMG401009323-(rev)G-LecRK\_3721

CTGCCAAAATGAAATCTTTAGCAAATTACATTTGCTTCCTCATCTTGACATTATTCTGCAGCCAAACATGT  
ATCATTAGCCTTCCATCTGTAGCTGCAATAACCTCAATGAAGCCTGGTG

>PGSC0003DMG401009323-(rev)G-LecRK\_3782

CCAAACATGTATCATTAGCCTTCCATCTGTAGCTGCAATAACCTCAATGAAGCCTGGTGATGTACTAAAT  
CACTCACAGGTACTTGATTGAGAAGGTGGAAGATTCAAGTTGGGATTTTT

>PGSC0003DMG401009323-(rev)G-LecRK\_3965

AAAATTATGGATAGCCAATCCAAACACACCTATATTGAACAGCTCAGGATTGCTCACATTAGATTCTGCA  
GGAACATTGAAAATCACCAGTGGAGGGAAGACAGTTGTGAATATTACCAC

>PGSC0003DMG401009323-(rev)G-LecRK\_4026

GATTCTGCAGGAACATTGAAAATCACCAGTGGAGGGAAGACAGTTGTGAATATTACCACTCCTTTATTG  
ACAGGAAGTTTAATAGCTAGGCTTCAAGATTCTGGAAATTTGGTGGTTCAG

>PGSC0003DMG401009323-(rev)G-LecRK\_427

GATGAAACTGAGAACAGGACTTTATGGCAAAGCTTCGATCATCCTACCGATACGCTTTTTCCAGGTATGA  
AGCTTGTTATAACCTTACAACAAAGCAGAATTGGACTTTAACTTCTTGG

>PGSC0003DMG401009323-(rev)G-LecRK\_4636

AGTGTCGAAAGAACAGTGATAAGTTGAGCAAAGAGAGGAGACTTTATAGATTTATCTGGTACTACTA  
CTAGCAATTATGACAATGCAAGCATTAGTCTTGGTGATTGTATGCAGAAGT

>PGSC0003DMG401009323-(rev)G-LecRK\_4758

TGGGAGCACTGCAGTTGTGTTGGATTACCAAGTCTTAACAGCAATGGGACAGGCTGCCGAATTTGGAAT

GGAAAGAGGGATTTTCGAGTCGATGAGAGTGGTAATGCAGTTCAAAGATAT

>PGSC0003DMG401009323-(rev)G-LecRK\_4819

TTTGGAAATGGAAAGAGGGATTTTCGAGTCGATGAGAGTGGTAATGCAGTTCAAAGATATGTTCTGATTT

CACCAAATCATCTAAAGGTTAGTCTTTAATTATGTCATAAATACACCTTC

>PGSC0003DMG401009323-(rev)G-LecRK\_488

CAGGTATGAAGCTTGGTTATAACCTTACAACAAAGCAGAATTGGACTTTAACTTCTTGGTTGAGTAGTTA

TATTCCGGCTTCGGGGGCTTTTACTTTAAGTTTGTAGTCCATTCAAGATG

>PGSC0003DMG401009323-(rev)G-LecRK\_4880

TCTGATTTACCAAATCATCTAAAGGTTAGTCTTTAATTATGTCATAAATACACCTTCTTATGAACTAATT

TTTTGGTCGAACAAACACATTTTATTGCAAACACCCAAAAACAGAATA

>PGSC0003DMG401009323-(rev)G-LecRK\_4941

ATGAACTAATTTTTGGTCGAACAAACACATTTTATTGCAAACACCCAAAAACAGAATACAGTATATCCTA

AGTAAAAAGATACAACCTGACCACAGCTAACCAAATTTAGAAACATCCCC

>PGSC0003DMG401009323-(rev)G-LecRK\_5002

GTATATCCTAAGTAAAAAGATACAACCTGACCACAGCTAACCAAATTTAGAAACATCCCCTACTCTTCCTCC

CTTCTATACAGTTTTCTATTTGTAAAGTTCTTGTGGTGTTTTTTTAAA

>PGSC0003DMG401009323-(rev)G-LecRK\_5307

TAGGTAGCTTATTATTTTAAAAAATGACTGCAGTAACTAAAAGCAAACCTCAACAGTTCTTCTATCCATTCT

CCGTCTTACAGTTTTTCAATTTTCAATATATAGACTGTATTAGTGAAG

>PGSC0003DMG401009323-(rev)G-LecRK\_5368

TATCCATTCTCCGTCTTACAGTTTTTCAATTTTCAATATATAGACTGTATTAGTGAAGAATCAACTGTATA

ATTTTCATCGTGTTACGTGTGCAGGAAAACTTGGATATGGATAGTAT

>PGSC0003DMG401009323-(rev)G-LecRK\_5429

TCAACTGTATAATTTTCATCGTGTTACGTGTGCAGGAAAACTTGGATATGGATAGTATTATCTATAGTTA

TCACAATGCTAATATGTGGTTTGATTGCTTGATCAAAACAAGAATACA

>PGSC0003DMG401009323-(rev)G-LecRK\_549

GAGTAGTTATATTCCGGCTTCGGGGGCTTTTACTTTAAGTTTGTAGTCCATTCAAGATGCATTTACAGCTG

GTTATACGTGCAAGGGGCGAGGTTTATTGGACTAGTGGCGCTTGGAGGAA

>PGSC0003DMG401009323-(rev)G-LecRK\_5490

TCTATAGTTATCACAATGCTAATATGTGGTTTGATTTGCTTGATCAAACAAGAATACAAAACTACAAC  
GTAAGTCTCTGAAAAGTGATTTACTAACTAGTATGTTGTTTATCAGTTAT

>PGSC0003DMG401009323-(rev)G-LecRK\_5551

AACTACAACGTAAGTCTCTGAAAAGTGATTTACTAACTAGTATGTTGTTTATCAGTTATTTTAAGCATGTA  
TGTAATCTACATACTTCTCTTGCATAGGTGAGAAAAGAAAGAAGGAGG

>PGSC0003DMG401009323-(rev)G-LecRK\_5612

TAAGCATGTATGTAAATCTACATACTTCTCTTGCATAGGTGAGAAAAGAAAGAAGGAGGAGCATATACG  
TGAGATGAACGCAGCAGACAGCTTCAACAACACAAATCTGAAAGAAGAAGA

>PGSC0003DMG401009323-(rev)G-LecRK\_5673

CATATACGTGAGATGAACGCAGCAGACAGCTTCAACAACACAAATCTGAAAGAAGAAGATGAAAGGGG  
AGTACAAGATTTGAAGCCTTAAGATCAATGAAGCTCTTGATACCACTGTTGG

>PGSC0003DMG401009323-(rev)G-LecRK\_61

AGCCATACAGGTATCATTACCCTTCCATCTGTGGCTGCAATAACCTCAATGAAGCCTGGTGATGAACTCA  
ATCACACTCAGTTCTTGATTCTGAAGATGGAACATTCAAGTTAGGATTT

>PGSC0003DMG401009323-(rev)G-LecRK\_610

TTTCAGCTGGTTATACGTCGAAGGGGCGAGGTTTATTGGACTAGTGGCGCTTGGAGGAATCAAAGTTTT  
CCATTCTTAACTGCATTGCATGATTCTTCTAACAGATATCAGTATAATCTC

>PGSC0003DMG401009323-(rev)G-LecRK\_6405

AGAAGAAGATGAAAGGGGAGTACAAGATTTGAAGATATTTAGCTTTGGATTGATATTGGCAGCCACAA  
ACAACCTCTCGAGTGATAACAAGCTCGGAGAGGGTGGTTTTGGACCTGTTTA

>PGSC0003DMG401009323-(rev)G-LecRK\_6466

GCCACAAACAACCTTCTCGAGTGATAACAAGCTCGGAGAGGGTGGTTTTGGACCTGTTTATAAGGTACAT  
TTTCAGTATGGTATATCATATATGTACCCCAAAAACCTTCTGTAGTACTCTC

>PGSC0003DMG401009323-(rev)G-LecRK\_6527

AGGTACATTTTCAGTATGGTATATCATATATGTACCCCAAAAACCTTCTGTAGTACTCTCATTATATGAAAT  
AATAATCTGTAAAAATGTATGACAGGGACAATTTCTGATGGGAGAGAG

>PGSC0003DMG401009323-(rev)G-LecRK\_6588

TATATGAAATAATAATCTGTAAAAATGTATGACAGGGACAATTTCTGATGGGAGAGAGGTGGCAATCA  
AGAGACTTTCAAGAACATCAGGTCAAGGGCTTGCAGGAGTTCAAGAATGAGC

>PGSC0003DMG401009323-(rev)G-LecRK\_6649

GGCAATCAAGAGACTTTCAAGAACATCAGGTCAAGGGCTTGC GGAGTTCAAGAATGAGCTTATACTAAT  
TGCCAAAGTTCAGCACAGAAATCTAGTTCGTGTTCTAGGATGTTGTATTCA

>PGSC0003DMG401009323-(rev)G-LecRK\_6710

ATACTAATTGCCAAAGTTCAGCACAGAAATCTAGTTCGTGTTCTAGGATGTTGTATTACGGAGATGAGA  
AAATGTTGATATATGAGTACATGCCTAACAAGAGCTTGGACATCTTCCTT

>PGSC0003DMG401009323-(rev)G-LecRK\_6771

GAGATGAGAAAATGTTGATATATGAGTACATGCCTAACAAGAGCTTGGACATCTTCCTTTTCGGTTTGTA  
ACCATTTCAAATAAGATCTAATCTTTCAAATAACTGTGCGAAATGTTTGA

>PGSC0003DMG401009323-(rev)G-LecRK\_6832

CGGTTTGTAACCATTTCAAATAAGATCTAATCTTTCAAATAACTGTGCGAAATGTTTGATGAAATGTTTTC  
AGTCATTGACAGATCCTGAAACAAAGAAGCTACTGGATTGGCAGAAGCG

>PGSC0003DMG401009323-(rev)G-LecRK\_6893

AAATGTTTTAGTCATTGACAGATCCTGAAACAAAGAAGCTACTGGATTGGCAGAAGCGCTTTGAGATT  
ATAGAAGGAATTGCTCAAGGATTACTCTATCTTCACAAATACTCAAGAATG

>PGSC0003DMG401009323-(rev)G-LecRK\_6954

TTGAGATTATAGAAGGAATTGCTCAAGGATTACTCTATCTTCACAAATACTCAAGAATGAGAGTGATACA  
TAGAGATCTAAAGGCTAGTAATGTGCTCTTGGATGAAAACATGAATCCTA

>PGSC0003DMG401009323-(rev)G-LecRK\_7015

AGTGATACATAGAGATCTAAAGGCTAGTAATGTGCTCTTGGATGAAAACATGAATCCTAAGATAGCTGA  
TTTTGGTCTGGCAAGAATTTTTAAACAGAATGAGACGGAGGCAGTGACTCG

>PGSC0003DMG401009323-(rev)G-LecRK\_7076

ATAGCTGATTTTGGTCTGGCAAGAATTTTTAAACAGAATGAGACGGAGGCAGTGACTCGAAGGGTAGTT  
GGAACATAGTGAGTTGAGCTTATTTCTTGATATTGACCTAGAGAACATGTA

>PGSC0003DMG401009323-(rev)G-LecRK\_7137

GGGTAGTTGGAACATAGTGAGTTGAGCTTATTTCTTGATATTGACCTAGAGAACATGTATACATATTCAT  
ACTGACATAGGTGGAAAATGTTTTCTATACACAGTGGTTACATGGCTCCC

>PGSC0003DMG401009323-(rev)G-LecRK\_7259

GTTCCGATGGAAGGAGCTTTCTCAATCAAGTCTGATGTCTTCAGCTTTGGAGTCTTAATGCTGGAAATT

TTGAGTGGTAGGAGAAATGCTAGCTTACAACAATTCAATCGTCCGCTCAA

>PGSC0003DMG401009323-(rev)G-LecRK\_7320

CTGGAAATTTTGAGTGGTAGGAGAAATGCTAGCTTACAACAATTCAATCGTCCGCTCAACTTAATAGGTT  
ATGTAAGTGTTTCTTGACATCCTTTTTATATTTGAAGTACTAAATGTACA

>PGSC0003DMG401009323-(rev)G-LecRK\_7381

TAATAGGTTATGTAAGTGTTTCTTGACATCCTTTTTATATTTGAAGTACTAAATGTACAAAGTTTGAGATA  
ATTGATCATTCTGGTTTAGGCATGGGAACTATGGAAAGAAGGGTGTGGA

>PGSC0003DMG401009323-(rev)G-LecRK\_7503

AGAACTGAAGGATCCAGCTCTTGAAGATCTTTATGACACTGAACAATTTTTACGAGTAATTCATGTCCGA  
CTACTATGTGTACAAGAAGGAGCAACAGATAGGCCAACAAATGTCTGATGT

>PGSC0003DMG401009323-(rev)G-LecRK\_7564

CATGTCGGACTACTATGTGTACAAGAAGGAGCAACAGATAGGCCAACAAATGTCTGATGTTATCTCAATG  
CTTGTAATGGAAGTATGTCATTGCCAATTGCAAACAACCTGCATTTTTTC

>PGSC0003DMG401009323-(rev)G-LecRK\_7686

AGGAAGAGATGAAGCTGAATCATATTCGTCATCAAACAAAACAGAACAATGTTCAATTAATGATTGTTCC  
ATTACTGTCATTGAAGCAAGATAAGATTAGAGATGTTATTTTTGTTGTAAT

>PGSC0003DMG401009323-(rev)G-LecRK\_7747

GATTGTTCCACTACTGTCATTGAAGCAAGATAAGATTAGAGATGTTATTTTTGTTGTAATAAAGATTGCAG  
TAGATCACCAATGTTTTAATGACCTCTAAAGTAACTTGAAGGCTCTTTTT

>PGSC0003DMG401009323-(rev)G-LecRK\_7798

GTTGTAATAAAGATTGCAGTAGATCACCAATGTTTTAATGACCTCTAAAGTAACTTGAAGGCTCTTTTTTG  
TTAAGGTTTAAAAGCTAATTTTTCTGCTTCATACATATTAGAACTCGG

>PGSC0003DMG401009323-(rev)G-LecRK\_793

AGTCTTGTGTTGACTTTTAATGGGGCTATTCTTGGTGGTGGTGAAGACAGTCGTATATACGCCCTTTATA  
ATGAGTTTTGTTATGGTTATGAAAGTCACGATGGTTGTGTCTCTAATCAG

>PGSC0003DMG401009323-(rev)G-LecRK\_854

CCCTTTATAATGAGTTTTGTTATGGTTATGAAAGTCACGATGGTTGTGTCTCTAATCAGTTGCCTGAGTGC  
CGAAAGGATGGGGATAAATTTGAGCTAAAGAGTGCATACTTCACTACTG

>PGSC0003DMG401009323-(rev)G-LecRK\_915

GCCTGAGTGCCGAAAGGATGGGGATAAATTTGAGCTAAAGAGTGCATACTTCACTACTGGTAGTGCTAC  
TTCTAATTATGATGATAATGCAAACATTAGTCTTGGTGATTGTATGAAGAA

>PGSC0003DMG401009323-(rev)G-LecRK\_976

AGTGCTACTTCTAATTATGATGATAATGCAAACATTAGTCTTGGTGATTGTATGAAGAATTGCTGGGAGC  
ACTGCAGTTGTGTTGGCTTCATCACCAGCAGCAATGGAATAGGCTGCATA

>PGSC0003DMG401009415-(rev)L-LecRK\_0

CTCCATTTTTCACTCATTGATCAATTATTTTATTTGCATTTACAAAAAAGTAAGACAAAGCCAACGTGCTTC  
AAAGTTTCTGCTCATTGATTCTTCTTCTTCCCCTGTTTTCTTGCCCA

>PGSC0003DMG401009415-(rev)L-LecRK\_1037

AAAAGTCCTTGGTTGAAGATTGTTTTAGGTGTTGGGATTCCTGTAGTGGTGCTTTTGATTCTTGCCGCGG  
CGTATTTAGGGTATTGTTATCATAAGAAAAGGATTGATAGGTCACAGTCT

>PGSC0003DMG401009415-(rev)L-LecRK\_1098

TTGCCGCGGCGTATTTAGGGTATTGTTATCATAAGAAAAGGATTGATAGGTCACAGTCTAACATATTGG  
GTGCACTCAAGAGCTTGCCTGGAACACCACAAGAGTTTCAGTTTAAGGCTT

>PGSC0003DMG401009415-(rev)L-LecRK\_1159

CATATTGGGTGCACTCAAGAGCTTGCCTGGAACACCACAAGAGTTTCAGTTTAAGGCTTTGAAGAAAGC  
TACAAACAATTTTGATGAAAAGAATAAGCTTGGGCAAGGAGGATATGGAGT

>PGSC0003DMG401009415-(rev)L-LecRK\_122

ACCAAATCTACTTCTCTGTAGCCACCACCATCTCTGAAGGGACTCACTGCTGATGAAAAATGGGATTGT  
TAACACCAAAAACACTCACCATTTTCATCATTCTTCTCTTTACTACAC

>PGSC0003DMG401009415-(rev)L-LecRK\_1220

AAGAAAGCTACAAACAATTTTGATGAAAAGAATAAGCTTGGGCAAGGAGGATATGGAGTTGTTTACAG  
AGGATTTTTAGCTGGTGAGGAGAACAAAGATATTGCTGTCAAATGGTTTTCT

>PGSC0003DMG401009415-(rev)L-LecRK\_1281

TTTACAGAGGATTTTTAGCTGGTGAGGAGAACAAAGATATTGCTGTCAAATGGTTTTCTAGGGAAAGCA  
TCAAAGGGCAAGATGATTTCTTGGCTGAGCTTACTATTATCAATCGTCTTC

>PGSC0003DMG401009415-(rev)L-LecRK\_1342

GGAAAGCATCAAAGGGCAAGATGATTTCTTGGCTGAGCTTACTATTATCAATCGTCTTCGACATAAACAT  
CTTGTCAAATTGCTTGGTAAGTGTCTTAGTTTTTCTCAAACATAGATT

>PGSC0003DMG401009415-(rev)L-LecRK\_1403

CATAAACATCTTGTCAAATTGCTTGGTAAGTGTTCTTAGTTTTCTTCAAACATAGATTTTGTGCATTTGTT  
TGAGTAGAGTATTAGAGTTATATTATTGTGACTGTTTTGTTTATGATC

>PGSC0003DMG401009415-(rev)L-LecRK\_1647

ATCCTTCTCAGTATAGCTACAAATTTGAGTCTCAAATAAGGCCTTATCTCCAATATTTCAATTGAAAAGTA  
AACTATACAAATAGGGTAAAGATTAGTTTTTATTTTTGGGTATGTACAT

>PGSC0003DMG401009415-(rev)L-LecRK\_1708

TTGAAAAGTAAACTATACAAATAGGGTAAAGATTAGTTTTTATTTTTGGGTATGTACATAAAATGTGTGA  
ATACCTTCAAGGCAAAGGAAGTTGTAAGTGTAGAGTAAATTTTGCTCAA

>PGSC0003DMG401009415-(rev)L-LecRK\_1769

AATGTGTGAATACCTTCAAGGCAAAGGAAGTTGTAAGTGTAGAGTAAATTTTGCTCAAATAGTTGCA  
TTTTCTTGAATTTCCCTTATAGAATTCTTTCCCCACCCCTCCTGCCATAAT

>PGSC0003DMG401009415-(rev)L-LecRK\_183

TGGGATTGTTAACACCAAAAACACTCACCATTTTCATCATTCTTCTCTTTACTACACCTCAAACCTCAAG  
CTCAAAAATGGAACATTACAACCTAGAATATGCATCTTTTGATCAA

>PGSC0003DMG401009415-(rev)L-LecRK\_1830

TAGTTGCATTTTCTTGAATTTCCCTTATAGAATTCTTTCCCCACCCCTCCTGCCATAATTAAGCAATGAGAC  
AAGGATAATGGCGAGAGGATCCAAATTTAGCAATCAGAAACAGAAATT

>PGSC0003DMG401009415-(rev)L-LecRK\_1891

AGCAATGAGACAAGGATAATGGCGAGAGGATCCAAATTTAGCAATCAGAAACAGAAATTGCCTCTATG  
TTTTTTGATTCTCAATGAAAGAGAGAATTCATTACCAGGATTCATTGATGT

>PGSC0003DMG401009415-(rev)L-LecRK\_1952

CCTCTATGTTTTTTGATTCTCAATGAAAGAGAGAATTCATTACCAGGATTCATTGATGTGACTTGAAAGA  
ATGGAACCAAAAACCTTGAAAAGTTACTGACATAATTTAAAGCCAAAGA

>PGSC0003DMG401009415-(rev)L-LecRK\_2013

CTTGAAAGAATGGAACCAAAAACCTTGAAAAGTTACTGACATAATTTAAAGCCAAAGATTGGTGGGAC  
ATCAAATTAATACTCCAATTTGTTTGTCAATTTGTCTTTCTTTTTTTGG

>PGSC0003DMG401009415-(rev)L-LecRK\_244

CAAACCTCAAGCTCAAAAATGGAACATTACAACCTAGAATATGCATCTTTTGATCAAACCTTTCTTTGACA



TCTTTGAAGTTGAAAGTCCTGCAACAATCAGTAACTTTGCTCTCCAAGT

>PGSC0003DMG401009415-(rev)L-LecRK\_305

TTCTTTGACATCTTTGAAGTTGAAAGTCCTGCAACAATCAGTAACTTTGCTCTCCAAGTAACCCCTGATTC

TGCTTCTTCAGATTTCAATCTCTACAATAACTCAGGAAGAATCCTCTTT

>PGSC0003DMG401009415-(rev)L-LecRK\_3416

CACATATTTAGAGAGAGCGAAGCAACACTAATACAATAGACTCATTAAACCGCGTGAGCACATGCCCTTG

TCTTTTTATGCTTTTCTTTTTCTAGTAACTAGTAATTGATCTTATTCAACT

>PGSC0003DMG401009415-(rev)L-LecRK\_3477

TGCCCTTGTCTTTTTATGCTTTTCTTTTTCTAGTAACTAGTAATTGATCTTATTCAACTAATTTATGTAATTT

TAACAAGGGACTAGTCTTTCTATTCTTACATTTAGTATGCTAGGAAT

>PGSC0003DMG401009415-(rev)L-LecRK\_366

CCCCTGATTCTGCTTCTTCAGATTTCAATCTCTACAATAACTCAGGAAGAATCCTCTTTAAGCGACCATTTA

AGCTCTGGGATGGTGTATGTTTTAGACAATAAAACAAGGGTTGCATCTT

>PGSC0003DMG401009415-(rev)L-LecRK\_3965

TAAGTAAGAGTTTAAGCCAAAAATATCAAGGAAGTAAGAAAACTAATGGAATGCCTTAAAGTTTTGAC

CAAGAACCAACTTGTTACTATGGTCCCTCCAATTTAGAAAAACAATGCACT

>PGSC0003DMG401009415-(rev)L-LecRK\_4148

TAAGCAGCCATTCGTCAAAGTTCAAACAATTTTTTATGTCAAATTTTGGGAAGTTTCCTTCTTGTCCTA

ACATCCCTTTCATTCATTGTCAACGATTAAGACAAGTTTTGGATGTTAG

>PGSC0003DMG401009415-(rev)L-LecRK\_4209

TCTTGTCTAACATCCCTTTCATTCATTGTCAACGATTAAGACAAGTTTTGGATGTTAGTTGAATGATGGT

AAATTAATCCAATGAAAAGGACATTAATTCTGTATTTTAGTATACATT

>PGSC0003DMG401009415-(rev)L-LecRK\_427

GCGACCATTTAAGCTCTGGGATGGTGTATTTTTAGACAATAAAACAAGGGTTGCATCTTCAACTCTTCT

TTTCTTGTCAACATTTACAGACCAAGAATGAAACAGCTGCTGAAGGGTT

>PGSC0003DMG401009415-(rev)L-LecRK\_4392

GTTTGTAAAATACAAAAAAAAGTTTACCATTTGGGTATTCTGCAACTTCTGTGTCTAGCTGTTTTACTGA

TAAAAACAACATATGCATCTTACAAAATTACATGTTATGGTGACAGG

>PGSC0003DMG401009415-(rev)L-LecRK\_4514

GGTGTACAAGAATGGAAAGTTACTGCTTGTATATGAATACATGCCTAATGGCAGTCTAGATATGCACCT  
CTTTGCGGGACCAGATAAAGAGTCGTTGAGCTGGAACGTCCGCTACAAGA

>PGSC0003DMG401009415-(rev)L-LecRK\_4575

TATGCACCTCTTTGCGGGACCAGATAAAGAGTCGTTGAGCTGGAACGTCCGCTACAAGATTGTTCAAGG  
TGTTGCCTCAGCATTGCACTATCTGCACAATGAGTATGAGCAGAGGGTGGT

>PGSC0003DMG401009415-(rev)L-LecRK\_488

AACTCTTCTTTTCTTGCAACATTTACAGACCAAAGAATGAAACAGCTGCTGAAGGGTTAACATTCTTGAT  
TTCACCAGATTTGGAGAAGCCCGATAATAGCCAGGGCCAGTATTTAGGG

>PGSC0003DMG401009415-(rev)L-LecRK\_5185

TTTGTGTGGCCATCAATGATGCCAATTGACATAGACTCAAGTGTTATGGACACAACATCCATTACTACTTC  
TCACTTCAATTCAGGATGGAGTCTTGACTATCAAAGCAGGGAGACCCCA

>PGSC0003DMG401009415-(rev)L-LecRK\_5368

AATGATTTTTTTGGCCTTCTATTTTTTAAAAATTTCTGTAATTATGTTTTCTTGGGAGGAGGTTAAAAAT  
TTCCTTCAGTTTTTATTTTTGTTGATGTTTTTTCCCTTATCAAT

>PGSC0003DMG401009415-(rev)L-LecRK\_5429

AGGTAAAAATTCCTTCAGTTTTTATTTTTGTTGATGTTTTTTCCCTTATCAATTTGTTATTGGGGCA  
TGATGAAAAGATCAGAGCAACCCGTGTACATTCATATAACTCAGTAG

>PGSC0003DMG401009415-(rev)L-LecRK\_549

CATTCTTGATTCACCAGATTTGGAGAAGCCCGATAATAGCCAGGGCCAGTATTTAGGGTTAACAAATGC  
TACTACAGATGGGAAATCTAGTAACAAAGTTGTTGCTGTTGAGCTTGATA

>PGSC0003DMG401009415-(rev)L-LecRK\_5490

GTTATTGGGGCATGATGAAAAGATCAGAGCAACCCGTGTACATTCATATAACTCAGTAGTGTACATTAT  
GTCATATTTACTGTTTTCTGTCTTTGTCAACCAAATTATGTAAAAGAC

>PGSC0003DMG401009415-(rev)L-LecRK\_5734

GAACTGATCAATTCTTATAAAAGCAATAGATAACAGAAGAACAACATAAAGATGGATCATAGATGCT  
TTGTTGATATGCATAAATGCTCTGCCATTTTATAGGCTATTGTAGTATTAG

>PGSC0003DMG401009415-(rev)L-LecRK\_5795

TAGATGCTTTGTTGATATGCATAAATGCTCTGCCATTTTATAGGCTATTGTAGTATTAGATCGTTGACAAAT  
ATATAGTAGATGAAATCCCACTAAGATTTATCTACTGTCAAGATCATT

>PGSC0003DMG401009415-(rev)L-LecRK\_5856

CGTTGACAATATATAGTAGATGAAATCCCCTAAGATTTATCTACTGTCAAGATCATTCTGTAAATCAAT  
ATAACGGAGAACCTGAGATGCTTGCCAAAGTTTTACAAGTTAGTGCGCA

>PGSC0003DMG401009415-(rev)L-LecRK\_5917

GTAAATCAATATAACGGAGAACCTGAGATGCTTGCCAAAGTTTTACAAGTTAGTGCGCATAAGATCAAG  
AGTTTCCCCCGCCTTTAACTTTGTTGATAAACGGAGCTTCCTATAATCATT

>PGSC0003DMG401009415-(rev)L-LecRK\_5978

AGATCAAGAGTTTCCCCGCCTTTAACTTTGTTGATAAACGGAGCTTCCTATAATCATTGAAAGTGAAAG  
GAACATAGATACGGGGGTGTTGAGCATCCACCAGCTCAGGTGGTGGTTCC

>PGSC0003DMG401009415-(rev)L-LecRK\_61

CAACGTGCTTCAAAGTTTCTGCTCATTGATTCTTTCTTCTTCCCCTGTTTTCTTGCCCATCACCAAATCTACT  
TCCTCTGTAGCCACCACCATCTCTGAAGGGACTCACTGCTGATGAAA

>PGSC0003DMG401009415-(rev)L-LecRK\_610

AACAAATGCTACTACAGATGGGAAATCTAGTAACAAAGTTGTTGCTGTTGAGCTTGATACTTCTAAACAA  
AGCTTTGACCCTGATGGTAACCATATAGGTATTGATGTTTCATAGTGTTAG

>PGSC0003DMG401009415-(rev)L-LecRK\_6161

CATATCACTCTATGCTTGACAGTGTGTAATCTTCCATTGCTCCATACCTTCACATAGGCCATAGCAAAAAG  
CAAGTATCATTGTCTAGTTCTTTTTTCGGAATCTTAGAAGGGTTAAGGG

>PGSC0003DMG401009415-(rev)L-LecRK\_6222

TAGCAAAAAGCAAGTATCATTGTCTAGTTCTTTTTTCGGAATCTTAGAAGGGTTAAGGGAGTAGGAATTA  
TCTAACTTCCTGCTAAACAATCCCCGCCAGAGGCTAGCATAAGATTGTTG

>PGSC0003DMG401009415-(rev)L-LecRK\_6283

TAGGAATTATCTAACTTCCTGCTAAACAATCCCCGCCAGAGGCTAGCATAAGATTGTTGGAACACGTCAA  
ATCTTGAAAATGAACTAGGTAGAGTAGCAGCATAGTTACCGTGCCCATGT

>PGSC0003DMG401009415-(rev)L-LecRK\_6527

TGTGTGTGTCTGAACCCAGAGGAACCTACAGCTTCTGGGGTGAAGTGGTACTTGTTAATCCTAACTG  
ACAAGGCCAATCCTCAAAGGAAACATTTGGCAGTCCCAACCCTTCACTCAT

>PGSC0003DMG401009415-(rev)L-LecRK\_6588

CTAAACTGACAAGGCCAATCCTCAAAGGAAACATTTGGCAGTCCCAACCCTTCACTCATCTTTTCGCAGAA

TGTCCATCATTAGTCCATTAGTTGCTGCAGCATACGTCTTGATTGTCTCT

>PGSC0003DMG401009415-(rev)L-LecRK\_6642

CTCATCTTTTCGCAGAATGTCCATCATTAGTCCATTAGTTGCTGCAGCATACGTCTTGATTGTCTCTCTCTGTT  
ACAGTAGGAATCAAAGCTTTTAAGCATTCTAGTAAAGCAGTCTTTT

>PGSC0003DMG401009415-(rev)L-LecRK\_671

TCTAAACAAAGCTTTGACCCTGATGGTAACCATATAGGTATTGATGTTTCATAGTGTAGATCTGTAAAGG  
TTGAATCTTTAACACCCCTTGGTATAGAAGTTGCTCCTATGGGTGCAAGA

>PGSC0003DMG401009415-(rev)L-LecRK\_732

CTGTAAAGGTTGAATCTTTAACACCCCTTGGTATAGAAGTTGCTCCTATGGGTGCAAGATTCTATAATGTT  
TGGGTACAATATGATGGAATCAAGAAAGTTCTTGATGTTTATATTGTTG

>PGSC0003DMG401009415-(rev)L-LecRK\_793

CTATAATGTTTGGGTACAATATGATGGAATCAAGAAAGTTCTTGATGTTTATATTGTTGAACAAGCACAG  
AAAAATGGGTCTACCCACCTATACCAAAAACCCCATTTTAACATATAA

>PGSC0003DMG401009415-(rev)L-LecRK\_854

CAAGCACAGAAAAATGGGTCTACCCACCTATACCAAAAACCCCATTTTAACATATAATCTTGATTGTA  
AAGAACATGTAAATCAAGAATCATATTTTGGGTTTTCTGCATCAACTGGG

>PGSC0003DMG401009415-(rev)L-LecRK\_915

TTGATTTGAAAGAACATGTAAATCAAGAATCATATTTTGGGTTTTCTGCATCAACTGGGACTAACTACCA  
ACTCAACTGTGTATTGAGATGGAAGTTAACAGTTGAGTACTTCCCAGAAA

>PGSC0003DMG401009415-(rev)L-LecRK\_976

TAACTACCAACTCAACTGTGTATTGAGATGGAAGTTAACAGTTGAGTACTTCCCAGAAAAGAAAAGTCCT  
TGGTTGAAGATTGTTTTAGGTGTTGGGATTCCTGTAGTGGTGCTTTTGAT

>PGSC0003DMG401010943LRR-RLPs\_0

ATGGCCGATCCTGTATTTGCTGCTACTGTAAAGTTTTGCTTGACAACTGCTTTCTCTCACTATCAAGGA  
GATCAACAGTTCAAGGGATTGCAACGAAGATCTGGAAATGTTACACAA

>PGSC0003DMG401010943LRR-RLPs\_1281

CATCTAAAAAAGTGCTTTGCTTACTTTGCAATGTTTCCAAAAGATTCCAAAAGATCTTATGTTTGAAAAGG  
CCCAACTAATCCAACTCTAGATGGCAGAAGGCTTTCTTCATCCATGTCA

>PGSC0003DMG401010943LRR-RLPs\_1525

GTGCATGATTTGGCTGGAGATATCTTCAAATCTAAACTATTTGATCAGAAGGGCAATGATGGAGAAAA  
CTTTCTCAAGTGCGATACTTTGGGTGGGACTCACCAAGTGATCAAATAGAT

>PGSC0003DMG401010943LRR-RLPs\_1769

TGTCAGCCTTAATCGGGAAGCTAATATACTTGAGATATCTAGATATCTCGAGCACTGAGATCACAACTT  
GCCCCACTCCATTTGCAAGCTCTATAATTTGCAAACCTTTAGAGTCAATT

>PGSC0003DMG401010943LRR-RLPs\_183

TCTGTGCAACAATGGCTCAGGAGGCTTGAGAGAGTTGCTGAAAATGCTGAAAATGTGTTTGATCGATTC  
AAATATGAATCTCTCAAAACAAAAGTGATGAACATCCGAAATAGCCCAATG

>PGSC0003DMG401010943LRR-RLPs\_1830

CACAACCTTGCCCCACTCCATTTGCAAGCTCTATAATTTGCAAACCTTTAGAGTCAATTGTTGCTATTCCT  
CAAGGAGTTTCCATATGAGATGGGAAATATGATAAGTTTGAGACACAT

>PGSC0003DMG401010943LRR-RLPs\_2074

AACCTTAGAGGTGAATTGTGTATCAATGAGCTGGAATTGGTCCATAGTAGAGAAGAAGCTCTAACAGCA  
TATTTACAAGAGAAATCAAATATTTACAAGCTGACATATTTATGGTCCCAT

>PGSC0003DMG401010943LRR-RLPs\_2318

AACAGTCGCTACCAAATTTGGTCAAGTTGAAATTAAGTAATTGCAGAAGTTGCAAAGAAATTCATCTCT  
TGGCCAACTGAAATTCCTTCGGCATCTTGAAGTGGTAGGGTTCCATAAGC

>PGSC0003DMG401010943LRR-RLPs\_244

ATCGATTCAAATATGAATCTCTCAAAACAAAAGTGATGAACATCCGAAATAGCCCAATGAAAAAGGTCA  
GTGGTTTCTTTACTCATACTGCTTTTAAGAGCAAATGTCTCGAAAAATCA

>PGSC0003DMG401010943LRR-RLPs\_2440

GAATGCATCGGAACTACATTTTATGGTATTGAGGTTAACAATATGGGATCAAGTAGCAATAATGCCATTA  
TCCAAGTGTTCCCATCATTAAAAGAACTAGTATTGGAGAATATGCGTAGC

>PGSC0003DMG401010943LRR-RLPs\_2501

ATGCCATTATCCAAGTGTCCCATCATTAAAAGAACTAGTATTGGAGAATATGCGTAGCCTTACTGAGTG  
GAAGGGAGTGGAATCGATACCAACAACAAGTGGGGTAAGAATGTTTCCTG

>PGSC0003DMG401010943LRR-RLPs\_2562

TACTGAGTGGAAGGGAGTGGAATCGATACCAACAACAAGTGGGGTAAGAATGTTTCCTGGGCTTGAGA  
AGTTGAGGATTAGCTACTGTCCATTGTTAAAAAGTACTCCGAAGCTATTTGA

>PGSC0003DMG401010943LRR-RLPs\_2623

CTTGAGAAGTTGAGGATTAGCTACTGTCCATTGTTAAAAAGTACTCCGAAGCTATTTGAAATCCTACGTG  
AATTGAGCATTAAAGTAGTTGACAGTGAAATGCCACTATTGAATTTGTGC

>PGSC0003DMG401010943LRR-RLPs\_2684

TCCTACGTGAATTGAGCATTAAAGTAGTTGACAGTGAAATGCCACTATTGAATTTGTGCAGCAACTTGAC  
ATCTCTTGTAAGCTTAGTGTCTCTTTTGTGGAAGAGCTCACTTGTTTTT

>PGSC0003DMG401010943LRR-RLPs\_2745

CAACTTGACATCTCTTGTAAGCTTAGTGTCTCTTTTGTGGAAGAGCTCACTTGTTTTCCAGATGAGATGC  
TACGCAACAACGTTTCTCTTCAACTTATCGGTCTCAAACCTGCAGAGA

>PGSC0003DMG401010943LRR-RLPs\_2806

GATGAGATGCTACGCAACAACGTTTCTCTTCAACTTATCGGTCTCAAACCTGCAGAGAGTTTCGTGAAT  
TGCCACAGAGCTTGTACAATCTGCATTCTCTTAAGAGCTTAATCATTAG

>PGSC0003DMG401010943LRR-RLPs\_2867

TTCGTGAATTGCCACAGAGCTTGTACAATCTGCATTCTCTTAAGAGCTTAATCATTAGTGTGCACCAAT  
TTCAGTTCCTTTCCTGTTCCAGTGGAGAGAATTATTTGACTTCCCTAC

>PGSC0003DMG401010943LRR-RLPs\_305

AAAGGTCAGTGGTTTCTTTACTCATACTGCTTTTAAGAGCAAATGTCTCGAAAAATCAACAGCATCAAT  
AAAGAGTTGACCGCTATTAACAGTGTAGCCAAAGACCTCGGTCTCCACTC

>PGSC0003DMG401010943LRR-RLPs\_3294

CCTTCGTACTCTGCTTGTGTTTCGGACATTTGCACTGGGATTCTCTGCCCTATCAGCTTATGCAACTCTCTG  
CCCTAACTCATATACATATATGTGATTTTCGGAATCGAGGCTCTTCTCA

>PGSC0003DMG401010943LRR-RLPs\_3355

CAACTCTCTGCCCTAACTCATATACATATATGTGATTTTCGGAATCGAGGCTCTTCTCATAGACTTGACAA  
TCTTACTTCTCTTGAAGTATTACGTTTAGTGAGGTGCAAACGGCTGCAA

>PGSC0003DMG401010943LRR-RLPs\_3416

GACTTGACAATCTTACTTCTCTTGAAGTATTACGTTTAGTGAGGTGCAAACGGCTGCAACATGTGGACTT  
CTCAGATGCCATGCCCAAATTACAGTATCTAACCATCTGTGGTTGTCCAT

>PGSC0003DMG401010943LRR-RLPs\_3477

TGTGGACTTCTCAGATGCCATGCCCAAATTACAGTATCTAACCATCTGTGGTTGTCCATTGTTAGAAGCTC

TGTCGGATGGGCTTGGCAACCTTGTTACTTTGCAACAGTTAAGATTAGA

>PGSC0003DMG401010943LRR-RLPs\_3538

TTAGAAGCTCTGTCGGATGGGCTTGGCAACCTTGTTACTTTGCAACAGTTAAGATTAGAGAACTGCGAA  
AAACTGGAGCATCTGCCATCCAGAGAGGCCATGCGACGCCTCACTAAATTA

>PGSC0003DMG401010943LRR-RLPs\_3599

ACTGCGAAAACTGGAGCATCTGCCATCCAGAGAGGCCATGCGACGCCTCACTAAATTATGGTACCTAA  
AAATTAAGGGTGCCCAAAGTTAGAAGAAAGTTGCAACAATCGGAGTGGCC

>PGSC0003DMG401010943LRR-RLPs\_3721

AACACCCAGTGGTCCAACATTTCCCATATTCCAAAAGTTAAAGTAGGTGGAAGCATAATTCAGGACTTGC  
GTAAGTCTCATTTTTAATTTTTATTTTCTACGAGTTCTAGAAAAGAAGTT

>PGSC0003DMG401010943LRR-RLPs\_3782

AGGACTTGCGTAAGTCTCATTTTTAATTTTTATTTTCTACGAGTTCTAGAAAAGAAGTTCTGTATGAATAT  
ATCTCAAATTATTCAAACGTTTCGTTTGTTTTGCACGTTTATCCTTCAA

>PGSC0003DMG401010943LRR-RLPs\_3843

GTATGAATATATCTCAAATTATTCAAACGTTTCGTTTGTTTTGCACGTTTATCCTTCAATAAAGAGTTTATC  
ACTTAATCCTAGAATGTAGTACTCTTCATTACATAGTATAATGGAAGT

>PGSC0003DMG401010943LRR-RLPs\_3904

AAGAGTTTATCACTTAATCCTAGAATGTAGTACTCTTCATTACATAGTATAATGGAAGTTATTAAGTGGTA  
TGTAATCCTCATTACATAGTATAATGGAAGTTCTTAAGTGGTATGGTTC

>PGSC0003DMG401010943LRR-RLPs\_3965

TTAAGTGGTATGTACTCTTCATTACATAGTATAATGGAAGTTCTTAAGTGGTATGGTCTTGAATAAGGT  
AATTGTTTATTCTCTTCAAGTATAGACAAGTATTTTACTGGCATAACATT

>PGSC0003DMG401010943LRR-RLPs\_4026

GAATAAGGTAATTGTTTATTCTCTTCAAGTATAGACAAGTATTTTACTGGCATAACATTTGCTTGTCATAT  
CTGGTATATTACAGTTTCTTTTGCCTAAGAGGAGGTGAACTGTAGAGAG

>PGSC0003DMG401010943LRR-RLPs\_4087

CTTGTCATATCTGGTATATTACAGTTTCTTTTGCCTAAGAGGAGGTGAACTGTAGAGAGGAAAAAGCTG  
ACCTAATTTGACTTCTATTCAATTTGCATCAGTGGTGCTTTTGGAGACTCT

>PGSC0003DMG401010943LRR-RLPs\_4209

TTGTATGTCGTTTGAGATTTAAGGTAAGTTTTGTCCATAAAAAGTTTGCAAATGGTGGATTTAGATCA  
ATACTTTGTTTTCTCTATGAATGGTTTTCTTTCCCCCTAAATGCCG

>PGSC0003DMG401010943LRR-RLPs\_427

TCATAGTTCCTTCTCGGAAAATATTTCCGATTCGAGAAACAGATTCCTTAGTAGTTGCTCCAGATGTTGTT  
GGTAGAGATTTGGATGTTGCTGAGATTAAGGAGAAAATTTGAAGATGA

>PGSC0003DMG401010943LRR-RLPs\_4270

TTTTAGATCAATACTTTGTTTTCTCTATGAATGGTTTTCTTTCCCCCTAAATGCCGTTTTAAATCATCC  
TACTTACCTTTATCTCGTATACTGTTCTTAGTTAATTGAAAACCTCTC

>PGSC0003DMG401010943LRR-RLPs\_4392

GGAACAACACCAAGTCTCATATATAGTAGAGGTCTATAACTTTCTTAATAGTCACACTTCTCGTACTT  
GAACAAAAAGGAAATTTCAAAGGACTGCTATGTCTTGAACCTTACAGCA

>PGSC0003DMG401010943LRR-RLPs\_4514

GAGTGCCCCATTGACTCTTAAAATTTCAAAGACAACACTAGGTTTGTACAAAGCAATTTGTGTTCTTGTAT  
GCAAGTTTTAGAGTTCAATAAGAATGTGAACTTACATTGATTATTTGCT

>PGSC0003DMG401010943LRR-RLPs\_4575

GTTCTTGTATGCAAGTTTTAGAGTTCAATAAGAATGTGAACTTACATTGATTATTTGCTGGTAATTGTTGT  
TTGGCATGTGGTTGAACTCTGGATACAGTCCTTCCTGTCTTGTGGATAT

>PGSC0003DMG401010943LRR-RLPs\_4636

TAATTGTTGTTTGGCATGTGGTTGAACTCTGGATACAGTCCTTCCTGTCTTGTGGATATCAATAAATCTTC  
AAGATTTGTTTCTCAAATTCTCACCGATGGAGTGGCTGCAGCCTCCAG

>PGSC0003DMG401010943LRR-RLPs\_4697

ATAAATCTCAAGATTTGTTTCTCAAATTCTCACCGATGGAGTGGCTGCAGCCTCCAGTTCCATCATGTC  
CCATTTGGGATATATTGCACAGAGACGTGATGGCATTGAAATGCTTATA

>PGSC0003DMG401010943LRR-RLPs\_4758

CCATCATGTCCATTTGGGATATATTGCACAGAGACGTGATGGCATTGAAATGCTTATAACCATTCTTGCT  
GACACTACAGTAAGTGATTGCCTCACATCTCAGTTAGATTGACAATCATT

>PGSC0003DMG401010943LRR-RLPs\_4819

ATTCTTGCTGACACTACAGTAAGTGATTGCCTCACATCTCAGTTAGATTGACAATCATTAGCCACAAAGG  
GAAGAAAAGAGTAAAAGGAGTATCATAGATGTCACCAAAGACGAATGTAC



>PGSC0003DMG401010943LRR-RLPs\_488

AGATGTTGTTGGTAGAGATTTGGATGTTGCTGAGATTAAGGAGAAAATTTGAAGATGAGAGAGGAGG  
ATGTTGTTATGTGCACTATCCCATAGTGGGTATGGGGGGTTAGGGAAAAC

>PGSC0003DMG401010943LRR-RLPs\_4880

CCACAAAGGGAAGAAAAGAGTAAAAGGAGTATCATAGATGTCACCAAAGACGAATGTACAAATAACTC  
CCAAGGATCCCCTGTCCTTAGGTCCTGAAAGAGACACCGATCATATATGAAA

>PGSC0003DMG401010943LRR-RLPs\_5002

TACATTCGAGTGGCTTTGAAGCTTGTGTCTTTACTTATGTCTAGTATATATGTAATTTATCTGATGTATCAT  
TGCCTAGTTGATATATAGCTTCTCTCATCTAGCTCTGTTTTGAAATTT

>PGSC0003DMG401010943LRR-RLPs\_5063

TGATGTATCATTGCCTAGTTGATATATAGCTTCTCTCATCTAGCTCTGTTTTGAAATTTATCTTGGCATTG  
CATTATTTAAGTGCAAATACTATGATGGTTCAAATCTAGAGCTTGTG

>PGSC0003DMG401010943LRR-RLPs\_5124

CTTGGCATTTCATTATTTAAGTGCAAATACTATGATGGTTCAAATCTAGAGCTTGTGTTCAAATCGAC  
AAGGCATGCAATGTCCTCTTTTGATATATCAACTGTTTGTGCAAATTC

>PGSC0003DMG401010943LRR-RLPs\_5185

CCAAATCGACAAGGCATGCAATGTCCTCTTTTGATATATCAACTGTTTGTGCAAATTCATGTGCTGTGTC  
TTGGTACTGAAGCACAACCTCCTACTAGATAATGCATTTGGTGAGCTTA

>PGSC0003DMG401010943LRR-RLPs\_5246

GTGCTGTGCTTTGGTACTGAAGCACAACCTCCTACTAGATAATGCATTTGGTGAGCTTACTATTAAGC  
ATTTATAACTACTGGAAACAGGAGTACTTACCATTCCGGAGTTAAACAGTA

>PGSC0003DMG401010943LRR-RLPs\_5293

TTGGTGAGCTTACTATTAAGCATTATAACTACTGGAAACAGGAGTACTTACCATTCCGGAGTTAAACA  
GTATGTACCATTTTATTGTAAAGATAGGTTATGCAATGGCTCTAACCAA

>PGSC0003DMG401010943LRR-RLPs\_549

GAGGAGGATGTTGTTATGTGCACTATCCCATAGTGGGTATGGGGGGTTAGGGAAAACAACCTTGGC  
TAAGAGGATTTACAATGATGAACACATCAAGCAAATCTTTGAAAAGAGAATT

>PGSC0003DMG401010943LRR-RLPs\_61

CTATCAAGGAGATCAACAGTTCAAGGGATTGCAACGAAGATCTGGAAATGTTACACAAAATGTATCCT

TAATCCAAGCTTTCCTTCATGATGTTGAAACACCACAAGTTGAGAAACAAC

>PGSC0003DMG401010943LRR-RLPs\_732

ACAGAGAGGAAAAGTGGAGGTCCAAAGGAGAGATATAATAGTCAAGAAGCTACAAGATGAATTGGGAG  
GAAAAAACTATTTACTAGTCCTGGATGATTTGTGGTGTGTTGACTCTACATCG

>PGSC0003DMG401010943LRR-RLPs\_793

TGGGAGGAAAAAACTATTTACTAGTCCTGGATGATTTGTGGTGTGTTGACTCTACATCGTGGCATGAGTT  
CGTCGACACCTTGAGAGGAATAAATACATCCATAGGAAACTGCATTCTTG

>PGSC0003DMG401010943LRR-RLPs\_854

GCATGAGTTCGTCGACACCTTGAGAGGAATAAATACATCCATAGGAAACTGCATTCTTGTGACTACTCGT  
ATGAAGCGGGTGGCATCCACTGTAGCAACAGATCTTCATATCTTGGGAAA

>PGSC0003DMG401010943LRR-RLPs\_976

TAACAGAAGATCATTGTTGGTCTATTTTCAAACAAAAGCATTGTTGATGGCAGGGCTCCAGAAGAATT  
AGCGAGCATGGACAACAAGATTGTTAAAATGTGCCAAGGCGGCAACAAGA

>PGSC0003DMG401013731LRR-RLKs\_0

GCTTTGCTGTCTGGTGTGATGCTTATCCTGCCTGCTTCTGATAAGAATTATTTACTTGCAGGGACCTGAGCA  
ACAACATGTTGAATGGTTAATCCCAGATACATTTAGTCAGTTGCACTTT

>PGSC0003DMG401013731LRR-RLKs\_1037

ATTCATATTCATAAACTGTGGAGGAGGTAGAATTACATATGAGGGAAATGATTATGAGGAGGACTTGA  
CCACTAGGGGTCCATCATATTTTTTTTCGTCCCCTGATAGATGGGCATTCA

>PGSC0003DMG401013731LRR-RLKs\_1098

GGACTTGACCACTAGGGGTCCATCATATTTTTTTTCGTCCCCTGATAGATGGGCATTCAGCAGTTCGGGA  
GTGTACGTAGGTCTTGCAAATGTTAGTTATATTGCAACAAATAGATTTTT

>PGSC0003DMG401013731LRR-RLKs\_122

TAACATGTAGGTACCTTGAAGTGAAACCTTTACAAGTTGAAGCATAAATGTTGTAATGTTTTTTTTTTTCC  
TCAAAGTTTTCTTTTCAGTAACAAGAAGCAAAGTTTTATCTGTGATGC

>PGSC0003DMG401013731LRR-RLKs\_1403

TAAGTTTGAGGCCCACTTCTTTTGTAATAATAAATATGTAATGTTGATATACTGAGTTCTGATATGATT  
GGCAACTTTCTGATTTAAGATTGAAGGTACCAATTTGTTGGAGATAACG

>PGSC0003DMG401013731LRR-RLKs\_2318

CTTTGATCCTGCCAATAAAATTGGTGAAGGAGGGTTTGGACCAGTTTACAAGGTATCAATTCTCTATTTA  
TATCTATCCGTA CTGATTTTGCGTAAGGACAGCTTGAGGTTCTGTGGTGA

>PGSC0003DMG401013731LRR-RLKs\_2379

CTCTATTTATATCTATCCGTA CTGATTTTGCGTAAGGACAGCTTGAGGTTCTGTGGTGTATGTTTCCTACTG  
GTTATGAAGGTCTGTAATATGATCGTTGTAAATTAATCCTGCTGTCTGT

>PGSC0003DMG401013731LRR-RLKs\_2440

TTTCCTACTGGTTATGAAGGTCTGTAATATGATCGTTGTAAATTAATCCTGCTGTCTGTAGGGTGTACTCT  
CCGATGGGGCAGTCATAGCTGTTAAGCAGCTCTCTTCCAAGTCAAAGCA

>PGSC0003DMG401013731LRR-RLKs\_2989

GATGAAGAAGAGAACACTCATATTAGCACCCGAATTGCTGGAACAGTGTGAGCCTTCTTATCATAACTG  
TCTCTGTA CTATCATGTTTTGATGAGAGAGTAACAGTTCTACCCATTTGAA

>PGSC0003DMG401013731LRR-RLKs\_305

AACATGTTGGTATTTGCTCAATTTGTTCCGTTTTCTCATCTAAGTAGTAACTTTGGTTATTATCATGCCA  
GCACACTTCAAAGTTAACAGTTTTTCCCCAAAACATTTTGATTGCTGA

>PGSC0003DMG401013731LRR-RLKs\_3050

CATAACTGTCTCTGTA CTATCATGTTTTGATGAGAGAGTAACAGTTCTACCCATTTGAATTTGTTGTCAT  
ACATTAACATGGTCAGTTTGAAGTATCTTACATTTCTTTTTCTCTTTT

>PGSC0003DMG401013731LRR-RLKs\_3172

AGAGGTTATATGGCTCCGGAGTATGCAACGAGAGGCTACTTGACAGATAAAAGCTGATGTTTATAGCTT  
CGGAGTTGTTGCTTTGGAGATTGTCAGTGGGAAAAGTAACACAAA ACTACA

>PGSC0003DMG401013731LRR-RLKs\_3355

TATCCCAAATACTAAAATCTTTAAAAACTGCTGCAACATCATGTATTATAAGTCTTGCATGTACATGTTT  
AGTTTAATTCCACTCTGAATTATAAGCCAGAAAAAACTTCTCTTGTTAG

>PGSC0003DMG401013731LRR-RLKs\_3416

GTACATGTTTAGTTTAATTCCACTCTGAATTATAAGCCAGAAAAAACTTCTCTTGTTAGTGTGTTTGTGCAA  
ATATATACTCCATCGGTTTCAATTTGTTGTCTTACTTTTATTCATAGT

>PGSC0003DMG401013731LRR-RLKs\_366

TTATCATGCCAGCACACTTCAAAGTTAACAGTTTTTCCCCAAAACATTTTGATTGCTGAAAGGACGCATT  
GCAAGAATTTGGTGTCTTCTAAGTGCATGGCAACTATAATTTTTTTTTT

>PGSC0003DMG401013731LRR-RLKs\_3660

AACCAGACAAACAAAGTGAAACGAAGGGAGTATTTGCTATGATACCTCCAAAGAAAATATCAGAATCAG  
AGTTGTTTCATTAGTTCTGCTCACATTCTTATAGATGCATCTTTGCGTATT

>PGSC0003DMG401013731LRR-RLKs\_3721

AGAATCAGAGTTGTTTCATTAGTTCTGCTCACATTCTTATAGATGCATCTTTGCGTATTTAGTTTTCTTTT  
CTCCAATTCATCTTGCTTTGTATGTCAATTTTGTTTTAGGCTTACGT

>PGSC0003DMG401013731LRR-RLKs\_3764

TGCATCTTTGCGTATTTAGTTTTCTTTCTCCAATTCATCTTGCTTTGTATGTCAATTTTGTTTTAGGCTT  
ACGTCCTACAAGAACAGGGAAATCTGTTAGAAGTACTAGTGGATCCACGT

>PGSC0003DMG401013731LRR-RLKs\_427

GGACGCATTTGCAAGAATTTGGTGTCTTCTAAGTGCATGGCAACTATAATTTTTTTTTTGCAGTGATATAT  
CATACAACAATTTACCCTTATATCTACTCGAGGATGCCAGTCCTCTAT

>PGSC0003DMG401013731LRR-RLKs\_488

AGTGATATATCATACAACAATTTACCCTTATATCTACTCGAGGATGCCAGTCCTCTATCATGTGAGCATT  
GTACTTCTTTGTTGGGAACCTACATCCGTGTATTATTTCTATTTTTAT

>PGSC0003DMG401013731LRR-RLKs\_549

TGTGAGCATTGTACTTCTTTGTTGGGAACCTACATCCGTGTATTATTTCTATTTTTATTAGTAAGAATTC  
GGTCATTTAACTACATAACTTACAAACCTTCTTTCTCAAACAGAAAC

>PGSC0003DMG401013731LRR-RLKs\_61

ACCTGAGCAACAACATGTTGAATGGTTAATCCCAGATACATTTAGTCAGTTGCACTTTGATAACATGTA  
GGTACCTTGAAGTGAAACCTTTACAAGTTGAAGCATAAATGTTGTAATGT

>PGSC0003DMG401013731LRR-RLKs\_732

TTATGCATCAGGTGCTAGTTTGTTTGATGCTTTCTGTGTATTGTCTATAATTATGTGGCTTAATCTATTCGA  
AATTGCAGGGATTCTGGTGTCCATGAAACCCCTCATTTGTCCCACA

>PGSC0003DMG401013876-(rev)G-LecRK\_0

GAAAACTTGAGACTTTAAGAAAGGGGACGAGAGGAGTACACATTTTTGTCCATAATTTCCAAAGCAGC  
TGACGACAACCTTTTAACCCTTTGTCACGTAATTCCTACTCAAGCAAATC

>PGSC0003DMG401013876-(rev)G-LecRK\_1037

TTGTATGGATGCAAATGATACGGCTTCAGGACACTTCTCTTTGGAATTAGACCCTAATCAAATGGTGAG

TTAGTCATGCTACGTAACCTCGTGGTAATGTGGATCTGGGTGCCTTTGAA

>PGSC0003DMG401013876-(rev)G-LecRK\_1220

CTTTGGTGAATCTGTCATTTCTCGAATTGTCTAGATCATAGCAGGTTTCATGAGGGAACTCTTCTGGTCTA  
ATGAGCATCAGAATTGGATGGTTGTGCGGTCTGTACCTGTTGATATGTG

>PGSC0003DMG401013876-(rev)G-LecRK\_1281

TTCTGGTCTAATGAGCATCAGAATTGGATGGTTGTGCGGTCTGTACCTGTTGATATGTGTGACGCAACG  
AATATATGTGGTGCTTTTGGAAATTTGTGATATAAATACCAGTCCAATCTGT

>PGSC0003DMG401013876-(rev)G-LecRK\_1342

ACGCAACGAATATATGTGGTGCTTTTGGAAATTTGTGATATAAATACCAGTCCAATCTGTGGATGTTTACA  
AGGTTATGAACCAAGTTTCCATTAGGTTGGGATACTAATGATTATTCTG

>PGSC0003DMG401013876-(rev)G-LecRK\_2501

ATAATAAGCTTGGAGAAGGAGGTTTTGGTCCTGTTTTTAAGGTATTGTTACTACAACCTGAATACCTGCA  
ACACAAATATGCGTTCACACCTAAAGAAAATGGAAAGAAATCCCTCCGGA

>PGSC0003DMG401013876-(rev)G-LecRK\_2562

ATACCTGCAACACAAATATGCGTTCACACCTAAAGAAAATGGAAAGAAATCCCTCCGAAATAGCCAGA  
TAGTATGTATCCTGATTTTAGTTAATATCTTTGCTAGCTGTACTTATGTCT

>PGSC0003DMG401013876-(rev)G-LecRK\_2623

TAGCCAGATAGTATGTATCCTGATTTTAGTTAATATCTTTGCTAGCTGTACTTATGTCTTGGAGGTGTGAT  
AAATGTTTTTTTGCAATTTCTAGGGTCAATTGCCAGATGGGCAGCAAAT

>PGSC0003DMG401013876-(rev)G-LecRK\_2684

GAGGTGTGATAAATGTTTTTTTGCAATTTCTAGGGTCAATTGCCAGATGGGCAGCAAATAGCTGTGAAA  
AGGCTATCAACTCAATCAAGGCAAGGCATAAGTGAATTCAAACCTGAGGCC

>PGSC0003DMG401013876-(rev)G-LecRK\_2867

GAGGAGAAAATGTTGGTATATGAATATATGCCAAATAAAAGTCTAGACTATTTTCATATTCGGTATATATG  
ATAATTTACTACCATCTGTTTTTGTGTTAACCTTTCTCCTGTCAAATG

>PGSC0003DMG401013876-(rev)G-LecRK\_2928

GTATATATGATAATTTACTACCATCTGTTTTTGTGTTAACCTTTCTCCTGTCAAATGTGTGCTTACTGGA  
TAAATTTGATATGTACAACCTTAGACGAGAGCAGGAGGTCATTGCTTGA

>PGSC0003DMG401013876-(rev)G-LecRK\_3233

CAAATACTCTTGAATAGTTGGCACATAGTAAGCAAGCAAATACTGAAAGTTCTTTTCCCATACTACTTTG  
CCTACTCATTATAGCTCCTTTTCTATGCAGTGGCTATATGTCACCTGAA

>PGSC0003DMG401013876-(rev)G-LecRK\_3294

TACTACTTTGCCTACTCATTATAGCTCCTTTTCTATGCAGTGGCTATATGTCACCTGAATATGCTCTAGCTG  
GTCTCTTCTCAGTAAAATCTGATGTCTTTAGCTTTGGTGTCAATTAT

>PGSC0003DMG401013876-(rev)G-LecRK\_3599

AGCTGATAGATCCAACGATAGTTGATTCTTGCCCCAGTGAGGAAGCACTACGCTGTATTCAAGTGGGAC  
TATTGTGTTTGAAGTGAATGCAGGGGACAGACCAACCATGTCATCAGTTC

>PGSC0003DMG401013876-(rev)G-LecRK\_3782

CTGACTCGAGTACAACAGAAACAACACCATCTTCGATCAATGAGGTGACTATTACTGCACCTTGATGGTCCG  
TTAGTCAGCTGATGACTGATGATTCAGCCAATCCGTTCAAGTGTGGGAGG

>PGSC0003DMG401013876-(rev)G-LecRK\_3843

TGATGGTCGTTAGTCAGCTGATGACTGATGATTCAGCCAATCCGTTCAAGTGTGGGAGGGTTATTGACC  
CATCCATTTACTAGCTCAACGAATTGGGTTGATATGTTGTCCAAATTGATT

>PGSC0003DMG401013876-(rev)G-LecRK\_3904

TATTGACCCATCCATTTACTAGCTCAACGAATTGGGTTGATATGTTGTCCAAATTGATTCGGGAGAGATT  
GTCAAATAATTTTCAGAGGACATTTTTTTATTTGATATGTTATATAAAT

>PGSC0003DMG401013876-(rev)G-LecRK\_3965

GGAGAGATTGTCAAATAATTTTCAGAGGACATTTTTTTATTTGATATGTTATATAAATAGTTACAATAAA  
GAAAACAATAATTTTAGGTATTAATAAATTCATAAAAAGAACAATAAATAAAT

>PGSC0003DMG401013876-(rev)G-LecRK\_4026

TTACAATAAAGAAAACAATAATTTTAGGTATTAATAAATTCATAAAAAGAACAATAAATAAATAAATTAACCTT  
ACTAAGAATTGAACGAATTGAGTTACAACCTCACATTGTAGTCCTGTTTCA

>PGSC0003DMG401013876-(rev)G-LecRK\_4082

AATAATTAACCTTACTAAGAATTGAACGAATTGAGTTACAACCTCACATTGTAGTCCTGTTTCAGTCAAAT  
TTAATCCACTCAAATTCGACTCAACCCGTCTATTTGAGACCTTTGATCT

>PGSC0003DMG401013876-(rev)G-LecRK\_732

AAGCCCAAGACCGTGGTTTGGATAGCAACTAGGGACAACCCCATCCGCCCTCCGTTCAATAGTTCTCATC  
TAGAGCTGTCTGATGGAAATCTAGGAATCTTTAATGAACGTAAACAAAGA

>PGSC0003DMG401013876-(rev)G-LecRK\_976

GGCTGCCTGGTGCAGGATTGGATTGATAAGTCCAAGAACACACTCCAGAACTTACTTCTTGTATGG  
ATGCAAATGATACGGCTTCAGGACACTTCTCTTTGGAATTAGACCCTAATC

>PGSC0003DMG401014048LRR-RLPs\_0

GAAAACTTTTCGGTGGCACTTCCATCTGCGATGACATCATTGAGTATAGGCTACTGTGAGAAGCTGAAG  
TGGCTTCCAGATCATATGCAGGAACTCCTTCCATCTCTTAATGGACTGCAT

>PGSC0003DMG401014048LRR-RLPs\_1098

TCCTTTTTAAAATCTTGTTGAGCAGTGTGGAGTGTCTATTGCTCAAACCACGGCTAGTGACCAAAAATTG  
CTCATATTTCCACCATATATGGGAGAACCTGAAATAATTAATGAGTGG

>PGSC0003DMG401014048LRR-RLPs\_1159

CAAAAATTGCTCATATTTCCACCATATATGGGAGAACCTGAAATAATTAATGAGTGGTGCTCCTACAG  
ATATATAAGTTATACTATTTCTTCGTATCTTTTGATTATTAGTTACTTC

>PGSC0003DMG401014048LRR-RLPs\_122

TTCTAATTGTCCAGAGATAGAGTCCTTCTCAAGGAGGATTGCCCTTCAATTTACAACAACCTTGAGATCA  
TTAATTGCAAGAACTGGTGAATGGCCGAAAGGAGTGGTGTTCACAGGG

>PGSC0003DMG401014048LRR-RLPs\_1220

CTCCTACAGATATATAAGTTATACTATTTCTTCGTATCTTTTGATTATTAGTTACTTCTATTTGCTTGCCTG  
TTAAATCTTTTGACCAGTGTGTAGCATCTATTACCTCTGTGAAGT

>PGSC0003DMG401014048LRR-RLPs\_1281

TTTGCTTGCCTGTAAATCTTTTGACCAGTGTGTAGCATCTATTACCTCTGTGAAGTCGAGGAAATATC  
TTAGATCAGGAAAAAACTCCTTATATTTGCATTGAAACATTGTAAAAG

>PGSC0003DMG401014048LRR-RLPs\_1342

AGGAAATATCTTTAGATCAGGAAAAAACTCCTTATATTTGCATTGAAACATTGTAAAAGAAATCTAATAT  
AAGCAGGAATTGAGATAATTTGCTCCAGAGTTGTCACCAGGATGTTTATC

>PGSC0003DMG401014048LRR-RLPs\_1403

ATCTAATATAAGCAGGAATTGAGATAATTTGCTCCAGAGTTGTCACCAGGATGTTTATCGCACAAAAGCA  
ATTCATATATACTTGTGACAAATCTCACTCTTCATGACCTATGTTCTCTC

>PGSC0003DMG401014048LRR-RLPs\_1464

ACAAAAGCAATTCATATATACTTGTGACAAATCTCACTCTTCATGACCTATGTTCTCTCTCAAATCTTGCA

GA CTGGAAGTTTATTTGCCATCATGAAAGTTGTTCCACATTTTTTCGTCT

>PGSC0003DMG401014048LRR-RLPs\_1525

AAATCTTG CAGACTGGAAGTTTATTTGCCATCATGAAAGTTGTTCCACATTTTTTCGTCTCTTCTACAGAGA  
TAAAGGGTCCAAGAAATCCAACCTCATTTGTCATCTCTTCTACATAGAT

>PGSC0003DMG401014048LRR-RLPs\_1647

CCCAAGAAATGCAACCTCACTTTCTCAATTAGGTAGCCAAGACCTTCACAAGAGTTACATCAAGCTTGAA  
ATTTAAAGAAATTGAAAACGACTTTGAATGCCTACTTTCATTATTTACTC

>PGSC0003DMG401014048LRR-RLPs\_1708

AAGCTTGAAATTTAAAGAAATTGAAAACGACTTTGAATGCCTACTTTCATTATTTACTCCATGTTGTACCA  
TATTGATATCAAATTTGATGCTACTGCATTTTACATCAGTTTTTTTTGGT

>PGSC0003DMG401014048LRR-RLPs\_1769

TGTTGTACCATATTGATATCAAATTTGATGCTACTGCATTTTACATCAGTTTTTTTTGGTATTCAAATCCAG  
AATATTACATCCATTTTTTTGGTTTTGATATTCAGAGAACTTTGGAGAT

>PGSC0003DMG401014048LRR-RLPs\_183

CTTGAGATCATTAATTGCAAGAACTGGTGAATGGCCGAAAGGAGTGGTGTTTACAGGGACTCCCTCGT  
CTCAGAGAGTTAGAATTAGTGATCTATCATGACGGCAGTGACGAAGAGATG

>PGSC0003DMG401014048LRR-RLPs\_1830

TCAAATCCAGAATATTACATCCATTTTTTTGGTTTTGATATTCAGAGAACTTTGGAGATTATGAAGTTTCT  
TTCAAGTTATGTCCACTCAACCTCGAGTGACACCTCACAGCTAGCG

>PGSC0003DMG401014048LRR-RLPs\_1952

AAGTCAAGGAAGTATATCCTAGTCGGGATGACTTCAAGGTTAGATAACAAAATAATGATTTACTCGTGTT  
TTAGTTACCAAGATGCGTATTTTTAAGTAATAGTTTGCACTCTCATAAAT

>PGSC0003DMG401014048LRR-RLPs\_2013

ACTCGTGTTTTAGTTACCAAGATGCGTATTTTTAAGTAATAGTTTGCACTCTCATAAATCAGCGAAATAGA  
TTTCCTTCATTGGCACTCTCATCAGTCATCAGCCAGCGAAACAAAGAAA

>PGSC0003DMG401014048LRR-RLPs\_2074

GCGAAATAGATTTCTTCATTGGCACTCTCATCAGTCATCAGCCAGCGAAACAAAGAAACCGTCGGTTTC  
AAAATTCCAATGACACCCAAGTTTAAAAAAAAGACATCAACAGAGGAGAA

>PGSC0003DMG401014048LRR-RLPs\_2135



GTCGGTTTCAAATTCCAATGACACCCAAGTTTAAAAAAGACATCAACAGAGGAGAAGAATTCAACC  
CCACACCCATTTCAACCCAAGTTTTCTGCTTTACCTGATGCGAAGAAGTTT

>PGSC0003DMG401014048LRR-RLPs\_2196

ATTCAACCCACACCCATTTCAACCCAAGTTTTCTGCTTTACCTGATGCGAAGAAGTTTATGGGTGAGAA  
AGGTCCAAAGGTATATATATTTTTTCTTCTCTCTTTCTCACTGCAGCACT

>PGSC0003DMG401014048LRR-RLPs\_2257

GGGTGAGAAAGGTCCAAAGGTATATATATTTTTTCTTCTCTCTTTCTCACTGCAGCACTTATATTGGTTTTT  
CCCTGCTTTACATCACAATGCTGTCGGAGTATATCAGTTTTCTACTGT

>PGSC0003DMG401014048LRR-RLPs\_2318

TATTGGTTTTTCCCTGCTTTACATCACAATGCTGTCGGAGTATATCAGTTTTCTACTGTTATTCAGATACTT  
AAAGTGGGAAATTGCTTCTGATTTGAGGTTAAAATTTATCTTTATTG

>PGSC0003DMG401014048LRR-RLPs\_2379

TTCAGATACTTAAAGTGGGAAATTGCTTCTGATTTGAGGTTAAAATTTATCTTTATTGTAATTATTTTGAT  
TTTTAACTTCAAATCTAAACGTGAATTTTTTACAACAACAATACAC

>PGSC0003DMG401014048LRR-RLPs\_244

TCCCTCGTCTCAGAGAGTTAGAATTAGTGATCTATCATGACGGCAGTGACGAAGAGATGGAACATTGGG  
AGTTACCTTCTCTATTCTGAAGACTTGAGGTATCCAATCTGAAAACAATAA

>PGSC0003DMG401014048LRR-RLPs\_2440

ATTATTTTGATTTTTTAACTTCAAATCTAAACGTGAATTTTTTACAACAACAATACACCCAATCTATGCCT  
GAATTTTTTCTGTTCCAATTGTTTTGCTACTACAGTATTTGTGTCCAG

>PGSC0003DMG401014048LRR-RLPs\_2501

AATCTATGCCTGAATTTTTTCTGTTCCAATTGTTTTGCTACTACAGTATTTGTGTCCAGCCTAATTGGTATT  
GTTCATTTTGTGAAACATCCTATAATTATTTGGAGAGATAATATCTTA

>PGSC0003DMG401014048LRR-RLPs\_2562

TAATTGGTATTGTTCATTTTGTGAAACATCCTATAATTATTTGGAGAGATAATATCTTAGTTGATCACTCA  
ACTATAAATTTTTTCTCAAAAATCACTCAACTTTGATTAACTATGGA

>PGSC0003DMG401014048LRR-RLPs\_2623

TGATCACTCAACTATAAATTTTTTCTCAAAAATCACTCAACTTTGATTAACTATGGAAGTTTTACTTACC  
AAGTCAATCAATCTATTTAATTGATTTTTTCATTATAATTTGCTAATA

>PGSC0003DMG401014048LRR-RLPs\_2806

CATTTTAATGATCCGACTAAAAATATTTAAAAGGTAATTACTATGTTAGTTTTAGTTTTTTAATATATTTA  
TAATGTAAAGCTCTATTTTCATTTTTTGAAAGCTGCAGTAGAAAATGTT

>PGSC0003DMG401014048LRR-RLPs\_2867

TAATATATTTATAATGTAAAGCTCTATTTTCATTTTTTGAAAGCTGCAGTAGAAAATGTTTTGATGTGAAGT  
GCAAACACTTGGAGTTTTTCATTTGCCAAATGAGACTCGTTTAATATAAG

>PGSC0003DMG401014048LRR-RLPs\_2928

GATGTGAAGTGCAAACACTTGGAGTTTTTCATTTGCCAAATGAGACTCGTTTAATATAAGTTTTCTTAATTA  
AGTATTCATATTTATGTATTTTTTAAATATGCAGTAAAATCAGGTGTTC

>PGSC0003DMG401014048LRR-RLPs\_2989

TTCTTAATTAAGTATTCATATTTATGTATTTTTTAAATATGCAGTAAAATCAGGTGTTCTTTTAGTTCTCAC  
TTTAGATTGAGGTTGAAAATAATGAATTTGATTGGAGAAATGGTGAAA

>PGSC0003DMG401014048LRR-RLPs\_3050

TTAGTTCTCACTTTAGATTGAGGTTGAAAATAATGAATTTGATTGGAGAAATGGTGAAACATATTGATTA  
TTCATTTGCAATAAAAGAAAAGATACTTGAAGGTTTCTTTTTGTTAGATT

>PGSC0003DMG401014048LRR-RLPs\_3111

TATTGATTATTCATTTGCAATAAAAGAAAAGATACTTGAAGGTTTCTTTTTGTTAGATTTTTTCGTGGAAT  
TTGCTTATGTTGGTTTTTTGGAGTTGTTTTTTTTGCTCAACTGTAAATA

>PGSC0003DMG401014048LRR-RLPs\_3416

TTCTAGGAAAGGTTCTATGCCTTTTAGGCCTCCAAGGACTGACAAGAGAACTAGTTACGTGGAAATATGTTG  
AATCAGCCTATAACTTCTATGAGCTTTCTTGATCCTCTAAACAATGCTA

>PGSC0003DMG401014048LRR-RLPs\_3477

AATATGTTGAATCAGCCTATAACTTCTATGAGCTTTCTTGATCCTCTAAACAATGCTATTCTCTCTGTAAA  
TTCTGTTTTTATCTGTGCAGTTACTATCTCACTATTGACAGTTGTGTT

>PGSC0003DMG401014048LRR-RLPs\_3538

CTCTCTGTAAATTCTGTTTTTATCTGTGCAGTTACTATCTCACTATTGACAGTTGTGTTTCTATACAACTTCT  
AGTTCCTTGCCATCCAAGTGCAGTAAACTATGGCACTCCAAATTGCT

>PGSC0003DMG401014048LRR-RLPs\_3599

TATACAACCTTAGTTTCTTGCCATCCAAGTGCAGTAAACTATGGCACTCCAAATTGCTGCAAATACTTAT

TTATAGAATTGCCTCTAATGCTTCCGCTTGATCCTTTCTAGGACTTGTC

>PGSC0003DMG401014048LRR-RLPs\_366

AGCCAAGATCTCAAAAGCCTCACCTCTCTGAATTTCTATATATTGCTTATTTACCTCATATCCAGTCACTT  
CTGGAAGAATGGCGGCTTCCCTCCTCTCTTTCTGAGCTATATTTATAT

>PGSC0003DMG401014048LRR-RLPs\_3660

AAATACTTATTTATAGAATTGCCTCTAATGCTTCCGCTTGATCCTTTCTAGGACTTGTCTCACCTCACCTCA  
CCTGGGTAAACTTGCATACCACCCCATGATAAAATTTAGCTTTAACT

>PGSC0003DMG401014048LRR-RLPs\_3721

ACCTCACCTCACCTGGGTAAACTTGCATACCACCCCATGATAAAATTTAGCTTTAACTTGTCCCAACCAA  
GTGCAATGGGCGAAGAGATGCAGTTGTCTCCATCACTTGGCTGCGGCAC

>PGSC0003DMG401014048LRR-RLPs\_3782

TCCCAACCAAGTGCAATGGGCGAAGAGATGCAGTTGTCTCCATCACTTGGCTGCGGCACAAACAACATG  
TCTCATTATCAACAGGAATGTTCAAATGTAGCATCCGGTCCTTGGTAAGTC

>PGSC0003DMG401014048LRR-RLPs\_3843

ACAACATGTCTCATTATCAACAGGAATGTTCAAATGTAGCATCCGGTCCTTGGTAAGTCGCCTGCCTTGT  
ACTGCTAACCACGTTATCATTCTATGCCTTGGCTGTGCTACAGAAGTCCA

>PGSC0003DMG401014048LRR-RLPs\_3904

CTGCCTTGTACTGCTAACCACGTTATCATTCTATGCCTTGGCTGTGCTACAGAAGTCCAGATAAGATCAG  
CTATCCGTAGCCTGTTTCAGTTCACCTAGCATTGCAATGTAAGTGGCAGAA

>PGSC0003DMG401014048LRR-RLPs\_4026

TGAATATTGGCCAGAGTGGGTCAAAGTATACCTCCCTTGTACTTACCCGTTCCATATTGTTCTTTATTG  
CATTTAGTTTTTTCTAATACAAGTTGTAGTCTAGAGGCGGGGTATGTTT

>PGSC0003DMG401014048LRR-RLPs\_4087

TTCTTTATTGCATTTAGTTTTTTCTAATACAAGTTGTAGTCTAGAGGCGGGGTATGTTCCACATGGAAAC  
ATCATTCCATATATAGAGCCCATGGACCCATTTTACTAAAAGTATTA

>PGSC0003DMG401014048LRR-RLPs\_4148

ACATGGAAACATCATTCCATATATAGAGCCCATGGACCCATTTTACTAAAAGTATTATCTTGTTTCTCT  
GATAACTGCCAGAGAAGTTTGCCAACTGATGCAACATTCCAGTTGCTAC

>PGSC0003DMG401014048LRR-RLPs\_4209

TTGTTTCTCTGATAACTGCCAGAGAAGTTTGCCAACTGATGCAACATTCCAGTTGCTACATCCCTTTACAT  
TCAGCCCTCCGAACTTTTTGGACAACAAATTTTCTCCAAGCTACAAGT

>PGSC0003DMG401014048LRR-RLPs\_427

TCCAGTCACTTCTGGAAGAATGGCGGCTTCCCTCCTCTCTTTCTGAGCTATATTTATATGGCCATCATGAG  
CTCAATTCAGGCCTTTGTTACCTCACTTCGCTTCTACGTCTACGCA

>PGSC0003DMG401014048LRR-RLPs\_4270

CCCTTTACATTCAGCCCTCCGAACTTTTTGGACAACAAATTTTCTCCAAGCTACAAGTAGCACTTTCCTCT  
TCTCTTCACTACTCCCCAAATGTAGTTCTTACAAATCTTGCAACCT

>PGSC0003DMG401014048LRR-RLPs\_4331

CACTTTCCTCTTCTTCTTCACTACTCCCCAAATGTAGTTCTTACAAATCTTGCAACCTCCATGAGGATACT  
CTTGGGAAGGATGAACACTGACCACCAGAACTGTGTATAGAAAACAA

>PGSC0003DMG401014048LRR-RLPs\_4392

ATGAGGATACTCTTGGGAAGGATGAACACTGACCACCAGAACTGTGTATAGAAAACAATACGGCAGT  
CACAACCTGAATTCTAGCATCATAAGATAGAAGTTTGGAAATATCTAGTGTTA

>PGSC0003DMG401014048LRR-RLPs\_4453

CGGCAGTCACAACCTGAATTCTAGCATCATAAGATAGAAGTTTGGAAATATCTAGTGTTAGTTTGATTAGT  
GATCTTCATCATCAGCTGTTGGCAATCCACTCTTGCCACTTCTTGATG

>PGSC0003DMG401014048LRR-RLPs\_4514

TTGATTAGTGATCTTCATCATCAGCTGTTGGCAATCCACTCTTGCCACTTCTTGATGACAATGGAAGCC  
CAAGATATCTGATTGGAAGCTGTCCCAAAGTGAAACCAGTTATTTCTAA

>PGSC0003DMG401014048LRR-RLPs\_4636

ATTGTCCTTGAGTTCCGTCATCAATTCCAGGTACAAAGAGGTTAGATTTTTCTACATTTGCCACCAAACCT  
GTAACCTCACTAAAATGAGTTAAAGCTTCCATCACTCTAGTCACAGAGC

>PGSC0003DMG401014048LRR-RLPs\_488

CCATCATGAGCTCAATTCAGGCCTTTGTTACCTCACTTCGCTTCTACGTCTACGCATCGGCAATTGCT  
GTAATCTCTAGTCACTTTCCGAATCAGCACTGCCCTCCTCCCTCTCTCA

>PGSC0003DMG401014048LRR-RLPs\_549

GGCAATTGCTGTAATCTCTAGTCACTTTCCGAATCAGCACTGCCCTCCTCCCTCTCTCATTTGACCATCAA  
GTATTGCCATAATCTCCGATCACTTTCCAAATCAGCACTGCCCTCCGCC

>PGSC0003DMG401014048LRR-RLPs\_5490

TTTTATTAGTGTCTATTTGAAACATGGCAGTCTTGATATTTTTAGGAGTATAAGCTTGCAAAAGCTCAACT  
TGTTGATCCACAGTAAGACAATGTCCATTCTTCAAAAAATTTCCATAGG

>PGSC0003DMG401014048LRR-RLPs\_5551

AAGCTCAACTTGTTGATCCACAGTAAGACAATGTCCATTCTTCAAAAAATTTCCATAGGCTCGCATCCTTT  
GACTGCACTTCTTCCCCAGTAAGTCTATGTAATAGTCTACAAACAGCTT

>PGSC0003DMG401014048LRR-RLPs\_5612

CGCATCCTTTGACTGCACTTCTTCCCCAGTAAGTCTATGTAATAGTCTACAAACAGCTTGACTATTACTTCT  
GGATCAGTCTTCCAATCCCAGAGTCATCCTTAAGTTGAGTTGTTGCT

>PGSC0003DMG401014048LRR-RLPs\_5978

AAGTCCCGATTATTAAGCTCCTTTAATCCATATTTTCATGATCTTTAGCTTTCTAACTACTTTTAGCAGCTTA  
CAACCTTCTACTTAAGTGTCCCATGCTTCTCTCACTTTCTCCTTAAAT

>PGSC0003DMG401014048LRR-RLPs\_6039

TTAGCAGCTTACAACCTTCTACTTAAGTGTCCCATGCTTCTCTCACTTTCTCCTTAAATCTGGGCTGAGTCA  
CTCATACACTACAAAATTGAAATGACTTCCTGTTCTATGAGTCTGCAT

>PGSC0003DMG401014048LRR-RLPs\_61

AGCTGAAGTGGCTTCCAGATCATATGCAGGAACTCCTTCCATCTCTTAATGGACTGCATCTTTCTAATTGT  
CCAGAGATAGAGTCCTTTCTCAAGGAGGATTGCCCTTCAATTTACAAC

>PGSC0003DMG401014048LRR-RLPs\_610

TGACCATCAAGTATTGCCATAATCTCCGATCACTTTCAAATCAGCACTGCCCTCCGCCCTCTCTGAGCTG  
ACCATTAAGTGTGGCCGTAATCTCCAATCACTTTCTGAATCAGCACTGC

>PGSC0003DMG401014048LRR-RLPs\_6161

GTTAGTGTCACTTTAATTGGGCAATGATCATTTATTCTTTTCAGGAAGGTACTTTACTACACTGGAACGCA  
GTGTGCCTAGCCATACATTGTTAATAAAGACCCTATAAATTTTTTAAAAA

>PGSC0003DMG401014048LRR-RLPs\_6222

TGGAACGCAGTGTGCCTAGCCATACATTGTTAATAAAGACCCTATAAATTTTTTAAAAAATCTTCTGATT  
ATCACTTTTATCATTCCAAGTTTATCTTTGACCCTGGTAAGACATTTCT

>PGSC0003DMG401014048LRR-RLPs\_671

CTCTGAGCTGACCATTAAGTGTGGCCGTAATCTCCAATCACTTTCTGAATCAGCACTGCCCTTCTCCCTCTC

TAAGCTGACCATCAAGGATTGCCCTAAGCTCCAATCACTTTCTGAATC

>PGSC0003DMG401014048LRR-RLPs\_7076

CAATTGTTGGAGGTGAGTTAGTTTGGAGTTGTTGAGCAAAAACCATTAGAATGGTAGAGAGCTATTCA  
GATATAATTGTTTTGAGACACTTTCAAAGTGGTATTCTAACAAAGAAGCAA

>PGSC0003DMG401014048LRR-RLPs\_7686

TTTTCCCTGTTTAGAATTGTTTTCTGTAGCTCCTAATTGTGATGCTTCATTTACACATTTTAAAATTTTTATC  
TCATAACAGGGAGAAATTCTACCTGAGTCAATTACAGACTAGCAACT

>PGSC0003DMG401014048LRR-RLPs\_7747

AAAATTTTTATCTCATAACAGGGAGAAATTCTACCTGAGTCAATTACAGACTAGCAACTAATTGTTGTGC  
ATTATATAATTGCATATTTCTTGGATGGCAGGTAATGGATTGGTTTCTCA

>PGSC0003DMG401014048LRR-RLPs\_7808

TTGTTGTGCATTATATAATTGCATATTTCTTGGATGGCAGGTAATGGATTGGTTTCTCATATTGCTTATTG  
ATTATGATCTTATCACGTTTTAATTTACATCTCAATTGCGAAAACATC

>PGSC0003DMG401014048LRR-RLPs\_7869

TTGCTTATTGATTATGATCTTATCACGTTTTAATTTACATCTCAATTGCGAAAACATCATATGTAGCTTGT  
GCAACCATGTTTAATTGAACTTTTTAGTTCTTGTAAGCATCAAAGAT

>PGSC0003DMG401014048LRR-RLPs\_7930

ATGTAGCTTGTGCAACCATGTTTAATTGAACTTTTTAGTTCTTGTAAGCATCAAAGATCCCATGTCTAGA  
ATGAACTTTTTCTTAACAGTAGAAGTAGAATGAAGATCTGATGTCACTA

>PGSC0003DMG401014048LRR-RLPs\_7991

CATGTCTAGAATGAACTTTTTCTTAACAGTAGAAGTAGAATGAAGATCTGATGTCACTACAGAAAATATT  
TTAAATGAATCTATGAAGGATACATATTTAATTGTGCCACAACATGATG

>PGSC0003DMG401014048LRR-RLPs\_8052

GAAAATATTTTTAAATGAATCTATGAAGGATACATATTTAATTGTGCCACAACATGATGATGATAACTAA  
GGTTTGTCAATTGGTTGTTAAATTGAATATAAGGTGAGTTTTCTATTGAA

>PGSC0003DMG401014048LRR-RLPs\_8113

GATAACTAAGGTTTGTCAATTGGTTGTTAAATTGAATATAAGGTGAGTTTTCTATTGAAACATATAGATTT  
CCTTACAAATATTTATGTAGGCTGGGGATATTCTTGAAAGCATAAGAAG

>PGSC0003DMG401014048LRR-RLPs\_8174

ATATAGATTTCTTACAAATATTTATGTAGGCTGGGGATATTCTTGAAAGCATAAGAAGAAAGAATATGC  
ATCAATCATCCATGGGAATGTATACTTACGAGGAGACAATGGTCATCACC

>PGSC0003DMG401014048LRR-RLPs\_8296

ATCTATTTGTTAGGACATAAAAAGAACATGTCTAAGGTATGGAAAGTCTTGCAAGATTCTGTTACATCAA  
TATGAACAGAACTTTTCTTTCAGAACTTCTCCTCCTTACTTTCTAACTG

>PGSC0003DMG401014048LRR-RLPs\_8357

TTACATCAATATGAACAGAACTTTTCTTTCAGAACTTCTCCTCCTTACTTTCTAACTGGCCGGTGATATAA  
CTATTGCAATTTAACAGTCCGTTAAATCGGAAAAGATTTTACTGTTAG

>PGSC0003DMG401014048LRR-RLPs\_8418

CGGTGATATAACTATTGCAATTTAACAGTCCGTTAAATCGGAAAAGATTTTACTGTTAGTACTTTTCTTTC  
TTCATTATTTTTACTCTTGCTCTTCTTCAAACATGTTCTCAGGTCGA

>PGSC0003DMG401014048LRR-RLPs\_8662

TATGTTGATTTTTACTTCTTAGAATTGACAGCATAACAAAGAAAGAGTCATCTCTTATTAATTCTAGTTTTA  
GCTGATGGATATAAGCTGTTCAAATATGATGTCGTCTTACTACGCTT

>PGSC0003DMG401014048LRR-RLPs\_8723

TTCTAGTTTTAGCTGATGGATATAAGCTGTTCAAATATGATGTCGTCTTACTACGCTTAGTTGCATTTAA  
TGTCCAGATAACTTGACAGTTAATTTGTGGAGTTCTCCTTTGCTTGTC

>PGSC0003DMG401014048LRR-RLPs\_8784

TTGCATTTAATGTCCAGATAACTTGACAGTTAATTTGTGGAGTTCTCCTTTGCTTGCTATTAGGTTGATT  
TGGTCGTTGATCGATTGTTATTTTAGGAGTTTTTCGATCTTTTCTATG

>PGSC0003DMG401014048LRR-RLPs\_8845

TTAGGTTGATTTGGTCGTTGATCGATTGTTATTTTAGGAGTTTTTCGATCTTTTCTATGTTCTTAACTTCA  
GTCAACTAAAATCATGAATGGTCAGCTATATATATAGATGTGTGTGGT

>PGSC0003DMG401014048LRR-RLPs\_8906

CTTAACTTCAGTCAACTAAAATCATGAATGGTCAGCTATATATATAGATGTGTGTGGTCTGTAATTGTA  
ATATGGGGATTGGCTAAGAGTTCTAAAATTTCTTTTTGATTACTTTTCAGT

>PGSC0003DMG401014048LRR-RLPs\_8967

GTAATTGTAATATGGGGATTGGCTAAGAGTTCTAAAATTTCTTTTTGATTACTTTTCAGTAAGAAGGCTGT  
GATTTCCAAGTCAGCCGTCTACTAGTTCCTTGAGATGAAGCATGACTTAT

>PGSC0003DMG401014048LRR-RLPs\_9028

GAAGGCTGTGATTTCCAAGTCAGCCGTCTACTAGTTCCTTGAGATGAAGCATGACTTATTGTAACACACA  
GGTACATGAGCTAAAAGTTGTTAATGTAACACACAAGAGACATATCAGG

>PGSC0003DMG401014048LRR-RLPs\_915

CCACTACTAGAATTTTCAGAAGGGGAATACTGGCCAAATATTGCTCAAATTCCTTCATATTTGTCGATG  
GGAAACACCTGTAATGTTTAAAACGAATGGTGCTCTGACAAATGTAAGTT

>PGSC0003DMG401014048LRR-RLPs\_9150

TTCTGGAGCAATATGTTAGCCTCGCGAACCTACAACCTATGGATTTTGATAAATAACAATTAACCAAATA  
TTATGTCTACAGAATCAATGAGAACAGATCACAATAAGGAAGGAAGCAC

>PGSC0003DMG401014048LRR-RLPs\_9211

AACCAAATATTATGTCTACAGAATCAATGAGAACAGATCACAATAAGGAAGGAAGCACAAGAGATTG  
AATTCATCCAAAGGAGAAATTC AAGGACAATTGATTTACTCTCCTGTAATCA

>PGSC0003DMG401014048LRR-RLPs\_9272

GAGATTGAATTCATCCAAAGGAGAAATTC AAGGACAATTGATTTACTCTCCTGTAATCAAGCGACGTAAT  
CAAATCAACAAAACCAGCATCAATGGAAGACAACCTCAGAGAATCTTCAAG

>PGSC0003DMG401014048LRR-RLPs\_9333

CGACGTAATCAAATCAACAAAACCAGCATCAATGGAAGACAACCTCAGAGAATCTTCAAGACCAAGATTG  
ATAGGCAAAATCAAATCAGAGAATCTTCAAAACCAAGCTACTGGACAAAGT

>PGSC0003DMG401014048LRR-RLPs\_9394

CAAGATTGATAGGCAAAATCAAATCAGAGAATCTTCAAAACCAAGCTACTGGACAAAGTTTCACAAATC  
AAGGAATCTGGAAAGGAAGGCAAATCTTGTCAAGAAGAAAGAAGATCATGA

>PGSC0003DMG401014605LRR-RLPs\_0

TATAGTATATTGCTTTTTTCTATATATCTTCTAAAACCTGGTTGATCACTTTGCAGAAGAAAATGAAAAT  
CAATAGGTTTCTACAATTCATTATTGCATTTTCAATGTTTCATAGGACT

>PGSC0003DMG401014605LRR-RLPs\_1116

ACTTGAAACATTGAACCTTTTCGAAAAACAAGTTTGTGGATCAATATCTTTCTTGTGCAAAATAGCCAA  
TCCATTGTTCCGTACCATTGACCTCTCGCATAACATGCTTTCAGGAGAAC

>PGSC0003DMG401014605LRR-RLPs\_1178

ATAGCCAATCCATTGTTCCGTACCATTGACCTCTCGCATAACATGCTTTCAGGAGAACTCCCCTGATTG



TTTCATGAATTTCTGAAGAACTAGCCGTTCTTAATTTAGCTAACAACAAG

>PGSC0003DMG401014605LRR-RLPs\_1302

ACGGTAAAATTCCTAGCTCTATTGGATATTTGATGGATATTCAATCTCTACAGTTGCGTAACAACAACCTT

ACTGGTCATCTTCCAACCTCTTTGAACAACCTGTGCTCTATTGGAAATCC

>PGSC0003DMG401014605LRR-RLPs\_1364

AACAACCTTACTGGTCATCTTCCAACCTCTTTGAACAACCTGTGCTCTATTGGAAATCCTGGATGTTGGTGG

AAATAATTTAATTGGAGAAATTCGTCATGGATTGGCTCAGATTTAACA

>PGSC0003DMG401014605LRR-RLPs\_1612

TCTCAAAAAAATCACATCATTGCTTCAGAGTAATAGTTCAACCTCAAGCATTCTTTTTGATTTGGGTGAAC

AAAACGGAAATGGTTTTTATTCTTTCGTTGAAGAATGCATTAGTTCAAT

>PGSC0003DMG401014605LRR-RLPs\_1674

TGGGTGAACAAAACGGAAATGGTTTTTATTCTTTCGTTGAAGAATGCATTAGTTCAATGGAAAAATAGT

GAATTTGTGTACAATAAAACACTCGGATTGTTGAAGATCATCGATTTTTCA

>PGSC0003DMG401014605LRR-RLPs\_1798

ACAAATTAGTCGGAAGAGTTCCTGATGAAATCACTCAATTAGATGGACTACTTTCCTAAATCTTCAAG

AAACAACCTTAACAGGACACATCGTACAAGGAATTGGGACGATGGAAATGT

>PGSC0003DMG401014605LRR-RLPs\_1860

CTTCAAGAAACAACCTTAACAGGACACATCGTACAAGGAATTGGGACGATGGAAATGTTAGAGTCTCTT

GATCTGTCTCGAAATCAGTTAACAGGACGAATTCGACAAGTCTTGCTCGA

>PGSC0003DMG401014605LRR-RLPs\_2294

CAACGTCGCGAATTGGATCTTTGTCACAACAATTATGTGTCTACGCAGATTGAAGATGCTCTGGAGCTAG

TTAGCAAACAACAAGCTGCATAATGTCATAAGTAAGTTTTACAAGTCTAG

>PGSC0003DMG401014605LRR-RLPs\_2356

GGAGCTAGTTAGCAAACAACAAGCTGCATAATGTCATAAGTAAGTTTTACAAGTCTAGCTTCTTTCATAA

AAAGAATTACATGTTTGTAGTCACCAATGGTGGTATATAGTATGTGATGT

>PGSC0003DMG401014605LRR-RLPs\_2418

TTTCATAAAAAGAATTACATGTTTGTAGTCACCAATGGTGGTATATAGTATGTGATGTTTCTCATGTATAA

TAATAAAATGTTACTATTAATGAAAATGTTTTGGGAGCAAATACATCTT

>PGSC0003DMG401014605LRR-RLPs\_310

CACTATACACCACAACCTTTTCTAGATGTGGATCAACACTTGAAAGGTAATATTACTCCTTCATTGCTTGA  
ATTGCAGCATTTGAACTACTTGGACCTTAGTAACAATGATTTTGGTACA

>PGSC0003DMG401014605LRR-RLPs\_496

TTATCTGGTCAAATTCCTTACTCATTTAGTAACCTTACACATTTGAAGATTCTCGATTTATCTTCGAATCAA  
ATTACAGGATTGTTTCCAACTTAACAATGTTTTCAGCTTTAAGAGAG

>PGSC0003DMG401014605LRR-RLPs\_558

TTCGAATCAAATTACAGGATTGTTTCCAACTTAACAATGTTTTCAGCTTTAAGAGAGTTGTATTTGAGCA  
ATAACAAATTCAAAGGGAGGTTACCTCAAAGTATTGAACAGCTTTCAAA

>PGSC0003DMG401014605LRR-RLPs\_62

AAATGAAAATCAATAGGTTTCTACAATTCATTATTGCATTTTCAATGTTTCATAGGACTTGAAACAAGTTGG  
GGTAAAACATTATGCATTGAGAAGGAAAGACAAGCTCTTGTCCAGTTTA

>PGSC0003DMG401014605LRR-RLPs\_868

TTCCCTCAATGGCTACGAACTCAGAAGACGTATTCATATCTTGATATCTCTTTTGTGGTATATCAGATAT  
AGCTCCTAACTGGTTTTGGGATCTTCTCCTGAAATGATTGATGTACTT

>PGSC0003DMG401014605LRR-RLPs\_930

ATCAGATATAGCTCCTAACTGGTTTTGGGATCTTCTCCTGAAATGATTGATGTACTTCAACATTTCTAAT  
AACAAAATAAGCGGAGAAGTTCCTGATTTGTCTTCCAAGTTTCTAGAAA

>PGSC0003DMG401014605LRR-RLPs\_992

ATTTCTAATAACAAAATAAGCGGAGAAGTTCCTGATTTGTCTTCCAAGTTTCTAGAACTAAGTATCAAA  
TAATGGATTTTAGTTTGAATAACTTATCAGGTTTAGTCCCATCATTCTCA

>PGSC0003DMG401015009LRR-RLPs\_0

ATGGGCGTATGGGCGAGTACTGCCGATGTTGACGTTGTCAGGGTTCTCTGCGATTTGGTGAGATCTTCC  
GAGTTTGCTGGGGATTTTCGCGTGAGGAAGAAGCACGCGCAGGGGGGTCGG

>PGSC0003DMG401015009LRR-RLPs\_122

CAGTTTGGTATTGCTGTTGTTGTATGGAACGTTGGATTGTTGTTTGGGTATGCTGTATGTATTGTGTGGA  
ATGGATTTGTTTGGTATTGAGTTGGTGGGCTGGGAATTGAGGTATTGGGC

>PGSC0003DMG401015009LRR-RLPs\_1281

TATATTCCAACATTAATATTAGTAAAATTTACACATAAACTTTGTAAGTGTCTCAGTAACAAAAGGTCAAA  
CGACATGATATTTTCTAATCTTATCTTAGACTGTGGAGACTTCCATTGA

>PGSC0003DMG401015009LRR-RLPs\_1464

GTGAGATGATATTGCAATAAAAGTTTGTGGGAATGTTAATATCTTCTCAAATCAATTAGTCAAACACAA  
ACTGATACTCTTTATCTTACCTTTTAAACAAAAACAGAACTTGAATGAG

>PGSC0003DMG401015009LRR-RLPs\_1525

CAAACACAACTGATACTCTTTATCTTACCTTTTAAACAAAAACAGAACTTGAATGAGATAATCAAAAG  
CATTTAGGCTTGGAAAAAGTTAAGGGTAAGACTTCATACACTTGTGAGAT

>PGSC0003DMG401015009LRR-RLPs\_183

TTGTGTGGAATGGATTTGTTTGGTATTGAGTTGGTGGGCTGGGAATTGAGGTATTGGGCTGCTGAAAAG  
AGGTAAACAAAATGTCCAAAATTGGTCTCCAAATGGGTTGGATTTGTAGTT

>PGSC0003DMG401015009LRR-RLPs\_2074

AAAAACAATCAACTCAACGGAAGTATACCAATAAGTCTATTTCAAACCGGAGAGTTCAAGTAATTCGT  
TGGCTTCAATGAACTCAGTGGTAAAATGTGGAAAGGGCCATGGTATGTA

>PGSC0003DMG401015009LRR-RLPs\_2135

TAATTTGTTGGCTTTCAATGAACTCAGTGGTAAAATGTGGAAAGGGCCATGGTATGTACCCGAACTCA  
GTTTTGGATCTCACCAACAATAGCCTCACGGGTATGATCCCTCCTTCTGTT

>PGSC0003DMG401015009LRR-RLPs\_244

CTGAAAAGAGGTAAACAAAATGTCCAAAATTGGTCTCCAAATGGGTTGGATTTGTAGTTAATAAAAGGG  
TCATAGGGTTACAGACTCAACCAACTTAAGTTGAGAAGTTAGCCAAATTGA

>PGSC0003DMG401015009LRR-RLPs\_2440

TAGCCTTCTGGTCTCTCTTGCTAGATGAAGGGAATATTGTGTGGAATCTGTACTTTTTAAGTATATCTG  
ACAACCAAATTTCTGGTTGCATTCCTTCCAGCATATGCCAACTCATAGA

>PGSC0003DMG401015009LRR-RLPs\_2623

TTTATCCAAGCTCGAGACTTTCTTGATTGGCGACAATCCAATAAAAAGGACTATCCCCATTCTATTGGGA  
ATCTTTCATCATTAAAGGAGCTTATCAAAGAATCACTGTACTGCTTGATG

>PGSC0003DMG401015009LRR-RLPs\_2684

TCTATTGGGAATCTTTCATCATTAAAGGAGCTTATCAAAGAATCACTGTACTGCTTGATGCAGCTATGGCA  
GTTGAATATCTACATCATGGTCATGCCACTCCAATAGTTCATTGTGACCT

>PGSC0003DMG401015009LRR-RLPs\_2806

AGCCAGCCAACATTCTTTTGGATGAAGATATGGTGGCTCATGTTGGTGATTTTGGAAATCTCTAAAATTTT

ATCGATAAGCAAGTCCATGGCTTATACCGAGACAATATTGGGCACTCTTG

>PGSC0003DMG401015009LRR-RLPs\_2867

TAAAATTTTATCGATAAGCAAGTCCATGGCTTATACCGAGACAATATTGGGCACTCTTGGAACATTGCAC  
CAGGTATAAAAAATCTACTCTCTTTGATTTTCTCTTATCATAATTAAGCC

>PGSC0003DMG401015009LRR-RLPs\_2928

ACATTGCACCAGGTATAAAAAATCTACTCTCTTTGATTTTCTCTTATCATAATTAAGCCTCTCCAATTCTA  
AAAGTAAAAGAGCAAGTCTTTATTTATGCAAAATTATTGTTGTATTT

>PGSC0003DMG401015009LRR-RLPs\_2989

TCCAATTCTAAAAGTAAAAGAGCAAGTCTTTATTTATGCAAAATTATTGTTGTATTTCAATTGAATAAT  
TTTTTTTCAAACCTTTTCTAAGAATATGGGTCCGAGGGAATAGTGTCTG

>PGSC0003DMG401015009LRR-RLPs\_3050

ATTGAATAATTTTTTTTCAAACCTTTTCTAAGAATATGGGTCCGAGGGAATAGTGTCTGCTAGTGGTGAT  
GTTTATAGTTACGGCATCATATTGATGGAGGTTTTGACAAGAAGAAGGCC

>PGSC0003DMG401015009LRR-RLPs\_3111

AGTGGTGATGTTTATAGTTACGGCATCATATTGATGGAGGTTTTGACAAGAAGAAGGCCAACAGATGAA  
GAGATATGCAATGAAAATCTTGACTTGAGGAAATGGATCACACAATCATTT

>PGSC0003DMG401015009LRR-RLPs\_3233

AGGGAGTATGATGGACGTTGTGGATGCCAATCTTTTTTCCGAGGAAGAACAGATCACTTCAAAAAGTGA  
AATCTGCATTGCGTCCATGATAGAATTGGGTTTAGATTGCACAATGGAAAT

>PGSC0003DMG401015009LRR-RLPs\_3416

TCTGAAACATAGAAGTGATCAGCATCTGTTCCGATGGTGTCTTTTTCTGAGCTGCAAGTTAATATGATG  
TTTCTTTAGTAAAGTCGTCGTATAGTACTTACTACTTGGAGTCATGTATT

>PGSC0003DMG401015009LRR-RLPs\_3477

AATATGATGTTTCTTTAGTAAAGTCGTCGTATAGTACTTACTACTTGGAGTCATGTATTGTTTGAATTC  
ATTTGAGTGATTTGAACCTATTTTACTTTATCTATTTGTAATTATGTTT

>PGSC0003DMG401015009LRR-RLPs\_3527

TCATGTATTGTTTGAATTTCAATTTGAGTGATTTGAACCTATTTTACTTTATCTATTTGTAATTATGTTTTGA  
ATGCTTGAAAGAAACCAGAATGAAATTAATAAAGGTGTTTAGCTGCA

>PGSC0003DMG401015009LRR-RLPs\_61

GATCTTCCGAGTTTGCTGGGGATTTTCGCGTGAGGAAGAAGCACGCGCAGGGGGGTCGGGTCAGTTTG  
GTATTGCTGTTGTTGTATGGAACGTTGGATTGTTGTTTGGGTATGCTGTATG

>PGSC0003DMG401015527RLKmalectin\_0

GCCTCATTGTCTTTCAATTCTATTCTTGAGTTCATTATTCTCTAGCTCAGCAGCATGGCTAGTAGTCATTTT  
CTCCTACTTGTTTTACTTCTTTCTGTTTTCTCTGTTTATGCTGATGGT

>PGSC0003DMG401015527RLKmalectin\_1037

AACAAAACATCAGGTAAATATTCTACCTAGCTATACATCAATGTTATCTTGTTGCTTCTCTTTGTGTTAG  
TTAGAGTACTTCTACTTAGCGTTAGTCAGTGGTGAAGTCAGAAATTTT

>PGSC0003DMG401015527RLKmalectin\_1098

CTTTGTGTTAGTTAGAGTACTTCTACTTAGCGTTAGTCAGTGGTGAAGTCAGAAATTTGACTTGCTTCAT  
TTGTCTAACTCAAGAAGGGAAGATCGTTCAAGTCCATATAAGAAAGTCC

>PGSC0003DMG401015527RLKmalectin\_1159

CTTGCTTCATTTGTCTAACTCAAGAAGGGAAGATCGTTCAAGTCCATATAAGAAAGTCCCCCTTGCATCA  
CTGATGTAGGATTGTATTCATTATTCCCGGACTTTGATACCATGTTAAAT

>PGSC0003DMG401015527RLKmalectin\_122

GCTTTCTCCATTTTCTATATTTAATTATTTGGGGTTGAAACCTTTTTGTCTCGATTAATTTGAATTCGTGTC  
AGATACGTCAACTAAGGAGTATAAAAAATCTACTTGTATACTAATCCA

>PGSC0003DMG401015527RLKmalectin\_1220

CTTGATCACTGATGTAGGATTGTATTCATTATTCCCGGACTTTGATACCATGTTAAATAGATTTTGGACC  
TATCTCAACTCAAATGCACATTGAGTCTTAACTCAACCCCAAAGCTAG

>PGSC0003DMG401015527RLKmalectin\_1342

CAAAGGGGAGCCCGATGTGAGATTTTTTTCATTCATCAATCGGACTCCCTTCTGATCATGTAGATCCACA  
CCGGATGCTGATAGAGACTAAATATATCTATATTTTGTGTTTCTCTGTTTT

>PGSC0003DMG401015527RLKmalectin\_1403

AGATCCACACCGGATGCTGATAGAGACTAAATATATCTATATTTTGTGTTTCTCTGTTTATGATCATATCA  
TCATTCTGTTTTCCGGATTAATACAATGACTCGATATATTTTGAATTT

>PGSC0003DMG401015527RLKmalectin\_1464

GATCATATCATCATTCTGTTTTCCGGATTAATACAATGACTCGATATATTTTGAATTTCTAGTACTTAAAT  
ATTCTCTATTTTTTAAAAGAAAAAGTCAAATATTGGATTAATGAAC

>PGSC0003DMG401015527RLKmalectin\_1525

AGTACTTAAATATTCTCTATTTTTTAAAAGAAAAAGTCAAATATTGGATTAATGAACATAAATAAAGG  
GGCATGAATAGTGAAGATTCATATATTCGATATATATATGGACTTAGTTG

>PGSC0003DMG401015527RLKmalectin\_1586

AAATAAAGGGGCATGAATAGTGAAGATTCATATATTCGATATATATATGGACTTAGTTGCTACTTAACTT  
TCGAAGCTATACAACATTGGGGTTGTTGTTTTACTTCATTAACAAATT

>PGSC0003DMG401015527RLKmalectin\_1769

GATTACACTGAATATGTTGTTGTTGTCGTAACAAATTTCTTTTGATCAAATGGACAGGAACACAGATGA  
TCCCTATGACAGAATATGGACTCCTGGTTCTGGAAATTTAATAGAAACAC

>PGSC0003DMG401015527RLKmalectin\_183

GAATTCGTGTCAGATACGTCAACTAAGGAGTATAAAAAATCTACTTGTATACTAATCCAAATTCGTGTTT  
GATCATATATATATAGGTCCATTACTAGAAACAAAGGTTCTTTCCATCGT

>PGSC0003DMG401015527RLKmalectin\_1891

ACTAGTGATGCCACAACACTATTGACACTAGCCATGGAGATCAACCCCCACAACAAGTGTTACAAAATGCA  
ATTTCCACAAACAATTCATTAATATCATATCATGGAACATGAATTTTCTT

>PGSC0003DMG401015527RLKmalectin\_2135

CTTATGAGGATTTTATTCAAATGTATGTTAGCAATCTCACTGTTTCACCAGCCACTATTTTTTCTGTTGTGA  
GAACCACAAATTCACACTTCCTCCTCTTATCAATGCCTTGAAATAT

>PGSC0003DMG401015527RLKmalectin\_2257

ACTATTGGTAATGCACTGACTGATGGAACAAACAGCCAAGATGGTATGTACACCCTCTTTTAATCTGTT  
GTAGCAGATAACTTATTCAGGTTACTTATAGTTATTTGATTGTGTAAAT

>PGSC0003DMG401015527RLKmalectin\_2318

TAATCTGTTGTAGCAGATAACTTATTTTCAAGGTTACTTATAGTTATTTGATTGTGTAAATCTTTAACACGCT  
TTCAACGTATAGAAATTAATCTCGATTTATGAGTTTGACTTCTATATG

>PGSC0003DMG401015527RLKmalectin\_2379

TTTAACACGCTTTCAACGTATAGAAATTAATCTCGATTTATGAGTTTGACTTCTATATGTTTGATAGTATA  
AAAGATTGTGTACACTTACCTAAAAGATTATCATAGATAATTGTCCAGA

>PGSC0003DMG401015527RLKmalectin\_244

TTCGTGTTTGATCATATATATATAGGTCCATTACTAGAAACAAAGGTTCTTTCCATCGTAAATTAGTGGAA

AACCTACTTGCCTAACTAATCCGAATTCACACTAGCTAGGTCTACTAAG

>PGSC0003DMG401015527RLKmalectin\_2440

TGATAGTATAAAAGATTGTGTACACTTACCTAAAAGATTATCATAGATAATTGTCCAGAGACCATAATAA  
CTATTGATAACTTGAAAACAATATGTGTTTATTTATATTATCAGTATATA

>PGSC0003DMG401015527RLKmalectin\_2501

CCATAAACTATTGATAACTTGAAAACAATATGTGTTTATTTATATTATCAGTATATATAAGTTAAATAC  
TTTATTTATTGATATTCTAGTATTGTTGAATTATAAATGGGATATTAT

>PGSC0003DMG401015527RLKmalectin\_2562

AGTTAAACTTTTATTTATTGATATTTCTAGTATTGTTGAATTATAAATGGGATATTATACTTACTGAAGTA  
CTATATATTTTTTATATATATAGTGGAGACTTTAATGTCATTGCAAA

>PGSC0003DMG401015527RLKmalectin\_2623

TTACTGAAGTACTATATATTTTTTATATATATAGTGGAGACTTTAATGTCATTGCAAAAGGAATTTGAAG  
TATTACAAGGCTGGATTGGTGATCCTTGTCTTCCATCACCTTTTACATA

>PGSC0003DMG401015527RLKmalectin\_2928

TTAGTGATTGTTTTTATGGTTCGAACATGTGACCTATAGGTCACACAAAGATAATTTTATTGTTGTTTCAG  
GGCGCGCACCCCTTTATATAATTGTAATTTTTTTTTGTTGAAATAAAATT

>PGSC0003DMG401015527RLKmalectin\_305

ATTAGTGGAAAACCTACTTGCCTAACTAATCCGAATTCACACTAGCTAGGTCTACTAAGGGGGGTAAAT  
GTACCTATACTGAATTGAAAGGTTTTCAATTCTCATAATTTAACTTGACA

>PGSC0003DMG401015527RLKmalectin\_3111

TGCTCTTGAGACAATGTAATGTTTCTTGTTTTTTTTTTTTAAAATTATTAATTTAAATACATTTCTTCTAAAT  
AGGGATATTTAATTTAATTAATTTCTAACTCTTTTTTTTTTTGTGC

>PGSC0003DMG401015527RLKmalectin\_3172

TTCTTCTAAATAGGGATATTTAATTTAATTAATTTCTAACTCTTTTTTTTTTTGTGCTTCTTGGATTGCAG  
TGATTTGAGTAACAACGATTTGGATGGACCTATTCCTGATTTTTTTTG

>PGSC0003DMG401015527RLKmalectin\_3233

CTTGGATTGCAGTGATTTGAGTAACAACGATTTGGATGGACCTATTCCTGATTTTTTTTGGCACATTACCGA  
ATCTAAAAGAACTGTTAGTATACTAATTATATTCTGATCGATTTAAT

>PGSC0003DMG401015527RLKmalectin\_3294

ACATTACCGAATCTAAAAGAACTGTTAGTATACAACCTATTATATTCTGATCGATTTAATTAGCTTGTTGG  
TCAATCTTCTCGGATGATAAAAGTATTTTGAAAAAATATTGATTTATTT

>PGSC0003DMG401015527RLKmalectin\_3355

GCTTGTTTGGTCAATCTTCTCGGATGATAAAAGTATTTTGAAAAAATATTGATTTATTTTAAAGAATTAAG  
GTGTTTGATAAAAGTTTTTTGTAAAAAATAAAATAAAATTTCAAATAGT

>PGSC0003DMG401015527RLKmalectin\_3416

AAGAATTAAGGTGTTTGATAAAAGTTTTTTGTAAAAAATAAAATAAAATTTCAAATAGTAGCAGAAGTTG  
AGAAAAAGGGGATTTCCCGTCAAAACACTTTTTGAAATTTTGACCAAGCA

>PGSC0003DMG401015527RLKmalectin\_3477

CAGAAGTTGAGAAAAAGGGGATTTCCCGTCAAAACACTTTTTGAAATTTTGACCAAGCACAAATTGTTGC  
TCTATAATATTGAAAAAATATTTTTCGAGTAACTAGATAAACTTTAAA

>PGSC0003DMG401015527RLKmalectin\_3538

AATTGTTGCTCTATAATATTGAAAAAATATTTTTCGAGTAACTAGATAAACTTTAAAAAACTATTCTTTT  
TTATAAGAAAAATAATATATATTTTTCCAAAATAAACAGATTTTGTA

>PGSC0003DMG401015527RLKmalectin\_3599

ACTATTCTTTTTATAAGAAAAATAATATATATTTTTCCAAAATAAACAGATTTTGTAAACTTAACCAA  
CAATCTATAATTTATATAAACTAACGATATTATAATTACTTTATAAATA

>PGSC0003DMG401015527RLKmalectin\_366

GGGTAATGTACTATACTGAATTGAAAGGTTTTCAATTCTCATAATTTAAACTTGACATCTTTGGTTAAC  
GACAGAGGAATACTCTTTTTCGTATATTATCTTTGATTATTTGATCTTT

>PGSC0003DMG401015527RLKmalectin\_3660

CTTAACCAAACAATCTATAATTTATATAAACTAACGATATTATAATTACTTTATAAATAACTTAGTAATTGT  
CTTTCTATATTTTAAAATAATTATGAGCTTGTTTGAATGGACTTTTGA

>PGSC0003DMG401015527RLKmalectin\_3843

ATTTTATTTTATTTTATCTAATTATAACAAAAATTTTAAAAGTTATTTTAACTTTAAAACACCTAAAATA  
AGCTAATACAAACCTACCTTTGTAAAAAATAAATGCTAATGCTTTTA

>PGSC0003DMG401015527RLKmalectin\_3904

CACCTAAAATAAGCTAATACAAACCTACCTTTGTAAAAAATAAATGCTAATGCTTTTATTTTATCTTGT  
TATGATACATAATTTTGGTCTAATTTCTTTTCAGGAATTTAGCAAATAA



>PGSC0003DMG401015527RLKmalectin\_3965

TTTATCTTGTTATGATACATAATTTTGGTCTAATTTCTTTTCAGGAATTTAGCAAATAACAAGTTCACTGGA  
CCAGTCCCTGCTTCATTGTCAAACAAAAATGGCCTAACCATAGAGTAA

>PGSC0003DMG401015527RLKmalectin\_4026

AGTTCACTGGACCAGTCCCTGCTTCATTGTCAAACAAAAATGGCCTAACCATAGAGTAAGCAAAAGCAA  
CATTAAACATATCTTCTGTTATATTTCTTGAAGTGGTTAGCCATTGAAAAG

>PGSC0003DMG401015527RLKmalectin\_4087

AAAAGCAACATTAAACATATCTTCTGTTATATTTCTTGAAGTGGTTAGCCATTGAAAAGTTAAAAATTATT  
TTACATACCTAATAAAAATTGTTTTAATCTTTGTTATTTCCATATAAAA

>PGSC0003DMG401015527RLKmalectin\_4148

AAAAATTATTTTACATACCTAATAAAAATTGTTTTAATCTTTGTTATTTCCATATAAAAACATATCAAATTAT  
AAAAAATAACATTTTTTAAAAATACTTTCAAGCTATATATCAATCTAA

>PGSC0003DMG401015527RLKmalectin\_4209

TATCAAATTATAAAAAAATAACATTTTTTAAAAATACTTTCAAGCTATATATCAATCTAAAATGTACTTAACT  
AATAAATAAACAGATCATATTTTCATCAGCTAATTTTGTGTTTTTTTT

>PGSC0003DMG401015527RLKmalectin\_4270

TGTACTIONACTAATAAATAAACAGATCATATTTTCATCAGCTAATTTTGTGTTTTTTTTCCCCAGTACTTCA  
GGCAATTTAGGTTTGTGCAGTTCATCTGATGAATCTTGCCAAAATAAT

>PGSC0003DMG401015527RLKmalectin\_4331

CCAGTACTTCAGGCAATTTAGGTTTGTGCAGTTCATCTGATGAATCTTGCCAAAATAATGATTCATCATCA  
CCAGGAAATGATCAACCAGCAACTGGATCAACCAAGAAAAATAATAAGA

>PGSC0003DMG401015527RLKmalectin\_4453

AAGAAAAATAATATGCCAATAATACTGGGTACTACAATCCAGCCTTCTTGCTTGTGTGGGCTATTGTGG  
GTATTTTTGCTATTTTACTACAAAAACAAAAGGGCTACTACATCTCTT

>PGSC0003DMG401015527RLKmalectin\_4514

CTATTGTGGGTATTTTTGCTATTTTACTACAAAAACAAAAGGGCTACTACATCTCTTGTCAATCCAGGT  
GAGGTTAAGAAACGGTTTGGATATAGAATTGTTATAATTTTTTTGGAATT

>PGSC0003DMG401015527RLKmalectin\_4575

CAATCCAGGTGAGGTTAAGAAACGGTTTGGATATAGAATTGTTATAATTTTTTTGGAATTCGAAAAACTCT

AAAAGGTTATTTTCGTAATTTTTTACTATTTATTTTTTAACACTATTTT

>PGSC0003DMG401015527RLKmalectin\_4636

AAAAACTCTAAAAGGTTATTTTCGTAATTTTTTACTATTTATTTTTTAACACTATTTTTAAATCCAATTAAT  
TATGCACTAATATAAAGTTGCAATTTTCAGGGCAAGCTAGTGGAGGC

>PGSC0003DMG401015527RLKmalectin\_4697

AATCCAATTAATATGCACTAATATAAAGTTGCAATTTTCAGGGCAAGCTAGTGGAGGCAGCACCCCTTT  
TGTAATAGAGTCCAAATGTCTGAAAATTTTAAAAGAATCCAGAGGTTG

>PGSC0003DMG401015527RLKmalectin\_4758

CACCCCTTTTGTAAATAGAGTCCAAATGTCTGAAAATTTTAAAAGAATCCAGAGGTTGCTGCCCATGAT  
CATGAGAACTCAACAAGTTTGTAGCTTAACCTGATTCTTAATTTCAAAG

>PGSC0003DMG401015527RLKmalectin\_4819

GCCCATGATCATGAGAACTCAACAAGTTTGTAGCTTAACCTGATTCTTAATTTCAAAGGAAAAATAATG  
CAAGGTTAATTAGAAATATCAAATTTATTATTGAGTTGGCTAGCAAGAAA

>PGSC0003DMG401015527RLKmalectin\_549

CAGAAGCATACTGATCATGAACTTCAATAGATTGGTTAGGAGATGCTGACTACGTAGCCAATGGAG  
AATCTCATGTTGTACAATCCAACAAGTTTGTAGCTTAACCTGATTCTTAATTTCAAAG

>PGSC0003DMG401015527RLKmalectin\_61

GTAGTCATTTTCTCCTACTTGTTTTACTTCTTTCTGTTTTCTGTTTATGCTGATGGTAAGCTTTCTCCATT  
TTCTATATTTAATTATTTGGGGTTGAAACCTTTTTGTCTCGATTAAT

>PGSC0003DMG401015527RLKmalectin\_854

GTATATTATGAGACAGTTTATGTCGTTAAAGGCGATTACCTTACTGTGTGTCTTGCTCAGACAGAGGACA  
ATCAATCCCTTTTATCTCAGCACTTGAAGTTCGTGGCTTGGATTCAACT

>PGSC0003DMG401015527RLKmalectin\_915

CAGAGGACAATCAATCCCTTTTATCTCAGCACTTGAAGTTCGTGGCTTGGATTCAACTATGTATAGTCAT  
GTTGATGATAATCATGCTTTGTTCTTAAGAAGAAGAGTTGCTTTTGGTT

>PGSC0003DMG401015877LRR-RLPs\_1240

GACTCAAACCGTGCTTTCTTTCTATGGGTGATTTCCAGAGGATTTTCAAGTTGATACTCGGAGATTGTTT  
CAATTATGGATCGCAGAAGGCTTCATAAGGGCGTCTGCTGGAAGTCGTG

>PGSC0003DMG401015877LRR-RLPs\_1302

AGATTGTTCCAATTATGGATCGCAGAAGGCTTCATAAGGGCGTCTGCTGGAAGTCGTGAAAGTTTGGAG  
GAAGTGGCTGAACATTATTTGGAGGATCTTATCAACAGGAACTTGATAATG

>PGSC0003DMG401015877LRR-RLPs\_1364

TTTGGAGGAAGTGGCTGAACATTATTTGGAGGATCTTATCAACAGGAACTTGATAATGGCTAGAAAAA  
GAGATTCAATGGTGAGGTAAGCATGCGGAATACATGATCTGCTGCGTGA

>PGSC0003DMG401015877LRR-RLPs\_1488

TGTTTGATAGAAGCTGAAATGACAAAGTTTATGCATGTTGTGAGAACTCCATTTTACCAGCACAAAAGC  
CTAATTTTCGTCGCTTCAGTATTCAAAGCGTATTGAGGATGCTTATAAG

>PGSC0003DMG401015877LRR-RLPs\_1550

ACAAAAGCCTAATTTTCGTCGCTTCAGTATTCAAAGCGTATTGAGGATGCTTATAAGCTCTTACCCCCTG  
TAGCCAGATCTATCTACTGCTTACTTACTTGGATCTACCTTATGAACC

>PGSC0003DMG401015877LRR-RLPs\_1612

TACCCCCTGTAGCCAGATCTATCTACTGCTTACTTACTTGGATCTACCTTATGAACCCCGTATTAAGATTC  
TCCCTAGATTGCCATCTACCGTCATGATCCTATAATACATGGATTTT

>PGSC0003DMG401015877LRR-RLPs\_1736

TTGTTTCAACCATCTCAGGGTATTGGCCATCTTTCCTCCTCGTTCAGCACATTTCCACTTGTGATTATGAA  
GTTATTTCAATTTGAGATATCTCCAATTTGATGTTTTGACAACAATAT

>PGSC0003DMG401015877LRR-RLPs\_1798

TGATTATGAAGTTATTTCAATTTGAGATATCTCCAATTTGATGTTTTGACAACAATATTCCTGAATCAATCT  
CAGAGCTTCTGAATTTGCAAACCTAATTTGTGAGGGTTTTCTTTAG

>PGSC0003DMG401015877LRR-RLPs\_1860

GAATCAATCTCAGAGCTTCTGAATTTGCAAACCTAATTTGTGAGGGTTTTCTTTAGAGATAACTTTACC  
TAGGAAGATATGGATGTTGAAGAACTTGAGGTATATACGTATAGGGGGA

>PGSC0003DMG401015877LRR-RLPs\_1922

AACTTTACCTAGGAAGATATGGATGTTGAAGAACTTGAGGTATATACGTATAGGGGGAGCCACTTATTT  
ACCAAGTCCTAGAATAGATAAGAATCTTGTGACAGGGATGCCAAGTCTTGA

>PGSC0003DMG401015877LRR-RLPs\_2046

CTTTACGGTATTTGTTACTCTAGTTGTACAAATGAAGTCATTTCTAGCACTCCCAATCTAAAGAGATTGAT  
CATTCGTGTACATTGGAGCATACTAAAGAATTTCCGGATCGTCCCTTG

>PGSC0003DMG401015877LRR-RLPs\_2108

GAGATTGATCATTCTGTACATTGGAGCATACTAAAGAATTTCCGGATCGTCCCTGGATATGTCCAGC  
TTGACAAAACTTGAGACATTCAAGCTTTACTGGGAAGGTTATTTGGAAG

>PGSC0003DMG401015877LRR-RLPs\_2170

TGTCCAGCTTGACAAAACTTGAGACATTCAAGCTTTACTGGGAAGGTTATTTGGAAGACCCCATCAAG  
ATATTTGTTTTTCCAAAATCAATTAGAAGAGTGTCTTTAACTAGGTGTGAA

>PGSC0003DMG401015877LRR-RLPs\_2232

CATCAAGATATTTGTTTTTCCAAAATCAATTAGAAGAGTGTCTTTAACTAGGTGTGAAAAGTTTATTTGG  
GAAGAGATATCATCAACTTTTATCATGTTGCCACATCTTGAAGAGCTCAA

>PGSC0003DMG401015877LRR-RLPs\_2418

GAAGTTGTTGTTACTGAGCGAGCTAAATCTTAAGGGTTGGGAAGCAAGCAGCGATAACTCCCTAATCT  
TAAACGCCTTGTTCTGAAGAAATGCAAGGACCTGCAAAAAATTCCAACAGA

>PGSC0003DMG401015877LRR-RLPs\_2604

TGTCAGAAATATCGAACAAGAACGAGAGGACATGGGATATAATATCGTTAAGGTCTACATCCATAACAG  
CCACAGTAAGTTATAATTCTCTCTGAAAAGTTCTTCGATTCTTCACATCAT

>PGSC0003DMG401015877LRR-RLPs\_2666

ATAACAGCCACAGTAAGTTATAATTCTCTCTGAAAAGTTCTTCGATTCTTCACATCATTTAAACCTCATT  
TTATTAATCATACCTCTTTGAAATTAAGATGATGACTTGTTCTTTTT

>PGSC0003DMG401015877LRR-RLPs\_2728

AACCTCATTTTTATTAATCATACCTCTTTGAAATTAAGATGATGACTTGTTCTTTTTATCTTGCATATGCA  
GGGAATTGAAGCTTATTTGAGGGATCATCTAATGCTATCTTCCAAT

>PGSC0003DMG401015877LRR-RLPs\_2790

TGCATATGCAGGGAATTGAAGCTTATTTGAGGGATCATCTAATGCTATCTTCCAATTCAGAACCTTGT  
AGTTCATATTTTTGTTTATATATTCTGATCATTTGTTAATTTTCATGTTTT

>PGSC0003DMG401015877LRR-RLPs\_2852

AACCTGTAGTTCATATTTTTGTTTATATATTCTGATCATTTGTTAATTTTCATGTTTTAGGAATAAGCATGT  
TTAATACATGTCTCGGCCAATTGTTTTTTTTATTTATTTGTAAACG

>PGSC0003DMG401015877LRR-RLPs\_2884

CTGATCATTTGTTAATTTTCATGTTTTAGGAATAAGCATGTTAATACATGTCTCGGCCAATTGTTTTTTTA

TTTTATTTTGTAACGGTAACTATTGATGTACTGTAAGATCTATTTTG

>PGSC0003DMG401015877LRR-RLPs\_434

TATGAGTGATCCAATGCTGTCAGATCACTTGAAAGATGATATTGTGCAGGGACTTGATGGTGA  
GACTTGGAGAAAATAGATAAGAGATTGAGAGGACCAACGTCGTATCTAGACATTGTCAC

>PGSC0003DMG401015877LRR-RLPs\_62

TTCTCTTCTTCAAACGTTGATCAACCAAATATTGCAGAACTCTTTCATGATCACAGTGCTGAAATGCTCG  
ATTCTCTTCGTGCTACAGCTGAATATTTTCAAGATGTTCTTGAAAACAC

>PGSC0003DMG401015877LRR-RLPs\_682

TATTGTTAGAAGCTTTACATTGCATTTCAAAGCAAAGAGTTAATGTGAACACAAAAGATTATGTTAAGAT  
GAATGCTAGTGAGTTAGCTGATCTGGTGCAAAGAGTCTAAAGGGTCCAA

>PGSC0003DMG401015877LRR-RLPs\_744

GTTAAGATGAATGCTAGTGAGTTAGCTGATCTGGTGCAAAGAGTCTAAAGGGTCCAAGATACCTTGTT  
GTCGTTGATGATATTTGGAGTAGGGATGTTTGGGATAGCATATCACAATA

>PGSC0003DMG401015877LRR-RLPs\_868

CTAATCGCAACAATGGGAGTCGAGTCTTATTGACTACTAGGGAACTGATGTAGCAATATATGCAACTA  
CTAGTAGCCCTCATAAGATGGACCTCTTGAATTTAGATAACAGTTGGAAGT

>PGSC0003DMG401015877LRR-RLPs\_930

GCAACTACTAGTAGCCCTCATAAGATGGACCTCTTGAATTTAGATAACAGTTGGAAGTTACTTCGTGTTA  
AGGTGTTTGGACTAGAACACGATCATCCTGCTGAGTTGGAAGAAATTGGA

>PGSC0003DMG401015877LRR-RLPs\_992

TCGTGTTAAGGTGTTTGGACTAGAACACGATCATCCTGCTGAGTTGGAAGAAATTGGAAAAACAATAGC  
AGGAAAATGCCAAGGACTTCCCTTAATAATTTCAAGTATTGCAGGGCCTCT

>PGSC0003DMG401015894-(rev)LRR-RLPs\_0

GTTAAGAACAAAATGGTAATTCAACTTTGAGGTTATGAGCTTCCCACTTATAATAATATGTCTATCATGCT  
AACAAATTGGTCTATTTTCTGCATATTCTTAAAGATGACTATGTATTA

>PGSC0003DMG401015894-(rev)LRR-RLPs\_122

GATCTCTATTCATTTAGTAGATTAGTCTATAACGGTCATTTCTTAGAGAGTAACTACAAGATCCACCCT  
ATGGAGCCTCCCTCAGATAACACGCCGACTTCATCTGGGGAAGGAAAAC

>PGSC0003DMG401015894-(rev)LRR-RLPs\_1464

TCAGGTACCAACTCTACAGCAACTTGATTTATCTGGCAATGAAAACCTTACTGGCATTTTACCTGAATTC  
CACATAAAAGTGCATTAAGGGAGGTAGTGCTTAGCTACACAGGATTCAC

>PGSC0003DMG401015894-(rev)LRR-RLPs\_183

GATCCACCCTATGGAGCCTCCCTCAGATAACACGCCGACTTCATCTGGGGAAGGAAAACCAACTTATGCT  
ATAACACTATACTTTAGGTTGATTTGCACAATATAAACTATTCAAGTCAA

>PGSC0003DMG401015894-(rev)LRR-RLPs\_244

ACTTATGCTATAACACTATACTTTAGGTTGATTTGCACAATATAAACTATTCAAGTCAACAGAAAACATC  
CCACACGCAAGAGAATCAACTTTAATTTTTTAATTTTCTTATGTGAAAT

>PGSC0003DMG401015894-(rev)LRR-RLPs\_2989

GAGACTGAACGTGAAATTGATGGGAAATATATAAGTTTTGCCTTGGGATCTTCTGTCTGGTTTTGGCATCA  
TAACCTGGCTGATTTTGCATAGCCGAAAATATAATGAGCTCGTTGATATA

>PGSC0003DMG401015894-(rev)LRR-RLPs\_3111

TCTTTTCAGAATTTTGGGTCAGCACCAAAGGAGTGGCAGGAATAAAAACCAGAGAAGGTCAAGGTAAG  
TTGAGGTTTGTGTAGAACAAAAGGCTAATAATATTGTTGATATATGACTAT

>PGSC0003DMG401015894-(rev)LRR-RLPs\_3172

AGGTAAGTTGAGGTTTGTGTAGAACAAAAGGCTAATAATATTGTTGATATATGACTATAAGCTTTTAAG  
TTCAATGTTTTACATTTTGTCTATAAGCGTGTGGTAATTAGTGTTCCGGA

>PGSC0003DMG401015894-(rev)LRR-RLPs\_3599

CAAAAAGGAATGATACTAGGCTAAGGGAATATGAATAATAGAAATTCCAGGACATCTTGCACTCACCTC  
TTGCACTCACCTCACAACTCGACACGATCTCTAGAAATTCCAGTAATTTT

>PGSC0003DMG401015894-(rev)LRR-RLPs\_366

TTGACTTGGTCACTGATCATGACACTCCTTAAATTCCTACATATATTAGTGCATCAACTCTTATTCCACATG  
CAACAACACTCAAGTCAACAGAAAACACTGCAGAAAGAAACCAAATTGTT

>PGSC0003DMG401015894-(rev)LRR-RLPs\_3660

CTCACCTCTTGCACTCACCTCACAACTCGACACGATCTCTAGAAATTCCAGTAATTTCCATATGCACATT  
ATAAGATGTACAAATCTAATCCTGTAAAGTTTTAAACAATAGATGTATG

>PGSC0003DMG401015894-(rev)LRR-RLPs\_4209

GTTATTATACAACAAGCAAGTCAGTTACAATCTAAGTCTAAAATGGGCATTGGGGCCGTTGGGATTGGA  
TATGAAAAATCAATTTTATAGATTGGATTATTTTTTAAGTTCCGGGTTTGGAT

>PGSC0003DMG401015894-(rev)LRR-RLPs\_427

TATTCCACATGCAACAACACTCAAGTCAACAGAAAAGTGCAGAAAGAAACCAAATTGTTGTAGAATAATT  
AAAGACACCTCAATCACCCAAGACCTGGTTGACCACAATGACATTTTTGG

>PGSC0003DMG401015894-(rev)LRR-RLPs\_4270

GGATTGGATATGAAAAATCAATTTTTAGATTGGATTATTTTTTAAGTTCGGGTTTGGATTAATCGGTTTG  
AGACACACAATGGAAATTAACAACCTCGGTTACCTAATAGTTTGTTACT

>PGSC0003DMG401015894-(rev)LRR-RLPs\_4514

CTTTGAAAATTCGACATACTAGCTAGCATTGGGCACACATGTTTCGGATATCCAATTTAAAAATGAAATC  
CAAAGTGAAATAATCCAAACCAAATATCCAAAAAGTTCGGATTTTCGGGTT

>PGSC0003DMG401015894-(rev)LRR-RLPs\_4575

AATGAAATCCAAAGTGAAATAATCCAAACCAAATATCCAAAAAGTTCGGATTTTCGGGTTGACCCAAACT  
ATGCCACCCTTAGCCTAAAATATAACTAGAGATAACCATCCATAATAAGT

>PGSC0003DMG401015894-(rev)LRR-RLPs\_4636

CCCAAATATGCCACCCTTAGCCTAAAATATAACTAGAGATAACCATCCATAATAAGTTGAATTAACAA  
CTAAAAAAAATAAGGCAGTTAACTTGTTACAAGAATTTACACATATTGAC

>PGSC0003DMG401015894-(rev)LRR-RLPs\_4697

AATTAACAATAAAAAAATAAGGCAGTTAACTTGTTACAAGAATTTACACATATTGACACTTGACAGTG  
TAAATATTTTTTACCCCGTAGTATATAAGAGATAAATCCTACTATCTCTC

>PGSC0003DMG401015894-(rev)LRR-RLPs\_4758

TTGACAGTGTAATATTTTTTACCCCGTAGTATATAAGAGATAAATCCTACTATCTCTCTAACATTGGCAA  
ACACAATTTTCAAATGACTAGTCAAATACAAATTGTTAATCTCCACAA

>PGSC0003DMG401015894-(rev)LRR-RLPs\_4819

ACATTGGCAAACACAATTTTCAAATGACTAGTCAAATACAAATTGTTAATCTCCACAAATACTTTTTCGA  
AAAACACTTTTGATAAAAATATTTTGCAAATAAACAGATTTTAAAAGG

>PGSC0003DMG401015894-(rev)LRR-RLPs\_4880

ACTTTTTCGAAAAACACTTTTGATAAAAATATTTTGCAAATAAACAGATTTTAAAAGGTTGACCAAACGT  
GCAATAAGTCACCGATGTGGGAGTCAACATTAACATATACTTTTGCTT

>PGSC0003DMG401015894-(rev)LRR-RLPs\_4941

GACCAAACGTGCAATAAGTCACCGATGTGGGAGTCAACATTAACATATACTTTTGCTTGTGTACCTAAC

AAAAACAAAAAATAAAAAGGGCAAGTTGTTGAAATTTTTTAGTGCTTACC

>PGSC0003DMG401015894-(rev)LRR-RLPs\_5002

GTACCTAACAAAAACAAAAAATAAAAAGGGCAAGTTGTTGAAATTTTTTAGTGCTTACCTACTTTTCTCCT  
TCATTTGAGTAAAGACATTATAAGAGCCGTAGGGACAAGGGGAAGGTTG

>PGSC0003DMG401015894-(rev)LRR-RLPs\_5063

CTTTTCTCCTTCATTTGAGTAAAGACATTATAAGAGCCGTAGGGACAAGGGGAAGGTTGGATAGTTATA  
GCAACTTATTTTGACATACACTATATTCAATTTCAACAATCATATATAA

>PGSC0003DMG401015894-(rev)LRR-RLPs\_5185

ACAATTACCAAATACTCTATAGAACAAGTAATATTCTTTACAAAAAAAAGAAAAGATGGAAGATTATTA  
AAGTAAATACAATTATCGTACCTGCTGTAGAAAAGTGGACTTTTTGTGGA

>PGSC0003DMG401015894-(rev)LRR-RLPs\_5368

CTTGCACTACTCTACATCAATAATTTAATTTTAGTATTACTCATTTTCGATGACAAGTCGGCCTTCCTCAT  
TACGAGTCAGTTAAAATCACAAGACATGTAGAACTCTCACCACCACTC

>PGSC0003DMG401015894-(rev)LRR-RLPs\_5429

GCCTTCCTCATTACGAGTCAGTTAAAATCACAAGACATGTAGAACTCTCACCACCACTCATTTAAAAGG  
AATGCTTGATATTTTGTCTTACTTTGTCTTACATGTCACAAATTTTTCT

>PGSC0003DMG401015894-(rev)LRR-RLPs\_5490

TTAAAAGGAATGCTTGATATTTTGTCTTACTTTGTCTTACATGTCACAAATTTTTCTATAATATCTTAAA  
TTACGTGTTCAATCTAATAGTTGTACATAAAATTGGACTTCTCCATA

>PGSC0003DMG401015894-(rev)LRR-RLPs\_5551

AATATCTTAAATTACGTGTTCAATCTAATAGTTGTACATAAAATTGGACTTCTCCATACAGAAAAACAAC  
CAATAAGAGAGCACAATATTCTTTATTTTTCTTGAATATTTTCAAGTA

>PGSC0003DMG401015894-(rev)LRR-RLPs\_5612

GAAAAACAACCAATAAGAGAGCACAATATTCTTTATTTTTCTTGAAATATTTTCAAGTAACCTCACATTGT  
TGACAGAATTTGACTCCTAAGTTTTCTAATGTAGATGTTTTACATGTA

>PGSC0003DMG401015894-(rev)LRR-RLPs\_5673

CTCACATTGTTGACAGAATTTGACTCCTAAGTTTTCTAATGTAGATGTTTTACATGTAATCAACAGCAAT  
AAATCTTACTAAATGGACAATAAAAGAGGGATCAATTATTTTTGAAC

>PGSC0003DMG401015894-(rev)LRR-RLPs\_5734



CAACAGCAATAAATCTTTACTAAATGGACAATAAAAGAGGGATCAATTATATTTTGAACCTTAGCTAATA  
GGAGCAATAAATAAGAGAACCAATTGCAAGTTTATTTCTTGTGGGATTTA

>PGSC0003DMG401015894-(rev)LRR-RLPs\_5795

TAGCTAATAGGAGCAATAAATAAGAGAACCAATTGCAAGTTTATTTCTTGTGGGATTTAAGCTATAACAAC  
AAAGTAAACATAAATCATAATATTAGTATAATTTGACATATTCTATCTA

>PGSC0003DMG401015894-(rev)LRR-RLPs\_61

CTATCATGCTAACAAATTGGTCTATTTTTCTGCATATTCTTAAAGATGACTATGTATTAGTGATCTCTATTC  
ATTTAGTAGATTAGTCTATAACGGTCATTTCTTAGAGAGTAAACTAC

>PGSC0003DMG401015894-(rev)LRR-RLPs\_610

ACTTAAGTACTATTTAAAGACAACCTATTTTGCAGTTTCATTAGTATAATCACTATGAAAATATTACTCCTC  
CTTCAGGTTTCTTTCATCACTATCCTTGTGGTGTCTCTAATTATACT

>PGSC0003DMG401015894-(rev)LRR-RLPs\_6344

ACATACCAAAAAATCGAGTTGAACAGAATCCACTACTTTCAGTTCGAATCATGTAATATCCGATAGTGCT  
ATGTGATCTAAAGGCTAGACTAAATCACTAAAAGTTGAAACGACATCAAA

>PGSC0003DMG401015894-(rev)LRR-RLPs\_6405

GATAGTGCTATGTGATCTAAAGGCTAGACTAAATCACTAAAAGTTGAAACGACATCAAAATTTTGATCAC  
CTAATTTCAAATTGTAATGAGTTTAGCTGTAAAACCTAAAGGTTGAACA

>PGSC0003DMG401015894-(rev)LRR-RLPs\_6466

TTTGATCACCTAATTTCAAATTGTAATGAGTTTAGCTGTAAAACCTAAAGGTTGAACACGTCAATTTTAA  
ATCCTGAATTCACCTCTAAATCATACTCGCTCCAAATAAACTAATTTGA

>PGSC0003DMG401015894-(rev)LRR-RLPs\_6527

TCAATTTTAAATCCTGAATTCACCTCTAAATCATACTCGCTCCAAATAAACTAATTTGACTTTAAATTGCTC  
GGATCCAACACATAGCTGTGACATTTTTGAAGAGTCTAAACGACATA

>PGSC0003DMG401015894-(rev)LRR-RLPs\_6588

TTAAATTGCTCGGATCCAACACATAGCTGTGACATTTTTGAAGAGTCTAAACGACATAGCTTTAAATTTT  
GGATCAAACCTTATCATAACAGAGTAAAACAGAGTCGAATGAATGAACGA

>PGSC0003DMG401015894-(rev)LRR-RLPs\_6649

TTTAAATTTTGGATCAAACCTTATCATAACAGAGTAAAACAGAGTCGAATGAATGAACGAAAAGGGAGAA  
TTAGTTGGTTGTAATACCAATAAGCAGCGGTGAATCCAGAAATTCCAGCA

>PGSC0003DMG401015894-(rev)LRR-RLPs\_671

TATTACTCCTCCTTCAGGTTTCTTTCACTACTCCTTGTGGTGTCTCTAATTATACTTCTGGCCAATGTTT  
GGAGGATCAAAAAGCCTTGTTGATTA AATCAAGAATAACCTCACGT

>PGSC0003DMG401015894-(rev)LRR-RLPs\_915

CATTTCTGGCGGAATTGAGAAGTCAAGCAGTCTCTTCCATCTTCGATATCTTGAGAAGCTCAATCTGGCT  
TATAATGGCCTATAACCCTGTTCCAATACCAAGAGAAATTTATAAGCTGGC

>PGSC0003DMG401015894-(rev)LRR-RLPs\_976

AATCTGGCTTATAATGGCCTATAACCCTGTTCCAATACCAAGAGAAATTTATAAGCTGGCAAACCTTGATGT  
ACCTGAATTTGTCACATAGTTTTAACGGGCAGATTCCTATGGAATTGTCA

>PGSC0003DMG401015976LRR-RLPs\_1116

AGACACAACAAGTTGCAAGGATCTATACCTGACTTAGTGAGCAACATGGTTGGTTTGAATTCCTAGAC  
ATTTCTCATAATAATATATCAGGAACCATTCTATGTCTATGGAGAACTT

>PGSC0003DMG401015976LRR-RLPs\_1178

CCTAGACATTTCTCATAATAATATATCAGGAACCATTCTATGTCTATGGAGAACTTCAATACCTCAAGT  
ATTTCAATGTTTCTGACAACAAATTGTATGGTGAAATACCCTTGGGGGG

>PGSC0003DMG401015976LRR-RLPs\_1488

AAGGTATAGAAGAGGTA AAGAGTTCCTCAACGACCTGATTCATTGTCTATCGCAACAACAGAAAGAAT  
TTCATACTATGAACTGCTCCAAGCAACTGATACGCTTGGCGAGAGTAATCT

>PGSC0003DMG401015976LRR-RLPs\_1674

TAAAGTGTTC AATCTGCAACTGGAAGCGGCATTCAAGAGTTTCGATATAGAATGTGAAGTTTTGCGTAG  
CTTCGCCATAGAAATCTCGTGAAAGTCATCACTAGTTGTTCCAACCTTGAT

>PGSC0003DMG401015976LRR-RLPs\_1736

TGCGTAGCTTCGCCATAGAAATCTCGTGAAAGTCATCACTAGTTGTTCCAACCTTGATTTTAAGGCTTTAG  
TGCTCGAGTATATGCCTAATGGAAGTCTTGACAAGTGTGTTGATTTCGCA

>PGSC0003DMG401015976LRR-RLPs\_186

CCAATGGAGATCTTCAACATATCACGACTGAGAACAATTCAACTTTCAGCCAACAATCTATCAGGAACTA  
TACTACCAAACATAGGTTCTACCTTACCCAACATTGAAATACTTTATCTG

>PGSC0003DMG401015976LRR-RLPs\_2046

GAGAGTGATTTATACTAAAACGTTAGCAACGTTTGGTTATATTGCACCGGGTACGTCTCTTTGTTTTTG

CTAATTTGAACATTGATTTTTTCATTTTTTTTTCTAATTCAAGAAAGTAT

>PGSC0003DMG401015976LRR-RLPs\_2108

TTGTTTTTGCTAATTTGAACATTGATTTTTTCATTTTTTTTTCTAATTCAAGAAAGTATATTGCATATTTAAAT

TAATTCTCTGACTGTAGAGTATGGACTGGATGGACTGGTGTCAATAA

>PGSC0003DMG401015976LRR-RLPs\_2232

TGATGTCTATAGTTACGGGATCATGTTGCTGGAAACGTTTACTAGGAGAAAGCCTACTGAGTTTGAGGG

AGATCTTAGCTTGAAGCAATGGGTGAGTTATCACTCCCCGAGGCAGTAATG

>PGSC0003DMG401015976LRR-RLPs\_2356

TTGTAGATGCCAATTTGGTAACAATACCAATGGATAATCGCTTACAGAAGGAGCTAGATTTAGCACTTGA

TTTGTGCATGATTCAGTTTTTCAGAAATTCTAGATGGTTGCAATAAATATC

>PGSC0003DMG401015976LRR-RLPs\_2418

GCACTTGATTTGTGCATGATTCAGTTTTTCAGAAATTCTAGATGGTTGCAATAAATATCACTATTTCAATTTG

ATTACCGGCAAATCTTGAAACAGAATGAGTTCAGTGCTTCTATCCTTTG

>PGSC0003DMG401015976LRR-RLPs\_2452

TTCTAGATGGTTGCAATAAATATCACTATTTCAATTTGATTACCGGCAAATCTTGAAACAGAATGAGTTCA

GTGCTTCTATCCTTTGTTTTGTGCTTTTTACTGATGCAGAGGATGAGTGA

>PGSC0003DMG401015976LRR-RLPs\_310

CCTTAACCAATCTTGTTGGGACTATTCTCATTCTATCTCCAATTGTTCAAAGCTTACTCATCTAGAGCTTT

CACAAAACAAACTCAGTGGCTTAATACCCAATTCTCTTGATATTTGA

>PGSC0003DMG401015976LRR-RLPs\_434

TCTAAACTTCTAAACTTGTGGGGAAACAATTTAACCAGTGATTCATTTTTAAGCTTCTCACTTCCTTAAC

CAATTGCAGAAGATTAACAACCTTTCTCTATCTTTCAACCCTCTAAA

>PGSC0003DMG401015976LRR-RLPs\_496

CTTCCTTAACCAATTGCAGAAGATTAACAACCTTTCTCTATCTTTCAACCCTCTAAATGGCATGCTTCCGG

TCTCCGTAGGGAATTTCTCAAATCTCTGTAAAGTTTTATGCCGCTG

>PGSC0003DMG401015976LRR-RLPs\_62

TGTATTGAGCTAGTTAAACTCATTCTTTCTTACGTGTTGACAGGTGAAATACCCAAAGATATAAGAAAT

CTCGTTGAGTTGGTGGAAATTTGATGTTGGGTTAATAGTTTTAGTGGTTC

>PGSC0003DMG401015976LRR-RLPs\_620

CAAGATTAATGGTCAGATTCCAAATGAAGTTGGCAACTTAAGCAGCGTATTAGACCTTGATCTTTCTAAT  
ATAACTTGATTGGATCAATTCCTACCTCAACTCGTAACTTGAGAAACCT

>PGSC0003DMG401015976LRR-RLPs\_744

CGCCTGTACTTGAACAACAACAAGCTTACGGGATTTATTGGAGATAATTTATGTAAATTGCAGCATTGG  
GTGCTATTTACTTGGGACAAAATCAACTTTCAGGATCTCTTCCTAATTGT

>PGSC0003DMG401015976LRR-RLPs\_868

GGAACGTCACTCCCTTAGAGAGATACATATGTATTCCAATAAATTGAGTTCCAATATACCAATAAGCTT  
ACGAAATCTTAAAAATCTAATGCCTCTTAACTTGTCAACAAACATGG

>PGSC0003DMG401015976LRR-RLPs\_930

ATAAGCTTACGAAATCTTAAAAATCTAATGCCTCTTAACTTGTCAACAAACATGGTTGGTTCTTTACC  
TCCGGAAATTGGAAATCTAAAGGCTGTGAATTATATGGATCTGTCAATG

>PGSC0003DMG401015976LRR-RLPs\_992

TTCTTTACCTCCGGAAATTGGAAATCTAAAGGCTGTGAATTATATGGATCTGTCAATGAATCAATTTTCAA  
ATGGAATTCCTAGGGAAATTGGAGGATTGCAAAATCTGGTGCATCTTTC

>PGSC0003DMG401016557LRR-RLPs\_0

ATGTCTTCTACCATGTTTGTAATGGCCGCCGATACTCTTTCTGATTCCGATCAAATATTTTCCAAGTTACCA  
GAAGACATCATCGAGAAAATCCTGTCTTATGTAACATGAAACAGAGA

>PGSC0003DMG401016557LRR-RLPs\_1134

TACATCTTTAGTATTTTTCAATTCGATTTCTTTCATGTTTGACAAGTCATTTTGTGTTGAATATTATTTTC  
ATTGTCTATGAAGGGAGTAACATTTTCAGCCAGGAAACCTTGGACCAC

>PGSC0003DMG401016557LRR-RLPs\_1197

ATTATTTTTCATTGTCTATGAAGGGAGTAACATTTTCAGCCAGGAAACCTTGGACCACTTTGTATCAAGTG  
CATAAATTTGGTAATACAATCTTCATTTAAACCAAGATATGAATCTTTTC

>PGSC0003DMG401016557LRR-RLPs\_126

GTTTCTCTTATTTCCAAAAATGGCAACAAATAATAAAATCATTCAACGACGATCTCAATTTAGTCCACAA  
ATATTCTGCAAAGATAGCTTGTGGATACTGCGGCTCCTCTCAATTGGAC

>PGSC0003DMG401016557LRR-RLPs\_1260

TCAAGTGCATAAATTTGGTAATACAATCTTCATTTAAACCAAGATATGAATCTTTTCTTGCTGAATTTTTTG  
GTTACTTCCATCCGCAGACCTTGGTAGTGACAGTGAATTCAGATGCC

>PGSC0003DMG401016557LRR-RLPs\_1323

AATTTTTGGTACTTCCATCCGCAGACCTTGGTAGTGACAGTGAATTCAGATGCCCGCAAACATGACTTT  
TTACAGGTATTCTACAATATTATAATGACTTCATTTTCAGCTTAATAAT

>PGSC0003DMG401016557LRR-RLPs\_1386

ATGACTTTTTACAGGTATTCTACAATATTATAATGACTTCATTTTCAGCTTAATAATTTCCCATCTTCACTTA  
TGTTATGAATTTGTAGGTCCTAATGAATGAGCTGGAATGCTGGAACA

>PGSC0003DMG401016557LRR-RLPs\_1449

TCTTCACTTATGTTATGAATTTGTAGGTCCTAATGAATGAGCTGGAATGCTGGAACAGAGACGGCACTAA  
ACGTTACAAACGTAGTGAGTACATATTTTGGTACAGTGCATTGAAACGCT

>PGSC0003DMG401016557LRR-RLPs\_1512

GCACTAAACGTTACAAACGTAGTGAGTACATATTTTGGTACAGTGCATTGAAACGCTTTACAGTCCTTGG  
ATCAACTGCATTTGCAAGACAAGAAAAGGAAACCCGGTGTGATAGGTCCA

>PGSC0003DMG401016557LRR-RLPs\_1575

TCCTTGATCAACTGCATTTGCAAGACAAGAAAAGGAAACCCGGTGTGATAGGTCCACGCTATGTGCTG  
GGTCAGGGGAAGGGTCAACCCAGAAGGGGCTATCAGTAGACTTACCCAACA

>PGSC0003DMG401016557LRR-RLPs\_189

GTCCACAAATATTCTGCAAAGATAGCTTGTGGATACTGCGGCTCCTCTCAATTGGACCGTCATGCGTCCT  
GTTTATGCTCCGACACTGATCTCTACCATGTTCGATCCATTTATTAACTT

>PGSC0003DMG401016557LRR-RLPs\_252

GCGTCCTGTTTATGCTCCGACACTGATCTCTACCATGTTCGATCCATTTATTAACTTGTGCGAGACAACAT  
CAGTTTCAAAGAGCTGTATTTATTCATACCACCTACTTTTAGGTATTGT

>PGSC0003DMG401016557LRR-RLPs\_315

GACAACATCAGTTTCAAAGAGCTGTATTTATTCATACCACCTACTTTTAGGTATTGTGCGTCTCCTGGAAT  
TTTAGATTCCAAATTTTAAACCATCCTCCATATAAAAGGAAATTGCAAC

>PGSC0003DMG401016557LRR-RLPs\_63

AAGTTACCAGAAGACATCATCGAGAAAATCCTGTCTTATGTAACATGAAACAGAGACCAATAGTTTCTC  
TTATTTCCAAAAAATGGCAACAAATAATAAAATCATTCAACGACGATCTC

>PGSC0003DMG401016557LRR-RLPs\_693

TGTTGTCCAGCCTTTACCAAACCTTGATCTGTCTGCTTCTACTAACTACAACCTCCATATAGATTCTACA

AATGTTCTGACTCATTTCCTCATGAAATTTGCTCAACATTCCCATCT

>PGSC0003DMG401016933LRR-RLPs\_0

CTTTATTACACTAGCCAGTGAAGAATTAATTGATCAGATATGGAATTCTTATCTATTTTTGTGAAAATGAT  
CACAGATTGCTTGATCCAGCCAGTTGCGCGAGGGATTGGGTATTTCTAT

>PGSC0003DMG401016933LRR-RLPs\_1037

AGATGTTGCCAAAGAATGCAAGGGGTTGCCACTTGCAATTATCACAGTTGCAGGAGCACTAAAGCATAA  
AACCAAGCCTTCATGGGAGGATGCCCTTAAACAATTACGTGATGCAAAAAC

>PGSC0003DMG401016933LRR-RLPs\_1098

AAGCATAAAACCAAGCCTTCATGGGAGGATGCCCTTAAACAATTACGTGATGCAAAAACAAGAAATATC  
CCTGGAGTGCACACAAAGGTGTATAAAATTCTGAGGCTAAGCTATGATCAC

>PGSC0003DMG401016933LRR-RLPs\_1159

GAAATATCCCTGGAGTGCACACAAAGGTGTATAAAATTCTGAGGCTAAGCTATGATCACTTGGAAAGTG  
ATGAAGCCAGGTACCTCTTTTTGCTTTGTTCTTTGTTTCGAGGAAGATAGTG

>PGSC0003DMG401016933LRR-RLPs\_122

CTACAAGAGCAACATCACATCTCTGGATGAAGAATCTCAGAAGCTGGAGAATATCAGACACGGCGTGG  
AGGAAAGAGCAGAGGCTGCCCGGAGAACTTACAAGTCATTTACCCAATGT

>PGSC0003DMG401016933LRR-RLPs\_1220

GGAAAGTGATGAAGCCAGGTACCTCTTTTTGCTTTGTTCTTTGTTTCGAGGAAGATAGTGATATTTGGACT  
GAAGAATTACTTAGGTATGTAATGAGGCTTGACATCTTTTCGGAAATCGA

>PGSC0003DMG401016933LRR-RLPs\_1281

ATTTGGACTGAAGAATTACTTAGGTATGTAATGAGGCTTGACATCTTTTCGGAAATCGAAAATTTAGAAC  
ATGCAAGAAATAGAGTGTGTCTTCTGTTAGAAACACTGAAAGGTTGCTTC

>PGSC0003DMG401016933LRR-RLPs\_1342

ATTTAGAACATGCAAGAAATAGAGTGTGTCTTCTGTTAGAAACACTGAAAGGTTGCTTCTTGTATCCCA  
AGGTTTCGGACAAAAATTATGTCAAATGCATGATGTGGTCCGTGATGTGG

>PGSC0003DMG401016933LRR-RLPs\_1464

ATATATATTGCGTCTGAAGGAGAGCATATCTTTATGGTAAGTCATAATGTGAACTCAAAGAGTTCCCAA  
GAAGAATTTCTTATGAGCATTTCAGTCACATGTCAATTGTTGCAAATAAA

>PGSC0003DMG401016933LRR-RLPs\_1525

AGTTCCCAAGAAGAATTTCTTATGAGCATTTCAGTCACATGTCAATTGTTGCAAATAAATTTGATGAGCTT  
CCTAGACCAATCGTTTGCCCAAACTGAAGCTTCTAATGTTAAACTCT

>PGSC0003DMG401016933LRR-RLPs\_1586

TGATGAGCTTCCTAGACCAATCGTTTGCCCAAACTGAAGCTTCTAATGTTAAACTCTGTTTTGAAAAG  
CCATTCAAATTACAGGACGATTTTTTTGATGGCATGAGTAAACTCAATGT

>PGSC0003DMG401016933LRR-RLPs\_1647

TTTGAAAAGCCATTCAAATTACAGGACGATTTTTTTGATGGCATGAGTAAACTCAATGTTTTAAGCATGA  
GGGGAGACAGATATAAGGAGTCCATTTGGCCTCTCCAGGATCCATTGAG

>PGSC0003DMG401016933LRR-RLPs\_1769

GTTGTCAAGTCTGAGGACGCTGTGTCTGAGTAAATTAAGGTTGGATGACATATCCGTTATTGGGGAACT  
TGTCACCTTAGAAATTCTCAGCATCAAAGATTCTCAGTTAGAGGAGTTGCC

>PGSC0003DMG401016933LRR-RLPs\_183

GGCGTGGAGGAAAGAGCAGAGGCTGCCCGGAGAACTTACAAGTCATTTACCCAATGTTGAGGCTTG  
GTTAACTAGTGTTGATATCACTACTGCAGATGTGGCAGCTGTGATGCAACGA

>PGSC0003DMG401016933LRR-RLPs\_1830

GGGGAACCTGTCACTTTAGAAATTCTCAGCATCAAAGATTCTCAGTTAGAGGAGTTGCCAGTGGAGATA  
GGAAAATTAACCAATCTAATTATCTTAGAGCTGCAGAATTATAAGCAAGTA

>PGSC0003DMG401016933LRR-RLPs\_1891

TGGAGATAGGAAATTAACCAATCTAATTATCTTAGAGCTGCAGAATTATAAGCAAGTAGAACTTGAAA  
GGATTTACCAGGTGTCTTATCAAGACTAGTACGATTGGAGGAATTACATA

>PGSC0003DMG401016933LRR-RLPs\_2013

GTGGGAGTAGAACATTTTAGTTACTCCACCTTAAGAGAGCTGGAATCCTTATCGAGATTGACTGCACTGA  
CATTAAAGTAAATGTTCCGGAGATGTGATCTACAATAACTTGGGCCTTTCC

>PGSC0003DMG401016933LRR-RLPs\_2074

CTGCACTGACATTAAGTAAATGTTCCGGAGATGTGATCTACAATAACTTGGGCCTTTCTCCGAGTTGAC  
ACGGTACGCTCTTACATTGGGTAGAGCTTACAGAACGACTTCAACCATAG

>PGSC0003DMG401016933LRR-RLPs\_2135

CGAGTTGACACGGTACGCTCTTACATTGGGTAGAGCTTACAGAACGACTTCAACCATAGATGATTATGA  
CAAGAATATTTCTTTAGAGGTCACTGAGACCACCCATTGGGTGATTGGAT

>PGSC0003DMG401016933LRR-RLPs\_2257

GCCACAAGCTTAGGAAGAGTGAACCTGTACATTCAACTGGAGAGGGCTCCAAGAATGTGCTGACAGAG  
TTGCAGCTGGATGAATTCAGAATGTGAAATATCTTCTCCTGGATGATTGTG

>PGSC0003DMG401016933LRR-RLPs\_2318

GACAGAGTTGCAGCTGGATGAATTCAGAATGTGAAATATCTTCTCCTGGATGATTGTGATTCATTGACA  
CATTTATTAAGATCCACTGTCAGAATAATATTCCATTCCCTGAACTCGA

>PGSC0003DMG401016933LRR-RLPs\_2379

TCATTGACACATTTATTAAGATCCACTGTCAGAATAATATTCCATTCCCTGAACTCGAAAGACTTGAGGT  
AAGCCGTTGTCGTGGTCTACAGTATGTTTTTGTGTGCCCTTGGCTGGA

>PGSC0003DMG401016933LRR-RLPs\_2440

GACTTGAGGTAAGCCGTTGTCGTGGTCTACAGTATGTTTTTGTGTGCCCTTGGCTGGAGGGAGTTGGA  
CAGTAGTTTGCCCTAATGATGAGGAAGAGGAGATCTCTCGGAGGACTCGTG

>PGSC0003DMG401016933LRR-RLPs\_2501

GAGTTGGACAGTAGTTTGCCCTAATGATGAGGAAGAGGAGATCTCTCGGAGGACTCGTGAAGTAATCA  
AGTTCCCAATTTATATGAATTGGACCTTCATTCTCTTGAATGCCTCACTCA

>PGSC0003DMG401016933LRR-RLPs\_2562

GTAATCAAGTTCCCAATTTATATGAATTGGACCTTCATTCTCTTGAATGCCTCACTCACTTTTGCAGTGAC  
AGTGTTGAGGGCATTGAGTTCCCTCGGTTACGGGAAATGAGCTTCTTT

>PGSC0003DMG401016933LRR-RLPs\_2684

GTTACCAGAGTTTCAAATTTCTTGCCTACAACCAACAACCTCAATCACTCACTCAAATCCTCTTTTTGATGA  
AAAGGTCTTCTTACTGCTCTATGTGACCTATCATTCAACAAAAAA

>PGSC0003DMG401016933LRR-RLPs\_2745

CTTTTTGATGAAAAGGTCTTCTTCTACTGCTCTATGTGACCTATCATTCAACAAAAAAAAAATGATAACT  
AATTTATAAATTTACAGTTTCTTGTCTCAGTCTGGAAGAGCTATCTAT

>PGSC0003DMG401016933LRR-RLPs\_305

TAGAATTGAGGTTGAAAGATATGGTTGGTGTCCAACTTGAATCACGTTACTCGCTGAGCAAGAGAGC  
CAAGAGAATTACCCTGGAGATGATTGAACTTCGAAATGAAGGTAACAAGCA

>PGSC0003DMG401016933LRR-RLPs\_3050

TGATCACAGAAGAGGAACAACAAGGAGAAGAAATCATGACTAATGAGCCCTTATTTCCCTGTTGCAAG



AATTGAGGCTTCAAAGTTTGCCATGGCTTGGGCATTTCTTTGTGACGAAGC

>PGSC0003DMG401016933LRR-RLPs\_3233

TTGTCCAACAAGGATTTGTGAGTCTCGAAAGGGTGAACAATGACGATGAGGTGAACAATAAAGTGATG

TTCAATTCTAAGGTTTGTCTTGTGCCTCTAGTTGTATAACTAACTAGTTTCT

>PGSC0003DMG401016933LRR-RLPs\_3294

AGTGATGTTCAATTCTAAGGTTTGTCTTGTGCCTCTAGTTGTATAACTAACTAGTTTCTGAGAAAGTGCAT

TGCACGTTGATCTCTATTTTTTACTTAAAGTTTGTATTACAAAATAATG

>PGSC0003DMG401016933LRR-RLPs\_3355

GAAAGTGCATTGCACGTTGATCTCTATTTTTTACTTAAAGTTTGTATTACAAAATAATGAATCGAAAAAGT

TATATCACTTTAAAATATATTTGTGGTTACCAAAACAAAGGAAGTTGAT

>PGSC0003DMG401016933LRR-RLPs\_3416

TCGAAAAAGTTATATCACTTTAAAATATATTTGTGGTTACCAAAACAAAGGAAGTTGATCCATTATAGAA

ATAACTTTGAATTGATTTCAATTCATGTTAATTTTTTTTATAGAGTGAAA

>PGSC0003DMG401016933LRR-RLPs\_3477

ATTATAGAAATAACTTTGAATTGATTTCAATTCATGTTAATTTTTTTTATAGAGTGAAATGGACACTATGT

GACAAAATATTATGCTAGATATCTGCTTTATATAAGCACTTGATTCACC

>PGSC0003DMG401016933LRR-RLPs\_3538

GACACTATGTGACAAAATATTATGCTAGATATCTGCTTTATATAAGCACTTGATTCACCCTAACATGCCAA

CAACAATATGTTTCCATTCAGTTGTACAACAATAGCATATTTAATTAAT

>PGSC0003DMG401016933LRR-RLPs\_3599

AACATGCCAACAACAATATGTTTCCATTCAGTTGTACAACAATAGCATATTTAATTAATTCATTGACTATC

TACTTATATCAATATCGATCATAATAGACAAGACACTTGATATATTTAT

>PGSC0003DMG401016933LRR-RLPs\_366

AAGAGAGCCAAGAGAATTACCCTGGAGATGATTGAACTTCGAAATGAAGGTAACAAGCATGATGTTTTC

TGCTATCCTGTCGTAGAAATTGAAGCTATTTCTAGTAACAGTACTGAAGAA

>PGSC0003DMG401016933LRR-RLPs\_3660

ATTGACTATCTACTTATATCAATATCGATCATAATAGACAAGACACTTGATATATTTATATTTAATAAAGT

TTGTGTTGAGTTATAAAATAGAACAAAACACTATTCATCTTCTGCTTCATA

>PGSC0003DMG401016933LRR-RLPs\_3721

TTAATAAAGTTTGTGTTGAGTTATAAAATAGAACAAAACACTATTCATCTTCTGCTTCATAATGTGAAAGTTA  
TTGGAACACTACCAATTAATACCTCTTTAGTTTATGACAAGCATGTTAAAA

>PGSC0003DMG401016933LRR-RLPs\_3782

GTGAAAGTTATTGGAACACTACCAATTAATACCTCTTTAGTTTATGACAAGCATGTTAAAATCATATTCAATT  
CTAATTAAATATTTAGTAATCCTAAAATTAGTAGTATATTTATCTTTTA

>PGSC0003DMG401016933LRR-RLPs\_3843

ATATTCAATTCTAATTAAATATTTAGTAATCCTAAAATTAGTAGTATATTTATCTTTTACAAATATTTTTCAT  
ATATCAACATTCACAAAAAATAGGTGAATTTAATTAATAATGGGA

>PGSC0003DMG401016933LRR-RLPs\_3904

AATATTTTTCATATATCAACATTCACAAAAAATAGGTGAATTTAATTAATAATGGGATCTAAAATAATA  
TAGTAATGTCAAGTGAATTCTCCACTAGGAATGTACATAATAACATTTT

>PGSC0003DMG401016933LRR-RLPs\_3965

TAAAATAATATAGTAATGTCAAGTGAATTCTCCACTAGGAATGTACATAATAACATTTTCTTTCCTTATAG  
CACCTCATGTACATGTAGTTATATTGCTTTCCTCTTGAAATGAGATATC

>PGSC0003DMG401016933LRR-RLPs\_4026

TTCCTTATAGCACCTCATGTACATGTAGTTATATTGCTTTCCTCTTGAAATGAGATATCAAGTTATTCTCCA  
CTTTGTTGTTCCGACTCTCCAAAATTGTTGCCGCACCCGTGTTGGATT

>PGSC0003DMG401016933LRR-RLPs\_4148

CCAAAATGCACTACTTTTGGAGTATCCAACATGTATCCATCGACATTTTGAAGAGATCGAGTAACATAG  
ATTCTTCATACCTTGCTATTACATTGTATTAGAGCCTGAGCTAGCTCTC

>PGSC0003DMG401016933LRR-RLPs\_427

ATGTTTTCTGCTATCCTGTCGTAGAAATTGAAGCTATTTCTAGTAACAGTACTGAAGAATTTGACTCCAGA  
AAATTGCAAGAGGAAGAGGTCATGGCAGCTTTGAGAGATGATGGGGTCA

>PGSC0003DMG401016933LRR-RLPs\_4941

GAGGTGAAAGTAGTTGATCTCAATAAAGTGATGTTCAATTCTAAGTTTGTCTCGTGCCGCTACTATATA  
GCTAATACTATTCTCTTTCCATTTTAACTAGTTAATAGTAATAGTAATC

>PGSC0003DMG401016933LRR-RLPs\_5002

TACTATATAGCTAATACTATTCTCTTTCCATTTTAACTAGTTAATAGTAATAGTAATCTTTGGATAGTTAT  
TTCTGTTCCGTTCATTTTTTATTTTGTACTTTAAGCTATTTTGAATTT

>PGSC0003DMG401016933LRR-RLPs\_5063

TGGATAGTTATTTCTGTTTCGGTTCATTTTTTATTTTGTACTTTAAGCTATTTTGAATTTTCATCCCTTACATA  
AAATACAAGTTGTCCTTCATCATTTGCAGGTTTCTTGTCCCAGCCTG

>PGSC0003DMG401016933LRR-RLPs\_549

ATGATTGGGATATGTGGTATGGGTGGTGTGGTAAGACAACACTGGCTGAGAAAATAAGAGCAAGGGC  
GAAACAAGAAAGGTTGTTTGTATGATGTTGTCATGGTAACTGTCAGTCAACAA

>PGSC0003DMG401016933LRR-RLPs\_5612

GACAATGAGGTGAAAGTAGATGATCTCAATAGAGCGATGTTCAATTCTAAGGTTTGTCTTGTGCCGCTA  
GCAGTATTATTGATTACTATATATATTTGTGTCATGCATTAATAAACCCCT

>PGSC0003DMG401016933LRR-RLPs\_5673

TGCCGCTAGCAGTATTATTGATTACTATATATATTTGTGTCATGCATTAATAAACCCCTGGTATACTGCTC  
TCTTAGCGTTTTAACAAACAAATAGTAGTAGTAATCTTCAGATAGTTAT

>PGSC0003DMG401016933LRR-RLPs\_5734

TATACTGCTCTCTTAGCGTTTTAACAAACAAATAGTAGTAGTAATCTTCAGATAGTTATTTGTCACCTGAT  
ATCTATCTATGTTGACGGAGGTAACAAACATAGGTGAATCTACAGTATT

>PGSC0003DMG401016933LRR-RLPs\_5795

GTCACCTGATATCTATCTATGTTGACGGAGGTAACAAACATAGGTGAATCTACAGTATTGTAATCCAAGG  
GTTTCAGATGAACCTAATAGCTTTTTGCGCAGAGACTTTTTATCTGTATTAG

>PGSC0003DMG401016933LRR-RLPs\_5856

AATCCAAGGGTTCAGATGAACCTAATAGCTTTTTGCGCAGAGACTTTTTATCTGTATTAGTTATATCTAGA  
GATTCCTTGATTGTGAATGCGATTATTATTGTATATTATTAACCTTGATGA

>PGSC0003DMG401016933LRR-RLPs\_5917

ATATCTAGAGATTCCTTGATTGTGAATGCGATTATTATTGTATATTATTAACCTTGATGACATTGGAGATAC  
CTATAAATTTCAAATTCTGAATCTACTTCTCATTCTAAATTCTTCTTTC

>PGSC0003DMG401016933LRR-RLPs\_5978

TTGGAGATACCTATAAATTTCAAATTCTGAATCTACTTCTCATTCTAAATTCTTCTTTCATTATATGTAACA  
GCTAATATGTTGATTTATTTTCTCATGTTATCTTGCATTCTATGTCAT

>PGSC0003DMG401016933LRR-RLPs\_6039

TATATGTAACAGCTAATATGTTGATTTATTTTCTCATGTTATCTTGCATTCTATGTCATTCTACTTCATCCCT

TCAACGTTTCGCAGGTTTCTTGTCACAGCCTTGAAGATCTAACTATCC

>PGSC0003DMG401016933LRR-RLPs\_61

TGAAAATGATCACAGATTGCTTGATCCAGCCAGTTGCGCGAGGGATTGGGTATTTCTATTACTACAAGA  
GCAACATCACATCTCTGGATGAAGAATCTCAGAAGCTGGAGAATATCAGAC

>PGSC0003DMG401016933LRR-RLPs\_610

CAAGGGCGAAACAAGAAAGGTTGTTTGATGATGTTGTCATGGTAACTGTCAGTCAACAACCAGACTTCA  
AAAGAATTCAGGGTGAGATCGCAAGAGAAGTCGGGCTGACATTAGAAGGGG

>PGSC0003DMG401016933LRR-RLPs\_6283

CAGAGGTGTTTTGAATCTCCGAATACTAAATATAGCAGGCTGCCAATCAATGGAAGAAGTGATCACACT  
AGAAGAACAACAAGGAAAAACAATTATGACTAATGAGCCCGTATTTCCCCG

>PGSC0003DMG401016933LRR-RLPs\_6344

ATCACACTAGAAGAACAACAAGGAAAAACAATTATGACTAATGAGCCCGTATTTCCCCGATTGGAAGAG  
CTGCAGCTTGAAGGCTACCTAAGCTGAGGCATTTCTTTCTGACGGAGCAT

>PGSC0003DMG401016933LRR-RLPs\_6588

TTAAAGTAGATGATTTGAATAAATGGACACAACAGAAGTTCAATTCTAAGGTTTGTCTTGTTCTTCTAGTT  
GTATAACTAATTAAGCTAGCGCTCTCTTTCCGTCTTAACTAGTACTCG

>PGSC0003DMG401016933LRR-RLPs\_6649

TCTTCTAGTTGTATAACTAATTAAGCTAGCGCTCTCTTTCCGTCTTAACTAGTACTCGACTACTTAATAGT  
GATAACAATATTAAGATTGTTATTTATGTTTGTCACTTGAAGCAACTT

>PGSC0003DMG401016933LRR-RLPs\_671

AGACTTCAAAGAATTCAGGGTGAGATCGCAAGAGAAGTCGGGCTGACATTAGAAGGGGATAATTTGT  
GGAGTCGTGGAGATCGGCTGCGTTCAAGGTTAAAGGATCAGAACAGCCGCGT

>PGSC0003DMG401016933LRR-RLPs\_6710

TACTTAATAGTGATAACAATATTAAGATTGTTATTTATGTTTGTCACTTGAAGCAACTTTCTTTTACTTGCC  
AAGTAAATGTTTTATTTACTGAGCTAGTCATCTCTCTCTCTGCTCGA

>PGSC0003DMG401016933LRR-RLPs\_6771

TTTTACTTGCCAAGTAAATGTTTTATTTACTGAGCTAGTCATCTCTCTCTCTGCTCGATCCCGGGAACAAA  
AGGCAGGACAAGGCACTACCGATGGCTACCAATCTGAAGCTAAAGATG

>PGSC0003DMG401016933LRR-RLPs\_6832

CCGGGAACAAAAGGCAGGACAAGGCACTACCGATGGCTACCAATCTGAAGCTAAAGATGGCGATGAAT  
CTAAAGCTACTGATGGGGAAAATCTAAAGCAAGTGATGGTGATGAATCTGA

>PGSC0003DMG401016933LRR-RLPs\_7015

CGGATCTGAAGCTACTGAGTCTCGAAAGGGTGAACCAGCTTGATTTTGGGGTGATGGCAATGAAGCCA  
AACCAAGTCATAGCAGAAGCTAGTGATGTCTATGAATCCGAAGCTAGCTAGG

>PGSC0003DMG401016933LRR-RLPs\_7076

GAAGCCAAACCAAGTCATAGCAGAAGCTAGTGATGTCTATGAATCCGAAGCTAGCTAGGAAGGTAATA  
AGTATTCGATGAAATGGTTGAAGTTAGCTCGAATATCACCTGATACCAATAG

>PGSC0003DMG401016933LRR-RLPs\_7137

GGTAATAAGTATTCGATGAAATGGTTGAAGTTAGCTCGAATATCACCTGATACCAATAGCGATGTTTGT  
GATATTATGAATGAAAAGGTGAAGCTTGAAGAAGTCTAGAGTAGCAGCCT

>PGSC0003DMG401016933LRR-RLPs\_7259

TACATTTTTTTTCAAGCCCCTTTGATATCTTATTAATCAAGCGTGATAGAGGTAACAAGAGAAAGGGGTG  
GGATCTATATTATAATTCATGCAACAGTTTTTGAAGAGACAATTCGTAT

>PGSC0003DMG401016933LRR-RLPs\_732

AATTTGTGGAGTCGTGGAGATCGGCTGCGTTCAAGGTTAAAGGATCAGAACAGCCGCGTTCTTATAATA  
CTGGATGATGTTTGGGAGGCTCTTCATGATCTAGAGAACTTGGGAATTCCA

>PGSC0003DMG401016933LRR-RLPs\_7320

AAAGGGGTGGGATCTATATTATAATTCATGCAACAGTTTTTGAAGAGACAATTCGTATTTGTATCAGTA  
ATTTCTTTAGTTAGAAATTCCTTTGATGTGCGGAGGGTTTTAAACATTCCA

>PGSC0003DMG401016933LRR-RLPs\_7359

TTGCAAGAGACAATTCGTATTTGTATCAGTAATTTCTTTAGTTAGAAATTCCTTTGATGTGCGGAGGGTTTT  
AAACATTCCACATTAATTGAGGAACTTTTCGGTTTGATTTTGATTCAA

>PGSC0003DMG401016933LRR-RLPs\_854

GGGTAGCAACCACAACCATCGGTGCAAAGTGACATTGACTACGCGTCTGAGAGATGTTTGTGAAGCTAT  
GGAAGCTCAGAAGATCATGGAAGTTGGAACCTTACCTGAAAATGAAGCATG

>PGSC0003DMG401016933LRR-RLPs\_915

GAAGCTATGGAAGCTCAGAAGATCATGGAAGTTGGAACCTTACCTGAAAATGAAGCATGGATTCTTTTT  
AGGCAGAAAGCCAGTAATTTAGTTGACAATCCTTCTCTCCTTGACATAGCA

>PGSC0003DMG401016933LRR-RLPs\_976

TTCTTTTTAGGCAGAAAGCCAGTAATTTAGTTGACAATCCTTCTCTCCTTGACATAGCAAAAGATGTTGCC  
AAAGAATGCAAGGGGTTGCCACTTGCAATTATCACAGTTGCAGGAGCAC

>PGSC0003DMG401017656RLKmalectin\_1037

TTTCCAATAAGTTGCTGAGGAAATGTTATCGTATCAACTGTGGTTATAATTGGTCCCTGAGGTTAGAAC  
AAACTCTCACTTGTGCGATTATGTTATGTATGTATGACTTATCGATTGTTT

>PGSC0003DMG401017656RLKmalectin\_1098

GGTTAGAACAAACTCTCACTTGTGCGATTATGTTATGTATGTATGACTTATCGATTGTTTAGTCCTTAGTTT  
CTGTTTAGATTTGATGTTTTTCGTGCTATGTAAAAGGTACCCGATCGAT

>PGSC0003DMG401017656RLKmalectin\_1220

GTATGATAGAATTTGGGATGCTGATGAGGATTTCAAGCCATTTTCATGTGTCTTCTGGTTTTGATATTCAA  
GCCAATTTCAATATGACAGTTCTCAAAGAGAACCCTCCTGCAGCTGTTCT

>PGSC0003DMG401017656RLKmalectin\_1281

GATATTCAAGCCAATTTCAATATGACAGTTCTCAAAGAGAACCCTCCTGCAGCTGTTCTTCAAACCGGAA  
GAGTTTTGGCACGGTGGAGTGATATGACATATAAATTTCTATTGATCAC

>PGSC0003DMG401017656RLKmalectin\_1769

CAGTCAACTGGTCTAGATCTTGATTGGGAAGATGATCCATGCTCTCCTAAATCATGGGAACACATAGAAT  
GTGAAGCAAATCTCGTAACTTCATTGTATGCCAAAGTTTACCCTAGAACT

>PGSC0003DMG401017656RLKmalectin\_1830

ACATAGAATGTGAAGCAAATCTCGTAACTTCATTGTATGCCAAAGTTTACCCTAGAACTACATTTTCCTTT  
TATTTTCTTTCTTTGGTCTTATTTTTGTTAAGAGCAGAACATAATAAAA

>PGSC0003DMG401017656RLKmalectin\_1891

ATTTTCCTTTTATTTTCTTTCTTTGGTCTTATTTTTGTTAAGAGCAGAACATAATAAAGTTAAGACTTTATA  
TAGGGAGCTTTTTGATGTAACTTGAGGTCAATCAGCCCAACATTTG

>PGSC0003DMG401017656RLKmalectin\_2013

GACCTACTGGATCTCAAATCACTGTAAGAGTCATTAGTCTTAACAACTTATCACTTAATAGCCATTGTTTG  
GCTATCTTGACTAACTTATTTGAGGTTCTTCTGTTGCAGAGATTTGCA

>PGSC0003DMG401017656RLKmalectin\_2074

CCATTGTTGGCTATCTTGACTAACTTATTTGAGGTTCTTCTGTTGCAGAGATTTGCATAATACTTCACTC

GCTGGAGAGATACAAAACATCGGCAGCCTGCAACATCTTAAGAAGCTG

>PGSC0003DMG401017656RLKmalectin\_244

GGTACGCTTCAAAGGCAGATACAAGATTTAAACTTACGAGTTCCAACCTTTTAAACATTCTTATACTGTAC  
TTCTAAAATTATGACTACAAAATGTAATATATATGTTAAAAGCCTAGTG

>PGSC0003DMG401017656RLKmalectin\_2623

ATAAGCTGCAAGGCCCTGCCACAATCTTTGAACAGAGAGAGCTTACAAGTCCTGTATGAAATCAGAA  
AGTCTTTTGTGTTTTGCTTCTCATGTCAGTTTCTCGGCTTATCTTTTTCGC

>PGSC0003DMG401017656RLKmalectin\_2684

AATCAGAAAGTCTTTTGTGTTTTGCTTCTCATGTCAGTTTCTCGGCTTATCTTTTTCGCCCTATTTTGCAGAT  
CATCAGGAAATCTGTGTCTTTCCTTCACTATGTCTTTATGCAATGAA

>PGSC0003DMG401017656RLKmalectin\_305

TATACTGTACTTCTAAAATTATGACTACAAAATGTAATATATATGTTAAAAGCCTAGTGGTTTCTTGATTTT  
ACTTCTTCAATCTTCTTTTCTCCCTTGTGTAAGTTGAAGTTATAT

>PGSC0003DMG401017656RLKmalectin\_61

AAAGCAACAGAAAAGGAAAGTAGAAAAGGACTTGTGTCTCTTCTTTTTTCTACTCACTTCTCTCTT  
TTTTCTCCCTGCAAATTCTTCTCTGCTTCAATGGAGCTGCATTGG

>PGSC0003DMG401017953-(rev)LRR-RLKs\_3050

TTTCTCGTCTTCGAGTATGTACCTAATGGGACCCTAAGGAGATGGATTTCTGGTAATTACTTGACAAGCA  
GATATATACCCCTTCCCTATTGTTGGATGTAAATGTGCTTCAGTAATTTG

>PGSC0003DMG401017953-(rev)LRR-RLKs\_3111

TGACAAGCAGATATATACCCCTTCCCTATTGTTGGATGTAAATGTGCTTCAGTAATTTGATGTTCTCTGTT  
GCTTAATTGCAGATAAACATGCTAGACGGAACTAACCTGGACACAACG

>PGSC0003DMG401017953-(rev)LRR-RLKs\_3172

GTTCTCTGTTGCTTAATTGCAGATAAACATGCTAGACGGAACTAACCTGGACACAACGTATAGCAGCTG  
CTACAGGAGTAGCGAAGGGACTACAATTCTTGCATAATGGAATTATCCCT

>PGSC0003DMG401017953-(rev)LRR-RLKs\_3233

TAGCAGCTGCTACAGGAGTAGCGAAGGGACTACAATTCTTGCATAATGGAATTATCCCTGGTCTCTTTTC  
GAATAATTTGAAGATAACAGATATTTTGTGGATCAGACCCTTGTGCCA

>PGSC0003DMG401017953-(rev)LRR-RLKs\_3287

TCCTGGTCTCTTTTCGAATAATTTGAAGATAACAGATATTTTGCTGGATCAGACCCTTGTCGCCAAAATT  
AGTAGCTACAATCTGCCTATTCTGTCTGGAGAATGTCTGGGAAGGTGTGAC

>PGSC0003DMG401018044LRR-RLPs\_1044

GGCTAAATTGTCTTTGTTTGATTTGTGGACTAATAAGTAACTGTTCTGTTTTGTCTTCTTTTTTTAATT  
TTCTATTTGTTGTTGTATATGTTAGAAACATAATTATATGTGTGTT

>PGSC0003DMG401018044LRR-RLPs\_396

TCATTGAGTTTGGTAATCAAAGGGCAGGATATTGAGCTACAAAGAATCAACACAATTATGACAACCATA  
GATCTCTCAAGCAACCATTTTGAAGGTGTCATTCCGAAAACACTAAAGGAT

>PGSC0003DMG401018044LRR-RLPs\_792

AAGCAATGTGGAACGAGTGATTCATCACATGTTCTCAACCATTGGAGTCCGCAGAAGAAGGCAAGTCA  
TATTTTTTAGTAGTAATAGGCTACAGTTTTGGACTTGTCATTGGAAGTGT

>PGSC0003DMG401018044LRR-RLPs\_990

AAGAAGGCCAAAGAAGAGAGCTCAGAGACGAAGGACTTAATGGAAGATTGAGAGGGCTAAATTGTCTT  
TGTTTGATTTGTGGACTAATAAGTAACTGTTCTGTTTTGTCTTCTTTTT

>PGSC0003DMG401018576LRR-RLPs\_0

GTTTGCAAATTACTCTTAACATTCAACAAGTAACTAAAGCTTTATAAACTGAGACTATTTGAAGATATA  
TCTTCTTAAAGAATCATATTGTGTTTCCTTGTTTTGCTTTCAGATTTT

>PGSC0003DMG401018576LRR-RLPs\_1098

GATGATGGGAAATGAGCAGATTAGCATGGACAATTTGTCTATTGAAGCCTCTTGGTCTTTATTTAAAAGA  
CATGCATTTGAAAACATGGATCCTATGGGACATCCGGAACCTGAAGAGGT

>PGSC0003DMG401018576LRR-RLPs\_1342

CTGCAAGACAAGGACATATTACCAGCGTTGATGTTGAGCTACAATGATCTTCCCGCACATTTAAAACGAT  
GCTTTTCTTTAGTGCAATATTTCTAAAGATTATCCATTTAGGAAAGAA

>PGSC0003DMG401018576LRR-RLPs\_1403

TAAAACGATGCTTTTCTTTAGTGCAATATTTCTAAAGATTATCCATTTAGGAAAGAACAAGTTATTCAT  
CTGTGGATTGCTAATGGTCTCGTACCAAAGGACGATGGGATAATTGAAG

>PGSC0003DMG401018576LRR-RLPs\_1464

AGTTATTCATCTGTGGATTGCTAATGGTCTCGTACCAAAGGACGATGGGATAATTGAAGATTTAGGCAA  
CCAATACTTTCAGGAGTTGAGATCAAGATCATTATTTGAAAGGGTCCCAA



>PGSC0003DMG401018576LRR-RLPs\_1525

TTAGGCAACCAATACTTTCAGGAGTTGAGATCAAGATCATTATTTGAAAGGGTCCCAAATCCTTCTGAAG  
GGAACATAGAGAATTTATTCTTAATGCATGATCTTGTCAATGATTTAGCC

>PGSC0003DMG401018576LRR-RLPs\_1586

CTTCTGAAGGGAACATAGAGAATTTATTCTTAATGCATGATCTTGTCAATGATTTAGCCCAAATTGCATCT  
TCAAAACTTTGTATCAGGTTGGAAGAGAAGCAAGGATCTCATATGTTGG

>PGSC0003DMG401018576LRR-RLPs\_1647

AATTGCATCTTCAAACTTTGTATCAGGTTGGAAGAGAAGCAAGGATCTCATATGTTGGAAAAAAGTCG  
GCACTTATCTTATTCCATGGGAAAAGATGGTGACTTTGAGAAATTGACACC

>PGSC0003DMG401018576LRR-RLPs\_1769

TCTACAAATTGGAGCAGTTGAGGACATTGCTTCCGACATGTATTGGTCTCAATTATTTTTACCCTCTAAGC  
AAGAGGGTGCAGCATAACATACTGCCAAGACTAAGATCCTTAAGGGCAT

>PGSC0003DMG401018576LRR-RLPs\_183

TGATAGGCTTGCTCCTCACGGTGATCTTCTCAACATGTTTCAGAAGCATAACAGATGATGTTTCAGCTCTTTG  
AGAAGCTGGGGGACATTCTGCTTGGTCTTCAAATTGTGCTAAGTGATGC

>PGSC0003DMG401018576LRR-RLPs\_2074

ATGGAGAAGTTGATTAACCTGCGTCATCTTGACATAAGCAACACTTGGCGCTTGAAGACGCCCTACATC  
TGAGCAAGTTGAAAAGCCTCCAAGTGCTAATGGGAGCCAAGTTTTTTCTT

>PGSC0003DMG401018576LRR-RLPs\_2135

CCCTACATCTGAGCAAGTTGAAAAGCCTCCAAGTGCTAATGGGAGCCAAGTTTTTTCTTGGTGGTTTGAG  
AATGGAAGATTTGGGTGAAGCACAGAACTTGTATGGATCTTTATCTGTTG

>PGSC0003DMG401018576LRR-RLPs\_2196

TGGTTTGAGAATGGAAGATTTGGGTGAAGCACAGAACTTGTATGGATCTTTATCTGTTGTAGAGTTGCA  
AAATGTGGTTGATAGTAGGGAAGCTGTGAAGGCAAAGATGAGGGAGAAGAA

>PGSC0003DMG401018576LRR-RLPs\_2318

ATGTTGACAAGTTATCTTTGGAGTGGAATGGAAGTAGTAGCGCCGACAATTCACAAACAGAAAGAGAC  
ATACTTGATGAGCTACGCCGCATAAAAACATAAAAGGAGTCGAAATCACTG

>PGSC0003DMG401018576LRR-RLPs\_2379

AAGAGACATACTTGATGAGCTACGCCGCATAAAAACATAAAAGGAGTCGAAATCACTGGATATAGAG

GGACAACATTTCCAAATTGGTTAGCTGATCCTTTGTTTCTTAAGCTGGTGAA

>PGSC0003DMG401018576LRR-RLPs\_244

CAGCTCTTTGAGAAGCTGGGGGACATTCTGCTTGGTCTTCAAATTGTGCTAAGTGATGCAGAGAATAAG

CAAGCATCAAATCAATTTGTGAGCCAGTGGTTAAATAAGCTTCAGACTGCT

>PGSC0003DMG401018576LRR-RLPs\_2440

TATAGAGGGACAACATTTCCAAATTGGTTAGCTGATCCTTTGTTTCTTAAGCTGGTGAAATTGTCTCTTAG

CTACTGCACGGACTGTTATTCCTTGCCAGCACTAGGACAACCTCCCTTCT

>PGSC0003DMG401018576LRR-RLPs\_2501

TGTCTCTTAGCTACTGCACGGACTGTTATTCCTTGCCAGCACTAGGACAACCTCCCTTCTTTGAAATATCTTT

ACATTGGAGGGATGCATGGAATAACAGAGGTGACAGAAGAATTCTATG

>PGSC0003DMG401018576LRR-RLPs\_2562

GAAATATCTTTACATTGGAGGGATGCATGGAATAACAGAGGTGACAGAAGAATTCTATGGCAGTTTGTG

CTCCAAAAGCCTTTTAACTGTCTTGAGAAGCTTGAATTTGAATATATGCT

>PGSC0003DMG401018576LRR-RLPs\_2623

AGTTTGTCTCCAAAAGCCTTTTAACTGTCTTGAGAAGCTTGAATTTGAATATATGCTGGAGTGGAAGC

AATGGCACGTATTAGGAAATGGAGAGTTCCTACACTTGAGAACCTTTCA

>PGSC0003DMG401018576LRR-RLPs\_2745

TAAATATTGCCCTGAACTCAGTTTGGAGACACCCATCCAACCTTTCAAGTTTAAAAGGTTTGAAGTTAGT

GGTTGTCCAAAGTTTTTGTATGATGCTCAACTGTTTAGATCCCAACTTGA

>PGSC0003DMG401018576LRR-RLPs\_2806

GAAGTTAGTGGTTGTCCAAAGTTTTTGTATGATGCTCAACTGTTTAGATCCCAACTTGAGGGAATGAAG

CAGTTTGAAGAATTAGATATTAGGGATTGTAACCTCTGTTACCTCCTTACCT

>PGSC0003DMG401018576LRR-RLPs\_2867

GAATGAAGCAGTTTGAAGAATTAGATATTAGGGATTGTAACCTCTGTTACCTCCTTACCTTTTAGCATACT

GCCCACTACCTTGAAGAGAATATACATAGATGGTTGCCAGAAATTGAAAT

>PGSC0003DMG401018576LRR-RLPs\_2989

GATCCGCCAGTTGGTGAGATGAGTATGTTTCTGGAGGATTTGAACTGCATGAATGTGATTGTATAGAT

GATATATCACACTTACGAGCACGCTCTTTGTCTGTATATAAGTGCCACAAC

>PGSC0003DMG401018576LRR-RLPs\_305

AGAATAAGCAAGCATCAAATCAATTTGTGAGCCAGTGGTTAAATAAGCTTCAGACTGCTGTGGACGGTG  
CTGAAAACCTTGATAGAACAAGTCAATTATGAAGCTTTGAGACTTAAAGTGG

>PGSC0003DMG401018576LRR-RLPs\_3050

GTATAGATGATATATCACACTTACGAGCACGCTCTTTGTCTGTATATAAGTGCCACAACCTTACTAGGATT  
TTGATTCCACTGTGACTGAAAGACTCCAGATTTGGGTATTTGAGAATG

>PGSC0003DMG401018576LRR-RLPs\_3111

TACTAGGATTTTGATTCCACTGTGACTGAAAGACTCCAGATTTGGGTATTTGAGAATGTTGAAAACTA  
TCGGTGGCATGTGGGGGGACCCAGATGACGTCACTGGATATTGGGTACTG

>PGSC0003DMG401018576LRR-RLPs\_3294

ACTGAGTAATTGTCCAGAAATAGAGTCCTTTCTGAAGGAGGATTGCCCTTCAATTTACAATTCCTTGAG  
ATCAGCGAGTGCAAGAACTGGTGAATGGCCGAAAGGAGTGGCATTTACA

>PGSC0003DMG401018576LRR-RLPs\_3355

TTCCTTGAGATCAGCGAGTGCAAGAACTGGTGAATGGCCGAAAGGAGTGGCATTTACAGAGACTTCCC  
TGTCTCAGAGAGTTATGGATCTATCATGATGGCAGTGACGAAGAGATTCTT

>PGSC0003DMG401018576LRR-RLPs\_3416

GACTTCCCTGTCTCAGAGAGTTATGGATCTATCATGATGGCAGTGACGAAGAGATTCTTGGTGCTGAGA  
ACTGGGAGTTGCCTTCTCTATTCAAACACTTAACATAAGGAATCTGAAAA

>PGSC0003DMG401018576LRR-RLPs\_3538

TTAAGCAGCAACCATCTCAAAGCCTCACCTCTTTCAACATCTTTGTATTGAGGGTAATTTACATCAAAT  
TCAGTCAATGCTGGAACAAGGCCAGCTTTCGCACCTCACTTCCCTTCAA

>PGSC0003DMG401018576LRR-RLPs\_3599

TACATCAAATTCAGTCAATGCTGGAACAAGGCCAGCTTTCGCACCTCACTTCCCTTCAAAGTTTAGGAAT  
CGGGAATTTCCCTAATCTCCAATCACTTCTGAATCGGCACTGCCCTCCT

>PGSC0003DMG401018576LRR-RLPs\_366

GGACGGTGCTGAAAACCTTGATAGAACAAGTCAATTATGAAGCTTTGAGACTTAAAGTGGAAGGTCAGCT  
TCAAATCTTGCAGAAACAAGCAACCAGCAAGTAAGTGACCTTAACCTGTC

>PGSC0003DMG401018576LRR-RLPs\_3721

CTCTCTCAGCTGATCATTAAATGAGTGCTCTAAGCTCCAATCCCTTCCAGTGAAAGGGATGCCATCTTCTT  
CTCTAAACTATATATTTACAACACTGTCCATTGCTCACACCACTACTAGAA

>PGSC0003DMG401018576LRR-RLPs\_3782

CATCTTCCTTCTCTAAACTATATATTTACAACGTCCATTGCTCACACCACTACTAGAATTTGACAAGGGG  
GAATACTGGCCAGAAATTGCTCATATCCCCACTATACAGATCGATCGGG

>PGSC0003DMG401018576LRR-RLPs\_4026

CTTGTTGAGCAGTGTGGTAAGTCTATTGCTCAAATCATATATGTTTCATTGGGAAAACCTGTAATGATTAA  
AACGAGTGCTGCTCTGATAGATGTAAGTTATTCTATTTCTTAATATATT

>PGSC0003DMG401018576LRR-RLPs\_4087

AATGATTAACGAGTGTGCTCTGATAGATGTAAGTTATTCTATTTCTTAATATATTTTGATTGTTTGT  
AATTCTTTTTGACAAGTGTGTACCATCTATTGCTTCTTTGAAGTCGAC

>PGSC0003DMG401018576LRR-RLPs\_4148

GATTGTTTGTAAATCTTTTTGACAAGTGTGTACCATCTATTGCTTCTTTGAAGTCGACGAAATATCTTTAG  
ATCAGGATGAAATCTTTATATTTGTAAAAGAAATCTAGTATAGGTAGG

>PGSC0003DMG401018576LRR-RLPs\_427

GGTCAGCTTCAAAATCTTGCAGAAACAAGCAACCAGCAAGTAAGTGACCTTAACCTGTCCTTGAGTGAT  
GATTTCTTTCTTAACATAAATAAGAAGTTGGAAGACACTATTAATAAATTG

>PGSC0003DMG401018576LRR-RLPs\_4270

TTGAGATAATTTGCTCAAGAAAATTGATTGCTTAATATATGTTAGGGTCTAAGAAATGCAACCTCACTCT  
CTCAATCAGGTAGCCAAGACCTTGATAAGAGTTACATCAAGCTTCAAAT

>PGSC0003DMG401018576LRR-RLPs\_4331

CCTCACTCTTCTCAATCAGGTAGCCAAGACCTTGATAAGAGTTACATCAAGCTTCAAATTTCAAGAAAGT  
GTAAACGACTTTGAATGCCTGCTGCCATTTTTATGCCATGTTGTACCAC

>PGSC0003DMG401018576LRR-RLPs\_4392

CAAGAAAGTGTAACGACTTTGAATGCCTGCTGCCATTTTTATGCCATGTTGTACCACATTGGTTTCAAG  
TTTGATGCGACTGCATTATTACATCAGTTTTTTTTTTTTCATATTCAA

>PGSC0003DMG401018576LRR-RLPs\_4453

TGGTTTCAAGTTTGATGCGACTGCATTATTACATCAGTTTTTTTTTTTTCATATTCAAAGATCCAGAATATT  
ACATCAGTTTTTTGGTTTTGATATGCAGAGAACTTCTAGGATCATGAA

>PGSC0003DMG401018576LRR-RLPs\_4514

TCCAGAATATTACATCAGTTTTTTGGTTTTGATATGCAGAGAACTTCTAGGATCATGAAGTTTCTCCAAA

TTATGTCCATTACTCAACCTTGAGTGACACCTCAGAGCTAGTGAAAGTC

>PGSC0003DMG401018576LRR-RLPs\_4575

TTCCTCCAAATTATGTCCATTACTCAACCTTGAGTGACACCTCAGAGCTAGTGAAAGTCAAAGAAGTATA

TACTGCTCGTGATGAATTCAAGGTTAGATAACAAAATAATGATTTACTGG

>PGSC0003DMG401018576LRR-RLPs\_4636

AGAAGTATATACTGCTCGTGATGAATTCAAGGTTAGATAACAAAATAATGATTTACTGGTGTTCAGTTA

CCAAGATACTTATTTTGTAGTAATAGTTTGCCTCTCATAAATCAGCAAA

>PGSC0003DMG401018576LRR-RLPs\_4697

TTTCAGTTACCAAGATACTTATTTTGTAGTAATAGTTTGCCTCTCATAAATCAGCAAAATAGATTTCTTC

ATTGGCACCCCTCATCAGTCATCTGTCTGCGAAACAGAGAAATCAACGG

>PGSC0003DMG401018576LRR-RLPs\_4758

AGATTTCTTCATTGGCACCCCTCATCAGTCATCTGTCTGCGAAACAGAGAAATCAACGGTTTCAAATCT

CTAGAACCCATTTTCATGAGCTTCAAGCCTTCAATTCTGATGACACAAA

>PGSC0003DMG401018576LRR-RLPs\_4819

TCAAATCTCTAGAACCCATTTTCATGAGCTTCAAGCCTTCAATTCTGATGACACAAAAGACATCAACAG

AGTAGAAGAATTCAACCCAAGTTTCAATTCTGCTTCACCTGATGGGA

>PGSC0003DMG401018576LRR-RLPs\_488

TGAGTGATGATTTCTTTCTTAACATAAATAAGAAGTTGGAAGACACTATTAATAAATTGGAGGGGTTGG

AAAAGCAAATTGGTCGCCTTGGCTTAAAGGAGCATTTTGTTCGACTAAAC

>PGSC0003DMG401018576LRR-RLPs\_4880

ACATCAACAGAGTAGAAGAATTCAACCCAAGTTTCAATTCTGCTTCACCTGATGGGAAAGGTACAAAT

ATTTTTTTCTTCTCCCTTTCTTACTGCGGCGCTAAATTGGTTTTGCCCA

>PGSC0003DMG401018576LRR-RLPs\_4941

GGTACAAATATTTTTTTCTTCTCCCTTTCTTACTGCGGCGCTAAATTGGTTTTGCCCACTTTGTATCACAA

TGGTGTGGAGTATATCGGTTTTCTACTGGTATTCAGATACTTAAAAT

>PGSC0003DMG401018576LRR-RLPs\_5002

TTGTATCACAATGGTGTGGAGTATATCGGTTTTCTACTGGTATTCAGATACTTAAAATGGAAAATTGCTT

TTGAAAATATCGTTTTTATTGTTTGAATGTTGTTTAAATCATCTGCTGA

>PGSC0003DMG401018576LRR-RLPs\_5063

AAAATTGCTTTTGAAAATATCGTTTTATTGTTTGAATGTTGTTTAAATCATCTGCTGATCCAAAATTTTAA  
TTTTTCTTGATCTTCTTCTATCTTTAGTTTTACATGTCTTCTGATTGA

>PGSC0003DMG401018576LRR-RLPs\_5185

TATAATACATGTCTTGATTCTATAGAAGATGAGAAATTGTCAAATGCCTTTATGAAGTGTTTGCTAAGTT  
GATGTCGCCTAATTCACATTTCACTGAATTAATTTTCTGACCCAAGTTTA

>PGSC0003DMG401018576LRR-RLPs\_5246

TGCTAAGTTGATGTCGCCTAATTCACATTTCACTGAATTAATTTTCTGACCCAAGTTTATGCATATGTTTGC  
TCTAACGTTGAAAAGGAAAAACGACCAATGATATGTTAAGAATTCATC

>PGSC0003DMG401018576LRR-RLPs\_5795

AACATGATATGAATATTTTCTTTTTTAAGAATACAAAGTCGTGATAAGATAGAAAATTTTCGATGGTATTA  
ATTTTCGACATGGATCACCGTTAAGTACTTTGCTTGAGGTATAAATTTCT

>PGSC0003DMG401018576LRR-RLPs\_5856

GATGGTATTAATTTTCGACATGGATCACCGTTAAGTACTTTGCTTGAGGTATAAATTTCTTTTTCCCTGTTT  
AGAAATGTTTCTGTAGCTCCTAATTGTGATGCTTCTTCATTTACACA

>PGSC0003DMG401018576LRR-RLPs\_5917

TTTCCCTGTTTAGAAATGTTTCTGTAGCTCCTAATTGTGATGCTTCTTCATTTACACATTTTTAAAATTTCA  
TCTTATAACAGCTATAAAGTGTGTCCGAGTCAATTAATATTACAGA

>PGSC0003DMG401018576LRR-RLPs\_5978

TTTAAAATTTTCATCTTATAACAGCTATAAAGTGTGTCCGAGTCAATTAATATTACAGACTTGGCTCTTCT  
TTGTTTAATTCATTTCTTCAATTCGACCAGAAATATTCCTCTAAAGGC

>PGSC0003DMG401018576LRR-RLPs\_6039

TGGCTCTTCTTTGTTAATTCATTTCTTCAATTCGACCAGAAATATTCCTCTAAAGGCATGTCAATTTTAT  
TATTTTACACGATTTCTGTTTGTGTTACTTTTTCGATTTCTAATTTGT

>PGSC0003DMG401018576LRR-RLPs\_610

GAAACTAGAACACCTTCAACTTCTTTGGTTGATGATGCTGGTATCTTTGGAAGGCAGAATGAAATAGAG  
AATTTGATTGGCTGTTTATTGTCTAAGGATACAAAAGGAAAAAATCTGGCT

>PGSC0003DMG401018576LRR-RLPs\_6100

GTCAATTTTATTATTTTACACGATTTCTGTTTGTGTTACTTTTTCGATTTCTAATTTGTTTTATGAATGTTTT  
TACAGTTTCATTTTCGATGCTTCCAAGTTTCAGCAGTCCTGATTCC

>PGSC0003DMG401018576LRR-RLPs\_6161

TATGAATGTTTTTACAGTTTCATTTTCGATGCTTCCAAGTTTCAGCAGTCCTGATTCTAAAGTTTTCCGG  
GTGAGCATAGTTGTGAGTTGCAAGTTTTGCAATTCAATTTCTGTATTA

>PGSC0003DMG401018576LRR-RLPs\_6222

AAGTTTTCCGGGTGAGCATAGTTGTGAGTTGCAAGTTTTGCAATTCAATTTCTGTATTATGAATCATTGAT  
GGACTATGATGAAATTTACTTTTCTTCGTAGAAAAAATATCAAAGAATT

>PGSC0003DMG401018576LRR-RLPs\_6265

TTCAATTTCTGTATTATGAATCATTGATGGACTATGATGAAATTTACTTTTCTTCGTAGAAAAAATATCAA  
AGAATTATACTACTATACTAATCAGGTTTGTTAATATTGATGCTGCTGA

>PGSC0003DMG401018576LRR-RLPs\_671

AAATAGAGAATTTGATTGGCTGTTTATTGTCTAAGGATACAAAAGGAAAAAATCTGGCTGTAGTTCCTAT  
TGTTGGAATGGGTGGCCTGGGTAAGACGACACTTGCTAAAGAGGTTTACA

>PGSC0003DMG401018576LRR-RLPs\_732

AGTTCCTATTGTTGGAATGGGTGGCCTGGGTAAGACGACACTTGCTAAAGAGGTTTACAATGATGAGAG  
AGTGCAGAAACATTTTGGTCTGAAAGCTTGTTTTGTGTTTCTGAGGCATA

>PGSC0003DMG401018576LRR-RLPs\_793

GATGAGAGAGTGCAGAAACATTTTGGTCTGAAAGCTTGTTTTGTGTTTCTGAGGCATATGATGCTTTCA  
GAATAACAAAAGGGCTACTTCAAGAAATTGGGTCAACTGACTTGAAGGTT

>PGSC0003DMG401018576LRR-RLPs\_854

ATGCTTTCAGAATAACAAAAGGGCTACTTCAAGAAATTGGGTCAACTGACTTGAAGGTTGATGACAATC  
TTAATCAGCTACAAGTCAAATTGAAGGAAAGCTTAAAGGGAAAGAAGTTTC

>PGSC0003DMG401018576LRR-RLPs\_915

TGACAATCTTAATCAGCTACAAGTCAAATTGAAGGAAAGCTTAAAGGGAAAGAAGTTTCTTATTGTTCTG  
GATGATGTGTGGAATGACAACACTACAATAAATGGGATGAATTGAGAAATAT

>PGSC0003DMG401018576LRR-RLPs\_976

ATTGTTCTGGATGATGTGTGGAATGACAACACTACAATAAATGGGATGAATTGAGAAATATTTTTGTACAA  
GGAGATATAGGAAGTAAGATCATTGTGACGACACGTAAAGAGAGTGTTGCC

>PGSC0003DMG401019148LRR-RLPs\_0

GAGAGAAATTTTACTCTGGTAAAGAAGGAAGAAGTCGACTGAGCCTAGAACTAGAAGCAAACCCAAC

AATGGCAGATCCAGTAATTGGTGCTACAGTTCAAGTTGTGCTTGAGAACTG

>PGSC0003DMG401019148LRR-RLPs\_1159

CTGCAAGTGTGTTGGGAGGCCTTTTACGCAACAAGGAAAGACATGAATGGCAGGCAATTCTTGATGGC

AACCCCCTTATTGCGGGTGAAAATGATAATGGGGAAAATAGCTTAAGGAAAA

>PGSC0003DMG401019148LRR-RLPs\_1281

CTAAACTTAGCTATGATTATTTACCATTTCCACATCTGAAAAAATGCTTTCCTACTTTGCAATGTTTCCA

AAAGATTTTGTGTTTGGAAAGGACCAACTAATCCAACCTCTGGATGGCG

>PGSC0003DMG401019148LRR-RLPs\_1769

CAGGTCAGGCATCAAGGGGTTGACAGCCTCAATTGGCAAATAATACTTGAGATATCTTGATCTCTCC

AATACTAATATCAAAGCCTTGCCTAACTCCATTTGCAAGCTCTACAATTT

>PGSC0003DMG401019148LRR-RLPs\_183

ACACAAAATGTATCTATCATTCAAGCTTTCATTAATGATGCTGAAAGACGACAAGTTGACGATCACGCTG

TGGAAAATGGGTGAAAATGCTTGAGATAGTTGCTGAAAATGCTGAAAAT

>PGSC0003DMG401019148LRR-RLPs\_2135

GAACCTTAGAGGTGAATTGATGATTAGAGATCTTCAATTGGTCTGTAATAGAGAAGAAGCTGTAAAAGC

ATGTCTATGGGAGAAACCAAATATCTCCAAGTTGGCATATTTATGGTCCCA

>PGSC0003DMG401019148LRR-RLPs\_2196

GTAAAAGCATGTCTATGGGAGAAACCAAATATCTCCAAGTTGGCATATTTATGGTCCCATGATGAATCA

GAAGACTATGAGGTCAATGATGAGTATGTTTTGGATGGTCTTCAACCGCAT

>PGSC0003DMG401019148LRR-RLPs\_244

ATCACGCTGTGGAAAATGGGTGAAAATGCTTGAGATAGTTGCTGAAAATGCTGAAAATGTTTTTGACG

AATTCACATATGAATCTCTCAAACACAAGTGATGCAGATCCGAAATAGCC

>PGSC0003DMG401019148LRR-RLPs\_2623

TTACTGAGTGAAGGAAGTGCAGTTGTTATCAACAGGAAATGATGGTAGCGACAGAGTTGGAGTAAGA

ATGTTTCCTGGGCTGGAGAAGTTGAGGATTATTAAGTGTCCACTGTAAAAA

>PGSC0003DMG401019148LRR-RLPs\_2745

ATACCGAATCAATTTGAAATGCTGCGTGAATTAAGCATCGATGGGAATCAGATAATTGAATTTGGAATT

GAGTTCTTCTCTTGAAACATTAATGCTAGTGAGCTGCAAATGGCTACACC

>PGSC0003DMG401019148LRR-RLPs\_2806



TTGGAATTGAGGTTCTTCTCTTGAACATTAATGCTAGTGAGCTGCAAATGGCTACACCATCTGGACTTTT  
AGATGCCATGCCCAAATTACATTATCTGAAGATCAAGGACTGTGCGATTG

>PGSC0003DMG401019148LRR-RLPs\_2928

AGGATTAAGCTATGTTGGATGGGCCCGTGAACCTTGTTTCTTTAATTTGCAACAGTTATTTTCATCGAAGT  
GTGGAAAAGTAGAGCATCTGCCATCCAGATATTCCATGTGATGCCTCAC

>PGSC0003DMG401019148LRR-RLPs\_3050

AATTGCGGTACCTGGGAATTAAGGCTGTGCTCAGTTAGAATTAAGTTCTATCAATAATAGGAGTGGCC  
GAAACTCCCAGTGGTCCAACATTTCTCATATTTTAGTTATTAACGTTGGGT

>PGSC0003DMG401019148LRR-RLPs\_3111

GAGTGGCCGAAACTCCCAGTGGTCCAACATTTCTCATATTTTAGTTATTAACGTTGGGTTTCATGAAAATTC  
AGGACTTGTGTTAGCCTCTATTTCTCCTTTTAGTTTTCCAAGCTTTTCA

>PGSC0003DMG401019148LRR-RLPs\_3172

ATGAAAATTCAGGACTTGTGTTAGCCTCTATTTCTCCTTTTAGTTTTCCAAGCTTTTCATTCCCCAAACGAA  
TACATCTTACTATAGTACTGAAGAAGTTGAGGATTAGTAGATGTCCAC

>PGSC0003DMG401019148LRR-RLPs\_3538

GTTCTCTTAAGAGCTTAAGGATTGAGCGCTGCAACAATTTAGTTCCCTTTCTGTTCCCAGTGGAGAGAA  
TCATTTTACTTCGCTCCAAAGTCTTGAGTTGTCCAATTGTGATGCCTTAA

>PGSC0003DMG401019148LRR-RLPs\_3599

TGGAGAGAATCATTTTACTTCGCTCCAAAGTCTTGAGTTGTCCAATTGTGATGCCTTAACCAGTTTACCAA  
GTGAAATGCTAGAGCGTTGTCGGTCTTTGGAATCTTTGAAGGTCAACAA

>PGSC0003DMG401019148LRR-RLPs\_3721

GTAACAACCTTAGTTTCTTCCCTTACATGTGTGGGAAATGCCTTCACTCTCATATTTGAATATATCAAAAT  
GCCTCAAATTGGATAGTGTACCTGCACAGGGTCTTCACCGTCTCACTG

>PGSC0003DMG401019148LRR-RLPs\_3782

TATATCAAAATGCCTCAAATTGGATAGTGTACCTGCACAGGGTCTTCACCGTCTCACTGGATTACAGGAA  
TTGTGCATTGGACCTTTCTCAGAGACGGTGGATTTTGAAGCATTCCAATT

>PGSC0003DMG401019148LRR-RLPs\_3904

TATTTAATGGCATTAGCGGCTATCGTCCCTTCTAAATTAGAGGTGTATGGGAATAGGCAATGGGATTC  
TCTGCCCTATCAGGTTATGCAACTTTCTTCCCTAACAGAAATCGGAATAA

>PGSC0003DMG401019148LRR-RLPs\_4026

GATTTTGGAAATCAAAACTCTTCCTGATAGATTTGGAAATCTTACTTCTCTTGAAACATTAGAGCTAGTGAG  
GTGCAGACGACTATTCAGGACTTAAGTAAGTCTCTACTTCAGAAATGAG

>PGSC0003DMG401019148LRR-RLPs\_4087

AGCTAGTGAGGTGCAGACGACTATTCAGGACTTAAGTAAGTCTCTACTTCAGAAATGAGAAAATTTACTT  
GTTTTTTGAAGTTATTTTTATGCACAGACTGACCAGATAGGAATAAGTAA

>PGSC0003DMG401019148LRR-RLPs\_4148

AATTTACTTGTTTTTTGAAGTTATTTTTATGCACAGACTGACCAGATAGGAATAAGTAATTCAACTGGTGC  
TCTCAACAATGACTCGAATGCATTGCAACGGTTGCTCTAAAGTTTATTT

>PGSC0003DMG401019148LRR-RLPs\_4209

CAACTGGTGCTCTCAACAATGACTCGAATGCATTGCAACGGTTGCTCTAAAGTTTATTTCTTTTGCAGAT  
TAAGTTTTACTACAAGTGAAAGAGGTCATCCCCATTCCGGCCTTGTTTG

>PGSC0003DMG401019148LRR-RLPs\_4270

TTTTGCAGATTAAGTTTTACTACAAGTGAAAGAGGTCATCCCCATTCCGGCCTTGTTTGGGTACTGAACA  
ACTTTTCCGGGAACTATAGTCTACATATGAAACATCAAACACTCAACG

>PGSC0003DMG401019148LRR-RLPs\_4331

TACTGAACAACCTTTTCCGGGAACTATAGTCTACATATGAAACATCAAACACTCAACGTGTCTAGGGTG  
CTCGATGAGAATCTACACAGGTCTATCCTCTGTCTTTGCATGGCCATGTT

>PGSC0003DMG401019148LRR-RLPs\_4392

TCTAGGGTGCTCGATGAGAATCTACACAGGTCTATCCTCTGTCTTTGCATGGCCATGTTTGCCTTTTTATT  
CTCCATTTAAGTTTTTGTACTAGATAAAGTTCCTTGACCACATGTAAAA

>PGSC0003DMG401019148LRR-RLPs\_4453

CCTTTTTATTCTCCATTTAAGTTTTTGTACTAGATAAAGTTCCTTGACCACATGTAAAAATTTCTGTCATTT  
TTCCCTTGATATGTGACATTTGCTACTAACTATGAACTCTTTGA

>PGSC0003DMG401019148LRR-RLPs\_732

TGGTTGTGTCTACCTGAAATGTCAGAGACTAAGAGCTTTCTTGAACAGATCCTCCAATCATTGACAGAGA  
GGAAACTTGAGGTCCAGACCAGGGATATAATAGTCAAGAACTCCGAGAT

>PGSC0003DMG401019148LRR-RLPs\_854

ACTAGGTGGAAAACGGTATTTGCTTGTCTTAGATGATTTGTGGCGTGTTGACCTTCCGGTATGGGATGA

GTTTGTGGATAGCTTGAGAGGAGTAAACACTTCTAGAGGAAATTGCATTCT

>PGSC0003DMG401019148LRR-RLPs\_915

TGGGATGAGTTTGTGGATAGCTTGAGAGGAGTAAACACTTCTAGAGGAAATTGCATTCTCGTGACTACT  
CGCATGAAACAAGTGGCATCCACTGTAGCGGTAGATGTTTCGTGTGTTGGGA

>PGSC0003DMG401019148LRR-RLPs\_976

TGACTACTCGCATGAAACAAGTGGCATCCACTGTAGCGGTAGATGTTTCGTGTGTTGGGAAAGTTAACAG  
AAGATCATTGTTGGTCCATTTTCAAACAAGAGCTTTTGTGATGGGGAGG

>PGSC0003DMG401019239G-LecRK\_0

ATGAGCGGTAATGGCTGGGGAAGGGGGCAAGTACATCCTTTTGTTCAGTTCGTGGGAATTGCTTCCA  
TACTAACCAGTTCAGCTCGGCTAGTGGGCTTTTGTGTTCGAACCTCGAAT

>PGSC0003DMG401019239G-LecRK\_122

GGACCTGTTGACAAGACCAGATCCATCAACAAACCTAGGTCCAATATTTGCGTCTACGAGCTAGCCATC  
AACAGACGGACATCCTTTTACCGCAGTCTTCCCCTATTGGGCATAGACTT

>PGSC0003DMG401019239G-LecRK\_1220

AGGTTATTGAGCCAGGACGTCTCGTCTTCTCAATGACACTAACAAAGTTGTATGGTCAACTAATACCTC  
TACATCTGTGCAGAATCCCATTGCACAGTTGCTGGATTCTGGGAATCTTG

>PGSC0003DMG401019239G-LecRK\_183

CTAGCCATCAACAGACGGACATCCTTTTACCGCAGTCTTCCCCTATTGGGCATAGACTTTTCTACGTTAGG  
CTCCTGTAAGGGCGGGTATGAGAAGGGTCCCCCTCTCCCTTGTCAAAGC

>PGSC0003DMG401019239G-LecRK\_2440

CCTTACAACCTCAATATCAACAAATTCAAATGATGTGCAGTACTCCAAAGGCTTACAGAATCTTTTTAAT  
TCAATATAAAATTATCTCCCTCGTGGATTGGACAGAAAGTGAAATTGAT

>PGSC0003DMG401019239G-LecRK\_2501

CTTTTTAATTCAATATAAAATTATCTCCCTCGTGGATTGGACAGAAAGTGAAATTGATTATTTTTGCGGA  
ATGGATACTTGCAGATAGTCTGGAGAAATCAGATGGAAAGAAAAGAAAA

>PGSC0003DMG401019239G-LecRK\_2684

TTCCATAGAAGAAGGAAGAAGGCTTTACAGCTCAAAGGAAAGGTAAAATAGGATAAATCTCATTTTTT  
ATTGACATCTTAGCAAAATCAAGGAACATAATTCAAAGAAAAGTGAAGAAC

>PGSC0003DMG401019239G-LecRK\_2745

CATTTTTTATTGACATCTTAGCAAAATCAAGGAACATAATTCAAAGAAAAGTGAAGAACTTTAATATTTG  
GTCTGGATCACAGCTTAAACAAAATTCACCTTCGTTTGCAGGCAGGTAGGT

>PGSC0003DMG401019239G-LecRK\_305

AGTTATCCGTGAATGAGAACTCGTTTTGCTTGTTGGCTGGCTTATGATGGTTTCCTGTCCCAATTCAACAT  
ATTCCTTTTTTTGCTCCTGCTTGGTAGCAGGCTTGTGTGCGAGCTTGGT

>PGSC0003DMG401019239G-LecRK\_3111

AATGAAATAAAGCTTTGGCTTGTGAAACCGAAGGAGACATACACAATAGCTAAGGAAGAACAAGGATA  
CGGTGGAACACAACTGATTGTCTCTTTCTAATTGGAACACAATTGACTCTG

>PGSC0003DMG401019239G-LecRK\_3904

ACATGAATCCAAAGATATTAGACTTCGGCTTGGCAAAAATATGTGAAGAGGATGACATTGGAGCCATGA  
CAAACCGAGTAGTTGGAACATAGTAAGAACCTTCCACTGGATAGTATTATT

>PGSC0003DMG401019239G-LecRK\_4026

GATAAGATTTACTGGATAATAATTTGAACCAAAGAAGAATCTTCAGTTAGTAAAGGCATGTTTTCCAGCA  
TTACTAATTATAATGTTGCGCACATTTTAATGCAGTGGGTACCTCTCACC

>PGSC0003DMG401019239G-LecRK\_427

GGTTTCGATTCCTAAAGCCCACGGAGAAGGGTGTGGAGCCTCGCTTTCATGCTGCTCCTAGTTCGTGG  
GAATTGCTTCATCAAATAGCCGTACCATTAAGTAAATTAATAAATAG

>PGSC0003DMG401019239G-LecRK\_4636

TCACACCCTTGGGTGCAGTTGTTTAAATTTATTTATTCCTTGGTGTATGTTATATACTAGTAACAAATATCT  
TGTAACGACCCCTGCTAATAAGCTTGAATATCTACAGGCATGGAA

>PGSC0003DMG401019239G-LecRK\_4758

TTTATATAACAAGGTAGGTCAATAGAACTACTTGATGAATGCCTAGGTGATTCTTGTTCACATCTGAAGT  
GGTACGATCAATTAGTGTGGTTTATTATGTGTCCAACAATGTCCTGAAG

>PGSC0003DMG401019239G-LecRK\_488

GTTTCGTGGGAATTGCTTCCATCAAATAGCCGTACCATTAAGTAAATTAATAAATAGCTACATTGGGG  
TAAATGCTTTCTAACAAATGCGACTTCATATCCAAAAAGATTCAAACCC

>PGSC0003DMG401019239G-LecRK\_5063

GTTCACTTGTGGCAACAAGCTTGCAGTTGCAATGATCTTTTCTAATTCTCTATAGTAATGTGGTGAAAA  
AAATGTGTGCATGATTGTGCTTTTTTAGGTGTATCAACTATGTCAAACA

>PGSC0003DMG401019239G-LecRK\_5117

TAGTAATGTGGTGAAAAAATGTGTGCATGATTGTGCTTTTTAGGTGTATCAACTATGTCAAACATATG  
TAGGAAGCTTGCTGACTGGCTGTTACTTTGATTTGCGCAGTATATCTGAT

>PGSC0003DMG401019239G-LecRK\_549

ACATTGGGGTAAAATGCTTTCTAACAAATGCGACTTCATATCCAAAAAGATTCAAACCCAAGACTTTTAA  
TTAAGAATGAAGGAGTCACATCACCACAACCTGTGTCAGTGATTTGATGTT

>PGSC0003DMG401019239G-LecRK\_61

TGCTTCCATCACTAACCAGTTCAGCTCGGCTAGTGGGCTTTTGTGTTCTGAACCTCGAATCCGGACCTGTT  
GACAAGACCAGATCCATCAACAAACCTAGGTCCAATATTTGCGTCTACG

>PGSC0003DMG401019239G-LecRK\_610

GACTTTTAATTAAGAATGAAGGAGTCACATCACCACAACCTGTGTCAGTGATTTGATGTTGTTGTTGTAAG  
CAAATAAGATAGAACATGGCCCAACATCCATGTGTGGCTGTGATTAAAT

>PGSC0003DMG401019239G-LecRK\_793

AGCCAAGCTAAGGTGTGTTCAAATAGGACTTGGGTCAAGTGTCATCAATATGCTGCATGAACTGGTCAT  
AAGAGTCGGAAGGCAGACTTGCTAAGCACTTCGACATAGAGGAAAGACAAC

>PGSC0003DMG401019239G-LecRK\_915

AACGTCTATTGGATCACAAAGCATGAAGGAATTGCTAAGGGAGAGTTTTCACTTATTCTTGCTCATGTAT  
TTGTATTTTGTTC AACGCAGCATTGGCGCTACAGATACCATAAGTACAAC

>PGSC0003DMG401019242G-LecRK\_0

ATGTTACTAACTTCTGCAGCACTAGACACAATCACTACAGATAAATCCATTAGAGATGGTGACACAATTG  
TTTTCAGCTGGAGGGGTTTATGAGCTTGGATTTTTCAGCCCTGGAAATTTCG

>PGSC0003DMG401019242G-LecRK\_1037

ACGTGTAATTATTTTTTGCCTTCACAGGTATCCTCAAGATTCTGCAGCAGACTGGTCTAGTGGCTGCATA  
AGGAGA ACTTCTTTAAATTGTACCCATGATGGTTTTCTTAAATTTACGG

>PGSC0003DMG401019242G-LecRK\_1098

TGGCTGCATAAGGAGAACTTCTTTAAATTGTACCCATGATGGTTTTCTTAAATTTACGGGTATCAAGGTG  
CCGATTCTAGAACTCCTGGTATGATGAGAGAATGAACCTTGAAGATTG

>PGSC0003DMG401019242G-LecRK\_1159

ATCAAGGTGCCGGATTCTAGAACTCCTGGTATGATGAGAGAATGAACCTTGAAGATTGCGAGAAAAT

GTGCTTGGCTGATTGCAATTGTACAGCCTACTCAGATCTTGATGTTAGAAAT

>PGSC0003DMG401019242G-LecRK\_122

GAATCATTACGTTGGCATATGGTACAAGAAGATATCACCTACAACCTGTTGTGTGGGTTGCAAACAGAGA  
TATTCCACTTAATGACACTTCAGGAATGTTAACACTTAATCCCAATGAAAT

>PGSC0003DMG401019242G-LecRK\_1342

GAGCAAAATCTGTATGTGAGAGTAGCTGCTTCAGAATTAGGTAATGACCCTACTCTGCATAAATGCACTA  
ACTCTTTAGAATTGAAGGAACTCTGCTACCTAATTTACTTACATGATGGA

>PGSC0003DMG401019242G-LecRK\_1403

AATGCACTAACTCTTTAGAATTGAAGGAACTCTGCTACCTAATTTACTTACATGATGGACATTAAAGTTG  
ATTAGGTGCTTTAGTAGTTGGTAATATGGCGATTTCAATTGTGAAGGATTT

>PGSC0003DMG401019242G-LecRK\_1464

TTAAAGTTGATTAGGTGCTTTAGTAGTTGGTAATATGGCGATTTCAATTGTGAAGGATTTCAATTTTCGGTG  
GTACTGGAACGGAAGTAGCTTGCTGCAAAGAGCATTGAATAATTTTCATA

>PGSC0003DMG401019242G-LecRK\_1586

TTACTCTACGACTATATGGATACTAGGACATAACCGGTTAGTAGGATTGCTAAGGGATGAGACACTTCAT  
TCCCTTAAAAGGCTTAAAAACATGCTAGACCTCATGACAGATCAAGGCTG

>PGSC0003DMG401019242G-LecRK\_1708

GACAGCGGGTGATAATCATATGCATTCTGTCCTTAGTAGTGCCGCTTGTAATCAGTGACACTGTACTTTA  
ATATGTGTCATCTTTCAAAGAAGATCTCCAATTTAACAATGCAGCTTGTA

>PGSC0003DMG401019242G-LecRK\_1769

TGTACTTTAATATGTGTCATCTTTCAAAGAAGATCTCCAATTTAACAATGCAGCTTGTAATCAATTAACA  
TTGACTACTTTTTTCAGTAATCTTGTTGATTGAATGCCCTGGTCTACAAG

>PGSC0003DMG401019242G-LecRK\_183

AACAGAGATATCCACTTAATGACACTTCAGGAATGTTAACACTTAATCCCAATGAAATTCTTGACTTGT  
TGATAAATCCAATGTATCAATTTGGTCATCAAACCTCATCAAGATCGTTA

>PGSC0003DMG401019242G-LecRK\_2013

ACAGGACGCGGAGGAGAAAGAGGTCAGTCCTGATTGGTGTCAATTCAGCAGTGGTAGCAACGCTTATC  
CTCAGCTTTTTAGCTTGGTTTTACTTCCAAAGAAGGAAAAGAAGAAGAATAG

>PGSC0003DMG401019242G-LecRK\_2074

GCTTATCCTCAGCTTTTTAGCTTGGTTTTACTTCCAAGAAGGAAAAGAAGAAGAATAGGTAAATATGCC  
TGAGGTACTCTTGTCTATCTGGCTGACATTGTTGCGCTTGACCAAATTCT

>PGSC0003DMG401019242G-LecRK\_2257

CATGGAGCTTCCATTGTTTATTAGTTACTGTTACTAGCGCCACTGGAACTTCTCTTCTGCTAATGTGA  
TTGGGGAAGGCGGATTTGGACCGGTTTACAAGGTAAATCAACTTTGATC

>PGSC0003DMG401019242G-LecRK\_2318

GCTAATGTGATTGGGGAAGGCGGATTTGGACCGGTTTACAAGGTAAATCAACTTTGATCTTCAACTTCTA  
GCTGGAAGTGGCATCTTTAACCTTGATAGAAAATTGCAGGGTATCCTAC

>PGSC0003DMG401019242G-LecRK\_244

TTGTACTTGTGATAAATCCAATGTATCAATTTGGTCATCAAACCTCATCAAGATCGTTAAAGAATCCAAAA  
GCATGGCTCCTGGATTCCGCGAACCTTGTTGTTAGTGATGGAAATGATA

>PGSC0003DMG401019242G-LecRK\_2501

TAAAAAATGAAATCGTTCTCATTTCCAAGTTGCAACATAGGAATCTTGTCAAGCTATTGGGTTGCTGCCTT  
GAAGGAGAAGAACGGATGCTAATCTATGAGTTCATGCCCAACGCTAGCT

>PGSC0003DMG401019242G-LecRK\_2623

GACTATTTCATTTTTGGTCTGCTTTTTCGTGATTTATTGCCTATACTAGTACTTGACAAGCCCTCAATATCT  
CTGATCACTCAATGATTAGTTCTACATTGTGCAGATCCAAGCAGAAAA

>PGSC0003DMG401019242G-LecRK\_2867

TAGATAGTGACATGAATGCCAAAATTTCTGACTTCGGCCTTGCCAAAATTTTTGGTGGAGATCAAGTGGA  
AGGAGAACTAAGAGTATAGTAGGGACATTGTAAGATTCTACACATCTTT

>PGSC0003DMG401019242G-LecRK\_305

GAATCCAAAAGCATGGCTCCTGGATTCCGCGAACCTTGTTGTTAGTGATGGAAATGATAGAGAACAGGG  
AATTAATTTGGCGTGGCAGAGTTTTGATTATCCAGGAAATACTTTATTACC

>PGSC0003DMG401019242G-LecRK\_3111

AGCATCGGCGTAATCATTCTTGAAATAGTTAGTGGCAGAAAGAACAGGAAATTTGTCATTTGGATCAT  
CATCACAATCTTTTGGGACATGTAAGCACAAAACCTTCACTCCCTTAATTCA

>PGSC0003DMG401019242G-LecRK\_3172

TGGATCATCATCACAATCTTTTGGGACATGTAAGCACAAAACCTTCACTCCCTTAATTCCTTAGCTTCCT  
ATTGTGAATACATTTGTATAAATGTGTTGTTCTGTTTGTAAATTTAGGC

>PGSC0003DMG401019242G-LecRK\_3233

CTTAGCTTCCTATTGTGAATACATTTGTATAAATGTGTTGTTCTGTTTGAATTTAGGCATGGTACTCTG  
GAGTGAAGGCAACGCGTTGGAAGTATAGACGAAAGTATCAAAGAATCC

>PGSC0003DMG401019242G-LecRK\_3416

GAGGATAGGCCTACAATGGCATCAGTAGTTTTCTGGTTAGGCAATGAAGGTCTAGTTCTTCCTCAACCAA  
AGCAACCTGGTTTTTTCATAGAGAGGAATTCAATAGAATCAACAGAGTCA

>PGSC0003DMG401019242G-LecRK\_3476

CCTCAACCAAAGCAACCTGGTTTTTTCATAGAGAGGAATTCAATAGAATCAACAGAGTCATCAACTGATG  
AAGTATATGTAAGTAGCAGCGTGTGATAACAGTTCTAGAGCCAAGATAA

>PGSC0003DMG401019242G-LecRK\_366

GAACAGGGAATTAATTTGGCGTGGCAGAGTTTTGATTATCCAGGAAATACTTTATTACCTGGAATGAAG  
GTAGGAATAGATTTGATTACGGGCATGGATAGGTATGTAACGTCATGGAAG

>PGSC0003DMG401019242G-LecRK\_427

GAATGAAGGTAGGAATAGATTTGATTACGGGCATGGATAGGTATGTAACGTCATGGAAGAGCACGGAT  
GATCCTACTCCTGGTGAATATGTAGATCGTGTTGATTACATGGATACCCTC

>PGSC0003DMG401019242G-LecRK\_488

CACGGATGATCCTACTCCTGGTGAATATGTAGATCGTGTTGATTACATGGATACCCTCAATTGTTCTTGA  
TGAGAAATTCATCTGTAGTGTGTTTTGCTCAGGGCCATGGACTGGTGCTGC

>PGSC0003DMG401019242G-LecRK\_549

TTGTTCTTGATGAGAAATTCATCTGTAGTGTGTTTTGCTCAGGGCCATGGACTGGTGCTGCGTTTTCTAGTA  
GTCCTAGTAATAAACCAACTTTGTATTATACGTTTCGAGTTTGTGTCAAT

>PGSC0003DMG401019242G-LecRK\_61

ACACAATTGTTTCAGCTGGAGGGGTTTATGAGCTTGGATTTTTTCAGCCCTGGAATTCGAAGAATCATT  
CGTTGGCATATGGTACAAGAAGATATCACCTACAACCTGTTGTGTGGGTTG

>PGSC0003DMG401019242G-LecRK\_610

TTTCTAGTAGTCCTAGTAATAAACCAACTTTGTATTATACGTTTCGAGTTTGTGTCAATCAGAAGGAAATT  
TACTTTAAATACGAGCTTAAAGAATGACTCTATGCCACCCAGGGTGGTGC

>PGSC0003DMG401019242G-LecRK\_671

GAAGGAAATTTACTTTAAATACGAGCTTAAAGAATGACTCTATGCCACCCAGGGTGGTGCTCAACCGGAT



GGGGTGATAGAACAACCTTAATATGGATTGAGCATACTCAGAGCTGGTTTCTC

>PGSC0003DMG401019242G-LecRK\_732

AACCGGATGGGGTGATAGAACAACCTTAATATGGATTGAGCATACTCAGAGCTGGTTTCTCTACTTGACAG  
CACAACCTGGATAATTGTGATCGTTTTGATTTATGCGGACCTTATTCAAGTT

>PGSC0003DMG401019242G-LecRK\_976

ACTAAGTTATGTTTTACACACCCCTCATGTGTGTGCTTGATTCTTTTTCATGGACCAAACACGTGTAATT  
ATTTTTTGCCTTACAGGTATCCTCAAGATTCTGCAGCAGACTGGTCT

>PGSC0003DMG401019681-(rev)LRR-RLPs\_1220

ATTTGCCCGAGCGAAACAGTGGATAGTAATCCAACAGTGATGAATACTCCTAATTCACAATTCAACTTTC  
TTAATCAAAGAAAGAAGAATTTGAGTGAAAACATGTTCCCTATTGATAGTC

>PGSC0003DMG401019681-(rev)LRR-RLPs\_1342

ACTTGATGCAATTGGCGTTATGATGACGGTTTTGGTAATAACATGGTGTGTTATTACAGAAAGAAGAAT  
CAAGAGAGTGAAATTGACAGATTGAGAAAGACGAATAGGAAGTATAATAA

>PGSC0003DMG401019681-(rev)LRR-RLPs\_1403

AAGAAGAATCAAGAGAGTGAAATTGACAGATTGAGAAAGACGAATAGGAAGTATAATAATCAGGACAC  
GAGTAGTTCAAGTCTGTATCATTCAATTTGAATATGGTATCAAGAAAACAAGT

>PGSC0003DMG401019681-(rev)LRR-RLPs\_1769

AGAGCTTATTATTCATCAAAAGAGGAATTGCTTCTTGTCTATGATTTTCTTCCCAATGGTAGTCTACACAA  
TCTCTTACATGGTAATTTTTCAATCCTTTCCTTCTCAATTCAAAACGG

>PGSC0003DMG401019681-(rev)LRR-RLPs\_1830

GTCTACACAATCTCTTACATGGTAATTTTTCAATCCTTTCCTTCTCAATTCAAAACGGAAATTTATAGTCT  
GTTTGGTCAAACCTTCAAACCTCTGTTTATTTTAAAAAGTGTTTTTTGT

>PGSC0003DMG401019681-(rev)LRR-RLPs\_1891

ATTTATAGTCTGTTTGGTCAAACCTTCAAACCTCTGTTTATTTTAAAAAGTGTTTTTTGTTAGAAAAAGTATT  
TTGTGCTTTGAAATACACTTTTGCAATATTAGAGCAACAATTTATGCT

>PGSC0003DMG401019681-(rev)LRR-RLPs\_1952

GAAAAAGTATTTTGTGCTTTGAAATACACTTTTGCAATATTAGAGCAACAATTTATGCTTGATCAAGTCTT  
CGATAATCTAAAGTTGAGCCACTGAGTATGTTGTTCTTGTGTAATCTC

>PGSC0003DMG401019681-(rev)LRR-RLPs\_2013

ATCAAGTCCTCGATAATCTAAAGTTGAGCCACTGAGTATGTTGTTCTTGTTGTAATCTCTGCTTGATTAAG  
CTTTCAAAAAGTGCTCCGGGGAAAACCTGCTTTTTTCAGCTTCTCTTA

>PGSC0003DMG401019681-(rev)LRR-RLPs\_2074

CTTGATTAAGCTTTCAAAAAGTGCTCCGGGGAAAACCTGCTTTTTTCAGCTTCTCTTACTACTCAAAAAC  
ACTTATGTATTTCTAAAAGTTTGCGAAACACCTCAACTCTCTAAATT

>PGSC0003DMG401019681-(rev)LRR-RLPs\_2135

ACTCAAAAACACTTATGTATTTCTAAAAGTTTGCGAAACACCTCAACTCTCTAAATTAAGCACTTTTTTA  
AAACAATAAACACTTTTTTAACCTCCCAAAAACCTTGATAAACAGATTAT

>PGSC0003DMG401019681-(rev)LRR-RLPs\_2196

GCACTTTTTAAAACAATAAACACTTTTTTAACCTCCCAAAAACCTTGATAAACAGATTATTAATTAGGAATA  
AAATGGAAGGGTTATTAAGAGTTCATATTGTTGATCCCCATTCATATGA

>PGSC0003DMG401019681-(rev)LRR-RLPs\_2257

ATTAGGAATAAAATGGAAGGGTTATTAAGAGTTCATATTGTTGATCCCCATTCATATGAGATTGAAATAT  
AATTGACTTACAAATTAACCTTATATGCATTATTATAAGTAACTAACGTTT

>PGSC0003DMG401019681-(rev)LRR-RLPs\_2318

TTGAAATATAATTGACTTACAAATTAACCTTATATGCATTATTATAAGTAACTAACGTTTATACTATCAGGC  
ATCAGCGTATTAATTAACATGTTATGATAAGTTGTCTGATAACAAGTTA

>PGSC0003DMG401019681-(rev)LRR-RLPs\_2379

ACTATCAGGCATCAGCGTATTAATTAACATGTTATGATAAGTTGTCTGATAACAAGTTACACTTATCATAA  
TCAGTACTTGTAGTTATCTTTTAGGTGATCTGATAGTATAAAAAGCTCC

>PGSC0003DMG401019681-(rev)LRR-RLPs\_244

GTAATCAATCACTTAAATCTCACCGGATCAATTCATCCATTGATTCATCTTACACAAATTCGGCATCTAAG  
TTTACACCACAATTCTCTCAGTTCGATTCCGAATTCGATTTTTGGCCT

>PGSC0003DMG401019681-(rev)LRR-RLPs\_2440

CTTATCATAATCAGTTACTTGTAGTTATCTTTTAGGTGATCTGATAGTATAAAAAGCTCCACAGGTAATCGT  
GGACCGGAAGAACACCATTGGATTGGACAACAAGACTAAAATATGCAT

>PGSC0003DMG401019681-(rev)LRR-RLPs\_2501

AGGTAATCGTGGACCGGAAGAACACCATTGGATTGGACAACAAGACTAAAATATGCATTAGGAGCAG  
CAAAAGGACTTAGTTTTTTACATAGCTACAACAAAACCAAGATTTGCCATGG

>PGSC0003DMG401019681-(rev)LRR-RLPs\_2684

TCTCCACTTGCTCTTACAAATGCCAATTTTCATCAAACAATGGATACAAAGCACCAGAATTATCAACACAAA  
ACAATGTAAACACAAACCAAAAATCCAAGAAAATTTTCTCAAAAGAGTGA

>PGSC0003DMG401019681-(rev)LRR-RLPs\_2745

TCAACACAAAACAATGTAAACACAAACCAAAAATCCAAGAAAATTTTCTCAAAAGAGTGATGTGTATAGCT  
TTGGAGTGGTTTTACTAGAGATTTTGACTGGGAAAATTGCAACAAGTGAA

>PGSC0003DMG401019681-(rev)LRR-RLPs\_2989

TGGCTATGGCTTGTGGTTTCATCTCCAAAAGATAGGCCAAAGATGATTGTAGTGGAGGAAATGATCG  
AAGACATCGCAAAAAAAGAGAACAATAGAGGGACAGGTCCATTATCCATC

>PGSC0003DMG401019681-(rev)LRR-RLPs\_305

GGCATCTAAGTTTACACCACAATTCTCTCAGTTCGATTCCGAATTTTCGATTTTTGGCCTAATCTCAAACAC  
GTTTACCTCTCTAACAACAAGTTTTCCGGTGAATTTCCGCCAGGAATTT

>PGSC0003DMG401019681-(rev)LRR-RLPs\_3050

AATGATCGAAGACATCGCAAAAAAAGAGAACAATAGAGGGACAGGTCCATTATCCATCGAATTTTGAA  
ATGTTATGTTTACTTATCCTTAGAAATTTATCGATCATCAAAGAGGAGAA

>PGSC0003DMG401019681-(rev)LRR-RLPs\_3111

ATTTTGAAATGTTATGTTTACTTATCCTTAGAAATTTATCGATCATCAAAGAGGAGAATAGAGTTCTTTA  
TACTACTAATTGTTCTCCTTCTACTCACAATTTGAATTTGATTCTTGGT

>PGSC0003DMG401019681-(rev)LRR-RLPs\_3172

GAGTTCCTTATACTACTAATTGTTCTCCTTCTACTCACAATTTGAATTTGATTCTTGGTAATCAATTAGCTA  
TGATGATTTTTTTTTTGTTCATTTTTACCTAGAAATAATTTGGTA

>PGSC0003DMG401019681-(rev)LRR-RLPs\_3218

TTTGATTCTTGGTAATCAATTAGCTATGATGATTTTTTTTTTGTTCATTTTTACCTAGAAATAATTTGGT  
ACAATTACTATATCATTCTTACTTCTTTAATTCTTGTTCATTTTTTTG

>PGSC0003DMG401019681-(rev)LRR-RLPs\_366

TCTCAAACACGTTTACCTCTCTAACAACAAGTTTTCCGGTGAATTTCCGCCAGGAATTTACCTTTTGAAGC  
GACTCAGGCGACTTGATTTGTCATTTAATGAGTTTTCCGGTGAGATTCC

>PGSC0003DMG401019681-(rev)LRR-RLPs\_549

CGGATCACTTGGTGCTGATGAAAAAAAAGTGTTCAGTTAAGGAATTCAATGTTTCTGGGAATAAC

TTTTCTGGGAAAATCCCAAATTGGTTATCAAATTTCCAGTGGCAGCTTT

>PGSC0003DMG401019681-(rev)LRR-RLPs\_610

GGGAATAACTTTTCTGGGAAAATCCCAAATTGGTTATCAAATTTCCAGTGGCAGCTTTTGCAGGTAAAG

TGCGGGAAACGAGCAGATTGGATCAAATTTGAACGGATCAAACGGATAA

>PGSC0003DMG401019681-(rev)LRR-RLPs\_671

CAGGTAAAGTGCGGGAAACGAGCAGATTGGATCAAATTTGAACGGATCAAACGGATAAAGTTCATAA

ATAACCATTTTTTAGTTCGTGTAATTGAGAATTAACCATGGTCATAGAATAT

>PGSC0003DMG401019681-(rev)LRR-RLPs\_793

TCGTAGAGTTTCACTTGTGAAATTTGAAACGTTACCACAATGACTATTTTCTCAATTACAAGATTGAAAAA

TGGCTAGGTGCGAAACAGGTCTTGATTAACCGTTCAAATTTGTCCGGT

>PGSC0003DMG401019681-(rev)LRR-RLPs\_854

GATTGAAAAATGGCTAGGTGCGAAACAGGTCTTGATTAACCGTTCAAATTTGTCCGGTCAAATGAGT

GAAATAGTGAGGAATTTGCACAATTGGCCTTAAAAGGTCACTATTTAGATT

>PGSC0003DMG401019681-(rev)LRR-RLPs\_915

AAATGAGTGAAATAGTGAGGAATTTGCACAATTGGCCTTAAAAGGTCACTATTTAGATTTTATCCCCCT

ATGCTAGTGAGCTAAAATTTGCATTCAACTTCTTCTGAATGCGGATTTTA

>PGSC0003DMG401019681-(rev)LRR-RLPs\_976

ATCCCCCTATGCTAGTGAGCTAAAATTTGCATTCAACTTCTTCTGAATGCGGATTTTAGCTGACTAAGCT

AACGATTACAAAATTTAAAAGAAACGATGATAATTCTATGTTGAAATAA

>PGSC0003DMG401020789-(rev)LRR-RLPs\_1037

GGATCTCTATCAATTCTAGAGTTGCAAATGTGGTTGATAGAAAGGATGCTGTGAAGGCAAAGATGAG

GGAGAAGAATCATGTTGATAAGTTATCTTTGAAGTGGAGTGAAAGTAGTGCC

>PGSC0003DMG401020789-(rev)LRR-RLPs\_1098

AGATGAGGGAGAAGAATCATGTTGATAAGTTATCTTTGAAGTGGAGTGAAAGTAGTGCCGACAATTCA

CAAAGTAAAGAGACATACTTGATGAGCTACGCCACACACAAACATAAAAC

>PGSC0003DMG401020789-(rev)LRR-RLPs\_1159

CAATTCACAACTGAAAGAGACATACTTGATGAGCTACGCCACACACAAACATAAAACAACCTCCAAATC

ACCGGATATAGAGGGACAAAATTTCCAAATTGGCTAGCTGATCATTTCGTT

>PGSC0003DMG401020789-(rev)LRR-RLPs\_1220

CTCCAAATCACCGGATATAGAGGGACAAAATTTCCAAATTGGCTAGCTGATCATTGTTTTCTTAAGCTAG  
TTGAATTGTCTCTTAGCAAATGCAGGGACTGTGATTCCTTGCCAGCACTA

>PGSC0003DMG401020789-(rev)LRR-RLPs\_1281

TAAAGCTAGTTGAATTGTCTCTTAGCAAATGCAGGGACTGTGATTCCTTGCCAGCACTAGGACAACCTCCC  
TTCTTTGAAATTCCTTTCCATTAGAGAGATGCATCAAATAACAAAGGTCA

>PGSC0003DMG401020789-(rev)LRR-RLPs\_1342

ACAACCTCCCTTCTTTGAAATTCCTTTCCATTAGAGAGATGCATCAAATAACAAAGGTCACGAAAGAATTCT  
ATGGCAGTTCATCCTCCAAAAGCCTTTTTACTCTCTTGAGAAGCTTTA

>PGSC0003DMG401020789-(rev)LRR-RLPs\_1403

AAAGAATTCTATGGCAGTTCATCCTCCAAAAGCCTTTTTACTCTCTTGAGAAGCTTTAATTTGCAAATAT  
GCCAGAGTGGAGGCAATGGCATGTACTAGGAAATGGAGAGTTCCTACA

>PGSC0003DMG401020789-(rev)LRR-RLPs\_1464

TTGCAAATATGCCAGAGTGGAGGCAATGGCATGTACTAGGAAATGGAGAGTTCCTACACTTGAGAACC  
TTTCAATTATAAATTTCCCTGAACTCAGTCTGGAGACACCCATCCAACCTTT

>PGSC0003DMG401020789-(rev)LRR-RLPs\_1525

TGAGAACCTTTCAATTATAAATTTCCCTGAACTCAGTCTGGAGACACCCATCCAACCTTTCAAAGTTTCAAG  
TTATTGGTTCTCCTAAGGTTGGAGTCTTGAGGGAATGAAGCAGATTGT

>PGSC0003DMG401020789-(rev)LRR-RLPs\_1586

AAGTTTCAAGTTATTGGTTCTCCTAAGGTTGGAGTCTTGAGGGAATGAAGCAGATTGTTGAATTATCTA  
TTATTGGTTGCAATTCTCTTACCTCCTTGCCTTTTAGCATACTGCCAGT

>PGSC0003DMG401020789-(rev)LRR-RLPs\_1647

AATTATCTATTATTGGTTGCAATTCTCTTACCTCCTTGCCTTTTAGCATACTGCCAGTACCTTGAAGAGAA  
TACGGATATCTCGTTGCCAGAAATTGAAATTGGAGGTGCCAGTTGATT

>PGSC0003DMG401020789-(rev)LRR-RLPs\_1708

CTTGAAGAGAATACGGATATCTCGTTGCCAGAAATTGAAATTGGAGGTGCCAGTTGATTATTATAACAT  
GTTTGTGAGGATTTGAGACTTGAAGAATGTGATTGTATAGATGATATATC

>PGSC0003DMG401020789-(rev)LRR-RLPs\_1769

TATAACATGTTTGTGAGGATTTGAGACTTGAAGAATGTGATTGTATAGATGATATATCACCCGAGTTGC  
TCCCAAGAGCACGCAAATTGAATGTATCTAATTGCCACAATCTTACTAGG

>PGSC0003DMG401020789-(rev)LRR-RLPs\_183

TGTTGAGCTACAATGATCTTCCTGCACATTTAAAGCGATGTTTTCTATTGTGCAATATTTCTAAAGATT  
ATCCATTTAGTAAAGAACAAGTTATTCATCTCTGGATTGCAAATGGTC

>PGSC0003DMG401020789-(rev)LRR-RLPs\_1891

TTTGATTCTACTTCCACTGAAAGTTTCTATATTGGTAATTGTAAGAATCTTGAAAACTTTCCGGTGGCAC  
TTCCATCTGCGATGACGTCATTGAGTATTGGCTACTGTGAGAAGCTGAA

>PGSC0003DMG401020789-(rev)LRR-RLPs\_1952

TCGGTGGCACTTCCATCTGCGATGACGTCATTGAGTATTGGCTACTGTGAGAAGCTGAAGTGGCTTCCA  
GATCATATGCAAGAACTCCTTCCATCTCTTAAGGGACTGCATCTTCCTAAT

>PGSC0003DMG401020789-(rev)LRR-RLPs\_2013

GGCTTCCAGATCATATGCAAGAACTCCTTCCATCTCTTAAGGGACTGCATCTTCCTAATTGCCAGAGATA  
GAGTCCTTCTCAAGGAGGATTGCCCTTCAATTTACAGCAACTTGAGA

>PGSC0003DMG401020789-(rev)LRR-RLPs\_2196

TAAGAGAGTTAGAATTAGTGATCTATCATGACGGCAGTGACGAAGAGATGGAACATTGGGAGTTACCA  
TGCTCTATTCTGAAGACTTGAGGTATCCAATCTGAAAACATTAAGCAGCCAGG

>PGSC0003DMG401020789-(rev)LRR-RLPs\_2257

GTTACCATGCTCTATTCTGAAGACTTGAGGTATCCAATCTGAAAACATTAAGCAGCCAGGATCTCAAAGC  
CTCACCTCTCTTAAATTTCTATATATTGCTTATTTACCTCAAATCCAGTC

>PGSC0003DMG401020789-(rev)LRR-RLPs\_2318

CTCAAAGCCTCACCTCTCTTAAATTTCTATATATTGCTTATTTACCTCAAATCCAGTCACTTCTGGAAGAA  
TGCGCGCTTCCCATCTCTCTTTCTGAGCTATATTTATATGGTCATCAT

>PGSC0003DMG401020789-(rev)LRR-RLPs\_244

TCCTAAAGATTATCCATTTAGTAAAGAACAAGTTATTCATCTCTGGATTGCAAATGGTCTTATACTGCAGG  
AAGATAAAATCATTCAAGATTTAGGCAACCAATACTTTCTCGAGTTGAG

>PGSC0003DMG401020789-(rev)LRR-RLPs\_2501

TGTAATCTCCAGTCACTTTCCGAATCAGCACTGCCCTCCTCCCTCTCTCATTTGACCATCAAGTATTGCCAT  
AACCTCCGATCACTTTCTGAATCAGCACTGCCCTCCGCCCTCTCTGAG

>PGSC0003DMG401020789-(rev)LRR-RLPs\_2806

GGTGCCCTCTTCCCTCTCTGAACTATGGATTTTCCGCTGCCCACTGCTCAGCCCACTACTAGAATTTCAGA

AGGGGAATACTGGCCAAATATTGCTCAAATTCCTTCATATTTGTCGA

>PGSC0003DMG401020789-(rev)LRR-RLPs\_305

ATACTGCAGGAAGATAAAAATCATTCAAGATTTAGGCAACCAATACTTTCTCGAGTTGAGATCAAGATCAT  
TATTCGAAAGGGTCCCAAATCCTTCTCAAGGGAACATAGAGAAATTCTTA

>PGSC0003DMG401020789-(rev)LRR-RLPs\_3050

AAATGTTGTTGAGCAGTGTGGAGTGTCTATTGCTCAAACCACGGCTACTGACCAAATTTTCATATTTTC  
CACCATATATGTTGATTGGGAGAACCTGAAATATTTAAAATGGGTGGTGC

>PGSC0003DMG401020789-(rev)LRR-RLPs\_3111

TCATATTTCCACCATATATGTTGATTGGGAGAACCTGAAATATTTAAAATGGGTGGTGCCTCCTACAGATA  
TGTAAGTTATACTATTCCTTAGTATCTTTTGATTTTTGGTTACTTCTATT

>PGSC0003DMG401020789-(rev)LRR-RLPs\_3172

CTACAGATATGTAAGTTATACTATTCCTTAGTATCTTTTGATTTTTGGTTACTTCTATTTTCTTGCCTGTAA  
ATCTTTTGGACCAGTGTGTAGCATCTATTACCTCTGTGAAGTCGTGG

>PGSC0003DMG401020789-(rev)LRR-RLPs\_3355

ATATAGGCAGGAATTGAGATAATTTGCTCCAGAGTTGTCACCAGGATGTTTATCGCCTTTGGAGATTCAT  
CACAAAAGCAATTCATATATTCTTGTGACAAATCTCACTCTTCATGACCT

>PGSC0003DMG401020789-(rev)LRR-RLPs\_3538

TTTCGTCTCTTCTACAGAGATAAAGGGTCCAAGAAATCCAACCTCATTGTCATCTCTTCTACATAGATGG  
CCCAAGAAATGCAACCTCACTTTCTCAATTAGGTAGCCAAGACCTTCAC

>PGSC0003DMG401020789-(rev)LRR-RLPs\_366

CAAGATCATTATTCGAAAGGGTCCCAAATCCTTCTCAAGGGAACATAGAGAAATTCTTAATGCATGACCT  
TGTC AATGATTTAGCCCAAATTGCATCTTCAAATTTTGTATCAGATTGG

>PGSC0003DMG401020789-(rev)LRR-RLPs\_3660

GAGTTGCATCAAGCTTGAAATTTAAAGAAATTGAAAACGACTTTGAATGCCTACTTTCATTATGTACGCC  
ATGTTACACCATATTGATATCAAATTGGGAAAAGGGCCTGATATACCCCT

>PGSC0003DMG401020789-(rev)LRR-RLPs\_427

GCATGACCTTGCAATGATTTAGCCCAAATTGCATCTTCAAATTTTGTATCAGATTGGAAGAGAGCCAA  
GGATCTCATATGTTGGAAAAGGTGCGACTTATCATATTCAATGGAAAG

>PGSC0003DMG401020789-(rev)LRR-RLPs\_4392

CCTTTCCCTATCAAATTTGATGCGACTGCATTTTACATCAGTTTTTTTTTTGTTTTGGTATTCAAATCCAG  
AATATTACATCCATTTTTTGGTTTTAATATTAGAGAACTTTGGAGA

>PGSC0003DMG401020789-(rev)LRR-RLPs\_4575

AAAGTCAAGGAAGTATATCCTAGTCGGGATGACTTCAAGGTTAGATAACAAAATAATGATTCACCTTGTG  
TTTTAGTTACCAAGATGCTTATTTTATAGTAATAGTTTGCCTCTCATAAA

>PGSC0003DMG401020789-(rev)LRR-RLPs\_4636

CACCTGTGTTTTAGTTACCAAGATGCTTATTTTATAGTAATAGTTTGCCTCTCATAAATCAGCGAAACAT  
ATTTCTTCATTGGCACTCTCATCAGTCATCAGCCAGTAAAATAAAGAA

>PGSC0003DMG401020789-(rev)LRR-RLPs\_4697

AGCGAAACATATTTCTTCATTGGCACTCTCATCAGTCATCAGCCAGTAAAATAAAGAACTGATGGTTT  
CAAACTCCAATCACATCCAAGATAAAAAAAGACATCAACAGAGTAGAAG

>PGSC0003DMG401020789-(rev)LRR-RLPs\_4758

TGATGGTTTTCAAACTCCAATCACATCCAAGATAAAAAAAGACATCAACAGAGTAGAAGAATTCAACCC  
CACACCCATTTCAACCCAAGTTTTCGATTCTGCTTTACCTGATGAGAAGA

>PGSC0003DMG401020789-(rev)LRR-RLPs\_4819

TTCAACCCACACCCATTTCAACCCAAGTTTTCGATTCTGCTTTACCTGATGAGAAGAAGTTTATGGGTG  
AGAAAGGTCCAAAGGTATATATCTCTTTCTCACTGTAGCGGTTATATTG

>PGSC0003DMG401020789-(rev)LRR-RLPs\_488

GAGAGCCAAGGATCTCATATGTTGGAAAAGGTCGACACTTATCATATTCAATGGAAAGTATCGACTTT  
GAGAAATTGACACCCCTCTACAAATTGGAGCATCTGAGGACATTGCTTCCA

>PGSC0003DMG401020789-(rev)LRR-RLPs\_4880

TTTATGGGTGAGAAAGGTCCAAAGGTATATATCTCTTTCTCACTGTAGCGGTTATATTGGTTCTTCCCTGC  
TTTGCATCACAATGATGTCGGAGTGTATCAGTTTTCTACTGTTATTCAG

>PGSC0003DMG401020789-(rev)LRR-RLPs\_4941

TCTTCCCTGCTTTGCATCACAATGATGTCGGAGTGTATCAGTTTTCTACTGTTATTCAGATACTTAAAGTG  
GGAATTTGCTTCTGATTTGAGCTTTAAATTTATCTTTATTGTAGTTATT

>PGSC0003DMG401020789-(rev)LRR-RLPs\_5002

ACTTAAAGTGGGAATTTGCTTCTGATTTGAGCTTTAAATTTATCTTTATTGTAGTTATTTTGAATTTTTCC  
TTCAAACCTAAACGTGATTTTTTACAACAACAATACACCCAATCTAT



>PGSC0003DMG401020789-(rev)LRR-RLPs\_5063

GTAATTTTTCTTCAAACCTAAACGTGATTTTTTACAACAACAATACACCCAATCTATACCTGAATTTTT  
CTGTTCCAATTGTTTTGCTACTACAGTATTTGTGTCCAGCCTAATTGG

>PGSC0003DMG401020789-(rev)LRR-RLPs\_5185

TTGTTCATTTTGTGAAACATCCTATAATTATTTGAAGAGATAATATCTTAGTTGATCACTCAACTATGAATT  
TTTTCTCATAAAATCACTCAACTTTGATTTTAAACACATAGGTCCT

>PGSC0003DMG401020789-(rev)LRR-RLPs\_5429

CTAATATGAAATTTTTATTTAAAATCAAATTTTAAAGAAAGAAAAAGACATCTATTCAAACCTTTCTAATG  
ATCTGACTAAAAATATTTAAAAGGTAATTACTATGTTAGTTTTAGTTTT

>PGSC0003DMG401020789-(rev)LRR-RLPs\_549

TCGACTTTGAGAAATTGACACCCCTCTACAAATTGGAGCATCTGAGGACATTGCTTCCAATCAATTTCCA  
ACATGGTGCTCCACTTAGCAAAGGGTGCTGCATAACATATTGCCAAGAC

>PGSC0003DMG401020789-(rev)LRR-RLPs\_5490

CTTTCTAATGATCTGACTAAAAATATTTAAAAGGTAATTACTATGTTAGTTTTAGTTTTTTAATCTATTTA  
TAATGTAAAGCTCTATTTCAATTTGTTGAAAGTTGCAGTAGAAAATGTT

>PGSC0003DMG401020789-(rev)LRR-RLPs\_5551

TAATCTATTTATAATGTAAAGCTCTATTTCAATTTGTTGAAAGTTGCAGTAGAAAATGTTTTGATGTGAACT  
GCAAACACTTGAGTTTTCAATTTGCCAAATGAGACTTGTTTAATATAAGT

>PGSC0003DMG401020789-(rev)LRR-RLPs\_5612

GATGTGAACTGCAAACACTTGAGTTTTCAATTTGCCAAATGAGACTTGTTTAATATAAGTTTTCTGAATTAA  
GTATTCACATTTATGTATTTTTTAAATATGCAGTAAAATCAAGTTGTTT

>PGSC0003DMG401020789-(rev)LRR-RLPs\_5673

TCTGAATTAAGTATTCACATTTATGTATTTTTTAAATATGCAGTAAAATCAAGTTGTTCTTTTAGTTCTCAC  
TTTAGATTGAGGTGGAAAATAATGAATTTGATTGGAGAAATAGTGAAA

>PGSC0003DMG401020789-(rev)LRR-RLPs\_5795

TCTTGATTATTCATTTGCAATAAAAGAAAAGATACTTGAAGGTTCTTTTTGTTAGATTTTTGTGTGGAAT  
TTGCTTATGTTGTTTTTTGGAGTTTTTTTTATTTTTTGGTAAACTGGT

>PGSC0003DMG401020789-(rev)LRR-RLPs\_5978

CAGGGAAGTTCTATGTCTTTTAAAGCCTCCAACCTGACAAGAAAAGTACATGAAAAAATGCTGAAT

CAGCCTATAACTTCTACGAGCTTTCTTGGATCCTCTAAACAATGCTAGTC

>PGSC0003DMG401020789-(rev)LRR-RLPs\_6039

ATGCTGAATCAGCCTATAACTTCTACGAGCTTTCTTGGATCCTCTAAACAATGCTAGTCTCTCTGTAAATT  
CTGTTTTTATCTGCCATCTCACTATTAACAGTGGTGTCTATACT

>PGSC0003DMG401020789-(rev)LRR-RLPs\_610

CAATTTCCAACATGGTGCTCCACTTAGCAAAGGGTGTGCATAACATATTGCCAAGACTAACATCCTTA  
AGGGCATTATCGTTGTCAAATTATGGGACTGTGGAGTTGCCGGATGCCTT

>PGSC0003DMG401020789-(rev)LRR-RLPs\_6100

TCTGTAAATTCTGTTTTTATCTGCCATCTCACTATTAACAGTGGTGTCTATACTTCTAGTTCCTTGC  
CATCCAAGTGTGGTAACTATGGCACTCCAAATTGCTGCAAATACTTC

>PGSC0003DMG401020789-(rev)LRR-RLPs\_6161

TAGTTCCTTGCCATCCAAGTGTGGTAACTATGGCACTCCAAATTGCTGCAAATACTTCCTTATAAAATTG  
CCTCTAATTTTTCTGCTTGATCATTCTAGGACTTGTCTCACCTCACCT

>PGSC0003DMG401020789-(rev)LRR-RLPs\_6222

TATAAAATTGCCTCTAATTTTTCTGCTTGATCATTCTAGGACTTGTCTCACCTCACCTGGGTAACTTGCA  
TACCACCCCATGATAAAATTCAGCTTTCATTTGTCCCAACCAAGTGC

>PGSC0003DMG401020789-(rev)LRR-RLPs\_6344

TGGGCGAAGAGATGCAGTTGAGTCTCCATCACTTGGCTGCGGCACAAACAACATATCTCATTATCAACAT  
GAATGTTCAAATGTAGTATCCGCTCCTTGGTAAGTCACCTGCCTTGTACT

>PGSC0003DMG401020789-(rev)LRR-RLPs\_6405

TATCAACATGAATGTTCAAATGTAGTATCCGCTCCTTGGTAAGTCACCTGCCTTGTACTGCTAACCACGTT  
ATCATTCTATGTCTTGGCTGTGCTACAGATGTCCAGATAAGATCAGCTA

>PGSC0003DMG401020789-(rev)LRR-RLPs\_6588

AGTGGGTCAAAGTATACTCCCTTGTACTTACCCGTTCCCTCATATTGTTCTTCAGTGCATTTAGTTTTTTCC  
AATAACAAGTTGTAGTCTAGAGGCGGGGTATGCTCCACATGGAAACAT

>PGSC0003DMG401020789-(rev)LRR-RLPs\_6649

TAGTTTTTTCCAATACAAGTTGTAGTCTAGAGGCGGGGTATGCTCCACATGGAAACATCATTCTCATA  
TAGAGCCCATGGACCCATTTCACTAAAAGTATTATCTTGTCTCTGATA

>PGSC0003DMG401020789-(rev)LRR-RLPs\_6710

TTCCTCATATAGAGCCCATGGACCCATTCCTACTAAAAGTATTATCTTGTTTCTCTGATAACTGCCAGAGAG  
GTTTGCCAAGTGATGCAACATTCCAGTTGCTACATCCCTTTACATTCAG

>PGSC0003DMG401020789-(rev)LRR-RLPs\_6771

TGCCAGAGAGGTTTGCCAAGTGATGCAACATTCCAGTTGCTACATCCCTTTACATTCAGCCCTCCGAACA  
TTTTTGACAAGAAATTTCTCCAAGCCACAAGTAGCACTTTCCTCTTCT

>PGSC0003DMG401020789-(rev)LRR-RLPs\_854

GAGGAGCTACCATTGCAGATGGAAAAGTTGATCAACTTGCATCATCTTGACATAAGTAACACTTCTTTCT  
TGGAGATGCCACTACATCTGAGCAAGTTGAAGAGCCTCCGTGTGCTAGTG

>PGSC0003DMG401020789-(rev)LRR-RLPs\_915

CTTCTTTCTTGAGATGCCACTACATCTGAGCAAGTTGAAGAGCCTCCGTGTGCTAGTGGGAGCCAAGTT  
TCTTCTAGGTGGATCAAGCATGGAAGATTTGGGTGAACTGCATAACTTGT

>PGSC0003DMG401020789-(rev)LRR-RLPs\_976

AGCCAAGTTTCTTAGGTGGATCAAGCATGGAAGATTTGGGTGAACTGCATAACTTGTATGGATCTCTA  
TCAATTCTAGAGTTGCAAATGTGGTTGATAGAAAGGATGCTGTGAAGGC

>PGSC0003DMG401021043LRR-RLPs\_0

TTGAGCGGTTTCAGTTGAATATTCACGCTTAATGATTCAGTTTATTGGTTAATGGTTATCGAATTTTAAATC  
GTTAACCAGGGCCGGCTCTGCCTATAAACTCCACCTAATAATAATTGAG

>PGSC0003DMG401021043LRR-RLPs\_1054

AAAAGTGCATTTTTTAAATTTGAAATATGTCTGCTGCTTCTCAAGCTTCTCTTTATTGTGCAAATTTCTGG  
ACCAGTTTTGTTTTAAATGAACCACAAGTTTATGGAAGAGACAAAGA

>PGSC0003DMG401021043LRR-RLPs\_1116

AAATTCTGGACCAGGTTTTGTTTTAAATGAACCACAAGTTTATGGAAGAGACAAAGAAAAGGATGAGA  
TAGTGAAAATCCTAATAAACAATGTTAGCGATGCCCAAACACTTCCGGTCC

>PGSC0003DMG401021043LRR-RLPs\_124

ATTGTGGAATAATTGAGTTTGTAAATTATAACAACTCCATCAAGTCAAGCTTTGTGCTTCTTACAGTCAGCT  
GTCCATATTACATCGATCTTACTTTATAGATTTATTGCTTACTCACAAC

>PGSC0003DMG401021043LRR-RLPs\_1302

GAGTAATTGAGCATTTCCATCCCAAATATGGATTTGTGTCTCGGAAGATTTTAAATGAGAAGAGGTTGAT  
AAGGAAATTGTAGAATCTATTGAAGGAAGGCCACTACTTGGTGACATGCA

>PGSC0003DMG401021043LRR-RLPs\_1364

AGGTTGATAAGGAAATTGTAGAATCTATTGAAGGAAGGCCACTACTTGGTGACATGCACTTGGCTCCAC  
TTCAAAGAAGCTTCAGGAGTTGTTGAATGGAAAAACATACTTGATTGTCT

>PGSC0003DMG401021043LRR-RLPs\_1426

GCTCCACTTCAAAGAAGCTTCAGGAGTTGTTGAATGGAAAAACATACTTGATTGTCTTAGATGATGTTT  
GGAATGAAGATCAACAAAAGTGGGCTAATTTAAGAGCAGTCTTGAAGGTT

>PGSC0003DMG401021043LRR-RLPs\_1488

TGATGTTTGAATGAAGATCAACAAAAGTGGGCTAATTTAAGAGCAGTCTTGAAGGTTGGAGCAAGTG  
GTGCATCTATTCTAACCCTACTCGTCTTGAAAAGGTTGGATCAATTATGGG

>PGSC0003DMG401021043LRR-RLPs\_1550

CAAGTGGTGCATCTATTCTAACCCTACTCGTCTTGAAAAGGTTGGATCAATTATGGGAACCTTGCACCC  
ATATGAATTGTCAAATTTGTCTCAAGAAGATTGTTGGTTGTTGTTTCATTC

>PGSC0003DMG401021043LRR-RLPs\_186

CAGTCAGCTGTCCATATTACATCGATCTTACTTTATAGATTTATTGCTTACTCACAACAATTCCACCAATCT  
ACACTCCCTCCACATATATGGCTGAAGCTTTCCTTCAAGTTCTGTTAG

>PGSC0003DMG401021043LRR-RLPs\_1860

TCTGTTCTGCCTGCCCTGAGACTTAGTTACCATCATCTTCCACTTGATTTGAGACAATGCTTTGCATATTGT  
GCAGTATTCCCAAAGGACACCGAAATAGAAAAGGAAAATCTAATCTCT

>PGSC0003DMG401021043LRR-RLPs\_1922

TGCATATTGTGCAGTATTCCCAAAGGACACCGAAATAGAAAAGGAAAATCTAATCTCTCTCTGGATGGC  
ACAGGGTTTTCTTTTATCGAAAGGAACTTGGAGCTAGAGGATGTAGGTAA

>PGSC0003DMG401021043LRR-RLPs\_2046

GTATGGAATGAATTATACTTAAGGTCTTTCTTCCAAGAGATTGAAGTTATATATGGTTCGAACTTATTTCAA  
GATGCATGATCTCATTGATGATTTGGCAACATCTCTGTTTTTCGGCAAGC

>PGSC0003DMG401021043LRR-RLPs\_2108

TTATTTCAAGATGCATGATCTCATTGATGATTTGGCAACATCTCTGTTTTTCGGCAAGCGCATCAAGCAACA  
ATATCCGTGAAATAAGTGTAAGGTCACCCACATATGATGTCAATTGG

>PGSC0003DMG401021043LRR-RLPs\_2170

CAAGCAACAATATCCGTGAAATAAGTGTAAGGTCACCCACATATGATGTCAATTGGTTTTCGCAAAAG

TGGTGTCTTCTTACTCTCGTTCTCACTTGCAAAAGTTTGTCTCGTTGAGGG

>PGSC0003DMG401021043LRR-RLPs\_2232

GCAAAAGTGGTGTCTTCTTACTCTCGTTCTCACTTGCAAAAGTTTGTCTCGTTGAGGGTGCTTAATCTAAG  
TTACATAGAACTTAAGCATTACCGTCTTCCATTGGAGACCTAGTACAT

>PGSC0003DMG401021043LRR-RLPs\_2294

TAATCTAAGTTACATAGAACTTAAGCATTACCGTCTTCCATTGGAGACCTAGTACATTTAAGATACCTAA  
ACTTGTCTGGCAATCTTAGAATTCGTAGTCTTCCAAAGCAGTTATGCAA

>PGSC0003DMG401021043LRR-RLPs\_2356

GATACCTAACTTGTCTGGCAATCTTAGAATTCGTAGTCTTCCAAAGCAGTTATGCAAGCTTCAAATCT  
GCAGACTCTTGATCTACATAGATGCTACTCTCTTTCTTGTTTGCCAAAAG

>PGSC0003DMG401021043LRR-RLPs\_2480

AAGTAACTTGGTAGTCTCCGAAATCTTCTACTTAATGATTGCTATGGATTGACTTGTATGCCACCAAGG  
ATAGCATCTTTGACATGCCTTAAGACTCTTGTTGCTTTGCAGTGGGAAG

>PGSC0003DMG401021043LRR-RLPs\_2542

CACCAAGGATAGCATCTTTGACATGCCTTAAGACTCTTGTTGCTTTGCAGTGGGAAGGAAGAAAAGTT  
GTCGAATTGGTGAATTACGAAACCTGAATCTCTATGGCTCAATTTCAATCA

>PGSC0003DMG401021043LRR-RLPs\_2790

GTTGAAGTGCTTGAAGCCCTCAAACCACACTCCAATCTGACAATTTTAAAAATCAGTGGCTTCAAAGGAA  
TCCGTCTCCAGAGTGGATGAATCACTCAGTTTTGAAAAATGTTGTCTCT

>PGSC0003DMG401021043LRR-RLPs\_2852

CAAAGGAATCCGTCTCCAGAGTGGATGAATCACTCAGTTTTGAAAAATGTTGTCTCTATTGAAATCATG  
TATTGCAGTAACTGCTCATGCTTACCACCCTTTGGTGAGCTGCCTTGTCT

>PGSC0003DMG401021043LRR-RLPs\_2976

AGTCTAGAGTTACAGAACGGGTCTGCGGAAGTGGAGTATGTTGATTCTGGATTCCCTACAAGAAGAAG  
GTTTCCATCGCTGAGAAAATTATTATAGGTGAATTCATAATCTGAAAGGA

>PGSC0003DMG401021043LRR-RLPs\_3100

TGAAAAAGGAAGGAGAAGAGCAATTCCTGTCCTTGAAGAGATGGAGATTCAGTGGTGCCCTGTGTTT  
GTTATTCCGACCCTTTCTTCTGTCAAGAAATTGGTAGCTTATGGGGACAAGT

>PGSC0003DMG401021043LRR-RLPs\_3162

GTGTTTGTATTCCGACCCTTTCTTCTGTCAAGAAATTGGTAGCTTATGGGGACAAGTCAGATGCAATAG  
GTTTCAGTTCATATCTAATCTCAGGGCTTACTTCCCTCCGAATTAGG

>PGSC0003DMG401021043LRR-RLPs\_3224

TGCAATAGGTTTCAGTTCATATCTAATCTCAGGGCTTACTTCCCTCCGAATTAGGGATAACAAAGAA  
ACTACTTCACTCCCAGAAGAGATGTTCAAAGCCTTGCAAATCTCAAATA

>PGSC0003DMG401021043LRR-RLPs\_3286

ACAAAGAACTACTTCACTCCCAGAAGAGATGTTCAAAGCCTTGCAAATCTCAAATACTTGAAAATCTC  
TTTCTTTAAGAATCTCAAAGAGCTGCCTACCAGCTTGGCTAGTCTTAATG

>PGSC0003DMG401021043LRR-RLPs\_3348

AAAATCTCTTTCTTTAAGAATCTCAAAGAGCTGCCTACCAGCTTGGCTAGTCTTAATGCTTTGAAGCATCT  
GGATATTATTTGGTGTGACGCACTCGAGAGTCTCTCCGAGGAAGGGGTG

>PGSC0003DMG401021043LRR-RLPs\_3410

GAAGCATCTGGATATTATTTGGTGTGACGCACTCGAGAGTCTCTCCGAGGAAGGGGTGAAAGGTTTAAC  
TTCACTCACACAGTTATCCATAACAAAGTGTGAAATGCTACAATGTTTACC

>PGSC0003DMG401021043LRR-RLPs\_3596

GCGATGTGAGAAGGGAATAGGACAAGACTGCTACAAAATTGCTCACATTCCTGATGTGTTTATTATCCT  
TGTCTTATTCCTAATTAGATGTAGTTTTCTGATTTTCTTTTGGAAGCAAA

>PGSC0003DMG401021043LRR-RLPs\_3658

TTTATCCTTGCTTATTCCTAATTAGATGTAGTTTTCTGATTTTCTTTTGGAAGCAAATCAACTATTTGTAA  
GATCTATTTGTATTATACTTGATTTTTCTTGGGTCTGTAACAATAAA

>PGSC0003DMG401021043LRR-RLPs\_434

AAGGACAAGGCAATAGAAAATTGGTTGCAGAACTCAATTCTGCTGCATATGAAGCTGATGACATCTTG  
GACGAATGTAAAAGTGGCACCATTAGACACAAGAAGAATAAATATGGG

>PGSC0003DMG401021043LRR-RLPs\_496

CATCTTGGACGAATGTAAAAGTGGCACCATTAGACACAAGAAGAATAAATATGGGTGTTATGATCC  
AAACATCACTTTCCGTCACAAGATTGGGAAAAGGATGAAAAACATTATGGA

>PGSC0003DMG401021043LRR-RLPs\_558

ATGATCCAAACATCACTTTCCGTCACAAGATTGGGAAAAGGATGAAAAACATTATGGAGAACTAGATG  
ATATTGCAGCGGAACGAATTAAGTTTCATTTGGGAAAACATTATGGAGAAA

>PGSC0003DMG401021043LRR-RLPs\_62

TTTTAAATCGTTAACCAGGGCCGGCTCTGCCTATAAACTCCACCTAATAATAATTGAGAGATATTGTGGA  
ATAATTGAGTTTGTAAATTATAACAACCTCCATCAAGTCAAGCTTTGTGCTT

>PGSC0003DMG401021043LRR-RLPs\_620

CTAGATGATATTGCAGCGGAACGAATTAAGTTTCATTTGGGAAAACATTATGGAGAACTAGATGCAAT  
TGCAGCGGAACGAATTAAGTTTCATTTGGATGAAAGGACTATAGAGAGACA

>PGSC0003DMG401021043LRR-RLPs\_744

GCTACACGCCAAACAGGTGCTCATCTTTAAATGATTTTCTAGTAATACAACAGCTTTATATCATCAAATTC  
ATGTGTGTTTTTGGGATTTTGTCTAATCTAAATGTTTCGTCTCAAGTCTA

>PGSC0003DMG401021043LRR-RLPs\_806

ATCAAATTCATGTGTGTTTTTGGGATTTTGTCTAATCTAAATGTTTCGTCTCAAGTCTAAATAGGATTTATT  
AATTGGGTTCAAATCTATTATCTAAATCTGTTTCAGTGAAGTTTTAAAC

>PGSC0003DMG401021043LRR-RLPs\_868

GGATTTATTAATTGGGTTCAAATCTATTATCTAAATCTGTTTCAGTGAAGTTTTAAACATATATAGCCTCA  
GATAAATCCATAGCTTACTCATAGGATTAGGATATGCCCCAAGTCTAA

>PGSC0003DMG401021043LRR-RLPs\_930

ATAGCCTCAGATAAATCCATAGCTTACTCATAGGATTAGGATATGCCCCAAGTCTAAATGACAGGATAA  
AGCCAGATTTGTTTTAGATCTTATAAATTAACAATGATAATAATGTGAAT

>PGSC0003DMG401021043LRR-RLPs\_992

CAGGATAAAGCCAGATTTGTTTTAGATCTTATAAATTAACAATGATAATAATGTGAATTCAAAAAAGTGC  
ATTTTTTAATTTGAAATATGTCTGCTGCTTCTCAAGCTTCTCTTTATTG

>PGSC0003DMG401021049LRR-RLPs\_0

ATGTTTACAATAGTTCCTAATGTTTCTGATTATTGTATCGGCATAAGAGGCCAATGGATTTCAGTCATATCC  
AAAACTCTTTCATGGAACAAGAGCACAGATTGTTGCTCTTGGGATGGA

>PGSC0003DMG401021049LRR-RLPs\_1197

AATCAGCTGGAAGGTCCTATTCCAAAGTCATTCCTAAAACCAGCAGGGACTATACTATCTTATTCTTTCTC  
AAAATAATCTCAGTGGACATATTGATTCAGCCATCTGCAATCTGAATTT

>PGSC0003DMG401021049LRR-RLPs\_1512

TTTGATCAATTGCAAATATTTGGAAATCTTTGATTTAGGTAACAATGAGTTGAATGACACATTTCCAAAAT

GGTTGGGAGCCCTACCTGATTTGCAGATTTTAAACATGAGATCAAATAA

>PGSC0003DMG401021049LRR-RLPs\_1827

TTCTTTGATAGTGACAACAAAGGAACTGGATCTTGAACCTCCTCAAGTTTTGACTACGGACATAATTATT  
GATCTCTCAATGAATAGATTTGAAGTTCTATCCCAAGTATTATTGGAGA

>PGSC0003DMG401021049LRR-RLPs\_2205

ACGTGGATTGCCACTCTCAAAGATTGTGGCAGTGATGAAGGGGTACCACAAGCAACAACTCCATTTGG  
GCTAGATCAAGAAGAAGGAGATTCATCAATGATAAGTTGGCAGGCGGTTCT

>PGSC0003DMG401021049LRR-RLPs\_2331

TTACGGTTGTGGACTTGTTATTGGACTGTCCGTAATATATATTATGTTGTCAACTCGATATCCAGTGTGGT  
TTTCGAGGATGGATGTAGATTTGGAACACAAAATTCTTACGAGAATGAA

>PGSC0003DMG401021049LRR-RLPs\_2394

AGTGTGGTTTTTCGAGGATGGATGTAGATTTGGAACACAAAATTCTTACGAGAATGAAGAAATACAAAA  
AGGATATGTAACCTCCAGGTATTAACCTGATCTTTTTCTTCAAAGATTA

>PGSC0003DMG401021049LRR-RLPs\_2487

ACTTGATCTTTTTCTTCAAAGATTAATTTTTATATAGCAATGAATTTTCTATTTCTTCATCCTTGAAGAT  
CTTGACTTTTAGTCTTCTTTTTTAAAATTGCAGGATTCAAGCCTAA

>PGSC0003DMG401021049LRR-RLPs\_252

GATTTTTCTGGGTCGCTCATTTACCTAAATTTGGTGAGTTTTCTAGTGTGACGCATCTTGATTTTCTTCTT  
ACAAGTTTTACTGGTCTAATCCCAGGAGAAATCTCTCACCTTTCTAAA

>PGSC0003DMG401021049LRR-RLPs\_315

TTTCTTCTTACAAGTTTTACTGGTCTAATCCCAGGAGAAATCTCTCACCTTTCTAAATTACGGGTTCTTCGT  
ATCCGGAGTGATTATGGGGTTAGATTTGGACCTAACAATTTTGAATTG

>PGSC0003DMG401021049LRR-RLPs\_441

AAAACTTGACCCAATTAAGAGAGCTCGACCTTAACTTTGTGAACATCTCTCCACGTTTCCTCTAAATTT  
CTCTTCTTATTTAACTCTATGGCTTCCATACACACAGTTACGTGGG

>PGSC0003DMG401021049LRR-RLPs\_693

GGTGTGAATTTCACTGGTAAGATACCTGAATTATTTAGTCATCTAACTTCATTGGTTGACTTAGTGATGA  
GTTCTTCCAATCTCTCGGGGCCATTCTTAATCCTTTATGGAATCTCACC

>PGSC0003DMG401021049LRR-RLPs\_882



AAGCTCAGGGAGTTCTCGCTTAGAAATAACAACCTTTGATCTCCAACCTTGAGTACTTACCCTTTAACAGAA  
GCTGGACACAACCTTGAAATGTTAGACTTTTTCGTCCAATTACCTAACTGGT

>PGSC0003DMG401021514LRR-RLKs\_0

CAATAATTCACTACATAGCTCGCTATAAGTTCAACAGTATCCAAAACAAGCAACGTAATGATGATG  
GTTTCATAGAATATTGCTCTTTTTTTTATTTAGAGTTTCTTTTGCTGCTTC

>PGSC0003DMG401021514LRR-RLKs\_1054

CCACCAGAGATTGGAAACATCAAAGGGCTTCAAGGACTTGATCTTTCATCCAATCATTGGTTGGGCAG  
ATACCTATGGAATTTGGAAAATTGACCTCTCTTGTAAATCTTTTTTTGCAA

>PGSC0003DMG401021514LRR-RLKs\_1116

TGGGCAGATACCTATGGAATTTGGAAAATTGACCTCTCTTGTAAATCTTTTTTTGCAAAACAACCACATTT  
CTGGAAATATACCTAGGGAACCTGGGTCACTCACAAAATTACTGTCCCT

>PGSC0003DMG401021514LRR-RLKs\_1178

ACCACATTTCTGGAAATATACCTAGGGAACCTGGGTCACTCACAAAATTACTGTCCCTTGATCTATCAAAC  
AATAGATTGAACGGGTTCGATCCCAACATTTATAGGAGATTACATGAACA

>PGSC0003DMG401021514LRR-RLKs\_124

GAGGAAGCAATAGGTCTCCTCAAATGGAAAGCAACTATCGAAAACCAGAATACTTCCTTATTTGTTTCTT  
GGACAATAAGTGTCAAGAATTCTCCAGCCATGGAGAAGCAAATCCTGAT

>PGSC0003DMG401021514LRR-RLKs\_1240

CTATCAAACAATAGATTGAACGGGTTCGATCCCAACATTTATAGGAGATTACATGAACATGTTTCTCTTGA  
ACCTAAGCAACAACAAGTTTAGCCAAAAAATTCCAAAGGAGATAGGGAGG

>PGSC0003DMG401021514LRR-RLKs\_1302

TCTCTTGAACCTAAGCAACAACAAGTTTAGCCAAAAAATTCCAAAGGAGATAGGGAGGATAGTTCATCT  
TACTGCACTTGATTTGAGTCATAATCTTCTTGATGGAGAAATACCCCCTCA

>PGSC0003DMG401021514LRR-RLKs\_1364

TTCATCTTACTGCACTTGATTTGAGTCATAATCTTCTTGATGGAGAAATACCCCCTCAGTTAGCCAGTTTG  
CTGGACTTGGCAAACCTGAATCTTCCCACAATAGCCTCTCTGGCCGCA

>PGSC0003DMG401021514LRR-RLKs\_1426

GCCAGTTTGCTGGACTTGGCAAACCTGAATCTTCCCACAATAGCCTCTCTGGCCGCATTCTGAAGAATT  
TGAAAGTTTGACTGGTCTGCAGGATGTTGTATTGTCATACAATGAGTTG

>PGSC0003DMG401021514LRR-RLKs\_1488

TGAAGAATTTGAAAGTTTGACTGGTCTGCAGGATGTTGTATTGTCATACAATGAGTTGGAAGGTCCAAT  
ACCAAATAATAAAGCTTTTACAAATGCCTCATTGGAAGGTAATAAAGGTCT

>PGSC0003DMG401021514LRR-RLKs\_1550

GTCCAATACCAAATAATAAAGCTTTTACAAATGCCTCATTGGAAGGTAATAAAGGTCTTTGCGGCAATGT  
AACAGGATTTGTGCAATGCAAAATGCCCTCTTCTATGATGAAGAAGCAAT

>PGSC0003DMG401021514LRR-RLKs\_1612

GGCAATGTAACAGGATTTGTGCAATGCAAAATGCCCTCTTCTATGATGAAGAAGCAATCAATGGCAAAG  
GGACGTAAACTCATTCTCATCACTCTACTTCCTGTATTGGGAGCACTGTTA

>PGSC0003DMG401021514LRR-RLKs\_1674

GGCAAAGGGACGTAAACTCATTCTCATCACTCTACTTCCTGTATTGGGAGCACTGTTACTATGTGCTTTTCG  
TTAGCATTCTCCTTATGCGTGTTAAAAGAAAGAGAGTACTTAGAGACGT

>PGSC0003DMG401021514LRR-RLKs\_1736

GTGCTTTCGTTAGCATTCTCCTTATGCGTGTTAAAAGAAAGAGAGTACTTAGAGACGTTGATAGAGGAG  
ATGATGGTTTGCCTTCGATATCAATGTTAGAAGGAAAGGCATTGTATAGGG

>PGSC0003DMG401021514LRR-RLKs\_1798

AGAGGAGATGATGGTTTGCTTTCGATATCAATGTTAGAAGGAAAGGCATTGTATAGGGATATCATAAAC  
GCCACAGAGGAGTTTGATGCAACATTTTGCATCGGGAAAGGAGGGCATGGA

>PGSC0003DMG401021514LRR-RLKs\_186

TGTTTCTTGGACAATAAGTGTCAAGAATTCTCCAGCCATGGAGAAGCAAATCCTGATGCATGCAGGGG  
CTGGTATGGAGTTAAATGTTTTAACGGTCGGGTAAACATGTTGAATATTAA

>PGSC0003DMG401021514LRR-RLKs\_1860

CATAAACGCCACAGAGGAGTTTGATGCAACATTTTGCATCGGGAAAGGAGGGCATGGAAGCGTTTACA  
AGGCAAATCTTCCATCATTAGGGAATATAGCTATAAAGAGACTTCATTCTTC

>PGSC0003DMG401021514LRR-RLKs\_1922

TTTACAAGGCAAATCTTCCATCATTAGGGAATATAGCTATAAAGAGACTTCATTCTTCATTTGAGAATTCA  
TATCACAATAGCTTCATGAATGAAATAAGGGCATTGATAGGGATTAAGC

>PGSC0003DMG401021514LRR-RLKs\_2046

GAACATTGTGAACCTCTACGGCTATTGTTGCAATGCACAACACTCGTTCTTGGTTTACGAGTATGCAGAG

AGGGGAAGTTTGTCTAGTATATTGAGCAACGAAGTTGAGTCCAGAAAATT

>PGSC0003DMG401021514LRR-RLKs\_2108

ATGCAGAGAGGGGAAGTTTGTCTAGTATATTGAGCAACGAAGTTGAGTCCAGAAAATTGGATTGGCTA

AAGAGGGTGAATATTATCAAAGGAGTTGCTTTTGCTTTATCTTACATGCACC

>PGSC0003DMG401021514LRR-RLKs\_2170

TGGCTAAAGAGGGTGAATATTATCAAAGGAGTTGCTTTTGCTTTATCTTACATGCACCATGATTGCTCCC

CACCGATTGTCCATAGAGACATATCAAGCAGTAATGTTTTGCTTGATTCC

>PGSC0003DMG401021514LRR-RLKs\_2232

TTGCTCCCCACCGATTGTCCATAGAGACATATCAAGCAGTAATGTTTTGCTTGATTCCAAGTATGAAGCTC

GTGTCTCTGATTTTGGCATTGCTAAGATTCTCAAGCCAGACTCATCCAA

>PGSC0003DMG401021514LRR-RLKs\_2294

ATGAAGCTCGTGTCTCTGATTTTGGCATTGCTAAGATTCTCAAGCCAGACTCATCCAATTGCACTGCGTTG

GCAGGAACATATGGCTATGTTGCACCAGGTTAGGTCTAACTTTACATTT

>PGSC0003DMG401021514LRR-RLKs\_2356

ACTGCGTTGGCAGGAACATATGGCTATGTTGCACCAGGTTAGGTCTAACTTTACATTTCTCTTTTTTTTC

AACTTTATGAACTATAGCCAAAGACTCCATTCTGTTTTTATTTCAATTT

>PGSC0003DMG401021514LRR-RLKs\_2418

TTTTTTTTCAAACCTTATGAACTATAGCCAAAGACTCCATTCTGTTTTTATTTCAATTTACACATTTGAATTGT

TACCTCTTTAGTTCAATTTGTTTGTCTTACTTTCAATTTTAGTATGT

>PGSC0003DMG401021514LRR-RLKs\_248

GCAGGGGCTGGTATGGAGTTAAATGTTTTAACGGTCGGGTAAACATGTTGAATATTAATAATGCTGGTG

TCATTGGTACACTCCGTGATTTTCCATTTTCATCTCTCTTATCTTGAAT

>PGSC0003DMG401021514LRR-RLKs\_2728

AGGGAGTAATACTTTTTCGTAAATTGTGTTGCTTCAGAGCTTGCATATACAATGAAGGTTACACAAATGT

GTGATGTCTATAGTTTTGGAGTATTAGCATTGGAGATAATCAAAGGAAA

>PGSC0003DMG401021514LRR-RLKs\_2790

ACAAATGTGTGATGTCTATAGTTTTGGAGTATTAGCATTGGAGATAATCAAAGGAAAGCATCTTGGGG

AATACATTAATGTGCTAGCAAATTCATCGACTAGAGATAACGTAAGTGCAGT

>PGSC0003DMG401021514LRR-RLKs\_2852

CTTGGGGAATACATTACTGTGCTAGCAAATTCATCGACTAGAGATAACGTAAGTGCAGTTTAGCGATTTGC  
TAGATGAACGCCTTCCATATCCTGAAGAGAGAGTAAAAGAGGTTTTGCTT

>PGSC0003DMG401021514LRR-RLKs\_2914

CGATTTGCTAGATGAACGCCTTCCATATCCTGAAGAGAGAGTAAAAGAGGTTTTGCTTTTTATCATCAAG  
CTAGCAAGCTCTTGTGTTGCTTGAAACTCCAAAATCAAGGCCAACAATGTA

>PGSC0003DMG401021514LRR-RLKs\_3038

ATCTCTCATAGTTATCATCAATAGATACGCATCCACCTATTTATGGAAGGCGATATGAATAACCTTTGAC  
ACCAAGTGGTTGTAAAGTTCCACAAAATGTTATTACTGGGACTAGTATT

>PGSC0003DMG401021514LRR-RLKs\_310

GCTGGTGTCAATTGGTACACTCCGTGATTTCCATTTTCATCTCTCTTATCTTGAATATGTTGATCTTAGT  
ATCAACCAGCTCTCTGGCATCATCCCTGCTGCAATAGGAAAGCTCACT

>PGSC0003DMG401021514LRR-RLKs\_3100

ACCTTTGACACCAAGTGGTTGTAAAGTTCCACAAAATGTTATTACTGGGACTAGTATTGTTGGTTAAAT  
CTTAGGGTGCTTAACTGGTTTATTGTACTAGAGTGTATGCAGTGAATGT

>PGSC0003DMG401021514LRR-RLKs\_3134

AATGTTATTACTGGGACTAGTATTGTTGGTTTAAATCTTAGGGTGCTTAACTGGTTTATTGTACTAGAGT  
GTATGCAGTGAATGTTGAAGGTAATTATCTAATTTCCATAGTATTTTGC

>PGSC0003DMG401021514LRR-RLKs\_434

TTGTCTATCTTGACTTGGGGTCTAATCAGTTTTTCAGGCACAATCCCACCACAAATCGGCTCACTAACAAA  
GCTTGAGACCCTCCGCATCGTTAACAATCATTTACATGGTTCCATTCCAG

>PGSC0003DMG401021514LRR-RLKs\_496

CTAACAAAGCTTGAGACCCTCCGCATCGTTAACAATCATTTACATGGTTCCATTCCAGGGGAGTTGGGGA  
ATTTGCAAAACCTCACTAGACTTGCTTTGTACGATAATCAACTTACTGGT

>PGSC0003DMG401021514LRR-RLKs\_62

TGATGATGGTTCATAGAATATTGCTTTTTTTTTATTTAGAGTTTCTTTTGCTGCTTCCACTGAGGAAGCA  
ATAGGTCTCCTCAAATGGAAAGCAACTATCGAAAACCAGAATACTTCCT

>PGSC0003DMG401021514LRR-RLKs\_620

TTCCTGCTTCATTTGGCAATTTGAGAACTTGCATATTCTGAATATACGTGCCAACAACTTTCTGGTTCC  
ATCCCTAAAGAGCTTGCATATTTGGATAACTTGGTAGTGATGATAATGA

>PGSC0003DMG401021514LRR-RLKs\_682

TCTGGTCCATCCCTAAAGAGCTTGCATATTTGGATAACTTGGTAGTGATGATAATGAGTAAAAATGAAT  
TTTCAGGTCATTTGCCAGAGAAGCTTTGCCAAGGTGGTAAACTTGAGAAT

>PGSC0003DMG401021514LRR-RLKs\_744

AAATGAATTTTCAGGTCATTTGCCAGAGAAGCTTTGCCAAGGTGGTAAACTTGAGAATTTTACAGTGAG  
CAGTAACAAACTTTTCAGGGCCAATACCAAGAAGCTTCAGCAAGTGCTCGAG

>PGSC0003DMG401021514LRR-RLKs\_806

CAGTGAGCAGTAACAAACTTTTCAGGGCCAATACCAAGAAGCTTCAGCAAGTGCTCGAGTTTTAAAAGGG  
TTCGCTTTGATAACAACAGCTTCACTGGGAATTTATCTGAAGCTTTTGGTA

>PGSC0003DMG401021514LRR-RLKs\_868

AAAAGGGTTCGCTTTGATAACAACAGCTTCACTGGGAATTTATCTGAAGCTTTTGGTATCTACACGGAGC  
TTCAGTTCATCGATTTGAGCGACAATGATTTCCATGGTGAACCTCAGCAGC

>PGSC0003DMG401021514LRR-RLKs\_930

CACGGAGCTTCAGTTCATCGATTTGAGCGACAATGATTTCCATGGTGAACCTCAGCAGCAACTGGGGGAA  
ATGTATGAATTTAACTAATCTGCAGGTGGCTAGAAATAACATTAGTGGTAG

>PGSC0003DMG401021514LRR-RLKs\_992

GGGGGAAATGTATGAATTTAACTAATCTGCAGGTGGCTAGAAATAACATTAGTGGTAGCATAACCACCAG  
AGATTGGAAACATCAAAGGGCTTCAAGGACTTGATCTTTCATCCAATCATT

>PGSC0003DMG401022197LRR-RLPs\_0

TGATAATATAAGATTGTTTCATAAACAACAAAAAAAAAATGAATTTGAACTTGTCACCTCTTGTAGTTATTTTT  
CTTTGCTTTGCTTCTCCTTCAGTCTCAGTAAGATGCAATCCAAAAGACA

>PGSC0003DMG401022197LRR-RLPs\_1008

CGGACTGTAAGTAGATATGGAGTTTCGAGGATTTGGATAGCCGAATGTTGTGGGAGAGGCATGAAGCCT  
CTCCTATATATTCCTAATCATATTTAGGAATCACATTTTTTCTGTCTGTATT

>PGSC0003DMG401022197LRR-RLPs\_1071

AGCCTCTCCTATATATTCCTAATCATATTTAGGAATCACATTTTTTCTGTCTGTATTTGTATATGTTGCTTAA  
TTAGCTTTGTATCTTCTAATCTGTCCGTTGAGAGTCTATTGAATAT

>PGSC0003DMG401022197LRR-RLPs\_1134

TGTTGCTTAATTAGCTTTGTATCTTCTAATCTGTCCGTTGAGAGTCTATTGAATATAGTCTTCAATCAAT

AAAAGTAGGGATAAAATATGTCCTCTTCAGATTCCACTAATGAAATTG

>PGSC0003DMG401022197LRR-RLPs\_1197

TCAATCAATAAAAGTAGGGATAAAATATGTCCTCTTCAGATTCCACTAATGAAATTGCACGGATTATGTT  
GTTGATCAATATTCTTATCCTTGATTCATGTGTTATCTTTTCGTTTGCA

>PGSC0003DMG401022197LRR-RLPs\_1241

ACTAATGAAATTGCACGGATTATGTTGTTGATCAATATTCTTATCCTTGATTCATGTGTTATCTTTTCGTTT  
GTCAAGTTGCTTTTCGGGATGAAATATGTCCTCTCCAGATTCCACAGA

>PGSC0003DMG401022197LRR-RLPs\_945

CGTTGCAGAGCTTTGATGTTTACTCTTATTTGCATAACAAATGCCTCTGTGGCTCTCCCTTGCCGGACTGT  
AAGTAGATATGGAGTTTCGAGGATTTGGATAGCCGAATGTTGTGGGAGAG

>PGSC0003DMG401023552-(rev)LRR-RLKs\_0

ATGTTGACATATCTAGAAGTGGGTAGCAATCCGTTGAGTGGCTTTCTGCCAAATTCTATTGGGAATCTCT  
CATCTACTATTGAAAAAATTAATTTAGCAGATGCACACATCAATGGCCTC

>PGSC0003DMG401023552-(rev)LRR-RLKs\_1197

AAGAGGTTTGATACCGAATGCGAAGTGATGAGAAATGTTAGACACGGAAATCTTGTTCCAGTGATTACT  
ACATGTTCTATTGACTATATAAGAGCCTTTGTTCTGCAATTTATGCCCAAT

>PGSC0003DMG401023552-(rev)LRR-RLKs\_126

ACAAGTATAGGCAACATGAGCGGTCCTATATCCCTATACATTGAAGAAAACAACCTTGATAGGGAGTATT  
CCTTCTGATGTTGGTAAGCTTAAATGACTCCAAGGACTCTATCTATCTAAC

>PGSC0003DMG401023552-(rev)LRR-RLKs\_1260

ATTACTACATGTTCTATTGACTATATAAGAGCCTTTGTTCTGCAATTTATGCCCAATGGAAGTCTTGACAA  
TTGGTTGTACAATGAAGATCGCCACTTGAACCTTCATCAAAGAGTTTCT

>PGSC0003DMG401023552-(rev)LRR-RLKs\_1638

TCCAGAATCATAAAAGCAAGTGTCTGTTAGTACATAATTATGCTATATTCAAATGAGTAATTCTTTTTCAT  
TTTCATTCTTTTTTAAGAATATGGCTCGGAGGGAATAGTGTCTTCTAGT

>PGSC0003DMG401023552-(rev)LRR-RLKs\_1764

GTTTATAGCTATGGCATCATGGTGATGGAGGTCTTGACGAAACGAAGGCCAACAGATGAAGAGATATG  
CAATGAAAACCTTGACTTGAGGAAATGGATCACACTAATCATTTTCAGGGAG

>PGSC0003DMG401023552-(rev)LRR-RLKs\_189

AGTATTCCTTCTGATGTTGGTAAGCTTAAATGACTCCAAGGACTCTATCTATCTAACAATAAATTGCAGG  
GACGTATCCAGAGGCGGTATGCCATCTATCTAATTTGGTTCAATTATAT

>PGSC0003DMG401023552-(rev)LRR-RLKs\_252

TTGCAGGGACGTATCCAGAGGCGGTATGCCATCTATCTAATTTGGTTCAATTATATCTGTATGGTAATG  
AGCTCTCTGGGTTAATTCCAGAATGCTTAGGAAATCTTAGCATGCTTCAA

>PGSC0003DMG401023552-(rev)LRR-RLKs\_315

GGTAATGAGCTCTCTGGGTTAATTCCAGAATGCTTAGGAAATCTTAGCATGCTTCAACAGCTTTCTTTGA  
ATTCTAACAATTATCTTCAAACCTTCCGTTGAGCCTTTGGAAGATGAGT

>PGSC0003DMG401023552-(rev)LRR-RLKs\_378

TCTTTGAATTCTAACAATTATCTTCAAACCTTCCGTTGAGCCTTTGGAAGATGAGTAGTCTTCTCTATCTA  
AGTGTGTCACAGAATTCAATAGAGGGAGAAGTTCCATCAGCTATTGGA

>PGSC0003DMG401023552-(rev)LRR-RLKs\_441

CTCTATCTAAGTGTGTCACAGAATTCAATAGAGGGAGAAGTTCCATCAGCTATTGGAGGACTGCAAGCC  
ATTGTAGAACTACATCTTTTCAGTAACCACTTTTCAGGCGTGATACCAACC

>PGSC0003DMG401023552-(rev)LRR-RLKs\_504

CAAGCCATTGTAGAACTACATCTTTTCAGTAACCACTTTTCAGGCGTGATACCAACCAGATTAGGGGAAC  
TCCAAAACCTGCAGTATATTGACCTATCAAACAATTCATTTTTTGGCCAA

>PGSC0003DMG401023552-(rev)LRR-RLKs\_567

GGGGAACCCAAAACCTGCAGTATATTGACCTATCAAACAATTCATTTTTTGGCCAAATTCCATTATCCTT  
TGCCAACTTGATAAACTTAGAATTCTTAGATCTGTCTTTAAATGCGTTG

>PGSC0003DMG401023552-(rev)LRR-RLKs\_630

TTATCCTTTGCCAACTTGATAAACTTAGAATTCTTAGATCTGTCTTTAAATGCGTTGTCGGGTACTATTCC  
AAGTCATTGGAAAACTCTCCTATCTTATAAGCATTAAATGTTTCATTT

>PGSC0003DMG401023552-(rev)LRR-RLKs\_693

ACTATTCCTAAGTCATTGGAAAACTCTCCTATCTTATAAGCATTAAATGTTTCATTTAATGATTTAGAAGG  
TGAAATACCGAGTGGTGGCGTGTGTTGCAAATCCACTCTGCAATCATTT

>PGSC0003DMG401023552-(rev)LRR-RLKs\_819

AACAAAGGTCTATGCAAAATGCACATATTGGAGATTCCTGATTGTGTTATCACTAATCCTGGAAAACAAT  
CAAAGCTTAAGGAGGTTGTGCTAAAAATTGTTACTCCAGTGGTTACTTCA

>PGSC0003DMG401023552-(rev)LRR-RLKs\_945

CTGATATTCTTATTTCGTTTCAATTTGGACAATGAAACGAAAAAGAAAGGGAAGTCCAAAGATGTGGAG  
AAGGTACCGGAGATCGGGACTCATCAATTAGTTTCTTATCATGAGATTCTGA

>PGSC0003DMG401023640LRR-RLPs\_0

TAATAATTAGGGAATCTCAATAACTTGTGTTAGAATAATATGATTGTATGACATAGGAACTGTAGCCAAT  
TAGAGGAGACAAAAGATTCTGGTGGAAAAATAATATTCTACACCAAGGAT

>PGSC0003DMG401023640LRR-RLPs\_1008

AACTCATACAACTTAAAATATTGTCCATATCTTTCAACAACATAACTGGAGAAATACCCAAAAATATTGAT  
TGTTTAACGAAGCTCGAGGAGTTTTATATTGGTAATAATCCAATAGATG

>PGSC0003DMG401023640LRR-RLPs\_1197

AGGGGCCAATTCCTCCAGAACTGGGTAAGCTATCAAATTTGATAGAATTCGATTTTGAAGAAAATTATAA  
TCTTATAGGTCAGATTCCAGAGGCTATTTTTAATATATCTTCTTTGAAAC

>PGSC0003DMG401023640LRR-RLPs\_126

ATAATGGTGTAACCTTGGCAACAAAACATATAAAACATATGGAGGAGCACATTTTCTTATTGATTTTTCTC  
TTTTTCTCTGCTTTTGTATCAGCTGCACCCTCAAATGAGACAGACCAAG

>PGSC0003DMG401023640LRR-RLPs\_1260

ATTATAATCTTATAGGTCAGATTCCAGAGGCTATTTTTAATATATCTTCTTTGAAACACATTGCGTAACT  
TGAACAACTCTCGGGGAGAATTCCAACCTCTACTGGTCTTCATCTTC

>PGSC0003DMG401023640LRR-RLPs\_1386

TCTTAGAACTTCACTTGACTGGCAATGAGCTTGAAGGGGAAATTCCTCCGCATATCACAAATGCCTCCAA  
GCTTGAAAATTTGGGGTTAGCACACAACCTTCTTCAGTGGCACTATTCCAA

>PGSC0003DMG401023640LRR-RLPs\_1449

CCTCCAAGCTTGAAAATTTGGGGTTAGCACACAACCTTCTTCAGTGGCACTATTCCAACCTCATTGGGGAAG  
TCTTCTGATCTGCGATTTCTTTTCTACATGATAATCAACTTACCAGTG

>PGSC0003DMG401023640LRR-RLPs\_1512

GGGGAAGTCTTCTGATCTGCGATTTCTTTTCTACATGATAATCAACTTACCAGTGAACATGAGTTGCC  
GTTCTTCGAATCTTTGGCAGACTGTAGGATGTTGCAATATCTAGATGTGG

>PGSC0003DMG401023640LRR-RLPs\_1575

AGTTGCCGTTCTTCGAATCTTTGGCAGACTGTAGGATGTTGCAATATCTAGATGTGGGTTACAATCCATT



GAATAGCATTCTGCCAAATTCAATAGGGAATCTTTCATCTACTATTGAAT

>PGSC0003DMG401023640LRR-RLPs\_1638

ATCCATTGAATAGCATTCTGCCAAATTCAATAGGGAATCTTTCATCTACTATTGAATTCTTTGAAATAAGC

GATGCTCACATCAATGGCCTCATCCCCACAAGTATAGGCAACATGAGTG

>PGSC0003DMG401023640LRR-RLPs\_1701

AAATAAGCGATGCTCACATCAATGGCCTCATCCCCACAAGTATAGGCAACATGAGTGGTCTTACAACCTT

AGTCTTTCAAGATAACAACCTTTACTGGAAATATTCCTCCTGAGTTTGGTA

>PGSC0003DMG401023640LRR-RLPs\_1764

CAACCTTAGTCTTTCAAGATAACAACCTTTACTGGAAATATTCCTCCTGAGTTTGGTAAGCTTAAACAACCTC

CAAGGGCTGTATCTAAATAACAATAAATTGAAGGGACATGTTCTGAGG

>PGSC0003DMG401023640LRR-RLPs\_1827

AACAACCTCAAGGGCTGTATCTAAATAACAATAAATTGAAGGGACATGTTCTGAGGCAGTATGAAATT

TATCTAATTTGGGTTCGATTATATCTGCAAGGCAATGAGCTCTTTGGTTTAA

>PGSC0003DMG401023640LRR-RLPs\_189

TTTTTCTCTTTTTCTCTGCTTTTGTATCAGCTGCACCCTCAAATGAGACAGACCAAGAAGCTCTACTAGCTT

TTCAAATCTTATTACAAGTCCCAATCATTTTTTGGCCAATAATTGGA

>PGSC0003DMG401023640LRR-RLPs\_1890

GAAATTTATCTAATTTGGGTTCGATTATATCTGCAAGGCAATGAGCTCTTTGGTTTAAATCCAGCATGTATA

GGAAATCTTAGCATGCTACAACATCTTTATTTAGATTCTAATAAATTTT

>PGSC0003DMG401023640LRR-RLPs\_1953

CATGTATAGGAAATCTTAGCATGCTACAACATCTTTATTTAGATTCTAATAAATTTTCATCAAAATTTCCGT

TGAGTCTTTGGAAAATGAGTGGTCTTCTCTTTCTAAGTGTGTCACAAA

>PGSC0003DMG401023640LRR-RLPs\_2016

AATTTCCGTTGAGTCTTTGGAAAATGAGTGGTCTTCTCTTTCTAAGTGTGTCACAAAATTCTATAGAGGG

AGAAGTTCCATCAGATATTGGAGAACTGAAGGCAATTGTAGAACTAGATA

>PGSC0003DMG401023640LRR-RLPs\_2079

TAGAGGGAGAAGTTCCATCAGATATTGGAGAACTGAAGGCAATTGTAGAACTAGATATTTCTGGTAATC

ACTTTTCAGGAATGATACCAAGAAATTTGGGTGACCTCCAAAACCTGCAGT

>PGSC0003DMG401023640LRR-RLPs\_2142

GTAATCACTTTTCAGGAATGATACCAAGAAATTTGGGTGACCTCCAAAACCTGCAGTCTCTTGCCCTGTC  
AAACAATTCATTTTCTGGCCAAATTCCATTATCCTTTGCCAACCTAATAA

>PGSC0003DMG401023640LRR-RLPs\_2205

CCCTGTCAAACAATTCATTTTCTGGCCAAATTCCATTATCCTTTGCCAACCTAATAAGCTTGCAATTCTTGG  
ATTTGTCTTTAAATGCGTTGTCAGGTACTATTCCTAAGTCTTTGGAAA

>PGSC0003DMG401023640LRR-RLPs\_2268

AATTCCTGGATTTGTCTTTAAATGCGTTGTCAGGTACTATTCCTAAGTCTTTGGAAAACTCCCCCTAAA  
AACATCAATGTTTCATTTAATGAATTAGAAGGTGAAATACCCAGTGGTG

>PGSC0003DMG401023640LRR-RLPs\_2331

CCCTTAAAAACATCAATGTTTCATTTAATGAATTAGAAGGTGAAATACCCAGTGGTGGTGTGTTTTCAA  
TTCCACTCTGCAATCATTCTTTGGGAACAGAGGTCTATGTGGAGCGCACA

>PGSC0003DMG401023640LRR-RLPs\_2366

GAAGGTGAAATACCCAGTGGTGGTGTGTTTTCAAATCCACTCTGCAATCATTCTTGGGAACAGAGGTC  
TATGTGGAGCGCACATATTGGAGATTCTGCTTGTGTTGCAACTCACTAA

>PGSC0003DMG401023640LRR-RLPs\_315

ATGCGTCTTTTTGCTCTTGGTTCGGTGTACGTGCAGTTCAAAAAGGCAACGGGTTGTAGCCTTGAATCT  
TCCTAATTTACAACCTCAAGGCACAATTTCTCCTTCTTTGGCCAATTTGT

>PGSC0003DMG401023640LRR-RLPs\_378

TGAATCTCCTAATTTACAACCTCAAGGCACAATTTCTCCTTCTTTGGCCAATTTGTCCTTTCTCAGAGAGC  
TCAATCTCGAGAACAACCTTATTCCATGGGGGCATCCCTTATGGGCTTG

>PGSC0003DMG401023640LRR-RLPs\_63

AGCCAATTAGAGGAGACAAAAGATTCTGGTGGAAAAATAATATTCTACACCAAGGATTGCTATATAATG  
GTGTAACCTTTGGCAACAAAACATATAAAACATATGGAGGAGCACATTTTCT

>PGSC0003DMG401023640LRR-RLPs\_630

GGAGAGGGCCATGGTATGTACCTGAACTCAGAGTCTTAAATCTCAGGAATAATAGCCTCACAGGTATAA  
TTCTCCTGCTATTGGAAATGCCACAAAGTTGCTGAACTTTAGTTTGTCTG

>PGSC0003DMG401023640LRR-RLPs\_693

GTATAATTCCTCCTGCTATTGGAAATGCCACAAAGTTGCTGAACTTTAGTTTGTCTGTTAATAGAATCAGC  
GGCAACATTCTAAGGAGATCGTTAATCTGAGCCAGCTTGCAGTTTTGT

>PGSC0003DMG401023640LRR-RLPs\_756

GAATCAGCGGCAACATTCTAAGGAGATCGTTAATCTGAGCCAGCTTGCAGTTTTGCCTTGACTGATAA  
TCAATTAACAGGTCCCATTCTGAAGCATTGTTAATATCTCGTCACTAC

>PGSC0003DMG401023640LRR-RLPs\_819

CTGATAATCAATTAACAGGTCCCATTCTGAAGCATTGTTAATATCTCGTCACTACTTTCTGTATCTCTGG  
GAAAGAACAGCCTATCTGGTCCTCTCTGGTTGAAAAGGAAATATTT

>PGSC0003DMG401023640LRR-RLPs\_882

TATCTCTGGGAAAGAACAGCCTATCTGGTCCTCTCTGGTTGAAAAGGAAATATTTTATCACATCTGGA  
GAGGTTAAGTTTAACTCACAATCAAATTTCTGGTCGAATTCCTTCCAACA

>PGSC0003DMG401023640LRR-RLPs\_945

ATCTGGAGAGGTTAAGTTTAACTCACAATCAAATTTCTGGTCGAATTCCTTCCAACATCTGCCAACTCATA  
CAACTTAAAATATTGTCCATATCTTCAACAACATAACTGGAGAAATAC

>PGSC0003DMG401023866-(rev)LRR-RLPs\_1037

CATTACGCGGAGGAGAAAGAAGCAGCGAGGTCAAAGGCATTACAAAAGAAGAAATAATCGCTTCTAGA  
CAATTGTTACCAATCAAGAAGGATTTGATTTCAGAACTTTAGGTATTGATCA

>PGSC0003DMG401023866-(rev)LRR-RLPs\_1098

TTCTAGACAATTGTTACCAATCAAGAAGGATTTGATTTCAGAACTTTAGGTATTGATCAAGCTAAGCTCT  
ATAATAATCTTTTTAGTTTATTTTAACTACTAATATATTAGCTTTCGTAT

>PGSC0003DMG401023866-(rev)LRR-RLPs\_1159

CTAAGCTCTATAATAATCTTTTTAGTTTATTTTAACTACTAATATATTAGCTTTCGTATTTATTCGTTGTAAC  
AACATCTGATCGATGCTCTATGCAAAGCATATTGAAAATGAGCTGAA

>PGSC0003DMG401023866-(rev)LRR-RLPs\_1220

ATTCGTTGTAACAACATCTGATCGATGCTCTATGCAAAGCATATTGAAAATGAGCTGAAGATTTTGAATA  
GGATTAGCCTTAGTTATATATATTGTTAATGGATGGTTAAACATGTGTTT

>PGSC0003DMG401023866-(rev)LRR-RLPs\_1281

TTTTGAATAGGATTAGCCTTAGTTATATATATTGTTAATGGATGGTTAAACATGTGTTTGTAGTGAAAATT  
AAGTAATTGATGTGTTACAAATTAACAAGAAAATATTACTAATTA

>PGSC0003DMG401023866-(rev)LRR-RLPs\_1342

AGTGAAAATTAAGTAATTGATGTGTTACAAATTAACAAGAAAATATTACTAATTAACCTGAATTCT

CTTCAATATTAATCATGGCCCTATTAATGTGGATATCAAAAACCAAATGA

>PGSC0003DMG401023866-(rev)LRR-RLPs\_1403

CTGAATTCTCTTCAATATTAATCATGGCCCTATTAATGTGGATATCAAAAACCAAATGAGAAATCATGAA  
AAAAGCCACGTGTTCAATTGTTCTAAATTCGTGTCCATTCAGGTCTGTTA

>PGSC0003DMG401023866-(rev)LRR-RLPs\_1647

GAAAAAAACATGACACACTGATATTTGACTTAGTCGTGTCTAATTTTTGAAAATGACACTTCTCTACTTT  
TTTTTTGTCTGCTTAATTATTCTTTCTTTGAAATTTCCATTGCAAGAC

>PGSC0003DMG401023866-(rev)LRR-RLPs\_1708

TCTCTACTTTTTTTTTGTCTGCTTAATTATTCTTTCTTTGAAATTTCCATTGCAAGACTTATGCATCGACTTT  
CCCTCTTTGTTGCTATGAGTTTACTATACGTCAAGGTGGAAGTTGG

>PGSC0003DMG401023866-(rev)LRR-RLPs\_183

TTGGGAAGTCTGCCATATCTGCAAGTTTTAAGCCTAAGATCAAACAAGTTGCATGGATCTATTAGAAGTT  
CAAGGATAGAAAACATGTTTCCCCAGCTTCGCATCATCGATCTCTCTTAC

>PGSC0003DMG401023866-(rev)LRR-RLPs\_2135

GCATAGACTAGGGGATACTTATGCATTTTCCCTAAAATTATTAGCAGTGACTAAATCAAGTTTATTAATG  
AGTTGAAACCATGTTTCGAAATATGTGAATTTTAATTTGAAAATATAGGC

>PGSC0003DMG401023866-(rev)LRR-RLPs\_2196

TTATTAATGAGTTGAAACCATGTTTCGAAATATGTGAATTTTAATTTGAAAATATAGGCTATCGATATCTA  
AAATTTAATGAAAATAGATGTATTAAGTTTCATATTATTAGCAGTGAGG

>PGSC0003DMG401023866-(rev)LRR-RLPs\_2257

TCGATATCTAAAATTTAATGAAAATAGATGTATTAAGTTTCATATTATTAGCAGTGAGGAACAGTAAATT  
TGACATTTTGTAAGTTGGAATTGATGATGATTTGAAATGAAGGCAGCAG

>PGSC0003DMG401023866-(rev)LRR-RLPs\_2318

CAGTAAATTTGACATTTTGTAAGTTGGAATTGATGATGATTTGAAATGAAGGCAGCAGTCCTTGCTTGA  
GTTTCCCCACTTTCCTCTTTCTTTGATAATAAAATTCGTAAGTAATTTA

>PGSC0003DMG401023866-(rev)LRR-RLPs\_2379

CTTGCTTGAGTTTCCCCACTTTCCTCTTTCTTTGATAATAAAATTCGTAAGTAATTTATTTTCATATGAAA  
ATTCAAAGCGAAAGTAATTTGTGCGTTAAGTAGCTTTCGTTTGAAATT

>PGSC0003DMG401023866-(rev)LRR-RLPs\_2440

TTCATATGAAAATTCAAAGCGAAAGTAATTTGTGCGTTAAGTAGCTTTCGTTTGAAATTTCCACAACAAG  
ACTCACTGCAATTACTCGGAAATTCAAAAACTGCATTAATACTTTTAGG

>PGSC0003DMG401023866-(rev)LRR-RLPs\_2501

CACAACAAGACTCACTGCAATTACTCGGAAATTCAAAAACTGCATTAATACTTTTAGGTGCAAGAAAA  
AGATATTTAGAGGGACTTGGTGCAAAAACCTTGGTGTTATTCCCCCCTT

>PGSC0003DMG401023866-(rev)LRR-RLPs\_2562

CAAGAAAAAAGATATTTAGAGGGACTTGGTGCAAAAACCTTGGTGTTATTCCCCCCTTAAATAGGCCTT  
ACGCGGCGAAAATGCAAACCCTAATGTGAATATAAAAAACCGAATGAAAA

>PGSC0003DMG401023866-(rev)LRR-RLPs\_2806

AAGACTCTATTATGTTCCGAAAATACCCTTATTAATAAGTCTAAATTGTTAAATAAAAAAAATACTACAT  
CTGACATTGAATAGAAAAGTTTATGACTTTTCTCTCTCTTATAAGTTAA

>PGSC0003DMG401023866-(rev)LRR-RLPs\_2867

AATACTACATCTGACATTGAATAGAAAAGTTTATGACTTTTCTCTCTCTTATAAGTTAATGTCACATCAATC  
ATTAATGTAAATCCAAAAGAGTCAAATATATTTATTTCTCTCTCTTTT

>PGSC0003DMG401023866-(rev)LRR-RLPs\_2928

TCACATCAATCATTAAATGTAAATCCAAAAGAGTCAAATATATTTATTTCTCTCTCTTTTTTCTACTGCATTCT  
CCATTCCCTCTCCCTTAGTCTTTCAATGAAGAAGATATATTCCAAAA

>PGSC0003DMG401023866-(rev)LRR-RLPs\_2989

CTACTGCATTCTCCATTCCCTCTCCCTTAGTCTTTCAATGAAGAAGATATATTCCAAAATGATTGATTTTTT  
GTCATTGCAGGTAAAAGTAGTTTTTTTTTTTCATAATTTTAATTGTAGT

>PGSC0003DMG401023866-(rev)LRR-RLPs\_3050

ATTGATTTTTTGTCAATTGCAGGTAAAAGTAGTTTTTTTTTTTCATAATTTTAATTGTAGTTTCAAAAAATTGA  
TAACATAAAAAAAAACGTGGGAAAAGATCAAATTTTCAGTTTCTAGC

>PGSC0003DMG401023866-(rev)LRR-RLPs\_3111

CAAAAAATTGATAACATAAAAAAAAACGTGGGAAAAGATCAAATTTTCAGTTTCTAGCGCCAATTTTTT  
TGCCAAATTTTAAAATACTAGCTAATGGACTCCATATATAAGTAGAGATA

>PGSC0003DMG401023866-(rev)LRR-RLPs\_3172

CAATTTTTTTGCCAAATTTTAAAATACTAGCTAATGGACTCCATATATAAGTAGAGATACTTTATCTTTAAT  
TTTTCAGTTCTTCTTTTACATTTTTTCCAATTAGTGATCTTAAAATG

>PGSC0003DMG401023866-(rev)LRR-RLPs\_3233

TTATCTTTAATTTTTAGTTCTTCTTTTACATTTTTTCCAATTAGTGATCTTAAAATGAGTGTTGAATTTTC  
AGAAGACCCAATTACCATAAAAAGGCGATTGAATCTGAACGAGCGTC

>PGSC0003DMG401023866-(rev)LRR-RLPs\_3294

TGTTGAATTTTCAGAAGACCCAATTACCATAAAAAGGCGATTGAATCTGAACGAGCGTCGAGCAATTGC  
AAAGTGGCTTTTGAAAGAAAGTAAGAATGGAAAACCTTAAACATGGTTCTGT

>PGSC0003DMG401023866-(rev)LRR-RLPs\_366

GACCAATCATTGAAGGCACCAAGATCATCTTACATAGAATCGTATTACCAAGATTCTATTACAATTGCAA  
CCAAGGGAATGGATCATGAAATTGTGAGAATCTTGTATTTGTACACTGCT

>PGSC0003DMG401023866-(rev)LRR-RLPs\_427

CAATTGCAACCAAGGGAATGGATCATGAAATTGTGAGAATCTTGTATTTGTACACTGCTCTTGATCTTTC  
AAGTAATAAATTTAGAGGAAAAATTCCAAGTATTATTGGGGATCTCATTG

>PGSC0003DMG401023866-(rev)LRR-RLPs\_4697

TTAATGTTTATGTTAAAATCATGCAAAGTGTAATTTACTTTTGGAAATGGTTTAAAGTTTTTGTGGGACAT  
TGTAATTTAACATGTTGAAATAAAAATTTTCATTTTGGTAAATGTAAGA

>PGSC0003DMG401023866-(rev)LRR-RLPs\_4758

GTTGGGACATTGTAATTTAACATGTTGAAATAAAAATTTTCATTTTGGTAAATGTAAGAAAATTTTACTTT  
TTGAAGTTTATATTTGAAAATTTTCATTTTATTTTTATTGTAAATCTGA

>PGSC0003DMG401023866-(rev)LRR-RLPs\_4819

ATTTTACTTTTTGAAGTTTATATTTGAAAATTTTCATTTTATTTTTATTGTAAATCTGAACTAAAGAAAAAA  
GAAGAAATATTCATCAAATATTTTTTAAGTGAGGACAACCTTTTGATTG

>PGSC0003DMG401023866-(rev)LRR-RLPs\_4880

TAAAGAAAAAAGAAGAAATATTCATCAAATATTTTTTAAGTGAGGACAACCTTTTGATTGTACATTCTTTAA  
TTTTTAAAAATAAAAATAAAATTACATTAACGTACTTCACAATTCTATC

>PGSC0003DMG401023866-(rev)LRR-RLPs\_4941

CATTCTTTAATTTTTAAAAATAAAAATAAAATTACATTAACGTACTTCACAATTCTATCATTAGTGTAAGG  
AAAGAAAGAATATGAAGTGGTGAAAAGAAAGAAAAGGTTATGACAAAG

>PGSC0003DMG401023866-(rev)LRR-RLPs\_5002

TAGTGTAAGAAAGAAAGAATATGAAGTGGTGAAAAGAAAGAAAAGGTTATGACAAAGTATTGAAA

AAAATGTTTAAAGTACTGTTGACTGTCAGAAAAAGAGAAAAGTATTTGACTT

>PGSC0003DMG401023866-(rev)LRR-RLPs\_5063

TTGAAAAAATGTTTAAAGTACTGTTGACTGTCAGAAAAAGAGAAAAGTATTTGACTTTACTGCATTTCC

AATAACTTTTTCTTTAAATTAAGAGTGCAACTATTGAAATGATGAGTT

>PGSC0003DMG401023866-(rev)LRR-RLPs\_5307

TATCACGTCTCATTGGAAAATGTTGTTTCTCTACTTTTTGGATACTTAAATATGCTTTCTTTGAAATTTCC

ACAGCAAACTTGTGCATTGACTTGAGAATAACAAACATTAATTTCCC

>PGSC0003DMG401023866-(rev)LRR-RLPs\_5368

TTGAAATTTCCACAGCAAACTTGTGCATTGACTTGAGAATAACAAACATTAATTTCCCAGTTTCTTTTCA

AATTTACAATTGGTGAAGGTGGAATTTGGAAATAATTACAGCGTGGAGT

>PGSC0003DMG401023866-(rev)LRR-RLPs\_5429

TTTCTTTTCAAATTTACAATTGGTGAAGGTGGAATTTGGAAATAATTACAGCGTGGAGTAGCTTTCATTG

AAATTTCCACGACAAGACTTGTTCAAGGACTTTTAAAACAATAATTTTTT

>PGSC0003DMG401023866-(rev)LRR-RLPs\_549

CTTCATGTGTTGAGTTTATCTCATAATGGATTGCAAGGTCCGATACCATCATCACTCGGAAATTTATCTTC

ACTTGAATCATTGGATCTATCGGTTAACCAACTTTCCGGTAAGATACCA

>PGSC0003DMG401023866-(rev)LRR-RLPs\_5490

CTTTCATTGAAATTTCCACGACAAGACTTGTTCAAGGACTTTTAAAACAATAATTTTTTTAAGTTCCACAA

GTAGAATTCCTCATTGTGTCCTCCACACTTCATTGTCCTCCACT

>PGSC0003DMG401023866-(rev)LRR-RLPs\_5734

TCCTACCGAACACACCTTGAATTGGGGGAATCTCAGTTGACATTTGGTTGACTATCTTTTATTAATTAAG

AAAAAAAAATAAGAAACACAATAACACAACTTGACTTGTGTTGAACAA

>PGSC0003DMG401023866-(rev)LRR-RLPs\_5795

TTAATTAAGAAAAAAAAATAAGAAACACAATAACACAACTTGACTTGTGTTGAACAATATAAAATCCT

ATGAACCCTCCACAATTAGTTCATTGAAACCCAAAATAATAAACTCAAAA

>PGSC0003DMG401023866-(rev)LRR-RLPs\_5856

TAAAATCCTATGAACCCTCCACAATTAGTTCATTGAAACCCAAAATAATAAACTCAAAAATATGATGATGG

TTCCAAAAAATATTCTTTACTTCAGTTTTTTACTCTTTTATCTCTC

>PGSC0003DMG401023866-(rev)LRR-RLPs\_5917

TGATGATGGTTCCCAAAAAAATATTCTCTTACTTCAGTTTTTTACTCTTTTATCTCTCTTTACAGTTACTTT  
TGCTTCCACTGGGGAAACAACCTCCCTCCTGAAATGGAAAGCAACTT

>PGSC0003DMG401023866-(rev)LRR-RLPs\_5978

TACAGTTACTTTTGCTTCCACTGGGGAAACAACCTCCCTCCTGAAATGGAAAGCAACTTTCAAGAACCAG  
AATAACTCCTTATTGGCTTCATGGAGACCAAGCTCTAACGCATGCCGGGA

>PGSC0003DMG401023866-(rev)LRR-RLPs\_6039

AAGAACCAGAATAACTCCTTATTGGCTTCATGGAGACCAAGCTCTAACGCATGCCGGGACTGGTATGGA  
GTTATATGCTTTAACGGTAGGATAAACAGGTTGAATATTGCAAATTCTAGT

>PGSC0003DMG401023866-(rev)LRR-RLPs\_6100

GGTATGGAGTTATATGCTTTAACGGTAGGATAAACAGGTTGAATATTGCAAATTCTAGTATCATTGGTAC  
CCTCTATGCTTTTCTGTTTTCATCTCTCCCTTTCCTTGAATATGTTGATC

>PGSC0003DMG401023866-(rev)LRR-RLPs\_6283

ATCTTGACTTGTCCATCAATCAGATTTTCAGGCACAATCCCACCACAAATCGGCTCACTATCCAAGCTTGAG  
ACCCTCCACATCTTTGATAACCATTTAAATGGTTCCATTCTAAAGAAA

>PGSC0003DMG401023866-(rev)LRR-RLPs\_6527

TGGCTCTATTCCGGAAGAAATAGGAAATCTTGCAATCTTGTTTCAGGTTTTTCTTGATACAAACCAATTA  
CAGGTCATATTCTGCAGAAATAGGAAAACCTTGCAATCTTGTTGAAGT

>PGSC0003DMG401023866-(rev)LRR-RLPs\_7015

CAAGAAACAACCTGAAAGGAAATATTATGAAATGCTTGGGTAATATCAGTGCCTCCAGTATGTGATGA  
TGTACATAATAATCTCAGTGGAGAGCTCCATCCGTCTATTTGCAATTTAA

>PGSC0003DMG401023866-(rev)LRR-RLPs\_793

GATTACGTGGATTCCCTATTTCAAAGGTTGTGCCCATGATCAGGTGTCAGAGACAAACTATAACCGAATC  
TGCTCTAGATCACGATCAAGAAAGCAATTCAGAATTTCTCAATGATTTTT

>PGSC0003DMG401023870-(rev)LRR-RLPs\_1342

TGGTTTTCTTTGAGAGTAATGGCTTCGTAATCTGTATTACCTATTGAGTACACTGTACTGAACTTCTGGA  
ATGTGTTTCTTAAGTTGCATTTCTTGTAAGTGCAGAAAGGGATTTGC

>PGSC0003DMG401023870-(rev)LRR-RLPs\_1403

AACTTCTGGAATGTGTTTCTTAAGTTGCATTTCTTGTAAGTGCAGAAAGGGATTTGCTGCTTACGCCA  
TATGCCAGACGTCCGCTAGCCGAGGTTTGTACTAGACGTACATAAATCAC



>PGSC0003DMG401023870-(rev)LRR-RLPs\_1647

ACCTAAGCTCTGCCCTGGTTTCAGTGATTTGGTATTTTCAGGGGAATAACTCATAGTTTAATGGTTTTAT  
TGTTACAAAAACAGTTACAAAGAGCAAGTTTGATAAATAGCTCGTATTG

>PGSC0003DMG401023870-(rev)LRR-RLPs\_1708

ATGGTTTTATTGTTACAAAAACAGTTACAAAGAGCAAGTTTGATAAATAGCTCGTATTGTTATGAAGAGT  
TAATTTAGAAATGACCATCGGTGAAATTATCCTCAAATTTTGTGATGAA

>PGSC0003DMG401023870-(rev)LRR-RLPs\_1769

ATGAAGAGTTAATTTAGAAATGACCATCGGTGAAATTATCCTCAAATTTTGTGATGAAGGTAAATGAG  
AAAGTAACACAACACACAATTCTATTTAATAACAAAACACTAAAAAAGATGA

>PGSC0003DMG401023870-(rev)LRR-RLPs\_1830

TAAATGAGAAAGTAACACAACACACAATTCTATTTAATAACAAAACACTAAAAAAGATGATTCTCTATCCTT  
TTAAGTTTGTTTTCTTTTTAGGGAATTTATTTTCTGTATGATAGATG

>PGSC0003DMG401023870-(rev)LRR-RLPs\_1891

CTCTATCCTTTTTAAGTTTGTTTTCTTTTTAGGGAATTTATTTTCTGTATGATAGATGTGTAACACATGGA  
TTAGAATTACATATGAACAGACAGAAATGGTTTAAGTGTGAATGAGAG

>PGSC0003DMG401023870-(rev)LRR-RLPs\_1952

TAACACATGGATTAGAATTACATATGAACAGACAGAAATGGTTTAAGTGTGAATGAGAGAAAGAGCAG  
CCAACAACATTTGGAGAAAACACGTTTCCGTTTGGTCTTCAATGATAAATTT

>PGSC0003DMG401023870-(rev)LRR-RLPs\_2013

AGAGCAGCCAACAACATTTGGAGAAAACACGTTTCCGTTTGGTCTTCAATGATAAATTTCATACAATATA  
AAATCCTATAGACCCTCCACAATAAGTTCATTGAAAACCCAAAATAATAA

>PGSC0003DMG401023870-(rev)LRR-RLPs\_2074

TACAATATAAAATCCTATAGACCCTCCACAATAAGTTCATTGAAAACCCAAAATAATAAACTCAAATAT  
GATGATGATTCCAAGCAAATATTCTCTACTTCAGTTTTTCACTCTTT

>PGSC0003DMG401023870-(rev)LRR-RLPs\_2135

TCAAATATGATGATGATTCCAAGCAAATATTCTCTACTTCAGTTTTTCACTCTTTTATATCTCCTTAC  
AGTTACTTTTGCTTCCATCGAAGAAGCAACTGCCCTCTTGAATGGAA

>PGSC0003DMG401023870-(rev)LRR-RLPs\_2196

TATCTCCTTACAGTTACTTTTTGCTTCCATCGAAGAAGCAACTGCCCTCTTGAATGGAAAACAACCTTTTAA

GAACCGGGATAATTTCTTATTGGCTTCATGGAAGCCAAGTTCTAATGCA

>PGSC0003DMG401023870-(rev)LRR-RLPs\_2257

CAACTTTTAAGAACCGGGATAATTTCTTATTGGCTTCATGGAAGCCAAGTTCTAATGCATGCAGGGACTG  
GTACGGAGTTATATGCTTTAACGGTAAGGTAAACAAGTTGAATATTAGAA

>PGSC0003DMG401023870-(rev)LRR-RLPs\_2562

TCACTAGCCAAGCTTCAGATCCTCCATATCATTGAAAACCATTTAAATAGTTTTATTCTGAAGAAATAGG  
TCATCTAAAGTCTCTTACTGAGCTAGATTTGAGTTCTAACGCACTTAAT

>PGSC0003DMG401023870-(rev)LRR-RLPs\_427

TGAAAGCCATGAGGACAATTGATCAAACCTATGAACGCACCACATTATGAAGGAAATATTACCAAGACTC  
GGTAGCTGTCGTATCTAAGGGATTTGAGCGTGAAATTGTGAGAATCTTGTA

>PGSC0003DMG401023870-(rev)LRR-RLPs\_4453

GTTCTGTCTCTCCATGAAAACAATCTGATTGAGGAAATTCCTTCATCTATTTGCAATTTAACATCACTGGT  
AGTCCTGTATTTGTCGAGAAACAACCTGAAAGGAAAAAATCTGCAATGC

>PGSC0003DMG401023870-(rev)LRR-RLPs\_4514

CATCACTGGTAGTCCTGTATTTGTCGAGAAACAACCTGAAAGGAAAAAATCTGCAATGCTTGGGTAATAT  
CAGTGCCCTCCAGTATGTGATAATGTCACATAATAGTCTCAGTGGAGAGC

>PGSC0003DMG401023870-(rev)LRR-RLPs\_4627

GGAGAGCTCCATCCGTCTATTTGCAATTTAACATCACTGCAAATTCTAGATTTGGGTAGAAACAATCTAA  
CCGGAGAAATCCGCAATGTTTGTGTCGCGTAATTTTCCTATTTTCTAG

>PGSC0003DMG401023870-(rev)LRR-RLPs\_488

CAAGACTCGGTAGCTGTCGTATCTAAGGGATTTGAGCGTGAAATTGTGAGAATCTTGTATTTGTACACCG  
TTCTCGATCTTTCAAGTAATAAATTTGGAGGGCAGATTCCATGTATCATG

>PGSC0003DMG401023870-(rev)LRR-RLPs\_671

TCATCACTTGGAAGTTTATCTTTGGTTGAATCATTGGACCTGTCAAGTAACCATCTTGTAGGAAATATACC  
AGCACAATTTGCTTCTTACATCTCTTGAAGTTTTCAACCTACAATCA

>PGSC0003DMG401024548LRR-RLPs\_0

AAAAAATCGAAACAGAATCGAGACCCCGCTTCATATCAAACGCGCATTTCGGTCCAAAAGTCGTCGGGA  
TTTCTCTTTCTCTCAGTTCCACGGTCGTCGACGTCAACGCCTTTGGTGT

>PGSC0003DMG401024548LRR-RLPs\_1159

ACACACAATAAAATGGGTATTGTTCTCCAGCTTCTTGAGCTCCTAATCTGTCTTCTTATCATTTCAGAGTAT  
AAAAACAAATTCTATTAGAAGATTGTTTTGTATACTTATCTTATTTT

>PGSC0003DMG401024548LRR-RLPs\_122

CTTCGGGGATATCCAATCTACAAAAAAGGTCTCCGACGCTTTTTCTTCTCTAAACAGATTGAAGACCTTTT  
TCATCTTATTTATCGAACCCAACCTCTTCGATAACTCCGAGAAGTTAGA

>PGSC0003DMG401024548LRR-RLPs\_1220

TTTCAGAGTATAAAAACAAATTCTATTAGAAGATTGTTTTGTATACTTATCTTATTTTTTTTTAAAAAGGTT  
GTTTTCTGGAAGCTAATTCTCACTCTTCTGTTGTGACAGTTGAAATT

>PGSC0003DMG401024548LRR-RLPs\_1281

TTAAAAAGGTTGTTTTCTGGAAGCTAATTCTCACTCTTCTGTTGTGACAGTTGAAATTCCTATGGAGATC  
AACAACTAACCAACTTACAACGTCTTGTAACTACTGCATCCTACTCTT

>PGSC0003DMG401024548LRR-RLPs\_1342

TATGGAGATCAACAACTAACCAACTTACAACGTCTTGTAACTACTGCATCCTACTCTTCCTCTCTTTTTGT  
CTGATGTTTGTTAATGTATCAGGGCCTCATTAATTAGAAAAAATATGT

>PGSC0003DMG401024548LRR-RLPs\_1403

TCTCTTTTTGTCTGATGTTTGTTAATGTATCAGGGCCTCATTAATTAGAAAAAATATGTATTCTATTTGGA  
AAGAAACTATACTGTTATTGGCGTCAAATCATATTATAAATGCTAGCT

>PGSC0003DMG401024548LRR-RLPs\_1464

TCTATTTGGAAAGAAACTATACTGTTATTGGCGTCAAATCATATTATAAATGCTAGCTGTTGAGAAGAT  
ATCAACTCATATACTCGCAGCCAAAATGCATATAAAGCTAATGAAAATG

>PGSC0003DMG401024548LRR-RLPs\_1525

TGAGAAGATATCAAACCTCATATACTCGCAGCCAAAATGCATATAAAGCTAATGAAAATGATTTAGGGAG  
CAGAAATGGAGCAAACAAGTATAGCGTTATTTGTTGTTGTTTATAGGATAA

>PGSC0003DMG401024548LRR-RLPs\_1586

TTAGGGAGCAGAAATGGAGCAAACAAGTATAGCGTTATTTGTTGTTGTTTATAGGATAAAATTTACTAG  
GGTAGAAAAAAGTTTCTACAGAAGACAATGTCAATAGGATAGAAGAAACAC

>PGSC0003DMG401024548LRR-RLPs\_1647

TTTACTAGGGTAGAAAAAAGTTTCTACAGAAGACAATGTCAATAGGATAGAAGAAACACAATTCTTCATT  
CTGTCATAAAGACTTCGATAAGTGGGATACCATTAATACTAATGTTGAGC

>PGSC0003DMG401024548LRR-RLPs\_183

AAGACCTTTTTTCATCTTATTTATCGAACCAACCTCTTCGATAACTCCGAGAAGTTAGAGAAAAATCCATC  
ATTTTTAATCATCGATAATGGGGTGCAGCAGCAGCAAGGCCGCTGATGC

>PGSC0003DMG401024548LRR-RLPs\_1891

ATTATACTATATAGTTATCTGTTTTTATTCTTGATTGGGACCTAAGGAGGGTAGATTAACTTTAAATGTA  
GCAAGACACGGAAAACATGTTTGTGAAGGGGAAGAAAACCTCTTGGTGA

>PGSC0003DMG401024548LRR-RLPs\_1952

TTTAAATGTAGCAAGACACGGAAAACATGTTTGTGAAGGGGAAGAAAACCTCTTGGTGATTACTTGATT  
AGCCACTCCTAAATCTTGCACCATAAATTTGAAATATAAAGCATAGAAAA

>PGSC0003DMG401024548LRR-RLPs\_2074

GCTGTTATAAACGAGGGAGAACCACACCCTAAAAGCTAACTATTAGGTTGGGAGAGCCCAAGGCTATAA  
ATACCCACATCAGAACTTTGTAGTACCGATGTAGGACTTTGCAATGGACC

>PGSC0003DMG401024548LRR-RLPs\_2135

GGCTATAAATACCCACATCAGAACTTTGTAGTACCGATGTAGGACTTTGCAATGGACCATAATAATAAC  
TCTTCTACTTGTCTGTTACTTTTTCTCGTTGAATAATTCTTTGTAGTTTT

>PGSC0003DMG401024548LRR-RLPs\_2196

AATAATAACTCTTCTACTTGTCTGTTACTTTTTCTCGTTGAATAATTCTTTGTAGTTTTTCTAAGGACTTTTA  
TCAGAGAATTTTTCTTGTTTATTACTCATAATGATATCATTAGTTTT

>PGSC0003DMG401024548LRR-RLPs\_244

AAAATCCATCATTTTTAATCATCGATAATGGGGTGCAGCAGCAGCAAGGCCGCTGATGCTGGCACAATT  
TCGCGATGGCGGTCTACTGGAATCGTTGCTTTACGCGACTCCAAATTGAAG

>PGSC0003DMG401024548LRR-RLPs\_2928

GCCACCTTATTGTGATATTTATTTAGTTGTCACACCTCTTGCTTCATGTTTTAATTTGTTTCCTATTATCTTT  
TTTGTCTCACTGTTAAACAGATAAAATACTGTATAGACTTGCATTA

>PGSC0003DMG401024548LRR-RLPs\_305

GCACAATTTGCGATGGCGGTCTACTGGAATCGTTGCTTTACGCGACTCCAAATTGAAGGTATTTCCCTT  
TATTCTTCGTGTTTCTGCAATATCTTAACAAGTTTAATTTGACATCTAAA

>PGSC0003DMG401024548LRR-RLPs\_3050

AGTTATTATTCAATTTCTTGTGTTGTGTTTTGGGGTTCTGAATCAAGTTCAATGGTTCTGTTGATTTTG

GAAGTGTTTTACATTTGCACATGTTATTATAAAAAGATTATCAGCTACT

>PGSC0003DMG401024548LRR-RLPs\_3416

GTGATTCTTTCTGTCTCTCCTTTTCTTTGGTCTCCTGGGTGTCGTAGCTTTGTATGCATATCAAATTGAAC  
ATTAGCAACTCTTACATGTGAGATGACTAGTCTTTGTGGAATACATT

>PGSC0003DMG401024548LRR-RLPs\_366

ATTTCCCTTTATTCTTCGTGTTTCTGCAATATCTTAACAAGTTAATTTGACATCTAAATTTTTTAATTGCA  
ATCTCACAATGTTTATCCCATGATACTTTTTCCATGATCAATTATGT

>PGSC0003DMG401024548LRR-RLPs\_3843

AAGGCATGCTTAGCATTAGTAGATCTAAAGTTGTACGGTCTGTCTCACATAATGTAACAAAAAGCAATAT  
TTACTTTGTTAGACTGATATTTTCTTCCAACACTCTCACTCTCTCTCTCT

>PGSC0003DMG401024548LRR-RLPs\_427

TTTTTAATTGCAATCTCACAATGTTTATCCCATGATACTTTTTCCATGATCAATTATGTGTGACCTTTCGTTT  
CACTAATTCTGATTTTCATTGTATTCTCATGTTTATTTGATTAGCAT

>PGSC0003DMG401024548LRR-RLPs\_4270

TCTCTCTCTCACACACACACACAAGGCTATTCAACAGACTCGTGTATAAATATGTTATATAACTCTTCA  
TCAACCATAAAACATGCACAAAAAGGCGTTTCCTTAAATTAACATCCT

>PGSC0003DMG401024548LRR-RLPs\_4331

TAAGTCTTCATCAACCATAAAACATGCACAAAAAGGCGTTTCCTTAAATTAACATCCTCATGTCTTGAAC  
TTGATATGAAATAGACATTGTGTCAAATATAGATATTTGCAAAGTAATC

>PGSC0003DMG401024548LRR-RLPs\_4392

TGTCTTGAAGTCTGATATGAAATAGACATTGTGTCAAATATAGATATTTGCAAAGTAATCCACATATGAGG  
TCATCTGCTTACACTTCTAGGTAGTTTCTTGTCTTTAATGTGTTATTCCT

>PGSC0003DMG401024548LRR-RLPs\_4453

CATATGAGGTCATCTGCTTACACTTCTAGGTAGTTTCTTGTCTTTAATGTGTTATTCCTGGAGTTCACCCTT  
CTCCTAGCTTATCTGCTTATTTTACAGCCATATTTTAGCTATTGATTT

>PGSC0003DMG401024548LRR-RLPs\_4514

AGTTCACCCTTCTCCTAGCTTATCTGCTTATTTTACAGCCATATTTTAGCTATTGATTTGTTGGTTCTCATT  
TTACAGATGCCTTCAAATTTATTAAGAGAATGCAAGGGCTTGCAGAA

>PGSC0003DMG401024548LRR-RLPs\_4575

TGGTTCTCATTTTTACAGATGCCTTCAAATTTATTAAGAGAATGCAAGGGCTTGCAGAACATAGCCCTAC  
ATGGCAATCCCATCACTATGGACCAATTTCAACAAGTAAGTCACTATTGT

>PGSC0003DMG401024548LRR-RLPs\_4636

TAGCCCTACATGGCAATCCCATCACTATGGACCAATTTCAACAAGTAAGTCACTATTGTGCTCACCTCTGT  
GCATCCTGAAAAAGTCACTTATGCAGATCTCCGACTGACCTTTTTCCAT

>PGSC0003DMG401024548LRR-RLPs\_4697

TCACCTCTGTGCATCCTGAAAAAGTCACTTATGCAGATCTCCGACTGACCTTTTTCCATTAGATGGAAGG  
ATTTCAAGAATTTGAAACCAGGCGTAAAATGAAGTTGACAAACAAATT

>PGSC0003DMG401024548LRR-RLPs\_4758

AGATGGAAGGATTTCAAGAATTTGAAACCAGGCGTAAAATGAAGTTGACAAACAAATTGATTCAAATG  
TGATAATTAGTTCTAAAGGGCTTGATGAGGGTGTGATCTGTGATACCAAT

>PGSC0003DMG401024548LRR-RLPs\_4819

TTCAAATGTGATAATTAGTTCTAAAGGGCTTGATGAGGGTGTGATCTGTGATACCAATACTGCTGTAAT  
TTTTGTAAGCCTTTCCACTCTGTCTTATTAATCTTGTTTTATATCCTTA

>PGSC0003DMG401024548LRR-RLPs\_488

GACCTTTCGTTTCACTAATTCTGATTTTCATTGTATTCTCATGTTTATTTGATTAGCATTCCAAAAATGTTCT  
CTTAAATAACATTTTCTATTTAGATCAAATTCATTGAACTATTCAA

>PGSC0003DMG401024548LRR-RLPs\_4880

TGCTGTAATTTTTGTAAGCCTTTCCACTCTGTCTTATTAATCTTGTTTTATATCCTTACTTCCTATTTGGG  
TTTTTTTAAAAAGGAACTTCTCCATAATACACGTTTATGCAATAA

>PGSC0003DMG401024548LRR-RLPs\_4941

TCCTATTTTGGGTTTTTTTTAAAAAGGAACTTCTCCATAATACACGTTTATGCAATAACCCCATTTGCAA  
AAAGAGGTGGCATCAACTTGAATTTTTGTAATATCTAAATTCACCTA

>PGSC0003DMG401024548LRR-RLPs\_5002

CCATTTGCAAAAAGAGGTGGCATCAACTTGAATTTTTGTAATATCTAAATTCACCTACTTCATTGTTGT  
CAAATGCTCATGGCATTGCTTCATATGCATGTTGGCGTTGATCTTGCCT

>PGSC0003DMG401024548LRR-RLPs\_5063

TCATTGTTGCAAATGCTCATGGCATTGCTTCATATGCATGTTGGCGTTGATCTTGCCTCCCTACCAATTA  
CCATATTGCCTCTGCTATCATATATGCCTCAATCAATGTTTGTATGACA

>PGSC0003DMG401024548LRR-RLPs\_5124

CTACCAATTACCATATTGCCTCTGCTATCATATATGCCTCAATCAATGTTTGTATGACAGTTATAGGCTTAT  
GCTCATGTCTCTGGTTGATAGGCATGTTGGCATTGATAAGCTTCCCTA

>PGSC0003DMG401024548LRR-RLPs\_5185

TATAGGCTTATGCTCATGTCTCTGGTTGATAGGCATGTTGGCATTGATAAGCTTCCCTACCATATTGCTCC  
TACTATCATTTACGCCCCAACCAATGCTTGTATAACAGTATAGAGTTAC

>PGSC0003DMG401024548LRR-RLPs\_5246

ATATTGCTCCTACTATCATTTACGCCCCAACCAATGCTTGTATAACAGTATAGAGTTACATAGCTGCCAGT  
GAAGGTATCCATTGTGGAAAACATGCTCAATCTAAAAAAAAGGTGCACC

>PGSC0003DMG401024548LRR-RLPs\_5307

AGCTGCCAGTGAAGGTATCCATTGTGGAAAACATGCTCAATCTAAAAAAAAGGTGCACCATAATTGTTA  
TAAACAGTGTCTTCGCAACAGGATTCTGTTGTCTGGCAAGTTTCTGAGTC

>PGSC0003DMG401024548LRR-RLPs\_5429

ATAGATATATCTACCAGTTCATTTGATTGCCAAAATTAGTTTCAACAGAGTACGATGAAATGCCAGATTA  
GGTGATGCATTTTGATTAAGTCTGGTCAATTTTGTGGTTGTCAGTTGGG

>PGSC0003DMG401024548LRR-RLPs\_549

CAAAAATGTTCTCTTAAATAACATTTTCTATTTAGATCAAATTCATTGAACTATTCAAAATTTAAACTATGA  
AGTGATGAGTTTTCTATAAGACTAATTCTTAAGTAACTGTTAGTCATA

>PGSC0003DMG401024548LRR-RLPs\_5490

GCCAGATTAGGTGATGCATTTTGATTAAGTCTGGTCAATTTTGTGGTTGTCAGTTGGGGTGGAAATGTA  
AGGCATTGAAATTGTTGACTTCAATGAACAGTTATAGCTGCTGACTGCG

>PGSC0003DMG401024548LRR-RLPs\_5551

GGAAATGTAAGGCATTGAAATTGTTGACTTCAATGAACAGTTATAGCTGCTGACTGCGAAGAATTTGCT  
CAGGCCTTTCTACAGTTCTTCATGGAATTGTTAACTTCGACAAACTGGGC

>PGSC0003DMG401024548LRR-RLPs\_5612

GAATTTGCTCAGGCCTTTCTACAGTTCTTCATGGAATTGTTAACTTCGACAAACTGGGCAATGCATCTATG  
ATGTGTTAGAATAATTGTACATGGTCTGTATATCAAGTGTCCAATCAC

>PGSC0003DMG401024548LRR-RLPs\_5673

TGCATCTATGATGTGTTAGAATAATTGTACATGGTCTGTATATCAAGTGTCCAATCACTTGTTCCTTTTC

TTTTTGAAAAGCTATGTATATATTTACTTAAAAGCTGGTTATATGTGC

>PGSC0003DMG401024548LRR-RLPs\_5734

GTTTCTTTTTCTTTTTGTAAAAGCTATGTATATATTTACTTAAAAGCTGGTTATATGTGCAACCTTTTGTAAC

ATAAAATTATCAGTCCTTATAACATGCACATAAGTATCTACAGAACTC

>PGSC0003DMG401024548LRR-RLPs\_5786

TATGTGCAACCTTTTGTAACATAAAATTATCAGTCCTTATAACATGCACATAAGTATCTACAGAACTCCAT

TGTTATTTTCAGAAATGCGATTTAAGCTTTTCCAGACTCTACATTGTCT

>PGSC0003DMG401024548LRR-RLPs\_61

CGTCGGGATTTCTCTTTCTCTCTCAGTTCACGGTCGTCGACGTCAACGCCTTTGGTGTTCCTTCGGGGAT

ATCCAATCTACAAAAAGGTCTCCGACGCTTTTCTTCTCTAAACAGAT

>PGSC0003DMG401024548LRR-RLPs\_610

TTAAACTATGAAGTGATGAGTTTTCTATAAGACTAATTCTTAAGTAACTGTTAGTCATACATTCTCCGAG

CTGAGGGTCTATTTGAACATTGCTAGGCATGGTAGAGCTTGACACGGAG

>PGSC0003DMG401024548LRR-RLPs\_732

TGGACTCTATAGGCAGGAGTTTGTAGTTTATACACCAAGAGATGCTCTAAGTTAACCAGGATAGTGAAA

TATAATCAAGCATCTTATAGAGGAGATTTTCCCATGCAAATCTTTTGGTTG

>PGSC0003DMG401024548LRR-RLPs\_793

TAGTGAAATATAATCAAGCATCTTATAGAGGAGATTTTCCCATGCAAATCTTTTGGTTGTTTCTTGTTTGA

TTCTCGAGGTCATTAAGTGAACAAATACATTTTGTGGGAAGTAGAGGT

>PGSC0003DMG401024548LRR-RLPs\_854

TCTTGTTTATTCTCGAGGTCATTAAGTGAACAAATACATTTTGTGGGAAGTAGAGGTGGGATGGTAA

TAACTACTCCCTCCAGCCCCATTCGAAACAAATCATTGTCCGAGGATTTA

>PGSC0003DMG401024548LRR-RLPs\_915

GATGGTAATTAATACTACTCCCTCCAGCCCCATTCGAAACAAATCATTGTCCGAGGATTTACTTTTGCTTGTT

TGTTTGTTTGTGATGGATGAAACTATGATGAAATGCTAAAACAGTTAAAT

>PGSC0003DMG401024548LRR-RLPs\_976

TTTGCTTGTTTGTGTTTGTGTTTGTGATGGATGAAACTATGATGAAATGCTAAAACAGTTAAATAAGGCAACATA

TTTAGTCCATTGAAAAGGCCACATATTTGTGATTTCTGACTAGCCTTTT

>PGSC0003DMG401024846-(rev)LRR-RLPs\_1020



TATGTTACAGTTGATTTCTGTAGTTTCGTGGCTTCAGAGATAGCAACCTCTATACTCTTGTATGATGGTTG  
TGTCTAATGTATCGTATTATTTTATATTGATGATTTTCCTTTAAATTG

>PGSC0003DMG401024846-(rev)LRR-RLPs\_896

TTTGTCTCTGCAGAAAGGTTGCTGGAGAGTTGGACACGTTTATTAGCAAGTTAGTGTTGATGTTCTGGCA  
AAATATCAATGGATGCATCTGTTTTTCACTTTATGTACATGGTTGTCAA

>PGSC0003DMG401024846-(rev)LRR-RLPs\_960

CTGGCAAATATCAATGGATGCATCTGTTTTTCACTTTATGTACATGGTTGTCAAATACATATGTTACAGT  
TGATTTCTGTAGTTTCGTGGCTTCAGAGATAGCAACCTCTATACTCTTG

>PGSC0003DMG401025507-(rev)LRR-RLPs\_128

ACCAGAATAATTCCGTACTGGCTTCATGGACTCCAAGTTCTGACGCATGCGAGGACTGGTATGGAGTTG  
TATGCTTTAATGGAAGGGTAAACACGTTGAATATTATAAATGCTAGTGTC

>PGSC0003DMG401025507-(rev)LRR-RLPs\_192

AGTTGTATGCTTTAATGGAAGGGTAAACACGTTGAATATTATAAATGCTAGTGTCAGTGCTACACTGTAT  
GCTTCCGTATTCATCTCTCCCTTTTCTTGAGACTCTTAATCTTAGCATG

>PGSC0003DMG401025507-(rev)LRR-RLPs\_320

CTCTGGTACCATTCCACCTGAGATTGGGGATCTCACTAATCTTGTCTATCTTGACTTGAACCTTCGATCAGA  
TTTCAGGAACAATCCCACCACAAATCGGTTCACTAGCCAAGCTTCAGAT

>PGSC0003DMG401025507-(rev)LRR-RLPs\_832

CTATTCCTGCTTCATTGGGGAATTTGAACAACCTGTCTTCTATGTTTCTTAATGATAACAACCTGAAGGGA  
AAAGTTCCGCAATGTTTGGGTAATATCGGTGGCCTCCAGGTTTTGTCTGA

>PGSC0003DMG401025507-(rev)LRR-RLPs\_896

GAAGGGAAAAGTTCCGCAATGTTTGGGTAATATCGGTGGCCTCCAGGTTTTGTCTGATGTCATCTAATAG  
TTTCAGTGGAGAGGTCCCTTCATCTATTTCCAATTTAACATCACTACAAAT

>PGSC0003DMG401025507-(rev)LRR-RLPs\_960

AATAGTTTCAGTGGAGAGGTCCCTTCATCTATTTCCAATTTAACATCACTACAAATACTTGATTTGGGCAG  
AAACAATCTGGAGGGAGCAATTCACAATGTTTTGGCAATATTATTAGT

>PGSC0003DMG401026447-(rev)LRR-RLPs\_1197

ATGCTAGTTATTGCAAACCTCCATAGTGTGATAGTCCAAGCTCCATATCTTCAATGCTTTAGATATACAGAA  
CCTACTGAACAGGGCAATCTTCATCCTTGCGAAATTGCTATTTTGGATG

>PGSC0003DMG401026447-(rev)LRR-RLPs\_126

AATATTTTTTCAATAGTCTACGCACCAAAAAAAAAAAAAAAAAACCACCAACGCTATAAAAAATTGACTGAAC  
ATTTGAGCTGTAAGCAGAAAAGTTGTTTATTATCTTTTCCTGCTCGC

>PGSC0003DMG401026447-(rev)LRR-RLPs\_2079

TCGTAACCTAAAAGATGTTATCAGTTGTTACTGGGACACCTGAGGAGGGAATGGCCGCCTCCATGTGGTA  
TCTCTGGTTGAAATCTACATCTGTAATTGACCAAGTGAATAATTTTCATGTT

>PGSC0003DMG401026447-(rev)LRR-RLPs\_63

GACTGCATAATCAGATAATCTCCAATGCAGTGGTCATATGCCGCCTGAATATGCAATACAAGAAATATTT  
TTTCAATAGTCTACGCACCAAAAAAAAAAAAAAAAAACCACCAACGCTATAA

>PGSC0003DMG401026447-(rev)LRR-RLPs\_630

ATATTATTCATCAAATCTTATGCCGCACTGACCTCGGCGTTGAAGAGGCGGCGAGAAGTTGTATGTTGTC  
CAAGACATGGTACTATTGCTGGACTTCAAGACCTAATTTGATATTCTATC

>PGSC0003DMG401026747-(rev)LRR-RLPs\_0

ATTTCCATGGAAATTTGCCTCAAGAAATGGTACGCTTACGTCGGCTTAAGTTTCTTAAGTTAAGTTTAAAC  
AAATTCAGAGGGGAAATTCCTTCTTGGTTTGGGTTTTAGAACAACTTC

>PGSC0003DMG401026747-(rev)LRR-RLPs\_1024

AGTGTCAATTACAACAAATAGCAAAGAAATAGATATAATTATTGTATTACACAAATCTAAAAAAGTTGTC  
TAGATGATAGTATCGACAAATCAATCGAAGTAGATAACATCCTATTATAA

>PGSC0003DMG401026747-(rev)LRR-RLPs\_1088

GTTGTCTAGATGATAGTATCGACAAATCAATCGAAGTAGATAACATCCTATTATAATTTACAATATGTAA  
GGCAAAAAAAAAATATCTTTTTCATAAATAAAGAATGAGAATTAGCCAAA

>PGSC0003DMG401026747-(rev)LRR-RLPs\_1152

ATGTAAGGCCAAAAAAAAAATATCTTTTTTCATAAATAAAGAATGAGAATTAGCCAAATTGTTACTACATAT  
TCTGTCTAAATGATGAACTAACTTTACCATCTTGTAATAAATTGGATG

>PGSC0003DMG401026747-(rev)LRR-RLPs\_1216

ACATATTCTGTCTAAATGATGAACTAACTTTACCATCTTGTAATAAATTGGATGGATAGTTGCCATTTA  
CCTTCGAGTAATTTGACTGTCATATGAAATTTAGTTTTTCAACTTCCTT

>PGSC0003DMG401026747-(rev)LRR-RLPs\_1280

CCATTTACCTTCGAGTAATTTGACTGTCATATGAAATTTAGTTTTTCAACTTCCTTTATCCATTTGAGGAAA

AGGAGTGGTATTTATACTATTTTATAGTAGTTCAATTGGAGAAGTCTA

>PGSC0003DMG401026747-(rev)LRR-RLPs\_1344

TGAGGAAAAGGAGTGGTATTTATACTATTTTATAGTAGTTCAATTGGAGAAGTCTAAATTGGTTAGACTA  
ATTTTAAATGTCCTATATTCATTTACAATGAATGTTGTGTGCATTGAATT

>PGSC0003DMG401026747-(rev)LRR-RLPs\_1408

AGACTAATTTTAAATGTCCTATATTCATTTACAATGAATGTTGTGTGCATTGAATTCATCTCTTAGAATTC  
TTCATGCTTTGACAAAACGTAAAAATGTTTTGAGTAAAGTACGTGTT

>PGSC0003DMG401026747-(rev)LRR-RLPs\_192

AGACTTTAGTAATATCTGACAATTTACTTGAAGGAAACATCCCGGAAGAGATTGGCAATCTTCACAACCT  
GAAATTGTTGTCCATACAATATAATATGCTTACGGGTTCTATACCATTCA

>PGSC0003DMG401026747-(rev)LRR-RLPs\_2146

TGATATGATGAATGCTAGTACTATTGTATCTAATTACCTTAGATCTTTTTTTATTACACATTAATGCAGG  
GATAATCCACAAGAAATCGGAAATCTTGTTAATTTGATGAAGTTAGCC

>PGSC0003DMG401026747-(rev)LRR-RLPs\_2272

ATAAACCAGATTACCAGCTCTATCCCGATCTCCATATTCAATATCTCATCGTTGCAATTTGTTTCACTATGG  
TCGAACAATCTCAAGGGATCCTTACCACGCGAGATTGGCAACTTAACC

>PGSC0003DMG401026747-(rev)LRR-RLPs\_2335

TCACTATGGTCGAACAATCTCAAGGGATCCTTACCACGCGAGATTGGCAACTTAACCAAGATGCAATTTT  
TATATCTAGAGGAGAATAGGTTTACTGGTACGTATACATTCAAAGTGATA

>PGSC0003DMG401026747-(rev)LRR-RLPs\_2398

CAATTTTTATATCTAGAGGAGAATAGGTTTACTGGTACGTATACATTCAAAGTGATAGCAATCTGAACTA  
GCCAATTTTTAGTTAAACTCATTCTTCTTCAGGTGAAATACCCAAAGAG

>PGSC0003DMG401026747-(rev)LRR-RLPs\_2461

TGAACTAGCCAATTTTTAGTTAAACTCATTCTTCTTCAGGTGAAATACCCAAAGAGATGAGAAATCTCGT  
TGAGTTGGAGGTACTTAATCTTGAGTTAATAGTTTTAGTGGTTCACTT

>PGSC0003DMG401026747-(rev)LRR-RLPs\_2524

AATCTCGTTGAGTTGGAGGTACTTAATCTTGAGTTAATAGTTTTAGTGGTTCACTTCCAATGGAGATCTT  
CAACATATCACGACTGAGAAATATTGCTCTTTCAGGCAATAATCTATCA

>PGSC0003DMG401026747-(rev)LRR-RLPs\_2587

GAGATCTTCAACATATCACGACTGAGAAATATTGCTCTTTCAGGCAATAATCTATCAGGAACTCTACCAC  
CAAACATAGGTTCTACCTTACCCAACATTGAAATACTTTATCTGAATAGC

>PGSC0003DMG401026747-(rev)LRR-RLPs\_2776

TCAAGAAACAAACTCAGTGGCTTGATTCCCAATTCTCTGGATATTTGACTCATCTAAACATCTTAACTT  
CCGGGGAAACAATTTAACCTAGTGATTCATTTTTAAGCTTCCTCACTTC

>PGSC0003DMG401026747-(rev)LRR-RLPs\_2839

TTAAACTTCCGGGGAAACAATTTAACCTAGTGATTCATTTTTAAGCTTCCTCACTTCCTTAAACCAATTGCA  
GAAGATTAACAGTTCTTTATGTATCTTTCAACCCTCTAAATGCCATGCT

>PGSC0003DMG401026747-(rev)LRR-RLPs\_2902

CAATTGCAGAAGATTAACAGTTCTTTATGTATCTTTCAACCCTCTAAATGCCATGCTTCCGGTCTCCGTAG  
GGAACTTCTCCATATCTCTTATAGATTTTGATGCCAATGATTGCAACAT

>PGSC0003DMG401026747-(rev)LRR-RLPs\_3091

CTTGATTGGATCAATTCCTACATCAATTCACAACCTTGAGAAACCTTCAGCGCCTGTACTTGAACAACAACA  
AGCTTACAGGATTTATTGGAGATAATTTATGTAAATTGCAACATTTGGG

>PGSC0003DMG401026747-(rev)LRR-RLPs\_3154

CAACAACAAGCTTACAGGATTTATTGGAGATAATTTATGTAAATTGCAACATTTGGGAGATATTTACTTG  
GGTCAAATCAACTTTCAGGAGCACTTCCTAATTGTTTAGGGAATGTTAC

>PGSC0003DMG401026747-(rev)LRR-RLPs\_320

AATATTTCTAGTATCCAAGTCATTGCATTTACAAACAATAGCTTATCAGGAAATCTTCCAATGGTTTATG  
CAATGGTCTCCCGATACTCAAAAACTTTATCTATCTGGAAACAAACTT

>PGSC0003DMG401026747-(rev)LRR-RLPs\_3217

TTACTTGGGTCAAATCAACTTTCAGGAGCACTTCCTAATTGTTTAGGGAATGTTACGTCCCTTAGGTTCT  
TACATCTTGATTCCAATAAATTGAGTTCCAATATACCACCAAGCTTGGG

>PGSC0003DMG401026747-(rev)LRR-RLPs\_3280

TAGGTTCTTACATCTTGATTCCAATAAATTGAGTTCCAATATACCACCAAGCTTGGGGAATCTTAGAGATC  
TAGTGGAGCTTAACTTATCATCAAACAACATGGTTGGTTCTTTACCTCT

>PGSC0003DMG401026747-(rev)LRR-RLPs\_3343

TAGAGATCTAGTGGAGCTTAACTTATCATCAAACAACATGGTTGGTTCTTTACCTCTGGAAATTGGAAAT  
CTAAAGGCTGCAATATATATGGATCTGTCAATGAATCAATTCACAAATGG

>PGSC0003DMG401026747-(rev)LRR-RLPs\_3595

TATATCAGGAACCATTCCCTATGTCTATGGAGAACTTCAATACCTCAAGTATTTCAATGTTTCTGTCAACA  
AGCTGTACAGTGAAATACCCTCGGGGGTCTTTCAAGAACCTCTCGAG

>PGSC0003DMG401026747-(rev)LRR-RLPs\_3637

CCTCAAGTATTTCAATGTTTCTGTCAACAAGCTGTACAGTGAAATACCCTCGGGGGTCTTTCAAGAAC  
CTCTCGAGTCAATTTTTCATCGACAATGAAGCATTGTGTGGTTCTTCAAG

>PGSC0003DMG401026747-(rev)LRR-RLPs\_384

GTTTATGCAATGGTCTCCCGATACTCAAAAACTTTATCTATCTGGAAACAACTTCATGGTCATATGCCT  
ACAAGCTTGTCAAATTGTTTCAAAATTGCAAATTTTGTCTCTATTTGAAA

>PGSC0003DMG401026747-(rev)LRR-RLPs\_448

TATGCCTACAAGCTTGTCAAATTGTTTCAAAATTGCAAATTTTGTCTCTATTTGAAAATGATTTTGATGGAC  
CAATACATAGTGAAATTGGAAGATTGAGTAACTTGCAGATATTGTATCT

>PGSC0003DMG401026747-(rev)LRR-RLPs\_512

GATGGACCAATACATAGTGAAATTGGAAGATTGAGTAACTTGCAGATATTGTATCTCGGATCCAACCATT  
TCACAGGTATATATGTTTTATCTTTCTAGTTTCTGGACACGTGTGTTTCAT

>PGSC0003DMG401026747-(rev)LRR-RLPs\_576

ACCATTTACAGGTATATATGTTTTATCTTTCTAGTTTCTGGACACGTGTGTTTCATCTAAATTGATATAAAT  
TGTTTCAAATTATCATTGTATTAATAATAGATTTATAATTAATTACAT

>PGSC0003DMG401026747-(rev)LRR-RLPs\_64

TTTAAACAAATTCAGAGGGGAAATTCCTTCTTGGTTTGGGTTTTTAGAACAACTTCAAGTTTTAAATCTTC  
AAAGAAATAGTTTCACTGGTTTCATTCCCCGTCCTCTCGAATGCCTC

>PGSC0003DMG401026747-(rev)LRR-RLPs\_640

ATATAAATTGTTTCAAATTATCATTGTATTAATAATAGATTTATAATTAATTACATGAATATCGTTTCATTT  
CAAACAAAAAATAGTTCAAATAATTGGAATATACTCTTGGATACCAAT

>PGSC0003DMG401026747-(rev)LRR-RLPs\_704

TTCATTTTCAAACAAAAAATAGTTCAAATAATTGGAATATACTCTTGGATACCAATAACAAATTAATAAT  
GACAACAAAGTATCTCTTCTCAAATAAAATAAAAAATGATAATATTTA

>PGSC0003DMG401026747-(rev)LRR-RLPs\_768

AAAATATGACAACAAAGTATCTCTTCTCAAATAAAATAAAAAATGATAATATTTAGTATTTTAAATACT

ATAATTATAAACACAAATTAATATATGTATATTCTTATCTCATATGTAT

>PGSC0003DMG401026747-(rev)LRR-RLPs\_896

AGATGTTATTGGCATACTCTATTAATAATCTGCAGCGTATATAAACTTCTCAAATAAAGGTCACCTTTTT

CCTCATAGTACATGAACTTCACATGTTGTCCAAAAAAAATTACAATA

>PGSC0003DMG401026747-(rev)LRR-RLPs\_960

CCTTTTTCTCATAGTACATGAACTTCACATGTTGTCCAAAAAAAATTACAATATAATTTAAAGTGCA

ATTACAACAAATAGCAAAGAAATAGATATAATTATTGTATTACACAAAT

>PGSC0003DMG401027271LRR-RLKs\_0

GTTTTCTTCATTTCTTGATATGGCTTCTTCTTAGATAGTACTCACTACTGCTGTCTATTTCTAAATTTAAG

GGCTTCTAGCTTTTTGGTTATTTTACATTTTCAAGATTCCTCAAATG

>PGSC0003DMG401027271LRR-RLKs\_1302

AATATCAGTAGTCTTACTTATTTTGAAGCAGATAGTAATAGTTTGTCTGGTGAAATTGTCACAGAGTTTCG

CGAAGTGCTCGAATCTCACTCTCCTTAATTTAGCTTCAAATGAGTTTAAT

>PGSC0003DMG401027271LRR-RLKs\_1364

AGAGTTCGCGAAGTGCTCGAATCTCACTCTCCTTAATTTAGCTTCAAATGAGTTTAATGGAACCTATTCCTC

CTGAGTTTGGTCAGCTTAACAGTTTGCAAGAATTGATTGTTTCTGGTAA

>PGSC0003DMG401027271LRR-RLKs\_3100

TAAATCTGTTATTGACTTGTTTTTTTTTCTAAACAGAGTATGCATATACGATGCAAGTAACAGCTCCTGG

AAATGTTTACAGCTATGGGGTTGTTTGGCTTGAGATCCTAACCACCCGA

>PGSC0003DMG401027271LRR-RLKs\_3596

TGTCTTACTTCAATCATATGATCACCAGTTCTTTTTCTCCAAAACATGTAGATGGAGATGTAGATTAATTT

CTCACAAGGAGAATATGTTTACAAATAGCATTATCTTTCATTTTCCATT

>PGSC0003DMG401027271LRR-RLKs\_372

ATTCTTGATTGTTCTATCTAGTTGTTTTGGAGGGAAAAGGAGGAAGTAATTGAAGAAAAGGTGTTTTCTT

GAAAAGAAAAAACTCAAGAATGACACTTTTGAGGTTTCTGTAACTGTG

>PGSC0003DMG401027271LRR-RLKs\_434

GTTTTCTTGAAAAGAAAAAACTCAAGAATGACACTTTTGAGGTTTCTGTAACTGTGTTTTTCTAGTTG

GTTTGTATCAAGATTCCAACTTGTGAATCCCAGTTGGTTTTTCATGA

>PGSC0003DMG401027811LRR-RLPs\_0

GAACTATTTGGTTAATAAAGCATTCTTGTGAGCTAATATGGCAATGTTTCATGTATGTTTACAGGATTTTC  
ATTTCTCTTTTGCTGATTTTGGTCCATTGTGAGGTGACTGTTGAACAGG

>PGSC0003DMG401027811LRR-RLPs\_1159

CTTGTTAATTGATTTTCTGAGTAATACGTTATTTGGAAATAATACAGGTCCTTTGATAGAATAAGCTGGA  
GATATTGATCGGATTACATTCGCCTATTTTTCTAATTATAAATTTGCACTG

>PGSC0003DMG401027811LRR-RLPs\_122

ACACACGGCCCTCTACGCAAAATCTGTACATTTACTAGGCGTGATAAAACTATAGCAGAAACACCTCCTC  
TTGCCAGAGAAGATGGTAAGATTGAGATTGTCATACTCTTTAAGGCTACT

>PGSC0003DMG401027811LRR-RLPs\_1220

TAAGCTGGAGATATTGATCGGATTACATTCGCCTATTTTTCTAATTATAAATTTGCACTGATATAATTAGTG  
ATCCATTATGCCATCATTTTTTTGGGAGTTTAATTTGGGGATTGTTTCAT

>PGSC0003DMG401027811LRR-RLPs\_1281

ATAATTAGTGATCCATTATGCCATCATTTTTTTGGGAGTTTAATTTGGGGATTGTTTCATAGGGAGCAATAT  
ATGCTTGTGCTCTTCGGCACTTTGCCTTCCTAATATTCTTCATGCAGTG

>PGSC0003DMG401027811LRR-RLPs\_183

CACCTCCTCTTGCCAGAGAAGATGGTAAGATTGAGATTGTCATACTCTTTAAGGCTACTTGGCCATTGTTT  
ACGTTCTACGCAAGTTAACTTGTGACGTGCTTCCTGAAAACCTATGT

>PGSC0003DMG401027811LRR-RLPs\_244

GCCATTGTTTACGTTCTACGCAAGTTAACTTGTGACGTGCTTCCTGAAAACCTATGTTTTGTCAAACCTC  
TTTATAAATGTCAACAGGTAGGTGTGTGTCGGATTCTCCAAAAGTAGTG

>PGSC0003DMG401027811LRR-RLPs\_2501

CTTTATGAATCTATCTACTTTGGTTGATCACAGTAATTTGGATAGAAACAAGTTGAATGGACCAATTCCTG  
AATCATTTAAAGAGCTGACGCGACTAACGCATATGTGAGTAGTTTCATA

>PGSC0003DMG401027811LRR-RLPs\_2928

AACCATTAGATTATTGGCGTTCCAATAACGAAAATTGTGAGTGAAGAATATTTTATAATCTAATGGTGAC  
AATTCTATTAGCCCTAATTTGATGTTAACATCACGCTTAGATGGTTTTTC

>PGSC0003DMG401027811LRR-RLPs\_2989

AATGGTGACAATTCTATTAGCCCTAATTTGATGTTAACATCACGCTTAGATGGTTTTTCCCCTCGTTTAAG  
TGTATCCAGATTATATACATGTCTGGTGACCTACATGATTAATAATTAGC

>PGSC0003DMG401027811LRR-RLPs\_366

CTTTTAGAGACTTCGACATGTGTGCTTCATAAAAATGAAGAGTTTGCGCAACTTAGCTGAAATCATGGTA  
TTTGTCCACCAAAGATATTGTTGCTGTCAAAGTCATAGTAATCCATTGT

>PGSC0003DMG401027811LRR-RLPs\_3904

TTAGTTACTTTTGGGTGCATGTACCTAACGAAACAGGGATACTTATTATTAAGTTGTAAATGATTCAGG  
CAGTTGCAGAACAAATGAATTTGTTGGTGCCTTGCCGTCGAGCTTCATAG

>PGSC0003DMG401027811LRR-RLPs\_427

ATCATGGTATTTGTCCACCAAAGATATTGTTGCTGTCAAAGTCATAGTAATCCATTGTTGTCTGAATTCA  
CAGTTGAAGTATTTTTAACTTGCCTTGTTATATTTTTGAATTATCTTTC

>PGSC0003DMG401027811LRR-RLPs\_4331

TTGGAACACGAAGAGAGAGAGAGATTAAGTTTTAAATCAATTGTTTATCTTCTTTCTTTGTAGCGATGTG  
CGAGGGAACAACCTCAATGGAACAATCCCAGATATTTTCAGAGGGTGGGA

>PGSC0003DMG401027811LRR-RLPs\_488

TCTGAATTCACAGTTGAAGTATTTTTAACTTGCCTTGTTATATTTTTGAATTATCTTCCATTTTGTACTGTT  
TTCATTGACTTCTTGTTGAGACTATATTAAGATGCTTGGATCCATAG

>PGSC0003DMG401027811LRR-RLPs\_4941

GGATATGGAAAATACCTCAACTAGAGTATCTGTAAGAAAGCTTCTGCATGCAGTAACTATCTCCATATTC  
GTTTACTTCACAAAGAAAAGGATGTGCTTTTTGATAGGGGAAAGTCGATG

>PGSC0003DMG401027811LRR-RLPs\_5002

TCCATATTCGTTTACTTCACAAAGAAAAGGATGTGCTTTTTGATAGGGGAAAGTCGATGCTTCAAATGTT  
CTCCTCTTTGACTGCTTTTTTCAAATGAACTATTATATTATGAGGTTTA

>PGSC0003DMG401027811LRR-RLPs\_549

TTTTGTACTGTTTTATTGACTTCTTGTTGAGACTATATTAAGATGCTTGGATCCATAGTTTTTAAATTCTG  
AAGTGTTAAATAAGCAAACATCTCCTTCTGCTACTTTATTTCTCTG

>PGSC0003DMG401027811LRR-RLPs\_5612

ATATGGATTTCTGTTACTATTTGTTGTTTCTTGACATTGACTATTGCATTGTTTTGTTGTAGCTTCCATTCT  
GTTATTTGTTATTATCTATAGTTTTTGTACTTGTATTACTTCTTTTT

>PGSC0003DMG401027811LRR-RLPs\_61

CAGGATTTTCATTTCTTTTTGCTGATTTTGGTCCATTGTGAGGTGACTGTTGAACAGGTTACACACGGCC



CTCTACGCAAATCTGTACATTTACTAGGCGTGATAAAACTATAGCAGA

>PGSC0003DMG401027811LRR-RLPs\_610

TTTAAATTCTGAAGTGTTAAATAAGCAAACATCTCCTTCTCTGCTACTTTATTTCTCTGTTTTTCGTTTAAAT  
TCTTTTTATTTGTCTGCAGACATGGATTTTGTGACTGTCTTGTTG

>PGSC0003DMG401027811LRR-RLPs\_671

TTTCGTTTAAATTCTTTTTATTTGTCTGCAGACATGGATTTTGTGACTGTCTTGTTGGATTATGTGACAT  
ATATGGTTTTTATGTCTTCGTCTAAAAAATTATCGCTTGCTTTGTTTA

>PGSC0003DMG401027811LRR-RLPs\_732

TTATGTGACATATATGGTTTTTATGTCTTCGTCTAAAAAATTATCGCTTGCTTTGTTTATGGTAAAGATAA  
CATAATAACTTTTTATGCATCGGCTATTACTGTTGAAATGAAAGCTGAA

>PGSC0003DMG401027811LRR-RLPs\_793

GTAAAGATAACATAATAACTTTTTATGCATCGGCTATTACTGTTGAAATGAAAGCTGAATAACCTTTACG  
GGCTATGCATATAGTATTTGTTTTCGAAATATTCATGACATCACAGGTTA

>PGSC0003DMG401027811LRR-RLPs\_854

ACCTTTACGGGCTATGCATATAGTATTTGTTTTCGAAATATTCATGACATCACAGGTTATCCATTTTAATTT  
TTTCCCCCAATATTTCTGTGTGTGGATGCCAGAGGATGTCATCACTG

>PGSC0003DMG401027811LRR-RLPs\_915

CATTTTAATTTTTTCCCCCAATATTTCTGTGTGTGGATGCCAGAGGATGTCATCACTGAGCTGCTTCGGT  
GTAATTCAAGAGTATTACCGCCAAGGTGTTTGATAACTGGAAGTAATTC

>PGSC0003DMG401027811LRR-RLPs\_976

CTGCTTCGGTGTAATTCAAGAGTATTACCGCCAAGGTGTTTGATAACTGGAAGTAATTCCAAAGTTATTT  
GCAATTGACTGTTGAGAATCATAAAATATGTCGAGTGGTGGAGATGTAT

>PGSC0003DMG401028427LRR-RLPs\_0

ATGGCTCCATTCTTCTCTCCTTGACCCTTCTCCTCTTTCTCCTCTCCACAAAATCATCATCTCAATCCACTA  
ATCTTGACCCAAACCAACTCAAAGCTCTCAGATCACTAAATGTACCA

>PGSC0003DMG401028427LRR-RLPs\_1178

TAAATGATCATGACTGTAAATTGTGACAAATTCTTGGTCCAGTTAGAAATTTGAGTTTTGAAAGCATGAA  
TCATTTACACTATTGAAAGTATGCATATGTTTCATGATTTAGTGTTCCTTG

>PGSC0003DMG401028427LRR-RLPs\_1240

AGCATGAATCATTACACTATTGAAAGTATGCATATGTTTCATGATTTAGTGTTTCTTGAAATTGATTCACA  
AACAAAAGTATGAACTTTGTACGTCTTATTATTAATCTAGCTCAAATTG

>PGSC0003DMG401028427LRR-RLPs\_1302

TGATTCACAAACAAAAGTATGAACTTTGTACGTCTTATTATTAATCTAGCTCAAATTGGACTCAAATATTT  
AAATGAGCAAGCTTGCGTATACGTTTGAAGTTATGTTTATATAAAATTA

>PGSC0003DMG401028427LRR-RLPs\_1488

GTTTTTTTATACTTAGTGATATTTGATACTCGATGAATGATGATATGAGCTATGAGCTATAATTAAGATG  
TAATCATGGTTTCTCTGTTTAGCATGAGTAATAAATAATGAAAAGATCA

>PGSC0003DMG401028427LRR-RLPs\_1550

TTAAAGATGTAATCATGGTTTCTCTGTTTAGCATGAGTAATAAATAATGAAAAGATCAAATCTGTCAGCT  
TTACTATGTTTCATGGTTGGTTTTTTTATTCCAATCTTGGTACAAAGGGAA

>PGSC0003DMG401028427LRR-RLPs\_1612

TGTCAGCTTACTATGTTTCATGGTTGGTTTTTTTATTCCAATCTTGGTACAAAGGGAACATGCCCTTTTCA  
GATTATTTTAAATTTGACAAAACATAATGTCTCTTAACTTCACAAAGG

>PGSC0003DMG401028427LRR-RLPs\_1736

AGAAAAGTTTAAGACGACTTGGGACTCATATTTGAACTGAGAAGAAGGATAAAATGCTCCAATCTTTTTT  
ATTTTCATTCATGTTACATATTTTTTACATAGAAATTTGTTTTTCATCAAGA

>PGSC0003DMG401028427LRR-RLPs\_1798

TCTTTTTTATTTTCATTCATGTTACATATTTTTTACATAGAAATTTGTTTTTCATCAAGATCTGACCATGTCCTT  
TTAGTACAAAATTTGATTATACATGTTGATAAAAGGATTCGTTTACT

>PGSC0003DMG401028427LRR-RLPs\_1922

TTGTTTTTTCATTTTCCTTTTACAAATGAACATTCAGAAAGGGTGACTGTAATAATTGGTGAAGAAACAAA  
CAAAAATCAAGTGGAGTGGTAAGTGCTCCTTCATCTTTAATCAAAGATT

>PGSC0003DMG401028427LRR-RLPs\_1984

AGAAACAAACAAAATCAAGTGGAGTGGTAAGTGCTCCTTCATCTTTAATCAAAGATTCAGGTTCAAGT  
ACCTTGATATGAATGTCAATTTTGTCTGGGAGCGTTTATCCTAATATGGC

>PGSC0003DMG401028427LRR-RLPs\_2046

GTTCAAGTACCTTGATATGAATGTCAATTTTGTCTGGGAGCGTTTATCCTAATATGGCATTTCCTGACGTG  
AATTCAAATTTAATCGAGCTCCATCATGACGCTCCAATATAAATACCGA

>PGSC0003DMG401028427LRR-RLPs\_2108

CCTGACGTGAATTCAAATTTAATCGAGCTCCATCATGACGCTCCAATATAAATACCGAACAACAGAATTA  
TTTTTTTTAAAAAAAATCCTTTTCTCATCCAAAACCACATTCTACTTG

>PGSC0003DMG401028427LRR-RLPs\_2170

CAGAATTATTTTTTTAAAAAAAATCCTTTTCTCATCCAAAACCACATTCTACTTGCAAATAGCACGTGT  
GATAAGTGACGATGAGACACAAAAATGTGTACATGGCTTTTGTGGTCA

>PGSC0003DMG401028427LRR-RLPs\_2356

TACGGTATATGTAATCTTCATTAAGAATCGAAAAATAGTTTTCTAAGAAAATATGGGTGCAACAGCAAC  
TGCAGTTTTCTCTCAAATTCTATATCTCAATTTCCCTCCTTCTCTGCTT

>PGSC0003DMG401028427LRR-RLPs\_2418

ACAGCAACTGCAGTTTTCTCTTCAAATTCTATATCTCAATTTCCCTCCTTCTCTGCTTTATGTAAACCCAACT  
TGGGGATCCGAATACCAAAGGTACTTTTTTTTTAATTATGAAAATC

>PGSC0003DMG401028427LRR-RLPs\_2480

TAAACCCAACTTGGGGATCCGAATACCAAAGGTACTTTTTTTTTAATTATGAAAATCTCCATGGAATG  
AGTTGATTAAGTTGTGTTCTTATGAATTCTTGAAATTAATAATTGGAATTT

>PGSC0003DMG401028427LRR-RLPs\_2542

ATGGAATGAGTTGATTAAGTTGTGTTCTTATGAATTCTTGAAATTAATAATTGGAATTTAATTGGGAAGTT  
GCTTCGAAAATCTTGGGTTTTATTACTATTGGAATTGCAAGCAAGAA

>PGSC0003DMG401028427LRR-RLPs\_2604

GGGAAGTTGCTTCGAAAATCTTGGGTTTTATTACTATTGGAATTGCAAGCAAGAATTGTTACCCCAA  
TTTACTTCAACTTACCTGTGTTATGAACATTGATCTAGGTTAGAATGTAG

>PGSC0003DMG401028427LRR-RLPs\_2666

TCACCCAATTTACTTCAACTTACCTGTGTTATGAACATTGATCTAGGTTAGAATGTAGCAGTACGAATTA  
CTAGTAGATGTGTGTTTAGCTCTCTGTAAACCTTTGCCTCACAGTATAG

>PGSC0003DMG401028427LRR-RLPs\_2728

ACGAATTAAGTAGATGTGTGTTTAGCTCTCTGTAAACCTTTGCCTCACAGTATAGCAAGGCGCCAAA  
TAATTAGTCGAGGTATGTGCAAGCTGAACCGAAAATAACCCACAAATAG

>PGSC0003DMG401028427LRR-RLPs\_2790

GCGCCAAATAATTAGTCGAGGTATGTGCAAGCTGAACCGAAAATAACCCACAAATAGTCCATGCAATT

GATGGATAAAAAATGTGGAATTTGAGTGTCTTGATTTTAATCAAGAAGGG

>PGSC0003DMG401028427LRR-RLPs\_2852

TGCAATTGATGGATAAAAAATGTGGAATTTGAGTGTCTTGATTTTAATCAAGAAGGGTTAAGTAGATG

AGAAGAAGAGCCTCAATATGCCTATTGTAGCTAGATCTGCTTTTCGATTTA

>PGSC0003DMG401028427LRR-RLPs\_2914

GTAGATGAGAAGAAGAGCCTCAATATGCCTATTGTAGCTAGATCTGCTTTTCGATTAACTTTGTGGATG

TTTTTCTGTTATCTGTAGAGGATCTTGGTATATTTGTATAATCACCATGA

>PGSC0003DMG401028427LRR-RLPs\_2976

TGTGGATGTTTTTCTGTTATCTGTAGAGGATCTTGGTATATTTGTATAATCACCATGACTTGGTAGTTGTA

GAAAGGAGTGCTTGGGAAAAATACATGACCTCTTTATTTTAAATTTGTC

>PGSC0003DMG401028427LRR-RLPs\_3013

ATATTTGTATAATCACCATGACTTGGTAGTTGTAGAAAGGAGTGCTTGGGAAAAATACATGACCTCTTTA

TTTTTAATTTGTCATTCTTGGTTTTTGTGTGTTGGGGGAAGGGGAGGGG

>PGSC0003DMG401028427LRR-RLPs\_310

TCCCTTCTGAACTTTCCTCCAATCTCCAATCTTCACTTGCATCAACTCCCTCAAGAACTCACAAGCCTTT

GGCTAATTCAATTGTGCAATGTGACAAGTTTAAACAGTGTCACATGTTC

>PGSC0003DMG401028427LRR-RLPs\_372

ACAAGCCTTTGGCTAATTCAATTGTGCAATGTGACAAGTTTAAACAGTGTCACATGTTCTGTTTCTGCTAG

TGGCCCTTCTATAATCTTGAACAGTATCAAGAACTTGCAGAGTGTCACA

>PGSC0003DMG401028427LRR-RLPs\_4123

ATTTTAAACATGAGGGACATCCTTGATATGATTTTACACAATGAGACTAATATACCTCAACAGTCTGATAT

TGGCTAGATGTGCACATCAGGGGTAAGAAATAGAAGTAACTTTGTAGCC

>PGSC0003DMG401028427LRR-RLPs\_4186

TCTGATATTGGCTAGATGTGCACATCAGGGGTAAGAAATAGAAGTAACTTTGTAGCCTGTCTCTAACTGT

TCGAAATTGACCTCCAACGTTGGCATAGACATATTTGAACCACTGGTGAT

>PGSC0003DMG401028427LRR-RLPs\_4249

TAACTGTTCGAAATTGACCTCCAACGTTGGCATAGACATATTTGAACCACTGGTGATCTCCTTTGGTTGA

GTTTCATCTGTTTTTTCCCGCTTCCATTTGGAGATAATGTTTGTAATG

>PGSC0003DMG401028427LRR-RLPs\_4312

TGGTTGAGTTCATCTGTTTTTTTCCCCGCTTCCATTTGGAGATAATGTTTGTAATGGACATACGGTTGTA  
CTATATGGATCTTGTGATTGCGATTGATTATGAATGGGTAGATACTTTTT

>PGSC0003DMG401028427LRR-RLPs\_4375

CGGTTGACTATATGGATCTTGTGATTGCGATTGATTATGAATGGGTAGATACTTTTTATTTTAGTCTACTA  
GAAATGATAACACCCAGCGTCACTGGTACGCCTCATATTTTCATCCAGAC

>PGSC0003DMG401028427LRR-RLPs\_4438

GTCTACTAGAAATGATAACACCCAGCGTCACTGGTACGCCTCATATTTTCATCCAGACATCAAGATGAGTA  
TGCATCTTATTAGATGGCATGAATTCTGGAAATTTAAACTGAGGTATTGA

>PGSC0003DMG401028427LRR-RLPs\_4501

ATGAGTATGCATCTTATTAGATGGCATGAATTCTGGAAATTTAAACTGAGGTATTGATTTTTGATGCAGC  
TTGTTCAATTTGGCAGAGATTGCATATGGGCTTTCCTTGAGTACAAATCG

>PGSC0003DMG401028427LRR-RLPs\_4564

ATGCAGCTTGTTCAATTTGGCAGAGATTGCATATGGGCTTTCCTTGAGTACAAATCGTAGGGATTTTCAT  
TGTTCAACTCTCTCCACCATAAGAGCTGATGGGATCAGGCGACGGAAGTC

>PGSC0003DMG401028427LRR-RLPs\_4627

TTTTATTGTTCAACTCTCTCCACCATAAGAGCTGATGGGATCAGGCGACGGAAGTCTTCAAAAGATGCT  
ACACCAGGGAAAACATCCAAAGGAAGTGAGCTCAATATACAGCCATCCCC

>PGSC0003DMG401028427LRR-RLPs\_4690

AGATGCTACACCAGGGAAAACATCCAAAGGAAGTGAGCTCAATATACAGCCATCCCCTGACAGTAAATC  
GCCAAATTCATTAACCAGGAAGAGATCATTCTCTTTTCAAGAGAATACA

>PGSC0003DMG401028427LRR-RLPs\_4753

TAAATCGCCAAATTCATTAACCAGGAAGAGATCATTCTCTTTTCAAGAGAATACAATCTTCAATTTCAA  
AAGGTGATTCTACAAGTTCCAAGAAAAGAAGTACCAAGTCTTCTGAAGA

>PGSC0003DMG401028427LRR-RLPs\_4816

AATTTCAAAGGTGATTCTACAAGTTCCAAGAAAAGAAGTACCAAGTCTTCTGAAGAGAAGCCCGCTAT  
TGATTGCGTCTTGAAATCCTTCGTCATTCAAAGACAGAACCAAAAAGGTAG

>PGSC0003DMG401028427LRR-RLPs\_4942

CTTTCAGTTTTACCCAAGCCTGTTCCAGTCGTCCCACCTTTTCCCAAATCTATCCCAGTGCAAATGATG  
ATACTCAGTTAGCTAATATCTCTTTTTCTTTTAAAGTACTAAGGATG

>PGSC0003DMG401028427LRR-RLPs\_5005

CAAATGATGATACTCAGTTAGCTAATATCTCTTTTTCTTTTTAAGGTACTAAGGATGACAAGGGTTTACT  
CATCAAAAAGATAAAAAAGAACCGGAAACAGACTATCCACCAACAGCAG

>PGSC0003DMG401028427LRR-RLPs\_5068

GTTTGACTCATCAAAAAGATAAAAAAGAACCGGAAACAGACTATCCACCAACAGCAGATCCAAGATCAA  
CACGCCTACGGTCAAGCTTTGTGAAAAGATCGCCTCTACAATCCCCATTTA

>PGSC0003DMG401028427LRR-RLPs\_5509

ACATTCATTTGTTTGTGGTTTGTAAACATGTGTTGTCTTTAAAGTCTAATTGCATTTATGATCAATTTCTCA  
AGTTGCTTACCTTCTCCTCTTCTCCTTCCCCAACAATTTGCTTGCTT

>PGSC0003DMG401028427LRR-RLPs\_5572

AATTTCTCAAGTTGCTTACCTTCTCCTTCTCCTTCCCCAACAATTTGCTTGCTTTAATGGTTGAAAGAG  
GGTTATTATTCTCCAATCTGCTAGTTGTTTTTTCTTATATAAATCT

>PGSC0003DMG401028427LRR-RLPs\_5626

CTTTAATGGTTGAAAGAGGGGTTATTATTCTCCAATCTGCTAGTTGTTTTTTCTTATATAAATCTGATGT  
GATCTTTTAGCCTGGTGTGGGAAGATCCTCACTTGCAATAACAAGTTGG

>PGSC0003DMG401028427LRR-RLPs\_682

TTTCTTTAAAAAATGTGTCATTAGCTTCAAATGCTCTGTCTGGAAGTATTCCGAAATCGATTGCTGCAATC  
CCTGGATTAGTCCATCTTGATCTTGGATCAAACCAATTGAATGGAAGT

>PGSC0003DMG401028427LRR-RLPs\_744

GCTGCAATCCCTGGATTAGTCCATCTTGATCTTGGATCAAACCAATTGAATGGAAGTGTCCAAAGTTCA  
TTTCAGATATGAAGGGATTGAAATACTTGAATCTTGAAGAAACAATTT

>PGSC0003DMG401028427LRR-RLPs\_806

AAAGTTCATTTAGATATGAAGGGATTGAAATACTTGAATCTTGAAGAAACAATTTGAAAGGGGTTTT  
GCCATTCAATGCTTCTTTTCAAGAACTAGTTGTGTTCAAAGTGGGAGA

>PGSC0003DMG401029358-(rev)LRR-RLKs\_0

CTCTTGTTTTATAATCCCCAAGTGTGCCATCCATTCTTATTTGTCTATTCATTATTCCAACCTCCATATGTT  
TGAAAATTCTGTGATGAGAACATCAAACCAAGAATTCAAGAATCATC

>PGSC0003DMG401029358-(rev)LRR-RLKs\_1008

GGAAAGAGGACTTAACTTCAGGAAGTGAAGAGGATTTAAGCAGCCACCAGAAGGTAAAGATTTTGCTA

ACTTTCCGTCTTTTCTCCTGCATTGTTAAGATACATATTTTTGCTGTAGCTC

>PGSC0003DMG401029358-(rev)LRR-RLKs\_1071

TGCTAACTTTCCGTCTTTTCTCCTGCATTGTTAAGATACATATTTTTGCTGTAGCTCTAGTTTAGTTATTAG

TCCTTACAAATCCATCATGGTATATATTCTTGACTAAAGAGATGAATC

>PGSC0003DMG401029358-(rev)LRR-RLKs\_1134

AGTTATTAGTCCTTACAAATCCATCATGGTATATATTCTTGACTAAAGAGATGAATCGAGGTATAAATTCT

TTATTTCGATGATCGAATGTGATTGAAGTAAGCTTCTCAAATTTCTGTTC

>PGSC0003DMG401029358-(rev)LRR-RLKs\_1197

TAAATTCCTTTATTTCGATGATCGAATGTGATTGAAGTAAGCTTCTCAAATTTCTGTTCTGTTCTGTGTATGTT

CCAATGATTCAACTTGCTGTTTTACAGATATTAATGTTGGAGAAGTTT

>PGSC0003DMG401029358-(rev)LRR-RLKs\_126

TGAAGACAAAAATTGAACTTTGTCATTGCTACAATATGTGTGAACCATGGAGAAAACCAATTCCAGAA

CAAGACCTTTCTTTTTCATCTGCGCATTCTTGGCTTTCTATTGATATTAC

>PGSC0003DMG401029358-(rev)LRR-RLKs\_1260

GTGTATGTTCCAATGATTCAACTTGCTGTTTTACAGATATTAATGTTGGAGAAGTTTGTACAAGAATGA

GCTTCACCGAGCTGGAAAATGCAACTTCTGATTTTAGTGAAGATTATTTG

>PGSC0003DMG401029358-(rev)LRR-RLKs\_1323

AGAATGAGCTTCACCGAGCTGGAAAATGCAACTTCTGATTTTAGTGAAGATTATTTGGTAGGTAATGGA

ATGTTGGGCAAAGTGTACAAAGCAATTCTACCAAATGACTGGACACTTGCA

>PGSC0003DMG401029358-(rev)LRR-RLKs\_1386

AATGGAATGTTGGGCAAAGTGTACAAAGCAATTCTACCAAATGACTGGACACTTGCAATCAAGAAGCTG

AATGACTCAGAGAACTTGGAGGACGAGTTTGTCTCGGAGATTACAACTCTT

>PGSC0003DMG401029358-(rev)LRR-RLKs\_1449

AAGCTGAATGACTCAGAGAACTTGGAGGACGAGTTTGTCTCGGAGATTACAACTCTTGGTGGTCTGAGG

CATCGGAACCTATTGCCTCTTATAGGTTTCTGTGTTGAAAGGGGAAAAAAAAA

>PGSC0003DMG401029358-(rev)LRR-RLKs\_1512

CTGAGGCATCGGAACCTATTGCCTCTTATAGGTTTCTGTGTTGAAAGGGGAAAAAAAAA

AAATACATGTTTAAATGGAAATCTTCATGAATGGCTGCACTCGAACGAAGAC

>PGSC0003DMG401029358-(rev)LRR-RLKs\_1575

GTTTACAAATACATGTTTAATGGAAATCTTCATGAATGGCTGCACTCGAACGAAGACAAGGCCAAGATTT  
TAGACTCCGTCTTAGAGTTAAAATTGCACTTGGGATAGCAAAAAGGTGTA

>PGSC0003DMG401029358-(rev)LRR-RLKs\_1638

AAGATTTTAGACTTCCGTCTTAGAGTTAAAATTGCACTTGGGATAGCAAAAAGGTGTAGCTTGGCTTCATC  
ATGGTTACAAATTGCACGTTGCACACGGAAGCATAAGCACACGATGTATC

>PGSC0003DMG401029358-(rev)LRR-RLKs\_1701

CTTCATCATGGTTACAAATTGCACGTTGCACACGGAAGCATAAGCACACGATGTATCTTGCTAGATCAAA  
ATTTTGAGCCCAAAATATCCAACCTTTGGGAAGCAAAAATTTGGAGTAAG

>PGSC0003DMG401029358-(rev)LRR-RLKs\_1764

GATCAAAATTTTGAGCCCAAAATATCCAACCTTTGGGAAGCAAAAATTTGGAGTAAGAATGATACAGCA  
TTAAGTTGGAGTCTTTCCAGTAGCTGAATATTCATGTTTAGGTTCTTAC

>PGSC0003DMG401029358-(rev)LRR-RLKs\_1827

ACAGCATTAAGTTGGAGTCTTTCCAGTAGCTGAATATTCATGTTTAGGTTCTTACAAGAAAGACATCT  
ACTGCTTTGGCGTCTGCTTCTCGAGCTGGTTACAGGGAAGGAACCGCAT

>PGSC0003DMG401029358-(rev)LRR-RLKs\_189

CCAGAACAAGACCTTTCTTTTTCATCTGCGCATTCTTGCTTTCTATTGATATTACTTAGCAGAATTTGTG  
TCTGCAGTGCTGCAGAAAGTGATTTGTATTGCTTGAAATCAATAAAAG

>PGSC0003DMG401029358-(rev)LRR-RLKs\_1890

GACATCTACTGCTTTGGCGTCTGCTTCTCGAGCTGGTTACAGGGAAGGAACCGCATGAATTGACAAGC  
TCGAGAAATCTGTTTGATCACTCGCCTTGCTACTTGATGCAGATAAAGAT

>PGSC0003DMG401029358-(rev)LRR-RLKs\_1953

ACAAGCTCGAGAAATCTGTTTGATCACTCGCCTTGCTACTTGATGCAGATAAAGATTTGCTTGGGAAAG  
GAATCAACGATTTGATCCTCGAATTTCTAGAGTTATCTTGTGACTGTGTG

>PGSC0003DMG401029358-(rev)LRR-RLKs\_2016

GGGAAAGGAATCAACGATTTGATCCTCGAATTTCTAGAGTTATCTTGTGACTGTGTGAAGTTCTTTCCTA  
ATGAAAGGCCAACAATGCTGAAAGTTTATGACAACTCAAGACAATTTCT

>PGSC0003DMG401029358-(rev)LRR-RLKs\_2079

TTTCCTAATGAAAGGCCAACAATGCTGAAAGTTTATGACAACTCAAGACAATTTCTCAAGGTCGAAACG  
ACGACTAGGTATAGAAAACCTCCCTTACATTCAACTGGCATTGGAAGTCTA



>PGSC0003DMG401029358-(rev)LRR-RLKs\_2142

CGAAACGACGACTAGGTATAGAAAACCTCCCTTACATTCAACTGGCATTGGAAGTCTATATATAGGACTAG  
TACTATTGTTTATAGTTTACACTATTGGAAAGTTATATTGATTGCATTG

>PGSC0003DMG401029358-(rev)LRR-RLKs\_2205

GGACTAGTACTATTGTTTATAGTTTACACTATTGGAAAGTTATATTGATTGCATTGTTGGTTTTAAAAGA  
ATCTACTGATGCTGCATTGACTAGTAACTTCAACCCCTGTACCTTAA

>PGSC0003DMG401029358-(rev)LRR-RLKs\_2268

TAAAAGAATCTACTGATGCTGCATTGACTAGTAACTTCAACCCCTGTACCTTAACTAGAGGTCTCGAG  
TTTGAGTCCCTAGGGGCTAGGAATGGAAAAAATCACGTTGAGAGCGCTG

>PGSC0003DMG401029358-(rev)LRR-RLKs\_2331

GTCTCGAGTTTGAGTCCCTAGGGGCTAGGAATGGAAAAAATCACGTTGAGAGCGCTGCTCCTAGAAATG  
GACCCTTCAATGCCGCGAATTTGACTTTAATGGGGCCCTTGATTCCCCTGC

>PGSC0003DMG401029358-(rev)LRR-RLKs\_2394

GAAATGGACCCTTCAATGCCGCGAATTTGACTTTAATGGGGCCCTTGATTCCCCTGCTACTTGATCAGTA  
ATATGTATTAGATGCTAACTACATTATTGAGTCTACTCAGATTGAGGCAC

>PGSC0003DMG401029358-(rev)LRR-RLKs\_252

GAATTTGTGTCTGCAGTGCTGCAGAAAGTGATTTGTATTGCTTGAAATCAATAAAAGATTCATTACAAGA  
TCCTTGTAATCCTTGGGCTCTTGGGATTTAGCAATGTTACCGAAGGCT

>PGSC0003DMG401029358-(rev)LRR-RLKs\_315

TACAAGATCCTTGTAATCCTTGGGCTCTTGGGATTTAGCAATGTTACCGAAGGCTTCATCTGCCAATTT  
AGAGGAATTGAATGCTGGCATGATTATGAGAATAAGGTAATGAACATTA

>PGSC0003DMG401029358-(rev)LRR-RLKs\_378

GCCAATTTAGAGGAATTGAATGCTGGCATGATTATGAGAATAAGGTAATGAACATTAGACTTTCAGACT  
CAGGACTAATAGGTGAGTTTCCACAAGGCATTCGAAATTGTACAAGTTTGA

>PGSC0003DMG401029358-(rev)LRR-RLKs\_441

CAGACTCAGGACTAATAGGTGAGTTTCCACAAGGCATTCGAAATTGTACAAGTTTATTGGTTTAGATCT  
TTCAGACAACAACCTTGATGGAACCTATCCCTTCAGATATTTCCGTAATAG

>PGSC0003DMG401029358-(rev)LRR-RLKs\_504

TAGATCTTTCAGACAACAACCTTGATGGAACCTATCCCTTCAGATATTTCCGTAATAGTTGAACATGTTACA

ACACTTGATCTCTCAAGTAACAAGTTTTCTGGCAATATACCACCTGACA

>PGSC0003DMG401029358-(rev)LRR-RLKs\_567

ATGTTACAACACTTGATCTCTCAAGTAACAAGTTTTCTGGCAATATACCACCTGACATAGCTAATTGTGAA  
TACCTTAACTTTCTAATGTTGAACAACAATAATCTAGGAGGTGAAATTC

>PGSC0003DMG401029358-(rev)LRR-RLKs\_63

TCCATATGTTTAAAATTCTGTGATGAGAACATCAAACCAAGAATTCAAGAATCATCGCTAAATGAAGAC  
AAAAATTGAACTTTGTCATTGCTACAATATGTGTGAACCATGGAGAAAA

>PGSC0003DMG401029358-(rev)LRR-RLKs\_630

ATTGTGAATACCTTAACTTTCTAATGTTGAACAACAATAATCTAGGAGGTGAAATTCCAAGTAGAATTGG  
TTCTCTATCTCGCCTTAATACATTCAGCGTAGCCAACAATAACTTGACAG

>PGSC0003DMG401029358-(rev)LRR-RLKs\_693

GAATTGGTTCTCTATCTCGCCTTAATACATTCAGCGTAGCCAACAATAACTTGACAGGGCCAGTGCCATC  
ATTTGTTAACATACAAATCACAGCTCACAGTTTTGCAAACAATTCAGAAC

>PGSC0003DMG401029358-(rev)LRR-RLKs\_756

TGCCATCATTTGTTAACATACAAATCACAGCTCACAGTTTTGCAAACAATTCAGAACTTTGTGGGAAGCC  
CTTGAAAGAATGTGAGTATTATGAGGATTCTTGGATTTGAAACATGTAG

>PGSC0003DMG401029358-(rev)LRR-RLKs\_819

GGAAGCCCTTGAAAGAATGTGAGTATTATGAGGATTCTTGGATTTGAAACATGTAGATCGTGCTTCAT  
TTATCGAGGCATTTGTGTGTGGTTGGGTACTTTTCTTACATTAGTTTTAG

>PGSC0003DMG401029358-(rev)LRR-RLKs\_882

CTTCATTTATCGAGGCATTTGTGTGTGGTTGGGTACTTTTCTTACATTAGTTTTAGTCCTTTGCTTCTTTA  
AATTCCTGTCAAGGTTATCAACAAGATAGTCTCATTAAACATATGGA

>PGSC0003DMG401029358-(rev)LRR-RLKs\_945

GCTTCTTTAAATTTCTGTCAAGGTTATCAACAAGATAGTCTCATTAAACATATGGAAGCTGAGGAAAGA  
GGACTTAACTTCAGGAAGTGAAGAGGATTTAAGCAGCCACCAGAAGGTAA

>PGSC0003DMG401029444G-LecRK\_0

GGTAATAGGAAGAGTATTAGAAAACCAAAAAAGATGACCACTAGCAGCAGAAATGTGCATCATTTTGT  
CATCTAATTCTTGTTATTCTTCATTGTTTTAATACAGGATTTTGCACAGAA

>PGSC0003DMG401029444G-LecRK\_1037

GAGGAAAGCTTTGCAATGTGAAGTAAGGAATAACTCAGGGGATTCAAGTAAAGAAGACGGATTTCTAA  
AGATAGGGTCAATAAAAATTGCCTGATTTTGCAGAAAGGTCATCGACTAGAGA

>PGSC0003DMG401029444G-LecRK\_1098

TTTCTAAAGATAGGGTCAATAAAAATTGCCTGATTTTGCAGAAAGGTCATCGACTAGAGAAGACCAATGT  
AAAAGCCAATGCTTGGGATATTGTTCTGCATAGCGTATGCATATGACTCA

>PGSC0003DMG401029444G-LecRK\_1159

ACCAATGTAAAAGCCAATGCTTGGGATATTGTTCTGCATAGCGTATGCATATGACTCAGGTACTGGCTG  
TATGTCATGGAGTAACAACCTTGATTGATATTCAGCAGTTCCAAAGCTCGG

>PGSC0003DMG401029444G-LecRK\_122

AGATAGCATTACCAGCACTCTATCTCTGAGGGATCCTGGGATTTTATCATCTCCAGGAGGCGTCTTGAAG  
TTGGGATTTTTCAGTCCTCTAACAGCTCTAACAGGTATGTTGGTATTTG

>PGSC0003DMG401029444G-LecRK\_1220

TACTGGCTGTATGTCATGGAGTAACAACCTTGATTGATATTCAGCAGTTCCAAAGCTCGGGGAAAGATCTC  
TATATTCGCGTGGCACATTCAGAGCTTGGTATGTATAGTGGTGTGAATA

>PGSC0003DMG401029444G-LecRK\_1281

AAAGATCTCTATATTCGCGTGGCACATTCAGAGCTTGGTATGTATAGTGGTGTGAATAGAAGACTCATT  
ATCCACCCAGAATAGCTTAATCAGTCATTTGAGATATCATGGACTTATTG

>PGSC0003DMG401029444G-LecRK\_1342

AGACTCATTATCCACCCAGAATAGCTTAATCAGTCATTTGAGATATCATGGACTTATTGAATTCCATATAT  
ATACATTAAGTAGCTTACTTCTGTAGAGAACTGATTTTGTTCACCTTT

>PGSC0003DMG401029444G-LecRK\_1403

TTCCATATATATACATTAAGTAGCTTACTTCTGTAGAGAACTGATTTTGTTCACCTTTTGTGATTGCTCTA  
CATTACAGATCATCATAAAGACATAAAGAAAATTGTAATTCCAGTAAT

>PGSC0003DMG401029444G-LecRK\_1464

TGATTGCTCTACATTACAGATCATCATAAAGACATAAAGAAAATTGTAATTCCAGTAATCCTTGGTTTTCT  
TACACTCTGTGTTTGTCTGTTCCCTTGTGTACATGGATGGCCAGACTT

>PGSC0003DMG401029444G-LecRK\_1525

TTGGTTTTCTTAACTCTGTGTTTGTCTGTTCCCTTGTGTACATGGATGGCCAGACTTAGAGGTAAAACA  
AGCTATAAAGTTTTAGTATTATACATTTAGAAGCACTTTGTTTGCTATA

>PGSC0003DMG401029444G-LecRK\_1586

AGGTAAAACAAGCTATAAAGTTTTAGTATTATACATTTAGAAGCACTTTGTTTGCTATAGTAGTTAATTTG  
TATCCCTGCTGATATTAGGAGTAAAAAGGAAGAAGATAAATTTACTTGG

>PGSC0003DMG401029444G-LecRK\_1647

AGTTAATTTGTATCCCTGCTGATATTAGGAGTAAAAAGGAAGAAGATAAATTTACTTGGTGACAGAAGT  
GCAGTTCATATGGAAGAGTTACCAGTCTTCAGCCTCGATACGCTTGCAAAT

>PGSC0003DMG401029444G-LecRK\_1708

ACAGAAGTGCAGTTCATATGGAAGAGTTACCAGTCTTCAGCCTCGATACGCTTGCAAATGCAACATCCCA  
ATTCCATGAGGATAAGAAGCTTGGTCAGGGCGGTTTTGGTCCAGTTTACA

>PGSC0003DMG401029444G-LecRK\_1769

AACATCCCAATTCATGAGGATAAGAAGCTTGGTCAGGGCGGTTTTGGTCCAGTTTACATGGTACAATTT  
TCTTCTCTCTCGATCACTTTTCAAATTTTCAAGTTGCTGAAATTGCTGATTA

>PGSC0003DMG401029444G-LecRK\_183

GTCTTGAAGTTGGGATTTTTTCAGTCTCTAAACAGCTCTAACAGGTATGTTGGTATTTGGTACAATTTTTTC  
TGAAACGATTGTCATTTGGGTGGCTAATAGGGACAAACCTTTAAGAGAT

>PGSC0003DMG401029444G-LecRK\_1830

GTACAATTTTCTTCTCTCTCGATCACTTTTCAAATTTTCAAGTTGCTGAAATTGCTGATTACTTGTAGGGAAAA  
TTGGAAGACGGGAAAGAAATAGCAGTCAAGAGGCTTTCAAAGCCTCG

>PGSC0003DMG401029444G-LecRK\_1952

ACAAGGGCTGGAGGAGTTCATGAATGAAGTGTGGTGATCTCGAAAGTCCAACATAGAAACCTTGTTAG  
ACTTTTGGGATGTTGCGTTGATAAAGAGGAGAAGATGTTGATTTATGAATA

>PGSC0003DMG401029444G-LecRK\_2013

CTTGTTAGACTTTTGGGATGTTGCGTTGATAAAGAGGAGAAGATGTTGATTTATGAATATATGCCCAAG  
AAAAGCTTGGATGTGTTTCTCTTTGGTTAGTCCTTGCTTTTAATAAGCATT

>PGSC0003DMG401029444G-LecRK\_2074

TGCCCAAGAAAAGCTTGGATGTGTTTCTCTTTGGTTAGTCCTTGCTTTTAATAAGCATTGTACTTCTCATA  
GCAGTTCCTTGTACTCCACATCTATGTTGTTCCGACTCTTCAATAATG

>PGSC0003DMG401029444G-LecRK\_2257

TCAACAATTTTGGGGAGTCTGAGCAACATTGCTCCACATTTCTTCTGAAGCAAAGTTAATCCCTTCTCCAT

TCATATTTGACAAACATCTAGATGAAGGCCACCGAGGCATTTTGGATTG

>PGSC0003DMG401029444G-LecRK\_2318

CCTTCTCCATTCATATTTGACAAACATCTAGATGAAGGCCACCGAGGCATTTTGGATTGGAGAAAACGTT

CCACTATAATCGAAGGGGTTGGTCGAGGACTCCTTTATCTTCACAGAGAT

>PGSC0003DMG401029444G-LecRK\_2379

GAAAACGTTCCACTATAATCGAAGGGGTTGGTCGAGGACTCCTTTATCTTCACAGAGATTCAAGATTGA

AGATAATTCATAGAGATCTGAAGCCAAGTAACATTTTGCTCGATAATGACT

>PGSC0003DMG401029444G-LecRK\_244

ACAATTTTTCTGAAACGATTGTCATTTGGGTGGCTAATAGGGACAAACCTTTAAGAGATTCTTCTGGGGT

TGTCAAATATCTGGTGATGGAAATATCTTAGTTATGAACGGGGAGGAGG

>PGSC0003DMG401029444G-LecRK\_2440

AAGATTGAAGATAATTCATAGAGATCTGAAGCCAAGTAACATTTTGCTCGATAATGACTTCAATCCAAG

ATTCAGATTTTGGCATGGCTAGGATTTTCGGATCTGACCAAGATCAAGC

>PGSC0003DMG401029444G-LecRK\_2501

AATCCAAGATTTTCAGATTTTGGCATGGCTAGGATTTTCGGATCTGACCAAGATCAAGCAGACACAAGG

AGAGTAGTTGGTACTTAGTAAGTGGACATTGATCTATATCTACCATAGCTT

>PGSC0003DMG401029444G-LecRK\_2562

ACACAAGGAGAGTAGTTGGTACTTAGTAAGTGGACATTGATCTATATCTACCATAGCTTTACACAGTTTT

CTCCTGTAAAAAACCATATCATACTACTACTAACTAATCATTTTTTTAC

>PGSC0003DMG401029444G-LecRK\_2623

CACAGTTTTCTCCTGTAAAAAACCATATCATACTACTACTAACTAATCATTTTTTTACACGAATGTGCTGA

CATTTTTACAGTGGATACATGGCCCCTGAATATGCAATGAAAGGAAGA

>PGSC0003DMG401029444G-LecRK\_2684

GAATGTGCTGACATTTTTACAGTGGATACATGGCCCCTGAATATGCAATGAAAGGAAGATTCTCTGAGA

AATCGGACGTTTTTCAGCTTTGGAGTTCTAGTGTTAGAGATCATCAGTGGCC

>PGSC0003DMG401029444G-LecRK\_2745

CTCTGAGAAATCGGACGTTTTTCAGCTTTGGAGTTCTAGTGTTAGAGATCATCAGTGGCCGAAAAAGTAC

AAGTTCTTGAATGAGACATCCTCTTTTAGCCTTTTCGGATATGTAAGATT

>PGSC0003DMG401029444G-LecRK\_2806

AAAAGTACAAGTTCTTGAATGAGACATCCTCTTTTAGCCTTTTCGGATATGTAAGATTCCCTTTATATGC  
TACTATTCAAATACTAAAAATGCTCATACTGCAAAAACACTATACAGTCAA

>PGSC0003DMG401029444G-LecRK\_2867

CTTTATATGCTACTATTCAAATACTAAAAATGCTCATACTGCAAAAACACTATACAGTCAAAACATTTCTACA  
TCGACCTCGTTTGTCCAGATATCTTTTGGTTGCTATAGTGAAATGCTAT

>PGSC0003DMG401029444G-LecRK\_2928

CATTTCTACATCGACCTCGTTTGTCCAGATATCTTTTGGTTGCTATAGTGAAATGCTATTATAGAGAACAT  
CCAAAGTAAATTTACCATTATAGTAACGTGTTGTTATAGTTTCGATTGT

>PGSC0003DMG401029444G-LecRK\_2989

TAGAGAACATCCAAAGTAAATTTACCATTATAGTAACGTGTTGTTATAGTTTCGATTGTGTGTACCTTATA  
TTTTTACATTATGATGGTAGAATTACTTTTGTCTGCTACTGTGTTTTATG

>PGSC0003DMG401029444G-LecRK\_305

TTCTGGGGTTGTCAAATATCTGGTGATGGAAATATCTTAGTTATGAACGGGGAGGAGGAGATTCTTTG  
GTCATCAAATGTTTCAACCTCTCAGGTAAACTCAATTGCCCTTCTCCAAGA

>PGSC0003DMG401029444G-LecRK\_3050

GTACCTTATATTTTTACATTATGATGGTAGAATTACTTTTGTCTGCTACTGTGTTTTATGCATCAATAAGTTT  
GATGATCAATTTTTCACTGTTTTCAGGCATGGATGTTATGGAAAGAAC

>PGSC0003DMG401029444G-LecRK\_3111

TCAATAAGTTTGTATGATCAATTTTTCACTGTTTTCAGGCATGGATGTTATGGAAAGAACAAGATTTATCA  
ACTTTTATCGATCCATTCATATTGAACACGAGCTCGGAAATGGAGATCAG

>PGSC0003DMG401029444G-LecRK\_3172

GATTTATCAACTTTTTATCGATCCATTCATATTGAACACGAGCTCGGAAATGGAGATCAGAAAATGCATAC  
AGATTGGTTTACTATGTGTTCAAGAATTTGCTGAAGACAGACCAAGTATT

>PGSC0003DMG401029444G-LecRK\_3233

AATGCATACAGATTGGTTTACTATGTGTTCAAGAATTTGCTGAAGACAGACCAAGTATTTTCATCTGTTCTT  
GCTATGCTTACCAGTGAAACTACAAGTCTTCCTGCACCATCACAACCTG

>PGSC0003DMG401029444G-LecRK\_3294

ATCTGTTCTTGCTATGCTTACCAGTGAAACTACAAGTCTTCCTGCACCATCACAACCTGCTTTTACTGAAA  
GACATGATTGTATCTTCAAATGTGCAATGTAACCTAATTGTACTTTGAA

>PGSC0003DMG401029444G-LecRK\_3355

TTTACTGAAAGACATGATTGTATCTTCAAATGTGCAATGTAATAATTGTACTTTGAACAATATCAGTAT  
CACAAACATAACTGGTAGATGACATGAGTATATGAAATTATTATTTTTA

>PGSC0003DMG401029444G-LecRK\_3416

ATATCAGTATCACAAACATAACTGGTAGATGACATGAGTATATGAAATTATTATTTTTAAGATATGCAAA  
ATTATCCATTTGTCTCAATTTGTATGATATCTTTGTCATTCATTTTTCGA

>PGSC0003DMG401029444G-LecRK\_3477

ATATGCAAAATTATCCATTTGTCTCAATTTGTATGATATCTTTGTCATTCATTTTTCGATTACATGTAAAT  
ATTCTGTTGAATCAAATATCATAATCCACAAGTGTAATATGTGTTTG

>PGSC0003DMG401029444G-LecRK\_3538

ACATGTAAATATTCGTGTTGAATCAAATATCATAATCCACAAGTGTAATATGTGTTTGCCAATCACAGA  
ATATATTATGGGATGTATTTGGAATAAAATGAAAAGGCATTTAGGTTTAA

>PGSC0003DMG401029444G-LecRK\_3599

AATCACAGAATATATTATGGGATGTATTTGGAATAAAATGAAAAGGCATTTAGGTTTAAATGTCAATTTGT  
GCAACAATACATTTTTTCATTACACTATGTGCATTATTACCACTTATAGTT

>PGSC0003DMG401029444G-LecRK\_366

ATTCTTTGGTCATCAAATGTTTCAACCTCTCAGGTAACTCAATTGCCCTTCTCCAAGATTCTGGGAATTTT  
GTTCTTGTAGATCATCTGAACAATGGGAGCACAATATGGCAGAGTTTT

>PGSC0003DMG401029444G-LecRK\_3660

TCAATTTGTGCAACAATACATTTTTTCATTACACTATGTGCATTATTACCACTTATAGTTGACAAGCATGTTG  
ACGTTGAGATGCTAGCTTATTGTCAAGGTCCCCACTCAATTCTCACAC

>PGSC0003DMG401029444G-LecRK\_3721

CAAGCATGTTGACGTTGAGATGCTAGCTTATTGTCAAGGTCCCCACTCAATTCTCACACTAACGTGGCTTT  
TGGATTTTCACTCATTTTACTTTTTCGAAATAGTTTAAATATATCAATC

>PGSC0003DMG401029444G-LecRK\_3843

TATATTTCTGGTCTAAGGTTGAATTAAGCTTAGATGTCATATCTTTACATCAATACTCATTTTATTTTATTTT  
CTTCTTCTTTTTCAATGAGCATTTAATAATTTAAGGAAAAGAAATG

>PGSC0003DMG401029444G-LecRK\_4026

GATAGTGATGGGAGAAAAGACTTATATTGTCAGCGTATAGAAGTTAACTCTACATTTTACATTATTCGT

TTTTAAGTGTCAATTTTTGCATTGGCCTAAAAGTCTCGGATAGAGAATGA

>PGSC0003DMG401029444G-LecRK\_4087

ATTATTCGTTTTTAAGTGTCAATTTTTGCATTGGCCTAAAAGTCTCGGATAGAGAATGATATGTGGTTTGT  
GATATTTCTATAGGGTCAACAAATTA AAAATCCTATTTGGCTGCTTGTG

>PGSC0003DMG401029444G-LecRK\_4148

TGTGGTTTGTGATATTTCTATAGGGTCAACAAATTA AAAATCCTATTTGGCTGCTTGTGATATTAGACTTT  
GACAACATATTGTGCTTTTGTTCATATAGTGTGGTAATAAGAAAAGTCT

>PGSC0003DMG401029444G-LecRK\_427

CTGGGAATTTTGTTCCTTGTAGATCATCTGAACAATGGGAGCACAATATGGCAGAGTTTTGAACATCCTTC  
TGATTCAATTGTCCCTAAAATGAGATTAAGTGAAAACACAAGGACAGGGG

>PGSC0003DMG401029444G-LecRK\_4636

ATCAAATGTTTCAACTTCTCAGGTAACTCAATTGGCCTTCTCCAAGATTCTGGGAACTTTGTTCTCGTTG  
ATCATCGGGACAATATGAGCACTATATGGCAGAGTTTTGAACATCCTTC

>PGSC0003DMG401029444G-LecRK\_4697

GTTCTCGTTGATCATCGGGACAATATGAGCACTATATGGCAGAGTTTTGAACATCCTTCTGATTCAACTAT  
TCCTAGAATGAGAATAAGTGAAAATACAAGGACAGGGGAGATGGTAGAA

>PGSC0003DMG401029444G-LecRK\_488

ACATCCTTCTGATTCAATTGTCCCTAAAATGAGATTAAGTGAAAACACAAGGACAGGGGAGAGGGTAGA  
AGTAAAATCTTGGAGAAGCCCTTGGGATCCTAATTTGCGAACTTTTCTTT

>PGSC0003DMG401029444G-LecRK\_5246

CCAAAGCATAGGGAAGAATGGGAAAAGGGGAATTGGACTAGTGGTTGTGTTAGGAGGAGTGCTTTC  
AATGTGAAGTTAAGAATAACACCGCGAATTCAAGTAAAGAAGACGGATTTCTA

>PGSC0003DMG401029444G-LecRK\_549

AGGGTAGAAGTAAAATCTTGGAGAAGCCCTTGGGATCCTAATTTGCGAACTTTTCTTTAGGAATGAATT  
CTGGATTCATTCCTCAGGTGTATATCTGGAAAGGTAGTCATCCCTATTGG

>PGSC0003DMG401029444G-LecRK\_5490

GTATGTCGTGGAGTGAAATGATTGACATTCAGCAGTTCCAAAGCTCGGGGAAAGATCTCTATATTCACG  
TGGCAAATTCAGAGCTTGGTATGTATTCTGGTACTGAATAAAAAACTCATT

>PGSC0003DMG401029444G-LecRK\_5734



ACACATTTATGTATTATGCCTTTGAGATATGTTTCGACTTAATTGAATTCCATGTATTCTGTAAAGAACTGA  
TATTTGTTACCTTTAGTGTTTTCTGCAGATCATGGTAAAGACATAAAG

>PGSC0003DMG401029444G-LecRK\_5795

AAAGAACTGATATTTGTTACCTTTAGTGTTTTCTGCAGATCATGGTAAAGACATAAAGAAAATCGTAAT  
TCCAGTAATTGTTGGTTCTCTTACACTCTGTGTTTGTCTGTTCCCTTTGCT

>PGSC0003DMG401029444G-LecRK\_5856

AATCGTAATTCCAGTAATTGTTGGTTCTCTTACACTCTGTGTTTGTCTGTTCCCTTTGCTATAACAATGGTGAT  
CAGACGTAGAGGTAAACATGCTAATAAGTTTTTGTATTACACATTAAG

>PGSC0003DMG401029444G-LecRK\_5917

ACAATGGTGATCAGACGTAGAGGTAAACATGCTAATAAGTTTTTGTATTACACATTAAGAAGCACTTTGT  
TCGCTATAGTTAACTTGTATTCTGCTGATATTAGGAGTGAAAAGAGAGG

>PGSC0003DMG401029444G-LecRK\_61

ATTTTGTTTCATCTAATTCTTGTTATTCTTCATTGTTTTAATACAGGATTTTGCACAGAAGTAGATAGCATT  
CCAGCACTCTATCTCTGAGGGATCCTGGGATTTTATCATCTCCAGGAG

>PGSC0003DMG401029444G-LecRK\_610

GAATGAATTCTGGATTCATTCCTCAGGTGTATATCTGGAAAGGTAGTCATCCCTATTGGCGAAGTGGTCA  
ATGGAATGGCCAGATCTTTATCGGAGTGCAGGGTATGTATTCTGTGTCGT

>PGSC0003DMG401029444G-LecRK\_6100

ATACGATTGCAAATGCAACATCCCAATTCAATGAGGATAATAAGCTTGGTCAGGGCGGTTTTGGTCCAG  
TTTACAAGGTACGAGTTTCATCTCTCTCGATCACTTCCATAATTCAAGTT

>PGSC0003DMG401029444G-LecRK\_6344

AAGTCCAACATAGAAACCTTGTTAGACTCTGTGGATGCTGTGTCGATAAAGAGGAGAAGATGCTGATTT  
ATGAATATATGCCAAAGAAAAGCTTAGATGTGTTTCTCTTTGGTTAGTCCT

>PGSC0003DMG401029444G-LecRK\_6527

ATGCTTGCTAGATCCCCAAAAGTACTGCATTTTTGGAGGATCCAACATGAGTACATCAGCATTCTGAGC  
AACATTACTCCACATTTCTTCTGATCCTTTTGTAAATTCTCCATTCAT

>PGSC0003DMG401029444G-LecRK\_6649

TTGACAAACATCTAGATGAAGCACATCGAGACATTTTGGATTGGACAAAACGTTCCATTATAATCGAAG  
GAGTTGGTCGAGGACTCCTTTATCTACACAGAGATTCAAGATTGAAGATAA

>PGSC0003DMG401029444G-LecRK\_671

AAGTGGTCAATGGAATGGCCAGATCTTTATCGGAGTGCAGGGTATGTATTCTGTGTCGTCTGATGGATT  
CAATGTAGTGAACGATCGCGAAGGTAAGTGTATAACCTTACTGGCCCTGGTGA

>PGSC0003DMG401029444G-LecRK\_6893

TGGTACTTAGTAAGTGATCATTATCTATATACAATACCATAACTTTGCATAATTTAACTACTCGAATCGT  
ACTGACATATTTACAGTGGATACATGGCACCCGAATATGCAATGGAAGG

>PGSC0003DMG401029444G-LecRK\_7076

TCGAAAAAGTACAAATTCTTGGACTGAGACATCCTCTTTGAGCCTTTTGGGATATGTAAGACTCCTCTTAT  
AGTTGCTATAGCGAAATGTTTGTATAAAGAACGTATAATATAACATAA

>PGSC0003DMG401029444G-LecRK\_7137

CTCCTCTTATAGTTGCTATAGCGAAATGTTTGTATAAAGAACGTATAATATAACATAACATGAAGAATC  
AGTTCCAAAAAAGAACTTGGCTGTTATATAATGAAATGTTATTATAGAGG

>PGSC0003DMG401029444G-LecRK\_7198

TGAAGAATCAGTTCCAAAAAAGAACTTGGCTGTTATATAATGAAATGTTATTATAGAGGACGACTATTAT  
AAAGAGGTCTGACCGACTATATCATGTACCTTATATTTTCAGGCATGGAAG

>PGSC0003DMG401029444G-LecRK\_7259

GACTATTATAAAGAGGTCTGACCGACTATATCATGTACCTTATATTTTCAGGCATGGAAGTTATGGAAAGA  
ACAAGATTTATCAACTTTTATCGATCCGTTTATATTGAATCCGAGCTCGG

>PGSC0003DMG401029444G-LecRK\_732

GATGGATTCAATGTAGTGAACGATCGCGAAGGTAAGTGTATAACCTTACTGGCCCTGGTGATTTTGATTCT  
TAACGAAATTTGTCTTGGATTGGAAAGGGAATTTGGTTCAATCATATTGG

>PGSC0003DMG401029444G-LecRK\_7381

ATAGAGATCAGAAAATGCATACAGATTGGTTTACTATGTGTACAAGAATTTGCTGAAGACAGGCCAAGT  
ATTTTCATCTGTTCTTGTATGCTTACTAGTGAAACAACAAGTCTTCCAGCA

>PGSC0003DMG401029444G-LecRK\_7564

AAGTTTACTTTGAACAAAATGAGTATCACAAACCTTACTGGTAGATAACATGAGCATATGAAATTACTTT  
TTAAAGATTTGCACAATTGTTATAGTATGATCCATTCGTCTCAATTTGTA

>PGSC0003DMG401029444G-LecRK\_7625

AATTACTTTTTAAAGATTTGCACAATTGTTATAGTATGATCCATTCGTCTCAATTTGTATGATACCTTTTGT

TTCAAATGTTTGACAATATTGGGTCCGTGTAAAGCACAGAATATTTG

>PGSC0003DMG401029444G-LecRK\_793

TTGATTTCTTAACGAAATTTGTCTTGATTGGAAAGGGAATTTGGTTCAATCATATTGGGATGTGAATGA  
GACAACTGGAAGATAATATGGTCAGCTCCAATAACGATTGTGAAGTTT

>PGSC0003DMG401029444G-LecRK\_854

TGTGAATGAGACAACTGGAAGATAATATGGTCAGCTCCAATAACGATTGTGAAGTTTATGGAACATG  
TGGTCCATTTGGGAGCTGCAATTTGGAGTCGCCGATCTGTTCTTGTCTGAA

>PGSC0003DMG401029444G-LecRK\_915

GGAACATGTGGTCCATTTGGGAGCTGCAATTTGGAGTCGCCGATCTGTTCTTGTCTGAAAGGTTTTGAG  
CCAAAGCACAGGGAAGAATGGGAAAAGGGGAATTGGACTAGTGGTTGTGTT

>PGSC0003DMG401030114LRR-RLKs\_0

AAATATTTTGTAAAGGAGAGTATCAAGTCATGGTGGATAAGTTAAAAGGGGGAGGGAGTAAATTAGT  
AGCTTGACTTGGTCAAAGGAGACAAGCTAGCCAATTATTATGGTTTGATTCT

>PGSC0003DMG401030114LRR-RLKs\_1054

CAGGAAACATTTAGAAAGTATAAAACATCTTAGGCCTAGAATTAGTTTAAGGCTTTGTTCCAACAAATT  
CTCAGGAAGAATTTCTTCTGAATTTGTTAAGCTAACATATGAAGAGAATT

>PGSC0003DMG401030114LRR-RLKs\_1116

AACAAATTCTCAGGAAGAATTTCTTCTGAATTTGTTAAGCTAACATATGAAGAGAATTGCTTTGATGAGT  
CCAATCTTCTTCTACATCCAATAGCTTATCTATCCCTGGGCTACCAAGC

>PGSC0003DMG401030114LRR-RLKs\_1178

TGATGAGTCCAATCTTCTTCTACATCCAATAGCTTATCTATCCCTGGGCTACCAAGCTTCTCTCTGGTGA  
TGAGGTTCAAAAAATTTGAGATCACAACACTTGATTATTCCTATTGT

>PGSC0003DMG401030114LRR-RLKs\_124

AGCCAAATAGTTGGCTCTAAATGACTATTTTATTGTTGGAATAAGAGTTGACTTGACAGACTTCATTATC  
AAATGAAAAGAAACACAAGGAAAGCATCAAATTAACATGATCCAAGCAAG

>PGSC0003DMG401030114LRR-RLKs\_1240

TCTCTGGTGTGAGGTTCAAAAAATTTGAGATCACAACACTTGATTATTCCTATTGTAGGAGTTGGGGT  
AGCTATACTGTTATTATGGATCTTTCACAGAACCAGAAAGCATTGGTGGA

>PGSC0003DMG401030114LRR-RLKs\_1302

GTTGGGGTAGCTATACTGTTATTATGGATCTTTCACAGAACCAGAAAGCATTGGTGGAAAACAAAGATG  
CAGAATGTCAAAGATAACATAAAGTTCATTTCAATTCAAAAGTTGAAGGTG

>PGSC0003DMG401030114LRR-RLKs\_1364

AAAGATGCAGAATGTCAAAGATAACATAAAGTTCATTTCAATTCAAAAGTTGAAGGTGACTACAGAAGA  
CATATTATCTAGCTTGAAAGACGAAAACATAATAGGAAATGGAGGATCAGG

>PGSC0003DMG401030114LRR-RLKs\_1674

GTCTATGAATACTTTGAGAAACAAAGCCTAGACAAGTGGCTTCACAGAAAGAAAAGAGCAGCGTCACCC  
GGTCAAAGTAGTACCCCGACCCTGGATTGGCAAAGAGATTAATAATAGCC

>PGSC0003DMG401030114LRR-RLKs\_186

TCATTATCAAATGAAAAGAAACACAAGGAAAGCATCAAATTAACATGATCCAAGCAAGCTCTAACTTTT  
TTGGCTCAATATGCAAATCTTCTTCTAATTAGCCTGTCTTTCCAAGAAA

>PGSC0003DMG401030114LRR-RLKs\_1860

ATTAAGTCCAGCAATATACTTCTGGACTCAGAATTCAATGCAAAAATAGCAGATTTTGGACTAGCAAAAA  
TACTATCCCGGAGGGATGATGATCCTGAGACAGCTTCTGCTATTGCTGGA

>PGSC0003DMG401030114LRR-RLKs\_1922

AGCAAAAATACTATCCCGGAGGGATGATGATCCTGAGACAGCTTCTGCTATTGCTGGAACATTTGGTTA  
CATTGCACCAGGTATATTACAGTTCAAATATATATCGTACCTCGTGAATTC

>PGSC0003DMG401030114LRR-RLKs\_1984

TTGGTTACATTGCACCAGGTATATTACAGTTCAAATATATATCGTACCTCGTGAATTCTCAAAGAATTTA  
TCCAACCTAATATTTTTTAATGTCGGGTCCTCACAGAGTATGCCTCGA

>PGSC0003DMG401030114LRR-RLKs\_2046

AAGAATTTATCCAACCTAATATTTTTTAATGTCGGGTCCTCACAGAGTATGCCTCGACATTCAGAGTGAA  
TATAAAGACAGATATATATAGCTTCGGAGTGGTTCTATTAGAATTAACA

>PGSC0003DMG401030114LRR-RLKs\_2108

CAGAGTGAATATAAAGACAGATATATATAGCTTCGGAGTGGTTCTATTAGAATTAACAACAGGGAGACA  
ACCCATTCTCAGAGAAGAGCAAATGAATCTAGCACAATGGGCTCAACAGCG

>PGSC0003DMG401030114LRR-RLKs\_2170

GGAGACAACCCATTCTCAGAGAAGAGCAAATGAATCTAGCACAATGGGCTCAACAGCGTTACAGAGAT  
GGGAATTTCAATGTTGAGGCCCTTGATGAAGAAATCATGGAAACAAGTAATG

>PGSC0003DMG401030114LRR-RLKs\_2232

AGAGATGGGAATTTTCATTGTTGAGGCCCTTGATGAAGAAATCATGGAAACAAGTAATGTGGAACAAAT  
GAGAGGTGTTTTAACTAGGACTGATGTGTAAGTGGAGCAACACCATACGGT

>PGSC0003DMG401030114LRR-RLKs\_2356

CGTCAATGAAGGAGGTCTGCAACATTCTTCAAAGCTTCAGAGACACCATATTTTGAGAAAACAGAATGT  
TTAGCCTTACATGGATAAATGTAGTTGTATTTTTTTAACAGAATGAGAAAAG

>PGSC0003DMG401030114LRR-RLKs\_2418

AGAATGTTTAGCCTTACATGGATAAATGTAGTTGTATTTTTTTAACAGAATGAGAAAAGTCTCAATAGCCT  
CAGCTGGTTTAAGTGGTGTCAAACACAAGGGCTTGTAAGCTTTACCTTAG

>PGSC0003DMG401030114LRR-RLKs\_248

AAACTTTTTTGGCTCAATATGCAAATCTTCTTCTAATTAGCCTGTCTTTCCAAGAAACCTTACAATTTTCA  
GGCACGGAACGGTCCACATTAAGCTTGAAACAACACTGGAGGGAT

>PGSC0003DMG401030114LRR-RLKs\_2542

TTACTCCTTGTTTCATAATTGAGATGTAGCGAGGCAAGAGCTAAGTGTCTTGGCAATTACAGTGTTTGTAT  
ATATCATTCTGGGAGATTAGACAGATTTTAAGCACACTGAGCATTAAAGTCT

>PGSC0003DMG401030114LRR-RLKs\_2604

GTTTGTATATATCATTCTGGGAGATTAGACAGATTTTAAGCACACTGAGCATTAAAGGTCTAACAATGCTTT  
AGGAAGGATAATCATGATGCAGATGCTTTAGCTAAATGAGTAATGGAGGT

>PGSC0003DMG401030114LRR-RLKs\_2666

AATGCTTTAGGAAGGATAATCATGATGCAGATGCTTTAGCTAAATGAGTAATGGAGGTTAGACCCATAT  
CTTTTTTAATTCTTCAGACAACCTGCCTATTCCCAACCAATGTGGGACTT

>PGSC0003DMG401030114LRR-RLKs\_2728

CCCATATCTTTTTTAATTCTTCAGACAACCTGCCTATTCCCAACCAATGTGGGACTTTTACCCACTCTAAC  
ACGGGAAGTAGATTTCTTTCATGAATAGAGATGCTGGTAACAGAACCA

>PGSC0003DMG401030114LRR-RLKs\_2790

CCACTCTAACACGGGAAGTAGATTTCTTTCATGAATAGAGATGCTGGTAACAGAACCATTCTGCAGCCT  
ATAGCATACCAACTGCAGTGTGAGGAACTGGAATCCAATAATTGATGAAA

>PGSC0003DMG401030114LRR-RLKs\_2852

TGCAGCCTATAGCATACCAACTGCAGTGTGAGGAACTGGAATCCAATAATTGATGAAATCCCCATAGTT

GCTTCAGCTCCAACAAAATGCTCTTCTCATTTTTCGTAGACGTCCTCTGTA

>PGSC0003DMG401030114LRR-RLKs\_2914

CATAGTTGCTTCAGCTCCAACAAAATGCTCTTCTCATTTTTCGTAGACGTCCTCTGTAAACCACCCTGGAA

ATGCATAAAGGCAAGTAAGGAAACAATGAAATGGTAAACTTGTTTCCTG

>PGSC0003DMG401030114LRR-RLKs\_2976

ACCCTGGAAATGCATAAAGGCAAGTAAGGAAACAATGAAATGGTAAACTTGTTTCCTGGGAATTGAAAA

TGTAGATTTTACAACATGAACATGGTTAGTTTTTCATGGTTCCTTTGGTTTCG

>PGSC0003DMG401030114LRR-RLKs\_3038

TTGAAAATGTAGATTTTACAACATGAACATGGTTAGTTTTTCATGGTTCCTTTGGTTTCGATTGTACTAGCTA

CCTCATTCTCTACAATCTCTTGTTTTATTTTTTTCAAGTGTTTTGATTG

>PGSC0003DMG401030114LRR-RLKs\_310

ACAATTTTCAGGCACGGAACGGTCCACACTAAGCTTGAAACAACACTGGAGGGATTCCGGAGTTTTT

CCAGTCGTGGAATTTGAATTCTTCAGAATGCAATTGGTTAGGAGTTTCATG

>PGSC0003DMG401030114LRR-RLKs\_3100

TACTAGCTACCTCATTCTCTACAATCTCTTGTTTTATTTTTTTCAAGTGTTTTGATTGGATAGTTAATTAGCT

TTGAAGAAACCGTGTATCATAACAACAAGTCAGTCAACATGGACAA

>PGSC0003DMG401030114LRR-RLKs\_372

AGTTTTTCCAGTCGTGGAATTTGAATTCTTCAGAATGCAATTGGTTAGGAGTTTCATGCATCAATGACAT

GGTAGAGACACAATTAATCTTGAGAAAAGAACACTTACTGGAACAATTC

>PGSC0003DMG401030114LRR-RLKs\_434

AATGACATGGTAGAGACACAATTAATCTTGAGAAAAGAACACTTACTGGAACAATTCATCAACAATA

ATATGTCAGCTCAACAACCTTACCTTCATTGATCTCTCCAACAACAACATA

>PGSC0003DMG401030114LRR-RLKs\_496

AACAATAATATGTCAGCTCAACAACCTTACCTTCATTGATCTCTCCAACAACAACATATCAGGAACTATAC

CACTAAGCCTGAAAGATTGCTCAATGTTACAACATTTGGACTTGTTCAA

>PGSC0003DMG401030114LRR-RLKs\_558

GAACTATAACCACTAAGCCTGAAAGATTGCTCAATGTTACAACATTTGGACTTGTTCAATAATTCTTTGAGC

GGCCGGATTCCAGGTGTTGTTGTTGGGATGAAAACACTAGTCAATTTG

>PGSC0003DMG401030114LRR-RLKs\_62

ATTAGTAGCTTGACTTGGTCAAAAGGAGACAAGCACTAGCCAATTATTATGGTTTGATTCTTCAAAGCCAAAT  
AGTTGGCTCTAAATGACTATTTTATTGTTGGAATAAGAGTTGACTTGACA

>PGSC0003DMG401030114LRR-RLKs\_620

TCTTTGAGCGGCCGGATTCCAGGTGTTGTTGTTGGGATGAAAACACTAGTCAATTTGTATCTTAATGGT  
AACATGTTGTCCGGTGAAATGCCAAAGCAAATATCAGCATCCCAACTGAA

>PGSC0003DMG401030114LRR-RLKs\_682

TTAATGGTAACATGTTGTCCGGTGAAATGCCAAAGCAAATATCAGCATCCCAACTGAAAAATCTTGATCT  
TTCTGAGAACCACTTGAACGGTTCGATTCCAGAAGCTATTGGTAACTTGA

>PGSC0003DMG401030114LRR-RLKs\_744

CTTGATCTTTCTGAGAACCACTTGAACGGTTCGATTCCAGAAGCTATTGGTAACTTGAAAAATCTTGTGA  
AATTGGATCTGTCACATAATTCTCTAAGTGGTCTATTACAAGCAAGTTG

>PGSC0003DMG401030114LRR-RLKs\_806

TCTTGTGAAATTGGATCTGTCACATAATTCTCTAAGTGGTCTATTACAAGCAAGTTGTTTCAATTGAACC  
AATTGAGTCACTTGTGCTAAGTTACAACACTTATCTGGTGTATTACC

>PGSC0003DMG401030114LRR-RLKs\_868

AATTGAACCAATTGAGTCACTTGTGCTAAGTTACAACACTTATCTGGTGTATTACCTAATGCAATGAAC  
TTGTTTAGTTTGTATGATATGGATCTTTCTCATAACCAATTGACTGGTT

>PGSC0003DMG401030114LRR-RLKs\_930

GCAATGAACCTGTTTAGTTTGTATGATATGGATCTTTCTCATAACCAATTGACTGGTCTATTCCAAAGGG  
ACTTGCAAGTTCAACTGGACTGGATGCTTTGGATTTGTCGTATAATCAG

>PGSC0003DMG401030114LRR-RLKs\_992

TCCAAAGGGACTTGCAAGTTCAACTGGACTGGATGCTTTGGATTTGTCGTATAATCAGTTATCAGGAAAC  
ATTTCAGAAAGTATAAAACATCTTAGGCCTAGAATTAGTTTAAGGCTTTG

>PGSC0003DMG401030236-(rev)LRR-RLPs\_122

GGATTATGTTTCAAGCTCTTAAAGAAGCTTAAATGACTTTGCGTGGTCTTCAGGCCGTGTTAAGTGATGCA  
GAGAATAAGCAAGCATCAAATCCATCTGTGAGCGACTGGCTTAATGAGCT

>PGSC0003DMG401030236-(rev)LRR-RLPs\_1464

TCTCGAGTTGAGATCAAGATCATTGTTAGACAGGGTCCCTGATTCTTTTGCATGGAAGAGAGGGGTAAG  
GCAGGACTTGGACATATATTCTGAAATGGATGGTGAGAAATTCGTTATGCA

>PGSC0003DMG401030236-(rev)LRR-RLPs\_1525

GGGGTAAGGCAGGACTTGGACATATATTCTGAAATGGATGGTGAGAAATTCGTTATGCATGACCTTGTC  
AACGATCTTGCCCAAATTGCATCTTCAAACATTGTACCAGGTTAGAAGAC

>PGSC0003DMG401030236-(rev)LRR-RLPs\_1647

CGAAGGATCTCATATGTTGGAACGAACTCGACACTTGTCGTATTCCACGGGTGATGGTAACTTTTCGCCA  
TTTACAATAGGAGATGGTGATTTTGGTAAATTGAAAACCCTCTACAAATT

>PGSC0003DMG401030236-(rev)LRR-RLPs\_1708

TTTTCGCCATTTACAATAGGAGATGGTGATTTTGGTAAATTGAAAACCCTCTACAAATTGGAGCAGTTAA  
GGACATTGCTTCCGATAAATTTCCGGCTCCATTCGTTTTTCAGTTAATCTA

>PGSC0003DMG401030236-(rev)LRR-RLPs\_1769

AGCAGTTAAGGACATTGCTTCCGATAAATTTCCGGCTCCATTCGTTTTTCAGTTAATCTAAGCAAGAGGGT  
GCTGCATAACATACTTCCAAGACTAACATTCTTAAGGGCATTGTCATTTT

>PGSC0003DMG401030236-(rev)LRR-RLPs\_183

AGTGATGCAGAGAATAAGCAAGCATCAAATCCATCTGTGAGCGACTGGCTTAATGAGCTTCGAGATGCT  
GTCGACTCTGCTGAGAACTTAGTTGAAGAAGTCAATTATGAATCTTTGAGG

>PGSC0003DMG401030236-(rev)LRR-RLPs\_1891

CGTTATGACATCAAGGAGGTACCAAATGACTTATTTATCAAATTAAACTCCTAAGATTTTTGGACCTTTC  
TTGGACAGAGATAAAACAGTTACCAGATTTAATTTGTGTGTTGTACAAC

>PGSC0003DMG401030236-(rev)LRR-RLPs\_2013

AGAGACACTTATCGTGTCTTGTGATTATCTTGAGGAGTTACCGCTGCAGATGGGAAATTTGATCAAC  
TTGCGTTACCTTGACATTAGGCGCTGTTCTCAGTTGAAATTGCCGCTACA

>PGSC0003DMG401030236-(rev)LRR-RLPs\_2074

TTGATCAACTTGCGTTACCTTGACATTAGGCGCTGTTCTCAGTTGAAATTGCCGCTACATCCTAGTAAGTT  
GAAAAGCCTTCAGGTGCTATTAGGAGTTAAATGTCTTCAAAGTGGTTTG

>PGSC0003DMG401030236-(rev)LRR-RLPs\_2379

CGATGAACTACAACCAAACACAAACATAAAAGAACTGGAAATCTCTGGATATAGAGGGACAAAATTTCC  
AAACTGGCTGGCTGATCTTTCTTTCTTAAGCTAGTGATGTTGTCTCTTAG

>PGSC0003DMG401030236-(rev)LRR-RLPs\_244

GAGATGCTGTGCGACTCTGCTGAGAACTTAGTTGAAGAAGTCAATTATGAATCTTTGAGGCTTAAGGTGG



AAGGCCAGCATCAAATCTTGCAGAAACAAGCAACCAGCAAGTAAGTCACC

>PGSC0003DMG401030236-(rev)LRR-RLPs\_2440

AAATTTCCAAACTGGCTGGCTGATCTTTCCTTCTTAAGCTAGTGATGTTGTCTCTTAGCCACTGCAACAA  
CTGTGATTCCTTGCCAGCACTAGGACAACCTTCTTCTTTGAAATCCCTC

>PGSC0003DMG401030236-(rev)LRR-RLPs\_305

TAAGGTGGAAGGCCAGCATCAAATCTTGCAGAAACAAGCAACCAGCAAGTAAGTCACCTCAGCTTGTC  
CTTGAGTGATGAATTTTTTCTTAACATAAAGGATAAGTTGGAAGAAAATAT

>PGSC0003DMG401030236-(rev)LRR-RLPs\_3477

ACAGAGACTCCCTTGCCTCAGAGAACTTAAAATCTTCCATCATTCTACTGACGAAGAGATTGATTGGGAG  
TTGCCTTGCTCAATTAATCACTTGTCATATACAATATGAAAACATTAAG

>PGSC0003DMG401030236-(rev)LRR-RLPs\_3538

GATTGGGAGTTGCCTTGCTCAATTAATCACTTGTCATATACAATATGAAAACATTAAGCAGCCAACTTC  
TCAAAGCCTCACCTCTTGAATCTCTATCCACTGATAATTTACCTCAA

>PGSC0003DMG401030236-(rev)LRR-RLPs\_3721

CATGAGCTCCATTCACTGTCAACTGAAGGTCTTCGGGGCCTCACTTCTCTTAGGCATCTACAGATTAGATC  
CTGCAGTCAACTCCAATCTCTTCCGGAATCAGCGCTTCCCTCCTCCCTC

>PGSC0003DMG401030236-(rev)LRR-RLPs\_3782

AGATTAGATCCTGCAGTCAACTCCAATCTCTTCCGGAATCAGCGCTTCCCTCCTCCTCTCTGAGCTGACC  
ATCACAAATTGTCCTGAACTTCAACATCTTCCAGTAAAAGGGATGCCCT

>PGSC0003DMG401030236-(rev)LRR-RLPs\_3843

TGAGCTGACCATCACAAATTGTCCTGAACTTCAACATCTTCCAGTAAAAGGGATGCCCTCTACCCTCTCTA  
AACTATCGATTTCACTGCCATTGCTCAATCCACGTTTAGAATTTAT

>PGSC0003DMG401030236-(rev)LRR-RLPs\_3965

AGGGGAATACTGGCCAAATATTGCTCATATTTCCACTATAGAGATCAATGGGAATACCTGTGATGAT  
CAAACAAATGGTACTCTGACAGATGTAAGAACTCTTTTATCTCAGTAGC

>PGSC0003DMG401030236-(rev)LRR-RLPs\_4026

GTGATGATCAAACAAATGGTACTCTGACAGATGTAAGAACTCTTTTATCTCAGTAGCTTTTATTGTTT  
ATTACTTCTTTGCTTGTGTTGAGTTTTTCTTTGTTATATTGAA

>PGSC0003DMG401030236-(rev)LRR-RLPs\_4087

TTTATTGTTCACTACTTCTCTTTGCTTGTTTGTGAGTTTTTTCCTTTGTTATATTGAAATCTTCCCAGAGGT  
TGAAATCAATCTTTAAAAGAACAAGTTGGACTTTAAGCAACTTTATT

>PGSC0003DMG401030236-(rev)LRR-RLPs\_4148

CTTCCCAGAGGTTGAAATCAATCTTTAAAAGAACAAGTTGGACTTTAAGCAACTTTATTGATAACCATGA  
TCATTTTCATGTTCTATGAAATTATATTTTTTATCAGATCTGATATTTCA

>PGSC0003DMG401030236-(rev)LRR-RLPs\_4209

TAACCATGATCATTTTCATGTTCTATGAAATTATATTTTTTATCAGATCTGATATTTCAAATCCTTGAATGA  
ATTCTATTGTAACGGTTTGTTCATTATGATAATTTATTTTAATATTAT

>PGSC0003DMG401030236-(rev)LRR-RLPs\_4270

TCCTTGAATGAATTCTATTGTAACGGTTTGTTCATTATGATAATTTATTTTAATATTATGTTGACATTAGAT  
ATTATTGTACGAAAATGCTTTGTTTGGGACCTAAAGCCGGTGATTTCT

>PGSC0003DMG401030236-(rev)LRR-RLPs\_4331

TGACATTAGATATTATTGTACGAAAATGCTTTGTTTGGGACCTAAAGCCGGTGATTTCTTCATACTTAAAG  
CTTTGAACATCTAGATTATATGTATTGGAAGCACATATATATAAAACAA

>PGSC0003DMG401030236-(rev)LRR-RLPs\_4392

ATACTTAAAGCTTTGAACATCTAGATTATATGTATTGGAAGCACATATATATAAAACAATGGTTGTTGCA  
TGACCTACCAATAAAAATAAATTTATTCATGTAAAAATCTAAGTTGCAAA

>PGSC0003DMG401030236-(rev)LRR-RLPs\_4453

GTTGTTGCATGACCTACCAATAAAAATAAATTTATTCATGTAAAAATCTAAGTTGCAAATAAAAACATTTT  
AATTTTCGTATTATATTCATGCTTTAGATAAGTTATTTTATTGTTTTAT

>PGSC0003DMG401030236-(rev)LRR-RLPs\_4575

ATAATTATTATTATTTAAAAAATTTCTTGTTATCATATTAATATCATATTTTTTCCTGTTGTTTTAACA  
CGTCATGAGATCAAAAGAGAATTATTAAGAAATTGCAATCGAAGTTT

>PGSC0003DMG401030236-(rev)LRR-RLPs\_4636

TTGTTTTTAACACGTCATGAGATCAAAAGAGAATTATTAAGAAATTGCAATCGAAGTTTGTAAATTGAAGA  
TGTTTTGATCTAATATATATACTCAACAGTTAACGCAATATACCGCTA

>PGSC0003DMG401030236-(rev)LRR-RLPs\_4697

AATTGAAGATGTTTTGATCTAATATATATACTCAACAGTTAACGCAATATACCGCTAGGAGTGAAAT  
CACATATAGCCAACCGTTTGATGCAATATTAATTAATTTGTTTAGCTTT

>PGSC0003DMG401030236-(rev)LRR-RLPs\_4758

AGTGTAATCACATATAGCCAACCGTTTGATGCAATATTAATTAATTTTGTAGCTTTGGTTGCATGTTA  
TATTATTGTTGGTTTGGCAATTTTCATTTTAAAGAAAATTATTAGCTTG

>PGSC0003DMG401030236-(rev)LRR-RLPs\_4819

TTGCATGTTATATTATTGTTGGTTTGGCAATTTTCATTTTAAAGAAAATTATTAGCTTGTAGACTTCACAAT  
TTATAATGTGTTTTAGTTTCTATTTGAGGAATCAATTATTGAATAGGC

>PGSC0003DMG401030236-(rev)LRR-RLPs\_488

GGGTAAGCAAGATACTAGAAGACCTTCAACTTCTGTGGTTGATGAATCTGATATCTTTGGTAGGCAGAG  
TGAAATAAAGGATTTGATTGACCGTTTATTGTCTGAAGATGCAAGTGGAGG

>PGSC0003DMG401030236-(rev)LRR-RLPs\_4880

GACTTCACAATTTATAATGTGTTTTAGTTTCTATTTGAGGAATCAATTATTGAATAGGCAGTGAGAAAATC  
GCCTTCGTGATTCAAGTAGTAAGCTCGGGTTCATGATTGAGAAAGGAA

>PGSC0003DMG401030236-(rev)LRR-RLPs\_4941

TGAGAAAATCGCCTTCGTGATTCAAGTAGTAAGCTCGGGTTCATGATTGAGAAAGGAATTTTTCAAGT  
GTAATTTGAAATTTTCTACTATTCTTAACATCTCATTATAAAGATTTTTTT

>PGSC0003DMG401030236-(rev)LRR-RLPs\_5002

TTTCAAGTGTAATTTGAAATTTTCTACTATTCTTAACATCTCATTATAAAGATTTTTTTAAATTATTTTATT  
GATTAAATATAGTTCTTACAAAATATAACACGATAATCATGTTTCAA

>PGSC0003DMG401030236-(rev)LRR-RLPs\_5063

ATTATTTTATTTGATTAAATATAGTTCTTACAAAATATAACACGATAATCATGTTTCAATTTTAAACGTCTAT  
CAGTAATTCAATACAACTTTATAAAATAGAAATATAATTAATAAATTA

>PGSC0003DMG401030236-(rev)LRR-RLPs\_5124

TTAACGTCTATCAGTAATTCAATACAACTTTATAAAATAGAAATATAATTAATAAATAAATAAATAAATAA  
AGTTTCTTAAATTCATCCTTTTAACTATAATTCTCCAAATTAAGAAAT

>PGSC0003DMG401030236-(rev)LRR-RLPs\_5185

CTAATCTAACAGTTTCTTAAATTCATCCTTTTAACTATAATTCTCCAAATTAAGAAATCCTCACACCATTA  
ACAAAATGCTACACCTTATATGTAGCTTTCCAATCTTTTCAGTTACCA

>PGSC0003DMG401030236-(rev)LRR-RLPs\_5246

TCACACCATTAACAAAATGCTACACCTTATATGTAGCTTTCCAATCTTTTCAGTTACCAATGTGGAGCTTT

GTTCGCATGCCTATTAGCAGTCTGTCAACTTCGAGGCCTCATGTTGCTT

>PGSC0003DMG401030236-(rev)LRR-RLPs\_5307

GTGGAGCTTTGTTCGCATGCCTATTAGCAGTCTGTCAACTTCGAGGCCTCATGTTGCTTCGATATCTAGCT  
ATCTGGGACTGCCATTATCTCCATTTTGAATTGCTCATTTTTCCACCAT

>PGSC0003DMG401030236-(rev)LRR-RLPs\_5368

ATATCTAGCTATCTGGGACTGCCATTATCTCCATTTTGAATTGCTCATTTTTCCACCATAATTATTGATAGG  
GATACCAGTAATGATTTAGAGAAATGGTGCTCTGATATATGTAATTAT

>PGSC0003DMG401030236-(rev)LRR-RLPs\_5429

TTATTGATAGGGATACCAGTAATGATTTAGAGAAATGGTGCTCTGATATATGTAATTATAATTCTTTCTTT  
TTTCATTATTCATTTATTTTTATCAACTTCTCCTTGCTTGTTAGTTAAT

>PGSC0003DMG401030236-(rev)LRR-RLPs\_549

AGGCAGAGTGAAATAAAGGATTTGATTGACCGTTTATTGTCTGAAGATGCAAGTGGAGGAAACCTGACT  
GTAGTTCCTATTGTTGGAATGGGCGGGAAGTTTGACTGTAATCCCTGTTGT

>PGSC0003DMG401030236-(rev)LRR-RLPs\_5490

TTCTTTCTTTTTTCATTATTCATTTATTTTTATCAACTTCTCCTTGCTTGTTAGTTAATTCTTTTCCTTTGTTAA  
ATCTTTAAGCAGCGCAAAGCGTCTATTAATGAACTAGTAATCTTG

>PGSC0003DMG401030236-(rev)LRR-RLPs\_5551

TTTTCTTTGTTAAATCTTTAAGCAGCGCAAAGCGTCTATTAATGAACTAGTAATCTTGTCAGCAGGATGT  
TTATCGTCTTGATTTTCATCTCATTGCAATTCATGAATCTTGTTAA

>PGSC0003DMG401030236-(rev)LRR-RLPs\_5612

AGCAGGATGTTTATCGTCTTGATTTTCATCTCATTGCAATTCATGAATCTTGTTAATTATATATATCAC  
TCTTCATCTTACTTAAAATATTAACACTATTTACAGTATCTCTTTTC

>PGSC0003DMG401030236-(rev)LRR-RLPs\_5673

ATATATATCACTCTTCATCTTACTTAAAATATTAACACTATTTACAGTATCTCTTTTCTTAATGTAATATCA  
ATGAGCTAGTAATCTTTAAGATTATTGTTTCTTGATTTTAAACCTA

>PGSC0003DMG401030236-(rev)LRR-RLPs\_5734

AATGTAATATCAATGAGCTAGTAATCTTTAAGATTATTGTTTCTTGATTTTAACTATGTTCTCCCTCAA  
AATCTCTCAGTCTGGGAAAATTTTTGCCATCATGAAAAGTTGTTTCGGC

>PGSC0003DMG401030236-(rev)LRR-RLPs\_5795

TTCTCCCTCAAAATCTCTCAGTCTGGGAAAATTTTTGCCATCATGAAAAGTTGTTCCGGCATTGTTCCCAT  
TTCTTGTGTCTTCCACAGGGATAAGGGGTCCAGGTTTTCTTCCAACATA

>PGSC0003DMG401030236-(rev)LRR-RLPs\_5856

TGTTCCCATTTCTTGTGTCTTCCACAGGGATAAGGGGTCCAGGTTTTCTTCCAACATATCACAATAAGTT  
GTGGACGGAGGAAGTGGTTTAGAGTAATGCACATGCTAACTTTGAATA

>PGSC0003DMG401030236-(rev)LRR-RLPs\_5917

ACAATAAGTTGTGGACGGAGGAAGTGGTTTAGAGTAATGCACATGCTAACTTTGAATAGGCAAATATT  
TAGCTCAACTGTGATCGGTCAACAGAATGTAGGTGCAGAAAGGTACTTTCT

>PGSC0003DMG401030236-(rev)LRR-RLPs\_6039

TTTCGCTGGAATTTGACACTACTACTTTTCTTTTATCTGACTGAGAAGTGAAATATTGAGCAAACCTTTGT  
ACAAGGAGTTTCTCCTATAGCACGTGAAGATCATTCTATTCTCTTCTC

>PGSC0003DMG401030236-(rev)LRR-RLPs\_61

ATGTTCTCTTTGATAGGCTTGCTCCTAACGGTGATCTGCTCAACATGTTTCGGAAACATAAGGATTATGTT  
CAGCTCTTAAAGAAGCTTAAAATGACTTTGCGTGGTCTTCAGGCCGTGT

>PGSC0003DMG401030236-(rev)LRR-RLPs\_6100

AAACTTTTGTACAAGGAGTTTCTCCTATAGCACGTGAAGATCATTCTATTCTCTTCTTCTGTCAGCAGC  
TCAACAAAGTACAAGGTTTCGATTGATCAGTTTCTCTGCCAAGATACGA

>PGSC0003DMG401030236-(rev)LRR-RLPs\_6222

TCATTTCTCATCGAGACAGCTGAAGTTTGCCACCAGAACCAATGCTAGAATTCCTTCCATCTACCGAAA  
GAATGGTAGGCATTTCAATCTCAGAAAAATAGGATATTTTTGTGTATTAA

>PGSC0003DMG401030236-(rev)LRR-RLPs\_6283

CTACCGAAAGAATGGTAGGCATTTCAATCTCAGAAAAATAGGATATTTTTGTGTATTAACTCTGATTGT  
TGTTGTTCACTGCTACAGCTGCTCTTCAAATGAGAACTTTAATTGCT

>PGSC0003DMG401030236-(rev)LRR-RLPs\_6344

TCTGATTGTTGTTGTTCACTGCTACAGCTGCTCTTCAAATGAGAACTTTAATTGCTCAAATGCCCATTT  
TATCATTTTGTGTTTCGAGTAATTTAACTGTTGTGGTCTTTATCAGGT

>PGSC0003DMG401030236-(rev)LRR-RLPs\_6405

AATGCCCATTTTATCATTTTGTGTTTCGAGTAATTTAACTGTTGTGGTCTTTATCAGGTAAACATTTGGATC  
GTGAGAGTTCCTTCTAGTTGTATGTCTAAGATGTGCTCCTCAAACCTCA

>PGSC0003DMG401030236-(rev)LRR-RLPs\_6466

ACATTTGGATCGTGAGAGTTCCTTCTAGTTGTATGTCTAAGATGTGCTCCTCAAACCTCAAAGAATGACT  
GCTTAAAACGGTTGGCTTGAAATGCTGAACCTGCATTTAGACCAGCAGTG

>PGSC0003DMG401030236-(rev)LRR-RLPs\_6588

ACAAGGTCAAGTTGGTATGTCCAGATGGTGTGTCGCCACGTGTTTGGTAATACTTCCATCCTCAACATTGC  
TCTGTTGTGTGAGAGTTTGTAGCATCAGATGGAATTTTATTTTGTATGTT

>PGSC0003DMG401030236-(rev)LRR-RLPs\_6649

CAACATTGCTCTGTTGTGTGAGAGTTTGTAGCATCAGATGGAATTTTATTTTGTATGTTGTATATGATCTT  
AGTTGAGTTGAAGCAGCAAATATTGCTATGTTGTCCTTGAGAATGTTCA

>PGSC0003DMG401030236-(rev)LRR-RLPs\_6710

ATATGATCTTAGTTGAGTTGAAGCAGCAAATATTGCTATGTTGTCCTTGAGAATGTTGAGGATTGAGATT  
ACAAGTGAAGTTAGTTTAGTATAATTACGAAAGACAAAGTTGGACCACTT

>PGSC0003DMG401030236-(rev)LRR-RLPs\_6771

ATTGAGATTACAAGTGAAGTTAGTTTAGTATAATTACGAAAGACAAAGTTGGACCACTTTATAGTGACG  
GACATCTTTTTGGCTGCTATAATGAATGATTGCTATTGTTACACACCTTAA

>PGSC0003DMG401030236-(rev)LRR-RLPs\_6832

TAGTGACGGACATCTTTTTGGCTGCTATAATGAATGATTGCTATTGTTACACACCTTAATAATATTTGACG  
TTTAGATCTTATTTGGTGGTTATTGATAAAAGAAATATGCAAGAAGTCA

>PGSC0003DMG401030236-(rev)LRR-RLPs\_6893

ATATTTGACGTTTAGATCTTATTTGGTGGTTATTGATAAAAGAAATATGCAAGAAGTCATTTCTCTTGAC  
TTTTTATGTTATAGAAGAAAACAAAATACTTAACAGGGTAAAGACATAA

>PGSC0003DMG401030236-(rev)LRR-RLPs\_6954

TCCTCTTGACTTTTTATGTTATAGAAGAAAACAAAATACTTAACAGGGTAAAGACATAAAATCCGTCTGA  
ACTTGTCTGAAAAGTCGAATATATTGTGGCAACCTATGAATTTTTCTAG

>PGSC0003DMG401030236-(rev)LRR-RLPs\_7015

TCCGTCTGAACTTGTCTGAAAAGTCGAATATATTGTGGCAACCTATGAATTTTTCTAGAGCAAAGAGG  
GTGCCTTTCTGCTTGGGCTATCTTTTCATAGTATTTGATTTTCATCAAATA

>PGSC0003DMG401030236-(rev)LRR-RLPs\_7076

CAAAGAGGGTGCCTTTCTGCTTGGGCTATCTTTTCATAGTATTTGATTTTCATCAAATAAAGAGAAAATT

ATAAAAGGAATACTTTTAAAACACATTAATTTCAAGAAAAAAAAAACCCA

>PGSC0003DMG401030236-(rev)LRR-RLPs\_7137

GAGAAAATTATAAAAGGAATACTTTTAAAACACATTAATTTCAAGAAAAAAAAAACCCA

AACAATTAGTAGGAAGTTTCTGGTCATTTTTTAAAGCTAATGCTAGTTGAT

>PGSC0003DMG401030236-(rev)LRR-RLPs\_7198

TCAAAGTAAACAATTAGTAGGAAGTTTCTGGTCATTTTTTAAAGCTAATGCTAGTTGATTGAAGAGACCA

ATCGTATGAAGGTCGTTGAATTAATTAATAGGAGATTAGTGTAATCATT

>PGSC0003DMG401030236-(rev)LRR-RLPs\_7259

AAGAGACCAATCGTATGAAGGTCGTTGAATTAATTAATAGGAGATTAGTGTAATCATTGAATTAATC

AAATGACTTTTTAAAAATAAATTTAAGTGTGAAAACAAGACAATGTAGT

>PGSC0003DMG401030236-(rev)LRR-RLPs\_732

CGACCATTTTGATTTGAAAGCTTGGTTTTGTGTGTCTGAACAATATGATGCTTTCAGGATAGCAAAGGA

TTGCTTCAAGAGATTGTAAGACAGGTTGATGATAATATAAATCAGATTCA

>PGSC0003DMG401030236-(rev)LRR-RLPs\_7320

ATTAATCAAATGACTTTTTAAAAATAAATTTAAGTGTGAAAACAAGACAATGTAGTGGTTAGATTTT

AACTTCAAAAAGGCATCTTCTATGAAAATTATTTAAAAACAGTTTGT

>PGSC0003DMG401030236-(rev)LRR-RLPs\_7381

TTAGATTTTAACTTCAAAAAGGCATCTTCTATGAAAATTATTTAAAAACAGTTTGTGTTATAACCACTAC

TTATAATTTACTCATTTACCTTTATATAATGGTGGTGTCCACCAATAAT

>PGSC0003DMG401030236-(rev)LRR-RLPs\_7442

TAACCACTACTTATAATTTACTCATTTACCTTTATATAATGGTGGTGTCCACCAATAATTTATTATTATTGT

ATGGAATTTGATAATCAAGCCAAAAGTTACAAGTTTGATTCAATTTAAA

>PGSC0003DMG401030236-(rev)LRR-RLPs\_7503

ATTATTATTGTATGGAATTTGATAATCAAGCCAAAAGTTACAAGTTTGATTCAATTTAAAATATAACAAGTT

CTGTTATTTTGTAGTTTTTAAATATATATGCCTCAAAGTGAAGAAGGACA

>PGSC0003DMG401030236-(rev)LRR-RLPs\_7564

ATAACAAGTTCTGTTATTTTGTAGTTTTTAAATATATATGCCTCAAAGTGAAGAAGGACACAGCTAAGAGA

GAAAAGTCATTCTCCAAAATTGGTATAACAATTGCAAATTAATTAGCAGA

>PGSC0003DMG401030236-(rev)LRR-RLPs\_7625

GCTAAGAGAGAAAAGTCATTCTCCAAAATTGGTATAACAATTGCAAATTAATTAGCAGACAGTCAGTAT  
ATTGTTTGCATATTGCTCTAGCATTCAACAGGTAAATTAATCTATTACTA

>PGSC0003DMG401030236-(rev)LRR-RLPs\_7686

GTCAGTATATTGTTTGCATATTGCTCTAGCATTCAACAGGTAAATTAATCTATTACTAGTAGAAATATTA  
AACCATTTTGTGATTCTTTGTTTTGTTTTTCAGGTTTCAGAAATGGAGA

>PGSC0003DMG401030236-(rev)LRR-RLPs\_7747

AGAAATATTAACCATTTTGTGATTCTTTGTTTTGTTTTTCAGGTTTCAGAAATGGAGATTGGCTTAGCAG  
TTGGTGGTGGCATTCTCTCTTCAGCTTTGAATGTTCTCTTTGATAGGC

>PGSC0003DMG401030236-(rev)LRR-RLPs\_793

GCAAAAGGATTGCTTCAAGAGATTGTAAGACAGGTTGATGATAATATAAATCAGATTCAGATCAAATTG  
AAGGAGAGCTTAAAAGGCAAAAAGTTTCTTATTGTTCTAGATGATGTTTGG

>PGSC0003DMG401030531-(rev)RLKWAX-EGF\_0

GTCAGAGCCAGTTGCAGAGAGCAAAAAATCCATCTTTTTGCTTAAAAAATCAATCTTTCTTCTATAGGA  
AAAAACCCAAGAAACCCCTTTTCTCTTTTTAGTATAATTTTCATTATCTA

>PGSC0003DMG401030531-(rev)RLKWAX-EGF\_1037

ATAGCTTGATGATTTAGTCAAGATACAGCTGAATTAATCGAATGGATATAGCTATGGATGATTAATAATG  
CGTTTACAACAAAGTGTAGCCAAGGAAATATCCTTATAGCTTCAAAGGAT

>PGSC0003DMG401030531-(rev)RLKWAX-EGF\_1098

TTAATAATGCGTTTACAACAAAGTGTAGCCAAGGAAATATCCTTATAGCTTCAAAGGATAAGTTAAATTT  
CCAGTATAGTTATGCAGCACCTTATCTTATGATTATGCTCCGTGCTTTAG

>PGSC0003DMG401030531-(rev)RLKWAX-EGF\_1159

GTTAAATTTCCAGTATAGTTATGCAGCACCTTATCTTATGATTATGCTCCGTGCTTTAGGTTCTTTTCGTGT  
GATTACAAGCGCCCAAAAAATGTAACCTTGATTTAGGCATCATGATACA

>PGSC0003DMG401030531-(rev)RLKWAX-EGF\_122

TGTTTAGTTTGTATATTTTCAGCTGTTTCAAGATTACAAATGAAACAAGAAAAAGGTATTTCTTGATAGT  
ATCATTAAACCTTTGTGTTTTATGCTTCATTTTGCAAATAGATAAGTGT

>PGSC0003DMG401030531-(rev)RLKWAX-EGF\_1220

TCTTTTCGTGTGATTACAAGCGCCCAAAAAATGTAACCTTGATTTAGGCATCATGATACAGCTGATTTAATC  
CTTATTAGTAGTATTATTTAGTAGTCGCGTAGTTTCTTATTCTTTAATG



>PGSC0003DMG401030531-(rev)RLKWAX-EGF\_1464

AAAAAGGTACAGCTAAGTGCAGGAAGTATCCTTATAGCTGCTAATACTGAATGGTGTCTAGTTTTGGTTA  
ATCCAAGCATTTTCTGGTTTGATATTTTGTCCAGTTAATCTTTTTGTTAC

>PGSC0003DMG401030531-(rev)RLKWAX-EGF\_1525

TTTTGGTTAATCCAAGCATTTTCTGGTTTGATATTTTGTCCAGTTAATCTTTTTGTTACACCAGTATTATTTT  
GTTAAGTATAACAAGGATACCAATTGAAGACTTCTTTAATTCTATTCT

>PGSC0003DMG401030531-(rev)RLKWAX-EGF\_1586

CAGTATTATTTTGTAAAGTATAACAAGGATACCAATTGAAGACTTCTTTAATTCTATTCTCAATCTAATAGG  
CCACTGAATCTCATTTTTCTTAGCCCATTCAACTTCACATTTGAGTAC

>PGSC0003DMG401030531-(rev)RLKWAX-EGF\_1647

ATCTAATAGGCCACTGAATCTCATTTTTCTTAGCCCATTCAACTTCACATTTGAGTACAAAATTACAGAC  
TCAAGGTCTGTTAAAGGAAAACCGCTTGTGATCATATCTGATTTGAGCT

>PGSC0003DMG401030531-(rev)RLKWAX-EGF\_1708

AATTACAGACTCAAGGTCTGTTAAAGGAAAACCGCTTGTGATCATATCTGATTTGAGCTTTATCTATGAT  
AATTCATGTCTAAGAAGCGATCTTTAATGATACTTATGAAGGACTAGGTT

>PGSC0003DMG401030531-(rev)RLKWAX-EGF\_1769

ATCTATGATAATTCATGTCTAAGAAGCGATCTTTAATGATACTTATGAAGGACTAGGTTAATAGTTTGAC  
ATGATTAGTTGAAGTAGGCTAATATGAACTCAGCAACCGGGTTGTTAACA

>PGSC0003DMG401030531-(rev)RLKWAX-EGF\_183

TCTTGATAGTATCATTAAACCTTTGTGTTTTATGCTTCATTTTGCAAATAGATAAGTGTTCTGCTGTTGATC  
CACAGTTTGTAGTATGTAATAAATCAGTAAATTGTAATATGGTCCAA

>PGSC0003DMG401030531-(rev)RLKWAX-EGF\_1830

TAGTTTGACATGATTAGTTGAAGTAGGCTAATATGAACTCAGCAACCGGGTTGTTAACAAACCACAGCT  
GTAATTAGTATGTATACATTGGCTGCACATATTGAGCAGTTGCTTGTTTGA

>PGSC0003DMG401030531-(rev)RLKWAX-EGF\_1891

CCACAGCTGTAATTAGTATGTATACATTGGCTGCACATATTGAGCAGTTGCTTGTTTGACGGAATCAGAA  
CTTACATTATTGACTTTAATATAGGTAGGAACTGCAACATGTAAAACCT

>PGSC0003DMG401030531-(rev)RLKWAX-EGF\_1952

GAATCAGAACTTACATTATTGACTTTAATATAGGTAGGAACTGCAACATGTAAAACCTAGTCAAACCTTA

AAATAAGAATAAGTAGAACATTTTCAGAAGTATGTAATCAGGAGCTGACTT

>PGSC0003DMG401030531-(rev)RLKWAX-EGF\_2013

TCAAACCTAAAATAAGAATAAGTAGAACATTTTCAGAAGTATGTAATCAGGAGCTGACTTTTATCTTACTT

TAGTAACTTTAATATCAGTAGAAAATTGCAACAACACTACTATGTTTTATAC

>PGSC0003DMG401030531-(rev)RLKWAX-EGF\_244

TGCTGTTGATCCACAGTTTGTAGTATGTAATAAATCAGTAAATTGTAATATGGTCCAAGAATAAGCTTT

CCATTTTATATTGAAGATGTTCAAGAATCTTATTGTGGGTACCCTGGATT

>PGSC0003DMG401030531-(rev)RLKWAX-EGF\_2562

CCAATCATTTTGGTTAGTGAATGCTGGCATAGTGAGTTATTCGTTTCATAGCTCTTCTGAGGTTTTTTGCTT

TTGATCGATTTCCCTTCATGTTTGGCTCAACTATATTATAGTAAATCTT

>PGSC0003DMG401030531-(rev)RLKWAX-EGF\_2684

ATTGTTTCAATAACTCTATTCCATAAAGTGCGCCAAAACCCAATTGCTTGTGCTTCAAATGATGTGAAT

CATCCCTATCCTGTTTTAGACAACGGGAAAACCAAGTCGATTGTAGTG

>PGSC0003DMG401030531-(rev)RLKWAX-EGF\_2989

TGTTATCGCTCTGTTAGTTTTGCCAGAATCATTGCTGGATGGTAAATGCTACTTACCAAGCTGCTAATTT

AAGATTCTAGGCATAAGATACTAACTATTTGCAGAGTTATAAAAAGCTAA

>PGSC0003DMG401030531-(rev)RLKWAX-EGF\_305

ATAAGCTTTCATTTTATATTGAAGATGTTCAAGAATCTTATTGTGGGTACCCTGGATTTGGGCTAAATTG

TAGTGAACAAGGGTTTCTGTTGTACATATAGCTGGAAATGAGTATGTA

>PGSC0003DMG401030531-(rev)RLKWAX-EGF\_3050

CTGCTAATTTAAGATTCTAGGCATAAGATACTAACTATTTGCAGAGTTATAAAAAGCTAAAACAACGATCA

ACGAGGTTTTTCATGTGCATCATAAACATCAAAAACCTTCTCTTATCTAT

>PGSC0003DMG401030531-(rev)RLKWAX-EGF\_366

GGCTAAATTGTAGTGAACAAGGGTTTCTGTTGTACATATAGCTGGAAATGAGTATGTAGTTGAAGATA

TTAGATATCAAGATCATACTTTTCAGCTTAAAAATTCAATCTTTAACAGTA

>PGSC0003DMG401030531-(rev)RLKWAX-EGF\_3843

ACATTACTTCATTTTCAGGGAATTATAATTTGGGGTTGATTCTTGGCTCAGGTAAATCAGTACTGTATTAT

TATTATCCCTGAATTTGACATTTCAACATAGTTCCACATCTTGTTTACT

>PGSC0003DMG401030531-(rev)RLKWAX-EGF\_3904

ACTGTATTATTATTATCCCTGAATTTGACATTTCAACATAGTTCCACATCTTGTTTACTTCATTTTTGTCTTT  
TTCAGTTTTAGGTGGAGCTGTGTTTATAATCCTCGTGGTCACTTTCA

>PGSC0003DMG401030531-(rev)RLKWAX-EGF\_3965

ATTTTTGTCTTTTTAGTTTTAGGTGGAGCTGTGTTTATAATCCTCGTGGTCACTTTTATTGTTTGTGTTA  
CAAGAAAGAACACAAAAGTTGTTTGTACTTCACCTCGCGAAAAAATC

>PGSC0003DMG401030531-(rev)RLKWAX-EGF\_427

TGAAGATATTAGATATCAAGATCATACTTTTCAGCTTAAAAATTCAATCTTTAACAGTAGTGTAAGGAAT  
GGATGTGTTTCTGATATCAAGAATATTTCACTCGATAATCGCCCTTTTCA

>PGSC0003DMG401030531-(rev)RLKWAX-EGF\_488

GTAAGGAATGGATGTGTTTCTGATATCAAGAATATTTCACTCGATAATCGCCCTTTTCAGTTTGTTAAGAA  
ATCGAAAATTTACTTCTTGTCGAAGTGTAATGGTTCGATATCTGGGAAT

>PGSC0003DMG401030531-(rev)RLKWAX-EGF\_5307

CTTTCATTTCAACATAAATGTTACAAATATGTACTCATTGATAATCTGTAAAGGAATAAGTTGCTGAGAC  
GTTCTTTTTATCTTTATTAGTTTTACTCTTGTTCTTTATTTGCCGTTTT

>PGSC0003DMG401030531-(rev)RLKWAX-EGF\_5368

TGCTGAGACGTTCTTTTTATCTTTATTAGTTTTACTCTTGTTCTTTATTTGCCGTTTTCTGAACACAGTGGGA  
GTGTAECTATTGAATATGGGCATGCTTTCTGCACTAACGAGCATGCA

>PGSC0003DMG401030531-(rev)RLKWAX-EGF\_5408

GTTCTTTATTTGCCGTTTTCTGAACACAGTGGAGTGTAECTATTGAATATGGGCATGCTTTCTGCACTAAC  
GAGCATGCATATTTTTACTATCCTGGATTTGAGGTTACTTAAATGAAT

>PGSC0003DMG401030531-(rev)RLKWAX-EGF\_549

TTGTTAAGAAATCGAAAATTTACTTCTTGTCGAAGTGTAATGGTTCGATATCTGGGAATCTTTCGAAGCA  
CATGATTGTTTTGGTTGTGGTGGGGAAAATGGGAATGATTGGGGTTATG

>PGSC0003DMG401030531-(rev)RLKWAX-EGF\_61

TCTATAGGAAAAACCCAAGAAACCCCTTTTCTTTTTAGTATAATTTTCATTATCTACTTGTTTAGTTTG  
TATATTTTCAGCTGTTTCAAGATTACAAATGAAACAAGAAAAAAGGTA

>PGSC0003DMG401030531-(rev)RLKWAX-EGF\_610

TTCGAAGCACATGATTGTTTTGGTTGTGGTGGGGAAAATGGGAATGATTGGGGTTATGCAATGTTTGC  
TGAGGATGAGAGCTTTGAGTCTGCATTACAAGTGTGTGAAAAACATGTGAT

>PGSC0003DMG401030531-(rev)RLKWAX-EGF\_732

CACCTGTAGAAATGCTTGGGGATGAGGGAAGTAATCGAGATGTTGACTATCTGGTGCTTTTGAGAAGG  
GGGTTTAGATTGAAATGGACTGCTAGTAATTGCAGTGAATGTGCAGCAAGTA

>PGSC0003DMG401030531-(rev)RLKWAX-EGF\_793

GAGAAGGGGGTTTAGATTGAAATGGACTGCTAGTAATTGCAGTGAATGTGCAGCAAGTAGAGGACATT  
GCGGATTTGATGCTATCAATTATCAATTCAAATGTTTCTGCACTGACAGGCC

>PGSC0003DMG401030531-(rev)RLKWAX-EGF\_854

GGACATTGCGGATTTGATGCTATCAATTATCAATTCAAATGTTTCTGCACTGACAGGCCTCATGCATTGA  
GTTGCAAACCTTCCAGTAAGCCCCTATGTCCTTATCTACCAGTTAATTTT

>PGSC0003DMG401030531-(rev)RLKWAX-EGF\_915

ATGCATTGAGTTGCAAACCTTCCAGTAAGCCCCTATGTCCTTATCTACCAGTTAATTTTCCAGTATAATTA  
AGCAGCACCTTATGCTATGCTAGGCACCGTGCTTTAAGGTTTTTTTCGTG

>PGSC0003DMG401030531-(rev)RLKWAX-EGF\_976

AGTATAATTAAGCAGCACCTTATGCTATGCTAGGCACCGTGCTTTAAGGTTTTTTTCGTGTGATAGCTTGAT  
GATTTAGTCAAGATACAGCTGAATTAATCGAATGGATATAGCTATGGAT

>PGSC0003DMG401030532-(rev)RLKWAX-EGF\_0

TCTAGGTAGAGTTTATACTGTATAATGAAAAACCTTCAGCTAGTTTTCTCTTCTTGAATATGGATTTT  
GCTTCTTCTTTATTTTGCTTCCTTTTATCTGTTTTTCTGATGTTAGTTC

>PGSC0003DMG401030532-(rev)RLKWAX-EGF\_122

GCAATGGGCAGAAATGATTCAACTTGCCAAAATCCTTTTCATGTGGAAATCTTACTAACCTGAGCTTTCC  
TTTCTCTTTCCACACAACCTGACTGTGGAATAATGTTCTTATCTGGT

>PGSC0003DMG401030532-(rev)RLKWAX-EGF\_2318

GAAGTTTTGGATACTCTAAAAGAGATTCAGATTAGTGAATTTGACAATGAGAAGAGAGCTGACACTAAT  
CTCAGTGGAAATGAAGCTAAAATTGTTACAGCACTCCCTTTCCCTAAATCA

>PGSC0003DMG401030532-(rev)RLKWAX-EGF\_2379

ACACTAATCTCAGTGGAAATGAAGCTAAAATTGTTACAGCACTCCCTTTCCCTAAATCAGAAGATAAGTT  
TATGCTGAAACAAGTTAAATCACTGTCTTCTCCAAATTCTGTTACTGATA

>PGSC0003DMG401030532-(rev)RLKWAX-EGF\_244

TGATGCTAAAACATTTCCGAAAATCCGACTGCTTCCTGAAGGAGATTGGTACTATGCTGTAGTAAATTTG

TTTAATTATACAGTTTGGGTTGAGGACCCTAAGCTTCATGCCAAGTTGAG

>PGSC0003DMG401030532-(rev)RLKWAX-EGF\_2440

AGATAAGTTTATGCTGAAACAAGTTAAATCACTGTCTTCTCCAAATTCTGTTACTGATAAATGGGTTACTT  
GCTCTGATATAACTACTACAAAGTAGTTAAAAGTTCTATACTCCCTTTC

>PGSC0003DMG401030532-(rev)RLKWAX-EGF\_2556

TTTCTTTGTTATTGATGTGAATTTTGAGAGATTACGAATGTACAAGTGTAAAGAGTTTCTTGAGCTATGTAT  
CTATGAGTGAAAGTGATTCAATATTTGATTTGATTATATAAGAGCTGTC

>PGSC0003DMG401030532-(rev)RLKWAX-EGF\_305

GTAAATTTGTTTAATTATACAGTTTGGGTTGAGGACCCTAAGCTTCATGCCAAGTTGAGGCAACACAAGT  
GTCAGGCTTTTAAACAAAACTTATCATTGCCAGCCTCTCCTTCTATTTCT

>PGSC0003DMG401030532-(rev)RLKWAX-EGF\_427

TGAAATTCTCCCAGTGAATATTCTCAACTTCATCAAATGCAACAGCACTAGTAGTAGCACCCCAAACATTA  
CCCATAAAATGAAAGATTATTTTGCTGATTATAGAATGTACAATGGCTG

>PGSC0003DMG401030532-(rev)RLKWAX-EGF\_488

CCAAACATTACCCATAAAATGAAAGATTATTTTGCTGATTATAGAATGTACAATGGCTGTAAAGACTTTA  
GCATATACTACAAGCTTCATGGAGGCGATGATGAACACGTTTCGAGCAGGC

>PGSC0003DMG401030532-(rev)RLKWAX-EGF\_549

AAGACTTTAGCATATACTACAAGCTTCATGGAGGCGATGATGAACACGTTTCGAGCAGGCAATCTTCCTG  
CCAAGTTCACCTTATCAGACTGCCGACCCACTCGAGATCAGATGATGGTG

>PGSC0003DMG401030532-(rev)RLKWAX-EGF\_61

TATGGATTTTGCTTCTTCTTTATTTTGCTTCTTTTATCTGTTTTTCTGATGTTAGTTCAGGCAATGGGCAG  
AAATGATTCAACTTGCCAAAATCCTTTTCATGTGGAAATCTTACTAA

>PGSC0003DMG401030532-(rev)RLKWAX-EGF\_610

TCTTCTGCCAACTGTTCACTTATCAGACTGCCGACCCACTCGAGATCAGATGATGGTGATTTGTTCAATA  
TGTTAAGCGCCGTTTTCTAGTAGAATGGAACTGTCTGAGGACTGTAA

>PGSC0003DMG401030532-(rev)RLKWAX-EGF\_671

TTGTTCAATATGTTAAGCGCCGTTTTCTAGTAGAATGGAACTGTCTGAGGACTGTAACAAATGTCACT  
ATGGTGGAGGTCAATGCCAGACTGATATAACCAACAAATTTTCATTGTGCA

>PGSC0003DMG401030532-(rev)RLKWAX-EGF\_732

AATGTCACTATGGTGGAGGTCAATGCCAGACTGATATAACCAACAAATTCATTGTGCATATCCAAATAA  
TCAACATGATCAAGGTCATCAAGAAATTTCTTCACTTGAAAAAGGATCAG

>PGSC0003DMG401030532-(rev)RLKWAX-EGF\_793

TCCAAATAATCAACATGATCAAGGTCATCAAGAAATTTCTTCACTTGAAAAAGGATCAGTCACTCAGTGC  
ATATTTCTTAGTGTCTTTCTTGTGTTTCATATCACATATCTATAATATTT

>PGSC0003DMG401030532-(rev)RLKWAX-EGF\_854

ACTCAGTGCATATTTCTTAGTGTCTTTCTTGTGTTTCATATCACATATCTATAATATTTTCATAACTTTCCC  
TCCTTTTCCTTTAGATGCAAAAATGGCTAAAAGAAAGTTCAGACTGA

>PGSC0003DMG401030532-(rev)RLKWAX-EGF\_915

TAATACTTTCCCTCCTTTTCCTTTAGATGCAAAAATGGCTAAAAGAAAGTTCAGACTGACTCTGGGAGCA  
GGTAGTTAAATTTCCATTAAGTGCAGTGTCTTTTCGATCTTTTTCTATTA

>PGSC0003DMG401030532-(rev)RLKWAX-EGF\_976

CTGGGAGCAGGTAGTTAAATTTCCATTAAGTGCAGTGTCTTTTCGATCTTTTTCTATTACAGAATTTCCAT  
GCATATCGTTTGAATTTCTTCTTCATTGTGGTAAAATCTCAAAACATTT

>PGSC0003DMG401030595-(rev)RLKANKrepeat\_1098

GTGGCAAGGATTCCAACAGTGATCATCCTTTGGTAAGTGTTTCATCGTTAACAGTGATCATCCTTTGAAAT  
TTGATGTTATGTATTTCTTATATGGAACAAATCTTAATAATTTTCATTTA

>PGSC0003DMG401030595-(rev)RLKANKrepeat\_1159

CTTTGAAATTTGATGTTATGTATTTCTTATATGGAACAAATCTTAATAATTTTCATTTACTTAGTGTGAGCA  
TCAAGTTCTTACCGTCCAATAAGAGTTGTATATATCATATCATGTCAT

>PGSC0003DMG401030595-(rev)RLKANKrepeat\_1220

TAGTGTGAGCATCAAGTTCTTACCGTCCAATAAGAGTTGTATATATCATATCATGTCATTCAGGTGCTTAA  
GATATTGACAATAGCTTCATTAACAAATAAAACTCCATCTTATGAATT

>PGSC0003DMG401030595-(rev)RLKANKrepeat\_1342

GCACCTGAAAACATACTTGAGACATACATGGTAGACTTAACTTTGGTAGAGTGTAGCTTTAGCTTAAATG  
TTGTTTACACAGACTGCTTGTCAAAGTGAAGTCTGGTTGAACTTCACGAA

>PGSC0003DMG401030595-(rev)RLKANKrepeat\_1403

GCTTAAATGTTGTTTACACAGACTGCTTGTCAAAGTGAAGTCTGGTTGAACTTCACGAATGGAACTTCT  
ATCTTTGACATTGCAGTTTTAGTCACCTTTGTTGACAATTTATGGAAAAA

>PGSC0003DMG401030595-(rev)RLKANKrepeat\_2379

ATCAAAAGGCATTCAATTTATATGTCATTATTACTATAATTATTTAAAAAGGCTTTCTGGATTAATTCT  
TTCTTTTAACTTTTTCCAATATACTTGATGCAGGGTGTTTTCTGCTAA

>PGSC0003DMG401030595-(rev)RLKANKrepeat\_2684

GTGAGACATGATGCAGAAATAAATGCATTTTGTAGCCTTCACTATGCTGTACTATTAATAGATATTTTTTG  
CCAAAGTACTATCACCTAATATTCTGGGTGCTAATTGTTATGGAAGT

>PGSC0003DMG401030595-(rev)RLKANKrepeat\_2745

ATATTTTTTGCCAAAGTACTATCACCTAATATTCTGGGTGCTAATTGTTATGGAAGTATGCCTATTAAT  
TTAACATTGATCTTCAAAAAATTTCTCCCAAGATCTTTCAGTGATTG

>PGSC0003DMG401030595-(rev)RLKANKrepeat\_2806

GCCTATTAATTTAACATTGATCTTCAAAAAATTTCTCCCAAGATCTTTCAGTGATTGCTAAAATGGTTA  
AGGATAGTCCCTGAATATGATATACTTCTTATTATGTTTTCCCATATAT

>PGSC0003DMG401030595-(rev)RLKANKrepeat\_3172

TCCTTATTAATAACATCTCACTGCAATTTTTTATGTATTTATTATCTTCTATACTTGGGAATTGTAGTTGA  
GTCTGCTTCCAAAAATAGGATCAGGGAAAATAACTGACCTCTAGTTT

>PGSC0003DMG401030595-(rev)RLKANKrepeat\_3233

ATTGTAGTTGAGTCTGCTTCCAAAAATAGGATCAGGGAAAATAACTGACCTCTAGTTTAAGTCTTTCTG  
TTTGCTGAGTTATTATGATTATTCTAGTATCTGTATCTTGGTGTTTAATC

>PGSC0003DMG401030595-(rev)RLKANKrepeat\_3416

TTTCTGCAATGGATTCTAGAGAGTTCTTTTGTGTAACAGTATTGTCAAGCTGCAGGTCATTTACATCTT  
TGCGTTATGTGCCTTGCTAATCTGACTTGAGATTTCTATCCTCTTAAAT

>PGSC0003DMG401030595-(rev)RLKANKrepeat\_3477

TTTACATCTTTGCGTTATGTGCCTTGCTAATCTGACTTGAGATTTCTATCCTCTTAAATGTTCAACTATCTT  
ATTACTTCATAACTCAGAGCATTTGGGTATGTTACGTTTTATTGCCA

>PGSC0003DMG401030595-(rev)RLKANKrepeat\_4636

ATTATCTTATTAAGAACTGGATGATCGTGACCTTTTTTATGTGTCATGAAAAGGGTAACTGGATTCAACTT  
TAATTACATATTCTGAAGAAGGACTAGCTGGATGCACCCAATACCTAGG

>PGSC0003DMG401030595-(rev)RLKANKrepeat\_4819

AATTCCAACTTTGGCATTAAACGTTCTTTAGTTGAGTGCCAAATTTGTTTCCCGTTAGATGGAAGTTCTTT

CCCCACAGTGAAAGCTCAAACCCATAGAAAAATAGTGACAAAATGAGCA

>PGSC0003DMG401030595-(rev)RLKANKrepeat\_488

ATACAACCCCATTCATTTATGTTACACATGGTTGTTACATATTGTTTTATAATGTATCATATTATACATGT  
TATGTAGTTACACCGTTACATTATGTTAGATATAAGCAATTTGAAGGA

>PGSC0003DMG401030595-(rev)RLKANKrepeat\_5002

TGGTAGAACTTTTTCTTTGGTTCATTGCCAGTGAAAAGTTGTTGTGTTATTAGAGTAAGTCATCTTTCTGT  
TACTTATTCTTACTTGACTTGACTATTATCACATGAGTTTCCATTAAG

>PGSC0003DMG401030595-(rev)RLKANKrepeat\_5063

ATCTTTCTGTTTACTTATTCTTACTTGACTTGACTATTATCACATGAGTTTCCATTAAGATTCAGTACTAAC  
ACTGGAAATGCTGCAGATGCTGGAAGGAAGACAAATAACTGACAGGAG

>PGSC0003DMG401030595-(rev)RLKANKrepeat\_5246

GAGTAGAATTCTTCAGTAAGTCAATCACTCAATCTTGAAGCTTTAATTTAACTTCTCCAAGACATGTCTTA  
TTACCCAACTCAGTATATTCTTCACTAAACCAGCTTCTAAGTAATTCAT

>PGSC0003DMG401030595-(rev)RLKANKrepeat\_5307

ACATGTCTTATTACCCAACTCAGTATATTCTTCACTAAACCAGCTTCTAAGTAATTCATACATAGACATCAT  
GATCCATGTTGATAAGAGGTTTAGTGATACTAGACTATCTGGTTAGAG

>PGSC0003DMG401030595-(rev)RLKANKrepeat\_5368

ATAGACATCATGATCCATGTTGATAAGAGGTTTAGTGATACTAGACTATCTGGTTAGAGCAACTCAGTAT  
ACGTTTAAATGATCATACTATCAGAAATACAGGCTACTAAGAACTCGAAC

>PGSC0003DMG401030595-(rev)RLKANKrepeat\_5429

ACTCAGTATACGTTTAAATGATCATACTATCAGAAATACAGGCTACTAAGAACTCGAACATACATTGTAG  
CTCAAATTATGAATTTAGATCCCAATCAACAACTCAAAGGACCAAATC

>PGSC0003DMG401030595-(rev)RLKANKrepeat\_549

ATTATACATGTTATGTAGTTACACCGTTACATTATGTTAGATATAAGCAATTTGAAGGAAAAACAACAA  
CAAGAAAAGTAGGGTTACGGAGTAGAGCTATCATAAAAAGGTAAGGTATG

>PGSC0003DMG401030595-(rev)RLKANKrepeat\_5490

ACATTGTAGCTCAAATTATGAATTTAGATCCCAATCAACAACTCAAAGGACCAAATCCCATACCCGTA  
AGCTTCAGTTATTGGCTCTGCCTATGTTGATAACATACTGTTATTTTGT

>PGSC0003DMG401030595-(rev)RLKANKrepeat\_5551



ATACCCGTAAGCTTCAGTTATTGGCTCTGCCTATGTTGATAACATACTGTTATTTTGTTCAGGTTAATAGA  
GGACTGCACGAGTACAGTACTTCTACAAGGCCATCATTTGCTACAGTG

>PGSC0003DMG402000299-(rev)LRR-RLPs\_0

CTTGGGTGCAAATGAAGGATACTATTAATGCCTCTCATCTTCTTACAACCAAAGTTAACATTCCATAATTG  
AGAATACATCAAAATCCACATATGGAGAAGTTATACCTTTTGGTTTTAA

>PGSC0003DMG402000299-(rev)LRR-RLPs\_122

TTCATAACAGTTTGGTTGAGTTCAGTCAGGGGATTTACAAACATAGAAACAGATGAATCTGCTCTTATTG  
CCTTTAGAGCATATATAACTTCAGACCATGATCATATCTTGTCCAAAAAC

>PGSC0003DMG402000299-(rev)LRR-RLPs\_2013

CGGAAACCTACCATCCATGAGCAGTCAATGTAATGTTCCCTCACATAACTGGTGAAATCCCAGCAAACACA  
TTCAGATGCAAACGCCTTCAAGTCATACAATTAGCAGACAATATGCTTAC

>PGSC0003DMG402000299-(rev)LRR-RLPs\_244

GACGCCATCCAGTAACAGATCCTCTATCTGTTACTGGATCGGCGTCTTTTGTAGTGGAGACAACGAAAAT  
CAAAGAGTGACATCTTTAAATGTCTCAGGATTCAGACTTTCAGGCACAAT

>PGSC0003DMG402000299-(rev)LRR-RLPs\_2440

TACTTAATGTTCGATGGAAATCACTTGTCAGGTGTCATTCCATCTGAAGTATTCAACATATCGACGTTGCA  
GATTCTAGACTTAAGCAGGAACCGGCTCACAGGAACTTTCCCTCAGGCT

>PGSC0003DMG402000299-(rev)LRR-RLPs\_3965

TGACAGAAGAAGCAACCAAGAGTTTCTATGCTGAATGTAAGATATTGAGCAATATCCGTCACCGAAACC  
TTACAAAAATCCTTAGTTGTTGTAGTACCACAGACTTCAAAGCTCTTGTAT

>PGSC0003DMG402000299-(rev)LRR-RLPs\_4087

GATTACATGCCAAATGGTAATCTTGAGAGGTGGTTACATTCCCAAGATTATTGTTTAAGTATGCTTCAGA  
GATTGAACATAGCAATAGATATTGCTTCAGCTTTAGAATATCTTCATTGT

>PGSC0003DMG402000299-(rev)LRR-RLPs\_427

TGGCTTGATGCCTAATAAGTTAGGTAATCTACAACGATTACAAGAGATAAACGTAGGATTCAACAATTTA  
AGCGGAGACATTCCAAGCTGTTTTGGAACTTGCCACAGCTCGAGAGCAT

>PGSC0003DMG402000299-(rev)LRR-RLPs\_4697

AAGCAATTAGTTTGAAGTTGTTGGATATAGAGGTTTTGCATAGGGAAATACTTGAACAATTTCCATAGTG  
TAATTTAAATGTGTTTAGATATACATTTCTTTCTAGTTATCCCTCTATTA

>PGSC0003DMG402000299-(rev)LRR-RLPs\_4758

TCCATAGTGTAATTTAAATGTGTTTAGATATACATTTCTTTCTAGTTATCCCTCTATTATAATTTGTTTCGTCT  
TATTTTCCTTTGAGTCCGTCTCATAAAAACCAAAAACATGTTTAAG

>PGSC0003DMG402000299-(rev)LRR-RLPs\_5368

TTGAATATTTAGCAATTAGAGGAAAGGCAGAAAAGGTGGTGTAAATTTTCTGATTGTGAAAAATGTTGT  
AAACATTTTGTTTTGTATTAGTGGTTACAATGGGAGTTCTTTTCAA

>PGSC0003DMG402000299-(rev)LRR-RLPs\_5551

CACAAGATATAGTGGAAGGTTTGTGTATTTGATTTCTTTTGGACCACATAAGAATTTGTCGTCCGATT  
GAATATTCCTTTTTCTCGATGCTCTATTGGAAAGGTTTGTGTATTTGAT

>PGSC0003DMG402000299-(rev)LRR-RLPs\_5596

CCACATAAGAATTTGTCGTCCGATTGAATATTCCTTTTTCTCGATGCTCTATTGGAAAGGTTTGTGTATTT  
GATTTCTTGACCATGTAAGAATTCATCGTCCGATTGAATATATTTT

>PGSC0003DMG402000299-(rev)LRR-RLPs\_915

TATCCTTGCCTACAATCAATTTAGTGGAAAAATCCCAGTTGAAATTGGATATATAACCAAGCTCAAGAT  
ATTATATCTGGGGATAAACAATTCATAGGTATCATATTATATTTATTCA

>PGSC0003DMG402000515RLKantifungi(GNK)\_0

GGGACACATAAAAAGAGAACGTAGCAGACAATGGTTGGCTGTAAAGTCCGAATCATTTTTGAACAACAC  
TAGTAAAAAATATCATTTATTCTTCTCAGCCTCTAACGAAAGCTTCTT

>PGSC0003DMG402000515RLKantifungi(GNK)\_1054

CAGTAGCGGTGGTAAGTATTTCTCATTATTTATGCTCAAATGAATTATTGCCTATGTTATTCTCTACTTC  
ATGTATTTTTCCATTTCAATTTAAGTTTTTTTTTGGTGTAAAATGAAG

>PGSC0003DMG402000515RLKantifungi(GNK)\_1116

TCTCTACTTCATGTATTTTTCCATTTCAATTTAAGTTTTTTTTTGGTGTAAAATGAAGTTTAAAGGTATATAT  
CGATTTAGAAAATCAGGATAGAATAACTATTTCTTCATTTCTACTCT

>PGSC0003DMG402000515RLKantifungi(GNK)\_1178

AAGGTATATATCGATTTAGAAAATCAGGATAGAATAACTATTTCTTCATTTCTACTCTTGCTATTAAAAAT  
GCCAGAAGTGAGTAATAACTAACTTTTCAATTAAGTAATAATTTAGT

>PGSC0003DMG402000515RLKantifungi(GNK)\_124

TCTTCCATTTCTAACTACCATATTTCTGTTTTCTGTAAATCCATCAAAAACGAAGTTTAGAACTAATCTC

ATAGAGCAAGACGAAAGAGAAGCAGAACTAGGATTCATTCGGCTTCTC

>PGSC0003DMG402000515RLKantifungi(GNK)\_1240

ATTAAAAATGCCAGAAGTGAGTAATAACTAACTTTTCAATTAAGTAATAATTTAGTAAATTATTATTTT  
TTACATAATATTTTTATAATTAATTAATACTAAAACCTTAAACAACATTGAA

>PGSC0003DMG402000515RLKantifungi(GNK)\_1302

TATTATTTTTTACATAATATTTTTATAATTAATTAATACTAAAACCTTAAACAACATTGAAACGAGGAGGGTAT  
AGTATTTCTTCGACCAGTTTTCAATGGCATGTCAAGGTGAATTTGATTT

>PGSC0003DMG402000515RLKantifungi(GNK)\_1364

GGAGGGTATAGTATTTCTTCGACCAGTTTTCAATGGCATGTCAAGGTGAATTTGATTTGCAAACATTTTC  
CCGGCTTCACTTTCTTTTCTATTTTAGCTGATCAACCTCAGAAGTTTATT

>PGSC0003DMG402000515RLKantifungi(GNK)\_1426

ACATTTTCCCGGCTTCACTTTCTTTTCTATTTTAGCTGATCAACCTCAGAAGTTTATTTGAATTTAAAGTT  
GATGAGTTTAAATTTTAAAGTTTTTAAAAAATGAACATATTGTTTCT

>PGSC0003DMG402000515RLKantifungi(GNK)\_1488

ATTTAAAGTTGATGAGTTTAAATTTTAAAGTTTTTAAAAAATGAACATATTGTTTCTTTTTTAAATTATCA  
ATATAAAGATTAAGCTTTTTAATTATTTTTTTGTAATTTTCGCACAA

>PGSC0003DMG402000515RLKantifungi(GNK)\_1550

TAAATTATCAATATAAAGATTAAGCTTTTTAATTATTTTTTTGTAATTTTCGCACAAAAAATGTATATTCC  
ATGTCAAAAATAAATGTGGCTGCATCCACCTCTGGTCAAATTTTCCTA

>PGSC0003DMG402000515RLKantifungi(GNK)\_1612

TGTATATTCCATGTCAAAAATAAATGTGGCTGCATCCACCTCTGGTCAAATTTTCCTATTGATTTTTTTGGT  
GGGTGGAGTGGGGAAGGGGGGGCGGTACTTTGCTTTTATTTGACGGC

>PGSC0003DMG402000515RLKantifungi(GNK)\_1674

TTTTTTGGTGGGTGGAGTGGGGAAGGGGGGGCGGTACTTTGCTTTTATTTGACGGCAAAAATTA  
ACGATTCAACGTTAAAATACCATAATTTTTCTAAATTTTCGCCAACTTTCT

>PGSC0003DMG402000515RLKantifungi(GNK)\_1736

ATTAACACGATTCAACGTTAAAATACCATAATTTTTCTAAATTTTCGCCAACTTTCTTGACCTACA  
AACTTTTCAAGGAAATGGTCCCTACTCTCTATGGTCATTTTCAAATAT

>PGSC0003DMG402000515RLKantifungi(GNK)\_1798

CTACAAC TAAACTTTTCAAGGAAATGGTCCCTACTCTCTATGGTCATTTTCAAATATGAATAGAAGGAA  
GATGACTTCTTTTCATAAATCTTACTCCCTCTGTGAAAGTTTCACAAAGA

>PGSC0003DMG402000515RLKantifungi(GNK)\_186

AACTAATCTCATAGAGCAAGACGAAAGAGAAGCAGAAGCTAGGATTCATTCGGCTTCTCCATTAGTCATT  
CAAGTGAAC TTTGTTTCGTATGCAGTAGCAGCTTGCTCATATCGTGCTAGA

>PGSC0003DMG402000515RLKantifungi(GNK)\_2170

TATTTGTAAAAGAAAATCTTTTACGAAAGAAACACAATTTTAAATTAATTTATAAAAGAATACAAA  
ATTAATTGACTTTTGTGCACCTGTTTTGACTTTATCTTCTGCATTTTTGT

>PGSC0003DMG402000515RLKantifungi(GNK)\_2418

AACGAGGTATTGAACAAAATAAAATAGTTTCGTAAGTACTGTTGCTGTTACTAACGTTCAATGACTAT  
ATATTACTACTACGTAAGCTTAGAAGTATAATAATTTTTTTGGTTGCATT

>PGSC0003DMG402000515RLKantifungi(GNK)\_248

AGTCATTTCAAGTGAAC TTTGTTTCGTATGCAGTAGCAGCTTGCTCATATCGTGCTAGAAAATTGAGATGA  
ATTTATCCCGCTCAAATTTTCCACTTTTAAATTGGACAGTTATTTTGTG

>PGSC0003DMG402000515RLKantifungi(GNK)\_2480

ATGACTATATATTACTACTACGTAAGCTTAGAAGTATAATAATTTTTTTGGTTGCATTGTTGCAGCACGCA  
TTAATCTTGGCAAAATATCGAATTCATACAACAAGTCGAGCTTGAATTT

>PGSC0003DMG402000515RLKantifungi(GNK)\_2666

AAATGGTTCTGTATACAAAGGAACTCTGCCTAATGGAAATGTTATTGCAGTTAAGAGACTATTTTTCAAT  
ACAAGACAATGGGTTGATGACTTCTTCAATGAGGTTAATCTCATCCATGG

>PGSC0003DMG402000515RLKantifungi(GNK)\_2914

TGTTCCATACATAAAAAGGGAAAGTTAAGGAATCCAAGTGTCAAAGGGTAAAACCCAATGTGACAAAAA  
CGTGAGGCCCAAAGTTTGGGGCAGAGTGGAAAATAGCTTGACAGTTGAAC

>PGSC0003DMG402000515RLKantifungi(GNK)\_2976

ACAAAAACGTGAGGCCCAAAGTTTGGGGCAGAGTGGAAAATAGCTTGACAGTTGAACCTGGATTTTG  
ACACAGCATTGTTCCACCTATACATTTCTAAGTTGTGACAGTTGCAGACTT

>PGSC0003DMG402000515RLKantifungi(GNK)\_3038

ATTTTGACACAGCATTGTTCCACCTATACATTTCTAAGTTGTGACAGTTGCAGACTTCTAATTGAGTTGT  
TGAATTTTTTTTTGTAGATAAGGACAAGGTAAAGATCCTAAGTTGGGAAG

>PGSC0003DMG402000515RLKantifungi(GNK)\_310

TGAGATGAATTTATCCCGCTCAAATTTTCCACTTTTAAATTGGACAGTTATTTTGTGCTGAATTTTGCTTT  
AATTTGTGAAGCCGATCCTCGAATTCAGAATCTGGACTAGTATGCGG

>PGSC0003DMG402000515RLKantifungi(GNK)\_3596

AGAATGCTATAAATTTCTCTTTATCATGGTCATTATATGAATATCATTGAACTTTTGTAGTAAAGTAAAA  
AAACTATTTTTATCATATAACTTAACTCAGTATATTGTCATTTTGGTT

>PGSC0003DMG402000515RLKantifungi(GNK)\_3658

AAGTAAAAAAAAAACTATTTTTATCATATAACTTAACTCAGTATATTGTCATTTTGGTTTCAGGTGTGGAAG  
CTGTACACAACAAATCAGGTAAGCATTAGATCCTCTATTGAAAG

>PGSC0003DMG402000515RLKantifungi(GNK)\_372

ATTTTGCTTTAATTTGTGAAGCCGATCCTCGAATTCAGAATCTGGACTAGTATGCGGCACGAACAGGAC  
AACACCGGCGATCATCATTCCCAATTTGTTAACTAATGGAAGTTGTTT

>PGSC0003DMG402000515RLKantifungi(GNK)\_434

AACAGGACAACACCGGCGATCATCATTCCCAATTTGTTAACTAATGGAAGTTGTTTCACAACGCGTGA  
CGGATAACAATTGGGGAAATCATTATGTAAATTCAACAAATATTTCAATT

>PGSC0003DMG402000515RLKantifungi(GNK)\_496

ACGCGTGACGGATAACAATTGGGGAAATCATTATGTAAATTCAACAAATATTTCAATTTATGCATTAGCA  
AATTGTTATCAGGATCTACCACATCAGGATTGTCTTCTATGCTACGCAGC

>PGSC0003DMG402000515RLKantifungi(GNK)\_558

CATTAGCAAATTGTTATCAGGATCTACCACATCAGGATTGTCTTCTATGCTACGCAGCTAGTCGAACTCG  
ACTCCCTCGTTGTCTTCTGGTAAATCCGGTCAATATATCTCGACGGAT

>PGSC0003DMG402000515RLKantifungi(GNK)\_62

ACAACACTAGTAAAAAATATCATTTATTCTTCTCTCAGCCTCTAACGAAAGCTTCTTCTTCTTCCCATT  
TCTAACTACCATATTTCTGTTTTCTTGTTAATCCATCAAAAACGAAGT

>PGSC0003DMG402000515RLKantifungi(GNK)\_620

CGAACTCGACTCCCTCGTTGTCTTCTGGTAAATCCGGTCAATATATCTCGACGGATGTTTTCTCCGGTA  
CGATCAATACAATTTTTTCAACGAACTACTGATTCAGCTAAAGATACA

>PGSC0003DMG402000515RLKantifungi(GNK)\_682

TCTCCGGTACGATCAATACAATTTTTTCAACGAACTACTGATTCAGCTAAAGATACAGTGAAGTGTAGC

AGCTCAATTGCAGTTGCTACTGGACAGGAATTGGCCACGTAAACGCATC

>PGSC0003DMG402000515RLKantifungi(GNK)\_744

ACTGTAGCAGCTCAATTGCAGTTGCTACTGGACAGGAATTGGCCACGTAAACGCATCAGCTGGAATT  
TGATTGATGAATTGACGAAGACAGCGGTGGCGAACGGCGGTTACGCGGCGG

>PGSC0003DMG402000515RLKantifungi(GNK)\_806

GGAAATTTGATTGATGAATTGACGAAGACAGCGGTGGCGAACGGCGGTTACGCGGCGGCGAATTTGAA  
CGGAGTTTATGGATTGGCGCAGTGTGGAAAAGTGTGAGTACAAGTGGTTGT

>PGSC0003DMG402000515RLKantifungi(GNK)\_868

TTTGAACGGAGTTTATGGATTGGCGCAGTGTGGAAAAGTGTGAGTACAAGTGGTTGTAAAAAATGTTT  
GGACAAAGCAAGTAGAGATATCAAAGGTGTTTTCCGAATAGAGATGCTAG

>PGSC0003DMG402000515RLKantifungi(GNK)\_930

AATGTTTGGACAAAGCAAGTAGAGATATCAAAGGTGTTTTCCGAATAGAGATGCTAGAGCTTTGATTG  
CTGGCTGTTATTTGAGATATTCTACTCAAATTTTCTCAATGATCCATCCG

>PGSC0003DMG402000515RLKantifungi(GNK)\_992

TTGATTGCTGGCTGTTATTTGAGATATTCTACTCAAATTTTCTCAATGATCCATCCGGGAACAGTAGCGG  
TGGTAAGTATTTCTCCATTTTATGCTCAAAGTGAATTATTGTCCTATG

>PGSC0003DMG402000674-(rev)LysMRLKs\_1220

CTAAGTTTAGTCCTAGTACTTCTTTTTCGGTTTCATGTTTTAGTCTCATGGGAAAAGGGAGAAAATGCTCT  
CTTTTTAATGATAAGGGAACCCCAACCACTCGTATGCAATAGCTCAC

>PGSC0003DMG402000674-(rev)LysMRLKs\_1342

ACCGCACAAGAGAGCAAAGTGCCTAGGCAAGTCCCGTGTGACGAGCTCGGCCTGGAAGGCCAACCC  
TGCTGTCACAGGCAAGGAGGCAAATGCATTTTAAAGGAAGGAAGTAGGCACT

>PGSC0003DMG402000674-(rev)LysMRLKs\_1464

GTCAAAAAAGAAGTTAGGAAGGAAGTAGGAATTAATTTAGGAAGCAACATGTTTTGTTAAAGGTAAC  
ATTGGATTGAAGTTTATTGTTTACTATAAACTGGAGTTTGTAGTTTGAATG

>PGSC0003DMG402000674-(rev)LysMRLKs\_1525

AAGGTAACATTGGATTGAAGTTTATTGTTTACTATAAACTGGAGTTTGTAGTTTGAATGGATAGAATCAA  
TGAGGATTGAATCATCAAGGATGGGTTTTGATGTGTCTAAATGCGCAATG

>PGSC0003DMG402000674-(rev)LysMRLKs\_1586

TAGAATCAATGAGGATTGAATCATCAAGGATGGGTTTTGATGTGTCTAAATGCGCAATGGGAACTTGAA  
GCAGTGATACAGCACTAATCATGGAGCATTAAATGCAAAATTTGTTGATGAT

>PGSC0003DMG402000674-(rev)LysMRLKs\_1647

AACTTGAAGCAGTGATACAGCACTAATCATGGAGCATTAAATGCAAAATTTGTTGATGATACCTGTTTTCT  
TTCTTCTTTTTTTGGCGTGATGCACAGTGTAGTGCTGGACCAATTGAAC

>PGSC0003DMG402000674-(rev)LysMRLKs\_1830

TACATGATTA ACTCTAGTAGTGCTGAACTGCTCATATCGGGAAAATGTGACAATTTTCAAGCATAATAAT  
CTTGTGTGAAATTCCTATGATTTACATAATGCTTTTGATTAGCTAAATTC

>PGSC0003DMG402000674-(rev)LysMRLKs\_1891

CATAATAATCTTGTGTGAAATTCCTATGATTTACATAATGCTTTTGATTAGCTAAATCTAGCTATACCAAC  
TGAGTTTATCGCTGGGTTCCGTAATGGCAACACAAGGGGCAAGCAGTA

>PGSC0003DMG402000674-(rev)LysMRLKs\_1952

GCTATACCAACTGAGTTTATCGCTGGGTTCCGTAATGGCAACACAAGGGGCAAGCAGTATTCACAAAAA  
GAAGAAGCACA ACTGAGTGACTGTTCTCTGTTGCTTGGCTTCTTTGAGCTC

>PGSC0003DMG402000674-(rev)LysMRLKs\_2013

CACAAAAAGAAGAAGCACA ACTGAGTGACTGTTCTCTGTTGCTTGGCTTCTTTGAGCTCTTCAATCTGCA  
TCCTGGATCATTCTTCAA ACTGCCGACCTGCCTCGATTCCGGTCTTGAA

>PGSC0003DMG402000674-(rev)LysMRLKs\_2135

AACATTTTTATATATACCACATGGAATGCAAATGTGAAGATTGAGAGATACATTTACCCTCAAAGAGAAT  
TAGATGAAATAAATGTAGAATAATCTTATCAAAAAAGAATGATCTTTAAT

>PGSC0003DMG402000674-(rev)LysMRLKs\_2196

AAAGAGAATTAGATGAAATAAATGTAGAATAATCTTATCAAAAAAGAATGATCTTTAATTTTGTTAGTGA  
TGGTAAAATATCTAGAGGTATACCCTTTTGGGAATCACAACAAGCCCTTT

>PGSC0003DMG402000674-(rev)LysMRLKs\_2318

AGTATTTTTCAATATCACTCTGTTTTCTGAAGATCAAACAGTAAGTACTGAACAAGAAGGATCAGAGTTA  
TGCTTTTGAGGATCTTTGCCGTCCATAATGGCTCTCAACAGCTTCAGAAT

>PGSC0003DMG402000674-(rev)LysMRLKs\_2379

TCAGAGTTATGCTTTTGAGGATCTTTGCCGTCCATAATGGCTCTCAACAGCTTCAGAATGAAAGCTATCTT  
CTTATAGGTTGAAAAAGGAAAAAGATATAAGGGCTTGCAGATTCTATT

>PGSC0003DMG402000674-(rev)LysMRLKs\_2440

AAGCTATCTTCTTATAGGTTGAAAAAGGAAAAAGATATAAGGGCTTGCGAGATTCTATTTATTCTTGTT  
CTTATTTTGGTACTTTGGATGAGCAGGAGTGTAGTGCGGGCATGTTGCTT

>PGSC0003DMG402000674-(rev)LysMRLKs\_2501

TTCTTGGTTCTTATTTTGGTACTTTGGATGAGCAGGAGTGTAGTGCGGGCATGTTGCTTGTTAGTCTCTCC  
TAGAGCAAACCTCAAATGATATACAACAAATGCCAAGATATTGTTGTGT

>PGSC0003DMG402000674-(rev)LysMRLKs\_2623

TAAATAGAATGCGTTTATCGAACTAAAACCTGACTCAAATCTGTGTCTTGTACAAATGCATTTCTGCT  
AAGACACTGATATGCTCGTGTATCTTTCTGTTTCTCATCATCTTAATGT

>PGSC0003DMG402000674-(rev)LysMRLKs\_3172

AGAGCAGTAACACATTTAGTACAAATACTTTGTCTGTTTTAGTGATTGTGCCTACTACGGTTCTTAATGTA  
TAAACAGTATTTGAACCATCATTTCTTTTATTATGCAGATAGAAATGGG

>PGSC0003DMG402000674-(rev)LysMRLKs\_3660

ACACAAAAGGTTTCGCTGCTCAGATCCGAAGACCACCTCCATCAGTATGGTCATGGTAGGTGTTGATCCC  
TGTTCTTTAGTTCTTAATTTCTTATAAGTTATAACATTCATTTATTTGAC

>PGSC0003DMG402000674-(rev)LysMRLKs\_3721

GTTGATCCCTGTTCTTTAGTTCTTAATTTCTTATAAGTTATAACATTCATTTATTTGACGTACAACATTTCTT  
AAGGTGCTTATACTTGGATCACTTTAAGGCTGAAAATGCAATTTAAA

>PGSC0003DMG402000674-(rev)LysMRLKs\_3782

ACAACATTTCTTAAGGTGCTTATACTTGGATCACTTTAAGGCTGAAAATGCAATTTAAAGTAGCTGATTTT  
TTTGTGGAATTGAATATTTCTTTAGTTATGCTGCCAACTTTTAGCAA

>PGSC0003DMG402000674-(rev)LysMRLKs\_3843

AGCTGATTTCTTTGTTGGAATTGAATATTTCTTTAGTTATGCTGCCAACTTTTAGCAAGTATTGGAGTAG  
TAGAAAACAATGTTTGTAGTTAACTTATATGTTAACCTTTGTCTTGAT

>PGSC0003DMG402000674-(rev)LysMRLKs\_4270

CAGTAGTCCAGAGAAAGGAGGAATAAGTAATAACAAAGGGCAGGGAAGACACATGCAGAAGAACATT  
CAACAAATAAATGAATTGCTTAGTCATCTGGTGATGCTCCAGACTTCCAGTGA

>PGSC0003DMG402000674-(rev)LysMRLKs\_4392

CATTGACATACATTATATCCTGTATATTTTGCACATATTAATCATAACCAACACTGAATCGTGATTTCACTT



CTCCACTGGGTGGGATGTCCCGTGATTTTTCTGTGGTTGTACTTTTTT

>PGSC0003DMG402000674-(rev)LysMRLKs\_4453

TGATTTCACTTCTCCACTGGGTGGGATGTCCCGTGATTTTTCTGTGGTTGTACTTTTTTTAAAGTTTTAAC

CATAACCAACTTAAAGAATTATTCAAGTGTCTTTATACCCAGTACTTT

>PGSC0003DMG402000674-(rev)LysMRLKs\_4636

TTTCTAGCTGAATTGAAGGTCTTGACAAATGTTTCATCACCTGAACCTGGTAAAACTAACTTCTCTGCCAC

TAGAGGCATGTCTCTTCTGACACTATTTTCATTTTCTCATTTGAGAATA

>PGSC0003DMG402000674-(rev)LysMRLKs\_4697

TCTCTGCCACTAGAGGCATGTCTCTTCTGACACTATTTTCATTTTCTCATTTGAGAATACATACATGATACA

TATATACAGGGTGGACCCACATGTAGCATTCTGGGTGCTCGAGCACCC

>PGSC0003DMG402000674-(rev)LysMRLKs\_4758

TACATGATACATATATACAGGGTGGACCCACATGTAGCATTCTGGGTGCTCGAGCACCCATTGACCCACC

CTGAACTACATATTCTTATACTGCAATTTCTTAAAATTGGGATATAAGAG

>PGSC0003DMG402000674-(rev)LysMRLKs\_4941

GCATGGTCAGCTACGTTCACTGTTTCGATTCCCTGATAAAACAATTTTAAGAACTCCTGTTTTCTTTTCTTA

CTCGACTTGCCTTCTTTTTCTCCATAAAACACTCTTTCTTTTTTAT

>PGSC0003DMG402000674-(rev)LysMRLKs\_5124

TTAATCACTTTTTTTAATGTTTCTTTGGTTGATTTTTTTTTAATTATCATTGTGTTCAAATAATGTTGCTCTT

ATATTTTATGTGATTGCTAGCAATTTTATATTAAGGAATGTCAGC

>PGSC0003DMG402000674-(rev)LysMRLKs\_5808

CTCCACTAAGACCATGGGGTGAGAGGGGGGGGGGGGGGGGGTTCGCAATACTAAAGCAATATCAATTC

AATGAACTAGTTCAAATAAATTACGTAAGCCAAGTGATTGCATTAGCTTGGT

>PGSC0003DMG402000674-(rev)LysMRLKs\_5870

AATTCATGAACTAGTTCAAATAAATTACGTAAGCCAAGTGATTGCATTAGCTTGGTAGTCTTGCTGCT

TGAGACATCTATCCTAATAAAGCATAAATCAAGTAGTGGCTGCCACTT

>PGSC0003DMG402000674-(rev)LysMRLKs\_5932

TTGCTGCTTGAGACATCTATCCTAATAAAGCATAAATCAAGTAGTGGCTGCCACTTTAATGTTTGTAT

GATCCTTGAAACCTATACTTGGAGTACCTTAGTTGTTACAATCTGCCAT

>PGSC0003DMG402000674-(rev)LysMRLKs\_5994

GTTTGTTATGATCCTTGAAACCTATACTTGGAGTACCTTAGTTGTTACAATCTGCCATTCATTTACAACCTG  
AATAAATTGCTTTAAATGCACCTAGAGTGCTCTGAAGAGAATTAAGGCC

>PGSC0003DMG402000674-(rev)LysMRLKs\_6056

TTACAACCTGAATAAATTGCTTTAAATGCACCTAGAGTGCTCTGAAGAGAATTAAGGCCTCGAAGGGAAT  
GGGTGCTGCAAACCTACGCTAAAGCTAAAAGAACAAGGTTGGAAAAGTAAAA

>PGSC0003DMG402000674-(rev)LysMRLKs\_610

CATGCTTTCCCGTACAGGATTAACCGGTGATACTTATGATCTTGTGGCGAAGAATACTCTGATTTGA  
CGACTGCACAGTGGATGATGAAGTTAATAGTTATCCTGAGAATGATATC

>PGSC0003DMG402000674-(rev)LysMRLKs\_6118

AGGGAATGGGTGCTGCAAACCTACGCTAAAGCTAAAAGAACAAGGTTGGAAAAGTAAAATCTTAGATAC  
AAACTTATAGTTGTAAAGTTATCAAGTGATGAGTGAGGTCTTGTTTTGATGC

>PGSC0003DMG402000674-(rev)LysMRLKs\_6180

AGATACAAACTTATAGTTGTAAAGTTATCAAGTGATGAGTGAGGTCTTGTTTTGATGCGGGTAATGACA  
CACTTCAGGAAGGGTATGTGACCACTGTGAGATGATTAATCCACTTTCT

>PGSC0003DMG402000674-(rev)LysMRLKs\_6242

AATGACACACTTCAGGAAGGGTATGTGACCACTGTGAGATGATTAATCCACTTTCTTGATTTGATATC  
CTGAAGAAAGTGCAATAGTTGCTGCAAACCTAAGAGATTCCAGGGGATTCGT

>PGSC0003DMG402000674-(rev)LysMRLKs\_6304

TTGATATCCTGAAGAAAGTGCAATAGTTGCTGCAAACCTAAGAGATTCCAGGGGATTCGTTACACTTGTAT  
TGAGGTTTGTAGTTTGGACAGGGTCTTCAACATTCTTAAACGGGAGGGCC

>PGSC0003DMG402000674-(rev)LysMRLKs\_6366

CTTGTTATTGAGGTTTGTAGTTTGGACAGGGTCTTCAACATTCTTAAACGGGAGGGCCATTGAAACTCAA  
AACATGGTGTAATTCTTCTTTTCTTACACTAGACTGATTGTTTCATTG

>PGSC0003DMG402000674-(rev)LysMRLKs\_6428

AAACTCAAACATGGTGTAATTCTTCTTTTCTTACACTAGACTGATTGTTTCATTGATATCGAGTGCAG  
GTGCGCTTGATAGGCTATTGTGTTGAAGGTTCCCTCTTCTTGTATATG

>PGSC0003DMG402000674-(rev)LysMRLKs\_6490

CGAGTGCAGGTGCGCTTGATAGGCTATTGTGTTGAAGGTTCCCTCTTCTTGTATATGAATACGTTGAGA  
ATGGCCACATAGGCCAACATCTACGTGGTGCAGGTATCTTTGATGTGAAT

>PGSC0003DMG402000674-(rev)LysMRLKs\_6552

CGTTGAGAATGGCCACATAGGCCAACATCTACGTGGTGCAGGTATCTTTGATGTGAATTAATCACATTT  
CATAACTAACAAATCTTTTCAGTAATAGTTAGTTCCTTAAAGAACTTTTACT

>PGSC0003DMG402000674-(rev)LysMRLKs\_6614

TCACATTTCATAACTAACAAATCTTTTCAGTAATAGTTAGTTCCTTAAAGAACTTTTACTCAATCTGGTCAATT  
TATCTCCAGGAAGGGACCCATTGCCATGGTCTAAGAGGGTTCAAATTG

>PGSC0003DMG402000674-(rev)LysMRLKs\_6676

CTGGTCAATTTATCTCCAGGAAGGGACCCATTGCCATGGTCTAAGAGGGTTCAAATTGCTCTAGATTGAG  
CTAGAGGTCTTGAGTACATACATGAACATACCGTACCAGTTTACATCCAT

>PGSC0003DMG402000674-(rev)LysMRLKs\_671

CTGATTTGACGACTGCACAGTGGATGATGAAGTTTAATAGTTATCCTGAGAATGATATCCCGAATACTGG  
GAATTTAAGTGTTGTAGTGAATTGTTCTTGTGGGAATGGTGTGATGTTTCGA

>PGSC0003DMG402000674-(rev)LysMRLKs\_6738

AGATTCAGCTAGAGGTCTTGAGTACATACATGAACATACCGTACCAGTTTACATCCATCGTGATATTTAA  
ACAGCAAATATTCTGATAGACAAAACTTCCATGCAAAGGTTTGTCAAGG

>PGSC0003DMG402000674-(rev)LysMRLKs\_6800

ATATTTAAACAGCAAATATTCTGATAGACAAAACTTCCATGCAAAGGTTTGTCAAGGGGCACCTCTTTT  
GTGTTTGTCTATTGTGGGAGGCTGTTTTGTAATCGTGTTAATCGTCTGAT

>PGSC0003DMG402000674-(rev)LysMRLKs\_6862

CCTCTTTTGTGTTTGTCTATTGTGGGAGGCTGTTTTGTAATCGTGTTAATCGTCTGATTTAGGTTGCAGAT  
TTTGGTTTAAACGAACTGACTGAAGTTGGAAGCTCATCTTTGCAAACAC

>PGSC0003DMG402000674-(rev)LysMRLKs\_6924

GTTGCAGATTTTGGTTTAAACGAACTGACTGAAGTTGGAAGCTCATCTTTGCAAACACGACTTGTGGGTA  
CATTTGGATACATGCCTCCAGAGTAAGTGTTTTCCATTTTGAATTGAAA

>PGSC0003DMG402000674-(rev)LysMRLKs\_6986

TGTGGGTACATTTGGATACATGCCTCCAGAGTAAGTGTTTTCCATTTTGAATTGAAACCTTAAGAGTAG  
TAATAGAGATGTTCCCTCACCTATTTTTTTCTTTGAAGAAGAGAATCCAT

>PGSC0003DMG402000674-(rev)LysMRLKs\_7048

AAGAGTAGTAATAGAGATGTTCCCTCACCTATTTTTTTCTTTGAAGAAGAGAATCCATTATTATTATTCTG

AGAGTTGTTCCATAATTATGTCGGTGTATCCGTTTTTTGTTAAATGACC

>PGSC0003DMG402000674-(rev)LysMRLKs\_7110

ATTATTCTGAGAGTTGTTCCATAATTATGTCGGTGTATCCGTTTTTTGTTAAATGACCGGTGATCAGTGCA  
CGGTCAGTCAGGAAAAGGGTAGTTCTAATTATAAACCAAGGTTTTCTCA

>PGSC0003DMG402000674-(rev)LysMRLKs\_7172

ATCAGTGACGGTCAGTCAGGAAAAGGGTAGTTCTAATTATAAACCAAGGTTTTCTCAATGCCTTGCTCA  
AAGCTTAAGTTGTTGCTTTCTGATTAACATTTCTTTTGAGTGCCTCAT

>PGSC0003DMG402000674-(rev)LysMRLKs\_7234

CTTGCTCAAAGCTTAAGTTGTTGCTTTCTGATTAACATTTCTTTTGAGTGCCTCATGTGACAGATTAGC  
ACATTGCTTTTCTACAGGTATGCTCAGTATGGTGATGTCTCTCCTAAAG

>PGSC0003DMG402000674-(rev)LysMRLKs\_7296

CAGATTAGCACATTGCTTTTCTACAGGTATGCTCAGTATGGTGATGTCTCTCCTAAAGTTGATGTTTATGC  
TTTTGGTGTTGTCCTATATGAACTAATTTAGCCAAGGAAGCGATTGTC

>PGSC0003DMG402000674-(rev)LysMRLKs\_7358

TGTTTATGCTTTTGGTGTTGTCCTATATGAACTAATTTAGCCAAGGAAGCGATTGTCAAGCCAAATGGT  
TCTGTAAGTGAATCAAAGGGTCTTGTTGCTTTGGTAAATTTCTTTACATA

>PGSC0003DMG402000674-(rev)LysMRLKs\_7420

CAAATGGTTCTGTAAGTGAATCAAAGGGTCTTGTTGCTTTGGTAAATTTCTTTACATATTTCTTCGAAAGG  
ACTATATGTTTCTTCTTCTTTACTAGTTTCCTCCTCCTTCACT

>PGSC0003DMG402000674-(rev)LysMRLKs\_7482

TTCGAAAGGACTATATGTTTCTTCTTCTTTACTAGTTTCCTCCTCCTTCACTTTGATAGGCAATTT  
ATATTTATATAACTCTGATGCTAGTTTTTCGTAGTATTGATCCCTC

>PGSC0003DMG402000674-(rev)LysMRLKs\_7544

TAGGCAATTTATATTTATATAACTCTGATGCTAGTTTTTCGTAGTATTGATCCCTCTTTTGCCTTTGTTT  
ATCATAGTTTGAAGAAGTACTTAATCAGCCAGAACCTGATGAAGATCT

>PGSC0003DMG402000674-(rev)LysMRLKs\_7606

GCCTTTGTTTATCATAGTTTGAAGAAGTACTTAATCAGCCAGAACCTGATGAAGATCTTCGCCAACTGAT  
TGACCCAAGACTCGGAGACGACTATCCCCTTGATTGATCCGGAAGGTAA

>PGSC0003DMG402000674-(rev)LysMRLKs\_7668

CAACTGATTGACCCAAGACTCGGAGACGACTATCCCCTTGATTCAGTCCGGAAGGTAATAAGATTTTAAT  
GAAACTTGCATTGGTAGTAGCTAAAACAGTTGTTTCTTTCAGCTTCTTAC

>PGSC0003DMG402000674-(rev)LysMRLKs\_7730

ATTTTAATGAAACTTGCATTGGTAGTAGCTAAAACAGTTGTTTCTTTCAGCTTCTTACAAAAAGTCCATTT  
CTTCACTAATCACAGATGGCACAGCTTGCCAAAGCTTGCACCCATGAAA

>PGSC0003DMG402000674-(rev)LysMRLKs\_7792

AGTCCATTTCTTCACTAATCACAGATGGCACAGCTTGCCAAAGCTTGCACCCATGAAAATCCTCTAATAA  
GACCAAGTATGAGATCAATAGTTGTTGCGTTGATGACACTCTCTTCGTCG

>PGSC0003DMG402000674-(rev)LysMRLKs\_7854

TCTAATAAGACCAAGTATGAGATCAATAGTTGTTGCGTTGATGACACTCTCTTCGTCGACAGAAGATTGG  
GATGTTGGATCTTTCTATGGAAATCAAGGTATGATAAACCTCATGTCTGG

>PGSC0003DMG402000674-(rev)LysMRLKs\_7916

AAGATTGGGATGTTGGATCTTTCTATGGAAATCAAGGTATGATAAACCTCATGTCTGGAAGGTAGTAAA  
CCAAAATTACGCTCCCACACGCAATTAACATTTTCATTGAGATCCATGCTGT

>PGSC0003DMG402000674-(rev)LysMRLKs\_793

GATTTTGGGTTGTTTGTGACGTACCCTGTGCGGGCGGAGGATAACTTGACGTCAGTGGCTTCAGCAGCC  
AATGTGAGTGAAGATATAATCCGACGGTATAATCCTGCGGCCGAGTCCATA

>PGSC0003DMG402000674-(rev)LysMRLKs\_7978

TAGTAAACCAAATTACGCTCCCACACGCAATTAACATTTTCATTGAGATCCATGCTGTTTAAGCATTGGAT  
ATGTGTACTACTTGTGCATTTTTACTTGTATAGTACTTGCTTGAATAGT

>PGSC0003DMG402000674-(rev)LysMRLKs\_8040

GCATTGGATATGTGTACTACTTGTGCATTTTTACTTGTATAGTACTTGCTTGAATAGTGTAAGAAAAGCAT  
AGAAAGATGTATTTCAATTTGTAACATTTAGCACATACTTTGTGAGTTAG

>PGSC0003DMG402000674-(rev)LysMRLKs\_8102

GAAAAGCATAGAAAGATGTATTTCAATTTGTAACATTTAGCACATACTTTGTGAGTTAGAAATGGAACATT  
TCCTCATGAGGAAATACATGTTTTCTTTGTTGTCTGCTGTCTGCTGATGT

>PGSC0003DMG402000674-(rev)LysMRLKs\_8164

GGAACATTTCTCATGAGGAAATACATGTTTTCTTTGTTGTCTGCTGTCTGCTGATGTGACGAGCAGTGT  
TTATTATCAGAAGCCGAGCCAGGATTTTTAGTTTATGAATTCTTGTCTAC

>PGSC0003DMG402000674-(rev)LysMRLKs\_8226

AGCAGTGTTTATTATCAGAAGCCGAGCCAGGATTTTTAGTTTATGAATTCTTGTCTACAATTCATTTTACA  
TATTGGTTTTGGATATATTATTTGTAAGTAAATTAATAAATTTATT

>PGSC0003DMG402000674-(rev)LysMRLKs\_8264

GTTTATGAATTCTTGTCTACAATTCATTTTACATATTGGTTTTGGATATATTATTTGTAAGTAAATTA  
AAATTTATTTACAATTATATGGTTCCGGAGTGACAATTACTATGTCTG

>PGSC0003DMG402000674-(rev)LysMRLKs\_854

CAGCAGCCAATGTGAGTGAAGATATAATCCGACGGTATAATCCTGCGGCCGAGTCCATACTAGATATAG  
GGCAAGGAATCATCTATATACCGGGAAGAGGTTGGTGTTCGTGATCTTTAT

>PGSC0003DMG402000674-(rev)LysMRLKs\_915

AGATATAGGGCAAGGAATCATCTATATACCGGGAAGAGGTTGGTGTTCGTGATCTTTATGTGTTGTTTT  
ATTTCTGATAGGAGTTTTATGTCTTGTCTTATAACTTTATGGGGTCGTT

>PGSC0003DMG402002888LRR-RLPs\_1550

GTTTCAGTGGCTCACTGCCTGCAGAAGTTTTTCAAACCTCAAAGGAATGATCAAATAGATGACAGTGA  
CAAAGGTGAGATCGAATATATGAAAACATCAGACTCATTTTTGTTATGTA

>PGSC0003DMG402002888LRR-RLPs\_434

TAACAGCTTCATCGGTCCATTTCCCTCTTCGATTTTAACTTGACACGTCTTGAAAACCTTAGACTTGTCTAG  
TAATTCCTTGTCTGGTCCATTGCCAAACAATGTCAGCATGCTTCTAAA

>PGSC0003DMG402002888LRR-RLPs\_62

GAGTACGGATTGCTGCACTTGGGGATGGATCACTTGTGACATGTAACTGGTTATGTAATTGGCCTAGA  
CCTTAGTAATGCAAATCTTAGCGGAACCTTATCCTAACAGCAGCCTCTT

>PGSC0003DMG402002925-(rev)LRR-RLKs\_1037

AAATAAACTCCAATTTCAACTTTCACTACTACATTTTTCTTCCAATTATAGGGGGTTCAATTTCAAGAA  
GAACAAAAGGTCACCGTTCTTATCTTTGTGCTGGAGATAAGAATAGTAA

>PGSC0003DMG402002925-(rev)LRR-RLKs\_1098

ATTTCAAGAAGAACAAAAGGTCACCGTTCTTATCTTTGTGCTGGAGATAAGAATAGTAACCTTTGTTTT  
ACTTGAAATTGAACCCCTATAATTGGAAGAAAATGTAGGGGTGACATC

>PGSC0003DMG402002925-(rev)LRR-RLKs\_122

TTTTCTCCTTAATTTTGCCCGTTGATCATTCAATTTTTCTGAATTTCTGTGTTTAAATTAAGTTAATTTTT

CCTGTGATTCTGTAGTTAAAGTTTGAAGCTTTGGGAAGTAGTTTGA

>PGSC0003DMG402002925-(rev)LRR-RLKs\_1403

GAAAGTAGCTCACCTGTGAGGCTACTTAGAAGAATTGATTTTTGATGTACCTAACCTTTTACATTTTTCA  
TGTTTTGCAGTGTCTGTGGAGGTGTGGTTTGATTCTAGAAATCCTCGTG

>PGSC0003DMG402002925-(rev)LRR-RLKs\_1769

AAACCACCAGGACAACCACATCCACAATAACTATTCTGTTGCTGCTAGCATAGTCAGGCGGAGAGTTTCT  
AGATTGAGCGATGATGCCCTCGCTCAAGCCTTGGTTGATCCTCAGTTTCC

>PGSC0003DMG402002925-(rev)LRR-RLKs\_183

AAGTTTAATTTTTCTGTGATTCTGTAGTTAAAGTTTGAAGCTTTGGGAAGTAGTTTGAGTTAGAGATGA  
AAATGGTGAACTTTTTTTTTACTTGGAATTGAAACCCACCCCCACCCC

>PGSC0003DMG402002925-(rev)LRR-RLKs\_1830

AGAGTTTCTAGATTGAGCGATGATGCCCTCGCTCAAGCCTTGGTTGATCCTCAGTTTCCCACCATTGGGC  
TTGAAATTTATGATGAATGGACAATTGACTTGAGGAGGCTTACCATTGGA

>PGSC0003DMG402002925-(rev)LRR-RLKs\_2196

GTGCGTCAGTTCCTCACAAGGCGGCAAACCGAGCTGTGCCATTGAAGTTAGCAGTTAAGCAGGCCTTG  
CATGTGGCAAGGGGGATGGAGTATGTGCATGGCCTGAATCTGATTCACCGG

>PGSC0003DMG402002925-(rev)LRR-RLKs\_244

TAGAGATGAAAATGGTGAACTTTTTTTTTACTTGGAATTGAAACCCACCCCCACCCCACCCCATAATTG  
GAAGAAAAATGTAGGGGTGAAAGTTGAATTTGGAGTTTTTTGTGATTTT

>PGSC0003DMG402002925-(rev)LRR-RLKs\_2745

CAAAATTTTTAGAACTAAAGTGAAAAGCATGGAGGTTGATGGGTTCAAGTCCTGTATGTCCTTTTGATG  
GCACCTCACTGACTCACTGATTGTGATTATATTTTCTATTGTATACGTGC

>PGSC0003DMG402002925-(rev)LRR-RLKs\_2806

CTTTTGATGGCACCTCACTGACTCACTGATTGTGATTATATTTTCTATTGTATACGTGCTGTTGCTAGGAG  
GGAGAAATTATTTGTTTCAGTTAGCTTTTTAACATAGTTATGTGCCTGT

>PGSC0003DMG402002925-(rev)LRR-RLKs\_2867

TTGCTAGGAGGGAGAAATTATTTGTTTCAGTTAGCTTTTTAACATAGTTATGTGCCTGTTAATGAAGTT  
AAAGAGTTGAGTGAACCTTTATTTTCTTTCAATTTTTTCCCTCCTTTTC

>PGSC0003DMG402002925-(rev)LRR-RLKs\_2928

ATGAAGGTTAAAGAGTTGAGTACTTTATTTTCTCTTTCAATTTTTTCCCTCCTTTTCTCTTCTTCTTGT  
CCCTGATTTGTAAGTTGATTCAAGTTAGTCACATCCAAGGGTGTGGC

>PGSC0003DMG402002925-(rev)LRR-RLKs\_305

CCCATAATTGGAAGAAAAATGTAGGGGTGAAAGTTGAATTTGGAGTTTTTTGTGATTTTGGAGTTGGTTT  
GAATGTGTATCTTTCTGGTTTTTATGTTTAAAGTTTGGAGCTTTTTTGCT

>PGSC0003DMG402002925-(rev)LRR-RLKs\_3172

CAAATAAATGGTAAAGTGCCTTAGTTGATAACTCCCAGCACCAACCACGTCATATTCCATGAACTTATCAT  
CCCAAAGTCATTATTAACAGGAAAAGAACTAATCTTAAAAAAAAAATAG

>PGSC0003DMG402002925-(rev)LRR-RLKs\_3233

AACTTATCATCCCAAAGTCATTATTAACAGGAAAAGAACTAATCTTAAAAAAAAAATAGTTCTTTTTCTGT  
CAATAATCACTTTGAGCTGATAAGGTTTCATGGAATATGACGTGGTTGGT

>PGSC0003DMG402002925-(rev)LRR-RLKs\_3294

CTTTTTCTGTCAATAATCACTTTGAGCTGATAAGGTTTCATGGAATATGACGTGGTTGGTGCTGGGAGTTA  
TCAACTAAGGCACTTTACCATTTATTTGGATGCATTCTCCCCGATGAAGA

>PGSC0003DMG402002925-(rev)LRR-RLKs\_3355

TGGGAGTTATCAACTAAGGCACTTTACCATTTATTTGGATGCATTCTCCCCGATGAAGATGATAAGTTCT  
ACATTGTGGTGGAATTTTGGCCTTTTAAACAGGCATCTTAGAGAAGCATG

>PGSC0003DMG402002925-(rev)LRR-RLKs\_3416

ATAAGTTCTACATTGTGGTGGAATTTTGGCCTTTTAAACAGGCATCTTAGAGAAGCATGGGAGGCTTTAC  
TTCAAATCTTAGAAGAGGCACAAAAACACTAGGTGATTTACCTGATACT

>PGSC0003DMG402002925-(rev)LRR-RLKs\_3477

AGGCTTTACTTCAAATCTTAGAAGAGGCACAAAAACACTAGGTGATTTACCTGATACTTGTGTTAGTGG  
GGTATTACAAGTACCTCATAAAATCATTGTTCGGCATGCACTAGTGATCTT

>PGSC0003DMG402002925-(rev)LRR-RLKs\_3843

AATTCCAGGAGAGGCCTTACAAAACTAGACTCTACAACGATAATGTGATTCTCCACTGAGTTACTACAT  
AGACTTTTTCCATCATAAGATCATCTCAATCTCTACGGAAAGGTAGAAGT

>PGSC0003DMG402002925-(rev)LRR-RLKs\_3965

AATATTTGGCTCAATCATCCATGAATCTAAATCATTGTTGGAACCTTCGGTCATTCTTTACGGAGAGACC  
TCTTTTATAAAGCATAAAAAGCAACTAGGTGATGTTTCTAGAATCTACA



>PGSC0003DMG402002925-(rev)LRR-RLKs\_4026

CGGAGAGACCTCTTTATAAAGCATAAAAAGCAACTAGGTGATGTTTCTAGAATCTACAACGATTATGTG  
GATTCTCCATTGAGTTGCTACGTAGACTTGTTCCATCCATAAGATTATCT

>PGSC0003DMG402002925-(rev)LRR-RLKs\_4087

GATTATGTGGATTCTCCATTGAGTTGCTACGTAGACTTGTTCCATCCATAAGATTATCTCAATCTCTACGG  
AAACGTAGAAGTAAAATACTTGGCTCAATCTTCTCACGACCCTAAATCA

>PGSC0003DMG402002925-(rev)LRR-RLKs\_4148

ATCTCTACGGAAACGTAGAAGTAAAATACTTGGCTCAATCTTCTCACGACCCTAAATCATTGTTGTAACC  
TCCGAGCATTCTTTCTGGAGAGAAGTCTTATTAAGCAAAAAGGCGATT

>PGSC0003DMG402002925-(rev)LRR-RLKs\_4209

CGTTGTAACCTCCGAGCATTCTTTCTGGAGAGAAGTCTTATTAAGCAAAAAGGCGATTCATGGAGTTTG  
AAGTGAAAAGCTAGGAGTGAAGCATGCAAGTTTTGGGGAAGTAAAAGAA

>PGSC0003DMG402002925-(rev)LRR-RLKs\_427

GGGAAGTAGTTTGAGCTGGAGATGAAAACATGTTTTGTTAATTTGGAATTGAAACAGAAAAATTTGTC  
TTGTTTGTGTTGATTTTTGATAAGTCTGAAACTAATAAAATGAAAGAGGTTA

>PGSC0003DMG402002925-(rev)LRR-RLKs\_4270

TGGAGTTTGAAGTGAAAAGCTAGGAGTGAAGCATGCAAGTTTTGGGGAAGTAAAAGAAAGTACCAAAC  
ACATACAAATTTAGTCATCTTCTCATGAACCTGAATCGTTTGTGAAACCTC

>PGSC0003DMG402002925-(rev)LRR-RLKs\_4331

ACCAAACACATACAAATTTAGTCATCTTCTCATGAACCTGAATCGTTTGTGAAACCTCCAATTACCGAGA  
GTAGTGTGTTTTCGAATCGAGAAATGCAAAAATGGCAAGGTCCATGATT

>PGSC0003DMG402002925-(rev)LRR-RLKs\_4392

ATTACCGAGAGTAGTGTTTTTGAATCGAGAAATGCAAAAATGGCAAGGTCCATGATTTTGAAGCAAA  
AAGAGAGAAGTGAAGCGCACTAGCTATAAGAAGTAAGTAATGCCAGACATA

>PGSC0003DMG402002925-(rev)LRR-RLKs\_4514

AGGATTTACTACTATAAAGATGCAATTAGAATAACTGATCTTTTCATCCAATTTACGGTAATATTGATATT  
AGTCTAGCTCCTCAAAGTCGAGATTCAAAAAGTAGACCCTTTCATTAG

>PGSC0003DMG402002925-(rev)LRR-RLKs\_4575

TATTGATATTAGTCTAGCTCCTCAAAGTCGAGATTCAAAAAGTAGACCCTTTCATTAGGATCGTTTTACA

TGTCATTGTTTAAAGCCCACACTTCTCTGAAATGCATGGCTTCAAGTGG

>PGSC0003DMG402002925-(rev)LRR-RLKs\_4636

TCGTTTTACATGTCATTGTTTAAAGCCCACACTTCTCTGAAATGCATGGCTTCAAGTGGTAACCCTTACTT

CAAATTGCTTAAAGCGATGGCTTTGAATAACACTGCAGGAGAGATGTGA

>PGSC0003DMG402002925-(rev)LRR-RLKs\_4697

ACCCTTACTTCAAATTGCTTAAAGCGATGGCTTTGAATAACACTGCAGGAGAGATGTGATACATGAAGA

AATCAATCTCCGGTAAAAAGAATGATAAGAATGCCTTATTTGGTATTTAGT

>PGSC0003DMG402002925-(rev)LRR-RLKs\_4758

CATGAAGAAATCAATCTCCGGTAAAAAGAATGATAAGAATGCCTTATTTGGTATTTAGTCTTACAACACG

TGTTGCTAGACCTGATTTAACGAATGCCTTATATAAGTTGAAGTAAGTCT

>PGSC0003DMG402002925-(rev)LRR-RLKs\_4819

TACAACACGTGTTGCTAGACCTGATTTAACGAATGCCTTATATAAGTTGAAGTAAGTCTTTTAGAAACAA

AGGGAGCATTAAACCCCTTAGTAATCAATCAACATGAACAACCTTGTTAA

>PGSC0003DMG402002925-(rev)LRR-RLKs\_488

AATTTGTCTTGTTTGTGGATTTTTGATAAGTCTGAACTAATAAAATGAAAGAGGTTAGAATGATGACA

TTTTGTTCTATCATTATTGGAAGAAAGATGTAGATGTAGGGGTGAAAGTT

>PGSC0003DMG402002925-(rev)LRR-RLKs\_4941

CAGGGAGAGCCTACGTCAGGCCGTTATGACTTAGTATTCCCGACGTCTTACTTTTTGTGCCTCACATAC

TATGTTATACCGGTCCTTGCATTACACACCCGTTGAAATGGGTGTGTGCG

>PGSC0003DMG402002925-(rev)LRR-RLKs\_5124

TATAATGATACTCTCGTACAACCTGATAAAATTCATACTCACAAATGAGGCCATACTTAGAAGCGGGTCTA

GAATATGAAGTTTATGGGCTCCCAACGATCTCAAATTAATAAAAAAT

>PGSC0003DMG402002925-(rev)LRR-RLKs\_5185

GCGGGTCTAGAATATGAAGTTTATGGGCTCCCAACGATCTCAAATTAATAAAAAATTATTATAAGTG

GTCAAAGGGAATCAGACCCTCAACGAGGAGGGCAACAAAGCATAAGCAAG

>PGSC0003DMG402002925-(rev)LRR-RLKs\_5307

CCATTATGCCGCTGGAGCAAGAGCTTACTTTGTTGGTAGATCCCAACAAATAGTTTTTATATATTTAATAG

ATTTTTTCAATAAAAAATACAAAAGTTAGTGGATTCCCCAAAACCTACAC

>PGSC0003DMG402002925-(rev)LRR-RLKs\_61

ATCGGCGTCGGAAAACAAGTAGGATTATAAATTTATAATCACAATCGAGGTAAATTTGCTTTTTCTCCTT  
AATTTGCCCGTTGATCATTCAATTTTTCTGAATTTCTGTGTTTAAT

>PGSC0003DMG402002925-(rev)LRR-RLKs\_6222

TCCATACTCCATATAATATGGATCACATAGTACCTTTAGTTGCTGAAGAAGTAATATTTGAAACATTTCAA  
AATTTGGATTTCTCTACTAGAATTCATTACCTCTAAGAATGATAGGAA

>PGSC0003DMG402002925-(rev)LRR-RLKs\_6283

AACATTTCAAATTTTGGATTTCTCTACTAGAATTCATTACCTCTAAGAATGATAGGAAAAACGAATGTAT  
CAAATCTATTTAGGGGGAATGGGTGTCCACATGGGCTTGATTTGCCAAG

>PGSC0003DMG402002925-(rev)LRR-RLKs\_6344

ACGAATGTATCAAATCTATTTAGGGGGAATGGGTGTCCACATGGGCTTGATTTGCCAAGTCTGTTCATAT  
GTATTATGGAACACCAAATTAATTTAGAAAGTAATGCATAATTAGTACGT

>PGSC0003DMG402002925-(rev)LRR-RLKs\_6405

TGTTTCATATGTATTATGGAACACCAAATTAATTTAGAAAGTAATGCATAATTAGTACGTAAGAATATATTT  
TACAATTTGTTTTATGTATTGCGGTGCATGTATAGGCTGACTATTGTAT

>PGSC0003DMG402002925-(rev)LRR-RLKs\_6466

GAATATATTTTACAATTTGTTTTATGTATTGCGGTGCATGTATAGGCTGACTATTGTATCAATTCATGCAT  
TTGCGCTTGATTGTTTAACTGTTGAAAATCTTTGTTTTATTGATATCTA

>PGSC0003DMG402002925-(rev)LRR-RLKs\_6527

ATTCATGCATTTGCGCTTGATTGTTTAACTGTTGAAAATCTTTGTTTTATTGATATCTATCAGAAGATCTCC  
TTGGTTGGCTCAATCTGACATAGAAGGTGCAAATAATGACAACGAAG

>PGSC0003DMG402002925-(rev)LRR-RLKs\_6588

AGAAGATCTCCTTGTTGGCTCAATCTGACATAGAAGGTGCAAATAATGACAACGAAGATAATTATAC  
TTCAATTTGCTTAGTTTATTGTTCCATTGATACATGGGGTTTTCTGTATT

>PGSC0003DMG402002925-(rev)LRR-RLKs\_6649

AATTATACTTCAATTTGCTTAGTTTATTGTTCCATTGATACATGGGGTTTTCTGTATTTAGAGTCTTATTT  
AAGAATGGGTATATTTAGTGAATCTTTGAGAAATTTTTCTTATCAT

>PGSC0003DMG402002925-(rev)LRR-RLKs\_671

TGTGGTTTTGGGAAGTTCAGCATATTGGTTTATGCTTTAAGTTTGGATTCTTTGGCTTATGGTGATGTTT  
TGTTTTACTTGGAATAAAAACCCCATATTTGGAAGAAAAATGTAGAGG

>PGSC0003DMG402002925-(rev)LRR-RLKs\_6832

ATGGCAGTTAGAATTTAAACCTTGAATTAGATCACCATTTGAGGATGAGAGAGAGAATATGGTATAGAT  
TGATTGCTTTATCCAGTTTATGAGTATGGATTACTGATGATAGAACTGGCA

>PGSC0003DMG402002925-(rev)LRR-RLKs\_6893

GTATAGATTGATTGCTTTATCCAGTTTATGAGTATGGATTACTGATGATAGAACTGGCATTCTTGATTTC  
CTTTGTCCCGGACAGAAGTATCACCATTAGTTTCTGTTTAGTTTTGCTC

>PGSC0003DMG402002925-(rev)LRR-RLKs\_6954

TCTTGATTTCTTTGTCCCGGACAGAAGTATCACCATTAGTTTCTGTTTAGTTTTGCTCCTTACATAATGTT  
GGAGACGAAAGTATATTCTTTATAAGCTAAGAGAGTTGGAGATTAAGC

>PGSC0003DMG402002925-(rev)LRR-RLKs\_7137

CAGACTTGAATCAAAGTAAGTTTTCATGTCTGCCTGAAATATTGTTGAAATGCTTGCGATCAGAAAGGAT  
TTAGGAGGTTGACCTTGTGAGTGGTGATAATTTTGGTGACCTAGTGCAGT

>PGSC0003DMG402002925-(rev)LRR-RLKs\_7198

AGAAAGGATTTAGGAGGTTGACCTTGTGAGTGGTGATAATTTTGGTGACCTAGTGCAGTCGTGAAACAC  
CACATCCCTGCGATGGTGGATGATGTAGCAGTGCAATATAGTTCTTCTCTG

>PGSC0003DMG402002925-(rev)LRR-RLKs\_732

GGTGATGTTTTGTTTTACTTGGAATAAAAACCCCATATTTGGAAGAAAAATGTAGAGGGTCAAAGTTG  
AATTTGGAGCTTTTTTCTTCTTTTGTCTTGTAGTTTTATTTTTCGACT

>PGSC0003DMG402002925-(rev)LRR-RLKs\_7320

TGATAATAGGCTAGTATGCATGCTAGACTTTCCTTGCGTAATAGACAGAAGAATCTGCTTGCAATTTGTT  
AATTTGATGTGATAATGAATGATCTTGCCAAAAGAAAATGATATTGAGC

>PGSC0003DMG402002925-(rev)LRR-RLKs\_7381

GCATTTGTTAATTTGATGTGATAATGAATGATCTTGCCAAAAGAAAATGATATTGAGCGATCTTTGCCA  
AAACAGGTGGGGATCGGATCTCAATATCTGGTAAAACCTCGTATACGTGCA

>PGSC0003DMG402002925-(rev)LRR-RLKs\_7442

TCTTTGCCAAAACAGGTGGGGATCGGATCTCAATATCTGGTAAAACCTCGTATACGTGCAGCCAGTCTCTG  
ACATTTGATTCTGATTGACTGAGAAATGAAGTTACTTTTCAAGTTCACTC

>PGSC0003DMG402002925-(rev)LRR-RLKs\_7503

CAGTCTCTGACATTTGATTCTGATTGACTGAGAAATGAAGTTACTTTTCAAGTTCACTCTTGAGAAATTAG

TTATTCACATTCTGCAGATCCTATCTTGTTAACATTGTGAATTTTTTG

>PGSC0003DMG402002925-(rev)LRR-RLKs\_7564

GAGAAATTAGTTATTCACATTCTGCAGATCCTATCTTGTTAACATTGTGAATTTTTGGCTAGTGTGTCT  
GGTTTCTTCTCTTTTCAGTAAAAGAAAAACGATGTTCAAAGTTGTTAGC

>PGSC0003DMG402002925-(rev)LRR-RLKs\_7808

CTGGGTTGCTTCCTTTCCAGAACATGACTGCTGTGCAGGCTGCTTTTGCTGTTGTCAACAAAGGCGTCCG  
TCCAACAATCCCCATTGATTGTTTGCCTGTCTTATCTGATATCATGACCT

>PGSC0003DMG402002925-(rev)LRR-RLKs\_793

CAAAGTTGAATTTGGAGCTTTTTTCTTCTTTTGTCTTGTAGTTTTATTTTTCGACTAGTTCTTTTTTTCT  
GTGATGGTGGTGTGGTTGAAGGTTTATCTTGATGATTTATGTTTA

>PGSC0003DMG402002925-(rev)LRR-RLKs\_8223

TTTTCTTTAAACTCTGGATTTAAGACAACGACTAGTTGTTAATACAGGATATCTGATGTGCATCTATGCAT  
GTCAGATTTTGGCTCTGTGTTTGTGAATTTGTTCAAAGTTATATCAGG

>PGSC0003DMG402002925-(rev)LRR-RLKs\_854

TTCTTTTTTTCTGTGATGGTGGTGTGGTTGAAGGTTTATCTTGATGATTTATGTTTAGTGTGGAGCTT  
TTTTCTCCCAAATTTTAAACATAAACCAAGAAGATAAACTTTCAACCA

>PGSC0003DMG402002925-(rev)LRR-RLKs\_915

GTTTGGAGCTTTTTTCTCCCAAATTTTAAACATAAACCAAGAAGATAAACTTTCAACCAACTCCAAAATTA  
CAGAGAAAAAAGAAGCTAATCAAAAATAGAAATAATAAGAAAAATGA

>PGSC0003DMG402002925-(rev)LRR-RLKs\_976

TCCAAAATTACAGAGAAAAAAGAAGCTAATCAAAAATAGAAATAATAAGAAAAATGAGAAAATAAA  
ACTCCAATTTCAACTTTCACTACTACATTTTTCTTCCAATTATAGGGGGTT

>PGSC0003DMG402003983-(rev)G-LecRK\_1240

TGTAGAAAGCAAAGGCTGCCTCTGAGGTATGGAAGGAGAGACTTGGGTAATTCTAATTTAGTATTGGTC  
AAGGTGGGCACTAATTTACATACCCAACGAAGGGGTGCTTTATCAGATGATT

>PGSC0003DMG402003983-(rev)G-LecRK\_1302

ATTGGTCAAGGTGGGCACTAATTTACATACCCAACGAAGGGGTGCTTTATCAGATGATTGAAGAAACAAA  
AGGCAAAAAGCTAAGGATAGACATCCTAATTGCCGGCATTACATTGGCTGT

>PGSC0003DMG402003983-(rev)G-LecRK\_1612

ACAGTATTTAAAGGAATTTTGGCAGAAGACCAGAAAGTGATAGCTGTTAAAAGACTAGACAAAGAATTA  
GTAGAAGGGGAAACAGAGTTCCAAACTGAAATAAAAATCATTGGAAGGACA

>PGSC0003DMG402003983-(rev)G-LecRK\_1674

AGAATTAGTAGAAGGGGAAACAGAGTTCCAAACTGAAATAAAAATCATTGGAAGGACACATCACCGAA  
ATCTCGTCCACCTCCTTGGTTATTGCCTGGAGGGATCAAGAAGGCTCCTGGT

>PGSC0003DMG402003983-(rev)G-LecRK\_2046

CACAGGGATAAGAGGGACCAGAGGCTATGTTGCACCAGAATGGCACCCGAAACTGCCAGTGACAGTGA  
AAGCAGACGTTTACAGTTTTGGTGTCTCCTATTGGAATTGATCTGTAGGCG

>PGSC0003DMG402003983-(rev)G-LecRK\_2108

CAGTGAAAGCAGACGTTTACAGTTTTGGTGTCTCCTATTGGAATTGATCTGTAGGCGGAAGTGTGTTG  
ATATGAGCCTTGATGAAAATGAGTCAATTCTTGAATACTGGGTCTACGATT

>PGSC0003DMG402003983-(rev)G-LecRK\_2170

TGTGTTGATATGAGCCTTGATGAAAATGAGTCAATTCTTGAATACTGGGTCTACGATTGCTTTGCTGCAG  
GAGAGCTAGATAAACTTGTCTGGGACGAGGAGGTTGATAGAAGACAATTC

>PGSC0003DMG402003983-(rev)G-LecRK\_2356

AAAGTTCTACTGATGCTGGAAGGGACAGTAGAAATCCAGTGCCTCCTAGTCCTACTTCTTTTTTAAGTG  
CCATATAGTTTTGAACTTCTTCACTTTATGGTTTTTGTACTTCAAATTC

>PGSC0003DMG402003983-(rev)G-LecRK\_2418

TTTAAGTGCCATATAGTTTTGAACTTCTTCACTTTATGGTTTTTGTACTTCAAATTTCAAGTATTCCAATTC  
CCCATAGAGAGCTGACCACTTTATCATCCATACTTGAGCTAAATAAA

>PGSC0003DMG402003983-(rev)G-LecRK\_620

TCAAAATGCAAGATGATGGGAACCTCGTTCAGTACCCTGTCAATACACCAGATAGTGCCTCATATTCTTA  
CTACTCAACAGGCACTTATGGAGCAGGGAATAATGTTACACTGAATCTTG

>PGSC0003DMG402003983-(rev)G-LecRK\_682

TATTCTTACTACTCAACAGGCACTTATGGAGCAGGGAATAATGTTACACTGAATCTTGATGATGACGGCC  
TCCTTACTTACTCAATTCCTAAAAGTCTAAGAAATCTAACTCAAGGA

>PGSC0003DMG402003983-(rev)G-LecRK\_744

TGACGGCCTCCTTACTTACTCAATTCCTAAAAGTCTAAGAAATCTAACTCAAGGAGGCAACCGTAGA  
GAAAGGACCATTATCTATATGCTGAAAATTGATGCTGATGGTATACTTAG

>PGSC0003DMG402003983-(rev)G-LecRK\_806

ACCGTAGAGAAAGGACCATTATCTATATGCTGAAAATTGATGCTGATGGTATACTTAGAATTTATTCAA  
TTCTCTGAACCAACAGAACAGCTCCGTGATATGGTCATCAACAAATGATA

>PGSC0003DMG402003983-(rev)G-LecRK\_868

TATTCAAATTCTCTGAACCAACAGAACAGCTCCGTGATATGGTCATCAACAAATGATAGGTGTAATCCAA  
AAGGCCTTTGTGGGCTTAATGGTTTTTGCACCAACATAGATGACCAAGCT

>PGSC0003DMG402004423LRR-RLPs\_0

GATGCCTGATAAAATAAGAGGATTGGGTTTACAAATCAATATAAAGTAGGAGGGTCTTTTCGTCATTCA  
CTTTTATTGTGTAATGAATTATTGTCTTCTTTTAGTGGTCCACAAAC

>PGSC0003DMG402004423LRR-RLPs\_122

GACTTGTGCAAAAACCTTTATAAGACTTTGGTGAAGAGGAACAAGACTTTGTGCAAGAAGTTTGGTGCT  
ACAATTCAAGTTTTGAGCAAAACACAACAATGGCCGATCCTGTAATTGGTG

>PGSC0003DMG402004423LRR-RLPs\_1342

AGGAAAAACATGAATGGCAGGCAATTCTTGATGGAAACCCCTTGTTCAGGTGAAGATGATAACGGA  
GAAAATAGCATAAGGAAAATACTAAAACCTCAGCTATGATTATCTACCATCTC

>PGSC0003DMG402004423LRR-RLPs\_1464

CATCTGAAAAAATGCTTTGCTTACTTTGCAATGTTTCCAAAAGATTTGAGTTTGAAAAGGACCAAATAA  
TCCAACCTGGATGGCAGAAGGCTTCTTCATCCATGTCAAGAGACCACCG

>PGSC0003DMG402004423LRR-RLPs\_1525

ACCAAATAATCCAACCTGGATGGCAGAAGGCTTCTTCATCCATGTCAAGAGACCACCGTAATGGAAGA  
CATCGGGAATAAGTTCTTTCAACTCTTGTTCGAAATTCCTTGCTGCAAGA

>PGSC0003DMG402004423LRR-RLPs\_183

TTGGTGCTACAATTCAAGTTTTGAGCAAAACACAACAATGGCCGATCCTGTAATTGGTGCTACTGTTCAA  
GTTTTGCTTGAAAAACTGCTTTTTCTTACTATTGAGGAACTCAGTAGCTC

>PGSC0003DMG402004423LRR-RLPs\_1952

ATTGGGAAGTGATACACTTGAGATATCTTGATCTCTCGAACACTGAGATCAGAGCCTTGCCCAACTCCA  
TTTGCAGCTCTATAATTTGCAAACATTTAGAGTCAATGGTTGCTATTTA

>PGSC0003DMG402004423LRR-RLPs\_244

ACTGTTCAAGTTTTGCTTGAAAAACTGCTTTTTCTTACTATTGAGGAACTCAGTAGCTCAAGGGACTGCA

AGAAAGATCTGGAAATGCTTACACAAAATGCATCCTTGATCCAAGCTTTC

>PGSC0003DMG402004423LRR-RLPs\_2623

GCCTACATTTTATGGTGTGAGGTTAATGATAATGGATCATGCAGCAAAATCCAAGTGTTCCCGTCATTG

AAAGAACTTATATTGGAGGATATGTGTAGCCTTATTGAGTGGAAGGGAGT

>PGSC0003DMG402004423LRR-RLPs\_2684

CCGTCATTGAAAGAACTTATATTGGAGGATATGTGTAGCCTTATTGAGTGGAAGGGAGTGGAATTGATA

CCAACAACAAGTGGGGTAAGAATGTTTCCTAAGCTTGAGAAGTTGAGGATT

>PGSC0003DMG402004423LRR-RLPs\_2745

AATTGATACCAACAACAAGTGGGGTAAGAATGTTTCCTAAGCTTGAGAAGTTGAGGATTGCGAACTGTC

AATTGTAAAAAGTACTCCGATTCAATTTGAAATCCTAAGTGAATTAGTGA

>PGSC0003DMG402004423LRR-RLPs\_2806

GAACTGTCAATTGTAAAAAGTACTCCGATTCAATTTGAAATCCTAAGTGAATTAGTGAATTGTCGAAGTT

GACAGTGAAATGCCATTGTTGAACTTGTGCAGCAACTTGACATCTCTCGT

>PGSC0003DMG402004423LRR-RLPs\_2928

AGCTTAGTGTCTATGGTGTGAAAAAGCTCACTTGTTTTCCAGATGAGATGCTACGCAACAACGTTTCTCT

TCAACACCTATCGGTTGAAAAATGCGGAGAGTTTCATGAATTGCCAAAGA

>PGSC0003DMG402004423LRR-RLPs\_3233

AGTGTCTACAAATGTAACGACTTGGTTTCCTTCCCTTTACATGTGGGGGAAATGCATTCACITTCATATTT

GGGTCTATCACTGTCCAAGTTGATTTGTGTACCCACAAGCGGCCTT

>PGSC0003DMG402004423LRR-RLPs\_366

TCATGATGCTGAAAGACGACAAGTTGACGATCAGGCTGTGAACTATGGCTCAAGATGCTTGAGAGAG

CTGCTGAAAATGCTGAAAATGTGTTTGACGAATTCAGATATGAATCTATCAA

>PGSC0003DMG402004423LRR-RLPs\_3721

ACTCAGCAACCTTGTTTCTTTGCAAAGTTAGTTTTACAGAAATGCGAGAACTAGAGCATCTCCATCTA

GTGATGCCATGCGACGCCTCACCAAATTAGGATATCTGATGATCCATGA

>PGSC0003DMG402004423LRR-RLPs\_3843

GGCCATTGTTAGAAGCTCTGTGCAATGGGCTTGGTGACCTTGTTTCTTTGCAAGAGTTATTTTTACAGAA

TTGCGAGAATCTAAAGCATATGCCATCCAGAGATGCCATGCGACGCCTCA

>PGSC0003DMG402004423LRR-RLPs\_4087



CAGAATTCAGGACTTGGCGTAAGTCTCTGTTTCTTTTCAGTTTCTAAGTCACACTTGTAATTATTATTTTC  
CAAGAGTTACTCTCCTCCATTCCCATTTTATAGTTTTCCAGACAAATT

>PGSC0003DMG402004423LRR-RLPs\_4270

CATTGGTTATTAGTTTCTAGGTCATGCTAGAAGGTTGCTGAGGCATTTCAAGTAAAAATCCATCGGCGCC  
AATTACATTAGGTAACTTTCAATTTAGAATGTTGTAACAAGTTTTTCTTT

>PGSC0003DMG402004423LRR-RLPs\_4331

ATCGGCGCCAATTACATTAGGTAACTTTCAATTTAGAATGTTGTAACAAGTTTTTCTTTGCACTCCTTTTTT  
TCTCATGACACAATTTTACTGTTTAAACAGGGTTGGTTATTACGACAGA

>PGSC0003DMG402004423LRR-RLPs\_4392

ACTCCTTTTTTCTCATGACACAATTTTACTGTTTAAACAGGGTTGGTTATTACGACAGAGGAACCACTTTG  
CACTCCGTTGTTTTGTTGAAGACTACATAATCTCTCAACATTTTACTCT

>PGSC0003DMG402004423LRR-RLPs\_4453

AACCACTTTGCACTCCGTTGTTTTGTTGAAGACTACATAATCTCTCAACATTTTACTCTTCATAACGGGGA  
TACCAACAACATTAAGTAATAATAATTGATTTACAGTCGCTCATTTG

>PGSC0003DMG402004423LRR-RLPs\_4514

ATAACGGGGATACCAACAACATTAAGTAATAATAATTGATTTACAGTCGCTCATTTGCCCAAGTGAAA  
CTATTTTTTAATGTACAGGTATGTTTTGATAAAATATCTGCTCAGGTACT

>PGSC0003DMG402004423LRR-RLPs\_4575

CAAGTGAAACTATTTTTTAATGTACAGGTATGTTTTGATAAAATATCTGCTCAGGTACTTTGGTCAAGGTA  
GTAAGGGGTATCCGTGGATCGAGCCATCAAATTCTGTTCATGAGATGAA

>PGSC0003DMG402004423LRR-RLPs\_4636

GGTCAAGGTAGTAAGGGGTATCCGTGGATCGAGCCATCAAATTCTGTTCATGAGATGAAGCTAGAAGG  
TTATTGTTATACAAAGACAAAATGTATGTCCACTACTAACTGCACCTTAAGA

>PGSC0003DMG402004423LRR-RLPs\_4697

TAGAAGGTTATTGTTATACAAAGACAAAATGTATGTCCACTACTAACTGCACCTTAAGACTTAAAAGCTA  
TGCGGGGAAGTATGAGGTATGCCAAGAACAATTTTCATCAATTTTACTTT

>PGSC0003DMG402004423LRR-RLPs\_4880

TGTTTCTCTTAATCCTCAAATCGTATTATACACTTTATTATATGGTATGATAAAAGAAAAGTCATATGATTC  
TGGTAAAGGAAATTGTTCTTTCTTTTGAAGAAAGTGAAGTATTTGAA

>PGSC0003DMG402004423LRR-RLPs\_4941

TCATATGATTCTGGTAAAGGAAATTGTTCTTTCTTTGAAGAAAGTGAAGTATTTGAATATTGGCATAA  
CATGATTGGTATACACAGAATTCTTAGATGCATGACAGATTTCATTTTGG

>PGSC0003DMG402004423LRR-RLPs\_5002

TTGGCATAACATGATTGGTATACACAGAATTCTTAGATGCATGACAGATTTCATTTTGGATTCCGTTGATT  
GATGCTTCACCAAATTATGTTACAGTCTTCAACATTATTATATTTTTGA

>PGSC0003DMG402004423LRR-RLPs\_5063

TCCGTTGATTGATGCTTCACCAAATTATGTTACAGTCTTCAACATTATTATATTTTTGAGGGGACACACTA  
GAACGTAGTGGACATTGGTGCCGCGTTGGAGACTCTGGTTGCACAAAGC

>PGSC0003DMG402004423LRR-RLPs\_5185

GAAAATTTAAGGTAAGTCAGTTTTTGTTCATAAAAGATTGCAAATGGTGCTTTAGATCAATTATAACGGG  
TTGCTTCTCATTTCGCAAGGATCAGAGAAAATGTGTGTCAAAACTGACT

>PGSC0003DMG402004423LRR-RLPs\_5429

ATTGTAATTTGGCGGAAACTGAAAGTGGAGATATTATTTACTTGTATGACTAAGATTTGACAGCACAGG  
CCTTTAGTTTCTTGCGCACAGAGTACATGCCGTACGTTTTCGTACACTACA

>PGSC0003DMG402004423LRR-RLPs\_5490

AGCACAGGCCTTTAGTTTCTTGCGCACAGAGTACATGCCGTACGTTTTCGTACACTACAAATAGAGTCCA  
TCAAACACTTTGAACTTAATAATAACAAAGGTCCTATCATTCAATTTGCA

>PGSC0003DMG402004423LRR-RLPs\_5551

TAGAGTCCATCAAACACTTTGAACTTAATAATAACAAAGGTCCTATCATTCAATTTGCATTGTTAAATCC  
AAACACTATGATGACTTAAATCTAAACTTGTGTGATGCATCTTTACGT

>PGSC0003DMG402004423LRR-RLPs\_5612

GTTTAAATCCAAACACTATGATGACTTAAATCTAAACTTGTGTGATGCATCTTTACGTGTGTAATTTCAA  
TTACGCACAGGACTGCATCATTGTGTGTTTTATCCAATATCAAGTCG

>PGSC0003DMG402004423LRR-RLPs\_5673

GTAATTTCAATTACGCACAGGACTGCATCATTGTGTGTTTTATCCAATATCAAGTCGAGTTTTCATGCA  
ACCATAATTAAGTCTATTCAATTAATGGACAATATTTTGATGAACCTT

>PGSC0003DMG402004423LRR-RLPs\_5734

TTTTCATGCAACCATAATTAAGTCTATTCAATTAATGGACAATATTTTGATGAACCTTAACAAATGATTT

TTCCTTCTCCTAGTTGCTCGTCACACCATTTGAGAACCACTAAGCTAGT

>PGSC0003DMG402004423LRR-RLPs\_61

GTCATTTCACTTTTATTGTGTACTATGAATTATTGTCTTCCTTTTAGTGGTCCACAAACAAGACTTGTGCAA

AAACTTTTATAAGACTTTGGTGAAGAGGAACAAGACTTTGTGCAAGAA

>PGSC0003DMG402004423LRR-RLPs\_915

TTTCTTCAACTAATCCTCGAATCCCTGACAAAGAGGAAAGTTGAGGTCCAAAGCAGAGACATAATAGTC

AAGACGCTACAAGATGAACTGGCAGGAAGAAAGTATTTACTTGTCTGGAT

>PGSC0003DMG402004902-(rev)LRR-RLKs\_122

TCTTTCTCCTATTAATTTGTCAAGAGGACTTCTCTCTTTTTCTGATAAAGCCTTGATTTTTTTTCGAGTT

CAGAGACATAGACGAATTTAGAATTTAAATTTGATGGATCAACCTTT

>PGSC0003DMG402004902-(rev)LRR-RLKs\_1220

ACTATCCGGATCAATGGGATACCAACTAATGAGTTTAACATCCGTAACCAACTTGTAAGATGATCAATGG

TTTCAATTACTATTTCTTACTTCGTTCTGTTATTTGTATTTACATCGTA

>PGSC0003DMG402004902-(rev)LRR-RLKs\_1281

GATCAATGGTTTCAATTACTATTTCTTACTTCGTTCTGTTATTTGTATTTACATCGTAAAATGTTGTAATTT

GCAGTGACATAAGCAACAATAATCTCGGAAACCAGATACCTTACCAG

>PGSC0003DMG402004902-(rev)LRR-RLKs\_1464

TTCCAGGCTCTAGTGTTTTTACAAAGTTGCTTACAAAATCTTTCTGTCATTTGCCTCGTATTGCAGTAACC

TTGCTGGTAATGGTTTTACCGGTGTCCTACCTTATTCCGTTTCACAAA

>PGSC0003DMG402004902-(rev)LRR-RLKs\_2074

CGTATCTTCTGATTCATTATTGTACTGTATTGGTCCAGTGTCAATTGAACTTTCTAGTATTGTTATGTTGTGC

AGCTACCTGCAGAACAACCAGTTCCTGAAATATTGATGTCCTCGCC

>PGSC0003DMG402004902-(rev)LRR-RLKs\_2135

TTATGTTGTGCAGCTACCTGCAGAACAACCAGTTCCTGAAATATTGATGTCCTCGCCAATCTTCCTCTT

GACGATCTGTGAGTTATGCAACATCTTTGTGTGTGTGAATGTTATCG

>PGSC0003DMG402004902-(rev)LRR-RLKs\_2196

TCTTCTCTTGACGATCTGTGAGTTATGCAACATCTTTGTGTGTGTGAATGTTATCGATCTCTGAATGT

TCCATTTCAAGGCTTTTCGAGTTACTATATTGTTGATTCCTTTATGCTT

>PGSC0003DMG402004902-(rev)LRR-RLKs\_2745

GTCACATGAAGTACAAGGTATATAATTTTATGACTTCTTTTTTGGGTCAATTGAGAACATAGCTGGTTAG  
TTTACTGATACTTCAATATCTCAACATTTATACACTCTTATGGTGGATA

>PGSC0003DMG402004902-(rev)LRR-RLKs\_2806

GCTGGTTAGTTTACTGATACTTCAATATCTCAACATTTATACACTCTTATGGTGGATAGGATCCTTTTCTT  
GCCATGTTATCTAATTTGAATATAGAGTTGAATTTATTGTGGTACACA

>PGSC0003DMG402004902-(rev)LRR-RLKs\_3111

TATATAAACACACTTTTAACTCTGGATGCAAGTTCCAGCAAAGATACTGAATCACCTTAGGTGAATTTTG  
GAAAATTAGTTTTCTTTTGAACCTCGTCGTCCTTCATTTTCATGTTCAAGT

>PGSC0003DMG402004902-(rev)LRR-RLKs\_3477

CCGTCCACAATAAGCATGGAAGCTACTGAAACTCCCACTATAGTATCTCTAAGACCTCCACCTATTTATAC  
TCATAAATCCATTGGTGGAGATGACATTTTCAGAAAACTCATTGTTCCA

>PGSC0003DMG402004902-(rev)LRR-RLKs\_366

GATGAGCTTGGTGGTAAAGGTGGCCCTACTCTTCTTCATTTTGCATGGCTGCAGCTTCATCAATGCAGAC  
ACAGATCCATCCGACGGTCAGCTTAATTCTACTGCTACGTAGCTTAATTA

>PGSC0003DMG402004902-(rev)LRR-RLKs\_3965

TGCTCAGAAGATGAGCAGCACCTGCTAGTTTATGAATTCCACAGAAATGGTTCTCTGCATGATTTCTCTGC  
ATCGGATGGATGAAGACAACCTCGCCACTAGCGTGGGATAGCAGAGTTCAG

>PGSC0003DMG402004902-(rev)LRR-RLKs\_4026

ATTTCTGCATCGGATGGATGAAGACAACCTCGCCACTAGCGTGGGATAGCAGAGTTCAGATTGCACTTG  
GCACAGCAAGAGCACTAGAGTGAGTTTCATAATTTACAAAATTACTTTTCAT

>PGSC0003DMG402004902-(rev)LRR-RLKs\_4087

TGCACTTGGCACAGCAAGAGCACTAGAGTGAGTTTCATAATTTACAAAATTACTTTTCATTAGGCATCACA  
TAAGATTAATGCAGCTTGGAGAAAACCTTTTGTGTTGCTTGGTTTCAGATAT

>PGSC0003DMG402004902-(rev)LRR-RLKs\_4148

GGCATCACATAAGATTAATGCAGCTTGGAGAAAACCTTTTGTGTTGCTTGGTTTCAGATATTTTTTTTATGGTA  
AACTACCCTATCTATCATAAATCTTCTAGTTTTCTTAAAACATTGATG

>PGSC0003DMG402004902-(rev)LRR-RLKs\_4209

TTTTATGGTAACTACCCTATCTATCATAAATCTTCTAGTTTTCTTAAAACATTGATGATAGTAAGCATGT  
AGAAGTGTTTCAATAATTTTCGAATAGAAAAGCAATTATATTGTTTT

>PGSC0003DMG402004902-(rev)LRR-RLKs\_427

AATGCAGACACAGATCCATCCGACGGTCAGCTTAATTCTACTGCTACGTAGCTTAATTATAAAGAAATTA  
ATATATTCACGGCACTTATGATTAATTTGGAAGTTACTAACAAAGTTTCT

>PGSC0003DMG402004902-(rev)LRR-RLKs\_4270

AGTAAGCATGTAGAAGTGTTCATAATAATTTTGAATAGAAAAGCAATTATATTGTTTTAAGTTGTAGAA  
CACCGCGTATGCTGGCTTTCCACTAGATCTAATCAGAATAAATTTTCTAT

>PGSC0003DMG402004902-(rev)LRR-RLKs\_4331

GTTGTAGAACACCGCGTATGCTGGCTTTCCACTAGATCTAATCAGAATAAATTTTCTATTTTGGCCGCGAC  
CTCTCCAATTCTTATGAGTAGGTTTATTCTAGTAGCTAAATCTAAGCTT

>PGSC0003DMG402004902-(rev)LRR-RLKs\_4575

ACCTTATGGCTGATGCAGATCAGGTAACACTTTATAAATTTGTTGTTTTGCCTTACTCTAAAGTATAATTT  
CCTAAAACCTCCACATCAGTATCTTCTTAATGGCTTCAACTTGGACCCCT

>PGSC0003DMG402004902-(rev)LRR-RLKs\_4636

AGTATAATTTCTAAAACCTCCACATCAGTATCTTCTTAATGGCTTCAACTTGGACCCCTTATTTTTGCTCCG  
TGTAGGGATTGAACCATAATATAGAGTCTGGATATGGCGCACCGGAGG

>PGSC0003DMG402004902-(rev)LRR-RLKs\_4697

TTTTTGCTCCGTGTAGGGATTGAACCATAATATAGAGTCTGGATATGGCGCACCGGAGGCTGCTATATCT  
GGGAAGTGTACCACCAAGAGTGATGTATACAGCTTTGGAGTTGTTATGTT

>PGSC0003DMG402004902-(rev)LRR-RLKs\_488

AAGAAATTAATATATTCACGGCACTTATGATTAATTTGGAAGTTACTAACAAAGTTTCTCTGTAAATAAG  
AAAGAATTTGTTGTCAACTTATAATGTGAGCGTGGATCACTTGGTGAAC

>PGSC0003DMG402004902-(rev)LRR-RLKs\_4941

TCAAGATCTGAACAGTCTTTAGTTAGATGGGCAACCCCTCAGCTTCATGATATTGATGCCCTGGAAAAGA  
TGGTTGATCCAGCTCTCTCTGGATTATATTCTGTCAAATCTCTTTCCCGG

>PGSC0003DMG402004902-(rev)LRR-RLKs\_5307

GTATGTTGTGTCAGCTTGAGCCTGAGTTTCGGCCACCTATGTCTGAAGTGGTTCAAGCATTAGTCCGGCT  
AGTGCAACGAGCAAATATGAGCAAGAGGTTACACAATAATGATCAGGACT

>PGSC0003DMG402004902-(rev)LRR-RLKs\_549

GTAAATAAGAAAGAATTTGTTGTCAACTTATAATGTGAGCGTGGATCACTTGGTGAACAACCTTTTTTTT

GTCTGGTGTTTCGATATCTTGCTTTATTGGCTTGCACTAAATCGAATTTGT

>PGSC0003DMG402004902-(rev)LRR-RLKs\_5490

TATGGGAGATCATCTGATGCTGATCAGCCCAGCAATATCTTCTTCGGTGCAGTTGTATTTGATTAAATAC

CATATGCTAAAATATTTCTCCTACATAAGCTCCTCCACTGTTGTAGCTGA

>PGSC0003DMG402004902-(rev)LRR-RLKs\_61

ATTTATAGATCATCCATCGGTATCATTGATCATATAACAAGAAGATTTGCAGATCGTCCTTTTCTTCTCCTA

TTAATTTGTCAAGAGGATTACTCTCTCTTTTTTCTGATAAAGCCTTGA

>PGSC0003DMG402004902-(rev)LRR-RLKs\_610

CTTTTTTTGTCTGGTGTTTCGATATCTTGCTTTATTGGCTTGCACTAAATCGAATTTGTCTATCCTAAAAC

CGTTAGAGTCCTATCTGTAATTTTTTATTCTCAAAAACCTCAAACCTGAG

>PGSC0003DMG402004902-(rev)LRR-RLKs\_671

ATCCTAAAACCTCGTTAGAGTCCTATCTGTAATTTTTTATTCTCAAAAACCTCAAACCTGAGACTTTTTATAGCT

AAGCTAGGTTGCTAATTTTCACTAAAAAGCCGGACGATAAGCCAAAGA

>PGSC0003DMG402004902-(rev)LRR-RLKs\_732

TTTTTATAGCTAAGCTAGGTTGCTAATTTTCACTAAAAAGCCGGACGATAAGCCAAAGAGTTCACAACAT

GCAAAAAAAAAAAGAGTTATAAAATTTAGTAACAAAATAGTGGAATTCGAT

>PGSC0003DMG402004902-(rev)LRR-RLKs\_793

TCACAACATGCAAAAAAAAAAAGAGTTATAAAATTTAGTAACAAAATAGTGGAATTCGATTTATATATTTT

TGGAGCTGTTCTTAGTCTCTGTGTGTATATTTATATGTTCTCAATAATTT

>PGSC0003DMG402004902-(rev)LRR-RLKs\_854

ATATATTTTTGGAGCTGTTCTTAGTCTCTGTGTGTATATTTATATGTTCTCAATAATTTTCGTTGGTGGCGTG

CAACTTTGGTTATCAGGTTCTGCCCTGAGAGTGATGTATAGCTCCCTA

>PGSC0003DMG402004902-(rev)LRR-RLKs\_915

TTGGTGGCGTGCAACTTTGGTTATCAGGTTCTGCCCTGAGAGTGATGTATAGCTCCCTAAATTCACCGGG

GCAGCTTACAAAATGGAGCTCATCAGACGGTGGTGATCCTTGTGGAGAAT

>PGSC0003DMG402004946G-LecRK\_0

ATTTTAAGGCCTTCAGAAGCTAGCTAGATTTACACTGAAAAGGTCAGGTTACCTCCAGATATCTAAACCTG

CATAGATTAGGTAGCATGTAATAAAGCAGTTCTTAATGGAAAGTTTTGTG

>PGSC0003DMG402004946G-LecRK\_124

TATTGCAGATATTGTTATGTGGTTTTGTATGCTCAATTTCTAGTGCGAAAGATATCATCACTGCAACTGAC  
TTTCTAACAGATGGAAAGACCATTACTTCATCTGATGGAAGTTTTGAGA

>PGSC0003DMG402004946G-LecRK\_1612

CTGGCCTGACCATTGGGCTGTATATTTGGAAAAAGAAGAAGAAGAGGAAGATGAATTTGAAAGATGAC  
CTAGACCTCCCACTGTTTACCTTATCAACTCTAACTAAAGCATCCTCTAATT

>PGSC0003DMG402004946G-LecRK\_2418

CTAATACACACCATGTGGTTGGGACACAGTAAGAAATTTAATACTACTCACTTGTTAGCATTATATTATG  
TATAATAACCTTTATTTTACACTACTTTCTGTTTAATATGTGATGCAGT

>PGSC0003DMG402004946G-LecRK\_2480

TATATTATGTATAATAACCTTTATTTTACACTACTTTCTGTTTAATATGTGATGCAGTGGTTACATGTCCCC  
GGAGTATGTAGTCCATGGTGTTCCTCAGTAAAATCAGATGTATTTAG

>PGSC0003DMG402004946G-LecRK\_2728

GCACTATATGGTAGCTACAGATATTTCTCTATAATAATTAATTGATAACACCTCGTACAAATGATAGTTAA  
ACTGCATTGAACTTAAATCCTTCAGGCACATCAACTGGTGCATGTTTCT

>PGSC0003DMG402004946G-LecRK\_3100

TCACGTCTGAATGTTCTATAAGCATGTGTTCAACAAACGAAATTACCGTCACACAGTTAGAACCCCGGTA  
AATTACATTACATGTTTCATTTCAGATCGTTCAATGTCAACAAGCTTGAATT

>PGSC0003DMG402004946G-LecRK\_3224

TATTTTGTGCTGTAAAGCCATAATTGCCTATGGTATCTGTTATTAGTAATTATGGGTGTGTTGTAGTTTT  
ATTAATTCTAATGTATTTTGAAGAATTCGTACAAAGTACCTATTCAACA

>PGSC0003DMG402004946G-LecRK\_62

TAAACCTGCATAGATTAGGTAGCATGTAATAAAGCAGTTCTTAATGGAAAGTTTTGTGCTTATATTGCAG  
ATATTGTTATGTGGTTTTGTATGCTCAATTTCTAGTGCGAAAGATATCAT

>PGSC0003DMG402004946G-LecRK\_682

ATCATTGTGATCCGACTGGATATCCTCAGGATGTCATGAGGAAAGGTAAGTTAAGGTGTACAGTACTG  
GACCATGGAATGGACTCCGCTGGAGTGGTGTACCAGGACTGACAAAAAATA

>PGSC0003DMG402005047G-LecRK\_0

CAATGGTTATCACATGAAAAGAACCATAGCAATTGTGACAATCTGCATTGGTGAATACTCATCGCGCTC  
TCGTTTGTGCTGTTGTTTGGTAATAAGGAAAAGGAGAAGAGGTAAAGGGTA

>PGSC0003DMG402005047G-LecRK\_1426

GAACACTACACATTATCAGGATCATTCAAATTTAGTTGGAAATGTAAGACATCTCTTCATCAAGAACT  
CACCTTTAGTTAAGAAGATGTATCTTGTTTTGCTCTAGCCCTTATACCA

>PGSC0003DMG402005047G-LecRK\_1488

TCAAGAACTCACCTTTAGTTAAGAAGATGTATCTTGTTTTGCTCTAGCCCTTATACCATTGCTCTAGGGAA  
GGATATGTGGAAATGTTTCATCTCTCTTTTTTTTTCTTATACGGTGGAGT

>PGSC0003DMG402005047G-LecRK\_1550

TCTAGGGAAGGATATGTGGAAATGTTTCATCTCTCTTTTTTTTTCTTATACGGTGGAGTCAGGGCTAGCTTC  
TGCATACTTTGACTATTACAATGTACCTGCTACCCTCCACCAACATAGG

>PGSC0003DMG402005047G-LecRK\_1612

GCTAGCTTCTGCATACTTTGACTATTACAATGTACCTGCTACCCTCCACCAACATAGGGATGGAAACAAT  
GGCGGGAGCTACATGCATTGGAAGGGTATTCAAATTGAATCCCCTTCTTT

>PGSC0003DMG402005047G-LecRK\_186

TTACAATAGTGAGTTACTTCATGTACAGATAAGGAGGACCAATTCACCAGTTTGAACACTTTGACAAGGA  
ATTTAGCATCCTATGAGAACTCTTCAAGAGGTAATGAGATGGATGGAAGT

>PGSC0003DMG402005047G-LecRK\_2046

AGATGCTTACACAAAAAGAAGCTAGTGGCCGTTTCGTGACCATAAATACTCTATTGATATGGTGGCACGC  
AGTGGAATCTCCAGATAAGCCTATAAAGTGATAGGTCATGTGGAECTCAAT

>PGSC0003DMG402005047G-LecRK\_2480

TTTGCTCTCCCTTTTTTCAGGTATGGGATTCATGGAATGATGACAAAGCTATAGATGTTGTTGATCCCTCA  
TTAGGGGATTGGTATGAAAGTAGTGAAGTTTTGAGATGCATCCAAATTG

>PGSC0003DMG402005047G-LecRK\_2790

TGCACAACATGCTCGCTAAGTGTGTGTCAGATCCTTCAAAGTAGTACCATATATTTTTGTGGATCTGAC  
ATGGGTTTCATCAACATTTTTGAAGAGCACTGAGCCATATGGTCATTAGGT

>PGSC0003DMG402005047G-LecRK\_434

AATTTCTTACTCATTTGTTGAGCCAATTTTACTTGACAACAAGCTTACATTTTGATTTGAGGGCCAGCTAA  
ACAATGGGCAAGAGATAGCGGTCAAAGACTTTCGAAAAATTCAGGGCA

>PGSC0003DMG402005047G-LecRK\_620

GCTTTTAGGATGTTGCATACAAAGAGGAGAGAAAATGTTGATCTATGAATACTTGCCAAACAAAGGCTT



GGACAGTTTCATCTTTGGTATATACATTTGCATATTGTGTTAAAATTTTAA

>PGSC0003DMG402005047G-LecRK\_682

AAGGCTTGGACAGTTTCATCTTTGGTATATACATTTGCATATTGTGTTAAAATTTTAAAAAATAGGCATGT  
TACTGATGGATTGCTTATGTATGAATTCGAATCGGTATTGCAGATAAA

>PGSC0003DMG402005047G-LecRK\_744

TAGGCATGTTACTGATGGATTGCTTATGTATGAATTCGAATCGGTATTGCAGATAAACTAAAGGGTCG  
CAGTTAGATTGGAGAAAACGATTTGAAATCATCGTTGGAATAGCACGAGG

>PGSC0003DMG402005047G-LecRK\_806

AAGGGTCGCAGTTAGATTGGAGAAAACGATTTGAAATCATCGTTGGAATAGCACGAGGATTATCATACC  
TTCACCACGACTCACGAGTAAGAATCATACACAGGGATCTAAAAGCCAGCA

>PGSC0003DMG402005482-(rev)LRR-RLKs\_0

AAATGCCAATTGAATAAATATAGTACAAAGGATAAAAAGAAGAAAAGAAAGGATTTTTCACACCAAAAA  
GCACAGAATAAACAGCTAGCTACCTCATTCTTGAATACATTGTCTGTAAG

>PGSC0003DMG402005482-(rev)LRR-RLKs\_1342

ACTGAATTGCAACTGCAAAAGAATGATTTTTCTGGTAGCATTCTGAAGTCGTTGGCAATCTTCGTAGGC  
TTCAGTTACTGGATTTGTCCGAAAACAAGTTTTTCAGGAAGTATTCCACCT

>PGSC0003DMG402005482-(rev)LRR-RLKs\_1403

TTCGTAGGCTTCAGTTACTGGATTTGTCCGAAAACAAGTTTTTCAGGAAGTATTCCACCTTCAATGTCTAAC  
ATGACTCGGTTATATTCACCTCATTGGAAAAGAATGAGTTAACTGGTA

>PGSC0003DMG402005482-(rev)LRR-RLKs\_1464

AATGTCTAACATGACTCGGTTATATTCACCTCATTGGAAAAGAATGAGTTAACTGGTAATATTCCCCTTA  
CTTTGGCAATTTCCGGTACTTGCAAGATTTAGACCTTTCTCAGAATCA

>PGSC0003DMG402005482-(rev)LRR-RLKs\_1769

TAGCTTTGGAAAGCCTTGTTTTAGCTGGCAACTTCTTTGAAGGTATAATTCCTTCATCCATTAGTTCTTTG  
AAAGGTCTCGAAGAATTGGATCTTTGCGCAACAATTTATCTGGGCAGA

>PGSC0003DMG402005482-(rev)LRR-RLKs\_1830

TAGTTCTTTGAAAGGTCTCGAAGAATTGGATCTTTGCGCAACAATTTATCTGGGCAGATTCCAACATCT  
CTTCAGCTCATTCTTAAAAAAGTGAACCTTGCTTTCAACCAGTTTGA

>PGSC0003DMG402005482-(rev)LRR-RLKs\_2562

GGTGAGGATACTAGGTCTAGTTGAAAGACTAAGCATTCTATTGATGTGGCTTGTGCACTGGAATATCTT  
CATAACCATTGCCATAATCCAATTGTGTTCTGTGATTTGAAGCCAGACAA

>PGSC0003DMG402005482-(rev)LRR-RLKs\_2623

GAATATCTTCATAACCATTGCCATAATCCAATTGTGTTCTGTGATTTGAAGCCAGACAACATTCTTCTCGA  
CAATGACATGACTGCCCATGTAGCTGATTTTGGATTAACAATGTTTTTC

>PGSC0003DMG402005482-(rev)LRR-RLKs\_3294

AAGATAAGGGACTATTTTGGGTCTTTTCTCGTGTCTTCTTGAGAAAGTTTTTCATATTTGATTTTACATGTTT  
TAAGTTGATTACATGTTTTCTTCTCTGTGGGCAGAGTACAGCATAG

>PGSC0003DMG402005482-(rev)LRR-RLKs\_3721

AAGGATGGATATCGGGGATGTTGTCAAGGAACCTCAACTAATTAGAGACATTCTCCTTGCTTCTCATGCA  
ATTCACAGCTCCACCAGCGGGTAAATTCGCTCTACTAGCTTTGTTTTCAA

>PGSC0003DMG402005482-(rev)LRR-RLKs\_3782

TCTCATGCAATTCACAGCTCCACCAGCGGGTAAATTCGCTCTACTAGCTTTGTTTTCAATCGTGATATTGA  
GTTCTCTGCTAGATATTGAGAACTAGTTTCTAAACACATGTGTTGCA

>PGSC0003DMG402005482-(rev)LRR-RLKs\_3843

GTGATATTGAGTTCCTCTGCTAGATATTGAGAACTAGTTTCTAAACACATGTGTTGCACGTGATTGTCC  
TGTGTAAATTCTTGATCCATTAGAACGATGAAAGTTCTATGAAGAT

>PGSC0003DMG402005482-(rev)LRR-RLKs\_3904

TGTATTGTCCTGTGTAAATTCTGTAGATCCATTAGAACGATGAAAGTTCTATGAAGATATGCATGTGTTT  
ACCATGTAAATTTTCTTCTTCTTGTAAATCGTTGTCTTTCTTTCCTTGG

>PGSC0003DMG402005482-(rev)LRR-RLKs\_3965

GCATGTGTTTACCATGTAAATTTTCTTCTTCTTGTAAATCGTTGTCTTTCTTTCCTTGGTTTCAGGAGCTTG  
AGTTTCGAAGGGTCTTCCAGTCGTTCTGTTACTAGTAACTGGCAAAT

>PGSC0003DMG402005482-(rev)LRR-RLKs\_4087

CACATCATTTGCTTGCCTTGATGTTTTAGCTCTTATATAACAAATTACTTTAGCAGATTGAAGATGTAA  
TCATCAGTTCAATCATTTGTTGAGTTGGCCTAATGCTGGTTAGTTTAG

>PGSC0003DMG402005482-(rev)LRR-RLKs\_4148

GAAGATGTTAATCATCAGTTCAATCATTTGTTGAGTTGGCCTAATGCTGGTTAGTTTAGTTGAGCTTAAGC  
AAATGGAATTGGAATTGTCTATGTATATGATGTTATGACTTGGCCAAAC

>PGSC0003DMG402005482-(rev)LRR-RLKs\_488

GAAAAATCCCACCACAGGTTGGTGGTTGTTTAGGCTTCAGCATCTTAGTTTGACTAATAACTCATTCTTCT  
GGAGAGATACCTGTAAATCTTCTAGTTGTTTGAATCTTGTTATACTTG

>PGSC0003DMG402005482-(rev)LRR-RLKs\_61

ACCAAAAAGCACAGAATAAACCCAGCTAGCTACCTCATTCTTGAATACATTGTCTGTAAGAAGTATGGTTT  
TTTCTCTAGACTTCAAGATTCCAATGCCATTCTGTTCTTTTGTCTTCTAT

>PGSC0003DMG402005729RLKWAX-EGF\_2232

AGAAAATAACCCACATAATTCCTTTATAAATTAGAAACAGTAAGAAGTTGTATTTATGTCTTTATAATACTA  
CTGGAGATATTTTGTCTGGTTCTGTATCATCACTTGTTTATGTCTGCA

>PGSC0003DMG402005729RLKWAX-EGF\_3658

GAAGCCAAGTCCCGGTGATGATGCTGGATTGTTGAAGAATCACACATTATCTCTCTCACCCGATTCAGTT  
ATTTCAAATGGACTAGCAGTAGCAGTTCAACAACACATGCTTCCAGTAT

>PGSC0003DMG402005927-(rev)LRR-RLPs\_236

CTCAGCCACCAGACTTGCCATCACCTTCATTTGTAGAGCCTCCACTACCTTCTCCTCCACCGTGTGAAAAT  
CAGAGAATACCATCAAGTCAAGATATGTCATCTCCTCACCTTGAAAGT

>PGSC0003DMG402006653LRR-RLPs\_0

ATGGCTAGTCTAACCGTGCTAGACTTGAGAAGGAACAATTTTCATAGGGAATCTTCCCCATTATGTGCAC  
AGGGCACTTCATTGAGTACCATTGTCGTAATGGTAATCGATTTGAAGGA

>PGSC0003DMG402006653LRR-RLPs\_256

TCCATGGACCTATAAGTACTTGTGAGACTAAGCTTTGCTTTCCCAACTTGCAAATTTTTTATCTTTCTCGTA  
ATGATTTCAAGTGGCTCACTTCTGCAAAAGTTTTTGGAACTTCAAGG

>PGSC0003DMG402006653LRR-RLPs\_384

AAATTAGATGACGAAGACACAAGAGAGATCAAGTACATGGAATCTAAGTCAAATTTGTCATTTGACACA  
TCTTATGAGGATTCAGTGAGTTTGGTAATCAAAGGGCACGATATTGAGCTA

>PGSC0003DMG402006653LRR-RLPs\_768

CTCGTCGGACCAATTCCTCAAGGTCCACAATTCAACACATTTGGATATGACTCATATGGTGGCAACCTTG  
ATTTATGTGGTCTTCTTTATCAAAGCAATGTGAAACAAGTGATTCATCA

>PGSC0003DMG402006653LRR-RLPs\_894

CCTCAACAAGAAGATGAAGGCGAGTCATATTTTTTTAGTGGATTTACGTGGGAATCAGTAGTCATAGGC

TACAGTTGTGGTCTAGTTGTTGGAACCTTTTCATGTGGAGTCTCATGTTTAA

>PGSC0003DMG402007101G-LecRK\_0

CAAGAAGCAAATGTATCATAACAAACAAGCTAAAACAACAACTAAACATGTCTCCTTCATGGCTTACTA  
CACTTCTTGCCTCTCTATTTCTTTTCTCCCAAATATTTTCTTGCCTTGCC

>PGSC0003DMG402007101G-LecRK\_124

TTCCACTTGAAAACACCTTCAAATTCGTCAATGAAGGCGAATTAGGACCTTATGTTGTAGAATACAGAGT  
AGACTATCGCGTTATTAGTATTTTCAATAACCCATTTTCAGCTTTGTTTCT

>PGSC0003DMG402007101G-LecRK\_186

TACAGAGTAGACTATCGCGTTATTAGTATTTTCAATAACCCATTTTCAGCTTTGTTTCTACAACACAACCTCCT  
AATGCATGGACATTAGCATTGCGAATGGGCACTGTCCGTTCTGAATCA

>PGSC0003DMG402007101G-LecRK\_496

CTAAGGGTAAATTCGTCTGGCAGAGTTTCAACTATCCCACTGACACATTACTAGTGGGCCAAACTCTCCG  
ATTGTCCGGTCCGAATAAGCTCGTGAGCCGGGCCTCGGTGAAAAAGAACG

>PGSC0003DMG402007101G-LecRK\_620

CGGGCCTTATAGCTTGGTGGTGCAGCCAAAATTGTTTCGCTATCTACAATAGGACTAAGTTAGGCGTGGA  
ATTAGCTTGGTTCGATTTTGGAAACAGTACGTTGGAATCAGTAAAATTGAA

>PGSC0003DMG402007101G-LecRK\_744

GGAAATCAAAGATTGAAATTGGATTATAGATTGGCAAATCAACAAAGAGAAGTTCACATGTGATGGCA  
TTTACTAAATATAACACAACATTAACATATCTTAGACTTGAAATTGATGGA

>PGSC0003DMG402007101G-LecRK\_806

GATGGCATTACTAAATATAACACAACATTAACATATCTTAGACTTGAAATTGATGGAAATTTAAAGGCT  
TACACTTTTGTAGAGATGAAGAAGCAGATGAATTCGTTGGAAGGTAAC

>PGSC0003DMG402007101G-LecRK\_992

TATAAGATAAGGATTTCAATTCAGTAAAATAAGTGGAGAAAATGAGTGGGTCCACAGCTATTATTTTC  
CTTTTTTTTTTGGTTGAAGGGTGTATTTTATTATTATGATTTCTAGTTT

>PGSC0003DMG402008032-(rev)LRR-RLKs\_0

AAAAAAGTTCTCTTTCAATGCATTGCTTCATTAATCCCACTTACTCATTCTGGGTAGTCTTTTTTTTTTT  
TCTCTGTATTTGTTTGCATGAAAATGCCGTCTTTATGGAAAGC

>PGSC0003DMG402008032-(rev)LRR-RLKs\_1037

TGGATTGATTGCAGTAACACTTTATAGGTCATTACCATAAAAGAACCATTTTTTCCTTTTTGGGTTGTGG  
ATTAAGTGCAGTAACCTTTATAAGGTTCCACCATAAAGGTTGGTTGGAA

>PGSC0003DMG402008032-(rev)LRR-RLKs\_1098

TGGGTTGTGGATTAAGTGCAGTAACCTTTATAAGGTTCCACCATAAAGGTTGGTTGGAAATTGTGAAAGA  
GCATGTGGTTTGTAGTTGTTTCAAATGATGATTTGTAGTGTGCTACTTTGT

>PGSC0003DMG402008032-(rev)LRR-RLKs\_2379

GTTTTGCATCATTGAGAAAATATTTTCGGAATGTTGGTAACTGACTGGGAAAAAAGTTTCATATTGTGG  
AGTTTTTTATTCTACTTGCTTATACATAGTTTGTGATGGATTGCAAAGAC

>PGSC0003DMG402008032-(rev)LRR-RLKs\_2989

TCTTTGCCATTTTTTTTTAAAAAAGTTTTTCGTTGACAGTGATGCTCAGTCTAATGGTTGGTTTCAATGATT  
TTTTCTGAGTAGGGACATTAAGGGAGCAAATTTGCTTGTAGATGCATC

>PGSC0003DMG402008032-(rev)LRR-RLKs\_3965

ATGATGCTACTTGAACATGCTTTTTTACGTAGTACTAGTTCCCTTGAGCATAGTATCAATGTTGCTGGTTG  
CTCAGAAGATTATCCGGGGAAGAAATTCATGTGAGTGGTACATGCTGC

>PGSC0003DMG402008032-(rev)LRR-RLKs\_4270

TGCAAAATCACCATGTAGCAGGTAATAACTGACTTGTGTTTGTGATGTTATATACCAAACACTTTATTCTG  
TGAGATTATTTTTTTCGCGTATTAGTATCTACAATTGCAGCCAGATACT

>PGSC0003DMG402008032-(rev)LRR-RLKs\_4514

CTCCACGTTCTGCACTTGAAGTCTTTCCCTGTATTTCTTCAATGGAGCTGAACTCGAGTTCACGTGCAGCC  
AGCCCATCAAGCATCCCTAGTAGCTTTCGCCTGGGACCTGAAAACAGAA

>PGSC0003DMG402008032-(rev)LRR-RLKs\_4575

ACGTGCAGCCAGCCATCAAGCATCCCTAGTAGCTTTCGCCTGGGACCTGAAAACAGAAGTCCTTATAG  
AATCATATCATAGGAAAGGAAATTCCAAACCTCTGTATAAGATCATAAATG

>PGSC0003DMG402008032-(rev)LRR-RLKs\_4636

CCTTATAGAATCATATCATAGGAAAGGAAATTCCAAACCTCTGTATAAGATCATAAATGAATGGAGAGG  
GGGAAAACCTCATGTACAGATCAGGAGAATTAGATACAGAGAAGTTTCAGTTG

>PGSC0003DMG402008032-(rev)LRR-RLKs\_4880

TACTGAAGATGATTCTGAAGTTAATAGTGTATTTTAGATTGAAAACATGATTTAGTGTACACAATTAAT  
GATTTATGCTAAATTCATGAGTATCTTTTTCCCTCATTTTTACAACCAA

>PGSC0003DMG402008483RLKWAX-EGF\_124

AGAAGATTAGGAATAGTGTCCCTATTGTGCTAGATTGGGCCATTGAAATCTTTCTTGTTGAAGCACA  
AAAAAGTAACGATTATGCTTGCCTCAATAATAGCCAGTGTATTGATTCTG

>PGSC0003DMG402008483RLKWAX-EGF\_1364

CTTACCTTCATTCATCCGCGCAAATGCCTATAATTCATAGAGATGTCAAGTCTGCCAATTTGTTATTGGAT  
GATGTTTACACCGCGAAAGTGGCAGATTTTGGTGCTTCAAGGGTAATCC

>PGSC0003DMG402008483RLKWAX-EGF\_1612

CTTTTGACAGGGATGAAACCTATTTCCAAGGACAGAAATGAGGAGGAGAAGAATTTGGCAGAGTATTTT  
GTTTTGTCTATGAGAAGGAATCAATTATTTCAAATTCTTGATCGCAGAGTG

>PGSC0003DMG402008483RLKWAX-EGF\_1674

GTATTTTGTCTATGAGAAGGAATCAATTATTTCAAATTCTTGATCGCAGAGTGGTAAGAGAAGGA  
AGCCTTGAGCAACTCCAAAAGGTGGCTGAGCTAGTGAAGAGTTGTCTTAG

>PGSC0003DMG402008483RLKWAX-EGF\_1736

GAGAAGGAAGCCTTGAGCAACTCCAAAAGGTGGCTGAGCTAGTGAAGAGTTGTCTTAGTTTACACGGA  
GAAGATAGGCCTATGATGAAAGAAGTAGCAAGTGAACCTGAAAATTTGAGAA

>PGSC0003DMG402008483RLKWAX-EGF\_372

AAGAAGTTTGTCTCTTTTTTTTCCCTCTGTTTCAATTTGTTTATTATACGTTCTCTTTTAGTCTGTTTAAAAG  
TAATGTCAGTTTCATTTTATAACAACTCTTTAATTCCAACCTTTGATA

>PGSC0003DMG402008483RLKWAX-EGF\_434

CTGTTTAAAAGTAATGTCAGTTTCATTTTATAACAACTCTTTAATTCCAACCTTTGATAGTAAGTATCTAAAA  
GAAACAAATAAAAAGGACAACACGTCTGGGATTAATTTTCTCTGTTTT

>PGSC0003DMG402008483RLKWAX-EGF\_496

GTATCTAAAAGAAACAAATAAAAAGGACAACACGTCTGGGATTAATTTTCTCTGTTTTGCATGCCAGATA  
TCGATGAATGTGCGGATCCAAATACCAATTCATGTGAAAAGATTTGCACA

>PGSC0003DMG402009306LRR-RLPs\_0

GTGCTTGAAGAGATGACAATTAATCGTGCTCTATGTTTGTATTCCGACCCTCCCTTCATTGAAAGTTTA  
TGCACAGATGCCTCAAGTTTGGAGTCCACATCTAATCTTAGTGCTCTT

>PGSC0003DMG402009306LRR-RLPs\_128

CAACATAAGCCATAACTATGAAGCTACTTCACTCCCAGAAGAGATGTTCAAAAACCTTGCAAATCTCAAA

TACTTGAAAATCTCTTACTTTAAGAATCTCAAAGAGCTGCCTACCAGCCT

>PGSC0003DMG402009306LRR-RLPs\_192

CTCAAATACTTGAAAATCTCTTACTTTAAGAATCTCAAAGAGCTGCCTACCAGCCTGGCTAGTCTCAATGC

TTTGAAGCATCTGGATATTTATTTCTGTGACGCACTAGAGAGTCTCCCA

>PGSC0003DMG402009306LRR-RLPs\_320

GGTGAAAGGTTTAACTTCACTCACCGAGTTATTTGTTACATCCTGTAAGATGCTAAAATGTTTACCGGAG

GGATTGCAGCACCTAACAGCCCTCACAACCTTAAACAATTAGGAGATGTCC

>PGSC0003DMG402009306LRR-RLPs\_384

CCGGAGGGATTGCAGCACCTAACAGCCCTCACAACCTTAAACAATTAGGAGATGTCCAACACTGGCCAAG

CGGTGTGAGGAGGGAATAGGAGAAGACTGGCACAAAATTGCACACATTCCG

>PGSC0003DMG402009306LRR-RLPs\_448

CCAAGCGGTGTGAGGAGGGAATAGGAGAAGACTGGCACAAAATTGCACACATTCCGTATCTGCATATT

CGTGACTATTAGTATTTATAATTCTTTCTTTGTTTGTGAATCTTTTTGGTTC

>PGSC0003DMG402009323-(rev)G-LecRK\_1178

TATATGTAGCTCAGACATTTGCTTACTGCTCTCACTACATAACGAATCAACTATAAAAATGGATGGCAGG

GAAAATTTCCAGATGGGCGAGAGGTGGCAGTCAAGAGACTTTCAAGAACC

>PGSC0003DMG402009323-(rev)G-LecRK\_1364

CTAGTTTGAGTTCTAGGATGTTGTATTCACGGAGATGAGAAAATGTTGATATATGAGTACATGCCTAACA

AGAGCTTGAACCTTCTCCTCTTTGGTCTGTTGCTATTCCAAAAAAAAAAAA

>PGSC0003DMG402009323-(rev)G-LecRK\_1426

GCCTAACAAGAGCTTGAACCTTCTCCTCTTTGGTCTGTTGCTATTCCAAAAAAAAAAAAAAGACTAATTTTT

CAGGTAATTTTTTAAAATTTTGATGTGAAATGCTTTCTTTAACAGAT

>PGSC0003DMG402009323-(rev)G-LecRK\_1488

CTAATTTTTCAGGTAATTTTTTAAAATTTTGATGTGAAATGCTTTCTTTAACAGATCCTGCAAGAAAGG

AGCTACTGGATTGGCAGAAACGATTTGCAATTATCGAAGGAATTGCTCA

>PGSC0003DMG402009323-(rev)G-LecRK\_1612

TTGCTCTATCTTCACAAATACTCAAGAATGAGAGTGATACATAGAGATCTAAAAGCCAGTAATATGCTTT

TGGATGAAAACATGAAATTTTGGTCTGGCAAGAATTTTCAAACAGAACGA

>PGSC0003DMG402009323-(rev)G-LecRK\_1860

CACAGTGGTTACATGGCTCCCGAGTTCGCCATGGAAGGTACTTTCTCAATCAAGTCTGATGTCTTCAGCT  
TTGGAGTCTTAATACTGGA AATTGTGAGTGGTAGGAGAAATACTAGCTTA

>PGSC0003DMG402009323-(rev)G-LecRK\_310

TGAATTCAGACGGGGATATTCTTGGTGGATACCGGTTTACATACACCCTTTTTAAAGACTTCTGTTATGGT  
TATGAAAGCGAGGATGGTTGTTTCTCTAATCAGTTGCCTGAGTGTGCGAA

>PGSC0003DMG402009323-(rev)G-LecRK\_372

TGTTATGGTTATGAAAGCGAGGATGGTTGTTTCTCTAATCAGTTGCCTGAGTGTGCGAAAGGATGGGGAT  
AAATTTGAGCAAAAGAGTGGAGACTTTATACATACATCTAGTATTACTACT

>PGSC0003DMG402009323-(rev)G-LecRK\_496

TTTATGACAATGCAAGCATTAGTATTGTTGATTGTATGCATAAGTGCTGGGAGCACTGCAGTTGTGTTGG  
CTTACCACCGCCAGCAGCAATGGGACAGGCTGCCGTATTTGGAATGGAA

>PGSC0003DMG402009323-(rev)G-LecRK\_558

TGTGTTGGCTTACCACCGCCAGCAGCAATGGGACAGGCTGCCGTATTTGGAATGGAAATGGGGATTTT  
CGAGTCTATGAGAGTGGTAATGCAGTGCAAAGATATGTTCTAGTTTCACCA

>PGSC0003DMG402009323-(rev)G-LecRK\_620

GGATTTTCGAGTCTATGAGAGTGGTAATGCAGTGCAAAGATATGTTCTAGTTTCACCAAATCATCTAAA  
GGAAAGTCTTTATATCAGGAATACTCATTTTTATGTACTCAATTGTCAAC

>PGSC0003DMG402009323-(rev)G-LecRK\_806

TTTTTATCGCGTTGCTAGTATCTGGTTTCATCTGCTACATTATAATGAGAAGACGCAAACACTACAAGGTAA  
ATCACCAAACGTGGTTTTAGAAGCTAGTAGGTTGTTTAGTCAATTATTT

>PGSC0003DMG402009323-(rev)G-LecRK\_868

CAAGGTAAATCACCAAACGTGGTTTTAGAAGCTAGTAGGTTGTTTAGTCAATTATTTAAGCATGAATG  
TATATCTACATACTCTTCTTACATAGATGAGAAAAGAAAGGAGGAAGCAT

>PGSC0003DMG402009323-(rev)G-LecRK\_930

CATGAATGTATATCTACATACTCTTCTTACATAGATGAGAAAAGAAAGGAGGAAGCATATATACGCGAG  
TTGACAGCAGTAGACAGCTTCAACACCGCAAATCTAAAAGAAGAAGATGGA

>PGSC0003DMG402009338LRR-RLPs\_1054

CAAGAAACCAGTTTCATGGGATTATTCCAGTGTCTTTATGCCAGATGCAAAGCTTCATATTTTGGACAT  
GTCAGCAAATTTACTCTCTGGGGTTTTACCTTCTTGCCTCGGTAACATAA



>PGSC0003DMG402009338LRR-RLPs\_1116

TTGGACATGTCAGCAAATTTACTCTCTGGGGTTTTACCTTCTTGCCTCGGTAACATAACCGCGTGGATGA  
AAGAATCTCAAGTTCTACTCCTAGCCTTCATGTGGTTGTCTCCTTCATAT

>PGSC0003DMG402009338LRR-RLPs\_124

CCTTGGTGGAATGACTTCCTTGGTTTCTTTAGATCTTTCTTTCAATCATTTTGAGGGGACTTTCTTCTTACA  
TATTCAGCAACCTGACTTTGCTCGAGACCCTTCGTCTTTCAGATAACA

>PGSC0003DMG402009338LRR-RLPs\_1240

ACTACAGGGTCAAAGTTCCTTTAACAACCAAGGGGAATGCACTCTCTTATGAAGGTATTCCTCTTTCTCA  
AATGACTATACTTGATCTATCTATGAACCATTTACCAGTGAAATTCCAT

>PGSC0003DMG402009338LRR-RLPs\_1302

CTTTCTCAAATGACTATACTTGATCTATCTATGAACCATTTACCAGTGAAATTCCATCACAACCTAGGACA  
ACTAGTAGCTCTCCGTTTATTAAACCTCTCACACAACGTCCTTTCTGGC

>PGSC0003DMG402009338LRR-RLPs\_1364

ACTAGGACAACCTAGTAGCTCTCCGTTTATTAAACCTCTCACACAACGTCCTTTCTGGCCATATTCCAGAAT  
CGTTCATCAACTTAAAGAACTGGAGAGTTTGGATCTTTCTTCTAACCA

>PGSC0003DMG402009338LRR-RLPs\_1426

TTCCAGAATCGTTCATCAACTTAAAGAACTGGAGAGTTTGGATCTTTCTTCTAACCATCTAATTGGAAAA  
ATCCCTCCTCAGATGACTCAACTTGATTCACCTTTCAACTTTAAATTTGG

>PGSC0003DMG402009338LRR-RLPs\_1488

ATTGAAAAATCCCTCCTCAGATGACTCAACTTGATTCACCTTTCAACTTTAAATTTGGCTTTCAATCATCTA  
TCAGGAAGAATCCCGTTTAAAACAAATTTGTCACCTTTGAAGCATCT

>PGSC0003DMG402009338LRR-RLPs\_1612

ATAGAGGTAACAAGGAACTCTGTGGACCACCTCTGGAAAATGATTGTGTGTTCTCGAGCCCGCCTCAGC  
AGCATGAAGAAGAAGAAGACGAGAAGCAAGGAATTGGTGAGAGTGACTTCT

>PGSC0003DMG402009338LRR-RLPs\_1674

CCTCAGCAGCATGAAGAAGAAGAAGACGAGAAGCAAGGAATTGGTGAGAGTGACTTCTTTTTCTTCTCA  
TGCATAGCTGTTGCTTATGTTTTGGGATTTTGGAGTGTCATTGCTCCTCTT

>PGSC0003DMG402009338LRR-RLPs\_620

TAATTGCTTAGGCAGTACACTTCGCACTAACGTGCTCGAATCATTTCCAGACTTATTCTATCTTAACCTGT

CAAATAACACCCTCGAAGGCACCCTTCCTTCATCTTTTGACAATCTGCT

>PGSC0003DMG402010943LRR-RLPs\_1178

GGTCCAACATTTCCCATATTCCTAAAGTTAAAGTTGGTGAAGCATAATTCAGGACTTGCCTAAGTCTCT

GTTTCTCTTTCCGTGTCTGAGTCGCATTTTAAATTATTATTTTCTATCAG

>PGSC0003DMG402010943LRR-RLPs\_1240

AAGTCTCTGTTTCTTTCCGTGTCTGAGTCGCATTTTAAATTATTATTTTCTATCAGTTCTAGAAAGAAGT

TCTGTATATAATTAATACTATCTCCTGCAATTATTTTGACGTTAAAA

>PGSC0003DMG402010943LRR-RLPs\_1302

AGAAAGAAGTTCTGTATATAATTAATACTATCTCCTGCAATTATTTTGACGTTAAAAAATGCAAAATTA

TTAGTCAATTGCATCTTATCTATGCTATGCTTTCAGCACTCTGCTAGTC

>PGSC0003DMG402010943LRR-RLPs\_1364

GCAAAATTATTAGTCAATTGCATCTTATCTATGCTATGCTTTCAGCACTCTGCTAGTCCACTTGAATCAA

TTGGTGTCTTCTTATAATTCTTCAAGTAATGTATATCTATATCACTTT

>PGSC0003DMG402010943LRR-RLPs\_1426

TGAATCAAATTGGTGTCTTCTTATAATTCTTCAAGTAATGTATATCTATATCACTTTTAAAGATATGATTTA

TTCATGAAAATTTATGTTTTTTTTCCCCTTAAAGGTTACTAGTTCCAA

>PGSC0003DMG402010943LRR-RLPs\_1488

ATATGATTTATTCATGAAAATTTATGTTTTTTTTCCCCTTAAAGGTTACTAGTTCCAAGGTCATACTTGAAC

ATCACTGTGGTAAATCAAGTCAAAATCCATGAATGGCAGGCAATTACG

>PGSC0003DMG402010943LRR-RLPs\_1550

ATACTTGAACATCACTGTGGTAAATCAAGTCAAAATCCATGAATGGCAGGCAATTACGTTAGGTCAATTT

TCATTTAGACTTGTTAGAGGAATGCGTTTTTTTTGCACTACTTTTTTCTCT

>PGSC0003DMG402010943LRR-RLPs\_1612

GTCAATTTTCATTTAGACTTGTTAGAGGAATGCGTTTTTTTTGCACTACTTTTTTCTTTTTACTGTTTAAATA

GGGTTGGTTATGTTCCACCACCACATTTGTTTGGTTGAAGAACAGAA

>PGSC0003DMG402010943LRR-RLPs\_1736

CGGCCGTAGACATTACGGGACACTTTCATGAATATTTAGTAACGATAACATAATCTGTCAACATTTTACTC

TTCATAATGGGGAATACCAACAATTATTAAGTGAAACTATTTGTTTGT

>PGSC0003DMG402010943LRR-RLPs\_186

GGAAGTTACTCTCCTCCATTCTCCTTTTATAGTTTTCCAAACATTTTTCTATTCCACTTGAAACAAATTTATG  
AATATCTATATTACTTTTAAGATATGGTTTAATCATGAATATTTATG

>PGSC0003DMG402010943LRR-RLPs\_1860

AAACATGTGCTACAAAAAGTTTTAAAGTGATGTCTCTATACTTTTATCAAGCATAGGAAGTCGACTATT  
CCAAATTCGTGCTGTGTAGGGCCCAATTCGAGGTAAAGCACTCTCCACC

>PGSC0003DMG402010943LRR-RLPs\_1984

ATTTTTCAATACCCAAGGCTCCAACCCGAGACATCTGGTTAAAGAGGAACATCCCATCAAGCACCTCAT  
ATTTTAAGTATTCTGCTAAAGAATGCATCAAATGATGAATATATCCTCTT

>PGSC0003DMG402010943LRR-RLPs\_2418

CCACTTGAAACAAATTTATGAATATCTATATTACTTTTAAGATATGGTTTAATCATGAATATTTATGTATT  
TTTTTCTCATTGGTTATTAGTTCCAAGGTCATACTAGAACATTGTTGA

>PGSC0003DMG402010943LRR-RLPs\_2480

TTATGTATTTTTTTTCTCATTGGTTATTAGTTCCAAGGTCATACTAGAACATTGTTGAGGCATTTCAAGTGC  
AAAATCCATGGGCGGCAATTACGTCAGGTGAACTTTCAATTAGAATTC

>PGSC0003DMG402010943LRR-RLPs\_2542

TTTCAAGTGCAAAATCCATGGGCGGCAATTACGTCAGGTGAACTTTCAATTAGAATTTTACCAAGTTT  
GCACAAAGCTGGAAAATCCAAGGAATTCATGATCTTCAGATGTAGCTGC

>PGSC0003DMG402010943LRR-RLPs\_2604

ACCAAGTTTGCACAAAGCTGGAAAATCCAAGGAATTCATGATCTTCAGATGTAGCTGCACTTTCATGGAA  
GGGGATATTGATATTTTTGTGAGGTTCTAAACGTCACAAAAATTATTGGC

>PGSC0003DMG402010943LRR-RLPs\_806

ACGCCAAGTTATGGGTAATGTTTATGTATTATACCAAAAATATTCTCTGGTTTTGGCTGATGAAGTCGAG  
TAAGACAGGAACTCCTTAGAGTCTTAAGAGGTGCAAACGGCTACAACATC

>PGSC0003DMG402010943LRR-RLPs\_868

AAGTCGAGTAAGACAGGAACTCCTTAGAGTCTTAAGAGGTGCAAACGGCTACAACATCTGGACTTCTCA  
GATGTCATGCCCAAATTATGGTATGTGGAGATCTGTGATTGTCCATTGTTA

>PGSC0003DMG402010943LRR-RLPs\_930

CTTCTCAGATGTCATGCCCAAATTATGGTATGTGGAGATCTGTGATTGTCCATTGTTAGAAGCTCTGTGC  
GATGGGATTGGCAACCTTGTCTTTGCAACAGTTAAGGTTACAGAGCTG

>PGSC0003DMG402010943LRR-RLPs\_992

CTCTGTCGGATGGGATTGGCAACCTGTTTCTTTGCAACAGTTAAGGTTACAGAGCTGCAAAAACTAGA  
GTATCTGCCATCCAGAGATGCCATACGACGCCTCACCAAATTACGGAACC

>PGSC0003DMG402011117LRR-RLPs\_1037

GACACATATATTGCAACTATCATTACCAATCAGAAATTCATGATCAGTTTCAGATGCCACTTAATATGGG  
GCAATTGACCAGTCTTCAGACGCTACAGTTTTTTTACATAGGTTTAGATA

>PGSC0003DMG402011117LRR-RLPs\_1098

TAATATGGGGCAATTGACCAGTCTTCAGACGCTACAGTTTTTTTACATAGGTTTAGATAAAGGTCGTGCGA  
ATAGAAGAATTAGGTCGTTTGAAAACCTTAGAGGTACATTGACGATTGA

>PGSC0003DMG402011117LRR-RLPs\_1159

GGTCGTGGAATAGAAGAATTAGGTCGTTTGAAAACCTTAGAGGTACATTGACGATTGACCGTCTCCAA  
TTAGTCGGAATAAAGAAGAGGCTCGAACAGCATGTCTACAGGAGAAACCC

>PGSC0003DMG402011117LRR-RLPs\_122

TCACTGCTGGTCCATTTTCAAGCAAAGAGCATTTGTTGATGGGGAAGTTCTGGAGGAAGTACTAACTGT  
GGAGAACAAGATTGTTGAAATGTGTCAAGGTCTACCGTTGGCAGCAAGTGT

>PGSC0003DMG402011117LRR-RLPs\_1281

TATCTACAAGCTGGCATATTTATGGTCCCATGATGAATCAGAAGGCCATGAGATCAATGATGAGCATGT  
GTTGGATGGTCTTCAACCGCATCCTAACTTGAAAACCTTATCAGTAGTGGA

>PGSC0003DMG402011117LRR-RLPs\_1708

TTTCTAGGCTTGAGAAGTTGACGATTTCAAGGTGTCGACTGTAAAAAGTACTCCAAGTCAATTTGAAA  
TCCTGCGTGAATTAGCAATTCATAGTGTTGACAGTGAAAAGCCATTGTTG

>PGSC0003DMG402011117LRR-RLPs\_1769

AATTTGAAATCCTGCGTGAATTAGCAATTCATAGTGTTGACAGTGAAAAGCCATTGTTGAACTTGTGCAG  
CAACTTGACATCTCTCGTAGAGCTTAGTGTCTATTTTGTGAAGGAGCTCA

>PGSC0003DMG402011117LRR-RLPs\_1891

TGTCTTCCCATGAGATGCTCCACAACAACGTTTCTTCAACACCTATGTATCTCAGACTGCGGAGAGTT  
TCGTGAATTGCCACAAAGCTTGACAATCTCCATTTTTTAAAGAGCTTA

>PGSC0003DMG402011117LRR-RLPs\_1952

GCGGAGAGTTTCGTGAATTGCCACAAAGCTTGACAATCTCCATTTTTTAAAGAGCTTAATGATTGACAG

CTGCCCAATTCAGTTCTTTTCCTGTTCCCAGTGGAGAGGATTATTTGA

>PGSC0003DMG402011117LRR-RLPs\_2196

GCCTTTACATGTGTGGGAAATGCCTTCACTTTCATATTTGGGTTTATTAGAATGTACCAAATTGACTAGCG  
TAGCCGCAGGAGGACTTCACCGTCTCACCGGGTTACGGAAATTACATAT

>PGSC0003DMG402011117LRR-RLPs\_2257

TTGACTAGCGTAGCCGCAGGAGGACTTCACCGTCTCACCGGGTTACGGAAATTACATATTGGTCCTTTCT  
CAGAGATGGTGGATTTTGAGGCATTCCAATTGATTTTAAATGGCATTTCGG

>PGSC0003DMG402011117LRR-RLPs\_2562

GCTGCGATATGTGGACTTCTCAGATGCCATGCCCAAATTACAATATATGAGGATACAAGATTGTCCATTG  
TTAGAAGCTCTGTCCGATGGGCTCGACCATCTTGTTTCTTTGGAAGAGTT

>PGSC0003DMG402011117LRR-RLPs\_2623

TGTCCATTGTTAGAAGCTCTGTCCGATGGGCTCGACCATCTTGTTTCTTTGGAAGAGTTAAGTTTATCTAA  
CTGCAAAAACTAGAGCATCTCCATCCAGAGATGTCATGCGACGCCTC

>PGSC0003DMG402011117LRR-RLPs\_2745

CAAATTATGGAACCTGCAAATTTATGCCTGCCCAAAGTTAGAAGAAAGTTGTAGCAATCTGAGTGGCCC  
AAACTCCCAGTGGTCCAACATTTCCCATATTCCAATATTGAATTAGGCAG

>PGSC0003DMG402011117LRR-RLPs\_2867

GGATAATTCAGGATAGACGTAAGTGTCTGTTTCTTTCACTTATGAGTAGATTTTTTAAATGTTATTTTC  
CGCGAGTTCCAGAAATAAAGCTTTGTATGTAATTTAATATTTTTTCT

>PGSC0003DMG402011117LRR-RLPs\_305

CCTTGTTGCAGGGGAAGATGATCTTCGGGAAAATAGCATAAAGAAGATCCTAAAATAAGCTATGATTA  
TCTACCATCTCCACATCTGAAGAAATGTTTTGGTTACTTTGCAATGTTTCC

>PGSC0003DMG402011117LRR-RLPs\_3538

GGAACACTTTCATGAGTATTTGGATACTGAACAACCTTTTTGGGCAACTGAAGTCTACATATGAAACATA  
AAAAAATTCAAAGTGTATAGGGTGCTCAATGAGAAGCTACACAGGTCTAT

>PGSC0003DMG402011117LRR-RLPs\_3965

AGATTTCCATGTAAGGTATGCCTATGACACCGAAATAACAACTTTTCCACAGCATAAGTTTCTATGTTTGT  
ATCATAATATCGCATAAGTTATGAAGTAAACGTAACACCTCGGATTTTCG

>PGSC0003DMG402011117LRR-RLPs\_4331

GCGGAAACATTAGTATAAACACATTTGAAGAGACAAGTCTTGTAAGAAACACTTGGCATAAATGTAA  
ATCATAGTACTAAAATCACTGACAAAGGACACGAAGGTCCAAAATGAAGCA

>PGSC0003DMG402011117LRR-RLPs\_4392

AAATGTAAATCATAGTACTAAAATCACTGACAAAGGACACGAAGGTCCAAAATGAAGCATAACTAACTG  
TCTATATATCTATGAAACATCTAGATATAACTGAGTAATGTCAAATGGGAG

>PGSC0003DMG402011117LRR-RLPs\_4514

GCCCATTGAATTCTGTTCATGAGTTGCAGCTCAAATAAATTCTCACTGATTGTTTTTATGGATTCAACTAG  
GAGGTTGCTGTTGTACAAAAACAAATTGCATGTGCCACCTCACTCTCGT

>PGSC0003DMG402011117LRR-RLPs\_4575

ATTCAACTAGGAGGTTGCTGTTGTACAAAAACAAATTGCATGTGCCACCTCACTCTCGTGCTAGCCAAGT  
ATTAACTTGGGTGCAAGTATGCTCAAGAACTATTGTAGCAGTATCCGCT

>PGSC0003DMG402011117LRR-RLPs\_4758

GATTCTCTATTCTGCTTATTGAACCAACCTTTCCATGTAAGCTTCTTCTAAAATTGTTAGTCTCCTACATTC  
CTTGTTTTTTTCTTATTGTTTTTATTGCTCACTTACTTCTATAAAGT

>PGSC0003DMG402011117LRR-RLPs\_4819

CTCCTACATTCCTGTTTTTTCTTATTGTTTTTATTGCTCACTTACTTCTATAAAGTTAGTCTGATGCAAT  
ATATCTCAAATTATTCAAATGTTTTGTTTGTTCACGAGTATCCT

>PGSC0003DMG402011117LRR-RLPs\_488

TCCAAGTCAAGAGATCCCTGTGATGGAAGATGTAGGGAACAAGTTTTTTCACTTTTGTGAAATATTCC  
TTGCTGCAAGATGTTGAGCTAGATGAGCACAACAATATAACGCACTGTAA

>PGSC0003DMG402011117LRR-RLPs\_4880

GTCTGATGCAATATATCTCAAATTATTCAAATGTTTTGTTTGTTCACGAGTATCCTTCAATAAAGAGT  
TTATCACTTAATCCCCGAATGTAGTATTCTTCATTACAAAGTATAATGG

>PGSC0003DMG402011117LRR-RLPs\_4941

AATAAAGAGTTTATCACTTAATCCCCGAATGTAGTATTCTTCATTACAAAGTATAATGGAAGTTATTAAGT  
GGTATGGTTCTTGAATAAGATAACTGATCATTCTCTTCAAGTACAGAGA

>PGSC0003DMG402011117LRR-RLPs\_5002

GTTATTAAGTGGTATGGTTCTTGAATAAGATAACTGATCATTCTCTTCAAGTACAGAGAAGTAATAGCTT  
GTCATAACAGGTCTATTACAGTTTTATCTTGCFTAAGAGGAGGTGGACCA

>PGSC0003DMG402011117LRR-RLPs\_5063

TAATAGCTTGTACATAACAGGTCTATTACAGTTTTATCTTGCGTAAGAGGAGGTGGACCATTACACGGAAA  
GCCACTAACGTAGGCTTTGATGCAAGACAGAGTTCCTTTTGAACCGAAAT

>PGSC0003DMG402011117LRR-RLPs\_5124

ACACGGAAAGCCACTAACGTAGGCTTTGATGCAAGACAGAGTTCCTTTTGAACCGAAATGTGACTTCTA  
CTGATAGTAGAAGCTTCTCCAGTTTTTGTGGCCGTCTTCAACAGTATTTTC

>PGSC0003DMG402011117LRR-RLPs\_5185

GACTTCTACTGATAGTAGAAGCTTCTCCAGTTTTTGTGGCCGTCTTCAACAGTATTTCTGTTTAATTTTC  
AAGGGTCAGATTGGAACATTTTCGCTTCAGTGATGACTGTGGTTGCACG

>PGSC0003DMG402011117LRR-RLPs\_5246

GTTTAATTTTCAAGGGTCAGATTGGAACATTTTCGCTTCAGTGATGACTGTGGTTGCACGAAGCTTGAAAG  
TTCAAGGTAAGTTAGTTTTTGTCCATAAAAGATAGCAAATGGTGTCAATA

>PGSC0003DMG402011117LRR-RLPs\_5307

GCTTGAAAGTTCAAGGTAAGTTAGTTTTTGTCCATAAAAGATAGCAAATGGTGTCAATACTTTTTTCTCTG  
GAATGGTTTTCTTTTTCTCTAAATGCTGTTTTTAAATCATCTCACTTA

>PGSC0003DMG402011117LRR-RLPs\_5368

TTTTTCTCTGGAATGGTTTTCTTTTTCTCTAAATGCTGTTTTTAAATCATCTCACTTATCTATATCTCGTTTA  
CTTTTCTTAGTATATTGAAAACCTCTCAAGGAACTATTTCCATGTCC

>PGSC0003DMG402011117LRR-RLPs\_5429

TATATCTCGTTTACTTTTCTTAGTATATTGAAAACCTCTCAAGGAACTATTTCCATGTCCATATATGGTAGAA  
ATGTGTA AAACTTTCTTAATAGGCTCATAAAAGAATAACTTTTTCTGCA

>PGSC0003DMG402011117LRR-RLPs\_549

AAATATTCCTTGCTGCAAGATGTTGAGCTAGATGAGCACAAATATAACGCACTGTAAGATGCATGAT  
CTTGGGCATGATTTGGCTGGAGATACATTTAAAATCTAAACTATTTGATAC

>PGSC0003DMG402011117LRR-RLPs\_5490

ATATGGTAGAAATGTGTAAAACCTTTCTTAATAGGCTCATAAAAGAATAACTTTTTCTGCAACGCTGGTTTT  
ATTTTCATGCTTTAGACAGTAGAACTTTTATGAATATATGACACACTTGT

>PGSC0003DMG402011117LRR-RLPs\_5551

GCTGGTTTTATTTTCATGCTTTAGACAGTAGAACTTTTATGAATATATGACACACTTGTCAATTGCTTTCACT

TCACAGGACAATTTCTCCGTTTCATTAACCTTTTCGTCATTGAAGGACTT

>PGSC0003DMG402011117LRR-RLPs\_5612

TTGCTTTCACTTCACAGGACAATTTCTCCGTTTCATTAACCTTTTCGTCATTGAAGGACTTCAACAGAGATAG

TTGTCATGAATCATTTAGCAAAGAATGCCCCATTGGCTCTTAAAATGTC

>PGSC0003DMG402011117LRR-RLPs\_5673

ACAGAGATAGTTGTCATGAATCATTTAGCAAAGAATGCCCCATTGGCTCTTAAAATGTCCTTAGCAACAT

CTGTTTCATCTTAACAGGTCTTGCTTTCTCCTTTTTTTAGTGGTCACTTGT

>PGSC0003DMG402011117LRR-RLPs\_5734

TAGCAACATCTGTTTCATCTTAACAGGTCTTGCTTTCTCCTTTTTTTAGTGGTCACTTGTAAATGATCTGCTTC

TCCATTTTCCAAGGAGGAAACGTGTGCCAAAACAGACTTTTTAACAT

>PGSC0003DMG402011117LRR-RLPs\_5795

TGATCTGCTTCTCCATTTTCCAAGGAGGAAACGTGTGCCAAAACAGACTTTTTAACATTTCTGGATGAT

TTCAGATTCATGTTTGAAACACCAGCATGGACCTCGTCGAAATGCTACT

>PGSC0003DMG402011117LRR-RLPs\_61

TGAAGCAGGTGGCATCCATAGTAGCAGAAGATCTTCATATGTTGAGAAGAATAGCTAGAGATCACTGCT

GGTCCATTTTCAAGCAAAGAGCATTGTTGATGGGGAAGTTCTGGAGGAAG

>PGSC0003DMG402011117LRR-RLPs\_610

TGCATGATCTTGGGCATGATTTGGCTGGAGATACATTTAAAATCTAAACTATTTGATACGAAAAGTGTTG

GAGGAGAAAATATTTCTCAAGTCCGATACTTTGGATGGGAATCACCAAGT

>PGSC0003DMG402011117LRR-RLPs\_671

AAAGTGTTGGAGGAGAAAATATTTCTCAAGTCCGATACTTTGGATGGGAATCACCAAGTGACCAATAG

AAAAGATATATGAGCCAGGACGTTTGTGCACATTGTTCTGGAAAAGCAATA

>PGSC0003DMG402011117LRR-RLPs\_6710

CAGAAAAGTATATATATAACATGAGGAAGCAATAGTTATTCATAGCATGAAAAAATGTATCAAATA

AGATAATTAATACTGTAAGATGCATGATCTTGTGCATGATTTGGCTGGA

>PGSC0003DMG402011117LRR-RLPs\_6832

TATTTTAAAGTCTAAACTATTTGATCAAAGAGGTGATAGGAGGAGAAAATCTTTCTCAAGTCCGATACTTT

GGATGGGACTCACCAAGTGATAAAATAGATAAGATAAACGAGCATGGACG

>PGSC0003DMG402011117LRR-RLPs\_6893



CGATACTTTGGATGGGACTCACCAAGTGATAAAATAGATAAGATAAACGAGCATGGACGTTTGTGCACA  
TTTTTCTGTAAAAGAAATATATCTGAAGATATGCTGTTGAGCTTTCAGTTC

>PGSC0003DMG402011117LRR-RLPs\_6954

TGTGCACATTTTTCTGTAAAAGAAATATATCTGAAGATATGCTGTTGAGCTTTCAGTTCTTGAGAGTTATA  
AATTTGTCCAGGTCAGGCATTGAGGTGTTGTCAGCCAAAATCGGCAAGC

>PGSC0003DMG402011117LRR-RLPs\_7015

GAGAGTTATAAATTTGTCCAGGTCAGGCATTGAGGTGTTGTCAGCCAAAATCGGCAAGCTAATACTT  
GAGATATCTTGATCTCTCCAGTACTGAGATCAAAGACTTGCCCAACTCCGT

>PGSC0003DMG402011117LRR-RLPs\_7076

ATATACTTGAGATATCTTGATCTCTCCAGTACTGAGATCAAAGACTTGCCCAACTCCGTTTGCAAGCTCTA  
CAATTTGCAAACATTTAGAGTCAATGGCTGTTCTTCACTGAGGAAGCTT

>PGSC0003DMG402011117LRR-RLPs\_7198

GGAAGAAATGGCAAATATGAAAAGTTTGAGACACATATATTACCAATCAGAAATTGATTATCAGTTTCA  
GATGCCACTTAATATGGGGAAATTGATCAGTCTTCAGACGCTACAATTTTT

>PGSC0003DMG402011117LRR-RLPs\_7259

CAGTTTCAGATGCCACTTAATATGGGGAAATTGATCAGTCTTCAGACGCTACAATTTTTCTACGTAGGTG  
TAGAGAAAGGTCGTCAAATAGAAGAATTAGGTCGTTTGAAAAACCTTAGA

>PGSC0003DMG402011117LRR-RLPs\_732

CCAAATAGAAAAGATATATGAGCCAGGACGTTTGTGCACATTGTTCTGGAAAAGCAATATATCTGATGA  
TATGCTATTGAGCTTTCAGTTCTTGAGAGTTTTAAATTTGTCTGGATCAGG

>PGSC0003DMG402011117LRR-RLPs\_7320

ACGTAGGTGTAGAGAAAGGTCGTCAAATAGAAGAATTAGGTCGTTTGAAAAACCTTAGAGGTGAATTA  
ACAATCAAATGTCTACAATTAGTCGGCAATAAAGAAGAGGCTCAAACAGCAT

>PGSC0003DMG402011117LRR-RLPs\_7381

TGAATTAACAATCAAATGTCTACAATTAGTCGGCAATAAAGAAGAGGCTCAAACAGCATATTTACAGGA  
GAAACCAAATATCTACAAGCTGGTGTATTTATGGTCCCATGATGAATCAGA

>PGSC0003DMG402011117LRR-RLPs\_7442

TTACAGGAGAAACCAAATATCTACAAGCTGGTGTATTTATGGTCCCATGATGAATCAGAAGGCTGTGAG  
ATCAATGATGAGCATGTGTTGTATGGTCTTCAACCACATCCTAACTGAAA

>PGSC0003DMG402011117LRR-RLPs\_7564

CTTAGTAGTGGAGAACTATTGGGGGACTATATTCCTTCATGGTTCAGTGAAGAATTGCTGCCAAATTTG  
GTCATGTTGAAATTAAGTGGTTGCAAGAGGTGCAAAGATATTCCATCGCT

>PGSC0003DMG402011117LRR-RLPs\_7625

CCAAATTTGGTCATGTTGAAATTAAGTGGTTGCAAGAGGTGCAAAGATATTCCATCGCTTGGTCAACTGA  
AGTTCCTTAGGCATCTTGAGATGATTGGATTCATTGAATTGGAATGCATT

>PGSC0003DMG402011117LRR-RLPs\_7747

ACCTACATTTTATGGTGTGATAATGGATCAAGCAGCAATAATGGCAATATCCAAGTGTCCCGTCATTG  
AAAGAACTAGTATTGAAGGATATGCATAGGCTTATAGAGTGGAAGGGAGA

>PGSC0003DMG402011117LRR-RLPs\_7808

CCGTCATTGAAAGAACTAGTATTGAAGGATATGCATAGGCTTATAGAGTGGAAGGGAGATGAAGTTGG  
AGTAAGACTGTTTCCTGGGCTTGAGAGGTTGACGATTACAGAGTGTCCACTG

>PGSC0003DMG402011117LRR-RLPs\_7869

AAGTTGGAGTAAGACTGTTTCCTGGGCTTGAGAGGTTGACGATTACAGAGTGTCCACTGTTAAAAAGTG  
CTCCAACCTCAATTGGAAACCCTGCATGAATTAGAAATTGAAAGAGTTGACA

>PGSC0003DMG402011117LRR-RLPs\_7930

AAAAAGTGCTCCAACCTCAATTGGAAACCCTGCATGAATTAGAAATTGAAAGAGTTGACAGTGAAATGCC  
ATTGTTGAACTTGTGCAGCAACTTAACATGTCTTGTGGATCTTTCTGTCAG

>PGSC0003DMG402011117LRR-RLPs\_7991

GAAATGCCATTGTTGAACTTGTGCAGCAACTTAACATGTCTTGTGGATCTTTCTGTCAGTGACGTGAAAG  
AGCTCACTTGTCTACCTGATGAGATGCTACGCAACAATGCTTCTCTTCAA

>PGSC0003DMG402011117LRR-RLPs\_8052

ACGTGAAAGAGCTCACTTGTCTACCTGATGAGATGCTACGCAACAATGCTTCTCTTCAACGCCTATGTAT  
CTCAGCCTGCAGAGAGTTTCATGAATTACCACAGAGCTTGTACAATCTCC

>PGSC0003DMG402011117LRR-RLPs\_8113

CCTATGTATCTCAGCCTGCAGAGAGTTTCATGAATTACCACAGAGCTTGTACAATCTCCATTCCCTTAAGA  
GCTTAGGAATAGCCTTGTGCCCAATTCAGTTCTTTCCGGTTCCAG

>PGSC0003DMG402011117LRR-RLPs\_8174

TCCCTTAAGAGCTTAGGAATAGCCTTGTGCCCAATTCAGTTCTTTCCGGTTCCAGTGGAGAGAATTA

TTTATCTTCCCTCCAAAGGCTTCAGTTACTTTATTGTGATGGATTGACC

>PGSC0003DMG402011117LRR-RLPs\_8235

GAGAGAATTATTTATCTTCCCTCCAAAGGCTTCAGTTACTTTATTGTGATGGATTGACCAGTTTACCAAAT

GGAATGCTAGAACAATGTCGGTCTCTAAAGATTTTGAGGGTCAGCAACT

>PGSC0003DMG402011117LRR-RLPs\_8296

TTTACCAAATGGAATGCTAGAACAATGTCGGTCTCTAAAGATTTTGAGGGTCAGCAACTGTAAGAACTT

GGTTTCCTTCCCTTACATGTATGGGAAATGCCTTCACTTTCCATTTTGGGA

>PGSC0003DMG402011117LRR-RLPs\_8357

AAGAACTTGGTTTCCTTCCCTTACATGTATGGGAAATGCCTTCACTTTCCATTTTGGATATGTCAGATTG

TCCCAAATTGATTAGTCTACCCACAGGAGGCCTTACCGTCTCACTGGG

>PGSC0003DMG402011117LRR-RLPs\_8418

TGTCAGATTGTCCCAAATTGATTAGTCTACCCACAGGAGGCCTTACCGTCTCACTGGGTTACGGCATTT

GAAAATTGGTCCTTCTCAGAGATGGTGGATTTTGAGGCATTCCAATTGT

>PGSC0003DMG402011117LRR-RLPs\_8479

ACGGCATTGAAAATTGGTCCTTCTCAGAGATGGTGGATTTTGAGGCATTCCAATTGTTTTTAATGGC

ATTGAGCAGCTGTTGTTTCCTTCGTACATTGAGGGTGTACGGACATGGGCA

>PGSC0003DMG402011117LRR-RLPs\_8540

TTTAATGGCATTGAGCAGCTGTTGTTTCCTTCGTACATTGAGGGTGTACGGACATGGGCACTGGGATTCTC

TGCCCTATCAGCTTATGCAACTCTTCTCTAATTGAGCTCGAATTAAGT

>PGSC0003DMG402011117LRR-RLPs\_8601

GGGATTCTTGCCCTATCAGCTTATGCAACTCTTCTCTAATTGAGCTCGAATTAAGTGATTTCAGTATC

GAGGATCTTCTCATAGTCTTTCGAATCTTACTTCTCTTGAAACATTAC

>PGSC0003DMG402011117LRR-RLPs\_8723

CTAGAGGGGTGCAAACGGCTACAACATGTGGACTTCAGAGGTGCCATGCCCAAATTACATTATCTTGAG

ATCTATTGTTGTCCATTGTTAGAATCTCTGTCCGATGGACTCAGCAACCTT

>PGSC0003DMG402011117LRR-RLPs\_8784

ATCTTGAGATCTATTGTTGTCCATTGTTAGAATCTCTGTCCGATGGACTCAGCAACCTTGTTTGGTGGAA

ACGTTAATTTTTGGAACTGCGAAATACTAGAGCGTCTGCCATCCAGAG

>PGSC0003DMG402011117LRR-RLPs\_8845

TTGTTTGAAACGTTAATTTTTGGAAGTGCAGAAATACTAGAGCGTCTGCCATCCAGAGATGTCATGCAA  
AGCCTCACGAAATTACAGTACCTGGAAATTAAGACTGCCACAGTTAGA

>PGSC0003DMG402011117LRR-RLPs\_8967

AAAGTTGCACCAATTGGAGTAGCCAACTCCCAGTGGTCCAACATTTCCCATATTCCAAAAATTAAGT  
AGGCTGGAGGATAATCCAGGATAGACGTAAGTCTCTGTTTCTCTTTCACT

>PGSC0003DMG402011117LRR-RLPs\_9028

AATTAAGTAGGCTGGAGGATAATCCAGGATAGACGTAAGTCTCTGTTTCTCTTTCACTTTCTGAGTCCA  
TTTTTAAATATTATTTTCTACGAGTCCAGAAAAAAGCTTTGTATGTG

>PGSC0003DMG402011117LRR-RLPs\_9089

CTGAGTCCATTTTTAAATATTATTTTCTACGAGTCCAGAAAAAAGCTTTGTATGTGATTTTTTTTTTCC  
TGCAACATTTTGACGTAAAAAATGCAAATTAACAATCAAGTGCATC

>PGSC0003DMG402011117LRR-RLPs\_9150

TTTTTTTTTCTGCAACATTTTGACGTAAAAAATGCAAATTAACAATCAAGTGCATCTGTGCTATGCTTT  
CAACATTCTGCGTGTCCACTTGAACCGAATTGTTCTTCTTCTAATTCT

>PGSC0003DMG402011117LRR-RLPs\_9211

TGCTATGCTTTCAACATTCTGCGTGTCCACTTGAACCGAATTGTTCTTCTTCTAATTCTTCAAGTATGGTAT  
ATCTTGCTATGCTTTAATCATGTAATTTATGTTTTTTTTTCTTATAG

>PGSC0003DMG402011117LRR-RLPs\_976

GTCAGTGGCTGTTCTTCACTGAGGAAGCTCCAGAAGAAATGGCAACTATGATAAGTTTGAGACACATA  
TATTGCAACTATCATTACCAATCAGAAATTCATGATCAGTTTCAGATGCCA

>PGSC0003DMG402011794RLKWAX-EGF\_1054

GATCATTAGAACAACCTCAAGTTGCAGCTGAACTTGTCAGAGATGCCTTCAATTGAACGGTGAGGACA  
GACCTACGATGAAAGAAGTTGCAATTGAACTTGAACGTCTAAGAAAATTCA

>PGSC0003DMG402011794RLKWAX-EGF\_496

ATCGACATGTGGTGAACTCATAGGGTGTGTATAGAAGCAGAAGTTCCTTTACTAGTATACGAATACG  
TCTCTCATGGAACACTGTTCCAGCATATTTACAAGAAAGATGGAGTACTTA

>PGSC0003DMG402011794RLKWAX-EGF\_62

ACTCATACTTGATTTGCGGTTGTGATTGGTTTCTTTAACGTACATTTCAACTCGAATTAATAATGCAGGCT  
TGGGGTTTGGCTTCTGTGCGTTAATAATTGGTTGAGTTGGGTATACCT

>PGSC0003DMG402012062LRR-RLPs\_1357

GACGCGAATTGCTCCTCTTCTAAGAAACATTCTAATATTCTTGGGAGAGTCGTCAGTTTCTTCAGCTGCAA  
ACCAAGGAATTTAGATTAAATAAATATAGGTAATATTCTAATATTTGTG

>PGSC0003DMG402012981-(rev)RLKWAX-EGF\_0

GGAAAATTGCCATGGGTCCTAAGTGATATATACAAATTGTGGTTCATATTGAGGATGTTATCTCTATTTTC  
CCTCTTCTTCTCTAACAAAAGATGACACACATAGAGAGAAGATGAAAAA

>PGSC0003DMG402012981-(rev)RLKWAX-EGF\_1037

TCTCAGCAGAATGAAGGAAGAAGGGCAATGATGGGCTCTTTTCTTATAGCTGGTAGCTCTCTTCATTTCT  
ATTTCTTGTTTTTCAGTCTTTACATTTTCATCATTTTGAAACACATTGAGT

>PGSC0003DMG402012981-(rev)RLKWAX-EGF\_1098

TTCATTTCTATTTCTTGTTTTTCAGTCTTTACATTTTCATCATTTTGAAACACATTGAGTTGTAGAATGCTAG  
AATCAATAGAATTTCTTGAAGTTTGTGCTAATTATCATTTGTAGATG

>PGSC0003DMG402012981-(rev)RLKWAX-EGF\_1159

TAGAATGCTAGAATCAATAGAATTTCTTGAAGTTTGTGCTAATTATCATTTGTAGATGTTATACCCCAT  
GAATAAACTTGTATGATTGGTTCATAGAAAAGCACCCCTACATACCGCTA

>PGSC0003DMG402012981-(rev)RLKWAX-EGF\_122

TAATCTTATTGCTACTTCCATAACTGTCAAGAATGGATCTTCTCCTCTACCATCCTCTCAAAGCCACCCCTT  
TCCTCAACTCTCTCCCCTCAACTCCCTTCTCAGGTAAGTGTCTCTCTC

>PGSC0003DMG402012981-(rev)RLKWAX-EGF\_1342

AAAAAAGAAAAAGAAAAACTCCATCACTTTCCCTTCTCATCATTTTAATACTTTTGCATTCTAGTTCTGT  
GTTAAGTGTTAATTGGTATTTTATTGTATGACTGTCCATTAAGAGTATT

>PGSC0003DMG402012981-(rev)RLKWAX-EGF\_1403

CTAGTTCTGTGTTAAGTGTTAATTGGTATTTTATTGTATGACTGTCCATTAAGAGTATTGGTAGTTGTTTC  
AGATTTCTTTCAAGATTCATTATTTTTTGTATGGATTATTACTTATTTTC

>PGSC0003DMG402012981-(rev)RLKWAX-EGF\_1464

TAGTTGTTTCAGATTTCTTTTCAAGATTCATTATTTTTTGTATGGATTATTACTTATTTCTCACCCCTTGGGA  
TGCGGCCCTTCTGGTCTTCCCTGGTCTGTATGAATGTGGGATGCTTT

>PGSC0003DMG402012981-(rev)RLKWAX-EGF\_1525

ACCCCTTGGGATGCGGCCCTTCTGGTCTTCCCTGGTCTGTATGAATGTGGGATGCTTTGTACATCGGAT

TGCCTTTTTGTTACTTATTTGATCTCTTTCACTACTCAGCTGCTGGCCTT

>PGSC0003DMG402012981-(rev)RLKWAX-EGF\_1586

ACATCGGATTGCCTTTTTGTTACTTATTTGATCTCTTTCACTACTCAGCTGCTGGCCTTGCCTCTGCGATG

TGGCTGGAGCCGCTAGCACAAGCAGAAGAGCTGTAAGAATAACTTCCA

>PGSC0003DMG402012981-(rev)RLKWAX-EGF\_1647

CCTCTGCGATGTGGCTGGAGCCGCTAGCACAAGCAGAAGAGCTGTAAGAATAACTTCCATCTGCCTTAT

ATGGATGCTGAGAATGCTCTTCTGTATTTATGGAAATTTTGTGTATTTT

>PGSC0003DMG402012981-(rev)RLKWAX-EGF\_1708

TGCCTTATATGGATGCTGAGAATGCTCTTCTGTATTTATGGAAATTTTGTGTATTTTCTTTTTGCAGCT

CAGGGGAGCAAAAATACCAGAGAGCGAGTACACAACCTTCCAAATGG

>PGSC0003DMG402012981-(rev)RLKWAX-EGF\_1769

TTTTTGCAGCTCAGGGGAGCAAAAATACCAGAGAGCGAGTACACAACCTTCCAAATGGTCTAAAGTTA

GTATACAATTTGAAGCATCTGAGTACTGTTTTCCCTACATTTGGATTTCT

>PGSC0003DMG402012981-(rev)RLKWAX-EGF\_183

AGCCACCCCTTCTCAACTCTCTCCCTCAACTCCCTTCTCAGGTAAGTGTCTCTCTCTCTCACACACAC

ACAACACACACAGAGAAGATGAAAAGATTACTAATTGAAGCTAAAGT

>PGSC0003DMG402012981-(rev)RLKWAX-EGF\_1830

TAAAGTTAGTATAACAATTTGAAGCATCTGAGTACTGTTTTCCCTACATTTGGATTTCTTTTACATTTGGTT

GTTGCACAAATTATAAAATCCCTTGGACTTGAACAAGATTACTGTAG

>PGSC0003DMG402012981-(rev)RLKWAX-EGF\_1891

TACATTTGGTTGTTGCACAAATTATAAAATCCCTTGGACTTGAACAAGATTACTGTAGCTAACTCGAGT

CTAGGGACGCAATATCTTAGCTCAACATATAATGTACACATTTTCTCATG

>PGSC0003DMG402012981-(rev)RLKWAX-EGF\_1952

AACTCGAGTCTAGGGACGCAATATCTTAGCTCAACATATAATGTACACATTTTCTCATGCAACATTGTCCT

CCTACAATAAAGGAAAAGAAATACGTATTCGTCCATCTAATTTTGAGGC

>PGSC0003DMG402012981-(rev)RLKWAX-EGF\_2013

ACATTGTCCTCCTACAATAAAGGAAAAGAAATACGTATTCGTCCATCTAATTTTGAGGCTAGAAGCAGTA

GTCTGATTTGTGATTTCTGCCTTATTTGTGGATTATTCACTTTATTCTT

>PGSC0003DMG402012981-(rev)RLKWAX-EGF\_2074

GAAGCAGTAGTCTGATTTGTGATTCCTGCCTTATTTGTGGATTATTCACITTTATTCTTCGGTGTAATCTC  
TCAGGTATTATGACTTGAAGGTCGGCGCTGGAGCTGAAGCAGTGAAGG

>PGSC0003DMG402012981-(rev)RLKWAX-EGF\_2135

GTGTAAATCTCTCAGGTATTATGACTTGAAGGTCGGCGCTGGAGCTGAAGCAGTGAAGGGATCTAGAG  
TTGCAGTACGGTTGTGCCAAAGTTGAATTGAGTATCTAAGTACAATGTTTGA

>PGSC0003DMG402012981-(rev)RLKWAX-EGF\_2196

TCTAGAGTTGCAGTACGGTTGTGCCAAAGTTGAATTGAGTATCTAAGTACAATGTTTGATTTATCTCGAA  
AAACATATTTGTATAAGTTAATATGCAACACCACATCATTAAATCCACCAT

>PGSC0003DMG402012981-(rev)RLKWAX-EGF\_2257

TATCTCGAAAAACATATTTGTATAAGTTAATATGCAACACCACATCATTAAATCCACCATTAAGTGCATTGT  
AAAATGTACCTTCTTTGTTTGAGCTTTCTAGATAGCAGTTCCACAGCAT

>PGSC0003DMG402012981-(rev)RLKWAX-EGF\_2318

AGTGCATTGTAAAATGTACCTTCTTTGTTTGAGCTTTCTAGATAGCAGTTCCACAGCATCCAAGCTTTCTA  
GTTTAGAGCAAAACACTTTGAGATCATTGCATCACATGTGATATACTAA

>PGSC0003DMG402012981-(rev)RLKWAX-EGF\_2379

AAGCTTTCTAGTTTAGAGCAAAACACTTTGAGATCATTGCATCACATGTGATATACTAATATAGACTCATA  
GGATTTATATTAAGAACTAATCAGACAACAGGATGTAATAGATTGCTGT

>PGSC0003DMG402012981-(rev)RLKWAX-EGF\_244

TCTCACACACACACAACACACACAGAGAAGATGAAAAGATTACTAATTGAAGCTAAAGTTTGAATCTTG  
AACTTGTAGGAAACAGACCCATGTCACTAATTGAAGCTAAAGTTTGAATCT

>PGSC0003DMG402012981-(rev)RLKWAX-EGF\_2440

TAGACTCATAGGATTTATATTAAGAACTAATCAGACAACAGGATGTAATAGATTGCTGTCCTGTATGGAA  
GTTTCAGGGGCTTTTGTGAGGTTCAAATTTCTACTGAGCCCTAAAAG

>PGSC0003DMG402012981-(rev)RLKWAX-EGF\_2501

TGTATGGAAGTTTCAGGGGCTTTTGTGAGGTTCAAATTTCTACTGAGCCCTAAAAGGATCTCTGTTA  
TGGTGACATGTTGCCACTTCTCACTCCACAACCACTACTAGTCTTGACC

>PGSC0003DMG402012981-(rev)RLKWAX-EGF\_2562

TCTCTGTTATGGTGACATGTTGCCACTTCTCACTCCACAACCACTACTAGTCTTGACCCTCCACAATGCTT  
TTCTGAAGTTCAGGCCAGCACGATATCGTTAGAGTGGTATTTAGGATA

>PGSC0003DMG402012981-(rev)RLKWAX-EGF\_2623

CCACAATGCTTTTCTGAAGTTCAGGCCAGCAGATATCGTTAGAGTGGTATTTAGGATAGAATTATACAA  
GAACCGAAATAACCAATCATGTTGATCCCCTACCAATGAGTCAAATGAA

>PGSC0003DMG402012981-(rev)RLKWAX-EGF\_2684

ATTATACAAGAACCGAAATAACCAATCATGTTGATCCCCTACCAATGAGTCAAATGAAGCTAAAAACG  
ACATCTCAGTAAATGCTTCATCAATCTAAATTATTTAGTTCATAGGTTACA

>PGSC0003DMG402012981-(rev)RLKWAX-EGF\_2745

TAAAAACGACATCTCAGTAAATGCTTCATCAATCTAAATTATTTAGTTCATAGGTTACAAGGAATGCCATA  
GACCTTTCATGAATTGTTAATGGTATTGGTGATCTCTTTGTTTATCGT

>PGSC0003DMG402012981-(rev)RLKWAX-EGF\_2806

GAATGCCATAGACCTTTCATGAATTGTTAATGGTATTGGTGATCTCTTTGTTTATCGTAACAGTTAGGCA  
TGTCACATGCCAATGTTGCCCTTGAAACCTTATTTTTGAGTCATTTTA

>PGSC0003DMG402012981-(rev)RLKWAX-EGF\_2867

CAGTTAGGCATGTCACATGCCAATGTTGCCCTTGAAACCTTATTTTTGAGTCATTTTATGATATATTTGA  
AAATGTAATGCATGTAGTCTCTCTGTACTTTGCAGTTTCTTCGTTTCATA

>PGSC0003DMG402012981-(rev)RLKWAX-EGF\_2928

ATATATTTGAAAATGTAATGCATGTAGTCTCTCTGTACTTTGCAGTTTCTTCGTTTCATACTCAAGTATAATA  
TATTTGTCAGAAATCTAGATTTACAGAATGCTTCTTAAAGTCTGAATT

>PGSC0003DMG402012981-(rev)RLKWAX-EGF\_2989

CAAGTATAATATATTTGTCAGAAATCTAGATTTACAGAATGCTTCTTAAAGTCTGAATTGTTTATTATGTC  
ATAATTCTAGATCCACTATGTTGCTAAATGGAGGAACATCACATTCATG

>PGSC0003DMG402012981-(rev)RLKWAX-EGF\_305

GAATCTTGAACCTGTAGGAAACAGACCCATGTCCTAATTGAAGCTAAAGTTTGAATCTTTAACTTGTAG  
GAAACTGACCCATGTGGCTAGTTGAAGCTAAAGTTTGAATCTTTAACTTG

>PGSC0003DMG402012981-(rev)RLKWAX-EGF\_3050

TTATTATGTCATAATTCTAGATCCACTATGTTGCTAAATGGAGGAACATCACATTCATGACAAGTAGACA  
AGGAATGGGAGTTGGTGGTGGAAACAGTAAGATTCATCTGCTTTATTTTTT

>PGSC0003DMG402012981-(rev)RLKWAX-EGF\_3111

AAGTAGACAAGGAATGGGAGTTGGTGGTGGAAACAGTAAGATTCATCTGCTTTATTTTTTCCAACCTGTAT



AATTTGTATGACAAATATCGGGAAATCTTAGTAGCTTAGTTGGTTGGCTG

>PGSC0003DMG402012981-(rev)RLKWAX-EGF\_3233

TACCTGAACTTTTCTCCTTGTTGGTGAGGATTGCTTCCCCACCCTGTAATCCCCTTCCCCATTTCCCCTTT

AGAAAAAAAAAAGTAATGGAAATATCAGATTCAAGCTTCAAGTGTGGAA

>PGSC0003DMG402012981-(rev)RLKWAX-EGF\_3294

ATTTCCCCTTTAGAAAAAAAAAAGTAATGGAAATATCAGATTCAAGCTTCAAGTGTGGAAACCTGCTACAT

GTAAAACAATGAATACTATTGCATGATTAGTCAAGGCGCACCTTGGAAG

>PGSC0003DMG402012981-(rev)RLKWAX-EGF\_3355

CTGCTACATGTAAAACAATGAATACTATTGCATGATTAGTCAAGGCGCACCTTGGAAGCTAGATTAGA

ACTCAAGCACCTTCATTTGAAATGTTTTGTATAGAAACCTTCGGTATAATT

>PGSC0003DMG402012981-(rev)RLKWAX-EGF\_3416

AGATTAGAACTCAAGCACCTTCATTTGAAATGTTTTGTATAGAAACCTTCGGTATAATTGTGTTATGACAT

TCCCGTTAGCTTAATTGATAGATTGATGTCATTTCCCTGCTTCTGGACA

>PGSC0003DMG402012981-(rev)RLKWAX-EGF\_3477

GTTATGACATTCCCGTTAGCTTAATTGATAGATTGATGTCATTTCCCTGCTTCTGGACAATGCCTATGTAA

TATTTCTGCGTCATGTTTATTTAATAGTCCTTGATTTGGAGCTACGTGA

>PGSC0003DMG402012981-(rev)RLKWAX-EGF\_3538

GCCTATGTAATATTTCTGCGTCATGTTTATTTAATAGTCCTTGATTTGGAGCTACGTGACTTACTTTTTCTG

TTTTTGAGATGCCATCATGTTTCTTATCCAATATCCTTACTTCCTGT

>PGSC0003DMG402012981-(rev)RLKWAX-EGF\_366

AACTTGTAGGAACTGACCCATGTGGCTAGTTGAAGCTAAAGTTTGAATCTTTAACTTGTAGGATGGCCC

ATGTTACTAATTGAAGCTAAAGTTTGAATCTTGAACCTTGTAGGAAACAGA

>PGSC0003DMG402012981-(rev)RLKWAX-EGF\_4575

TTATTATTACCCTCACATTAGTTTGACTTTTCCACAAGTCCTCCTTATCTAAATGAAGACTTGAATATCAG

TATAAGAATAAATGTGAGATTTTAGAGAACCTCTAGTTGCAGAGAAAC

>PGSC0003DMG402012981-(rev)RLKWAX-EGF\_5307

AATGCAAATGCTGTCTTTACCTTTTCGCTATGAAAGATCATCATCACTTTTTTAGAATTAACCTTATCA

GAATCATCAAATATGTGGCTAGCAGAAAACCTTTCTAATGGGAGCCTT

>PGSC0003DMG402012981-(rev)RLKWAX-EGF\_5856

CAGTAGCCTGATAAACTAGCAACTTTGTAGTTTGAACGAAAACCTCAAACCTGAGAACAATGTAGAGAA  
ACTTTAAAATTTGTGTCAAGACTGTAACGTTATATATAACCCCCACAATTA

>PGSC0003DMG402012981-(rev)RLKWAX-EGF\_5917

GTAGAGAACTTTAAAATTTGTGTCAAGACTGTAACGTTATATATAACCCCCACAATTAACAGCTGCACC  
TTGGATCACAAACATCATTTTCTAATTAGTTTTCTGCCCCAGTTCCGTGCA

>PGSC0003DMG402012981-(rev)RLKWAX-EGF\_5978

AGCTGCACCTTGATCACAAACATCATTTTCTAATTAGTTTTCTGCCCCAGTTCCGTGCAAGCTAGCCCCAAA  
CATCCCCTCTACCCAAAAGAACAATAATATCAGTTTTCCGCCACACCTT

>PGSC0003DMG402012981-(rev)RLKWAX-EGF\_6039

CTAGCCCAAACATCCCCTCTACCCAAAAGAACAATAATATCAGTTTTCCGCCACACCTTTTTGCAAGTTTC  
ATCTATTCATAATTTACTTATTCTTGAAATGGATGGTATTATCTCTAAC

>PGSC0003DMG402012981-(rev)RLKWAX-EGF\_61

CTCTATTTCCCTCTTCTCTCTAACAAGATGACACACATAGAGAGAAGATGAAAAAATAATCTTATT  
GCTACTCCATAACTGTCAAGAATGGATCTTCTCTCTACCATCCTCTC

>PGSC0003DMG402012981-(rev)RLKWAX-EGF\_6100

TGCAAGTTTCATCTATTCATAATTTACTTATTCTTGAAATGGATGGTATTATCTCTAACATTATTATGTGGT  
CATTGTATCTTTACTTCTTTACCTACTGATTTTTAAATCTACAG

>PGSC0003DMG402012981-(rev)RLKWAX-EGF\_6161

TATTATGTGGTCATTGTATCTTTACTTCTTTACCTACTGATTTTTAAATCTACAGATGGATATTGAAC  
TGCTGTCTATTAACAAAGCCCATTCGGGTGAGTAGCCAACCTTTAGA

>PGSC0003DMG402012981-(rev)RLKWAX-EGF\_6222

GGATATTGAACTGCTGTCTATTAACAAAGCCCATTCGGGTGAGTAGCCAACCTTTAGAAATATTCAAAAA  
ATTAATGGACTTATTTCTTGATTTAGCTTCATTATCCTCAGCATCTTAT

>PGSC0003DMG402012981-(rev)RLKWAX-EGF\_6283

ATTCAAAAAATTAATGGACTTATTTCTTGATTTAGCTTCATTATCCTCAGCATCTTATGTATTTACTGTAC  
ATTCCTATTTTTTTCTTTTCGGTGCAGAACTCCTGTCAAAATTGTTGA

>PGSC0003DMG402012981-(rev)RLKWAX-EGF\_6344

ATTTACTGTACATTCCTATTTTTTTCTTTTCGGTGCAGAACTCCTGTCAAAATTGTTGAAGGATAACCACA  
GTGTTACCTACTTCATGTTATAATGATTCATCACCTGCAAAAGCACTC

>PGSC0003DMG402012981-(rev)RLKWAX-EGF\_6588

AATTGCTTTGAGCATATAAAAGTGCTGTAAGGACTTGTTTCGAGAATAACCCCAAAGAATTGCAGTGAGA  
AAATTCAGATATAGATAACTGAATCAATCAGGGGTGAAGCAACTAGTTCCC

>PGSC0003DMG402012981-(rev)RLKWAX-EGF\_6649

CAGTGAGAAAATTCAGATATAGATAACTGAATCAATCAGGGGTGAAGCAACTAGTTCCCAGAGATATAA  
ATAGTACAAAAGACATTAAGACTTAGTTTAGGACAAATTCAGCTCTGTAAG

>PGSC0003DMG402012981-(rev)RLKWAX-EGF\_7076

CTCCTTTAGGCAAGTTCTTACCTTAATAAGCAAATATTATATACCTCTTCCAGAAAGTGGTAATTGAATT  
GCAGGTATAATAAAAATATTCTACAGGCAGAATTGCAGGGTAAGGTTGT

>PGSC0003DMG402012981-(rev)RLKWAX-EGF\_854

AGACCCATGTCACTAATTGAAGCTAAAGTTTGAATCTTGAAGTTGTAGGAAACAAACCCATGTTAAAGTT  
TGAATGTTGAATTTTCAGGAAACAGACCCTTTTCAGCCAACTGGAGTAGA

>PGSC0003DMG402012981-(rev)RLKWAX-EGF\_8967

CTCAGGGTACATTAGGTTACTTGGACCCTGAATATTTTCGCAACTATCAGCTAACCGATAAAAAGTGATGT  
TTACAGCTTCGGGGTTGTGTTACTAGAACTTCTTACTTCTCAGAAGGCAG

>PGSC0003DMG402012981-(rev)RLKWAX-EGF\_9028

AAGTGATGTTTACAGCTTCGGGGTTGTGTTACTAGAACTTCTTACTTCTCAGAAGGCAGTTGACTTCTCTC  
GAGACGAAAATAGTGTCAACTTGGTTTCTTATGTCATTCAGCAAGAAAA

>PGSC0003DMG402012981-(rev)RLKWAX-EGF\_9089

GACTTCTCTCGAGACGAAAATAGTGTCAACTTGGTTTCTTATGTCATTCAGCAAGAAAACCATGGTTCAG  
TTATGGATGTAGTGGACAGGCGCTTGCTTGGGGAGGAGCCTTTGACTAAT

>PGSC0003DMG402012981-(rev)RLKWAX-EGF\_915

GTTAAAGTTTGAATGTTGAATTTTCAGGAAACAGACCCTTTTCAGCCAACTGGAGTAGAACAGCTTTACC  
TTGTGTTTGTGTTCAAAATCATCATCTTTGGATGTTCCAGAAAAAATA

>PGSC0003DMG402012981-(rev)RLKWAX-EGF\_9272

GAGAGACCCTGCATGAAAGATGTTGTTTCAGCAACTTCACTGCATAAGTGAAATAGTTGATCAAGAAGAG  
CCTATTGAGGTTAGTTAGAAGTATCATAGTCCTACAAAATAAAGTGTCAC

>PGSC0003DMG402012981-(rev)RLKWAX-EGF\_9333

AAGAAGAGCCTATTGAGGTTAGTTAGAAGTATCATAGTCCTACAAAATAAAGTGTCCTGGTCTTGAT

CTTTTAAAATTCATATTAGTGTAAGAAGAATTTTATAAAAAGGCATGGATC

>PGSC0003DMG402012981-(rev)RLKWAX-EGF\_9638

CCACCGGGCTACCCTATTTCCAACCTGGTGTCTAGAATCCGCATTGGGGTCCTGACTTCCCAGGTTGGTG

CCGCTTAAGGACCATTAAGTGGGGGATGAGCTCCCTACCATAGTATATAT

>PGSC0003DMG402012981-(rev)RLKWAX-EGF\_9699

AGGTTGGTGCCGCTTAAGGACCATTAAGTGGGGGATGAGCTCCCTACCATAGTATATATATTTTTTCATT

CTCATAGCTAGAACCTGAGATCTTTGGTCTAGAGTGGAGGGATCTTATCC

>PGSC0003DMG402012981-(rev)RLKWAX-EGF\_976

AGCTTTACCTTGTGTTTGTCTGCAAAATCATCATCTTTGGATGTTCCAGAAAAAATATTTCTCAGCAGA

ATGAAGGAAGAAGGGCAATGATGGGCTCTTTTCTTATAGCTGGTAGCTC

>PGSC0003DMG402012981-(rev)RLKWAX-EGF\_9760

TTTTTCATTCTCATAGCTAGAACCTGAGATCTTTGGTCTAGAGTGGAGGGATCTTATCCATCCGACCATAA

CTCTTGATGGGATCAGATGCCTTACTTTGTCCAAAAAGCAGGATAGACA

>PGSC0003DMG402013876-(rev)G-LecRK\_0

TTAGTCCTCTATCAGATTTCCCCCAAAGTTTCATTGCCATCACCTAGGAACTTTCTTTATTCTCCTCTTTTCG

TTTTTACGTAGTATGAAGATAATATTGGTTCTCTTGCTTTCTTACTT

>PGSC0003DMG402013876-(rev)G-LecRK\_1037

TAGATTGGGATAGTAGAACTATTCAGGTGGGTGTGTGAGAAAAATCCGCTGCAGTGTGGCAGCAAT

AACAAAAATTTTGTCCATATGCCAAATGTAAACTTCCTGTGTCATCTGAAT

>PGSC0003DMG402013876-(rev)G-LecRK\_1098

CAGCAATAACAAAAATTTTGTCCATATGCCAAATGTAAACTTCCTGTGTCATCTGAATCAATGAAAGTA

GGAAATGATCAGATCTGTGAATATATATGTTTCATCCAATTGCTCATGCAA

>PGSC0003DMG402013876-(rev)G-LecRK\_2318

AATGTTGATCTACGAATATATGCCAAACAAAAGTCTAGACTATTTTCATATTTGGTATGATAACTTCTTATC

TGATGTTATGTTAACTCTTTCCCTAAGTAGTGCTTACTGGATAAATT

>PGSC0003DMG402013876-(rev)G-LecRK\_2379

ACTTCTTATCTGATGTTATGTTAACTCTTTCCCTAAGTAGTGCTTACTGGATAAATTTGATATGAACAAC

TTAGACGAGAGCAGGAAGTCGTTGCTTGATTGGAGAAGGCGGTATGAA

>PGSC0003DMG402013876-(rev)G-LecRK\_2684

TGGAACATAGTAAGCACGAAAATACCAAAGGGATTTCTCTGTCGCATCCTTACCATTTATCAATACTTT  
GCGCACTCATTATTGCCCTTCCCTTTCAGTGCCTATATGTCACCTGAA

>PGSC0003DMG402013876-(rev)G-LecRK\_2745

CAATACTTTGCGCACTCATTATTGCCCTTCCCTTTCAGTGCCTATATGTCACCTGAATATGCTCGAGCT  
GGTCTCTTCTCAGTAAAATCTGATGTCTTTAGCTTTGGTGTATATTAT

>PGSC0003DMG402013876-(rev)G-LecRK\_2867

GAGGTCATAAGTGGCAAAGGAACATGGTCTTATAATAGTGATTCCCCTCCTAATTTGATACGACGG  
GTGAGTTTTAAGATACAAACATTTGAACTAACTTTTGATTTAATAATCAA

>PGSC0003DMG402013876-(rev)G-LecRK\_2928

TACGACGGGTGAGTTTTAAGATACAAACATTTGAACTAACTTTTGATTTAATAATCAAACCTATTTGCTA  
AATGAACTGCTGCTTCAGGCCTGGGAGTTGTGGAATGATGGTAAGGCCT

>PGSC0003DMG402013876-(rev)G-LecRK\_61

TCTCCTCTTTCGTTTTTACGTAGTATGAAGATAATATTGGTTCTTCTGCTTCTTACTTTCATTTAGTTAGCT  
GCAACAGTACTCGTTCAGATACCTTGTTCCTGGCCAGTCCTTTTCC

>PGSC0003DMG402013876-(rev)G-LecRK\_915

AGTGTGGTCTCGATCTACTGATAATTGTGACCGAATAAATTTCTGTGGTGCTTTTGCAATTTGTGACATG  
AATGCCGGTCCACCCTGTGAATGCTTAAAAGGTTATGAAAAGAAGTTTAA

>PGSC0003DMG402013876-(rev)G-LecRK\_976

TGTGACATGAATGCCGGTCCACCCTGTGAATGCTTAAAAGGTTATGAAAAGAAGTTTAAATTAGATTGG  
GATAGTAGAACTATTCAGGTGGGTGTGTGAGAAAAAATCCGCTGCAGTGT

>PGSC0003DMG402014186LRR-RLKs\_0

GCAGCAGCAGCTGCTGCCATGACGGCTACTGGAAAGGGAGGAGAGATCGGTGGAAATGGTATTA  
AGCTGATCTTTTTCGGGTCTGATAGATCGTTTGATTTAGAGGATTTGTTGAGA

>PGSC0003DMG402014186LRR-RLKs\_1008

GTGCTCCAGAGGTAACGGACCCACGCAGAGTTTCCCAAAGGCAGATGTATATAGCTTTGGTGTATTGC  
TTCTGGAGCTTCTTACTGGGAAGGCACCCACTCATGCCCTCCTGAATGAGG

>PGSC0003DMG402014186LRR-RLKs\_1071

TATTGCTTCTGGAGCTTCTTACTGGGAAGGCACCCACTCATGCCCTCCTGAATGAGGAAGGTGTTGACTT  
GCCAAGATGGGTGCAGTCCATCGTTCAAGACCAATGGACTTCACAAGTTT

>PGSC0003DMG402014186LRR-RLKs\_1134

TTGACTTGCCAAGATGGGTGCAGTCCATCGTTCAAGACCAATGGACTTCACAAGTTTTTGATATTGAGCT  
CCTCAGGTACCAGAGCGTTGAGGAAGAAATGGTGCAACTCTTGCACTCG

>PGSC0003DMG402014186LRR-RLKs\_1197

TTGAGCTCCTCAGGTACCAGAGCGTTGAGGAAGAAATGGTGCAACTCTTGCACTCGCAATAGATTGCT  
CGACTCAATATCCCGACCACAGACCTTCTATGTCTGCTGTCGTTGAGCGAA

>PGSC0003DMG402014186LRR-RLKs\_1260

ATTGCTCGACTCAATATCCCGACCACAGACCTTCTATGTCTGCTGTCGTTGAGCGAATTCAAGAGCTCTGT  
CTCTCAAGCTTGCGGGTACTCAAGAACAGTCTGACTCTGTCAATGAAT

>PGSC0003DMG402014186LRR-RLKs\_1323

AGCTCTGTCTCTCAAGCTTGCGGGTACTCAAGAACAGTCTGACTCTGTCAATGAATCTGATTGAGGTGG  
TCCTTGGTCCTTTTACATGTGCAGTACTTGAAGTAAAGAAGCACCATCAC

>PGSC0003DMG402014186LRR-RLKs\_1386

GAGGTGGTCCTTGGTCCTTTTACATGTGCAGTACTTGAAGTAAAGAAGCACCATCACCAATTTACAGAAC  
CCCCTTTAAGCATATTAAGTAACTTTAATGCTTTCTGTTGGTTAGTAGGGCCT

>PGSC0003DMG402014186LRR-RLKs\_1449

ACAGAACCCCTTTAAGCATATTAAGTAACTTTAATGCTTTCTGTTGGTTAGTAGGGCCTATCTTCTTTCATTTA  
AATTTTAACAATTTATGCCCTTTCTTTTTTCTCAGTTCTCCATTGTA

>PGSC0003DMG402014186LRR-RLKs\_1512

TTTCATTTAAATTTTAACAATTTATGCCCTTTCTTTTTTCTCAGTTCTCCATTGTAGTTGAGCTAGAGCCCT  
TTTCATTTTCTTTGTGTGGGGGGCCATTCTCTGTACCATTTGTTCT

>PGSC0003DMG402014186LRR-RLKs\_1575

CTAGAGCCCTTTTCATTTTCTTTGTGTGGGGGGCCATTCTCTGTACCATTTGTTCTTGTGGGTGGATAA  
TGTTGCTGTAATTACTTTTCTCAGCCTTTACTTTGCTTTCACTTTAAC

>PGSC0003DMG402014186LRR-RLKs\_1638

GTGGATAATGGTTGCTGTAATTACTTTTCTCAGCCTTTACTTTGCTTTCACTTTAACCAACTTTGTTGAGAA  
CTTAATACCTACCTTTACTTTGTAGTACTTTTCTTATTTAGGAGGTTTGT

>PGSC0003DMG402014186LRR-RLKs\_1701

TGTTGAGAAGTAAATACCTACCTTTACTTTGTAGTACTTTTCTTATTTAGGAGGTTTGTGTTTGGTAGTAGTA

AATTAGTGAAGTTTTTTTTTTGGTTCCACCTGGTGTCCCGTAACTA

>PGSC0003DMG402014186LRR-RLKs\_1764

TAGTAGTAAATTAGTGAAGTTTTTTTTTTGGTTCCACCTGGTGTCCCGTAACTACATTGGAACCTCGAC

TATTCAGGGGAAGCGCTCTCTACCAAGGATTGCCATGCTTTGTTTGTG

>PGSC0003DMG402014186LRR-RLKs\_1823

TTGGAACCTCGACTATTCAGGGGAAGCGCTCTCTACCAAGGATTGCCATGCTTTGTTTGTGATCAGGACA

AAGTTTCTTTGTTTCACGGATTGTGTACCCTCTTTACTTCGTTTTTGA

>PGSC0003DMG402014186LRR-RLKs\_189

GTTGTAGCTGTTAAGAGATTGAAGGATGTAACCATATCTGATATGGAGTTCCGGGAGAAAATCGATAAA

GTTGGACAAATGAATCATGAGAATTTGGTTCCTCTTAGGGCATATTATTAC

>PGSC0003DMG402014186LRR-RLKs\_252

GATAAAGTTGGACAAATGAATCATGAGAATTTGGTTCCTCTTAGGGCATATTATTACAGCAGGGAGGAA

AAGCTTCTGTCTATGACTACATGCCAATGGGAAGCTTGTCTGCACTTCTT

>PGSC0003DMG402014186LRR-RLKs\_315

GAGGAAAAGCTTCTTGTCTATGACTACATGCCAATGGGAAGCTTGTCTGCACTTCTTCATGGTGAGTCAA

AGTTATACTTTTCTTATAAATTGATGATTTTTTGTGTTGTAATACC

>PGSC0003DMG402014186LRR-RLKs\_378

GAGTCAAAGTTATACTTTTCTTATAAATTGATGATTTTTTGTGTTGTAATACCTGAGGGCAATCTCT

ATTGCTTTTCTTGCTTAGTCTGTGGATTGGTTAGTTGGACTTGTTAGC

>PGSC0003DMG402014186LRR-RLKs\_441

CAATCTCTATTGCTTTTCTTGCTTAGTCTGTGGATTGGTTAGTTGGACTTGTTAGCTTATTGTAGTACTAC

ATGCAATGCATCTTTTGTGGGAGAACATCTAACTGAAGTGTTGCATT

>PGSC0003DMG402014186LRR-RLKs\_504

TAGTACTACATGCAATGCATCTTTTGTGGGAGAACATCTAACTGAAGTGTTGCATTTTCGTATGAATTTG

AACATTTCTTTTGTGAATTTTAAAAGCACGAGTTCAATTATTGATAAT

>PGSC0003DMG402014186LRR-RLKs\_567

GAATTTGAACATTTCTTTTGTGAATTTTAAAAGCACGAGTTCAATTATTGATAATGTCCTCTCATTCTC

TAGATTTGGTAGAGTTGTATCTGTGAAATGTTGCTTTTATAGCCTGTG

>PGSC0003DMG402014186LRR-RLKs\_63

AAAAAGCTGATCTTTTTCGGGTCTGATAGATCGTTTGATTTAGAGGATTTGTTGAGAGCTTCAGCTGAGG  
TTTTAGGGAAGGGGACGTTTGAACAGCTTACAAGGCAGTGTTGGAGATG

>PGSC0003DMG402014186LRR-RLKs\_630

TCATTTCTCTAGATTTGGTAGAGTTGTATCTGTGAAATGTTGCTTTTATAGCCTGTGAAACTCGGAAACT  
ATTAAATTGCTAATAGATTGTAAGATGTTTGCTATAATTTTATTCGTGC

>PGSC0003DMG402014186LRR-RLKs\_693

GGAAACTTATTAAATTGCTAATAGATTGTAAGATGTTTGCTATAATTTTATTCGTGCTATTCACTACTAAG  
CTCTGTAATTTTCCAGGAAATAAGGGGGGTGGCAAGACTCCACTGGATT

>PGSC0003DMG402014186LRR-RLKs\_756

CTACTAAGCTCTGTAATTTTCCAGGAAATAAGGGGGGTGGCAAGACTCCACTGGATTGGCAAGTCAGGT  
CAGGCATTGCCCTTGGCACTGCTCGGGGCATTGAATACCTGCACTCTCAAG

>PGSC0003DMG402014186LRR-RLKs\_819

TCAGGTCAGGCATTGCCCTTGGCACTGCTCGGGGCATTGAATACCTGCACTCTCAAGGTTCAAACGTCCA  
TGGGAACATTAAATCATCCAATGTTCTTCTCACCAAATCATATGATGCAC

>PGSC0003DMG402014186LRR-RLKs\_882

ACGTCCATGGGAACATTAAATCATCCAATGTTCTTCTCACCAAATCATATGATGCACGAGTGTCAGATTTT  
GGCCTAGCCCAGCTGGTTGGACCTCCAACCTCCCAACTCGAGTTGCTG

>PGSC0003DMG402014186LRR-RLKs\_945

CAGATTTTGGCCTAGCCCAGCTGGTTGGACCTCCAACCTCCCAACTCGAGTTGCTGGATATCGTGCTCC  
AGAGGTAACGGACCCACGCAGAGTTTCCCAAAGGCAGATGTATATAGCT

>PGSC0003DMG402014514-(rev)G-LecRK\_0

TTCATGCATTTCTCACTTCACTCCATAACTCCTATGCATCCACACTCACCGTCCCCTCGCCGTCGTGCGAA  
GCCAAAATGGTATCACTTCAAGAGCCATTCTAAACCGCCGCCAACA

>PGSC0003DMG402014514-(rev)G-LecRK\_1098

TAAGAGTTTTACCCTGTGAGCGCTCAAAGGGTAGCTTCTGTGAATTTCCCTTGCCTTTAAGAAAAAAAAA  
TTAAGAAGAGAACAAGTAGCTACATCAAATAACACAATAATTGAAGCAAA

>PGSC0003DMG402014514-(rev)G-LecRK\_1159

AAAAAAAAATTAAGAAGAGAACAAGTAGCTACATCAAATAACACAATAATTGAAGCAAAGGAAATAAT  
AGGTAAGTCTAAAGTCGAAGAAAAAATTAGTAAGAGGGTAATAATATAACA



>PGSC0003DMG402014514-(rev)G-LecRK\_122

CATTAATTTTACACATTCACCACTGCCGCTTCGCCGTCATCACCGAACGCGTCGTTAAAGCCAATAATTA  
AACCTATTGATGATAAAATCGCTTTACATCCACCGCCACGGCGGCCGAT

>PGSC0003DMG402014514-(rev)G-LecRK\_1464

CCACTACAACCAACCTCTCACACCCAGTGAGGTACGCAAGATTTTTGTAAGGCATGTCGGTATTTAAAA  
ATAAATAATTGATATAGCAACATTATATTAATATCTTGTACAGGAGCAGA

>PGSC0003DMG402014514-(rev)G-LecRK\_1647

ACTTCATAAAAAAAAAAATTATAAAAATTATTTAAAGCATACTAATAAAAAATAAATCAAGTAACTACTA  
CAGCTTATTATTGTGTCCTATTCTATTTTGGACAAGTAATCAAATTTCTA

>PGSC0003DMG402014514-(rev)G-LecRK\_1708

AAACTACTACAGCTTATTATTGTGTCCTATTCTATTTTGGACAAGTAATCAAATTTCTATAATAGGATATA  
AATTGTATTTTAGTTCAATTGGTTTATCTTATCCTGATTTTGAATAGGA

>PGSC0003DMG402014514-(rev)G-LecRK\_1769

ATAGGATATAAATTGTATTTTAGTTCAATTGGTTTATCTTATCCTGATTTTGAATAGGAATTGAAGGTTGG  
AGTTCAAATCCCTATAACACTTACTTTTATCTAAAAAGGCCCCAAAAT

>PGSC0003DMG402014514-(rev)G-LecRK\_183

CCAATAATTAACCTATTGATGATAAAATCGCTTTACATCCACCGCCACGGCGGCCGATATATACTCATCC  
GTTACCGAAGCTTCTTCCGAAACTTACGTTACCACCGCCTCCGGTAACG

>PGSC0003DMG402014514-(rev)G-LecRK\_1830

TGAAGGTTGGAGGTTCAAATCCCTATAACACTTACTTTTATCTAAAAAGGCCCCAAAATATAACTCAAATT  
TGGGCTTGTTGAGGGTCGAACTCGGCCACACTTTAGAGAATGACTACAC

>PGSC0003DMG402014514-(rev)G-LecRK\_1891

AACTCAAATTTGGGCTTGTTGAGGGTCGAACTCGGCCACACTTTAGAGAATGACTACACCATCTGCACGC  
AGTAAACCAATAAGCCAAGGAAGCTGTTCAAGTAGTGTCATTAATATTTT

>PGSC0003DMG402014514-(rev)G-LecRK\_1952

TCTGCACGCAGTAAACCAATAAGCCAAGGAAGCTGTTCAAGTAGTGTCATTAATATTTTTTCTACTTATAT  
TTGAGTTTTTCAGATTTTTAGATATAATTATATAAATACTAAAAATTTTCA

>PGSC0003DMG402014514-(rev)G-LecRK\_2013

CTACTTATATTTGAGTTTTTTCAGATTTTTAGATATAATTATATAAATACTAAAAATTTTCATCGAAGCAGTGTC

GGTTGACACTCCTTGACATAGGGTGGGTCCGCCCTTGCTCGCACCTCA

>PGSC0003DMG402014514-(rev)G-LecRK\_244

ATACTCATCCGTTACCGAAGCTTCTTCCGAACTTACGTTACCACCGCCTCCGGTAACGGCGTTAATGTTT  
CCTGTGAATGGTTCTTCTGCACCAGTTTCTAGAGATGAAACTTCGTCGA

>PGSC0003DMG402014514-(rev)G-LecRK\_305

GTTAATGTTTCCTGTGAATGGTTCTTCTGCACCAGTTTCTAGAGATGAAACTTCGTCGATTAAAGTTCAAT  
CGCCGTTGTCAAGTGCATCAATCGGATCTGTAATTGGAATTTCTGTAGG

>PGSC0003DMG402014514-(rev)G-LecRK\_3233

AAGATCAAAGATGATTTAATTAATACTATTTAAATTTATCATTATTTTGTTTTATGATTTAGTAGGAGTGGTGA  
CTTTATCTCTAAATCAACTATTGAAAATTAGTGATCCAAATTGCTATT

>PGSC0003DMG402014514-(rev)G-LecRK\_366

AAAGTTCAATCGCCGTTGTCAAGTGCATCAATCGGATCTGTAATTGGAATTTCTGTAGGCGTTACCGGAG  
CTTTCTTCATTGTTGCAATTATACTCTTCGTGTGTTGCAGGAATAAGCTT

>PGSC0003DMG402014514-(rev)G-LecRK\_427

TTACCGGAGCTTTCTTCATTGTTGCAATTATACTCTTCGTGTGTTGCAGGAATAAGCTTAAATGTGGAAAA  
TTACGTGATCGTGAATCTCCACTGCCAAAAGGTAAAGCTTTTTTCAGTTT

>PGSC0003DMG402014514-(rev)G-LecRK\_4331

AGAGATTGCTTGTTTACGAATTTGTTTCCAACAGGACCTTAGAGTATCATTTACATGGTATGTTCTTTCTC  
TTTTCTTAATTCTGGTTGTTGGTGAATCCTGTATCAATAAGATTTT

>PGSC0003DMG402014514-(rev)G-LecRK\_4392

GTTCTTTCTTTTTCTTAATTCTGGTTGTTGGTGAATCCTGTATCAATAAGATTTTGTGACCAGCTTAA  
GGCATTTTTTGAATTATGCTAATATTTGTACAGCAGAGAGTTGATAAT

>PGSC0003DMG402014514-(rev)G-LecRK\_4819

CTATTTCTATGCTTTTGGAAAGACCAGCATTTAATATCTTCTGACTTCTGCTGTCCCAGGCACTTCATTTGC  
AATTTCCACATACTTTTCTATACCCTTATGGTGTATTATTTAACAC

>PGSC0003DMG402014514-(rev)G-LecRK\_488

ATGTGGAAAATTACGTGATCGTGAATCTCCACTGCCAAAAGGTAAAGCTTTTTTCAGTTTGATACAGTAGT  
TGAATCAGTAATATATACAGTAACAACTAAAGCTGCTTTTTTCAGGGGAAA

>PGSC0003DMG402014514-(rev)G-LecRK\_549

TACAGTAGTTGAATCAGTAATATATACAGTAACAATAAGCTGCTTTTTTCAGGGGAAATGTGTTTCACT  
TAACCAGAAAATATTTTTCTTTGCTCATGAAGCTTTCAATGTTCTGTTTA

>PGSC0003DMG402014514-(rev)G-LecRK\_61

CGTCGTCGGAAGCCAAAAATGGTATCACTTCAAGAGCCATTCTAAACCGCCGCAACAGTCATTAATTT  
TACACATTCACCACTGCCGCCTTCGCCGTCATCACCGAACGCGTCGTAA

>PGSC0003DMG402014514-(rev)G-LecRK\_610

TGTTTCACTTAACCAGAAAATATTTTTCTTTGCTCATGAAGCTTTCAATGTTCTGTTTATCTTCAGTAATTG  
ATTACCTTGCTAGCTTGATATTTTGCAAAGAAATGACGTTTCAGGGTT

>PGSC0003DMG402014514-(rev)G-LecRK\_6161

GGGCTGTTTTCTATTATCGACAACCTGGCTTCTGAGTACACCTAGAATCCACTGTTGATGTAAATAGTTTTT  
TGTTCTTAACAATAAAATCCATATGATGAGATTAATTTGAACCCAAATG

>PGSC0003DMG402014514-(rev)G-LecRK\_671

TTCAGTAATTGATTACCTTGCTAGCTTGATATTTTGCAAAGAAATGACGTTTCAGGGTTAAGTACTTCACT  
TCGCCTGAATTTTATTTGCCAAAGATGATTTGATACAACAACGTACC

>PGSC0003DMG402014514-(rev)G-LecRK\_7686

TTTAGAAGTACTGGGTGGTTTTATCCTTTATTGCTTTTCTTTTTTGCGAGTGATAAATGGTTGAGAAATTT  
TATCACGGCAGTAATCAATATCACGGAAACAACCTTTCTACCTCCACGA

>PGSC0003DMG402014514-(rev)G-LecRK\_8967

GTAATAACATCTTCTCTTAATCTTTTTCTGTTAGTGCTGGCGGATTTCTTTAAAGGGGTTTATAAACCAA  
ACCTTCTACTTATTGTTTCAGGTAGTTTCGTGCTTTAGAAGGCGATGCCT

>PGSC0003DMG402014514-(rev)G-LecRK\_9028

ATAAACCAAACCTTCTACTTATTGTTTCAGGTAGTTTCGTGCTTTAGAAGGCGATGCCTTTATCCTGGACC  
TTGATGAGGAAAATAGGCCAGGACAGAGTACCATTTGTGACTTTGATTC

>PGSC0003DMG402014514-(rev)G-LecRK\_9211

AGAATGGTAATACCACCGTGCACCGGGGGCTGTCATGGAAGTACACCAACTGAAAATGGAGTTAGATG  
AACGAAGCTCTTCTCCCCTTTTTATCTTTCTTTTCACTGATGTAGATGATAA

>PGSC0003DMG402014514-(rev)G-LecRK\_9272

TTAGATGAACGAAGCTCTTCTCCCCTTTTTATCTTTCTTTTCACTGATGTAGATGATAATTCGAGGGTGAA  
ATATATGATTGCAACCATCAAAGTTGTCTCACTTAGTGAGAGGATTGAT

>PGSC0003DMG402015682-(rev)LRR-RLPs\_3162

CGTTTGTGTATAAAGATGAACCAACAGAACATTGCATTGGGACACCATGATGAAGCCAATTGCTCCTCG  
TCTAAGAAACAAAGCTCTTATTTCTAATATTCATTGGAGCTGTCTTTGAG

>PGSC0003DMG402015682-(rev)LRR-RLPs\_3249

TTATTTCTAATATTCATTGGAGCTGTCTTTGAGAATCTGCAGCAACAACCAGTCTCTTTCAGAACTTTGC  
AGCTCTCTCCCCAAGCCCAGAATTTTGTCTTAAATATAGGTAATATAC

>PGSC0003DMG402015827-(rev)RLKWAX-EGF\_1240

AAGTTATGCTGGTTCGTCATTGATCACCAGAAACATTCTTTCCTATCCTTCCTCCATGAAGGATCCTGAAA  
AGGCTAATATAGCTATGGGAGTTCACCTCTTTGACTACAATGAACTGGA

>PGSC0003DMG402015827-(rev)RLKWAX-EGF\_1302

ATCCTGAAAAGGCTAATATAGCTATGGGAGTTCACCTCTTTGACTACAATGAACTGGAGGAAGCCACTA  
ACAATTTTGATTCCAAGAAAGAGCTTGGAGATGGTGGATATGGCACAGTAT

>PGSC0003DMG402015827-(rev)RLKWAX-EGF\_1426

AGGTAAGTAACTGATCTAAAATTGAAATCTTACTGATAATGTGTCACTCAACTCACACACCTGATTGA  
TTCATTAAGCATTGGTTGAATATGATATGCTTATAGGTAACTTCGTGA

>PGSC0003DMG402015827-(rev)RLKWAX-EGF\_1798

CATAGAAACAGCAAACGCACCTTGCCTATCTCCATGCTTCAGACGTCATCCACCGTGATGTAAAACTAAT  
AATATCCTTCTGGACAATAATTTCTGTGTTAAAGTAGCAGATTTTGGCTT

>PGSC0003DMG402015827-(rev)RLKWAX-EGF\_2046

TGGTATTAGTTGAGCTTATATCATCACTGCCTGCTGTTGATATCTGTAGGCACCGACATGAAATTAATTTG  
TCAAATATGGCCATCAACAAGATTCAGAGCAATTTATTACATGAGTTGG

>PGSC0003DMG402015827-(rev)RLKWAX-EGF\_2108

ATTAATTTGTCAAATATGGCCATCAACAAGATTCAGAGCAATTTATTACATGAGTTGGTGGATTCAAATA  
TCGGGTTTGACACTGATGATAATATAAGGTCAATGATAACTGCAATGGCA

>PGSC0003DMG402015827-(rev)RLKWAX-EGF\_2170

TTCAAATATCGGGTTTGACACTGATGATAATATAAGGTCAATGATAACTGCAATGGCAGAGTTAGCATT  
CAATGTCTACAGAACGACGGGGATATGAGGCCATCTATGCAGGAAGTTGT

>PGSC0003DMG402015827-(rev)RLKWAX-EGF\_2232

TAGCATTCCAATGTCTACAGAACGACGGGGATATGAGGCCATCTATGCAGGAAGTTGTGGAGGCTCTAC

TGAGAATTCAGAGAATGAATAAAACTGGGAAAACAGACAAGGGTCATCCTG

>PGSC0003DMG402015827-(rev)RLKWAX-EGF\_2356

CGATGATGCAGGCTTGTGCGAAGAATAACACATCATTAGTTTCACCTGATTTCGGTTACTGCAAAATGGAGT  
AGTAGTTTAAACAACACCCAATGGTAGTACCTAGCATTGGTTCTCTAAGG

>PGSC0003DMG402015827-(rev)RLKWAX-EGF\_2418

AATGGAGTAGTAGTTTAAACAACACCCAATGGTAGTACCTAGCATTGGTTCTCTAAGGTGGTGCACCTCAA  
ACGCCTCCATGTTGGTTTCCAAAACCTGAATTACACACTTTGATTACCT

>PGSC0003DMG402015827-(rev)RLKWAX-EGF\_2480

GCACTCAAACGCCTTCCATGTTGGTTTCCAAAACCTGAATTACACACTTTGATTACCTTGGTTTTCTCTGTT  
AAAGAGGATGTACATATGTCAGTGCAACACGTTTAAATGATTCAATTTG

>PGSC0003DMG402015827-(rev)RLKWAX-EGF\_2542

TTTCTCTGTTAAAGAGGATGTACATATGTCAGTGCAACACGTTTAAATGATTCAATTTGAACTTCTCAAGTC  
TTCTTTTATCTTTTCGATCTTCTCAAGTGATCTGCTGATTTATTTTTGT

>PGSC0003DMG402015827-(rev)RLKWAX-EGF\_2604

TCTCAAGTCTTCTTTTATCTTTTCGATCTTCTCAAGTGATCTGCTGATTTATTTTTGTAGCAGTACATGTTTA  
ATTTAGTGCCTAGCAATGGAAGAATAGGATTAGTTTCAAGAGAACAT

>PGSC0003DMG402015827-(rev)RLKWAX-EGF\_434

TCTTTGGGACTTAACACTGCAGATCTTTTTTCTTCTATGACTGCACTCTACCTTATGAAAGGGAGACATA  
TGATGTCAATTGTGCCCGTAATGCCACTCACCATTCTTTCGCGGTTTTT

>PGSC0003DMG402015976LRR-RLKs\_792

GGTGAGTCATTCCTCCAGAGGCAGTAATGGACGTTATGGATGCCAATCTGGTTACACCAATGGATAA  
TCGCTTACAGAAGGAGCTAGATGTTGTGGCATCAATCATGAAAGTGGCATT

>PGSC0003DMG402015976LRR-RLKs\_919

TGTGCTGAATCTCCGGCAAGAAGGACAAACATAGAAAGATGTTGTAGGGATGCTACAGAAGATCAAGA  
TTCAACTTCTTGCACGCTGAGCATGTTACCGGAATCTCCTTTTCCAAATTGA

>PGSC0003DMG402016933LRR-RLPs\_3720

ATTCTCAAATGGGTGAACCGTGATGATGAGGTTAAAGTAGATGATTTGAATAAATGGACACAACAGAAG  
TTCAATTCTAAGGTTTGTCTTGTCTTCTAGTTGTATAACTAATTAECTCT

>PGSC0003DMG402019148LRR-RLPs\_325

GTTGTCGGTCTTTGGAATCTTTGAAGGTCAACAAATGTAACAACCTAGTTTCCTTCCCTTTACATGTGTGG  
GAAATGCCTTCACTCTCATATTTGAATATATCAAATGCCTCAAATTGG

>PGSC0003DMG402019148LRR-RLPs\_455

TGCACAGGGTCTTCACCGTCTCACTGGATTACAGGAATTGTGCATTGGACCTTCTCAGAGACGGTGGAT  
TTTGAGGCATTCCAATTGATATTTAATGGCATTACAGCGGCTATCGTCCCT

>PGSC0003DMG402019148LRR-RLPs\_585

GAGGTGTATGGGAATAGGCAATGGGATTCTCTGCCCTATCAGGTTATGCAACTTTCTTCCCTAACAGAAA  
TCGGAATAAATGATTTTGAATCAAACCTTCTGATAGATTTGGAAT

>PGSC0003DMG402019242G-LecRK\_0

ATGAAAGGCCTATTTTCATTATGCATTTGCTGCCAATTTCTCTTCATTTTACTAACTTCTGCAGCATTAGAC  
ACAATCACTACAGATAAATCCATTAGAGATGGTGACACAATTGTTTCA

>PGSC0003DMG402019242G-LecRK\_1037

CACACGCCCTCATGTGTGTGCTTGATTCTTTTTTTGTTACCTAATTATGTCTTCACAGGTATCCTCAAGAT  
TCTGCAACAGAATGGTCTAGTGGTTGCGTTAGGAGAACTTCTTTGGAT

>PGSC0003DMG402019242G-LecRK\_1098

ATCCTCAAGATTCTGCAACAGAATGGTCTAGTGGTTGCGTTAGGAGAACTTCTTTGGATTGTACCCATGA  
TGGTTTTCTTAAATTTACGGGTATCAAGATGCCTGATTCTAGAACTCCT

>PGSC0003DMG402019242G-LecRK\_1159

TACCATGATGGTTTTCTTAAATTTACGGGTATCAAGATGCCTGATTCTAGAACTCCTGGTATAATGAG  
AGCATGAACCTTGAAAATTGCGAGAAAATGTGCTTGGCTGATTGCAATTG

>PGSC0003DMG402019242G-LecRK\_122

TGGAGGGATTTATGAGCTTGGATTTTTTCAGCCCTGGAAATTCGAAGAATCGTTACGTTGGCATATGGTAC  
AAGAAAATATCAACTGGAAGTGTGTTTGGGTTGCCAACAGAAACATTCC

>PGSC0003DMG402019242G-LecRK\_1342

ACTCATTGATATACGAGAGTTTCAGCCAAAATGAACAAAACCTGTTTGTGAGAGTAGCTGCTTCAGAATTA  
GGTAATGTCCCCACTCTGCACCATTCTCTCGTCTTAACAATATAAATACA

>PGSC0003DMG402019242G-LecRK\_1403

TCAGAATTAGGTAATGTCCCCACTCTGCACCATTCTCTCGTCTTAACAATATAAATACACAACCTTTAGAA  
TTGAAGGAACTCTACTATCTTATTTACTTGATAGACATTAATAATTGTTT

>PGSC0003DMG402019242G-LecRK\_1464

ACTCTTAGAATTGAAGGAAGCTACTATCTTATTTACTTGATAGACATTAATAATTGTTTATCAGCCATTAA  
ATGGCTGCACATCTACAATAGTTTCCCCTTAAGGAGGGAGCTGATAATC

>PGSC0003DMG402019242G-LecRK\_1525

CAGCCATTAAATGGCTGCACATCTACAATAGTTTCCCCTTAAGGAGGGAGCTGATAATCTAGTACGAAC  
GTATCCATCTAGTAGTGCTGTACTTGCATTTGCCTCTCAGATCATCCACTA

>PGSC0003DMG402019242G-LecRK\_1586

GTACGAACGTATCCATCTAGTAGTGCTGTACTTGCATTTGCCTCTCAGATCATCCACTAGTCCCCTTTGTT  
GCAGACTTTATTTTGTATAGAGTTTGACACTAGCAGCTATATTCAGAAT

>PGSC0003DMG402019242G-LecRK\_1647

CCCCTTTGTTGCAGACTTTATTTTGTATAGAGTTTGACACTAGCAGCTATATTCAGAATGAATAACCATAT  
AGGAGAGCAAAGATTGTTGCGTAACAGTTTCTCCAAGGGATTTTAGGA

>PGSC0003DMG402019242G-LecRK\_1708

ATAACCATATAGGAGAGCAAAGATTGTTGCGTAACAGTTTCTCCAAGGGATTTTAGGAAAGCTGCCTC  
TCAGCTTCTGATGTGCTAGACCTTATGGAAGATCAAGGATGTTAACAGCGG

>PGSC0003DMG402019242G-LecRK\_1769

GCTGCCTCTCAGCTTCTGATGTGCTAGACCTTATGGAAGATCAAGGATGTTAACAGCGGGGGATGGTGC  
TACACACTCTATCCTTTAATAGTTACTGATTAGCAAGTCTGCGGGGTTTCA

>PGSC0003DMG402019242G-LecRK\_183

ATATGGTACAAGAAAATATCAACTGGAAGTGTGTTGGGTTGCCAACAGAAACATTCCACTGAATGAC  
AATTCAGGAGTGTTAACACTCAATCCCAATGGAATTCTTGTACTTGTGAT

>PGSC0003DMG402019242G-LecRK\_1830

GATGGTCGTACACACTCTATCCTTTAATAGTTACTGATTAGCAAGTCTGCGGGGTTTCATAGAAAAATAA  
GAAGTAATAACAATCAATGCAATTCATTACTGATATGGCCAACATCATATGT

>PGSC0003DMG402019242G-LecRK\_1891

GAAAAATAAGAAGTAATAACAATCAATGCAATTCATTACTGATATGGCCAACATCATATGTAAATTGAACAT  
ATTCAGACAGGAAGGGGAGGAGAAAGAGGTCAATCCTGATTGGTGTTCATT

>PGSC0003DMG402019242G-LecRK\_1952

ATTGAACATATTCAGACAGGAAGGGGAGGAGAAAGAGGTCAATCCTGATTGGTGTTCATTTAGCAGCA

GTAGCAACATTTATCCTCAGCCTTTTAGCTTGGTTTTACTTCCGAAGAAGGA

>PGSC0003DMG402019242G-LecRK\_2013

AGCAGCAGTAGCAACATTTATCCTCAGCCTTTTAGCTTGGTTTTACTTCCGAAGAAGGAAAAGAAGAAG

AGGTATATATACTTGAGATACTCTTGTCTTTCTGGCTGACATTGTTGGC

>PGSC0003DMG402019242G-LecRK\_2074

AGAAGAAGAGGTATATATACTTGAGATACTCTTGTCTTTCTGGCTGACATTGTTGGCCTTTTACCAATT

CTCATTGATATCATGTTTGAGGCGGGCGAATGTATATTGACAGGTTTAG

>PGSC0003DMG402019242G-LecRK\_2135

TTTACCAATTCTCATTGATATCATGTTTGAGGCGGGCGAATGTATATTGACAGGTTTAGAAGTTGAAAAT

GAGGAAATGGAGCTTCCATTGTTTGATTTAGTAACTGTTACTAGTGCCAC

>PGSC0003DMG402019242G-LecRK\_2196

GTTGAAAATGAGGAAATGGAGCTTCCATTGTTTGATTTAGTAACTGTTACTAGTGCCACTGAGAACTTCT

CTTCTGCTAATGTGATTGGAGAGGGAGGTTTTGGACCCGTTTACAAGGTA

>PGSC0003DMG402019242G-LecRK\_2257

AGAACTTCTCTTCTGCTAATGTGATTGGAGAGGGAGGTTTTGGACCCGTTTACAAGGTAAATCAACTTTG

ATCCTCAATGTCTAGCAAGAAGTGGCATCTTTGACTCTTGATAGAAAATT

>PGSC0003DMG402019242G-LecRK\_2318

TCAACTTTGATCCTCAATGTCTAGCAAGAAGTGGCATCTTTGACTCTTGATAGAAAATTGCAGGGTATCC

TACCAAATGGACAAGAGATTGCAGTAAAGAGGCTATCAAAGCATTCTGGA

>PGSC0003DMG402019242G-LecRK\_244

TGAATGACAATTCAGGAGTGTTAACTCAATCCAATGGAATTCTTGTACTTGTGATAAATCGAATGT

CTCAATTTGGTCATCAAATCATCAAGATCGTTAAAGAATCCAAAAGCAC

>PGSC0003DMG402019242G-LecRK\_2440

AGGCTTTCAAGAGTTAAAAAATGAAATCGTTCTATTTCCAAGCTGCAACATAGAAACCTTGTCAAGCTA

TTGGGTTGCTGCCTTGAAGGAGAAGAAAGGATGCTAATCTATGAGTTCAT

>PGSC0003DMG402019242G-LecRK\_2562

CCAACGCTAGCTTGGACTATTTCAATTTTGGTCTGATTTTCATGATTCATTAATAACTAACTACTTGATATG

TCCTCAATATCTCTGCATCACTCAACGATTAGTTCCACATTGTGCAGA

>PGSC0003DMG402019242G-LecRK\_2623



TACTTGATATGTCCTCAATATCTCTGCATCACTCAACGATTAGTTCCACATTGTGCAGATACAAACAGAAA  
AGCTTCACTAGCATGGAAGAATCGCTTTGAAATTGCTATGGGAATATCT

>PGSC0003DMG402019242G-LecRK\_2684

CAAACAGAAAAGCTTCACTAGCATGGAAGAATCGCTTTGAAATTGCTATGGGAATATCTCGAGGTCTTCT  
TTACCTTACCAGGATTCAAGATTACGAATTATTCACAGAGATCTCAAGA

>PGSC0003DMG402019242G-LecRK\_2745

AGGTCTTCTTTACCTTACCAGGATTCAAGATTACGAATTATTCACAGAGATCTCAAGACCAGCAACATTT  
TATTAGATAGTGACATGAATGCAAAGATTTCTGACTTCGGCCTTGCCAA

>PGSC0003DMG402019242G-LecRK\_2806

AGCAACATTTTATTAGATAGTGACATGAATGCAAAGATTTCTGACTTCGGCCTTGCCAAAATTTTTGGTG  
GAGATCAAGTGAAGGAAAACTAAGAGAGTAATAGGGACATAGTAAGTT

>PGSC0003DMG402019242G-LecRK\_2867

TTTTTGGTGGAGATCAAGTGAAGGAAAACTAAGAGAGTAATAGGGACATAGTAAGTTTCTACACATC  
TTCAAATCATAGAATCTTTATTACATTCAATCAGTACATGAGCATAAATAT

>PGSC0003DMG402019242G-LecRK\_2928

TACACATCTTCAAATCATAGAATCTTTATTACATTCAATCAGTACATGAGCATAAATATATTGAGTTGATG  
CAGTGGATATATGTCCCCGGAATATGCTGTTGATGGGAAATATTCAGTA

>PGSC0003DMG402019242G-LecRK\_2989

TGAGTTGATGCAGTGGATATATGTCCCCGGAATATGCTGTTGATGGGAAATATTCAGTAAAATCAGATG  
TATTCAGCATTGGCGTAATCATTCTTGAAATAGTCAGTGGCAGAAAGAACA

>PGSC0003DMG402019242G-LecRK\_3111

AAATTCGTCATTTGGAGCATCATCACAATCTTTTGGGACATGTAAGCACAAAACCTTCATTCCCTTAATTC  
CCTCTCAACTCCTATTGTAAATACATTTGTATAAATGTGTTGTTCTGT

>PGSC0003DMG402019242G-LecRK\_3172

CCCTTAATCCCTCTCAACTCCTATTGTAAATACATTTGTATAAATGTGTTGTTCTGTTTGTAATCTAGGC  
ATGGTTACTTTGGAGTGAAGGCAACGCGATGGGACTGATAGATGAATG

>PGSC0003DMG402019242G-LecRK\_3233

GTAATCTAGGCATGGTTACTTTGGAGTGAAGGCAACGCGATGGGACTGATAGATGAATGTTTGAAAGA  
ATCATTTTCAGAATCTCAAGTGTGAGATGCATCCAAGTTGGTTTGTATGC

>PGSC0003DMG402019242G-LecRK\_3355

CCAAAACTCCCCGAGGATAGGCCTACCATGGCATCAGTAGTTTTCTGGTTAGGCAATGAAGGCCTGGT  
TCTTCTCAACCAAAGAAACCTGGTTTTTTTTATTGAGAGGAATTCAACGGA

>PGSC0003DMG402019242G-LecRK\_3416

GGCCTGGTTCTTCTCAACCAAAGAAACCTGGTTTTTTTTATTGAGAGGAATTCAACGGAATCAGCAGAGT  
CATCTGATGAAGGATATCTAAGTAACAACGTATCGATAACAGTCCTAGAG

>PGSC0003DMG402019242G-LecRK\_3477

CAGCAGAGTCATCTGATGAAGGATATCTAAGTAACAACGTATCGATAACAGTCCTAGAGCCAAGATAGA  
CATAAATCCAACAATTGTAACTTTTGAAATGTATCCACTTTGTCCTGTTT

>PGSC0003DMG402019242G-LecRK\_3538

AAGATAGACATAAATCCAACAATTGTAACTTTTGAAATGTATCCACTTTGTCCTGTTTTTGTCAACAGTA  
TTAGTGTATATATGGACTATATCATGAGGTGCATTGAGGAAGATAGTCT

>PGSC0003DMG402019242G-LecRK\_3652

TAGTCTAGTATTTCTGTTTTTCATTGACATGTGTATTCTTCGATACTATAATAAACGTAACGAATTGGCCTA  
TTCTGAATAACTTGTA AAAATCATGTCTCCGCTGCTGACCATCAAAAT

>PGSC0003DMG402019242G-LecRK\_427

TCGCGTGGCAGAGTTTTGATTATCCAGGAAATACTTTGTTACCTGGCATGAGGATTGGAAAAGATTTGG  
TCACGGGAATGGATTGGCATGTAACGTCATGGAAGAGCATGGATGATCCAA

>PGSC0003DMG402019242G-LecRK\_488

AGATTTGGTCACGGGAATGGATTGGCATGTAACGTCATGGAAGAGCATGGATGATCCAACCTCCTGGTG  
AATATGTAGATGGTCTTGATTCTCATGGATATCCACAATTGTTTGTGTGGAA

>PGSC0003DMG402019242G-LecRK\_549

CCTGGTGAATATGTAGATGGTCTTGATTCTCATGGATATCCACAATTGTTTGTGTGGAAAAATTCATCTGT  
AGTATTTAGCTCAGGGCCATGGAATGGTATTGCATTCAGTGGTAGTCCT

>PGSC0003DMG402019242G-LecRK\_610

ATTCATCTGTAGTATTTAGCTCAGGGCCATGGAATGGTATTGCATTCAGTGGTAGTCCTAATAATAAACC  
AAATACATATTACAGTTTCGAGTTTGTATTATAATCAACAGGAAATTTACT

>PGSC0003DMG402019242G-LecRK\_671

TAATAAACCAAATACATATTACAGTTTCGAGTTTGTATTATAATCAACAGGAAATTTACTACACATATACAA

TTAGGAATGACTCCATTCCCACCAGGGTGGTGCTCAATCCGTCTGGTGT

>PGSC0003DMG402019242G-LecRK\_732

ACATATAACAATTAGGAATGACTCCATTCCCACCAGGGTGGTGCTCAATCCGTCTGGTGTGCTAGAACACC

TAATATGGATAGAGCGCAGTCAGAGCTGGTTTCTCTACTTGACAGCACAA

>PGSC0003DMG402019242G-LecRK\_793

TAGAACACCTAATATGGATAGAGCGCAGTCAGAGCTGGTTTCTCTACTTGACAGCACAAATTTGATAATTG

TGATCGTTTTAGTTTATGTGGACCTTATTCAAGTTGCAACATCAATAACT

>PGSC0003DMG402019242G-LecRK\_915

CCTCCATGTGACTGTTTGAAAGGTTTTGAGCCTAGGTTTGTATTTGTTACACTATCTGATCATCTCACGTT

AAGCTGTCAGAGAAAGCACACATTGGACTTTTGATTACTTACTTATGTT

>PGSC0003DMG402019242G-LecRK\_976

ATCTCACGTTAAGCTGTCAGAGAAAGCACACATTGGACTTTTGATTACTTACTTATGTTTTTCACACGCCCC

TCATGTGTGTGCTTGATTCTTTTTTTGTTACCTAATTATGTCTTCACAG

>PGSC0003DMG402019252-(rev)RLKmalectin\_0

AAAACAGAGCCTGGCACAGATAGATAAATATTACATTTAATGTATCACTTACAGAAGCTTCATAGCTCTT

TCTGAGATACTGATGAGTGTATCAAATCAAACCACAATGTCCATTGAAA

>PGSC0003DMG402019252-(rev)RLKmalectin\_2806

TGATAGACCTTCCATGGGGGATGTTCTATGGAATCTAGAGTATGCTCTTCAGCTTGAGGAAACCTCATCA

GCTCTGGCAGAGCCCGATGATAACAGCACGAACCATATACCCAGCATAACC

>PGSC0003DMG402019252-(rev)RLKmalectin\_2867

ACCTCATCAGCTCTGGCAGAGCCCGATGATAACAGCACGAACCATATACCCAGCATAACCTTTGACACCAT

TTGACAATAGTGTGAGTATGATCGAAGGGATCAACTCTGGAACCTGATGAT

>PGSC0003DMG402019252-(rev)RLKmalectin\_427

GCTTCTTTGCTACTCTTACATTGCTTCAGATAGATCTATTAATGGTTTGTAAGATTAGTGTTTAGGTCTCCT

TGGGGAATTTGGAGTTTGTGTGCCACCAGGTGTTTGTAAAATGGG

>PGSC0003DMG402019252-(rev)RLKmalectin\_61

ATAGCTCTTTCTGAGATACTGATGAGTGTATCAAATCAAACCACAATGTCCATTGAAACACAGCTGGTG

TAACTGTGGGGGTGCGGGGTGGGGGTTCTTTTGTGGGGTCTCCATTTCT

>PGSC0003DMG402019681-(rev)LRR-RLPs\_704

AAATTTGAACGGATCAAACGGATAAAGTTCATAAATAACCATTTTTAGTTCGTGTAATTGAGAATTAA  
CCATGGTCATAGAATATTGTCGTAGAGTTTCACTTGTGAAATTTGAAACG

>PGSC0003DMG402020263LRR-RLKs\_0

CTTTAGTGGCCTAGGTTAAGACGGCCCTGGTGGCACAGTGCTTTTCTGAGACTCTGTGAAAAGAAA  
GTCACCATTAAAGCCAGAACTGAATCGGTCCCCTGTTTTTCTCCTTGA

>PGSC0003DMG402020263LRR-RLKs\_2013

AAAATTTTGATCAGTCAGCATTACTTGGTGAAGGGTCAGTTGGAAAAGTATGGCTTCAAACAATACTTA  
TGGTTCTCATTGATAATATATATCTTGATGTTTTCCATTCAATCAATGGT

>PGSC0003DMG402020263LRR-RLKs\_2074

CAATACTTATGGTTCTCATTGATAATATATATCTTGATGTTTTCCATTCAATCAATGGTCACGCTGAATTT  
GGCGCAAAGTGATATACTTGCTGTAAAACCTGAATAAACGAAGCAGGA

>PGSC0003DMG402020263LRR-RLKs\_2135

CGCTGAATTTTGGCGCAAAGTGATATACTTGCTGTAAAACCTGAATAAACGAAGCAGGACGTAGATTTT  
GTTGCATAGACCATGTCCAACAATGATAATGCAATGAATGCACTAGTTCAC

>PGSC0003DMG402020263LRR-RLKs\_2196

TAGATTTTGTTCATAGACCATGTCCAACAATGATAATGCAATGAATGCACTAGTTCACCAAAGTACAAA  
ATGGATTTAGGTGTTTTTTTTTTTTTAAAGTGCTTGCCTATCATATTC

>PGSC0003DMG402020263LRR-RLKs\_2257

AAGTACAAAATGGATTTAGGTGTTTTTTTTTTTTTAAAGTGCTTGCCTATCATATTCGCATTCTACATGT  
GCATCTGTGACTTCTTTTGATGATAAAAACCTGGTGTCCACCAATAATGC

>PGSC0003DMG402020263LRR-RLKs\_2562

TATTTTAGTTATCAGCAATCCCTCAATATTTATCTCCATTTAGATTACAAGGGAAGATTAGAGAATGG  
AGCTTACATAGCTGTAAGGTCCTAAATGTGTGCATAGTTCACAAAAGT

>PGSC0003DMG402020263LRR-RLKs\_2623

TAGAGAATGGAGCTTACATAGCTGTAAGGTCCTAAATGTGTGCATAGTTCACAAAAGTTAAAAATTGT  
TTTAGTTTTTTTTTTTTTTTTTAAAGTGCTTGCCTATCATATTCGCATTCT

>PGSC0003DMG402020263LRR-RLKs\_2989

GTTATCAGCAATCCCTCAATATTTATCTCCATTTAGATTACAAGGGAAGATTAGAGAATGGAGCTTA  
CATAGCTGTAAGGTCCTAAATGTGTACAAAAGATACTCTAACCGGAACC

>PGSC0003DMG402020263LRR-RLKs\_3050

TGGAGCTTACATAGCTGTAAGGTCACTAAATGTGTACAAAAGATACTCTAACCGGAACCTCAAACCTACG  
ATTGGACTTACTGTCAAAGTTTCGTCACCCCCATTTAGTTAGCCTTCTGGG

>PGSC0003DMG402020263LRR-RLKs\_3111

AAACTACGATTGGACTTACTGTCAAAGTTTCGTCACCCCCATTTAGTTAGCCTTCTGGGTCACTGCATTGA  
TGGTGGAGCACCAGATGATTCAACTGTCCCCAGAATTTTTCTCATTAT

>PGSC0003DMG402020263LRR-RLKs\_3172

ACTGCATTGATGGTGGAGCACCAGATGATTCAACTGTCCCCAGAATTTTTCTCATTATGAATATATCTCT  
AATGGAAACTTCCGTGCTCATCTATCAGGTCAGCTAAGTAAATCCTTTA

>PGSC0003DMG402020263LRR-RLKs\_3233

ATATATCTCTAATGGAAACTTCCGTGCTCATCTATCAGGTCAGCTAAGTAAATCCTTTAGCATGAGCATTG  
CATGTGTTTTGATGCTTGGTTGAATATGGAAATATTATATGATGCACAT

>PGSC0003DMG402020263LRR-RLKs\_3294

ATGAGCATTGCATGTGTTTTGATGCTTGGTTGAATATGGAAATATTATATGATGCACATATGGAGTGCTG  
GTTGGATTCTTTTCTCCCAGAAATGATTGGGATACCCTTGTTGATGAATC

>PGSC0003DMG402020263LRR-RLKs\_3355

GGAGTGCTGGTTGGATTCTTTTCTCCCAGAAATGATTGGGATACCCTTGTTGATGAATCTCTATCTAGCA  
TTGCAAGTATTTTTGCTACTTATGAGCTTGAGGCATCTTATTCATCATAT

>PGSC0003DMG402020263LRR-RLKs\_3416

TATCTAGCATTGCAAGTATTTTTGCTACTTATGAGCTTGAGGCATCTTATTCATCATATTAATTTACACAT  
AGTGGTATTCAGTATGCAATTAAGTACTGTCAGTTTGATTGAGCAACAATGT

>PGSC0003DMG402020263LRR-RLKs\_3477

ATTTACACATAGTGGTATTCAGTATGCAATTAAGTACTGTCAGTTTGATTGAGCAACAATGTAATGATCACTT  
GCACGAAGTTCTGTTGGTTGAATTCATACTGAGTTGGACCTTTATTTT

>PGSC0003DMG402020263LRR-RLKs\_3538

TGATTCACCTGCACGAAGTTCTGTTGGTTGAATTTCATACTGAGTTGGACCTTTATTTTTGTTGTTATATAC  
TTTCATTTAACCTGCATGTCCAATAAGTACAGAAAATACAAGAGACA

>PGSC0003DMG402020263LRR-RLKs\_3599

TTGTTATATACTTTCAATTTAACCTGCATGTCCAATAAGTACAGAAAATACAAGAGACACGCCATAACGT

ATTCAGCTTATCTCAAACACTTGTACTTGCAGAAAATAGTTCAAGAAAGA

>PGSC0003DMG402020263LRR-RLKs\_3660

CCATAACGTATTTCAGCTTATCTCAAACACTTGTACTTGCAGAAAATAGTTCAAGAAAGATCCTCAAGTGG  
TCAGACAGGTTGTCGGTGCTGATTGGTGTGCCAAGGCAGTGCACCTTCT

>PGSC0003DMG402020263LRR-RLKs\_3721

CTCAAGTGGTCAGACAGGTTGTCGGTGCTGATTGGTGTGCCAAGGCAGTGCACCTTCTTCACACAGGT  
GTAATTCCTTCTTCATTTAGCAACCGCTTGAAGACGAGTAACATATTGCTT

>PGSC0003DMG402020263LRR-RLKs\_3782

ACACAGGTGTAATTCCTTCTTCATTTAGCAACCGCTTGAAGACGAGTAACATATTGCTTGATGAGCATAA  
CATGGCAAATAAGTGATTTTGGGATGTCCATTCTTATGGAAGAAAGTG

>PGSC0003DMG402020263LRR-RLKs\_3843

TGAGCATAACATGGCAAATAAGTGATTTTGGGATGTCCATTCTTATGGAAGAAAGTGAAAAGGTGGG  
TATTTAATATTTTGTGTGAAAGGTGAAAATTCAAAATTTAGGATAGATGG

>PGSC0003DMG402020263LRR-RLKs\_3904

AAGGTGGGTATTTAATATTTTGTGTGAAAGGTGAAAATTCAAAATTTAGGATAGATGGTAATTTCTCAT  
ACTCAATATGTCTTTTTTCAGGCAAAGGAGATGACGTCACCTCCTGGTA

>PGSC0003DMG402020263LRR-RLKs\_3965

ATTTCTCACTCAATATGTCTTTTTTCAGGCAAAGGAGATGACGTCACCTCCTGGTATGAAACTCTTCA  
CTCATGTATTCCGTAACGTGCCTTACCAACTTCCTTTTACTAAACCAAC

>PGSC0003DMG402020263LRR-RLKs\_4026

AAACTCTCACTCATGTATTCCGTAACGTGCCTTACCAACTTCCTTTTACTAAACCAACTGGGATTCTATTT  
CAAGAGTGTCAACTAGAGGCATATATATCATCTACTATAGCTGTTTGC

>PGSC0003DMG402020263LRR-RLKs\_4087

GGATTCTATTTCAAGAGTGTCAACTAGAGGCATATATATCATCTACTATAGCTGTTTGCAGGATATAAAT  
CAGTGATATTTTATTCTTGTGTAGGCATATGACAAAGAAAGAGGACGATG

>PGSC0003DMG402020263LRR-RLKs\_4148

GATATAAATCAGTGATATTTTATTCTTGTGTAGGCATATGACAAAGAAAGAGGACGATGTTTATAACTTT  
GGTTTCATATTACTGGAGTCGCTGGTTGGCCCTTCTGTCAGTGGAAAAGG

>PGSC0003DMG402020263LRR-RLKs\_4209

TATAACTTTGGTTTCATATTACTGGAGTCGCTGGTTGGCCCTTCTGTCAGTGGAAAAGGAGAAGCATTTT  
TGATGAATGAAATGGTATGAAACTGCTATATTATTATGTATGCAACTCCT

>PGSC0003DMG402020263LRR-RLKs\_427

GGTTGCTTCAAGATTGTTGGAACTTGGCTCCATTTTGAAGTCACTGTAAATGGGTTTCTTCAAGCTTTT  
TGTGATAGTGTGGTTATTTGCGCTTTCTTTATAGCAAATACTTATCAG

>PGSC0003DMG402020263LRR-RLKs\_4270

AAGCATTTTTGATGAATGAAATGGTATGAAACTGCTATATTATTATGTATGCAACTCCTTTGTCATTGACA  
GTAACGTAAAGTATTCTTCAGCAATTTGTTCCCTTTAGGATCCTAAACG

>PGSC0003DMG402020263LRR-RLKs\_4331

GTCATTGACAGTAACGTAAAGTATTCTTCAGCAATTTGTTCCCTTTAGGATCCTAAACGTTGTTGCAATGT  
TGGATAAGTAACAAAATTTTCGTTGCTCTGCAACCTAACTTTACAATC

>PGSC0003DMG402020263LRR-RLKs\_4392

GTTGCAATGTTGGATAAGTAACAAAATTTTCGTTGCTCTGCAACCTAACTTTACAATCAGTACTAATATA  
GATTAACAGAACTACACACATTATTCAAGTTTTATTAGGTAAACCTTCT

>PGSC0003DMG402020263LRR-RLKs\_4453

TACTAATATAGATTAACAGAACTACACACATTATTCAAGTTTTATTAGGTAAACCTTCTGATATGCAAGTA  
CCATAGGGAGAAAAGTTGAGCCTGATATACAAGAGTCAAAAAGTCTTGAT

>PGSC0003DMG402020263LRR-RLKs\_4514

TATGCAAGTACCATAGGGAGAAAAGTTGAGCCTGATATACAAGAGTCAAAAAGTCTTGATTTTTTCACTG  
GTGTGTTACATAAATATCTCTGGATTTTCTCTTTGAATGACAGGCATCCTT

>PGSC0003DMG402020263LRR-RLKs\_4575

TTTCACTGGTGTGTTACATAAATATCTCTGGATTTTCTCTTTGAATGACAGGCATCCTTTGGTAGCCAAGA  
TGGTCGACGCAGAATTGTGGATCCAATAGTGCTAGCCACTAGCTCCAAT

>PGSC0003DMG402020263LRR-RLKs\_4636

GTAGCCAAGATGGTCGACGCAGAATTGTGGATCCAATAGTGCTAGCCACTAGCTCCAATGAGTCATTGT  
CAATTGTAATATCCATCACCAACAAATGCATATCTACAGAGTCATCAACTC

>PGSC0003DMG402020263LRR-RLKs\_4697

GTCATTGTCAATTGTAATATCCATCACCAACAAATGCATATCTACAGAGTCATCAACTCGCCCCTCGTTTG  
AGGATGTTCTCTGGAACCTACAATATGCTGCTCAAGTTCAAGCTACAGC

>PGSC0003DMG402020263LRR-RLKs\_4758

CCCTCGTTTGAGGATGTTCTCTGGAACCTACAATATGCTGCTCAAGTTCAAGCTACAGCTGATGCAGATC  
AGAAATCTGATGCTACTTCACCGTCATAAGCTATTTGAGAAGTACAACCTG

>PGSC0003DMG402020263LRR-RLKs\_4819

ATGCAGATCAGAAATCTGATGCTACTTCACCGTCATAAGCTATTTGAGAAGTACAACCTGCATCGAATCAA  
CGATATTTAATTTGGTCAGATCATAGGAGAATGTTAGCTGATTAATTTCA

>PGSC0003DMG402020263LRR-RLKs\_4880

TCGAATCAACGATATTTAATTTGGTCAGATCATAGGAGAATGTTAGCTGATTAATTTTCATGATGGTTGTG  
GGAGTACCAACCGGTAGGCTACTAGCCTTAAAGCTCAAGTTTACGCTACA

>PGSC0003DMG402020263LRR-RLKs\_4941

ATGGTTGTGGGAGTACCAACCGGTAGGCTACTAGCCTTAAAGCTCAAGTTTACGCTACAGGTCCTCCCAT  
ATTTTCTTTATTTTGTATCAGAATTGTAAATTTTGTGATTCTAGTAATA

>PGSC0003DMG402020263LRR-RLKs\_5002

TCCTCCCATATTTTCTTTATTTTGTATCAGAATTGTAAATTTTGTGATTCTAGTAATAGGTGATGTTTTCAT  
ATAGTATAGACCCTCGTTTTAAATTCTATCATTGCAAGTAGGCAATT

>PGSC0003DMG402020263LRR-RLKs\_5063

TGATGTTTTCATATAGTATAGACCCTCGTTTTAAATTCTATCATTGCAAGTAGGCAATTGAACTCGTAGAA  
GTCTAGATTCAGACAAGACAATACTTTAGTCATCATATATATGTTTGGT

>PGSC0003DMG402020263LRR-RLKs\_5099

TCTATCATTGCAAGTAGGCAATTGAACTCGTAGAAGTCTAGATTCAGACAAGACAATACTTTAGTCATCA  
TATATATGTTTGGTGCAACGGAAAAAAGATATGGATACCGCAAATGCAAG

>PGSC0003DMG402021049LRR-RLPs\_0

ATGGGCAATGGAAATCTTGCAATTGTTTCTGCTATACGCGTTTCTTTGTCAACTTGCTTTCTCTTCGTCCTTA  
TCTCATTTGTGCCCAAAGATCAATCTCATGCTCTTCTACAATTCAAG

>PGSC0003DMG402021049LRR-RLPs\_1116

TCCCTAACAGGTCCAATTCCTTCTAATGTAAGTGGTTTGCAAACCTAGGATCACTCAGCTTGTCATTAAA  
CCACTTGAATGGGAATATAACCATCATGGATATTCTCCCTCCCACTTACTT

>PGSC0003DMG402021049LRR-RLPs\_1178

GTCATTAAACCACTTGAATGGGAATATAACCATCATGGATATTCTCCCTCCCACTTACTTGAATTGTTAGACT



TGAGTGATAACCATTTCAATGGAAACATTCCGGACTTCAAGTCCAAATG

>PGSC0003DMG402021049LRR-RLPs\_124

TGCTTACAATAAGTCCTAATGCTCCTGATTATCGTTTTCGACATAACAGACCACTTGATTCAGTCATATCCA

AAAACTCTTTCGTGGAACAAGAGCACAGATTGTTGCTCTTGGGATGGAG

>PGSC0003DMG402021049LRR-RLPs\_1240

TGTTAGACTTGAGTGATAACCATTTCAATGGAAACATTCCGGACTTCAAGTCCAAATGGTTGTTTCTTGTT

ATTCTAAAACAAAATAAGCTGCAAGGTCTATTCCAAAGTCACTCCTAA

>PGSC0003DMG402021049LRR-RLPs\_1302

TTTCTTGTTATTCTAAAACAAAATAAGCTGCAAGGTCTATTCCAAAGTCACTCCTAAACCAGCAGCGCTT

ACAGTTTCTTGTCTATCACAAAATAATCTCAGTGGACAGATCGCTTCA

>PGSC0003DMG402021049LRR-RLPs\_1364

GCAGCGCTTACAGTTTCTTGTCTATCACAAAATAATCTCAGTGGACAGATCGCTTCAACAGTCTGCAAT

CTGAAAACACTACAAGTGCTAGATTTGGGCAGCAATAATTTGGAGGGAAC

>PGSC0003DMG402021049LRR-RLPs\_1488

CCACTATGTTTGGGTGAGATGAGTGAACCTTTGGGCTTTAGATTTAAGCAACAATAGTCTTAGCGGGACA

ATTAATACTAATTTTAGTATTGGAAACCAACTTAGAGTCATCAAATTTGAT

>PGSC0003DMG402021049LRR-RLPs\_1550

CGGACAATTAATACTAATTTTAGTATTGGAAACCAACTTAGAGTCATCAAATTTGATGGGAATAAGTTA

GAGGGGAAAGTCCCGCAATCTTTGATCAATTGCAAAAATTTGGAAGTTCT

>PGSC0003DMG402021049LRR-RLPs\_1674

TTAGGTAACAATGAGTTGAGTGACACATTTCTAAATGGTTGGGAGCCCTACCTATTTGCAGATTTTAA

ACTTGAGATCAAATAAGTTCTATGGCCCTATAAAAGATTCAAGGACTGAC

>PGSC0003DMG402021049LRR-RLPs\_1736

GATTTTAACTTGAGATCAAATAAGTTCTATGGCCCTATAAAAGATTCAAGGACTGACAACCTGTTTGCT

CAAATTCTAGTCATAGATCTCTCATTCAATGTATTTAGTGGAGATTTACC

>PGSC0003DMG402021049LRR-RLPs\_1798

TGTTTGCTCAAATTCTAGTCATAGATCTCTCATTCAATGTATTTAGTGGAGATTTACCAGTGAGACTTTTT

GAGAGTTTTGAAGCCATGAAAATAATTAGTGAGAGCAGTGGAAACCCGAG

>PGSC0003DMG402021049LRR-RLPs\_1860

AGACTTTTTGAGAGTTTTGAAGCCATGAAAATAATTAGTGAGAGCAGTGGAACCCGAGAGTATGTAGG  
AGCTGTATATTCTCCTTATTACACTAATTCCATGATAGTGACAACAAAGGGA

>PGSC0003DMG402021049LRR-RLPs\_1922

TGTAGGAGCTGTATATTCTCCTTATTACACTAATTCCATGATAGTGACAACAAAGGGACGGGATCTTGAA  
CTTCCTCAAGTTTTGACTACAGACCTAATTATTGATCTCTCAAGTAATAG

>PGSC0003DMG402021049LRR-RLPs\_1984

ATCTTGAACCTCCTCAAGTTTTGACTACAGACCTAATTATTGATCTCTCAAGTAATAGATTTGAAGGTCAT  
ATCCCAAGCATTATTGGAGATCTCATTGGGCTTCGCATGTTGAACTTAT

>PGSC0003DMG402021049LRR-RLPs\_2046

GAAGGTCATATCCCAAGCATTATTGGAGATCTCATTGGGCTTCGCATGTTGAACTTATCACATAATCACTT  
GGAAGGTATTATACCAGCATCACTGCACCAGTTATCTGTACTTGAATCA

>PGSC0003DMG402021049LRR-RLPs\_248

TTGTGACGAGATGACAGGACAAGTGATTGAGCTTAACCTCCCTTTCAGCAAACCTCAAGGCAGGTTTCAT  
TCCAATAGTAGCCTCTTCAACTCTCCAATCTCAAAGGCTTGATTTATC

>PGSC0003DMG402021049LRR-RLPs\_310

GGTTTCATTCCAATAGTAGCCTCTTCAACTCTCCAATCTCAAAGGCTTGATTTATCTTATAATAATTTCT  
CTGGGTCGTACATTTACCTAAATTTGGTGAGCTTCTAGTTTGATGC

>PGSC0003DMG402021049LRR-RLPs\_434

TGATTTGTTAGATTTTAGTTTTACAGGTCTAATCCCTGAAGAAATATCTCGTCTTTCAAAATTACAAGTTCT  
TCGTATCAATAGTGATCTATATGGTCTTAGATTCGGACCTCACAATTT

>PGSC0003DMG402021049LRR-RLPs\_496

TACAAGTTCTTCGTATCAATAGTGATCTATATGGTCTTAGATTCGGACCTCACAATTTTGAAGTCTCCTT  
AAGAACTTGACCAATTAAGAGTGCTCGACCTTAGCTATGTAGACATCT

>PGSC0003DMG402021049LRR-RLPs\_62

TTCGTCCTTATCTCATTTGTGCCCAAAGATCAATCTCATGCTCTTCTACAATTCAAGCACATGCTTACAAT  
AAGTCCTAATGCTCCTGATTATCGTTTCGACATAACAGACCACTTGAT

>PGSC0003DMG402021049LRR-RLPs\_620

CGCTATTCCTCTAAATTTCTTCTTATTTAACTACTCTACAACCTTGGAAATACACAGTTATATGGGATATT  
GCCCAGAAGAGTTTTCCACCTTCCAACCTGAAATCTCTTATTTAGA

>PGSC0003DMG402021049LRR-RLPs\_682

ATGGGATATTGCCAGAAGAGTTTTCCACCTTCCAACCTGAAATCTCTTATTTAGAAGACAATCCCCAG  
CTCACTGTAAAGTTTCCCACAACCAAATGGAATAGCAGTGCATCACTTA

>PGSC0003DMG402021049LRR-RLPs\_744

AATCCCCAGCTCACTGTAAAGTTTCCCACAACCAAATGGAATAGCAGTGCATCACTTATGGAGTTAGATC  
TCTATCGTGTGAATTTTATTGGCAAGATACCTGAATCATTTAGTCATCTA

>PGSC0003DMG402021049LRR-RLPs\_806

GTTAGATCTCTATCGTGTGAATTTTATTGGCAAGATACCTGAATCATTTAGTCATCTAACTTCACTGCGTA  
GATTGACAATAGCTTCTTGTAACTCTCTCAGGCTCTATTCCTAAACCTCT

>PGSC0003DMG402021049LRR-RLPs\_868

CACTGCGTAGATTGACAATAGCTTCTTGTAACTCTCTCAGGCTCTATTCCTAAACCTCTATGGAATCTCACC  
AACATAGAGAAGTTGGACCTTGGTTATAACCATCTTGAAGGACCAATTT

>PGSC0003DMG402021049LRR-RLPs\_930

AATCTCACCAACATAGAGAAGTTGGACCTTGGTTATAACCATCTTGAAGGACCAATTTCCGATTTCTTTA  
GATTTGGAAAGCTGTGGTGGTTATCACTTGCAAATAACAACCTTTGATGGC

>PGSC0003DMG402021049LRR-RLPs\_992

TTTCTTTAGATTTGGAAAGCTGTGGTGGTTATCACTTGCAAATAACAACCTTTGATGGCCAGCTTGAGTTTT  
TATCCTTTAACAGAAGCTGGACGCAACTTAAACGGCTAGATTTTTTCATC

>PGSC0003DMG402023866-(rev)LRR-RLPs\_837

TATTGCATGTTCTCAACTGGAAAGTCGAGATGGCTTGAAGAACCATTGAGAAGCTGGAACACAAAATT  
ATTAACTAAGGAGAAAGAAGCAACGGTGTCAAAGGAATTATAGAAGATGA

>PGSC0003DMG402025507-(rev)LRR-RLPs\_1054

GGCATGAGGACAATTGATCAAACAATGAAGTTACCAAGCTATGAAGGAAATGGAGATTACCAAGACTC  
AGTGGTAGTTGGATCAAAGGGATTGAAGCTAGAAGTTGTGAGAATTTTGTCT

>PGSC0003DMG402025507-(rev)LRR-RLPs\_1116

AGACTCAGTGGTAGTTGGATCAAAGGGATTGAAGCTAGAAGTTGTGAGAATTTTGTCTTTGTACACAGT  
TATAGATCTTTCAAACAACAAATTCCAAGGACATATTCCTGGTGTCTGGG

>PGSC0003DMG402025507-(rev)LRR-RLPs\_1302

ACTTGGAAGTTTATCTATAGTGAATCGTTGGACCTTTCGTTTAACCAGCTTTCGGGAGAGATACCACAA

CAACTTGCTTCTCTAACGTCTCTTGAATTCTTAAATCTCTCCCACAATTA

>PGSC0003DMG402025507-(rev)LRR-RLPs\_1488

TGATGGATTACGTGGATTCCCTGTTTCAAAGGTTGTGGCAATGATCCTGTGTATGAGACAAACTATACA  
GTGTCTGCGCTAGAAGATCAAGAAAGAAATTCTGAATTTTTCAATGATTT

>PGSC0003DMG402025507-(rev)LRR-RLPs\_1719

ACTGGAACACAAAATTGTCATGCGAAGGAGAAAGAAGCAGCGAGGTCAAAGAATTACAGAAGAAAA  
AATAATCGCTTCTAGACAAGTTACCAGTAAGAAGAATTTGATTTCAGAACTTC

>PGSC0003DMG402025507-(rev)LRR-RLPs\_930

AAATTGCATGGACCCATAAGATCTTCAGGGACTGAAATCATGTTTCTGATCTTCGAATCATAGATCTCTC  
TAACAATGCCTTCTACAAAAGACTTACCAACGAGTCTGTTTCAACATTT

>PGSC0003DMG402026153G-LecRK\_1280

TAATGTGGCACTCCTATGTGTTCAAGAAGATCCAGCTGAGCGTCTGTAATGTCAAATGTTGTTTTATG  
CTTGGAGGTGAAAGCATAACACTACCAAGACCAAATCAACCAGCTTTTAT

>PGSC0003DMG402026153G-LecRK\_256

TCTTTCGTTTTTCATTATATAACAGTCCGGAGATATATTTATGCAGGGTAAGTTTCTCGGAGGTACAGATAT  
GGCAGTTAAAAGGTTGTCAAGTAATTCTGGACAAGGTGTTGAAGAATTT

>PGSC0003DMG402026153G-LecRK\_64

TTAATCACTGAAGATGATAAGAAACGGATTGATGTCCCGTTTTTTCAGCTTGAATAGCATACTAGTTGCTA  
CTGAAAACCTTCTCAAATGCAAGTAAGCTCGGGAGAGGTGGATTTGGACCT

>PGSC0003DMG402026153G-LecRK\_768

ATCAGATTTTGGCTTGGCAAGGATTGTTGAAGGCAAAAATACAGAAGCCAATACTAACAAAGTCGTTGG  
AACATAGTAAGTCTCTTAGTTCTGCTTACCTTTGATTTGGTGGGAAGAAG

>PGSC0003DMG402026432LRR-RLPs\_1464

CTAAAAGTATTTTTCATTTAGATTTTTTTTTTCATCCGTCAGATGCTAACCACTCGAAACTTCGATCCTAGT  
TTTGTCATCCAATTTAAATTTTCGCAAGCGTAACTAATTTAAAAGTGTAC

>PGSC0003DMG402026432LRR-RLPs\_1525

TCGATCCTAGTTTTGTCATCCAATTTAAATTTTCGCAAGCGTAACTAATTTAAAAGTGTACATATAGACATCT  
CAACTAACAGCTAAACTCCAACCTCACCTTAATGTGTCTCGTGGACA

>PGSC0003DMG402026432LRR-RLPs\_1586

ATAGACATCTCAACTAACAGCTAAACACTCCAACCTCACCCCTTAATGTGTCTCGTGGACACCCTATACTGAC  
GTGACACACAAGCTTAAAGTACAAAGAGGAAAACCTTGAACCTAAACAAA

>PGSC0003DMG402026432LRR-RLPs\_1647

CTATACTGACGTGACACACAAGCTTAAAGTACAAAGAGGAAAACCTTGAACCTAAACAAAAGTATATTGT  
ACAATTAATCTATTCAATTAGTACAATTAATAAGTTAGAAACAAATGGTAT

>PGSC0003DMG402026432LRR-RLPs\_1708

TATATTGTACAATTAATCTATTCAATTAGTACAATTAATAAGTTAGAAACAAATGGTATTATCATGATTTT  
GAGGAATATACAAATATTATATTTCCCATACAGTCATACACCATTTTAC

>PGSC0003DMG402026432LRR-RLPs\_1769

TCATGATTTTGAGGAATATACAAATATTATATTTCCCATACAGTCATACACCATTTTACAGTATTTTGTCAT  
AAAATATTATGATAATTCAATCCATAGAAAAATGGGACGCCTGGAAGA

>PGSC0003DMG402026432LRR-RLPs\_1830

TATTTTGCATAAAATATTATGATAATTCAATCCATAGAAAAATGGGACGCCTGGAAGATTAATAAACTG  
CACAAATAAATTACATTTTCTTTTTTTCCACAGTAAGGATAGAGCACA

>PGSC0003DMG402026432LRR-RLPs\_1891

AAAAAACTGCACAAATAAATTACATTTTCTTTTTTTCCACAGTAAGGATAGAGCACAAAATCAATATTT  
GGTTGGCATTCTGATAATATTTAATTCTATTCCCTTTTTTCCTTTCAA

>PGSC0003DMG402026432LRR-RLPs\_1952

ATCAATATTTGGTTGGCATTCTGATAATATTTAATTCTATTCCCTTTTTTCCTTTCAAAAATACTATAAAGA  
AAGTGAAGTTGGAGCAGAAGATATGGTTTGTATTCCCTTGCTTTTCT

>PGSC0003DMG402026432LRR-RLPs\_2013

TACTATAAAGAAAGTGAAGTTGGAGCAGAAGATATGGTTTGTATTCCCTTGCTTTTCTTTGTTCCAAATA  
CTATGACTGCTACTGGCATTTCGATTTTATATTTATAGGTTCTCAATTT

>PGSC0003DMG402026432LRR-RLPs\_2074

GTTCCAAATACTATGACTGCTACTGGCATTTCGATTTTATATTTATAGGTTCTCAATTTTATAAAAAGCATT  
TACTGGTCGGATCGGGTCCGGATATTATTTTACACATAACAAACAA

>PGSC0003DMG402026432LRR-RLPs\_2135

TAAAAAGCATTTACTGGTCGGATCGGGTCCGGATATTATTTTACACATAACAAACAAATTTATTATCAT  
AAATACAAAGTTCAATTTGGATCAAATTAATGATTTGATTATTATAGA

>PGSC0003DMG402026432LRR-RLPs\_2196

TTATTATCATAAATACAAAGTTCAATTTGGATCAAATTAAGTATTGATTATTATAGAGAGGTTAGTGTG  
AACTCAATAGATTTTATTTCATATTATTATATGTACTAAGAAAATCATT

>PGSC0003DMG402026432LRR-RLPs\_2257

GGTTAGTGTGAACTCAATAGATTTTATTTCATATTATTATATGTACTAAGAAAATCATTAAAGTAATTAATA  
TAATTTGATTATGAACTCAATTATTATCATTTCATAAATTTATTTATTTT

>PGSC0003DMG402026432LRR-RLPs\_2318

GTAATTAATATAATTTGATTATGAACTCAATTATTATCATTTCATAAATTTATTTATTTTTATAAGAATTCAT  
AAATTTTAAGTTCTGAATTCACCTCTATATCAGTATGATAGGTATAG

>PGSC0003DMG402026432LRR-RLPs\_2379

ATAAGAATTCATAAATTTAAGTTCTGAATTCACCTCTATATCAGTATGATAGGTATAGGATTAAGACCA  
ATGGTTCAGTAAGAGTGATCCAATTAGTTTTATTAGTTGTTTACTTGTTT

>PGSC0003DMG402026432LRR-RLPs\_2440

TTAAGACCAATGGTTCAGTAAGAGTGATCCAATTAGTTTTATTAGTTGTTTACTTGTTTAATAGTTGCAAT  
AGACTAGTAGTTAGTTTTATTACGACAAAGTTTCCTAGTTTTTACTATT

>PGSC0003DMG402026432LRR-RLPs\_2501

TAGTTGCAATAGACTAGTAGTTAGTTTTATTACGACAAAGTTTCCTAGTTTTTACTATTAATACAAAGTGT  
TTTAATTTCTTTTAAAAAATTATCGTTATAATTTATGCGATACTACTTG

>PGSC0003DMG402026432LRR-RLPs\_2562

TACAAAGTGTTTTAATTTCTTTTAAAAAATTATCGTTATAATTTATGCGATACTACTTGATTAGGTAAAAA  
AGAAAAAAAAGTTTAATCCAACCTGTGAATTGAGAACAATCGATGTTT

>PGSC0003DMG402026432LRR-RLPs\_2623

TAGGTAAAAAAGAAAAAAAAGTTTAATCCAACCTGTGAATTGAGAACAATCGATGTTTTCAATTCCATT  
ATTAAGATTATGACATCAAGCTTAACATCATCATAATTATGTGGAGAG

>PGSC0003DMG402026432LRR-RLPs\_2684

AATTCCATTATTAAGATTATGACATCAAGCTTAACATCATCATAATTATGTGGAGAGATGAACTTTTG  
AGTTTTCAAGGAAGAAAGAATCTTACTTTTTATCATTCAAGTCTTTAACA

>PGSC0003DMG402026432LRR-RLPs\_2745

GAACTTTTGAGTTTTCAAGGAAGAAAGAATCTTACTTTTTATCATTCAAGTCTTTAACAATTAAGATGA

GACAAAAGGTAAAGAATCATTAAAAAAAAAAGTCCCAATTAACAAAATTT

>PGSC0003DMG402026432LRR-RLPs\_2806

TTAAAGATGAGACAAAAGGTAAAGAATCATTAAAAAAAAAAGTCCCAATTAACAAAATTTAATGAAGAAT  
AATTGTACAAAATAAATTAAGAATATATAGCATTAGTTAAGTTACCAAGA

>PGSC0003DMG402026432LRR-RLPs\_2867

TGAAGAATAATTGTACAAAATAAATTAAGAATATATAGCATTAGTTAAGTTACCAAGAAAAAACCAT  
GCATGTGCATGGTATATTATATAGATAGCTACTCATTCTCCATATATTAG

>PGSC0003DMG402026747-(rev)LRR-RLKs\_189

AGCAACATGGTAGGTTTGAATTCCTAGACCTTCTCATACTAATATATCAGGAATCATTCTATGTCTTT  
GGAGAACTTCAATACCTCAAGTATTTCAATGTTTCTGACAACAAATTG

>PGSC0003DMG402026747-(rev)LRR-RLKs\_252

ATGTCTTTGGAGAACTTCAATACCTCAAGTATTTCAATGTTTCTGACAACAAATTGCACGGCGAAATAC  
CCTCGGCGGGTCCTTCAAGAAGTCTCGAGTCTTTTTTTCATCAACAAT

>PGSC0003DMG402026747-(rev)LRR-RLKs\_315

GAAATACCCTCGGCGGGTCCTTCAAGAAGTCTCGAGTCTTTTTTTCATCAACAATGAAGCATTGTGTG  
GTTCTTCAAGATTTAGCGTCCCTCCATGCCCCACTTCATCAAAGCATAGG

>PGSC0003DMG402026747-(rev)LRR-RLKs\_378

TTGTGTGGTTCTTCAAGATTTAGCGTCCCTCCATGCCCCACTTCATCAAAGCATAGGTCAAATAGGAAAA  
AAAATCTTATGCTGGGAATTGCACTTGTATTTGTTCTATTACCCTTGTG

>PGSC0003DMG402026747-(rev)LRR-RLKs\_441

AGGAAAAAAATCTTATGCTGGGAATTGCACTTGTATTTGTTCTATTACCCTTGTGTTTGTATGGATAAG  
GTATAGAAGAGGTAAAAGATCTCCTCAGCAAAGTTCATTGTCTATG

>PGSC0003DMG402026747-(rev)LRR-RLKs\_882

TACTTCCTAGACATCAGACAGAGACTAAGCATTATGATAGATGTGGCATGTGCGTTGGAATATTTTCATC  
ATGGATGCTCCTCTCCCGTGATTCACTGTGATCTGAAGCCTAGTAACGTC

>PGSC0003DMG402027402-(rev)LRR-RLPs\_0

TTGAATCCAGACGGGCAGACTCCATAATTTTTGCTACTCTATTTTTCTGTGGCTGTGAGCTGCAGACT  
GTAGATAAACATAGTTATAACCAATTACAAGCAAAGAGAGGGAGAAAG

>PGSC0003DMG402027402-(rev)LRR-RLPs\_1037

AGGTTGATGACAATCTTAACCAGCTACAAGTCAAATTAAGGAAAGATTAAGGGAAAGAAGTTTCTTC  
TTGTTCTGGACGATGTGTGGAATGACAACGCGTGGGATGACTTGA

>PGSC0003DMG402027402-(rev)LRR-RLPs\_122

CATTCTTGATTACATATCACTCTTAGTTCTTAGCATTCAACAGGTAAAATAAAGTTGTTAGTAATTGAAAT  
TTGAACATTTATCTTCTTAAAATCATTTTGTGTTCTTGTTTTGCTTGC

>PGSC0003DMG402027402-(rev)LRR-RLPs\_1464

ATGGGAGCTGCCACACAATGACGTATTACCAGCGTTGATGTTGAGCTACAATGATCTTCCTGCACATTTA  
AAGCGATTTTTTCTATTTTGAATATTTCTAAAGATTATCCATTTGG

>PGSC0003DMG402027402-(rev)LRR-RLPs\_1525

GCACATTTAAAGCGATTTTTTCTATTTTGAATATTTCTAAAGATTATCCATTTGGGAAAGAACAAGT  
CATTCACTGTGGATTGCCAATGGTCTCGTACCTCAGGAAGATGAAATA

>PGSC0003DMG402027402-(rev)LRR-RLPs\_1647

TGAAGATTCAGGCAACCAATACTTTCTCGAGTTGAGGTCAAGATCATTATTCGAAAGGGTCCCCAATCCT  
TCTGAAGGGAACATAGAGAATTTATTCTTAATGCATGACCTTGTCATGA

>PGSC0003DMG402027402-(rev)LRR-RLPs\_1769

TAGCCCAAATTGCATCTTCAAACCTTTGTATCAGGTTGGAAGAGAGCAAAGGATCTCATATGTTGGACA  
AAAGTCGGCACTTATCTTATTCAATGGGATATGATGGTGAGTTTGAGAAAT

>PGSC0003DMG402027402-(rev)LRR-RLPs\_1891

ACACCCCTCTACAAATTGGAGCAGCTGAGGACATTGCTCCGACATGTATTAGTGTCAATAATTGTTATC  
ACCCTCTAAGCAAGAGGGTGCAGCTTAACATACTGCCTAGACTAAGATCC

>PGSC0003DMG402027402-(rev)LRR-RLPs\_1952

ATTGTTATCACCCCTAAGCAAGAGGGTGCAGCTTAACATACTGCCTAGACTAAGATCCTTGAGGGTACT  
ATCATTGTCTCATTACAAGAATAAGGAGTTGCCAAATGACTTGTTTATCA

>PGSC0003DMG402027402-(rev)LRR-RLPs\_2013

GAGGGTACTATCATTGTCTCATTACAAGAATAAGGAGTTGCCAAATGACTTGTTTATCAAATTAAGCTC  
CTCAGATTTTTGGATGTTTCTCAGACAGAGATTAAGGTTGCCAGATTC

>PGSC0003DMG402027402-(rev)LRR-RLPs\_2135

TTTGTGTGTTGTATAACTTAGAGACACTTCTTCTGTCATCTTGGAAGATCTTAAGGAGCTACCGCTGCAG  
ATGGAGAAGTTGATTAACCTGCGTCATCTTGACATAAGCAACACTTGGC



>PGSC0003DMG402027402-(rev)LRR-RLPs\_2257

TTGAAGACGCCCTACATCTGAGCAAGTTGAAAAGCCTCCAAGTGTTAGTGGGAGCCAAGTTTCTTCTAA  
GTGGTTGGAGAATGGAAGATTTGGGTGAAGCACGGATCTGTATCAGTTGT

>PGSC0003DMG402027402-(rev)LRR-RLPs\_2318

TTCTTCTAAGTGGTTGGAGAATGGAAGATTTGGGTGAAGCACGGATCTGTATCAGTTGTAGAGTTGCAA  
AATGTGGTTGATGGTAGGGAAGCTGTGAAGGCAAAGATGAGGGAGAAGAAT

>PGSC0003DMG402027402-(rev)LRR-RLPs\_2440

TGTTGACAAGTTATCATTGGAGTGGAGTGAAAGTAGTAGTGCCGACAATTCAAAAAGTAAAGAGACAT  
TCTTGATGAGCTACGCCACATAAAAACATAAAAAGAAGTCGAAATCACTGG

>PGSC0003DMG402027402-(rev)LRR-RLPs\_2501

AGAGACATTCTTGATGAGCTACGCCACATAAAAACATAAAAAGAAGTCGAAATCACTGGATATAGAGGG  
ACAATATTTCCGAATTGGCTAGCTGATCCTTTGTTCTTAAGCTAGGACAGT

>PGSC0003DMG402027402-(rev)LRR-RLPs\_2562

ATAGAGGGACAATATTTCCGAATTGGCTAGCTGATCCTTTGTTCTTAAGCTAGGACAGTTGTCTATTGAT  
AACTGCAAGAACTGTTTTTCCTTGCCAGCACTAGGACAGCTTCCTTGTTT

>PGSC0003DMG402027402-(rev)LRR-RLPs\_2684

AAATCCTTTCCATTAGAGGGATGCATGGAATAACAGAGGTGACAGAAGAATTCTATGGTTGTTTGCCT  
CCAAAAGCCTTTTAACTGTCTTGAGAACCTTGATTTGAAGATATGGCGG

>PGSC0003DMG402027402-(rev)LRR-RLPs\_2745

TTTGTCGTCCAAAAGCCTTTTAACTGTCTTGAGAACCTTGATTTGAAGATATGGCGGAGTGGAAGCAA  
TGGCACGTACTAGGAAGTGGAGAGTTCCCTATACTTGAGCAGCTTAAAAT

>PGSC0003DMG402027402-(rev)LRR-RLPs\_2867

AAAATTGCCCTGAACTCAGTTTGGAGACACCCATCCAACCTTTCATGTTTAAAAGGTTTAAAGTTGTTGG  
TTCATCTAAGGTTGGAGTTGTTTTCGATGATGCTCAACTGTTTAGATCCC

>PGSC0003DMG402027402-(rev)LRR-RLPs\_2928

AGTTGTTGGTTCATCTAAGGTTGGAGTTGTTTTCGATGATGCTCAACTGTTTAGATCCCAACTTGAGGGA  
ATGAGGCAGATTGAGGAATTGTATATTAGGGATTGTAACCTCTGTTACCTC

>PGSC0003DMG402027402-(rev)LRR-RLPs\_2989

CTTGAGGGAATGAGGCAGATTGAGGAATTGTATATTAGGGATTGTAACCTCTGTTACCTCCTTTCTTTTA

GCATACTGCCACTACCTTGAAGACAATAAGGATATCTCGTTGCAAGAAA

>PGSC0003DMG402027402-(rev)LRR-RLPs\_3050

TTCCTTTTAGCATACTGCCACTACCTTGAAGACAATAAGGATATCTCGTTGCAAGAAATTGAAATTGGA

GGTGCCAGTTGGTGAGATGAGTTATTGTAACATGTTTATTGAGGATTTGA

>PGSC0003DMG402027402-(rev)LRR-RLPs\_3111

GAAATTGGAGGTGCCAGTTGGTGAGATGAGTTATTGTAACATGTTTATTGAGGATTTGACACTGAAAGA

ATGTGATTGTATAGATGATATATCACCTGAGTTTCTCCCAACAGCACGCAC

>PGSC0003DMG402027402-(rev)LRR-RLPs\_3172

CTGAAAGAATGTGATTGTATAGATGATATATCACCTGAGTTTCTCCCAACAGCACGCACGTTGAATGTAT

CTAATTGCCACAACCTTACTAGTTTTTATTCTACTGCCACTGAAAGT

>PGSC0003DMG402027402-(rev)LRR-RLPs\_3294

CCATATTTGGAATTGTGAGAATGTTGAAATACTTTCGGTGGCATGTGGGGAGACCCAGATGACGTCCT

GAGTATTCAGGGCTGTAGGAAGCTGAAGTGGCTGCCAGAACGTATGCAGGA

>PGSC0003DMG402027402-(rev)LRR-RLPs\_3355

ACGTCCTGAGTATTCAGGGCTGTAGGAAGCTGAAGTGGCTGCCAGAACGTATGCAGGAACTCCTTCCA

TCTCTTAAGGAACTGTATCTGTATAATTGTCCAGAAATGGAGTCCTTTCCT

>PGSC0003DMG402027402-(rev)LRR-RLPs\_3416

TCCTTCCATCTCTTAAGGAACTGTATCTGTATAATTGTCCAGAAATGGAGTCCTTTCCTGAAGGAGGATTA

CCCTTCAATTTACAATTCCTTGTGATCAGCGCGTGCAAGAACTGGTGA

>PGSC0003DMG402027402-(rev)LRR-RLPs\_3538

GGCCGAAAGGAGTGGCATTACAGAGACTCCCCTGTCTCACACAGTTAAGCATCTACCATGATGGCAGT

GACGAAGAGATTGTTGATGGTGAGAATTGGGAGTTGCCTTCCTCTATTCAA

>PGSC0003DMG402027402-(rev)LRR-RLPs\_3660

ACTTACAATAACAATGTGAAAACATTAAGCAGCCAACATCTCAAAGCCTCACCTCTCTTTCTGAGCTA

GAATTATATGACCATCATGAGCTCCATTCCTAGGTCTTTGGCACCTCAC

>PGSC0003DMG402027402-(rev)LRR-RLPs\_3721

TCTGAGCTAGAATTATATGACCATCATGAGCTCCATTCCTAGGTCTTTGGCACCTCACTTCGCTTCAAAG

TCTAGAAATCAGGAATTTCCCTAATCTCCAATCACTTCCTGAATCAGCA

>PGSC0003DMG402027402-(rev)LRR-RLPs\_3782

CGCTTCAAAGTCTAGAAATCAGGAATTTCCCTAATCTCCAATCACTTCCTGAATCAGCACTGCCCTCCTCC  
CTCTCTCAGCTGATCATCATGCATTGCCCTAATCTCCAATCCCTTCCAG

>PGSC0003DMG402027402-(rev)LRR-RLPs\_3904

AAAGGGATGCCCTCTCCCTCTCTGACCTATCTATTTCCAAGTCCCATGCTCAAACCACTACTAAAATT  
GACAAGGGGGAATACTGGCCAAATATTGTTCAATTTCCCACCATAAAG

>PGSC0003DMG402027402-(rev)LRR-RLPs\_3965

TACTAAAATTTGACAAGGGGGAATACTGGCCAAATATTGTTCAATTTCCCACCATAAAGATCGATGGGG  
AATGCATGTGATAATTAATGGATGGCTCTTCAACTGATGTAAGCTATTC

>PGSC0003DMG402027402-(rev)LRR-RLPs\_4005

TCAATTTCCCACCATAAAGATCGATGGGGAATGCATGTGATAATTAATGGATGGCTCTTCAACTGATG  
TAAGCTATTCTTTCCCTTGGAAAGCTTTTTATTTCCGTCTACTTCACTTT

>PGSC0003DMG402027402-(rev)LRR-RLPs\_61

GCTGCAGACTGTAGATAAAACATAGTTATACCAATTACAAGCAAAGAGAGGGGAGAAAGATCATTCTTG  
ATTACATATCACTCTTAGTTCTTAGCATTCAACAGGTAATAAAGTTGTT

>PGSC0003DMG402027402-(rev)LRR-RLPs\_610

CTGTGCTTGACTGATGAATTTTCTTAACACAAAGGAGAAGTTGGAAGAAACCATTGAAACATTGGAG  
GTGTTGAAAAGCAAATCGGTCGCCTTGGCTTAAAGGAGCATTTTGGTTTCG

>PGSC0003DMG402027402-(rev)LRR-RLPs\_732

TAAACAAGAACTAGAACACCTTCAACTTCTTTGGTTGATGATTCTGATATCTTTGGAAGGATGAATGAT  
ATAAAGGATTTGATTGACCGTTATTATCTGAAGATGCAAGTGGAAAGAA

>PGSC0003DMG402027402-(rev)LRR-RLPs\_854

TGACTGTAGTTCCTATTGTTGGAATGGGCGGCCTGGGTAAGACAACACTTGCTAAAGCGGTTTACAATG  
ATGAGAGAGTGCAGAAACATTTTGTGTTGAAAGCTTGGTTTTGTGTTTCTG

>PGSC0003DMG402027811RLKmalectin\_1403

AGGCGATCTCCAAAATCTGAAAATGTTATCTCTCTCTTACTTGCCCTTTACCATCCTGGAAAGGAGACC  
CAAGATCCATTTCTTATCATGGCATCAATATCAGATCTATCCCAATTCT

>PGSC0003DMG402027811RLKmalectin\_1464

AAAGGAGACCCAAGATCCATTTCTTATCATGGCATCAATATCAGATCTATCCCAATTCTTAGTTTACCGAT  
GTTAGGCCCCCATATTATGTTTTCCACCCTCCCGTTGGTAAGCTTGGGC

>PGSC0003DMG402027811RLKmalectin\_2013

AAAGATATTCTCTCATGACAAAAGTTGCAGTACTAATATTGTGTAGCTGCACTATGCACAACCTTTCTCCG  
TTTGCTAGTTGGATGACCGGACATCTAGATATATACTCCCTCCATTCA

>PGSC0003DMG402027811RLKmalectin\_2684

GTAGTAAAGAATTTAGTTGTACAAATTAACGTCGAGCTTTGGCTACTTACAGGTTACAGACGAACCTATA  
AGAGCAAGACTAGACTGGCCAACAAGATATAGAATTTGTCTTGGGCTAGC

>PGSC0003DMG402027811RLKmalectin\_2745

GAACTTATAAGAGCAAGACTAGACTGGCCAACAAGATATAGAATTTGTCTTGGGCTAGCAGAAGGTTTA  
ACTTTTCTTACGAGGGGTCCAACTTGAATTATACACGGGAATATTA

>PGSC0003DMG402027811RLKmalectin\_3050

GAACTAAAAGGTGTGCGAGTTTCCTACCTGAACTATCACCAACTATTTACCAAAACACACCTCAACTATTA  
CCTTAAATATCACCATCATCATTAGGTAGCTGGTGATCGTTCAGGTAG

>PGSC0003DMG402027811RLKmalectin\_3111

TCAACTATTACCTTAAATATCACCATCATCATTAGGTAGCTGGTGATCGTTCAGGTAGGAACTCGAAA  
AACCTGGATACTTTAGGTGTTATTTTGACCTTCACTCTCTTTCAGATAC

>PGSC0003DMG402027811RLKmalectin\_3416

ATCAAGACCCCGAGGGCAGGTGGTGACTGAATACCTCGTTGATGAGGTGAGTGAGACTCGATTAAC  
TGCAATAGTAATGTACATTAATTTAGGAACTAGACAAAGTTATTGGTTTGT

>PGSC0003DMG402027811RLKmalectin\_3477

GATTAAGTCAATAGTAATGTACATTAATTTAGGAACTAGACAAAGTTATTGGTTTGTTCGACTACTAT  
AGGCACAAATAAAGAATCGGAGGGGAACTCTAATGGATTTAGTCGATCA

>PGSC0003DMG402027811RLKmalectin\_3660

CTCACCGCCATTCAGACCAACCATGTCTACAATCGTGAAGATTTAAGGAAAGAACGTTCAATAGAGACC  
ATTTTGATCAAGCCAAATGGTGATTAACACTACAACATCTTGGCGAAAAAGG

>PGSC0003DMG402027811RLKmalectin\_3721

ATAGAGACCATTTTGATCAAGCCAAATGGTGATTAACACTACAACATCTTGGCGAAAAAGGTTACAAAATCC  
TGTCTAGCTGATTGTTCTGCTGAAAAATACCACTCAGATTGAAAAGTGA

>PGSC0003DMG402027811RLKmalectin\_3782

ACAAAATCCTGTCCTAGCTGATTGTTCTGCTGAAAAATACCACTCAGATTGAAAAGTGAAGGACTATCAT

ATTCCTTTAACAATGTGCTTGAGTAAGGGCGGAGCTAGAAGGCAACTTA

>PGSC0003DMG402027811RLKmalectin\_3843

GACTATCATATTTCTTTAACAATGTGCTTGAGTAAGGGCGGAGCTAGAAGGCAACTTATGAGTTCAGCT

GAATCAAGTAGTACGTCCGTCCTAAGTCTTGTATCAATCTATTTGTGTTG

>PGSC0003DMG402027811RLKmalectin\_3904

AGTTCAGCTGAATCAAGTAGTACGTCCGTCCTAAGTCTTGTATCAATCTATTTGTGTTGTAAAGTTTTCTA

AATATGTGCAGATCTTAAATTAAGAGTTCAGTTATTAGCACTTGAAGTC

>PGSC0003DMG402027811RLKmalectin\_3965

AAGTTTTCTAAATATGTGCAGATCTTAAATTAAGAGTTCAGTTATTAGCACTTGAAGTCGTTATTGTAAGA

TTCAGAACCAATTAATTCAAATGCTACTAGTGTTAATGATTTCTTTTT

>PGSC0003DMG402029358-(rev)LRR-RLKs\_0

ATTACAAGAAAGTTGAGTTCCTAGCCTTACTAGTTTGACTGACCCCATGCTACAAATAACTCAATAAGTT

TAAAAAGTGATATTTCTTCTTGATTTGCTAGGAAGTCTCTCAAGAA

>PGSC0003DMG402029358-(rev)LRR-RLKs\_1116

TCAAACATGATAGCAATAAGGTTCTCAAGTTTCTGTTCTGTATATGTTCAAATGATTCAACTTGTTGTTTT

AATTACAGATATTAAGCTGGAGAAGTTTGTACGAGAATGAACTTCAC

>PGSC0003DMG402029358-(rev)LRR-RLKs\_1178

TGTTGTTTTAATTACAGATATTAAGCTGGAGAAGTTTGTACGAGAATGAACTTCACGGAGCTAGAAA

ATGCGACTTCTGGTTTTAGTGAAGACTATTTAGTAGGAAATGGAATGTTGG

>PGSC0003DMG402029358-(rev)LRR-RLKs\_124

AAAATATGGAGAAAACCAATTCAGAACATTTCTGGTTTTGTATTAGTATTACTACTTAGCAGAATTTGT

GTCTGTTGTGCTTCAGAGAGTGATGTTTATTGCTTCAAATCAATAAAAG

>PGSC0003DMG402029358-(rev)LRR-RLKs\_1302

AGTGTACAAGGCAATTCTTCAAATGGCTGGATACTTGCCATCAAGAAGCTCAATGACTGGGAGAATTT

GGAAGACGAGTTTGTCTCGGAGATTACAACCTTGGTGGTCTGAGACATCG

>PGSC0003DMG402029358-(rev)LRR-RLKs\_1426

CTATTGCCTCTTATAGGTTTCTGTGCTGAAAAGCAAGAAAGACTTCTTGTTTACAAATACATGGCTAATG

GAAGTCTTGATGAATGGCTGCACTCGAATGAAGTTAGCGCCAAAATTTG

>PGSC0003DMG402029358-(rev)LRR-RLKs\_1488

GGCTAATGGAAGTCTTGATGAATGGCTGCACTCGAATGAAGTTAGCGCCAAAATTTGGATTTCCCTCTG  
AGAGCTAAAATTGCACTTGGGATAGCGAAAGGCCTGGCTTGGCTTCATCA

>PGSC0003DMG402029358-(rev)LRR-RLKs\_1674

TGAACCAAAAATATCCAACCTTTGGGAAGCAAATTTGGAGTAAGAATGATTCTGCATTAAGTTGGAG  
TCTTTTCCCAGTAGCTGAATATTCTGGTTTAGGCTCTTACAAGCAAGACAT

>PGSC0003DMG402029358-(rev)LRR-RLKs\_1736

GTTGGAGTCTTTTCCCAGTAGCTGAATATTCTGGTTTAGGCTCTTACAAGCAAGACATCTACTGTTTTGGT  
GTCGTGCTTCTCGAGCTGGTAACAGGGAAGGAACCACATGAATTGACTA

>PGSC0003DMG402029358-(rev)LRR-RLKs\_1798

TGTTTTGGTGTGCTGCTTCTCGAGCTGGTAACAGGGAAGGAACCACATGAATTGACTAGCTCAAGAAAT  
CTATTCGATCACTCGCCTTGCTACTTGATGCAGATAGAAATTTCTTGGG

>PGSC0003DMG402029358-(rev)LRR-RLKs\_186

AGAATTTGTGTCTGTTGTGCTTCAGAGAGTGATGTTTATTGCTTGAAATCAATAAAAGATTCATTACATG  
ACCTTTCAATTCTTTGGGCTTTTGGGATTTTCAGCAATGCTACTGAAGGT

>PGSC0003DMG402029358-(rev)LRR-RLKs\_1860

AAGAAATCTATTCGATCACTCGCCTTGCTACTTGATGCAGATAGAAATTTCTTGGGAAAGGAGCTGAT  
GATTAATCCTCCAATTTCTTGAATTGGCTTGTGACTGTGTGAAGTTCTT

>PGSC0003DMG402029358-(rev)LRR-RLKs\_1922

GAGCTGATGATTAATCCTCCAATTTCTTGAATTGGCTTGTGACTGTGTGAAGTTCTTTCCTAATGAAAGG  
CCAACAATGCTGGAAGTGTATGACAGACTCAAGAATATTTCTCAAGGTC

>PGSC0003DMG402029358-(rev)LRR-RLKs\_1984

AATGAAAGGCCAACAATGCTGGAAGTGTATGACAGACTCAAGAATATTTCTCAAGGTGGAAGGGACTG  
GATACAAAAGATACCATTATCAACCGATATTTCAAGTAAATATGACTAGTGTC

>PGSC0003DMG402029358-(rev)LRR-RLKs\_2046

GGACTGGATACAAAAGATACCATTATCAACCGATATTTCAAGTAAATATGACTAGTGCTTATGTTTTTAT  
GGTACTGAGAAAAACAAATTAGGAATACACTACATTAAGCATGAAATC

>PGSC0003DMG402029358-(rev)LRR-RLKs\_2108

GTTTTTATGGTACTGAGAAAAACAAATTAGGAATACACTACATTAAGCATGAAATCCGTGCTTCGAGT  
CTGTATGCTGATAGCTTCTGTTGCAACTTTAATATATATATATGAATACG

>PGSC0003DMG402029358-(rev)LRR-RLKs\_2170

CTTCGAGTCTGTATGCTGATAGCTTCTGTTGCAACTTTAATATATATATATGAATACGTATATAATCTACA  
ACATTGGAAAGCCTTACTGACTGCAGTTTTCAAGTCTGGCATTAAACATC

>PGSC0003DMG402029358-(rev)LRR-RLKs\_2232

TAATCTACAACATTGGAAAGCCTTACTGACTGCAGTTTTCAAGTCTGGCATTAAACATCTTGCAGTTTCTTT  
AGTTAGATAGTTTTTATTTGCATATTGTAAAGAAGAGAAGTTGACTATG

>PGSC0003DMG402029358-(rev)LRR-RLKs\_2294

AGTTTCTTTAGTTAGATAGTTTTTATTTGCATATTGTAAAGAAGAGAAGTTGACTATGAATCTGCATATAC  
TAATAGAACAAATCAATGGTATTTAATAGTTGACTTCATTGTGCTATAT

>PGSC0003DMG402029358-(rev)LRR-RLKs\_2342

GTTGACTATGAATCTGCATATACTAATAGAACAAATCAATGGTATTTAATAGTTGACTTCATTGTGCTATA  
TTGTGTAAGGTTGACAGAACAATATATAAATCATATTATTGAAAGCTTT

>PGSC0003DMG402029358-(rev)LRR-RLKs\_248

ATTACATGACCCTTTCAATTCTTTGGGCTTTTGGGATTTTCAGCAATGCTACTGAAGGTTTCATATGTAAAT  
TTTCAGAAGTTCTTTGCTGGCATCCTGATGAGAATAAGGTTACTGAGCCT

>PGSC0003DMG402029358-(rev)LRR-RLKs\_310

TATGTAAATTTTCAGAAGTTCTTTGCTGGCATCCTGATGAGAATAAGGTTACTGAGCCTCTCACTTTTCAGG  
CTATGGATTAATAGGTGAGTTTCCTCGTGGCATTCAAATTTGTACAAGCT

>PGSC0003DMG402029358-(rev)LRR-RLKs\_372

CTTTCAGGCTATGGATTAATAGGTGAGTTTCCTCGTGGCATTCAAATTTGTACAAGCTTGACAAGTTTAG  
ATCTTTCAGGGAACAGCTTATATGGAAGCTATCCCTTCTGATATTTTCAGCA

>PGSC0003DMG402029358-(rev)LRR-RLKs\_434

AAGTTTAGATCTTTCAGGGAACAGCTTATATGGAAGCTATCCCTTCTGATATTTTCAGCAATAGTTGAACAT  
GTTACAATACTTGATCTCTCAAATAACACGTTTTTCGGGTGATATAACCACC

>PGSC0003DMG402029358-(rev)LRR-RLKs\_496

TTGAACATGTTACAATACTTGATCTCTCAAATAACACGTTTTTCGGGTGATATAACCACCTGATATAGCTAAT  
TGTC AATACCTTAATGGTCTAAAGTTGGATAATAACTATCTAGAAGGTG

>PGSC0003DMG402029358-(rev)LRR-RLKs\_558

ATAGCTAATTGTCAATACCTTAATGGTCTAAAGTTGGATAATAACTATCTAGAAGGTGAAATTTCCAAGCA

GAATAGGCTATTTGCCTCGCCTTAAGACGTTTCAGTGTAGCCAACAATTAC

>PGSC0003DMG402029358-(rev)LRR-RLKs\_62

CAATAAGTTTAAAAAAGTGATATTTTCCTTCTTGATTTGCTAGGAAGTCTCTCAAGAATATCAAATATGG  
AGAAAACCAATTTTCAGAACATTTCTTGTTTTGTATTAGTATTACTACT

>PGSC0003DMG402029358-(rev)LRR-RLKs\_620

TCCAAGCAGAATAGGCTATTTGCCTCGCCTTAAGACGTTTCAGTGTAGCCAACAATTACTTGACTGGGCCA  
GTGCCATTGTTTTATAGAGAAAGTATCACAGTTGAGAGTTTTGAAAACAA

>PGSC0003DMG402029358-(rev)LRR-RLKs\_682

CTGGGCCAGTGCCATTGTTTTATAGAGAAAGTATCACAGTTGAGAGTTTTGAAAACAATTCAGAGCTTTG  
TGGGAAGCCCTTGAAAGGATGTGAGGATTCTTCGATATGGAAACATGTAG

>PGSC0003DMG402029358-(rev)LRR-RLKs\_868

TTTGCTTATTTAAATTTCTACCAAGGCTATCAACAAGATAGTCTCATTAAACATATGGAGGCTAGGGAA  
AAAGGAACATTTAACTTCAGGAAGTGAAGAGGAATTAAGCAGCCAACATA

>PGSC0003DMG402029358-(rev)LRR-RLKs\_930

CTAGGGAAAAAGGAACATTTAACTTCAGGAAGTGAAGAGGAATTAAGCAGCCAACATAAGGTAAAGAT  
CTTACTAAATTTGCTGCACTGCTTGTAGTCTGTAAAGTTACCTTTTCTTCTG

>PGSC0003DMG402029358-(rev)LRR-RLKs\_992

AAAGATCTTACTAAATTTGCTGCACTGCTTGTAGTCTGTAAAGTTACCTTTTCTTCTGTAGTTCTAATTTTG  
TGATTAGTCCTTGCTAGTCCATTATGTTATAAATTTCTTATTTCGATCG

>PGSC0003DMG402029906-(rev)G-LecRK\_0

CAAAGAAGTACAAAACACTCATGAAGTAGAAATAATTGGGGACTAAGACTATTTCCCACCGTGATCAAA  
GTAACAGTCTTATTTTCAAATTATCACTTCCACTTAATTATGAAATGTTT

>PGSC0003DMG402029906-(rev)G-LecRK\_122

ATCTTTTATGGATAGTGGTGTATAAAAGATAAAACTCACATTTATATACCATAGTTTTTGATATGTGAAAA  
TGACATACTTCATAAAATATCTTCTTGTTCTTGTTCTTGTTCTTCTCAT

>PGSC0003DMG402029906-(rev)G-LecRK\_1647

ATTTCATACATTTCAAGAAACATATTGCACTGAGATACAGATACAGGTTATTGATGTACTCTTATAGGTCCA  
AGCAAATGAATAATGGAAAAAAAAAATGGTTGATCTAAATAGAATCGAC

>PGSC0003DMG402029906-(rev)G-LecRK\_1708



TTTAGGTCCAAGCAAATGAATAATGGAAAAAAAAAATGGTTGATCTAAATAGAATCGACAAACGAAAA  
GGGTCAGGAGGAATTGATACTTCAACAGAACCTTCAAGCATTAAACATGACT

>PGSC0003DMG402029906-(rev)G-LecRK\_1952

TATTTCTTTTATAGCAATCATAAGCCCACTCCAGTAGTATCATTTTCGTTCTCGTTTGCCACATCCTGCTCAT  
AGTTTTTTCTGCAGCAAATCAACTCCAAGAGCAAGACTCCGAAGCTGT

>PGSC0003DMG402029906-(rev)G-LecRK\_61

TGATCAAAGTAACAGTCTTATTTTCAAATTATCACTTCCACTTAATTATGAAATGTTTTTCATCTTTTATGG  
ATAGTGGTGATAAAAGATAAACTCACATTTATATACCATAGTTTTT

>PGSC0003DMG402030114LRR-RLKs\_0

CCAGAAAACGATTATCAATAACATAATCAACATGTTTTTGTGGTAATCTAAAGAACTGCCAATTATTTAT  
TTGAATTATTAATGGGAAAACCAATTAGCTCAAATTCAACATAATA

>PGSC0003DMG402030114LRR-RLKs\_1159

GTTTCAGTTGCATGATTTGCGTCACCTGTCGCTAAGTTCCAACTACTTGTCAGTGTGATACCTGATGAAA  
TGGACTTGTGTTAGTTTGTATGATATGGATCTTTCACACAACCAATTGAC

>PGSC0003DMG402030114LRR-RLKs\_122

AATAAGAAATAGCTTTTGAACCTAACTCAACTGTAAAAACAAGCTAAGAATTGTCCGAACTATATAAAG  
AGACCAAATCCATCATCCCACTACAATTTTTGTGCAAGCACAAGAAAGTG

>PGSC0003DMG402030114LRR-RLKs\_1220

CCTGATGAAATGGACTTGTTAGTTTGTATGATATGGATCTTTCACACAACCAATTGACTGGTTCTATACC  
AAAGCGATTTAGGGATTTACCTGGACTGGATTCTATGGATTTGTCTTTT

>PGSC0003DMG402030114LRR-RLKs\_1281

GTTCTATACCAAAGCGATTTAGGGATTTACCTGGACTGGATTCTATGGATTTGTCTTTAATCAGTTATCA  
GGAGACATTTCAAAAAGTATAGAACGTCTTAGGCCTAGAAATACTTTAA

>PGSC0003DMG402030114LRR-RLKs\_1342

TCAGTTATCAGGAGACATTTCAAAAAGTATAGAACGTCTTAGGCCTAGAAATACTTTAAGGCTTTGTTCC  
AACAAATTCTCAGGAAGAATTTCTACTGAATTTGTAAAGTTGACATACGA

>PGSC0003DMG402030114LRR-RLKs\_1403

CTTTGTTCCAACAAATTCTCAGGAAGAATTTCTACTGAATTTGTAAAGTTGACATACGAAGAGAATTGCT  
TTGACGAGTCCAATCTTTGTTCTACATCCAACAACCTTATACATCCCCGGC

>PGSC0003DMG402030114LRR-RLKs\_1464

AGAATTGCTTTGACGAGTCCAATCTTTGTTCTACATCCAACAACCTTATACATCCCCGGCCTACCAAGCTGC  
TCCTCTGGTGATGAGGTTGAAAATCTTCGAAACCAAACACTTGATTA

>PGSC0003DMG402030114LRR-RLKs\_1525

ACCAAGCTGCTCCTCTGGTGATGAGGTTGAAAATCTTCGAAACCAAACACTTGATTATTCCTATTGTA  
GGAGTTGGGGTAGCTACACAGTTATCATGGATCTTTTACAGAACAAGAAA

>PGSC0003DMG402030114LRR-RLKs\_1586

CCTATTGTAGGAGTTGGGGTAGCTACACAGTTATCATGGATCTTTTACAGAACAAGAAAGCATTGGTGG  
AAAACAAGAAGCAGAATGTCAAAGATGACATGAAGTTCATTTCAATTTCAA

>PGSC0003DMG402030114LRR-RLKs\_183

TATATAAAGAGACCAAATCCATCATCCCCTACAATTTTTGTGCAAGCACAAGAAAGTGCACCTACAAAT  
TCATTTTACAGTCTCTTTTCTTTCTCACATGACTTCACATATTTTATA

>PGSC0003DMG402030114LRR-RLKs\_1952

GTAGACAGAAAGCTTCTAGTCTATGAATACTTTGAGAAACAAAGCCTCGACAAGTGGCTTCACAGAAAG  
AAAAGAGAAGCGTCACCCGGTCAAAGTAGTACCCCATCCCTGGATTGGCAA

>PGSC0003DMG402030114LRR-RLKs\_2013

ACAGAAAGAAAAGAGAAGCGTCACCCGGTCAAAGTAGTACCCCATCCCTGGATTGGCAAAGAGATTA  
AAAATAGCCACTGGTGCAGCTCAAGGACTCAGCTATATGCACCACGACTGTA

>PGSC0003DMG402030114LRR-RLKs\_2257

AGCTTCTGCTATTGCTGGAACATTTGGTTACATTGCACCAGGTCTATTACCGTTCAAATATATATCGTACC  
TCGTGAATTCTCAAAGAATTTATCCAACCTCTAATATTAATTTTAATG

>PGSC0003DMG402030114LRR-RLKs\_2318

ATATCGTACCTCGTGAATTCTCAAAGAATTTATCCAACCTCTAATATTAATTTTAATGTTTGGTCCTCACA  
GAGTATGCCTCGACATTCAGAGTGAATATAAAGACAGATATATATAGC

>PGSC0003DMG402030114LRR-RLKs\_2379

TGGTCCTCACAGAGTATGCCTCGACATTCAGAGTGAATATAAAGACAGATATATATAGCTTCGGAGTGG  
TGCTATTAGAATTAACAACAGGGAGACAACCCATTCTCAGGGAGGAGCAAA

>PGSC0003DMG402030114LRR-RLKs\_244

CCTACAAATTCATTTTACAGTCTCTTTTCTTTCTCACATGACTTCACATATTTTATAATGAGGGTATCAA

GTCATCGTGGGTAAGTACAAAGGAAGGGAGGGAGTAAATTACTAGCTT

>PGSC0003DMG402030114LRR-RLKs\_2440

CGGAGTGGTGCTATTAGAATTAACAACAGGGAGACAACCCATTCTCAGGGAGGAGCAAATGAATCTGG

CACAATGGGCTCAACAGCGTTACAGAGATGGAAATTTTCATTGTTGAGGCCCT

>PGSC0003DMG402030114LRR-RLKs\_2562

ATGAAGAAATCATGGAAACAAGTAATGTGGAACAAATGAGAGGTGTTTTAACTAGGACTGATGTGTA

CTGGAGCAACACCATACGGTAGGCCGTCATGAAGGAGGTCTGCAACATTC

>PGSC0003DMG402030114LRR-RLKs\_2867

CGCGAGGCAAGAGCTAAGTGTCTTGGCAATTACAGTTTATGTATATATCATTCCGGGAGATTAGACAGAT

TTTAAGCACACTGAGCATTAAAGGTCTAACAATGCTTTAGGAAAGTAATCAT

>PGSC0003DMG402030114LRR-RLKs\_2928

AGACAGATTTTAAGCACACTGAGCATTAAAGGTCTAACAATGCTTTAGGAAAGTAATCATGATATCCGCAT

GGAGGTTAGAATCATATCTTCTTTCTTTTTTAACTCTTCAGAACTCCCTA

>PGSC0003DMG402030114LRR-RLKs\_2989

TATCCGCATGGAGGTTAGAATCATATCTTCTTTCTTTTTTAACTCTTCAGAACTCCCTAAGGAAGCTTTTG

GAACTTACAGGTTTGATGAACTGCAAATGCCTTCTTTCAGATATAAATC

>PGSC0003DMG402030114LRR-RLKs\_305

GAGGGTATCAAGTCATCGTGGGTAAGTACAAAGGAAGGGAGGGAGTAAATTACTAGCTTGACTTAGTC

AGAAGGAGACAATTATTATGGCTTGATTTTTCAAAGCCAAATACTTGGCTCT

>PGSC0003DMG402030114LRR-RLKs\_3050

GAAGCTTTTGAACTTACAGGTTTGATGAACTGCAAATGCCTTCTTTCAGATATAAATCCTTCTCATGATA

CATGGGGATAATCTTGTAGGAAGTCTAGTTCTTTTAGTTAAGTTGAATG

>PGSC0003DMG402030114LRR-RLKs\_3111

TTCATGATACATGGGGATAATCTTGTAGGAAGTCTAGTTCTTTTAGTTAAGTTGAATGGGATCGTCCAT

TTTCGAAAAGGGGGCACAACCTGAAGGCATAATTGATTGGAAAAAATA

>PGSC0003DMG402030114LRR-RLKs\_3172

ATCGTCCATTTTCGAAAAGGGGGCACAACCTGAAGGCATAATTGATTGGAAAAAATAATCGAAAGAT

ATAGGAGAGTGTTTTTAAATGAATAAGTCCTTATTGTAGTTGAGGAGATG

>PGSC0003DMG402030114LRR-RLKs\_3233

CGAAAGATATAGGAGAGTGTTTTTAAATGAATAAGTCCTTATTGTAGTTGAGGAGATGATAATCAACTT  
CAAGAAGAACTTTCATCTCAAATACTAAAAAAAAGTTTTTCATACTATC

>PGSC0003DMG402030114LRR-RLKs\_3294

AATCAACTTCAAGAAGAACTTTCATCTCAAATACTAAAAAAAAGTTTTTCATACTATCAATGTTATTGAA  
TTGCCTCTGCATATGAATATACTTCATAATAAATGTGGGACTTCTCACC

>PGSC0003DMG402030114LRR-RLKs\_3355

TGTTATTGAATTGCCTCTGCATATGAATATACTTCATAATAAATGTGGGACTTCTCACCGCGAATCTGAAT  
TTAGTTAAACCTCAATGCATGTACCGGACATTGGGTGAAAACAAAAAAG

>PGSC0003DMG402030114LRR-RLKs\_3416

GAATCTGAATTTAGTTAAACCTCAATGCATGTACCGGACATTGGGTGAAAACAAAAAAGGATAGTATGA  
AAAACCTATCCCAAGTGTGCAAACCTATTAGCTGGAAGTGCCTCGCACTG

>PGSC0003DMG402030114LRR-RLKs\_3477

TAGTATGAAAACTATCCCAAGTGTGCAAACCTATTAGCTGGAAGTGCCTCGCACTGAATGTAGAAAT  
GCAATATTGATGGCTCCTCTAATGAAAATCCAGACCCCAGATCGTGGACC

>PGSC0003DMG402030114LRR-RLKs\_3538

TGTAGAAATGCAATATTGATGGCTCCTCTAATGAAAATCCAGACCCCAGATCGTGGACCTTTTTGTATCA  
GAGATATTATGGGAGAGTTAATTTATGCTACTACTAATGTCATGAATCAT

>PGSC0003DMG402030114LRR-RLKs\_3599

TTTGTATCAGAGATATTATGGGAGAGTTAATTTATGCTACTACTAATGTCATGAATCATGATTAACACTAC  
TAGCCTATGTGCTGAGGCTAAAGCAATAGAAAAGGAGTTGGAATATTCT

>PGSC0003DMG402030114LRR-RLKs\_366

CTTAGTCAGAAGGAGACAATTATTATGGCTTGATTTTTCAAAGCCAAATACTTGGCTCTGGATGACTATT  
TAATTGTTGAAATATGATTTCTTTATTAATCCCACTGACTTCACAGAC

>PGSC0003DMG402030114LRR-RLKs\_3660

TTAACTACTAGCCTATGTGCTGAGGCTAAAGCAATAGAAAAGGAGTTGGAATATTCTGTGAGCCATC  
AATACAACCTCTTATAATAGAGACTGATTCAACCAAGTTGCGGATTTTTTA

>PGSC0003DMG402030114LRR-RLKs\_3721

GAGCCATCAATACAACCTCTTATAATAGAGACTGATTCAACCAAGTTGCGGATTTTTTAGCTAATTATGT  
GTTCAATTATCAATATCTACTATATGAAGCAAAGAAATTATTGAACATTGA

>PGSC0003DMG402030114LRR-RLKs\_3782

TAATTATGTGTTTCATTATCAATATCTACTATATGAAGCAAAGAAATTATTGAACATTGATAAGCAACAAGT  
TCCCGGGTGATATTTTAAAAAAAAGGCAGGAACTAGCAACAAGAACAAC

>PGSC0003DMG402030114LRR-RLKs\_3843

AGCAACAAGTTCCCGGGTGATATTTTAAAAAAAAGGCAGGAACTAGCAACAAGAACAACAAGCAGGCT  
ACTCAATCAACTATCACAATAGACTATCCATACAAAATATACAAATCTTCAT

>PGSC0003DMG402030114LRR-RLKs\_3904

GCAGGCTACTCAATCAACTATCACAATAGACTATCCATACAAAATATACAAATCTTCATGAGTACAACCA  
GAGTAATAACAAAATACAGATGGTGAAATTAACCTTGACAAATCCTCCAAA

>PGSC0003DMG402030114LRR-RLKs\_3965

GTACAACCAGAGTAATAACAAAATACAGATGGTGAAATTAACCTTGACAAATCCTCCAAATATTTTCTTAT  
CAAAAGTGGTATCAATCTCAAACAAGGTTCAATCTTTTGGGGAGGAAATA

>PGSC0003DMG402030114LRR-RLKs\_4026

TTTTCTTATCAAAAGTGGTATCAATCTCAAACAAGGTTCAATCTTTTGGGGAGGAAATATTAGAGGACTA  
TCTCGGGGGTTTTTGACACTTTACTCGCTTCTTGAAACTATTTTGAGGA

>PGSC0003DMG402030114LRR-RLKs\_427

ATGACTATTTAATTGTTGAAATATGATTTCTTTATTAAATCCCACTGACTTCACAGACTTCATTATCAAAT  
GAAAAGAAGCACAAGGGAAGCATCAATTAACATGTTCCCAGCAAGCTC

>PGSC0003DMG402030114LRR-RLKs\_488

CATTATCAAATGAAAAGAAGCACAAGGGAAGCATCAATTAACATGTTCCCAGCAAGCTCTAACCATTTTT  
TGCTTAATATGCAAATTTTCTTCTAATTAGCCTGTTTTTTCAAGAAACC

>PGSC0003DMG402030114LRR-RLKs\_4880

TAACACCTTAGAATTTGGCAAGTGTGGTTTGAAAGTGTCATGGTTTTAACGGGCAGGTTTCATGGACAG  
TGAAGTGGTCCACGACCTGCCAACCCATCCGTGAACCCTACTCCCCAAGGC

>PGSC0003DMG402030114LRR-RLKs\_4941

ATGGACAGTGAAGTGGTCCACGACCTGCCAACCCATCCGTGAACCCTACTCCCCAAGGCTCAGGAGAAC  
TTGATCCCTCACGGACGCCTGAACGGTCTGTGGAAGGGTAAATGTCCAGTT

>PGSC0003DMG402030114LRR-RLKs\_5002

AGGAGAACTTGATCCCTCACGGACGCCTGAACGGTCTGTGGAAGGGTAAATGTCCAGTTGATAGGGCC

GTGGTGATTGGCAATAAAATCCCATTTTTCTCTCTTGTTCAACAATCACCTT

>PGSC0003DMG402030114LRR-RLKs\_549

ACCATTTTTTGCTTAATATGCAAATTTCTTCCTAATTAGCCTGTTTTTCAAGAAACCTTACAATTTTCGG

GCACGGAACAGTCCATATTAAGCTTGAAACAACACTGGAGGGATT

>PGSC0003DMG402030114LRR-RLKs\_61

AATTATTTATTTGAATTATTAATGGGAAAACCTCAATTAGCTCAAATTCACATAATATTAATAAGAAAT

AGCTTTTGAACCTAACTCAACTGTAAAACAAGCTAAGAATTGTCCGAA

>PGSC0003DMG402030114LRR-RLKs\_610

ACAATTTTCGGGCACGGAACAGTCCATATTAAGCTTGAAACAACACTGGAGGGATTCCGGAGTTCCT

CCAGTCATGGAATTTGAATTCTTCAGTATGCACTTGGTCAGGAGTTTCATG

>PGSC0003DMG402030114LRR-RLKs\_671

GAGTTCCTCCAGTCATGGAATTTGAATTCTTCAGTATGCACTTGGTCAGGAGTTTCATGCCTCGATGACC

GGGTAGTGACACAATACTTTGGAGAAAAGAACATTACTGGAACAGTT

>PGSC0003DMG402030114LRR-RLKs\_7137

TTTTGCCCTCAAGTTCATAGGTATTGCAATCACATAAGTTTTATGTCAAACCTAATTGTAATGATGTGAATA

TCAACAAGGAGTGATATGCAGCTAATTACAAAGCCATTAAGGCATCAAC

>PGSC0003DMG402030114LRR-RLKs\_7198

GATGTGAATATCAACAAGGAGTGATATGCAGCTAATTACAAAGCCATTAAGGCATCAACAACGTAATGA

GCTATCAATACCCCATCTAAGCAATGACAATTTATCCAAGAAGATTCTTAC

>PGSC0003DMG402030114LRR-RLKs\_7259

CGTAATGAGCTATCAATACCCCATCTAAGCAATGACAATTTATCCAAGAAGATTCTTACGTCGCTTTTTAA

CATGTATCACCAACTAAACAAGAATAATCCCAATAAGGAAAGCTCACAT

>PGSC0003DMG402030114LRR-RLKs\_732

TCGATGACCGGGTAGTGACACAATACTTTGGAGAAAAGAACATTACTGGAACAGTTCATCAACAA

TAATATGTGAGCTTAACAACCTTACCTTCATTGATCTCTCCAACAACAACA

>PGSC0003DMG402030114LRR-RLKs\_7503

TTTAACATACCTTTTTTCATCGAATTTACTCTGTCATATTACTTCTGCCCGCACCTTATGATACTCGCTGCA

GACACCCAAAGAACTTTCAAGAACTCAAAACACAGCCAGATCCCTACT

>PGSC0003DMG402030114LRR-RLKs\_7564

TACTCGCTGCAGACACCCAAAGAACTTTCAAGAACTCAAACACAGCCAGATCCCTACTGACACAACCTTC  
CACAGAGCTACACCGCACAAATCCACAGAGAAAAAATATACCAAACAAAG

>PGSC0003DMG402030114LRR-RLKs\_7625

CACAACCTCCACAGAGCTACACCGCACAAATCCACAGAGAAAAAATATACCAAACAAAGAGCGCGAGAC  
GTAGAGCAATTTCCGTTAAAGACCCAAGACAAGATCATAAATATATATATG

>PGSC0003DMG402030114LRR-RLKs\_793

ATCAACAATAATATGTGAGCTTAACAACCTTACCTTCATTGATCTCTCCAACAACAACATTTTCAGGAACTA  
TACCACTAAGCATGAAAGATTGCTCAATGTTACAACATTTGGACTTGTC

>PGSC0003DMG402030114LRR-RLKs\_854

TCAGGAACTATAACCACTAAGCATGAAAGATTGCTCAATGTTACAACATTTGGACTTGTCCAAGAATTCTT  
TGAGCGGACAGATTCCAGGCGAGTTGTTTGGGATGAAACAATTACTCAAT

>PGSC0003DMG402030114LRR-RLKs\_915

AGAATTCTTTGAGCGGACAGATTCCAGGCGAGTTGTTTGGGATGAAACAATTACTCAATTTGTATCTTAA  
TGGTAACATGTTGTCTGGTGAGATGCCAAAACAATATCATCTCAACTGG

>PGSC0003DMG402030236-(rev)LRR-RLPs\_1037

CTGAAAGAGACATACTTGATGAGCTACAACCAAATACAAACATAAAAGAACTCCGAATAACTGGCTATA  
GAGGAACAAAATTTCAAATTGGCTAGGTGATCCTTCATTTCATAAGCTAA

>PGSC0003DMG402030236-(rev)LRR-RLPs\_1403

CGATTGATGGTTGCCCAAAGTTGATTGGGAAGTTGCCTGAAAATCTTTCTTCTCTGAGAAGATTGAGGAT  
ATCAAATGCCCTGAACTCAGTTTGGAGACACCTATCCAACCTTTCAAATT

>PGSC0003DMG402030236-(rev)LRR-RLPs\_1769

TAGGATGTGATTCACCCGAGTTTCTCCCGAGAGCACGCTCTTTGAGTGTAAGAAGTTGCAACAACCTTAC  
TAGGTTTTTATTCTACTGCCACTGAAACAGTCAGTATTAGAGATTGTG

>PGSC0003DMG402030236-(rev)LRR-RLPs\_1830

CAACCTTACTAGGTTTTTATTCTACTGCCACTGAAACAGTCAGTATTAGAGATTGTGATAATCTTGAAA  
TACTTTTCACTGGCATGTGGGACTCAGATGACATCATTGCATATTTACAA

>PGSC0003DMG402030236-(rev)LRR-RLPs\_1952

GCGAGAAGCTGAATTCGCTGCCAGAACATATGCAACAACCTCCTTCCATCTCTTAAGGAACTGAAACTGGT  
TAATTGTTCAAATAGAGTCCTTTCTGTAGGAGGATTGCCCTTCAATT

>PGSC0003DMG402030236-(rev)LRR-RLPs\_2013

GAAACTGGTTAATTGTTCCACAAATAGAGTCCTTTCCTGTAGGAGGATTGCCCTTCAATTTACAACAACCTT  
GGATCTCCTGTTGTAAGAACTGGTGAATGGCCGAAAAGAGTGGCATT

>PGSC0003DMG402030236-(rev)LRR-RLPs\_244

GGTCCGAGAGTCTTCTGAATGGAATCCGGGGAATTCTTAATGCATGACCTTGTCAATGATTTGGCCCAA  
TTGCATCTTCAAATCTGTGTATCAGGTTGGAAGAGAACCAAGGATCTCAT

>PGSC0003DMG402030236-(rev)LRR-RLPs\_488

GCCATCTTAGCAAGAGGGTGTGCATGACATATTGCCAAGACTAACATCTTTGAGGGCACTATCATTGTC  
TCATTATAAGAATGAGGAGTTGCCAAATGACTTGTTTATTAATTAAGC

>PGSC0003DMG402030236-(rev)LRR-RLPs\_854

GTCGTAGTGGTTCGAGAATGGAAGATTTGGGTGAACTGCATAACTTGTATGGATCTCTATCAATTCTTGG  
GTTGCAACATGTGGTAGATAGAAGGGAATCTCTGAAGGCAAACATGAGGG

>PGSC0003DMG402030236-(rev)LRR-RLPs\_915

AATTCTTGGGTTGCAACATGTGGTAGATAGAAGGGAATCTCTGAAGGCAAACATGAGGGAAAAGAAAC  
ATGTTGAAAGTTATCTTTGGAGTGGAGTGGAAAGTGTGCTGACAATTCACG

>PGSC0003DMG402030531-(rev)RLKWAX-EGF\_1178

ACACTTTCAAAGGATTAGATTTTGATTACTGTATCTTATGTTTTCTAGTTTTAGGTGGAGTTGGTTTGATC  
CTACTATCTCCATTTTCGCCTTGTCTATCTGGTGTGCGCAAGCGAGGGA

>PGSC0003DMG402030531-(rev)RLKWAX-EGF\_1240

GGTTTGATCCTACTATCTTCCATTTTCGCCTTGTCTATCTGGTGTGCGCAAGCGAGGGAAGAATGGTTTGA  
CACAATTCATCAGGATCTTGAGGTAGAGAGCAAATATTTTGGATTTGAG

>PGSC0003DMG402030531-(rev)RLKWAX-EGF\_186

AGTACTAGGTAACCTCAAATCCAACCTGCACCGATGAATTCGAGTGTGGAGGCCTTGGAGCTATGAAGTT  
TCCTTTACAAATCCAGCAACCTTCAGTGTGGATTATGCAGGTTTGATTG

>PGSC0003DMG402030531-(rev)RLKWAX-EGF\_1922

AATGTAACTTTTGACCTTTATACTTGGTATAGTTTTCGGTATACACCATATAATTTTACGAAGGGTGTTC  
AACTGATCACTTTTACCATGTGTGCGGAAAACCTCAGTATCTCATTGTTA

>PGSC0003DMG402030531-(rev)RLKWAX-EGF\_248

TGAAGTTTCCTTTACAAATCCAGCAACCTTCAGTGTGGATTATGCAGGTTTGATTGTCATGCTAAACCA



TATCCTAAGATTGTATTTGGTGGACAAAAATATGATGCTTTAGTGAAGA

>PGSC0003DMG402030531-(rev)RLKWAX-EGF\_310

GCTAAACCATATCCTAAGATTGTATTTGGTGGACAAAAATATGATGCTTTAGTGAAGAAGGGTGATTTTT

TCCTTATTTTCAGATCCTAAACTTCAAGAGTATTTAAATAACAAAAGTTGC

>PGSC0003DMG402030531-(rev)RLKWAX-EGF\_3162

AGCACCATAGGTGAATATCTTAGCTAATATAGTTTTTCAGACTTCAGAATCTACTAACTCTTAGCTAAAGCA

TTTGAGCTTATAGGAATGTACATATAATAAATTATGTTCTTGATGTTAT

>PGSC0003DMG402030531-(rev)RLKWAX-EGF\_372

TGATTTTTTTCCTTATTTTCAGATCCTAAACTTCAAGAGTATTTAAATAACAAAAGTTGCAAGTCTTTTAGCA

GAAACTTCTCATTTACAAATTCCCCTTTGATTTCTTTCCAAATTGTTCC

>PGSC0003DMG402030531-(rev)RLKWAX-EGF\_434

CTTTTAGCAGAACTTCTCATTTACAAATTCCCCTTTGATTTCTTTCCAAATTGTTCCCTAACTTAACCTTGTA

CAATGCAAACATAGTCATGGCAACACCATCCAGAAGACTAATGATT

>PGSC0003DMG402030531-(rev)RLKWAX-EGF\_496

TTAACCTTGTACAAATGCAAACATAGTCATGGCAACACCATCCAGAAGACTAATGATTCCTTTTTCAAAG

ATTTTGATAGATATACTGAGTGTGAAGGTTTGAATGTTTACTATCACCAT

>PGSC0003DMG402030531-(rev)RLKWAX-EGF\_558

TTTCAAAGATTTTGATAGATATACTGAGTGTGAAGGTTTGAATGTTTACTATCACCATCCCAATAAAACA

ATATTGGGAAATACTAGTGCTAAGATAAGTGGCAAACCTTCCAAAGCACTG

>PGSC0003DMG402030531-(rev)RLKWAX-EGF\_620

ATAAAACAATATTGGGAAATACTAGTGCTAAGATAAGTGGCAAACCTTCCAAAGCACTGTTCACTTGTACA

GTTGCCAATTCCATTGCCTACACCATCAAACTATATGCAGGTGGCTTGT

>PGSC0003DMG402030531-(rev)RLKWAX-EGF\_930

ATTTATCTTTTTTTCCTTTACTGCAGGACAAAATGGACAAAGTAATTCGAAAATGATTATTATGGCCTCAGG

TGATTAATAGACAATGACCACATTTTTATAGTAGTAGTTGCTTCGGAG

>PGSC0003DMG402030531-(rev)RLKWAX-EGF\_992

GGCCTCAGGTGATTAAATAGACAATGACCACATTTTTATAGTAGTAGTTGCTTCGGAGCAACGGTAAAG

TTGTCTTGGGTTTTGAGCAGTGGAATCAGCCACTGAAGCTTGCATCAGGGT

>PGSC0003DMG402030532-(rev)RLKWAX-EGF\_0

TTAGTATTTCTTTTTGACAAGTTTTACCAGTAAGATGGAGACTATTAATGGAGAAAGTGTTTAGAAGTTA  
TGGCACTTGATCTTATAAGATAACCAGTCTGGTGAAGTAGAGTTGCAATTC

>PGSC0003DMG402030532-(rev)RLKWAX-EGF\_1054

CCATTAACCTCATCTTTCTTTCTATTTCCAGAAATTTCCATACATGTTCTTTGAATTTCTTTTTATTGTGGTA  
AATTCTCAAAACATATTCATAATGACAAAGTGGAGTTGAGAGATTGC

>PGSC0003DMG402030532-(rev)RLKWAX-EGF\_1116

TCATTGTGGTAAATTTCTCAAAACATATTCATAATGACAAAGTGGAGTTGAGAGATTGCGATGTTTTGCTT  
CTTTTTTTTTGAAACCTTCGATTTTTATTTATTTCCAGTTTTTGGTGGA

>PGSC0003DMG402030532-(rev)RLKWAX-EGF\_1178

TTTTGCTTCTTTTTTTTTGAAACCTTCGATTTTTATTTATTTCCAGTTTTTGGTGGAGATTGGTGATGATA  
ACTTGTTAGCTGTCTACTTTATCTGGTGTACAAGAAGAGGAAATT

>PGSC0003DMG402030532-(rev)RLKWAX-EGF\_1364

CAGTATATACTTTGGCATCCCAGTCTTTCTTATTCAGAACTTGAAGAAGCCACGAATGATTTTAAATCCT  
CTCGAGTTCTTGGAGATGGAGGGTTCGGAAGTGTACTATGGTGAGAG

>PGSC0003DMG402030532-(rev)RLKWAX-EGF\_1426

TTAAATCCTCTCGAGTTCTTGGAGATGGAGGGTTCGGAAGTGTACTATGGTGAGAGACTTCCTAATCC  
AACTGAGCTATGCTTCAATTCTTTCTTCATGTGCCTAATACTTGTTCACT

>PGSC0003DMG402030532-(rev)RLKWAX-EGF\_1488

CCTAATCCAAGTATGCTTCAATTCTTTCTTCATGTGCCTAATACTTGTTCACTAATGACTAGGACA  
ACTTAAGGATGGACGAGAGGTTGCTGTGAAGCGCCTTTATGAGCACAAC

>PGSC0003DMG402030532-(rev)RLKWAX-EGF\_1674

GTCACTCTTATGGCTGCACTTCAAGGCGTAGCCGTGAAGTAACTCCTTGTCTATGAATACATTCCTAACGG  
AACTCTAGCTGATCACCTCCATGGTGACAGAGCGAAGAACAGATCACTC

>PGSC0003DMG402030532-(rev)RLKWAX-EGF\_186

CTGTTTGCATTATTCTATCTCTTCTTGATGTTAGTTCAGGCAAAGGGGAGAAATGATTCAACTTGTTCA  
AAGTCCTTTTCATGTGAAATCTTACTGACCTGAGCTTTCTTTCTCTC

>PGSC0003DMG402030532-(rev)RLKWAX-EGF\_2108

TATGAAGAGGCATAGTCAAGAGATCAATTTAGCTAACTTTGCTATAAACAAGATTGTAAAATGTGCATTC  
AACGAGTTGATCGATCCATCCCTGGGGTTCGATTCAGATTCCAAGATTTG

>PGSC0003DMG402030532-(rev)RLKWAX-EGF\_2170

GTGCATTCAACGAGTTGATCGATCCATCCCTGGGGTTCGATTCAAGATTTGGGAAATGACTAG  
TTCAGTTGCAGAGTTGGCTTTTTTATGCTTACAGACAGATAGGGACATGA

>PGSC0003DMG402030532-(rev)RLKWAX-EGF\_2232

ATGACTAGTTCAGTTGCAGAGTTGGCTTTTTTATGCTTACAGACAGATAGGGACATGAGGCCTACTATGG  
CTGAAGTTTTGGATACTCTAAAAGAGATTCAGACTAGTGAATTTGACAAT

>PGSC0003DMG402030532-(rev)RLKWAX-EGF\_2480

TGAGAAGTTTCTTGCTATGTTGTTGCTCCGACTCTTCGAAAATATCCTCTGGTGTGTGCGGATACTCCATAA  
GTAGTGAATTTTGAAGAATCCAACCTCGGGTGCAACAAATTTTTTGGAGA

>PGSC0003DMG402030532-(rev)RLKWAX-EGF\_2542

ACTCCATAAGTAGTGAATTTTGAAGAATCCAACCTCGGGTGCAACAAATTTTTTGGAGAGTCTGCGCAACA  
TAGGTAATAGGTTTTATGTATCTTAGTATATCTAACTTTAATTCTATCTT

>PGSC0003DMG402030532-(rev)RLKWAX-EGF\_310

CACACAACCCGACTGCGGAATAGTTCCCATCTCTGGTTGTGATGTTAACTATTTCCAAGAATCCAACCTG  
GTTCTGAGGAGAATGGTACTATGCTATAGGCAAGGAGTATAGTTATAC

>PGSC0003DMG402030532-(rev)RLKWAX-EGF\_372

TCCAACCTGGTTCTGAGGAGAATGGTACTATGCTATAGGCAAGGAGTATAGTTATACAGTTTGGGTGCG  
TGGACCCGAAGCTTCAAACCTATATTGAGGAAAACAAGTGCCAAGCTTTTA

>PGSC0003DMG402030532-(rev)RLKWAX-EGF\_434

TGGGTCGTGGACCCGAAGCTTCAAACCTATATTGAGGAAAACAAGTGCCAAGCTTTTAACAAAAATATC  
TCCCTTTCAGGCTCTCCTTCTATTTCTTCTCTGCAGTTAACCTTCAGAAC

>PGSC0003DMG402030532-(rev)RLKWAX-EGF\_496

AAATATCTCCCTTTCAGGCTCTCCTTCTATTTCTTCTCTGCAGTTAACCTTCAGAACTTCTACAAATGCAA  
TAGGACTAGTAGTAACAACCCATACATTAATCAGCAGATGAAAGATCA

>PGSC0003DMG402030532-(rev)RLKWAX-EGF\_558

ACAAATGCAATAGGACTAGTAGTAACAACCCATACATTAATCAGCAGATGAAAGATCATTTTGGATGGTTA  
TACTCATATGATGGCTGTGATGGATTCACCATATACTACAAGTTTTATG

>PGSC0003DMG402030532-(rev)RLKWAX-EGF\_62

AGAAGTTATGGCACTTGATCTTATAAGATACCAGTCTGGTGAACCTAGAGTTGCAATTCACAAAACTTCA

GCTAGCTTTGCTCTTCTTGCAGTAGGATTCACAATATGTCTTTGGCTTCT

>PGSC0003DMG402030532-(rev)RLKWAX-EGF\_620

GATGGTTATTACTCATATGATGGCTGTGATGGATTACCATATACTACAAGTTTTATGGAGTTGATGATG

AAGACATTCTAGCAGACAATCTTACTGCCAACTGTTCCCTTATCAGATTG

>PGSC0003DMG402030532-(rev)RLKWAX-EGF\_682

TGATGATGAAGACATTCTAGCAGACAATCTTACTGCCAACTGTTCCCTTATCAGATTGCCATATTACCAA

CAGAACCTGGTAATAATTTGGTCAACTTCTTACGTTCTGCATTTCTAGT

>PGSC0003DMG402030532-(rev)RLKWAX-EGF\_744

ATTACCAAACAGAACCTGGTAATAATTTGGTCAACTTCTTACGTTCTGCATTTCTAGTAGAATGGAAATTG

TCTGATGACTGTAACAAATGTCACTATGGTGGAGGTCGATGTCAGACTG

>PGSC0003DMG402030532-(rev)RLKWAX-EGF\_806

TGGAAATTGTCTGATGACTGTAACAAATGTCACTATGGTGGAGGTCGATGTCAGACTGATAAGAAGAAC

AATTTTCTTTGTTACAAAGGTAGACATCTCAAATAATTAACATGTTCAAG

>PGSC0003DMG402030532-(rev)RLKWAX-EGF\_868

GAAGAACAATTTTCTTTGTTACAAAGGTAGACATCTCAAATAATTAACATGTTCAAGGTCAAATGCATA

TTTCTTAGGGTCCTTTTTTGTTCATATGACATCTGATAATTTTCCCTCT

>PGSC0003DMG402030532-(rev)RLKWAX-EGF\_930

AATGCATATTTCTTAGGGTCCTTTTTTGTTCATATGACATCTGATAATTTTCCCTCTTCTGTTTAGATGCA

AAAGCAAATAGAAGCAAGTTGGGACTGACTCTTGGAGCAGGTAGTTAA

>PGSC0003DMG403000927LRR-RLPs\_1054

TCCCACCTTAAGAATGCAAAAAAAAAAAAAAAAAAGAAGAAGAAAAGGTTCTACTAAATTAACAACACTACTA

TAAAGGAGGAGTTTTTGTATACAATATGTATTTTCCAATTCAAGTAGAAT

>PGSC0003DMG403000927LRR-RLPs\_1116

ACTACTATAAAGGAGGAGTTTTTGTATACAATATGTATTTTCCAATTCAAGTAGAATATTCATTTATTAG

TTTCTGCATGATTAGAAATAGAAAGGTCCAACCTCATGACTAAATAGATA

>PGSC0003DMG403000927LRR-RLPs\_124

AAAGTCGATGATCTCAATAAAGCAATGTTCAATTCTAAGGTTTGTCTTGCGCTAGATGTATAAATAT

TACCTTACACTCCTTTTTTGGTCGGAACATTACCTTACTTGAGGACTAA

>PGSC0003DMG403000927LRR-RLPs\_1736

TCTGAATAAATGAACACAACAGAGGTTCAATTCTAAGGTTTGTCTTGTGCCGTTAGCTGTATAACTAATT  
AACTCTTGTGCTTTCTATTGCATACTTAATAGTAATAACCATATTCAGAT

>PGSC0003DMG403000927LRR-RLPs\_1798

AACTAATTAECTCTTGTGCTTTCTATTGCATACTTAATAGTAATAACCATATTCAGATATTTATCTATGTTT  
GTCACTAGAAACAACCTTCCTTTTACCTGCTCCCAAATATATTCAATAA

>PGSC0003DMG403000927LRR-RLPs\_1860

ATCTATGTTTGTCACTAGAAACAACCTTCCTTTTACCTGCTCCCAAATATATTCAATAAGAAAATAAGCA  
TCAGCATAGTCATTTATCTTTCAAGTACATGTTGTACATACTAAGCTAG

>PGSC0003DMG403000927LRR-RLPs\_310

TTTTTGGGCACAATACATAAATGTATCCTTTAACTGACTCTATACAAGATGGGAGATAGTTGAGACCCTG  
GGTTTCAGCAATGGAGTCCTCCCTATCAAATATTTGGGAGTACCATTGAG

>PGSC0003DMG403000927LRR-RLPs\_372

AGACCCTGGGTTTCAGCAATGGAGTCCTCCCTATCAAATATTTGGGAGTACCATTGAGCACTAAAAGGG  
TATCTATAGTACAATGTCAACCCATCTTGGATAAGATGCTAGGTAGAAGAA

>PGSC0003DMG403000927LRR-RLPs\_434

AAAAGGGTATCTATAGTACAATGTCAACCCATCTTGGATAAGATGCTAGGTAGAAGAAAGAGCTGGACC  
AAATTCCTCCTTTCAATTTGTGCTGTTCCATGGTCACTTTGGTAATGAAATC

>PGSC0003DMG403000927LRR-RLPs\_806

ATTATGCCTTTTTGTGTGTGACTGAGATACTAAAAACTTTTTAAAAATATGAAACGAGACAAATACACT  
TTTATTTTATATATTTCACTAGTGAAGGATCTAATTCTTTTTGAATCAAT

>PGSC0003DMG403000927LRR-RLPs\_868

AATACACTTTTATTTTATATATTTCACTAGTGAAGGATCTAATTCTTTTTGAATCAATAAAGCAATGTTCTA  
TTGTGGGTCATCGATCCACATGATATTAATCAACTGTTTTTAGGGGG

>PGSC0003DMG403000927LRR-RLPs\_930

CAATGTTCTATTGTGGGTCATCGATCCACATGATATTAATCAACTGTTTTTAGGGGGATAGTTCATAGA  
TGTAGCTTGTCTTGGGATTCTCAAGTGTAGTCTTGGTCTCTTGGCCTGG

>PGSC0003DMG403000927LRR-RLPs\_992

TTCATAGATGTAGCTTGTCTTGGGATTCTCAAGTGTAGTCTTGGTCTCTTGGCCTGGTGCATCCCACCTT  
AAGAATGCAAAAAAAAAAAAAAAAAAGAAGAAGAAAAGGTTCTACTAAATTA

>PGSC0003DMG403003025LRR-RLPs\_1008

AAAACTATAATCATTTATTTATAATACTTTTAATCAAACATCTATTTATTAATTTGTCTTCGTCATATTTA  
AATTAACAACCTTATCACCTAGTGTTTAAACAATTTTGGCTTCTCAA

>PGSC0003DMG403003025LRR-RLPs\_1071

GTCATATTTAAATTAACAACCTTATCACCTAGTGTTTAAACAATTTTGGCTTCTCAACGTAACACCTAATG  
TTTTCTTCTGGTGTGAATTGGGTTATGATTGAGCCCAATAACTCCTAC

>PGSC0003DMG403003025LRR-RLPs\_1134

ACCTAATGTTTTCTTCTGGTGTGAATTGGGTTATGATTGAGCCCAATAACTCCTACTGTAACCTGACTAAC  
TGCAACAAAATACAATTAAGTTTGATACTTCATCCCTTCAACGTTTGCA

>PGSC0003DMG403003025LRR-RLPs\_1197

TGACTAACTGCAACAAAATACAATTAAGTTTGATACTTCATCCCTTCAACGTTTGCAGATTTCTGTCCCA  
ACCTAGAAAACTATATATCAATGGGGCTAACAGCATAACTGCTCTATG

>PGSC0003DMG403003025LRR-RLPs\_1638

AAGACGCTTATCAAACAAGAAACATCTGTGAGTACACCGTGTCTCAAAAAGTGAAACAATGATTATAGG  
GTGAAAGTGGGTGATCTGAATATATGGACACAACAATGATTCAATTCTAAG

>PGSC0003DMG403003025LRR-RLPs\_1701

TATAGGGTGAAAGTGGGTGATCTGAATATATGGACACAACAATGATTCAATTCTAAGGTTTGTCTTGTGC  
CTCTTTCTCTATAACTAATTAACCTAGTTCTCTCTTTCCATCTTAACTT

>PGSC0003DMG403003025LRR-RLPs\_1764

CTTGTGCCTCTTTCTCTATAACTAATTAACCTAGTTCTCTCTTTCCATCTTAACTTAATAGTAATTGTAATA  
TTCAGATAGTTGTTTGTAGTTGTACTIONACTAAGCTAGTCATCTCTCT

>PGSC0003DMG403003025LRR-RLPs\_1827

AATTGTAATATTCAGATAGTTGTTTGTAGTTGTACTIONACTAAGCTAGTCATCTCTCTTTTTTTCCATTCTCT  
GCTTCTTTTCCAGGAACCGCTATATCCTAAATAAAGTGATACAAAAGATA

>PGSC0003DMG403003025LRR-RLPs\_1876

ATCTCTCTTTTTTTCCATTCTCTGCTTCTTTTCCAGGAACCGCTATATCCTAAATAAAGTGATACAAAAGATAT  
TCAATTCTAAGGTTTGTCTTGTGCCGCTTAATAACTACTATATTTGTC

>PGSC0003DMG403003025LRR-RLPs\_315

AGAGTTGATCTCAACAAAGCGATGTTCAATTCTAAGGTTTGTCTTGTGCCGCTAGTTGTACAACAAATTA

CTATATATATATTTGTGGACCTATGTTGATGGGGGTAACAAATATAGGCA

>PGSC0003DMG403003025LRR-RLPs\_378

CAAATTAATATATATATATTTGTGGACCTATGTTGATGGGGGTAACAAATATAGGCAAACTAAAATATT  
GTAAGTCAAGGGTTCACGTGAACCCAATTGATTTTGCCAGAGACTTTAA

>PGSC0003DMG403003025LRR-RLPs\_441

AAATATTGTAAGTCAAGGGTTCACGTGAACCCAATTGATTTTGCCAGAGACTTTAATTTACATTAGTAAT  
ATCTAGAGATTCTTAATTATGAACATGATTGTTATTGGATATTAAGT

>PGSC0003DMG403003025LRR-RLPs\_504

TTAGTAATATCTAGAGATTCTTAATTATGAACATGATTGTTATTGGATATTAAGTGAAGTTCATCAGAG  
CTATCTATAAATTTAATACTGTGAATCTGCATCTCATTCAAATTTCTTTA

>PGSC0003DMG403003025LRR-RLPs\_567

ATCAGAGCTATCTATAAATTTAATACTGTGAATCTGCATCTCATTCAAATTTCTTTATTTTTTACGCTTCAA  
TAGGAATAATAAGATAAGGCATAGCCATTTACTTGTACTTTTTCTTT

>PGSC0003DMG403003025LRR-RLPs\_693

TCGCTTTTATATTATTTTTTAAAAAATACCCTAAAAATACGTCTTTTATTATATTTAGCACGTAATGTGTG  
GATTTATTTTCTCATGCCATCTAATATTCTATGTCATTTTAAATCTTC

>PGSC0003DMG403003025LRR-RLPs\_756

TAATGTGTGGATTTATTTTCTCATGCCATCTAATATTCTATGTCATTTTAAATCTTCTTTTATTATTTAGC  
ACGTAATATGTGGATTTATTTTCTCATGTCATCTAATATTCTATGTC

>PGSC0003DMG403003025LRR-RLPs\_819

TATATTTAGCACGTAATATGTGGATTTATTTTCTCATGTCATCTAATATTCTATGTCATTTTAAAGATTTA  
AAAGAATGCTGTTTTGGAGATGATTTTTAAATACTTCTTTTATTGA

>PGSC0003DMG403003025LRR-RLPs\_882

AAAGATTTAAAGAATGCTGTTTTGGAGATGATTTTTAAATACTTCTTTTATTGAGTAATTTGGCTTAG  
ATGATTTCTAAAATAATGGTCTTTTTATGGGAAGTTTCCAAAAAATGA

>PGSC0003DMG403003025LRR-RLPs\_945

TGGCTTAGATGATTTCTAAAATAATGGTCTTTTTATGGGAAGTTTCCAAAAAATGAGCAGTTAAACTA  
TAATCATTTATTTATAATACTTTAATCAAATCTATTTATTAAATTT

>PGSC0003DMG403010943LRR-RLPs\_0

ATGCGTAGCCTTATTGAGTGGAAGGGAGATGAAGTTGGAGAAAGAATGTTTCCTAAGCTTGAGAAGTT  
GACGATTAGGAAGTGTCCATTGTTAAAAAGTACTCCGAATCAATTTGAAATC

>PGSC0003DMG403010943LRR-RLPs\_1116

CCAAAGTTAGAAGAAAGTTGCACCAATCGGAGTGGTCCAAACTCCCAGTGGTCCAACATTTCCCATATTC  
AAAAAATTAAGTTGGTGGAAGCACAATTCAGGACTTGCGTAAGTCTCTA

>PGSC0003DMG403010943LRR-RLPs\_1178

CCATATTCAAAAATTAAGTTGGTGGAAGCACAATTCAGGACTTGCGTAAGTCTCTATTTCTCTTTCAAT  
TTCCGAGTCGCATTTTTTAATTATTATTTCCACGAGTTAGTCTTCTCC

>PGSC0003DMG403010943LRR-RLPs\_1488

CATTTAGAATTCTGTAACAATTTTGTCAAGTTTTTCTTTGCACTCCTTTTTTTTTCTTCTCATGACACAATTT  
TATTGTTTAACGGGGTTAGTTATGTTTCGATAGAGAGGAACCAACACG

>PGSC0003DMG403010943LRR-RLPs\_186

ACATCTCTCATAGGGCTTGAAGTCTATGATATGAAAGAGCTCACTTGTTTGCCAGATGAGATGCTACGCA  
ACAACATTTCTCTTCAAACCTAATGGTCTCAGGCTGTGGAGAGTTTCGT

>PGSC0003DMG403010943LRR-RLPs\_248

GCTACGCAACAACATTTCTCTTCAAACCTAATGGTCTCAGGCTGTGGAGAGTTTCGTGAATTGCCACAA  
AGCGTGTACAATCTCATTCTCTTAAGCACTTAACGATTGGTAACTGCAC

>PGSC0003DMG403010943LRR-RLPs\_992

GCTTGGCAACCTTGTTTTTTTGGAACAGTTACATTTAGTAAACTGTGAGAAACTAGAGCATTGCCATCC  
AGAGATGCCATGCAACGCCTCACCAAATTATGGAACCTGGGAATTAAGG

>PGSC0003DMG403014059-(rev)RLKWAX-EGF\_1139

CTAATATCACTGTAGTCACATTTTGTATGGAATTGTAGCAAAAAGTGGTACTGTTACAGGTTTCGGTTTTCT  
GATGTGTTTAGATGTCCTTGAATGTAAGAAGCTGTAAATTCATGCTTTT

>PGSC0003DMG403014059-(rev)RLKWAX-EGF\_64

AAGATTATGCGGTACAAGTGCCTCAGGTTTTCGGAATCTAATGCTGAGGATCACCAAAAAGTTGAAGCA  
TTCTTAAAGAACTATGGTTCATACGCTCCAAACAGATAGAATTATACAGAC

>PGSC0003DMG403015682-(rev)LRR-RLPs\_3294

TGATGAAGCCAATTGTTCTCTTCTAAGAAACAAAGCTCTTATTTATAATTCATTGGAGGAGCTGTCTT  
TGAGAATCTGCAGCAACAACAGTCTCTTCAGAAACTTTGCAGCTCTCT



>PGSC0003DMG403015682-(rev)LRR-RLPs\_3538

TCTTCTTCCAATTCTGTTAATAACTTTTTCAATTCCTTTCTTTTTTTCTTTATTCTTTCCCGTACTGACAG  
GAGCTCATCAATGGTGATGTATGTATCAACAGTGAGTTTTGTTGAT

>PGSC0003DMG403015682-(rev)LRR-RLPs\_3660

ATTCTCCATCTTGTGTTAAGCCATGATTAACCATGGTGAGTTAAAGGATGTGAACAAGTTTTTTTTTCGAT  
ACTCAAATCAGATCTTGGAATCATTCAATCTTCATAAATTCTTACCTTA

>PGSC0003DMG403015682-(rev)LRR-RLPs\_4514

CATTCTCTTAGTTCTTCATTTAATTATGTGCTGTATTAATTACAGAACTAGTTTTCTCCATGCAGTAAAT  
TTAGTGGGGTTTTTCAGGCCTGTGCAGCTGCTGAGGAGTTTATGCGGC

>PGSC0003DMG403015877LRR-RLPs\_122

TTTCCCAGAGGATTTCAAGTTGATACTTGGAGATTGATCCAATTATGGATCGCAGAAGGTTTCATAAGG  
ACGTCTTCTGGACGTCATGAAAGCTTGAAGAAGTGGCAAAACATTATTT

>PGSC0003DMG403015877LRR-RLPs\_1259

GATGTATGGAAATTGAGTGACAAAGACATATTCAAAAGCTTGAAGTTGTTGTTACTGAGCGATGTAAAT  
CTTAAGTGTGGGAAGCTAGAAGTGATAACTTCCCTAATCTAAAACGCCTT

>PGSC0003DMG403015877LRR-RLPs\_1323

TAAATCTTAAGTGTGGGAAGCTAGAAGTGATAACTTCCCTAATCTAAAACGCCTTGTCTGAAGAAATG  
CAAGGACCTGAAAAAATCCAACAAATTTGGGGAAATTTATTCTTTGG

>PGSC0003DMG403015877LRR-RLPs\_1387

GAAATGCAAGGACCTGAAAAAATCCAACAAATTTGGGGAAATTTATTCTTTGGAATTGATTGAGTTA  
CATGATTGCACCACTACTGCTAAGGCTTCTGTCAGAAAGATCAAACAAGA

>PGSC0003DMG403015877LRR-RLPs\_1515

ACTTGGATAATAATATCCTTAAGGTCTACATCCATAACAGCTACAGTAAGTTATAATTCTCTCTTAAAAGT  
TCTTCGATTCTTCACATTATTTAAAACCTCATTTTTATTAAATCATACT

>PGSC0003DMG403015877LRR-RLPs\_1571

TTCTCTTAAAAGTTCTTCGATTCTTCACATTATTTAAAACCTCATTTTTATTAAATCATACTTCTTTGAAA  
TTAAGATGATGACTTCTACTTCTTATCTTTCTTATGCAGCGAATTGA

>PGSC0003DMG403015877LRR-RLPs\_366

TTTATGCATGTTGTGAGAACTCCATTTTCACTAGCACAAAAGCCTAATTTTCGTCGCTTCAGTATTCAAAA

GTATATTAGTCATAAGCTCTTACCCCCTGTAGCCAGATCTATCCACTGC

>PGSC0003DMG403015877LRR-RLPs\_427

GTATTCAAAGTATATTAGTCATAAGCTCTTACCCCCTGTAGCCAGATCTATCCACTGCTTTTCTTCCTTGG

ATCTACCTTTTGAATCCCGTATTCATGGATTTTTCTCTAGTTTCAACC

>PGSC0003DMG403015877LRR-RLPs\_488

TTCTTCCTTGGATCTACCTTTTGAATCCCGTATTCATGGATTTTTCTCTAGTTTCAACCATCTCAGGGTATT

GGCCATCTTCTCTGCCTTGTCGTCTCATTCCACTTGTGATTAGAAA

>PGSC0003DMG403015877LRR-RLPs\_610

TATTTCAATTTGAGATATCTCCAAGTTCAATGTTCTGGCAATATTCCTGAATCAATCTCAGAGCTTCAAAT

TTGCAAACCTAATTTCTGATGCTTATTCATTGGATATGACTTTACCTC

>PGSC0003DMG403015877LRR-RLPs\_671

GCTTCAAATTTGCAAACCTAATTTCTGATGCTTATTCATTGGATATGACTTTACCTCGGAATATATGGA

TGATGAAGAACTTGAGGTATATACGTTTAAGGGAAGCCGGTATTTACC

>PGSC0003DMG403015877LRR-RLPs\_727

CTCGGAATATATGGATGATGAAGAACTTGAGGTATATACGTTTAAGGGAAGCCGGTATTTACCAAGTC

CTAGAATAGATAACAATCTTGTGACAGGGATGCCAAATCTAGAGGAATTTT

>PGSC0003DMG403018696LRR-RLPs\_0

ATGCAGGAACTCTTCCATCTCTTAAGATACTGTATCTGATTAATTGTCCAGAAATAGAGTCCTTTCCTGA

AGGAGGATTGCCCTTCAATTTACAAGTCCTTCTATCAGCAAGTGCAAG

>PGSC0003DMG403018696LRR-RLPs\_132

GGCCGAAAGGAGTGGCGACTCCCCTGTCTCAGAGAATTAAGCATCTACCATGATGGCAGTGACGAAGA

GATTGAACATTGGGAGTTGCCTTCTCTATTCATTCACTTGGTATAGACAAT

>PGSC0003DMG403018696LRR-RLPs\_198

GAGATTGAACATTGGGAGTTGCCTTCTCTATTCATTCACTTGGTATAGACAATCTGAAAACATTAAGCA

GCCAACATCTCAAAGCCTCACCTCTCTTCAATATCTATCTATTCAGGGT

>PGSC0003DMG403018696LRR-RLPs\_264

AGCAGCCAACATCTCAAAGCCTCACCTCTCTTCAATATCTATCTATTCAGGGTAATTTACCTCAAATTCA

GTCAATGCTGGAACAATGCCAGTTTTCTCCTTTTCGCGCCTCACTTCG

>PGSC0003DMG403018696LRR-RLPs\_330

ATTCAGTCAATGCTGGAACAATGCCAGTTTTCTCCTTTTCGCGCCTCACTTCGCTTCAAACCTCTACAAATC  
GTGAATTTCCCTAATCTCCAATTAATTTCCGAATCAGCACTGCCCTCC

>PGSC0003DMG403018696LRR-RLPs\_396

CAAATCGTGAATTTCCCTAATCTCCAATTAATTTCCGAATCAGCACTGCCCTCCTCCCTCTCTCAGCTGGA  
GATCTACCATTGCCCTAATCTCCAATCTCTTCCAGTAAAAGGGATGCCC

>PGSC0003DMG403018696LRR-RLPs\_462

CTGGAGATCTACCATTGCCCTAATCTCCAATCTCTTCCAGTAAAAGGGATGCCCTCTTCTTCTCTAAACT  
ATATATTCACAGCTGTCCATTGCTCACACCACTACTAGAAGTTAACAAG

>PGSC0003DMG403018696LRR-RLPs\_66

CCTGAAGGAGGATTGCCCTTCAATTTACAAGTCCTTTCTATCAGCAAGTGAAGAACTGGTGAACGGC  
CGAAAGGAGTGGCGACTCCCCTGTCTCAGAGAATTAAGCATCTACCATGAT

>PGSC0003DMG403026153G-LecRK\_1024

TTTGTAACAGCAATGGAAGTTCAGTGTGCAGCTGTTTGCCTGGGTTTCAGAGTGATCCTCCAGAAGATA  
ATGGAGACGGGGAATATTCAGGTGGATGTTGAGAATATCAGATAACTCAT

>PGSC0003DMG403026153G-LecRK\_128

AAGGAGCACGATCGATGGAGGGAGTGAGTTAATAGACAACGGGGAAACTGGTATCTGCTGGAAAA  
AAATTCGAAATGGGATTCTTTTGTGATGATGCCGGGTAAACTGGTATGTAGG

>PGSC0003DMG403026153G-LecRK\_1408

ACATGCACCCATCCTCCCCTTCTAACCCTATATAATACTACTATTTTTCTAATTATCTTTTAAATTTGTA  
TTGGTGAACCCAAGGTTAAAAAGAATACTCTAGTATATTGATAAGTA

>PGSC0003DMG403026153G-LecRK\_1472

AAATTTGTATTGGTGAACCCAAGGTTAAAAAGAATACTCTAGTATATTGATAAGTAAGTACAAATAGGG  
GGTGCATAACTTATAGATTTGTGGTTCAAATTTTTCTATCCACATTAACAT

>PGSC0003DMG403026153G-LecRK\_1536

TAGGGGGTGCATAACTTATAGATTTGTGGTTCAAATTTTTCTATCCACATTAACATTTTTAATTTTAATTA  
ATATAACAAAATGTACCACTTTTCATAGATCTTTTAAATAATTTATAA

>PGSC0003DMG403026153G-LecRK\_1586

TAACATTTTTAATTTTAAATTAATATAACAAAATGTACCACTTTTCATAGATCTTTTAAATAATTTATAAATA  
AAAAGAGGTTCAAATACCCATATTTTTAGGTTGCATTAGCTATGTCT

>PGSC0003DMG403026153G-LecRK\_192

AAAAAATTCGAAATGGGATTCTTTGTGATGATGCCGGGTAAACTGGTATGTAGGCATATGGTATAAC  
AAGAAAGGTCCTCGAACTGTTGTATGGGTTGCTAATTGGAATGATTTCGATT

>PGSC0003DMG403026153G-LecRK\_256

ATAACAAGAAAGGTCCTCGAACTGTTGTATGGGTTGCTAATTGGAATGATTTCGATTCAGAATTCAACAA  
AAAATAAGGAGAATGTTTCCATGGTCGTTGAAGATGGTAAGCTCAAAGTTT

>PGSC0003DMG403026153G-LecRK\_320

AACAAAAATAAGGAGAATGTTTCCATGGTCGTTGAAGATGGTAAGCTCAAAGTTTTGAATATTAGTGG  
ACACATTTATTTCTCCTCAGAAGTAGATGGTAACTCTGGCGTTAAAGCAGA

>PGSC0003DMG403026153G-LecRK\_384

AGTGGACACATTTATTTCTCCTCAGAAGTAGATGGTAACTCTGGCGTTAAAGCAGAGTTGTTGGATACA  
GGGAATTTGGTTTTATTTGATGAATCAGGAACTAAAATGTGGCAGAGTTTT

>PGSC0003DMG403026153G-LecRK\_448

ATACAGGGAATTTGGTTTTATTTGATGAATCAGGAACTAAAATGTGGCAGAGTTTTCGGAATCCAACCG  
ATACATTTCTACCAGGCATGAAAATGGATAGTAATTTGAAGTTGATTGATT

>PGSC0003DMG403026153G-LecRK\_512

AACCGATACATTTCTACCAGGCATGAAAATGGATAGTAATTTGAAGTTGATTGATTCAAAAAATGGCAAC  
TACAAATTCCAATTAGATCAAACAAACAACAAAAAATATGTCATAGTTGA

>PGSC0003DMG403026153G-LecRK\_576

GGCAACTACAAATTCCAATTAGATCAAACAAACAACAAAAAATATGTCATAGTTGATGAGAATGGAATG  
CATAAAATTCCTGGCAAGGGTCTGTAGGAGGGTTTGCGAAATCAACTGCT

>PGSC0003DMG403026153G-LecRK\_64

TGCAAATGAGTAATTTCTCTTGTGTTGTTTGCAGTGTTGGTGATTATATGTGGATGTGATGCAAGGAG  
CACGATCGATGGAGGGAGTGAGTTAATAGACAACGGGGAAACTGGTAT

>PGSC0003DMG403026153G-LecRK\_640

GAATGCATAAAATTCCTGGCAAGGGTCTGTAGGAGGGTTTGCGAAATCAACTGCTTATGAATTCTTCA  
GATTCAATGATATGCCCTCTTTTGTAACCTTCTTTTTATCCAATAATTCAG

>PGSC0003DMG403026153G-LecRK\_704

CTTCAGATTCAATGATATGCCCTCTTTTGTAACCTTCTTTTTATCCAATAATTCAGTTGAAGCGAGAAGAA

CATTATTCAATAATTCAGTGGAAGCGACAAGAACATTATTCAATAATAA

>PGSC0003DMG403026153G-LecRK\_768

AGAAGAACATTATTCAATAATTCAGTGGAAGCGACAAGAACATTATTCAATAATAATCGTAGTTTTACTC  
CGATTGATTTTTCAAGGTTAGCCAATCATAGTAGCAAAGATTCTATTTTC

>PGSC0003DMG403026153G-LecRK\_832

TTACTCCGATTGATTTTTCAAGGTTAGCCAATCATAGTAGCAAAGATTCTATTTTCGAAGGTACTAGACTC  
CTGATGAACCTCTCTGGAGAAATACAATTCTACTTATGGGATAACCAGA

>PGSC0003DMG403026153G-LecRK\_896

TAGACTCCTGATGAACCTCTCTGGAGAAATACAATTCTACTTATGGGATAACCAGAGTGGATGGTCCTTG  
TTATGGTCTGCCCCAAAAGATGAATGCGACGAGTTTAGAAAATGTGGGAC

>PGSC0003DMG403026153G-LecRK\_960

TCCTTGTTATGGTCTGCCCCAAAAGATGAATGCGACGAGTTTAGAAAATGTGGGACATTTGAGATTTGTA  
ACAGCAATGGAAGTTCAGTGTGCAGCTGTTTGCCTGGGTTTCAGAGTGAT

>PGSC0003DMG403030532-(rev)RLKWAX-EGF\_124

ATGTCTGGTTGTGATACTAAACCATATCCAAGAATCCAAGTCTTCTGGAGGGGATTGGTACACTCCTA  
TGAAAAACCGCATAATTTTACAGTTTGGCTCTTGGACCCGAAGCTTCAT

>PGSC0003DMG403030532-(rev)RLKWAX-EGF\_1302

CTAACTCTTGTTTCATCAATGACCAGGAAAGCTTAAGGATGGAAGAGAGGTTGCTGTGAAGCGCCTTTAC  
GAGCACAACCTGCAAACGAATGCAGCAGTTTGTGAATGAAATTGAGATCCTT

>PGSC0003DMG403030532-(rev)RLKWAX-EGF\_1426

GGCTAAGGCACAACAATCTTGTTACCCTCTATGGTTGCACTTCAAGGCGAAGCCGTGAACTACTCCTTGT  
CTATGAATATATTCCTAATGGAACCTTGTCTGATCACCTCCATGGTAATA

>PGSC0003DMG403030532-(rev)RLKWAX-EGF\_2108

TAGTGAATTTGGCAATGAAAAGAGAACTGAGTCTAATATCAATGCCACTGAAGCTAAAATAGTAACAGC  
TTCTCCTTTCTTGAATCAGAAGATACGTTATCGTTGAAACAAGTTAAATC

>PGSC0003DMG403030532-(rev)RLKWAX-EGF\_2170

TAACAGCTTCTCCTTTCTTGAATCAGAAGATACGTTATCGTTGAAACAAGTTAAATCACTACCTTCTCCA  
AATTCTGTGACCGATAAATGGATTACTTGTCTCTGATATAACTAGAACAA

>PGSC0003DMG403030532-(rev)RLKWAX-EGF\_248

TGTTGAGGCAACACAAGTGCCAGTACTTTTAGACTAAAAGTTTCCTCCCTTCAAGACTCTCCTTCTATTTCTTCACTACCCCTACGCTTCACGATTTCTTCAAATGTAACAGCACCAGT

>PGSC0003DMG403030532-(rev)RLKWAX-EGF\_434

TGTAAAGACTTTAGCATATACTACAAGCTTTCTGGAGATGGTGATGAAGACATTCGAGCAGGCAATTTCTGCCAATTGTTCACTTATCAGATTGCCAATTGACACGTTAGCATATGAT

>PGSC0003DMG403030532-(rev)RLKWAX-EGF\_496

CAATTTTCTGCCAATTGTTCACTTATCAGATTGCCAATTGACACGTTAGCATATGATAGGGATGTGTTCAAATGTTAAGTCACGTTTTTCTGGTACAATGGGAACTGTCTTACGACTG

>PGSC0003DMG403030532-(rev)RLKWAX-EGF\_62

ATCTTACTGACTTGAGCTTTCCTTTCTCTTTCTCCTCACGATCTGATTGCGGACTAATGATCATGTCTGGTTGTGATACTAAACCATATCCAAGAATCCAAGTCTTCTGGAGGGGATT

>PGSC0003DMG403030532-(rev)RLKWAX-EGF\_620

CAATGTCACCAAGGTGGAGGTCATTGCCAGACTGATAAAACCAACAAATTTCAATGTACAGGTATAAATAATCCACATGCTCAAGGTCTAGTGCATATTTCTTACCCTTTCCTATTTTCA

>PGSC0003DMG403030532-(rev)RLKWAX-EGF\_682

TATAAATAATCCACATGCTCAAGGTCTAGTGCATATTTCTTACCCTTTCCTATTTTCATCTCACATATCATAATATTCATAGTATTTTCGCTCTTATTTTAGATGCAAAAACAACAAAA

>PGSC0003DMG403030532-(rev)RLKWAX-EGF\_744

ACATATCATTAAATATTCATAGTATTTTCGCTCTTATTTTAGATGCAAAAACAACAAAAAGCAAGTTAGGAGTGACTCTGGGAGCAGGTAATTTAATATCCATTAAGTGCAGAGTTCTTTC

>PGSC0003DMG404010943LRR-RLPs\_1403

GAAGAATTATATTTACATGACTGCGAAAACTAGAGCATCTGCCATCCCGAAATGCCATGCGACACCTCACGAAATTACAGAGCCTGAAAATTAAGGCTGCCCAAAGTTAGAAGAAAGT

>PGSC0003DMG404010943LRR-RLPs\_1464

GACACCTCACGAAATTACAGAGCCTGAAAATTAAGGCTGCCCAAAGTTAGAAGAAAGTTTCACCAACTACTCCCAGTGGTCCAAAATTTCCCATATTTCAAATATTGAATTAGGTGGGC

>PGSC0003DMG404010943LRR-RLPs\_1952

CTATCTTCTTTTTGTTGGAAACCAATTTTCGGAGGTCTATGCTGATGAATACAACATTACCTTCTTAAAAAAAGTTTACTGGAATTCTGTGCCGTATCAGTTTATGCAACTCTCTTC

>PGSC0003DMG404010943LRR-RLPs\_2440

ATATTTCAAATATTGAATTAGGTGGGCGGAGAAGGACAACCGTAAGTCTCGGTTTCTCTTTCACTTACTG  
AGTCGCTCGCATTTTTAATTAGAATATTATTTCCACGAGTTCCAAAAAA

>PGSC0003DMG404010943LRR-RLPs\_305

ATTTTATGGTATTGACGGTAACAATAAGGGATCAAGCAGCAATATCCAAGTGTTCCCGTCACTGAAAAA  
CTAATATTGGAGGATATGTCTAGTCTTATTGAGTGGAAGGGAGATGAAATT

>PGSC0003DMG404010943LRR-RLPs\_549

CATTGTTGAACTTGTGCAGCAACTTGACATCTCTCGTAAAGCTTAGTATCTATGGTGTGAAAGAGCTCAC  
TTGTTTGCCAGATGAGATGCTTCGCAACAACGTTTCTCTTCAAACCTAA

>PGSC0003DMG404010943LRR-RLPs\_671

GTCTCAGGCTGCAGAGAGTTTCGTAACCTGCCACAAAGCTTGACAATCTCCATTCTCTCAGGAGCTTAC  
AAATACACTTCTGCCCAATTCAGTTCTTTTCTATTCCCAGTGGAGAG

>StSERK3\_0

ATGGATCAGTCGGTGTTGGCGATCTGGGTATTTCTCTACTTAATTGGGCTGCTTTTGAATTTGTCAATGG  
TCGCCGGTAACGCTGAAGGTGATGCCTTGAATGCTCTGAAGACAAATTTG

>StSERK3\_1054

GGGGATTTTGCATGACACCCACTGAGCGGGTGCTTGTTTATCCGTACATGGAGAATGGAAGTGTTGCAT  
CACGTTTAAGAGAGAGGCCTGAATCAGAGCCCCACTTGACTGGCCAAAAA

>StSERK3\_124

ATCCTAATAGTGTTCTACAGAGTTGGGATGCAACCCTTGTTAATCCTTGACTTGGTCCATGTAACATGC  
AACAAATGAAAATAGTGTGACTAGAGTTGATCTAGGAAATGCAAATCTAT

>StSERK3\_1426

ATGTGTTTGGCTATGGGGTTATGCTTCTAGAGCTCATAACTGGGCAAAGGGCTTTTGATCTTGCTCGACT  
TGCGAATGGTGATGATGTCATGCTGCTAGATTGGGTGAAGGGACTCCTGA

>StSERK3\_1488

GCTCGACTTGCGAATGGTGATGATGTCATGCTGCTAGATTGGGTGAAGGGACTCCTGAAGGACAAGAA  
ATATGAAACATTAGTTGATGCAGATCTTCAAGGTAATTACAATGAAGAAGAA

>StSERK3\_186

GTAACATGCAACAATGAAAATAGTGTGACTAGAGTTGATCTAGGAAATGCAAATCTATCAGGTCAACTG

GTACCACAGCTTGGCCAACTCCAGAACTTGCAGTACTTGGAACCTTATAGT

>StSERK3\_248

TCAACTGGTACCACAGCTTGGCCAACTCCAGAACTTGCAGTACTTGGAACCTTATAGTAATAACATAAGC  
GGAAGAATTCCAAATGAACTGGGGAACTTGACAGAGTTGGTTAGTTTGGGA

>StSERK3\_372

TACCTGAACAACCTTAAATGGTCCTATCCCTCCCTCATTGGGCAAGCTTCAGAACTACGCTTCCTGAGGCT  
CAATAATAACAGTTTGAATGAAGGTATTCCCGTGTCTCTAACCACCATT

>StSERK3\_434

CCTGAGGCTCAATAATAACAGTTTGAATGAAGGTATTCCCGTGTCTCTAACCACCATTGTTGCACTTCAA  
GTACTTGATCTCTCAAACAACCATTTGACAGGACCAGTTCAGTCAACGG

>StSERK3\_496

CACTTCAAGTACTTGATCTCTCAAACAACCATTTGACAGGACCAGTTCAGTCAACGGTTCCTTTTCACTT  
TTTACTCTATAAGTTTTGCTAATAATCAGTTGGAAGTTCCTCCAGTTT

>StSERK3\_62

GTCAATGGTCGCCGGTAACGCTGAAGGTGATGCCTTGAATGCTCTGAAGACAAATTTGGCTGATCCTAA  
TAGTGTTCTACAGAGTTGGGATGCAACCCTTGTTAATCCTTGTACTTGGTT

>StSERK3\_682

CTATCGCTGGAGGAGTTGCTGCAGGCGCTGCCCTTCTATTTGCAGCTCCTGCAATTTTTATTGCTTGGTG  
GCGTCGGAGGAAACCGCAAGACCACTTCTTTGATGTTCTGCTGAGGAGG

>StSERK3\_868

ATTTTAGCAACAGAAATATACTCGGTAGAGGCGGATTTGGTAAGGTTTATAAAGGCCGGTTAGCTGATG  
GCTCTTTAGTTGCAGTGGAAAGACTAAAAGAGGAACGTACTCAAGGTGGAG

>Ve1\_0

ATGAAAATGATGGCAACTCTGTACTTCCTATGGCTTCTCTTGATTCCCTCGTTTCAAATCTTATCAGGATA  
CCACATTTTCTGGTTTCTCTCAATGCCTTGACGATCAAAAGTCATTG

>Ve1\_1037

TTTCTATGGATCAATACCTTCCACAATGGCAAACCTTAGAAATCTTGGTTATTTGGATTTCTCCTTCAACA  
ATTTCACTGGTTCTATCCCATATTTTCGACTGTCCAAGAACTCACCTA

>Ve1\_1098



TCCTTCAACAATTTCACTGGTTCTATCCCATATTTTCGACTGTCCAAGAACTCACCTACTTAGACCTTTCA  
CGTAATGGTCTAACTGGTCTCTTGTCTAGAGCTCATTTTGAAGGACTC

>Ve1\_1159

TAGACCTTTCACGTAATGGTCTAACTGGTCTCTTGTCTAGAGCTCATTTTGAAGGACTCTCAGAGCTTGTC  
CACATTAATTTAGGGAACAATTTACTCAGCGGGAGCCTTCCTGCATATA

>Ve1\_122

GCTGCAGTTTAAGGGAAGCCTCCAATATGATTCTACTTTGTCAAAGAAATTGGCAAATGGAACGACAT  
GACAAGTGAATGTTGCAATTGGAATGGGGTTACATGCAATCTCTTTGGTCA

>Ve1\_1220

AGAGCTTGTCCACATTAATTTAGGGAACAATTTACTCAGCGGGAGCCTTCCTGCATATATATTTGAGCTC  
CCCTCGTTGCAGCAGCTTTTTCTTACAGAAATCAATTTGTTGGCCAAGT

>Ve1\_1281

TTTGAGCTCCCCTCGTTGCAGCAGCTTTTTCTTACAGAAATCAATTTGTTGGCCAAGTCGACGAATTTTCG  
CAATGCATCCTCCTCTCCGTTGGATACAGTTGACTTGACAAACAACCAC

>Ve1\_1342

ACGAATTTGCAATGCATCCTCCTCTCCGTTGGATACAGTTGACTTGACAAACAACCACCTGAATGGATC  
GATTCCGAAGTCCATGTTTGAAATTGAAAGGCTTAAGGTGCTCTCACTTT

>Ve1\_1403

GAATGGATCGATTCCGAAGTCCATGTTTGAAATTGAAAGGCTTAAGGTGCTCTCACTTTCTTCCAACCTCT  
TTAGAGGGACAGTGCCCCTTGACCTCATTGGGAGGCTGAGCAACCTTTC

>Ve1\_1464

TCCAACCTCTTTAGAGGGACAGTGCCCCTTGACCTCATTGGGAGGCTGAGCAACCTTTCAAGACTGGAG  
CTTTCTTACAATAACTTGACTGTTGATGCAAGTAGCAGCAATTCAACCTCT

>Ve1\_1525

GACTGGAGCTTTCTTACAATAACTTGACTGTTGATGCAAGTAGCAGCAATTCAACCTCTTTCACATTTCCC  
CAGTTGAACATATTGAAATTAGCGTCTTGTGCGGCTGCAAAGTTCCCCG

>Ve1\_1586

CACATTTCCCAGTTGAACATATTGAAATTAGCGTCTTGTGCGGCTGCAAAGTTCCCCGATCTCAAGAAT  
CAGTCATGGATGATGCACTTAGACCTTTCAGACAACCAAATATTGGGGGC

>Ve1\_1647

CTCAAGAATCAGTCATGGATGATGCACTTAGACCTTTCAGACAACCAAATATTGGGGGCAATACCAAATT  
GGATCTGGGGAATTGGTGGTGGAGGTCTCACCCACCTGAATCTTTCATTC

>Ve1\_1708

TACCAAATTGGATCTGGGGAATTGGTGGTGGAGGTCTCACCCACCTGAATCTTTCATTCAATCAGCTGGA  
GTACGTGGAACAGCCTTACACTGCTTCCAGCAATCTTGTAGTCCTTGATT

>Ve1\_1769

TCAGCTGGAGTACGTGGAACAGCCTTACACTGCTTCCAGCAATCTTGTAGTCCTTGATTTGCATTCCAACC  
GTTTAAAAGGTGACTTACTAATACCACCTTGCACTGCCATCTATGTGGA

>Ve1\_183

AACGACATGACAAGTGAATGTTGCAATTGGAATGGGGTTACATGCAATCTCTTTGGTCATGTGATCGCTT  
TGGAAGTGGATGATGAGACTATTTCTAGTGGGAATTGAGAATTCTAGTGCA

>Ve1\_1830

CATTCCAACCGTTTTAAAAGGTGACTTACTAATACCACCTTGCACTGCCATCTATGTGGACTACTCTAGCAA  
TAATTTAAACAATTCCATCCCAACAGATATTGGAAAGTCTCTTGGTTTT

>Ve1\_1891

ACTCTAGCAATAATTTAAACAATTCCATCCCAACAGATATTGGAAAGTCTCTTGGTTTTGCCTCCTTTTTCT  
CGGTAGCAAACAATGGCATTACTGGAATAATTCCTGAATCCATATGCA

>Ve1\_1952

CTCCTTTTTCTCGGTAGCAAACAATGGCATTACTGGAATAATTCCTGAATCCATATGCAACTGCAGCTACC  
TTCAAGTTCTTGATTTCTTAACAATGCCTTGAGTGGAAACAATACCACC

>Ve1\_2013

TGCAGCTACCTTCAAGTTCTTGATTTCTTAACAATGCCTTGAGTGGAAACAATACCACCATGTCTACTGGA  
ATATAGTACAAAACCTGGAGTGCTGAATCTTGGGAACAATAAACTCAAT

>Ve1\_2074

GTCTACTGGAATATAGTACAAAACCTGGAGTGCTGAATCTTGGGAACAATAAACTCAATGGTGTTATACC  
AGATTCATTTTCAATTGGTTGTGCTCTACAAACATTAGACCTCAGTGCGA

>Ve1\_2135

TGTTATACCAGATTCATTTTCAATTGGTTGTGCTCTACAAACATTAGACCTCAGTGCGAATAACTTACAAG

GCAGGCTGCCAAAATCGATTGTGAATTGTAAGTTGTTGGAGGTCCTGAA

>Ve1\_2196

AACTTACAAGGCAGGCTGCCAAAATCGATTGTGAATTGTAAGTTGTTGGAGGTCCTGAATGTTGGAAAT

AACAGACTTGTTGATCATTCCCATGCATGTTGAGGAACTCAAACAGTCTG

>Ve1\_2257

TTGGAAATAACAGACTTGTTGATCATTCCCATGCATGTTGAGGAACTCAAACAGTCTGAGGGTCCTAGT

CTTGCCTCCAATAAATTCTATGGAAATCTTATGTGTGATGTAACCAGAA

>Ve1\_2318

GGTCCTAGTCTTGCCTCCAATAAATTCTATGGAAATCTTATGTGTGATGTAACCAGAAATAGCTGGCAG

AATCTCCAGATCATAGATATAGCTTCCAACAACCTCACTGGTGTGTTGAA

>Ve1\_244

TGATCGCTTTGGAAGTGGATGATGAGACTATTTCTAGTGGAAATTGAGAATTCTAGTGCACCTTTTCAGTCT

TCAATATCTTGAGAGCCTAAATTTGGCTGACAACATGTTCAATGTTGGCA

>Ve1\_2440

CAGAATCTTTTCAAATTGGAGAGGAATGATGGTTGCAGATGATTACGTGGAGACAGGACGCAATCATA

TCCAGTATGAGTTCTTACAATAAGTAAATTGTACTATCAGGACACAGTGA

>Ve1\_2562

TTAACCATCAAAGGCATGGAGCTGGAGCTTGTGAAGATTCTCAGGGTCTTCACATCTATTGATTTCTCTTC

CAATAGATTTCAAGGAGCGATACCAGATGCTATCGGGAATCTCAGCTCA

>Ve1\_2623

ATTTCTTTCCAATAGATTTCAAGGAGCGATACCAGATGCTATCGGGAATCTCAGCTCACTTTATGTTCTG

AATCTGTCACACAATGCCCTTGAGGGACCAATCCCAAATCGATTGGGA

>Ve1\_2684

TTATGTTCTGAATCTGTCACACAATGCCCTTGAGGGACCAATCCCAAATCGATTGGGAAGCTACAAATG

CTTGAATCACTAGACCTGTCAACAAACCACCTGTCCGGGGAGATCCCATC

>Ve1\_2867

AATCCATCAACTAATCAGTTTCAAACATTCTCAGCAGATTCCTTTGAAGGAAACAGTGGCCTATGCGGG

CTCCCTCTCAACAACAGTTGTCAAAGCAATGGCTCAGCCTCAGAGTCCCT

>Ve1\_2928

CTATGCGGGCTCCCTCTCAACAACAGTTGTCAAAGCAATGGCTCAGCCTCAGAGTCCCTGCCTCCACCAA  
CTCCGCTACCAGACTCAGATGATGAATGGGAGTTCATTTTTGCAGCAGTT

>Ve1\_2989

CTCCACCAACTCCGCTACCAGACTCAGATGATGAATGGGAGTTCATTTTTGCAGCAGTTGGATACATAGT  
AGGGGCAGCAAATACTATTTTCAGTTGTGTGGTTTTACAAGCCAGTGAAGA

>Ve1\_3042

GCAGTTGGATACATAGTAGGGGCAGCAAATACTATTTTCAGTTGTGTGGTTTTACAAGCCAGTGAAGAAA  
TGGTTTGATAAGCATATGGAGAAATGCTTGCTTTGGTTTTCAAGAAAGTGA

>Ve1\_305

TTTCAGTCTTCAATATCTTGAGAGCCTAAATTTGGCTGACAACATGTTCAATGTTGGCATACCAGTTGGTA  
TAGCCAACCTCACAACTTGAAGTACCTGAATTTATCCAATGCTGGTTT

>Ve1\_366

CCAGTTGGTATAGCCAACCTCACAACTTGAAGTACCTGAATTTATCCAATGCTGGTTTTGTCGGGCAA  
TTCCTATAACATTATCAAGATTAACAAGGCTAGTTACTCTTGATCTCTCA

>Ve1\_427

TCGGGCAAATTCCTATAACATTATCAAGATTAACAAGGCTAGTTACTCTTGATCTCTCAACTATTCTCCCTT  
TTTTTGATCAGCCACTTAACTTGAGAATCCCAATTTGAGTCATTTCA

>Ve1\_488

TATTCTCCCTTTTTTTGATCAGCCACTTAACTTGAGAATCCCAATTTGAGTCATTTCAATTGAGAACTCAAC  
AGAGCTTAGAGAGCTTTACCTTGATGGGGTTGATCTTTTCGTCTCAGAG

>Ve1\_61

TATCAGGATACCACATTTTCTTGTTTTCTCTCAATGCCTTGACGATCAAAGTCATTGTTGCTGCAGTTT  
AAGGGAAGCCTCCAATATGATTCTACTTTGTCAAAGAAATTGGCAAAT

>Ve1\_610

CTGAGTGGTGTCAATCTTTATCTTTACATTTGCCTAACTTGACCGTTTTGAGCTTGCCTGATTGTCAAATTT  
CAGGCCCTTTGGATGAATCACTTTCTAAGCTTCACTTTCTCTCTTTTG

>Ve1\_671

TTGTCAAATTTAGGCCCTTTGGATGAATCACTTTCTAAGCTTCACTTTCTCTCTTTTGTCCAATTTGACCA  
GAACAATCTCTCTAGCACAGTTCCTGAATATTTTGCCAATTTCTCGAA

>Ve1\_732

CAACTTGACCAGAACAATCTCTCTAGCACAGTTCCTGAATATTTTGCCAATTTCTCGAACTTGACTACATT  
GACCCTGGGCTCTTGTAATCTACAGGGAACATTTCTGAAAGAATCTTT

>Ve1\_793

TGACTACATTGACCCTGGGCTCTTGTAATCTACAGGGAACATTTCTGAAAGAATCTTTCAGGTATCAGT  
TTAGAGAGTTTGGACTTGTCAATTAACAAGTTGCTTCGTGGTAGTATTC

>Ve1\_854

GGTATCAGTTTTAGAGAGTTTGGACTTGTCAATTAACAAGTTGCTTCGTGGTAGTATTCCAATTTTTTCC  
GAAATGGATCTCTGAGGAGGATATCACTAAGCTACACCAACTTTTCCGG

>Ve1\_915

ATTTTTTCCGAAATGGATCTCTGAGGAGGATATCACTAAGCTACACCAACTTTTCCGGTTCATTACCAGA  
GTCCATTTCGAACCATCAAATCTATCCAGGTTAGAGCTTTCTAATTGC

>Ve1\_976

CATTACCAGAGTCCATTTCGAACCATCAAATCTATCCAGGTTAGAGCTTTCTAATTGCAATTTCTATGGA  
TCAATACCTTCCACAATGGCAAACCTTAGAAATCTTGGTTATTTGGATT

>Ve2\_0

ATGAGATTTTTACTTTCTATGGATCTTCTTCATCATACCCTTTTTGCAAATTTATTAGGTAATGAGATT  
TTATTGGTTTCCTCTCAATGTCTTGATGATCAAAAGTCATTGTTGCTG

>Ve2\_1054

CAATGGCGAACCTTACCAATCTTGTTTATTAGATTTCTCCTTCAACAATTTCACTGGTTCCTCCCATATT  
TCCAAGGGGCCAAGAACTCATCTACTTGGACCTTTCACGTAATGGTC

>Ve2\_1116

CTCCCATATTTCCAAGGGGCCAAGAACTCATCTACTTGGACCTTTCACGTAATGGTCTAACTGGTCTCTT  
GTCTAGAGCTCATTTTGAAGGACTCTCAGAACTTGTCTACATTAATTTA

>Ve2\_1178

TGGTCTTGTCTAGAGCTCATTTTGAAGGACTCTCAGAACTTGTCTACATTAATTTAGGGAACAATTCAC  
TCAACGGGAGCCTTCTGCATATATATTTGAGCTCCCCTCGTTGAAGCA

>Ve2\_124

TGAAGGGCAGCTTCCAATATGATTCTACTTTGTCAAATAAATTGGCAAGATGGAACCACAACACAAGTG

AATGTTGTAACCTGGAATGGGGTTACATGTGACCTCTCTGGTCATGTGATTG

>Ve2\_1240

ACAATTCACTCAACGGGAGCCTTCCTGCATATATATTTGAGCTCCCCTCGTTGAAGCAGCTTTTTCTTTAC  
AGCAATCAATTTGTTGGCCAAGTCGACGAATTCGCAATGCATCCTCCT

>Ve2\_1364

GTTGGATACAGTTGACTTGAGAAACAACCACCTGAATGGATCGATTCCCAAGTCCATGTTTGAAGTTGG  
GAGGCTTAAGGTCCTCTCACTTTCTTCCAACCTCTTTAGAGGGACAGTTCC

>Ve2\_1426

AAGTTGGGAGGCTTAAGGTCCTCTCACTTTCTTCCAACCTCTTTAGAGGGACAGTTCCCCTTGACCTCATT  
GGGAGGCTGAGCAACCTTCAAGACTGGAGCTTTCTTACAATAACTTGA

>Ve2\_186

ACAAGTGAATGTTGTAACCTGGAATGGGGTTACATGTGACCTCTCTGGTCATGTGATTGCCTTGGAAGT  
GATGATGAGAAAATTTCTAGTGGAATTGAGAATGCAAGTGCTCTTTTCAGT

>Ve2\_1860

CCTTCCACTGCCATCTATGTGGACTACTCGAGCAATAATTTAAACAATTCCATCCCAACAGATATTGGAA  
GATCTCTTGTTTTGCCTCCTTTTTCTCGGTAGCAAACAATAGCATCACT

>Ve2\_1922

TATTGGAAGATCTCTTGTTTTGCCTCCTTTTTCTCGGTAGCAAACAATAGCATCACTGGAATAATTCCTG  
AATCCATATGCAACGTCAGCTACCTTCAAGTTCTTGATTTCTCTAACAA

>Ve2\_1984

TAATTCCTGAATCCATATGCAACGTCAGCTACCTTCAAGTTCTTGATTTCTCTAACAAATGCCTTGAGTGG  
ACAATACCACCATGTCTACTGGAATATAGTCCAAAACCTGGAGTGCTGA

>Ve2\_2046

TTGAGTGGAAACAATACCACCATGTCTACTGGAATATAGTCCAAAACCTGGAGTGCTGAATCTAGGGAAC  
AATAGACTCCATGGTGTATACCAGATTCATTTCCAATTGGTTGTGCTCTA

>Ve2\_2356

GTAATATAACCAAACATAGCTGGAAGAATCTCCAGATCATAGATATAGCTTCCAACAATTTTACTGGTAT  
GTTGAATGCAGAATGCTTTACAAATTGGAGAGGAATGATGGTTGCAAAAG

>Ve2\_2418

ACTGGTATGTTGAATGCAGAATGCTTTACAAATTGGAGAGGAATGATGGTTGCAAAGATTACGTGGA  
GACAGGACGCAATCATATCCAGTATGAGTTCTTACAATAAGTAACTTGTAC

>Ve2\_2480

CGTGGAGACAGGACGCAATCATATCCAGTATGAGTTCTTACAATAAGTAACTTGTACTATCAGGATACA  
GTGACATTAATCATCAAAGGCATGGAGCTGGAGCTTGTGAAGATTCTTAG

>Ve2\_2542

AGGATACAGTGACATTAATCATCAAAGGCATGGAGCTGGAGCTTGTGAAGATTCTTAGGGTCTTCACAT  
CTATTGATTTCTCTTCCAATAGATTTCAAGGAAAGATACCAGATACTGTTG

>Ve2\_2604

TTCACATCTATTGATTTCTCTTCCAATAGATTTCAAGGAAAGATACCAGATACTGTTGGGGATCTTAGCTC  
ACTTTATGTTTTGAACCTGTCACACAATGCCCTCGAGGGACCAATTCCA

>Ve2\_2666

TCTTAGCTCACTTTATGTTTTGAACCTGTCACACAATGCCCTCGAGGGACCAATTCCAAAATCAATTGGGA  
AGCTACAAATGCTTGAATCACTAGACCTGTCAACAAACCACCTGTCCGG

>Ve2\_2790

ATCCCCTCAGAGCTTTCAAGTCTCACATTCTTAGCAGTTTTGAACTTATCGTTCAACAATTTGTTTGGAAA  
AATCCCGCAAAGTAATCAATTTGAAACATTCCCAGCAGAATCCTTTGAA

>Ve2\_2852

GTTTGGAAAAATCCCGCAAAGTAATCAATTTGAAACATTCCCAGCAGAATCCTTTGAAGGAAACAGAGG  
CCTATGCGGGCTTCCTCTTAACGTCATTTGCAAAGCGATACTTCAGAGTT

>Ve2\_2914

ACAGAGGCCTATGCGGGCTTCCTCTTAACGTCATTTGCAAAGCGATACTTCAGAGTTGAAACCAGCACC  
AAGTTCTCAAGATGACTCTTATGATTGGCAGTTCATATTTACGGGTGTGG

>Ve2\_3038

TGGAGTAGGGGCAGCAATCTCCATTGCACCTCTGTTGTTTTACAAGCAAGGAAACAAATACTTTGACAA  
ACATTTGGAGAGAATGCTTAAACTGATGTTTCCTAGATACTGGTTCAGTTA

>Ve2\_310

AGTATCTTGAGAGGCTAAATTTGGCTTACAACAAGTTCAATGTTGGCATAACCAGTTGGTATAGGCAACCT  
CACCAACTTGACGTACCTGAATTTATCCAATGCCGGTTTTGTTGGCCAAA

>Ve2\_3100

TTGACAAACATTTGGAGAGAATGCTTAAACTGATGTTTCCTAGATACTGGTTCAGTTACACCAGATTTGA  
CCCTGGGAAGGTTGTGGCTGTGGAACACTATGAAGATGAGACCCCAGATG

>Ve2\_3162

AGATTTGACCCTGGGAAGGTTGTGGCTGTGGAACACTATGAAGATGAGACCCCAGATGACACCGAAGA  
TGACGATGAGGGGGGAAAAGAAGCATCTCTGGGCGTTATTGTGTCTTCTGT

>Ve2\_3224

CGAAGATGACGATGAGGGGGGAAAAGAAGCATCTCTGGGCGTTATTGTGTCTTCTGTAGTAAACTGA  
TTTTAGAAAATGAAGCAATGCATGATCCAAAATGCACTTGTCATATGTC

>Ve2\_3286

AACTTGATTTTCAGAAAATGAAGCAATGCATGATCCAAAATGCACTTGTCATATGTCATCATCCCCAAT  
TCTTTTCTCCTACGCCGTCTCTTCTTACCTTTATTAGTCATATATC

>Ve2\_372

GGCAACCTCACCAACTTGACGTACCTGAATTTATCCAATGCCGTTTTGTTGGCCAAATTCCTATGATGTT  
ATCAAGGTTAACAAGGCTAGTACTCTTGATCTCTCAACTCTTTCCCT

>Ve2\_434

TATGATGTTATCAAGGTTAACAAGGCTAGTACTCTTGATCTCTCAACTCTTTCCCTGACTTTGCCAGCC  
ACTAAAAGTAGAGAATCCCAATTTGAGTCATTTTCATTGAGAACTCAAC

>Ve2\_496

TTGCCAGCCACTAAAAGTAGAGAATCCCAATTTGAGTCATTTTCATTGAGAACTCAACAGAGCTTAGAGA  
GCTTTACCTTGATGGGGTTGATCTCTCAGCTCAGAGGACTGAGTGGTGTGTC

>Ve2\_558

CTTAGAGAGCTTTACCTTGATGGGGTTGATCTCTCAGCTCAGAGGACTGAGTGGTGTCAATCTTTATCTT  
CATATTTGCCTAACTTGACTGTCTTGAGCTTGCCTACTTGTCGAATTTCA

>Ve2\_62

TAATGAGATTTTATTGGTTTCTCTCAATGTCTTGATGATCAAAAAGTCATTGTTGCTGCAGTTGAAGGGCA  
GCTTCCAATATGATTCTACTTTGTCAAATAAATTGGCAAGATGGAACCA

>Ve2\_620

TTTATCTTCATATTTGCCTAACTTGACTGTCTTGAGCTTGCCTACTTGTCGAATTTAGGCCCTATTGATGA



ATCACTTTCTAAGCTTCACTTTCTCTCTTTTCATCCGTCTTGACCAGAA

>Ve2\_682

CTATTGATGAATCACTTTCTAAGCTTCACTTTCTCTCTTTTCATCCGTCTTGACCAGAACAATCTCTCTACCA  
CAGTTCCTGAATACTTTGCCAATTTCTCAAACCTTGACTACCTTGACCC

>Ve2\_744

CTCTCTACCACAGTTCCTGAATACTTTGCCAATTTCTCAAACCTTGACTACCTTGACCCTCTCCTCTTGTAAT  
CTGCAAGGAACATTTCTAAAAGAATCTTTCAGGTACCAGTCTTAGAG

>Ve2\_806

CTCTTGTAATCTGCAAGGAACATTTCTAAAAGAATCTTTCAGGTACCAGTCTTAGAGTTTTTGGACTTGT  
CAACTAACAAATTGCTTAGTGGTAGTATTCCGATTTTTCTCAAATTGG

>Ve2\_868

TGGACTTGTCAACTAACAAATTGCTTAGTGGTAGTATTCCGATTTTTCTCAAATTGGATCATTGAGGAC  
GATATCACTAAGCTACACCAAGTTTTCTGGTTCATTACCAGACACCATTT

>Ve2\_930

TTGAGGACGATATCACTAAGCTACACCAAGTTTTCTGGTTCATTACCAGACACCATTTTGAACCTTCAAAA  
CCTATCCAGGTTAGAACTCTCCAAGTTCAGTGAACCAATACCT

>Ve2\_992

CCTTCAAACCTATCCAGGTTAGAACTCTCCAAGTTCAGTGAACCAATACCTTCCACAATGGCG  
AACCTTACCAATCTTGTTTATTTAGATTTCTCCTTCAACAATTTCACTGG

## Notes S5 Java script for calling the informative SNPs

```
import java.util.List;
import java.io.*;
import java.util.ArrayList;

import com.beust.jcommander.JCommander;
import com.beust.jcommander.Parameter;

public class FilterSNPs
{

    static BufferedWriter writerGFF = null;

    public static void main(String[] args) throws Exception {

        // set up JCommander
        JCommanderParams params = new JCommanderParams();
        JCommander jc = new JCommander(params);
        try {
            jc.parse(args);
        } catch (Exception e) {
            jc.usage();
            System.exit(1);
        }
        jc.setProgramName("FilterSNPs");

        // help?
        if (params.help) {
            jc.usage();
            System.exit(1);
        }

        // parse command line arguments
        File vcfFile = params.getVCFfile();

        Integer minDepth = params.getDepth();
        ArrayList<String> alleles = params.getAlleleRatios();
        Integer leeway = params.getLeeway();
        String outputFile = params.getOutput();

        ArrayList<String> resistant = new ArrayList<String>();
        ArrayList<String> susceptible = new ArrayList<String>();
        // check command line args
        for (String al : alleles) {
            String[] al_array = al.split("-");
```

```

    susceptible.add(al_array[0]);
    resistant.add(al_array[1]);
}

//I/O
writerGFF = new BufferedWriter(new FileWriter(outputFile));

Float lowerCutoffRes = null;
Float upperCutoffRes = null;
Float lowerCutoffSus = null;
Float upperCutoffSus = null;

// assign expected SNP ratios
for (String al : alleles) {
    String[] al_array = al.split("-");
    Float s = Float.parseFloat(al_array[0]);
    Float r = Float.parseFloat(al_array[1]);
    upperCutoffRes = r + leeway;
    if ( upperCutoffRes > 100 ) {
        upperCutoffRes = (float) 100;
    }
    lowerCutoffRes = r - leeway;
    if ( lowerCutoffRes < 0 ) {
        lowerCutoffRes = (float) 0;
    }
    upperCutoffSus = s + leeway;
    if ( upperCutoffSus > 100 ) {
        upperCutoffSus = (float) 100;
    }
    lowerCutoffSus = s - leeway;
    if ( lowerCutoffSus < 0 ) {
        lowerCutoffSus = (float) 0;
    }
}

//do the filtering
System.out.println("Filtering SNPs");
filterSNPs(vcfFile, lowerCutoffRes, upperCutoffRes, upperCutoffSus, lowerCutoffSus,
minDepth);
}

//clean up
writerGFF.close();
System.out.println("Pipeline complete!");
}

```

```

//-----
// Remove SNPs outside the expected allele ratios
private static void filterSNPs(File infile, float lowerCutoffRes, float upperCutoffRes, float
upperCutoffSus, float lowerCutoffSus, int minDepth) throws IOException
{
    BufferedReader reader = new BufferedReader(new FileReader(infile));

    //parse the file
    String line = null;

    //ignore header
    reader.readLine();

    int lineCount = 0;

    while((line = reader.readLine()) != null)
    {
        //ignore header lines
        if(line.startsWith("#"))
            continue;

        lineCount++;
        //          System.out.println("\nprocessing line " + lineCount);

        String [] tokens = line.split("\t");

        //sample input
        //          #CHROM    POS    ID    REF    ALT    QUAL FILTER
        INFO FORMAT    Sample1    Sample2
        //          Contig3    133    .    T    A    .    PASS
        ADP=59;WT=1;HET=1;HOM=0;NC=0
        GT:GQ:SDP:DP:RD:AD:FREQ:PVAL:RBQ:ABQ:RDF:RDR:ADF:ADR
        0/0:49:64:64:55:9:14.06%:1.4447E-3:37:37:47:8:9:0
        0/1:35:55:55:44:11:20%:2.8065E-4:36:37:39:5:11:0

        //get the variant allele frequency for both samples
        //Sample1 is BS, Sample 2 is BR
        //sample info is incolumns 9 and 10 (0-based)
        String sample1Info = tokens[9];
        String sample2Info = tokens[10];

        //          System.out.println("sample1Info = " + sample1Info);

        //within each of these we want the FREQ tag which is the 7th element of the string
        separated by ":" characters
        String sample1FREQStr;

```

```

String sample2FREQStr;
try
{
    sample1FREQStr = sample1Info.split(":")[6];
    sample2FREQStr = sample2Info.split(":")[6];
}
catch (ArrayIndexOutOfBoundsException e)
{
    continue;
}
//need to strip off the % sign at the end
sample1FREQStr = sample1FREQStr.substring(0, sample1FREQStr.indexOf("%"));
sample2FREQStr = sample2FREQStr.substring(0, sample2FREQStr.indexOf("%"));

//          System.out.println("sample1FREQStr = " + sample1FREQStr);

//now parse these
float sample1FREQ = Float.parseFloat(sample1FREQStr);
float sample2FREQ = Float.parseFloat(sample2FREQStr);

//System.out.println("sample1FREQ = " + sample1FREQ + "\tsample2FREQ = " +
sample2FREQ);

//also extract the read depth for each sample
int readDepthSample1 = Integer.parseInt(sample1Info.split(":")[2]);
int readDepthSample2 = Integer.parseInt(sample2Info.split(":")[2]);

//now test our conditions
boolean depthPass = minDepth <= readDepthSample1 && minDepth <=
readDepthSample2;
boolean BRPass = false;
boolean BSPass = false;

BRPass = sample2FREQ >= lowerCutoffRes && sample2FREQ <= upperCutoffRes;
BSPass = sample1FREQ >= lowerCutoffSus && sample1FREQ <= upperCutoffSus;

//if (BSPass) {
//    System.out.println("sample1FREQ = " + sample1FREQ + " passed: " + BSPass +
"; sample2FREQ = " + sample2FREQ + " passed: " + BRPass);
//}

if(BSPass && BRPass && depthPass)
{

    //System.out.println("SNP passes");
}

```

```

        writerGFF.write(line + "\n");
    }

}

reader.close();
}

//-----
// Command line parameters
static class JCommanderParams {

    // <vcfFile> <minDepth> <resistantAltRatio? lower:higher> <inBetween? true|false>
    <susceptibleAltRatio? lower:higher> <inBetween? true|false>
    @Parameter
    private List<String> parameters = new ArrayList<>();

    @Parameter(names = { "-v", "--vcf" }, description = "VCF file to filter", required=true)
    private File vcfFile;

    @Parameter(names = "--debug", description = "Debug mode", hidden = true)
    private boolean debug = false;

    @Parameter(names = { "-d", "--depth" }, description = "Read depth" )
    private Integer depth = 50;

    @Parameter(names = { "-a", "--alleleRatios" }, description = "Allele ratios, given in form:
    susceptible-resistant. e.g. For homozygous, opposite alleles, use \"0-100 100-0\"", variableArity
    = true)
    private List<String> allele = new ArrayList<String>();

    @Parameter(names = { "-l", "--leeway" }, description = "Leeway in allele ratios")
    private Integer leeway = 10;

    @Parameter(names = { "-h", "--help" }, description = "Help", help = true)
    private boolean help;

    @Parameter(names = { "-o", "--output" }, description = "Output file")
    private String output = "filteredSNPs.vcf";

//-----
// return statements
public File getVCFfile() {
    return vcfFile;
}
}

```

```
}  
  
public Integer getDepth() {  
    return depth;  
}  
  
public boolean getDebug() {  
    return debug;  
}  
  
public ArrayList<String> getAlleleRatios() {  
    return (ArrayList<String>) allele;  
}  
  
public Integer getLeeway() {  
    return leeway;  
}  
  
public boolean help() {  
    return help;  
}  
  
public String getOutput() {  
    return output;  
}  
}  
  
}
```
